# Supplementary material for: A Humanized Yeast Phenomic Model of Deoxycytidine Kinase to Predict Genetic Buffering of Nucleoside Analog Cytotoxicity
Source: MDPI journal article supplement (doi:10.3390/genes10100770), 2019-09-30

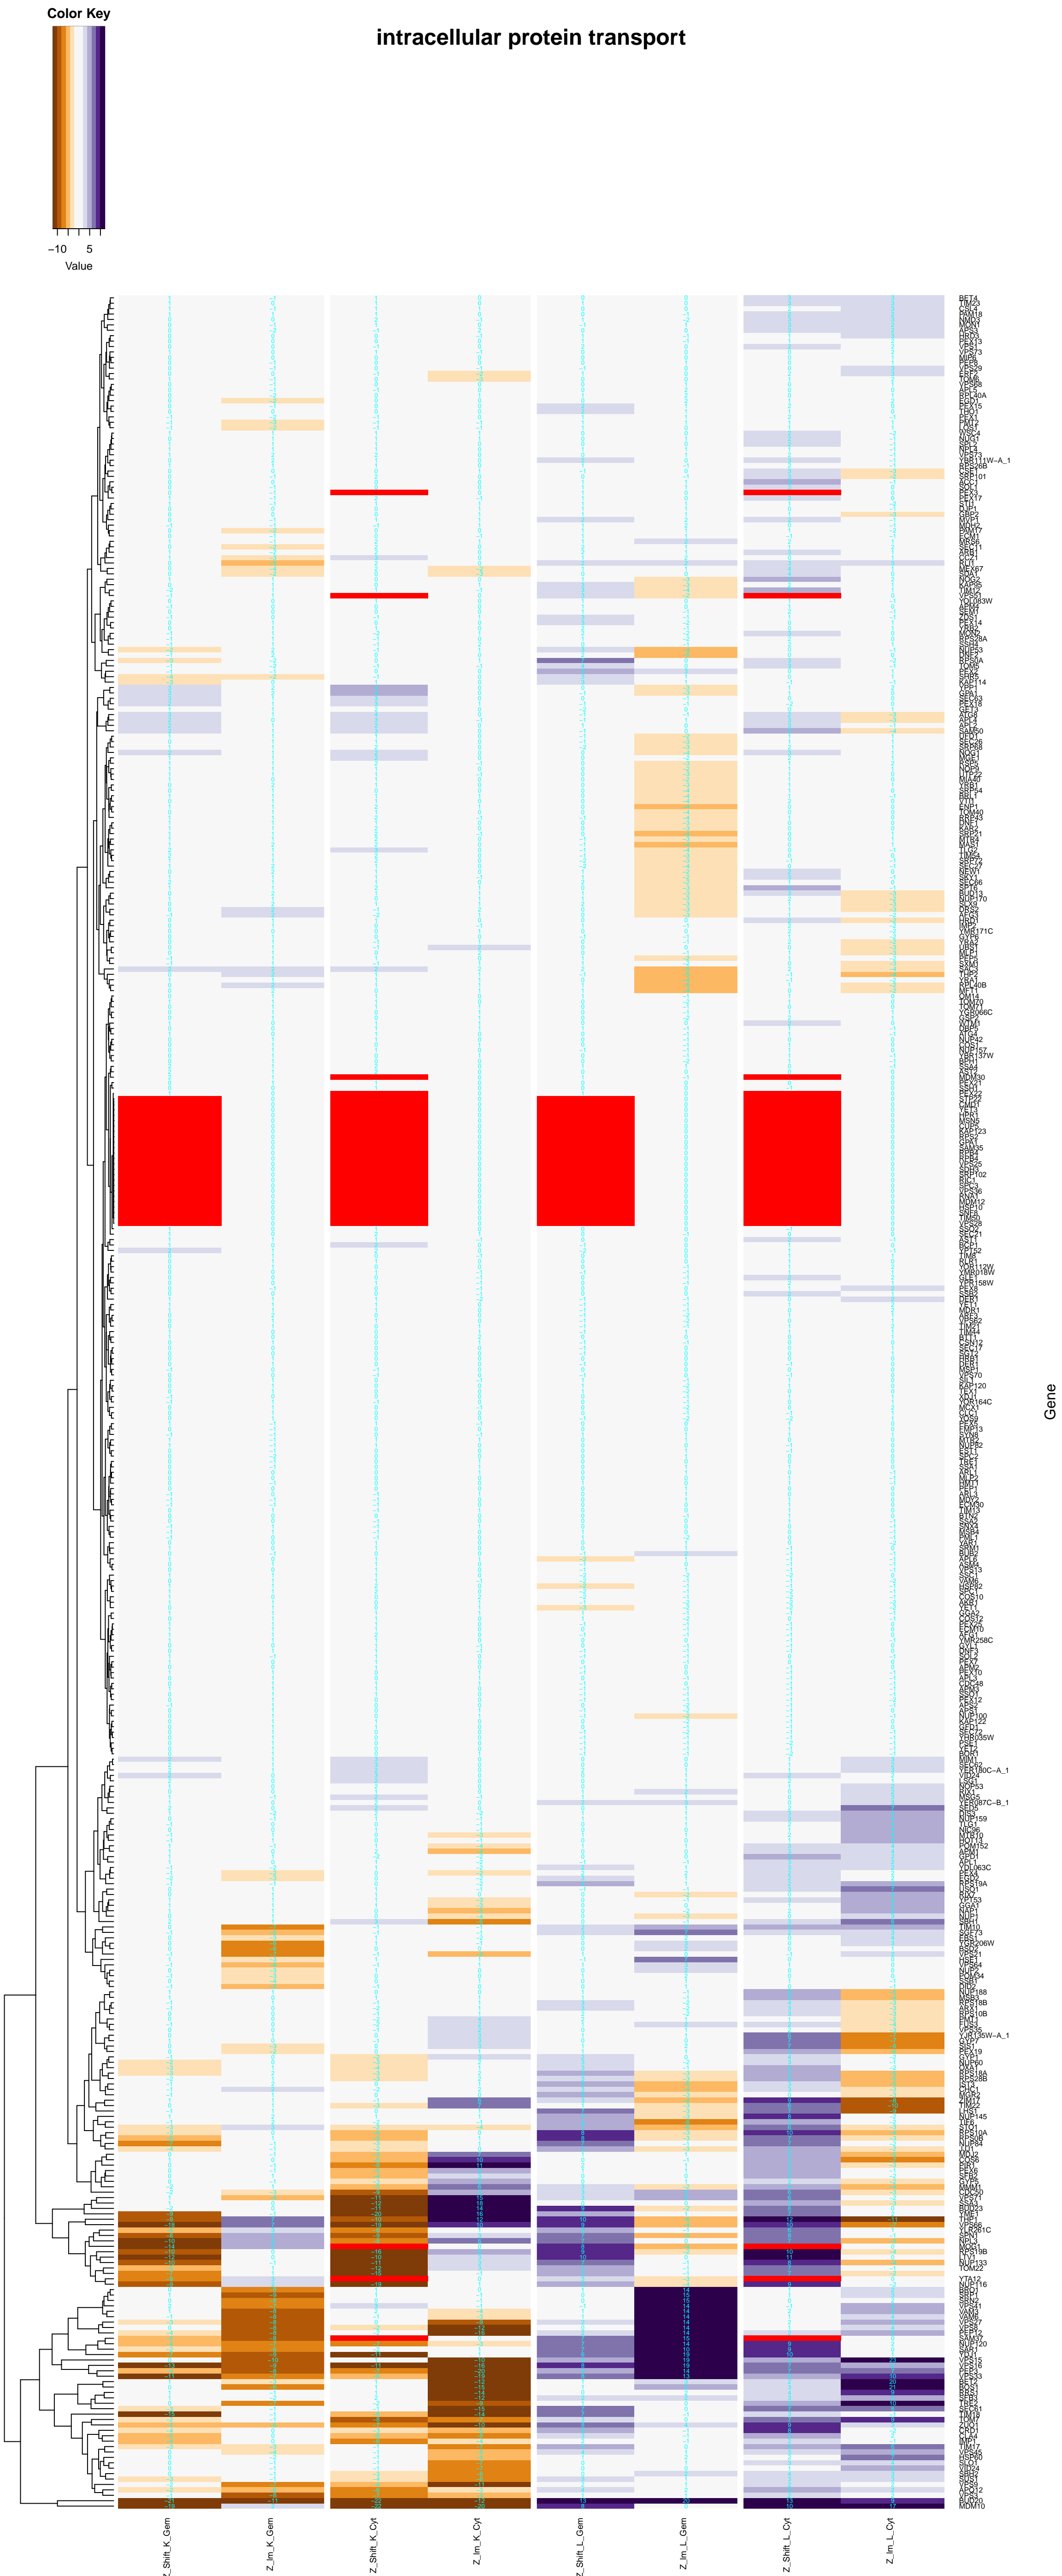

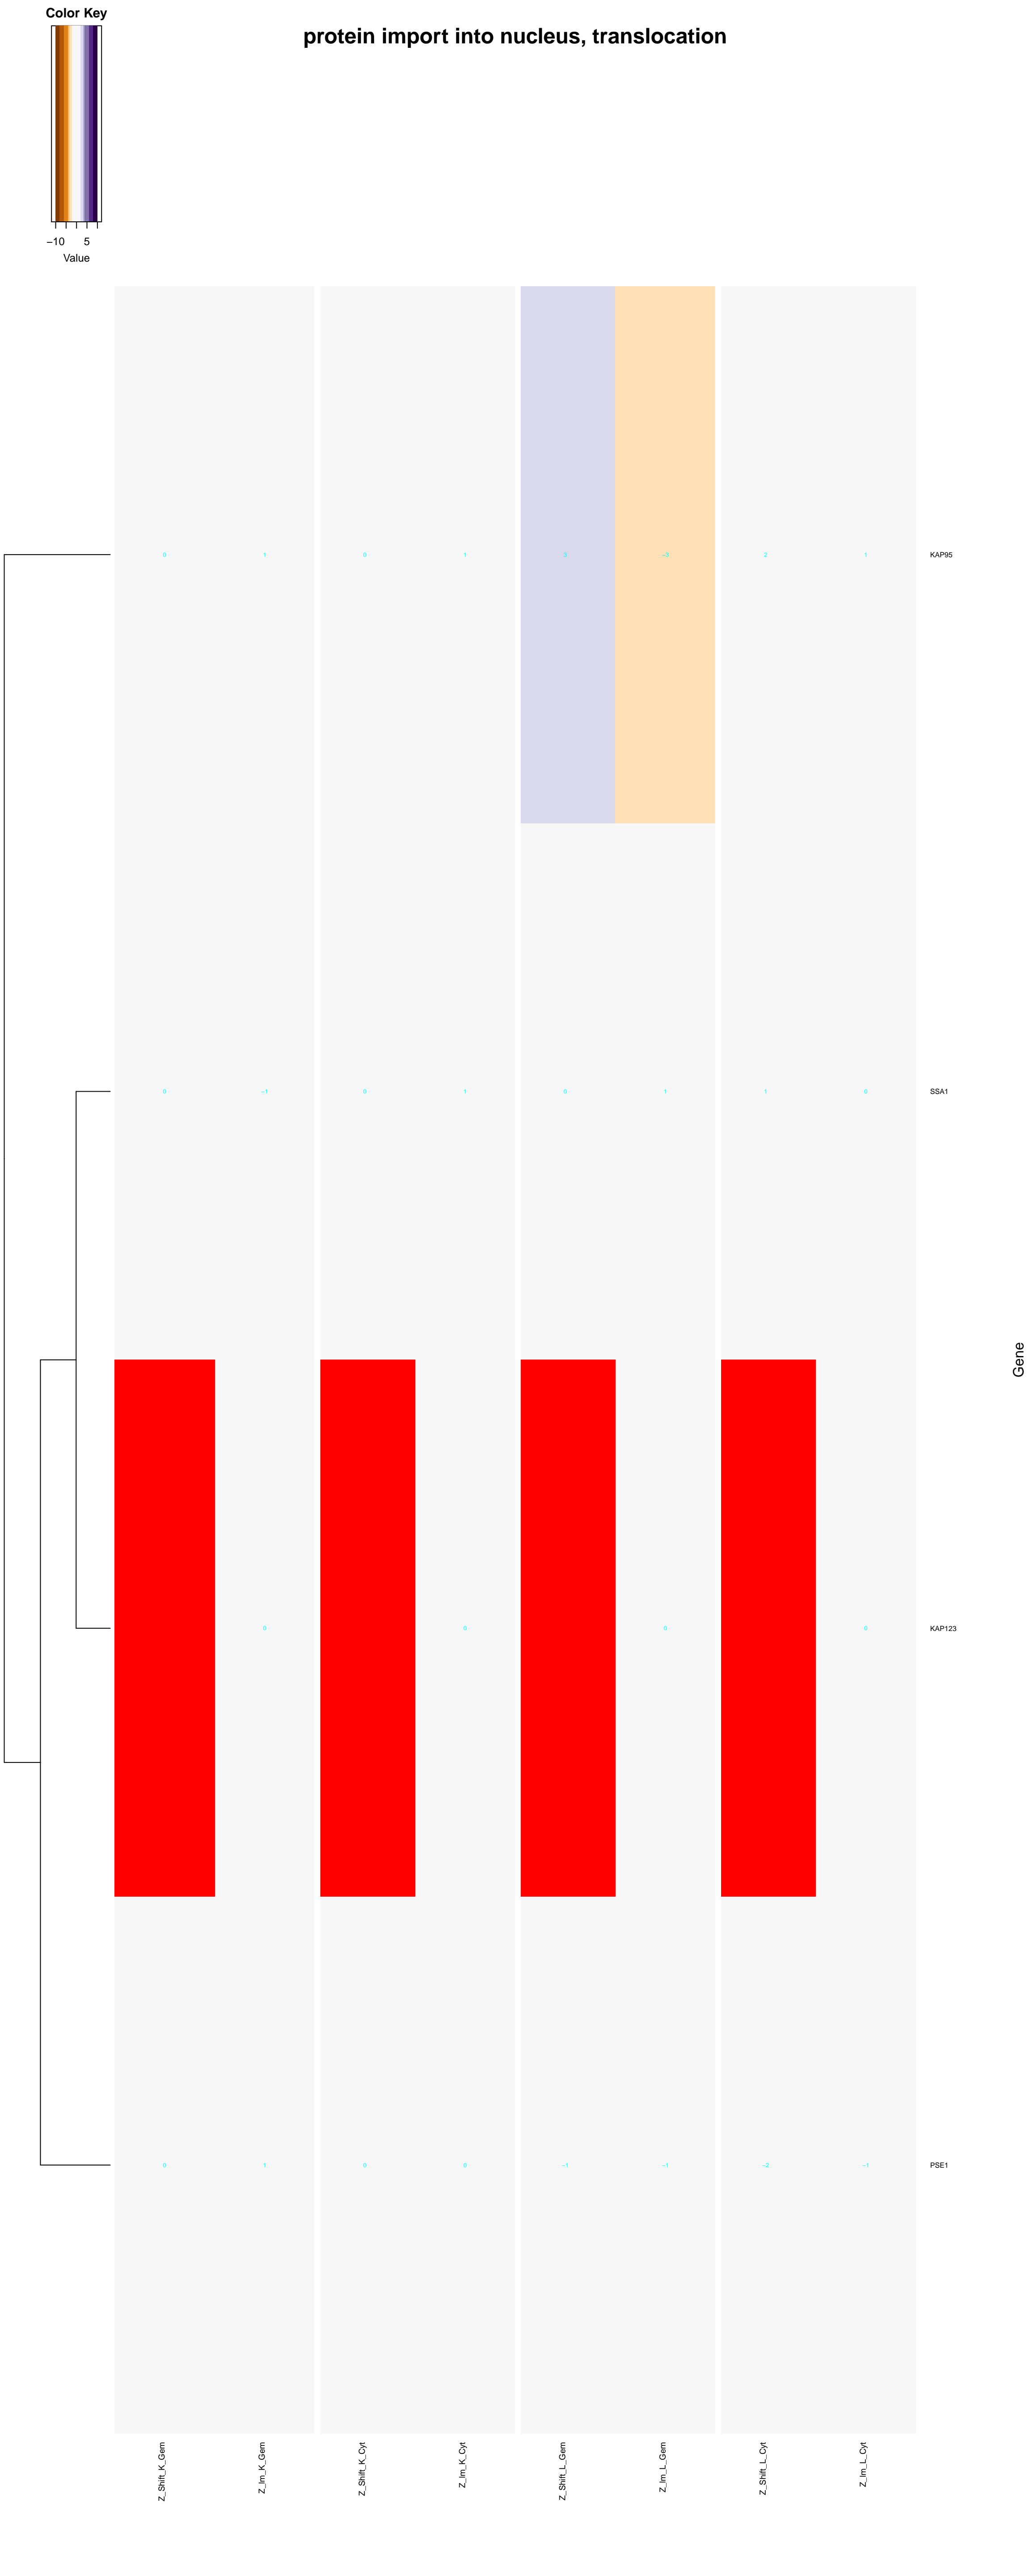

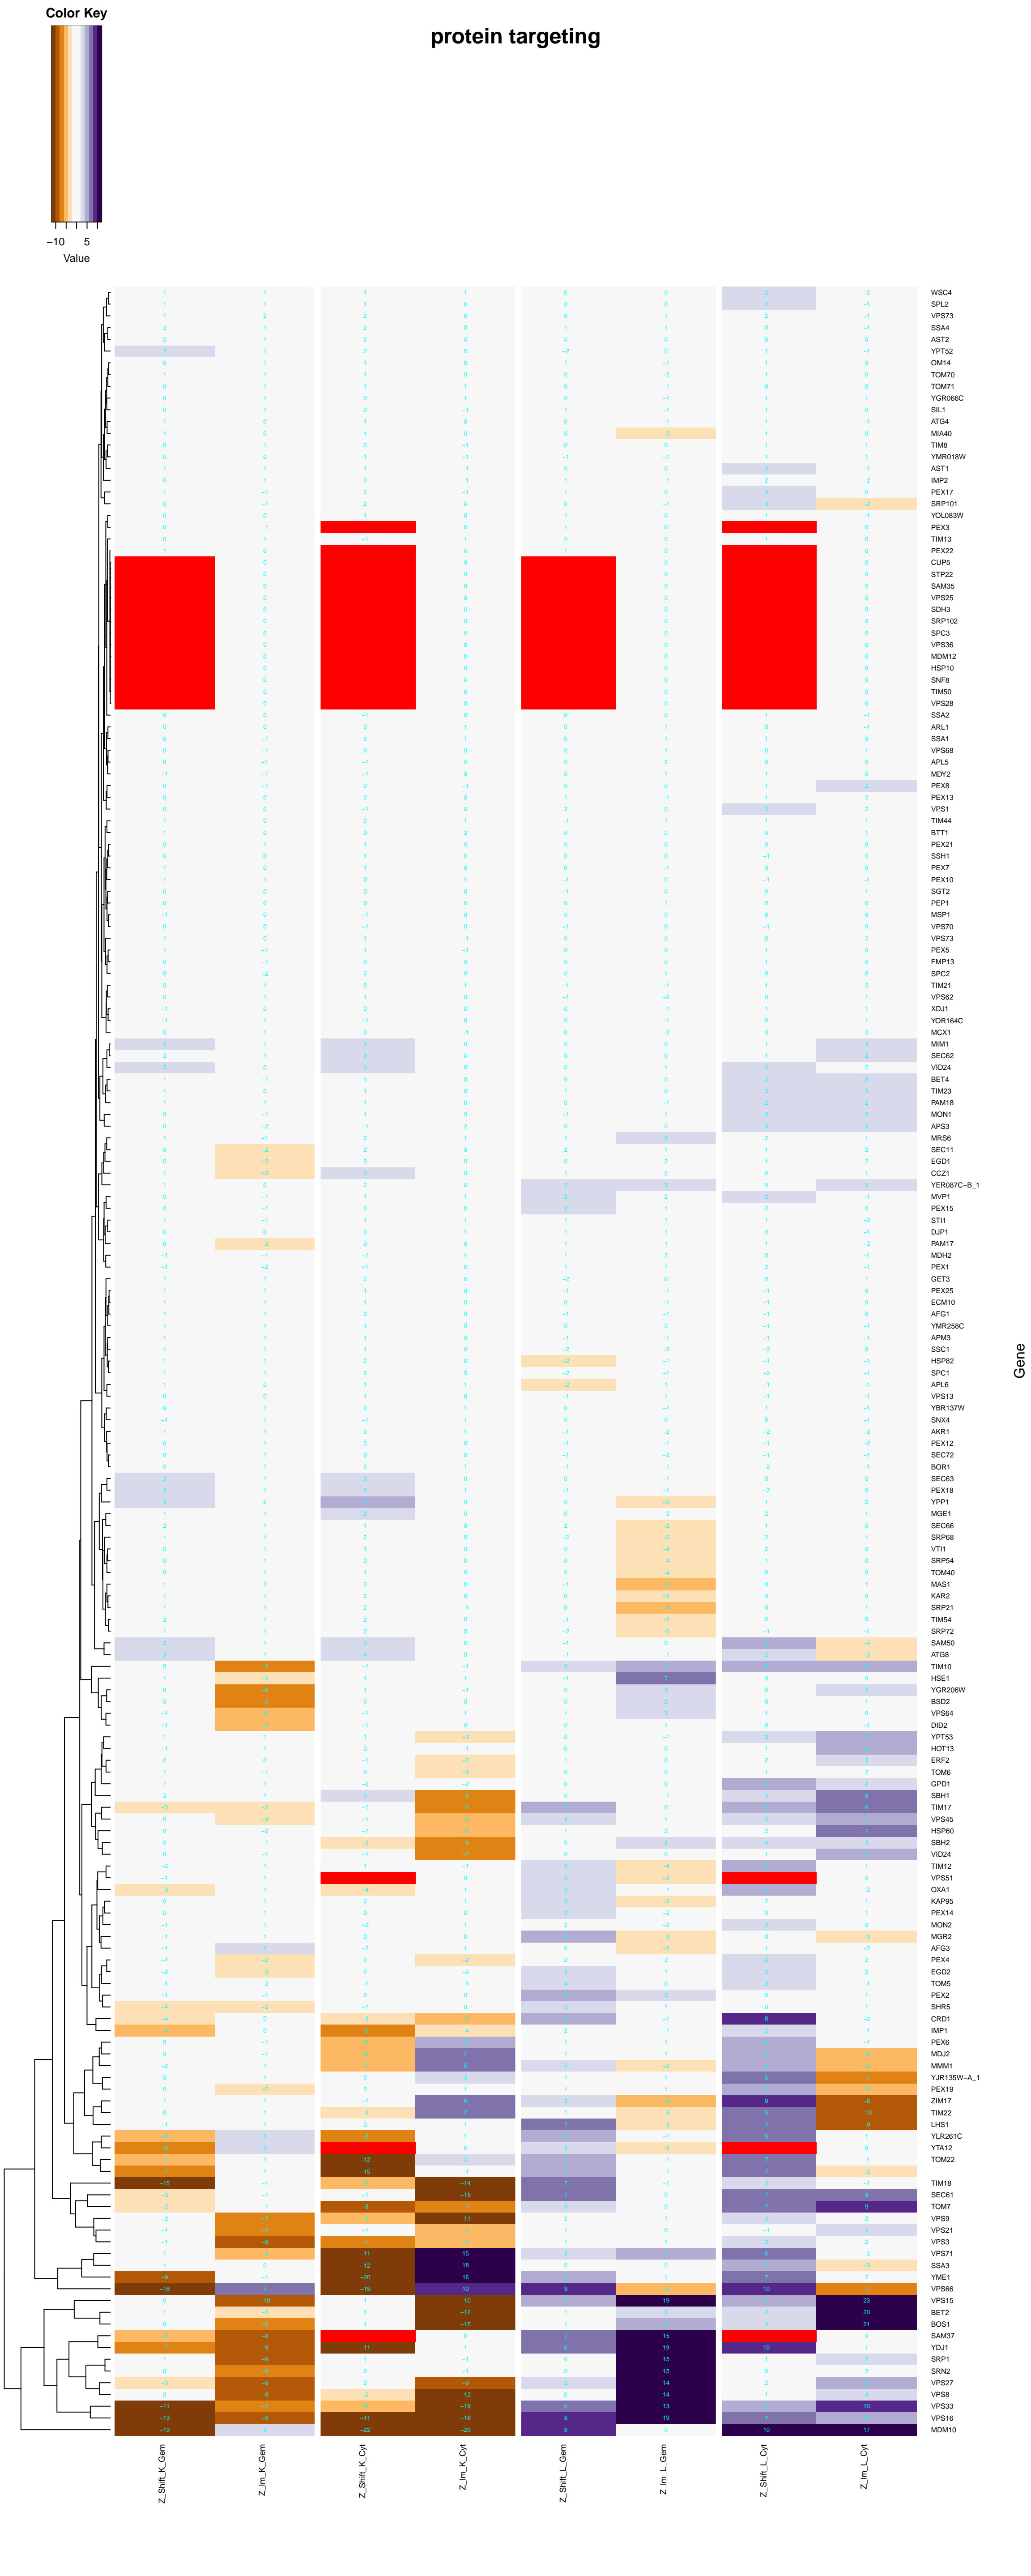

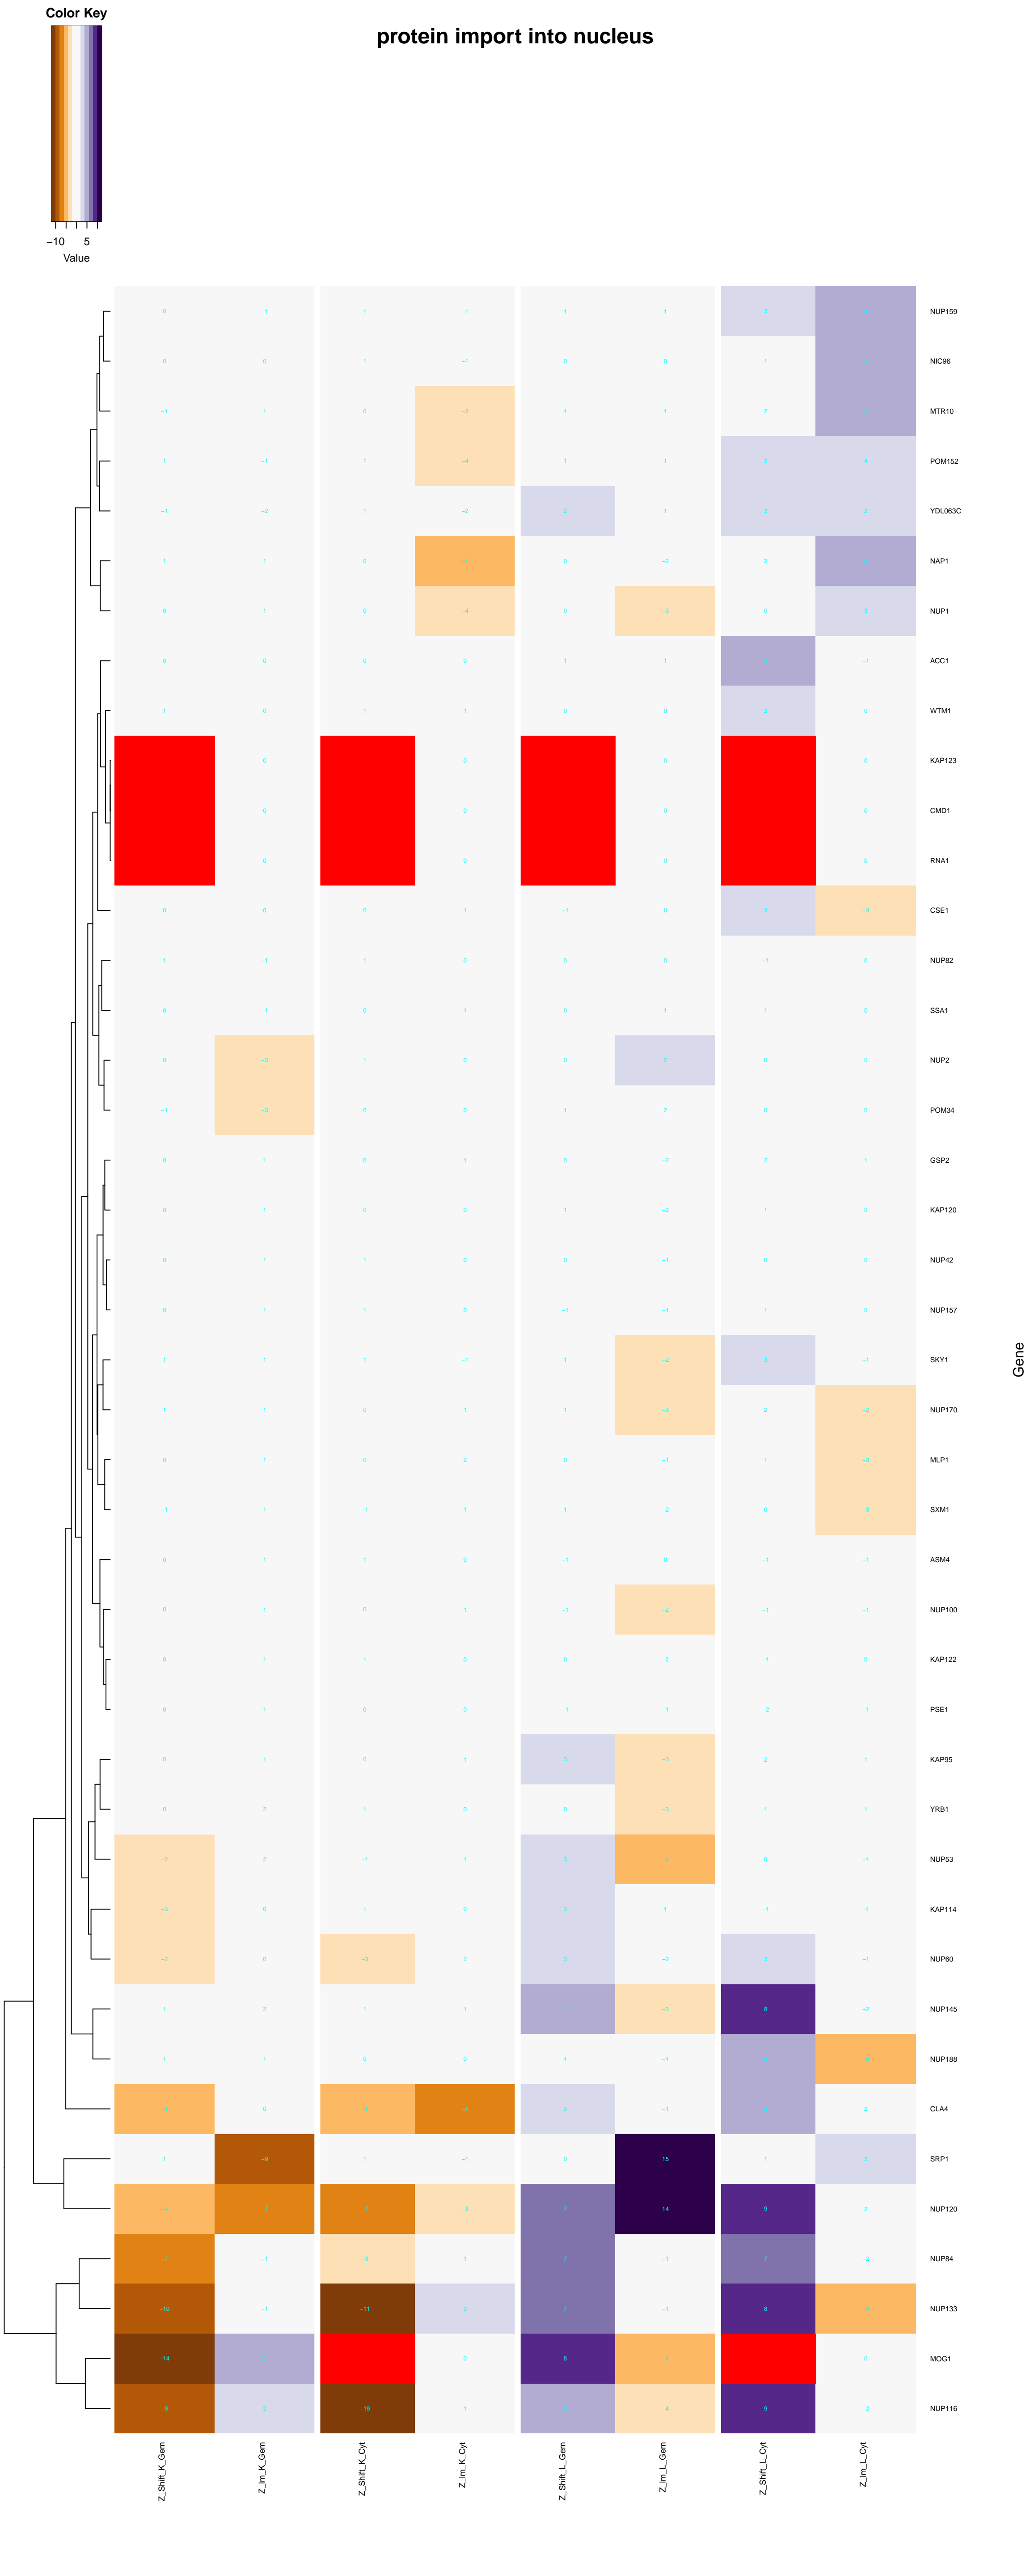

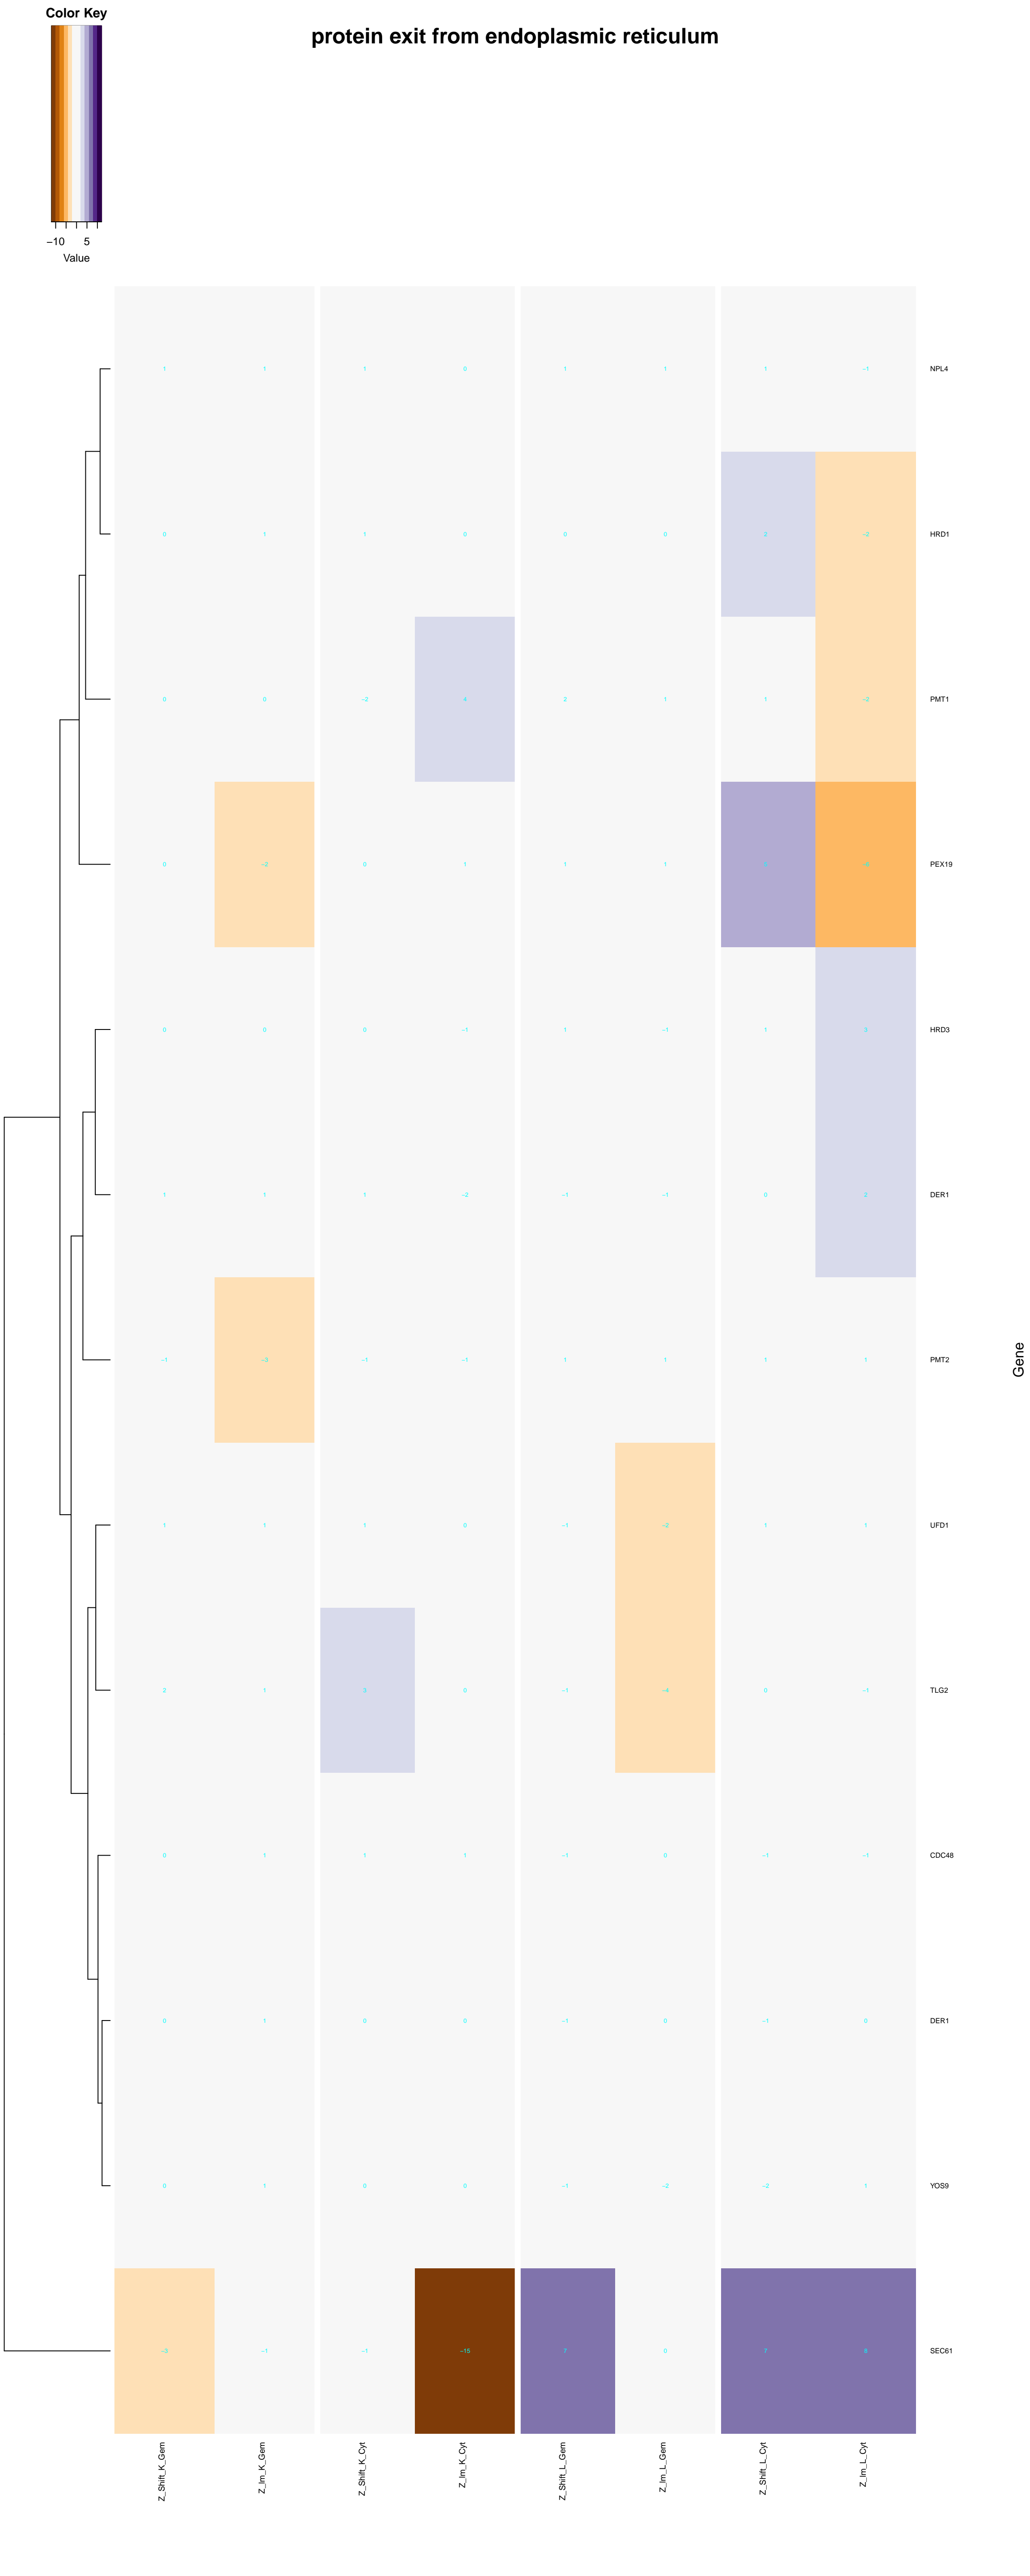

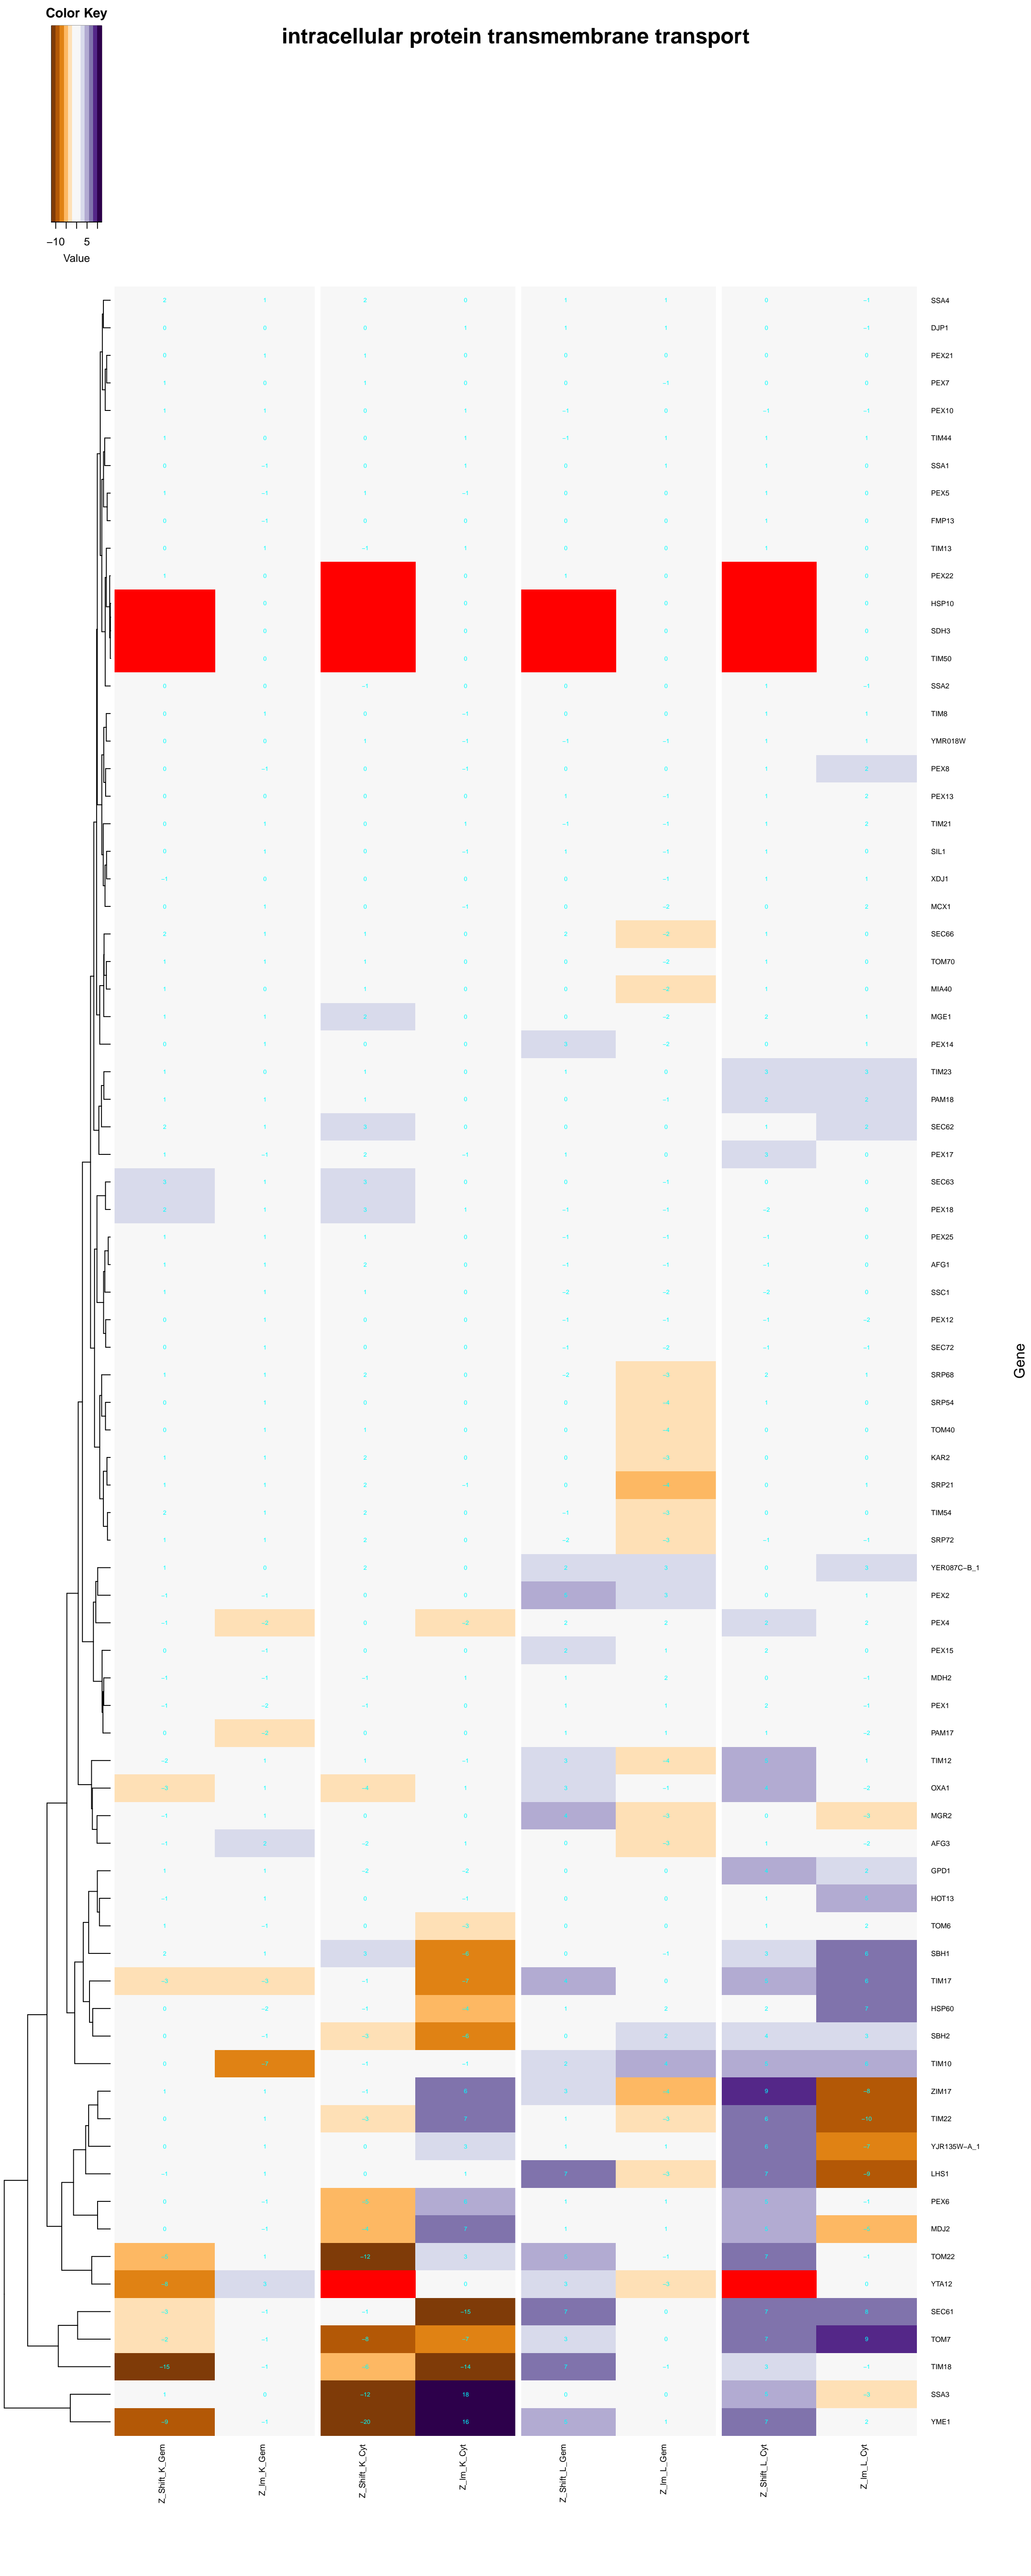

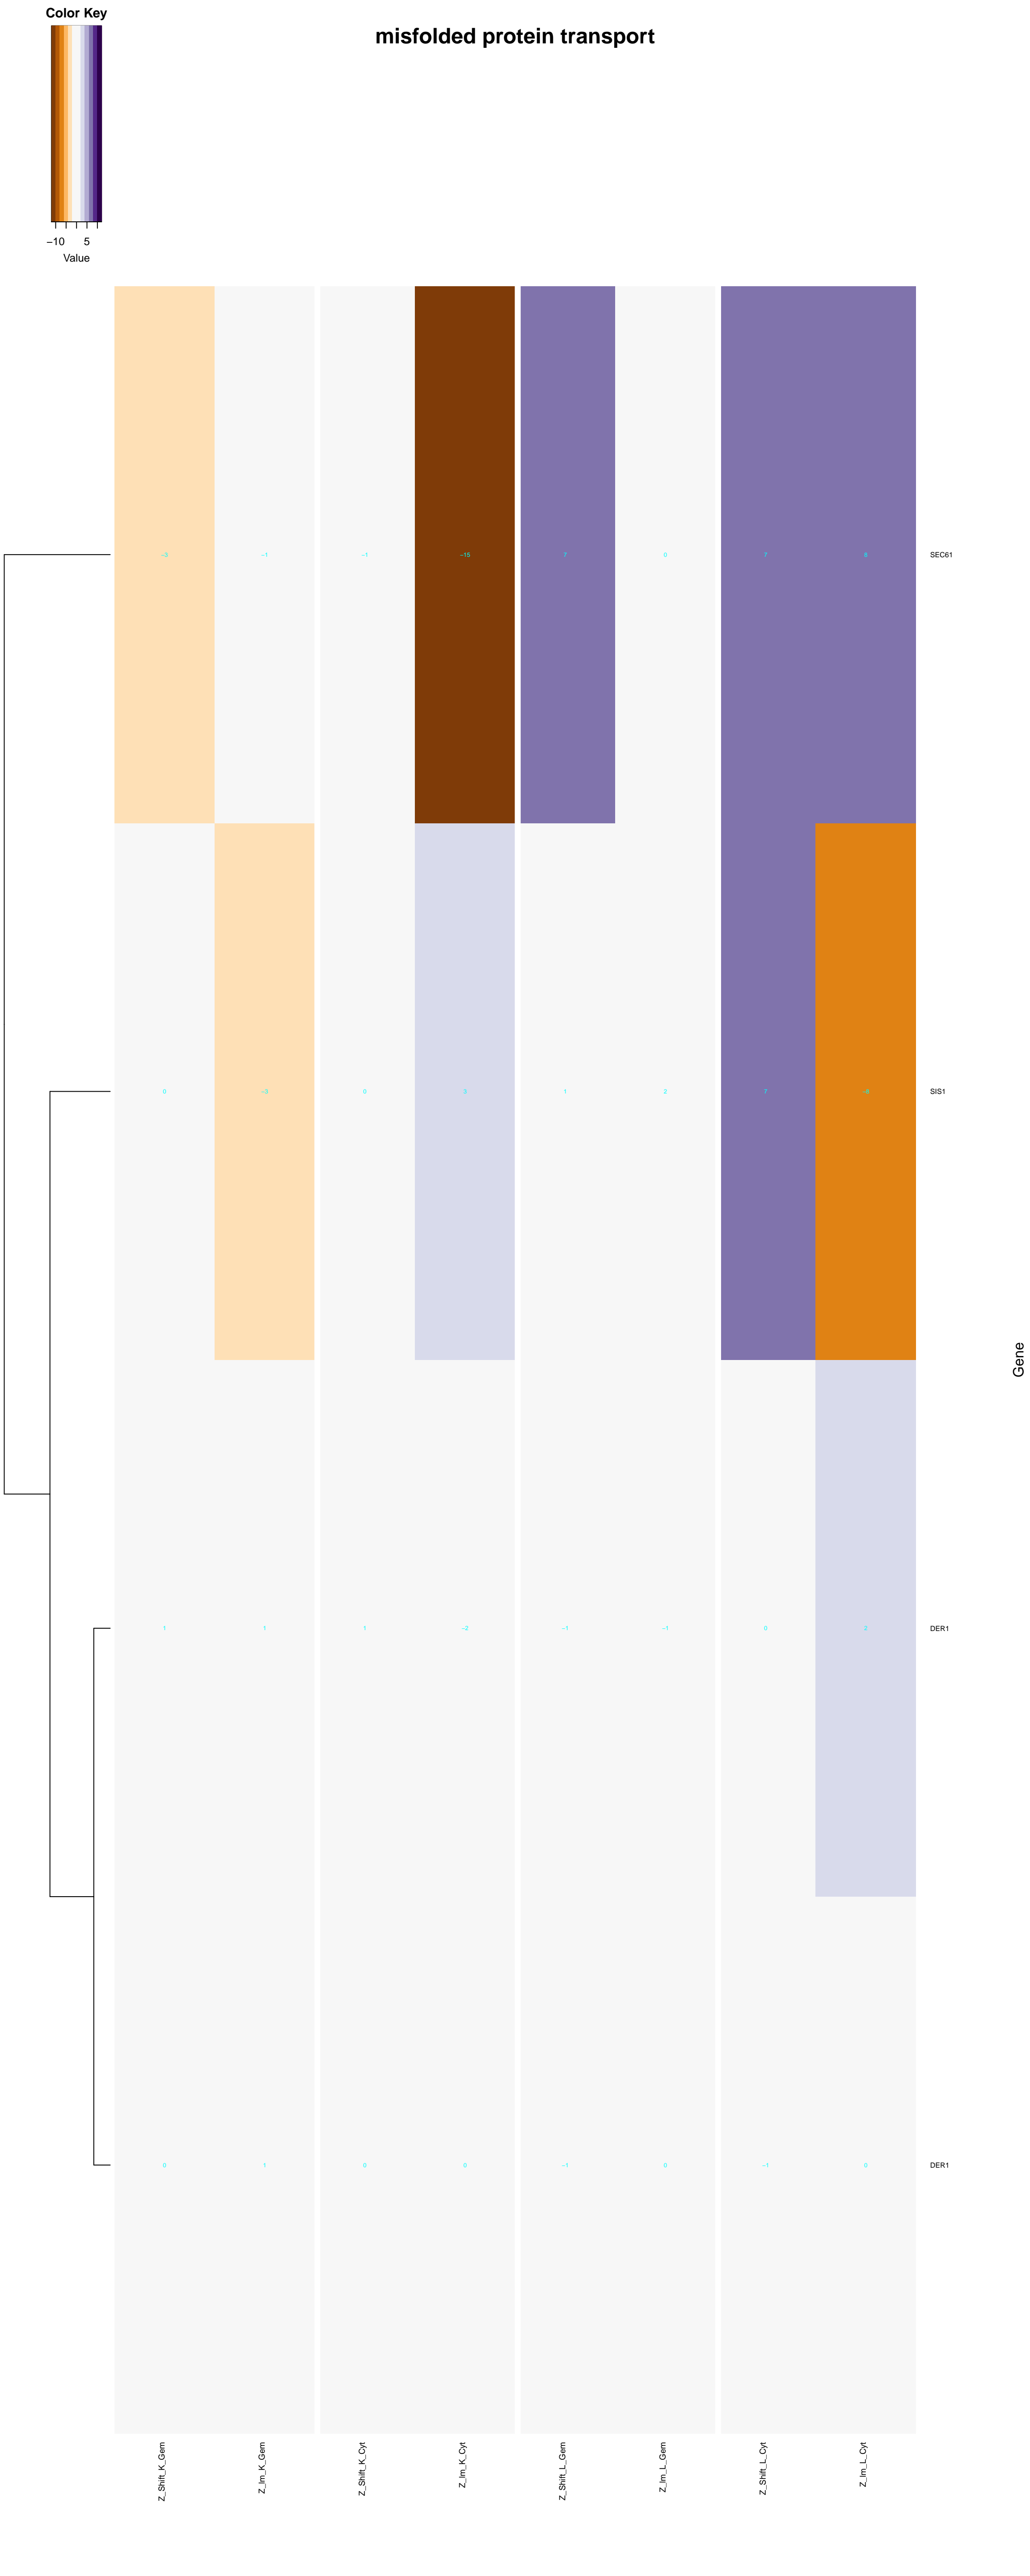

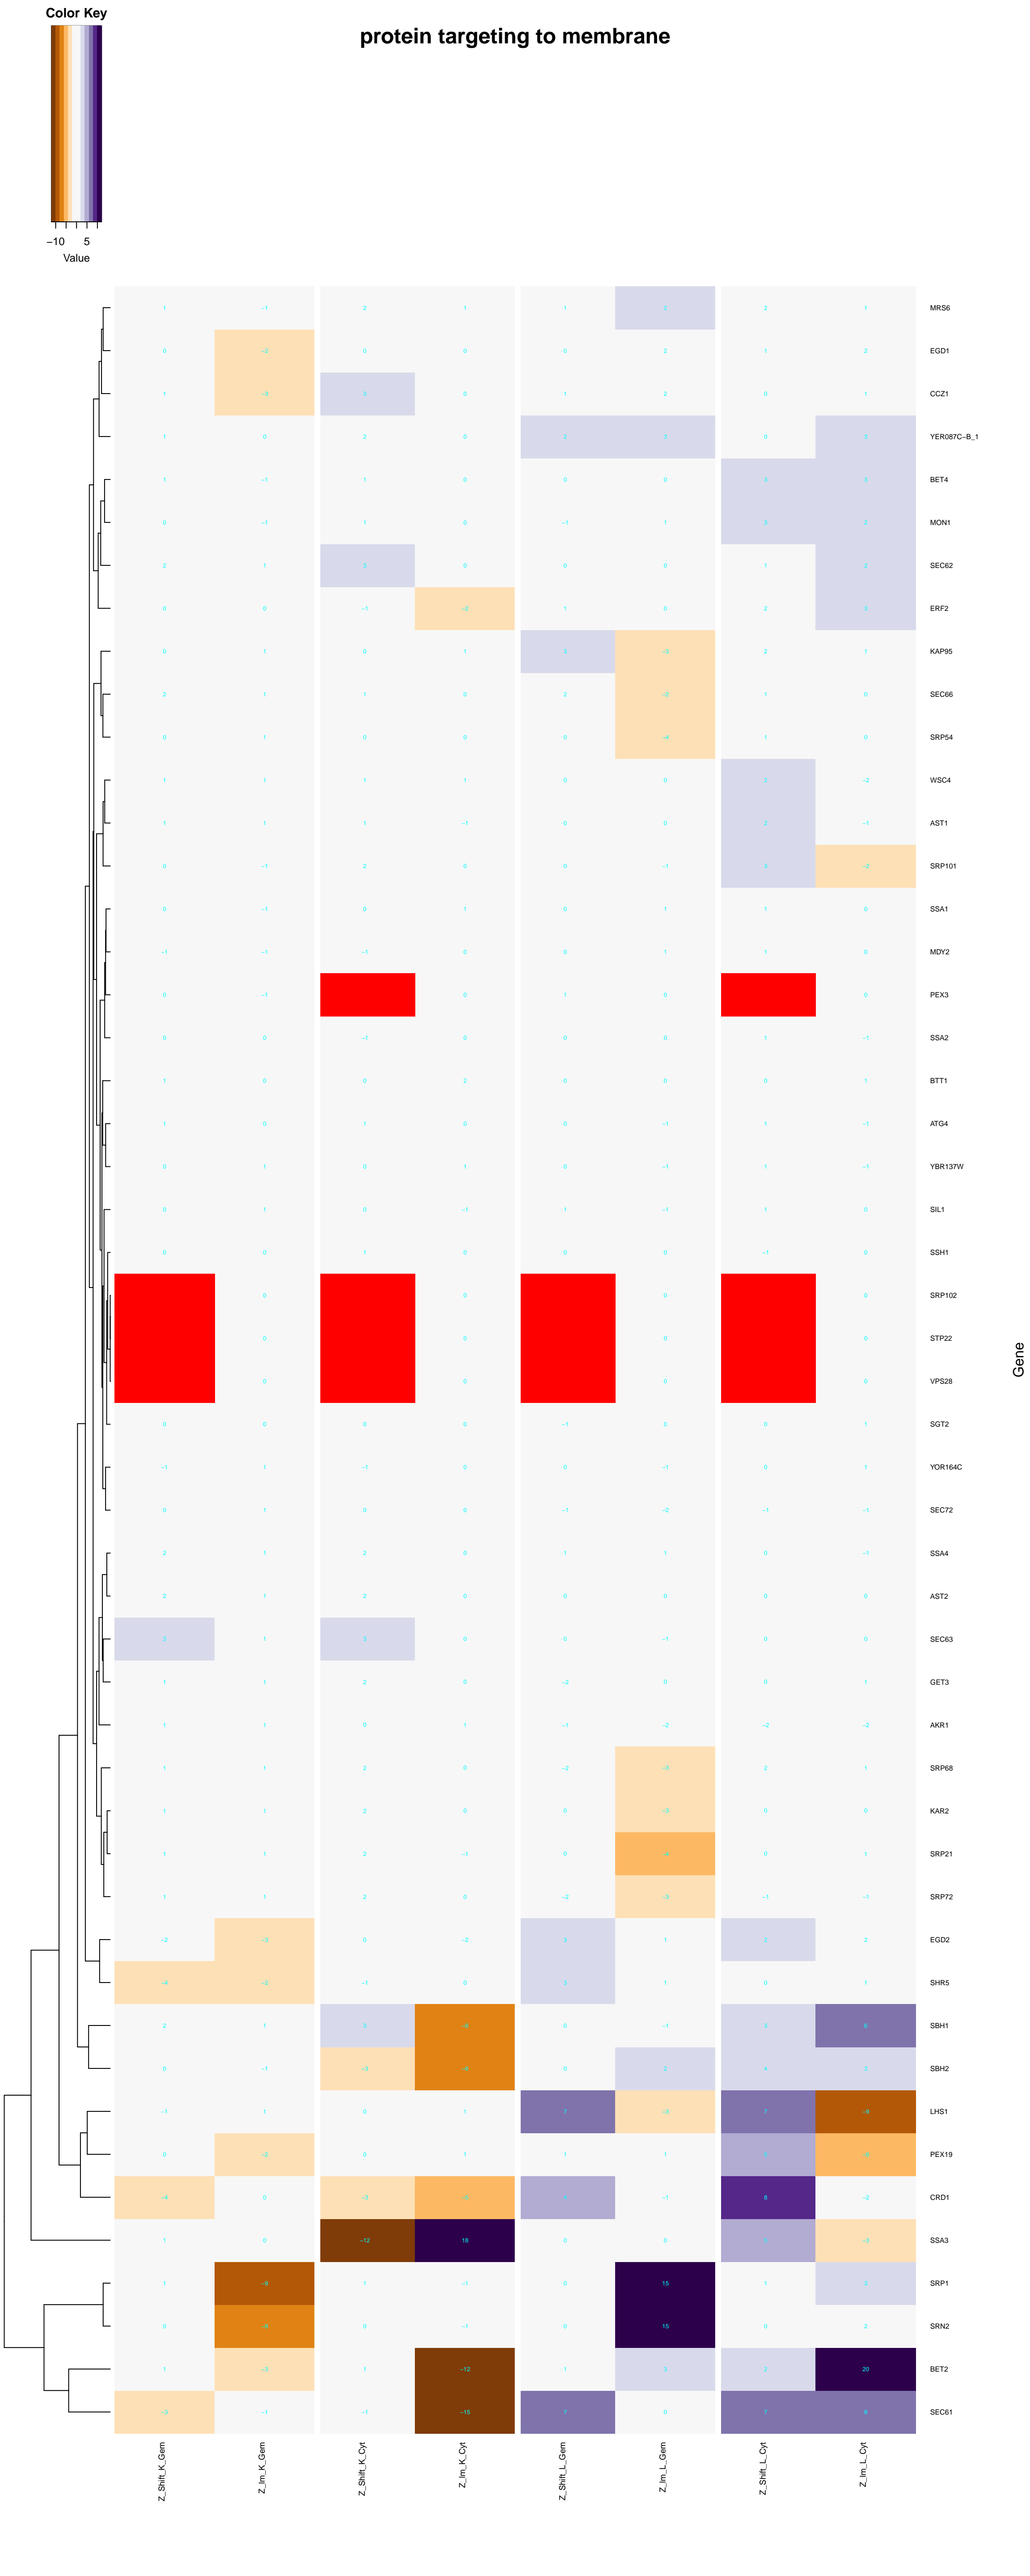

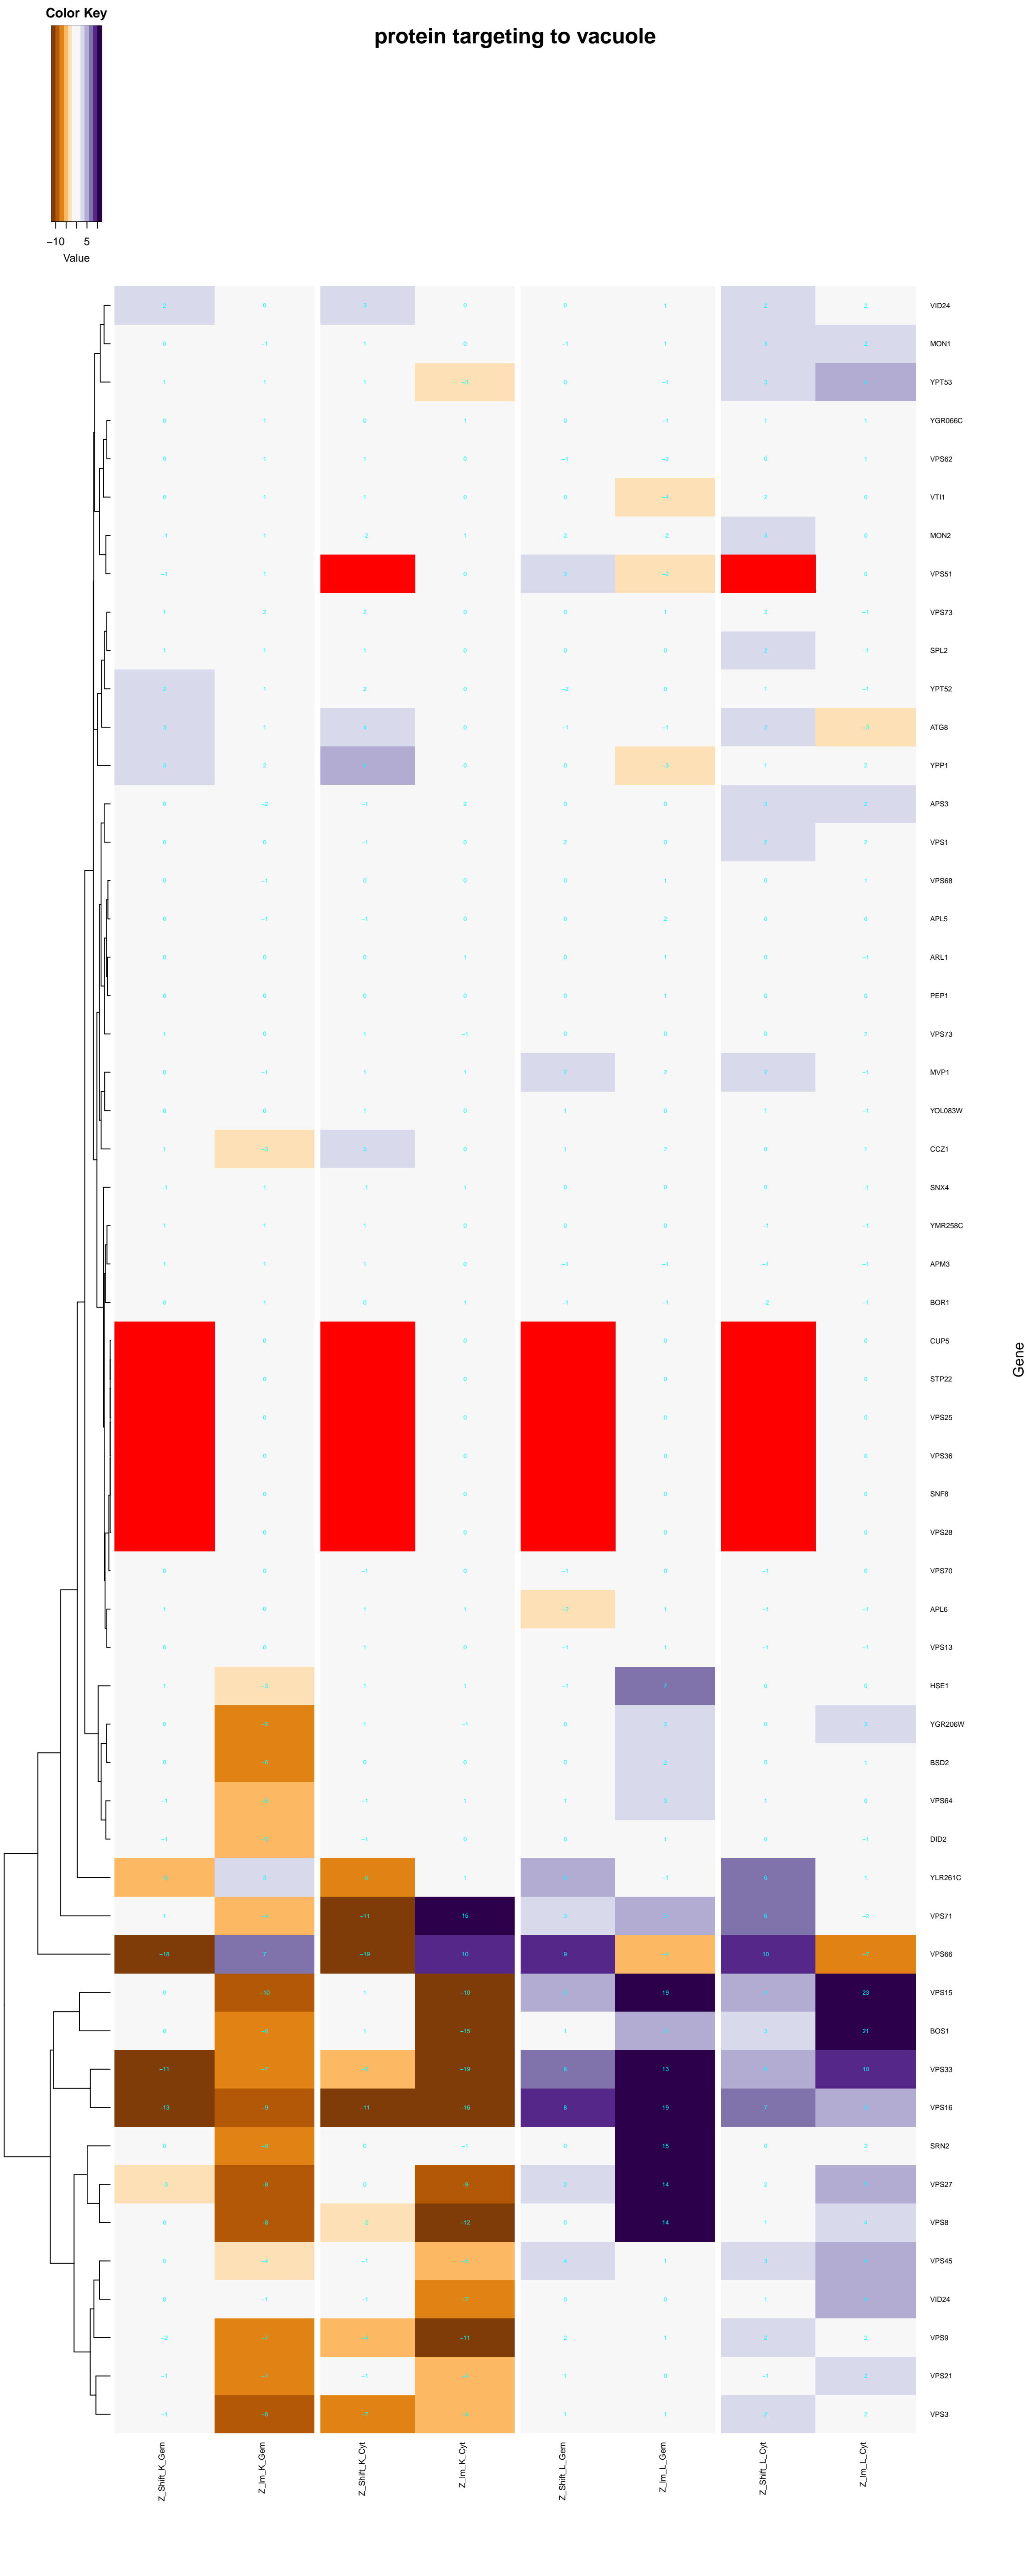

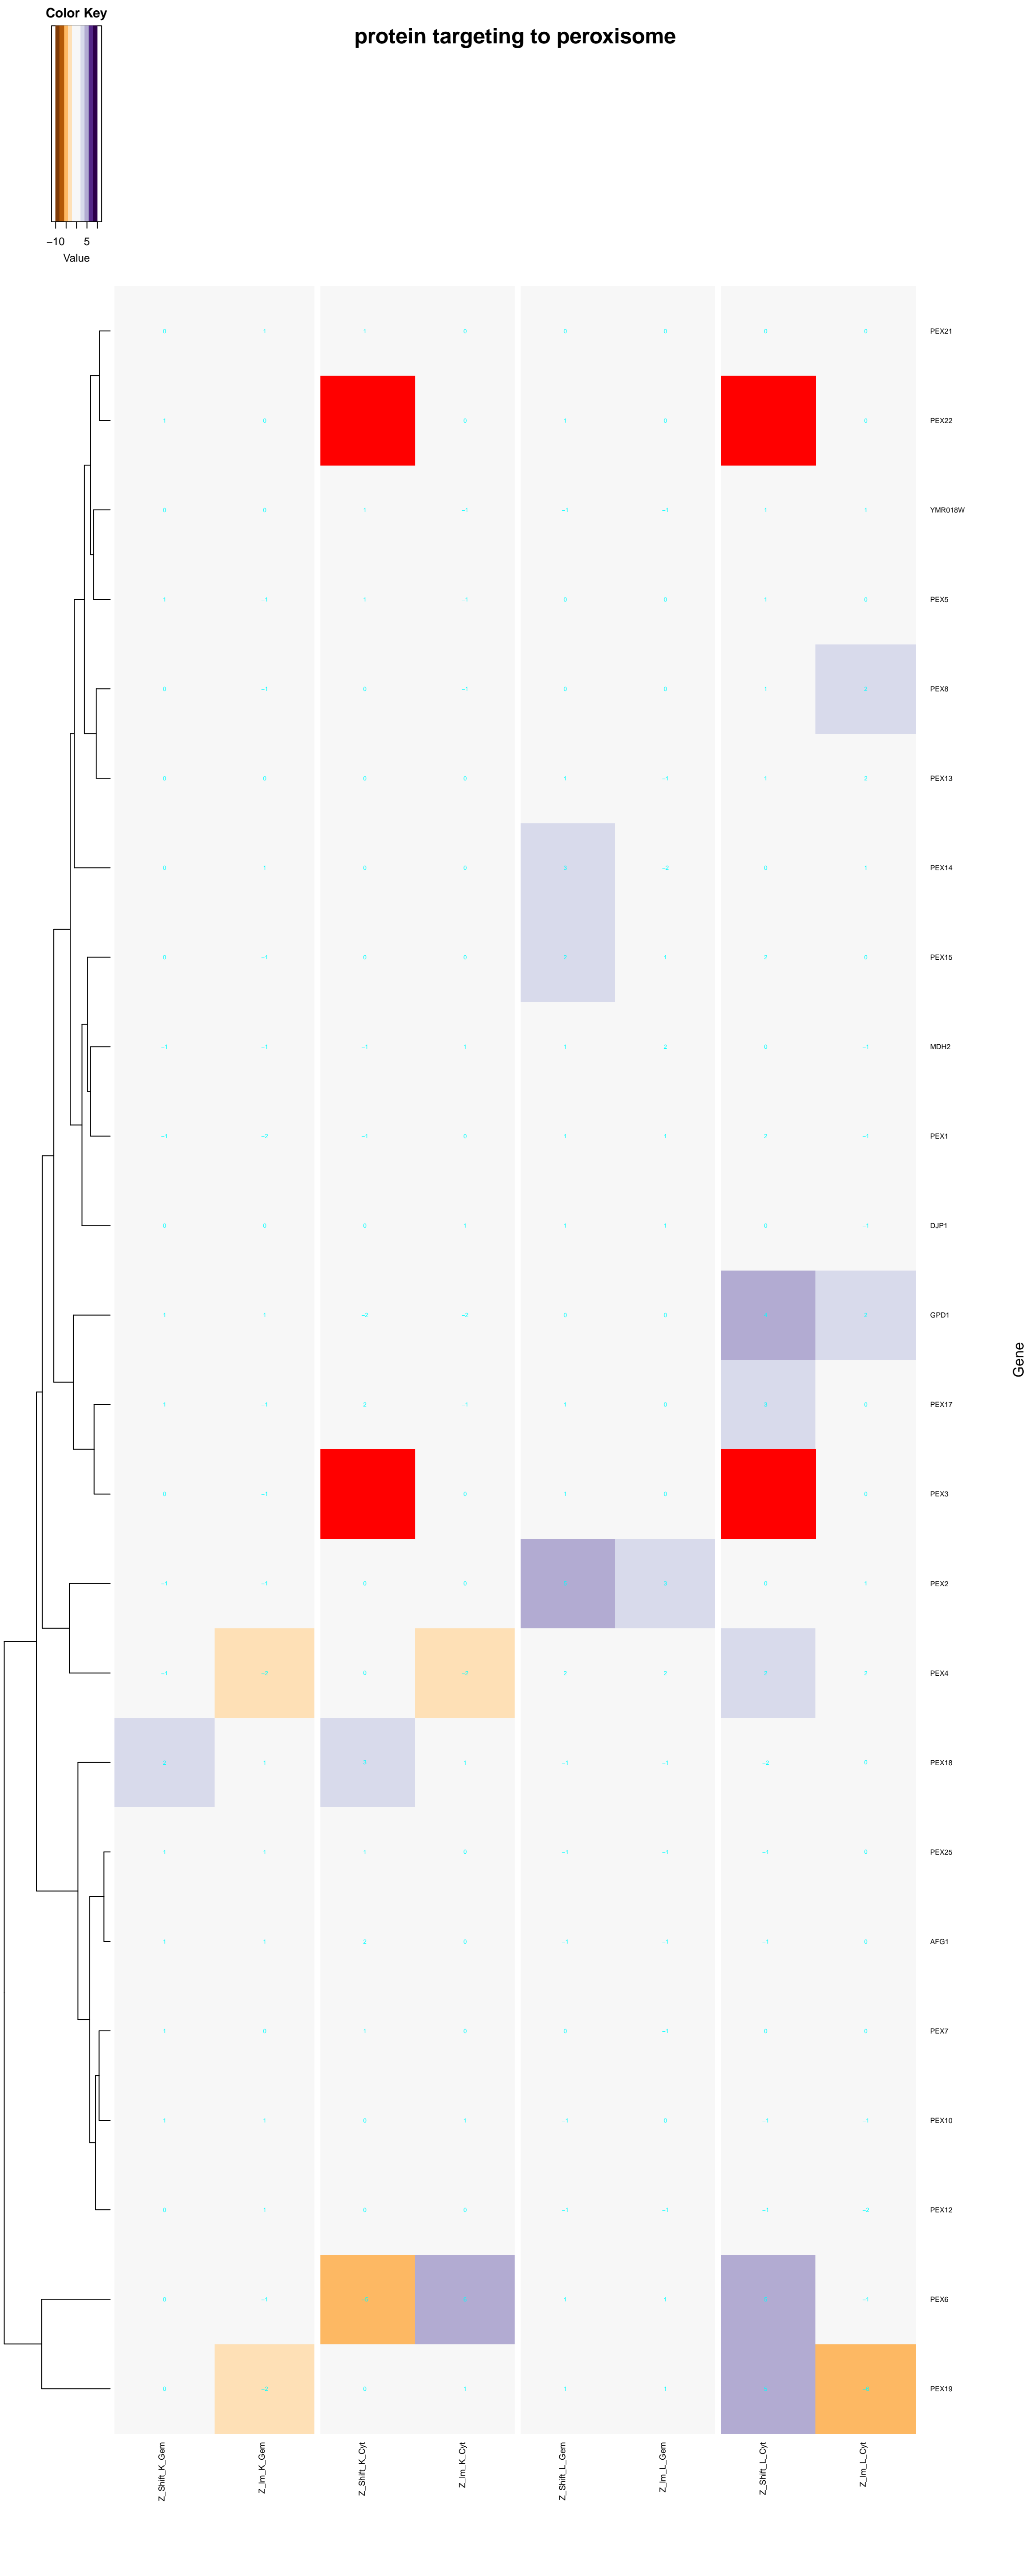

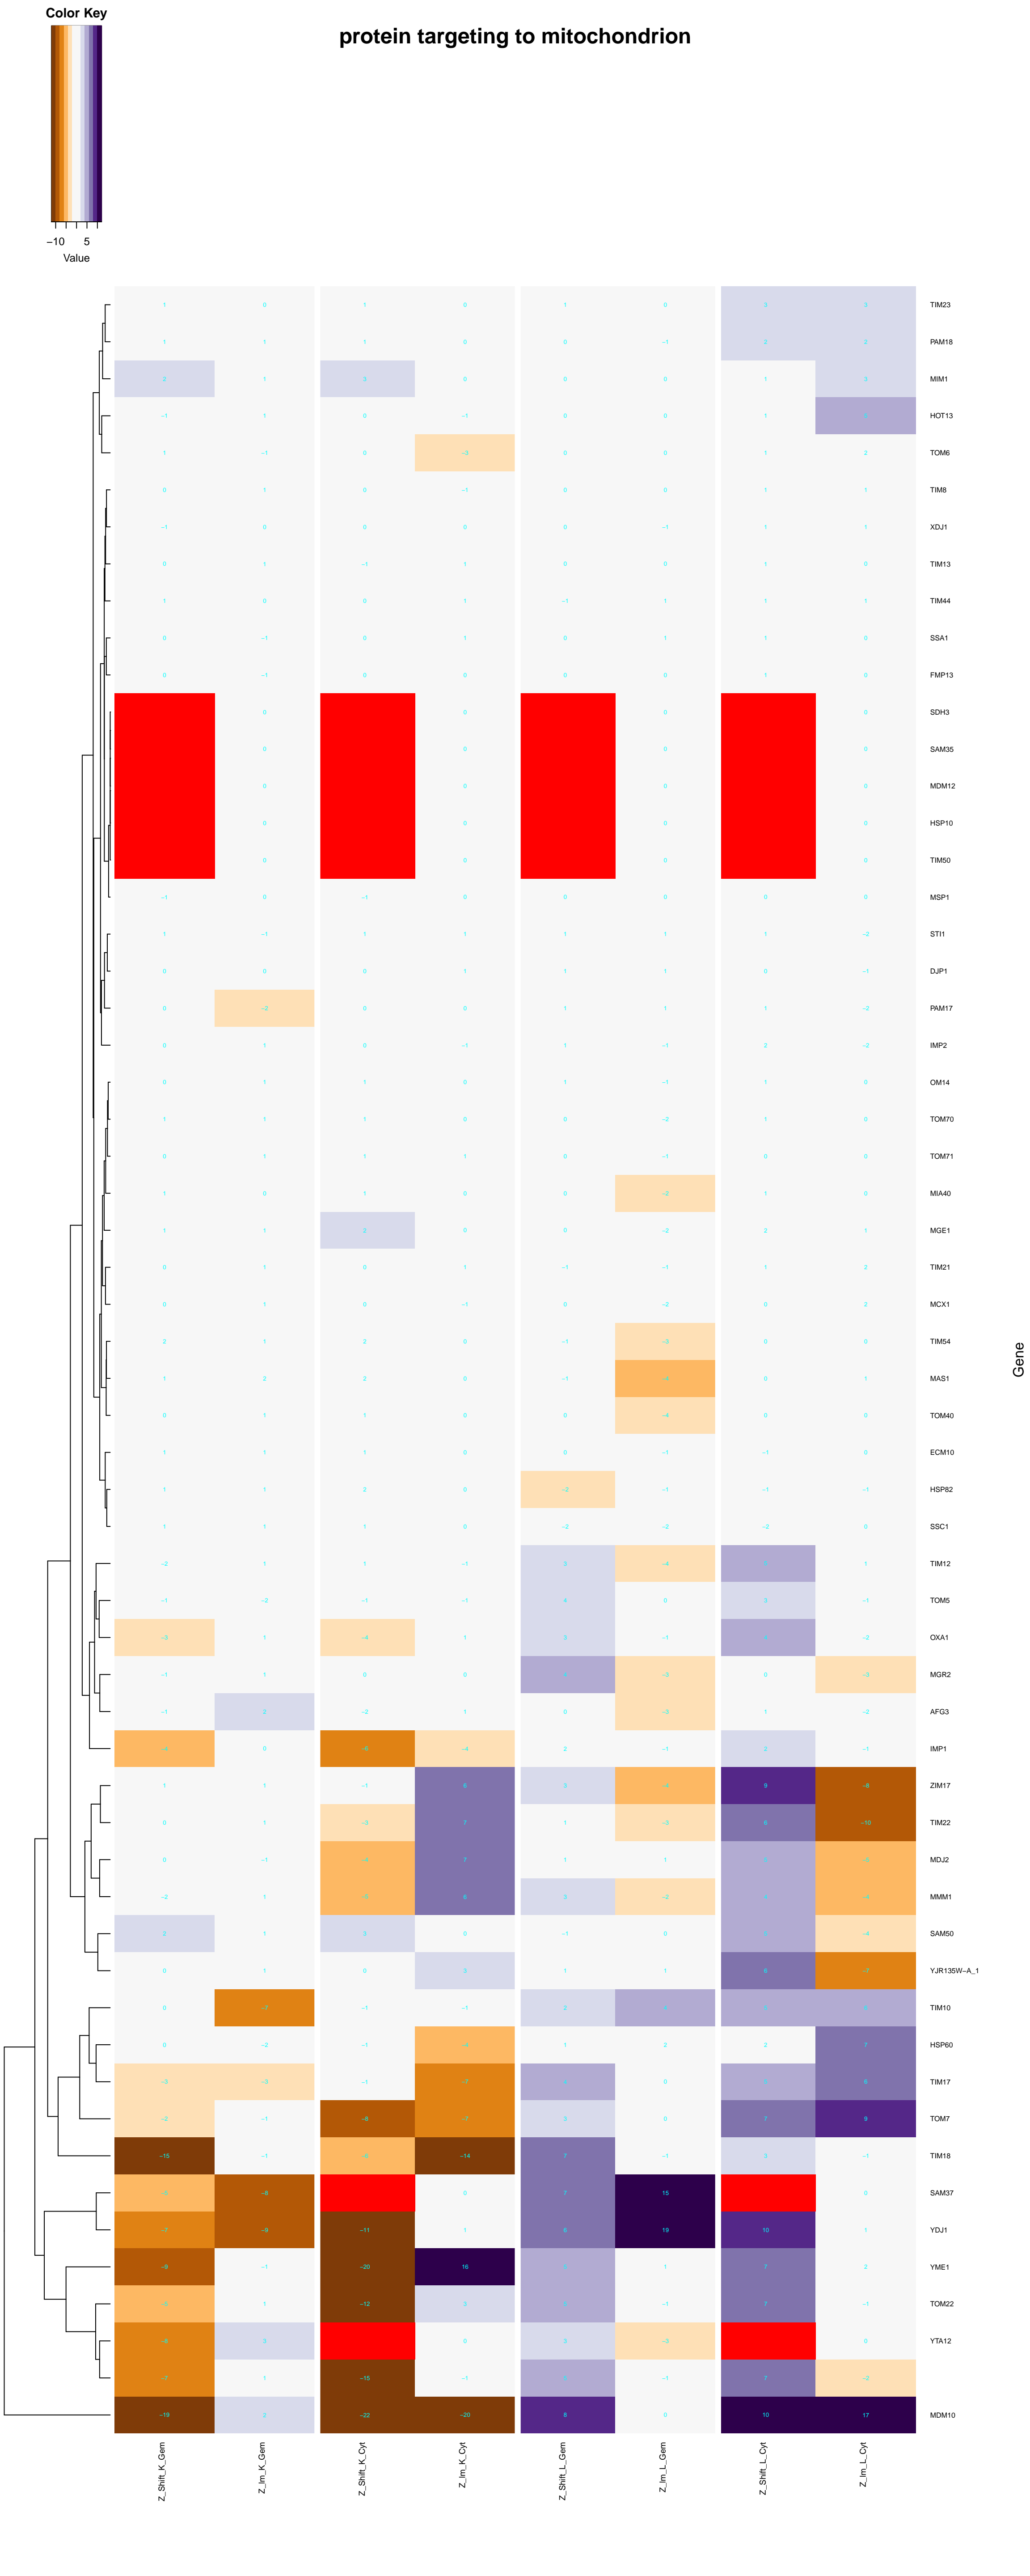

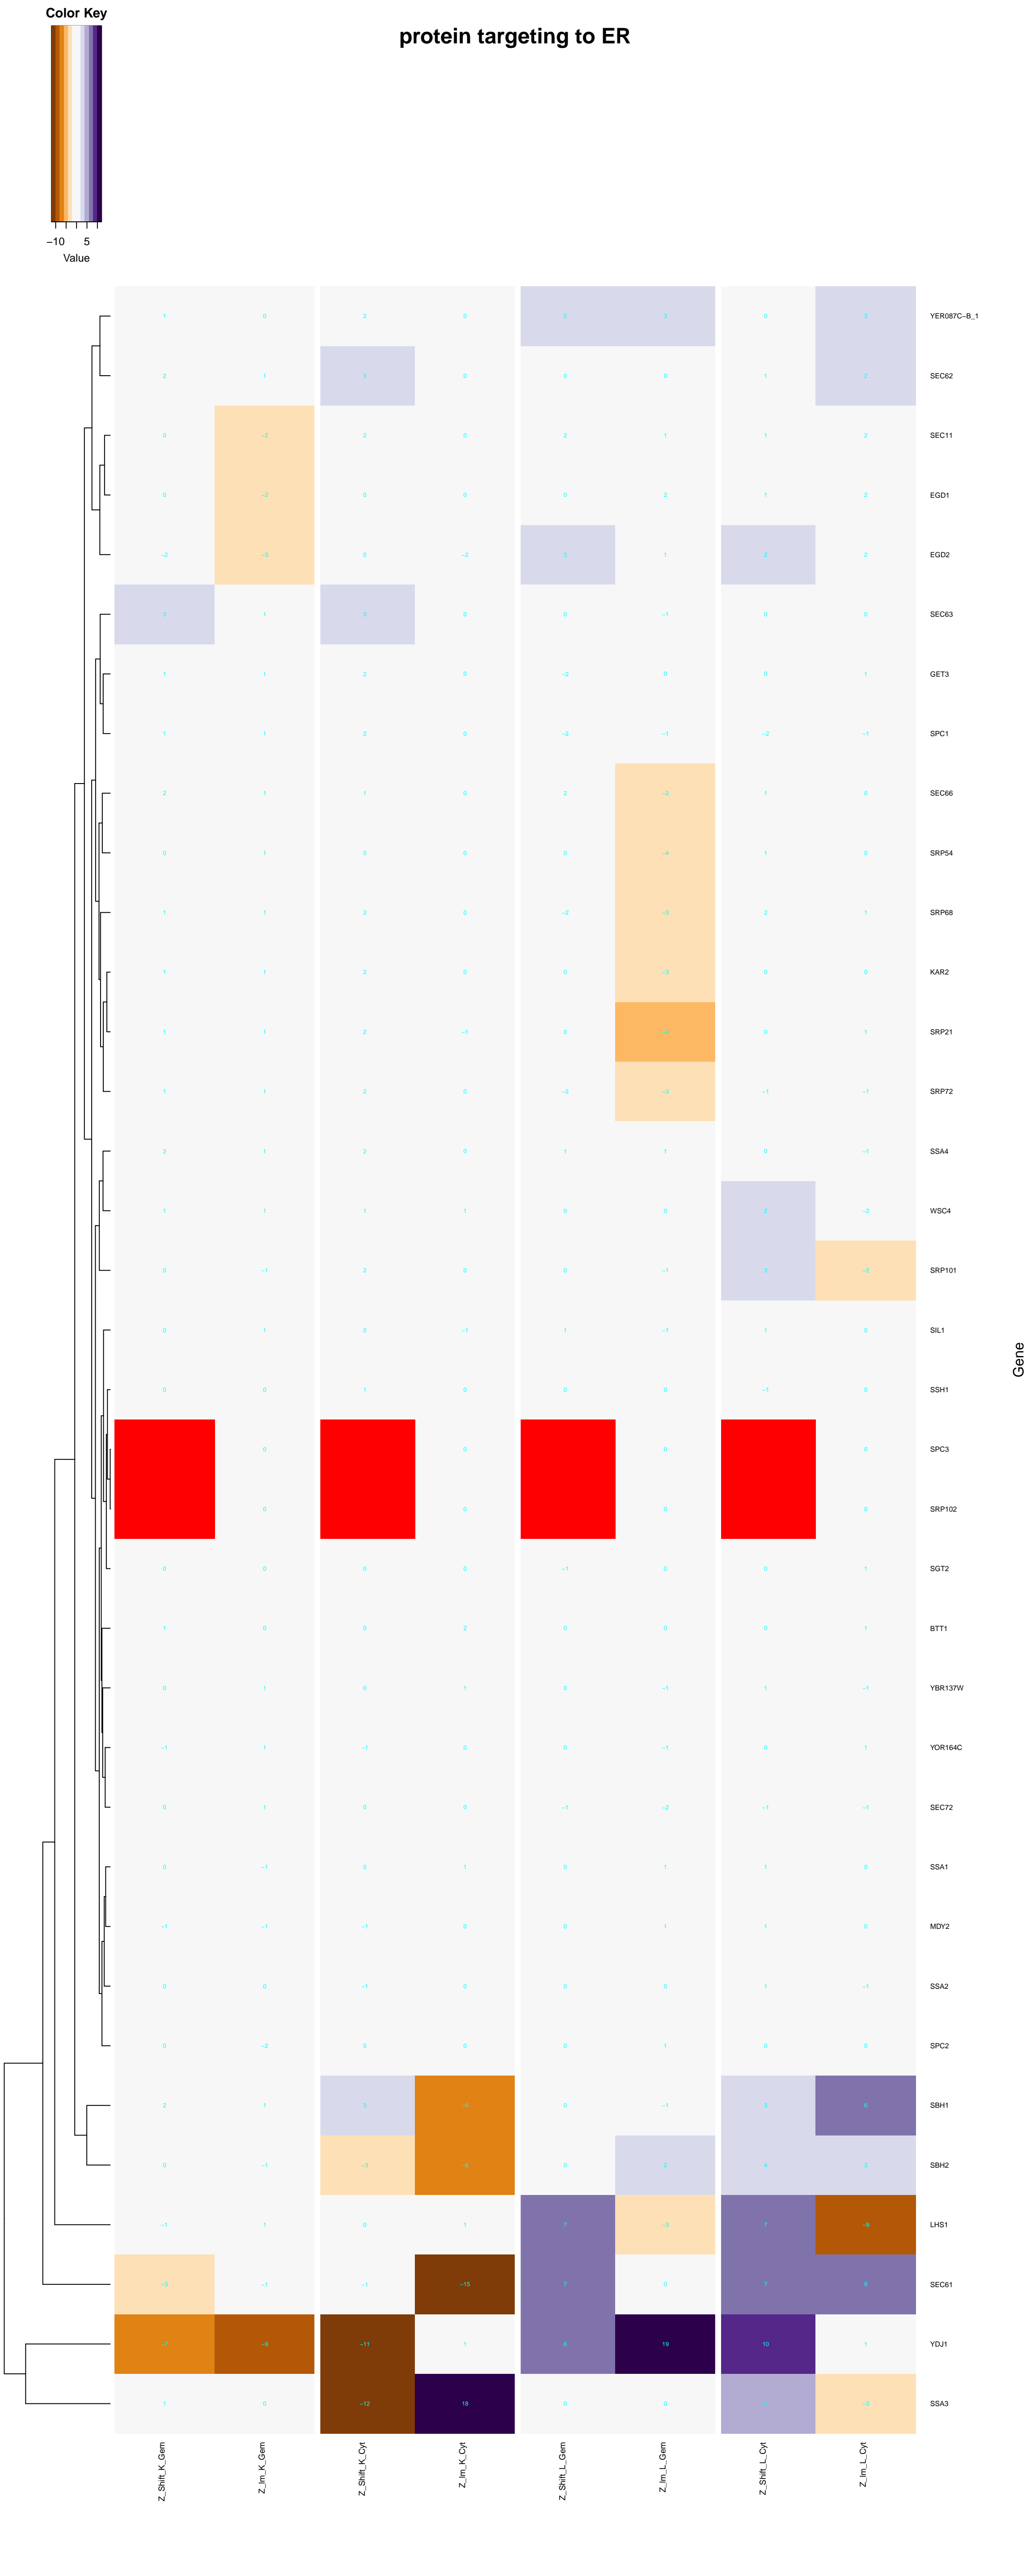

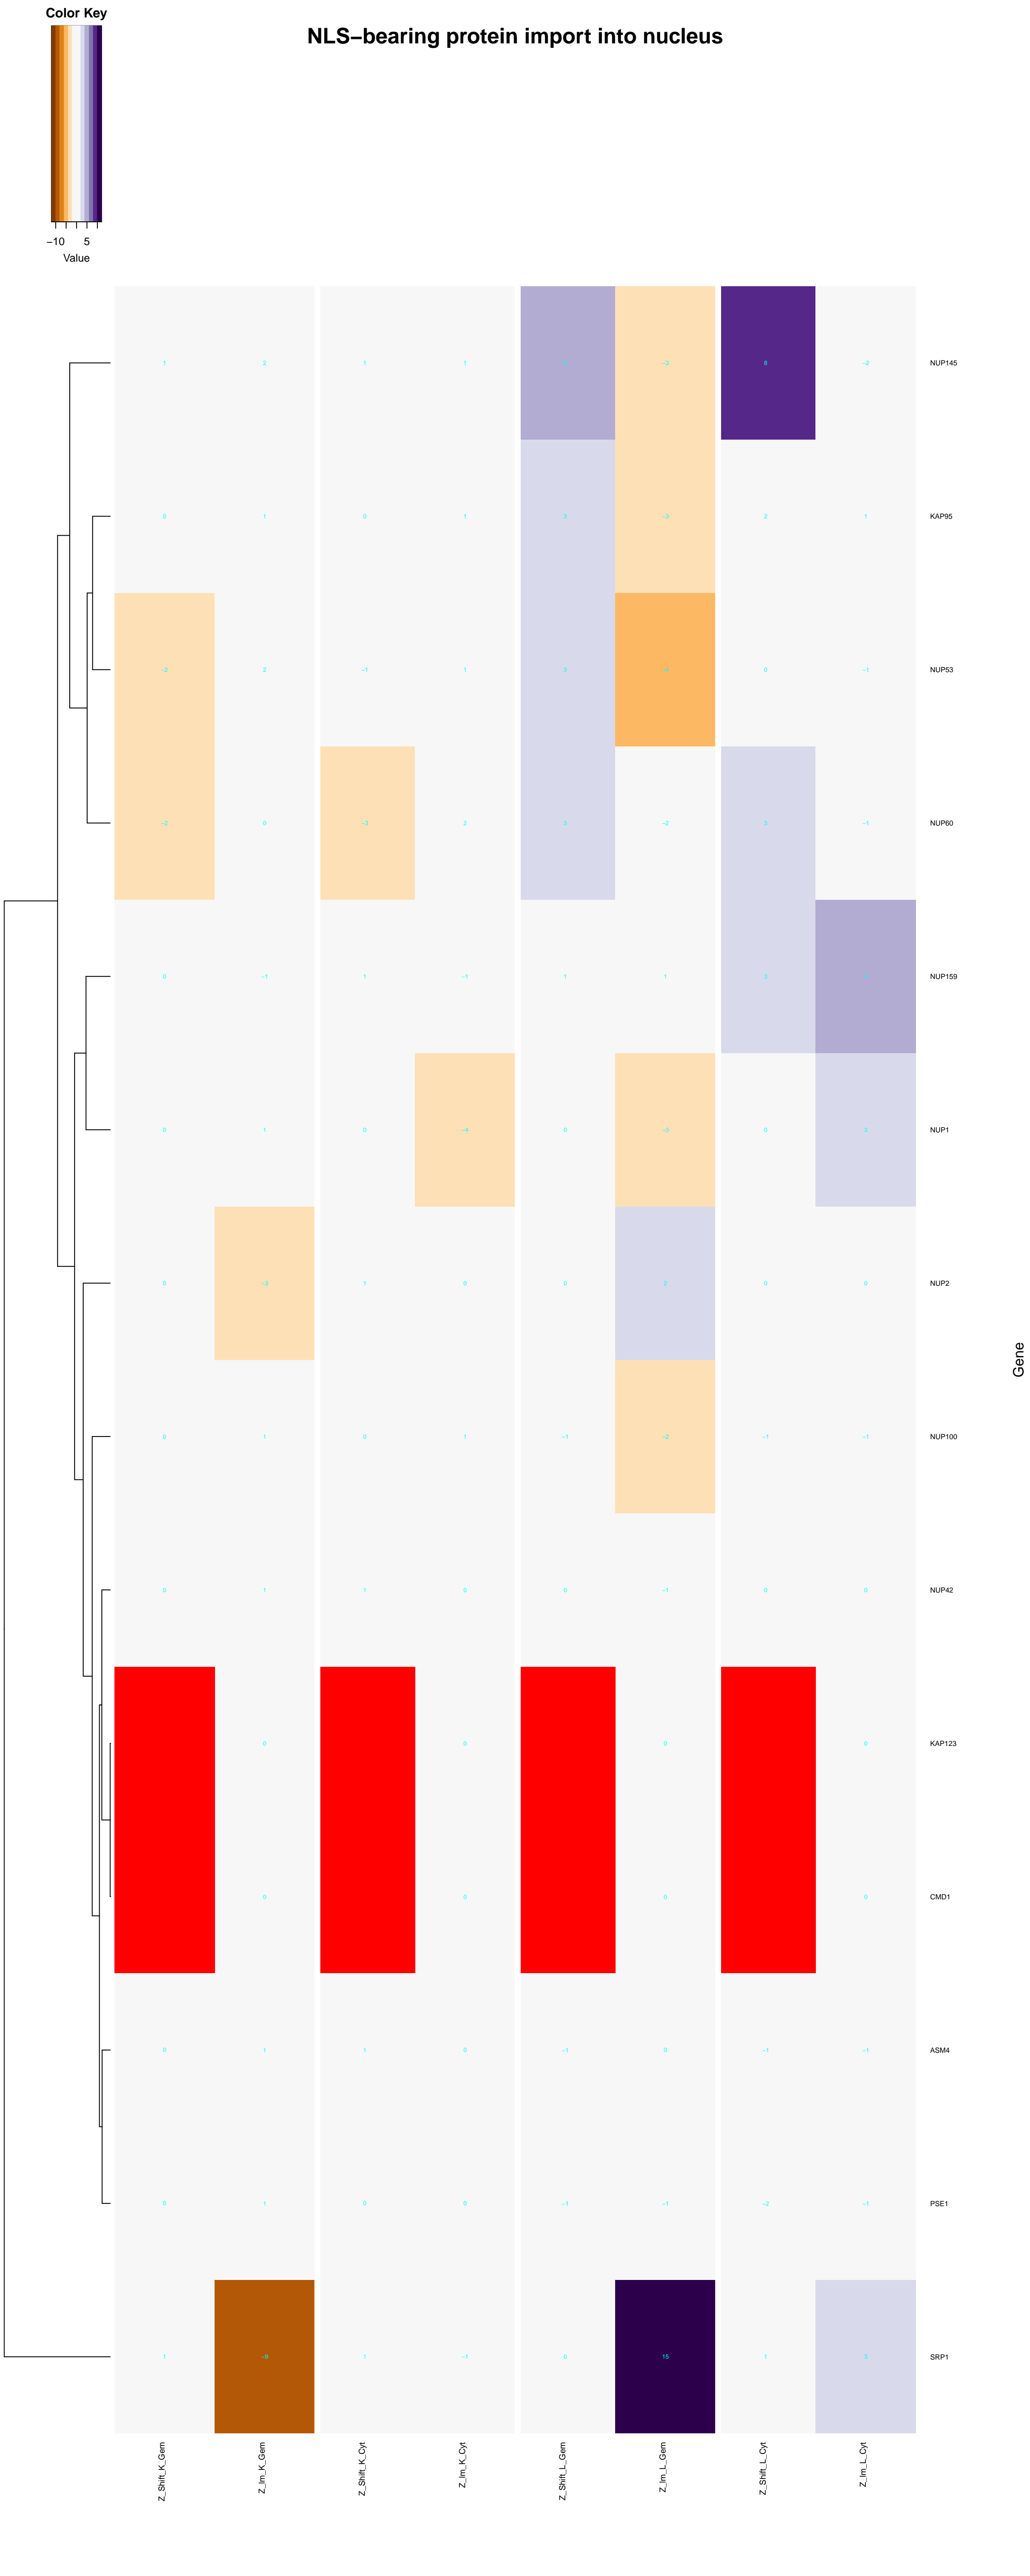

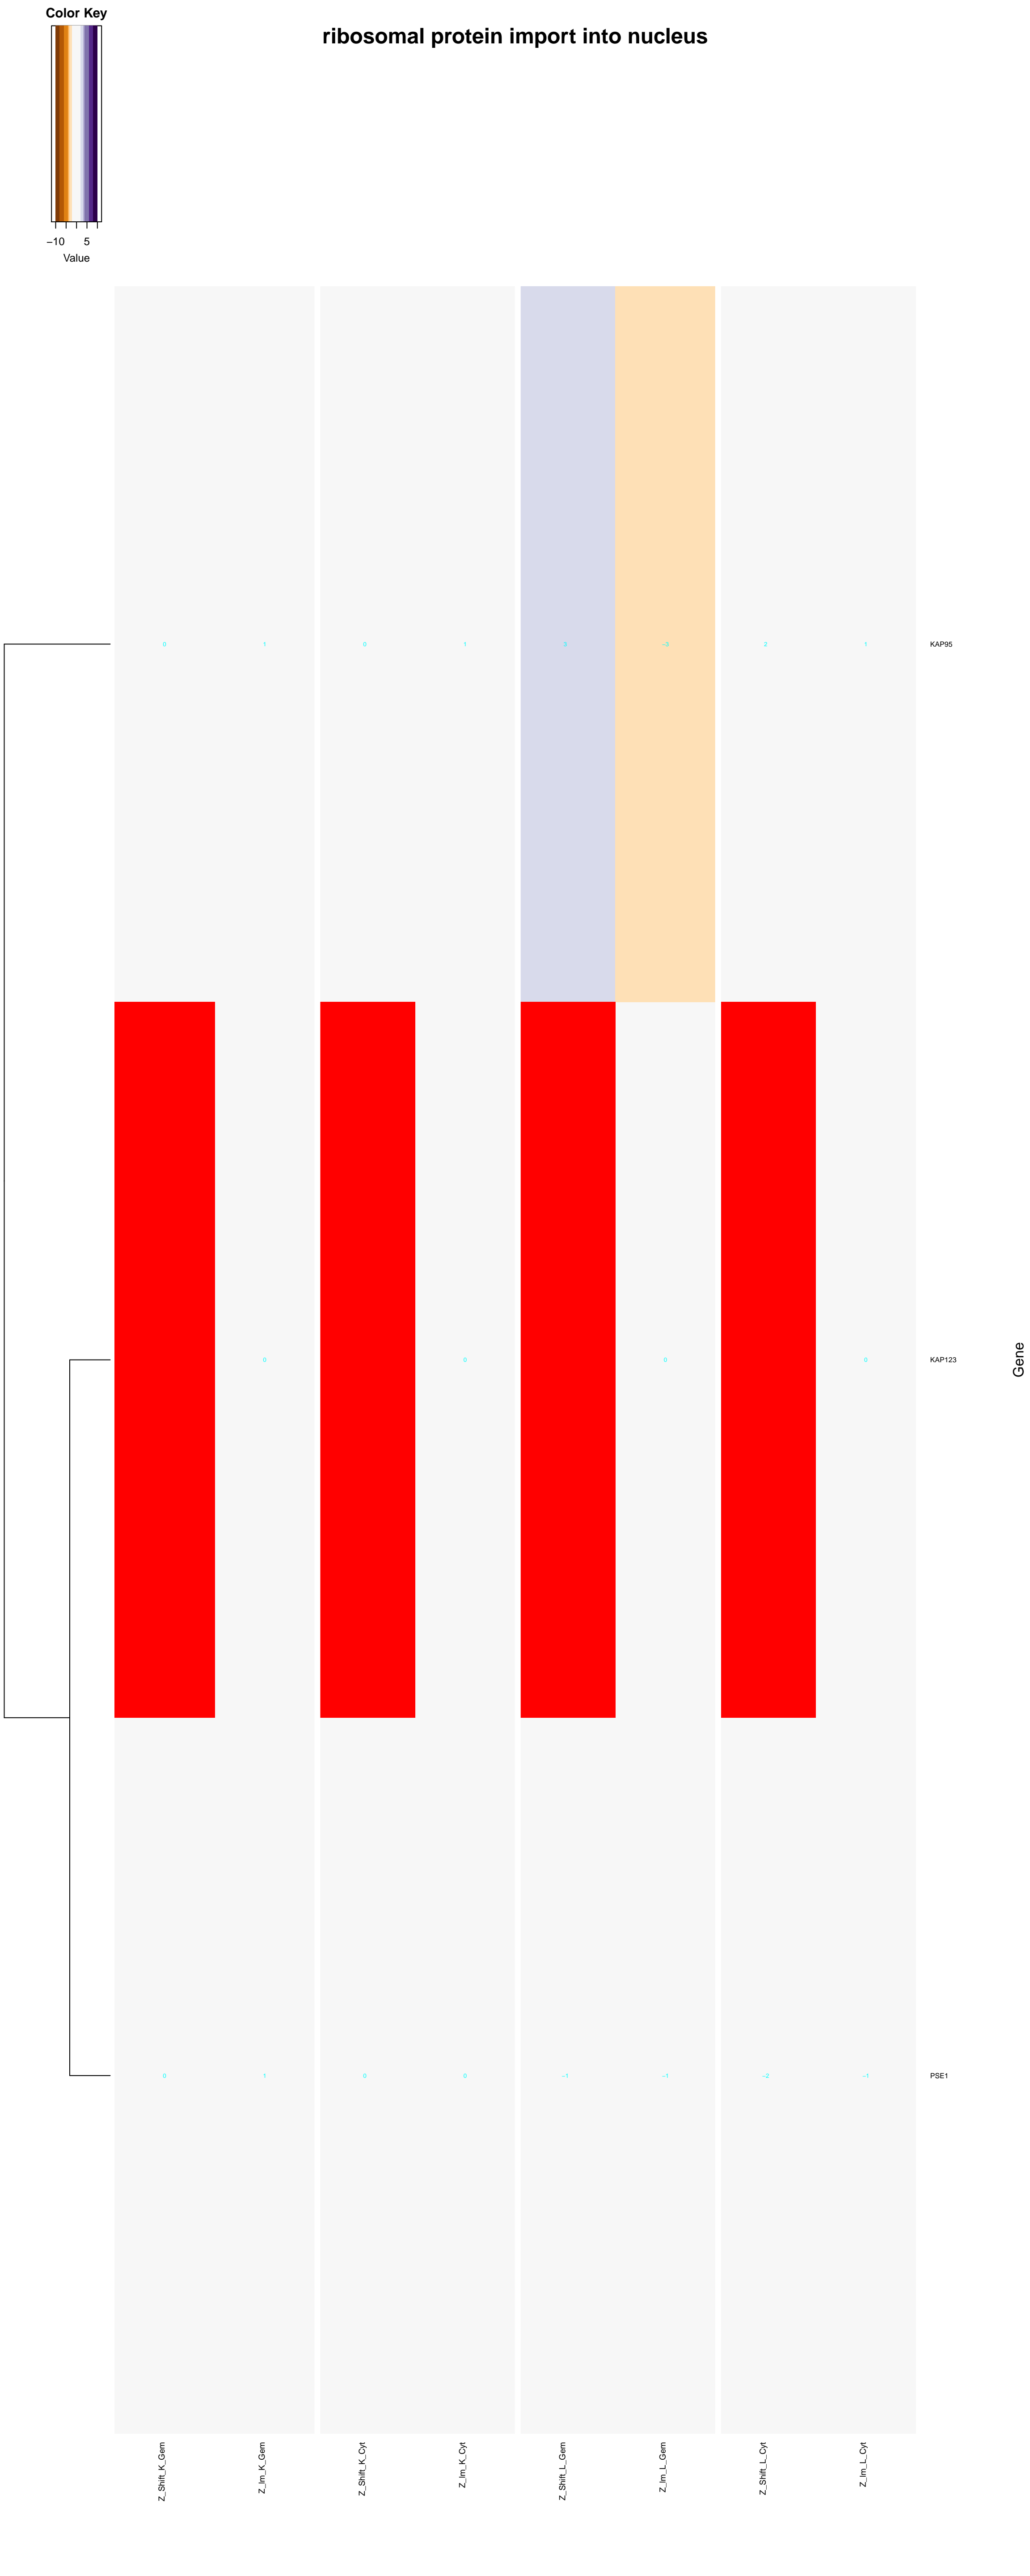

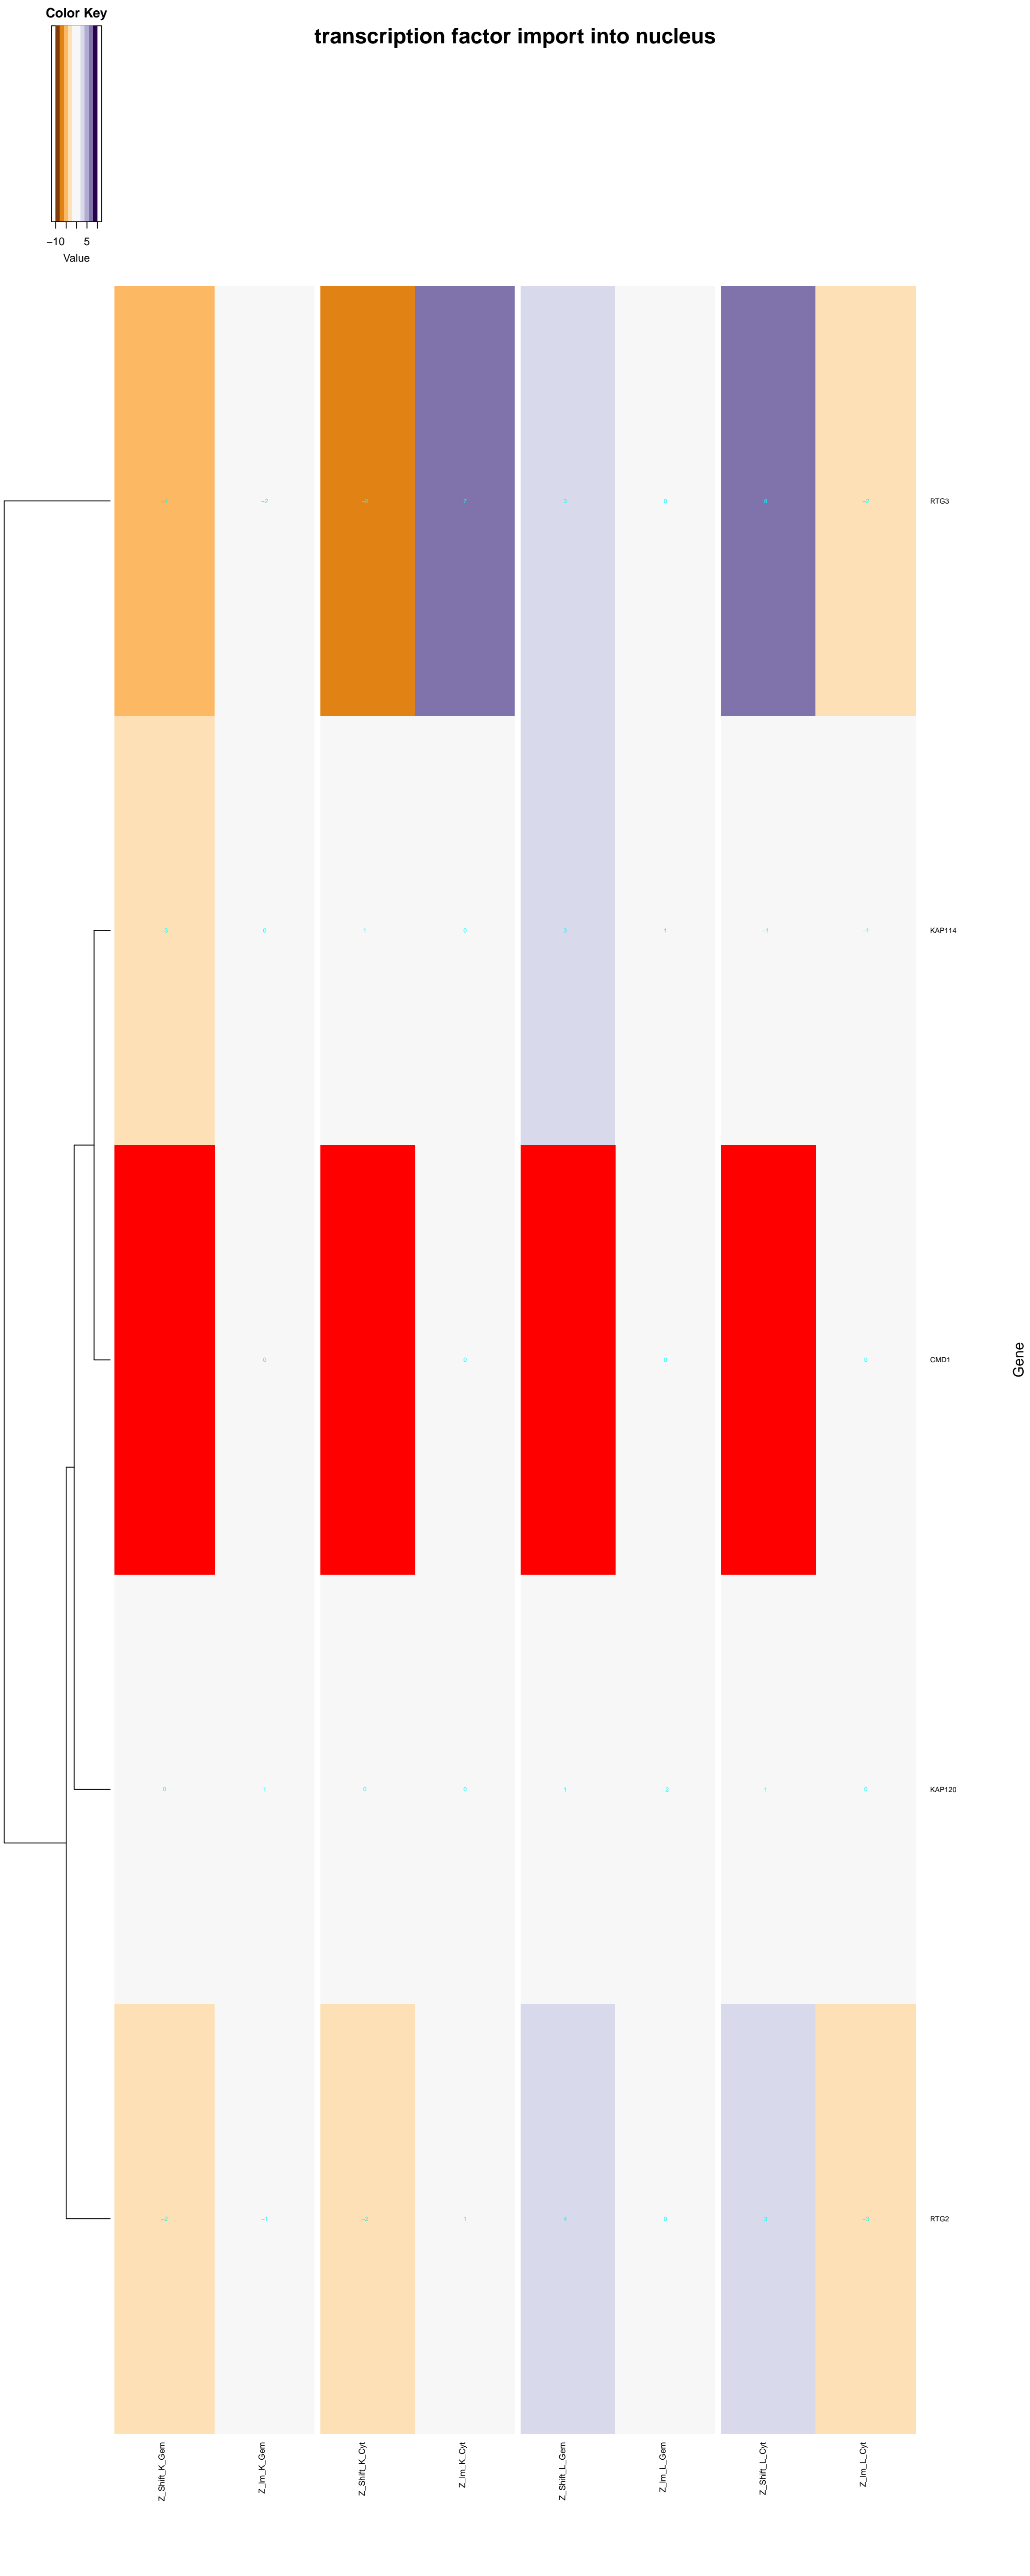

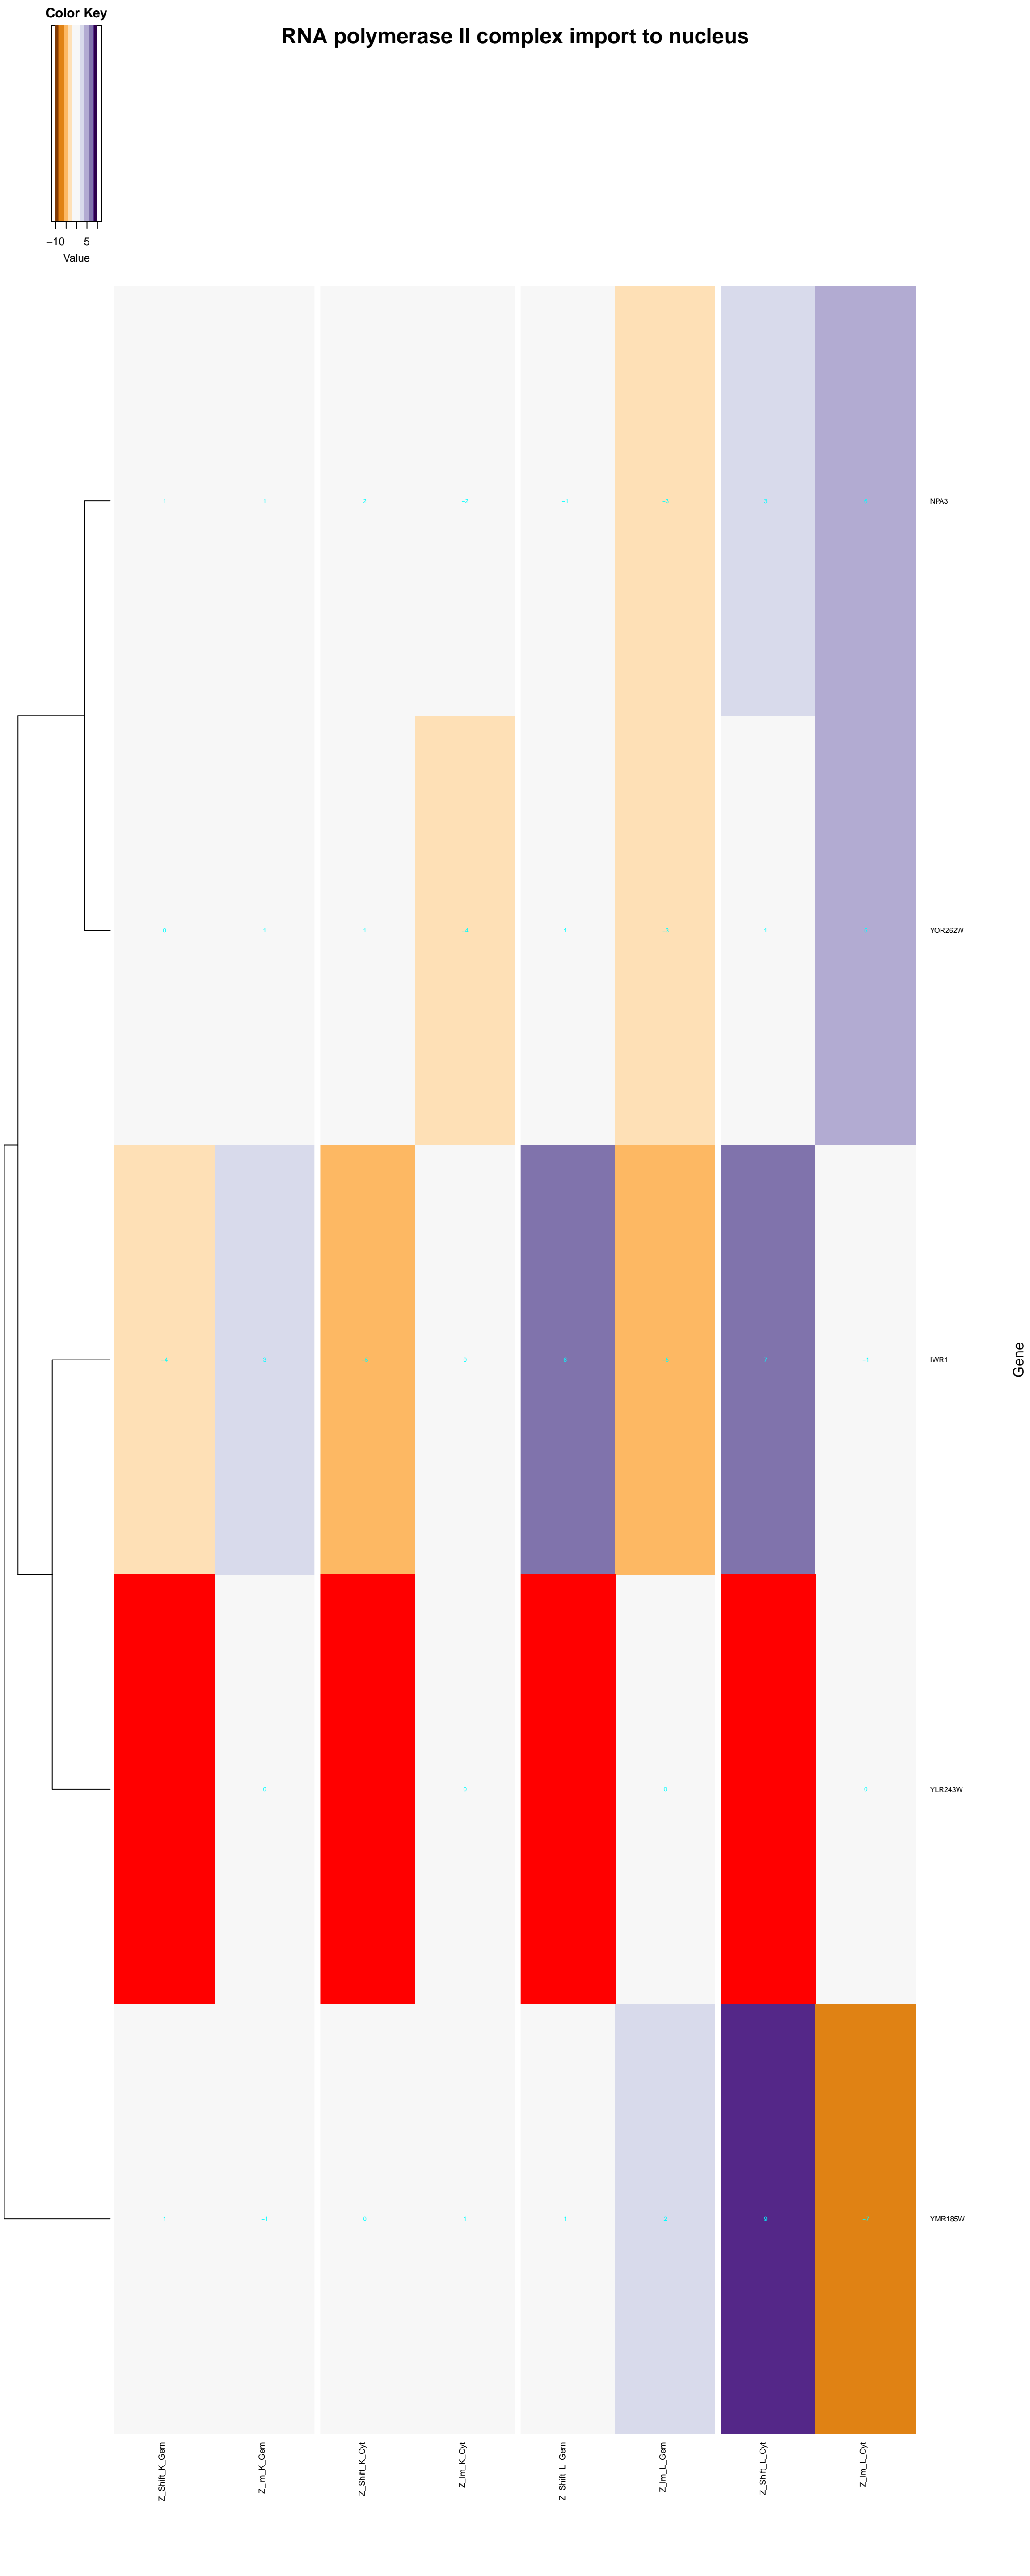

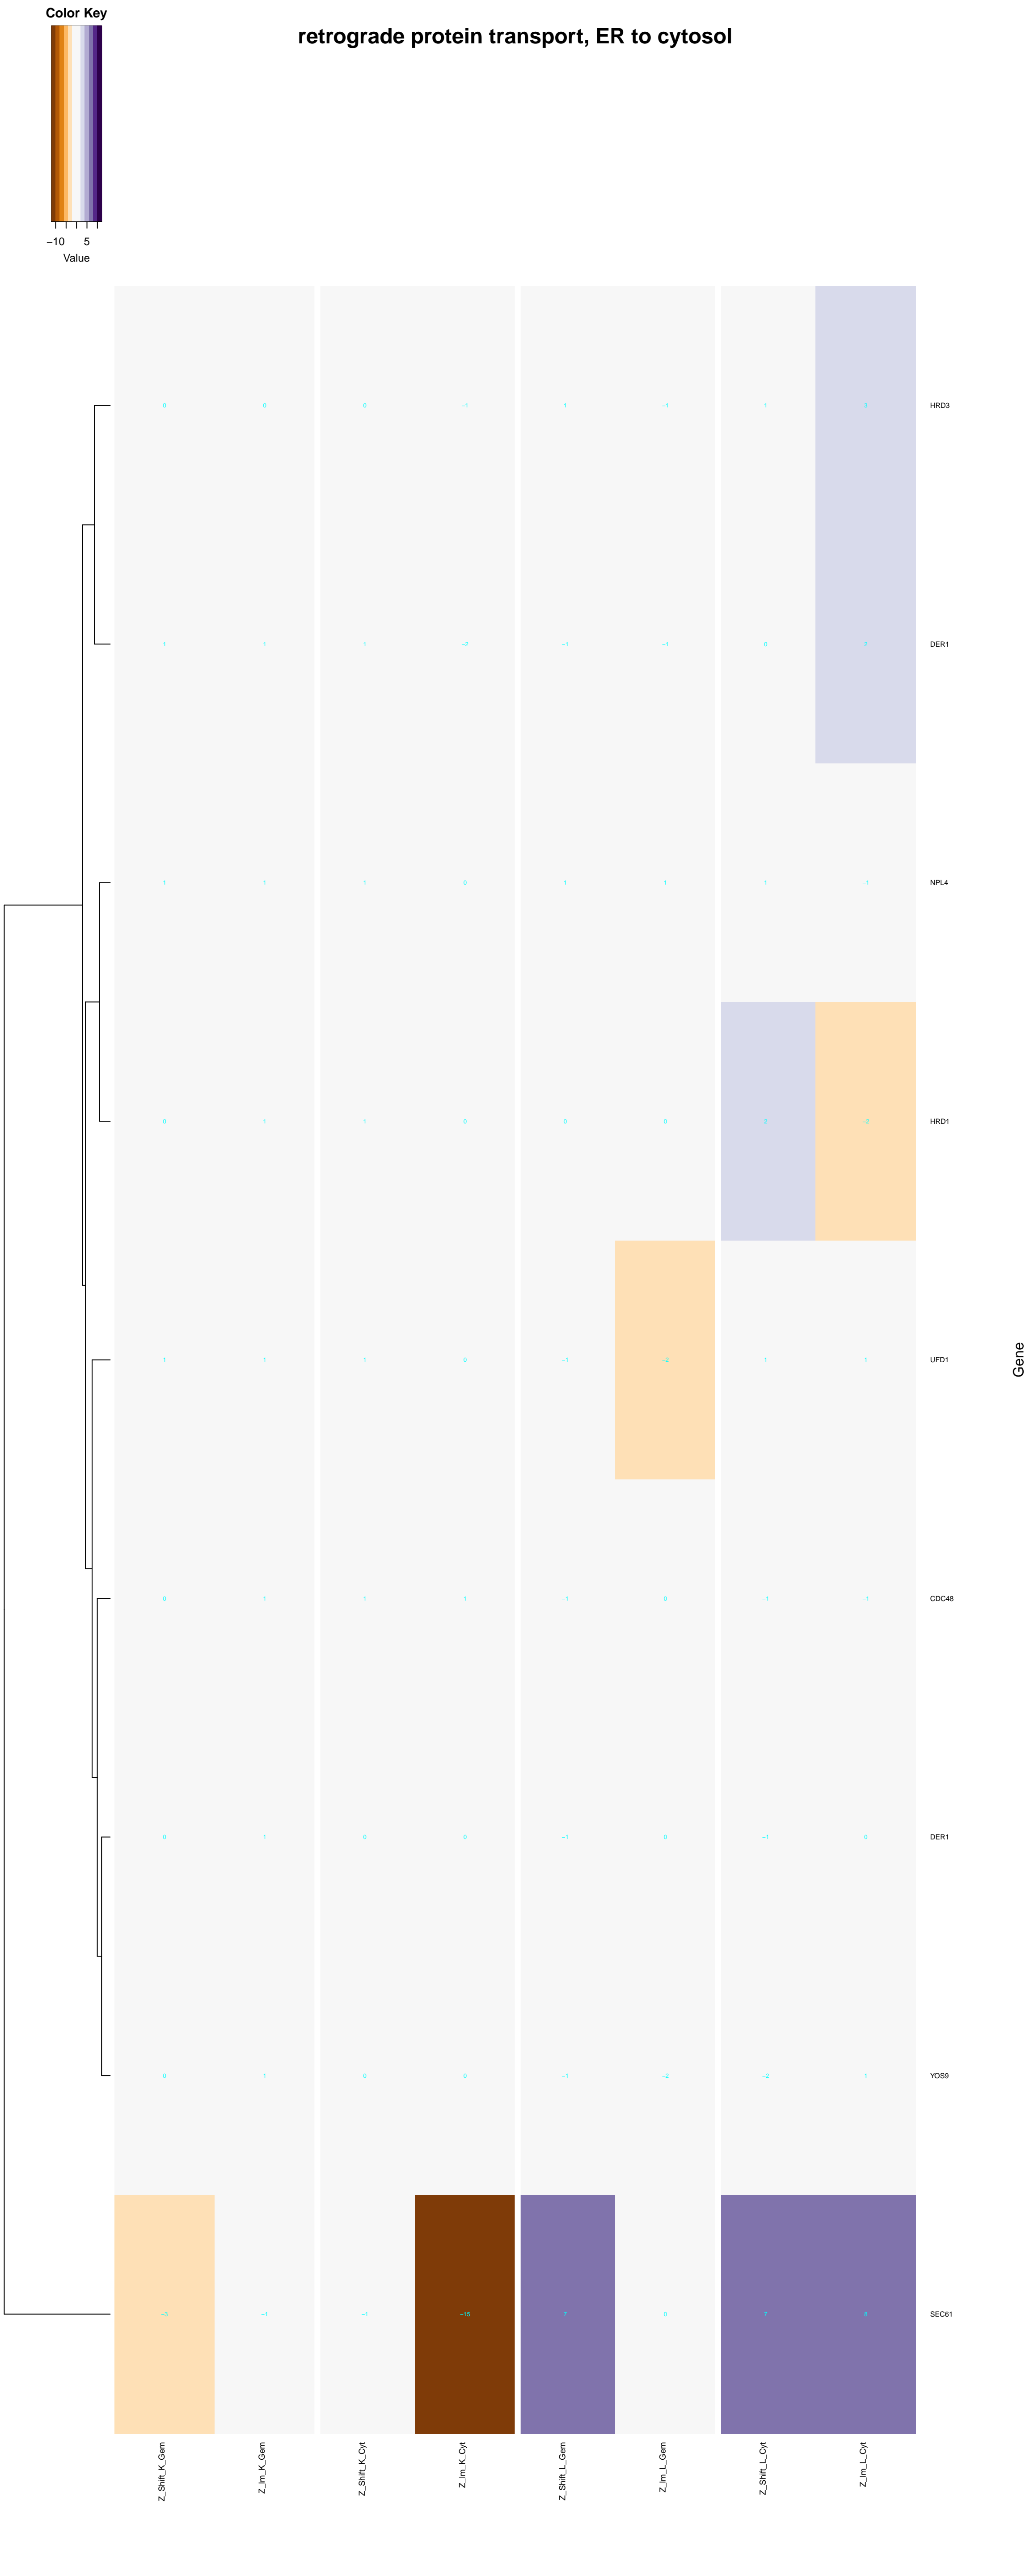

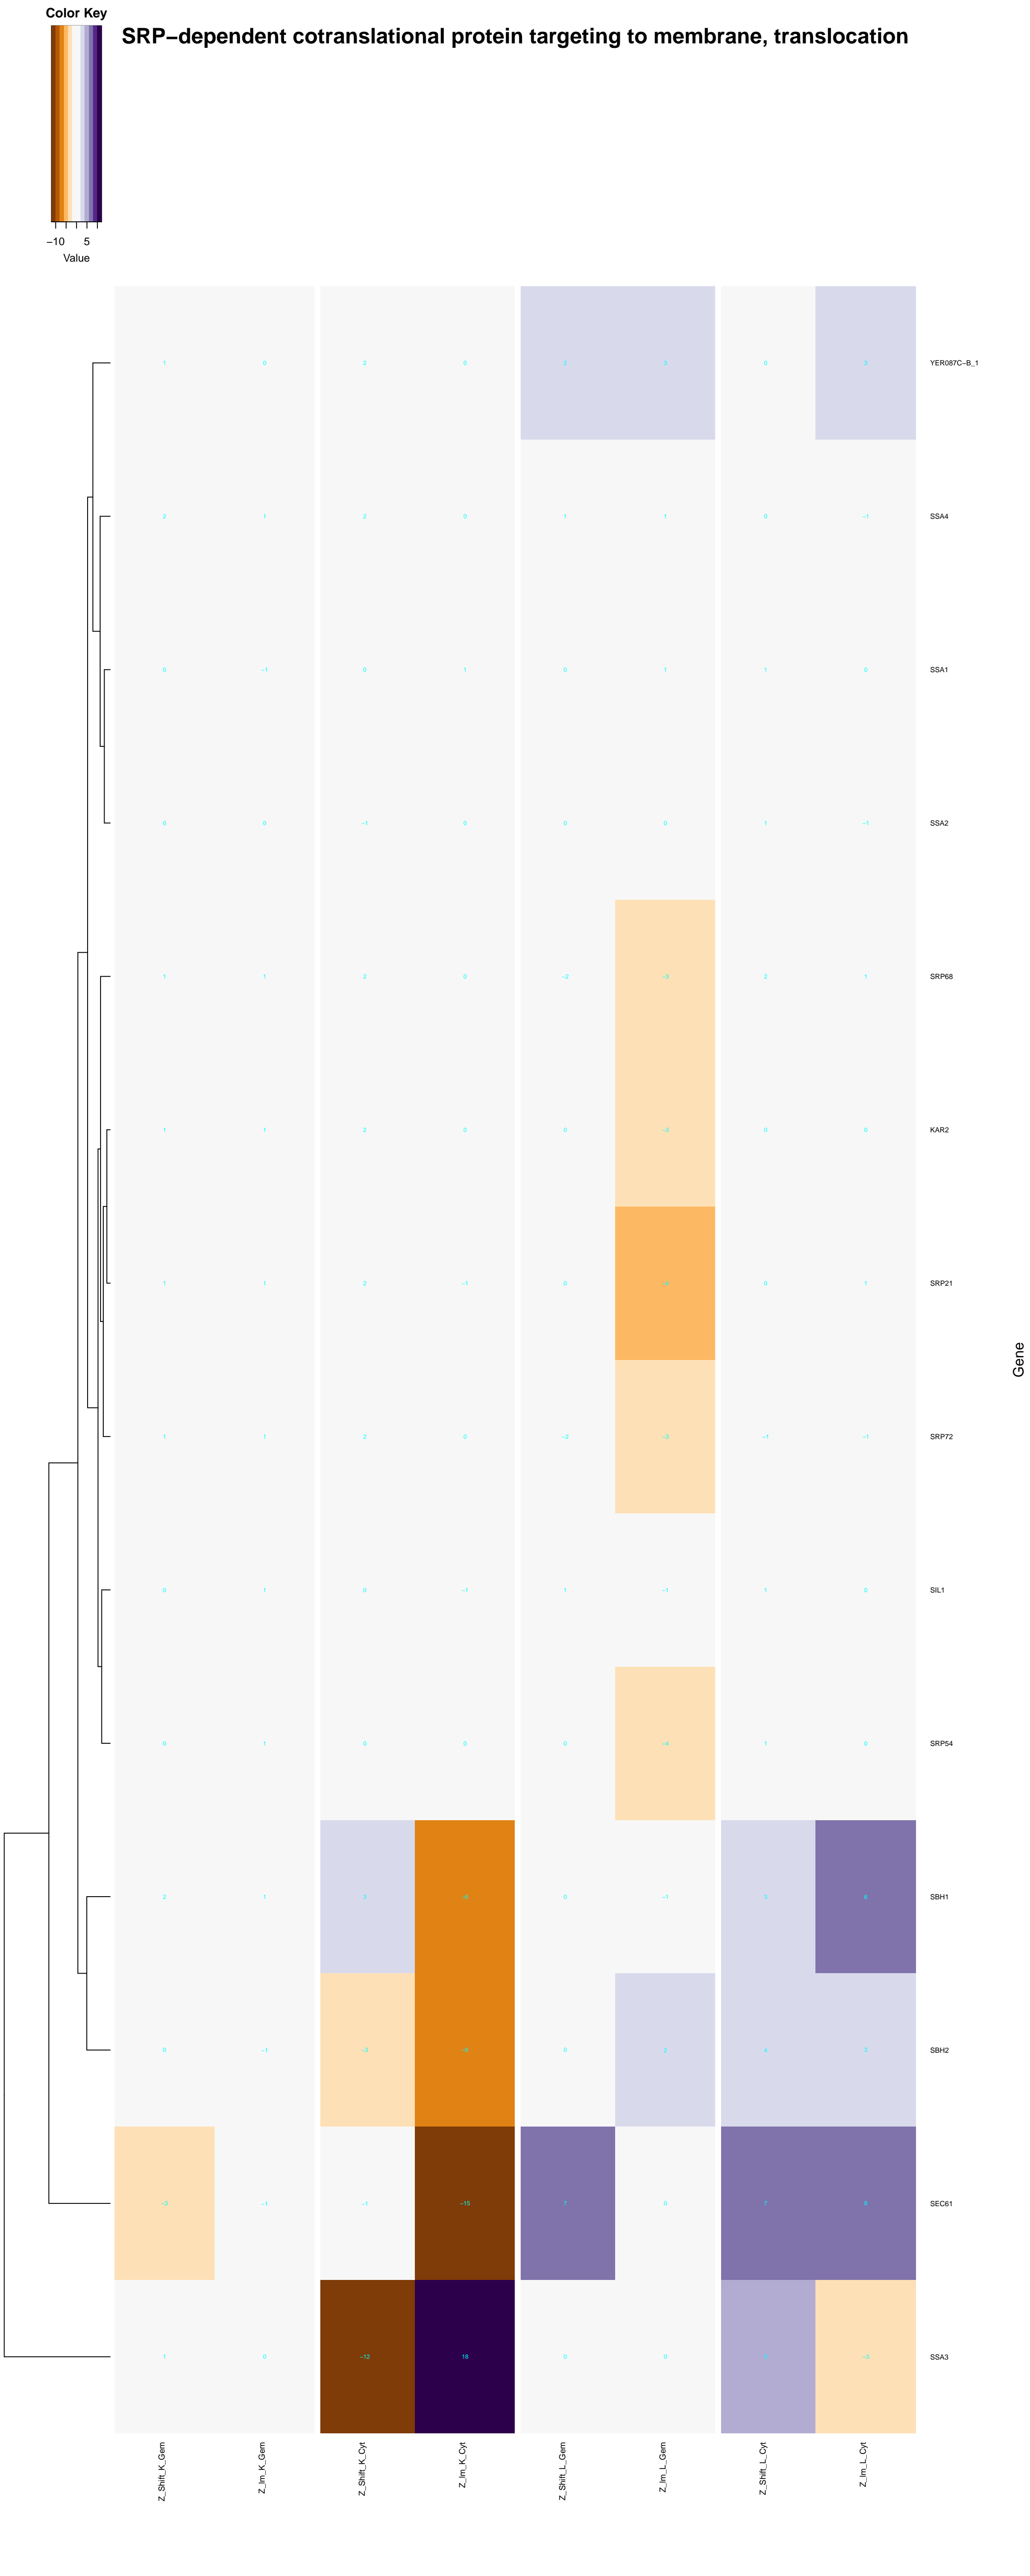

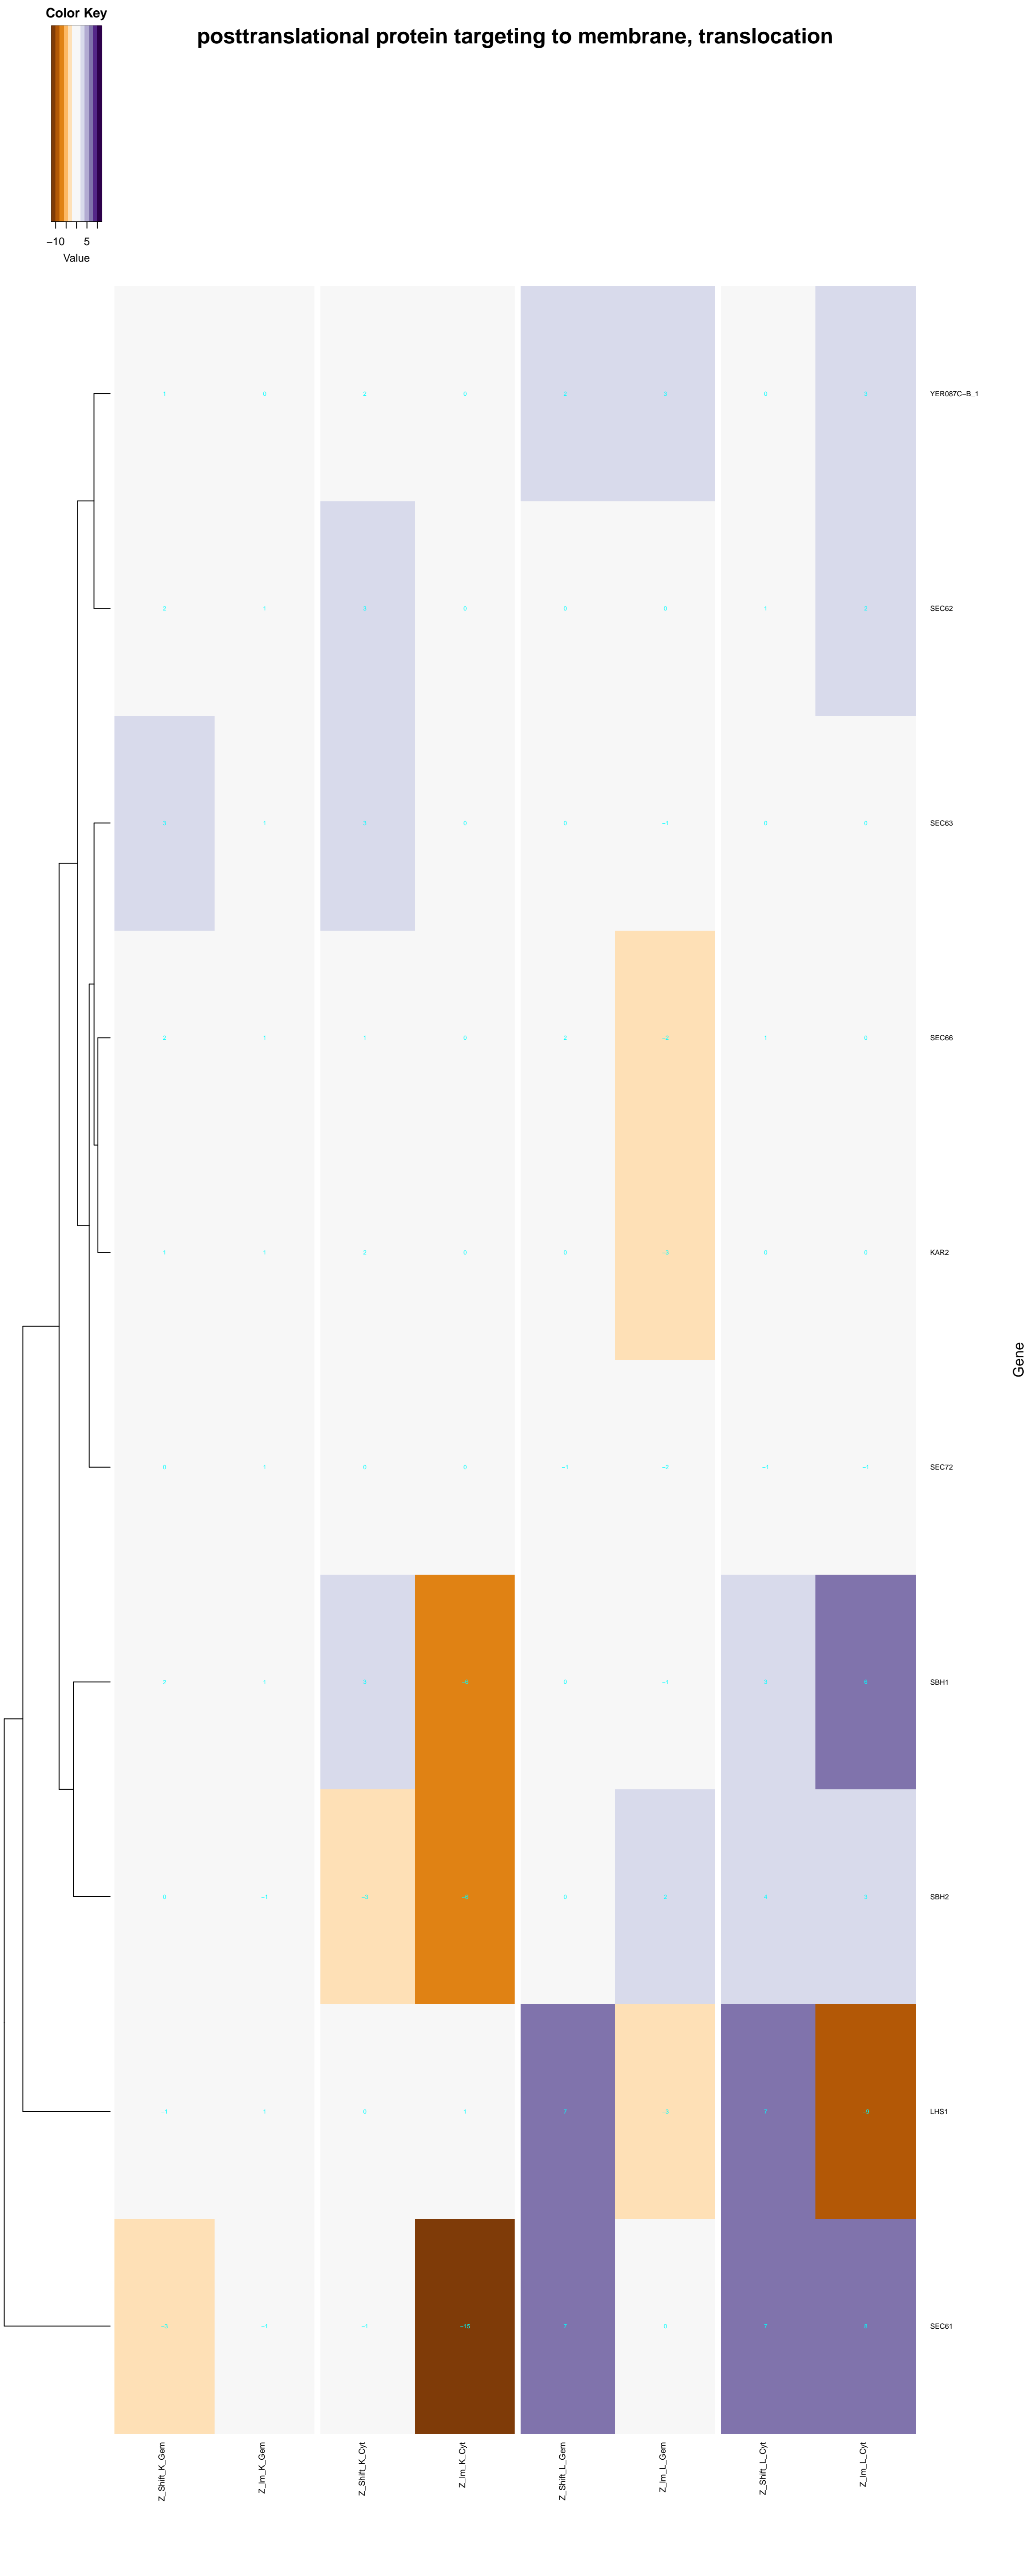

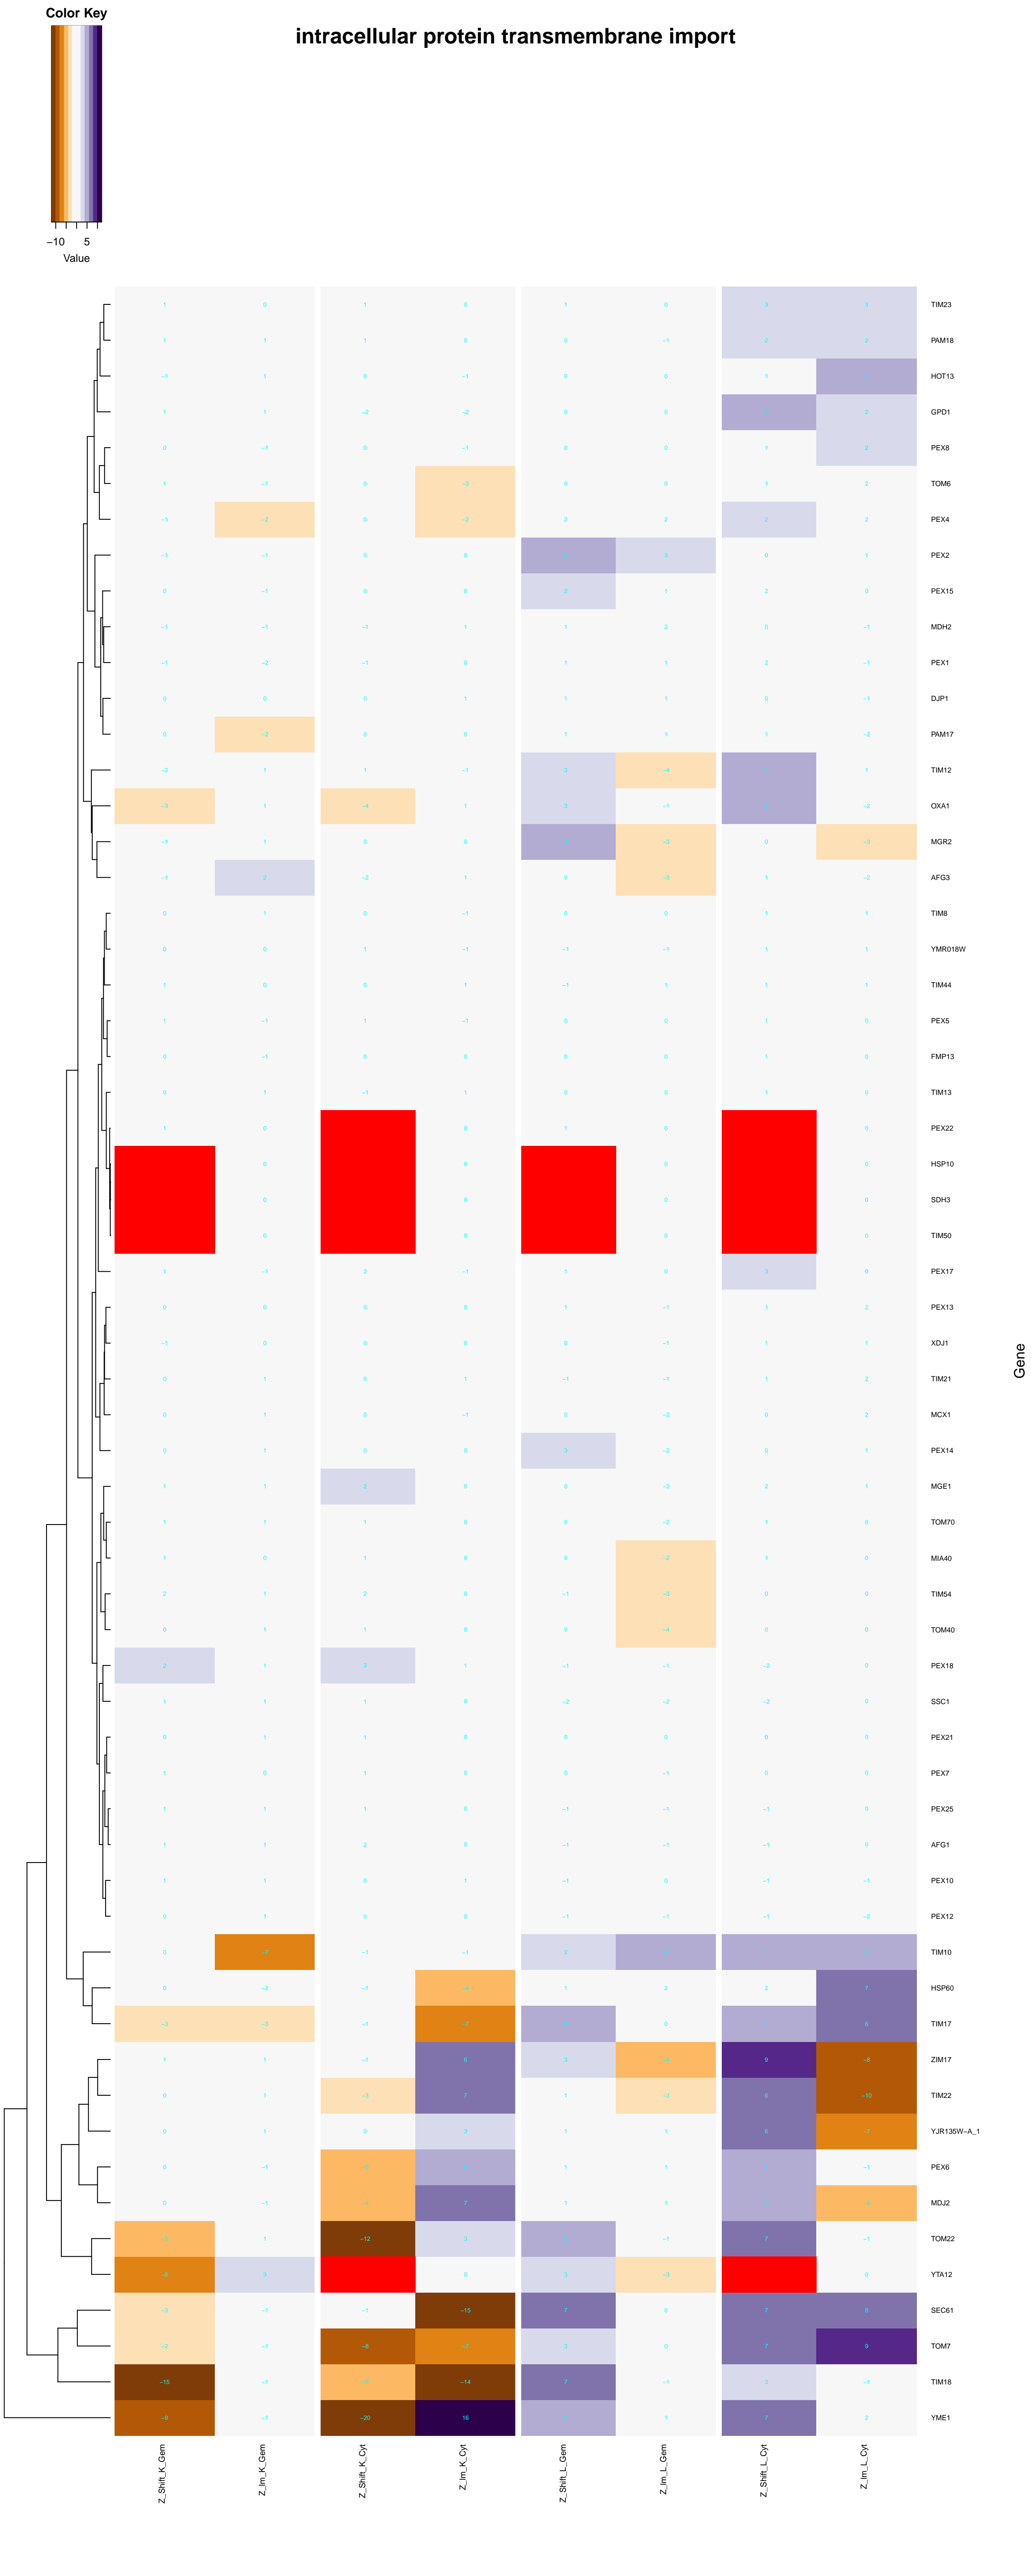

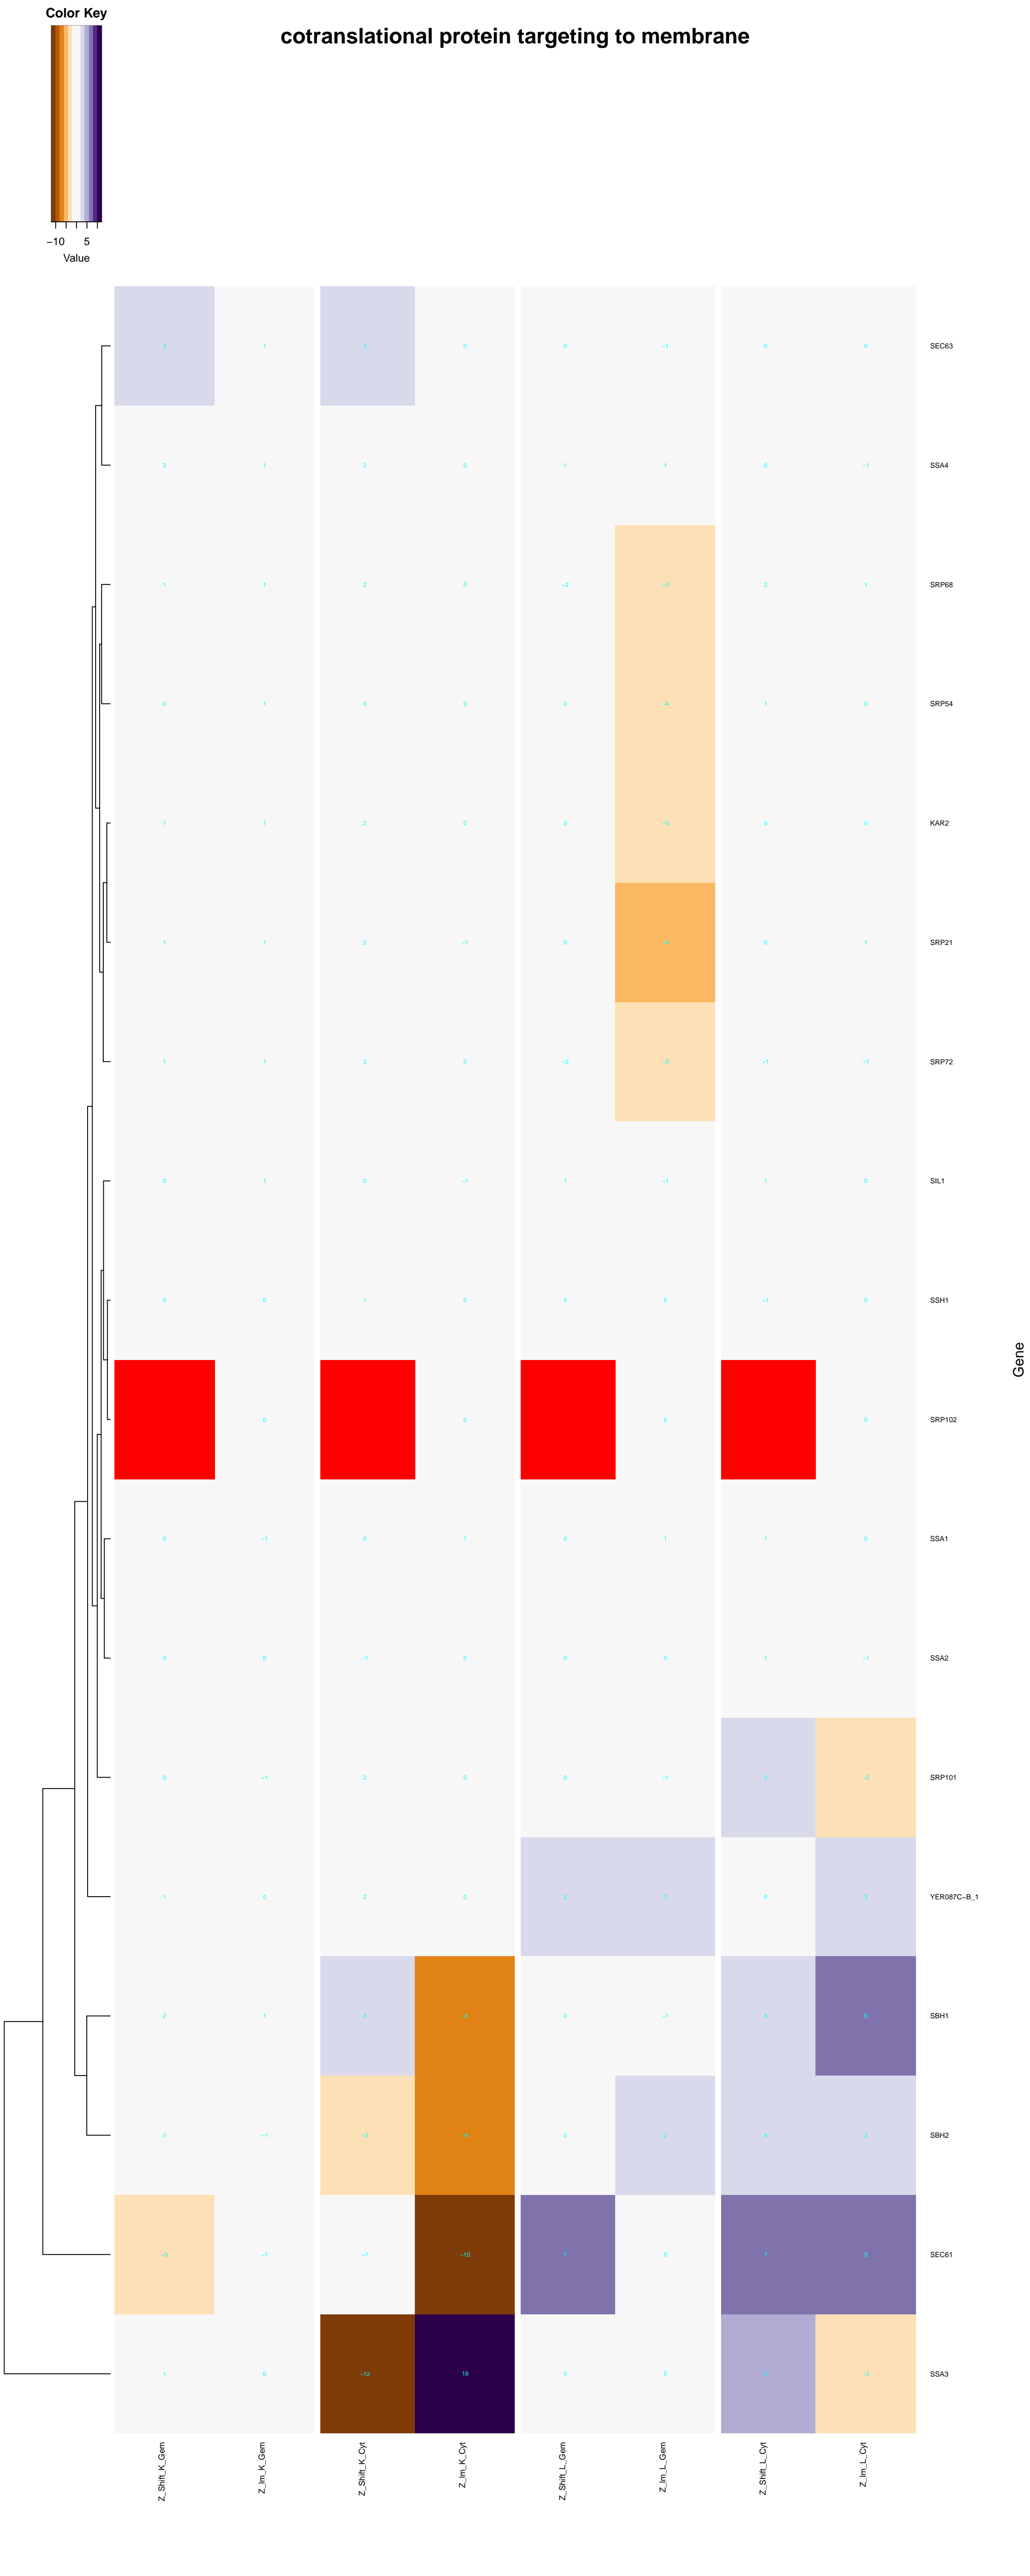

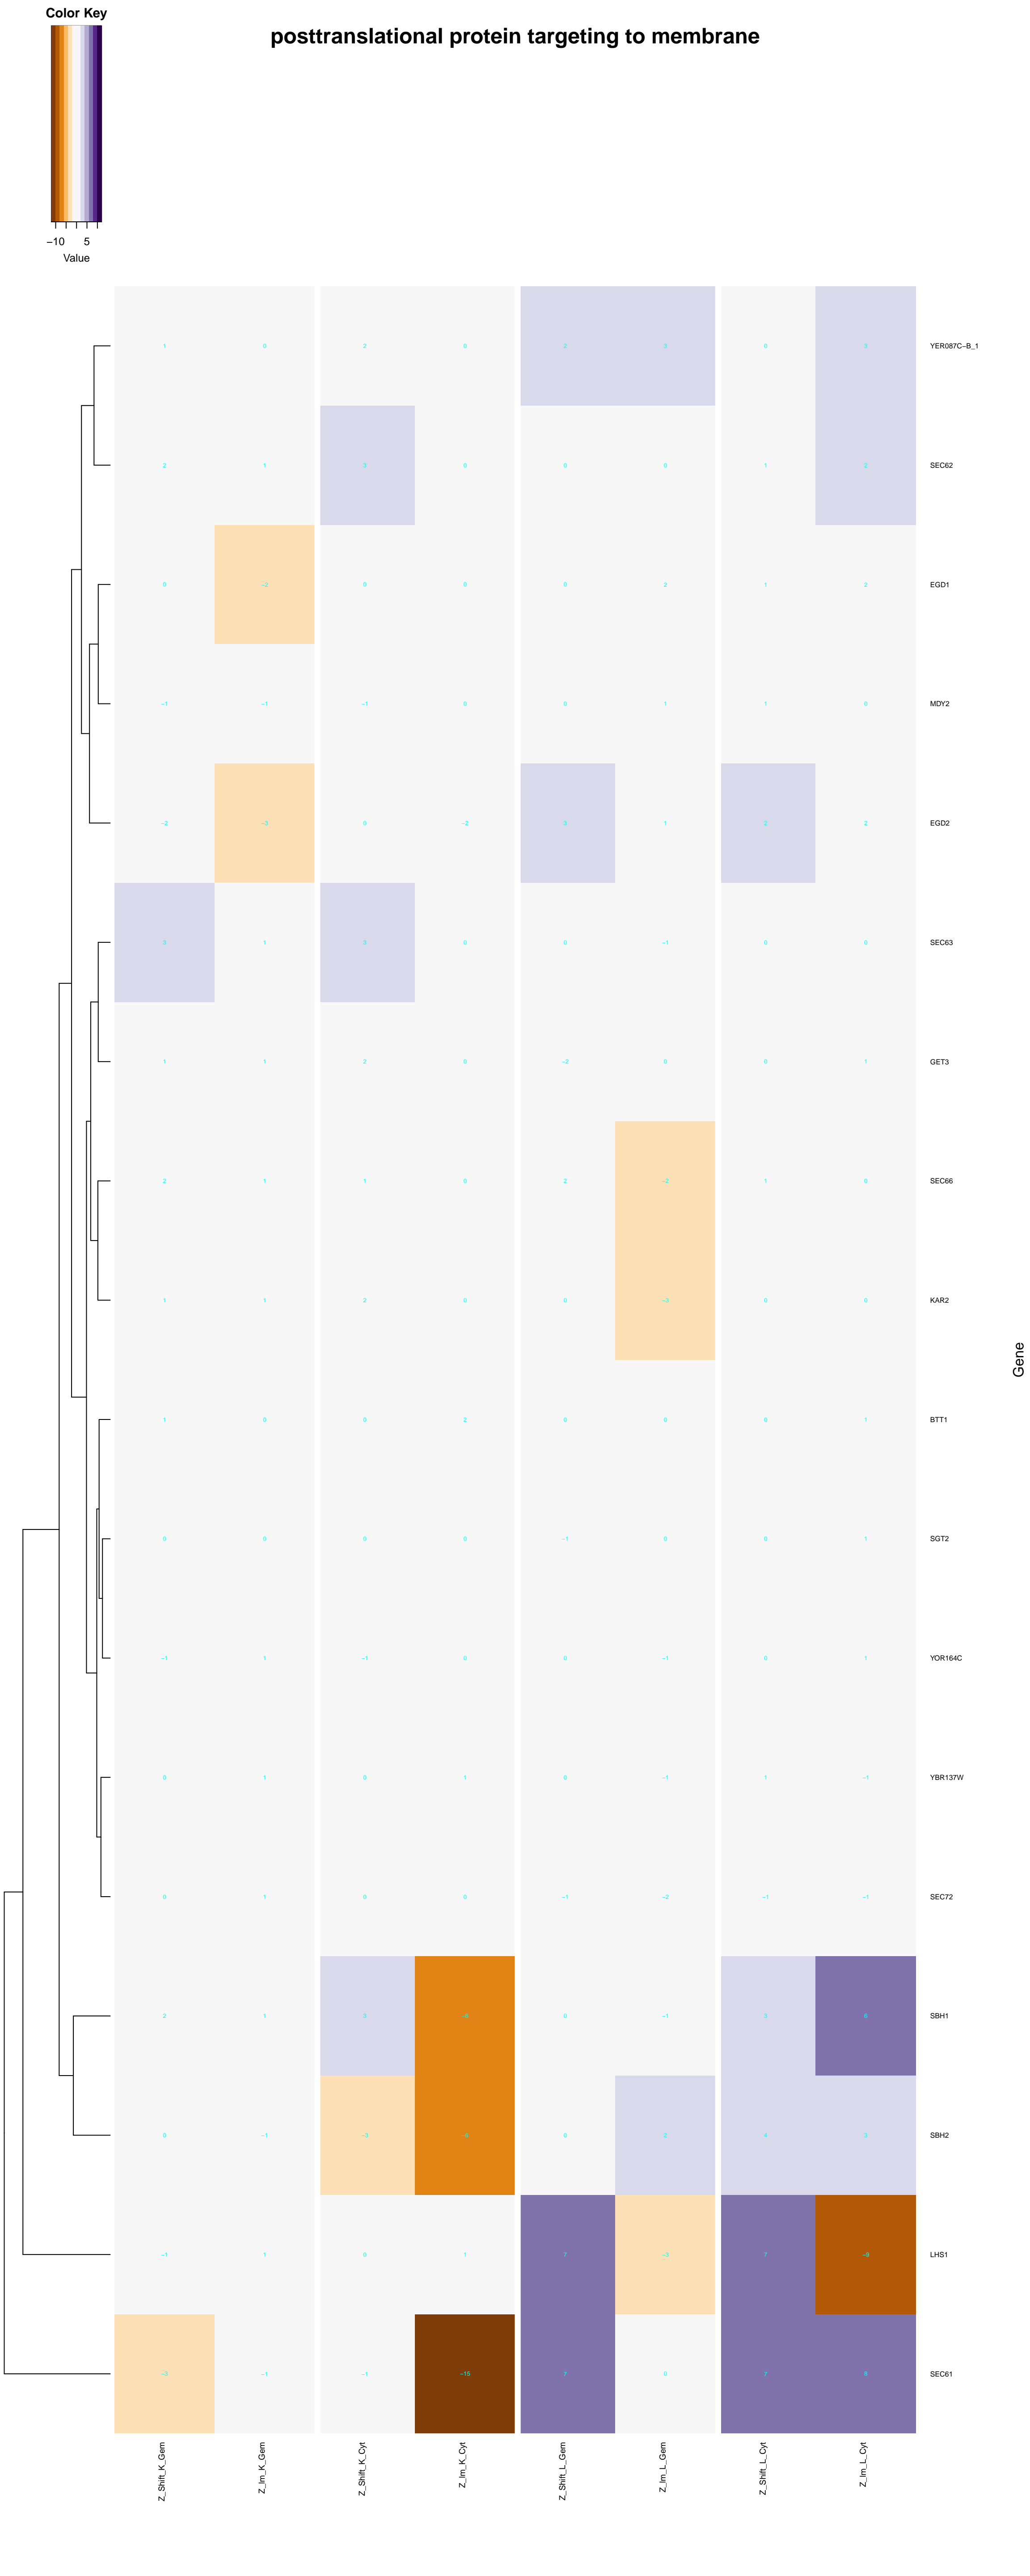

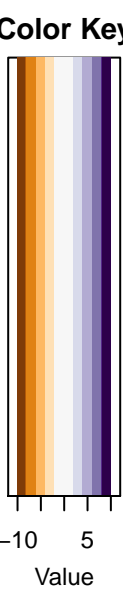

protein targeting to nuclear inner membrane

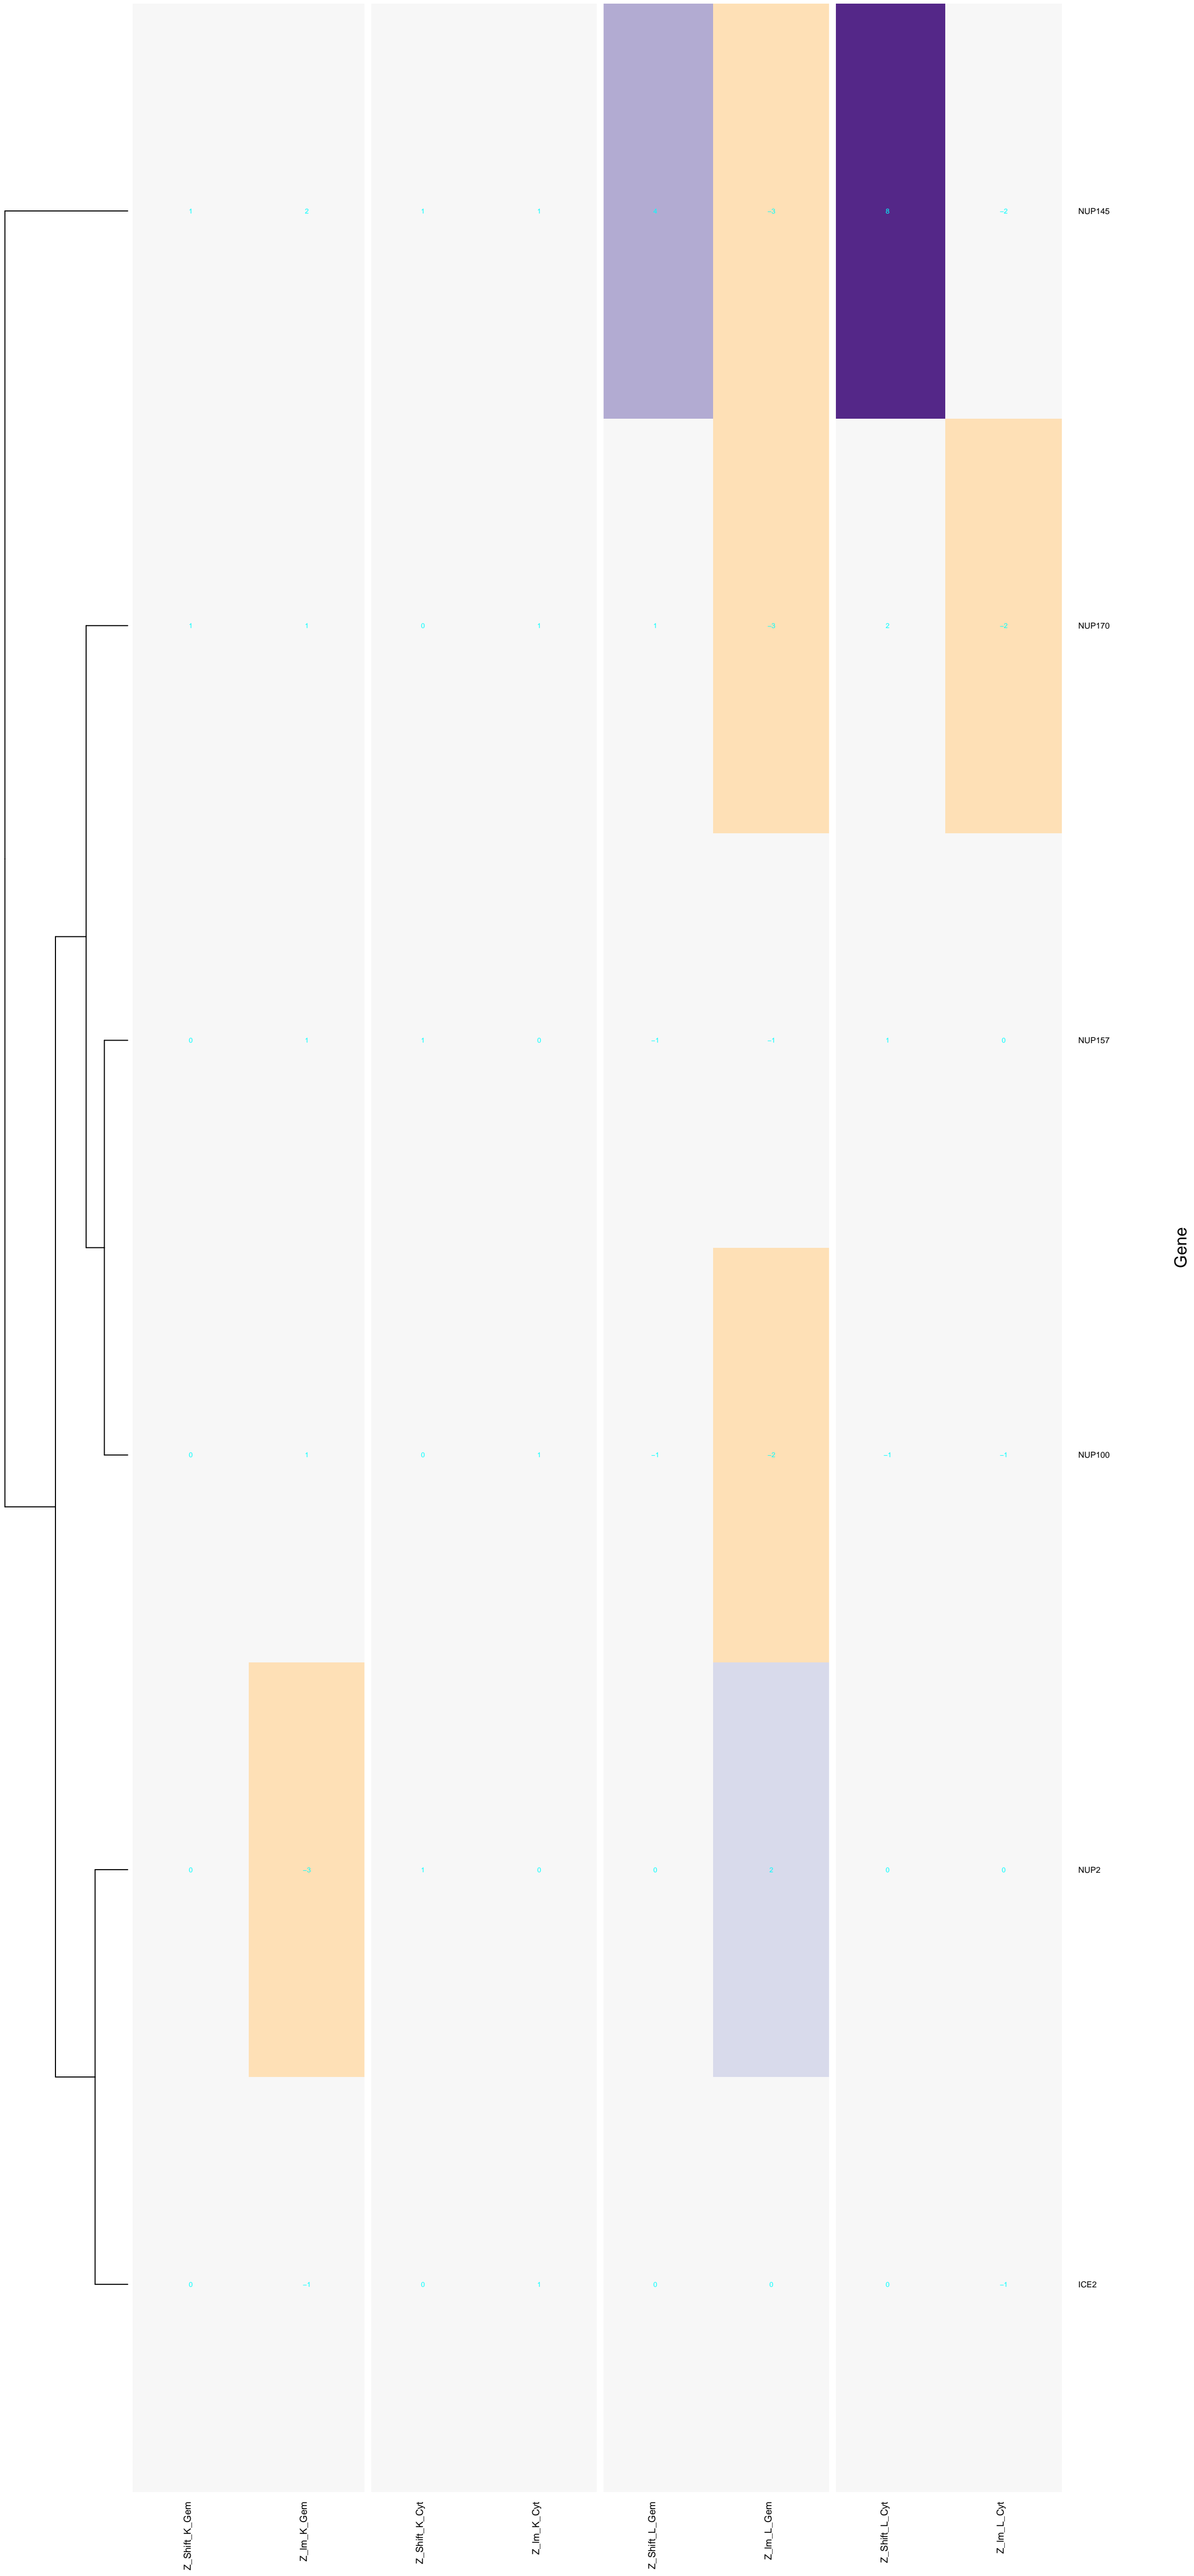

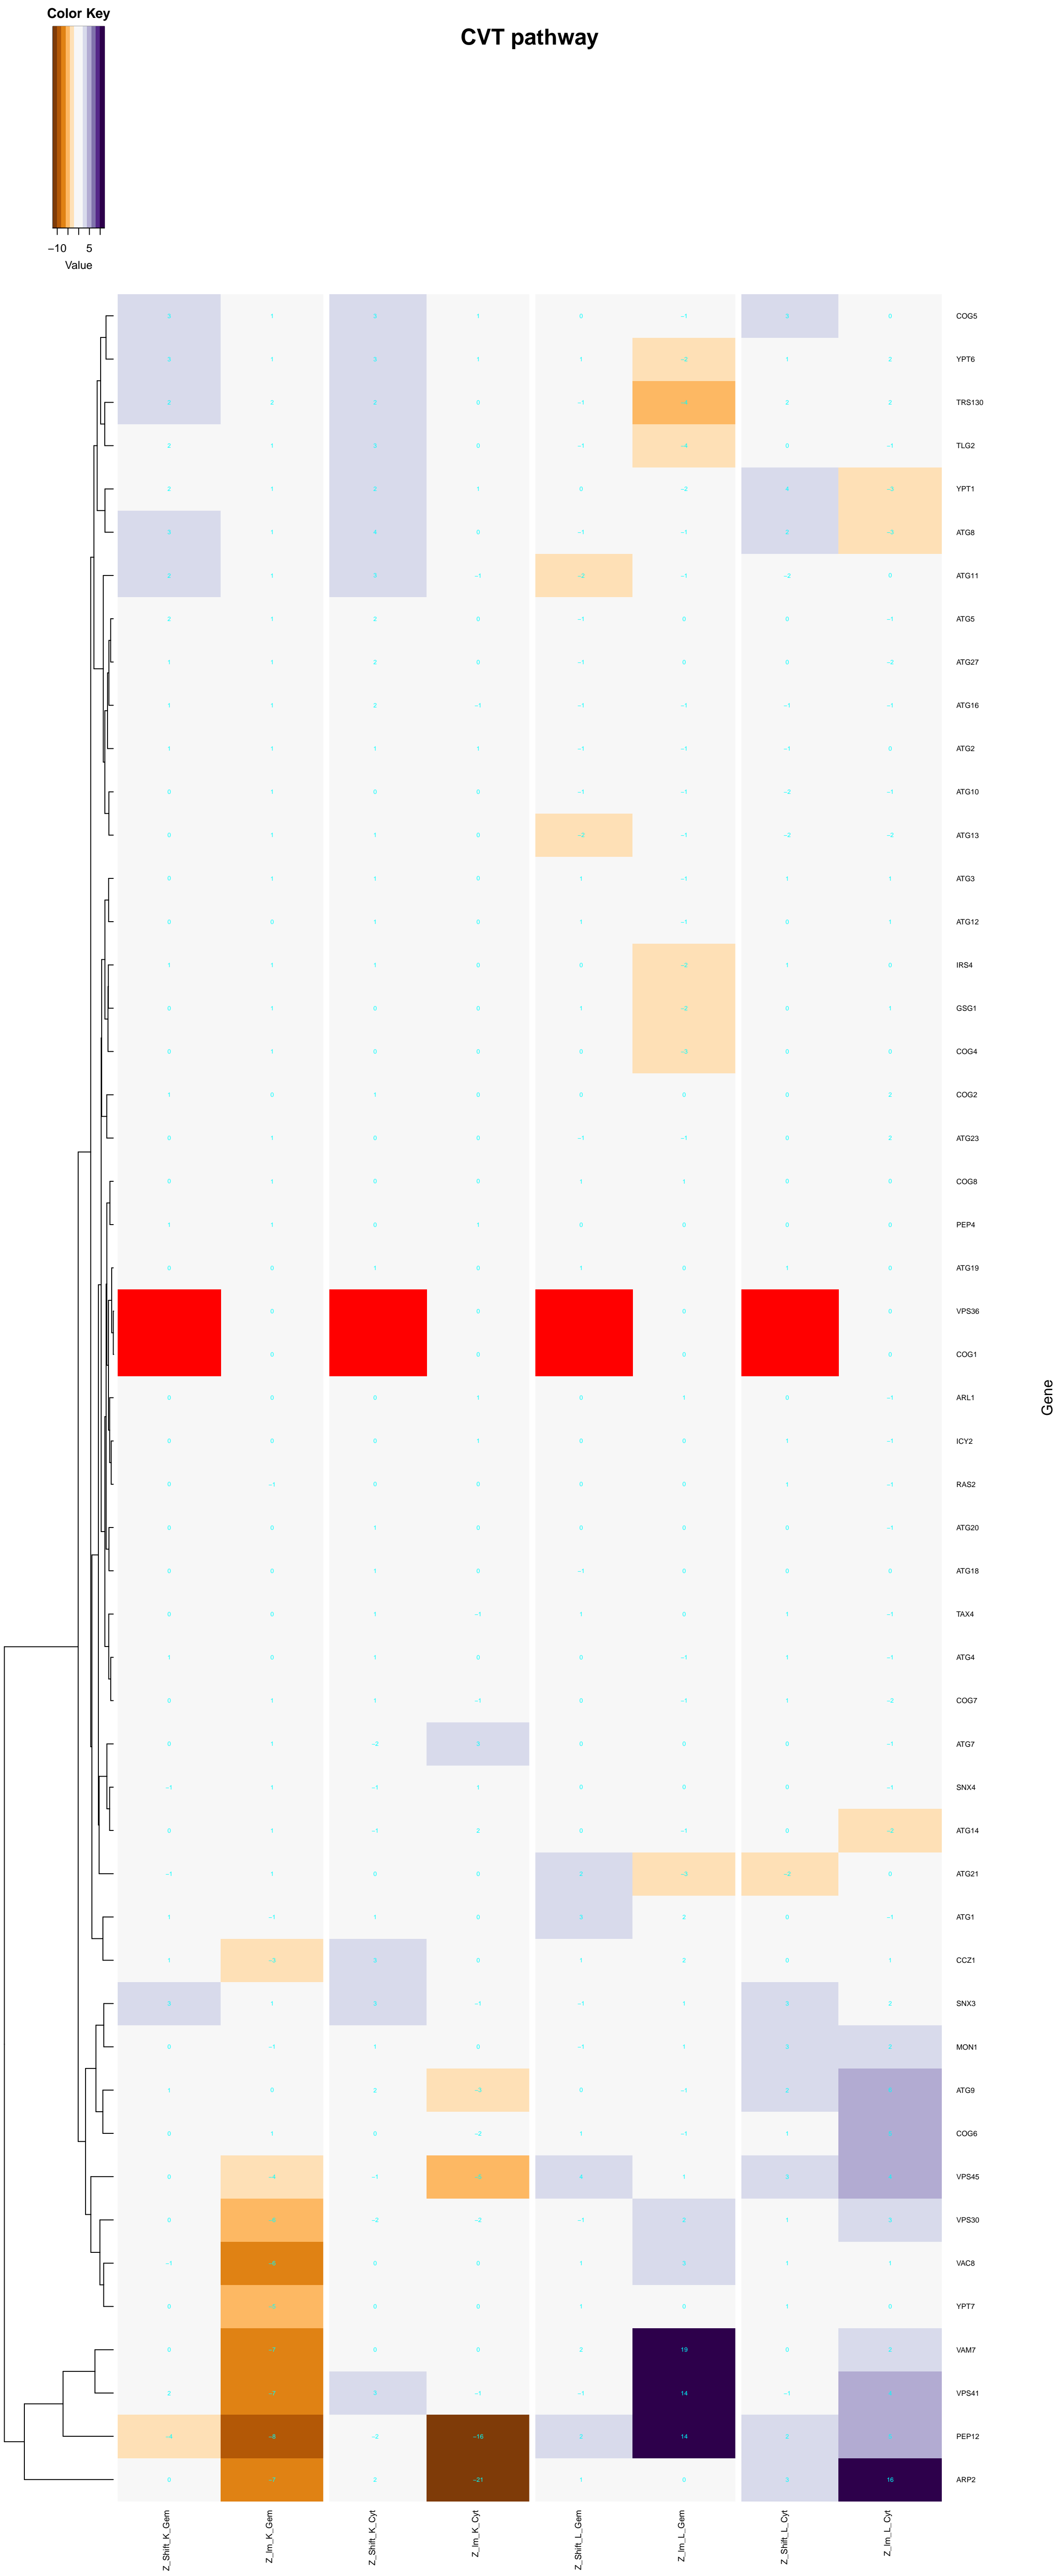

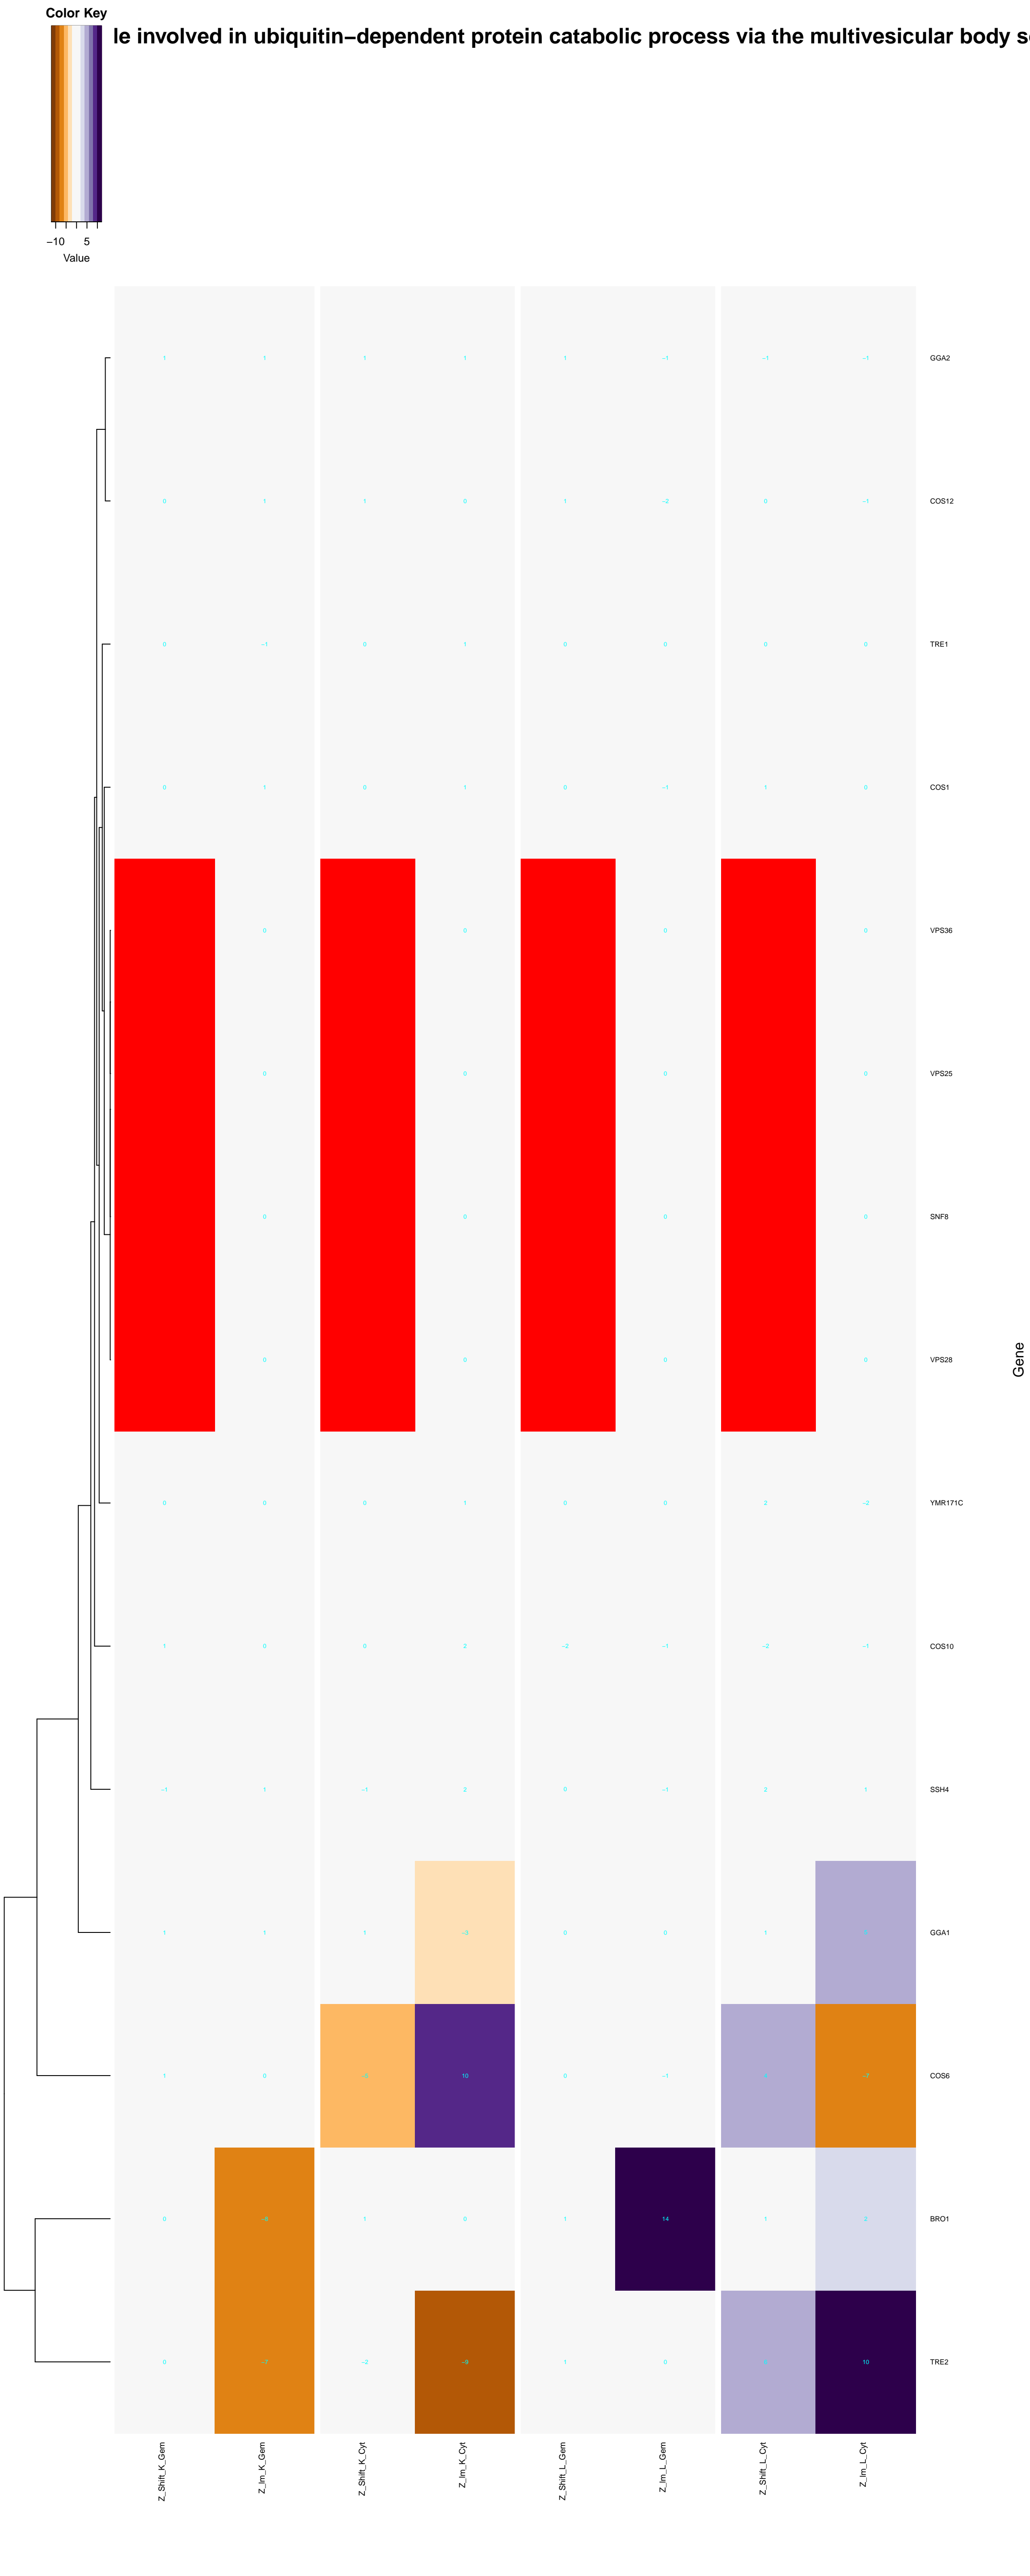

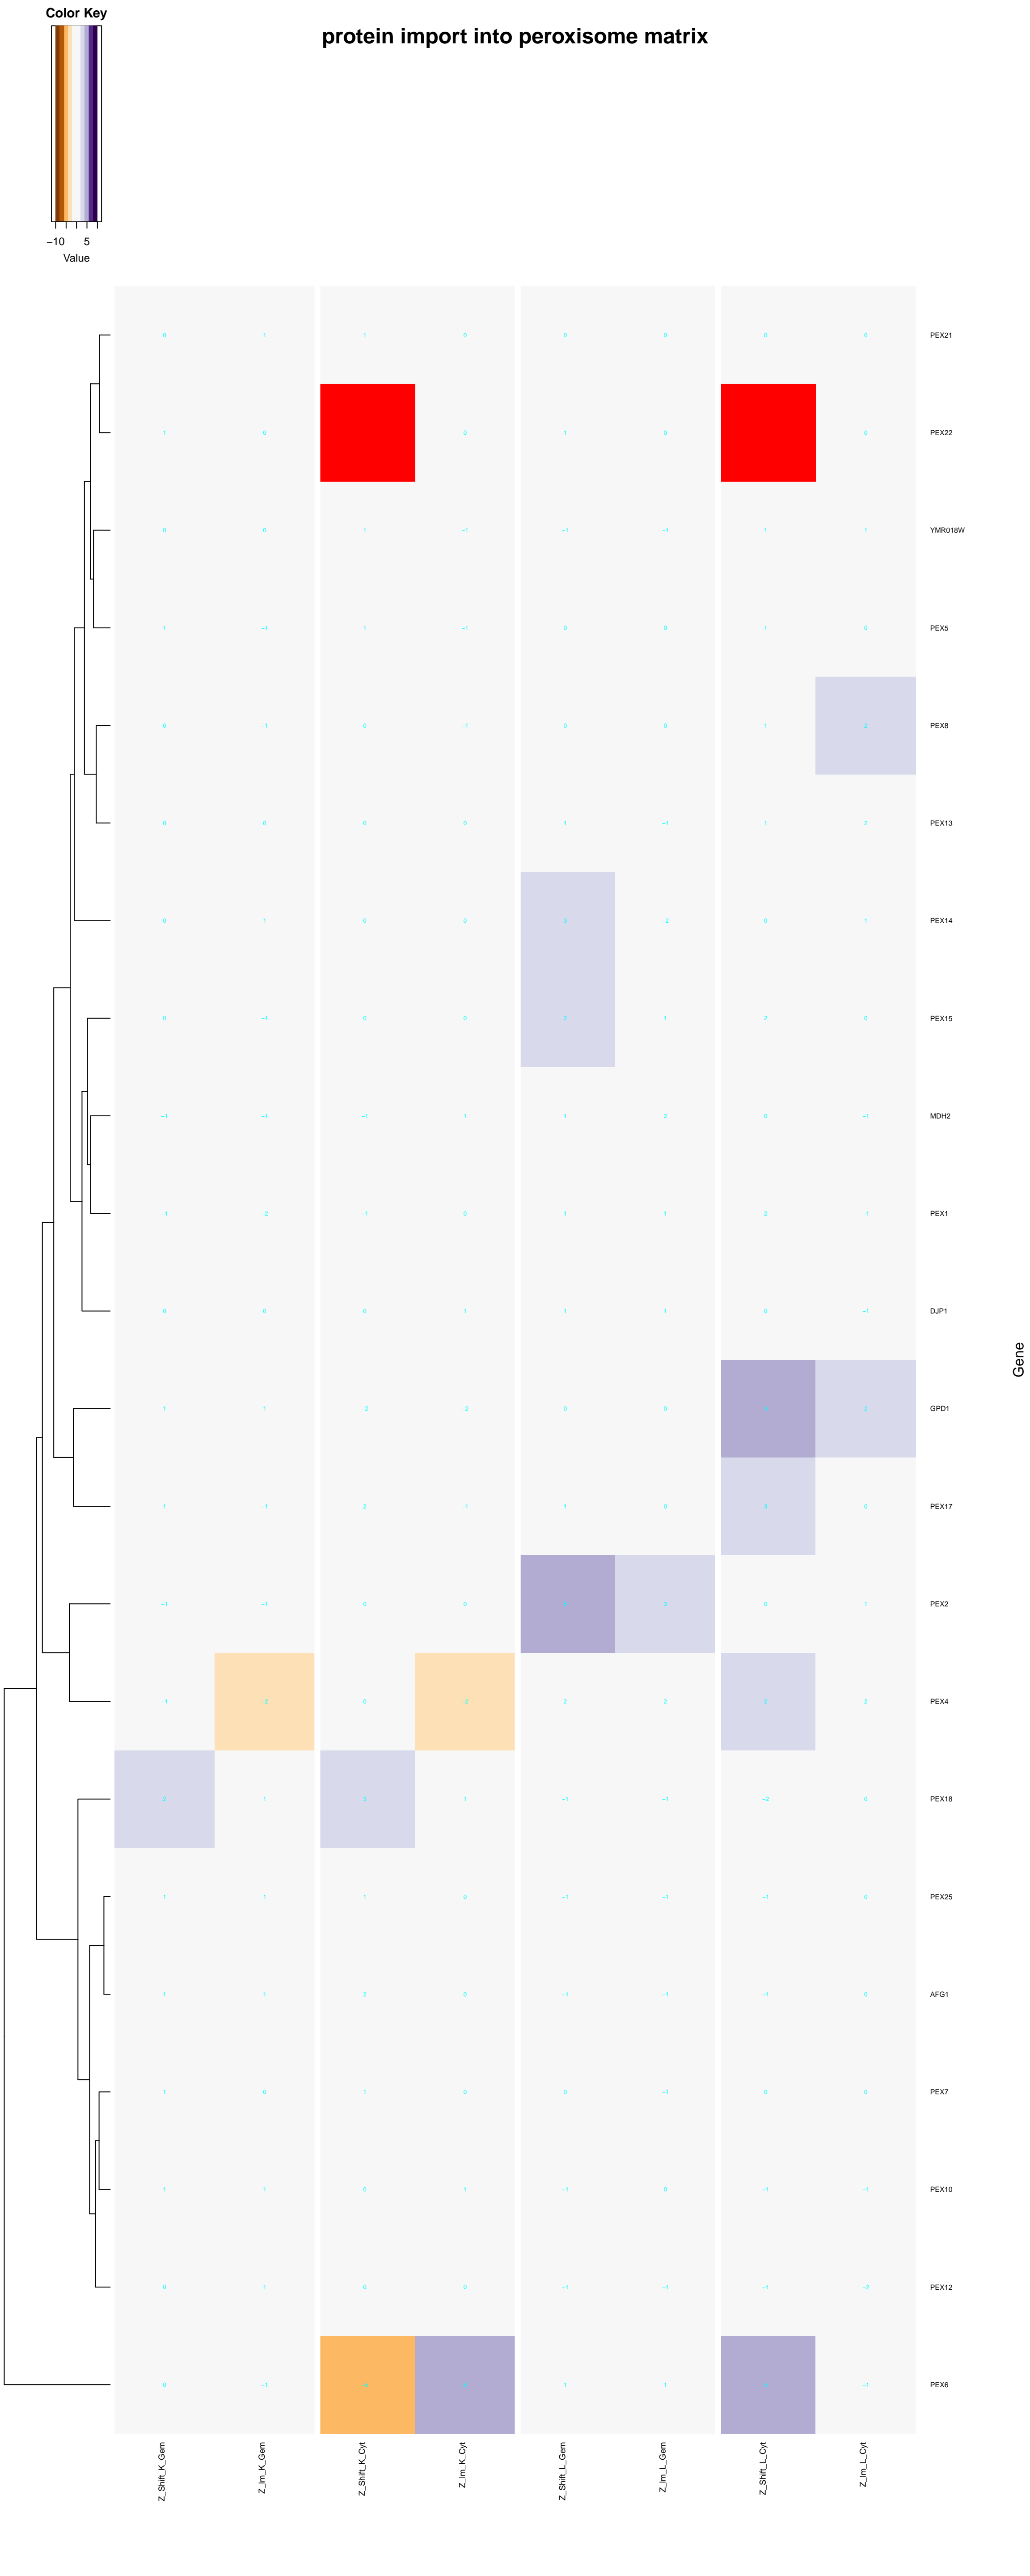

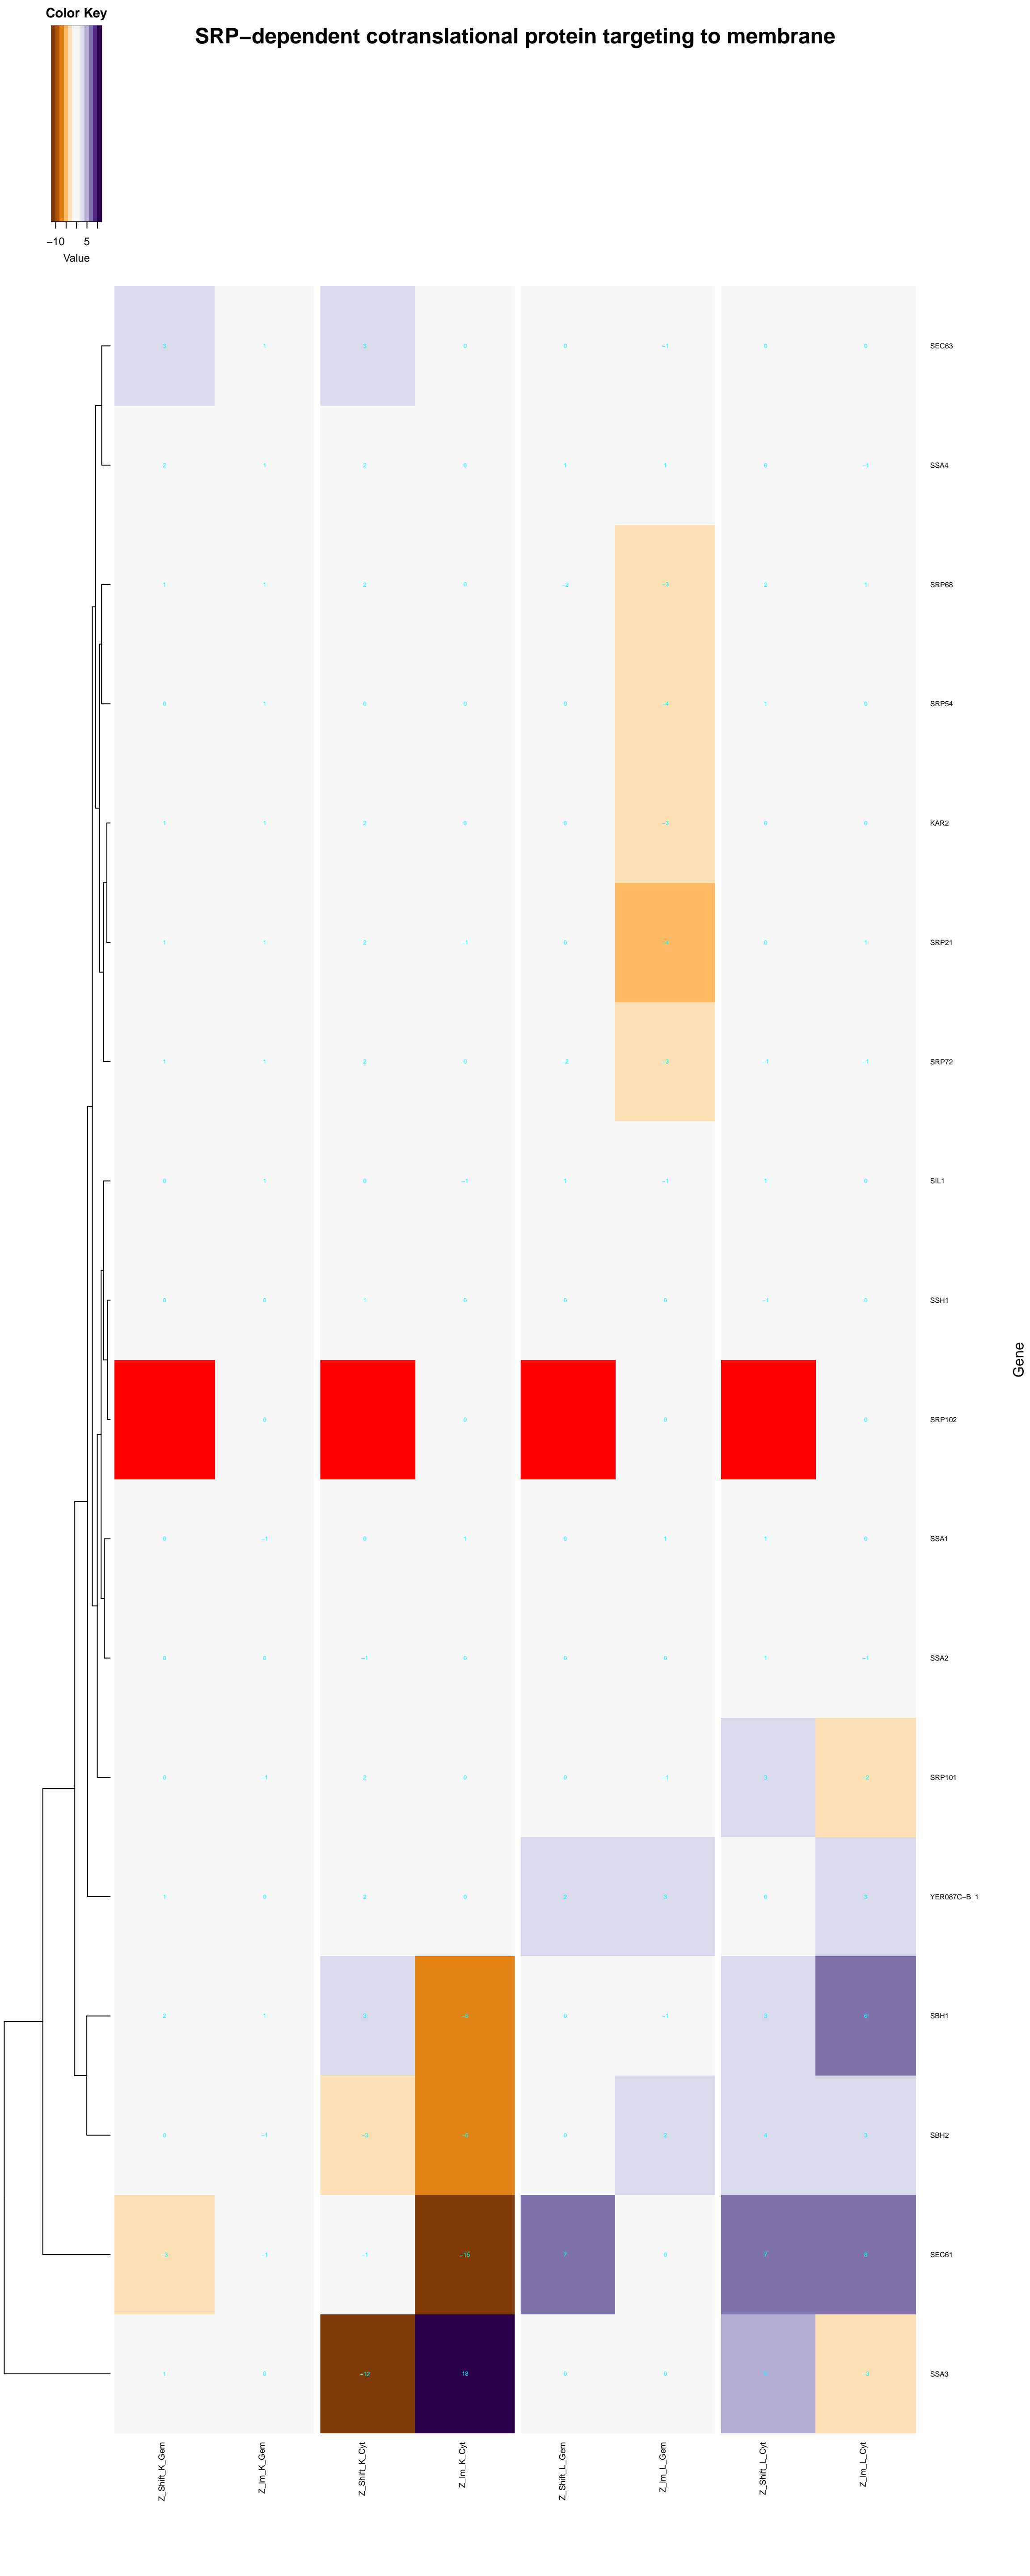

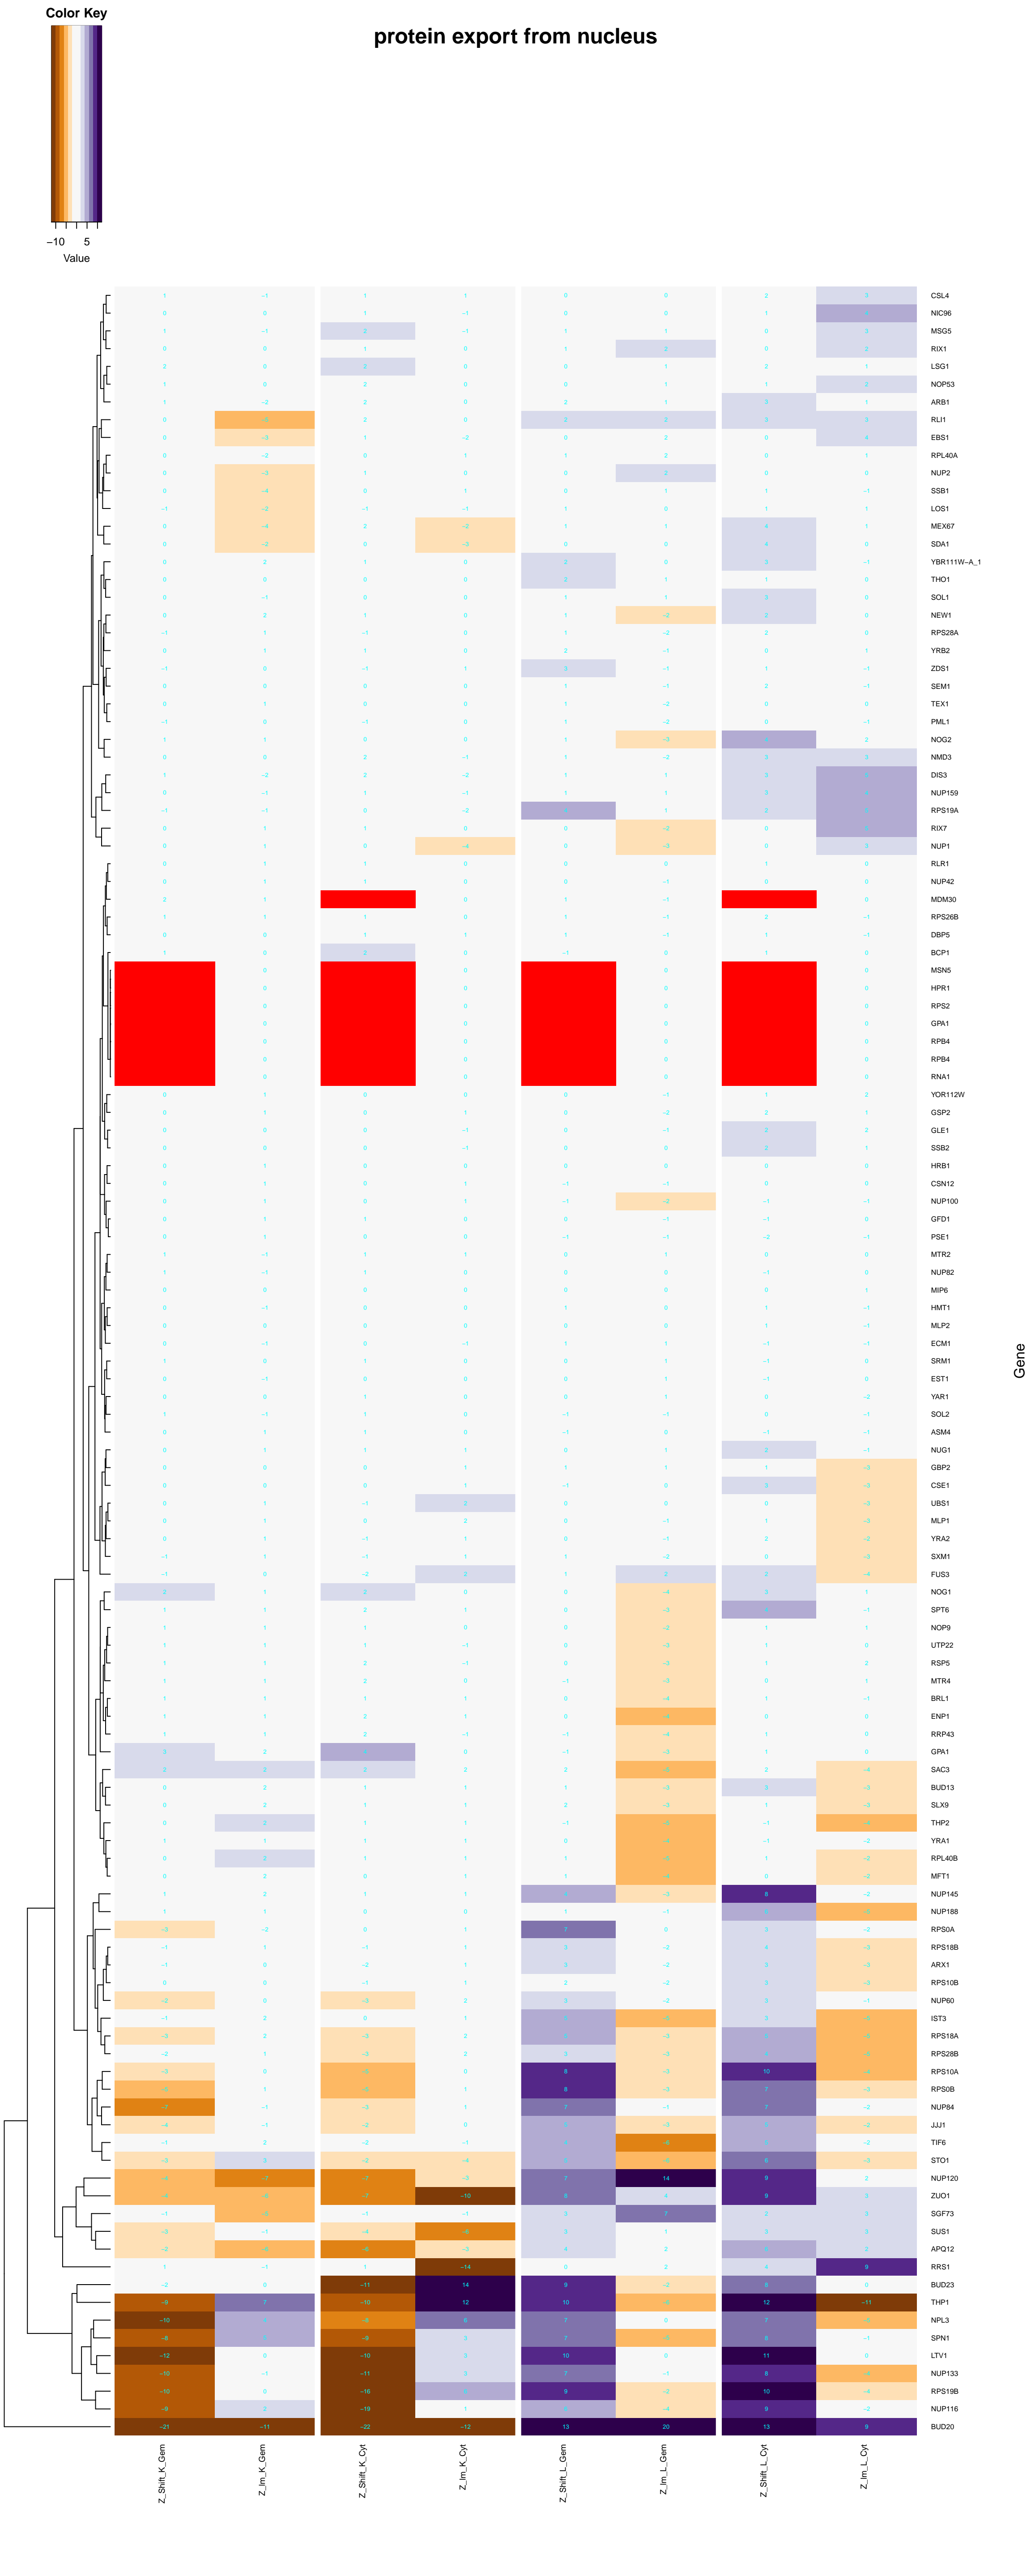

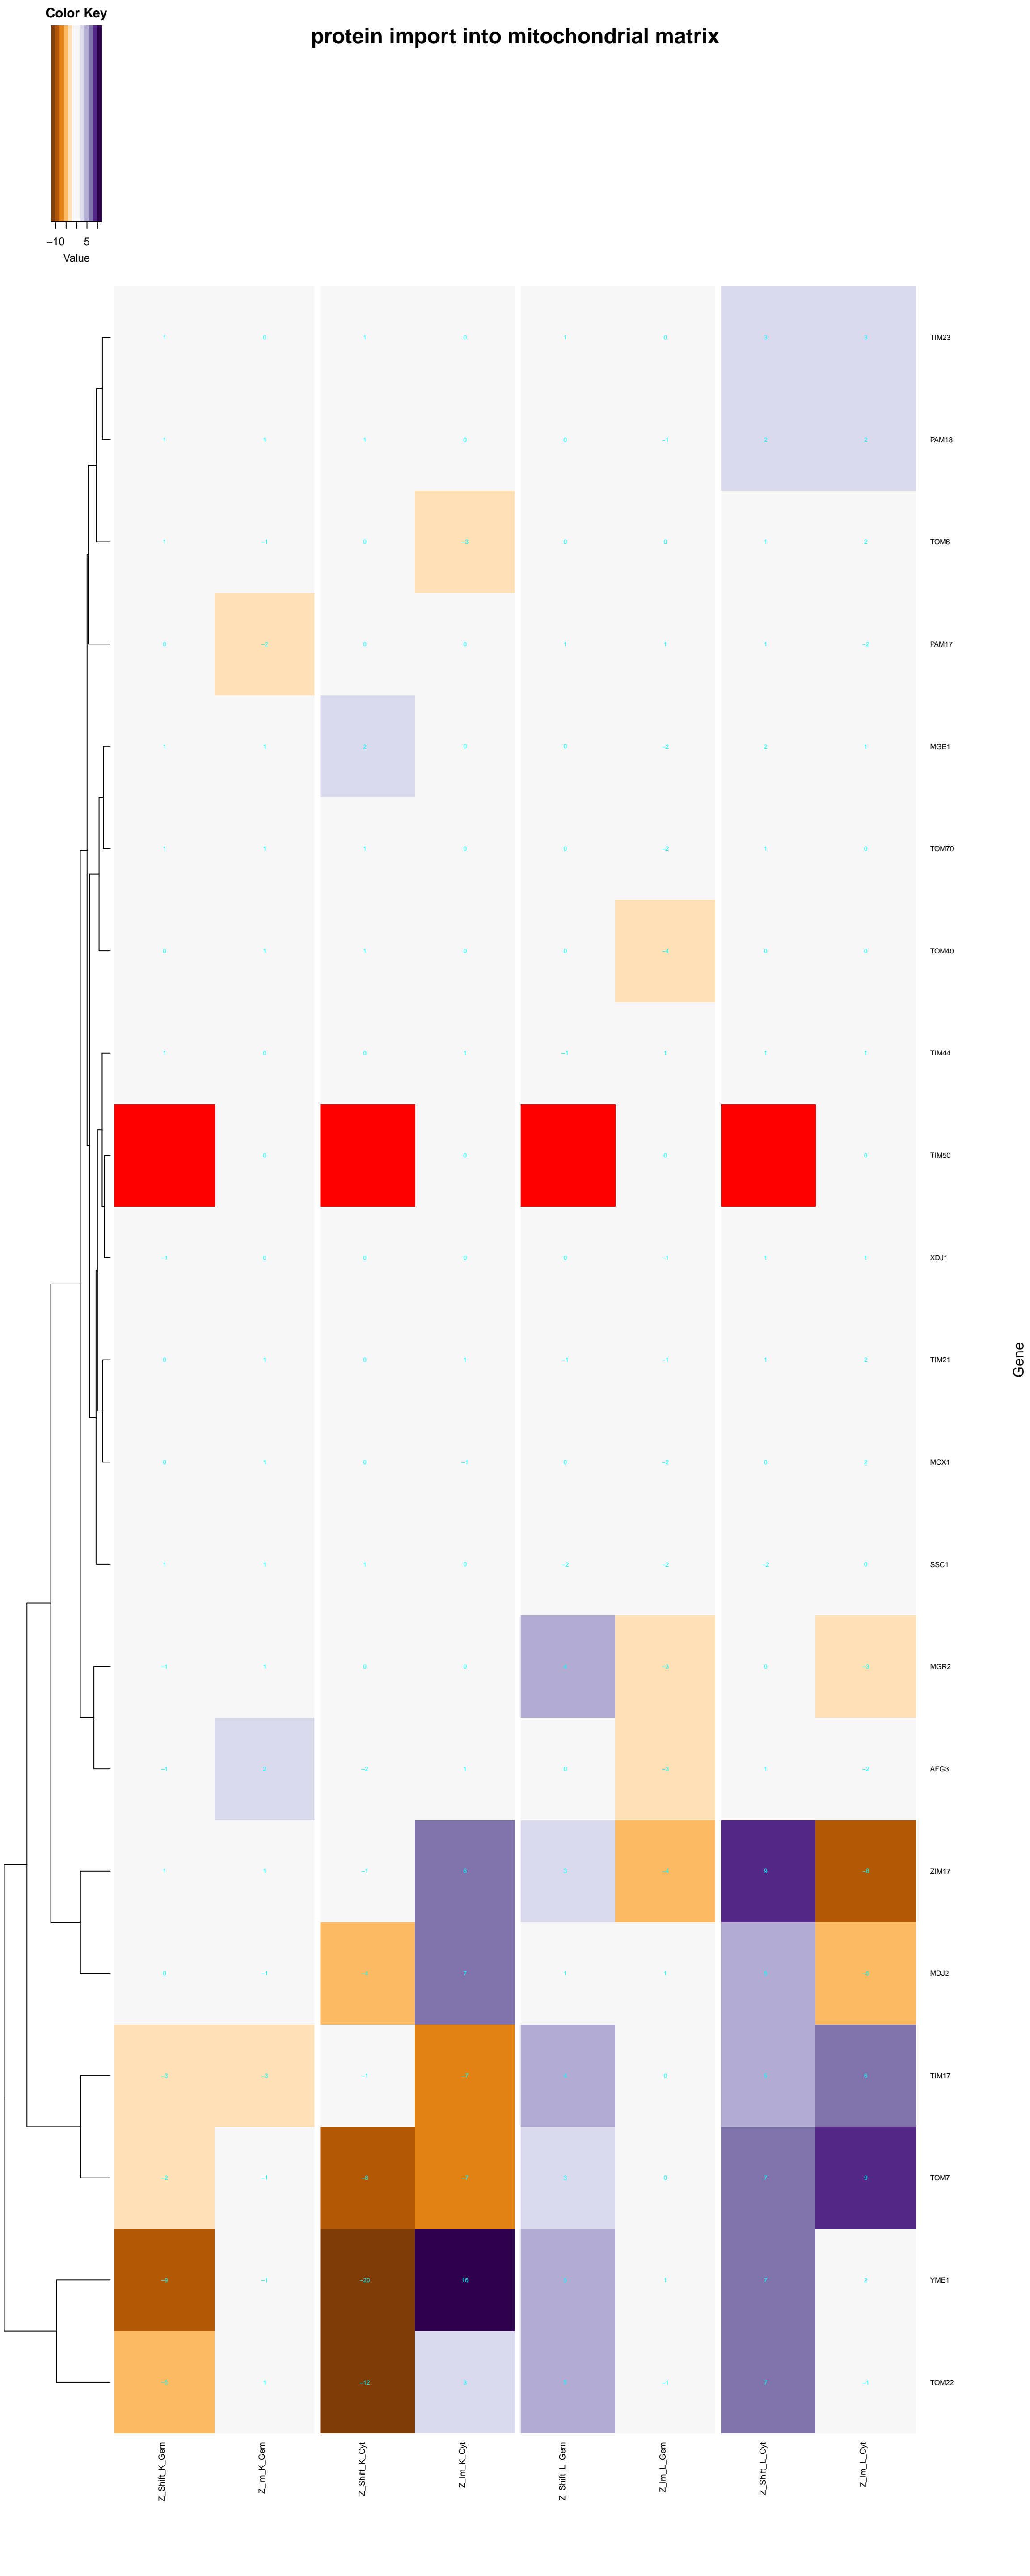

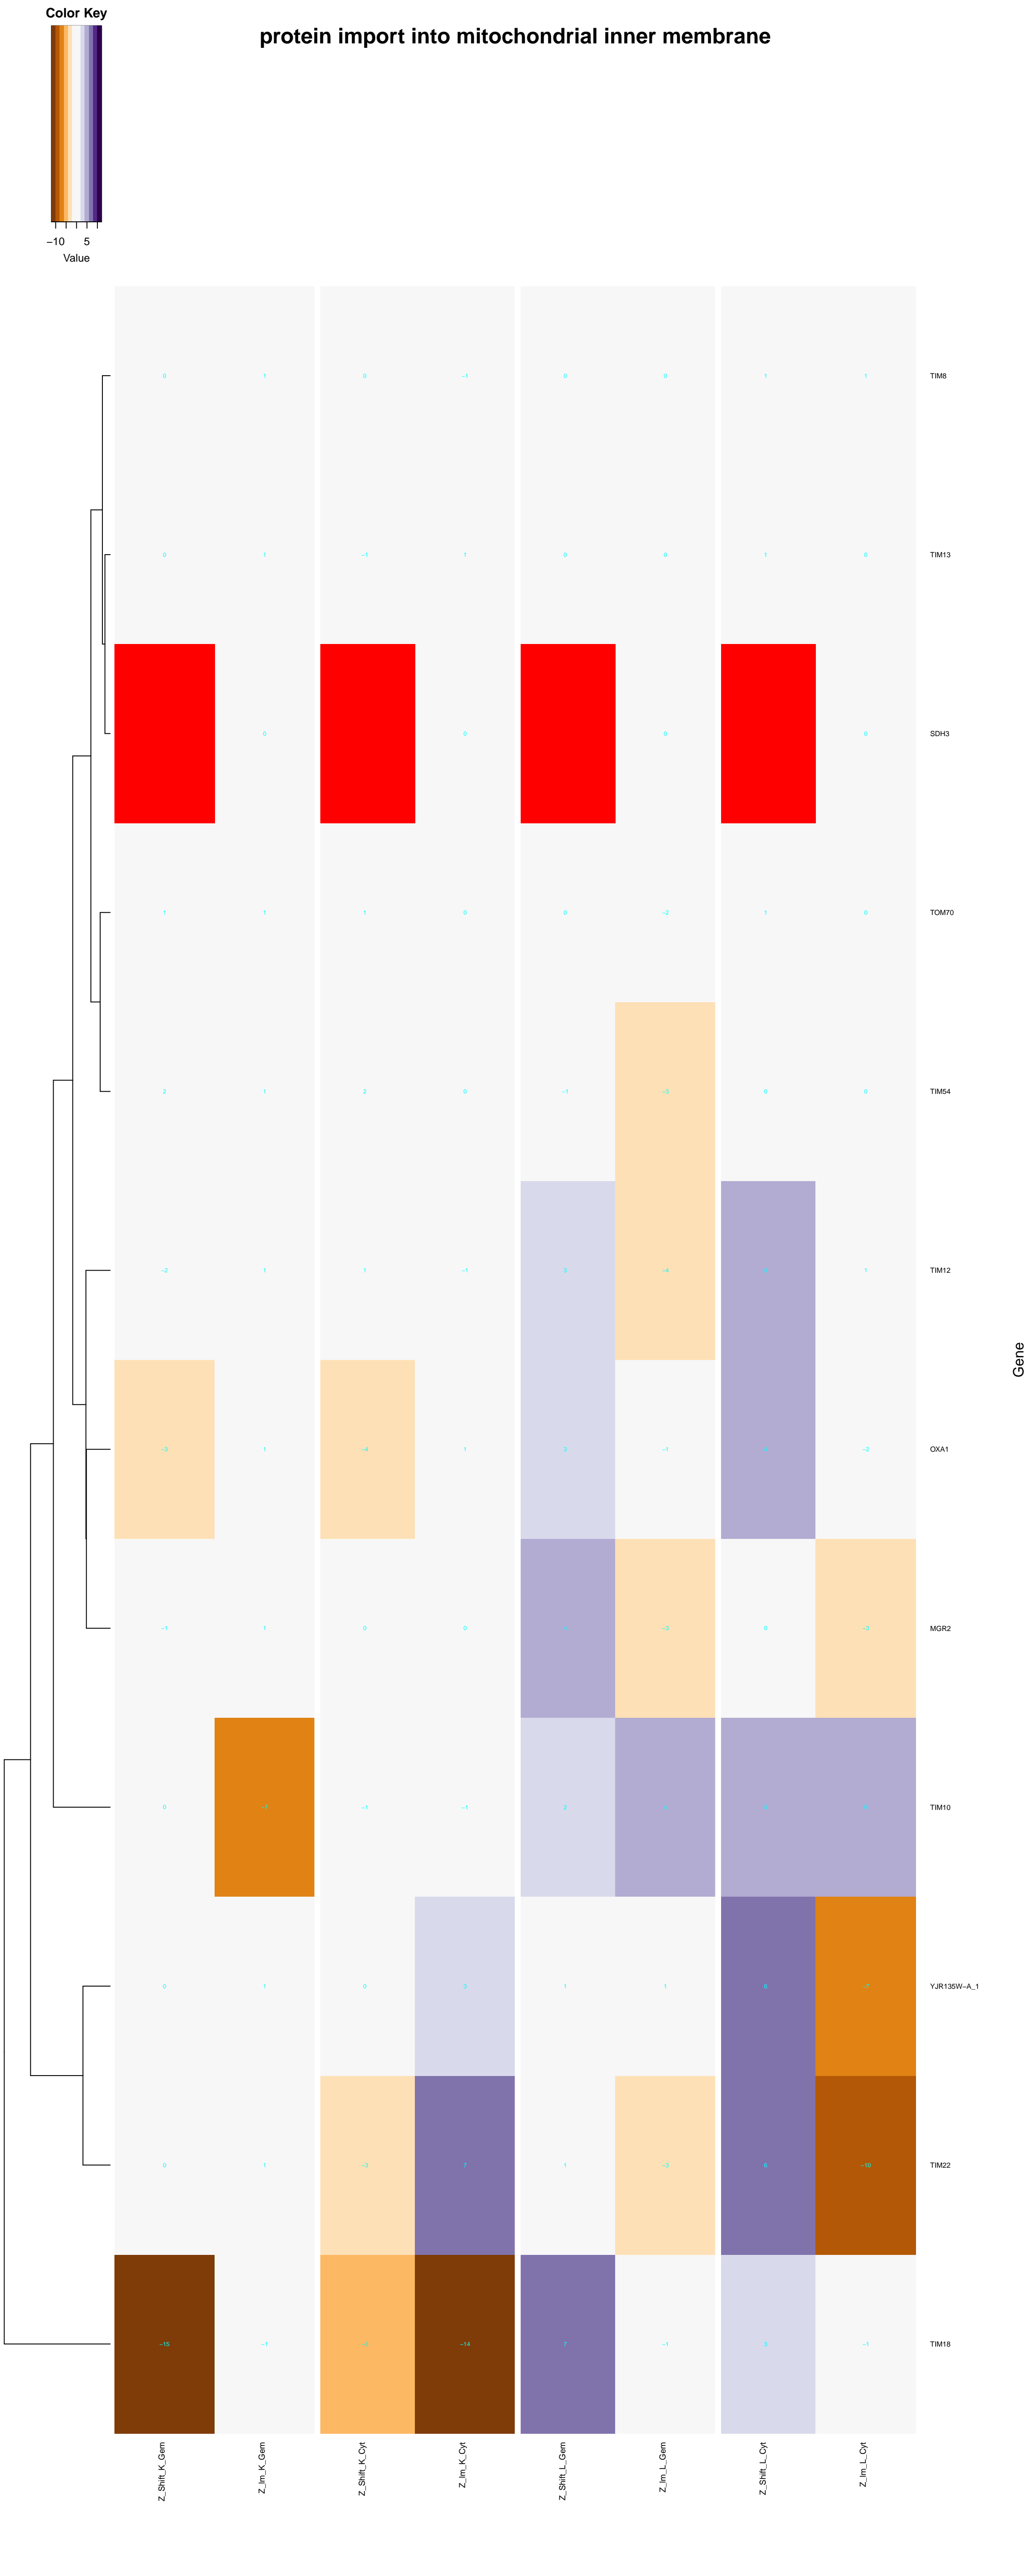

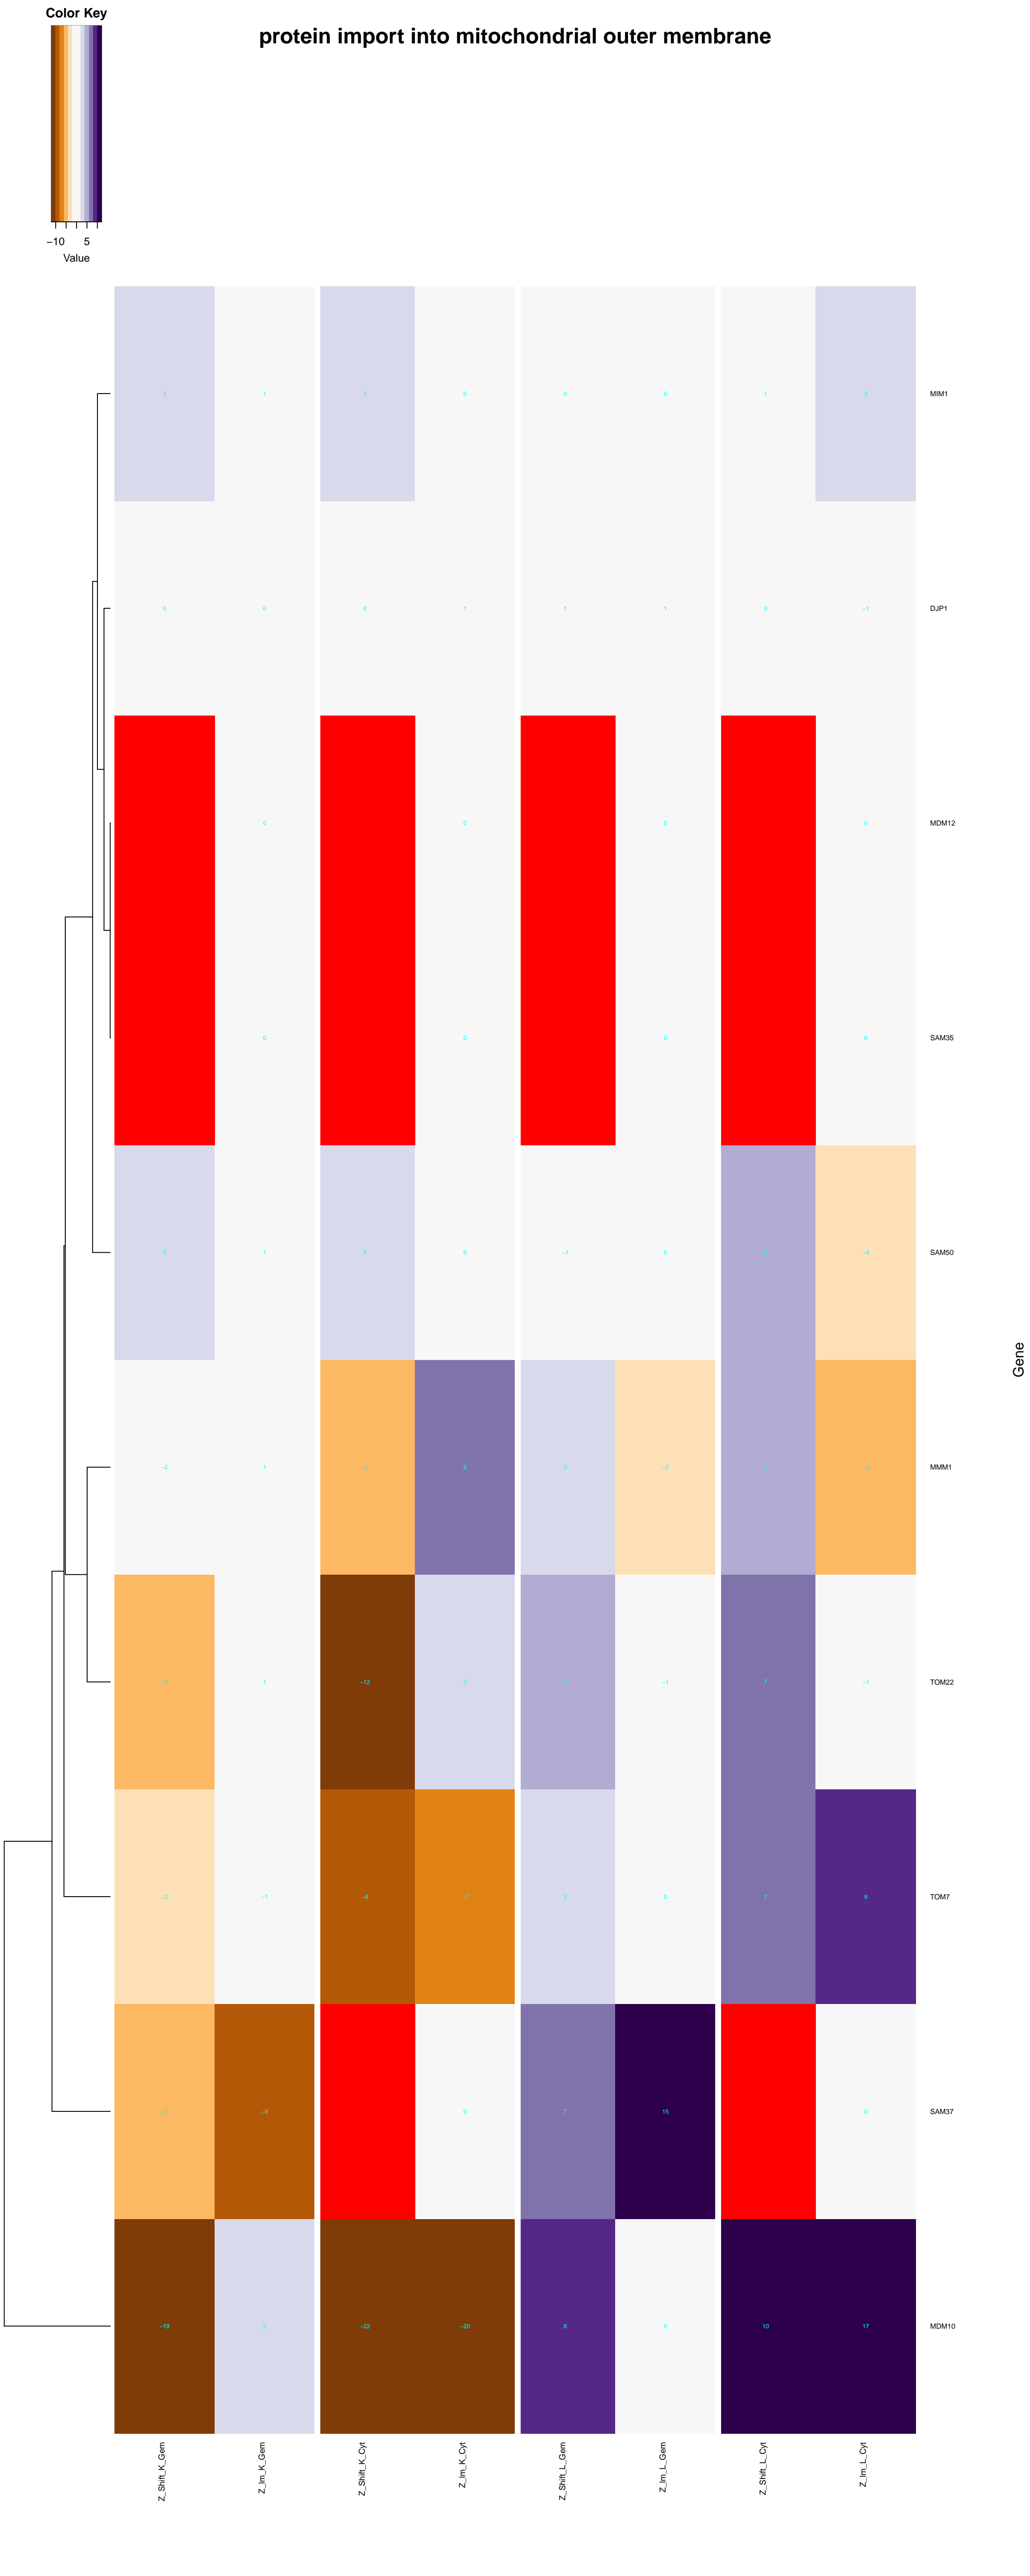

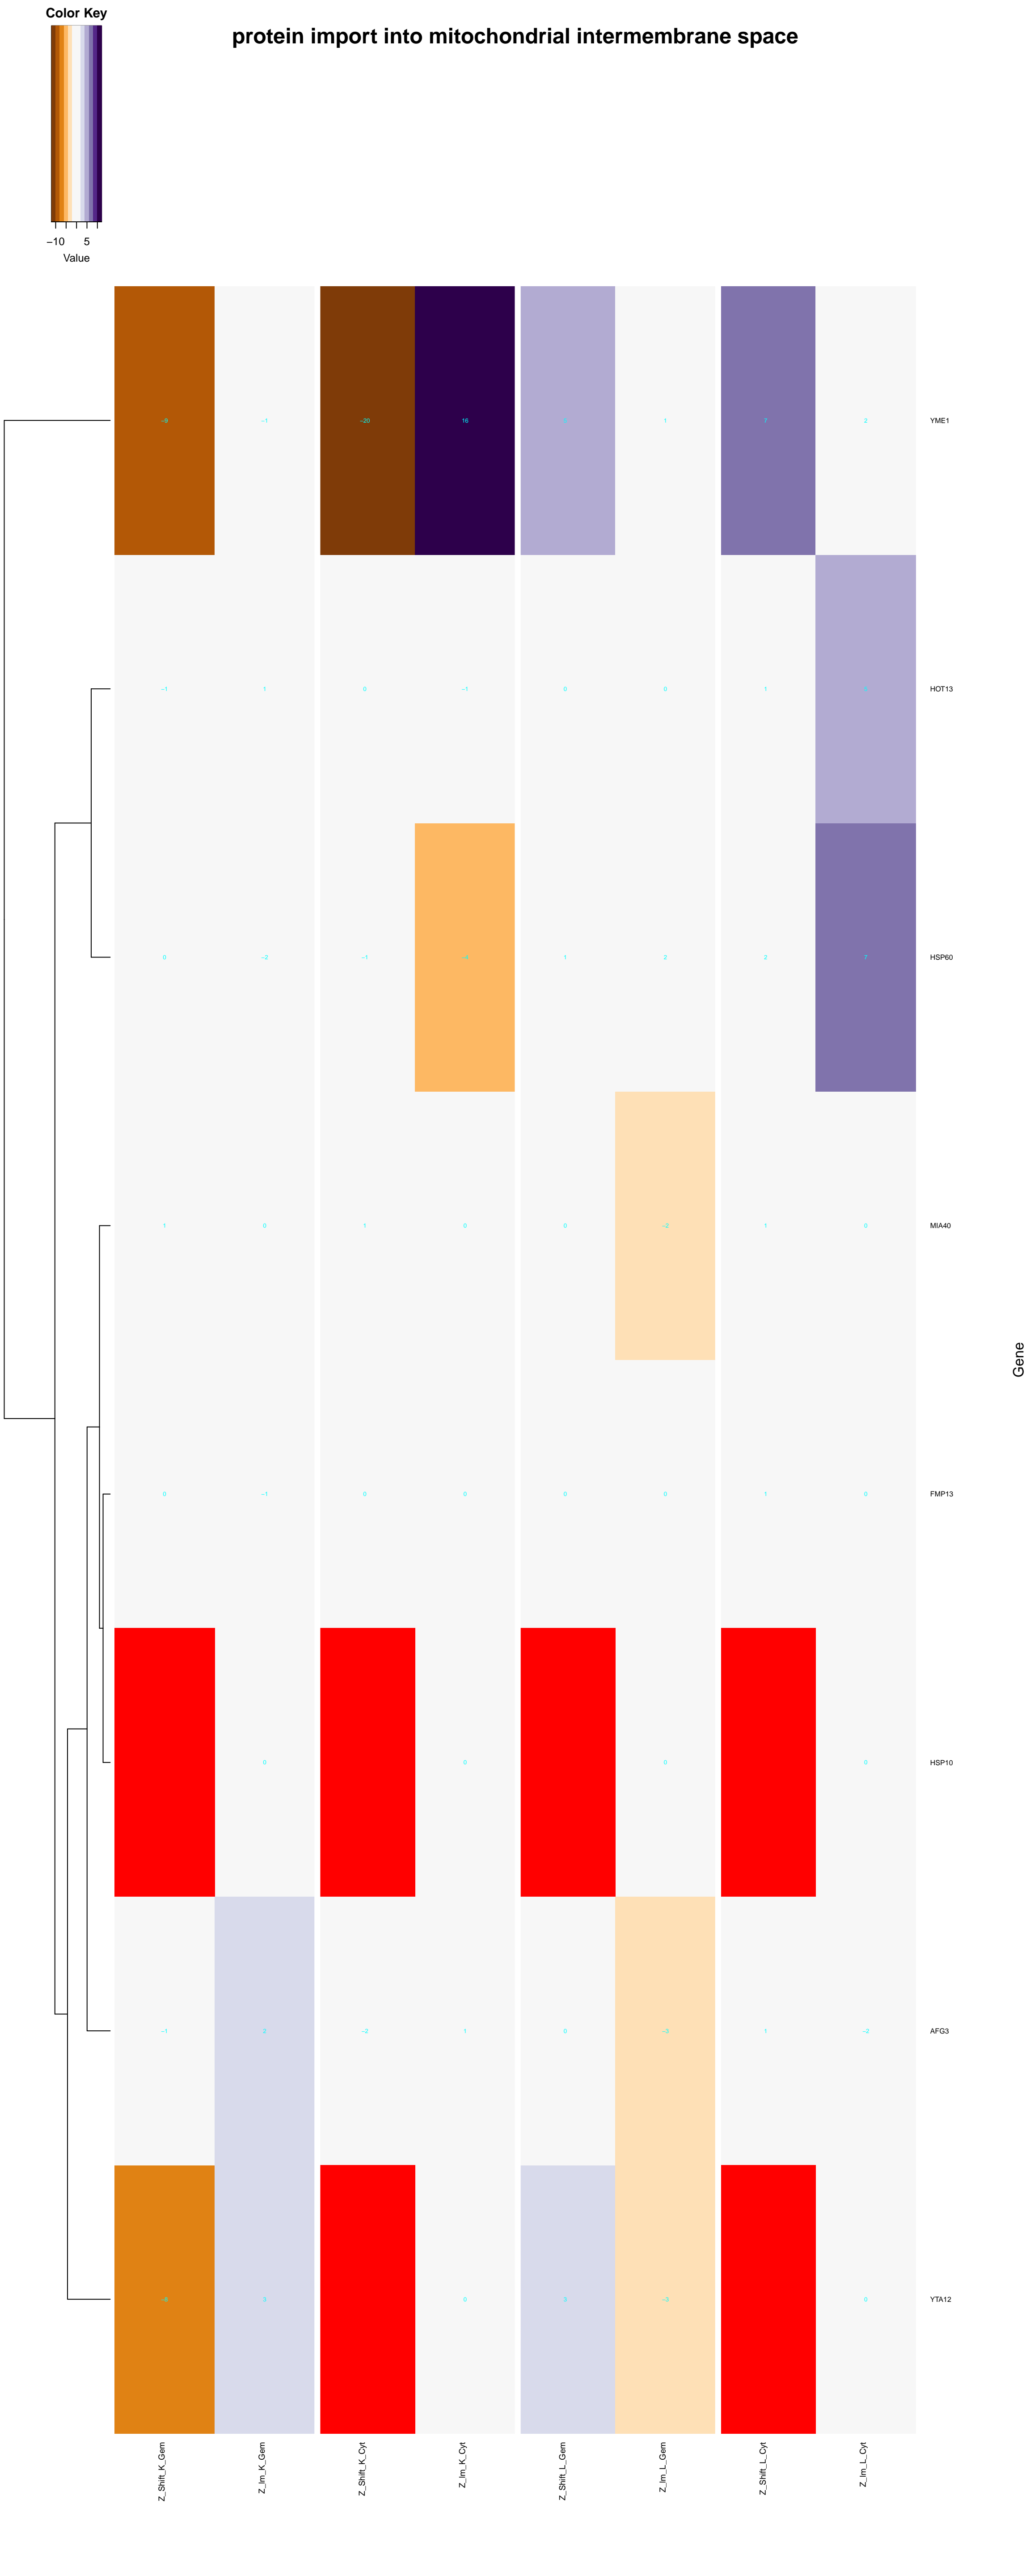

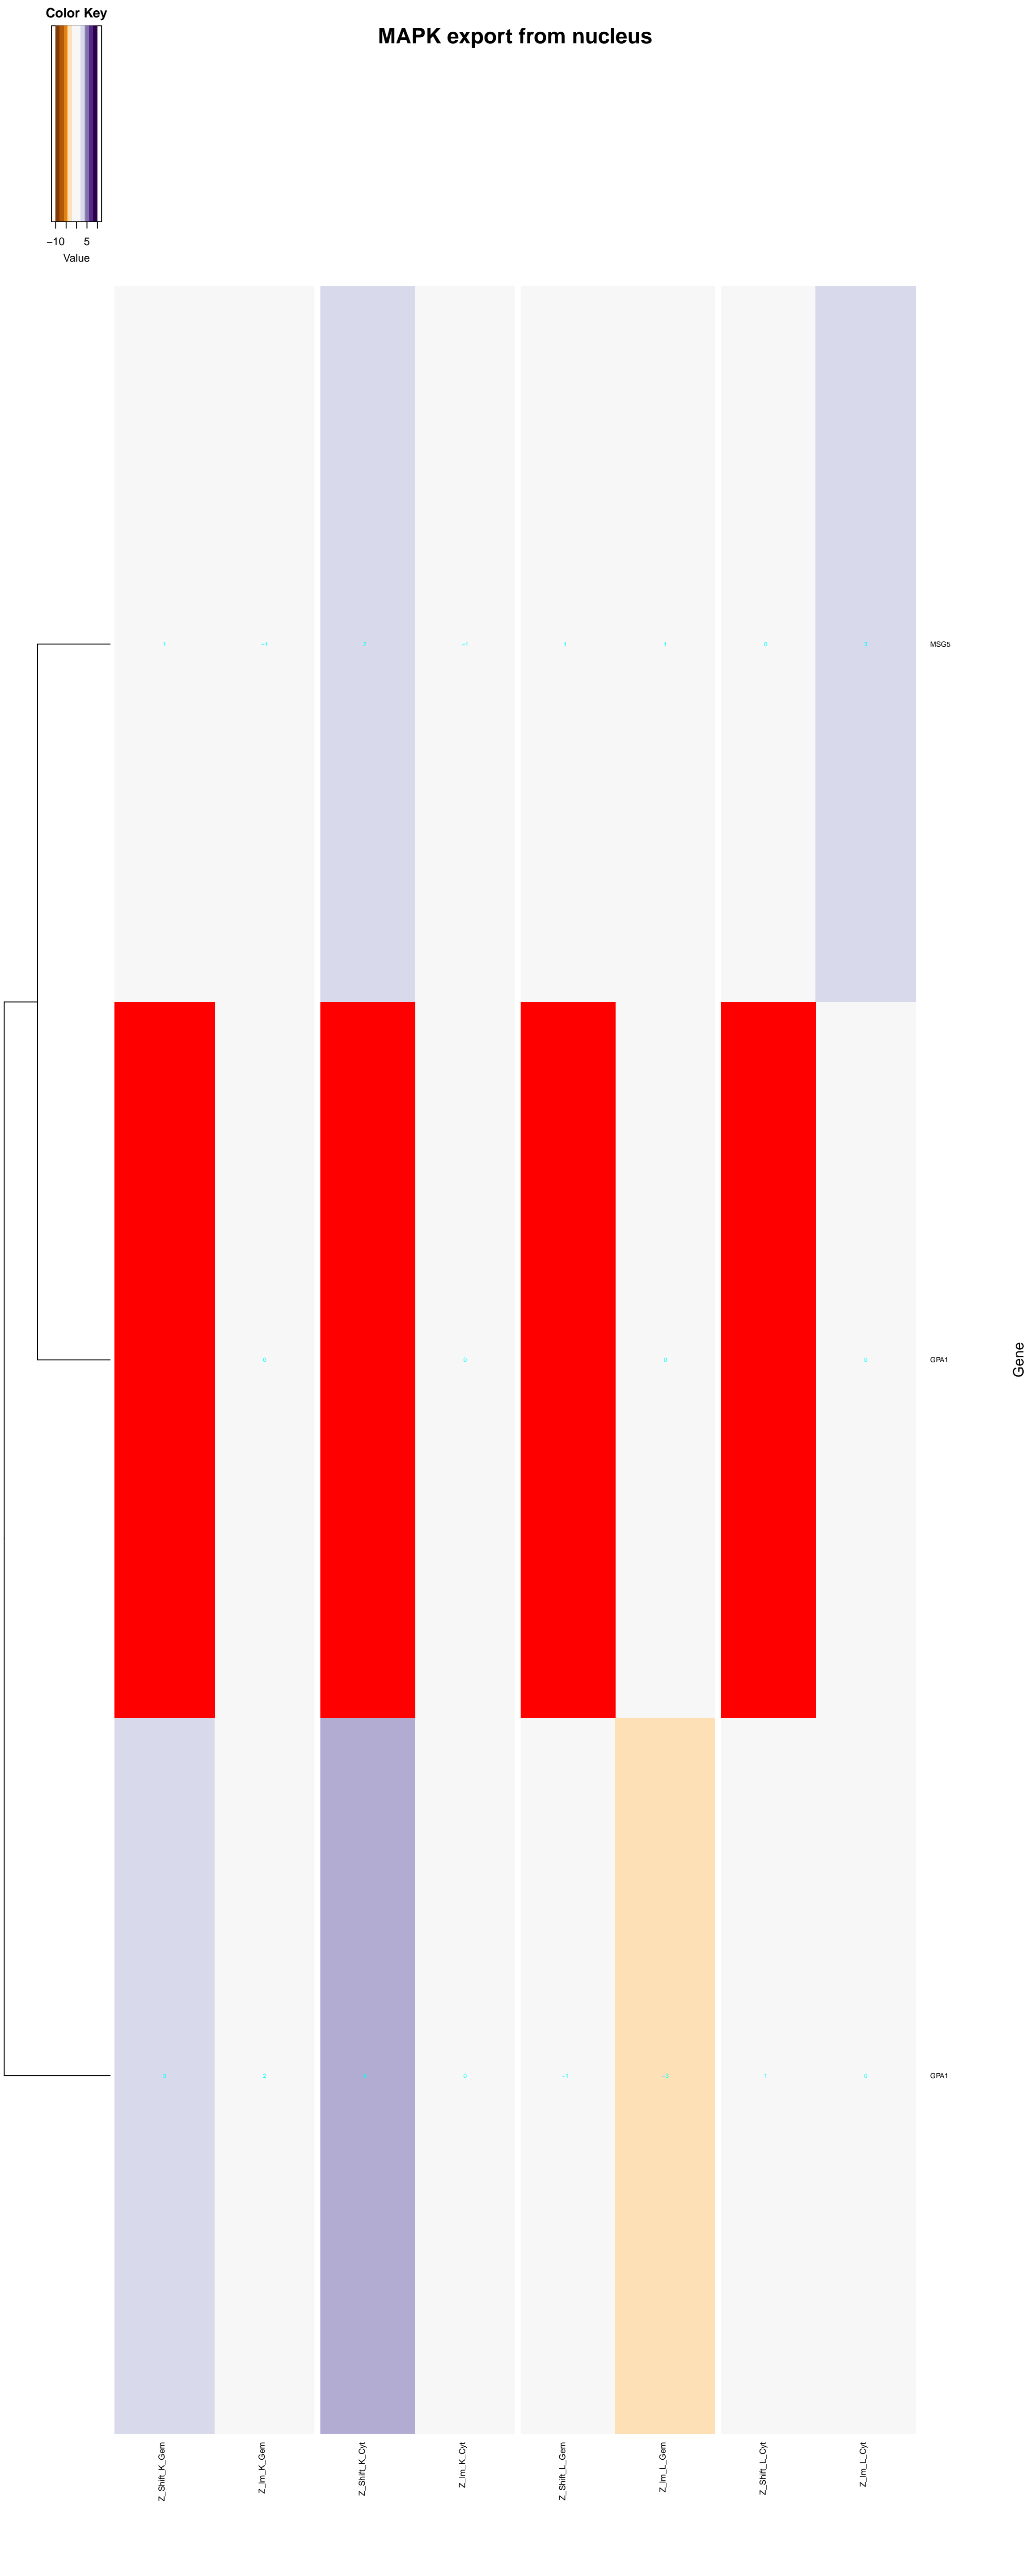

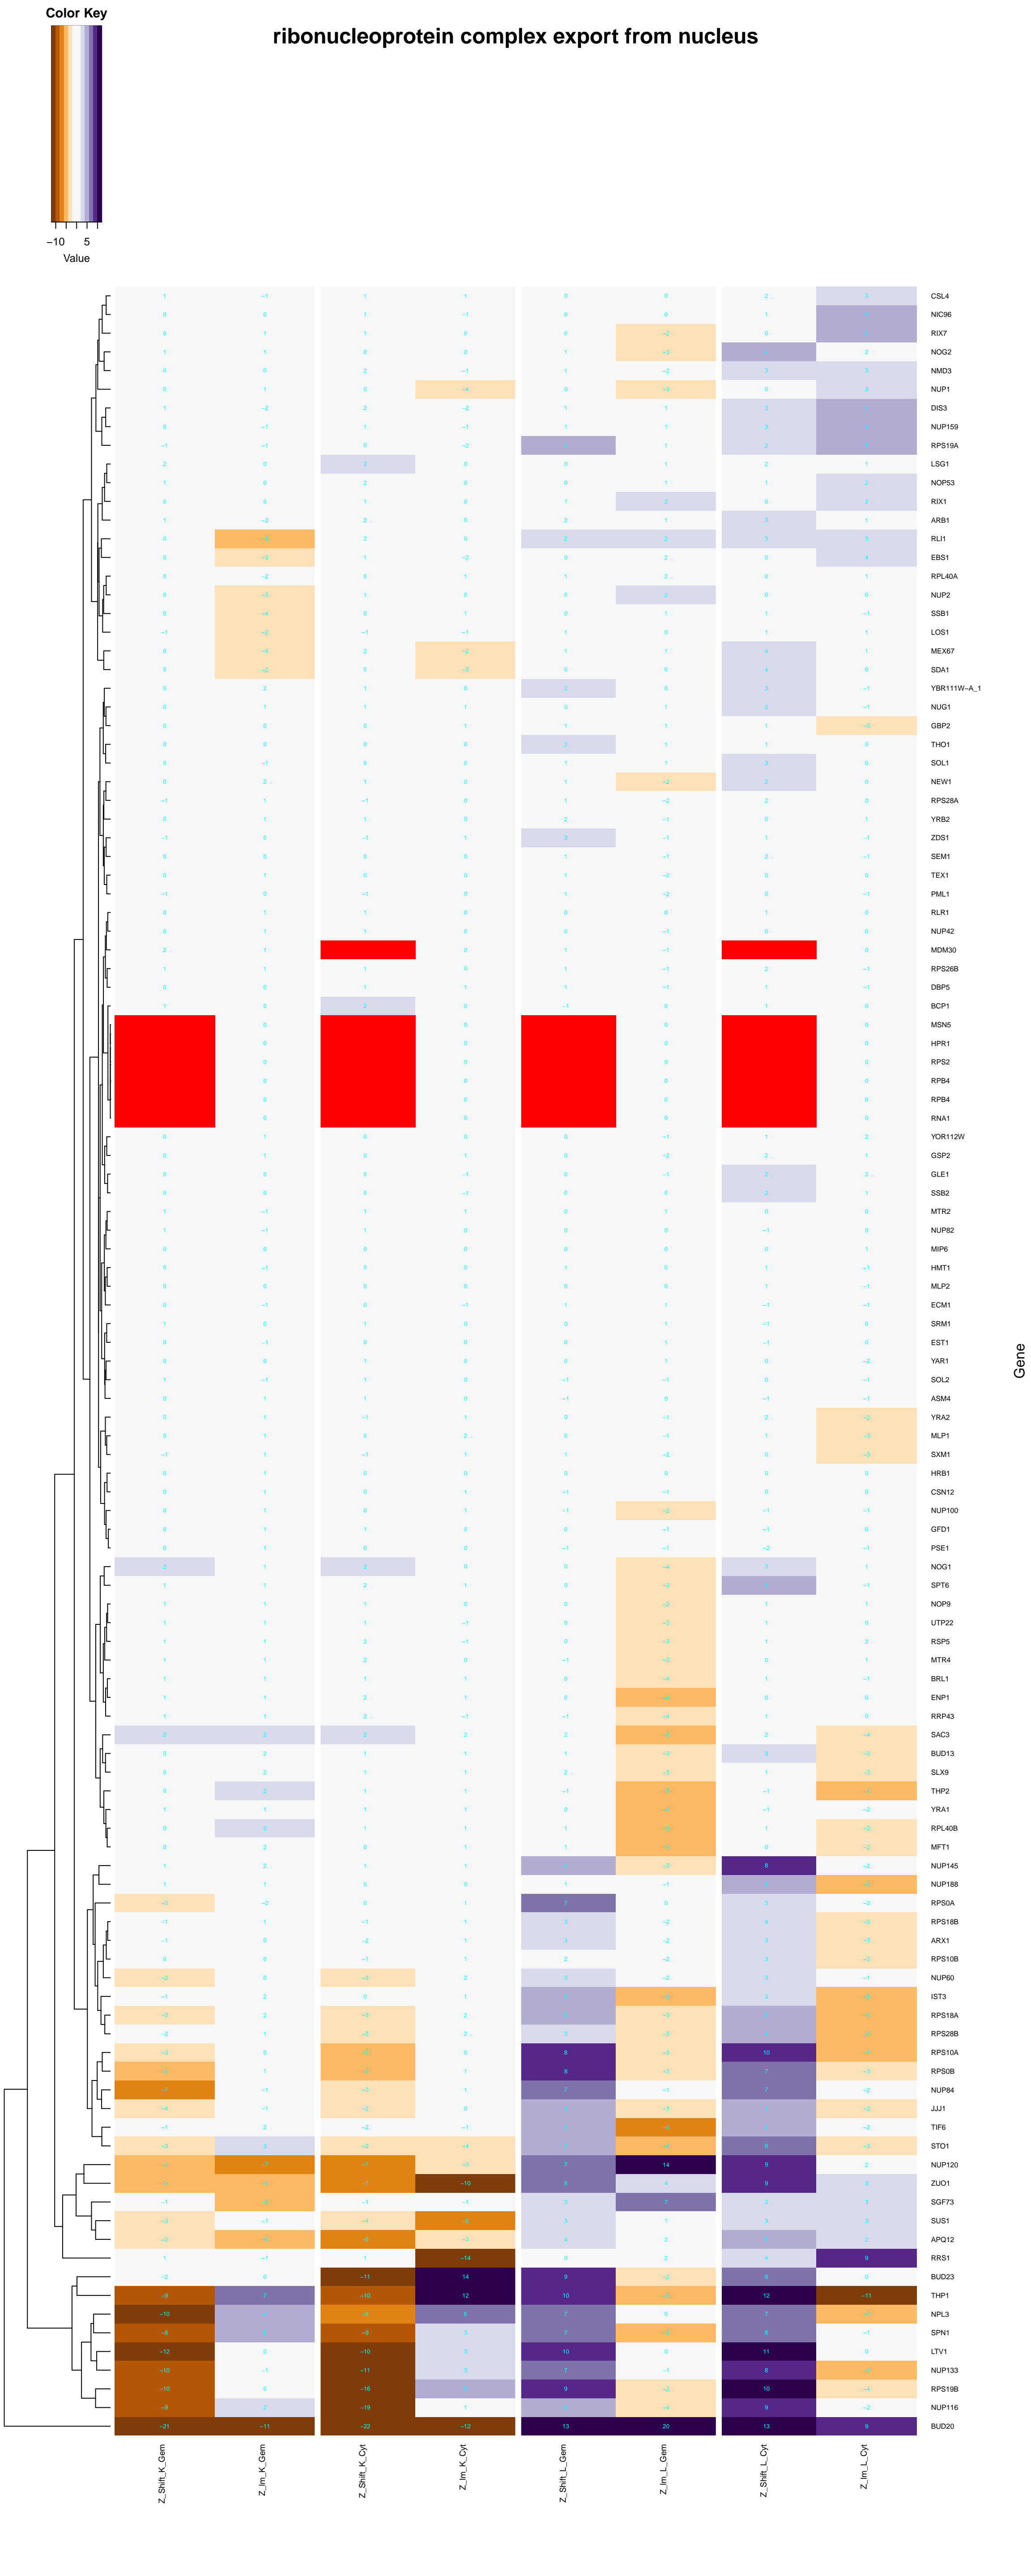

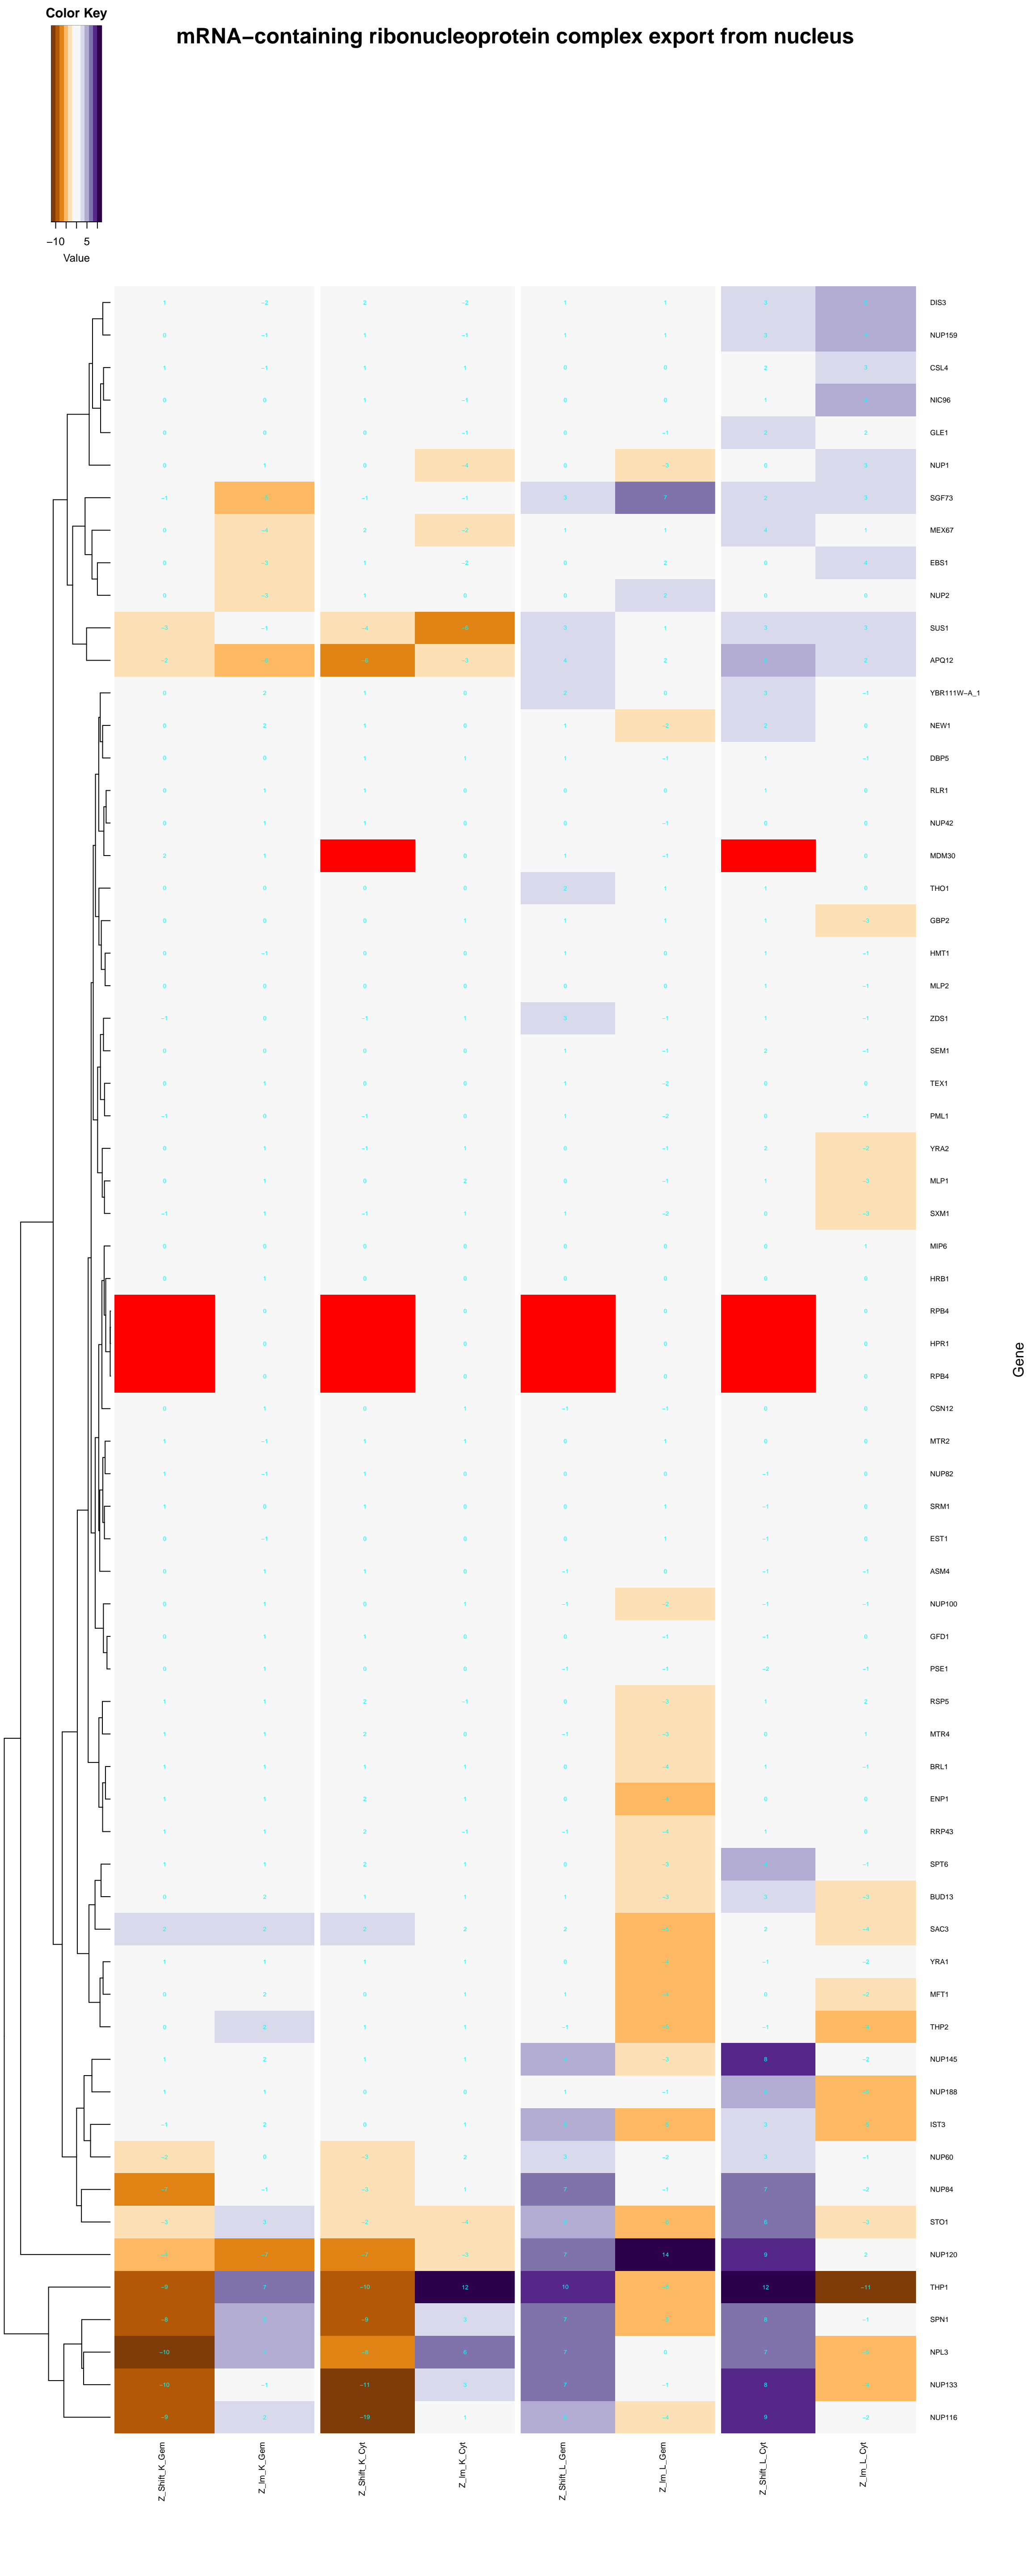

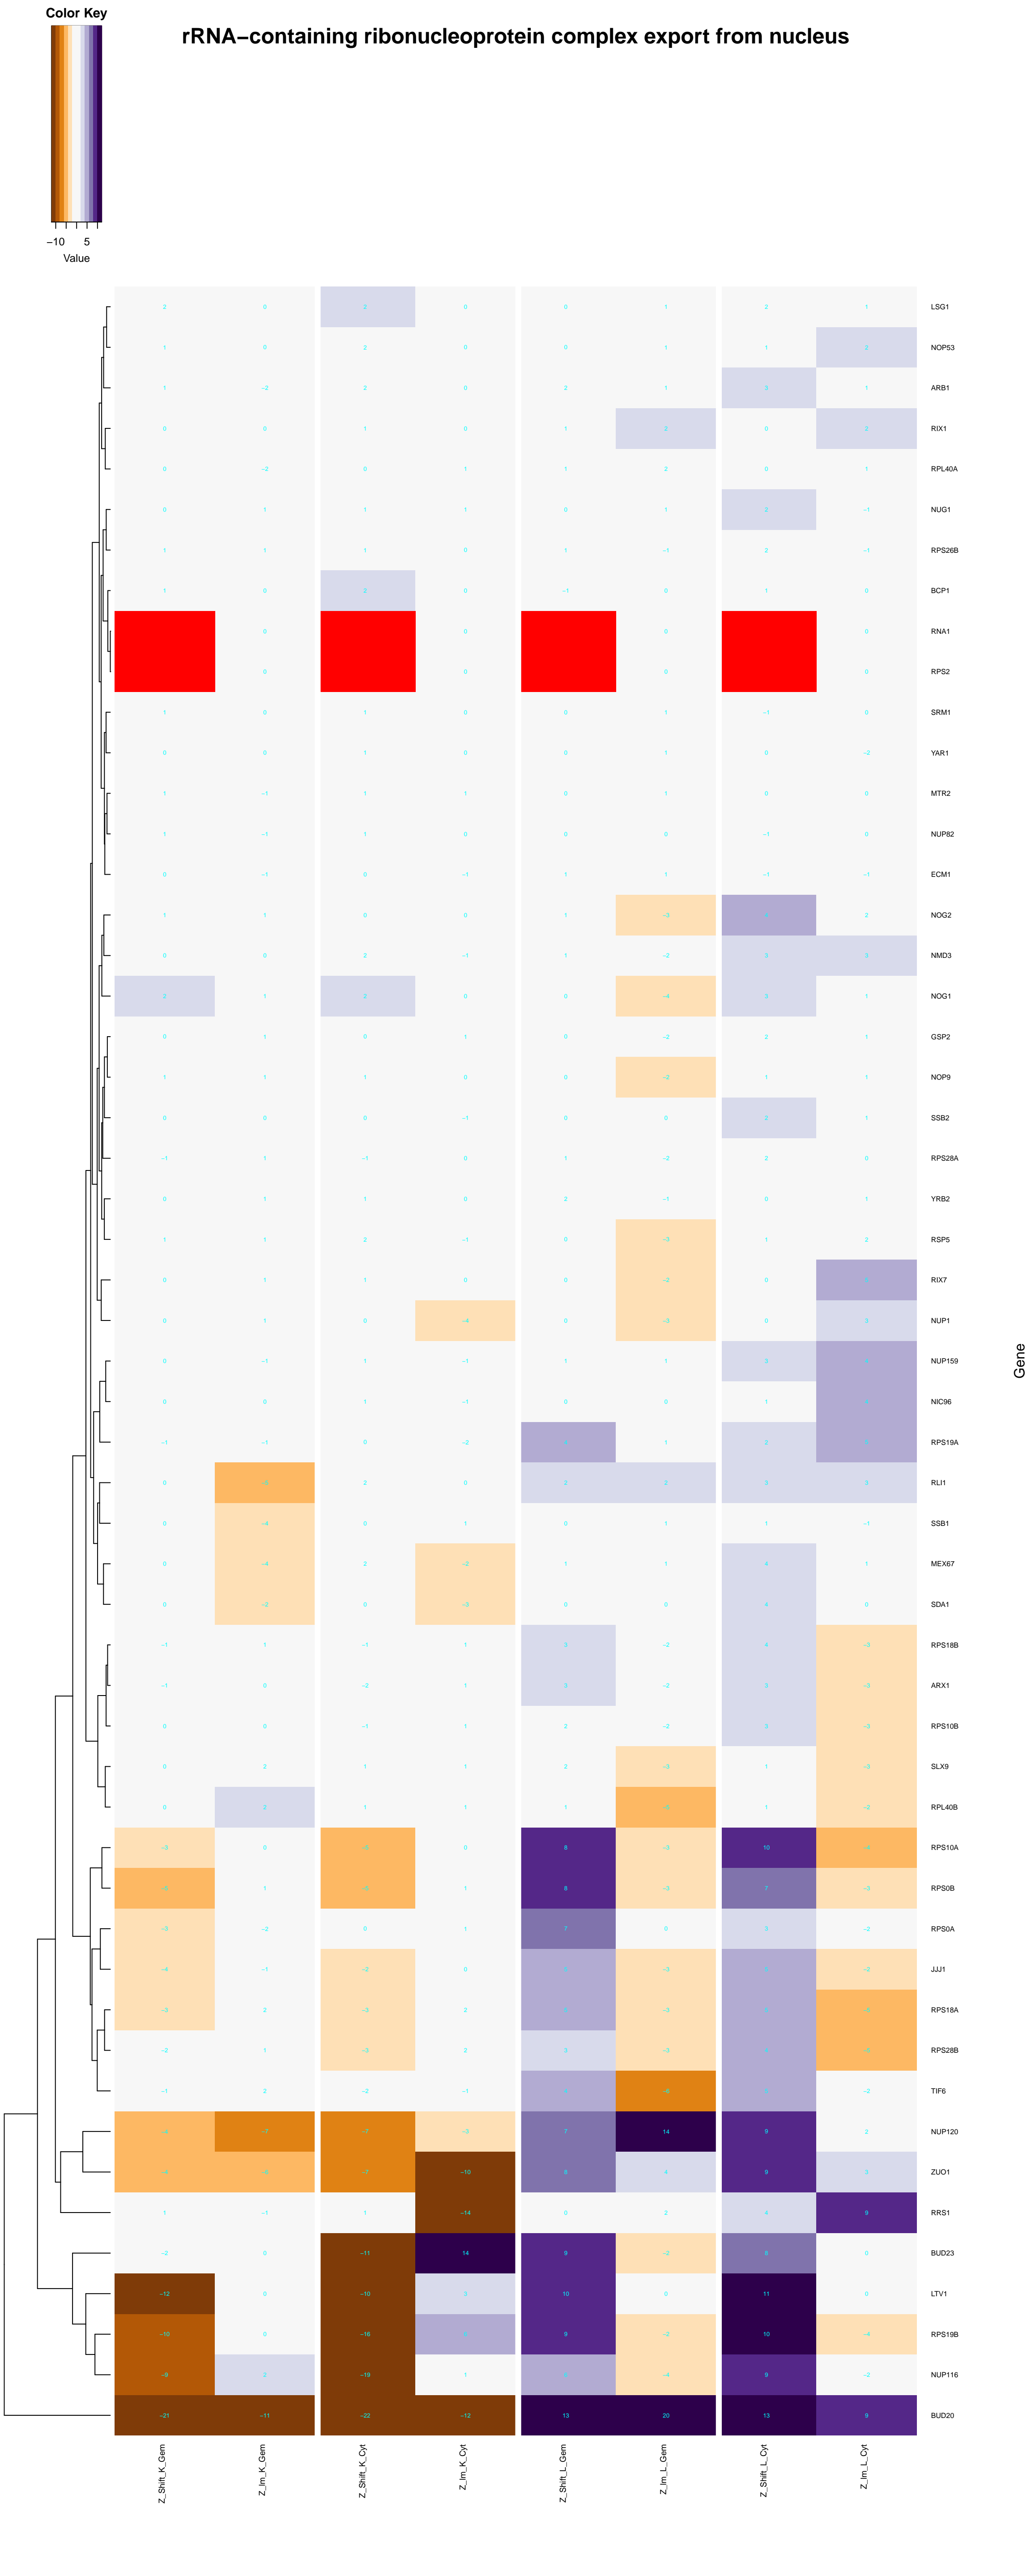

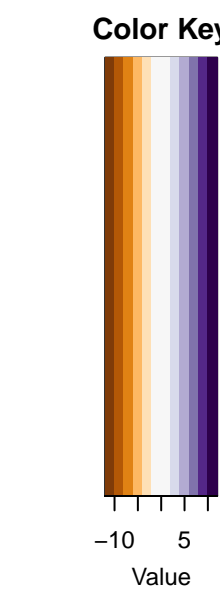

tRNA-containing ribonucleoprotein complex export from nucleus

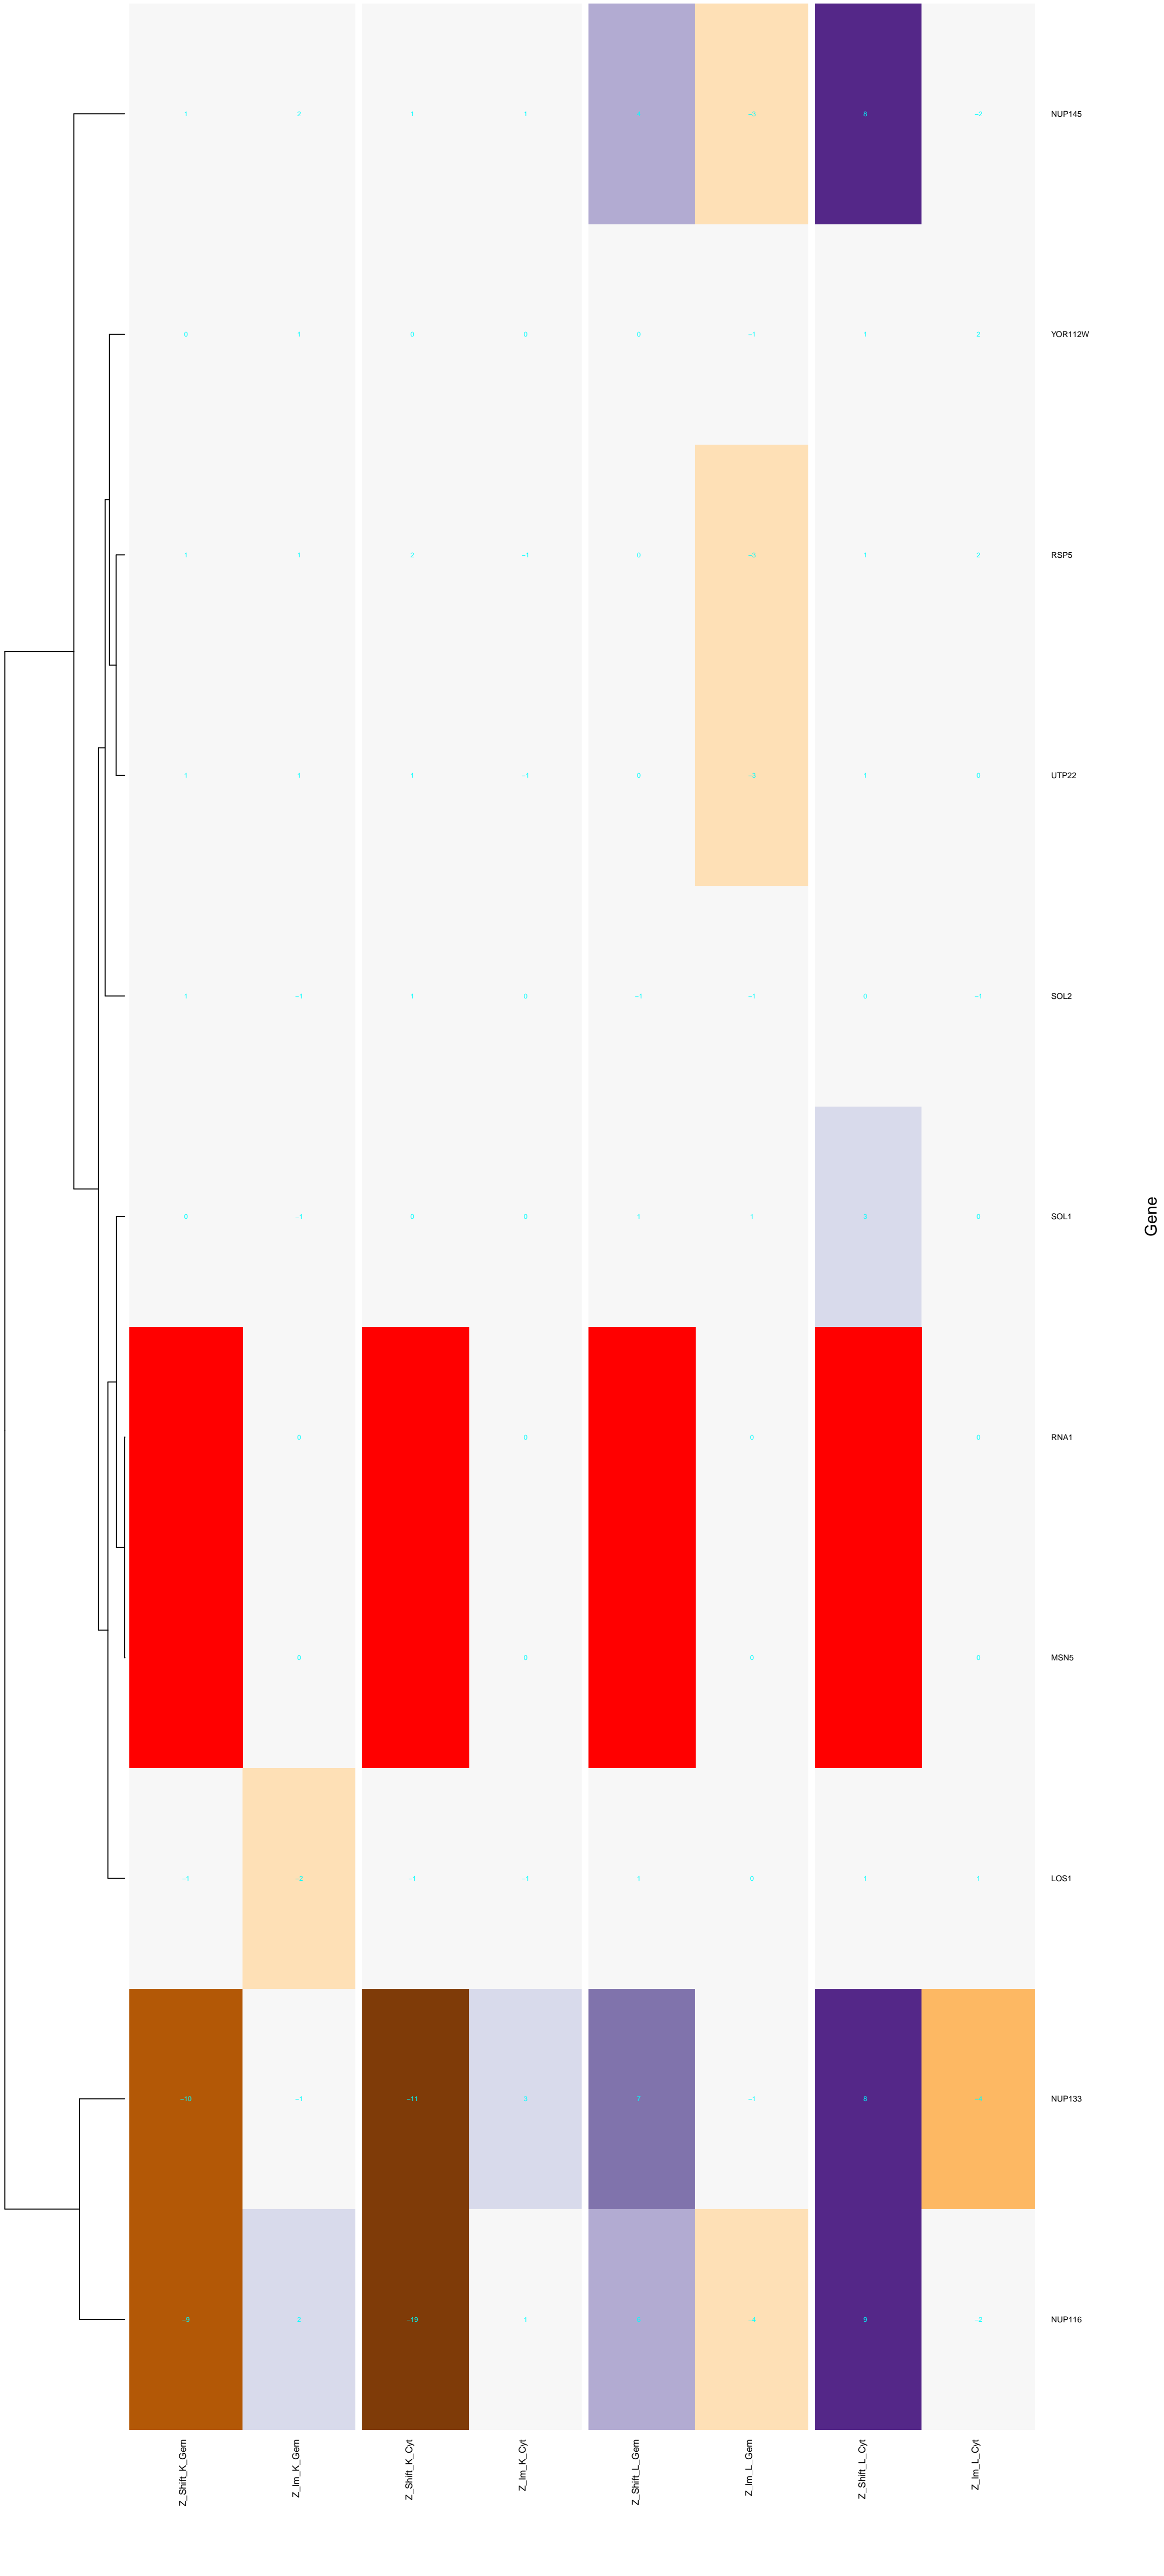

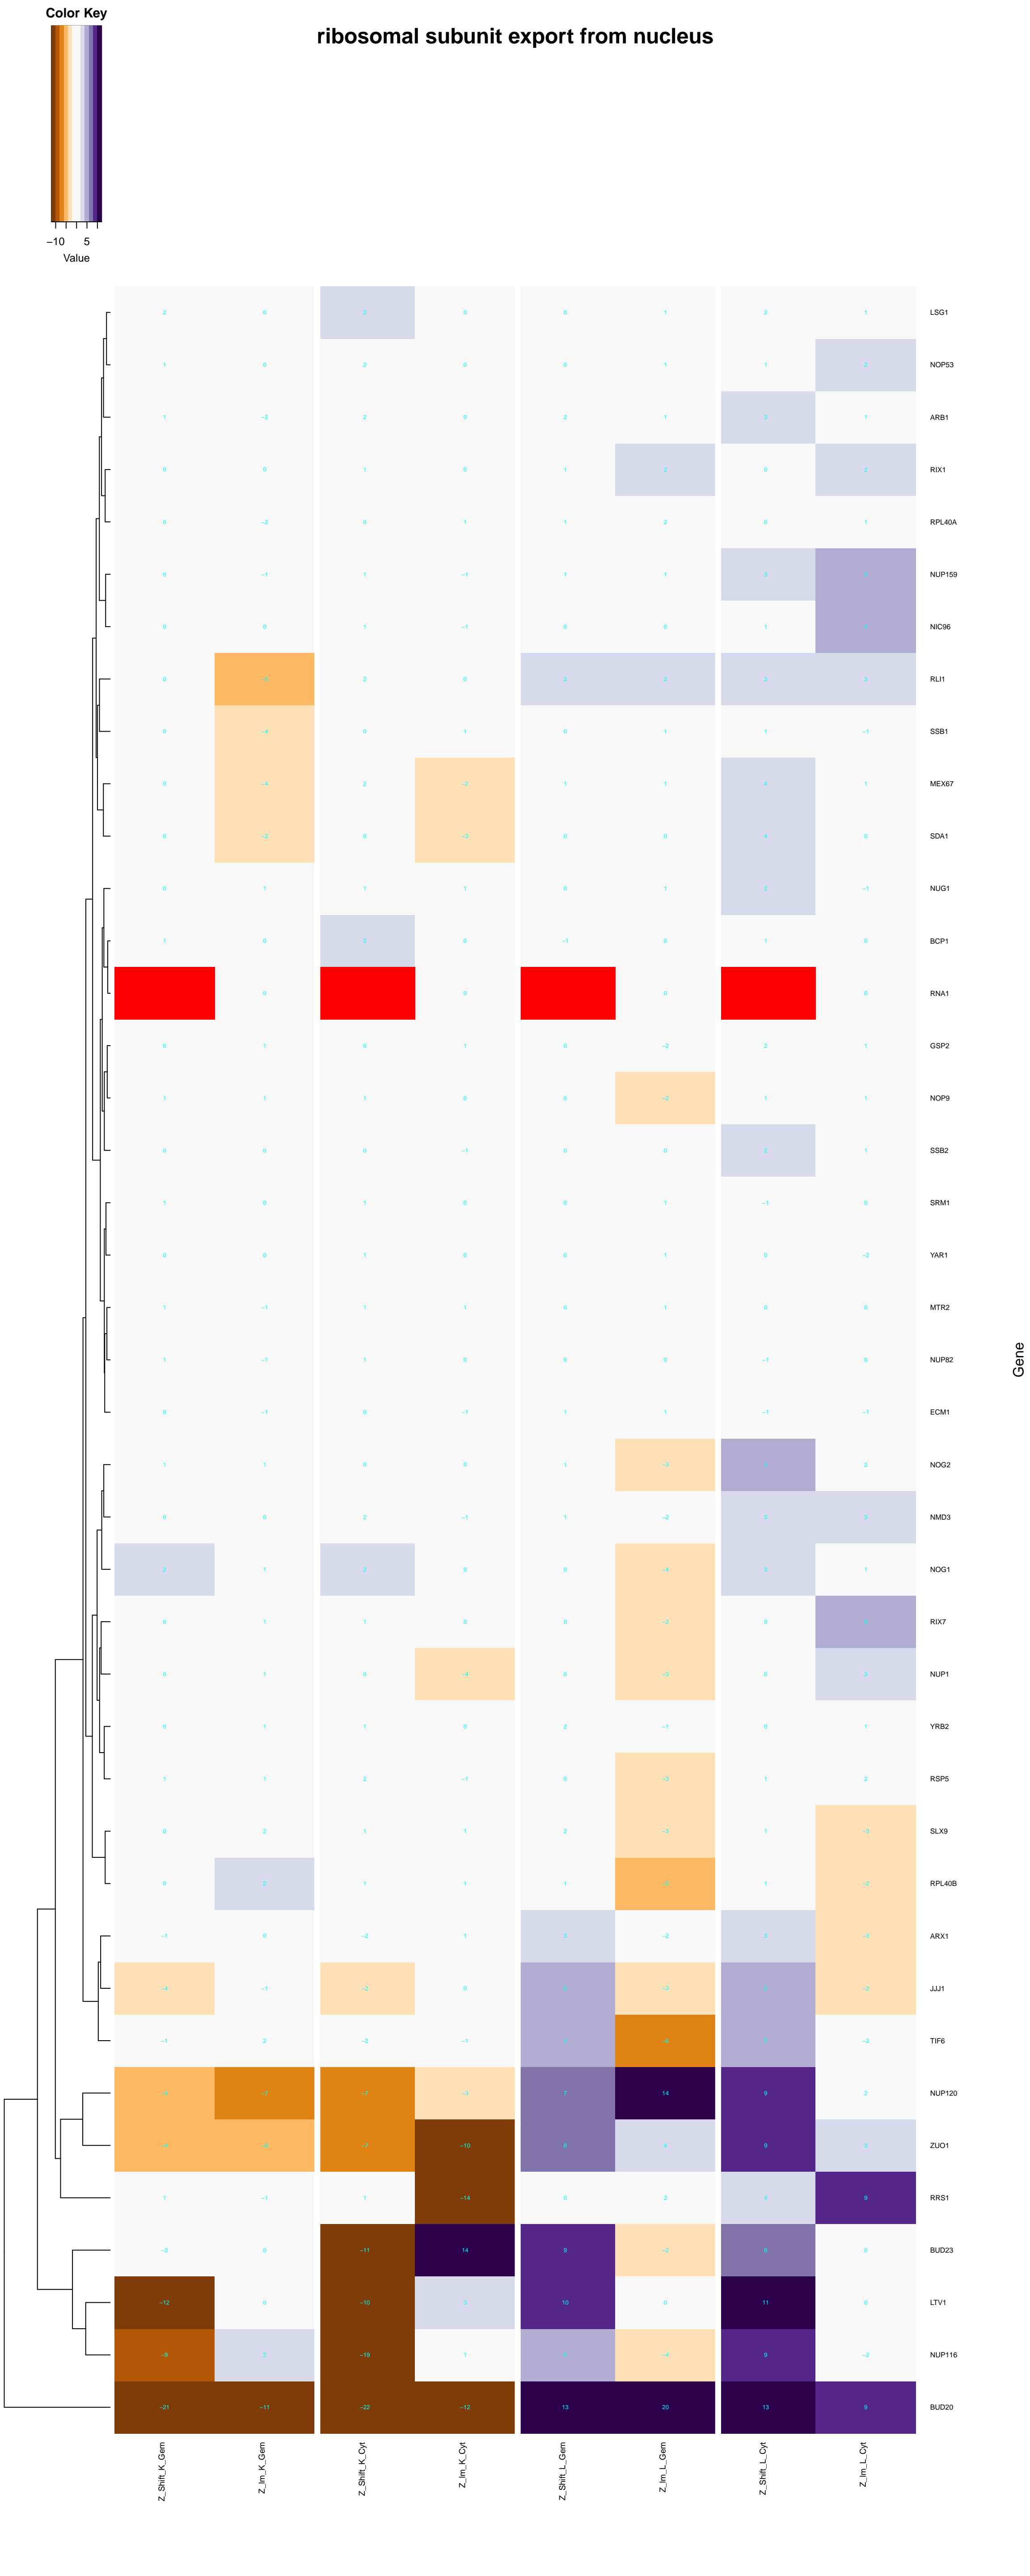

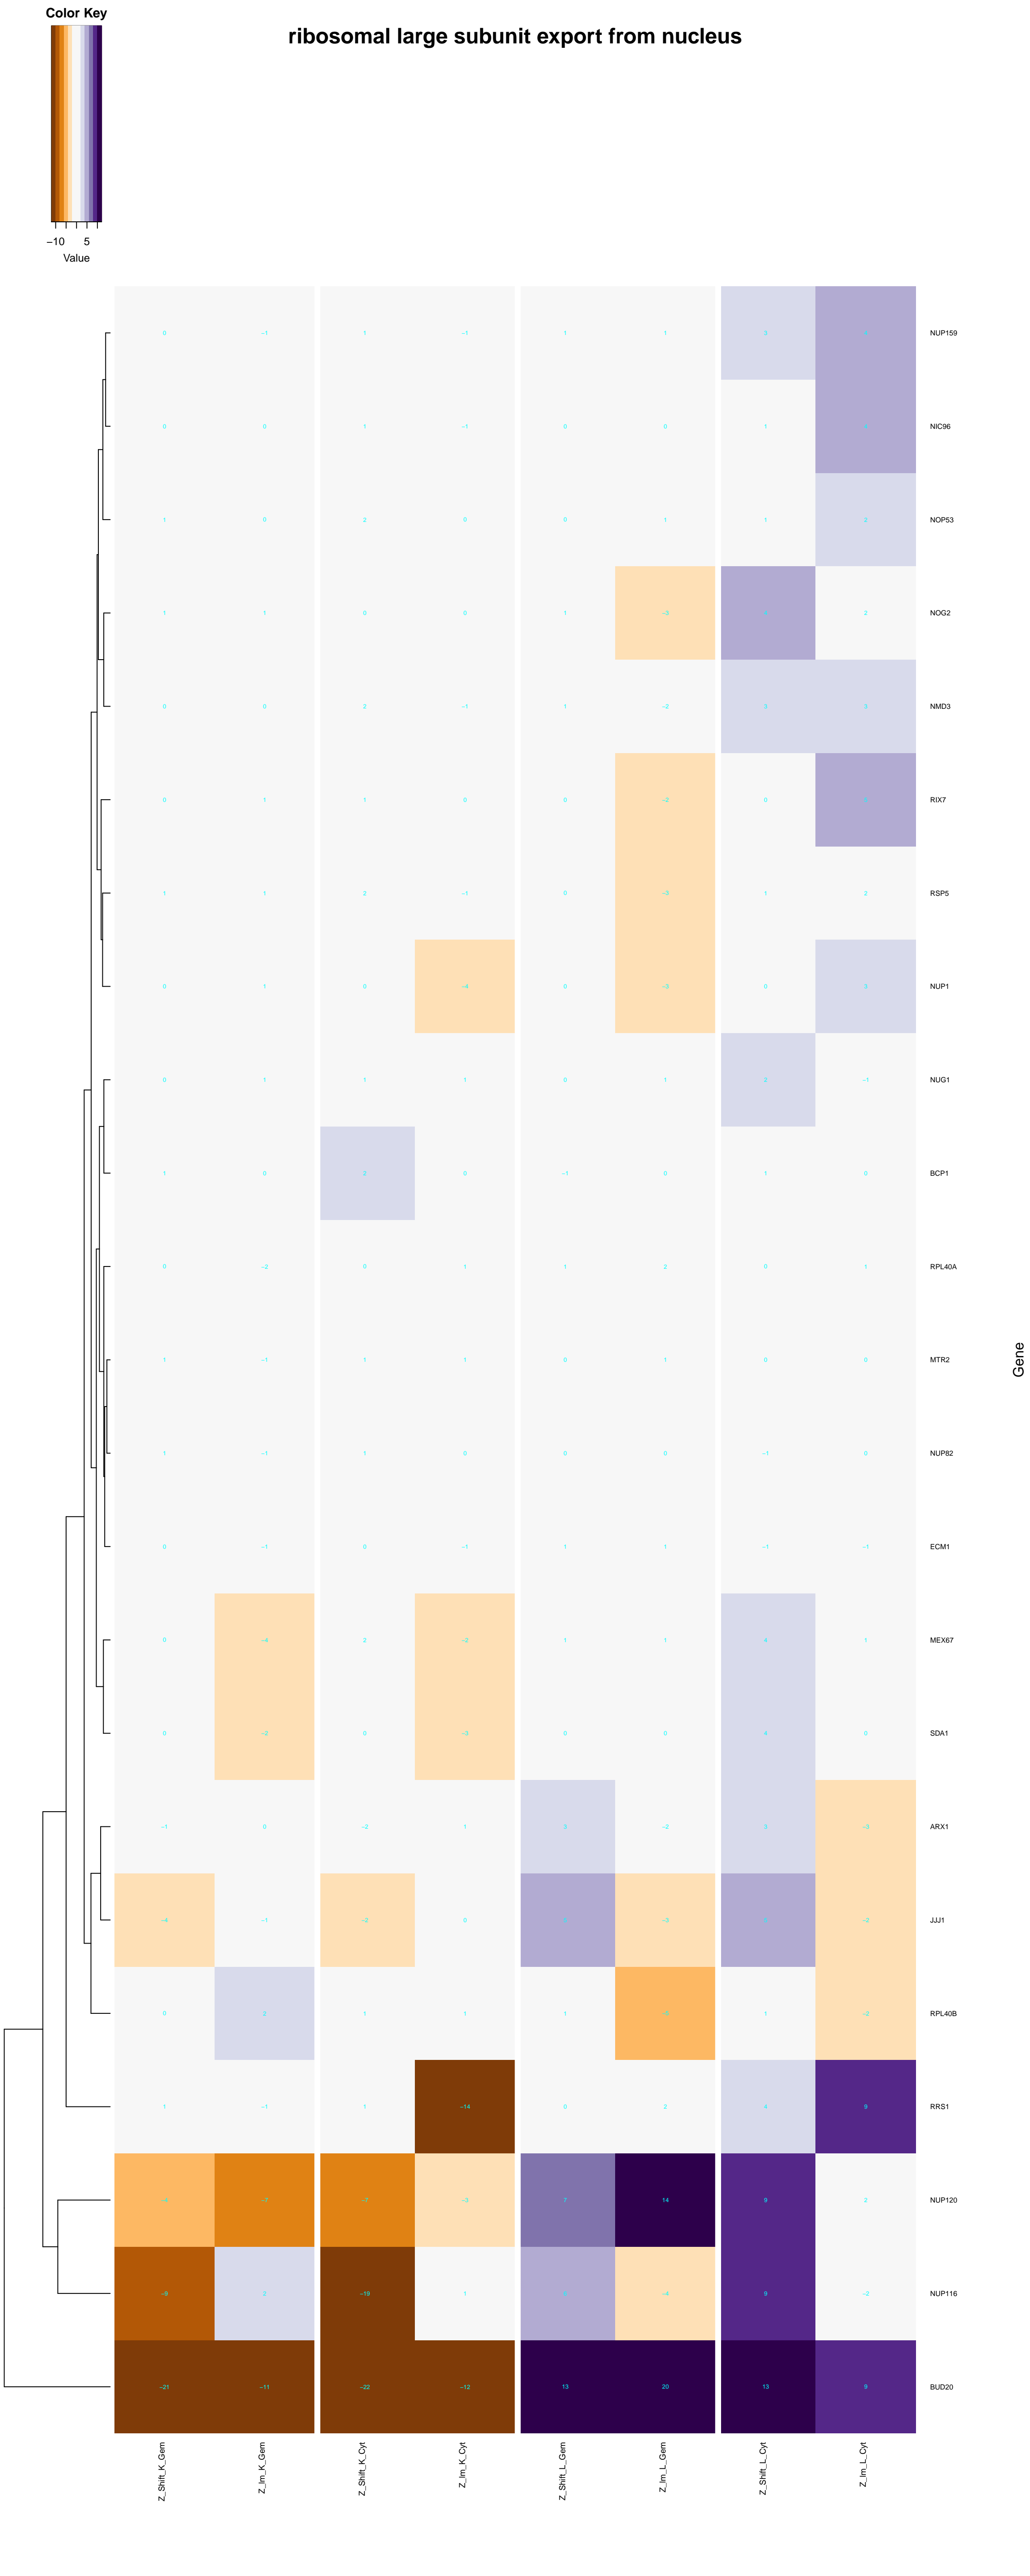

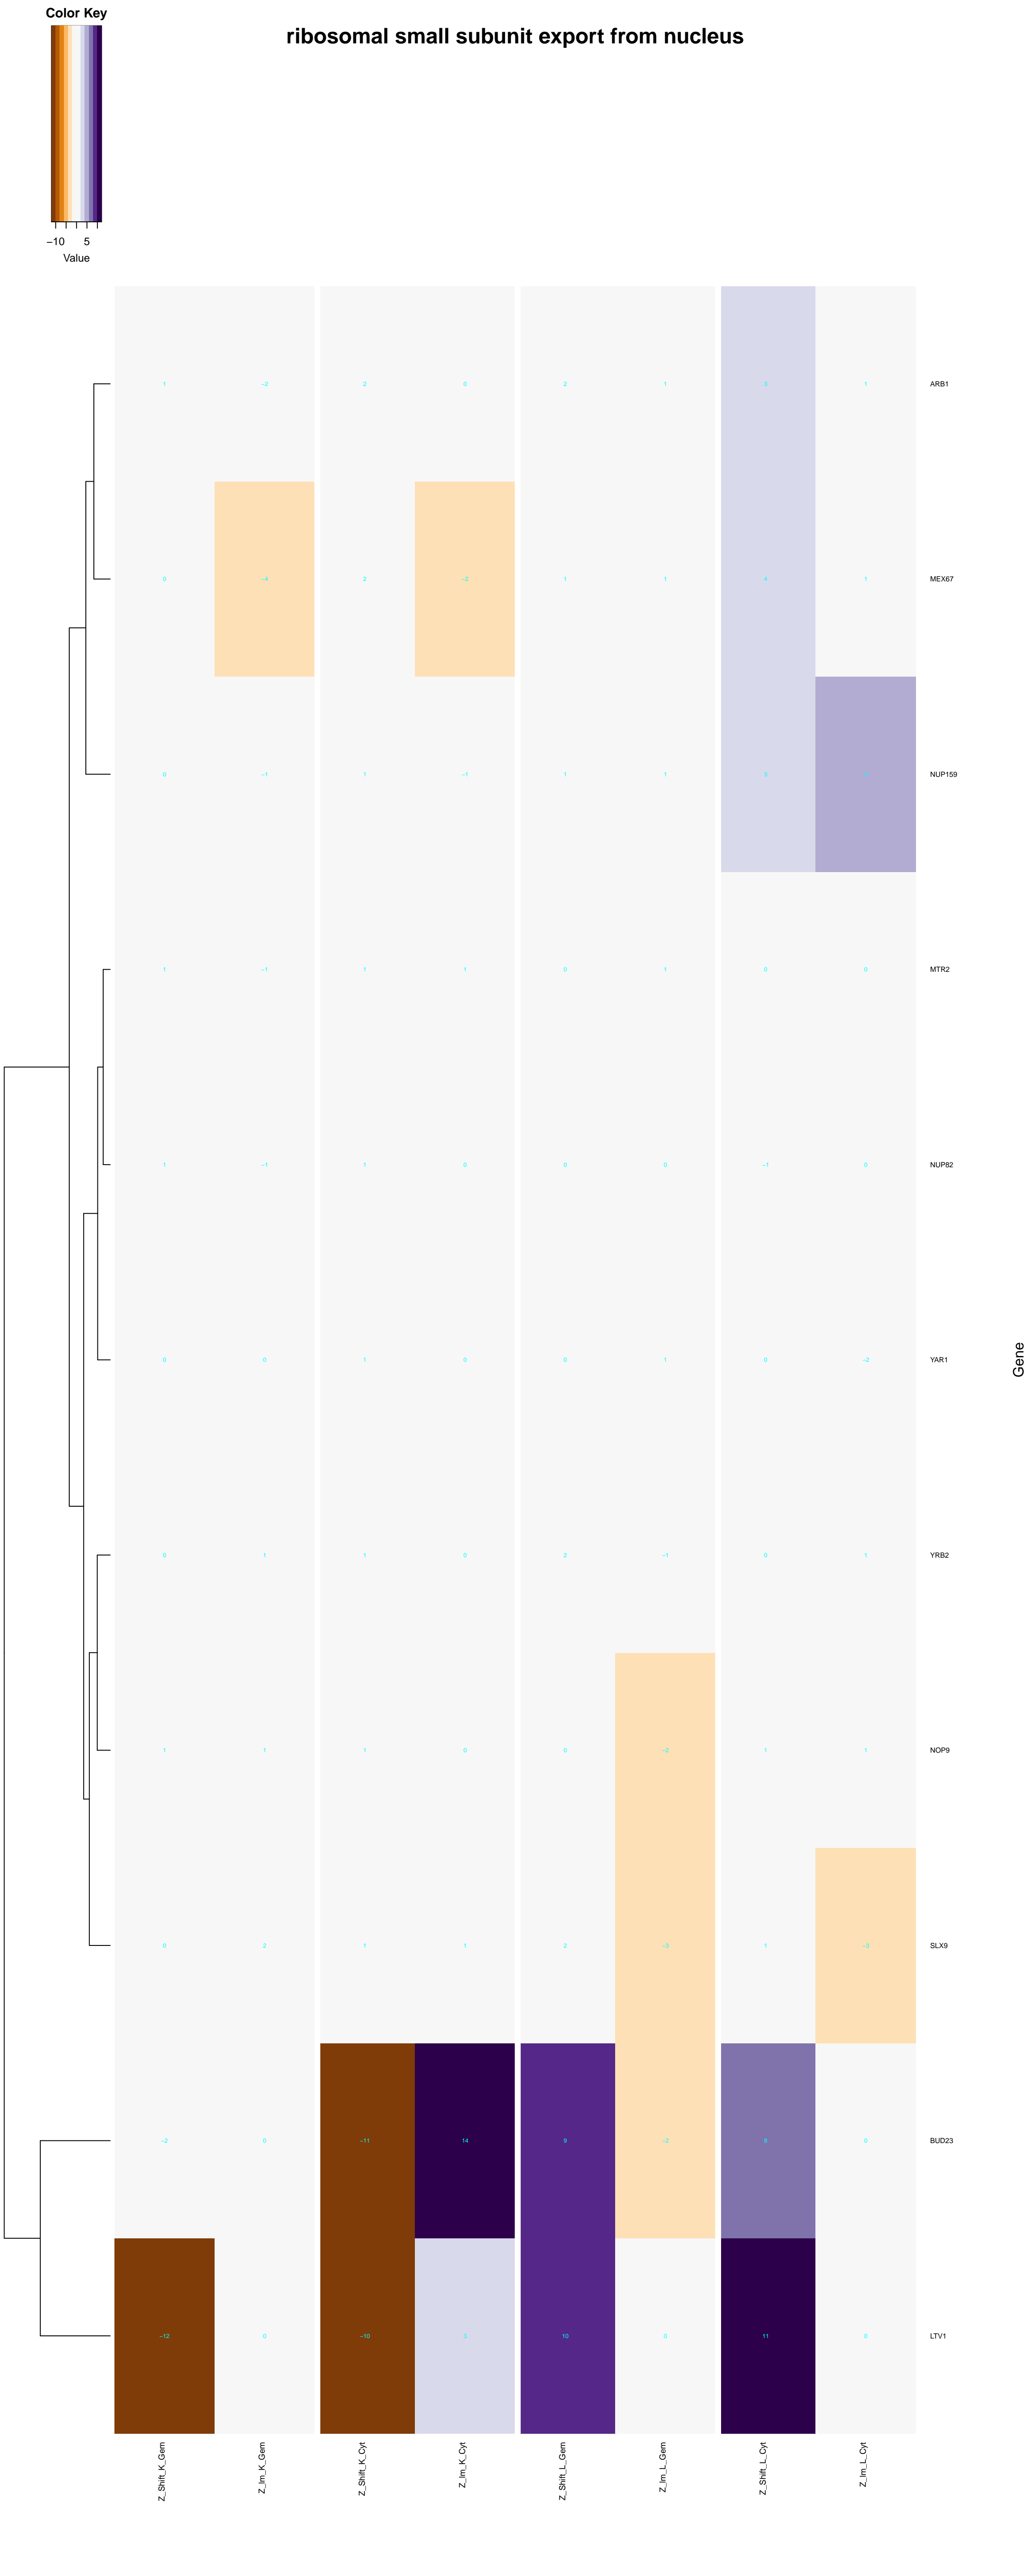

Supplement: s1 [file s1]
