# Supplementary material for: A Humanized Yeast Phenomic Model of Deoxycytidine Kinase to Predict Genetic Buffering of Nucleoside Analog Cytotoxicity
Source: MDPI journal article supplement (doi:10.3390/genes10100770), 2019-09-30

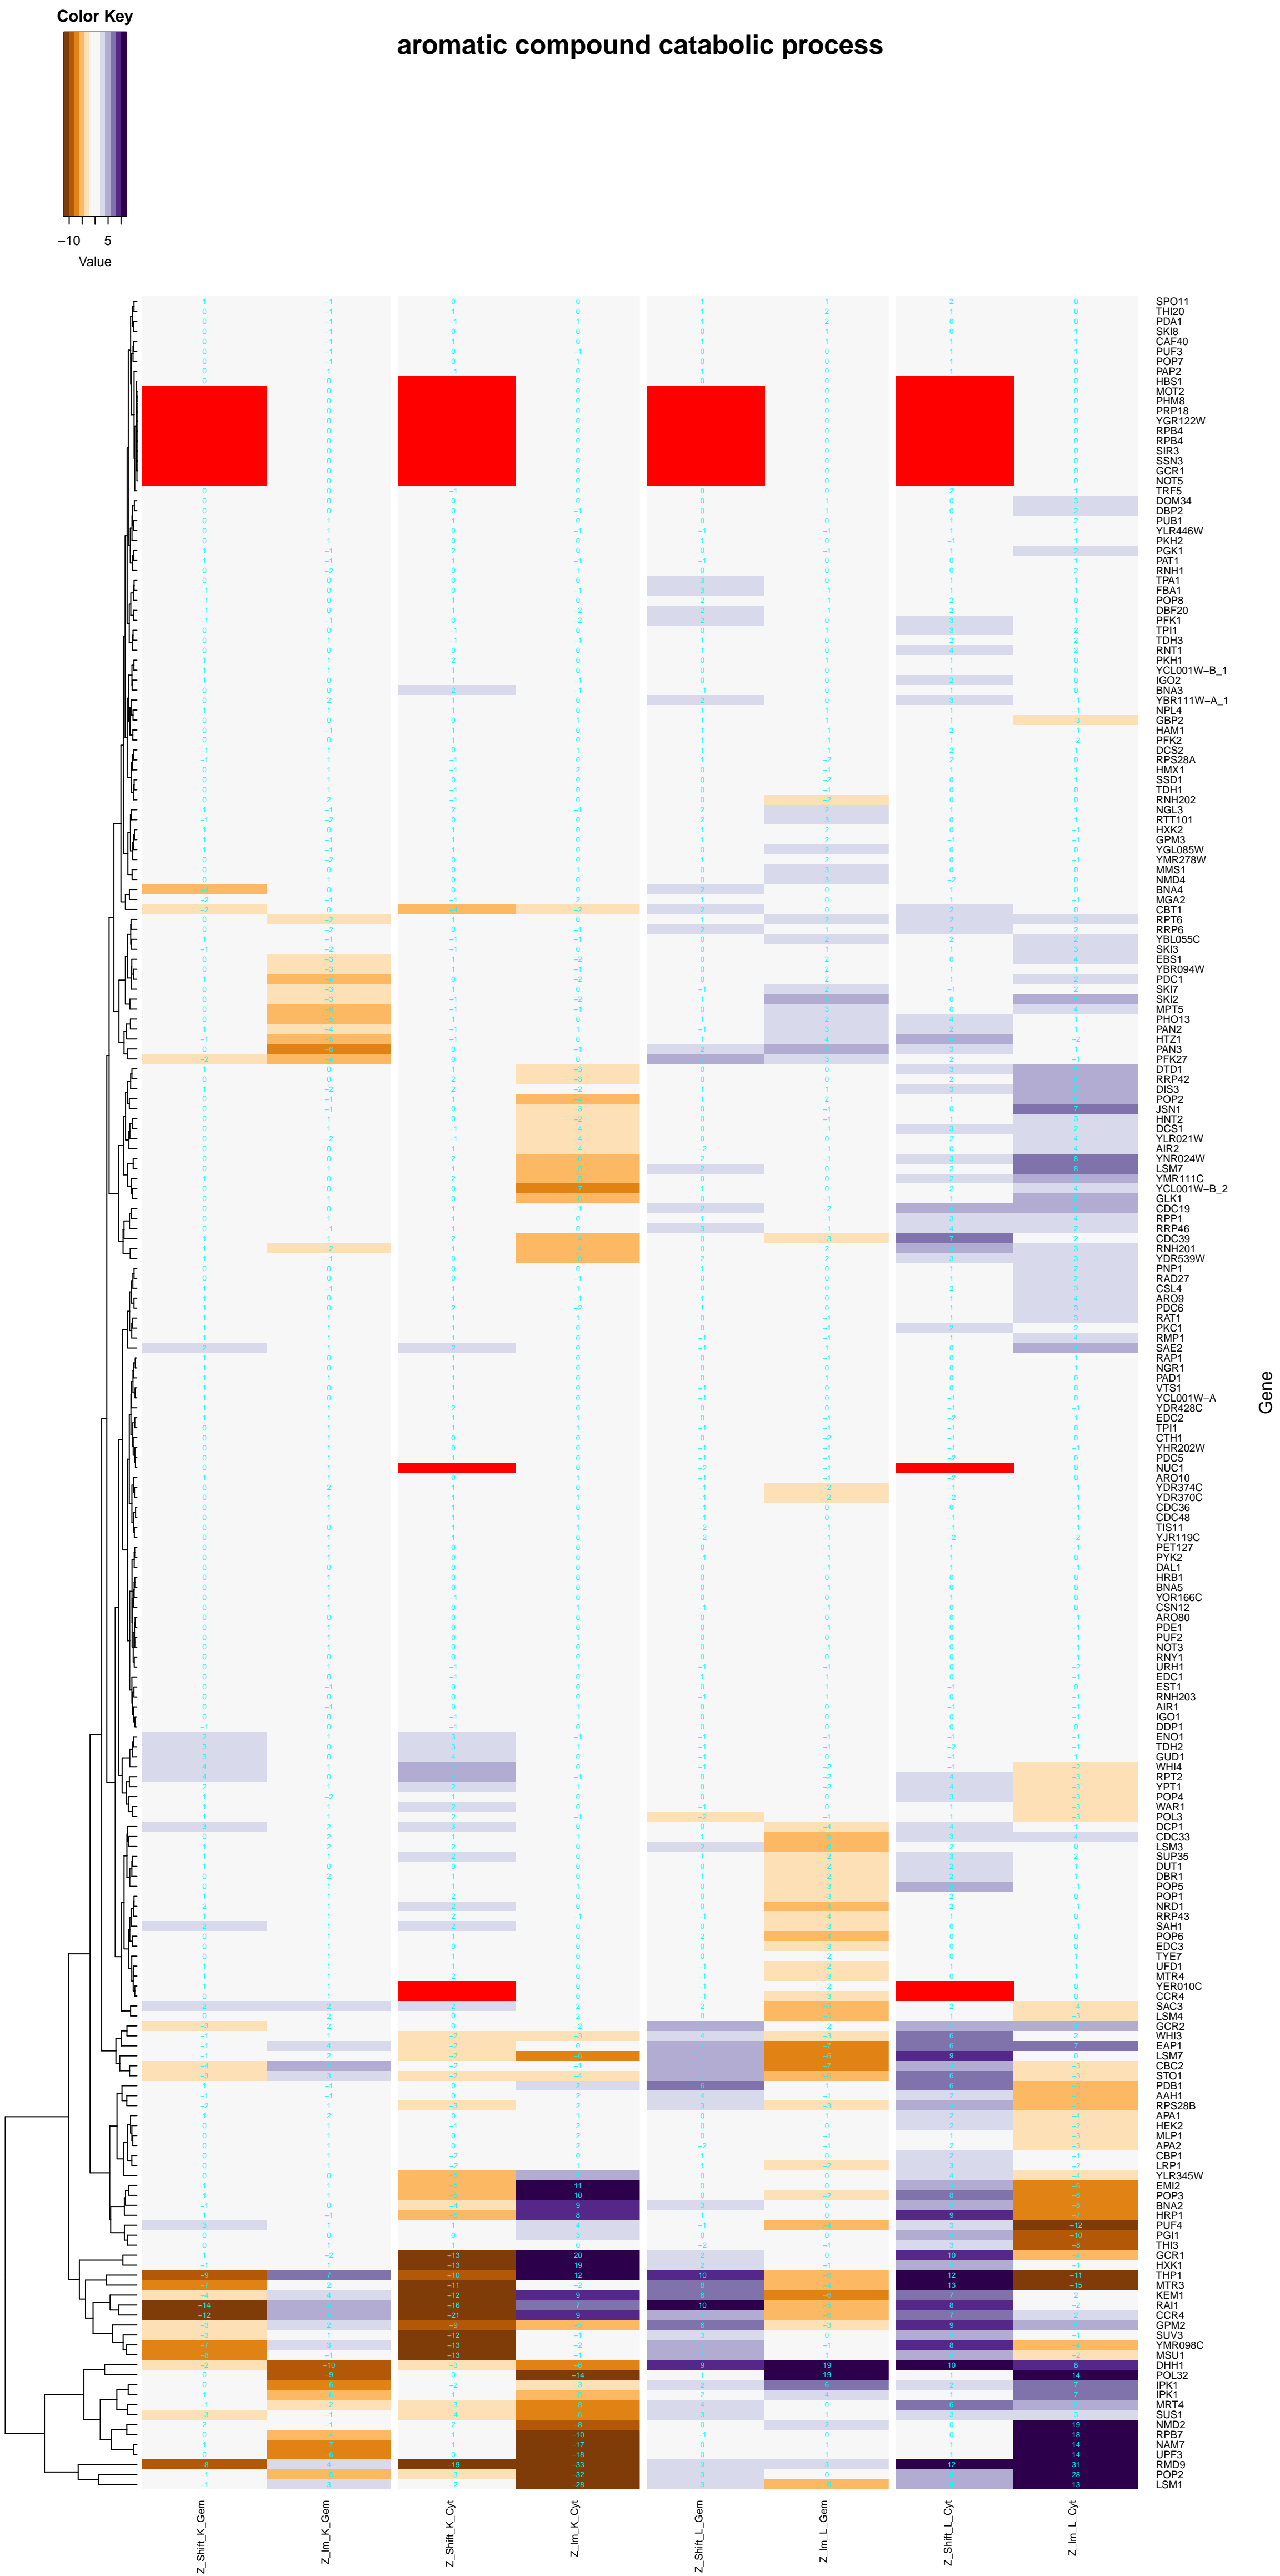

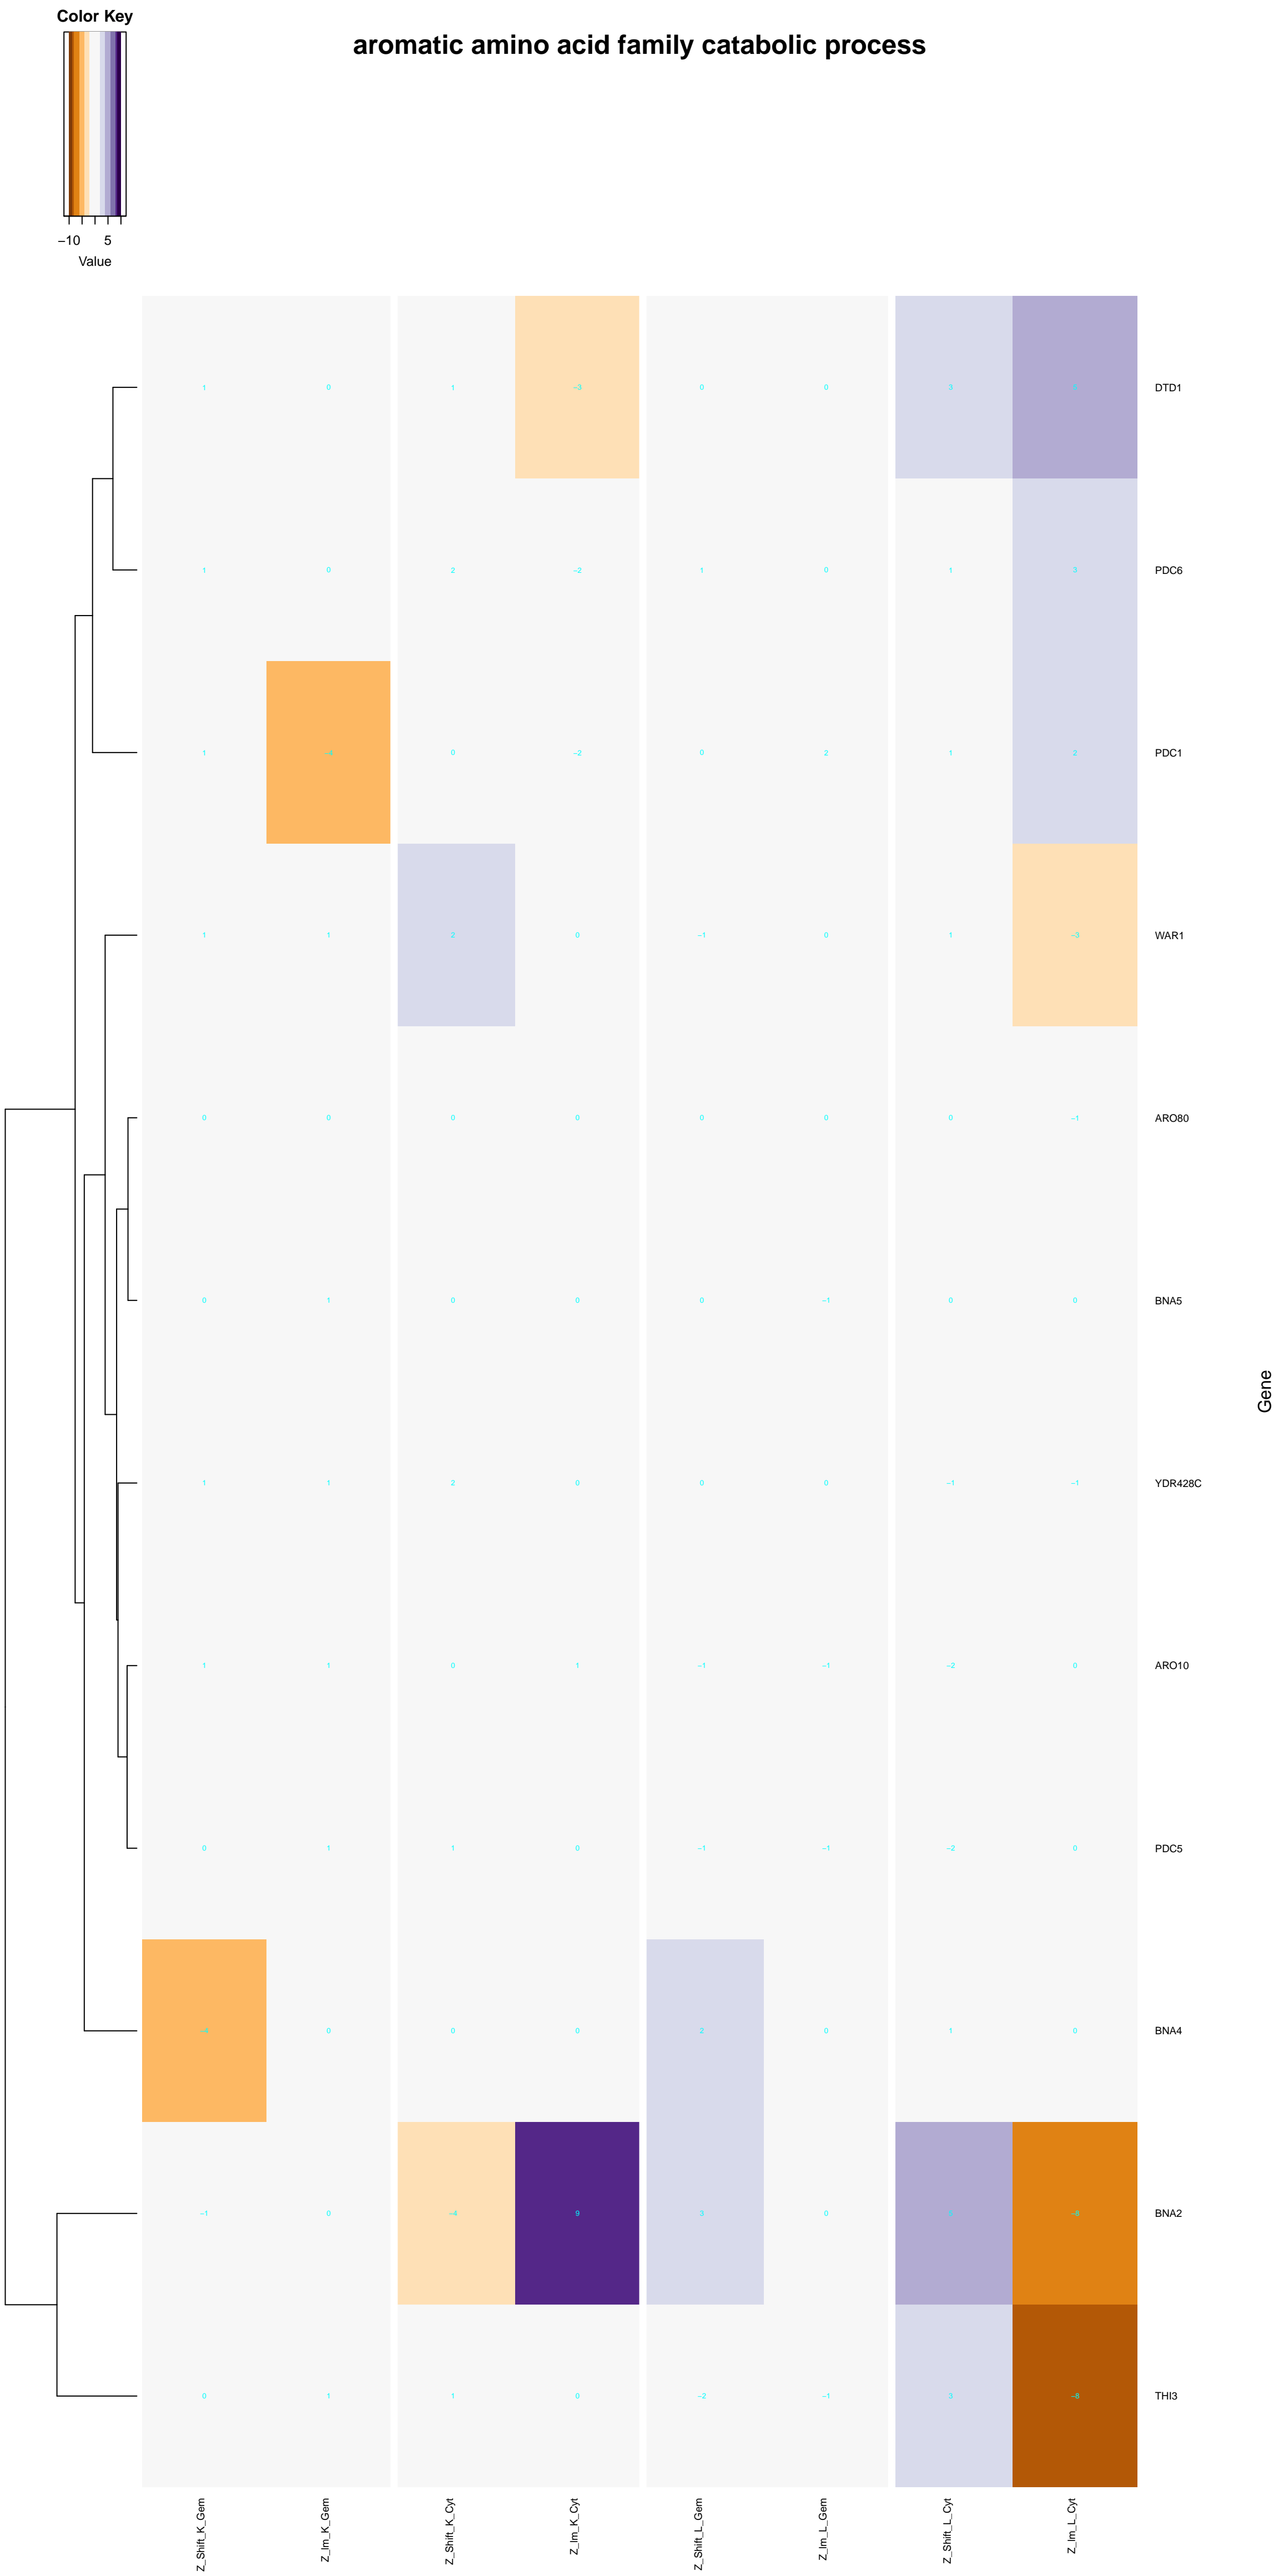

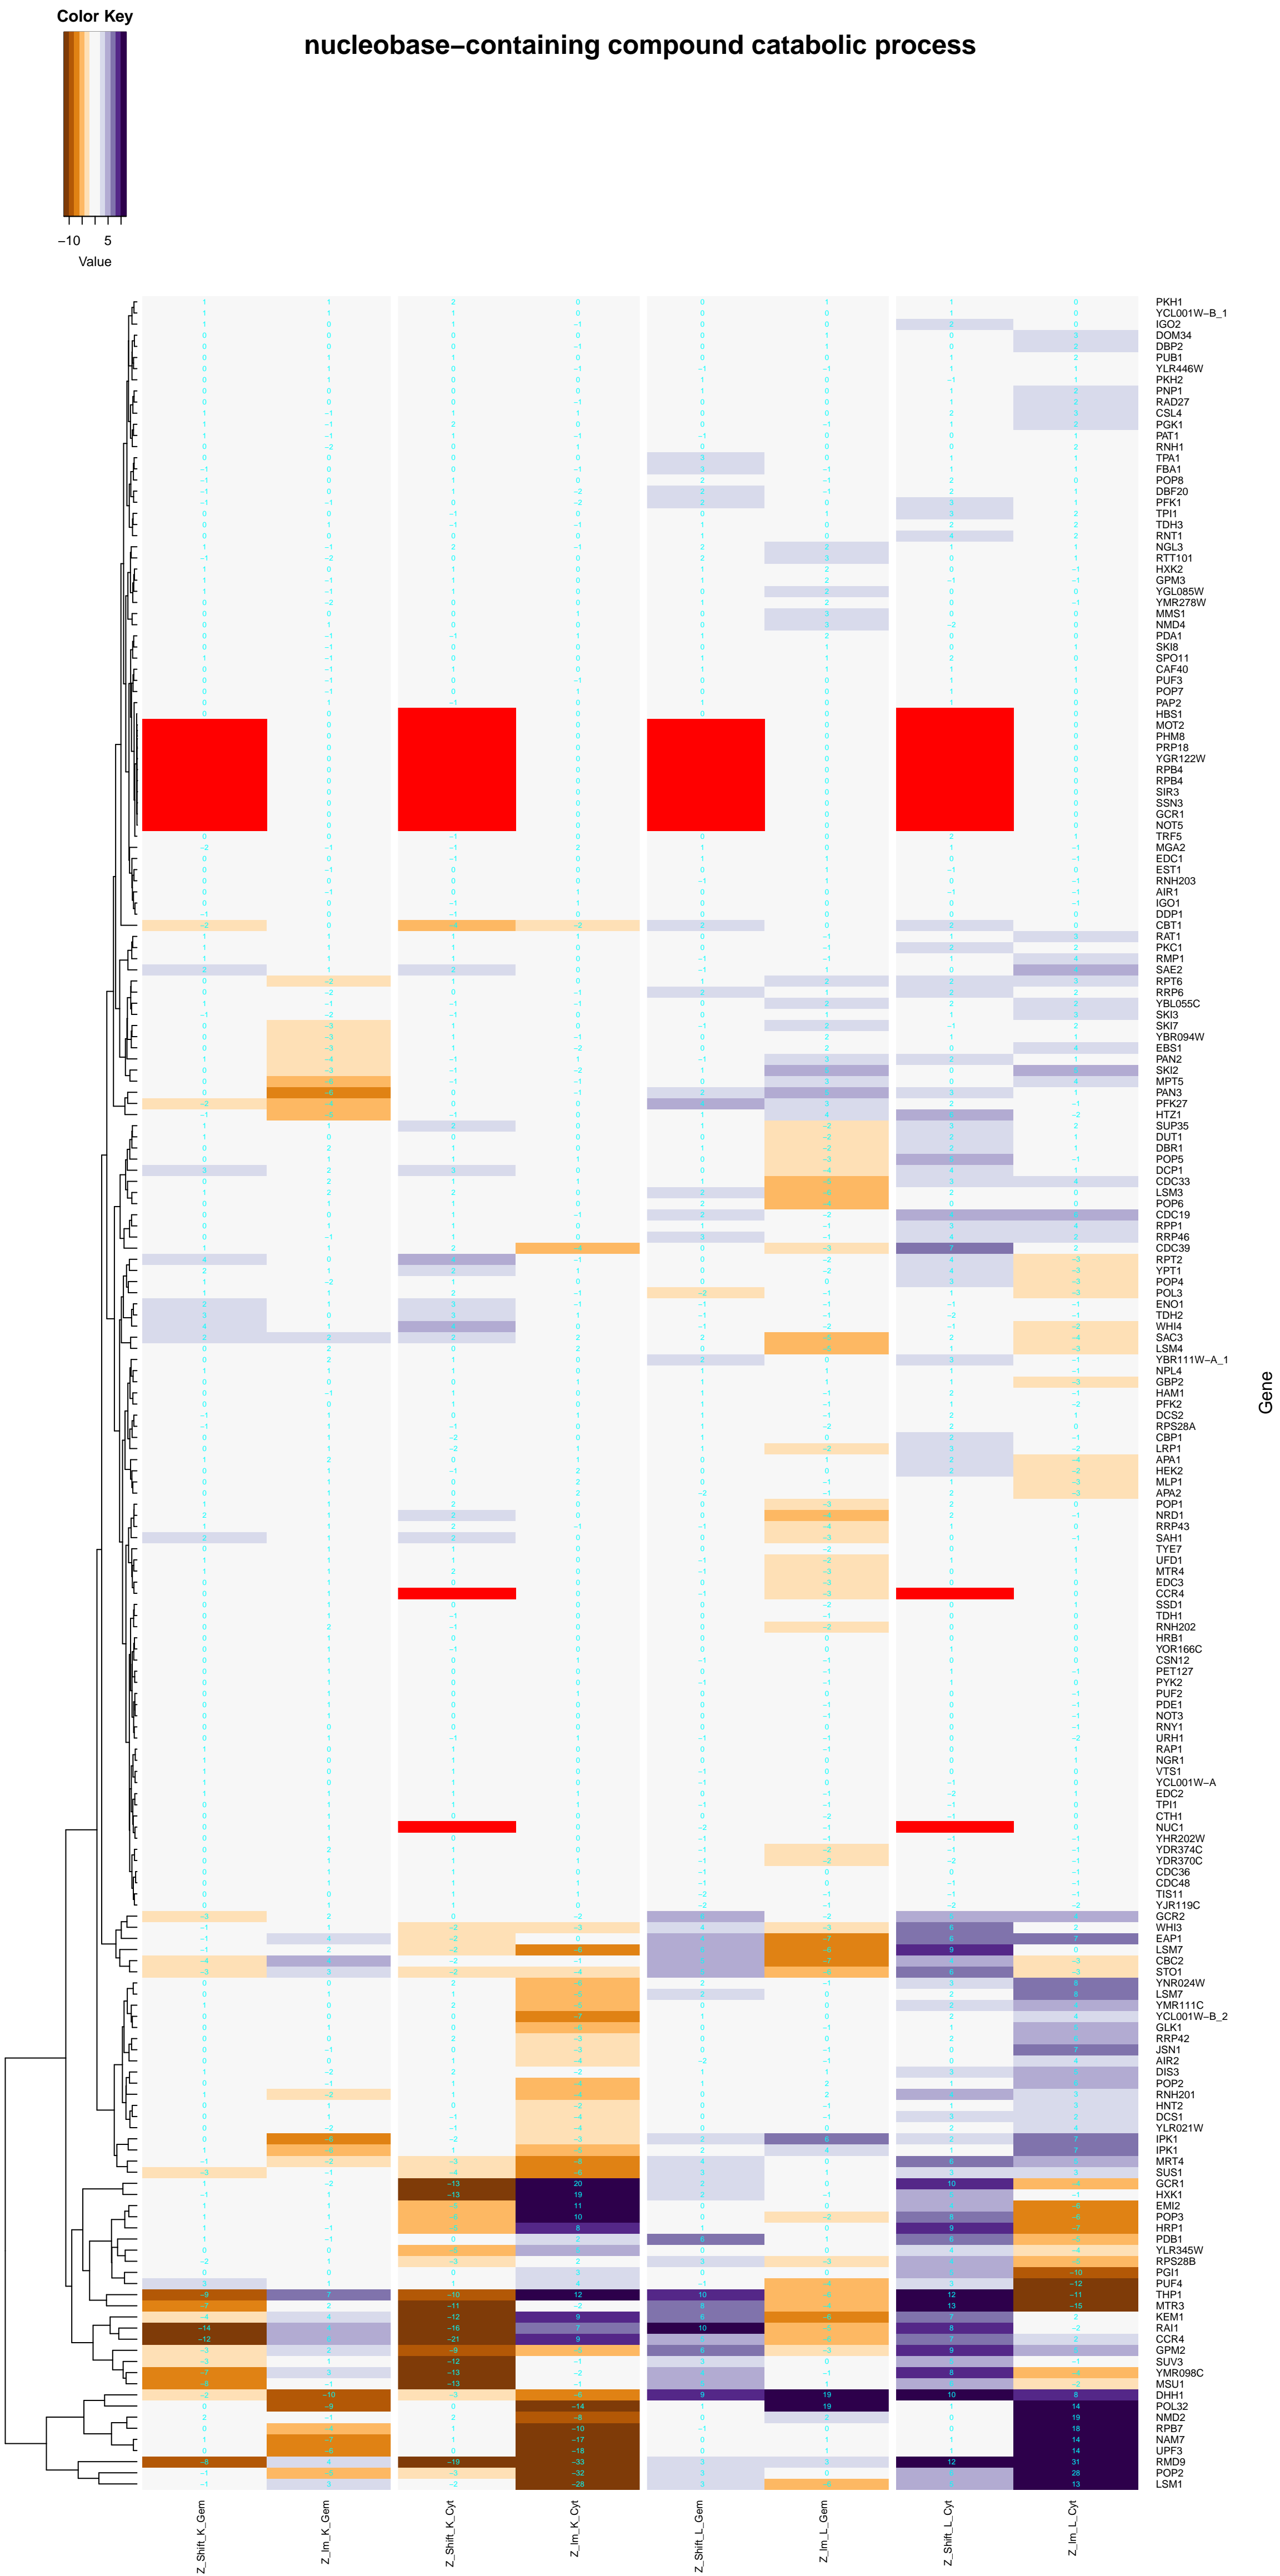

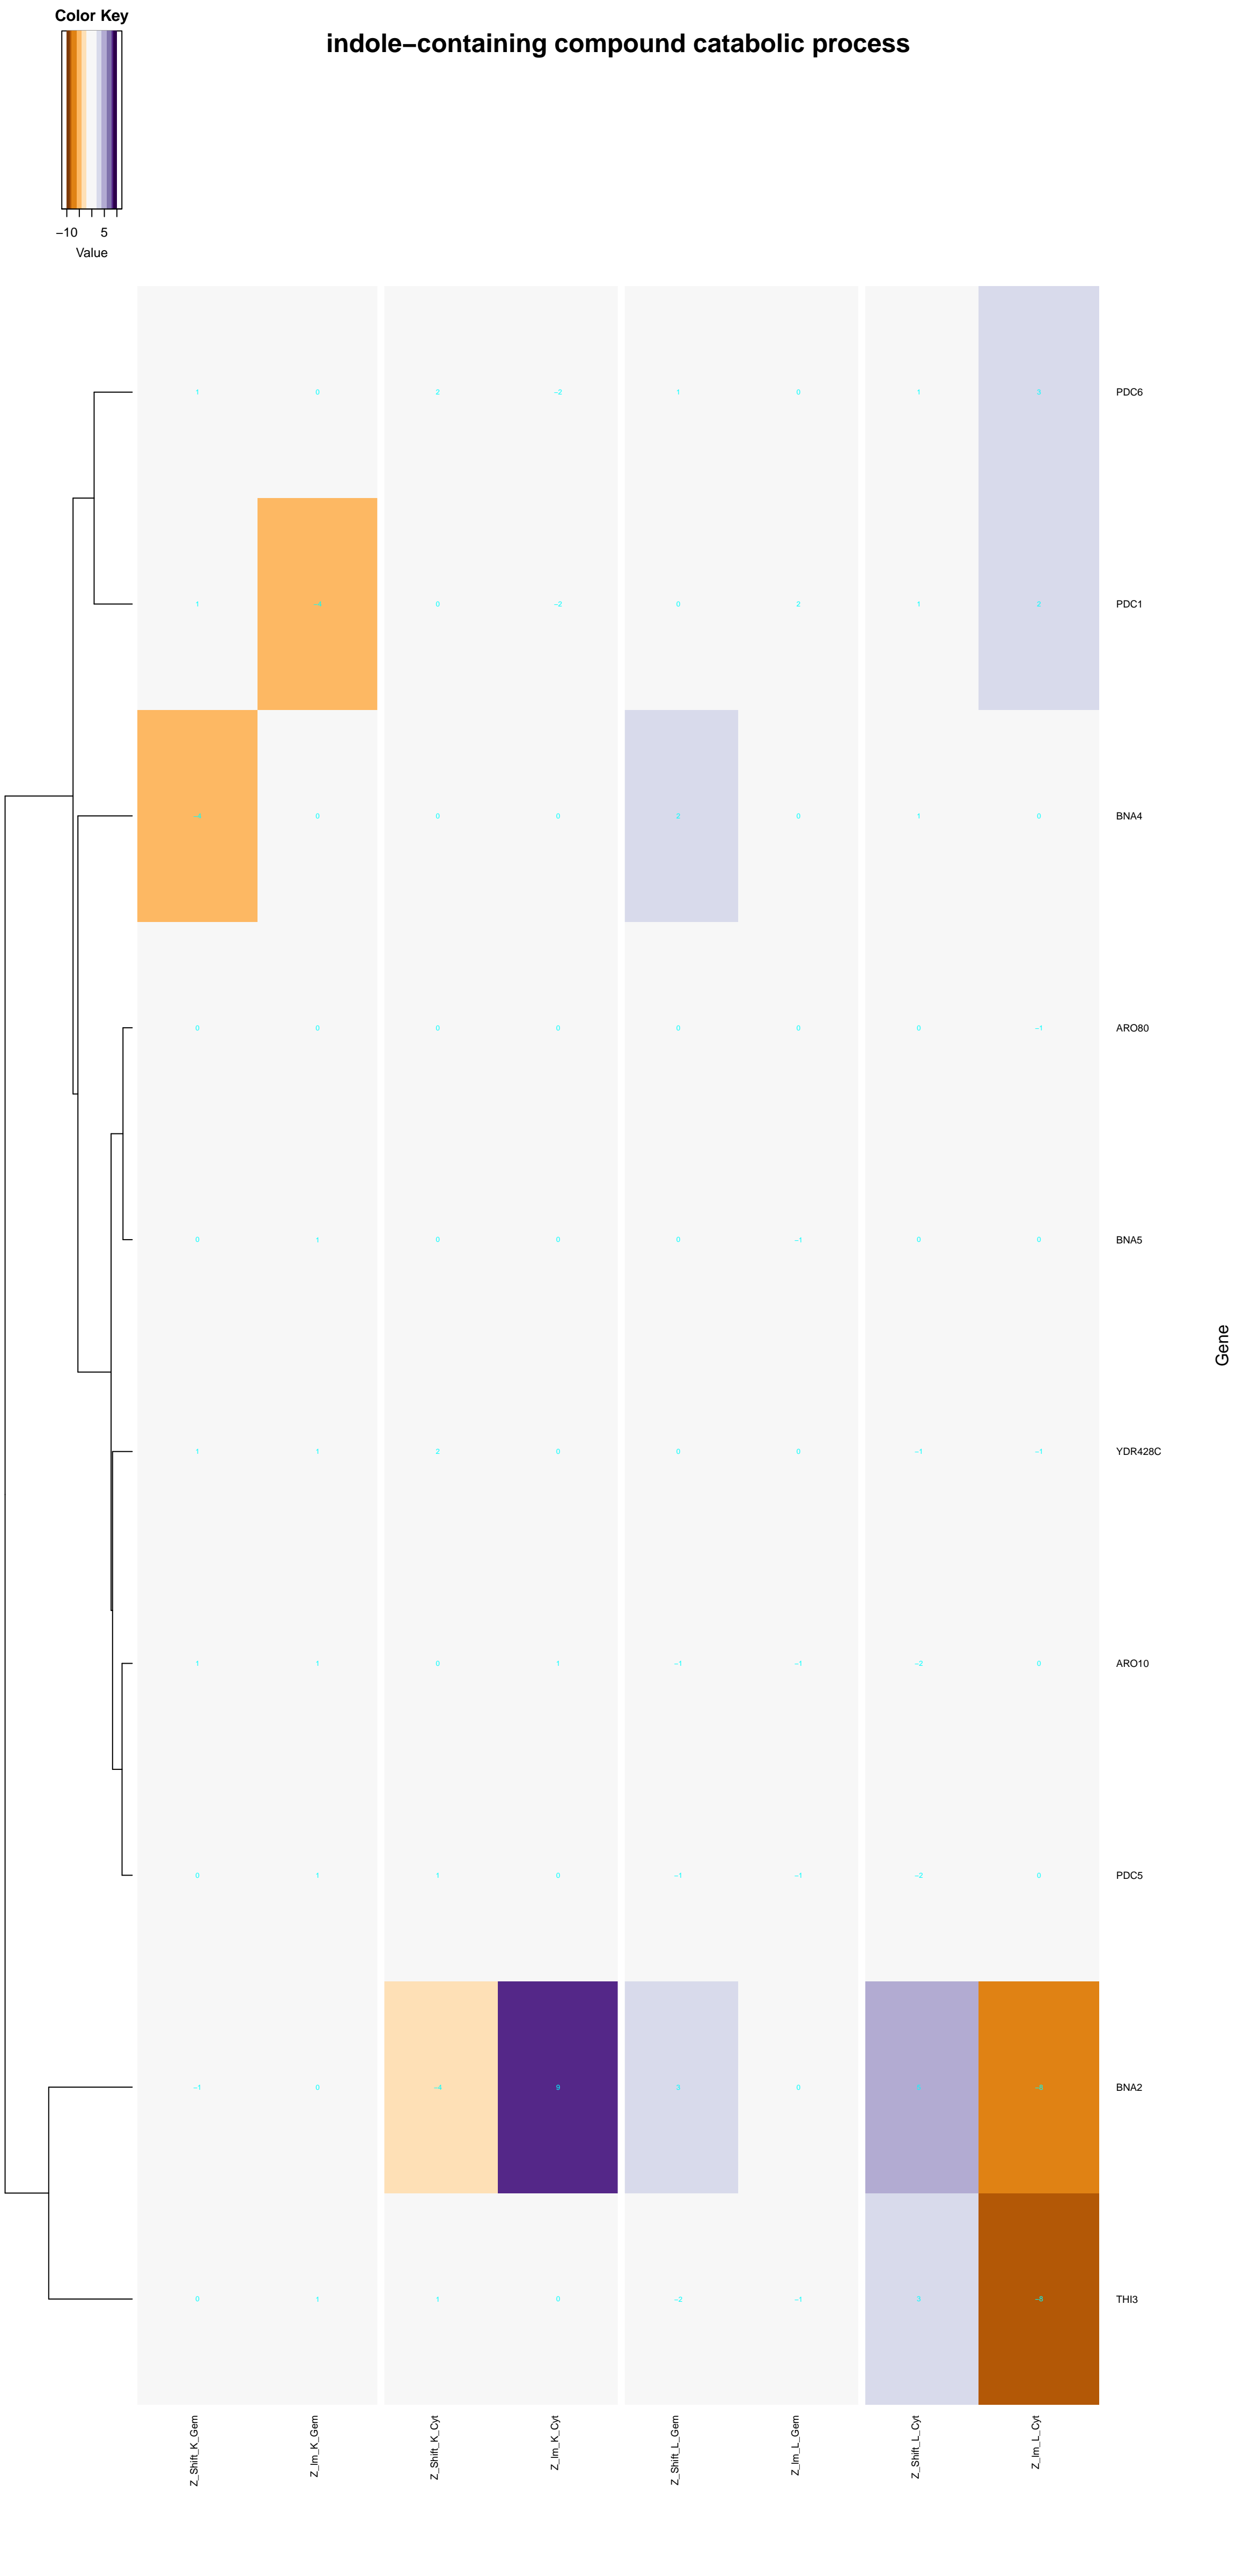

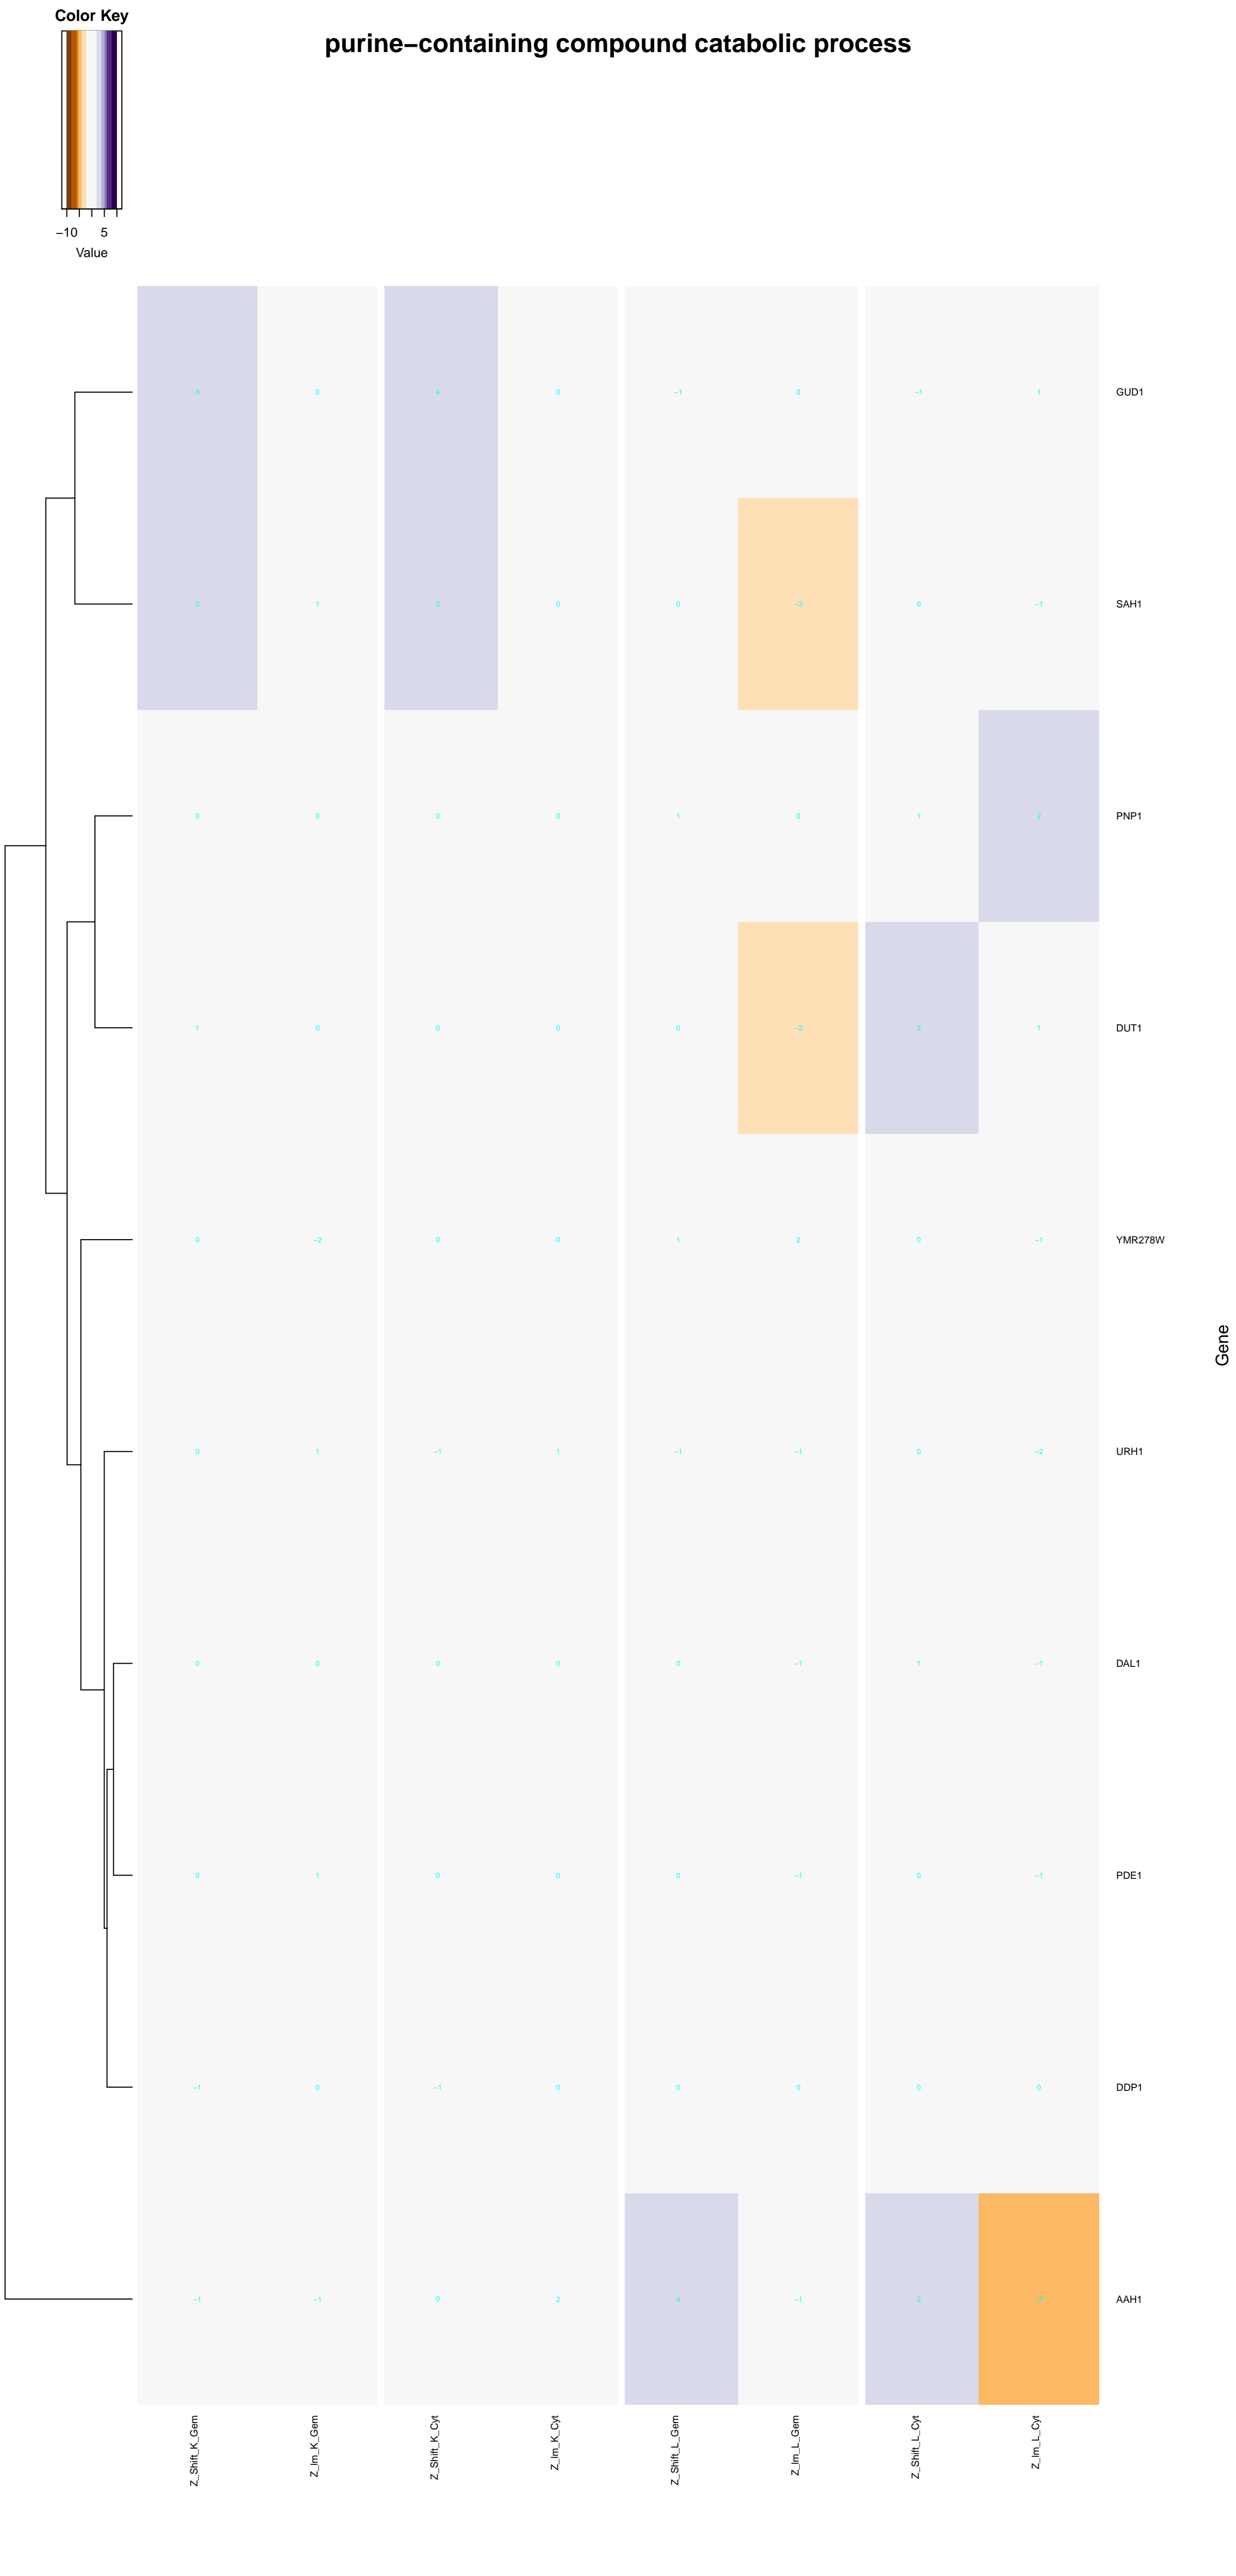

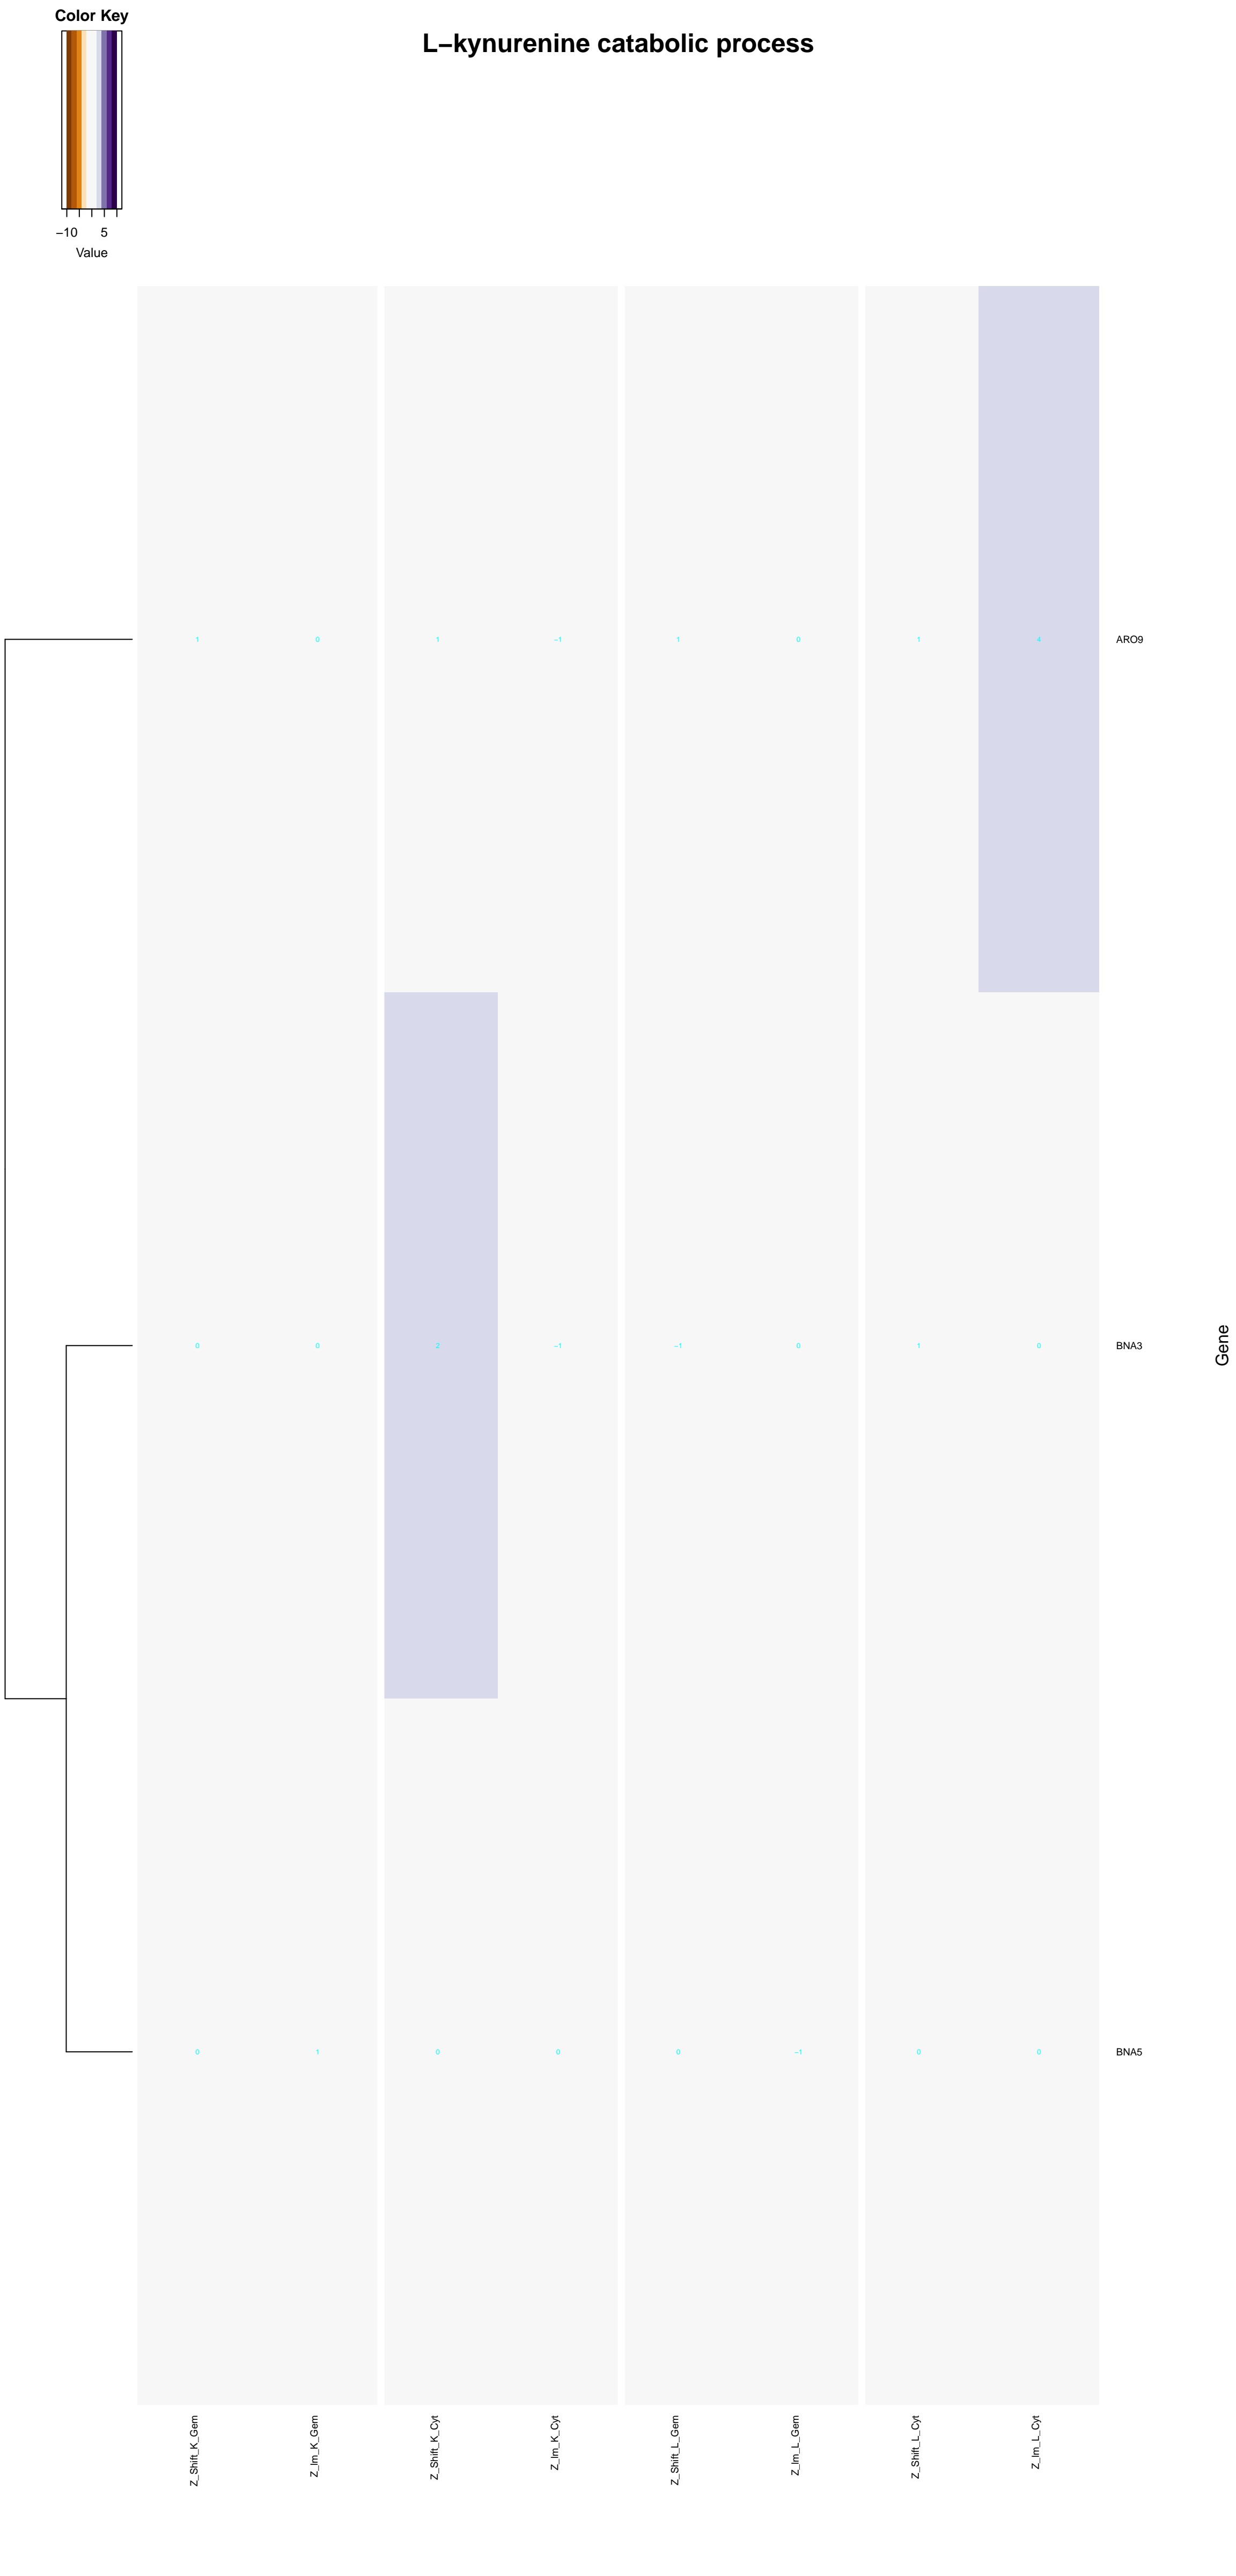

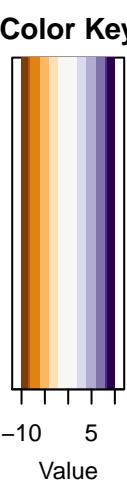

aromatic amino acid family catabolic process to alcohol via Ehrlich pathway

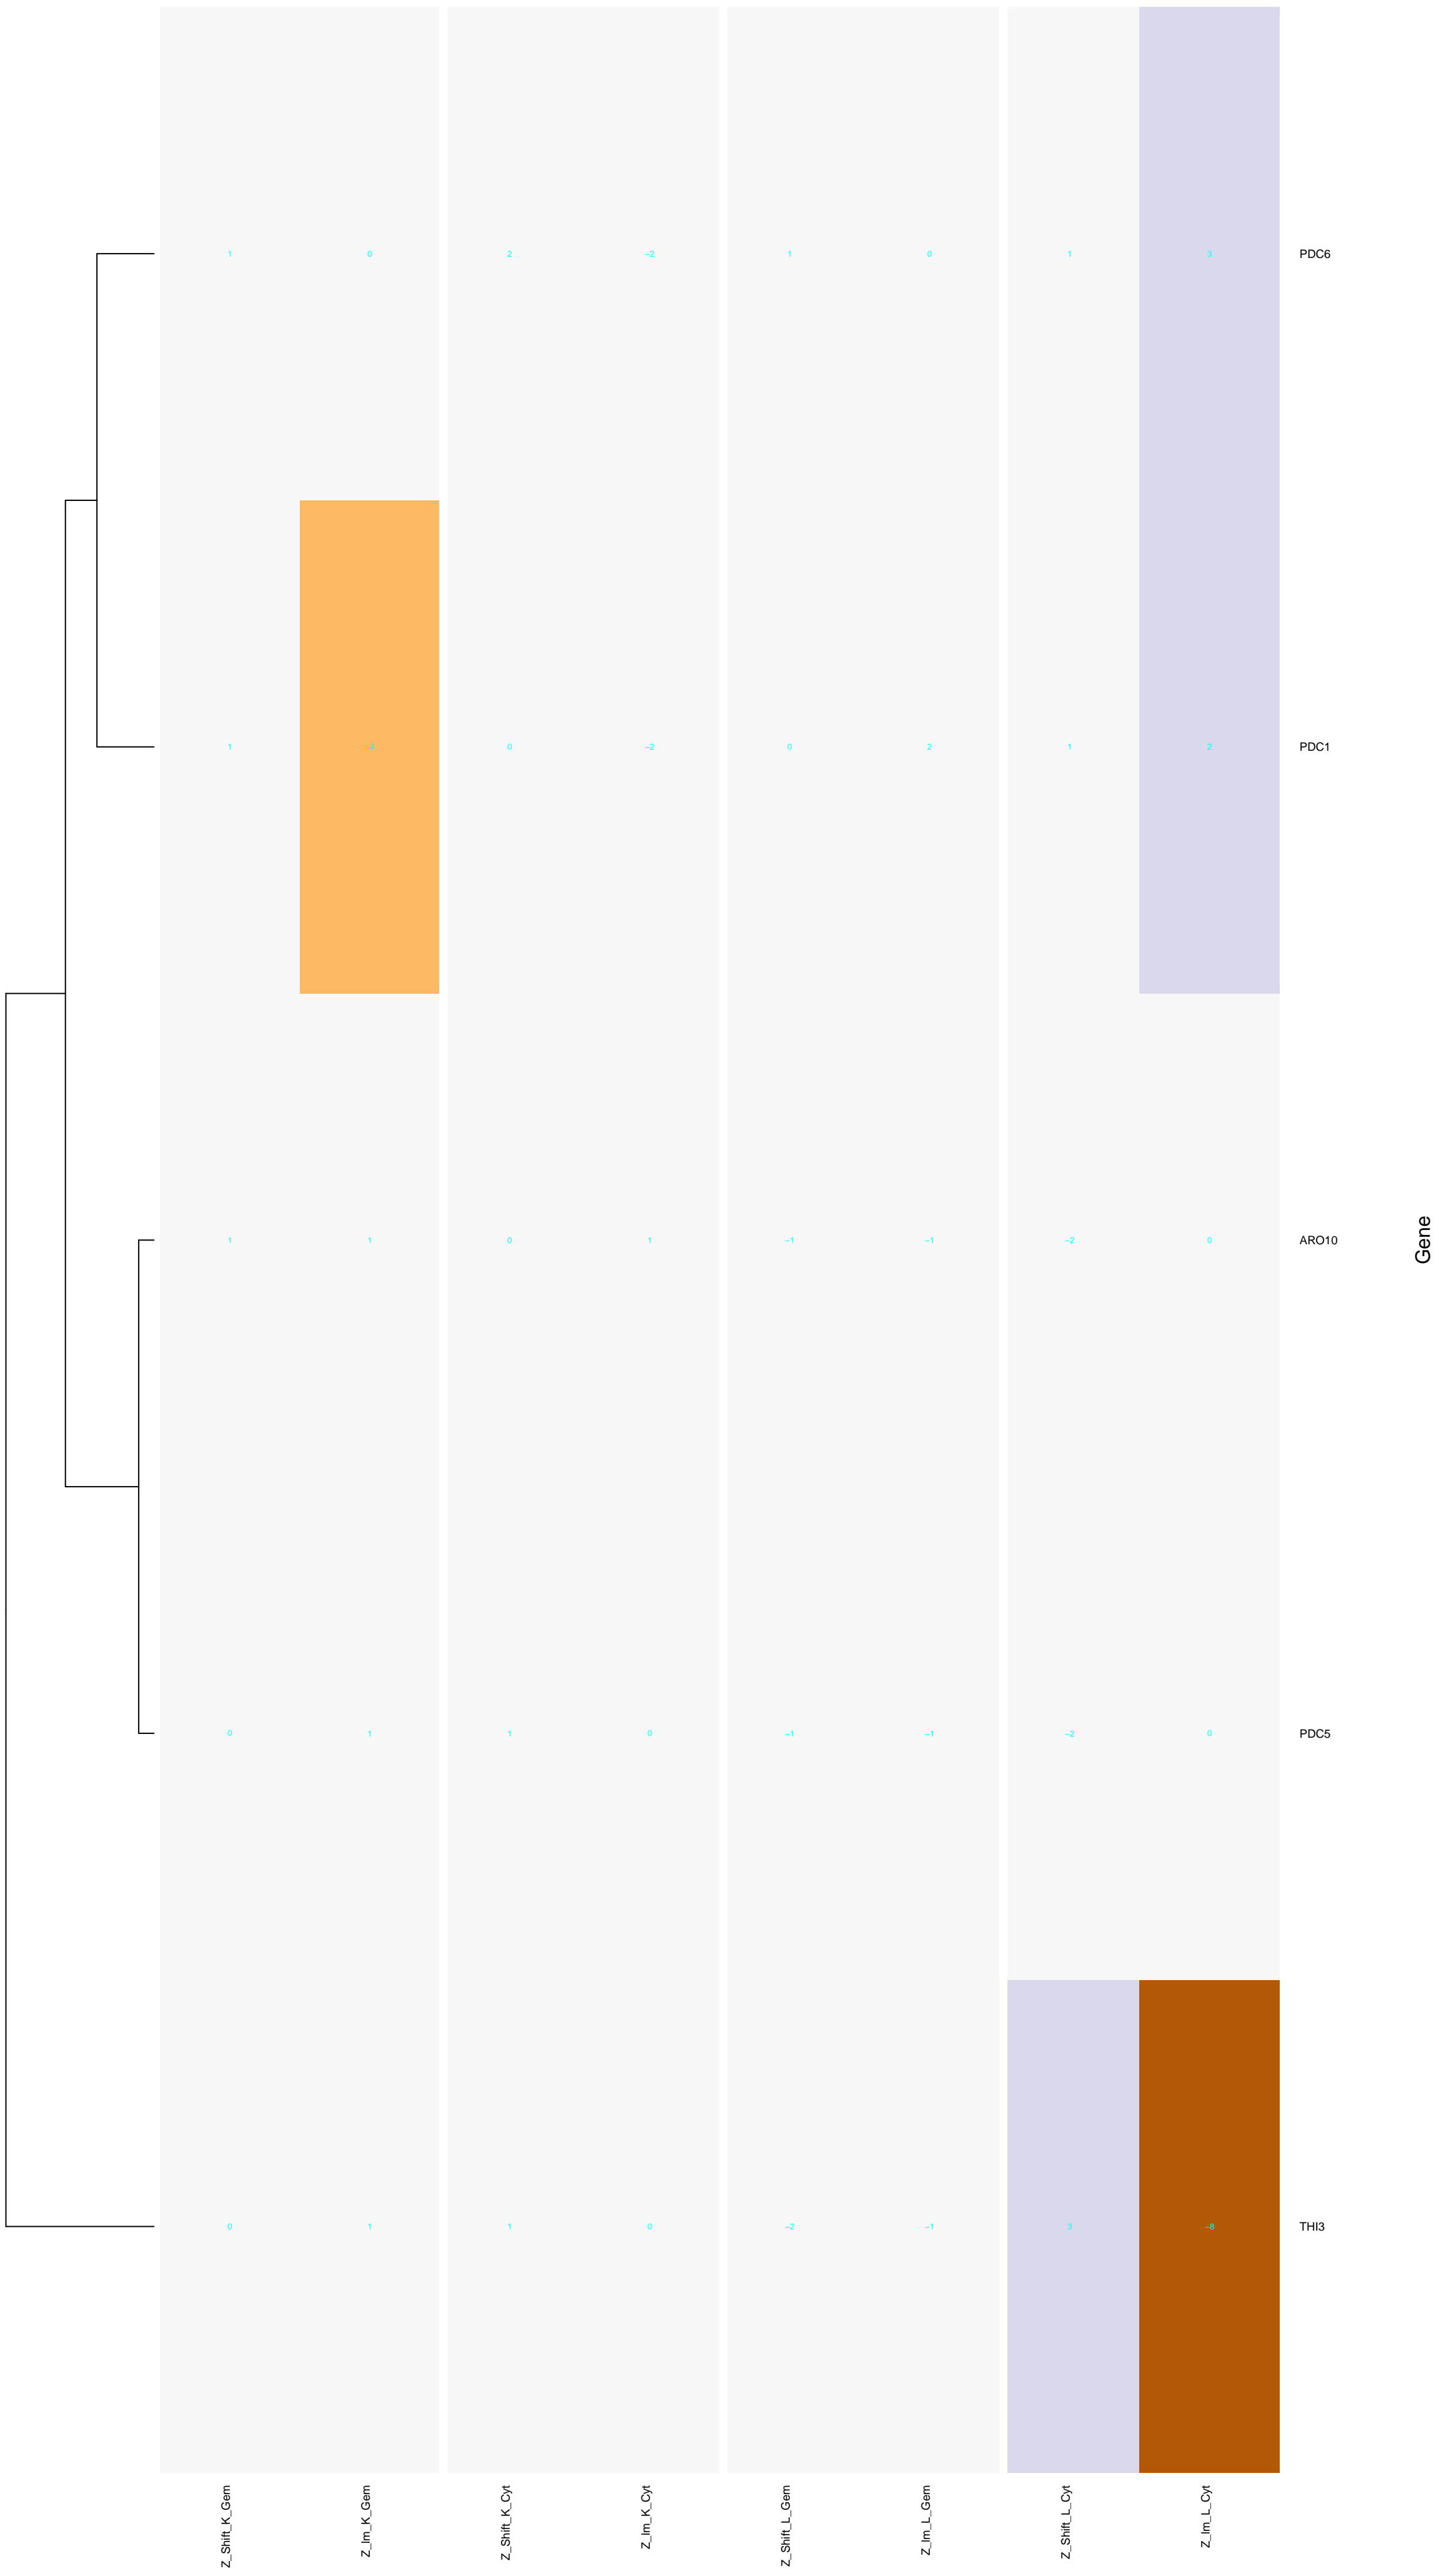

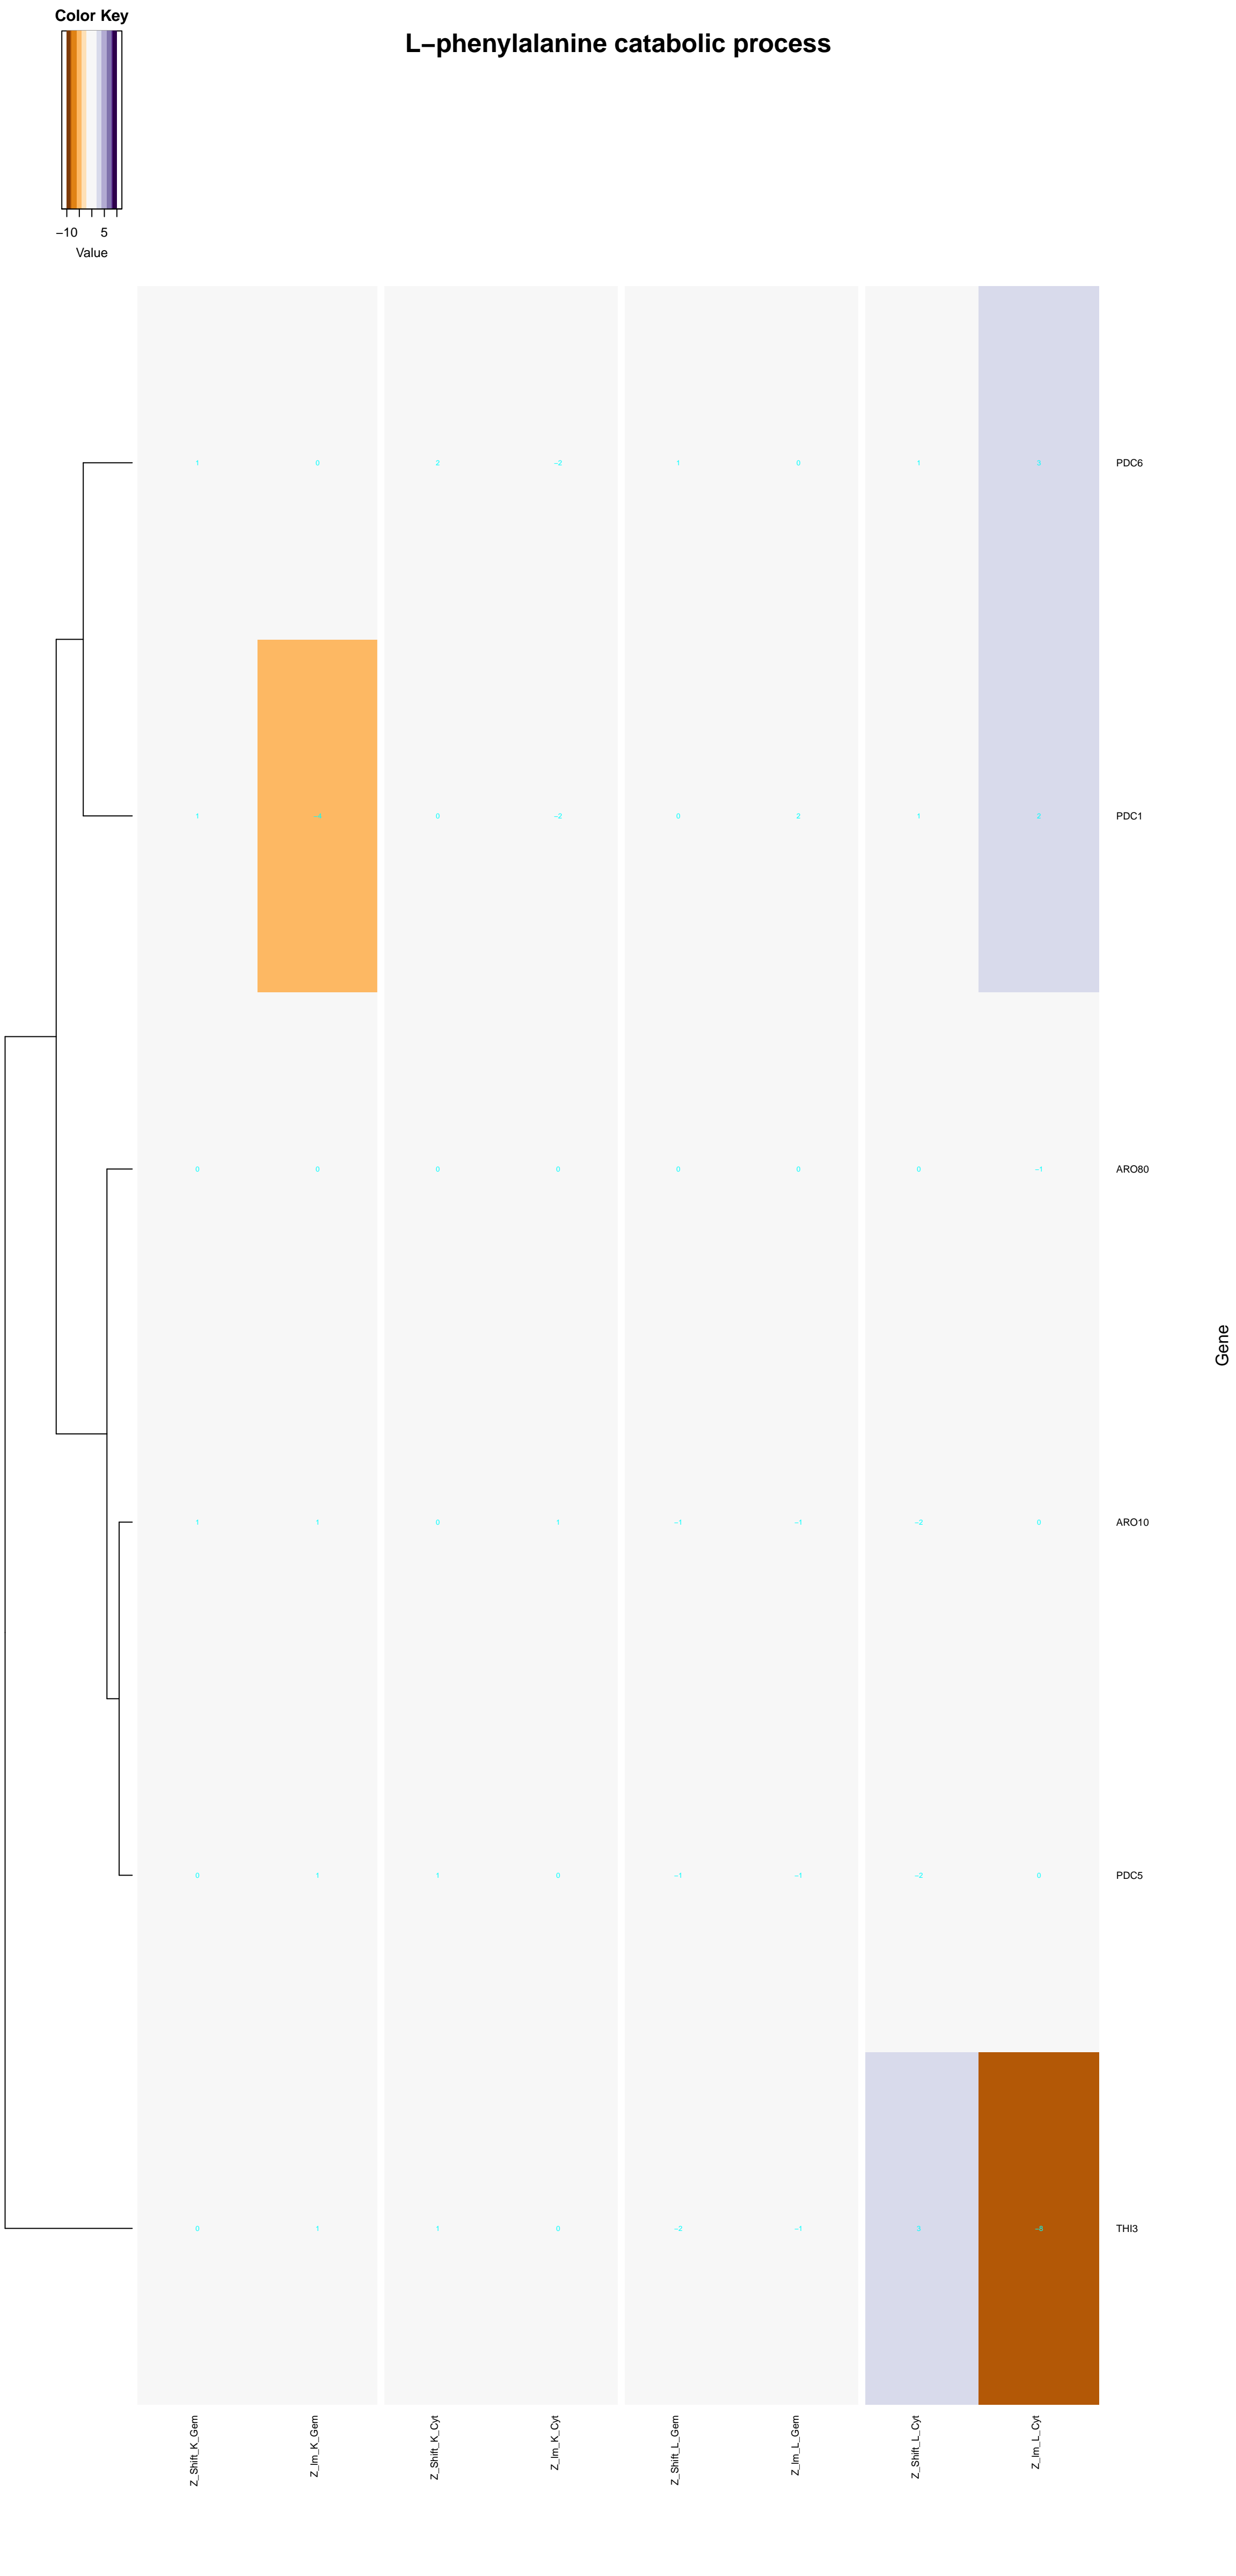

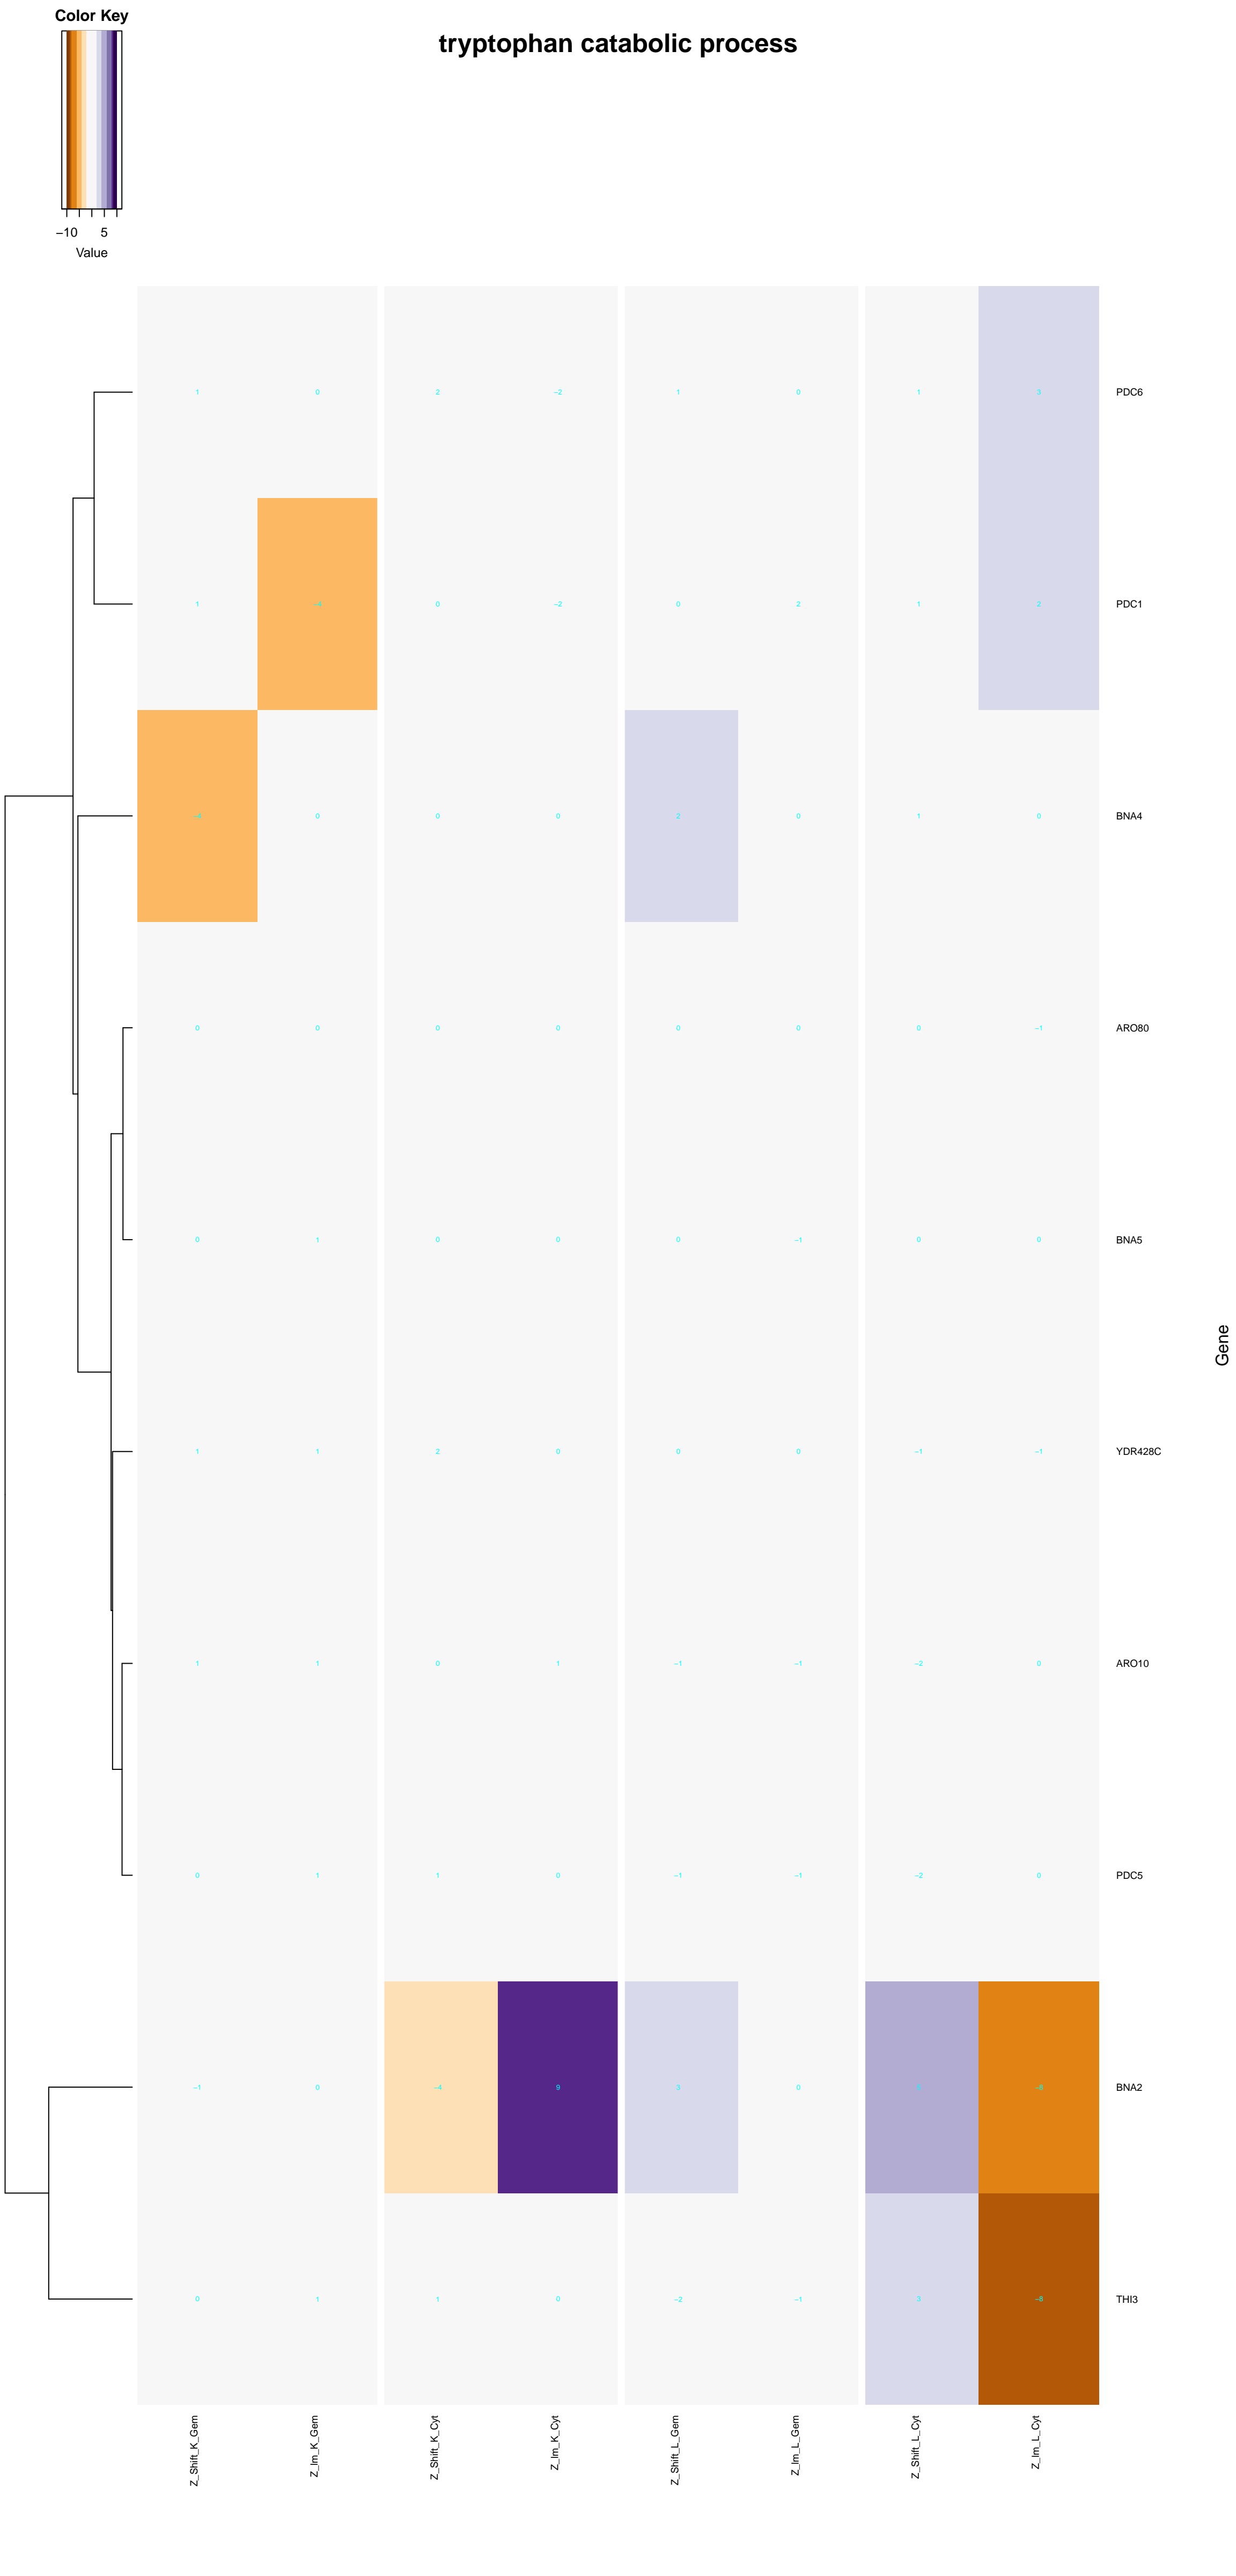

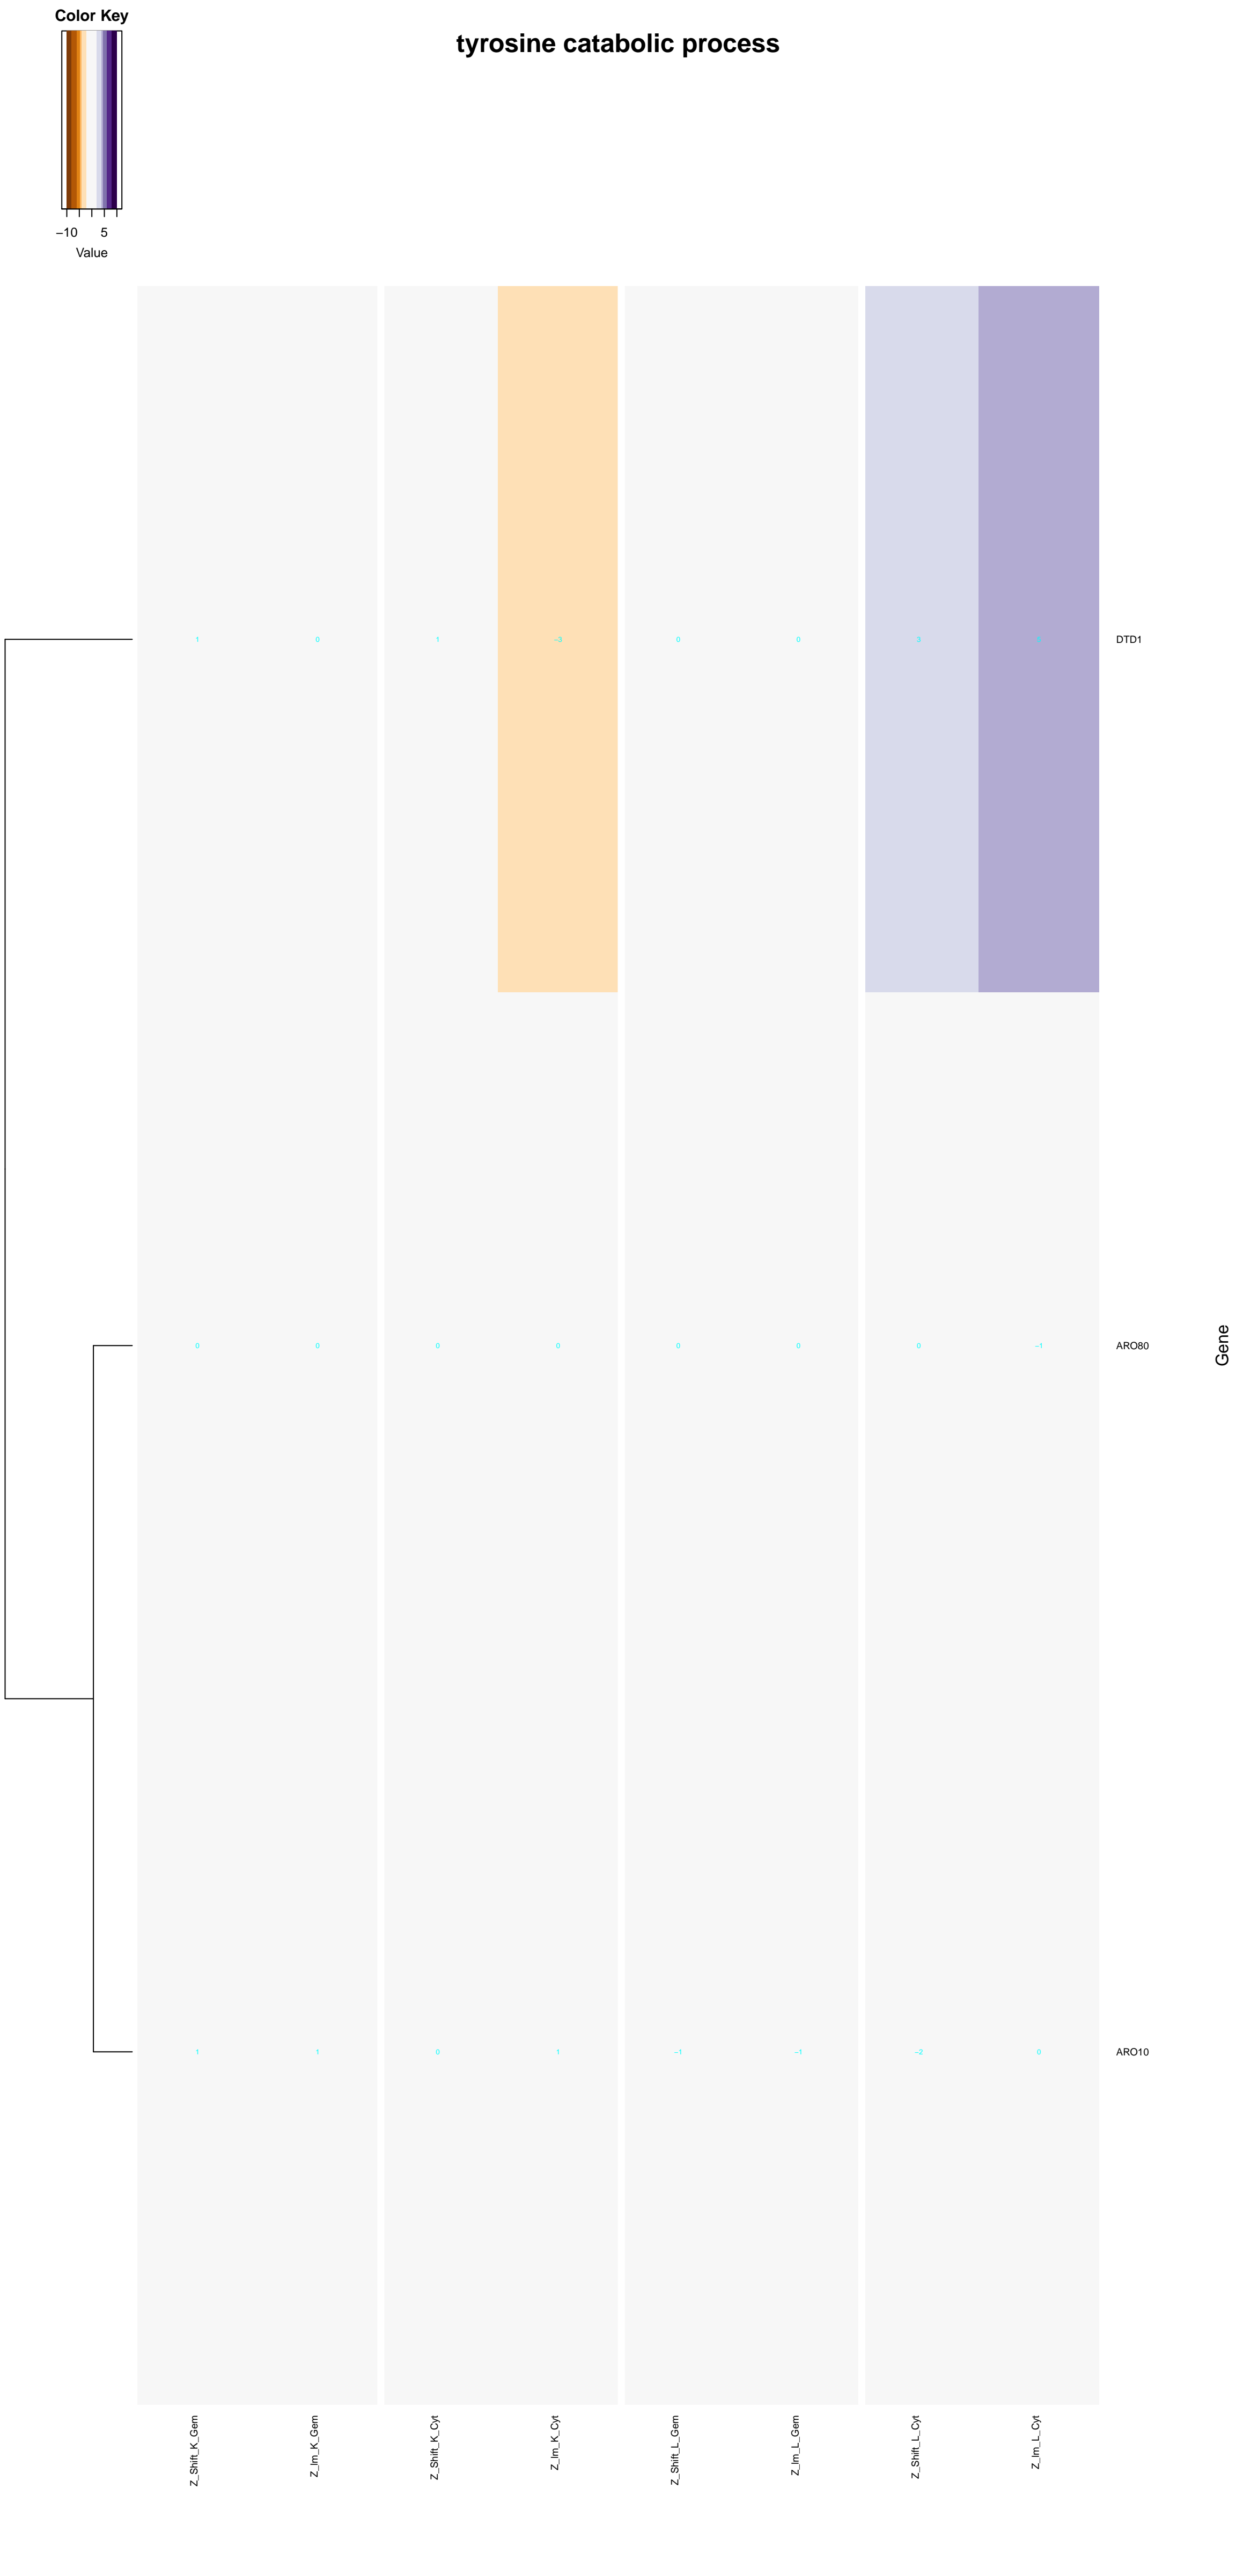

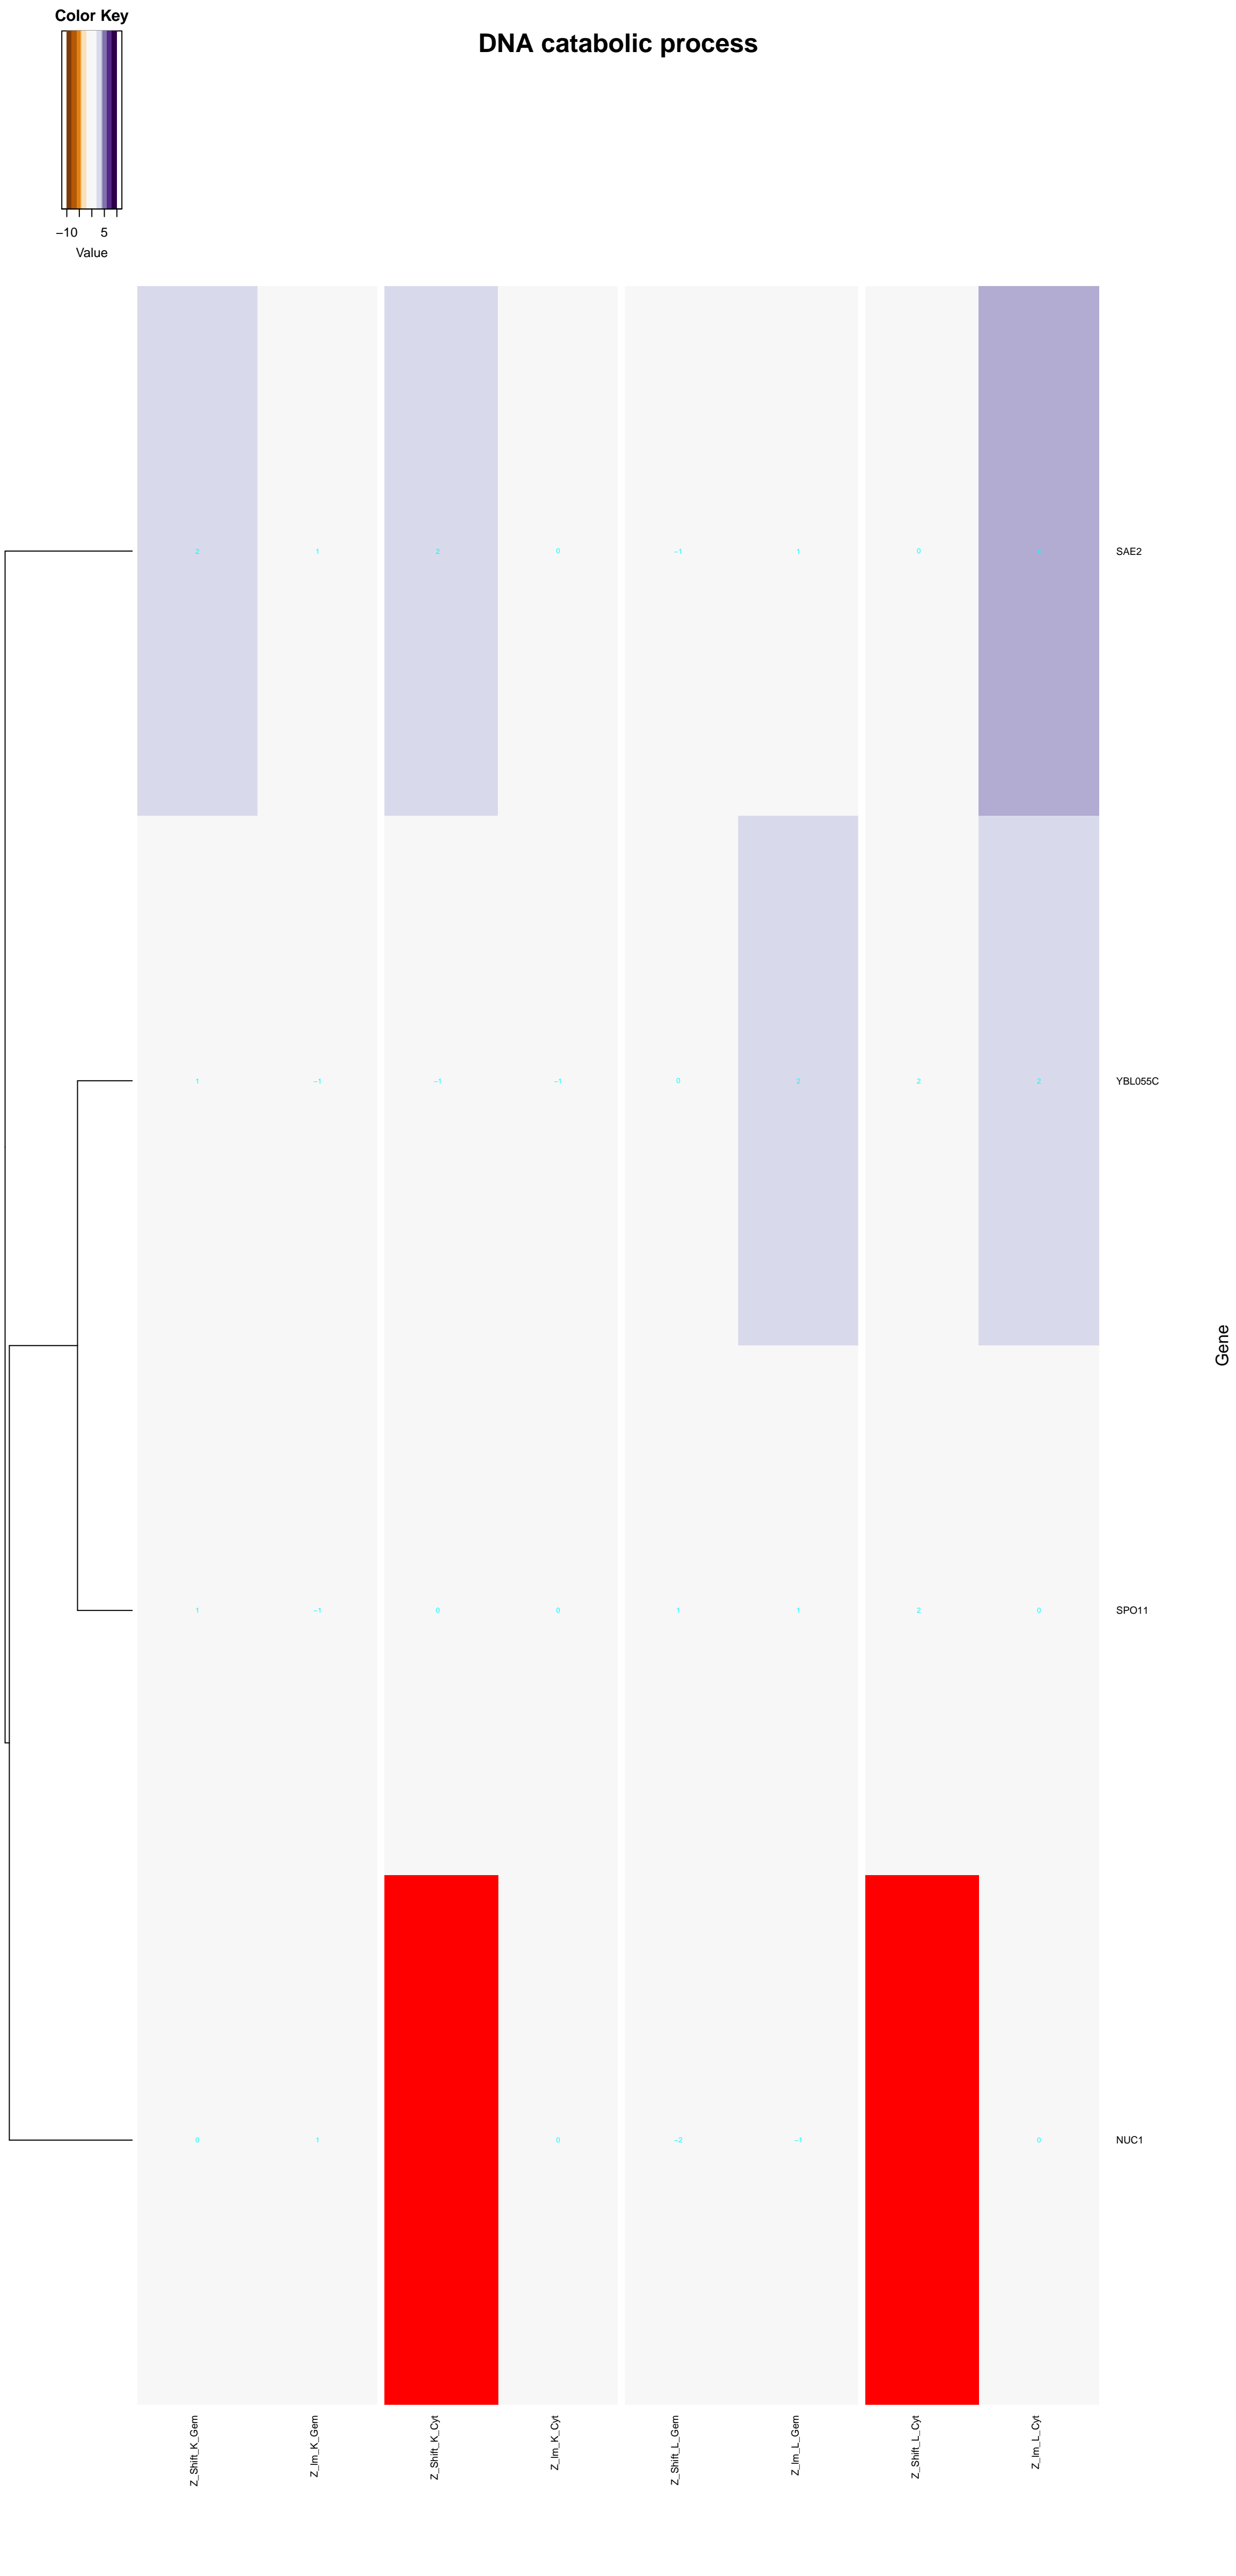



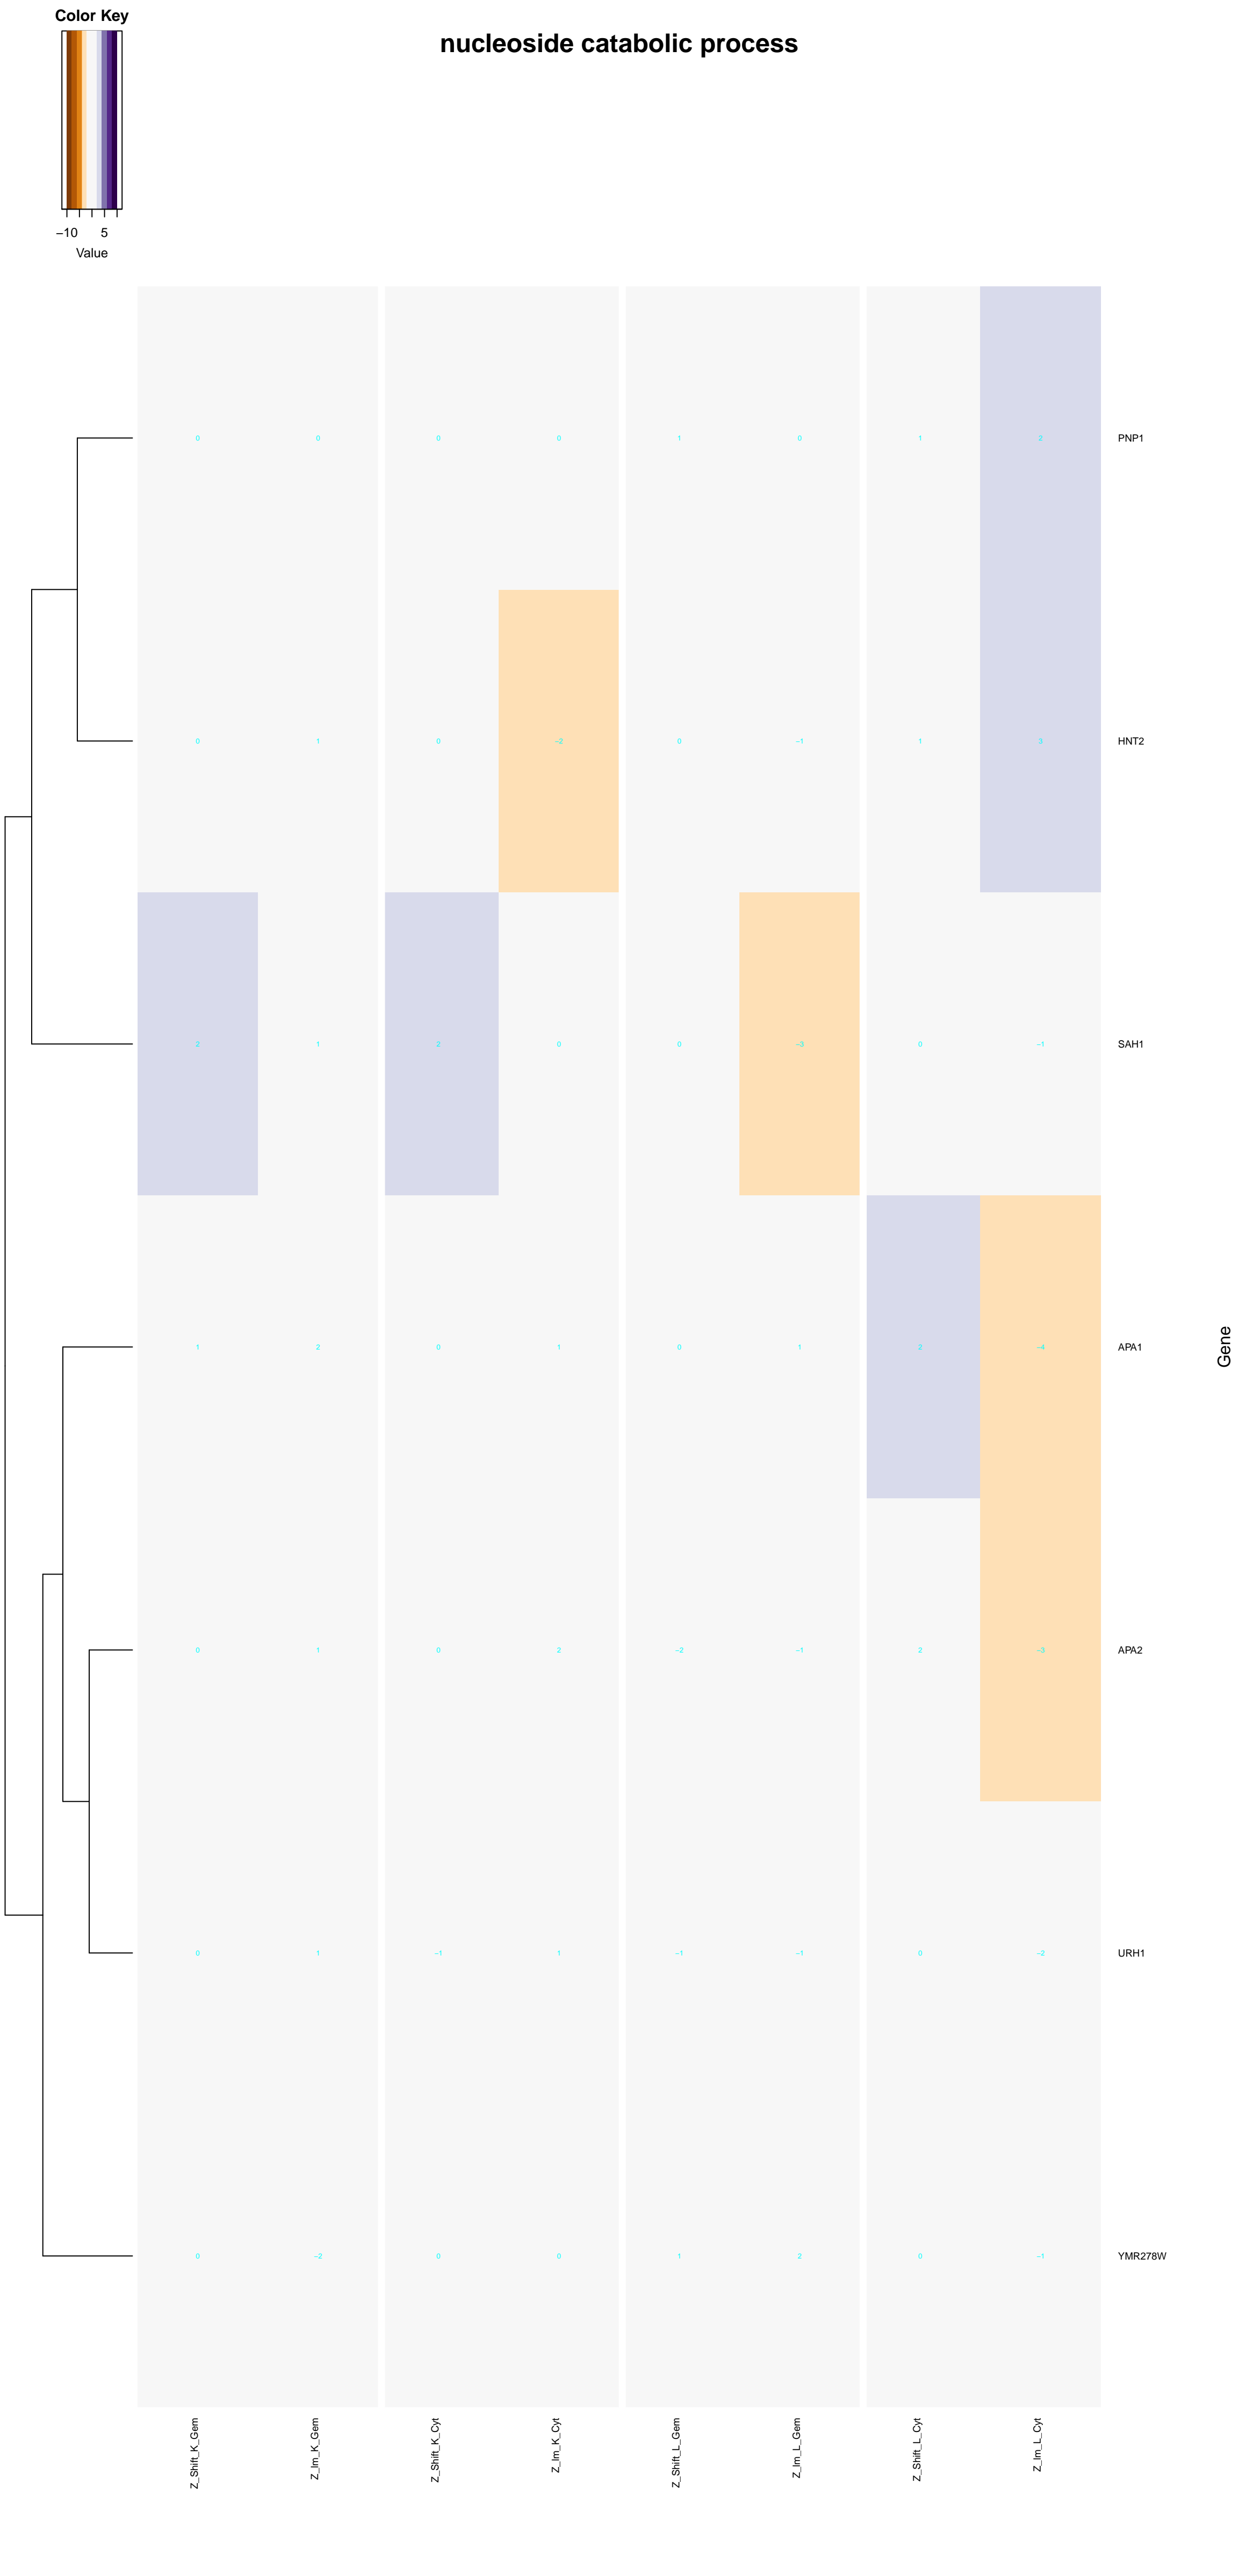

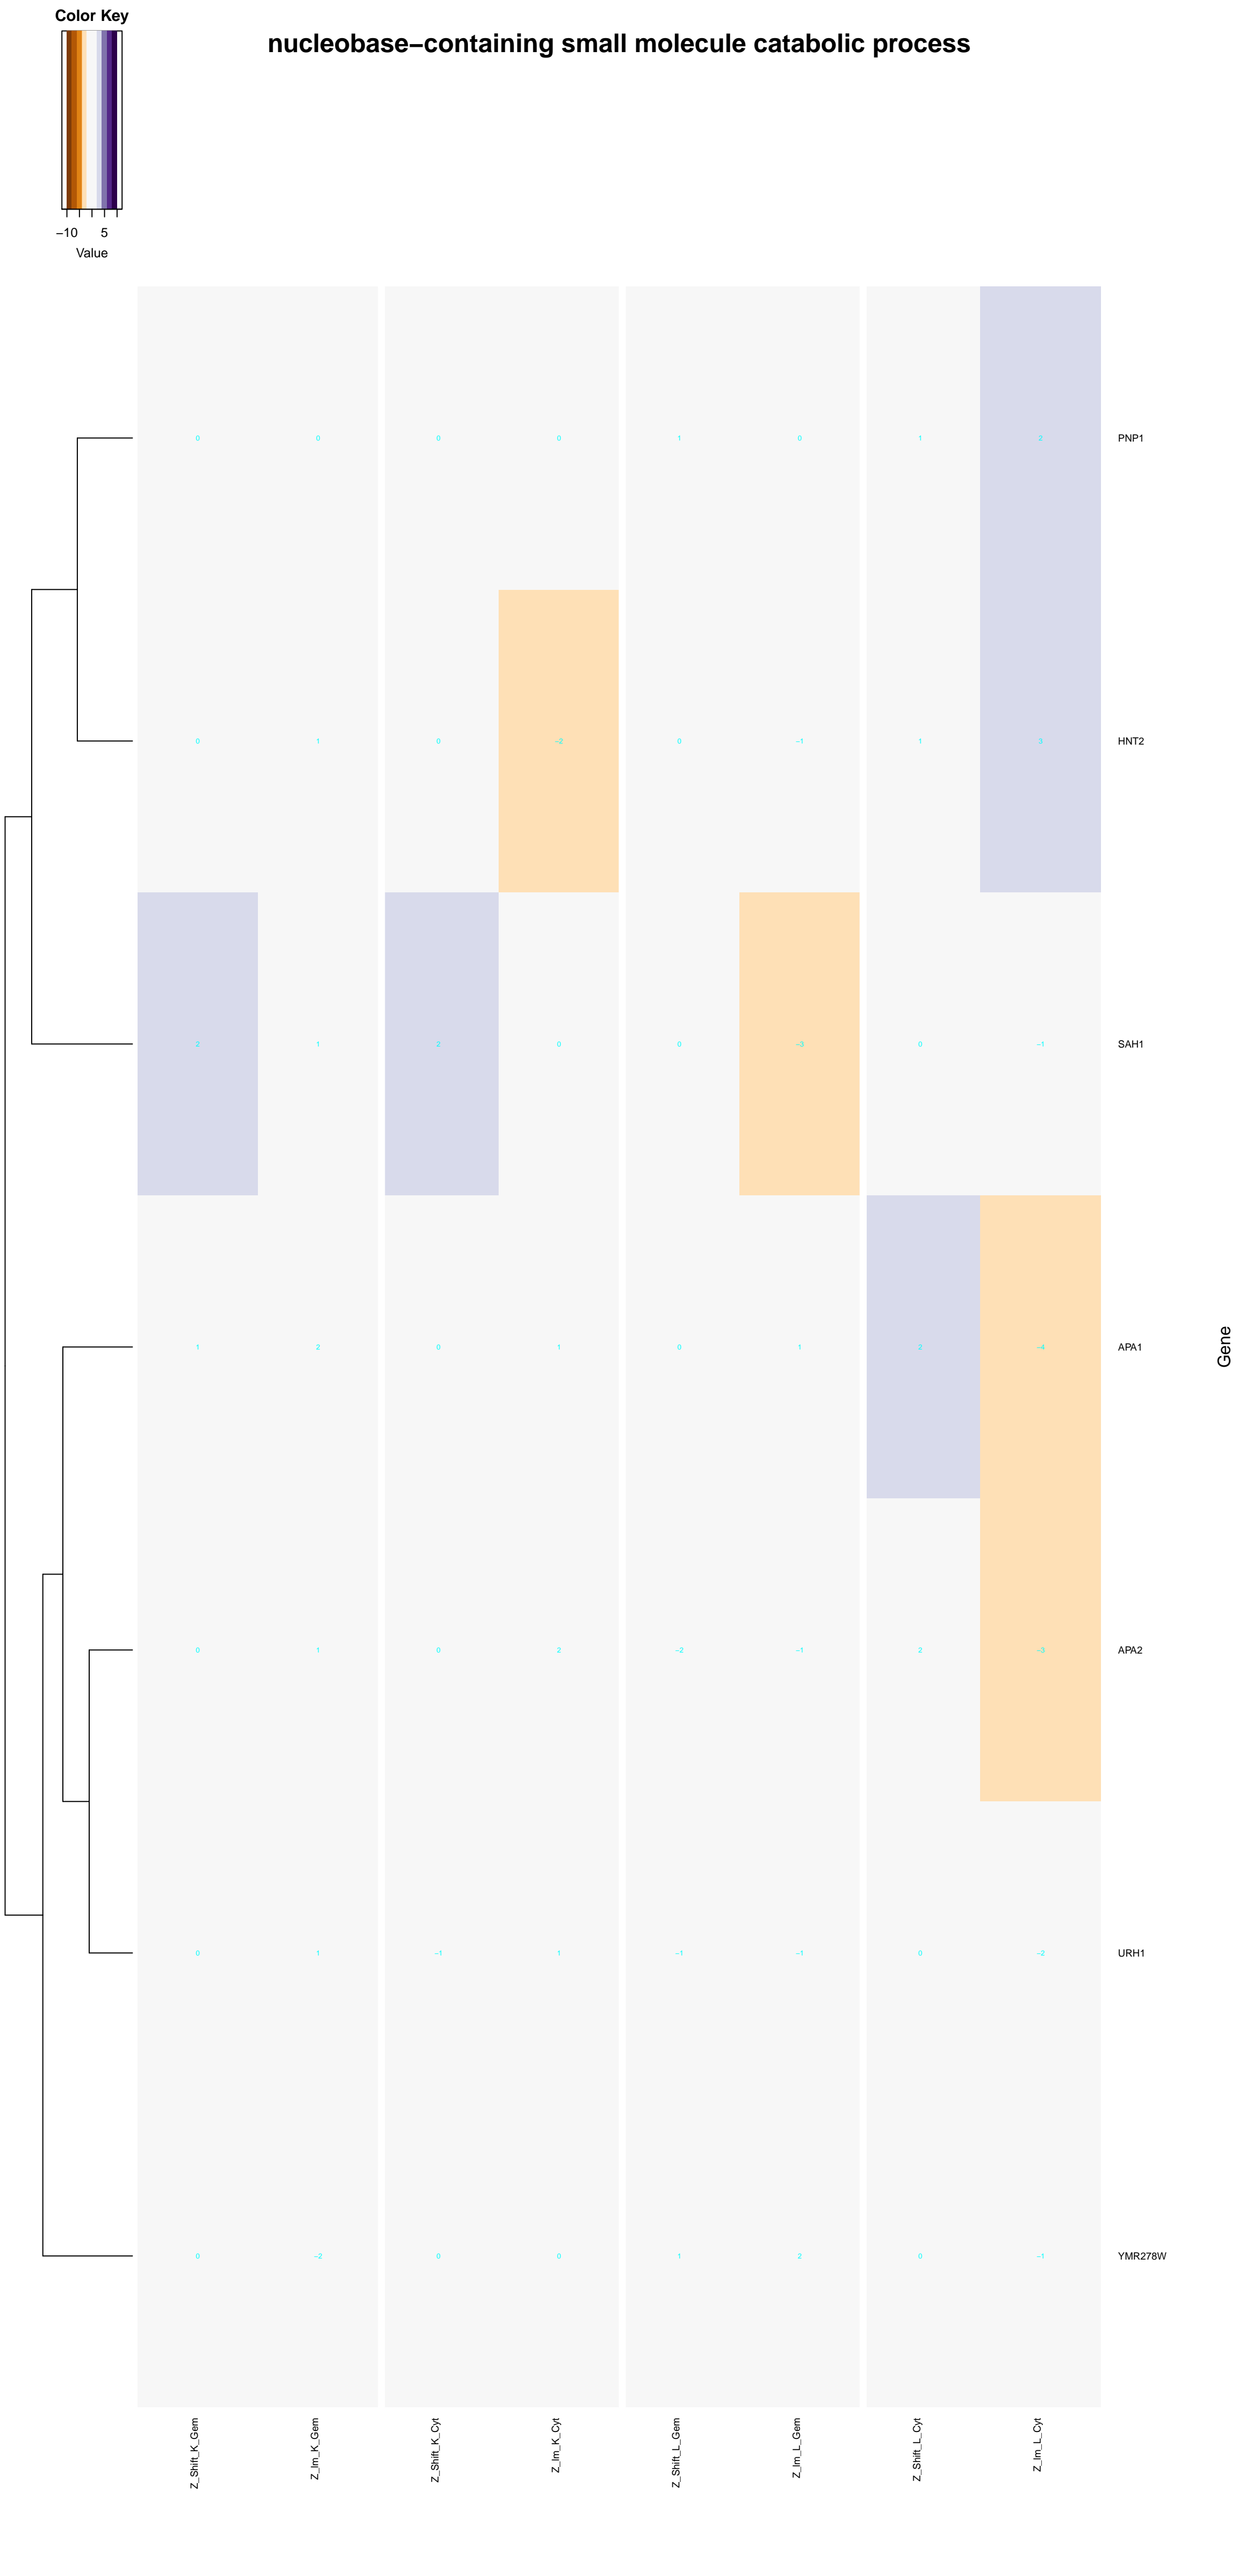

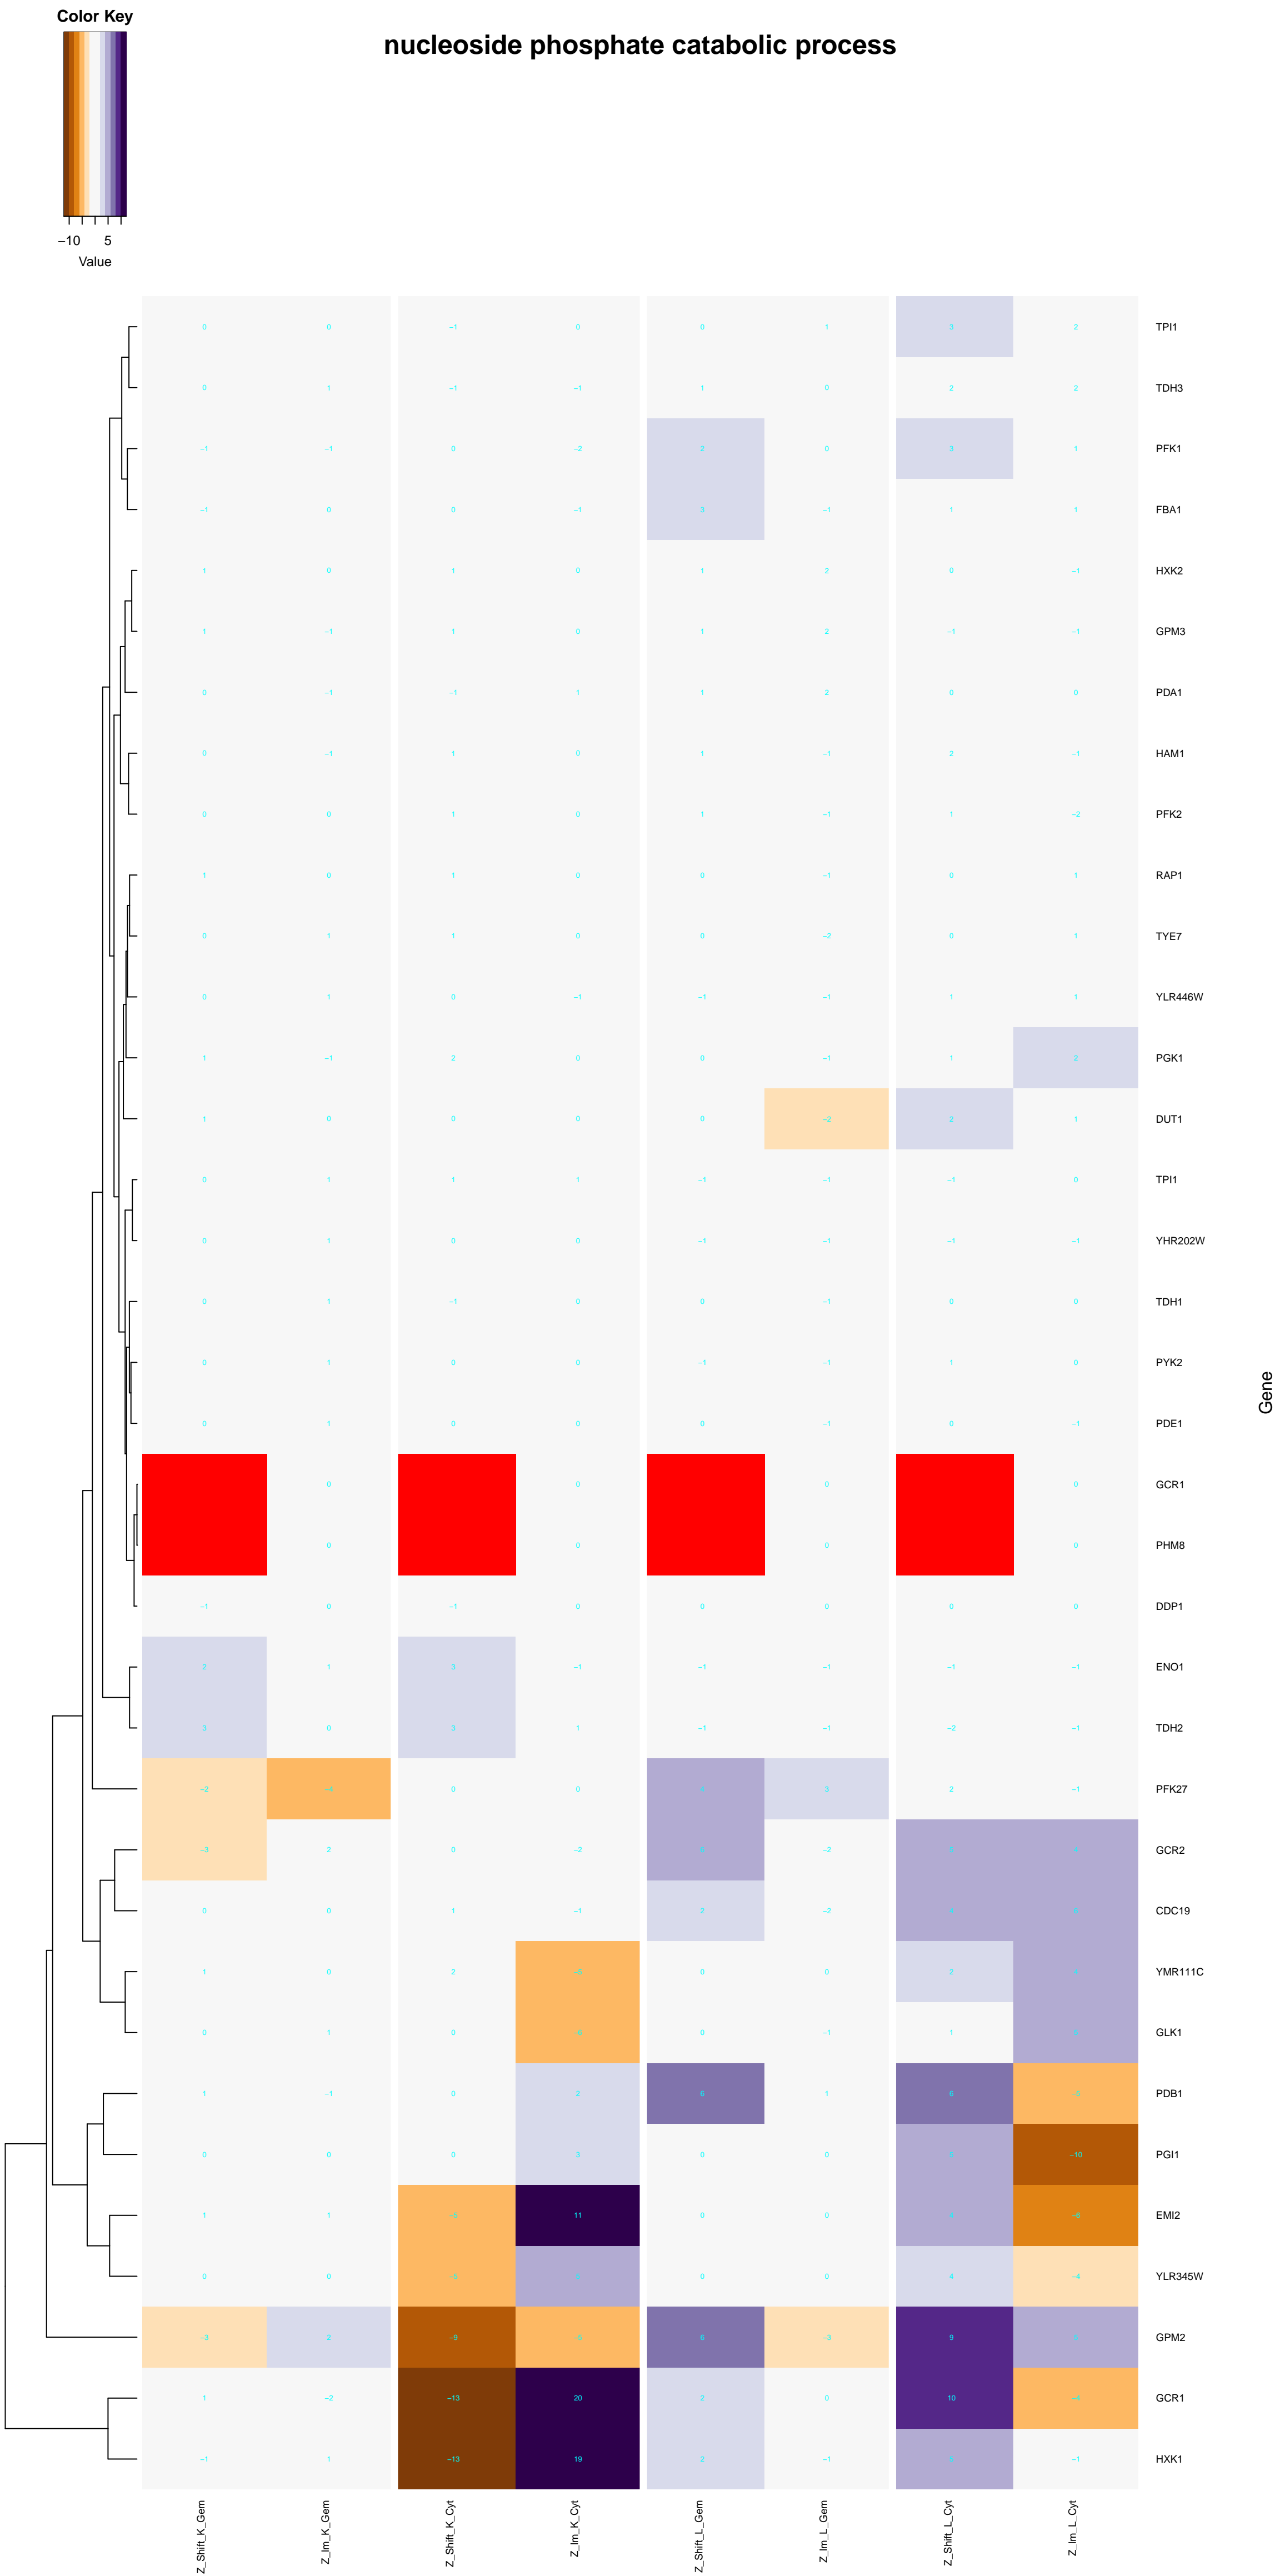

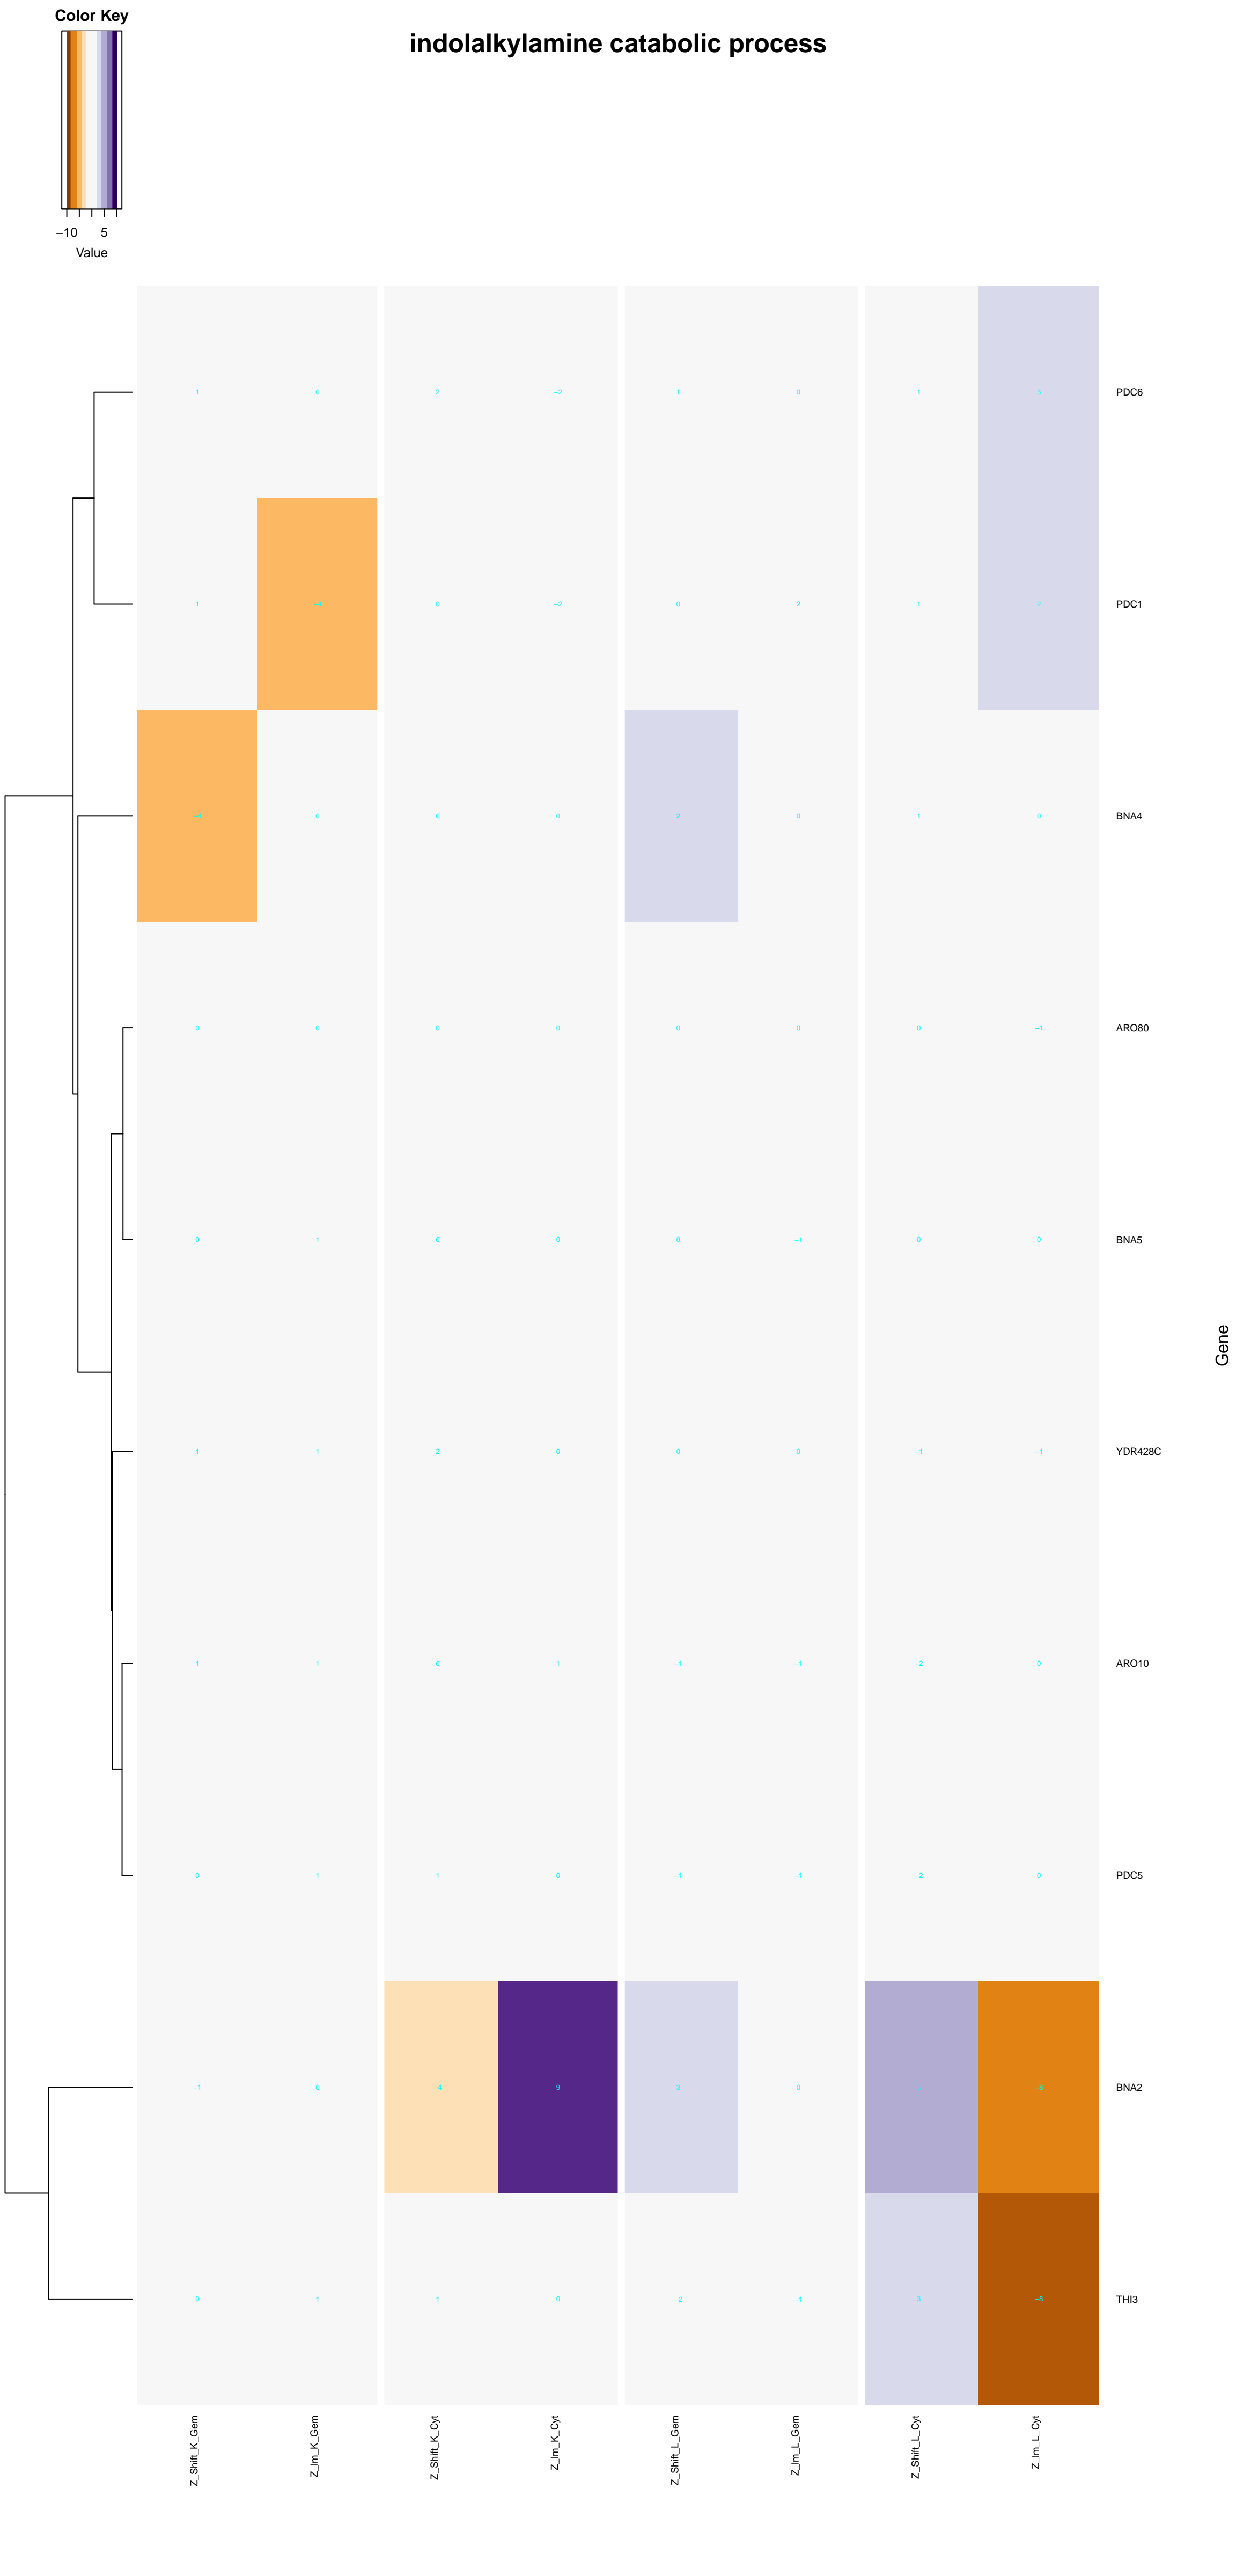

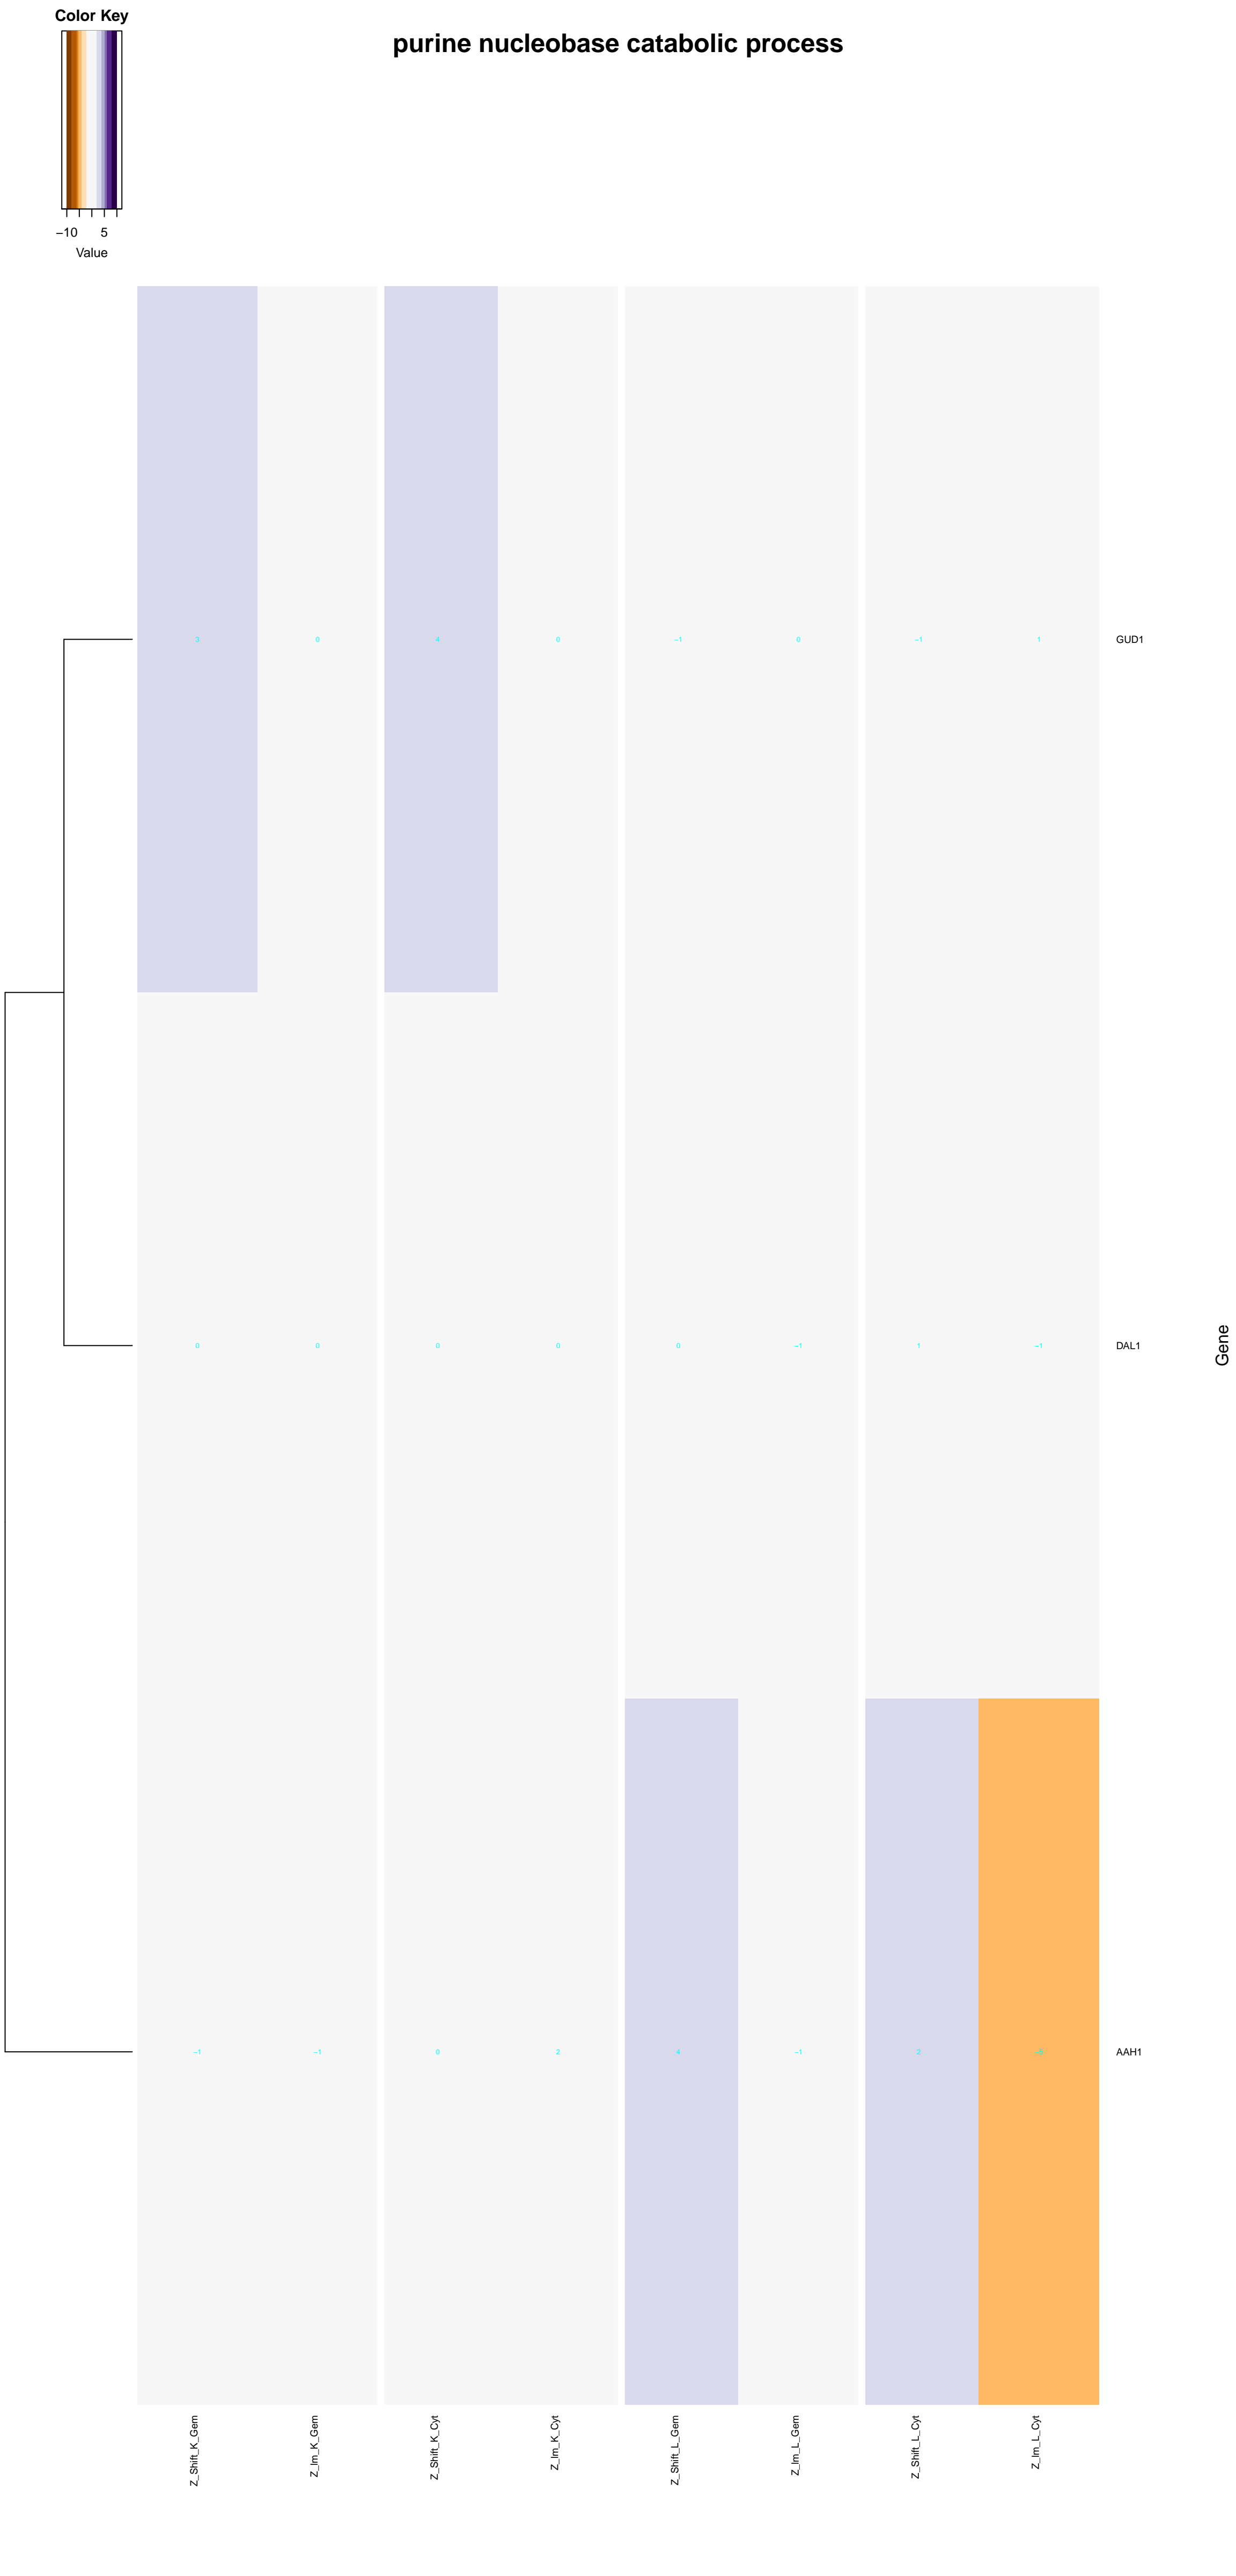

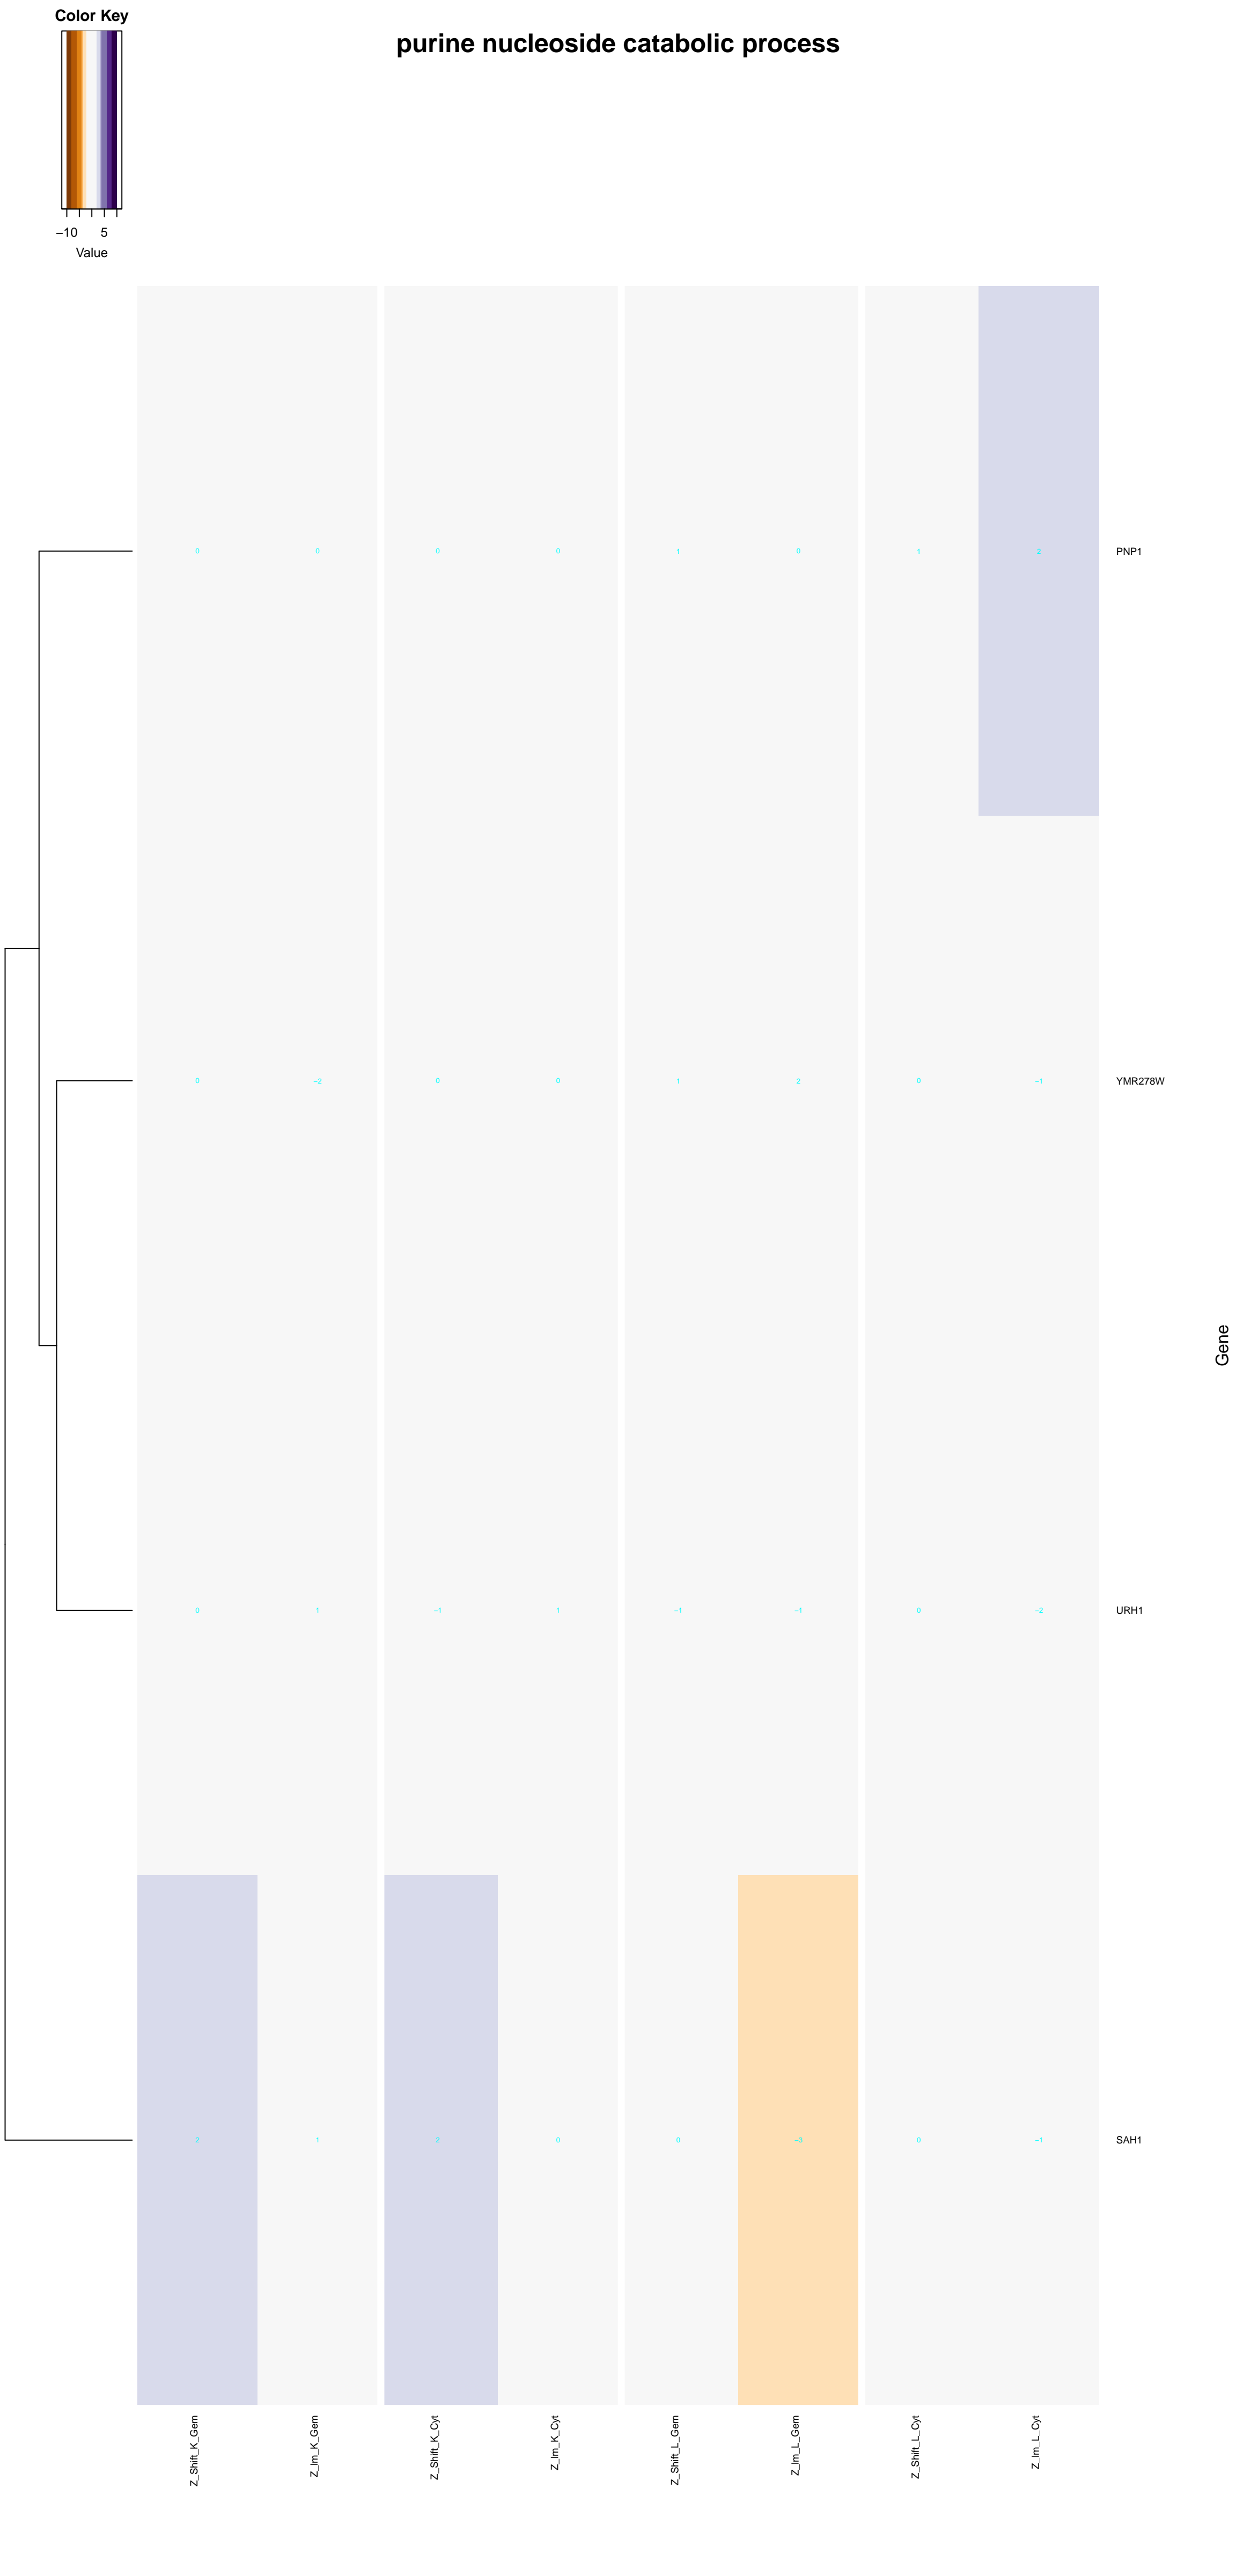

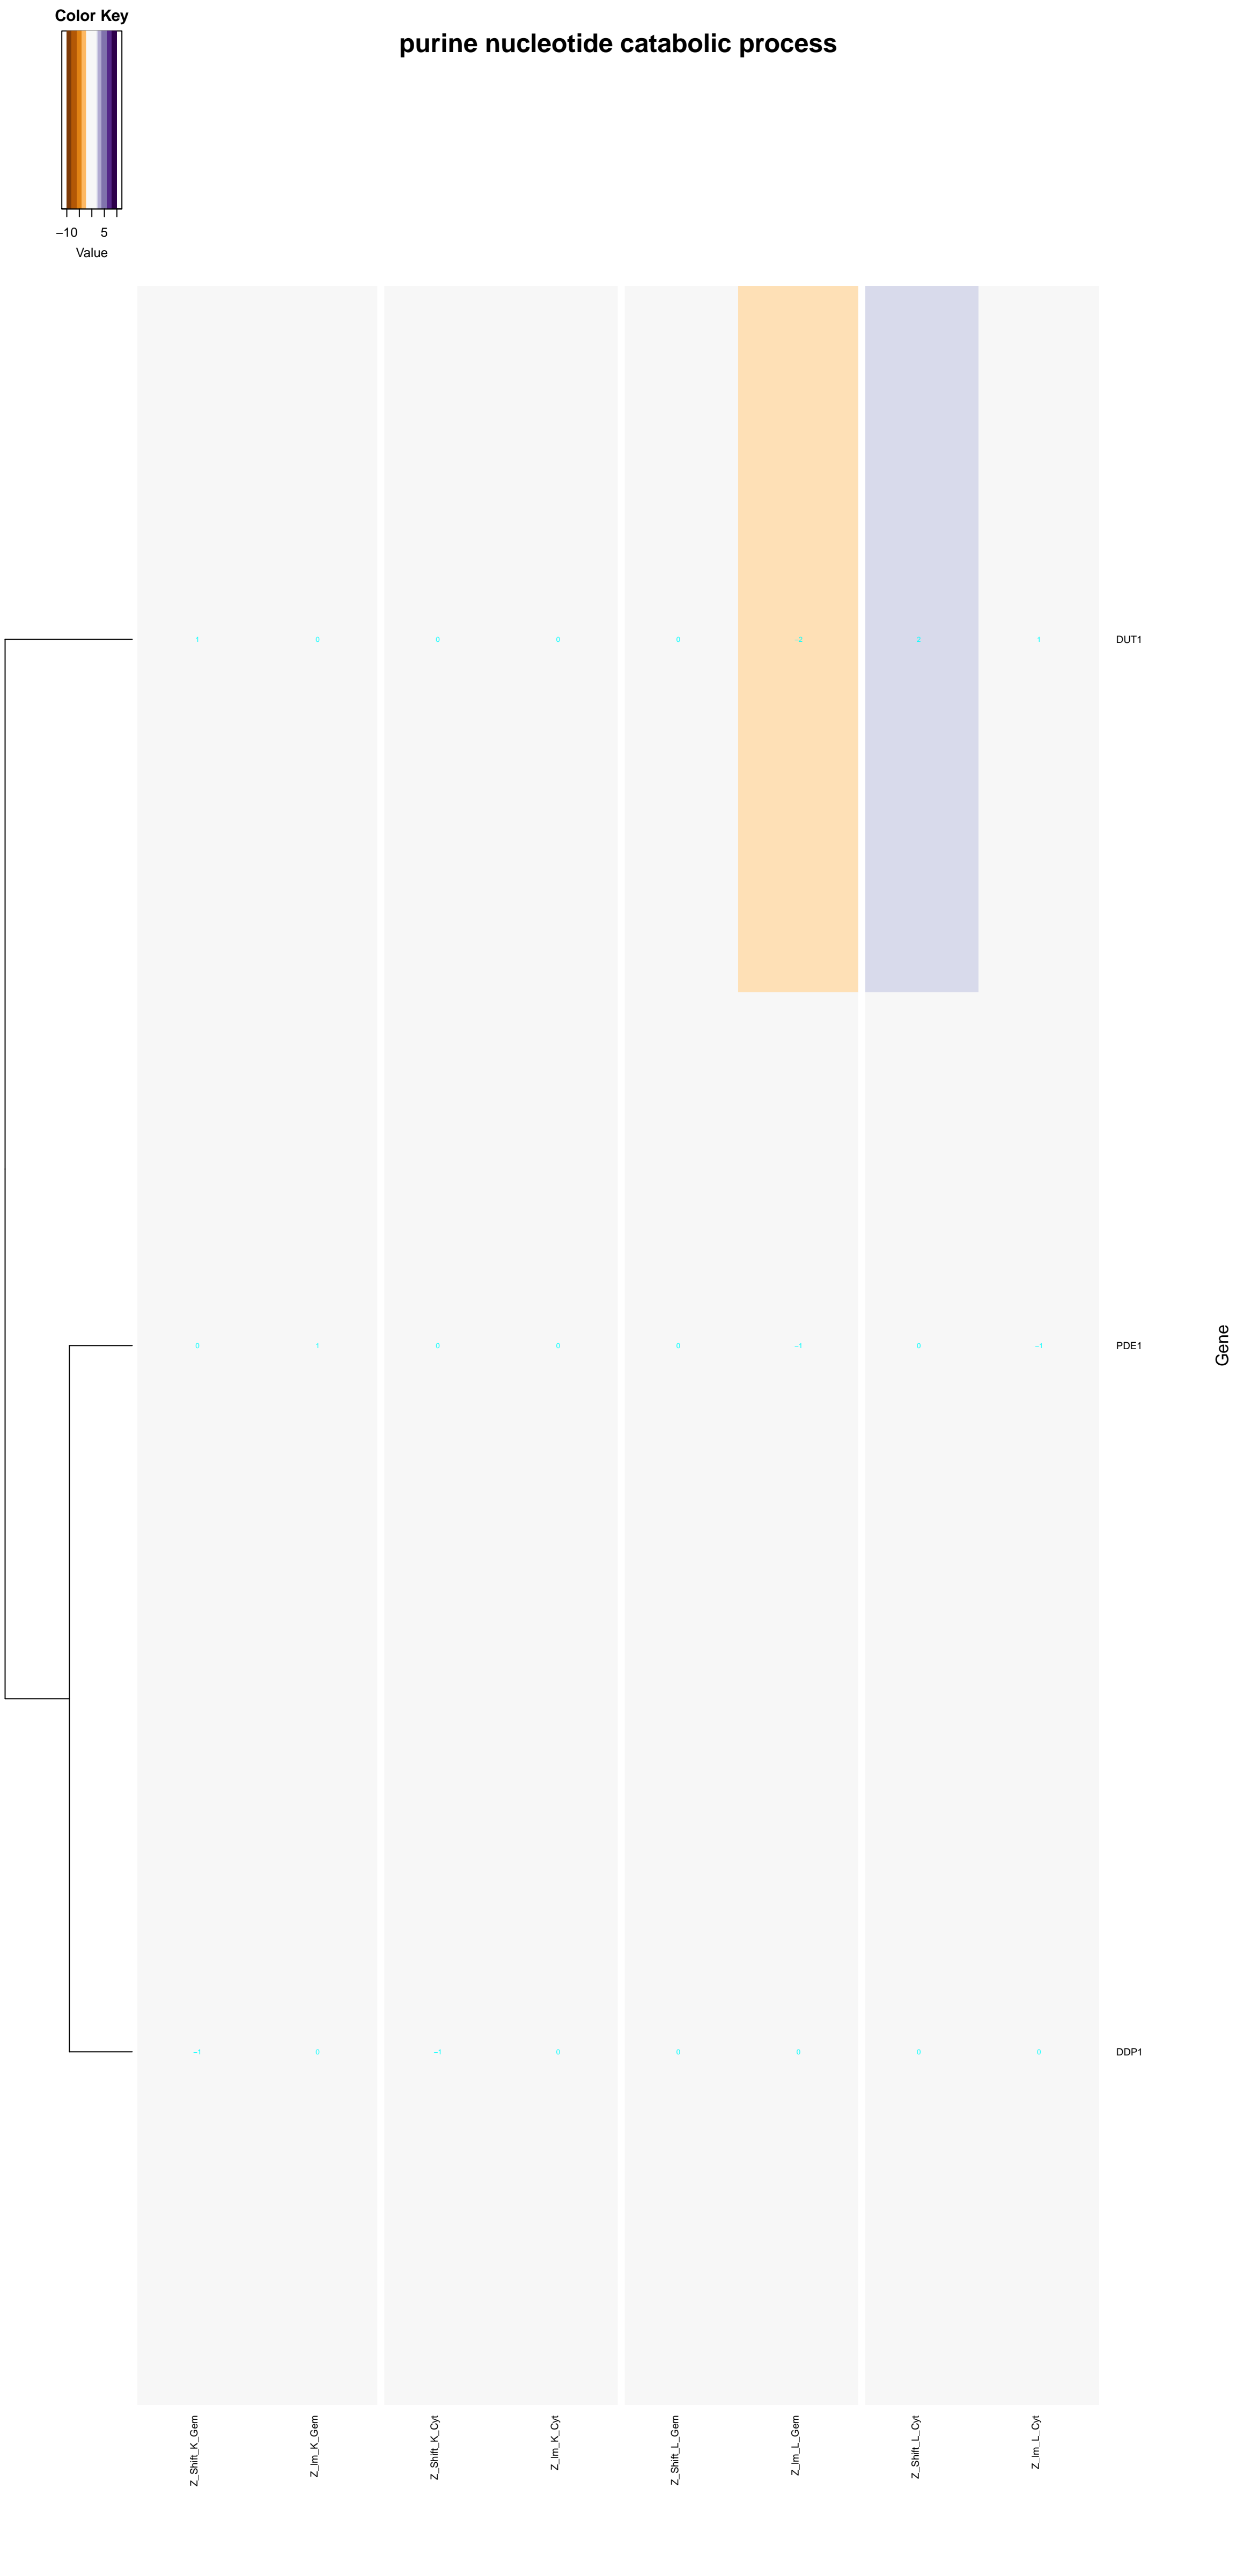

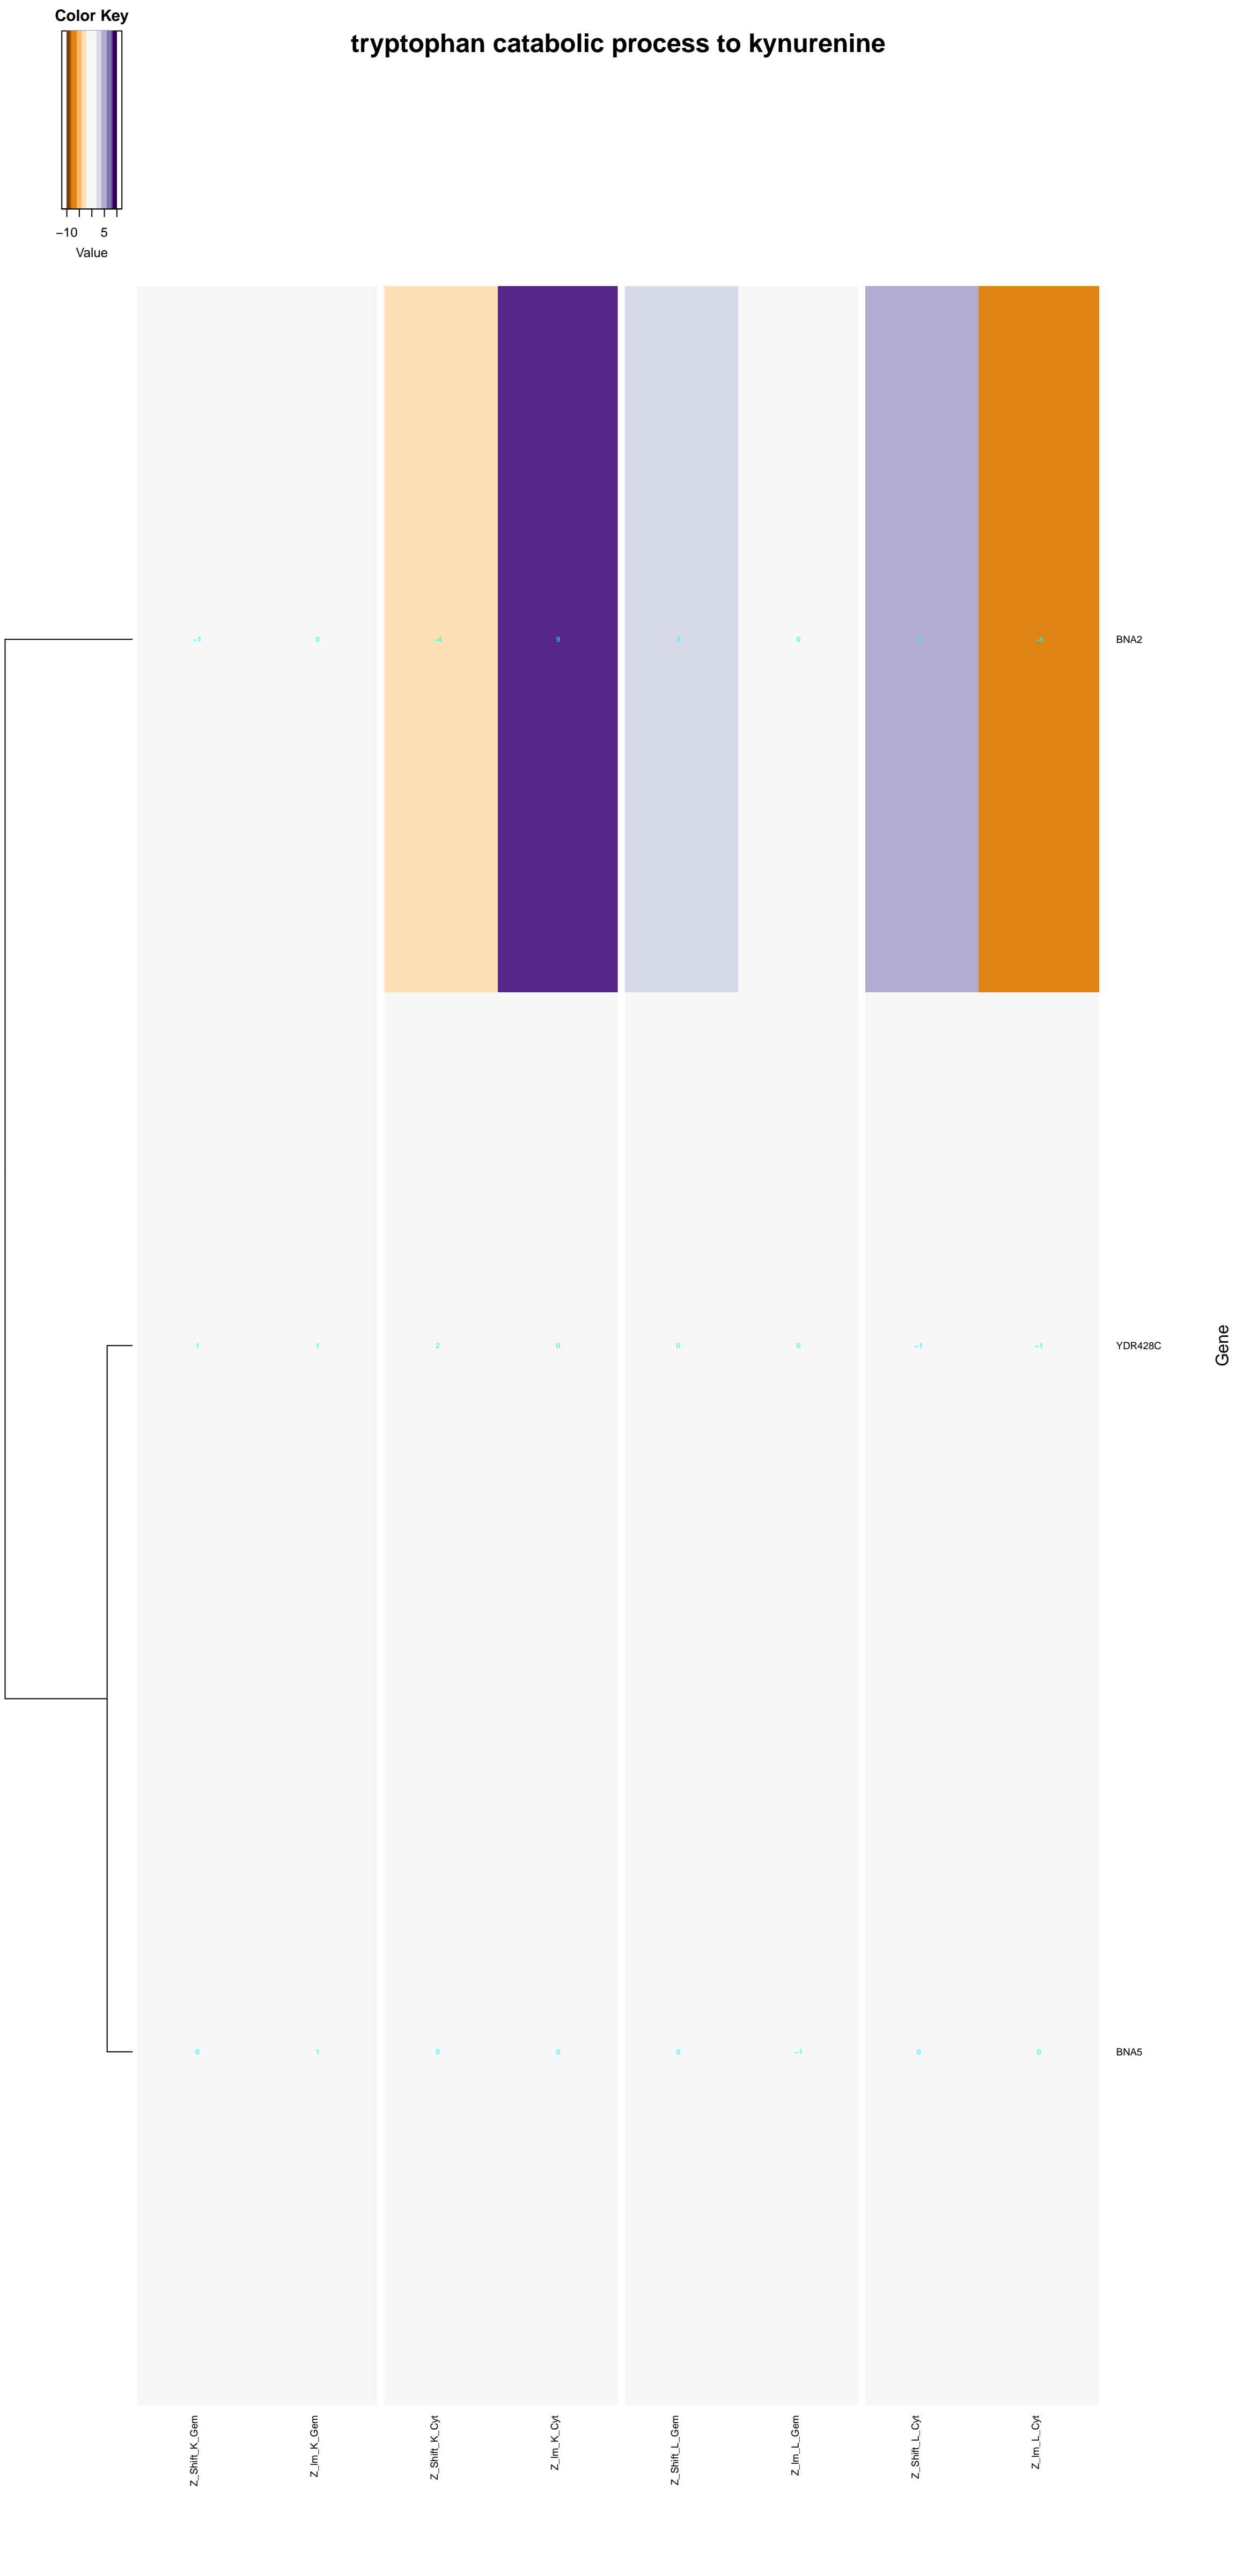

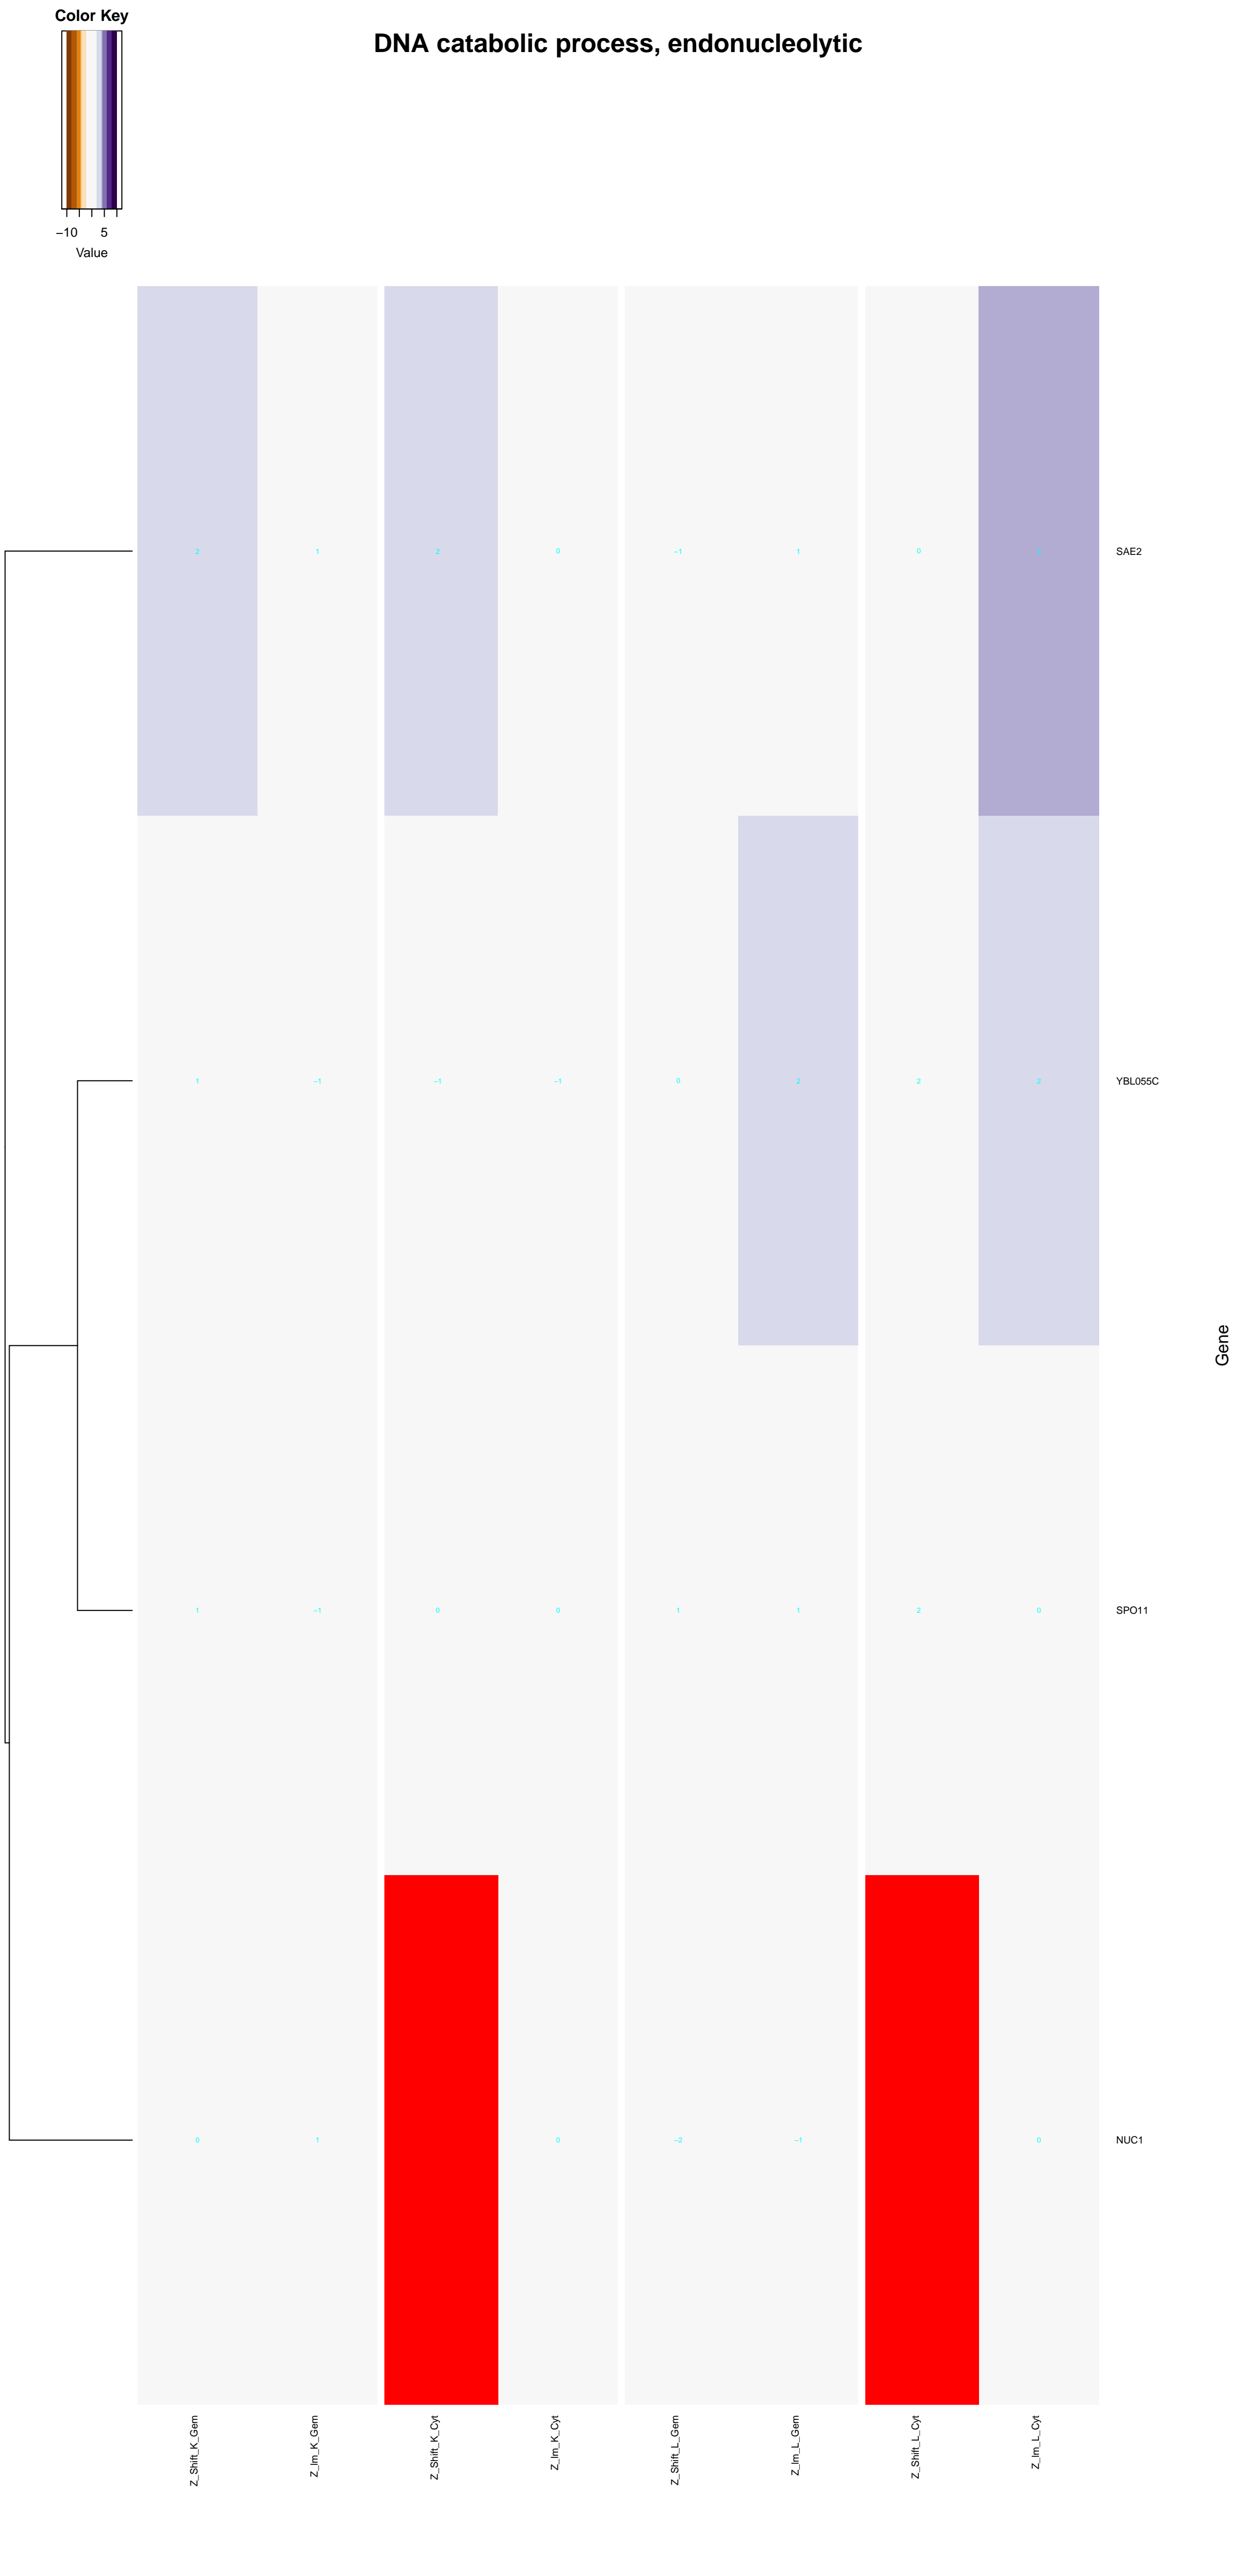

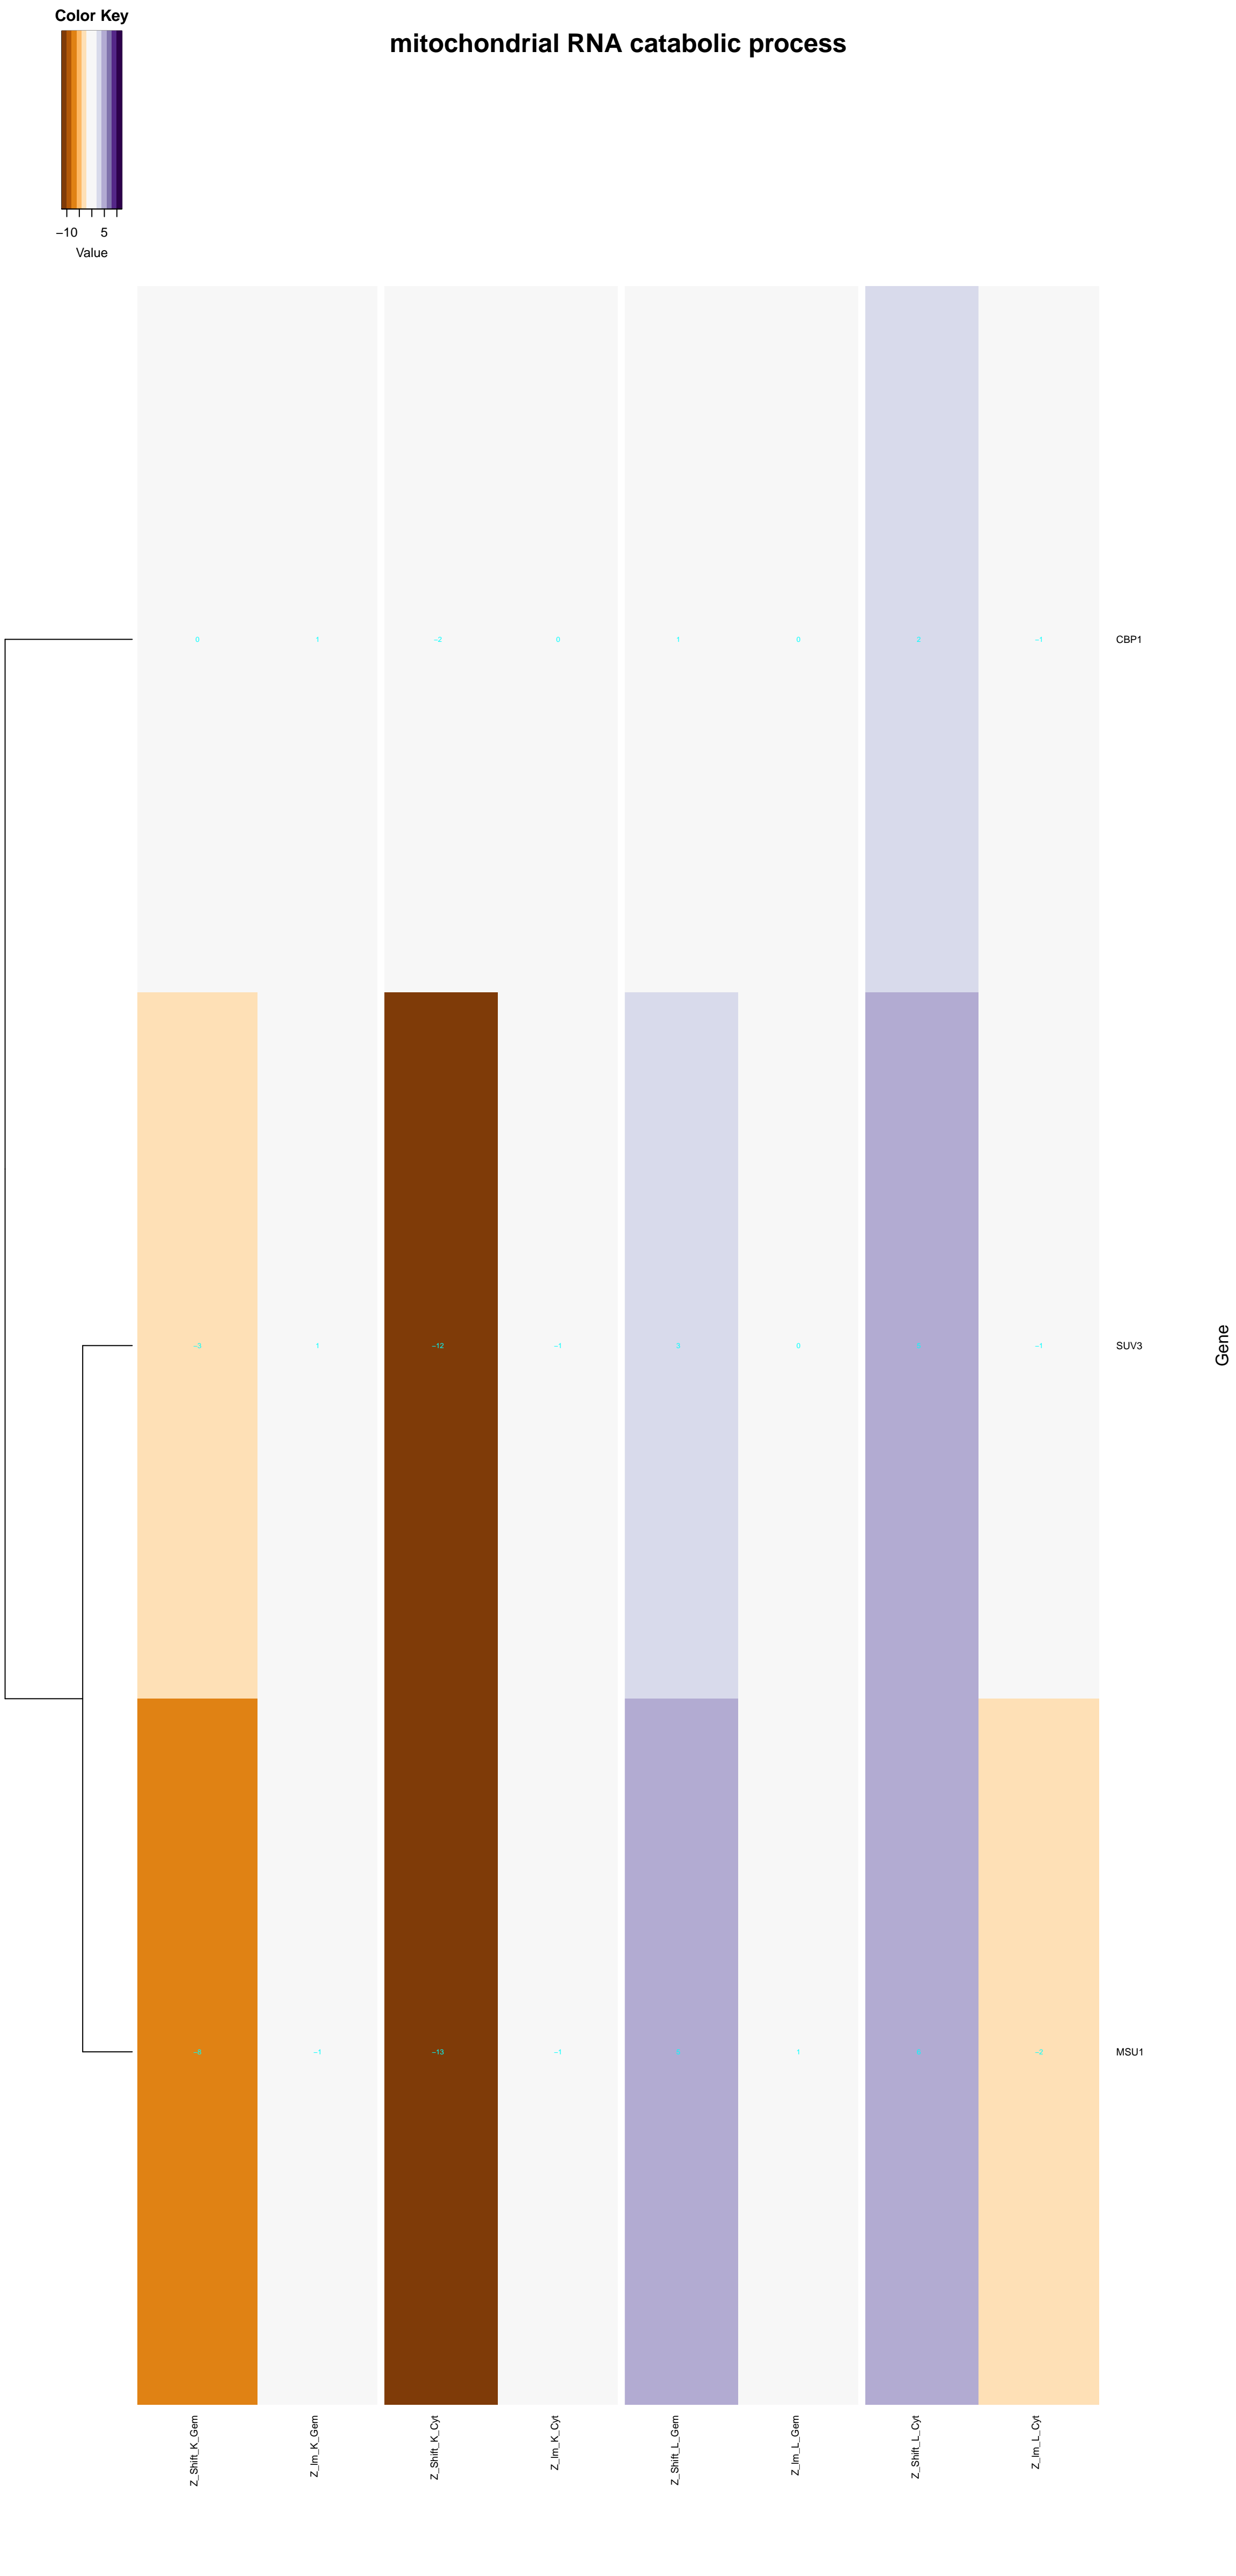

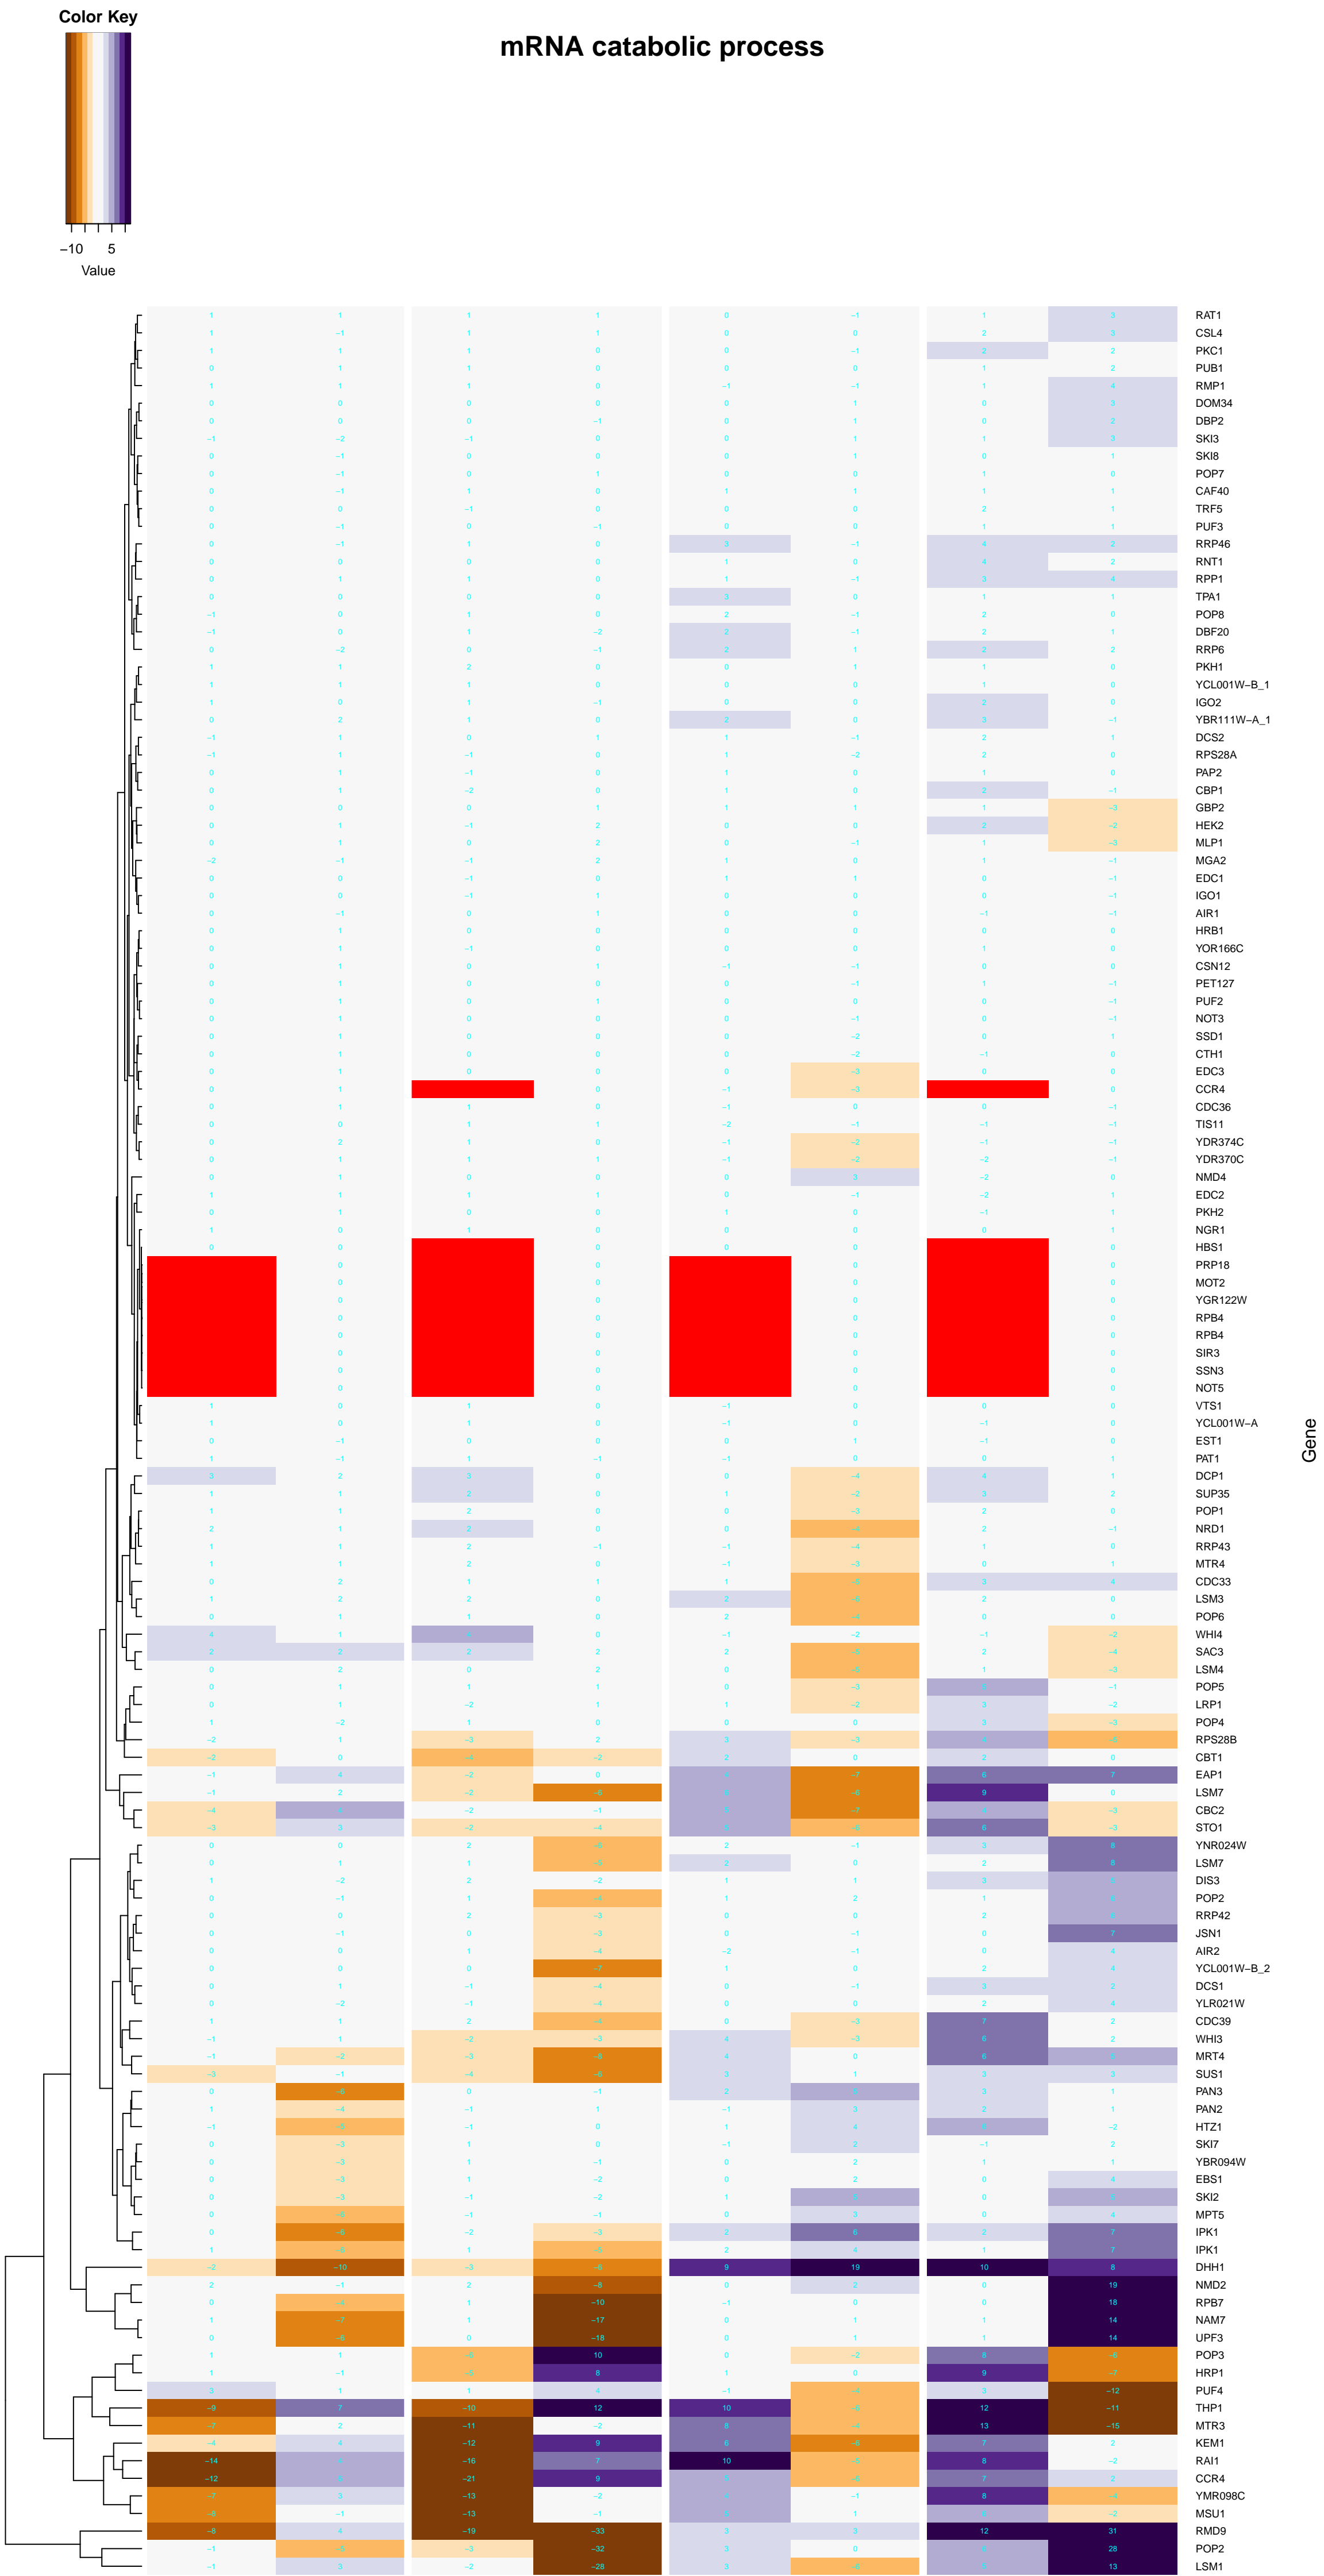

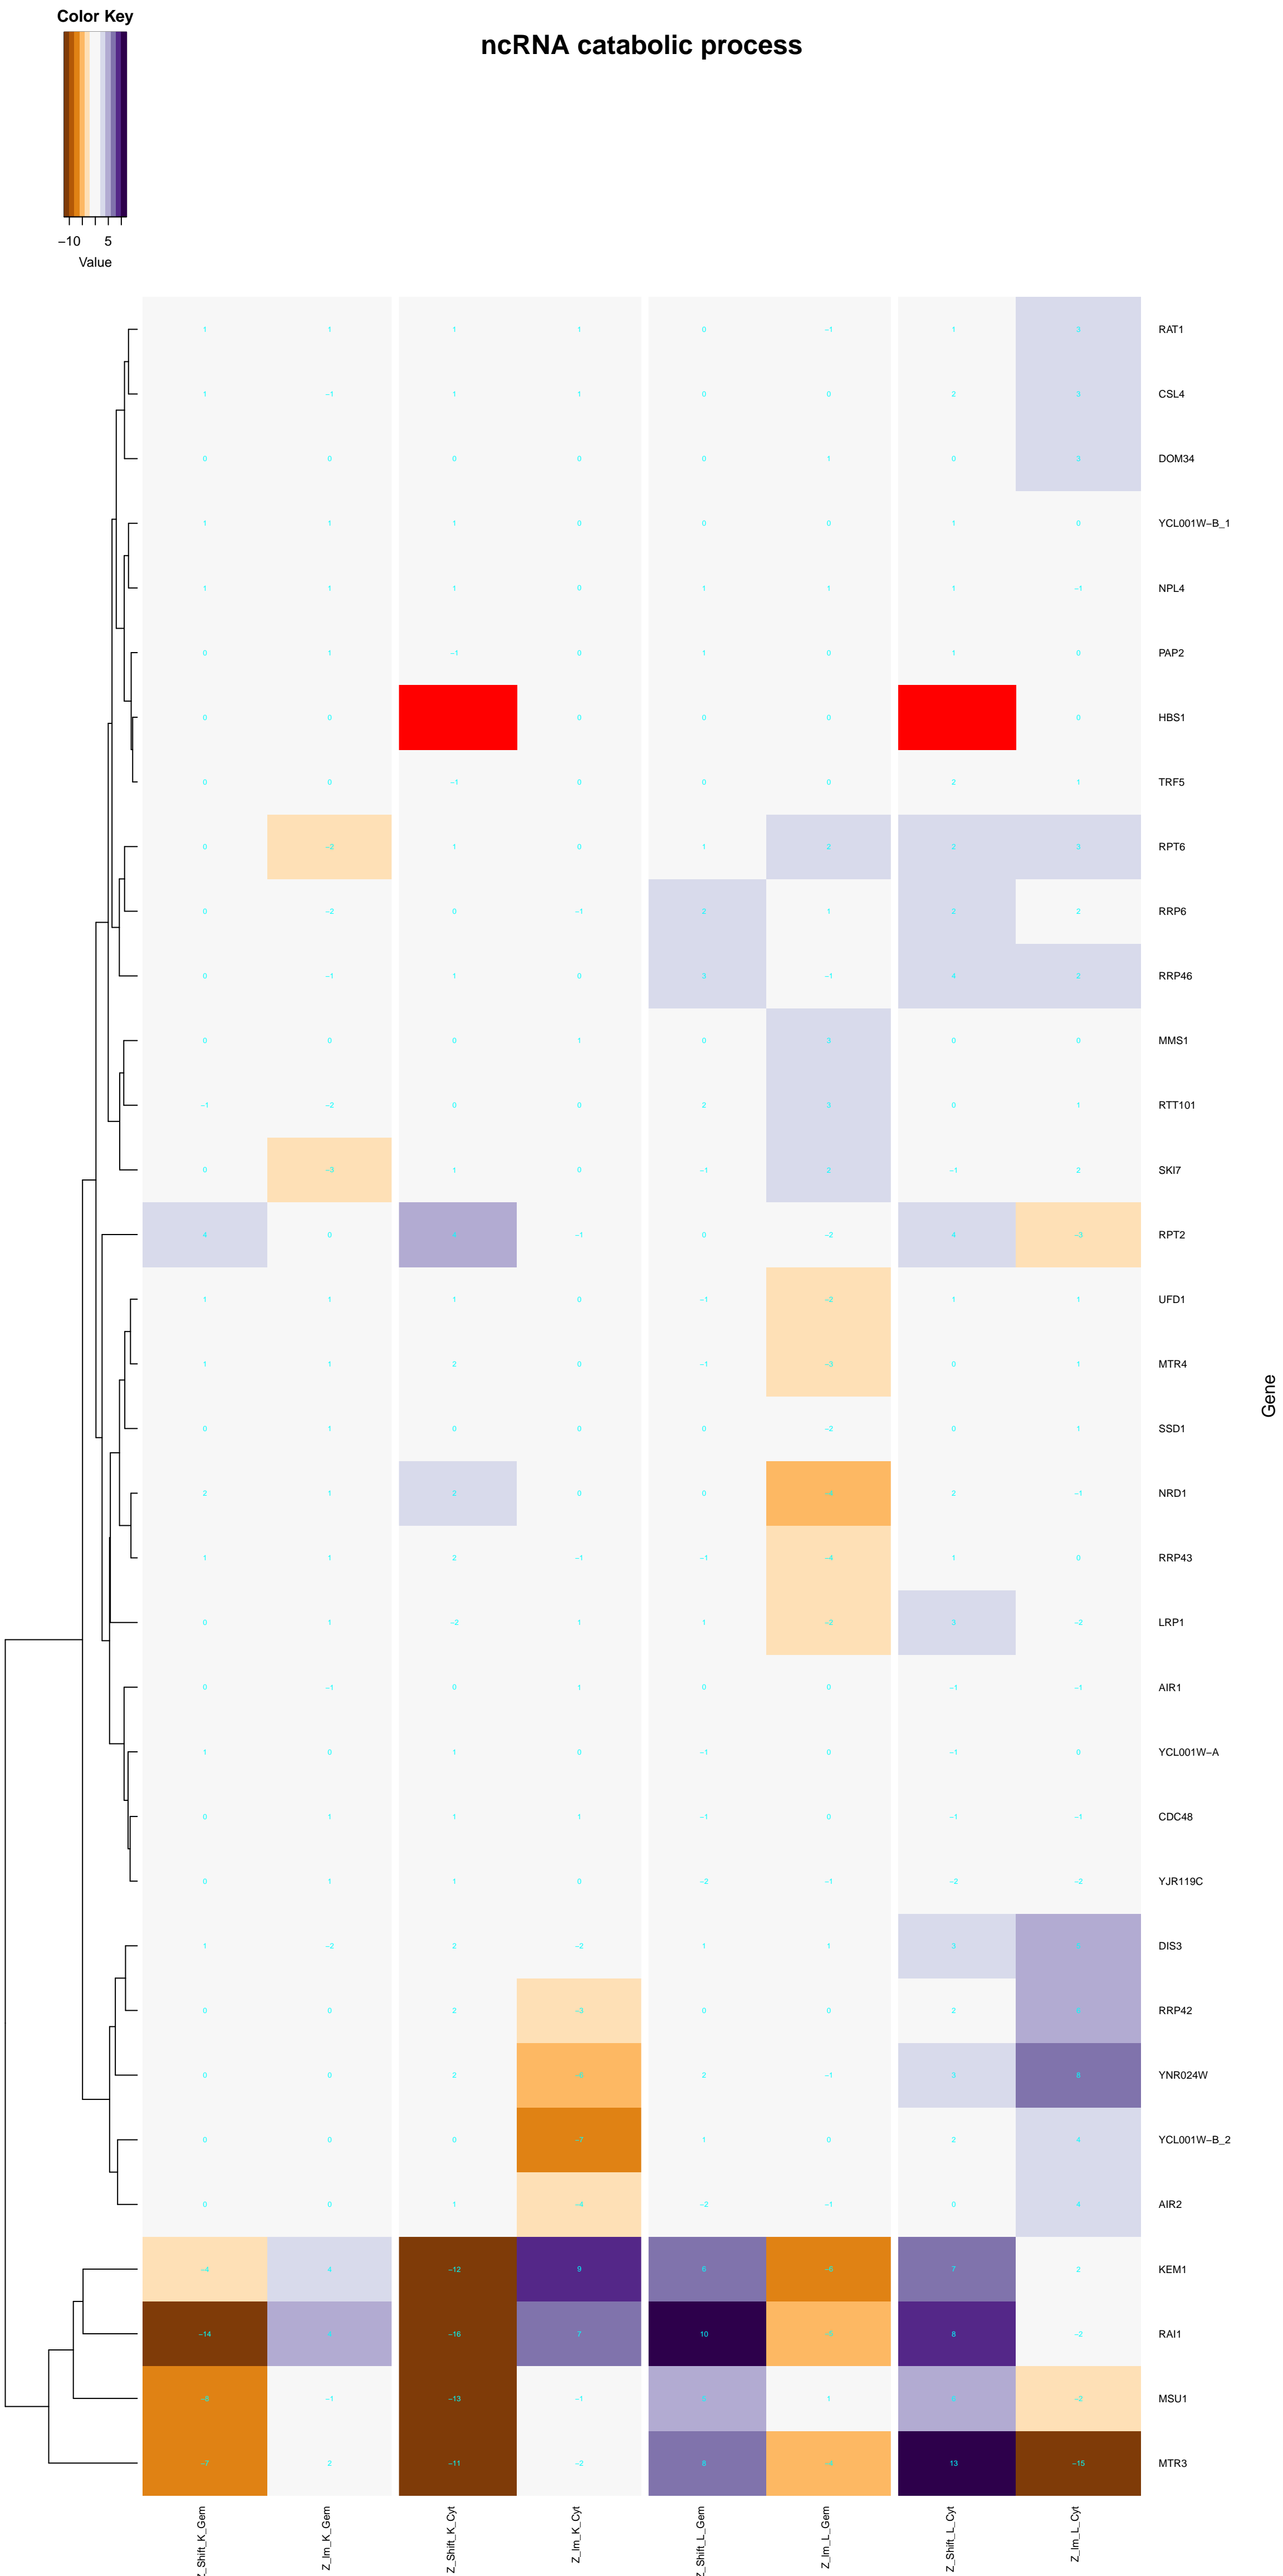

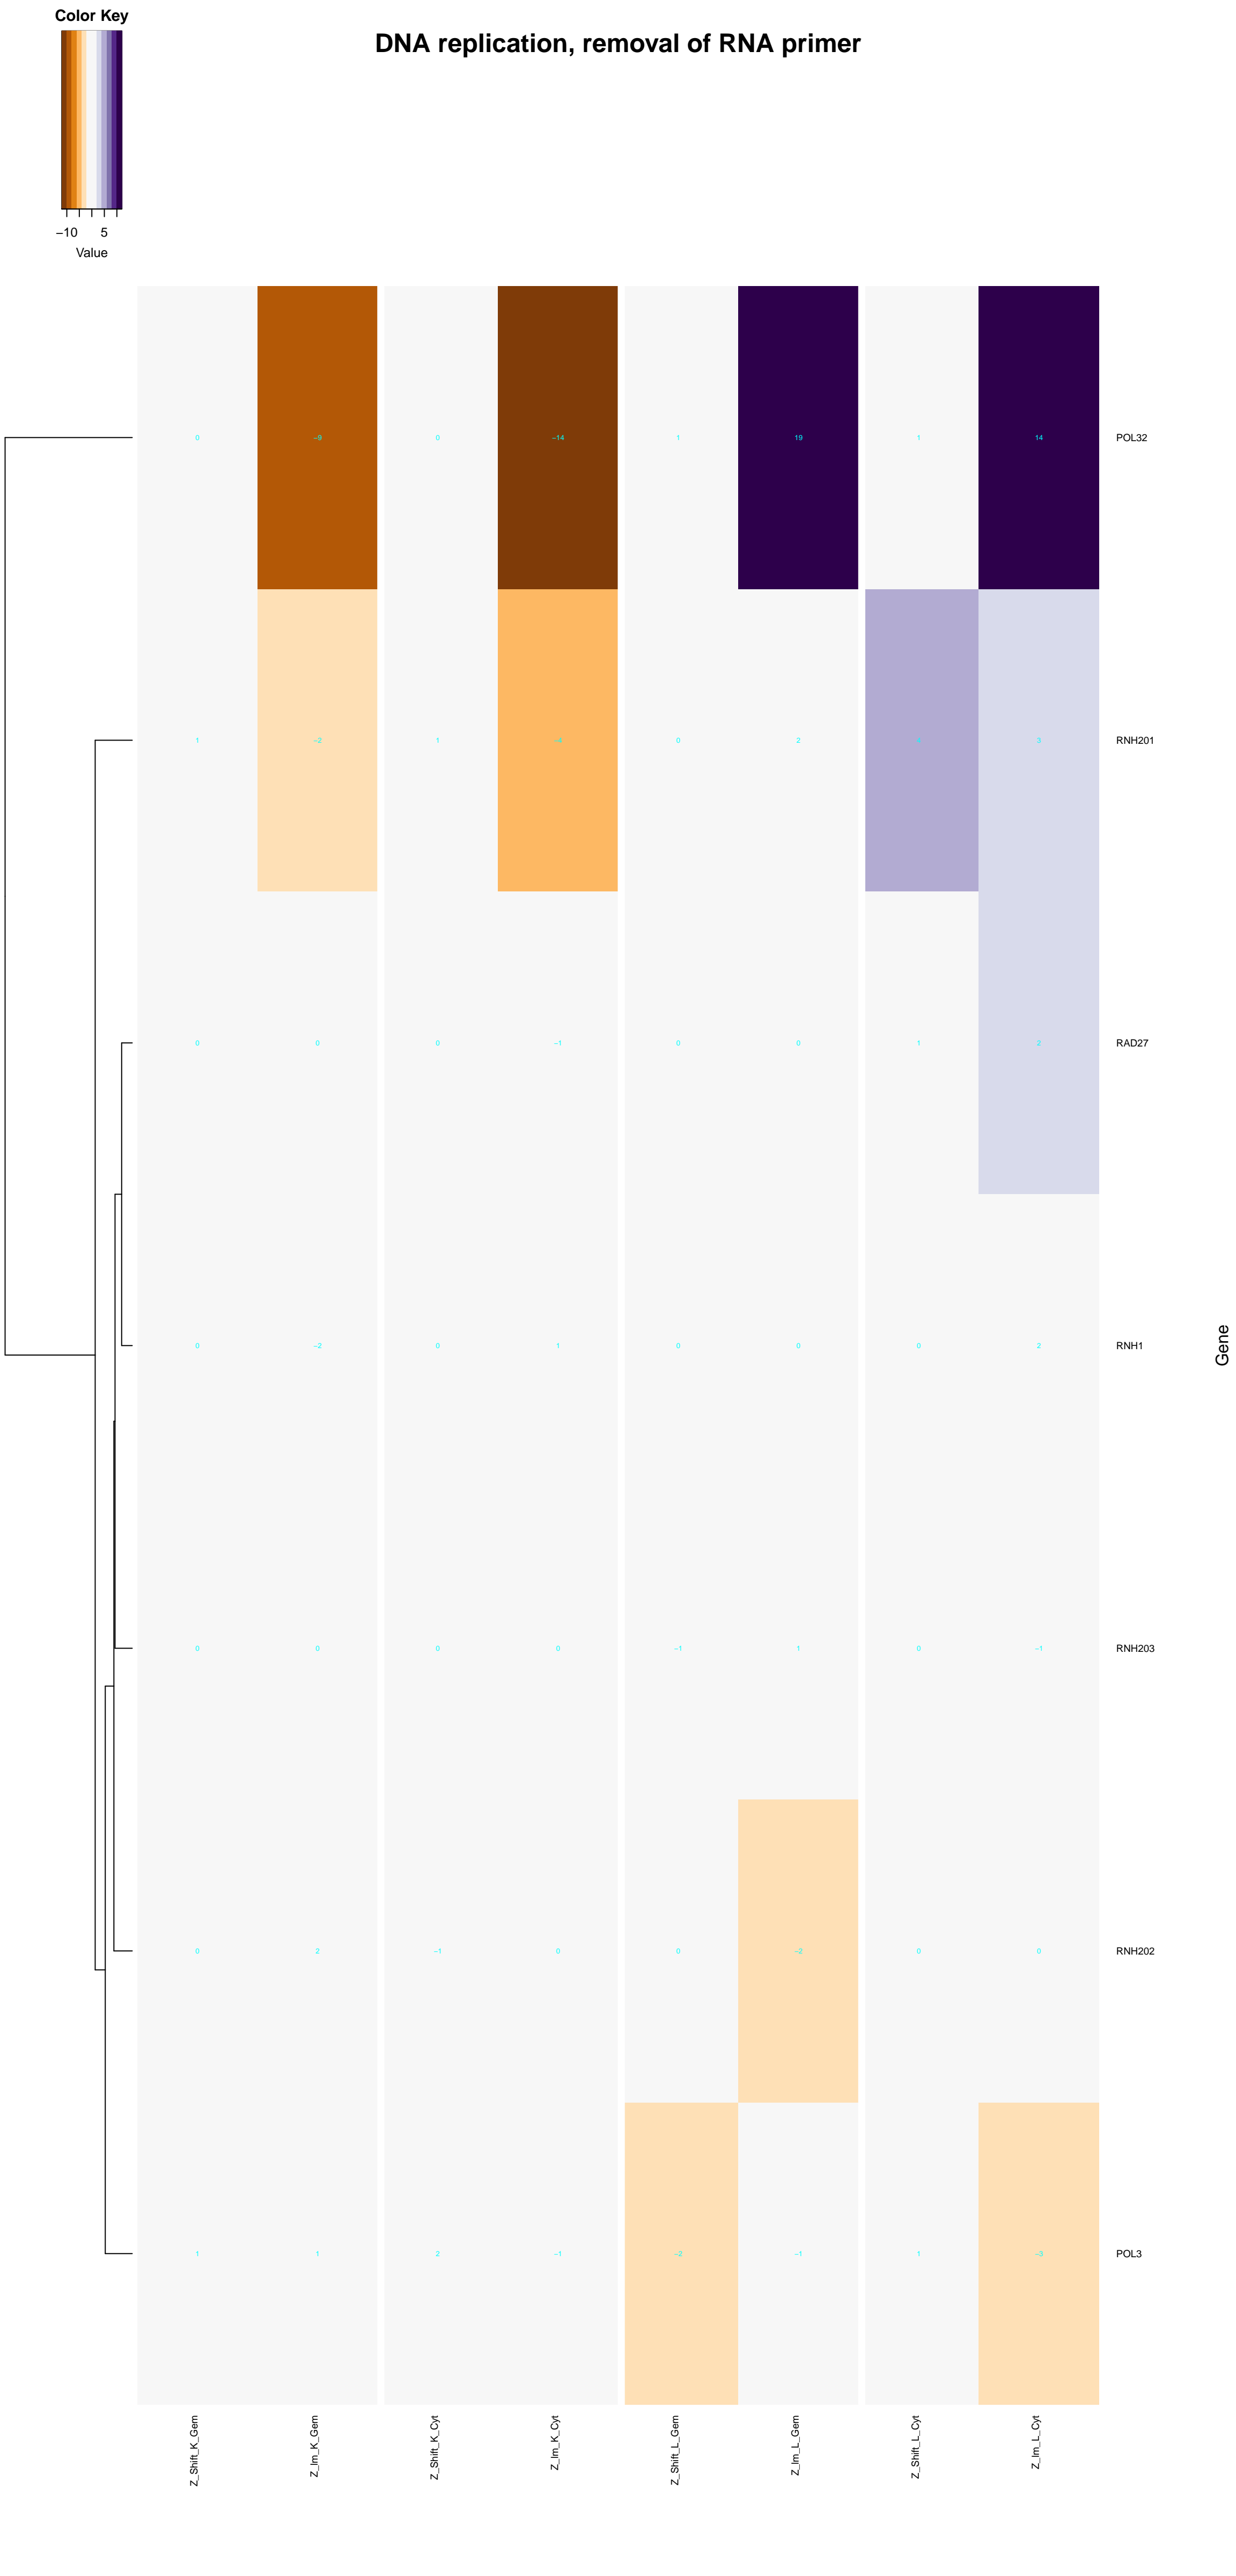

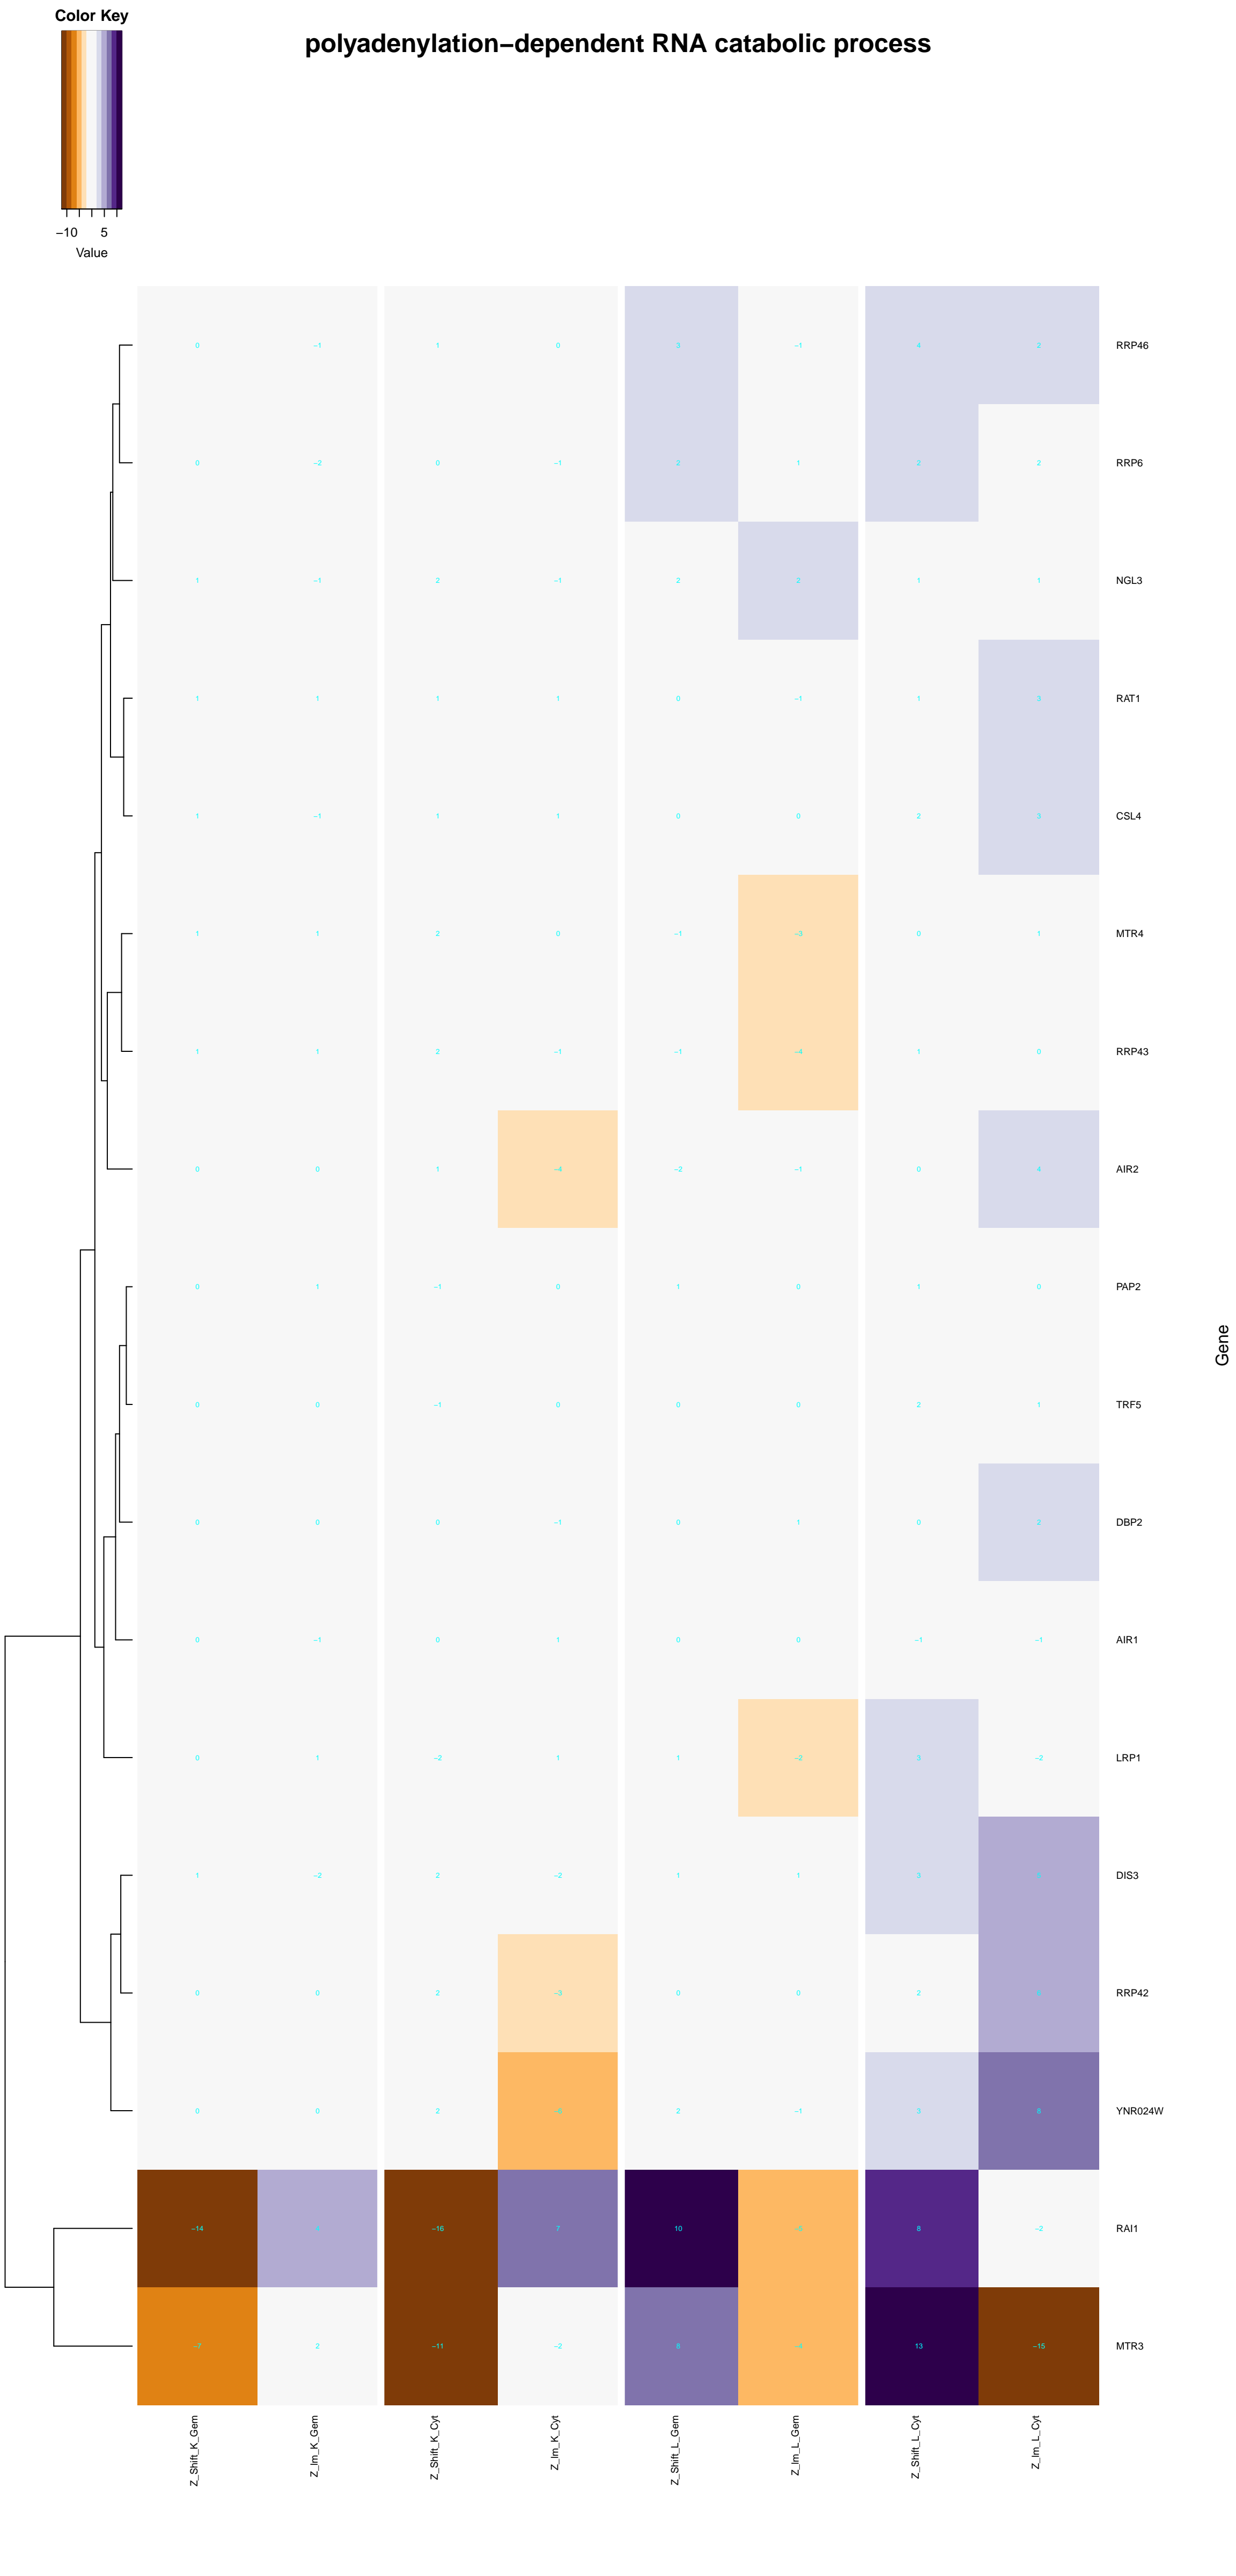

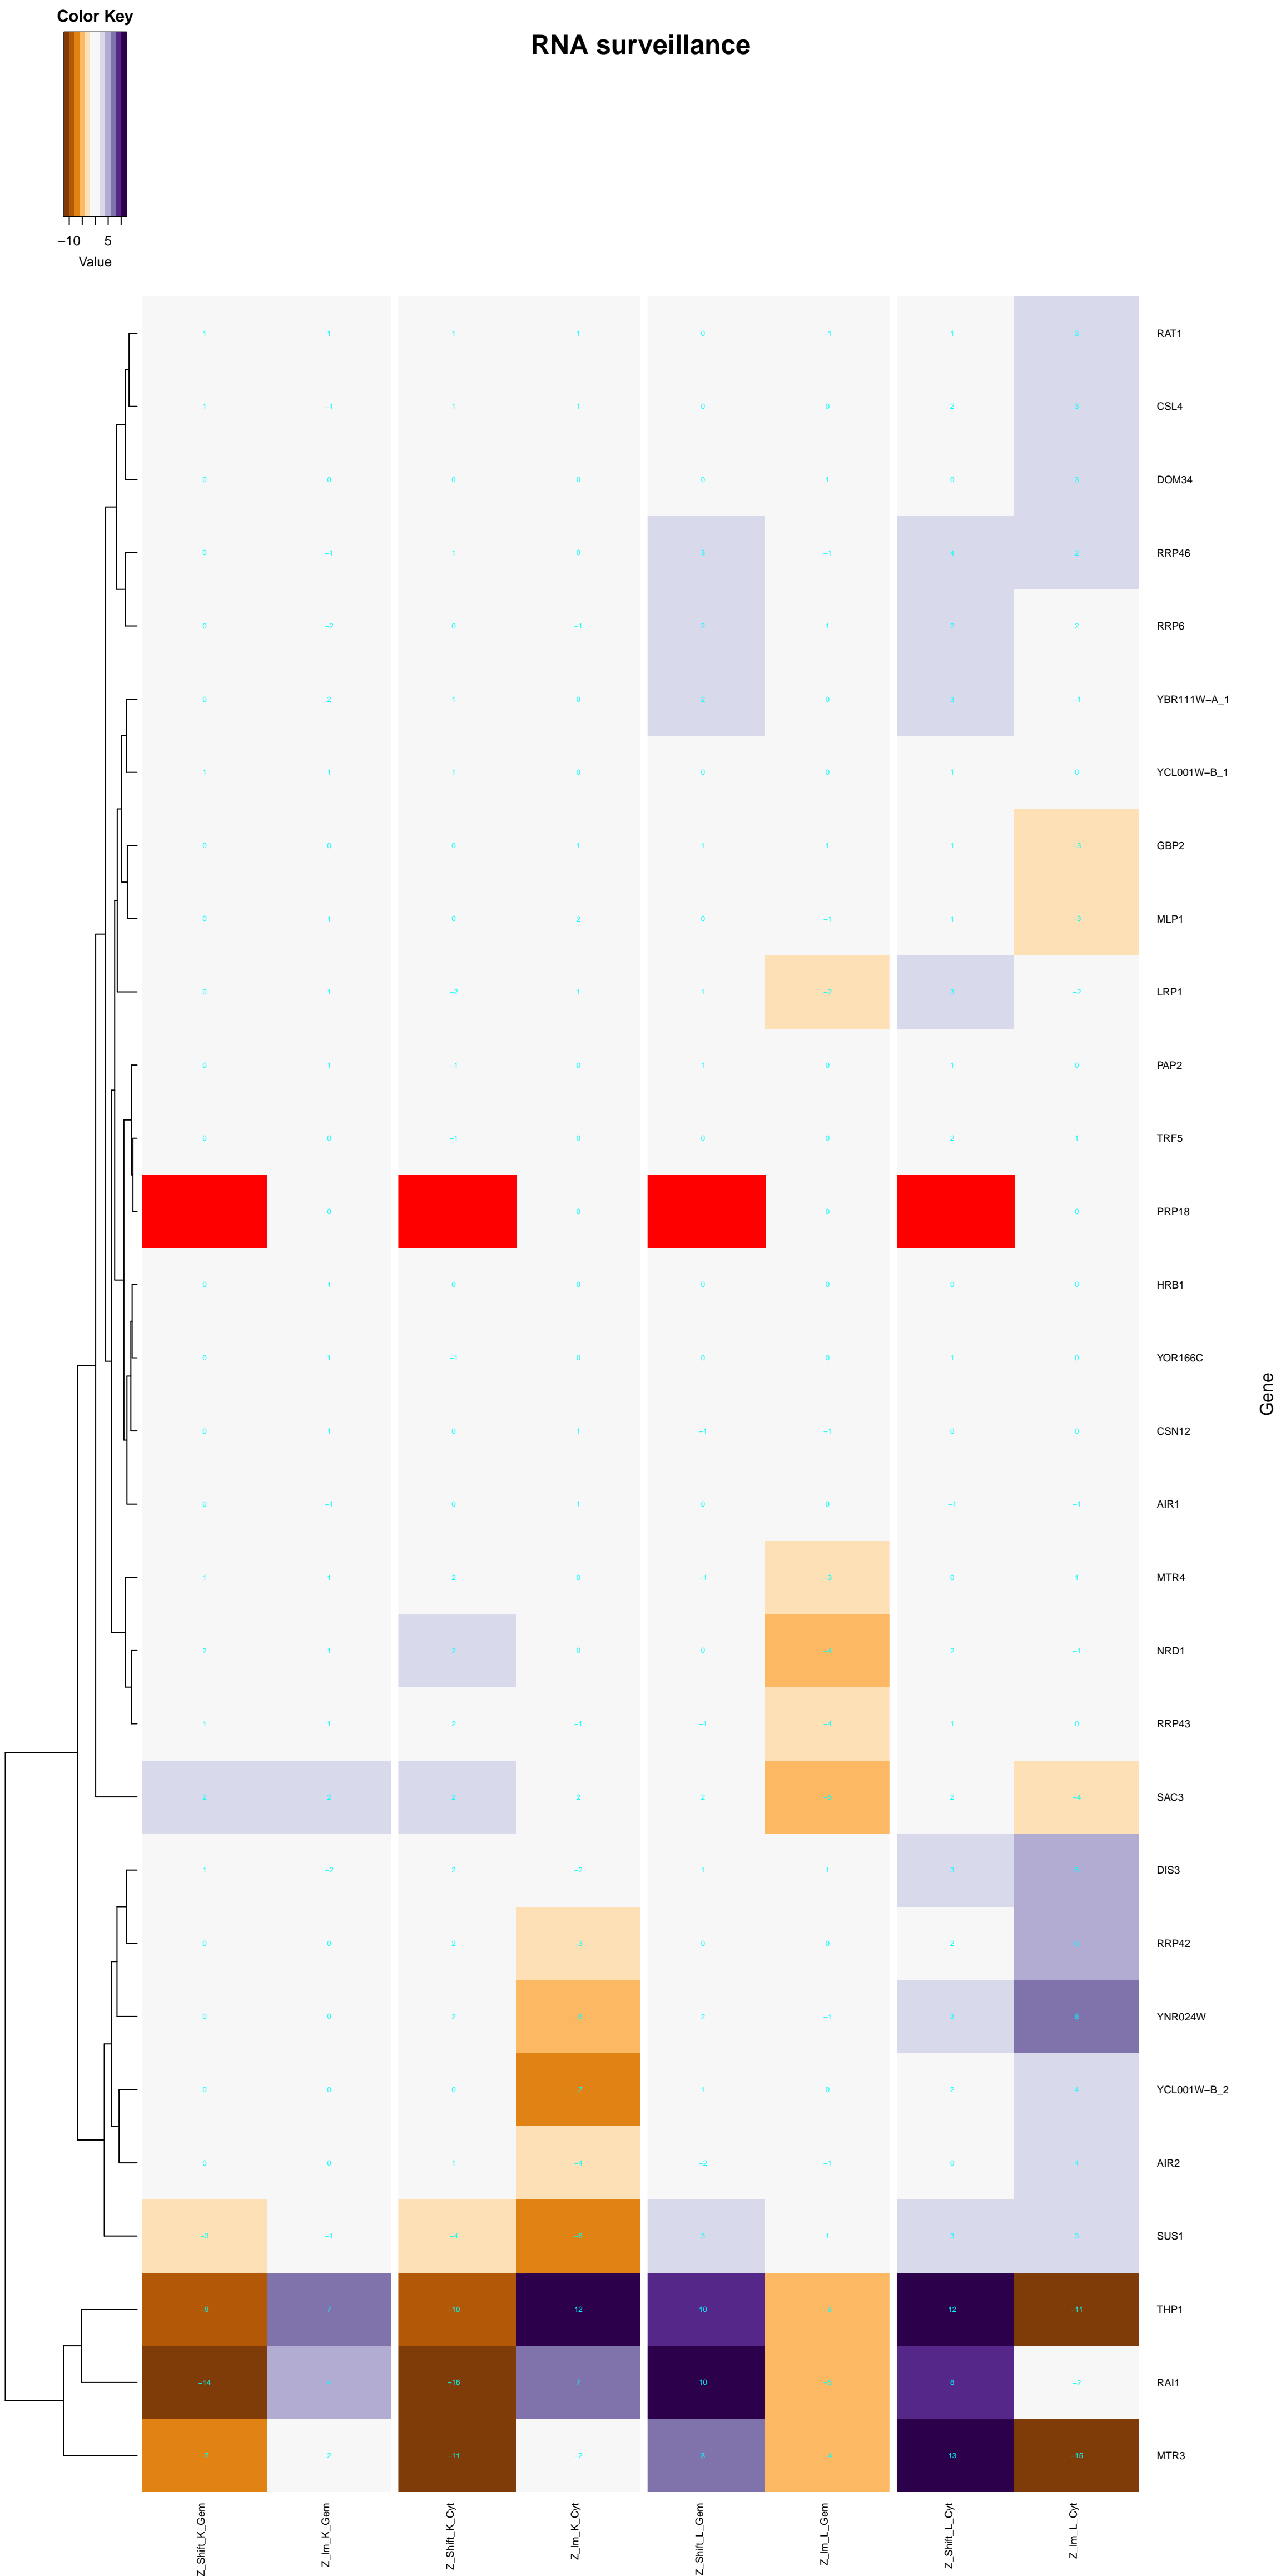

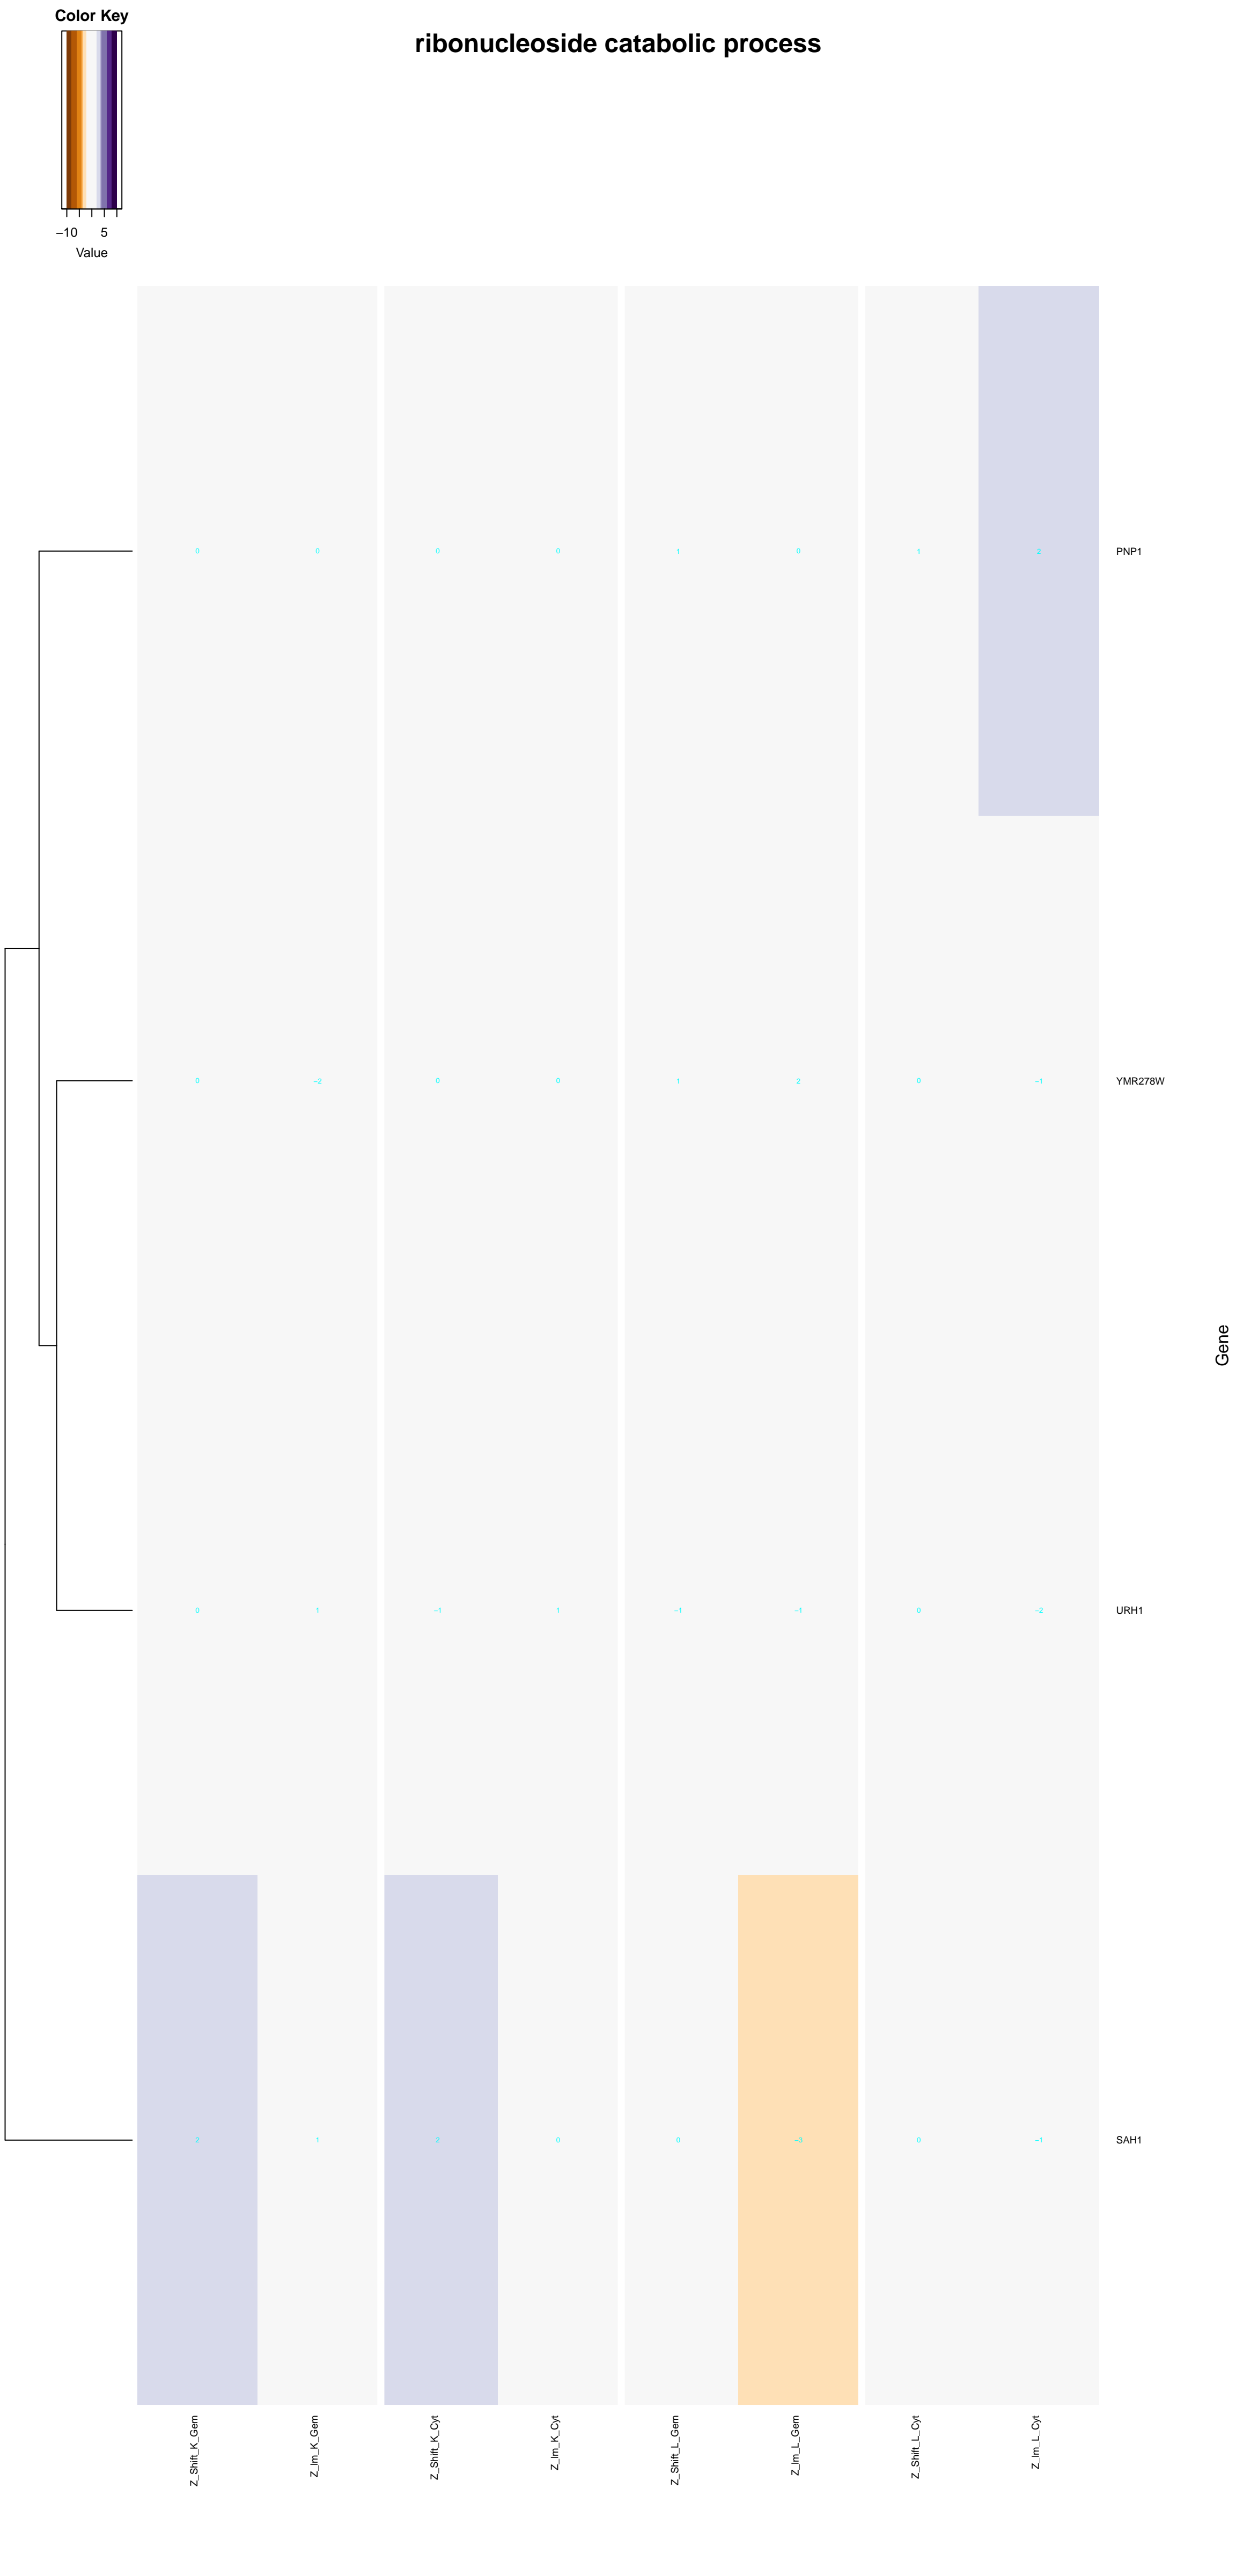

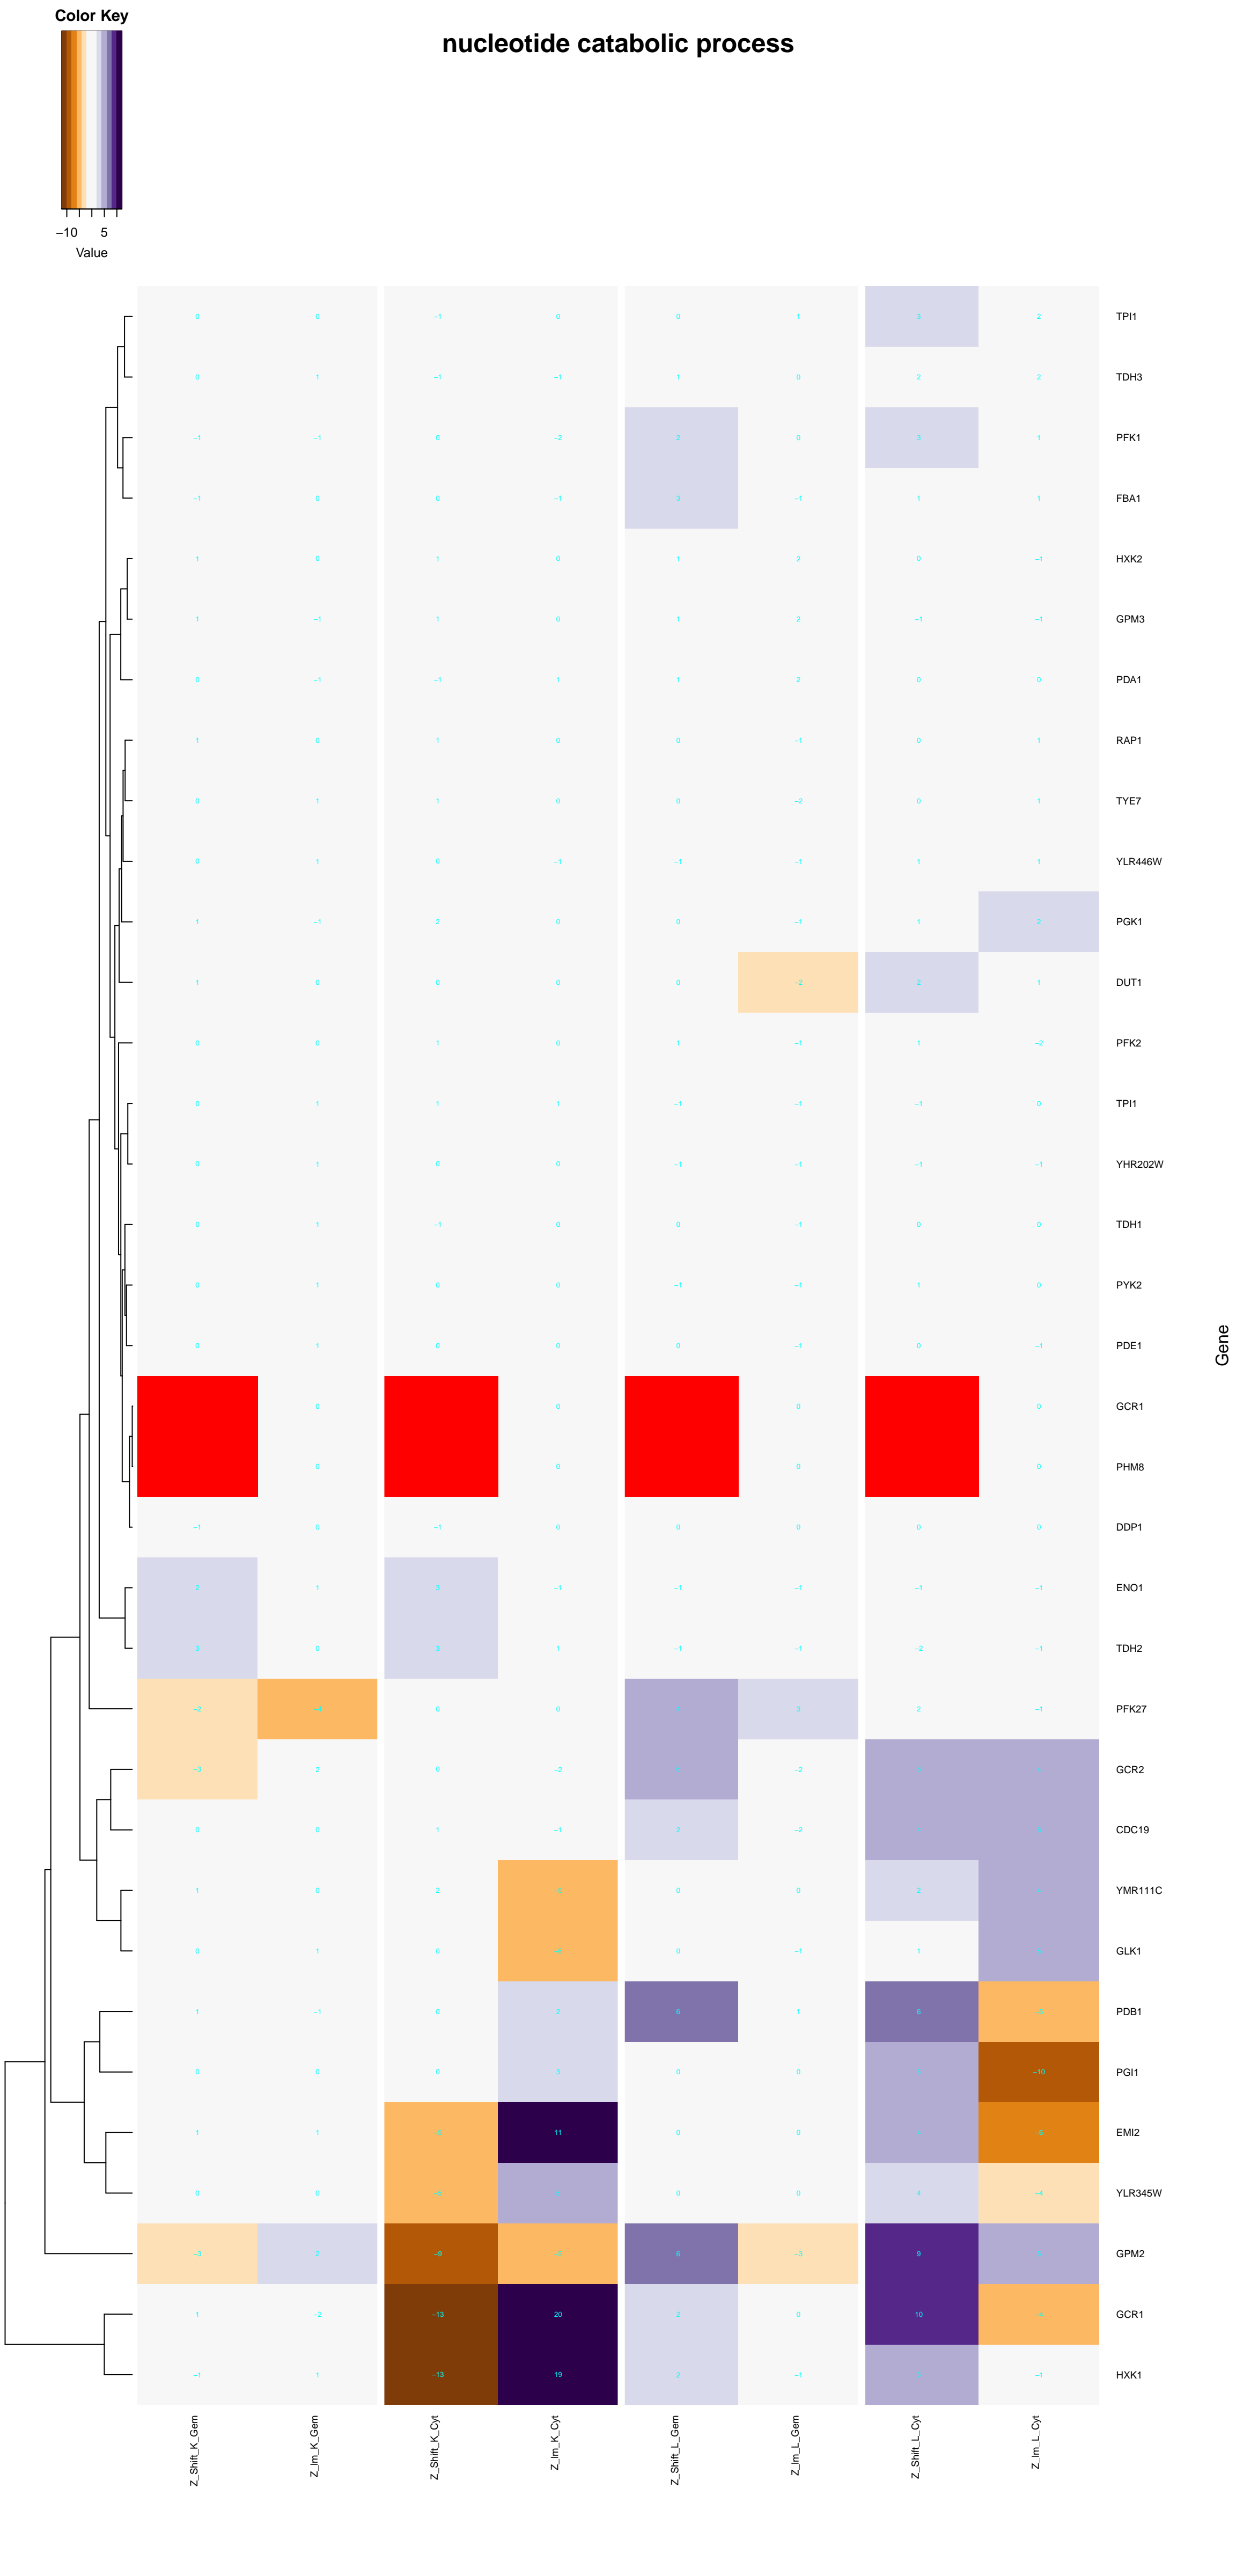

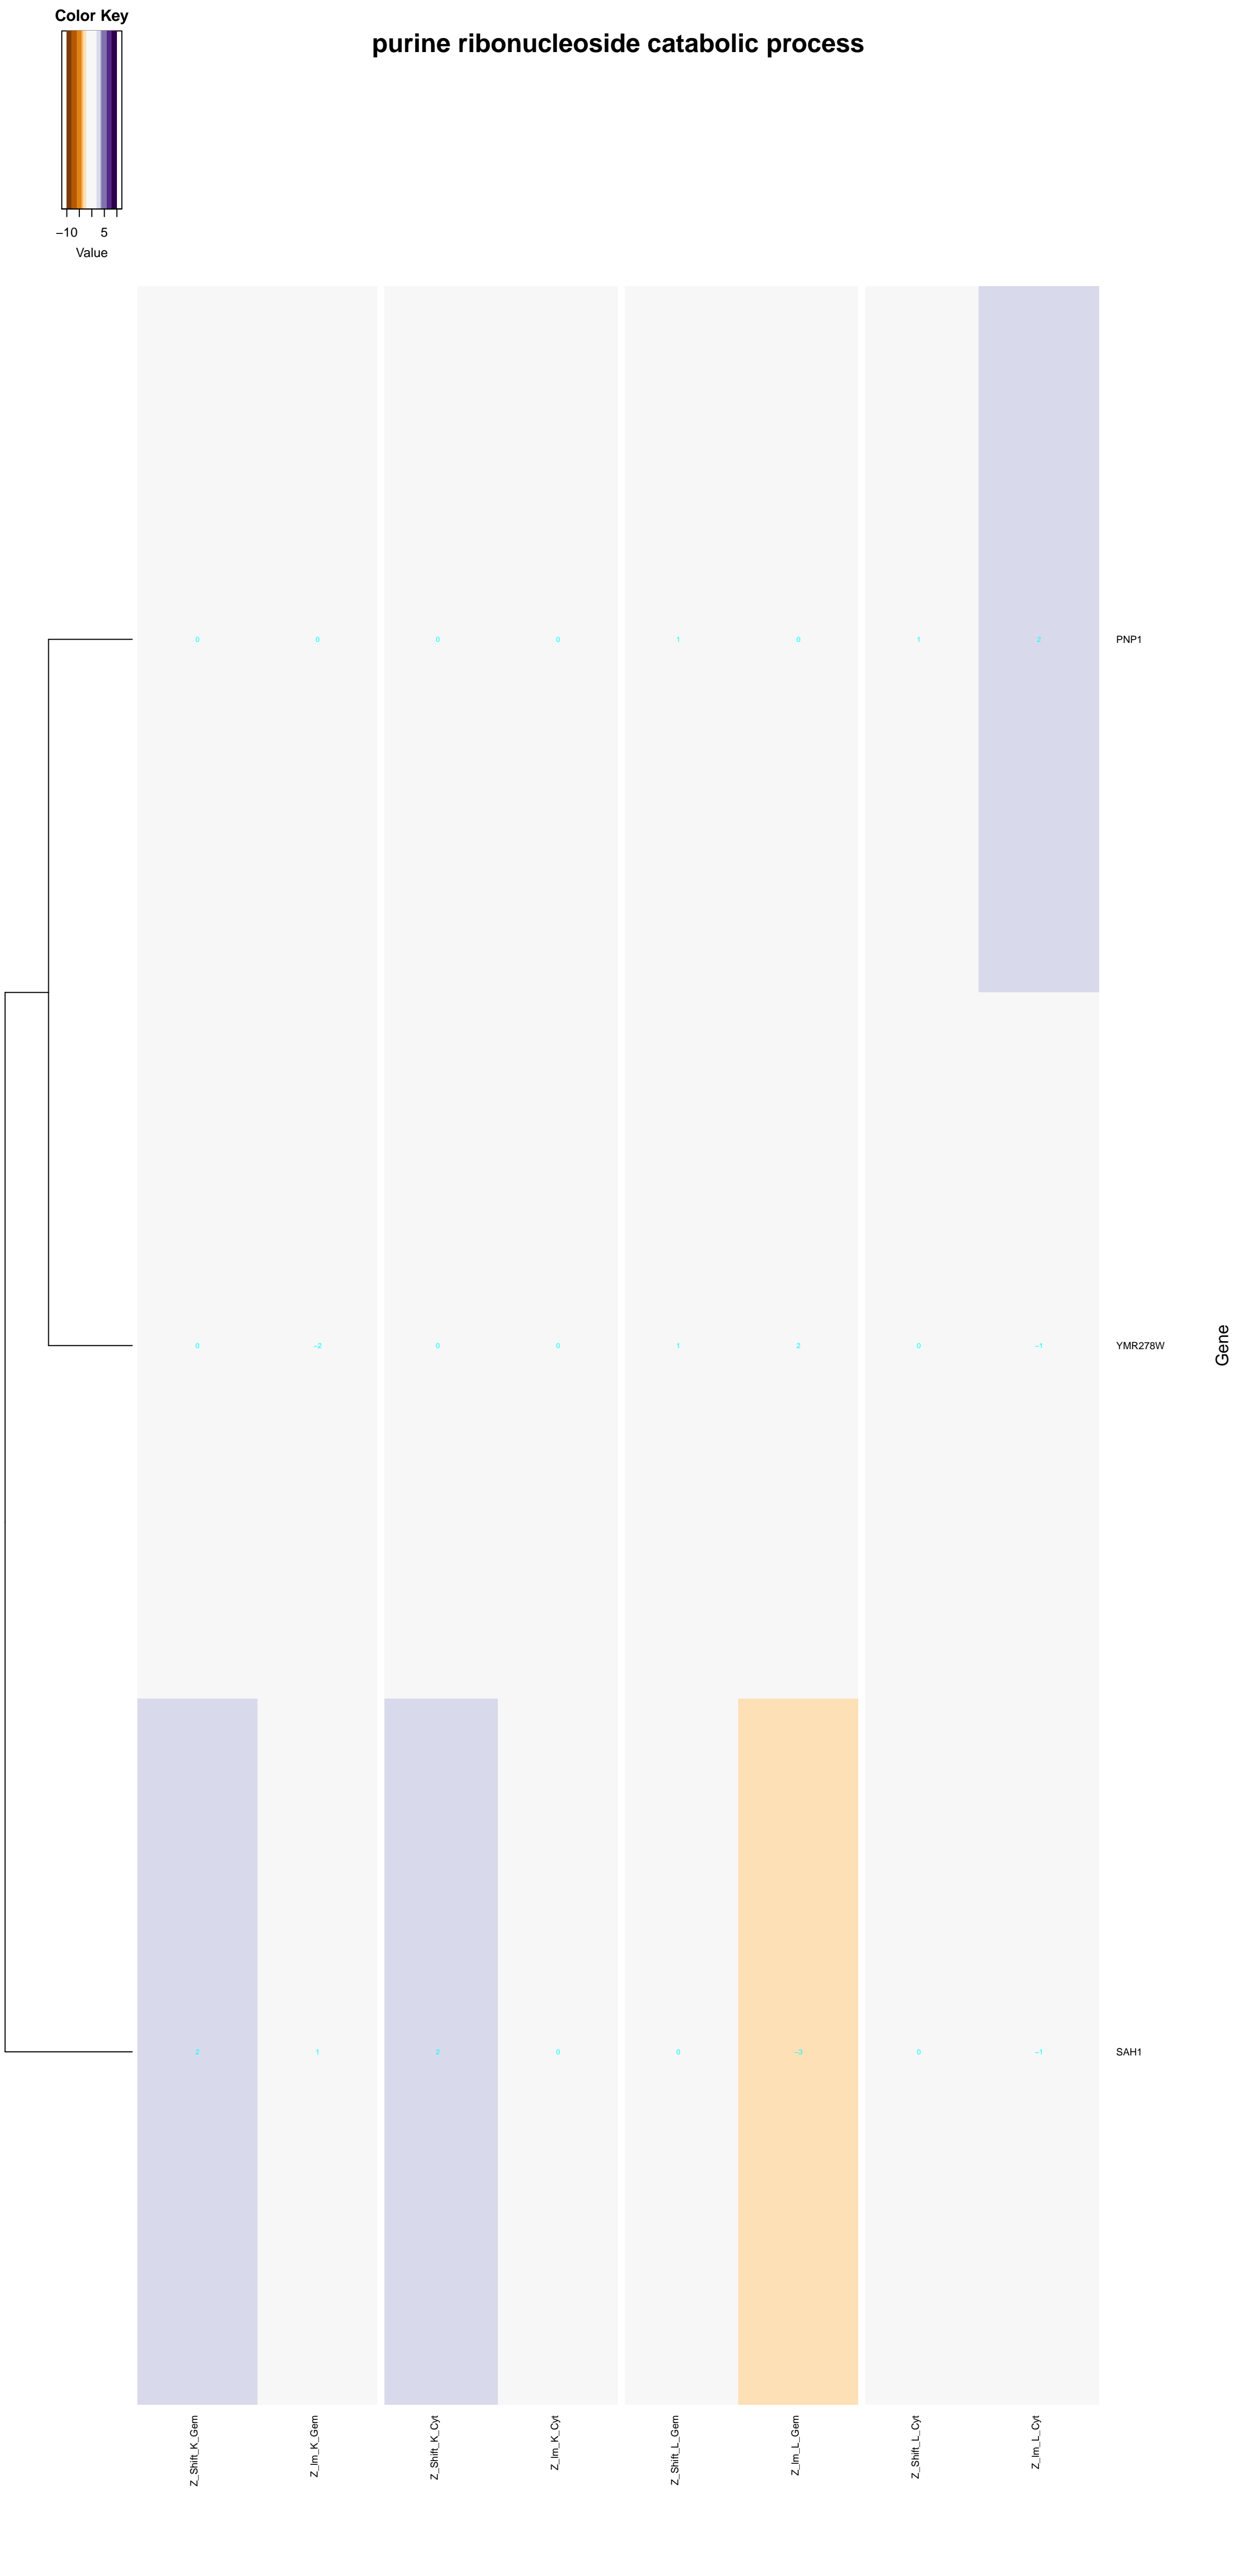

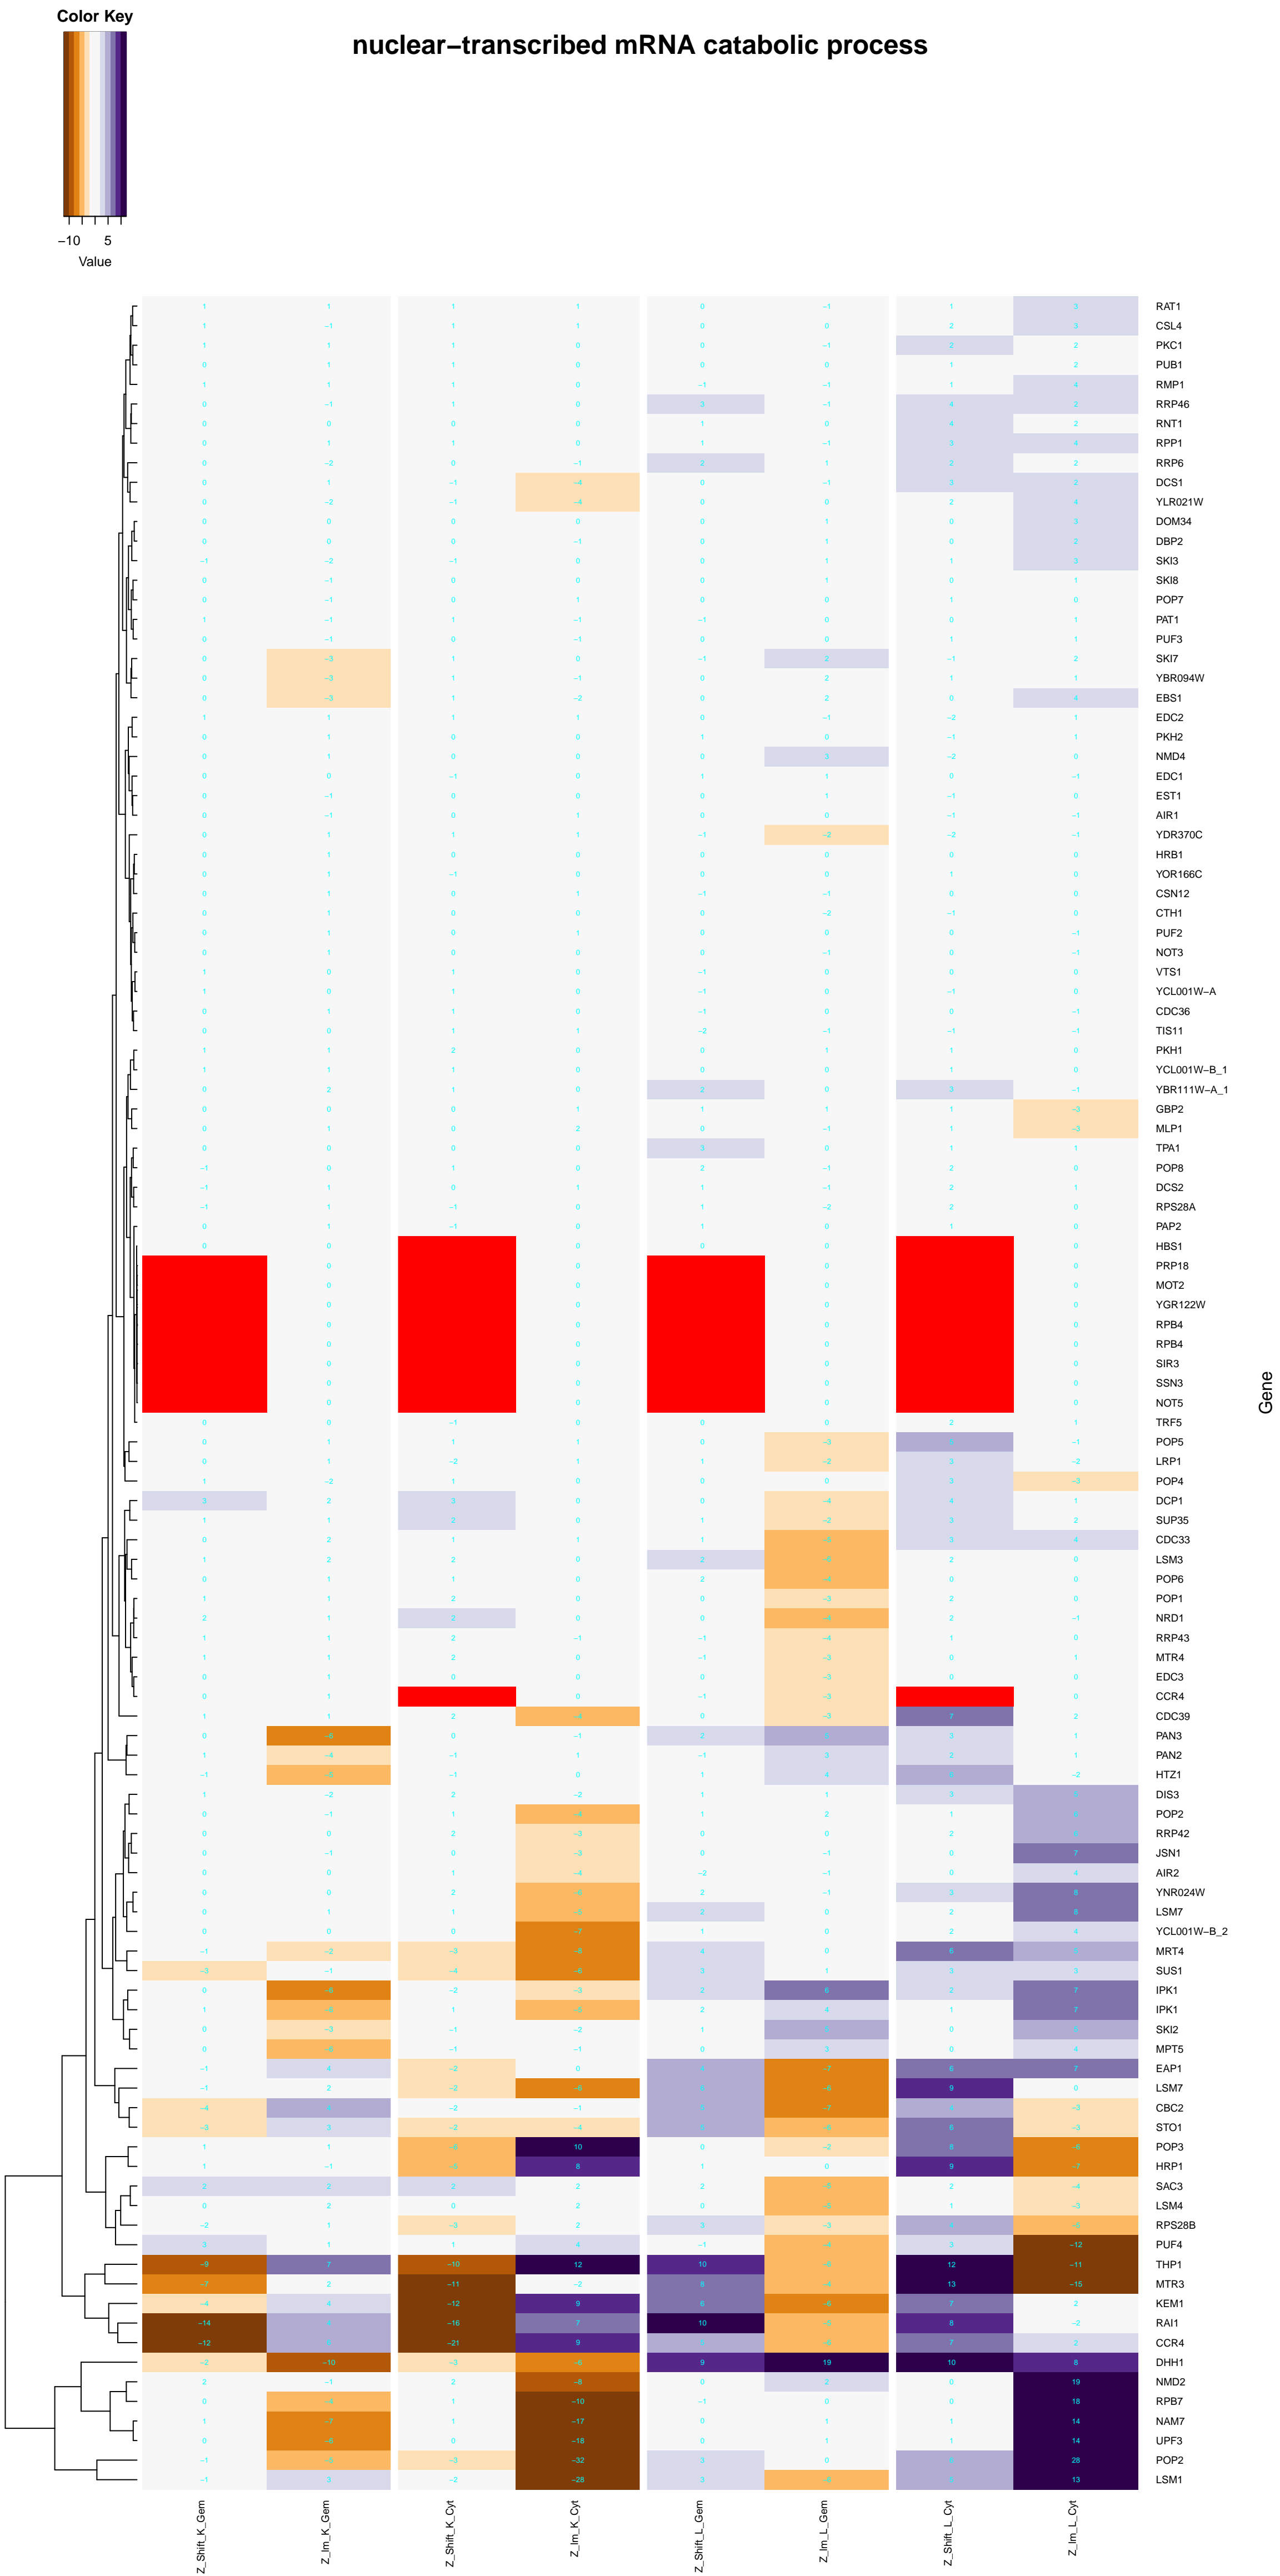

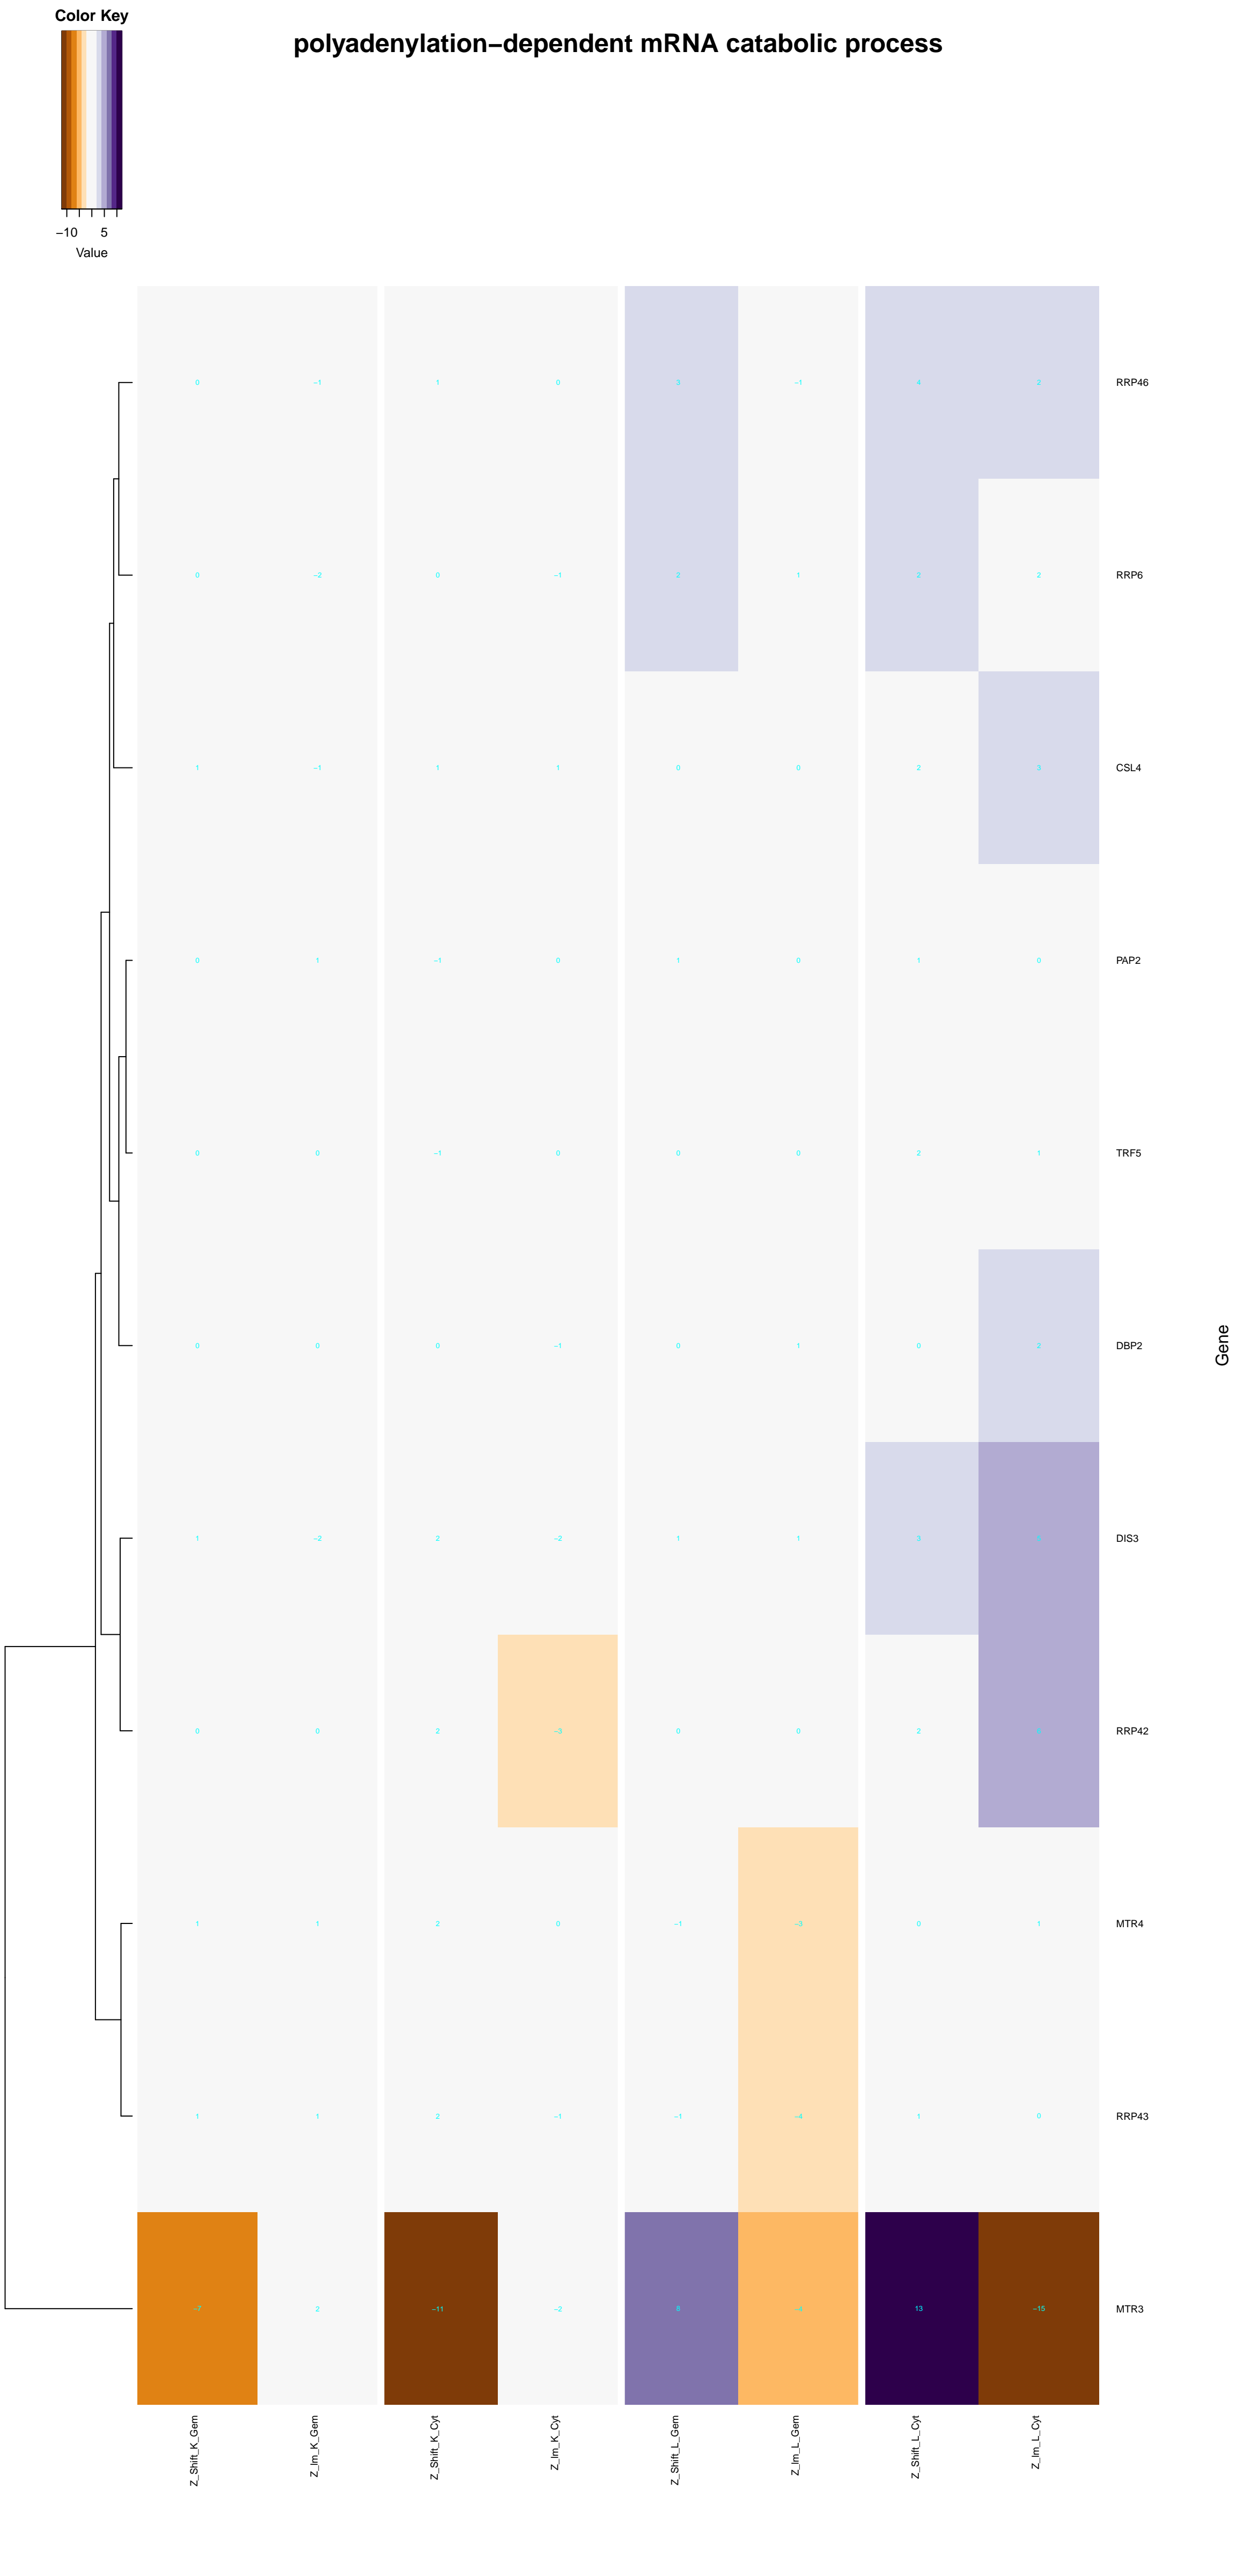

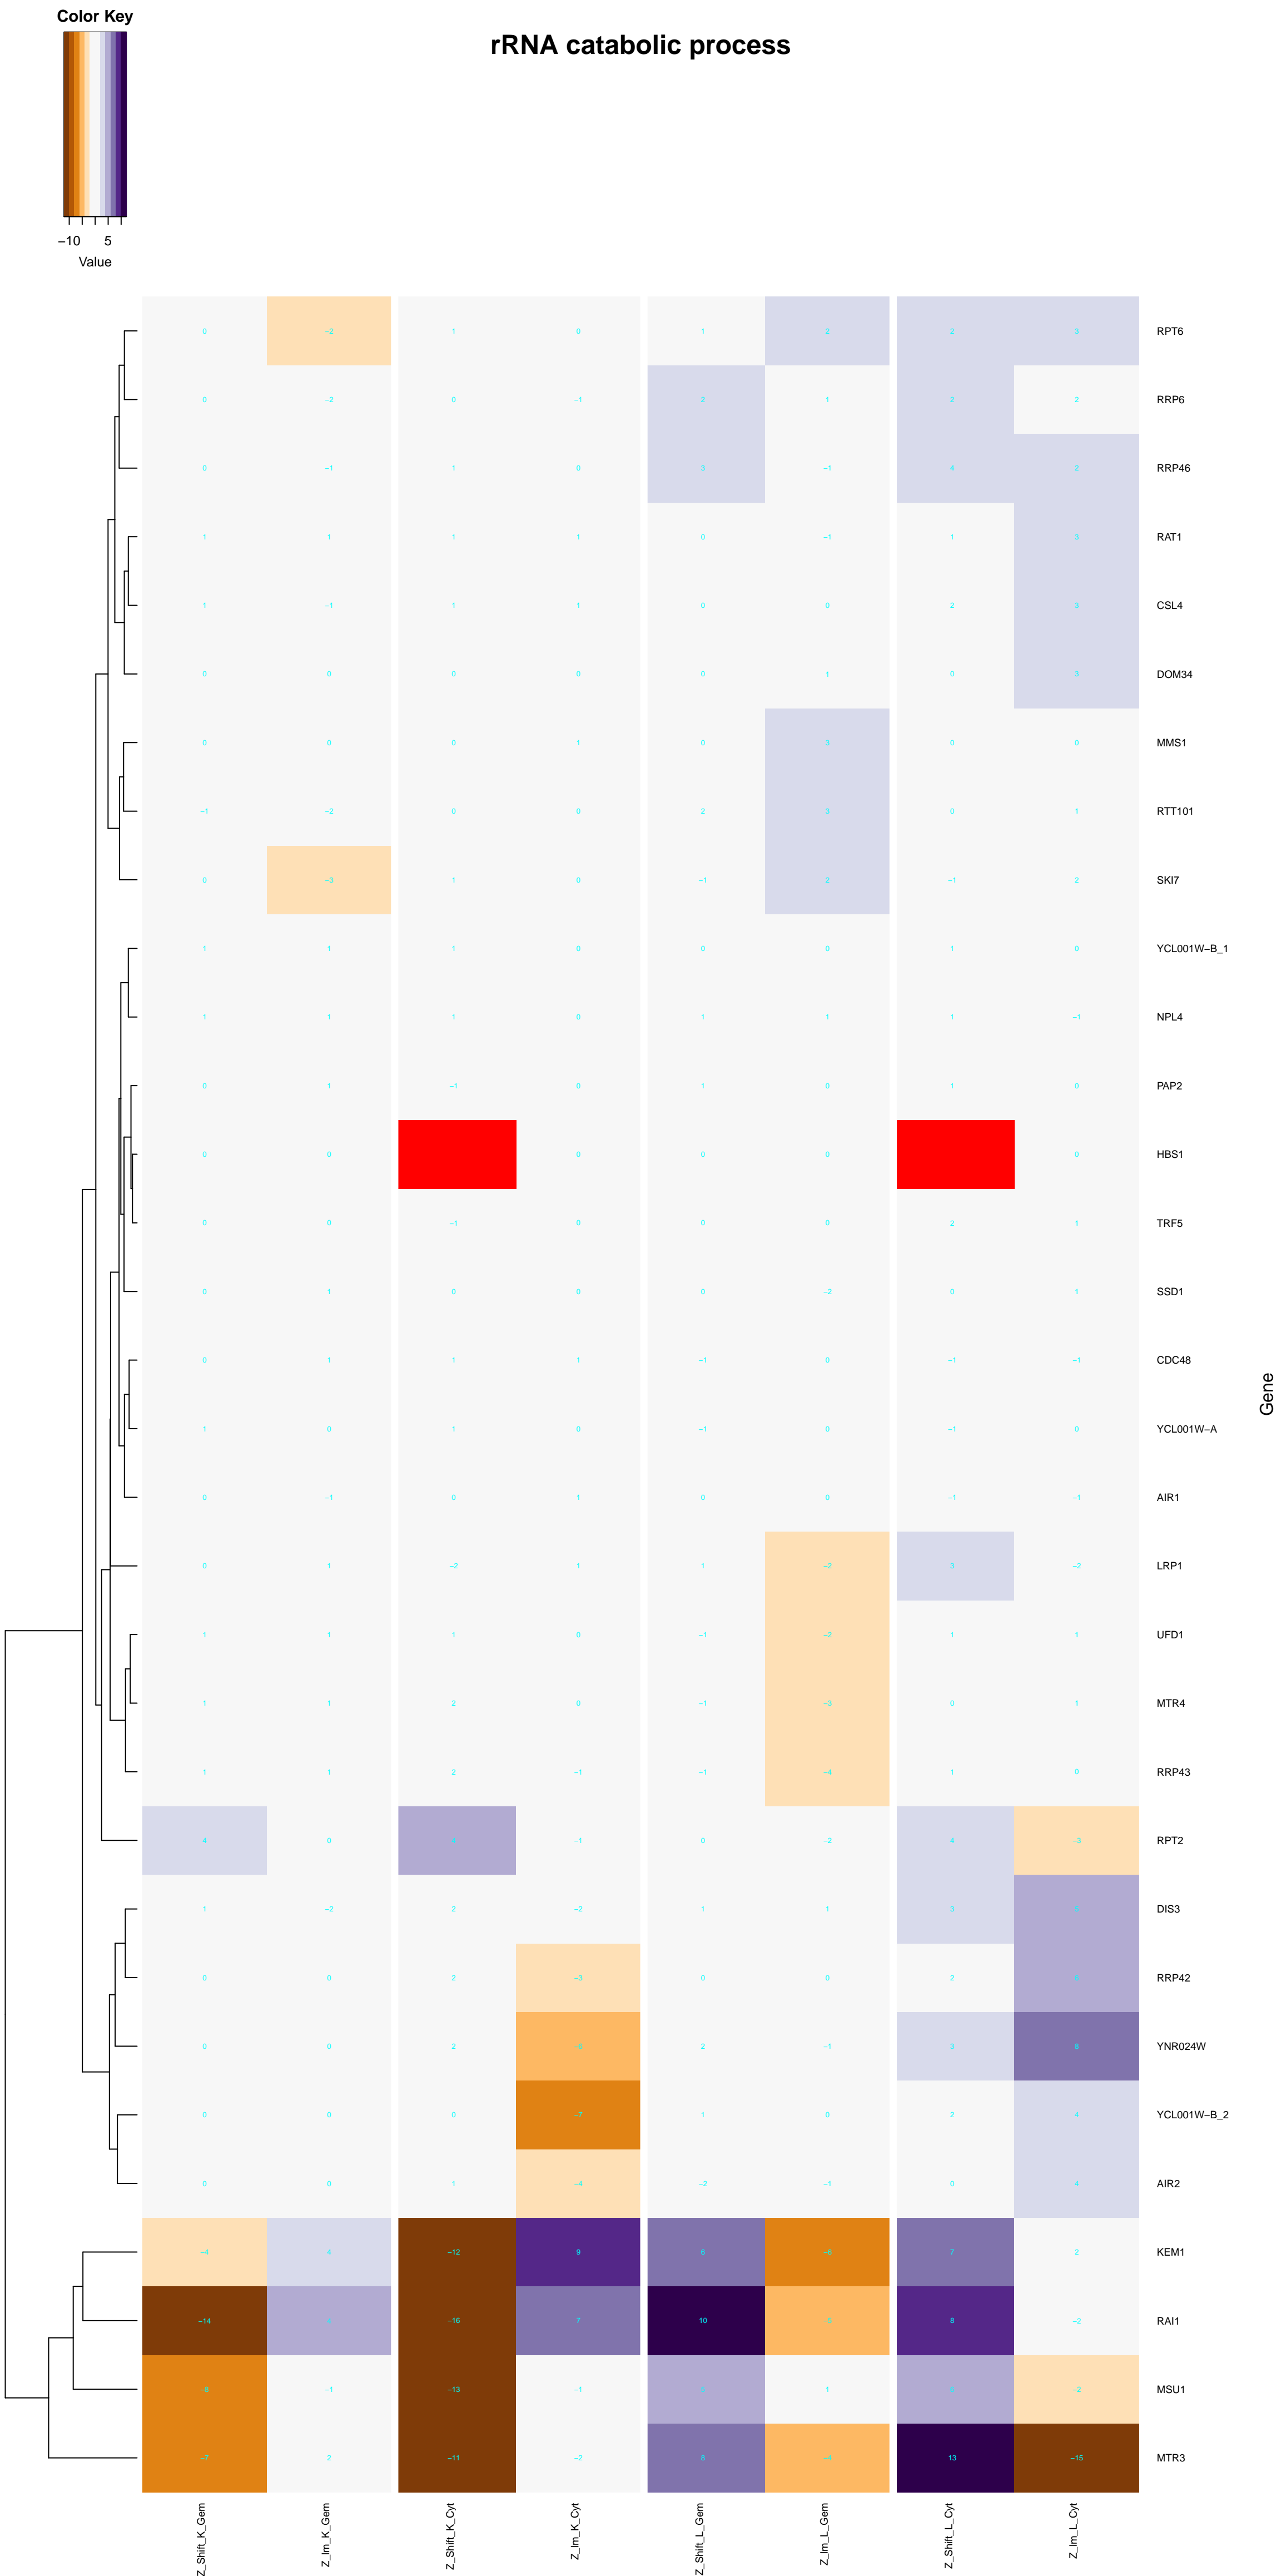

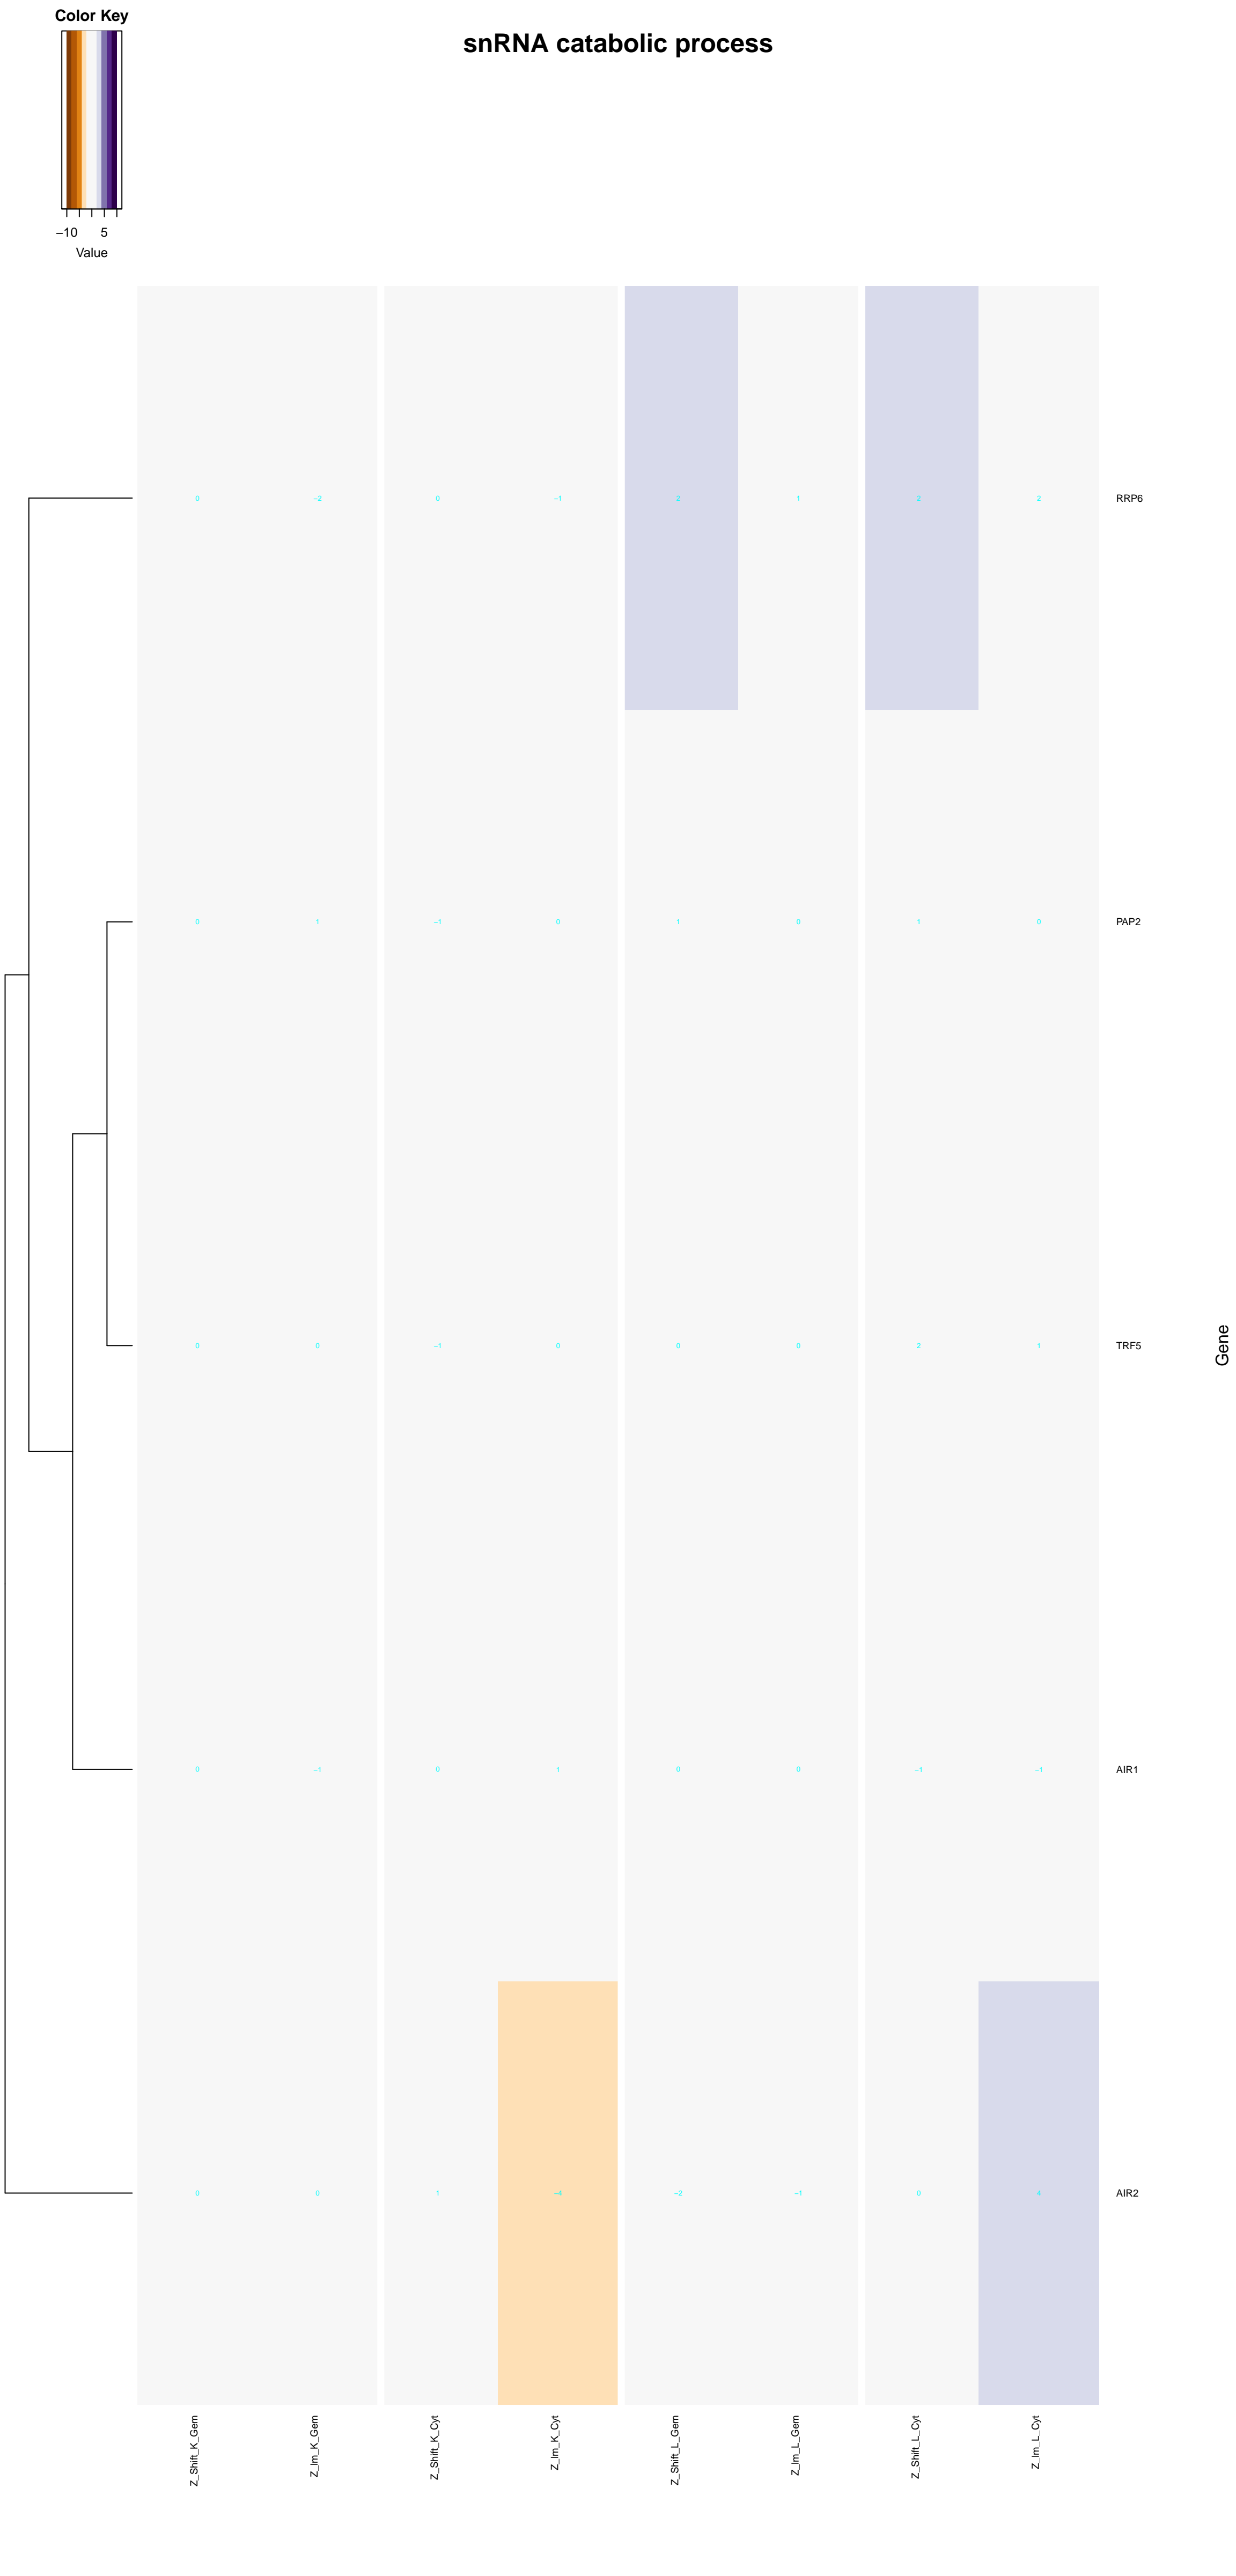

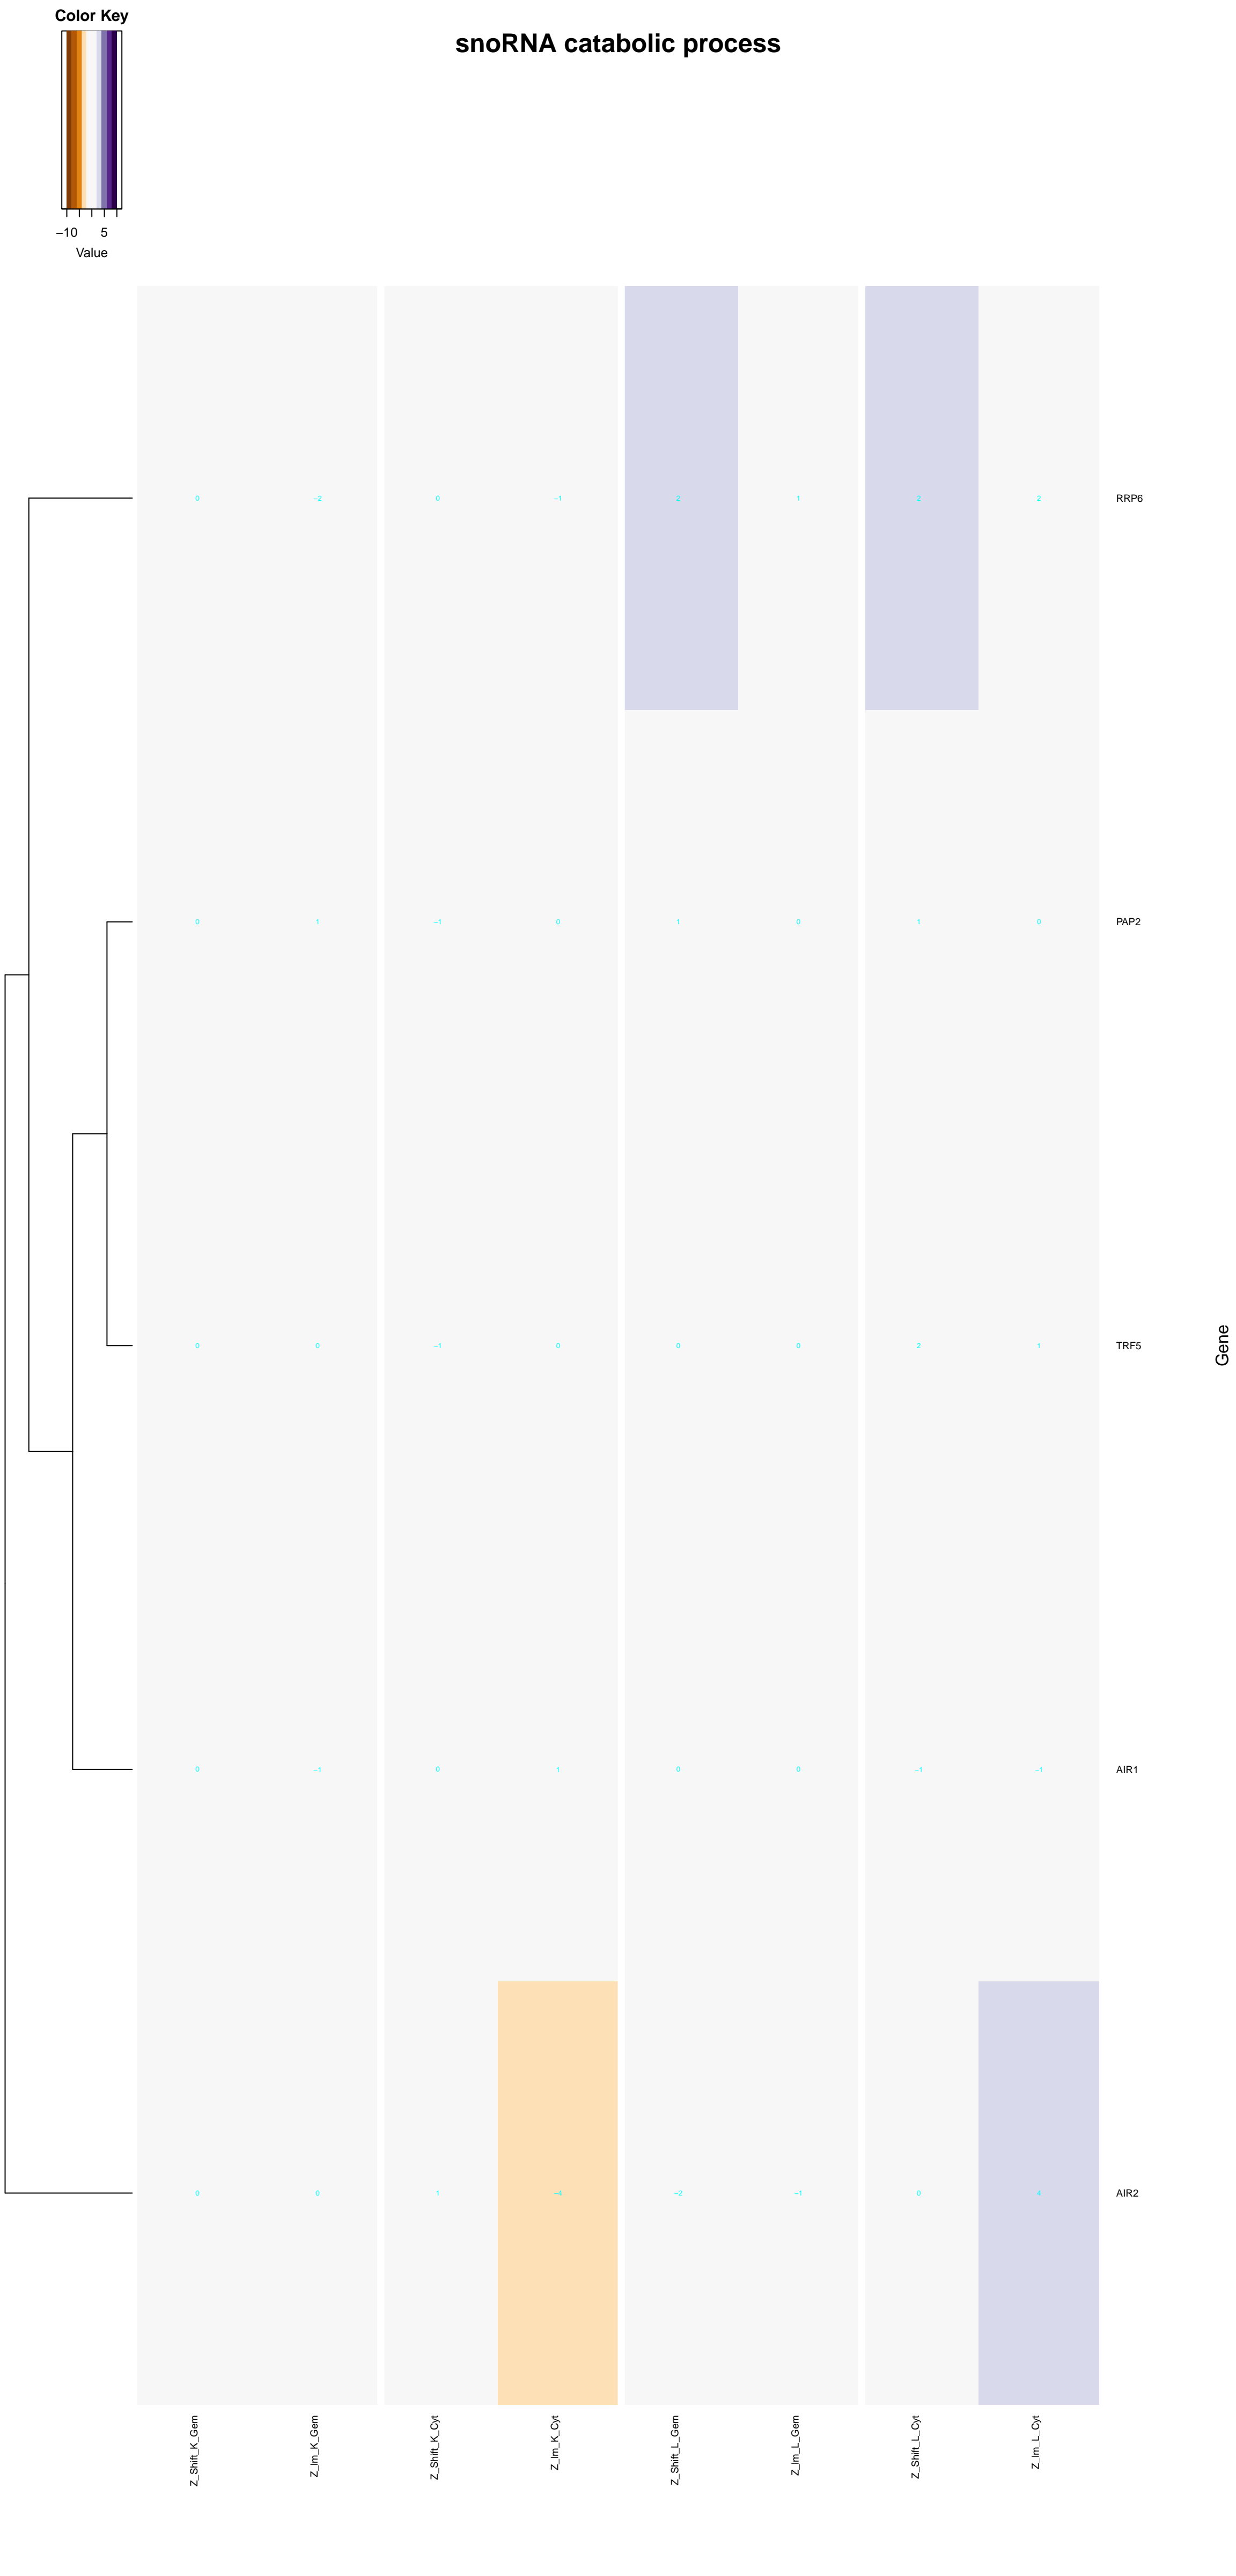

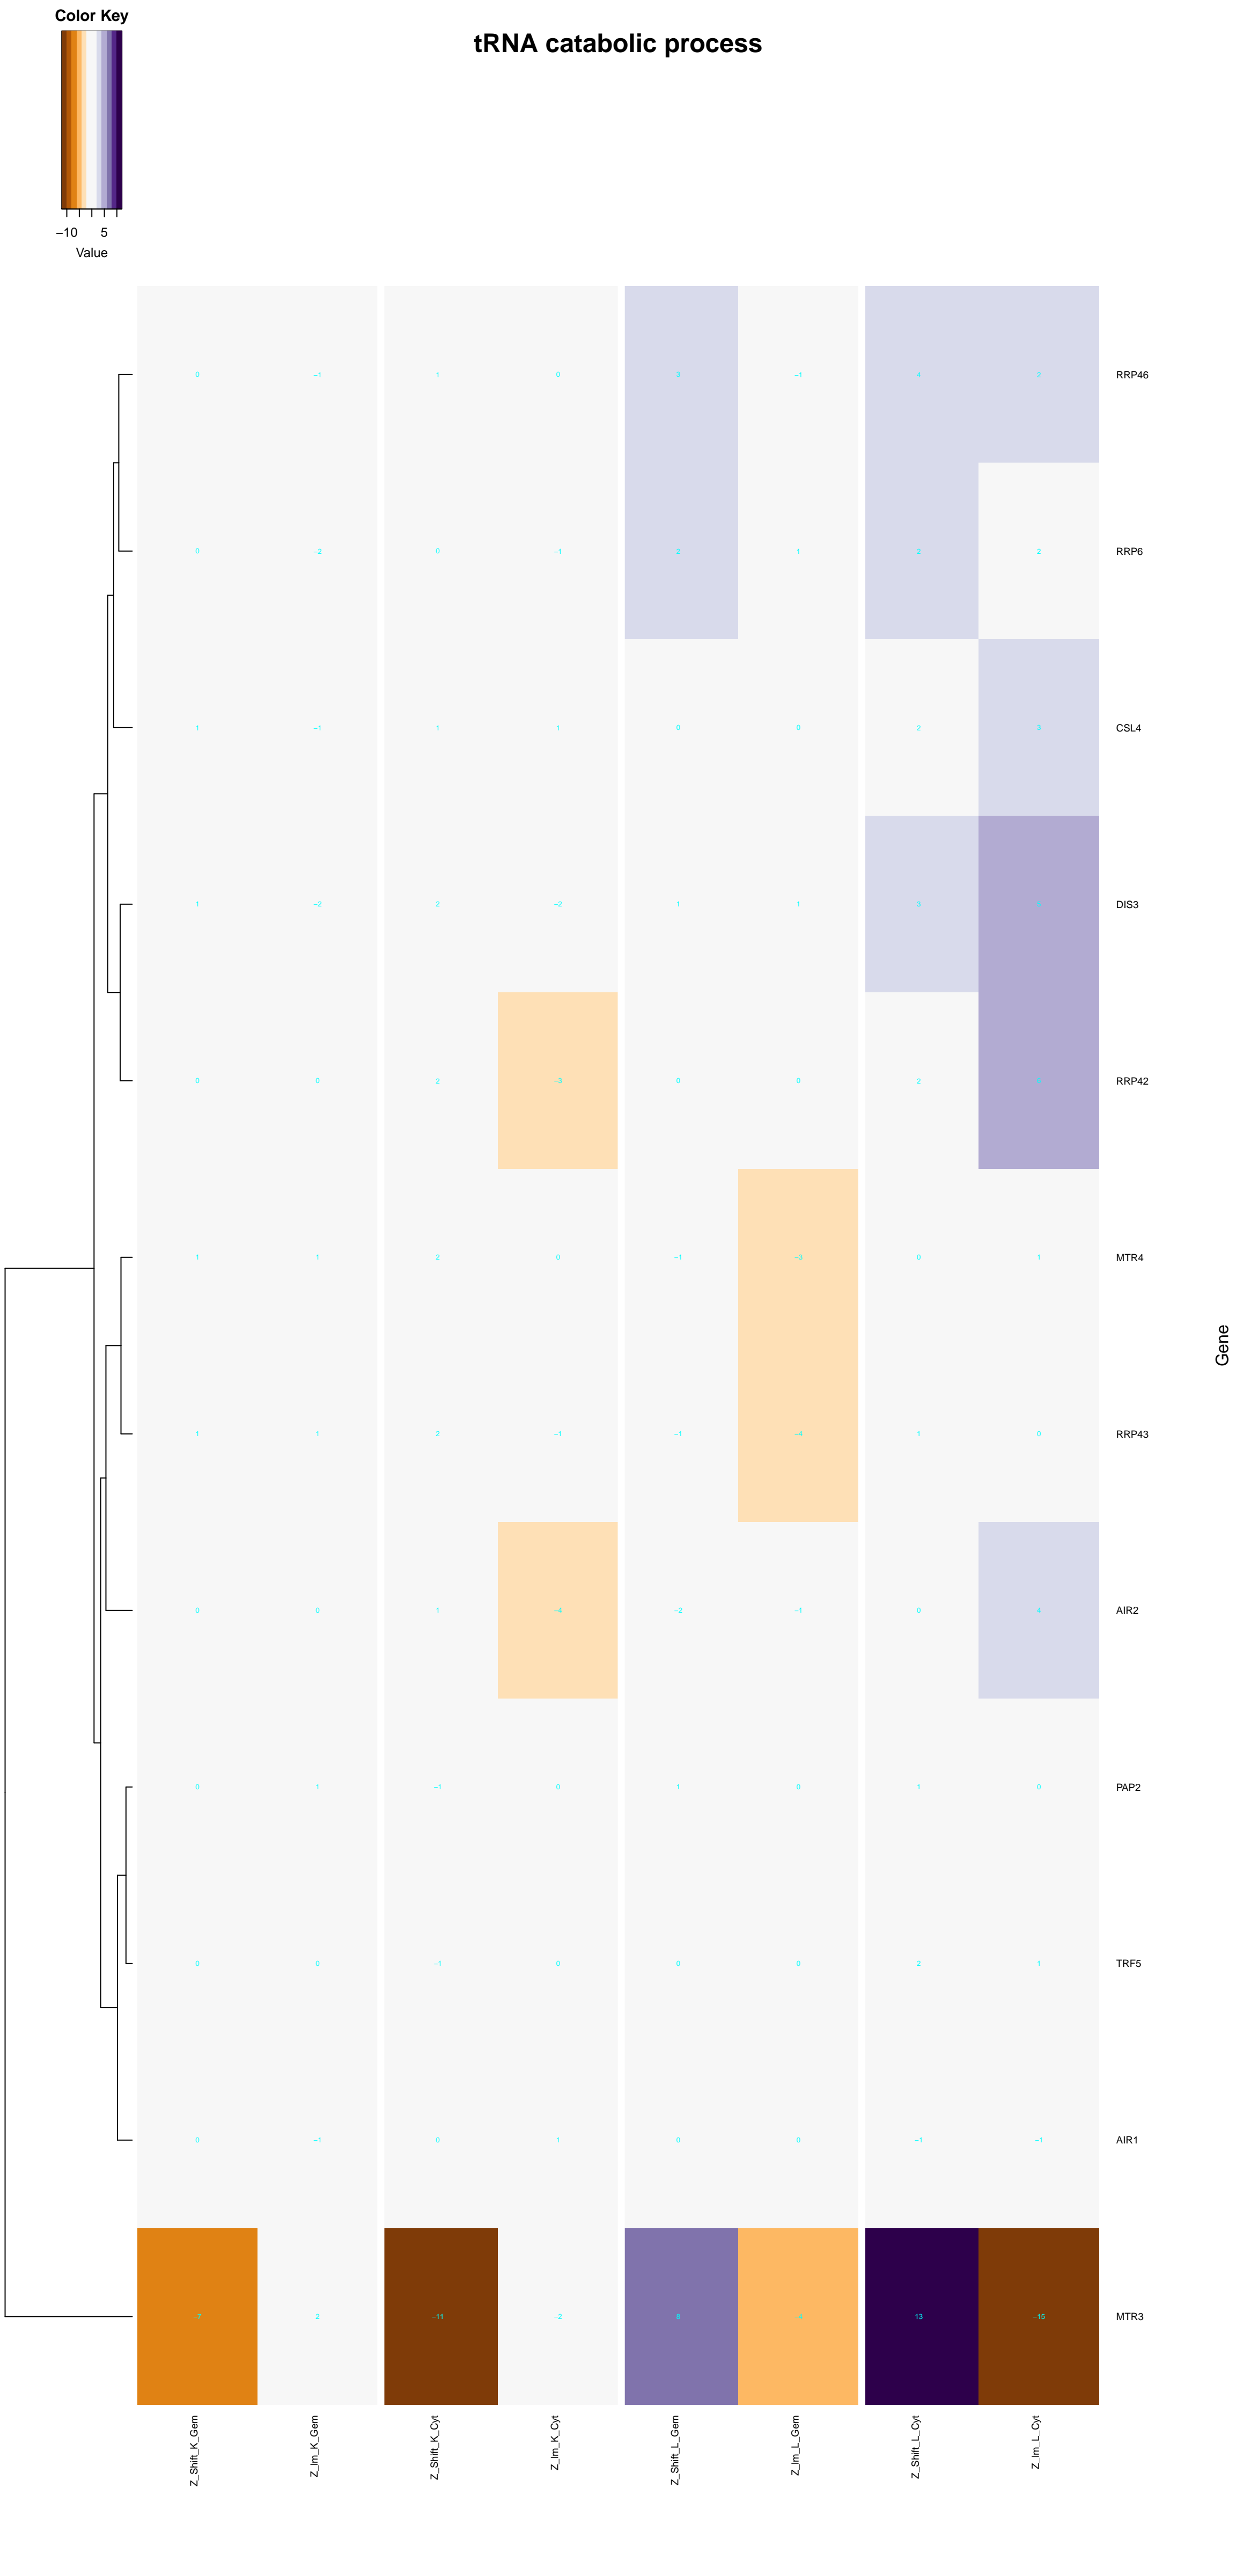

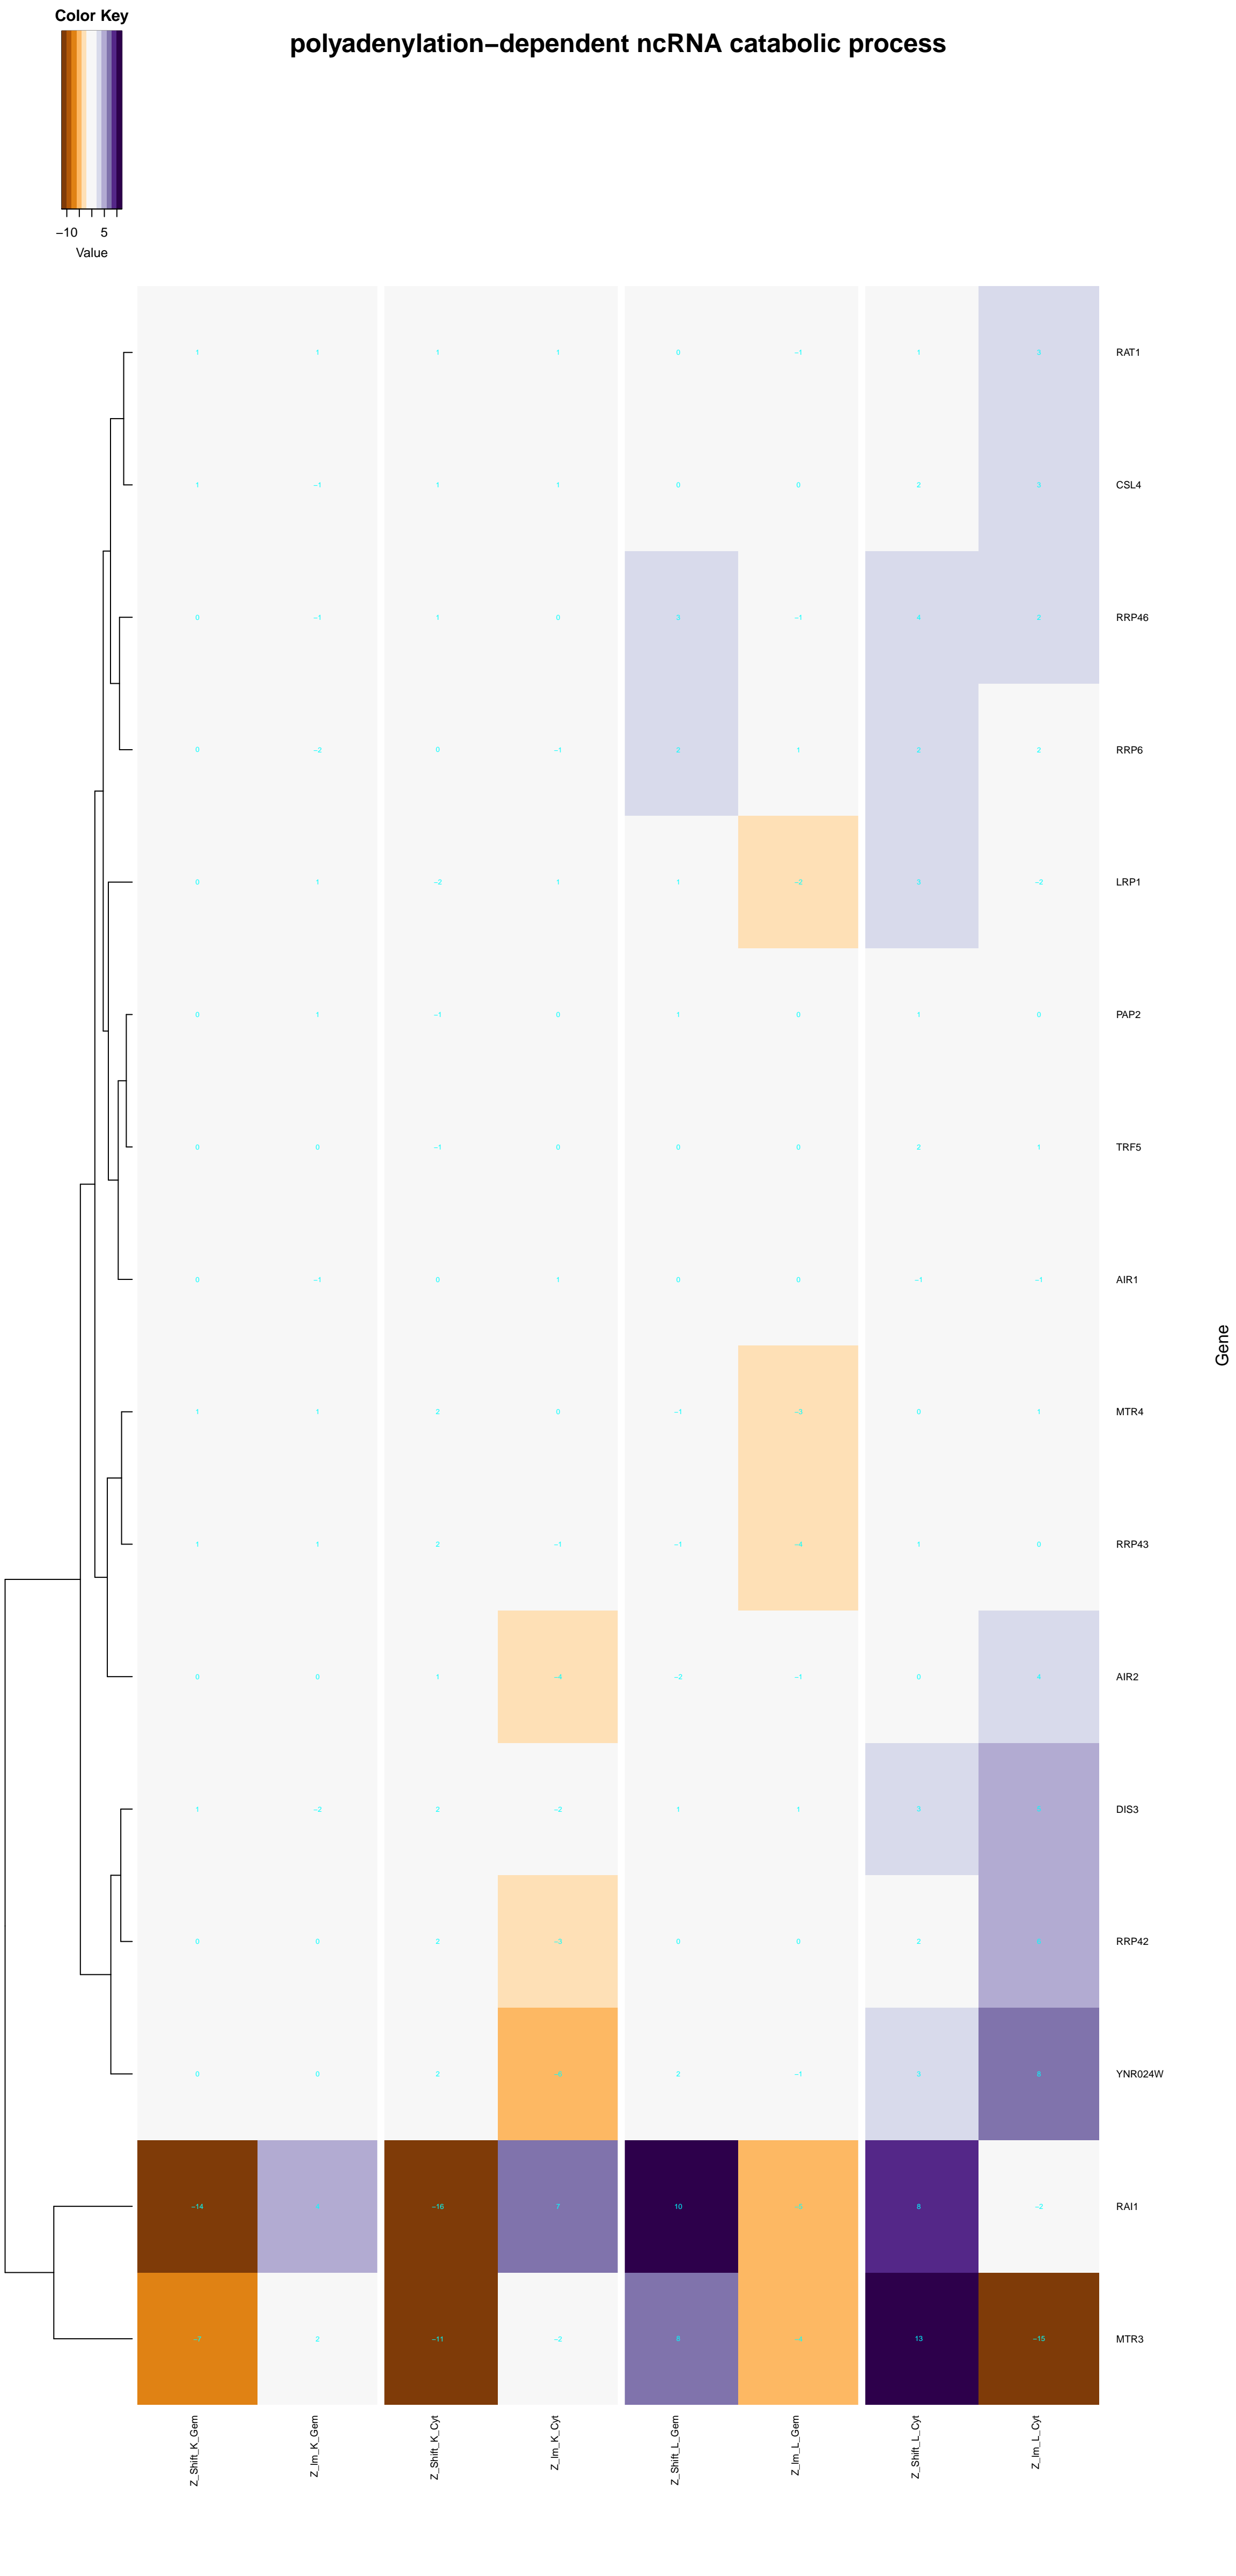

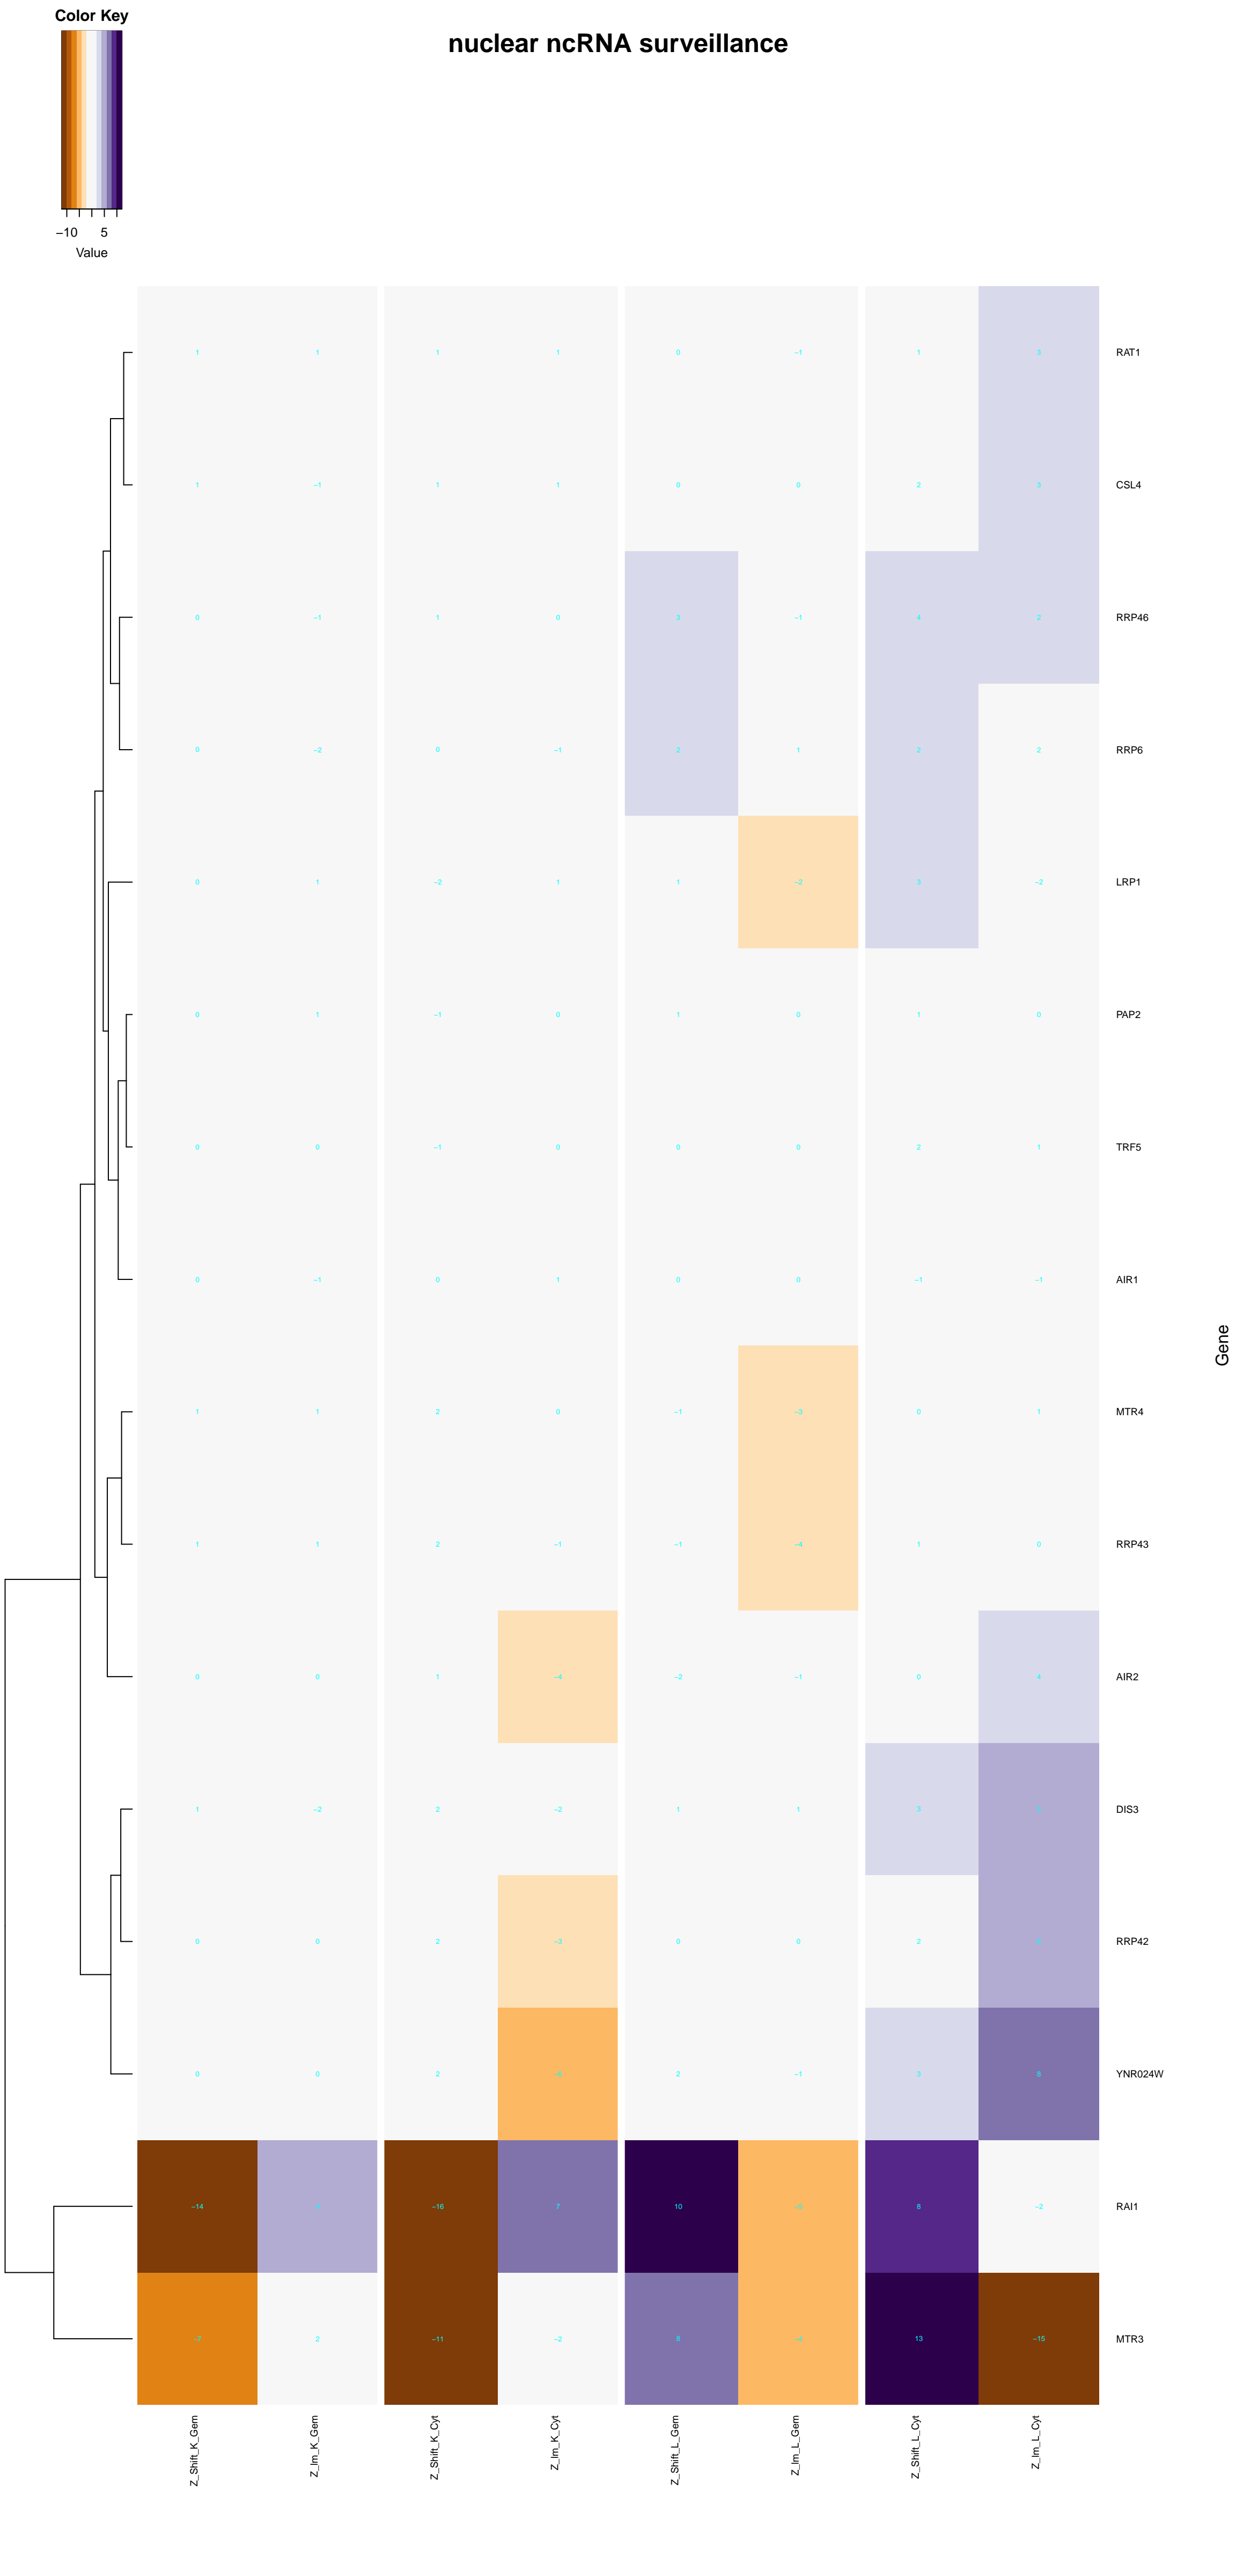

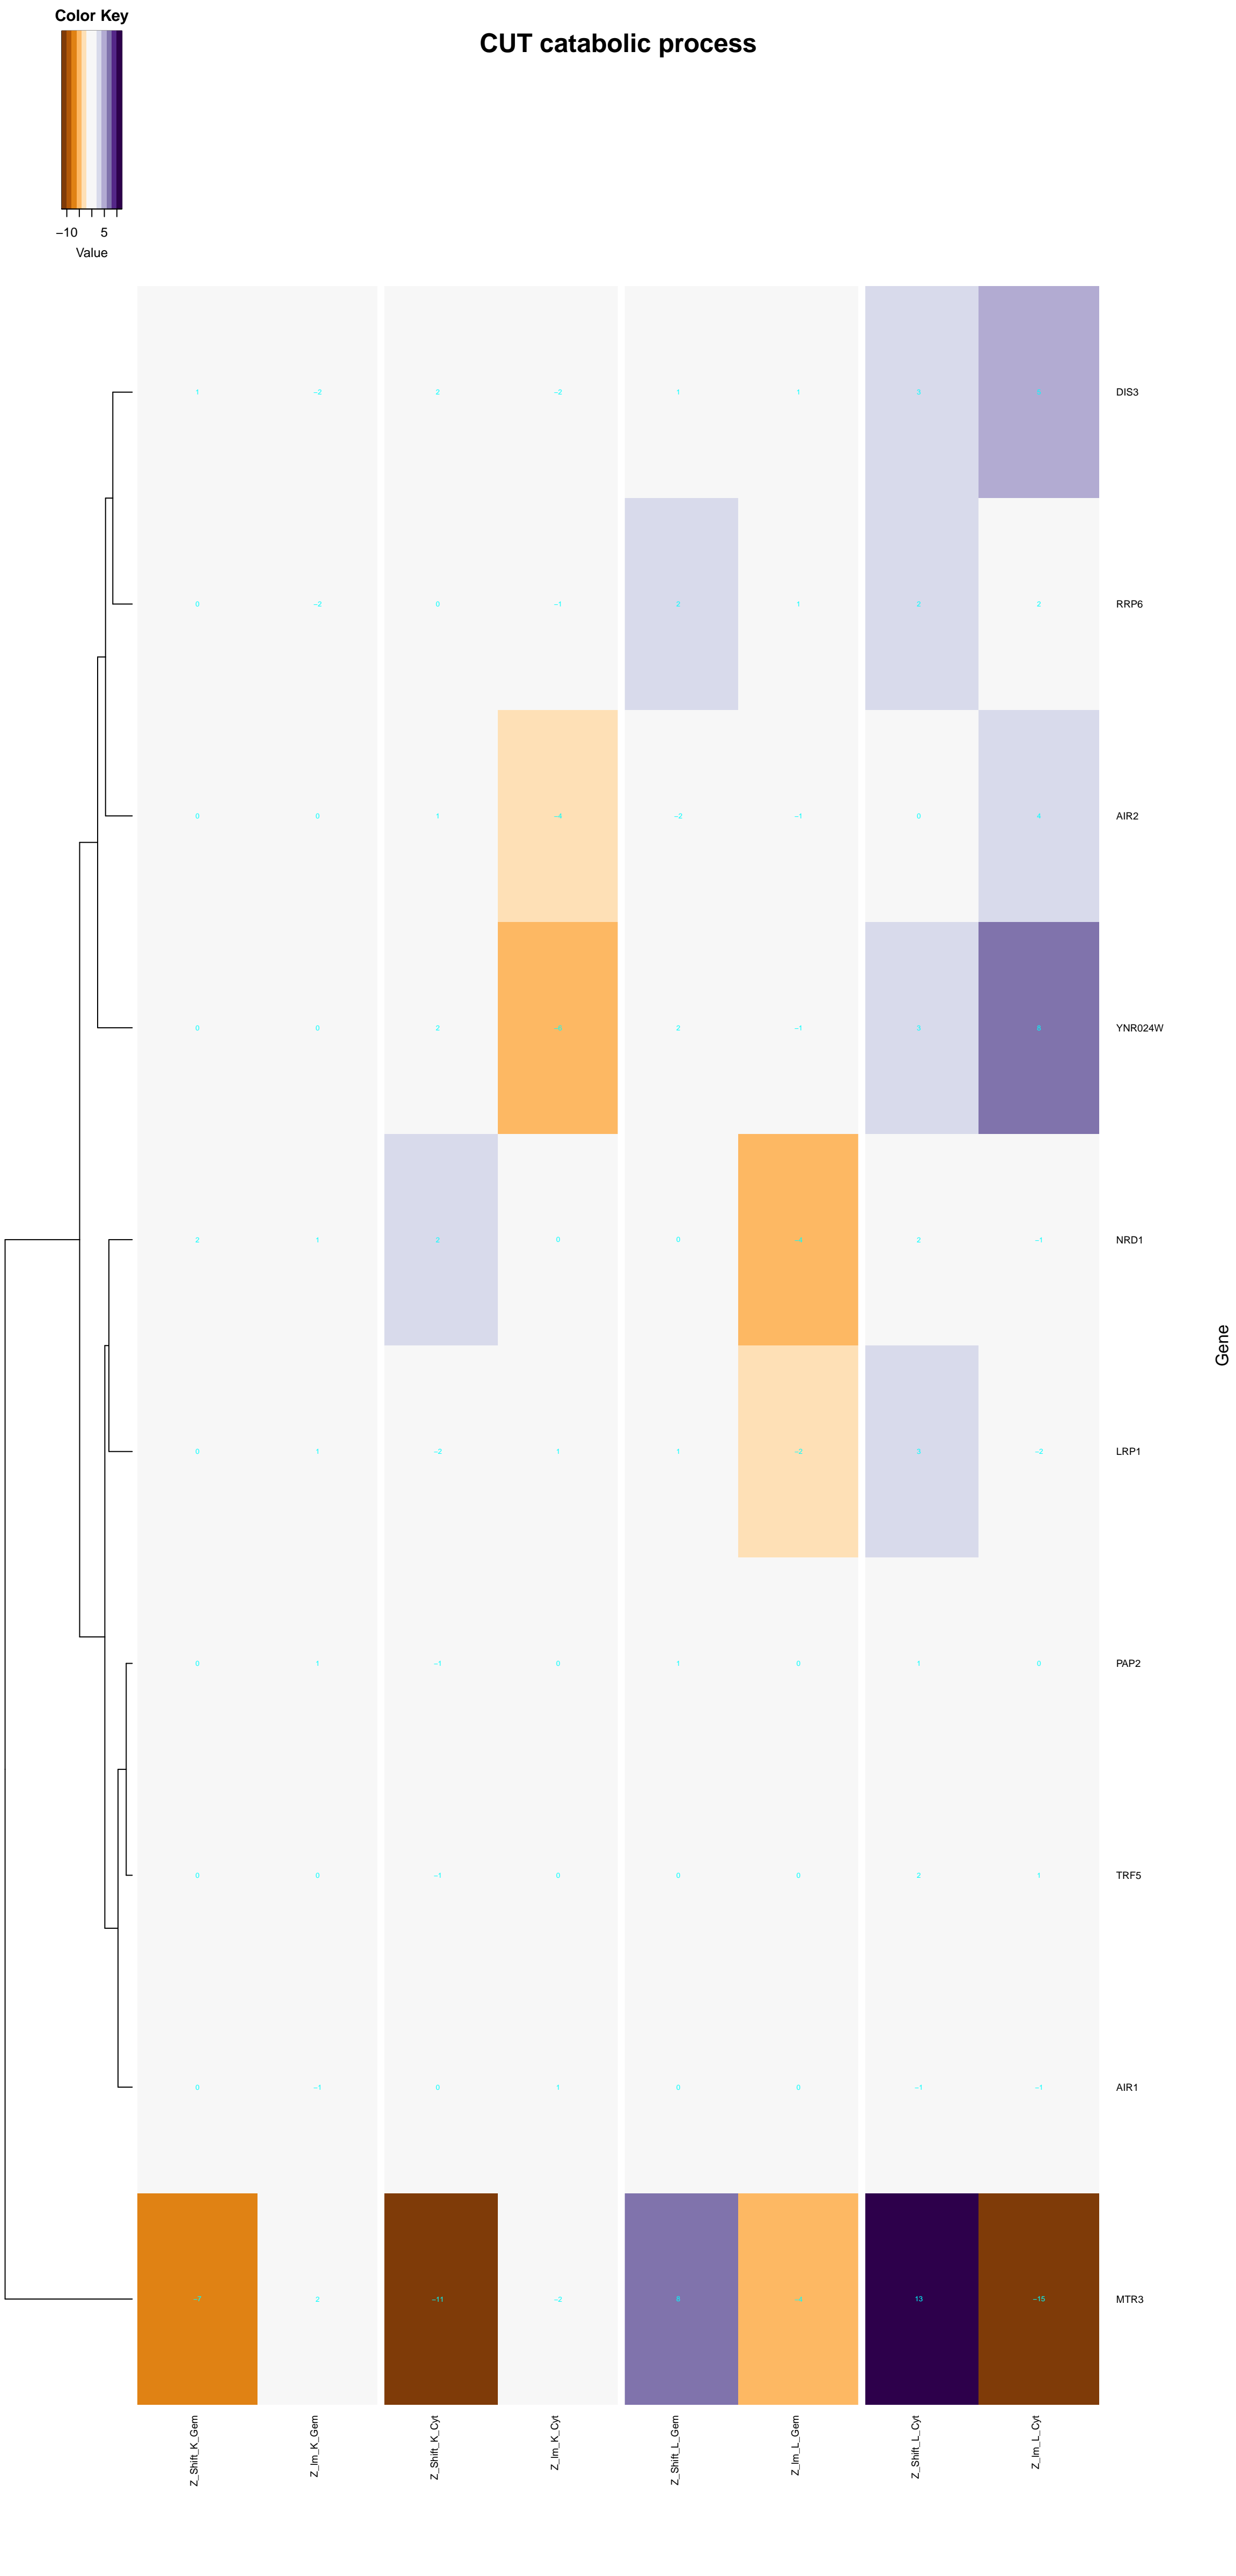

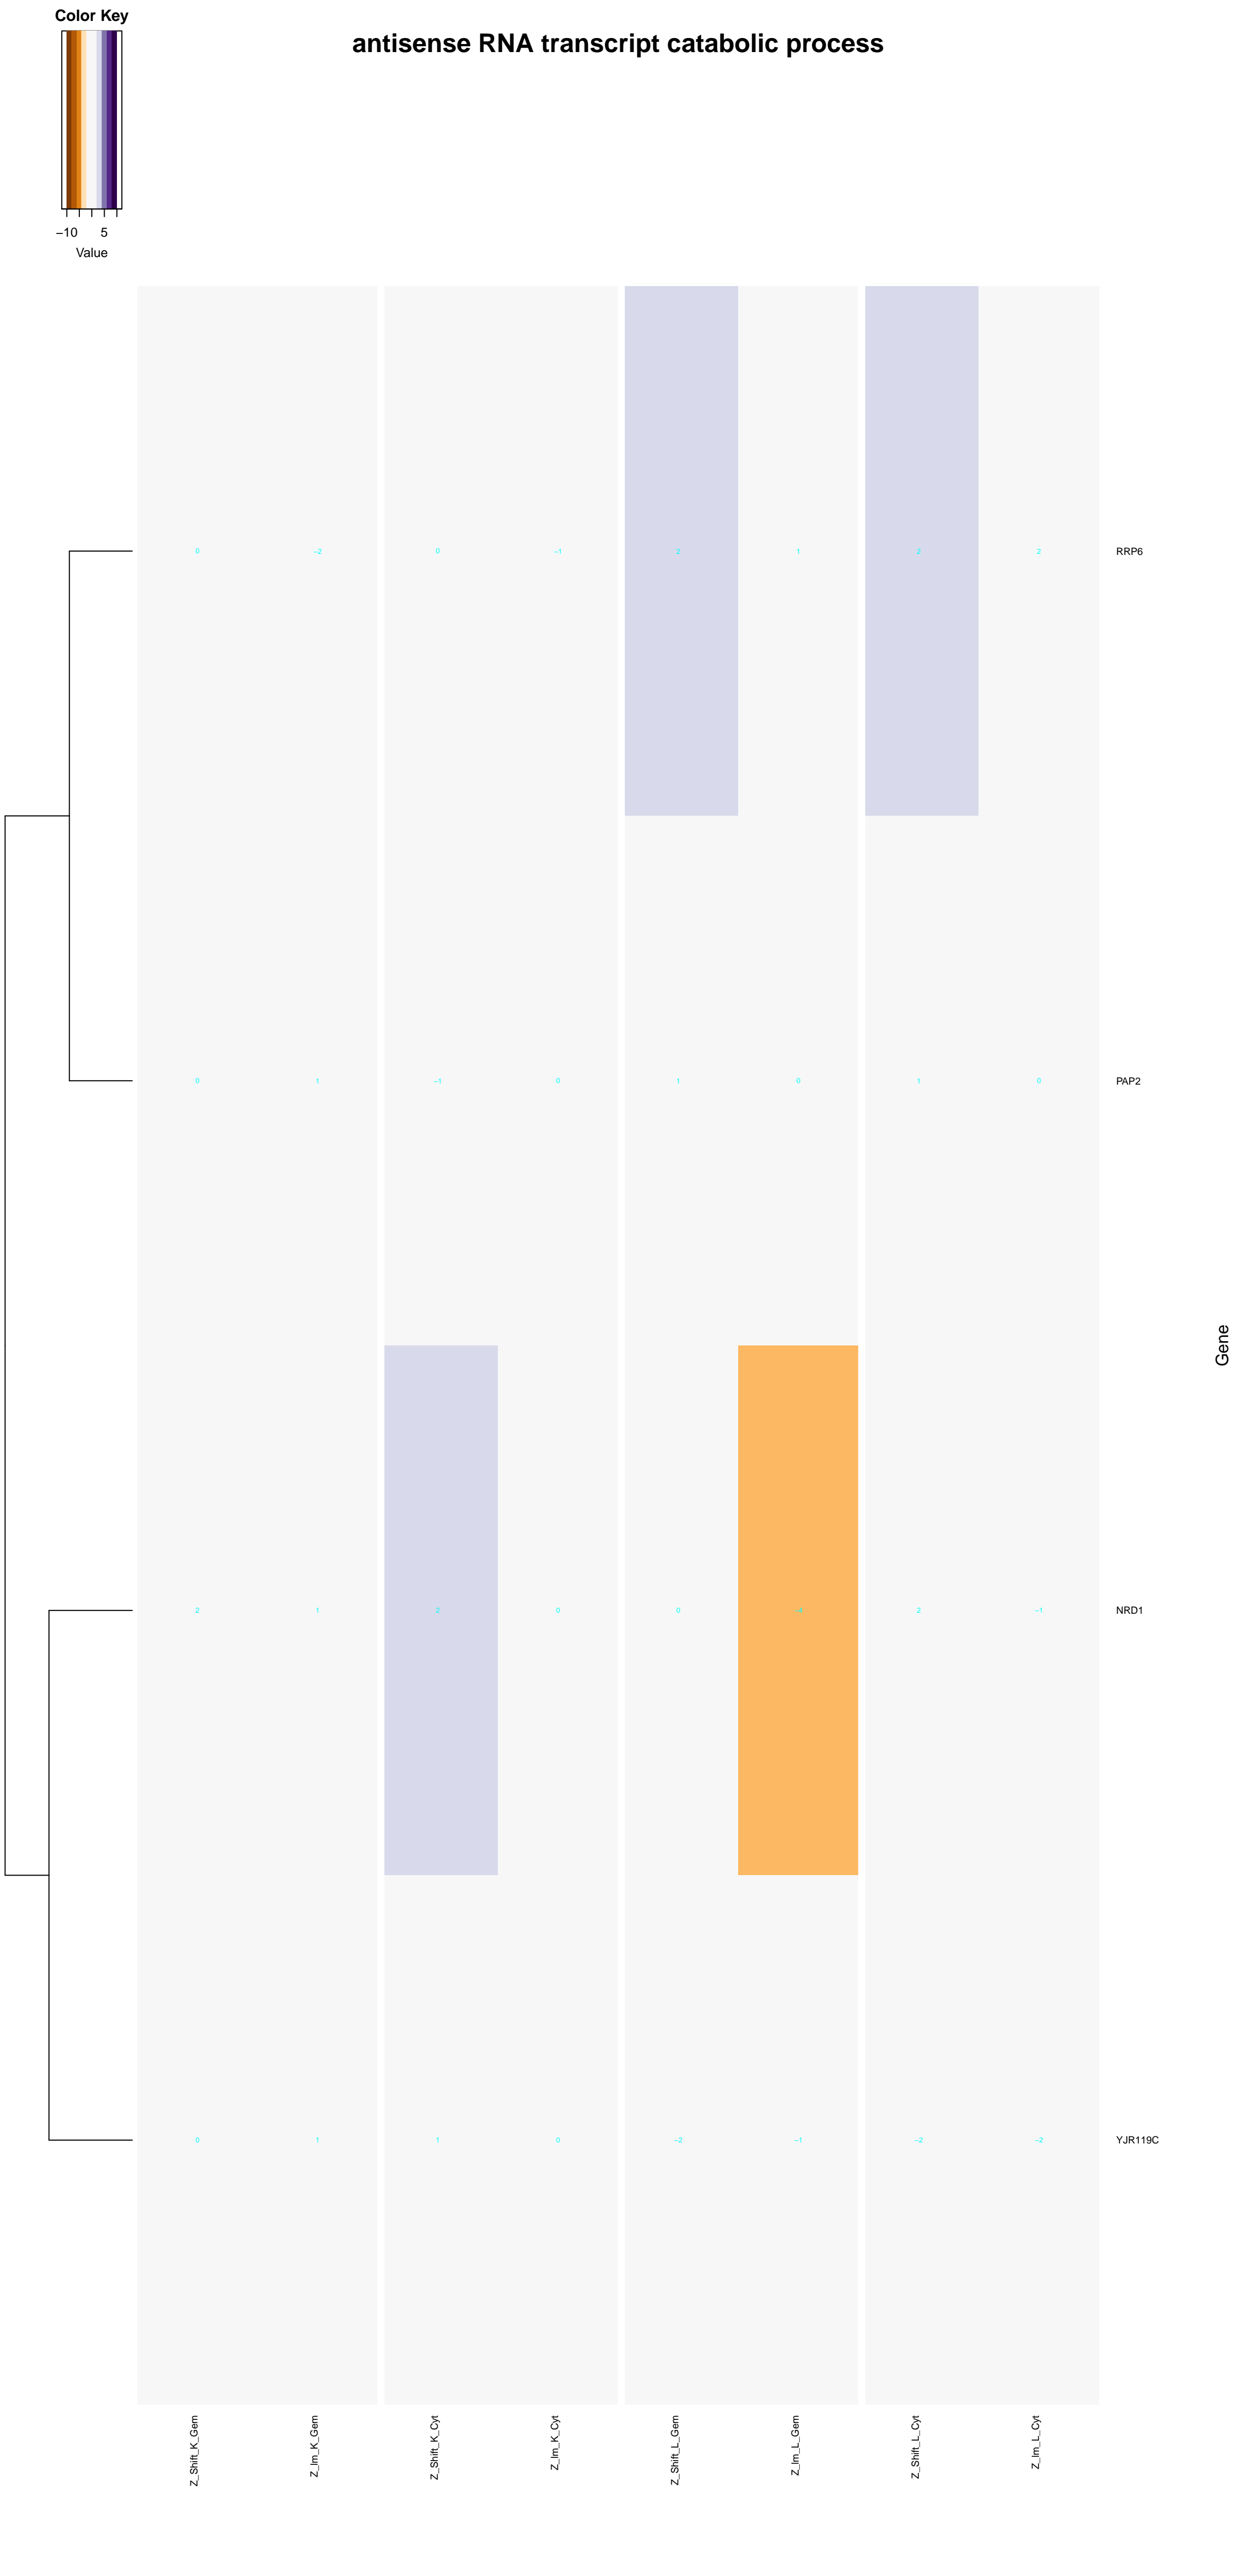

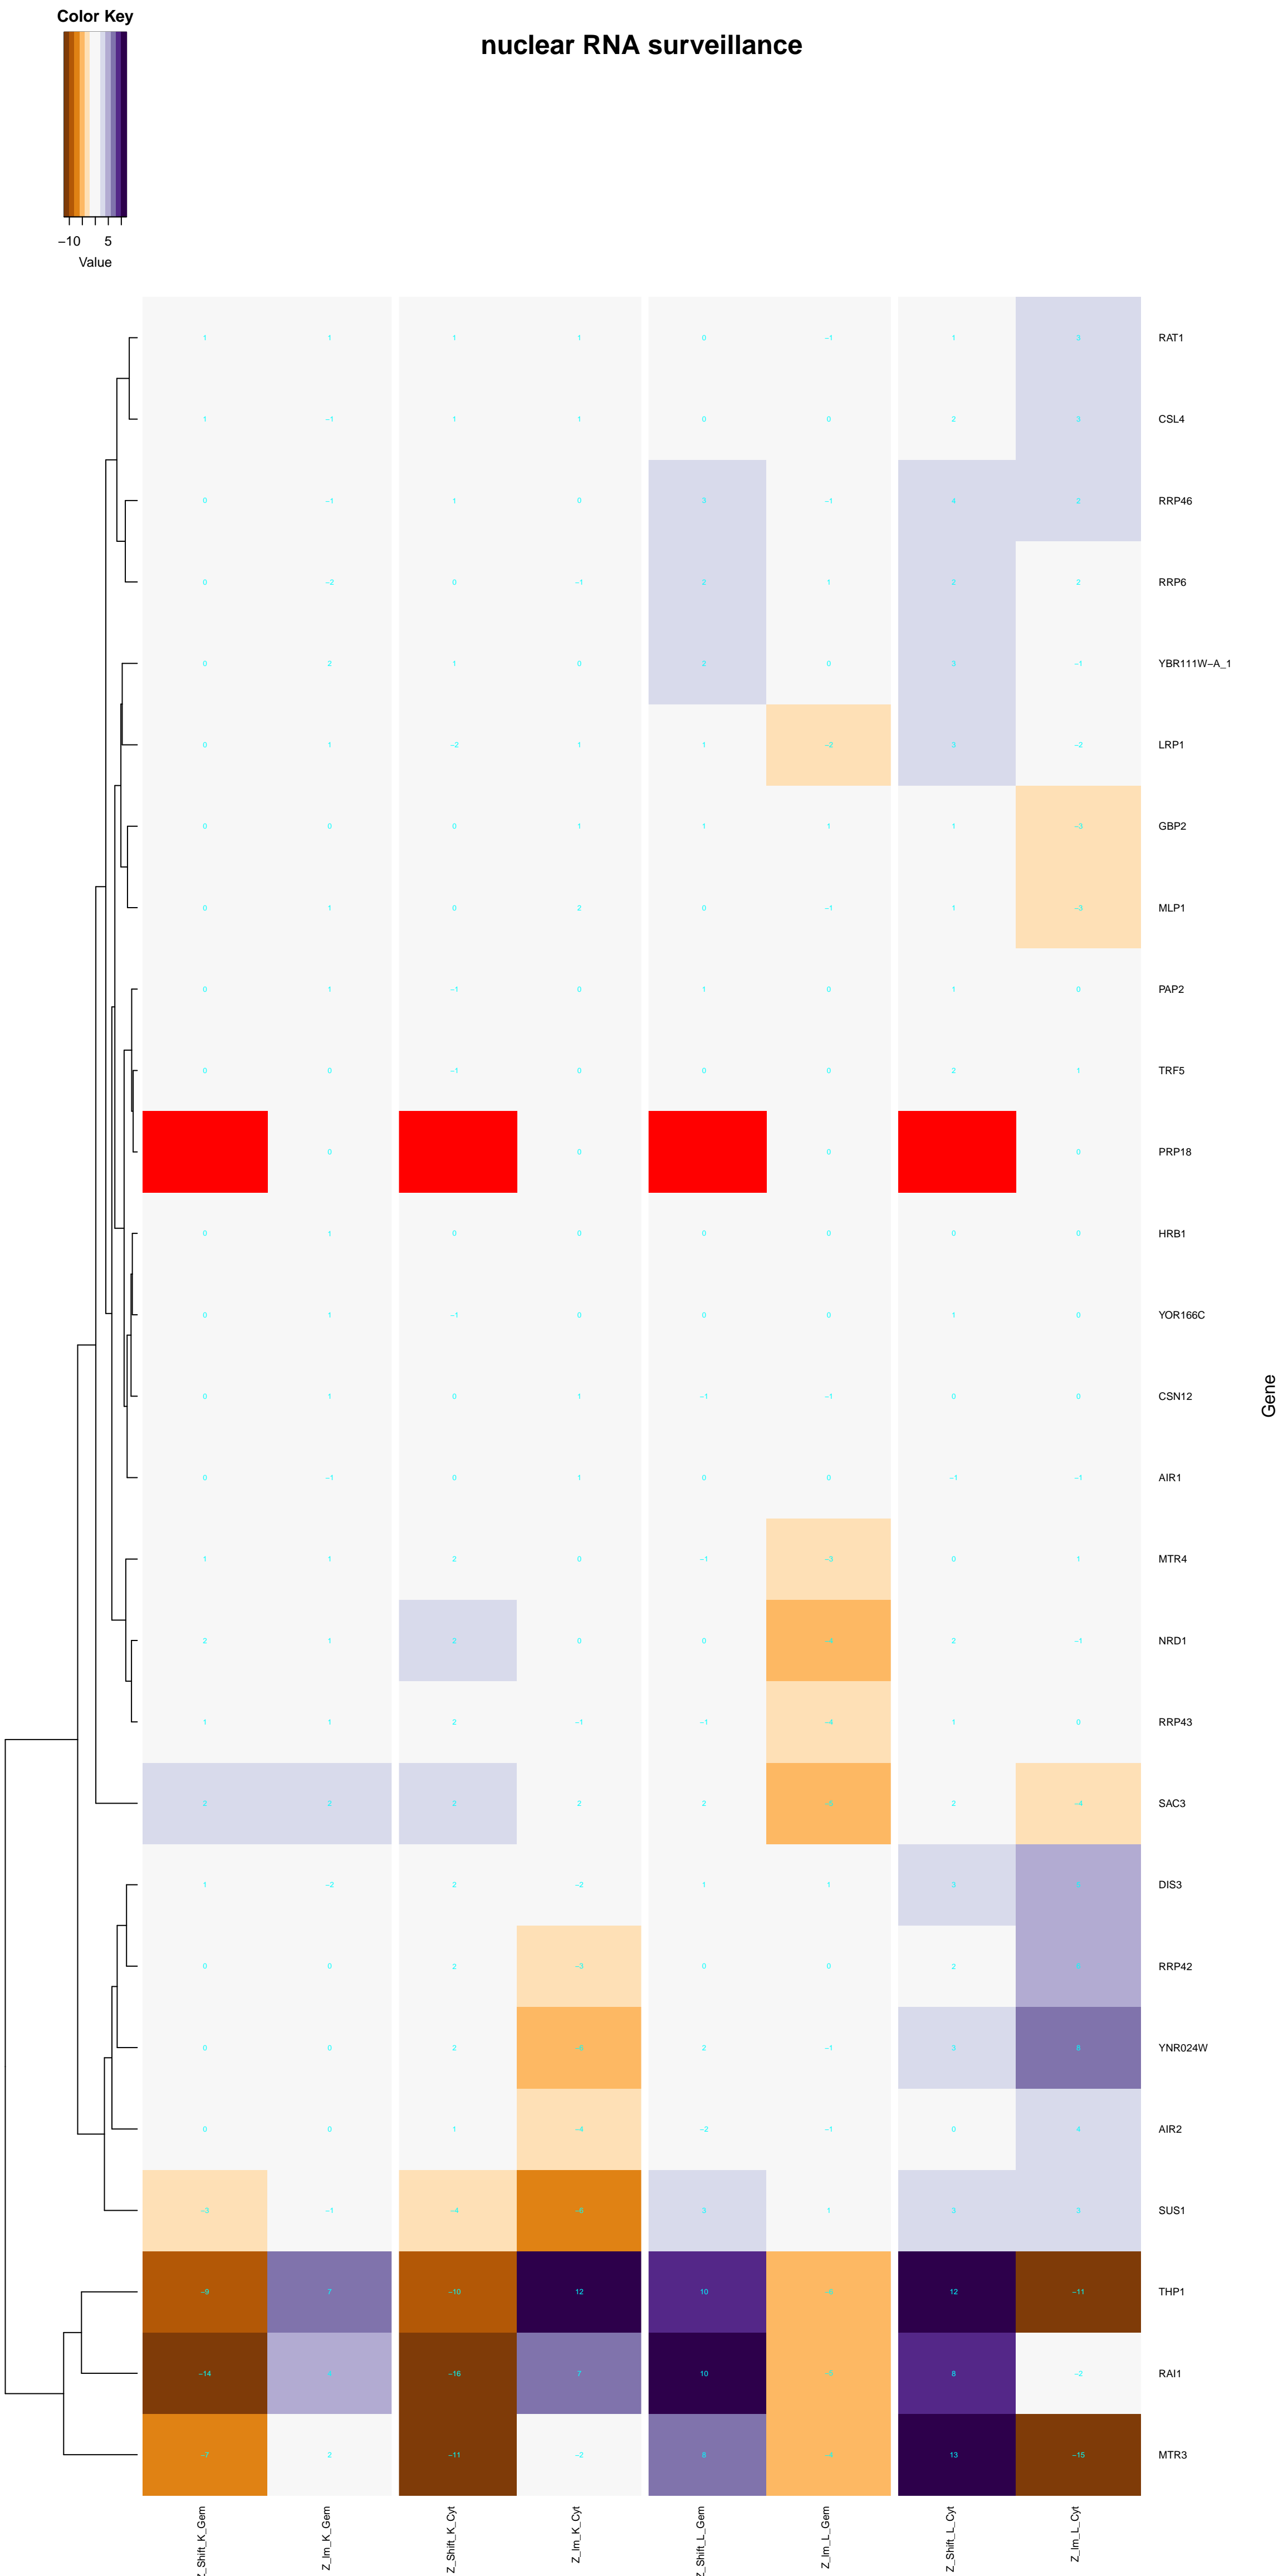



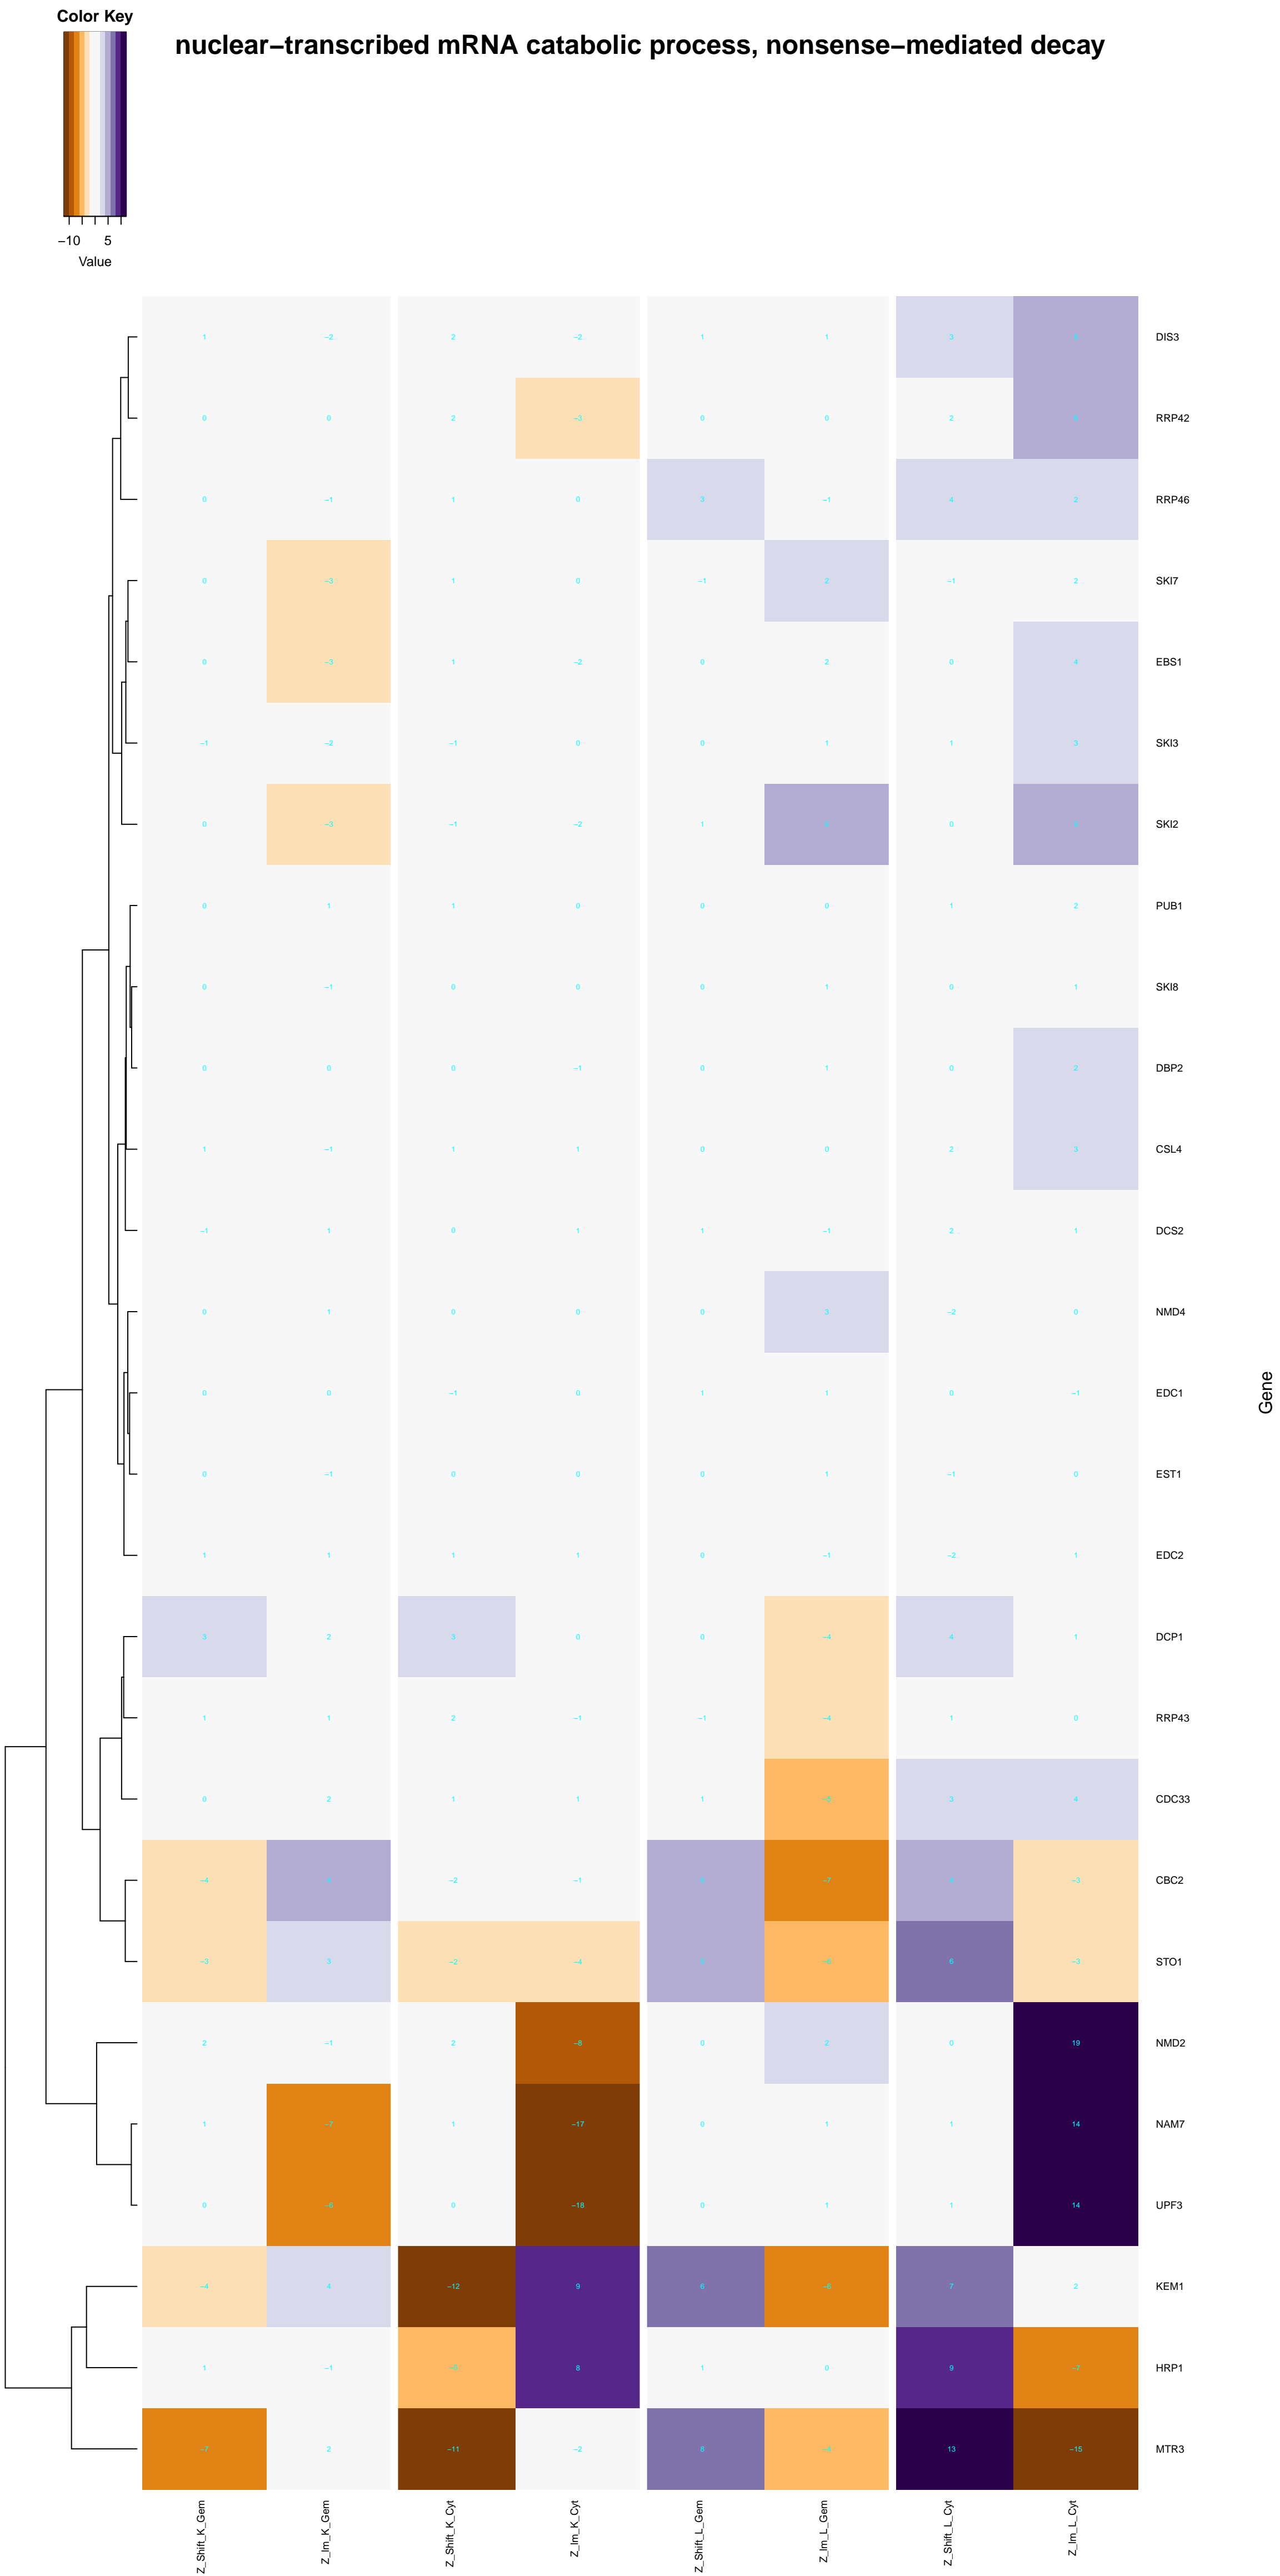

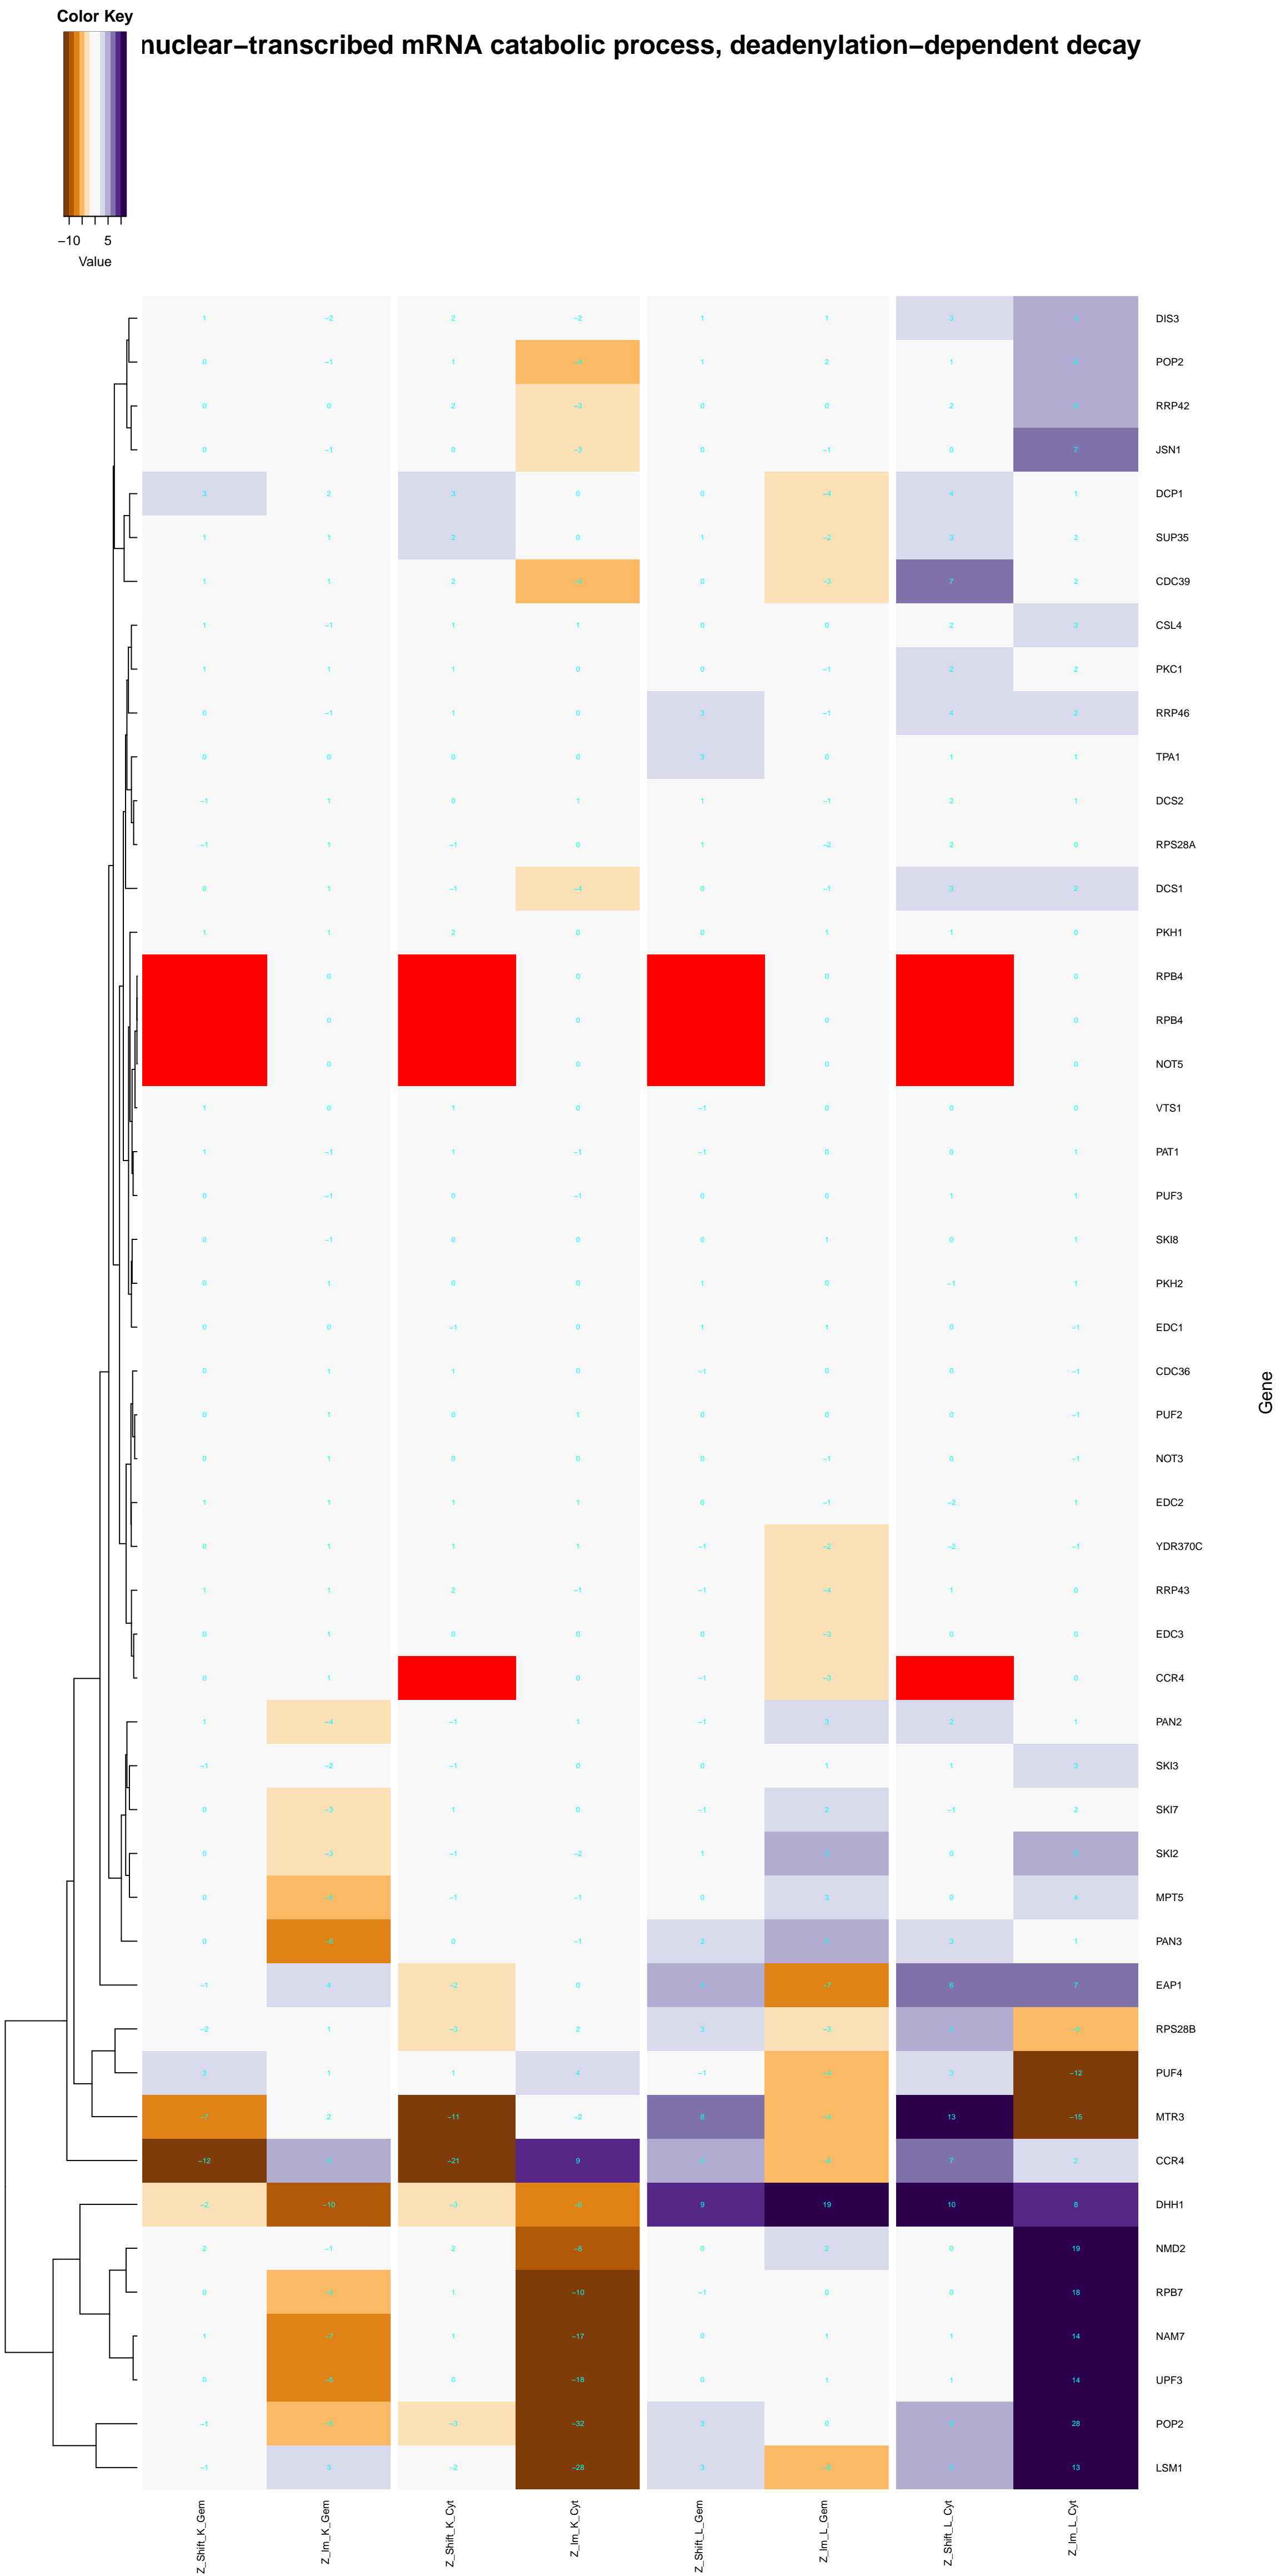

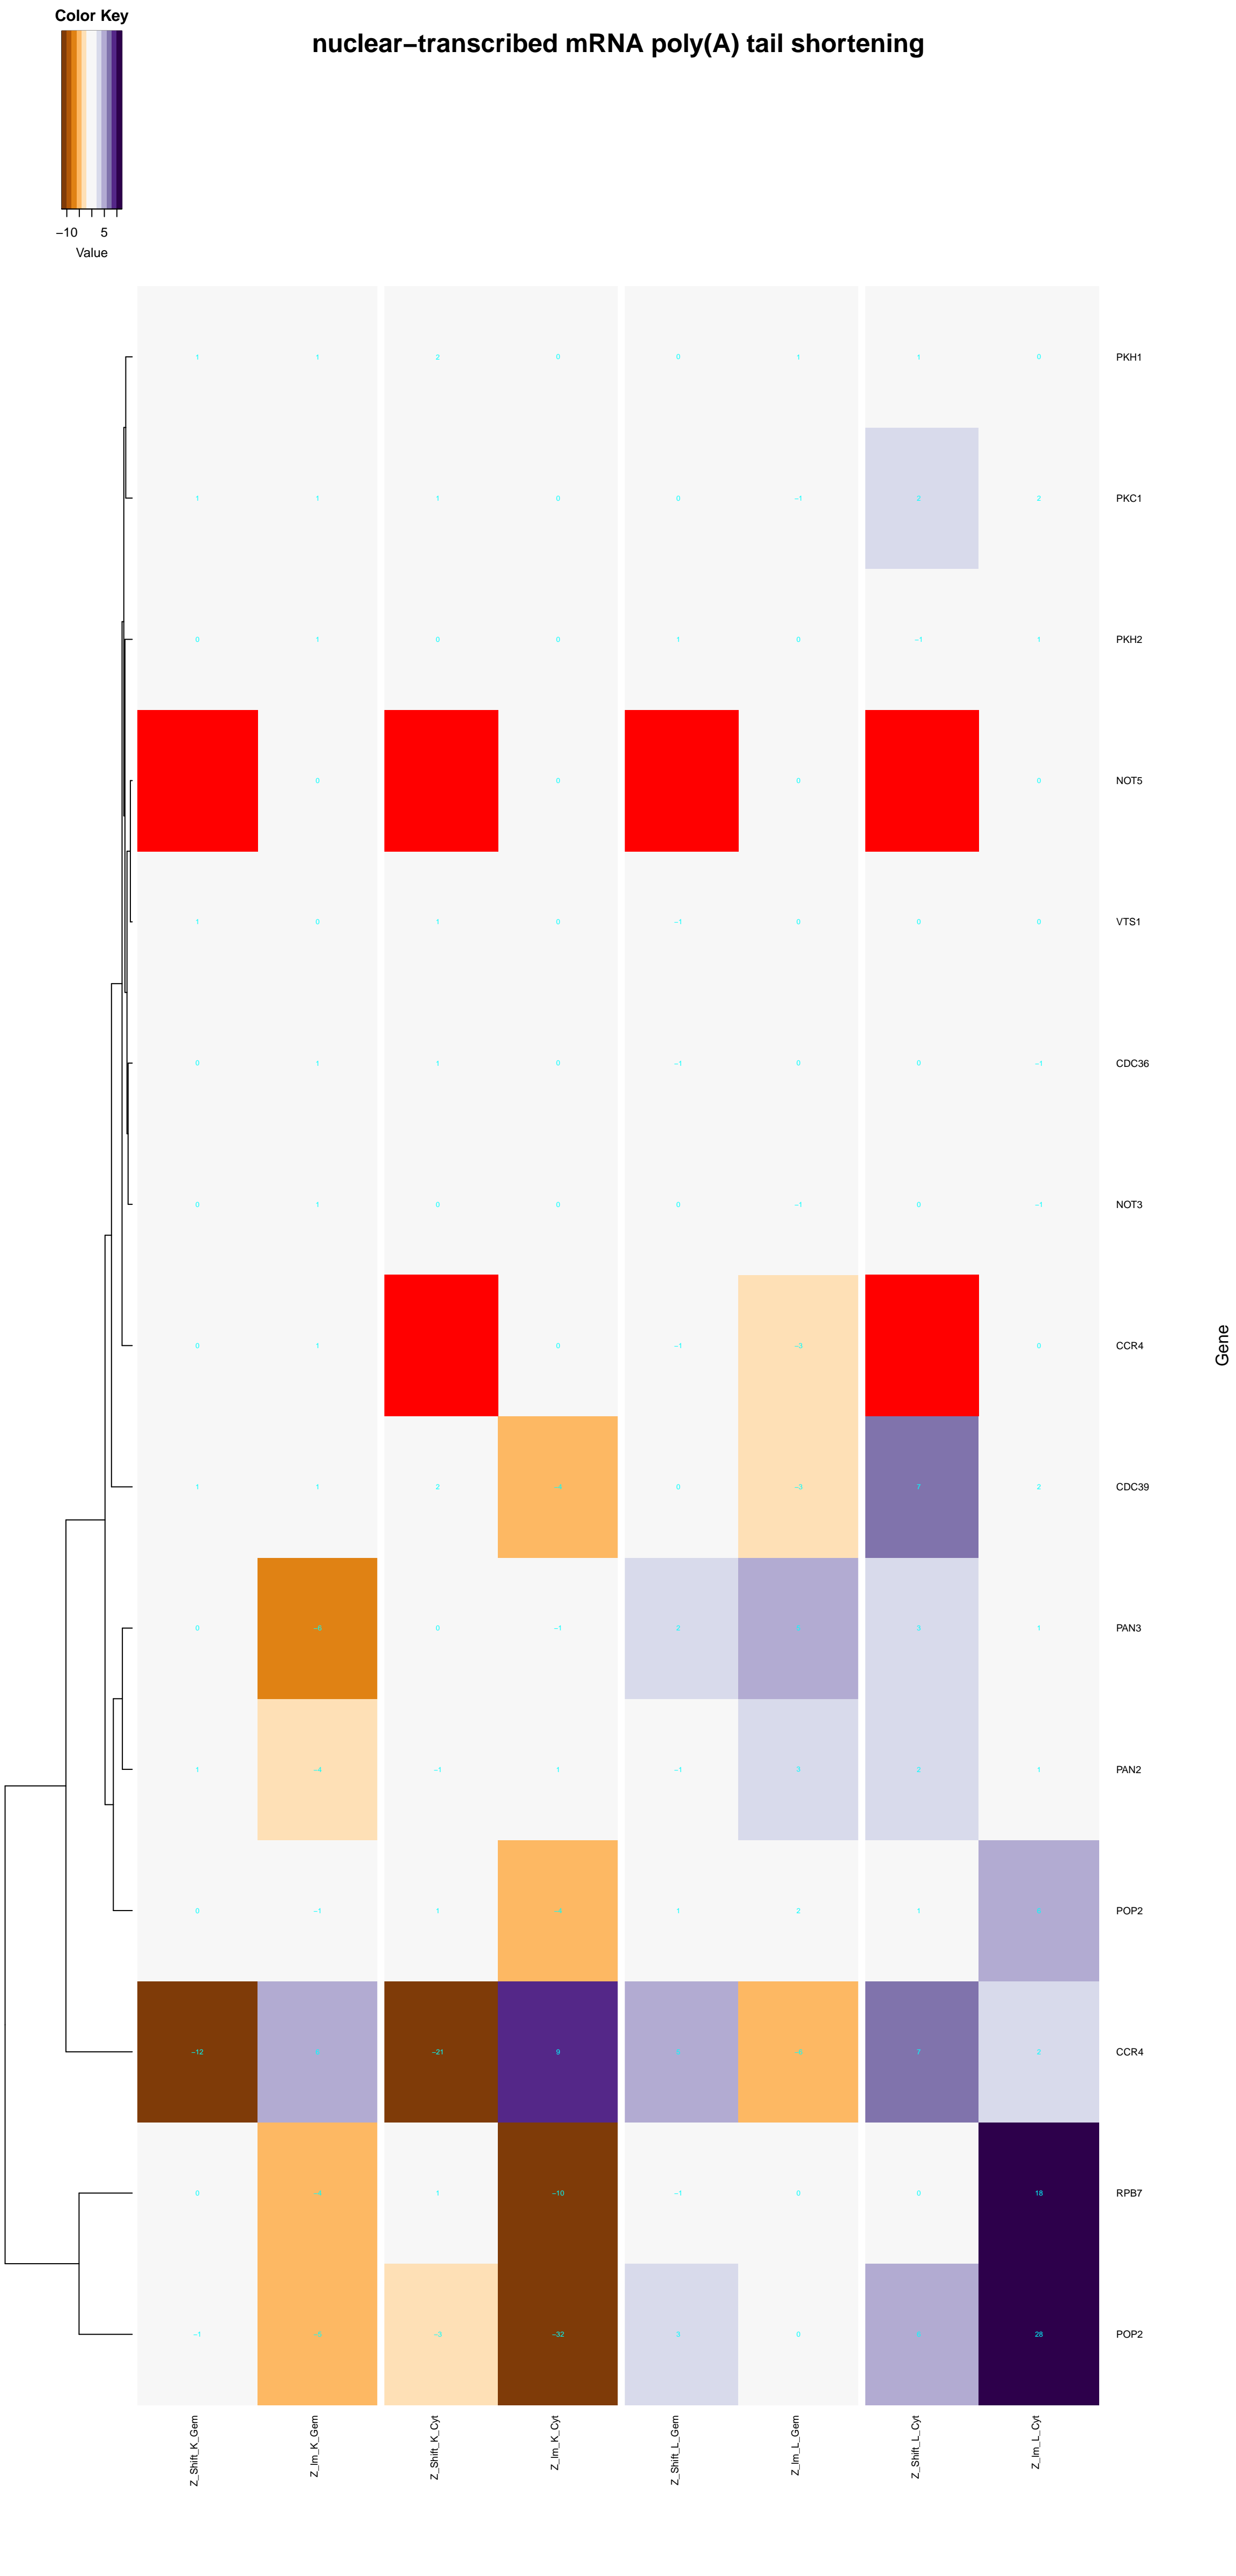

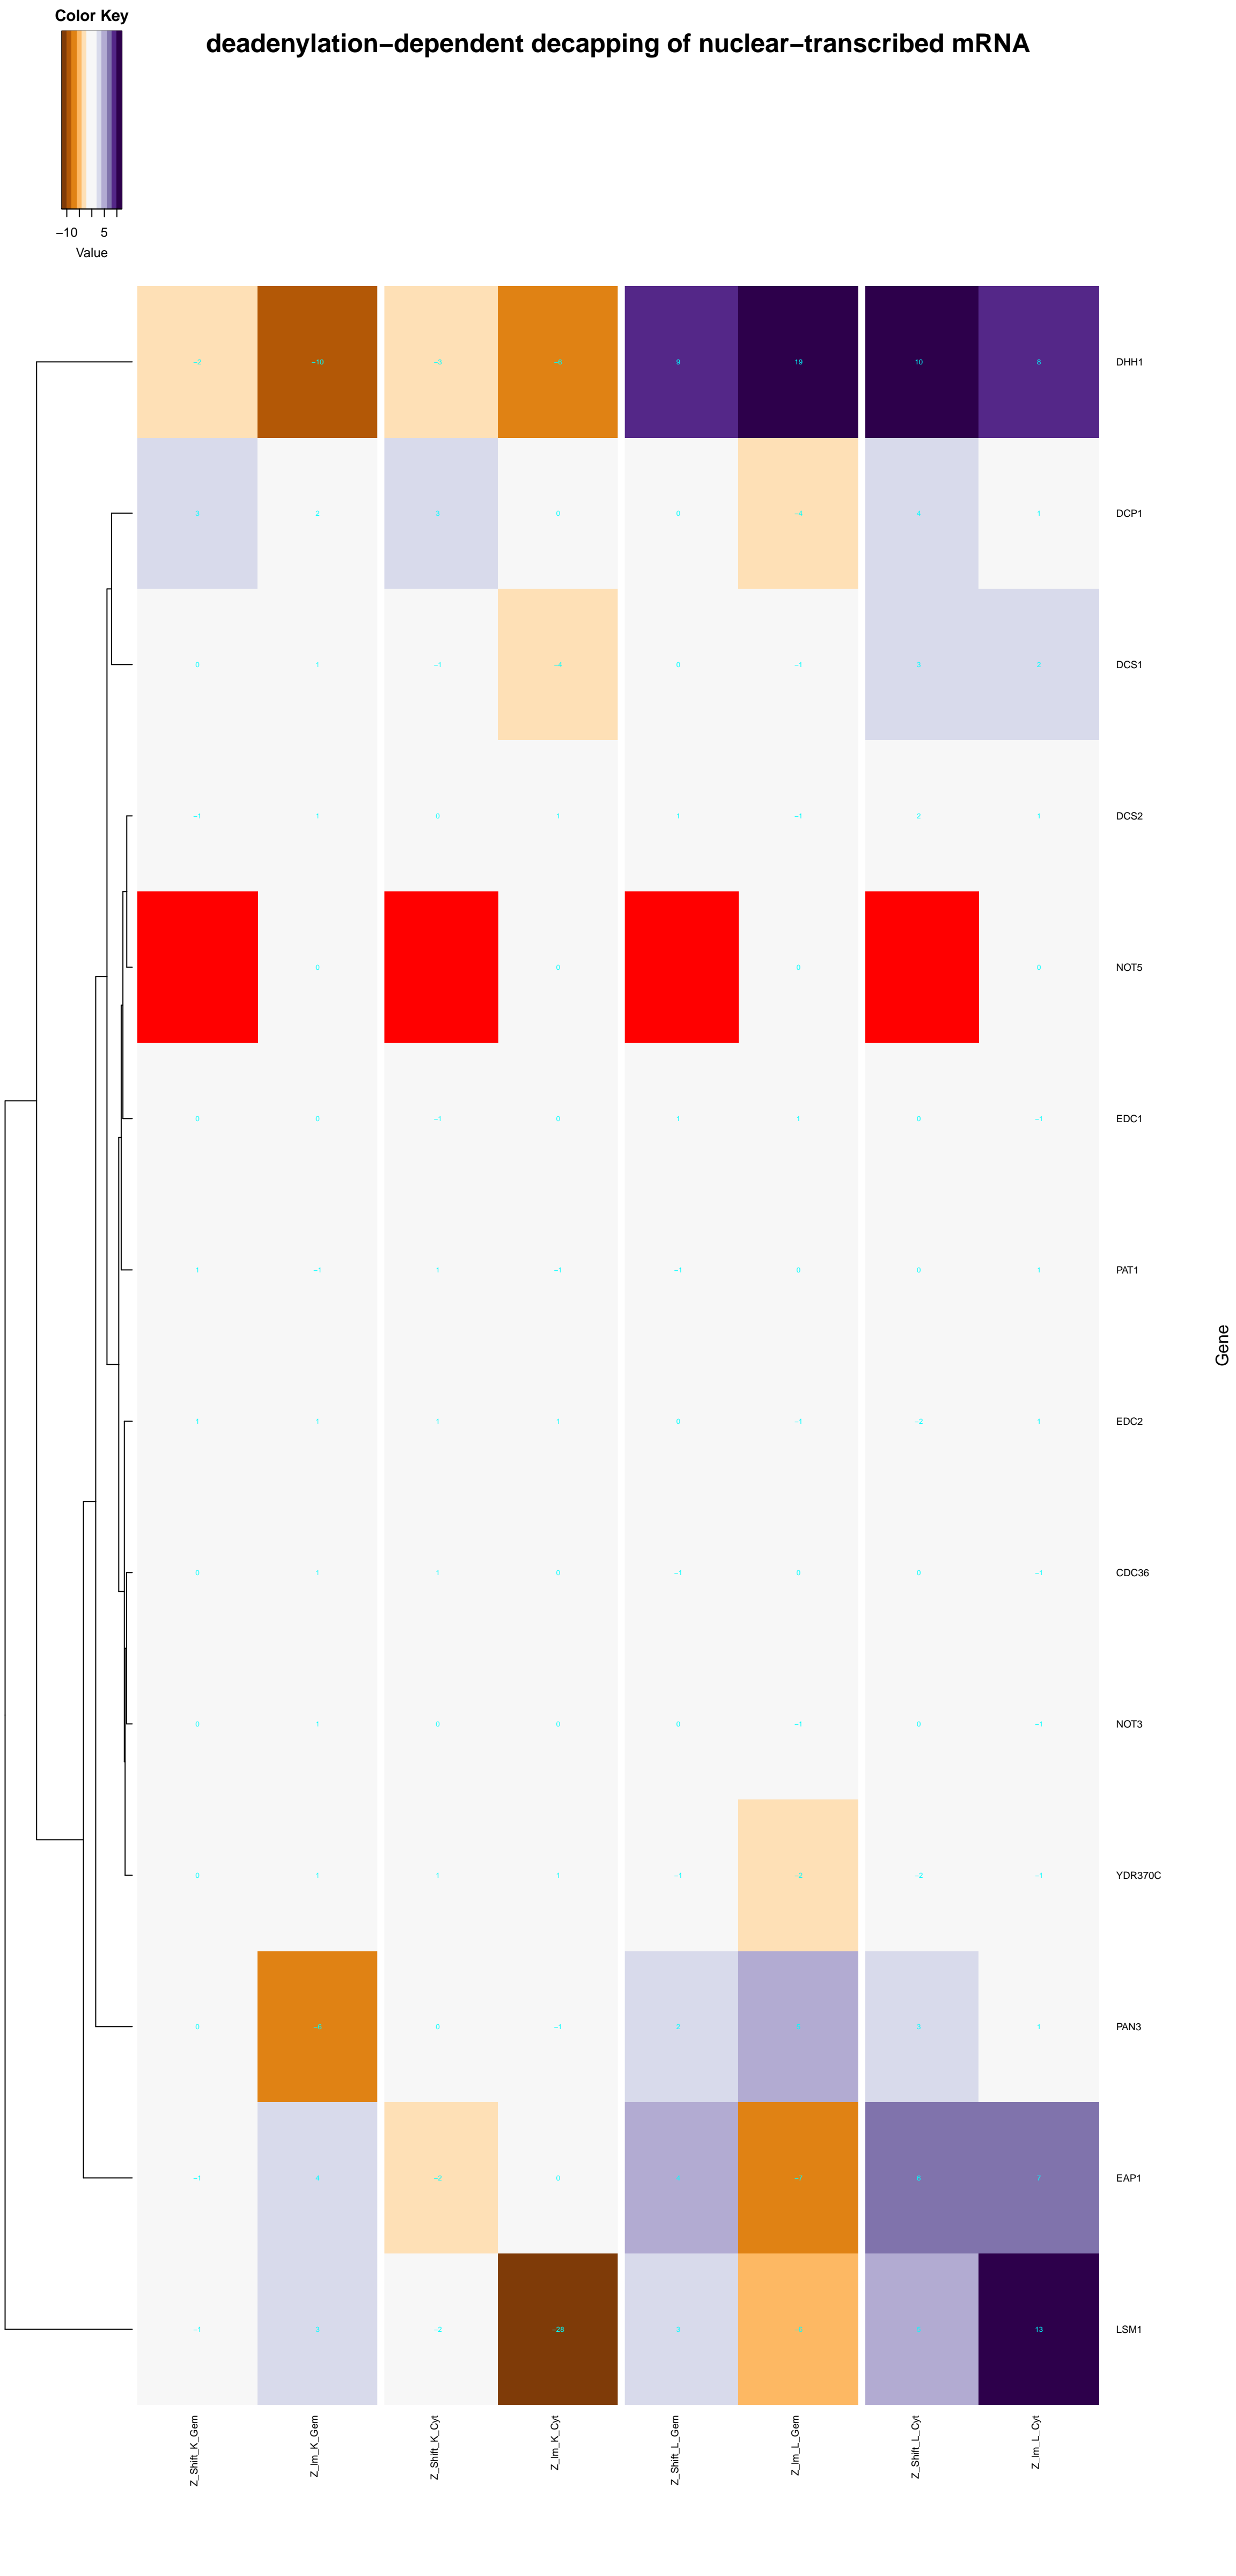

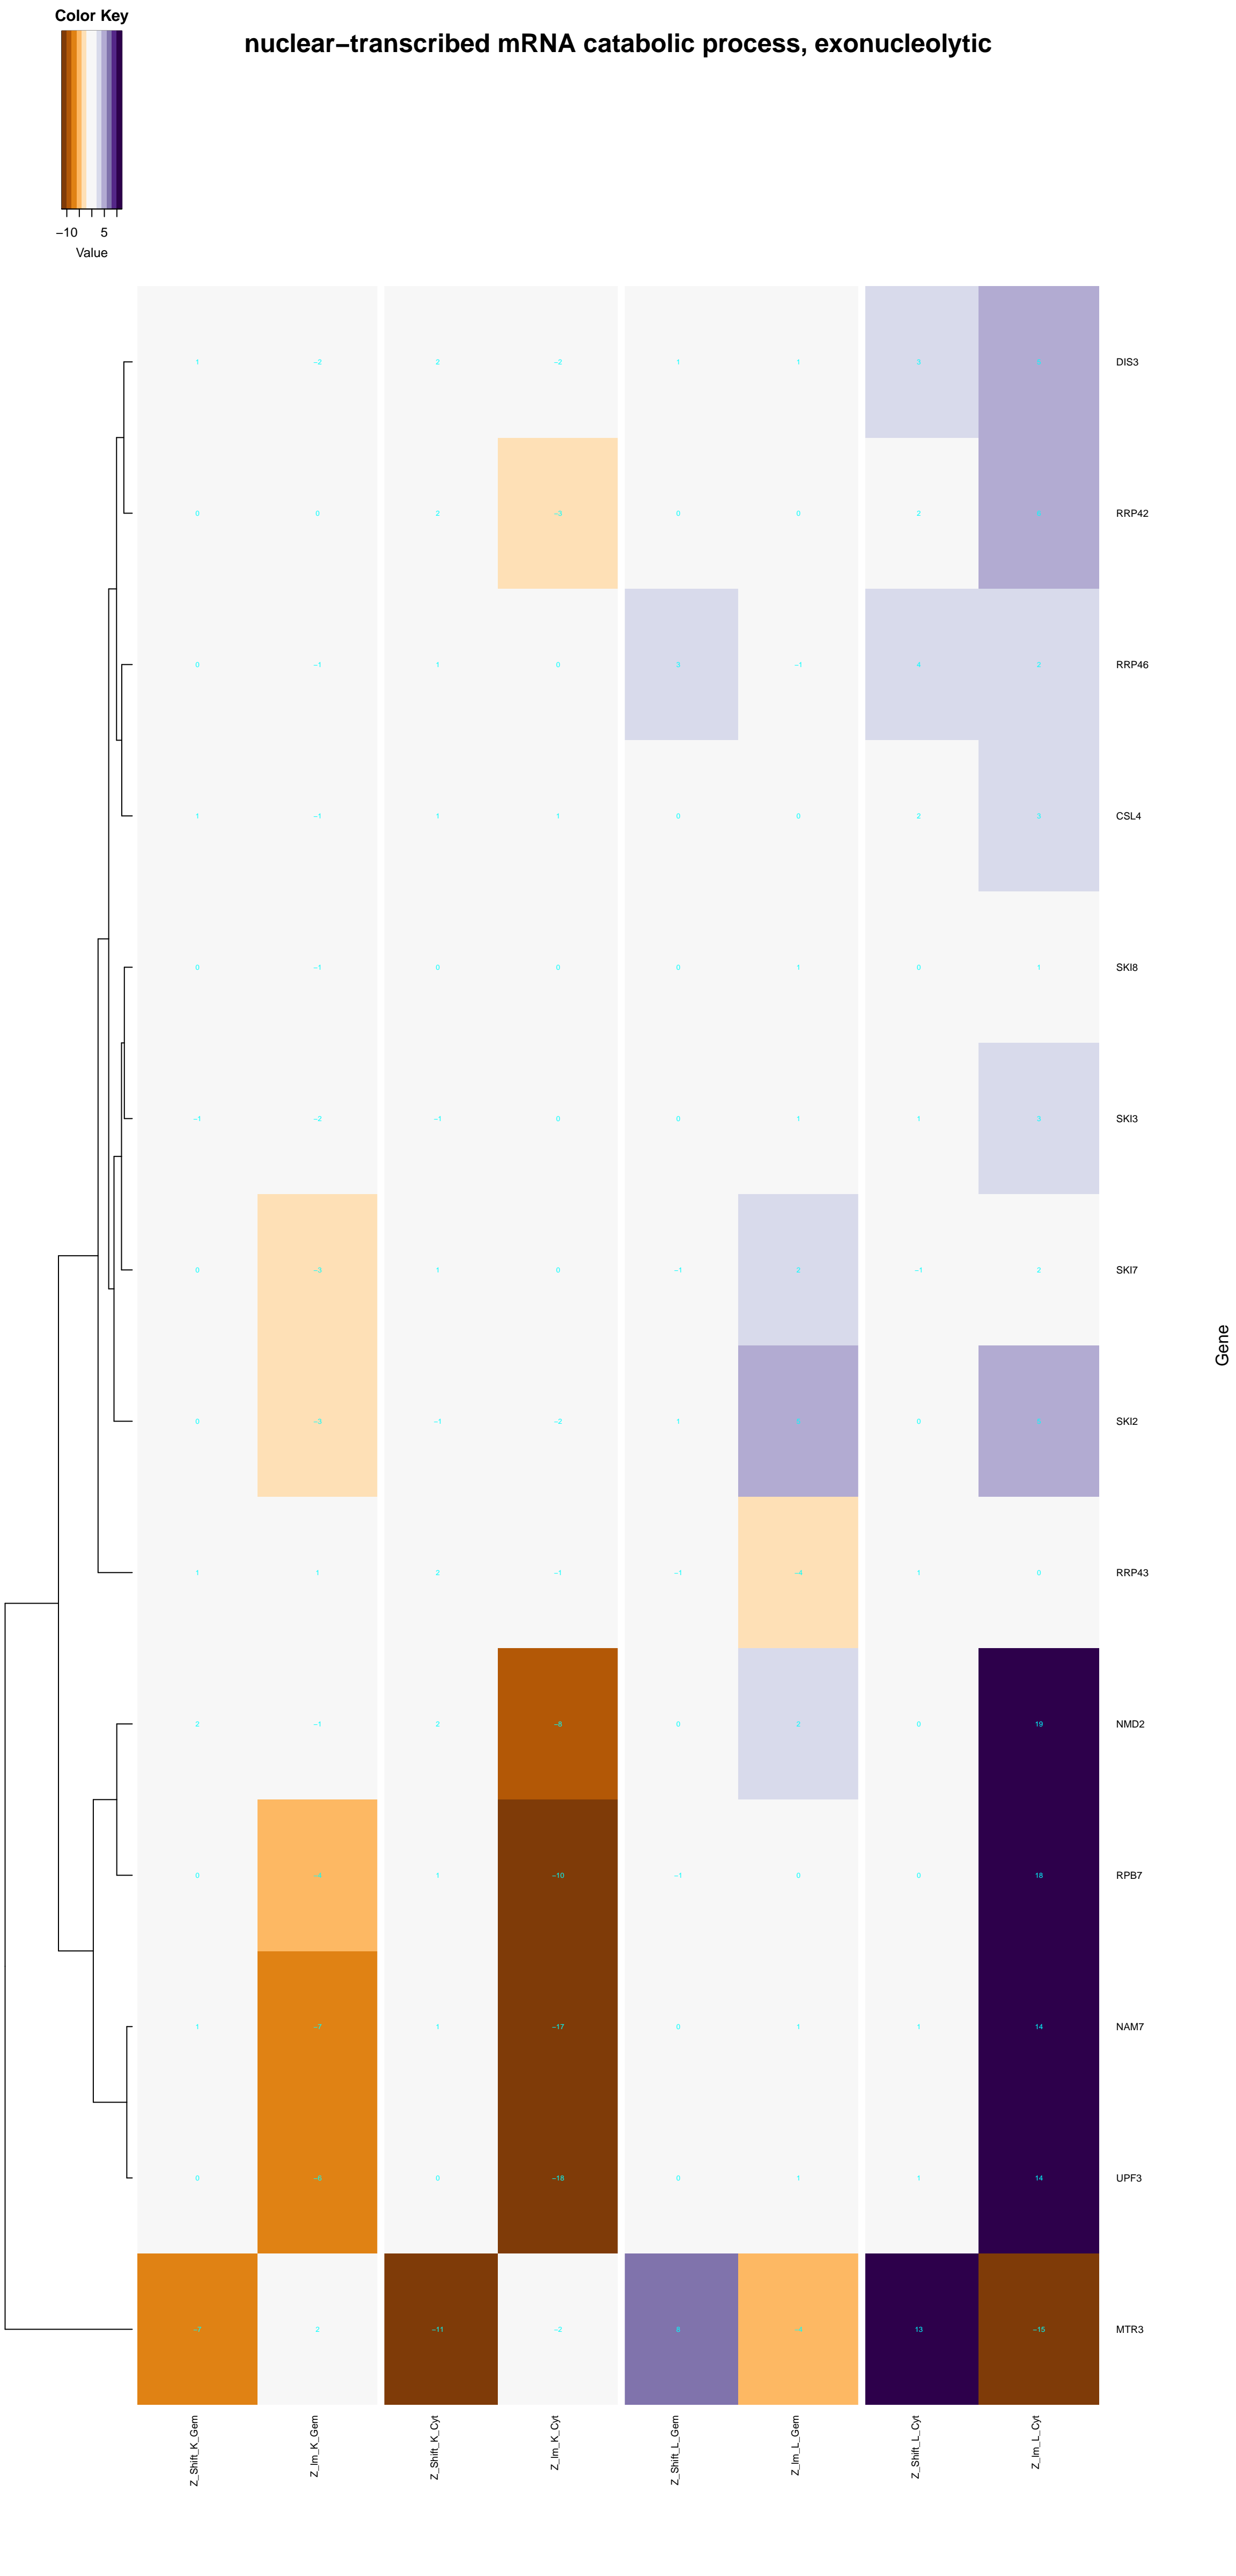

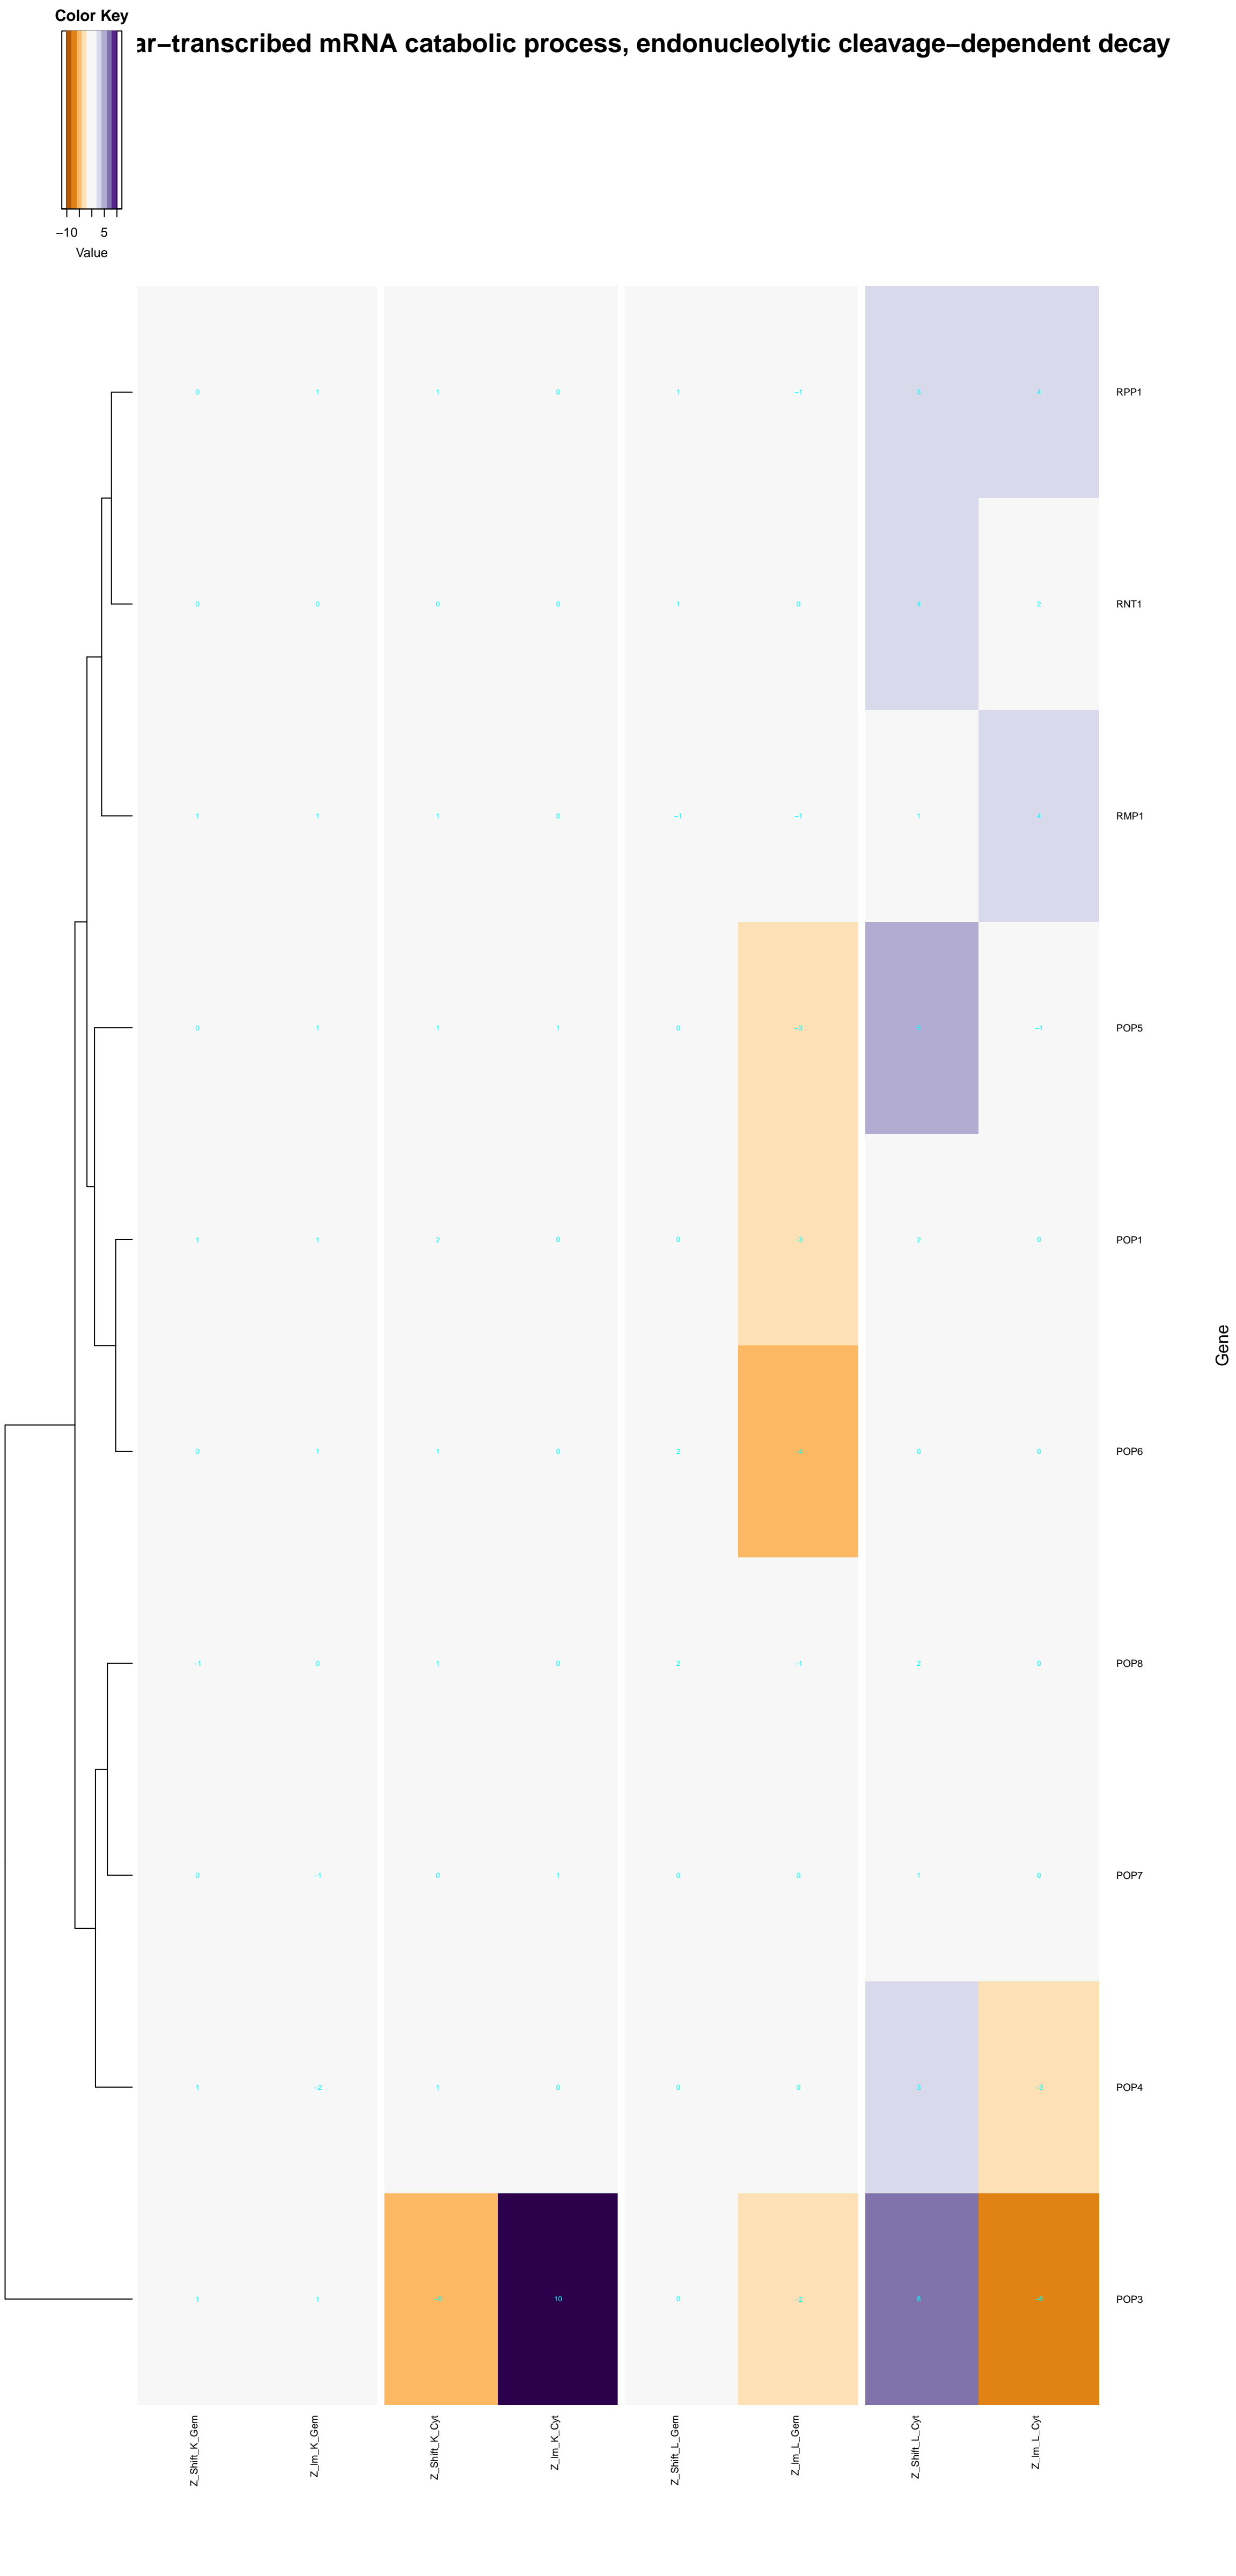

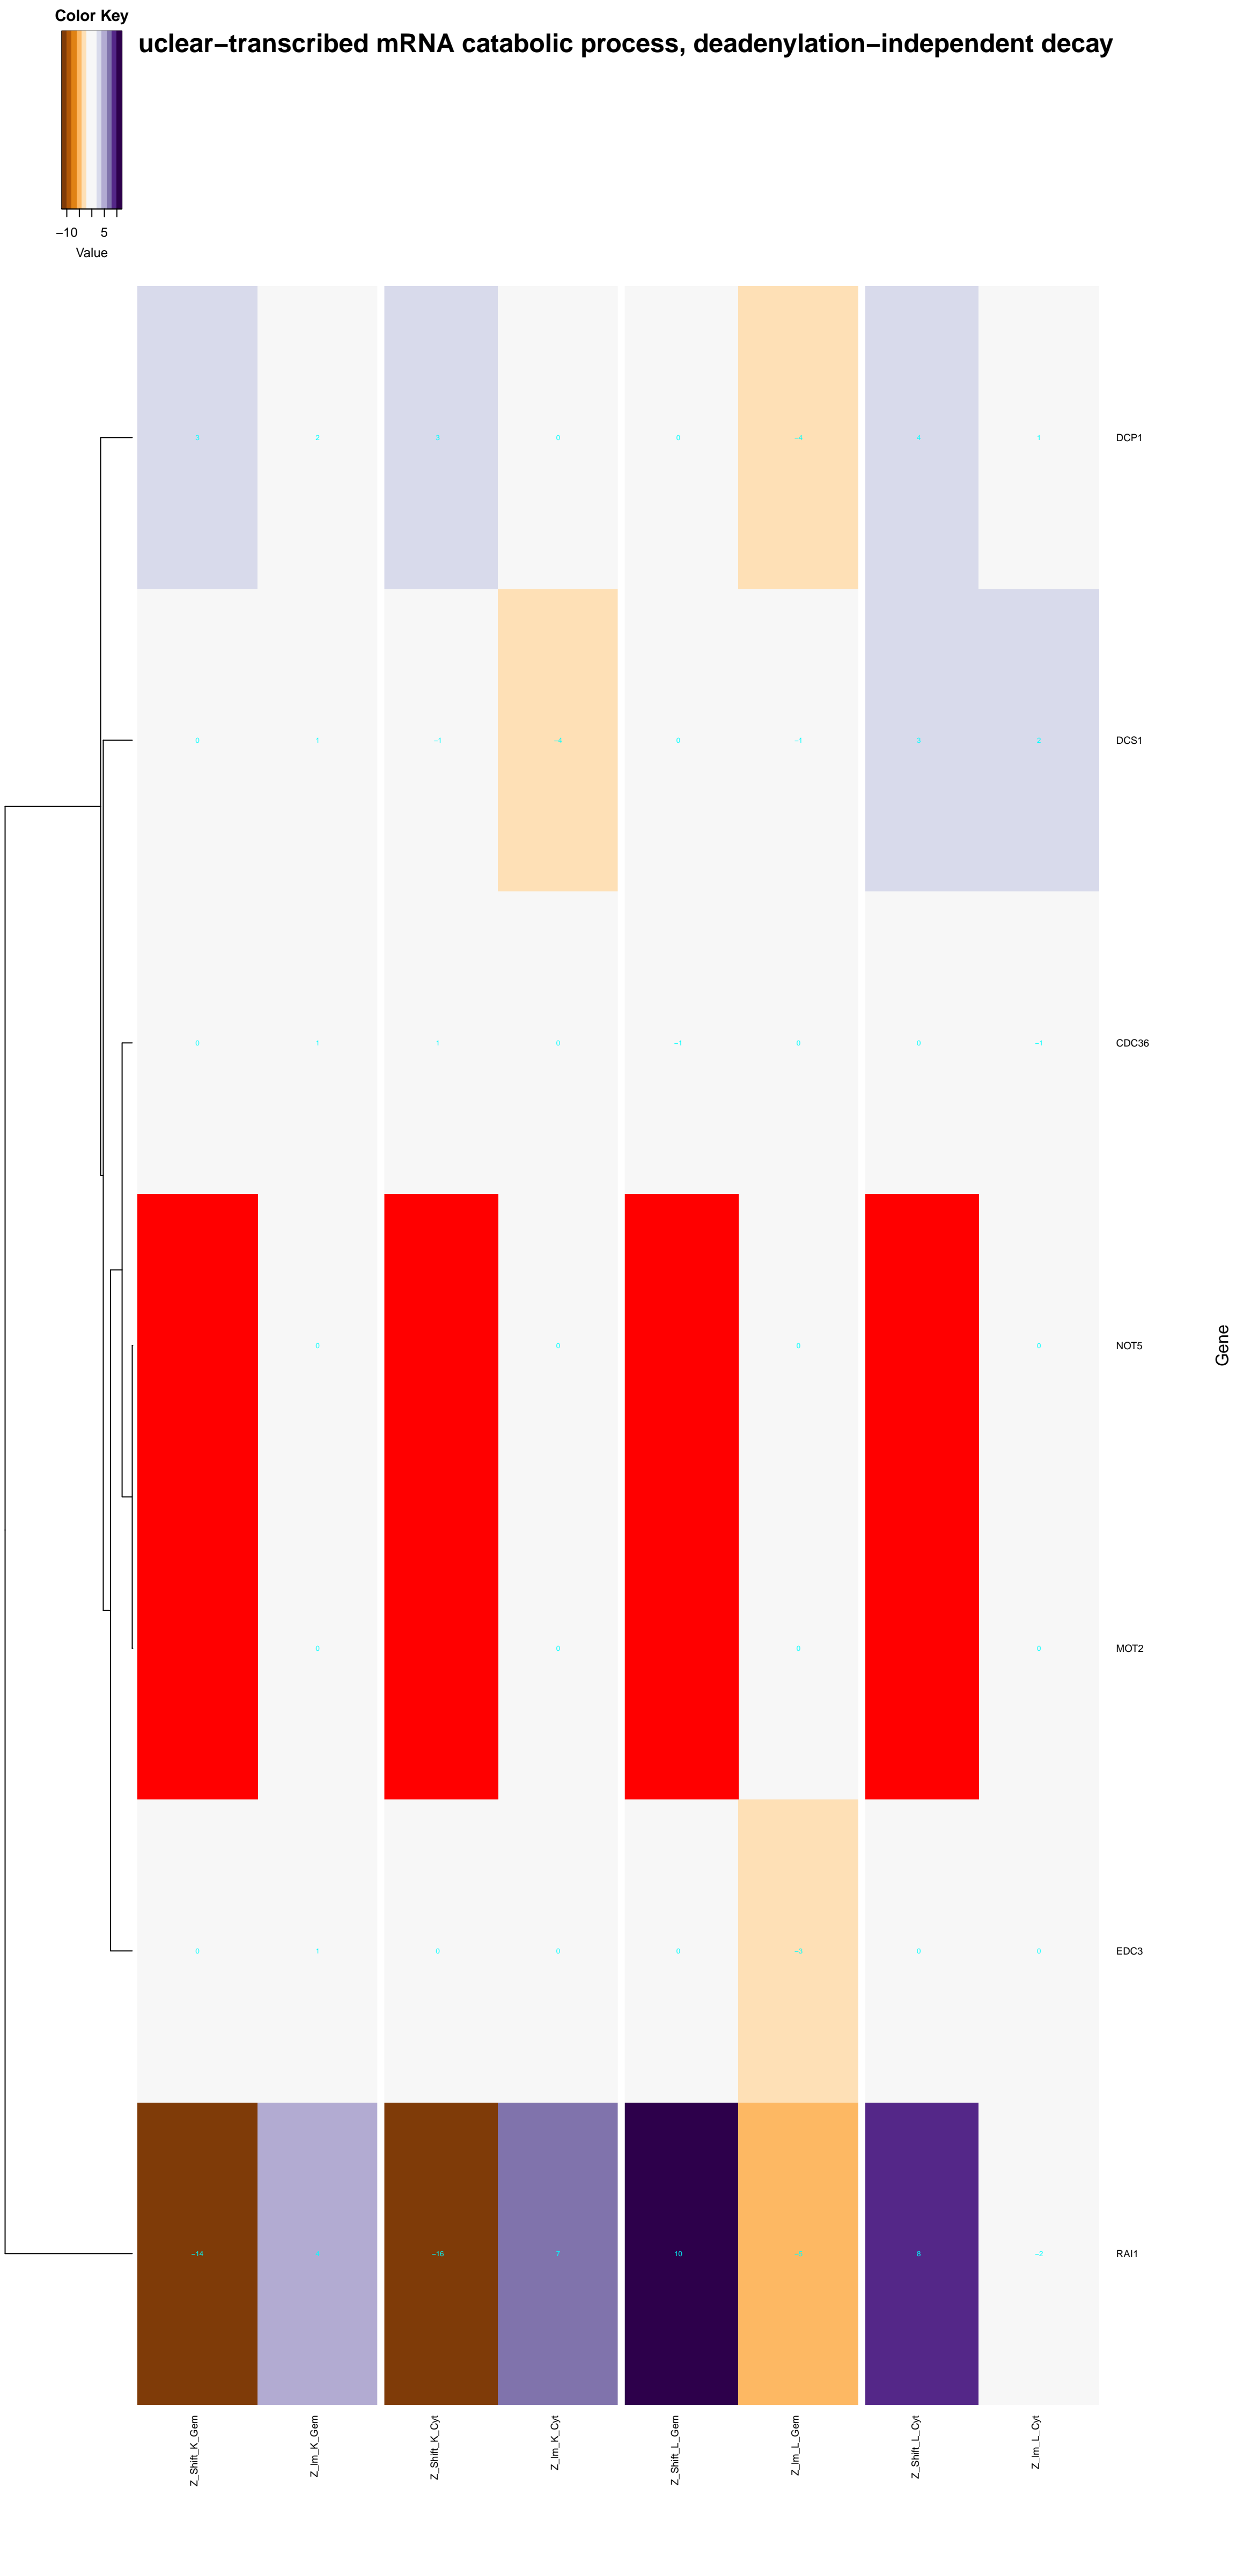

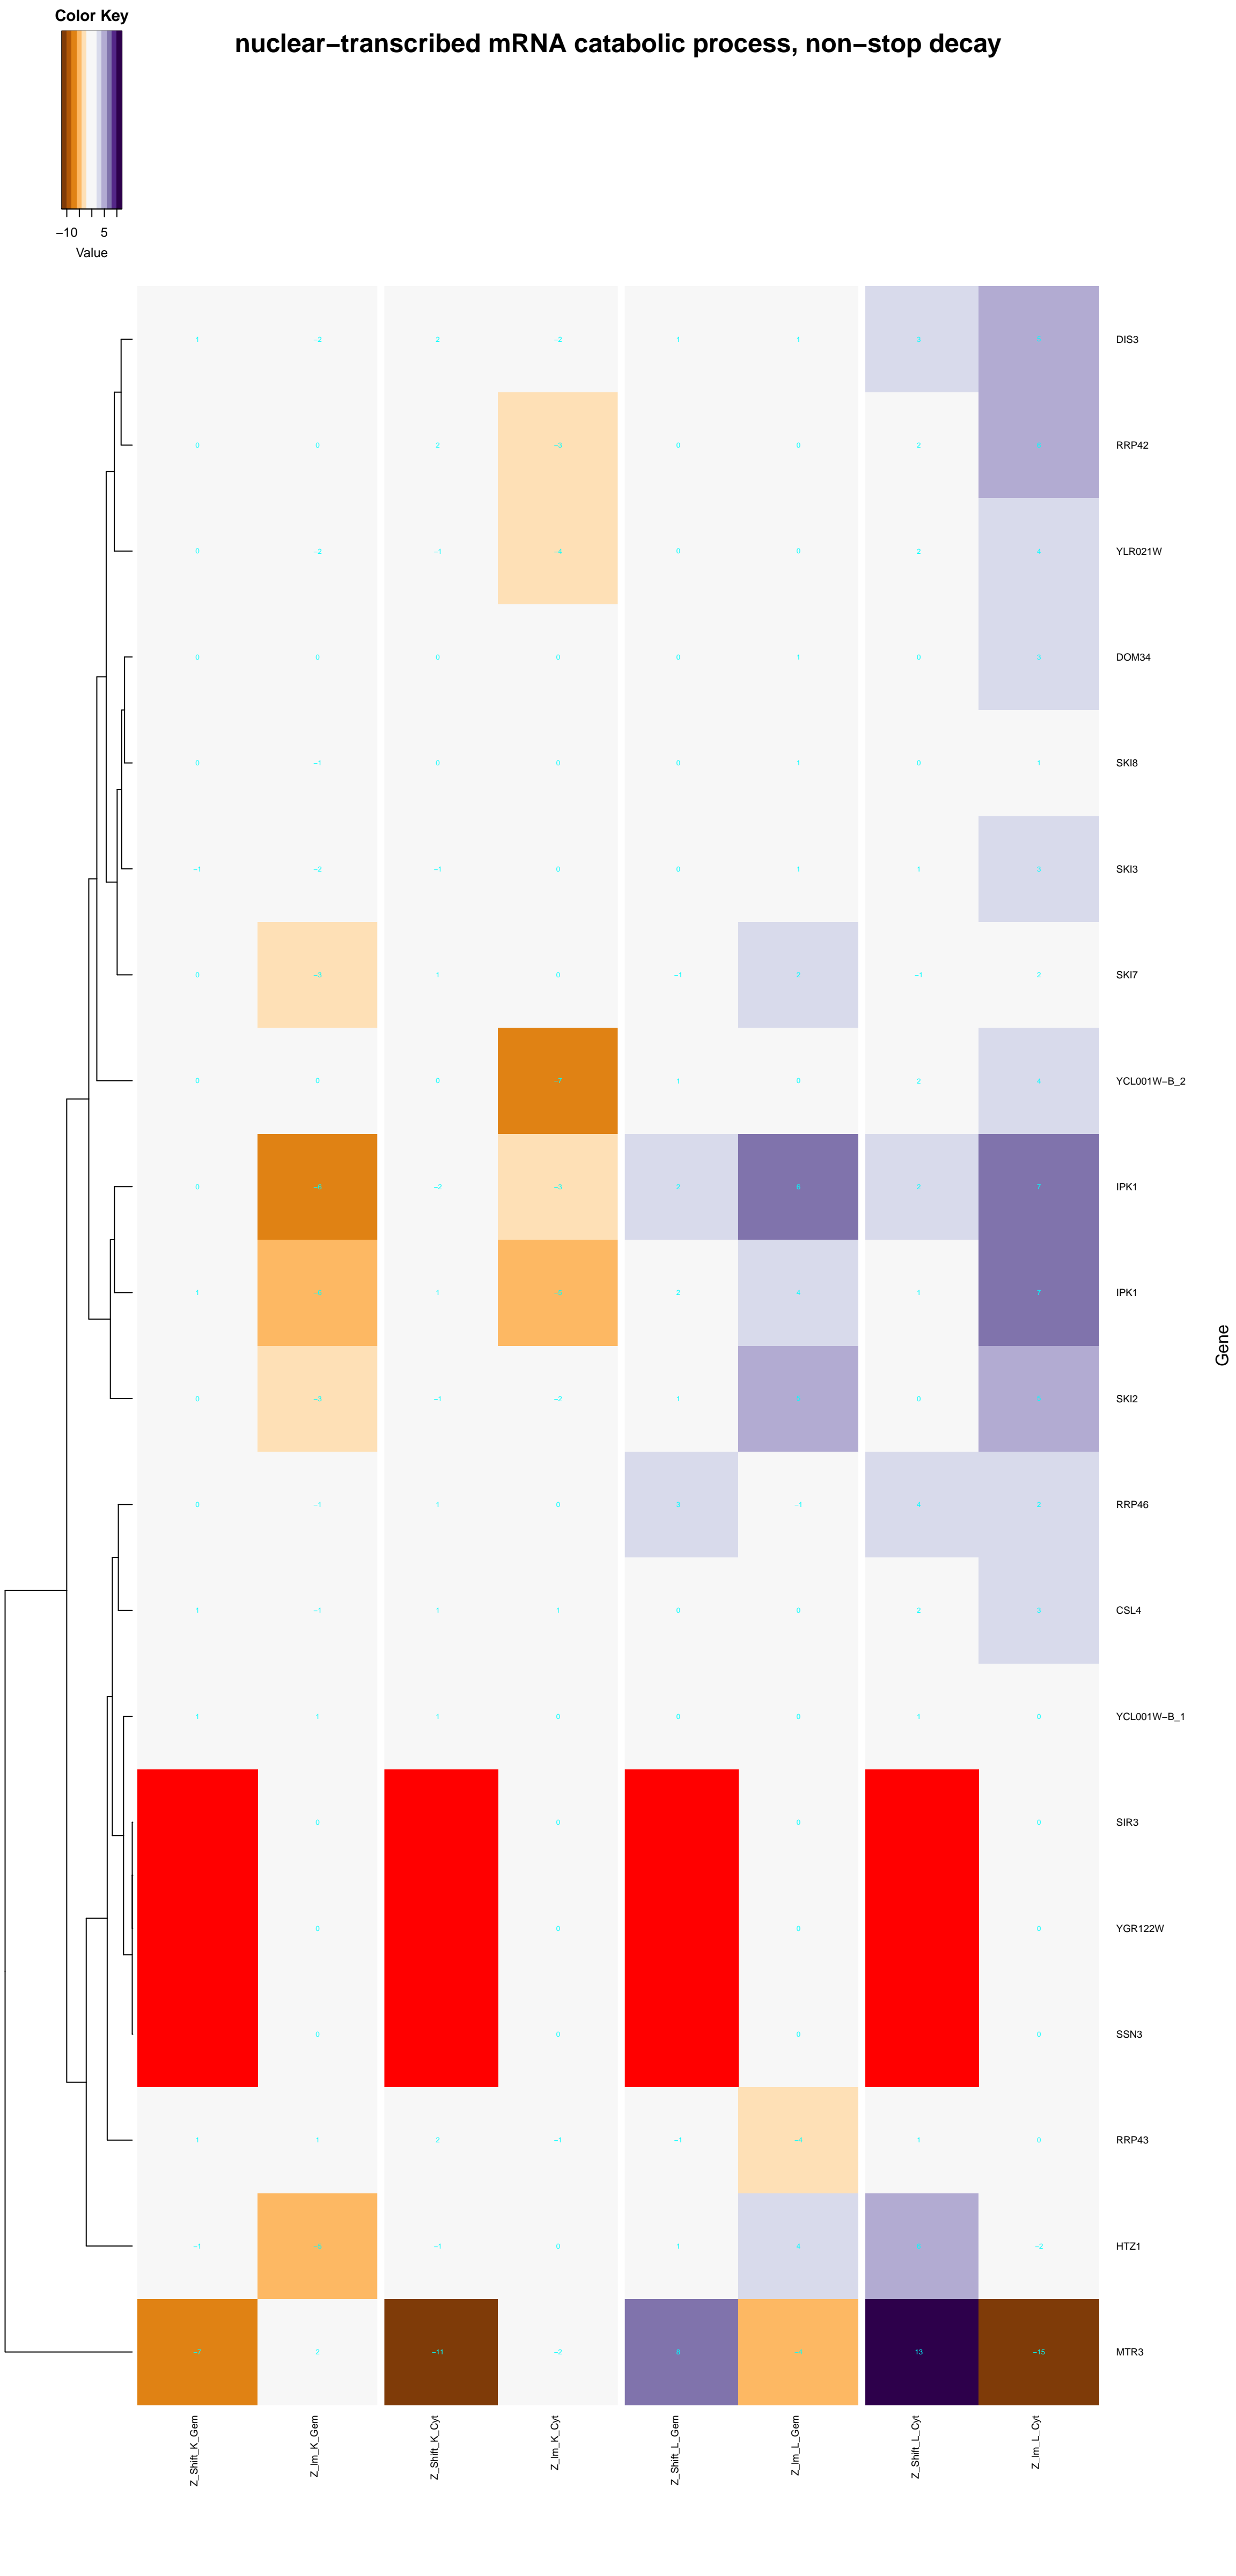

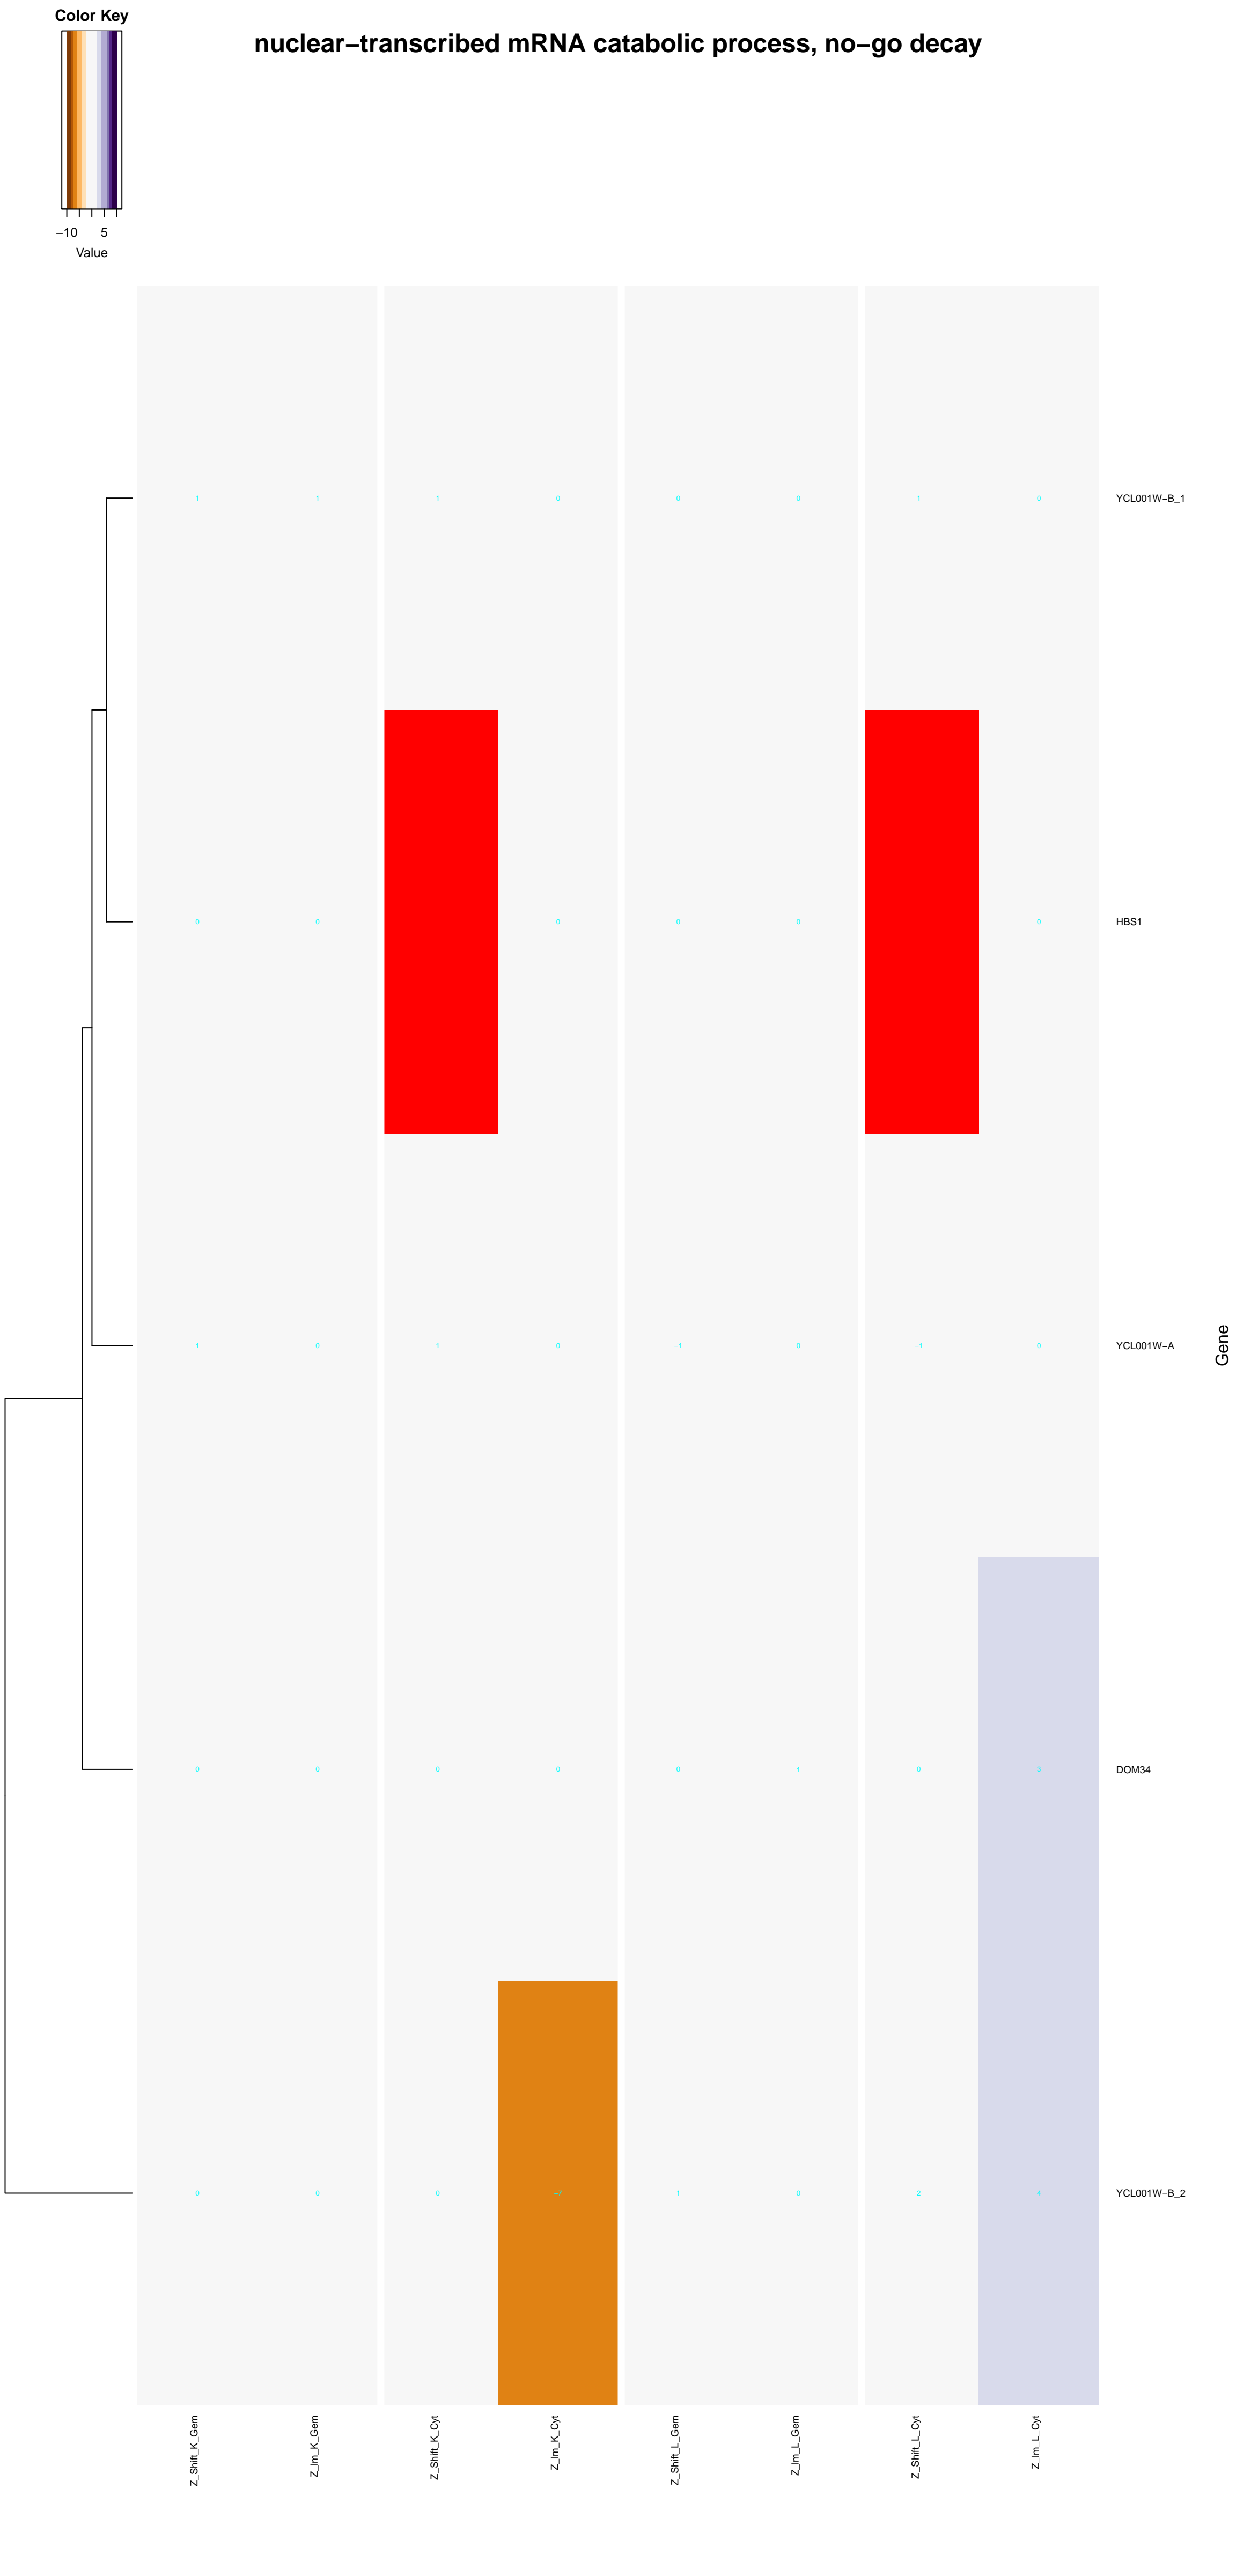

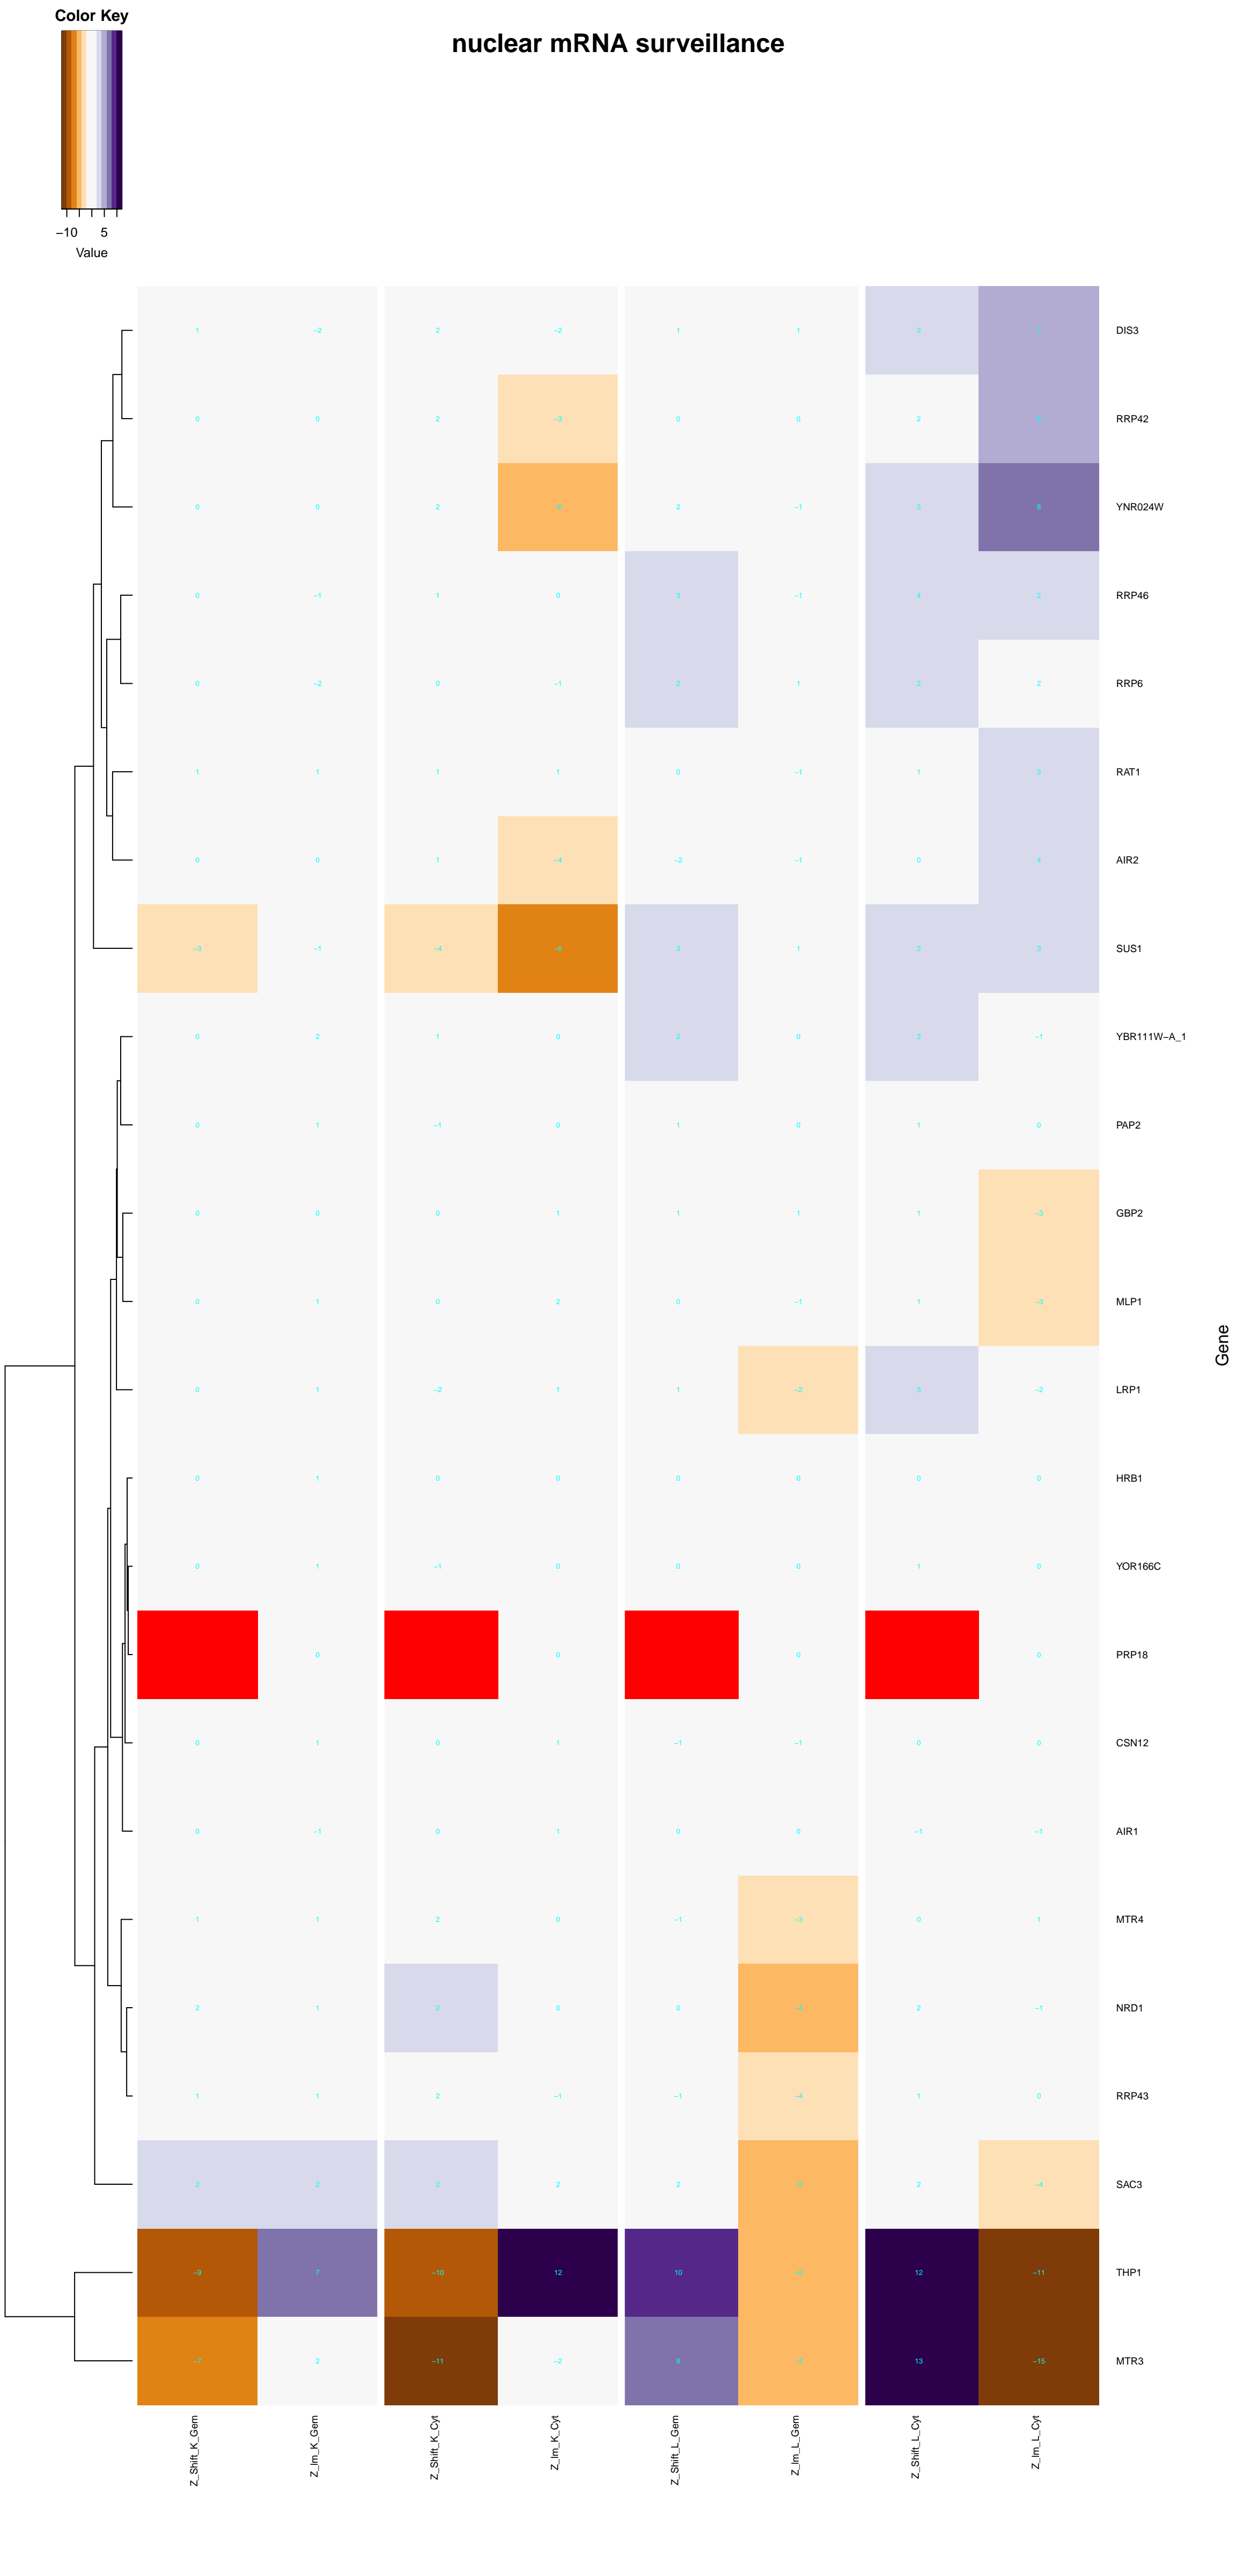

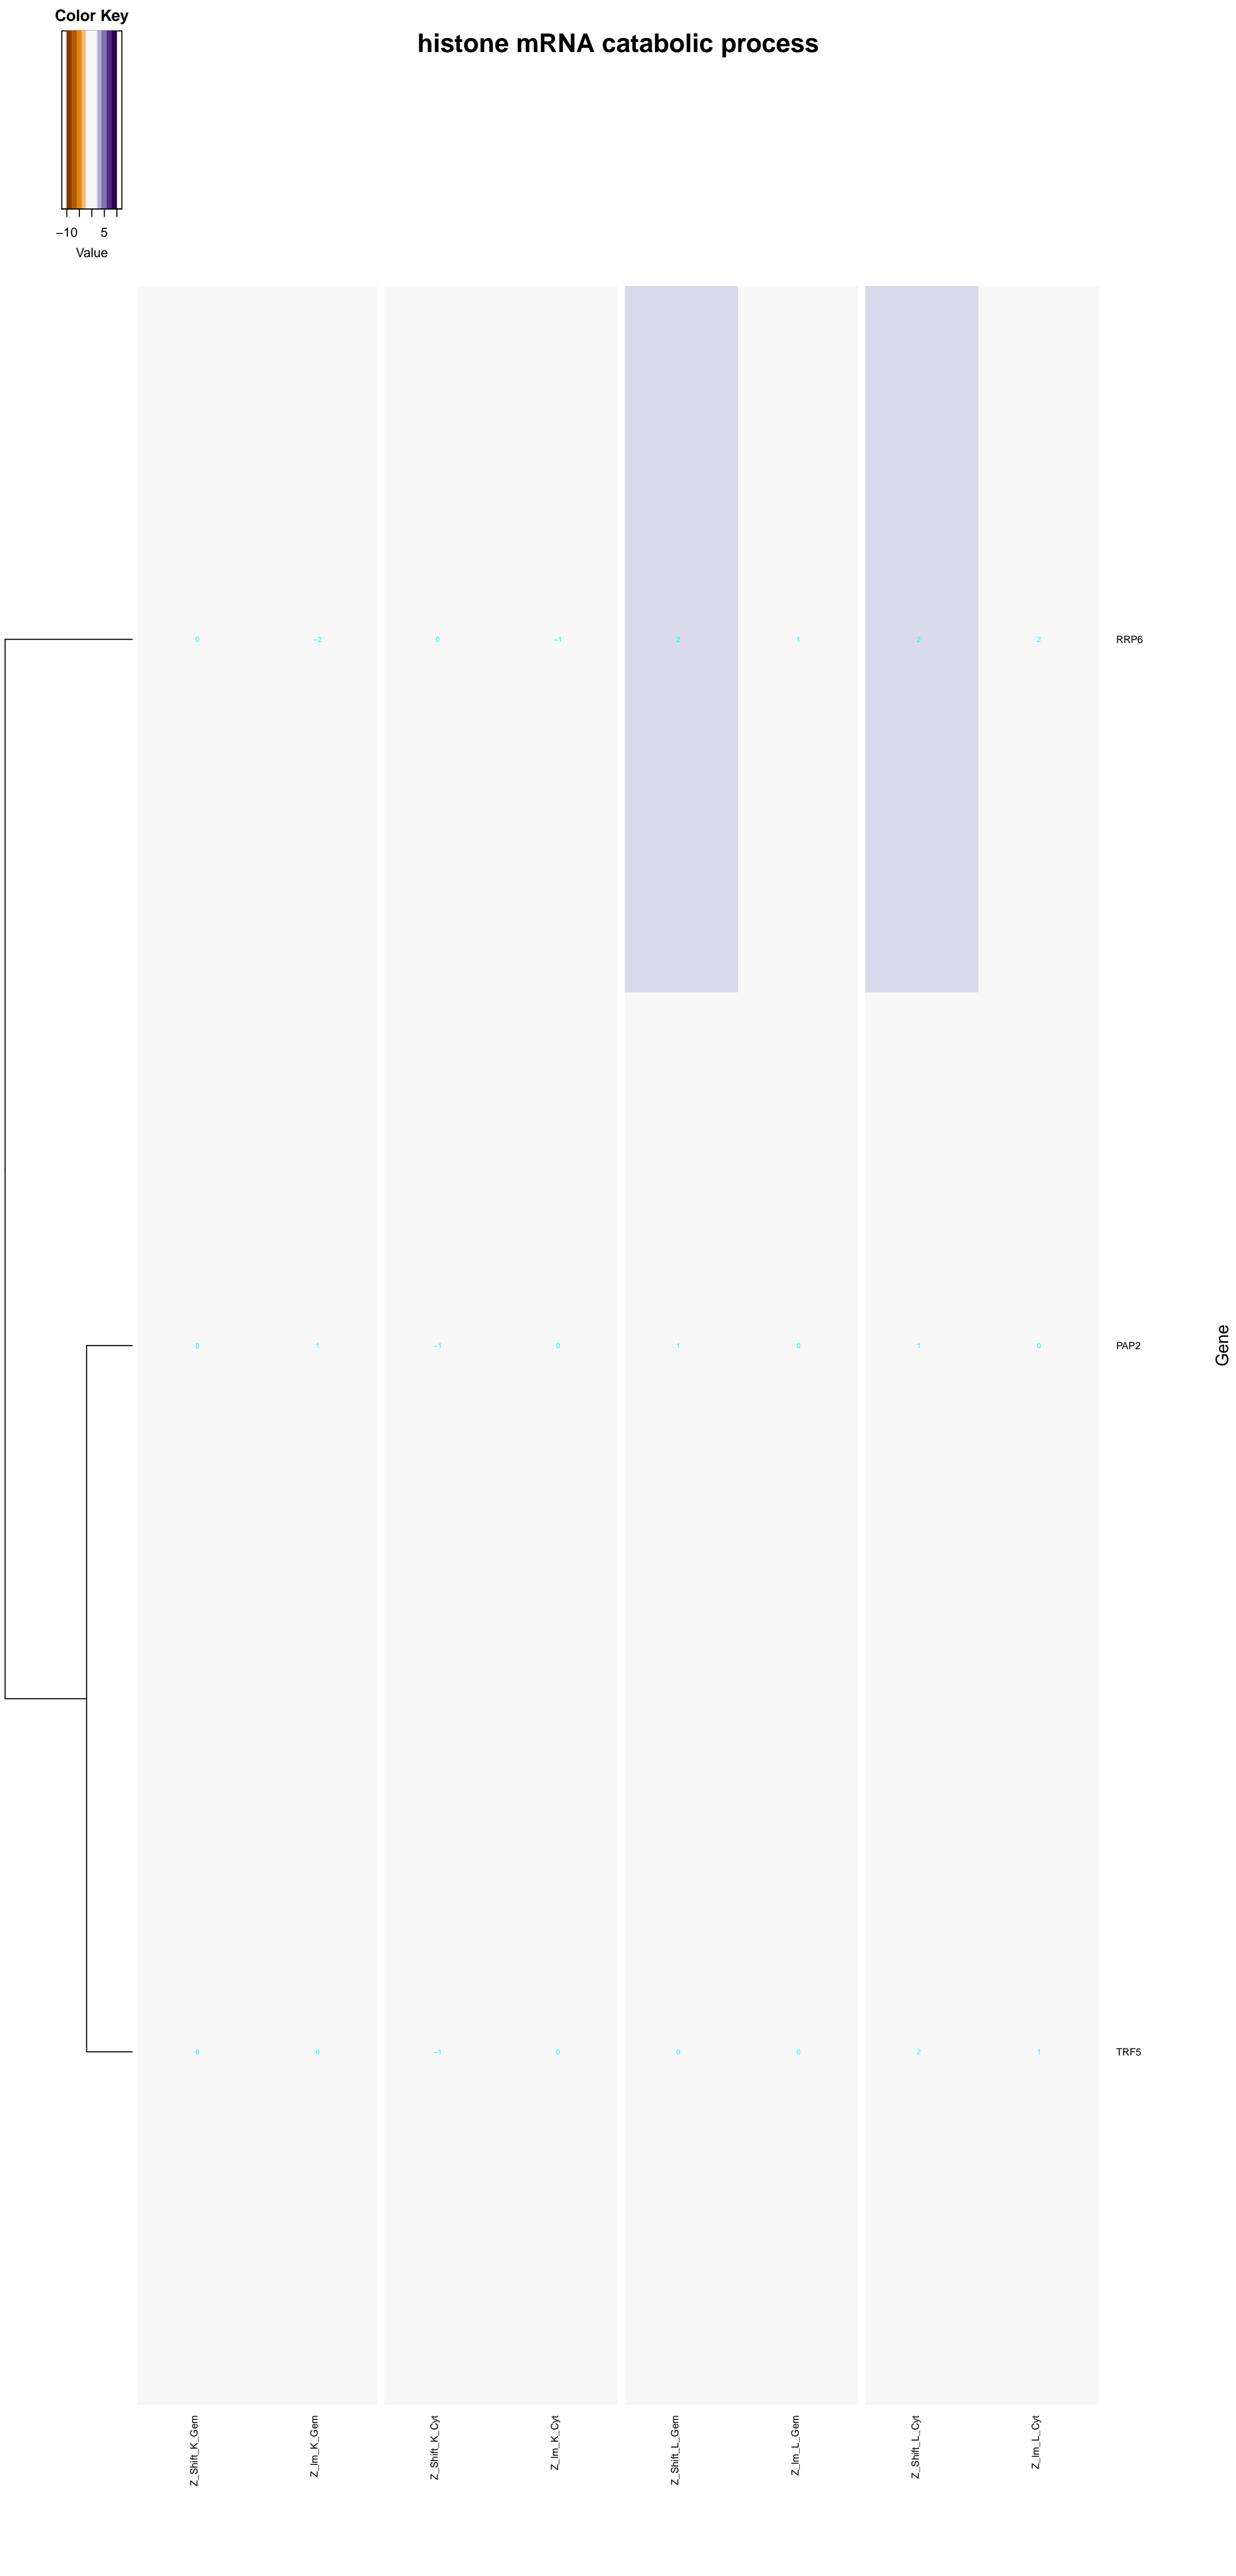

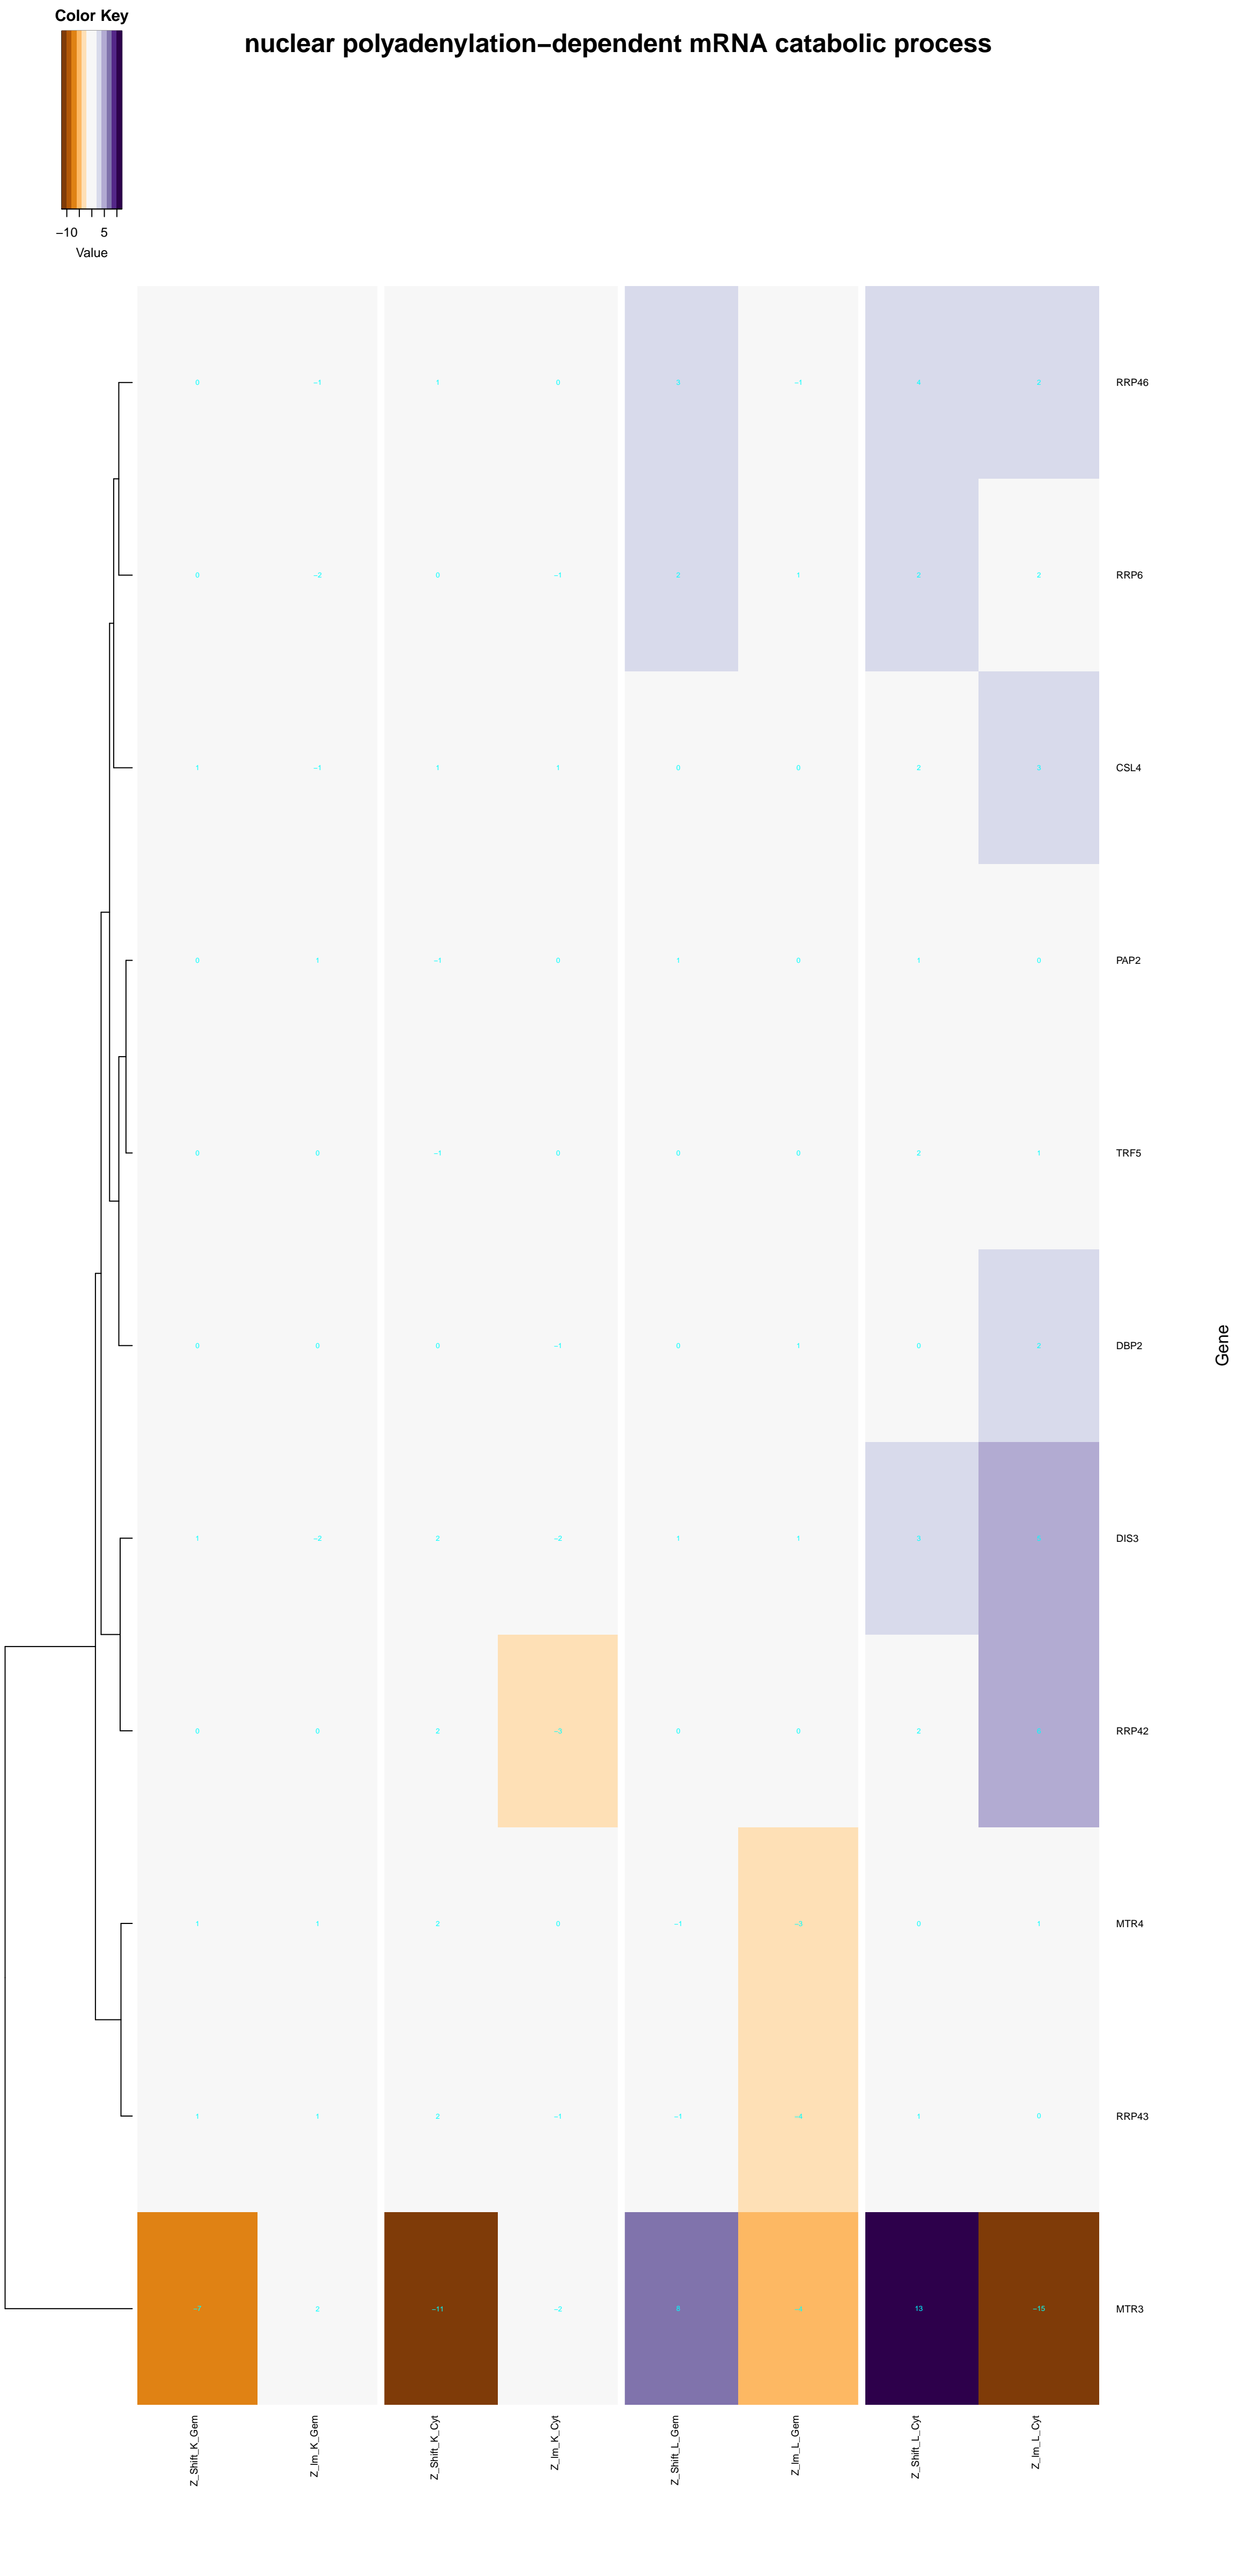

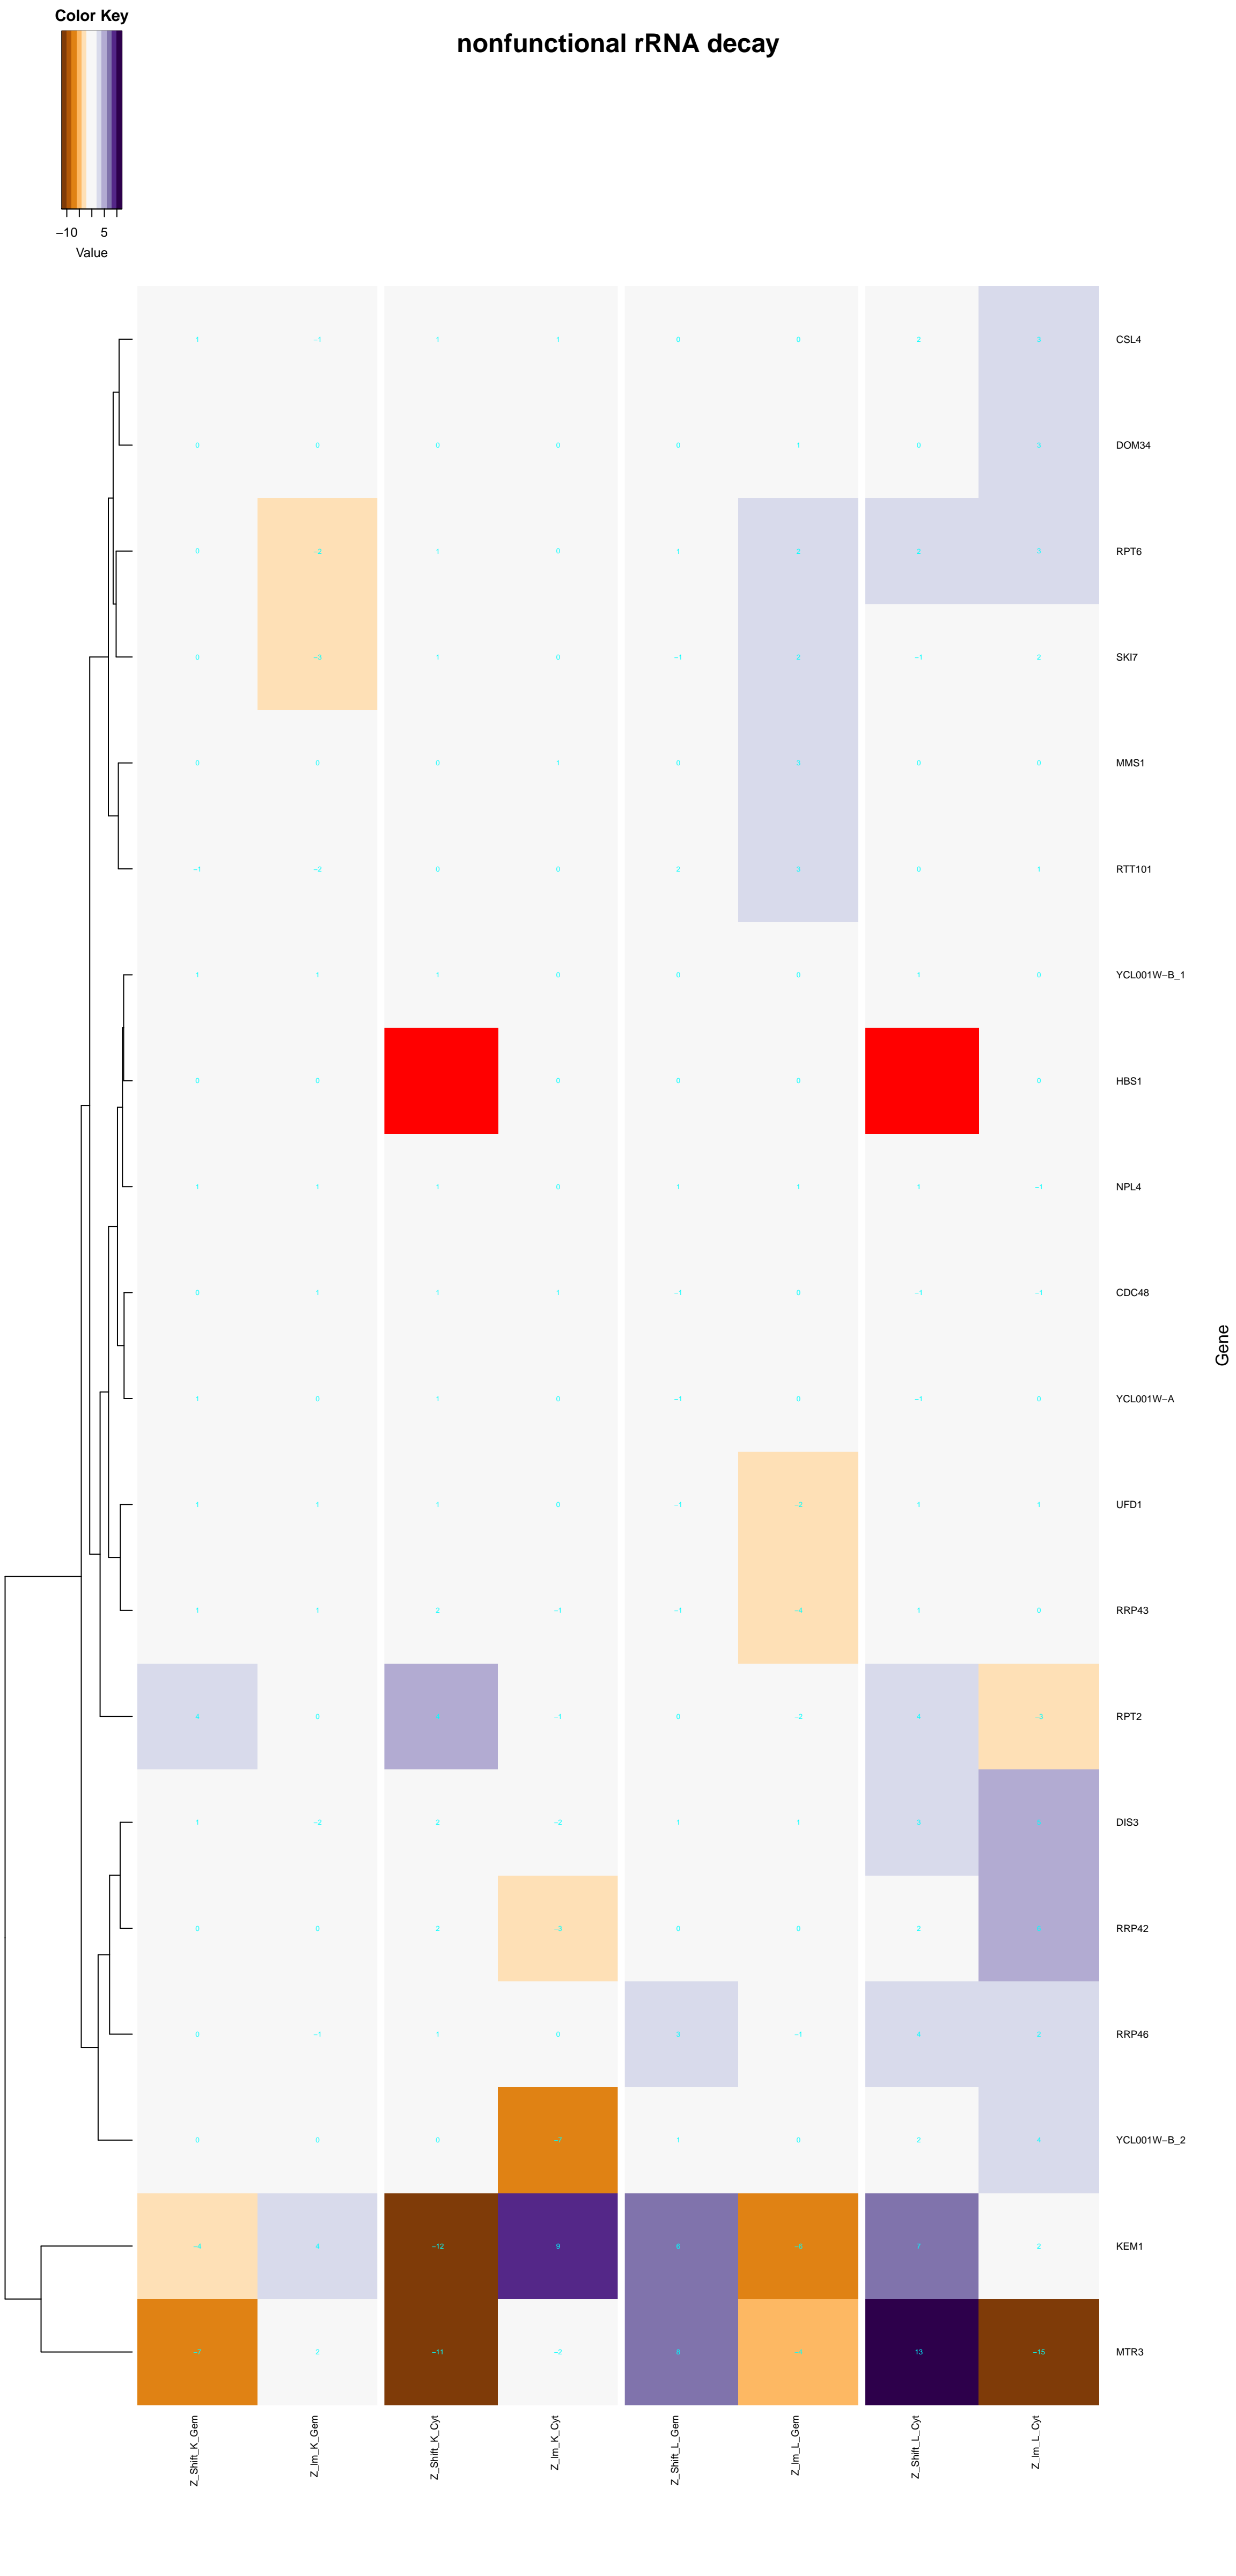

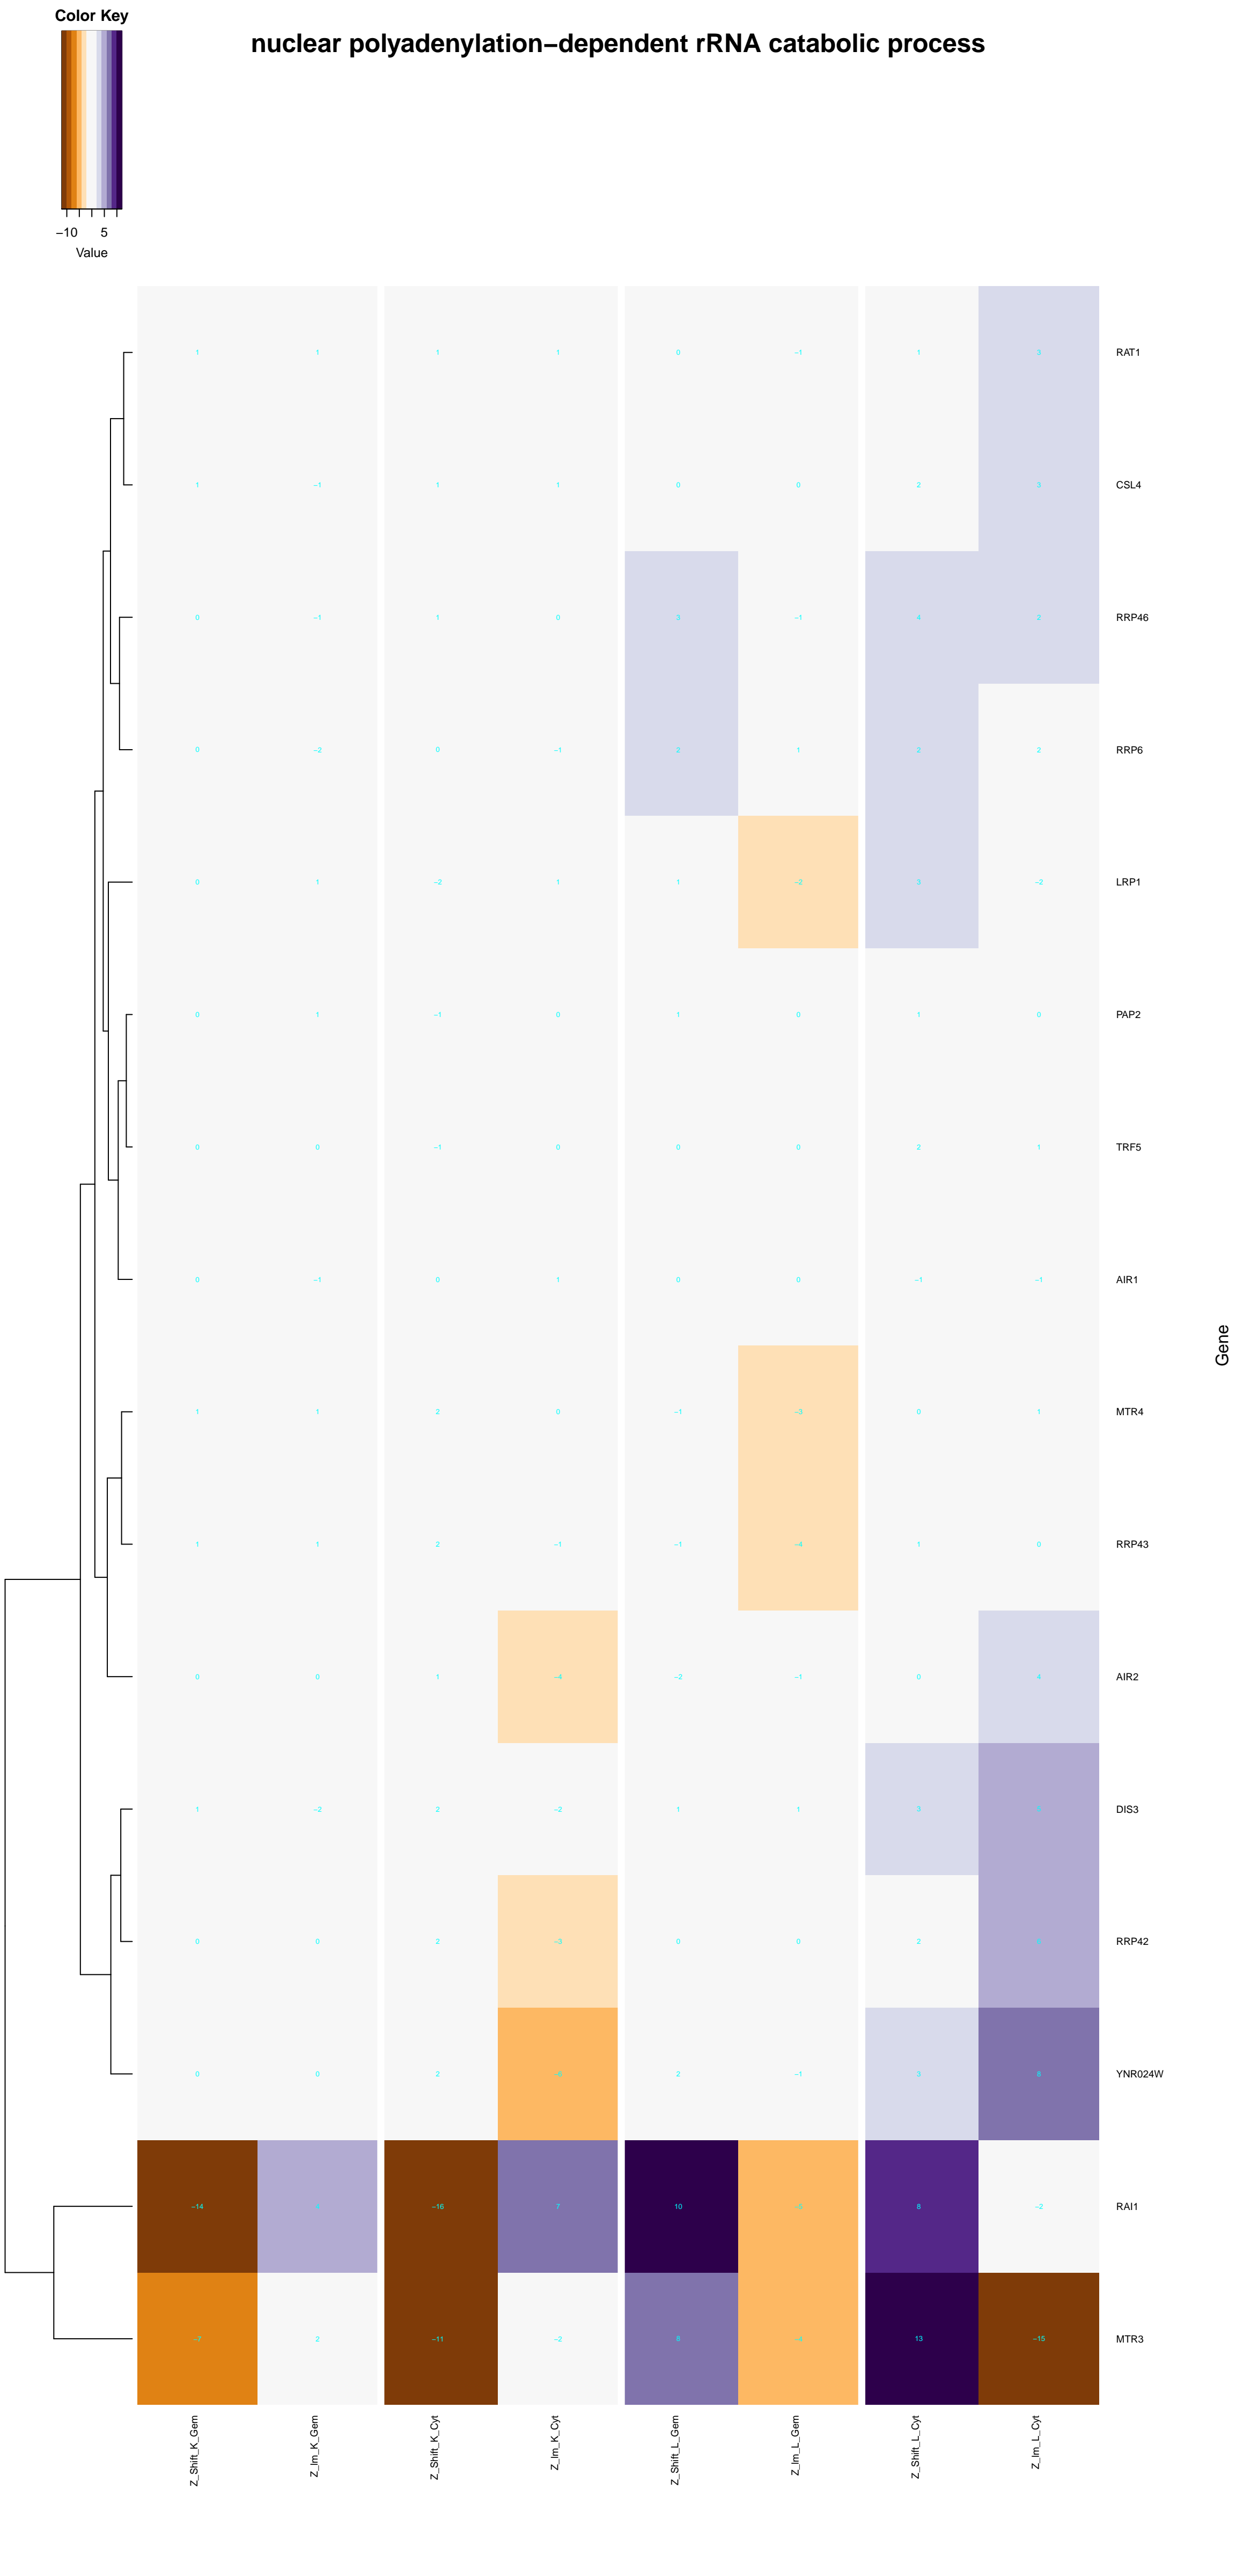

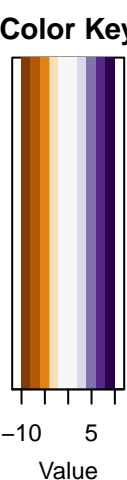

nuclear polyadenylation-dependent snRNA catabolic process

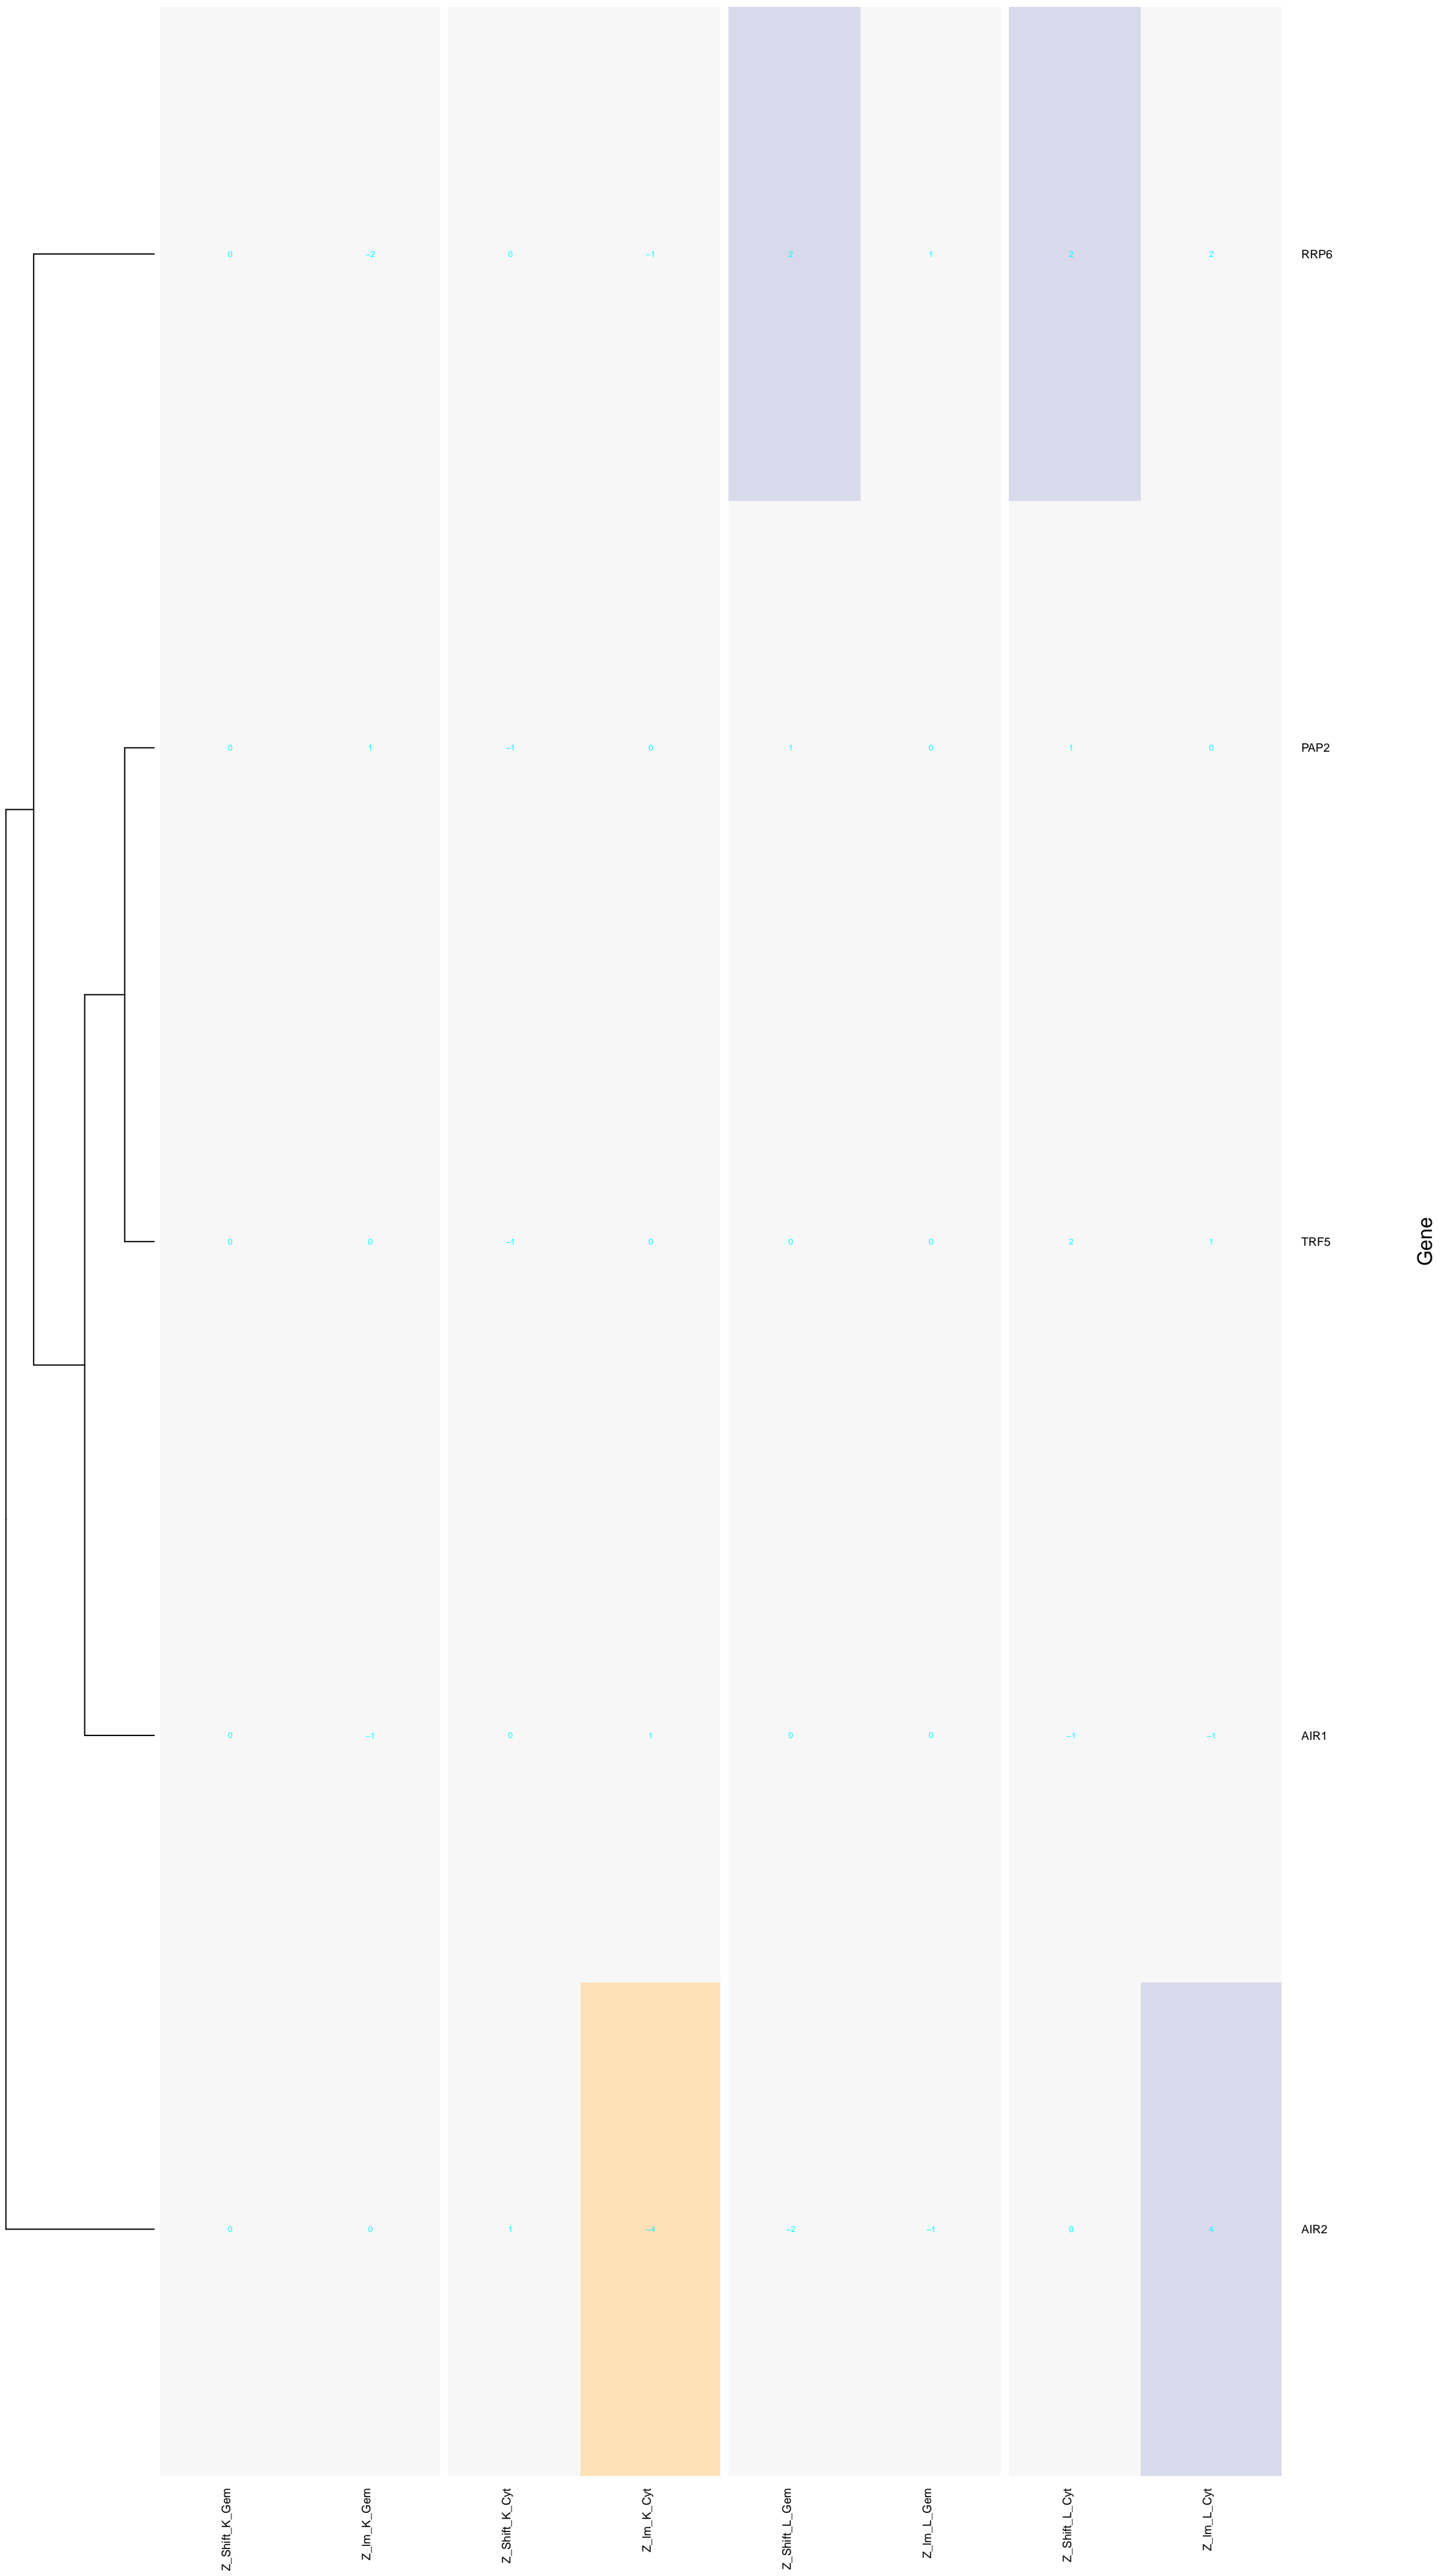

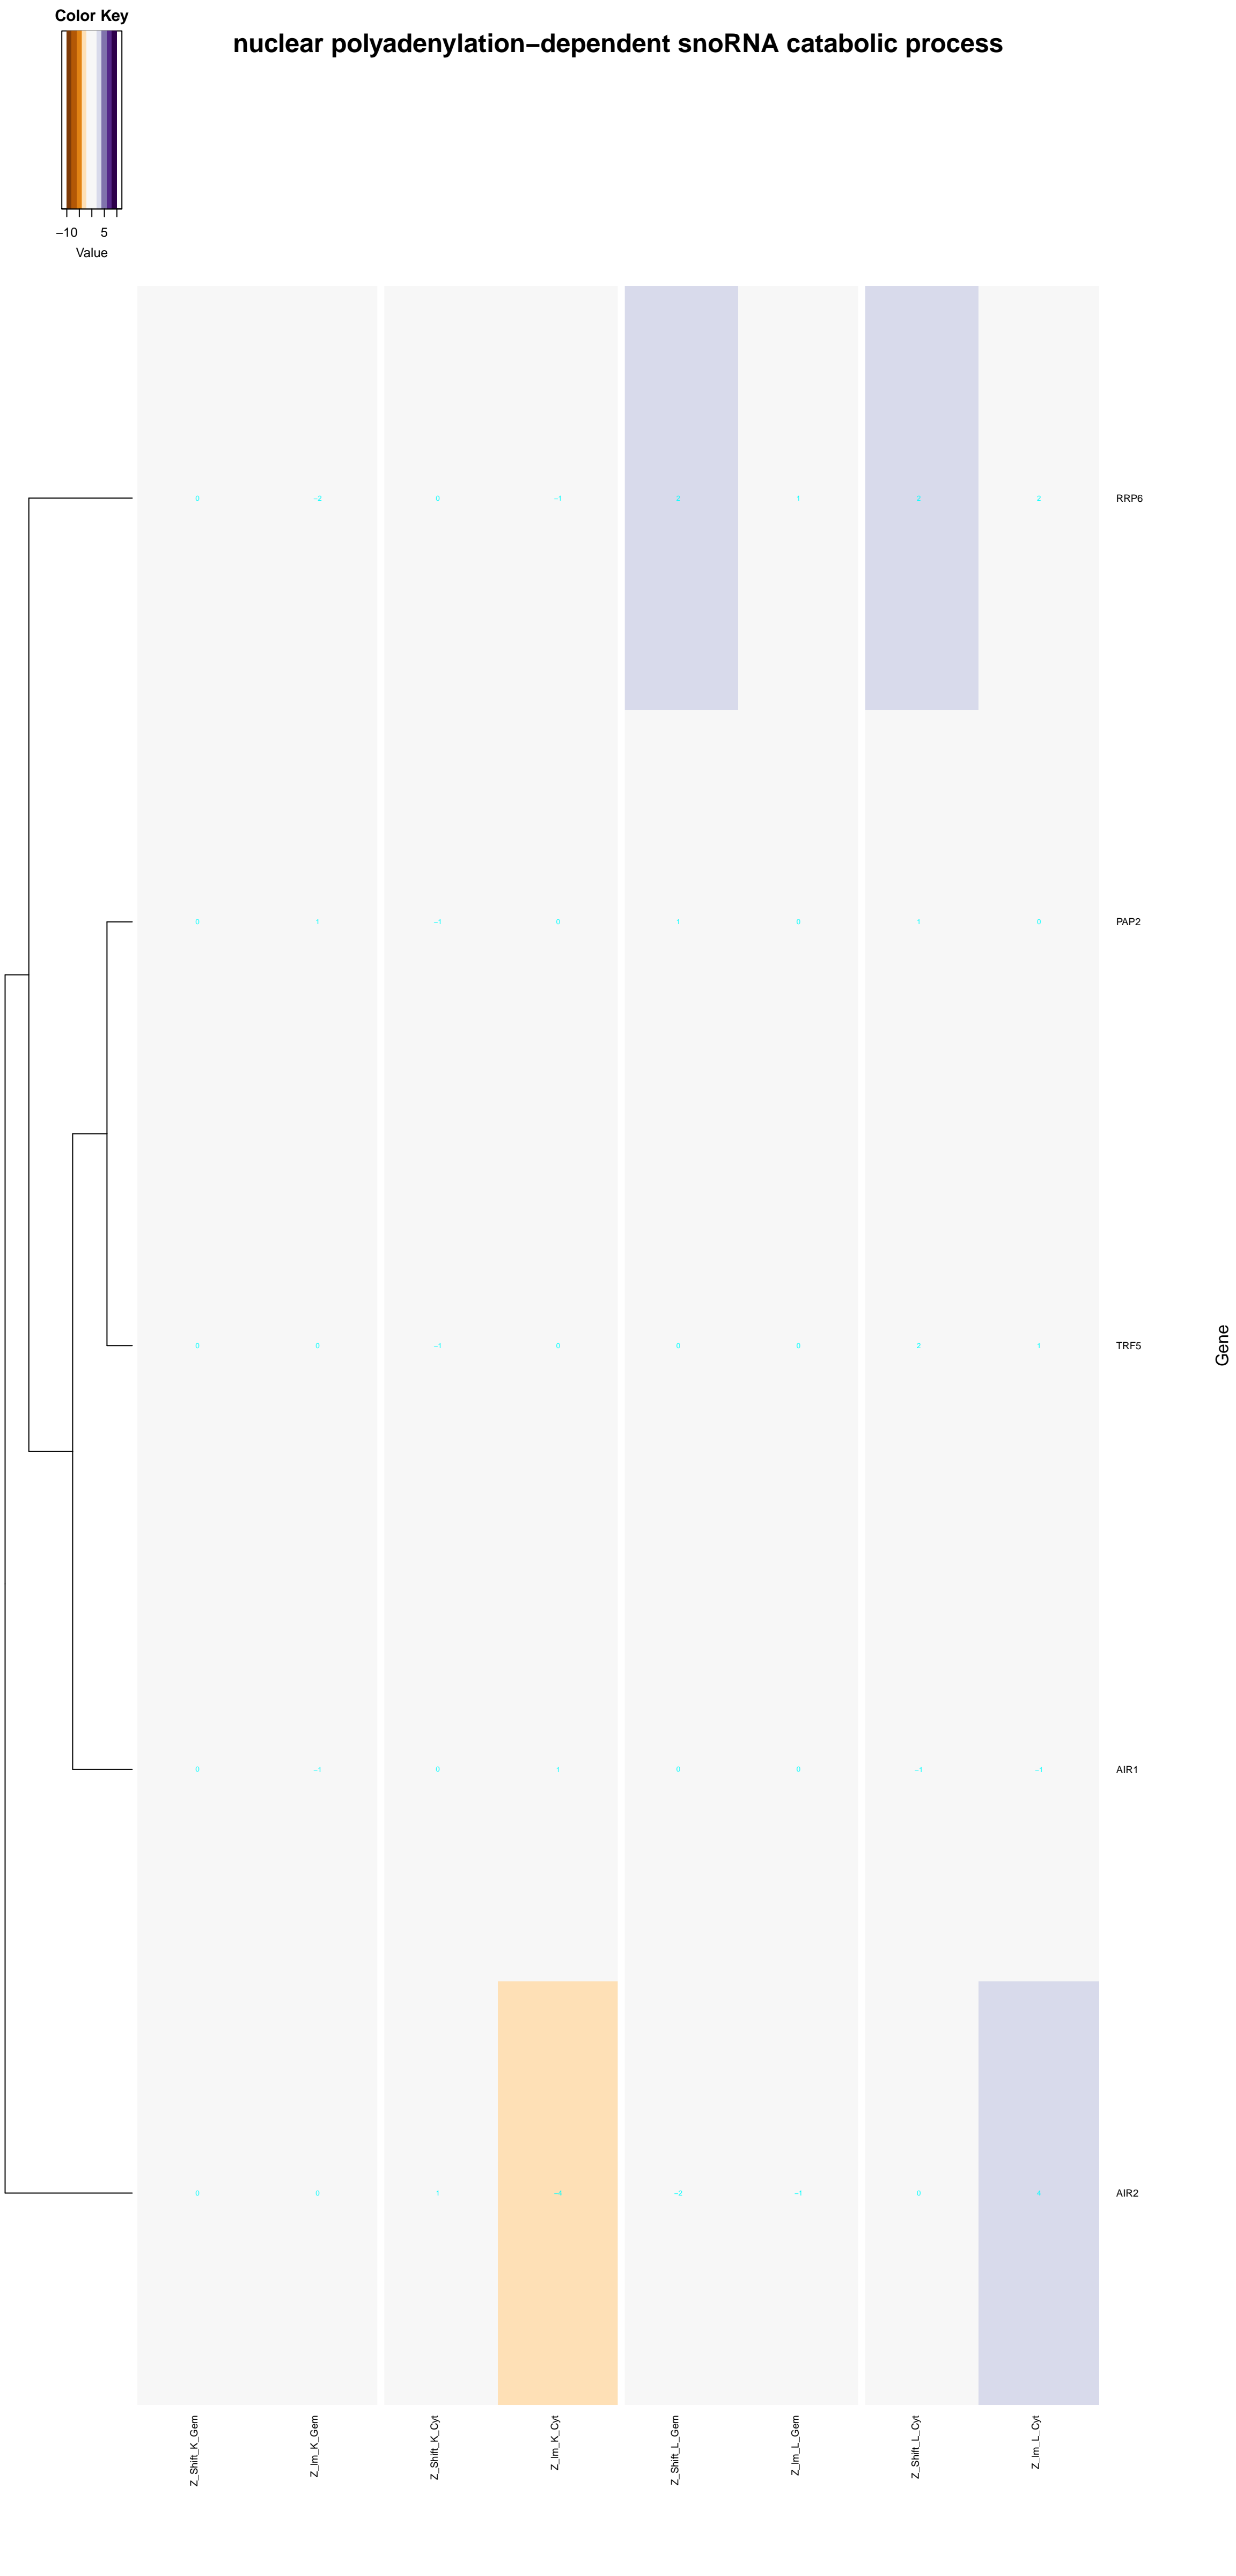

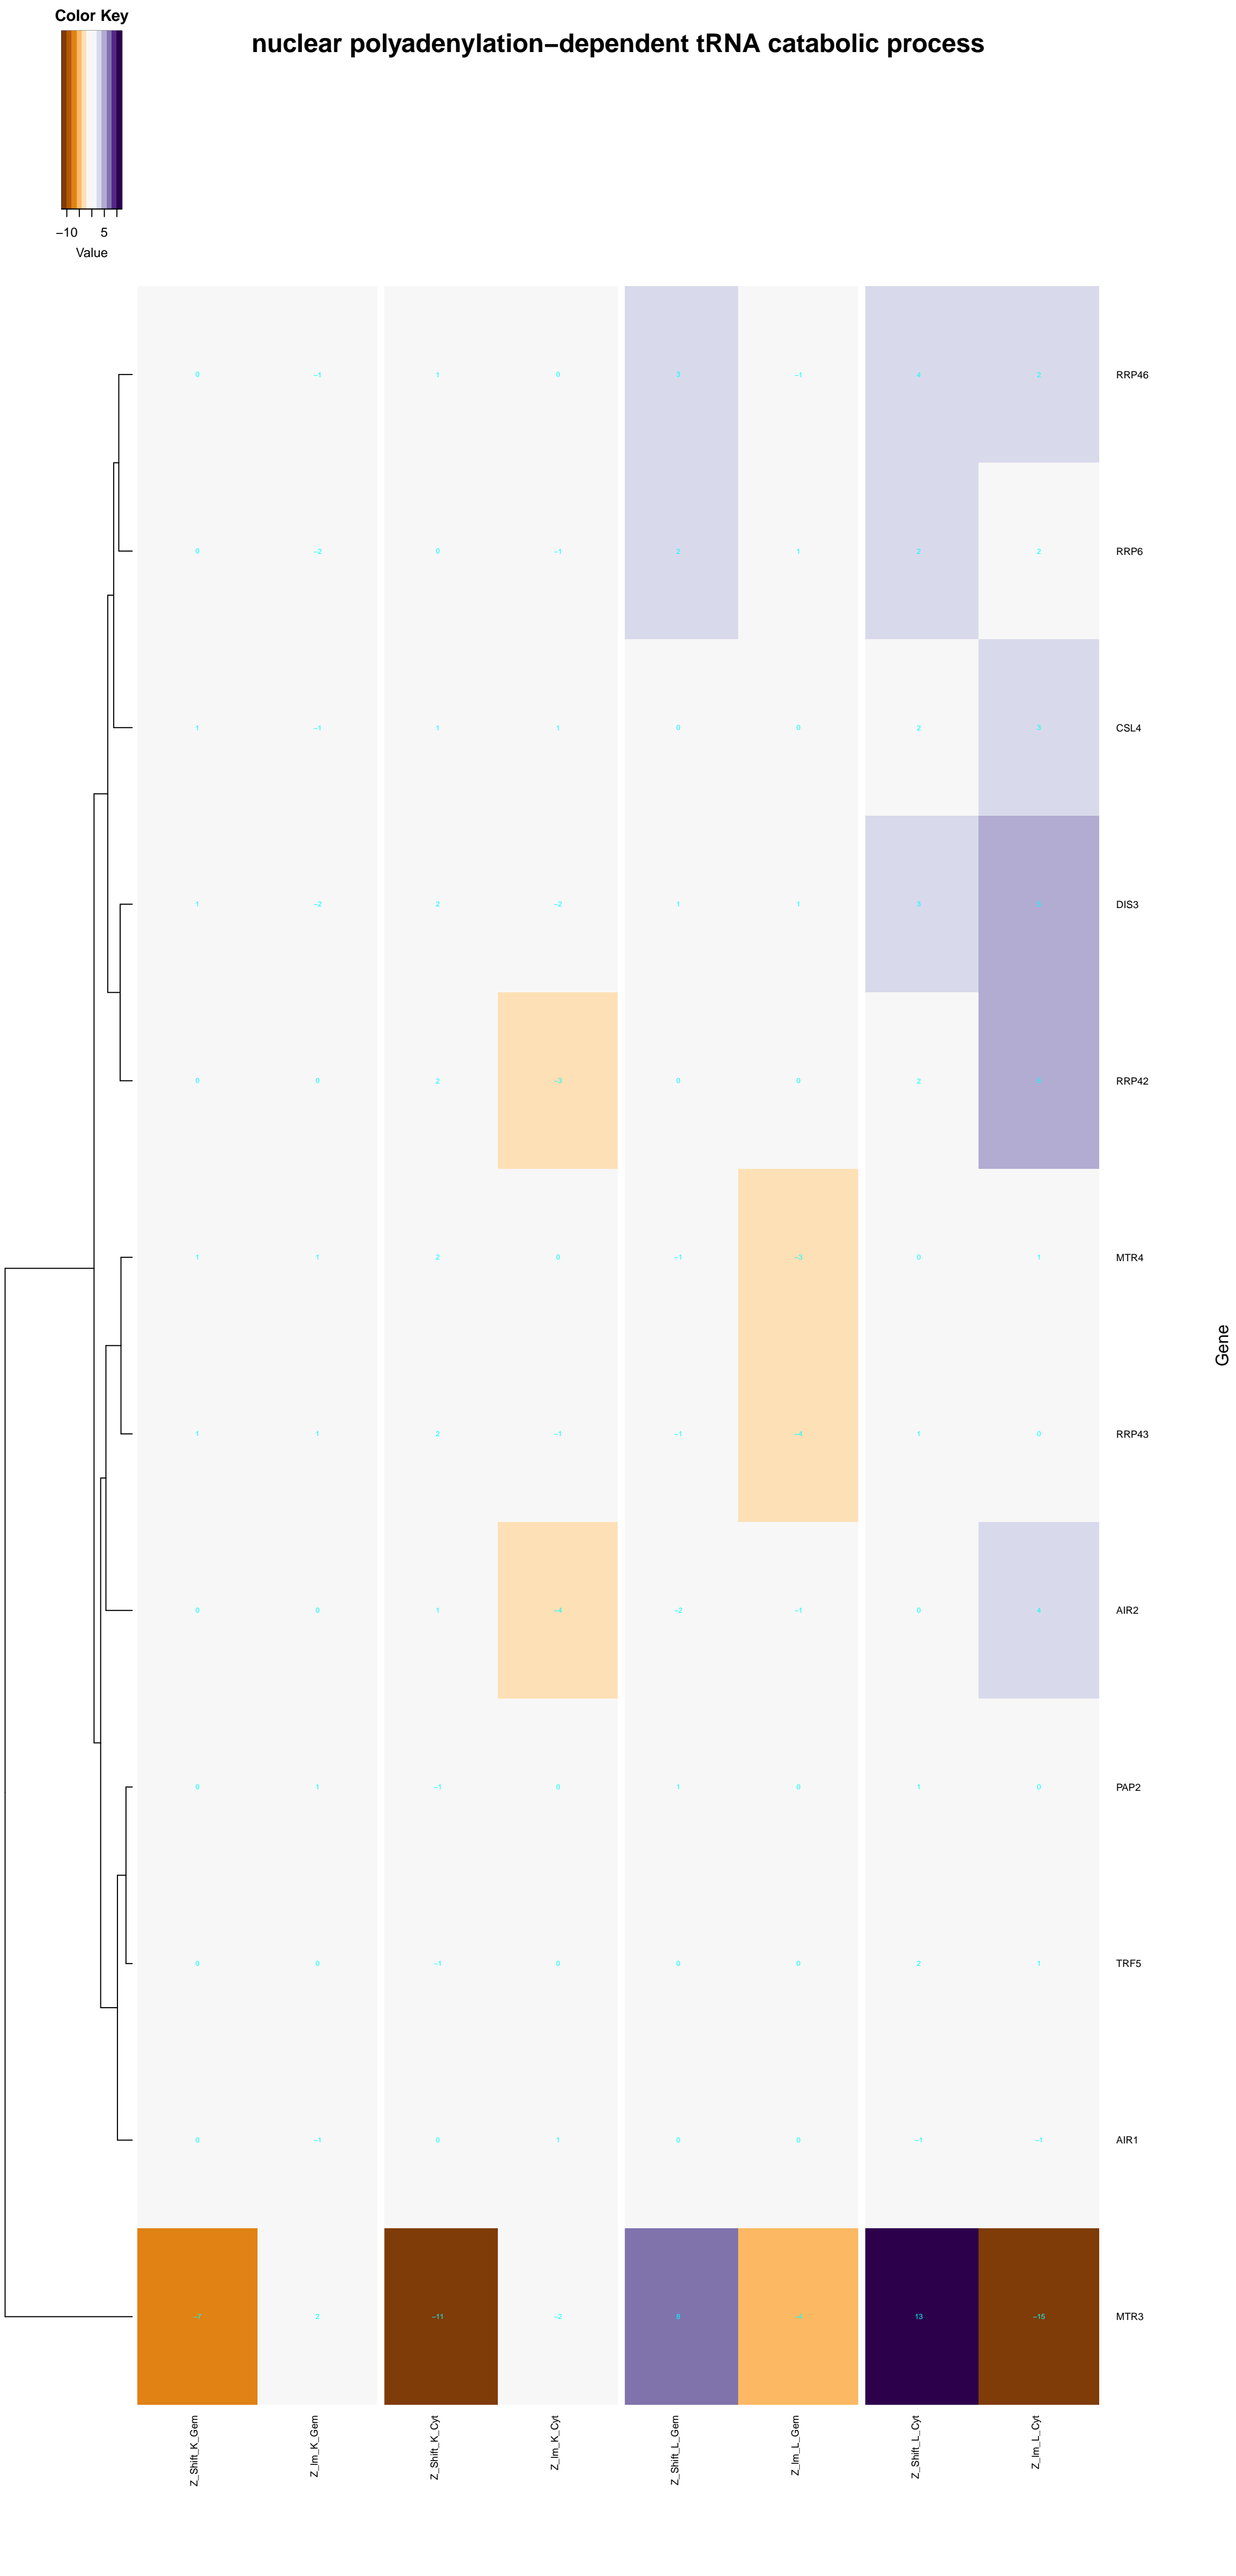

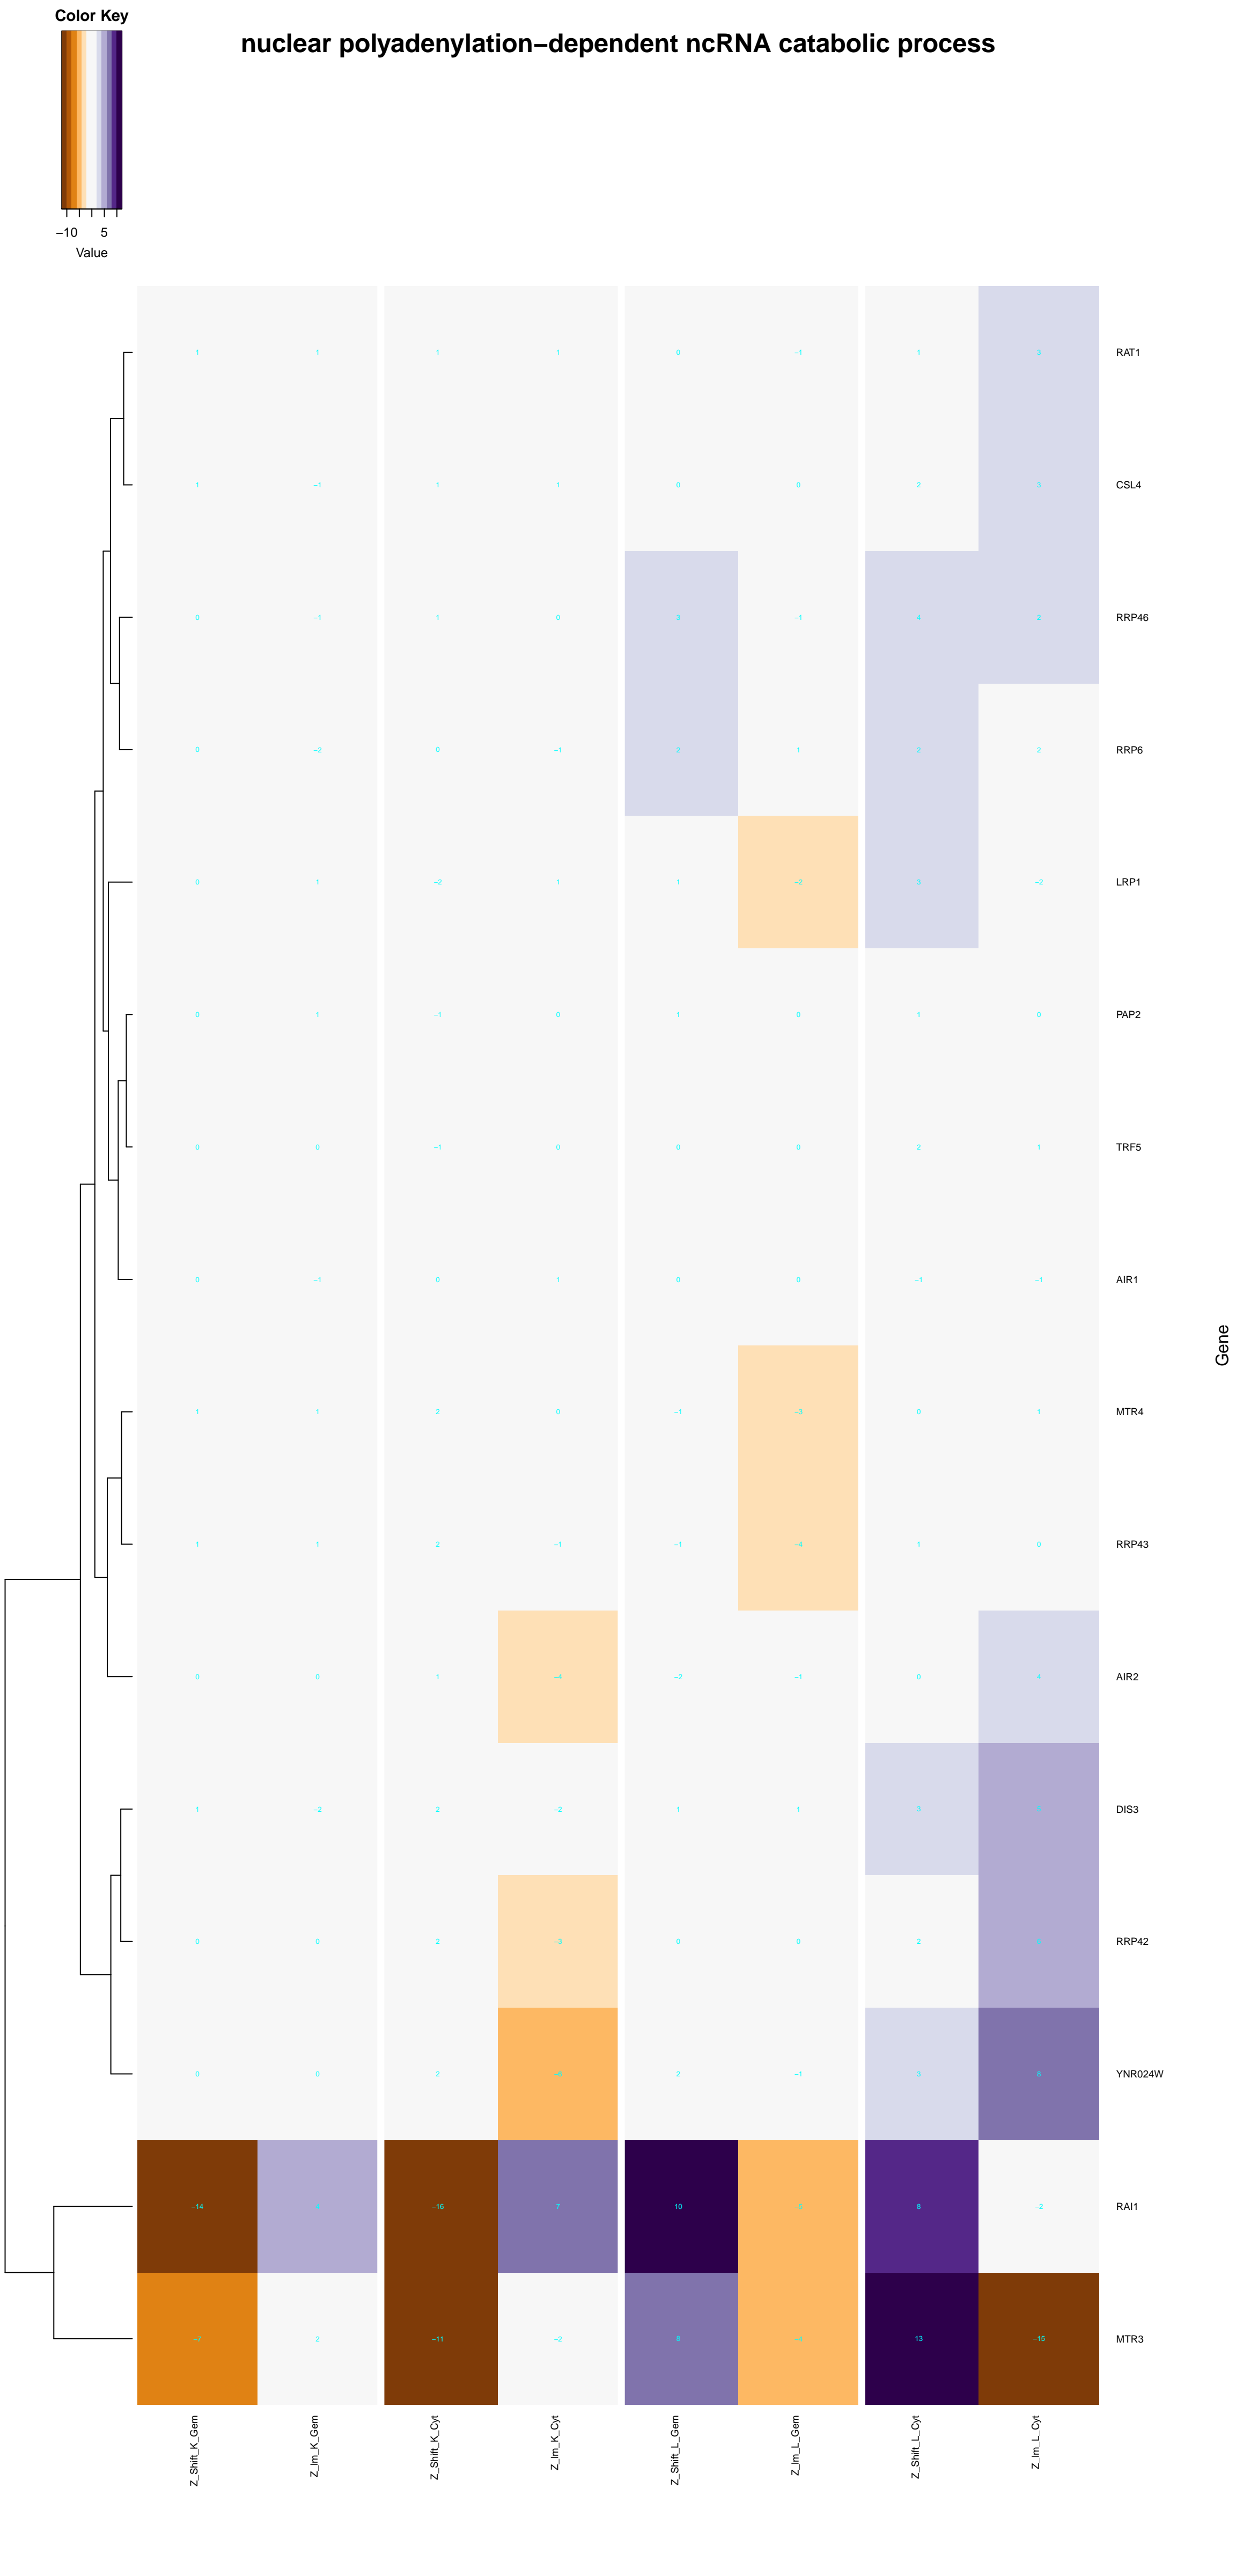

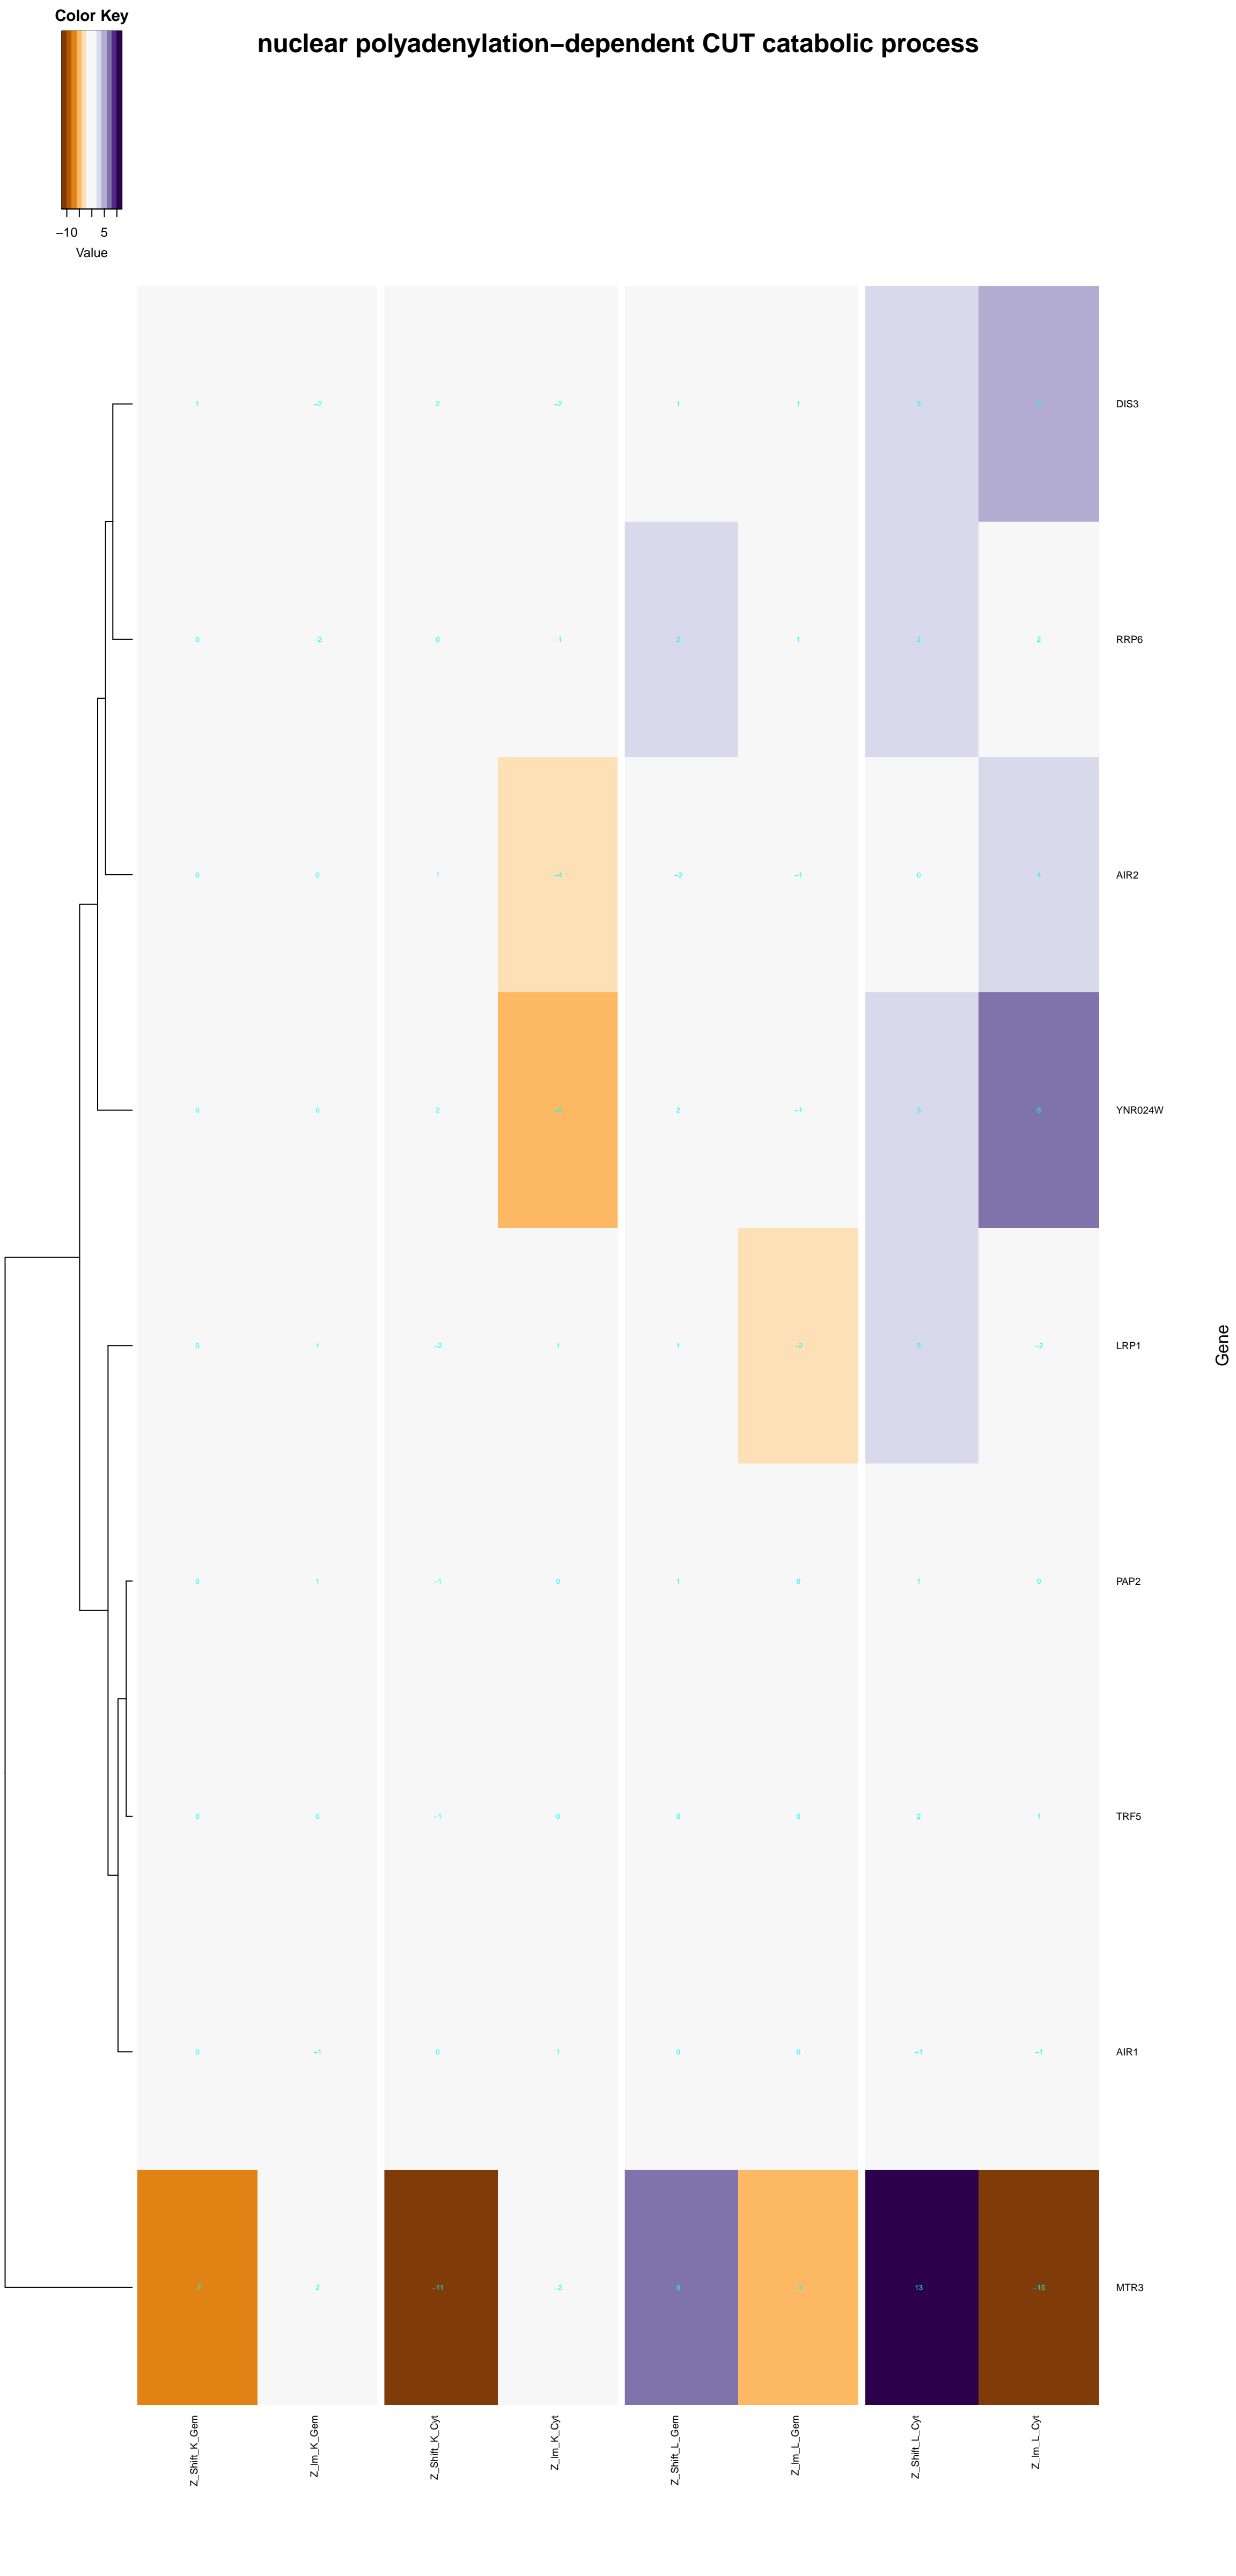

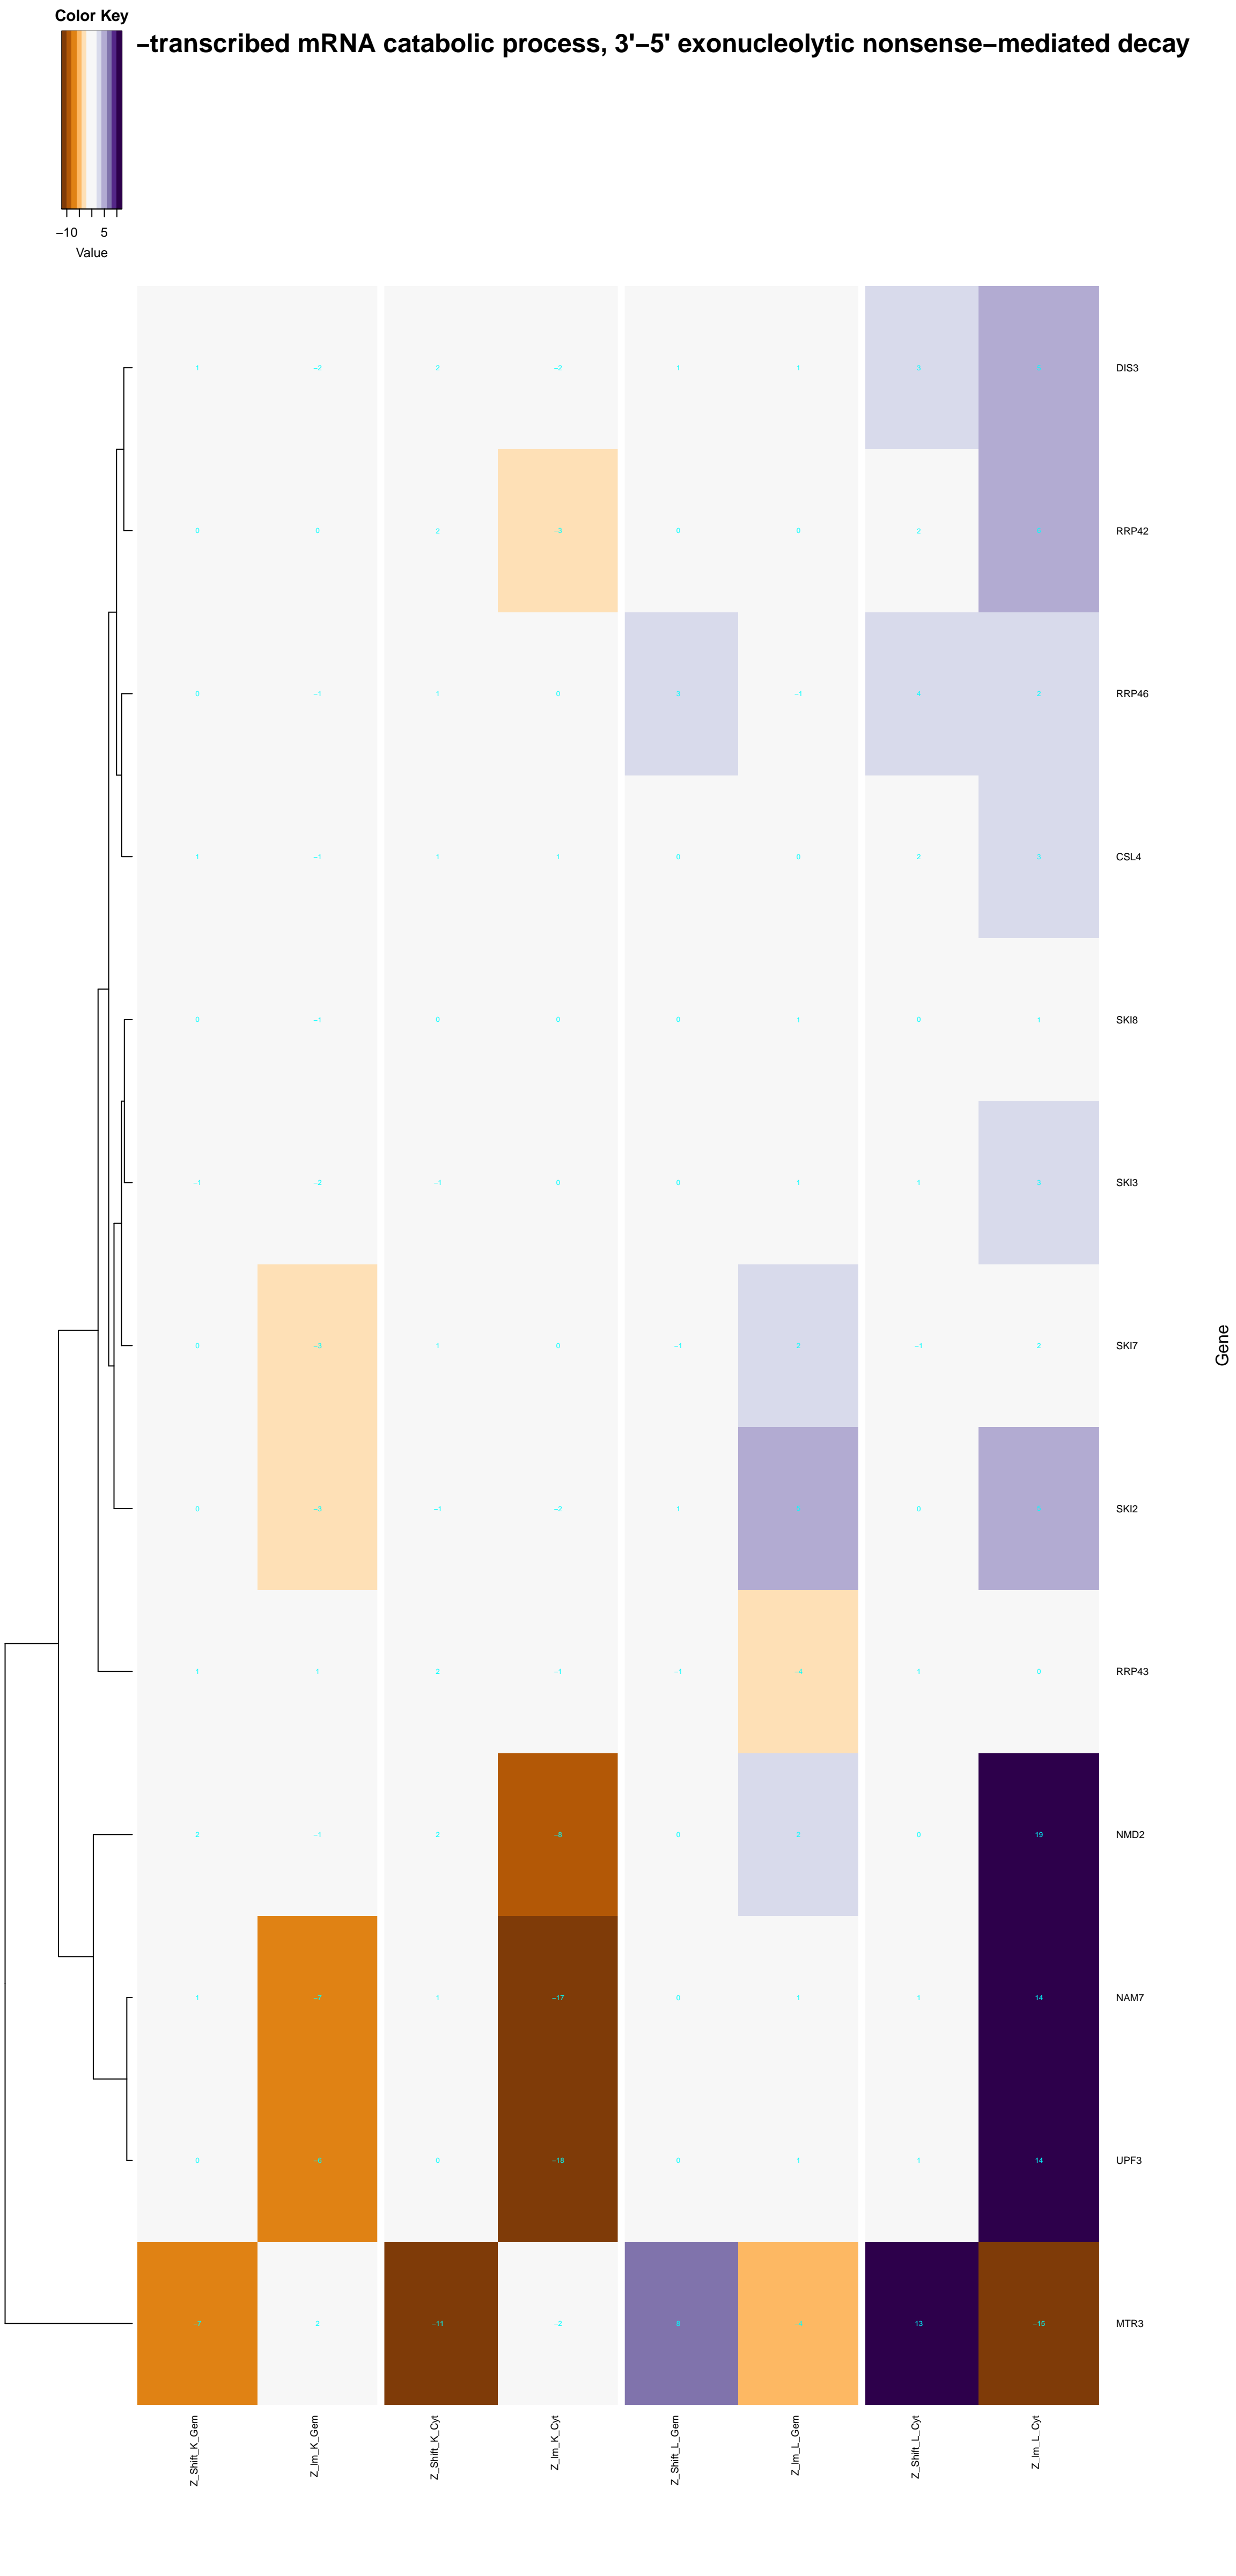

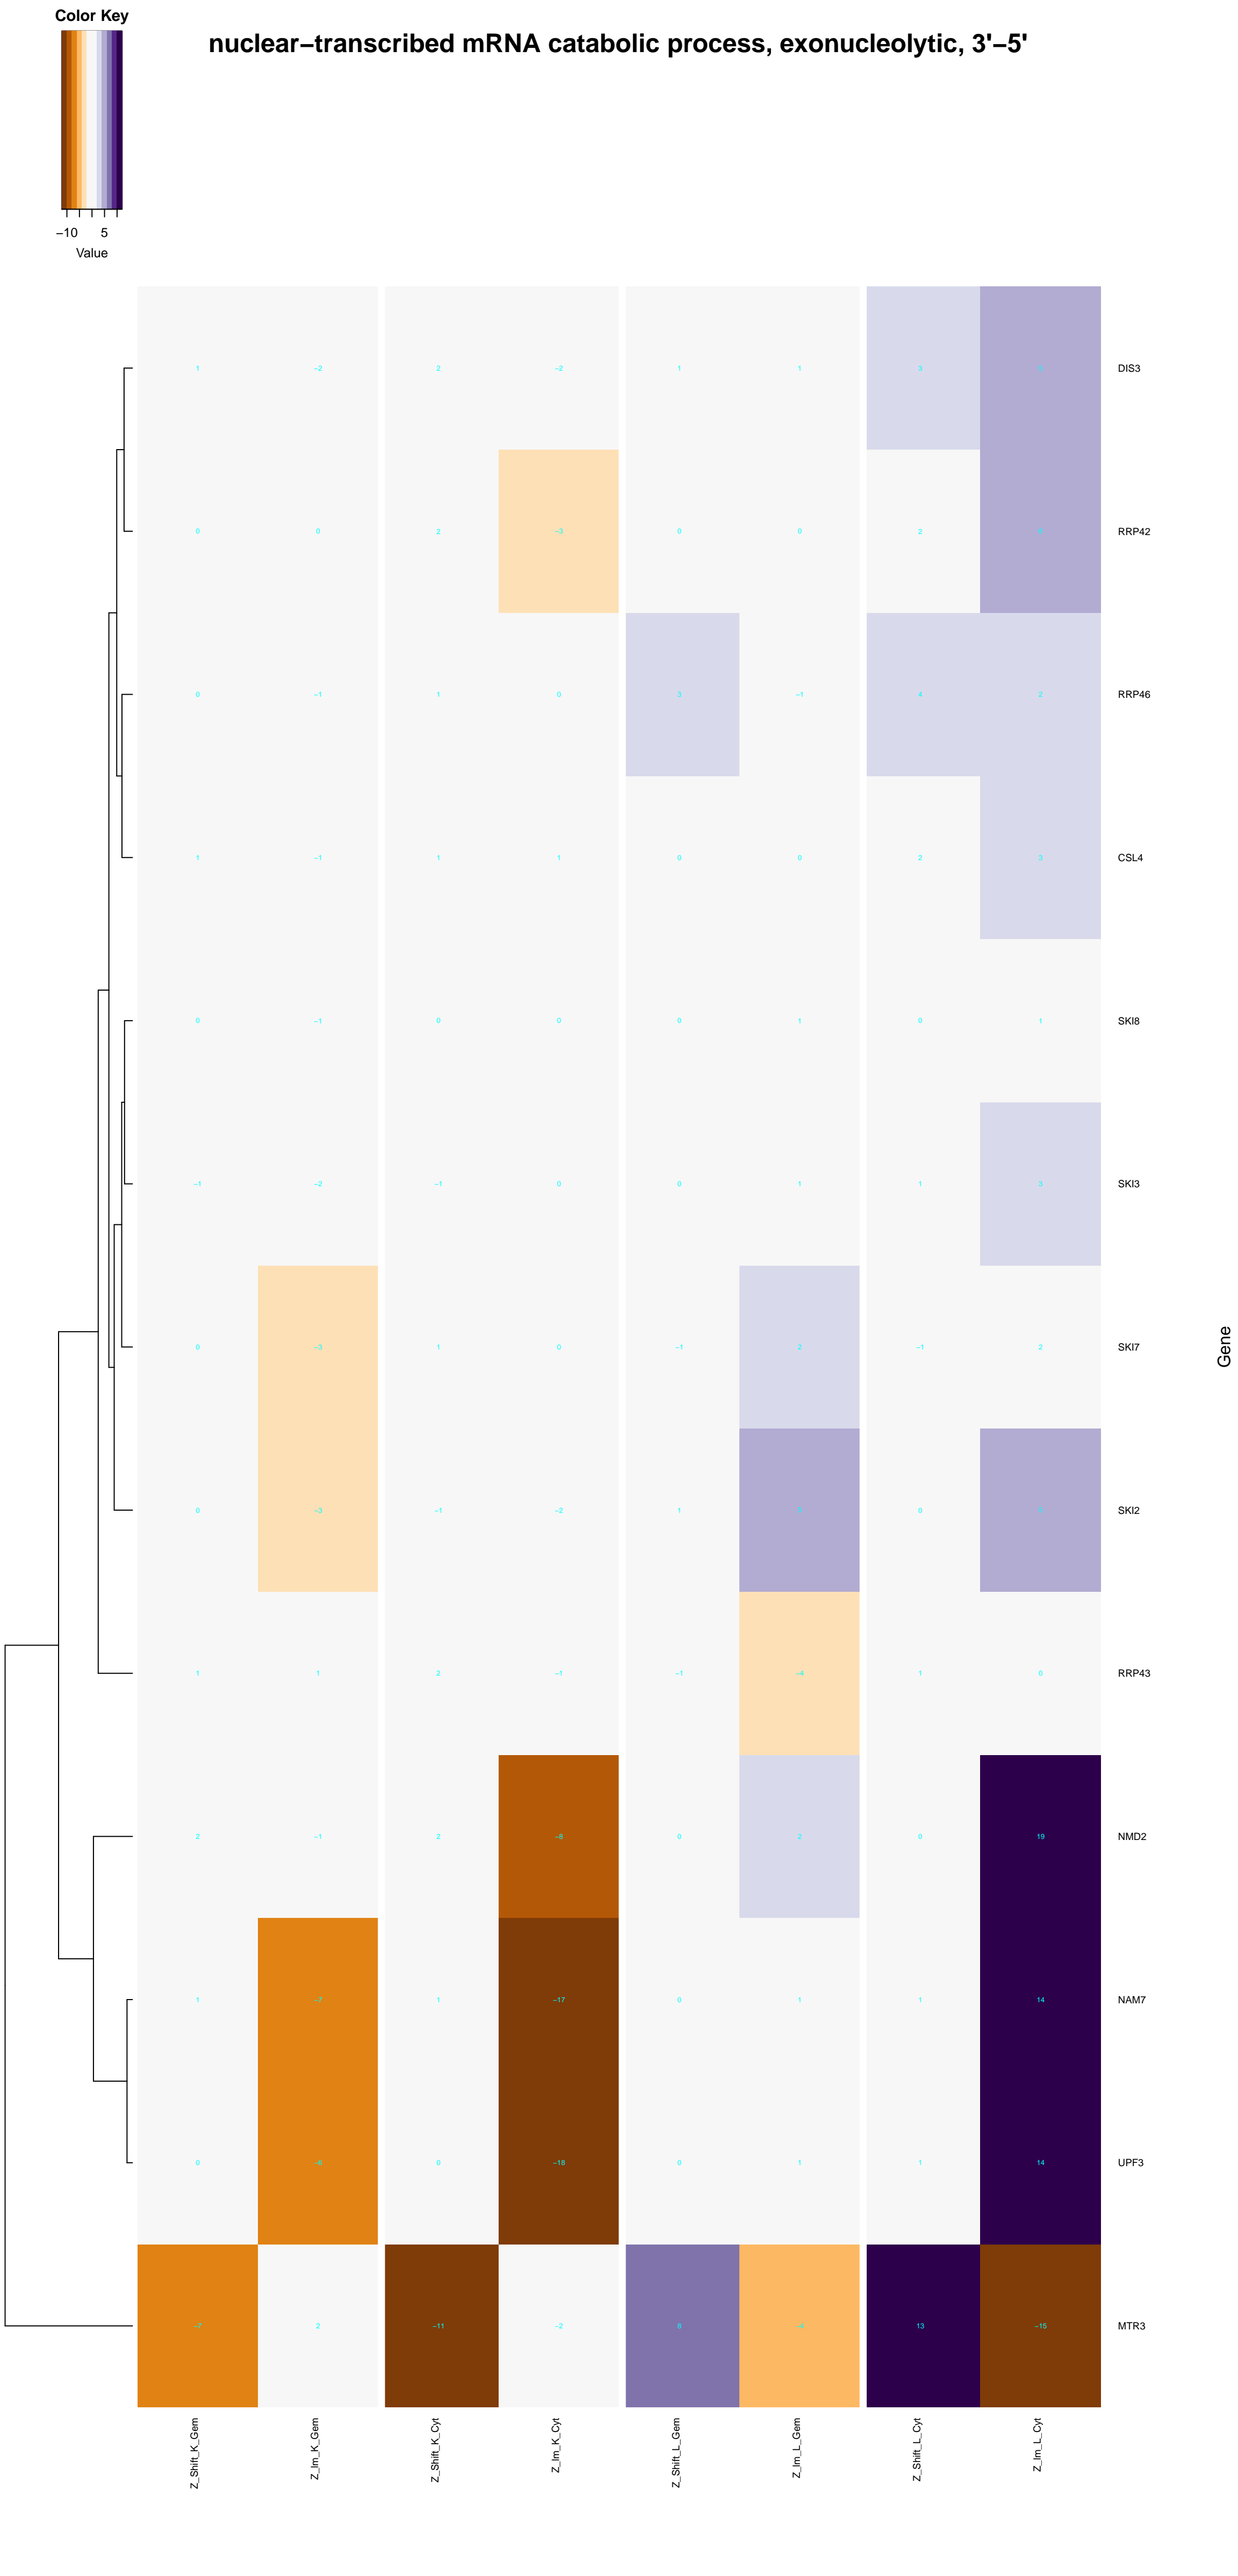

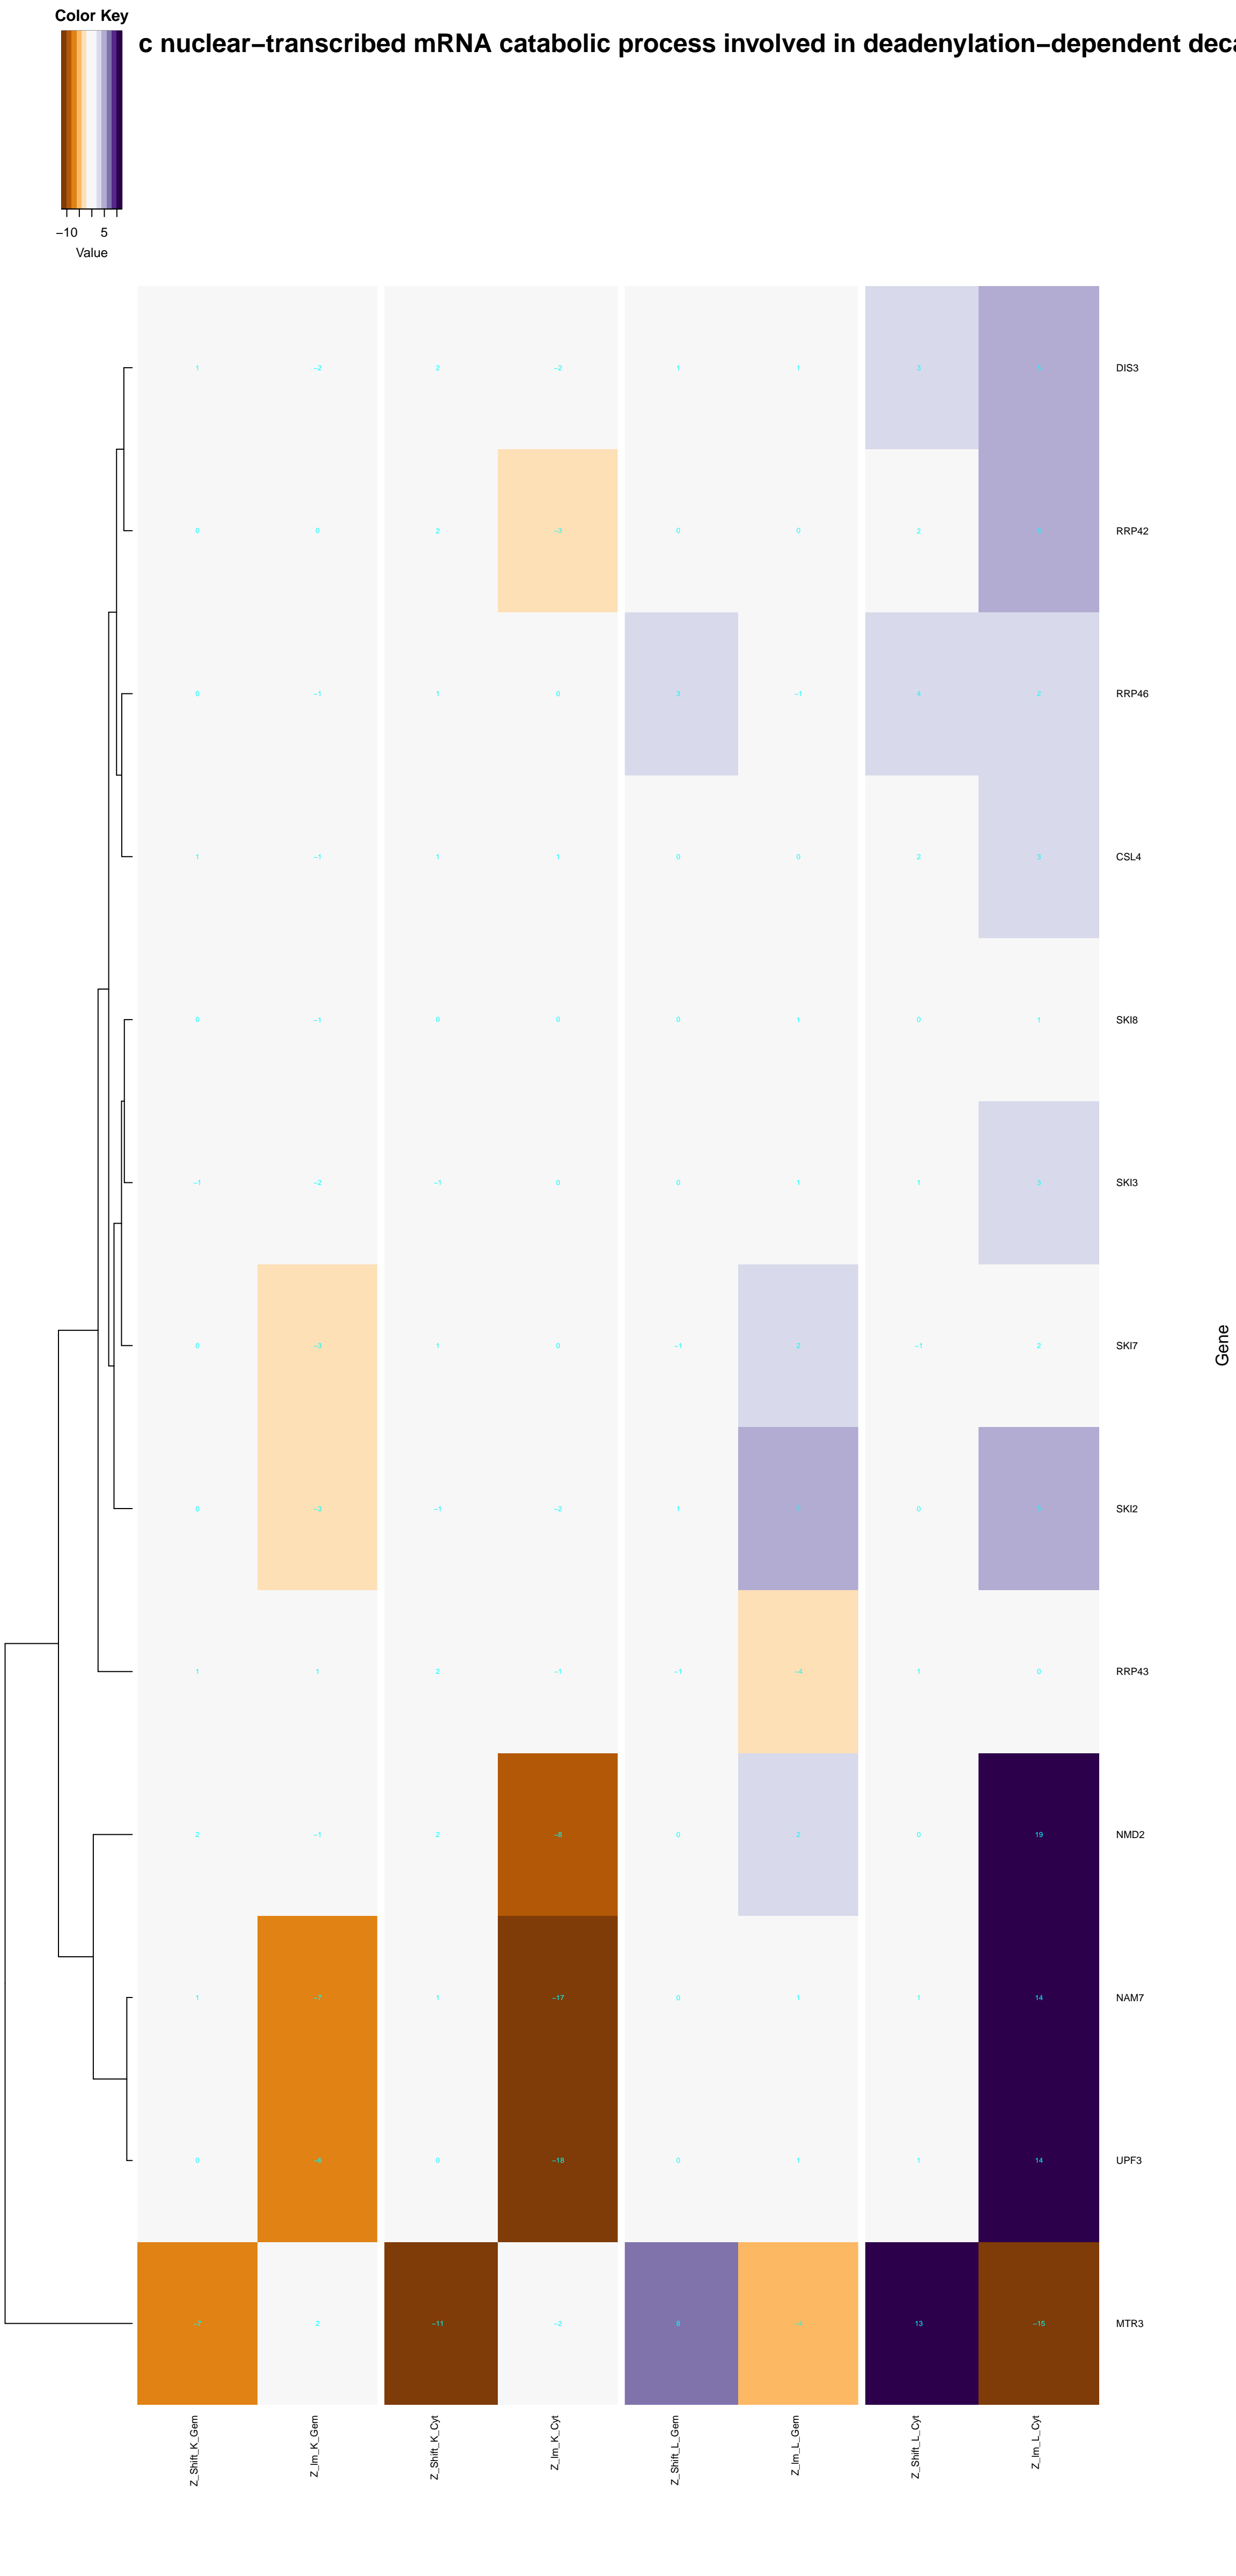

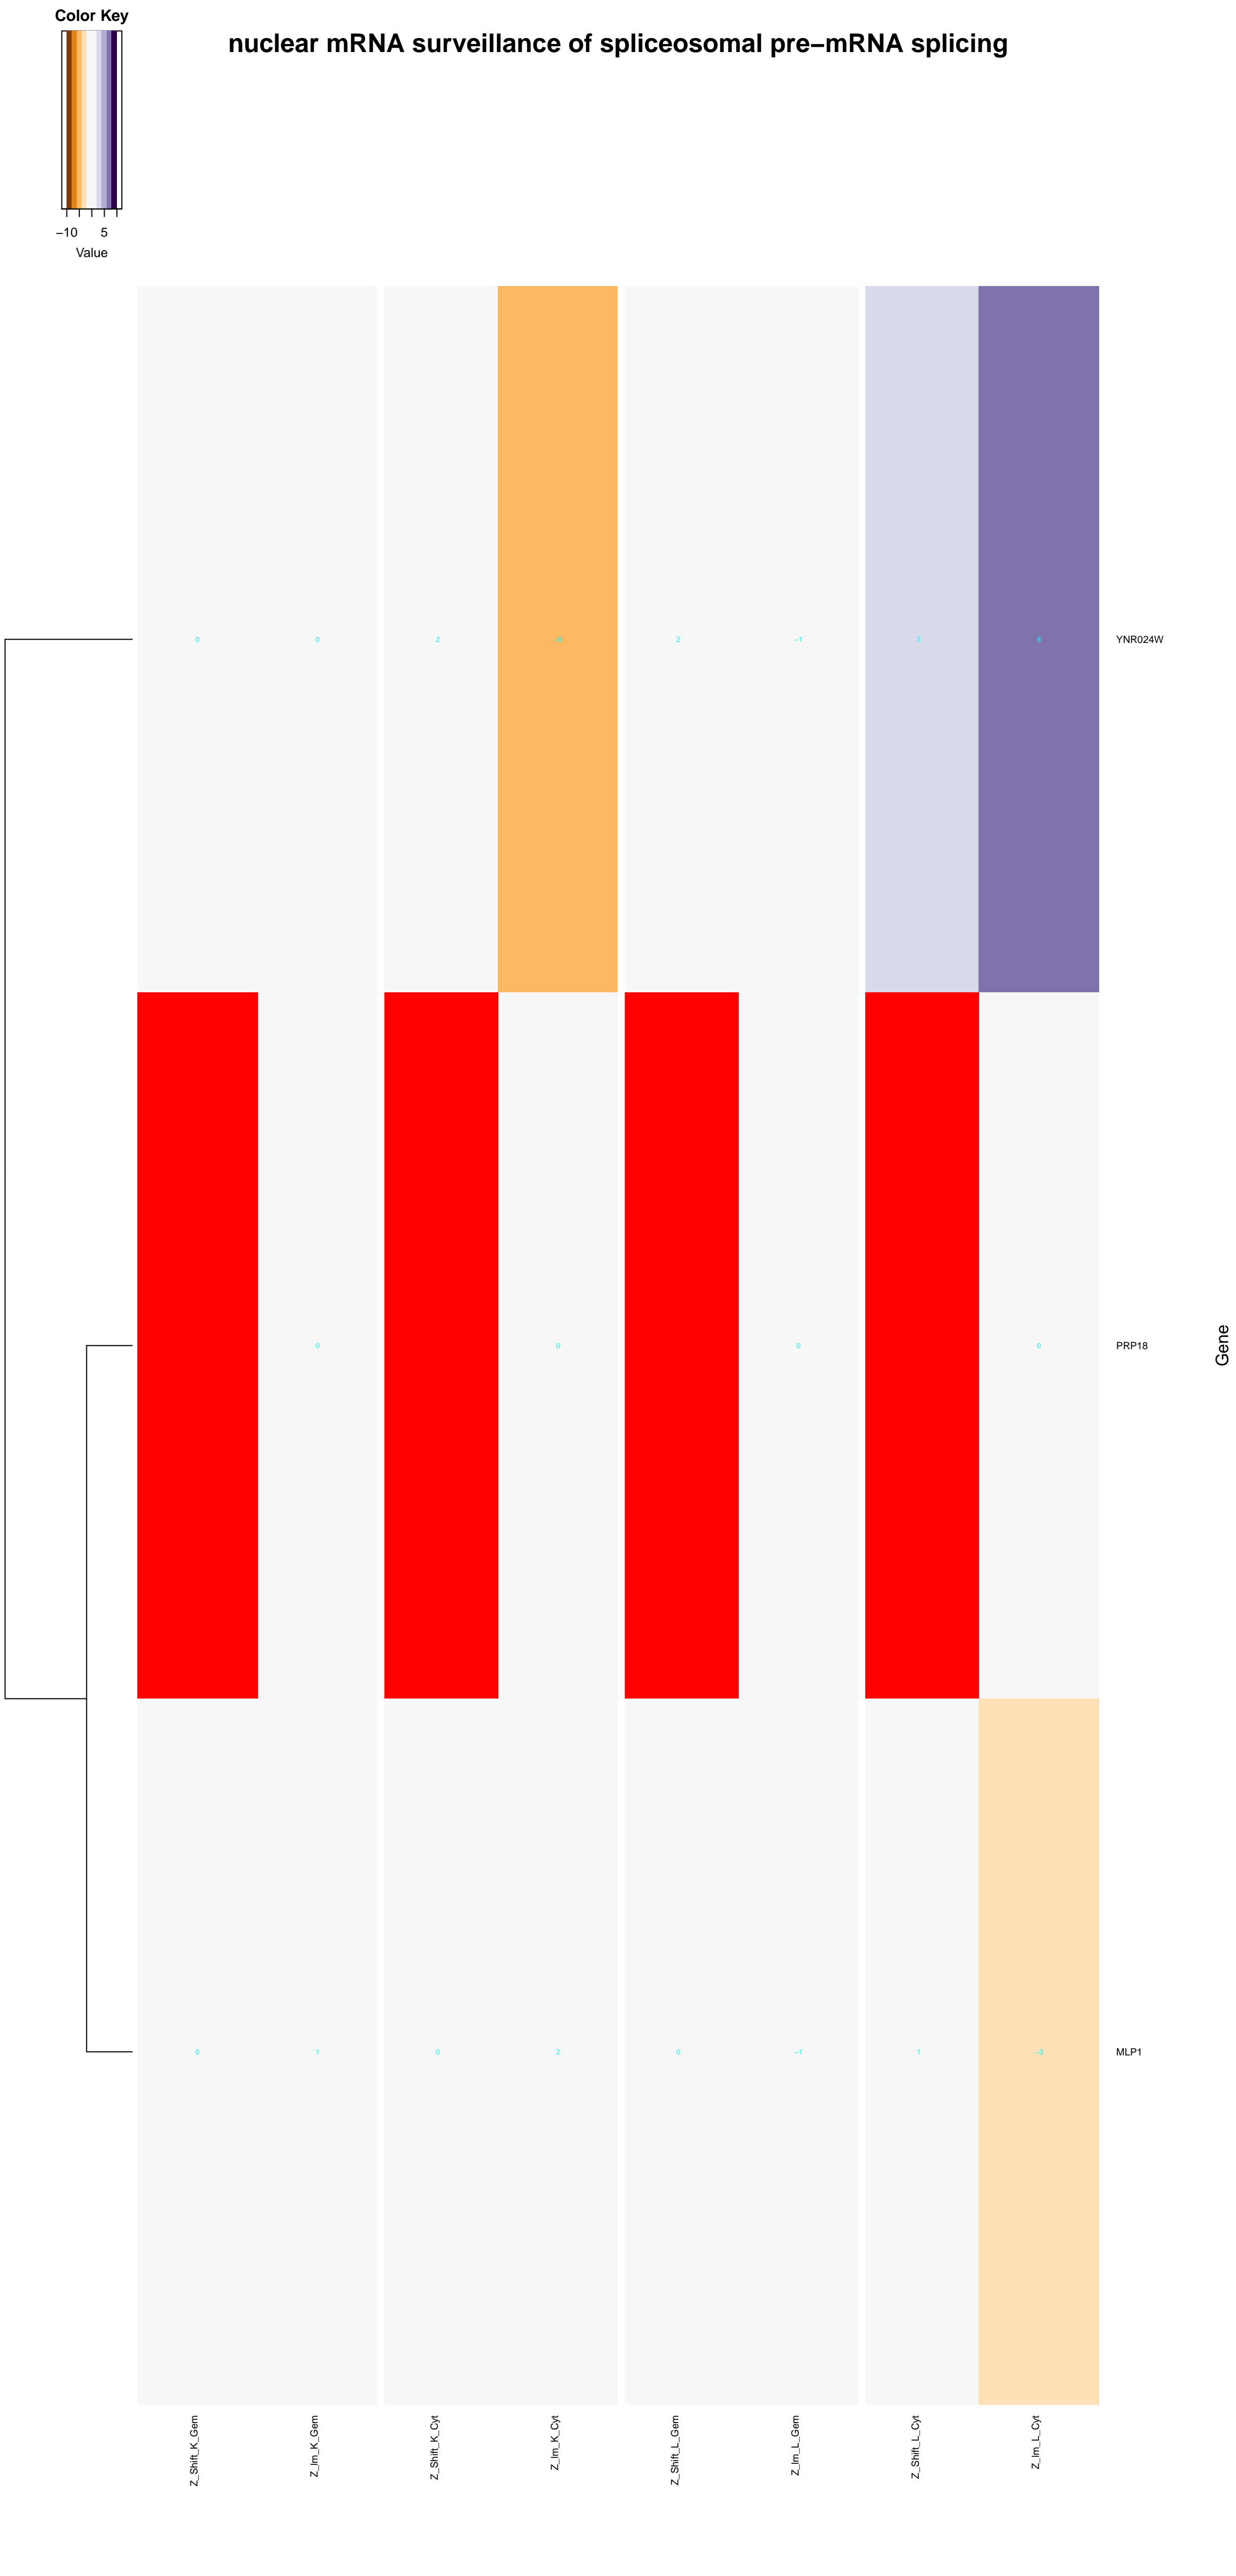

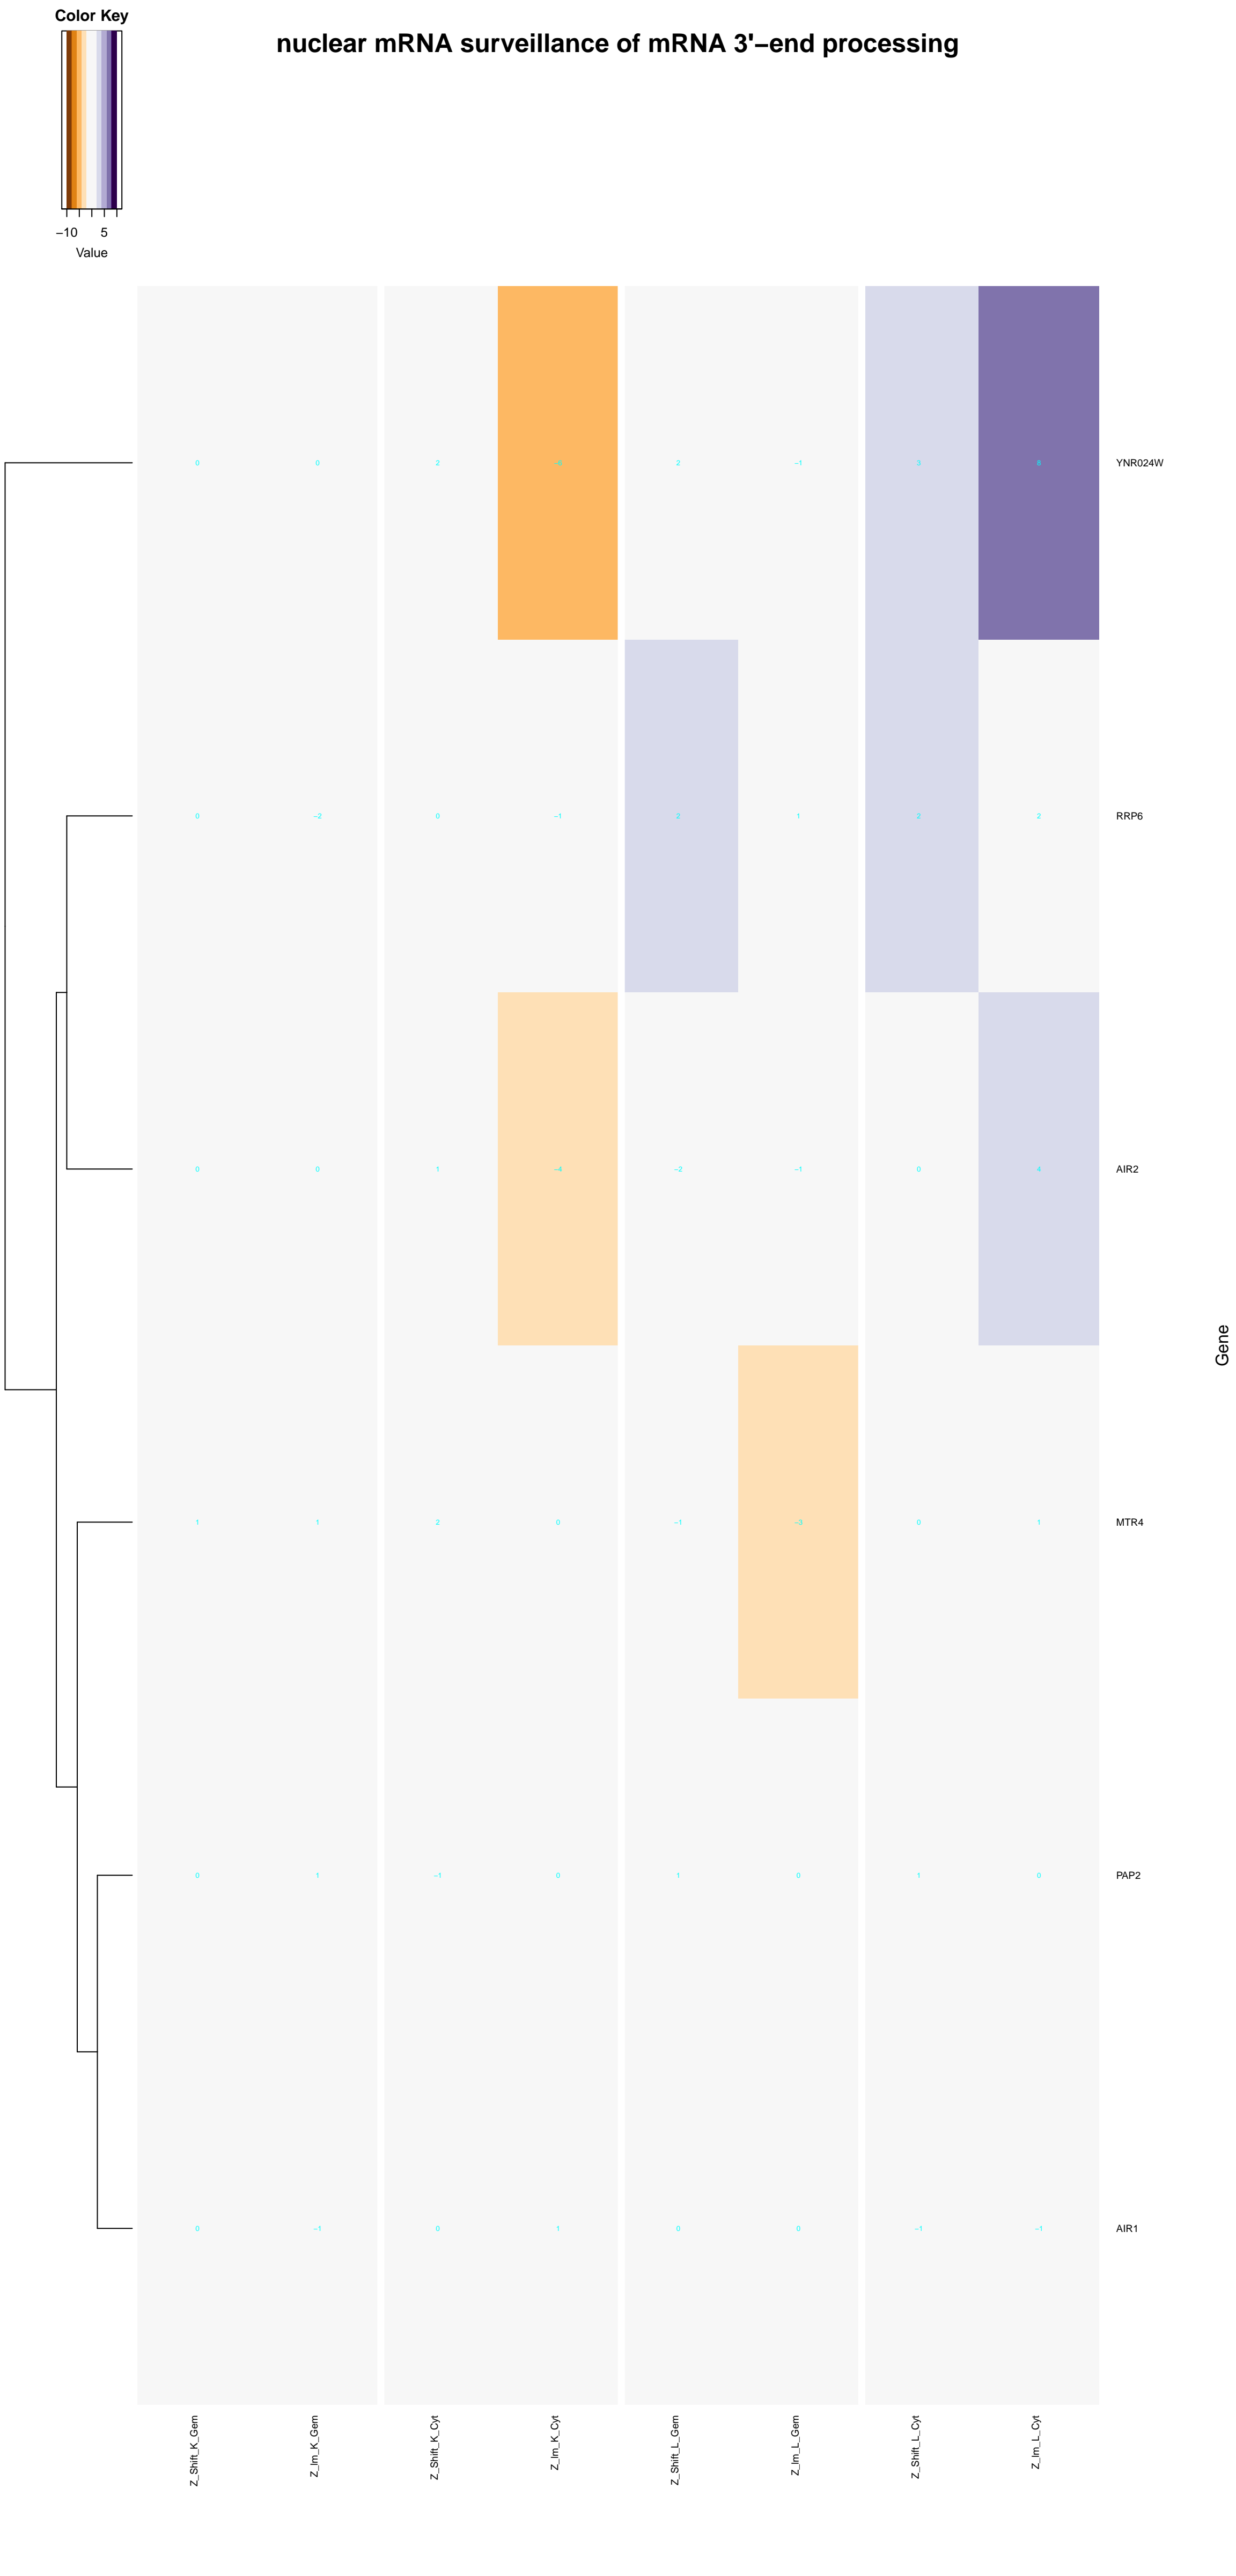

Supplement: s1 [file s1]
