# Supplementary material for: A Humanized Yeast Phenomic Model of Deoxycytidine Kinase to Predict Genetic Buffering of Nucleoside Analog Cytotoxicity
Source: MDPI journal article supplement (doi:10.3390/genes10100770), 2019-09-30

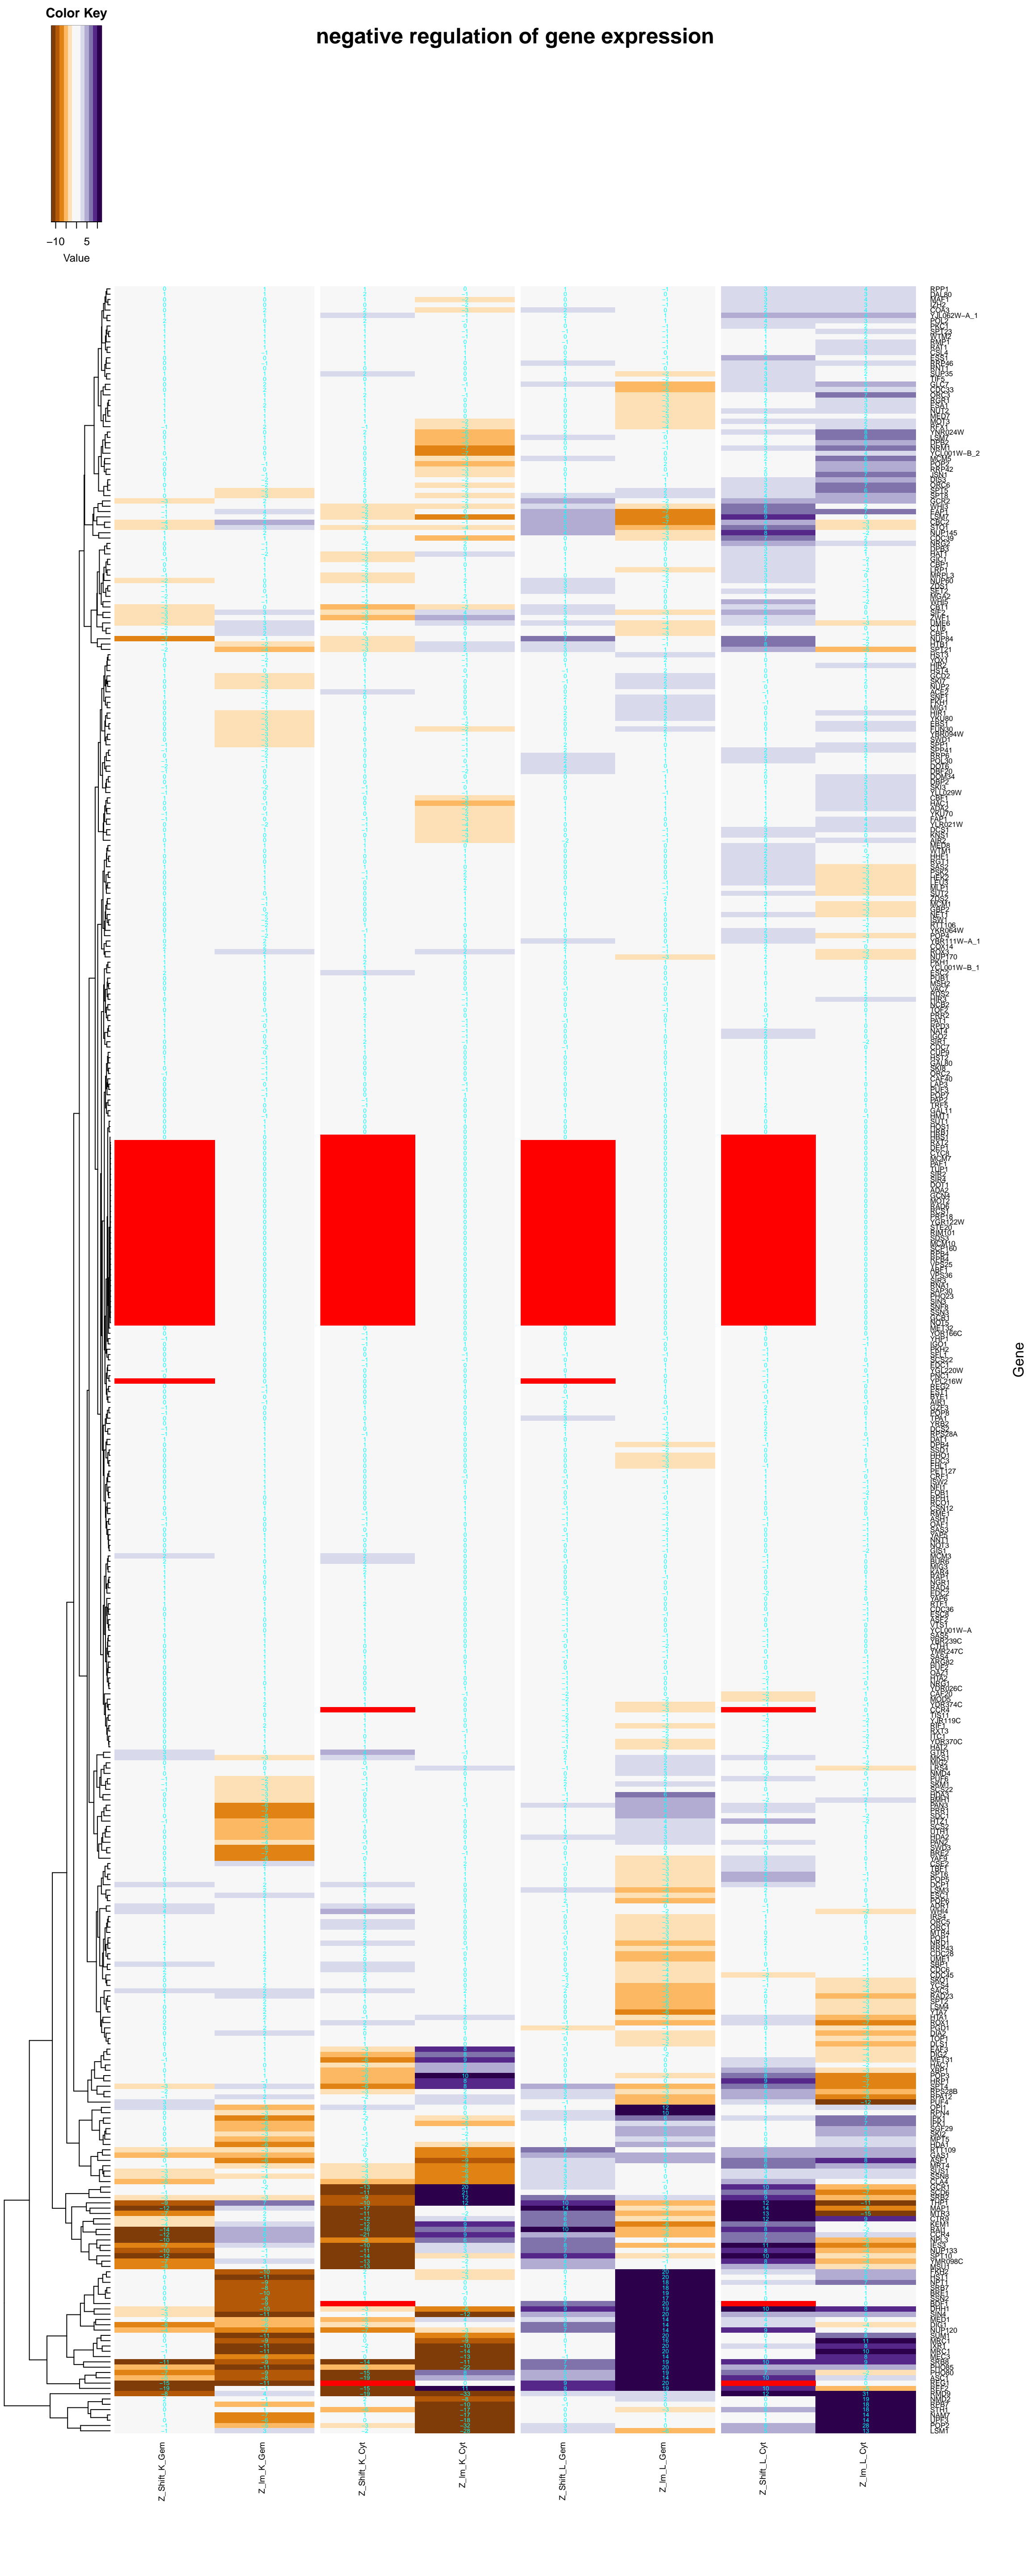

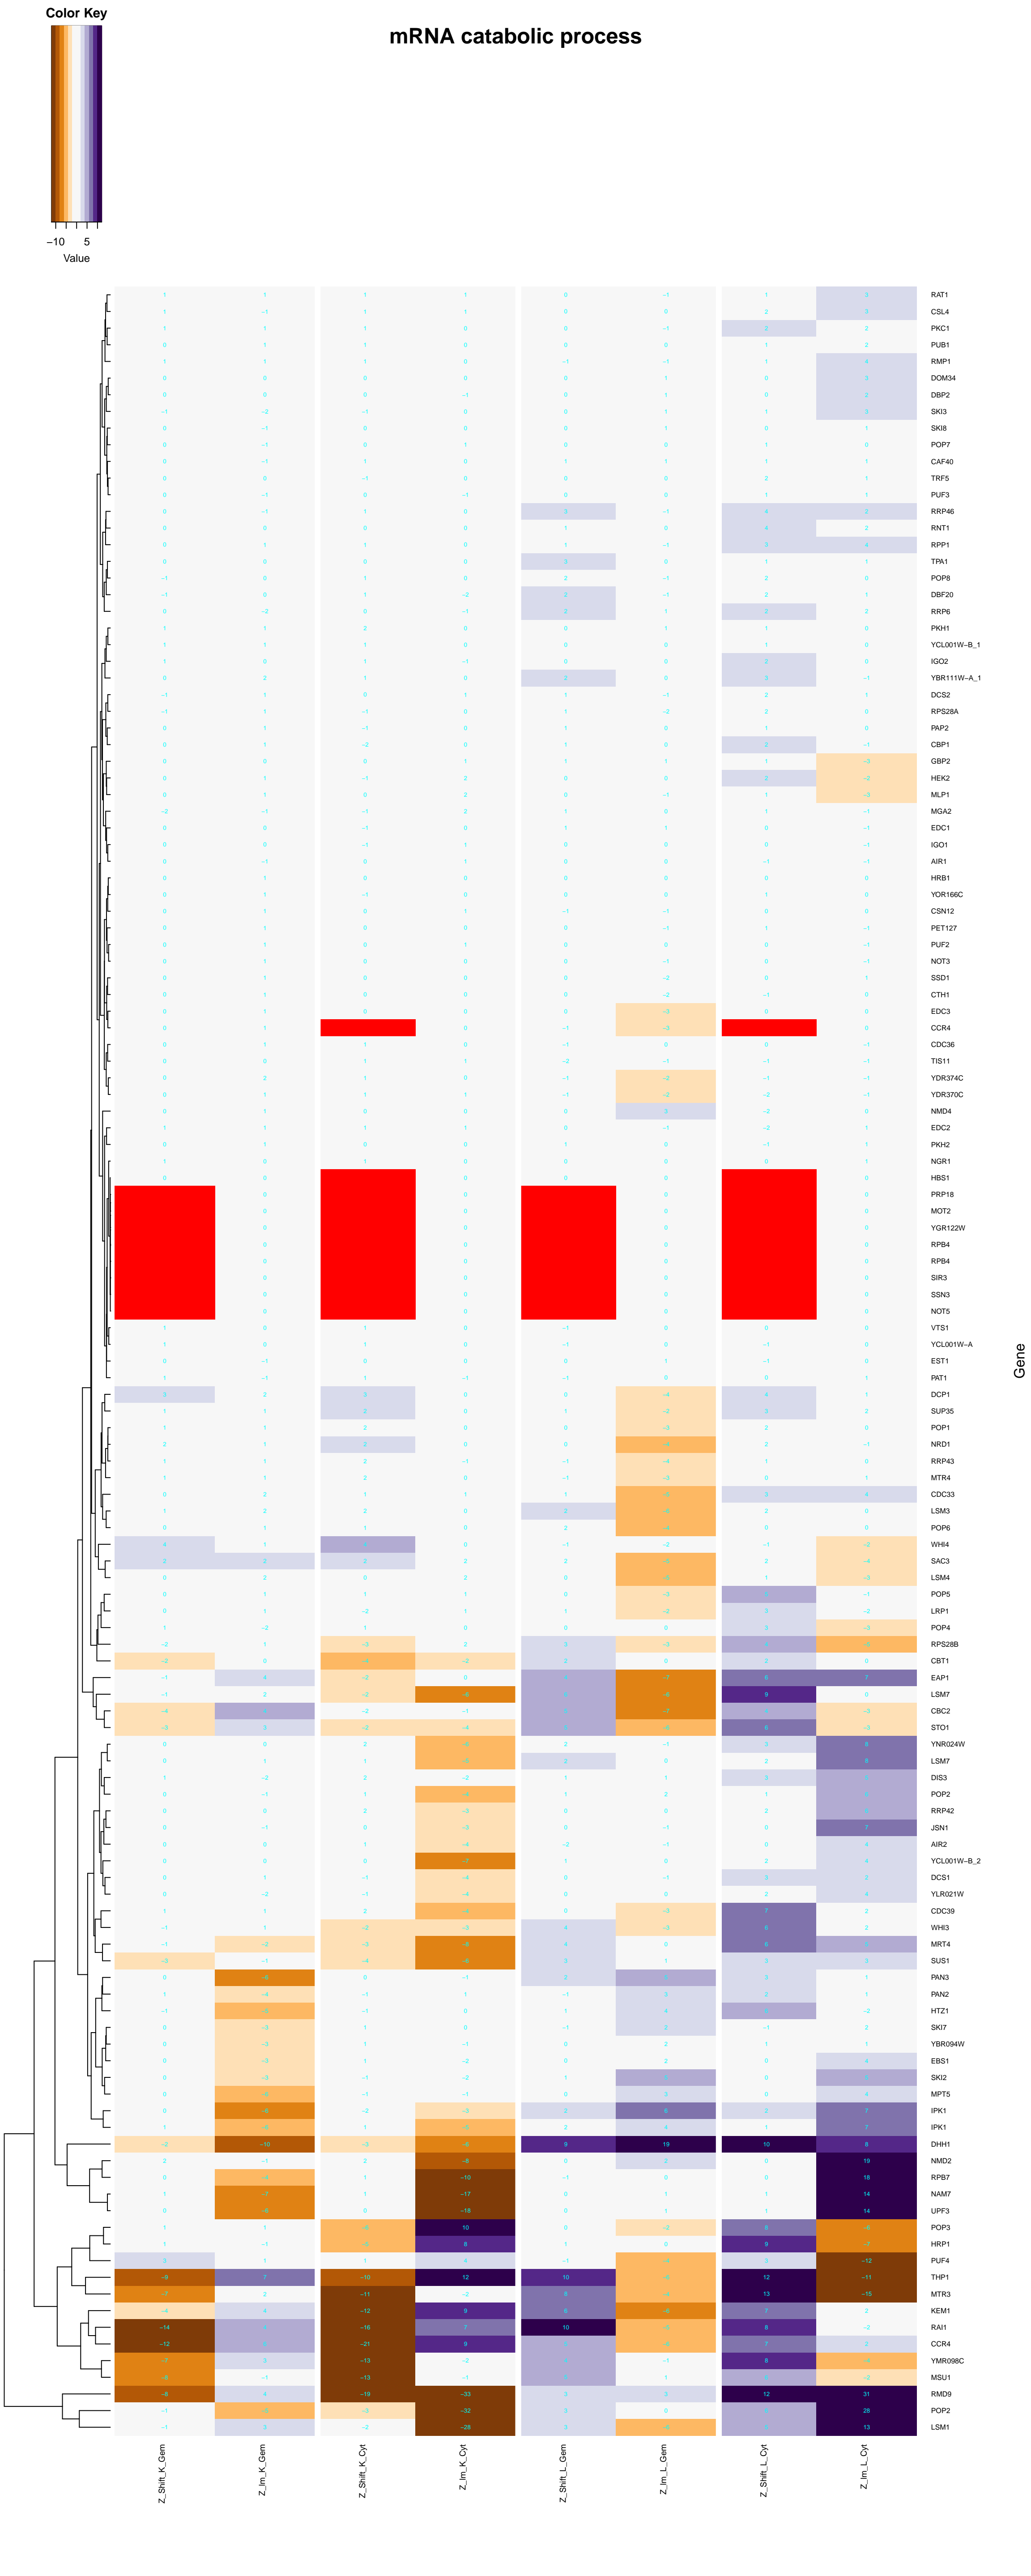

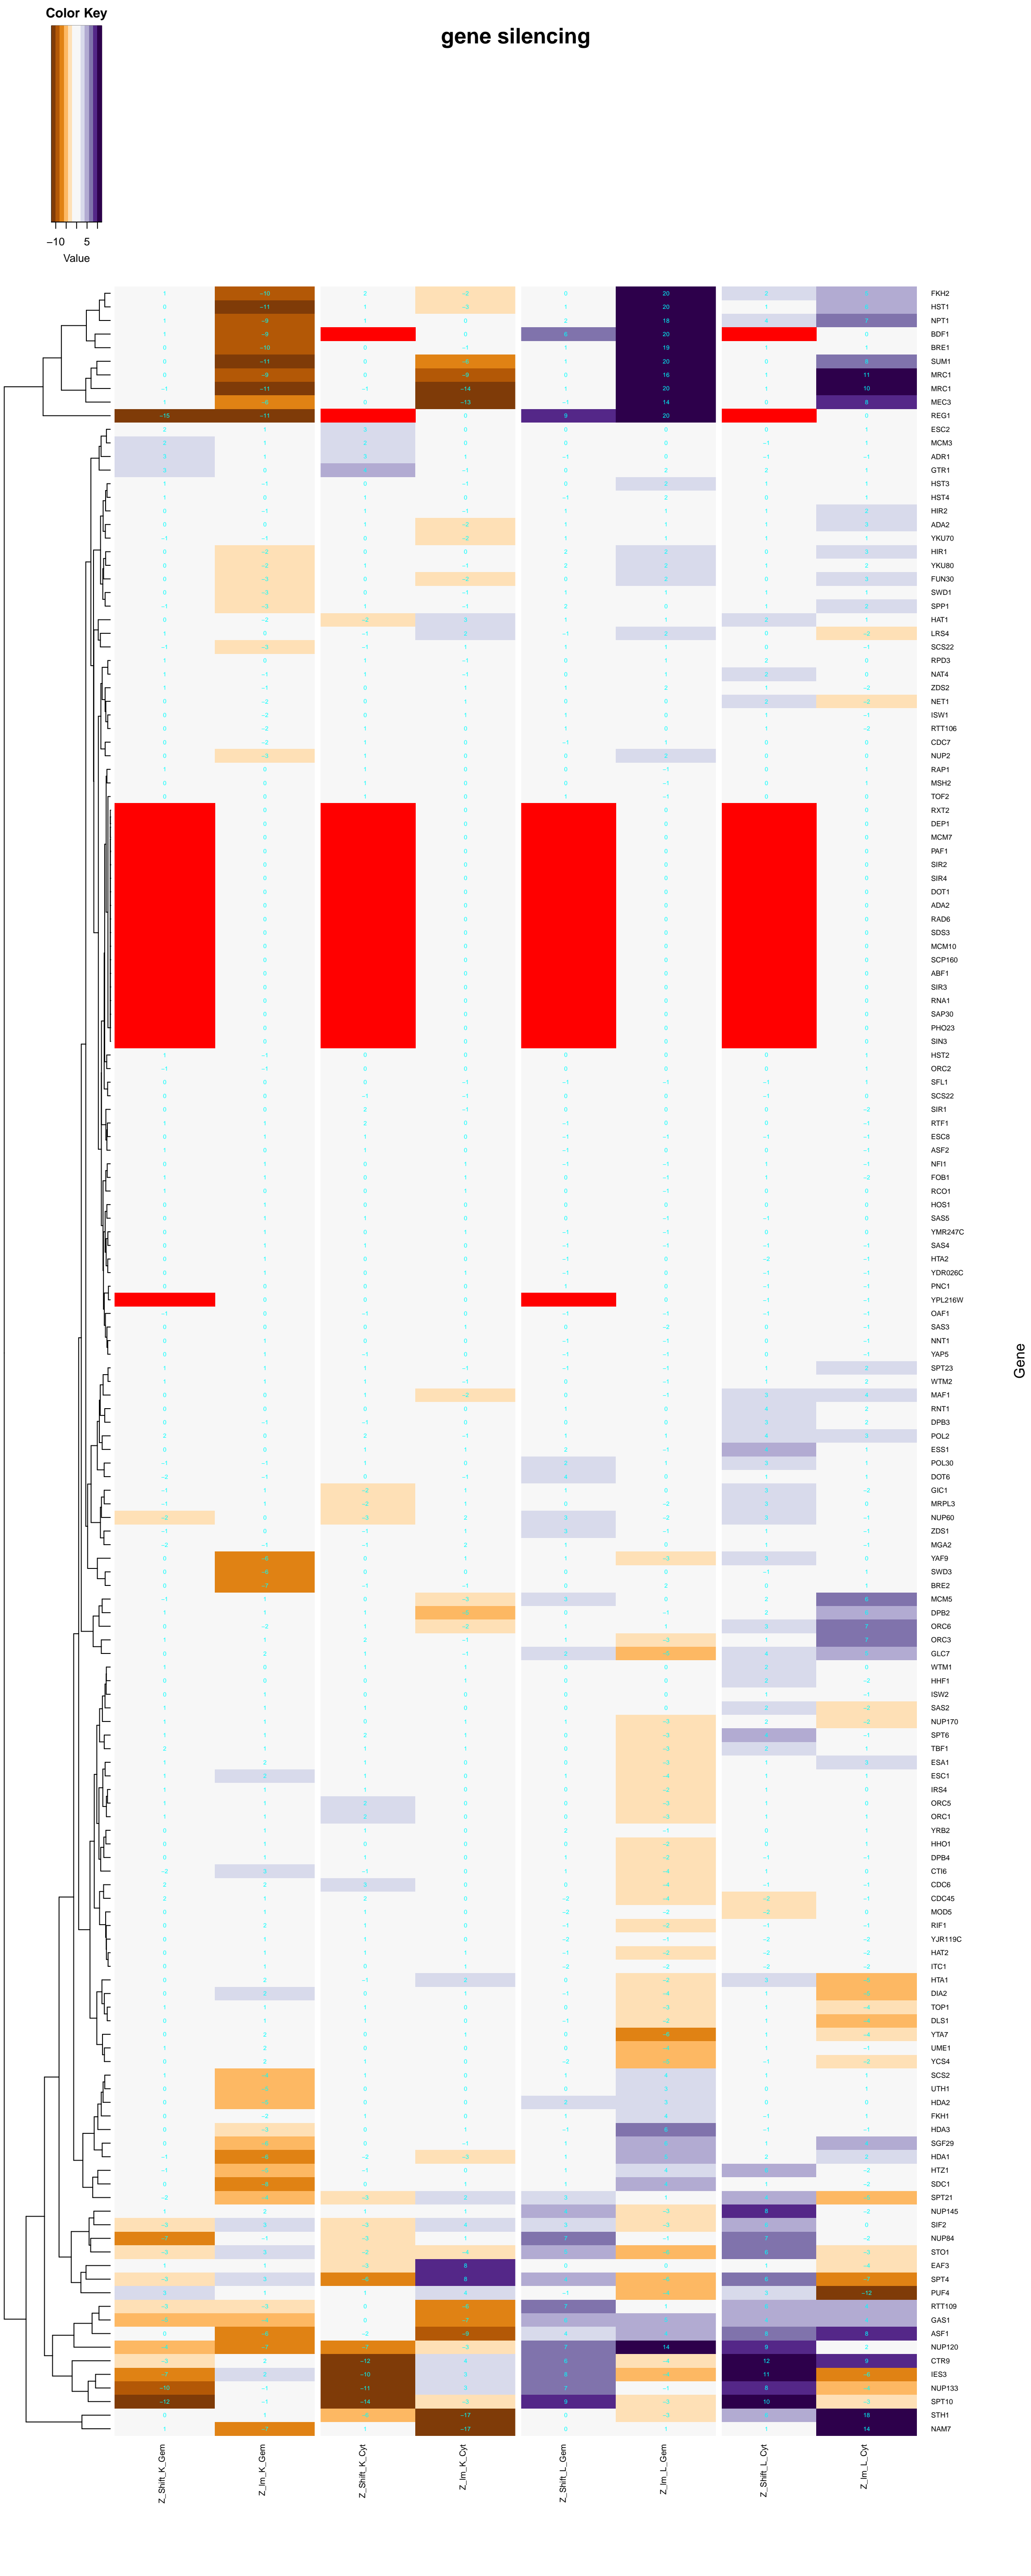

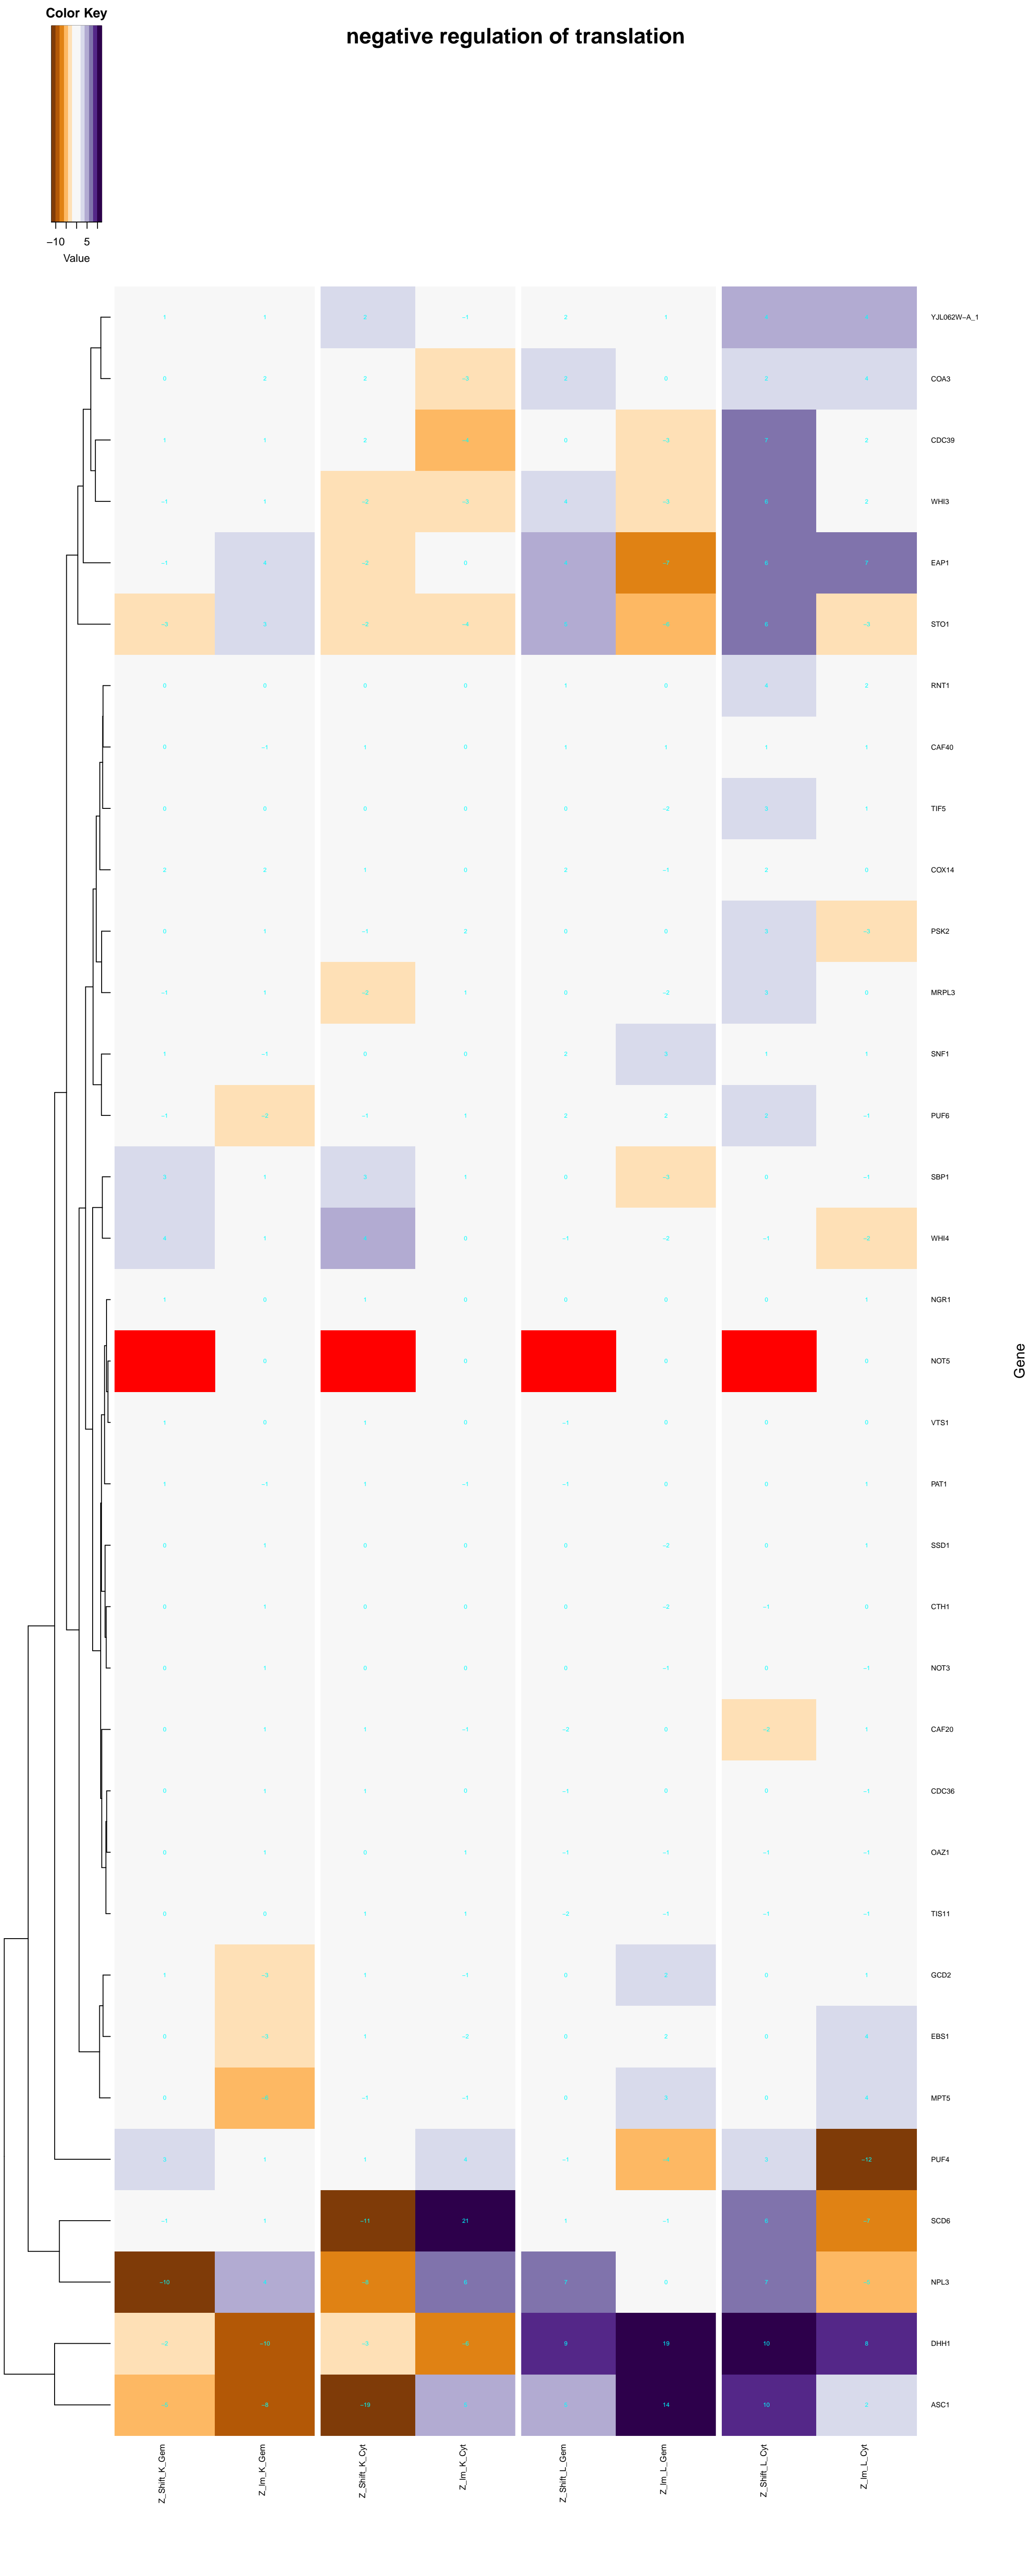

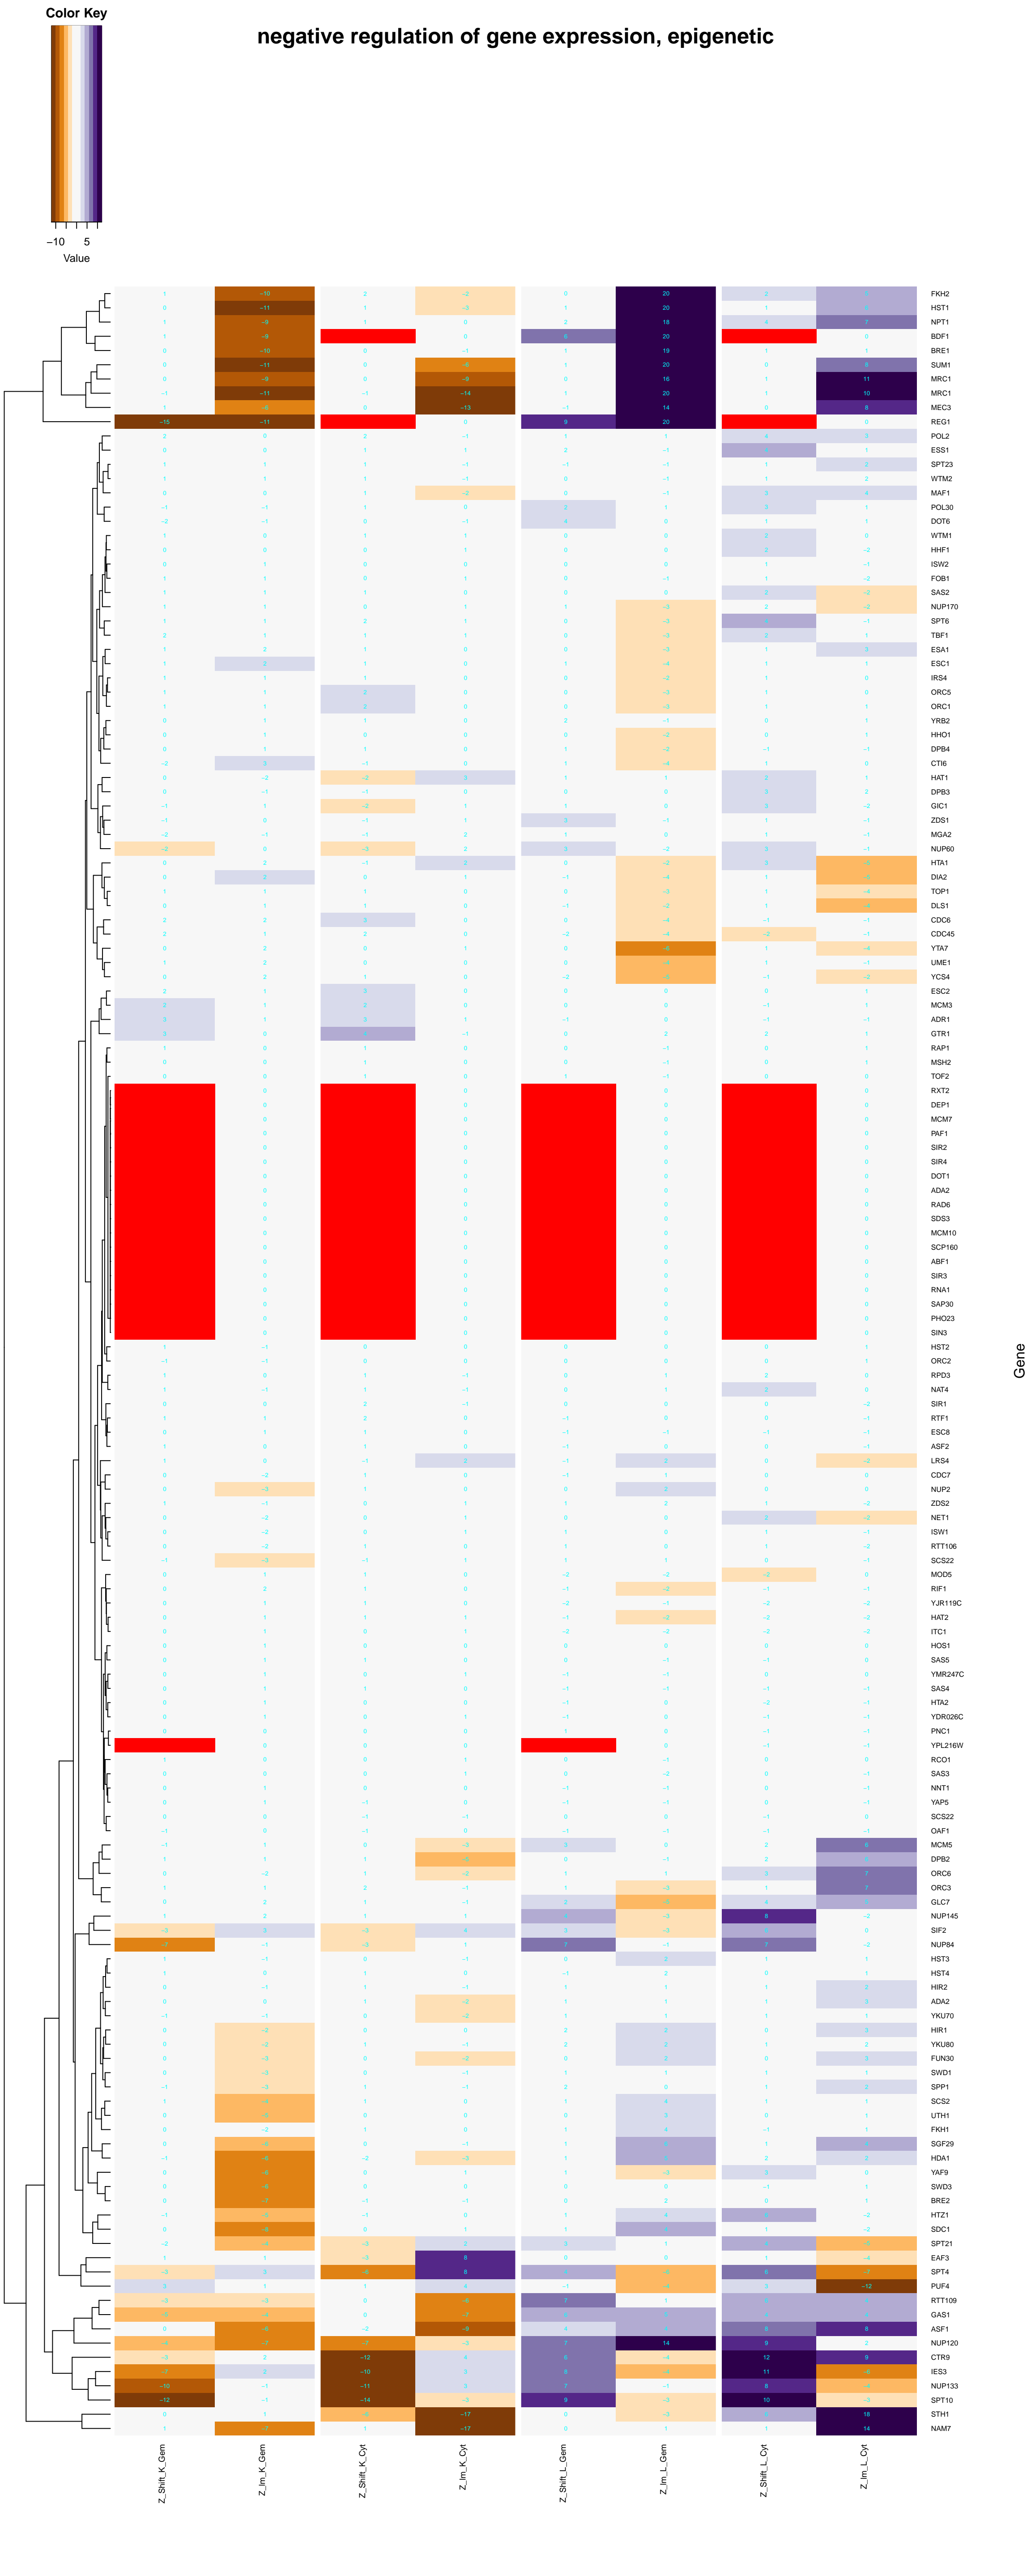



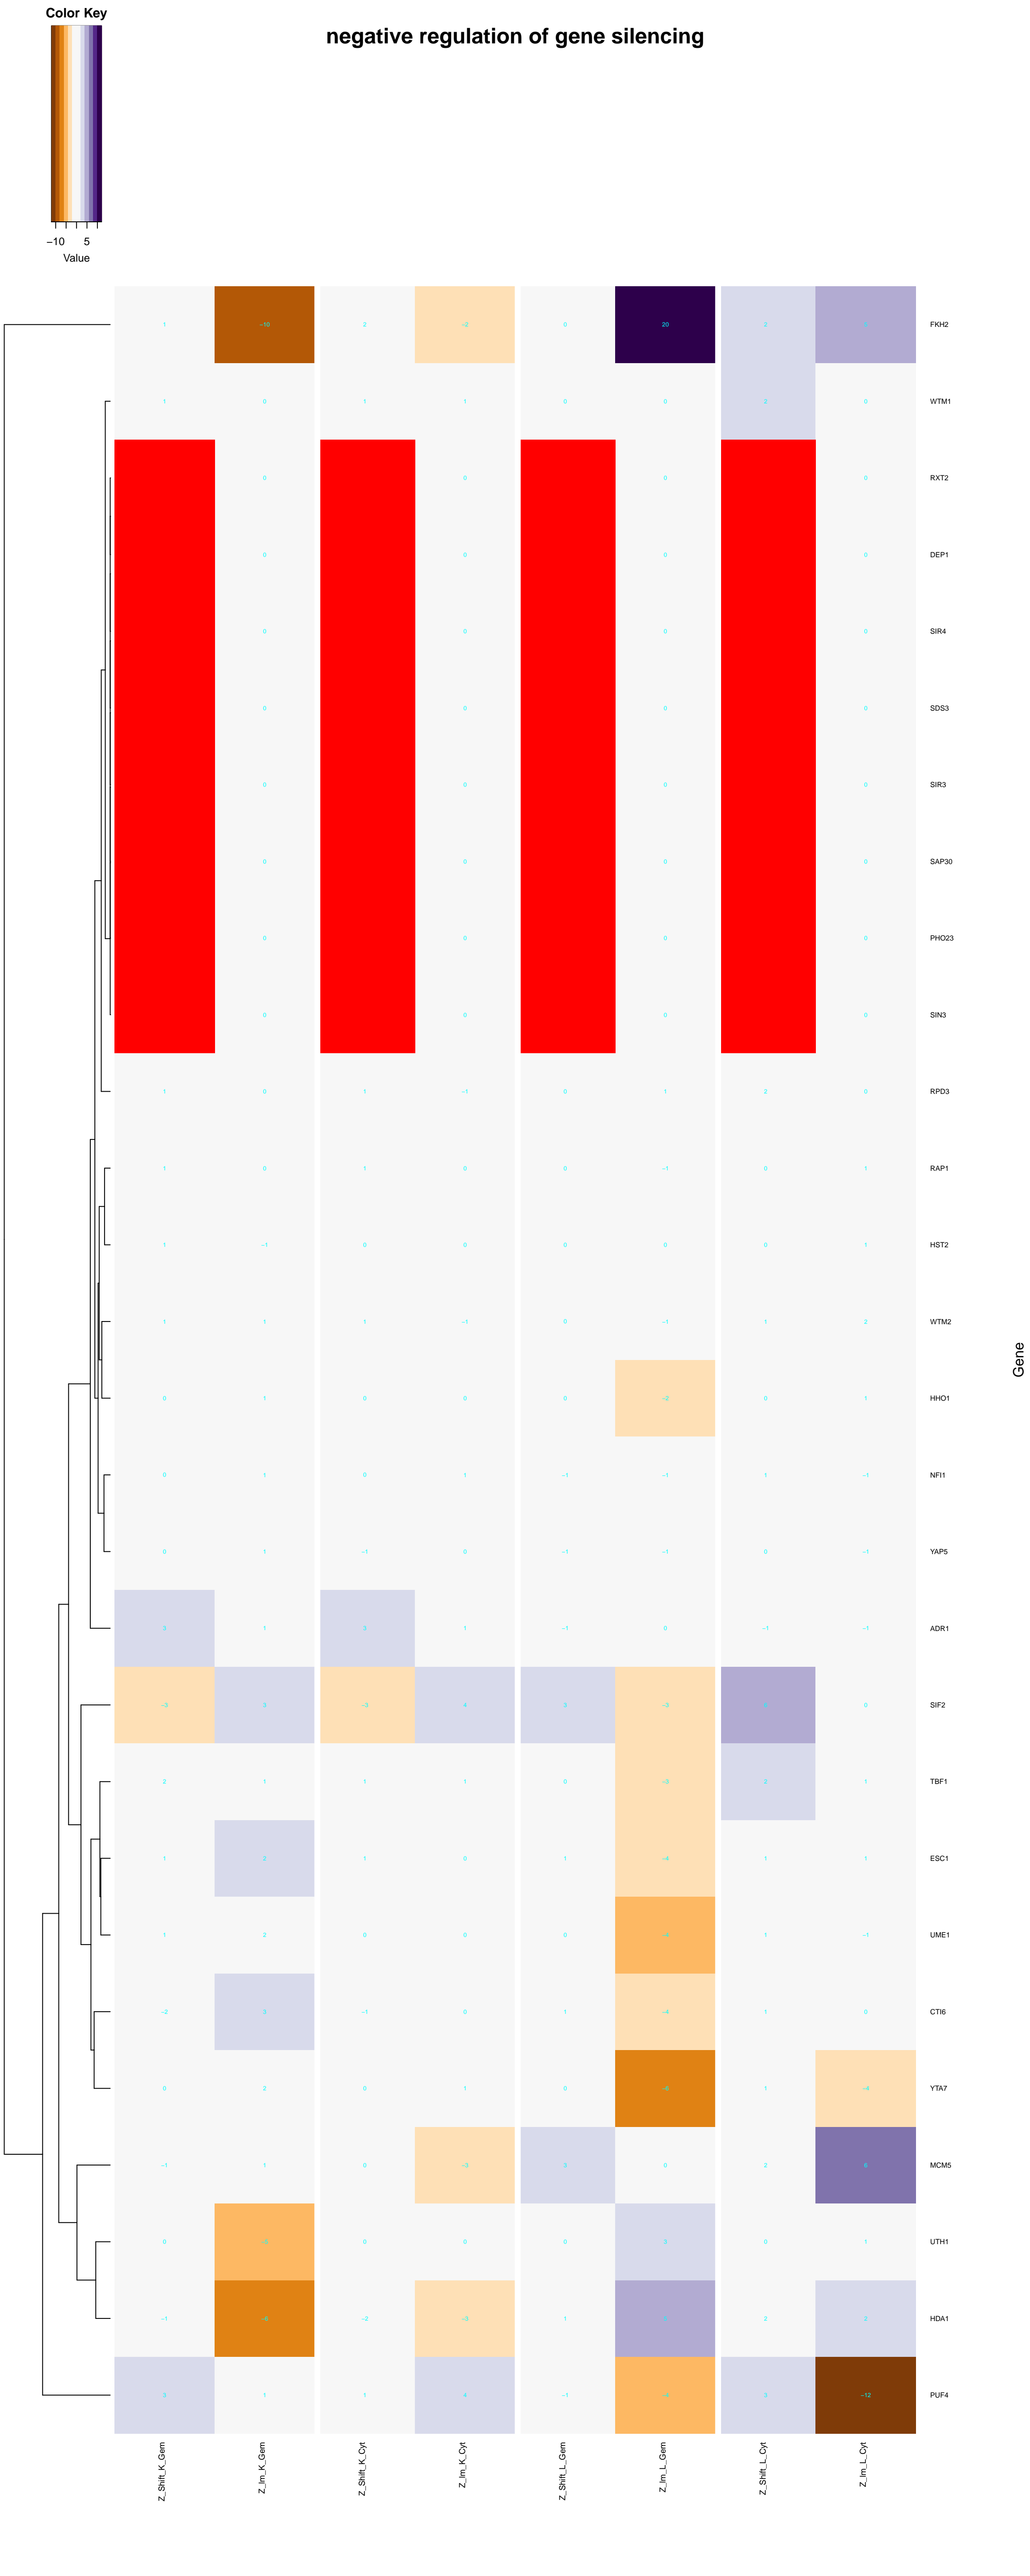

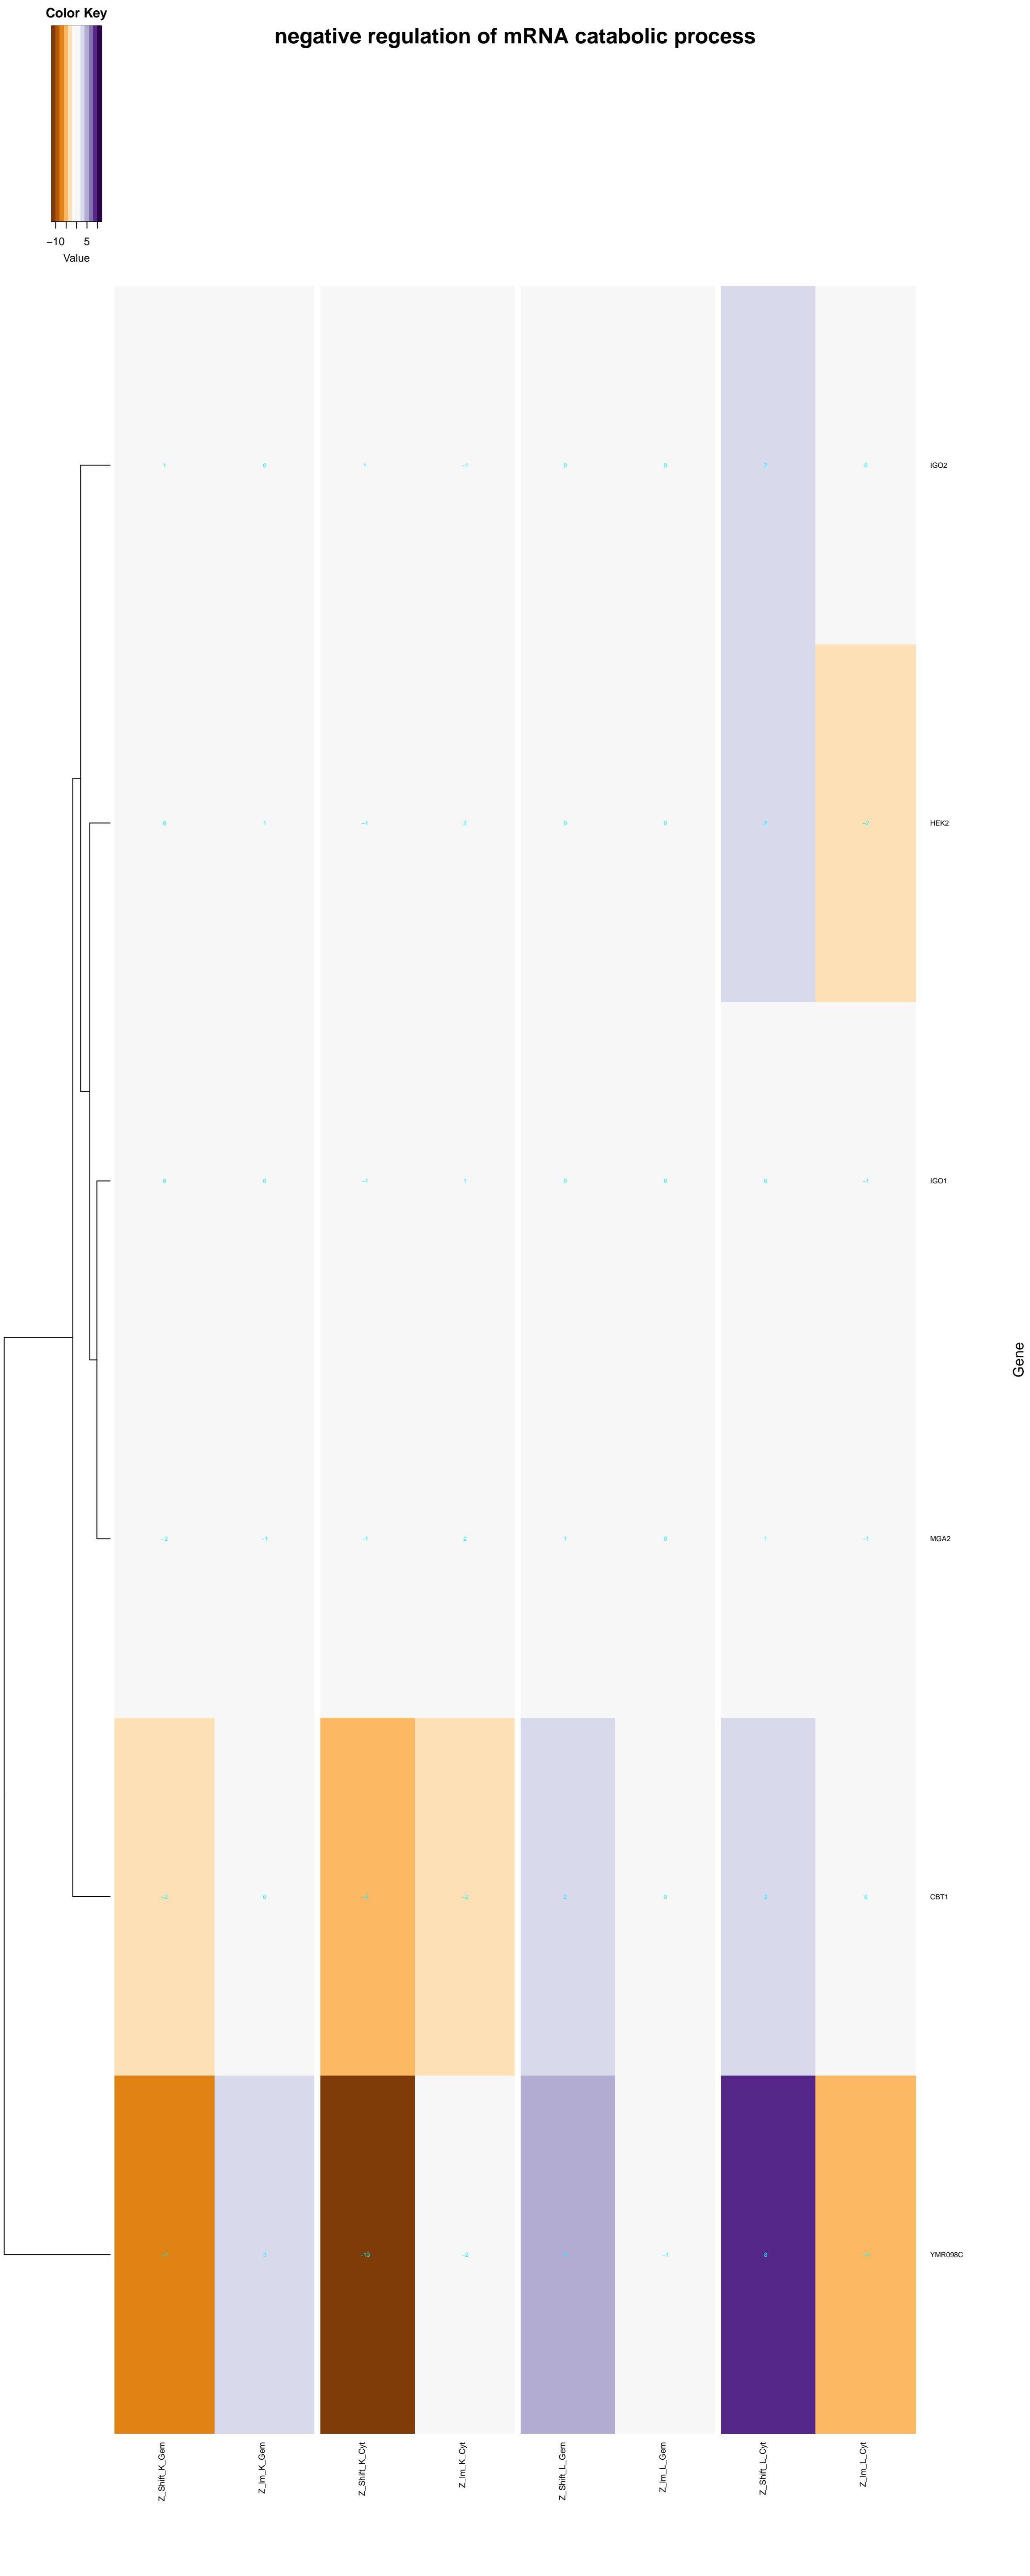

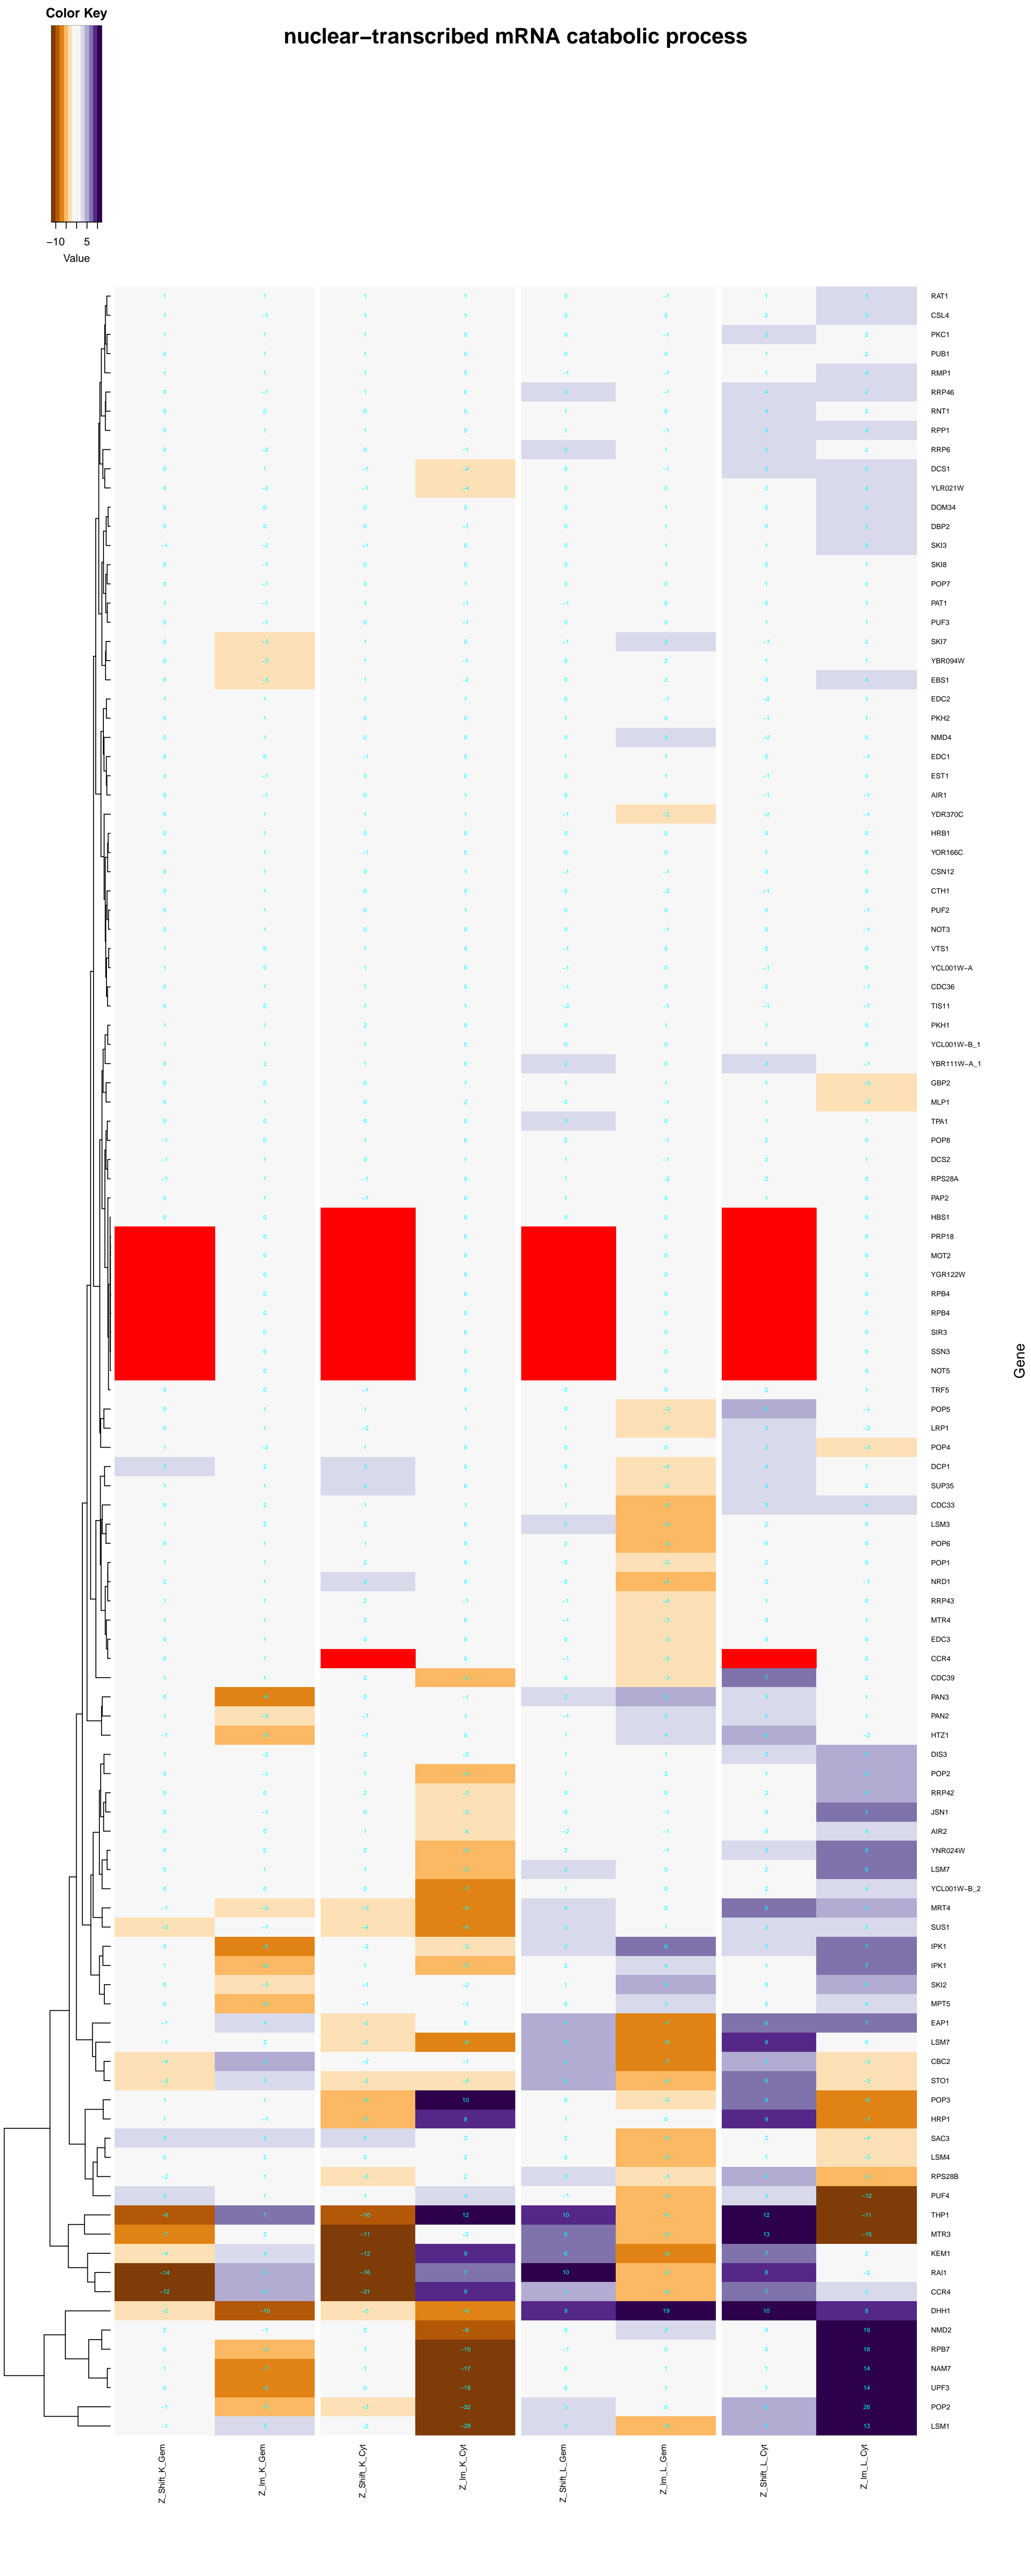

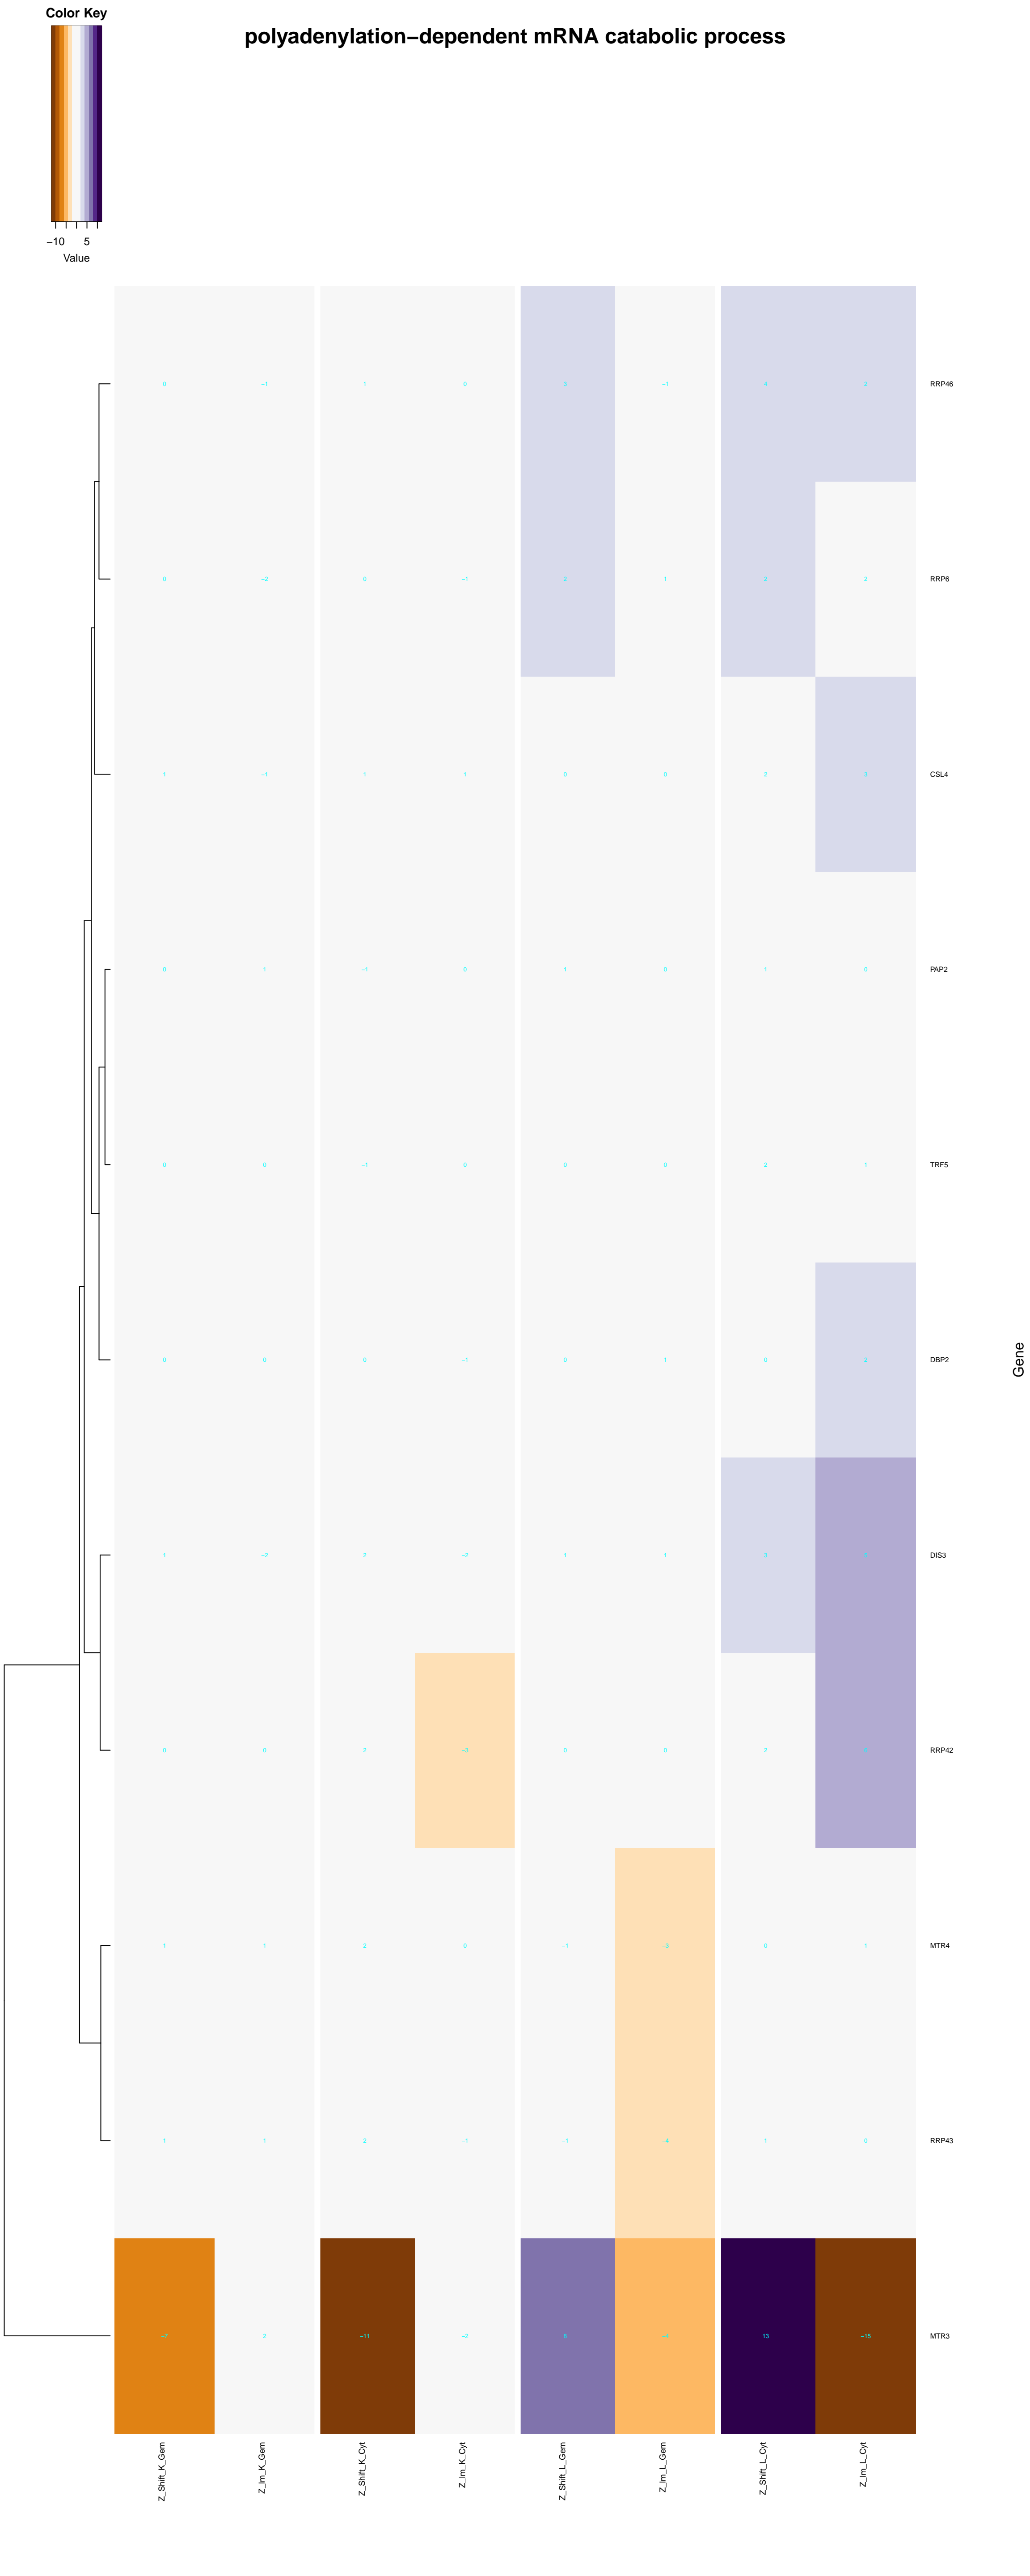

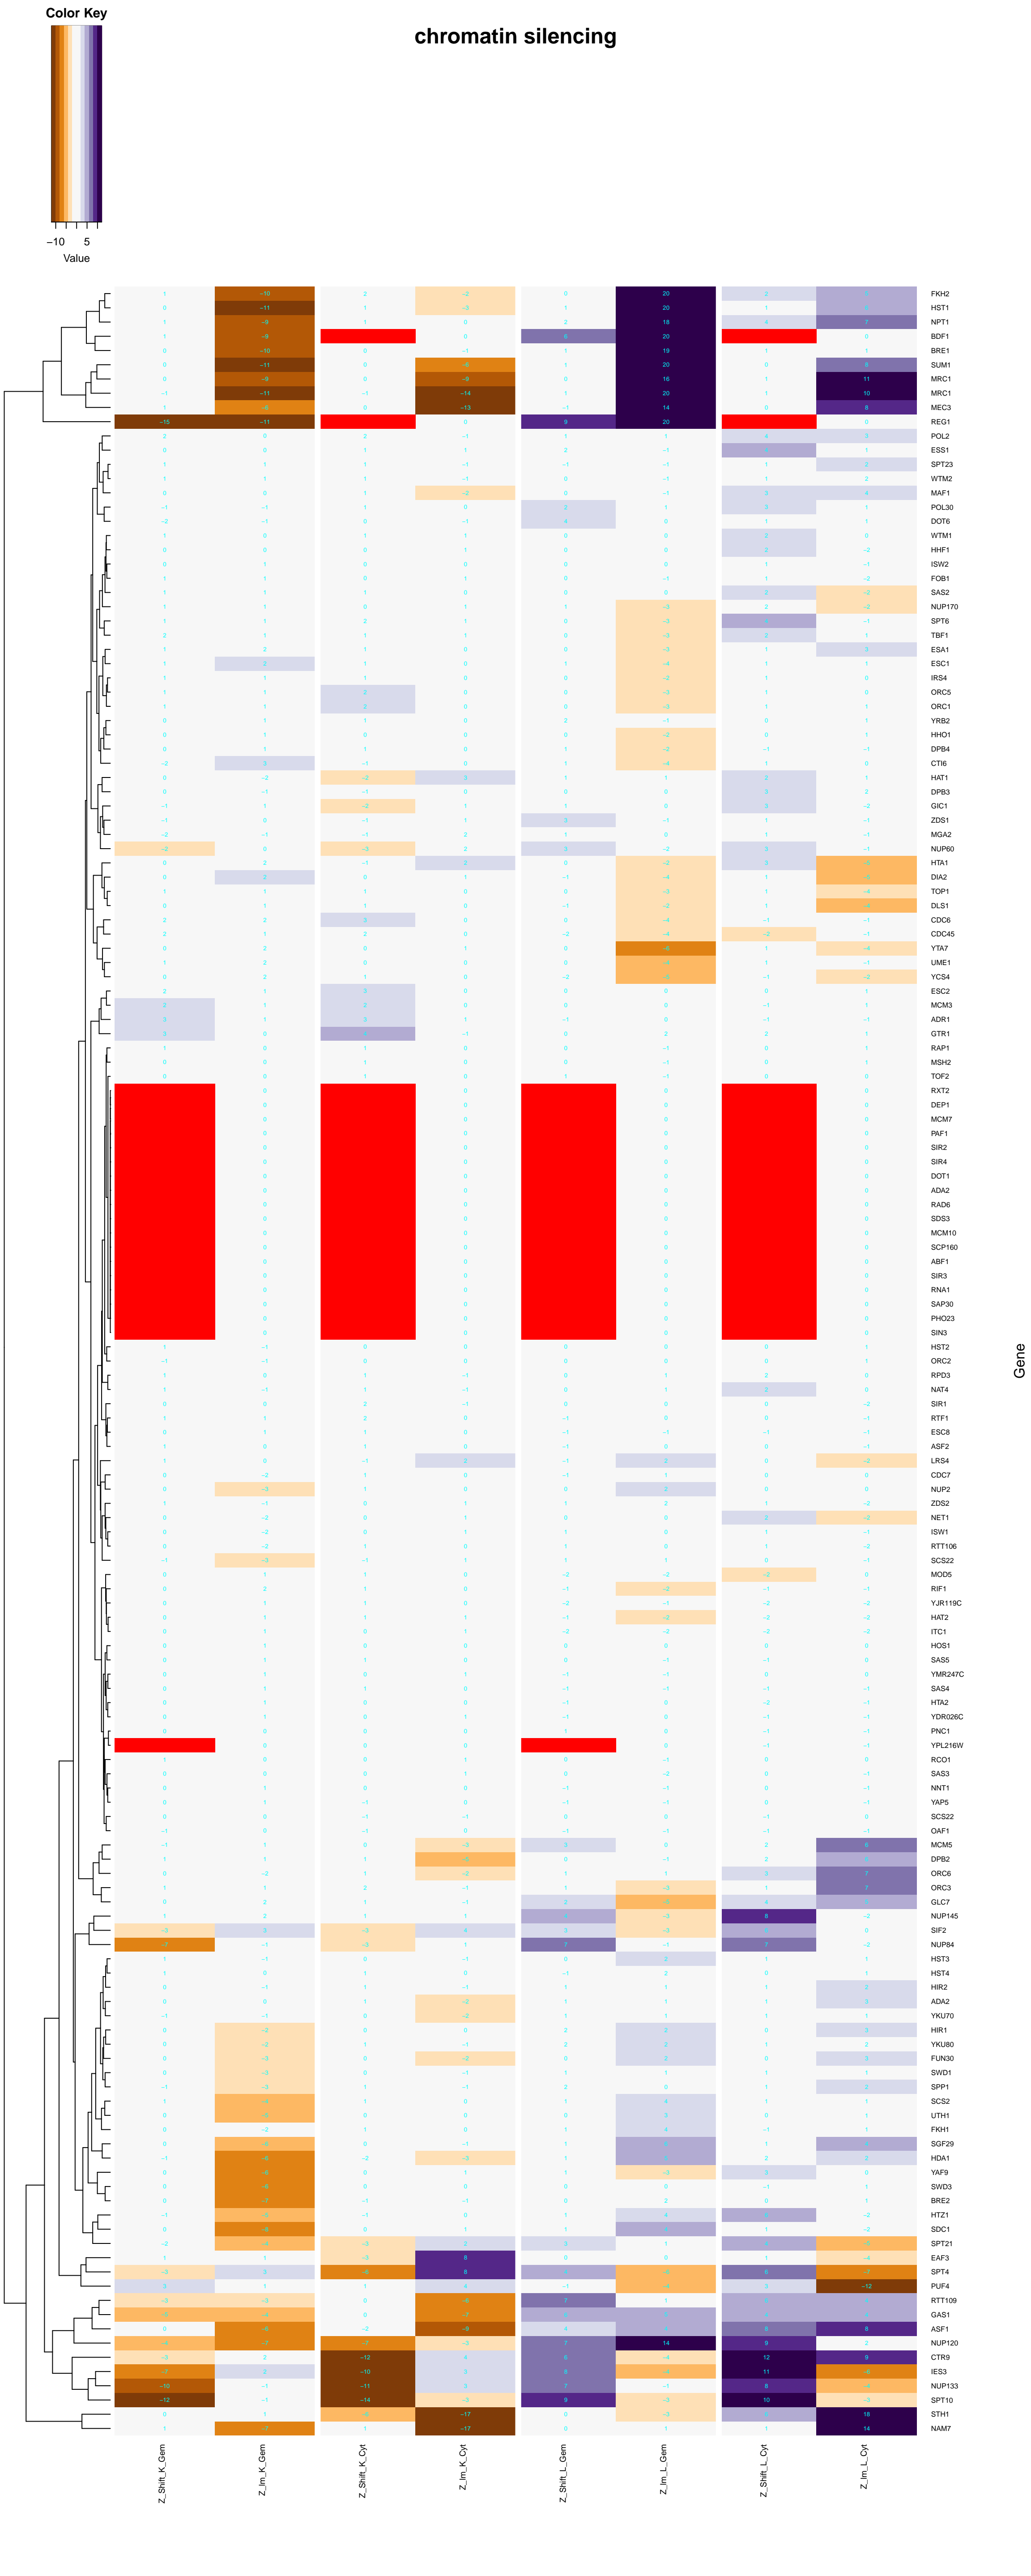

gene silencing involved in chronological cell aging

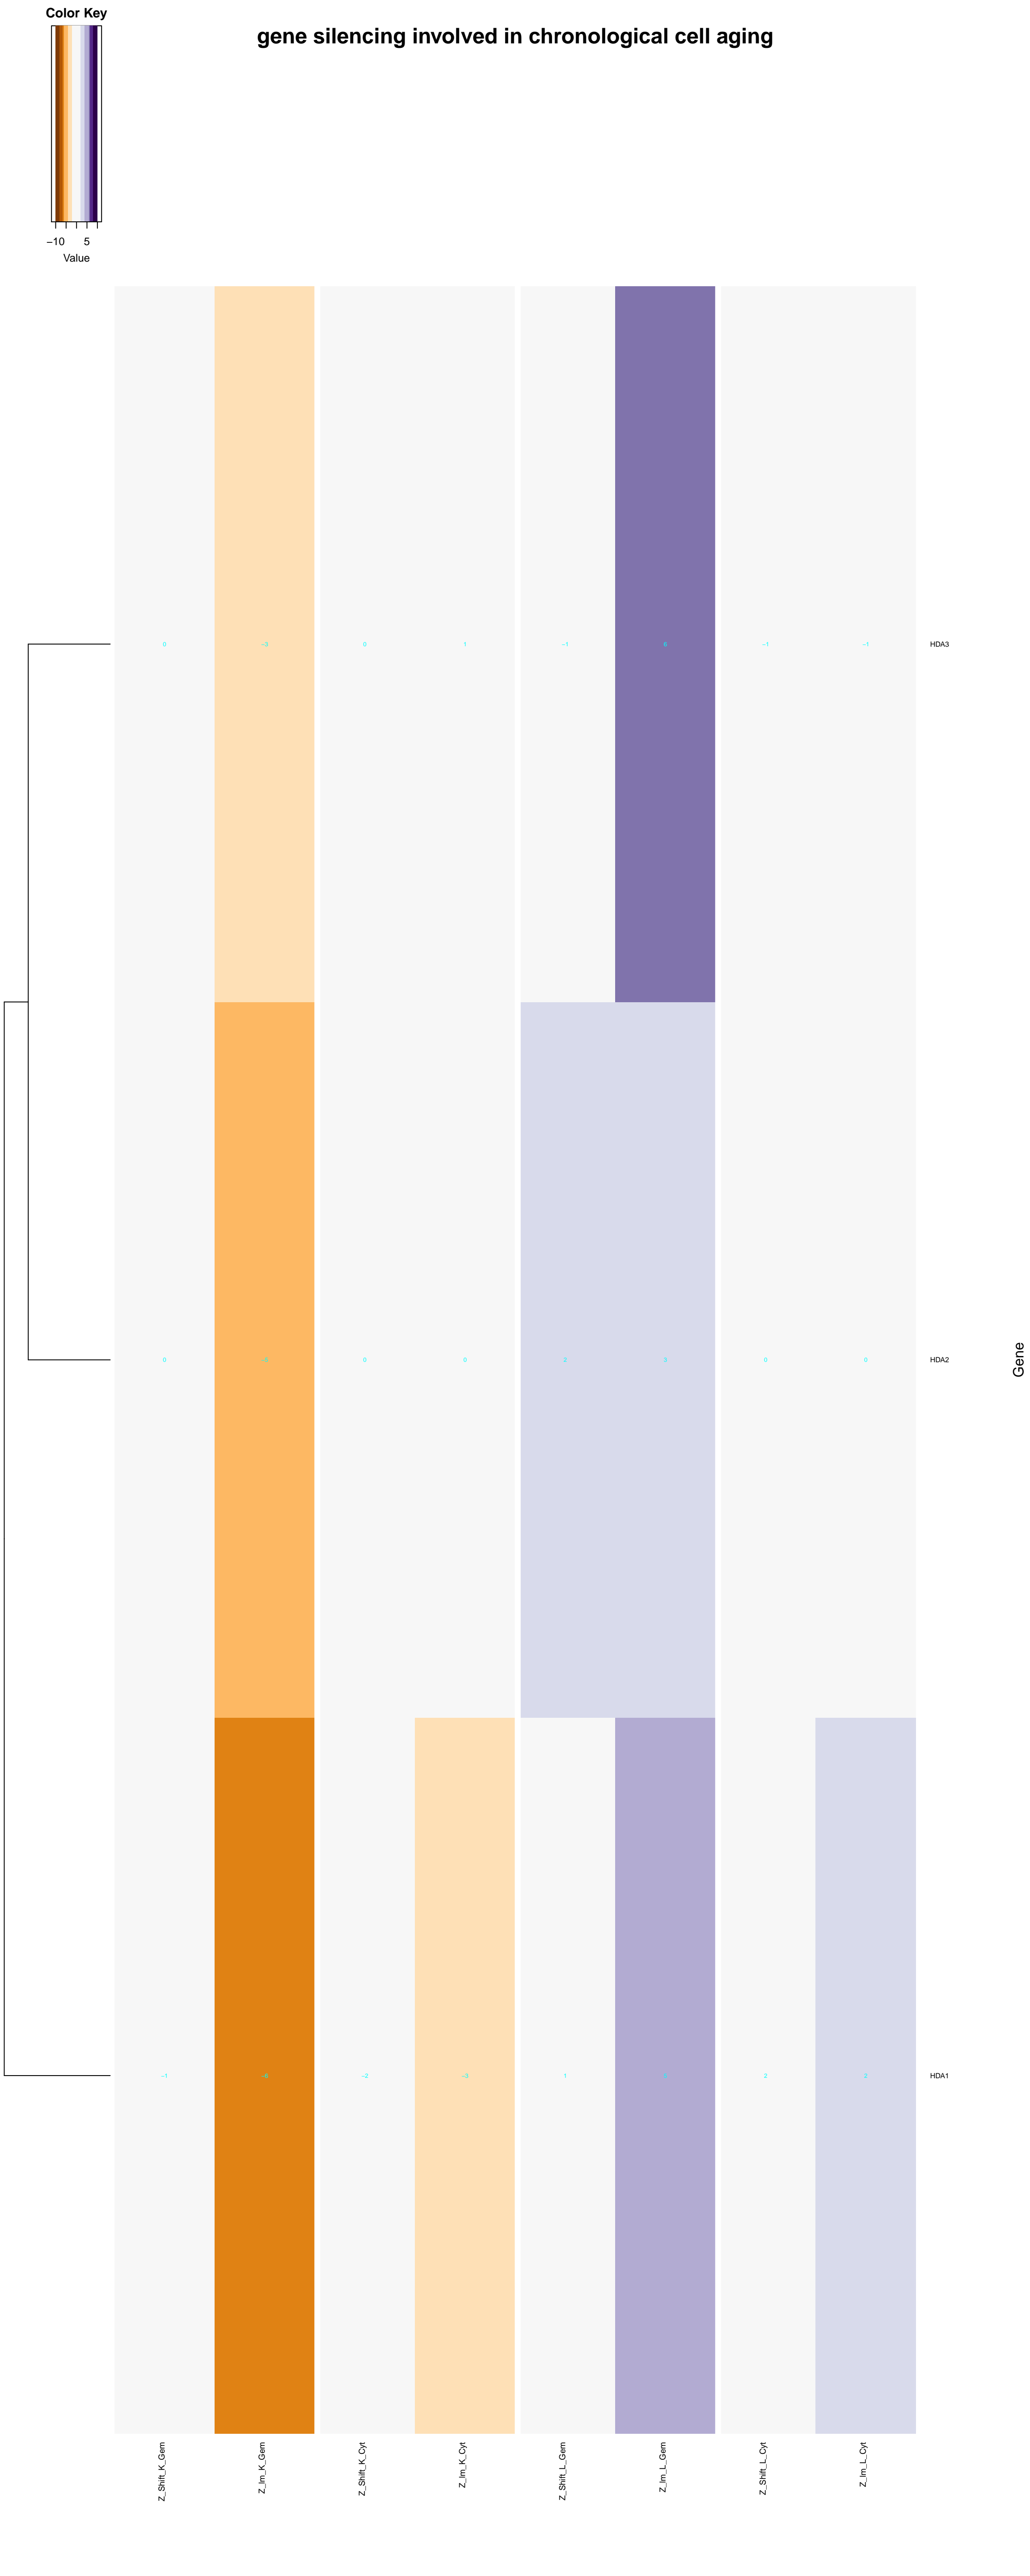

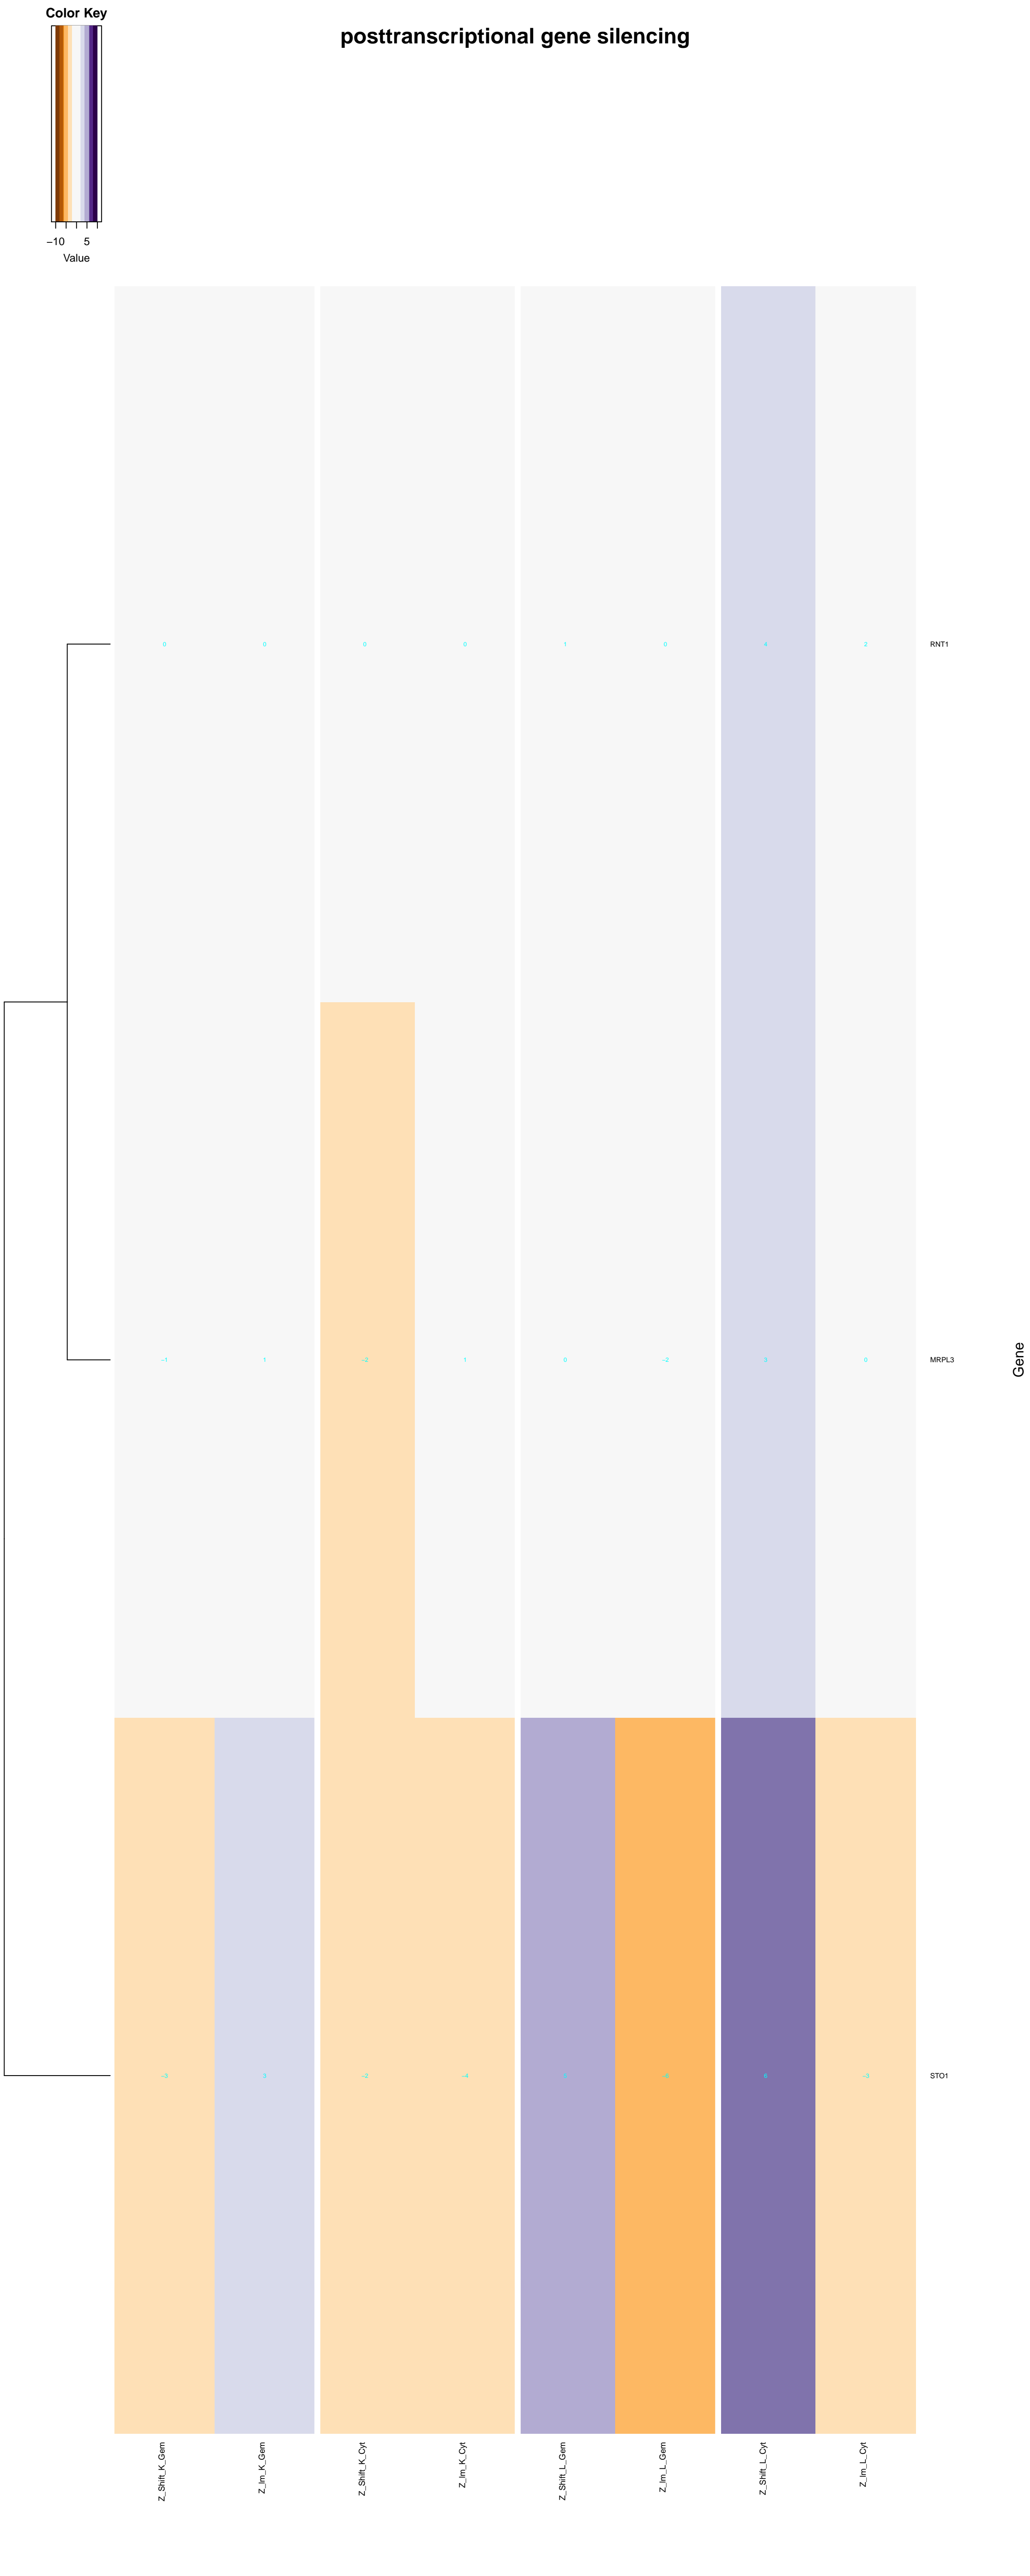

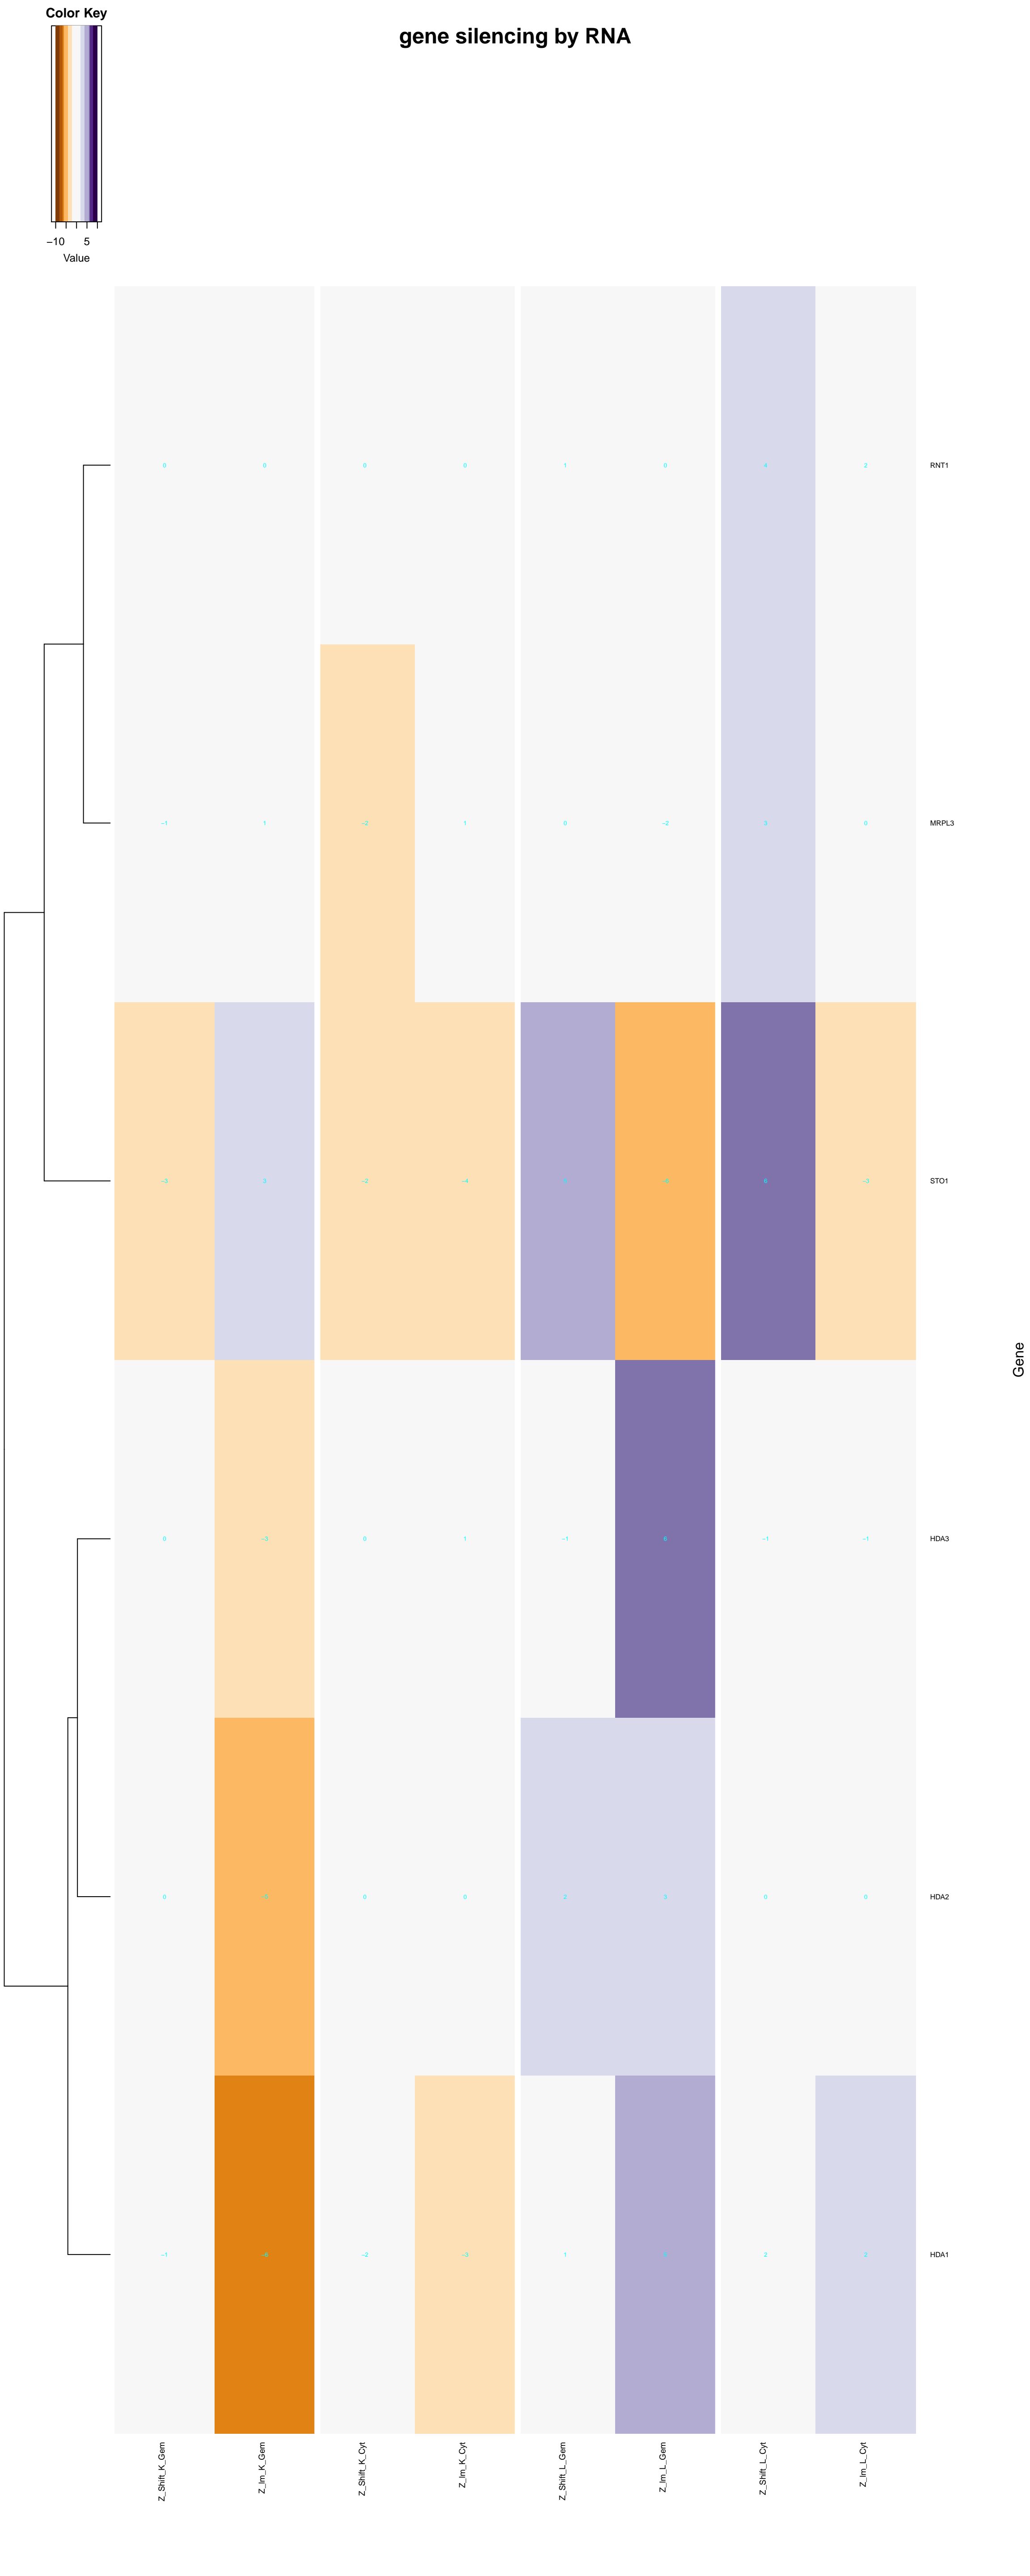

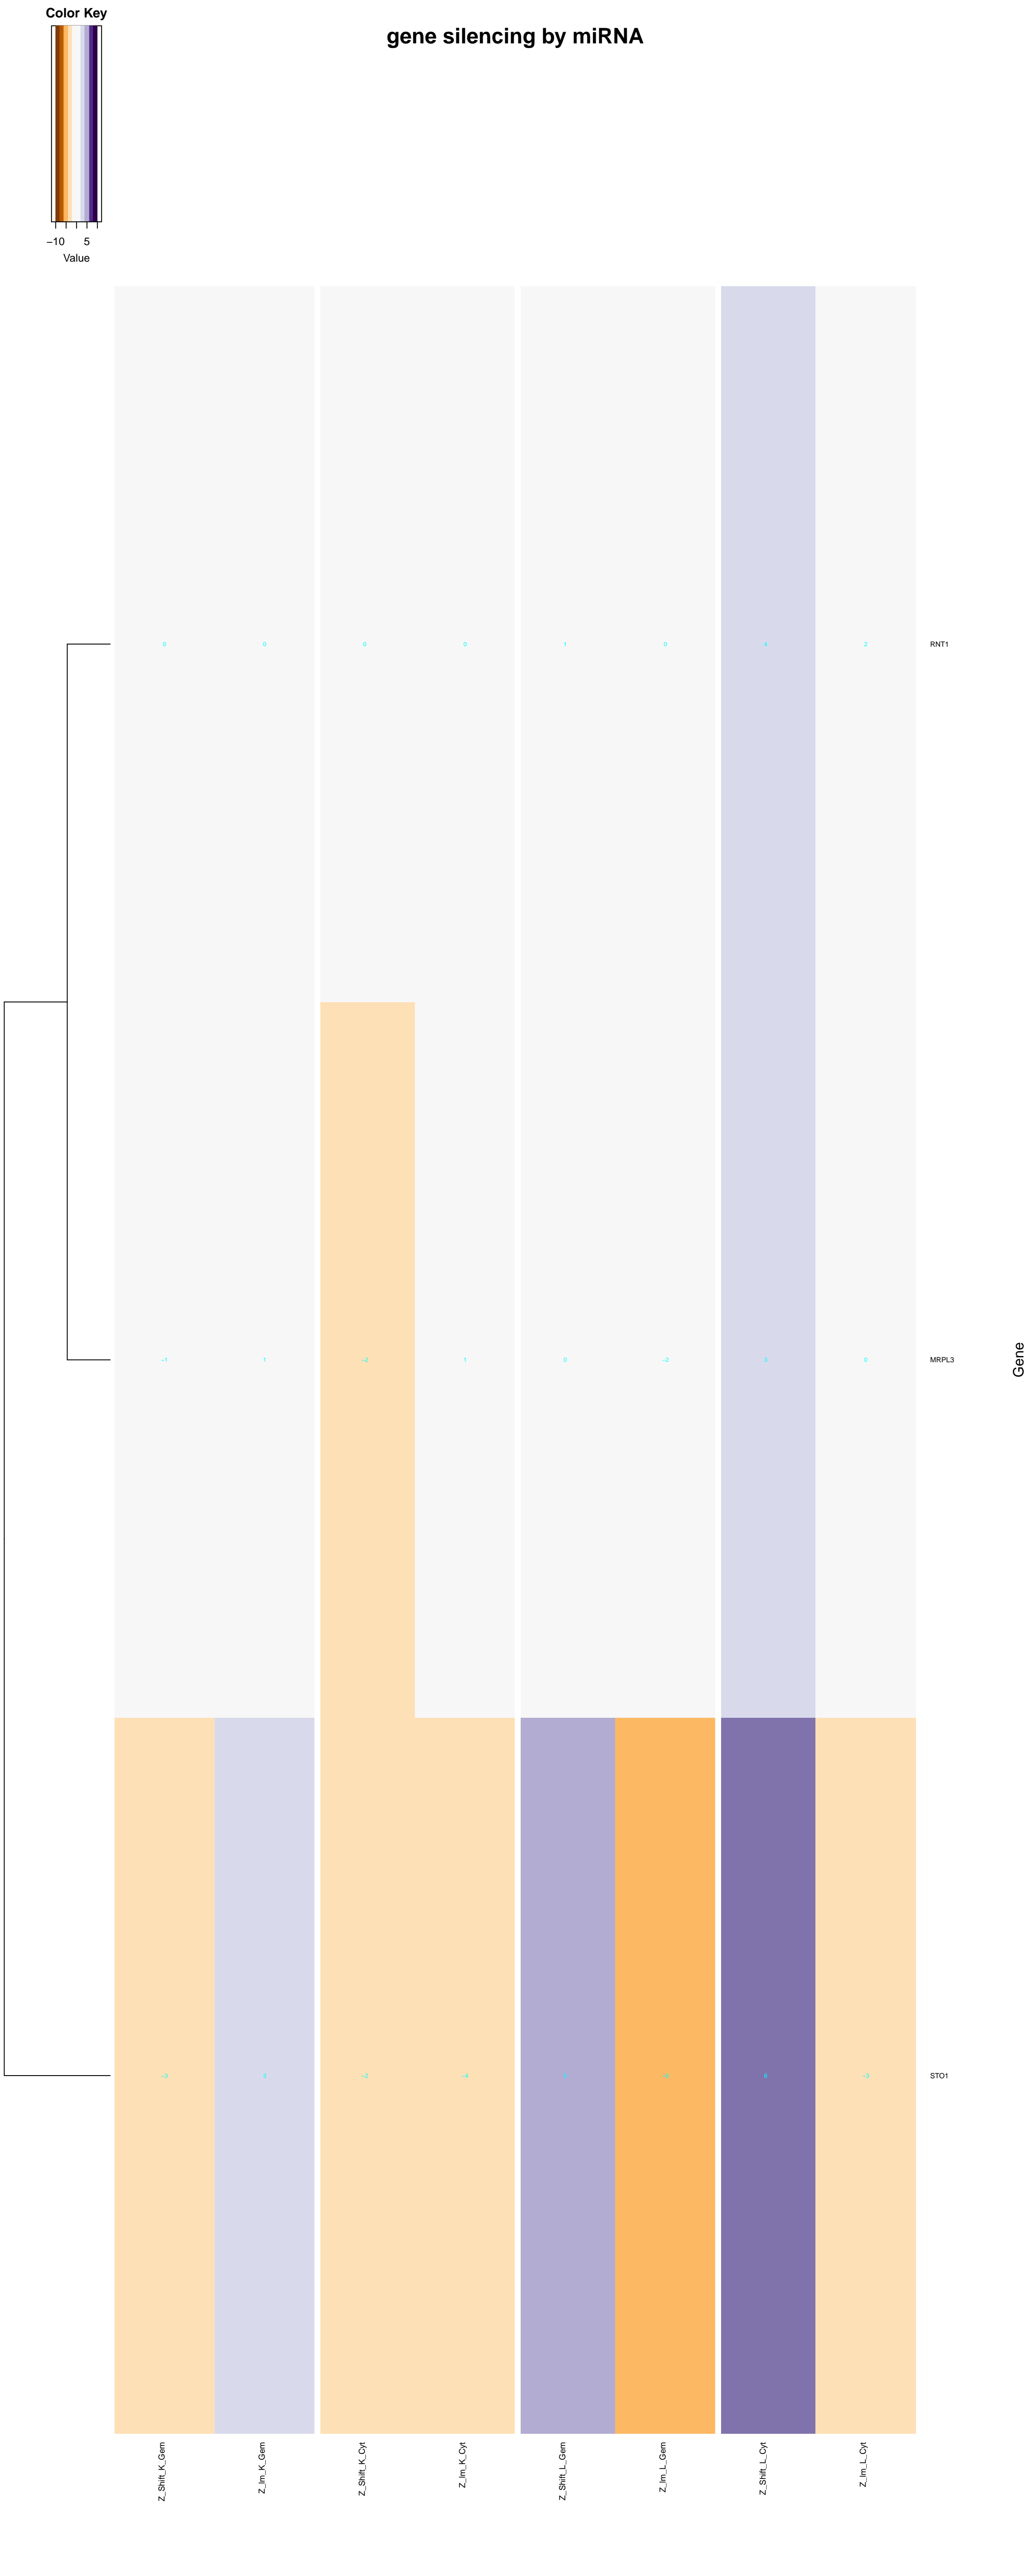

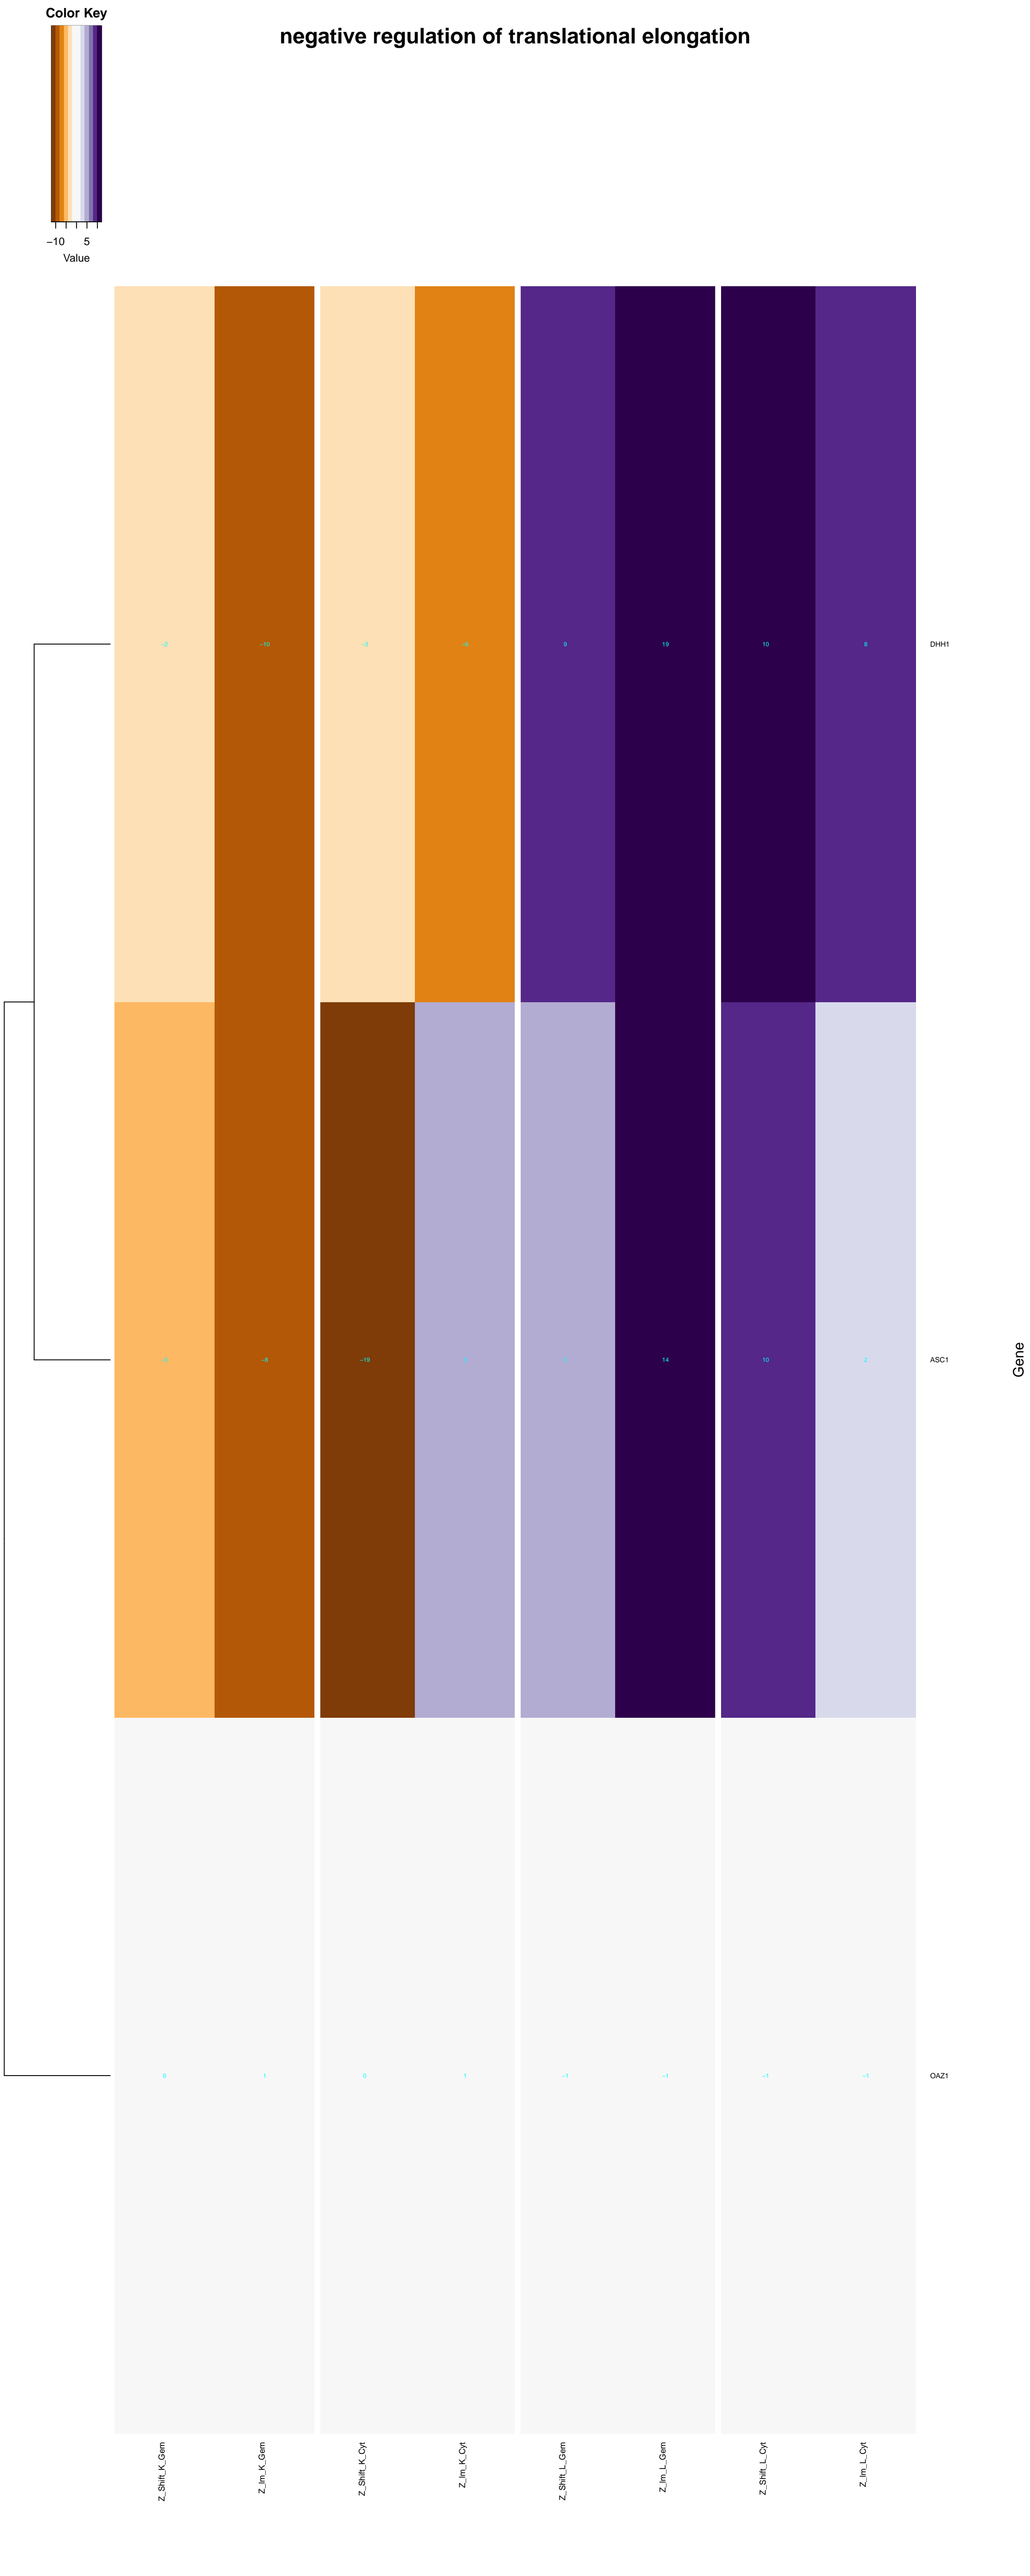

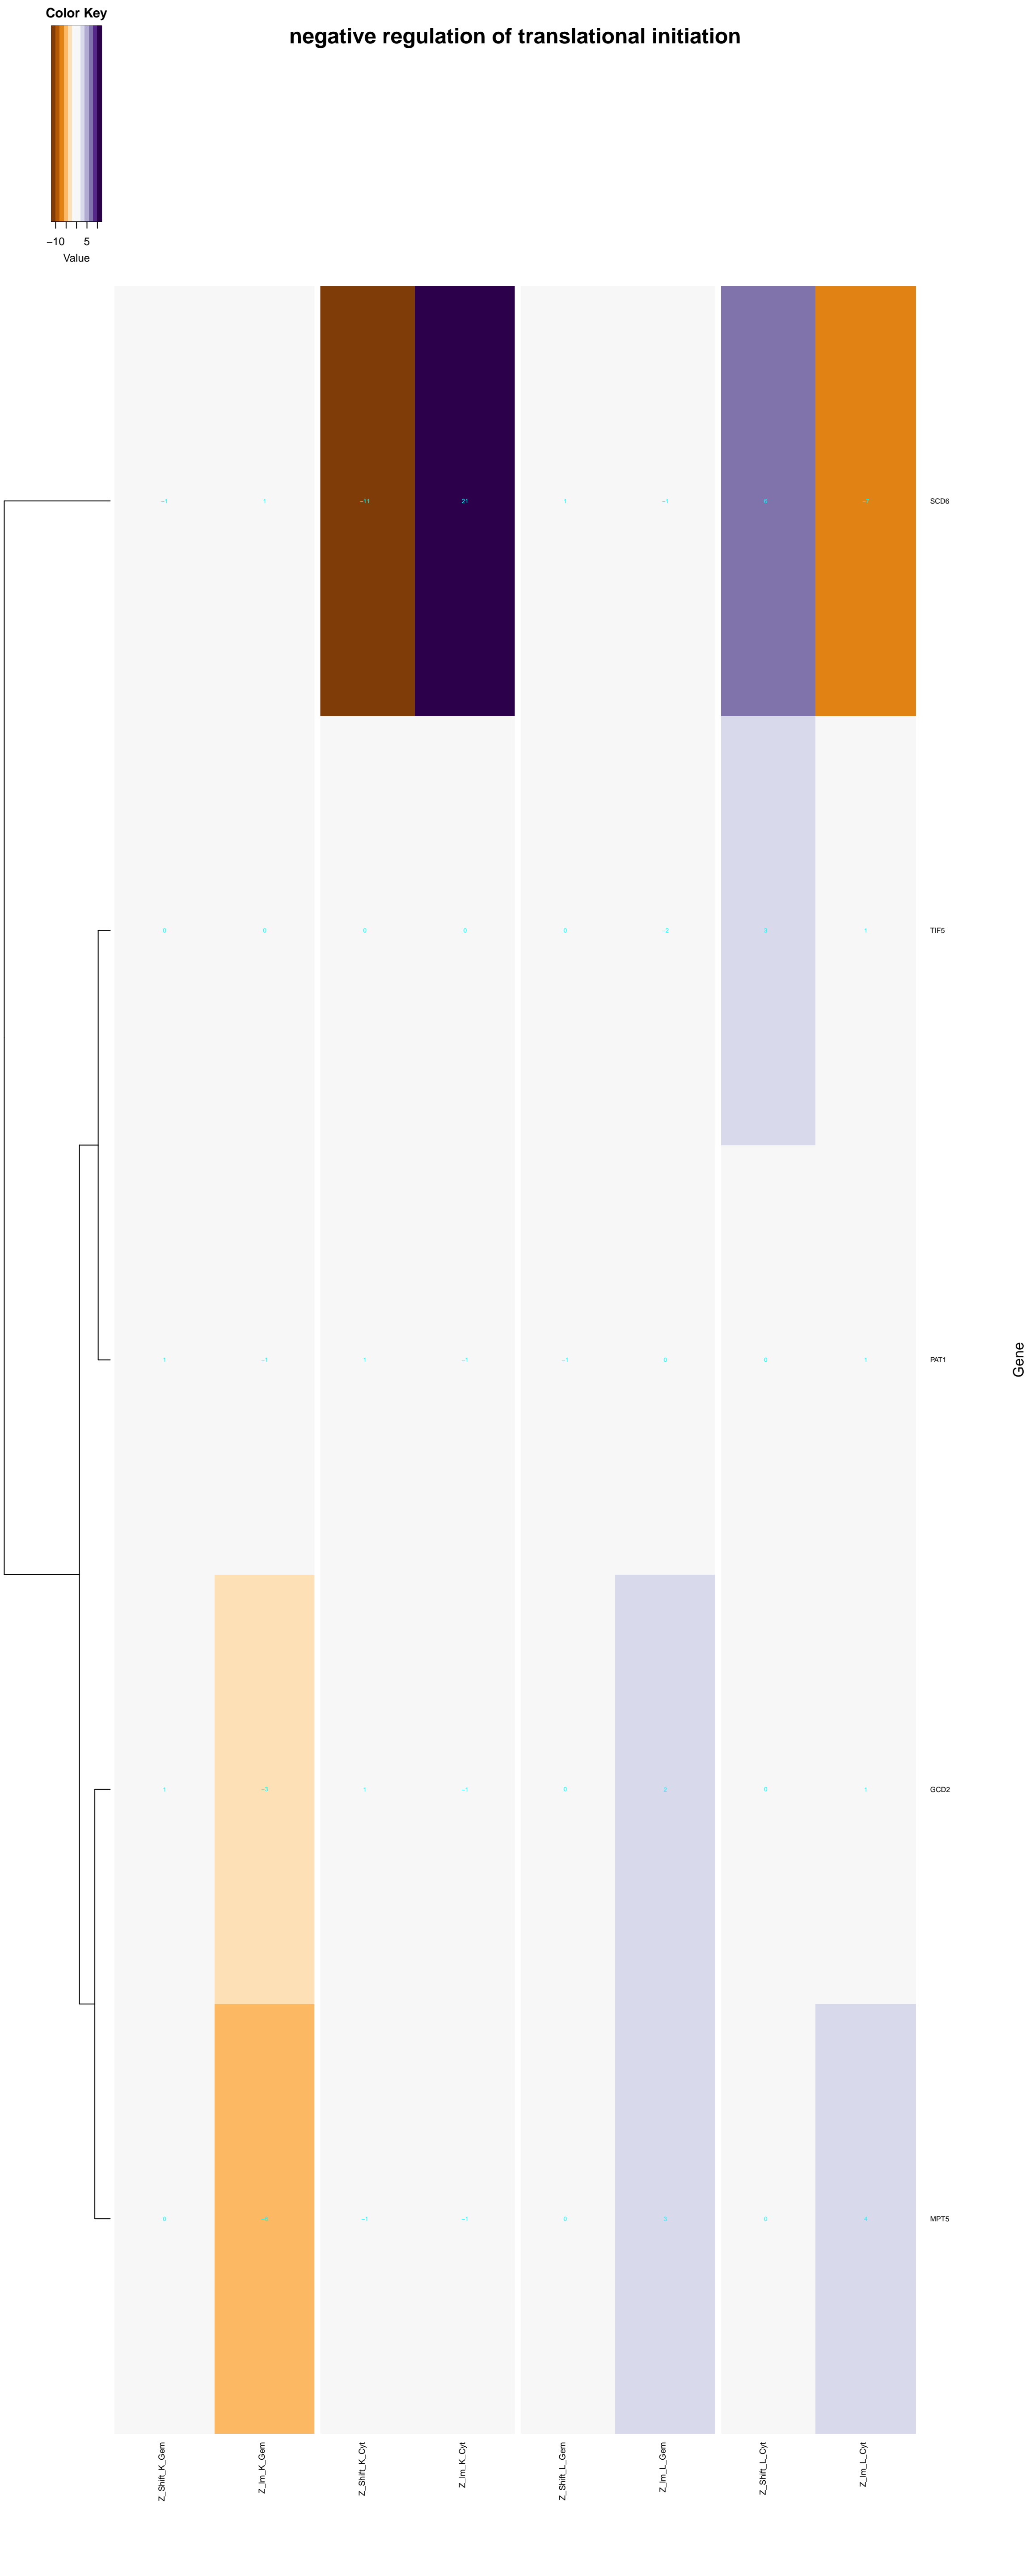

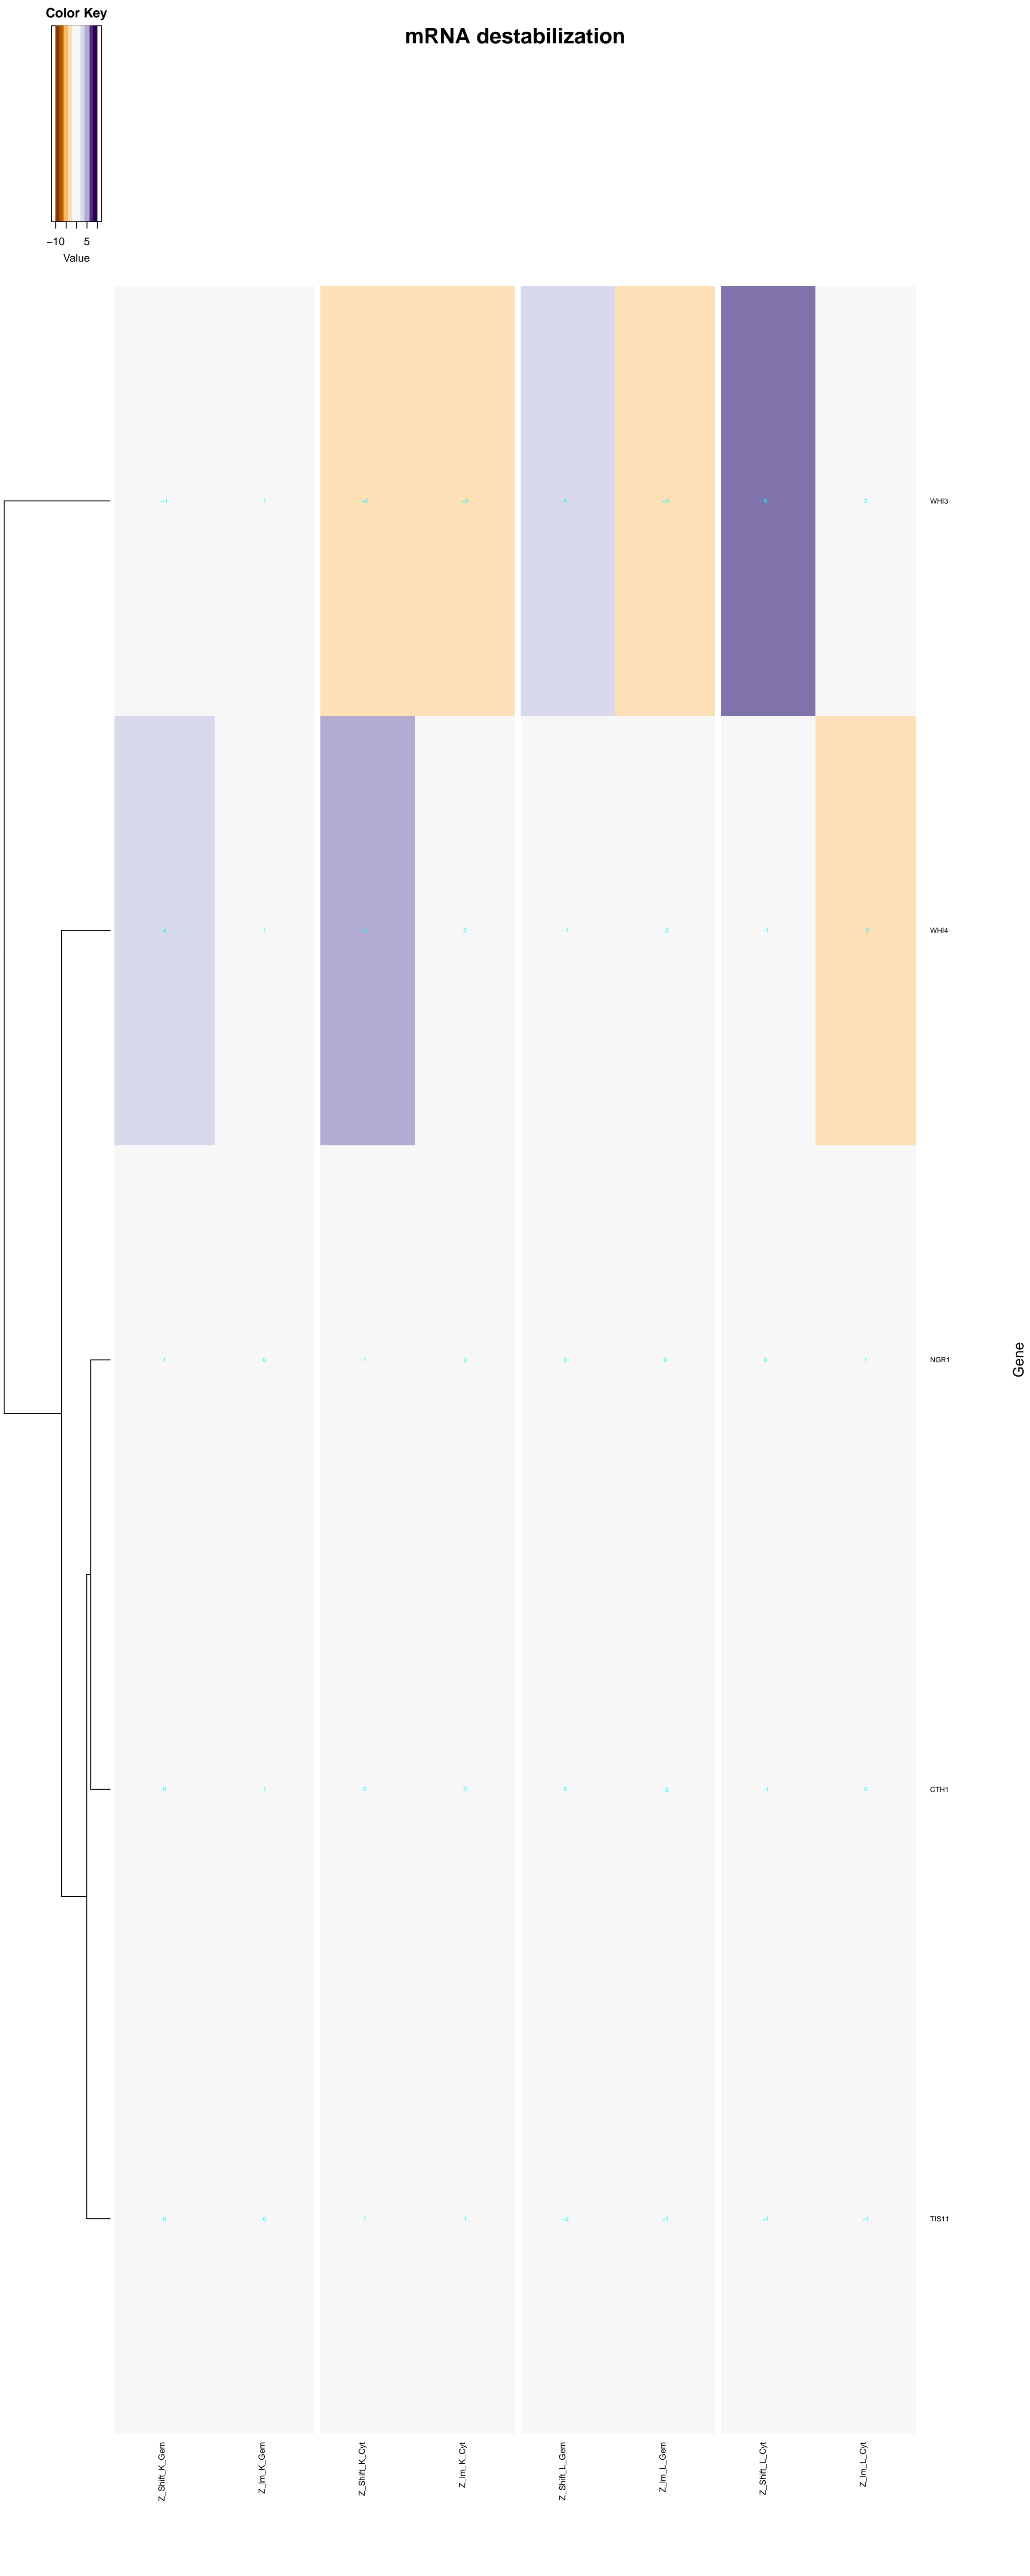

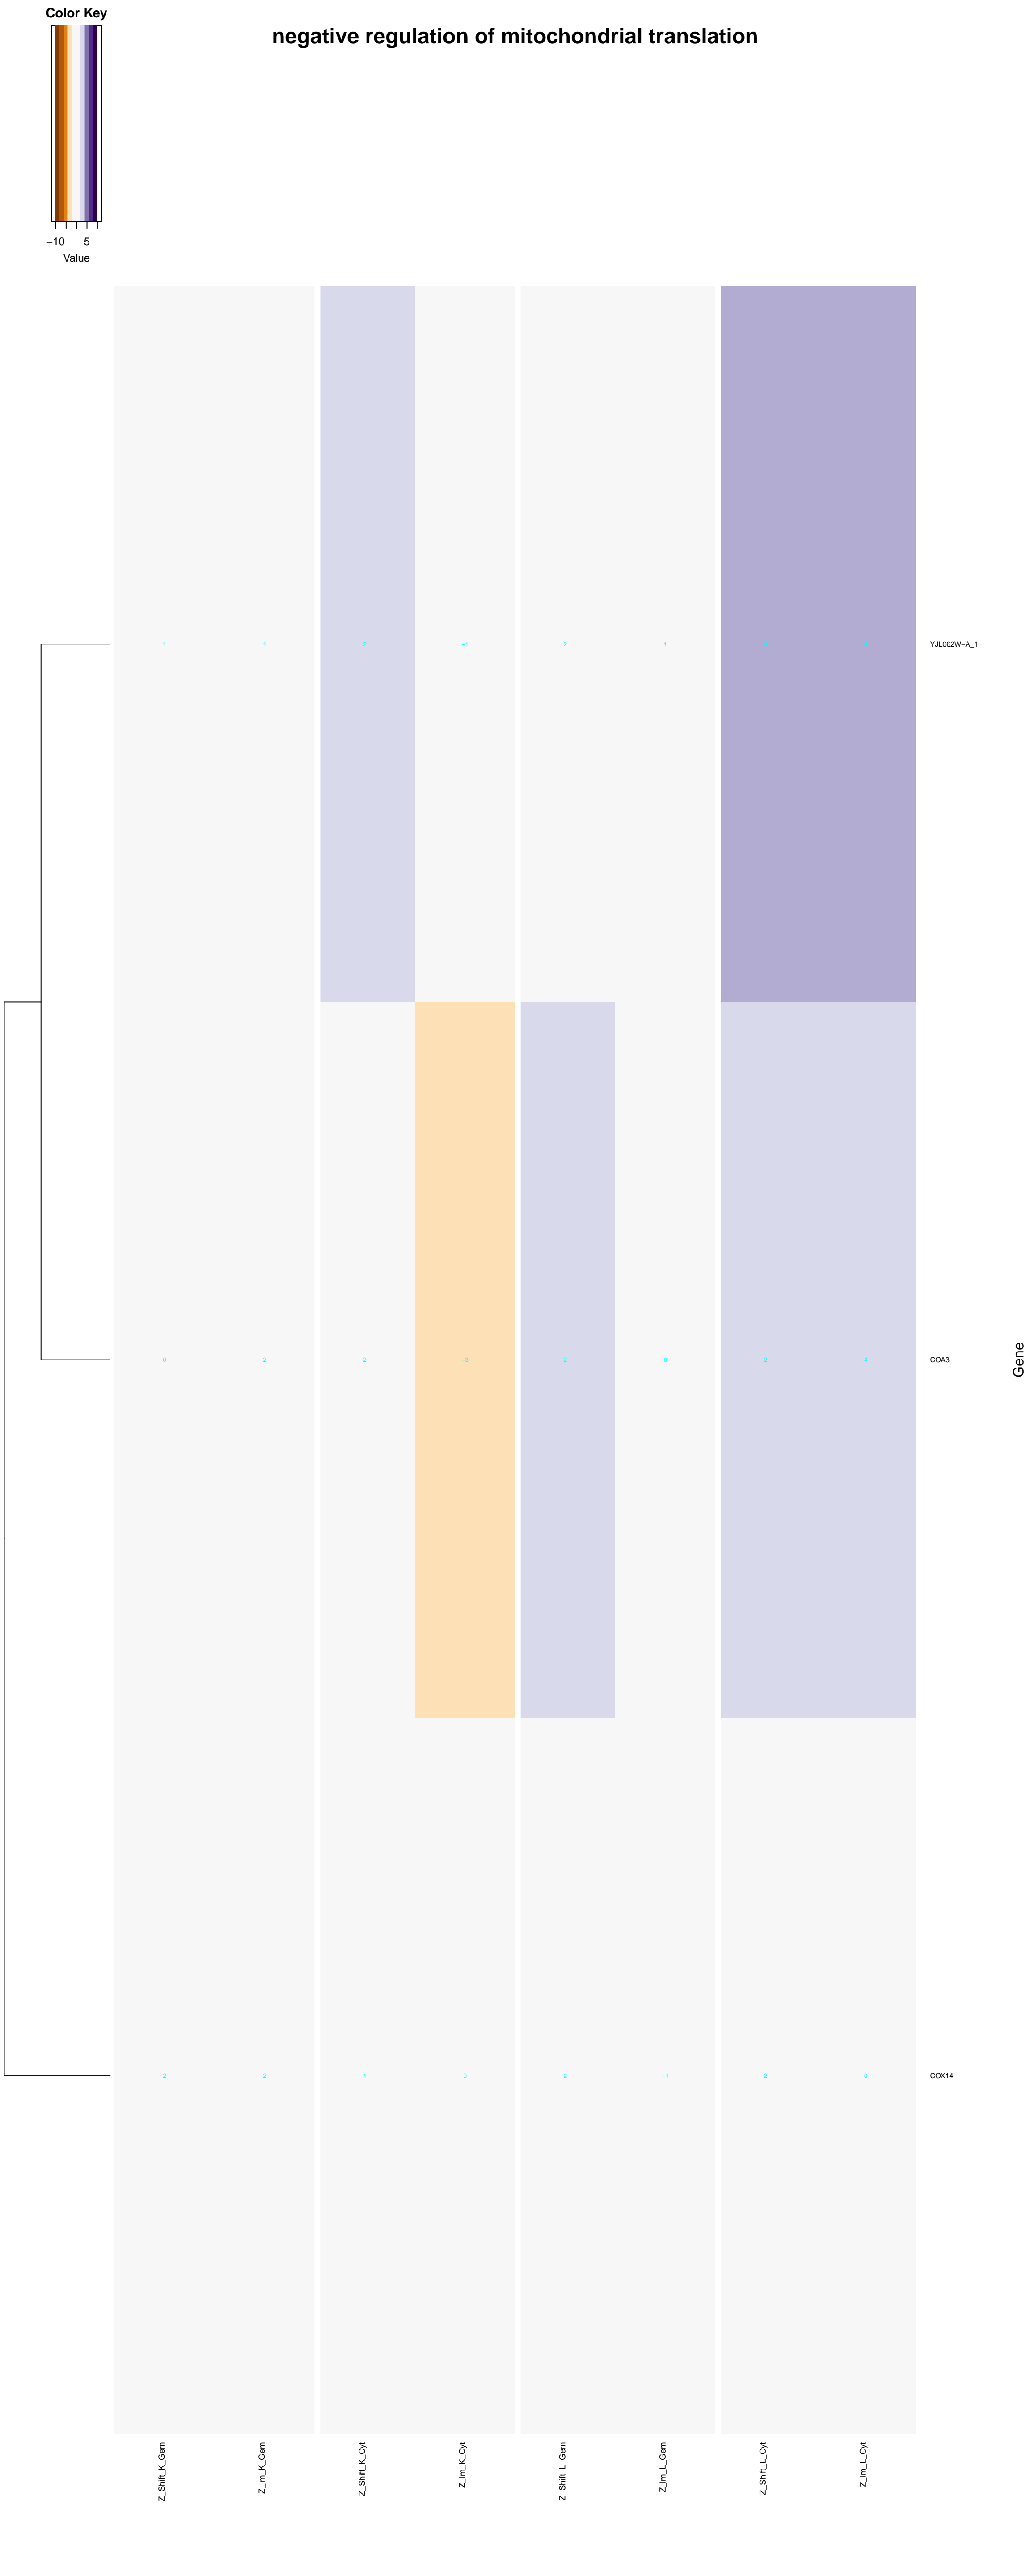

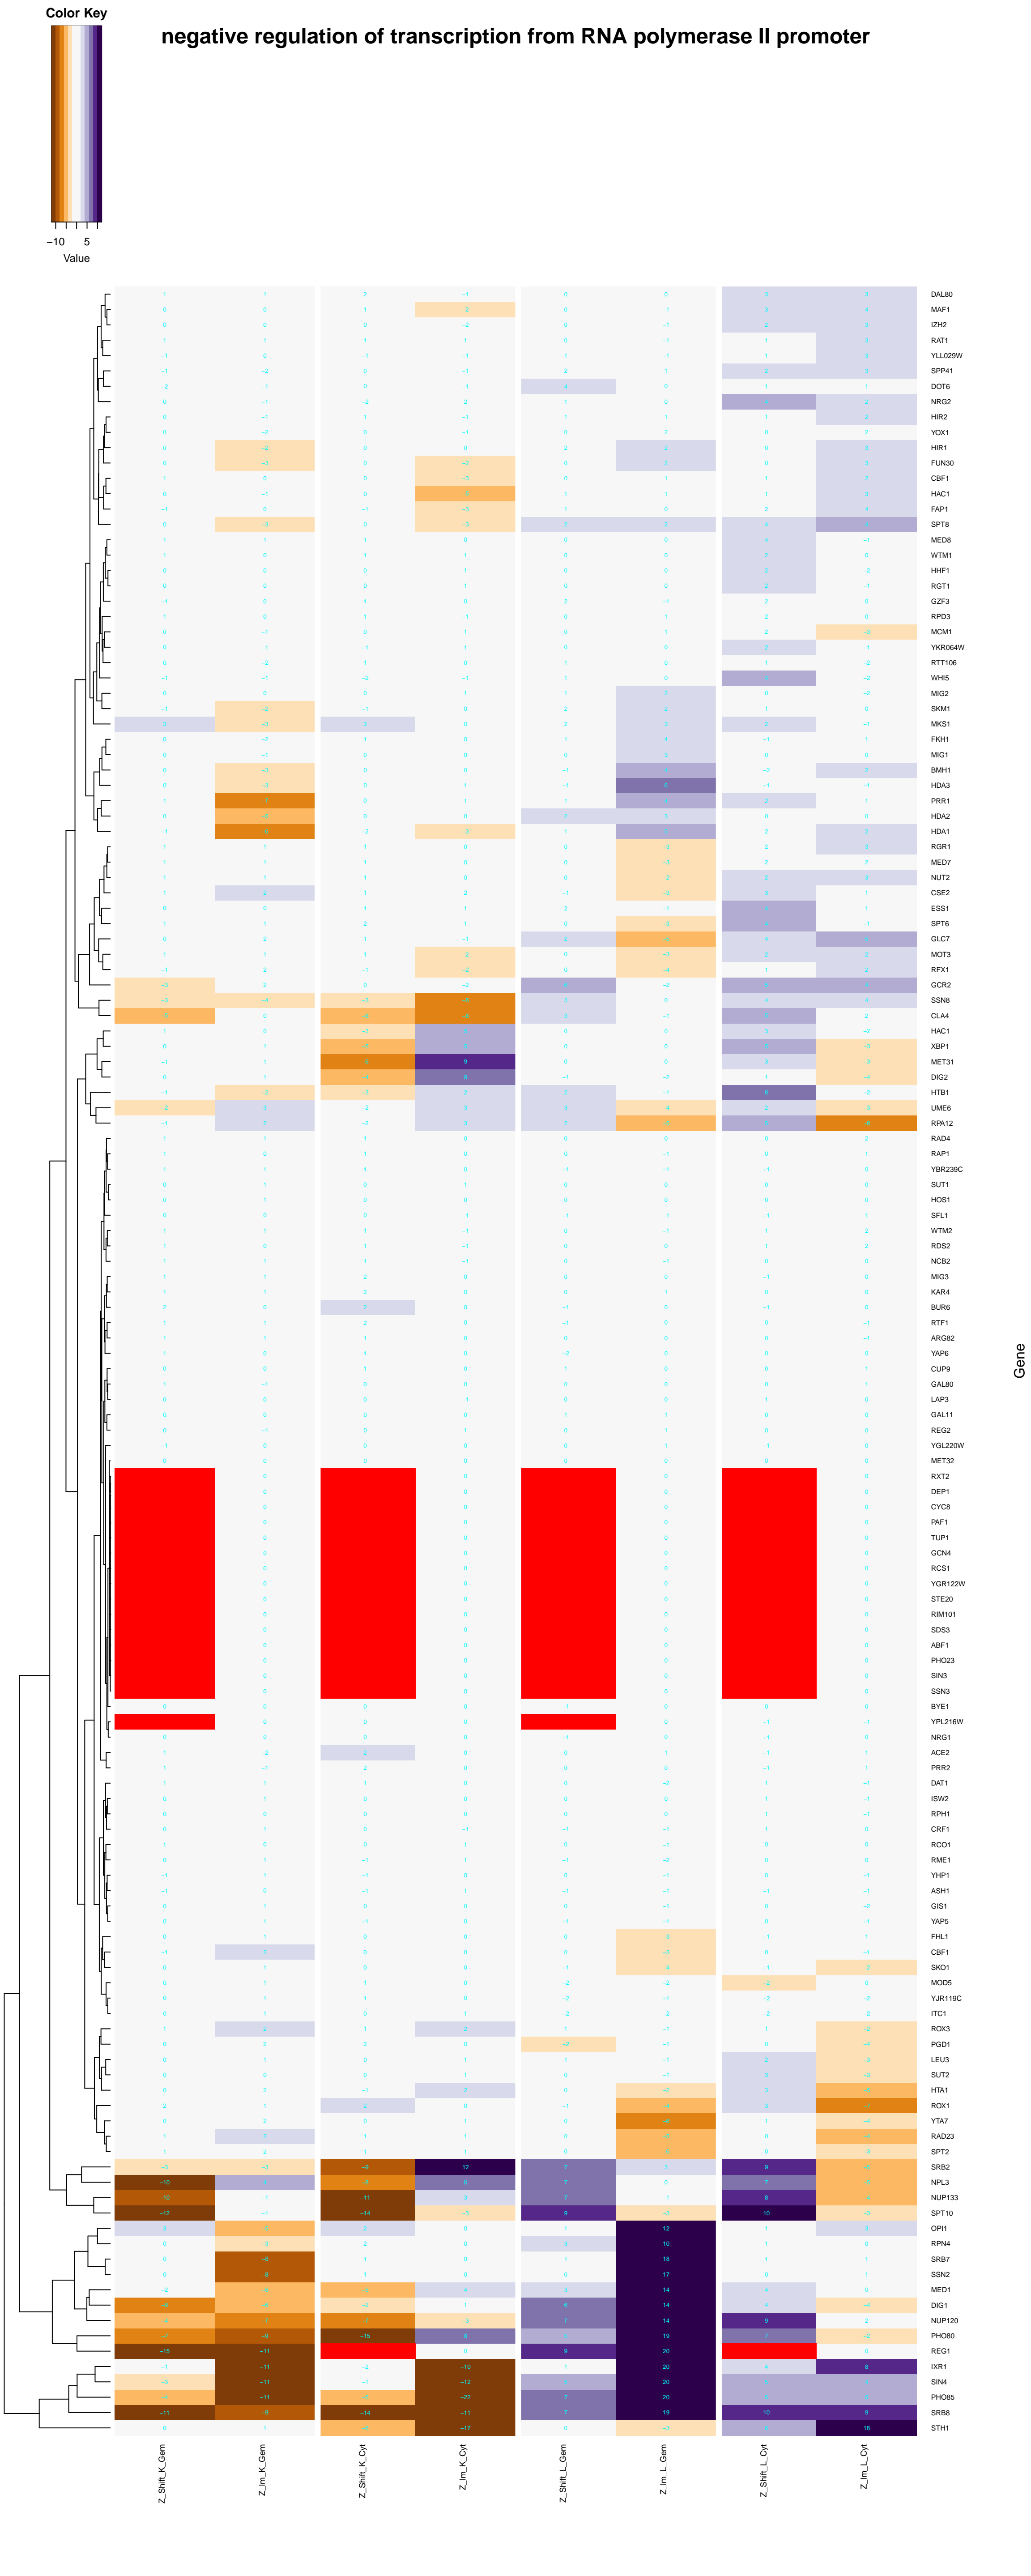

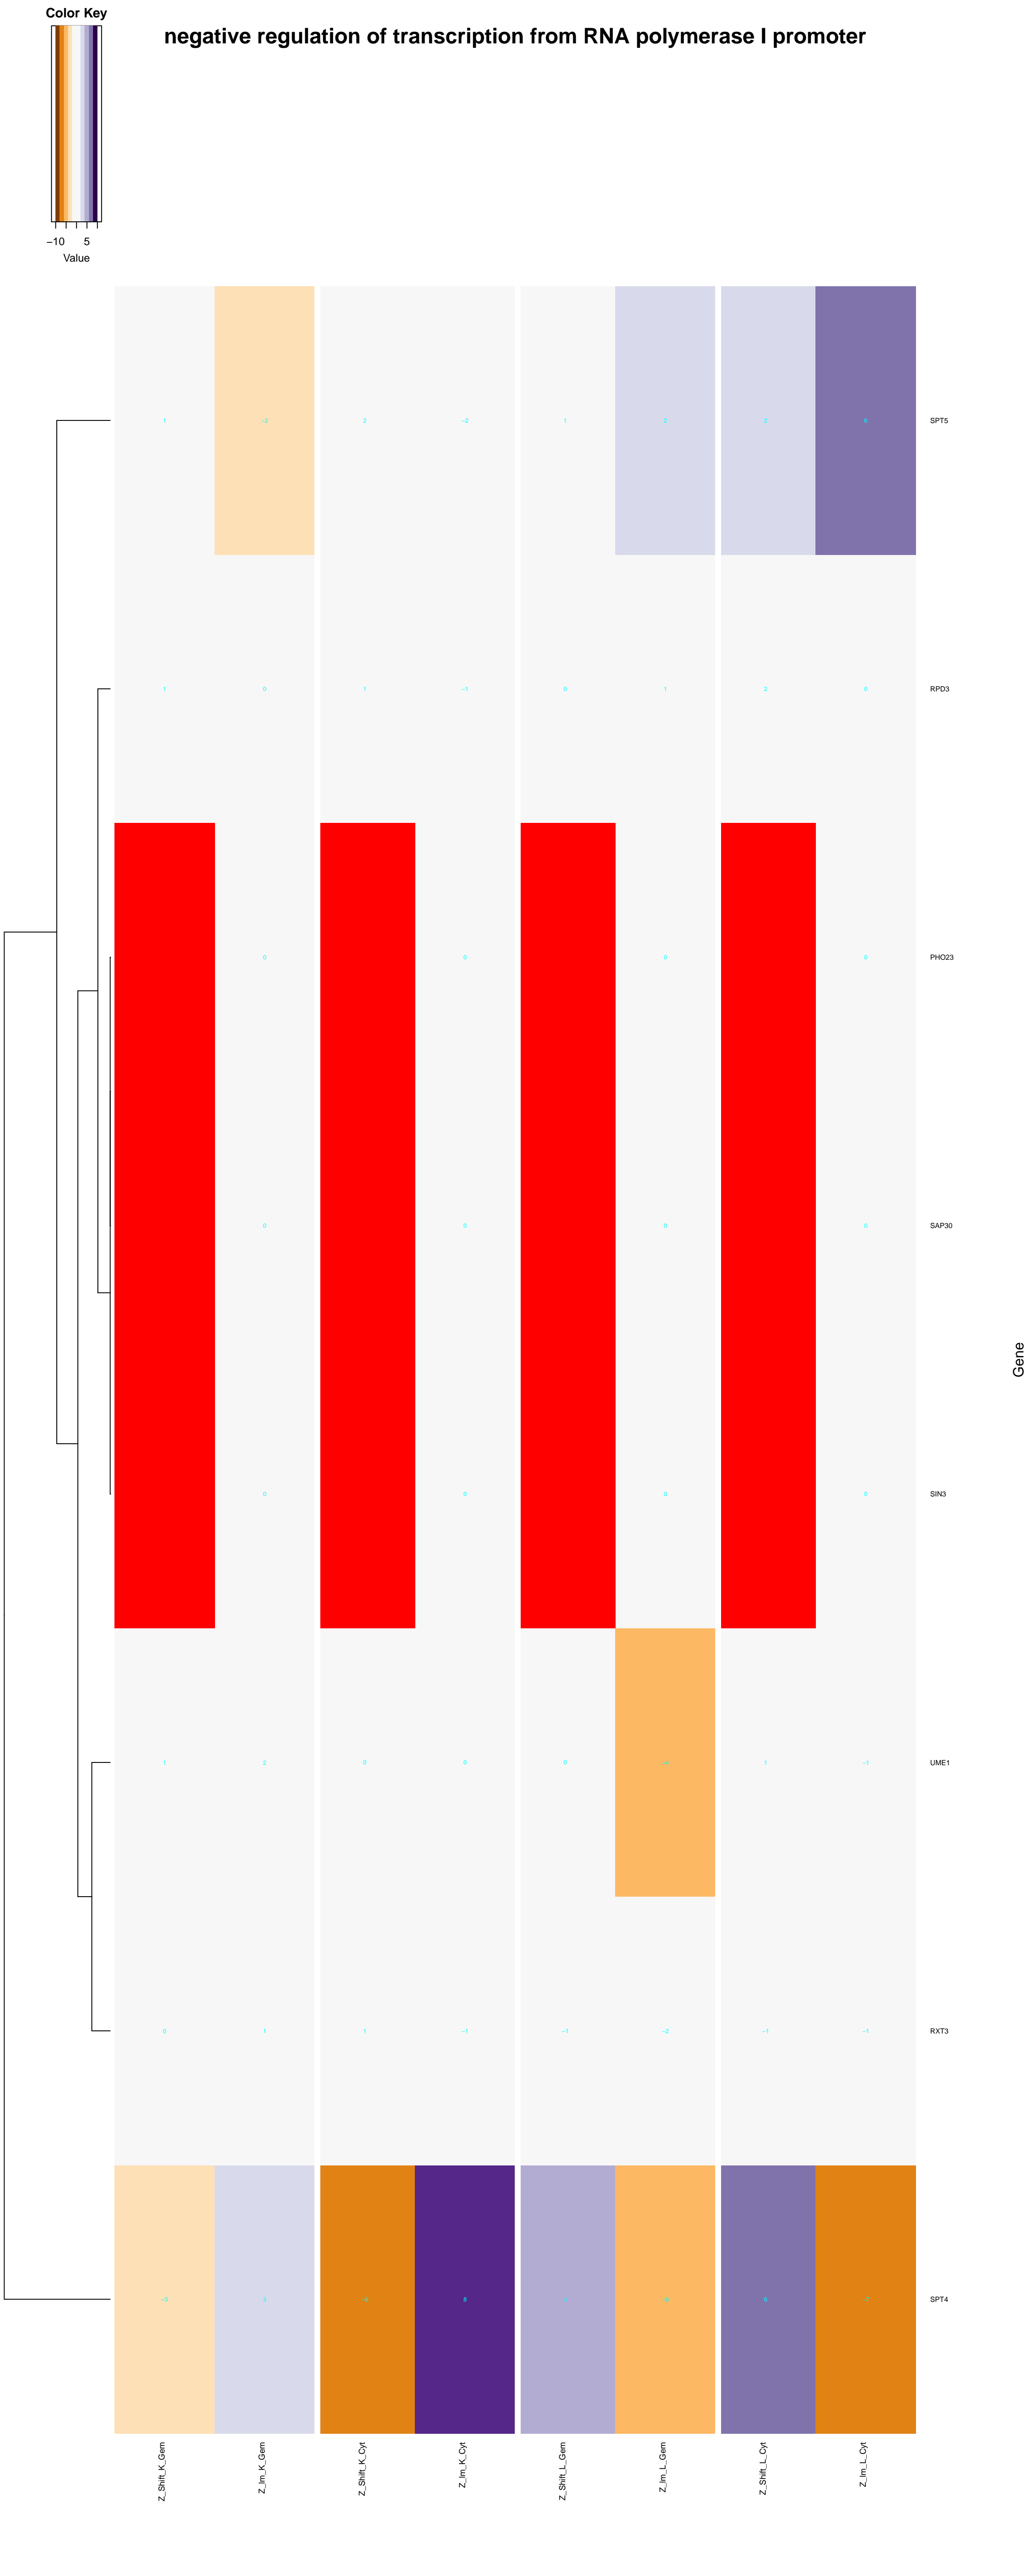

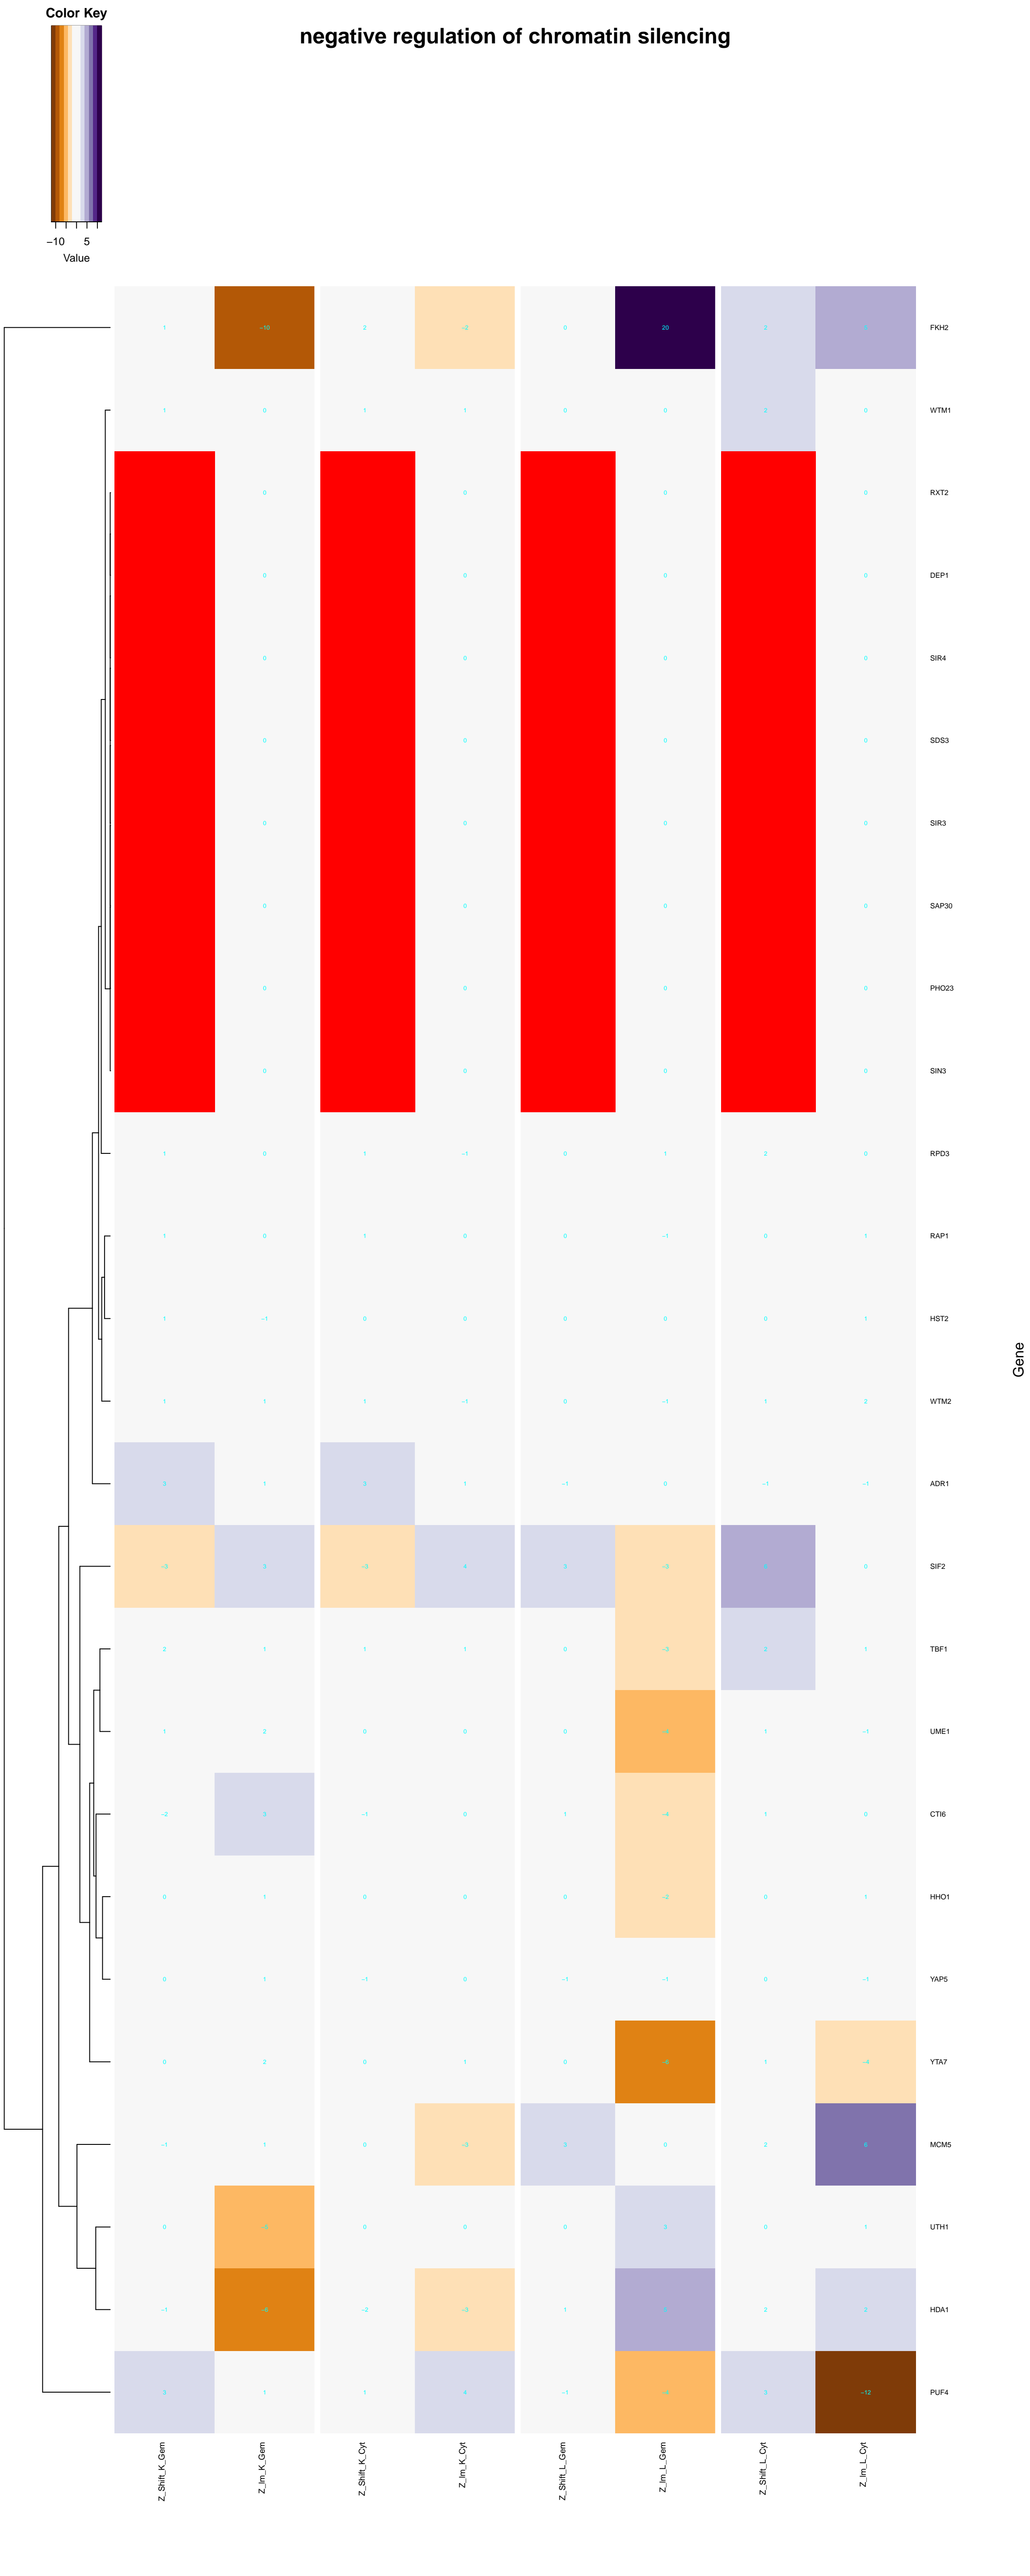

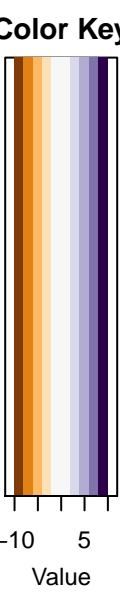

negative regulation of DNA-templated transcription, elongation

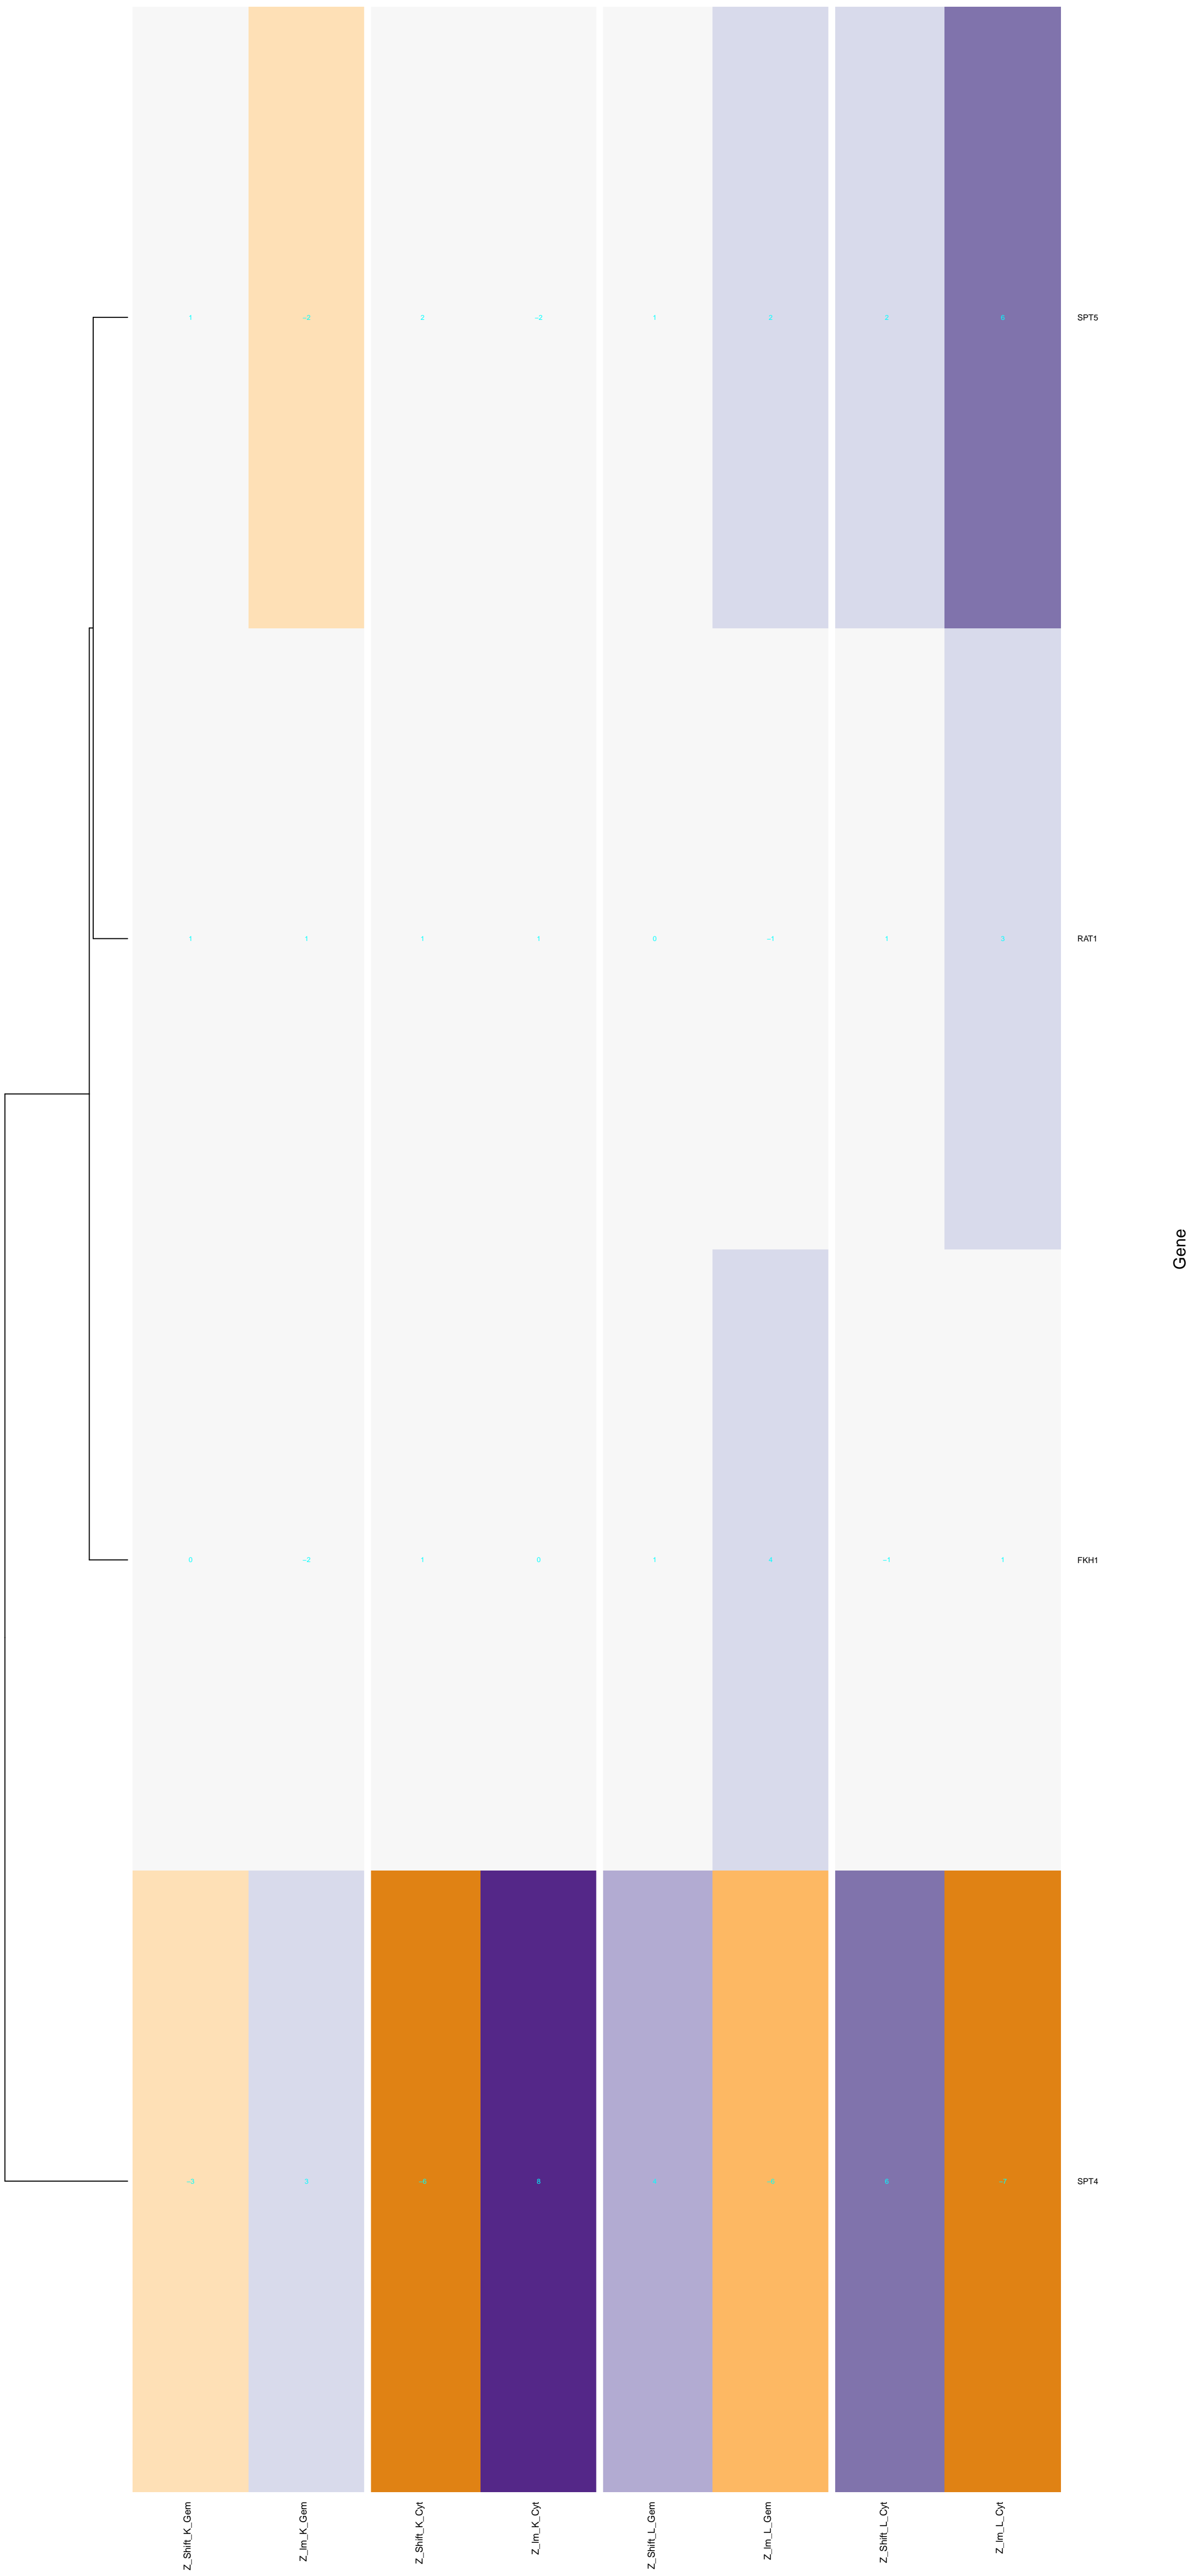

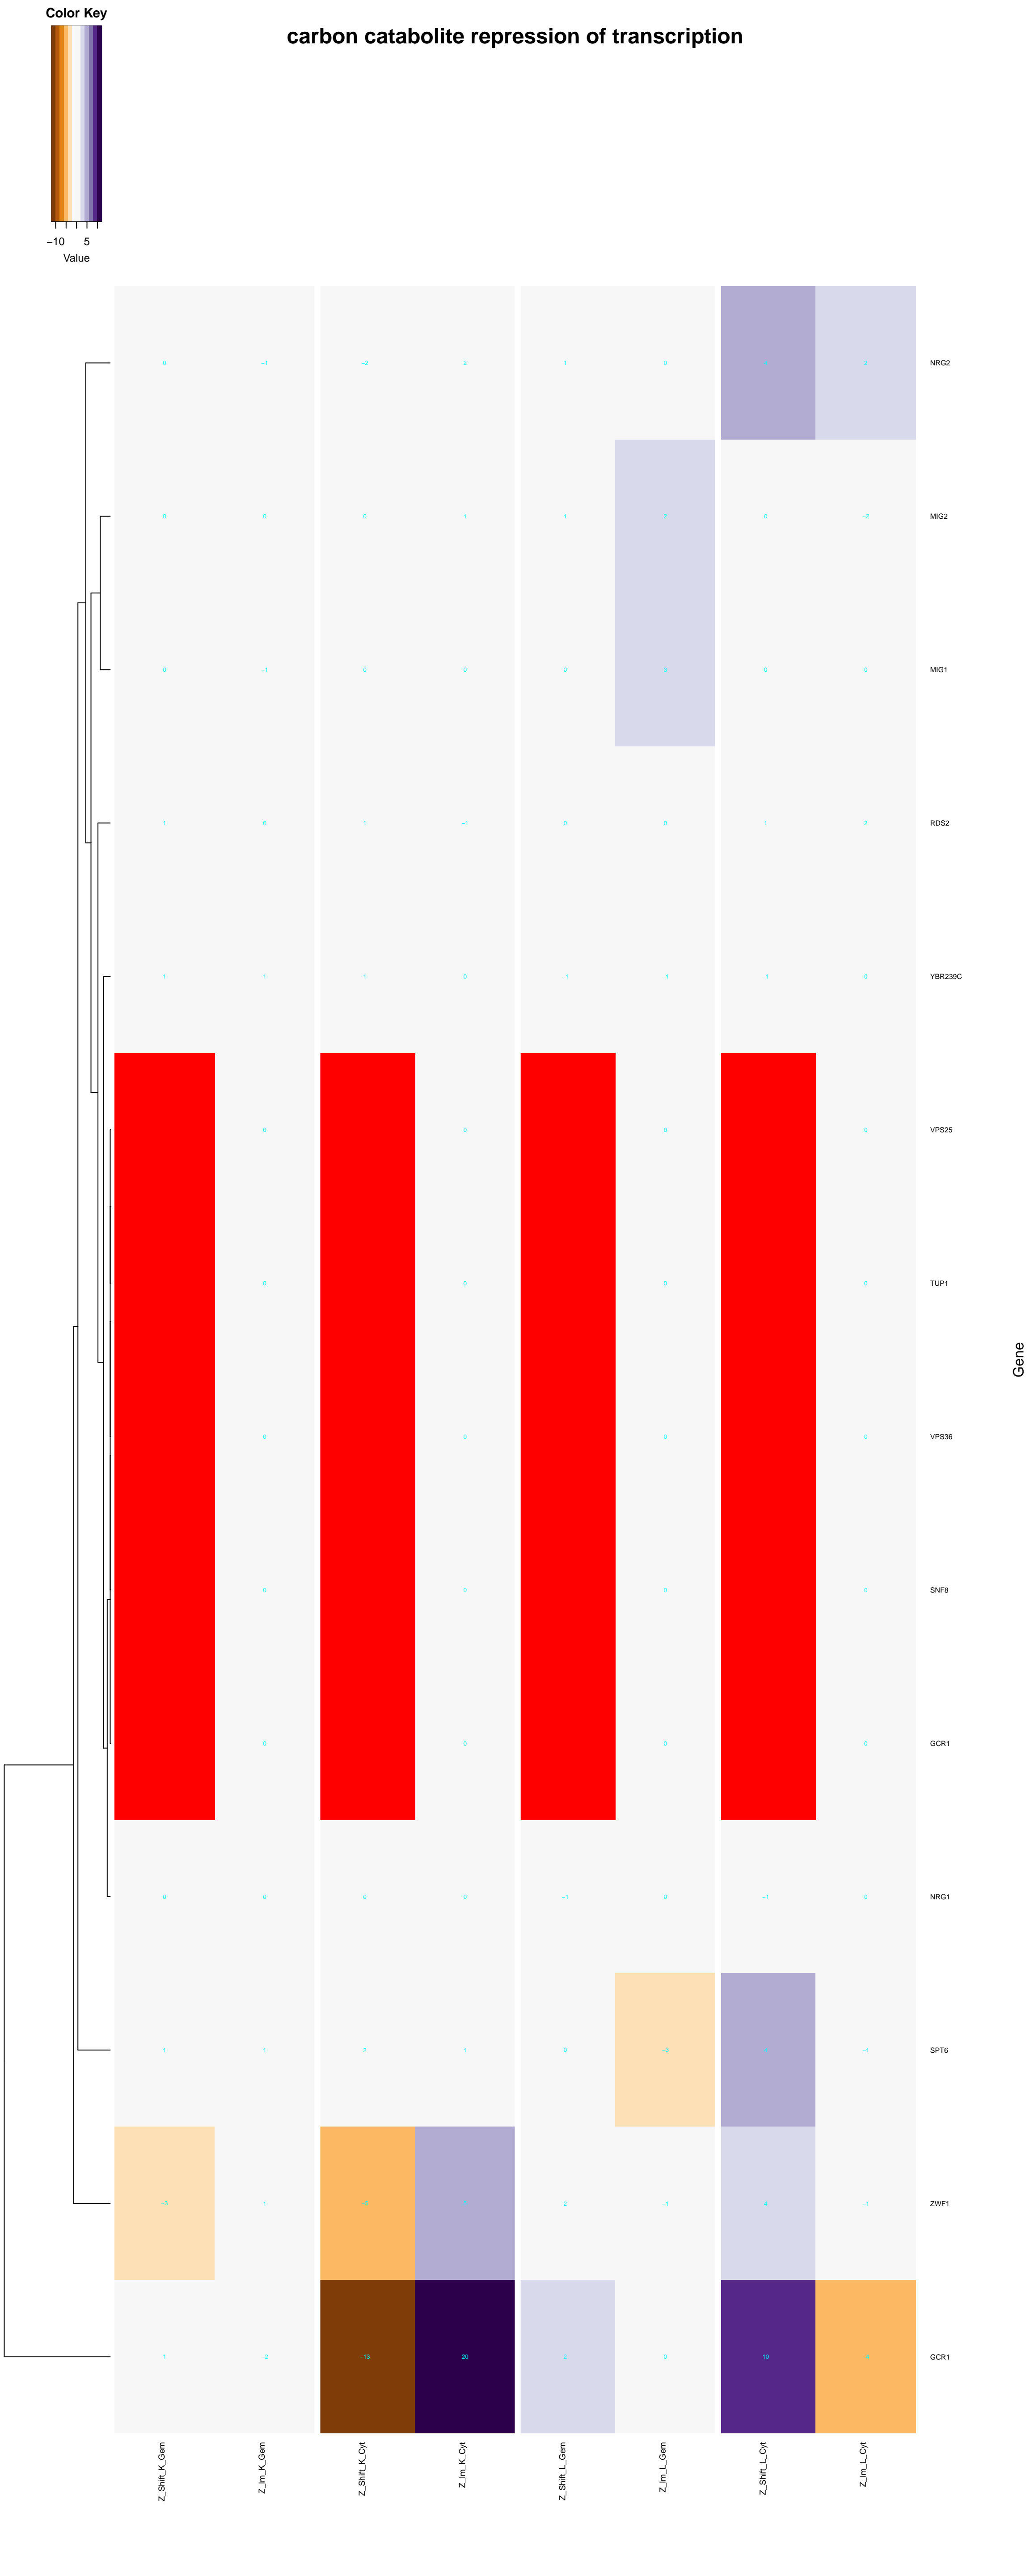

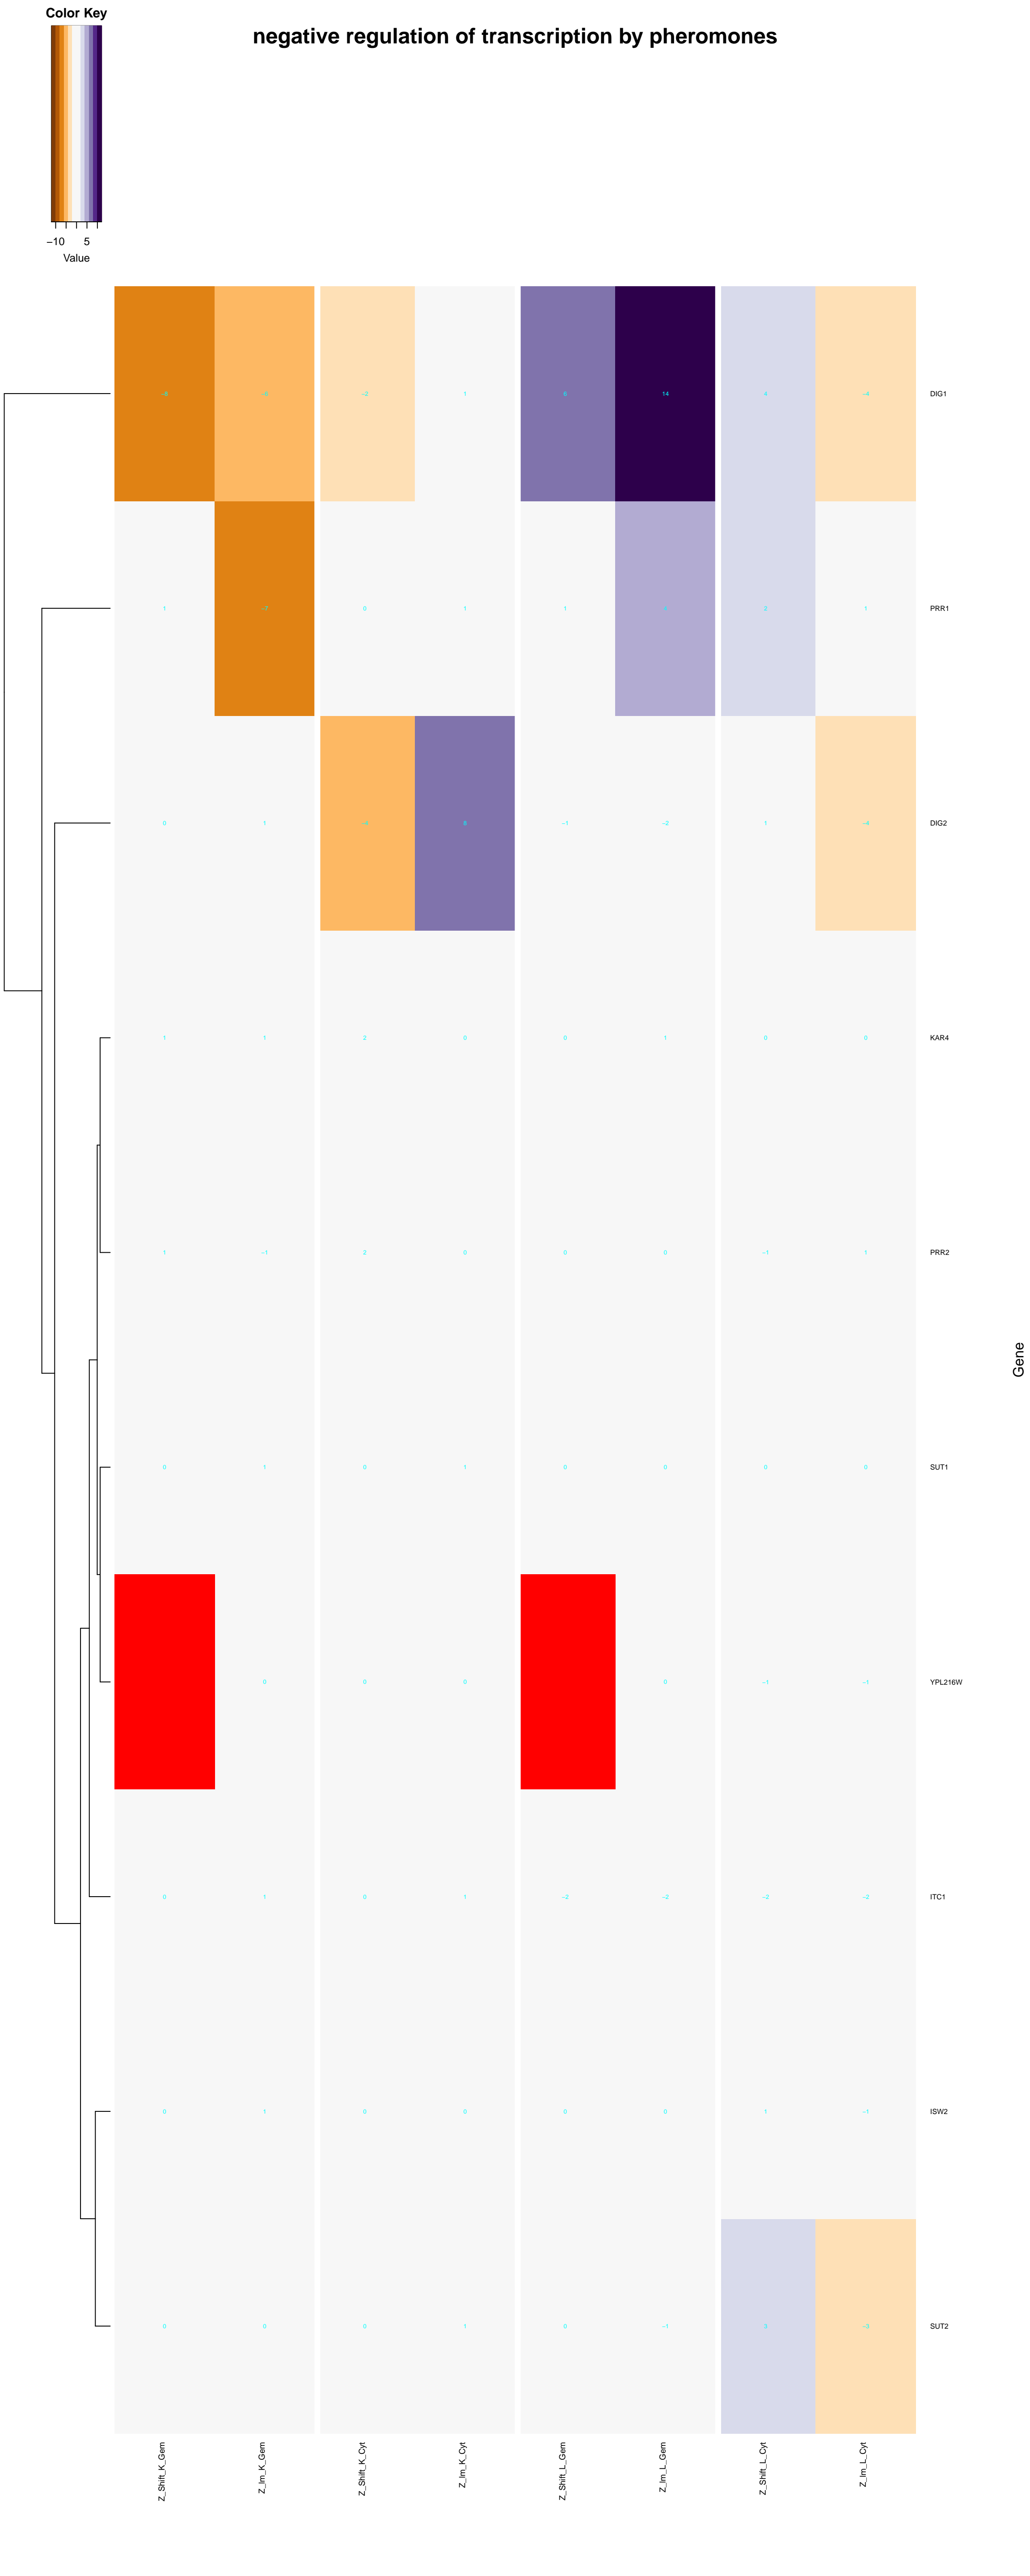

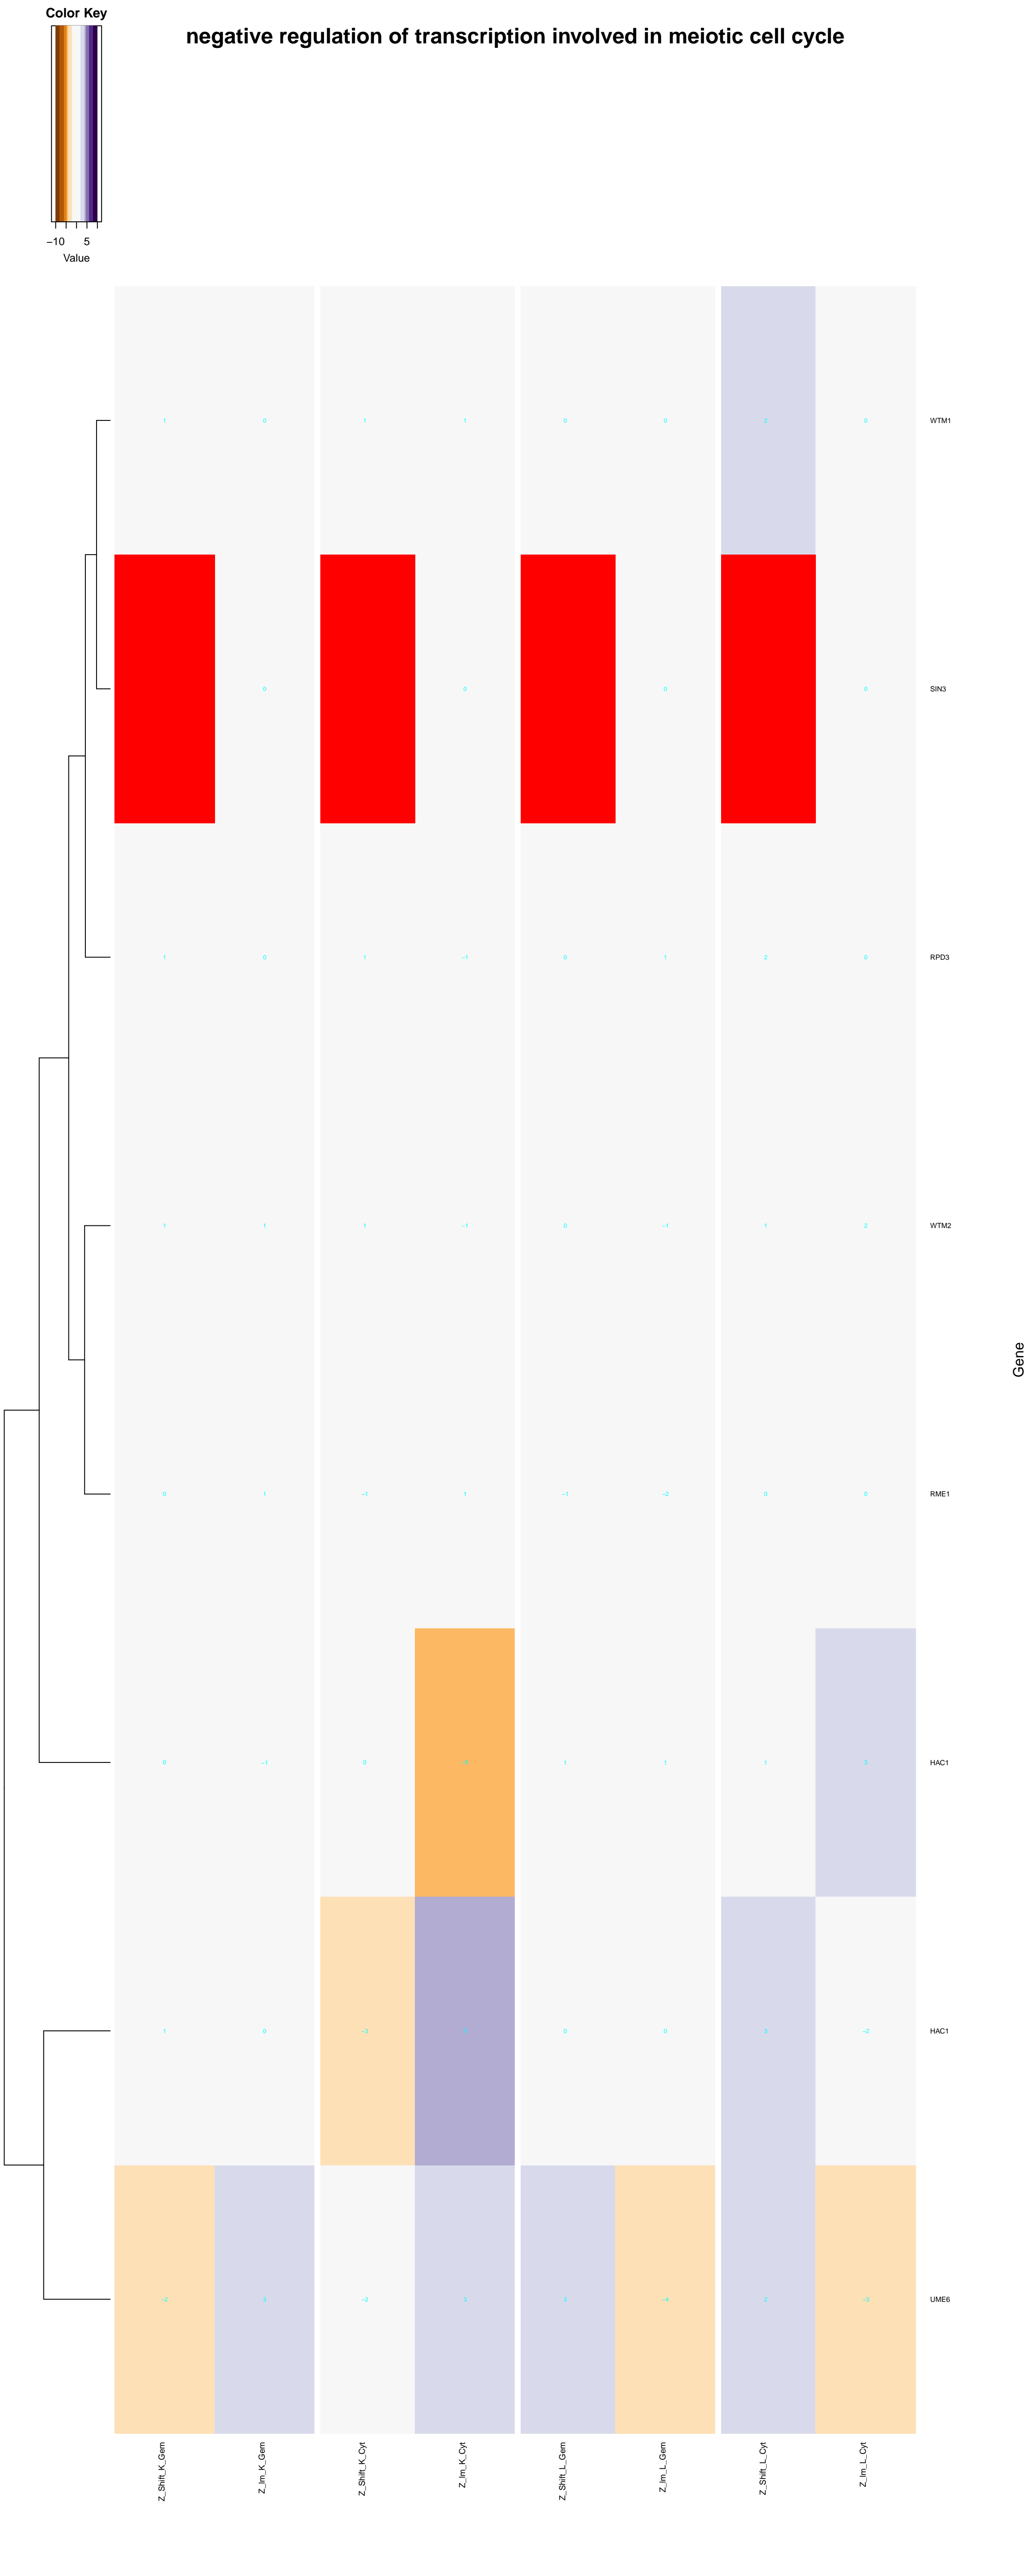

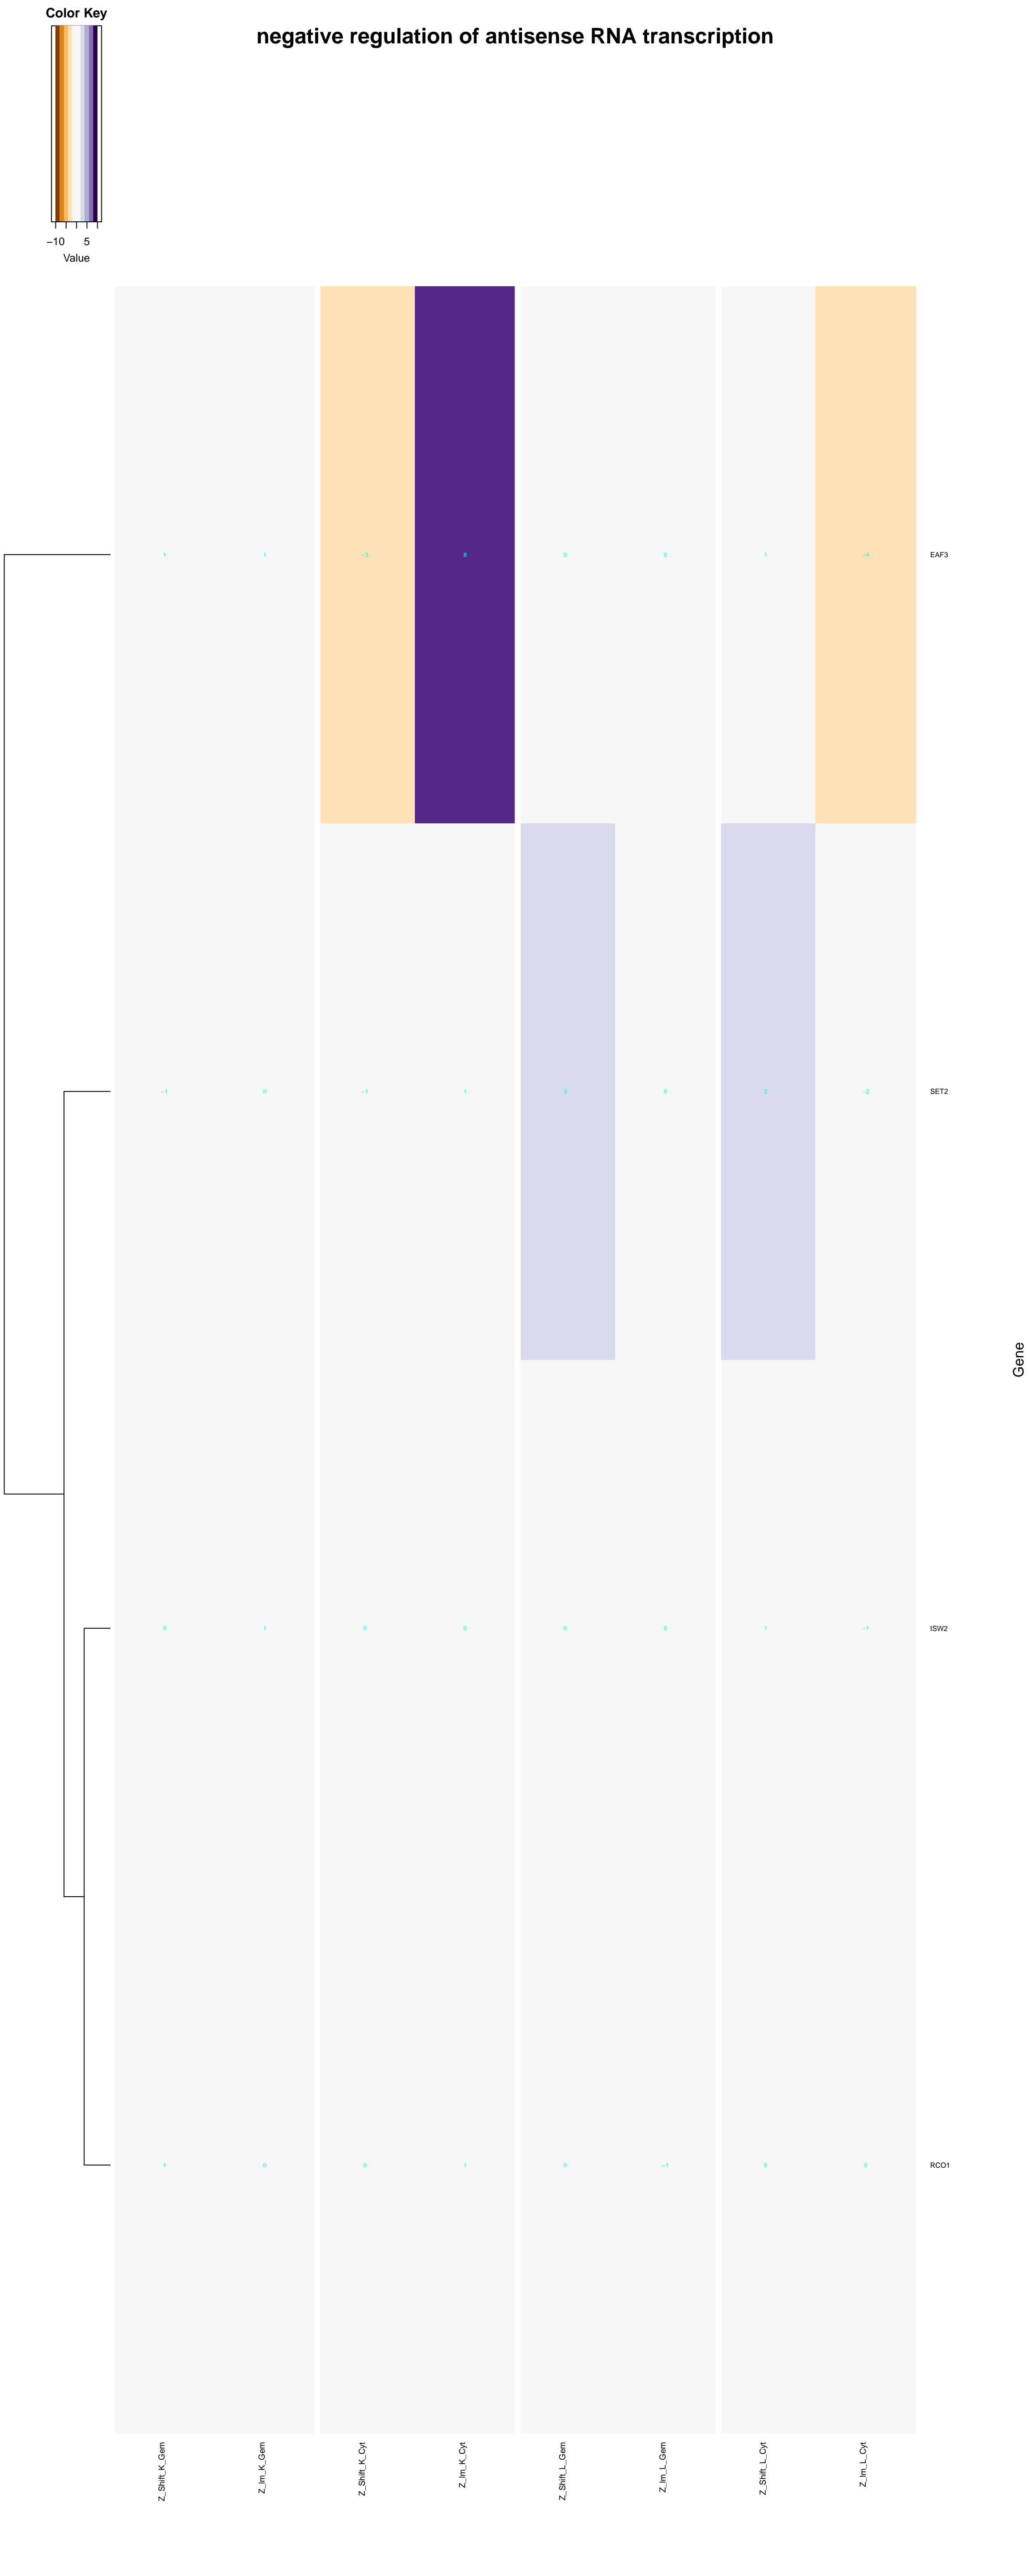

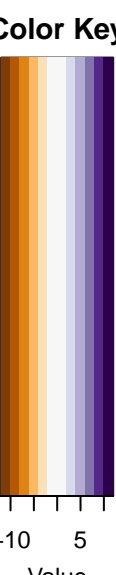

egative regulation of transcription involved in G1/S transition of mitotic cell cycle

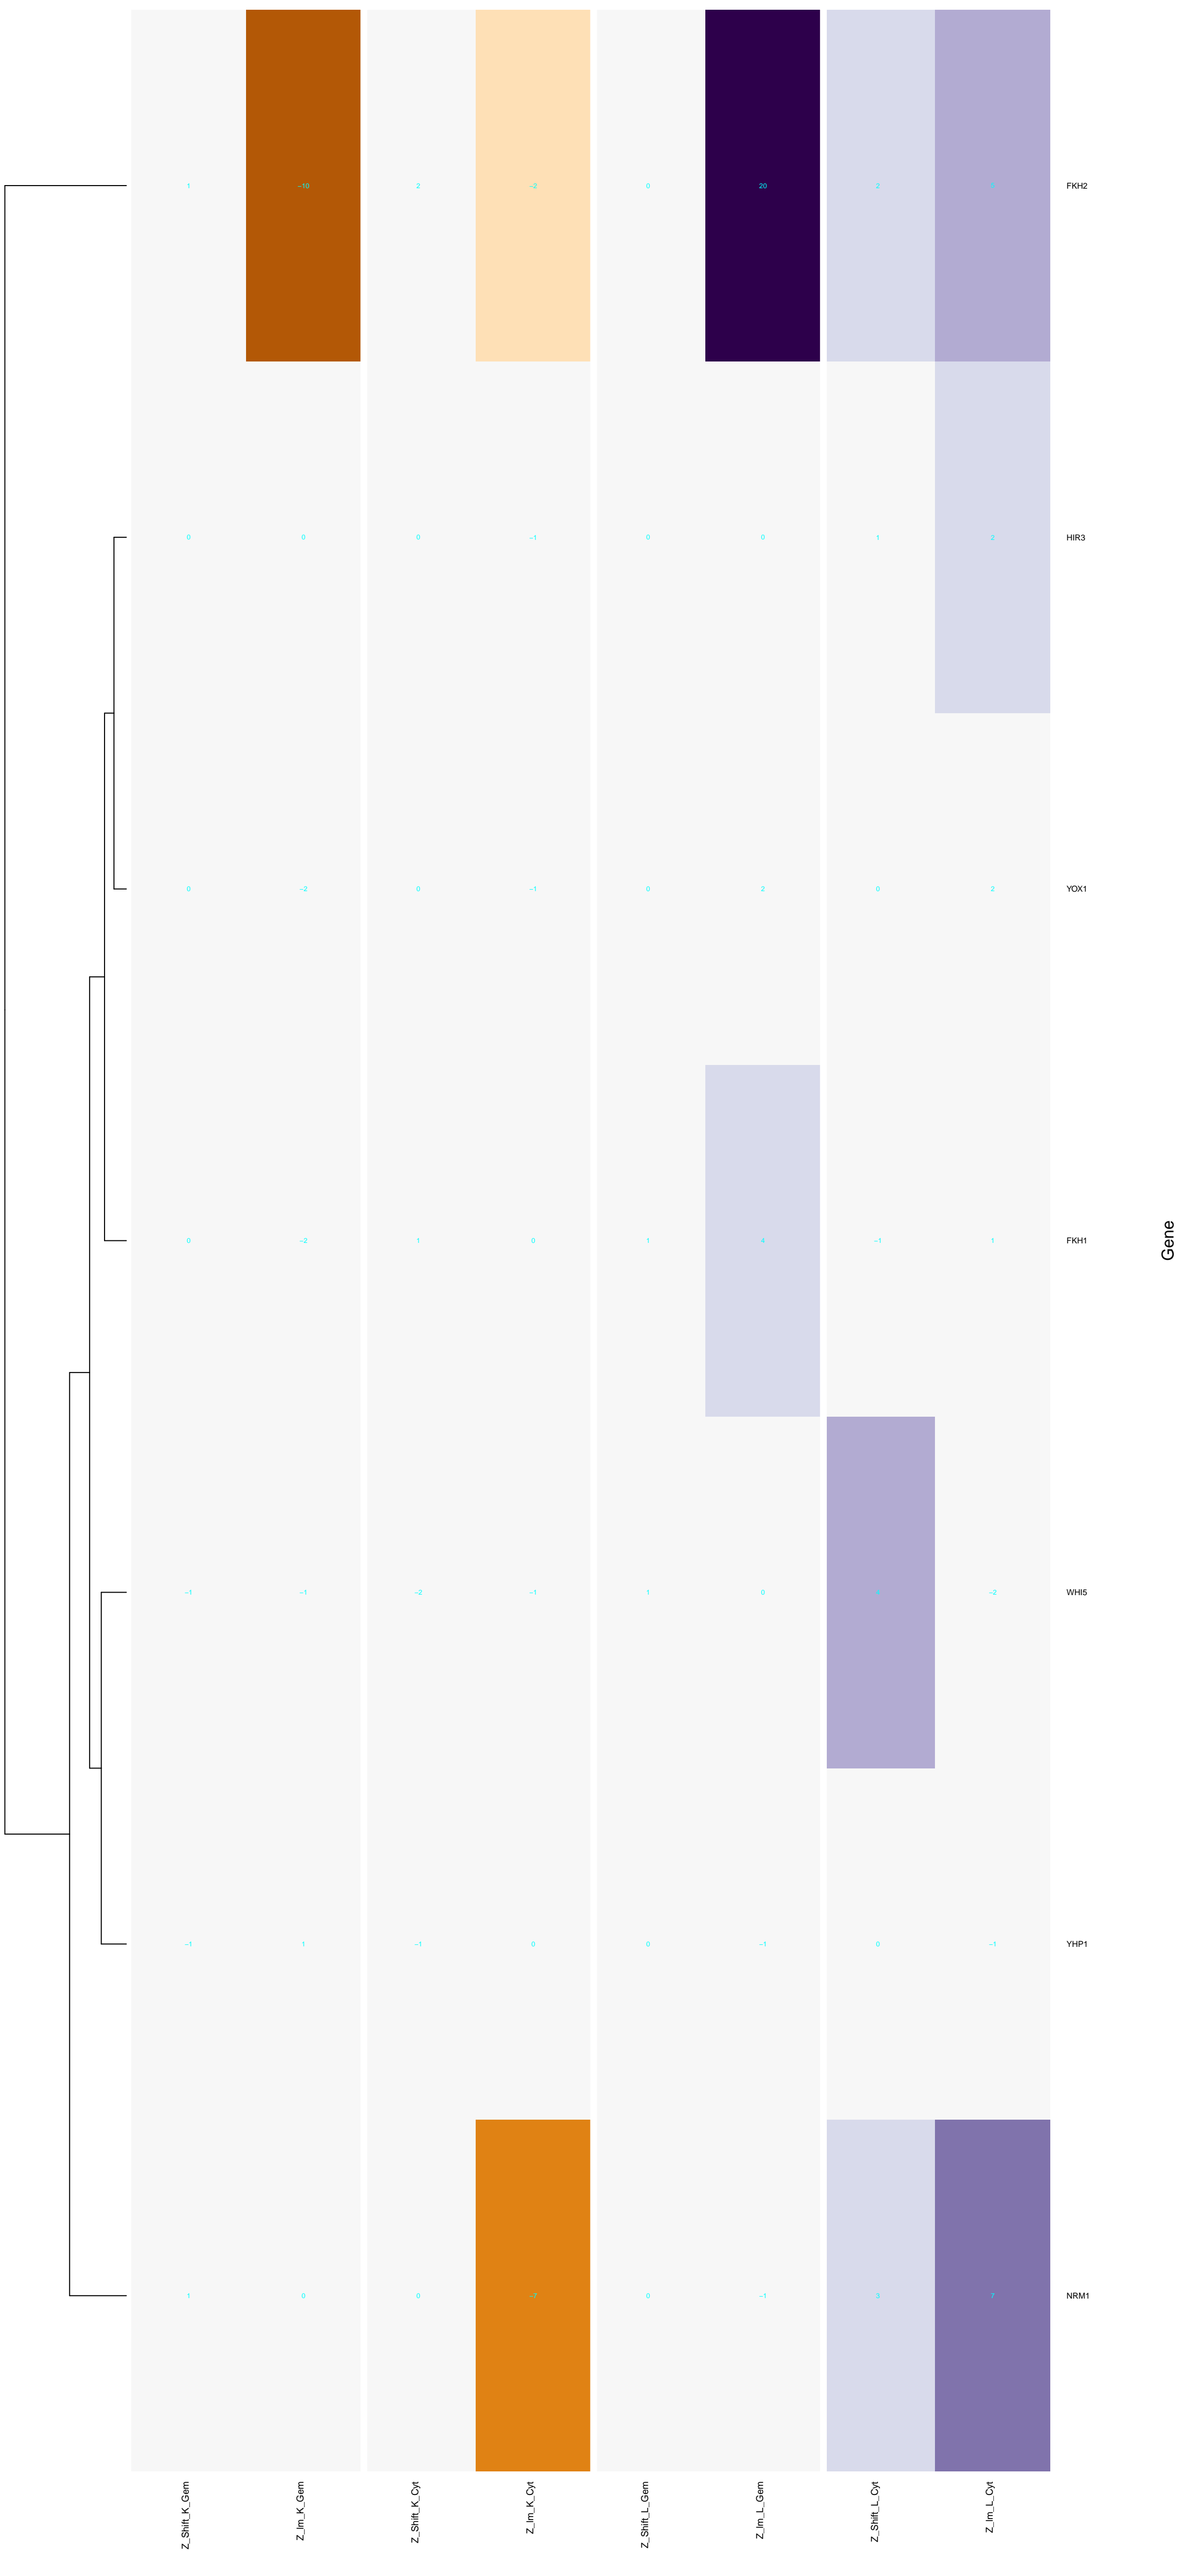

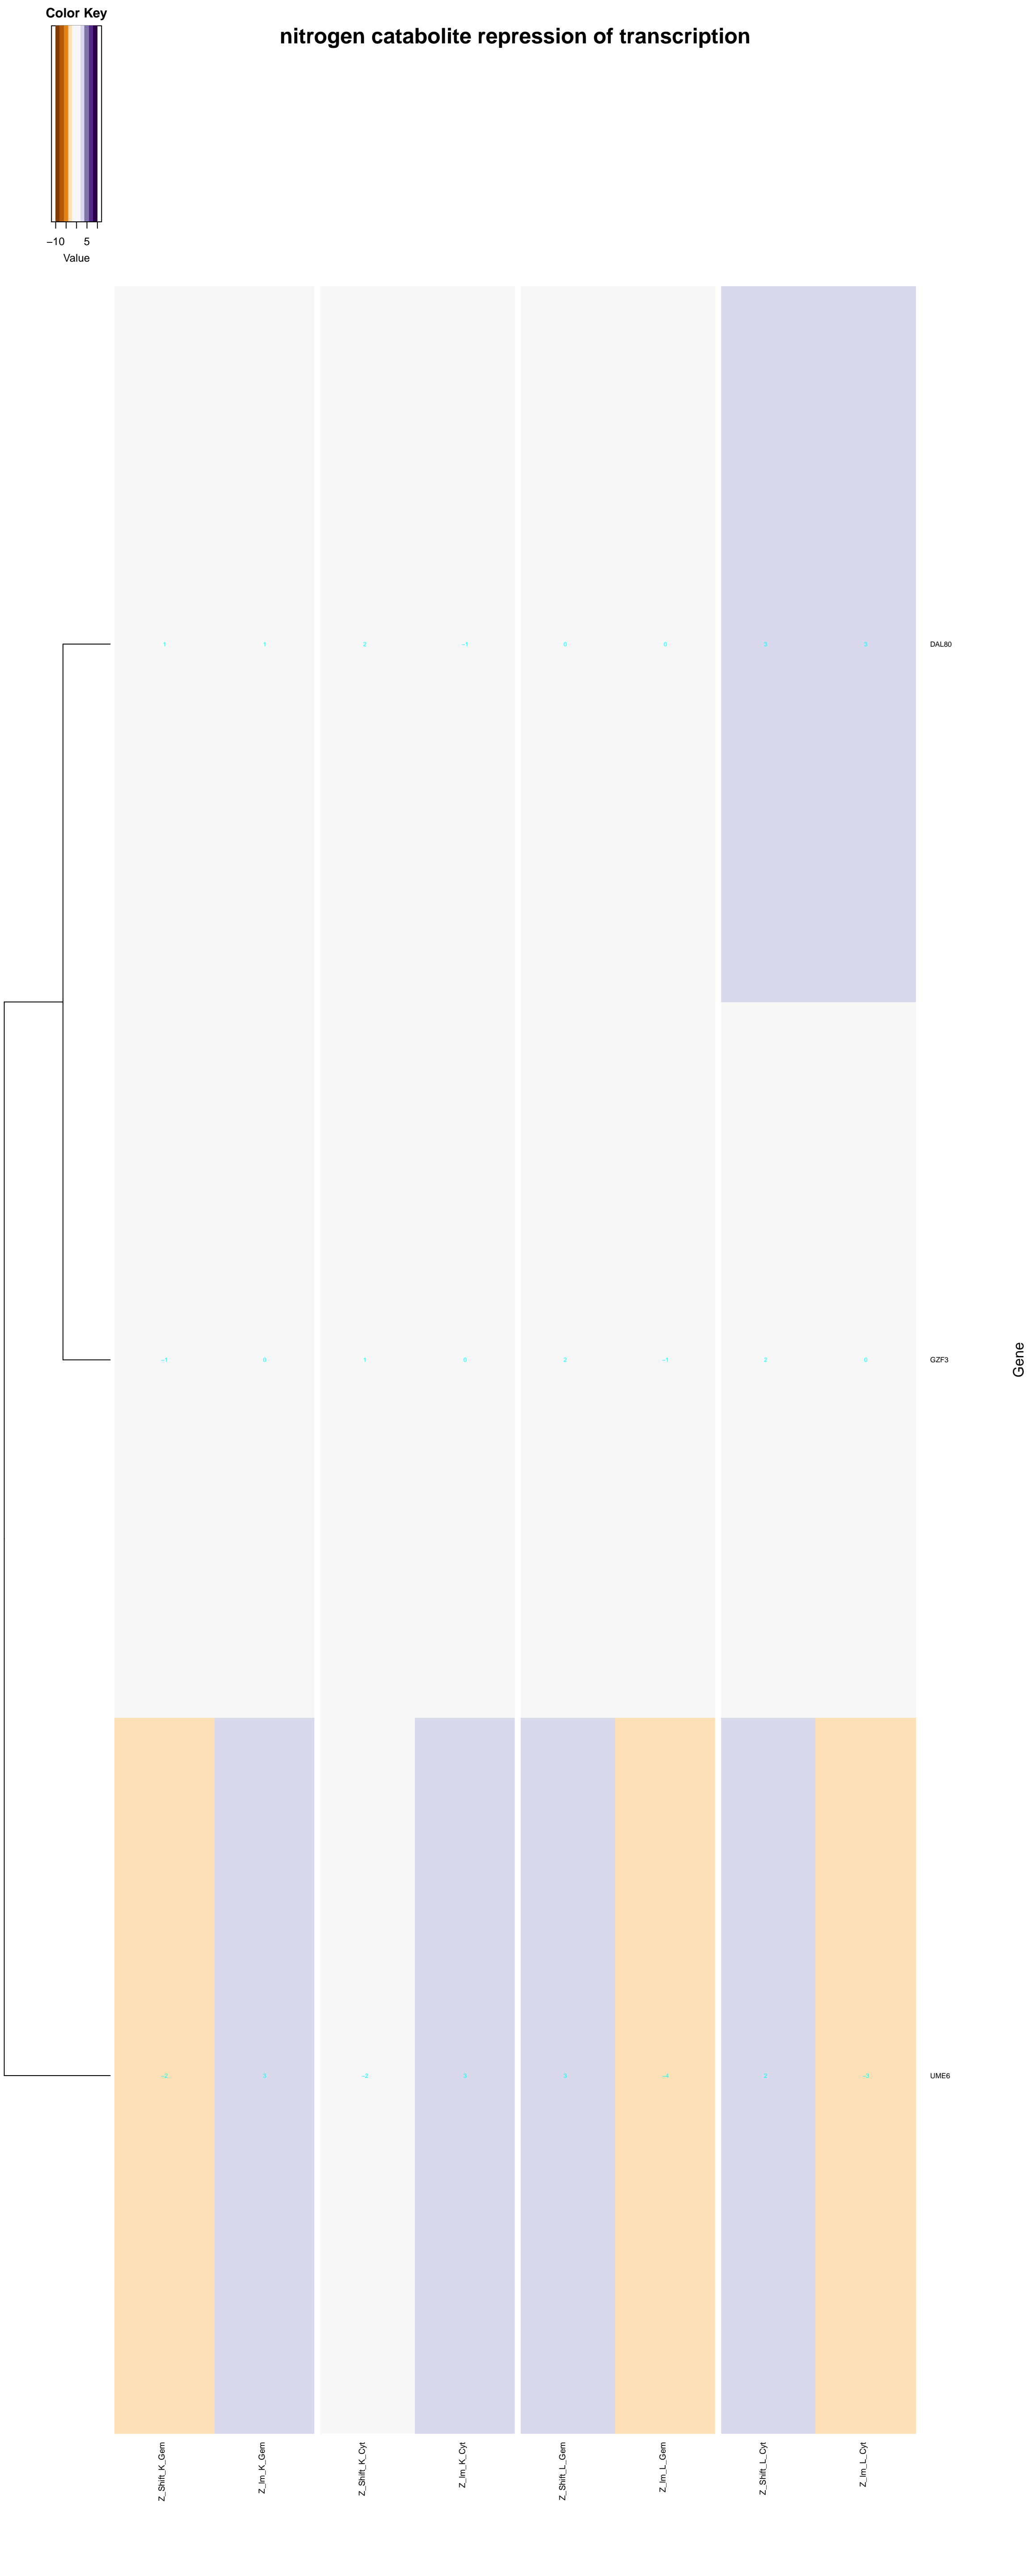

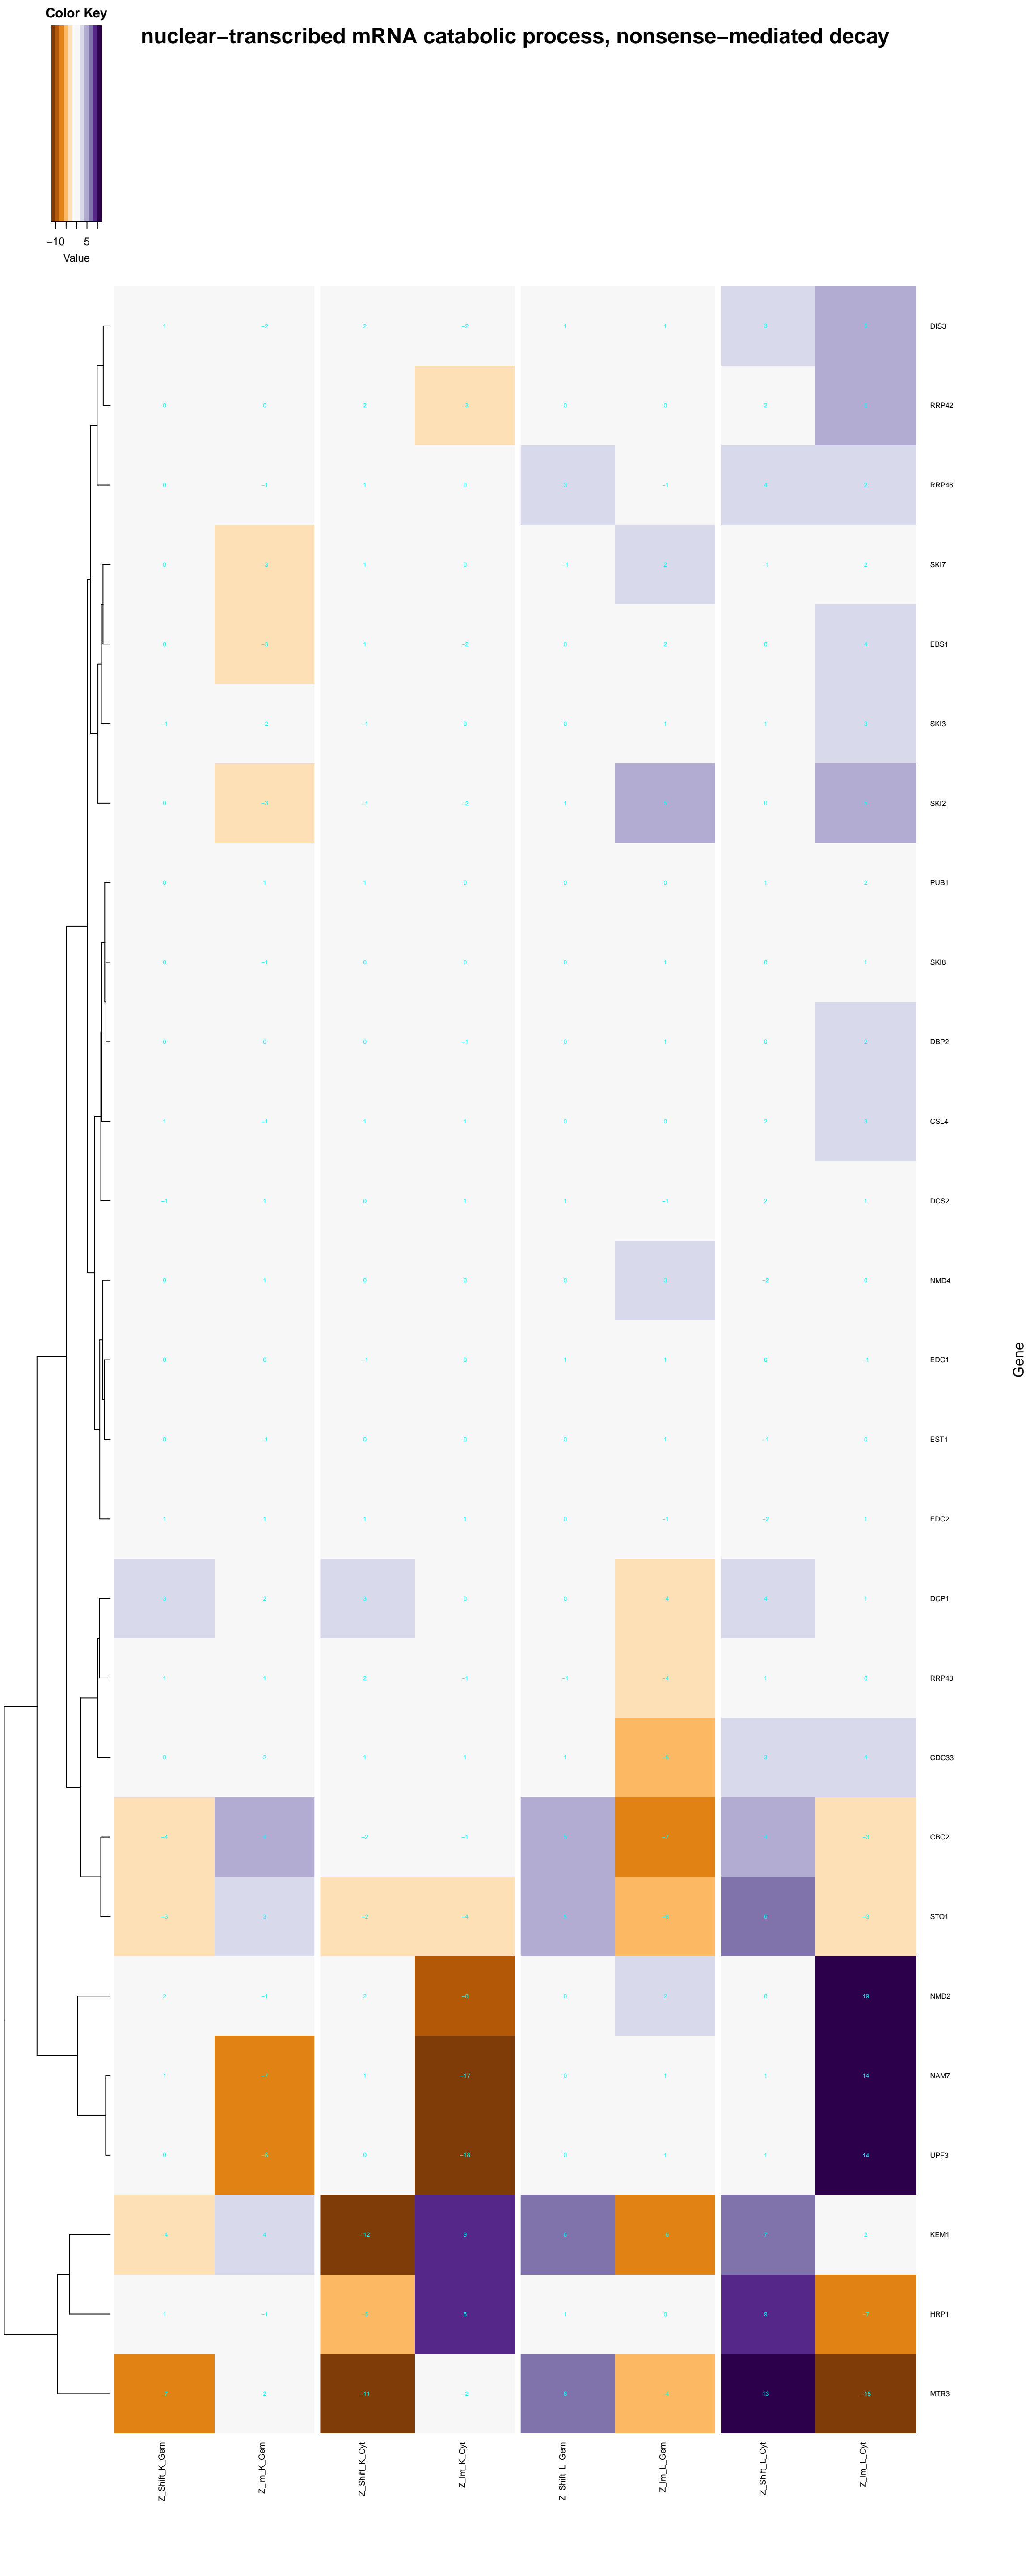

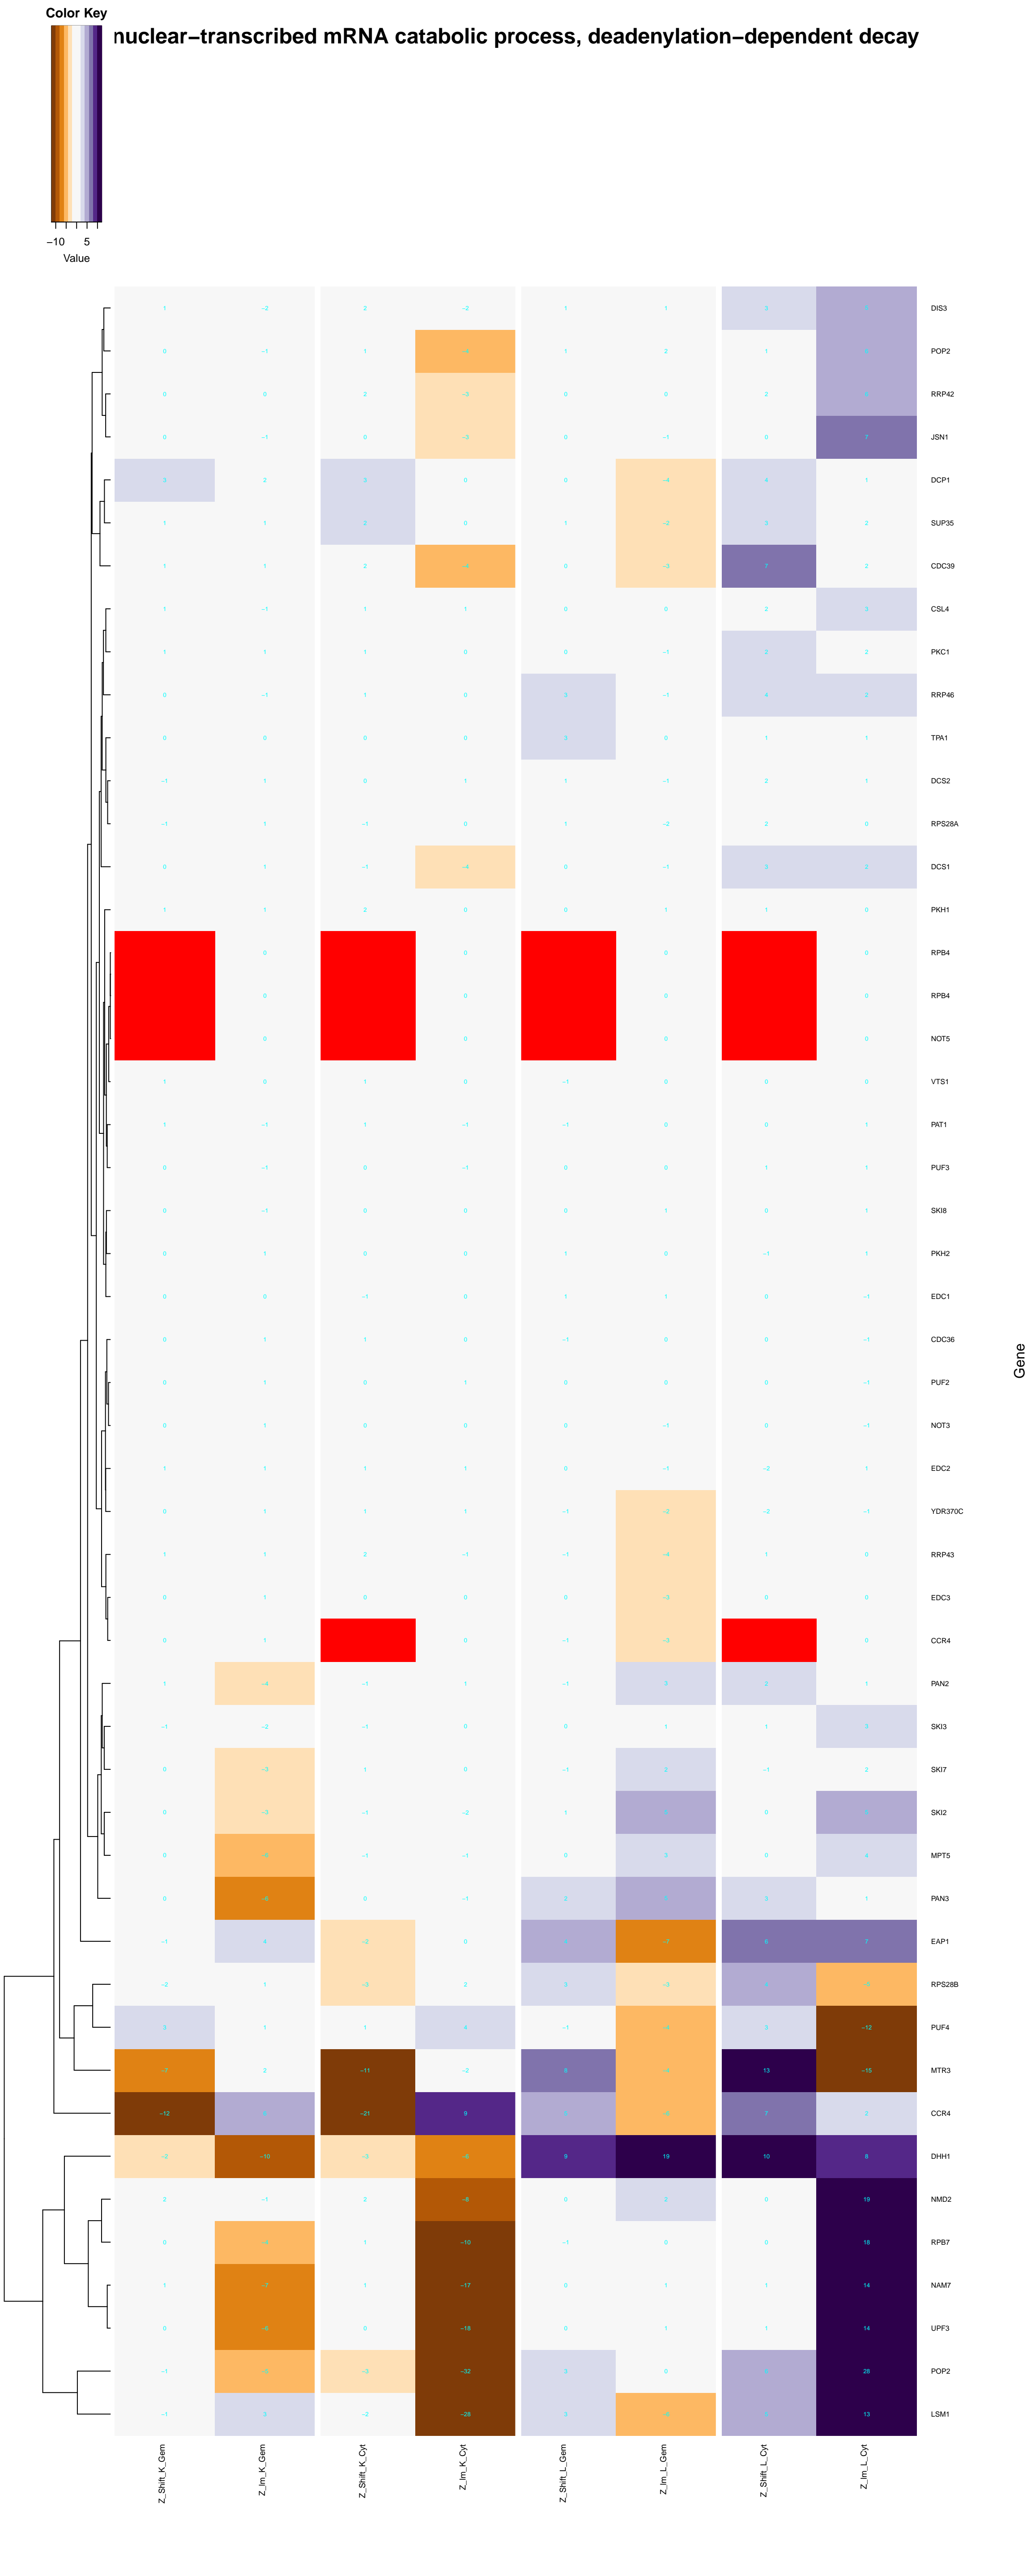

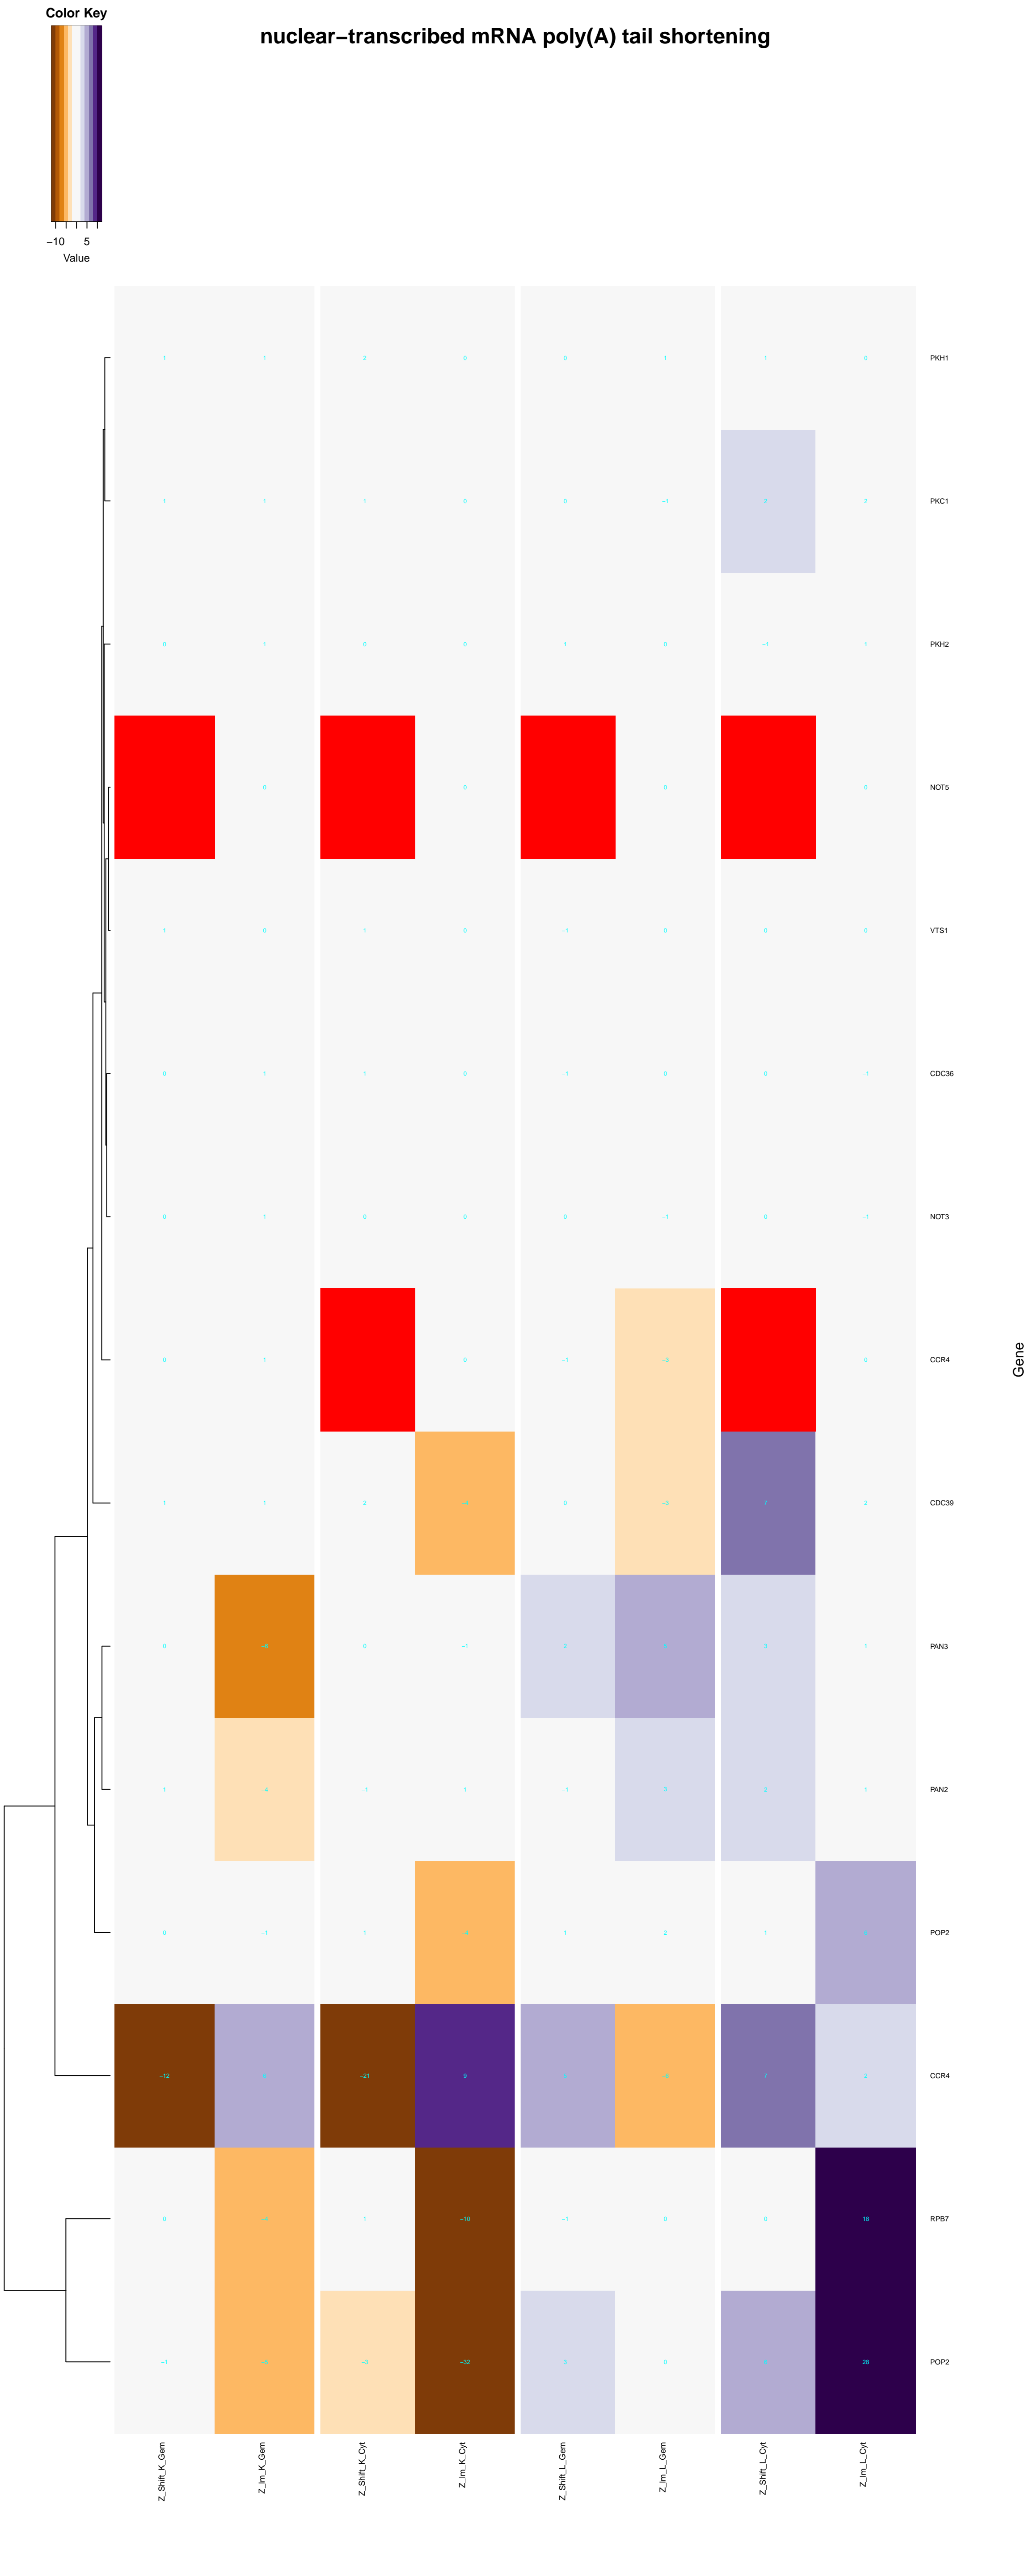

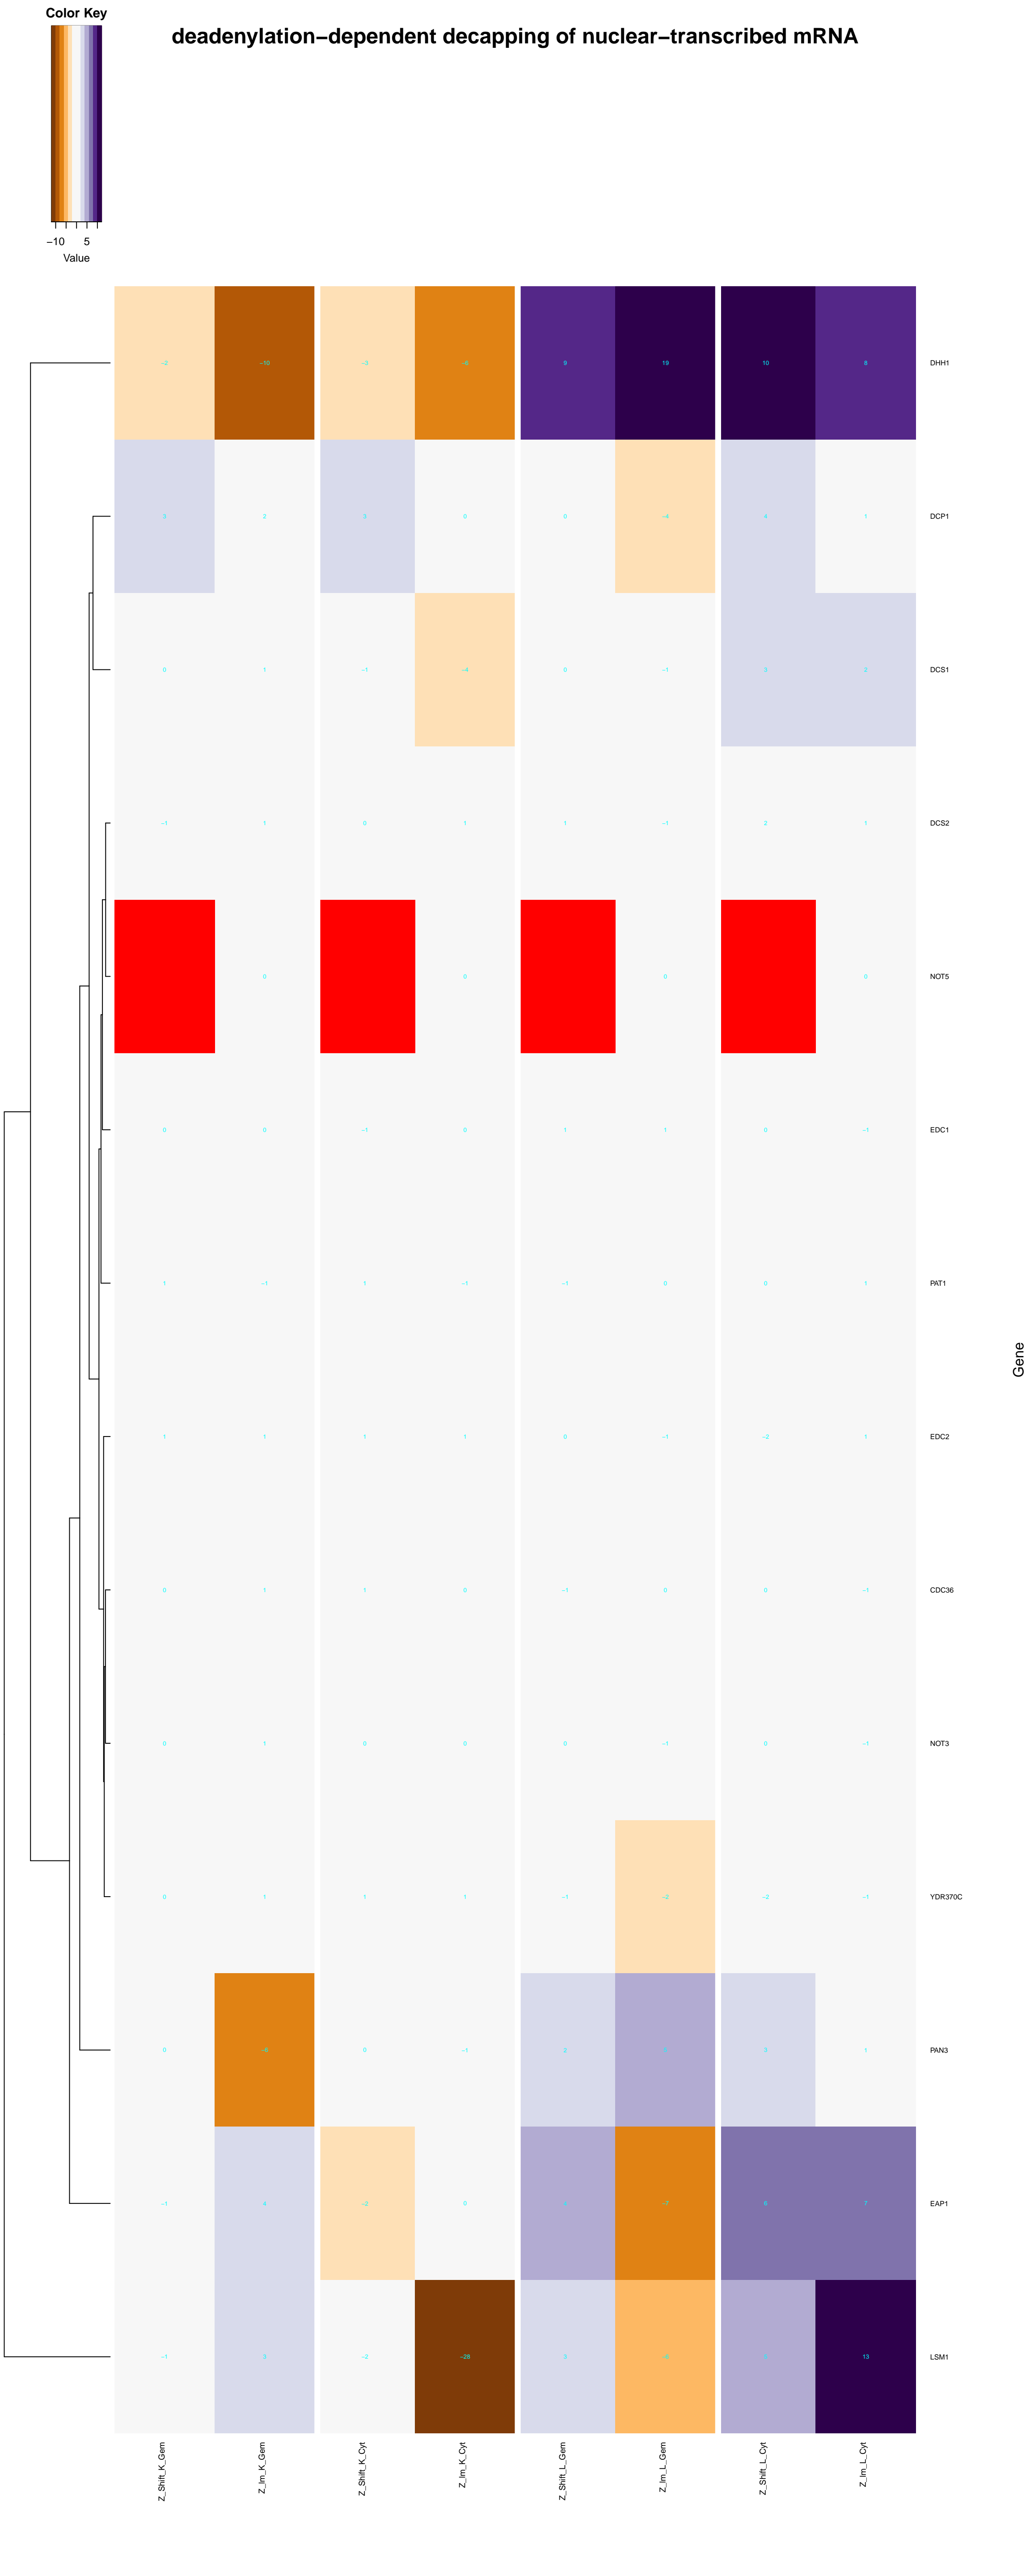

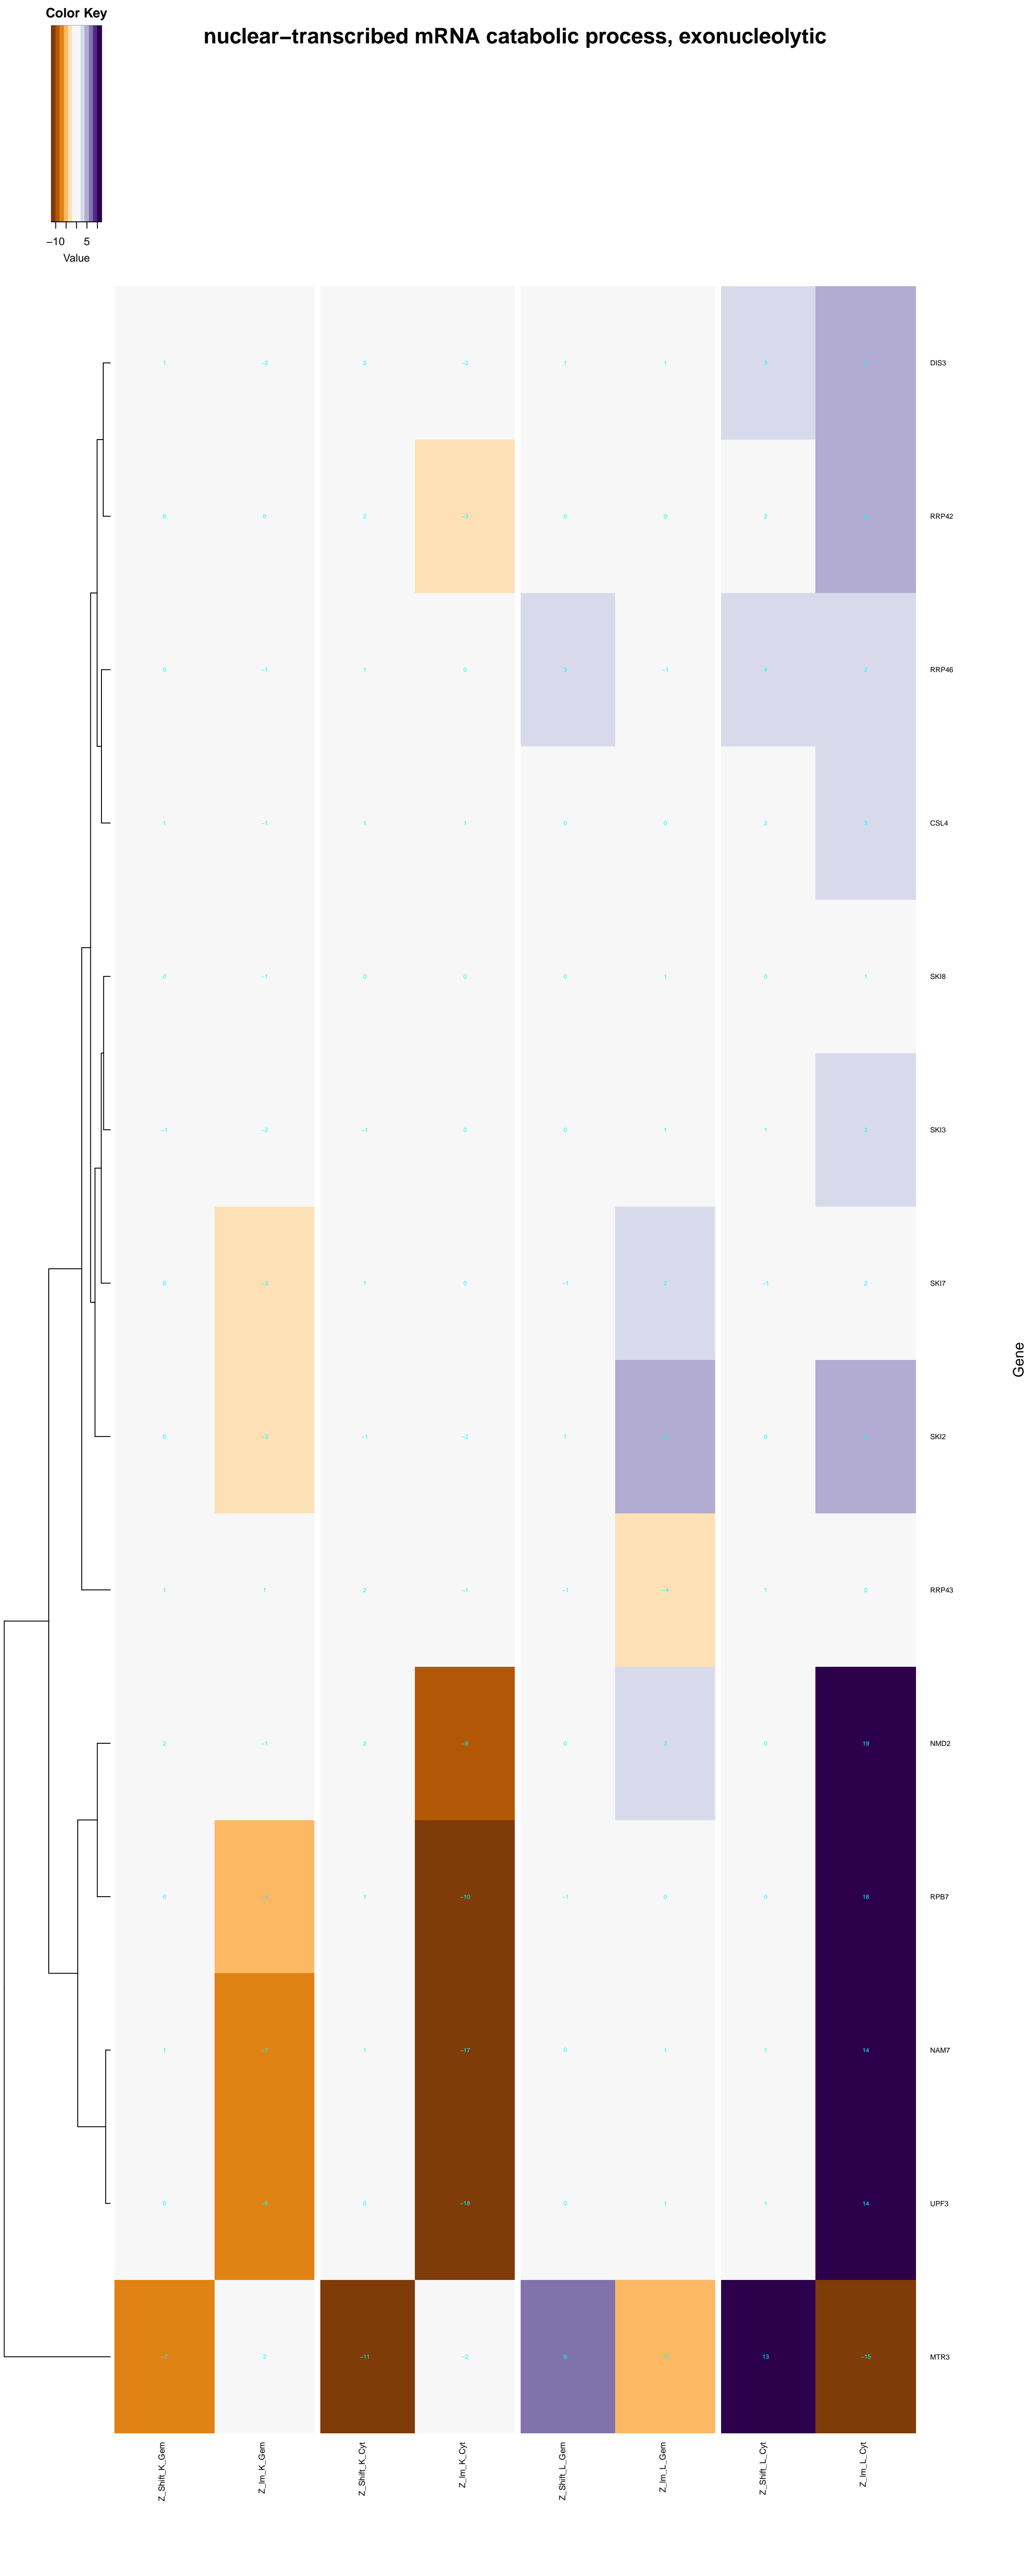

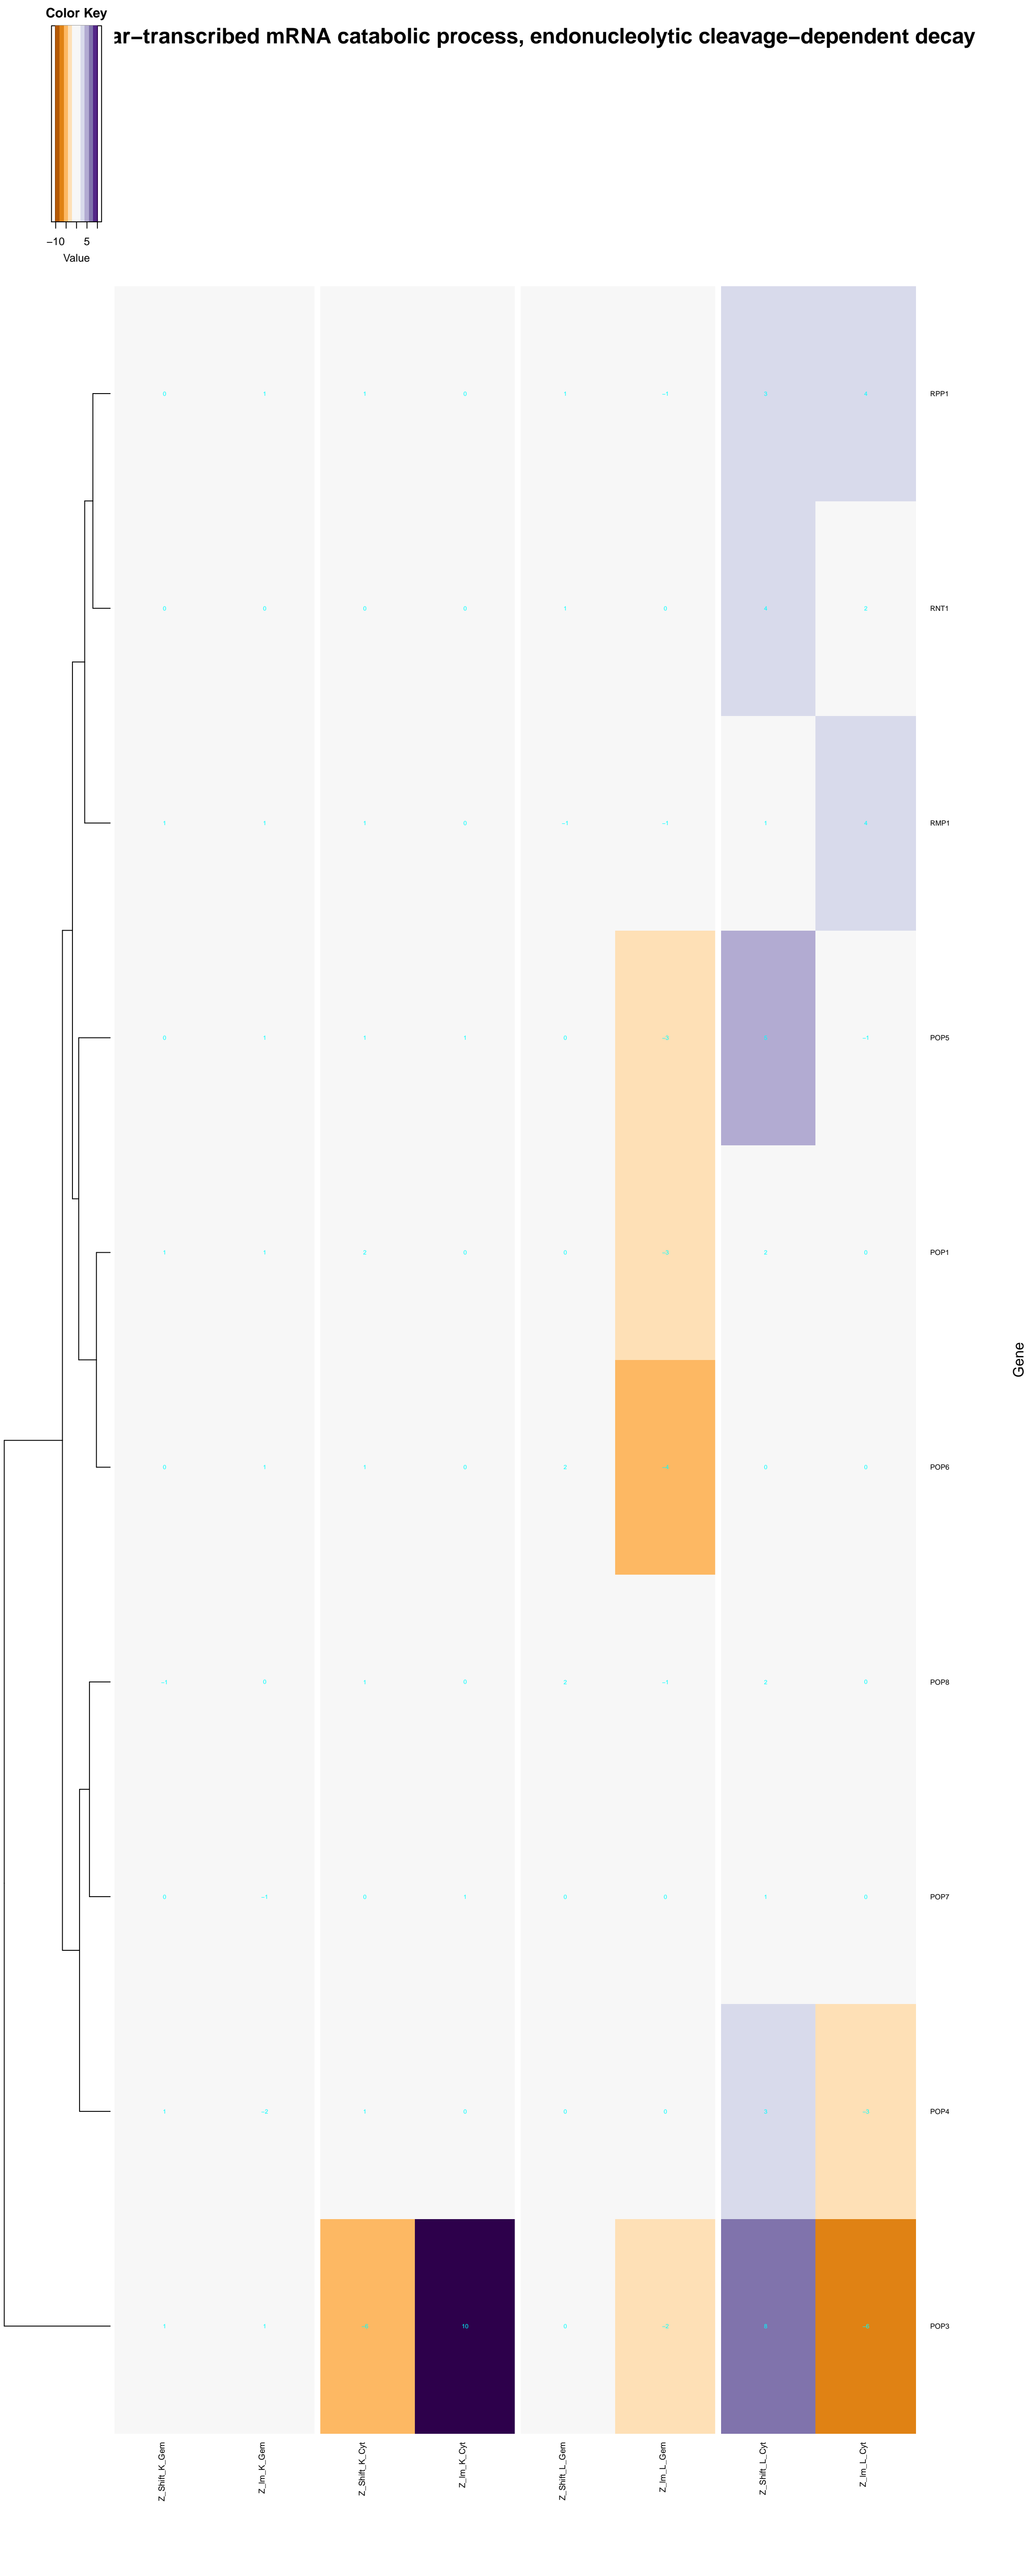

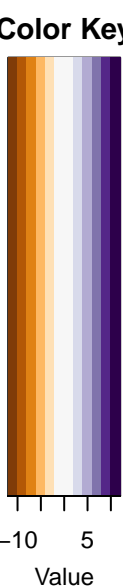

uclear-transcribed mRNA catabolic process, deadenylation-independent decay

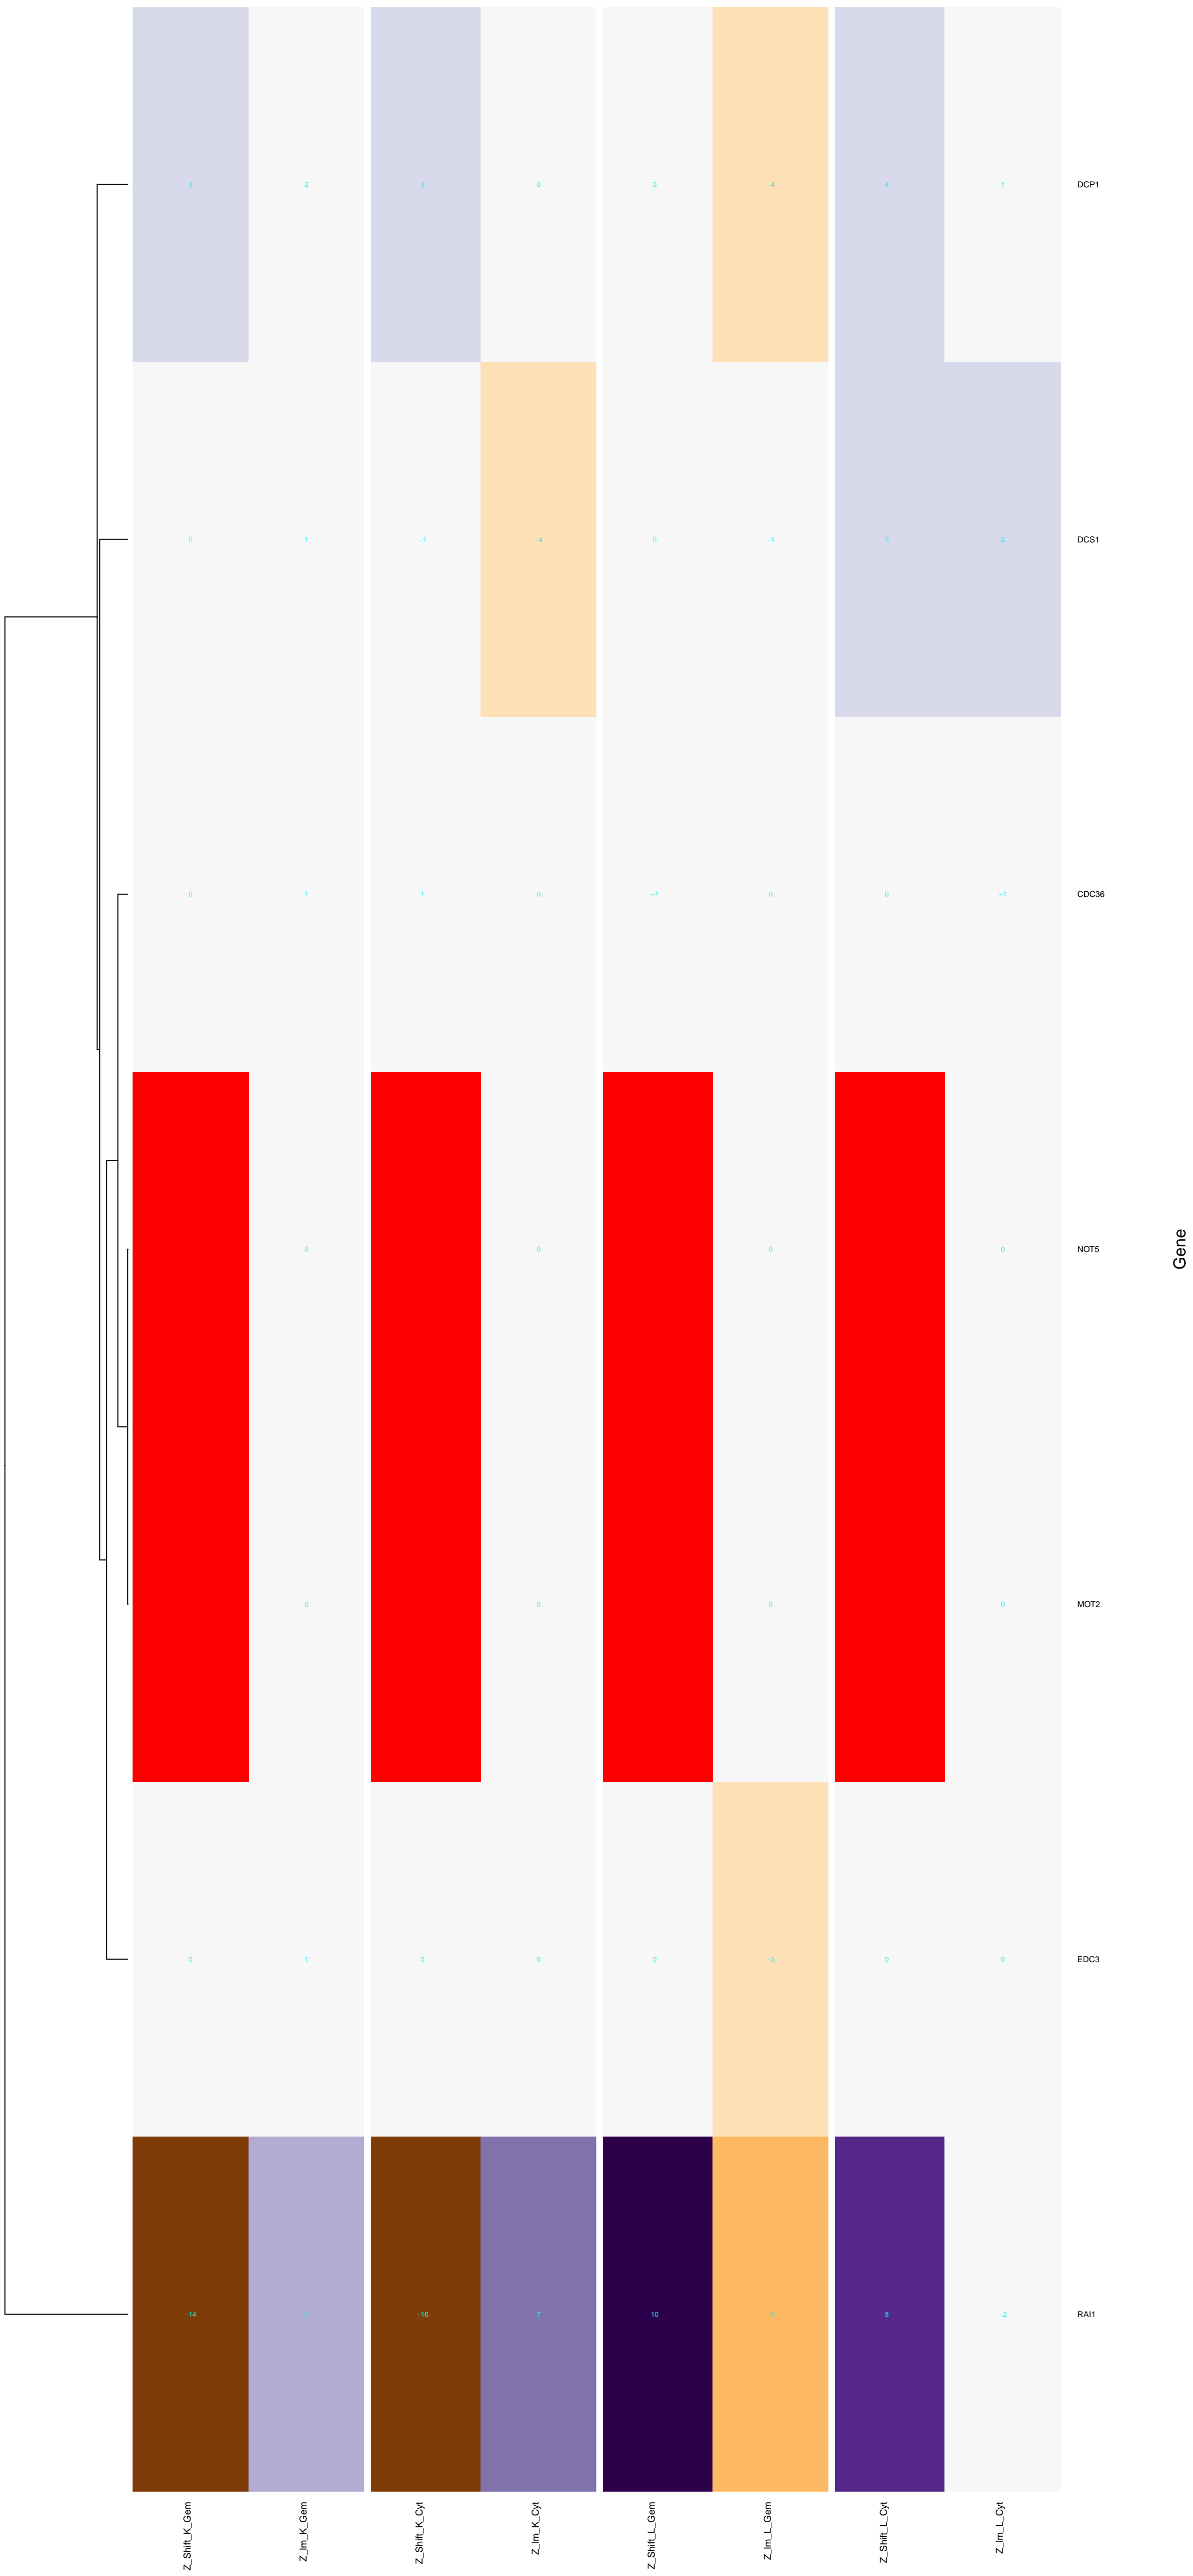

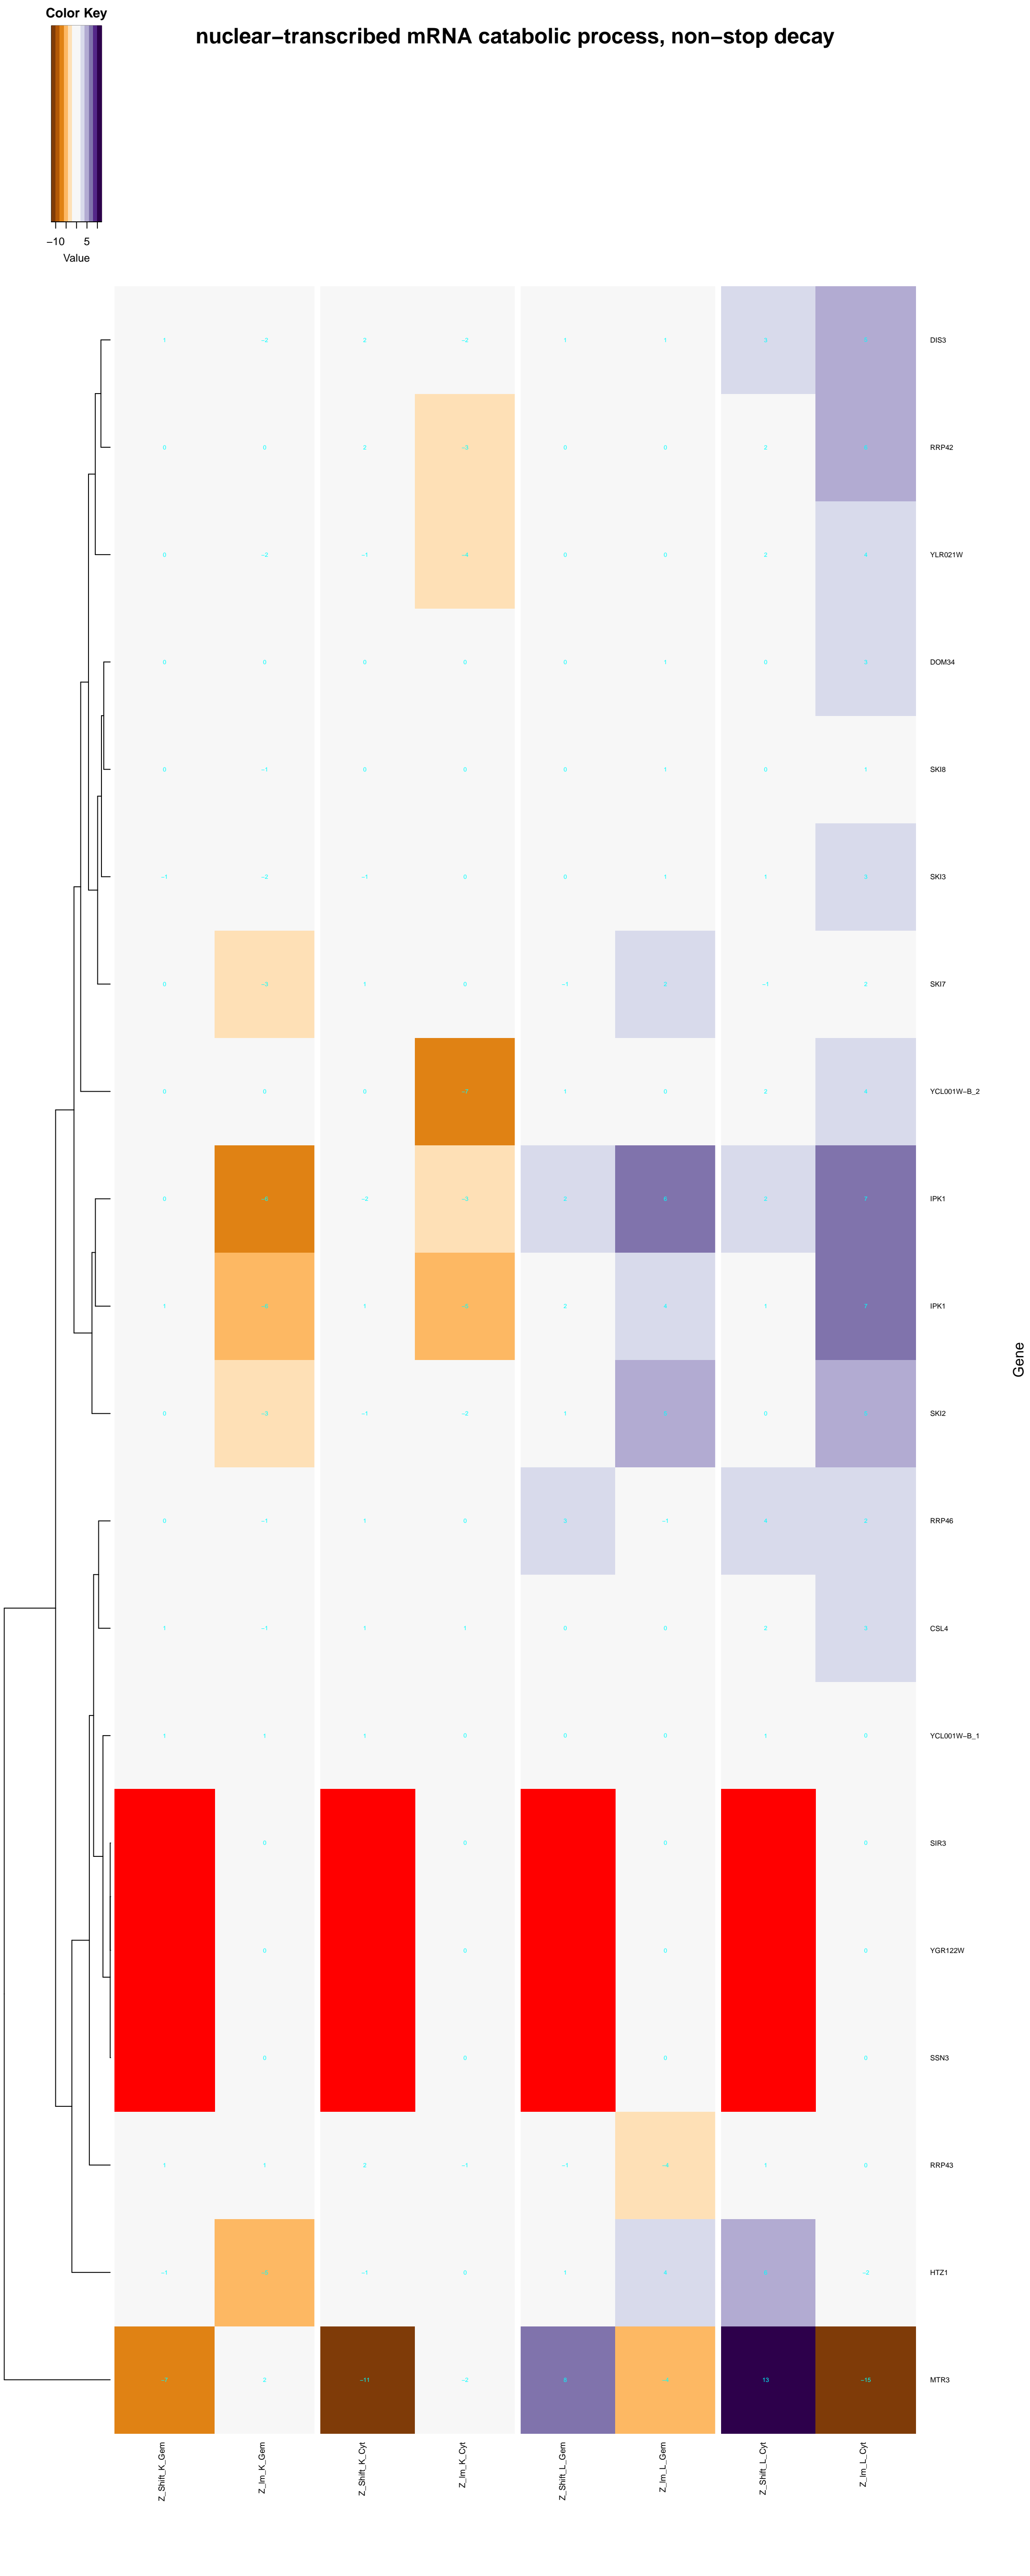

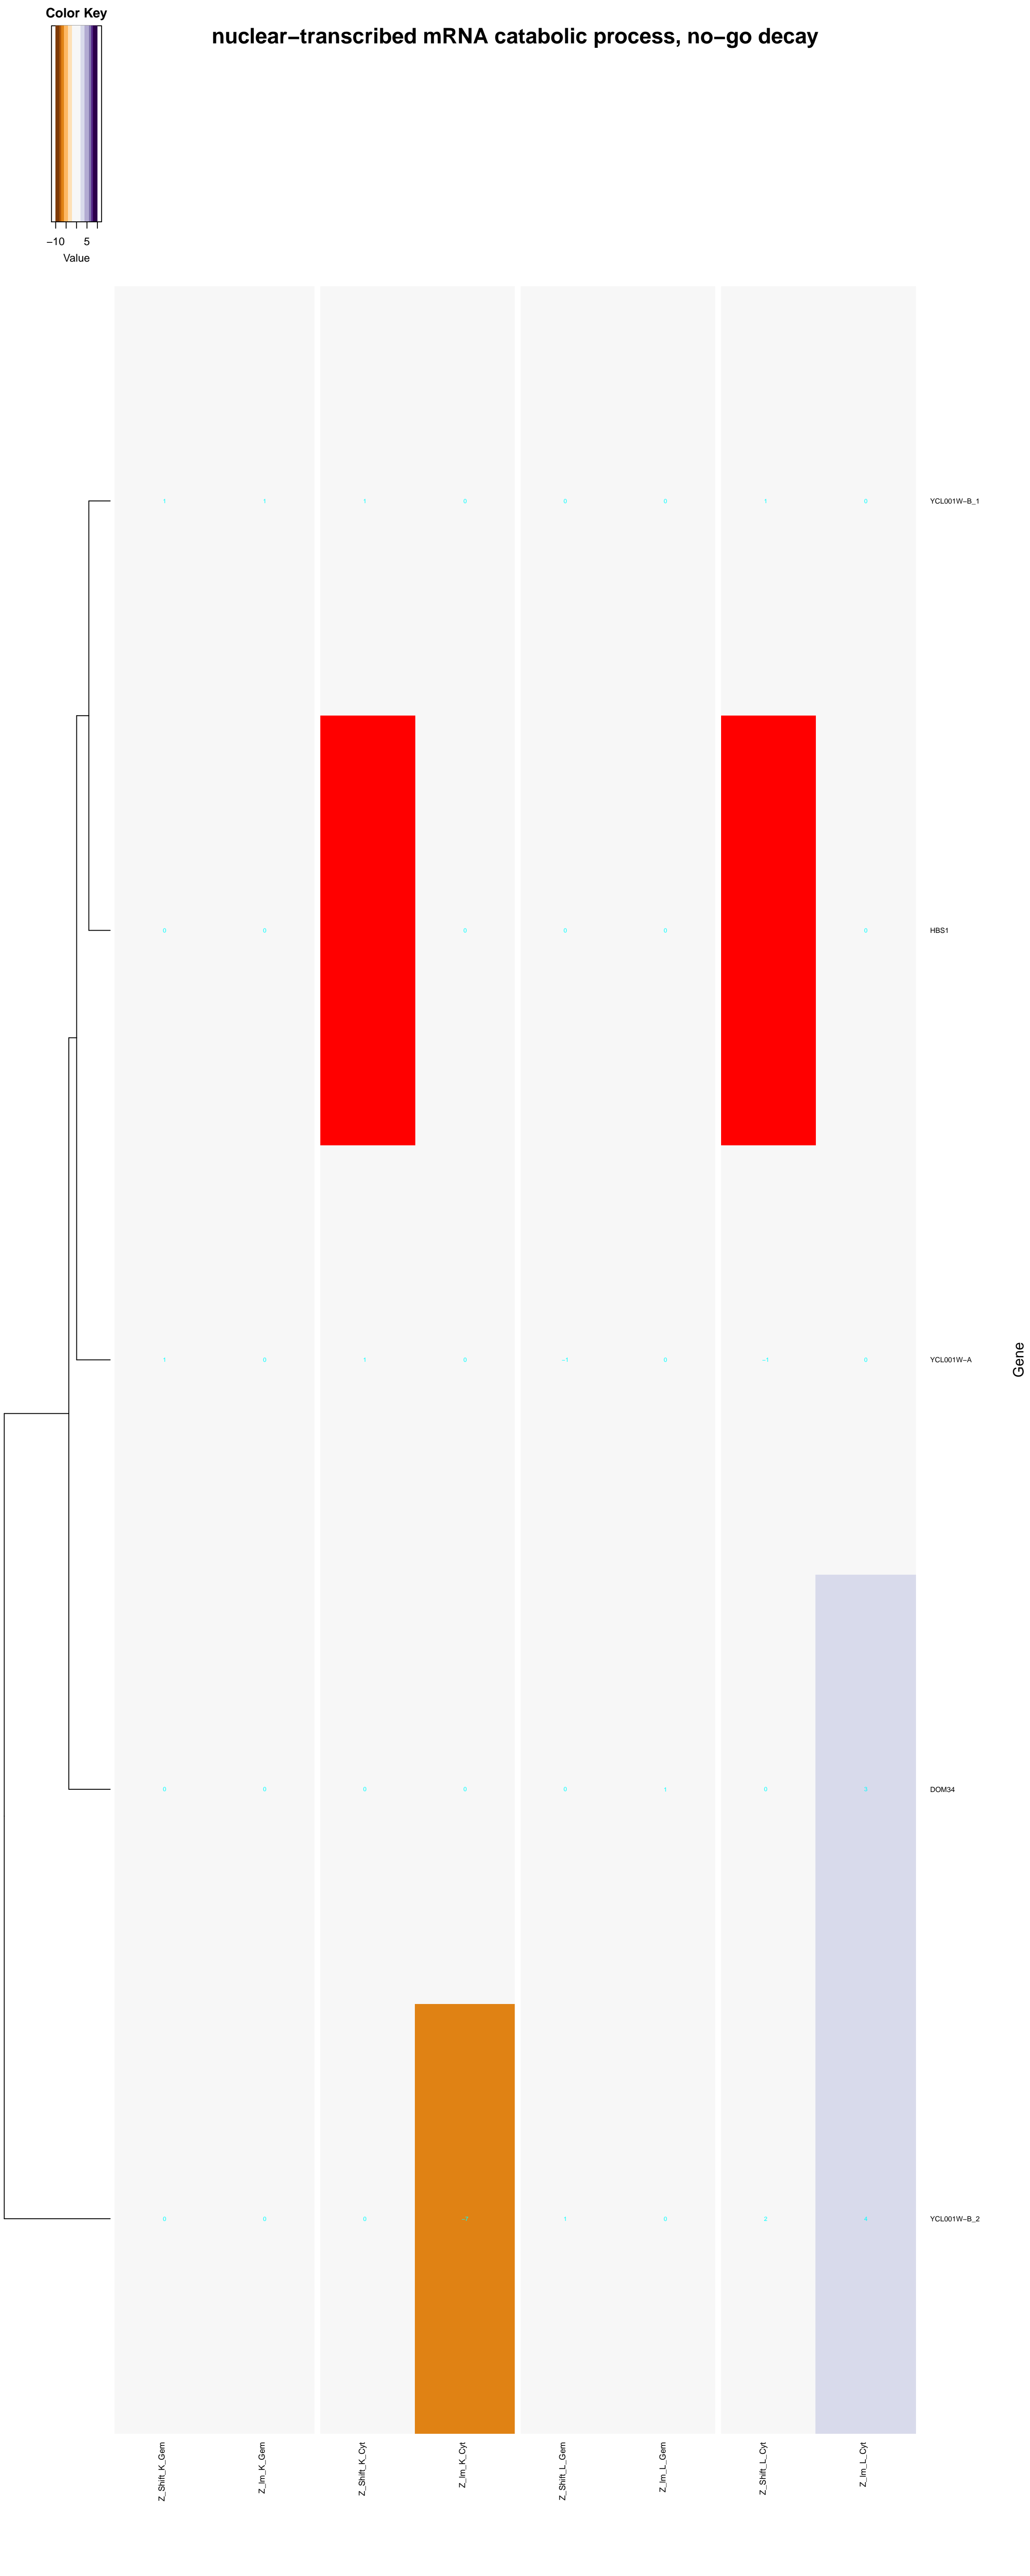

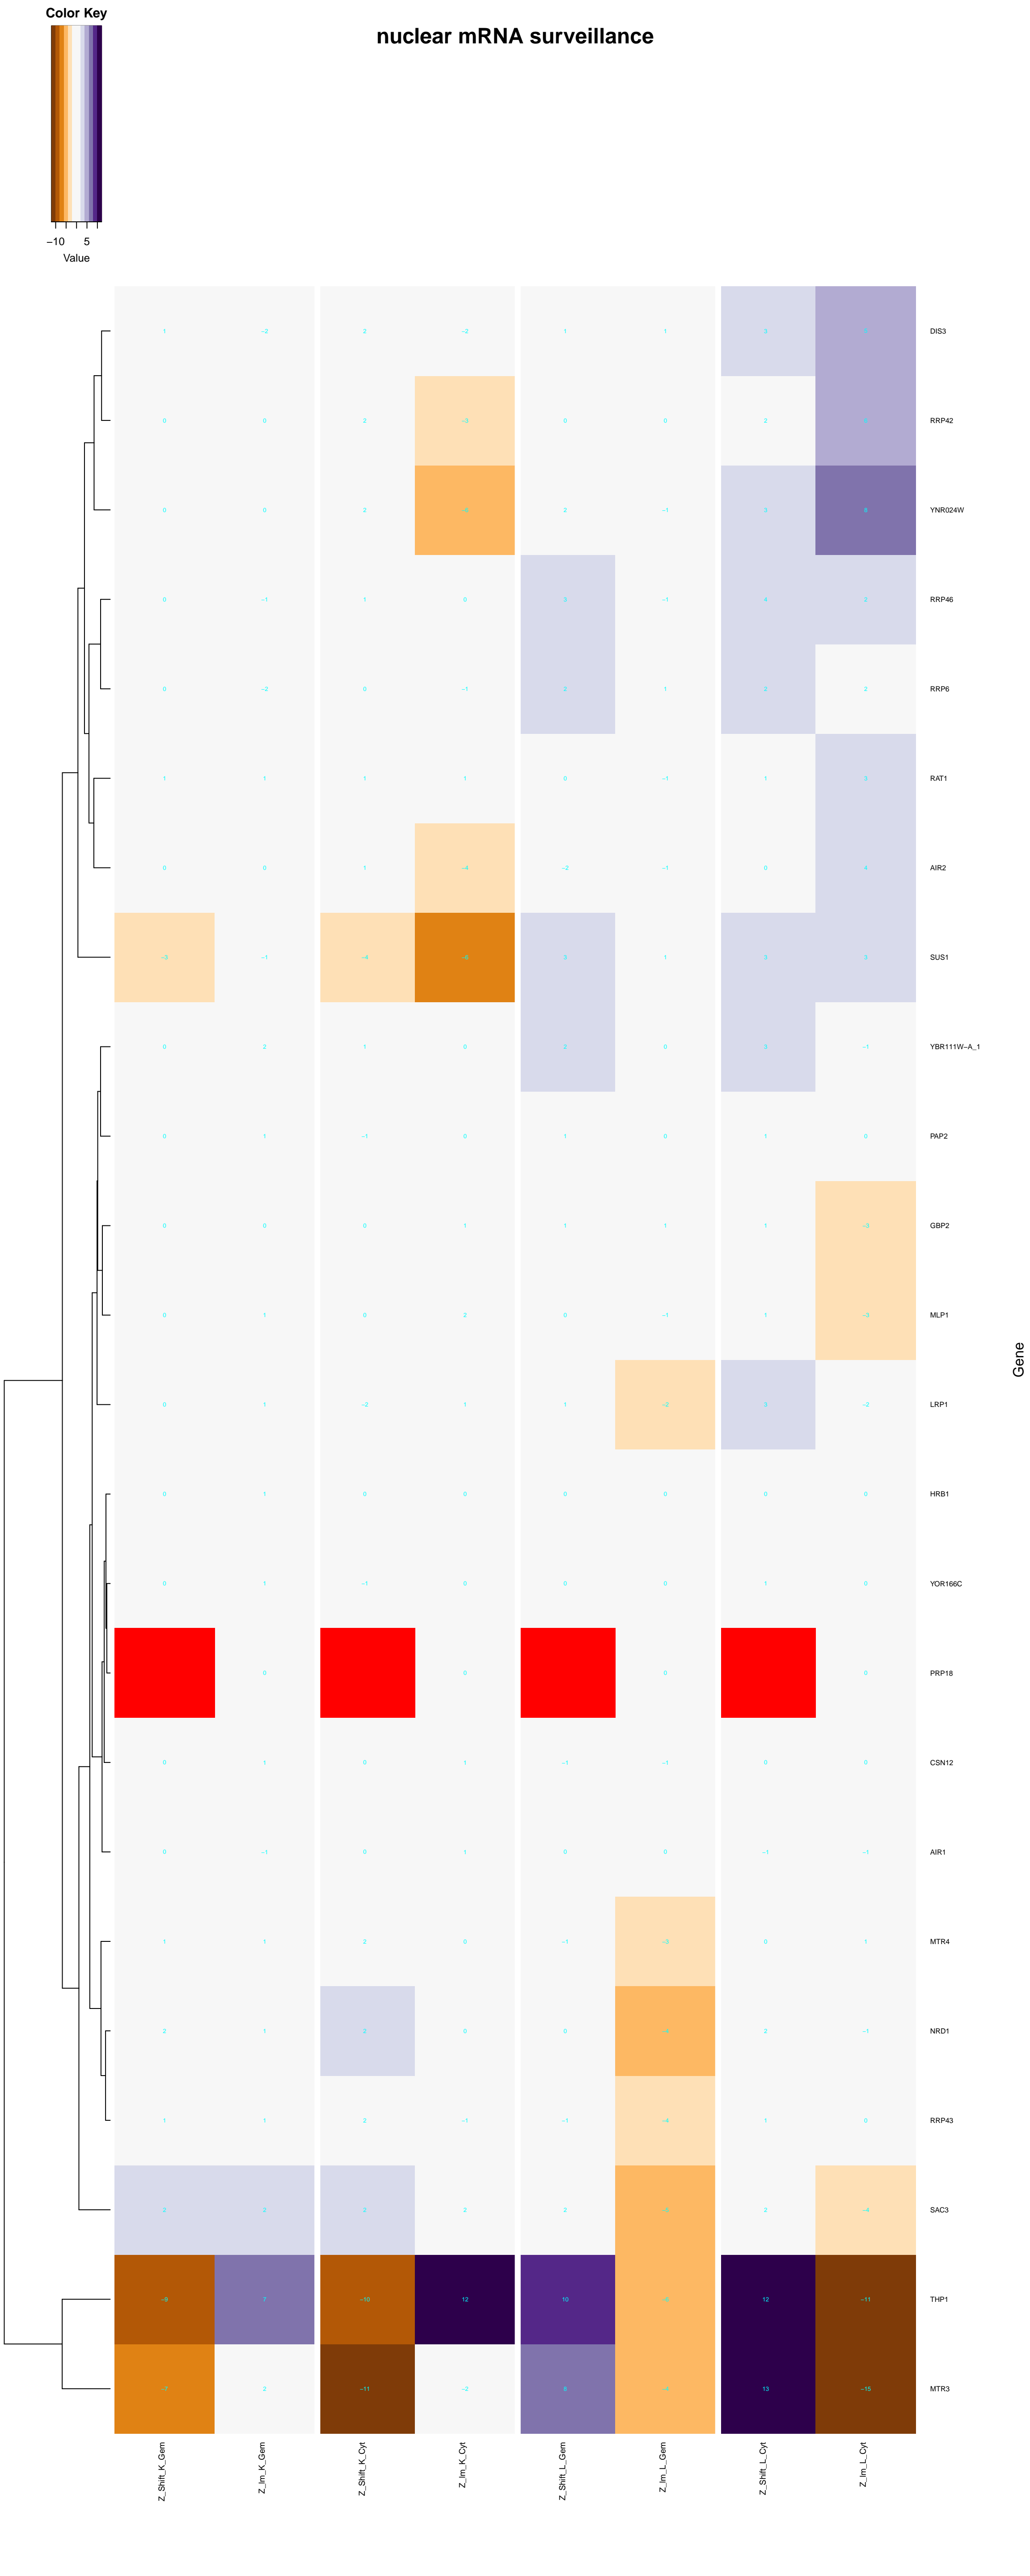

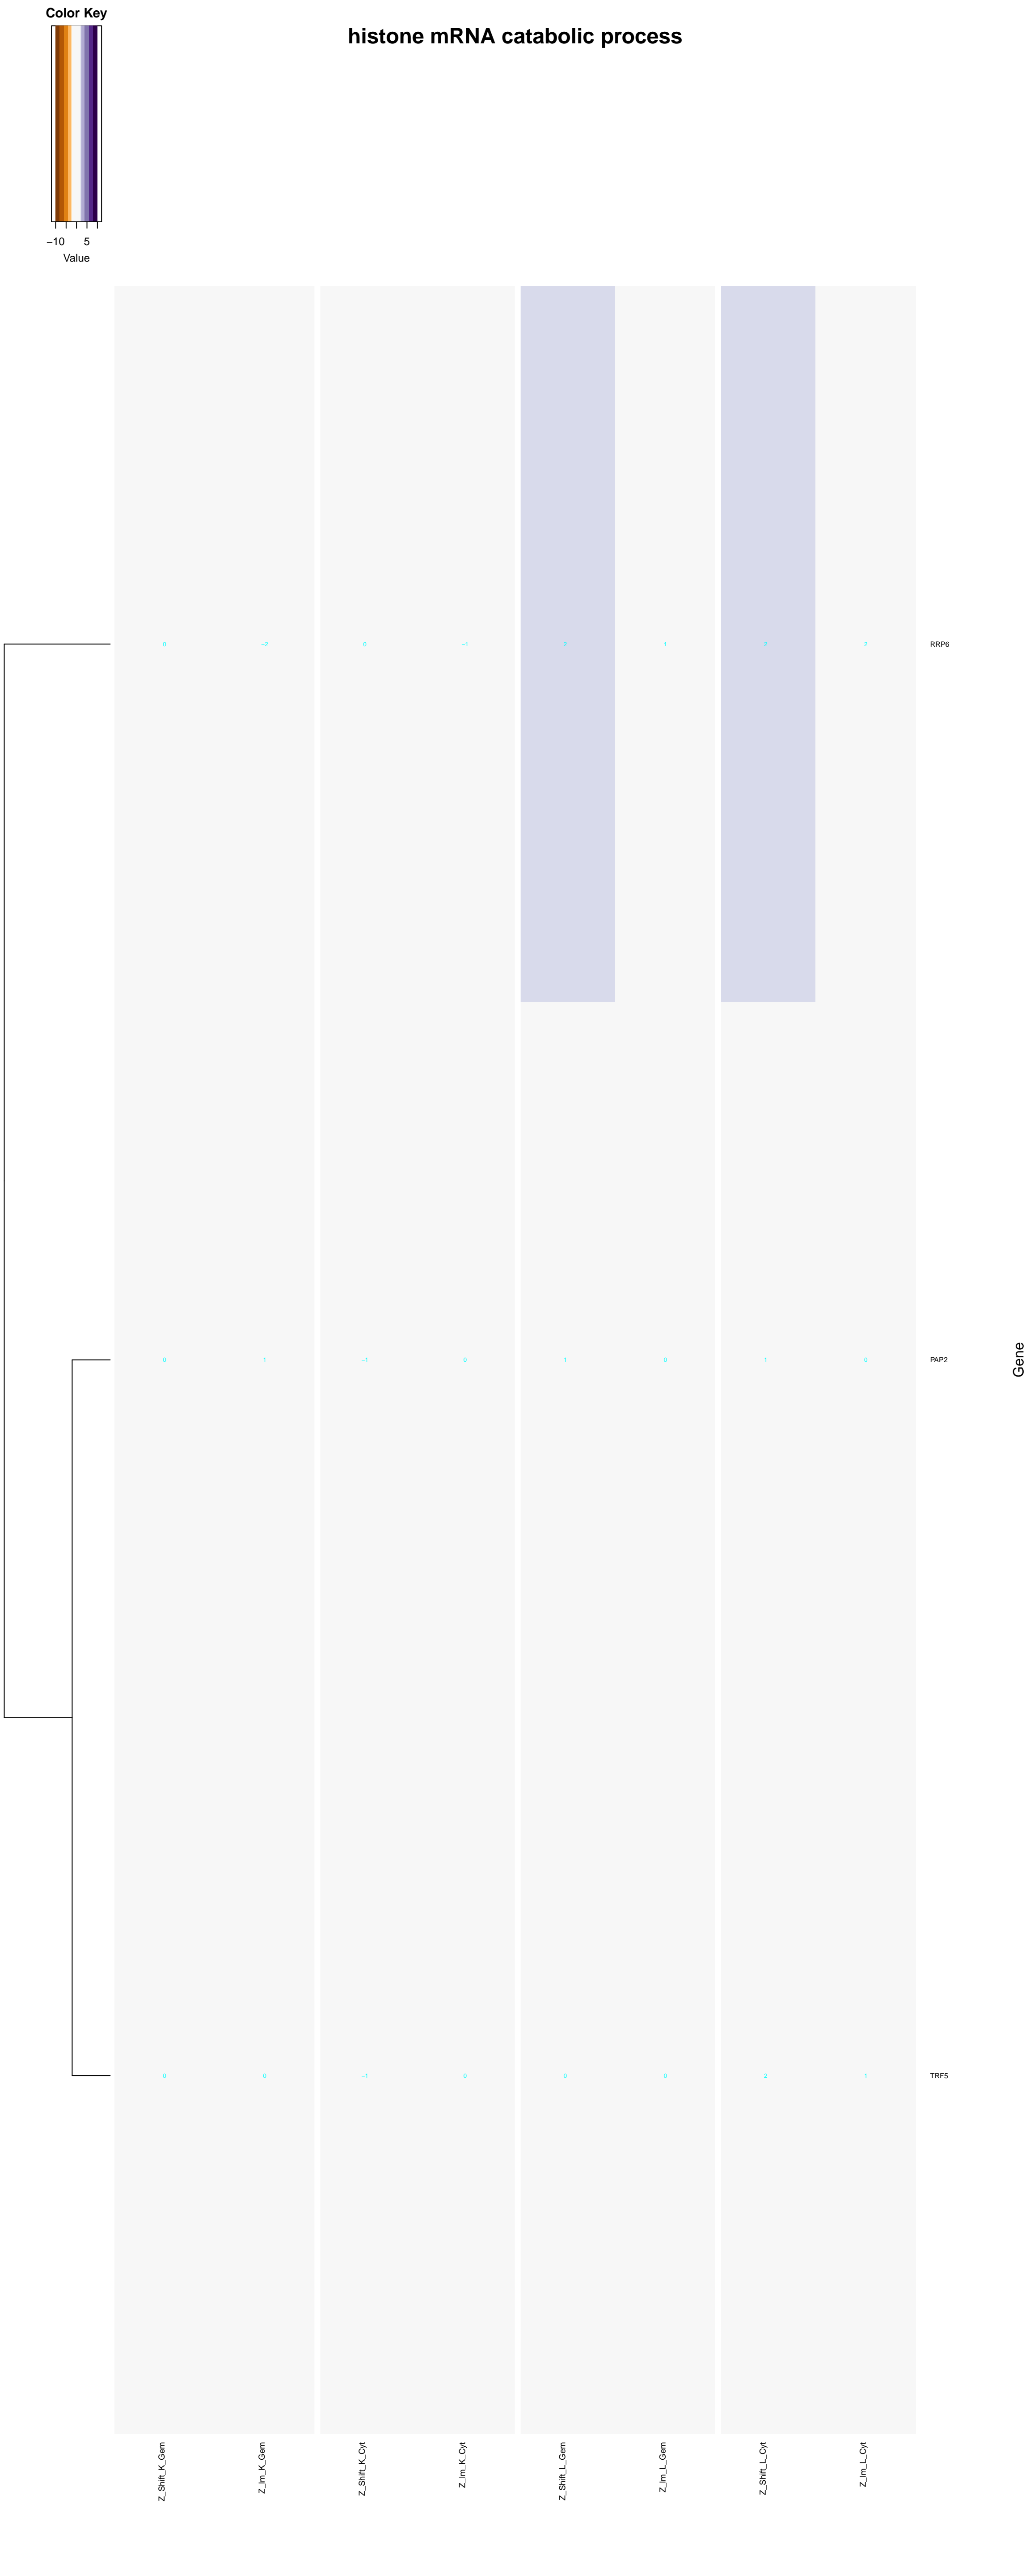

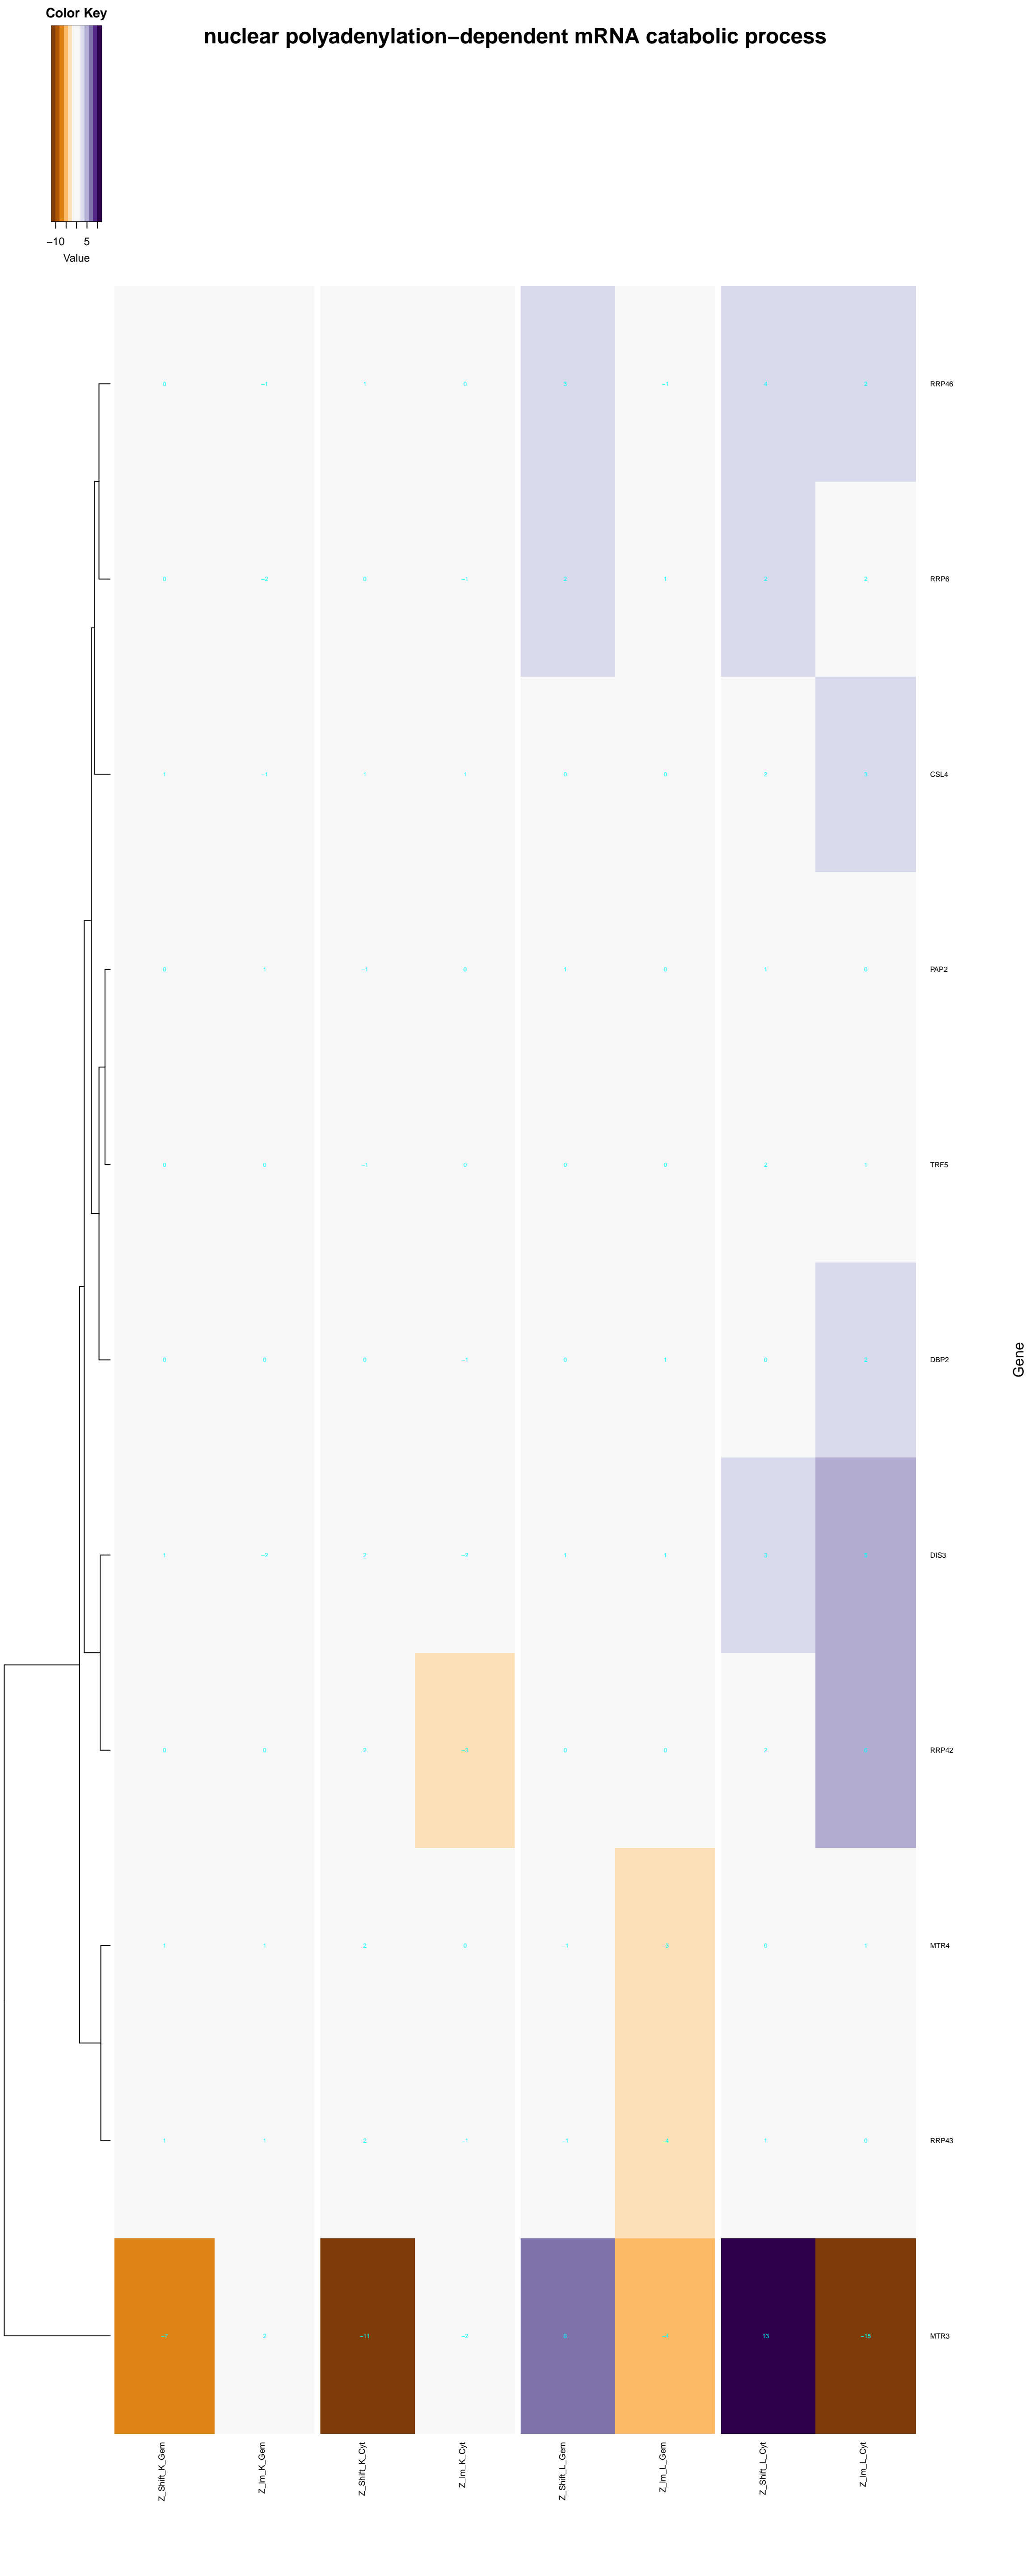

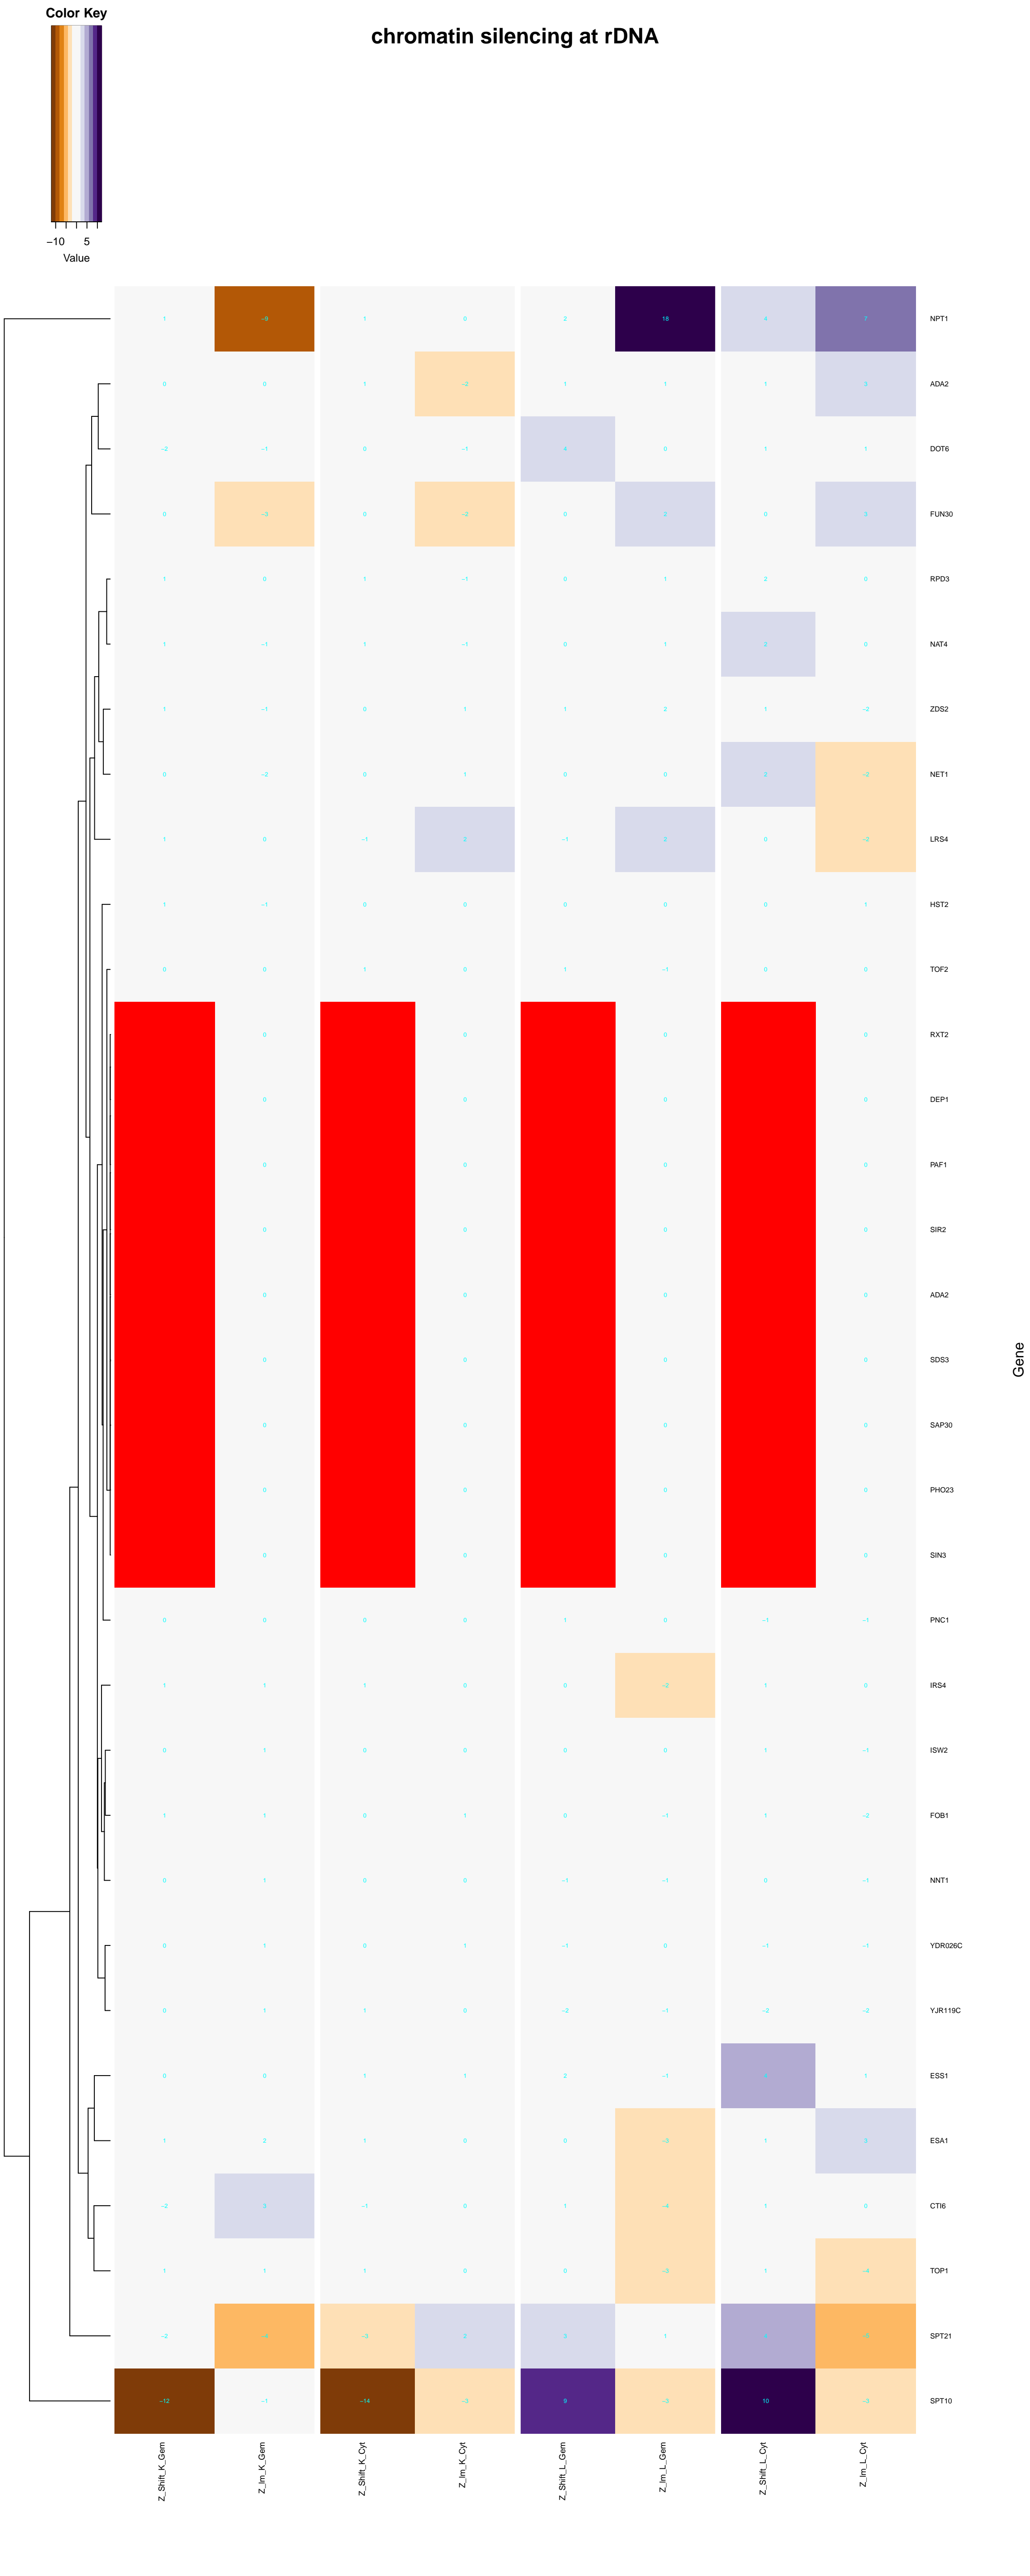

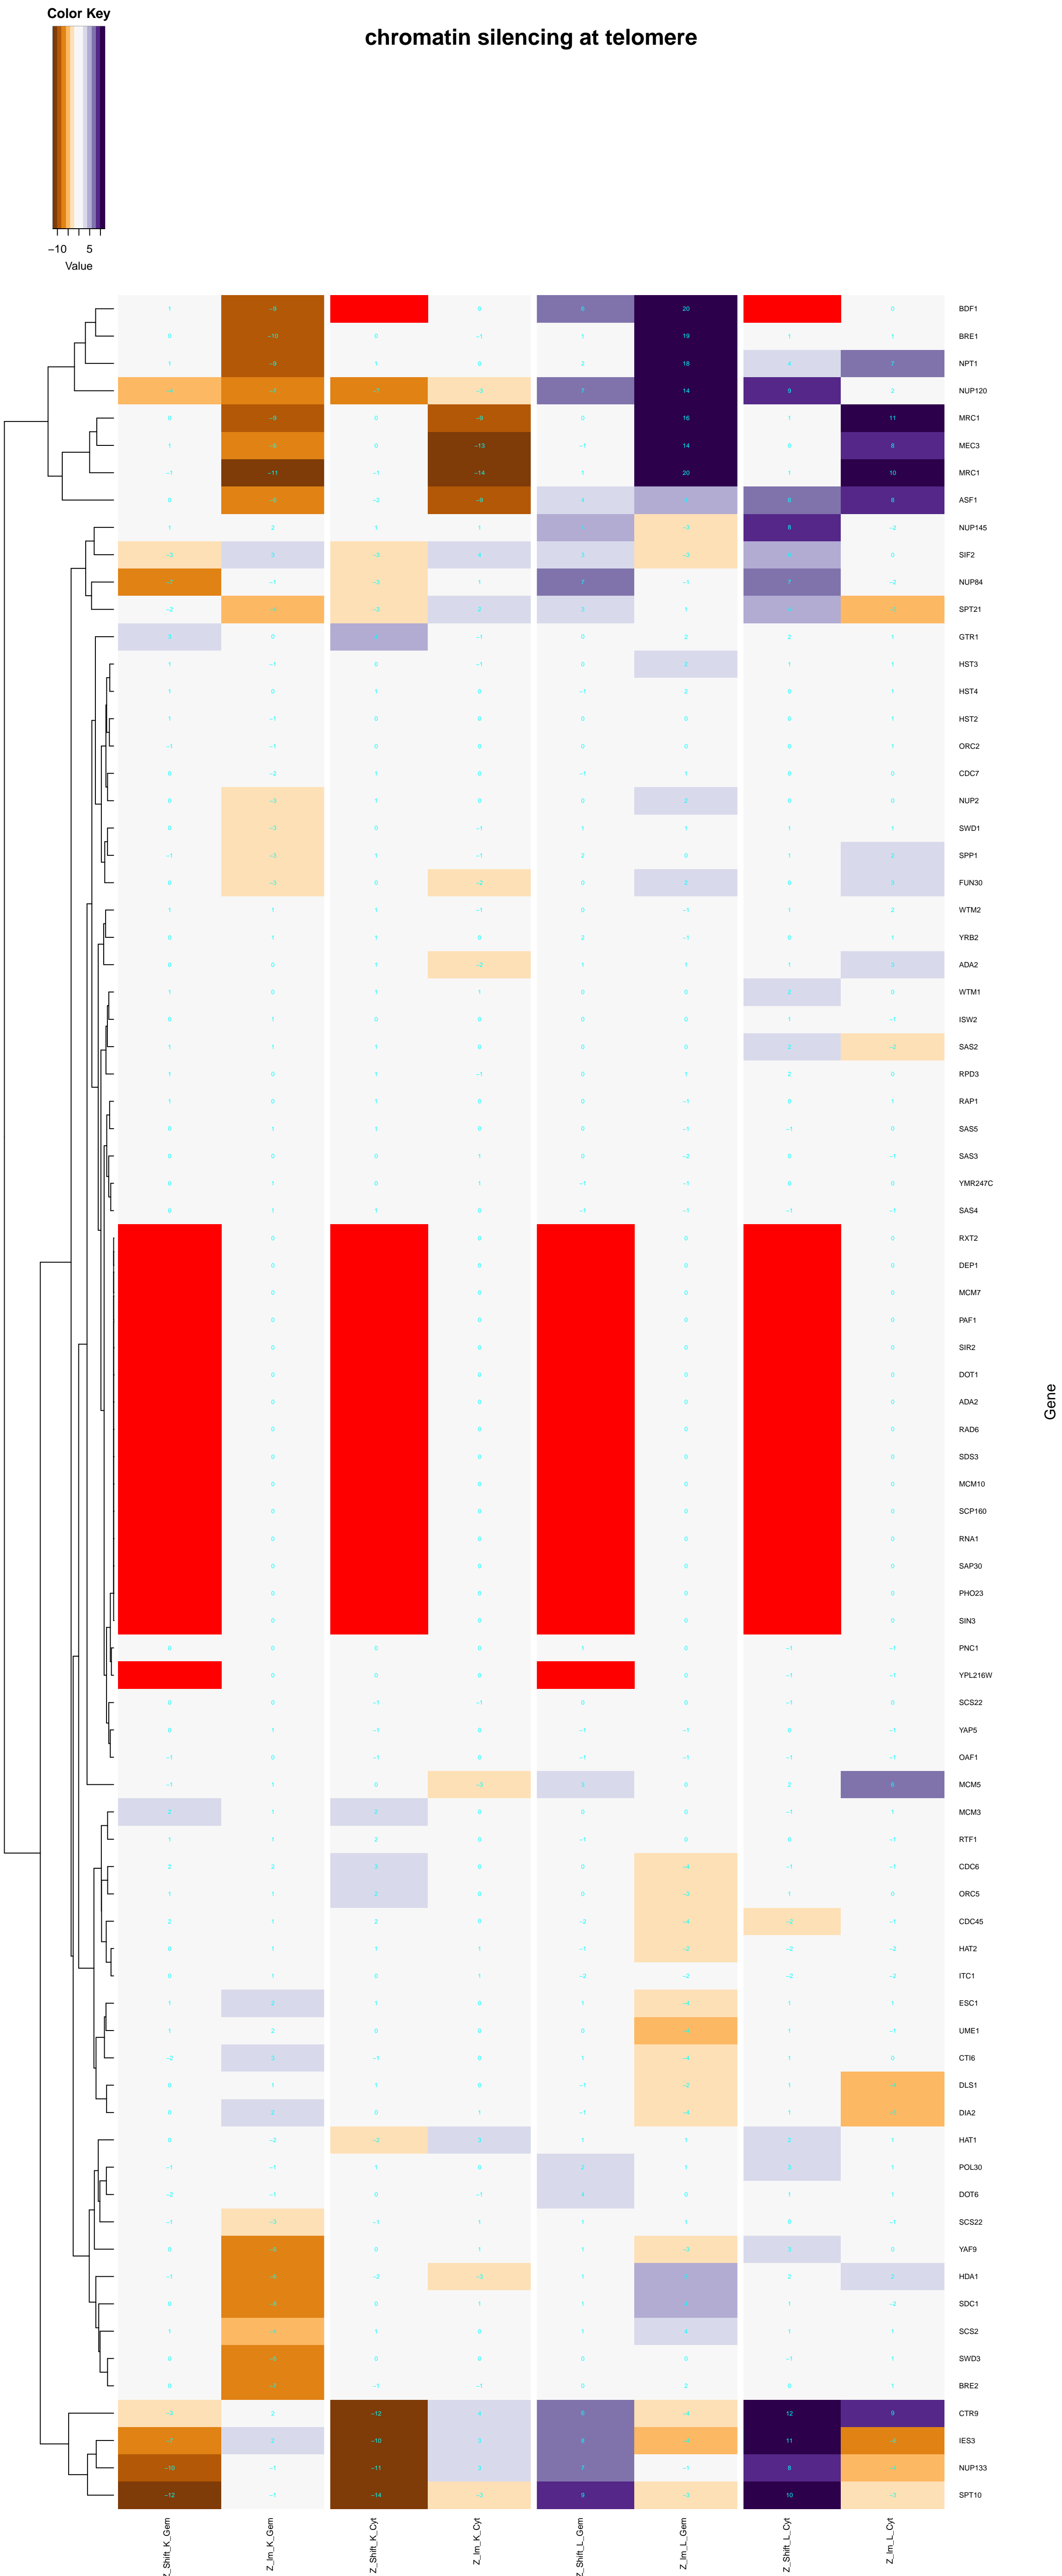

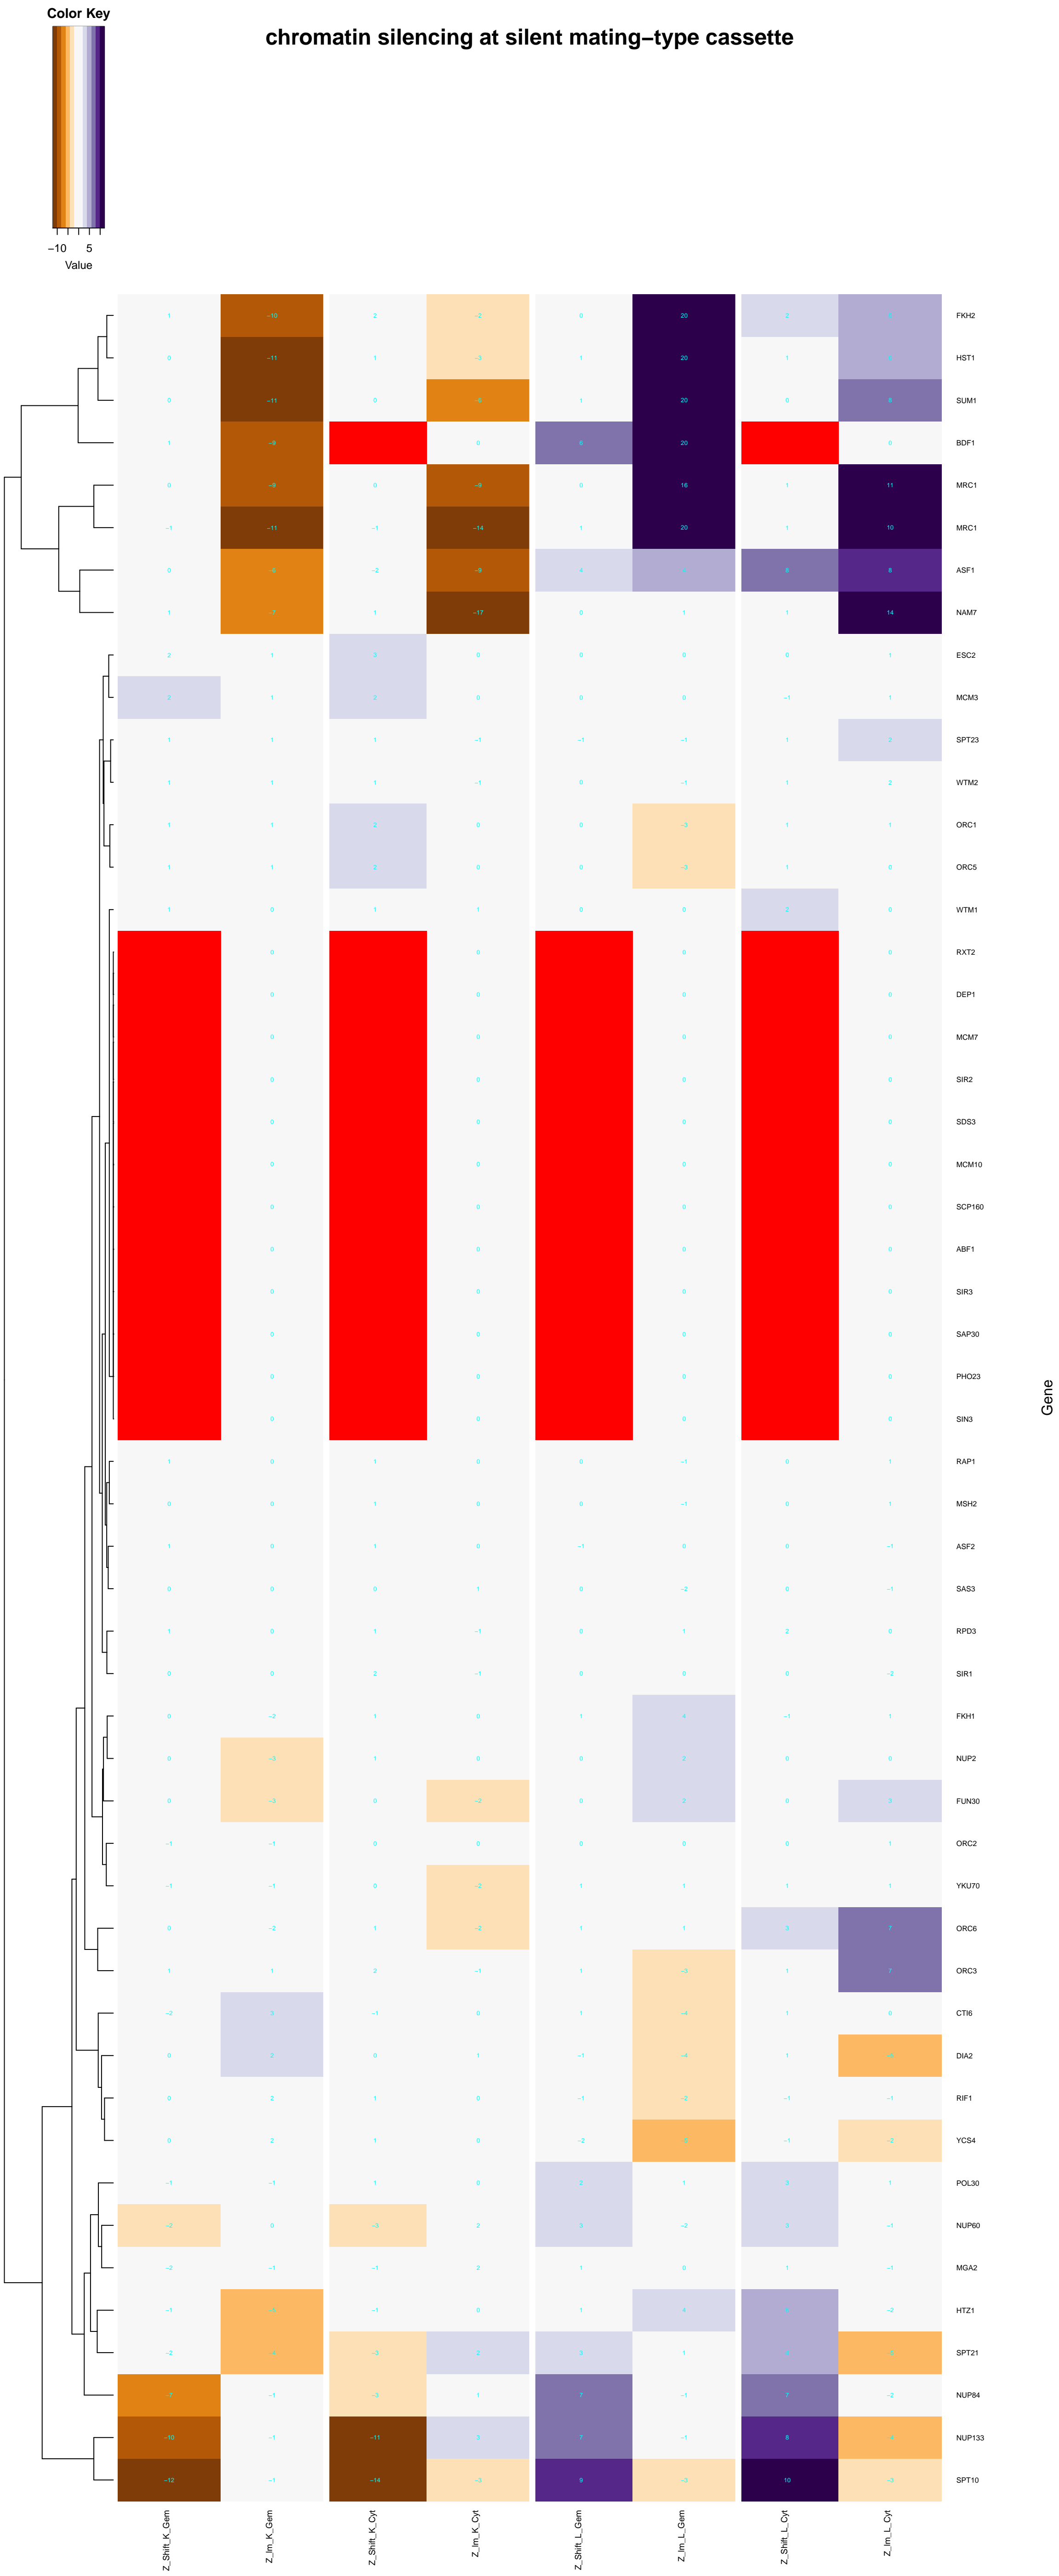

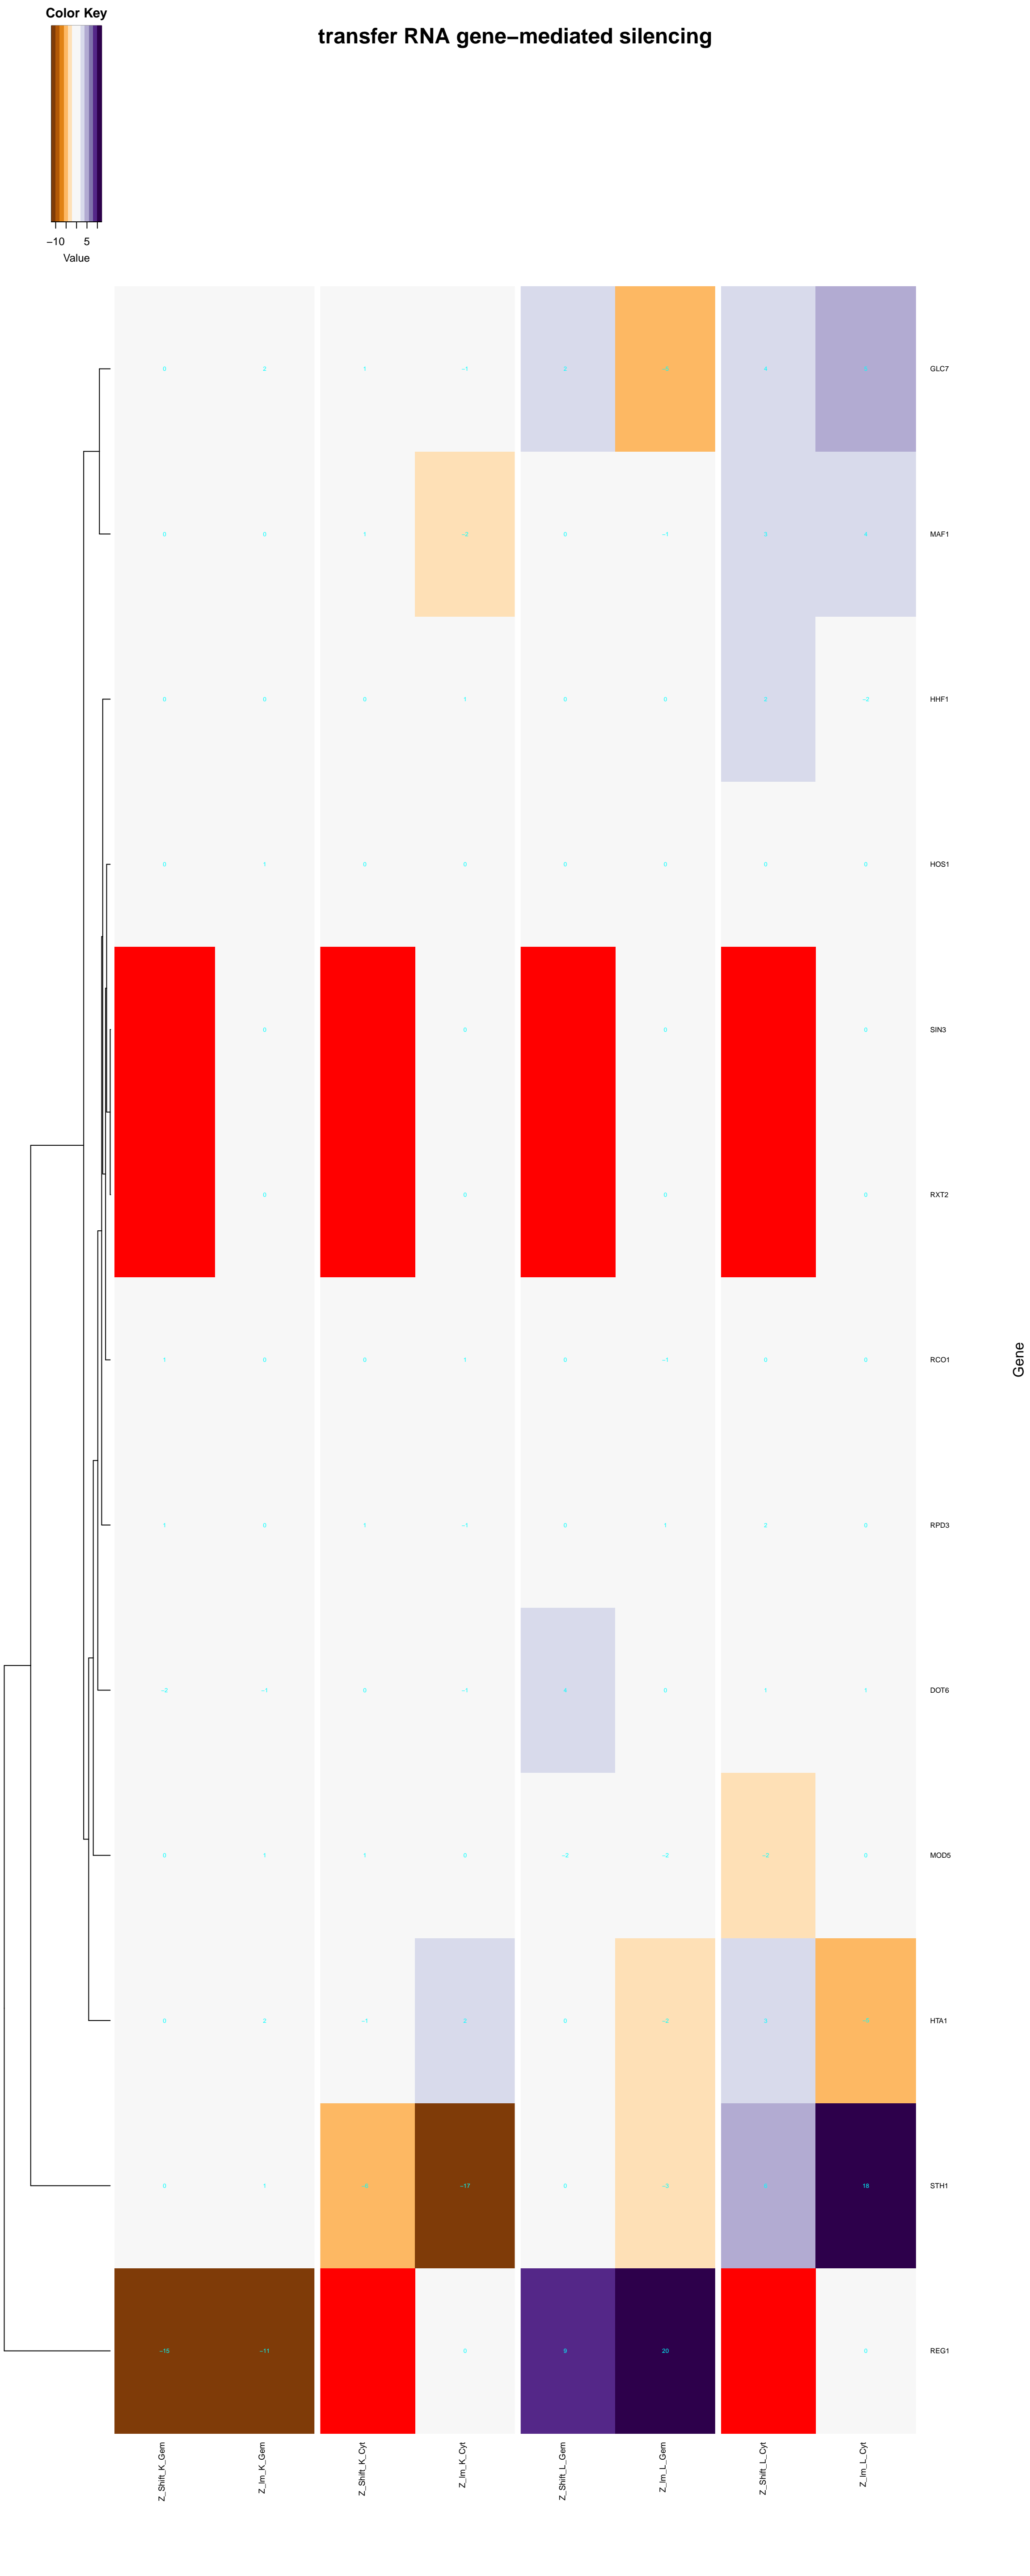

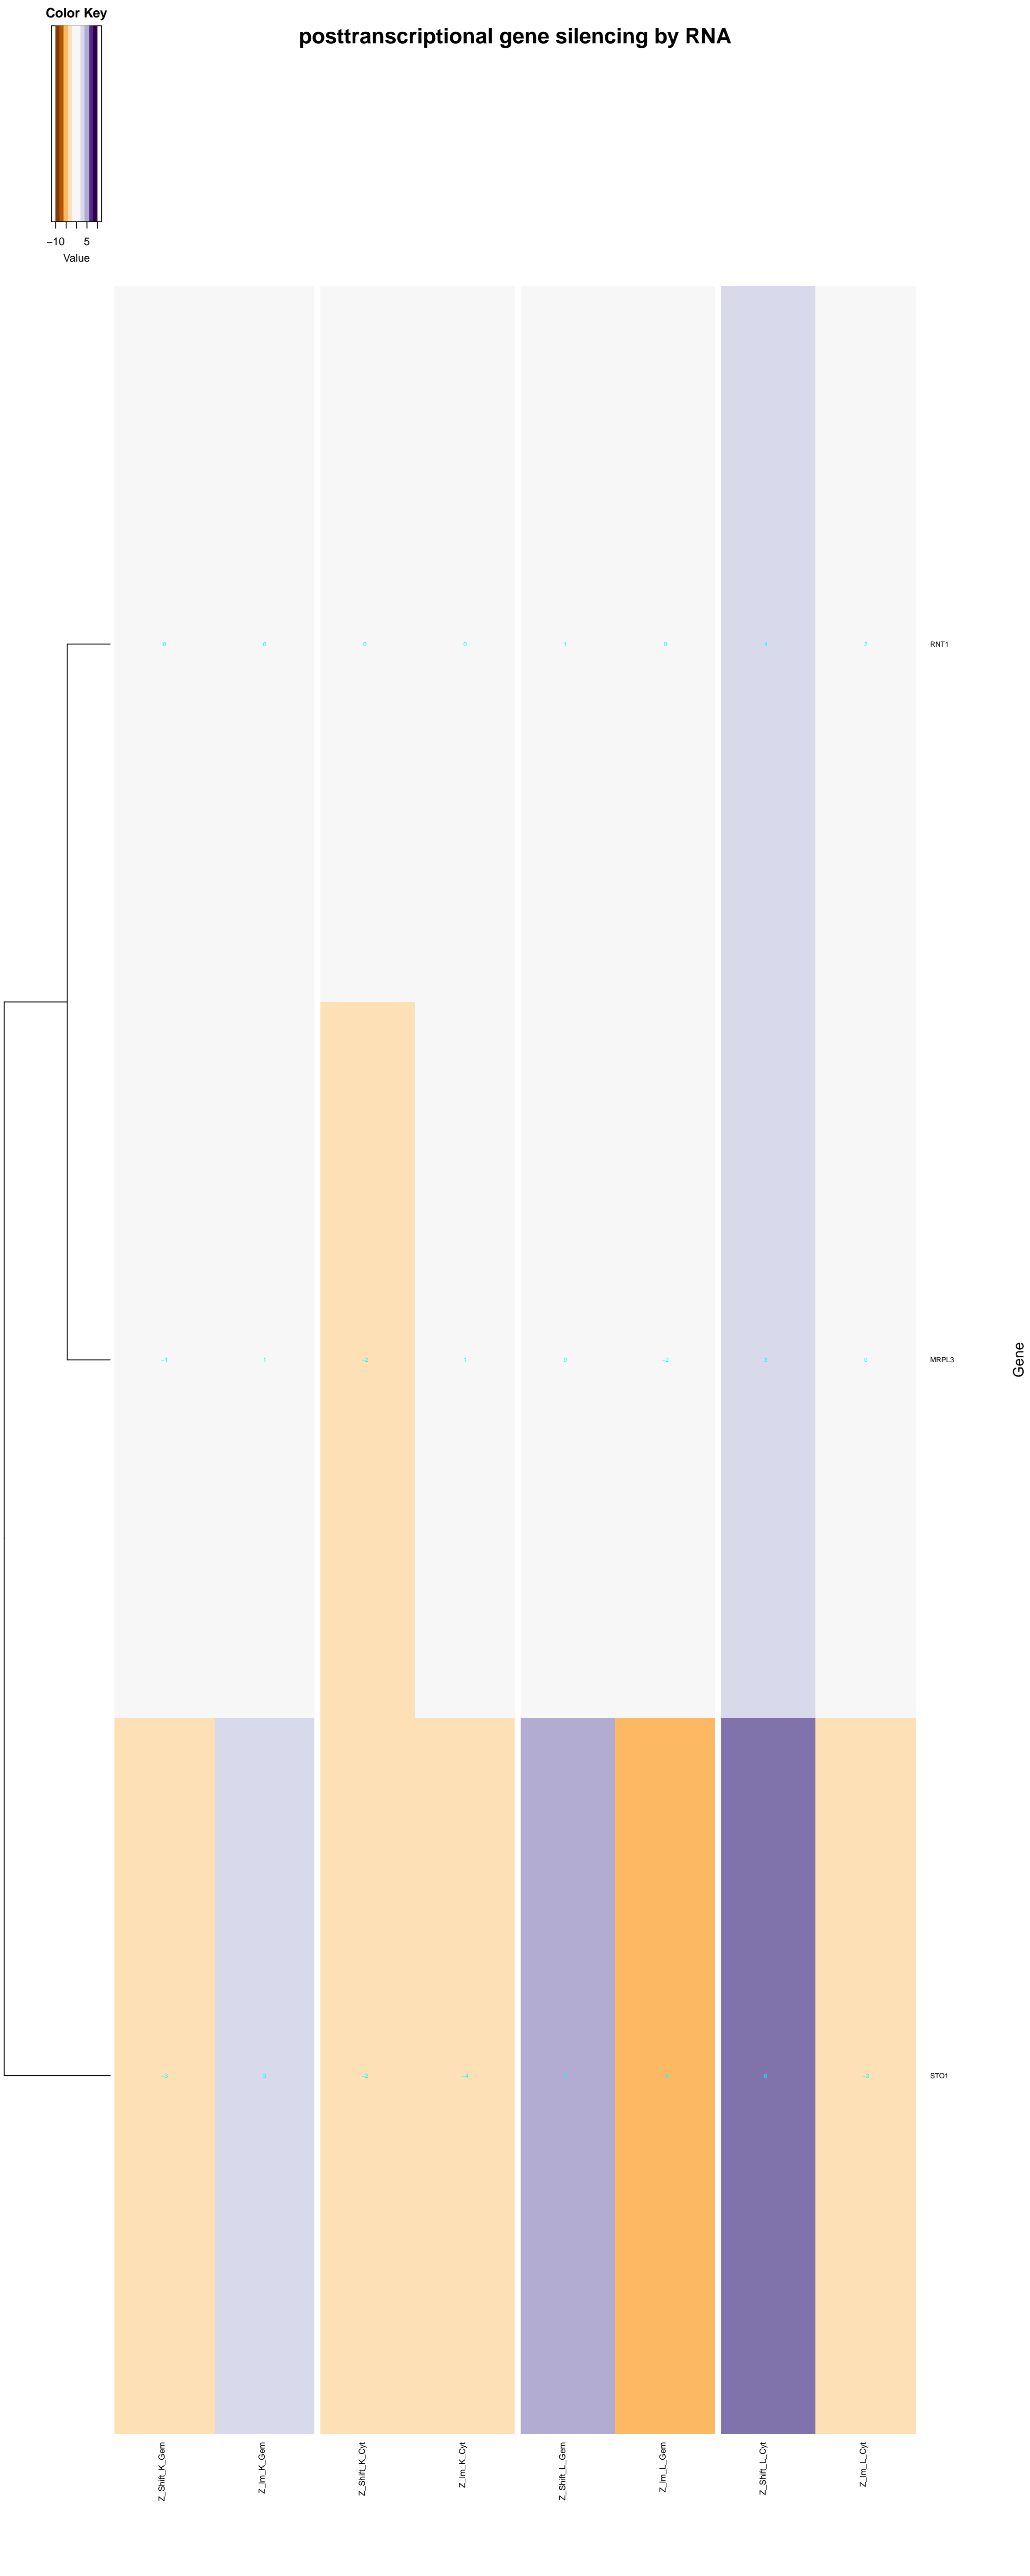

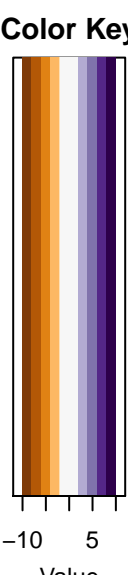

3'-UTR-mediated mRNA destabilization

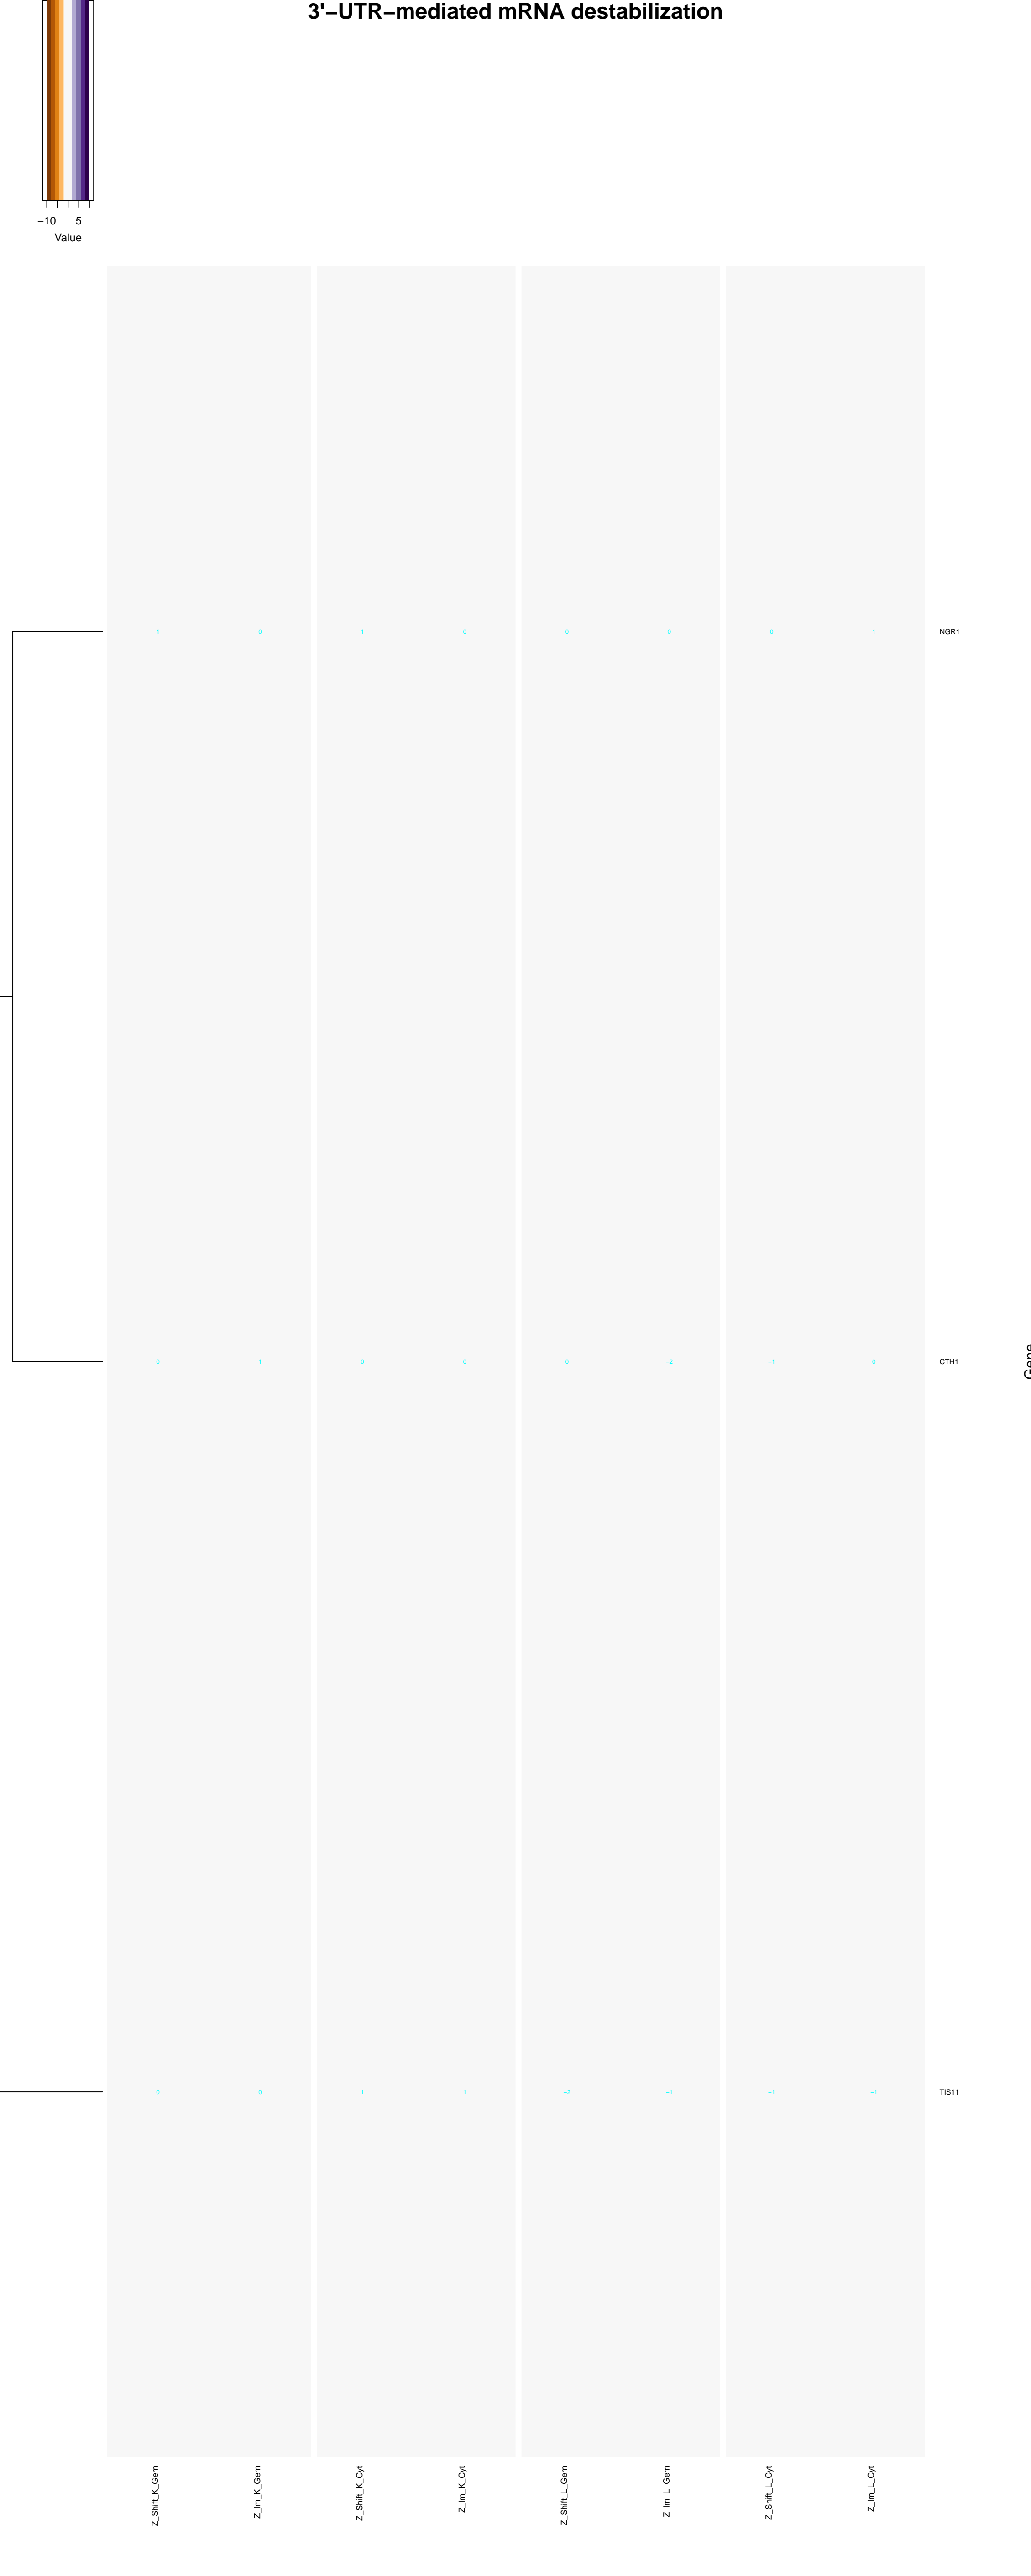

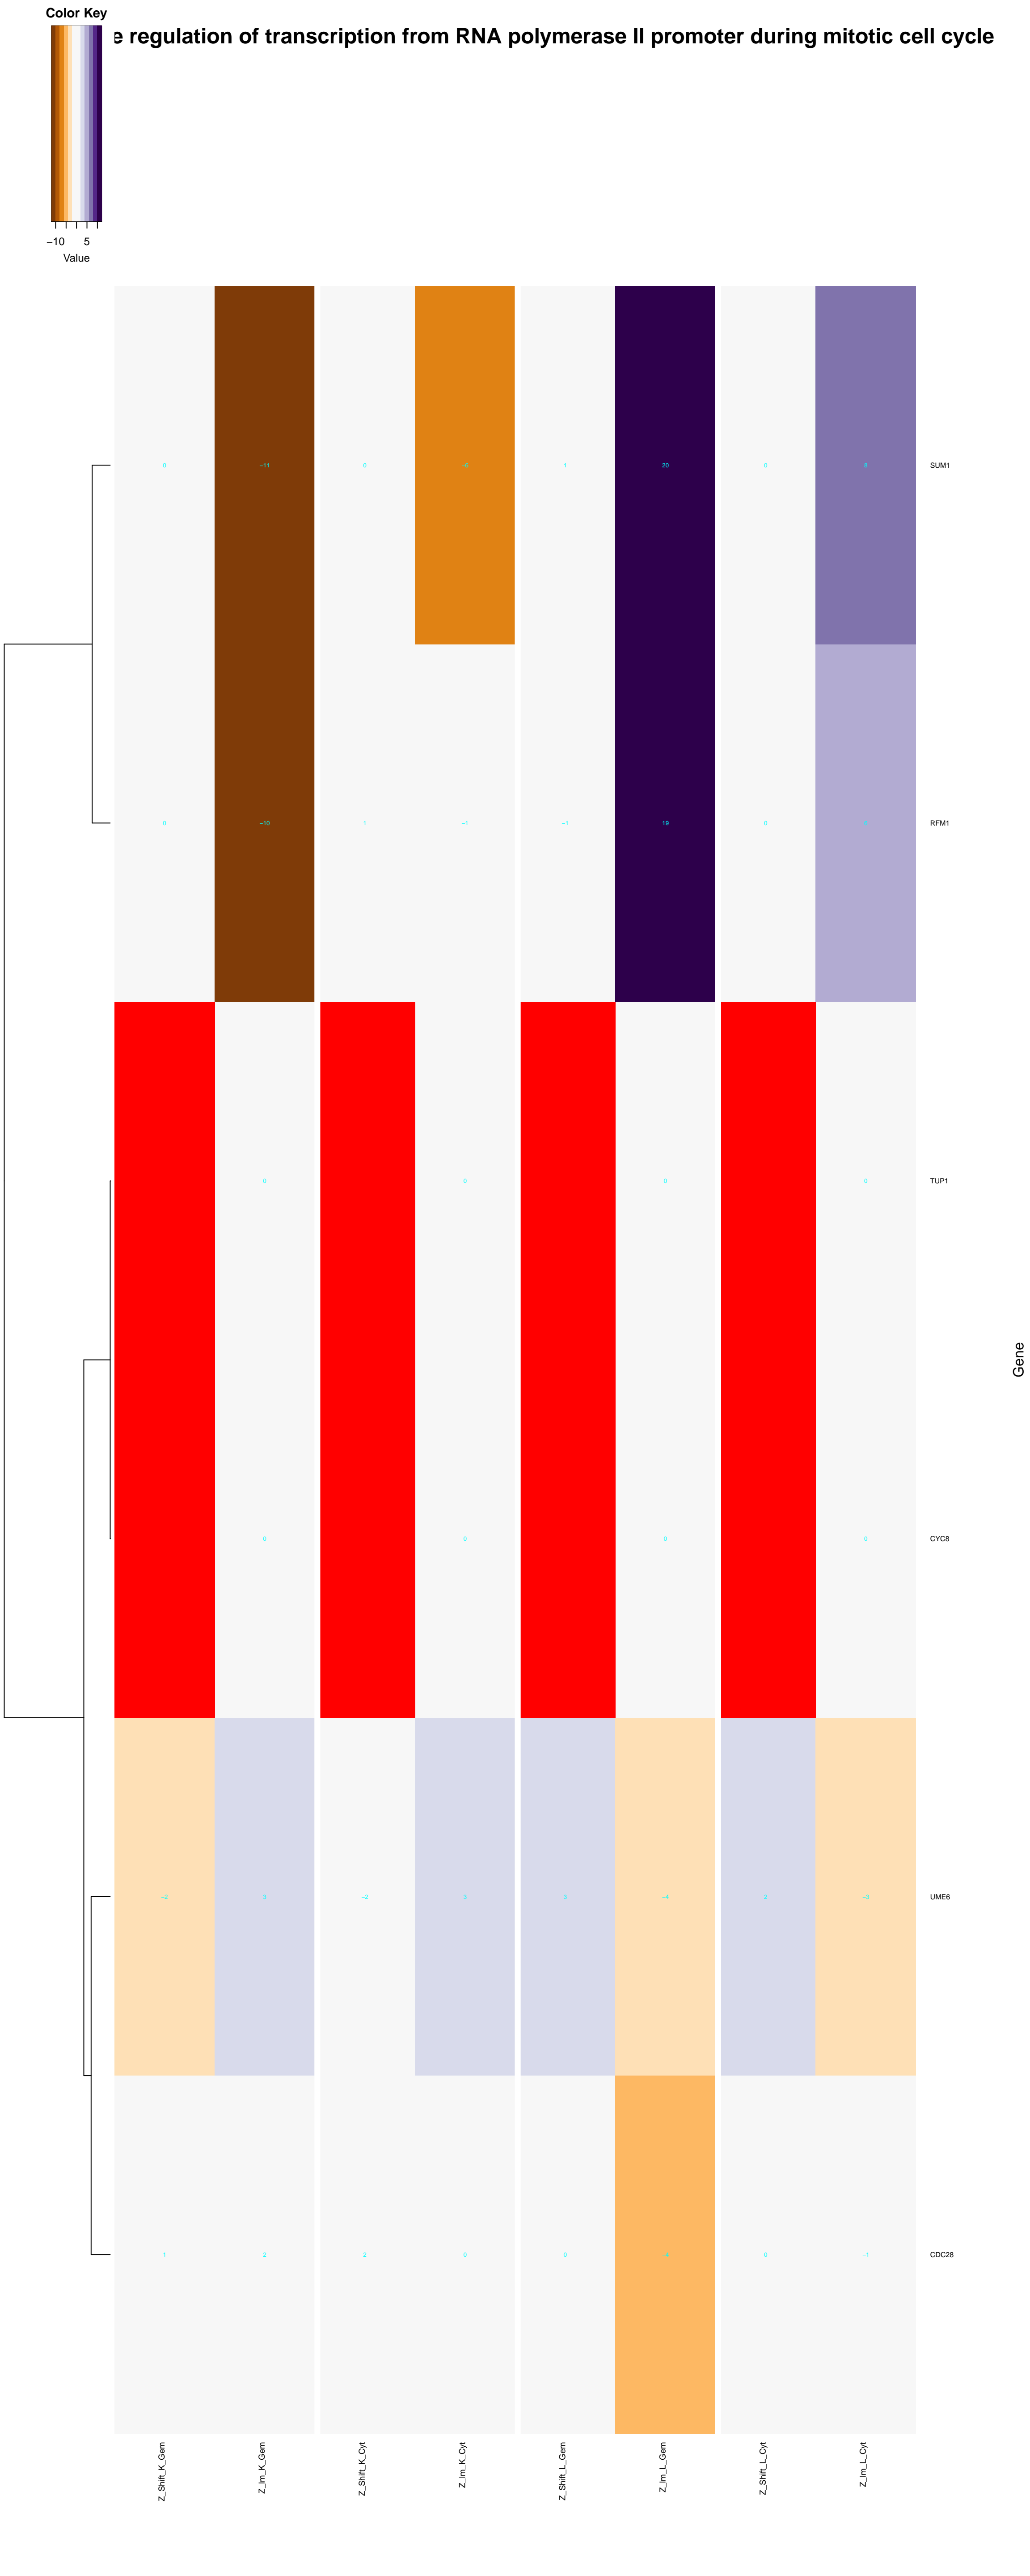

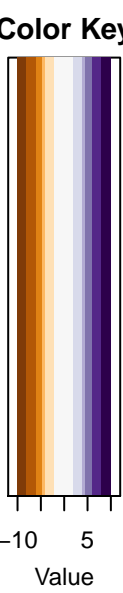

egulation of transcription from RNA polymerase II promoter involved in meiotic cell cycle

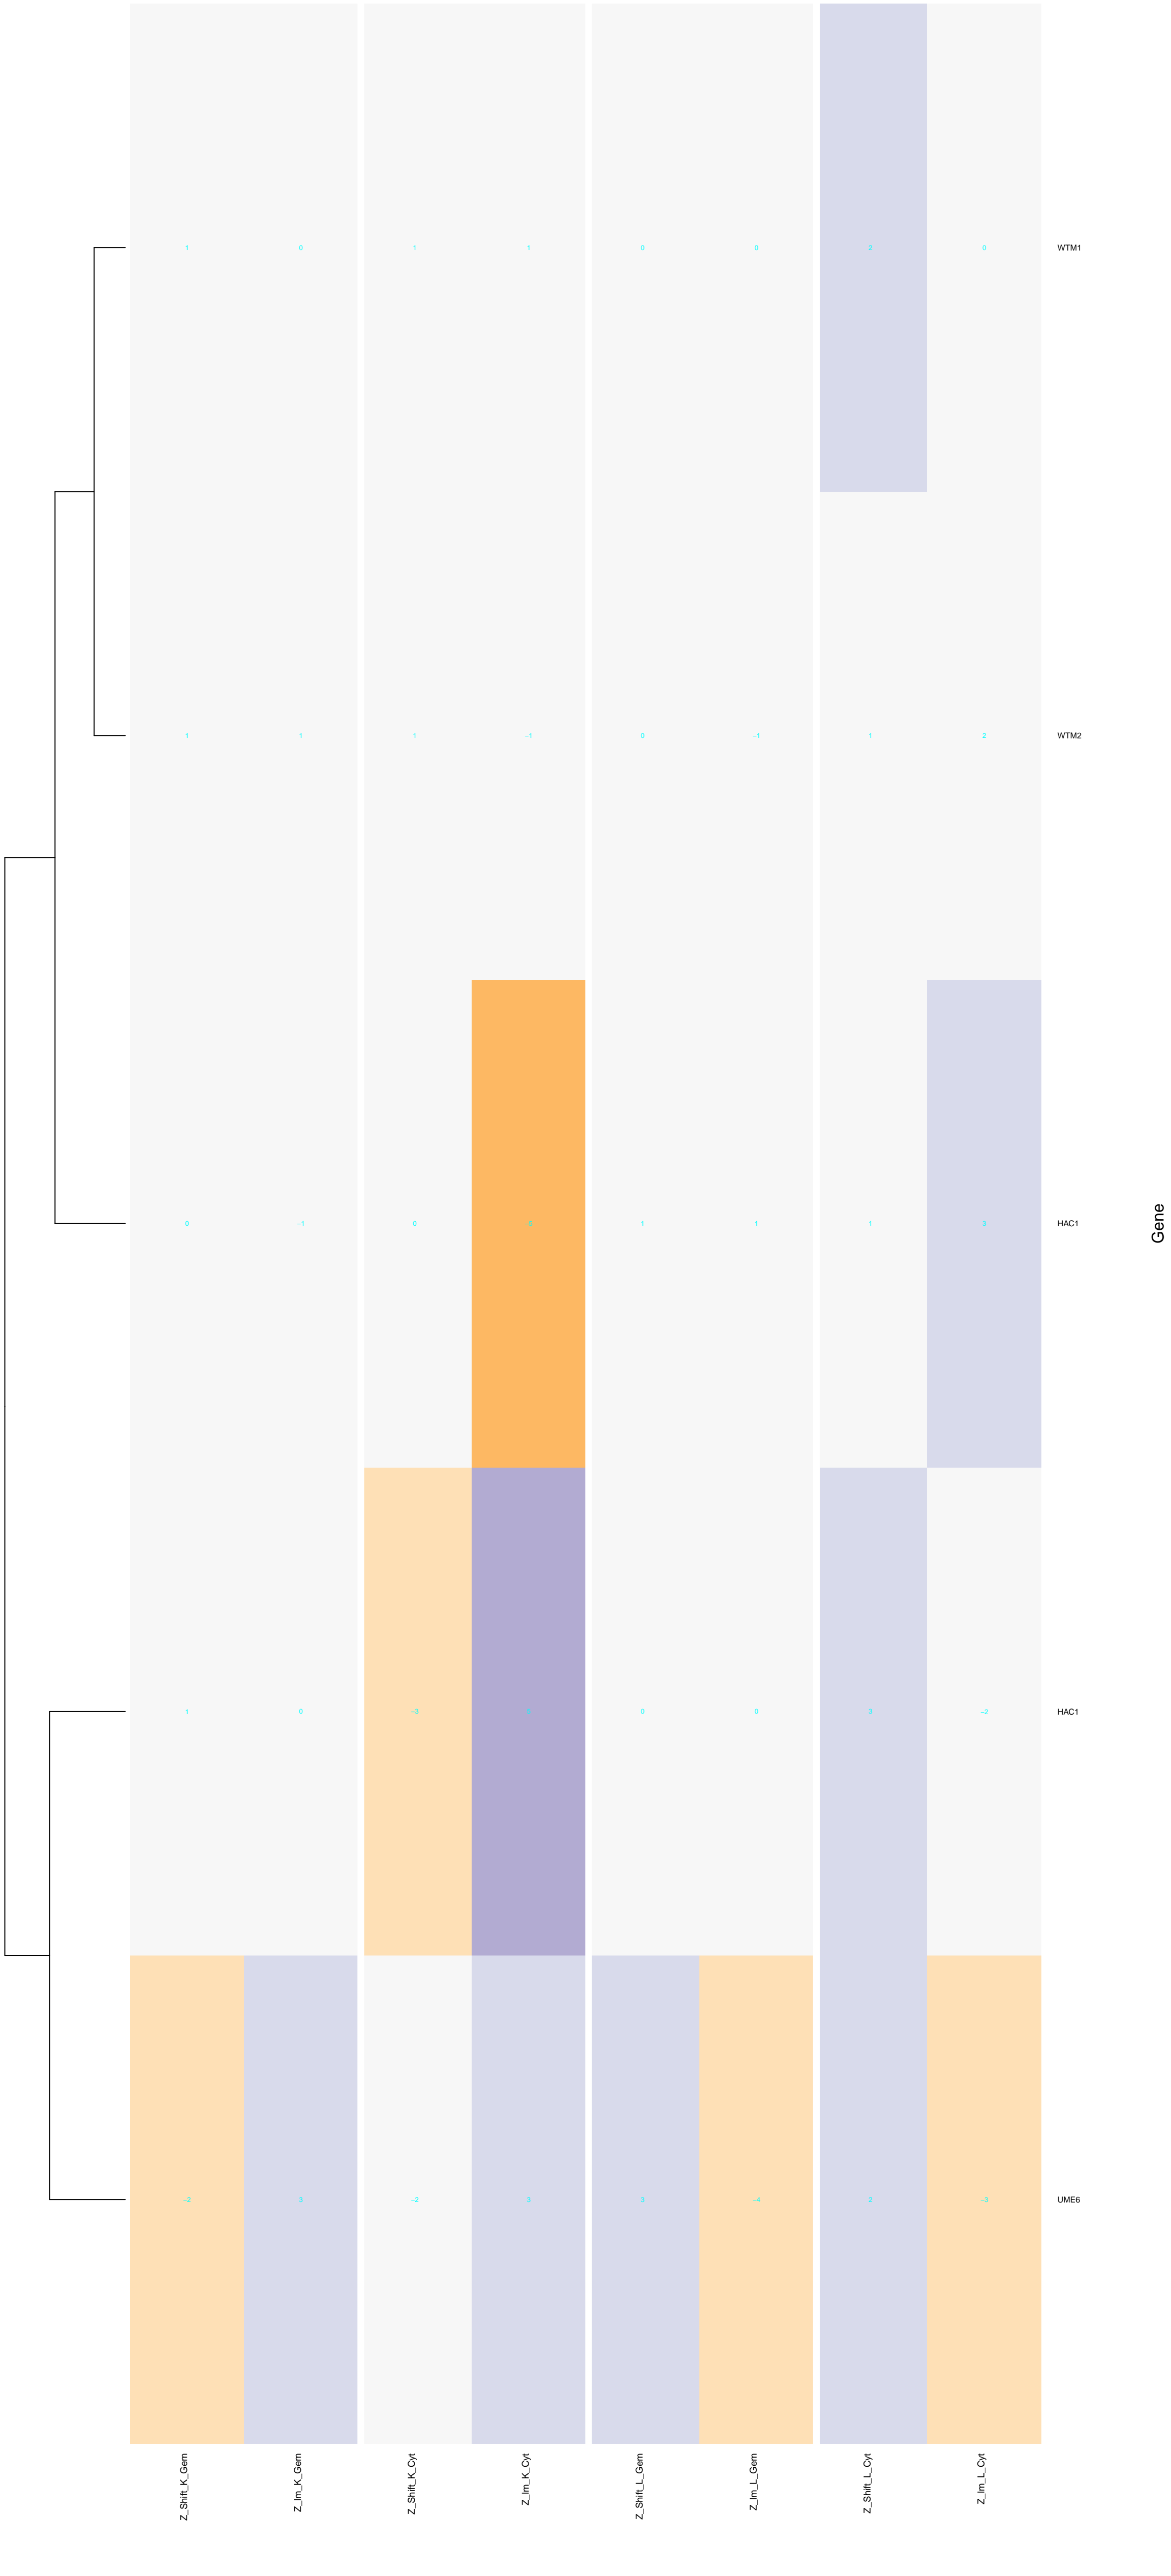

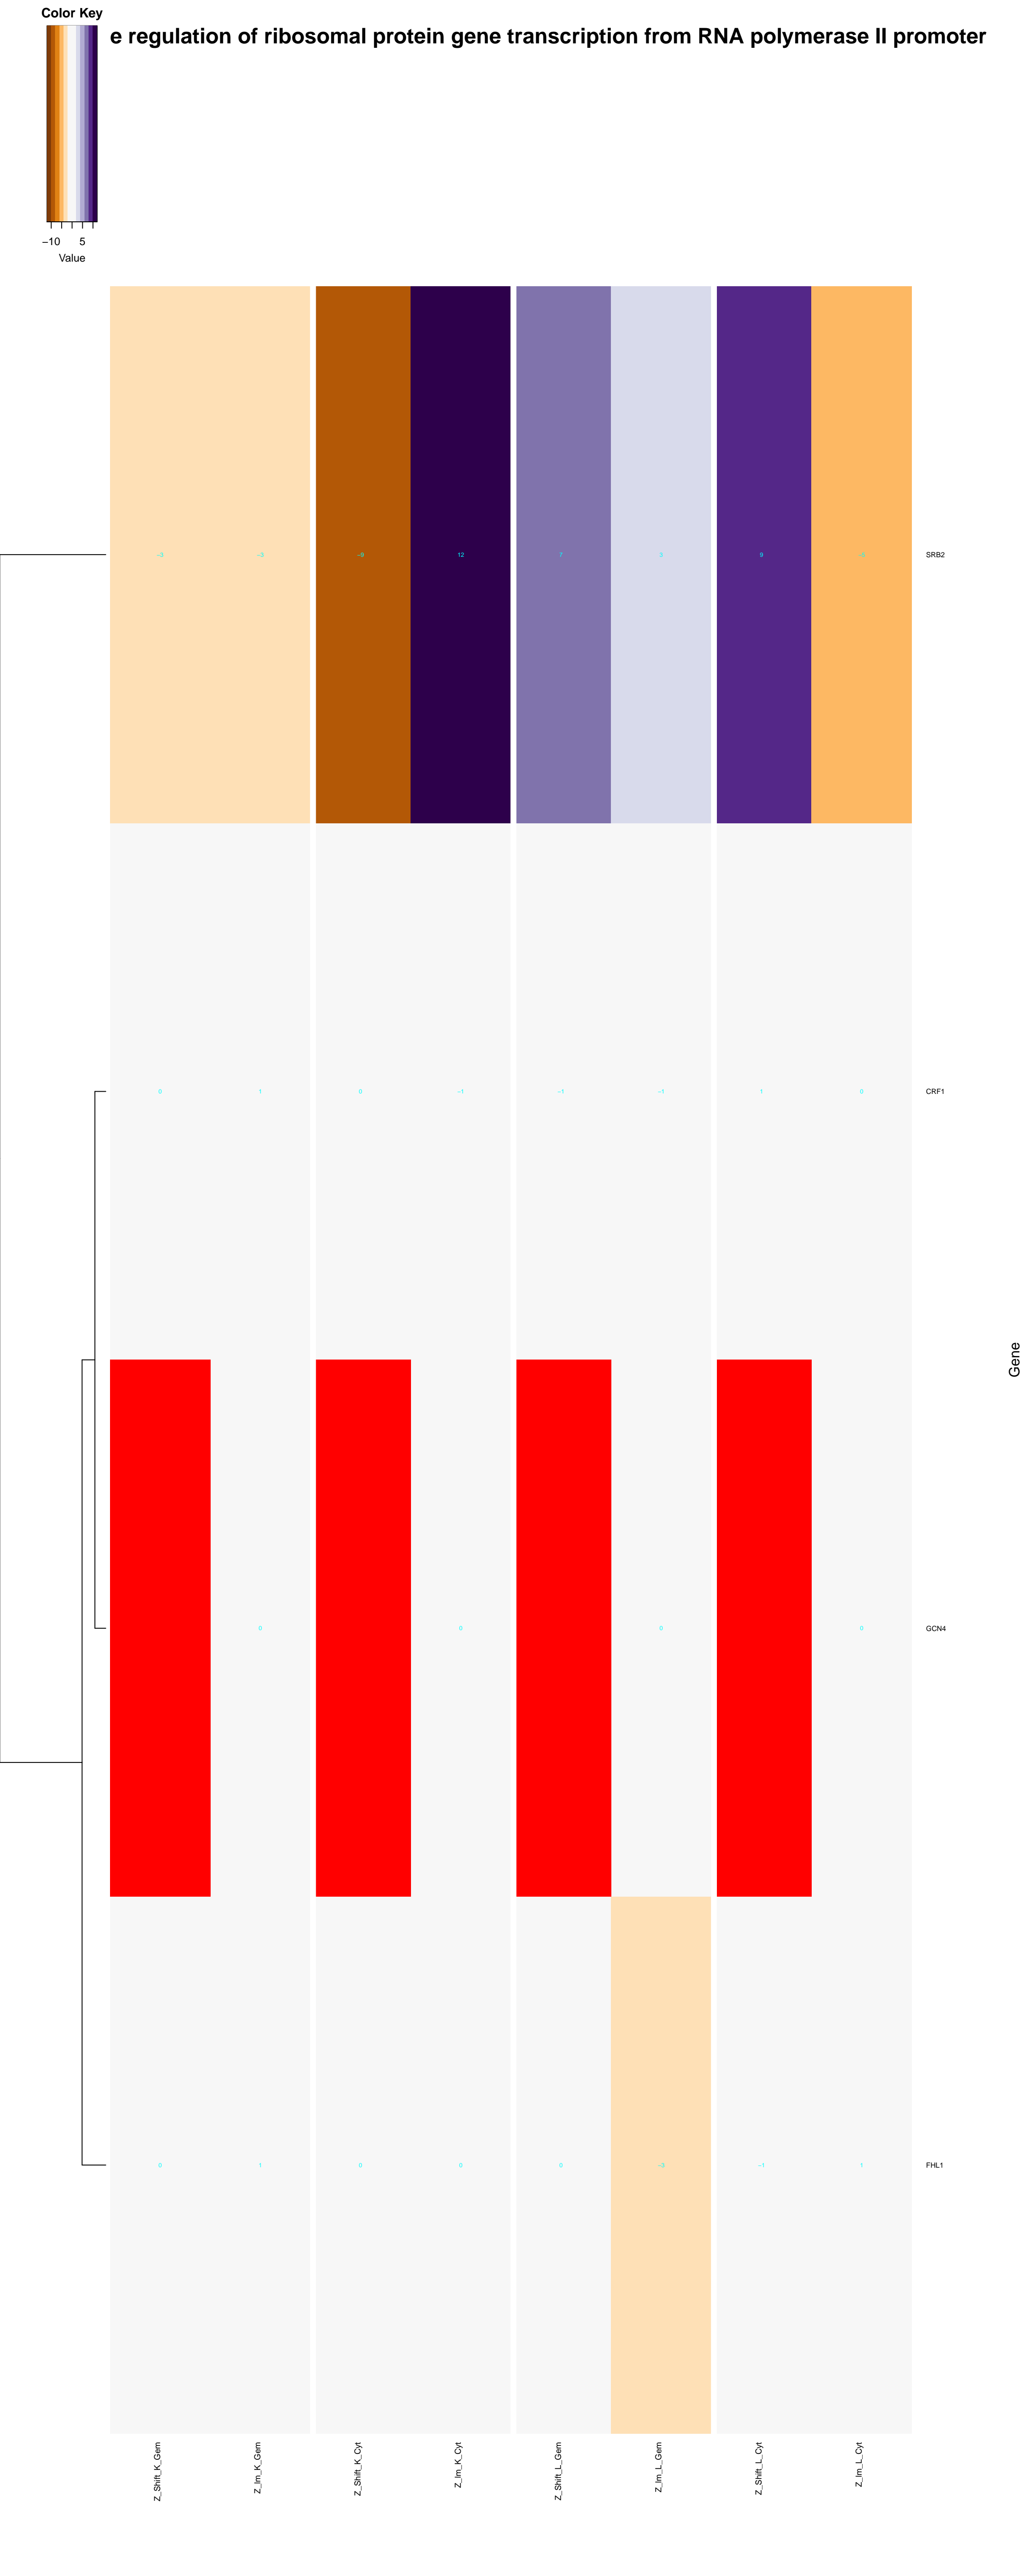

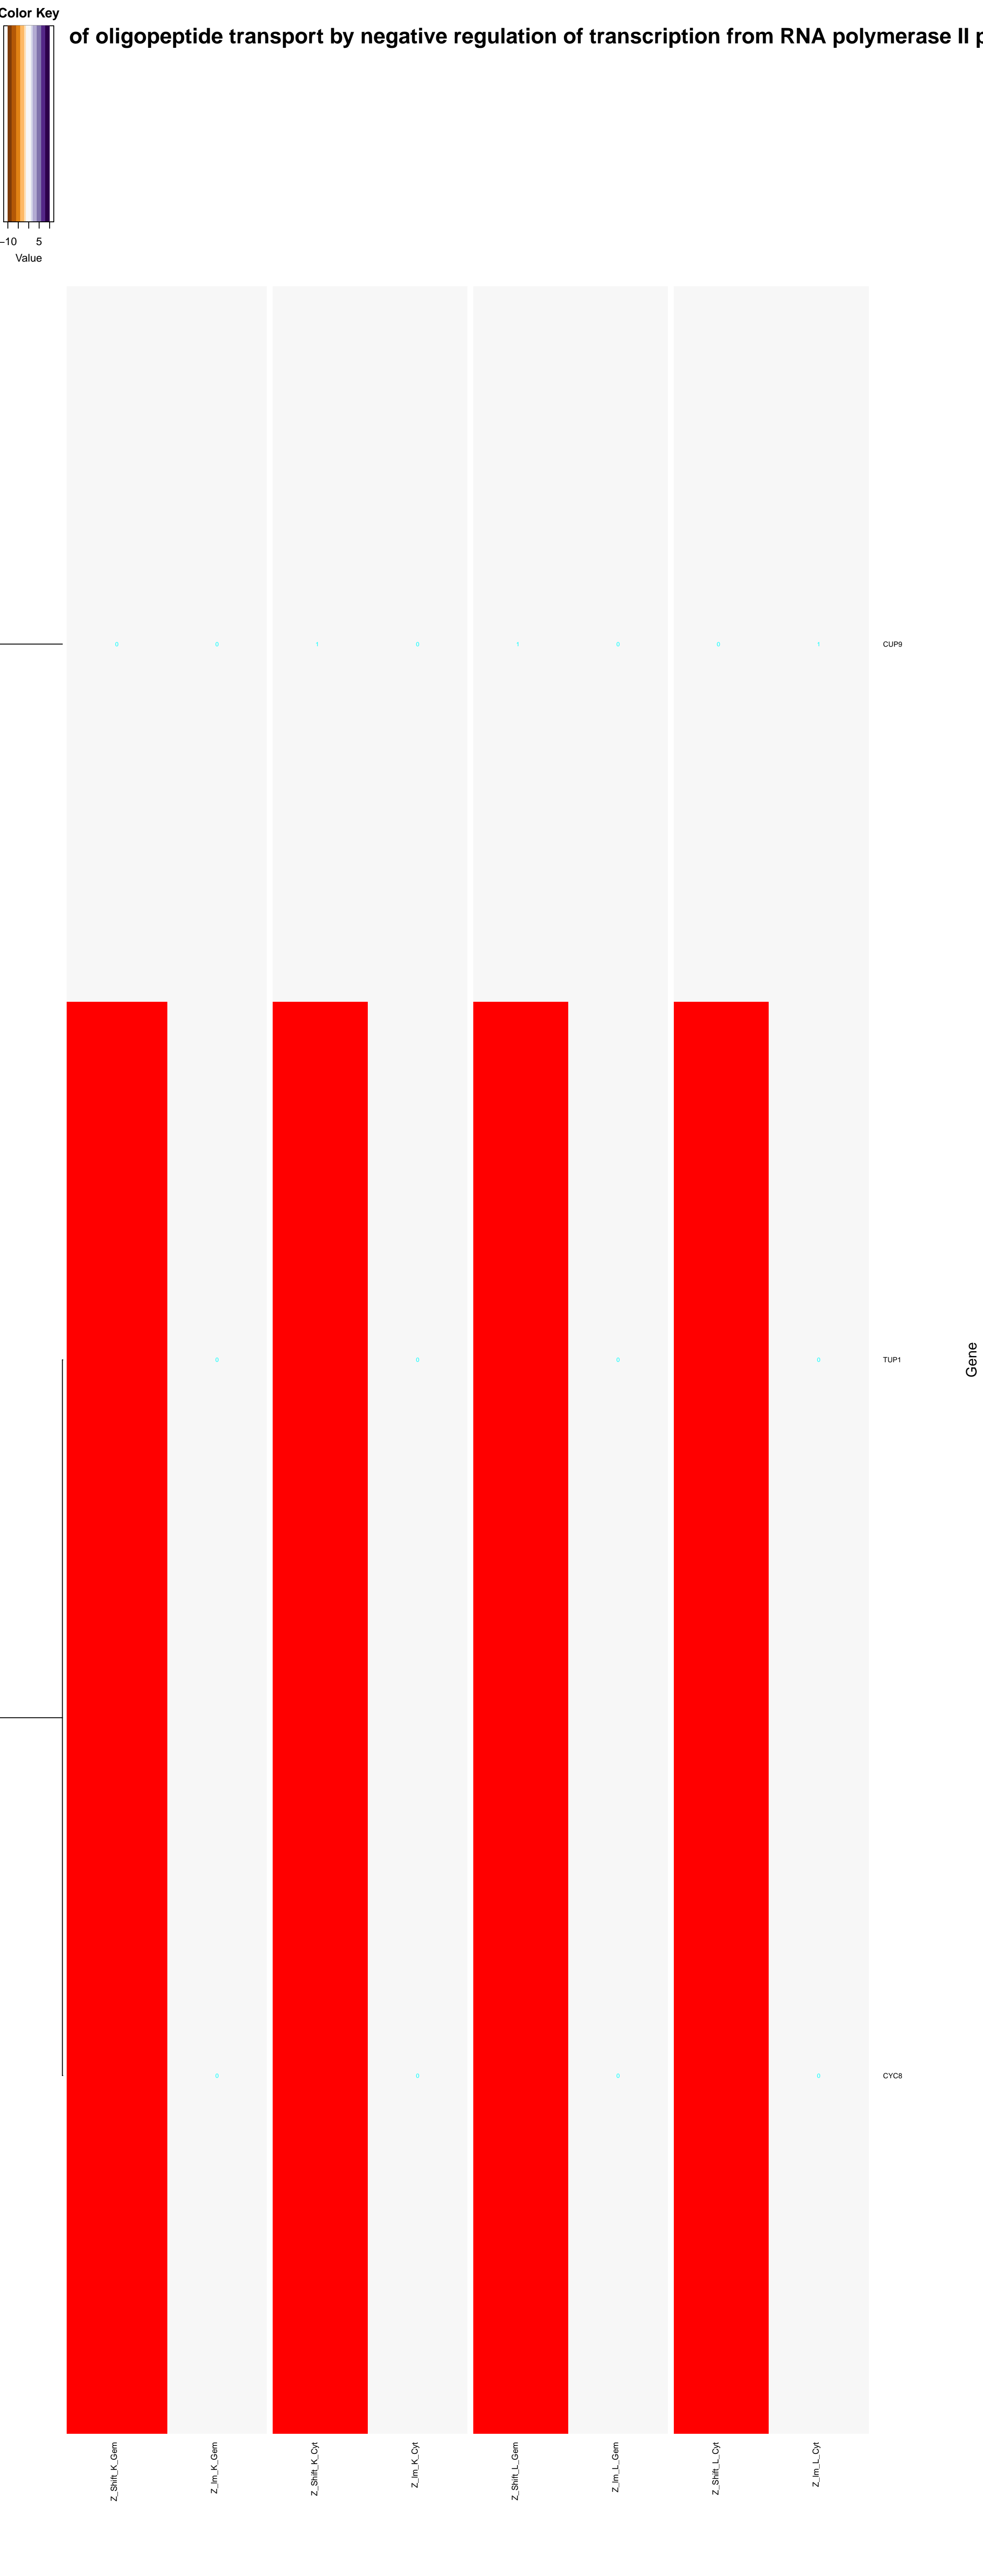

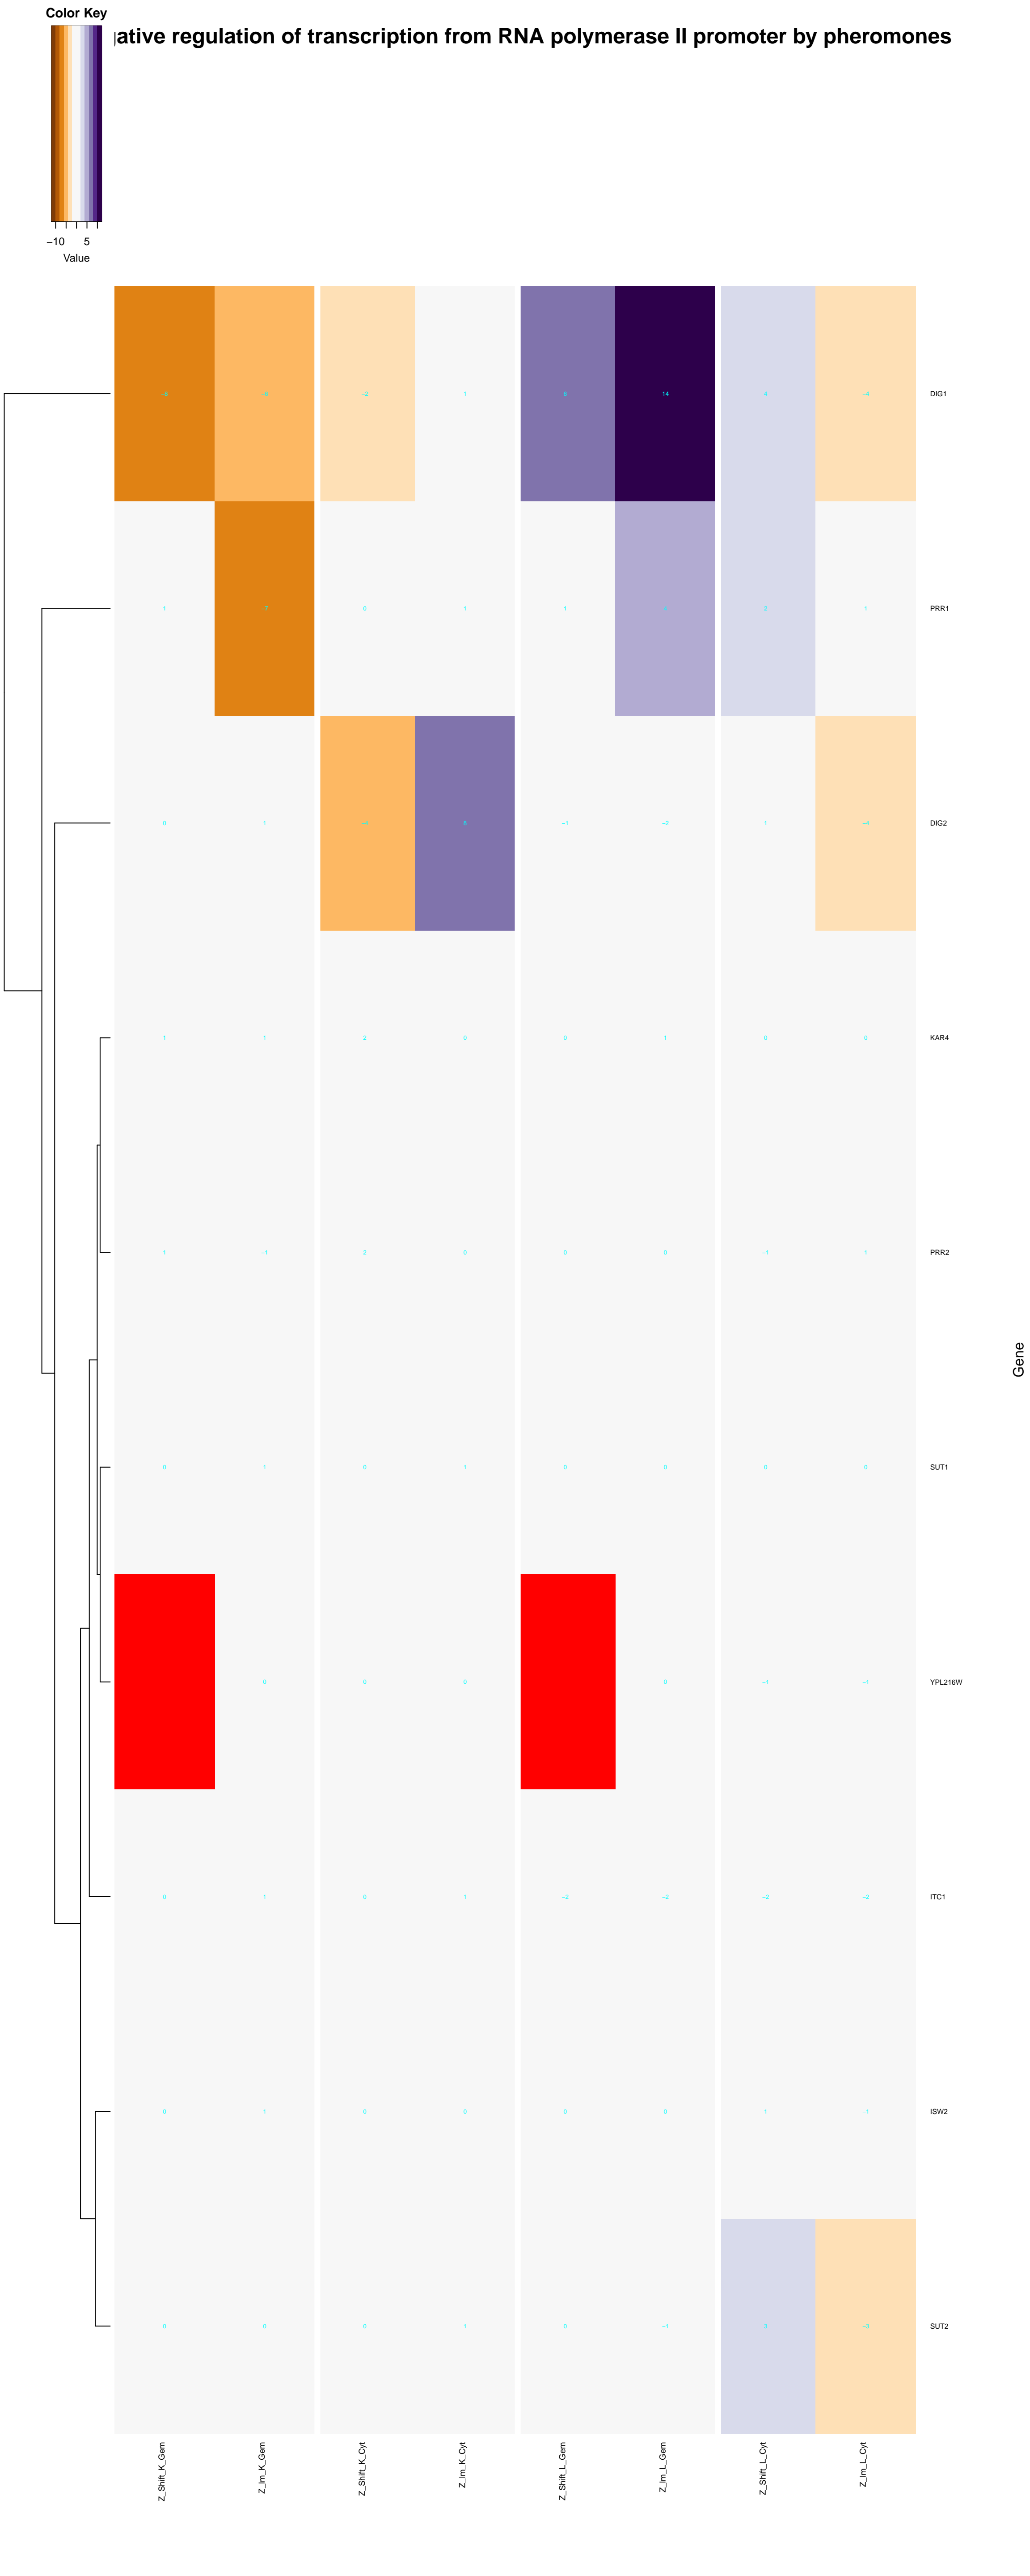

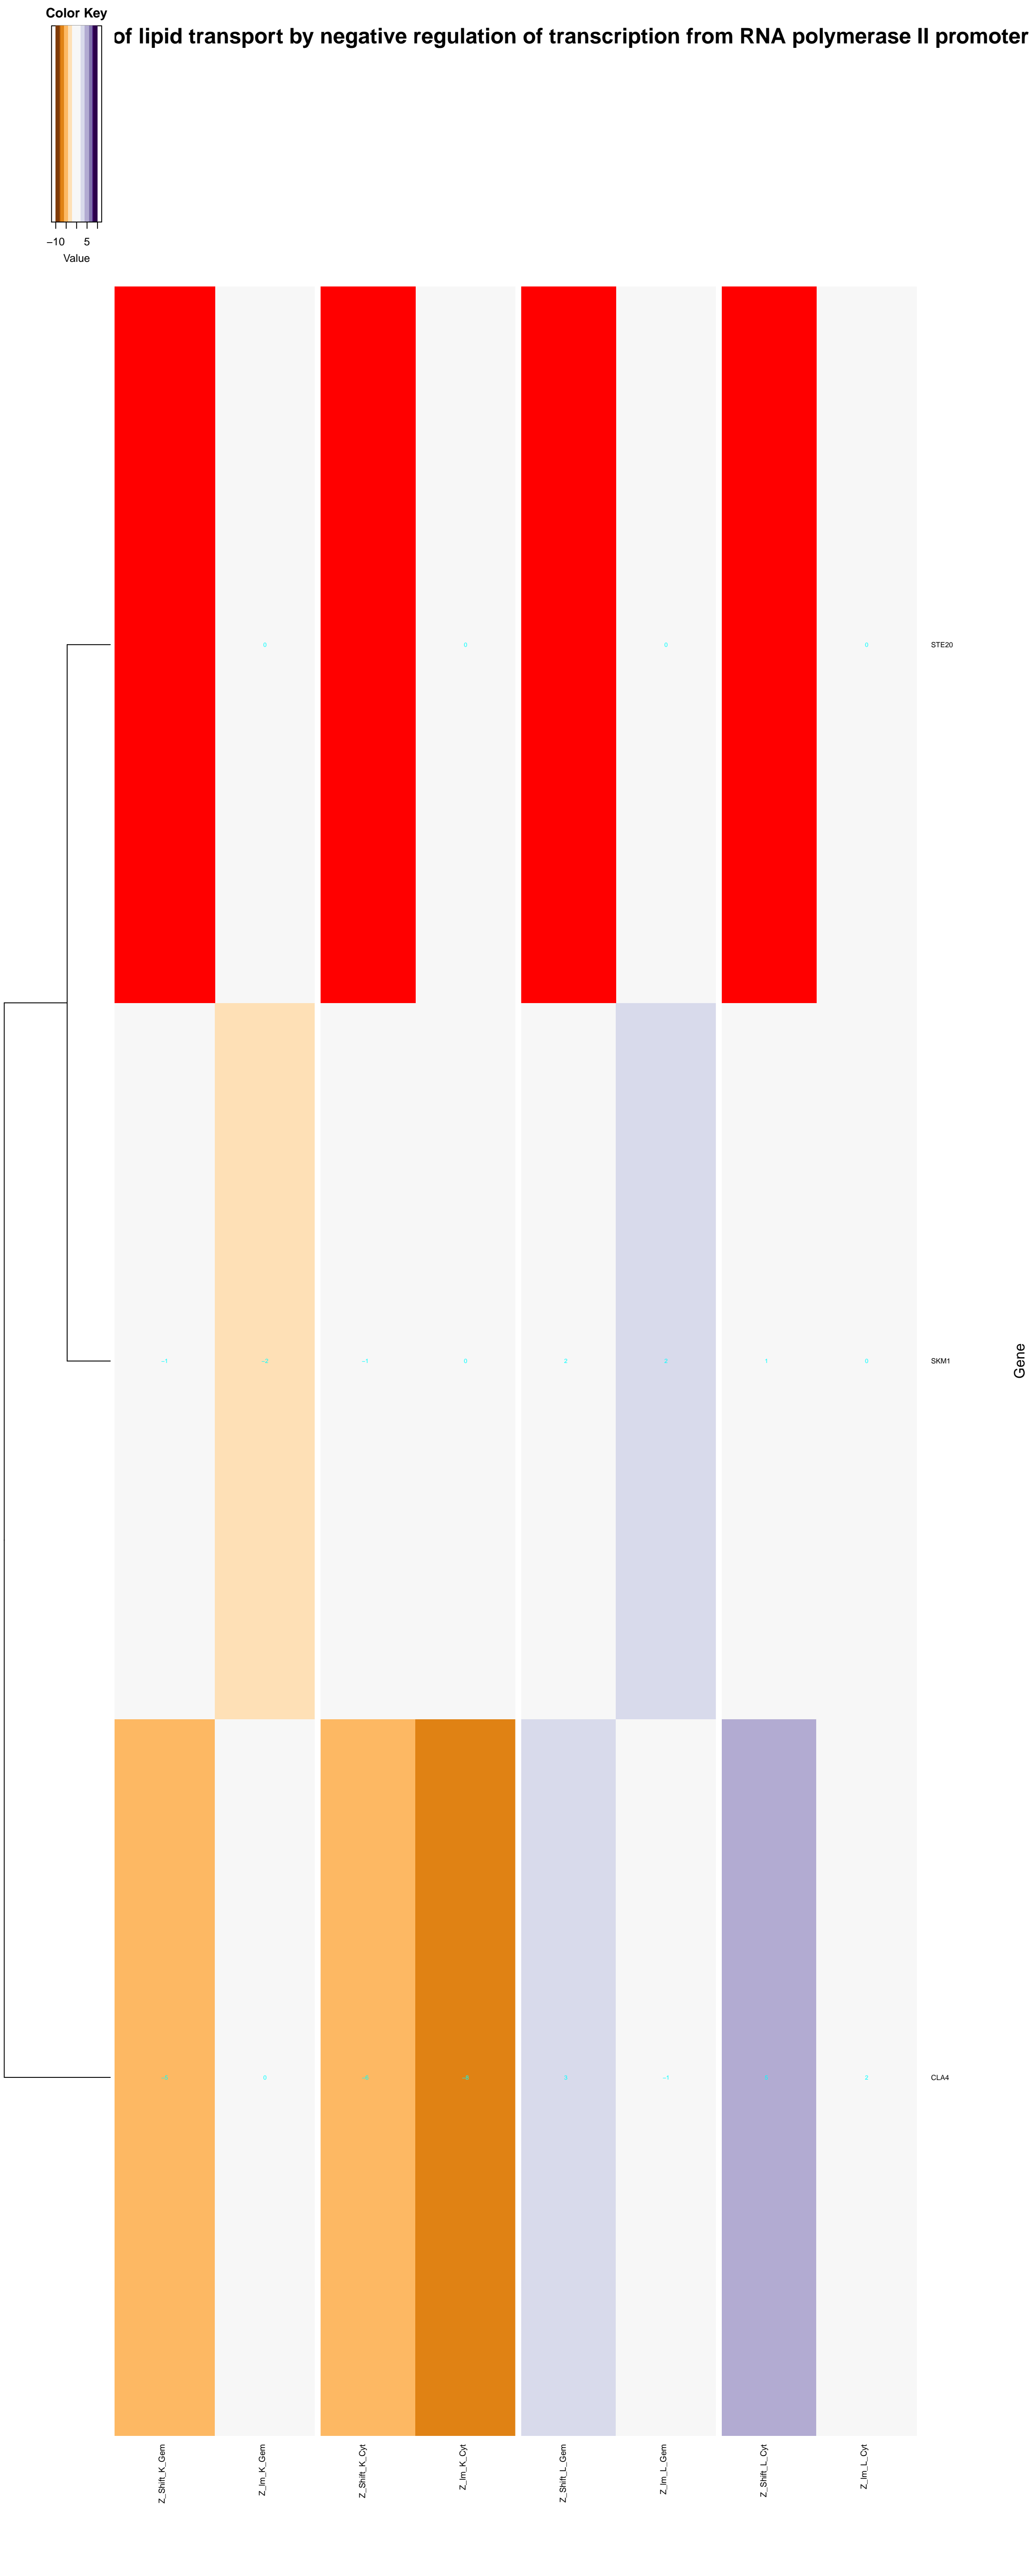

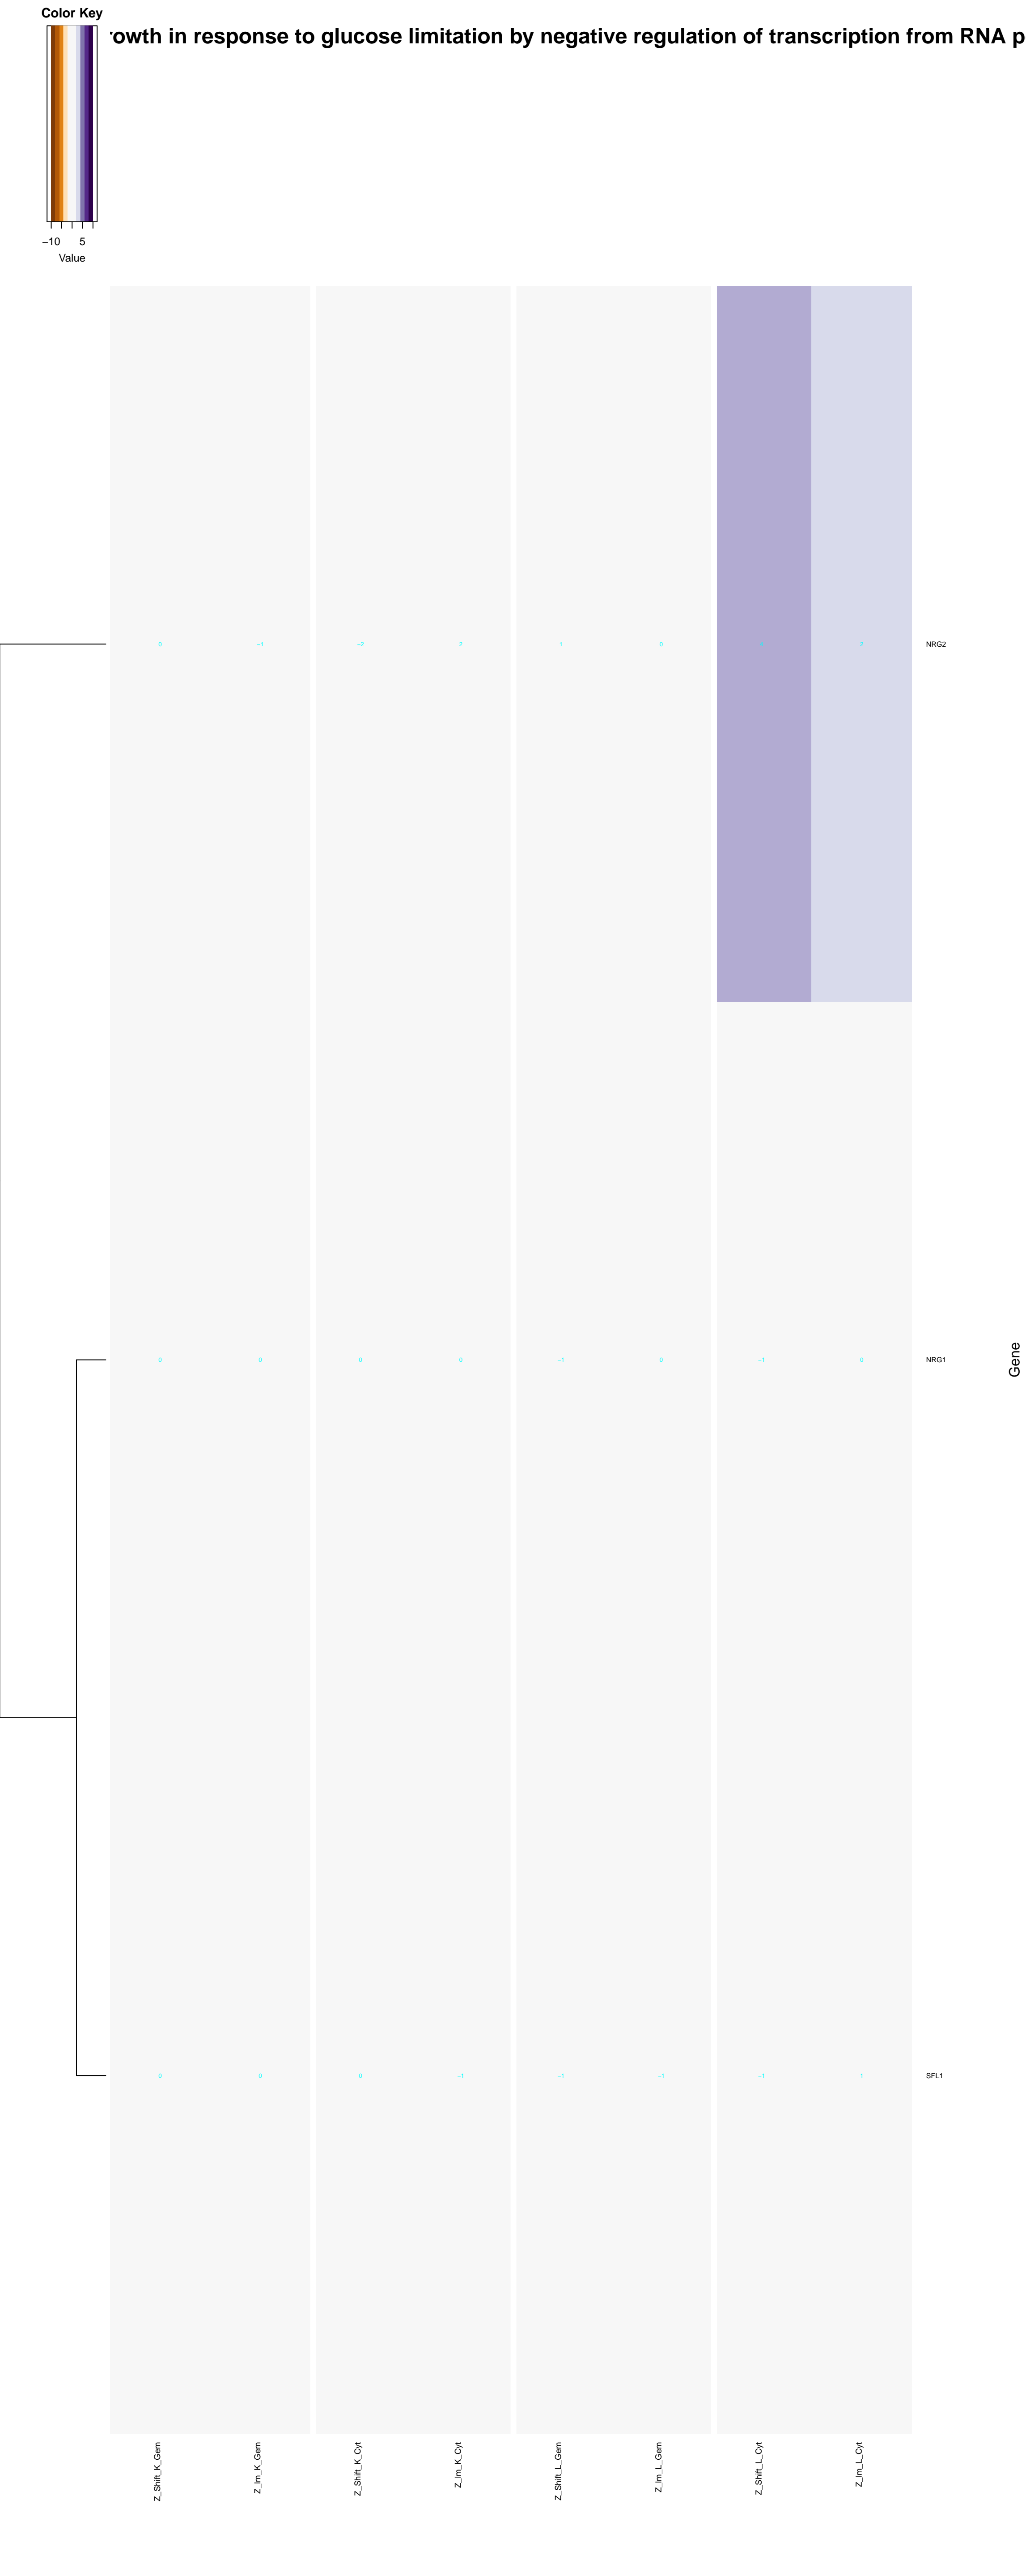



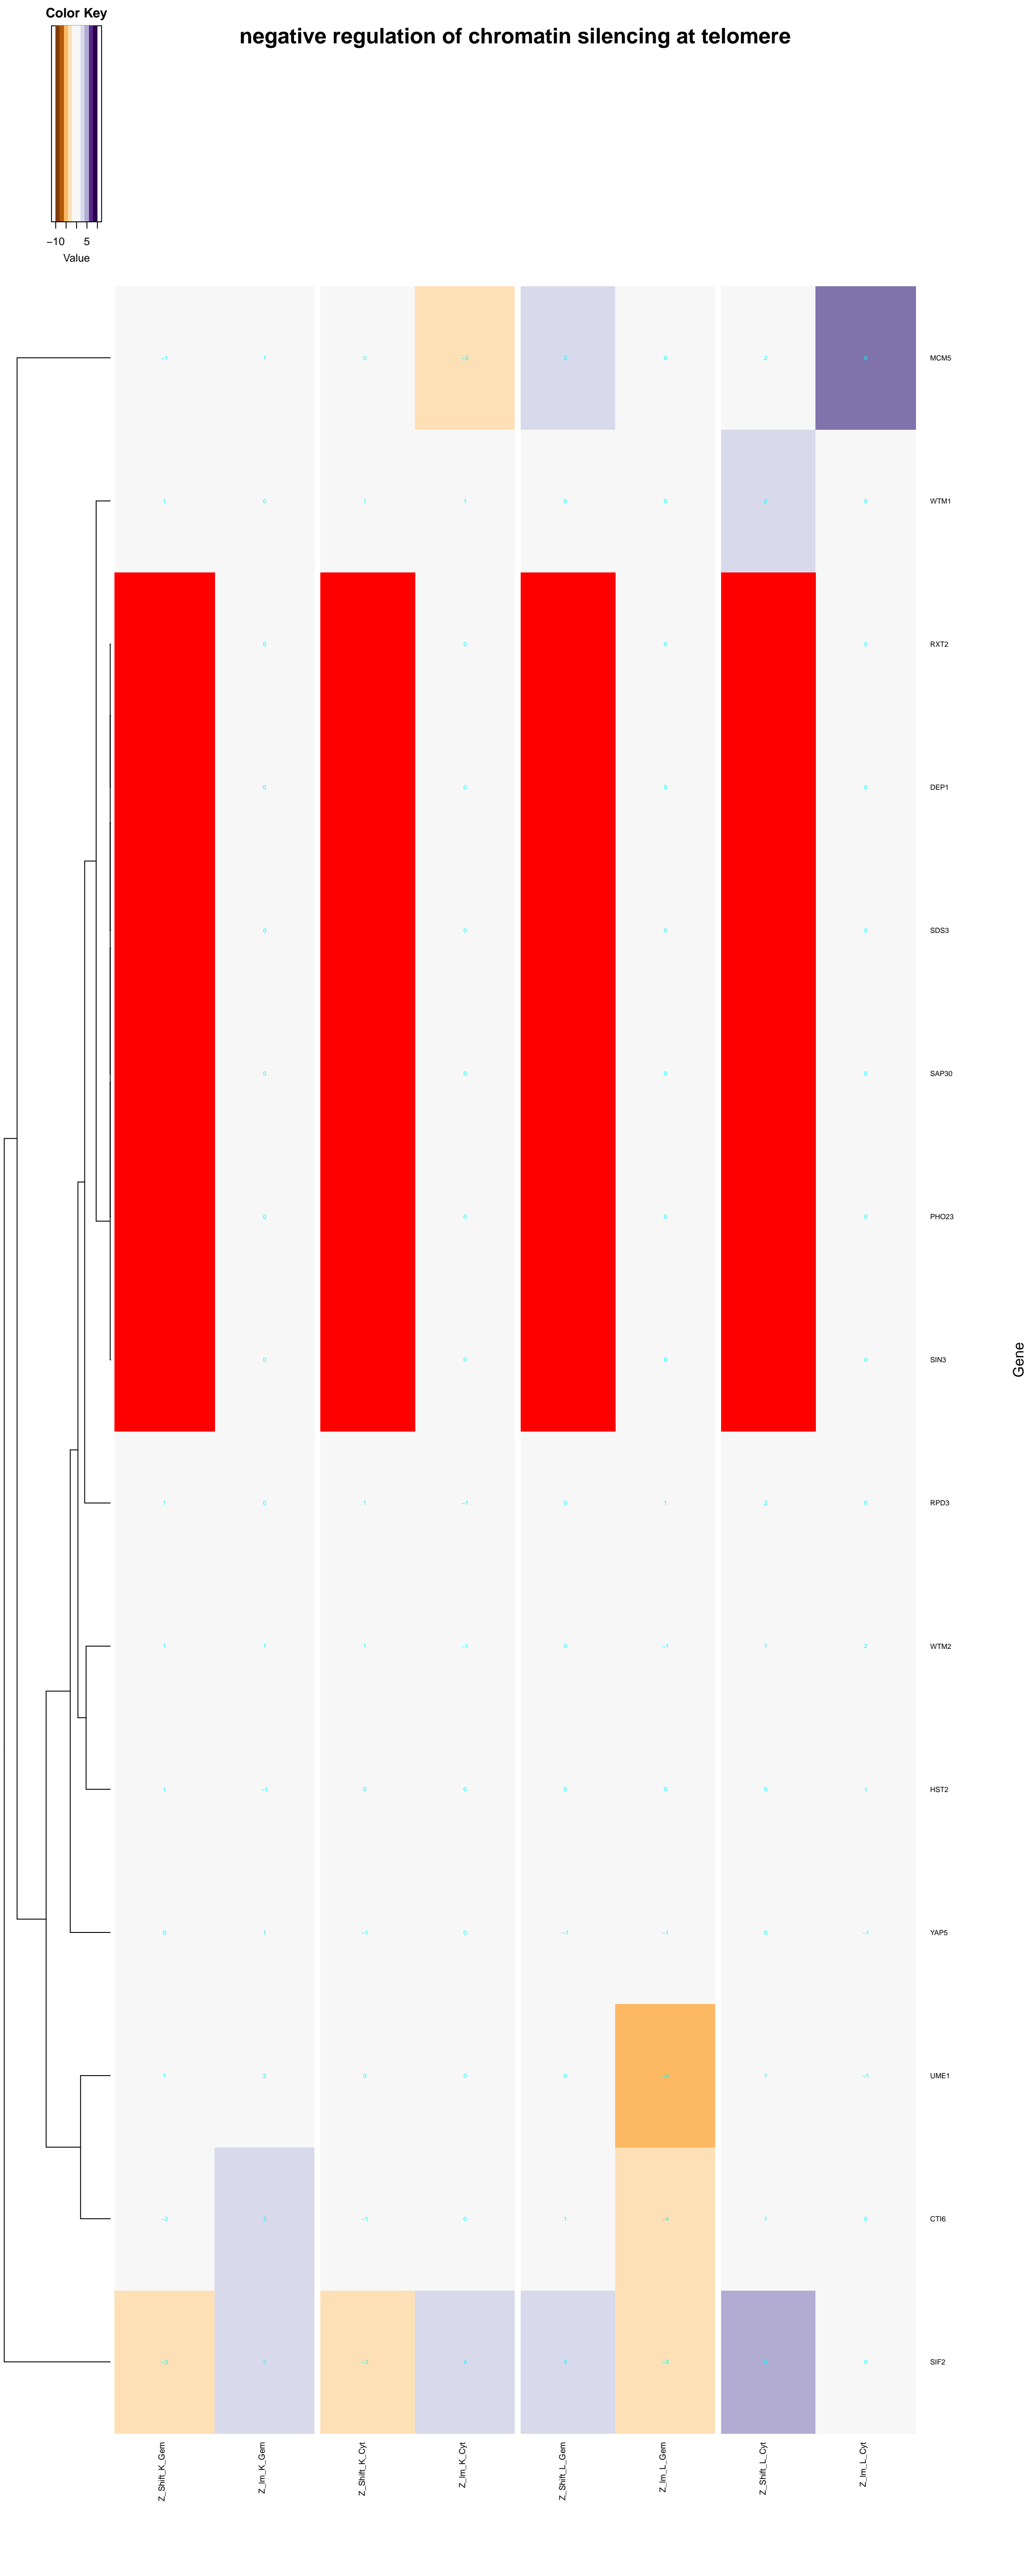

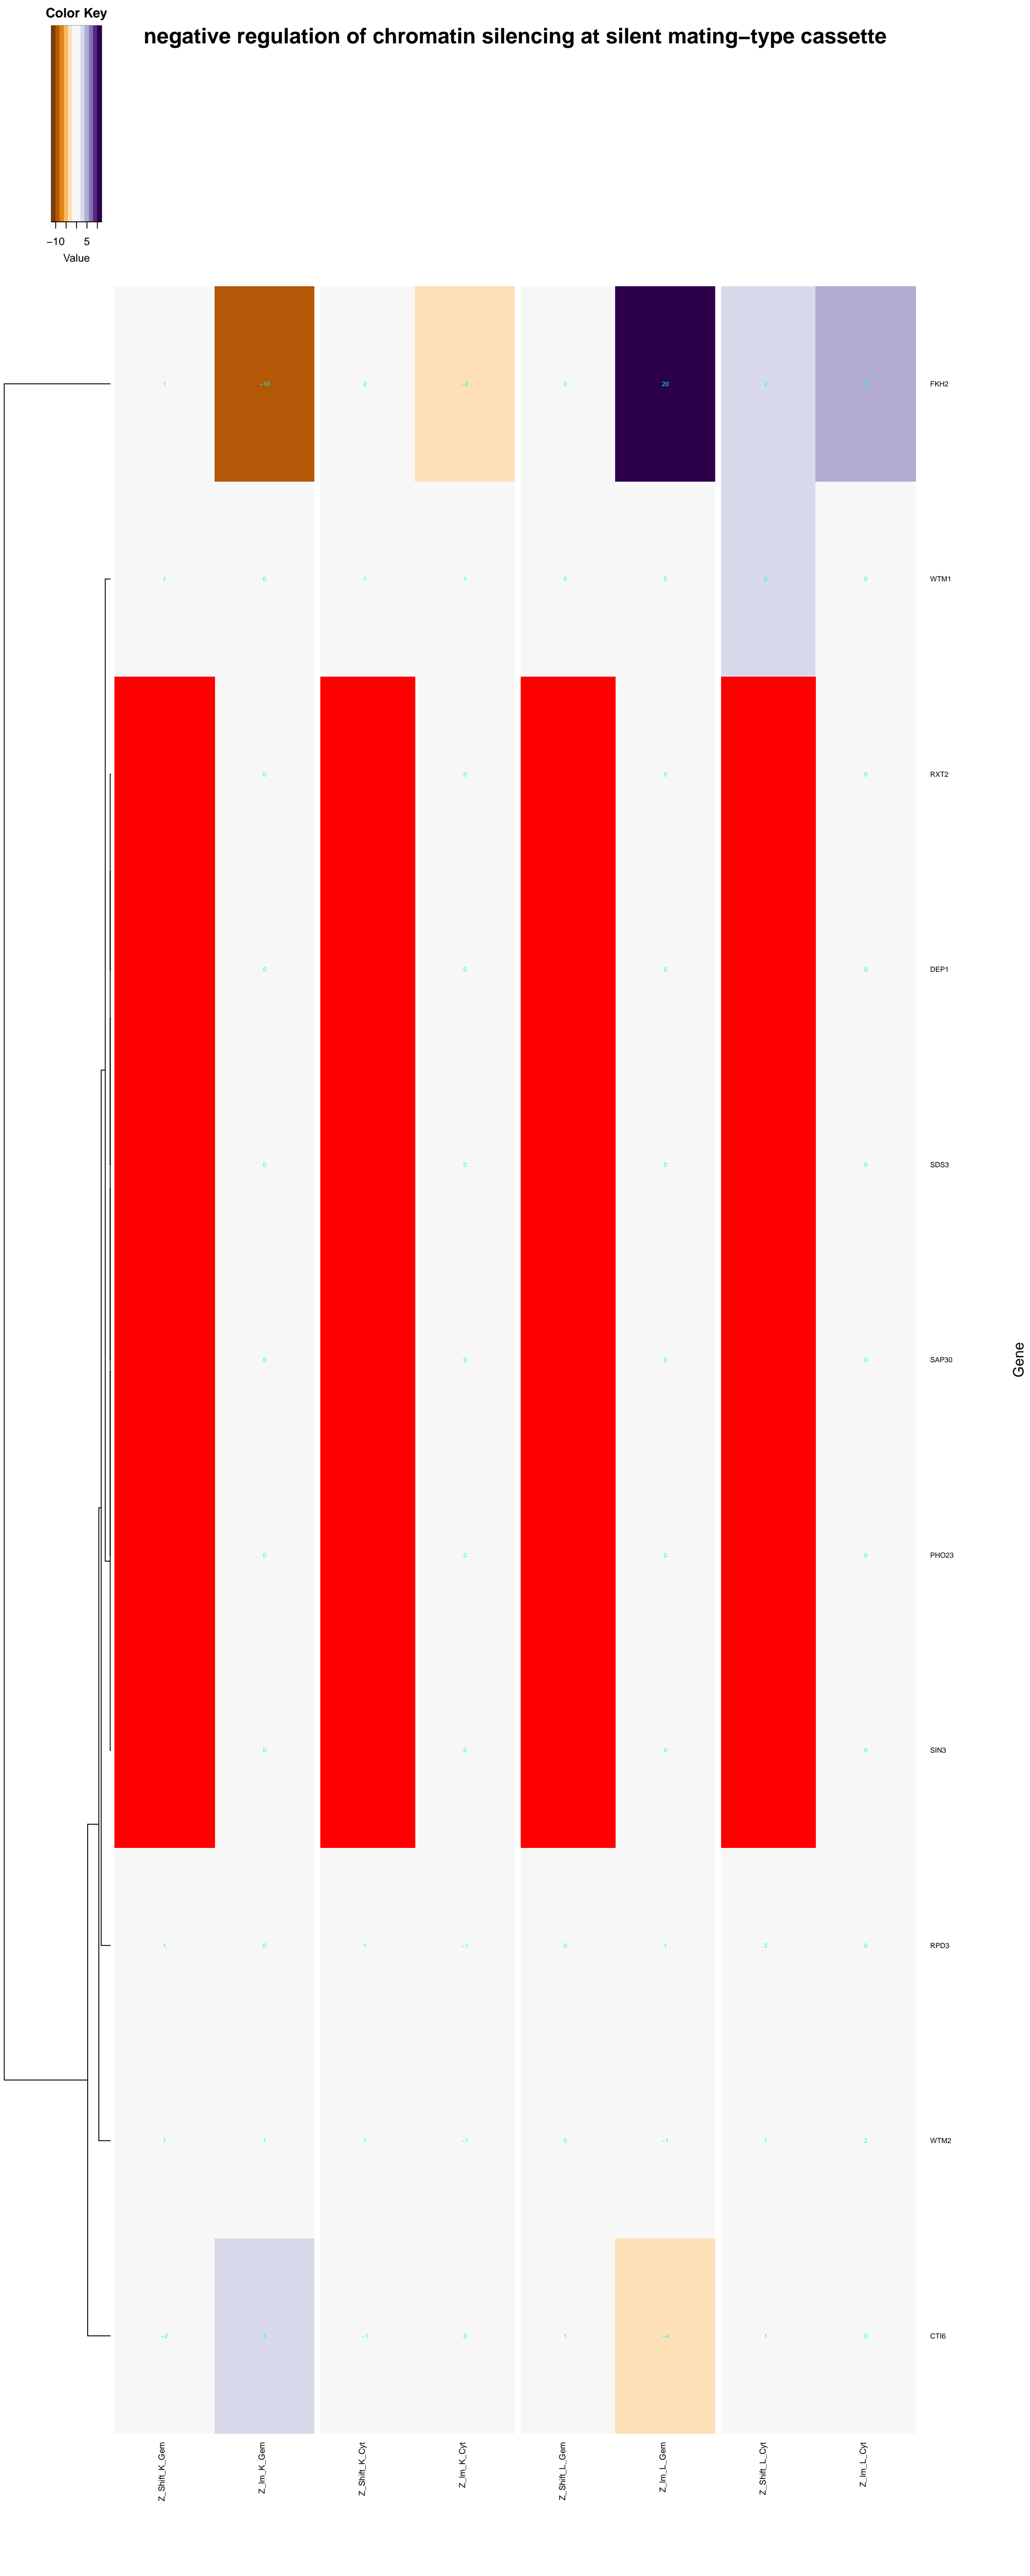

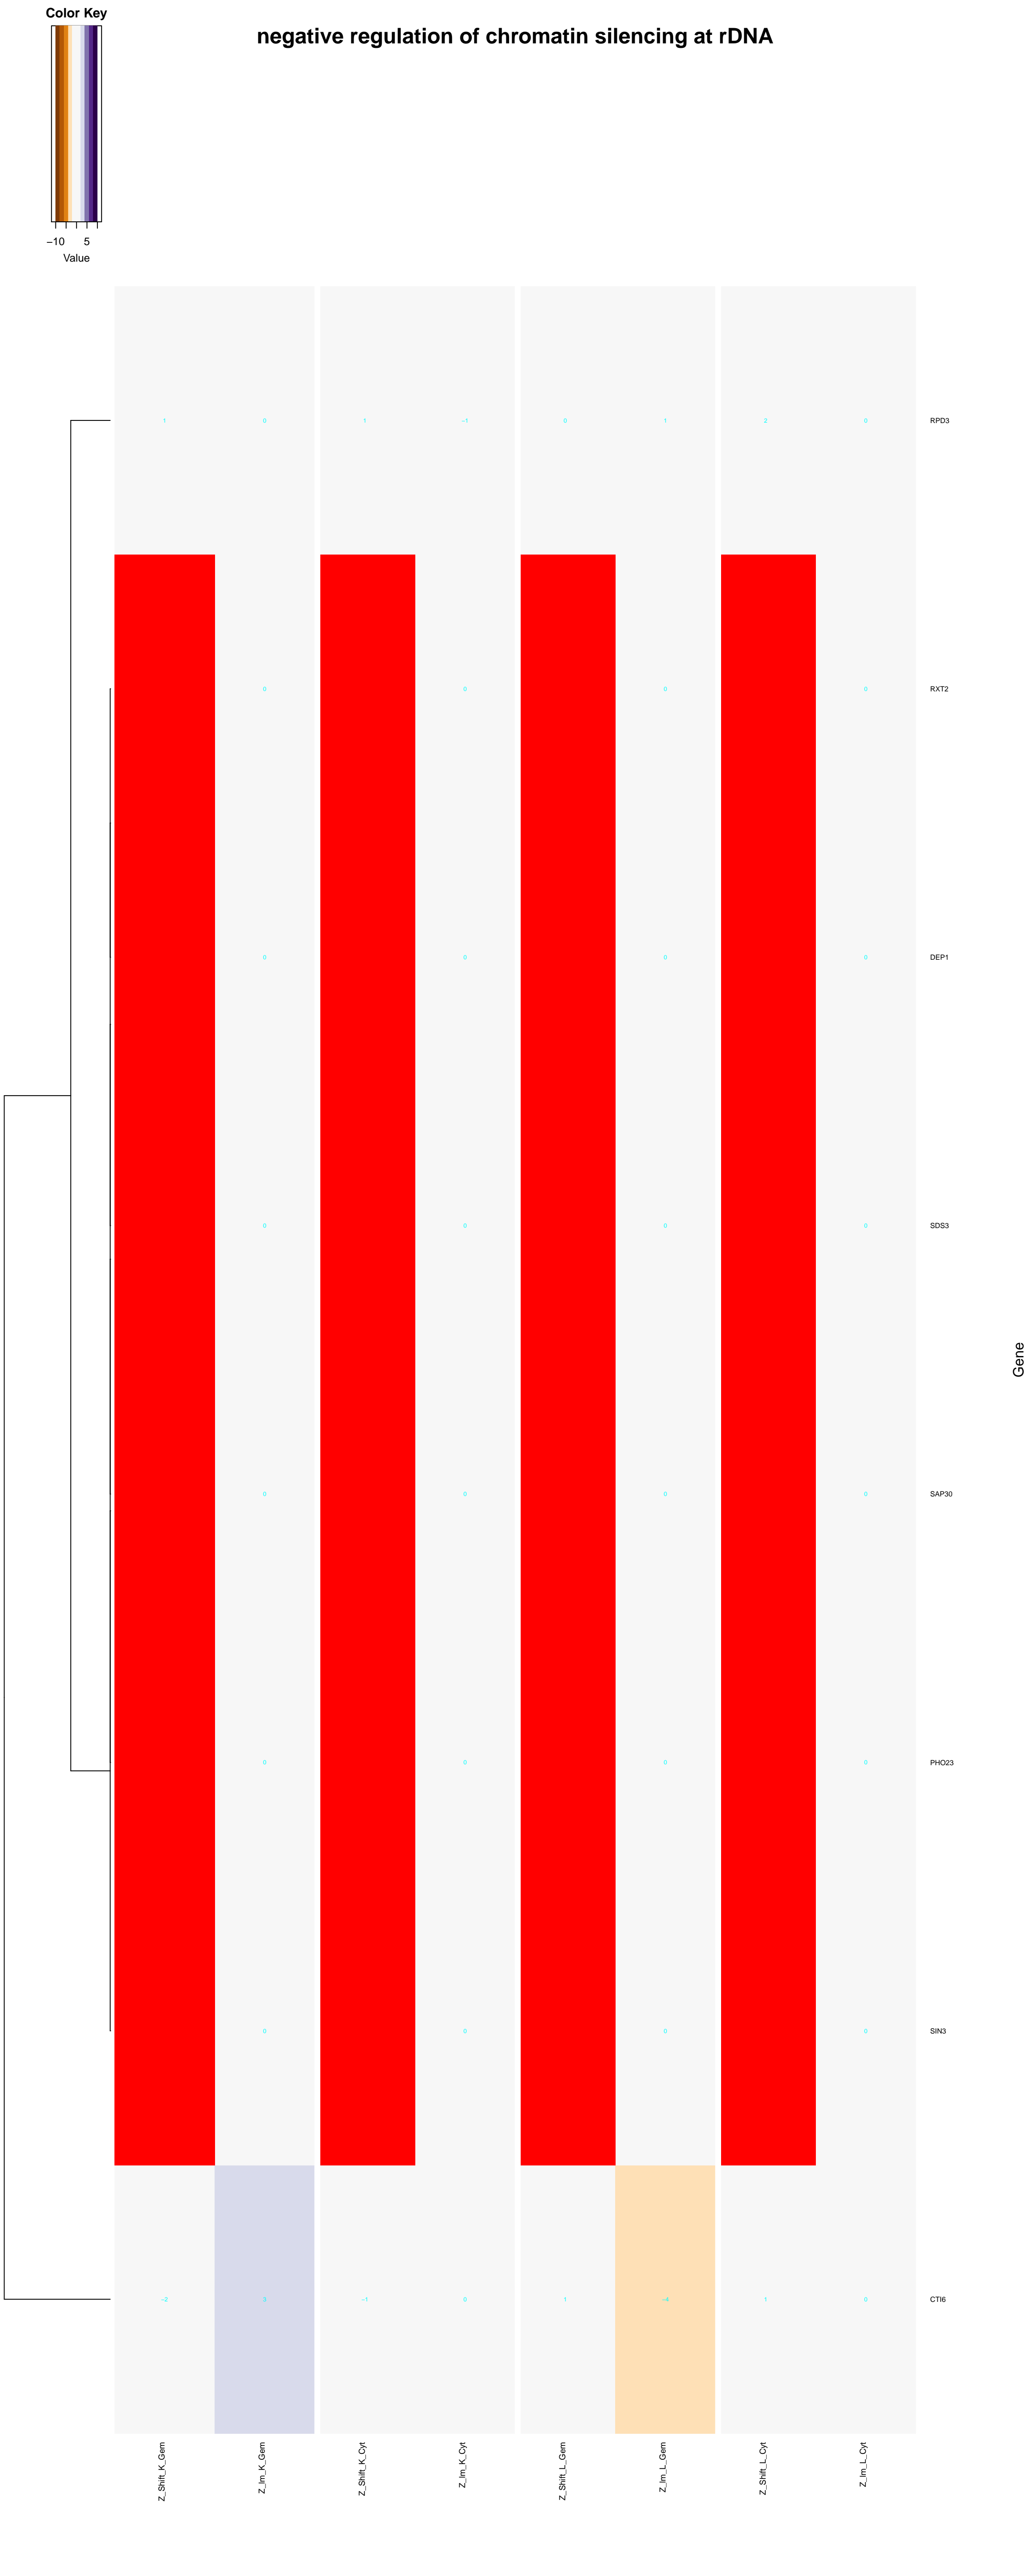

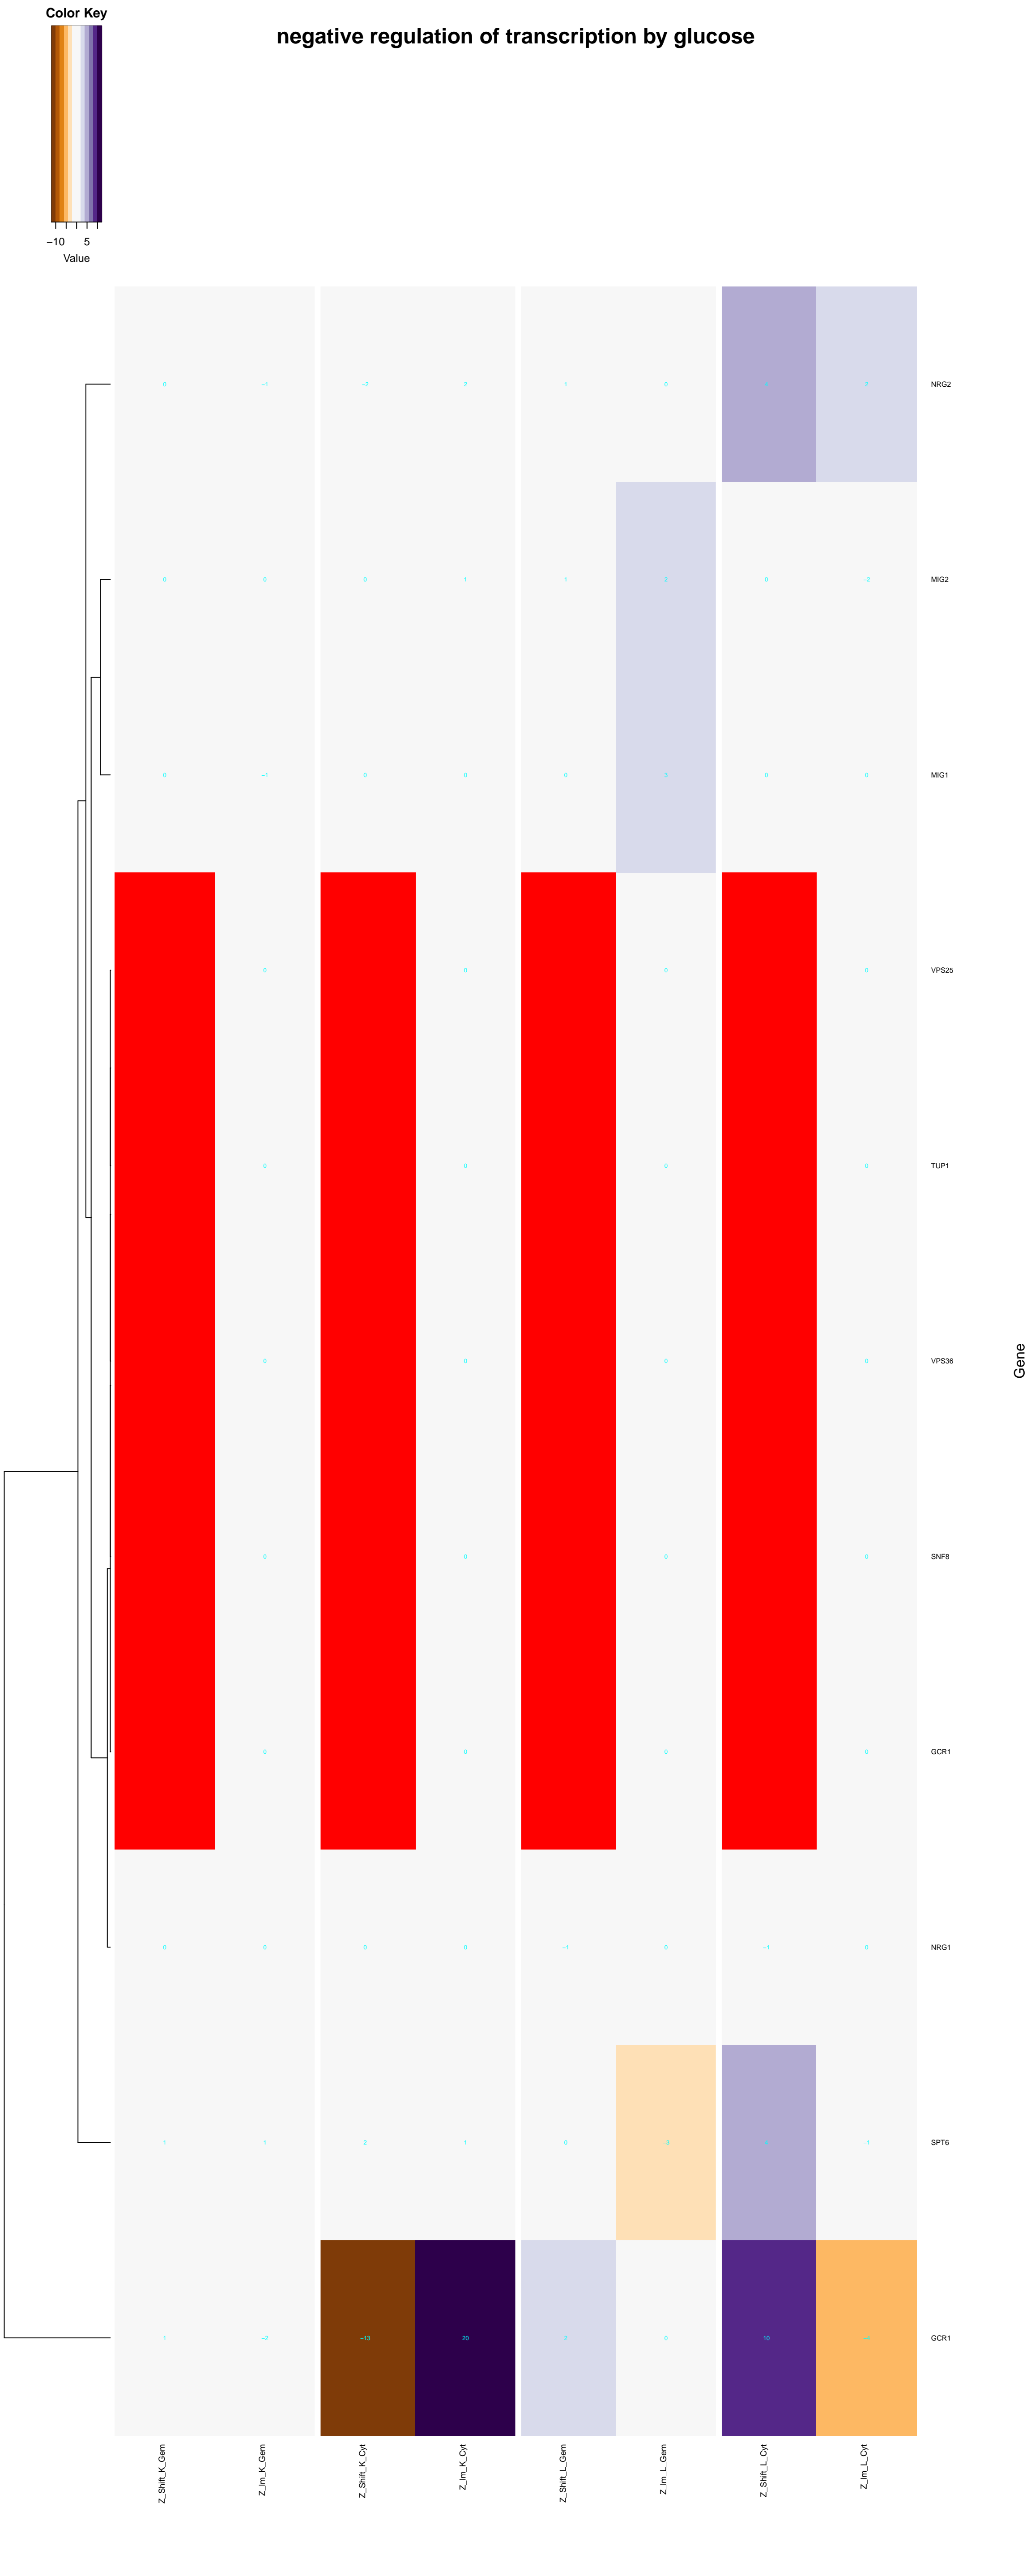

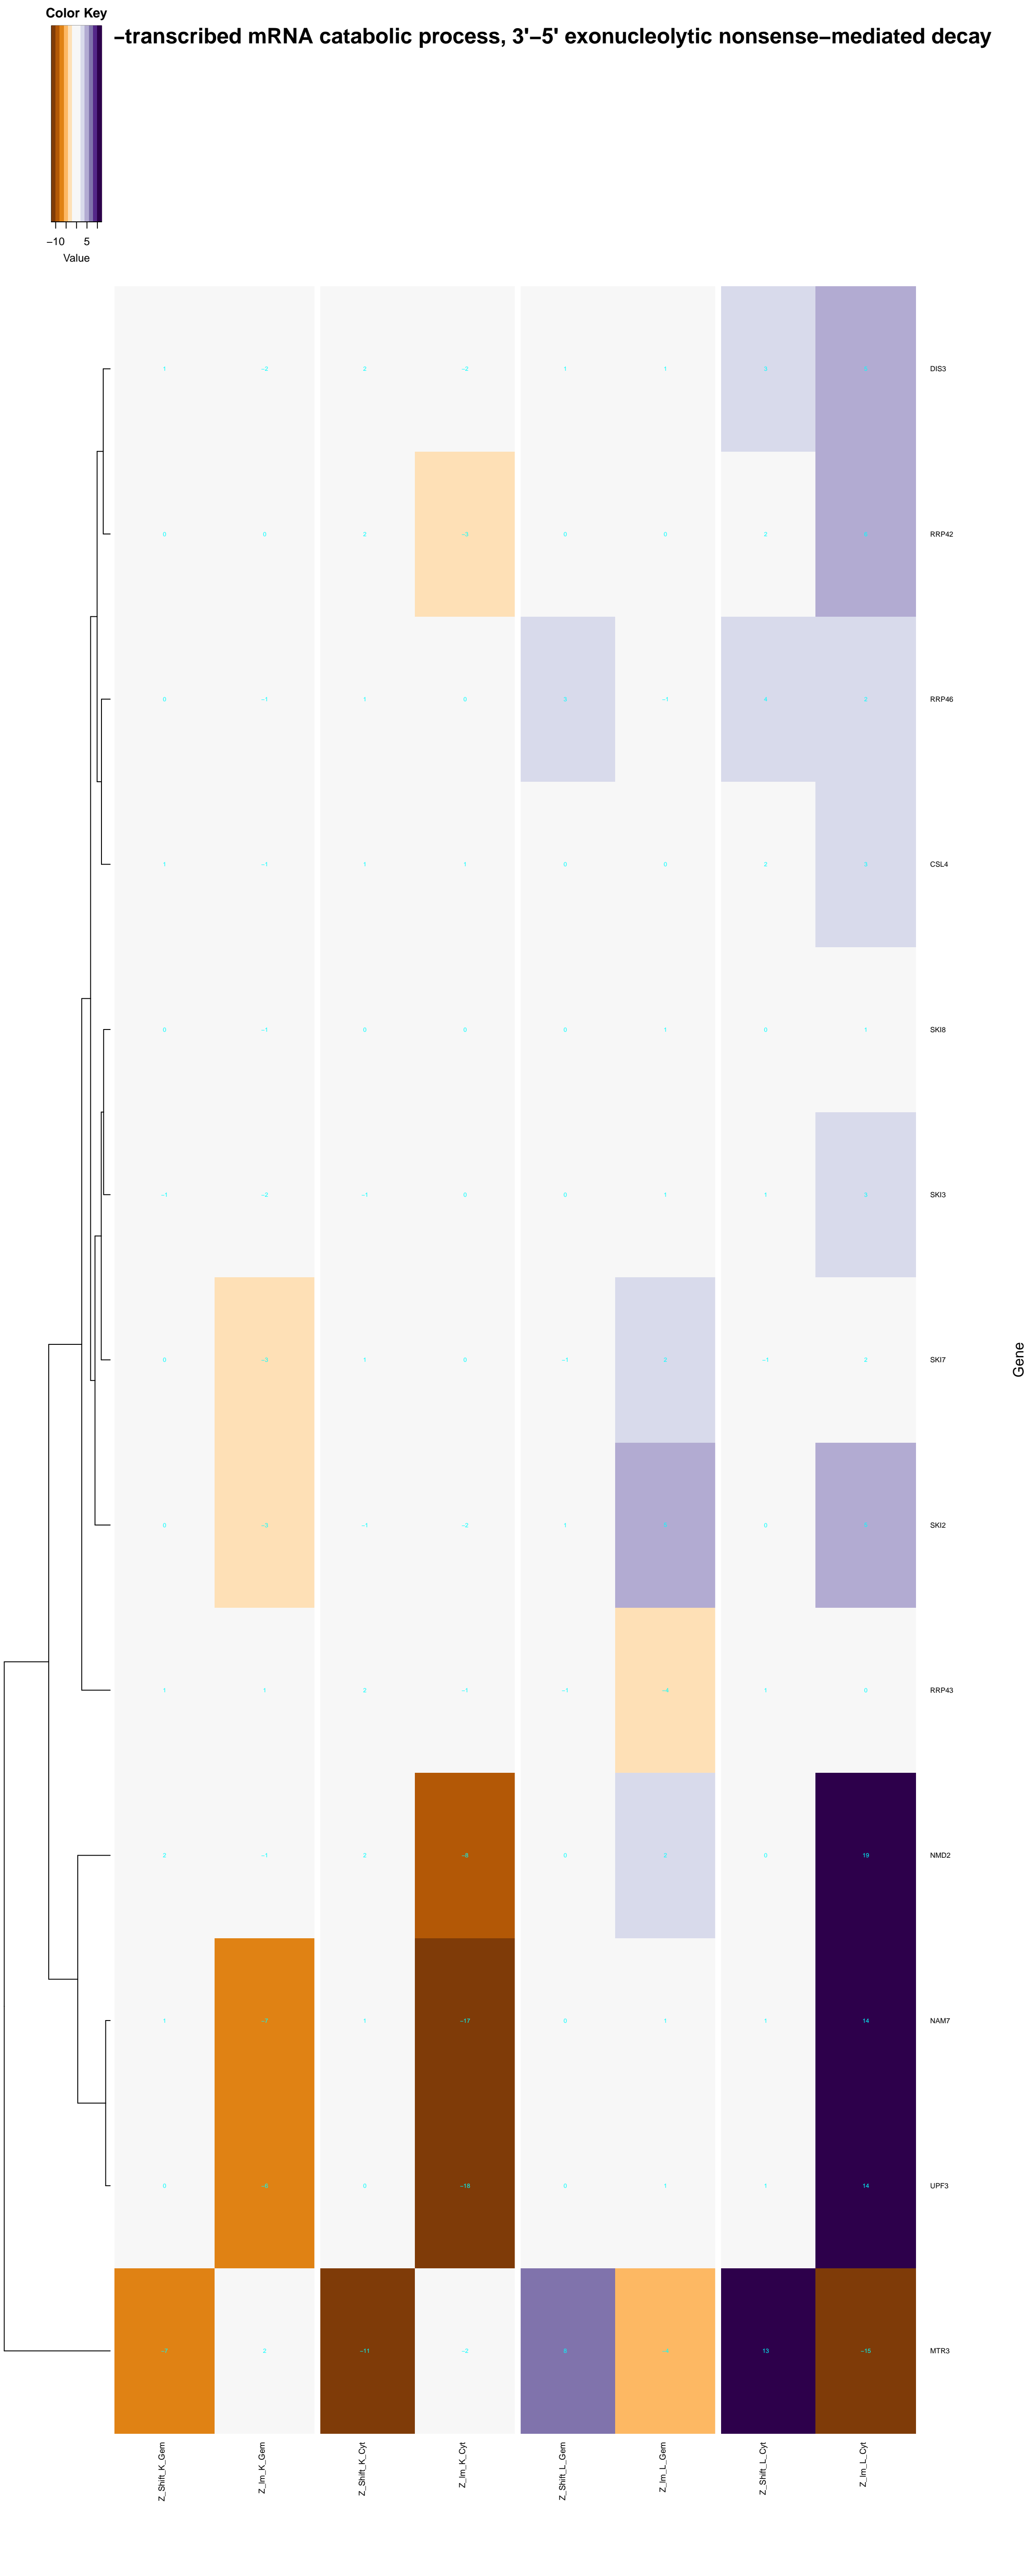

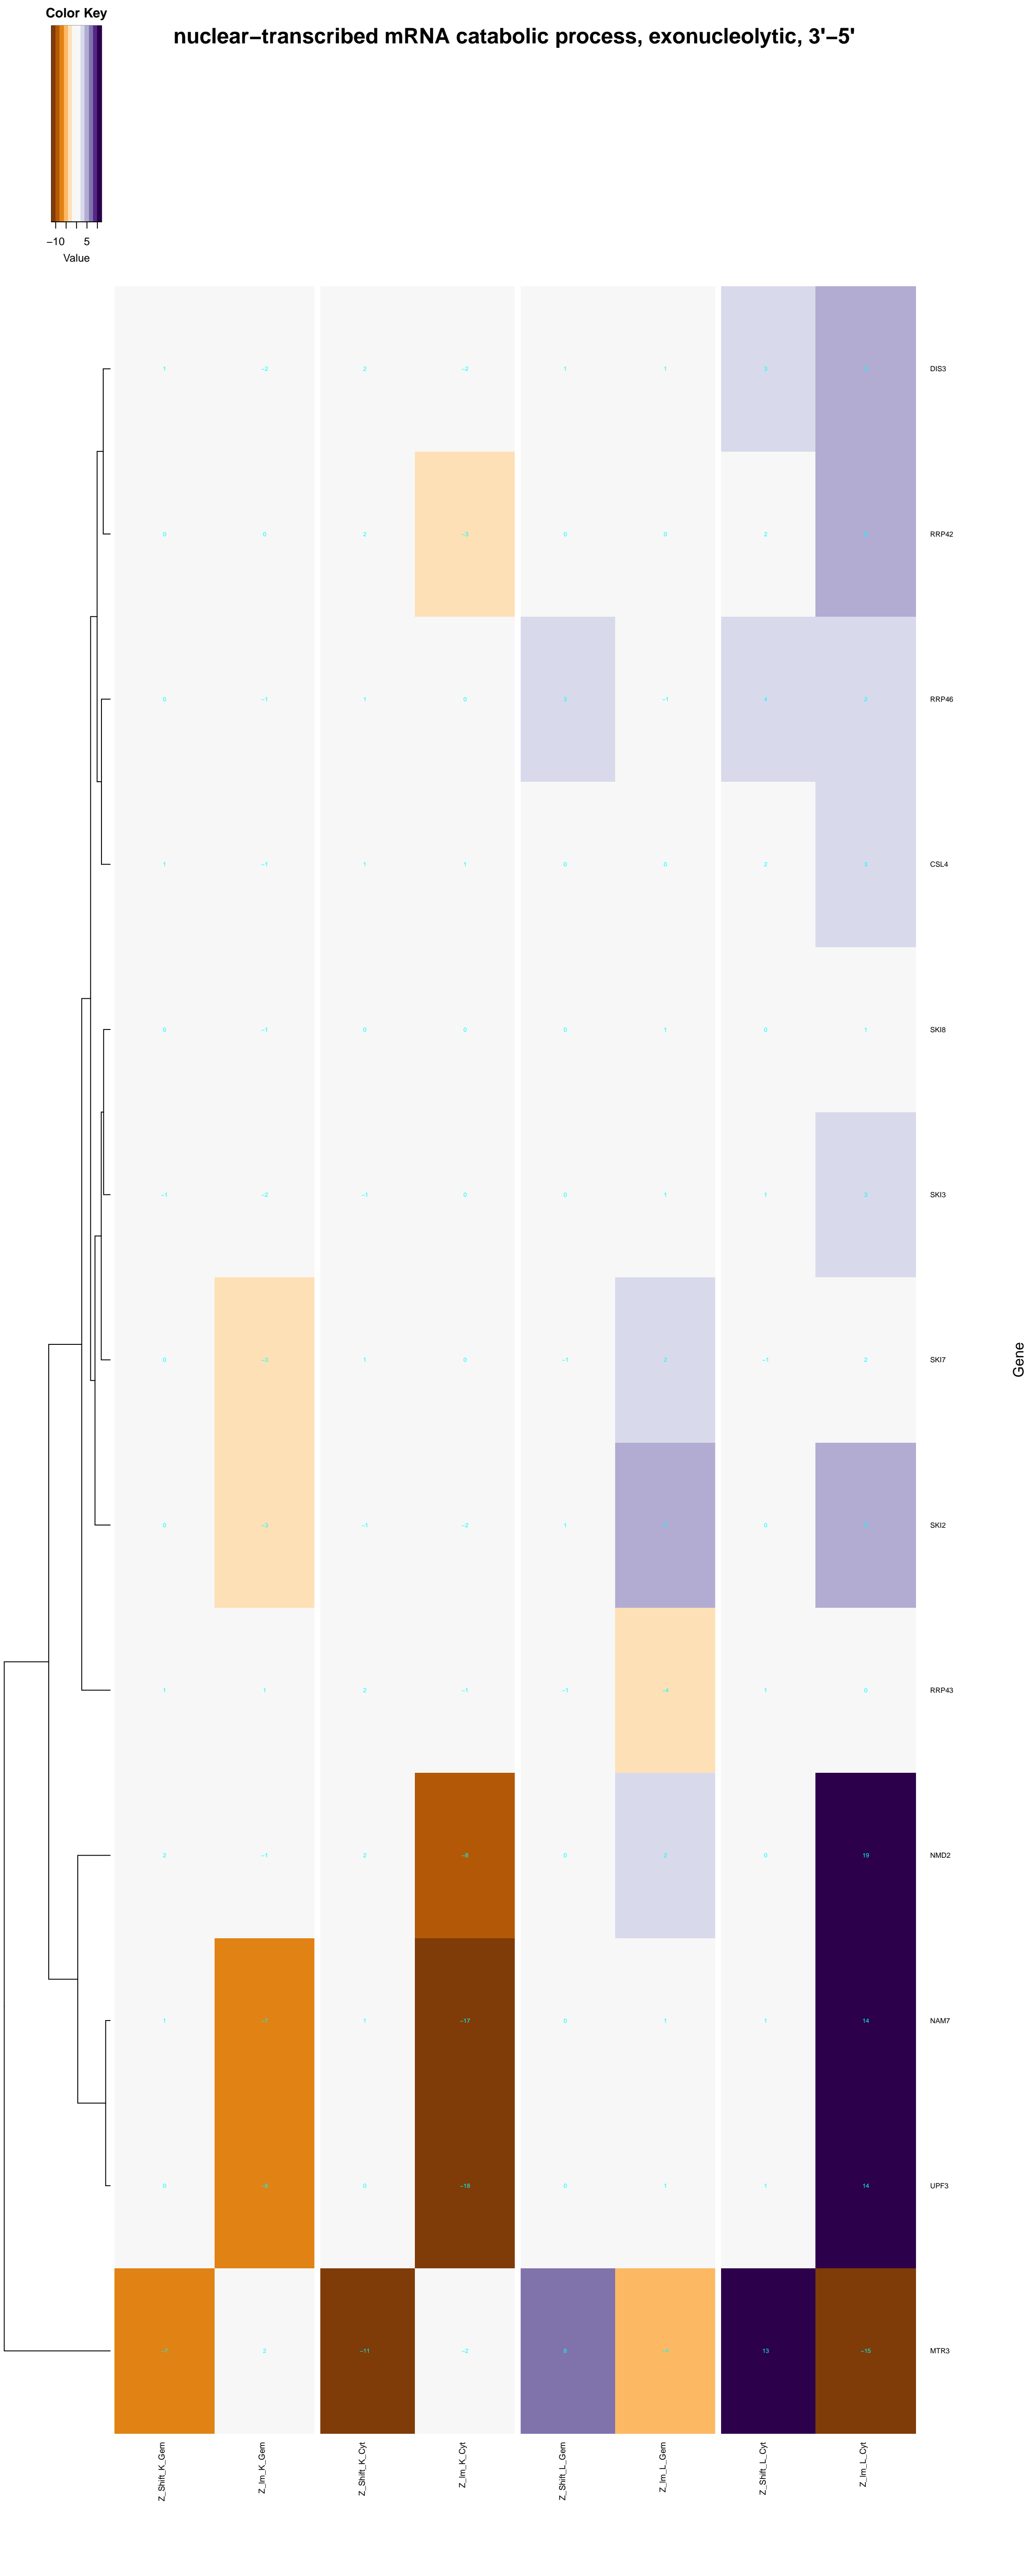

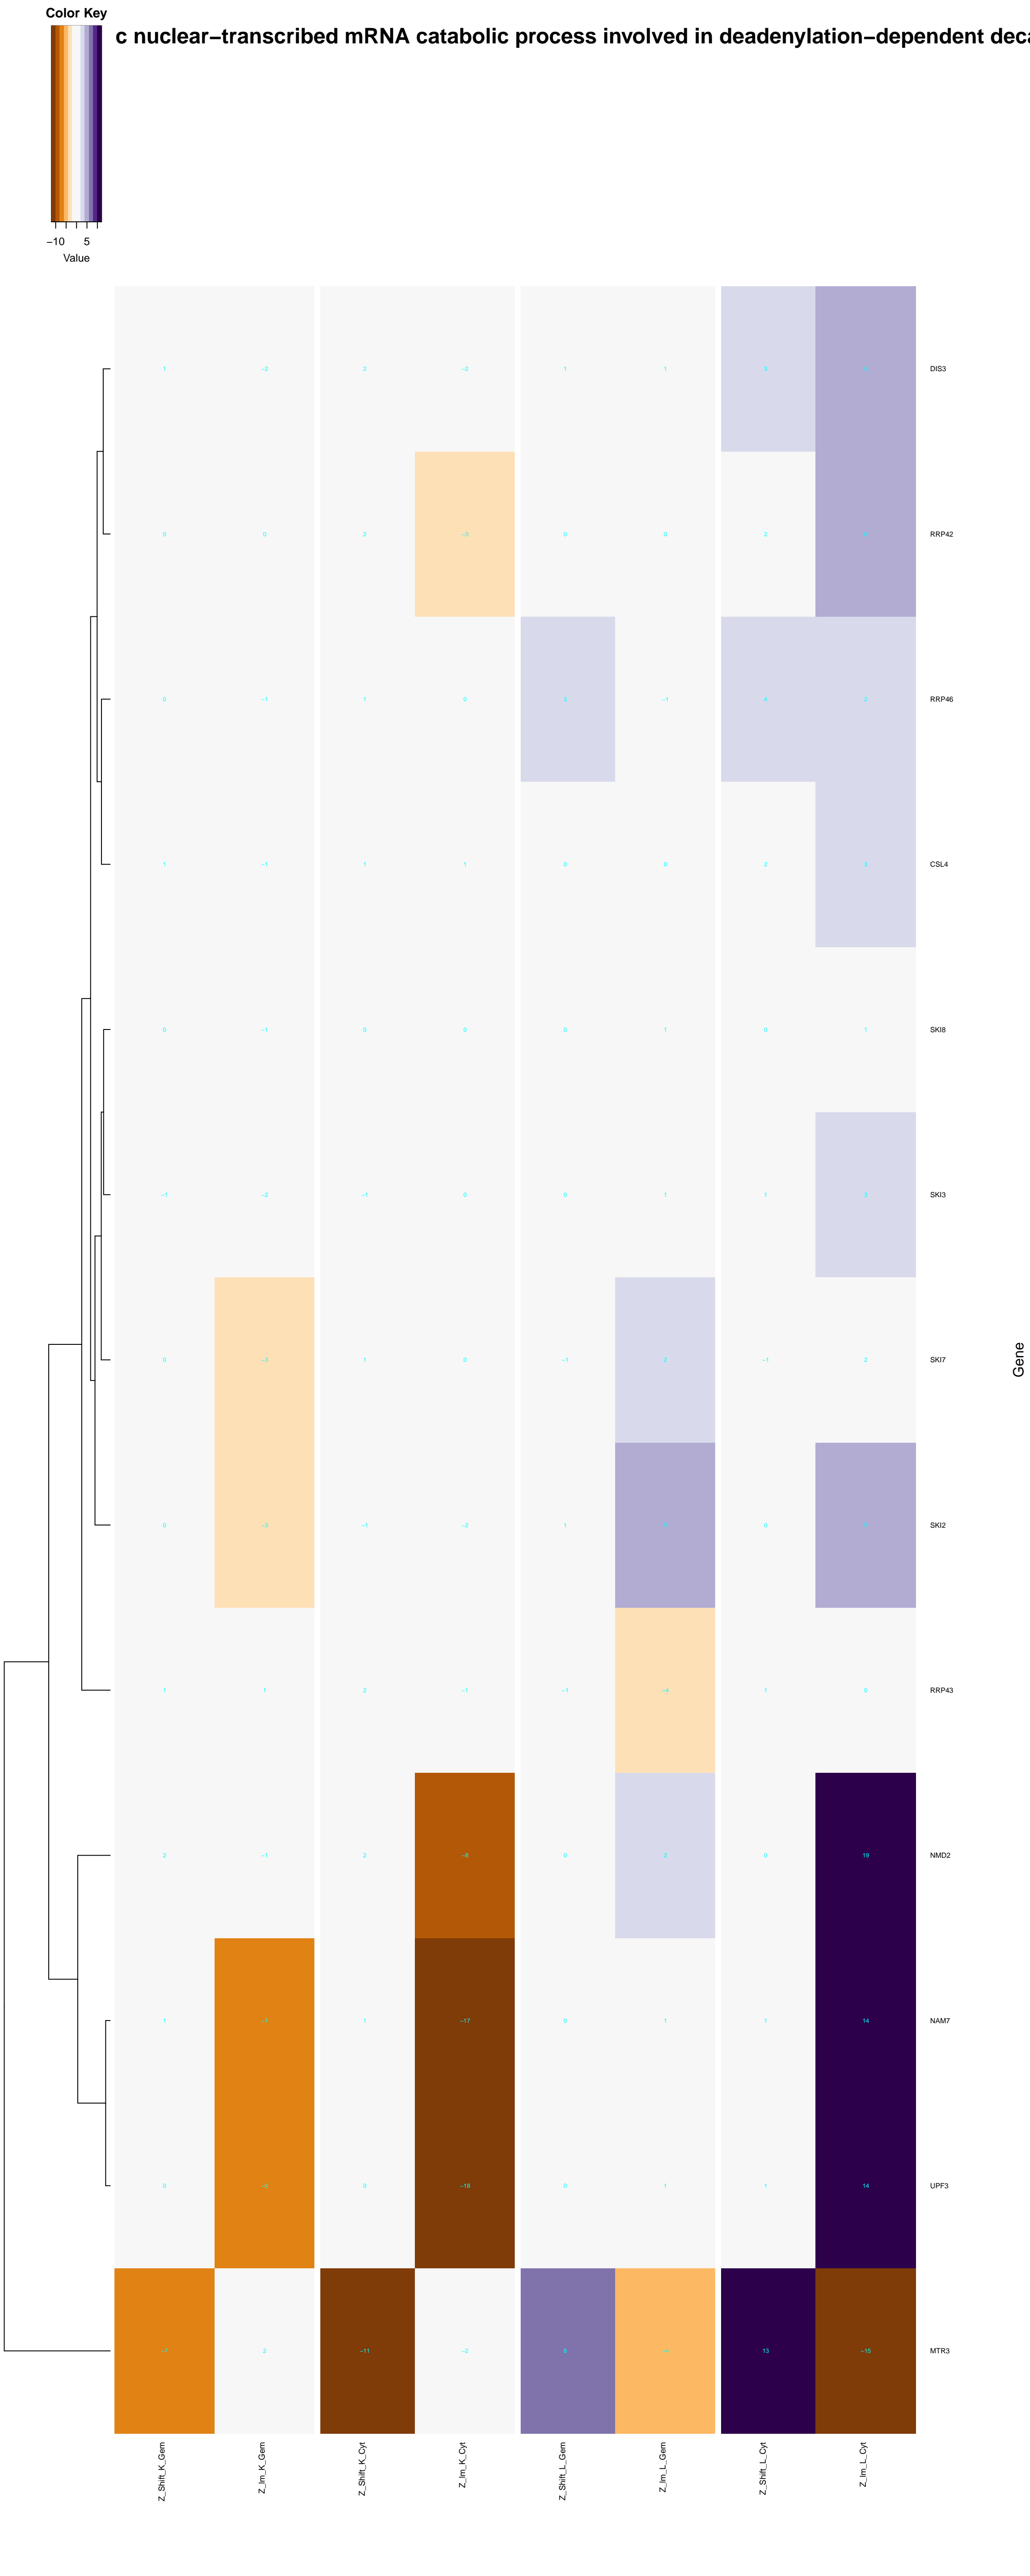

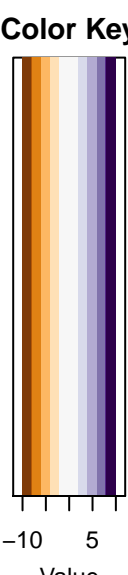

nuclear mRNA surveillance of spliceosomal pre-mRNA splicing

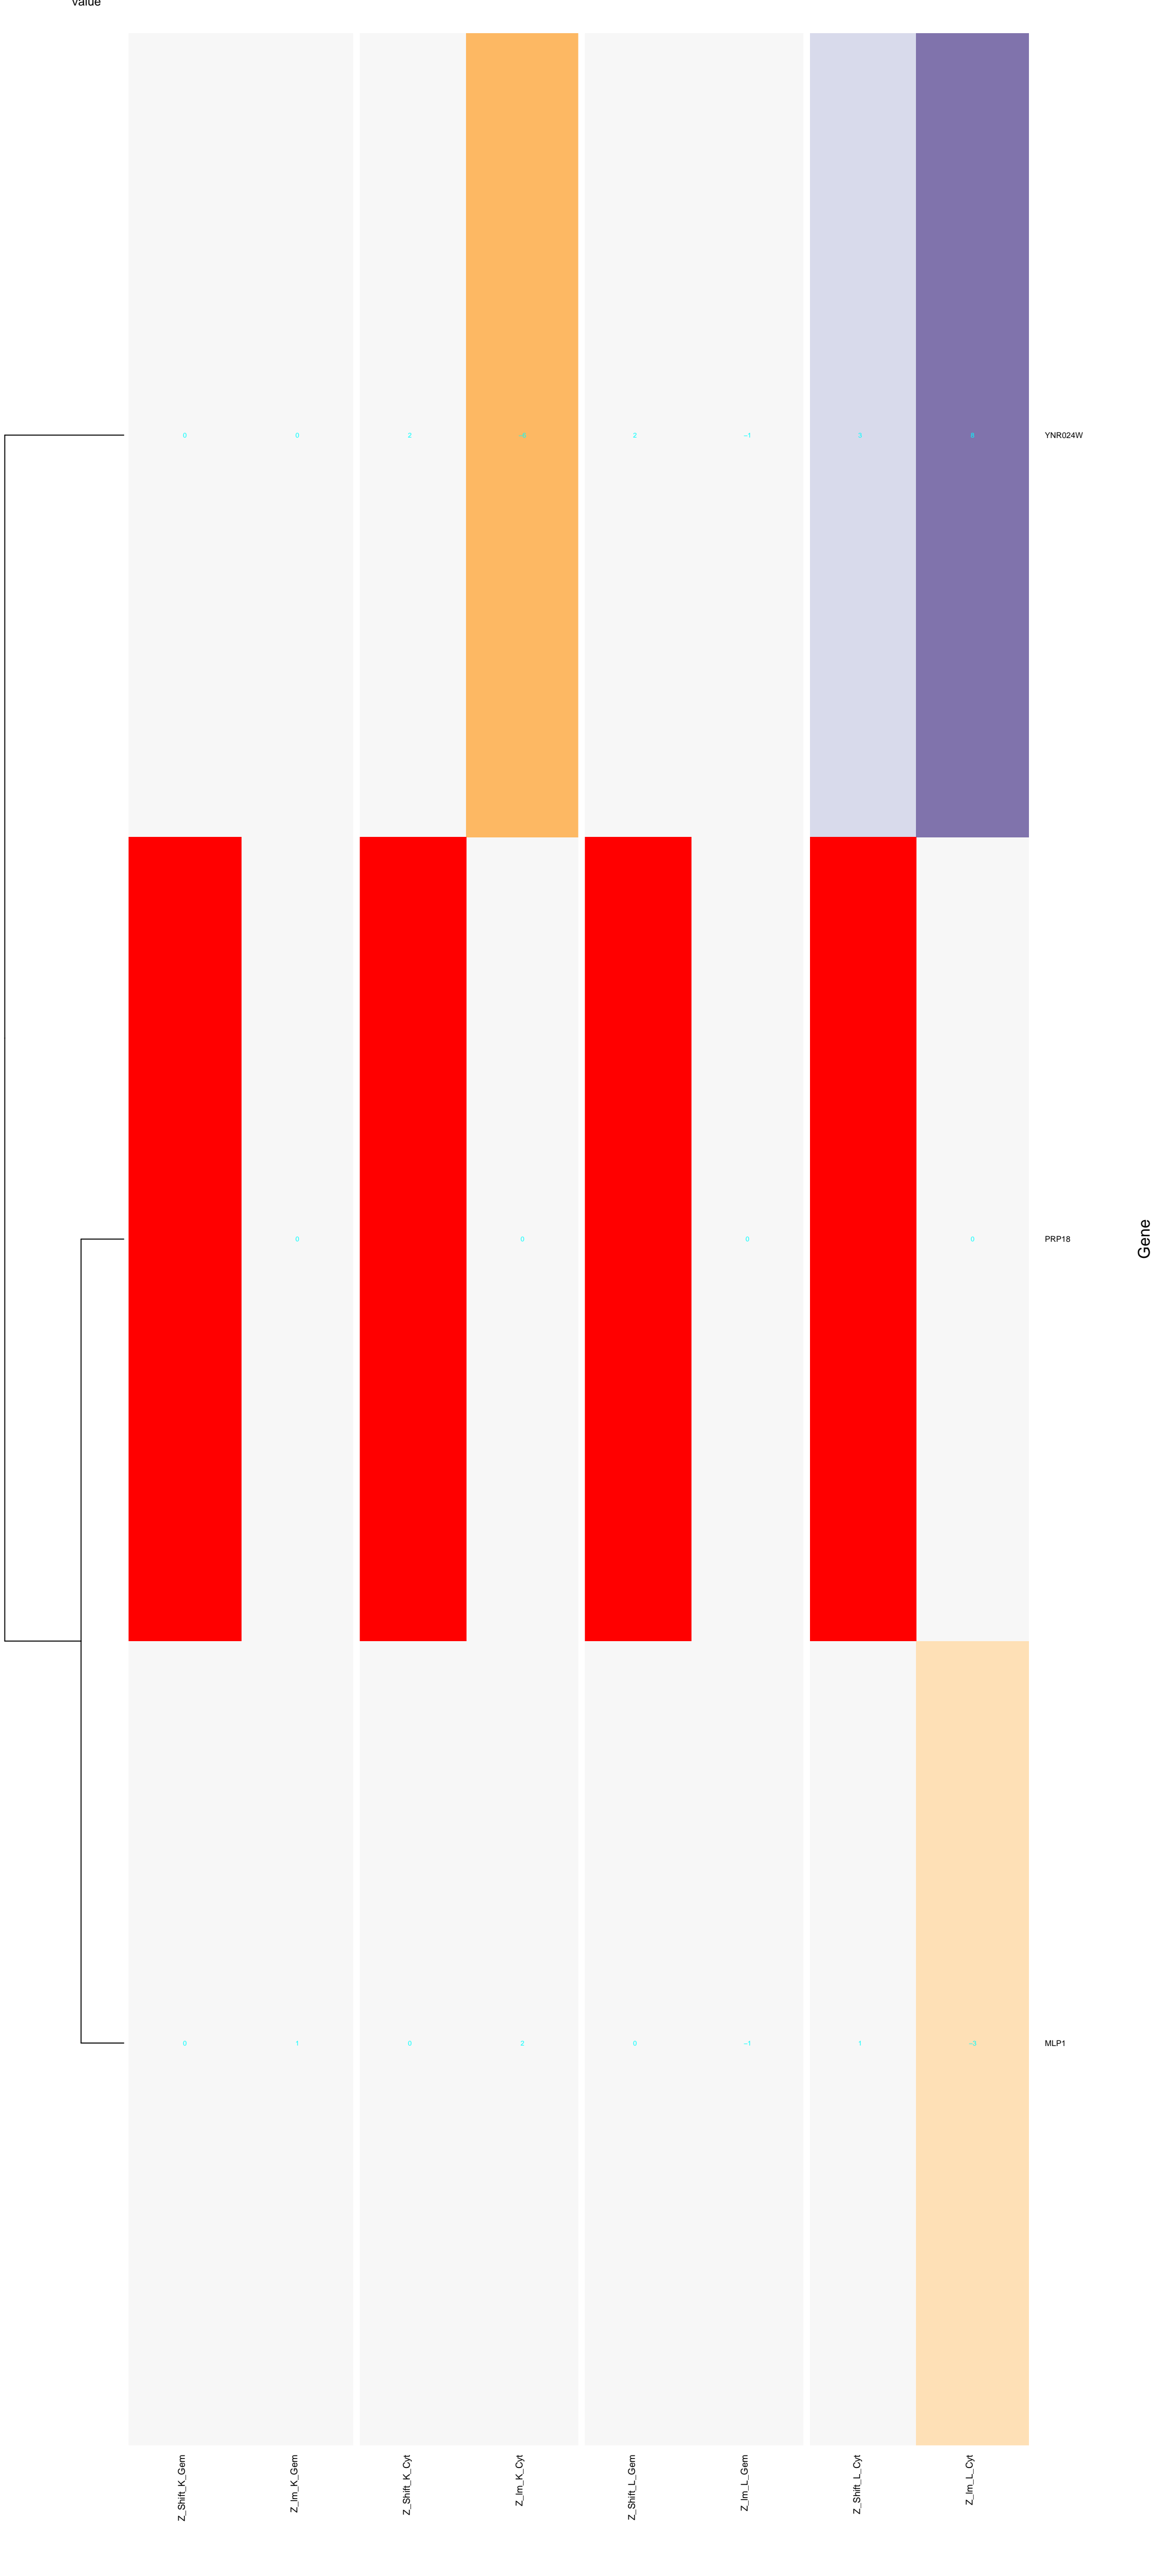

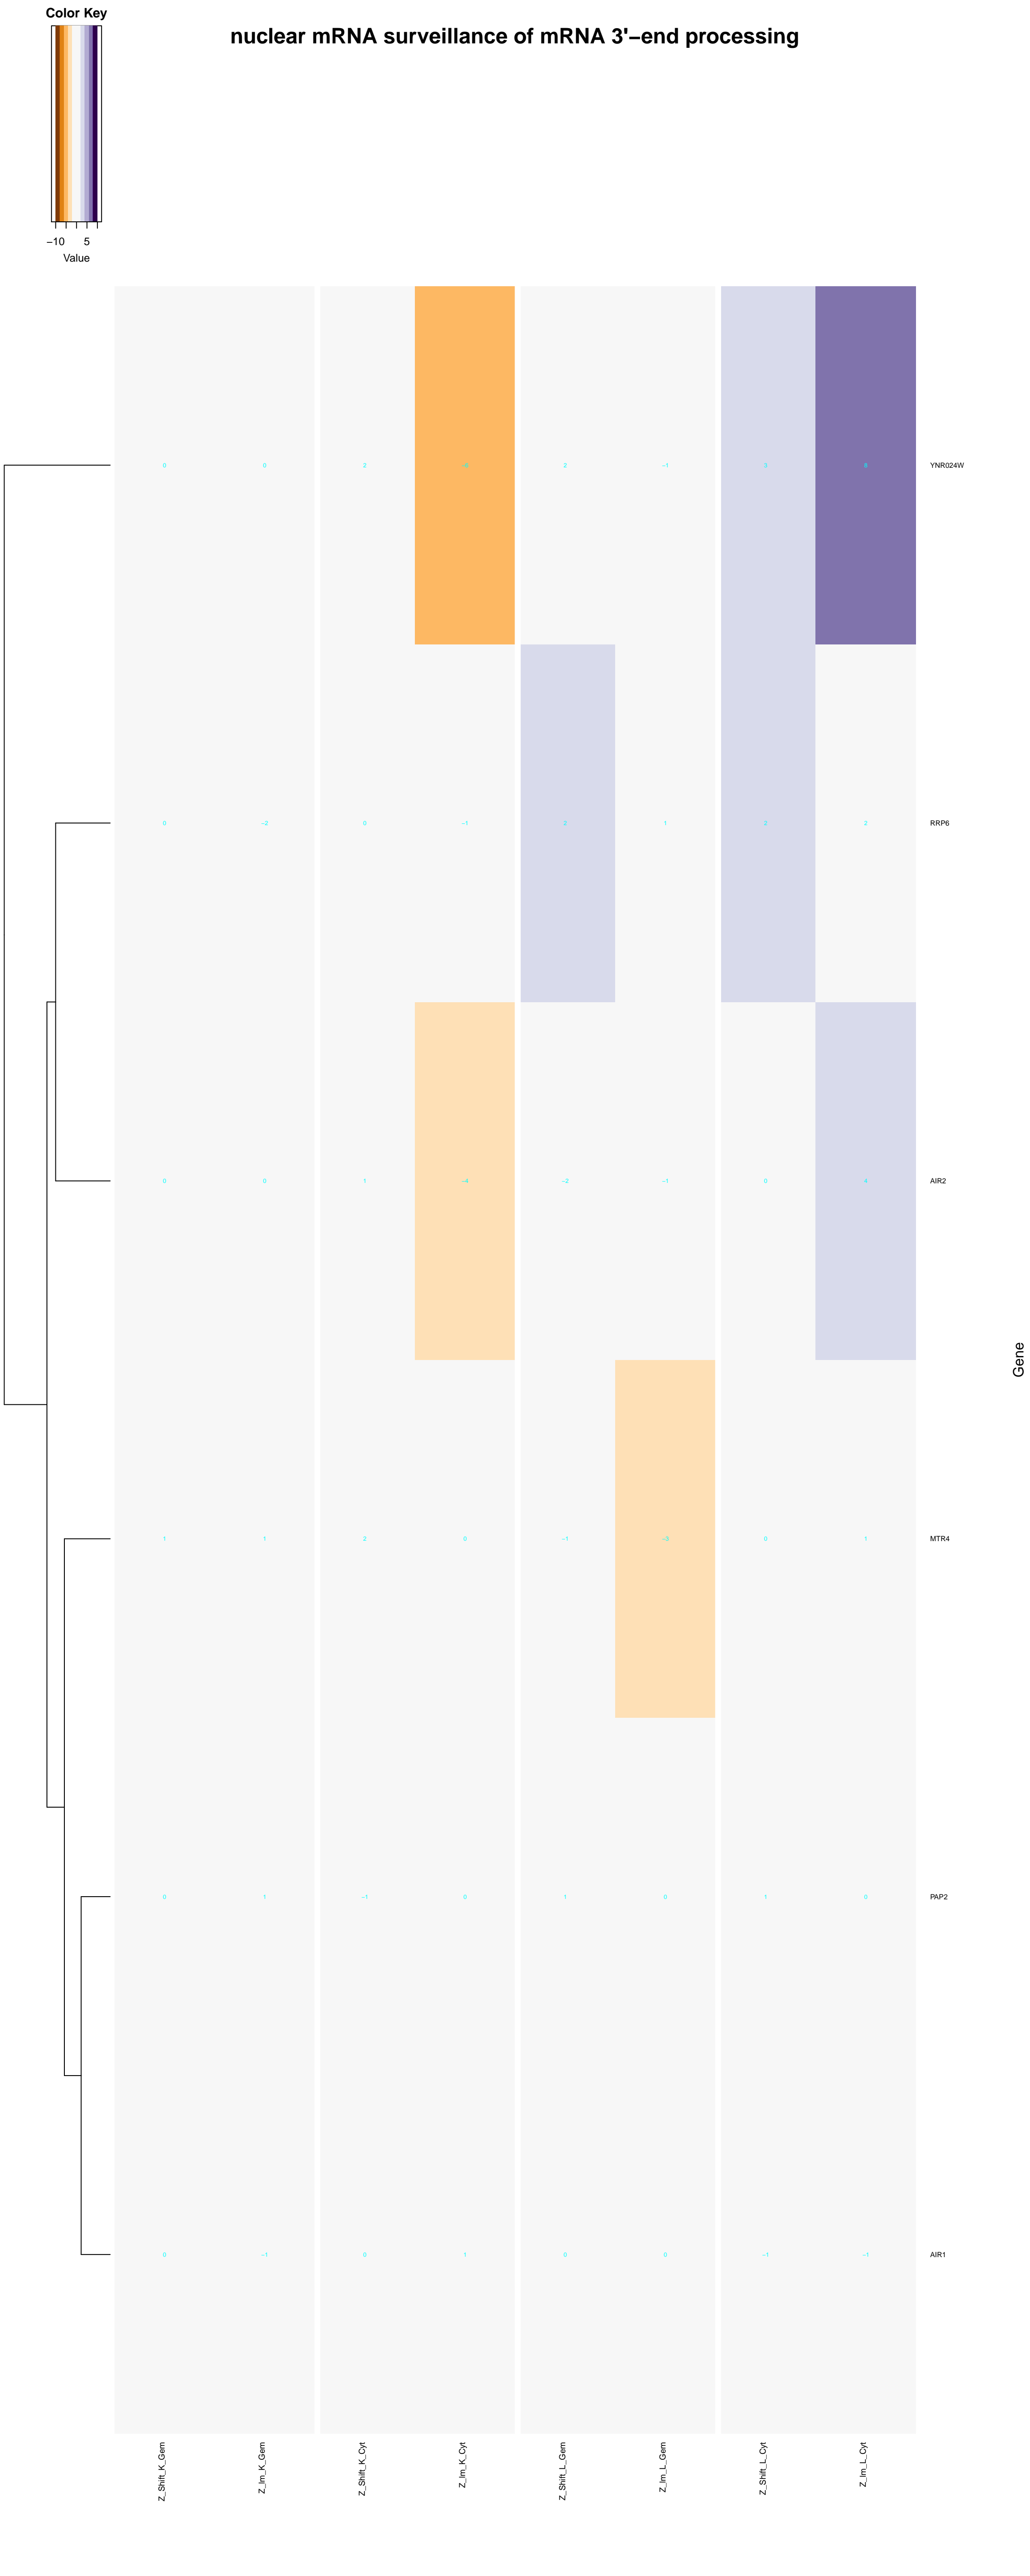



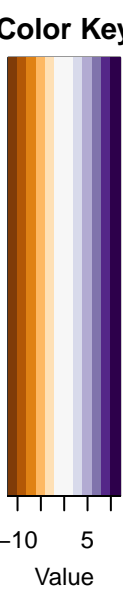

egative regulation of transcription from RNA polymerase II promoter by glucose

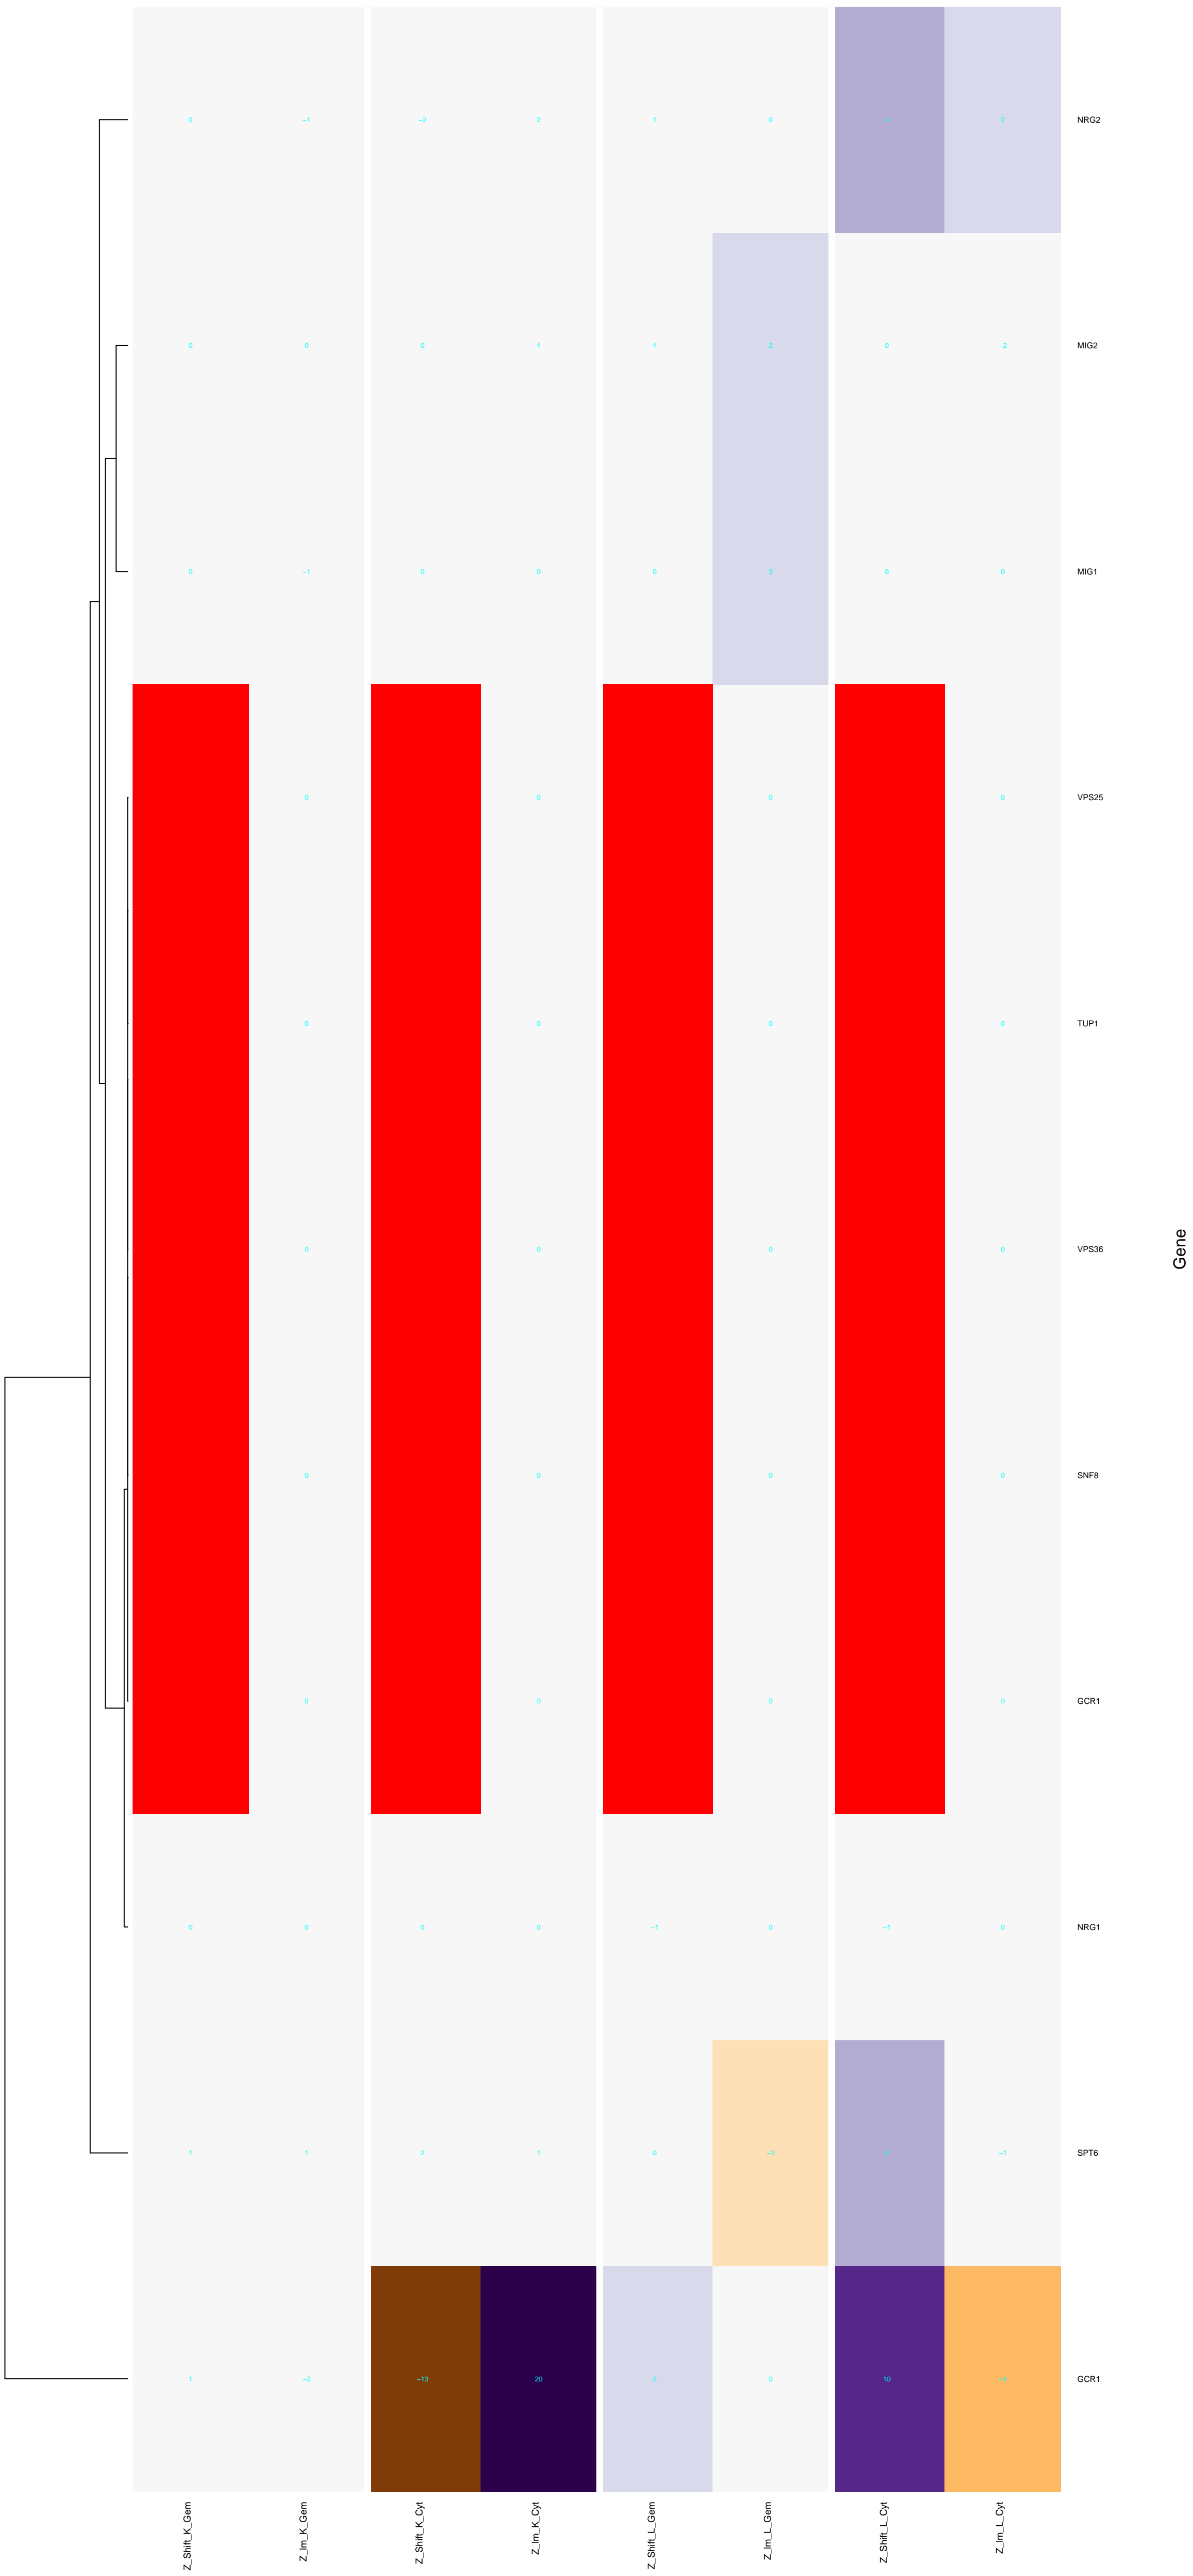

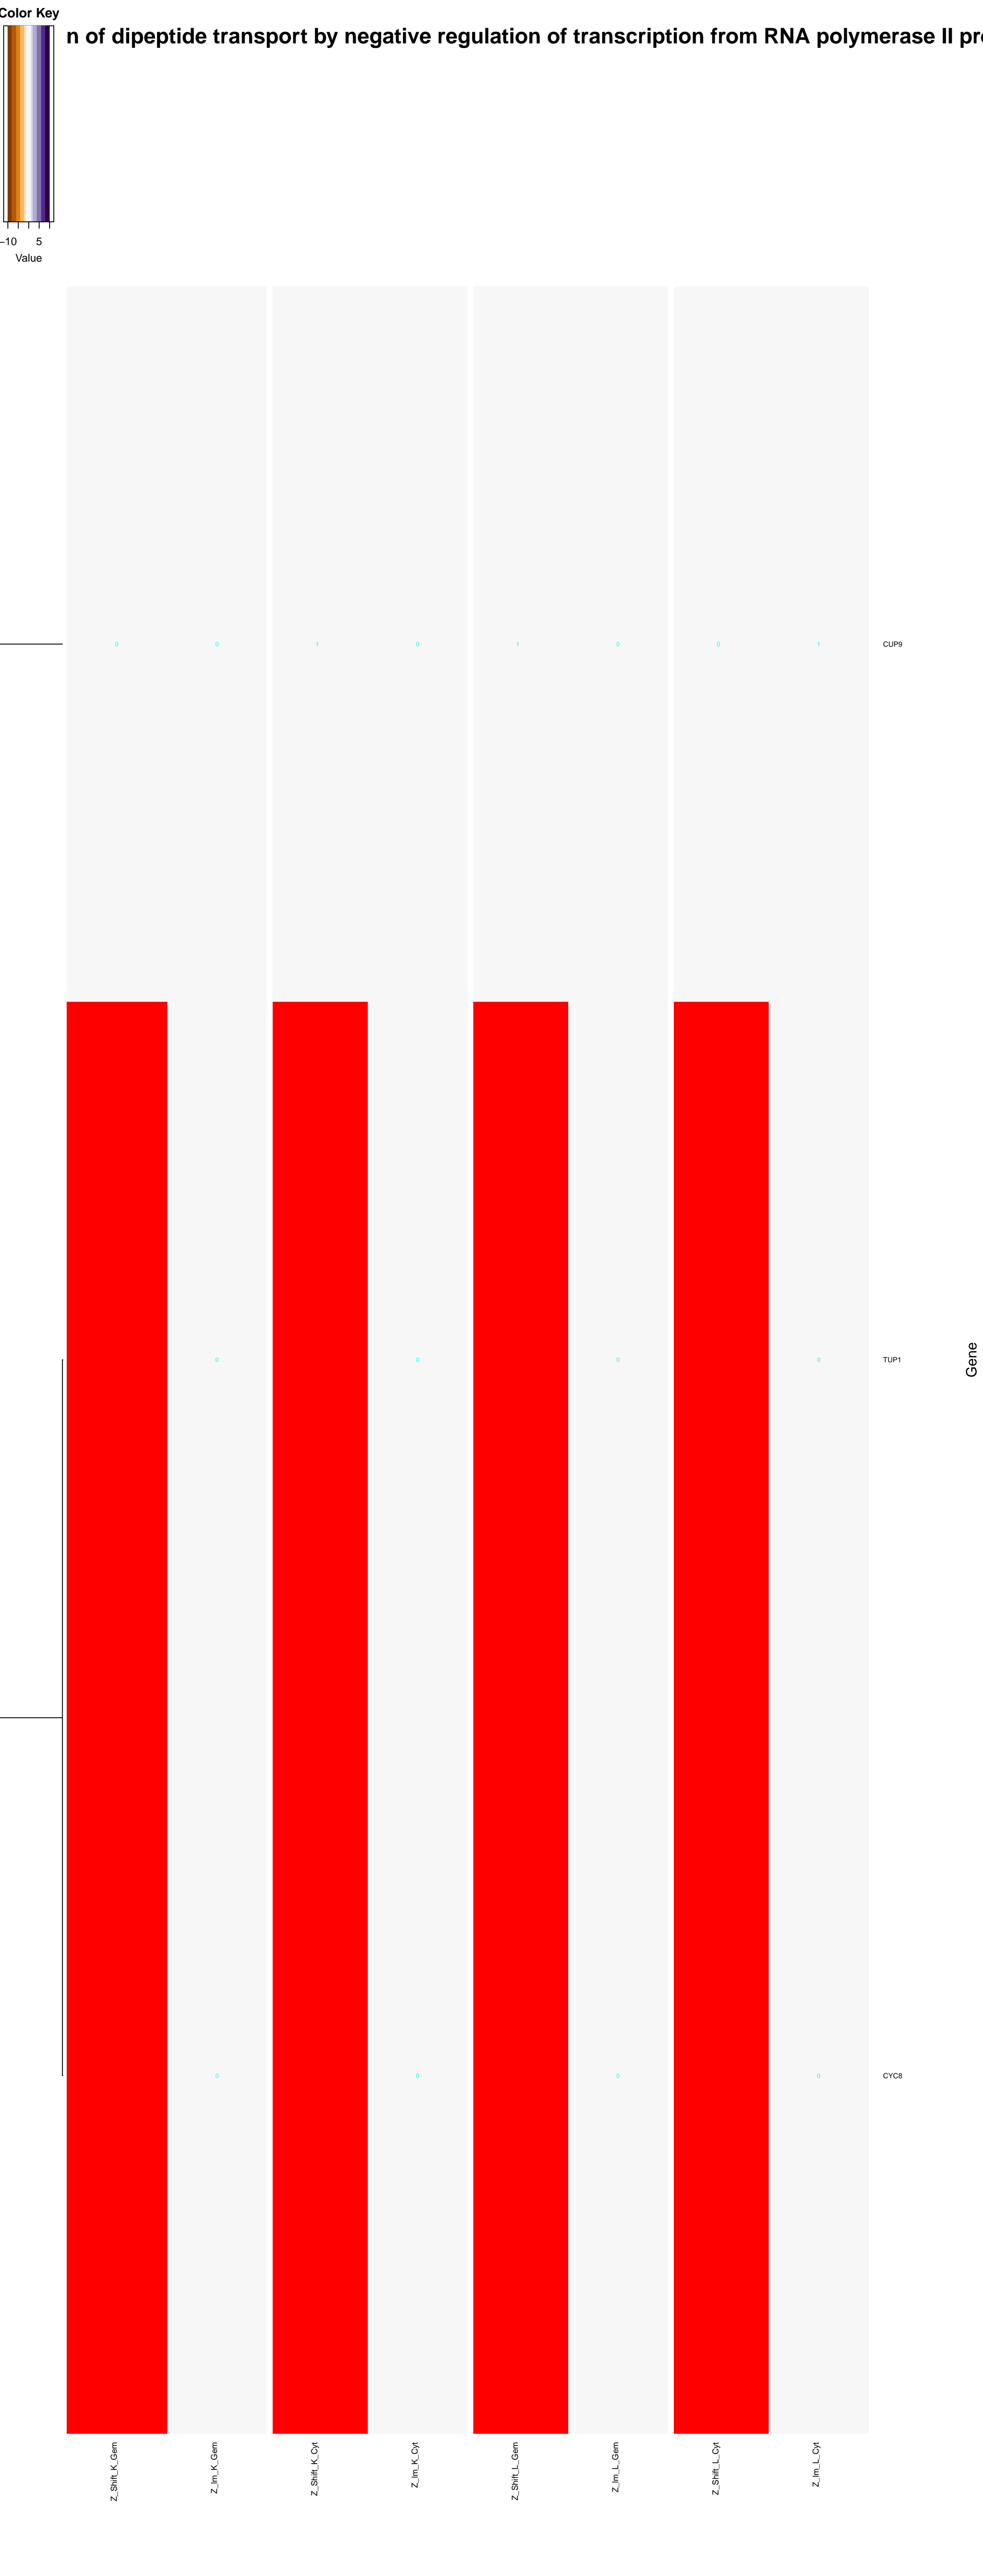

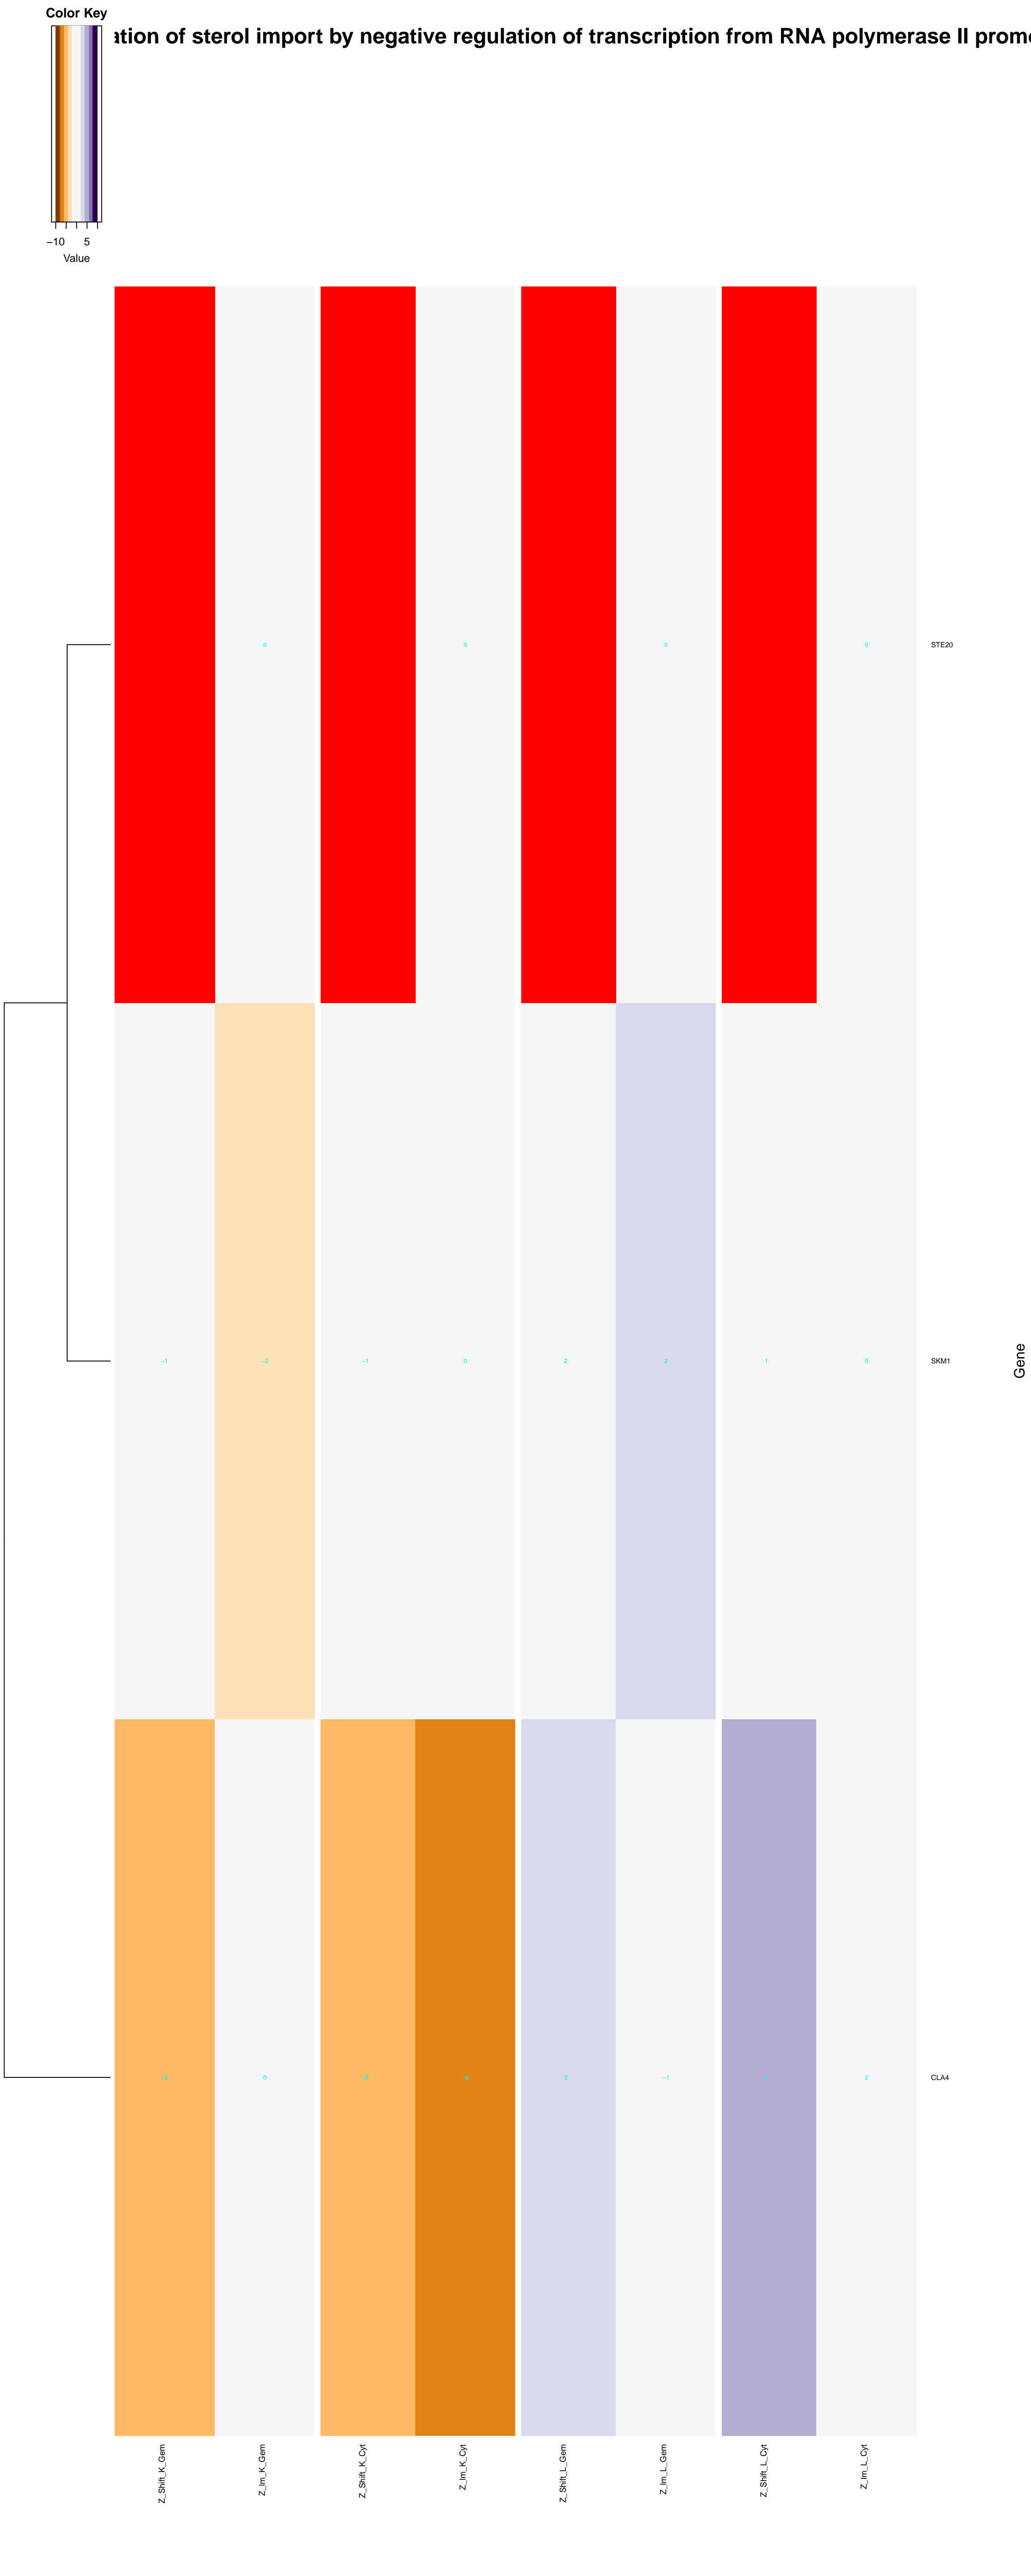

Supplement: s1 [file s1]
