# Supplementary material for: A Humanized Yeast Phenomic Model of Deoxycytidine Kinase to Predict Genetic Buffering of Nucleoside Analog Cytotoxicity
Source: MDPI journal article supplement (doi:10.3390/genes10100770), 2019-09-30

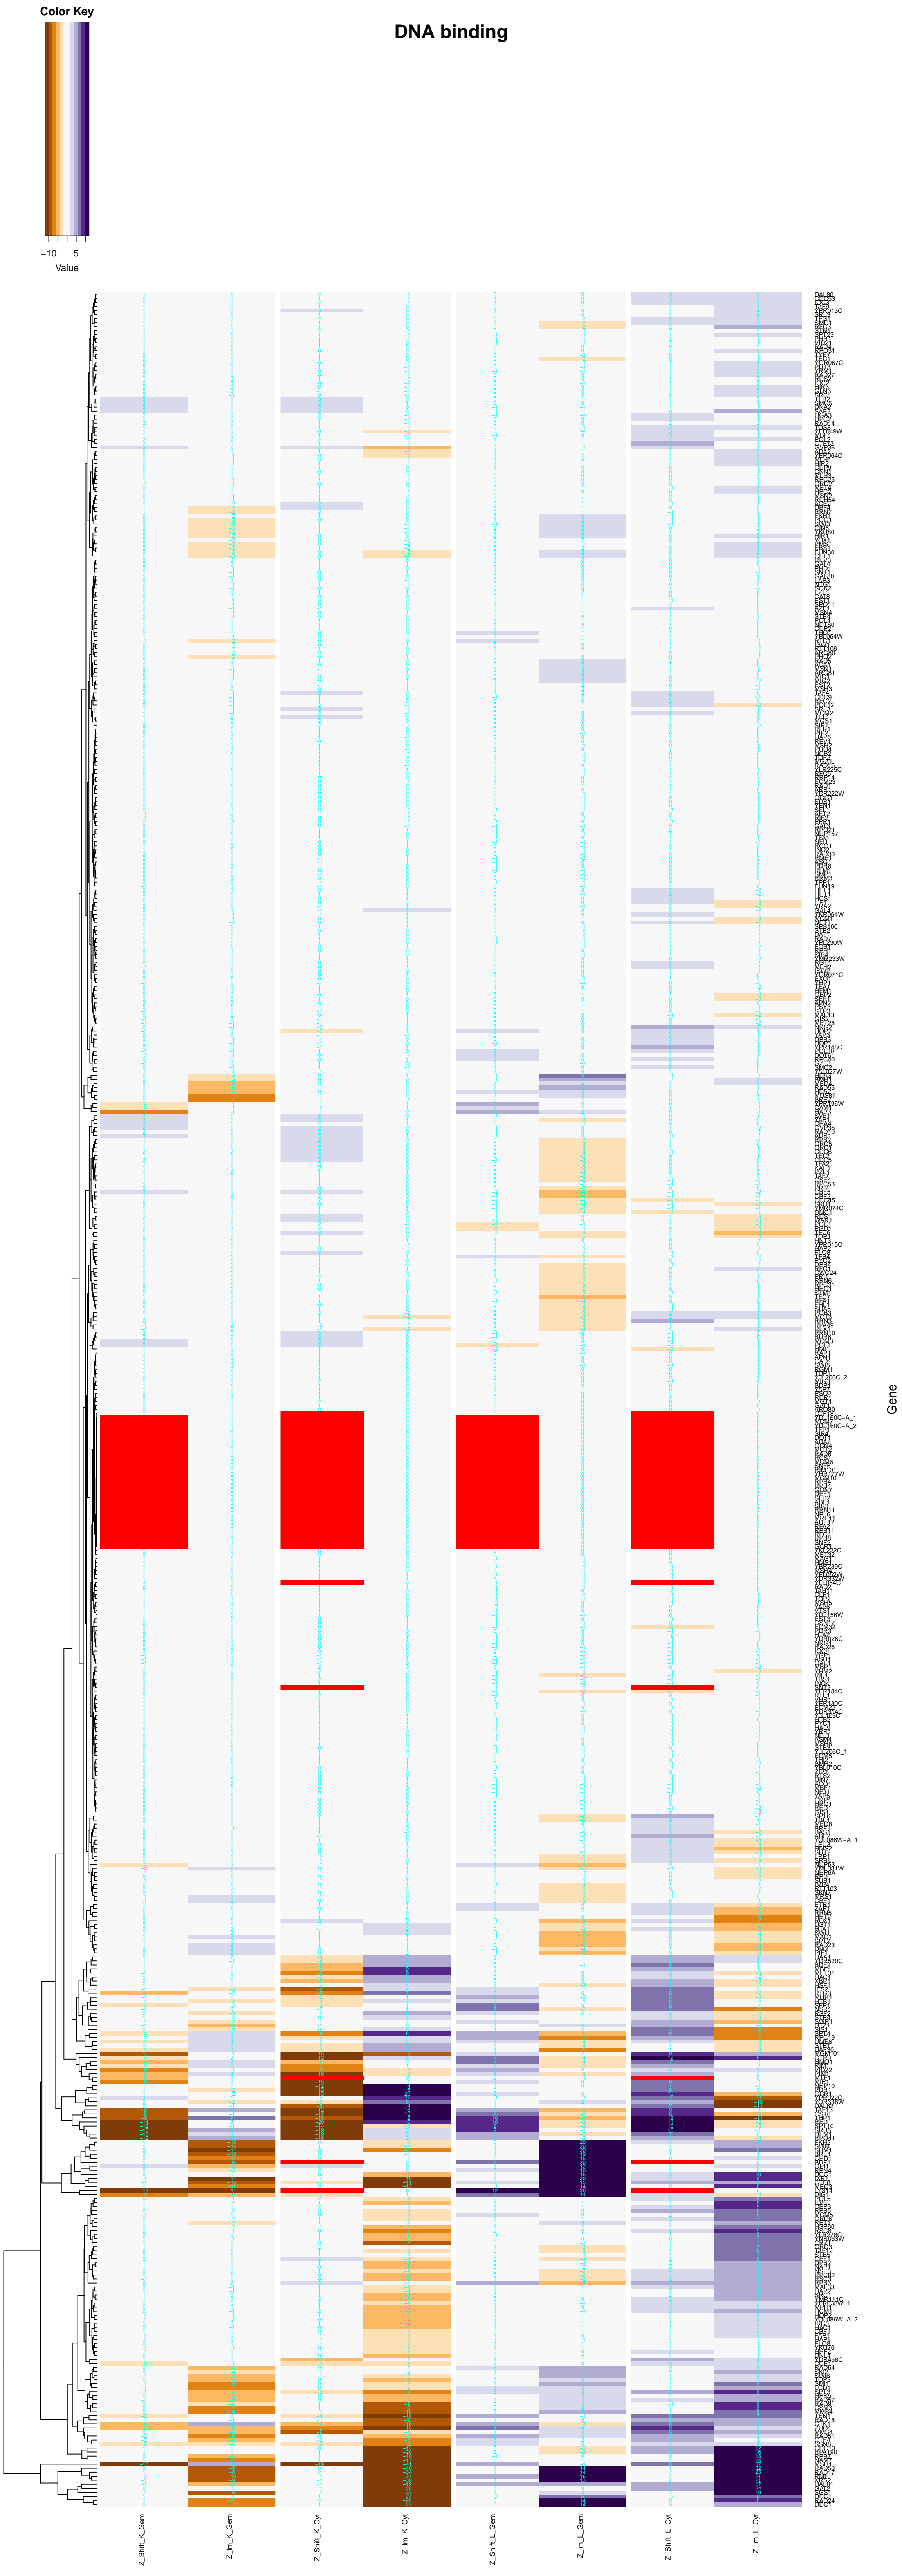

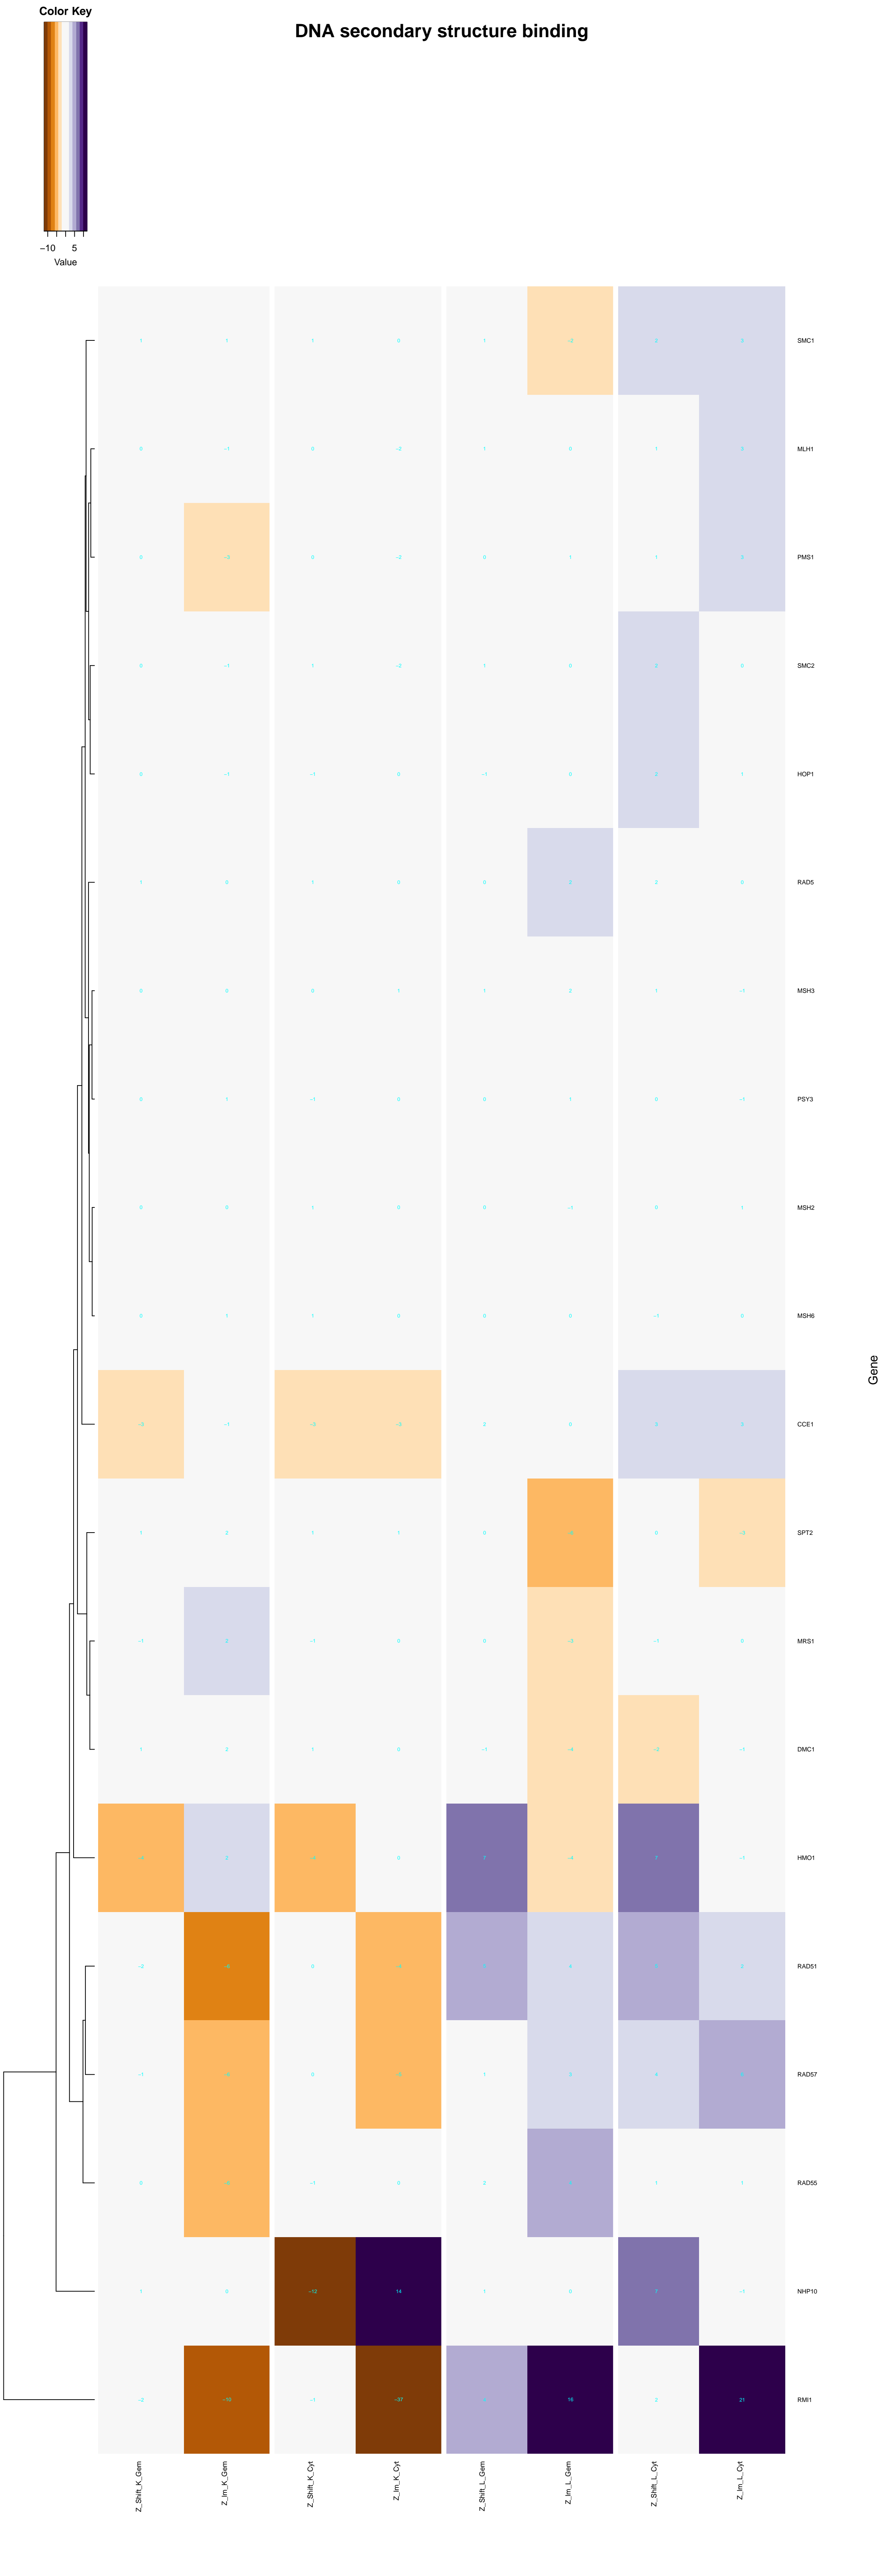

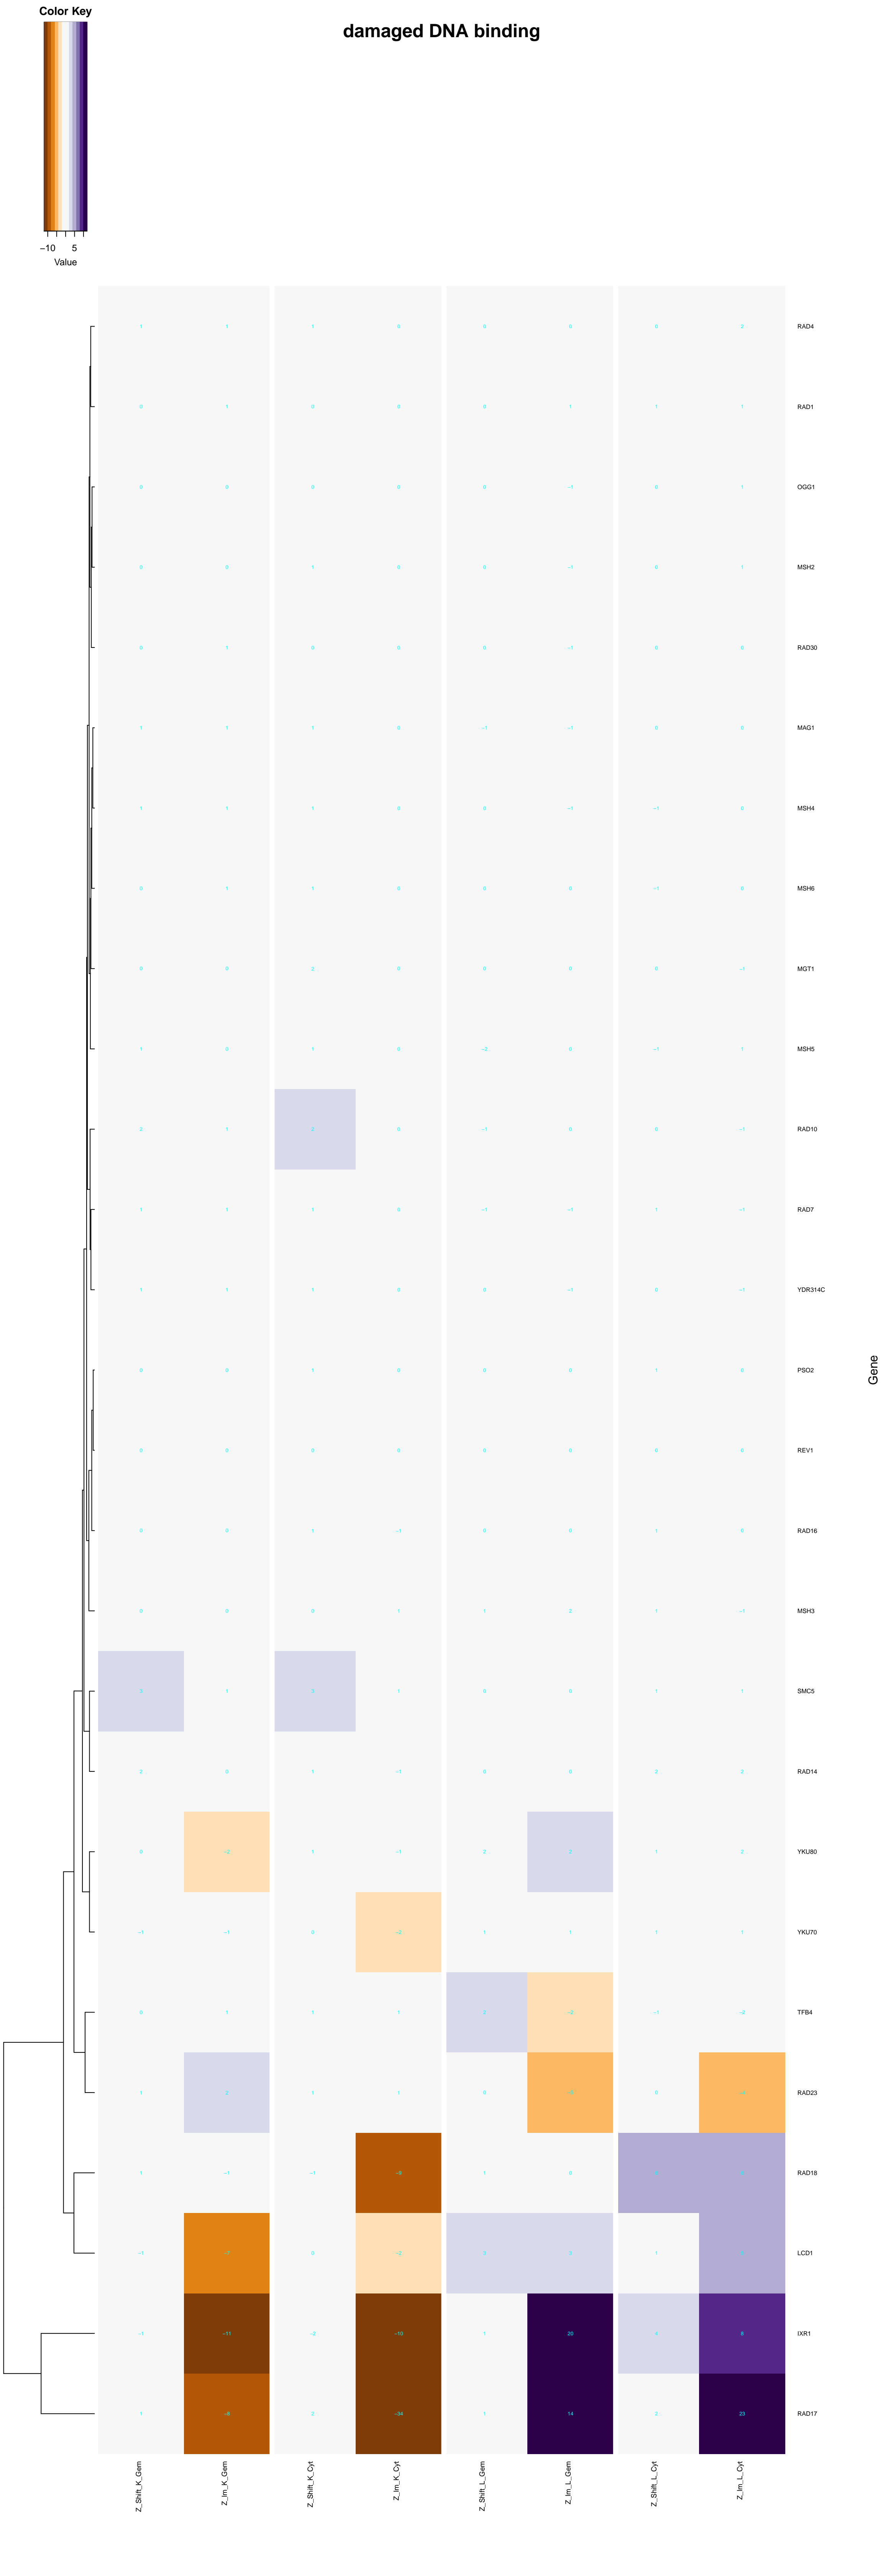

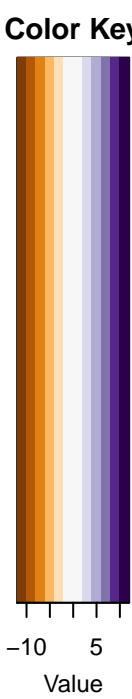

DNA clamp loader activity

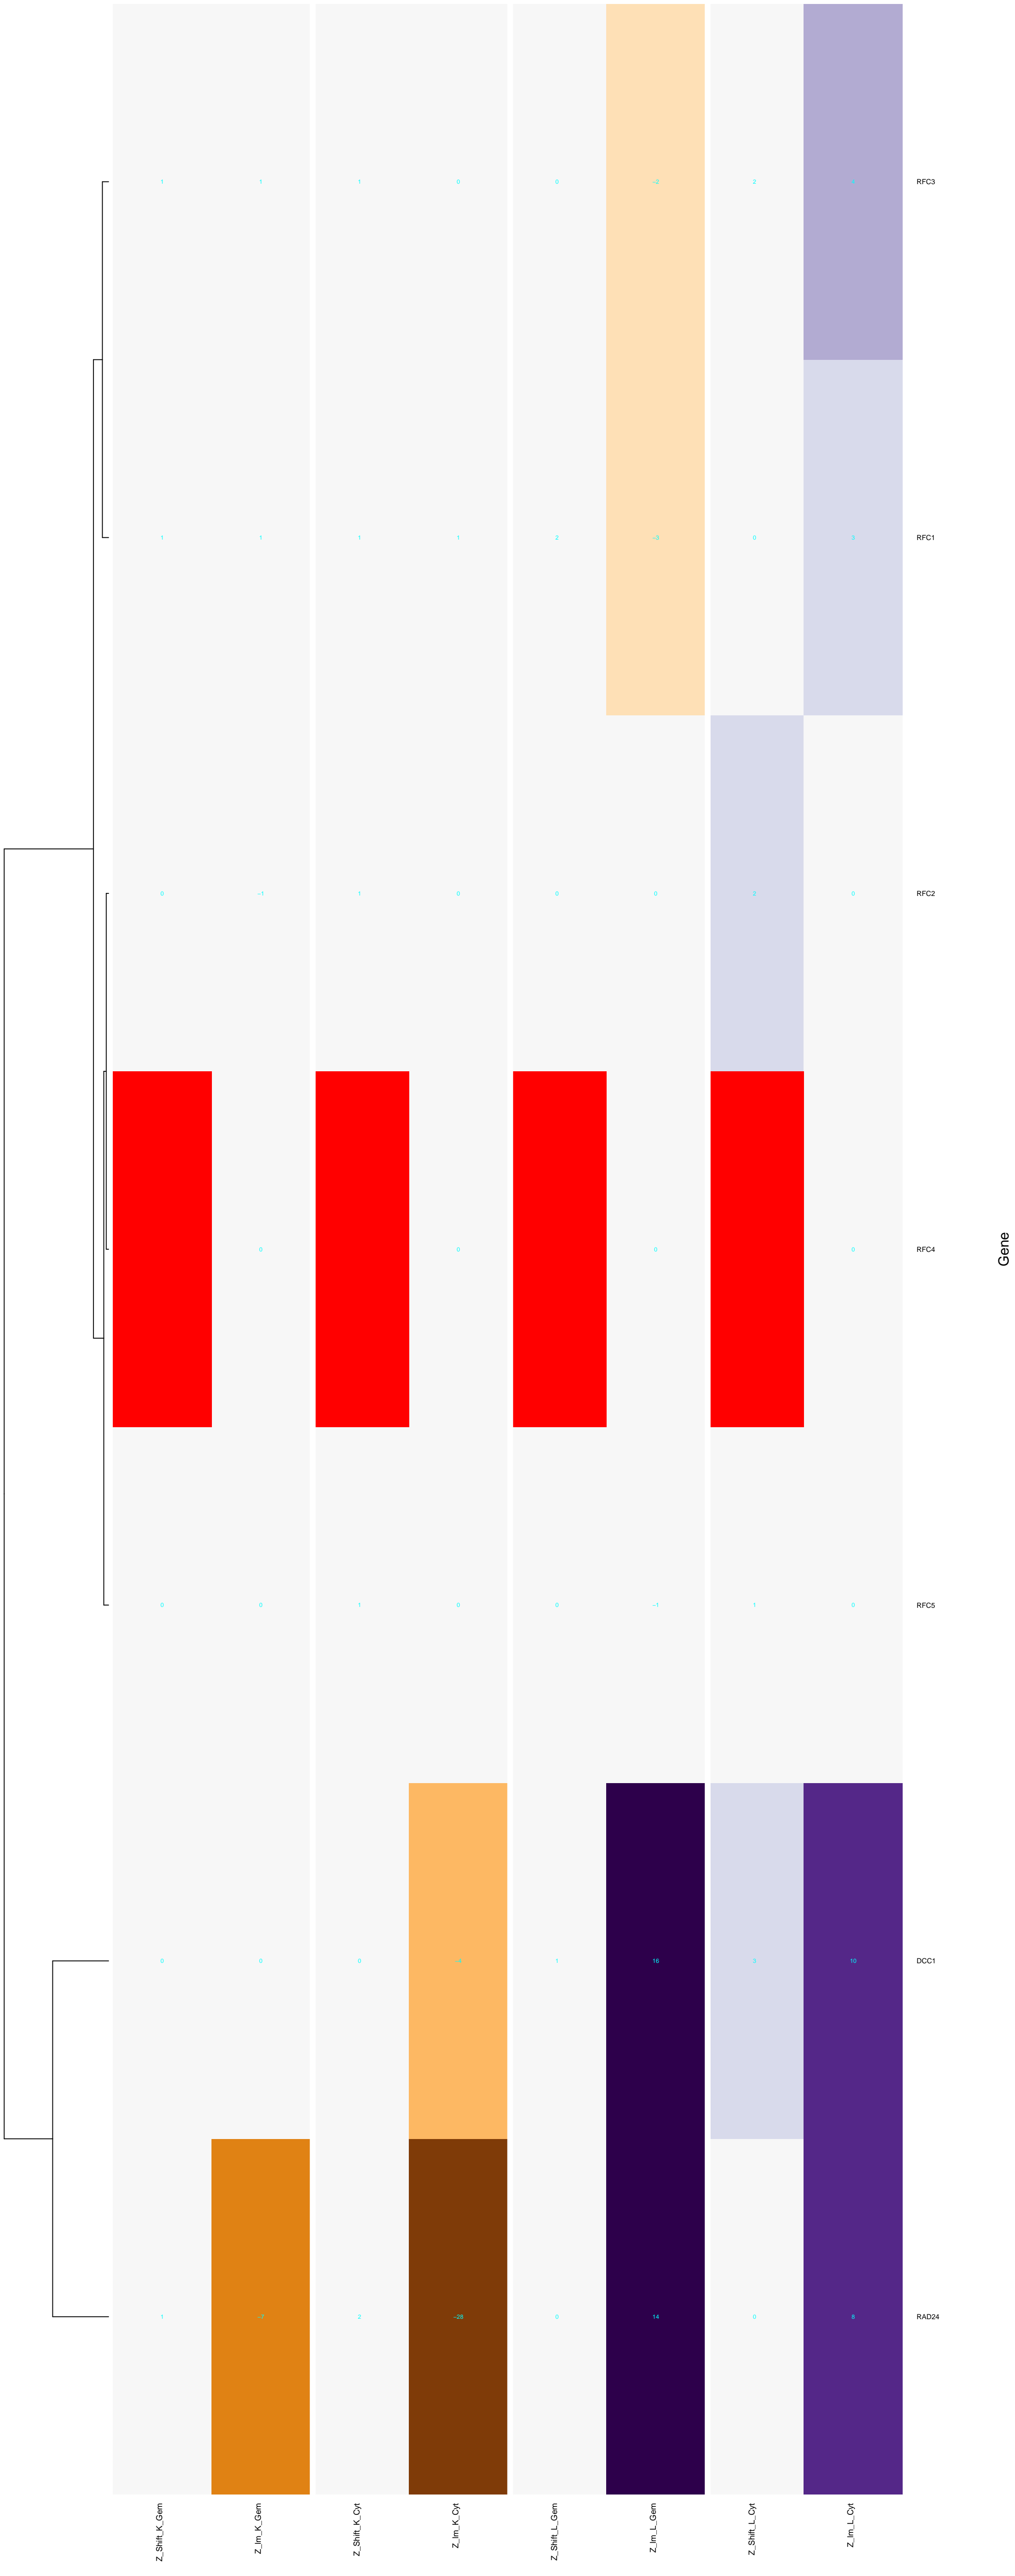



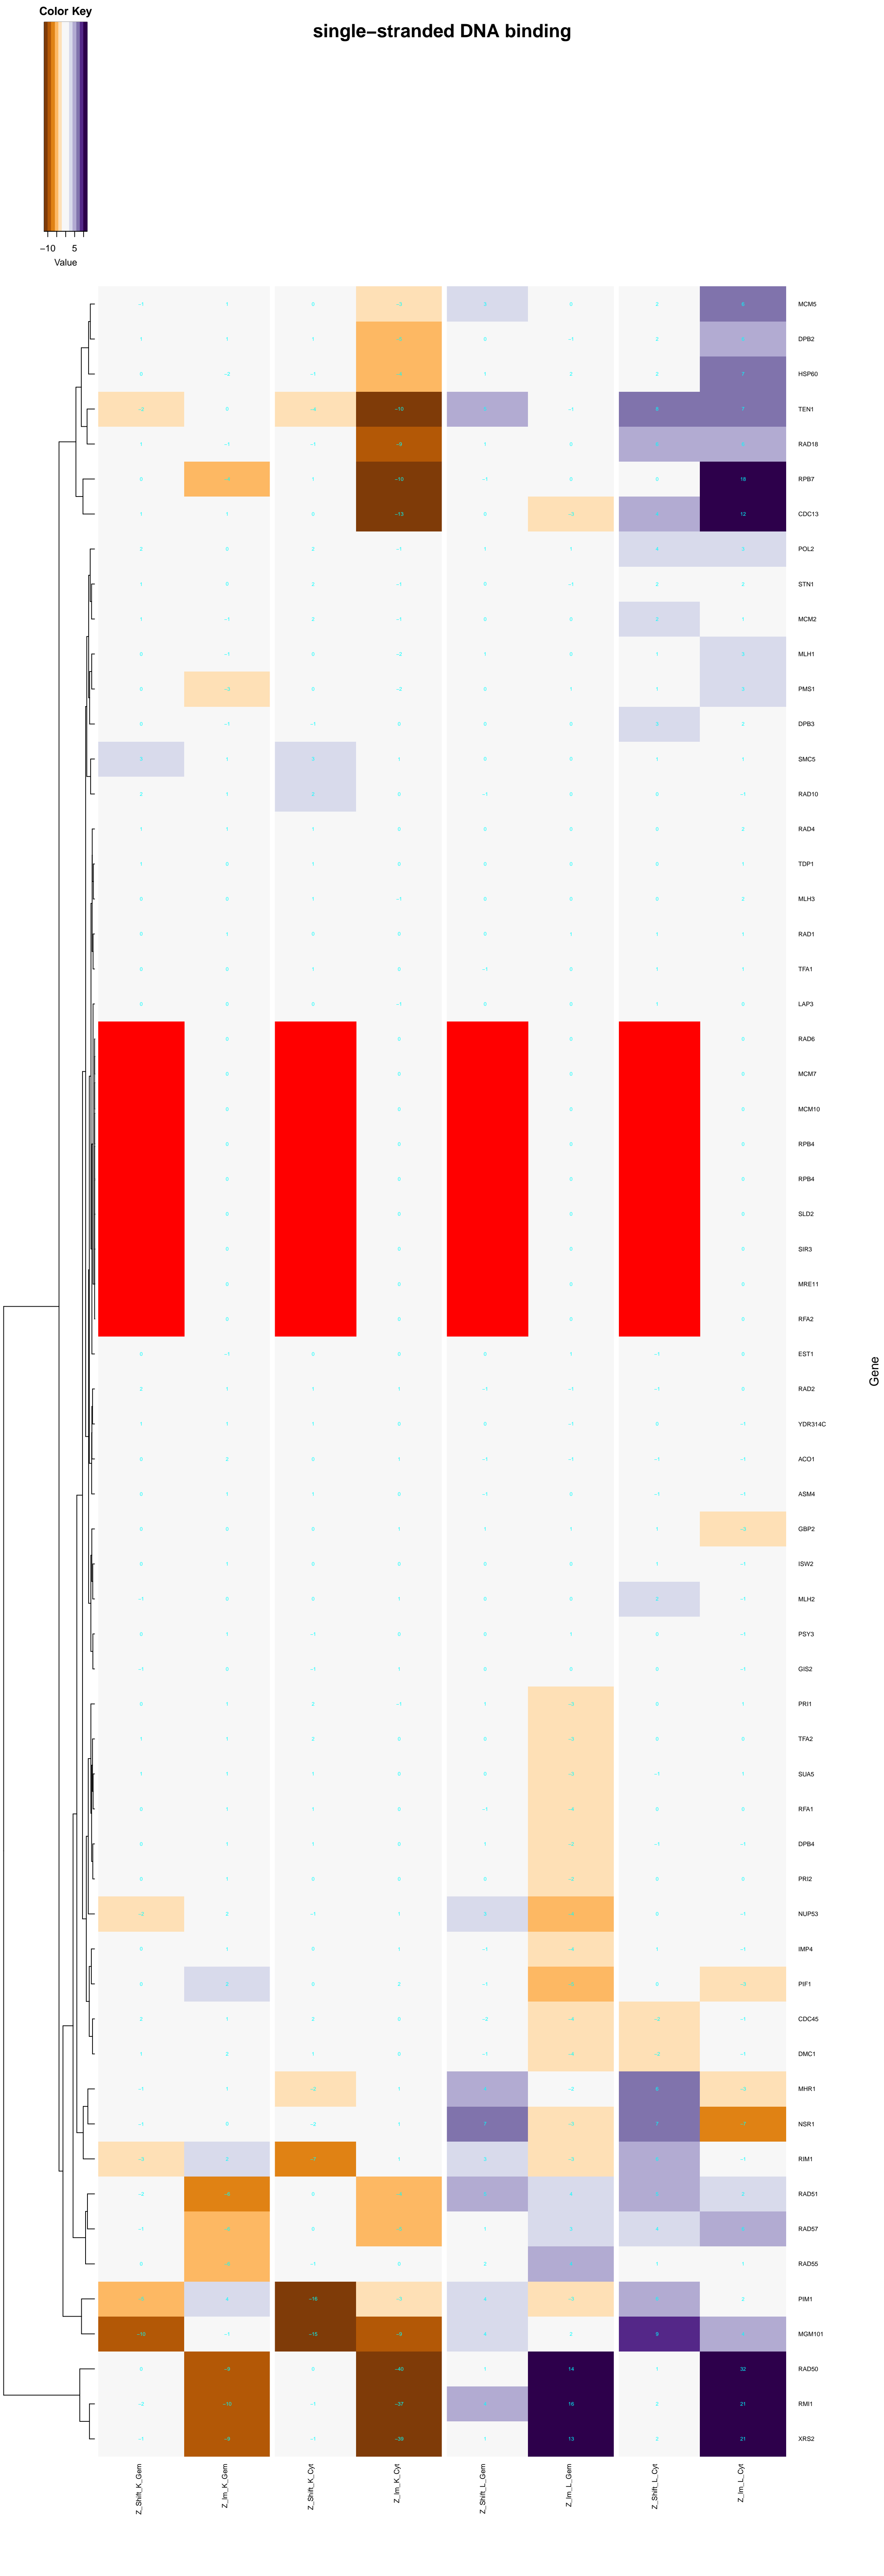

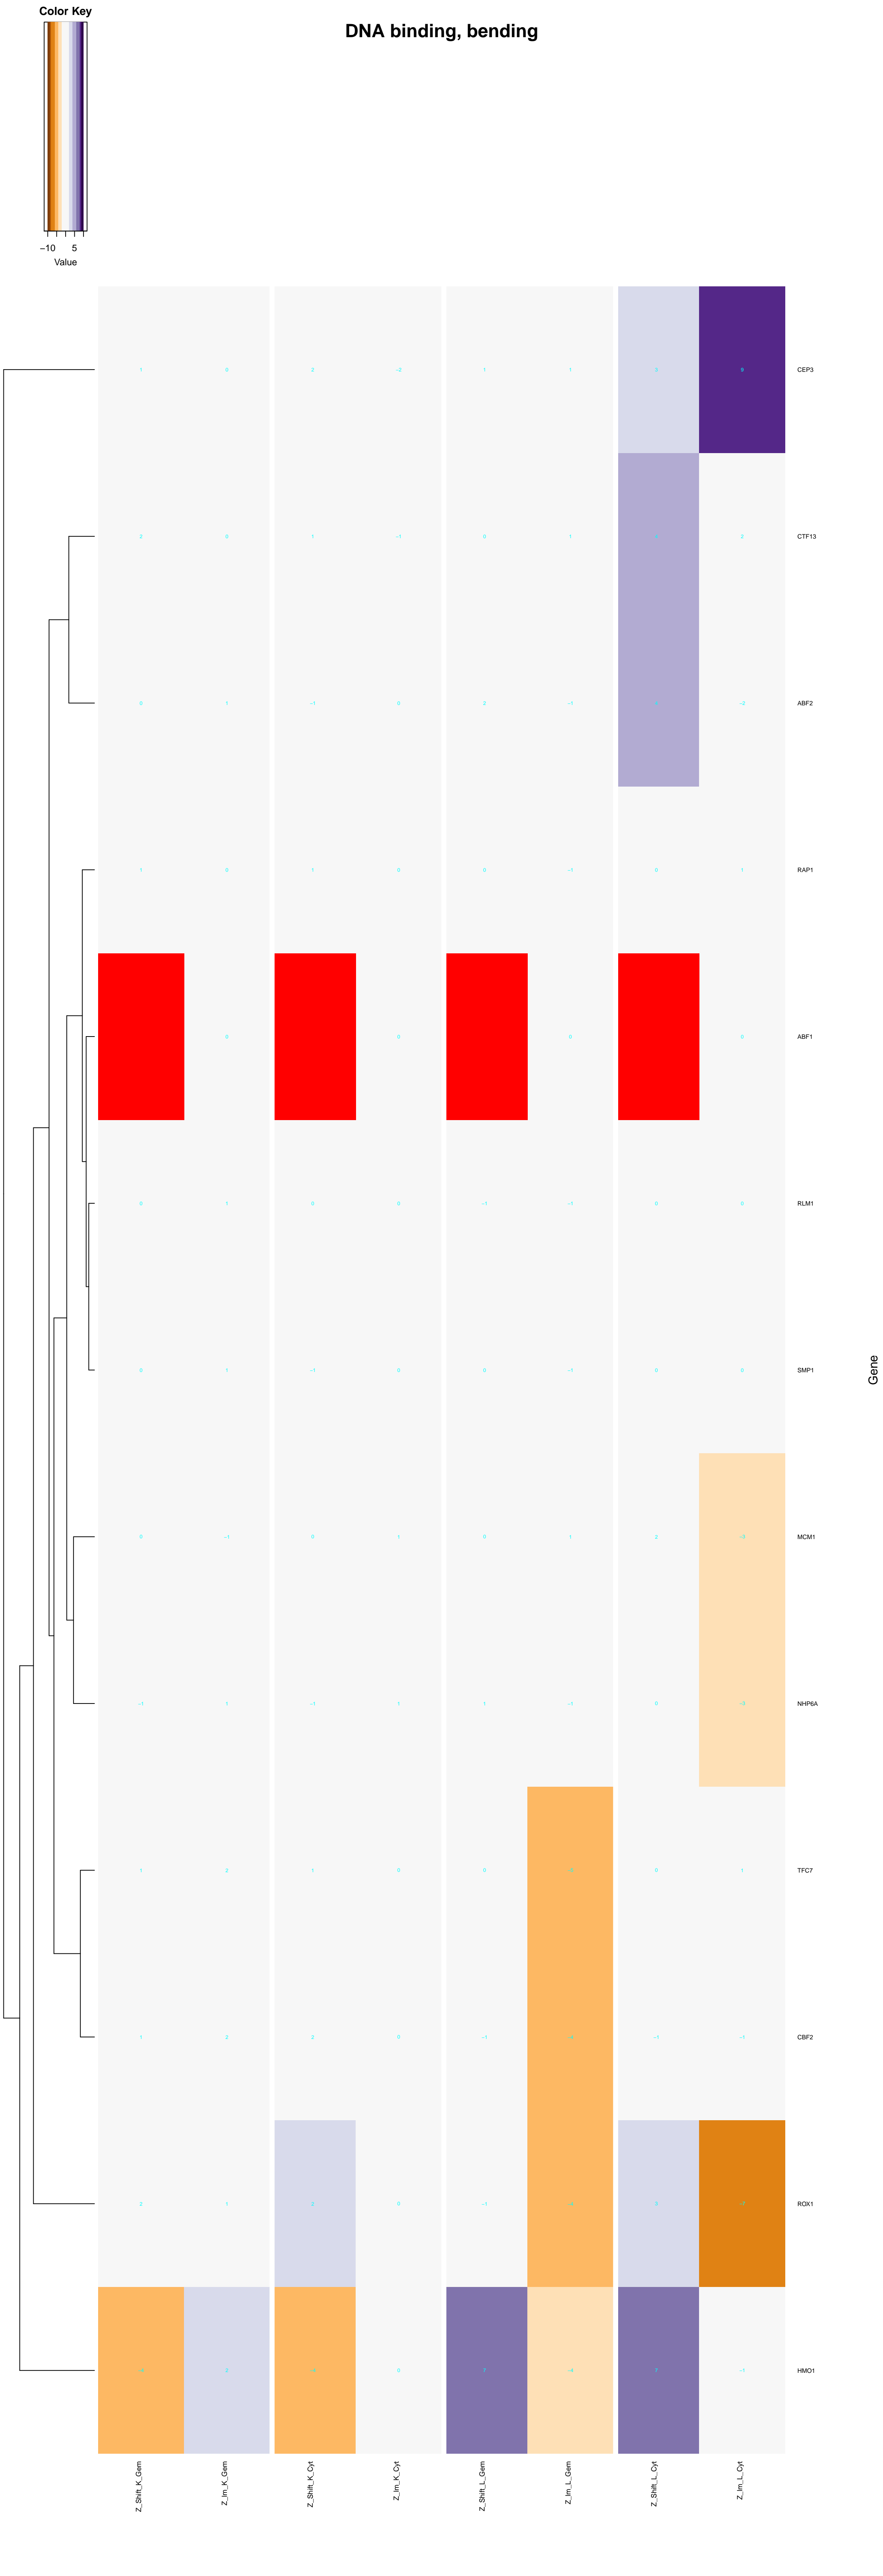

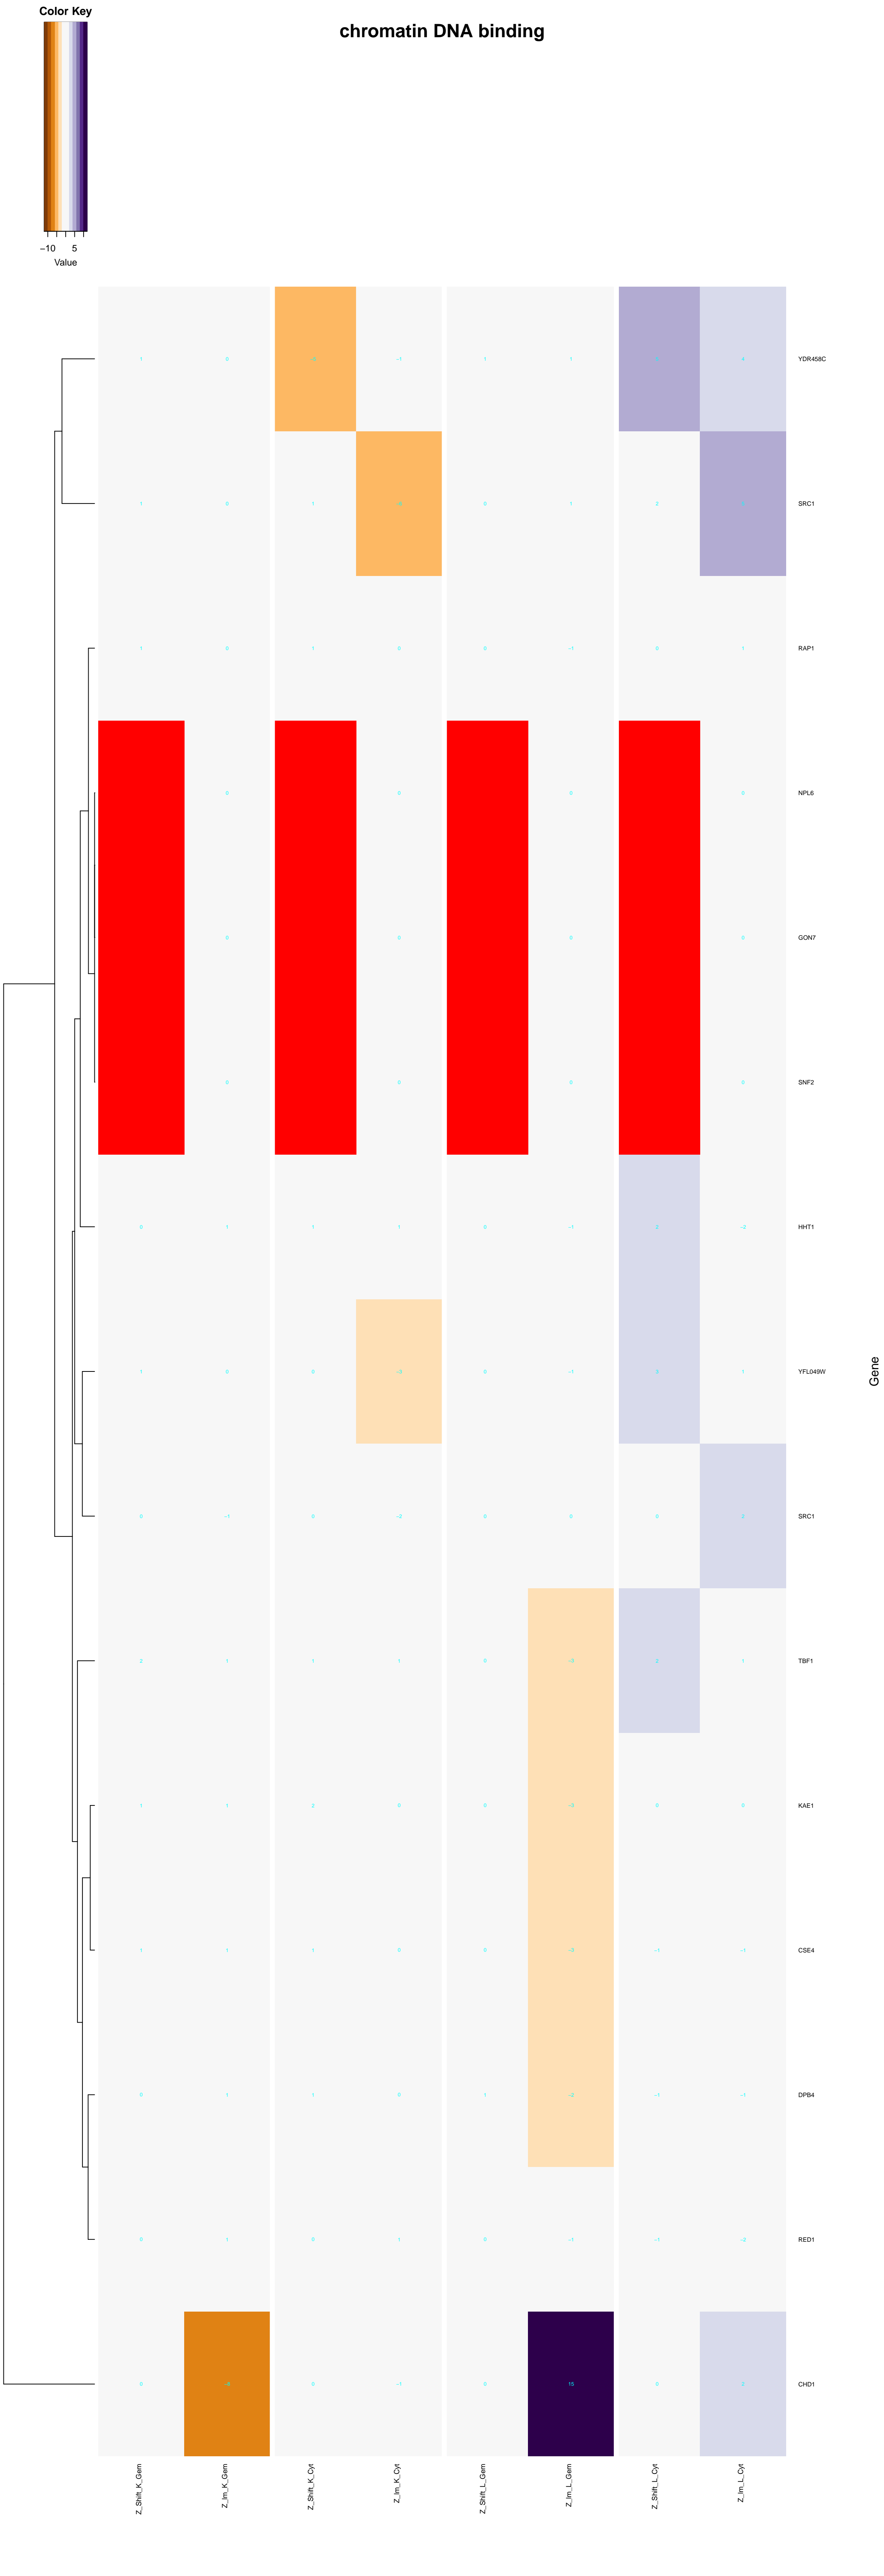

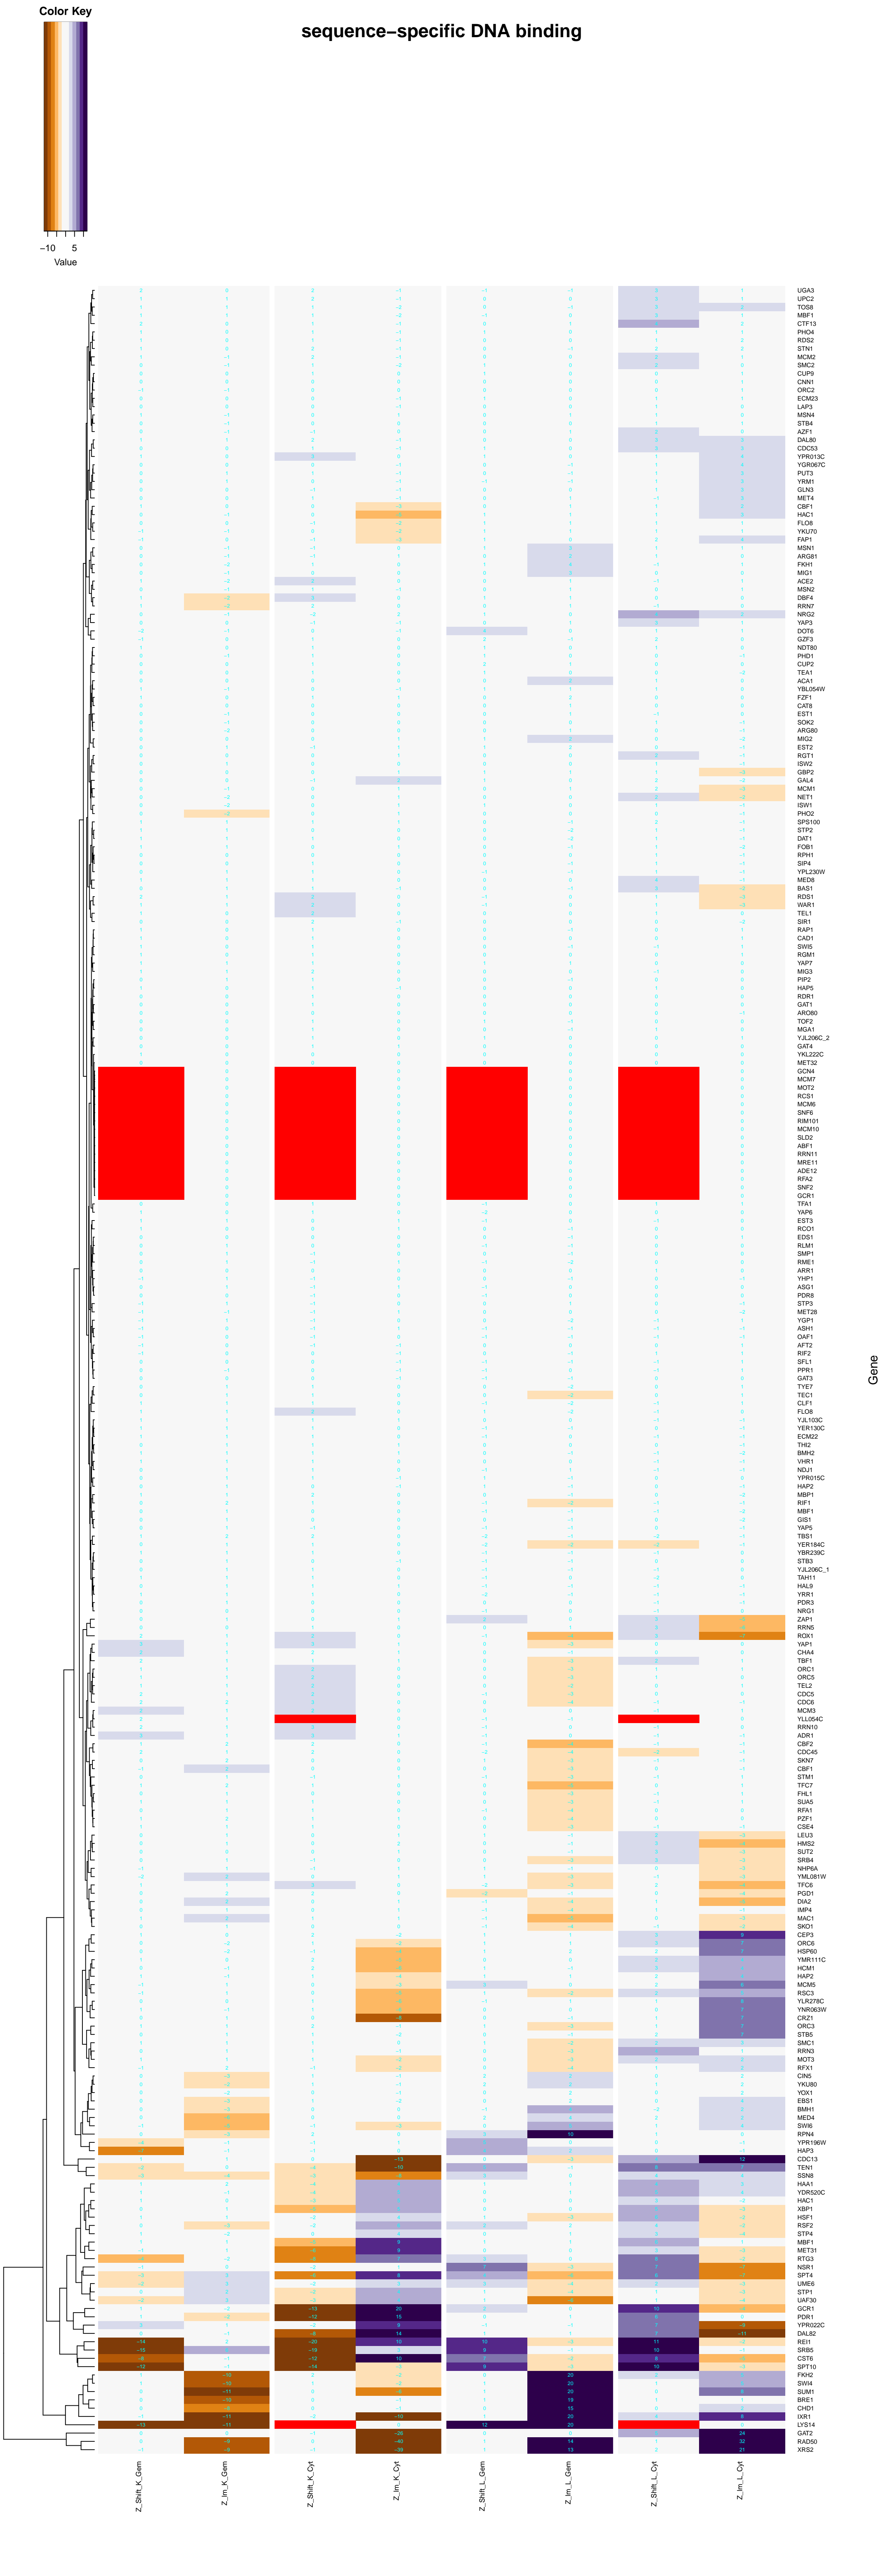

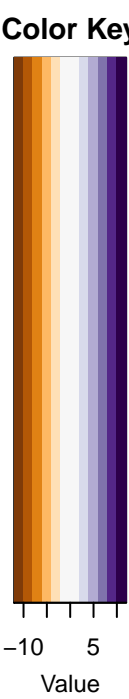

G-quadruplex DNA binding

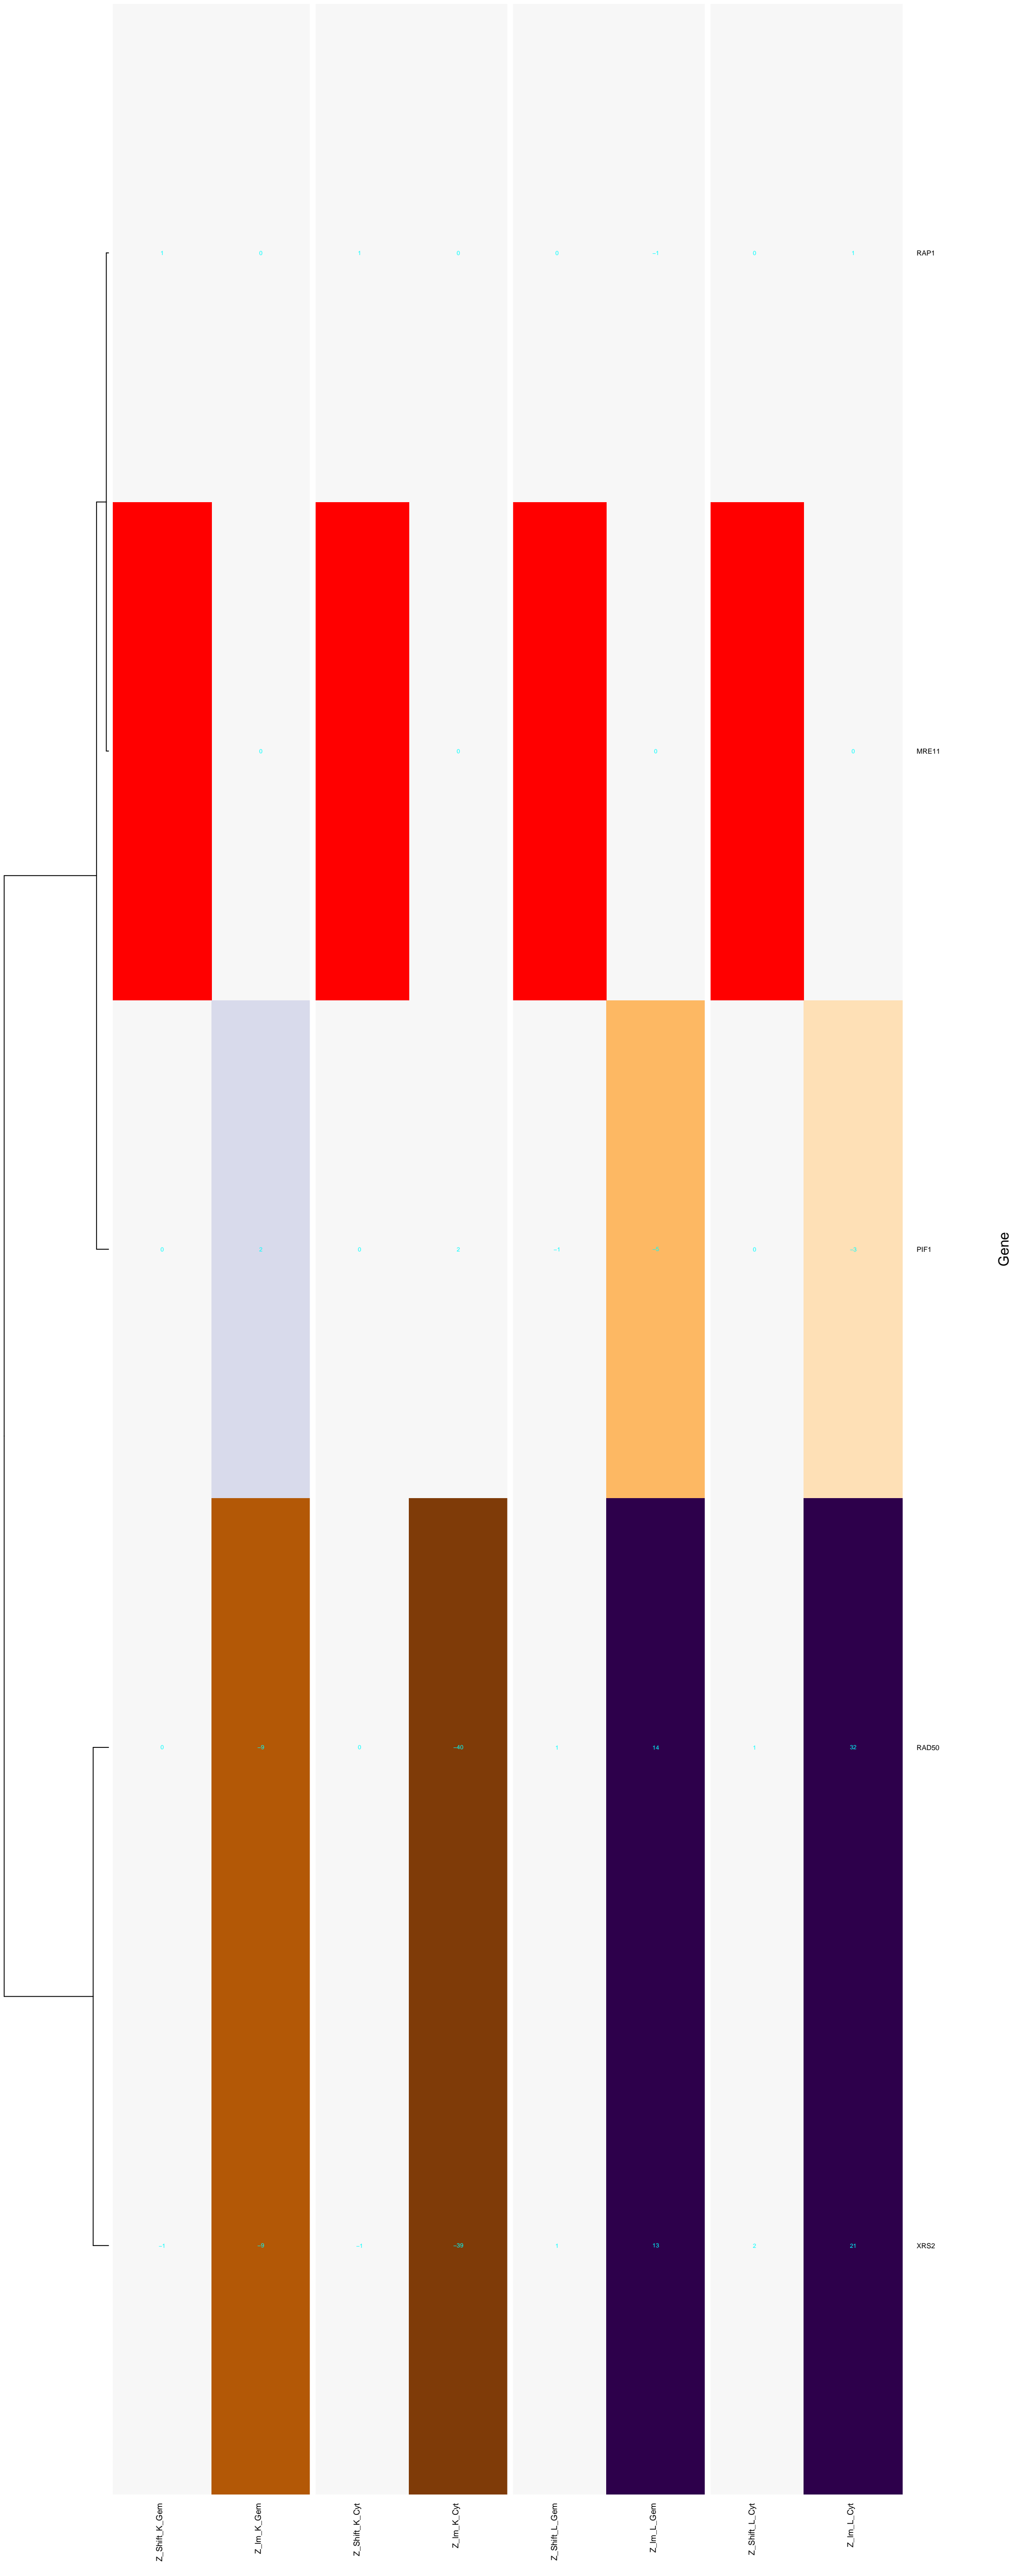

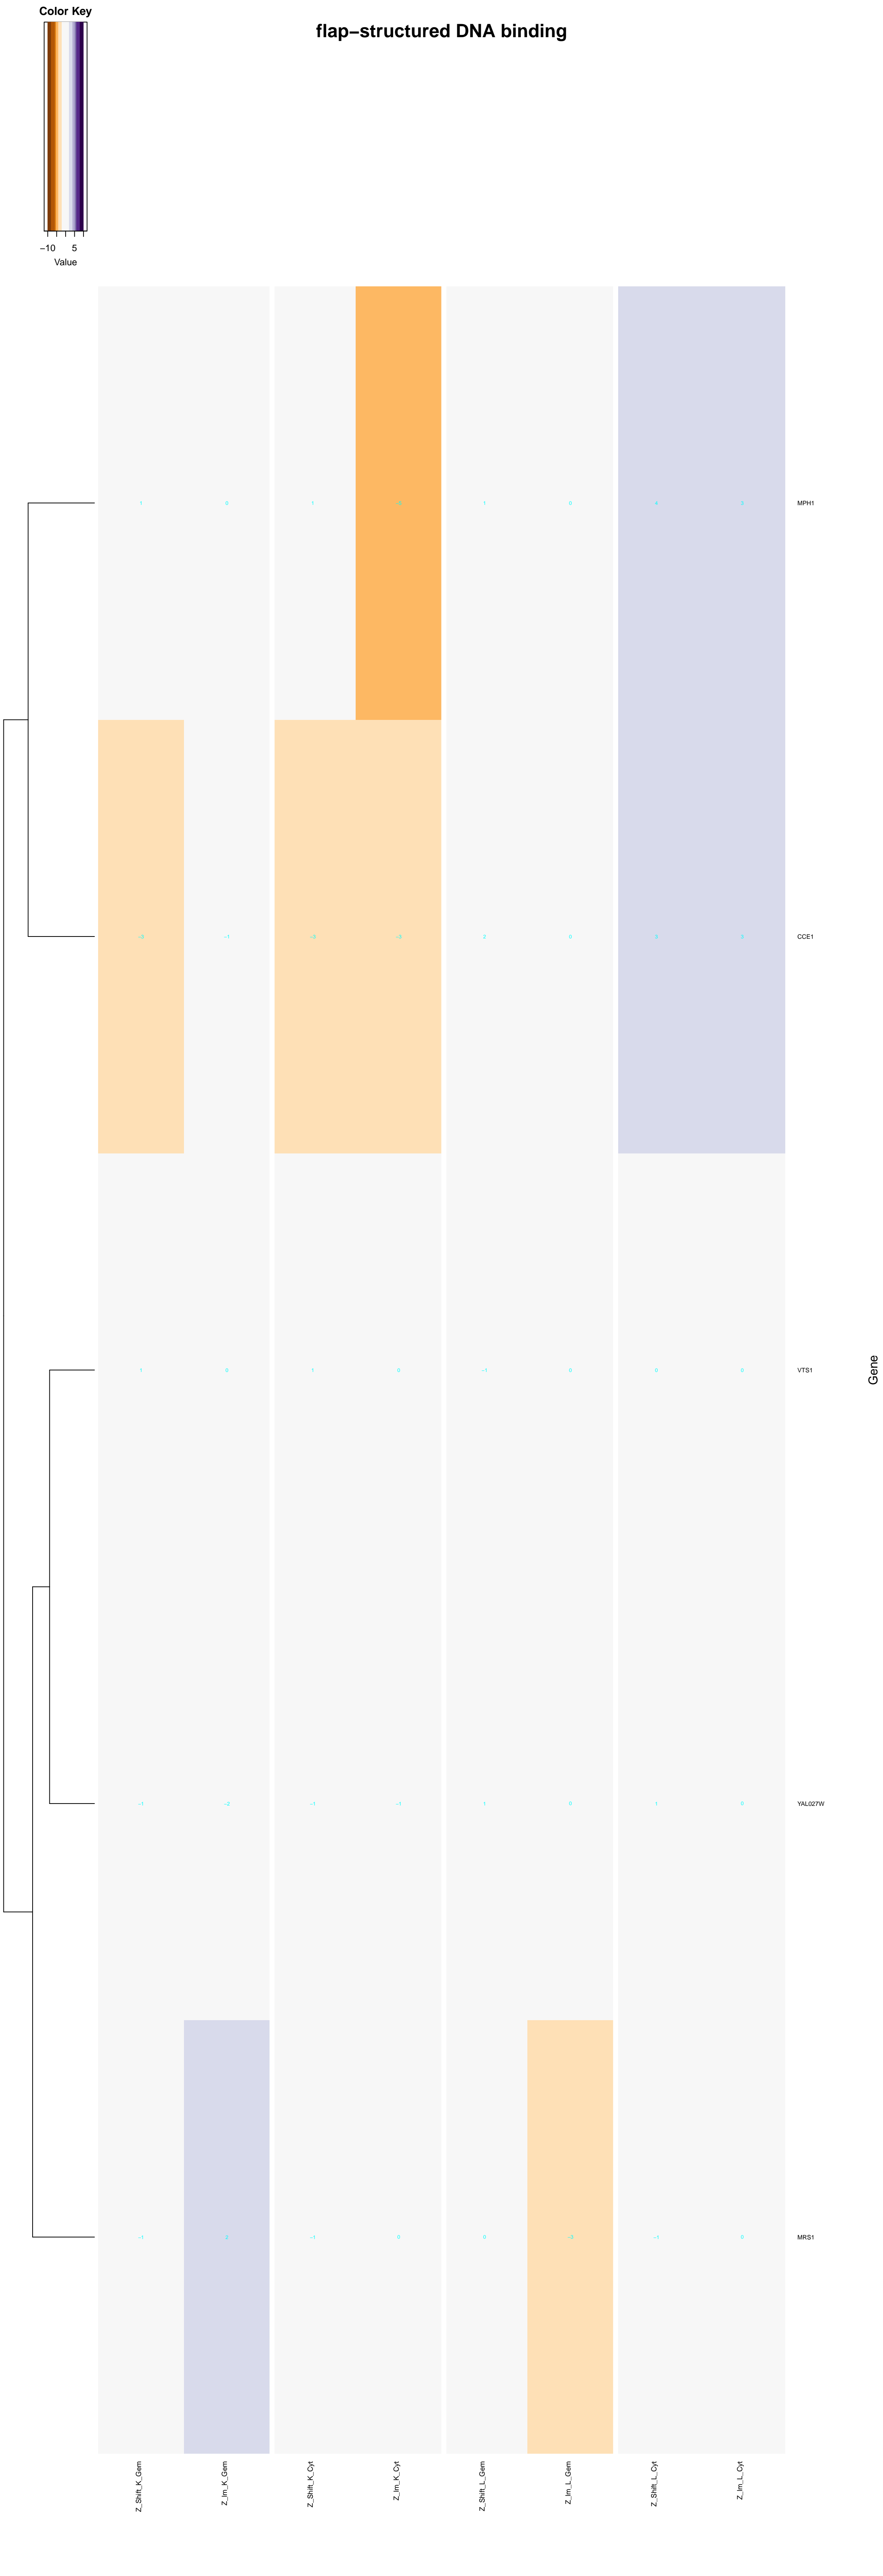

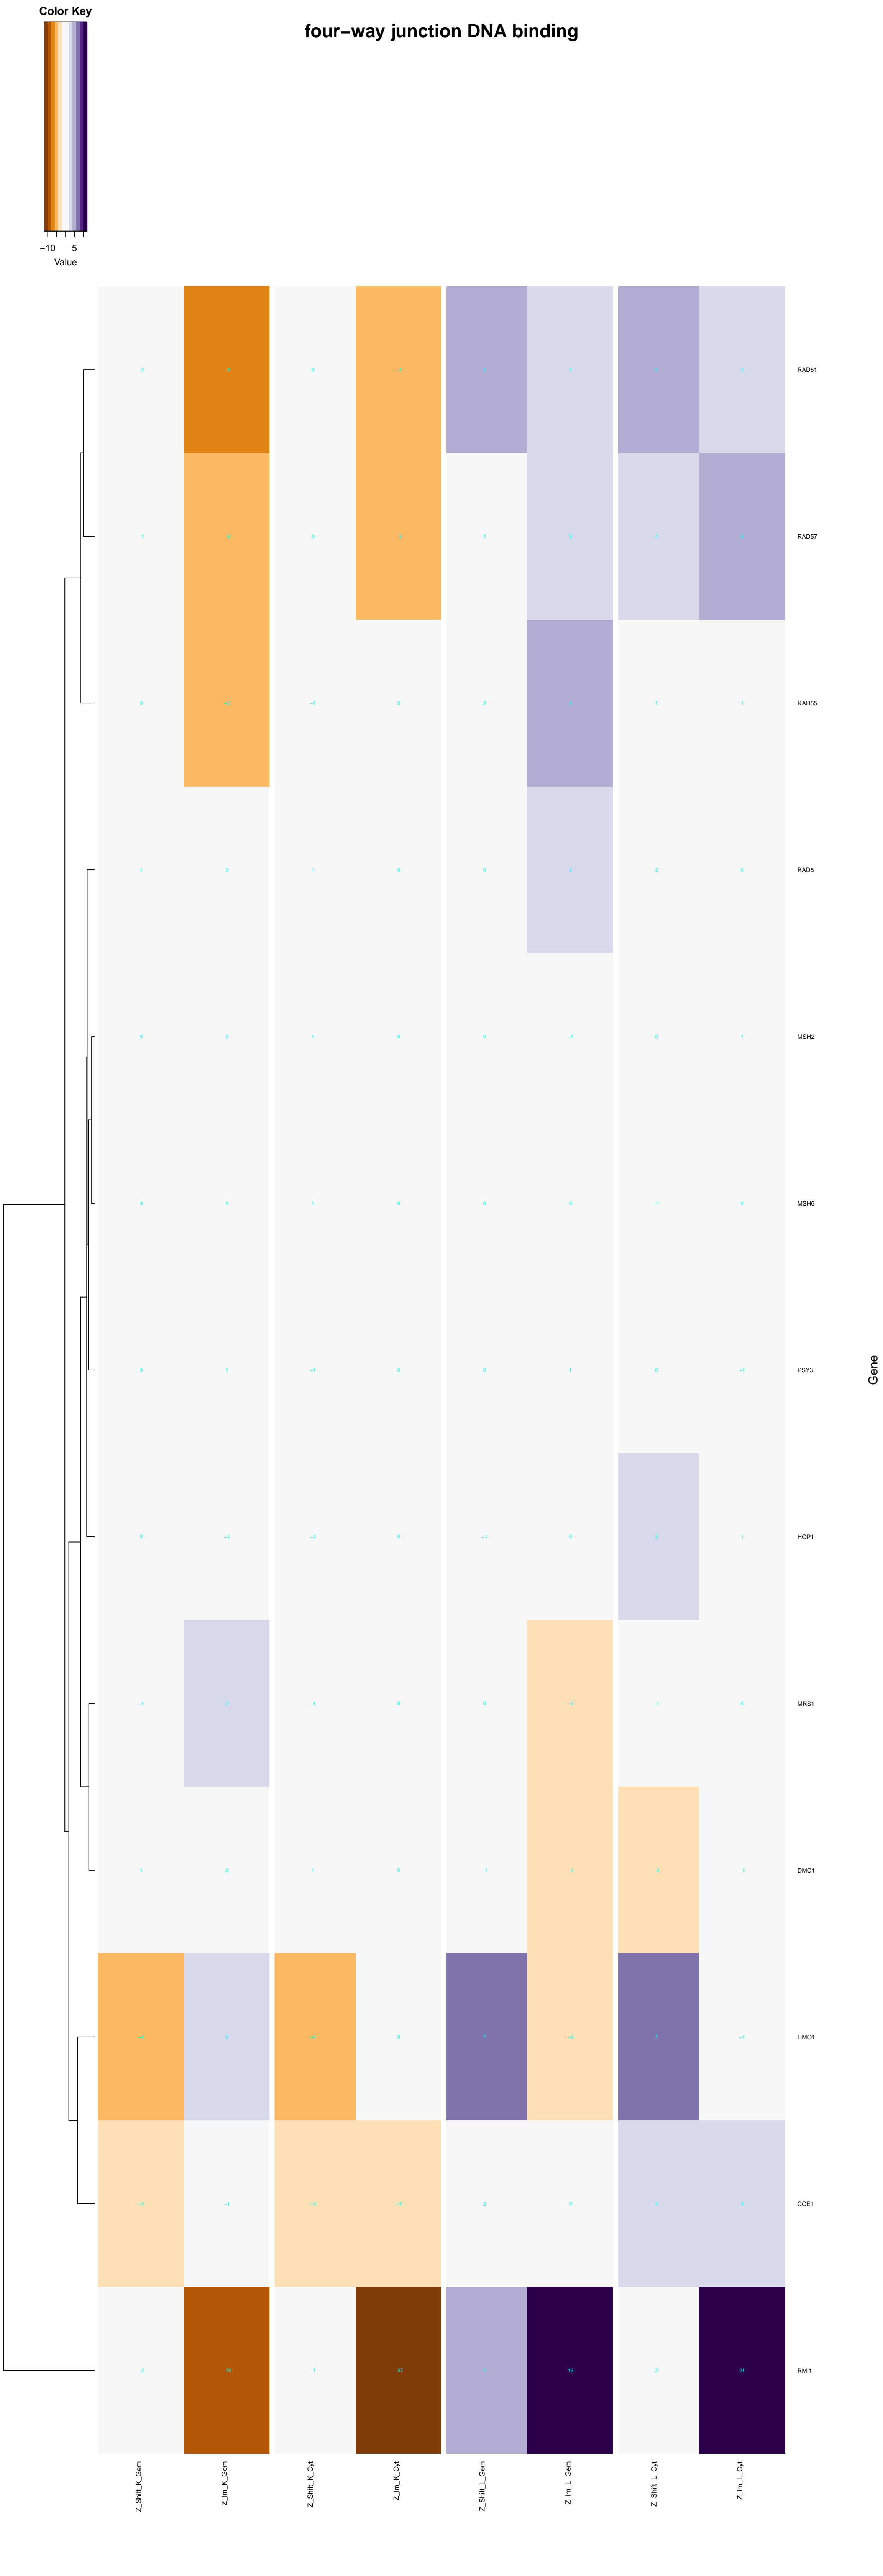

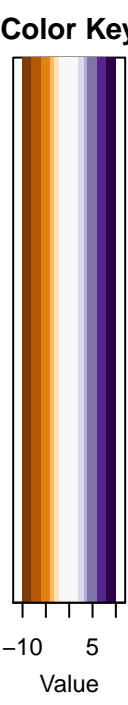

Y-form DNA binding

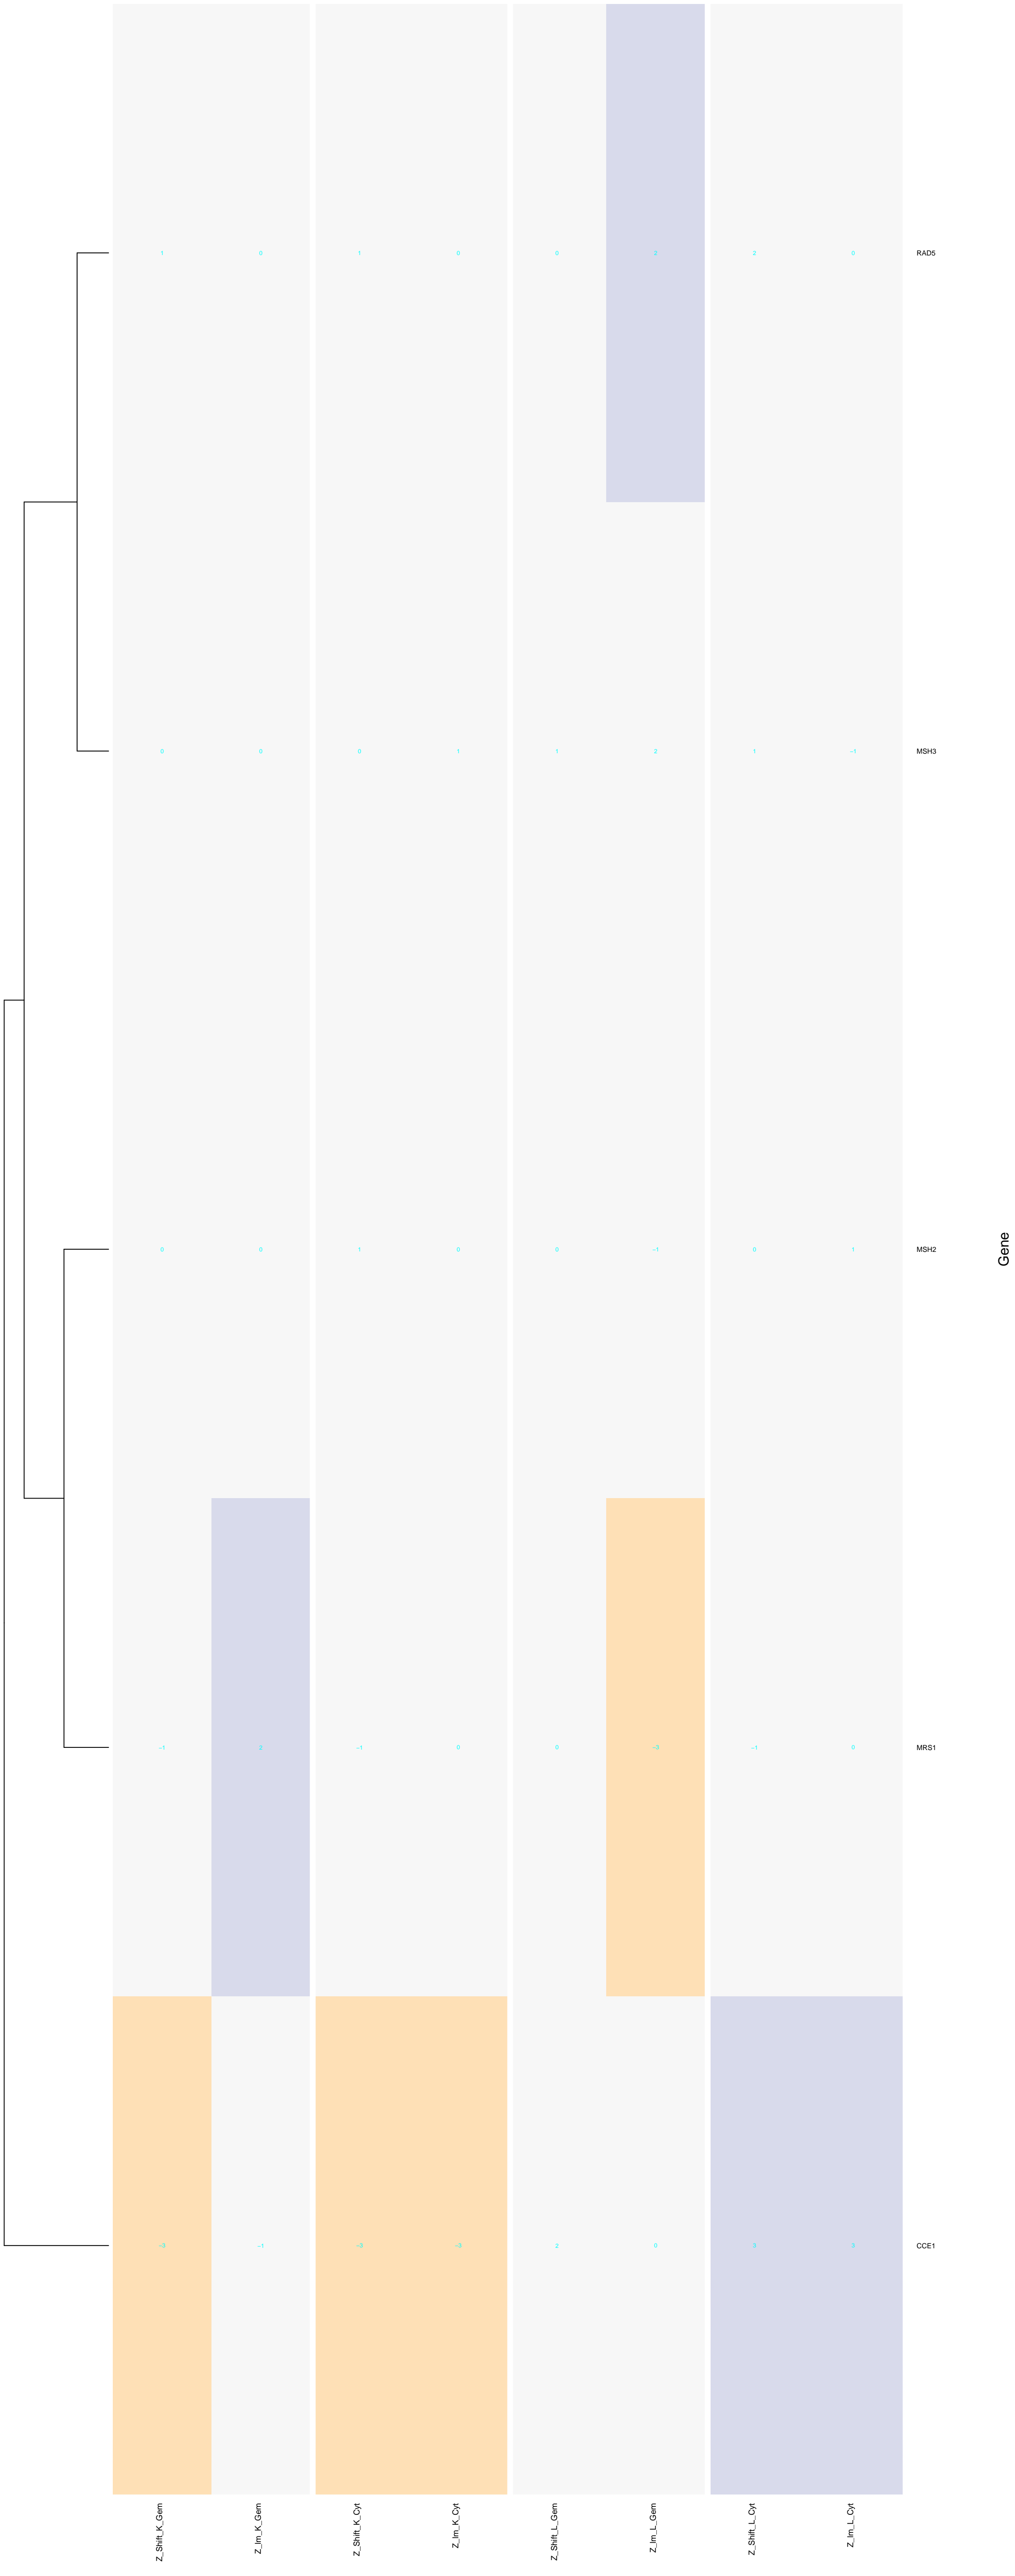

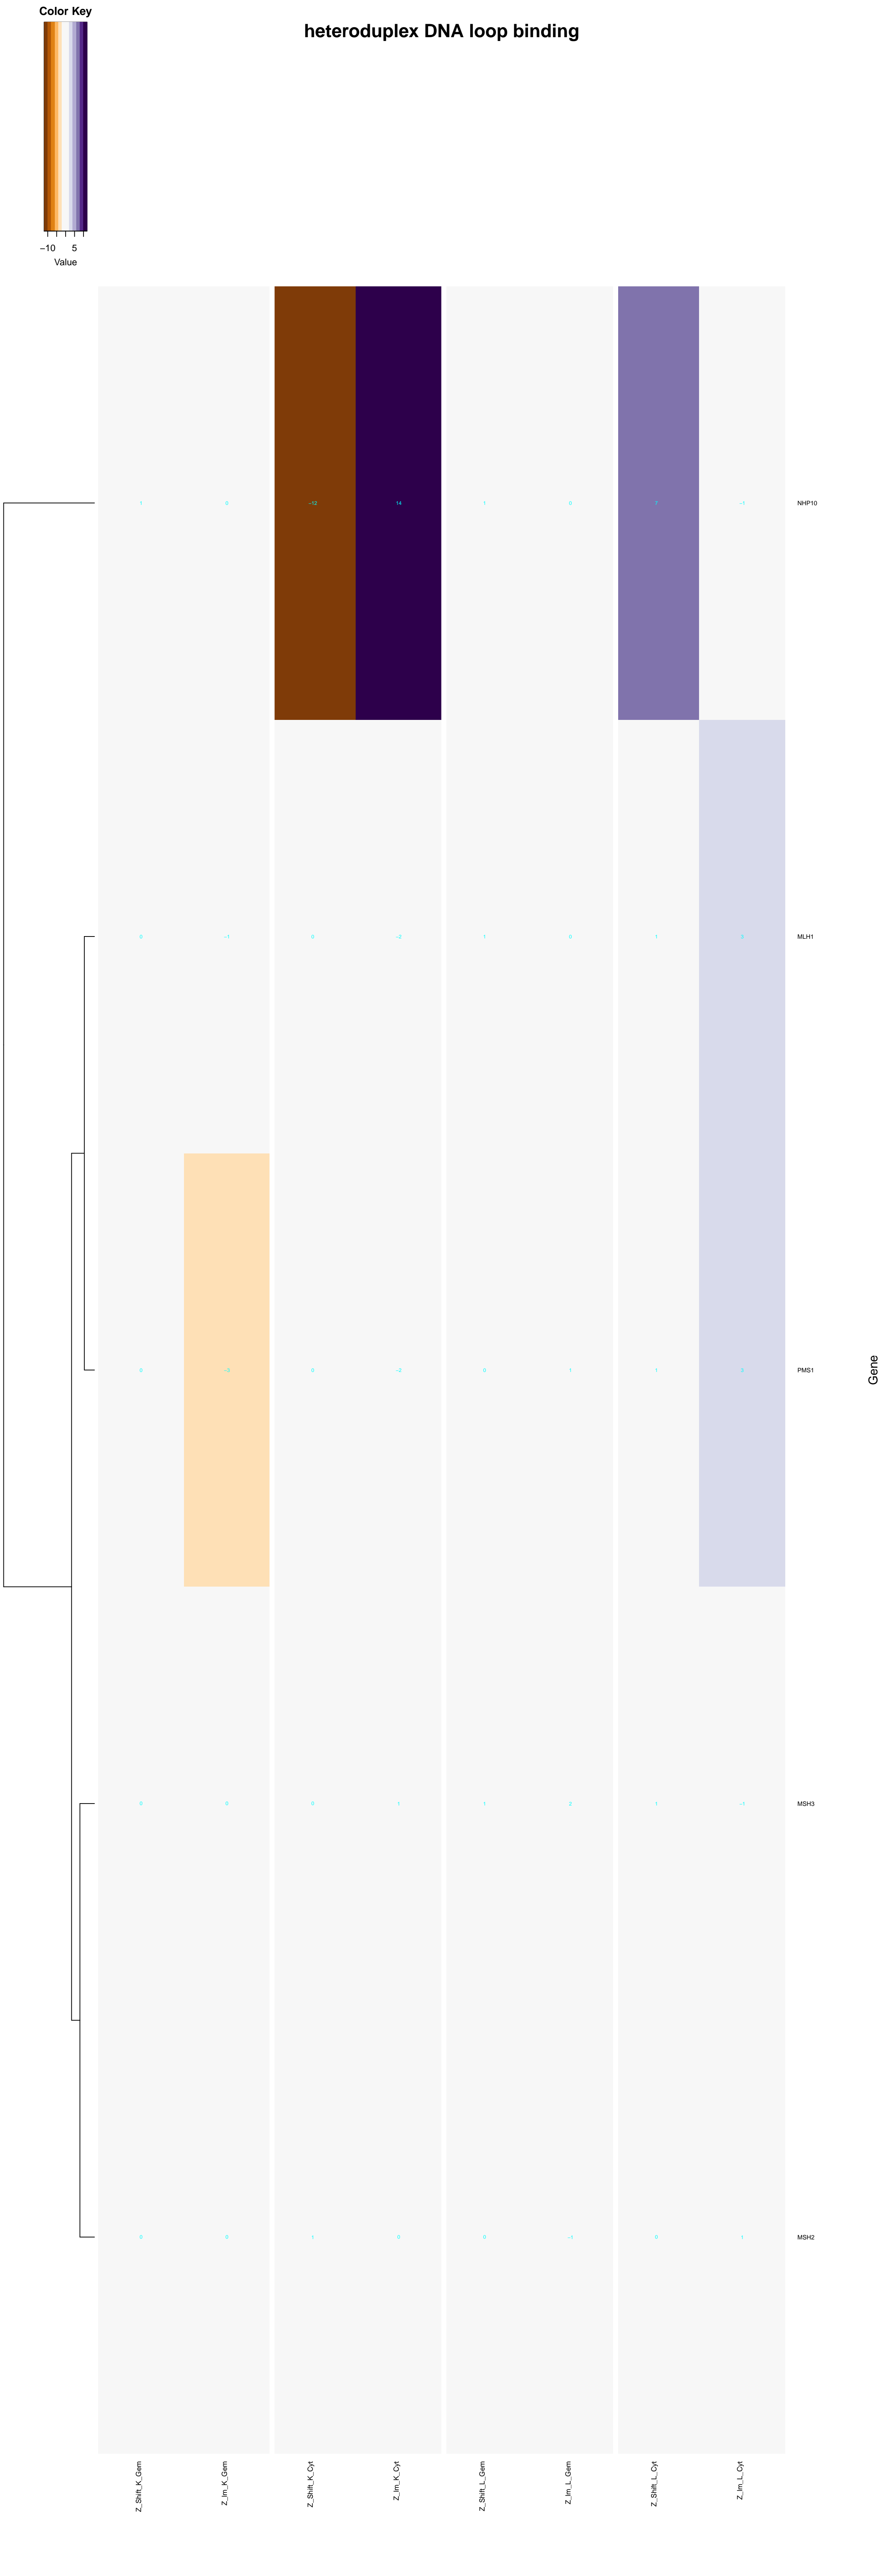

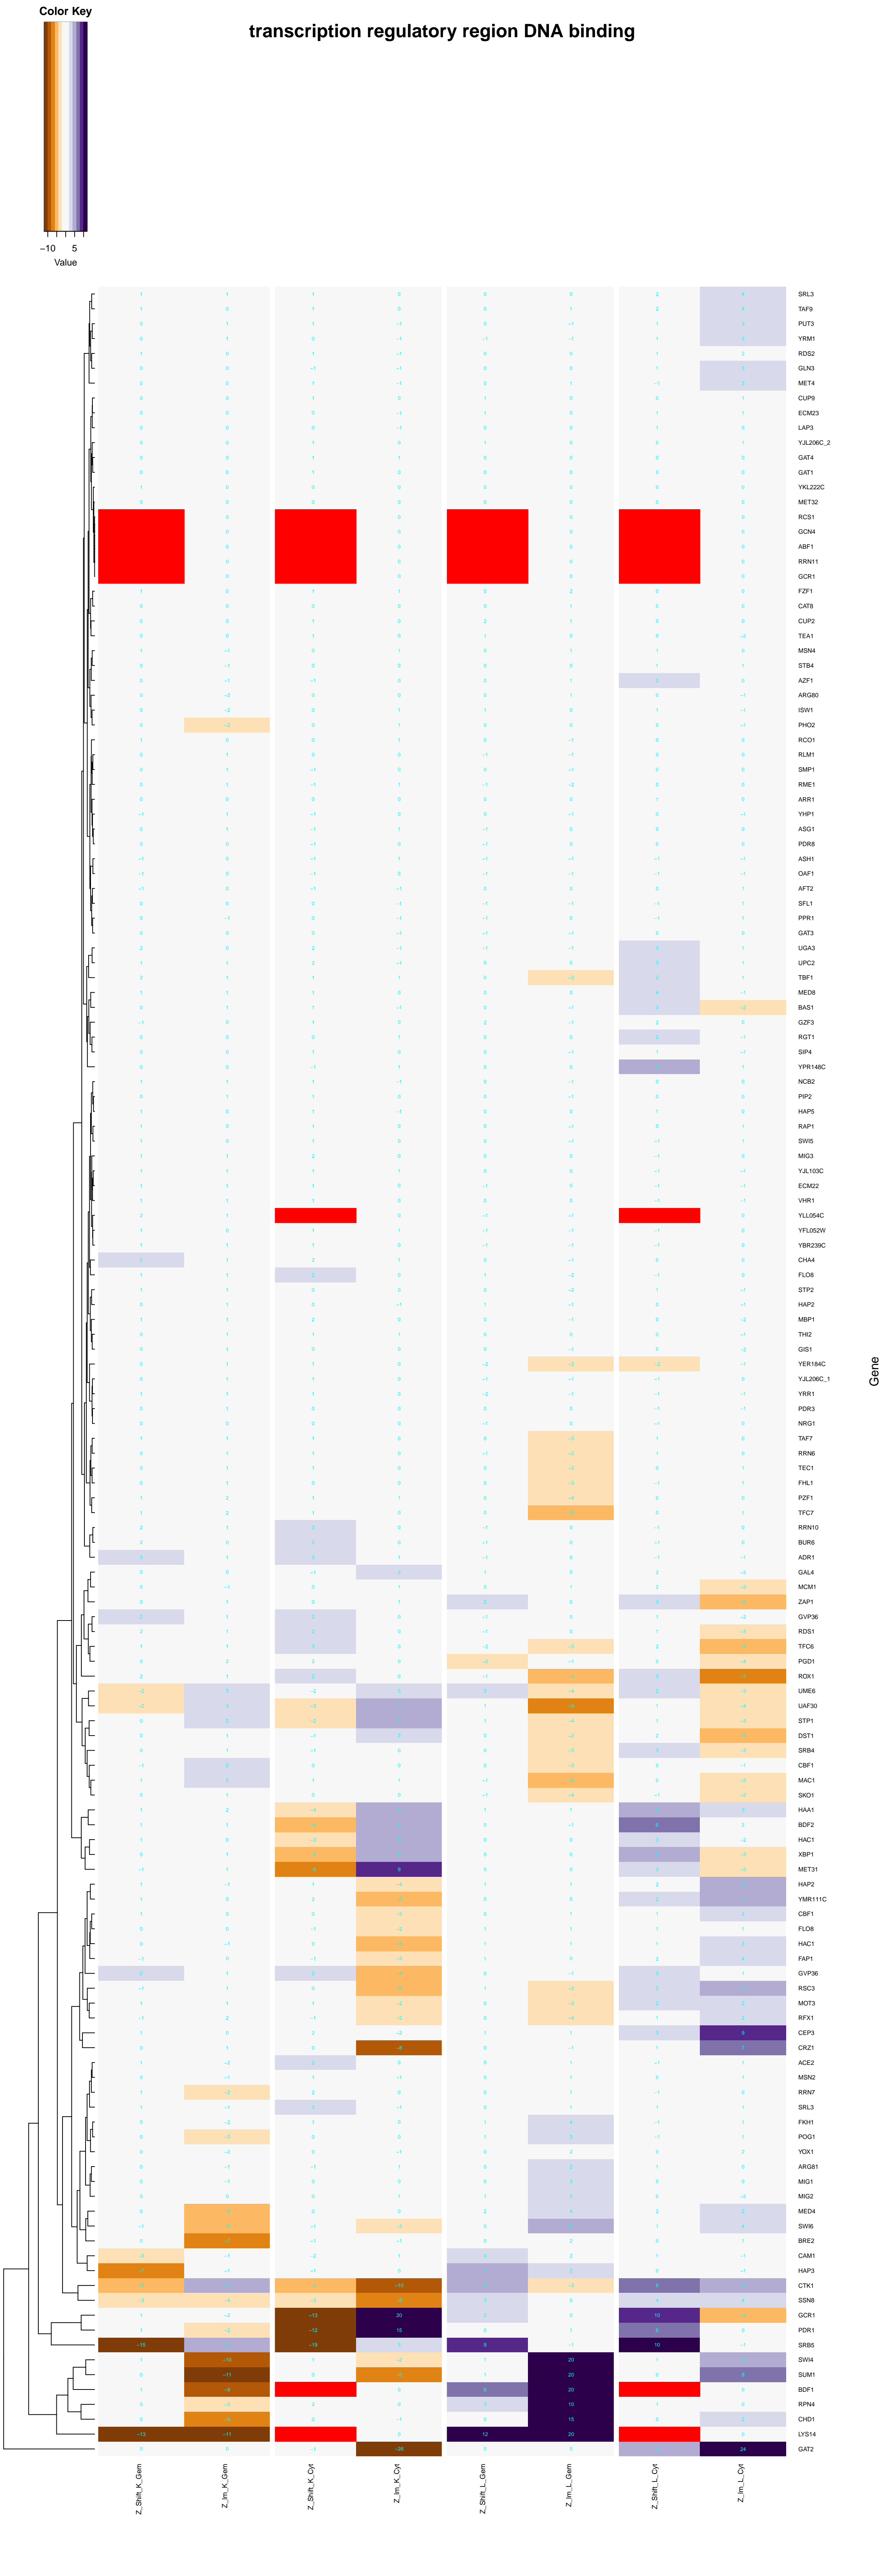



double-stranded telomeric DNA binding

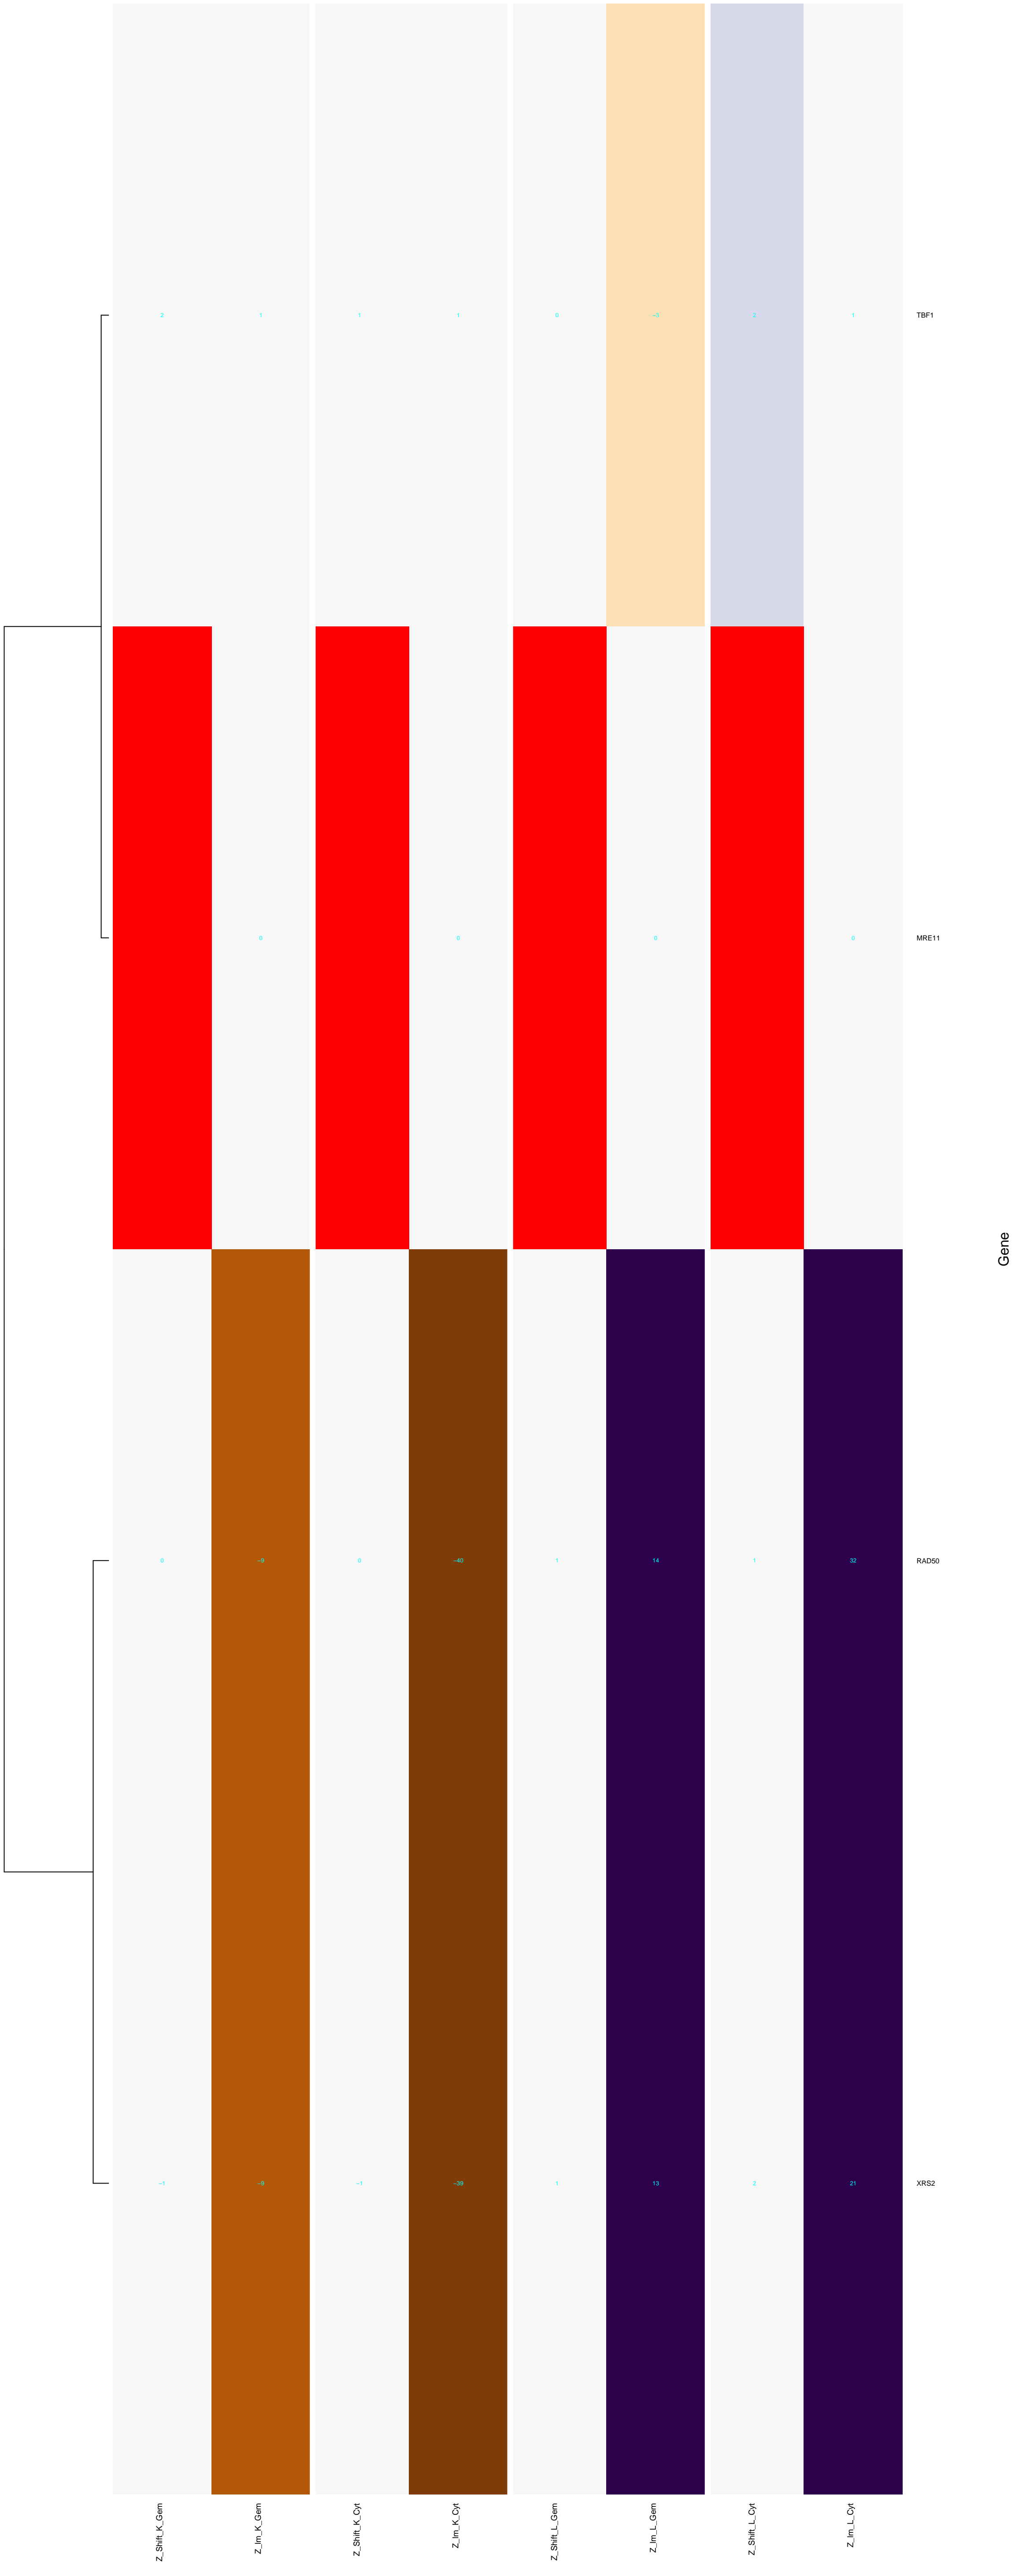

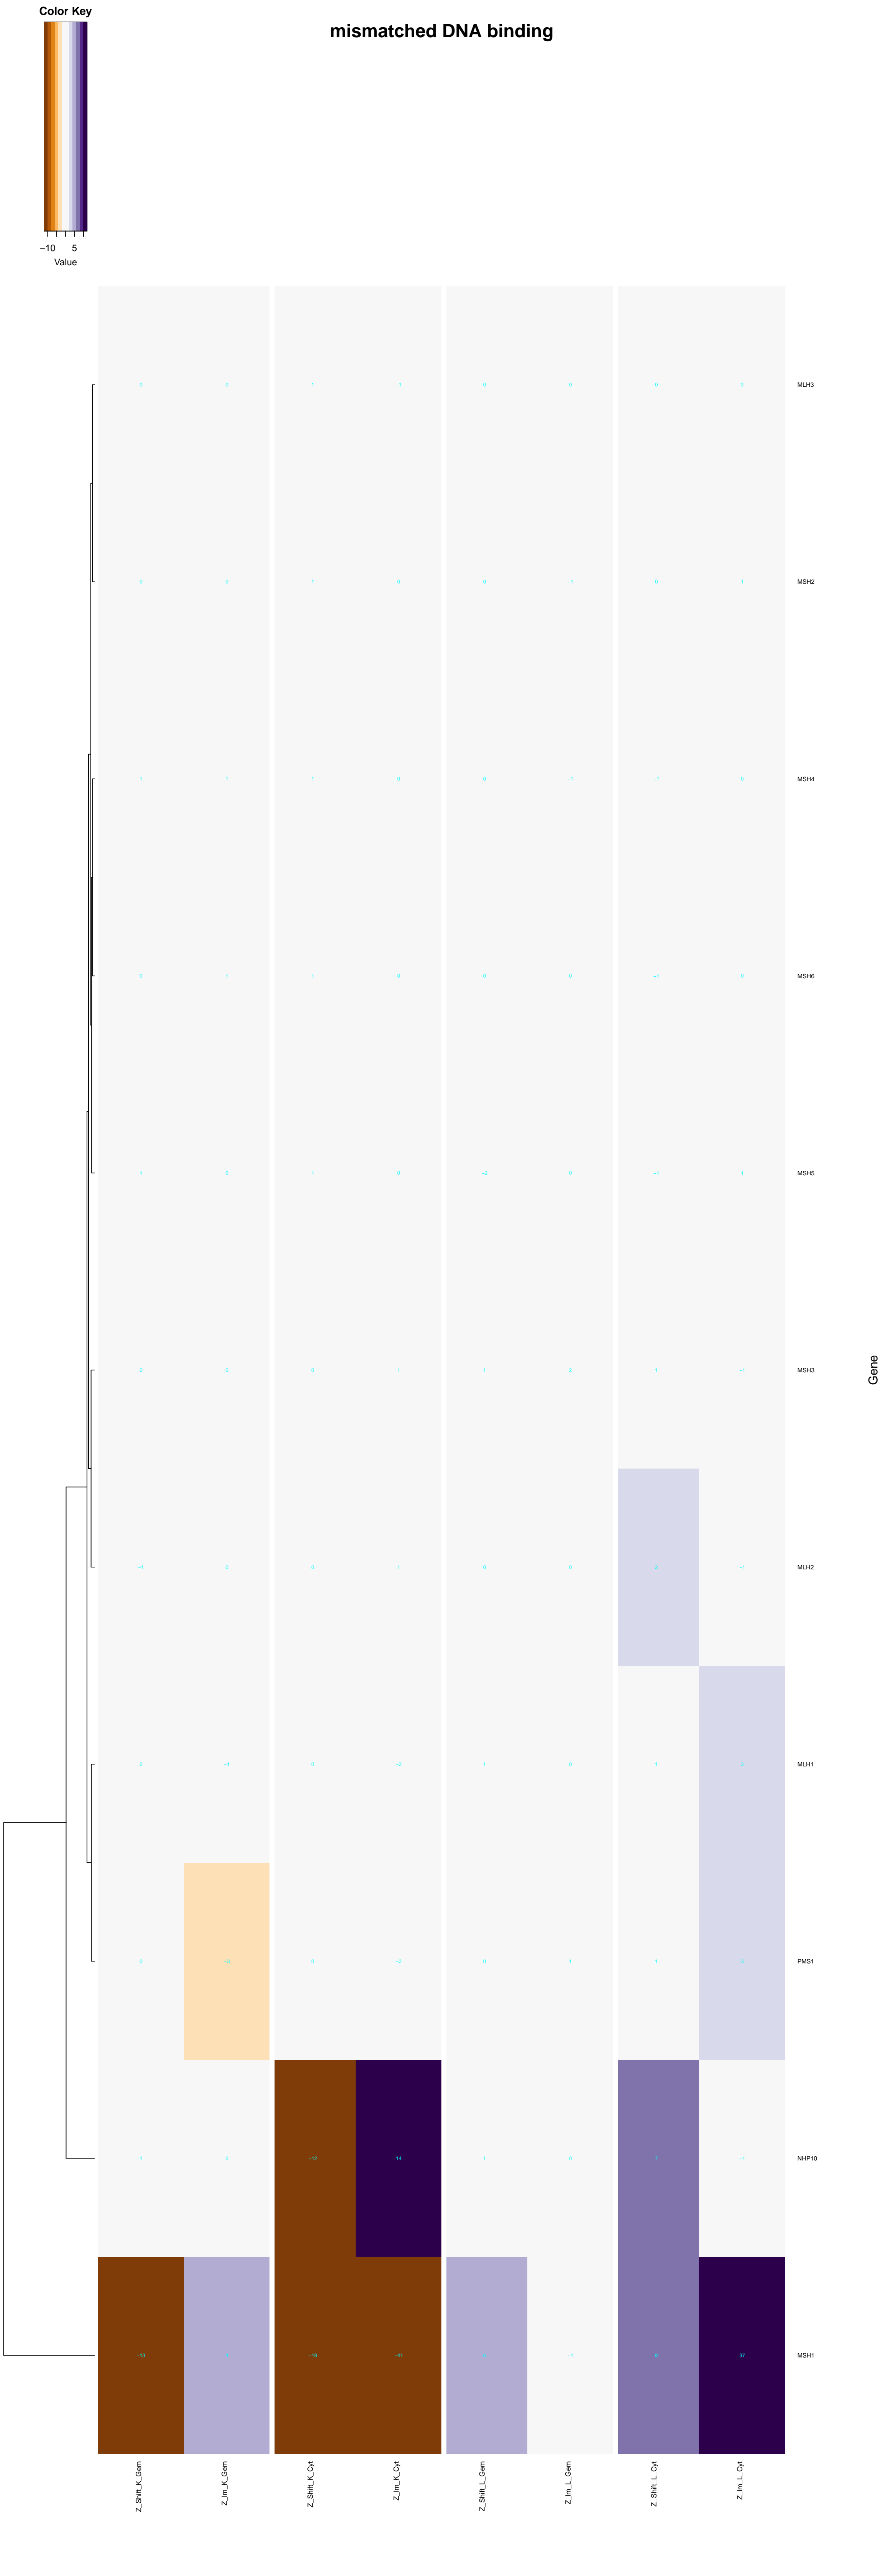

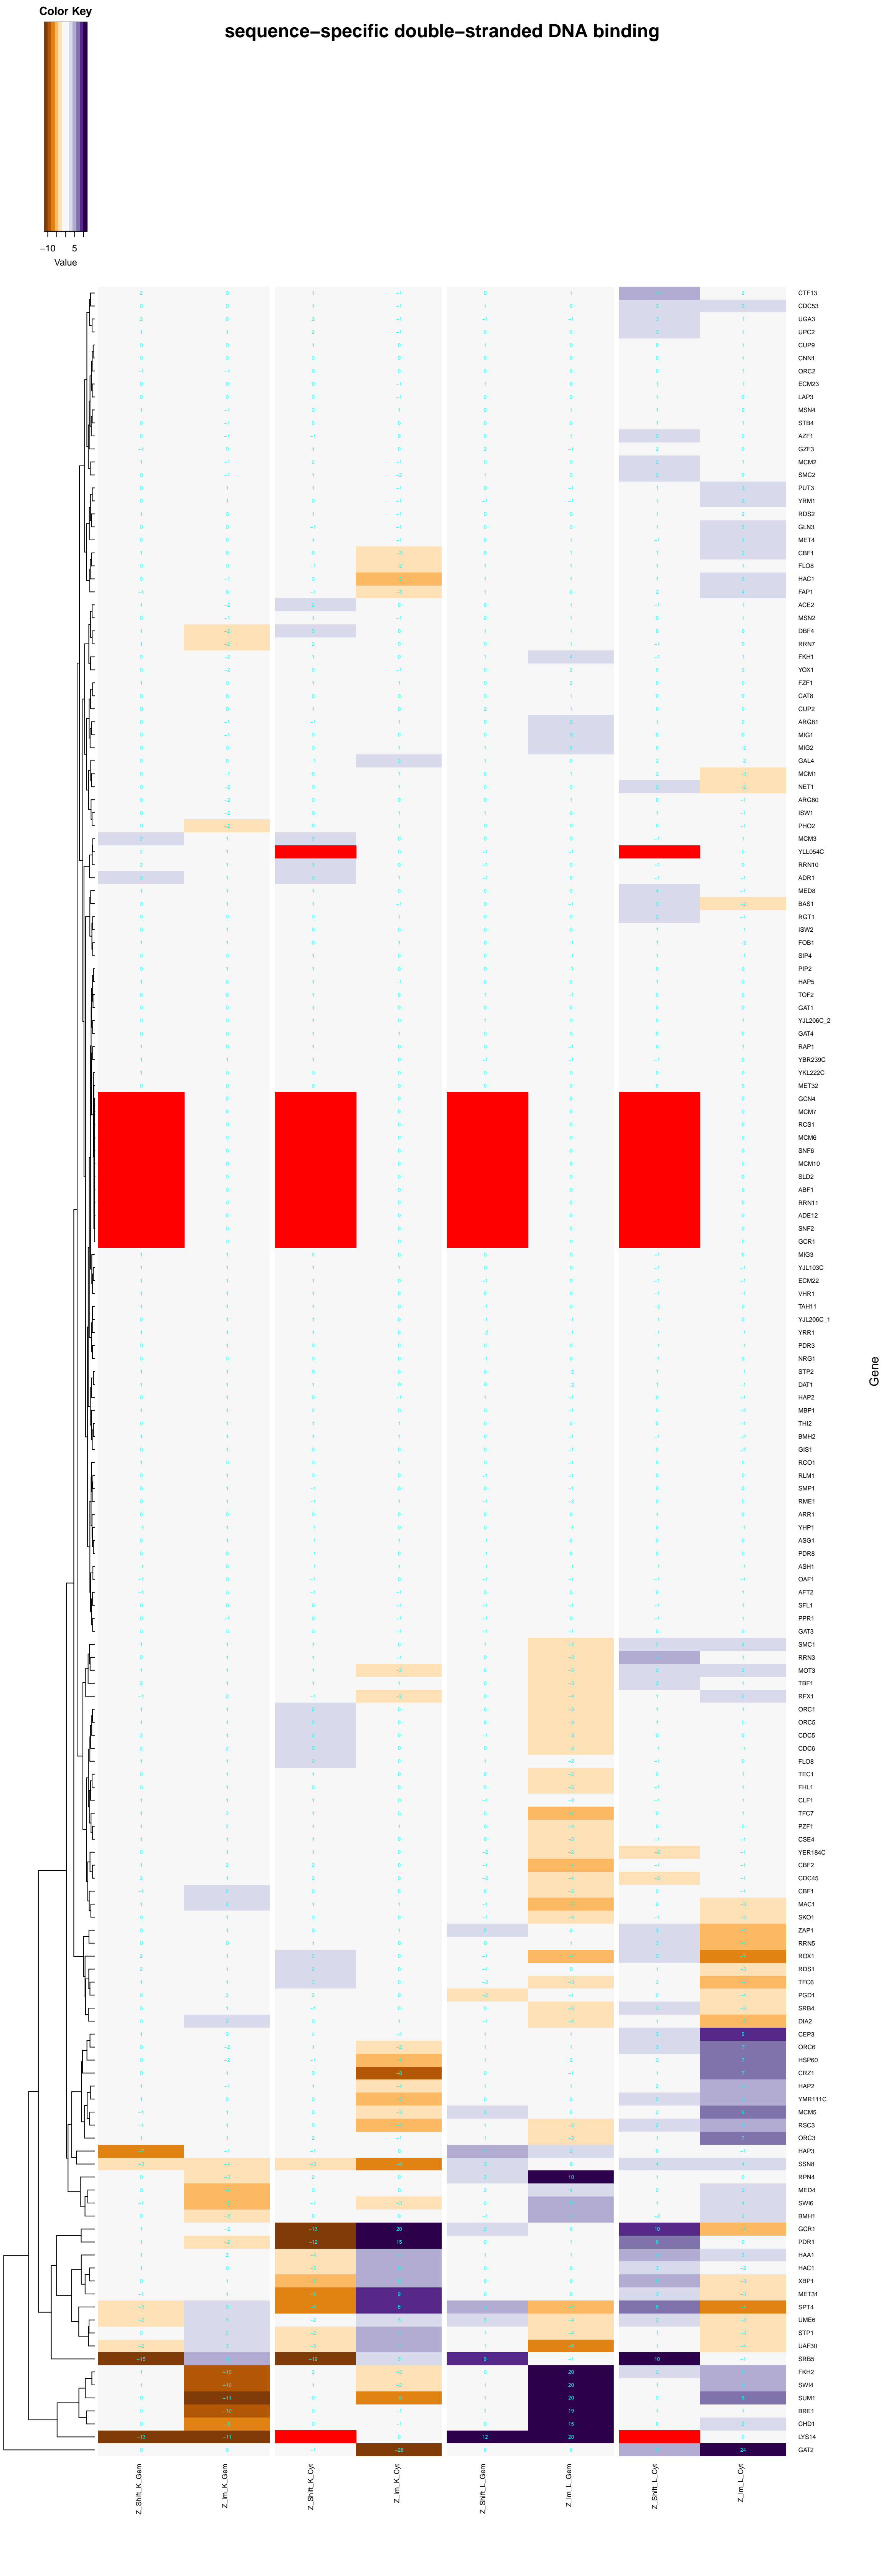

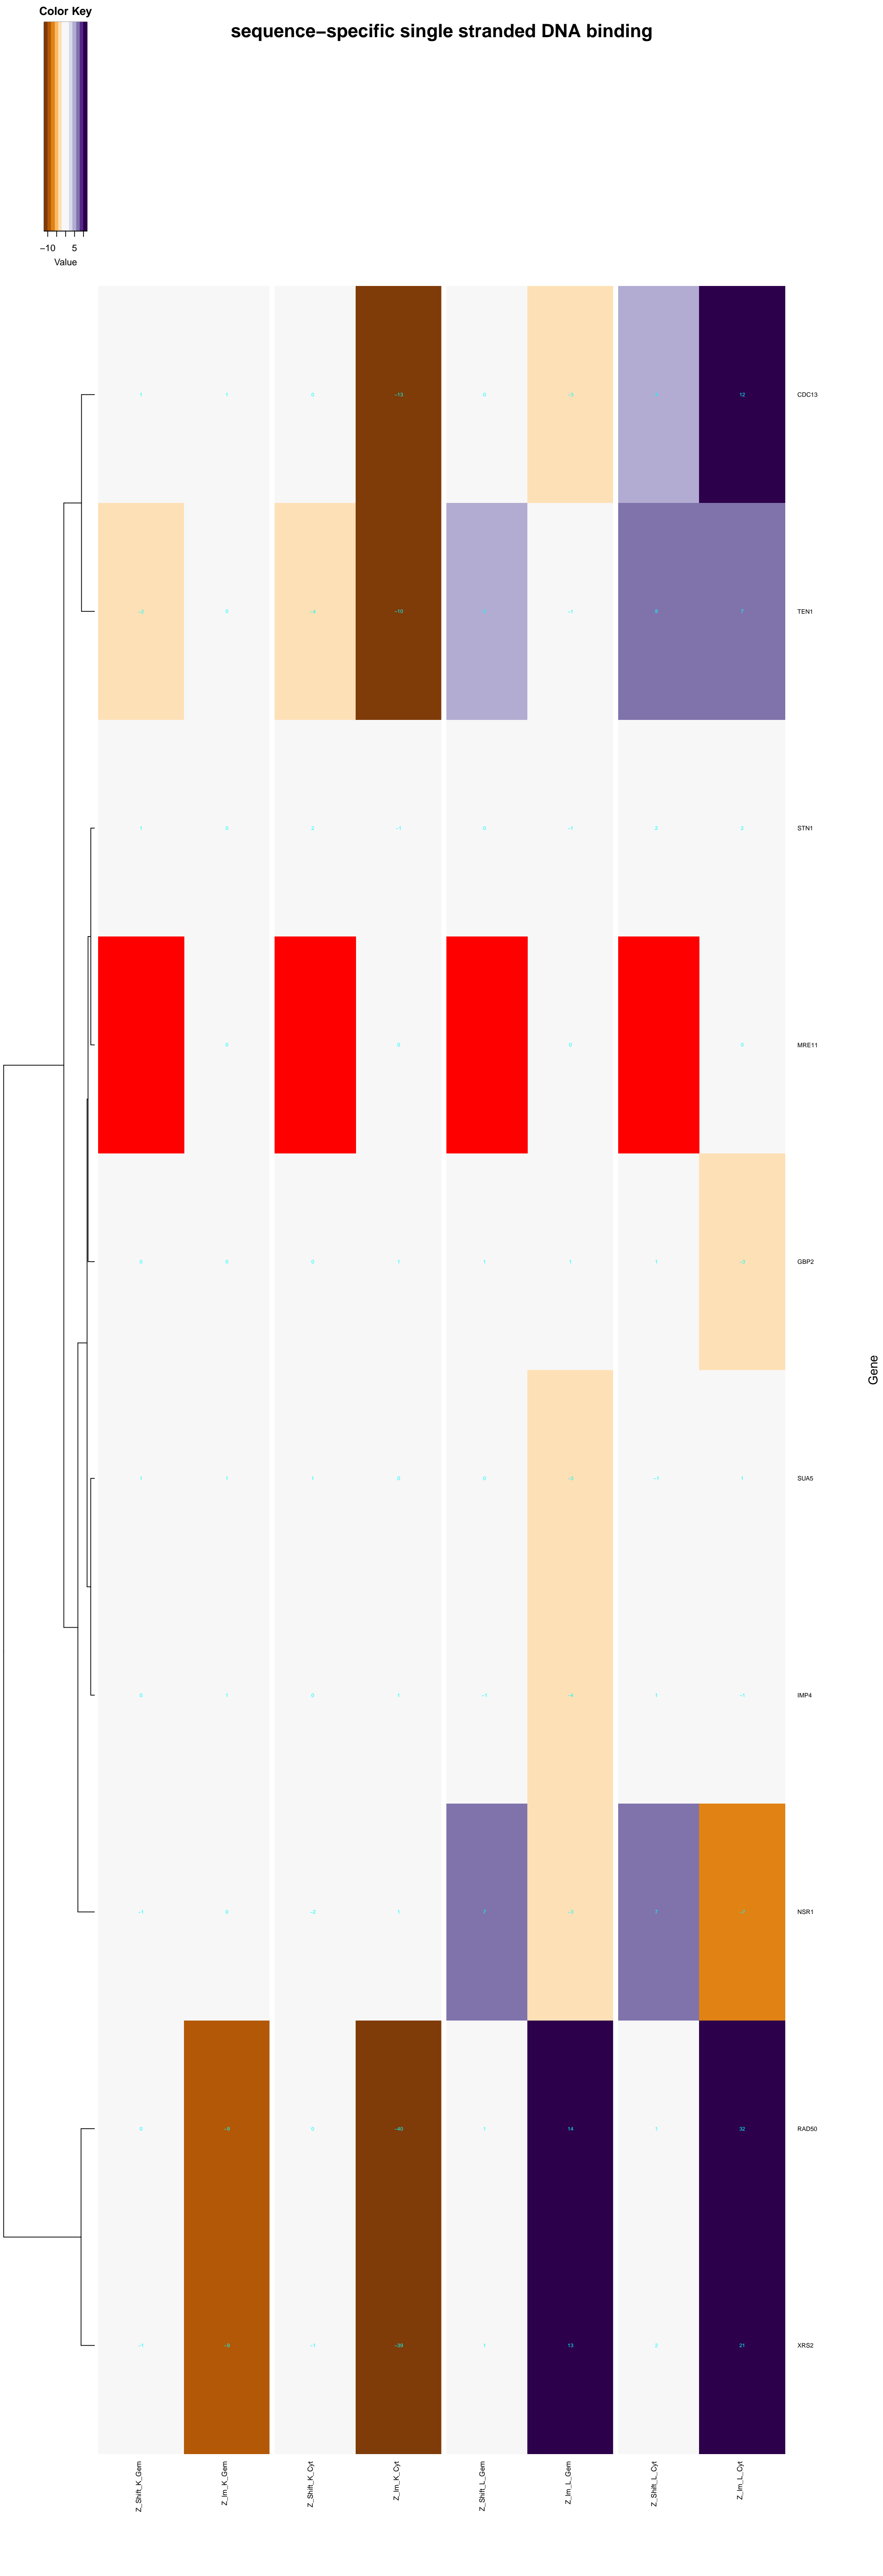

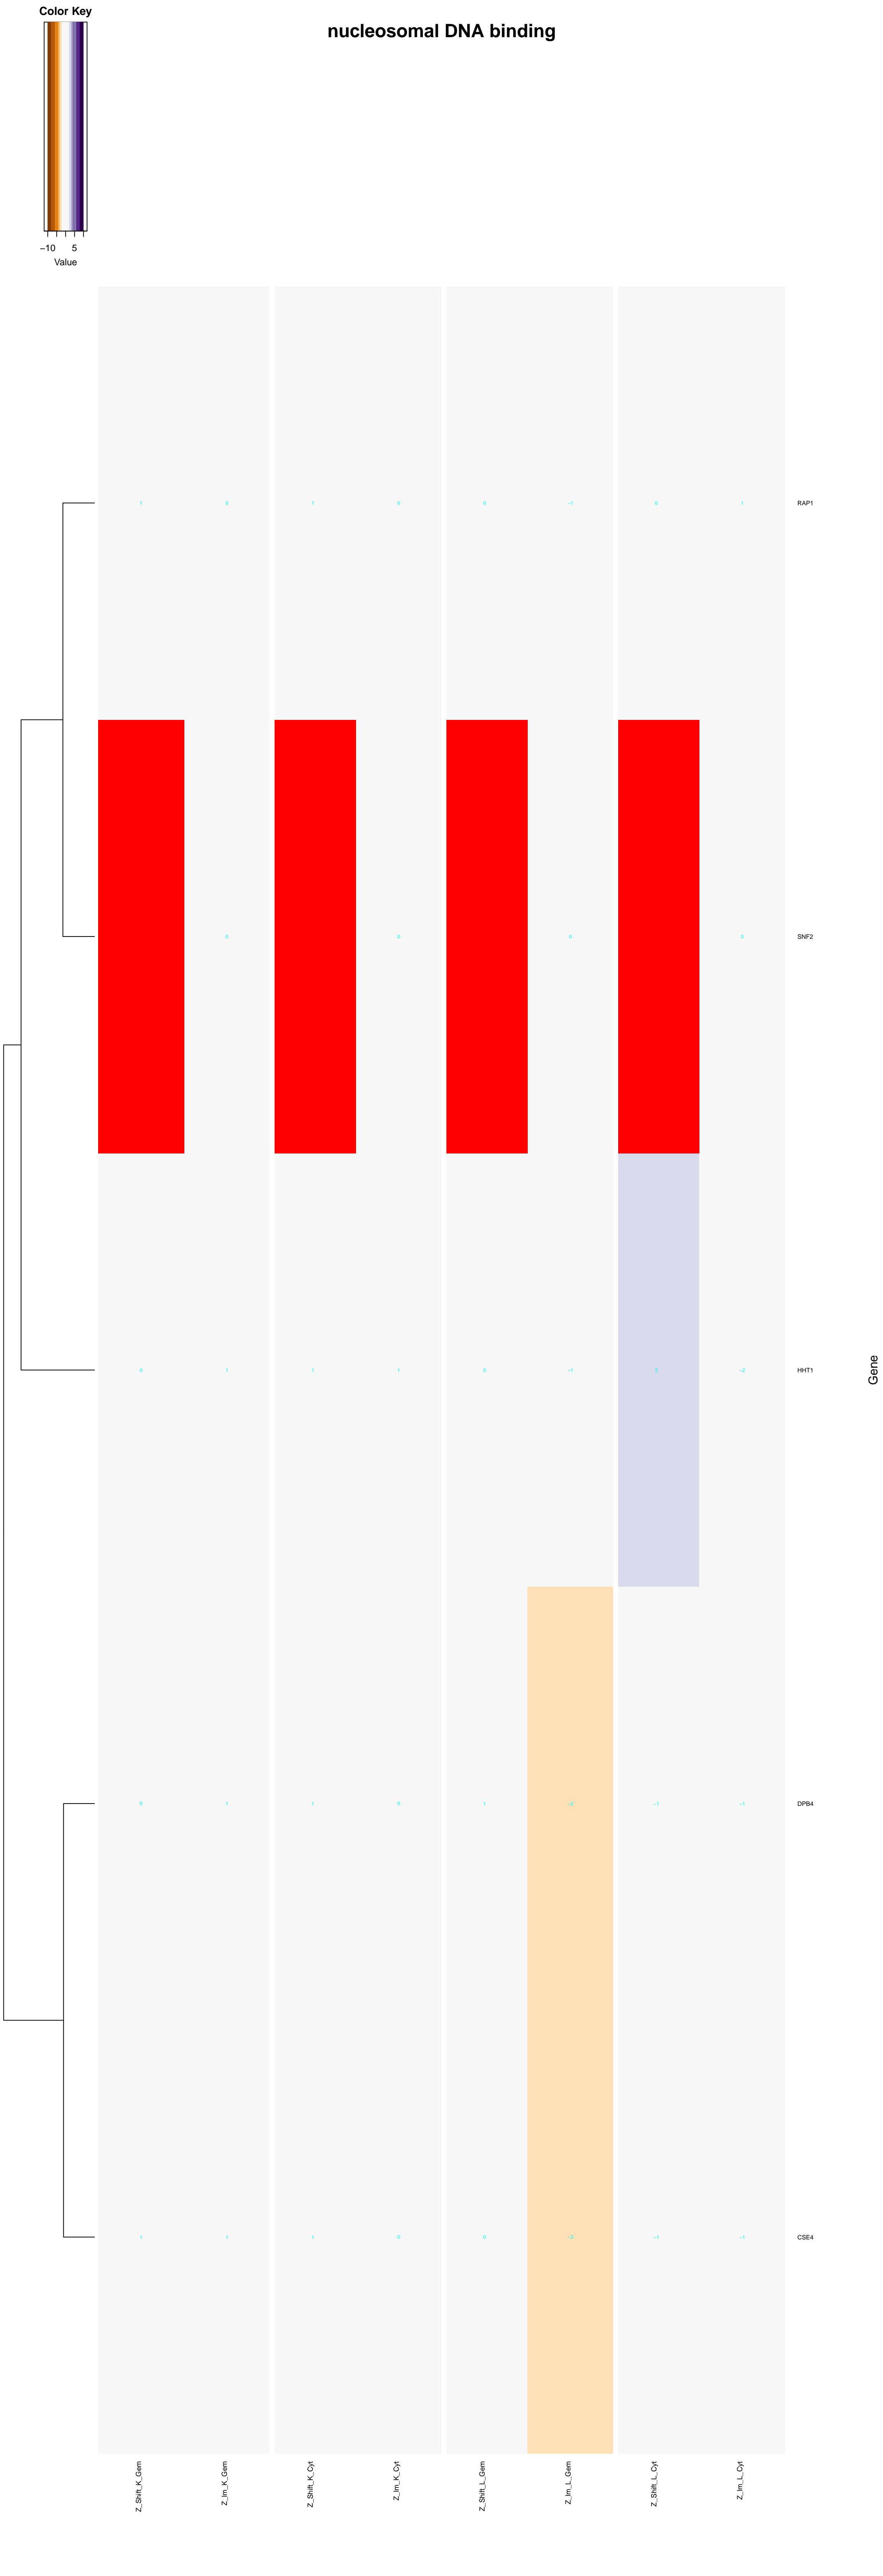

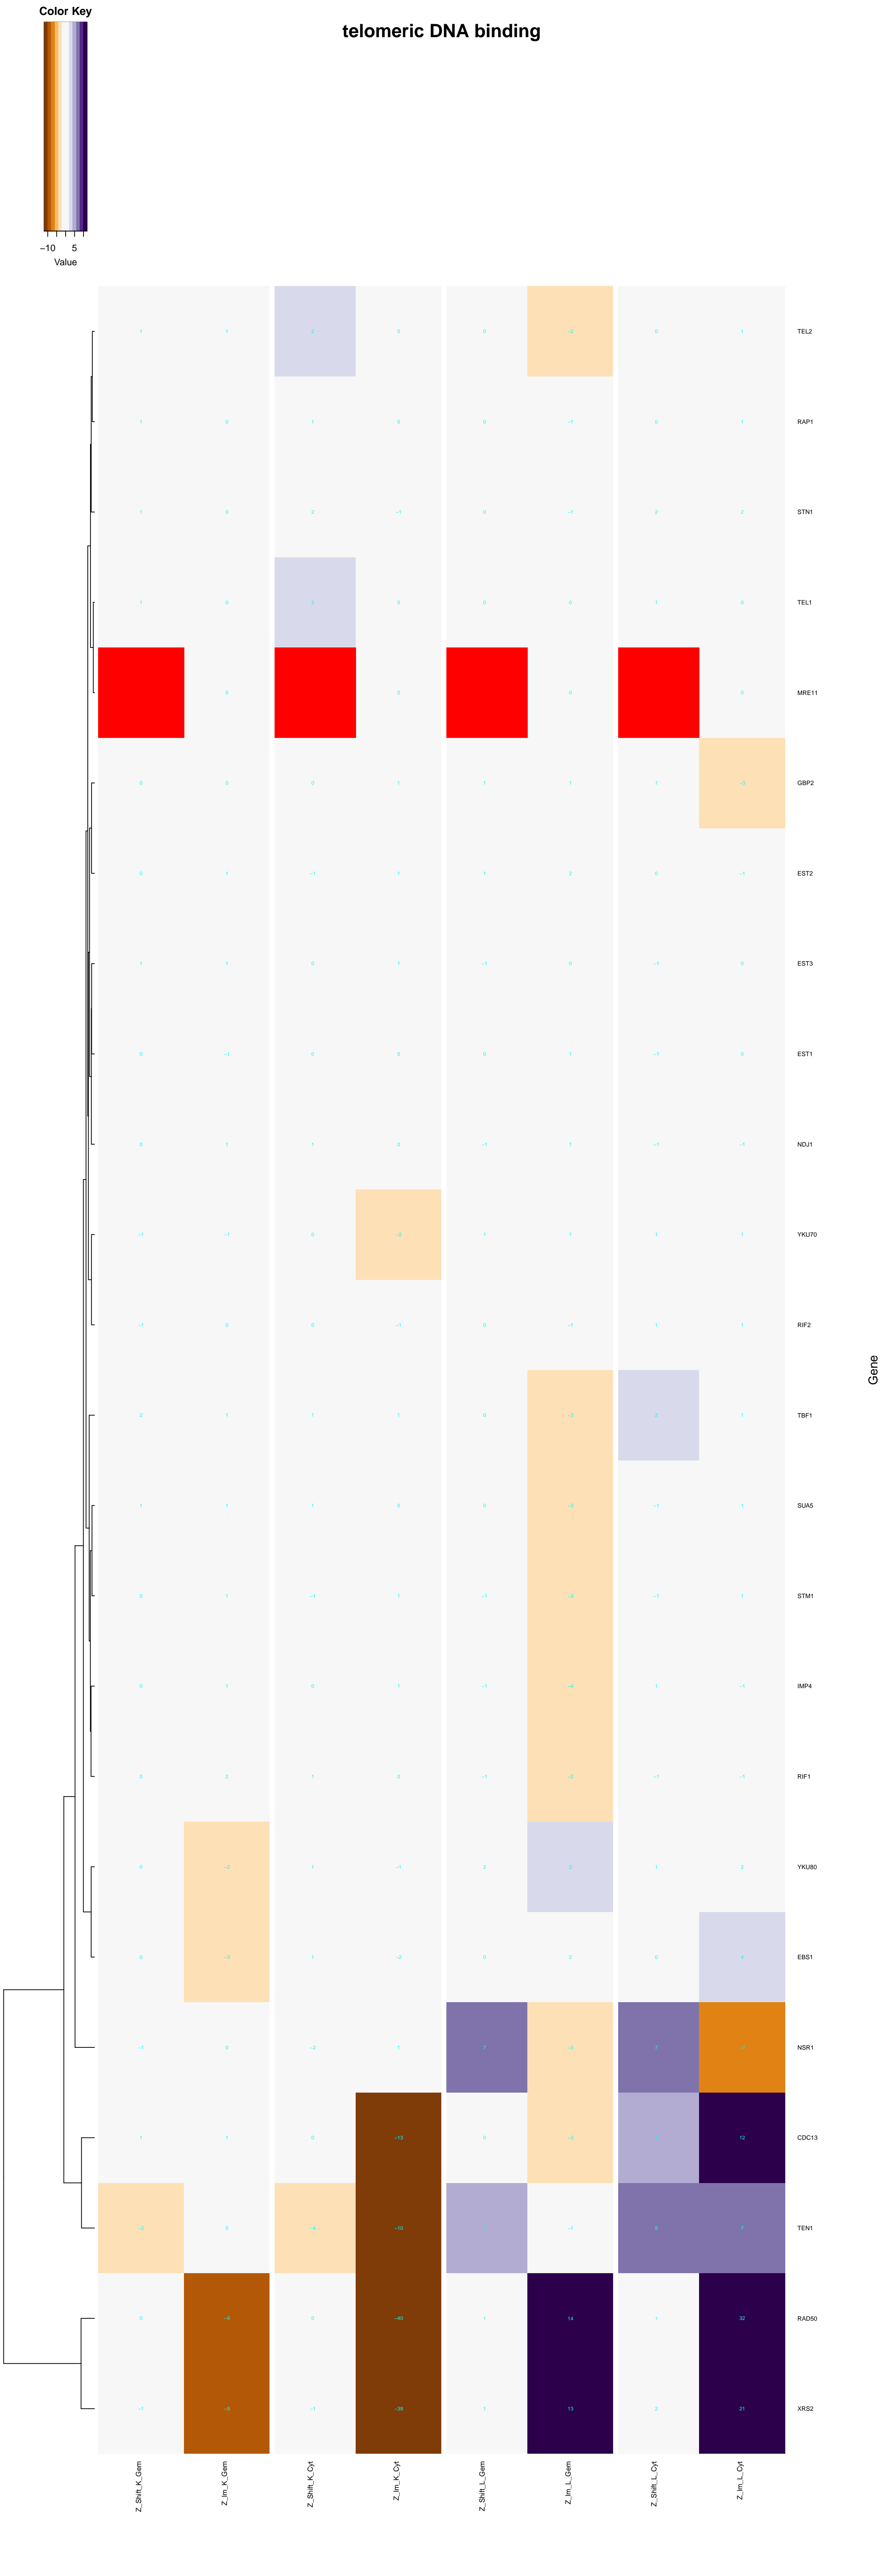

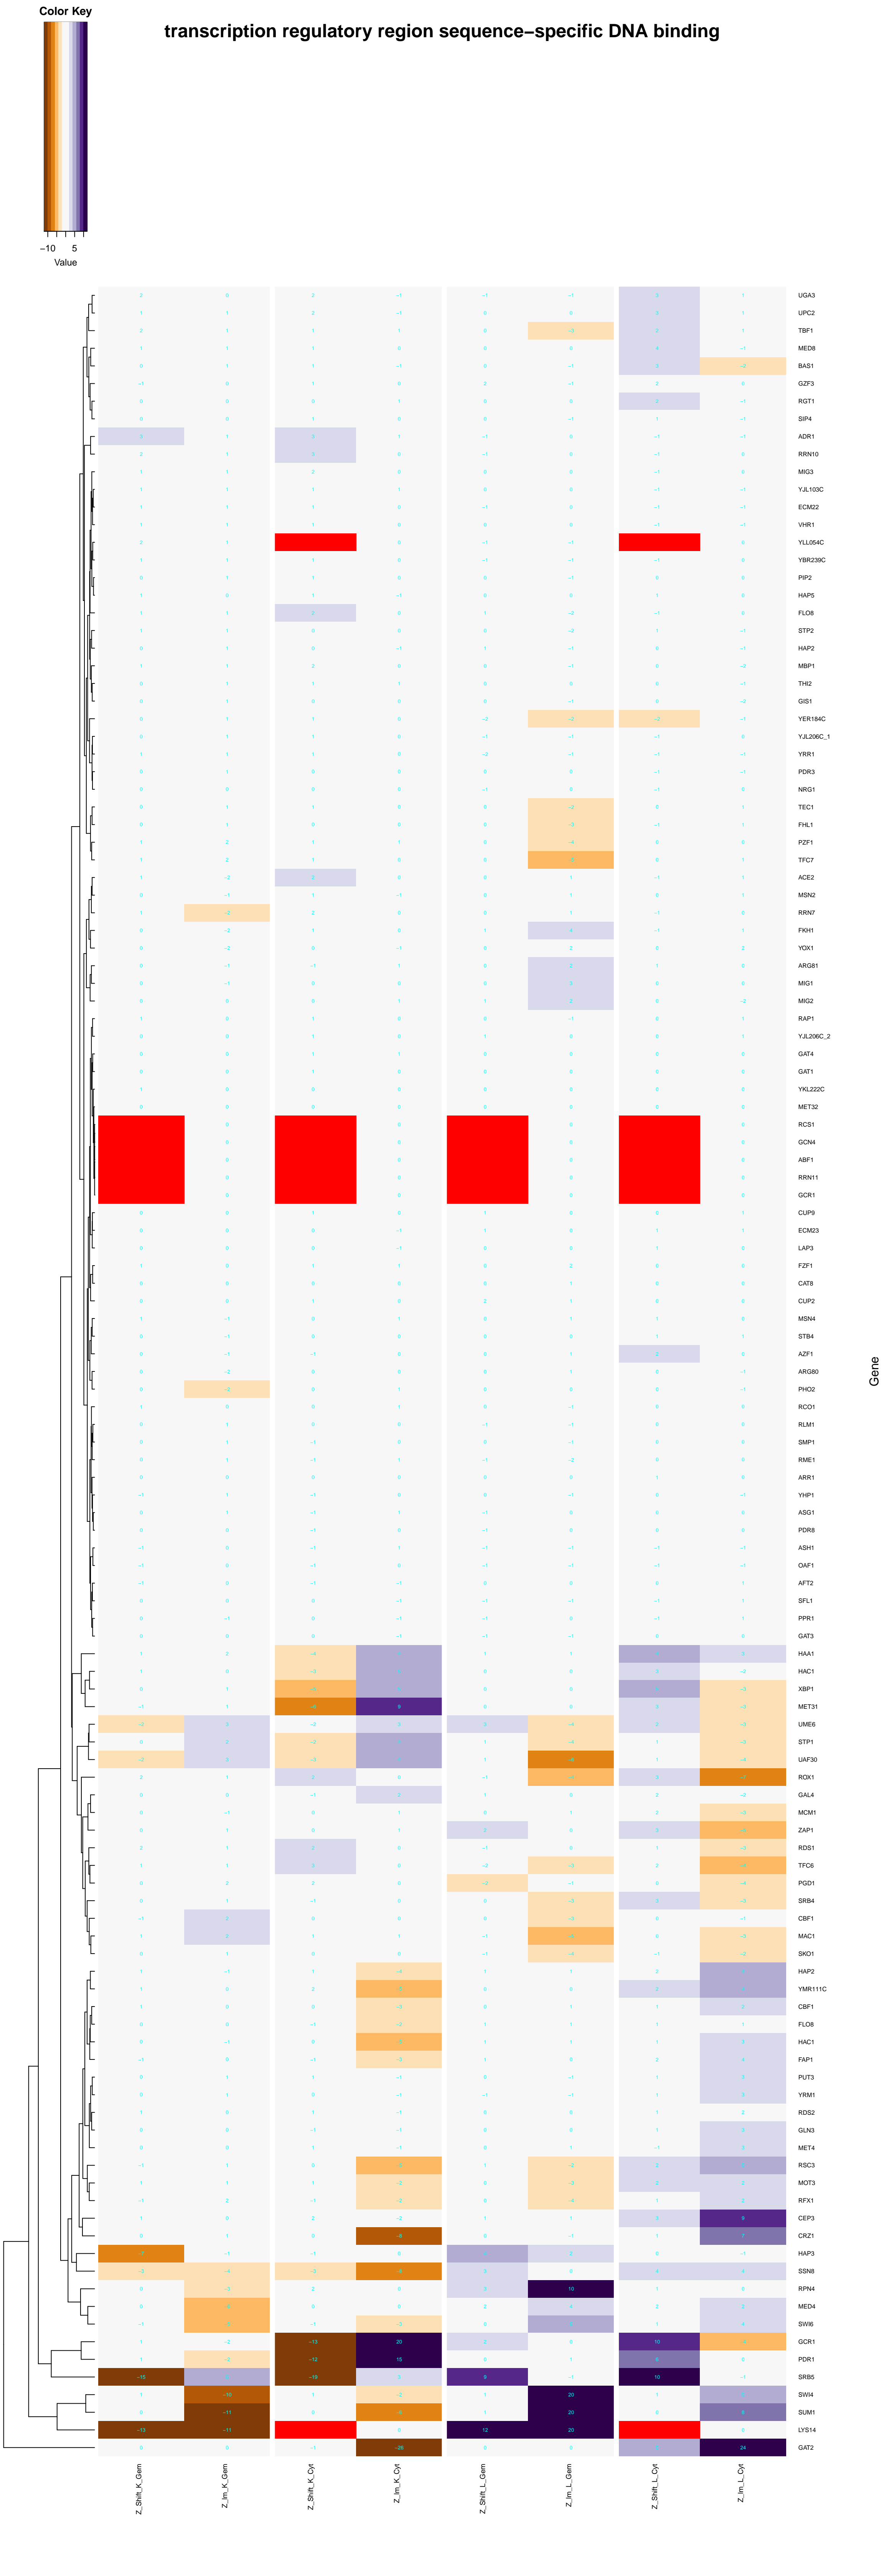

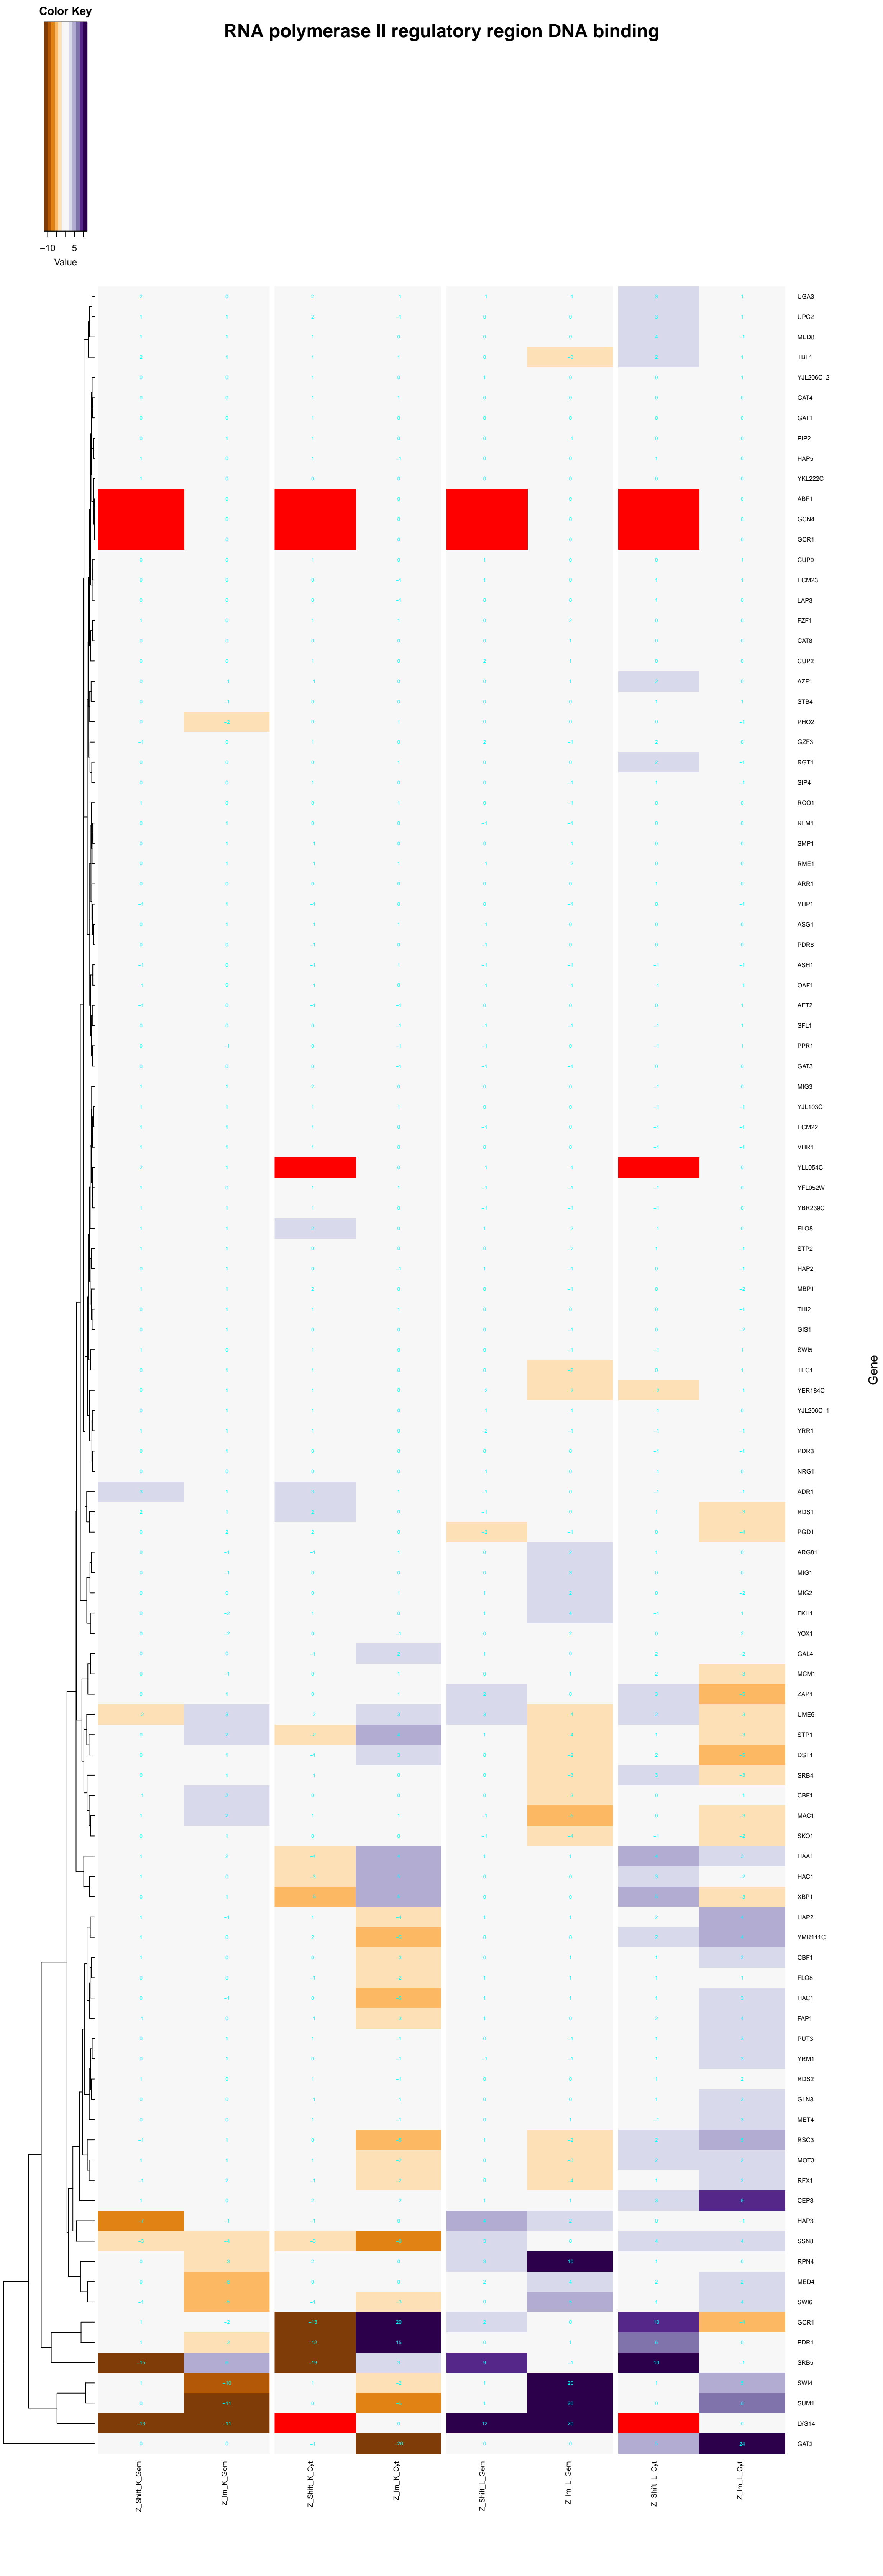

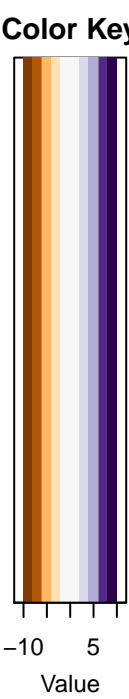

RNA polymerase I regulatory region DNA binding

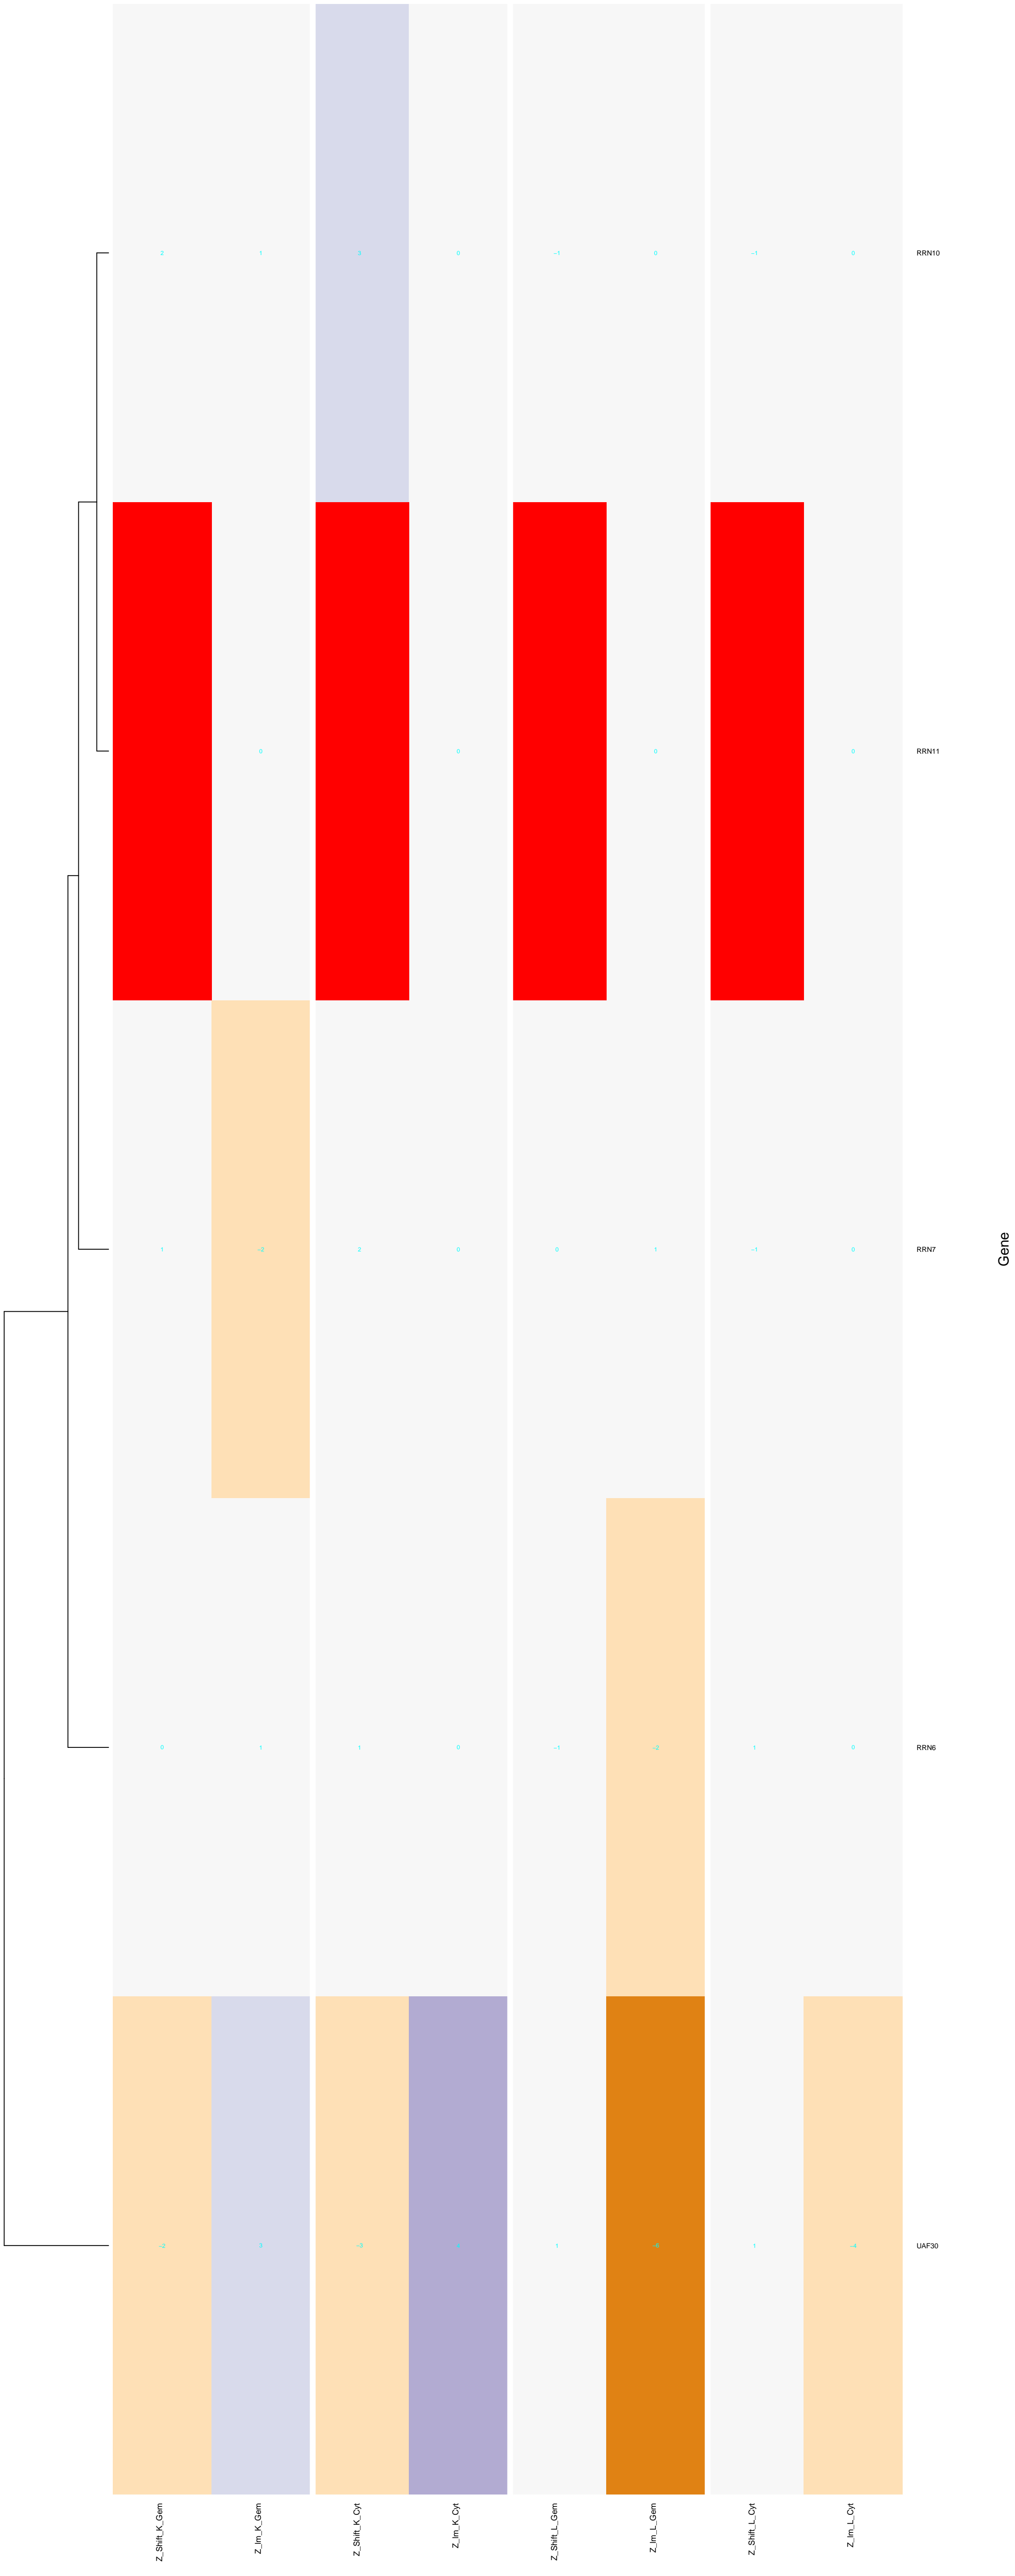

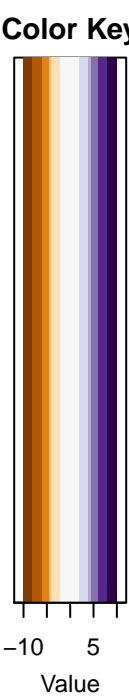

RNA polymerase III regulatory region DNA binding

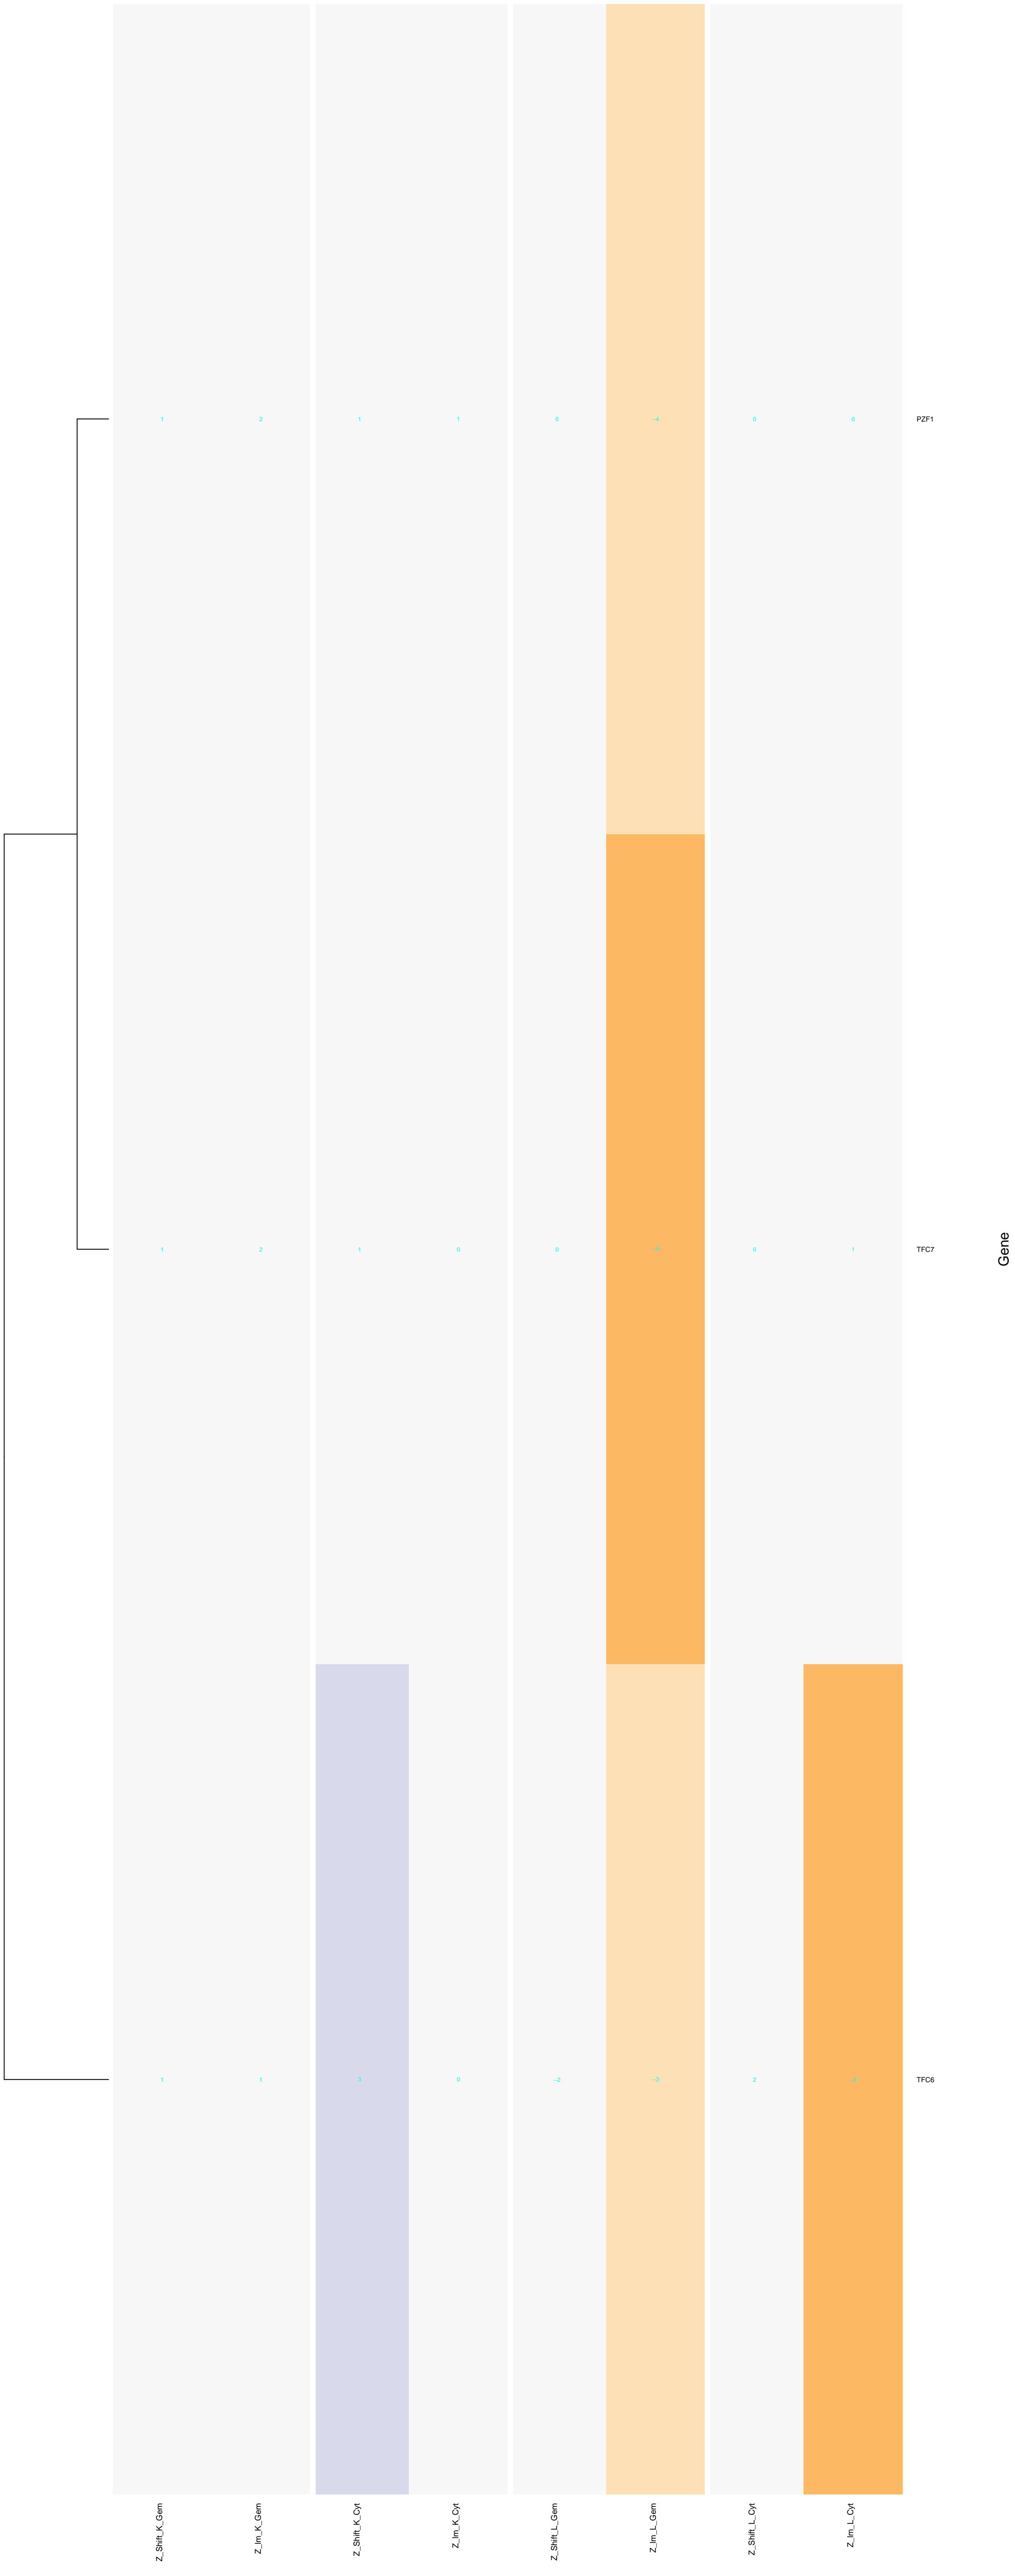

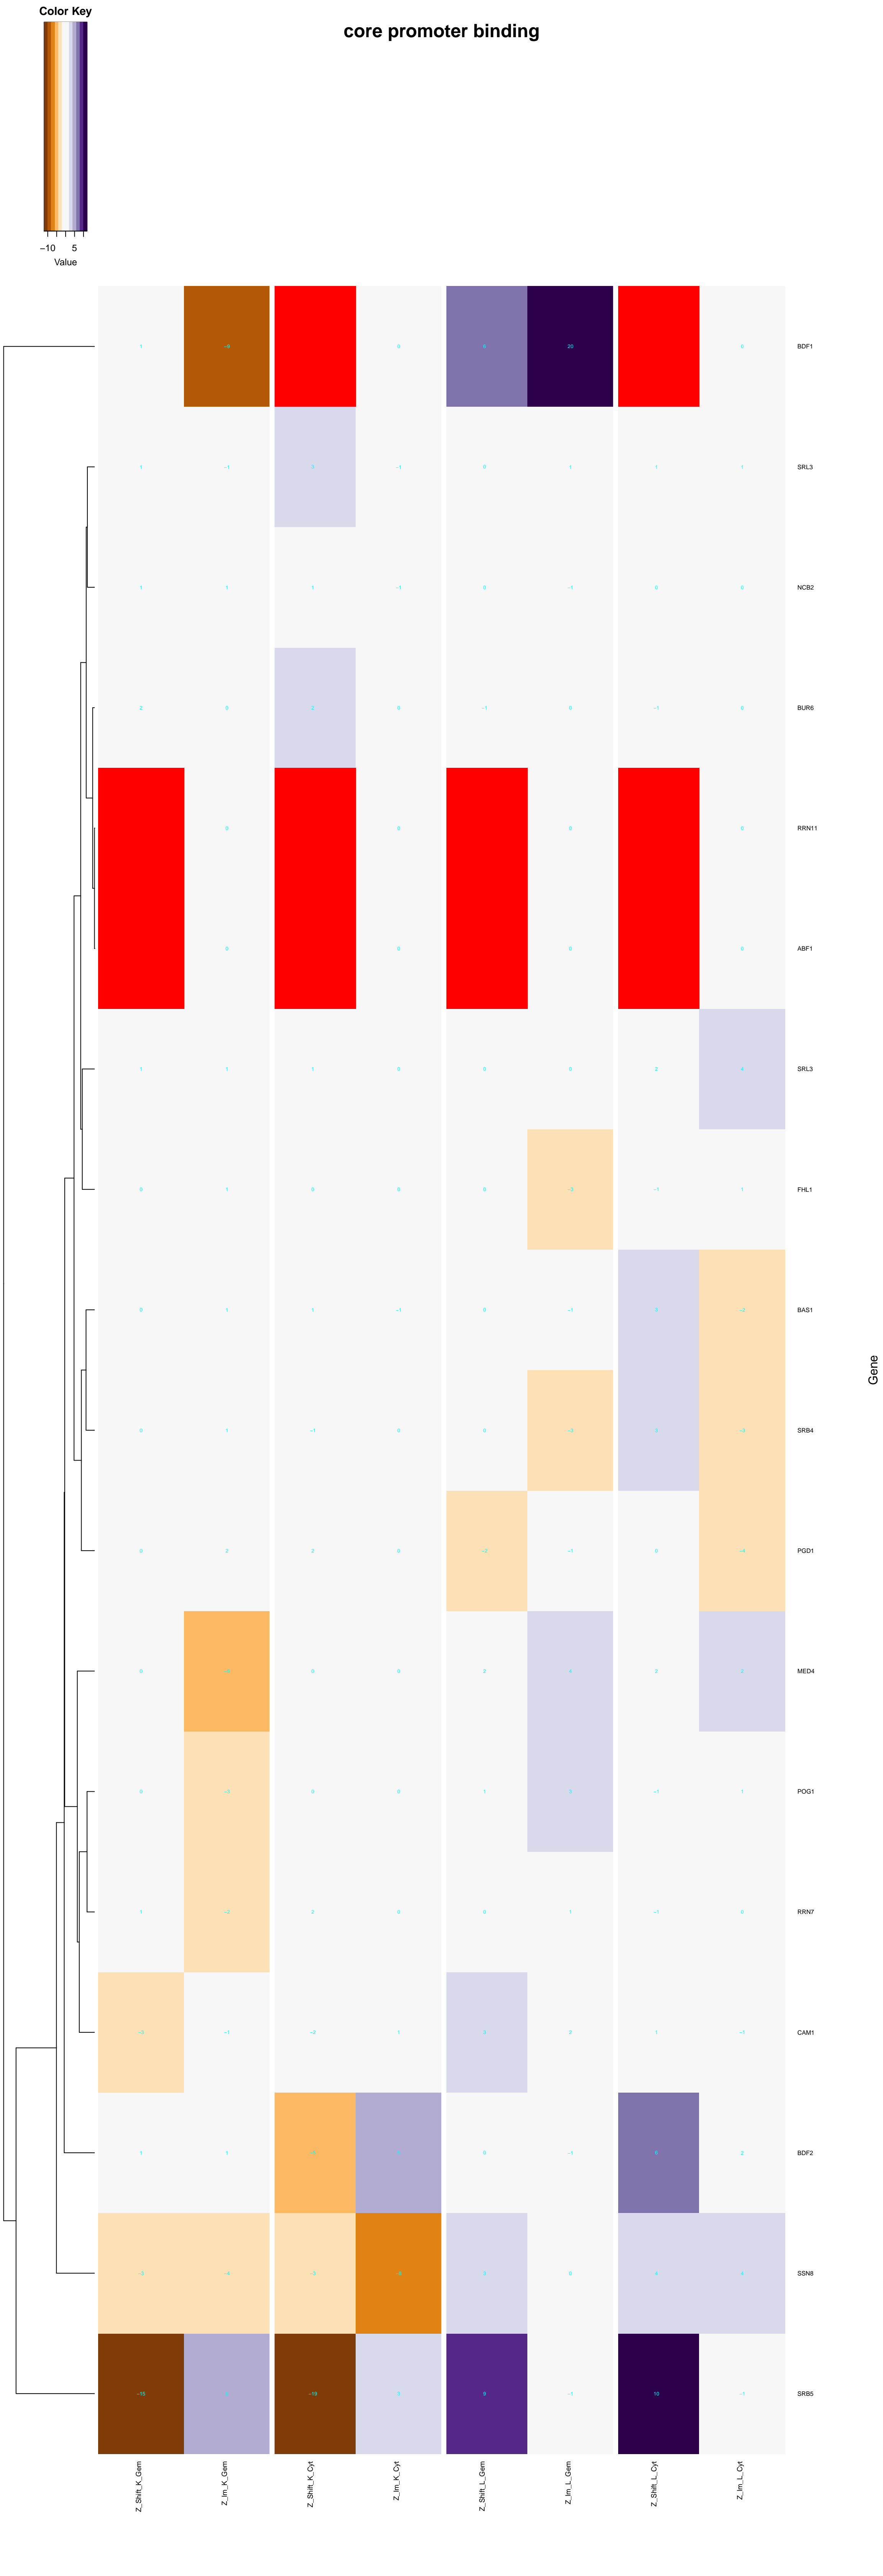

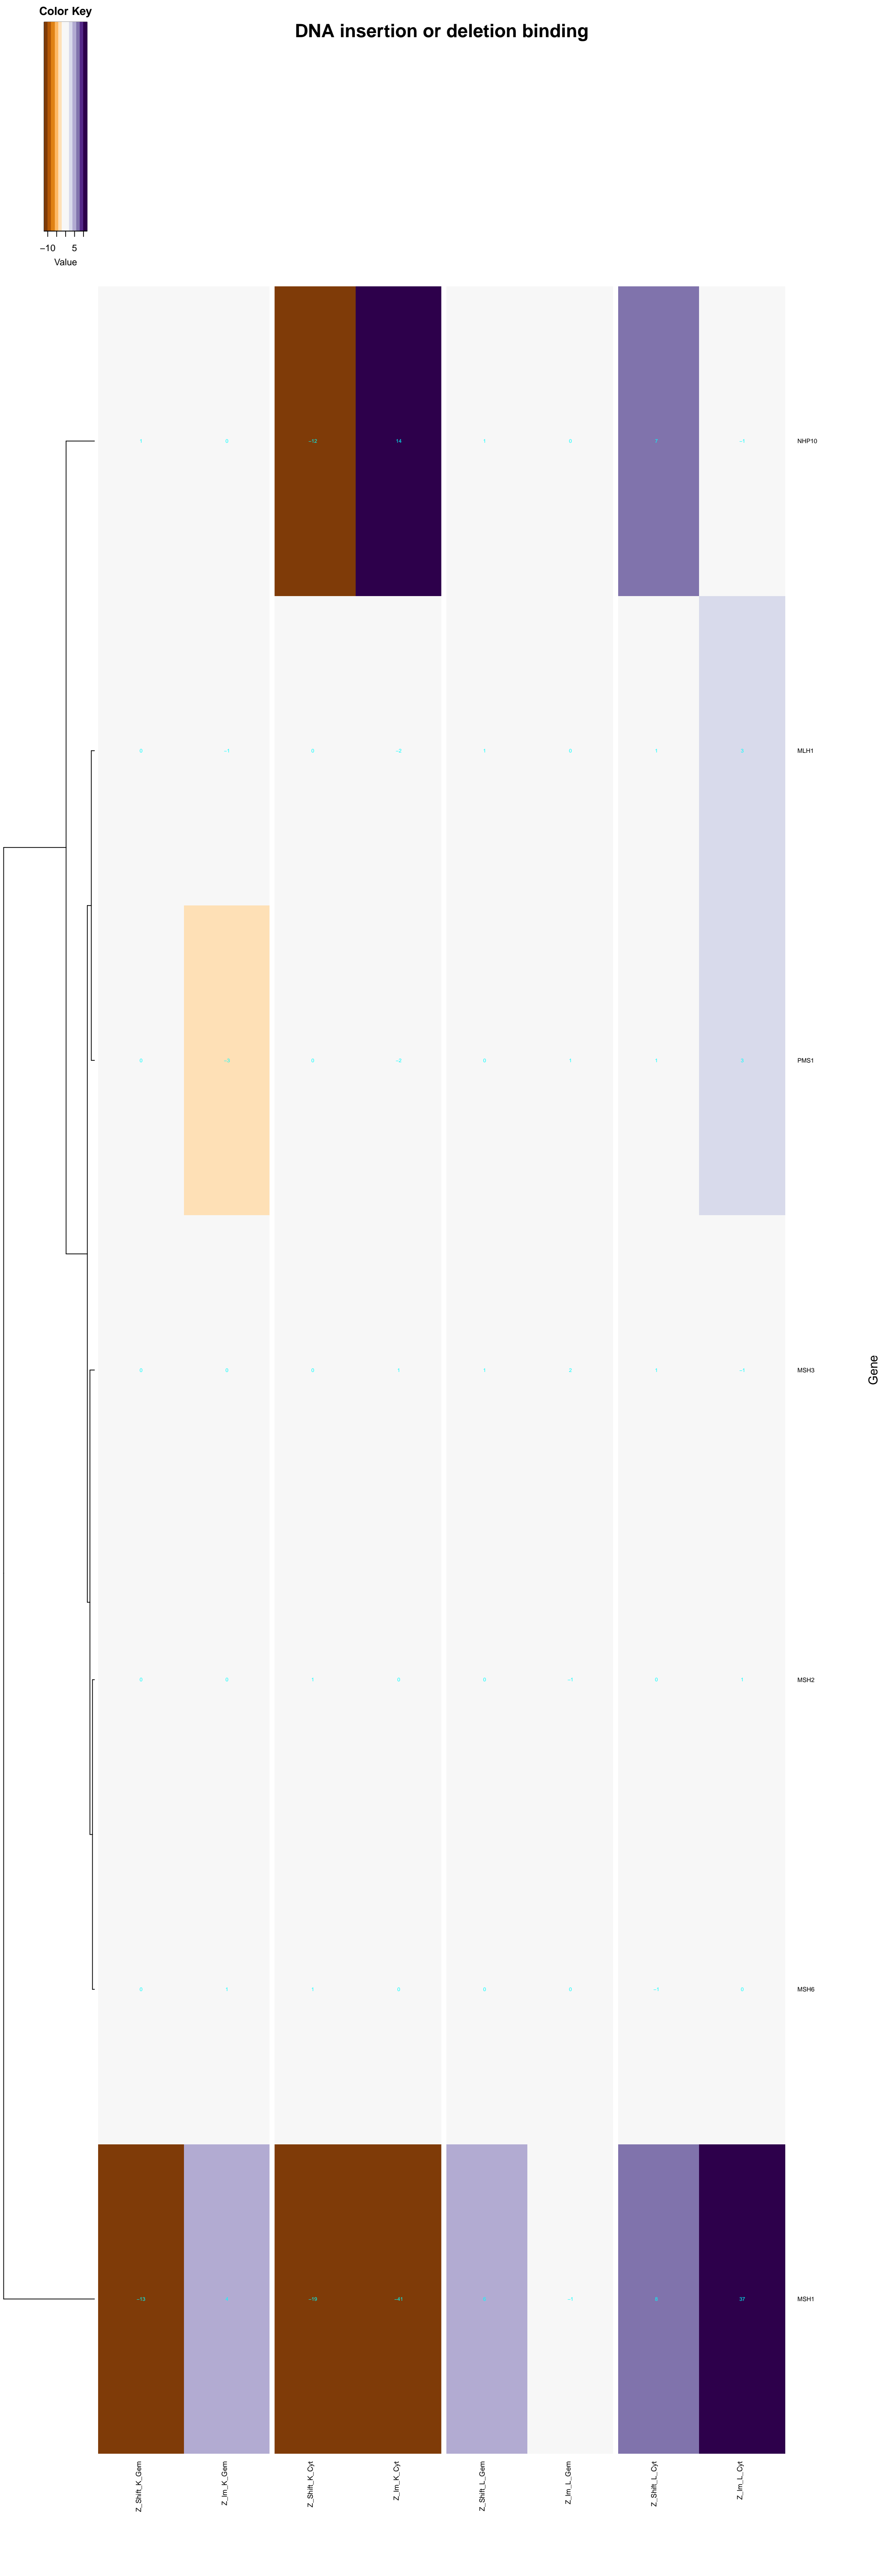



guanine/thymine mispair binding

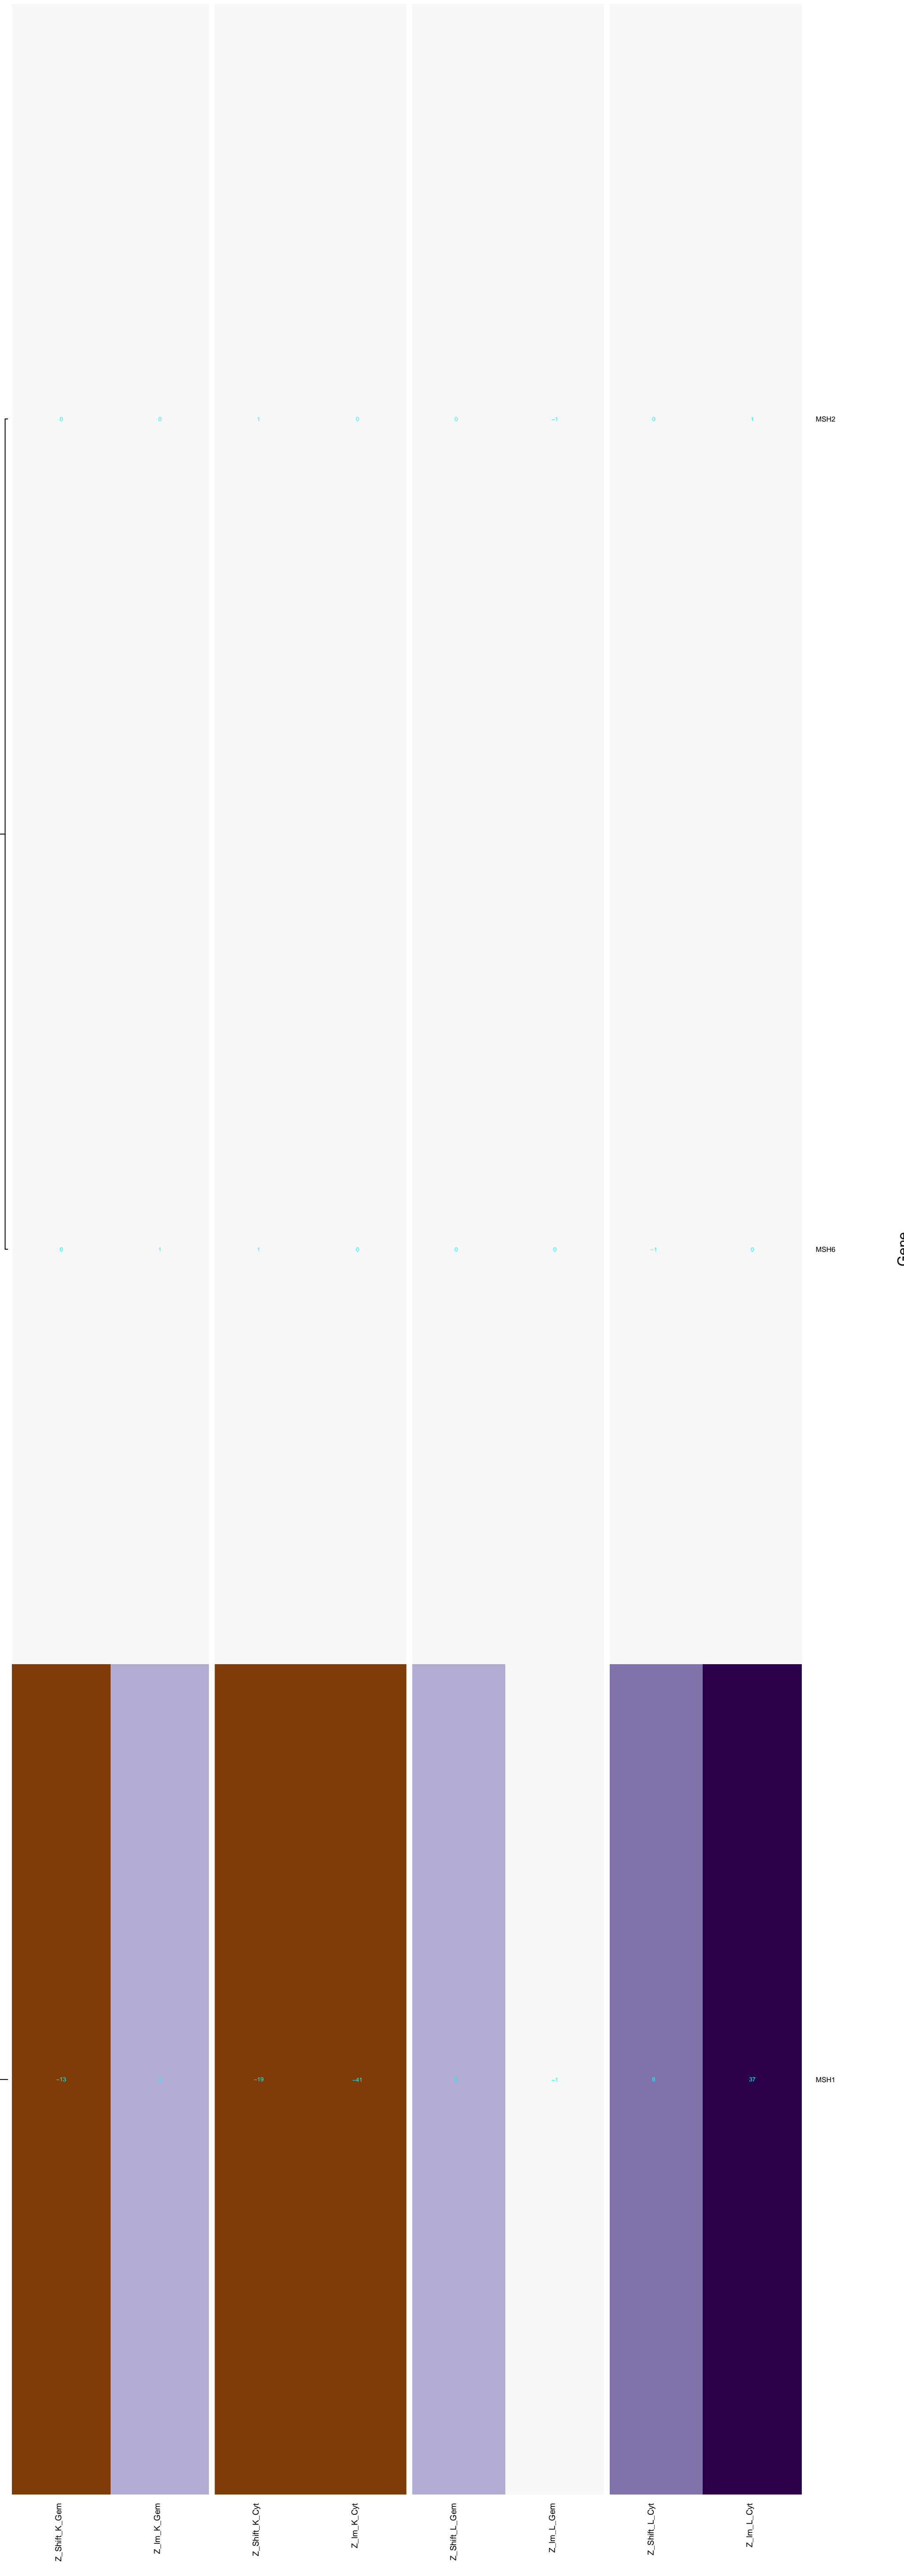

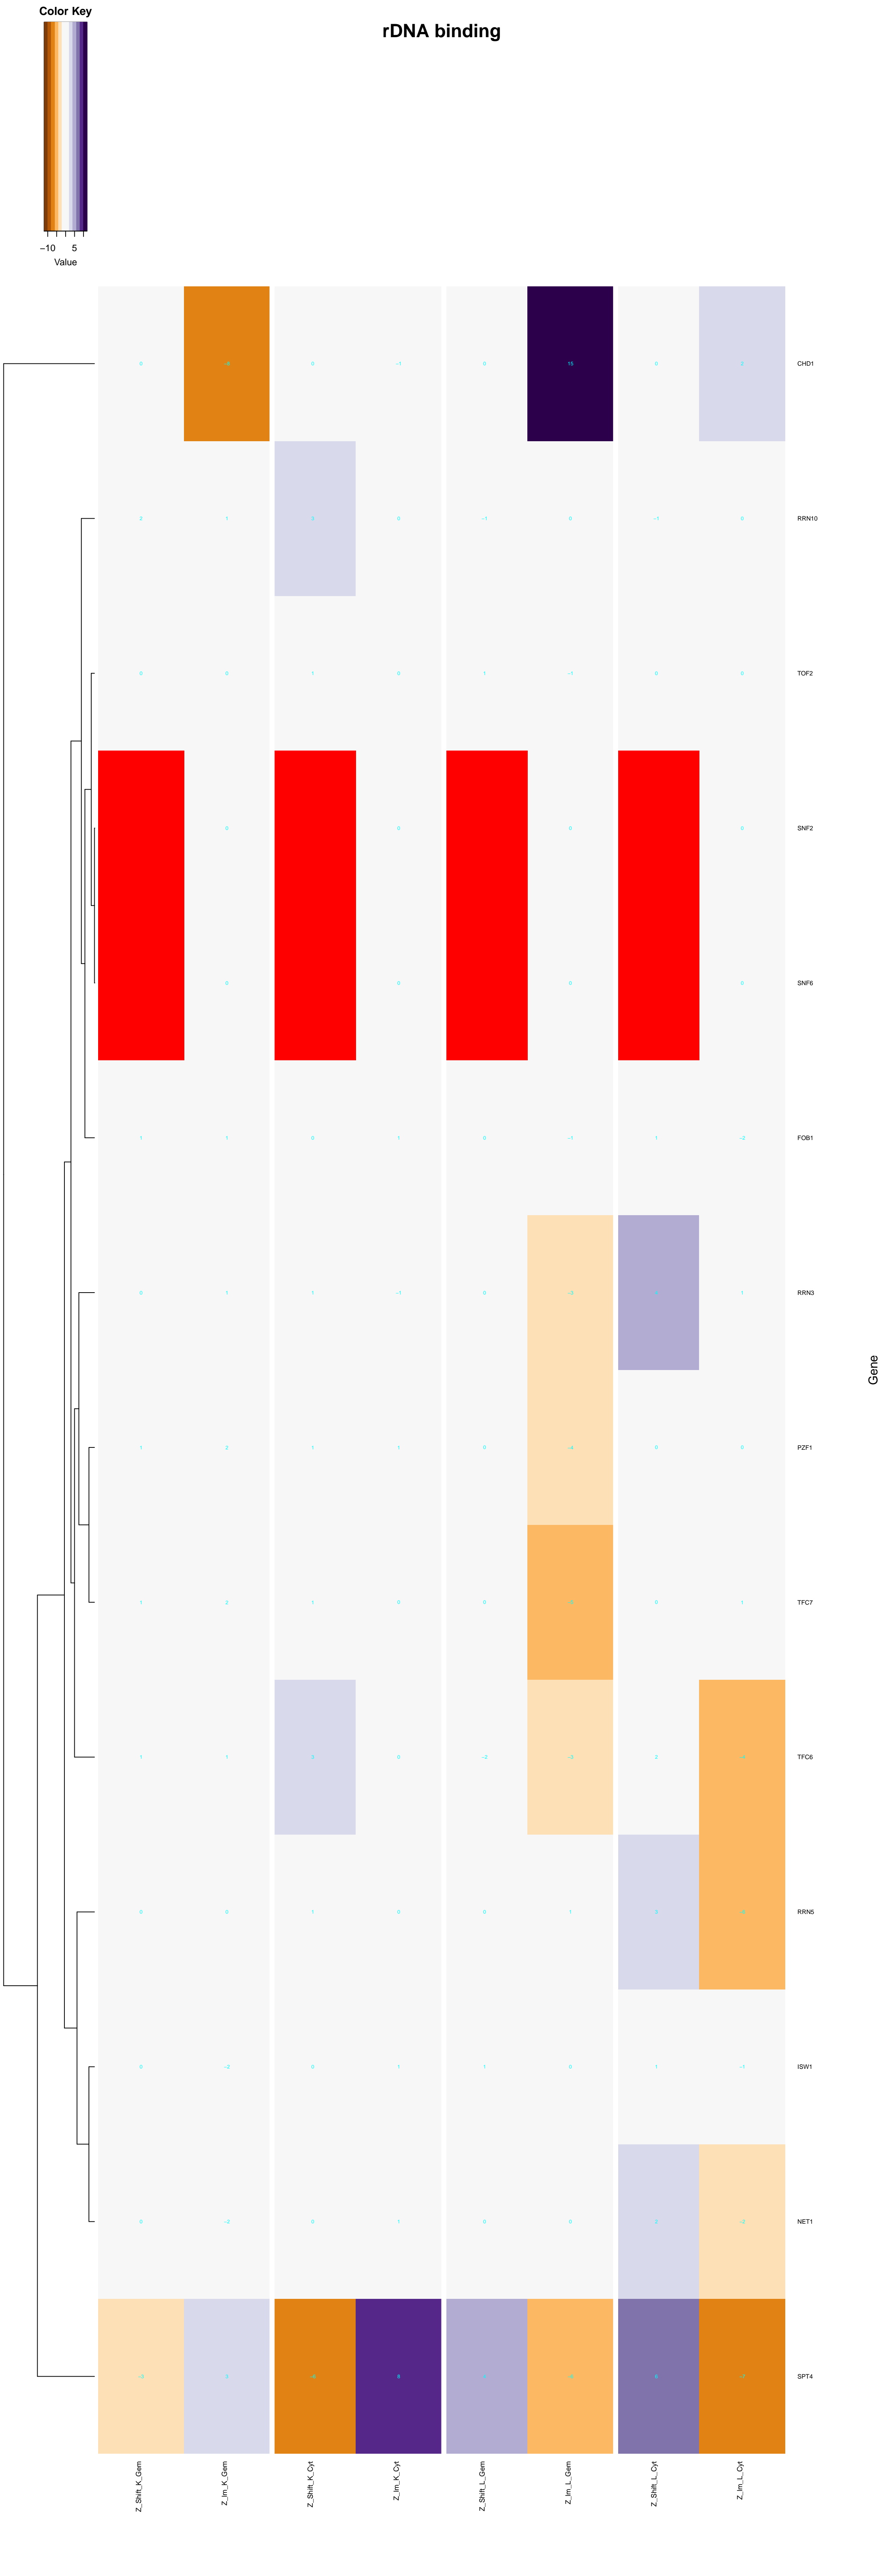

AT DNA binding

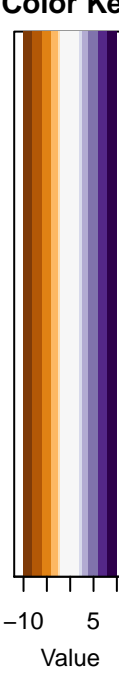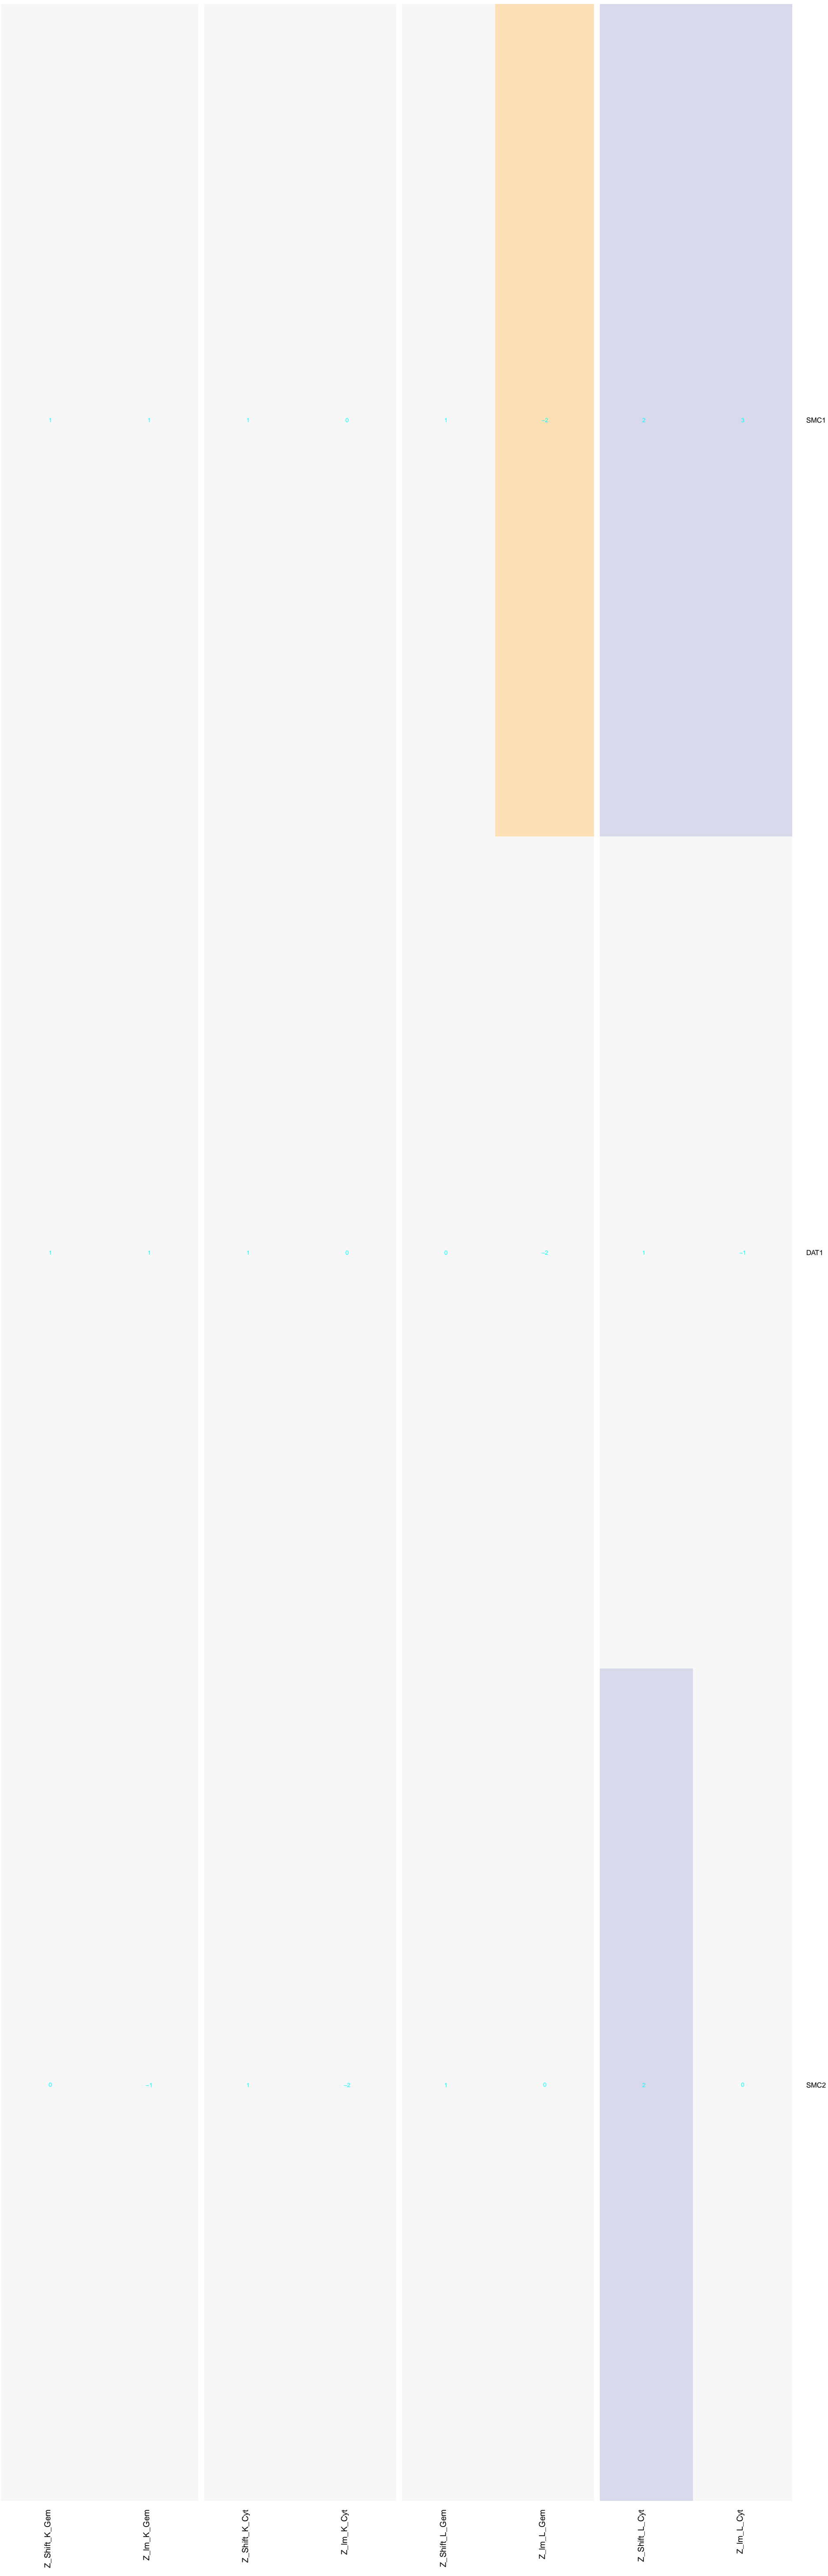

Gene

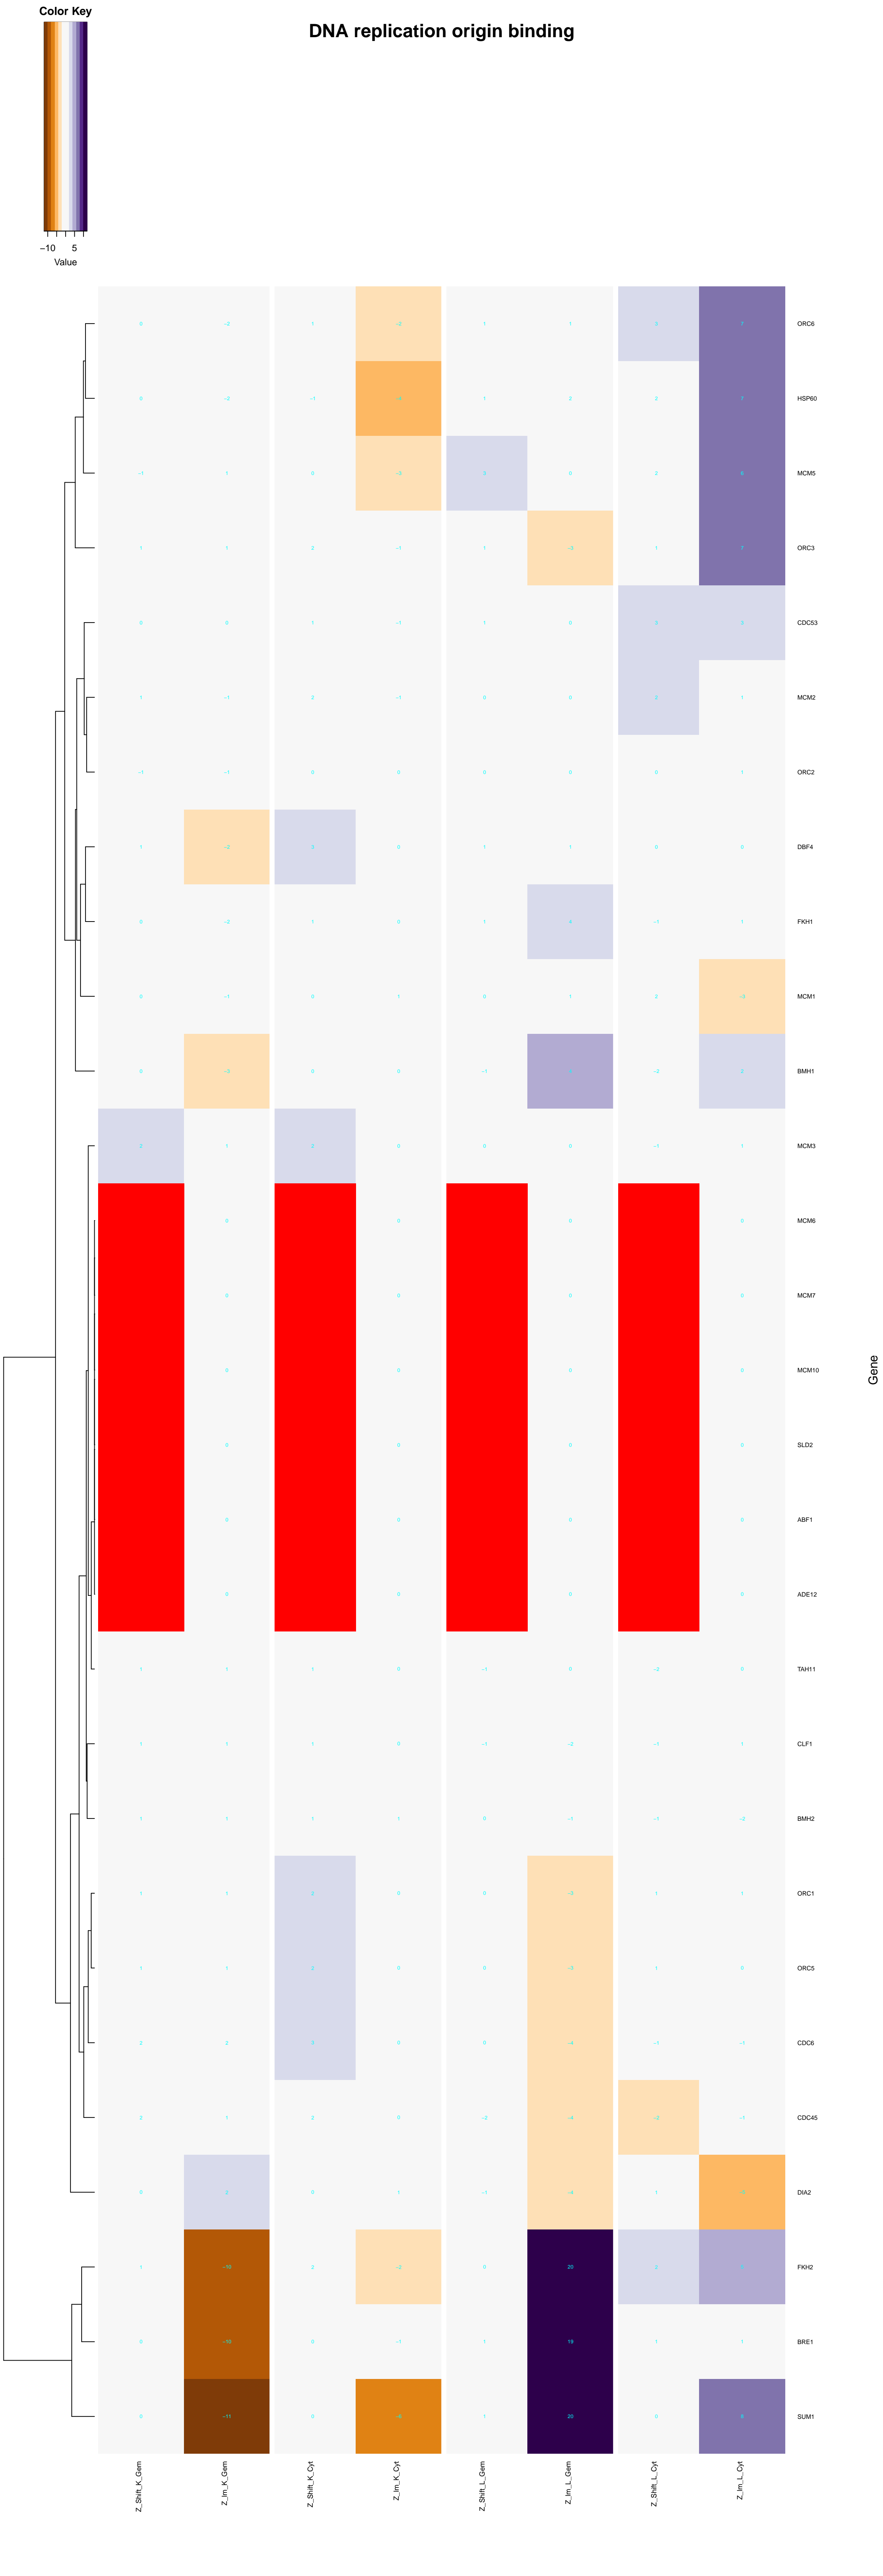

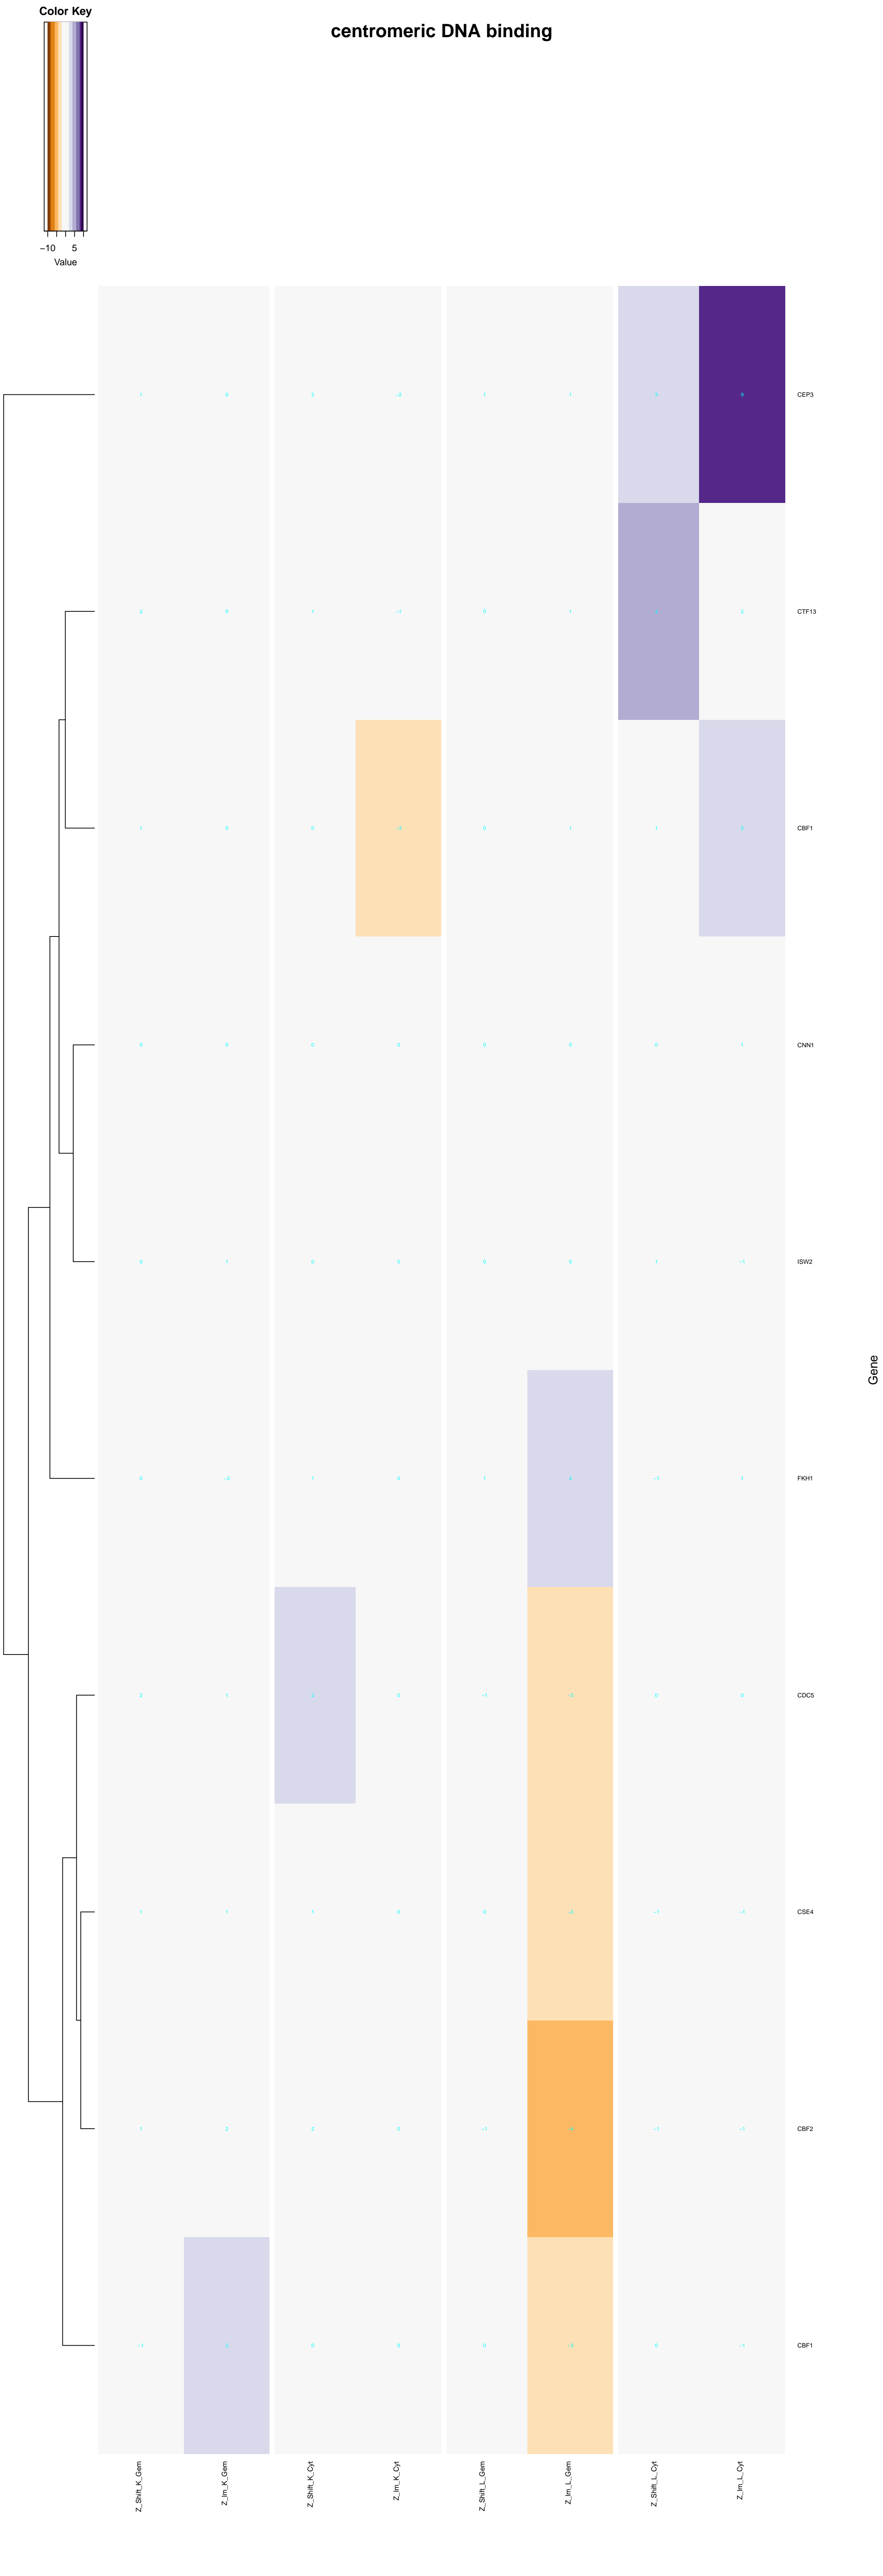

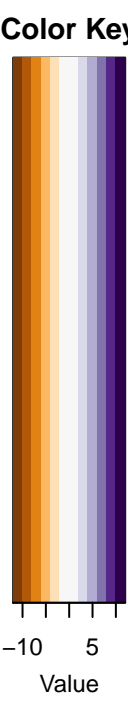

single-stranded telomeric DNA binding

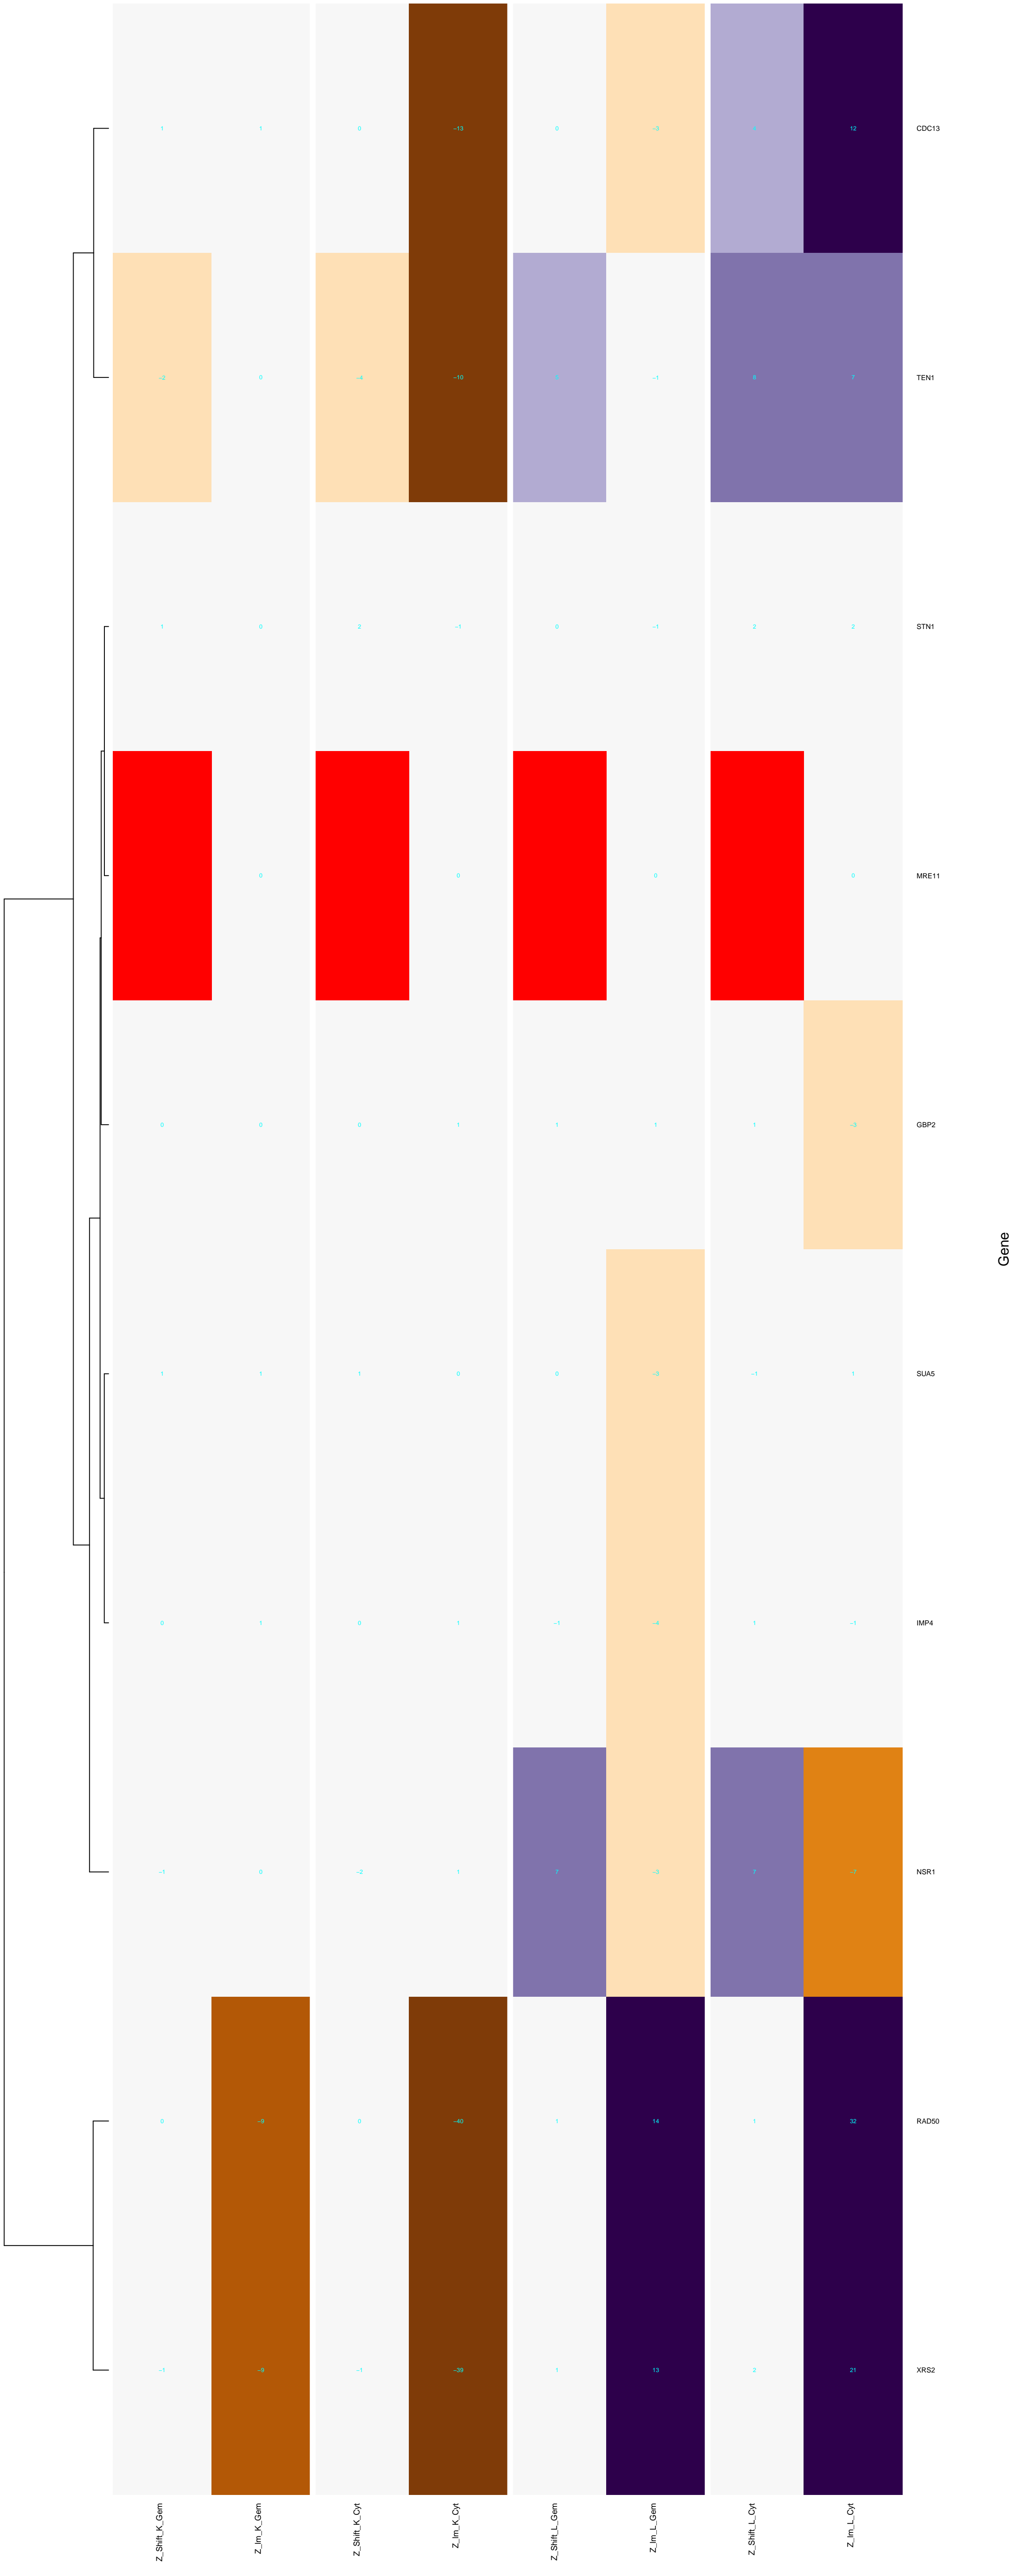

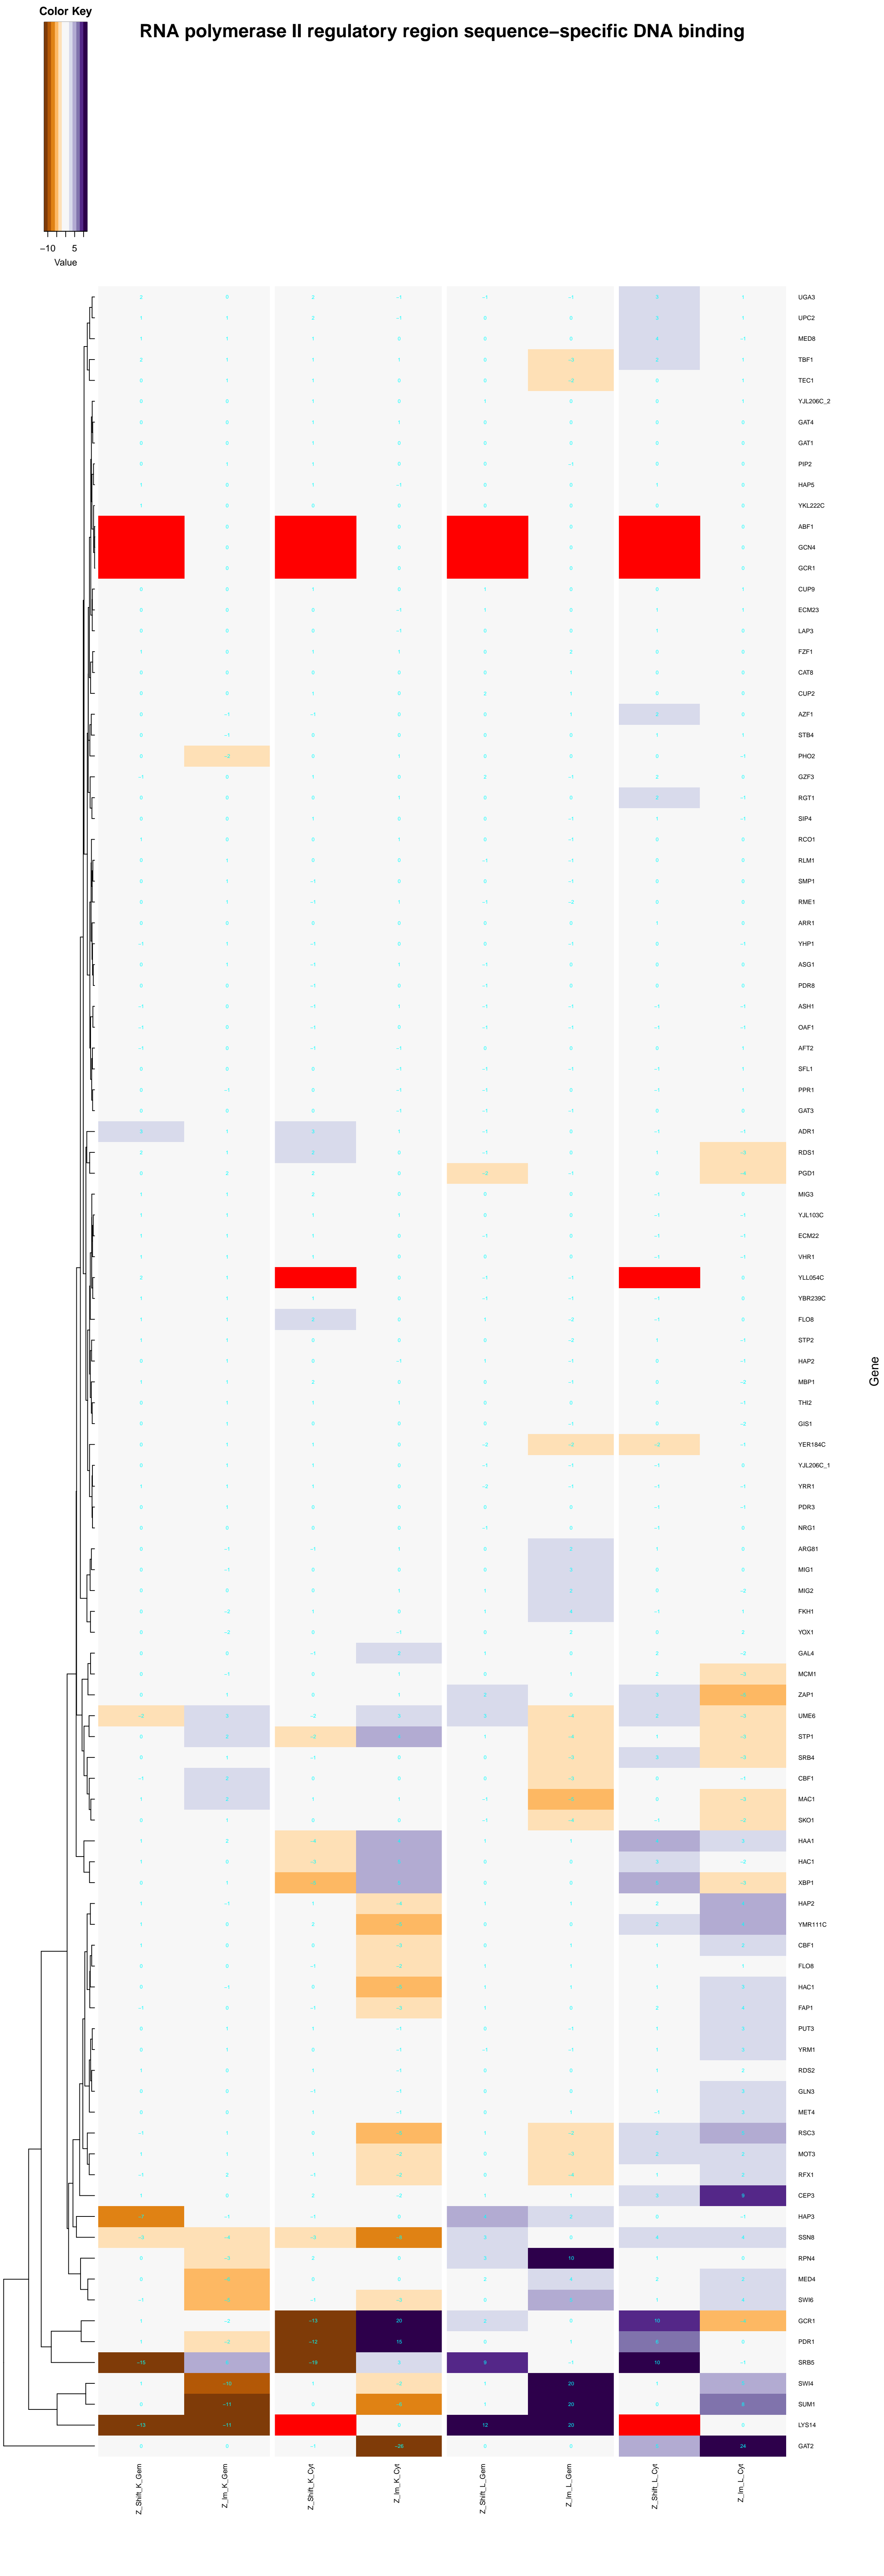

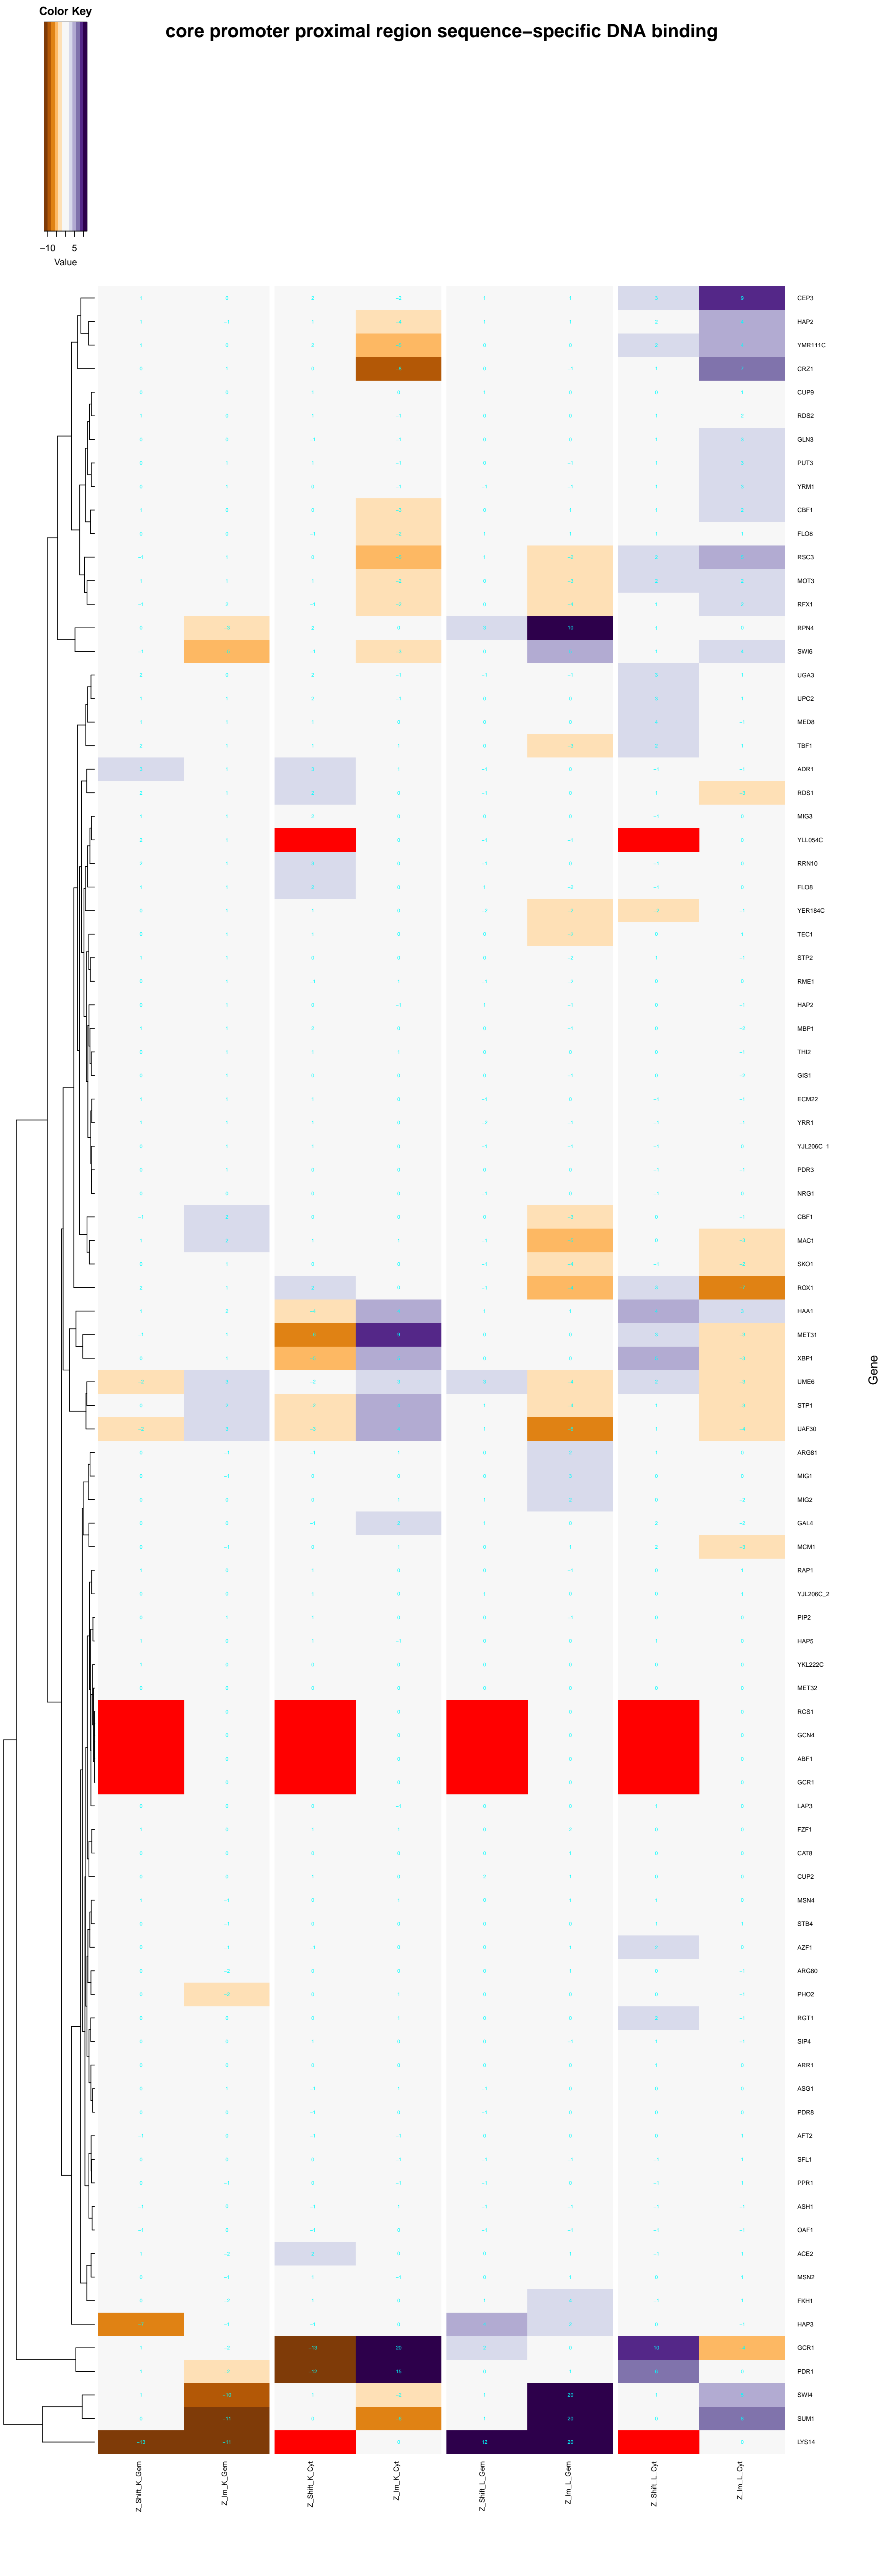

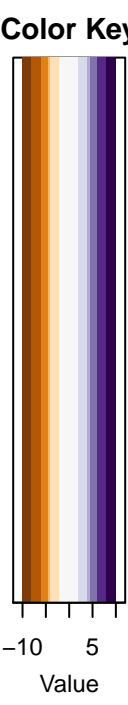

polymerase III regulatory region sequence-specific DNA binding



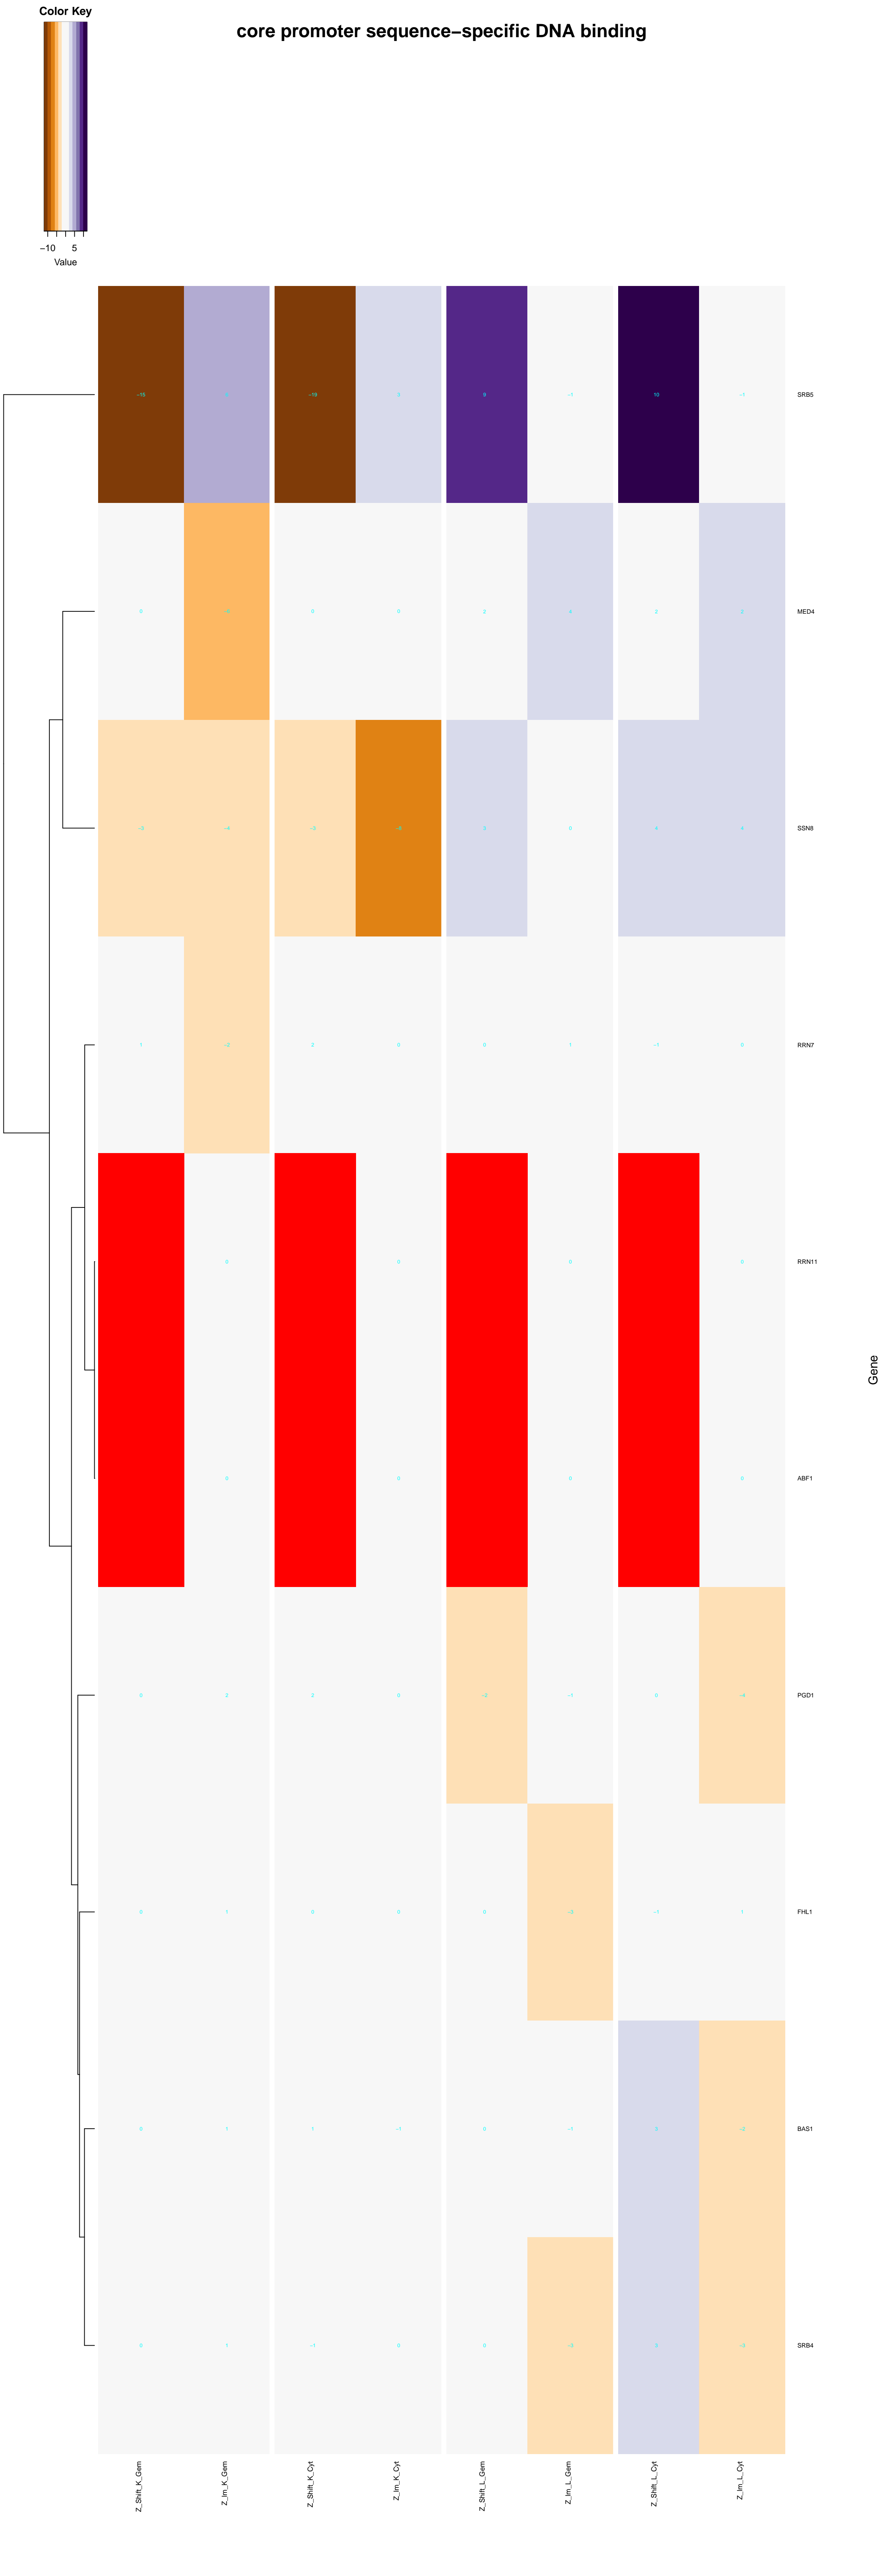

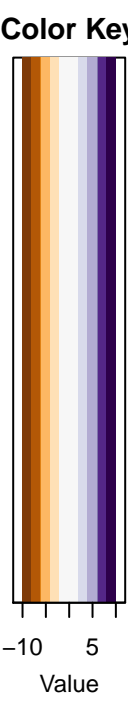

RNA polymerase I regulatory region sequence-specific DNA binding

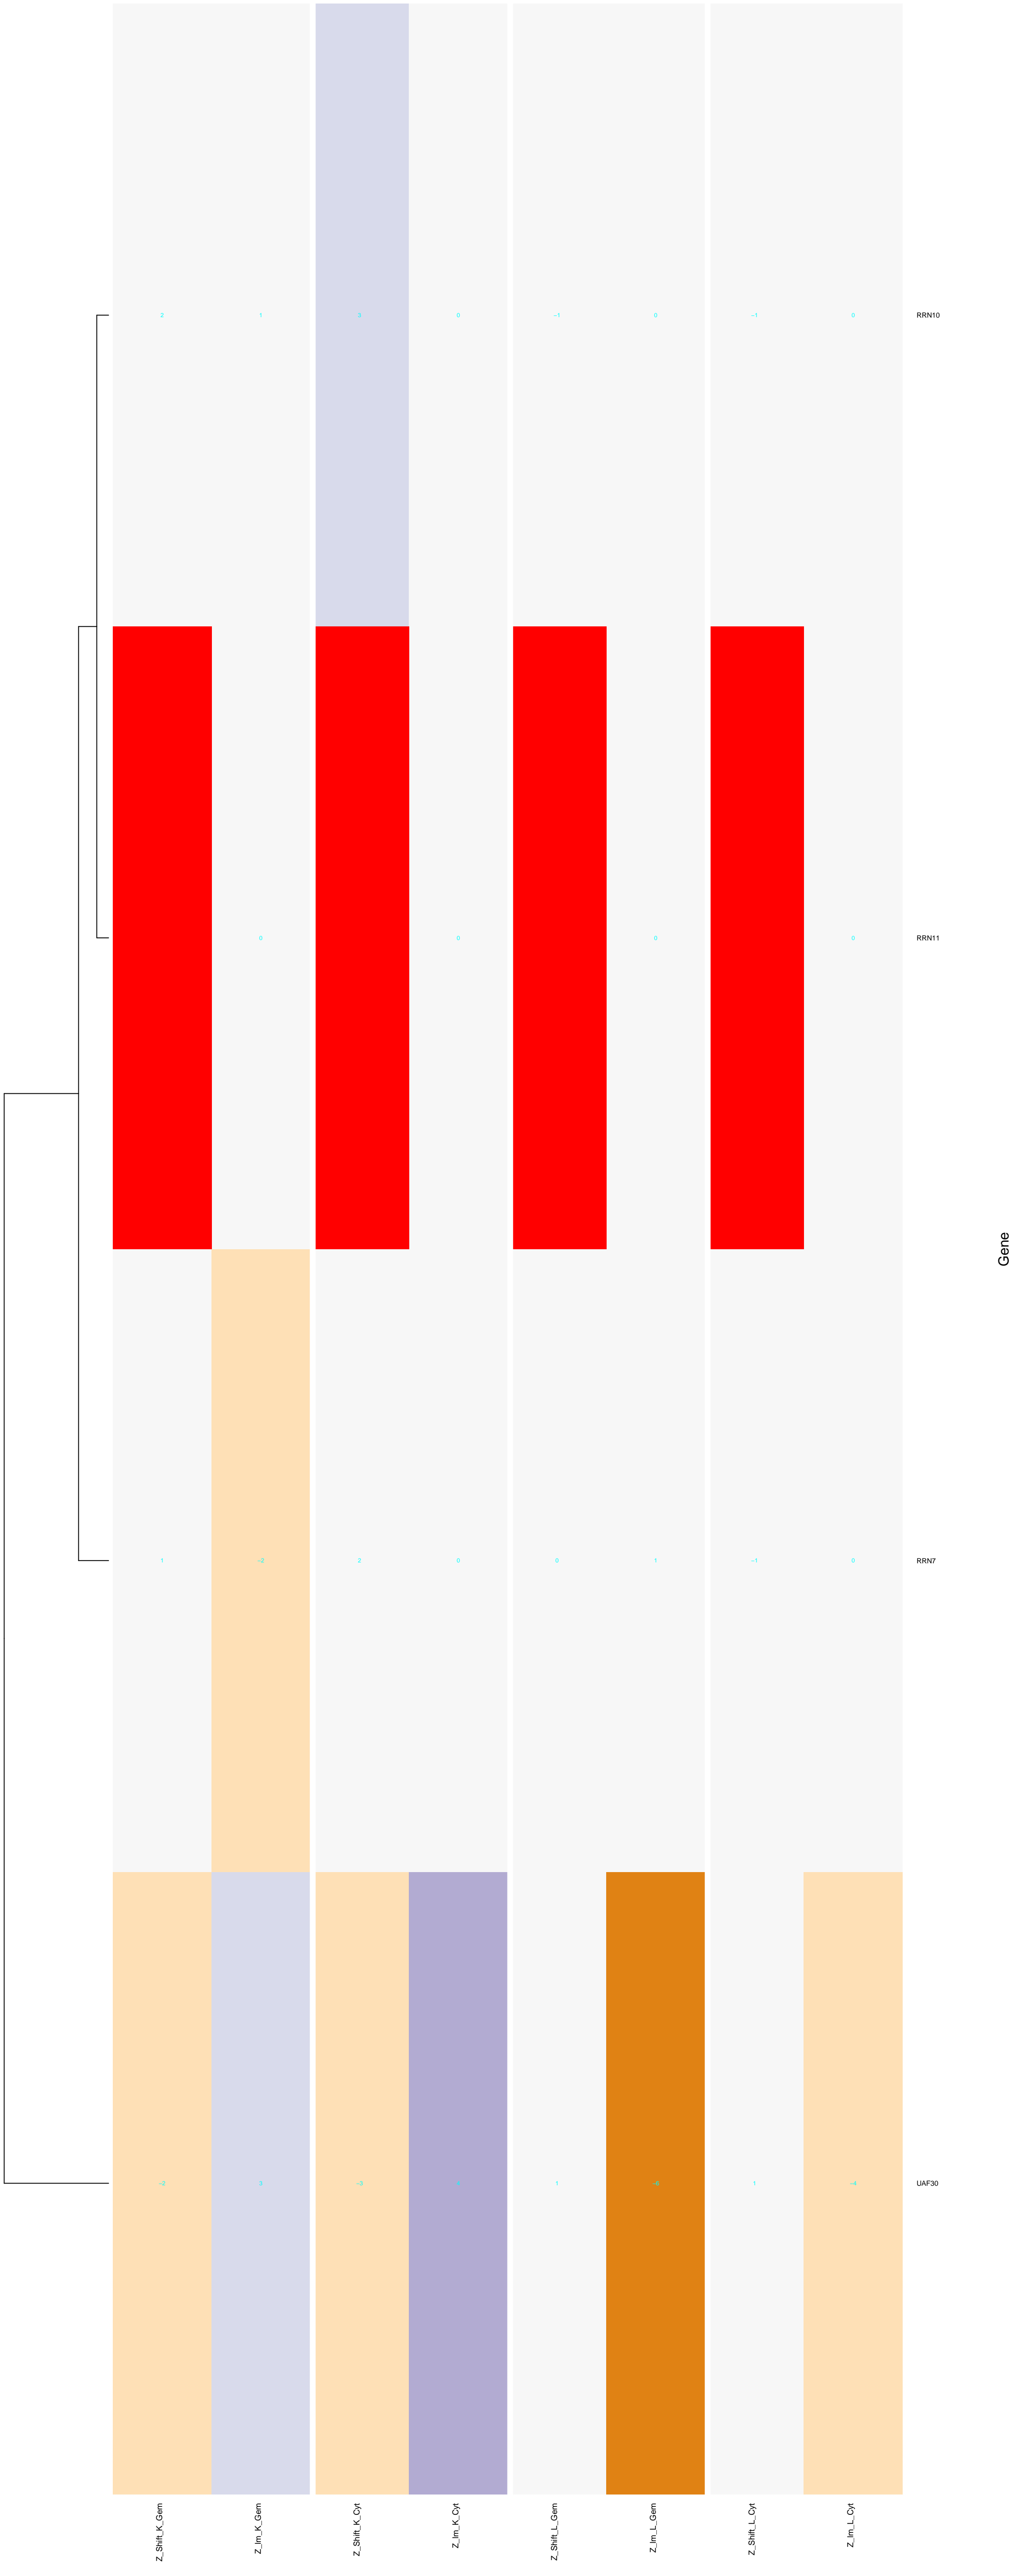



RNA polymerase III type 1 promoter DNA binding







dinucleotide insertion or deletion binding

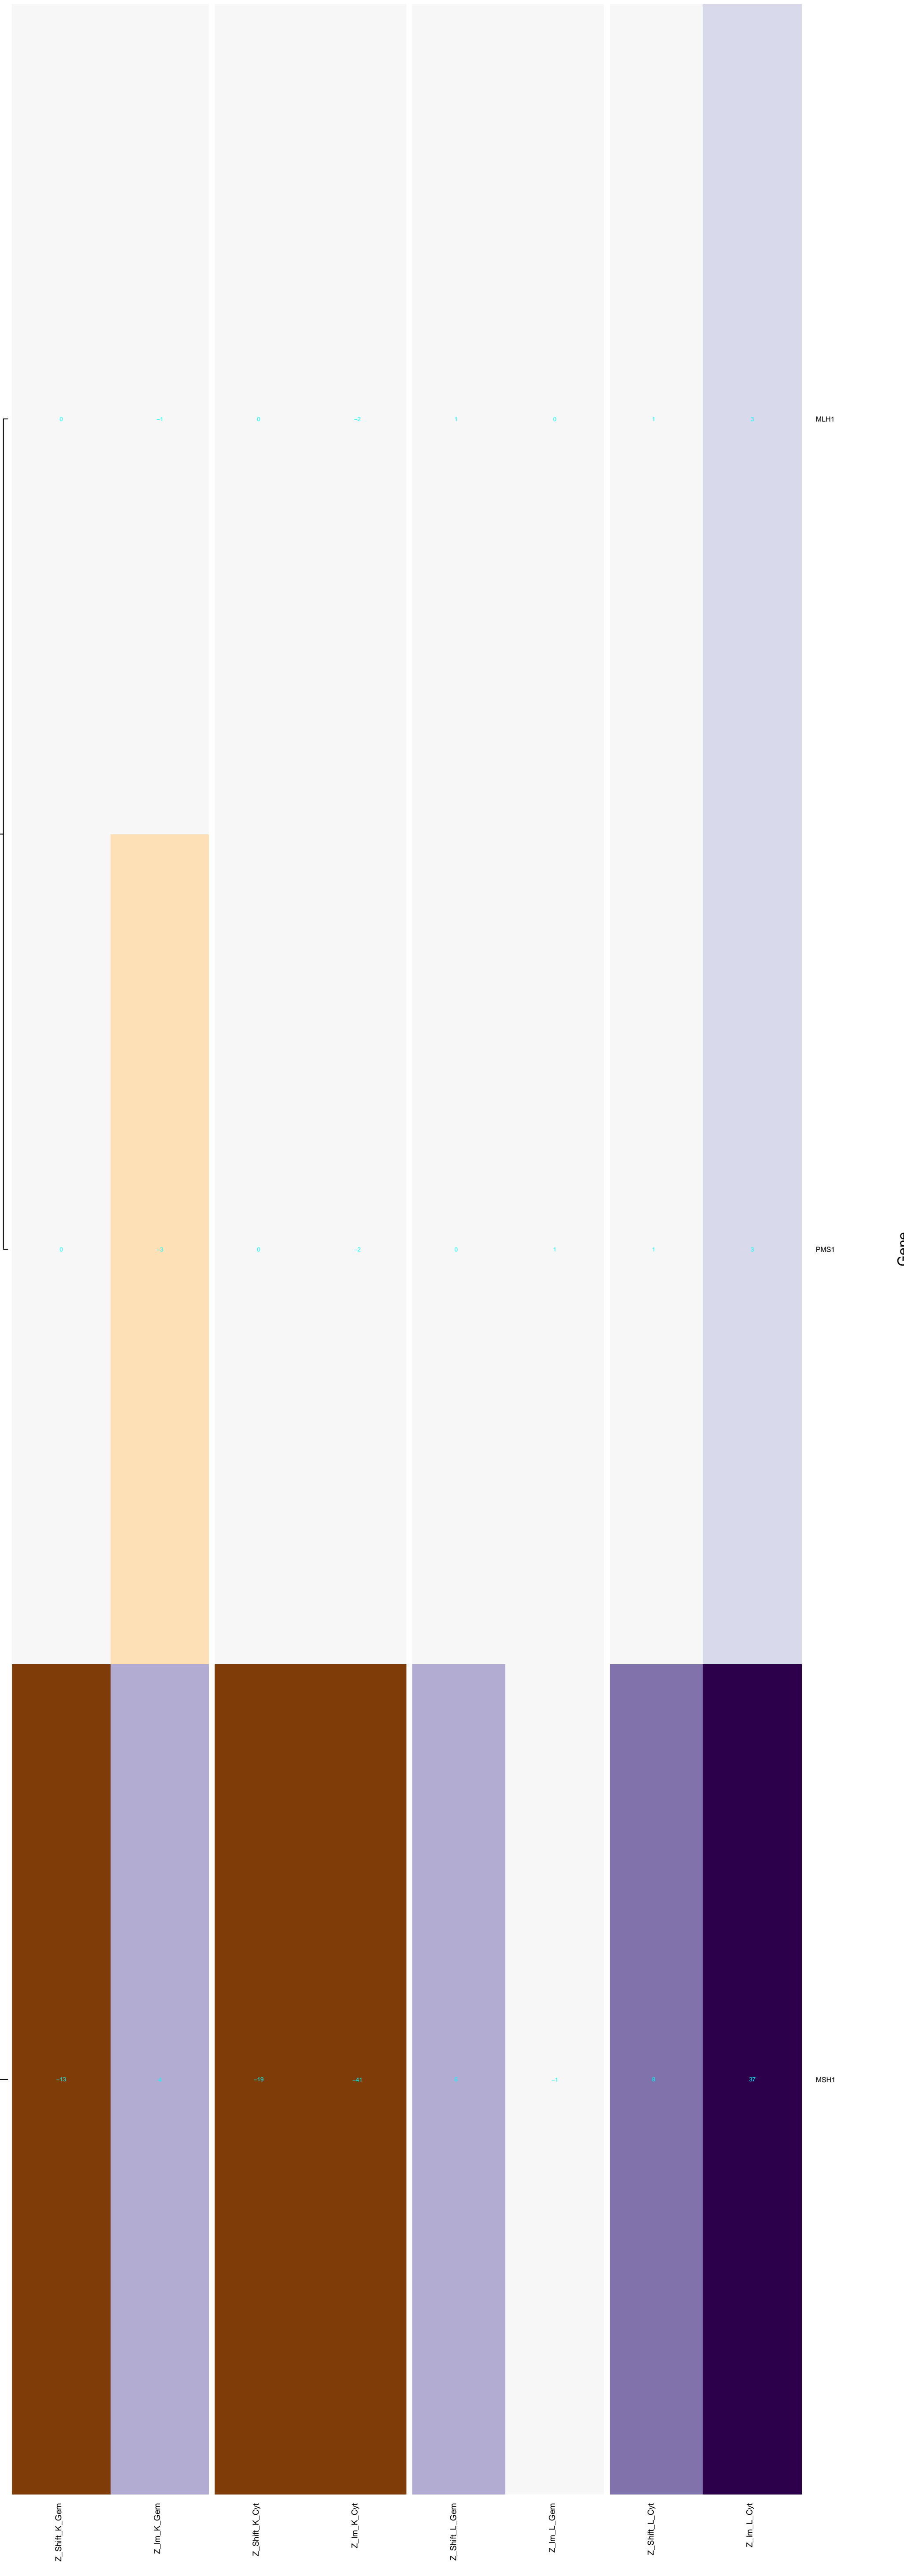

5S rDNA binding

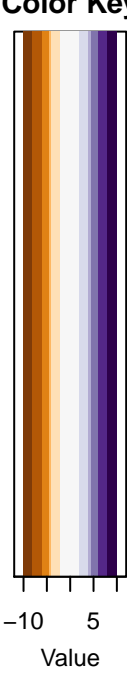

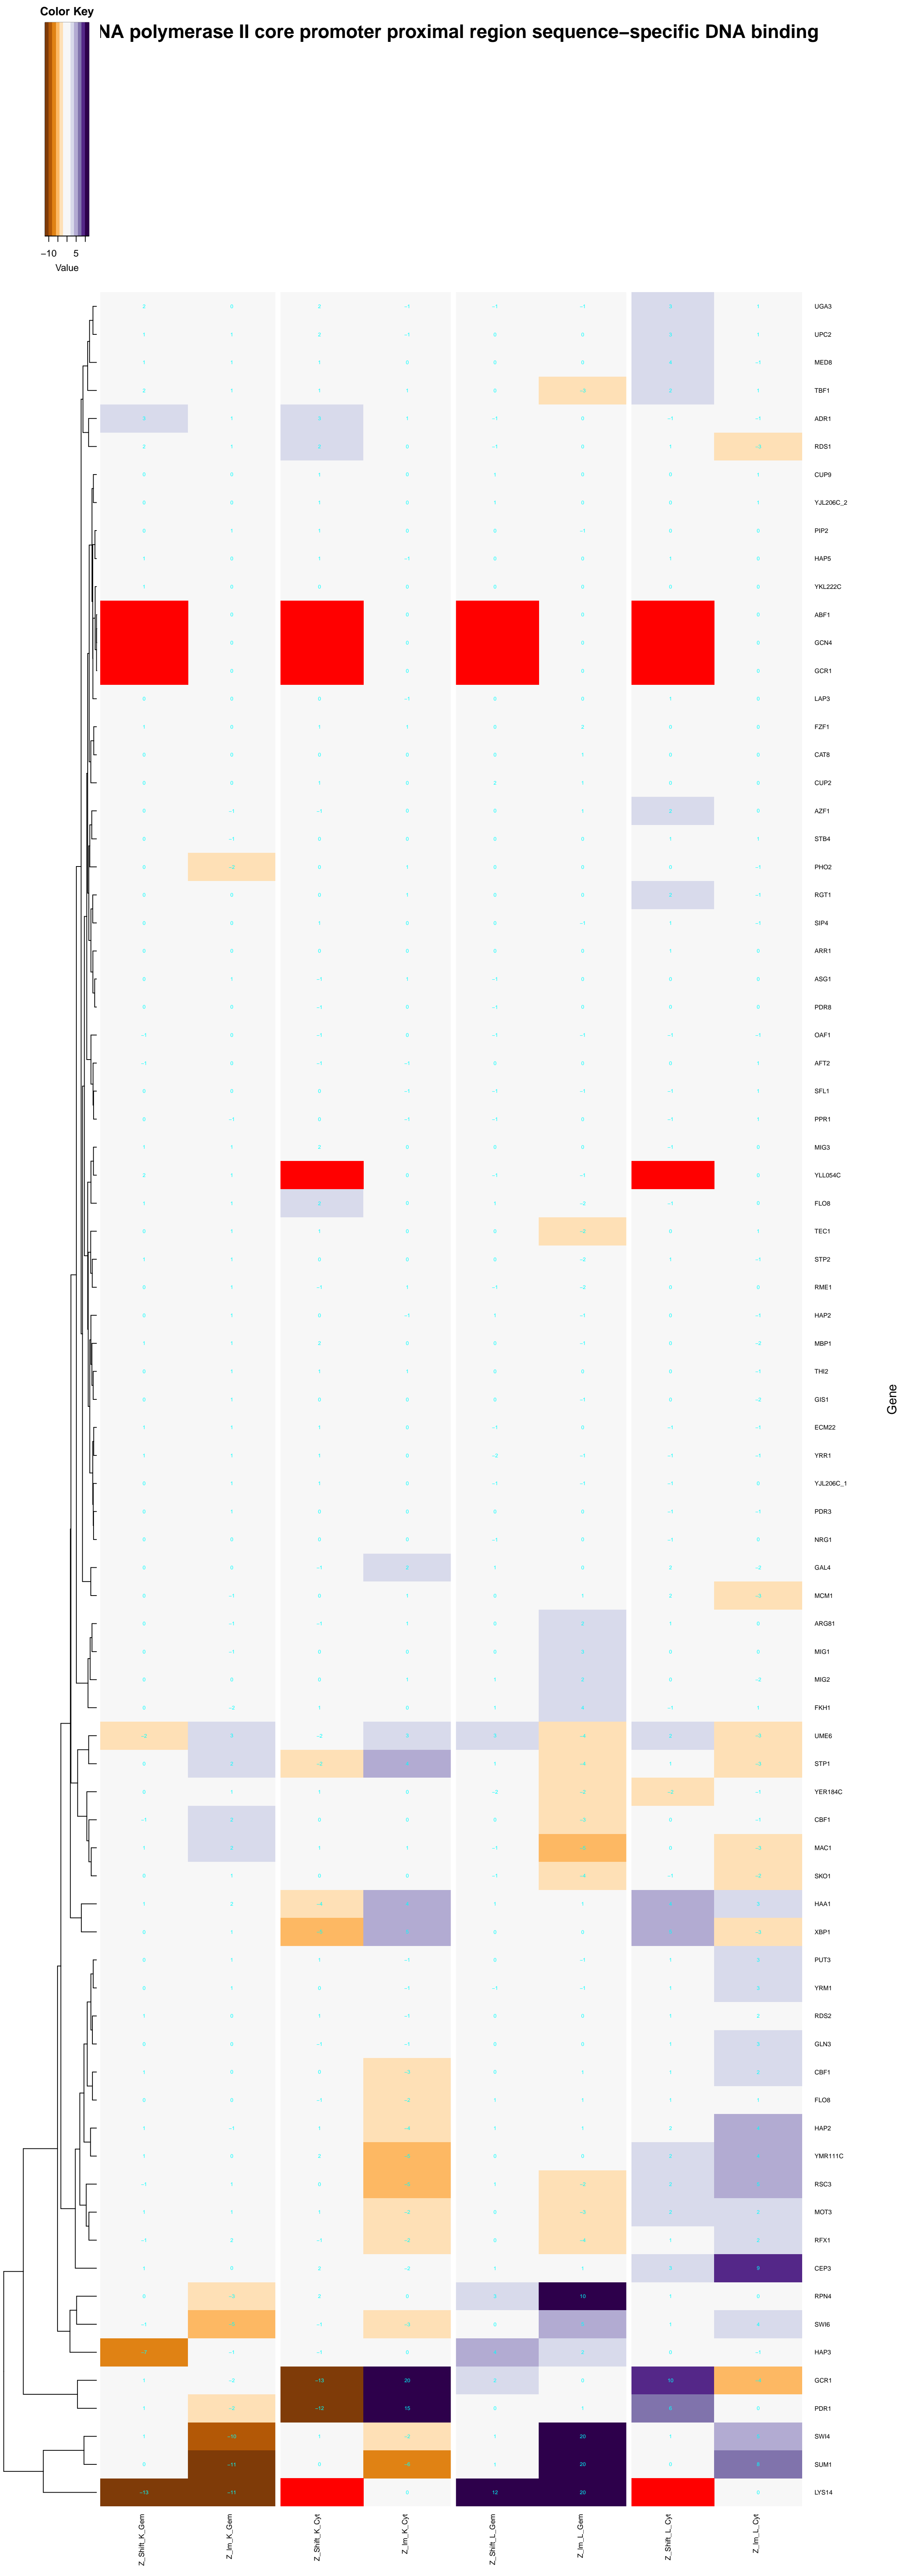



RNA polymerase II core promoter sequence-specific DNA binding

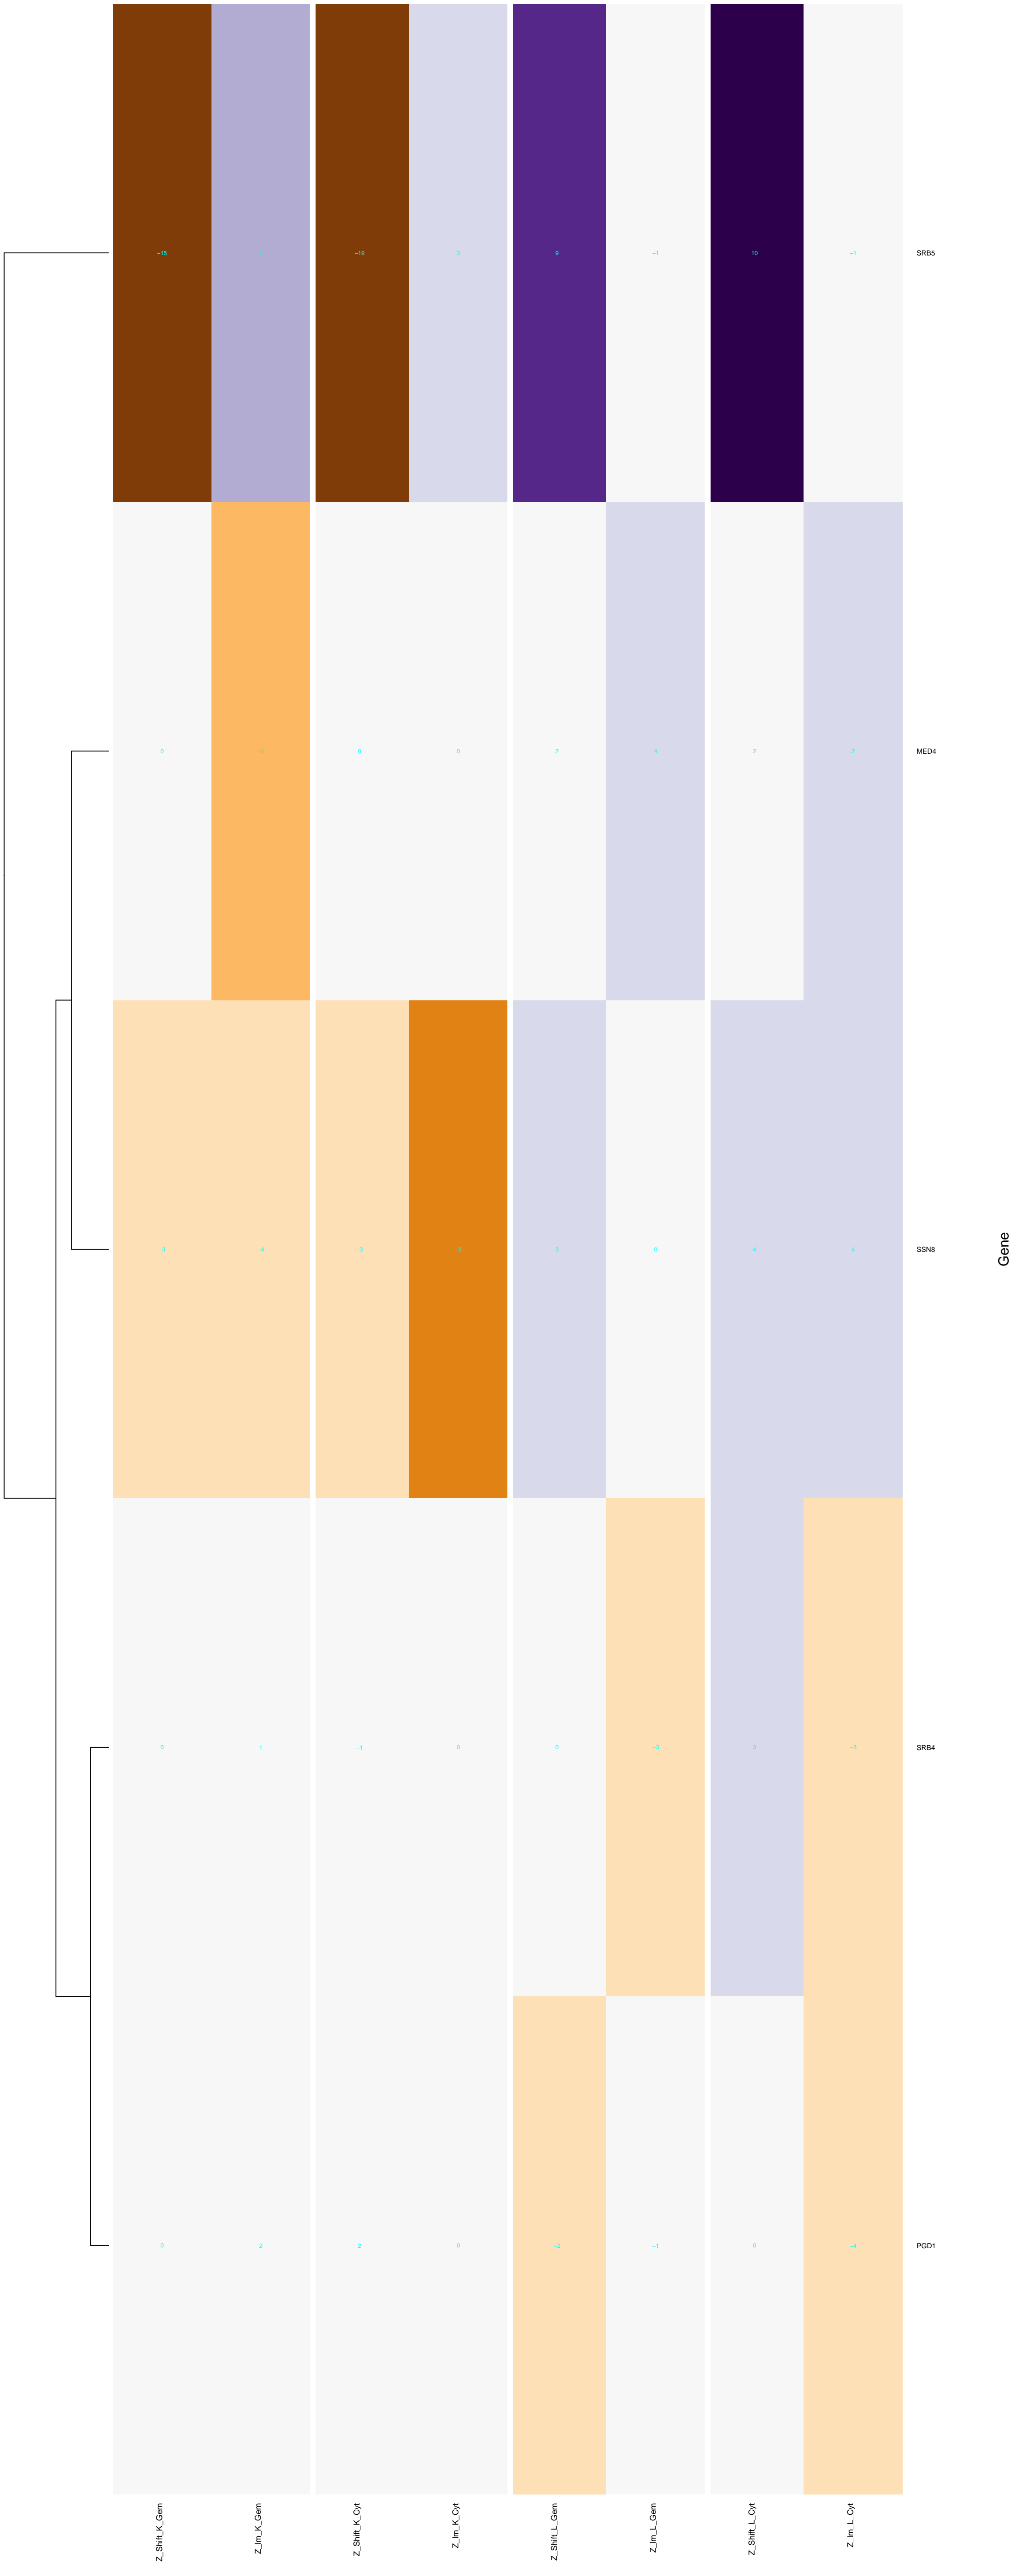



RNA polymerase III type 1 promoter sequence-specific DNA binding



Supplement: s1 [file s1]
