# Supplementary material for: A Humanized Yeast Phenomic Model of Deoxycytidine Kinase to Predict Genetic Buffering of Nucleoside Analog Cytotoxicity
Source: MDPI journal article supplement (doi:10.3390/genes10100770), 2019-09-30

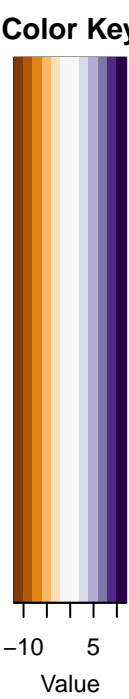

allantoin metabolic process

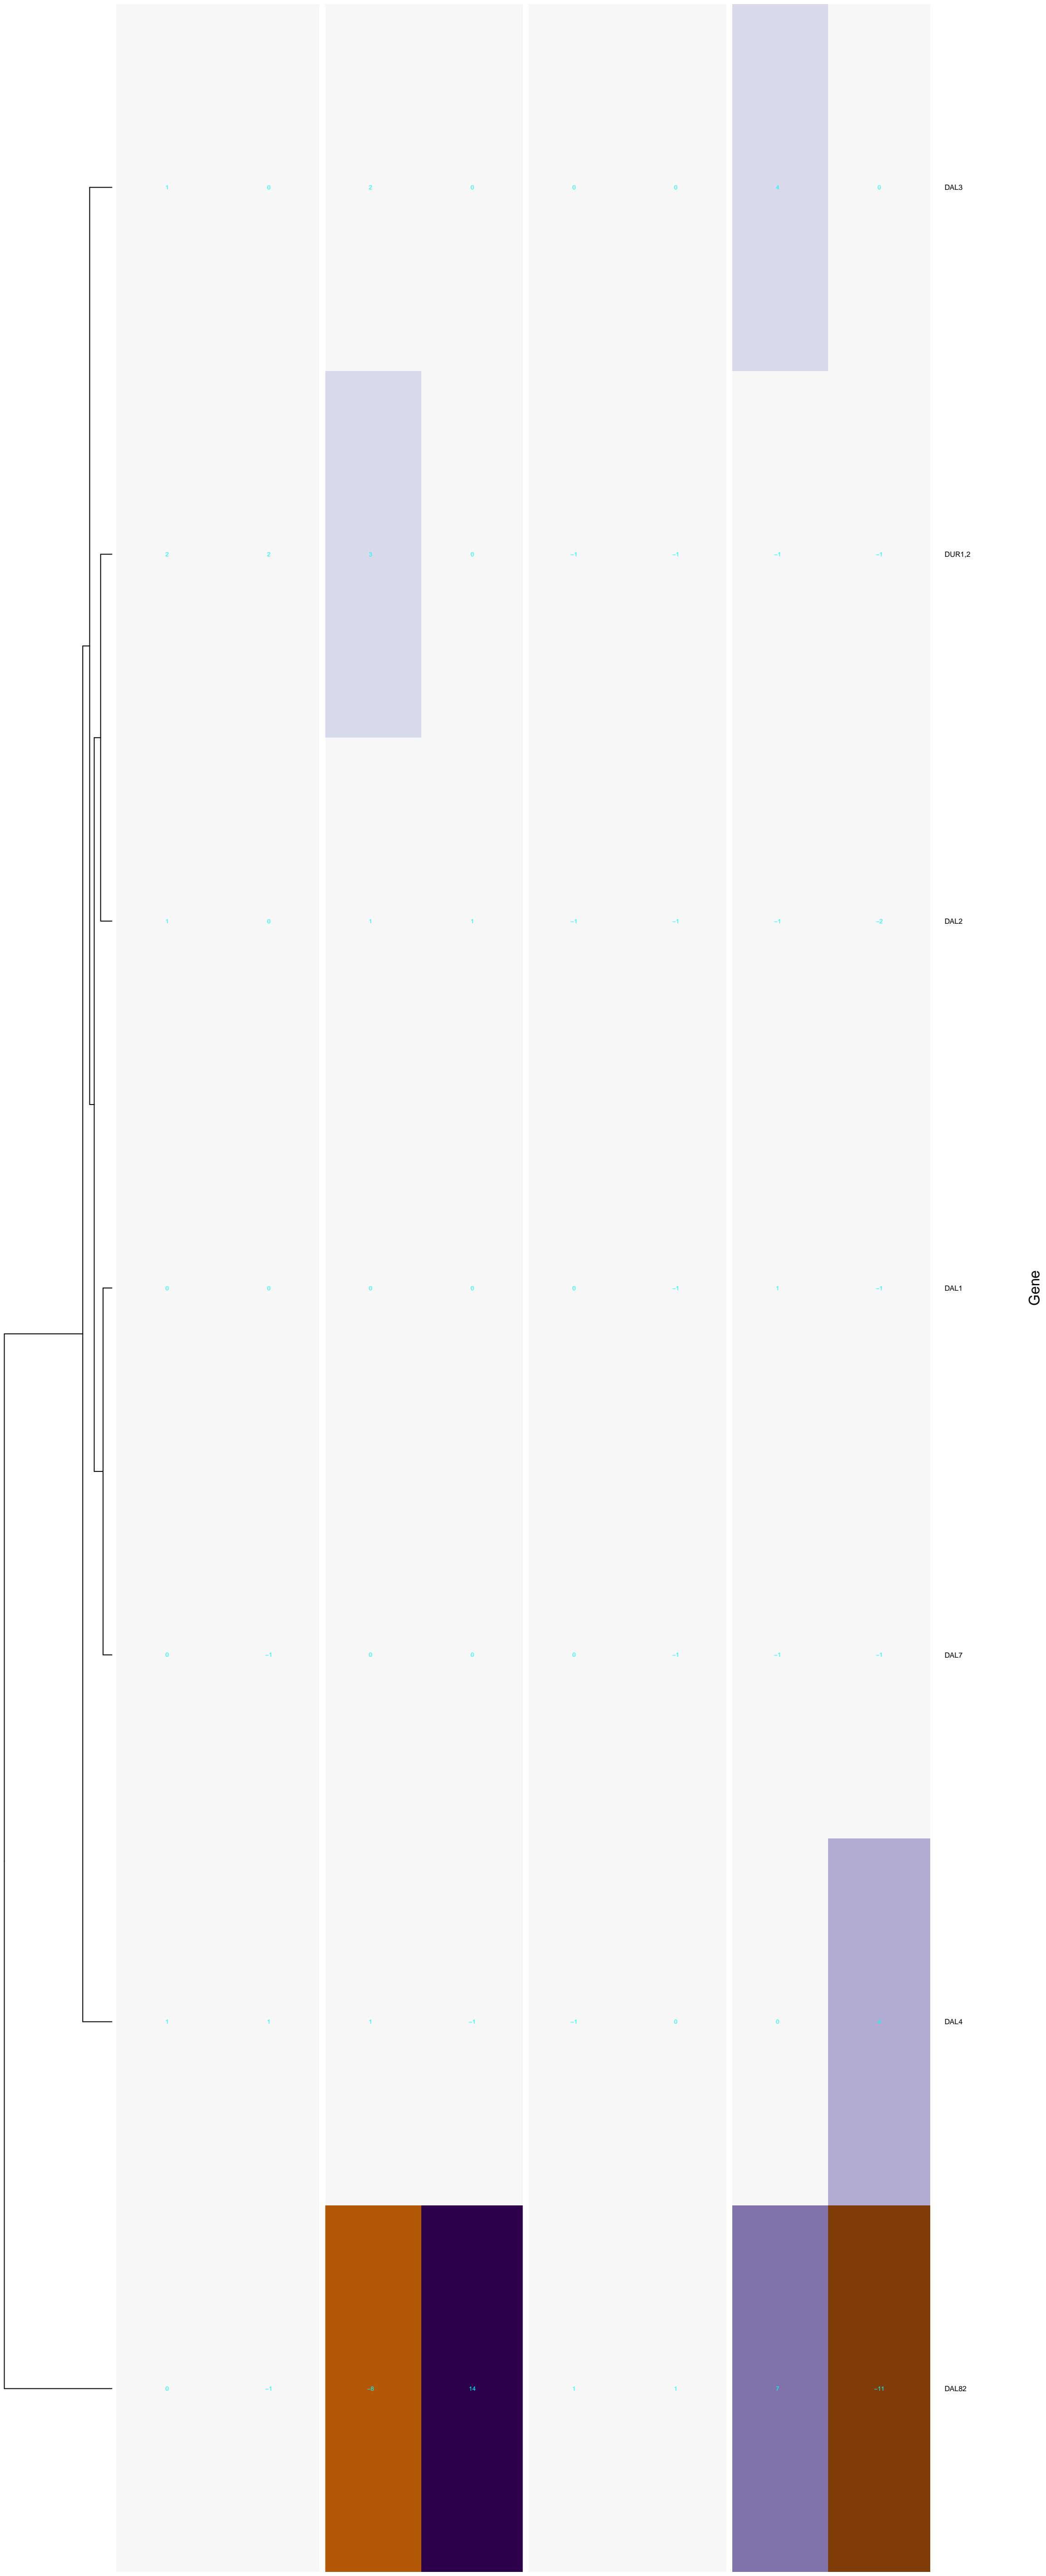

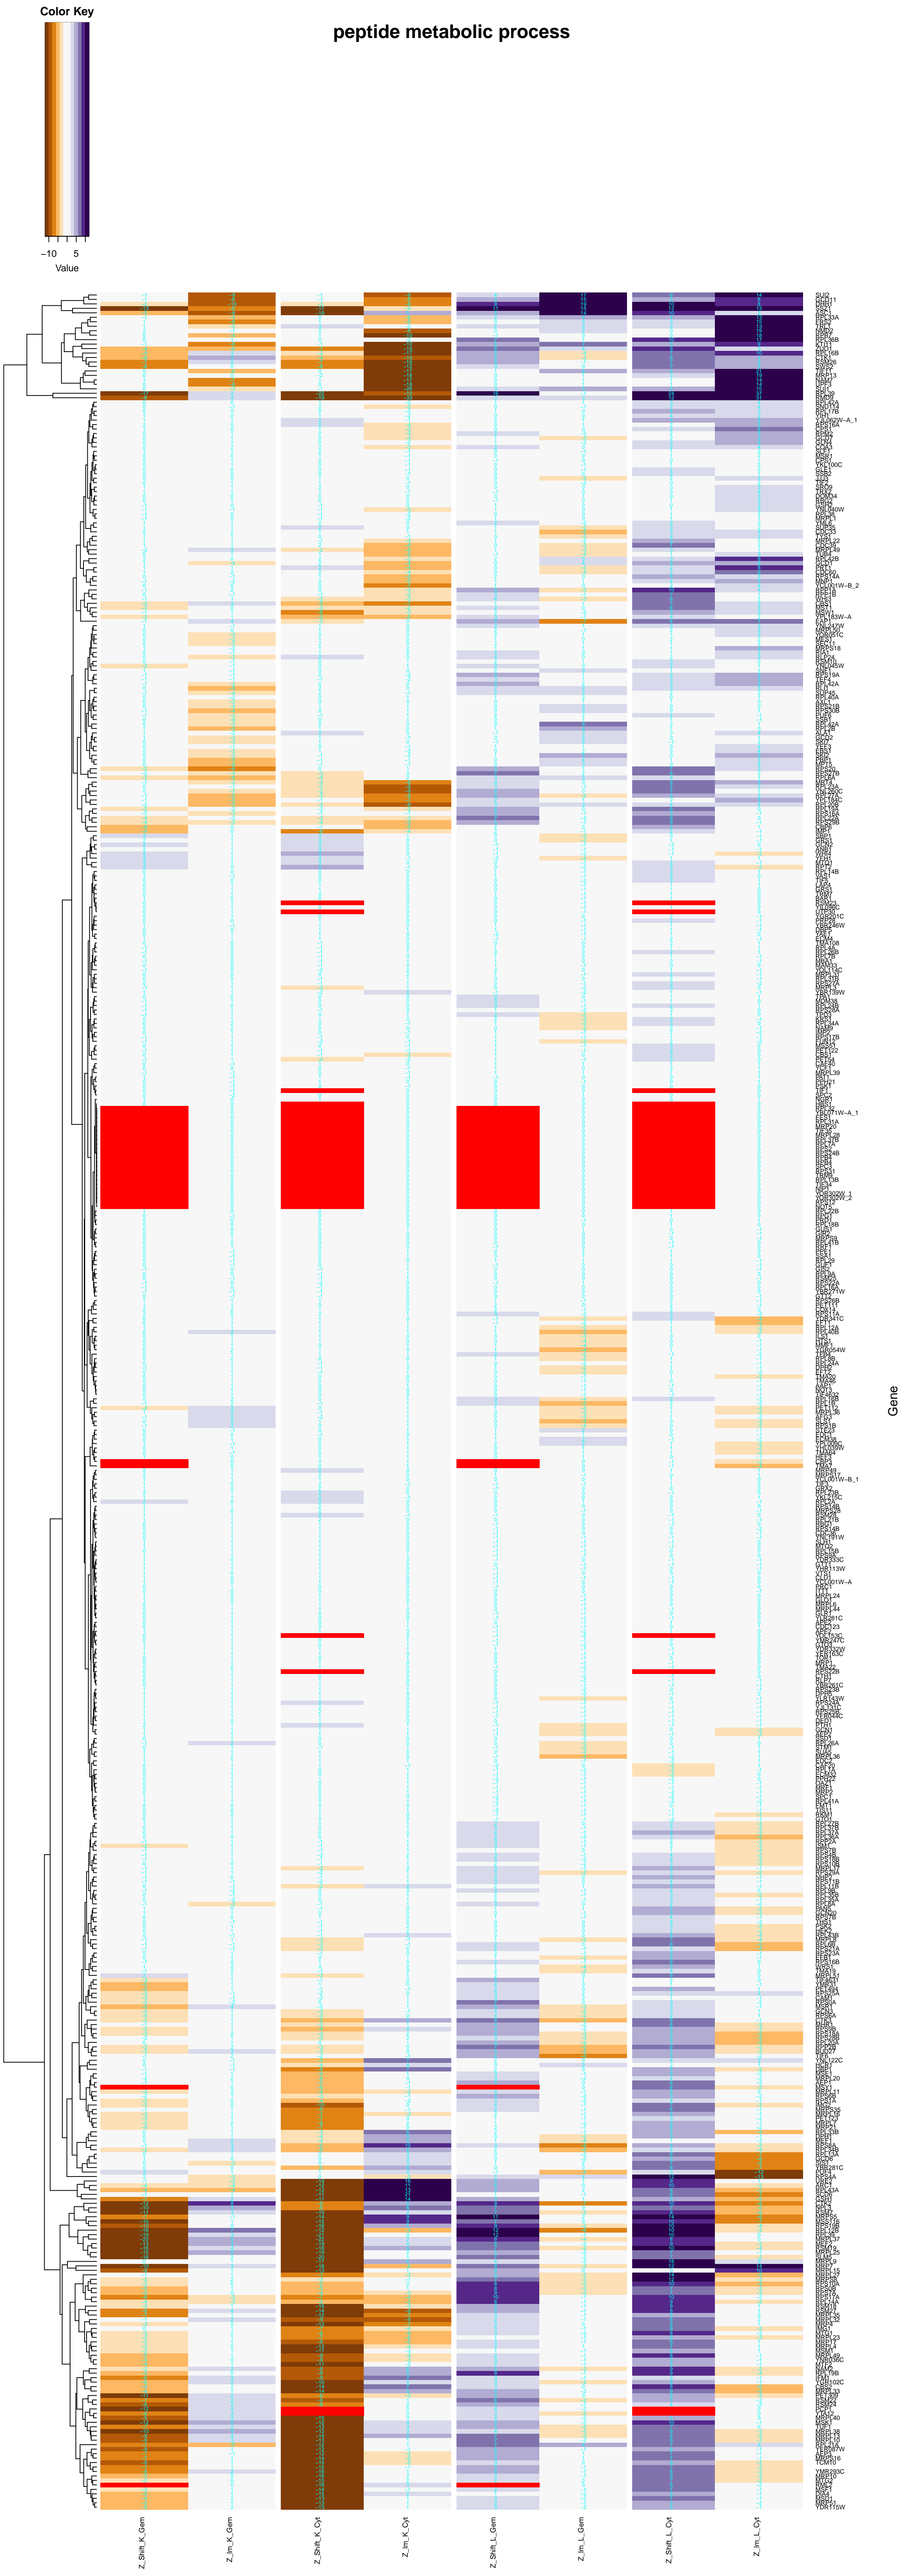

ene

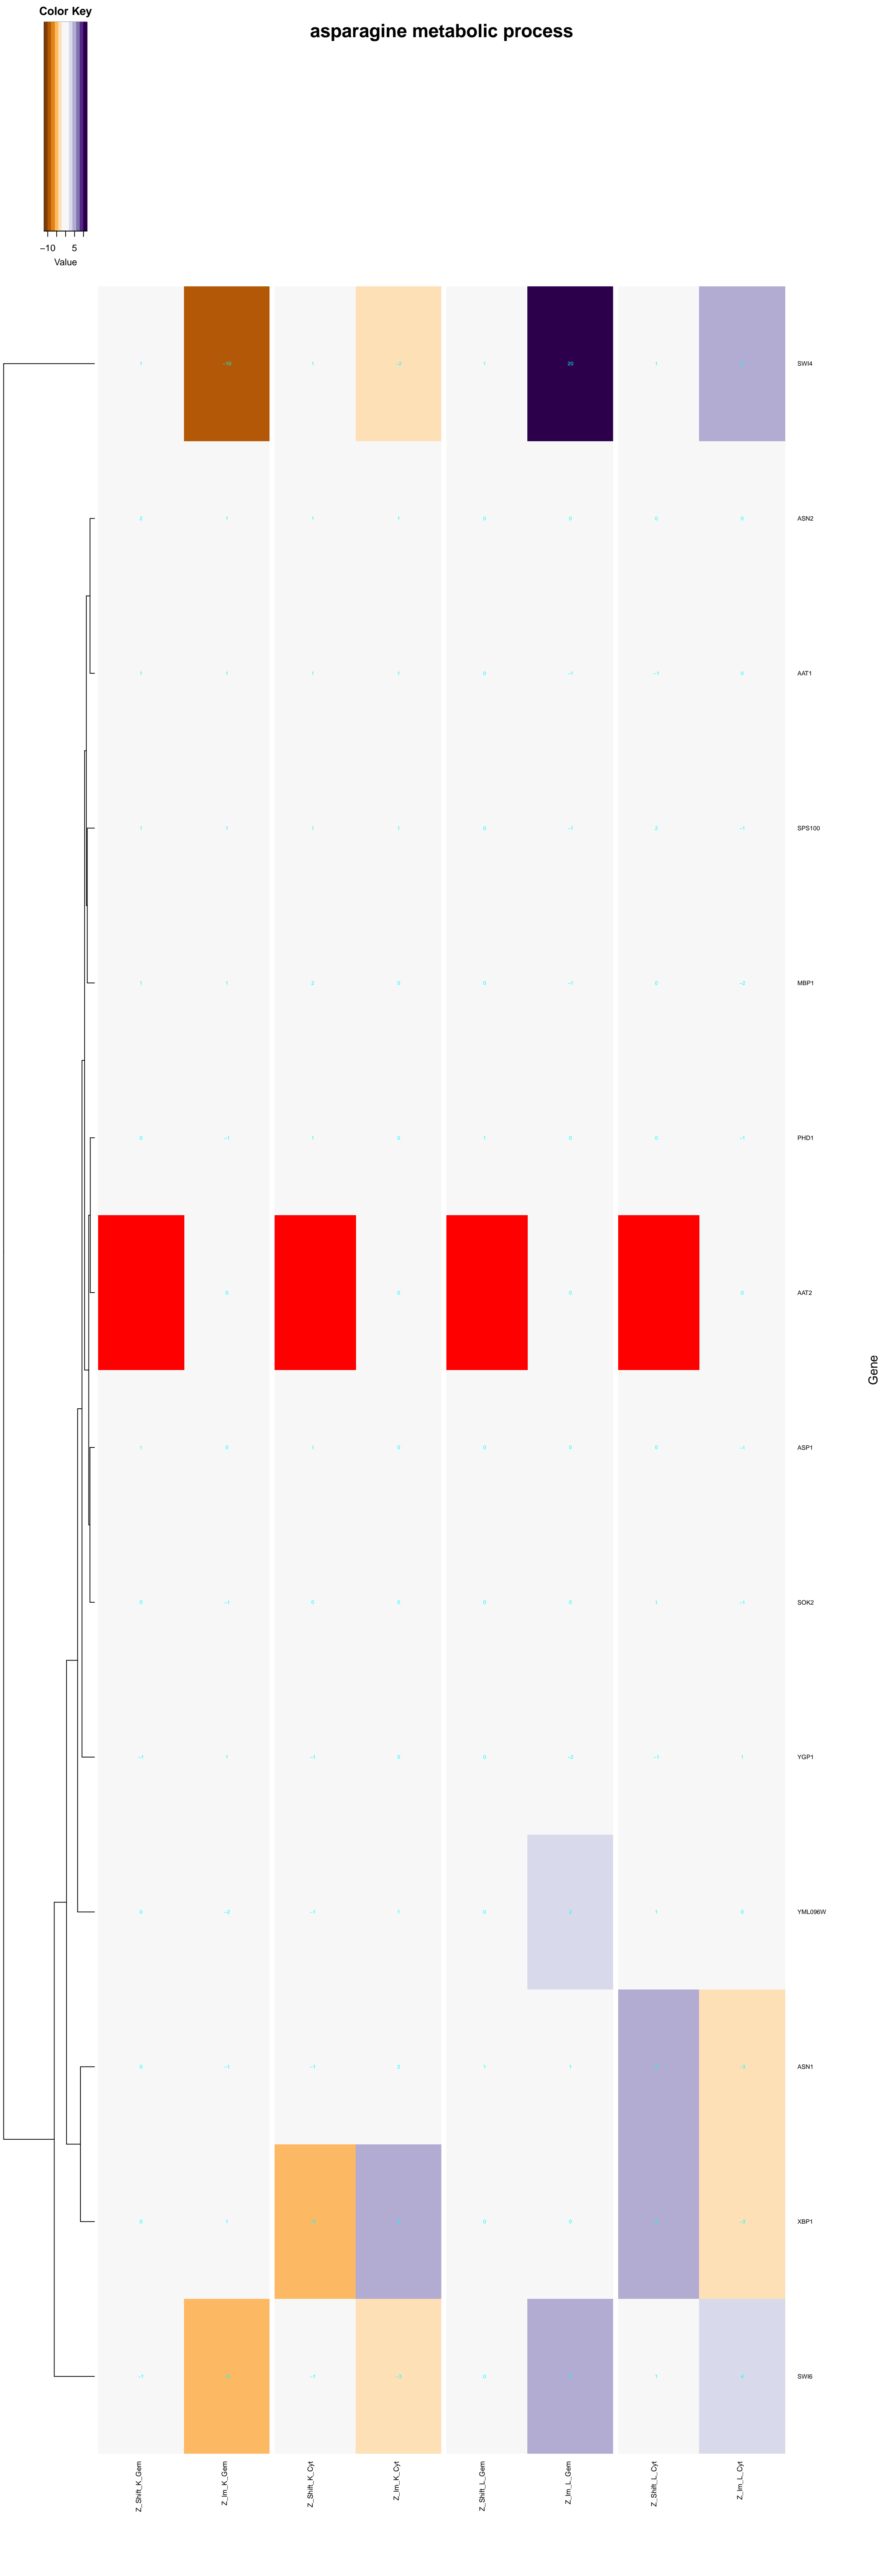

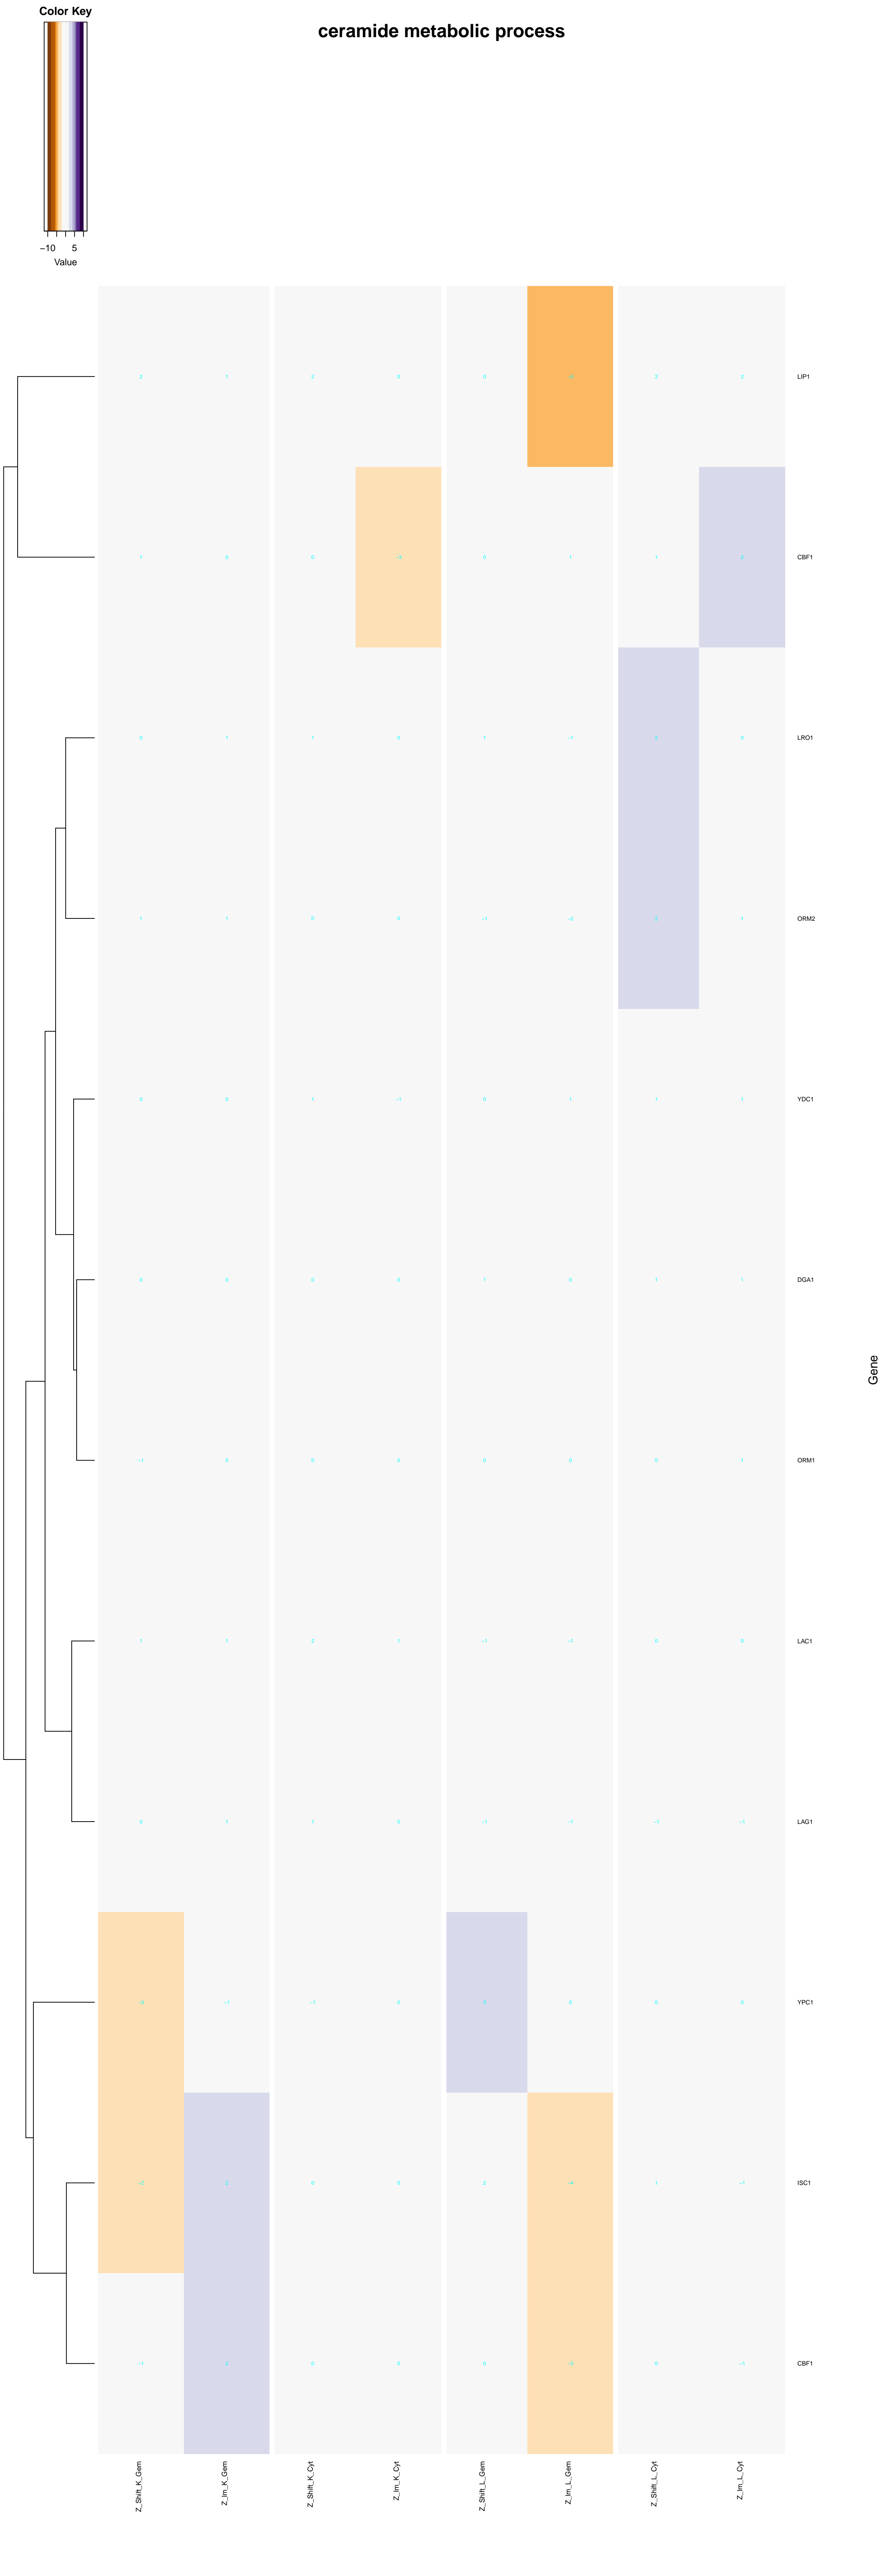

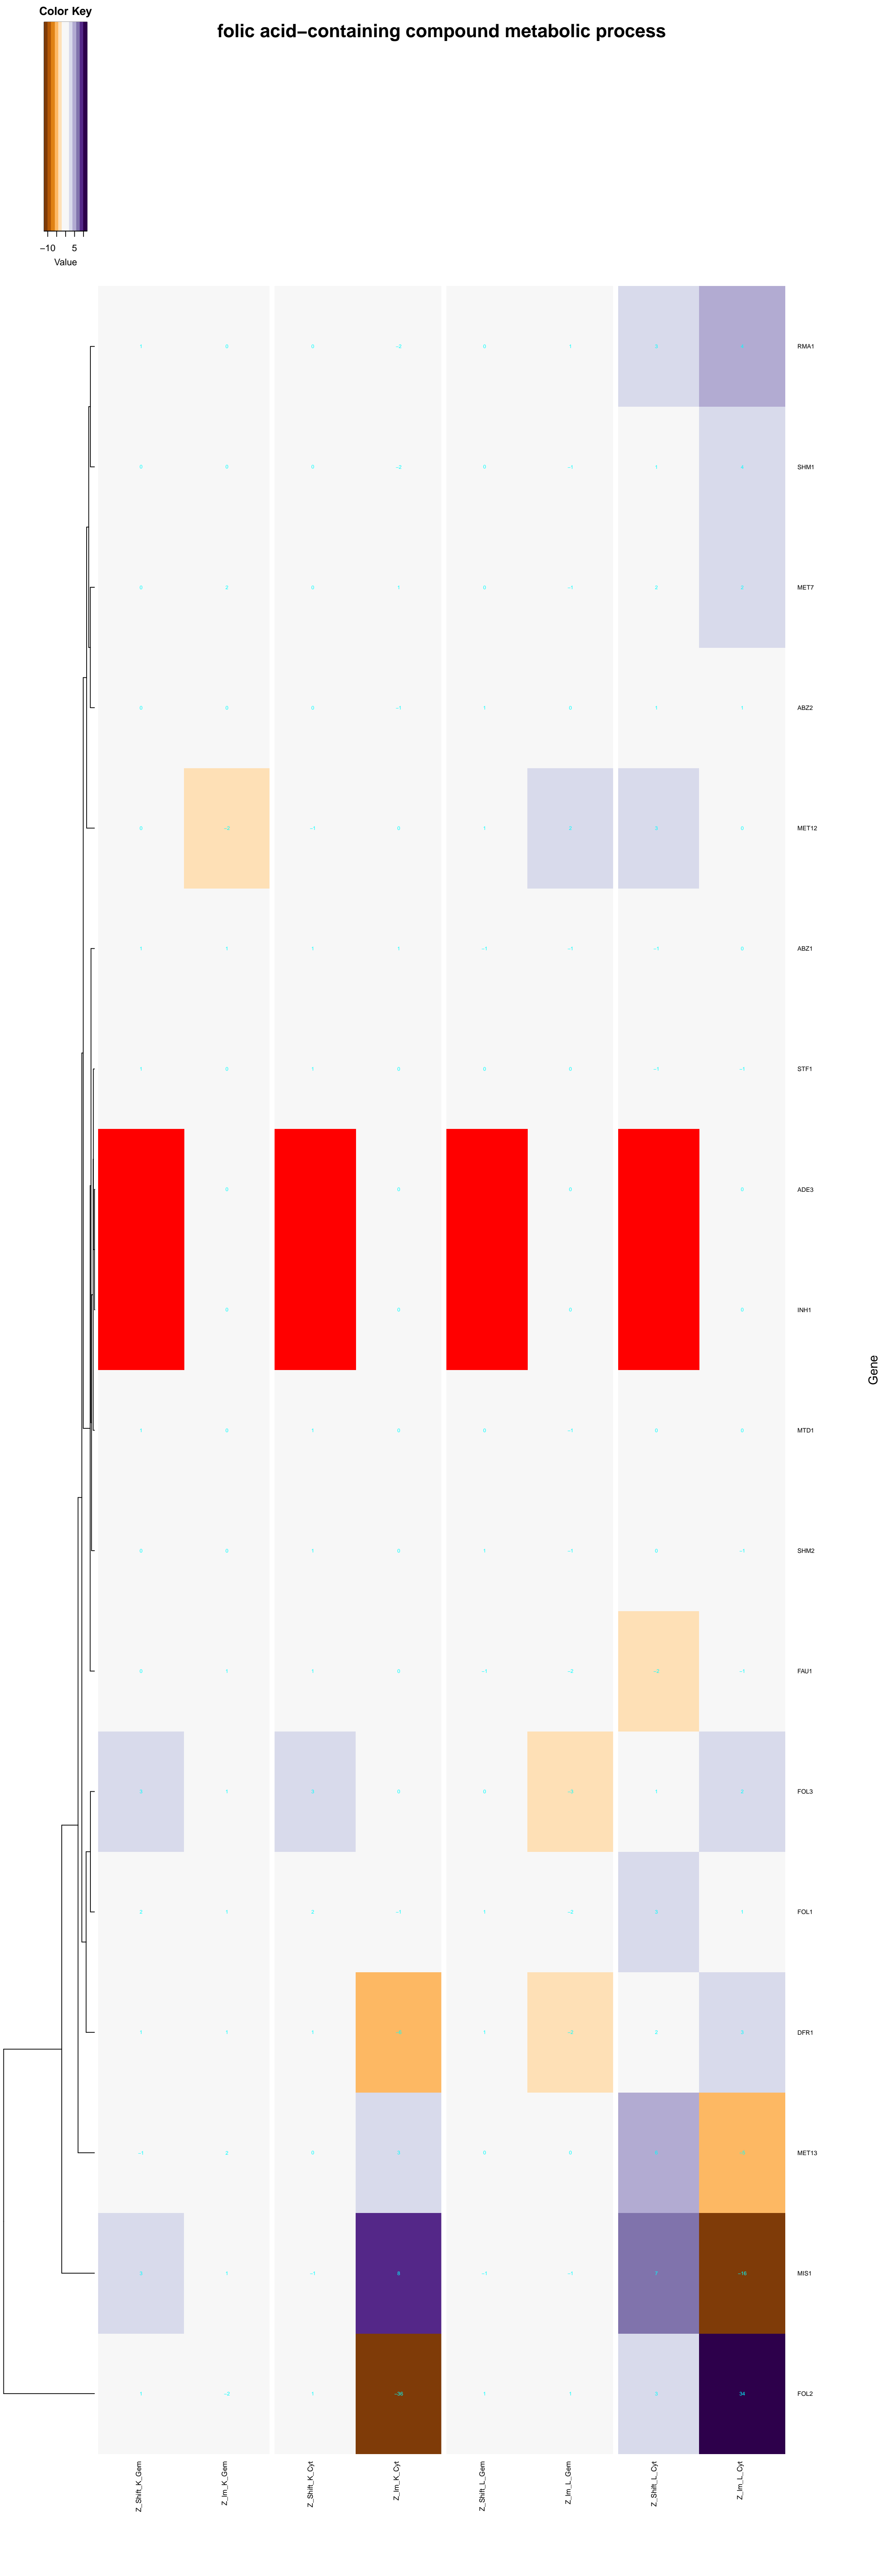

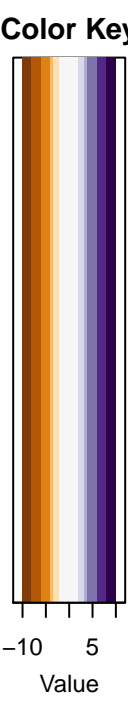

biotin metabolic process

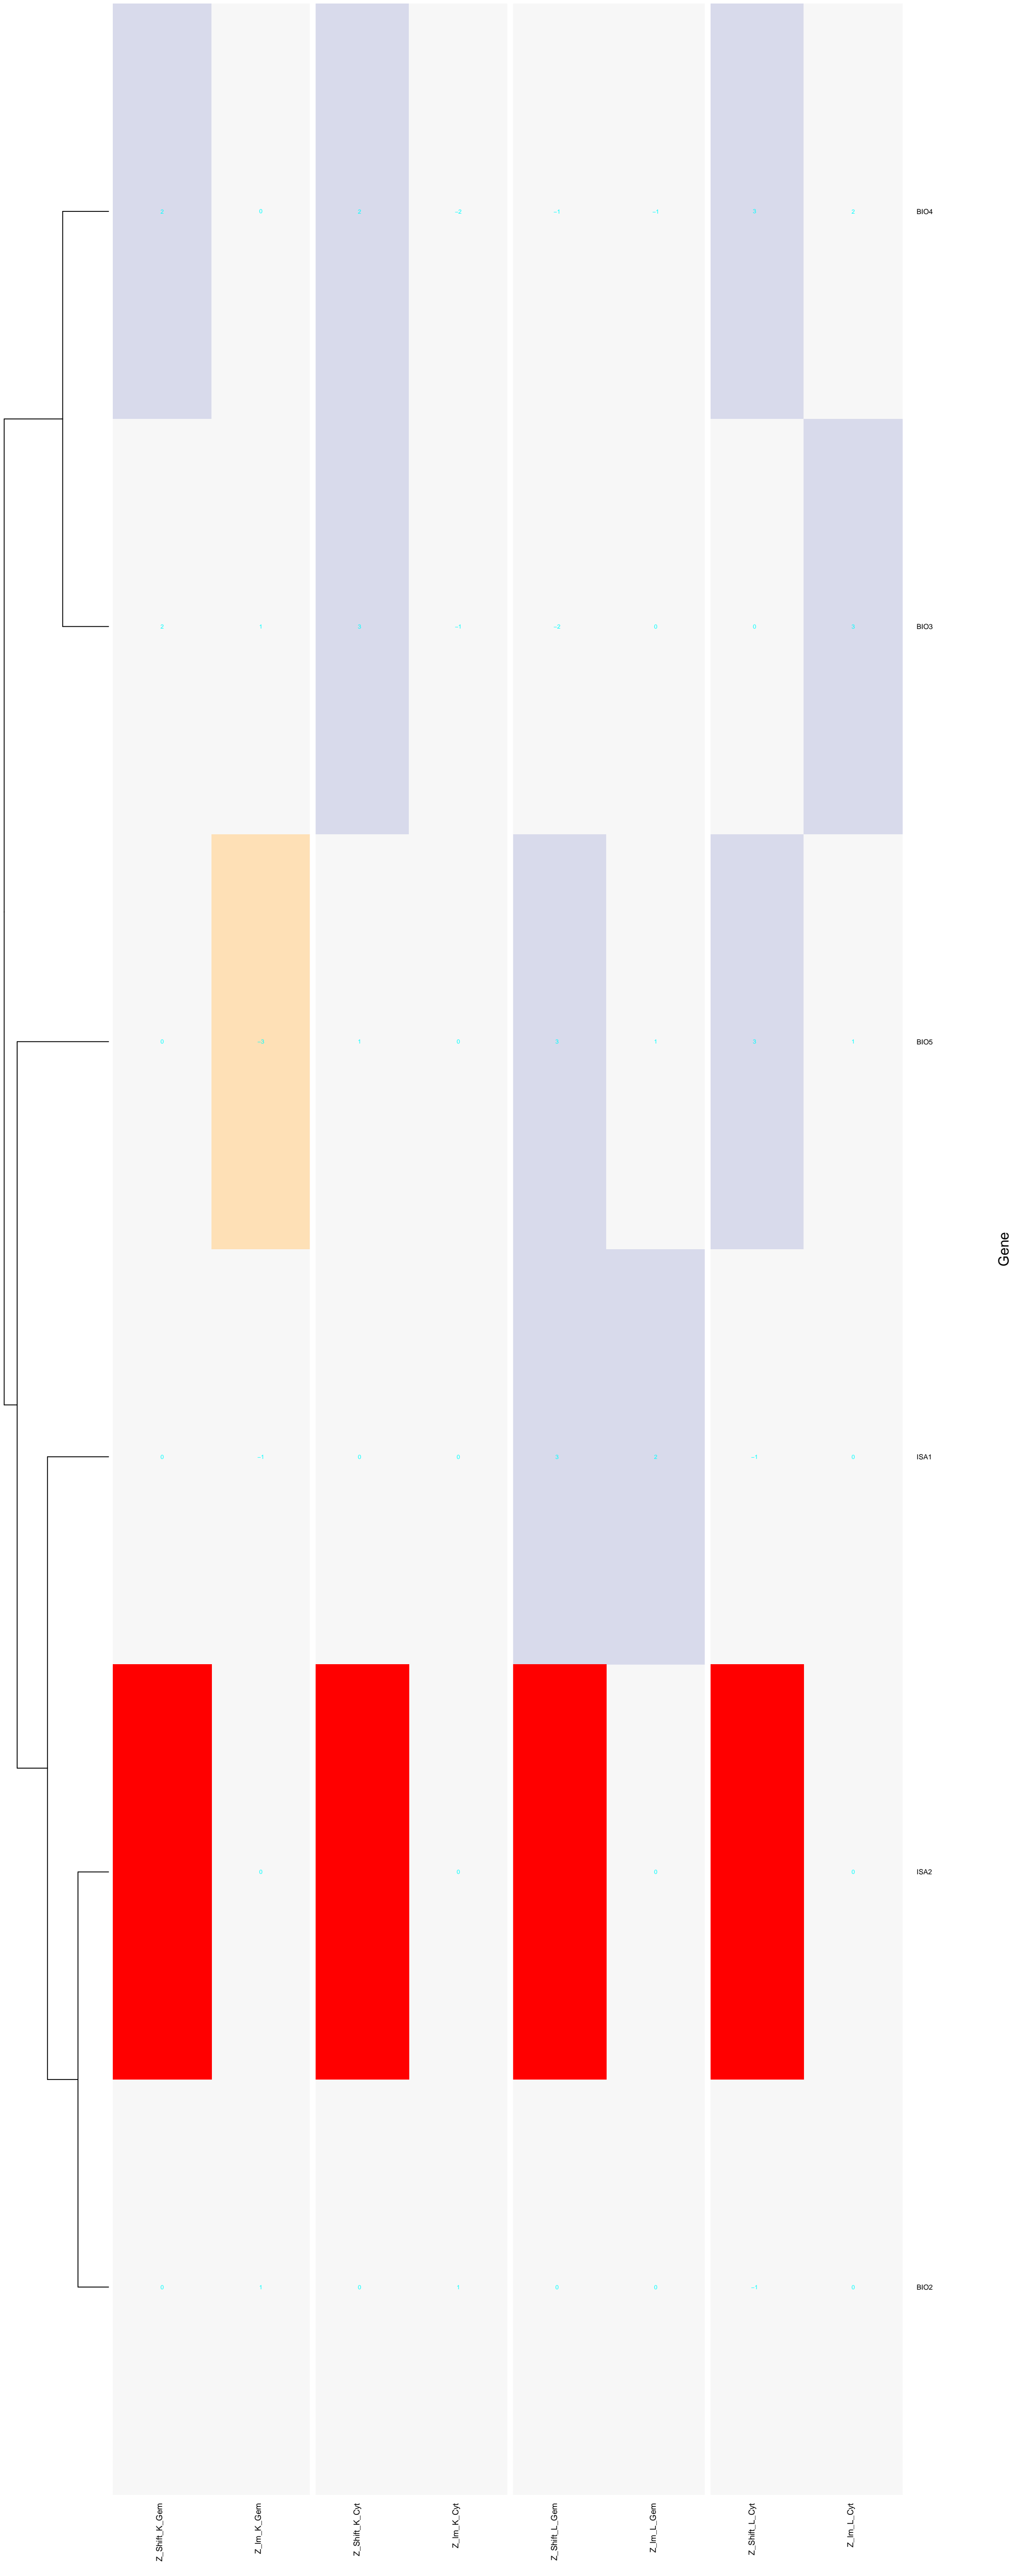

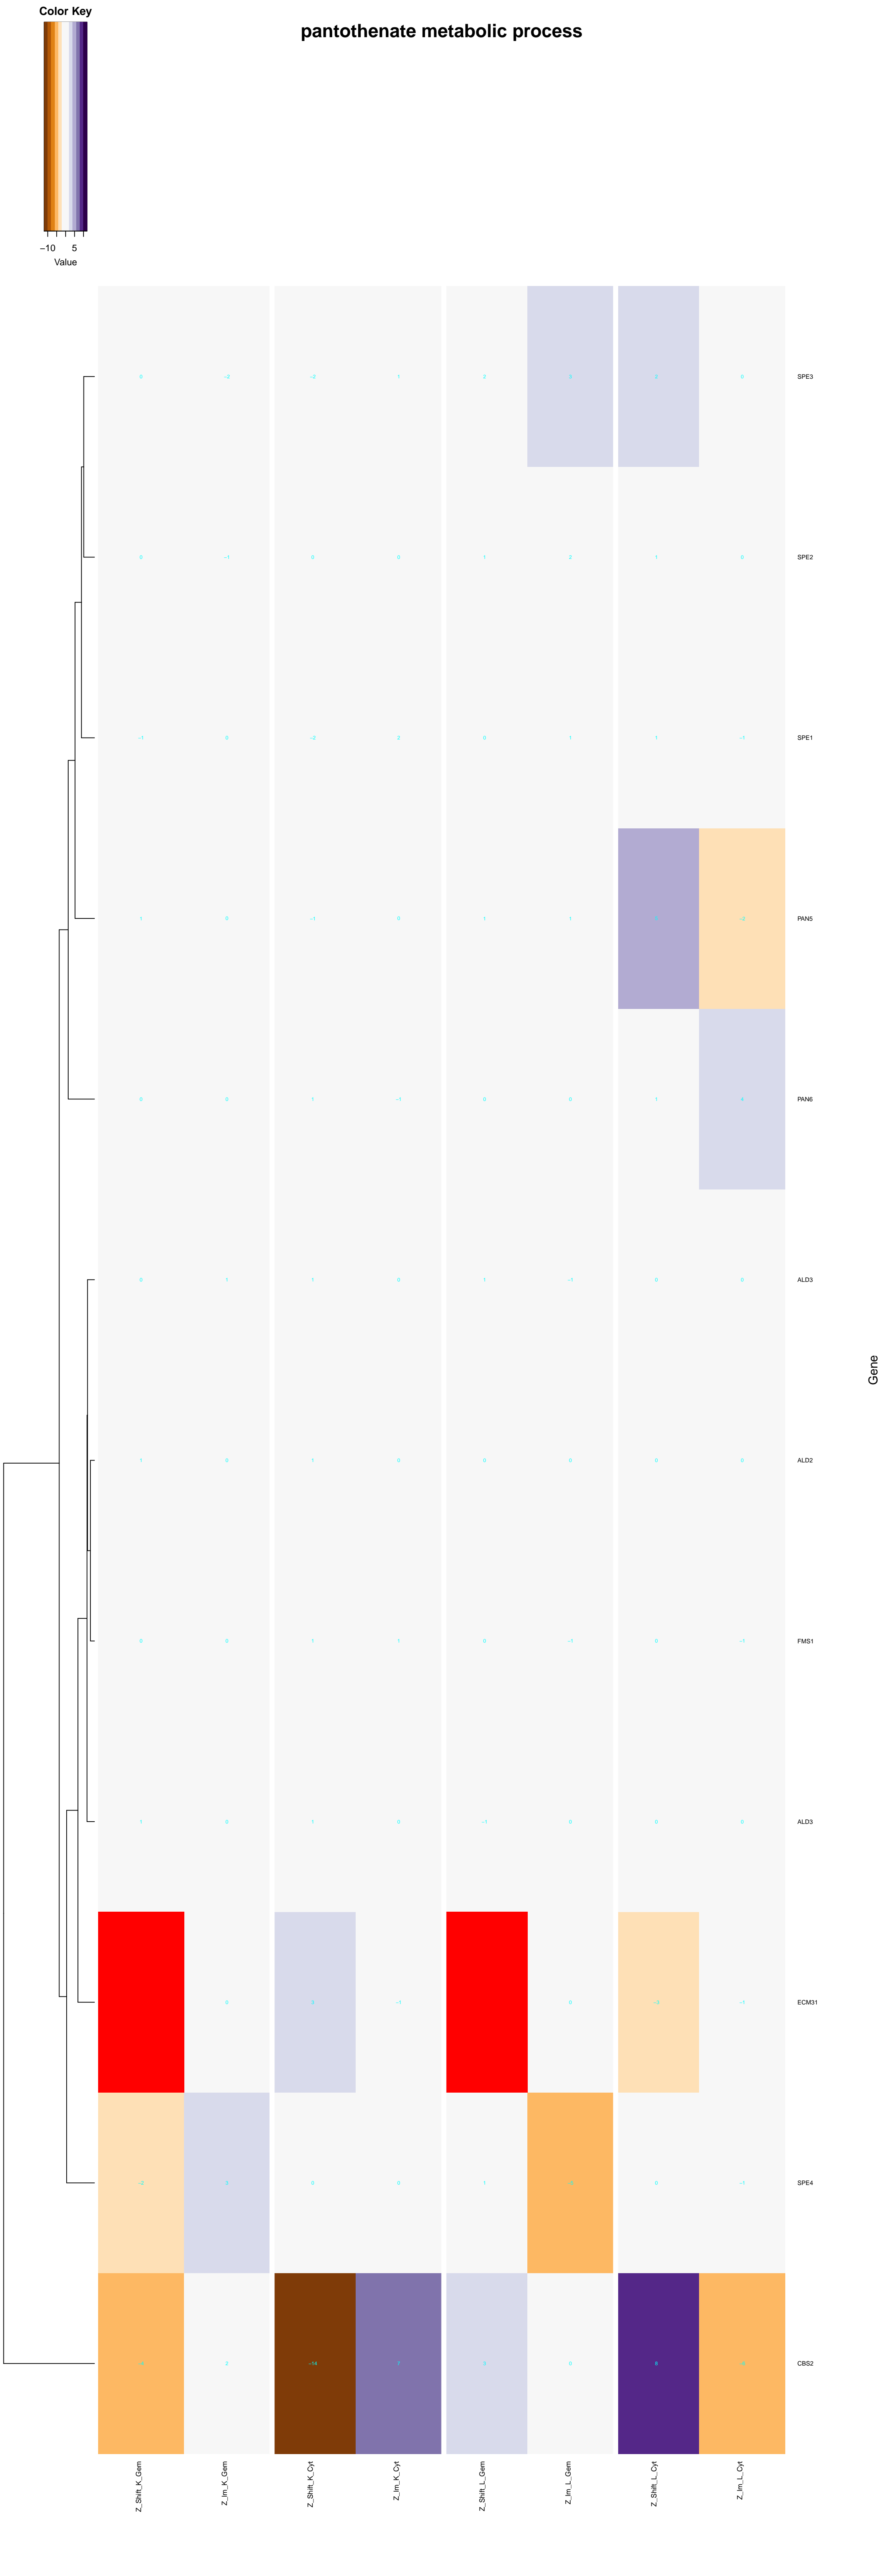



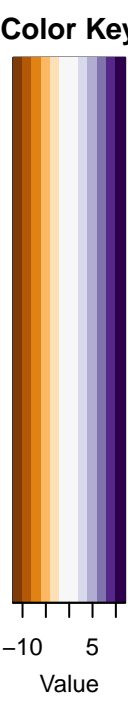

urea metabolic process

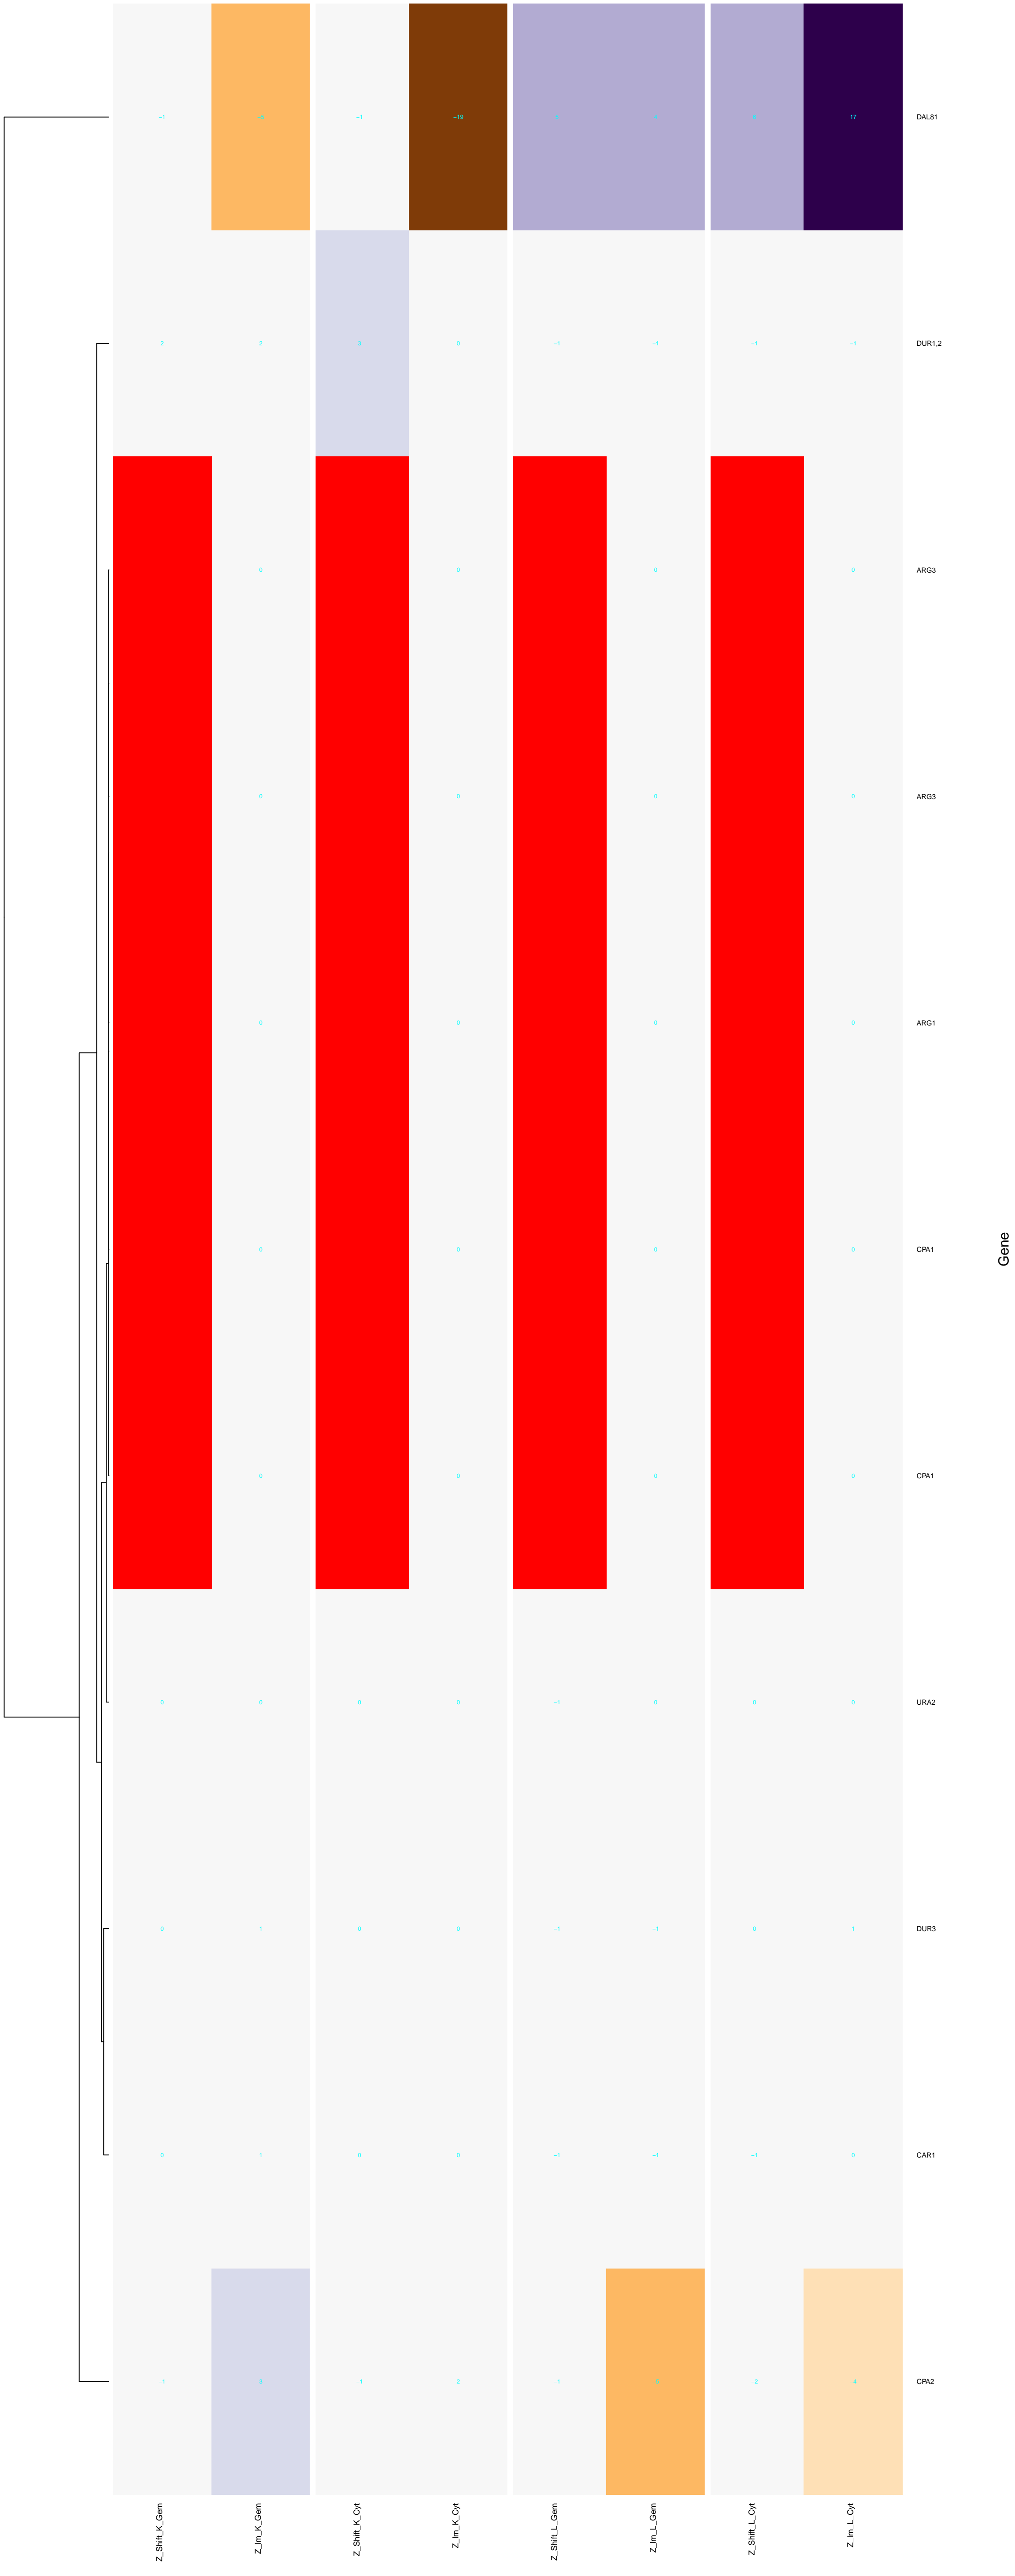

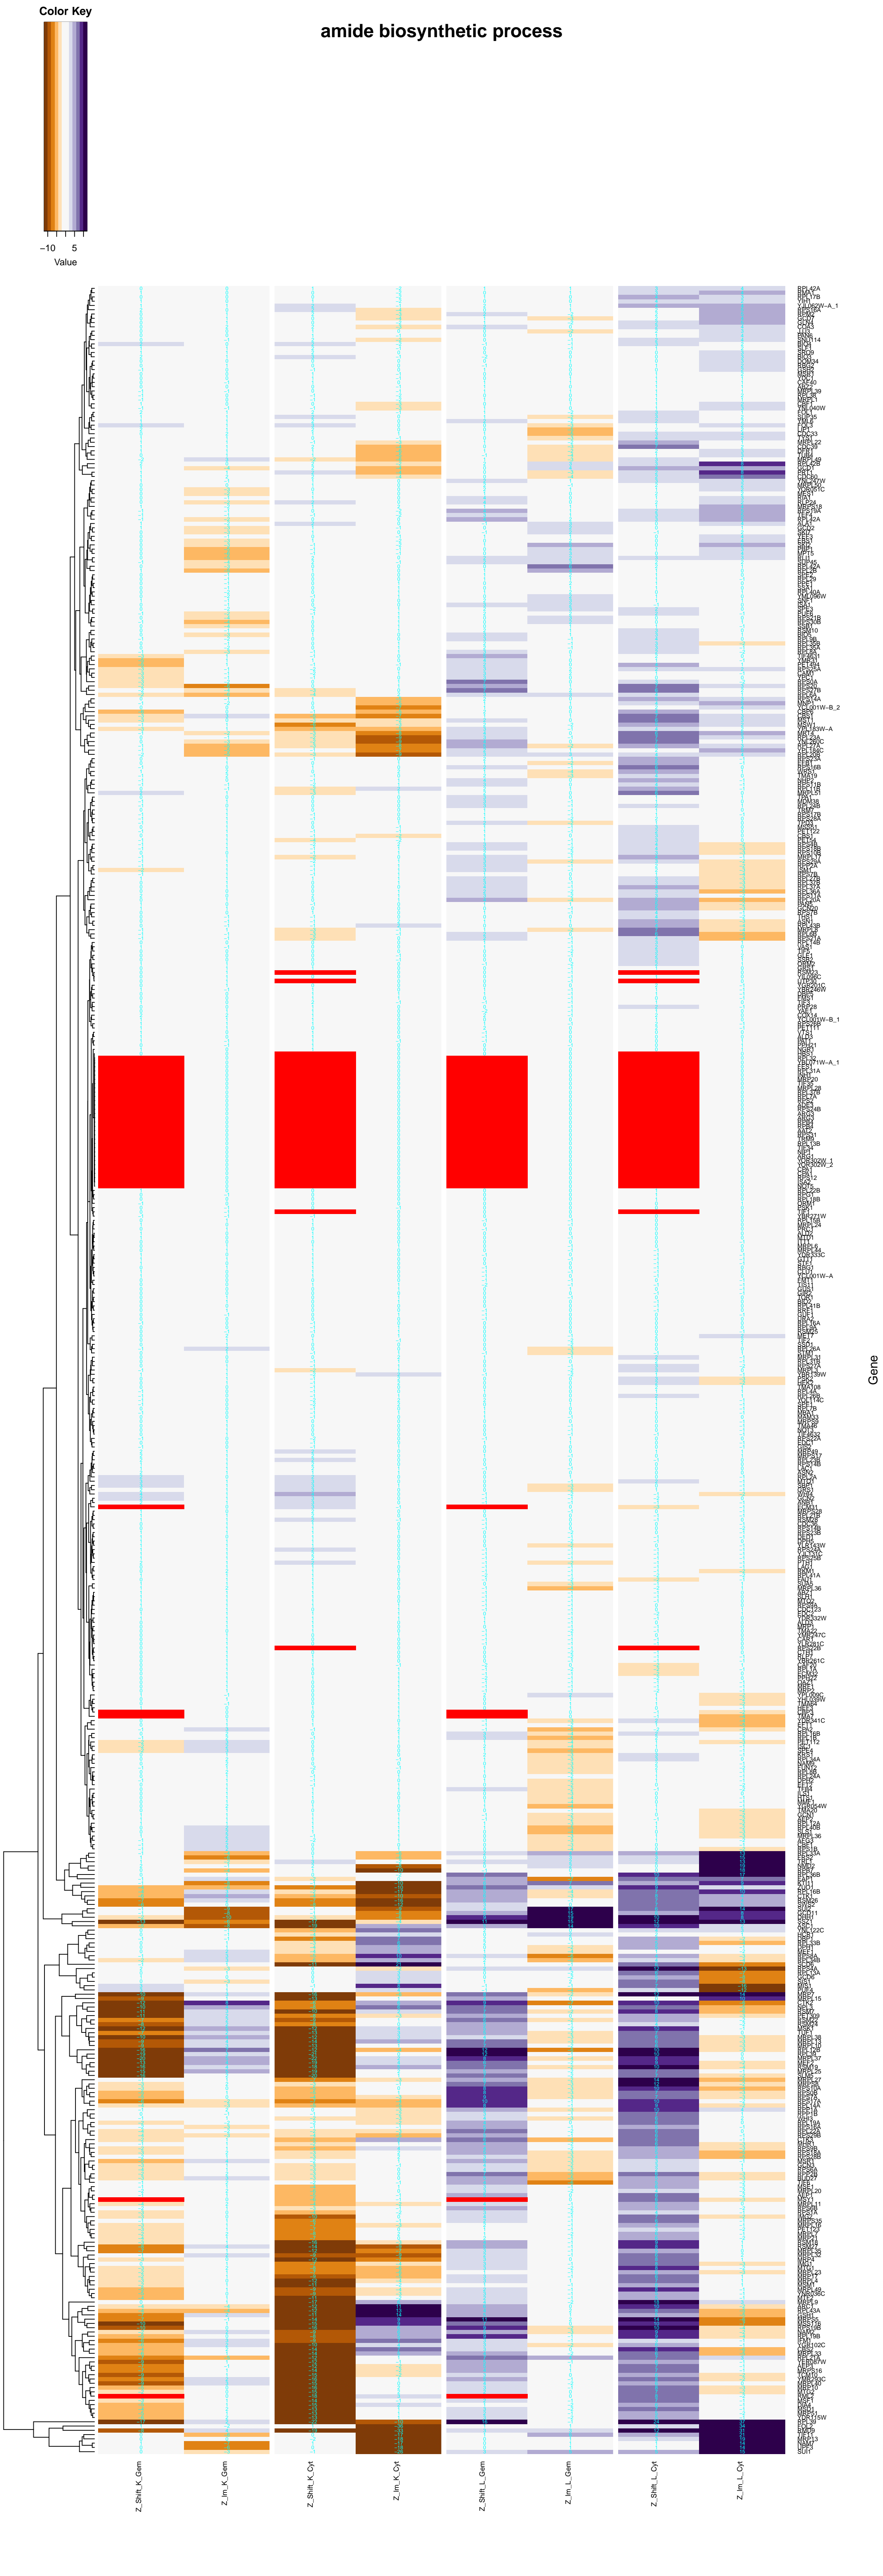

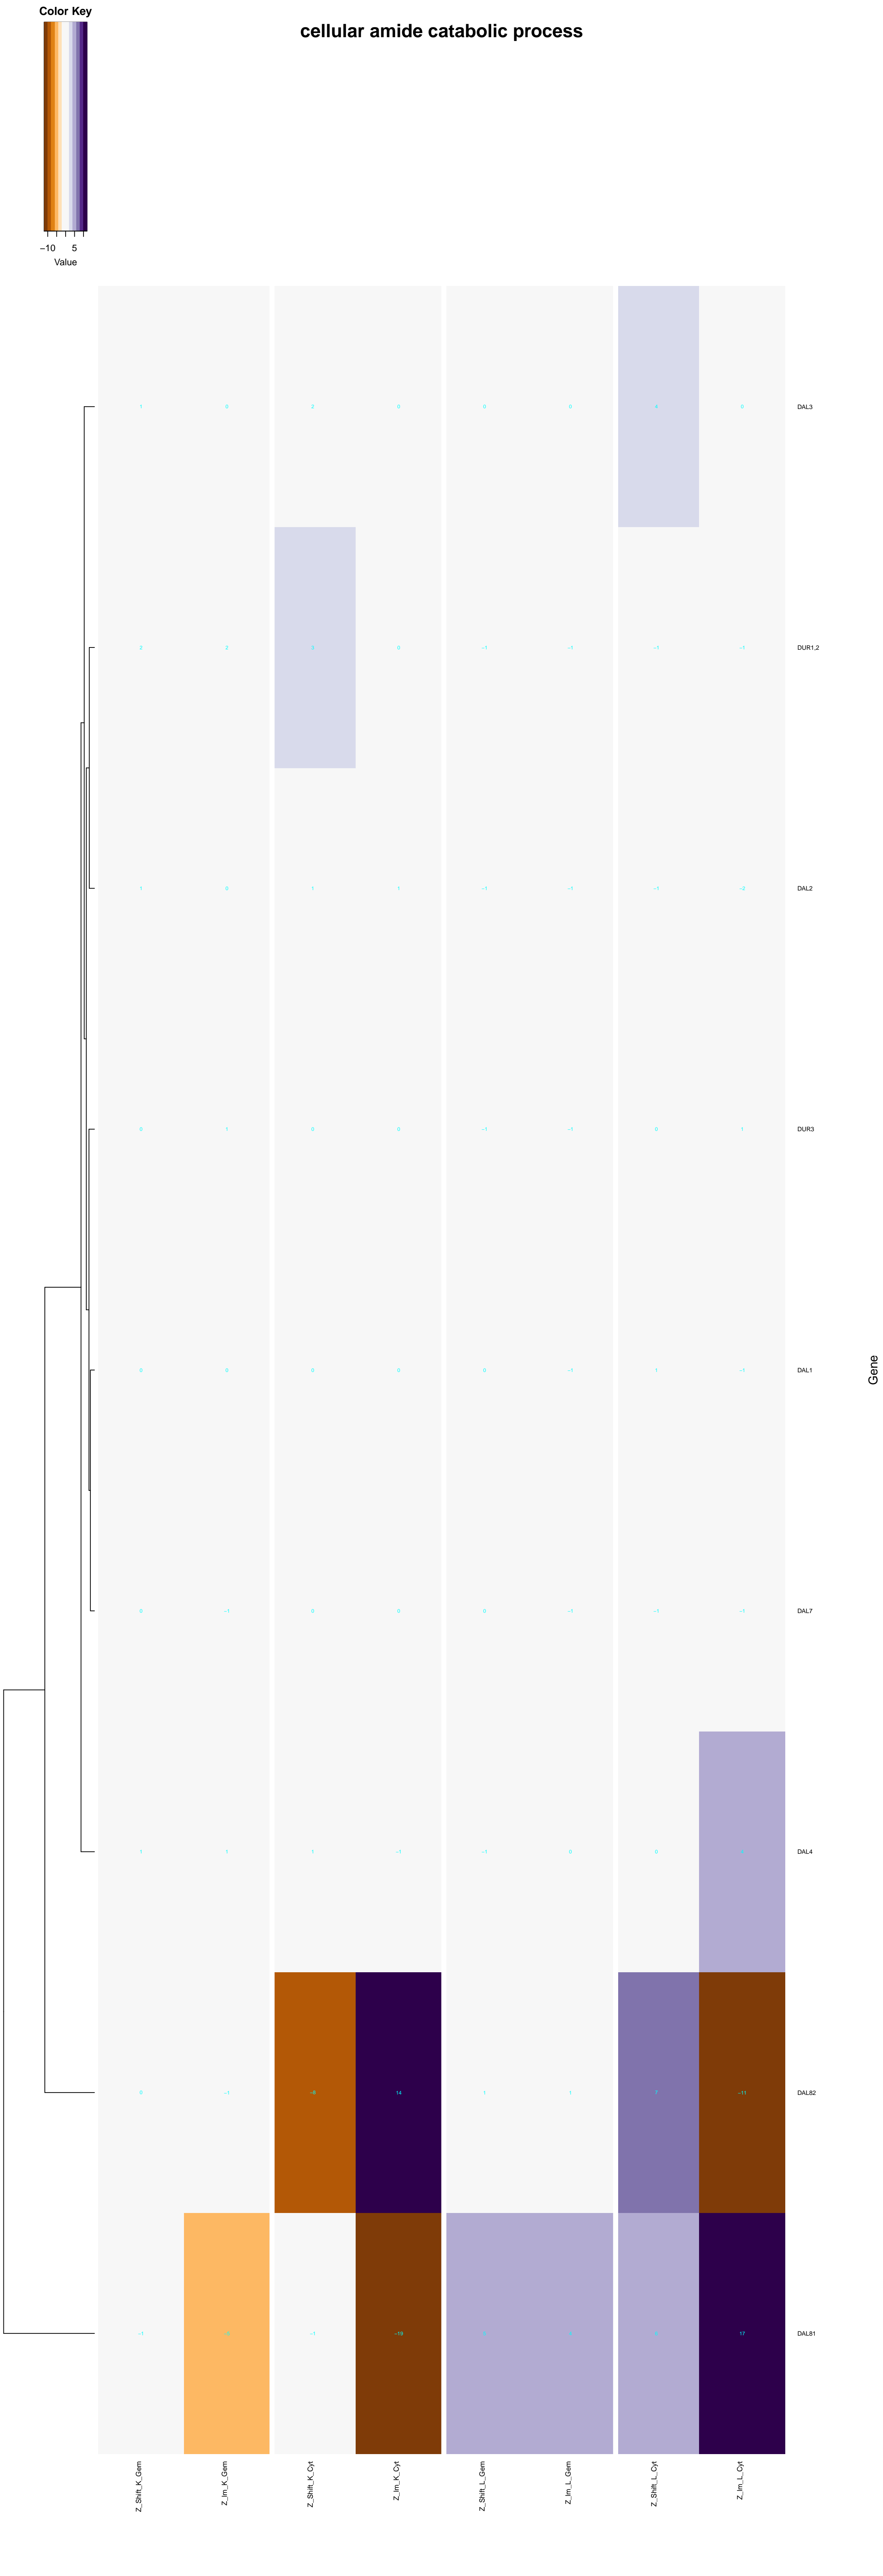



allantoin catabolic process

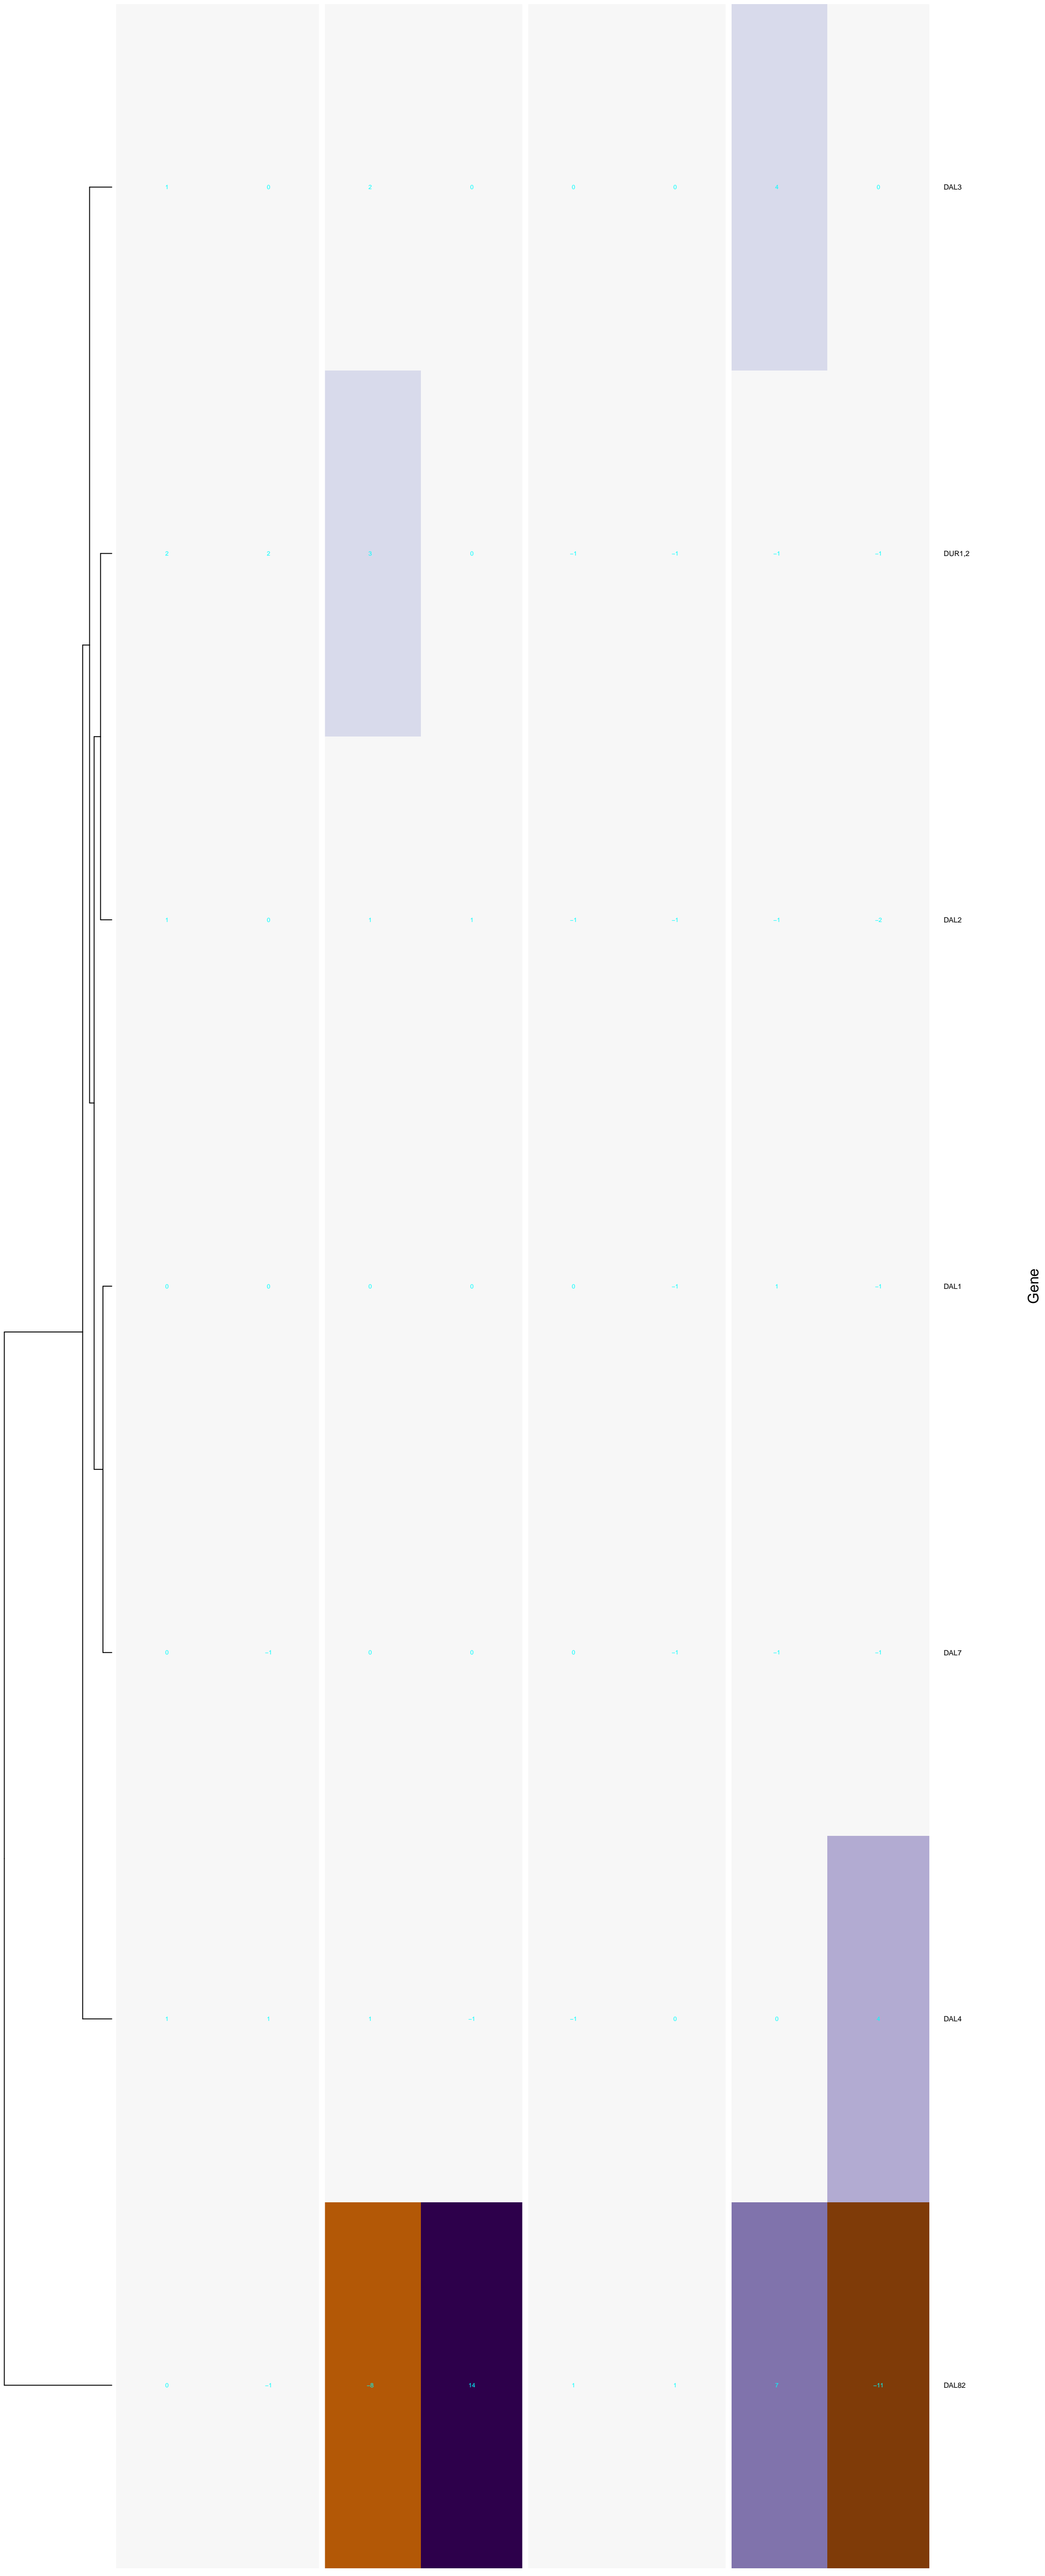

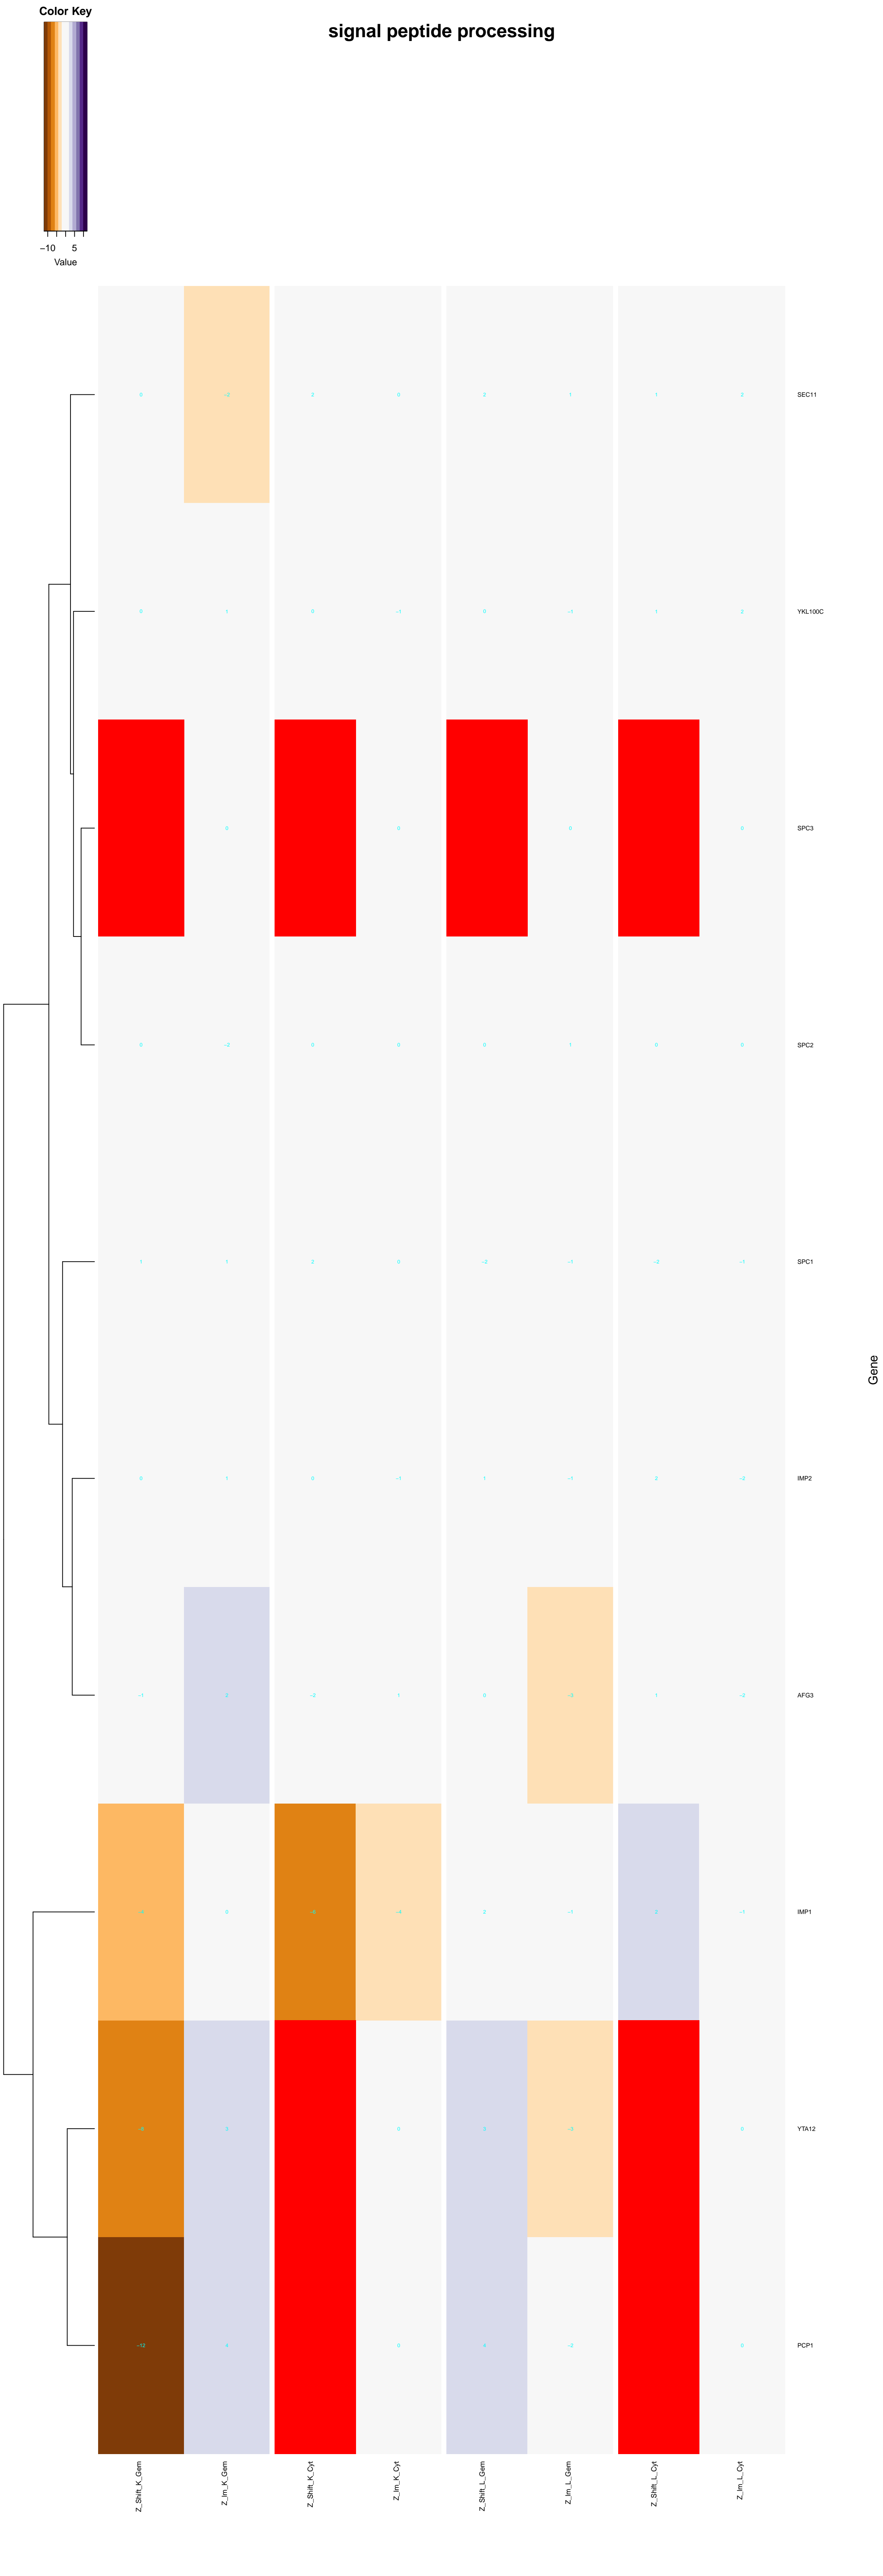

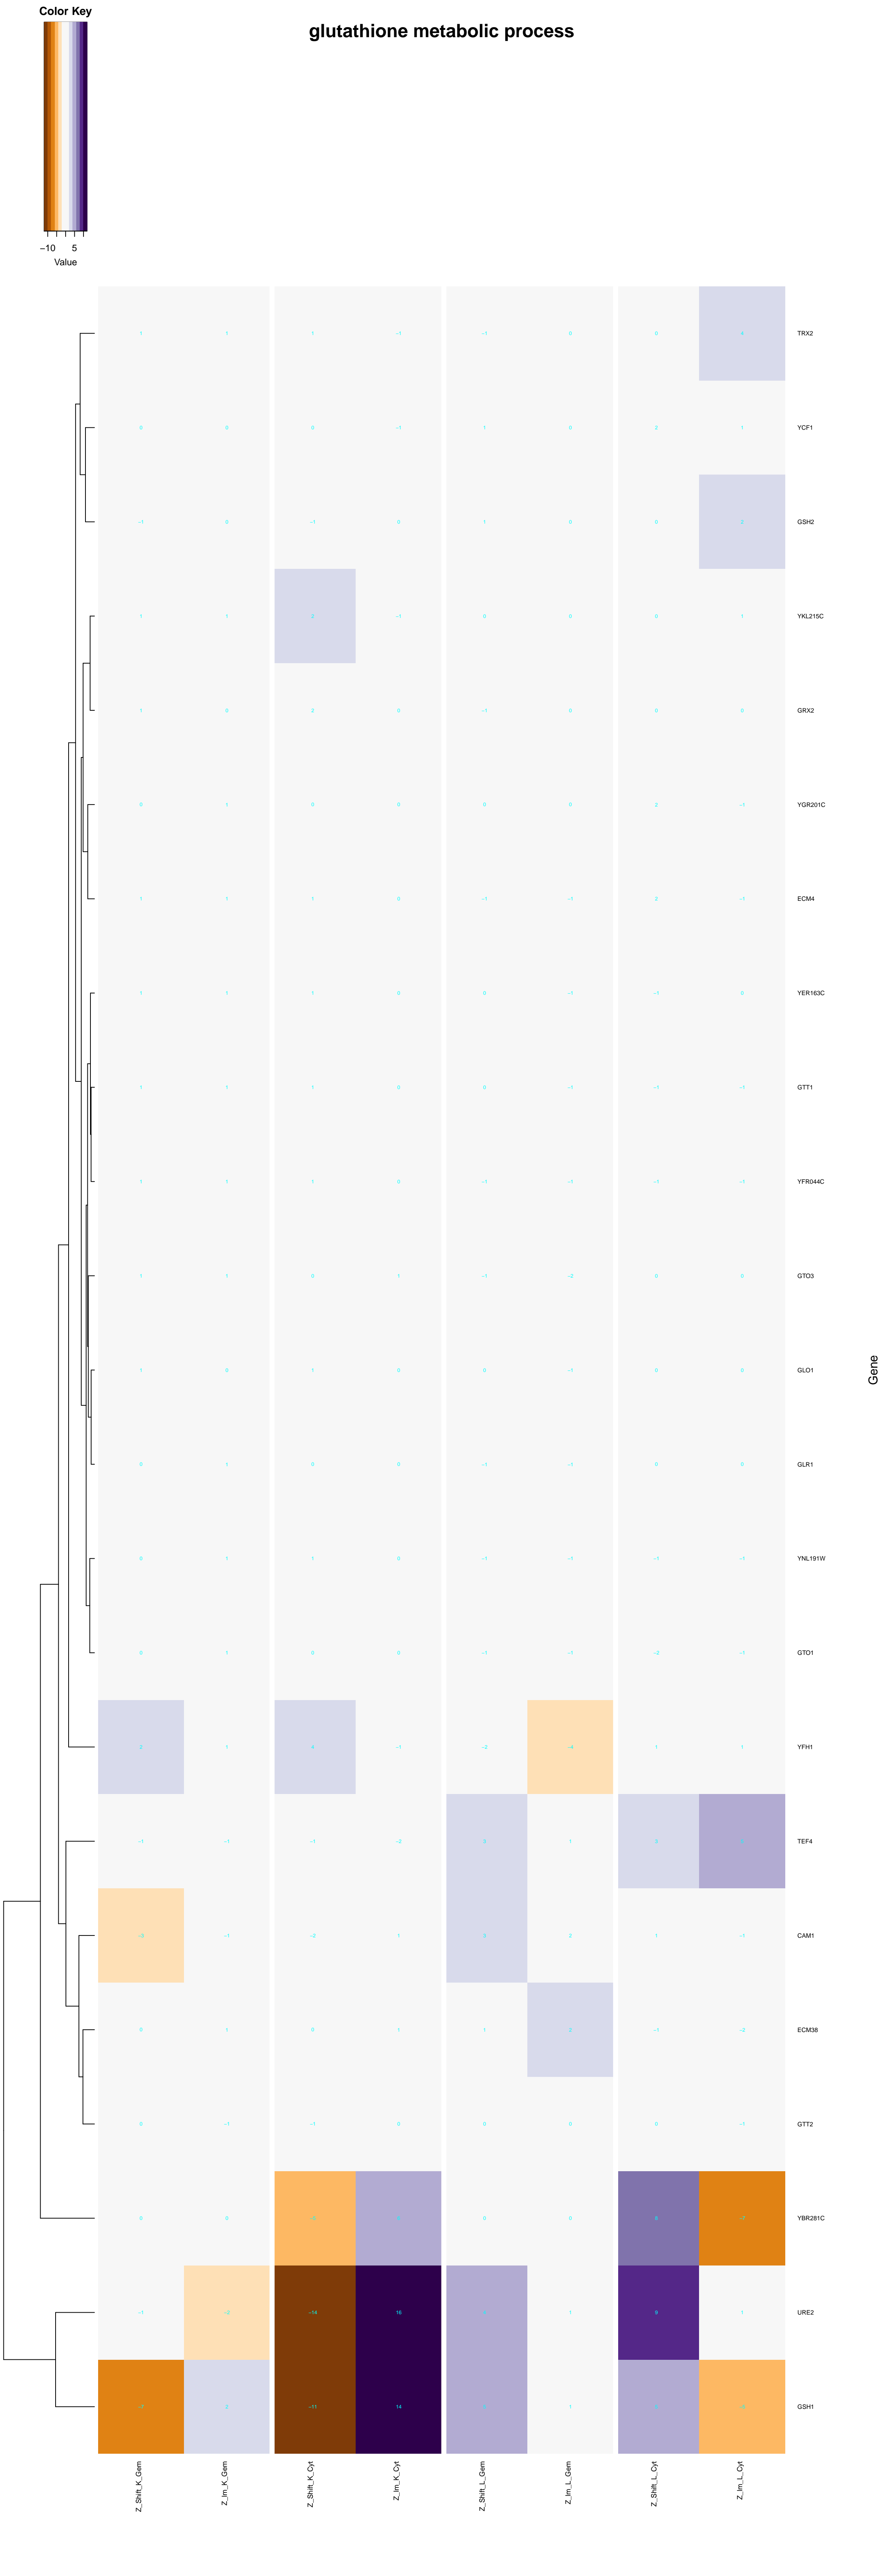

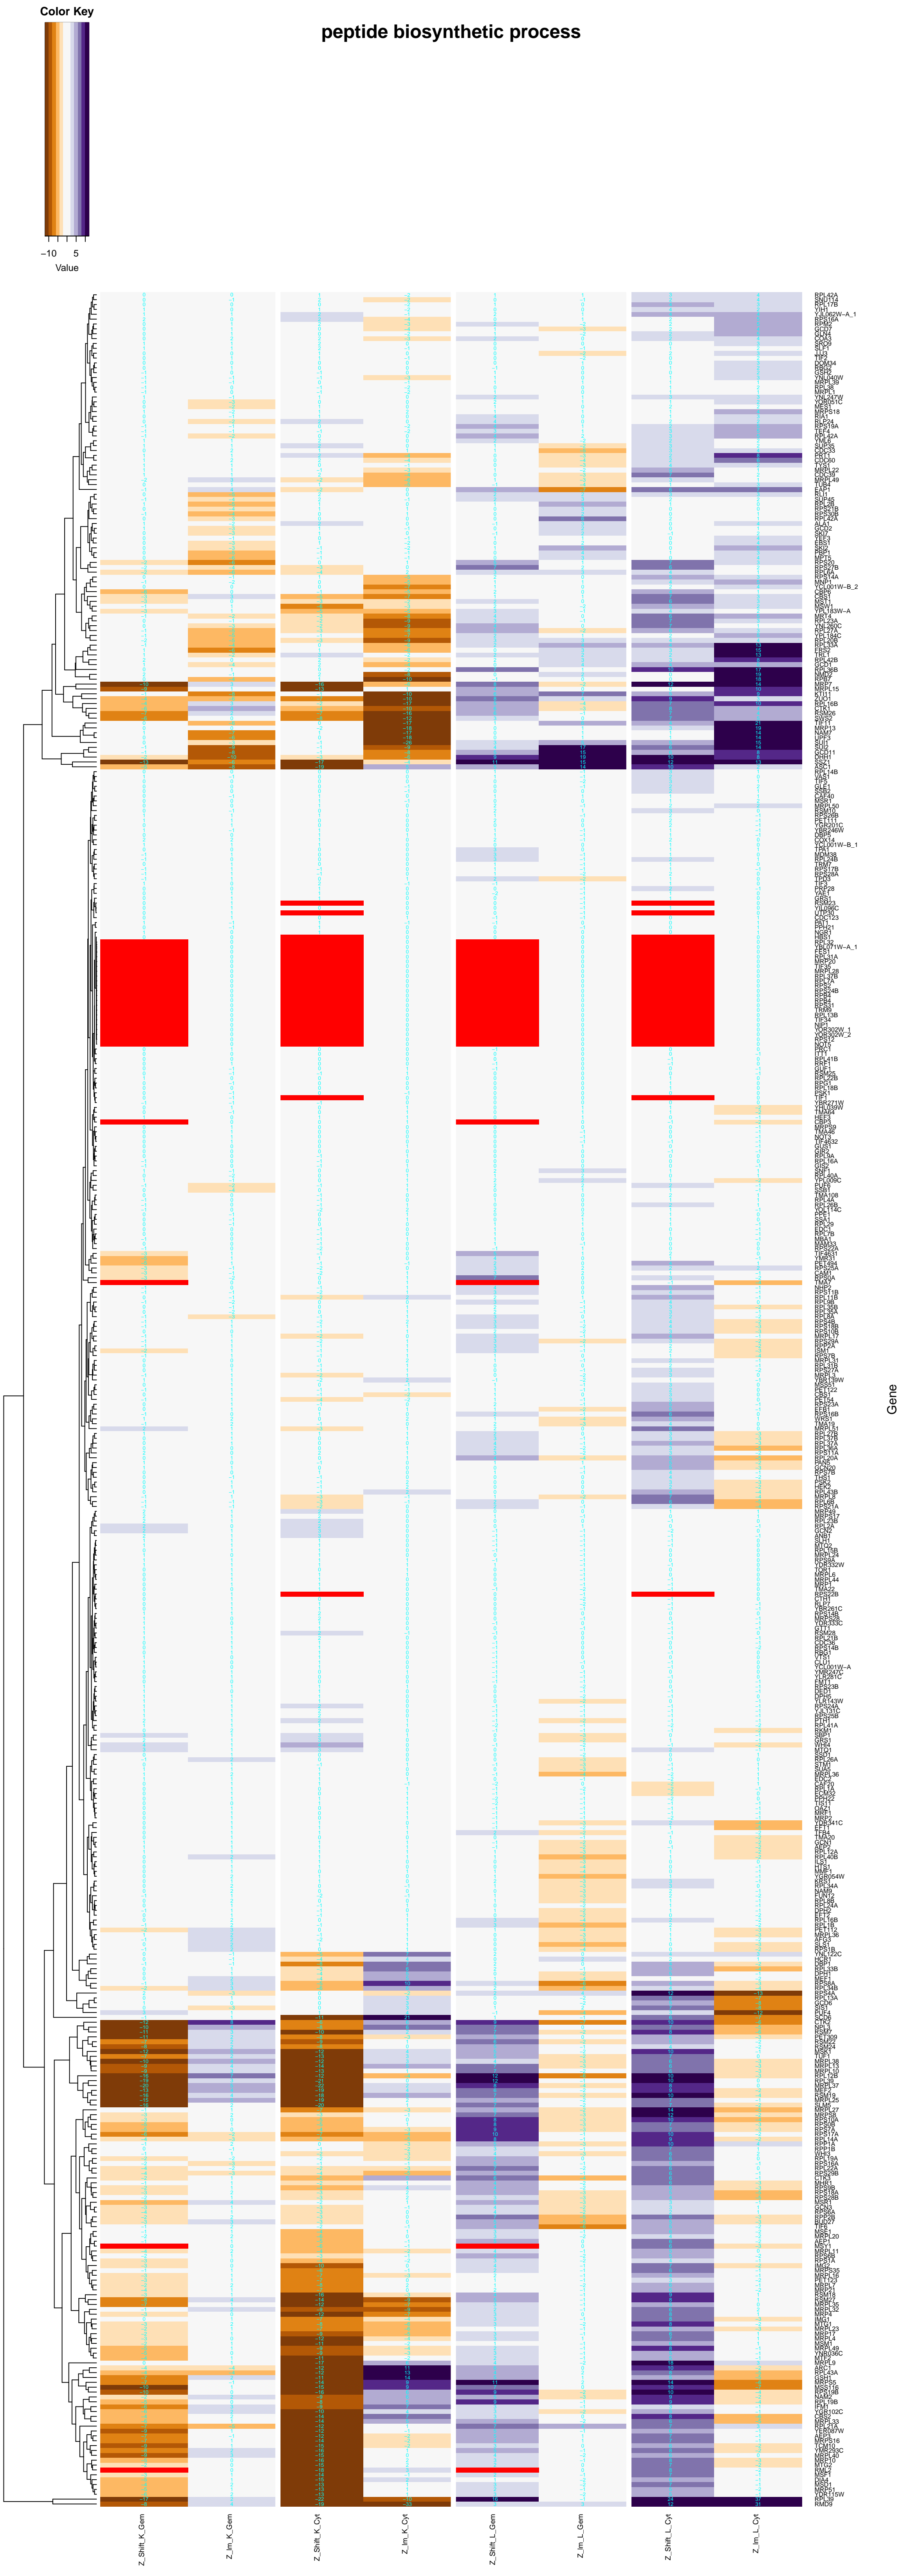

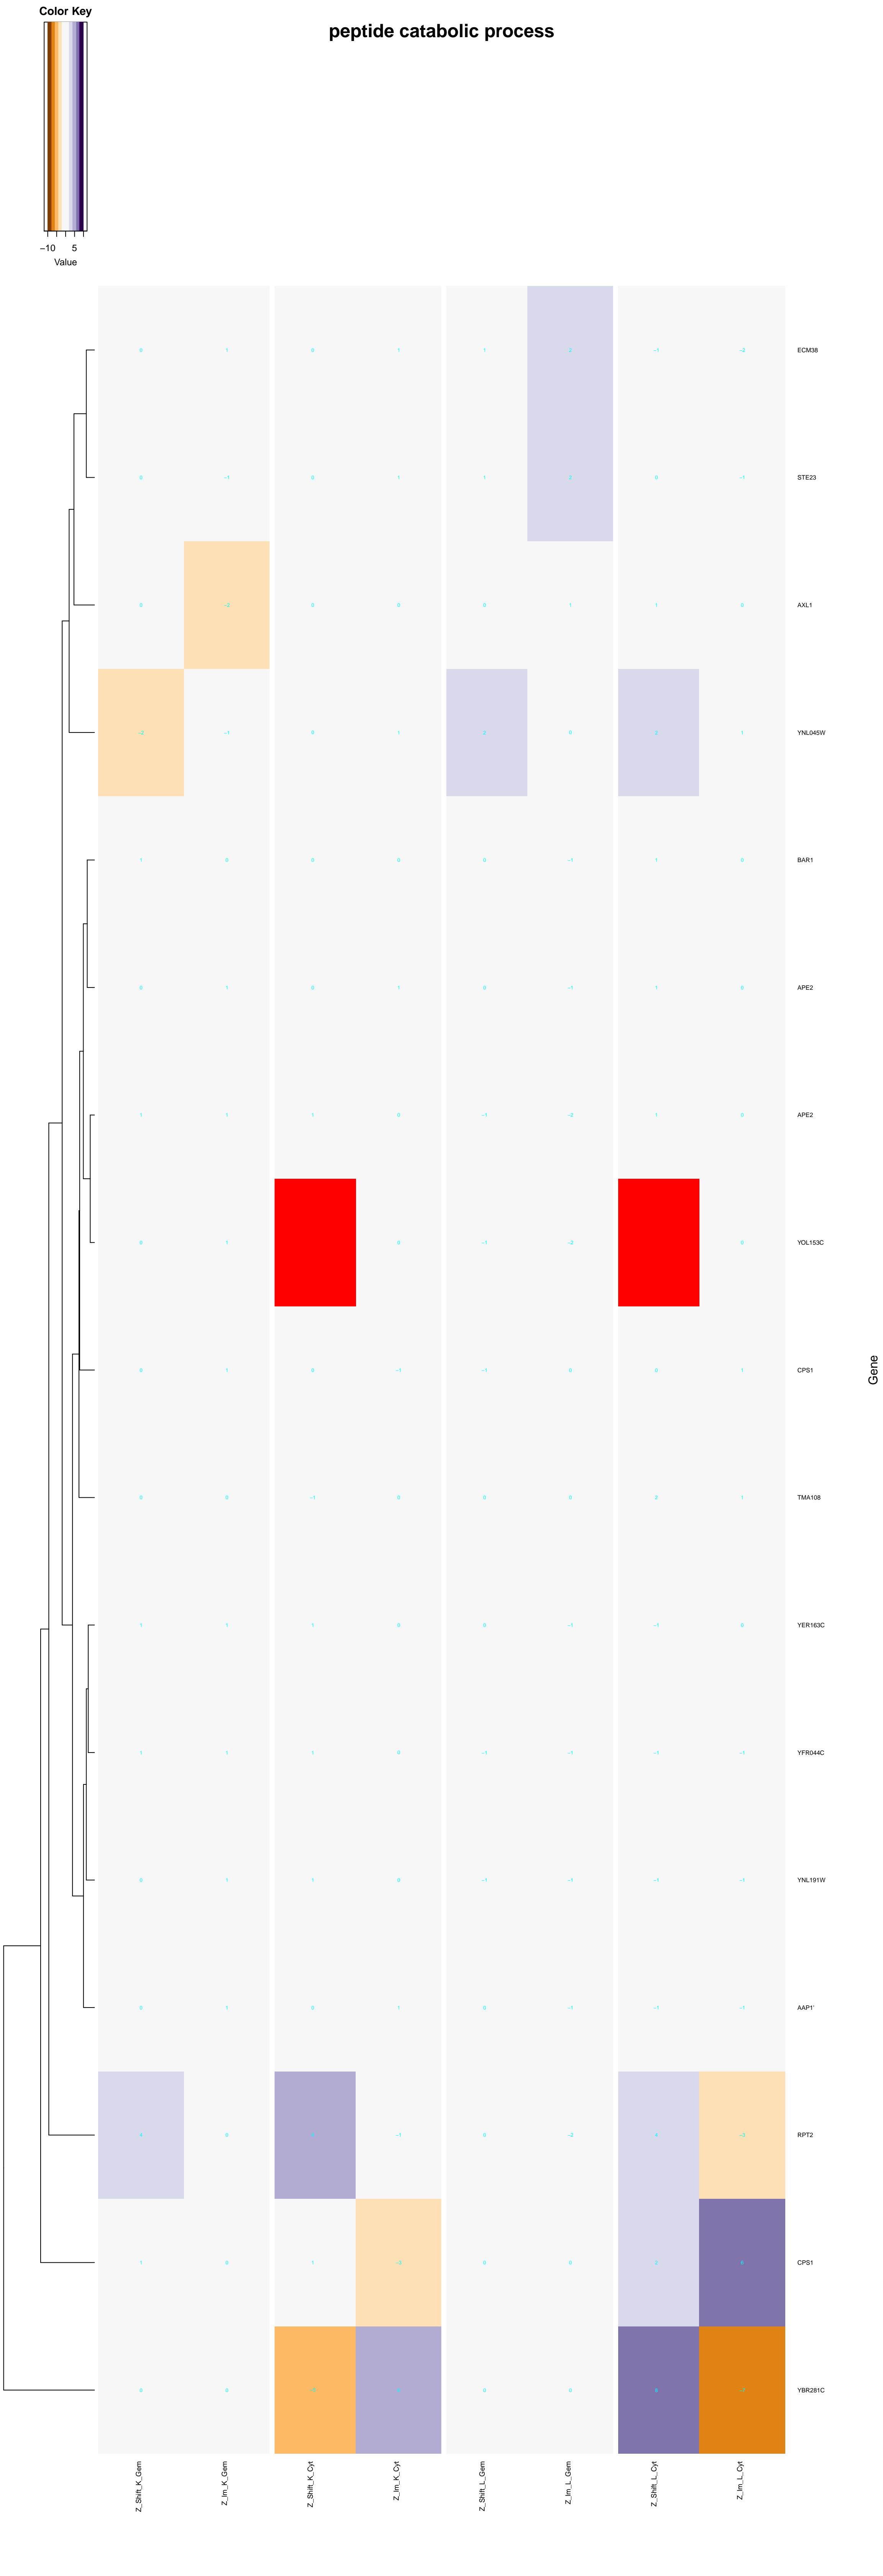



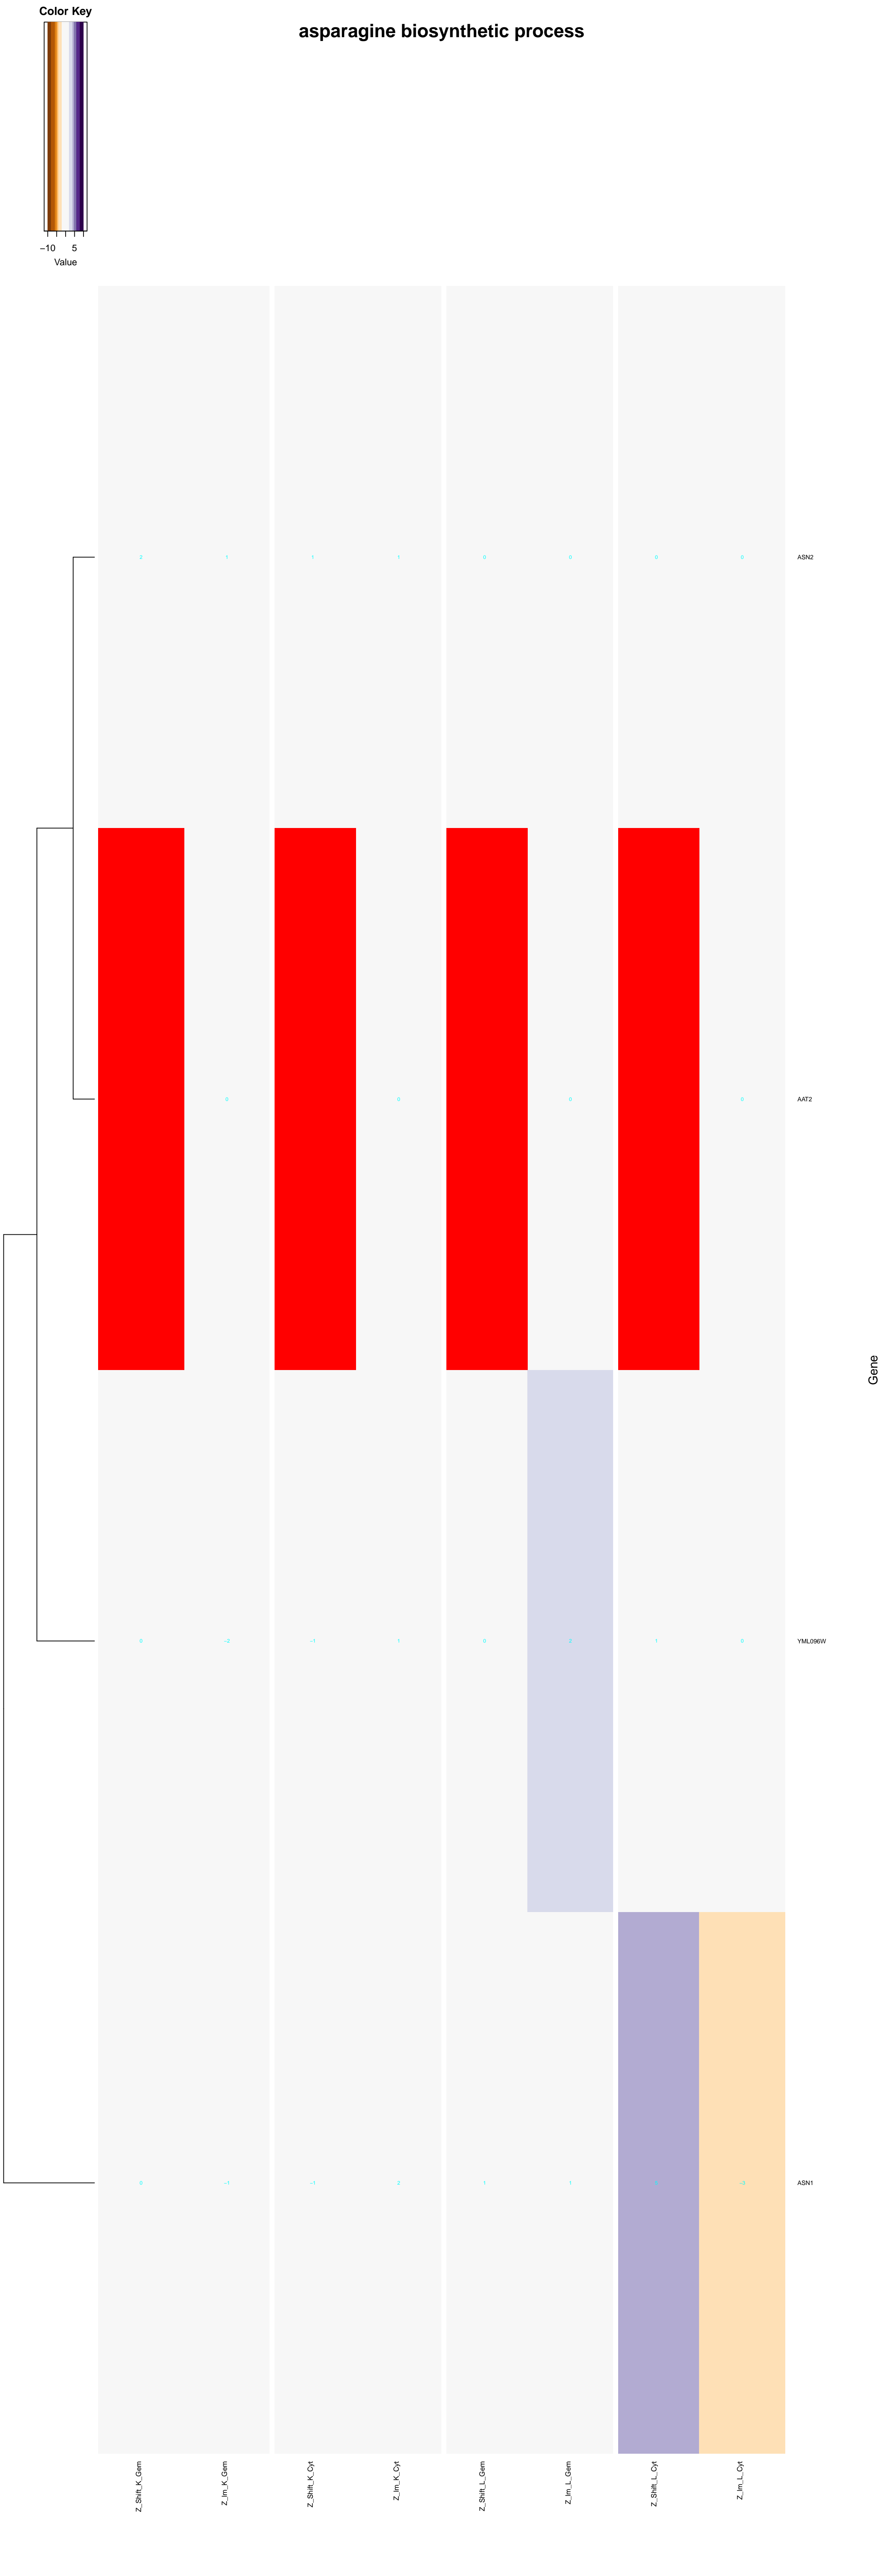

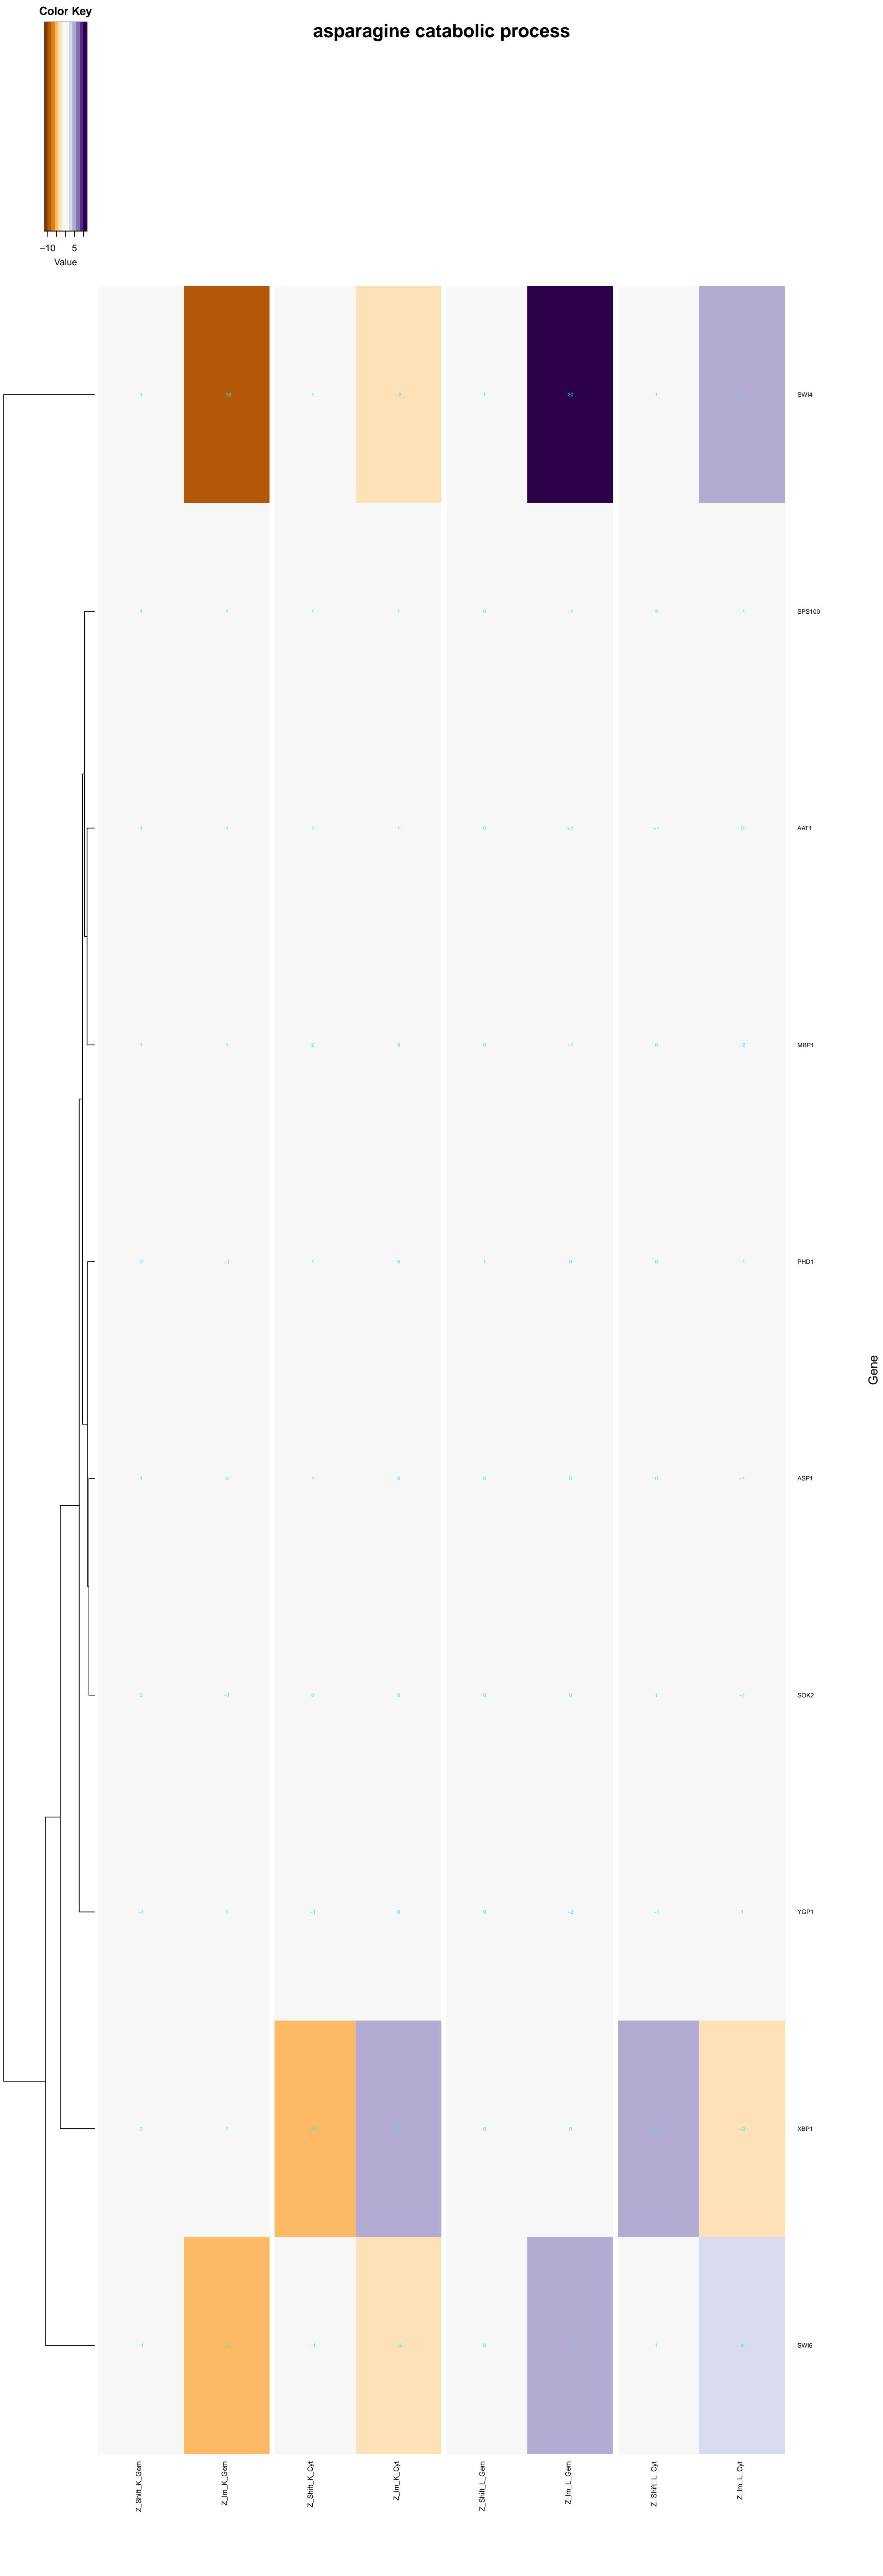

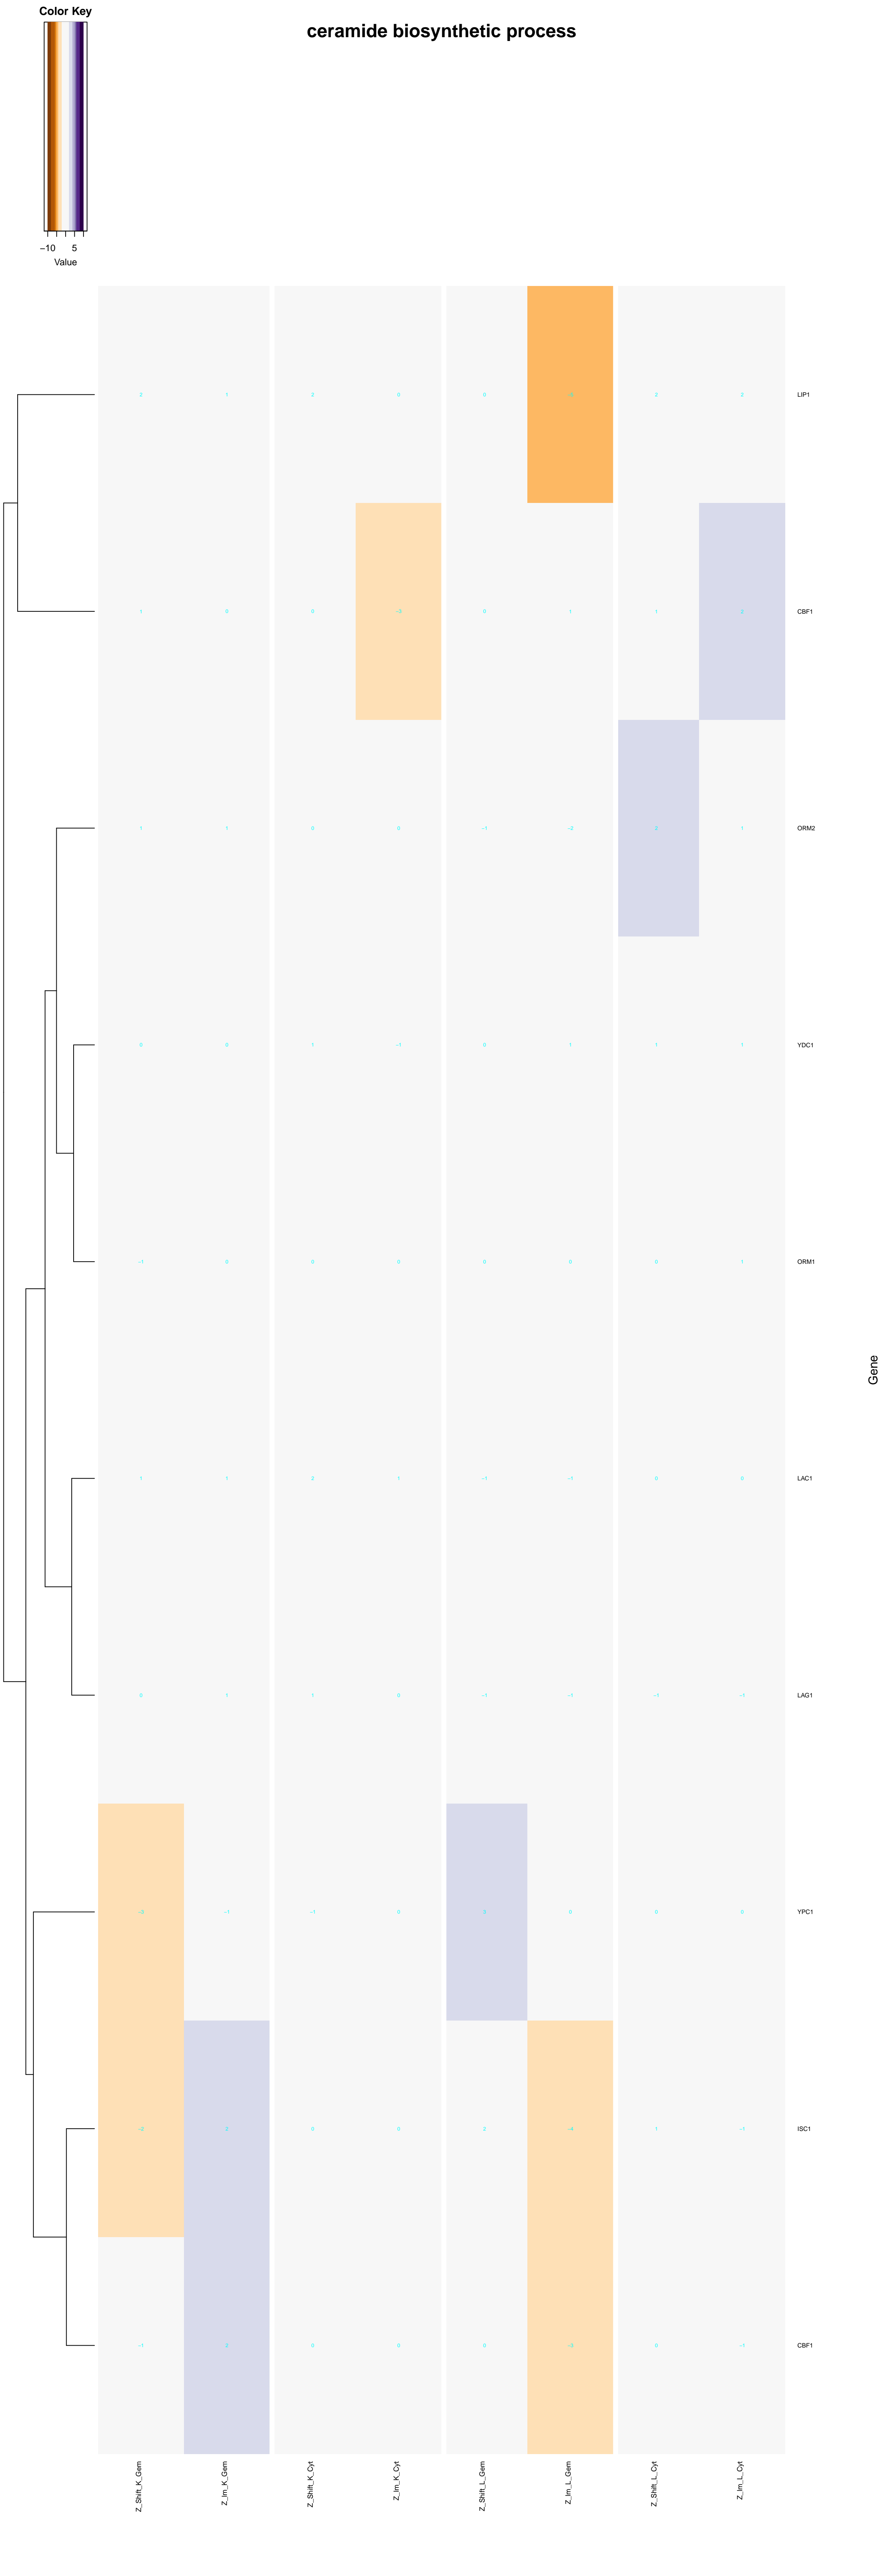

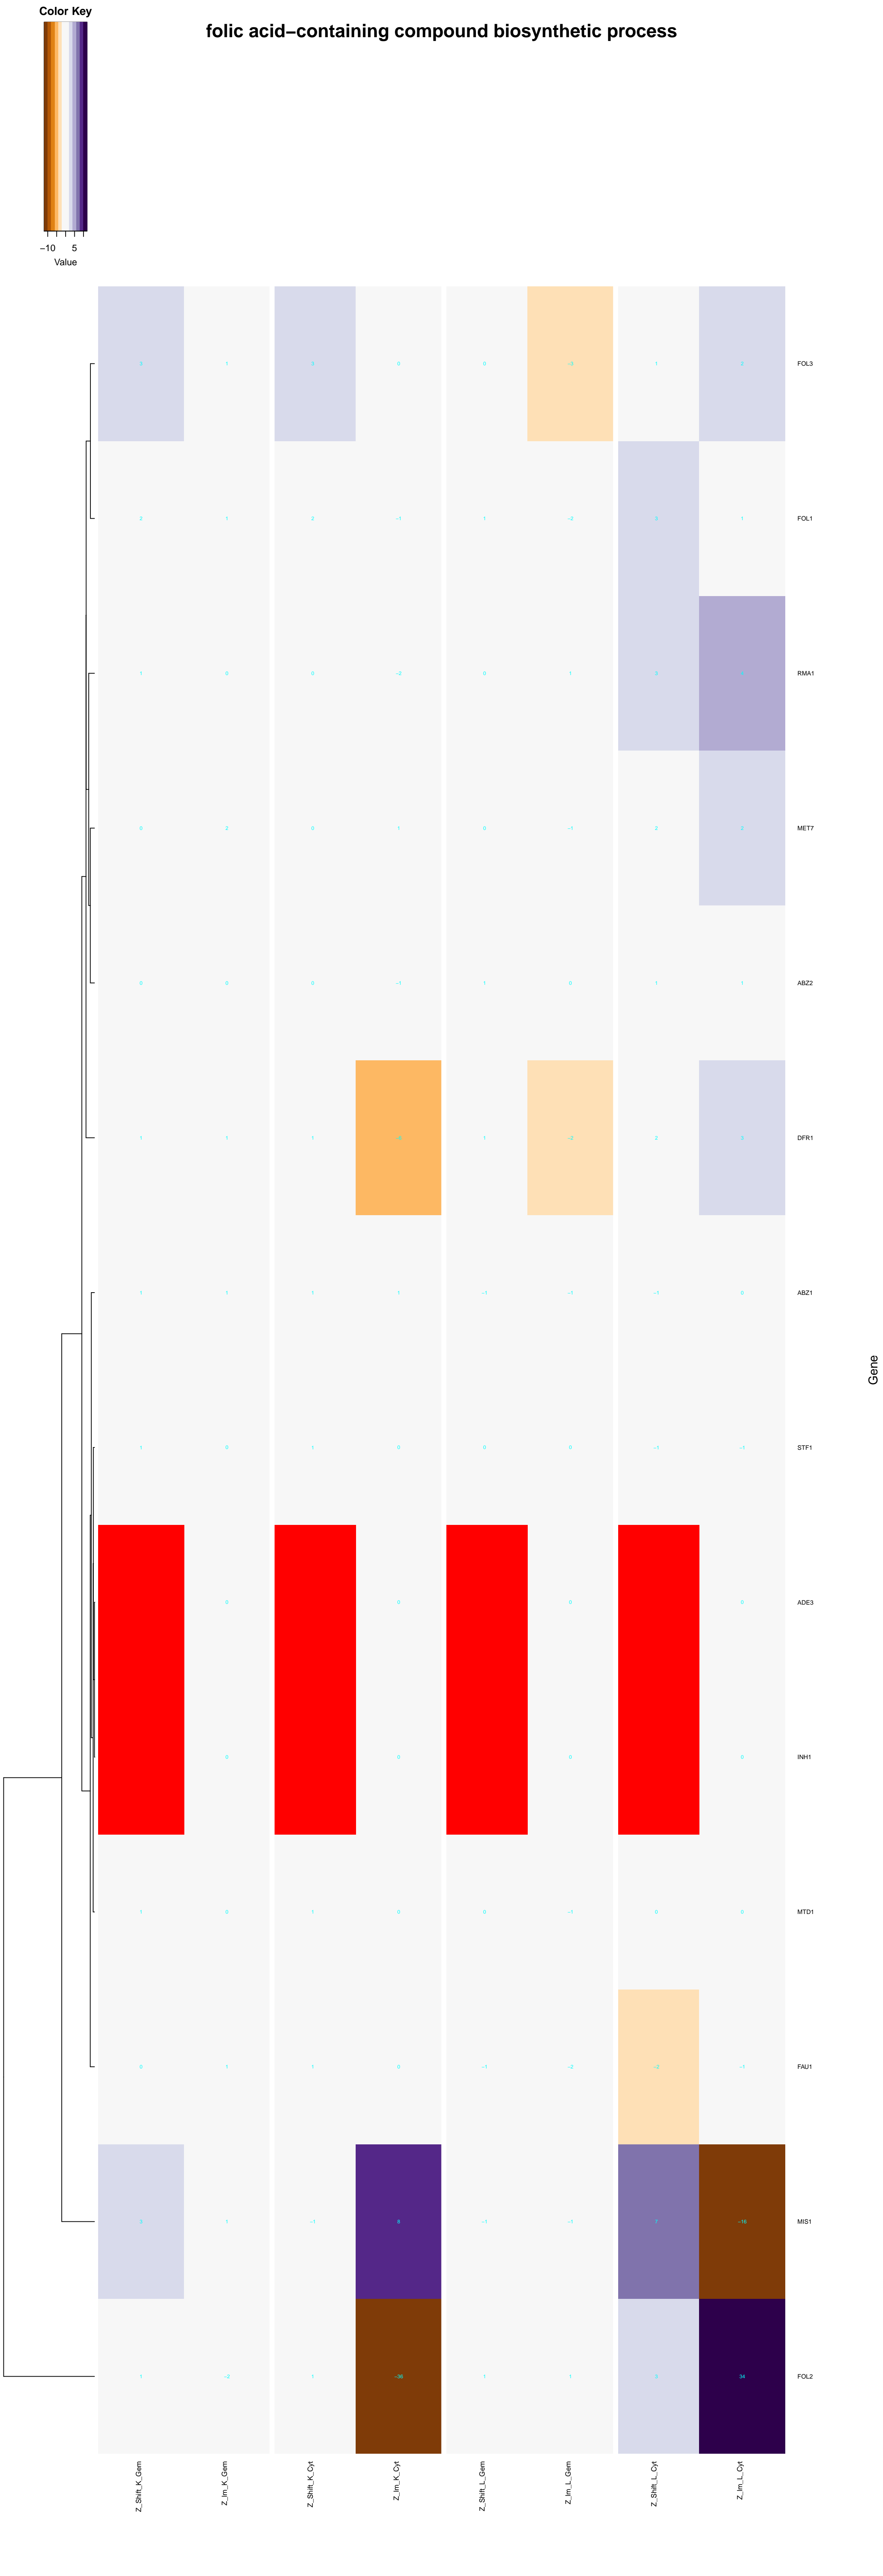

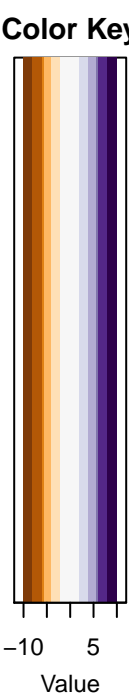

dihydrofolate metabolic process

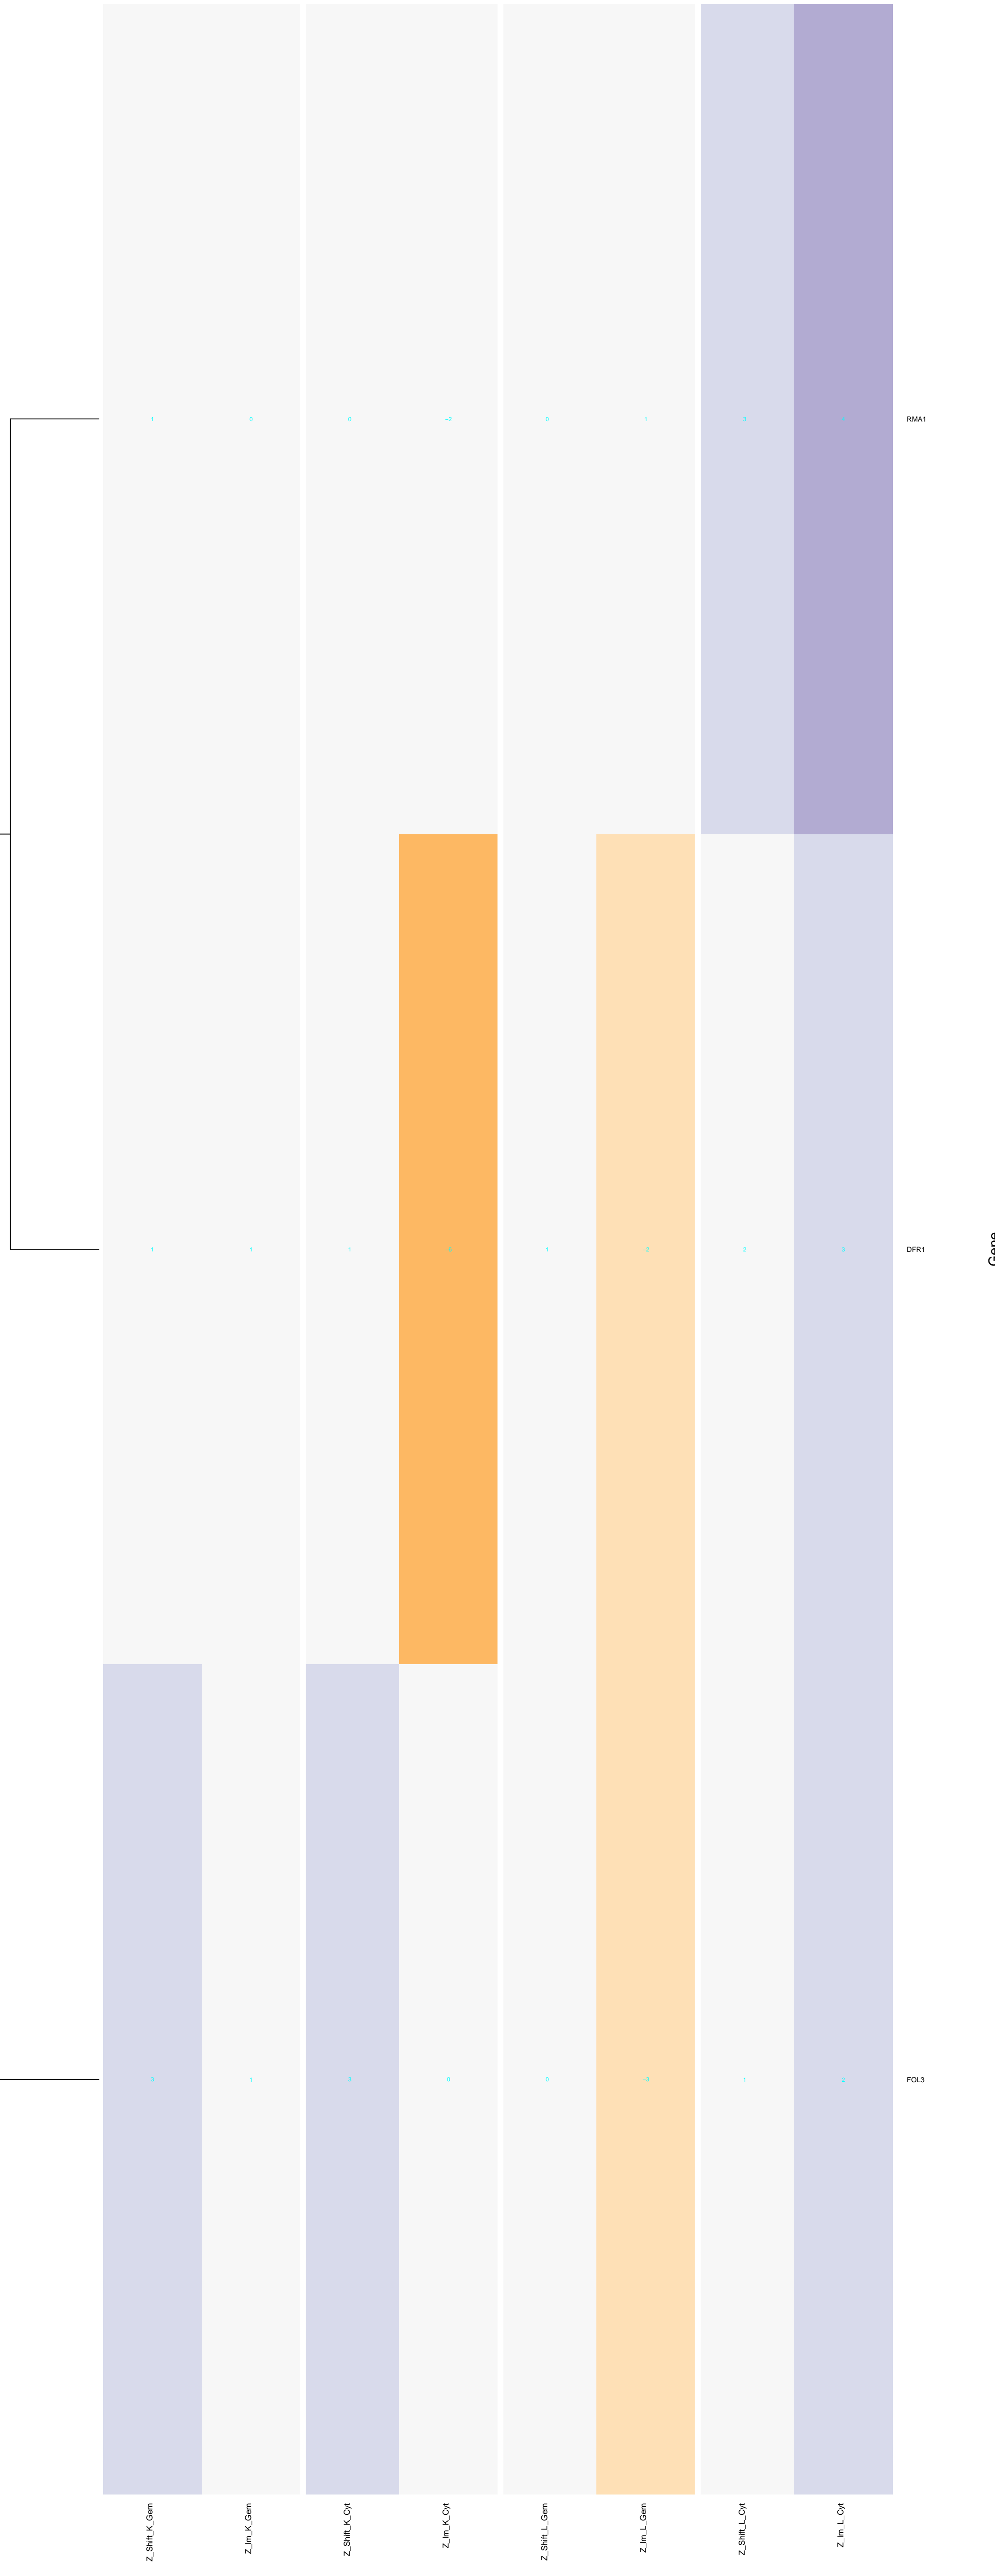

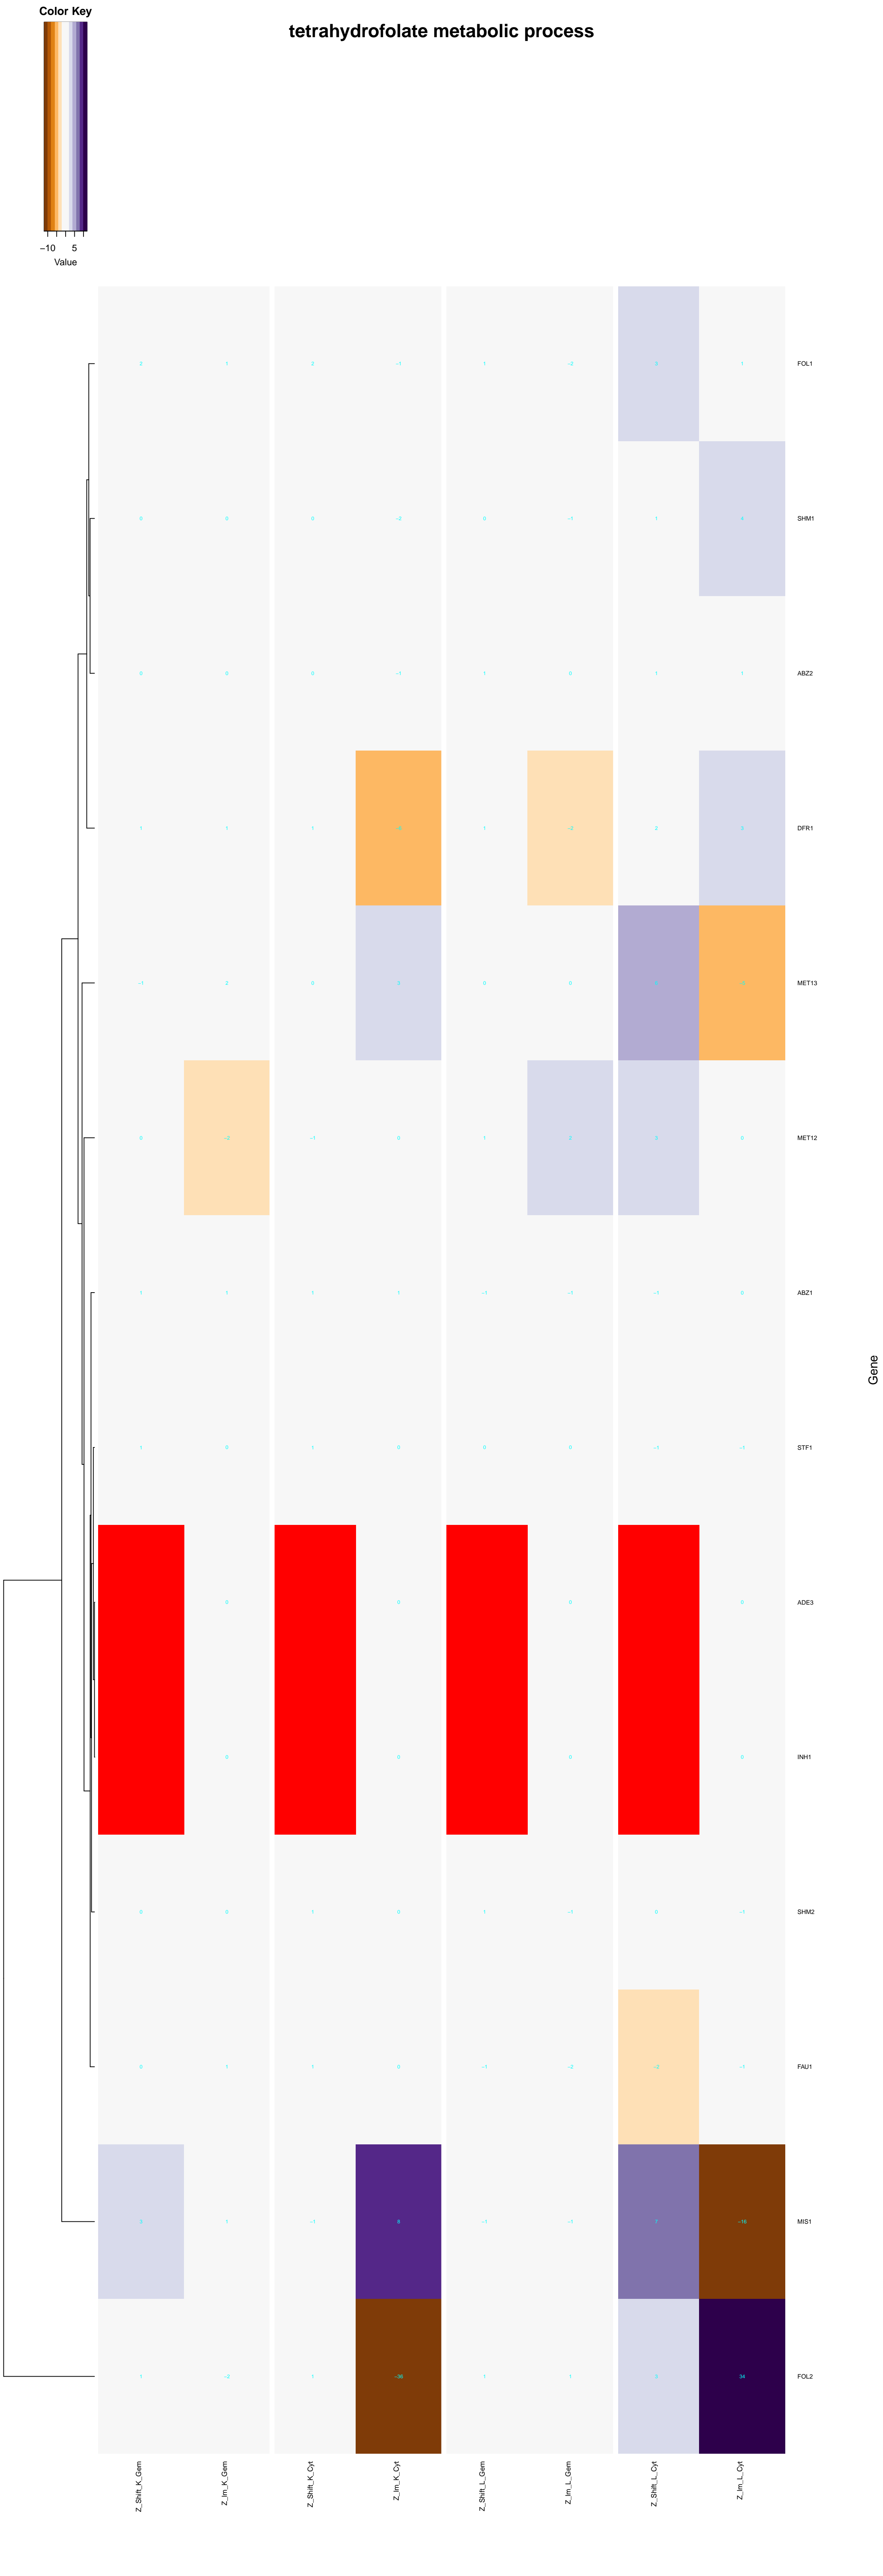



folic acid metabolic process

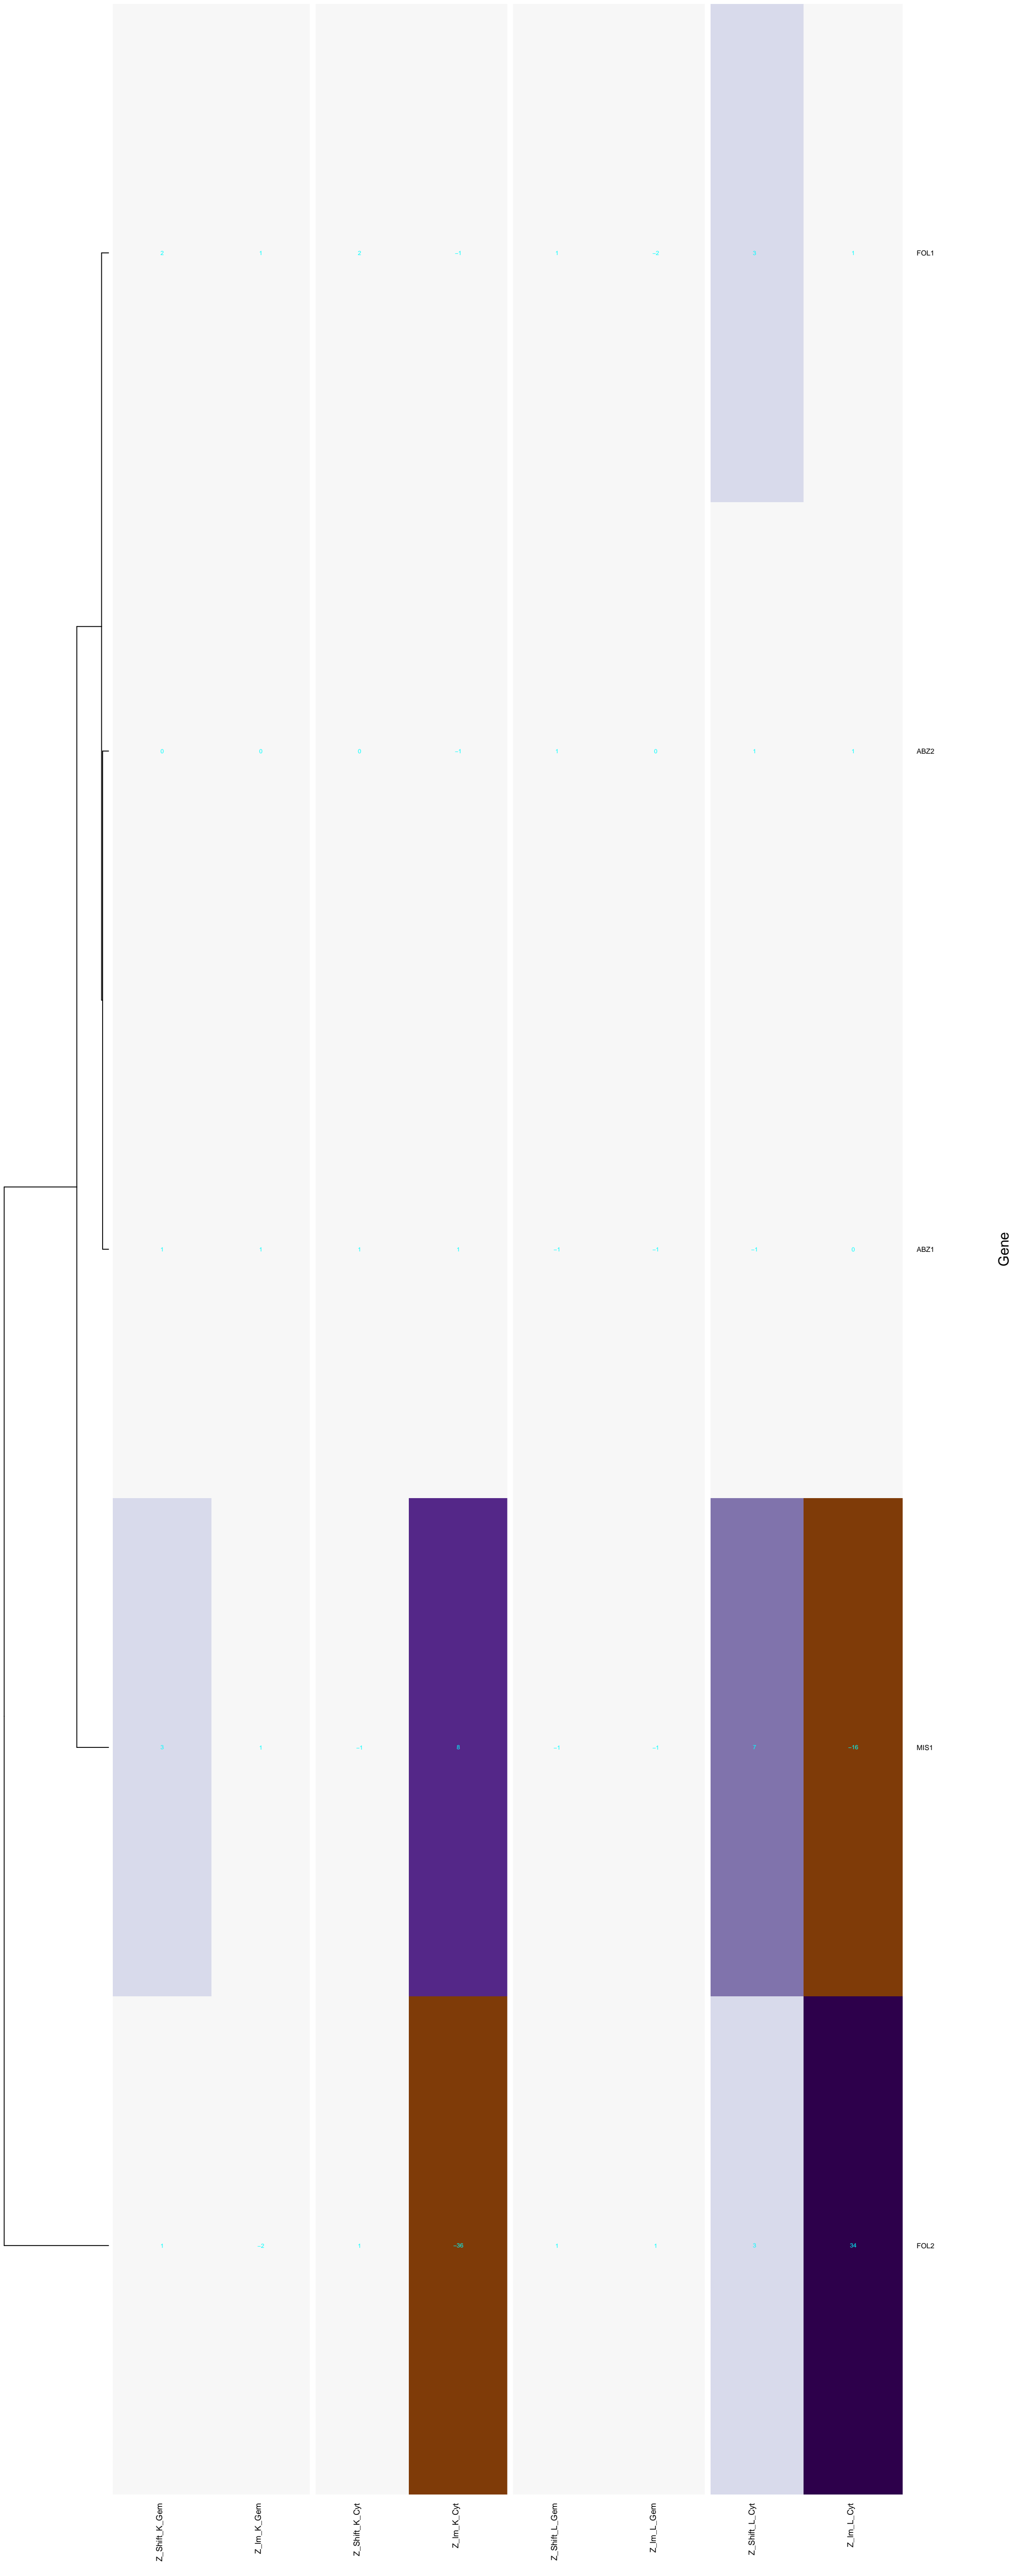

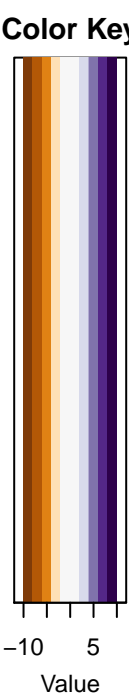

tetrahydrofolylpolyglutamate metabolic process

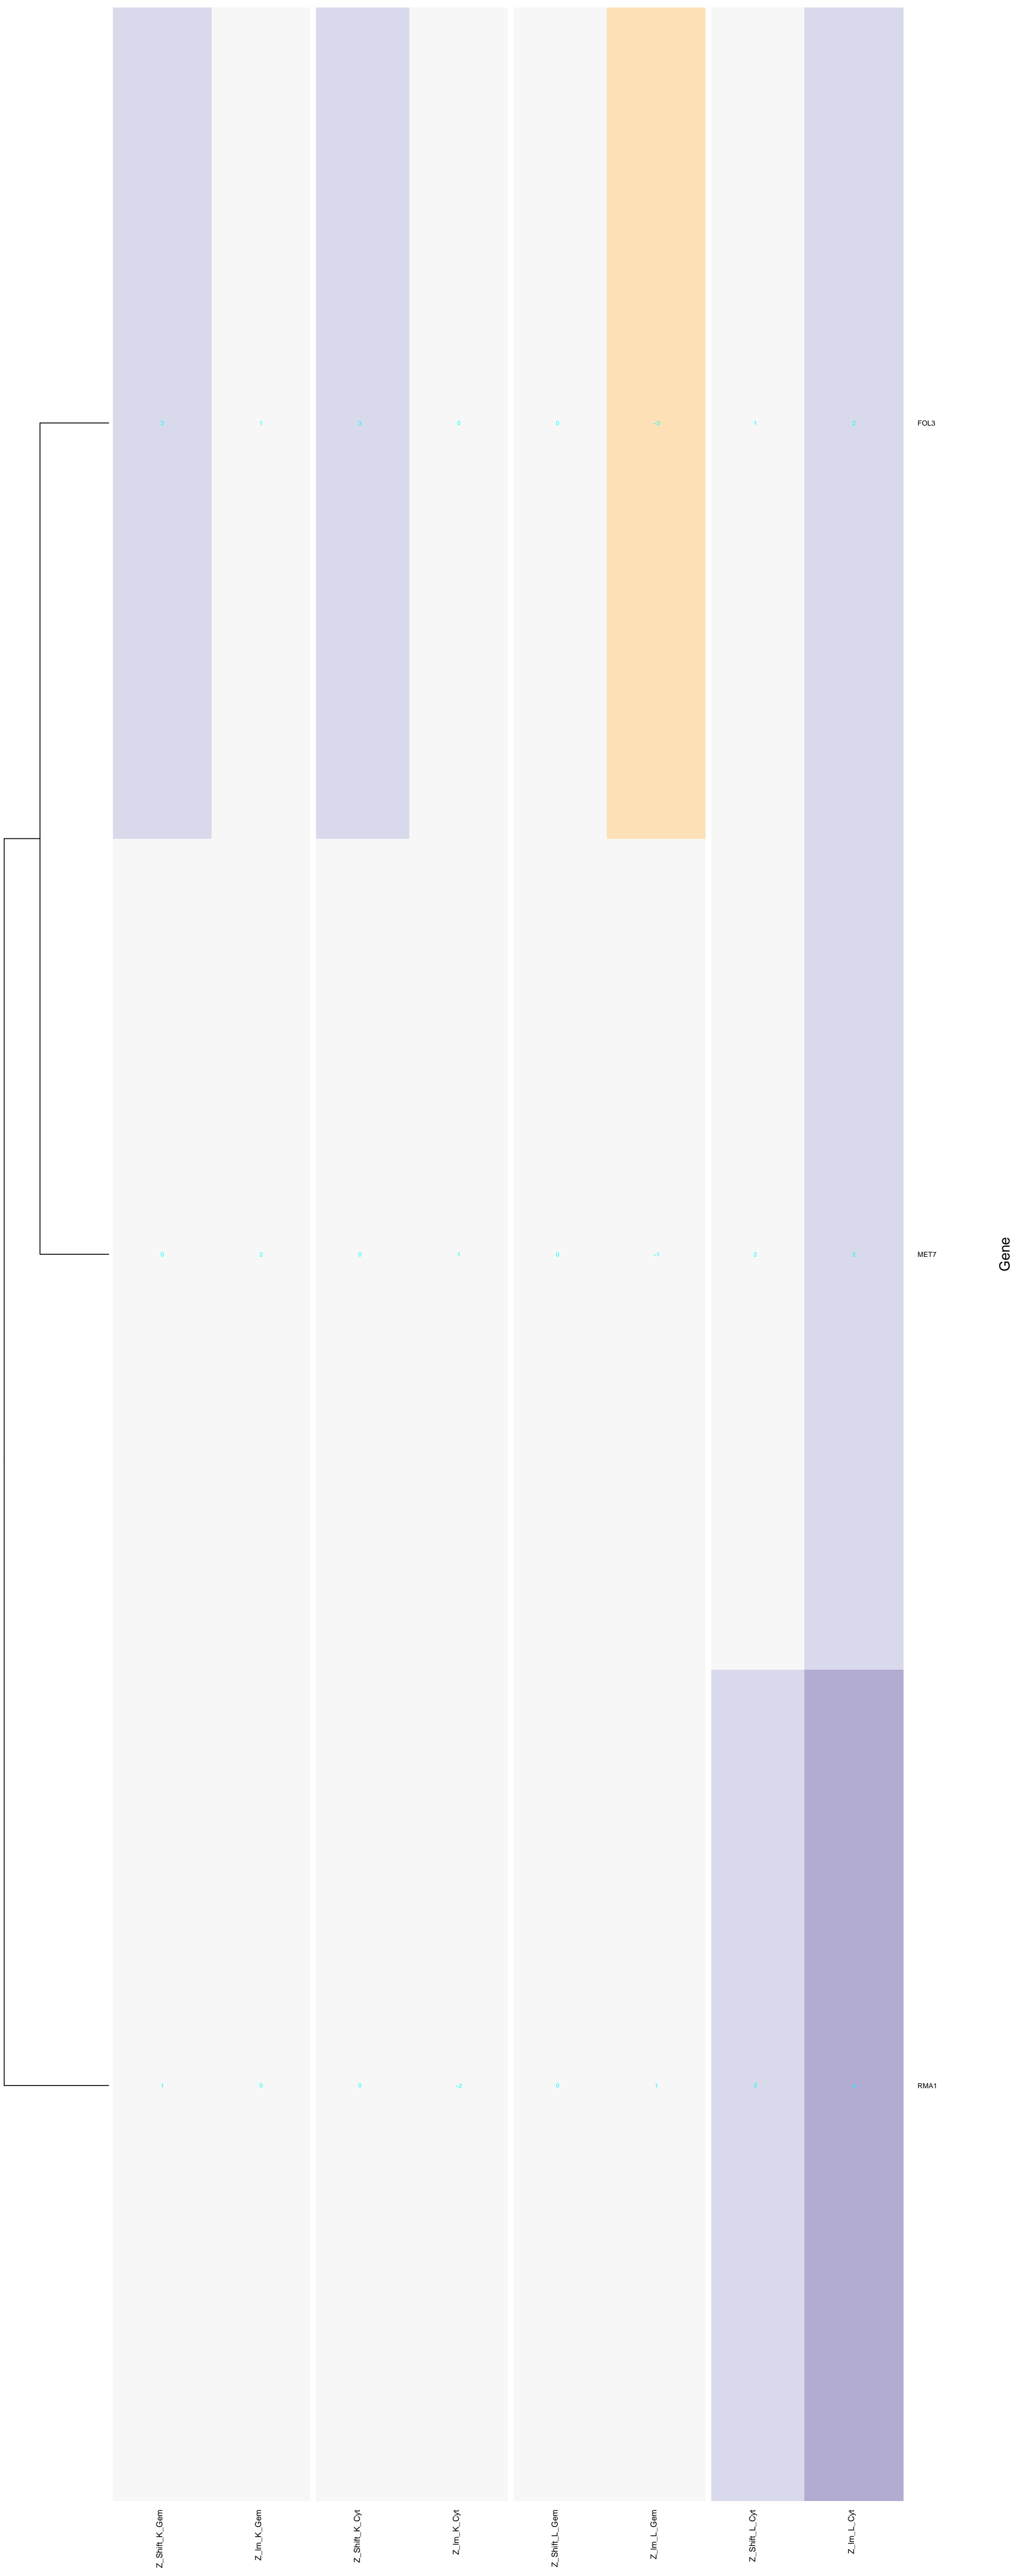



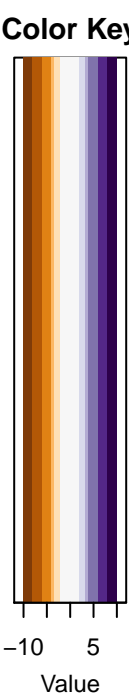

biotin biosynthetic process

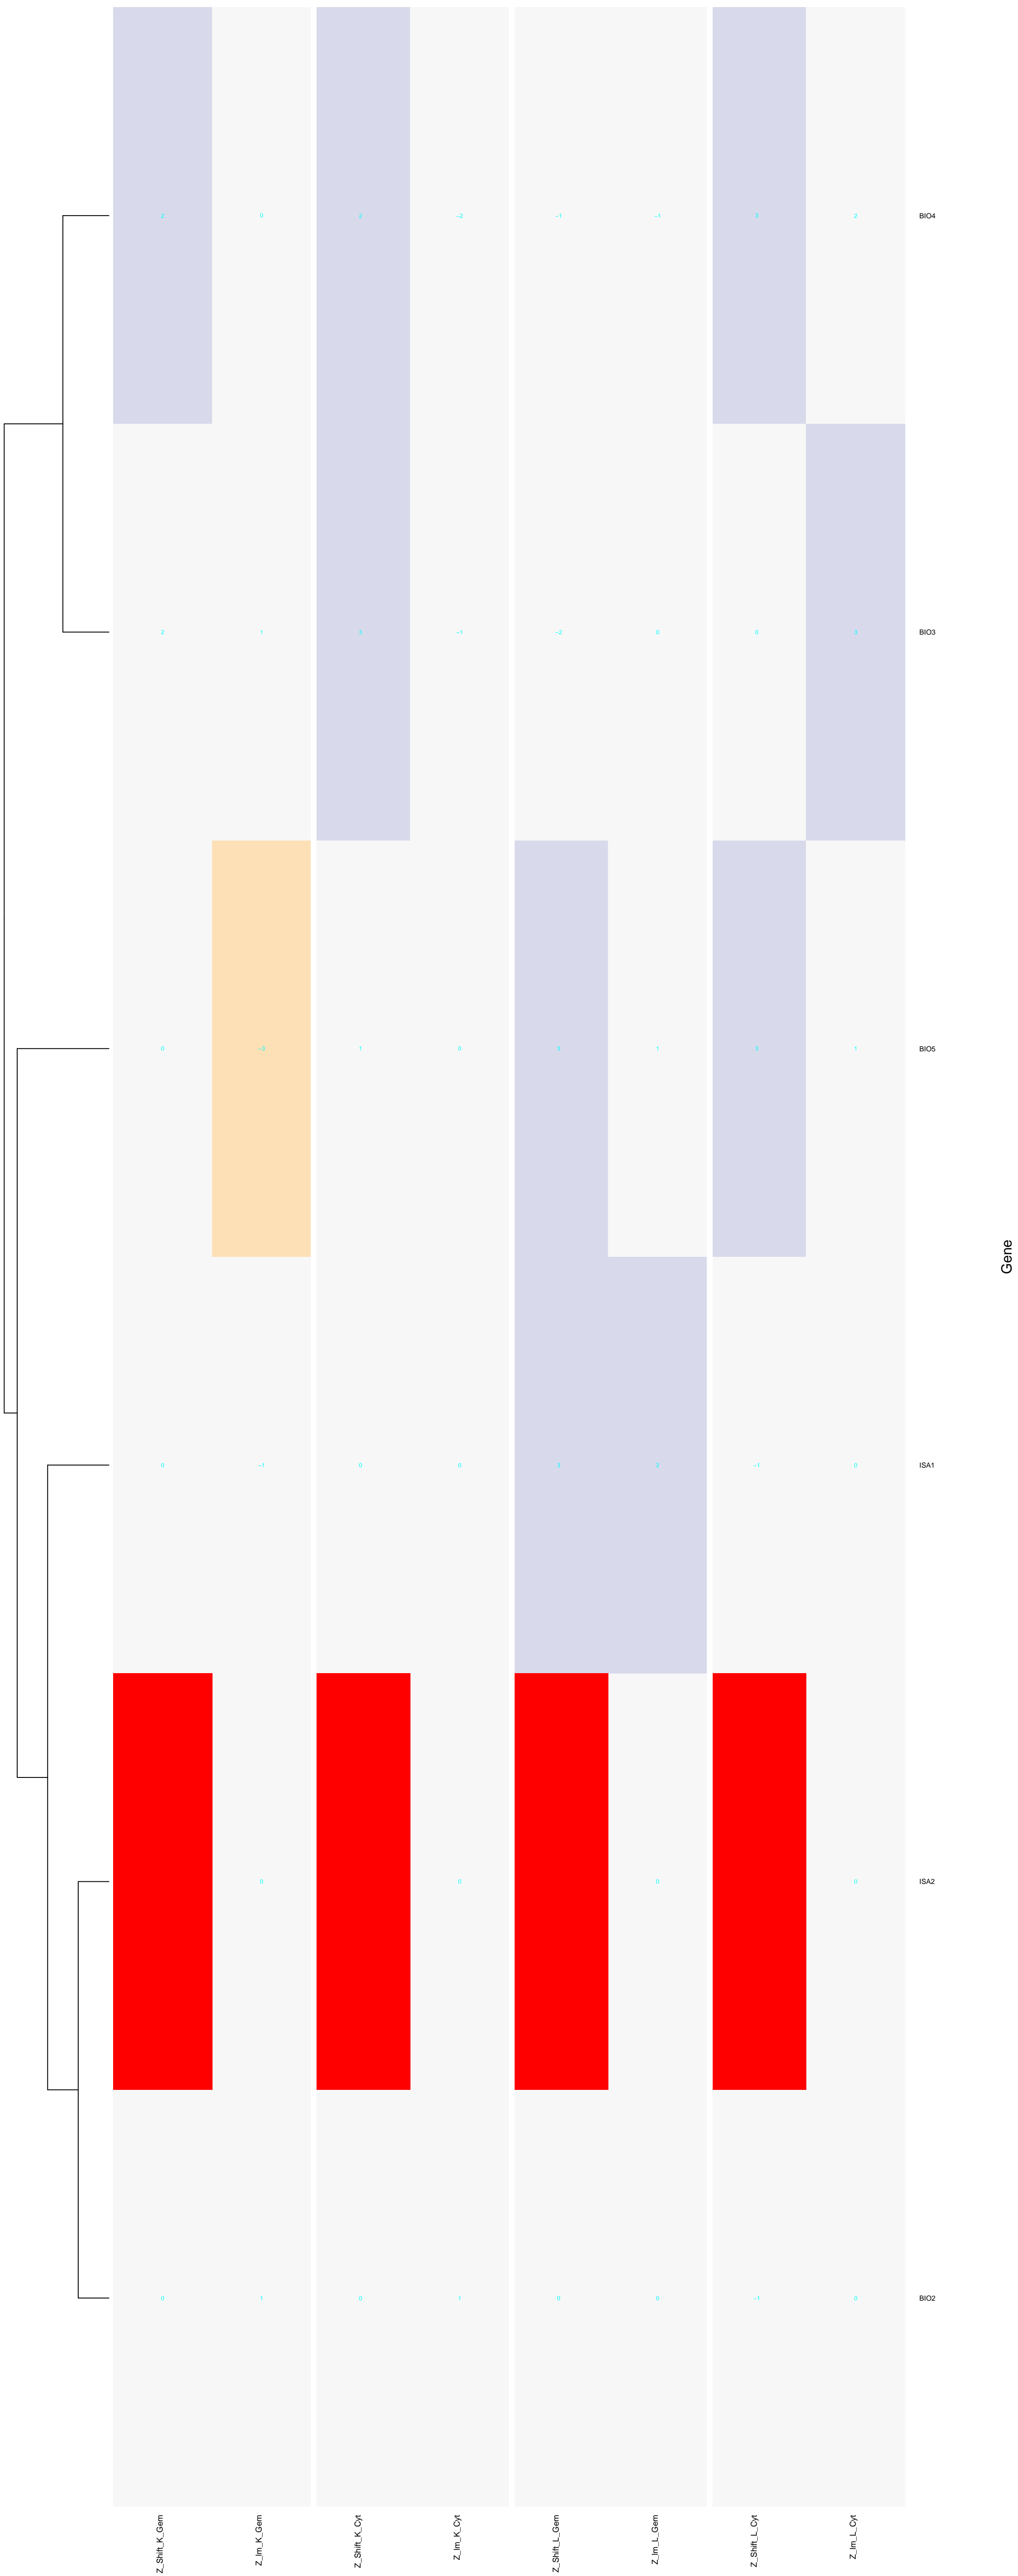

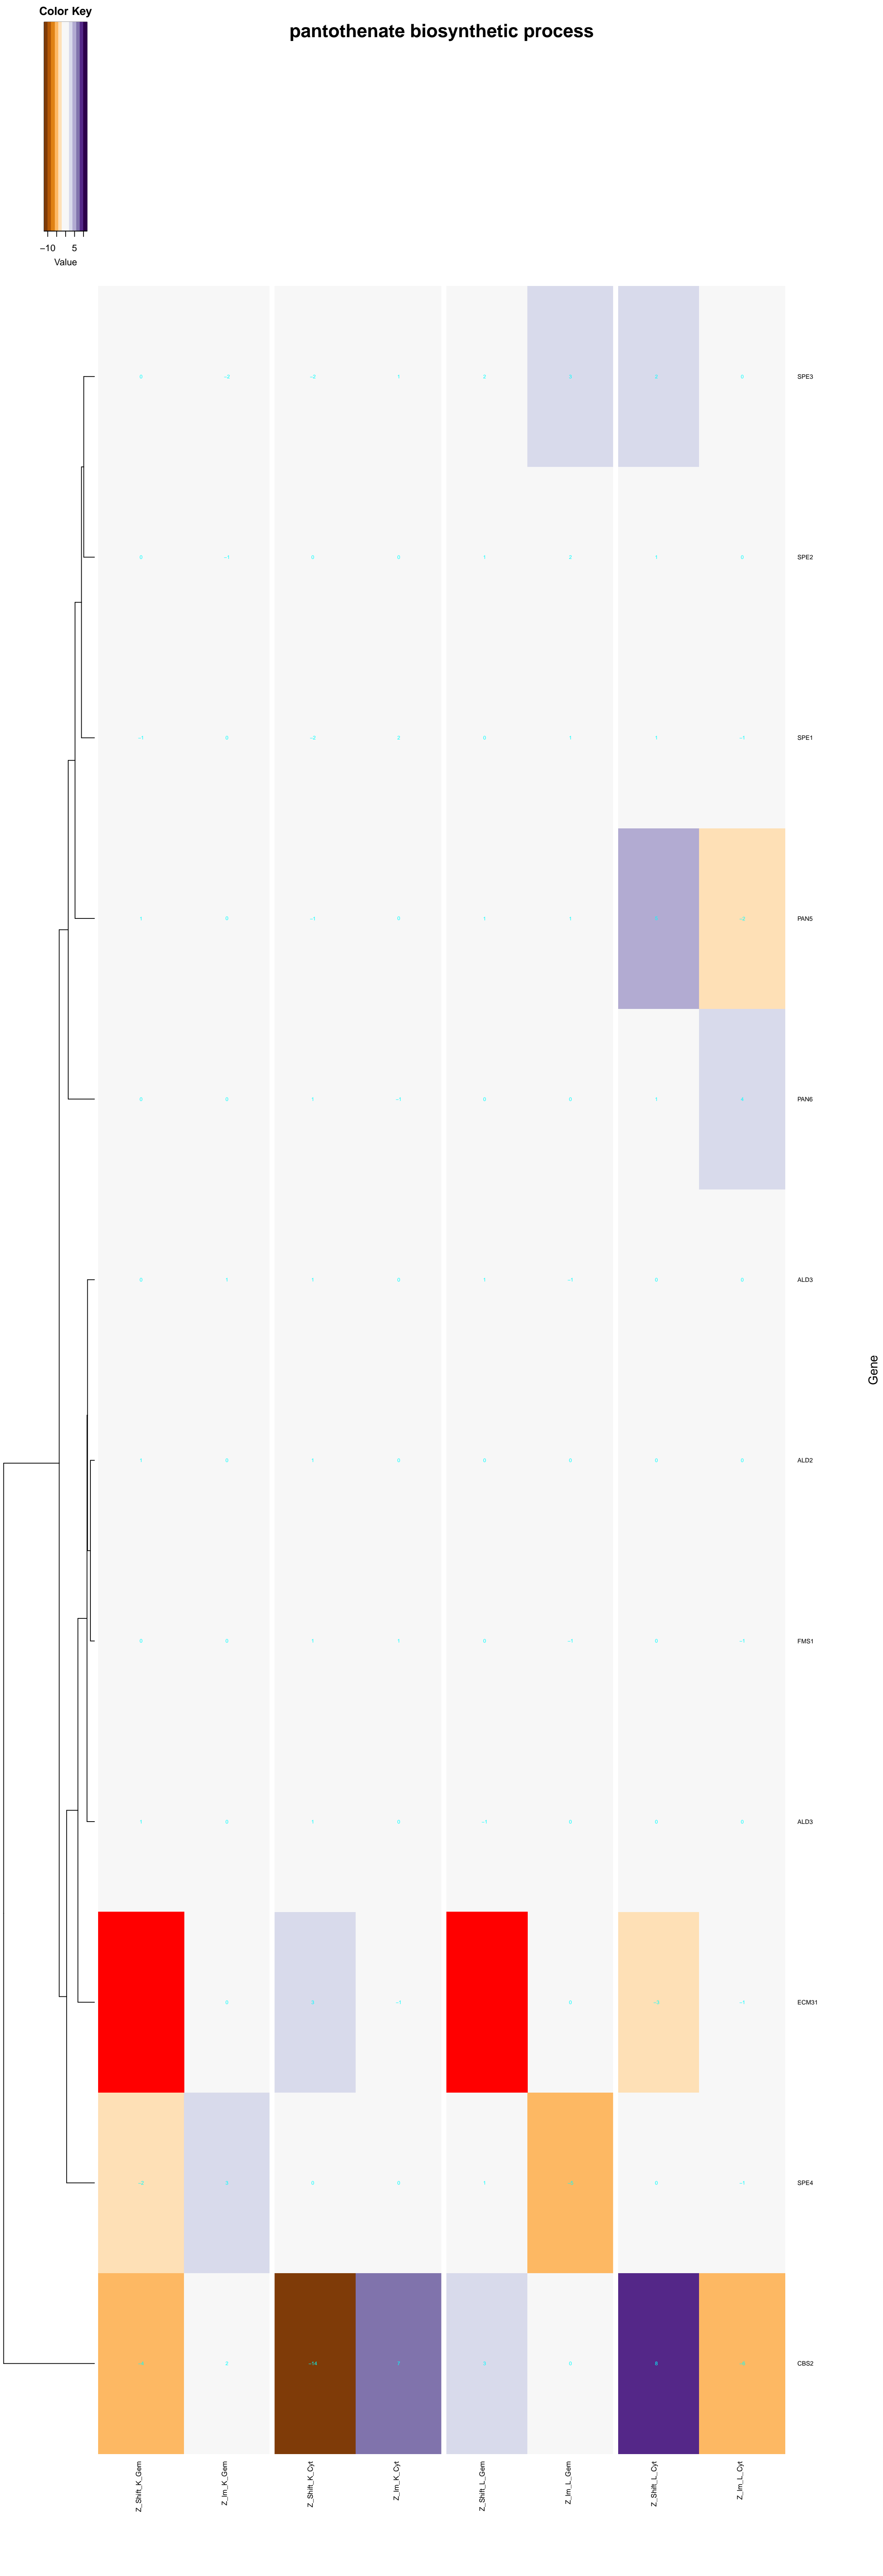

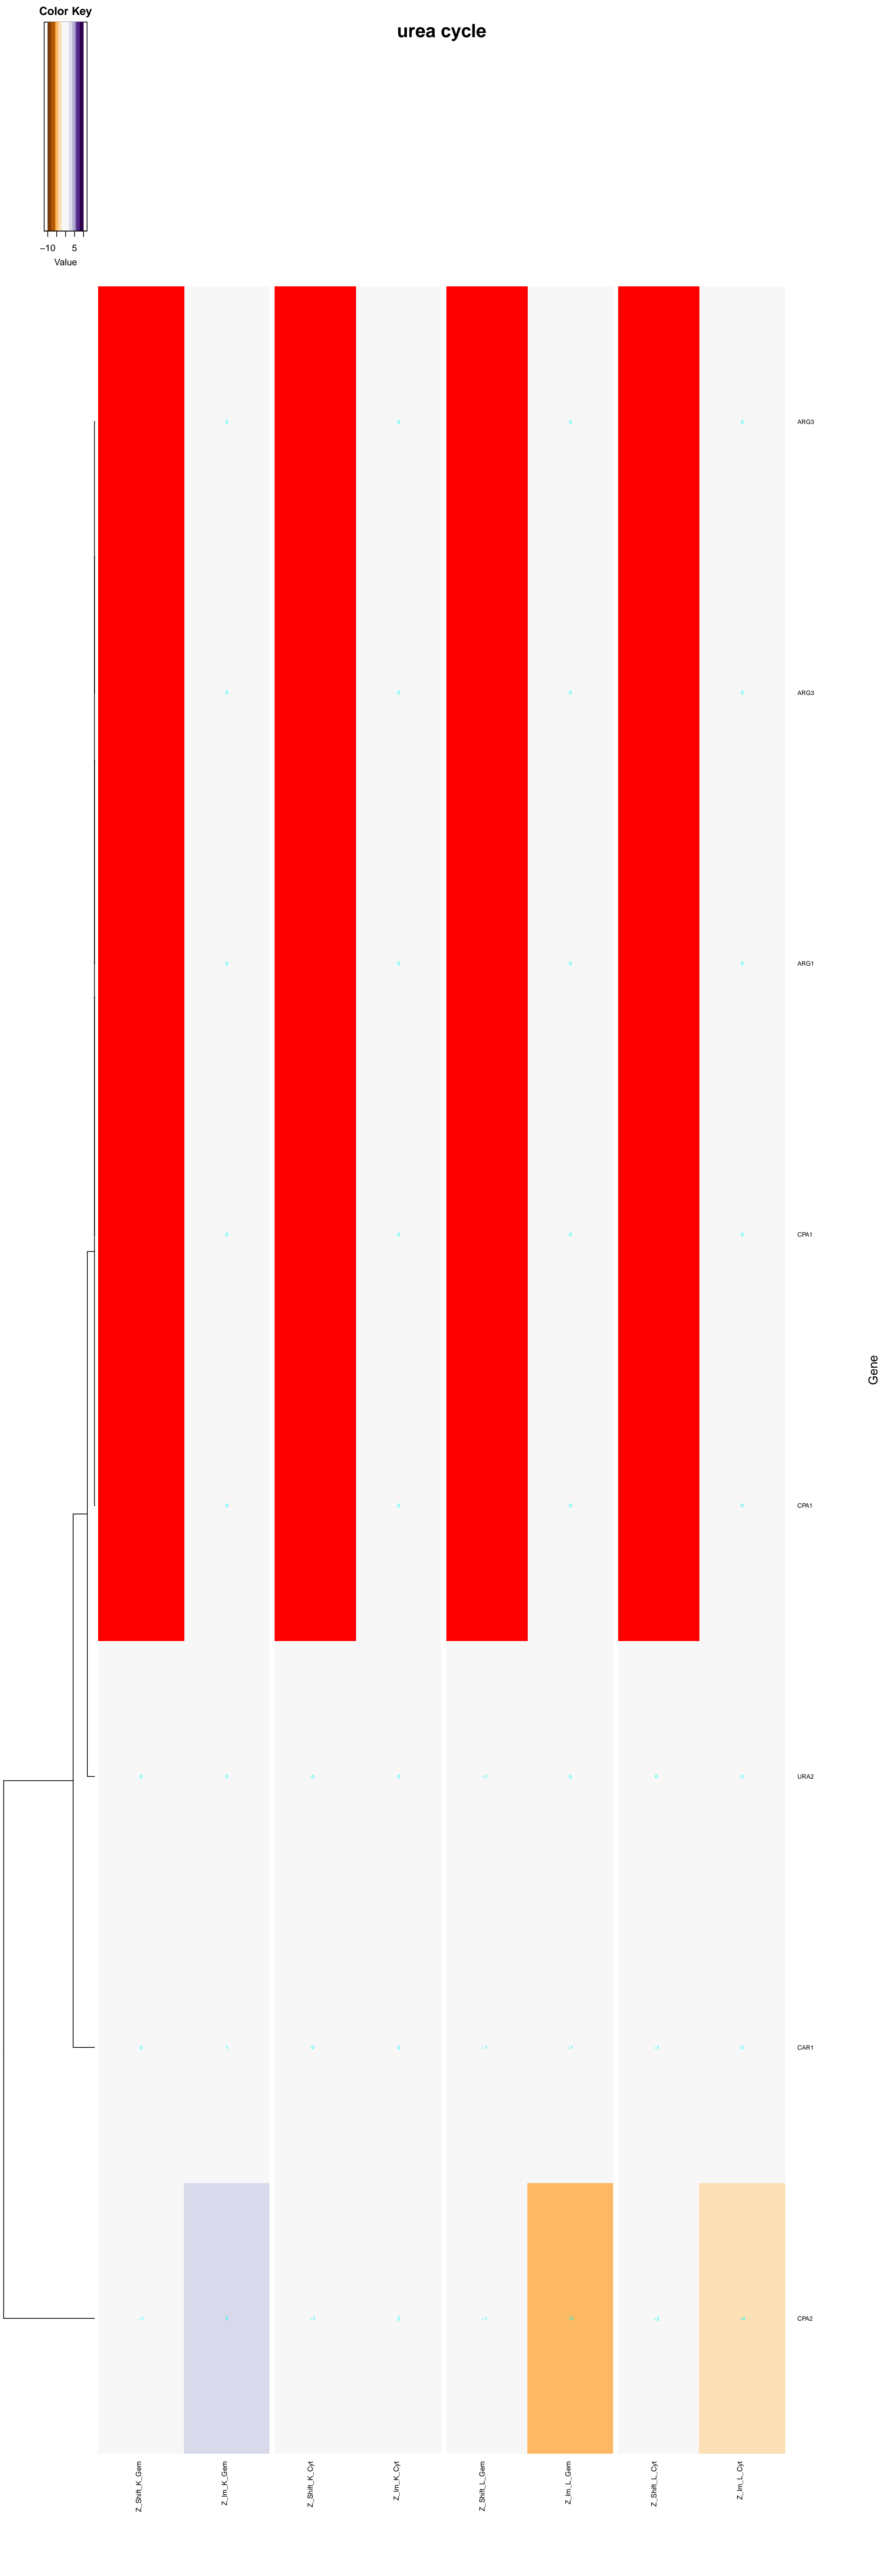

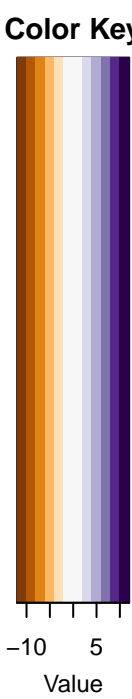

urea catabolic process

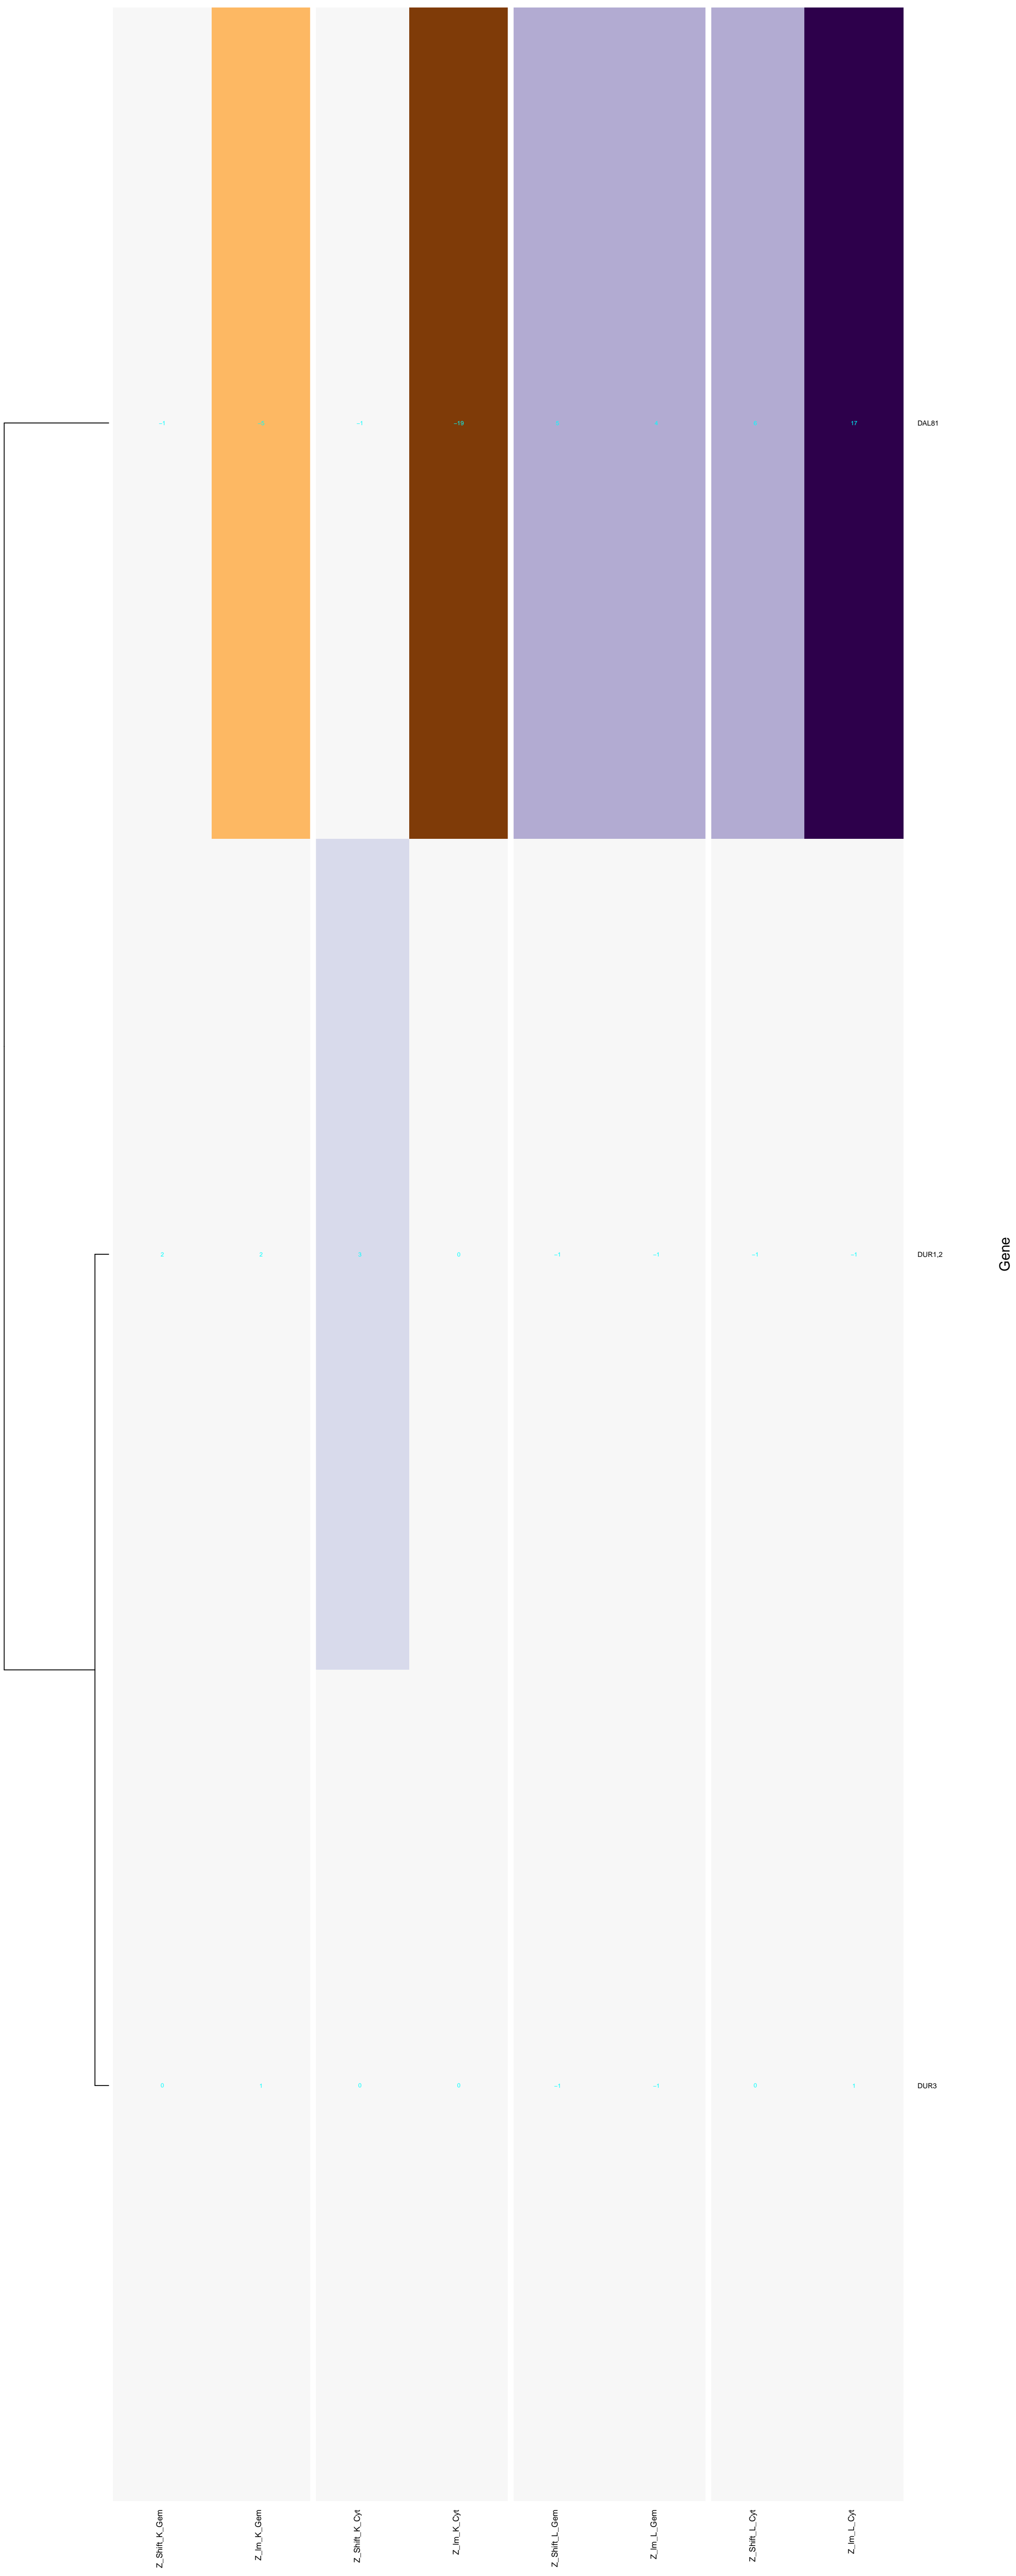

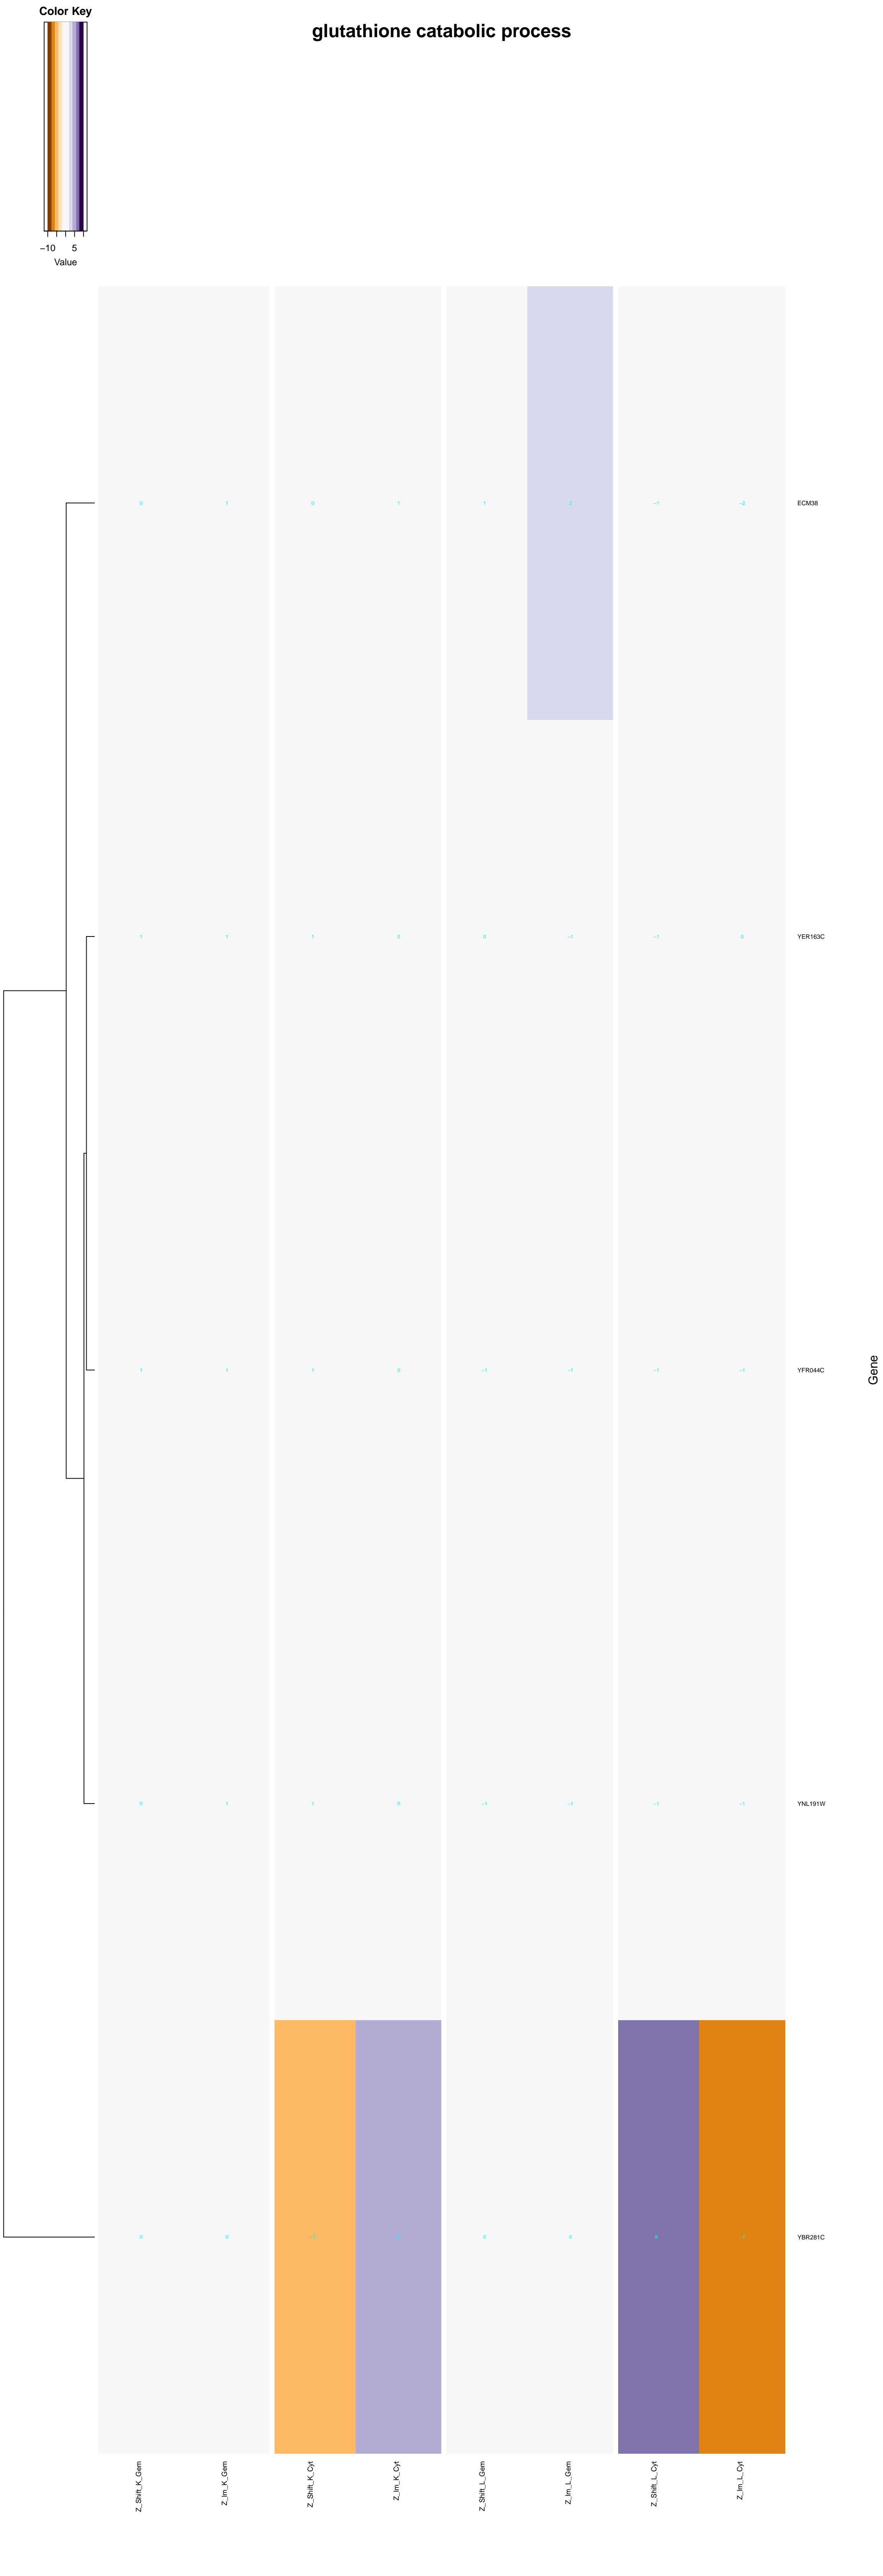

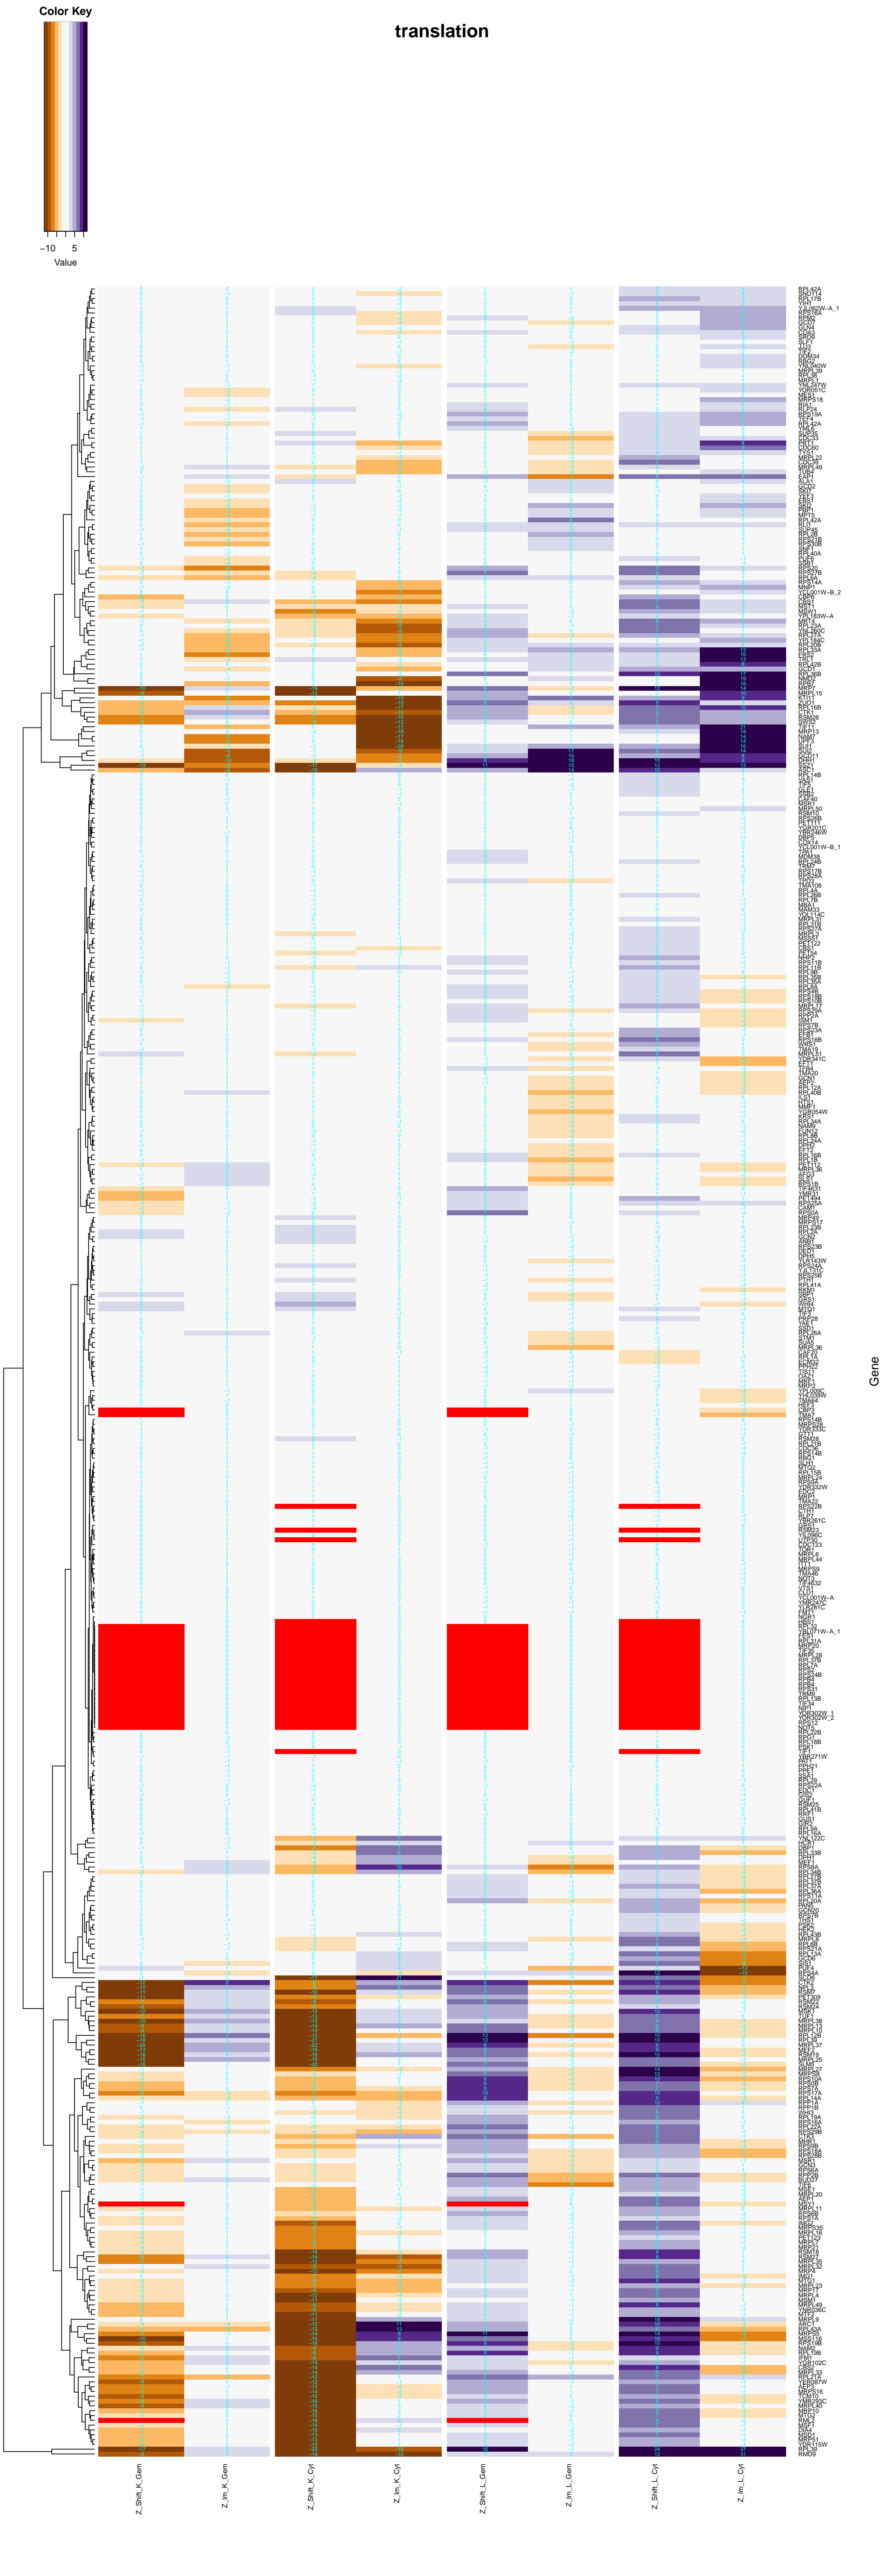



tetrahydrofolate biosynthetic process

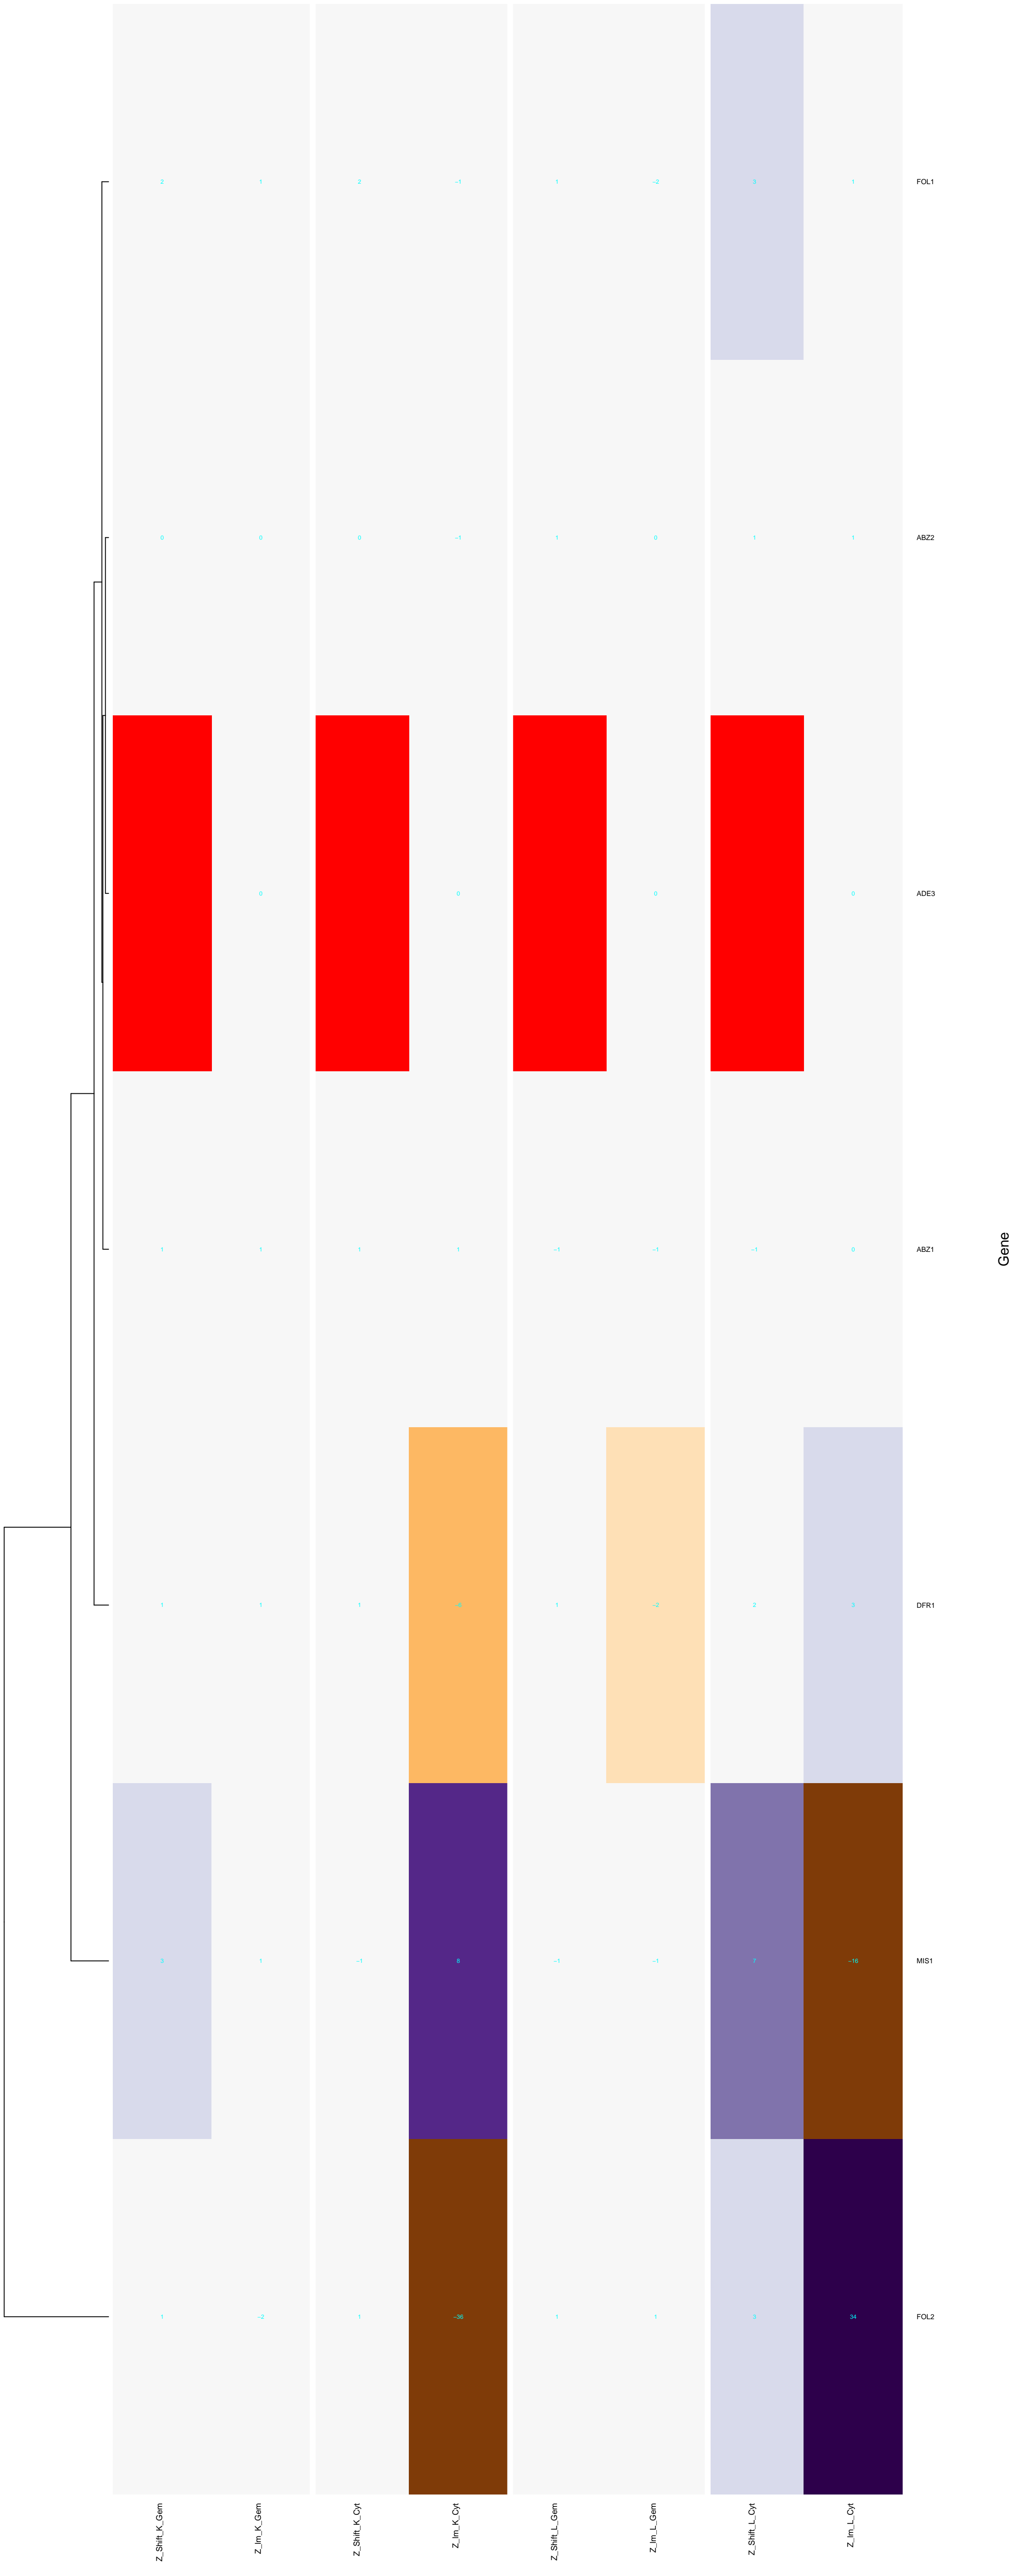

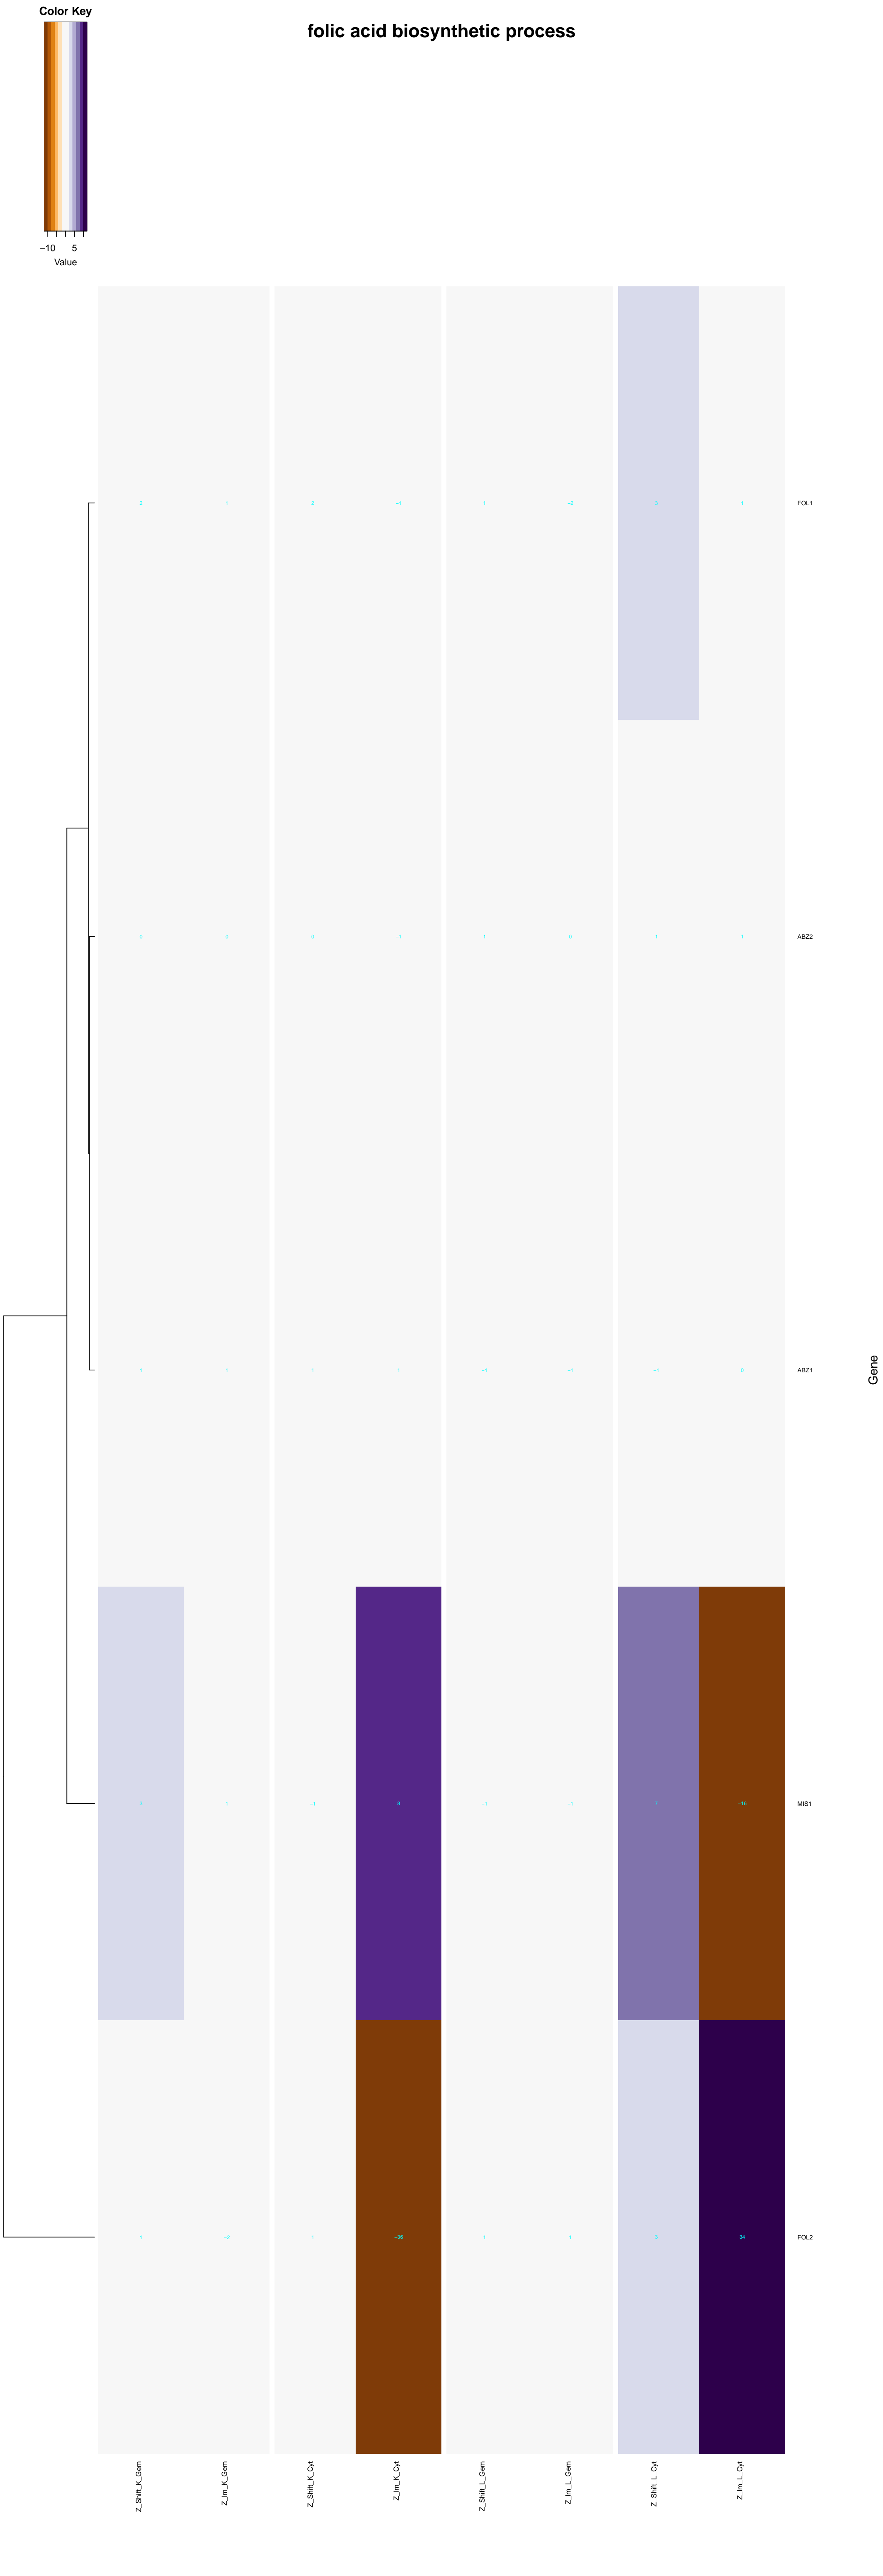



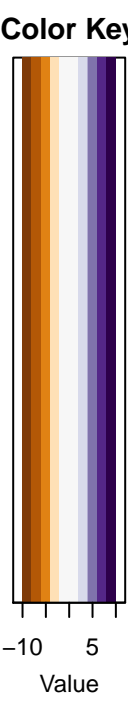

tetrahydrofolylpolyglutamate biosynthetic process

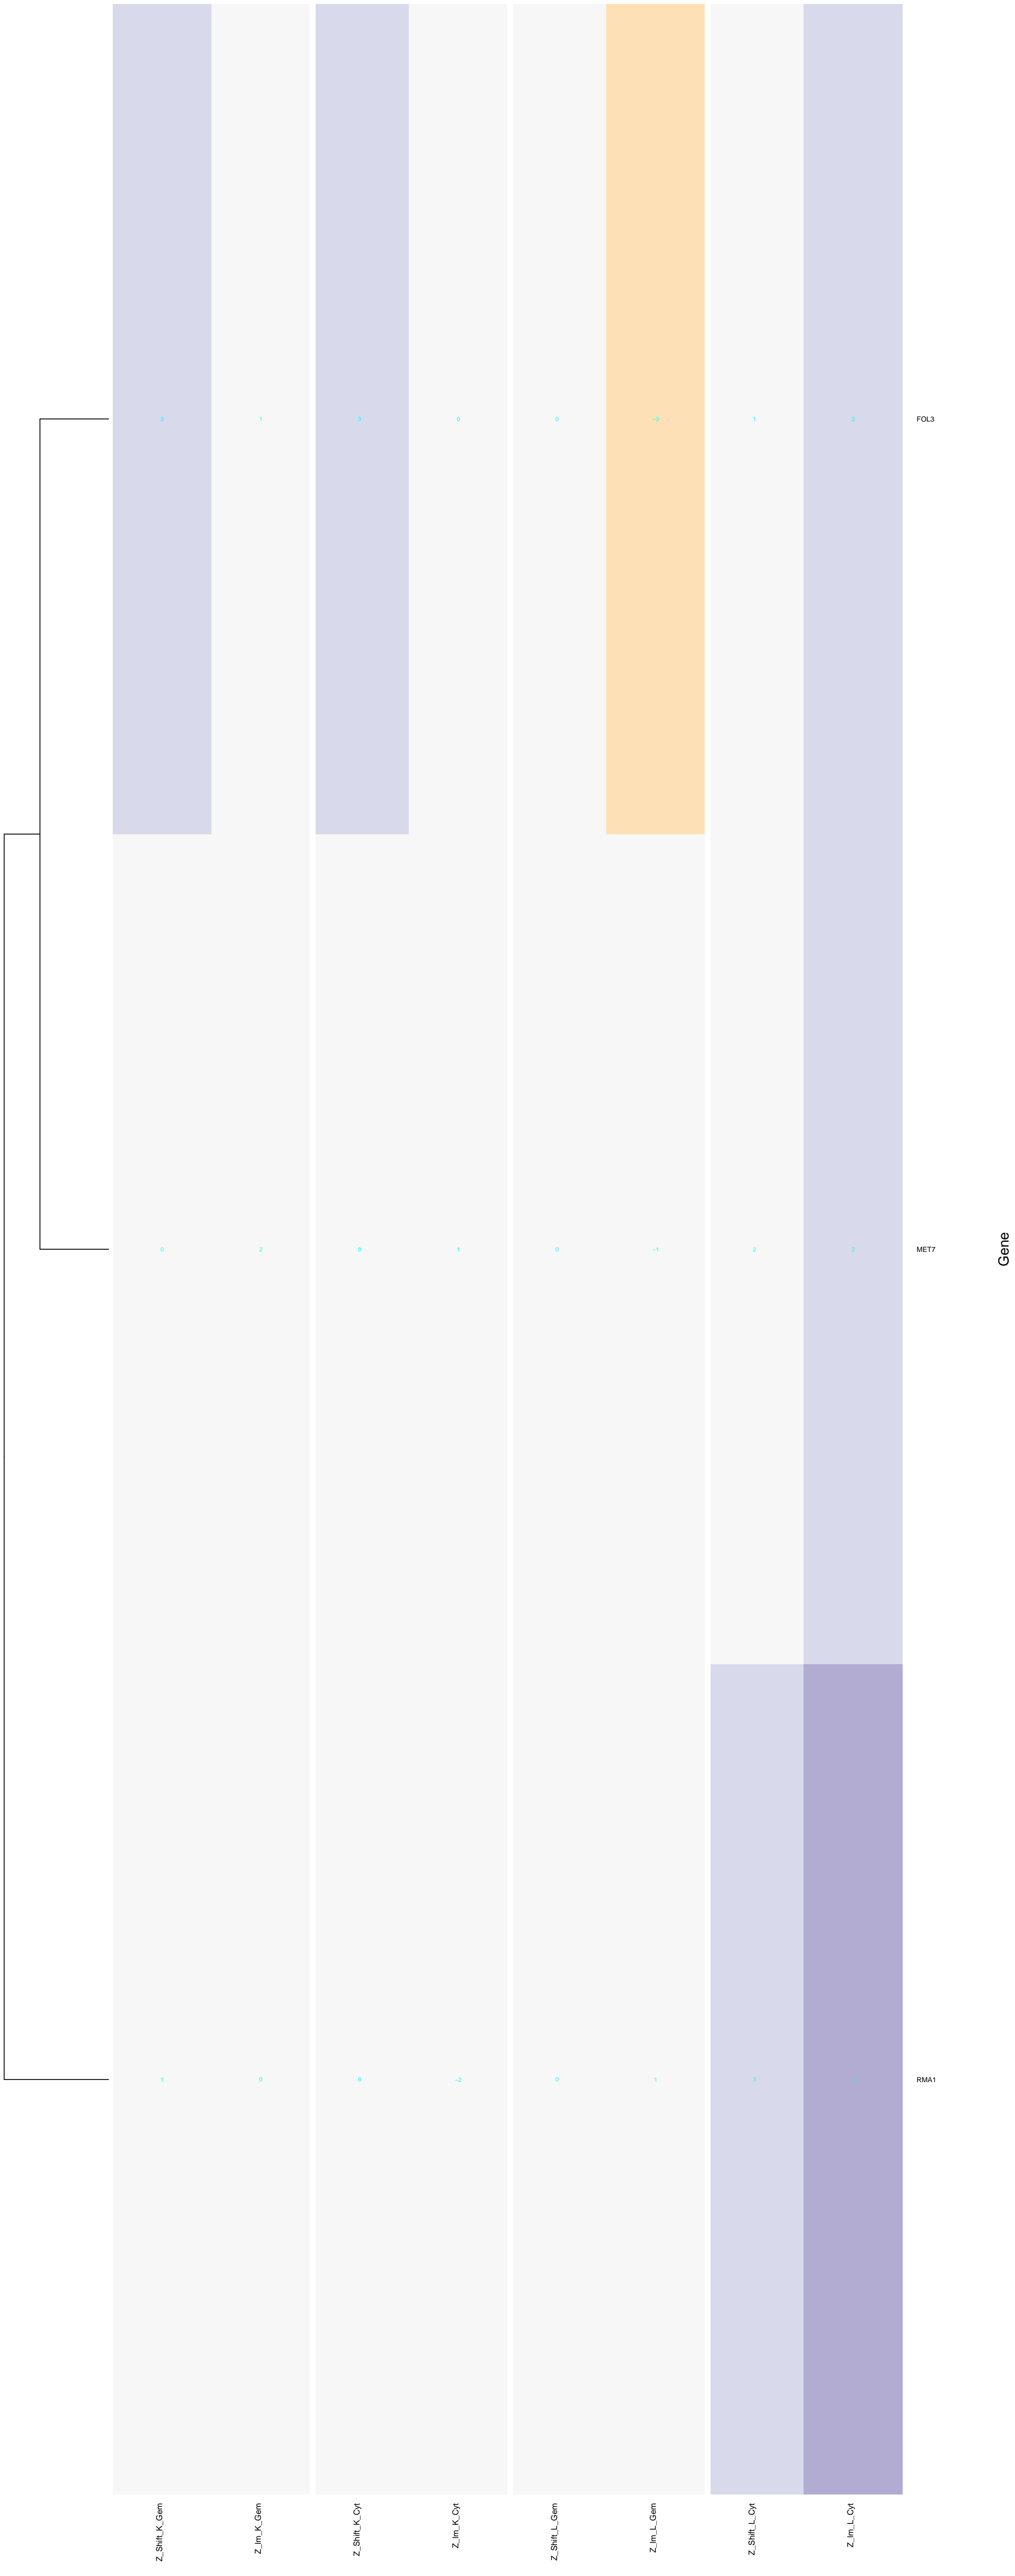

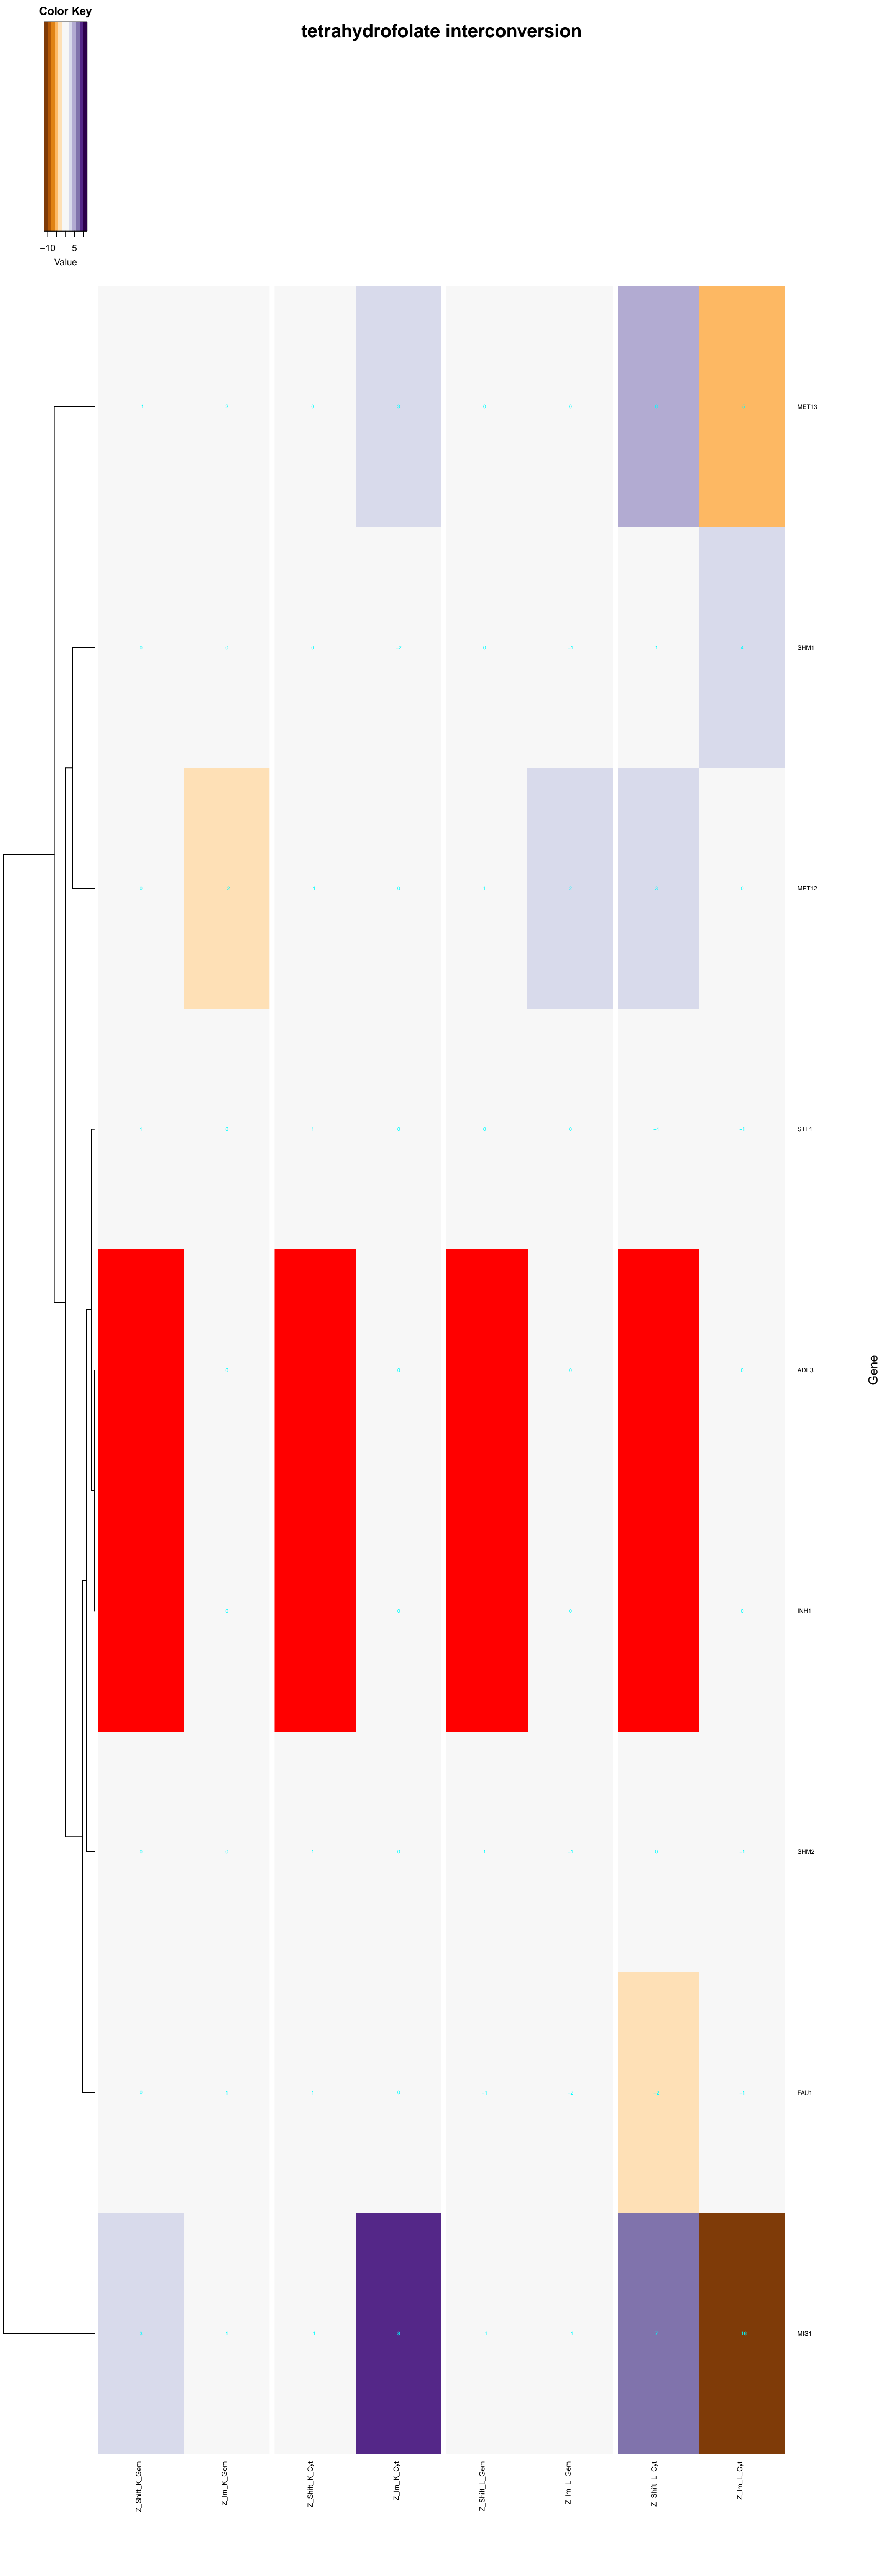



pantothenate biosynthetic process from valine

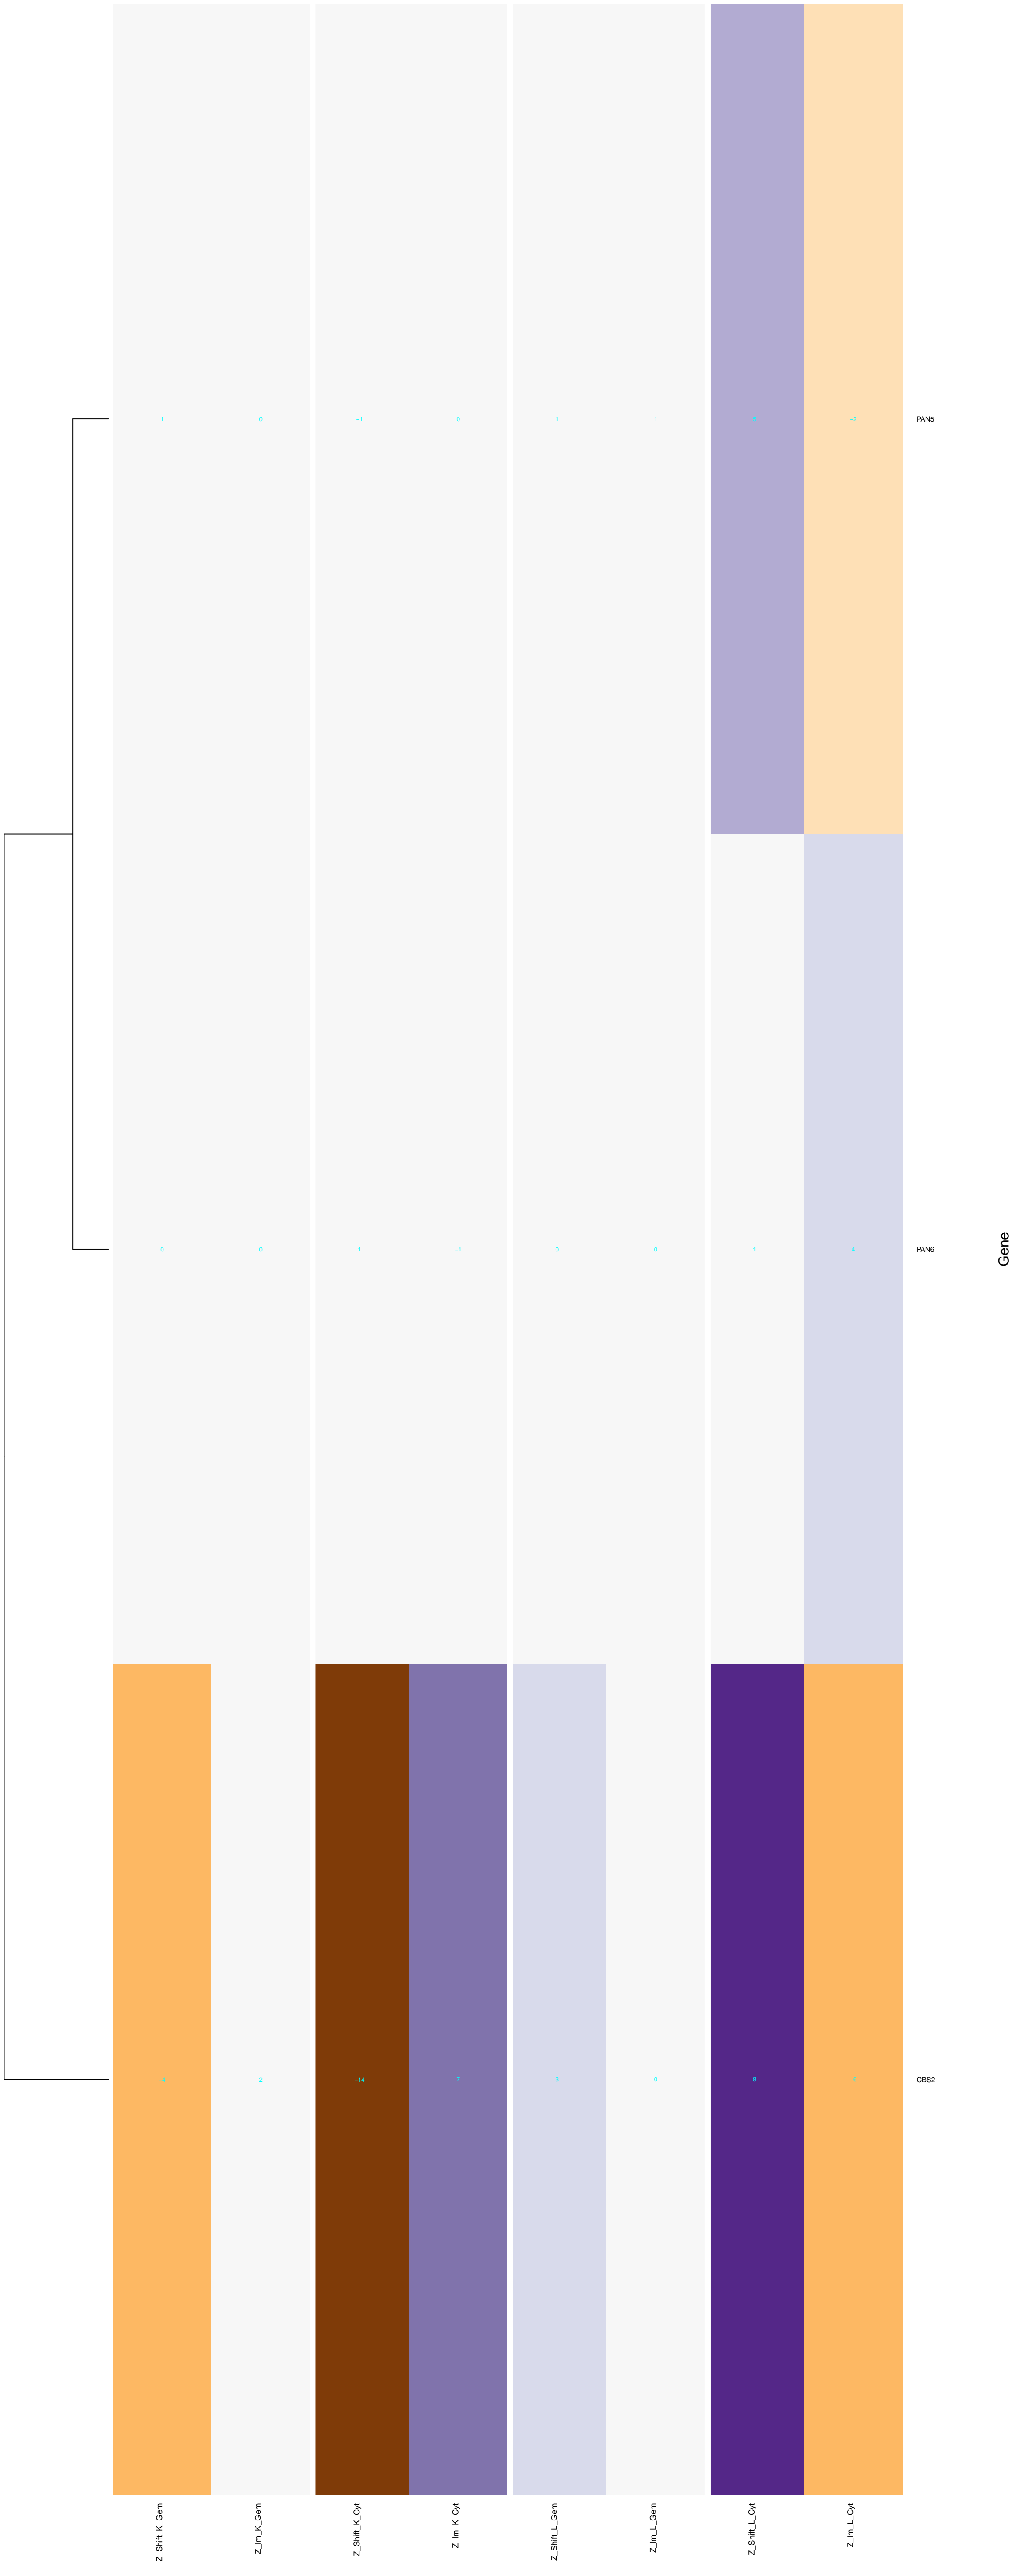

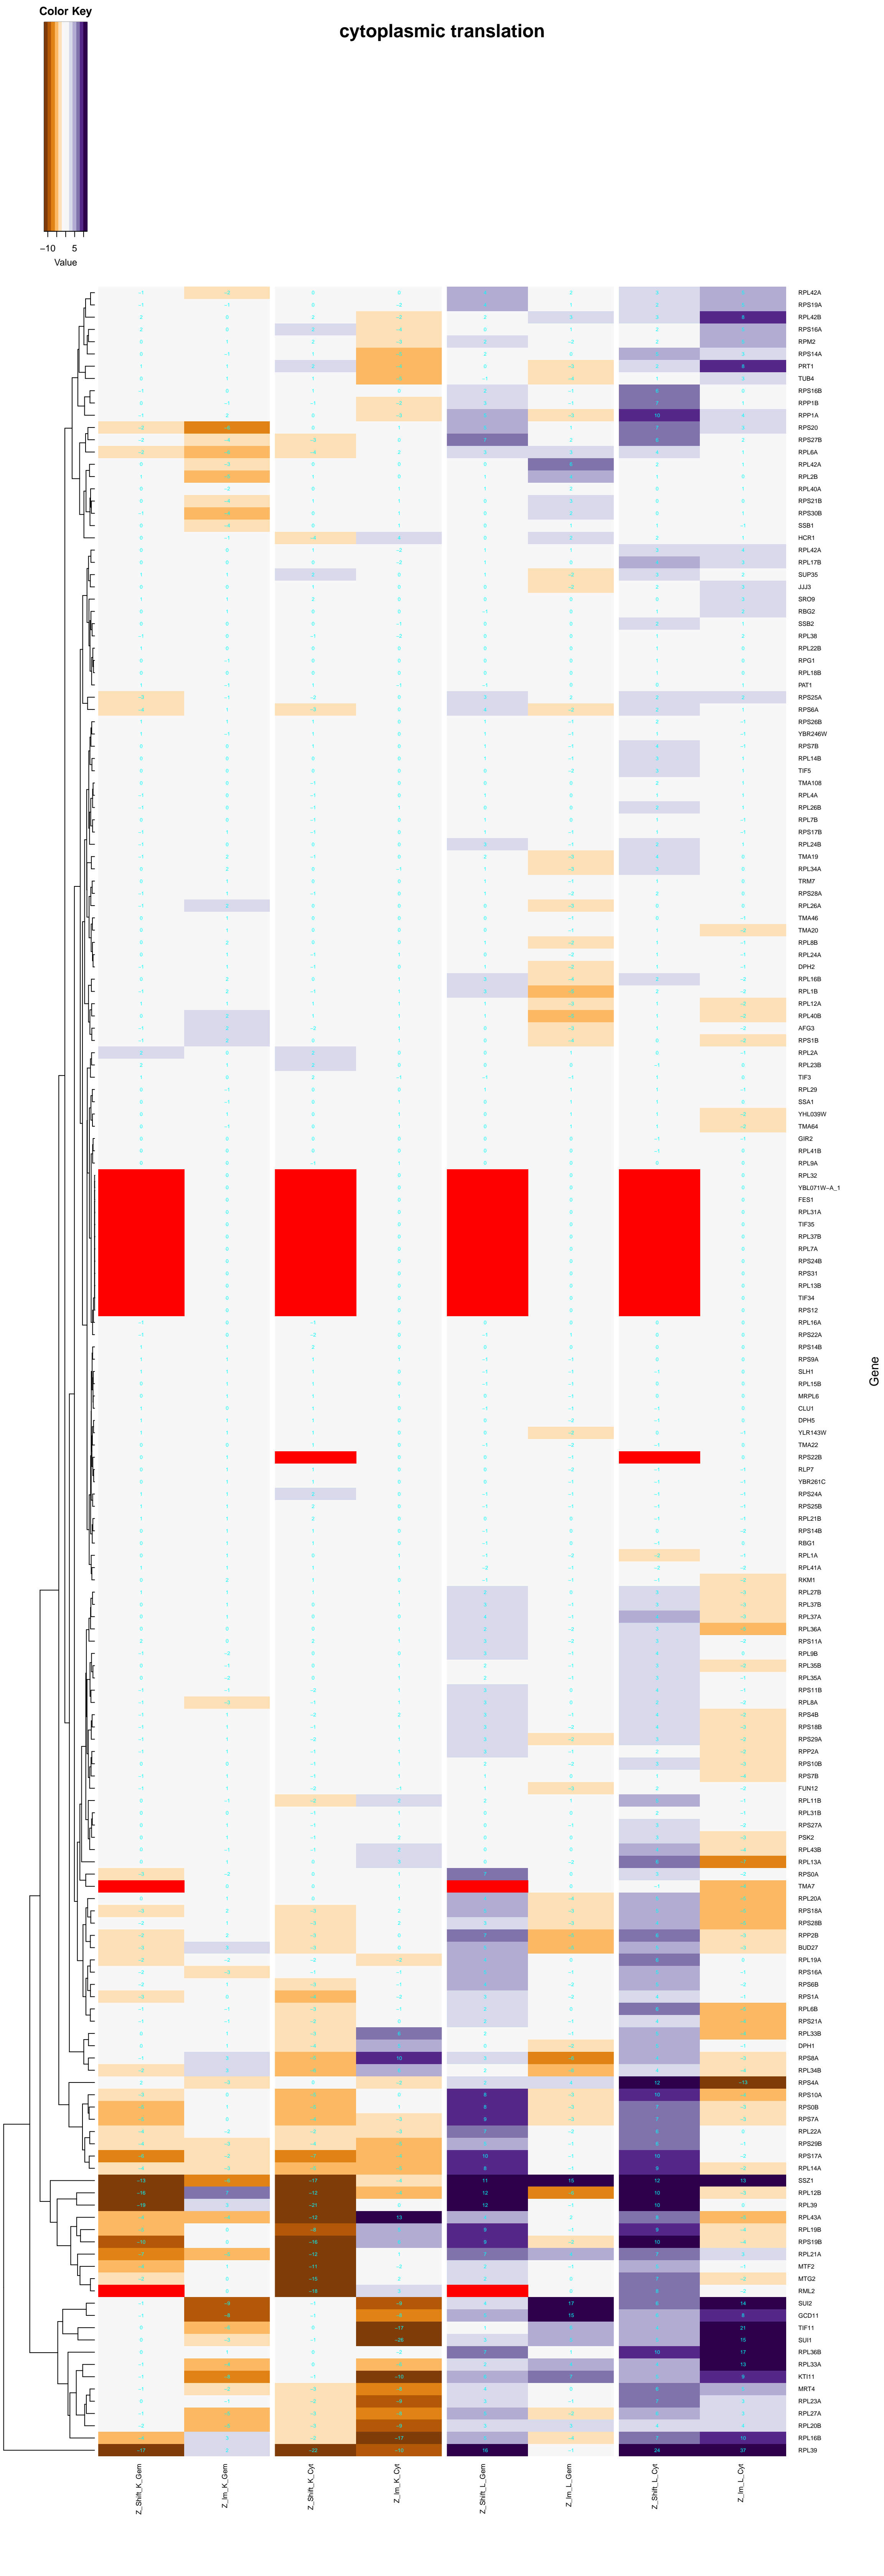

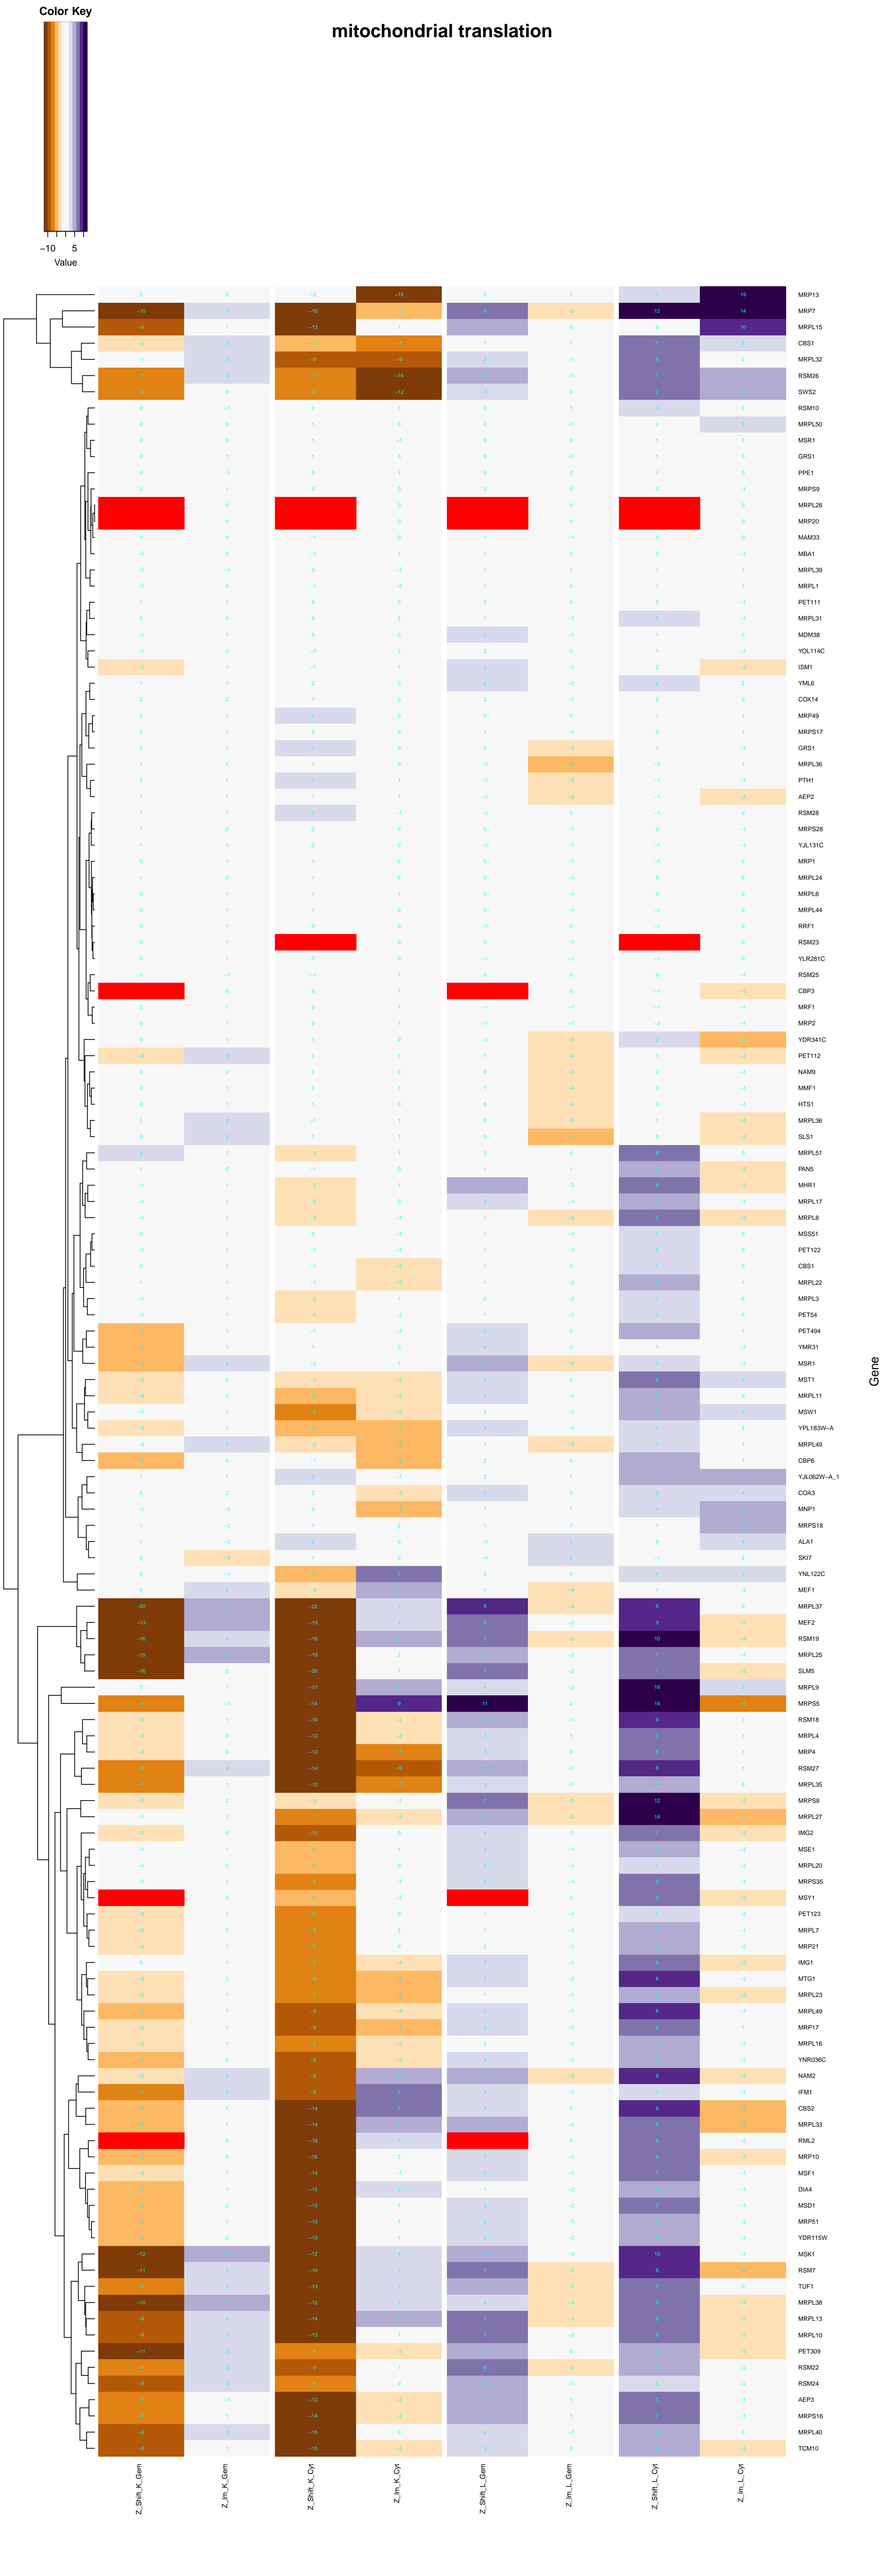

Supplement: s1 [file s1]
