# Supplementary material for: A Humanized Yeast Phenomic Model of Deoxycytidine Kinase to Predict Genetic Buffering of Nucleoside Analog Cytotoxicity
Source: MDPI journal article supplement (doi:10.3390/genes10100770), 2019-09-30

YDL227C Scatter RF for L with SD

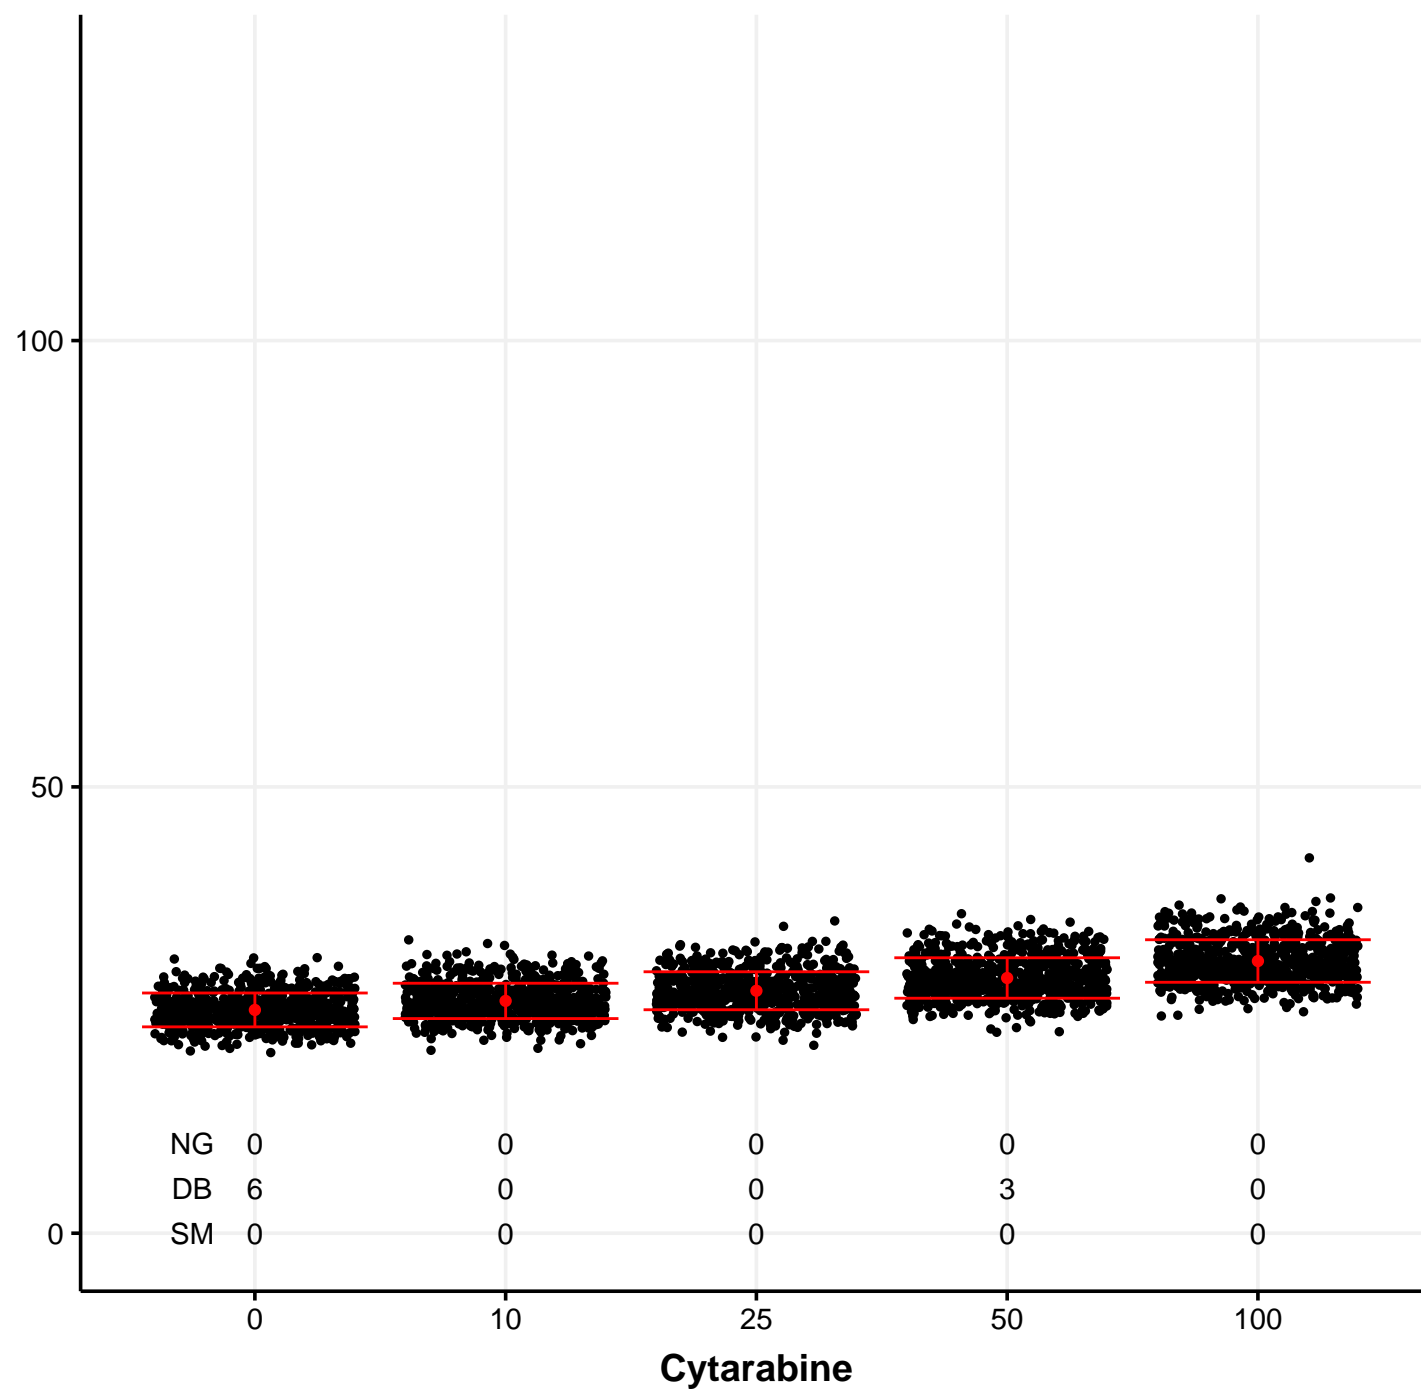

YDL227C Scatter RF for K with SD

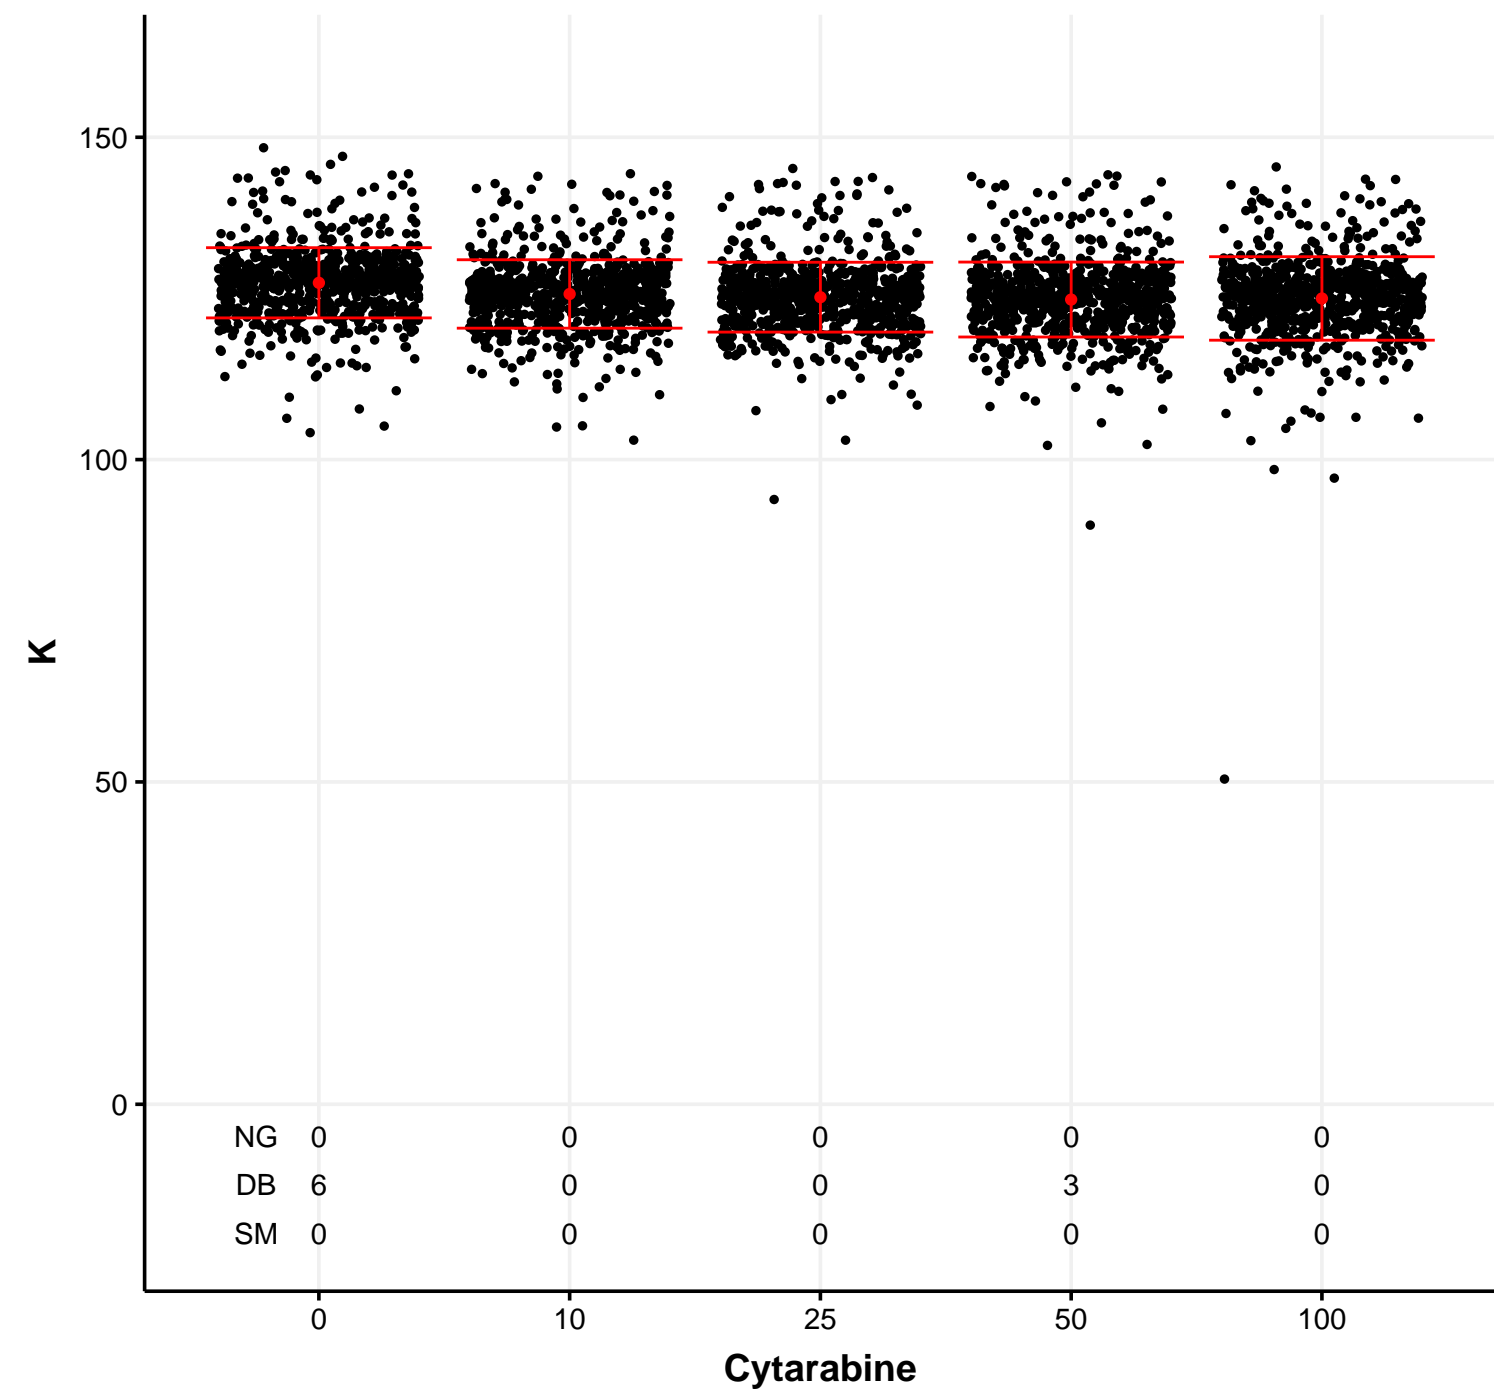

YDL227C Scatter RF for r with SD

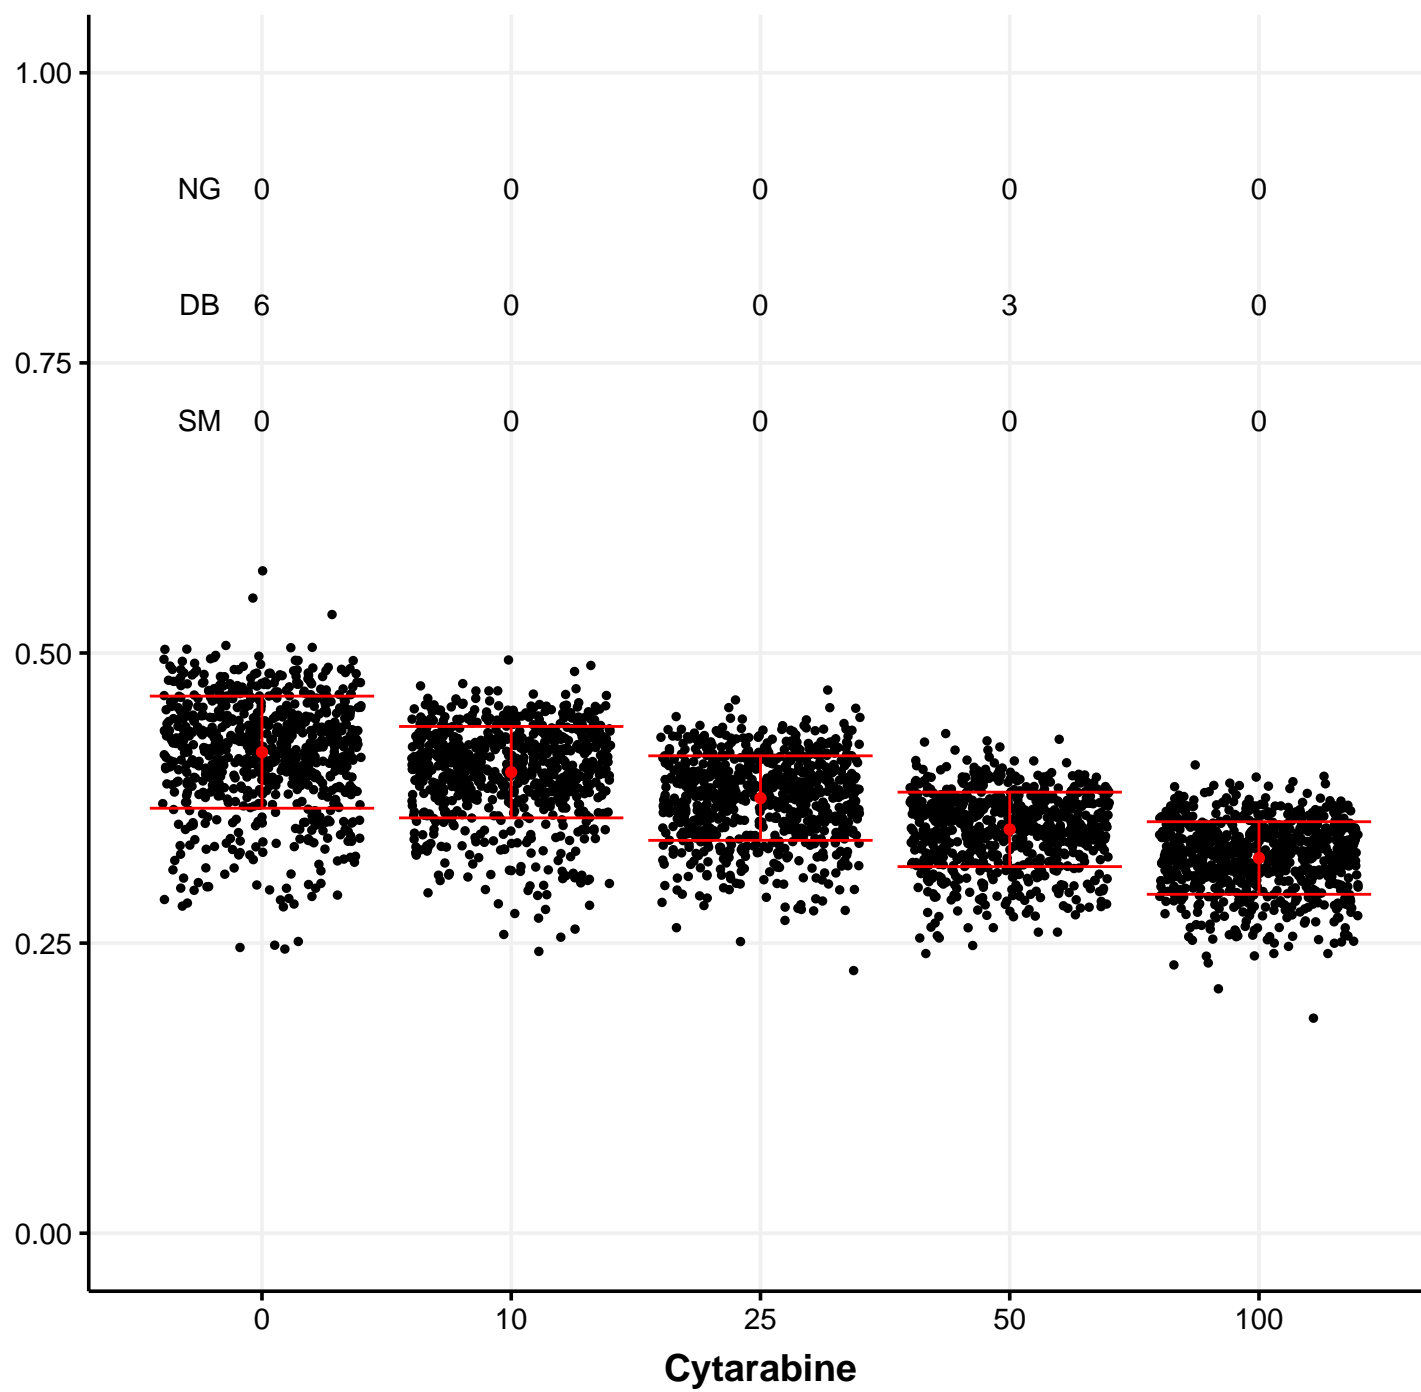

YDL227C Scatter RF for AUC with SD

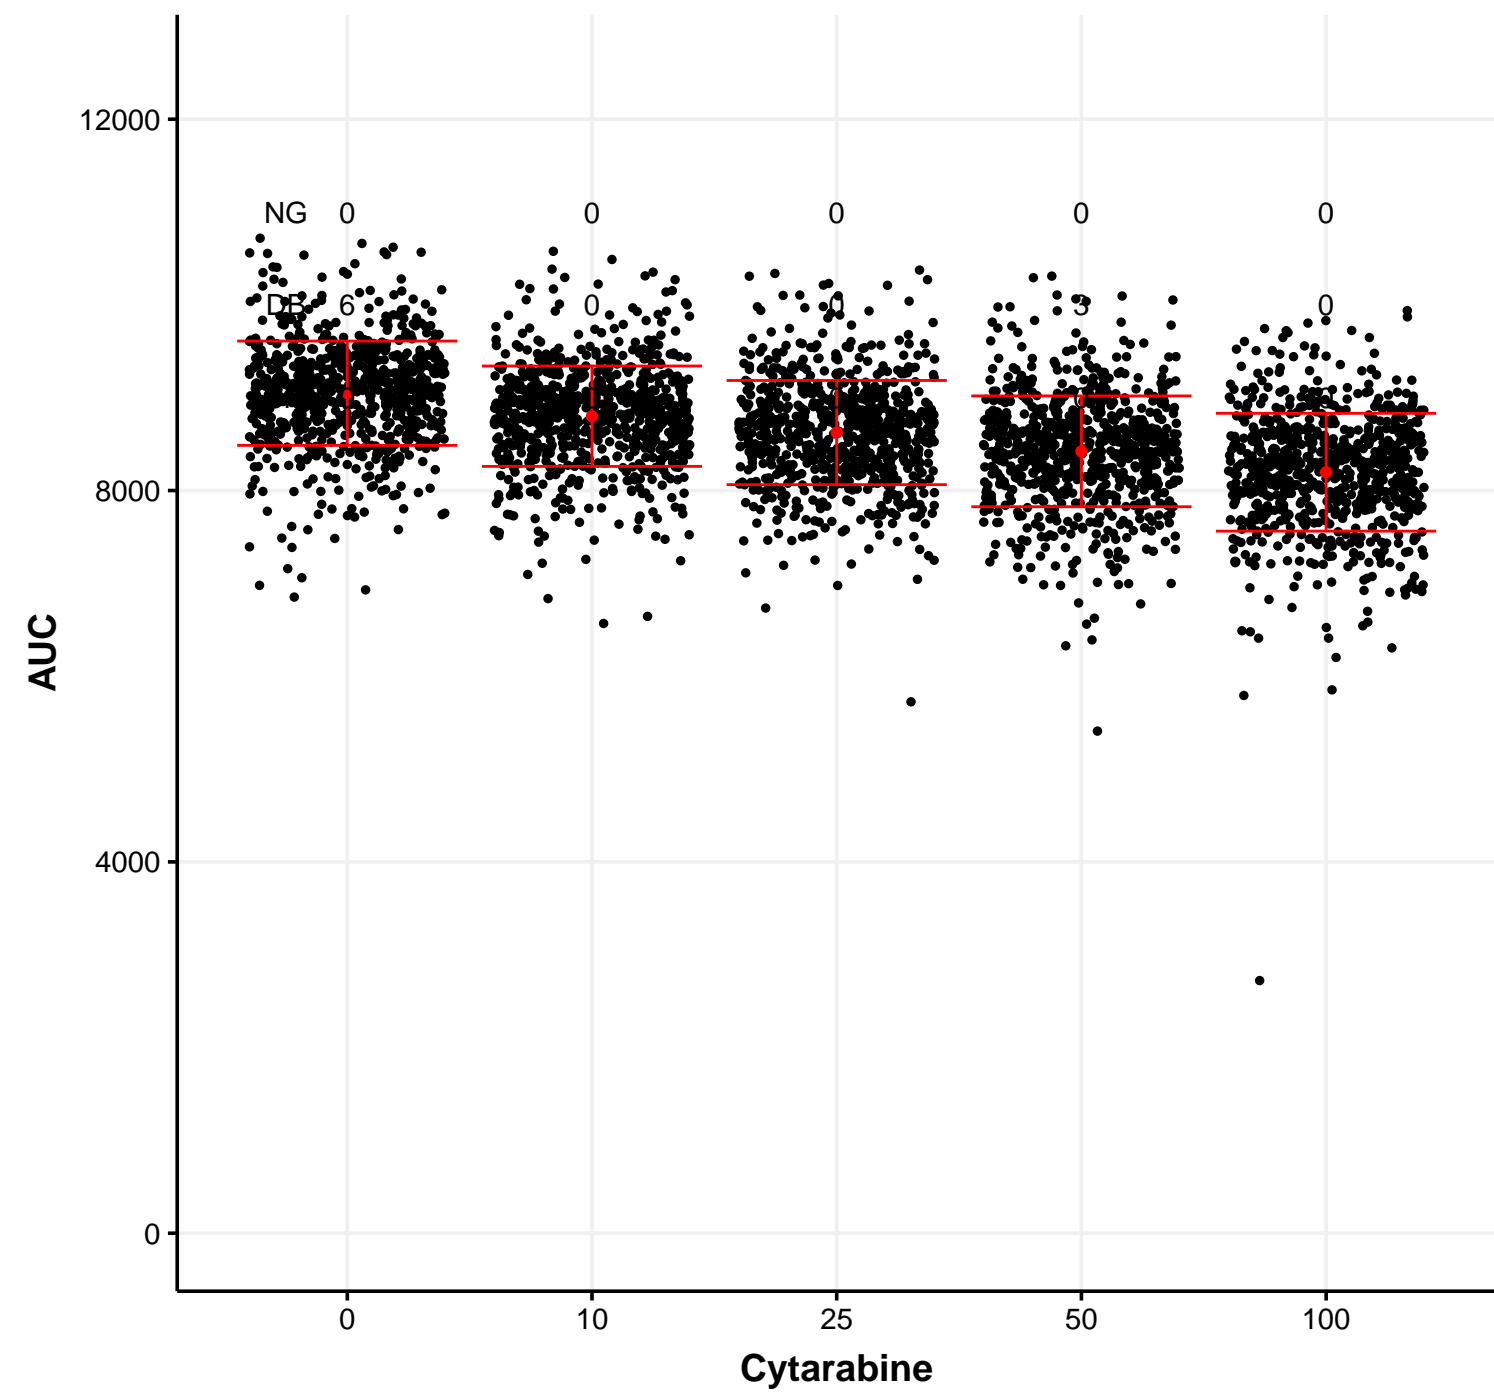

YDL227C Scatter RF for L with SD

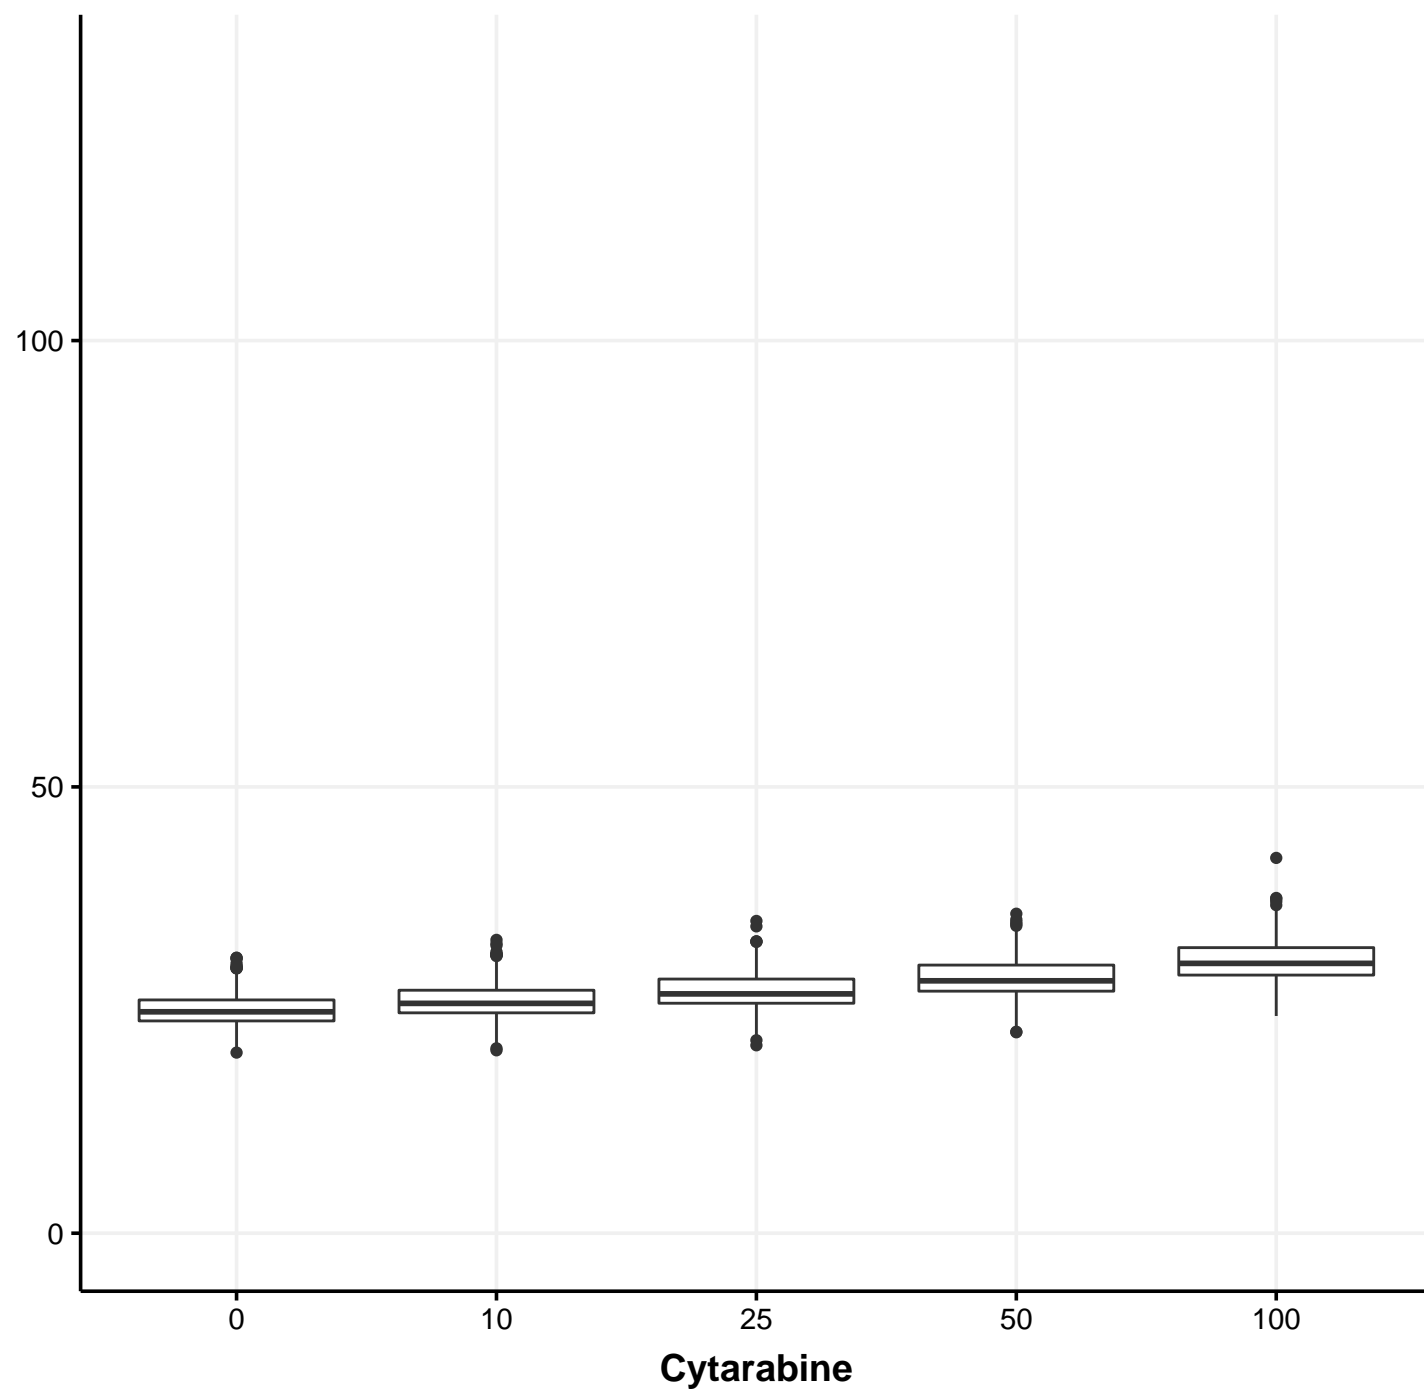

YDL227C Scatter RF for K with SD

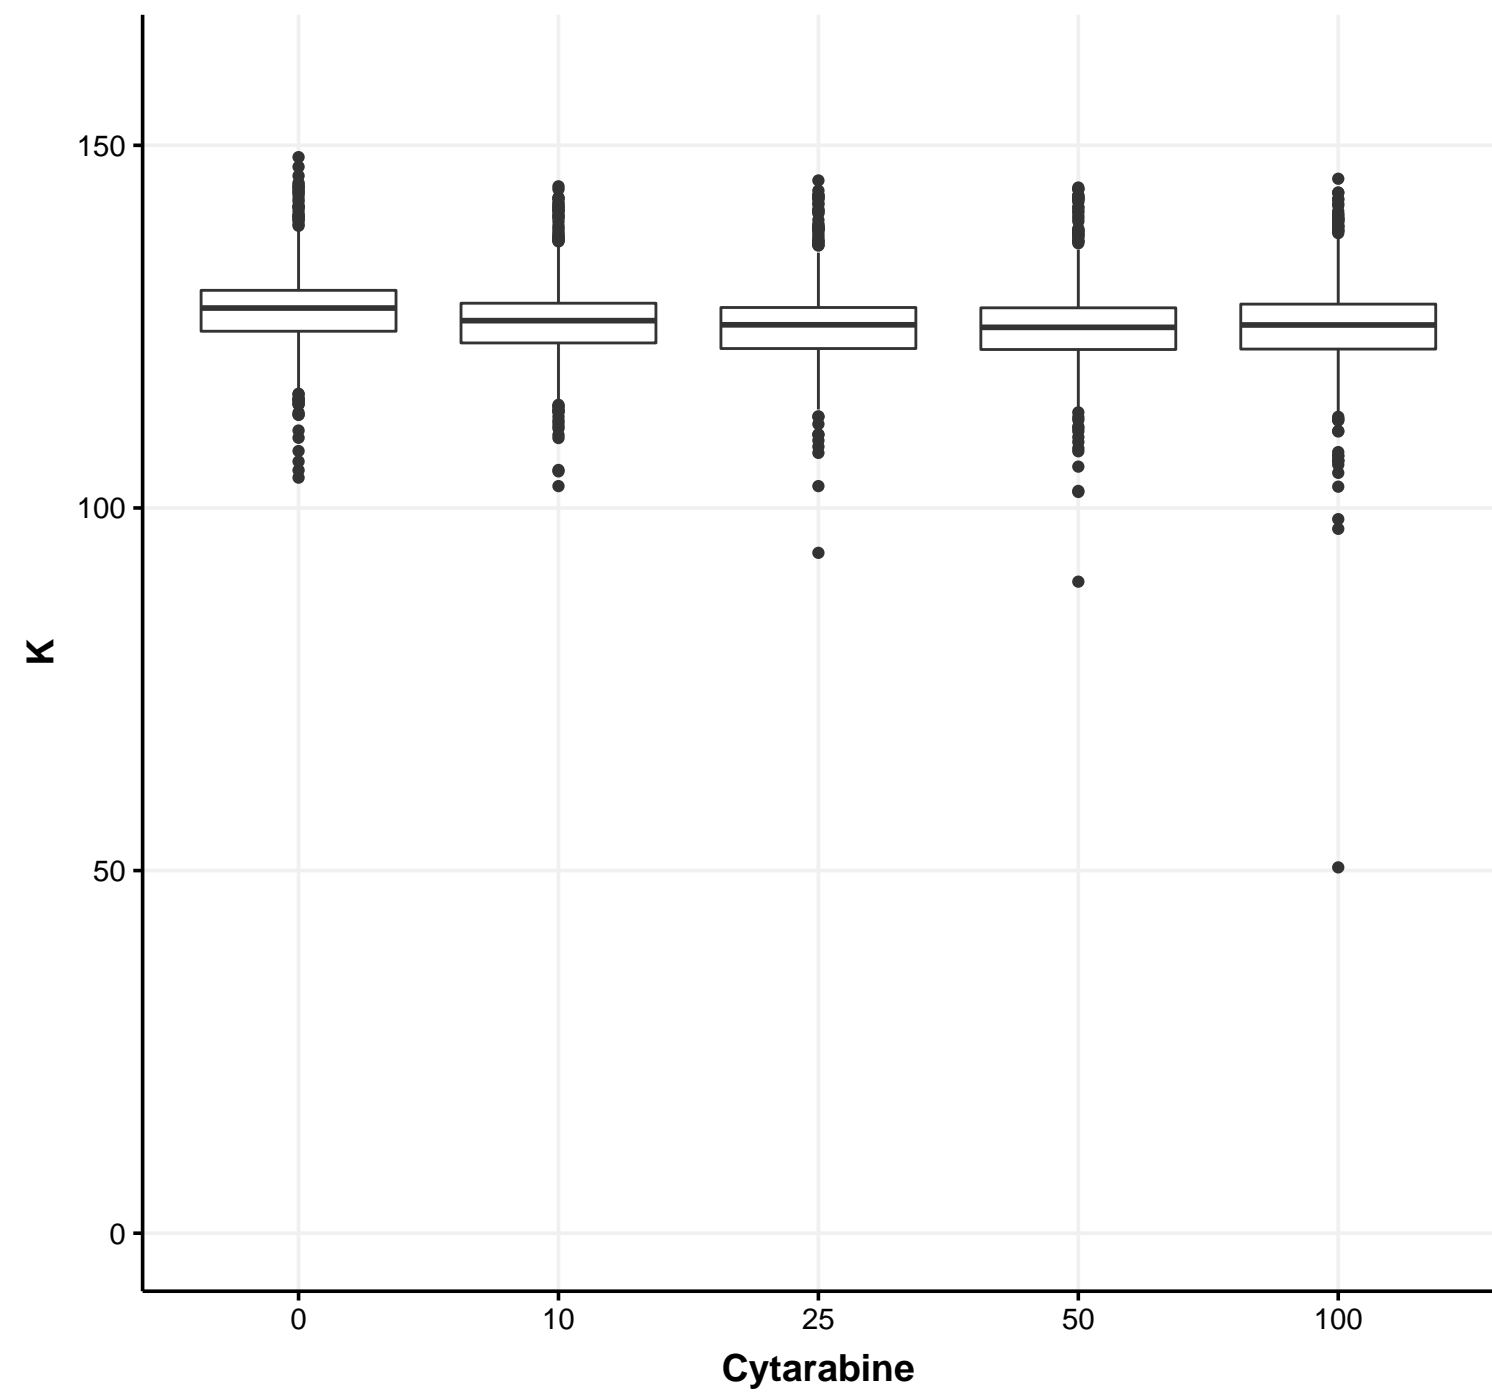

YDL227C Scatter RF for r with SD

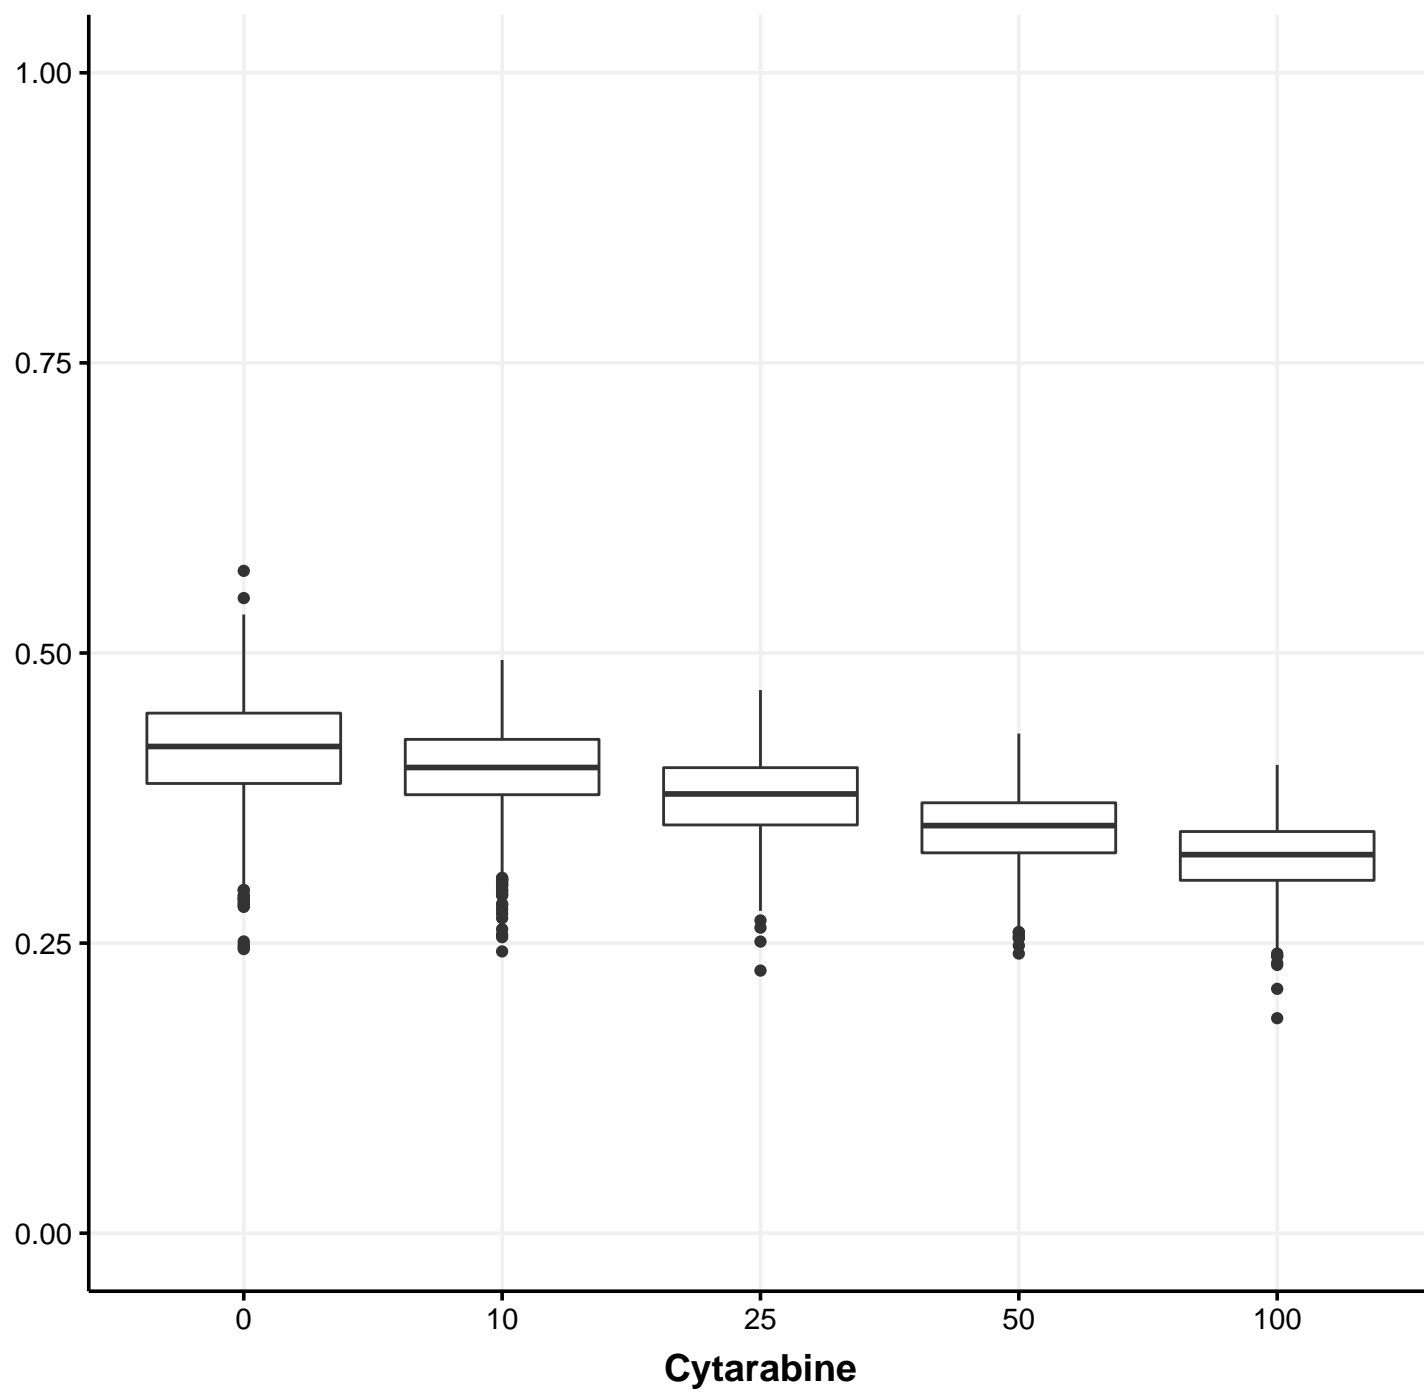

YDL227C Scatter RF for AUC with SD

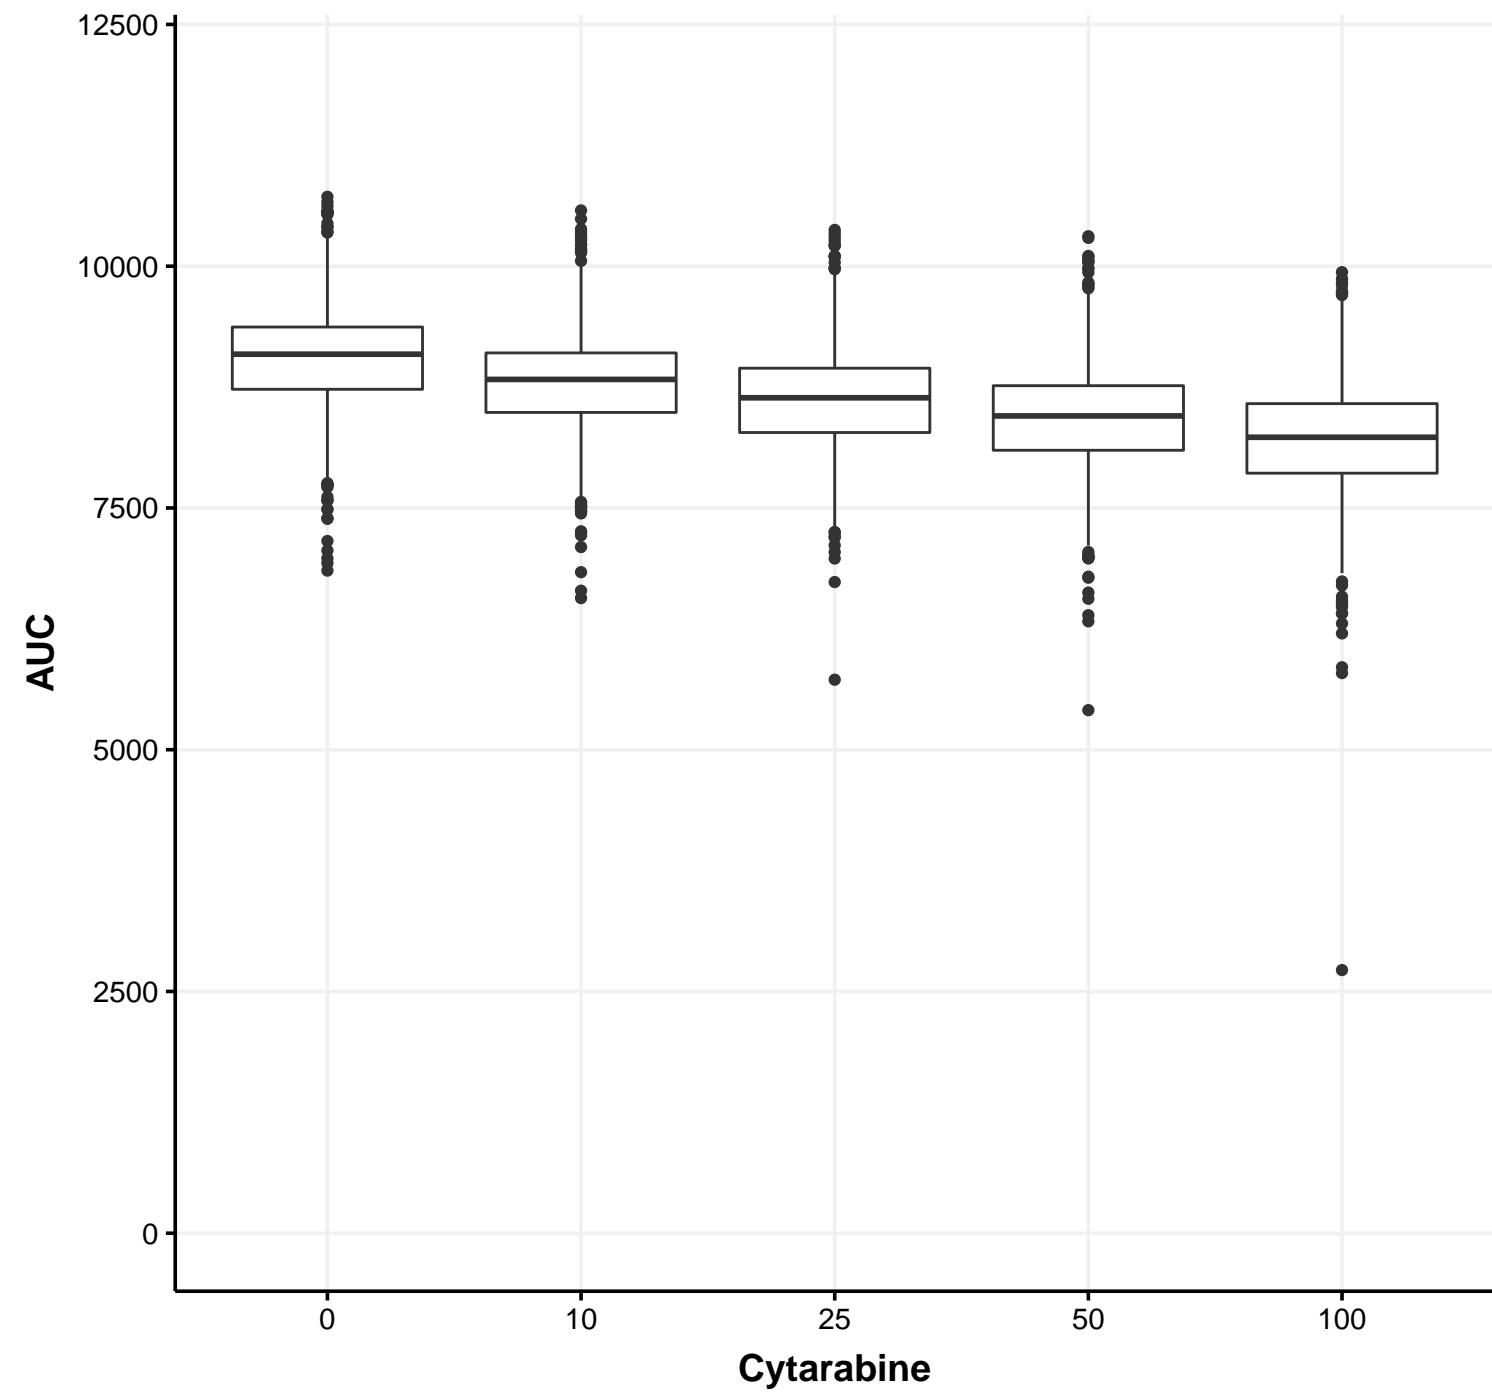

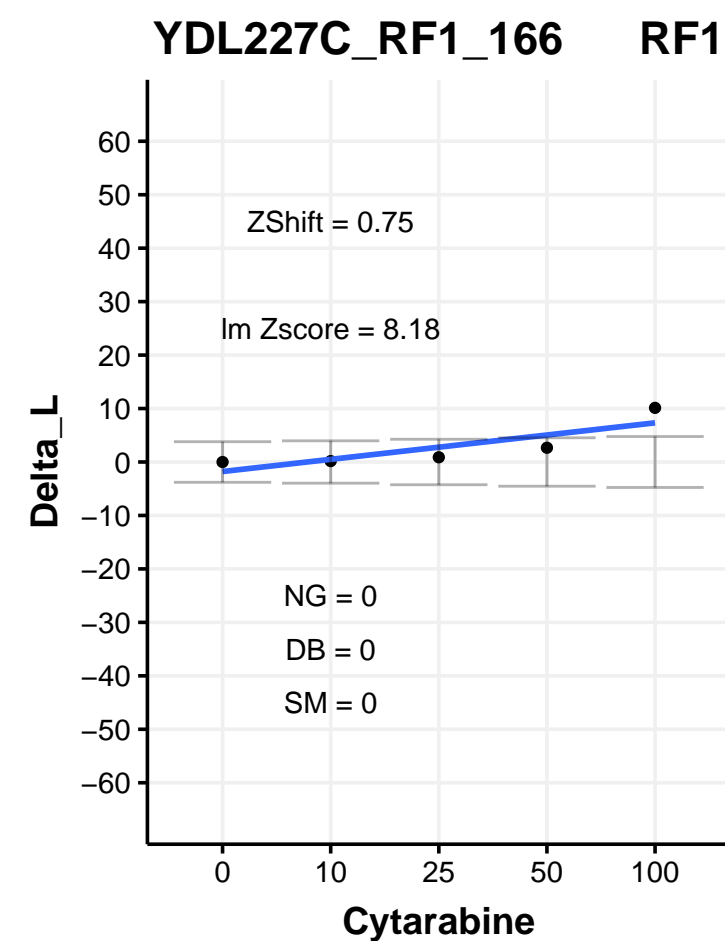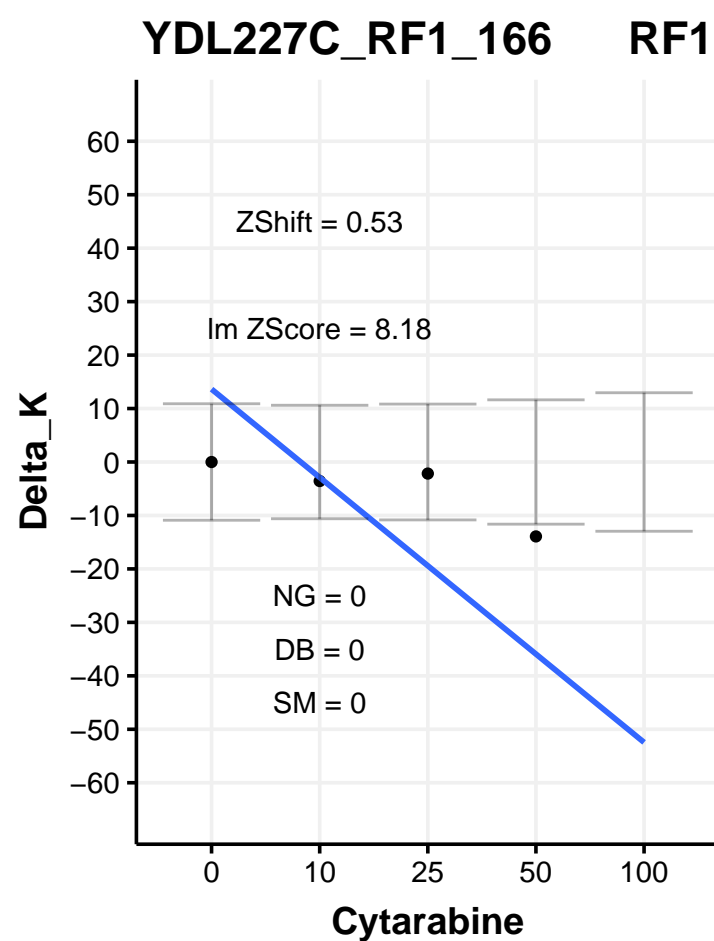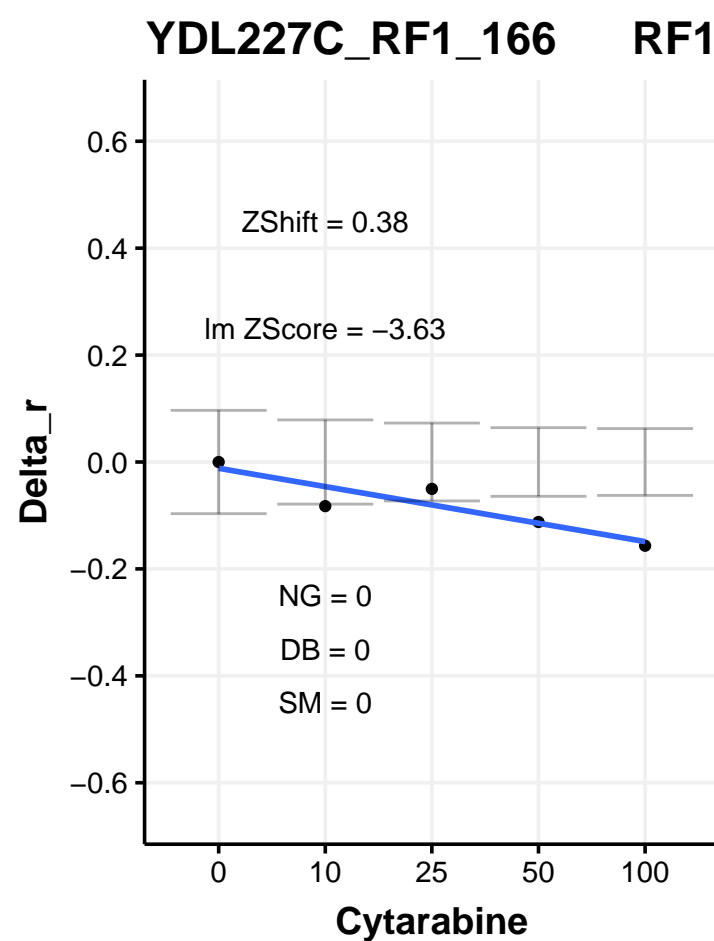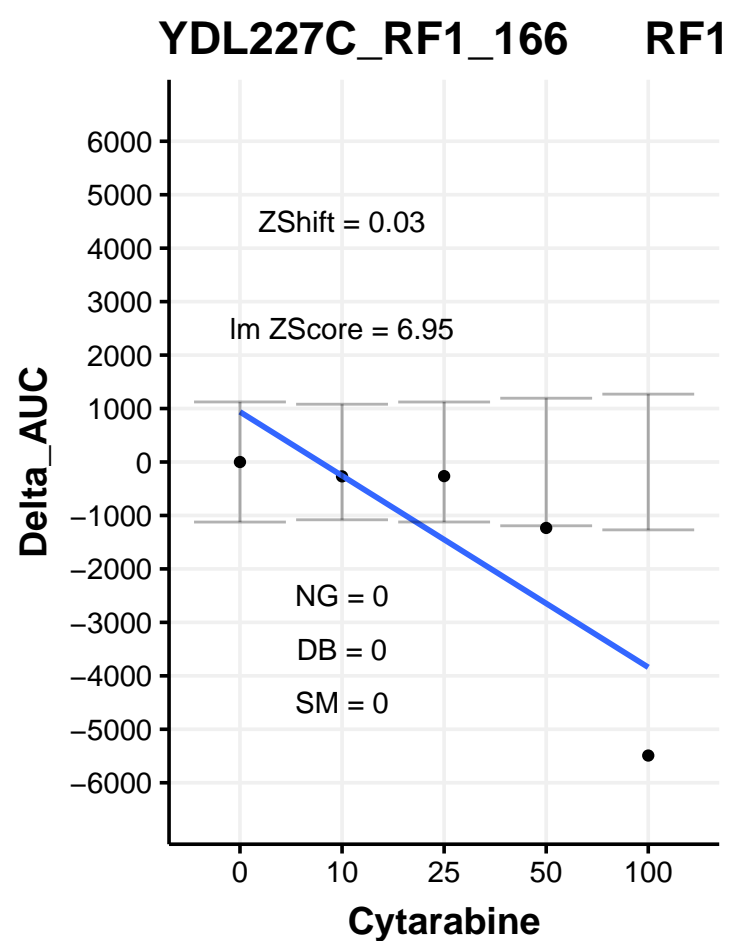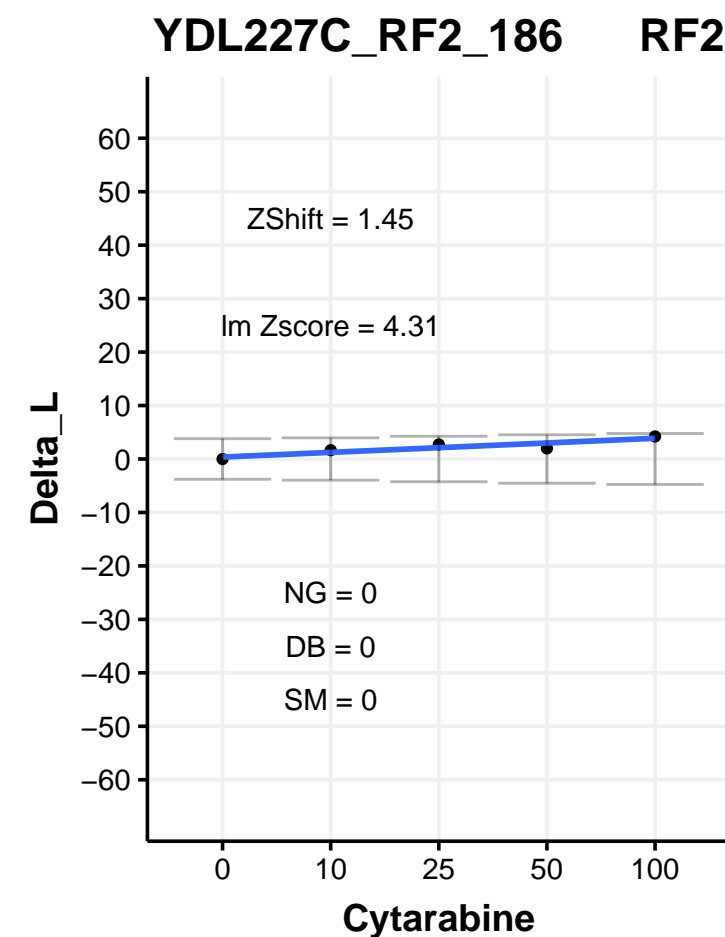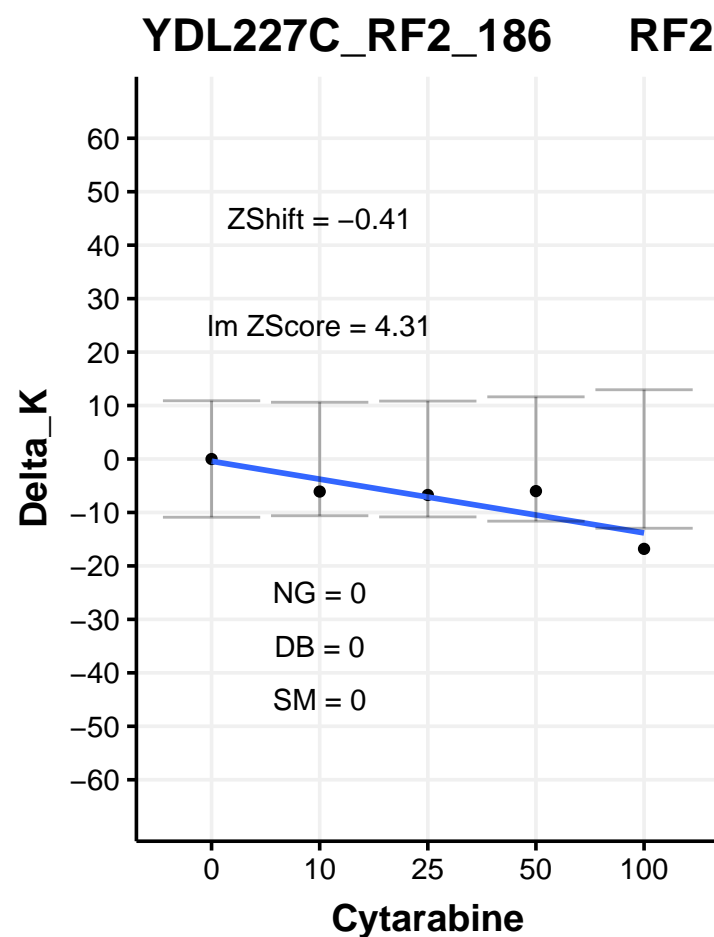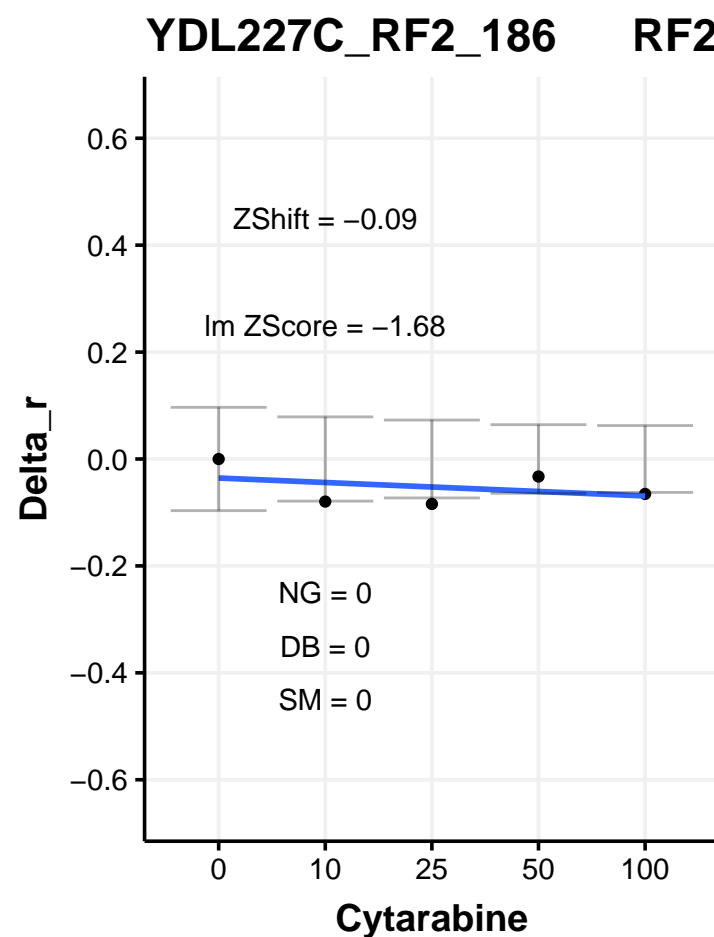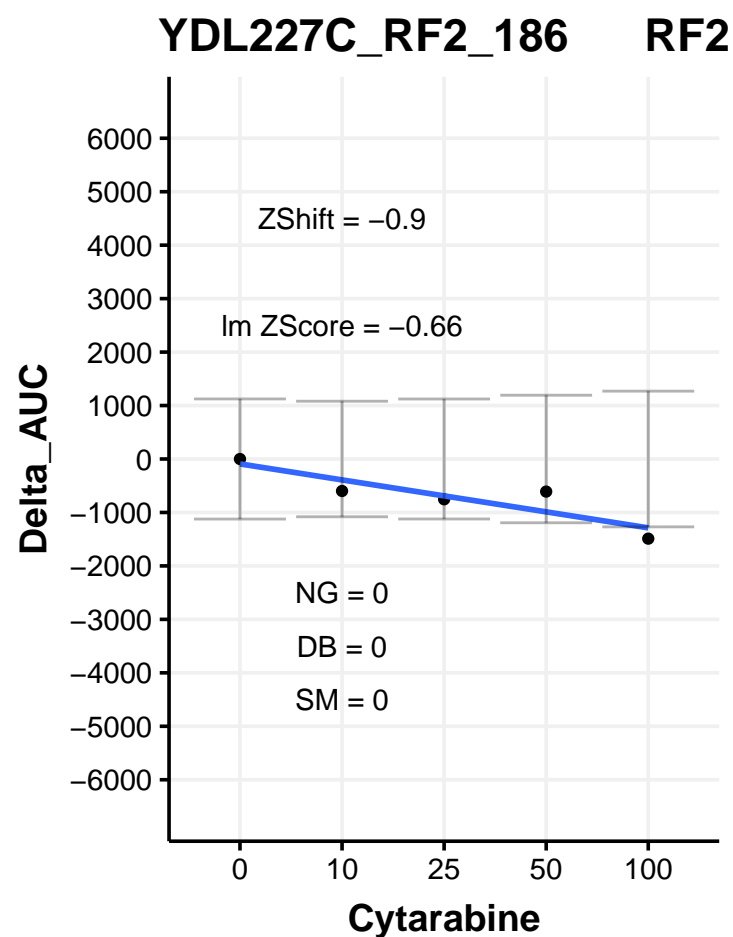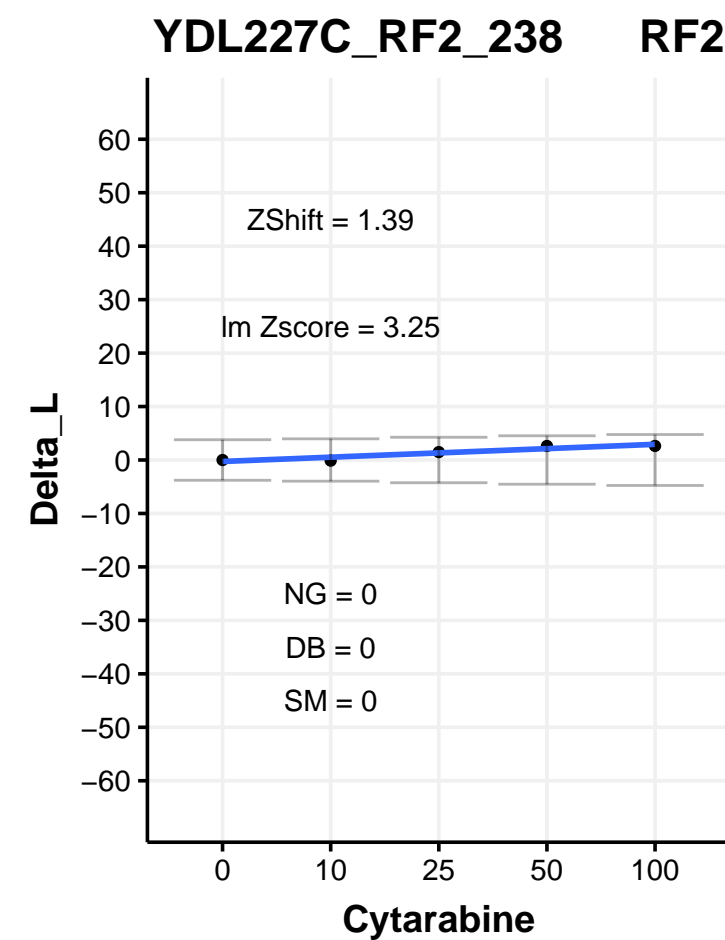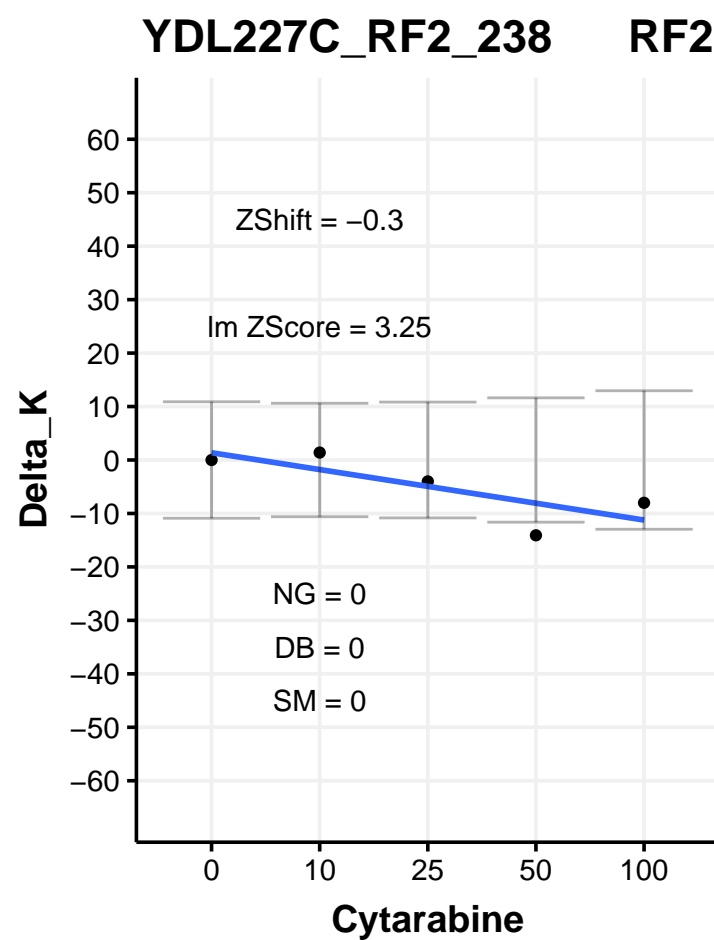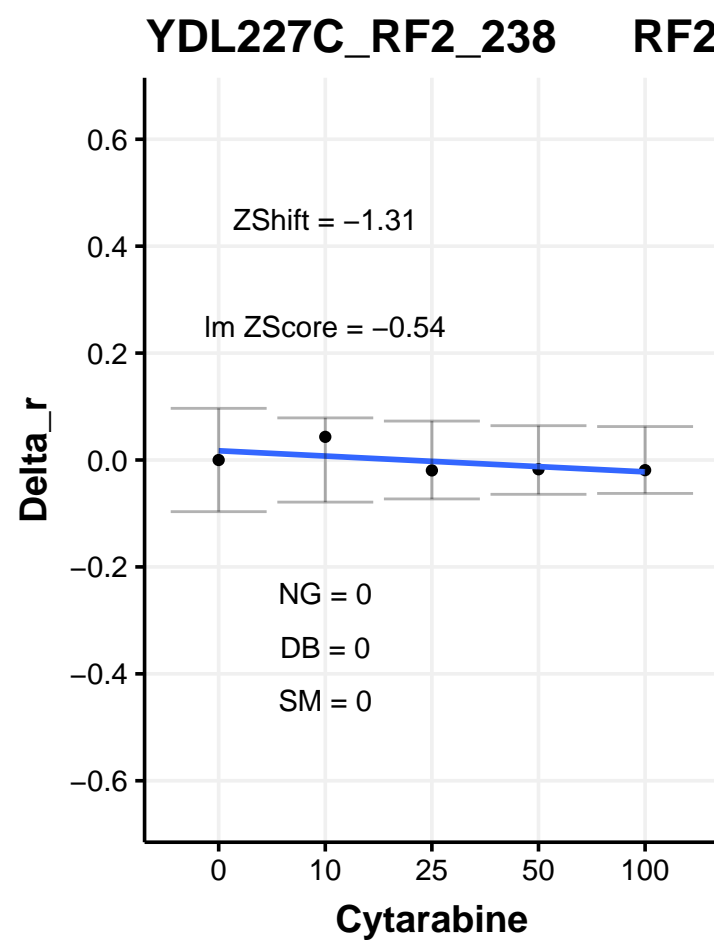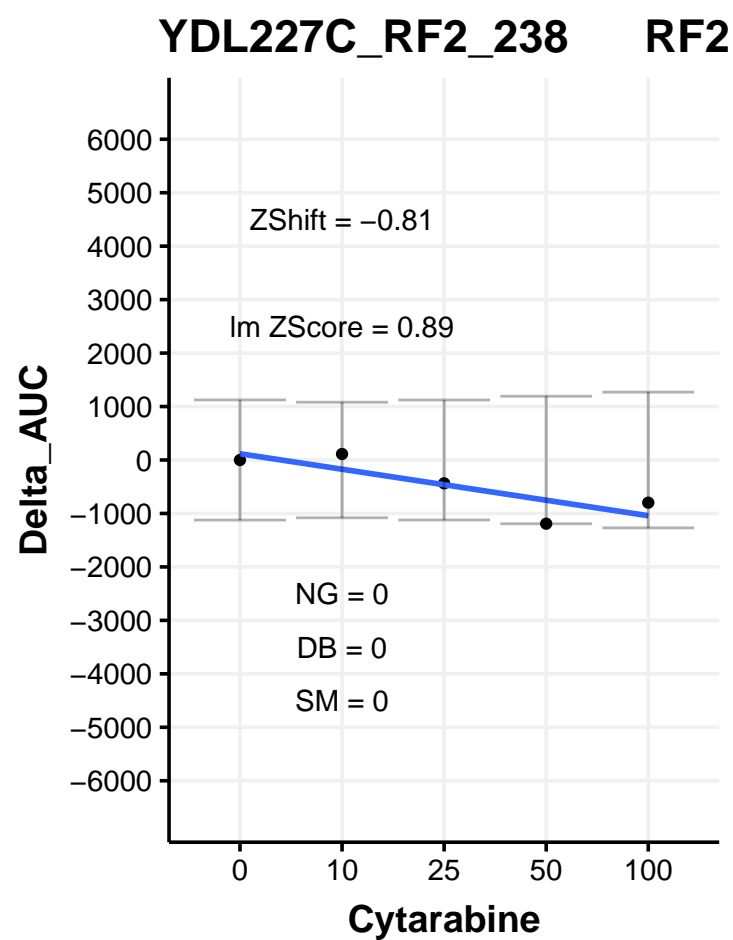

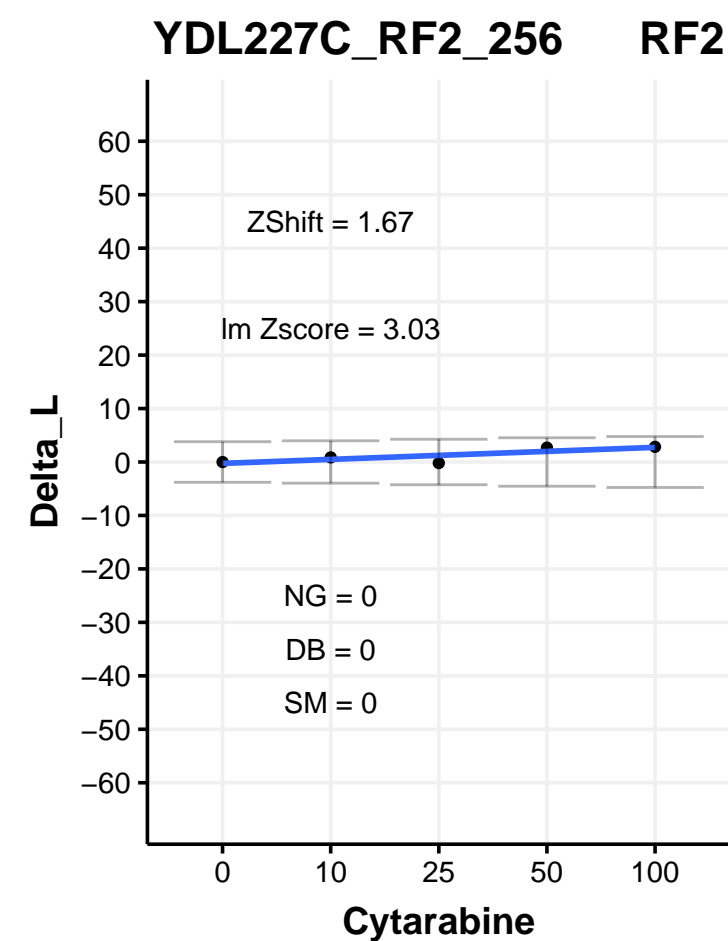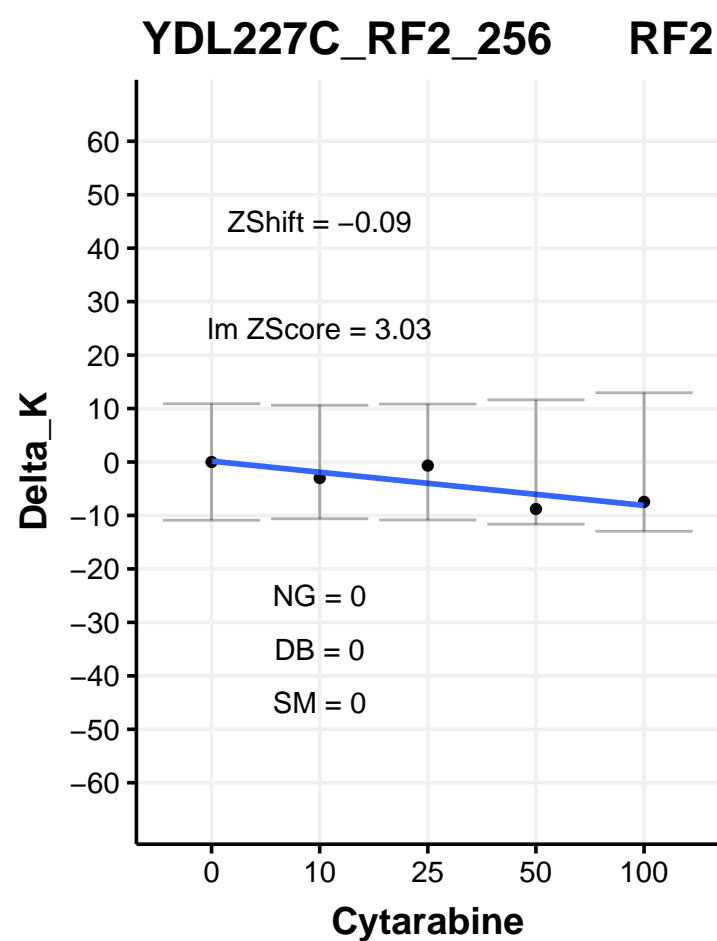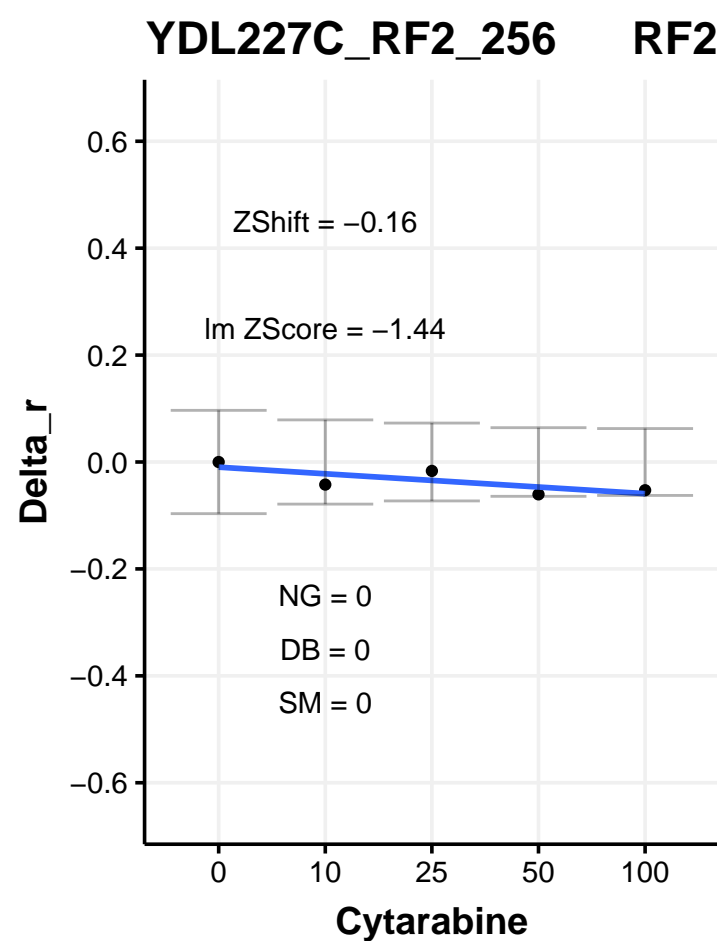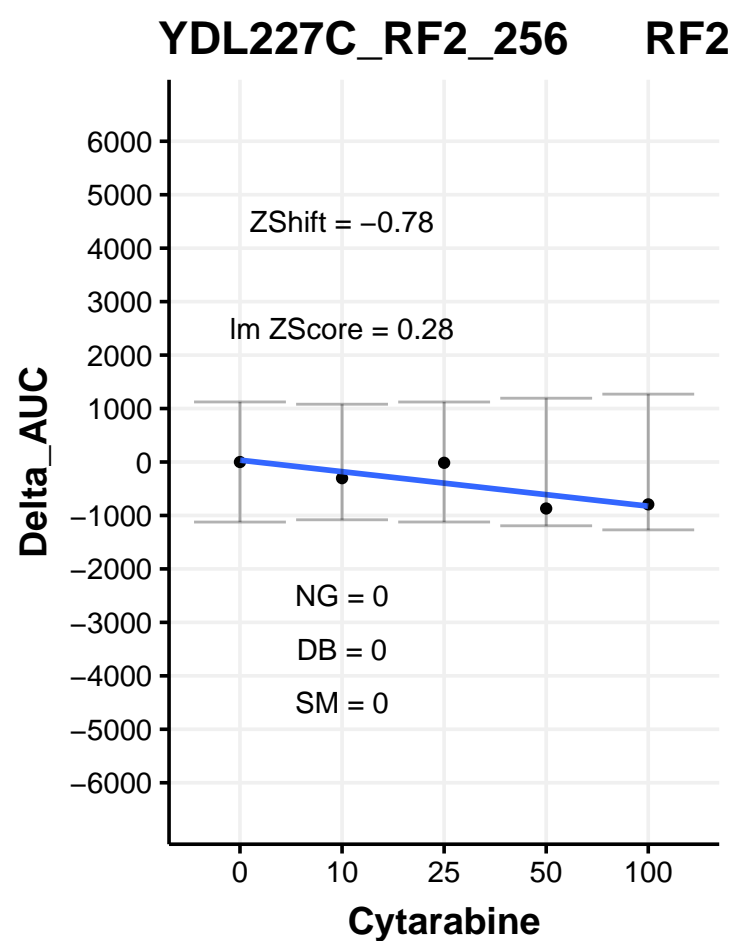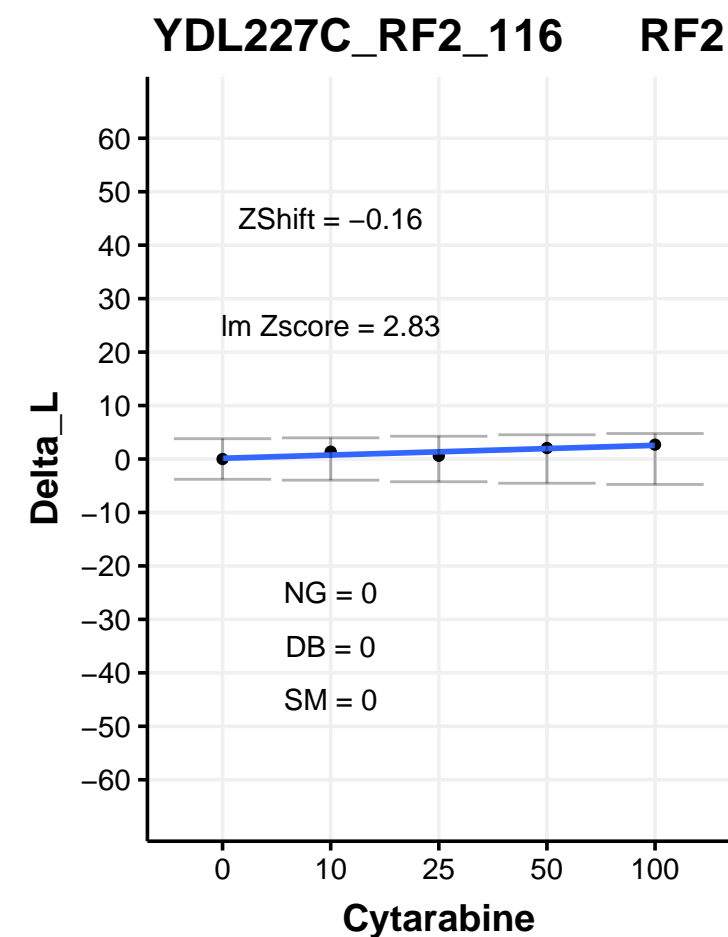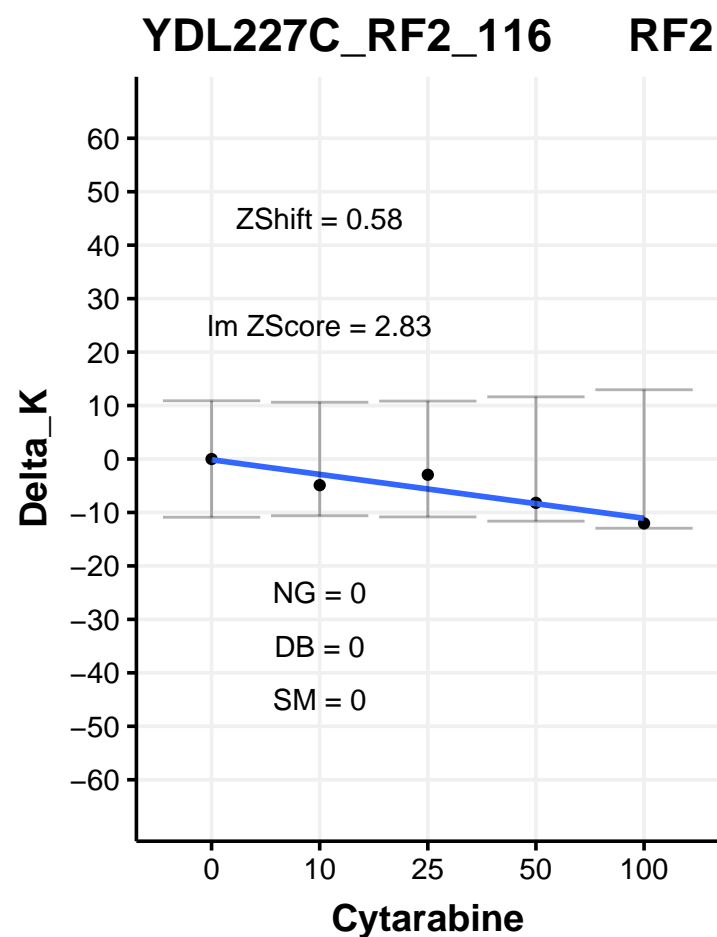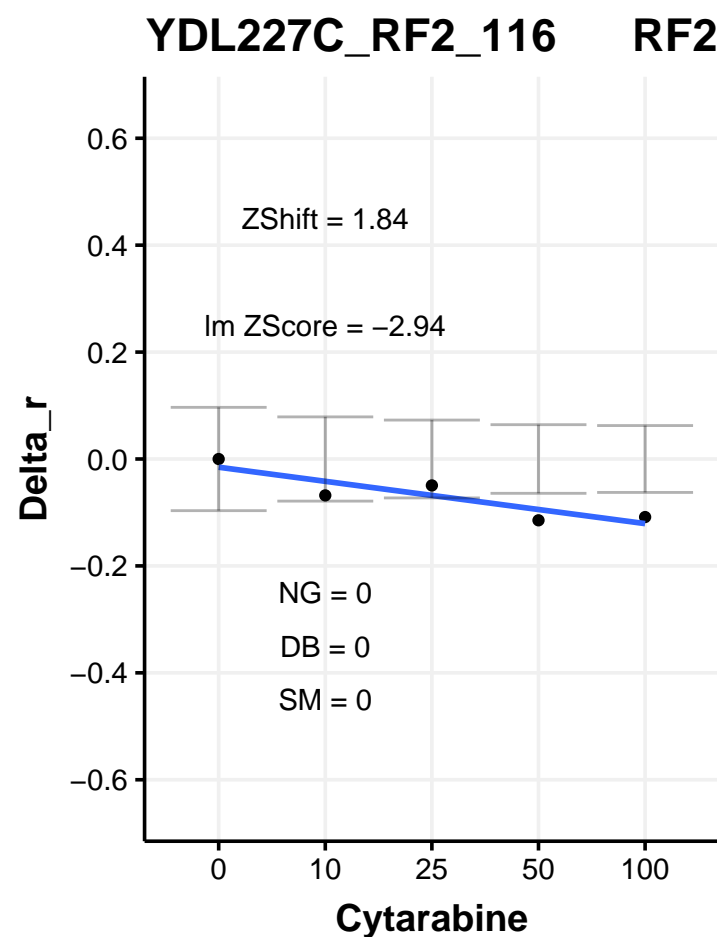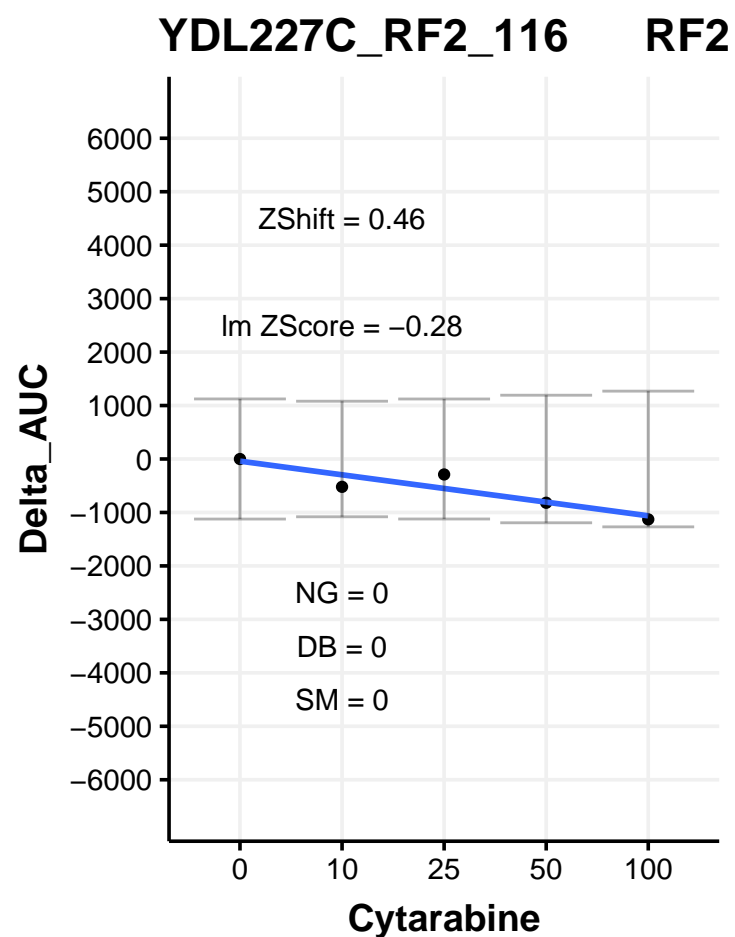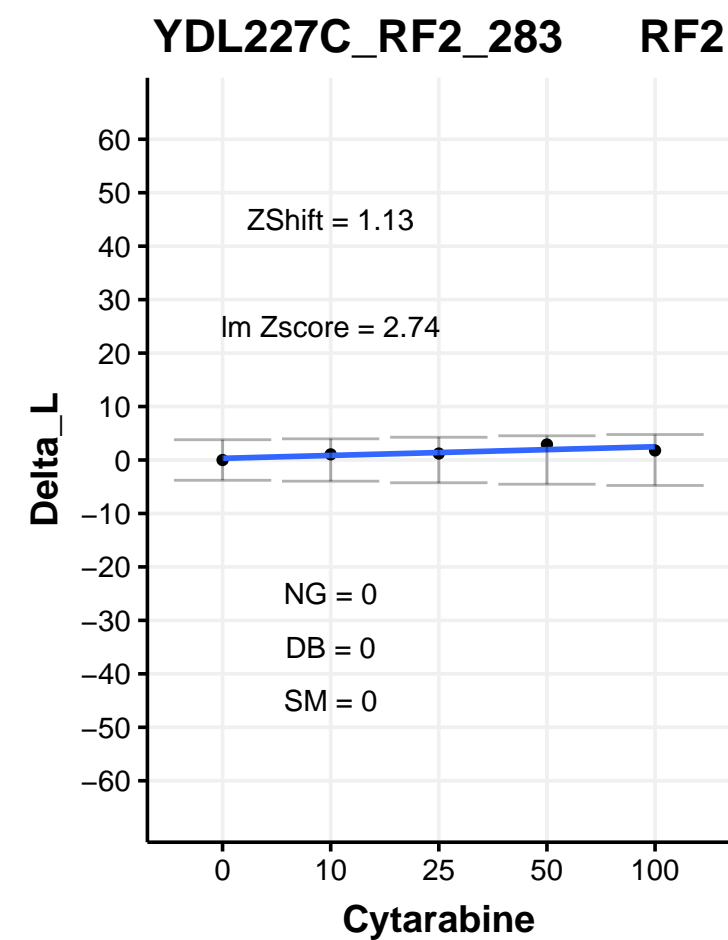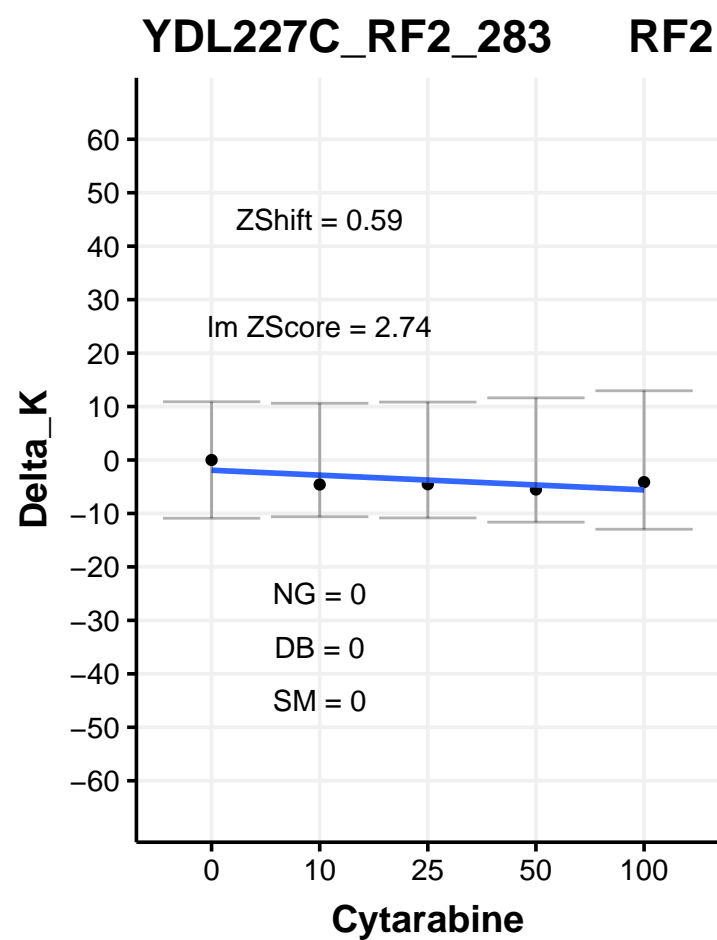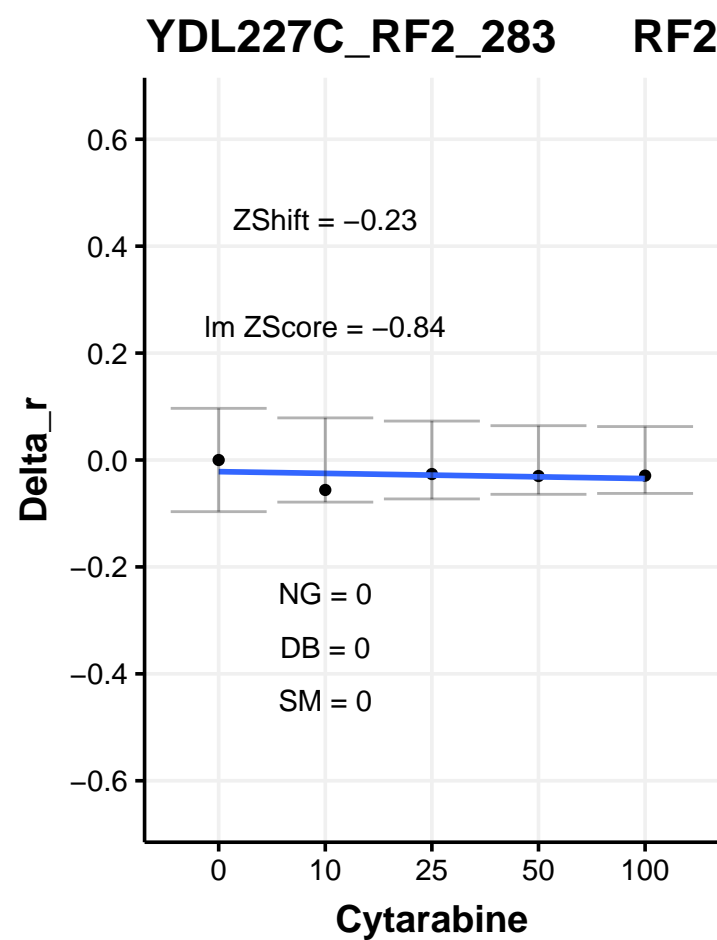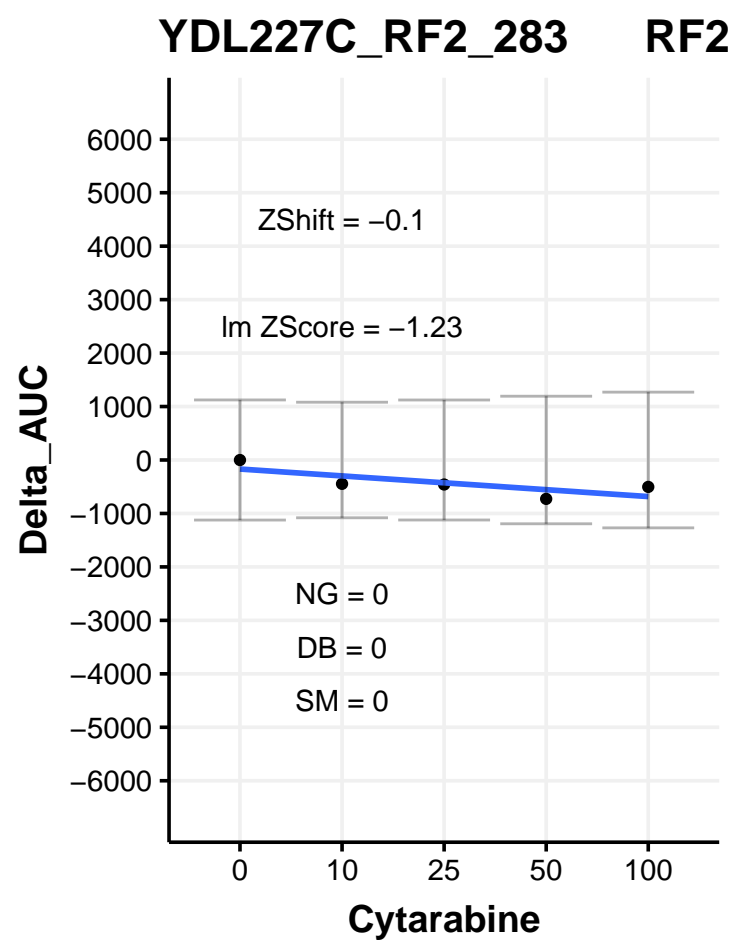

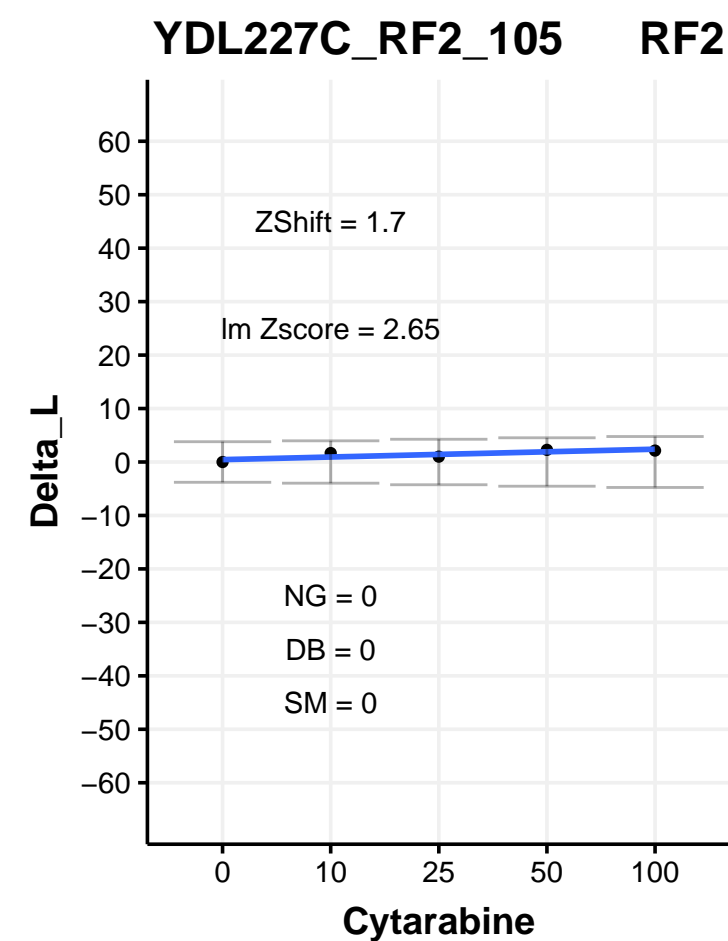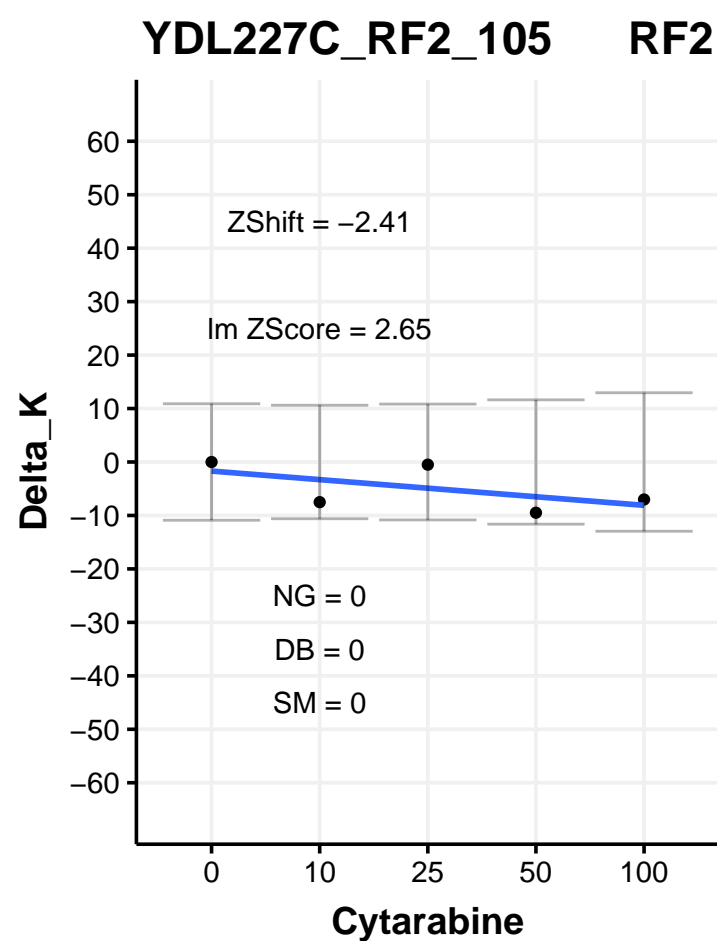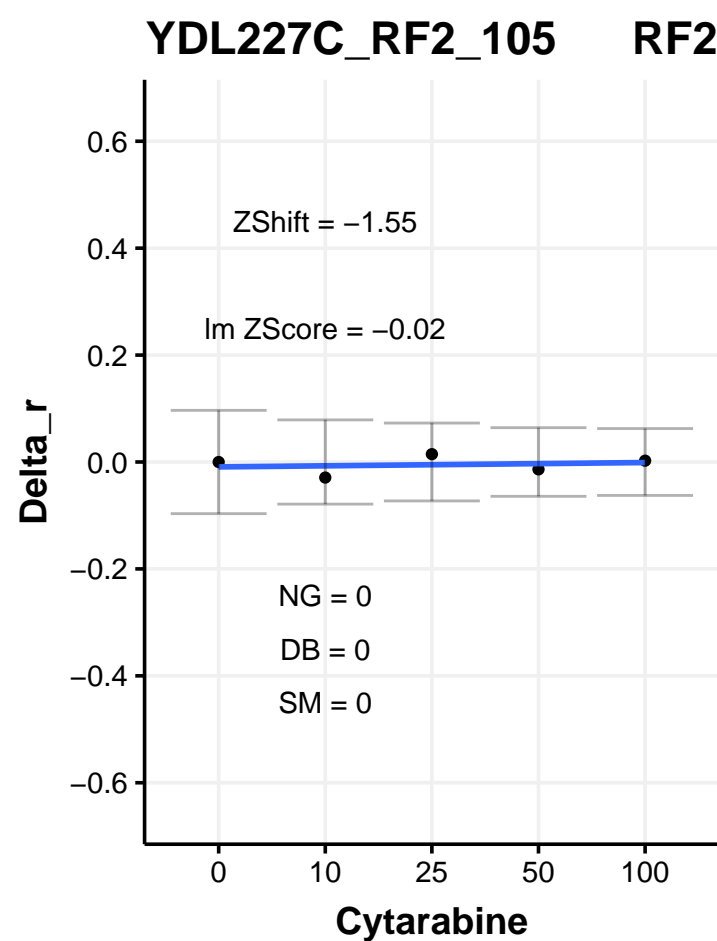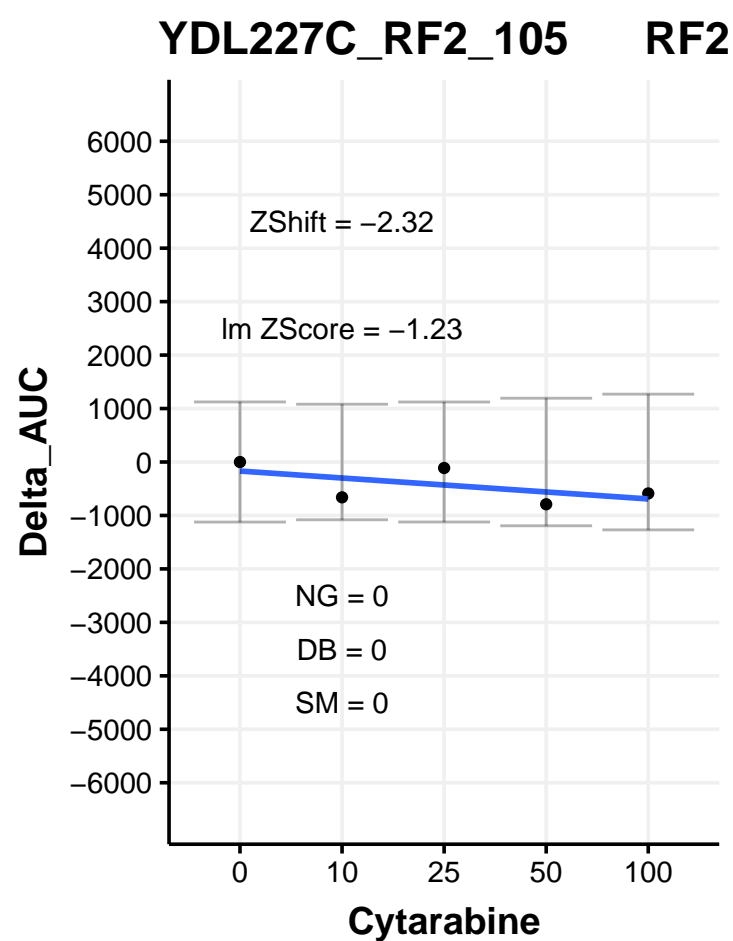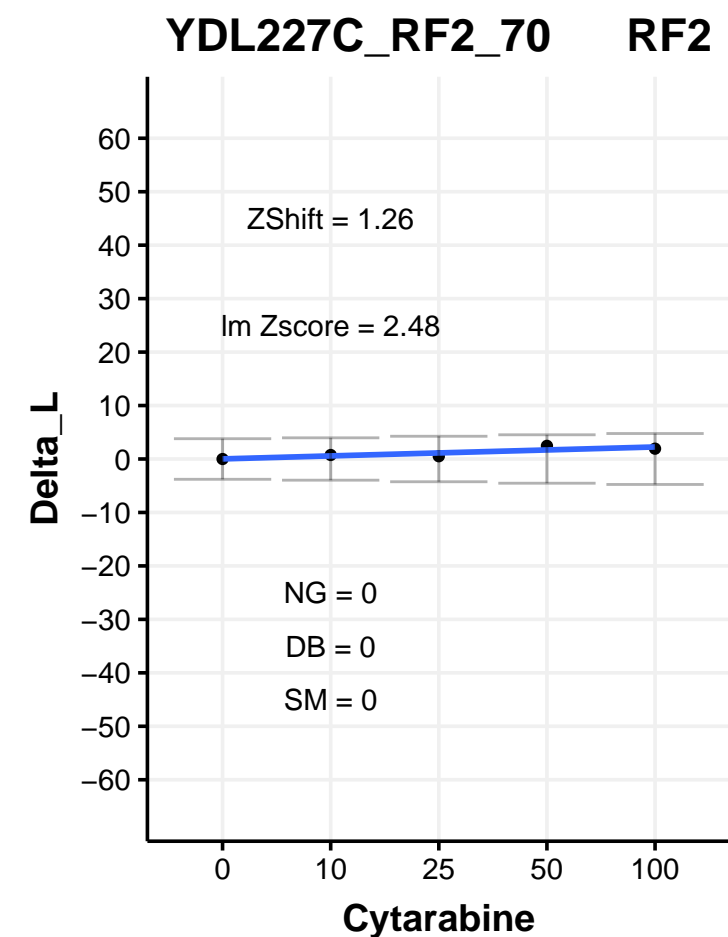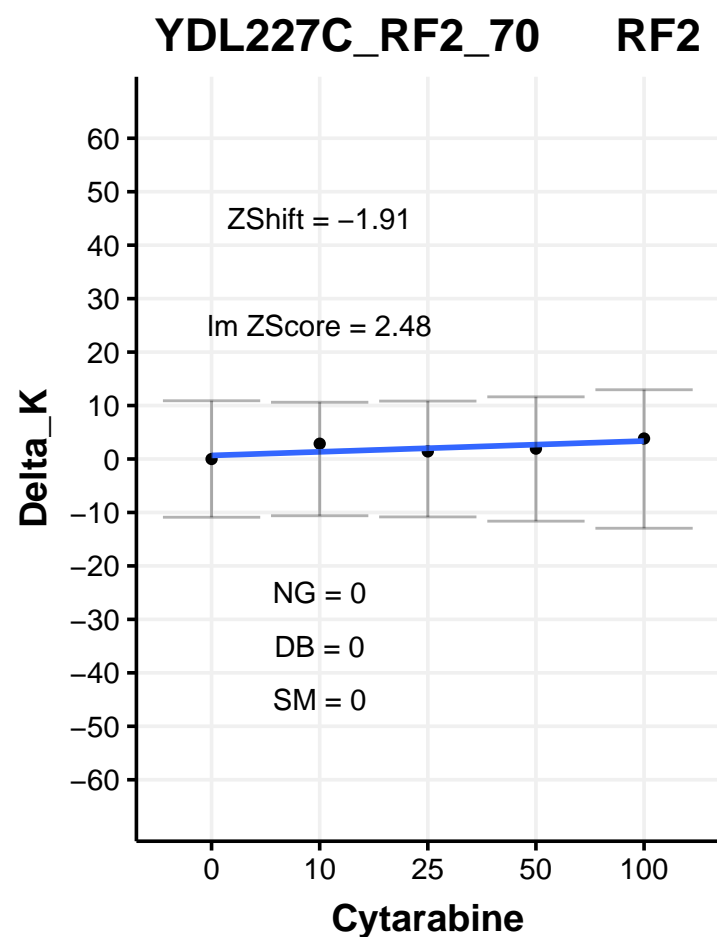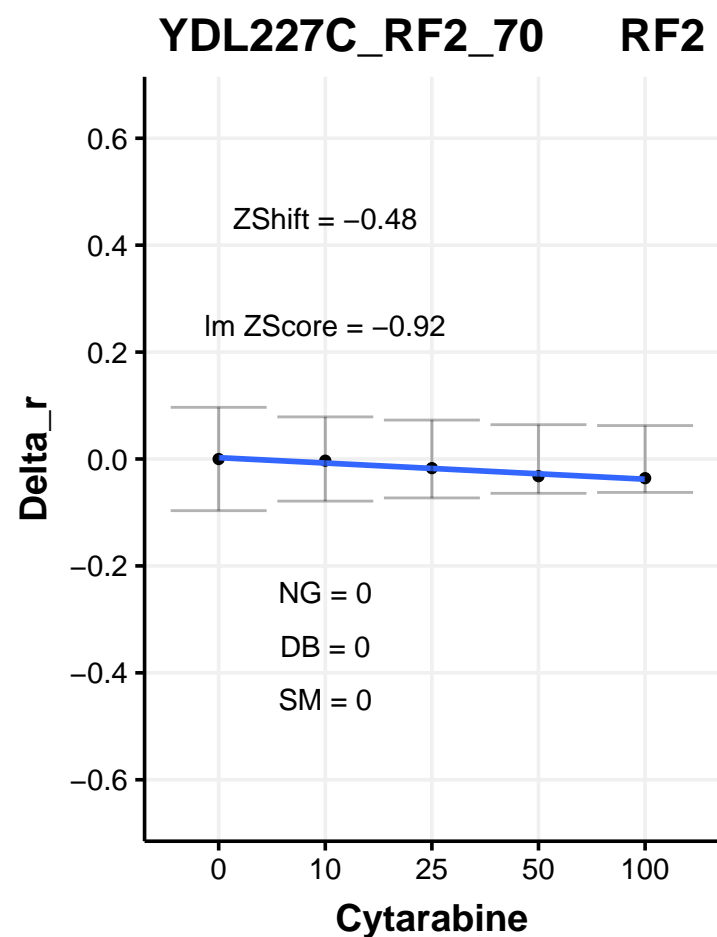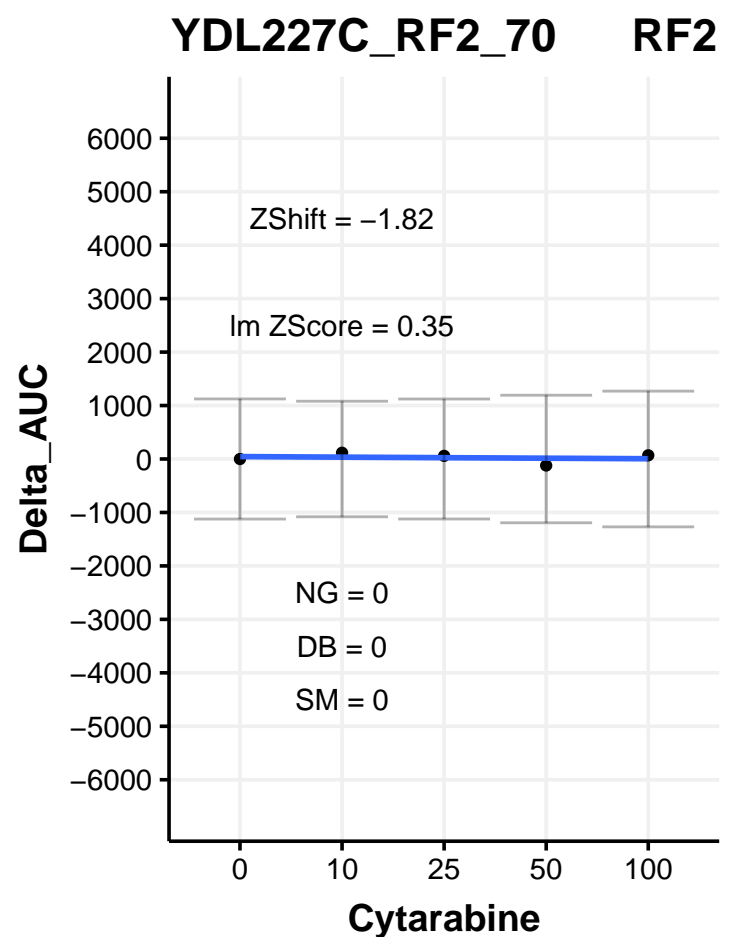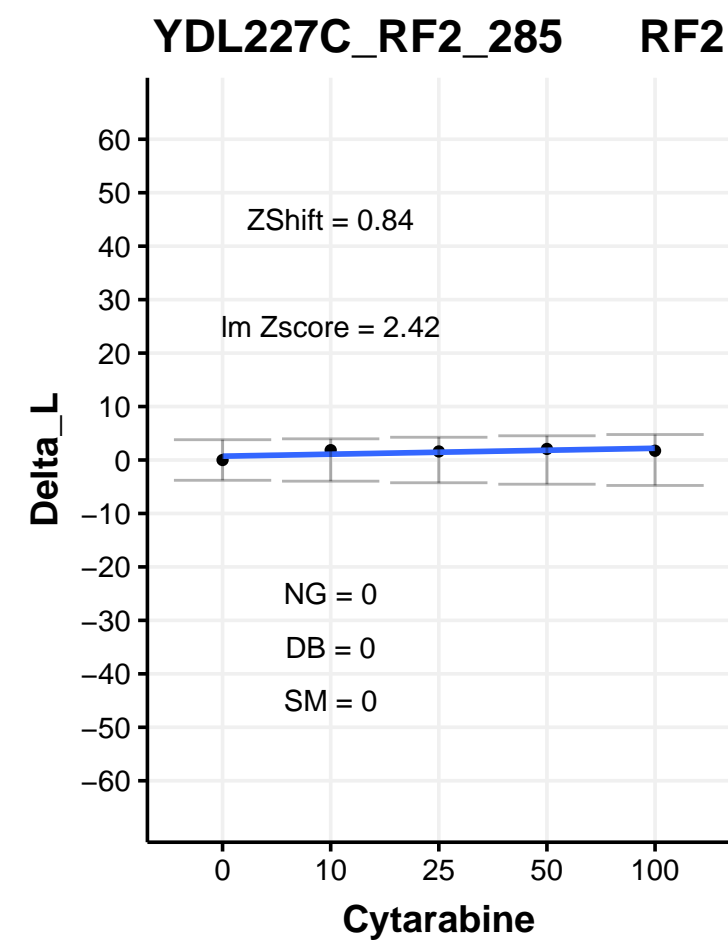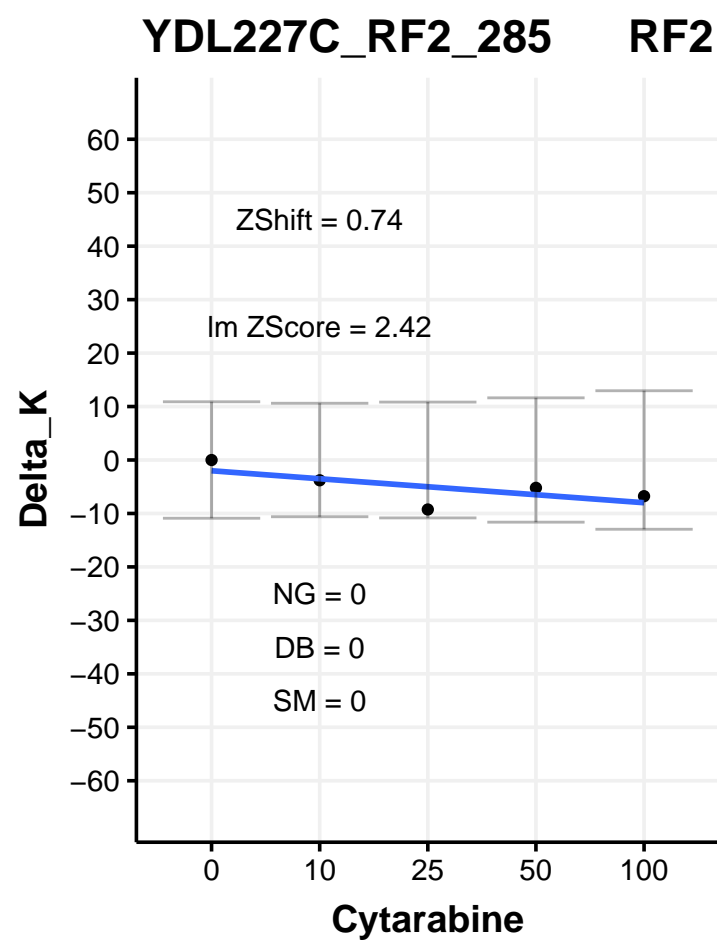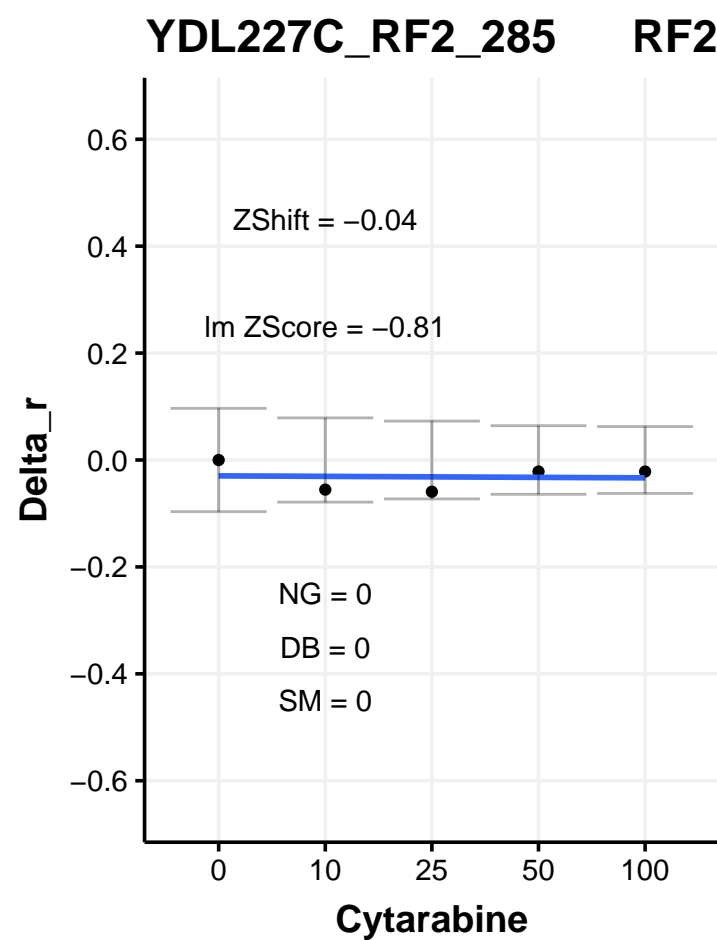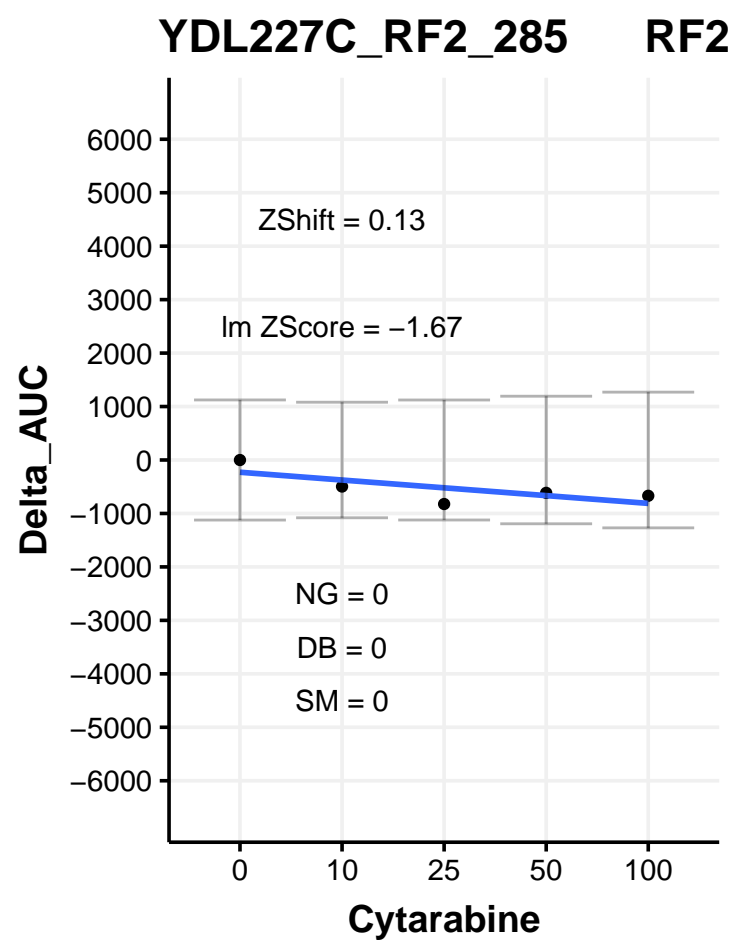

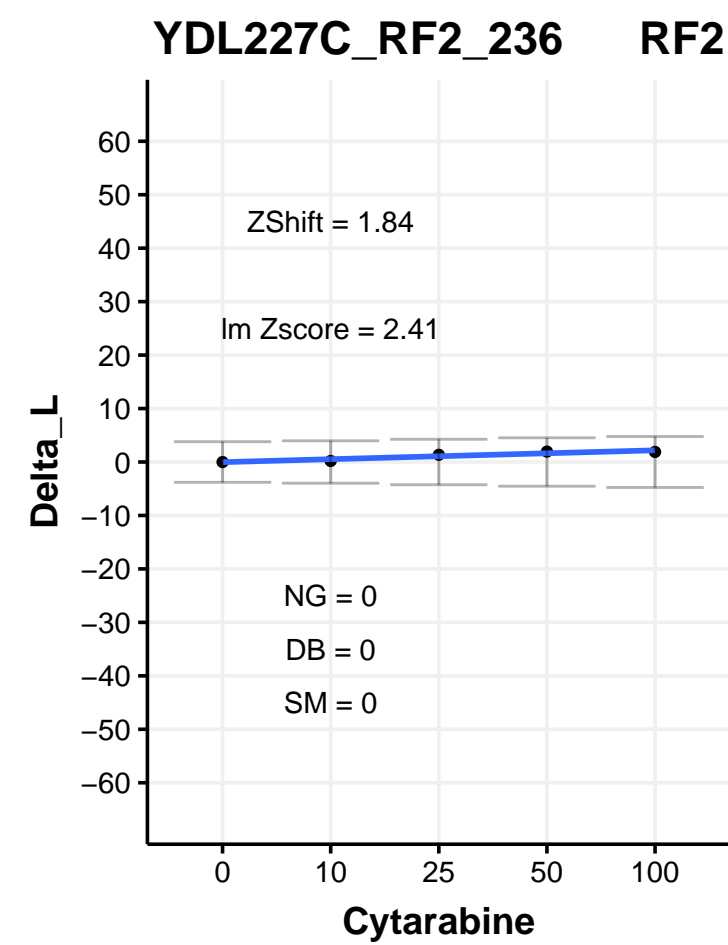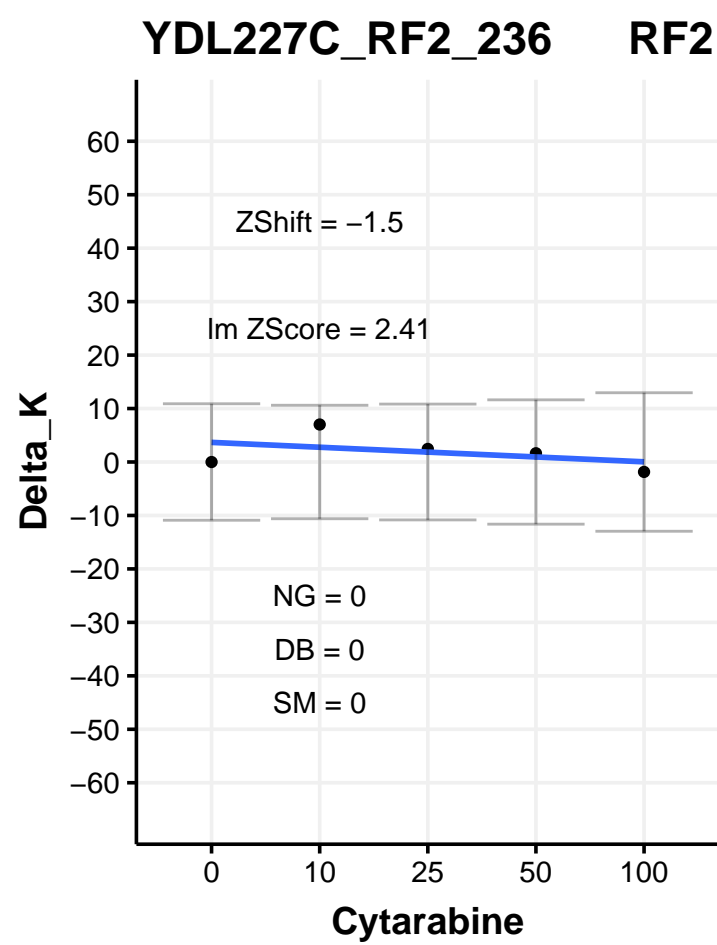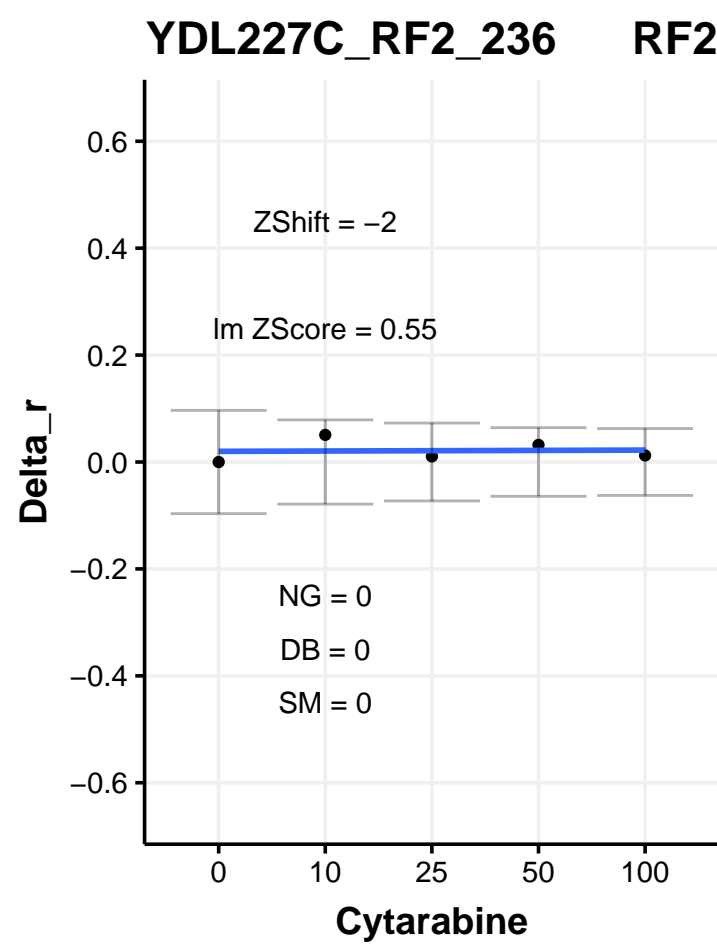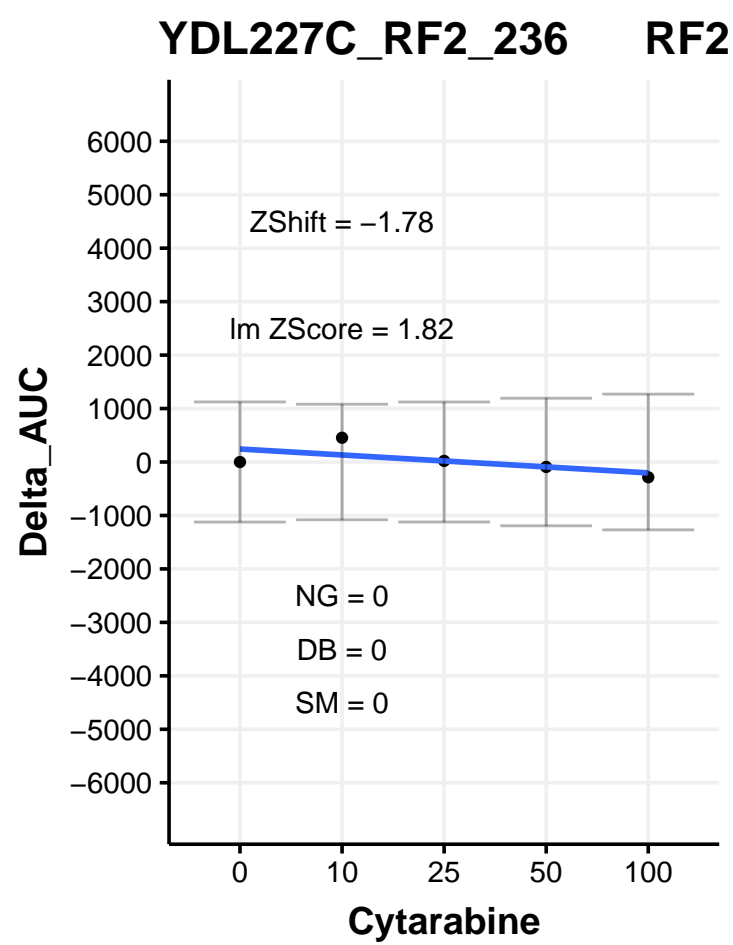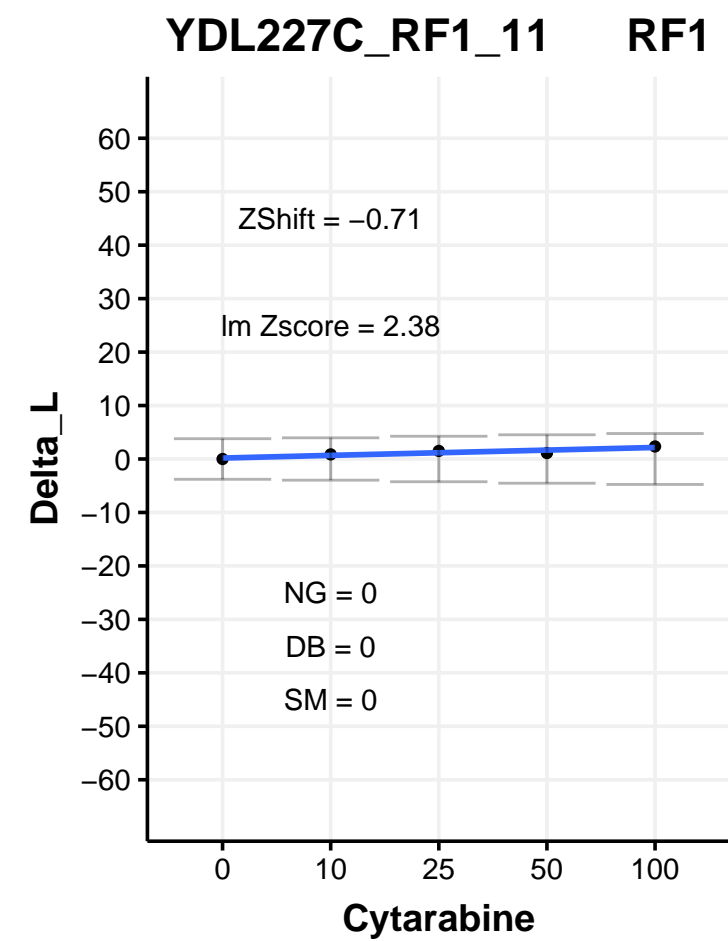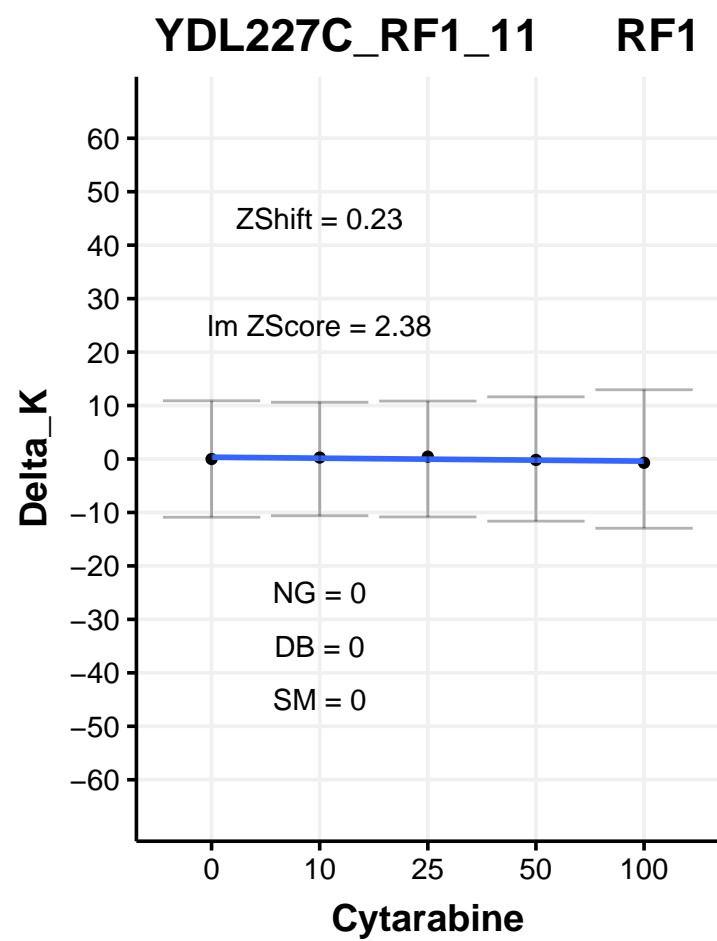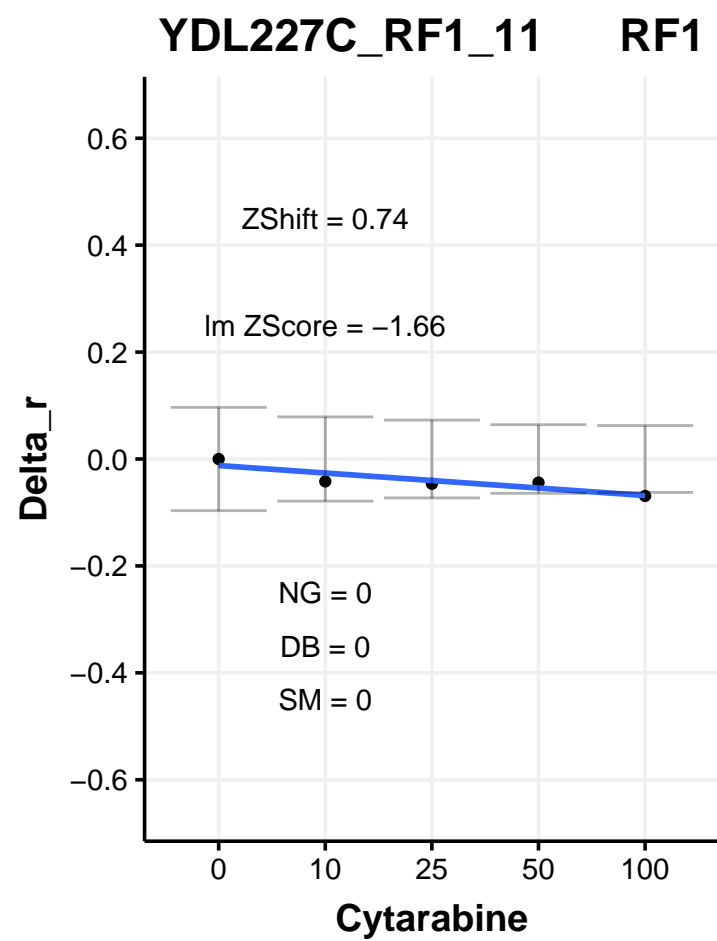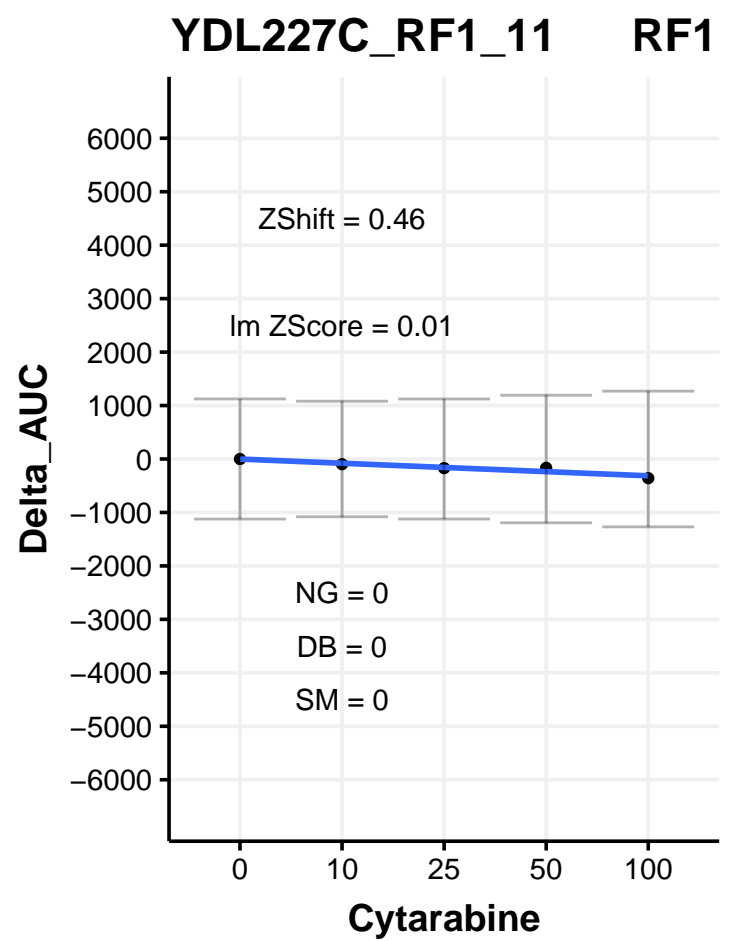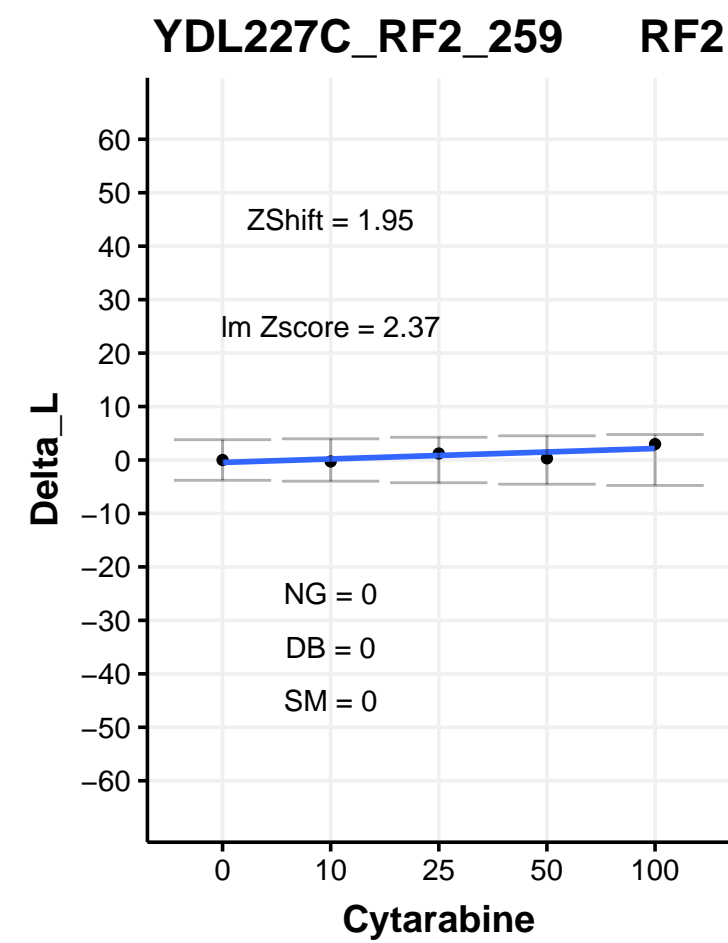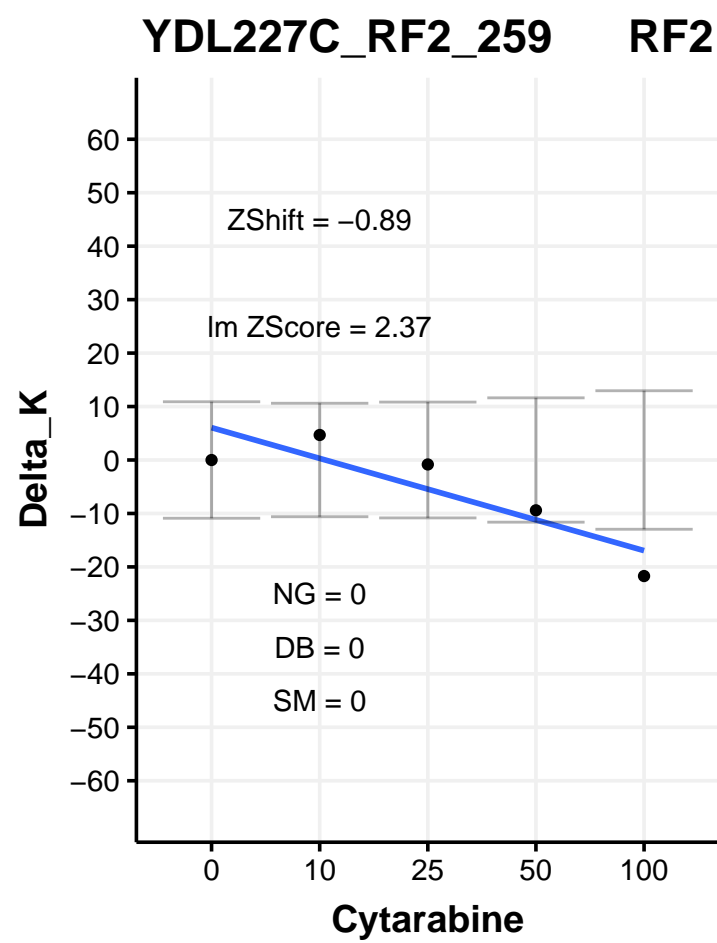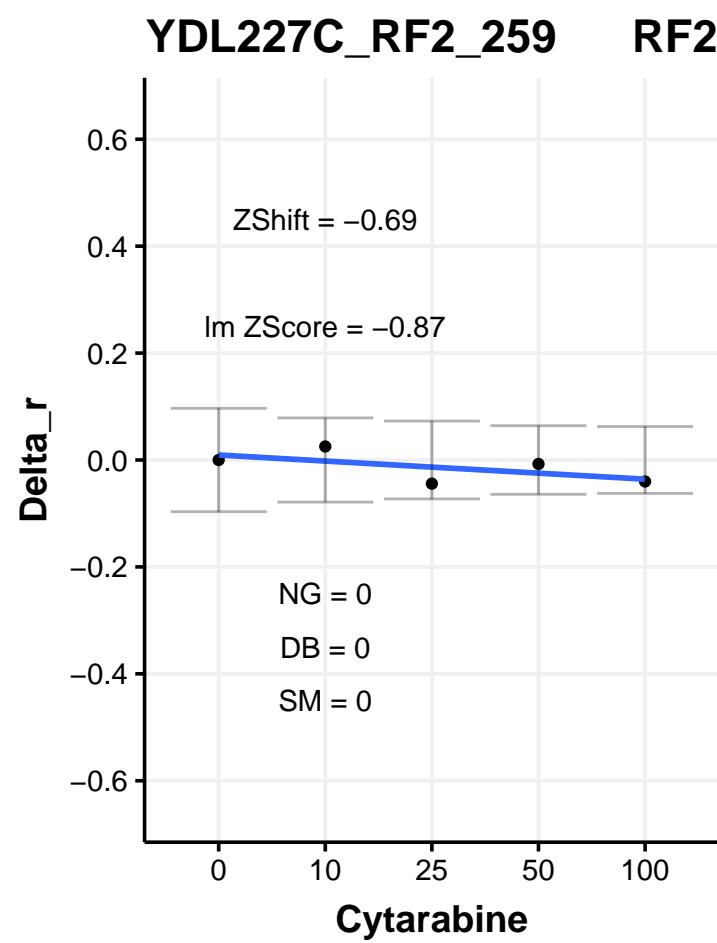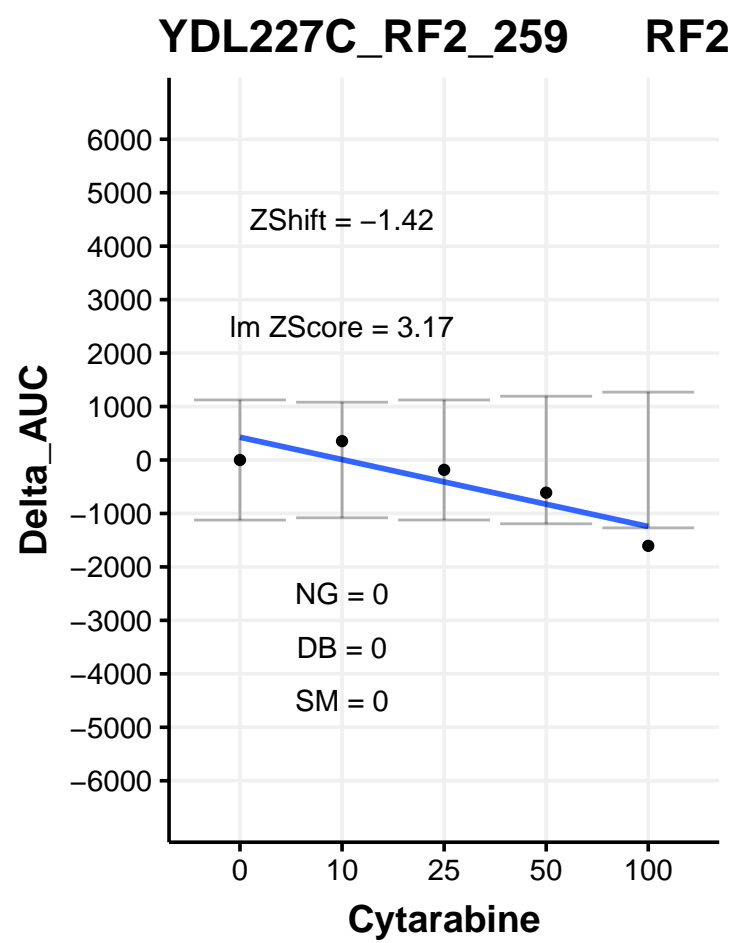

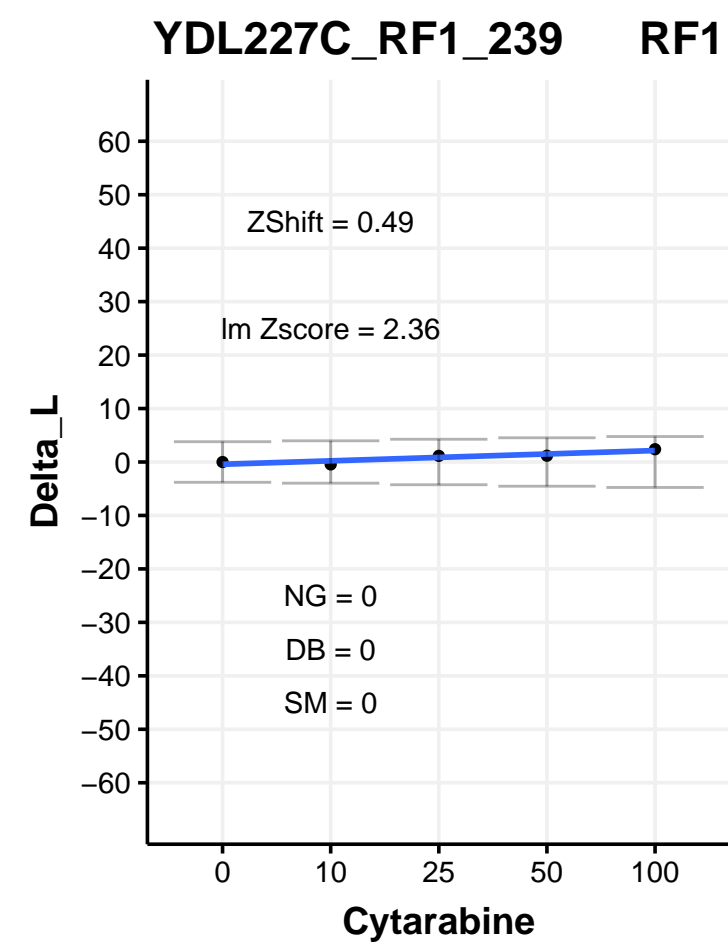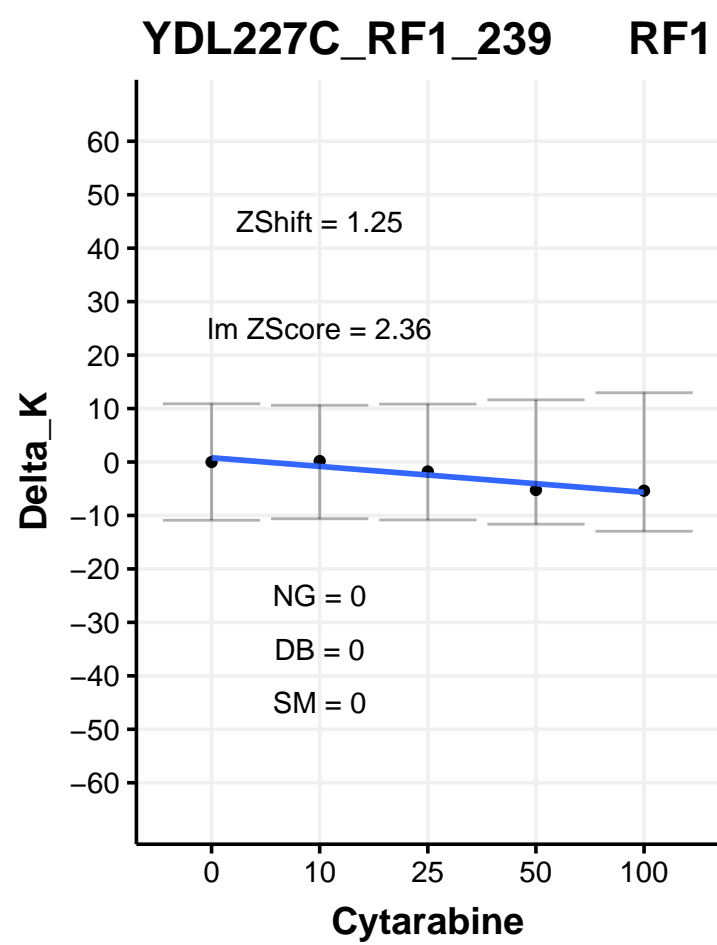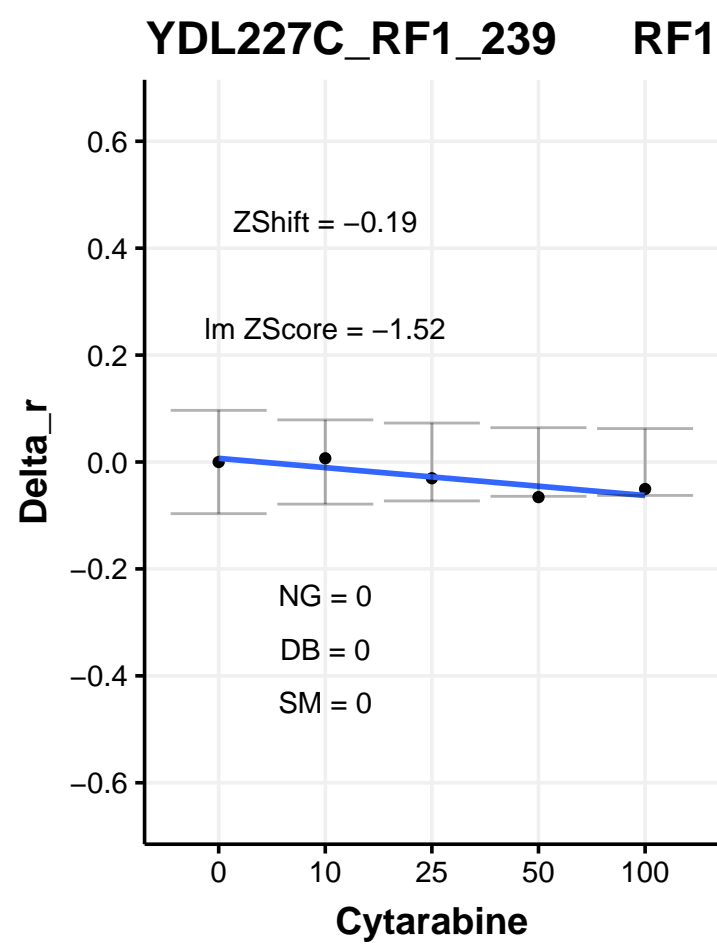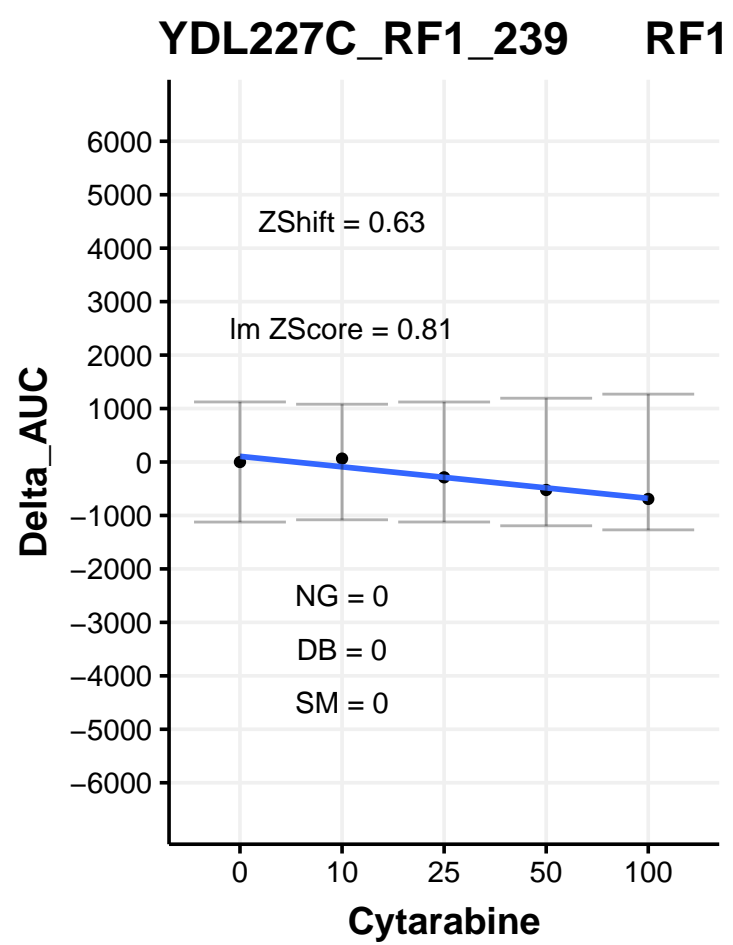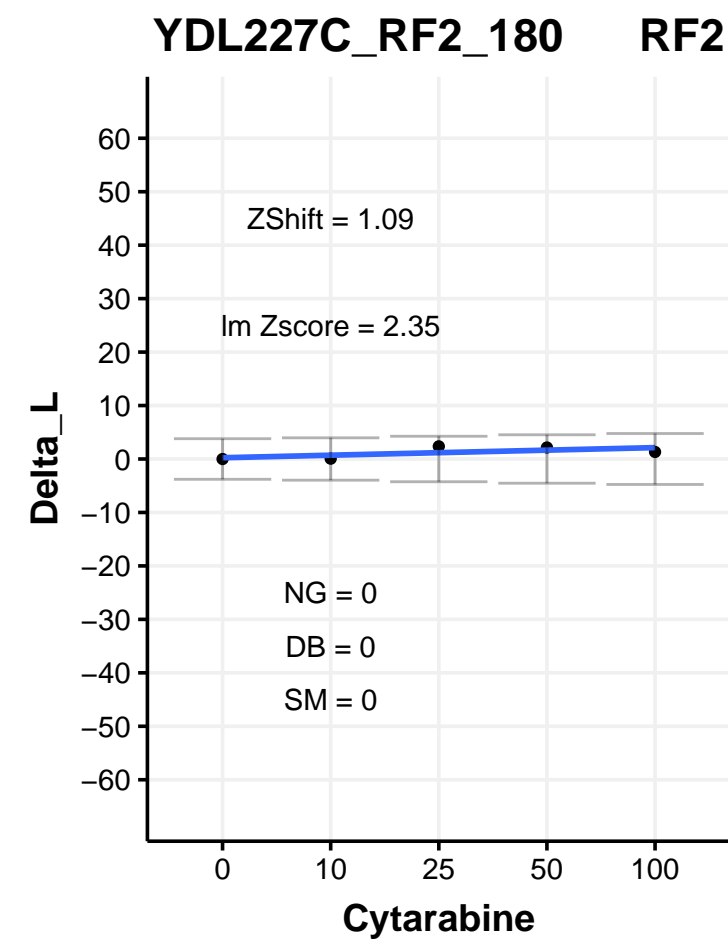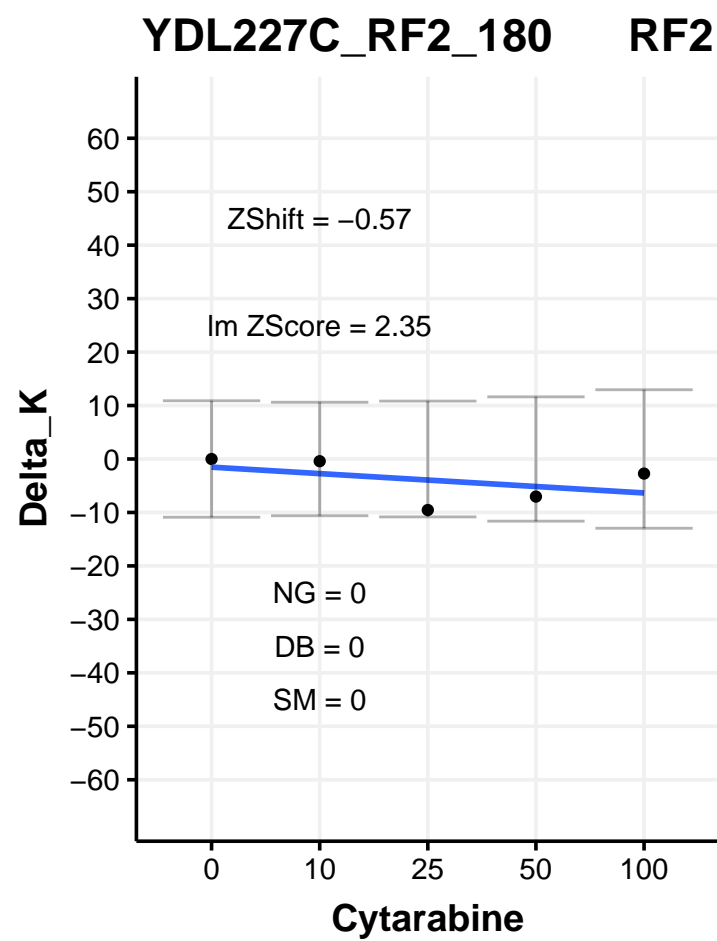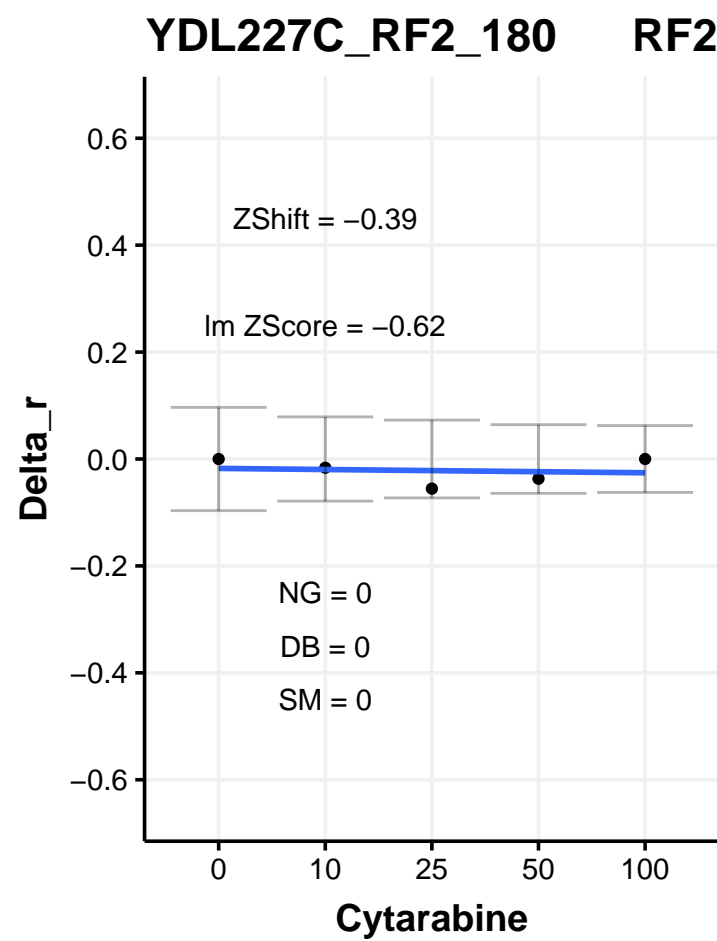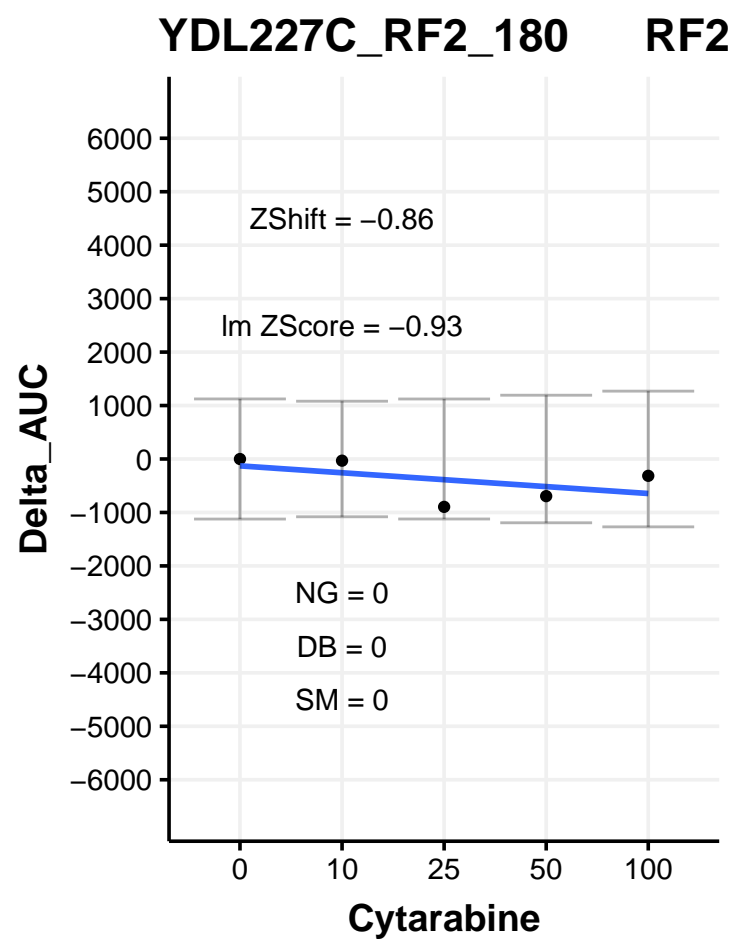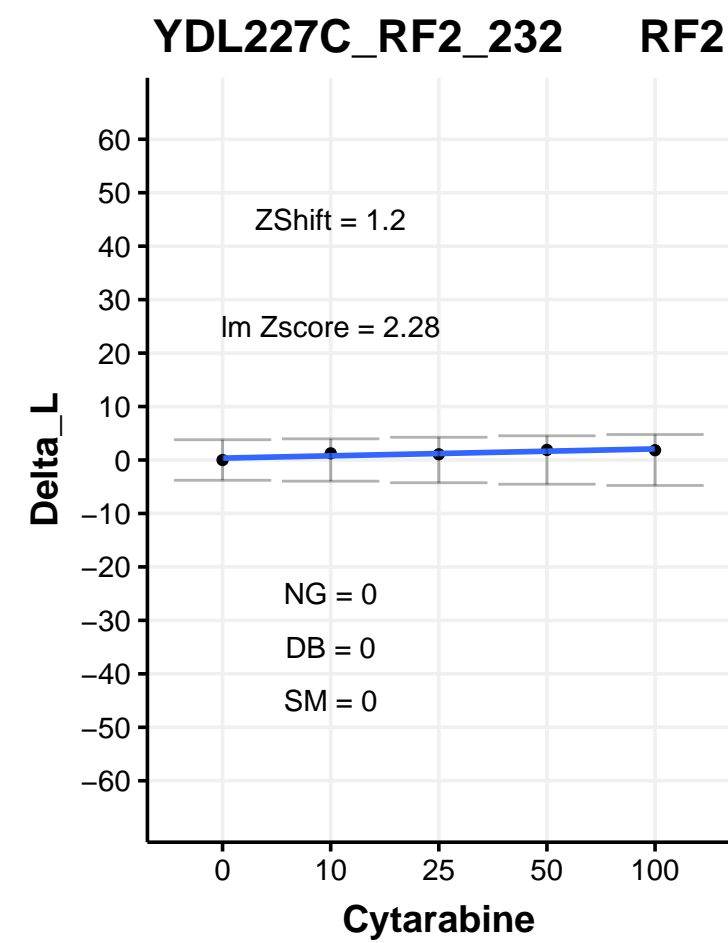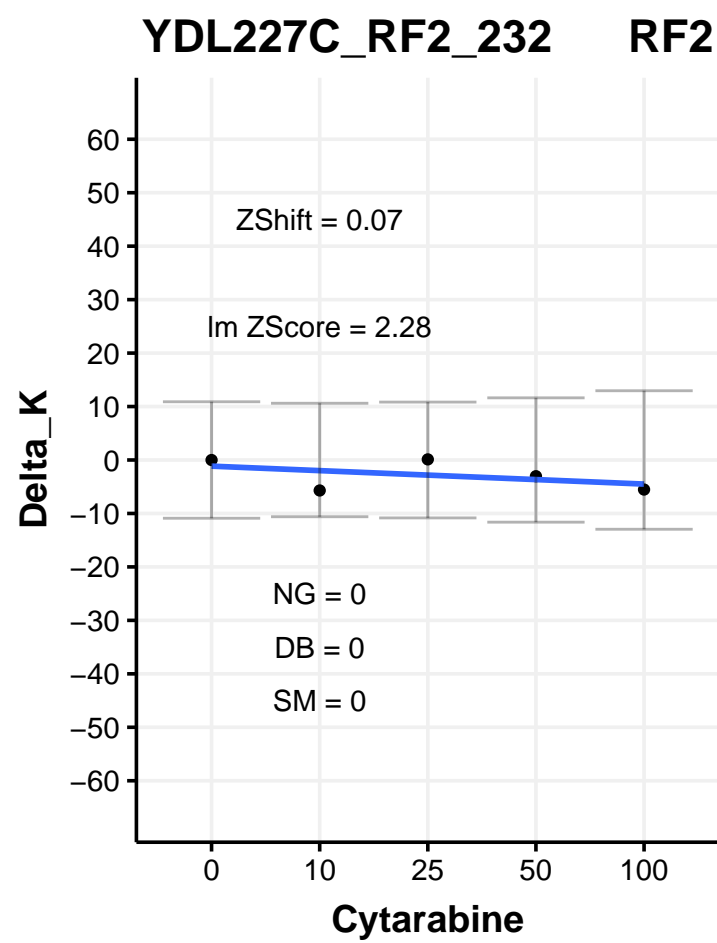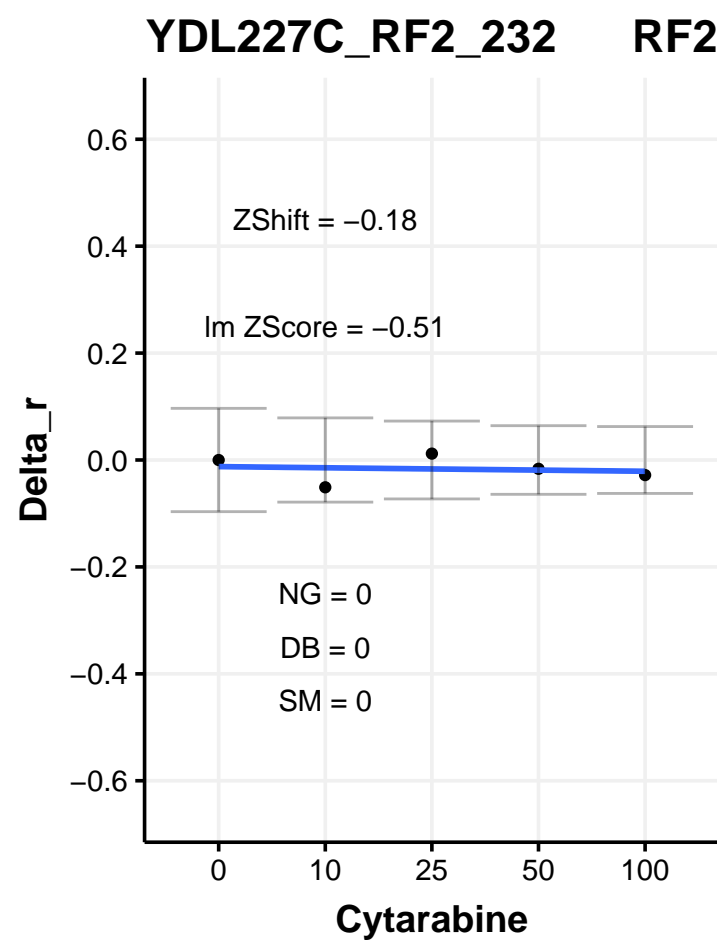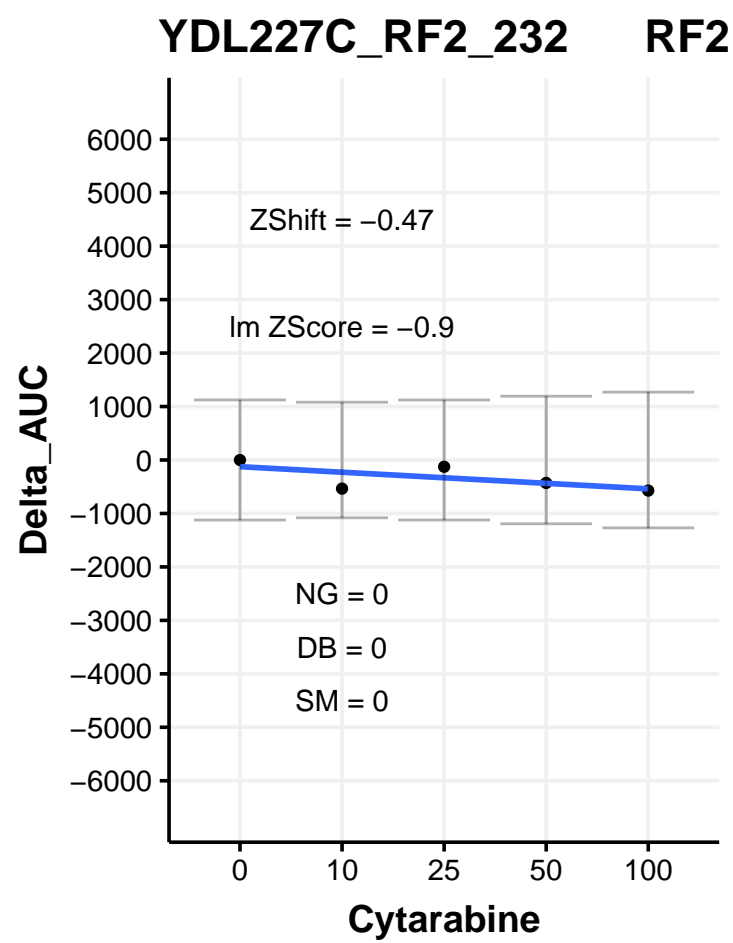

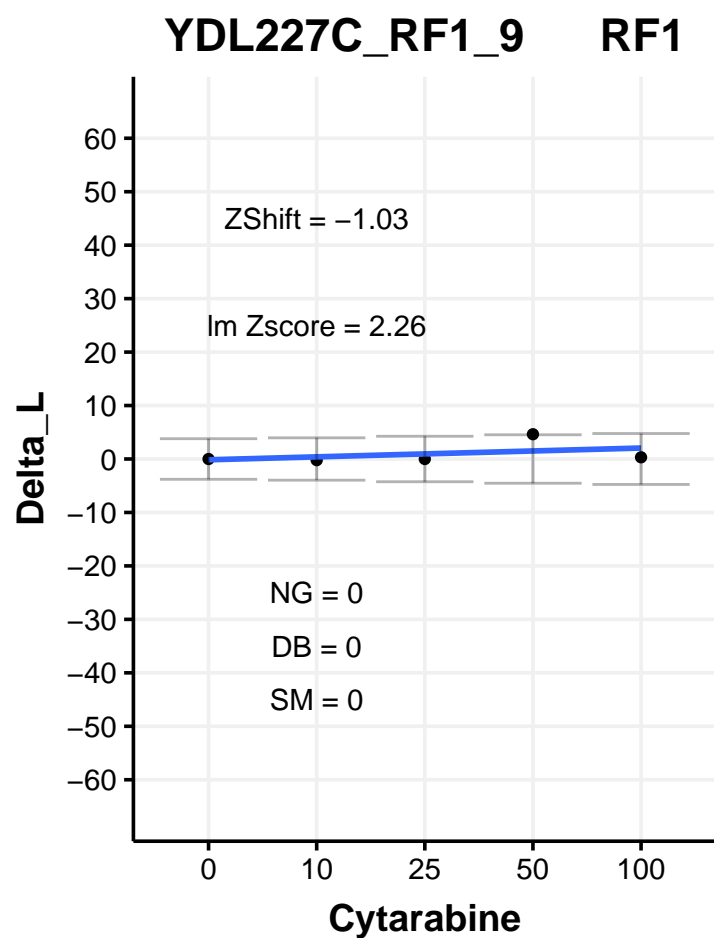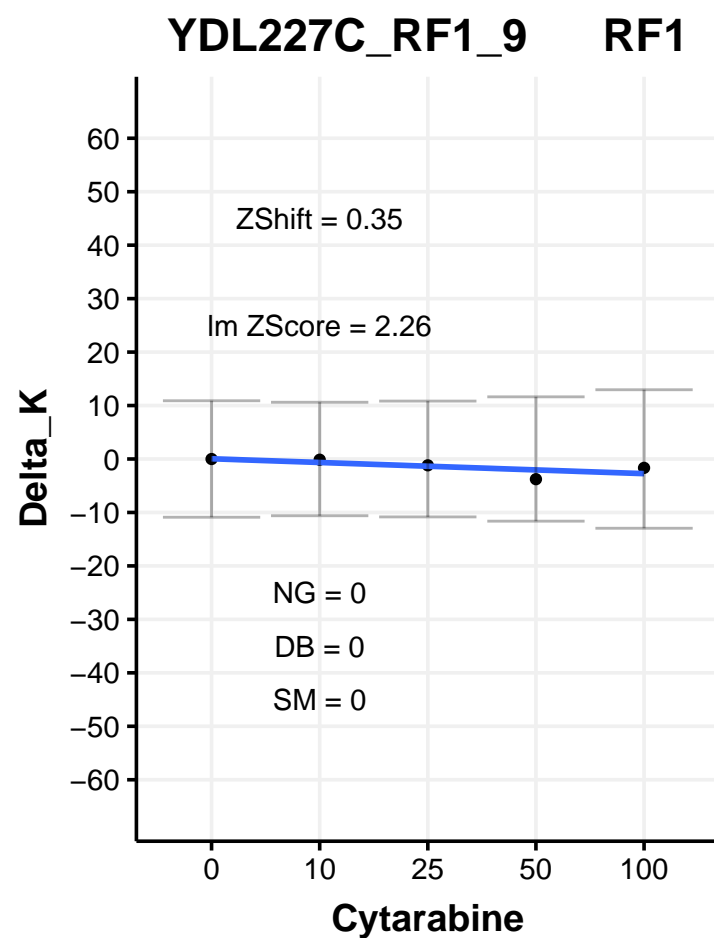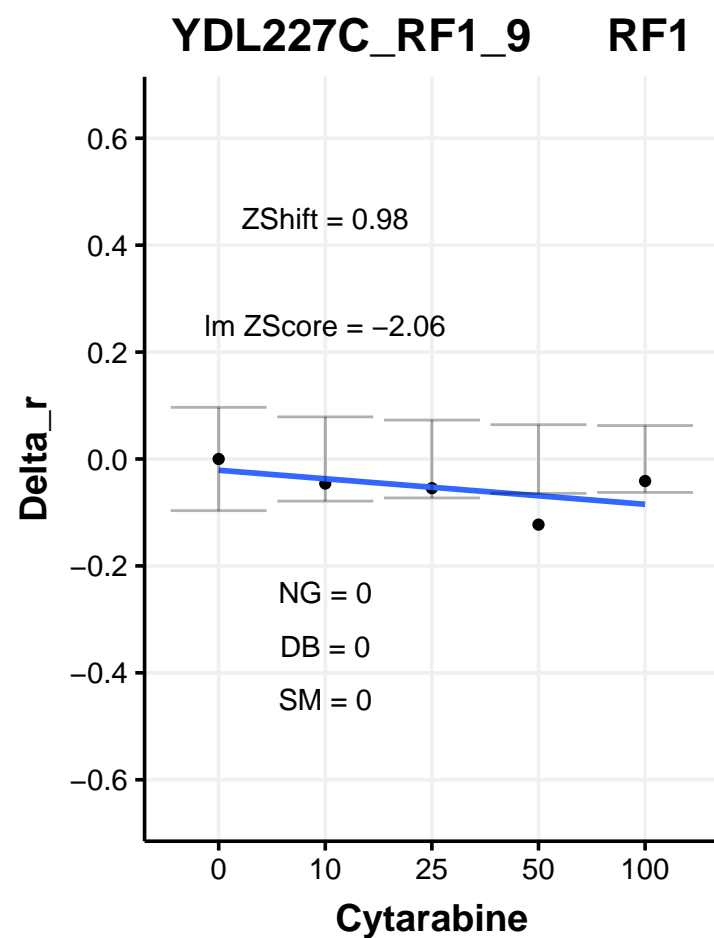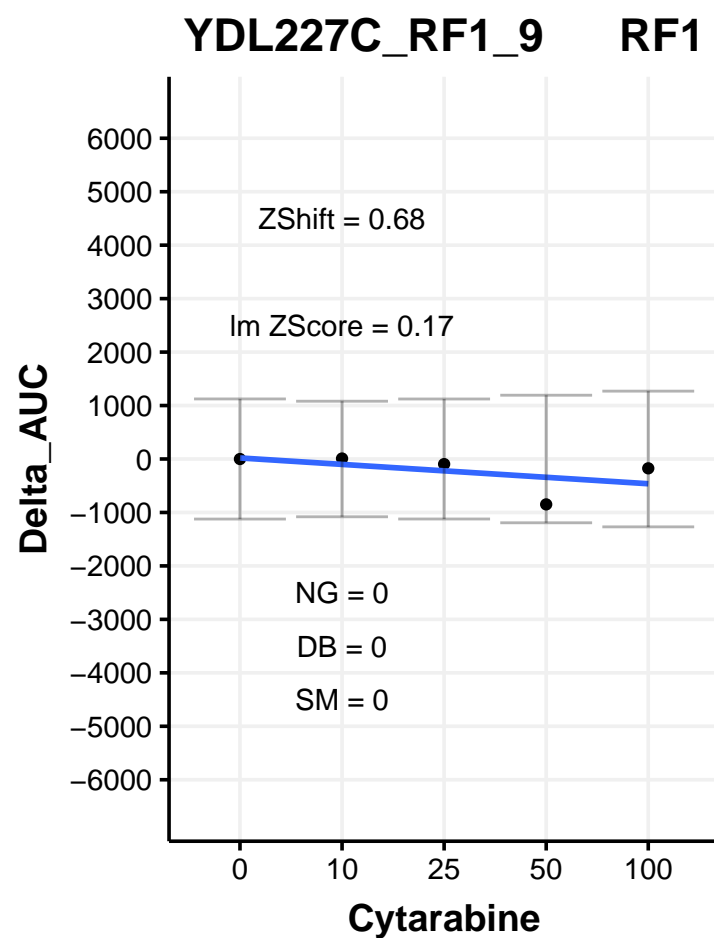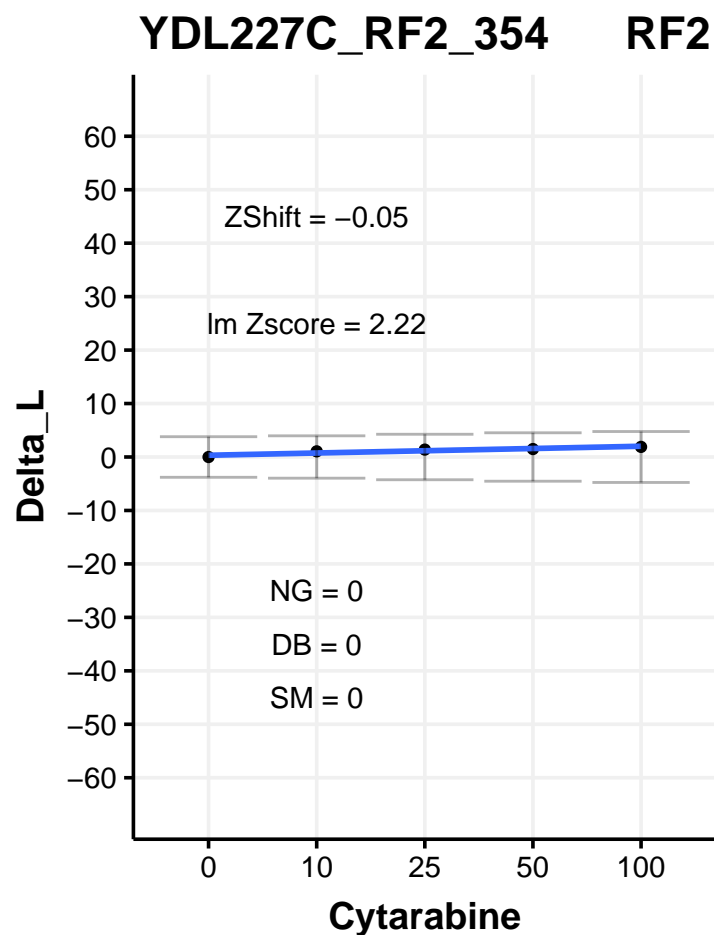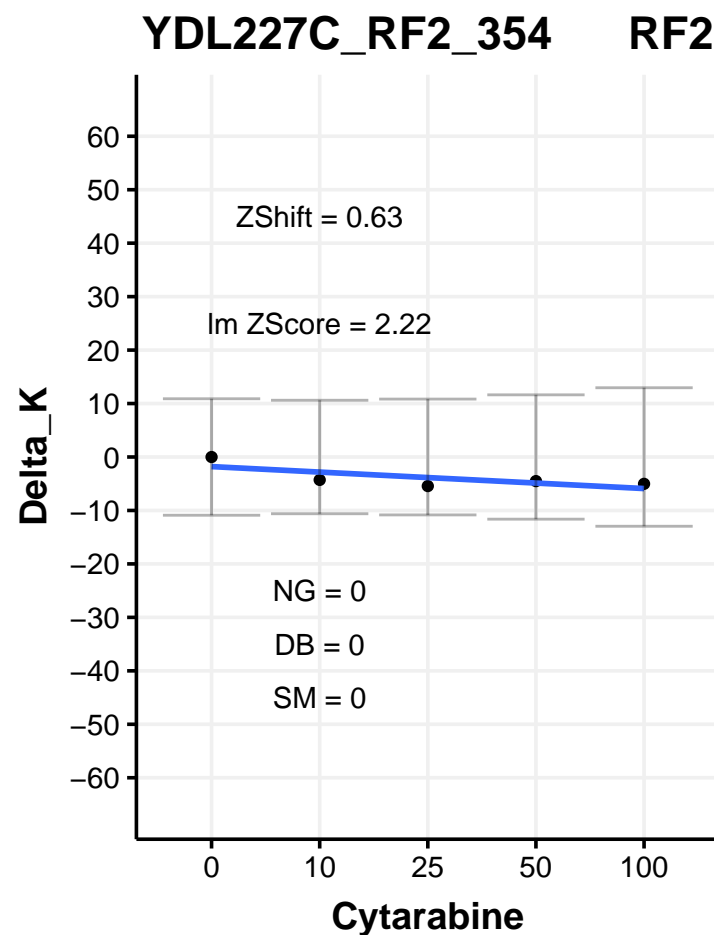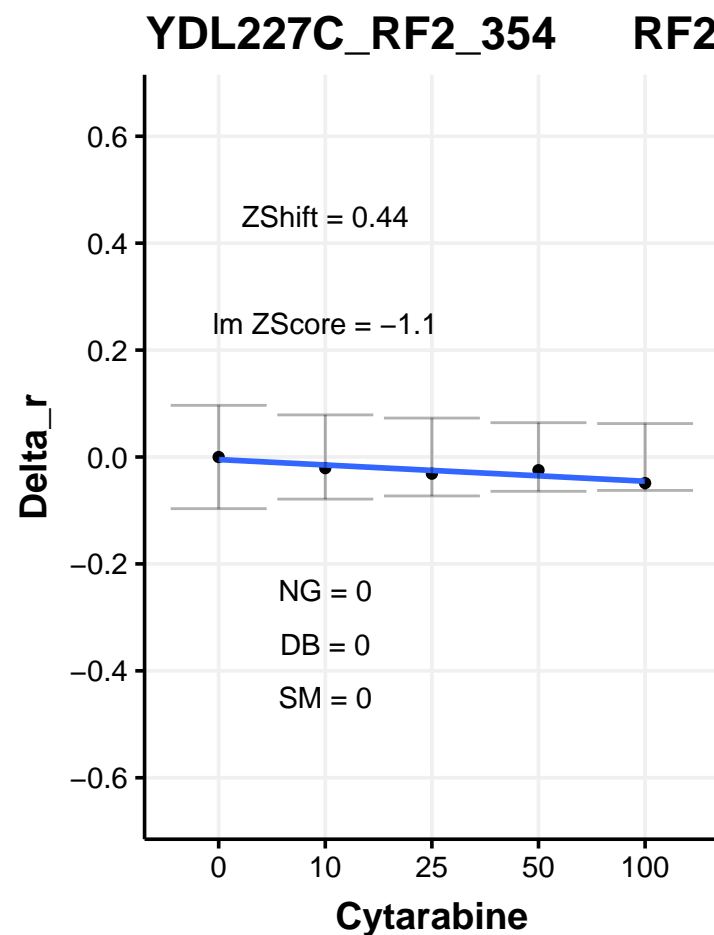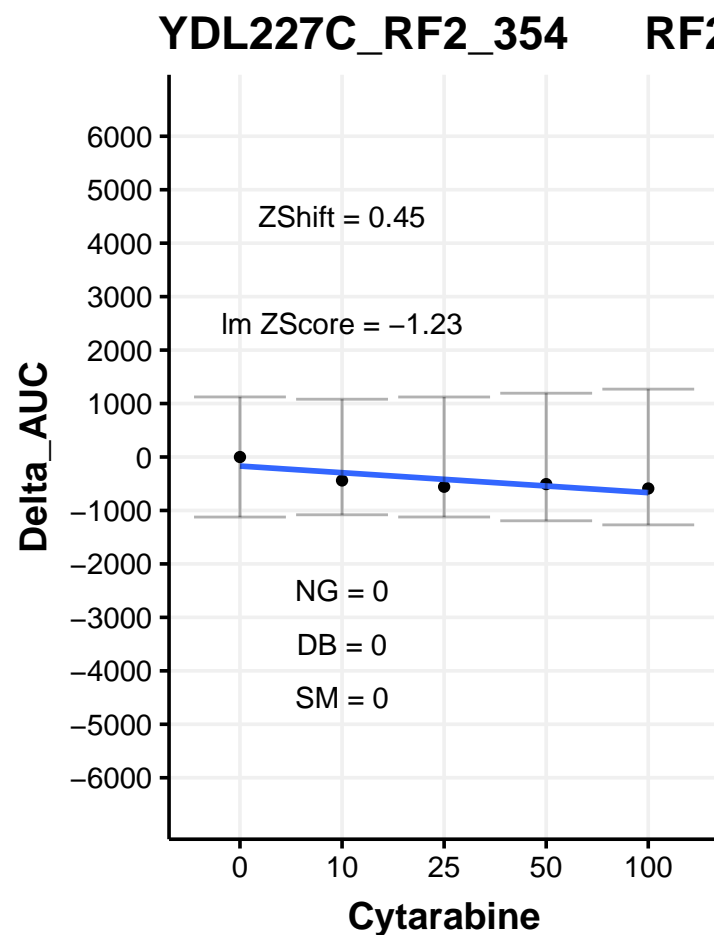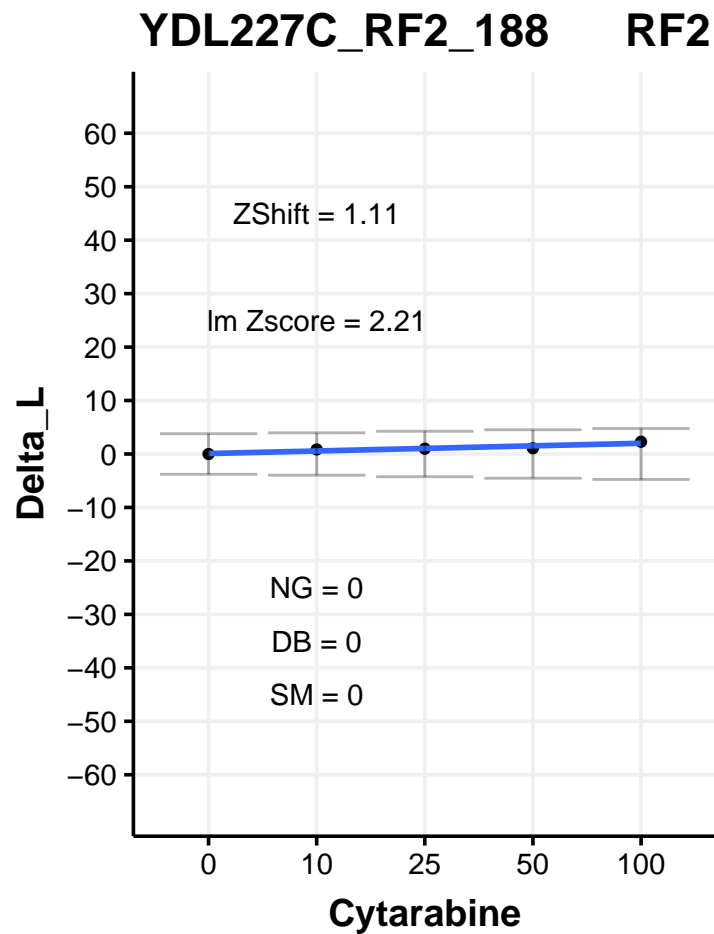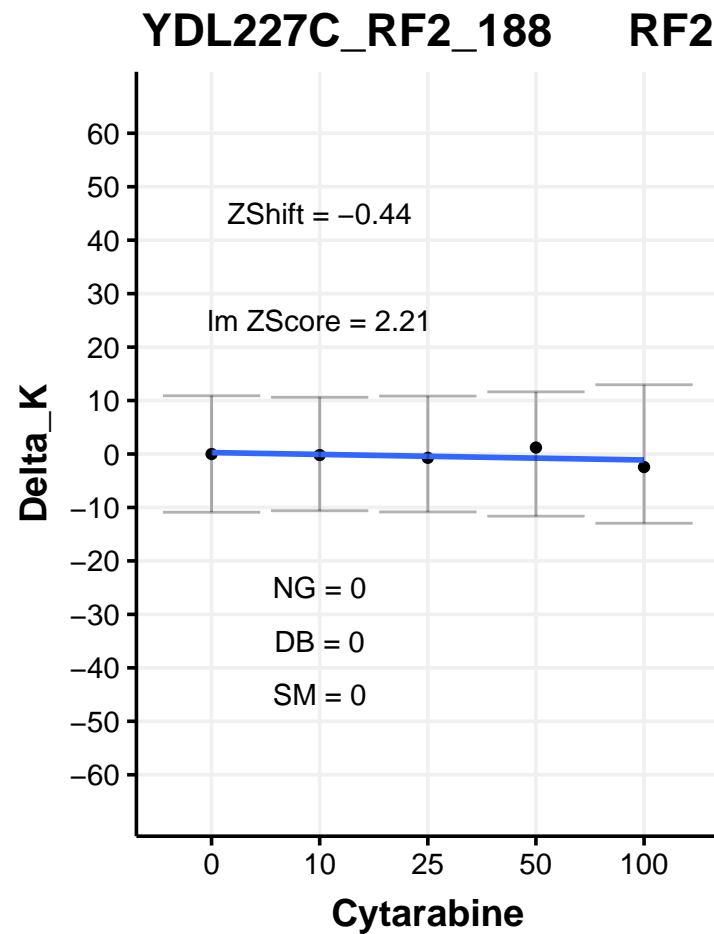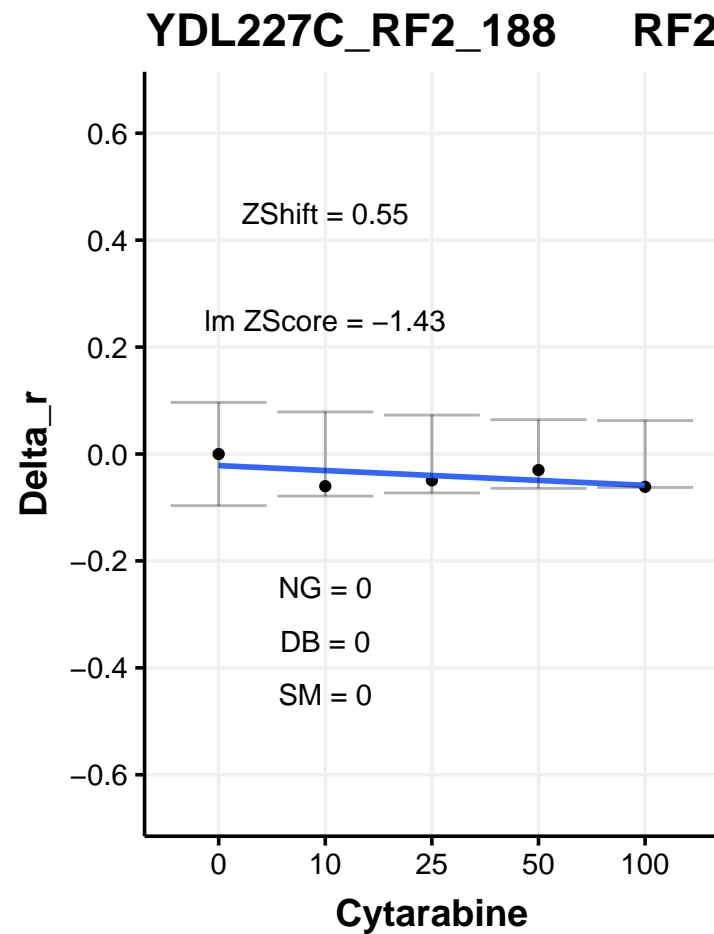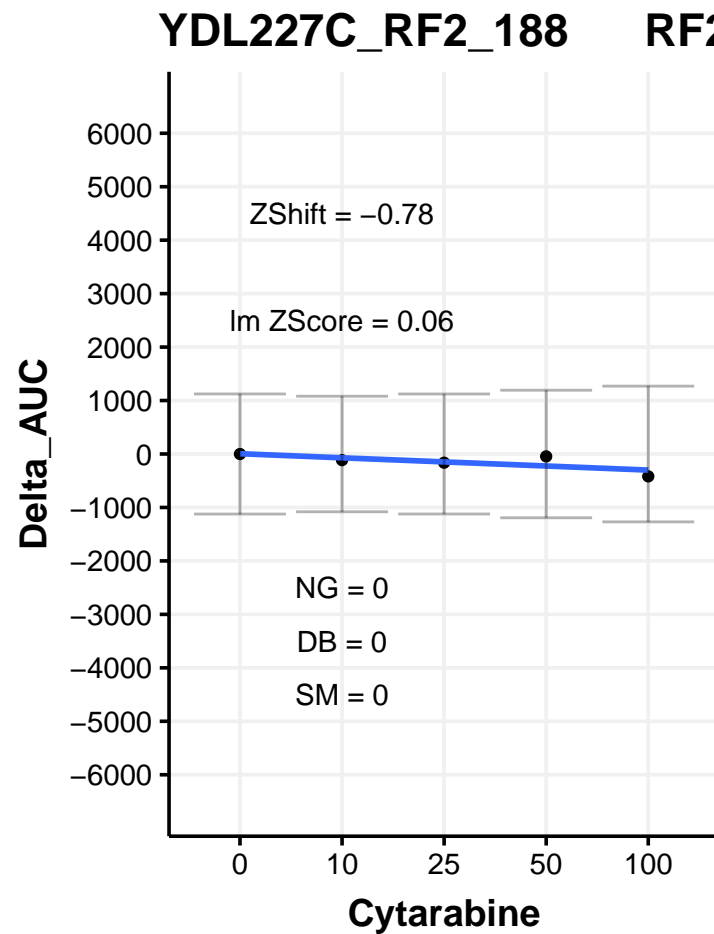



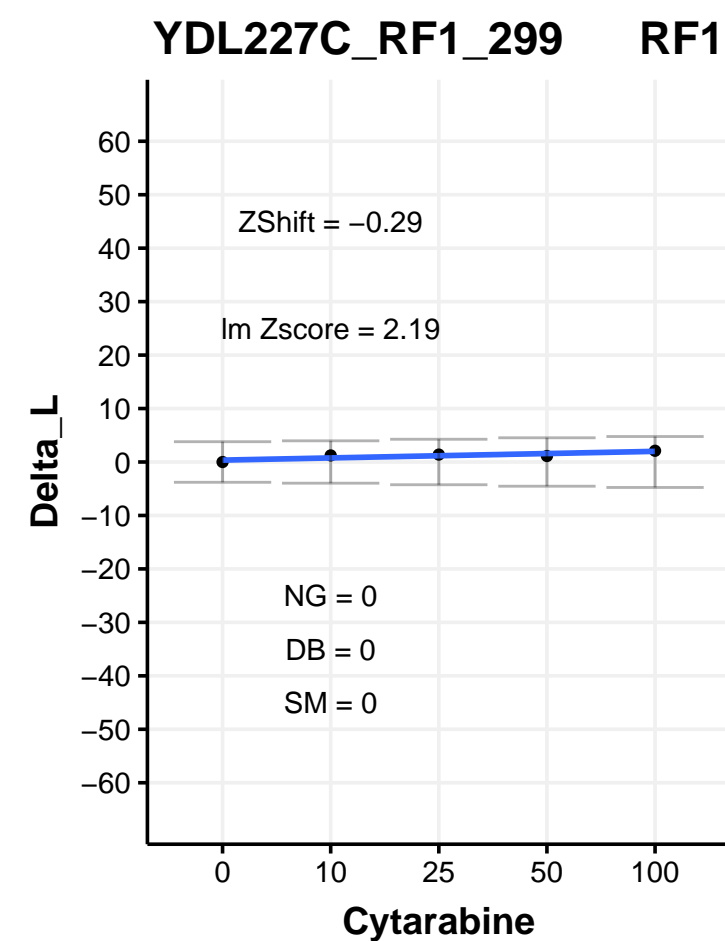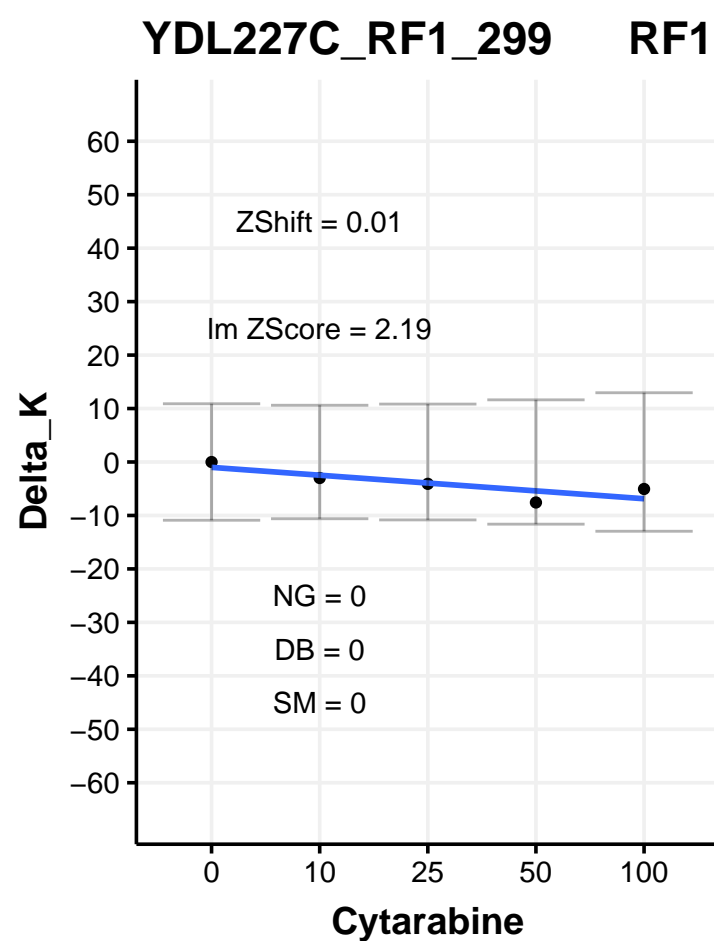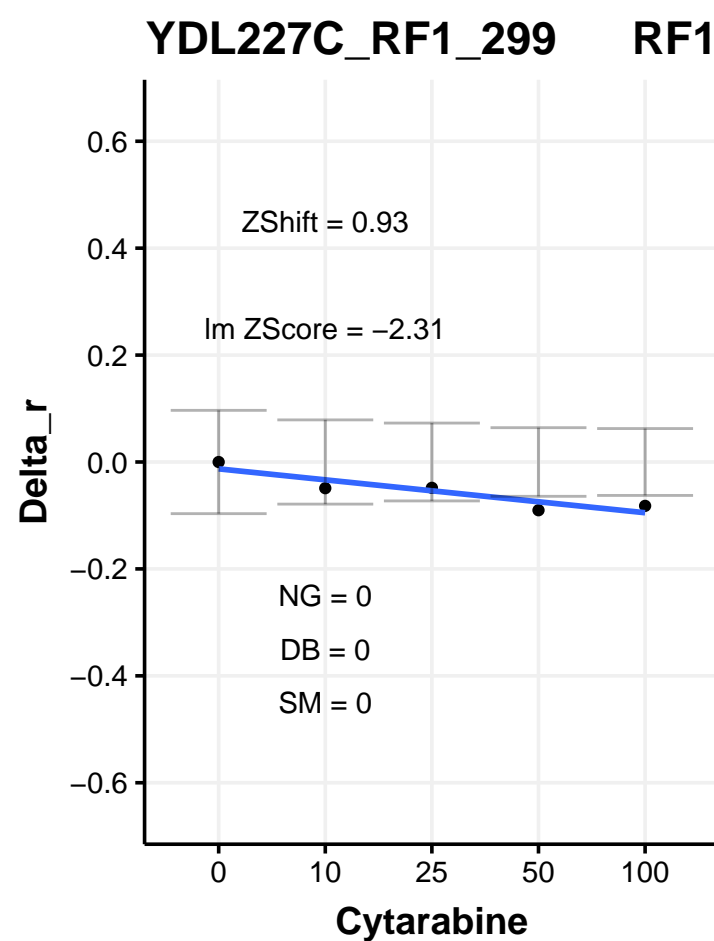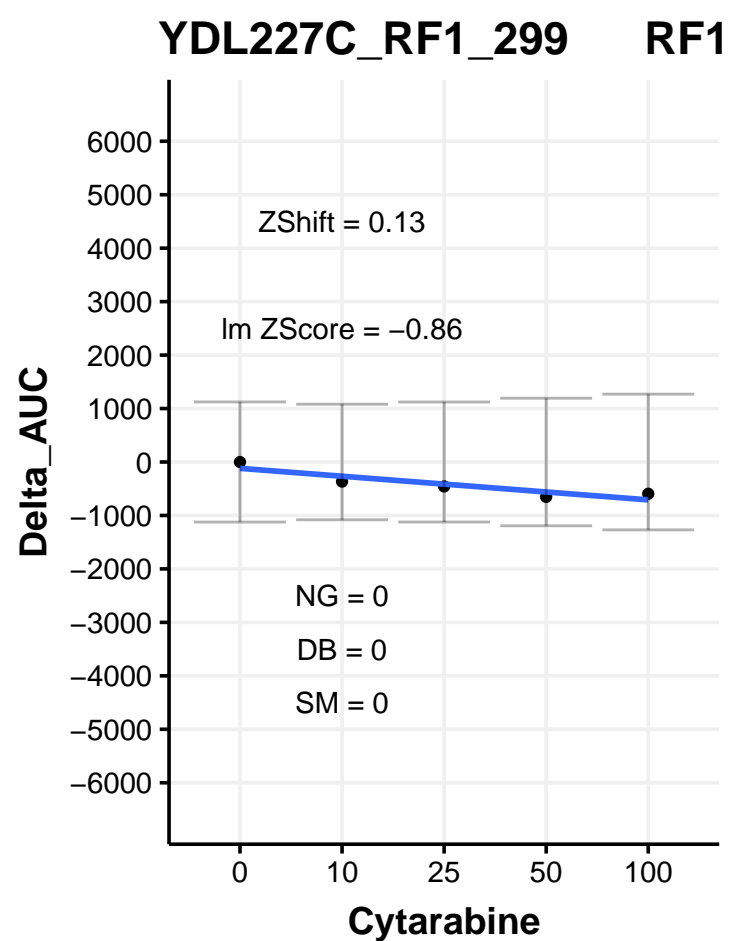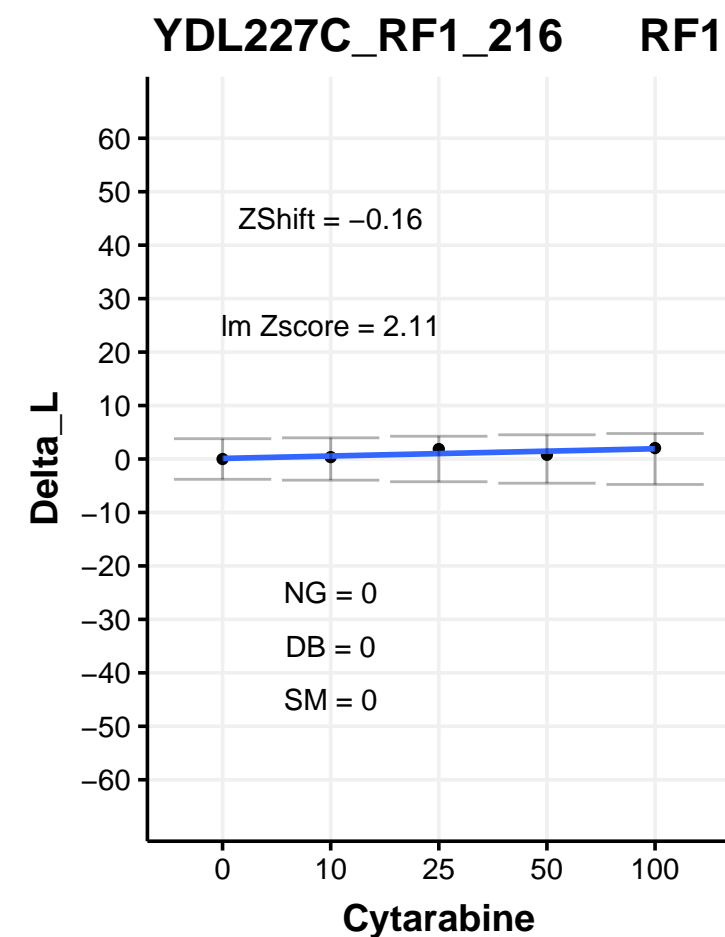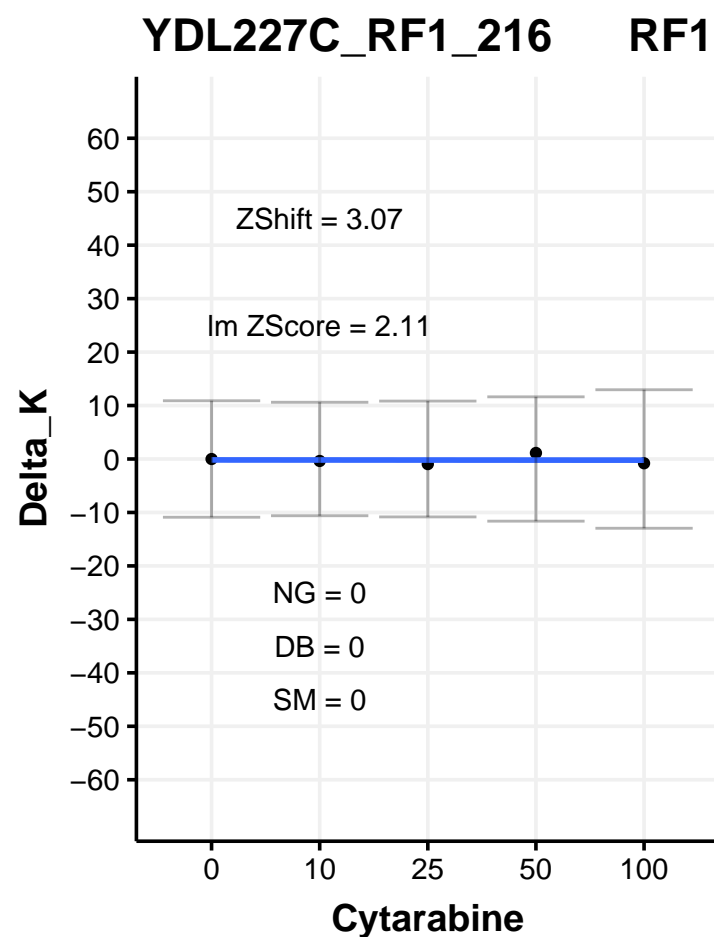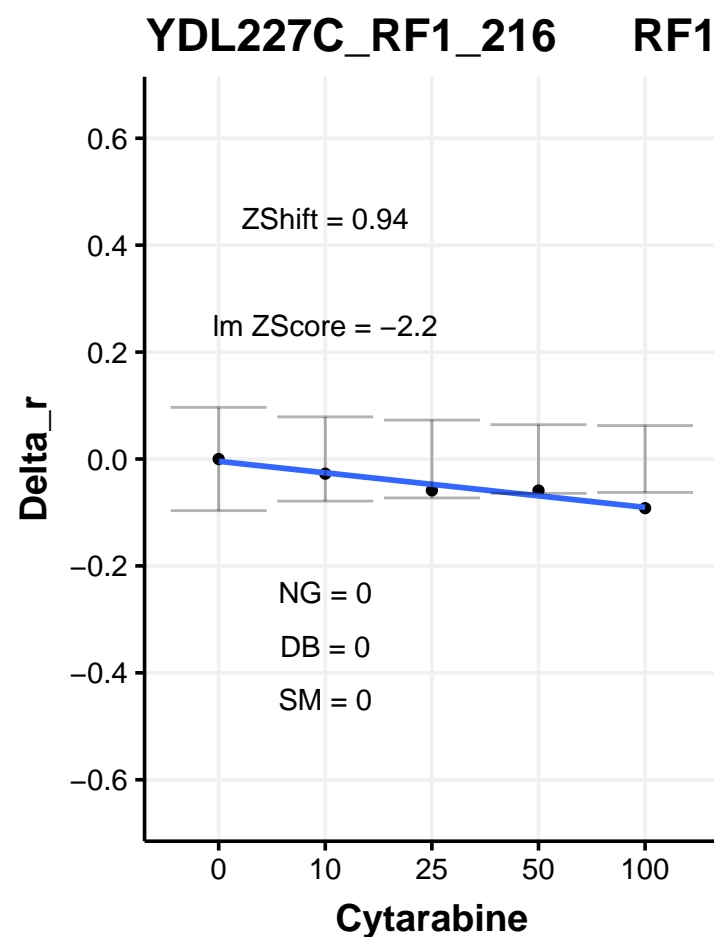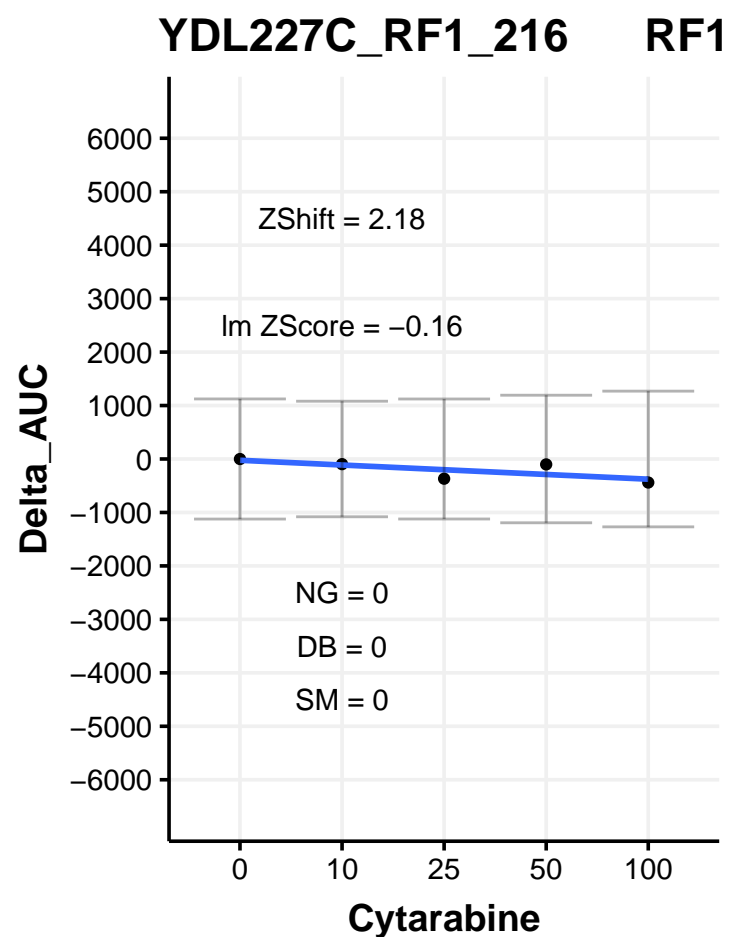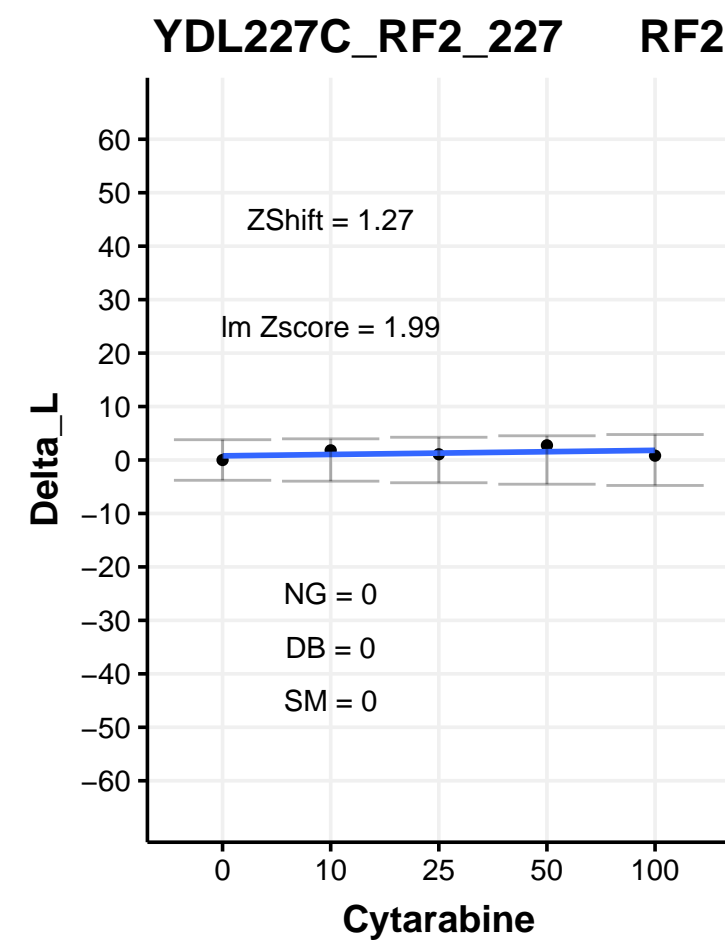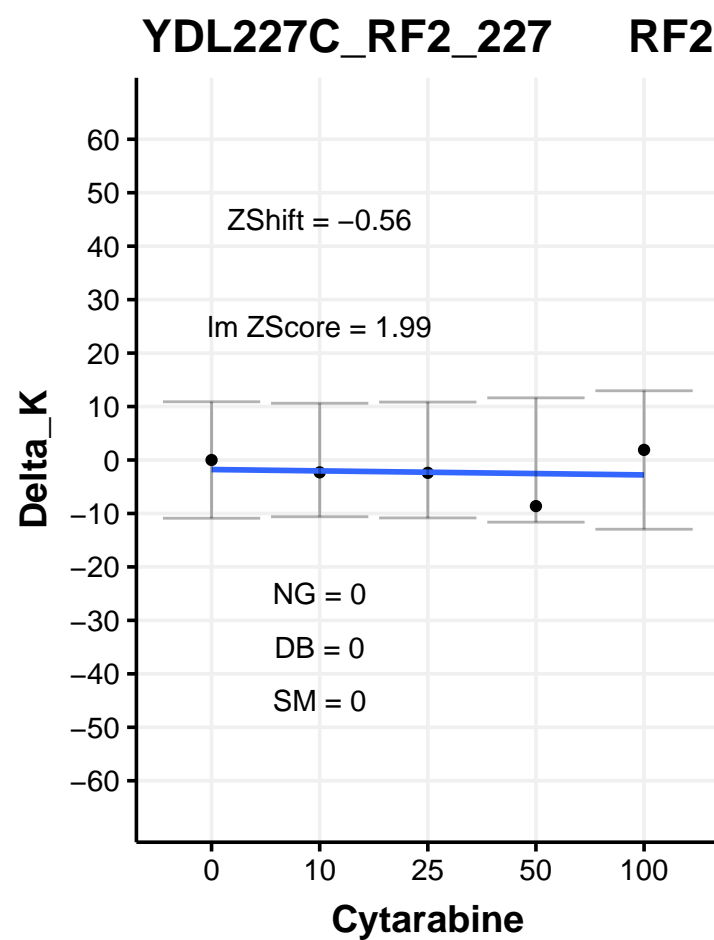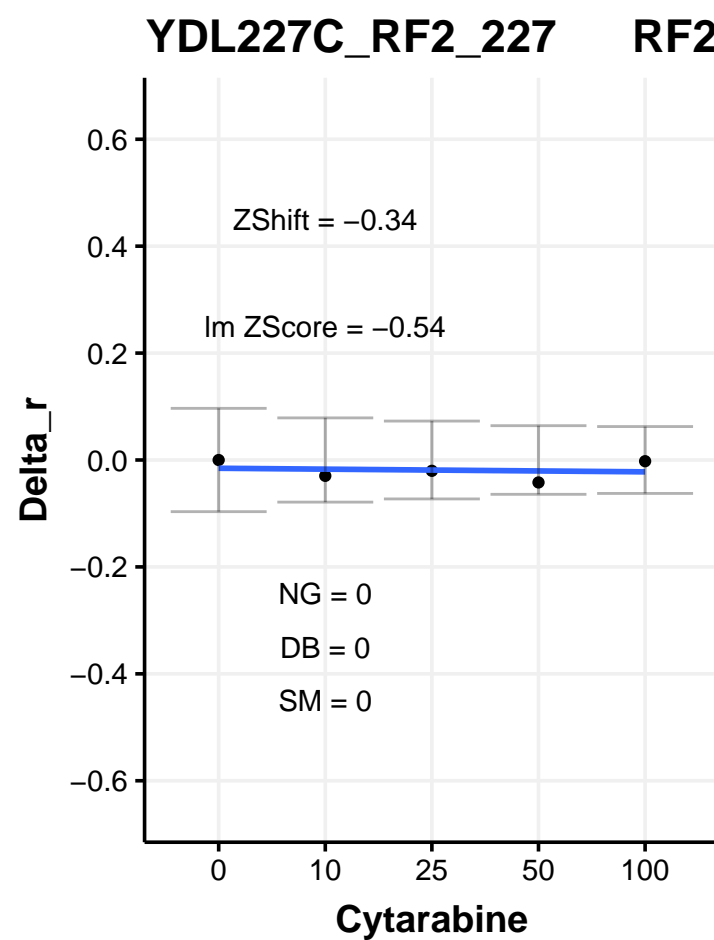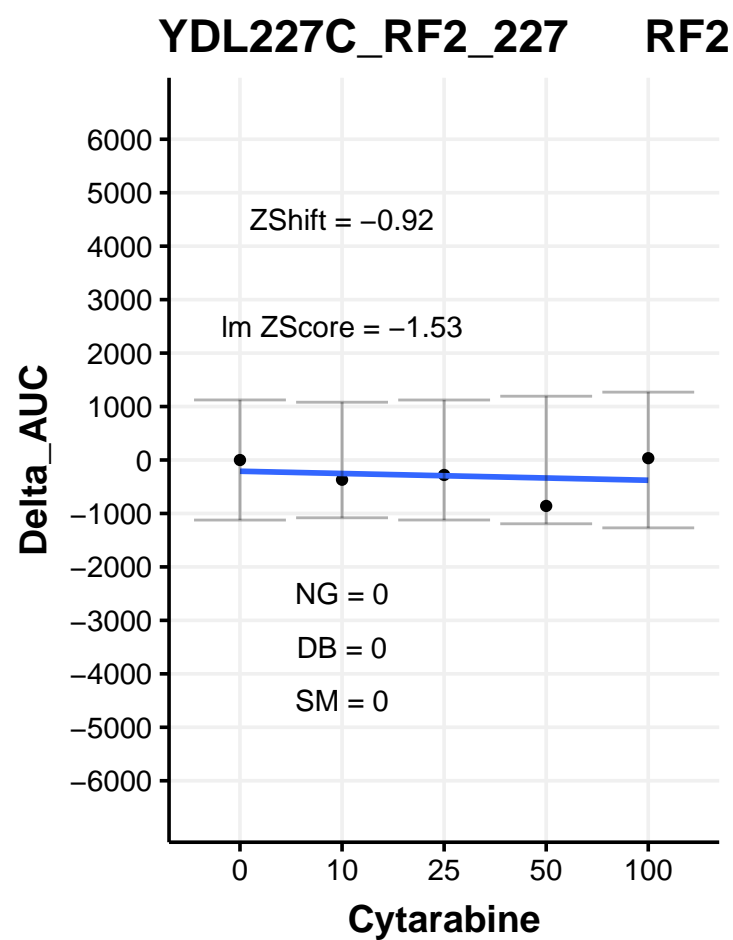

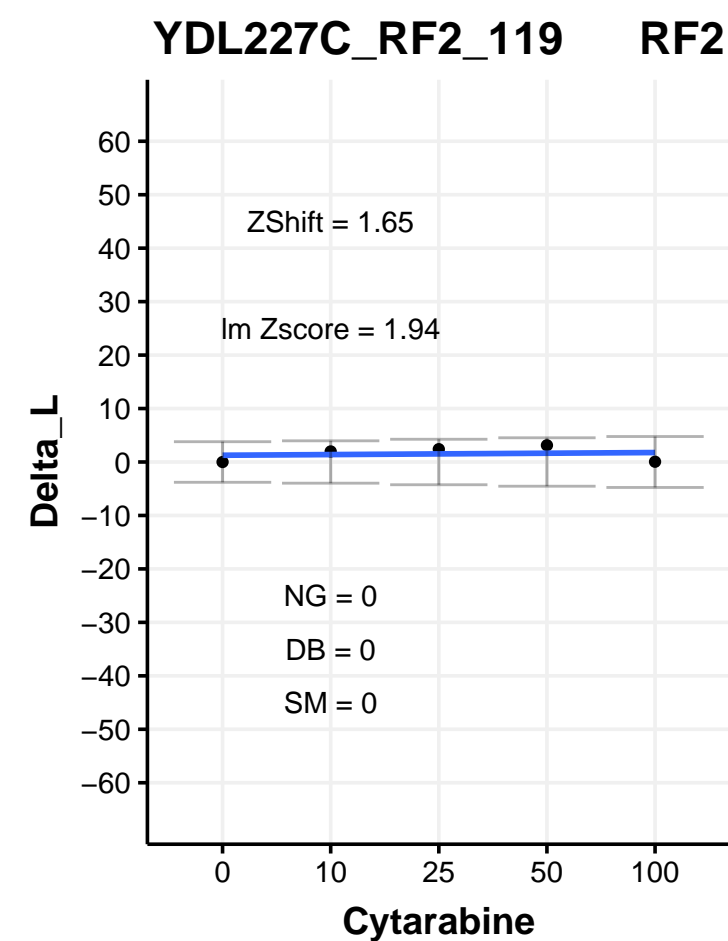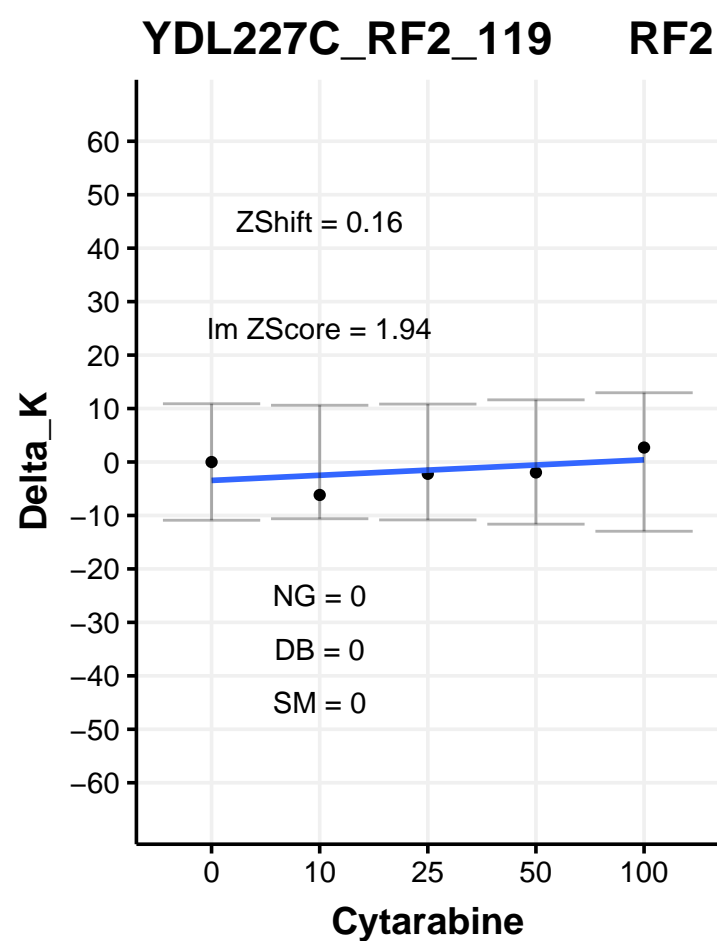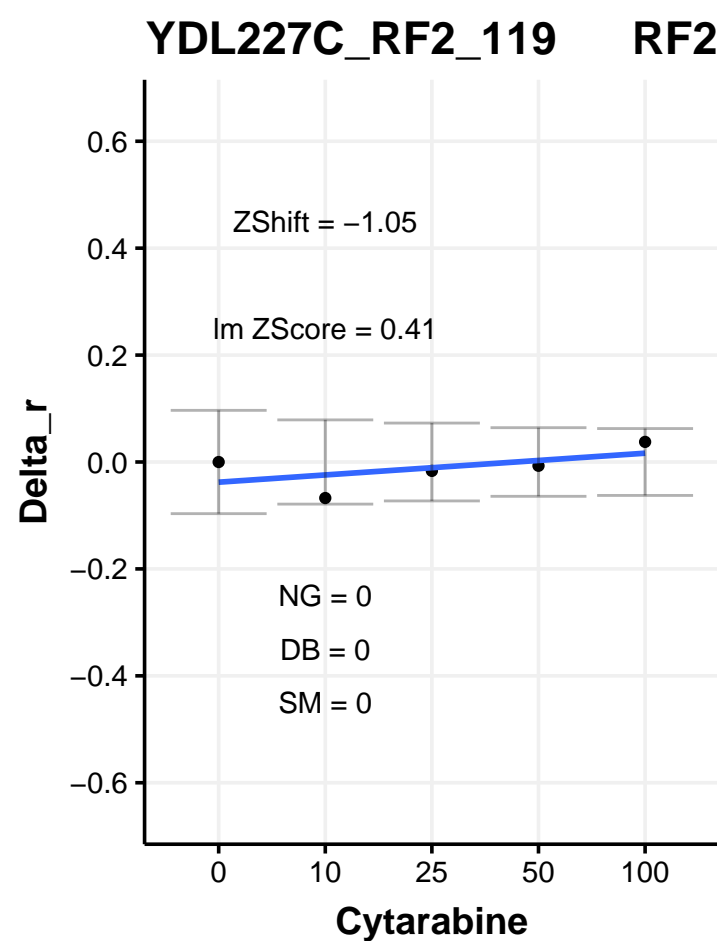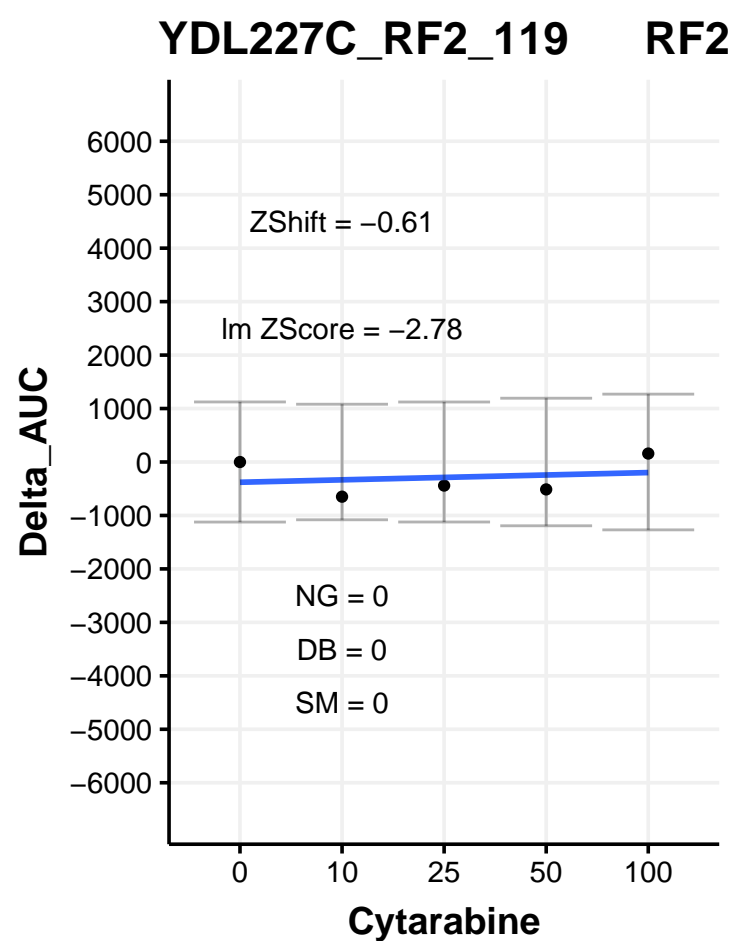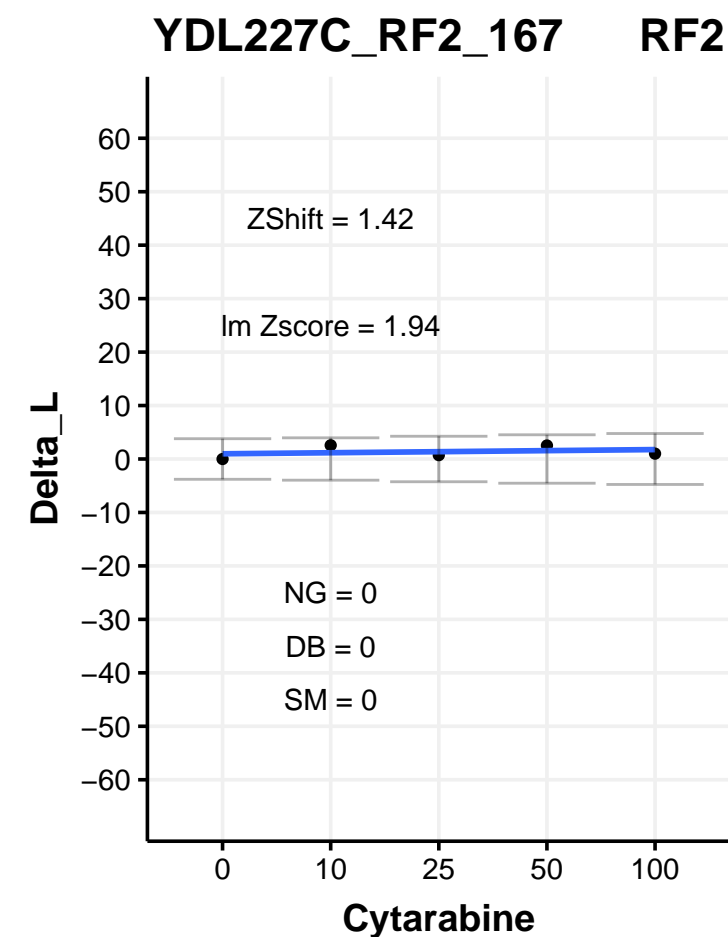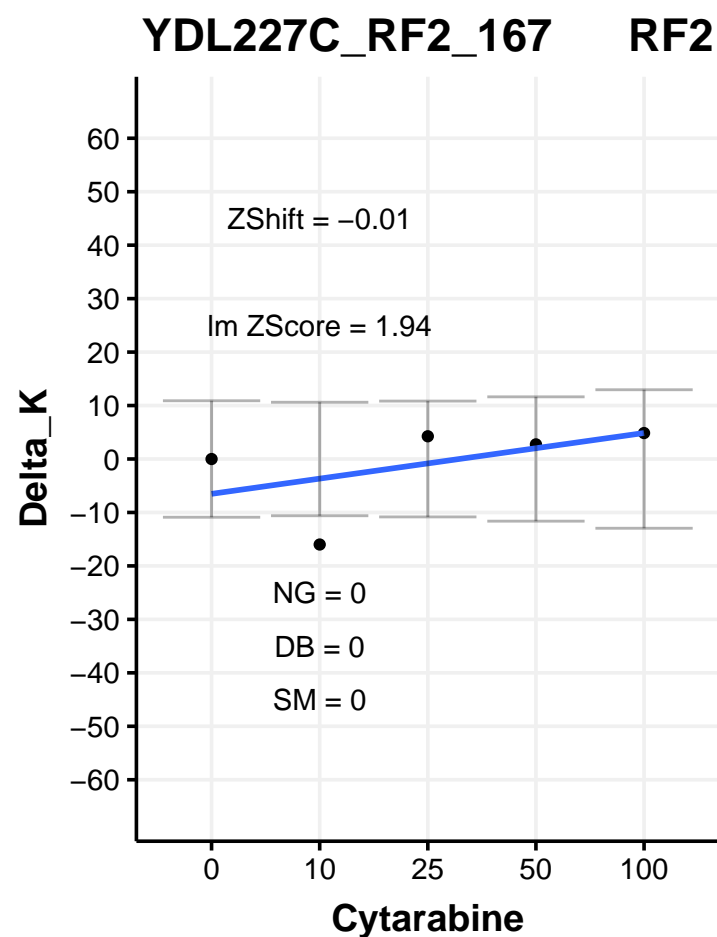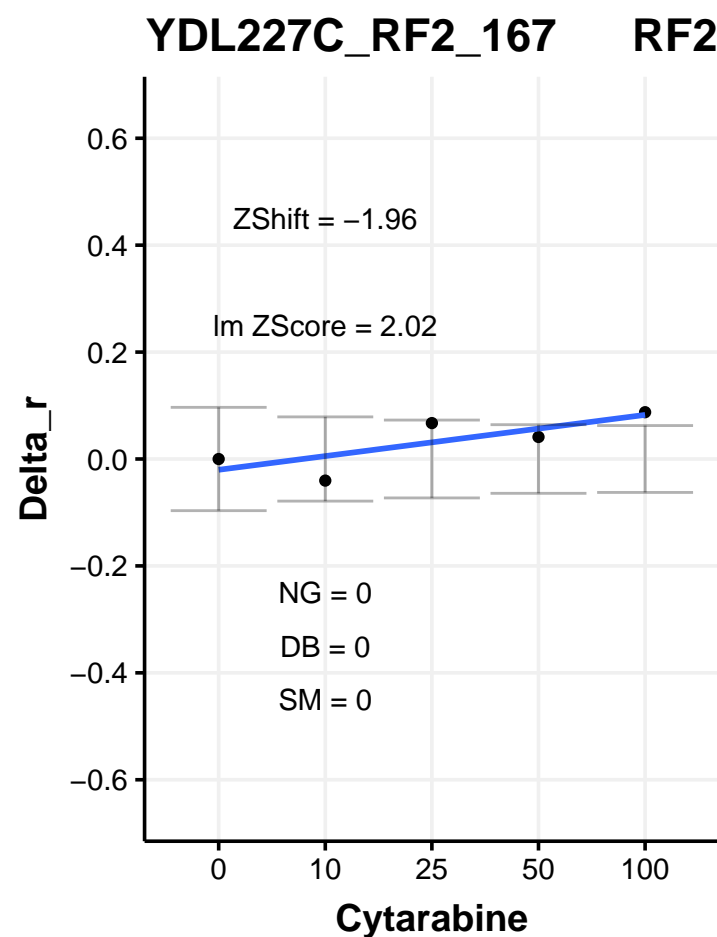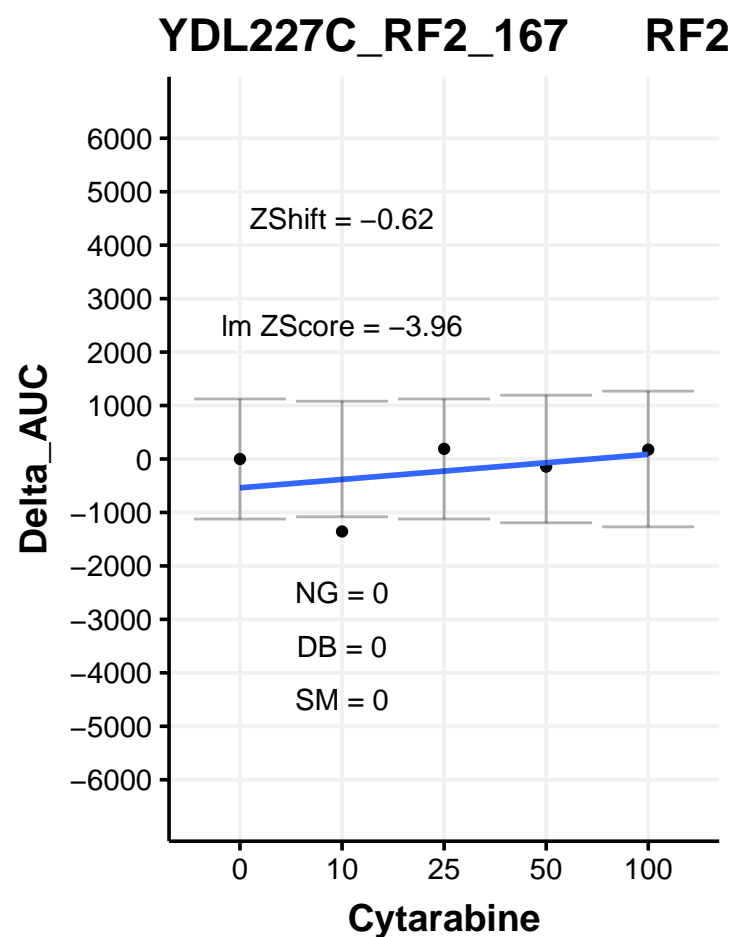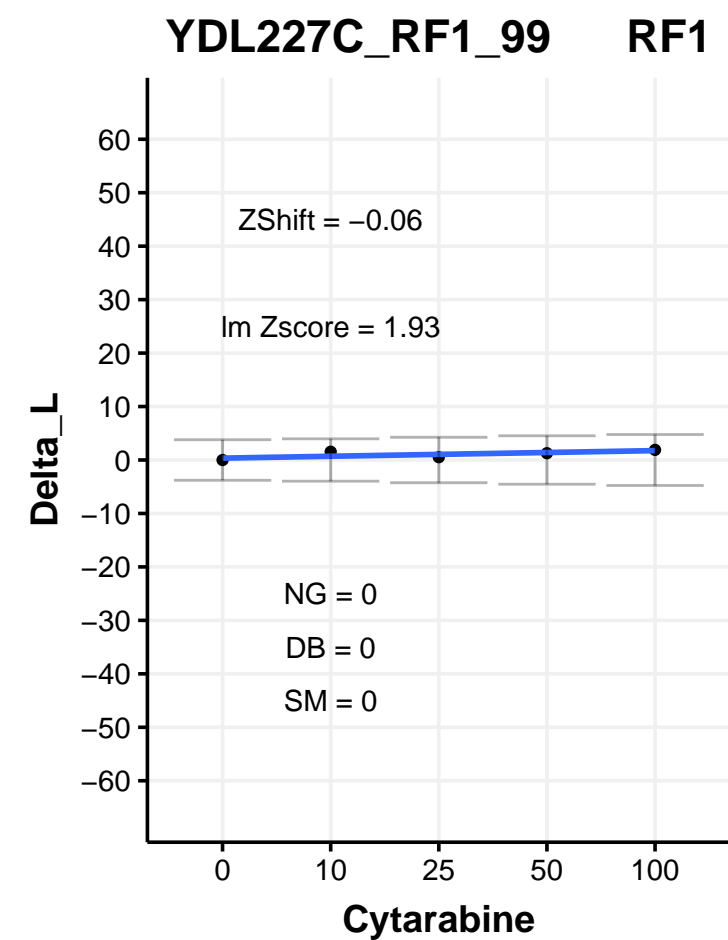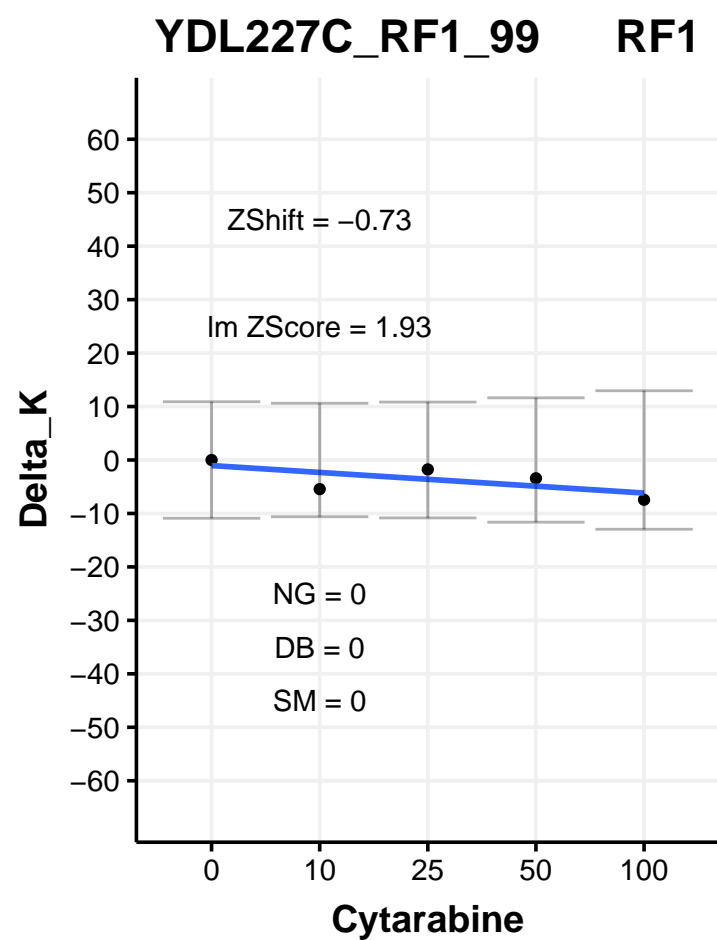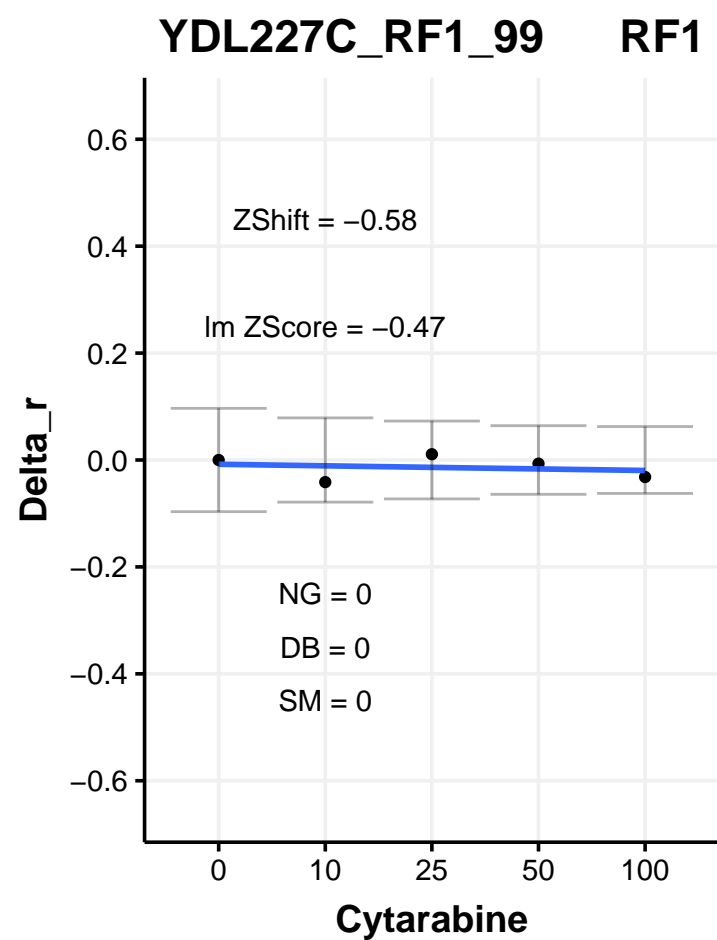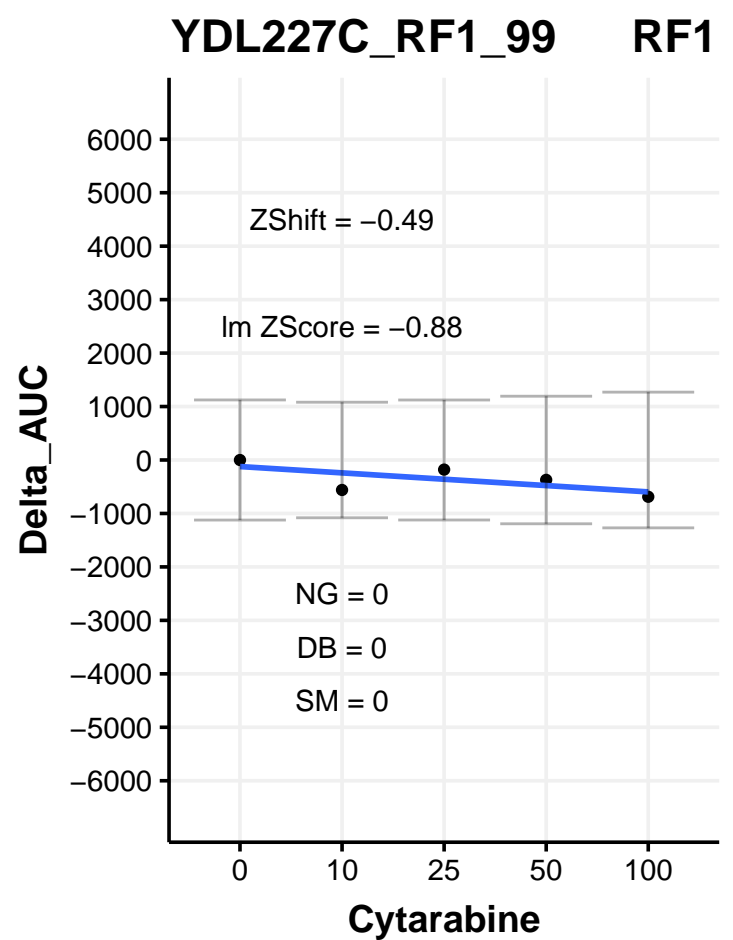

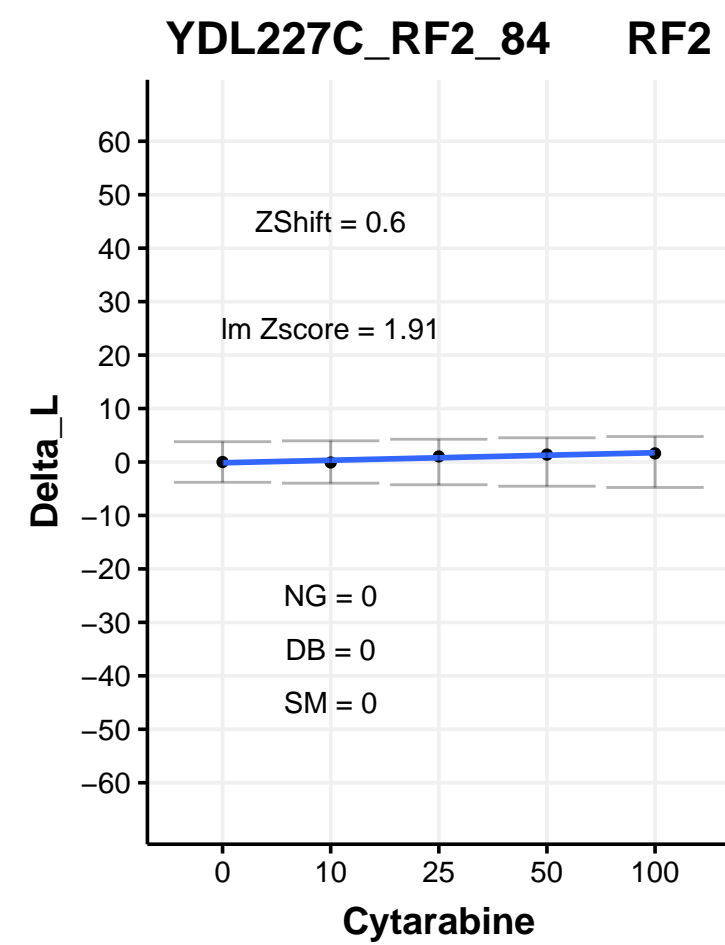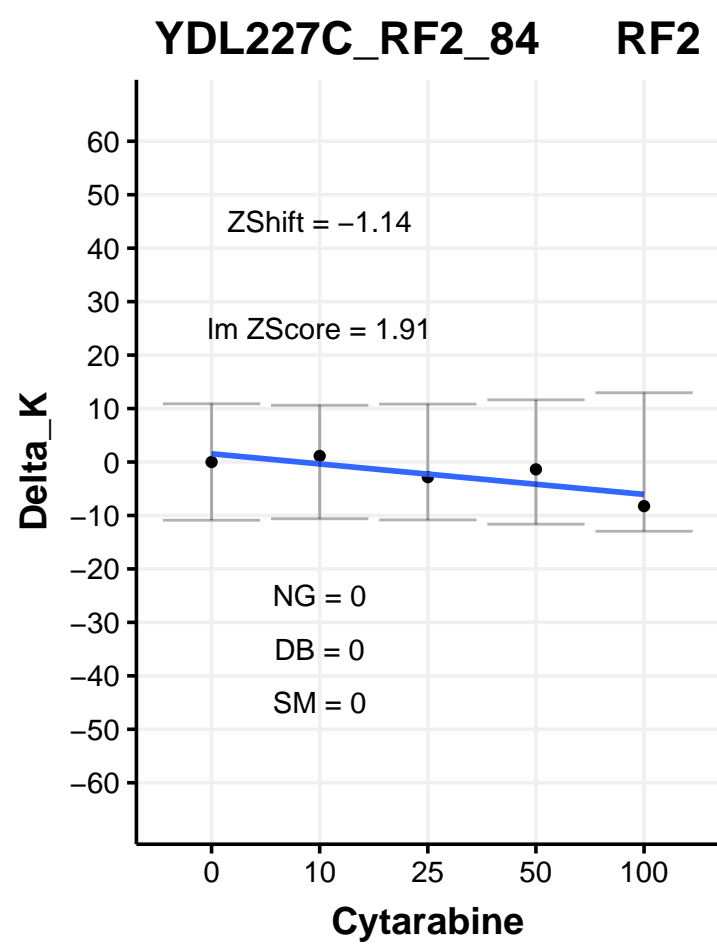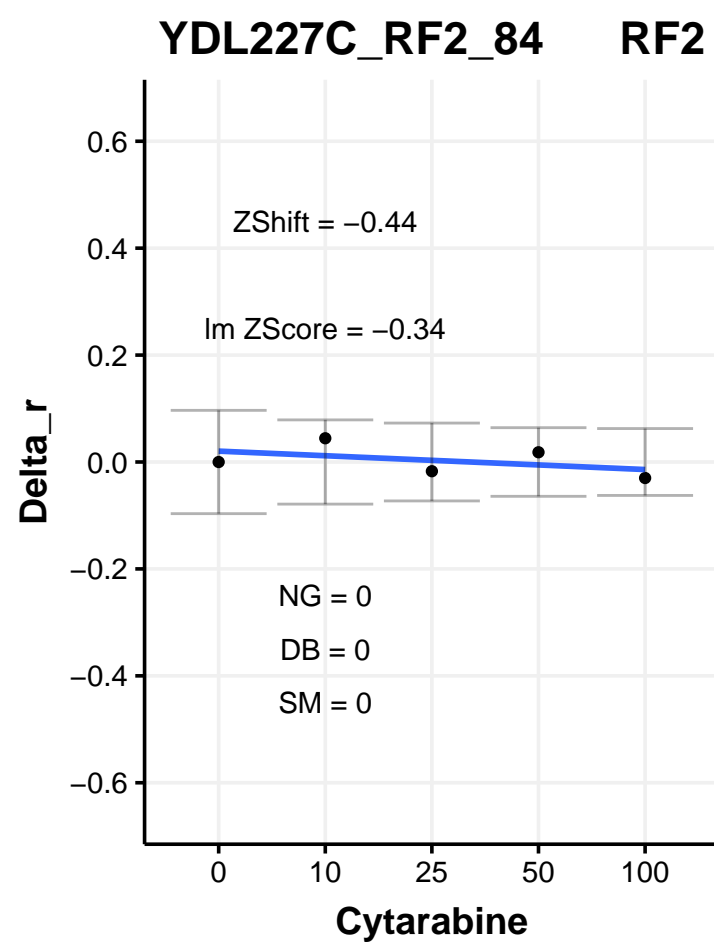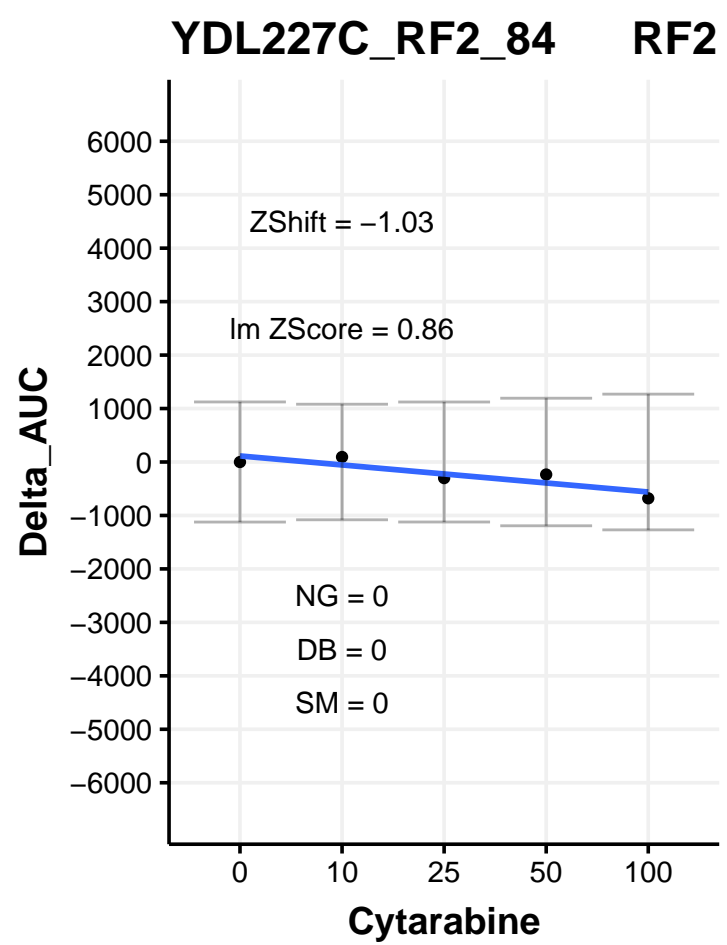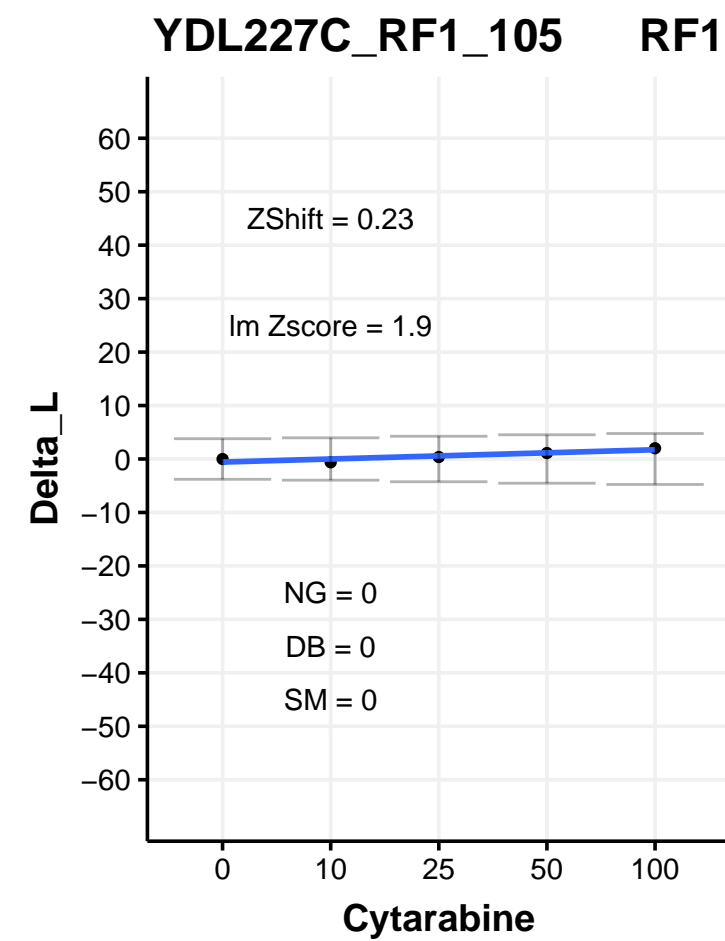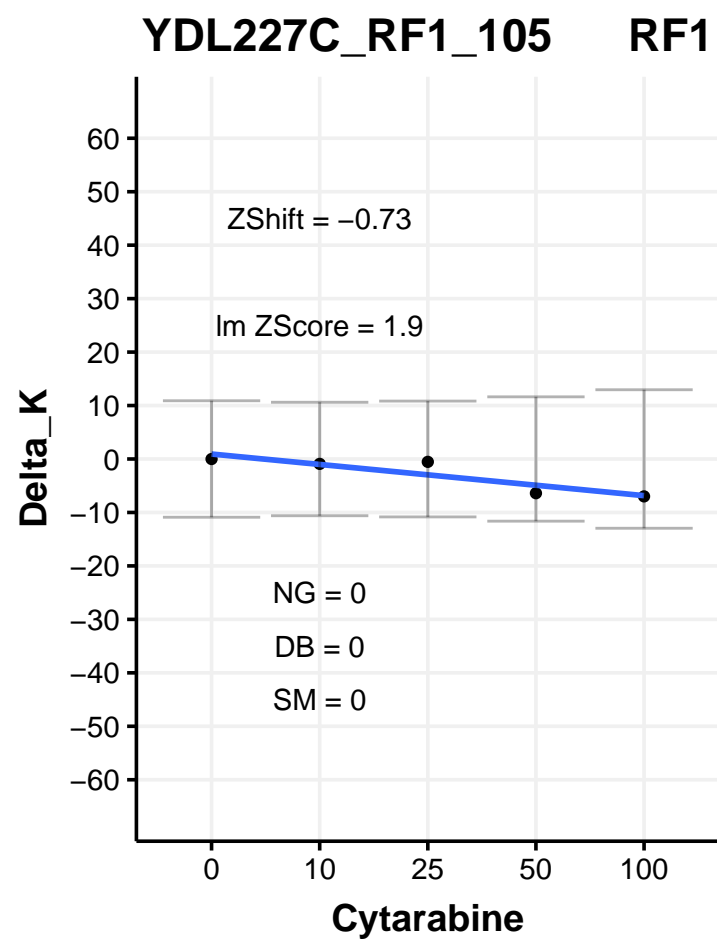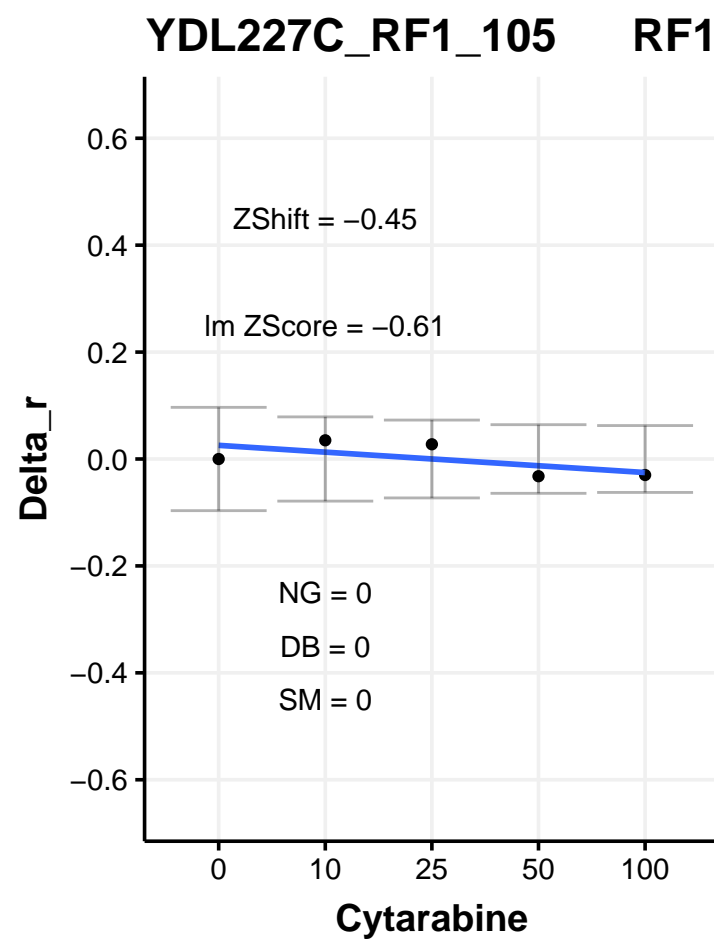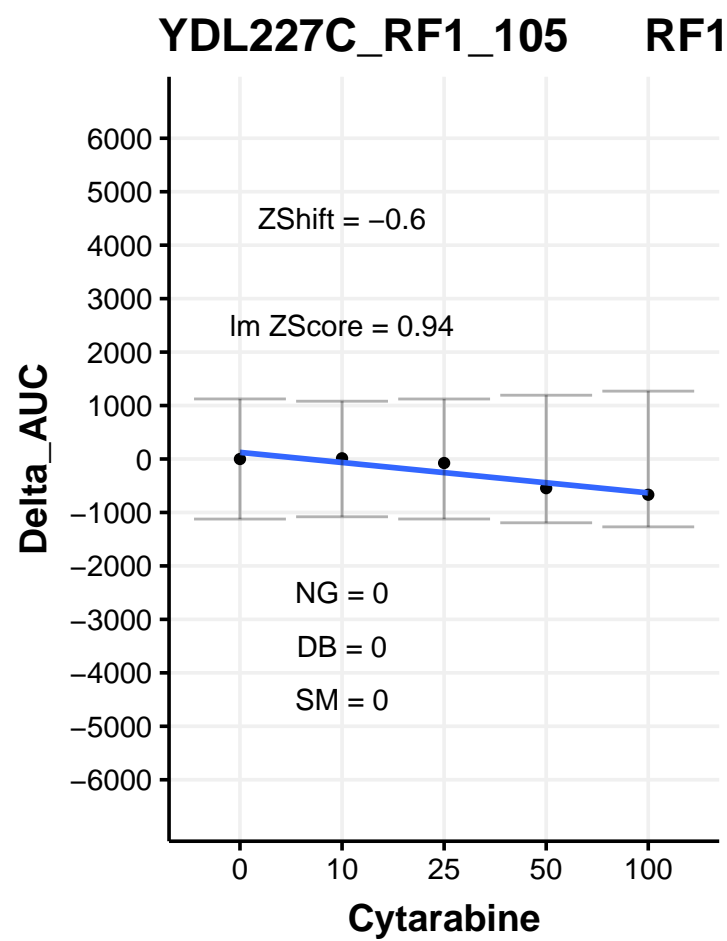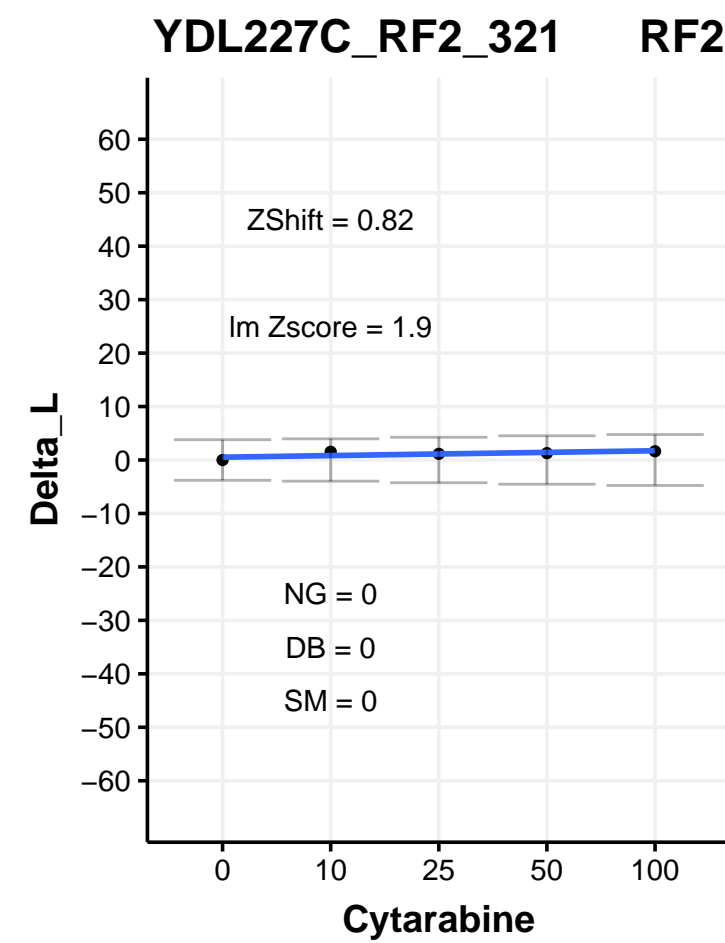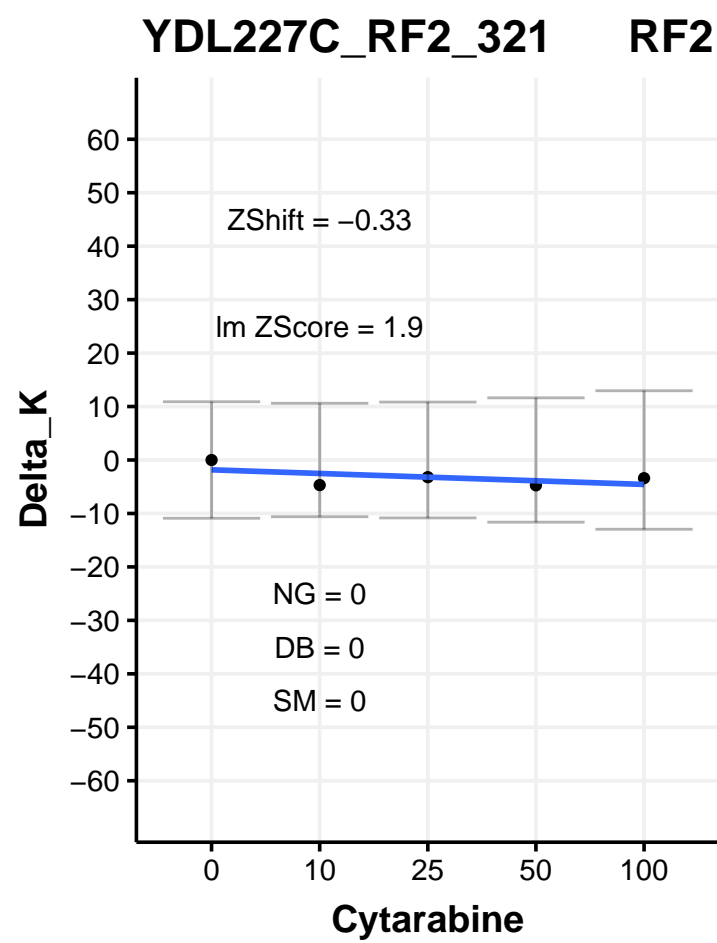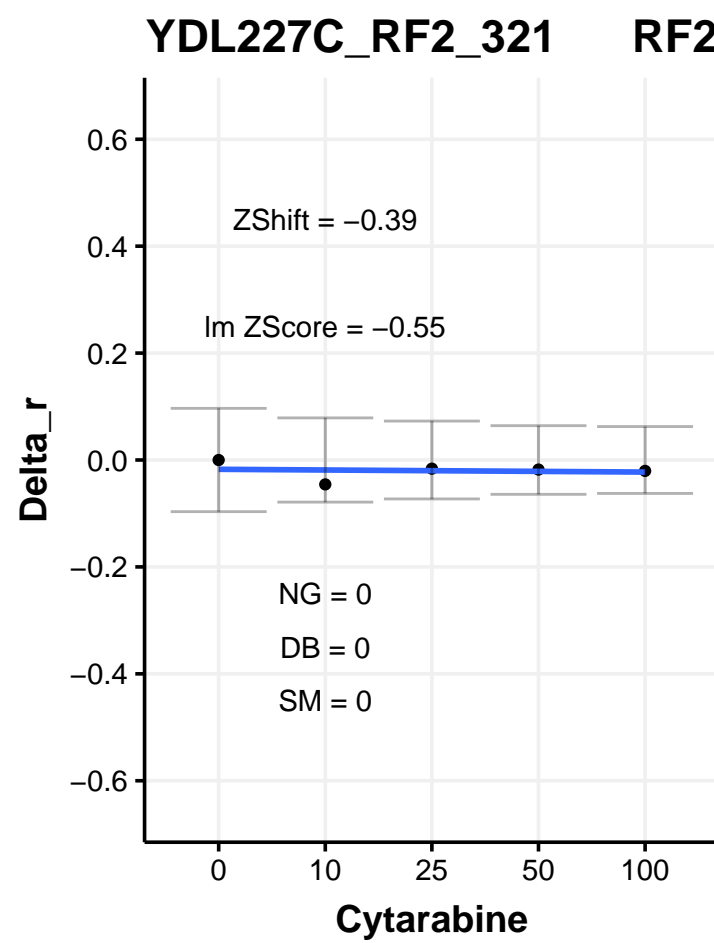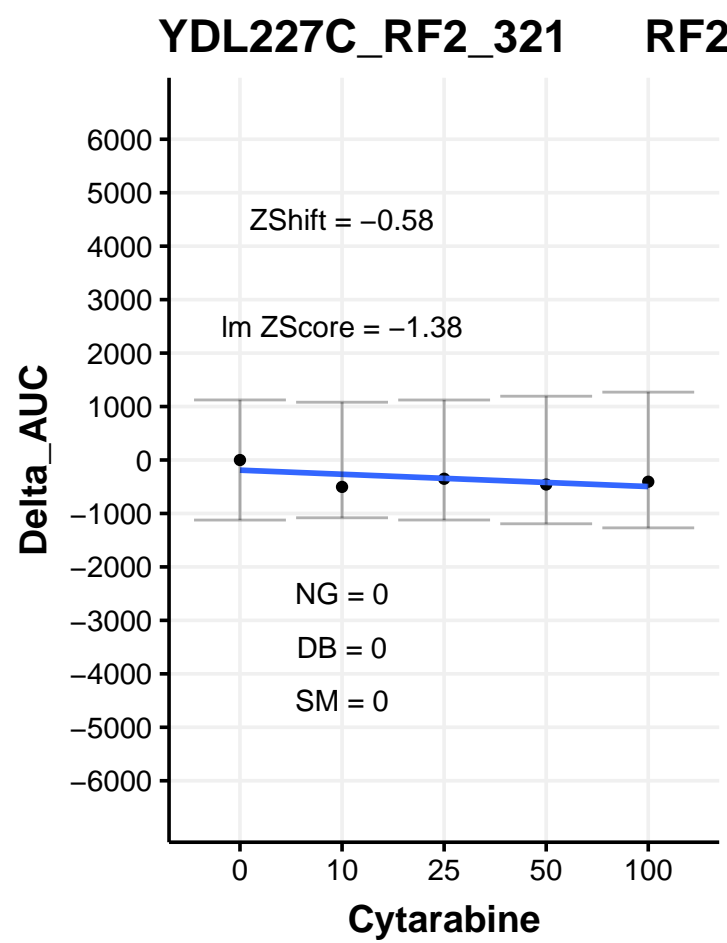

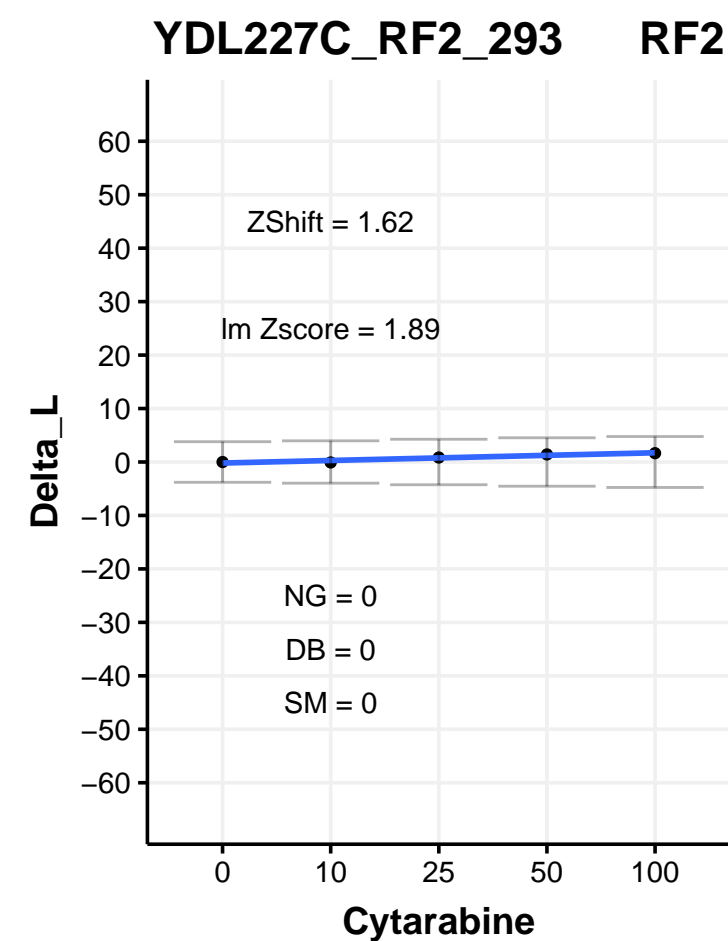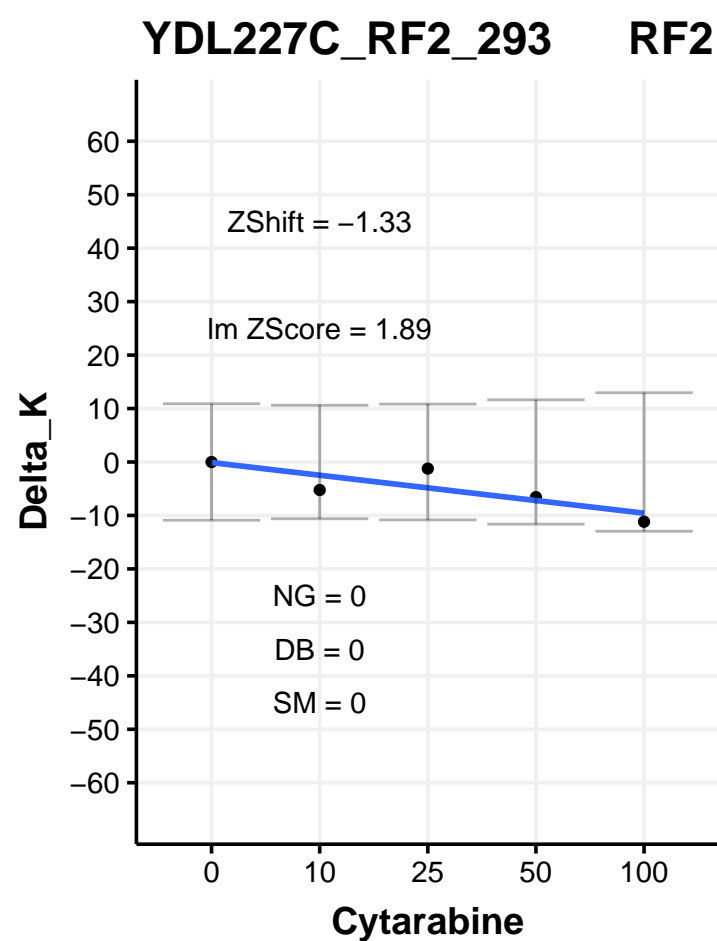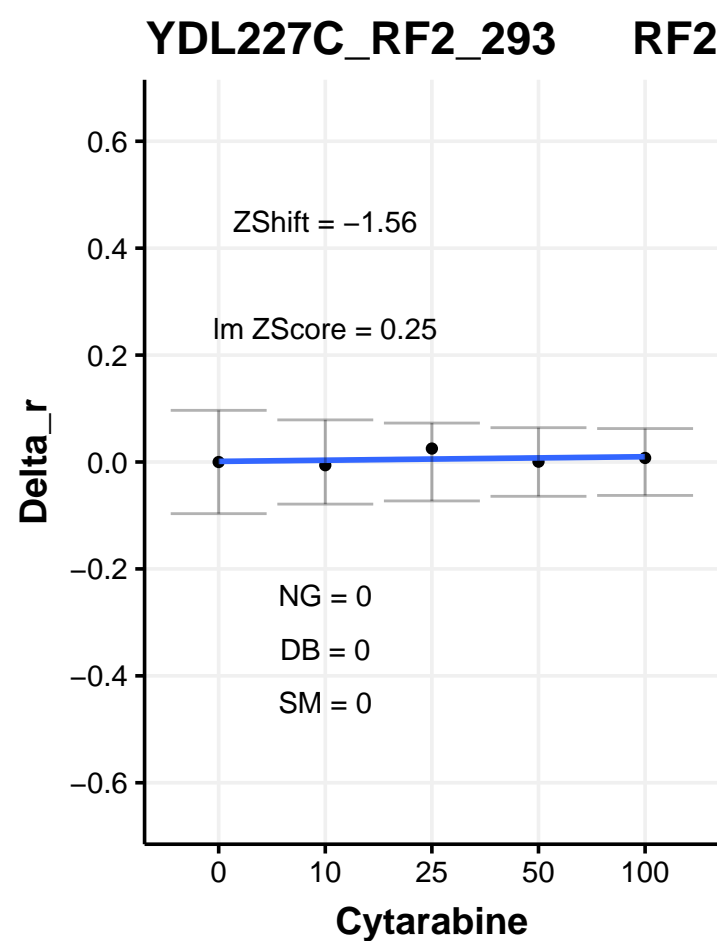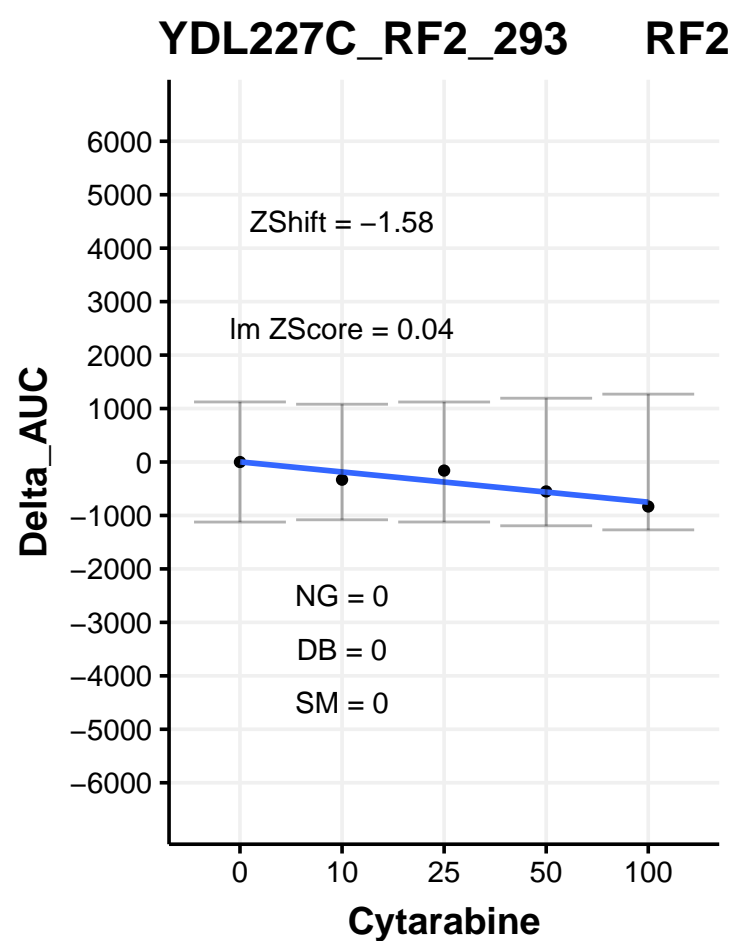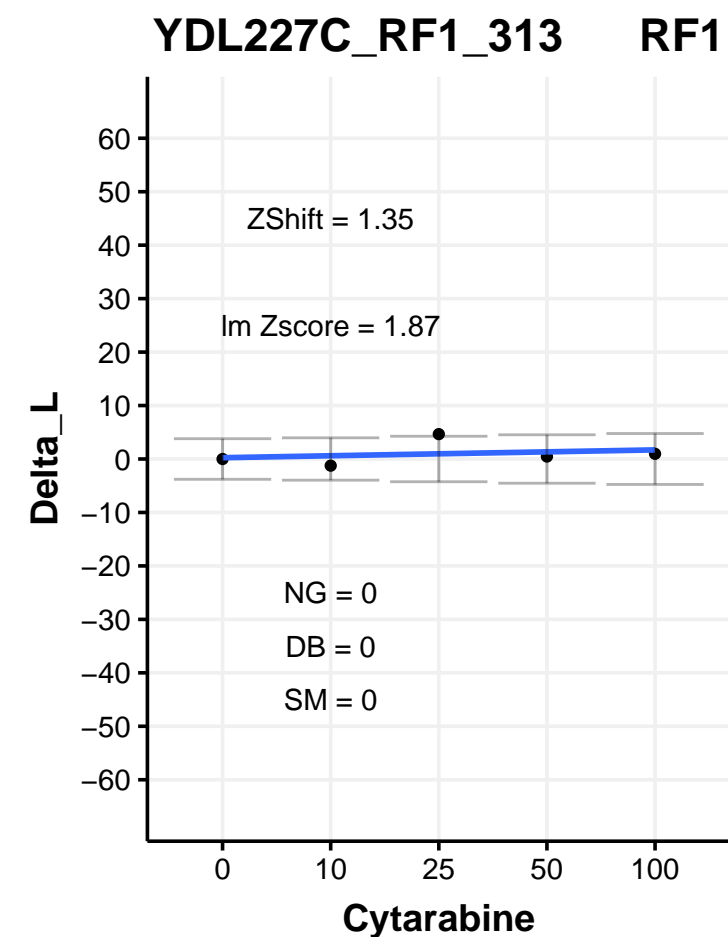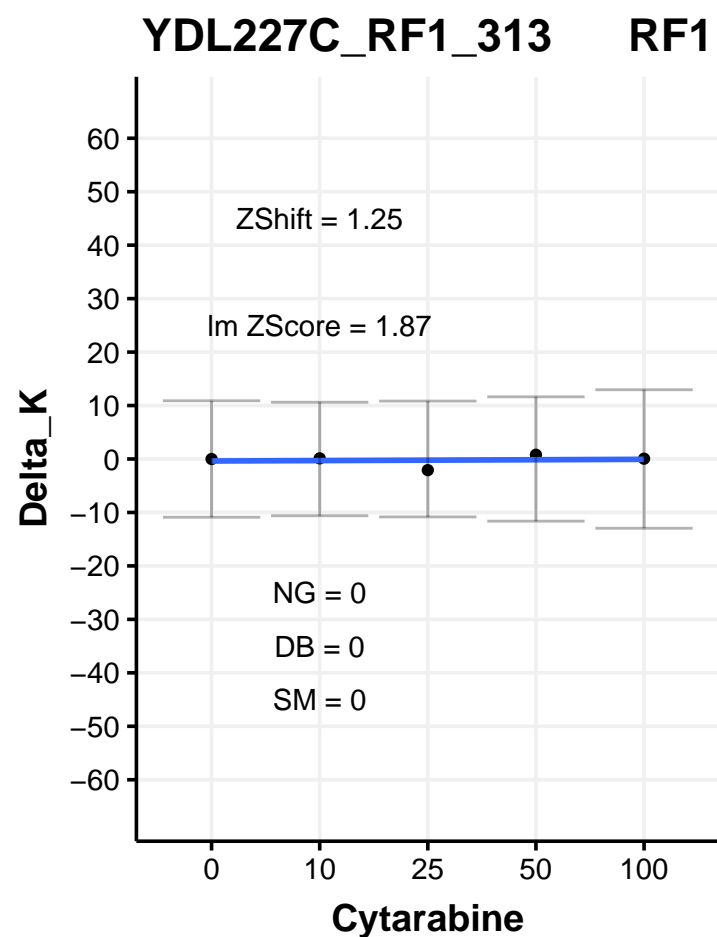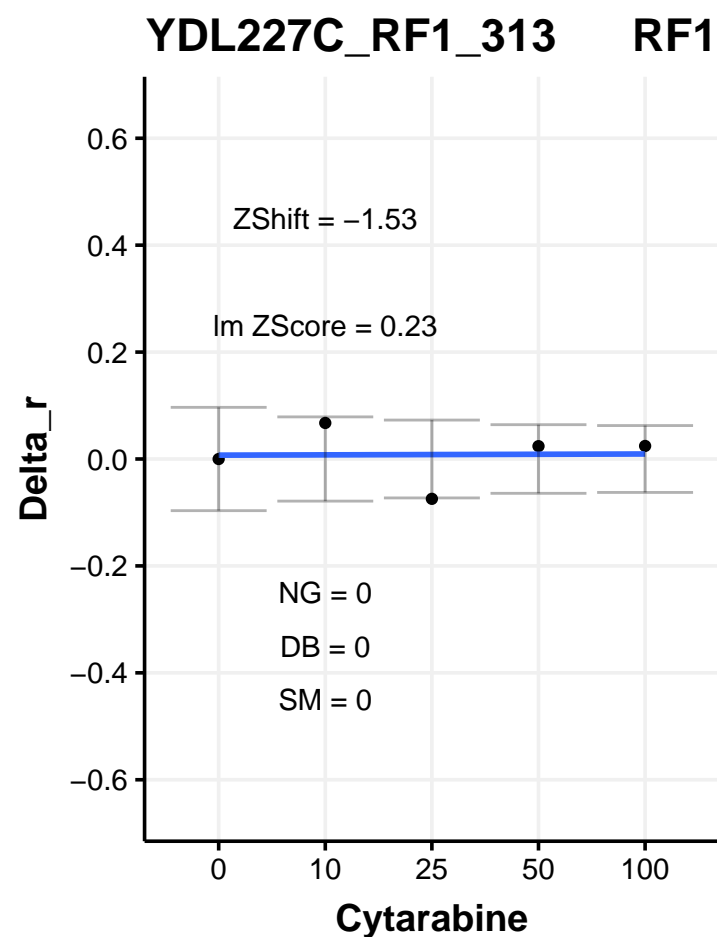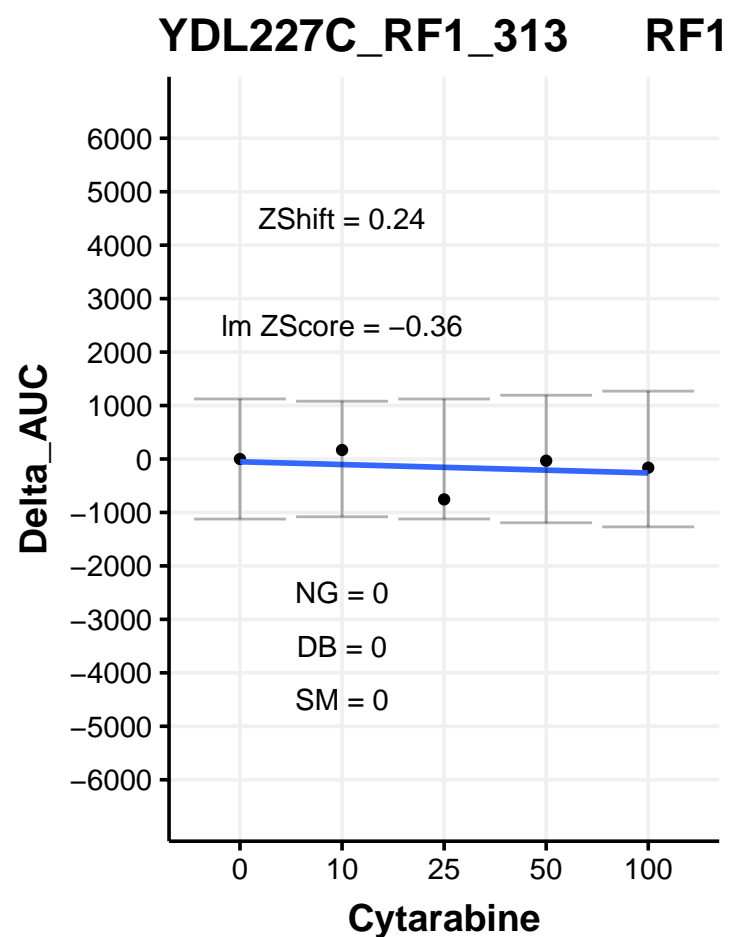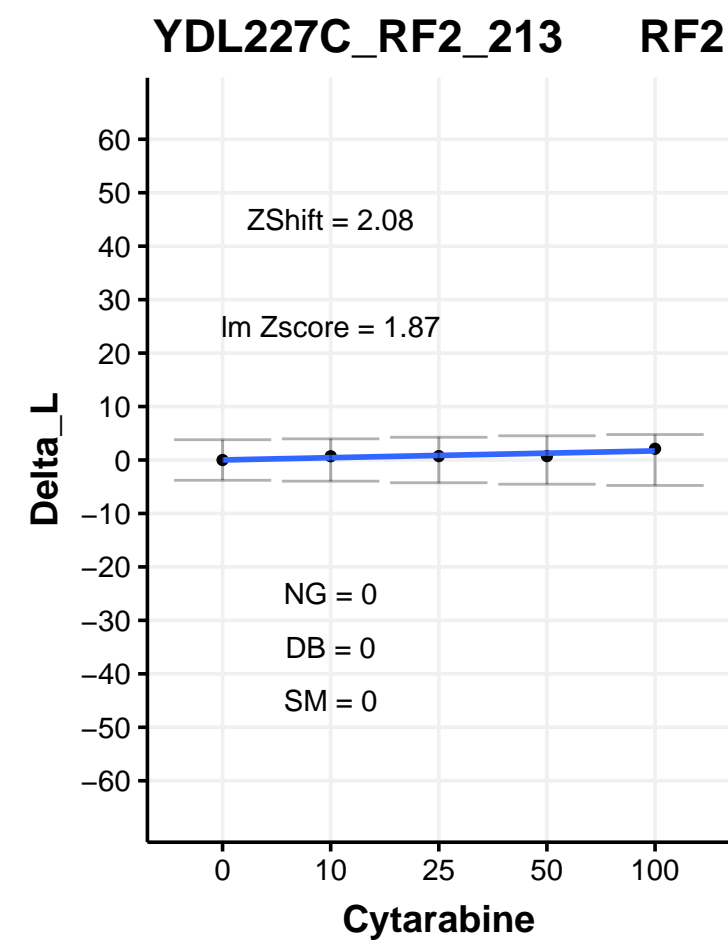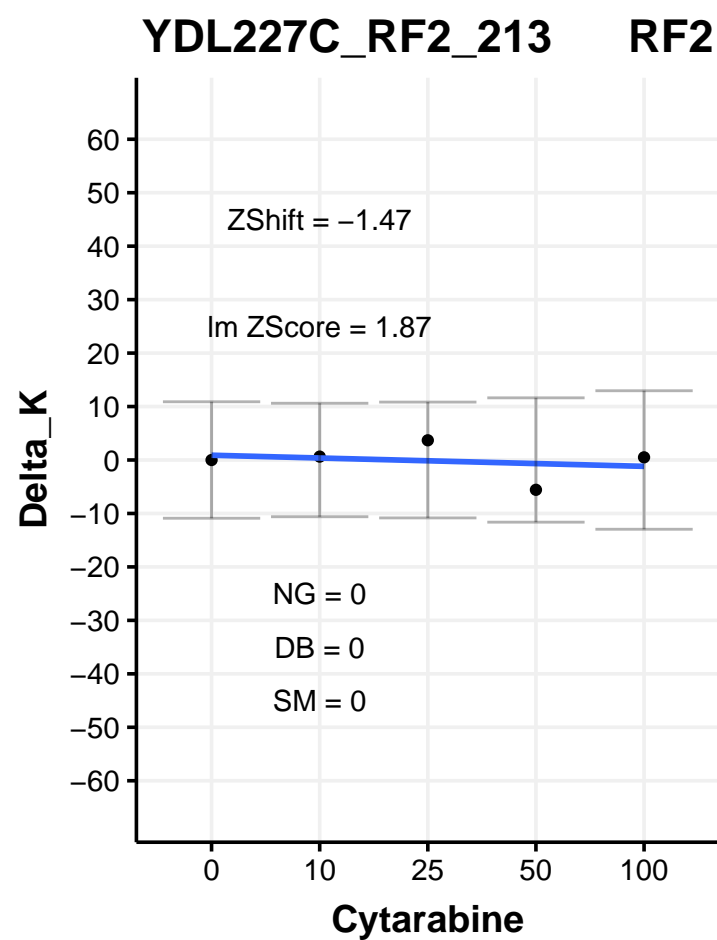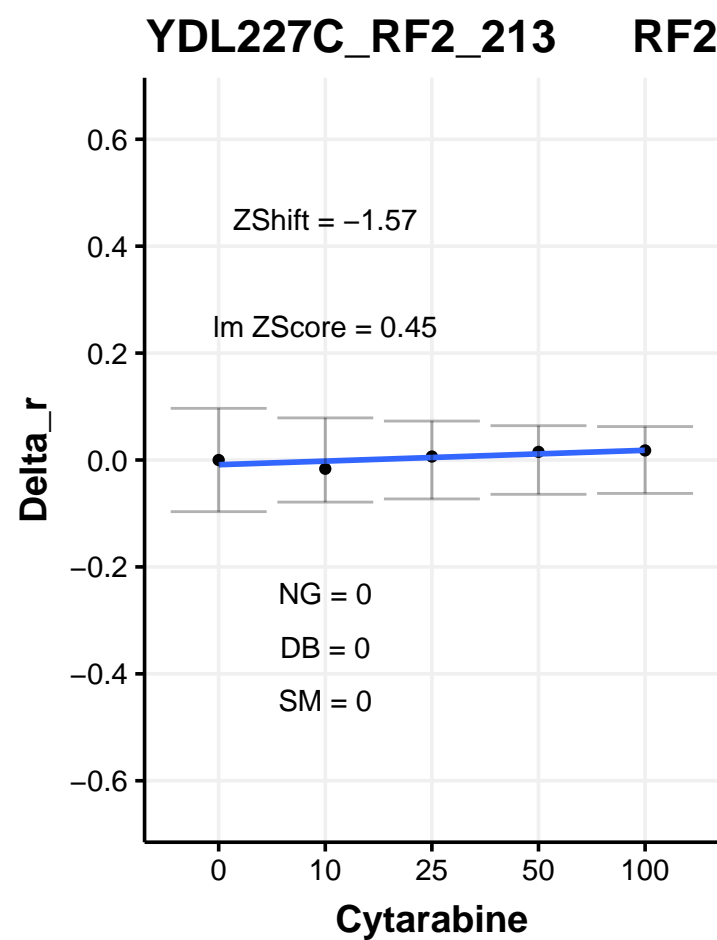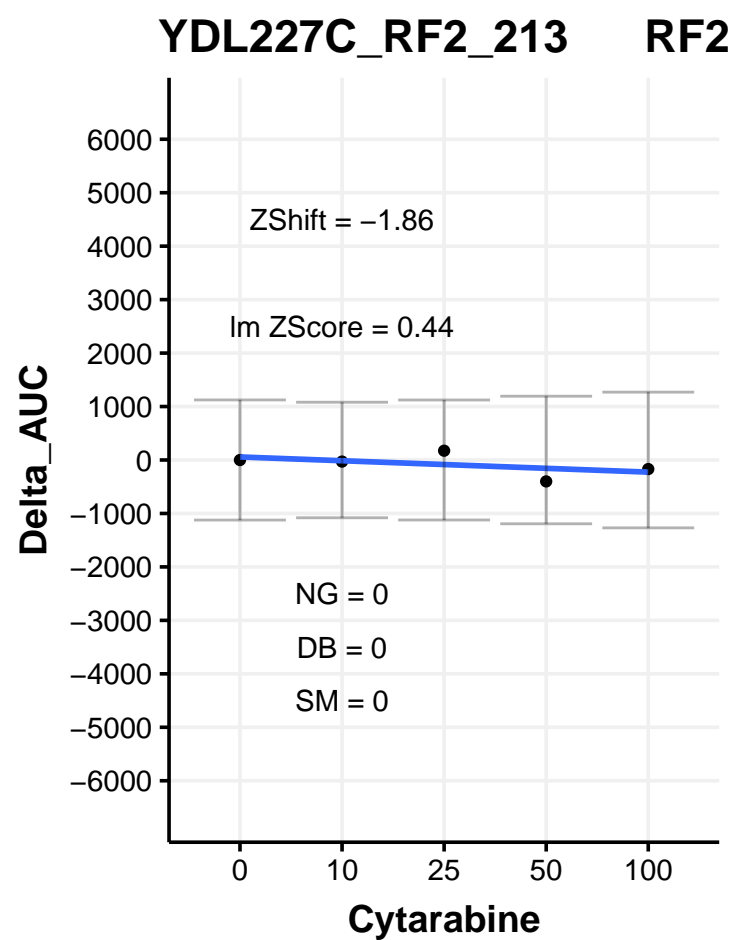

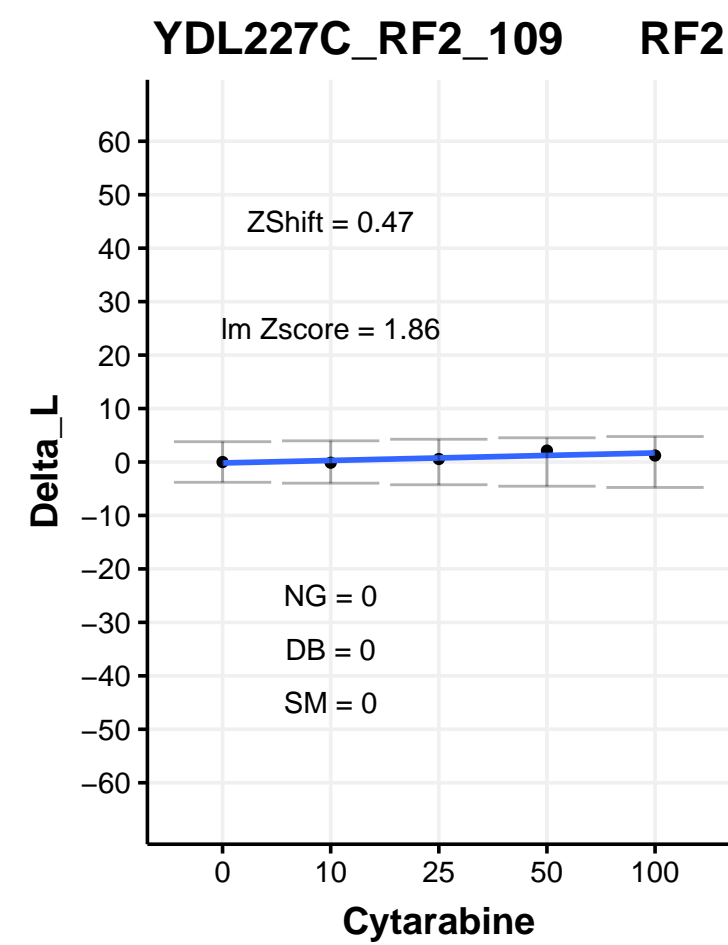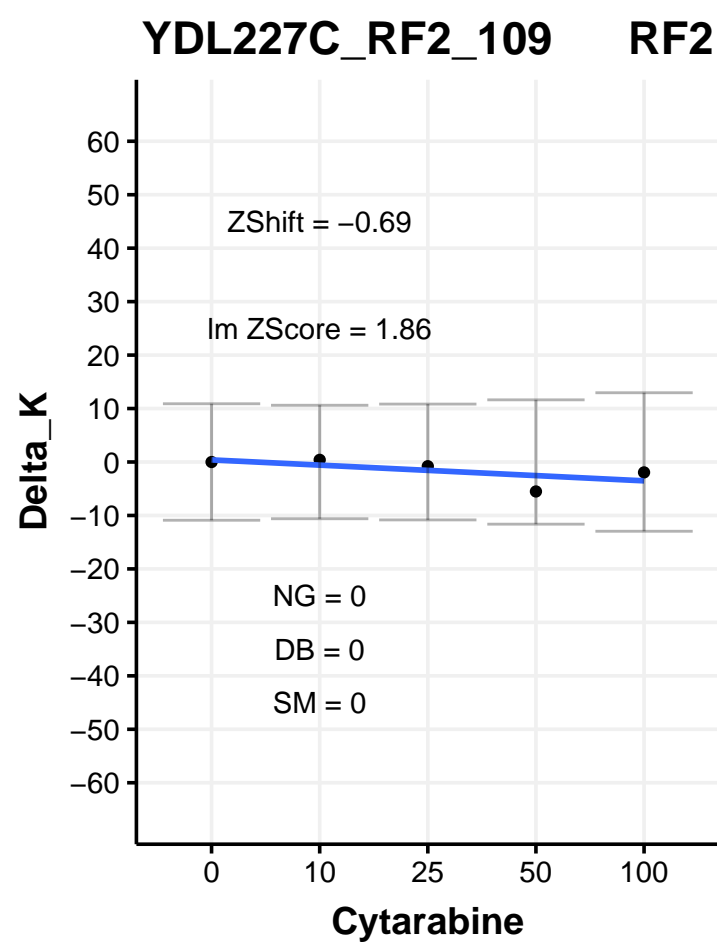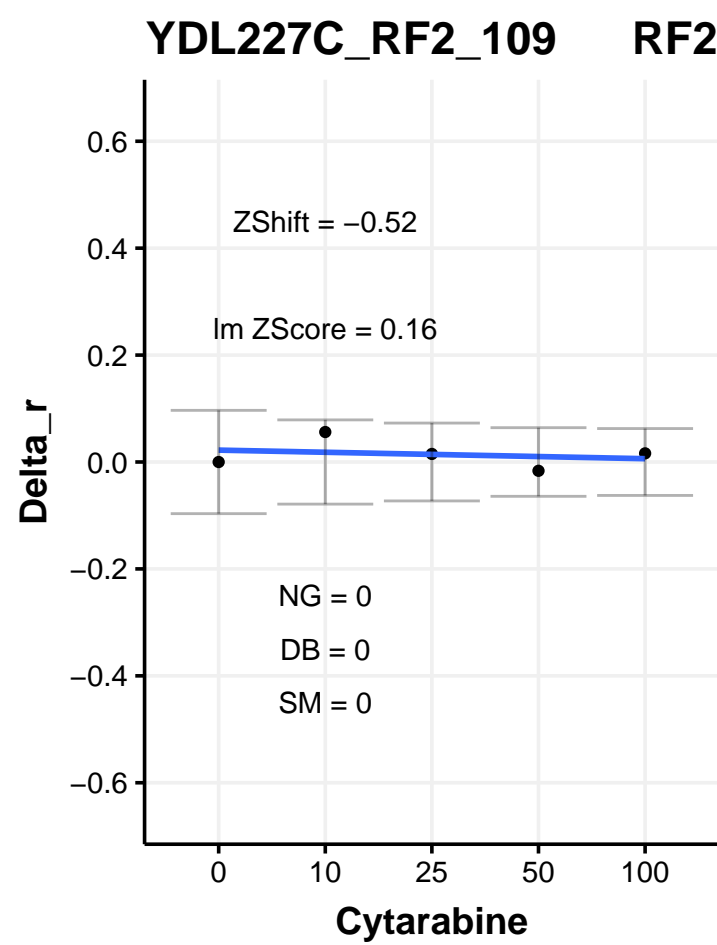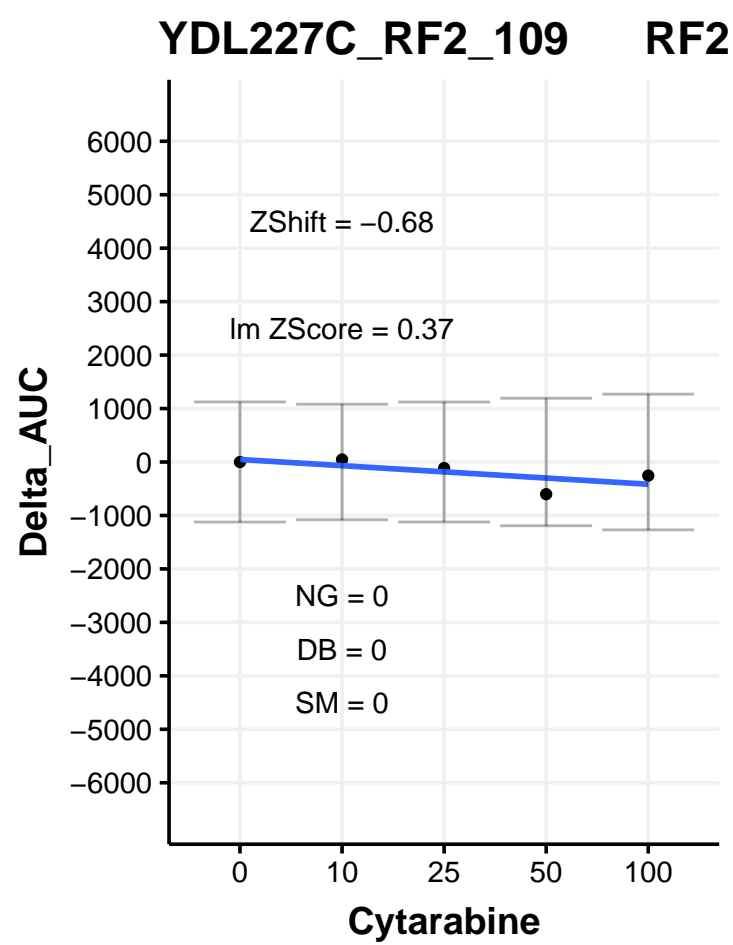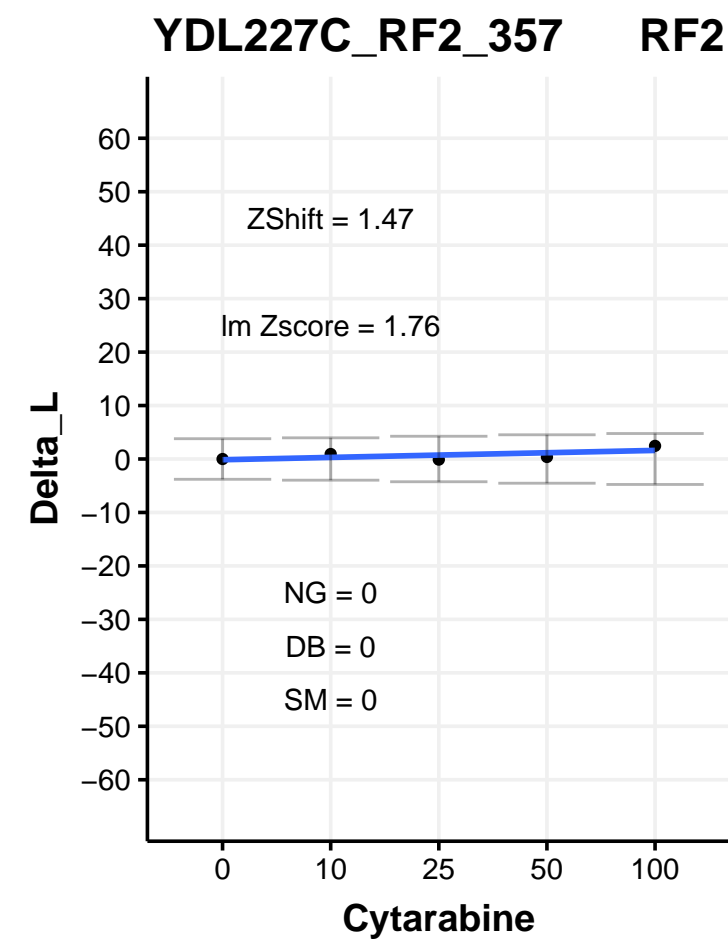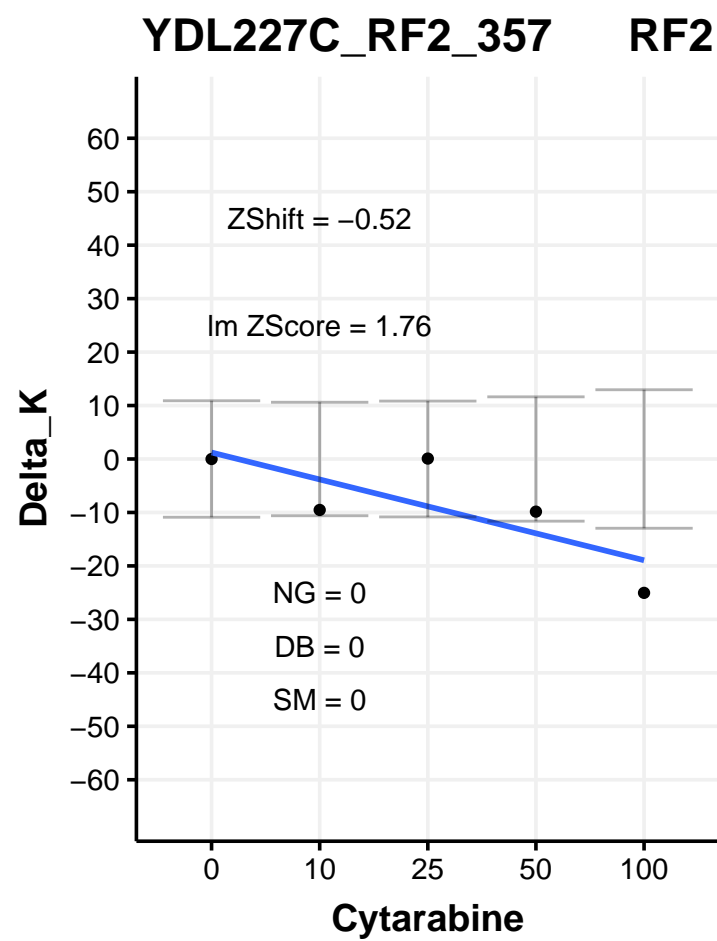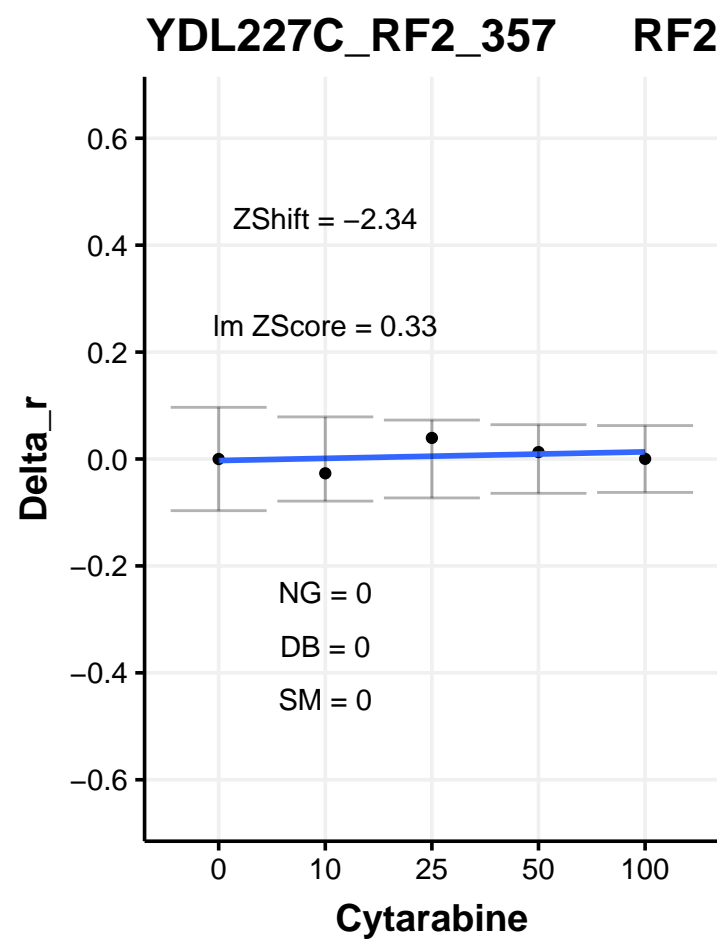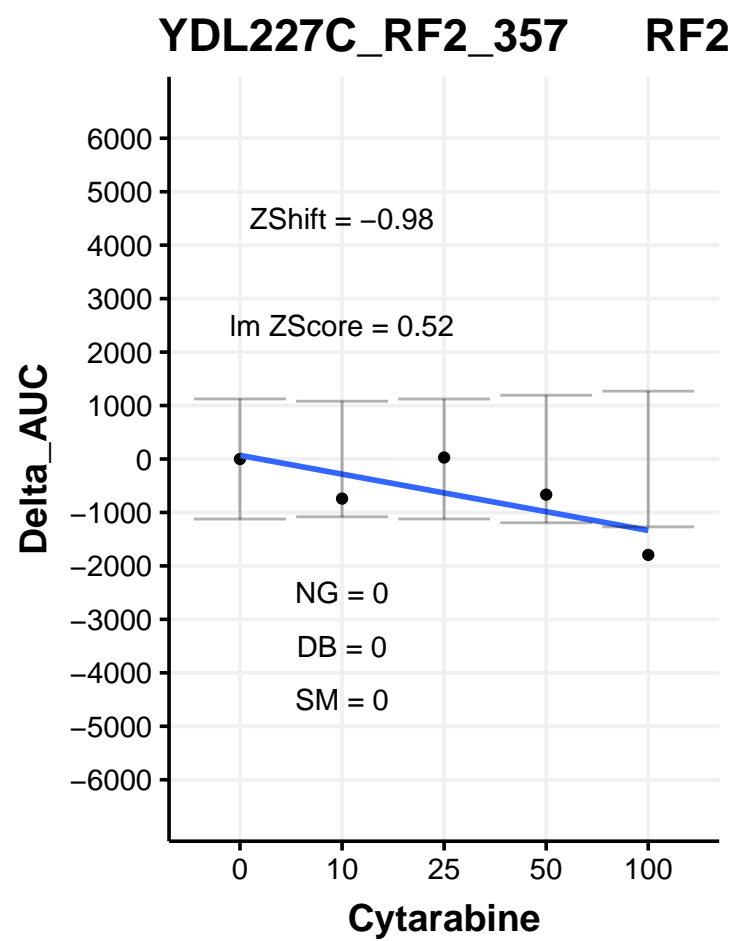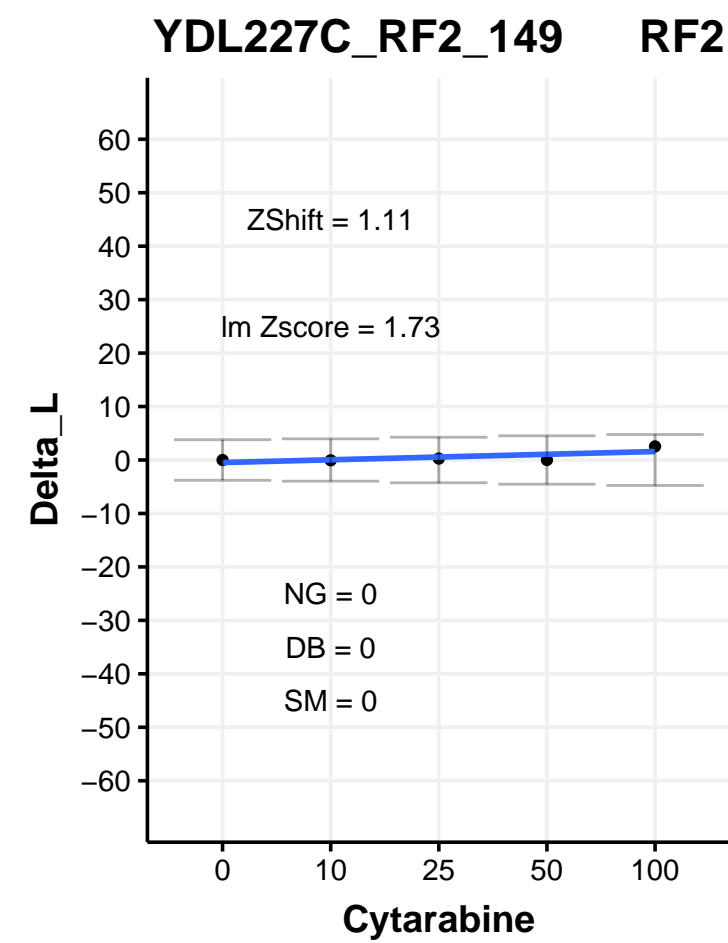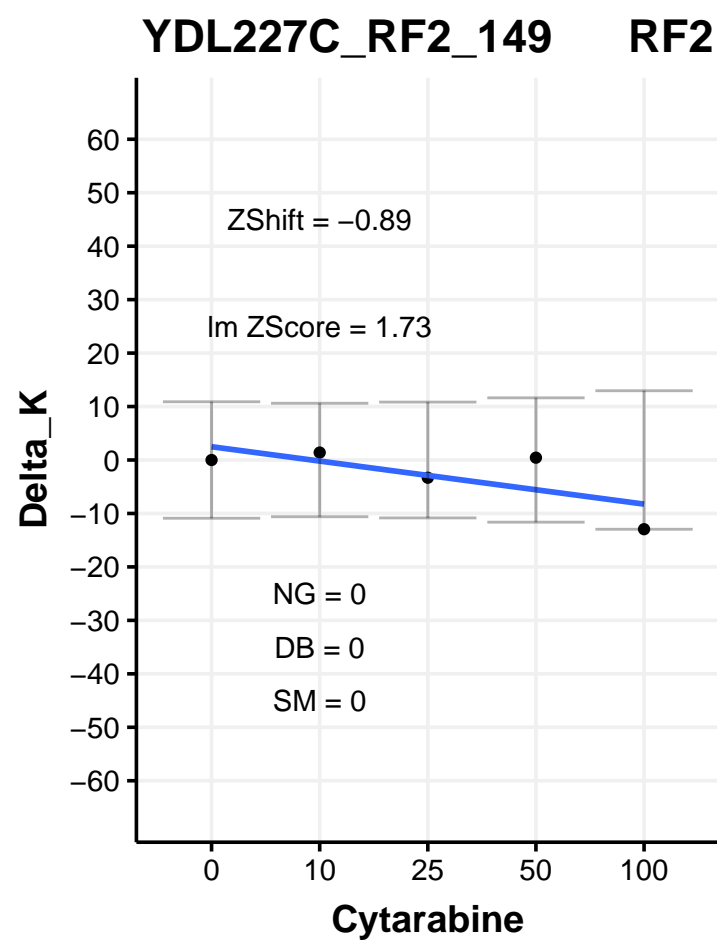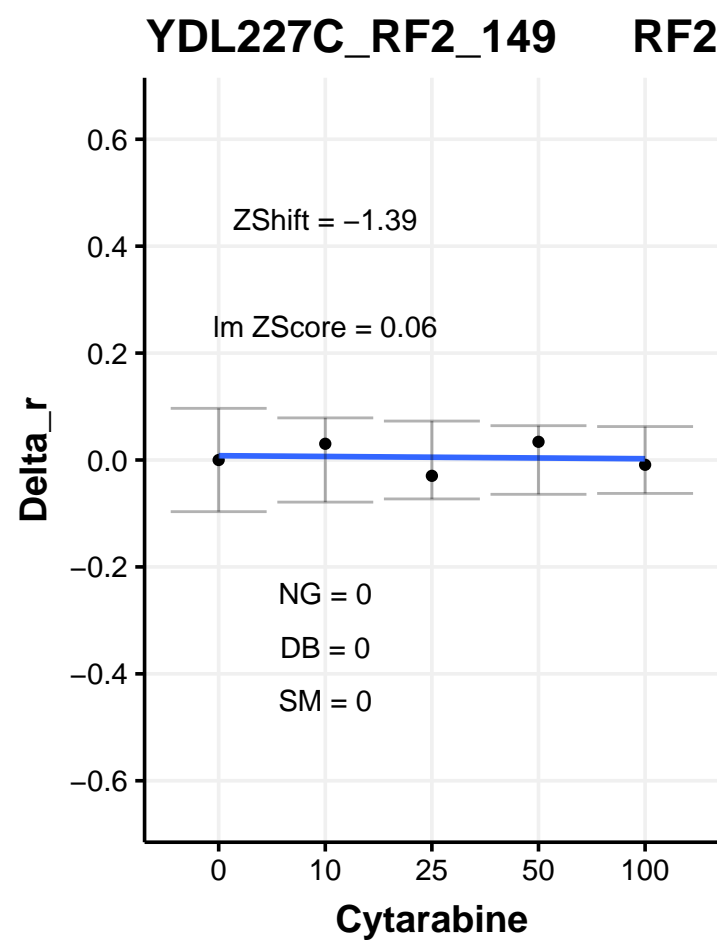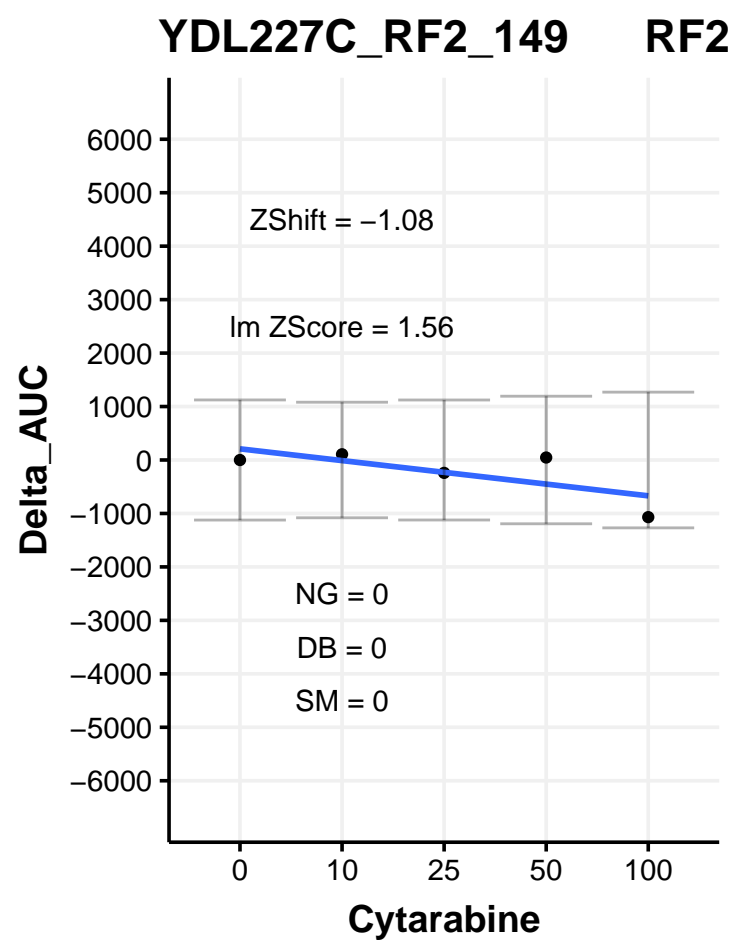

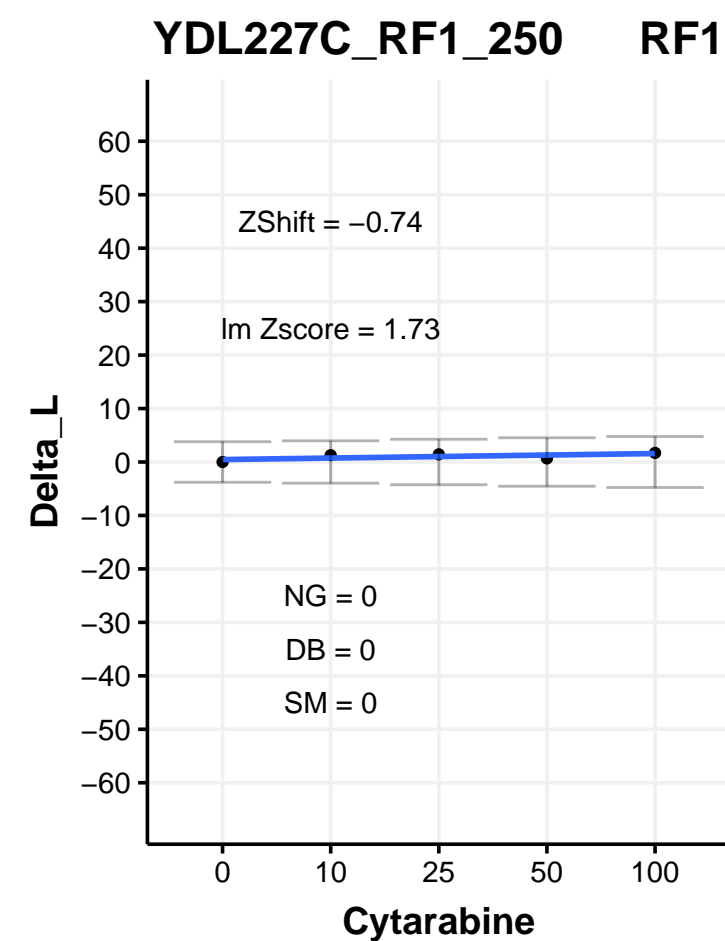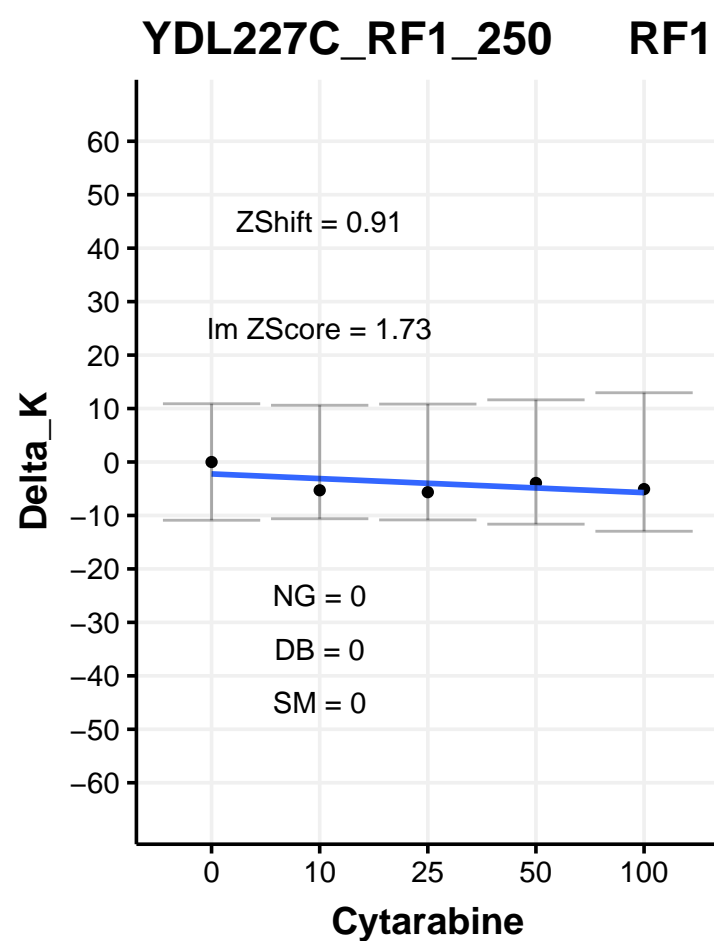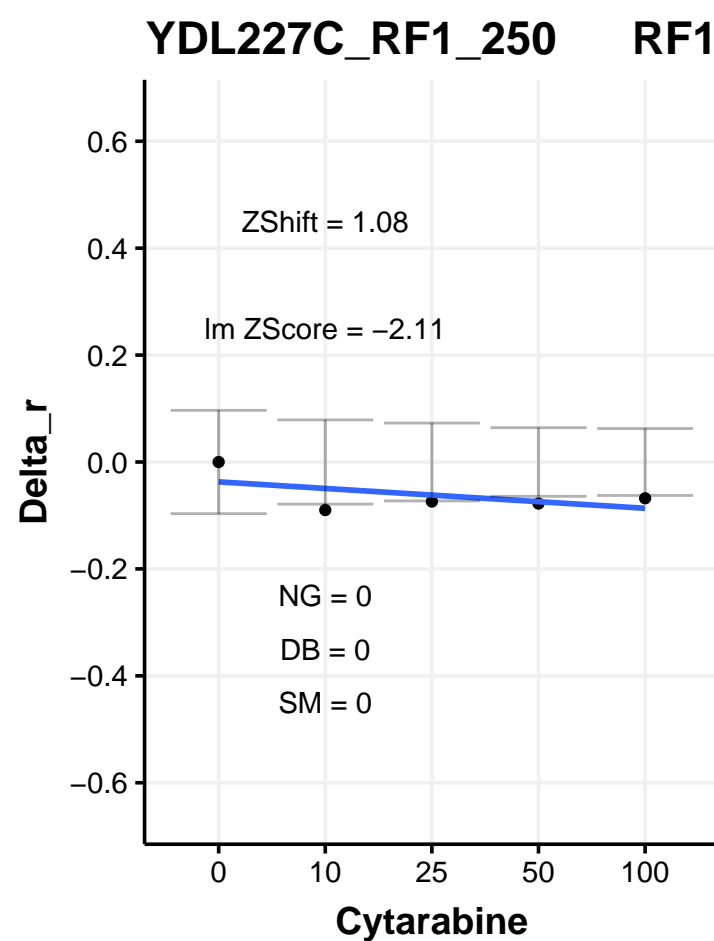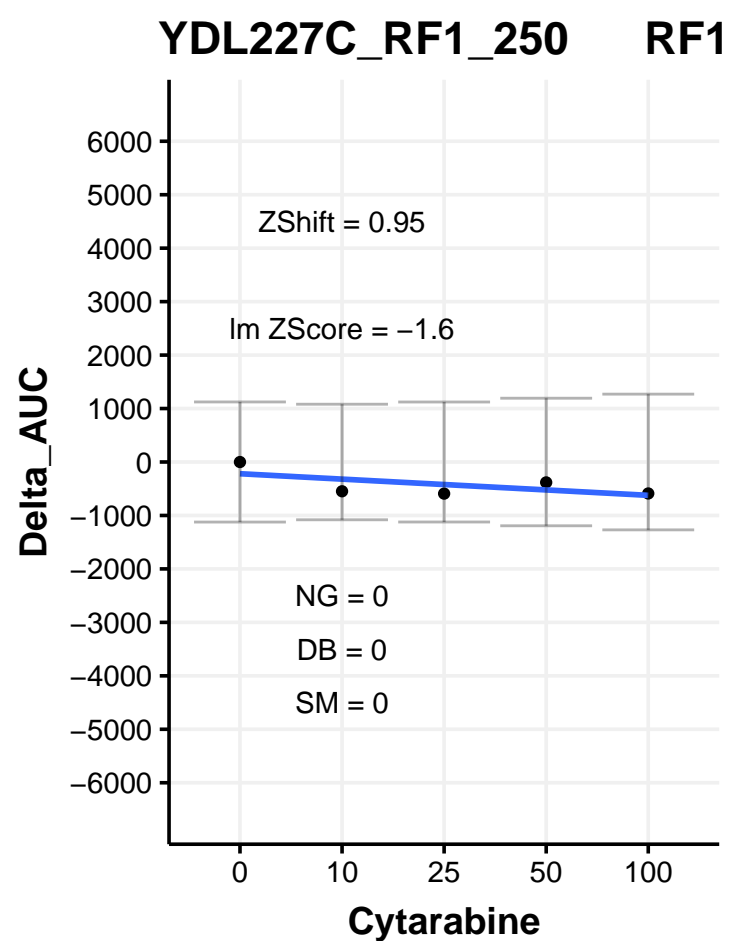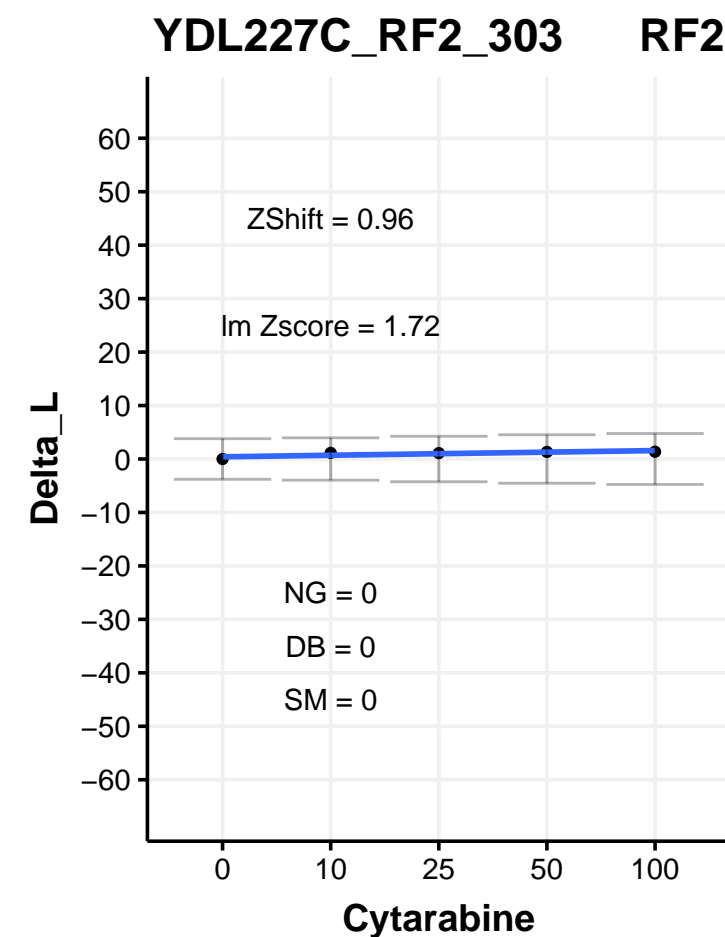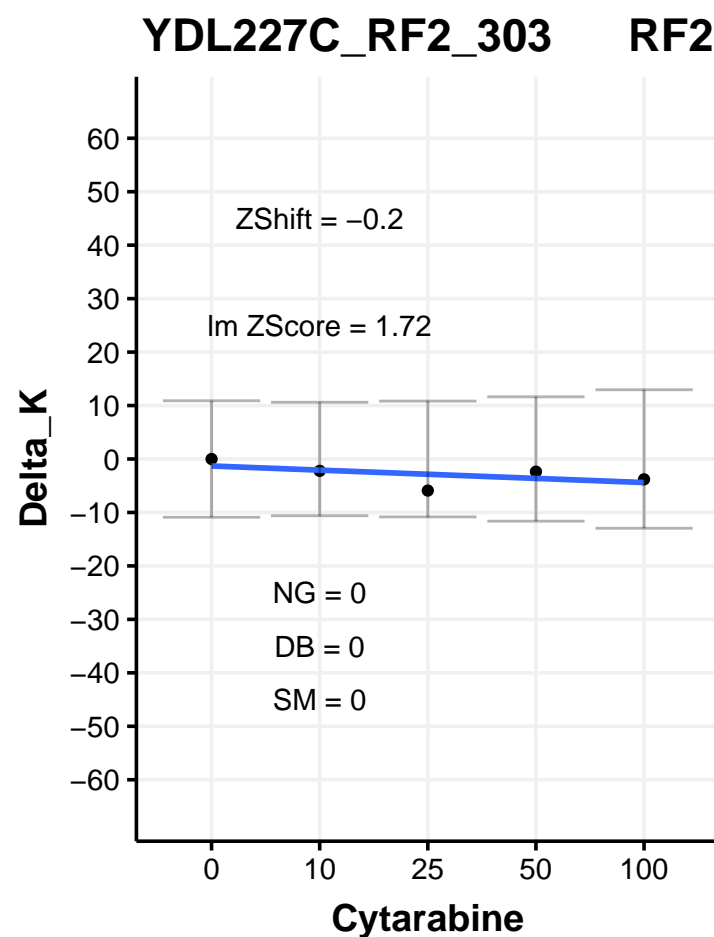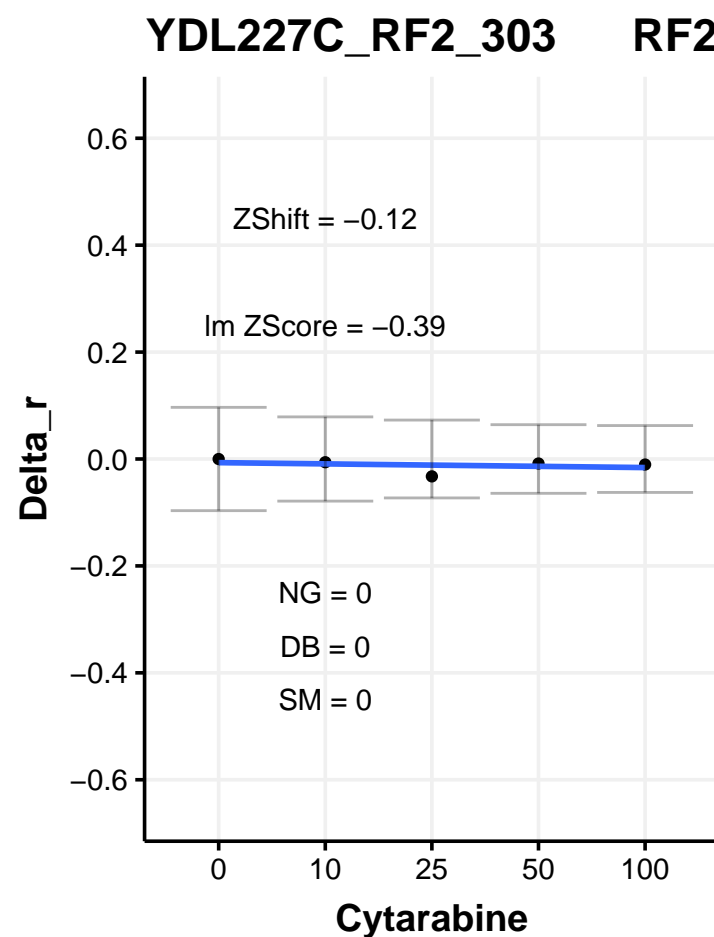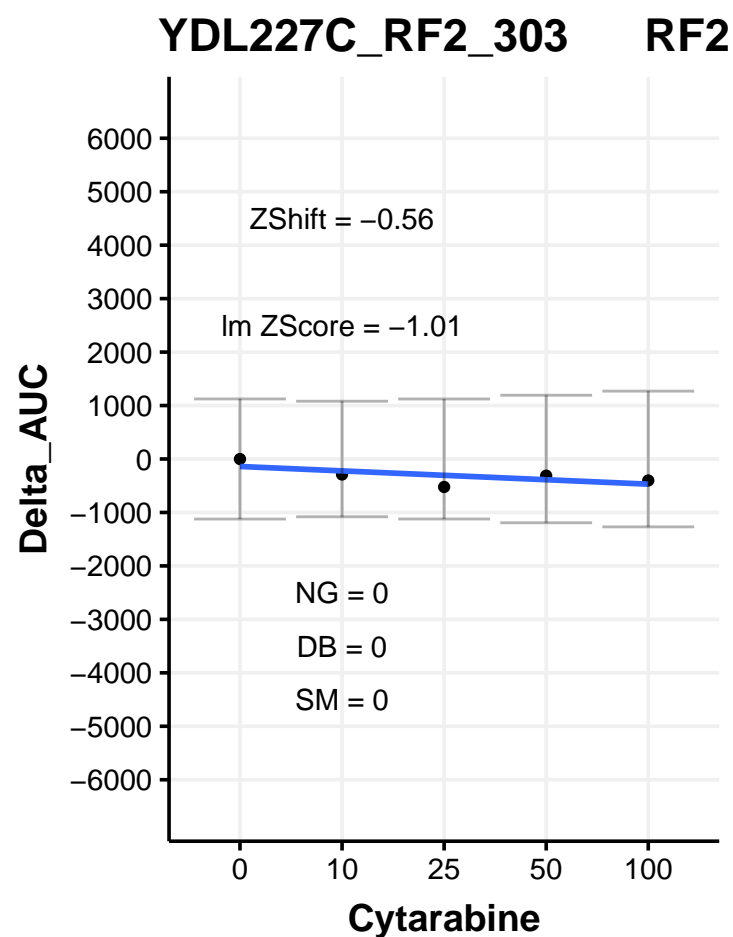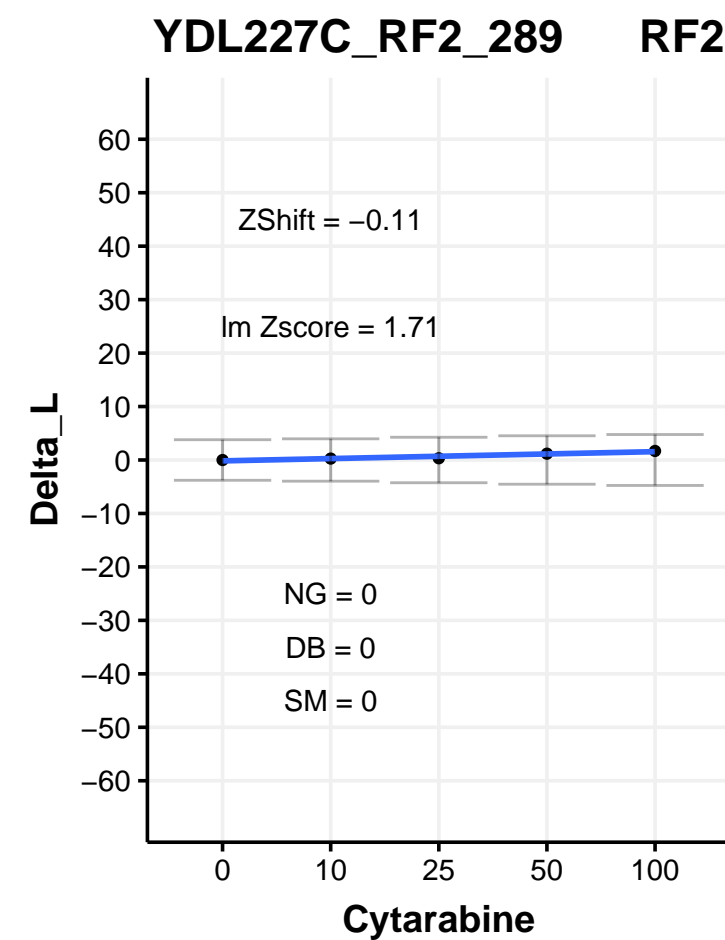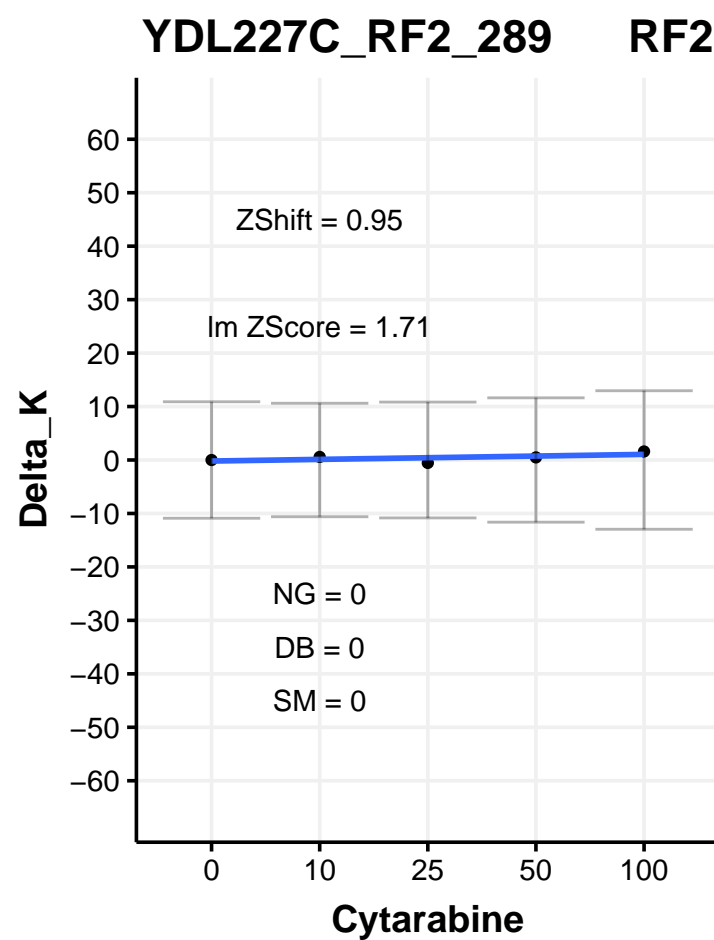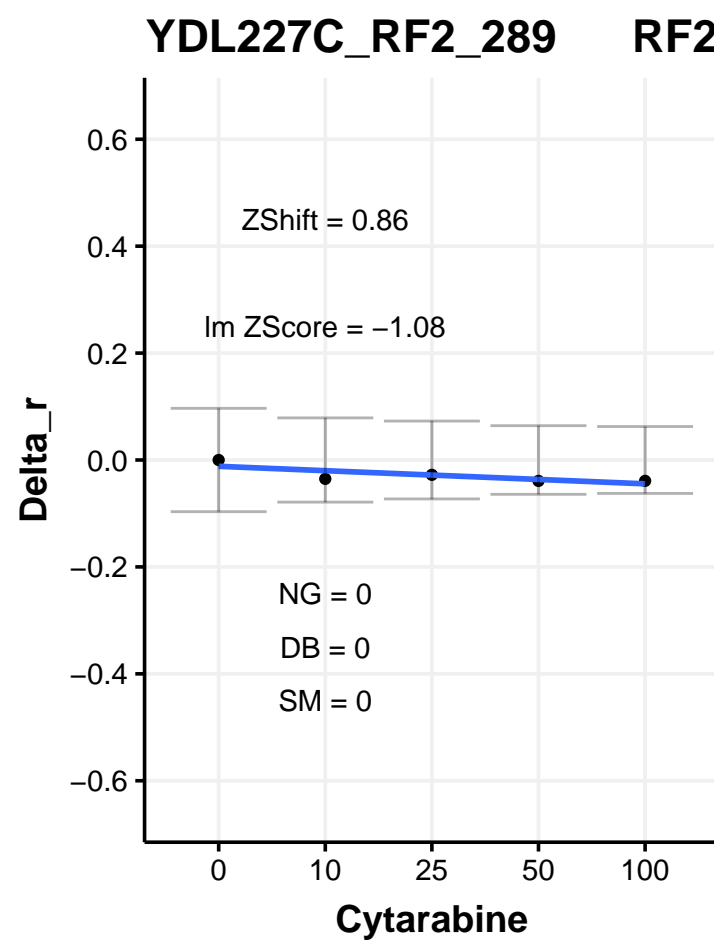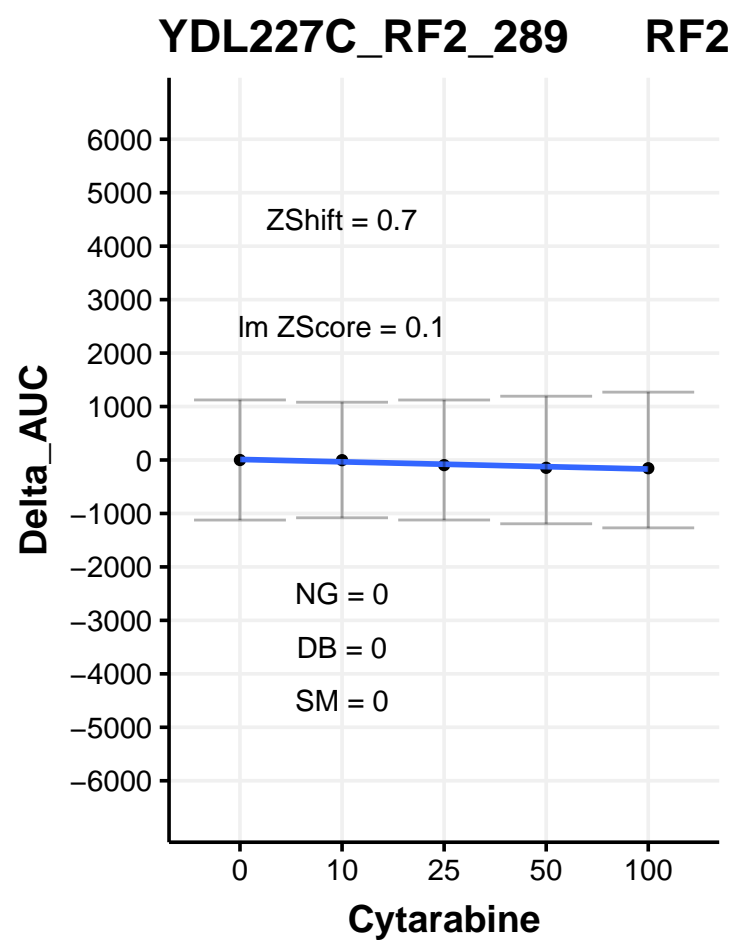

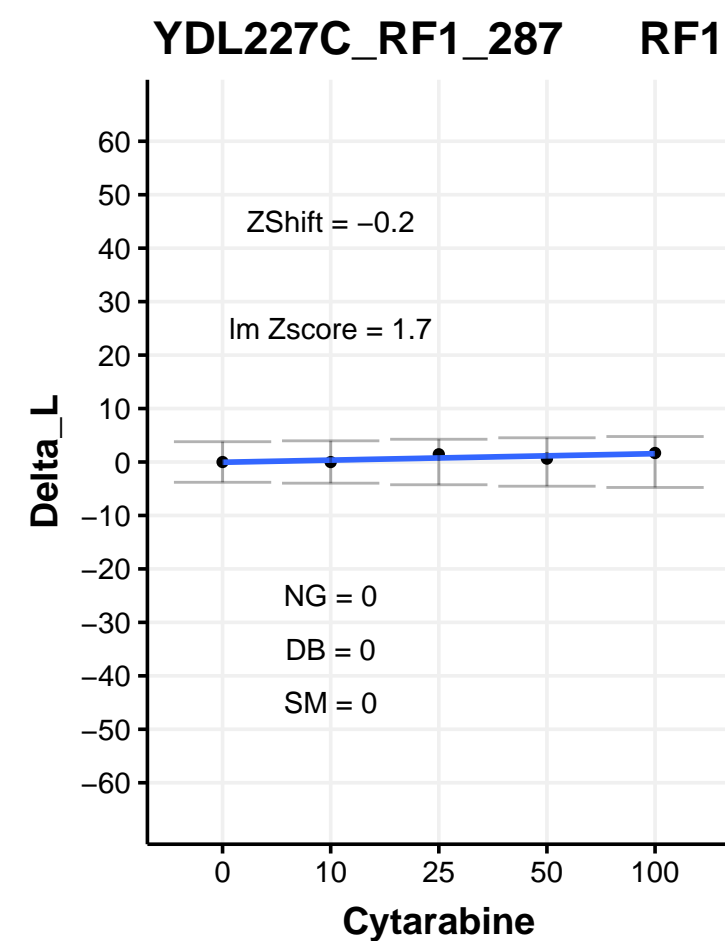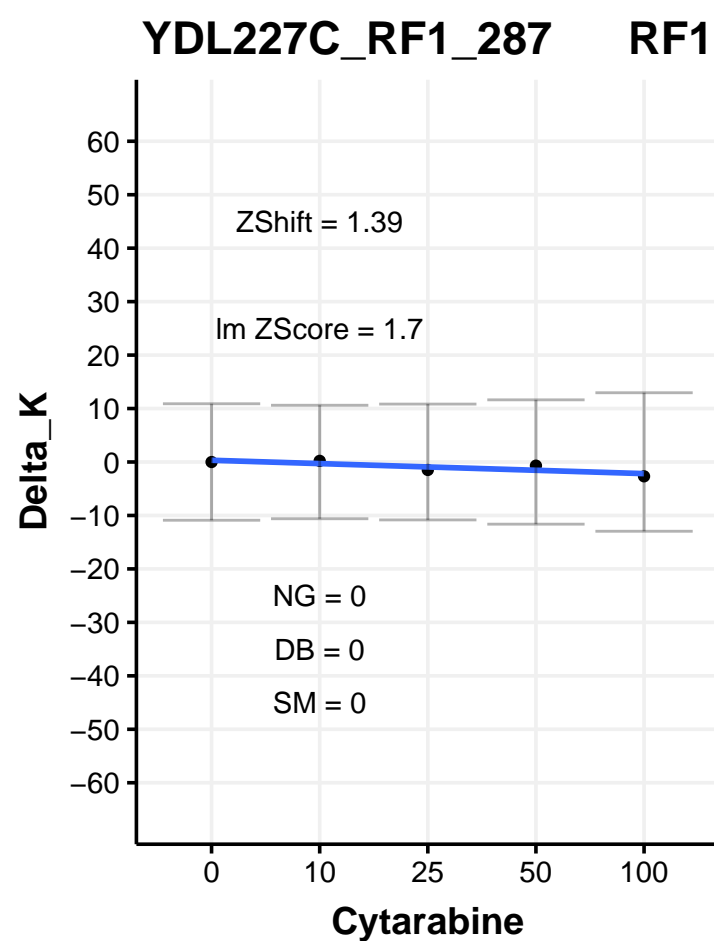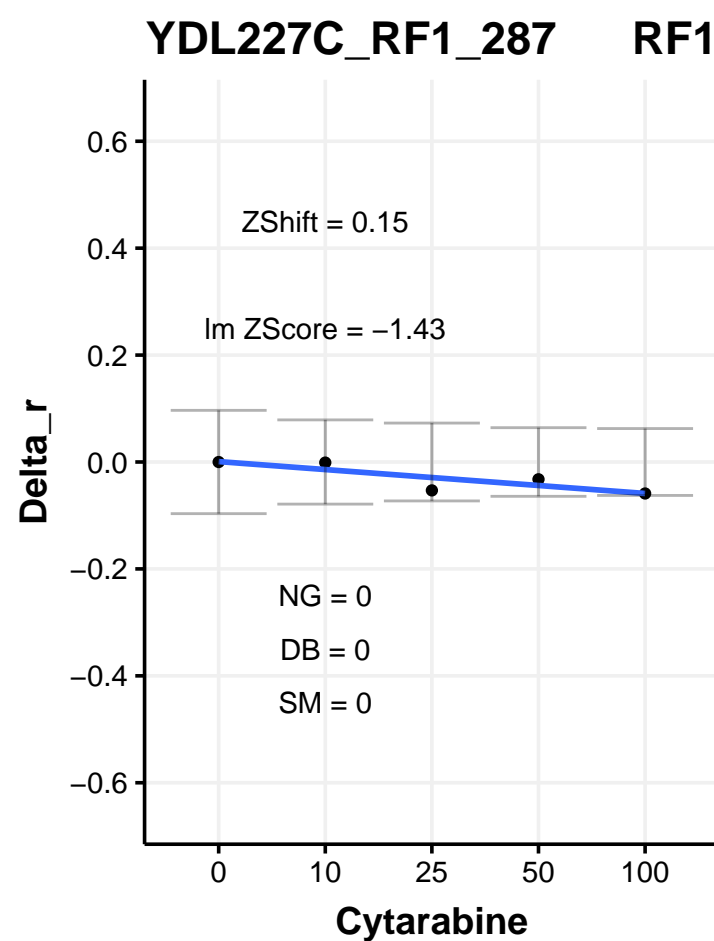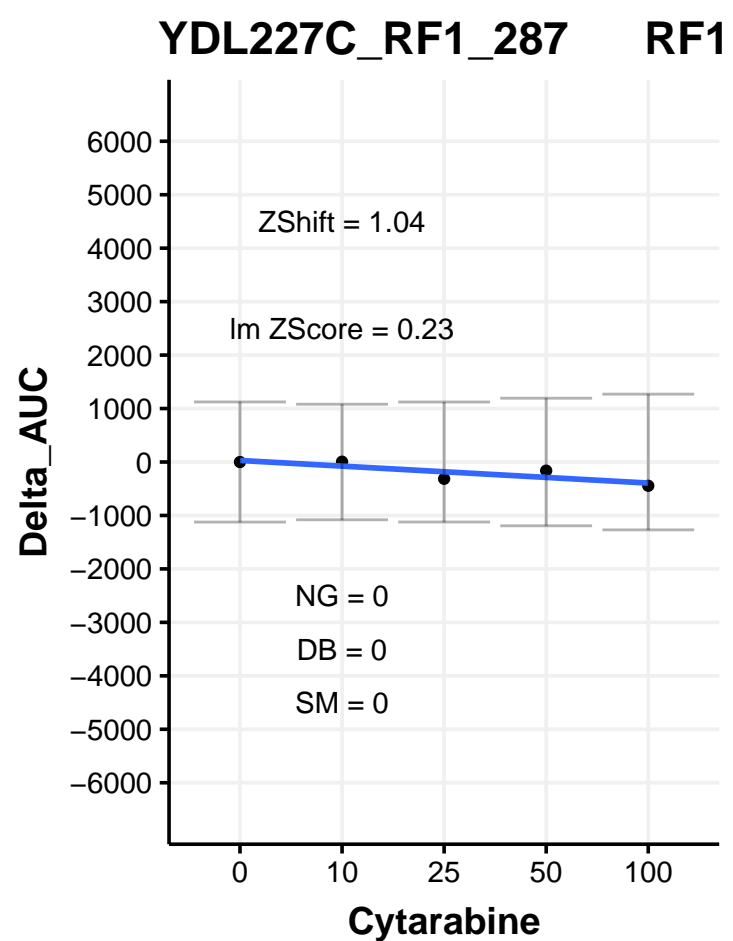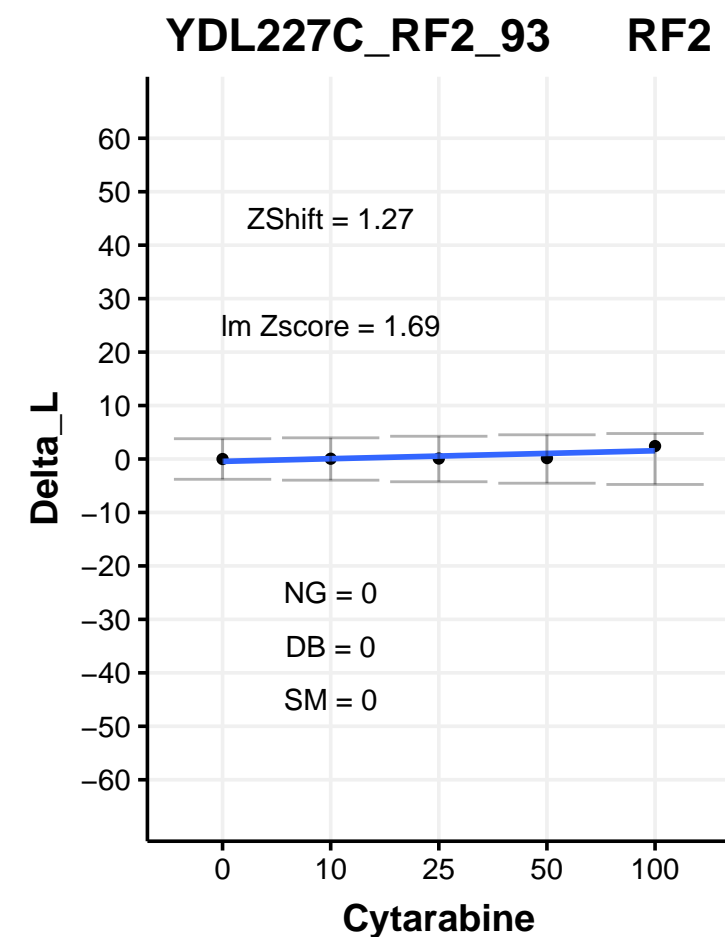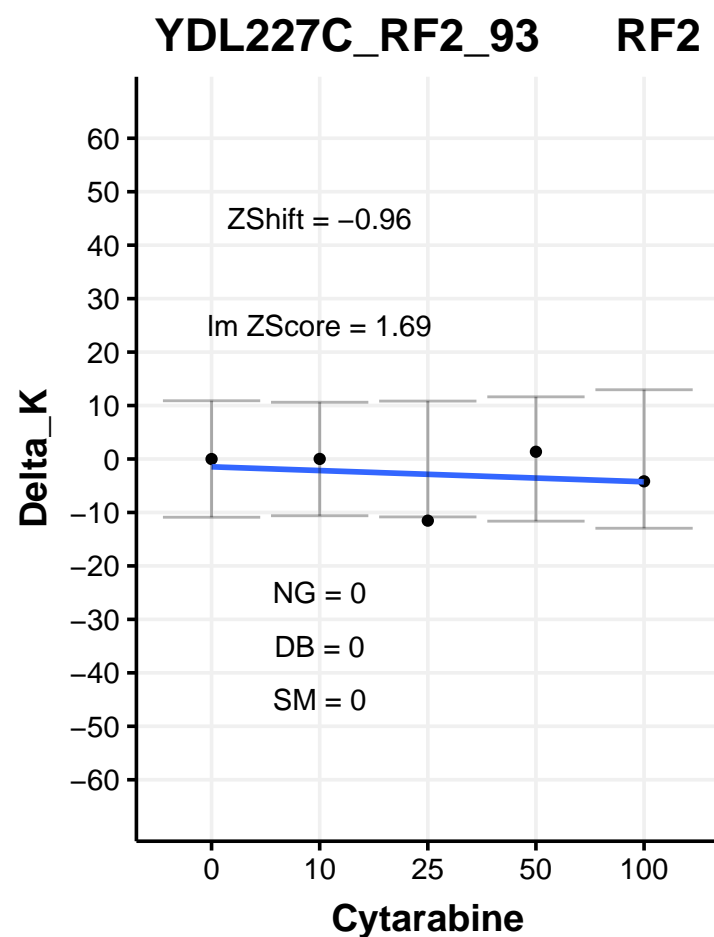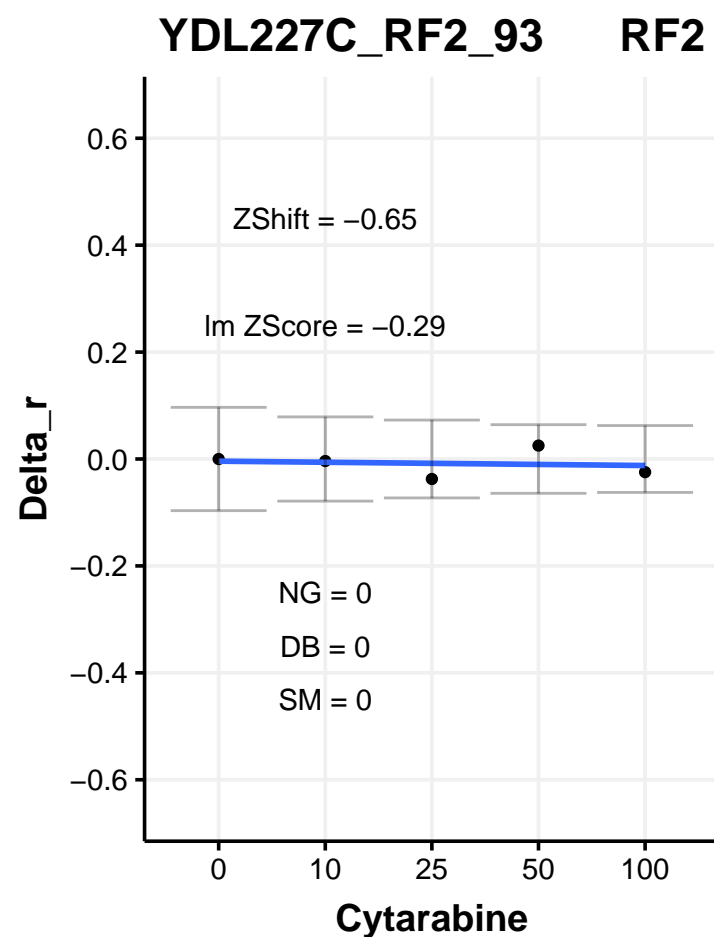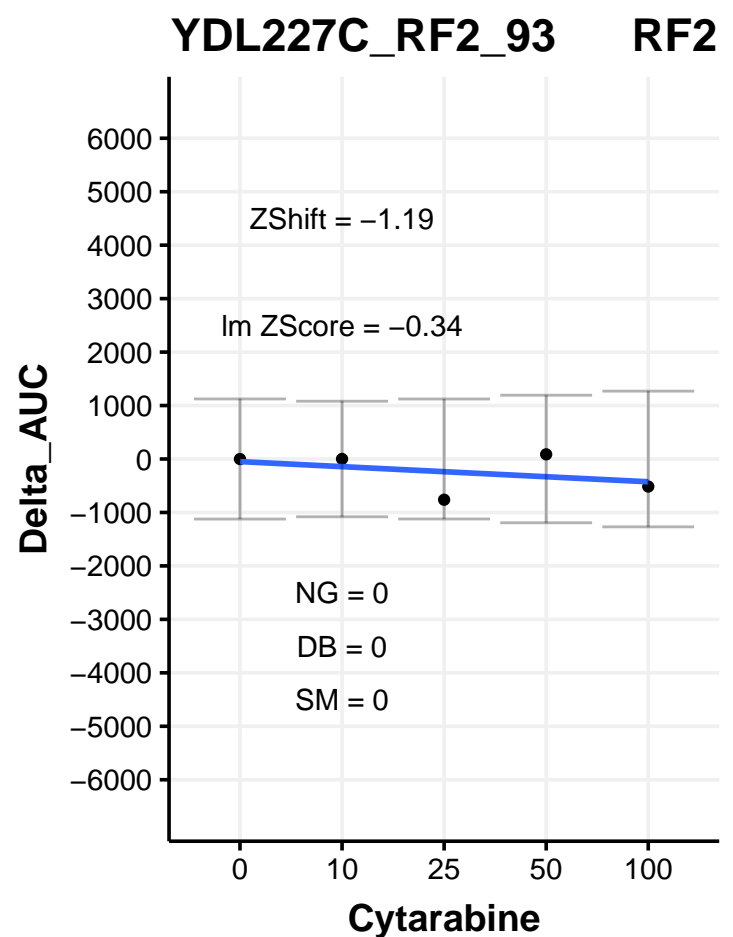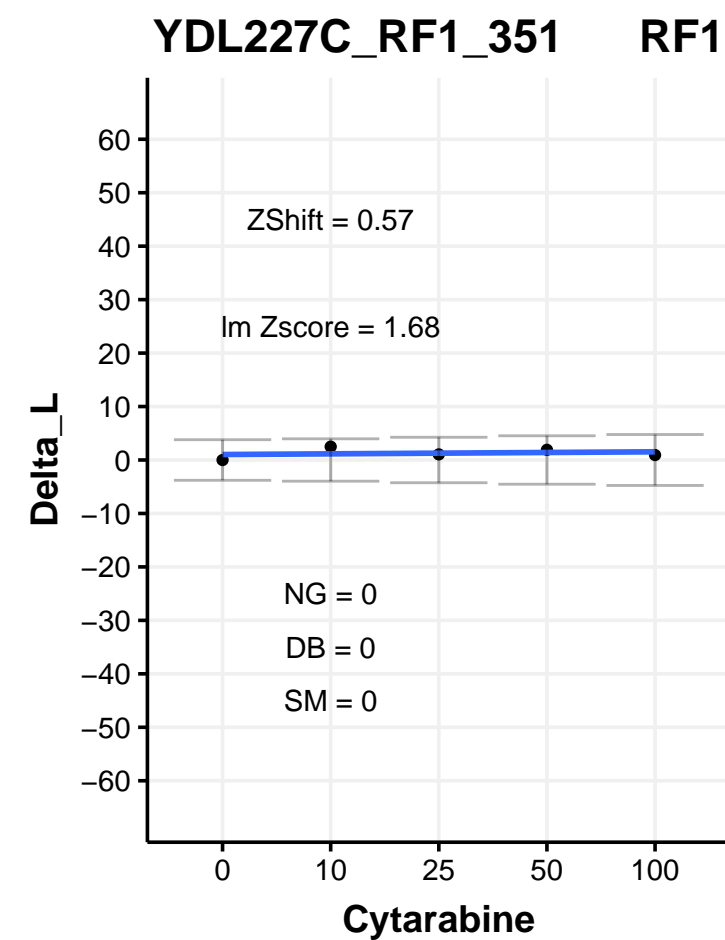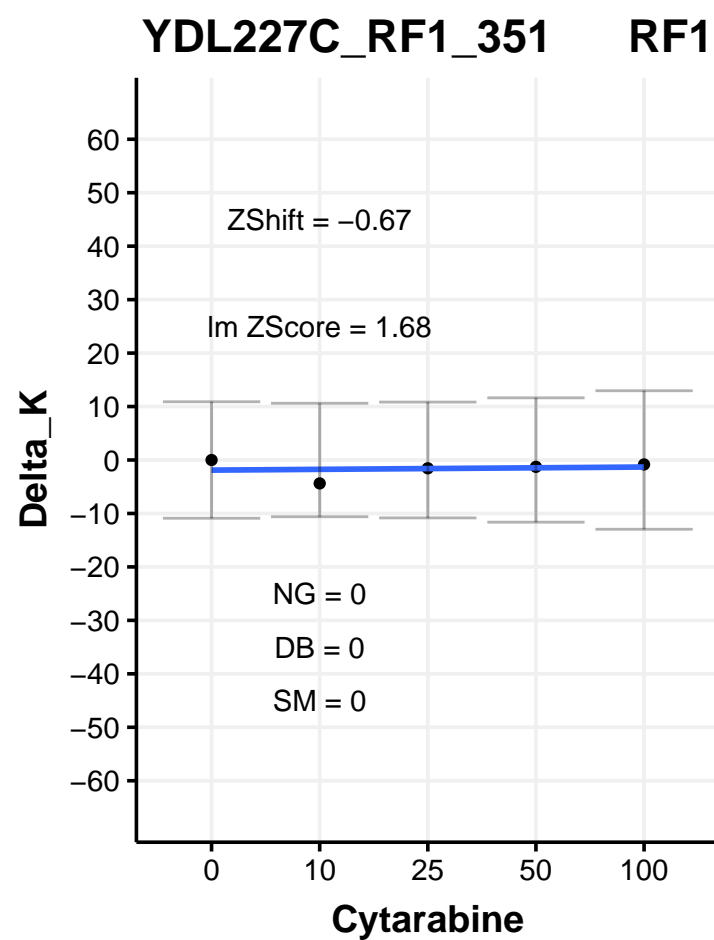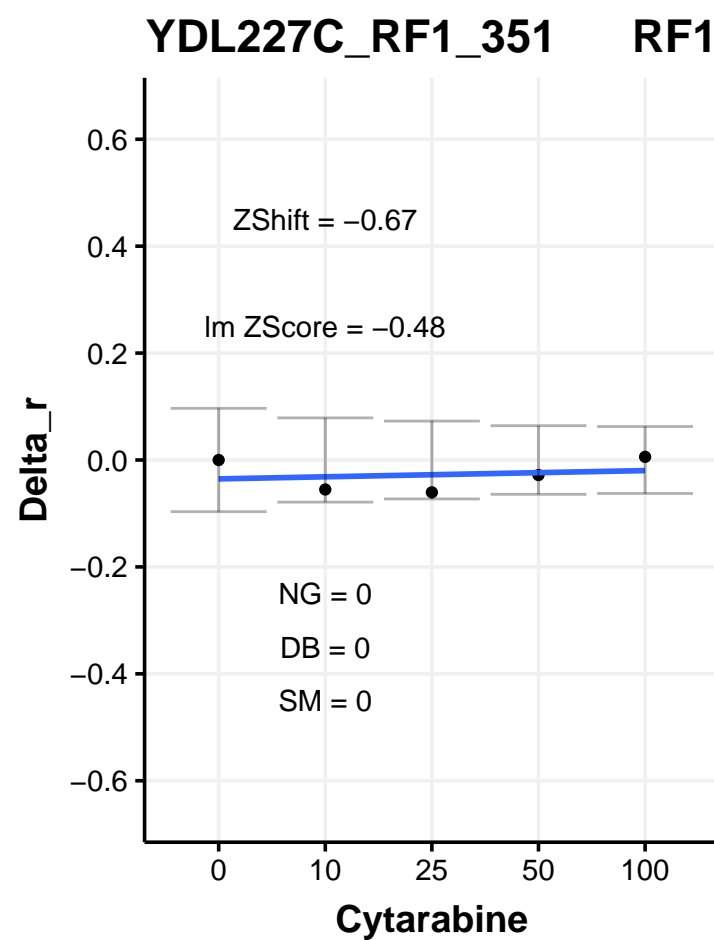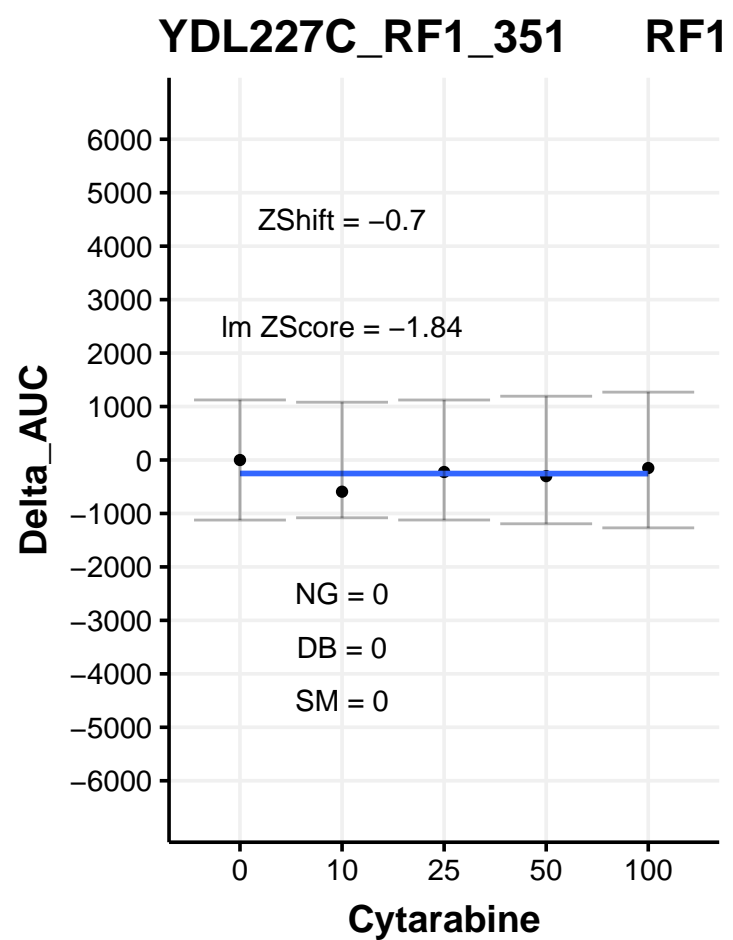



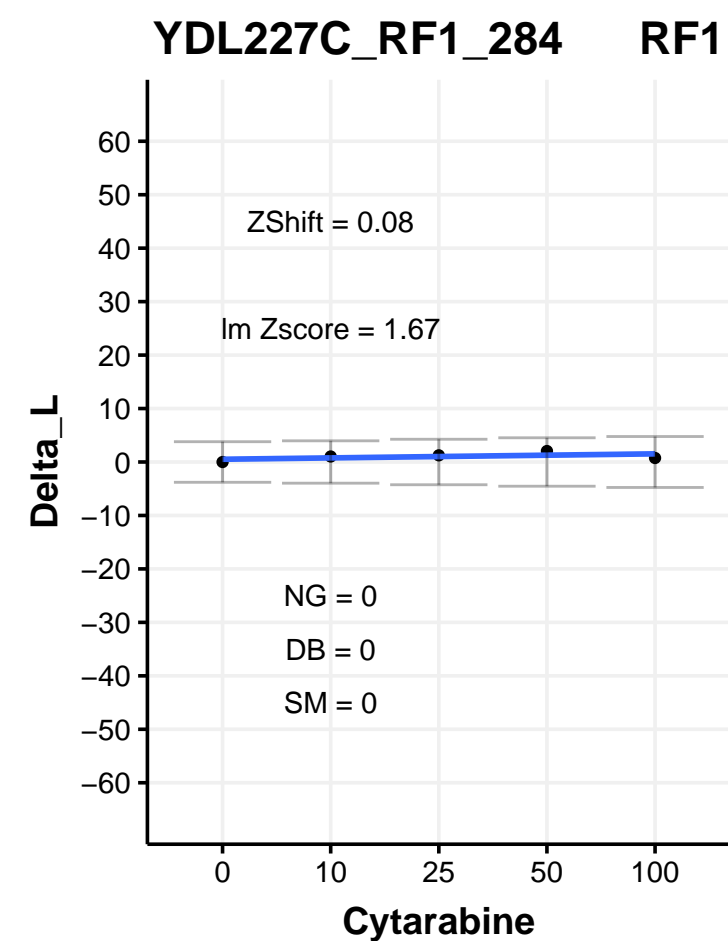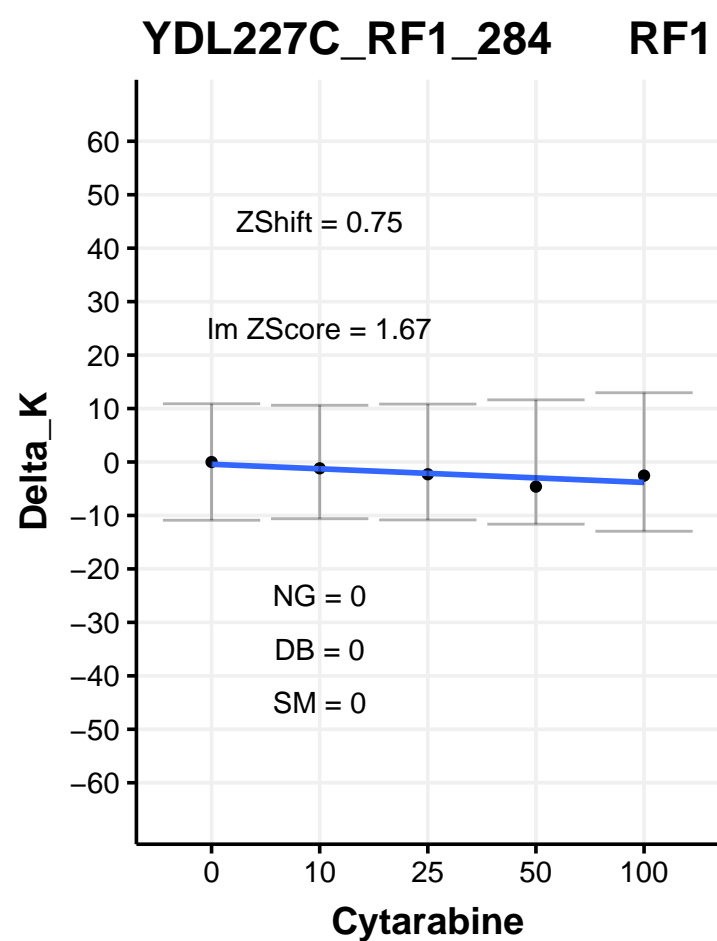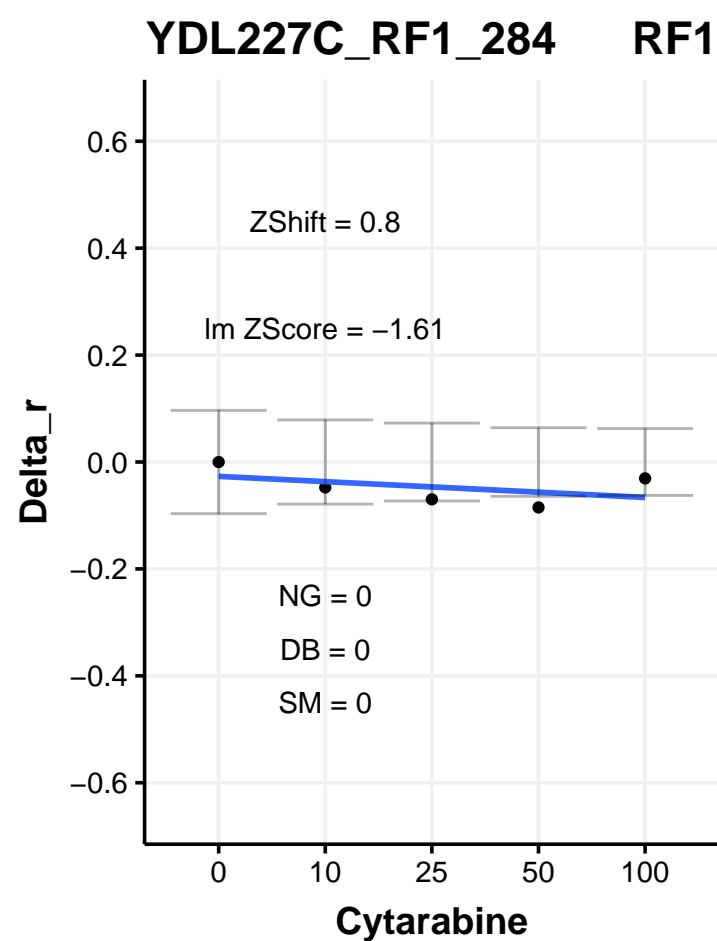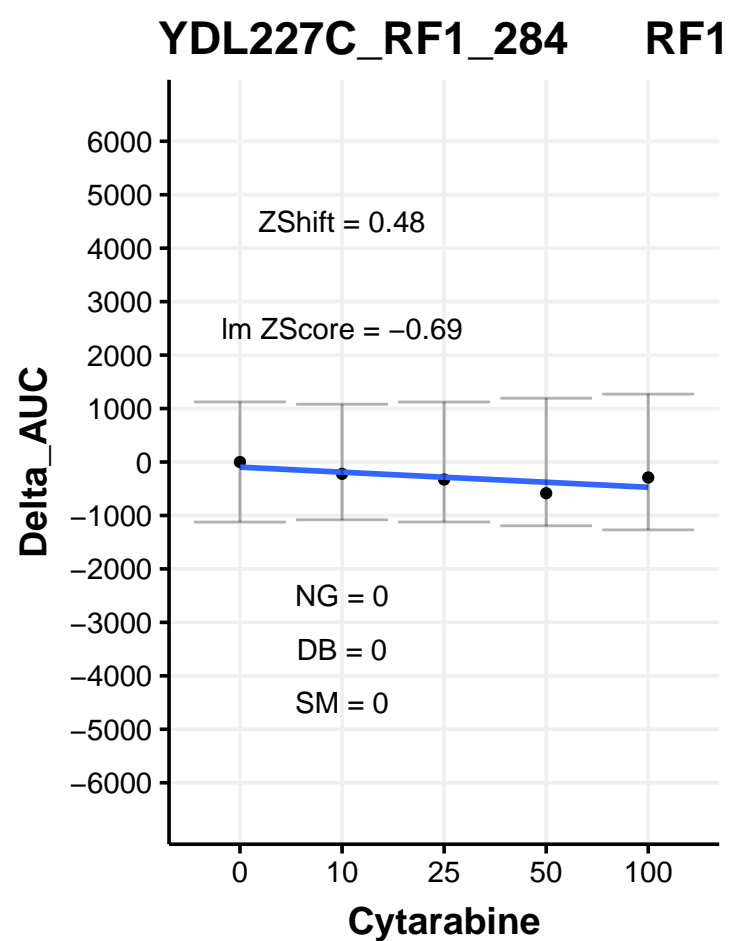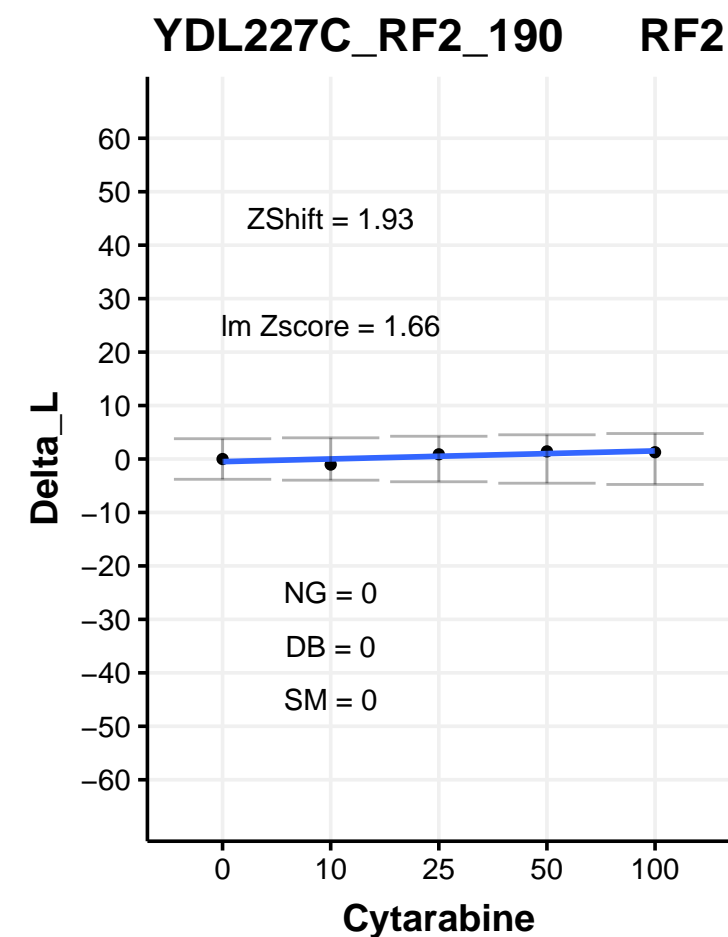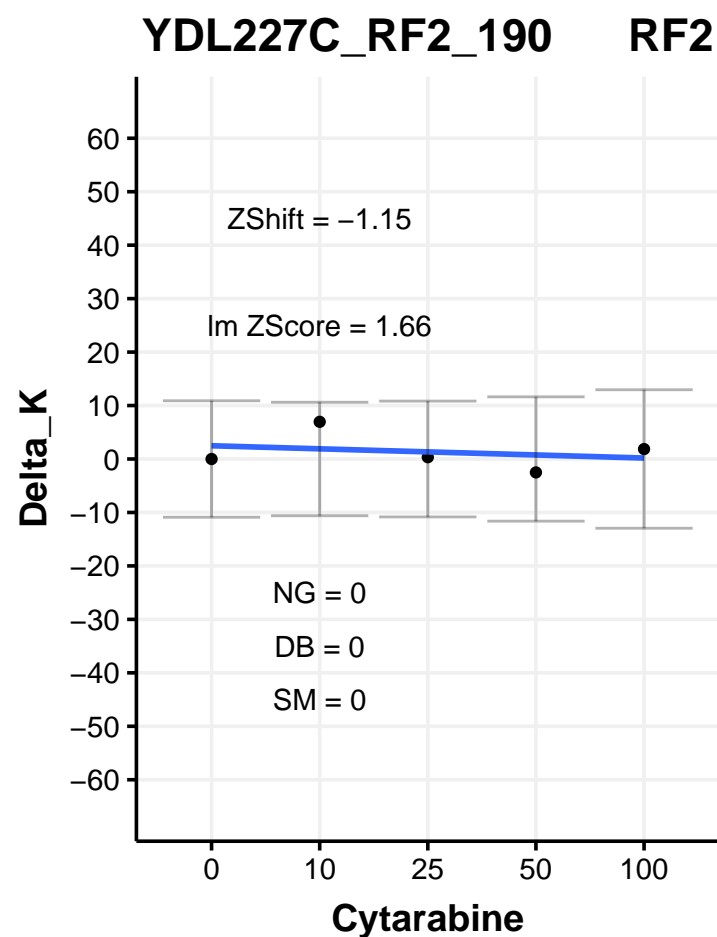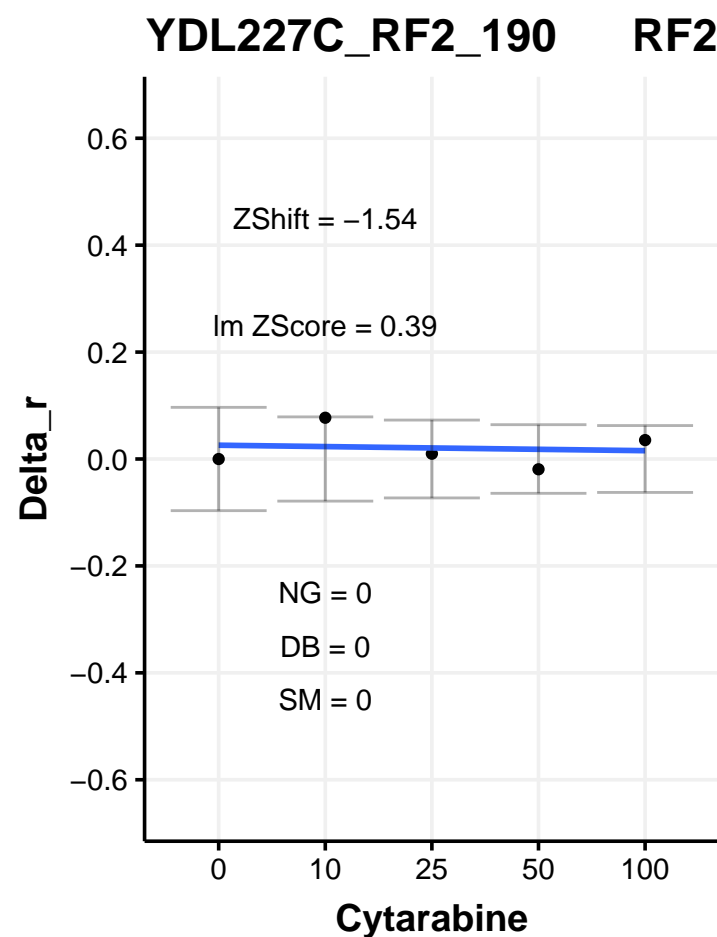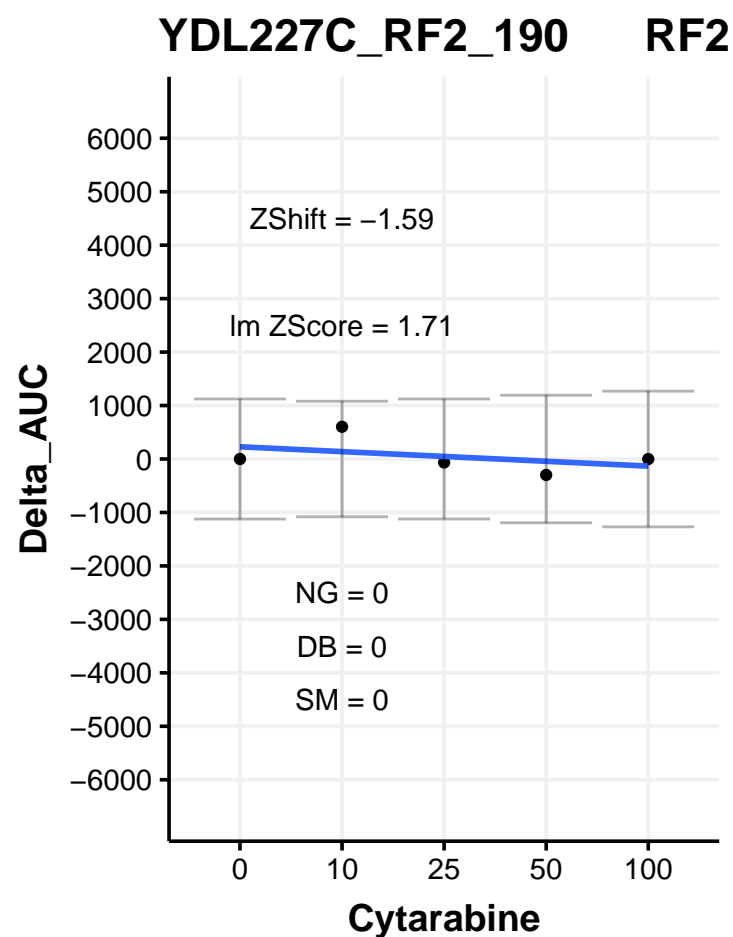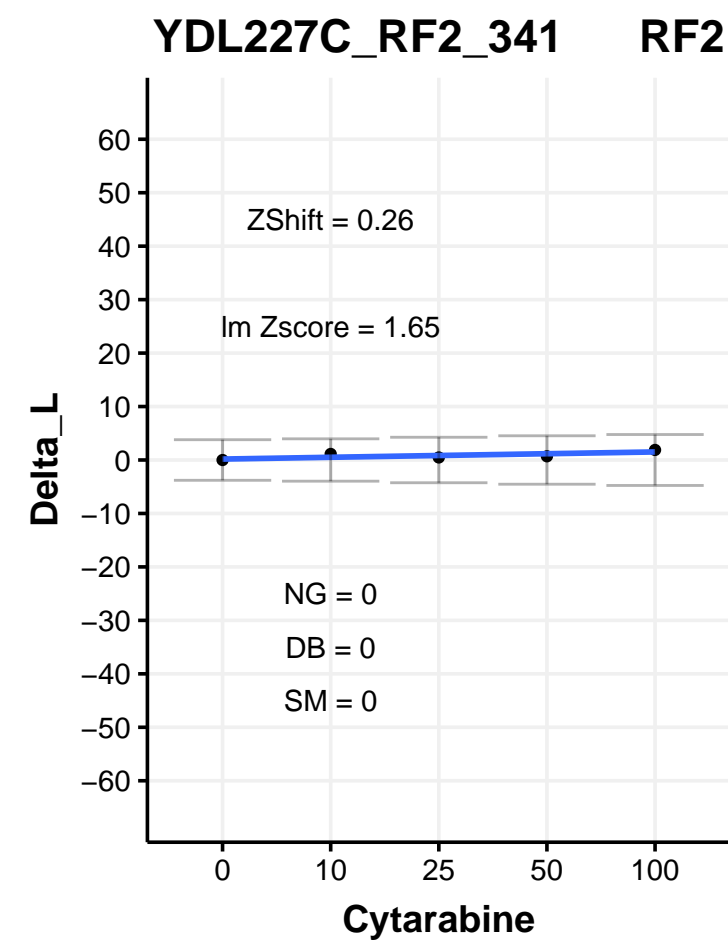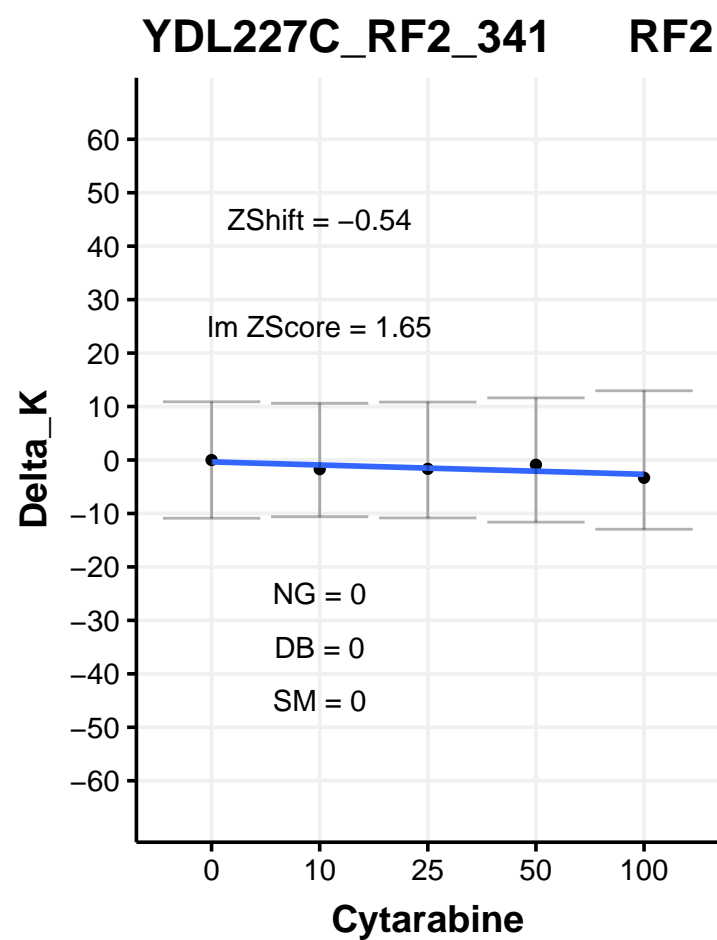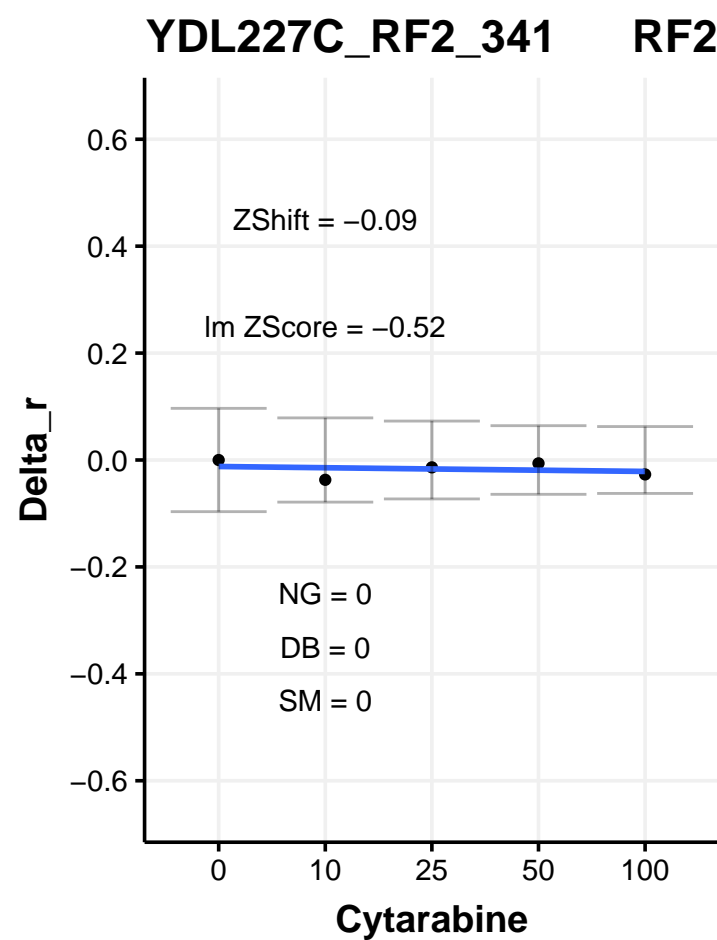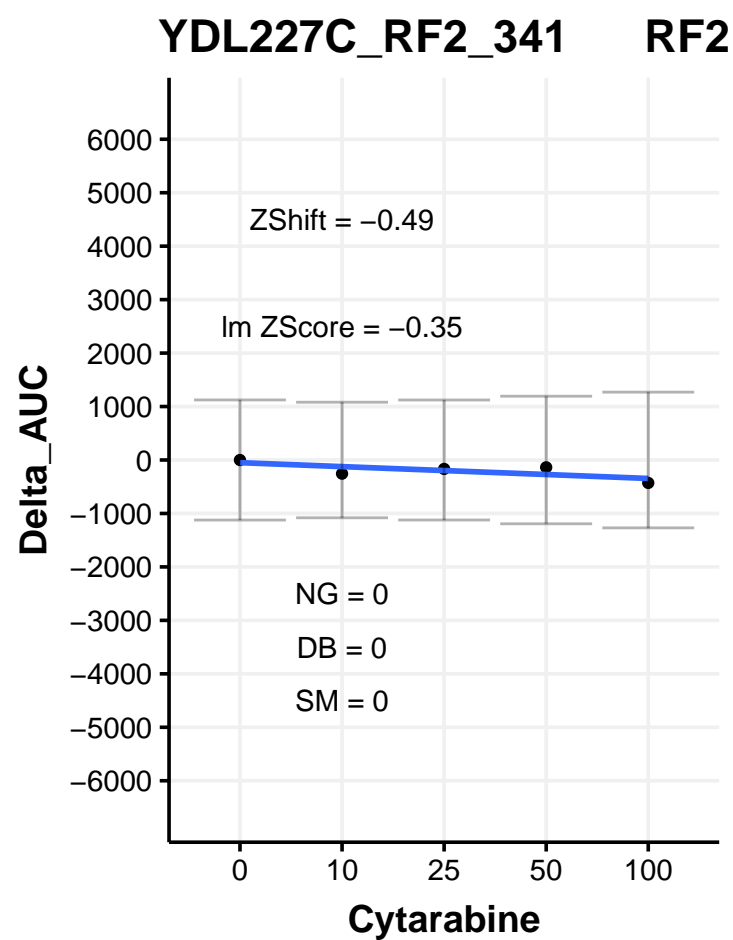



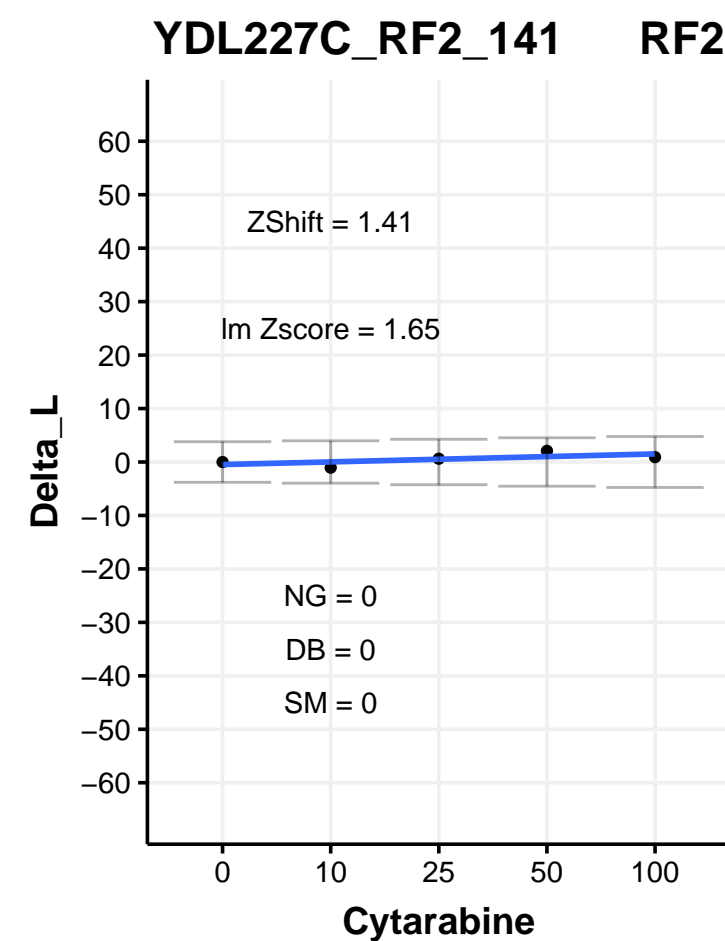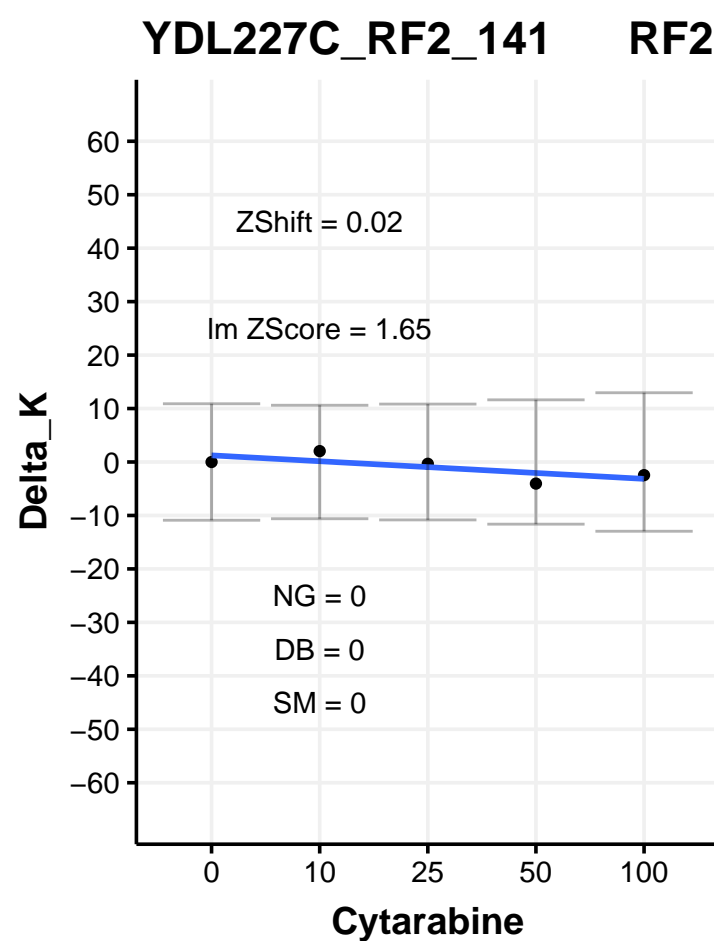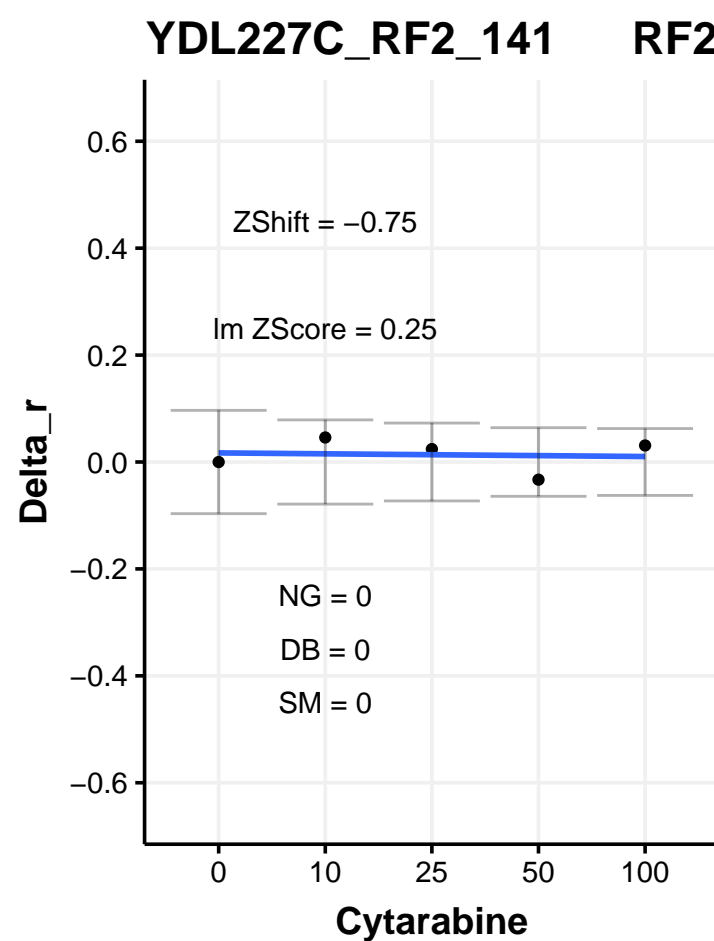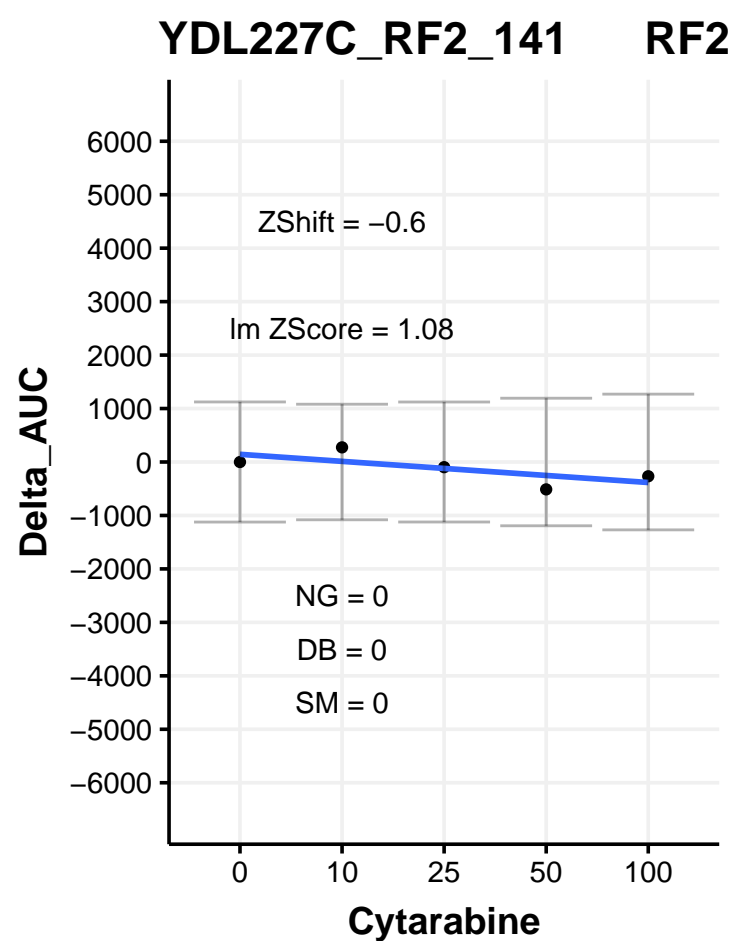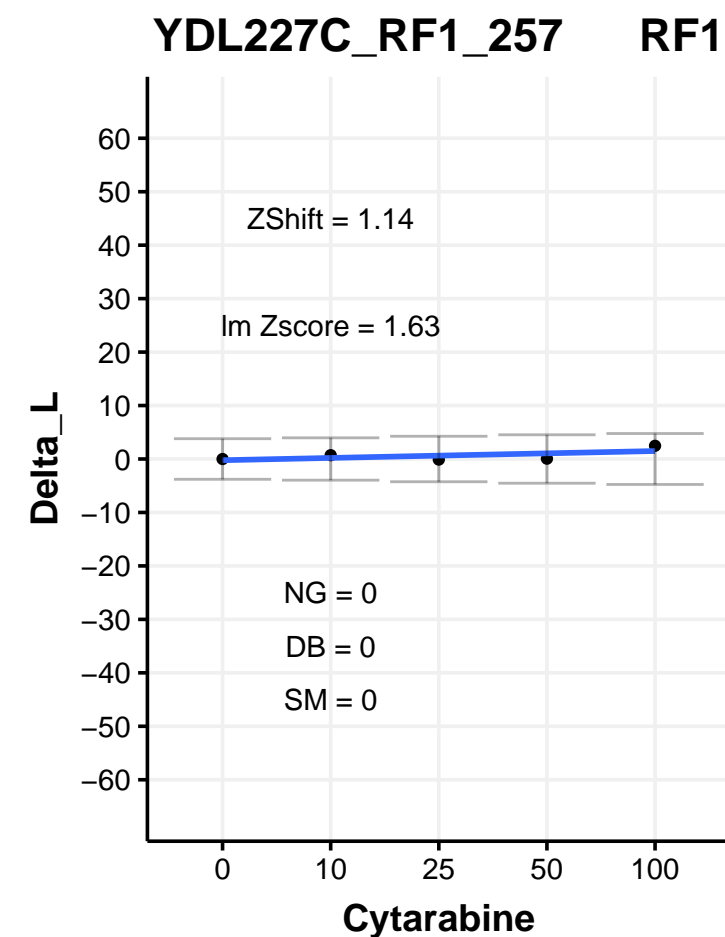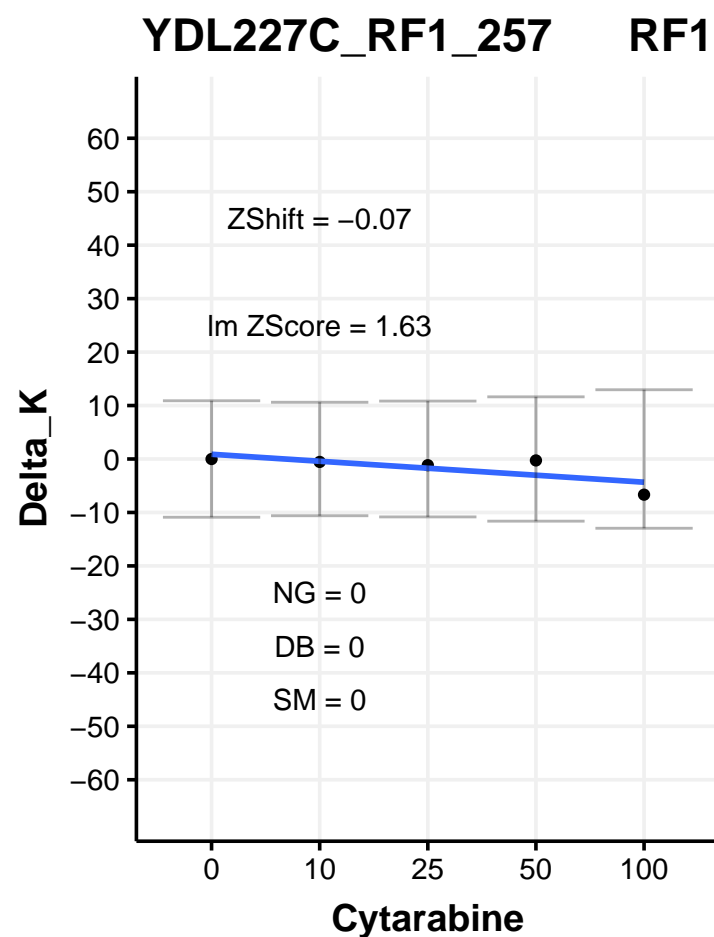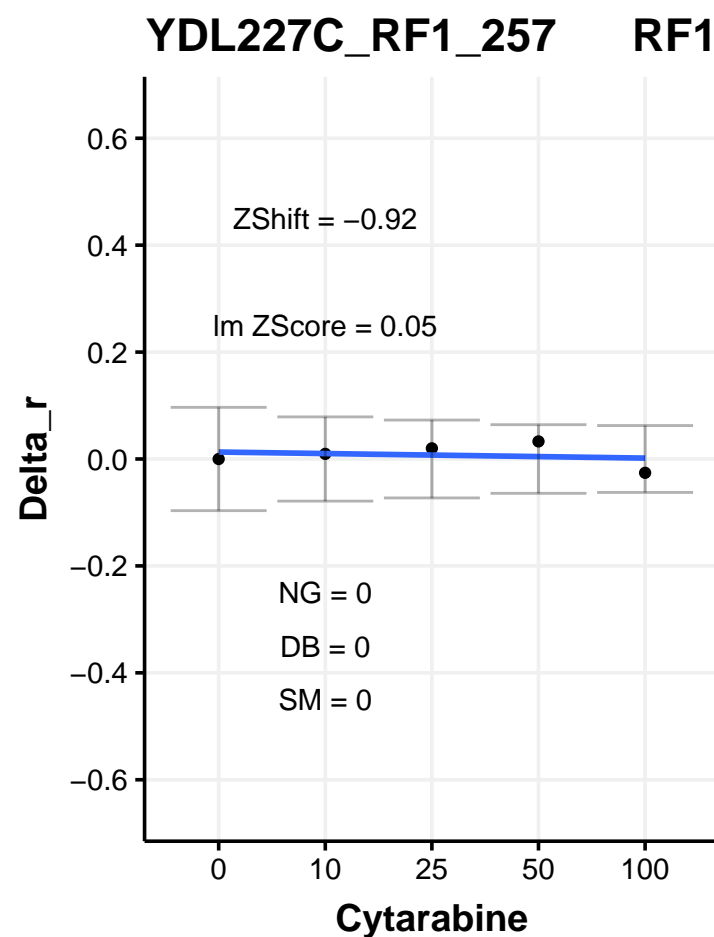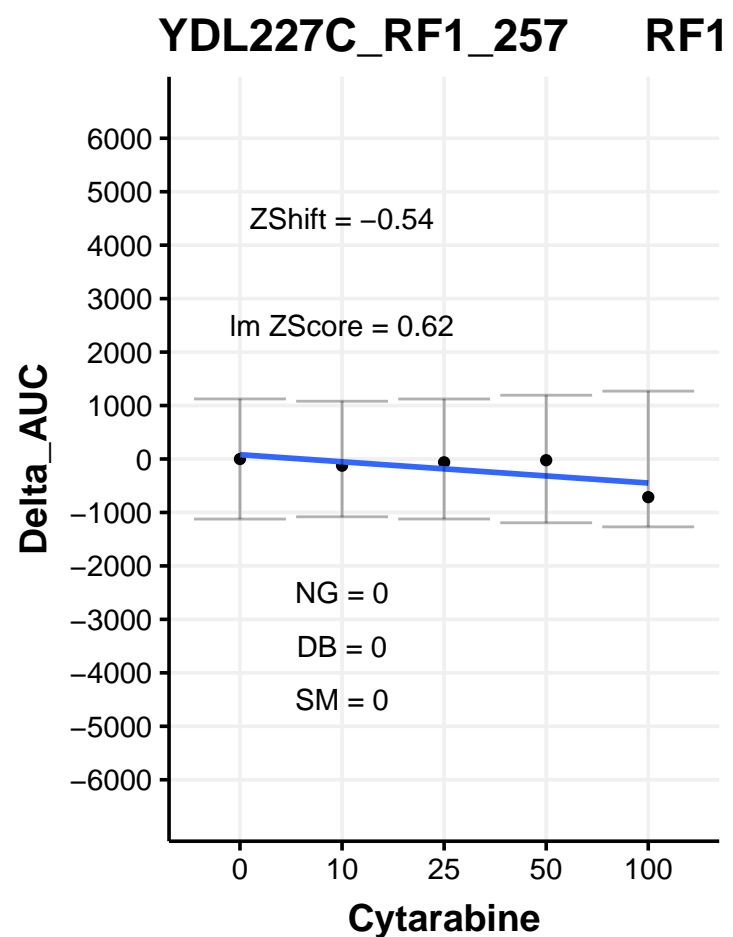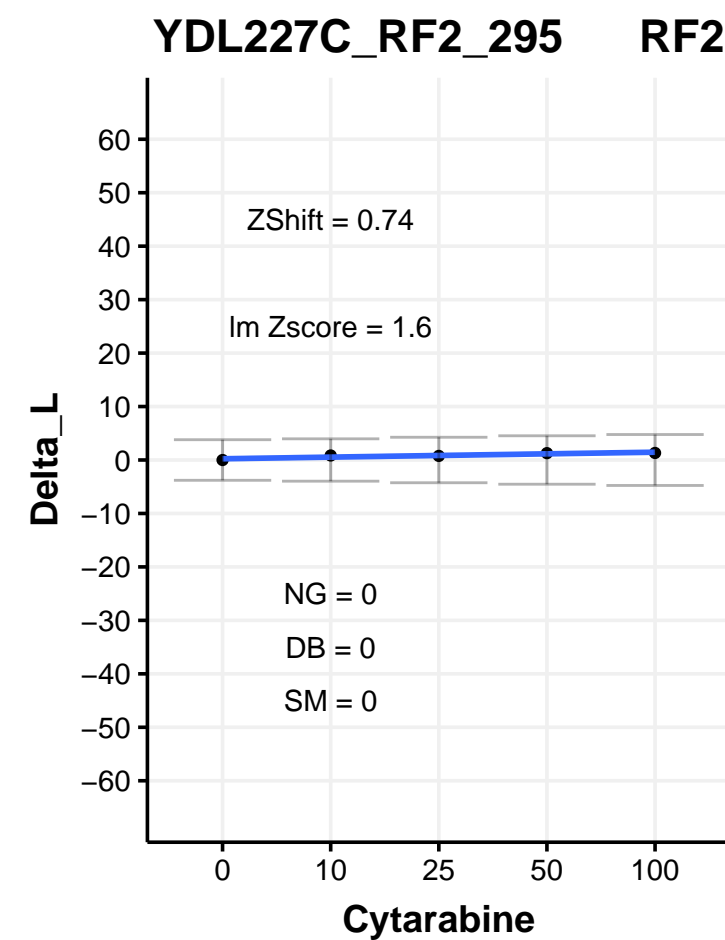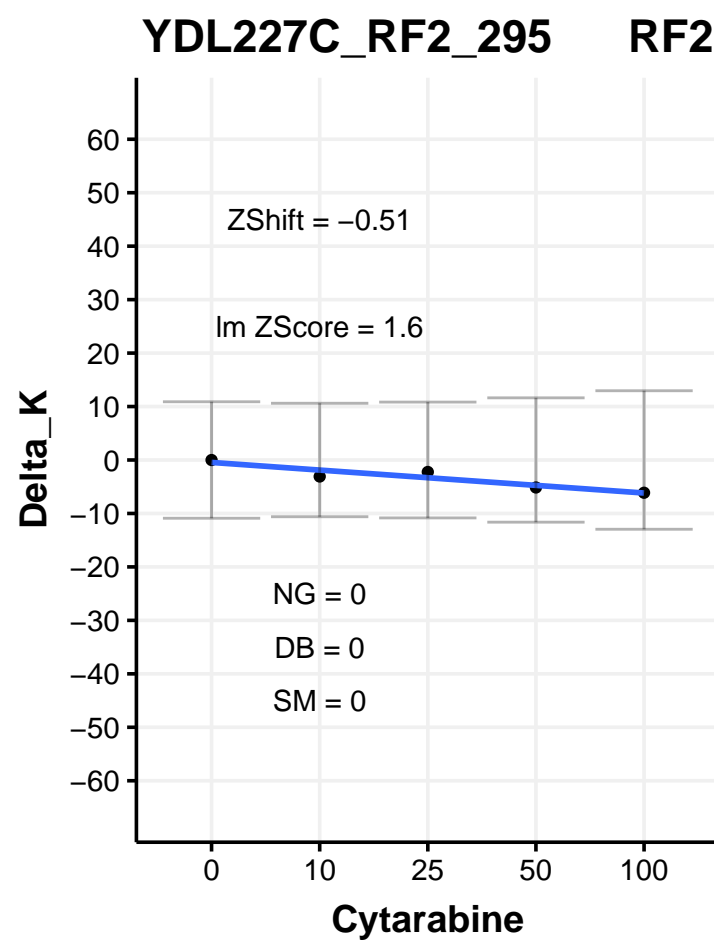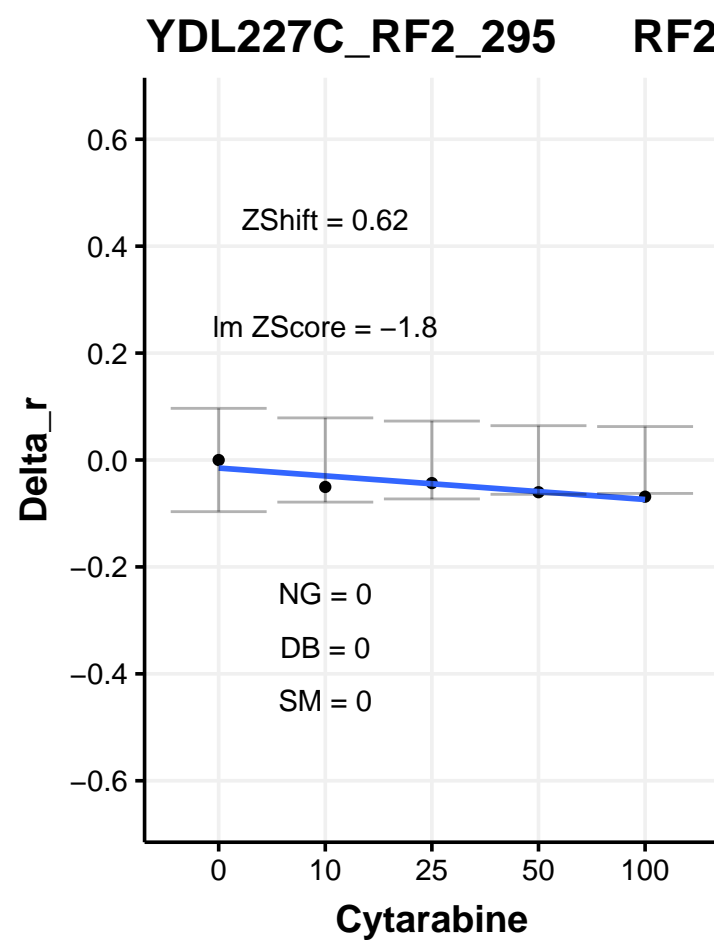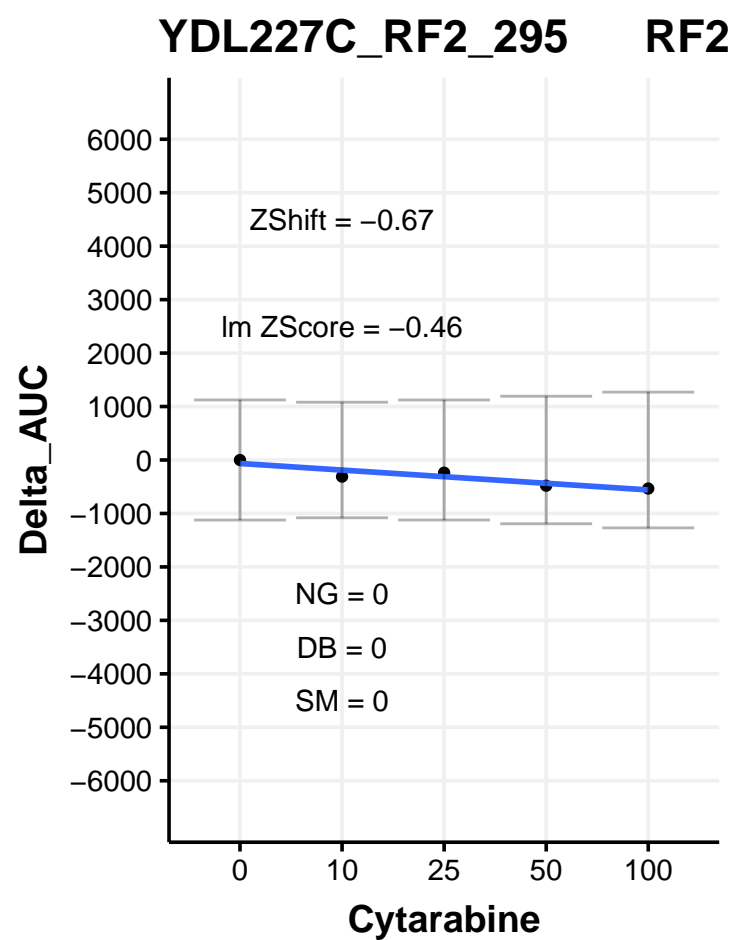

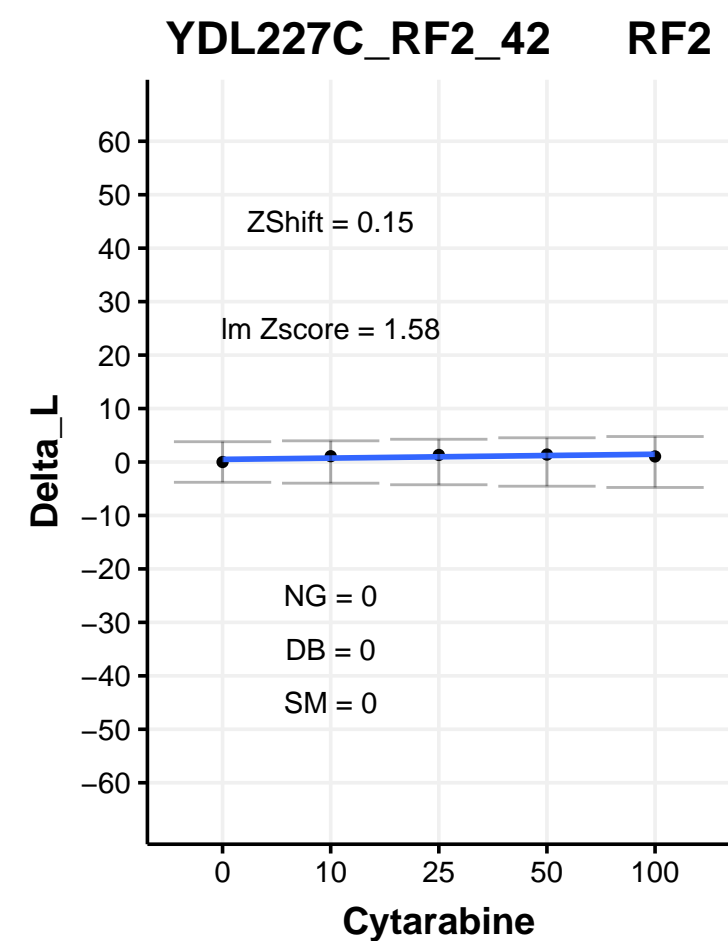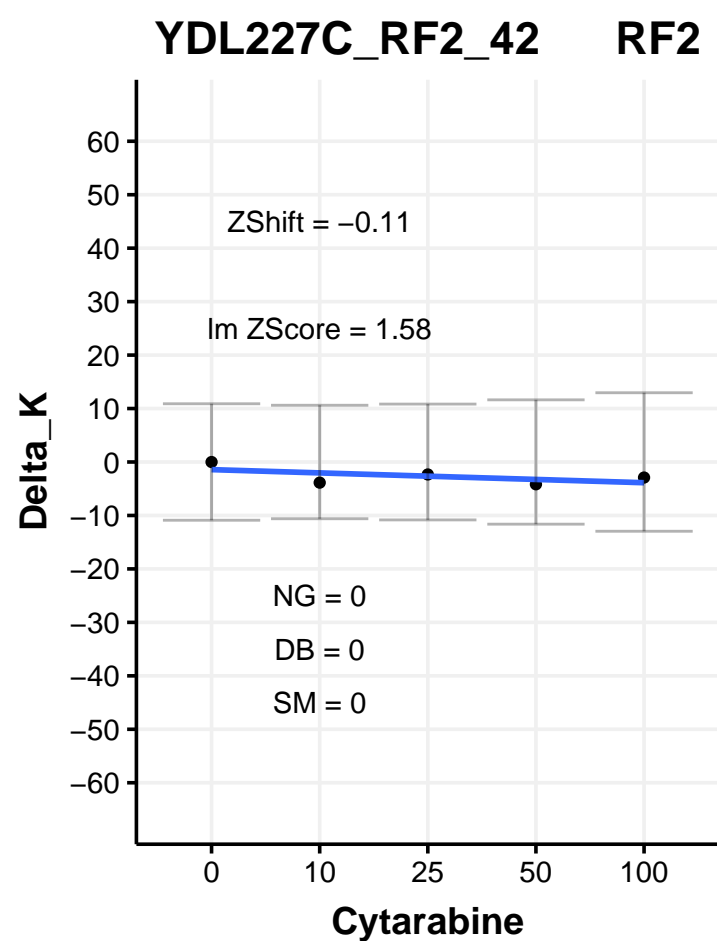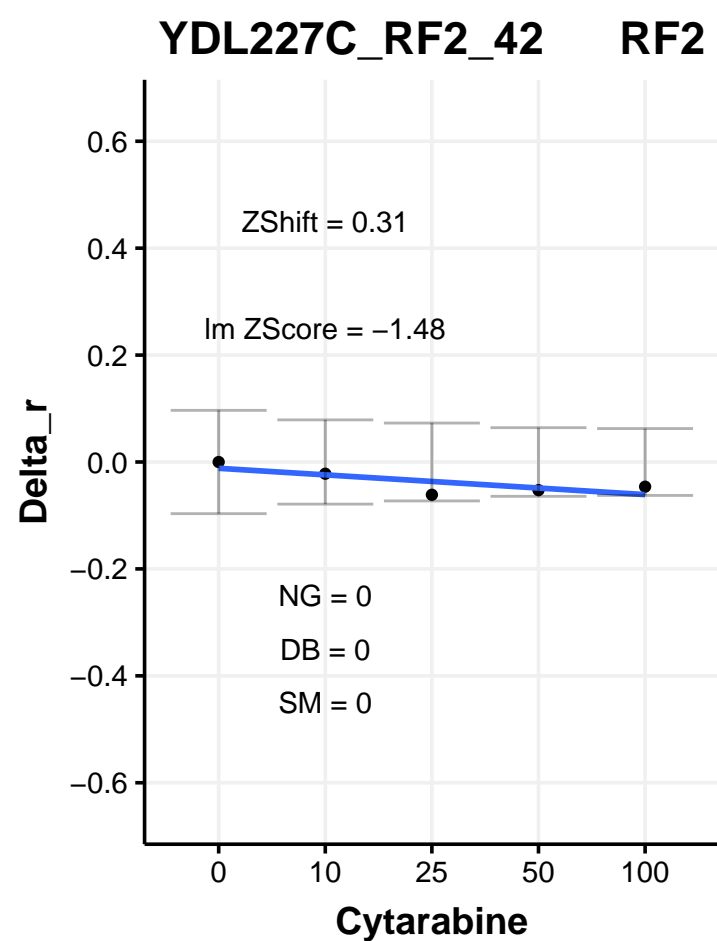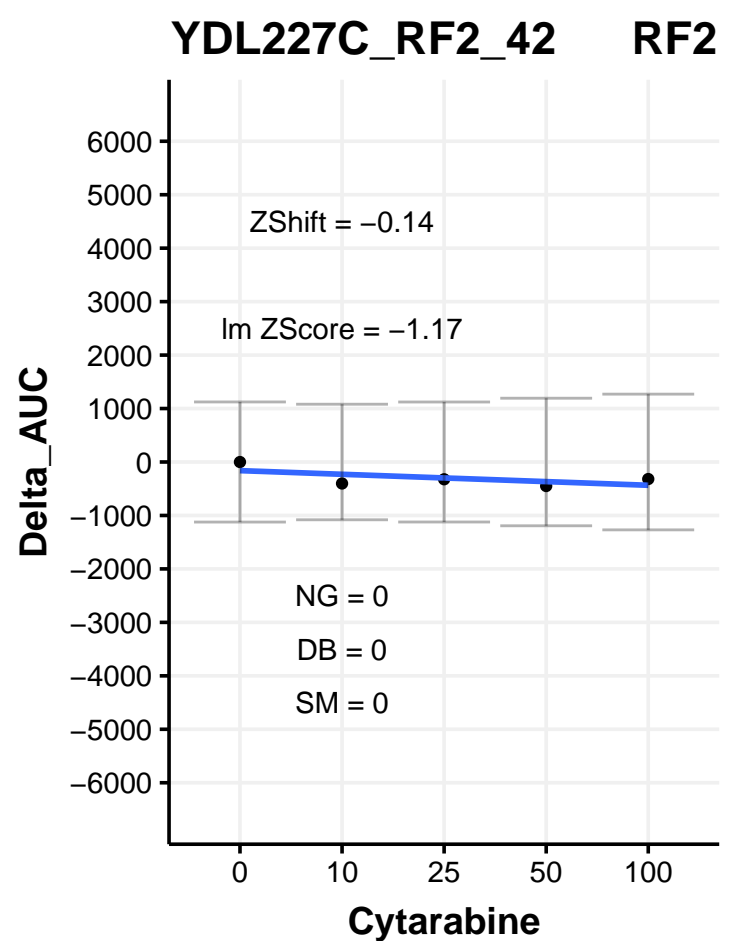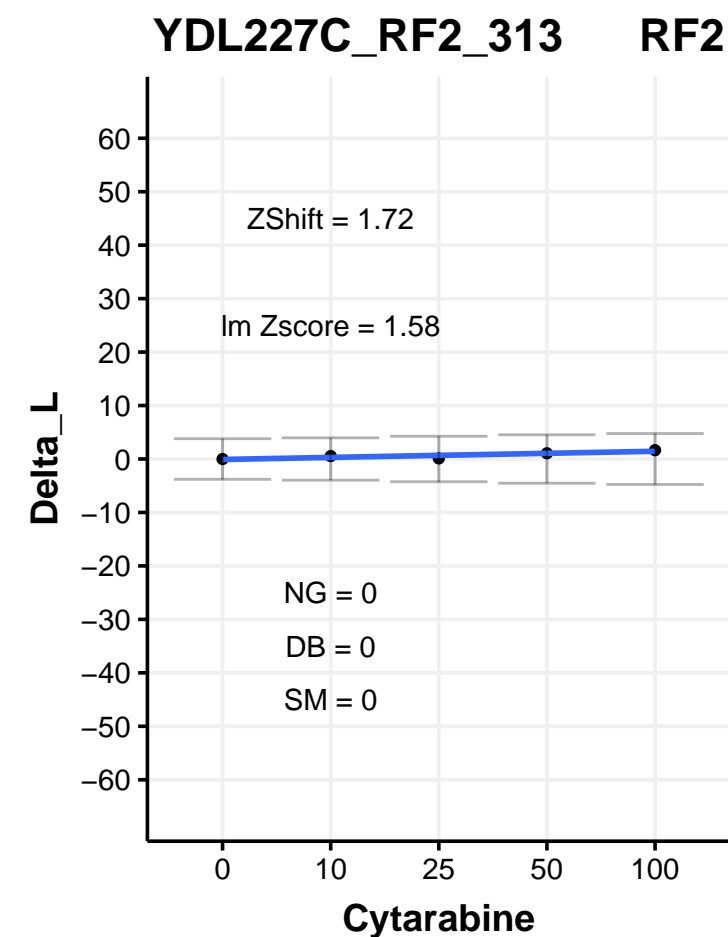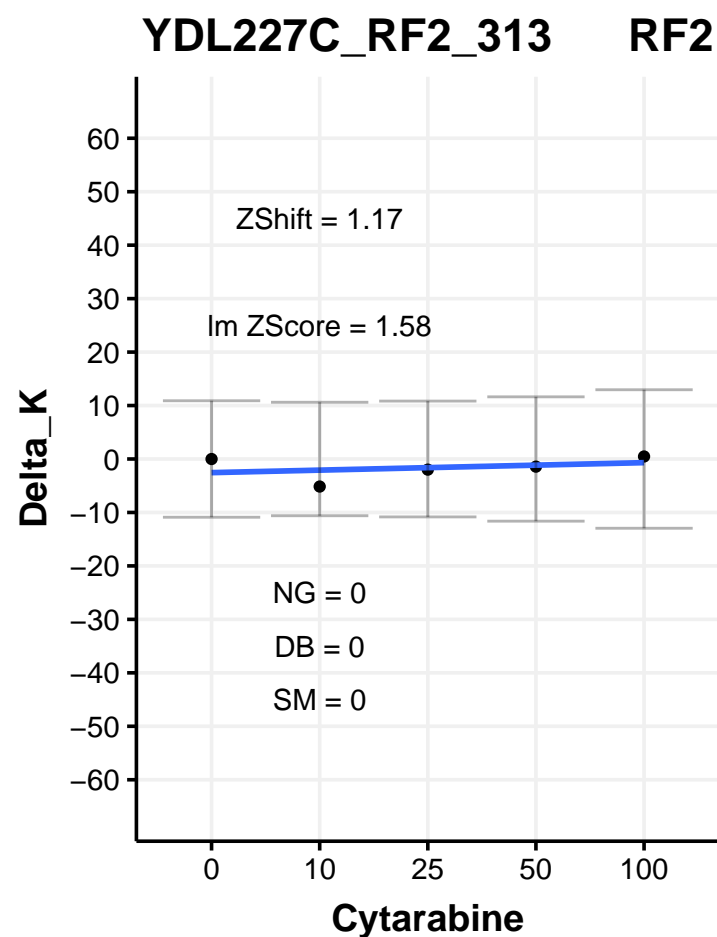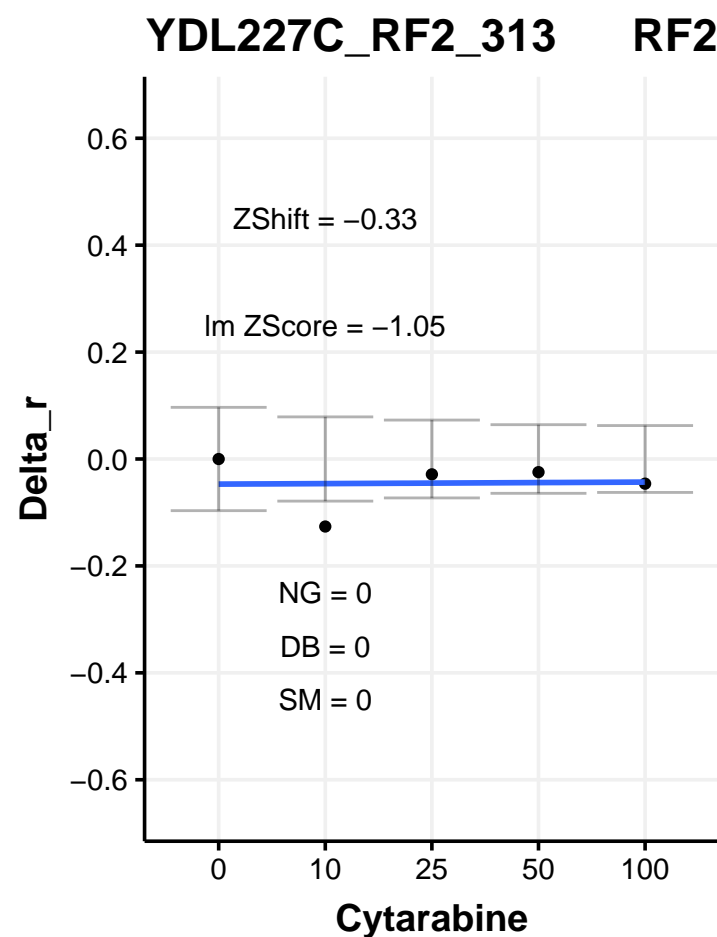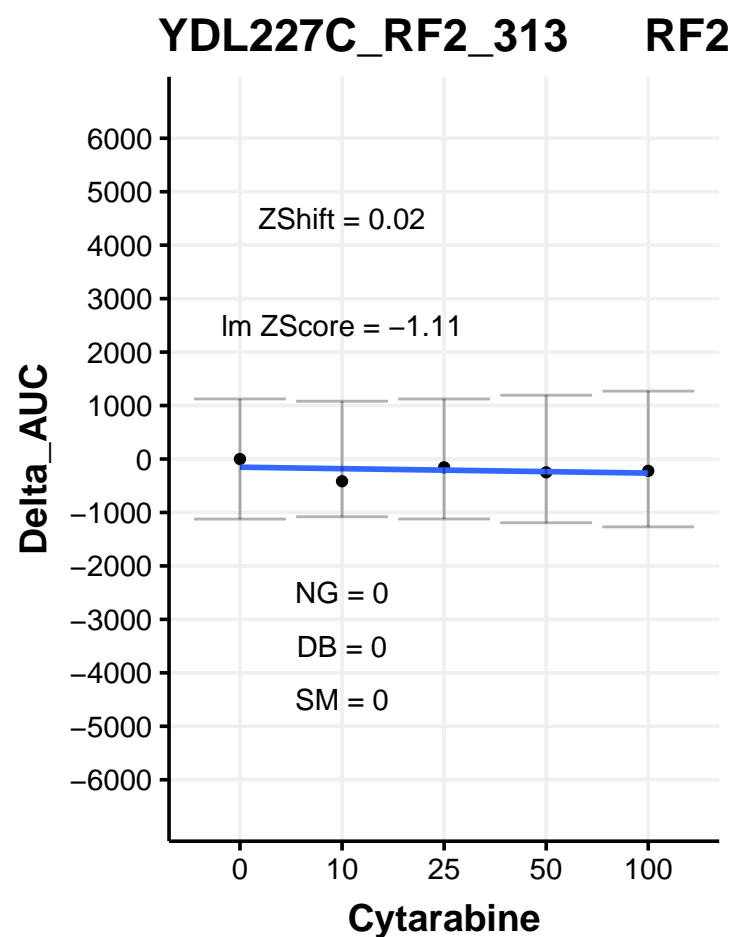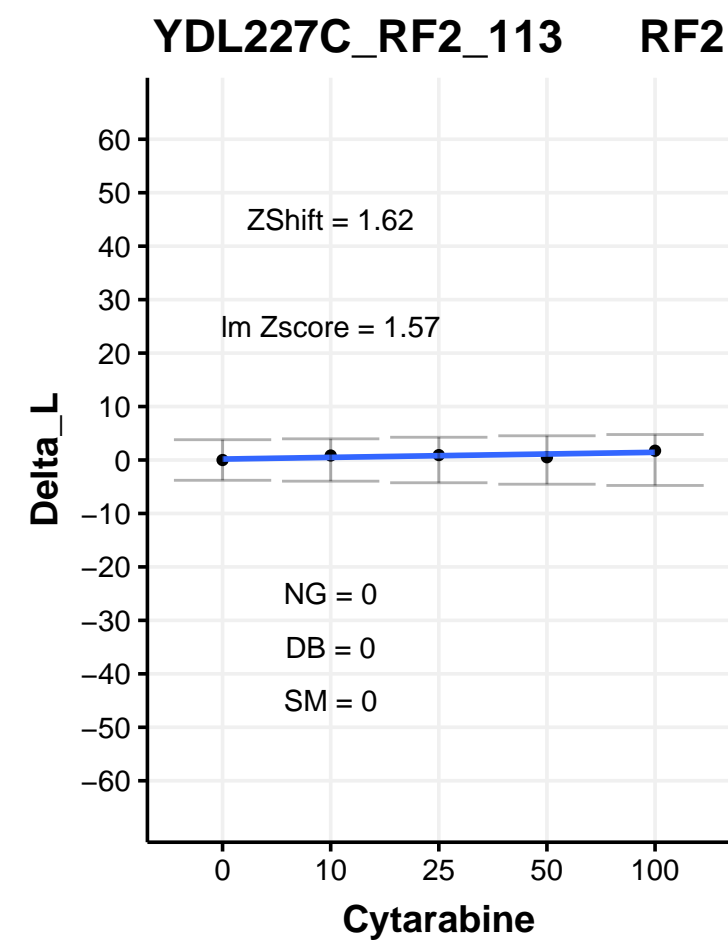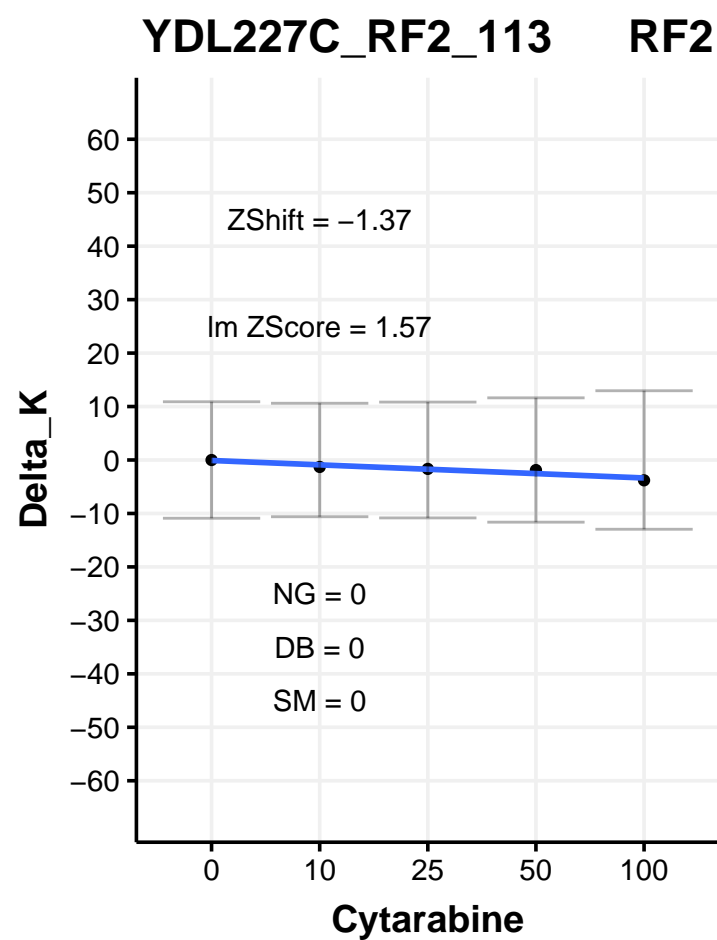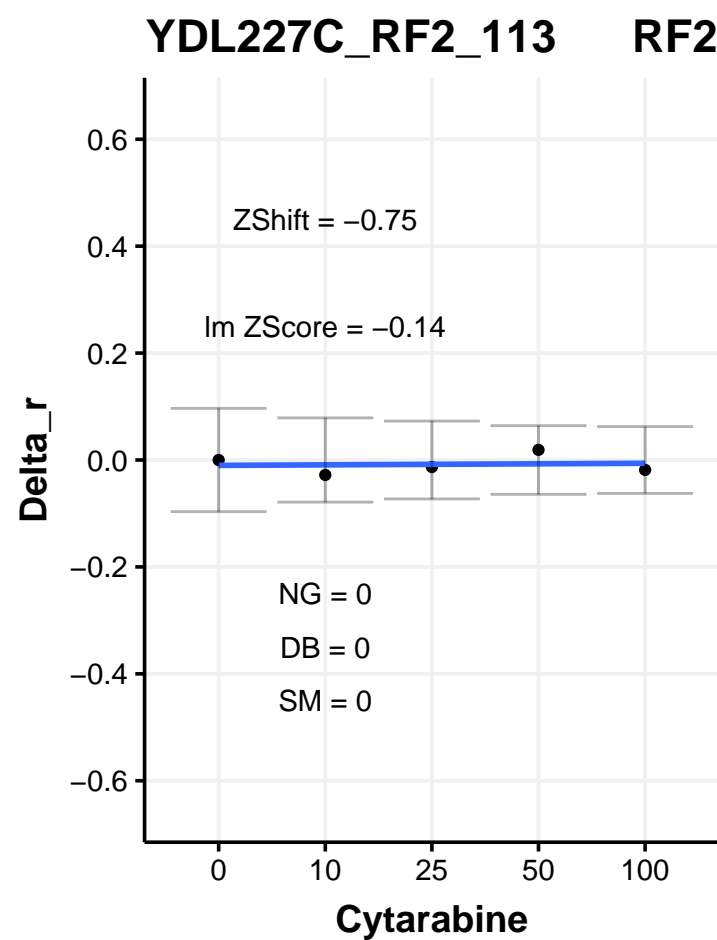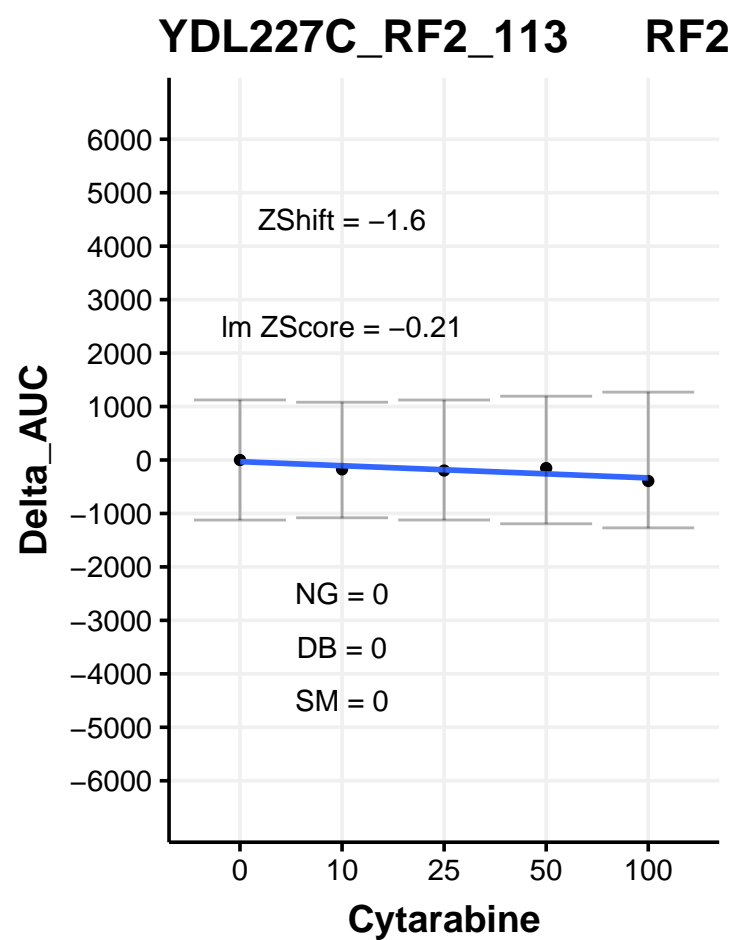

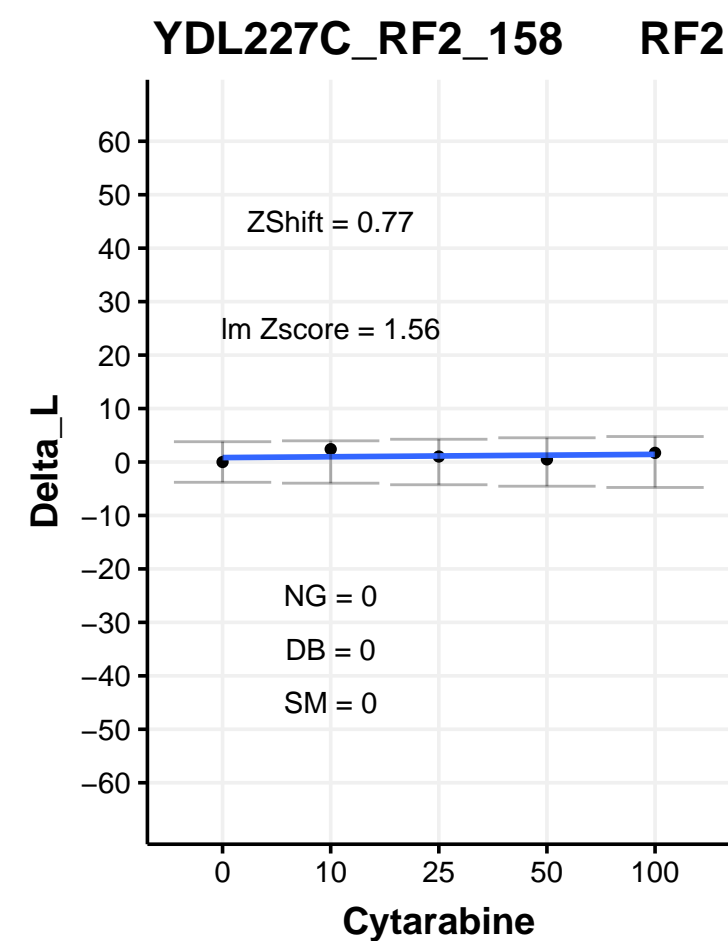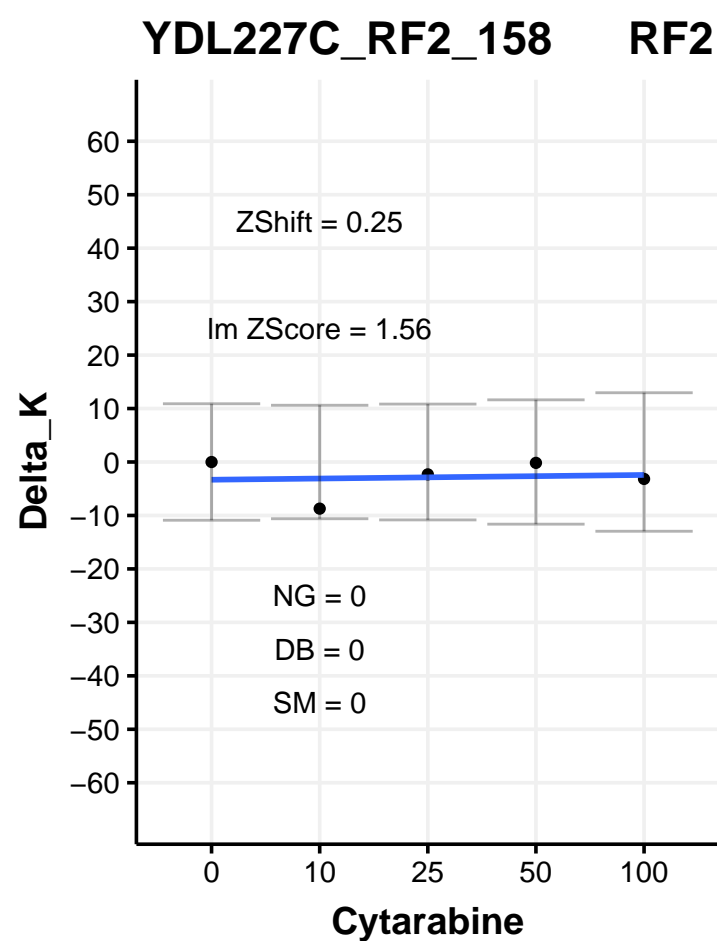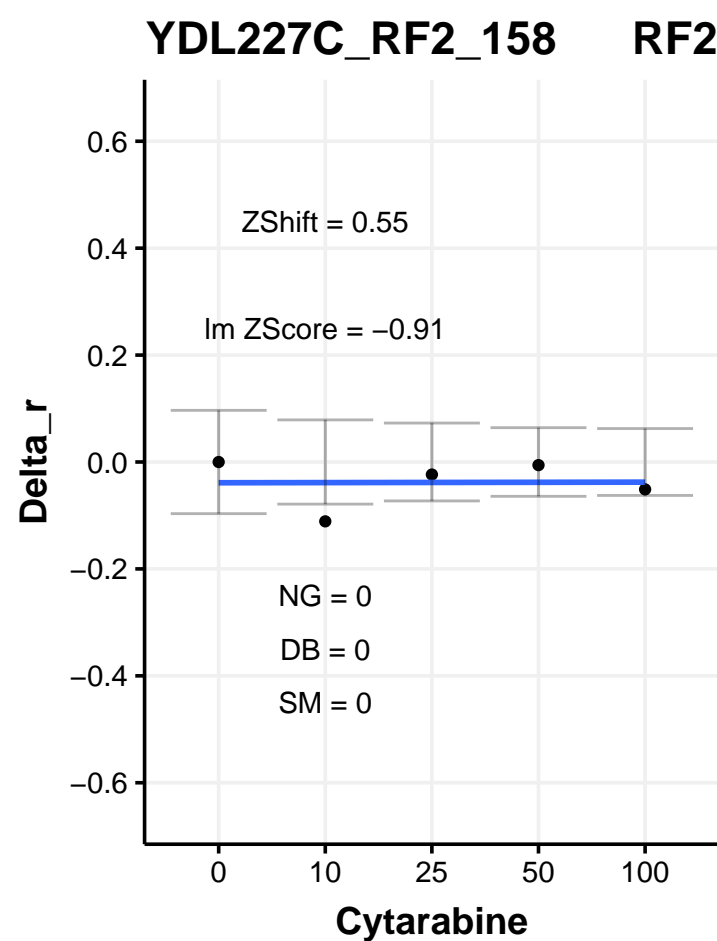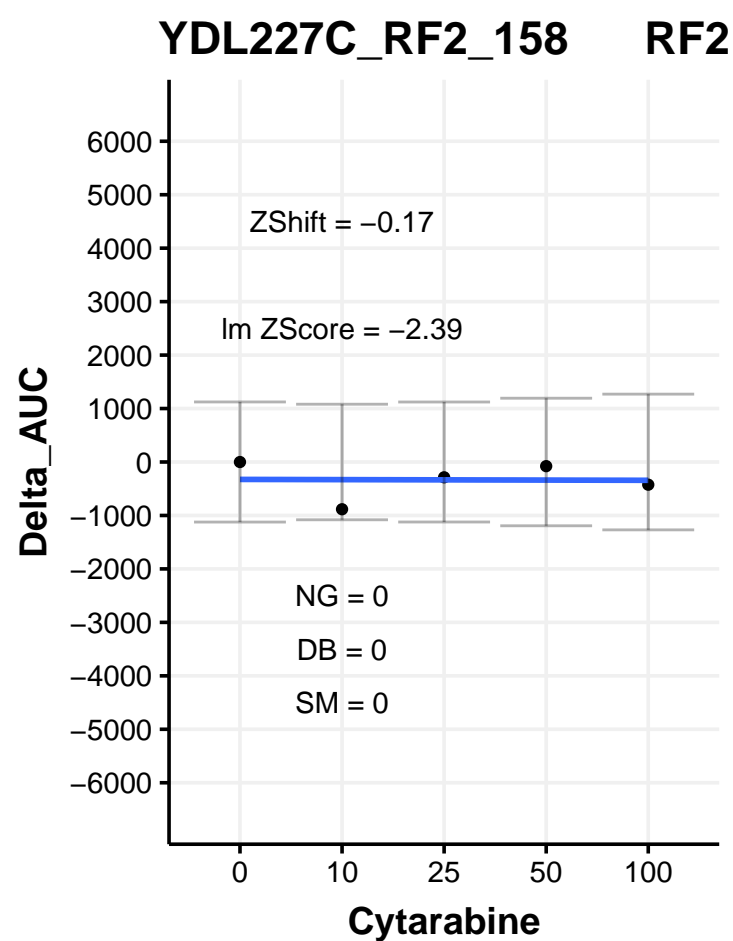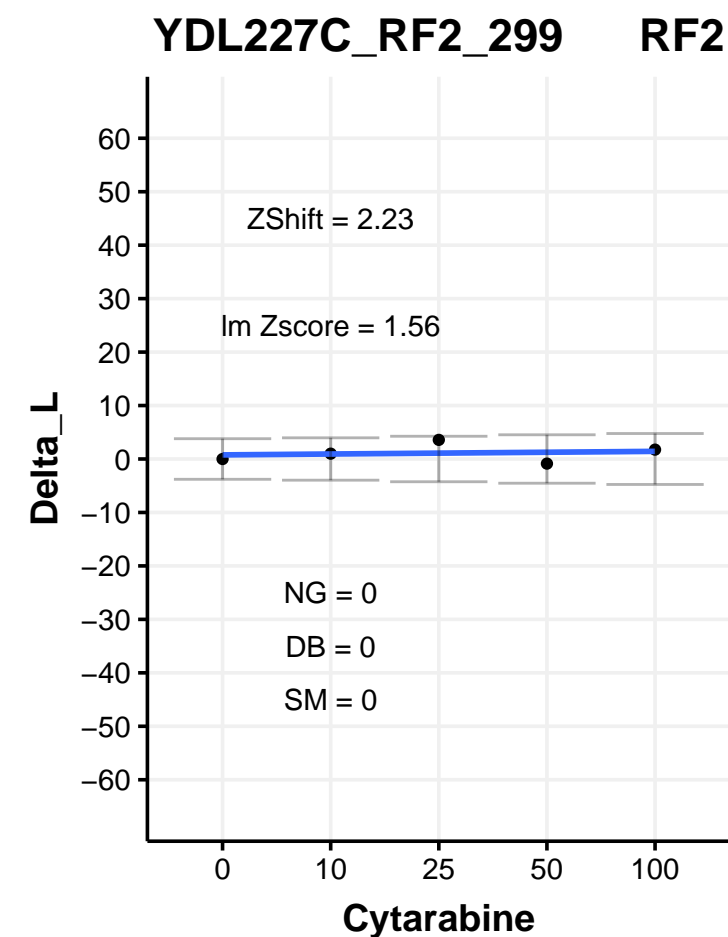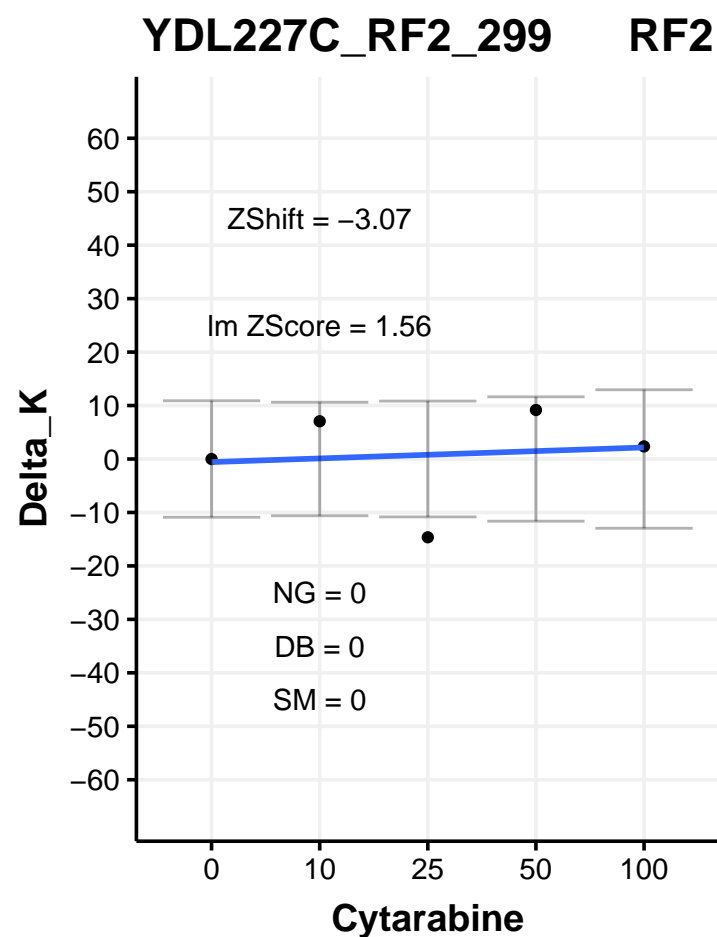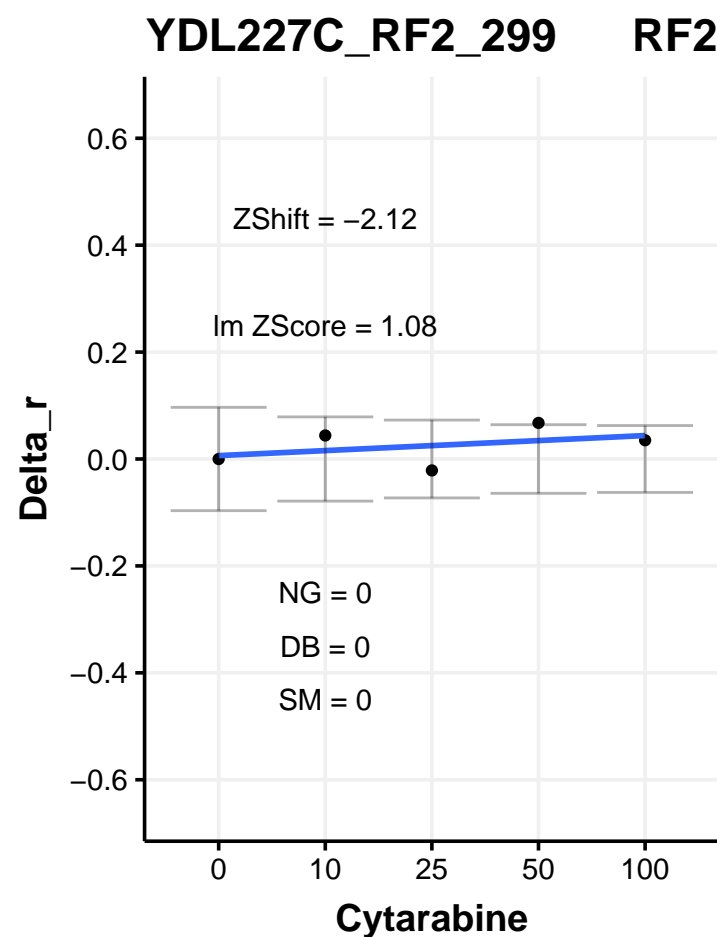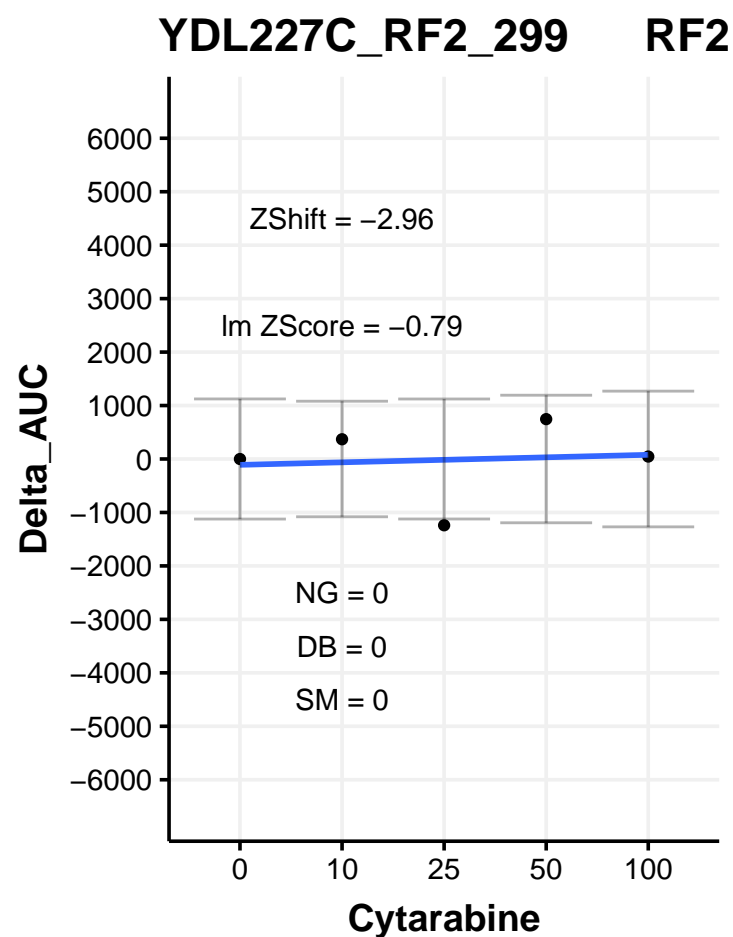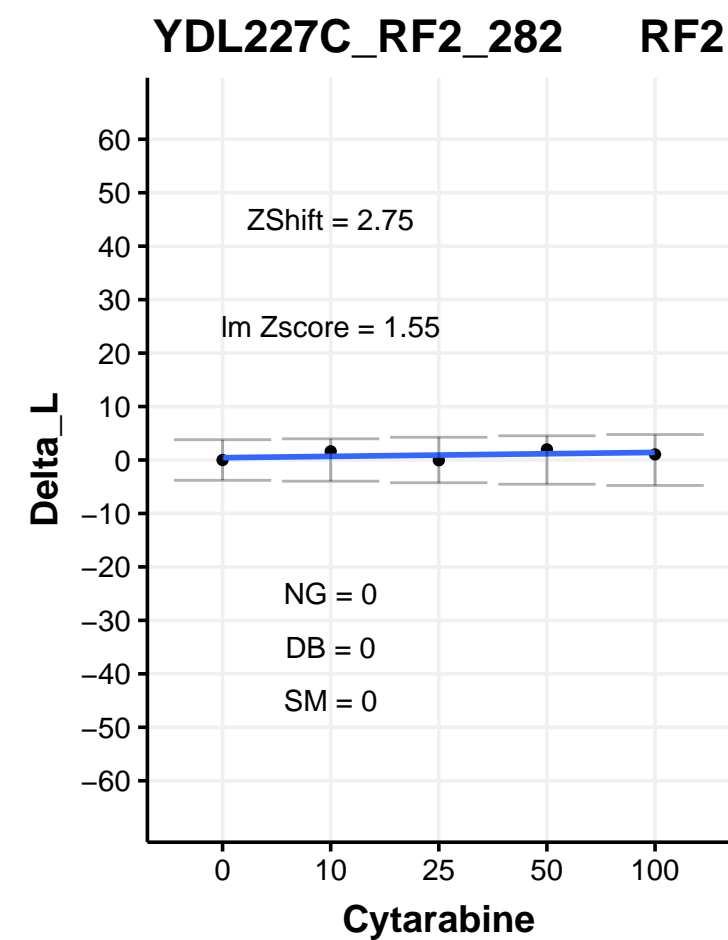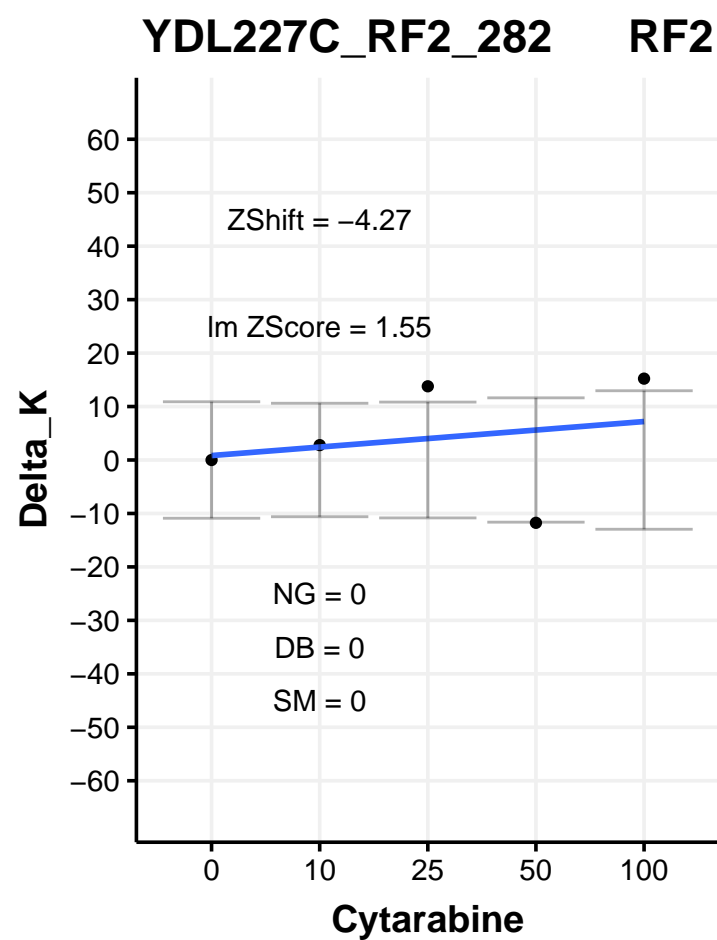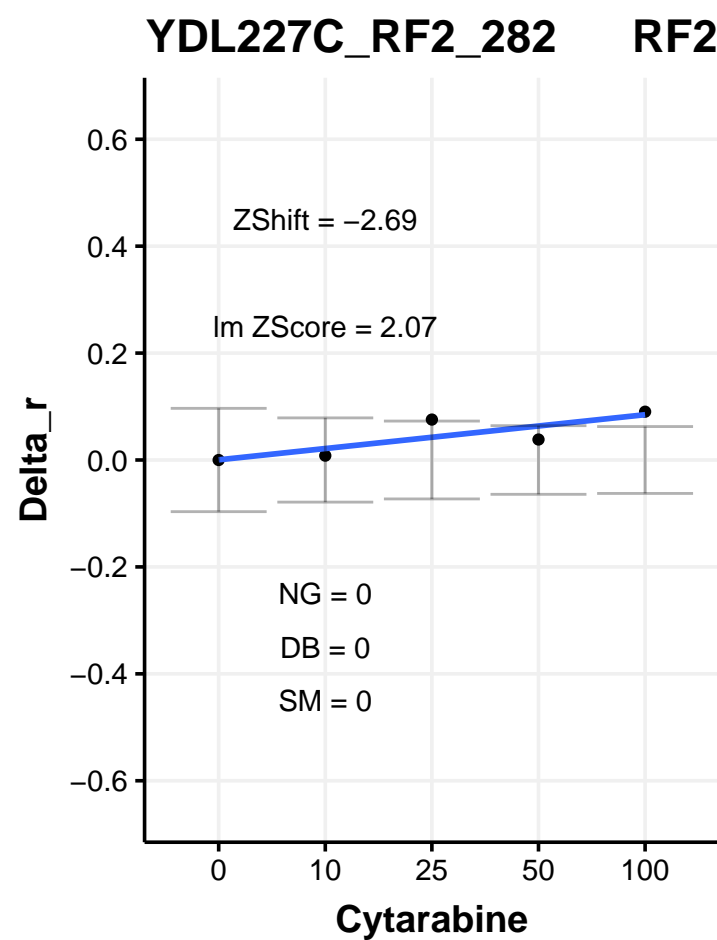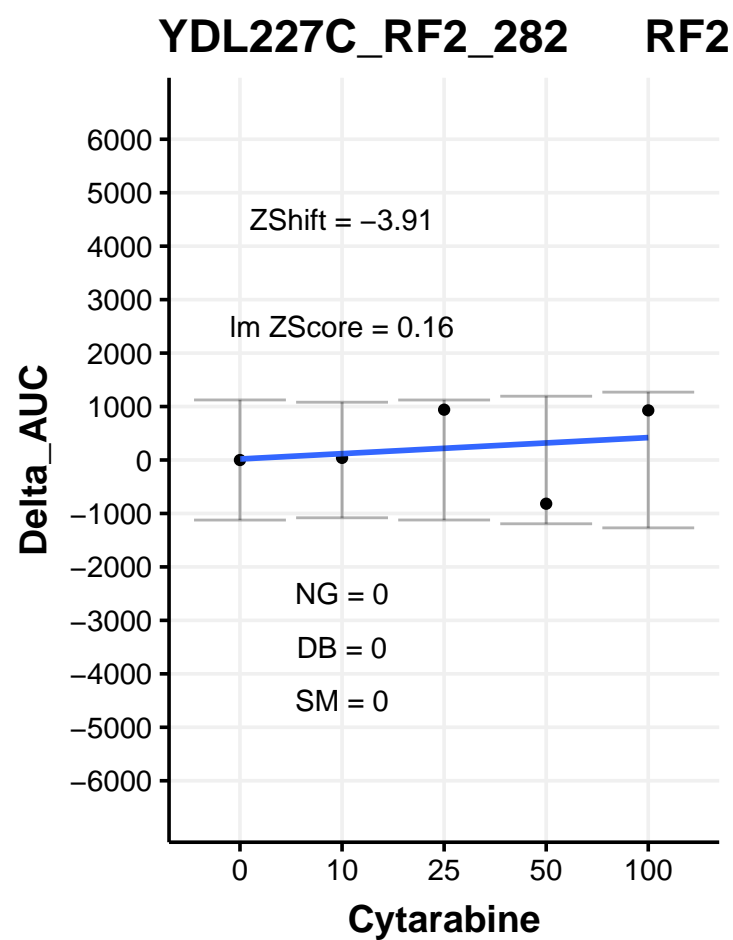

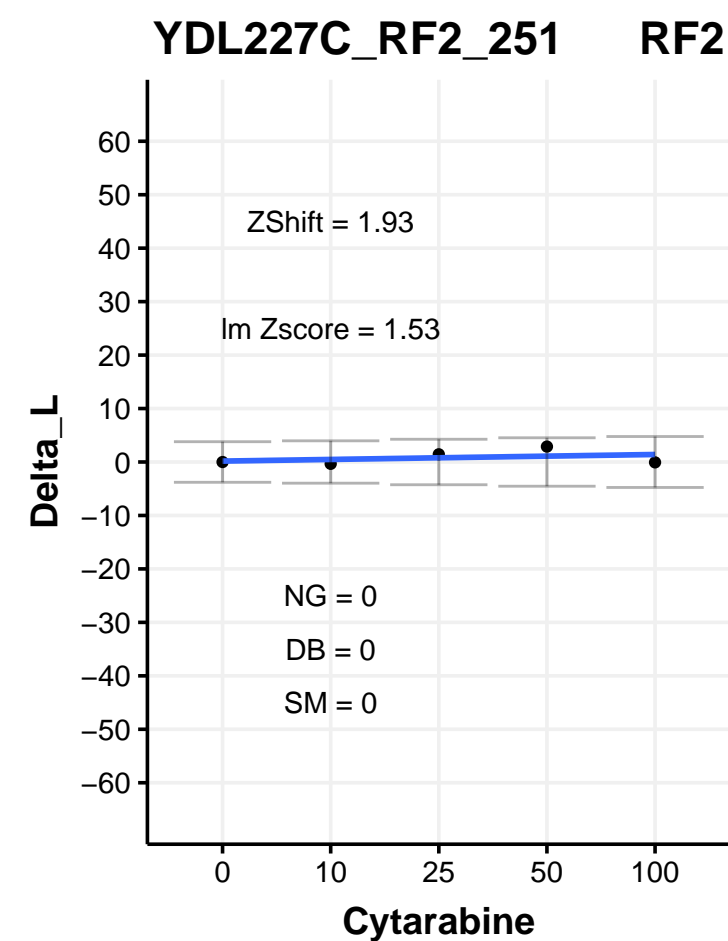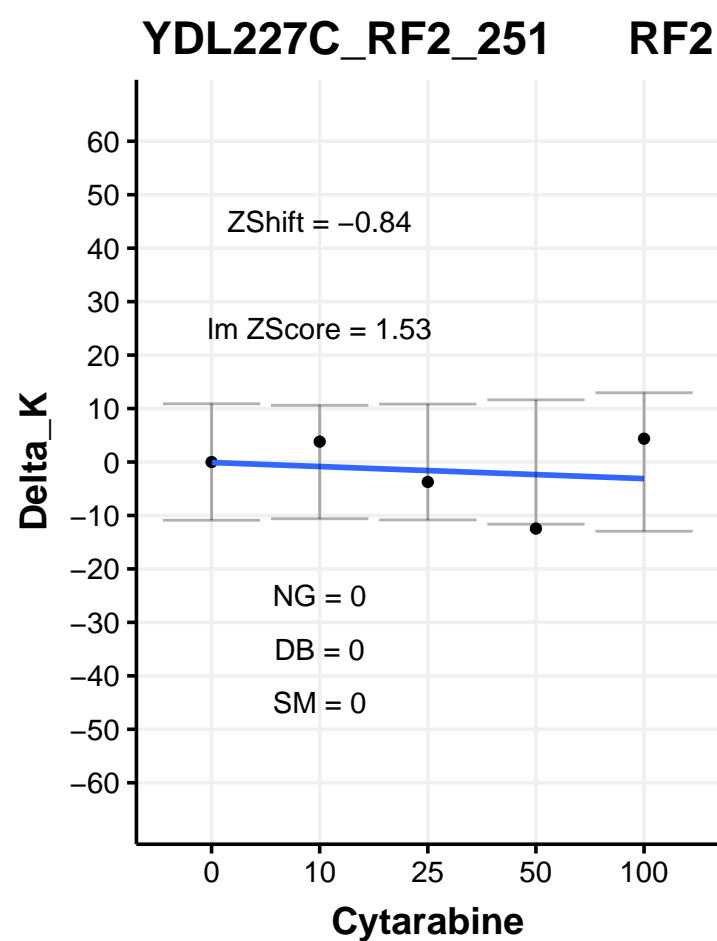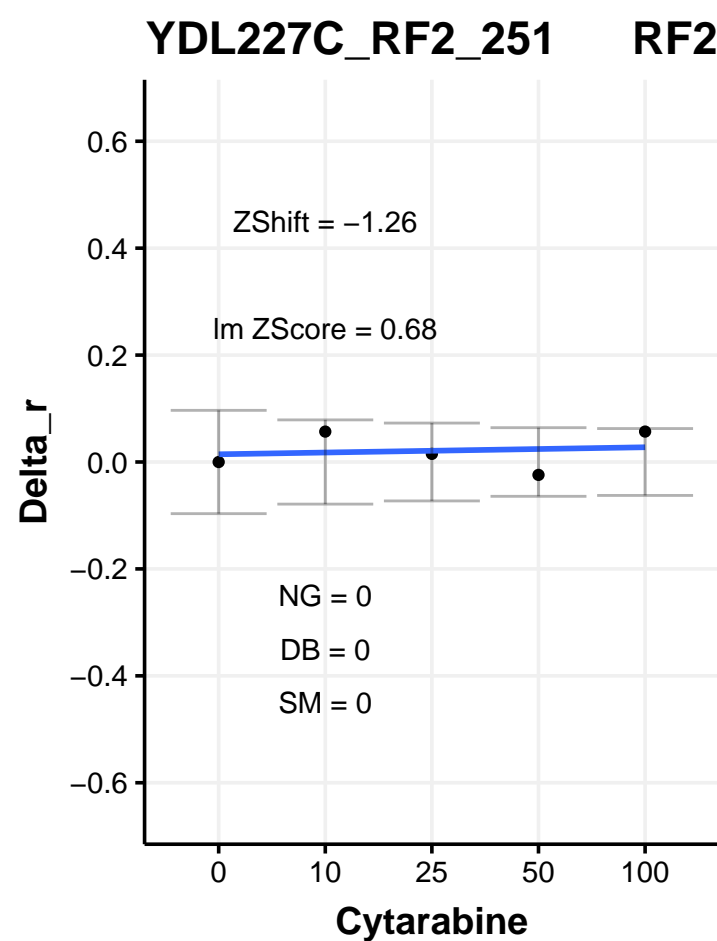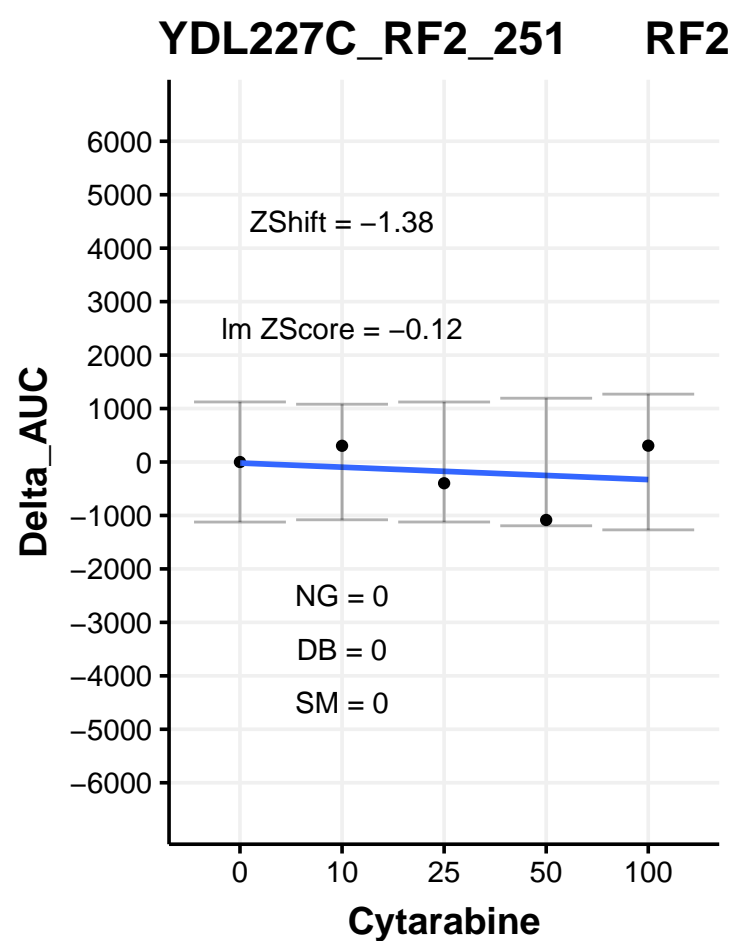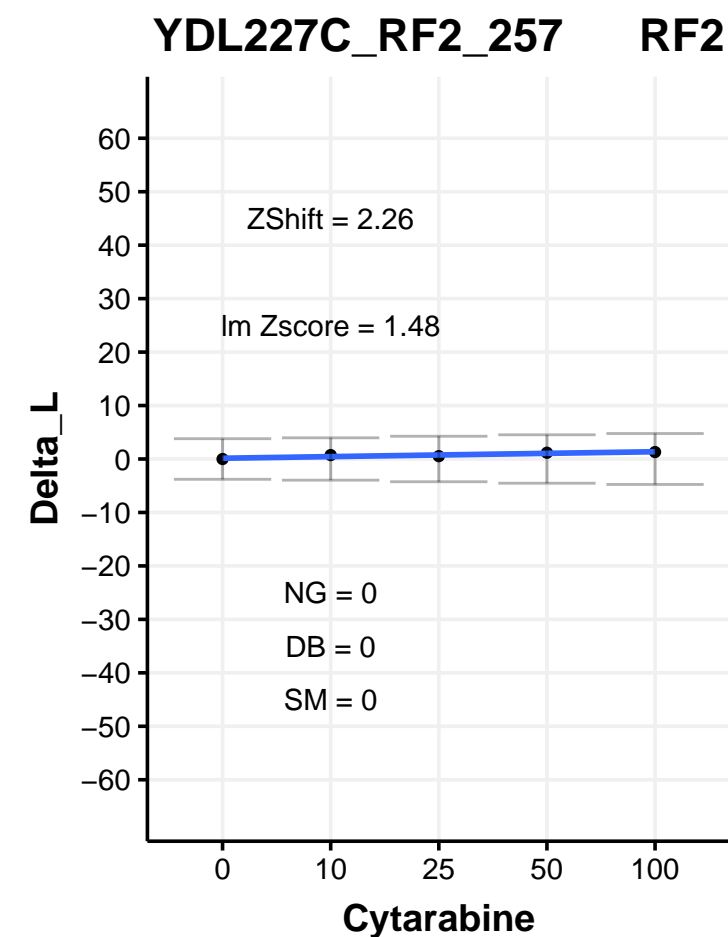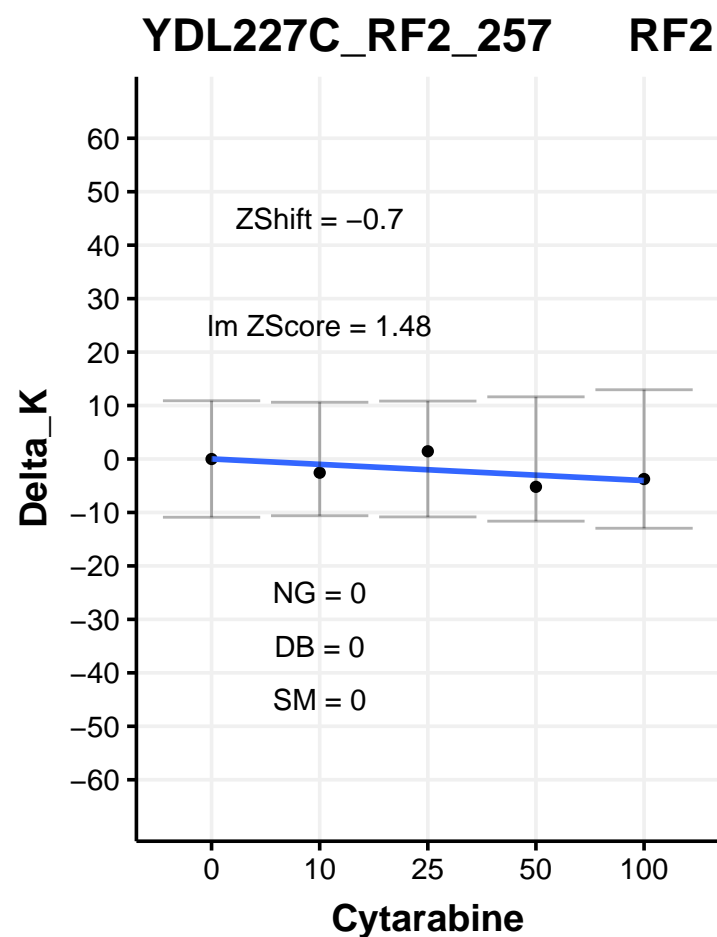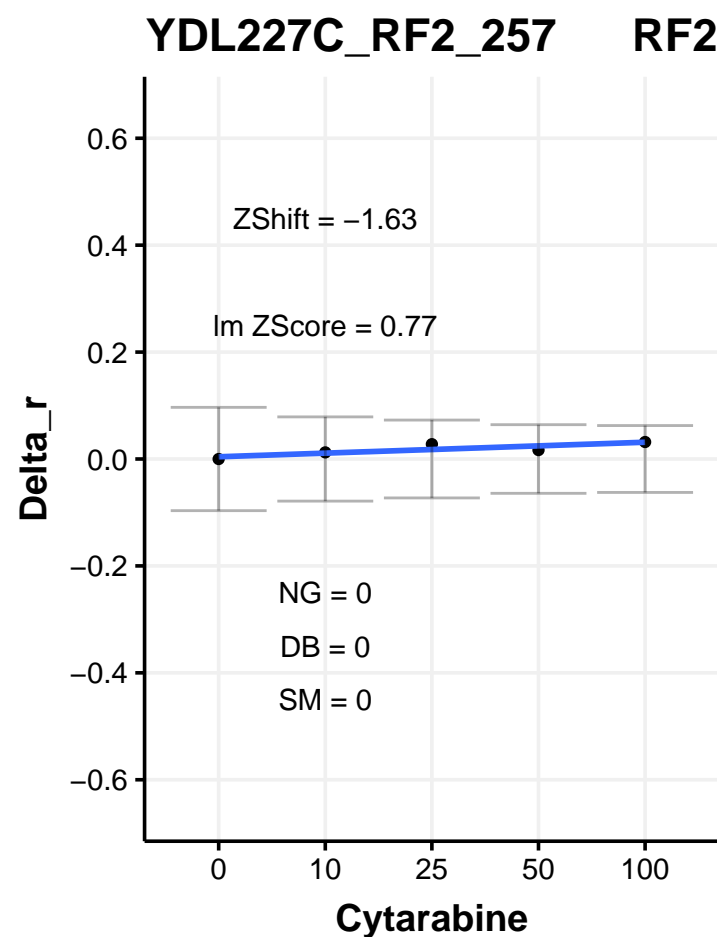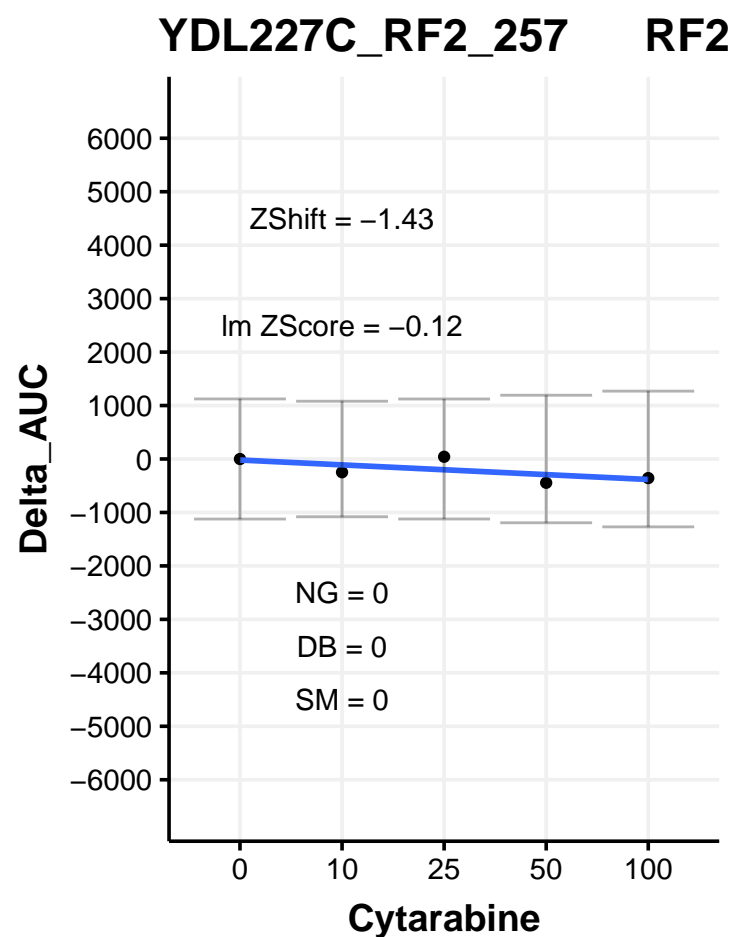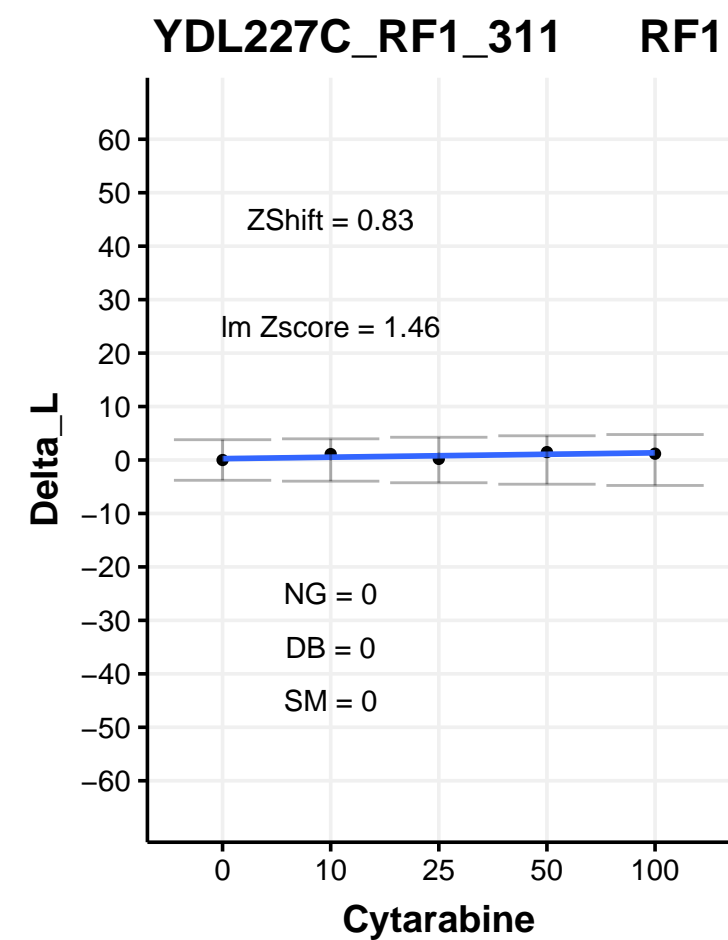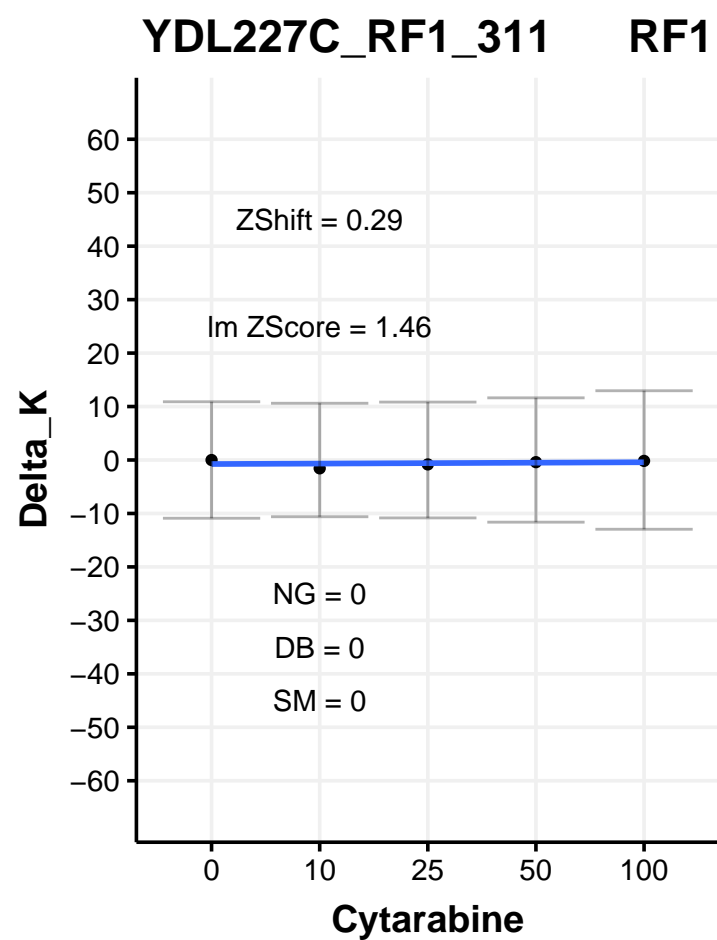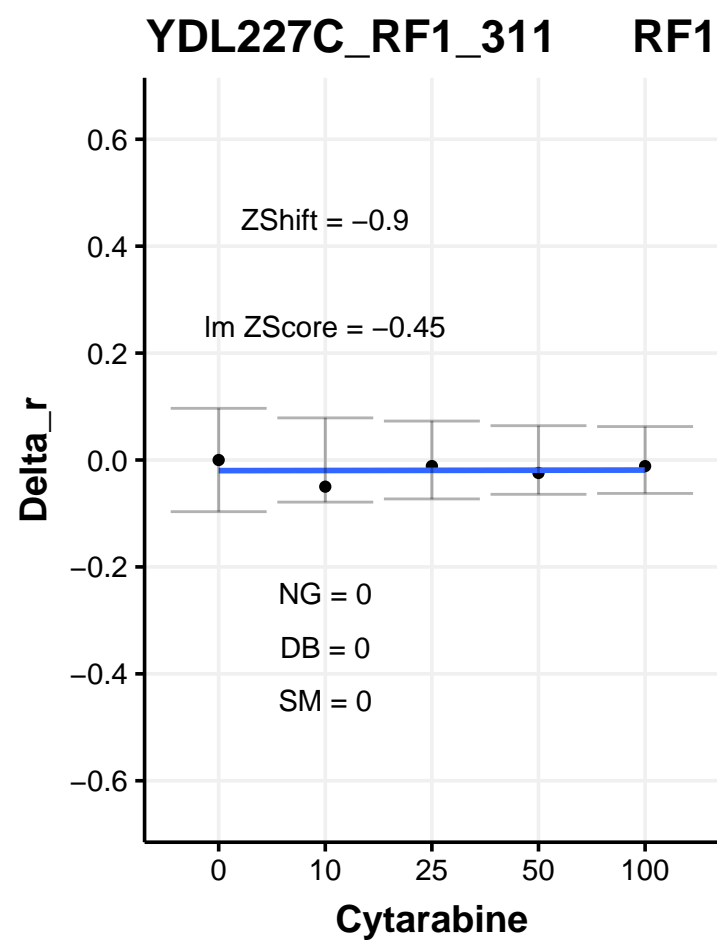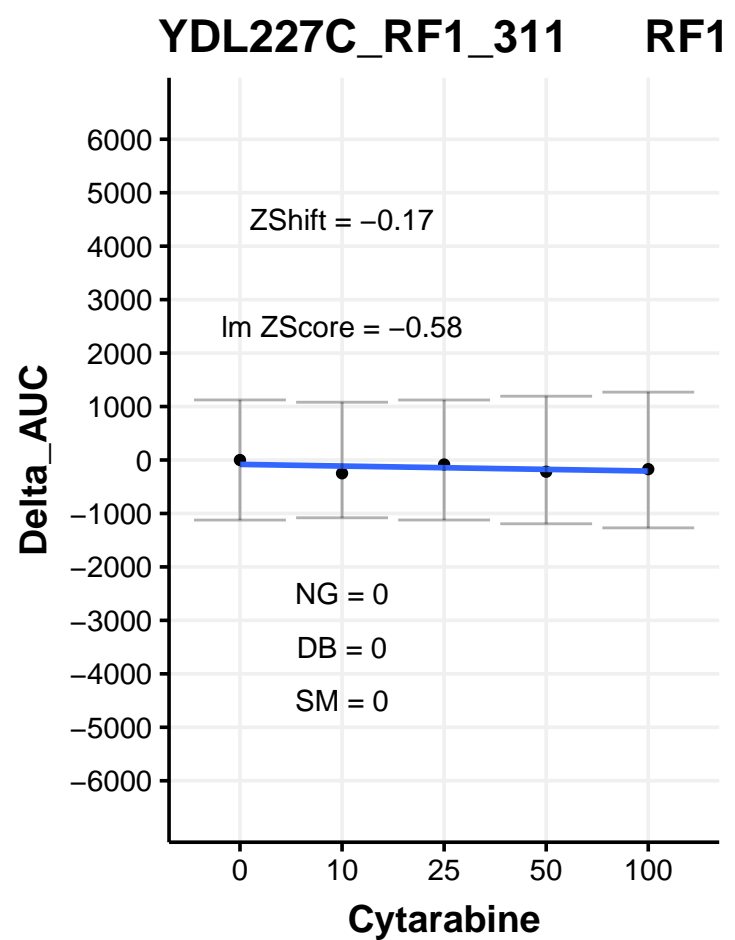

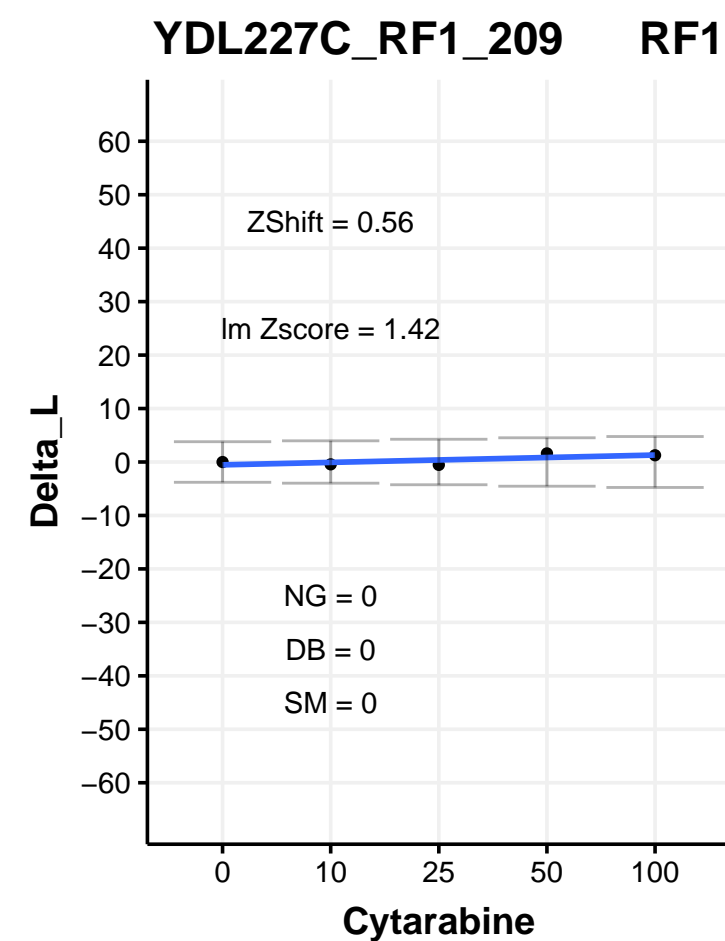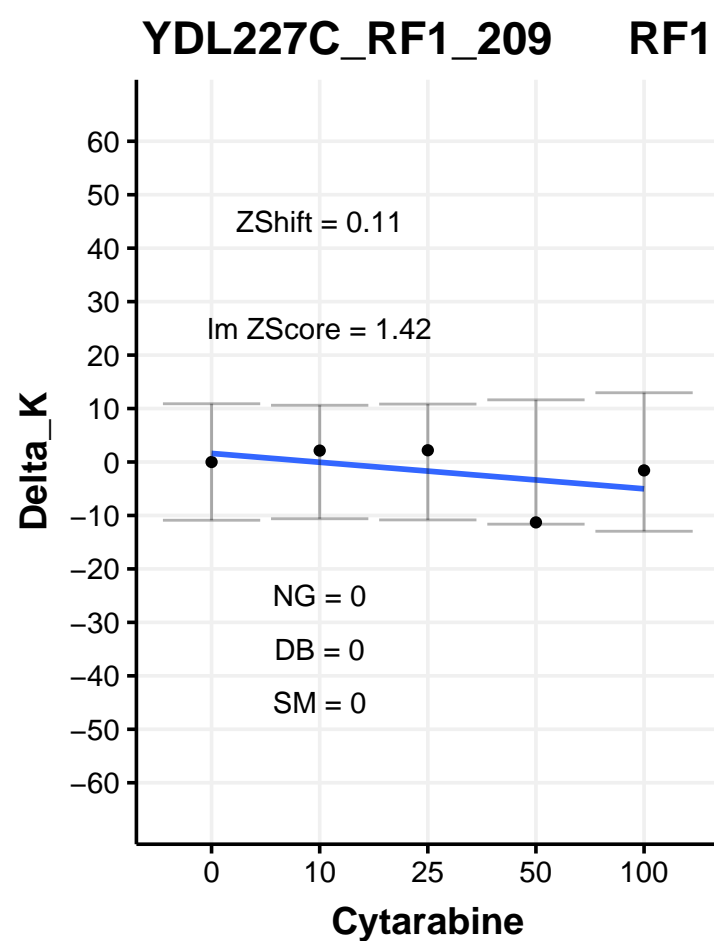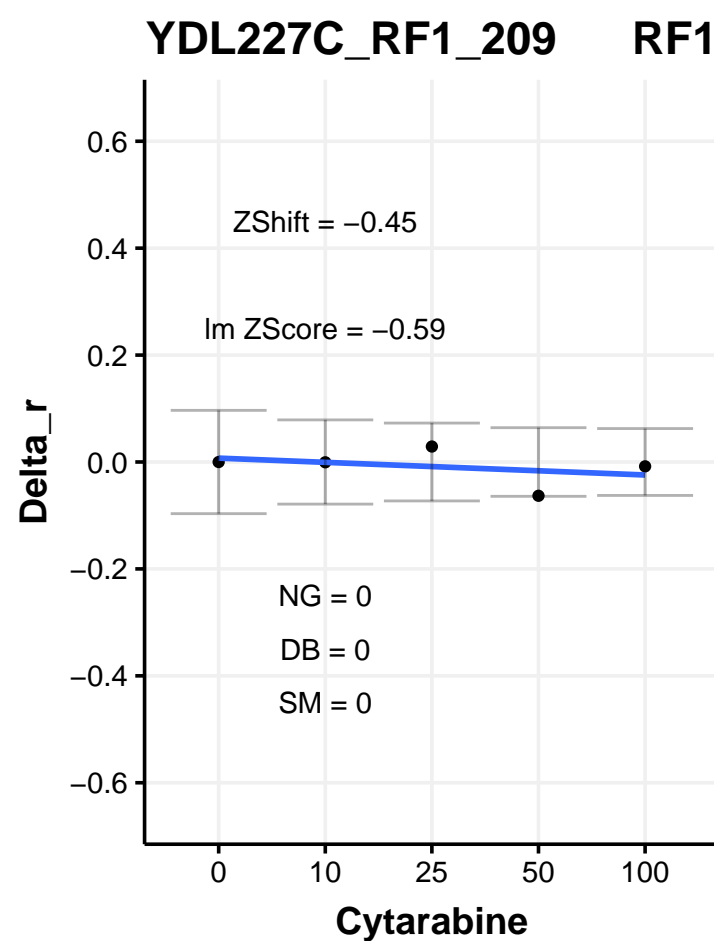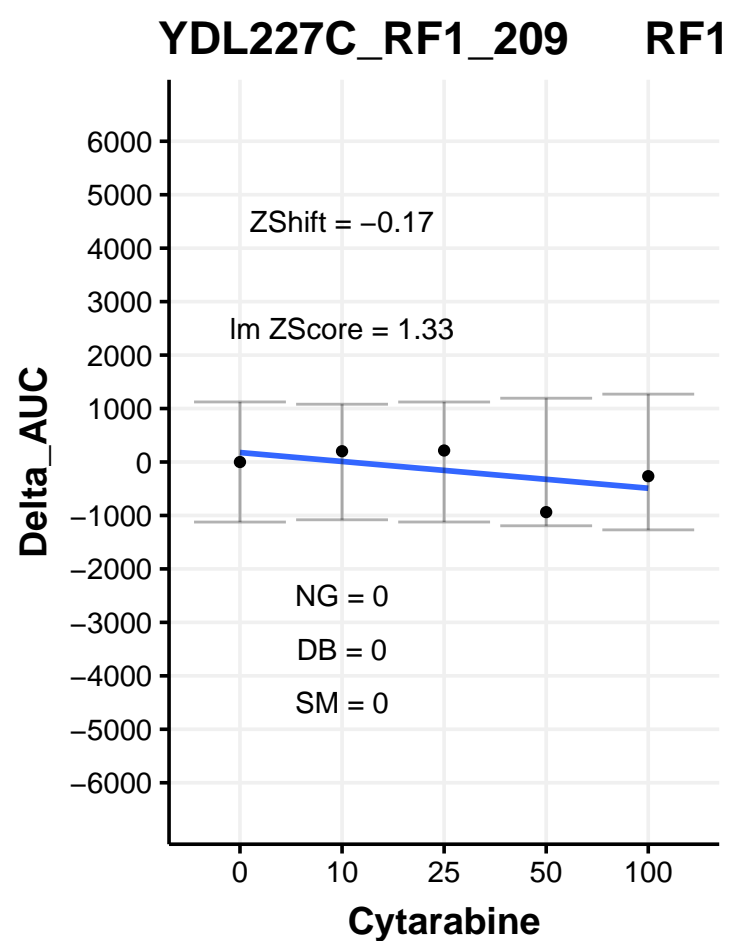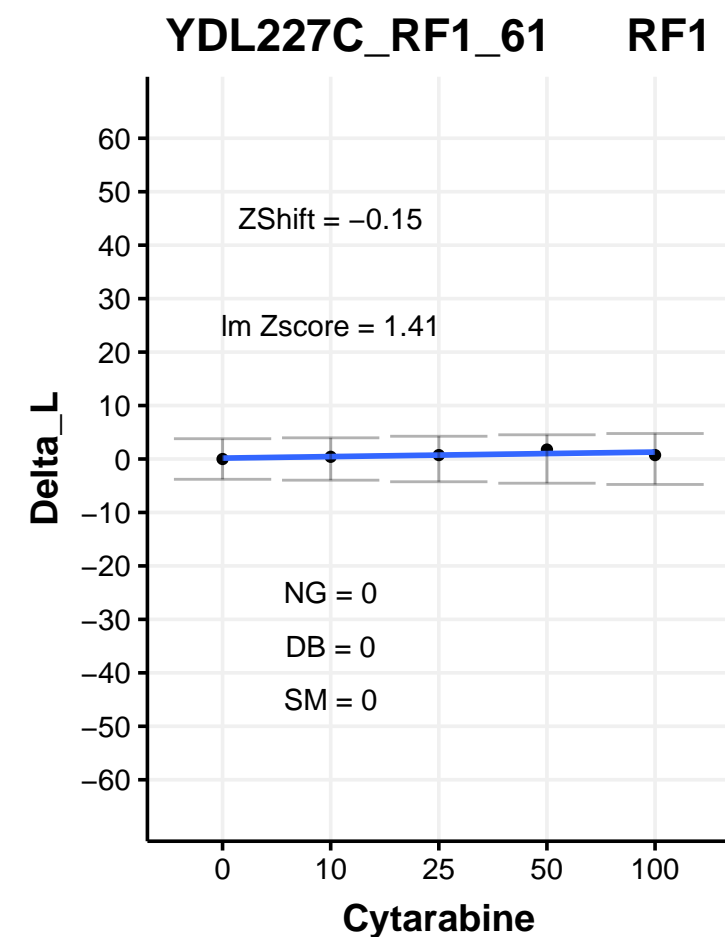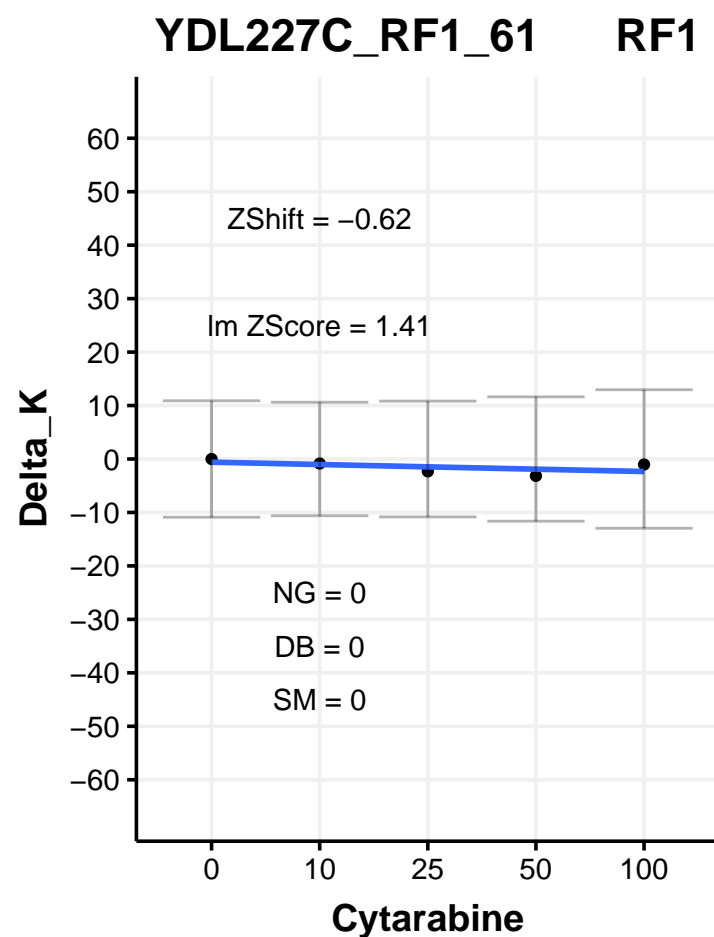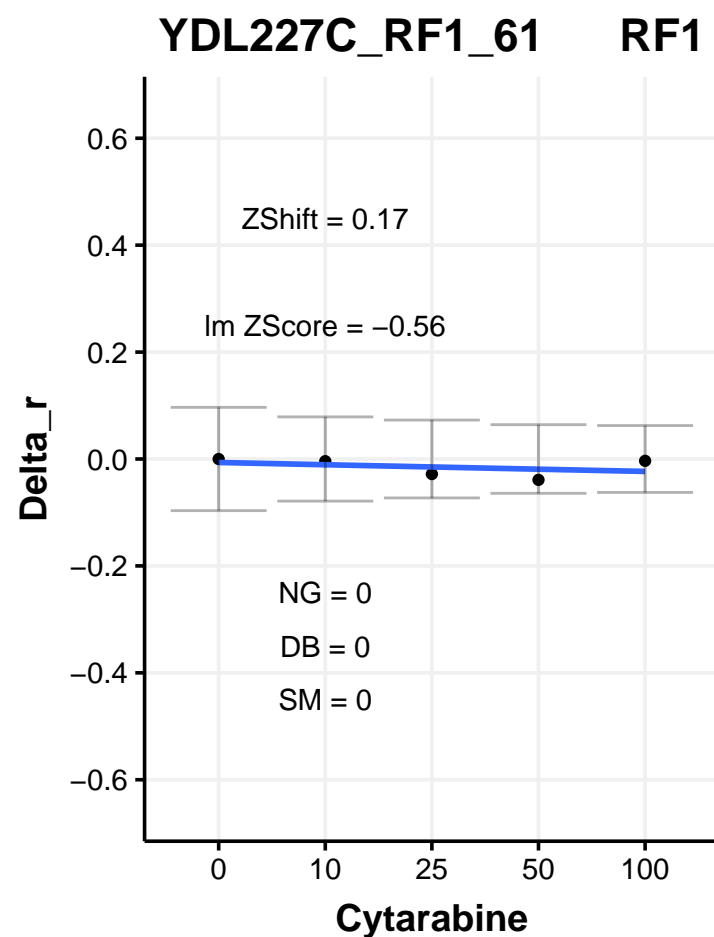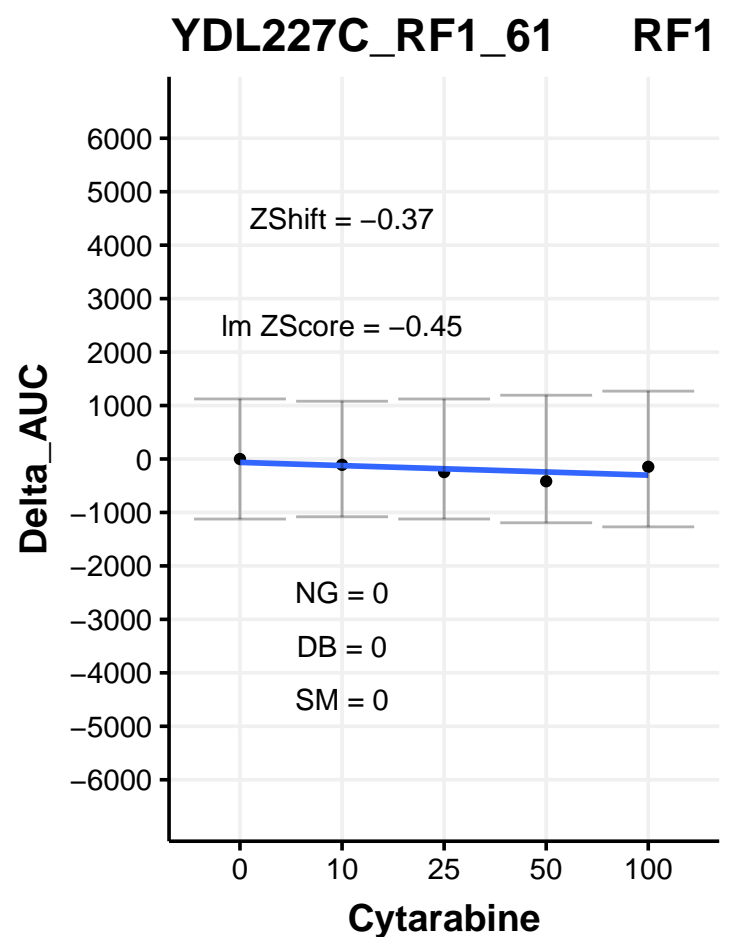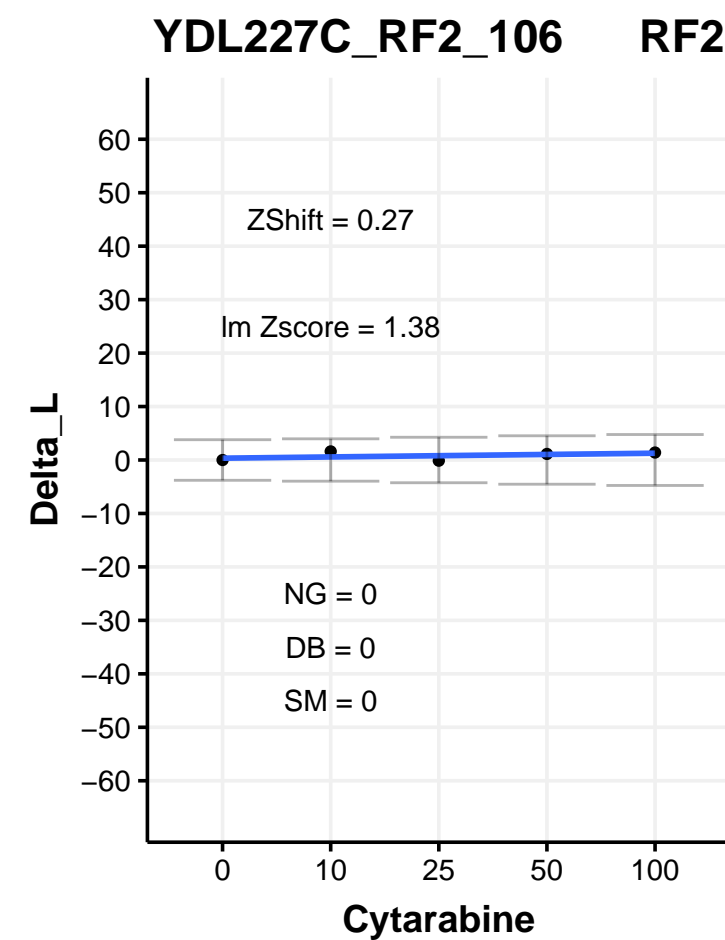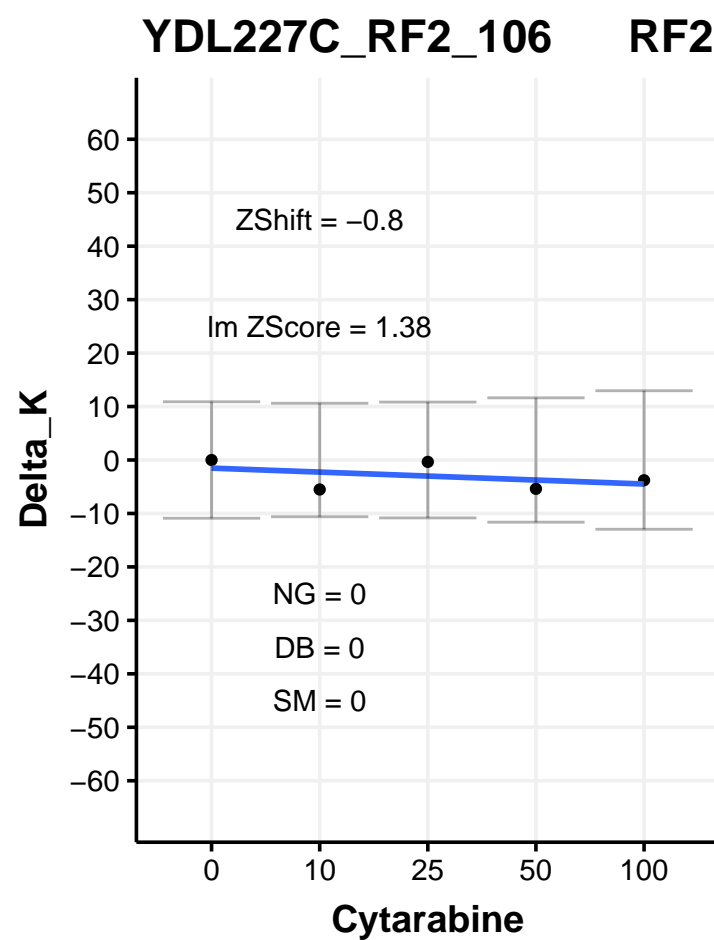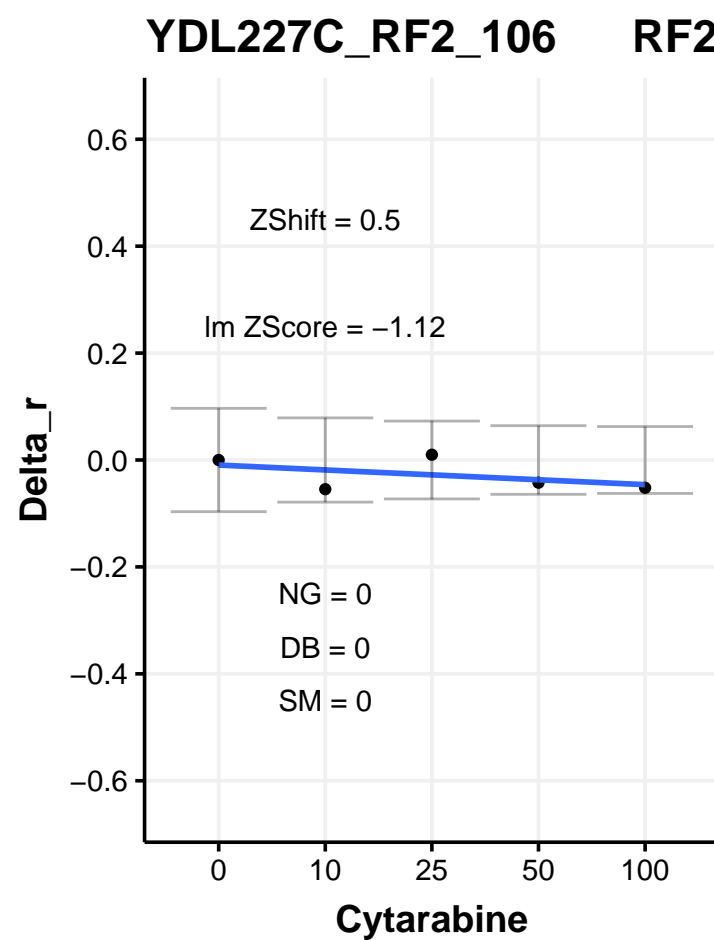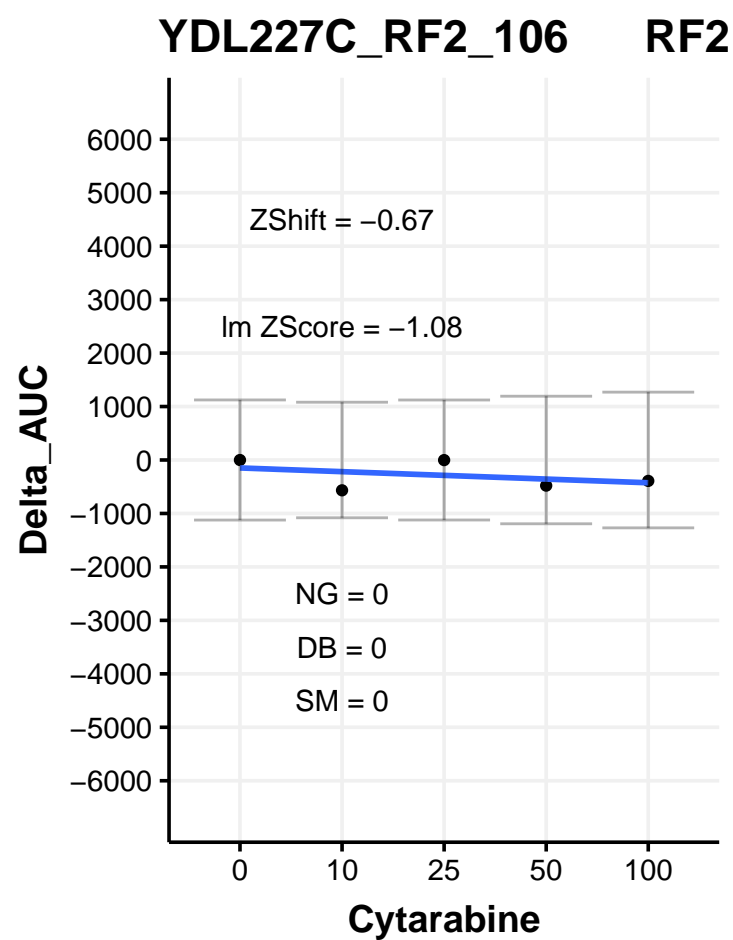

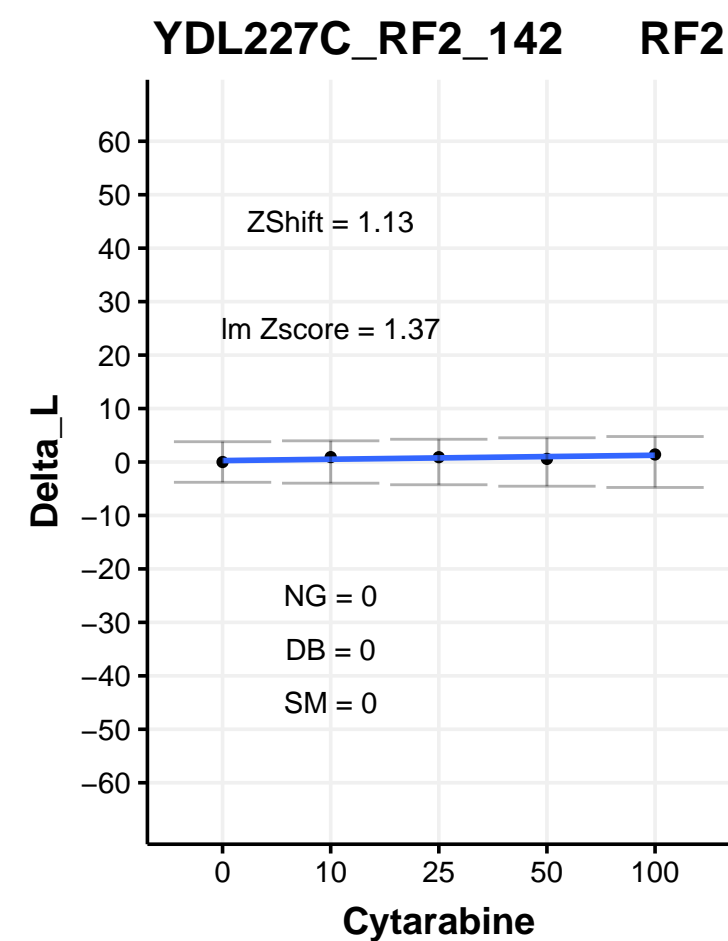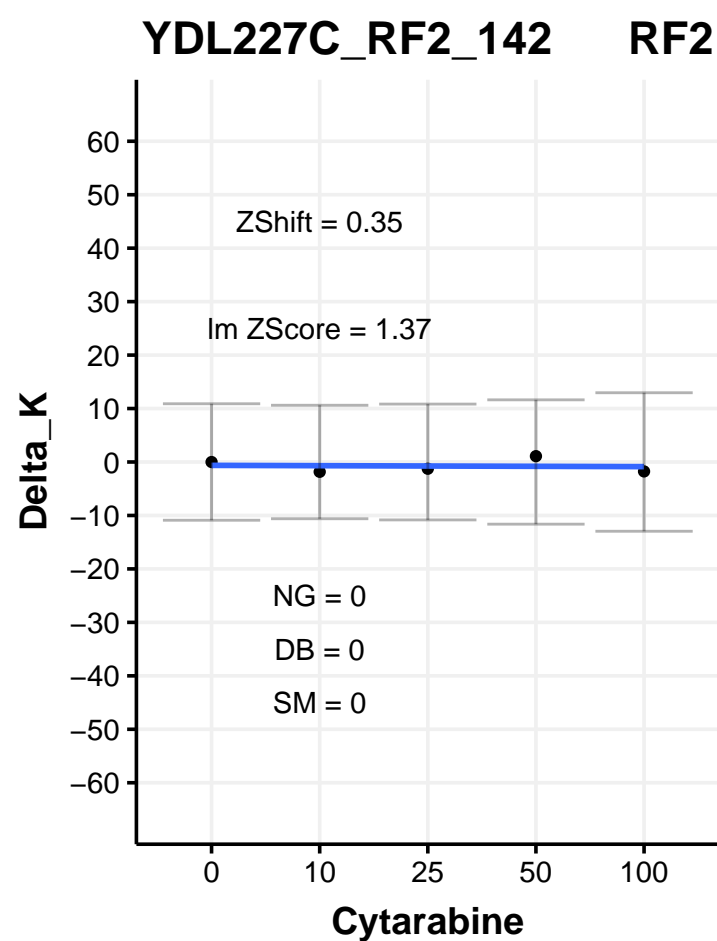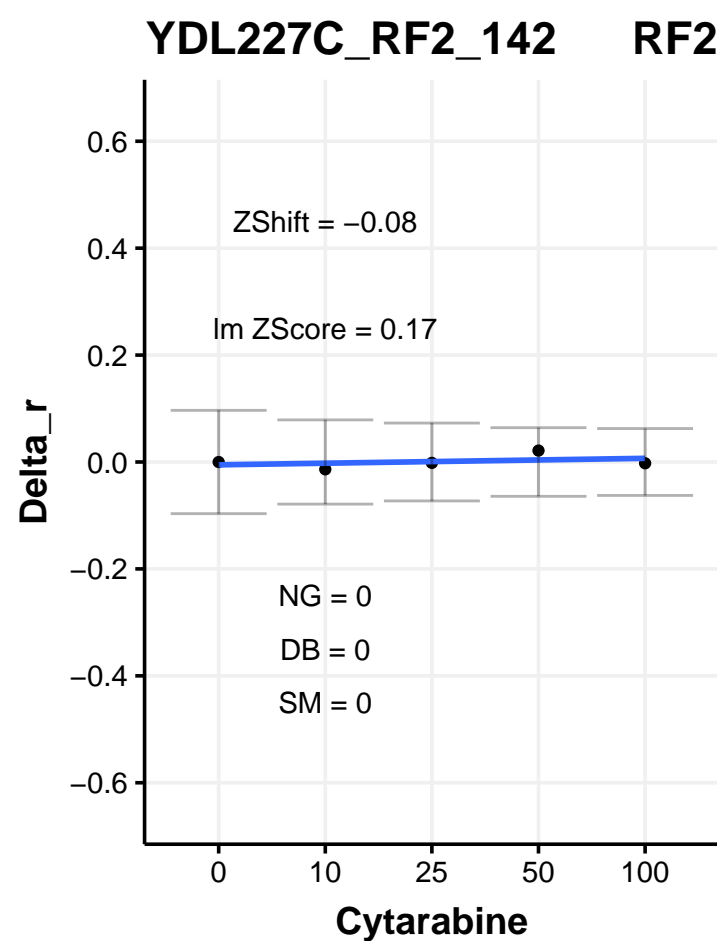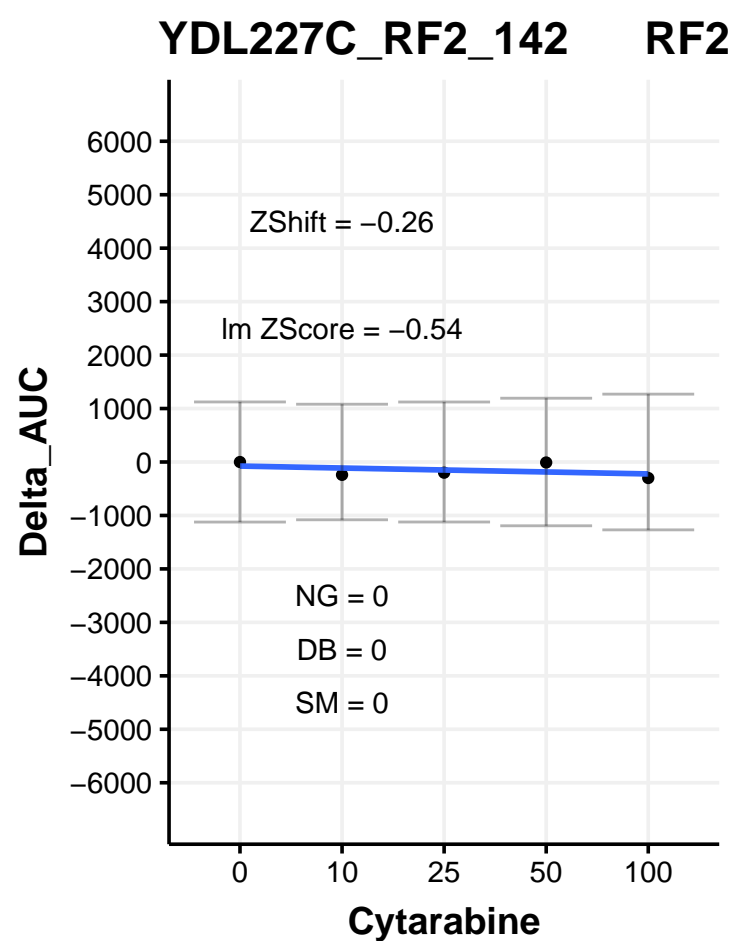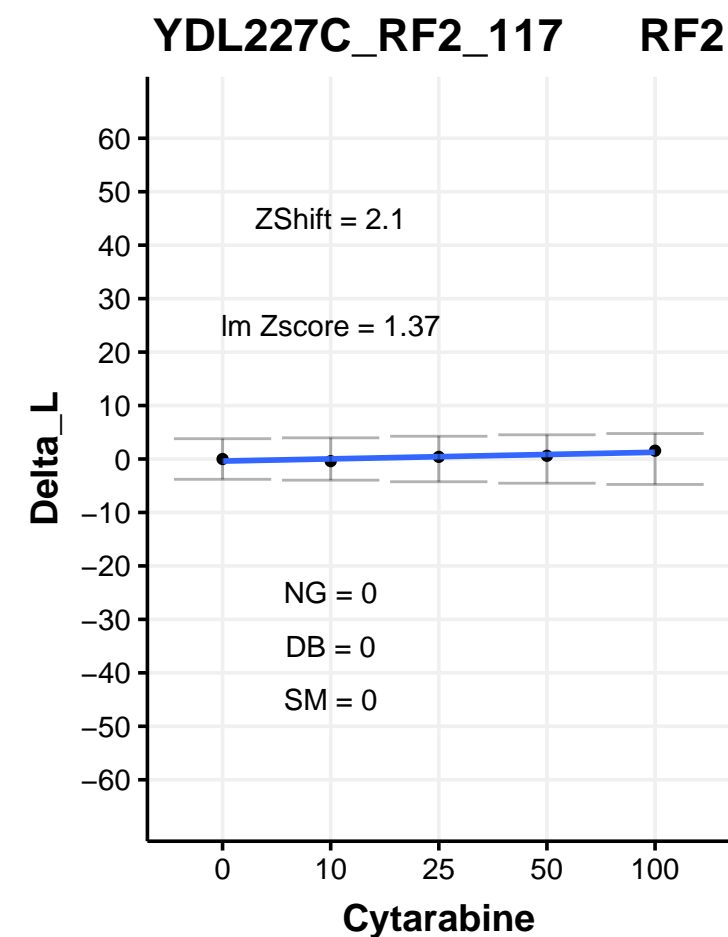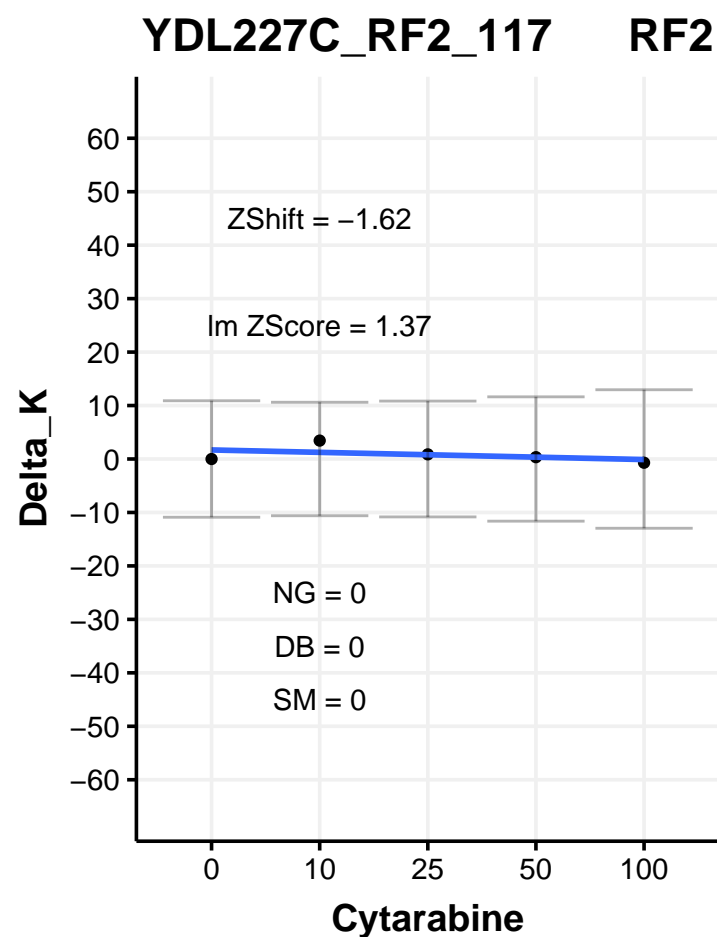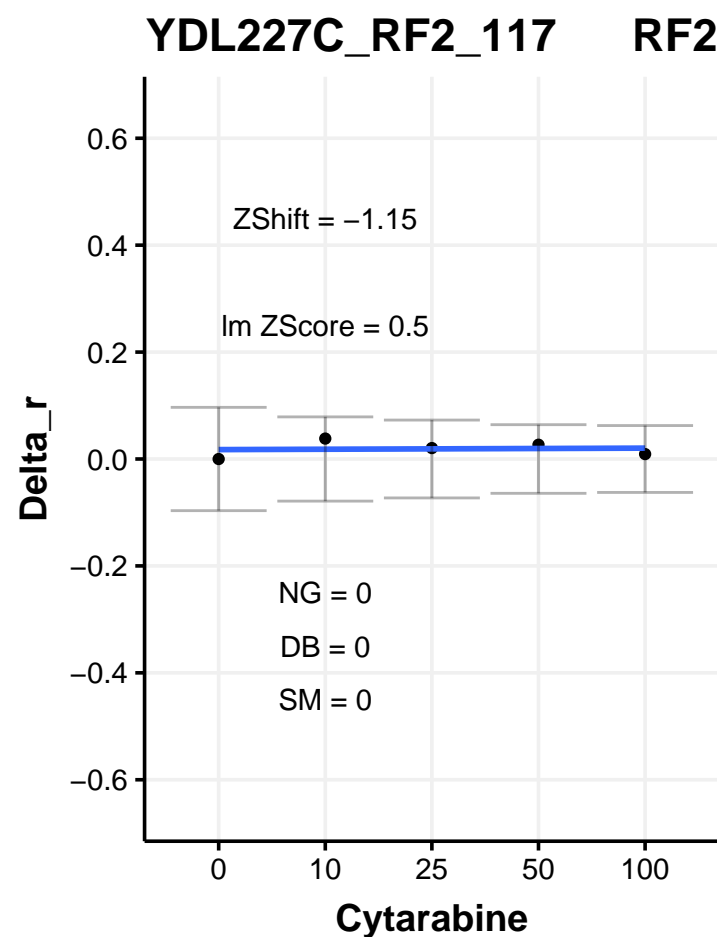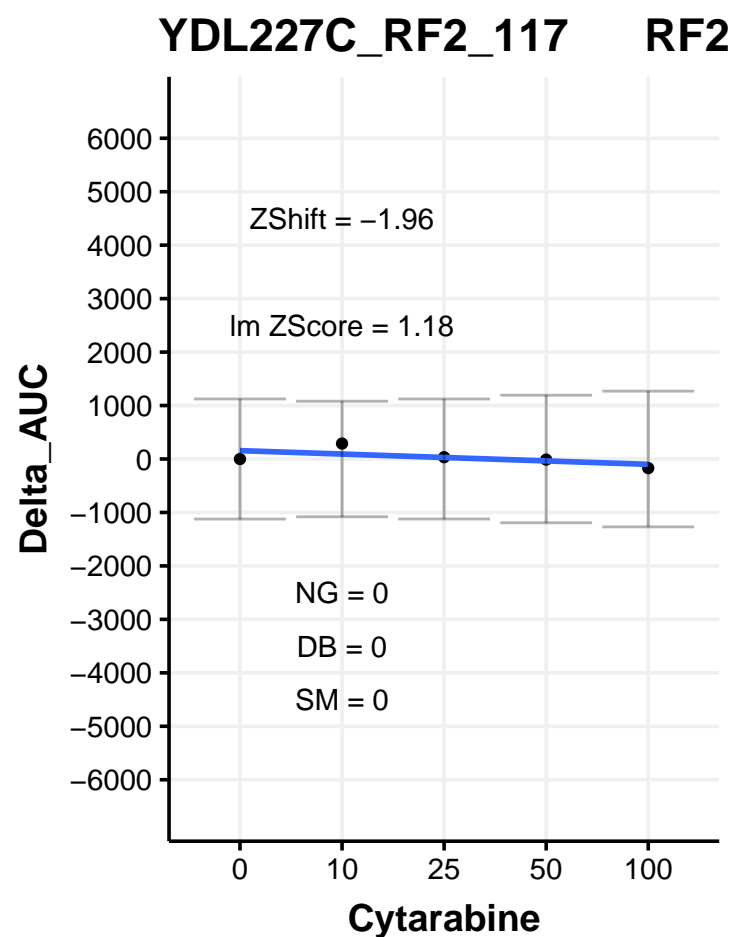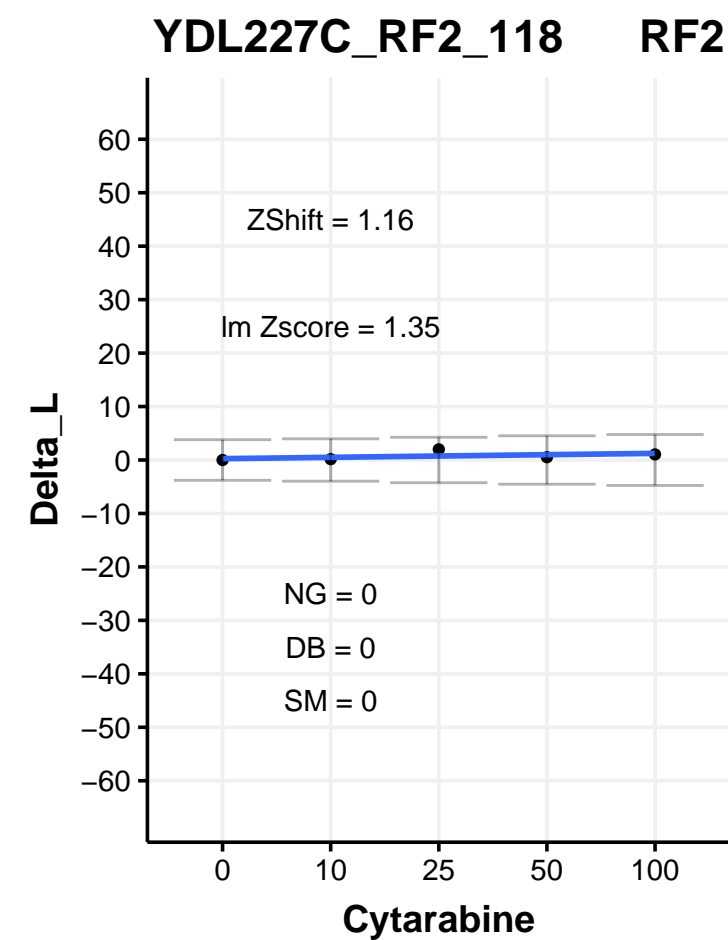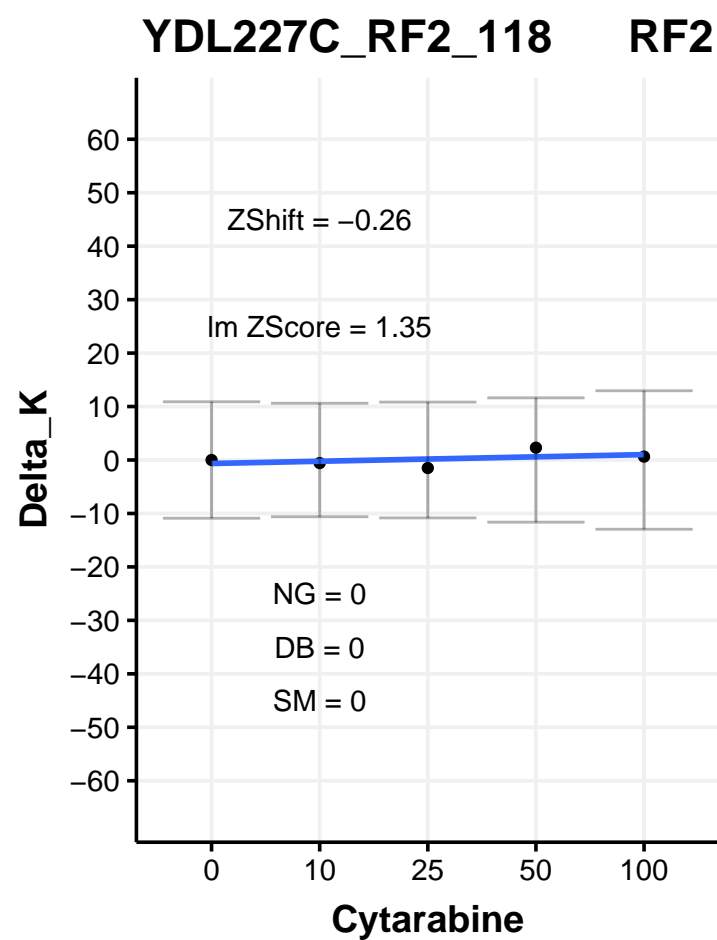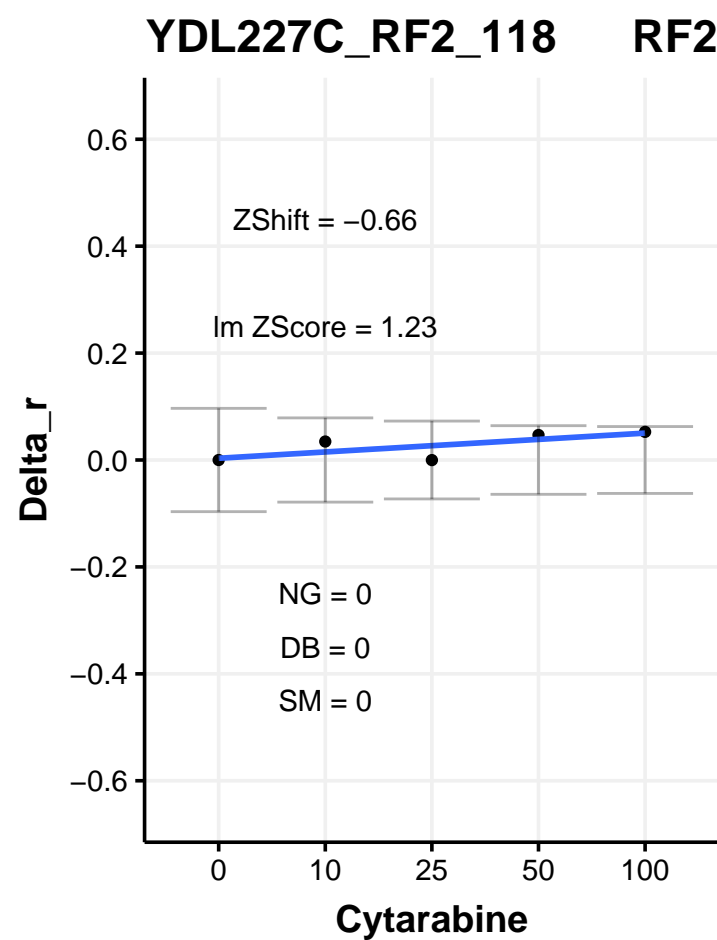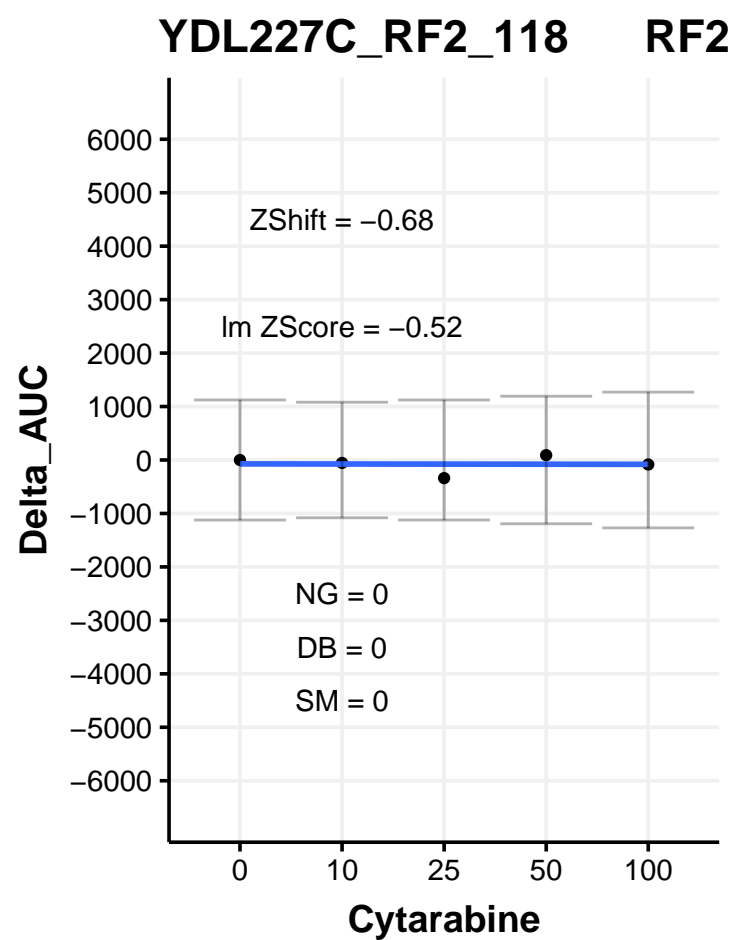

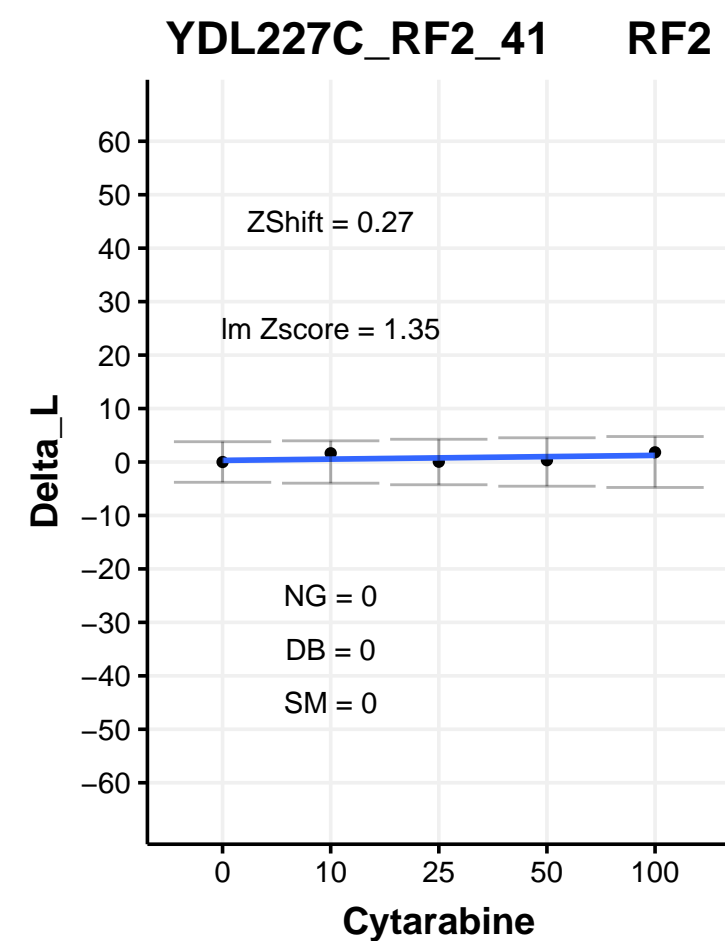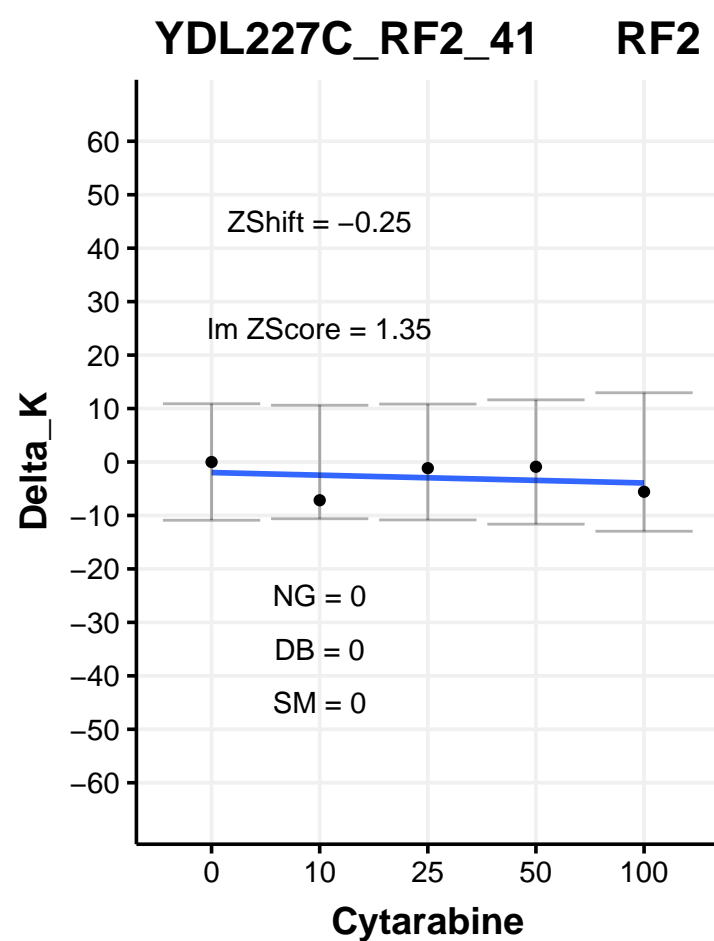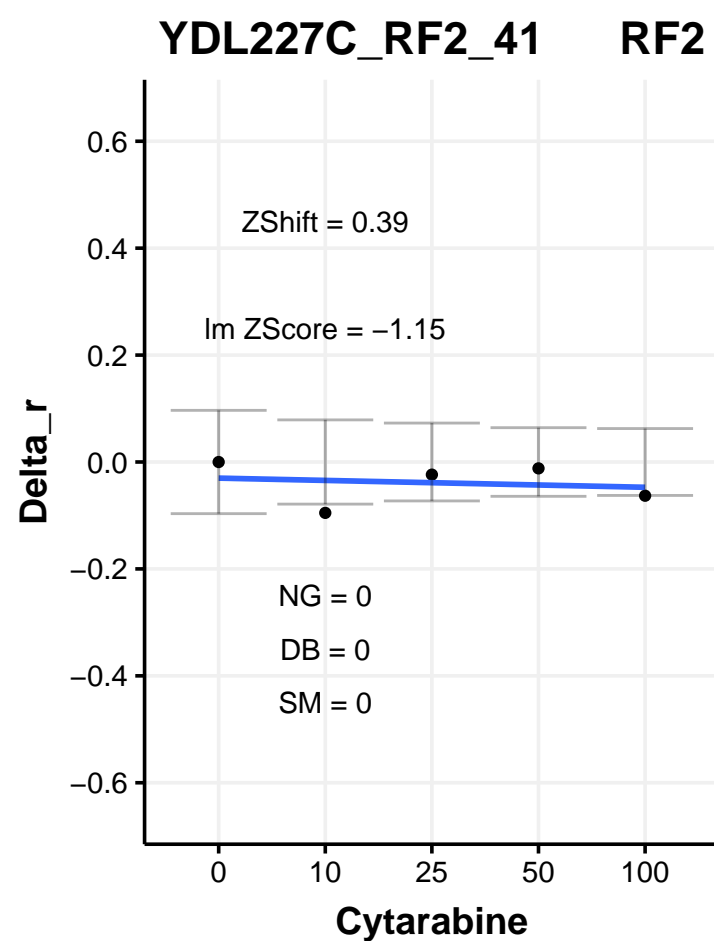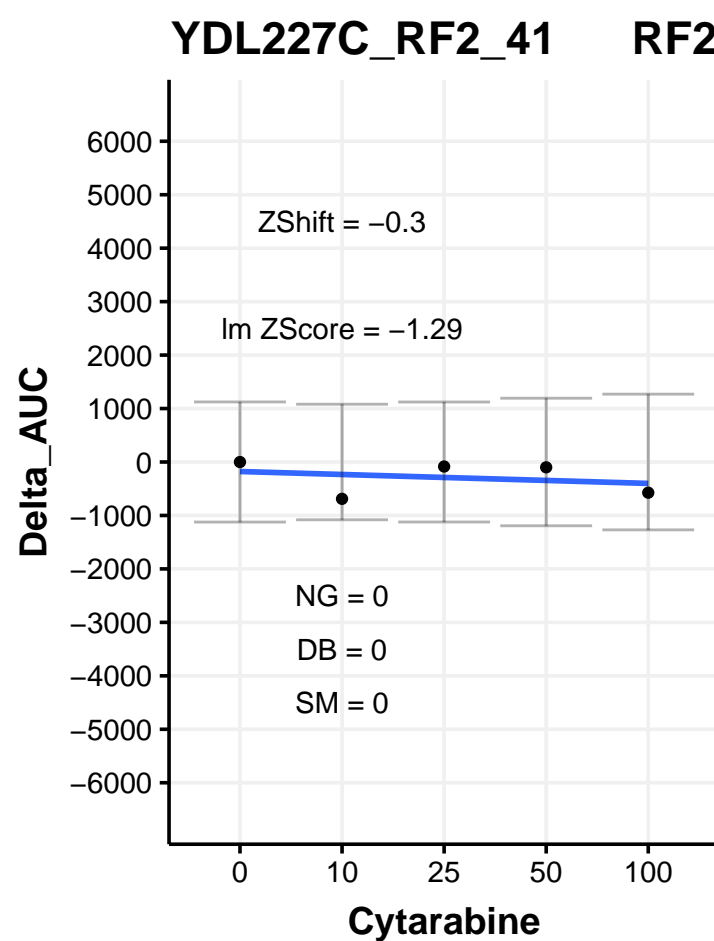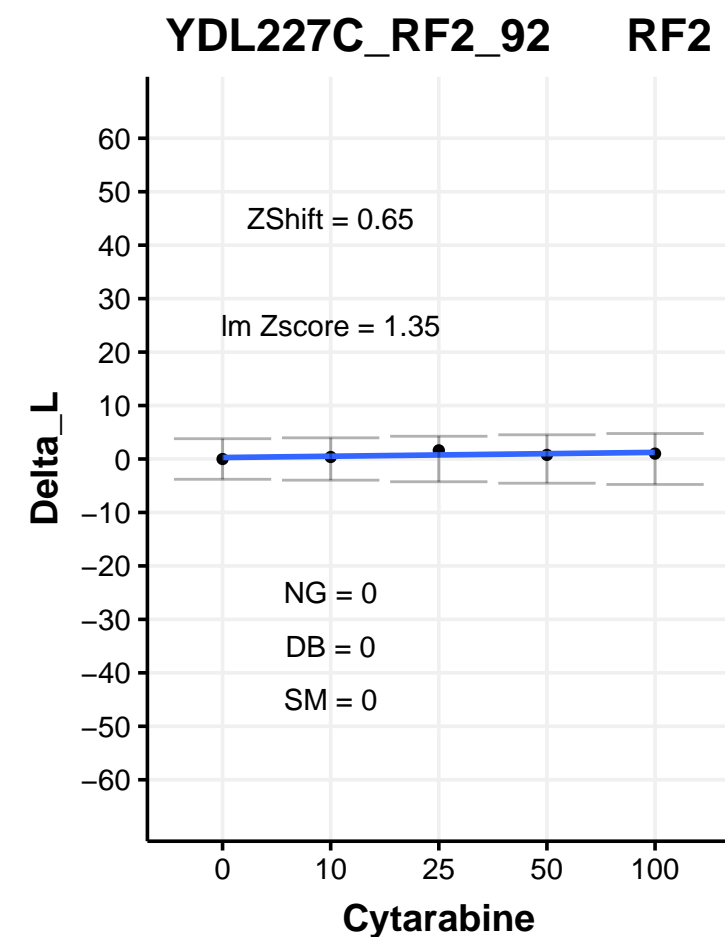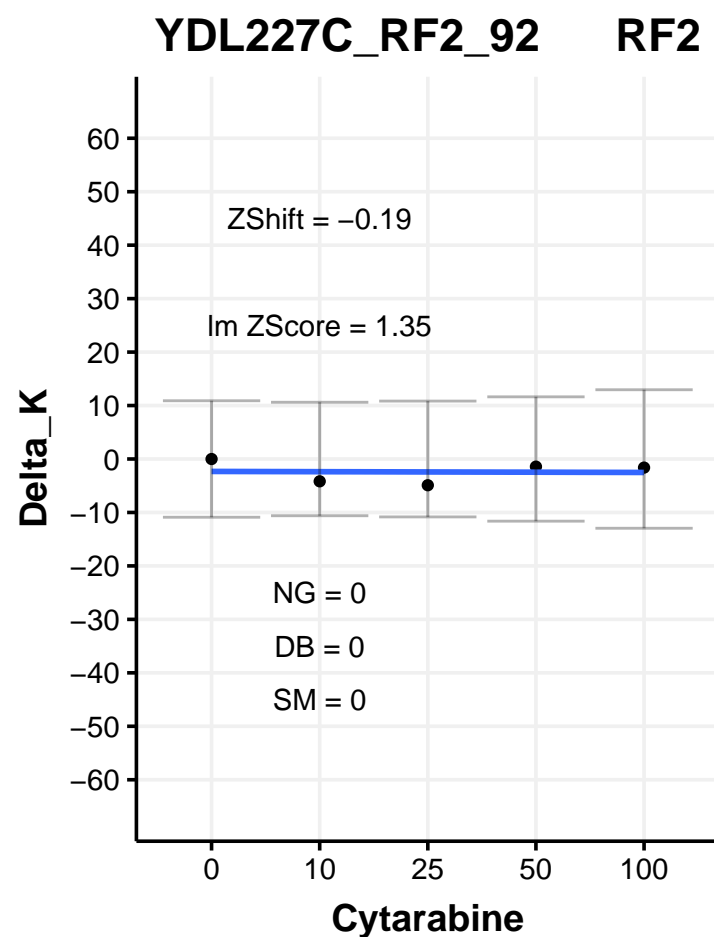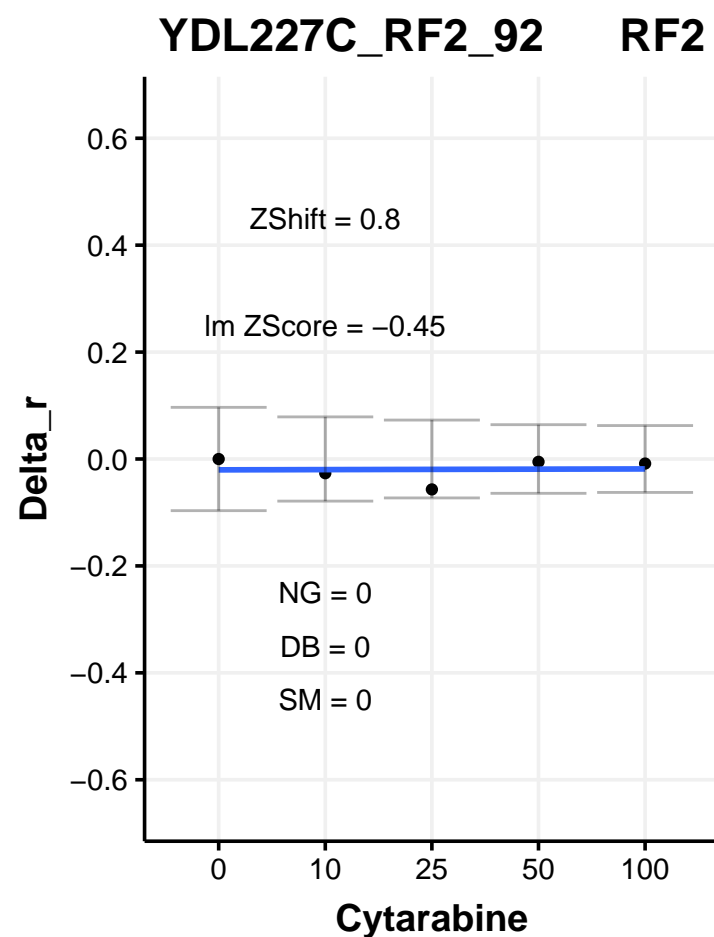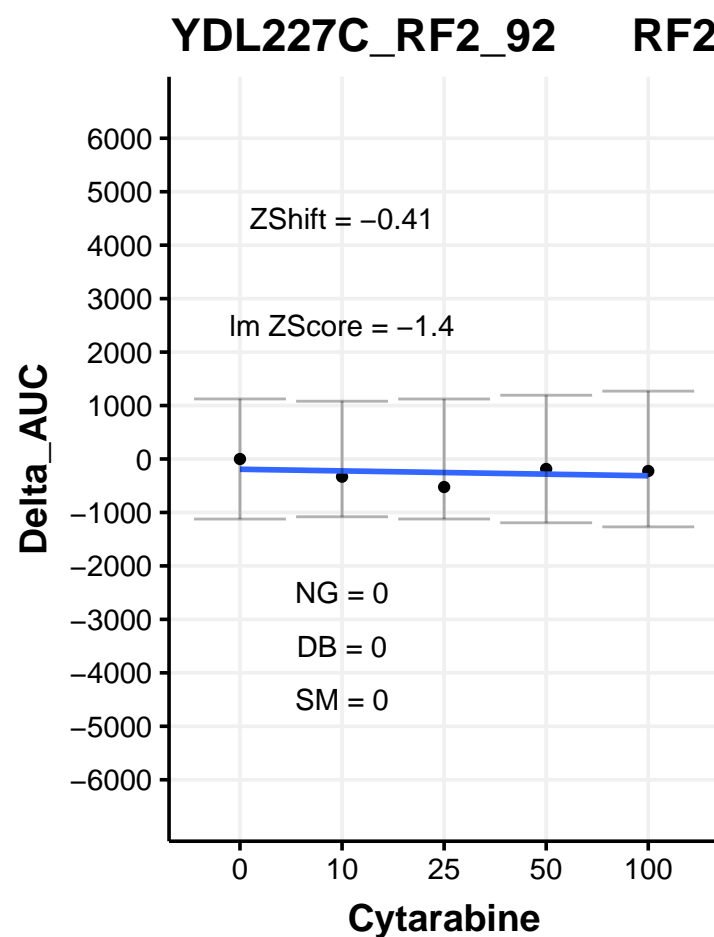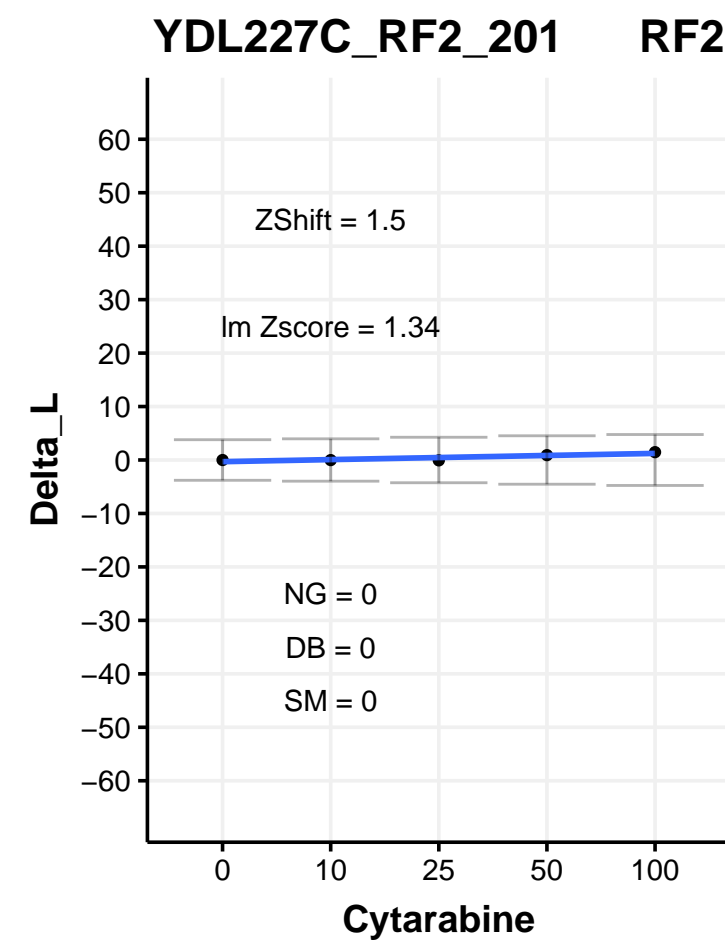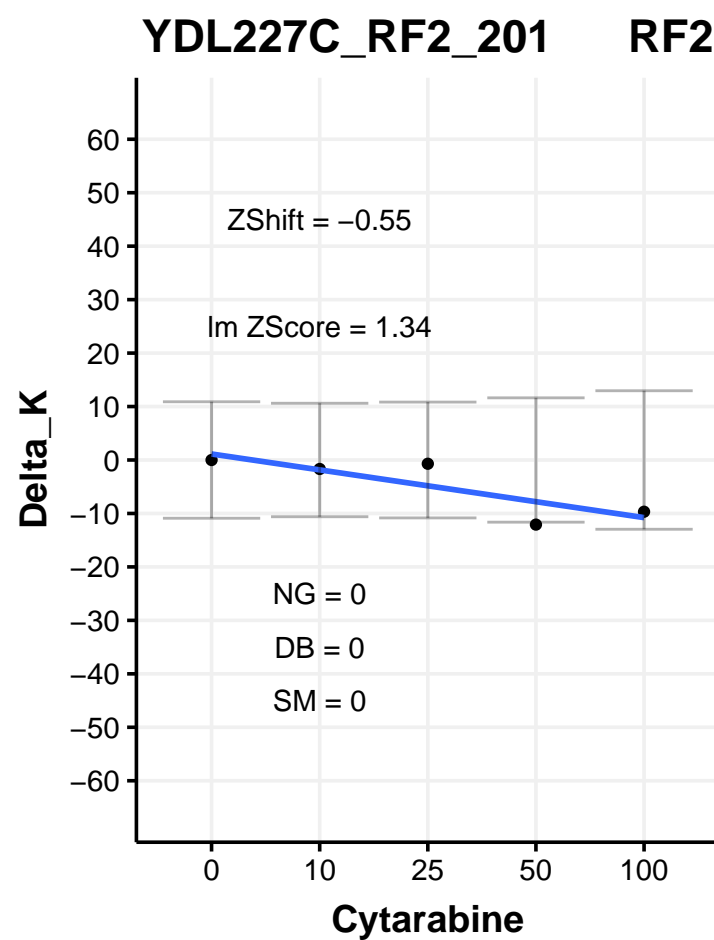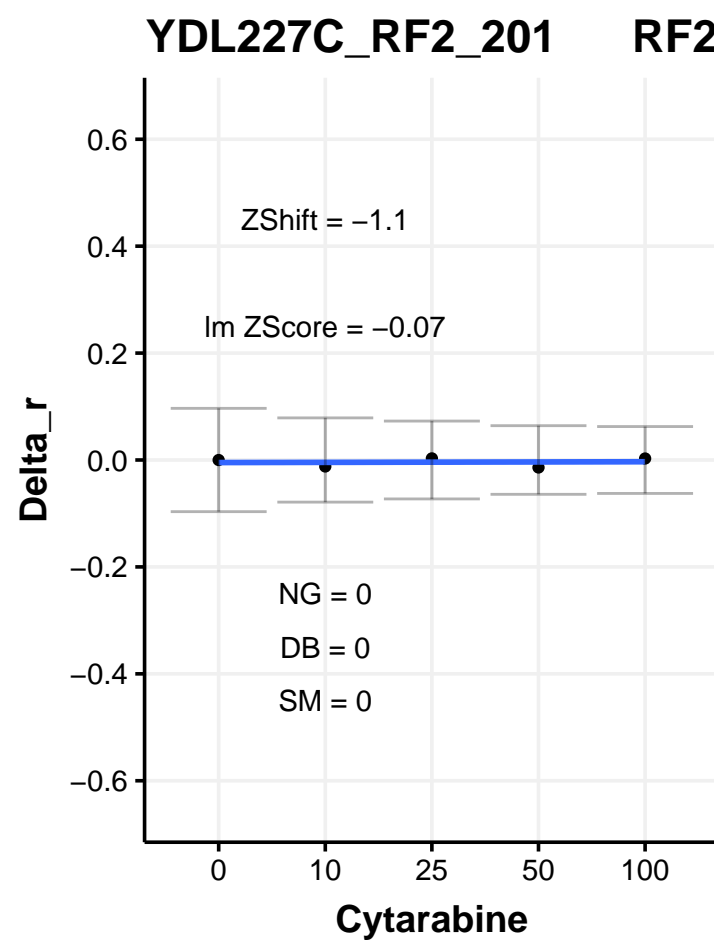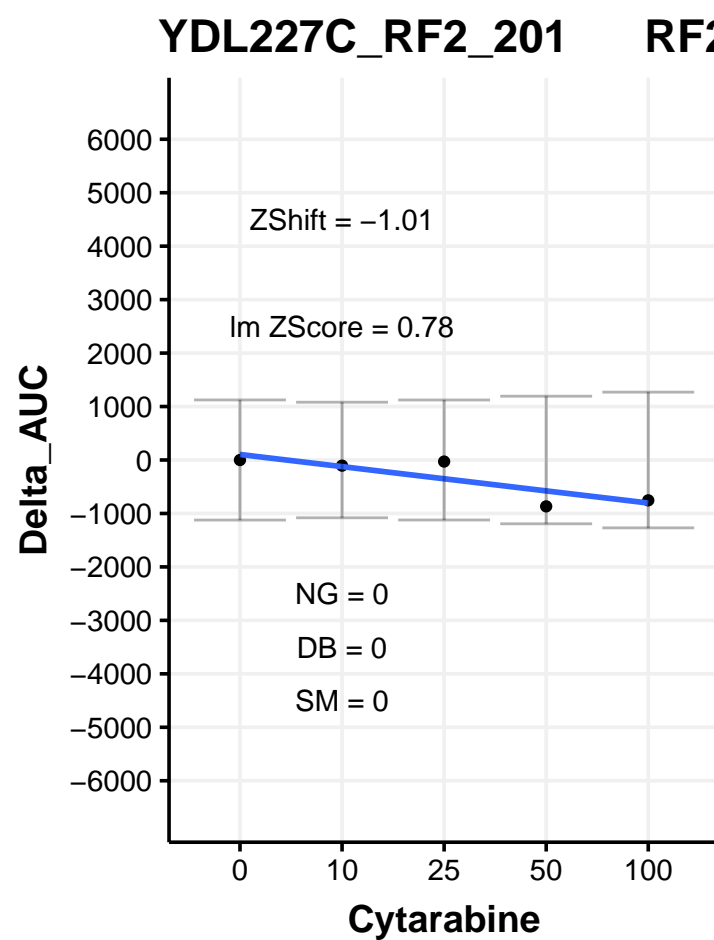

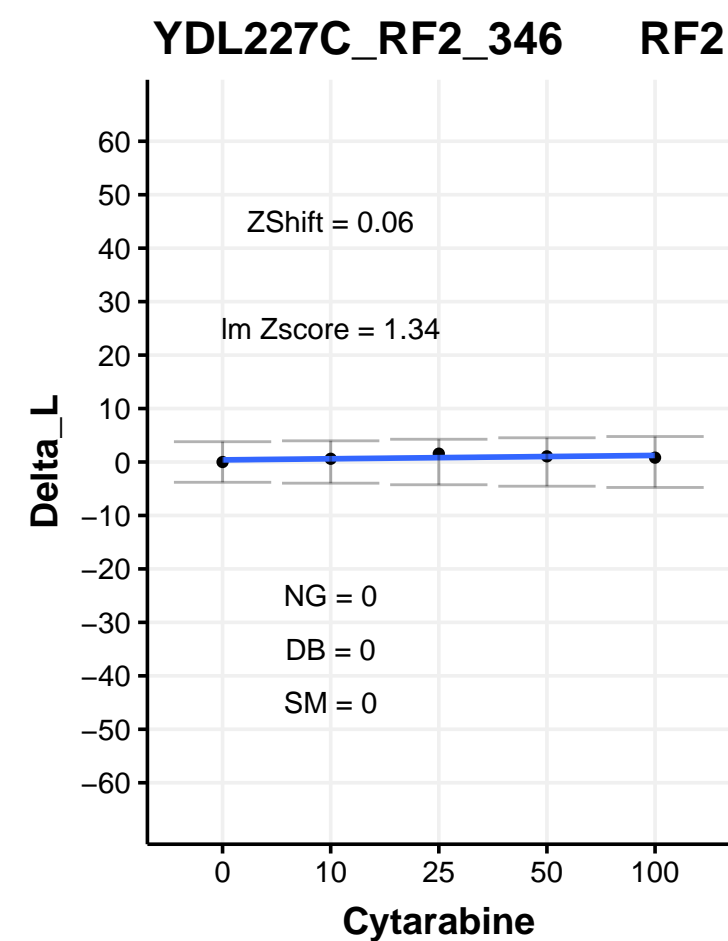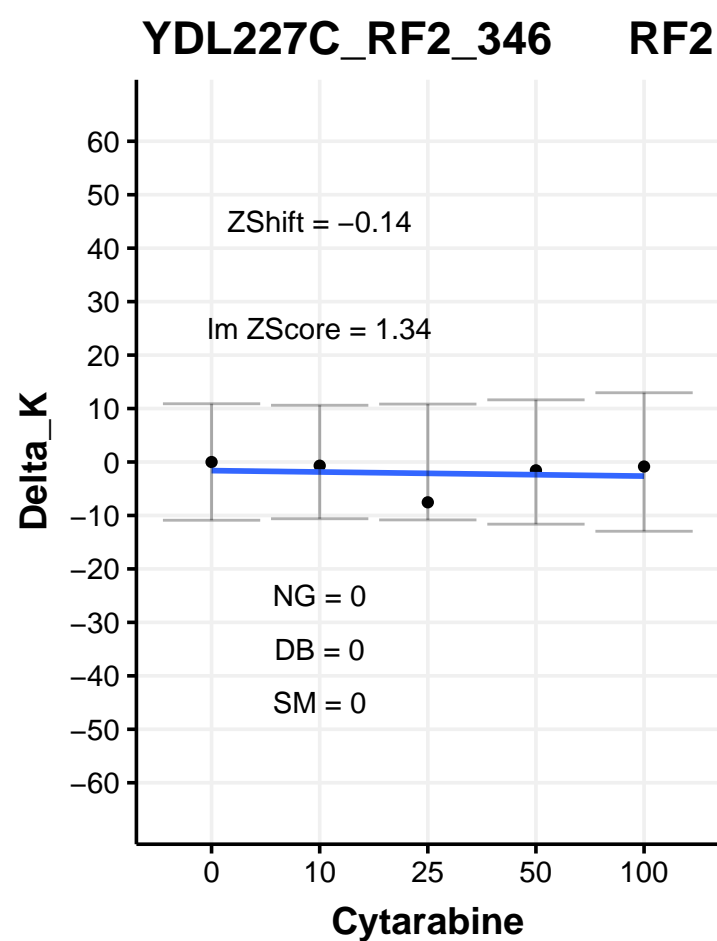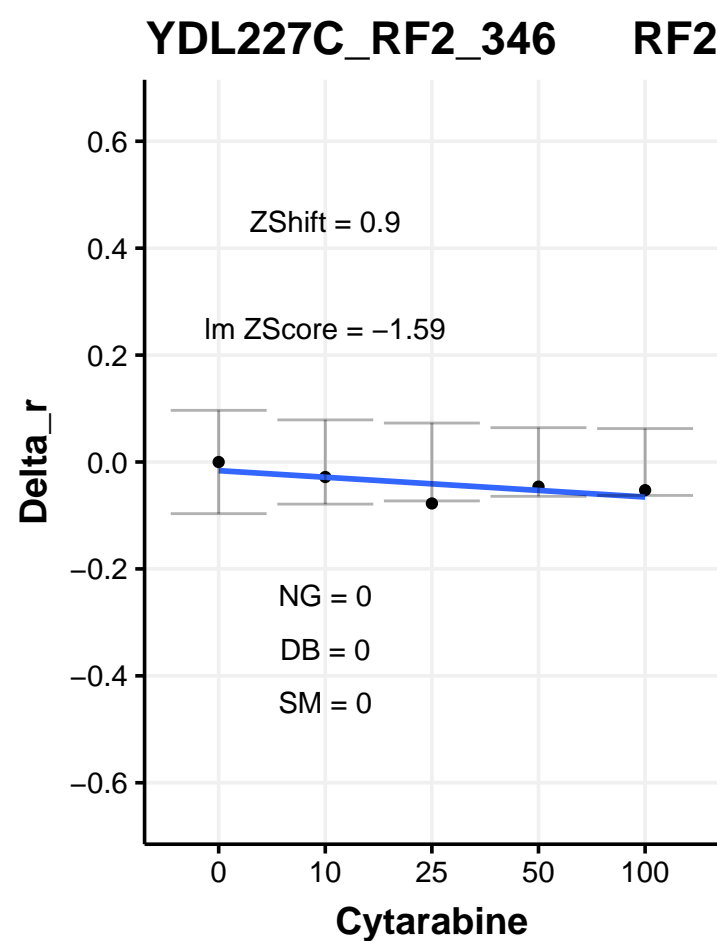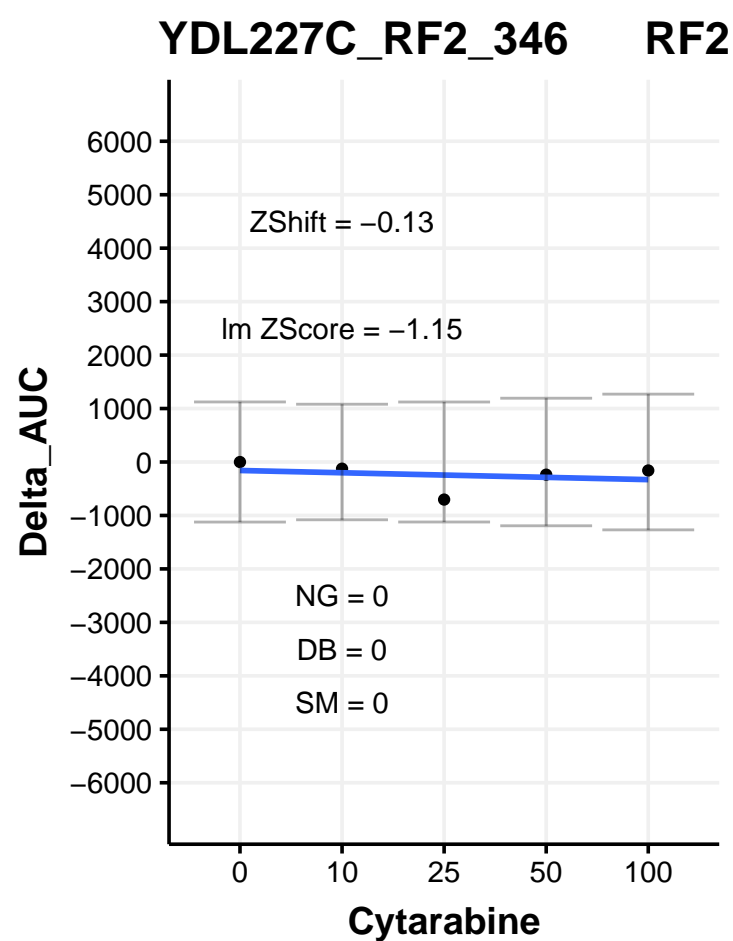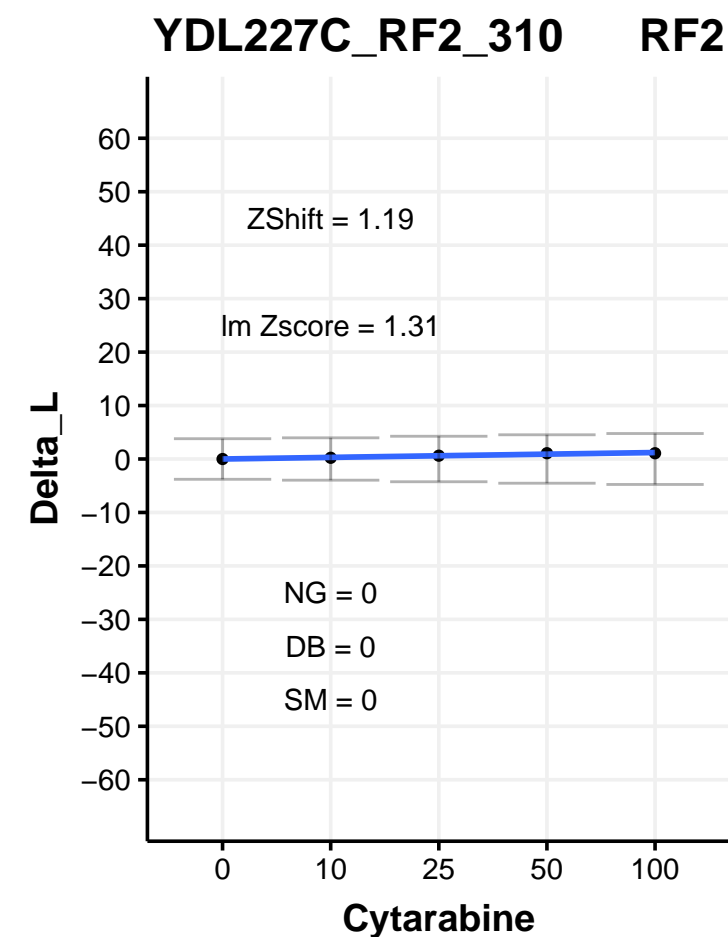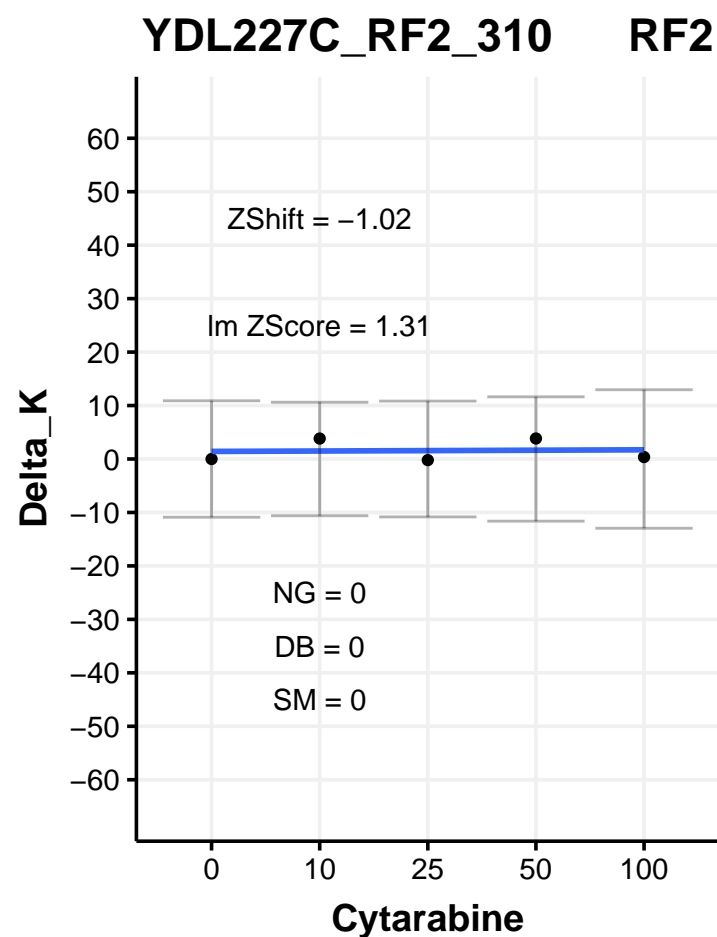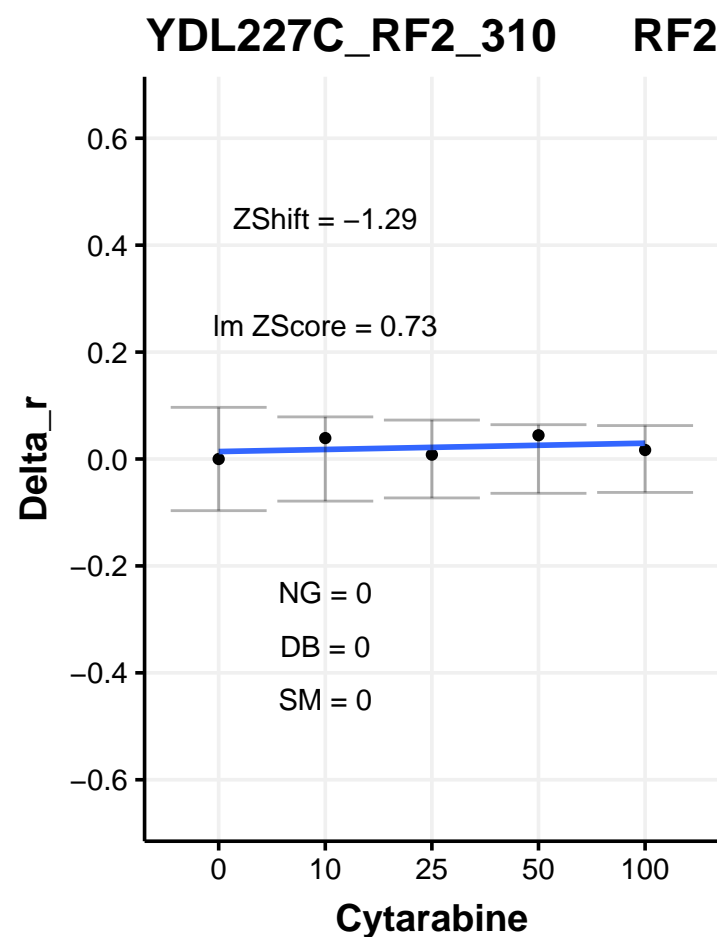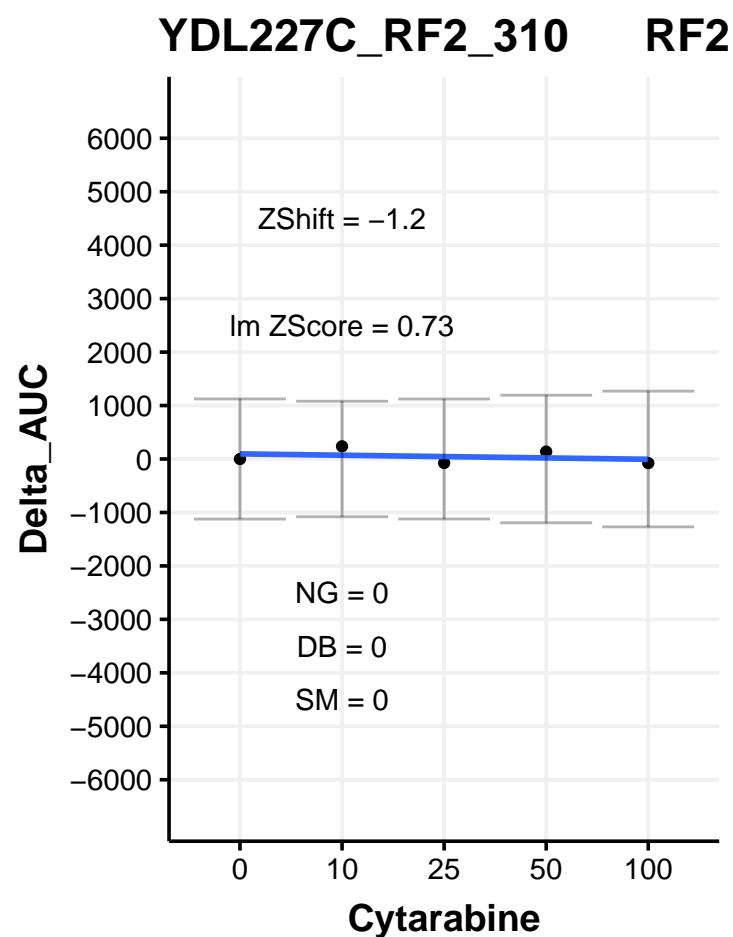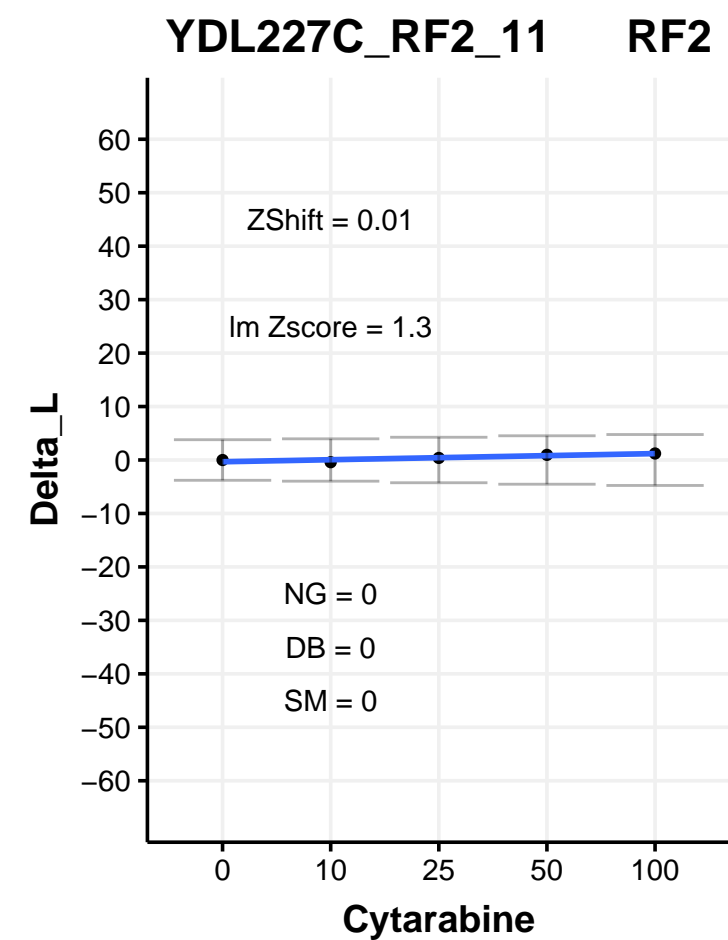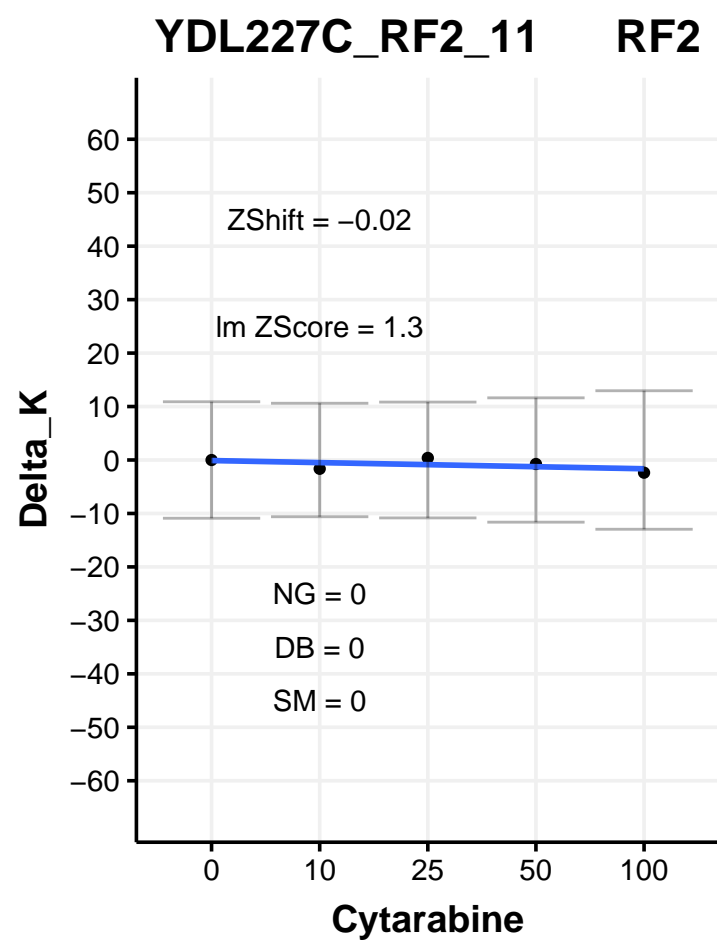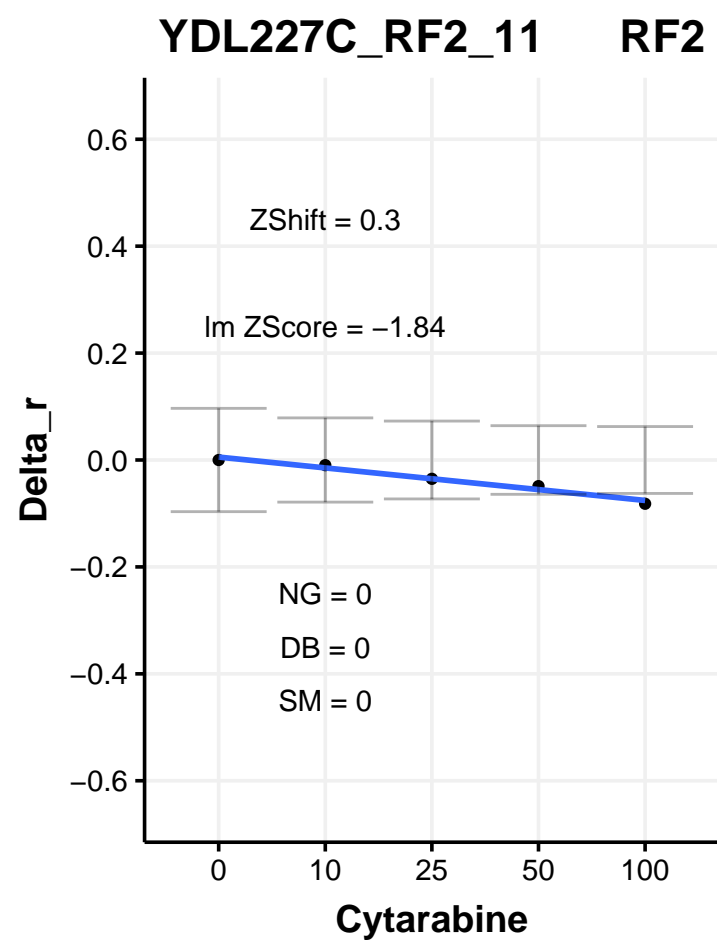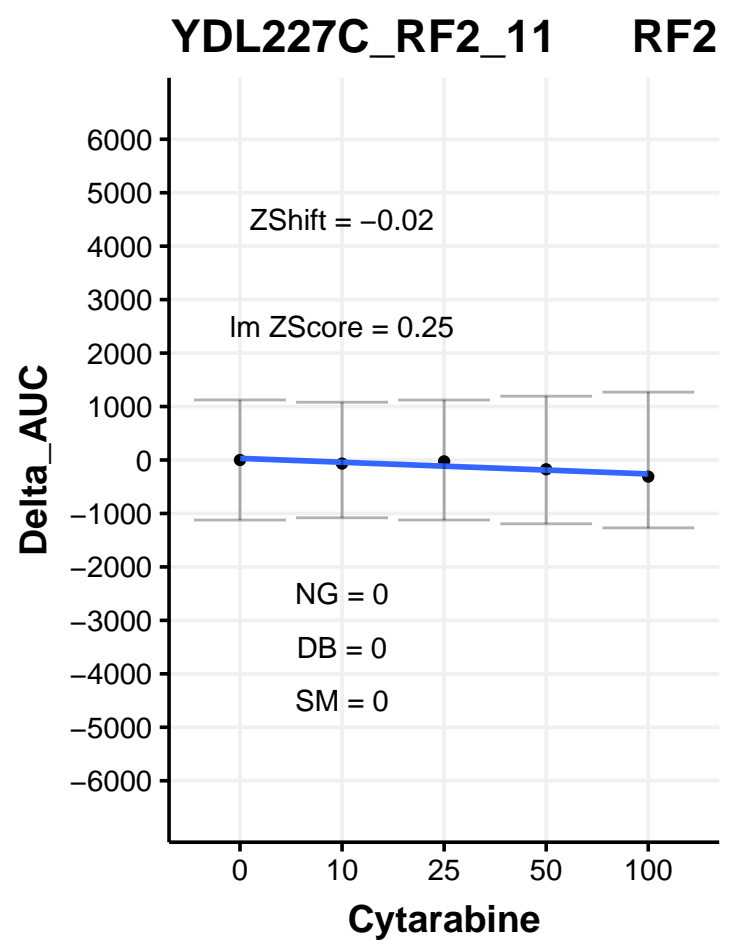



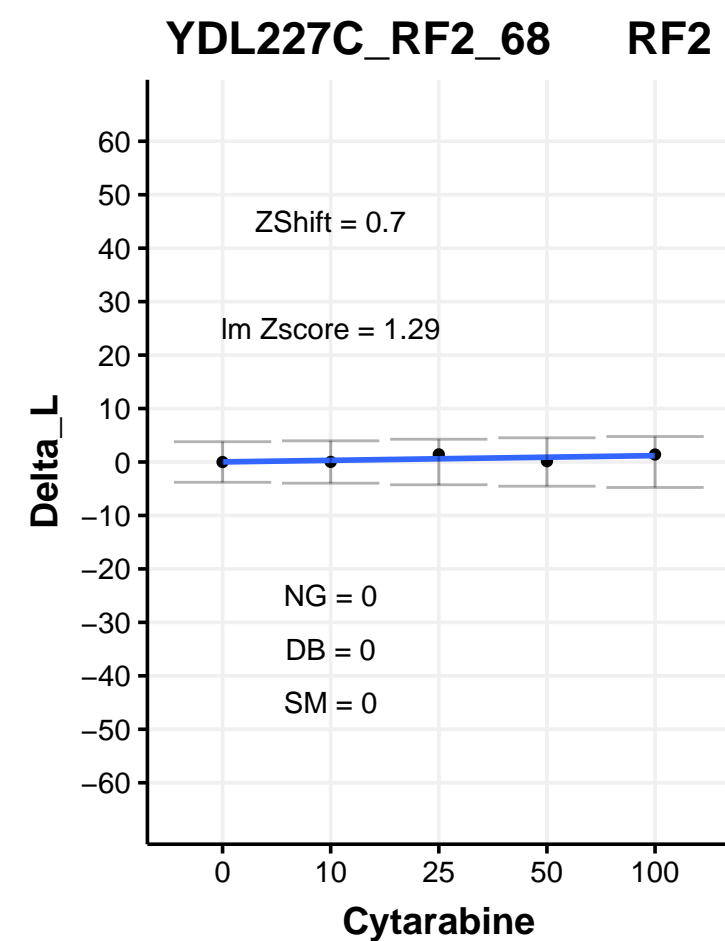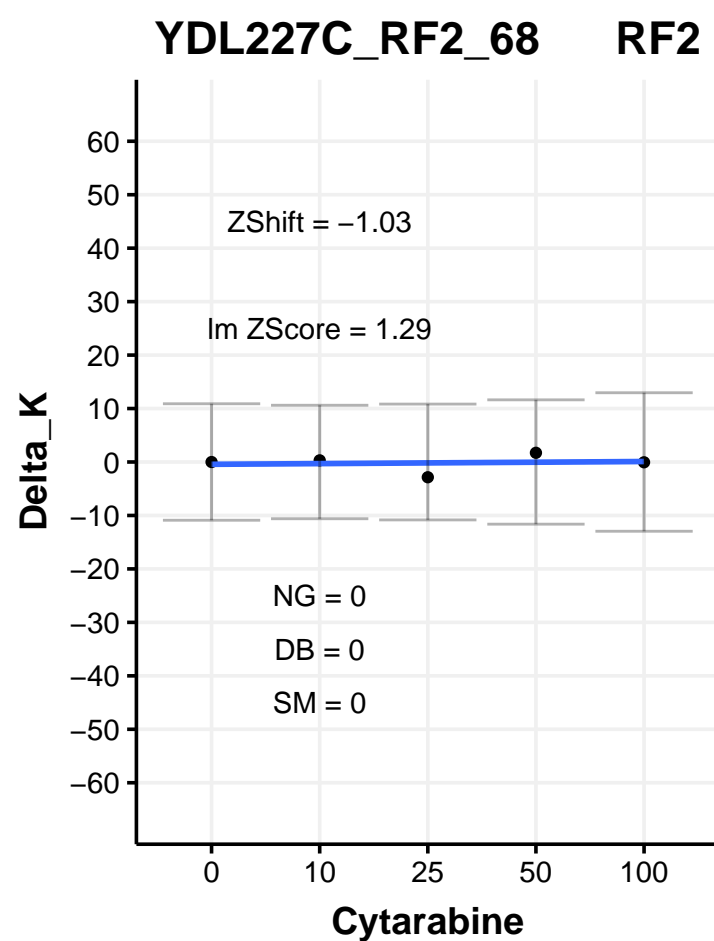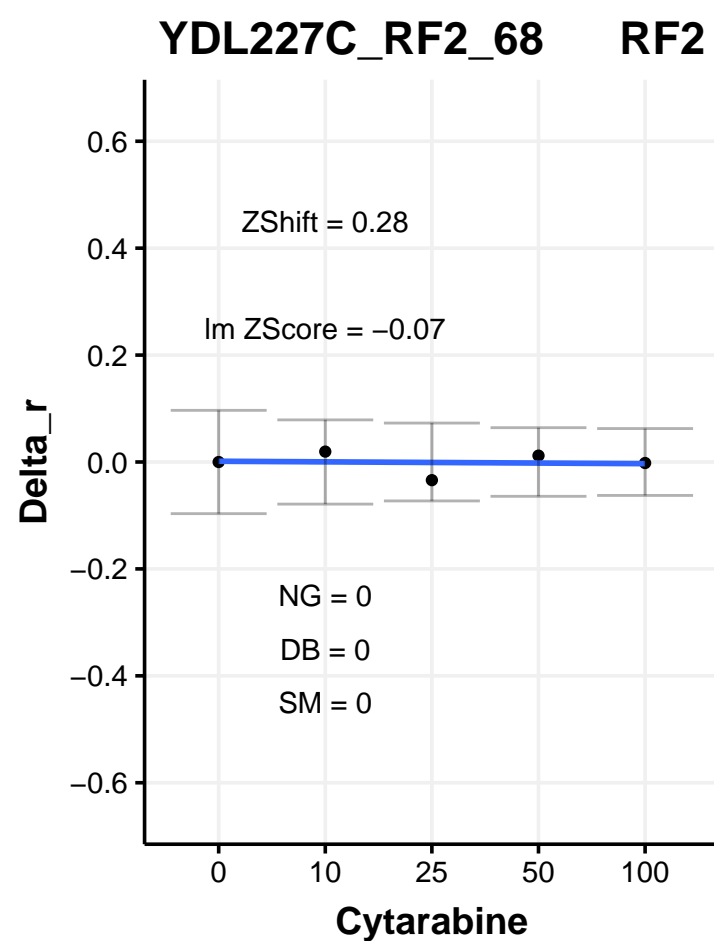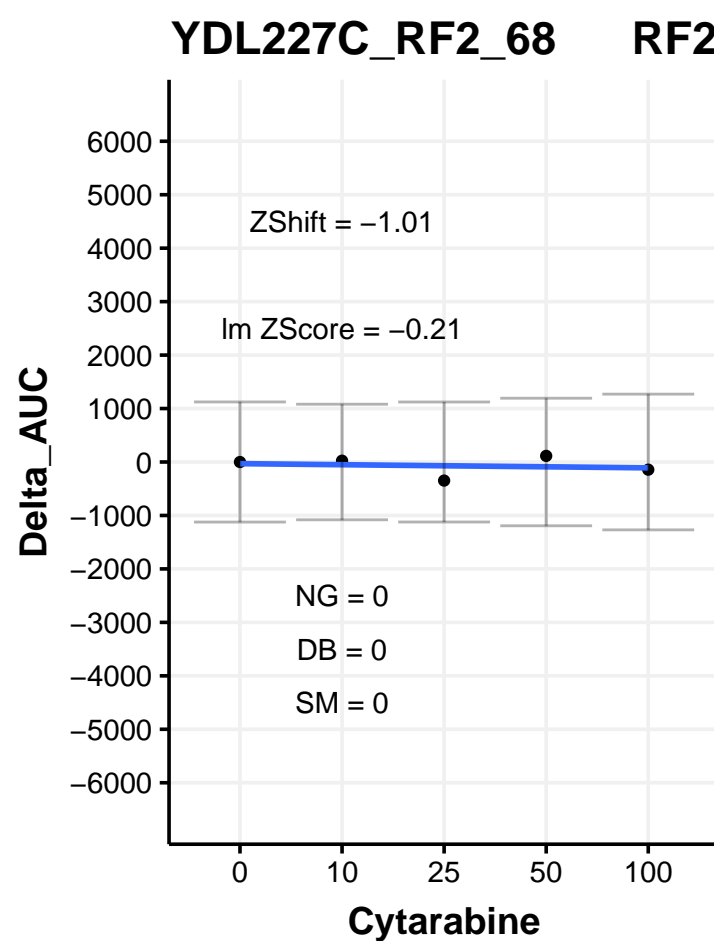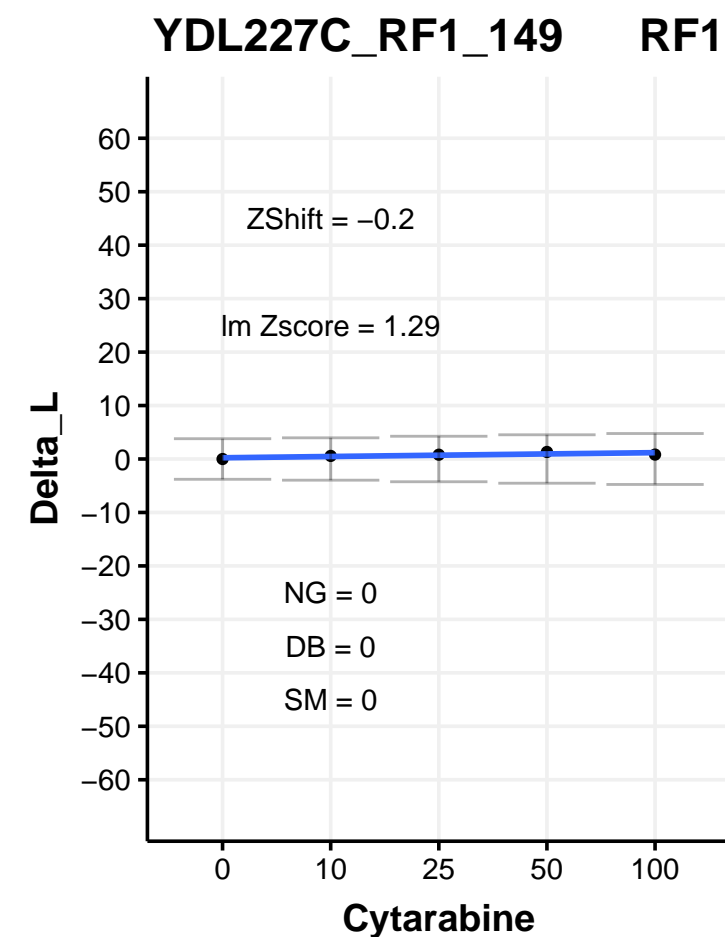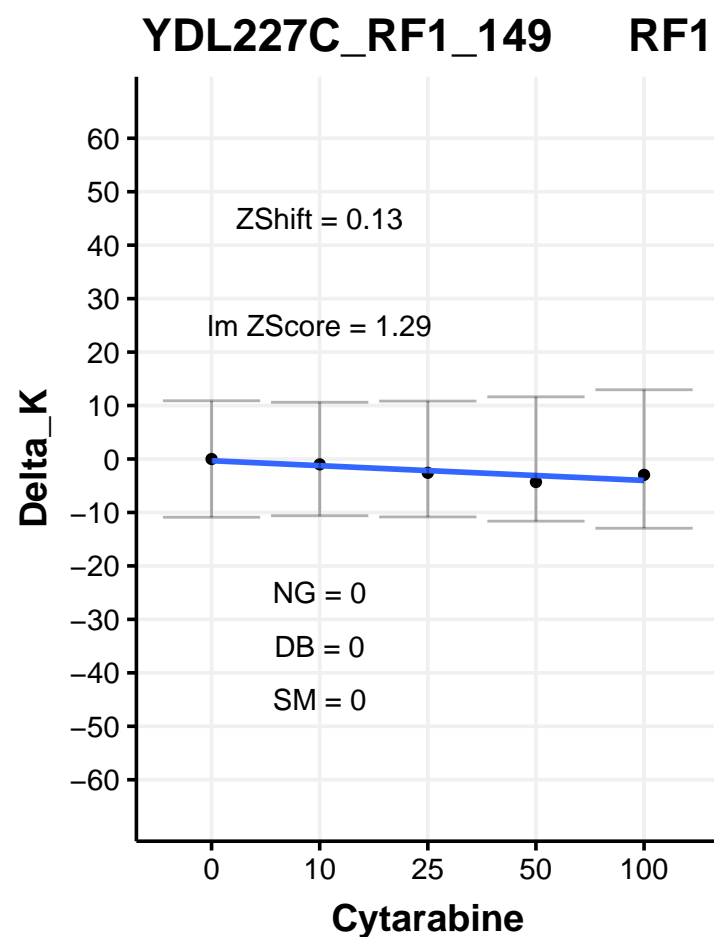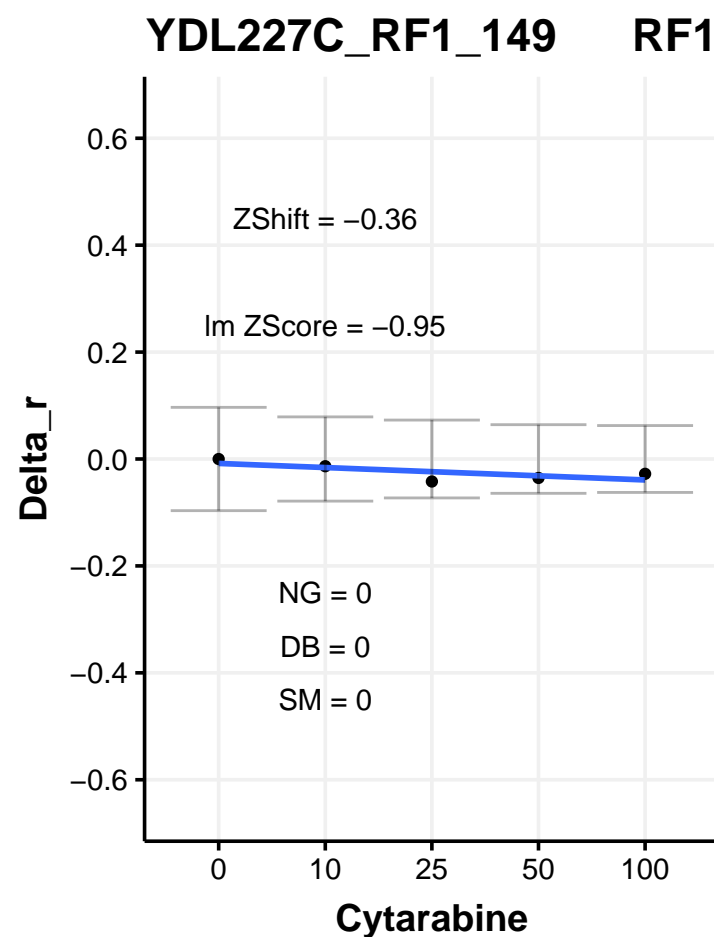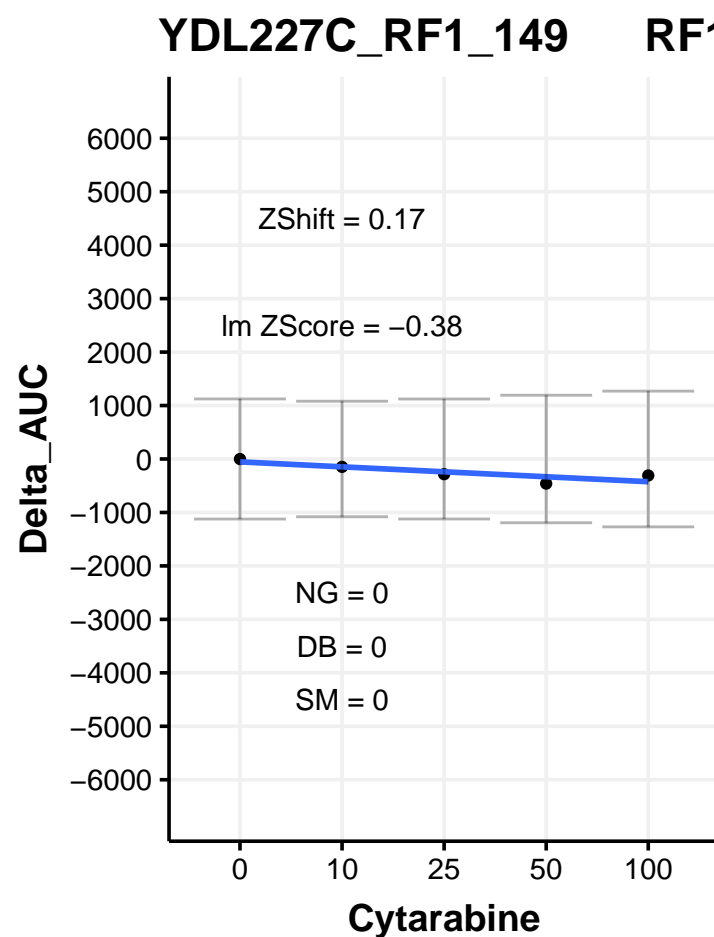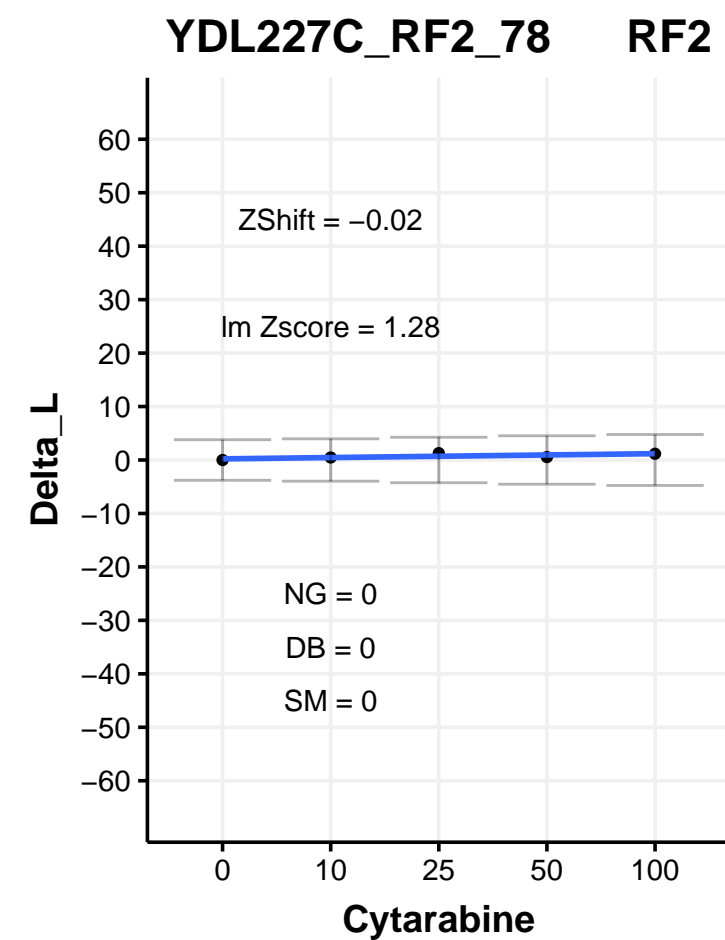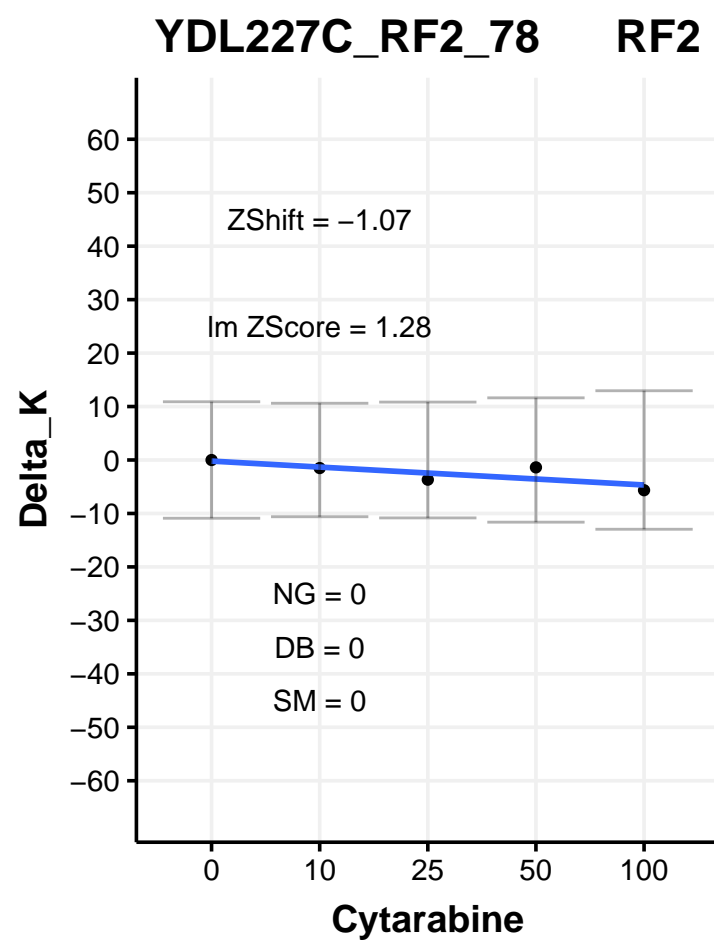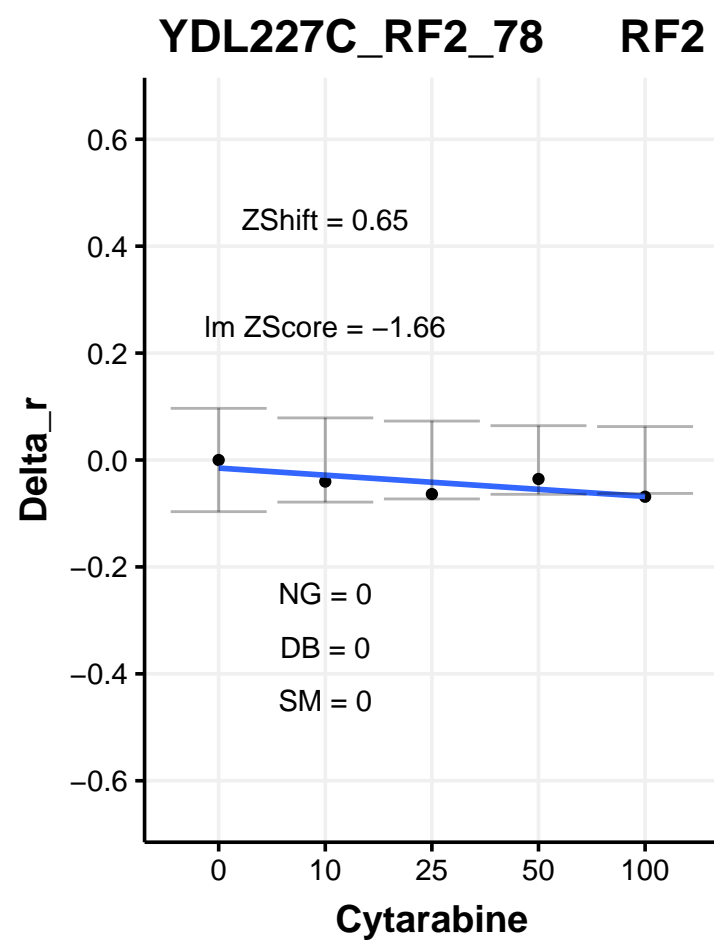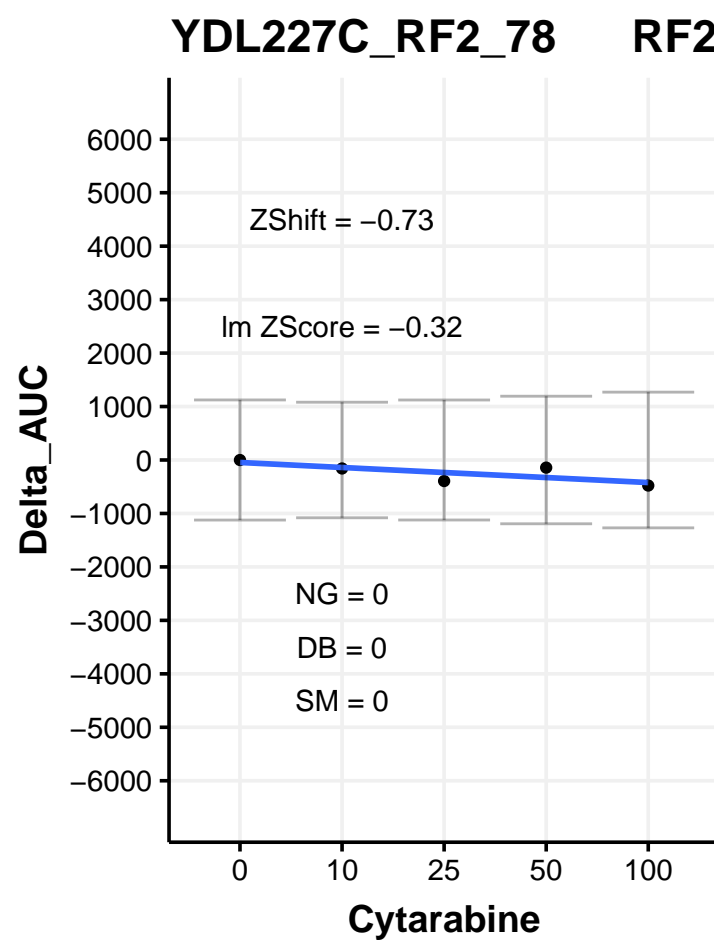

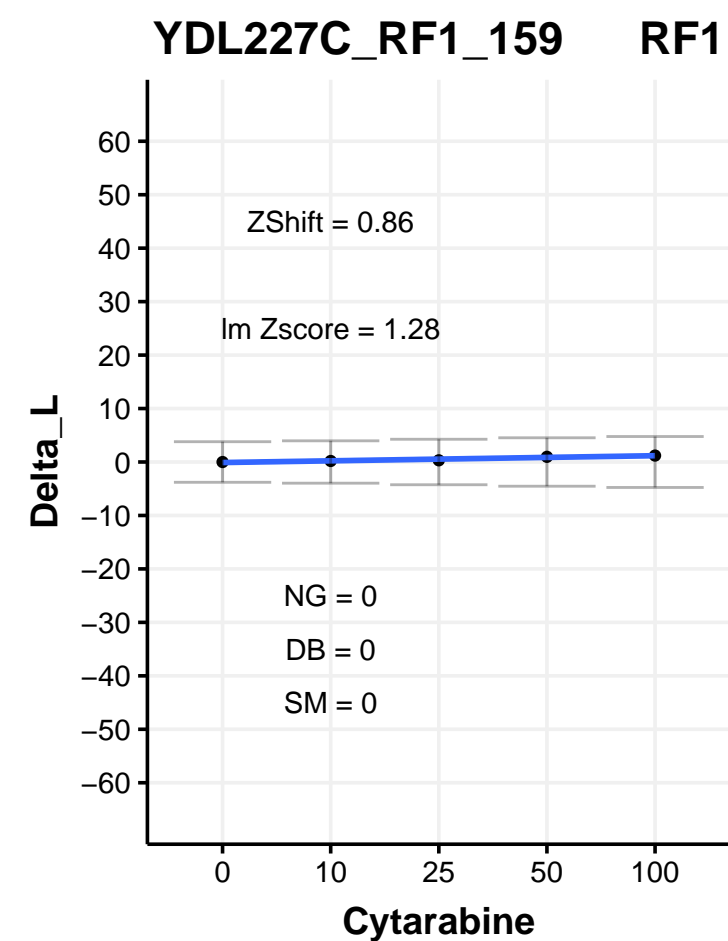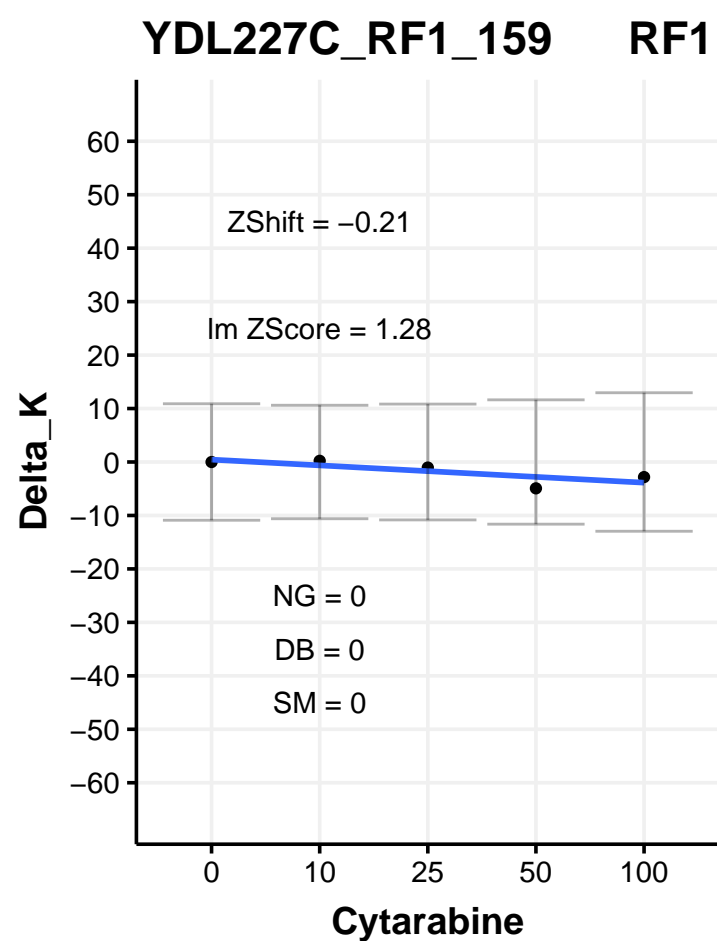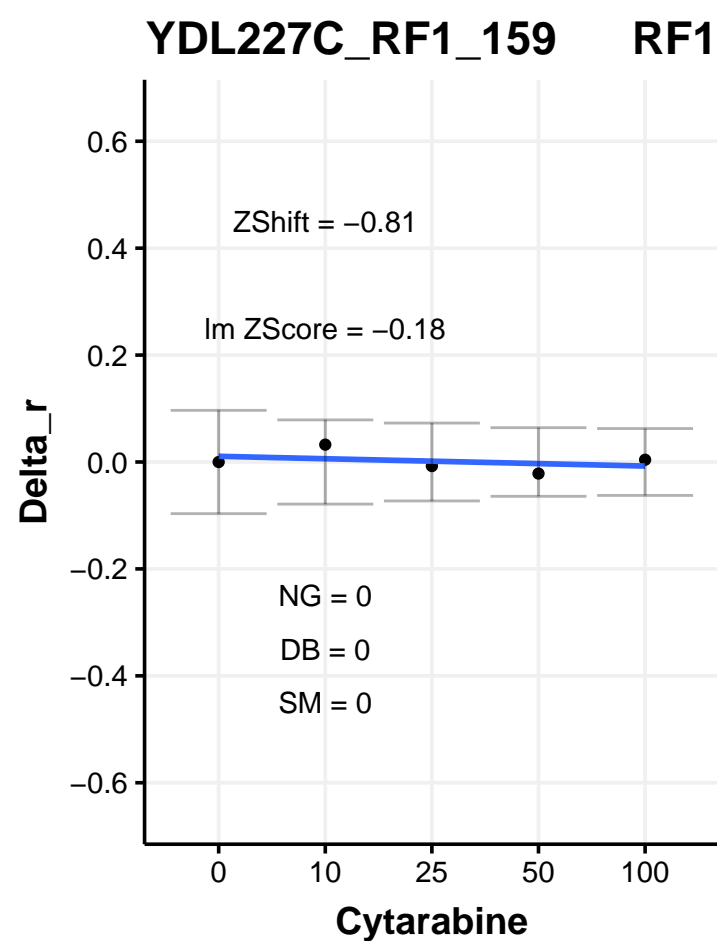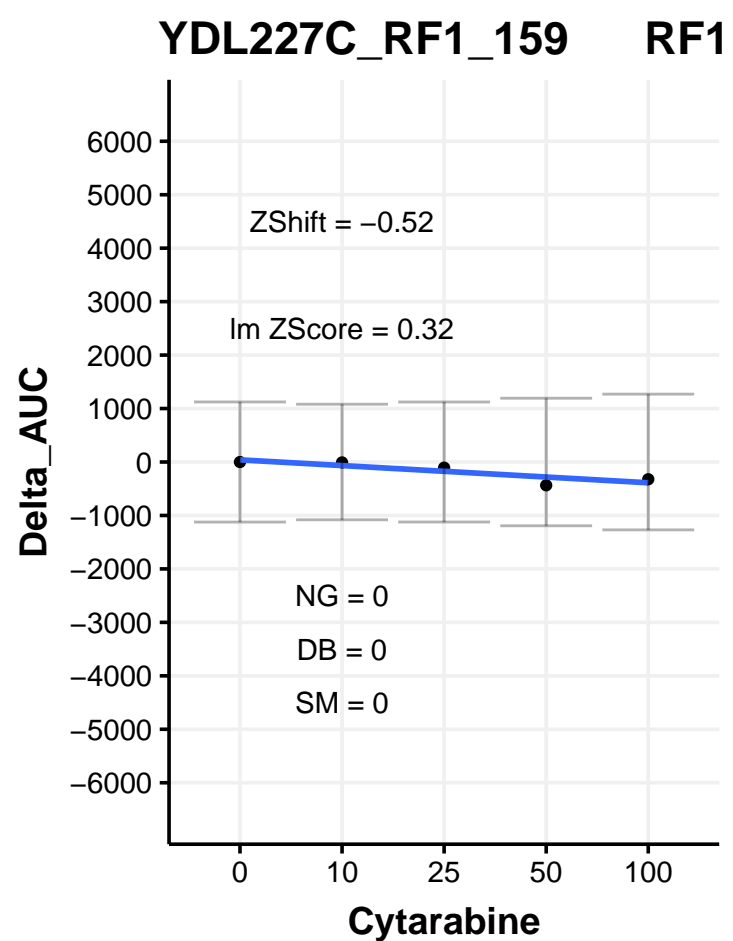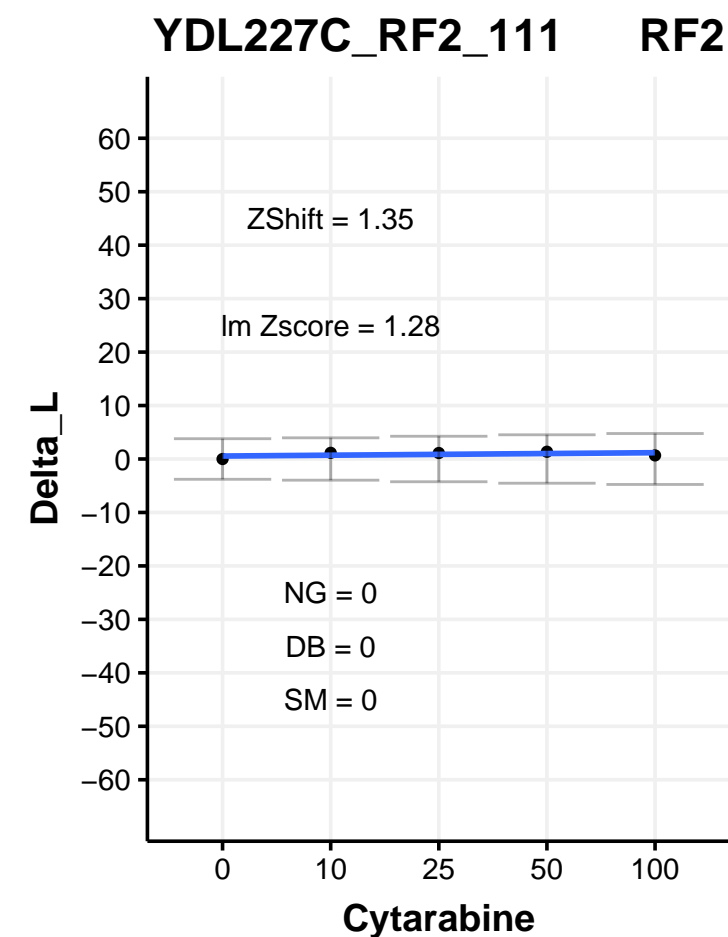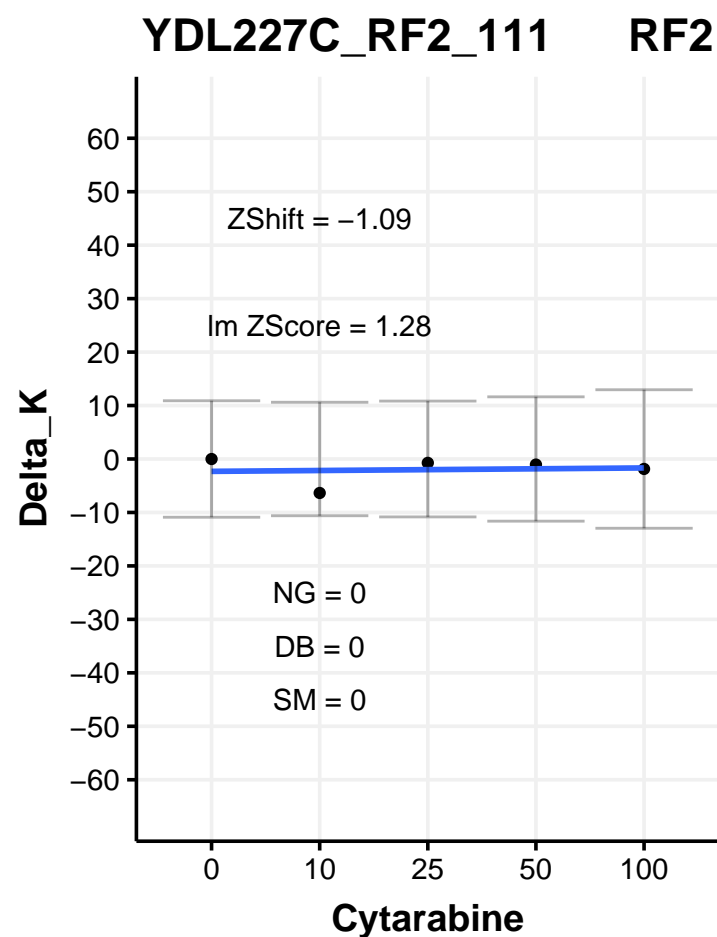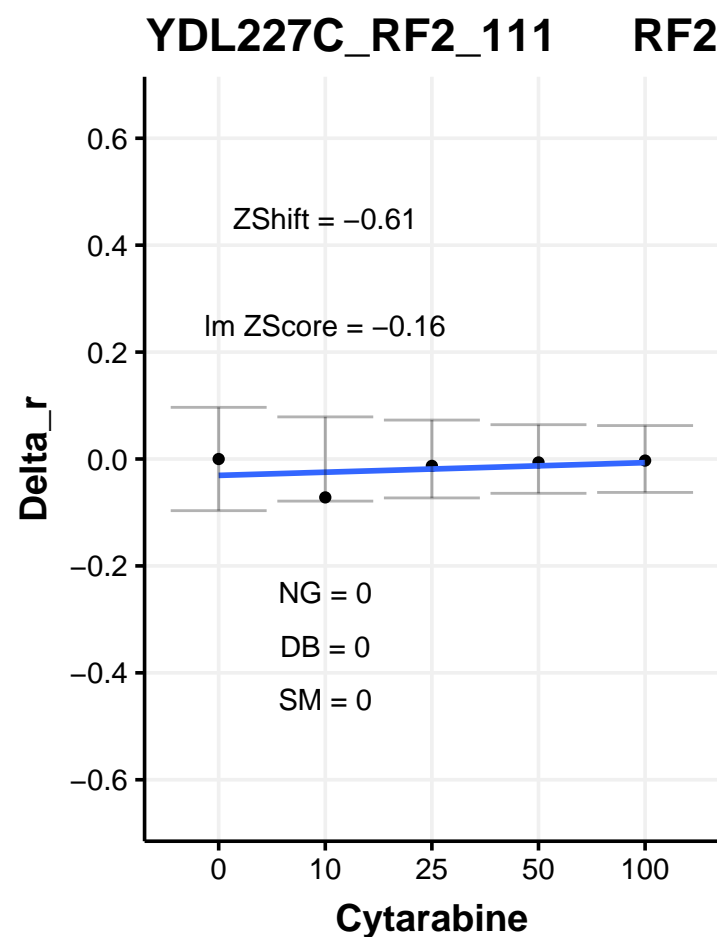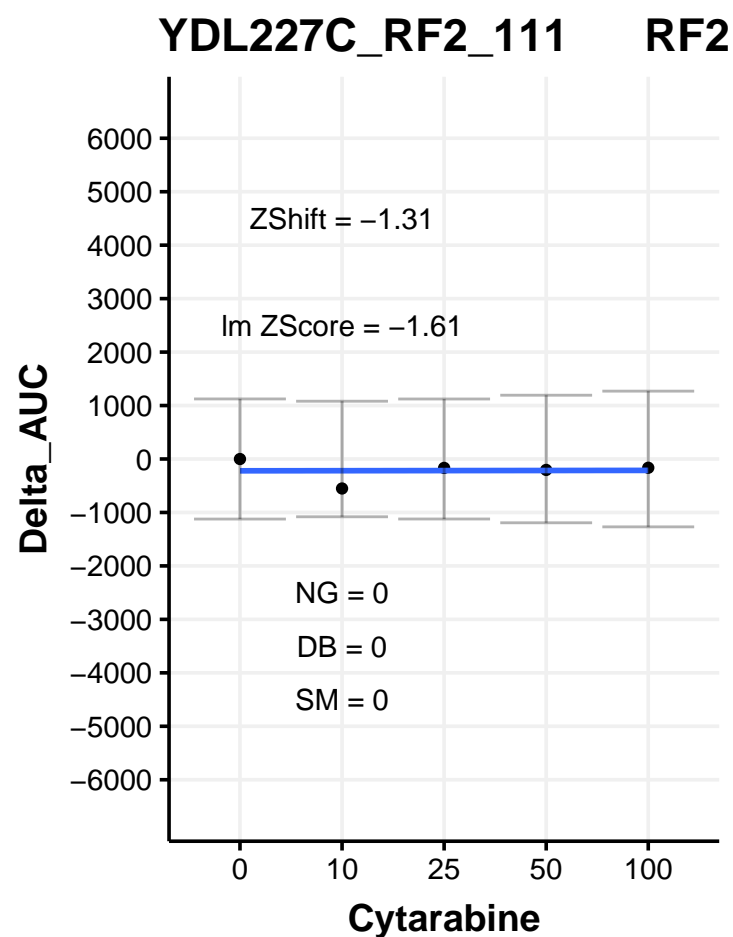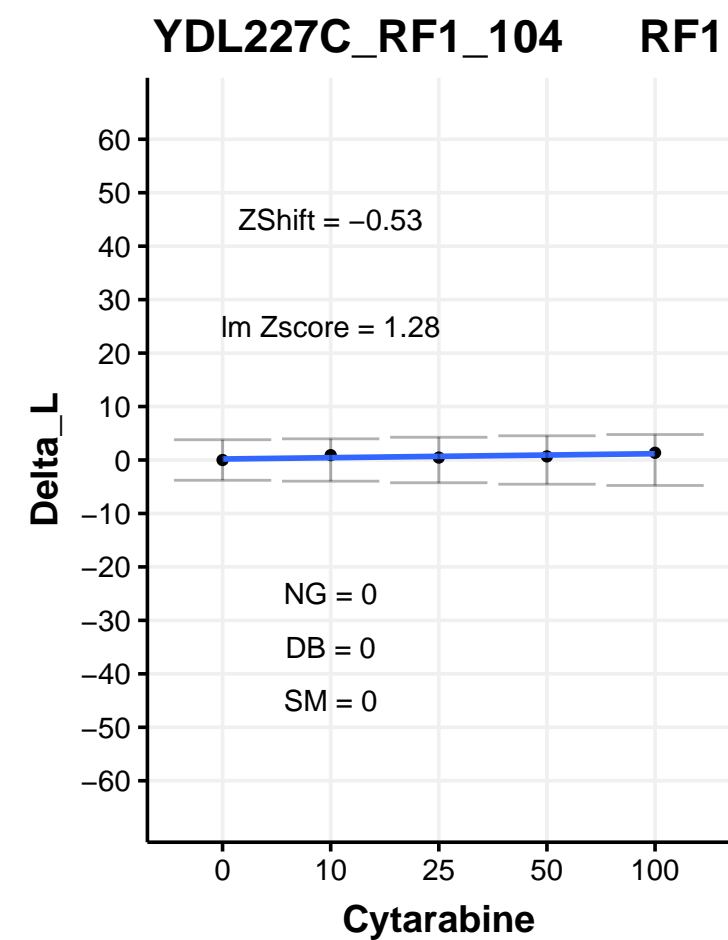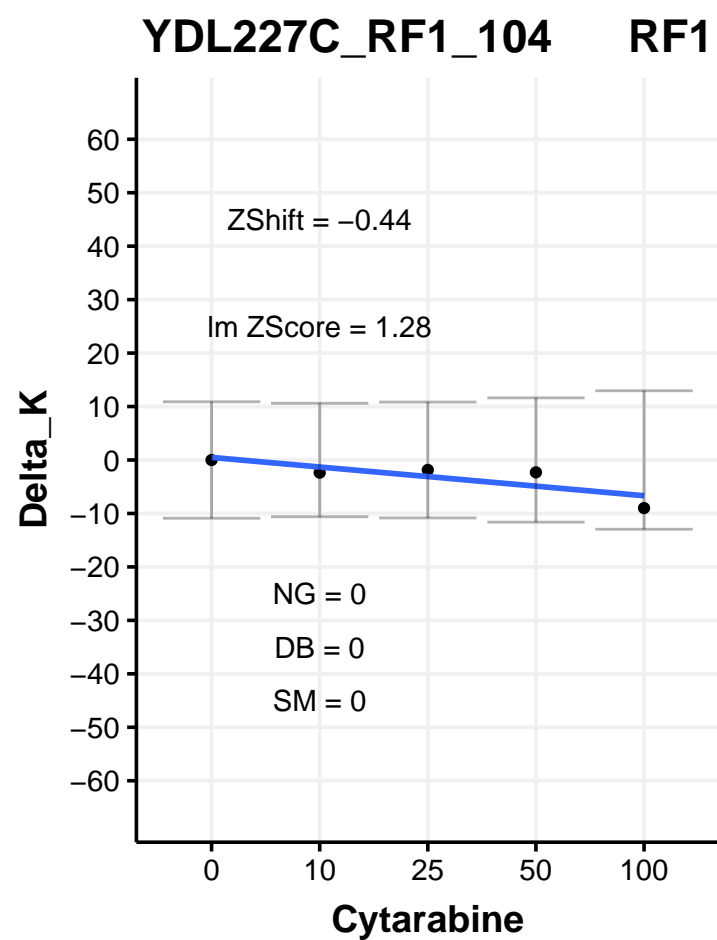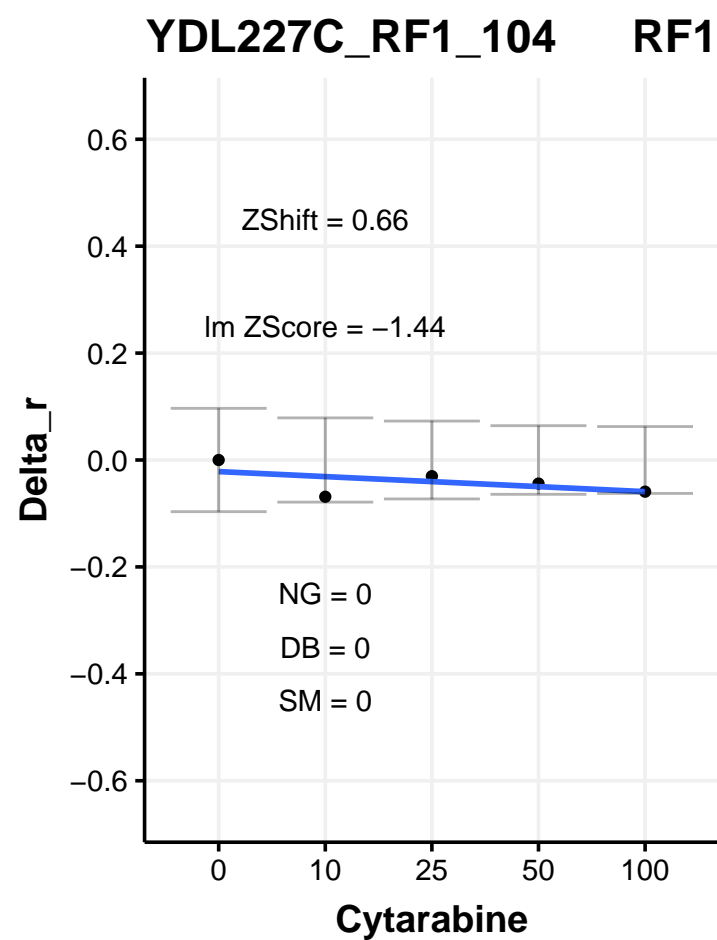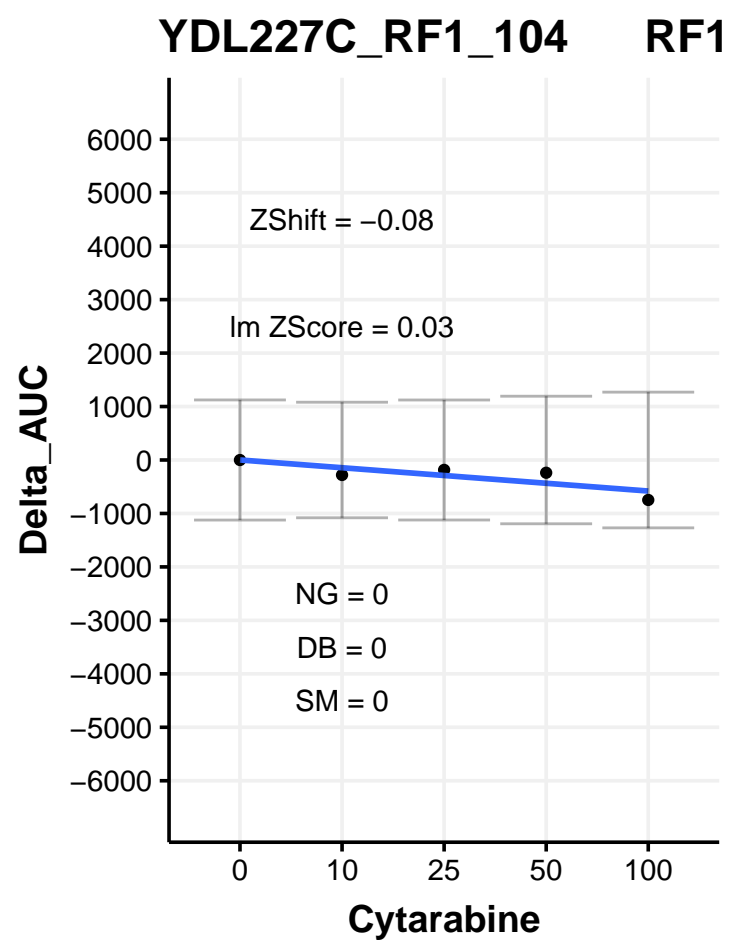

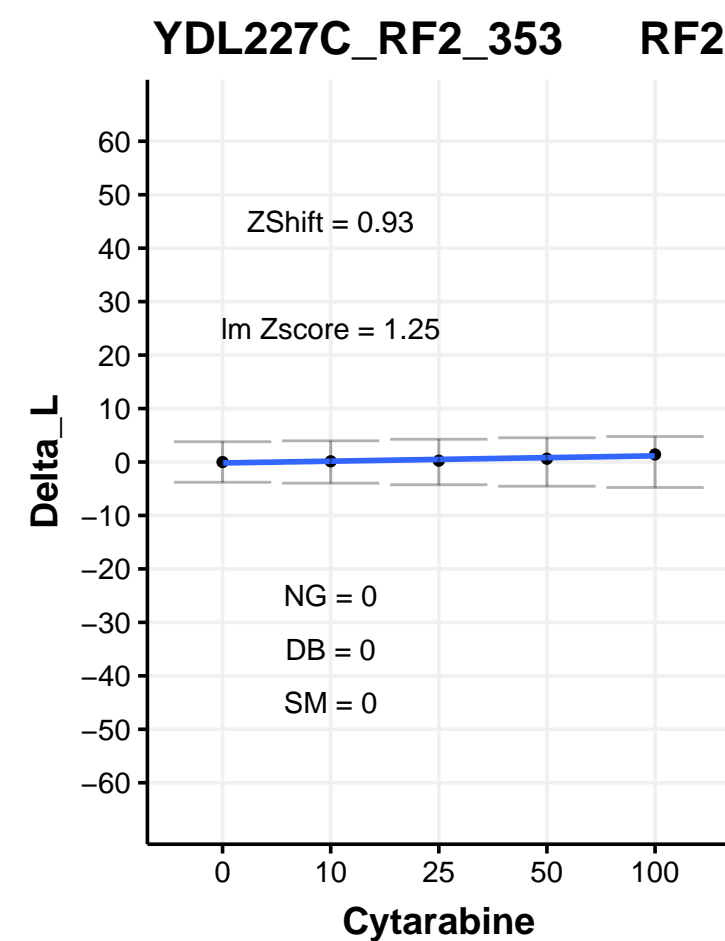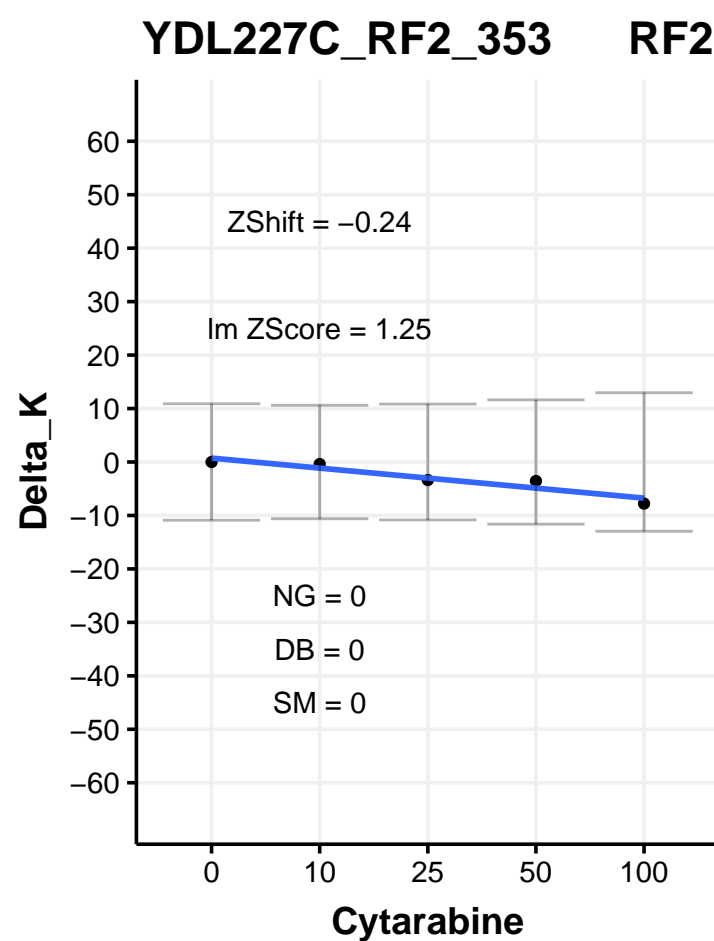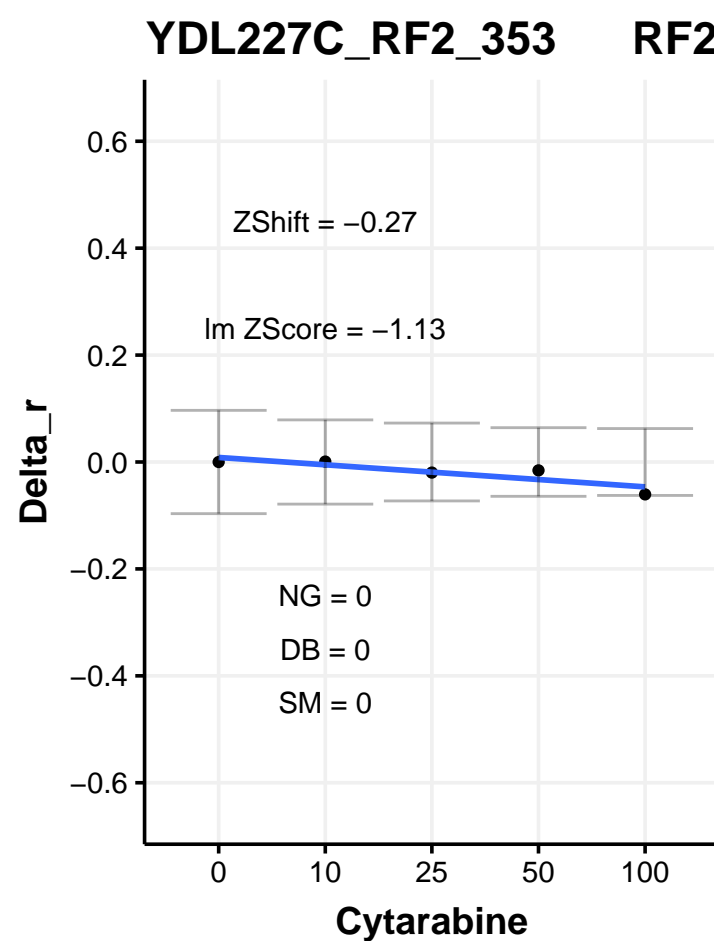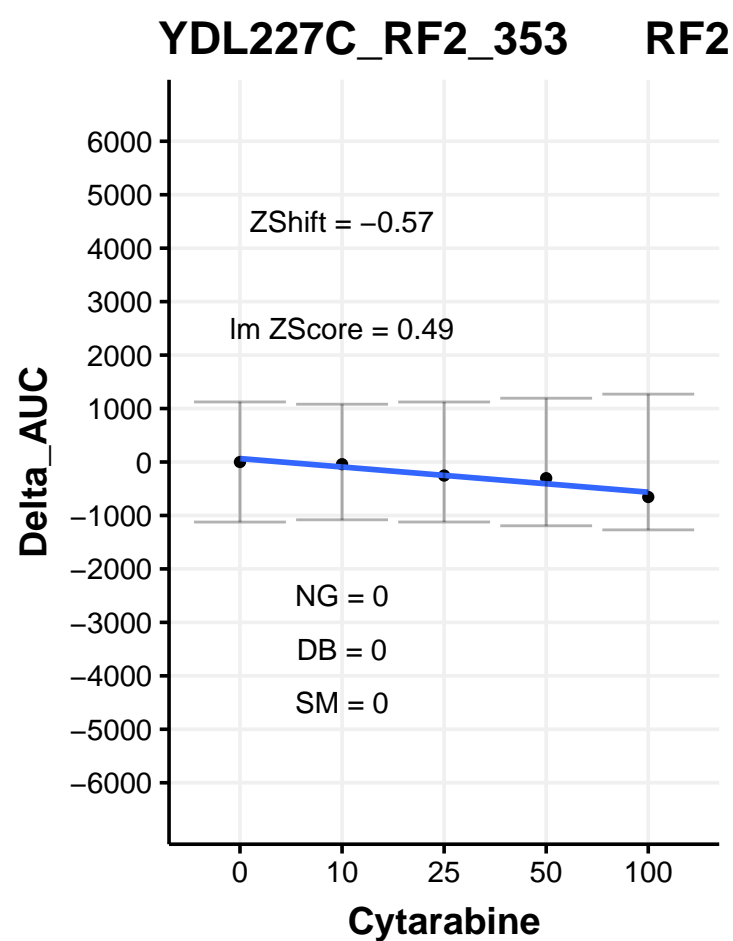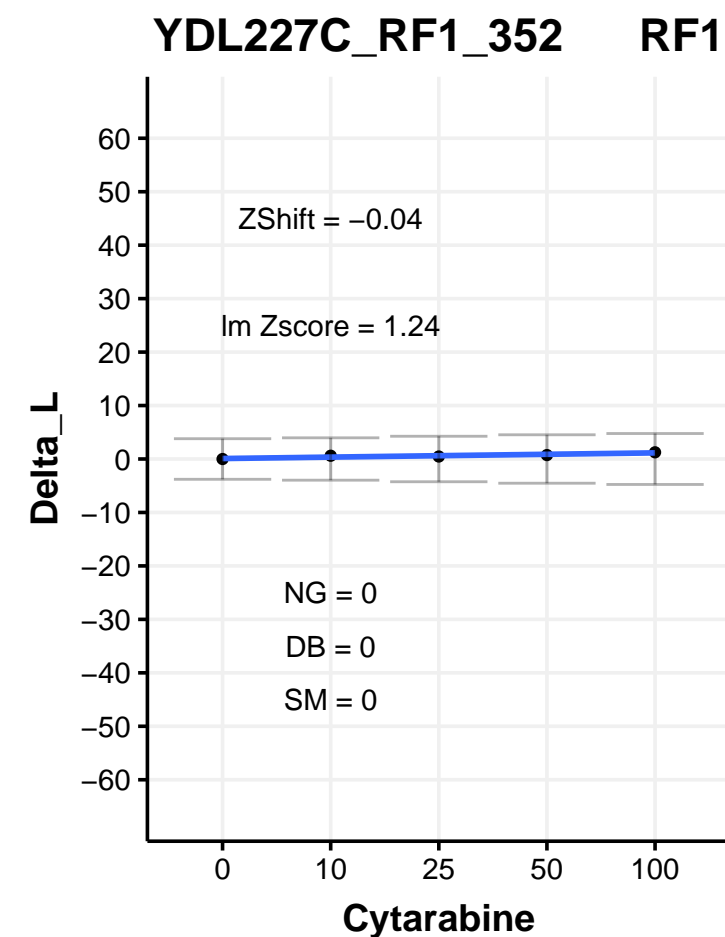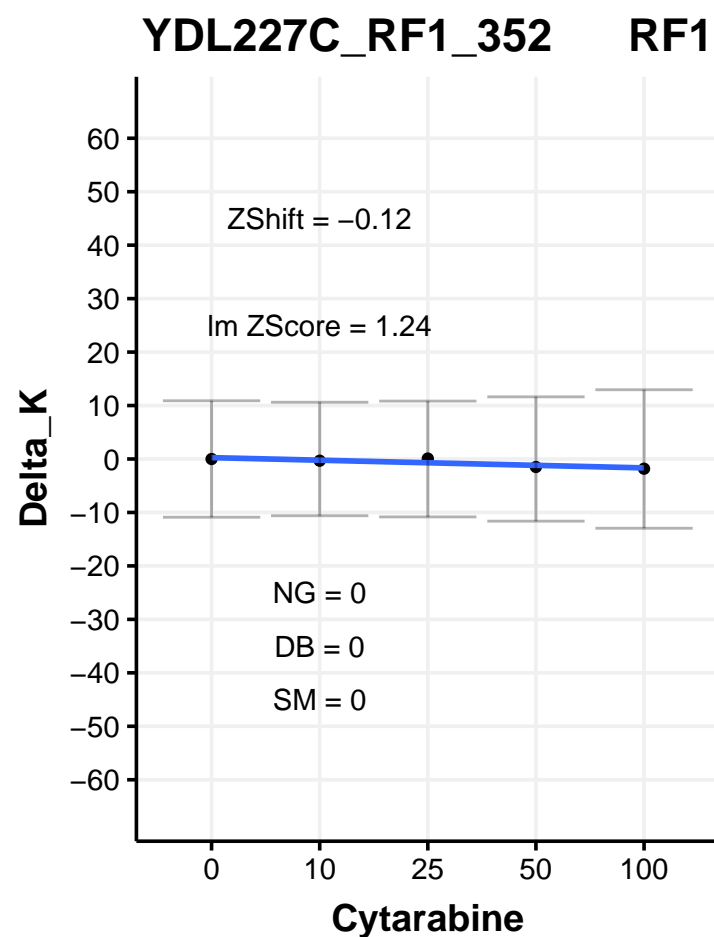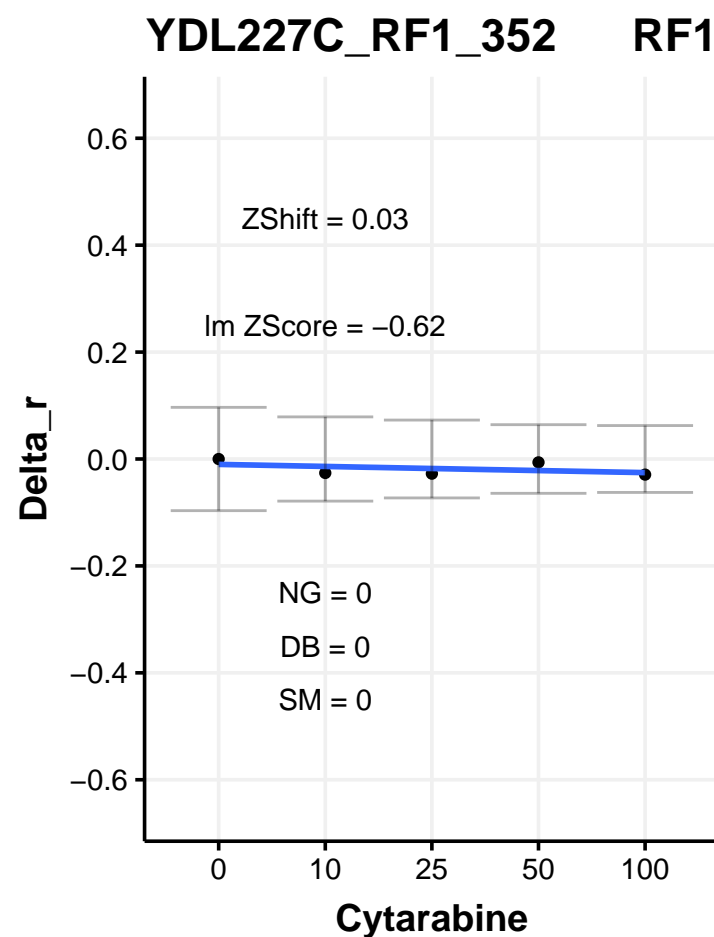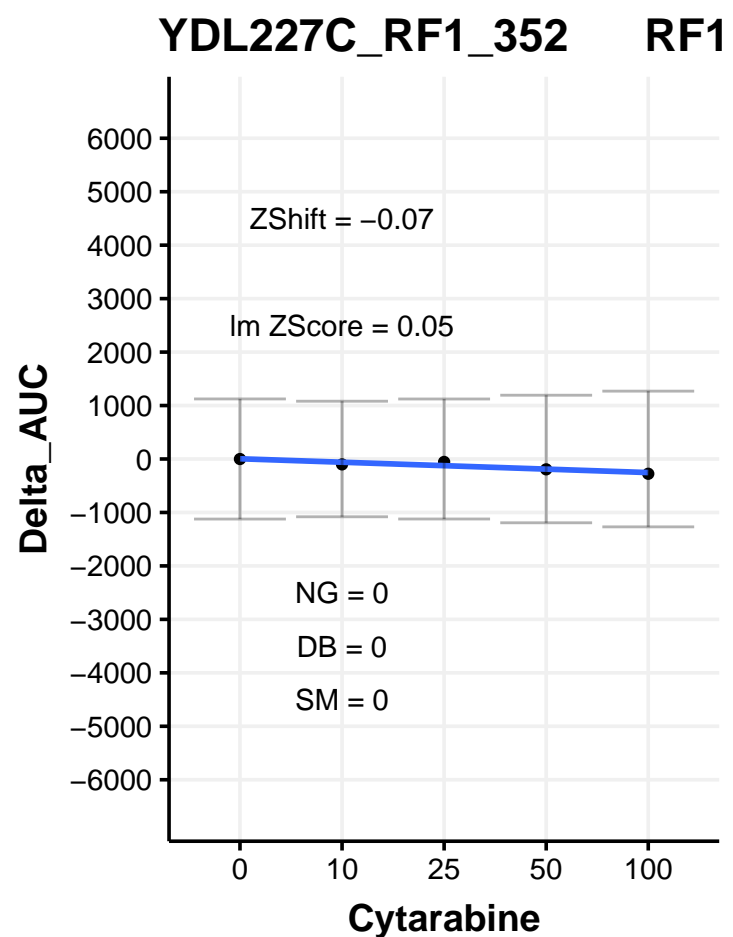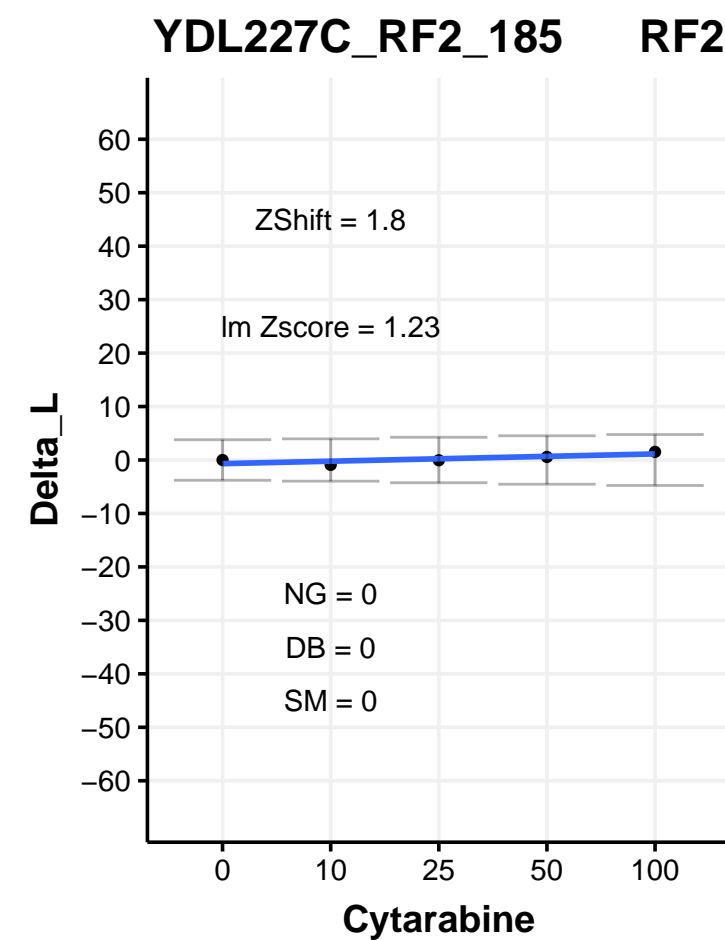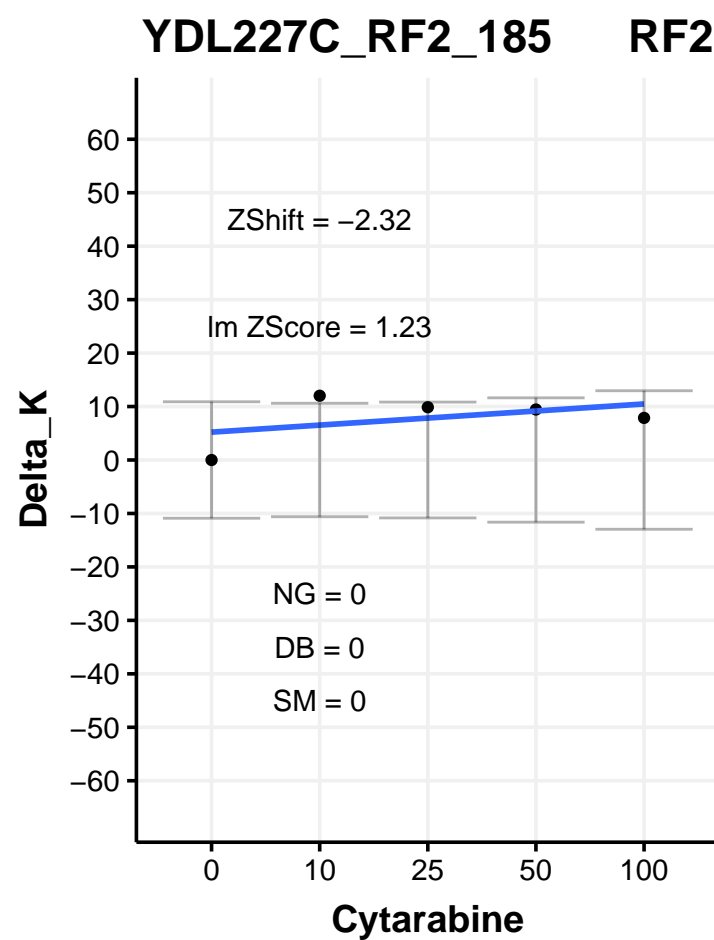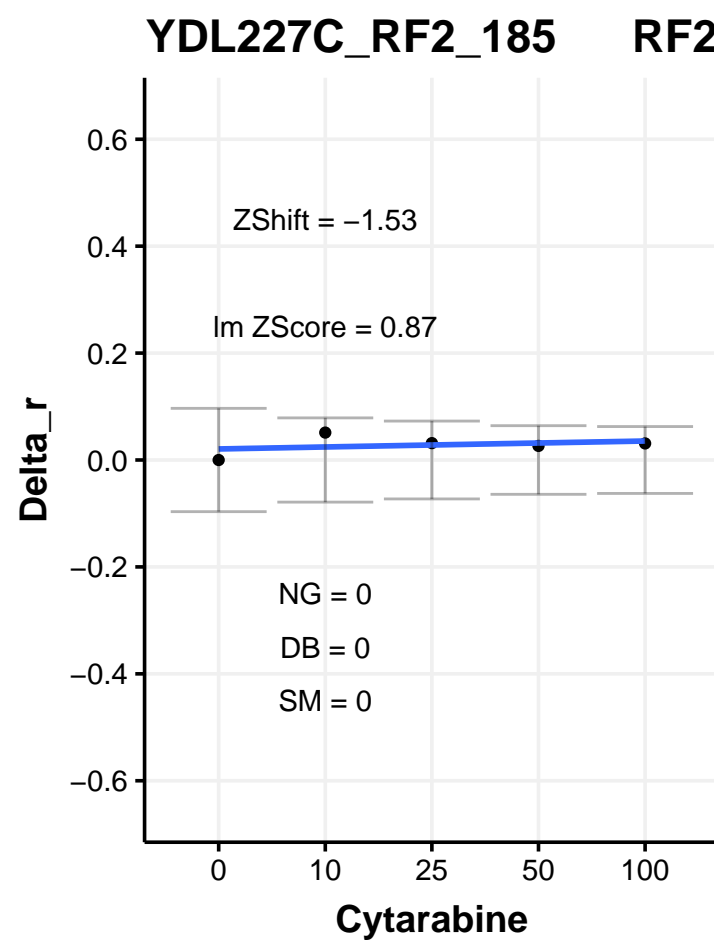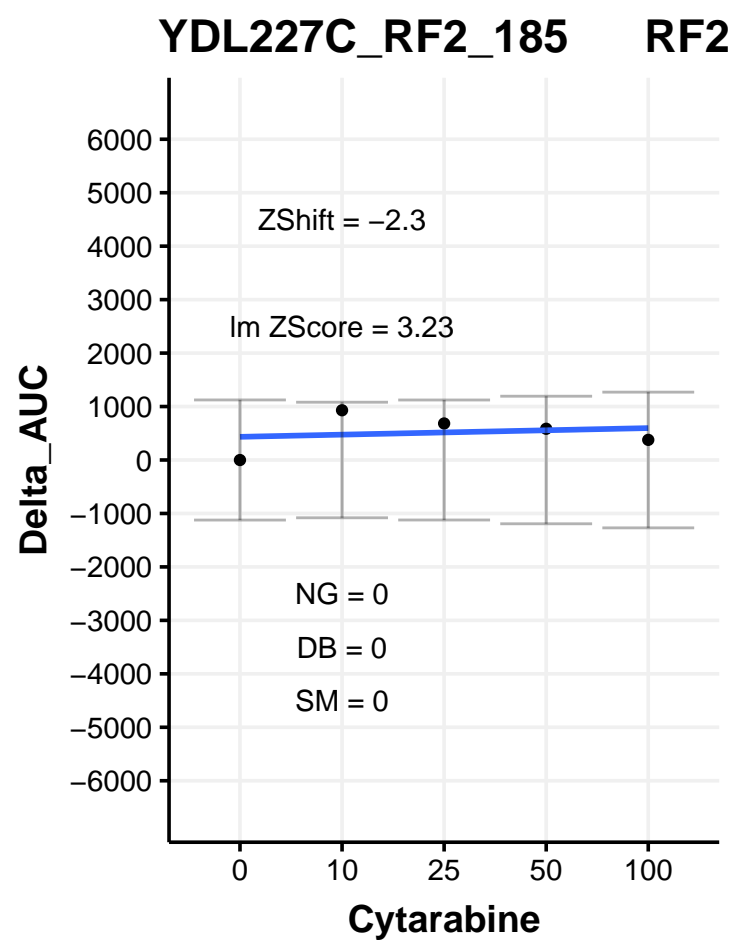

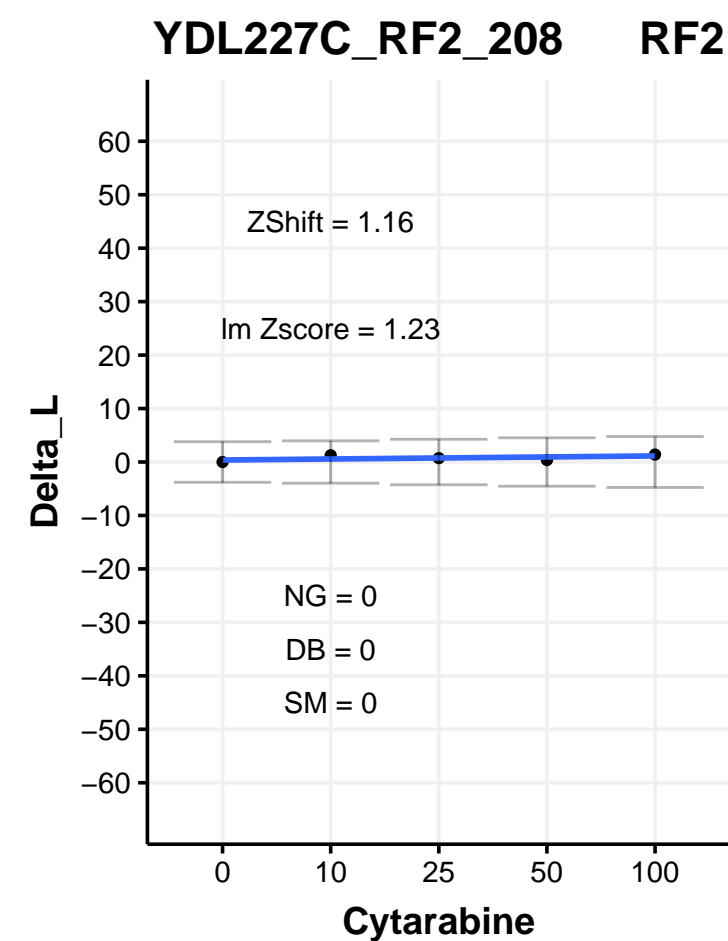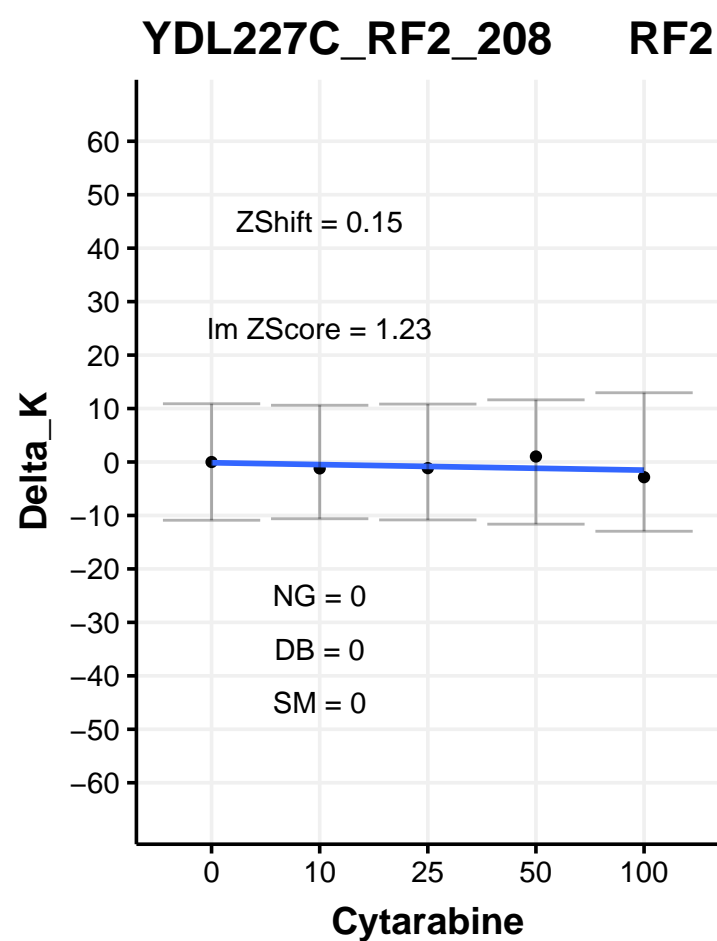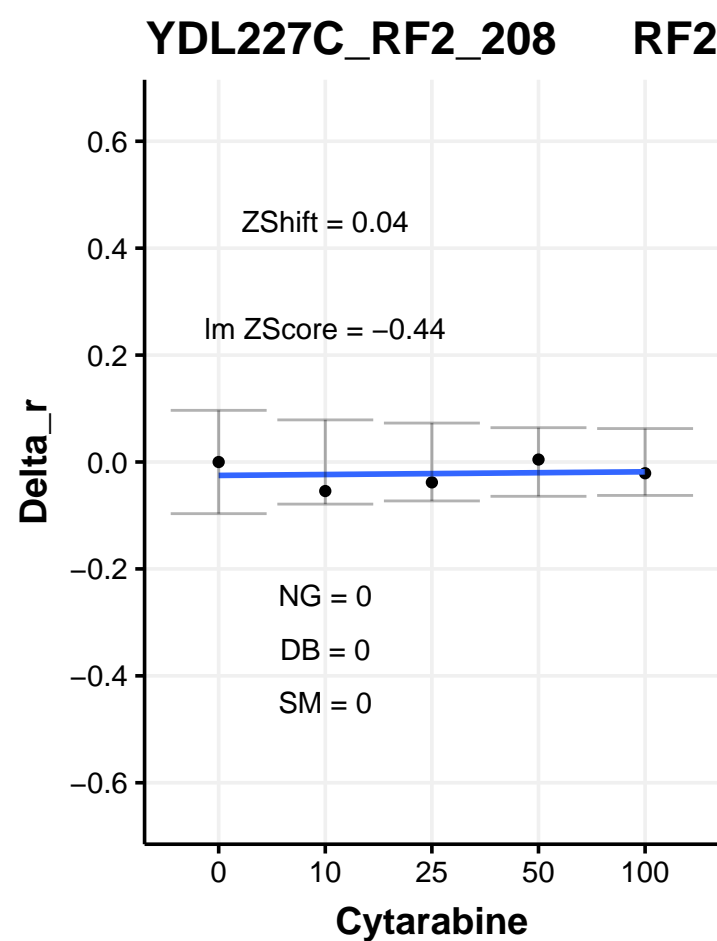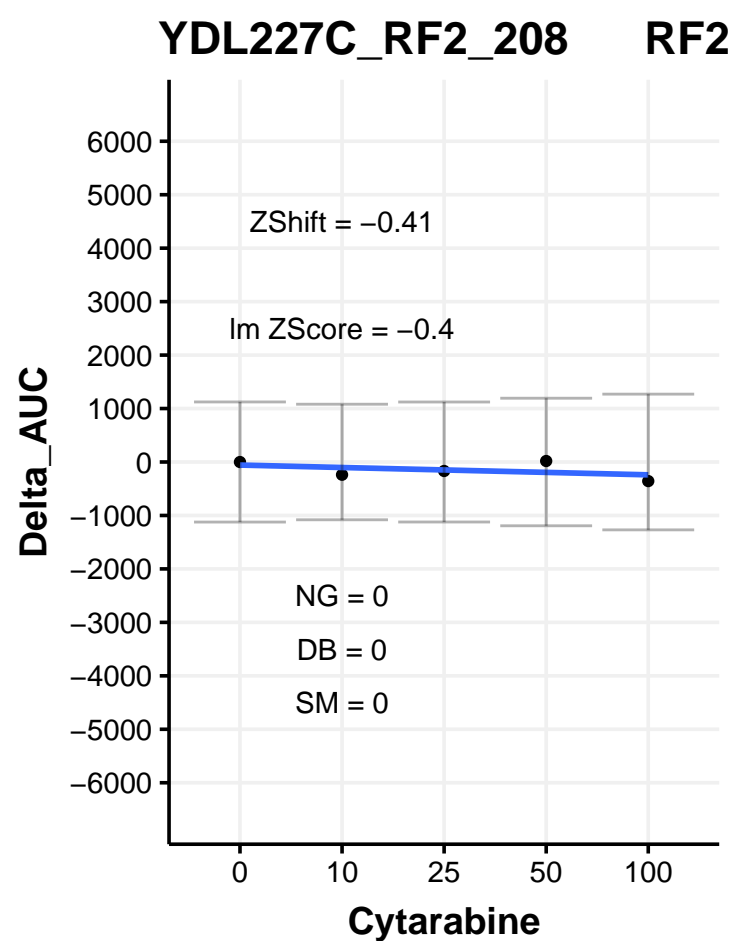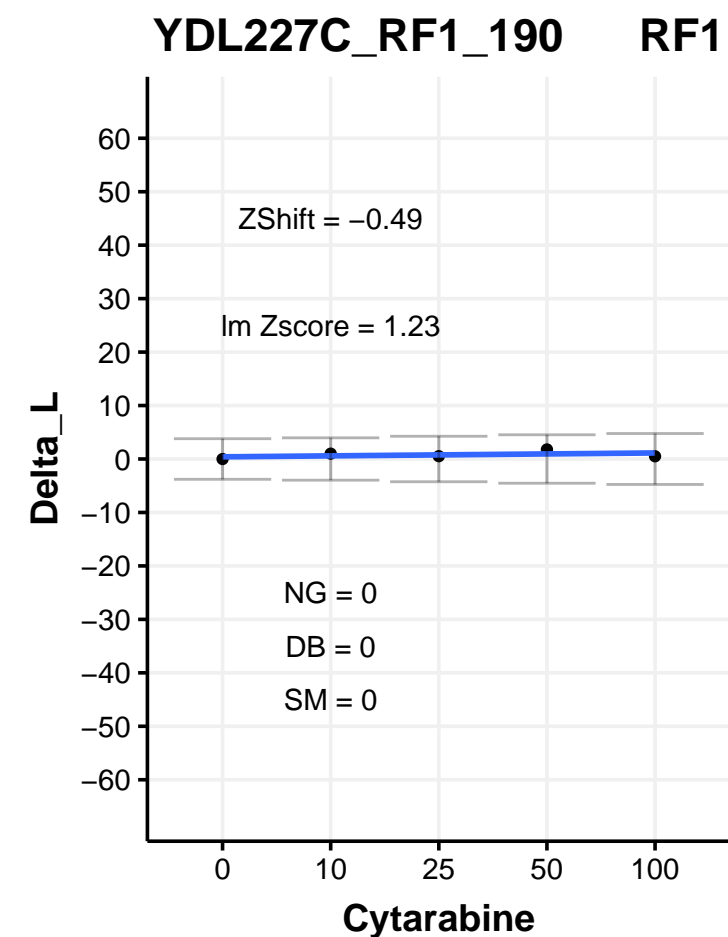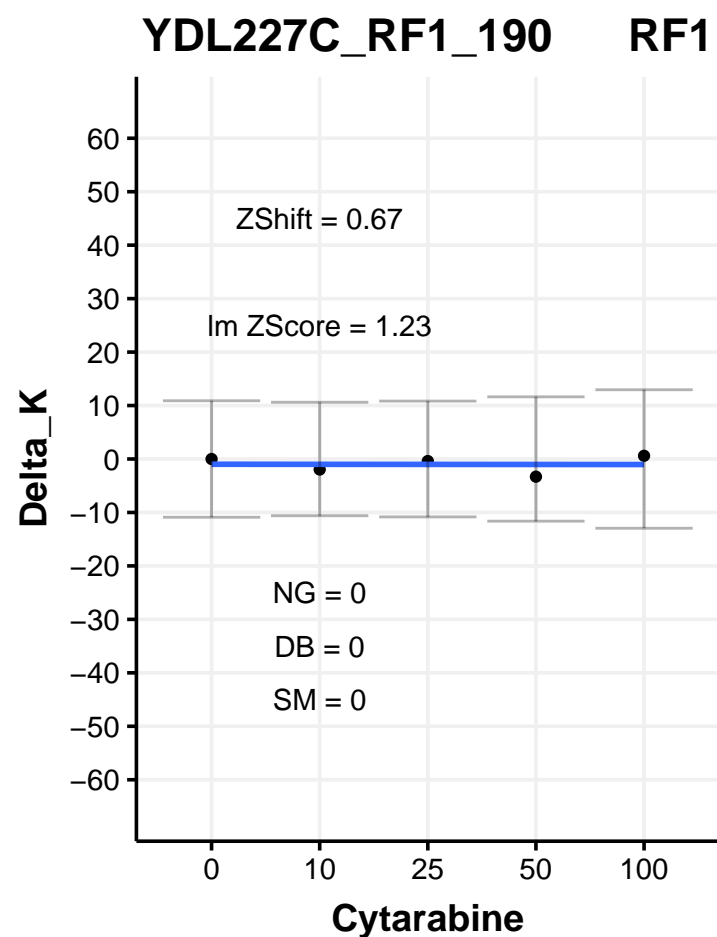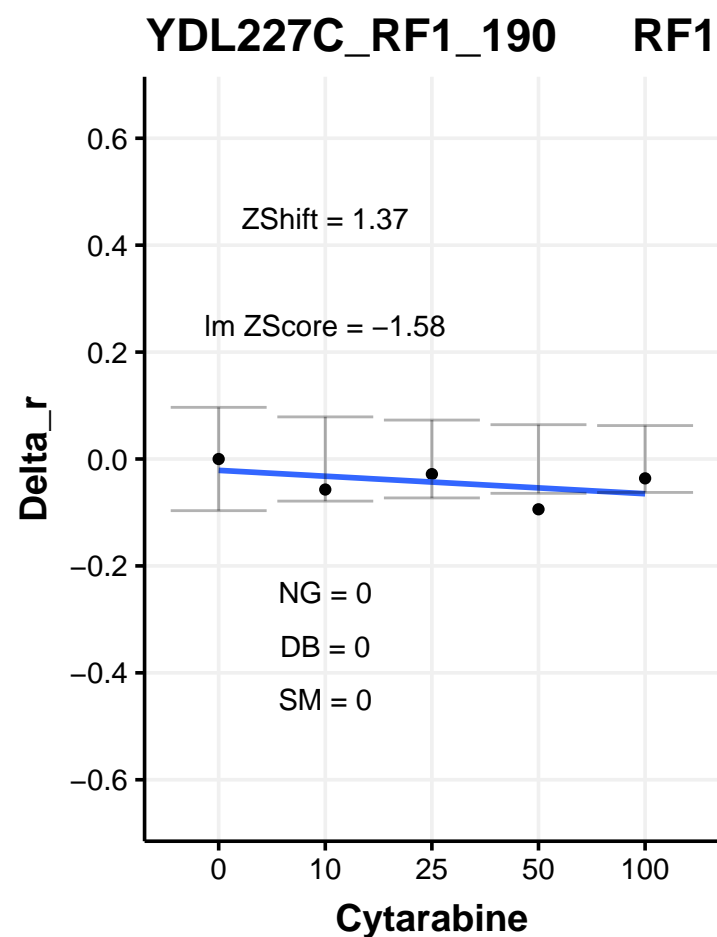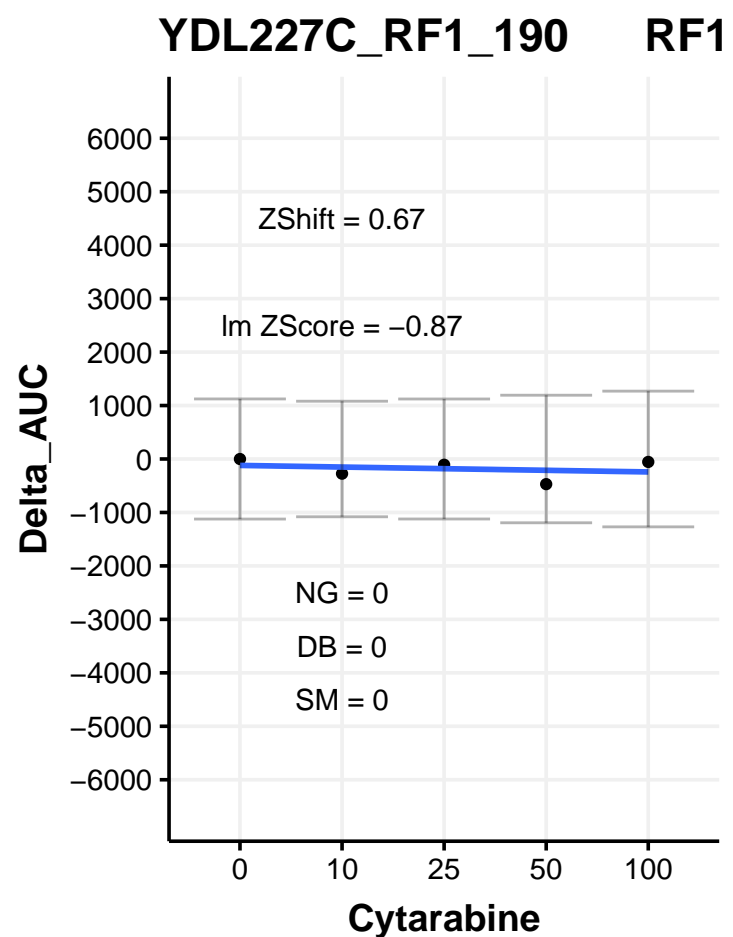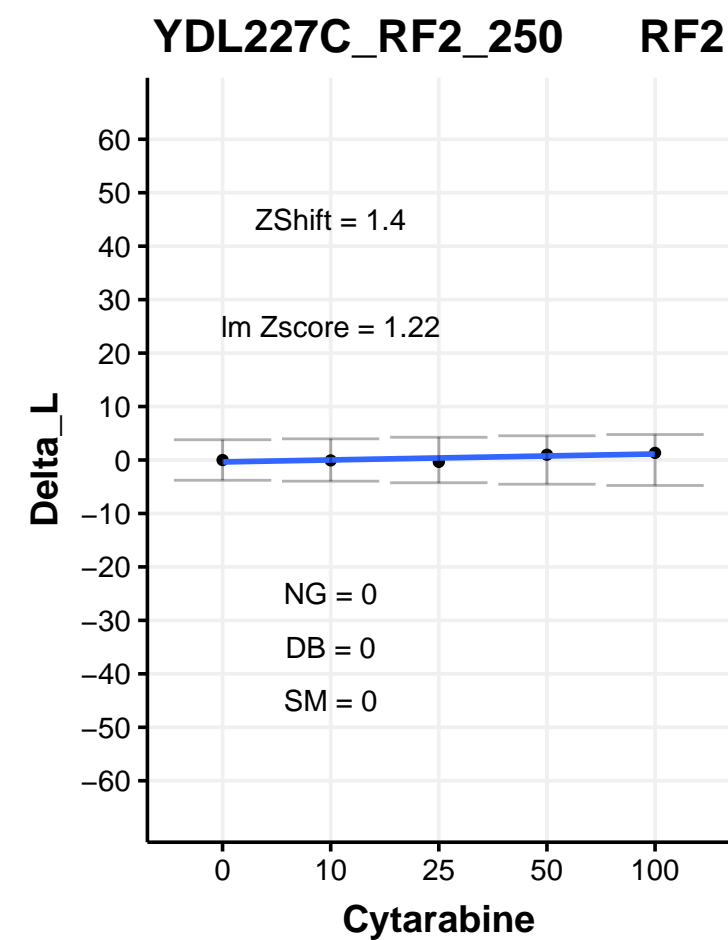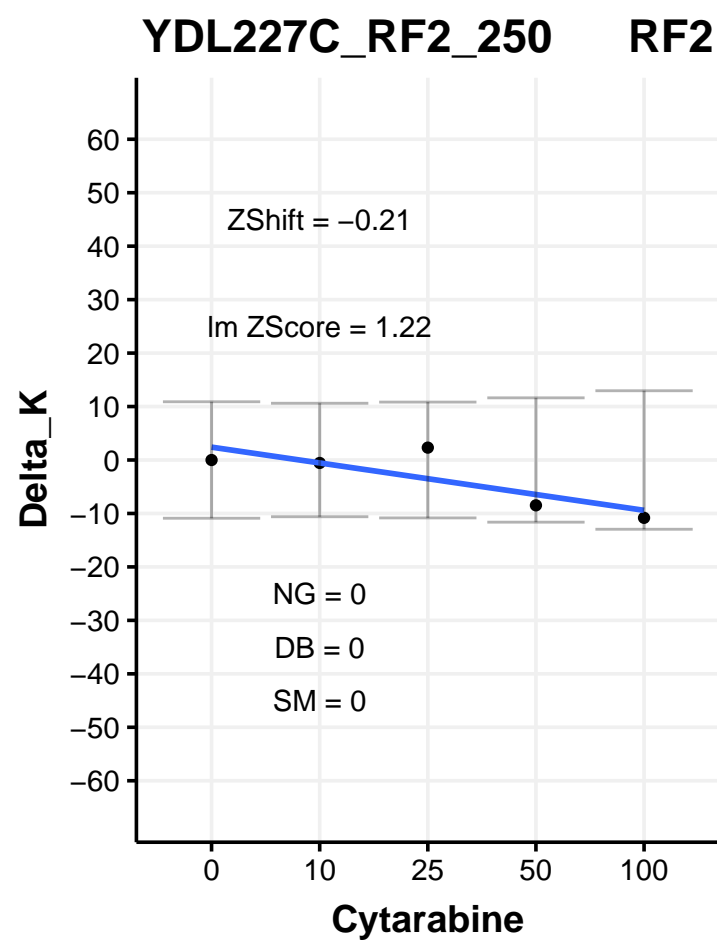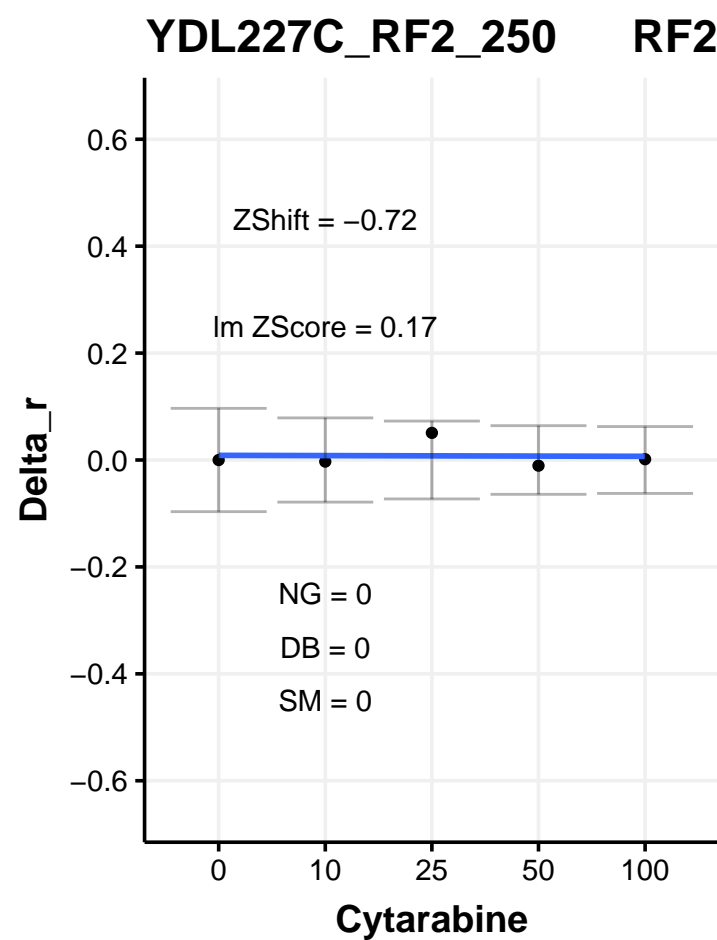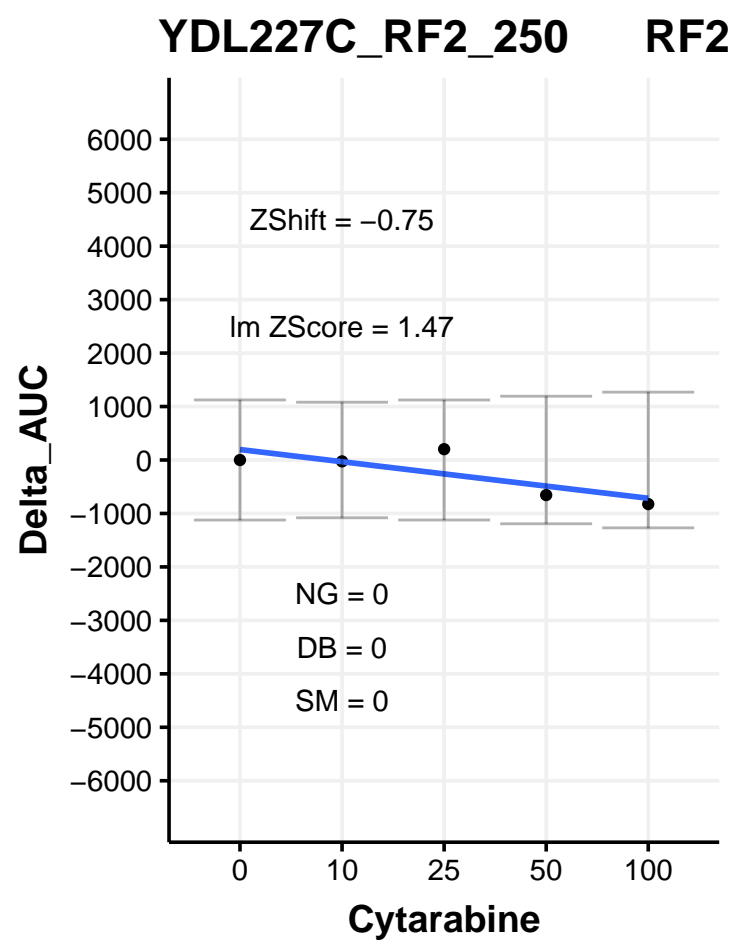

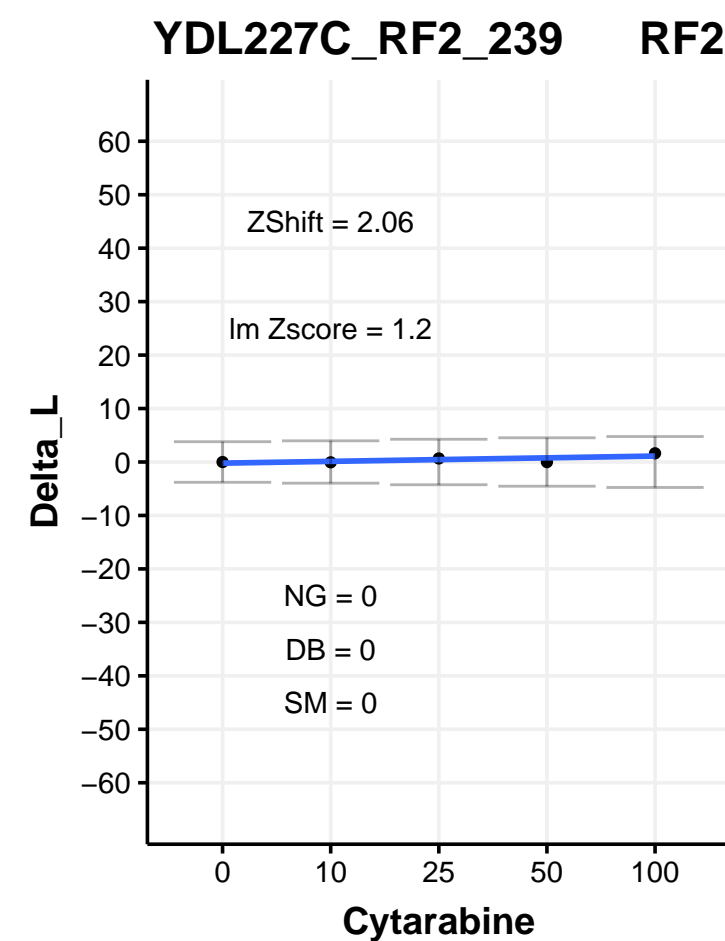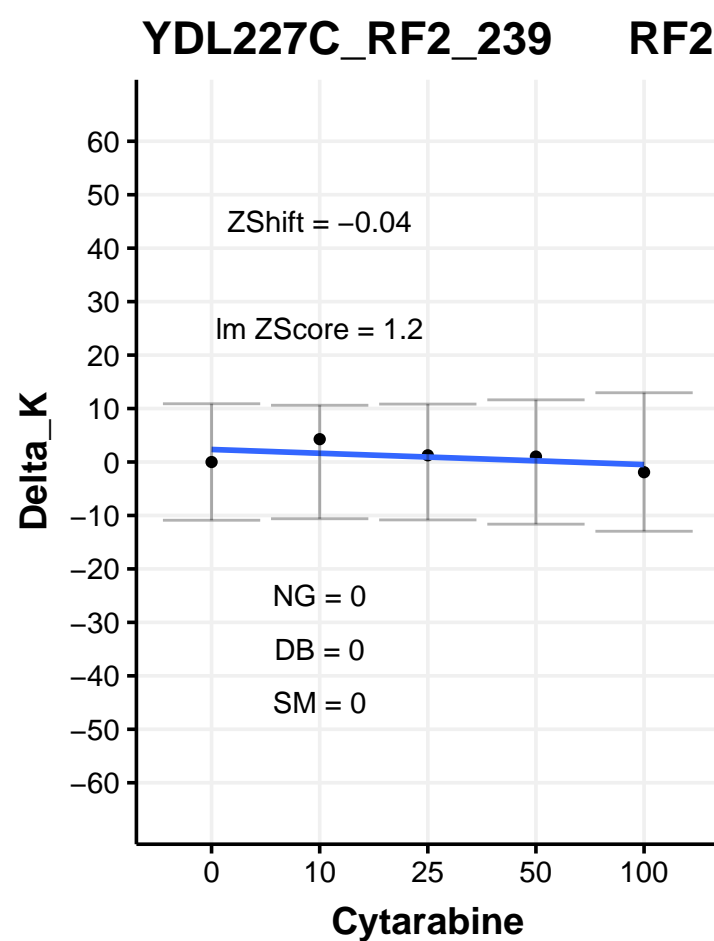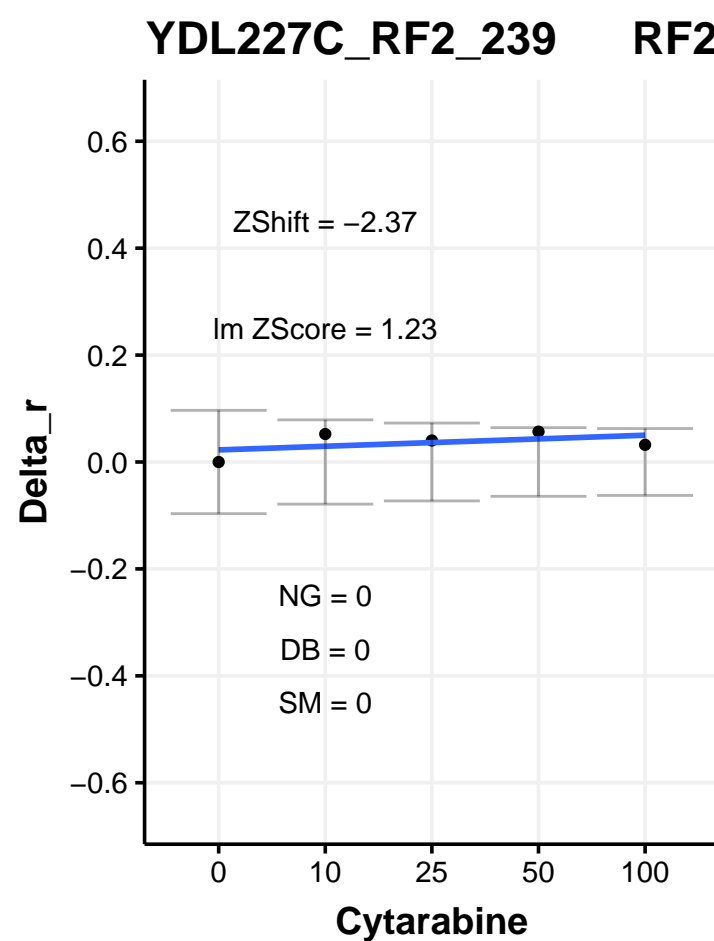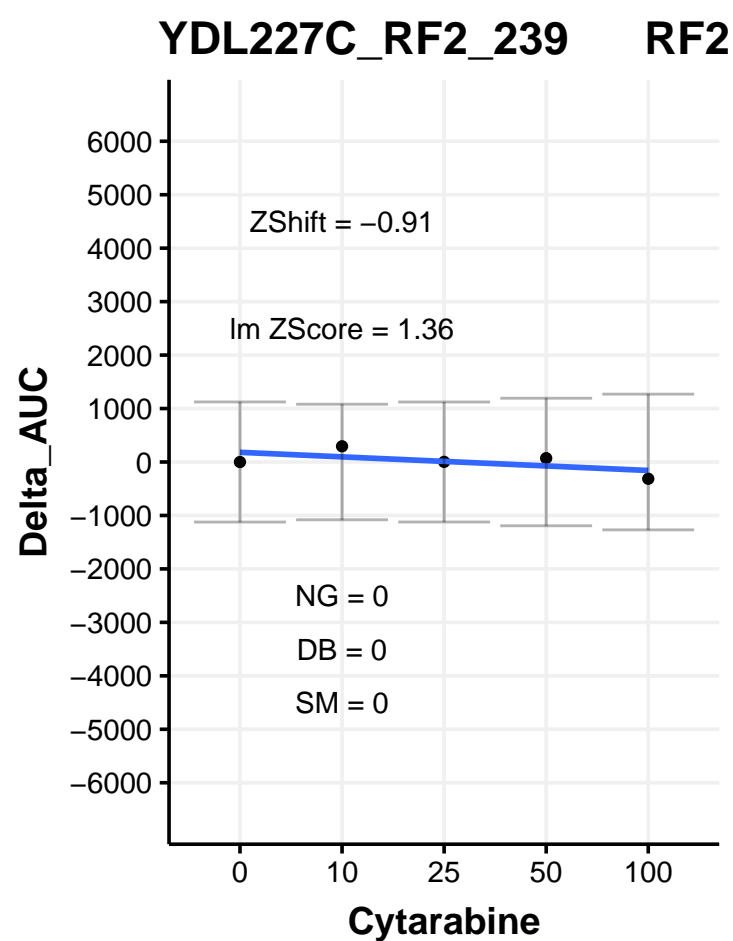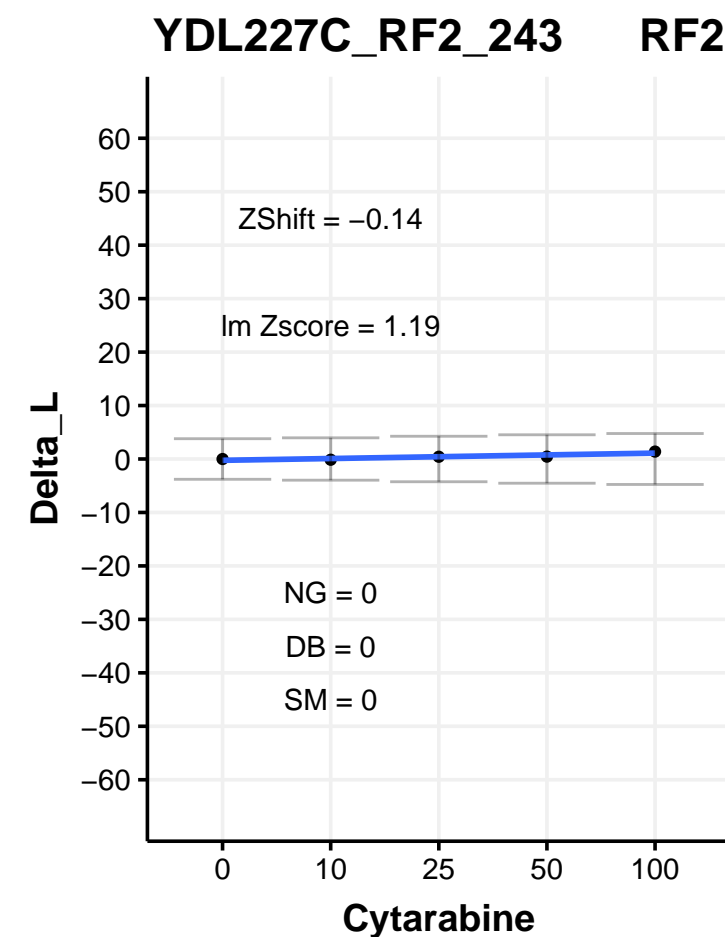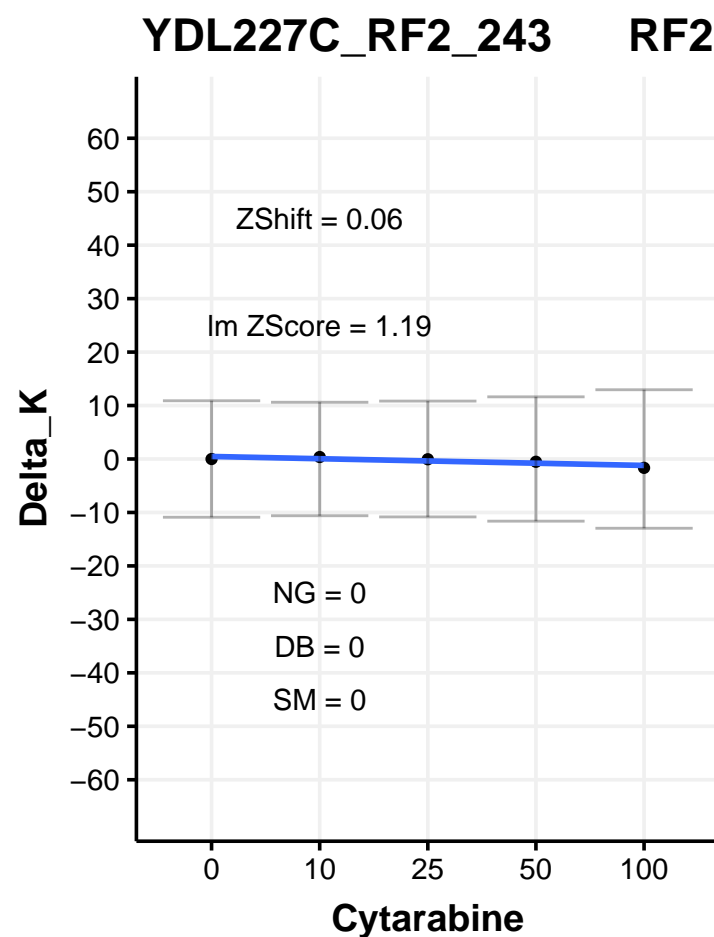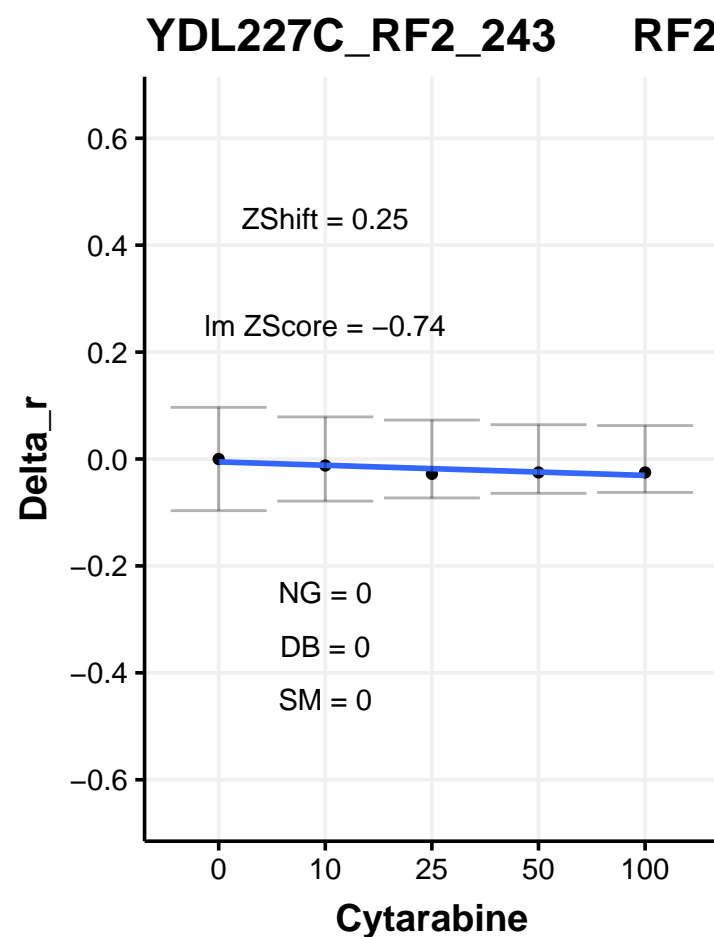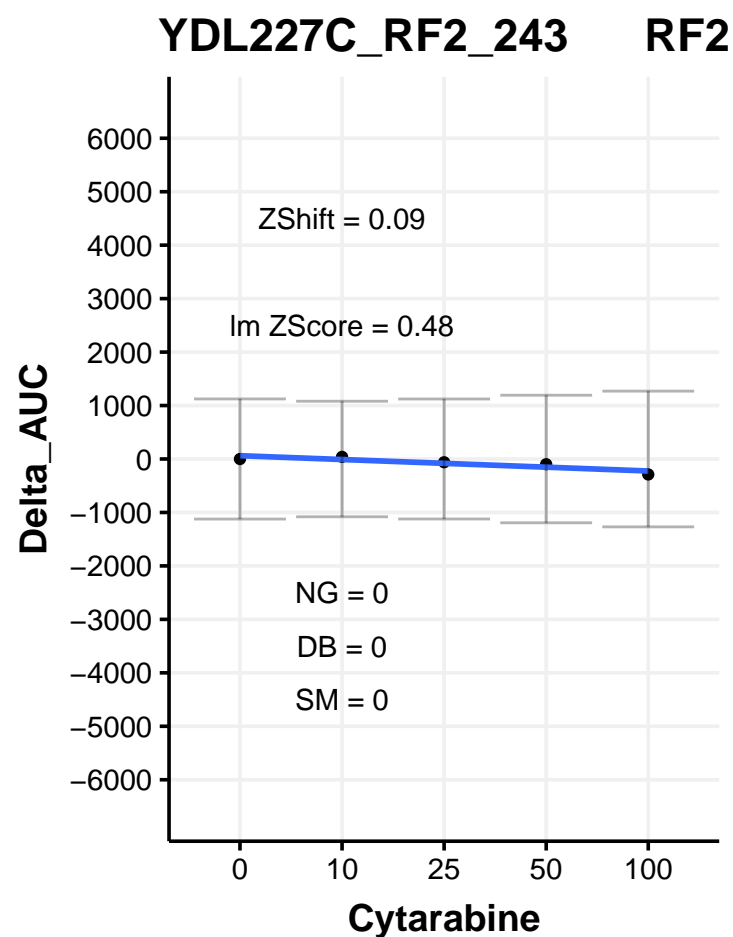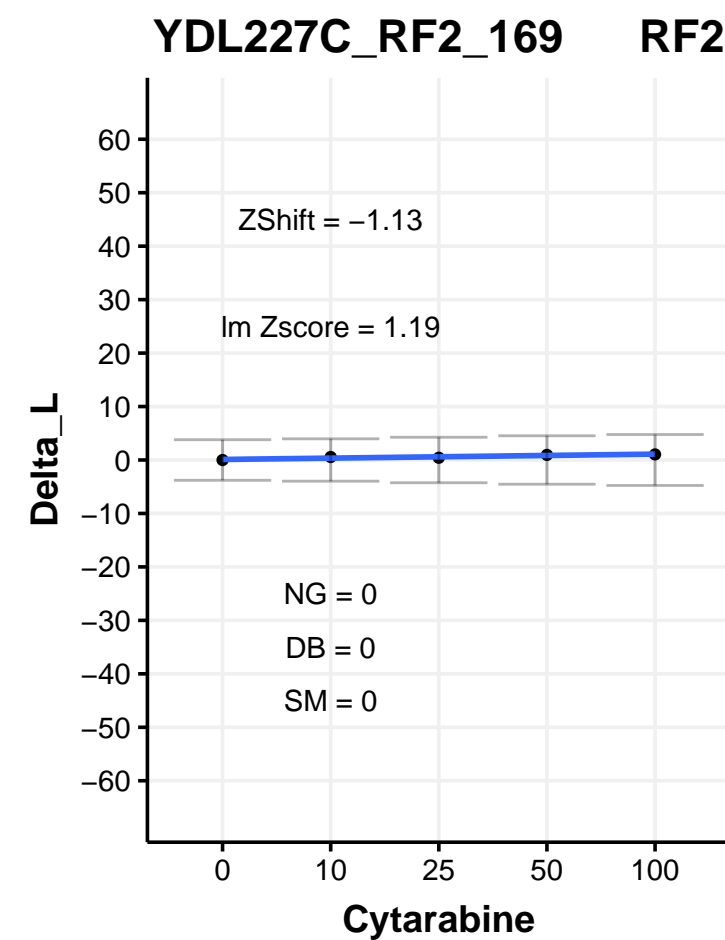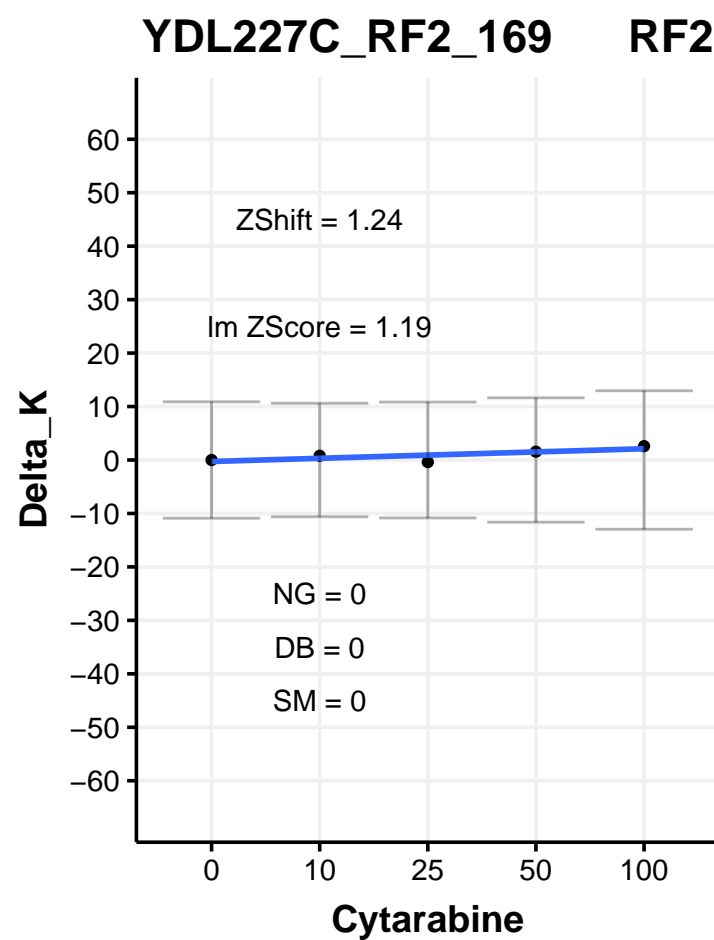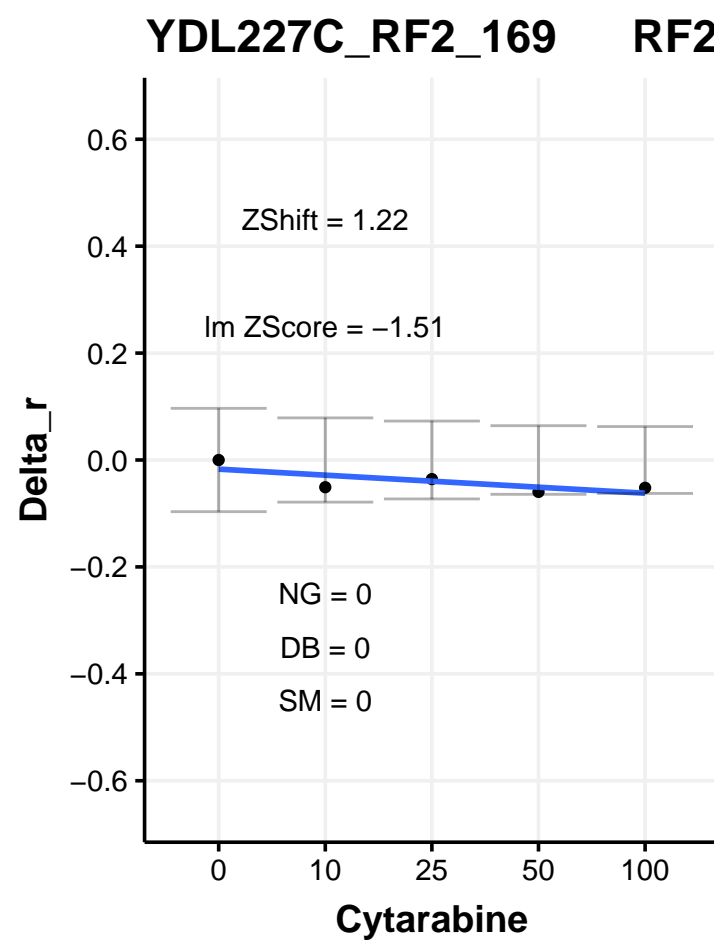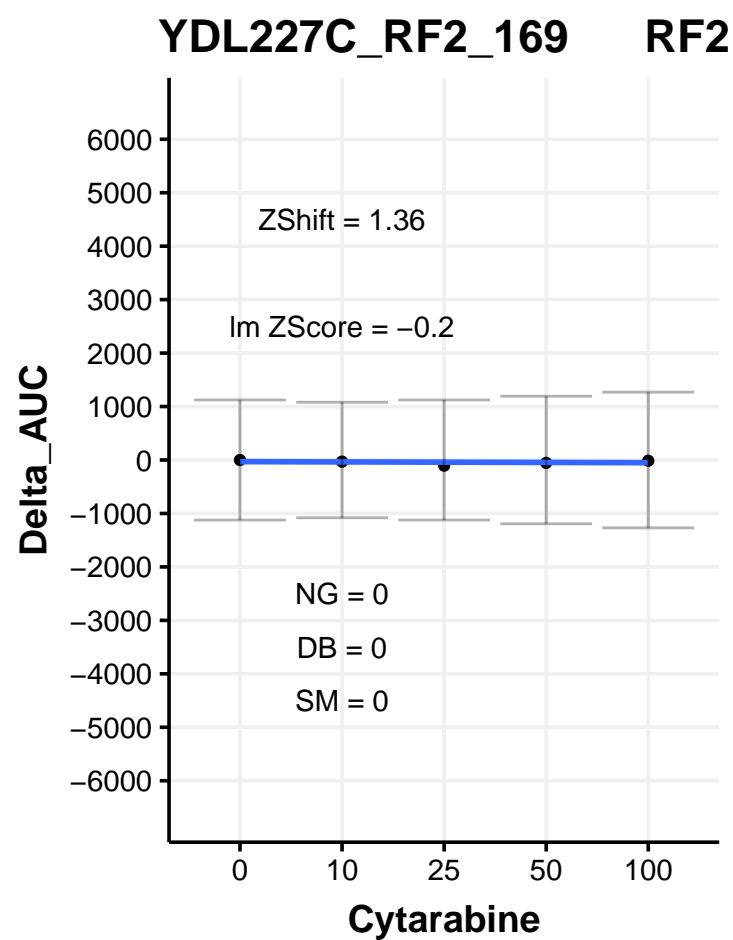

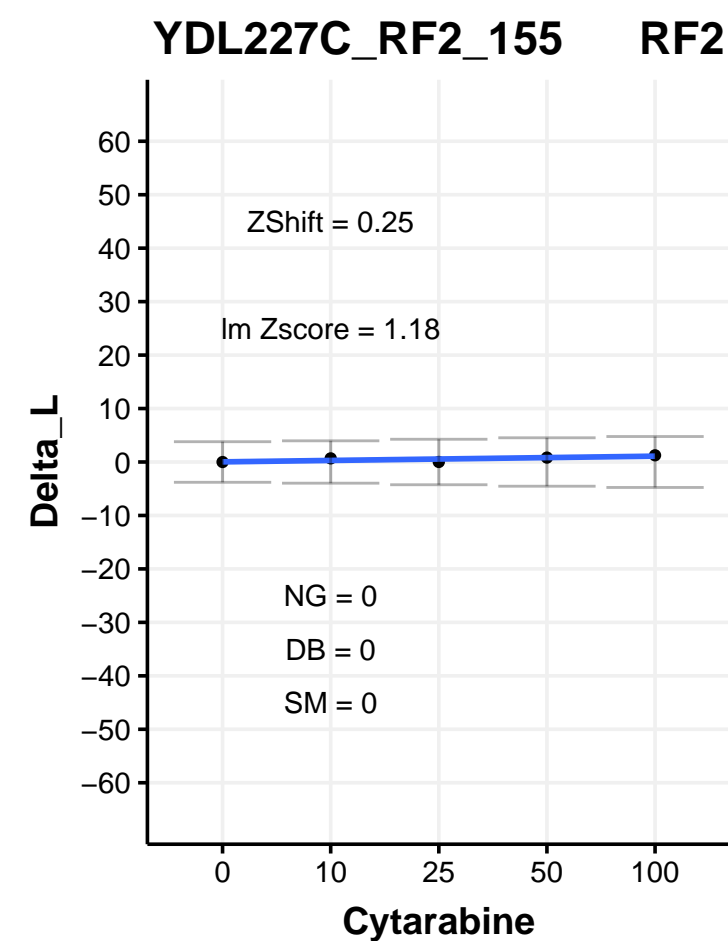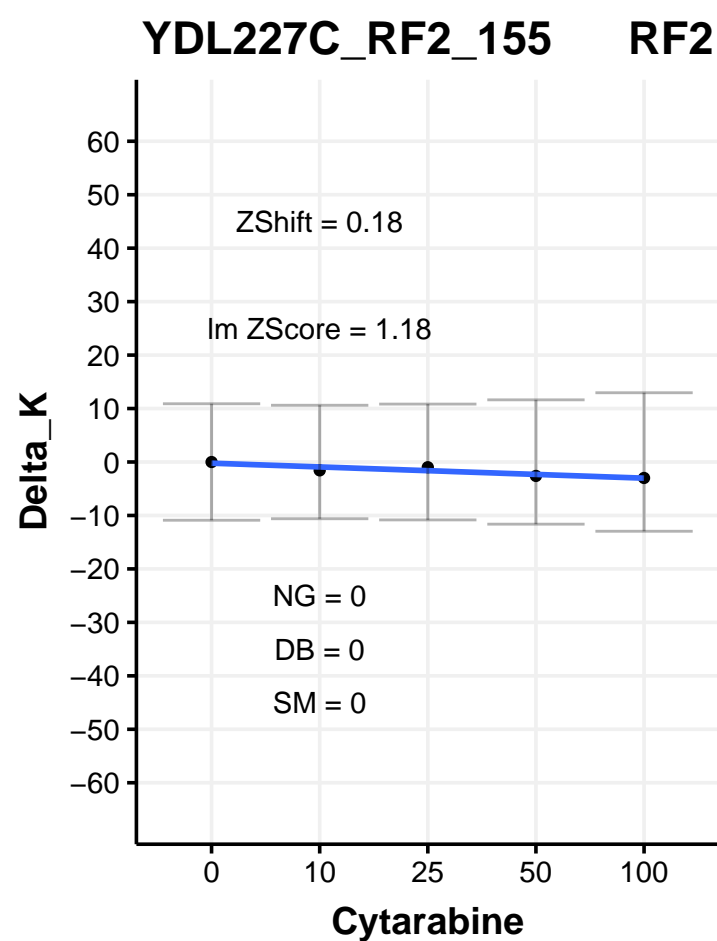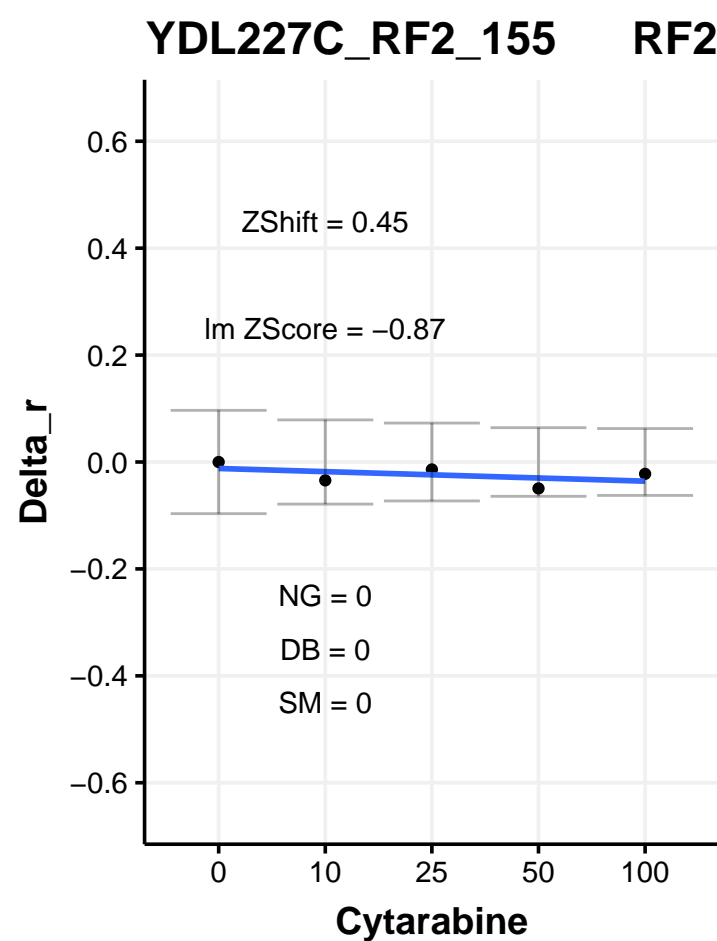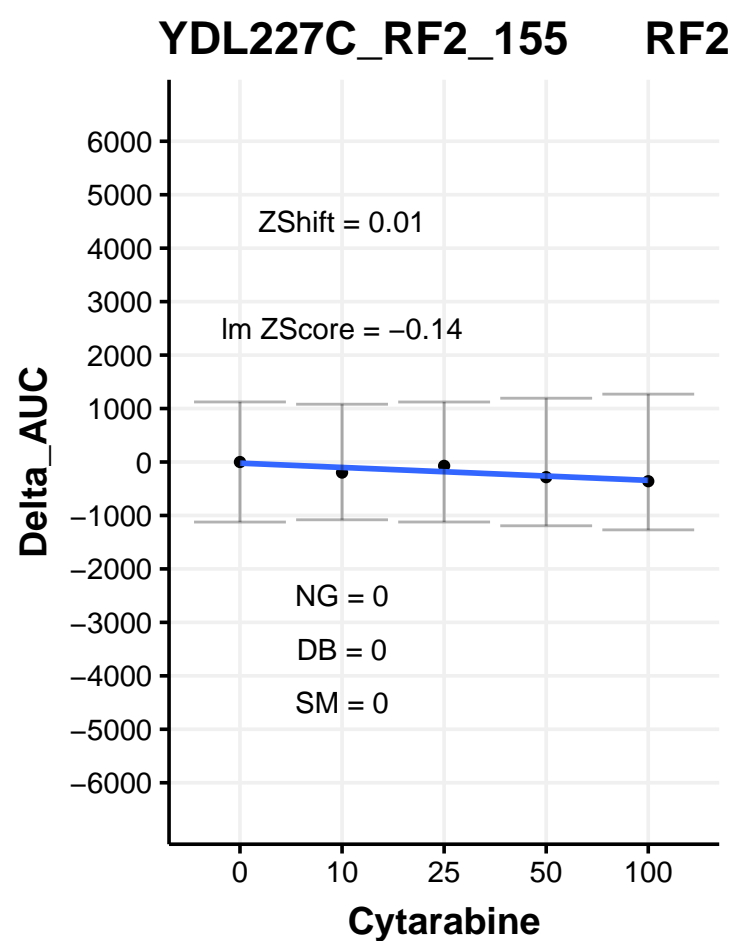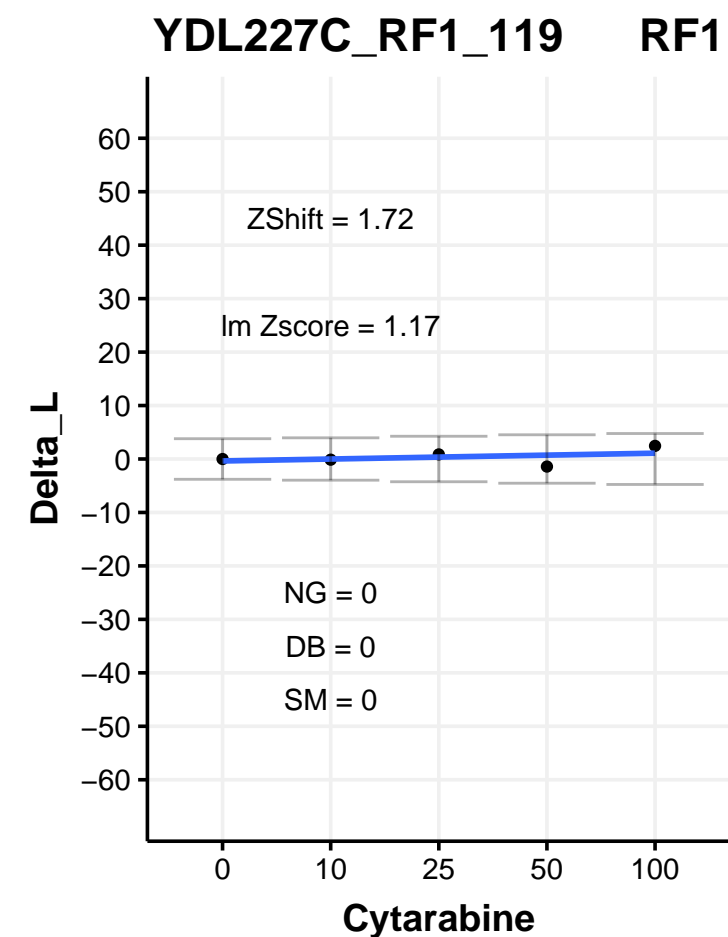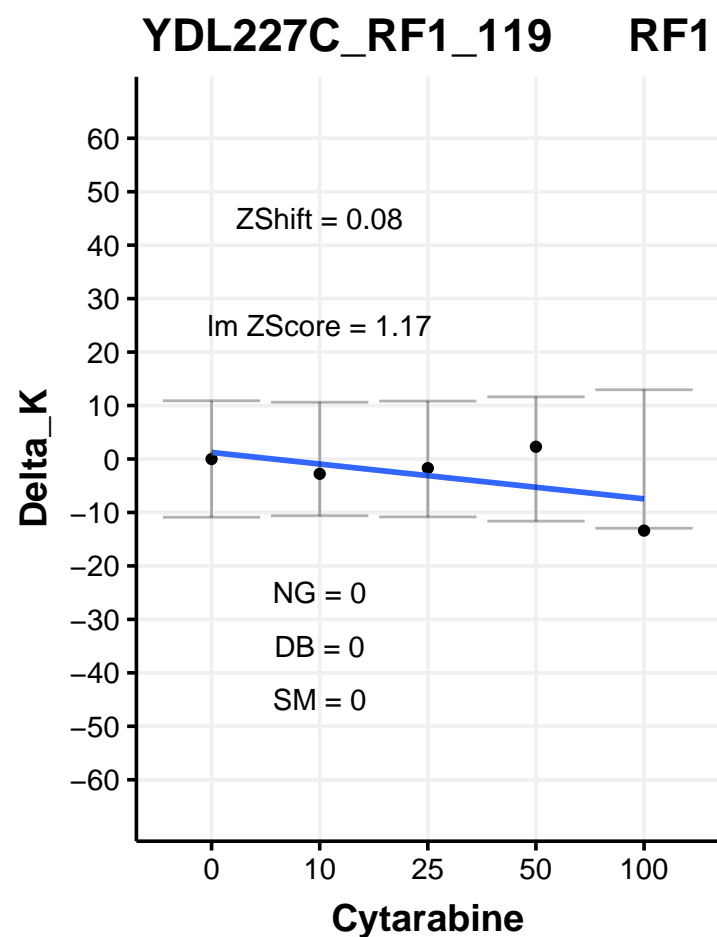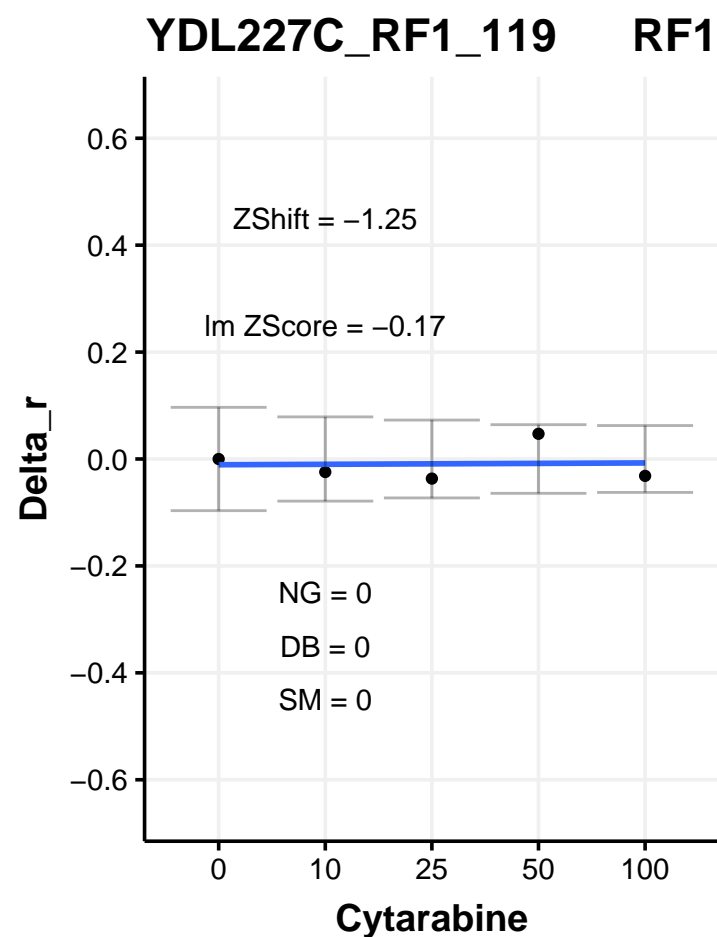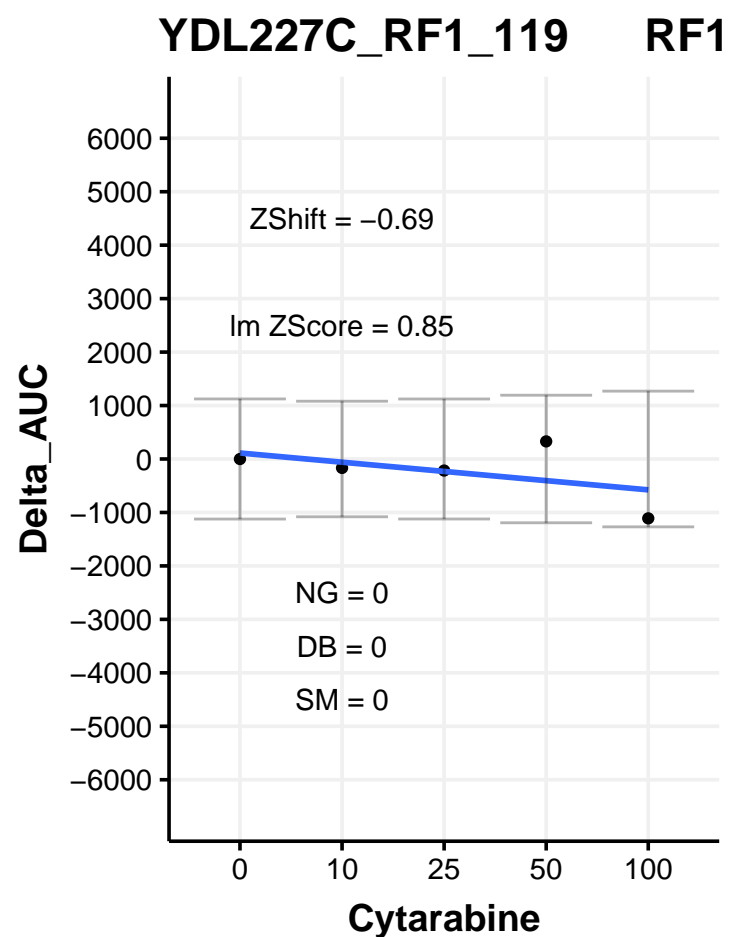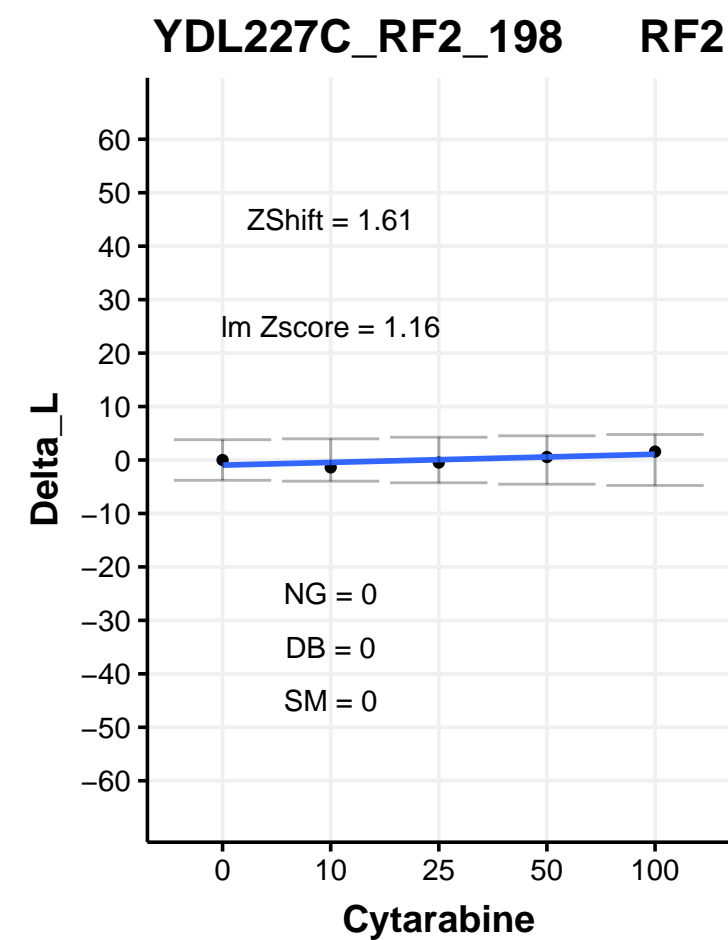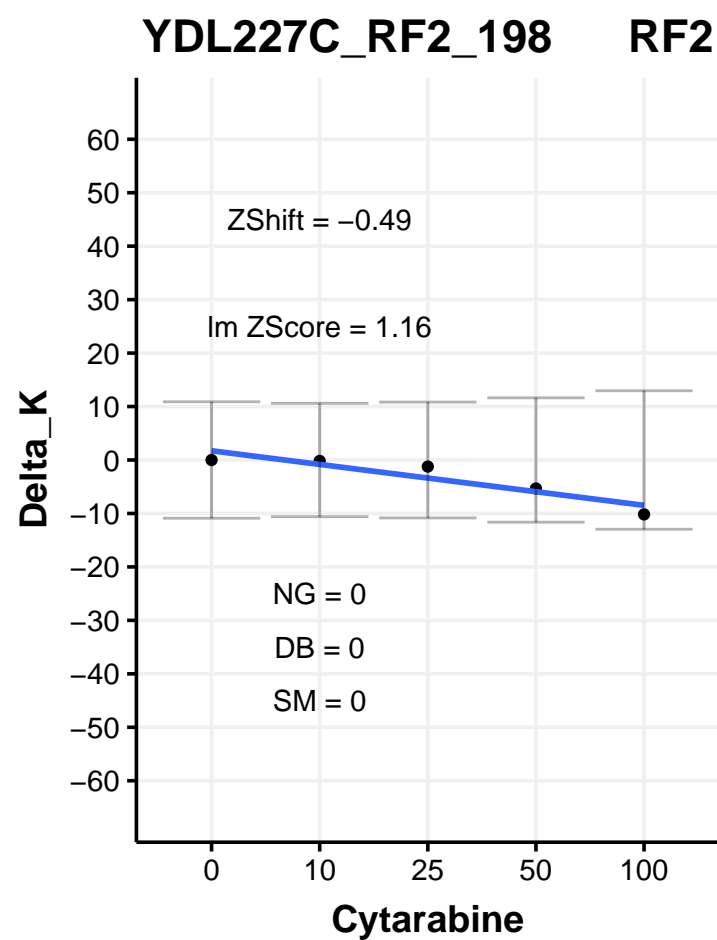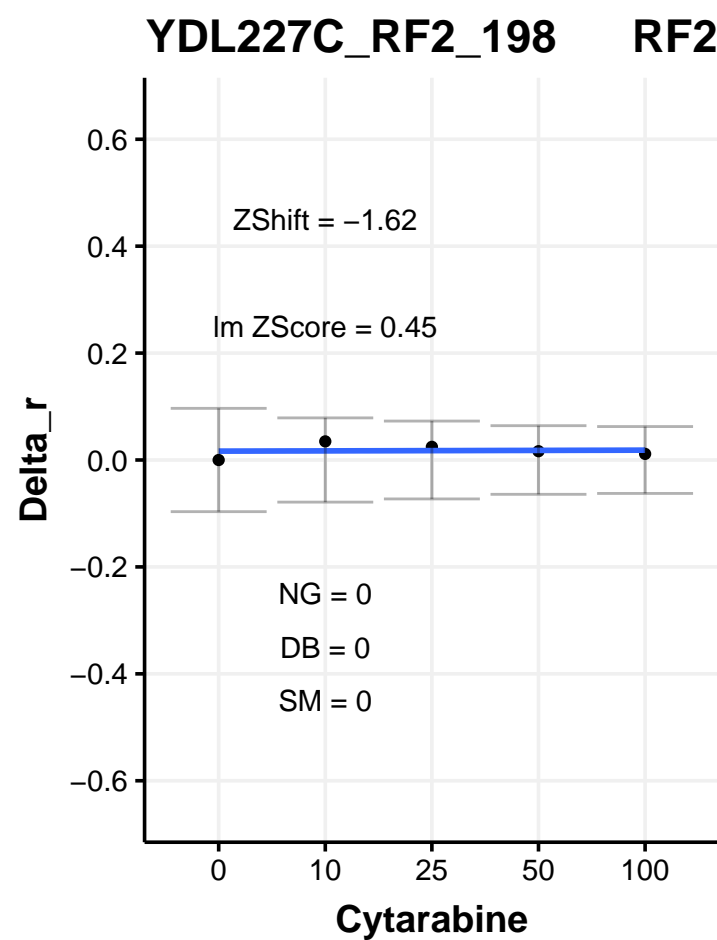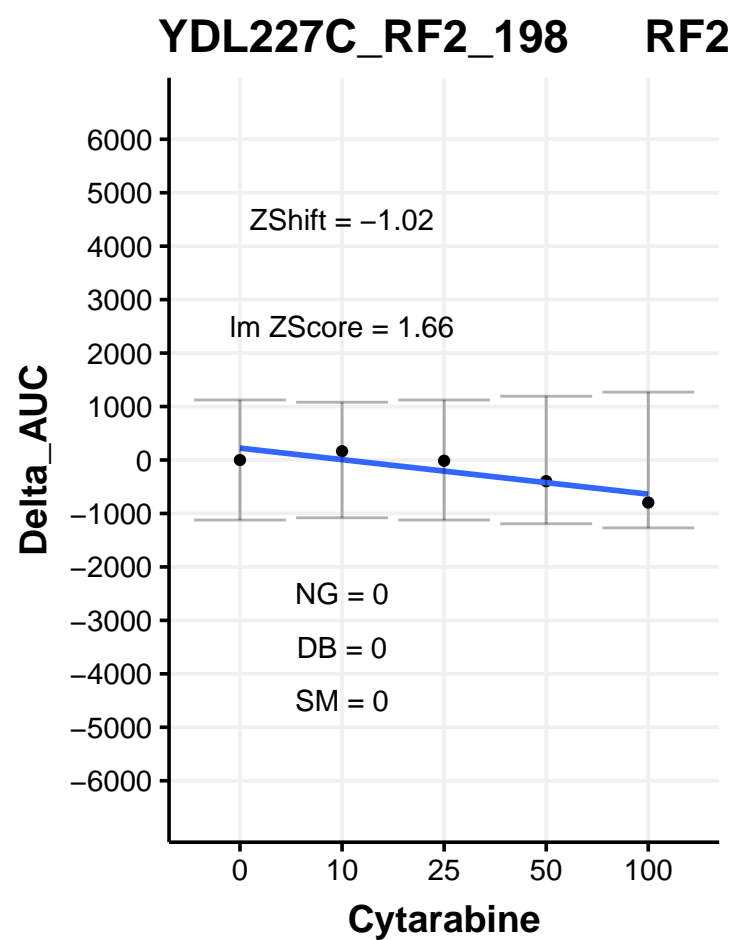

YDL227C\_RF1\_33 RF1

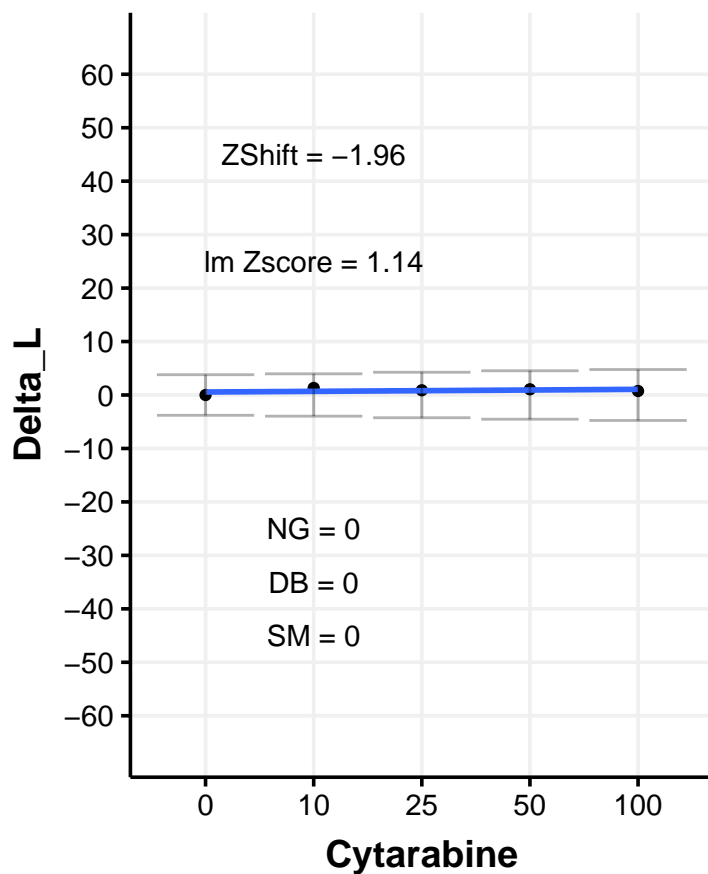

YDL227C\_RF1\_33 RF1

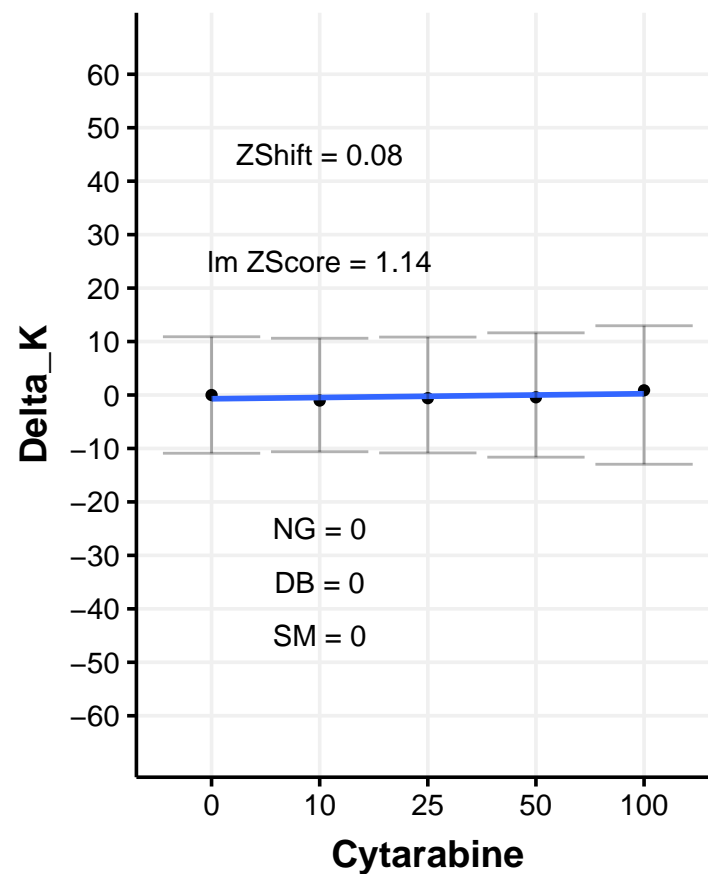

YDL227C\_RF1\_33 RF1

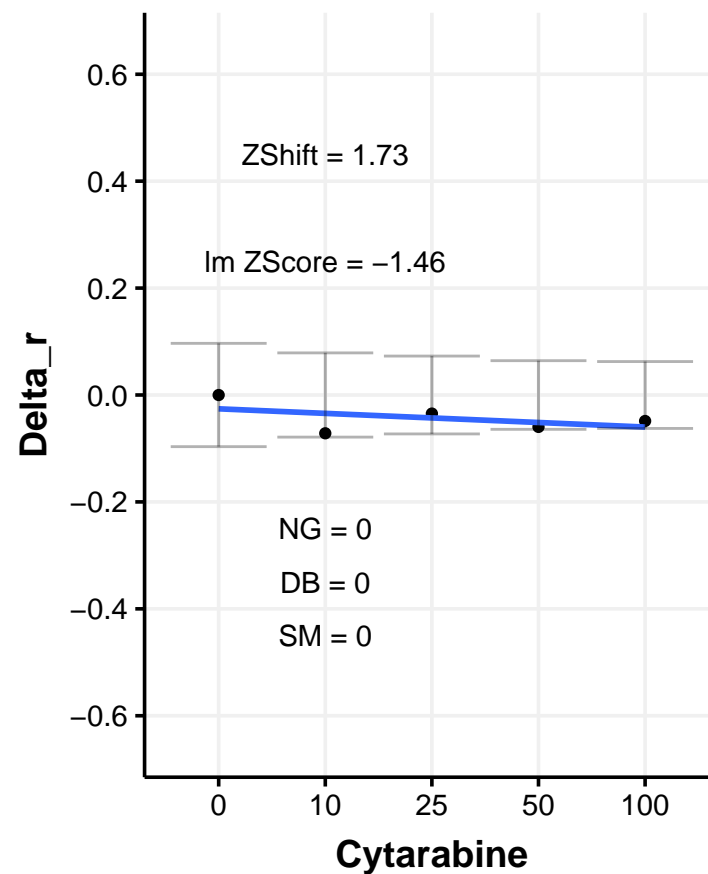

YDL227C\_RF1\_33 RF1

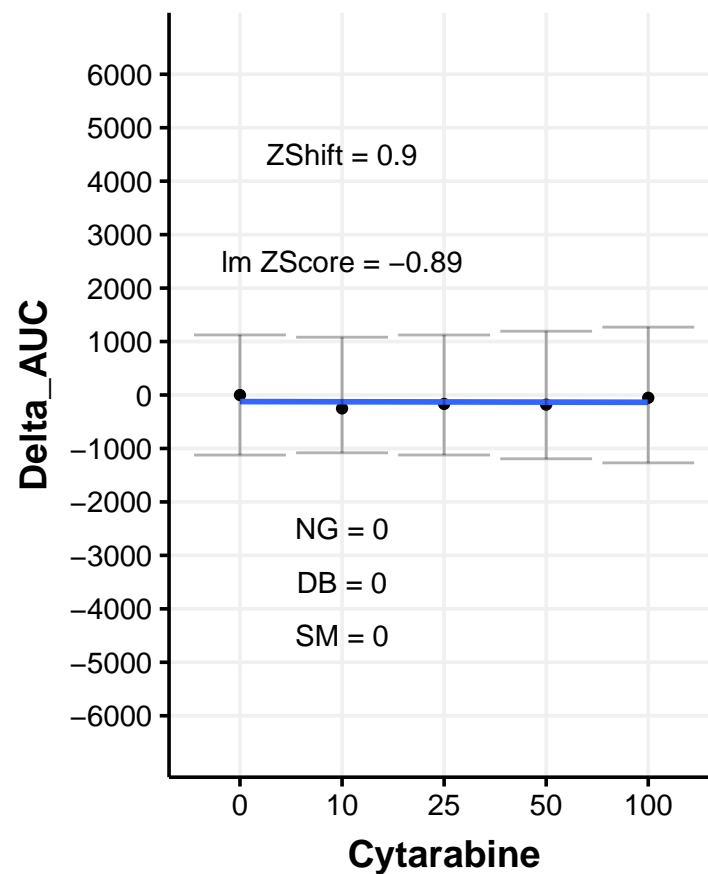

YDL227C\_RF2\_286 RF2

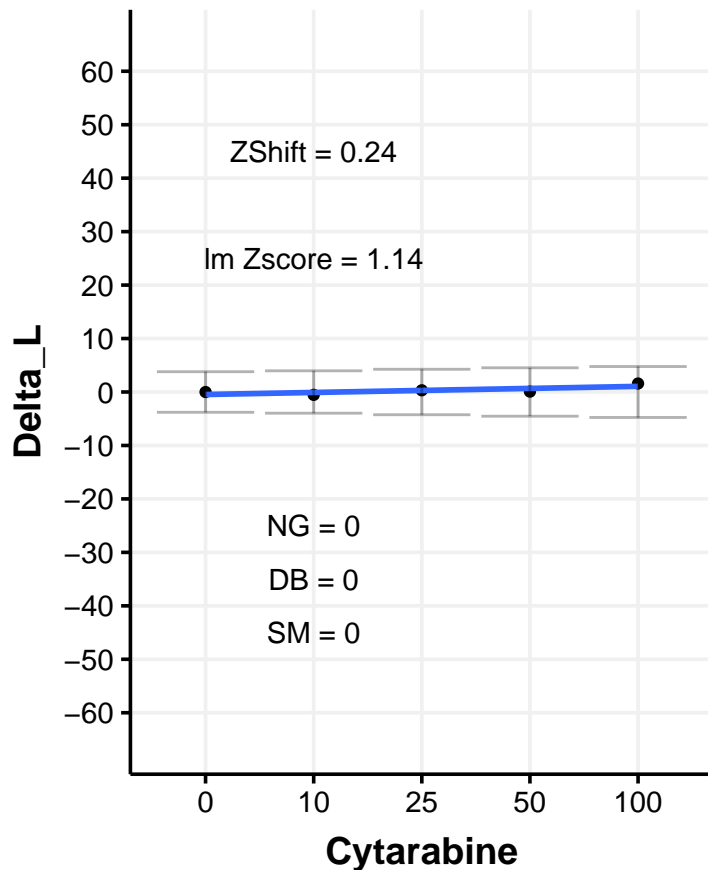

YDL227C\_RF2\_286 RF2

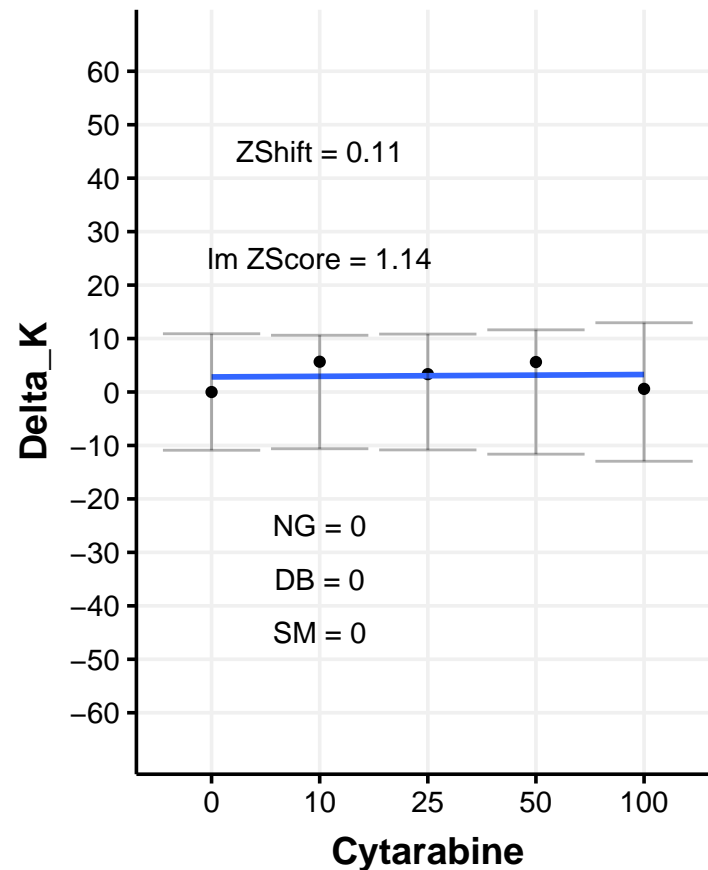

YDL227C\_RF2\_286 RF2

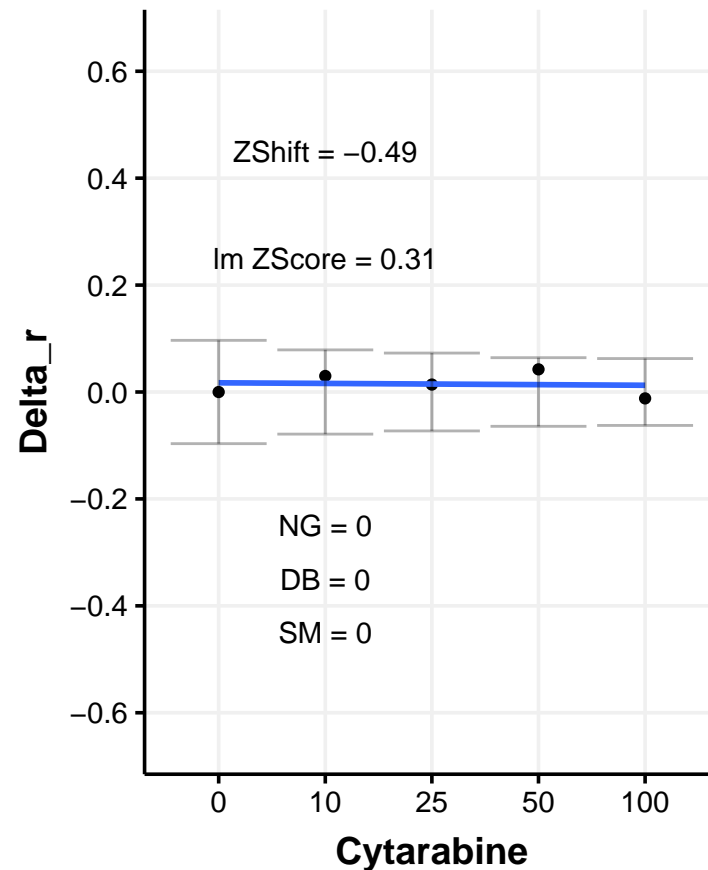

YDL227C\_RF2\_286 RF2

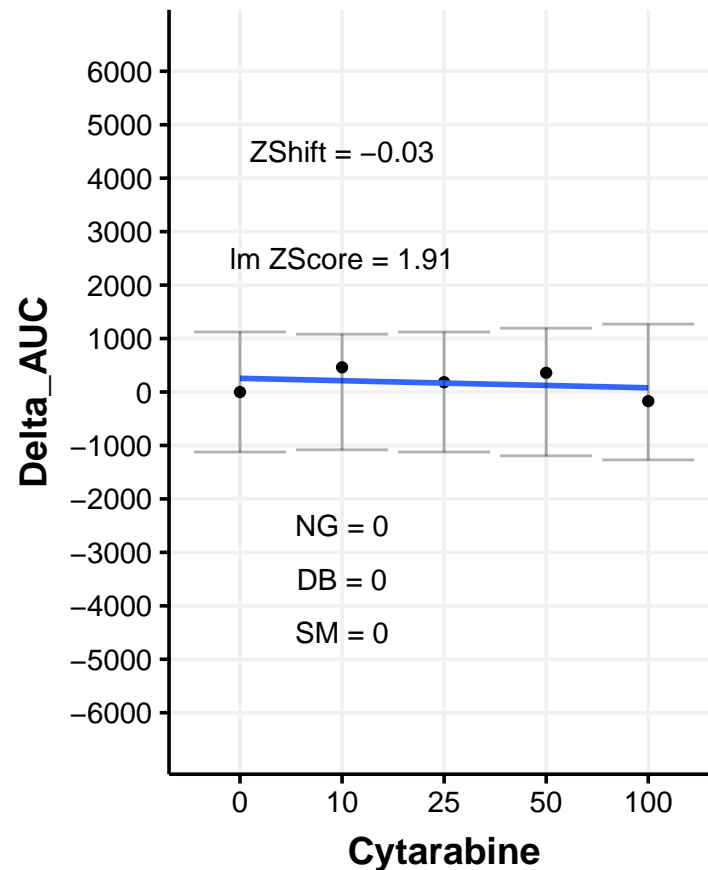

YDL227C\_RF2\_269 RF2

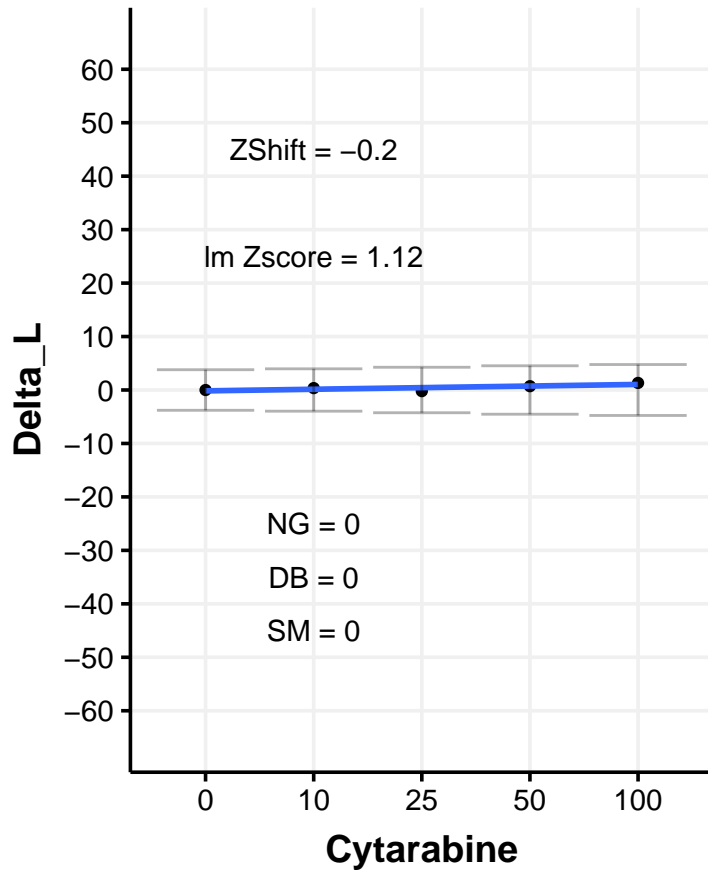

YDL227C\_RF2\_269 RF2

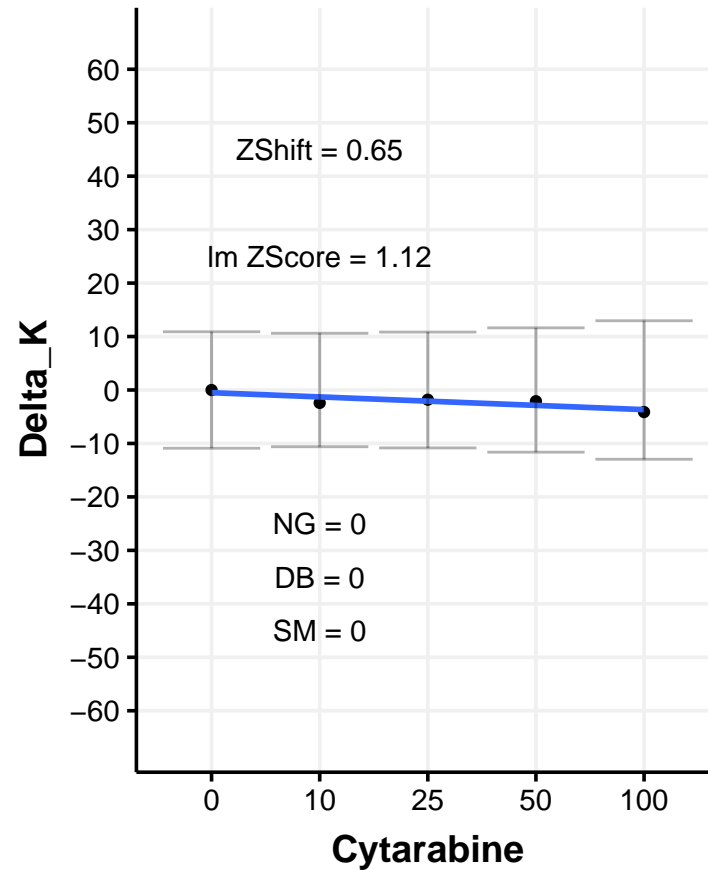

YDL227C\_RF2\_269 RF2

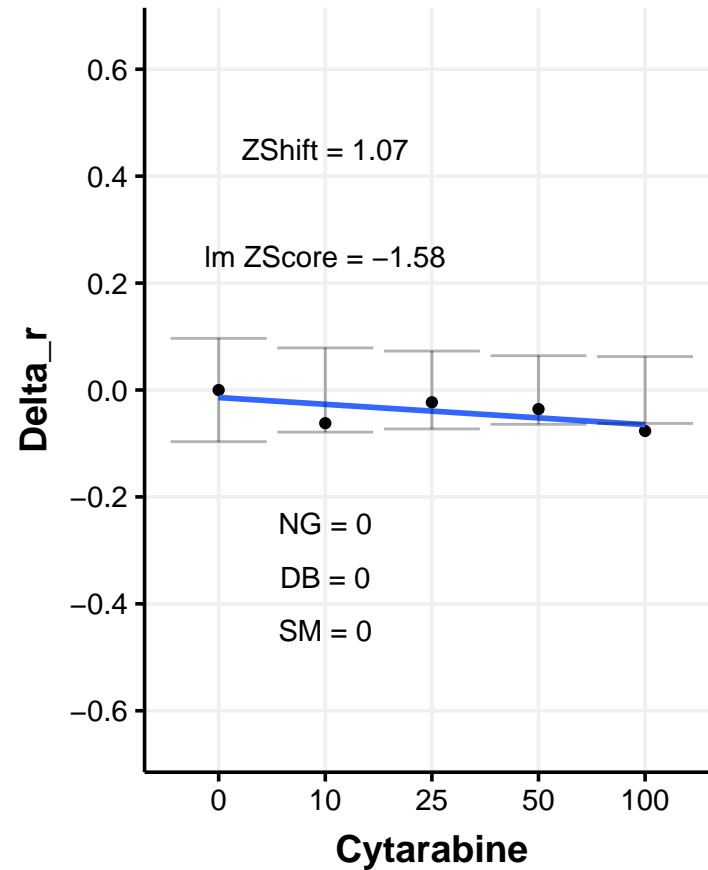

YDL227C\_RF2\_269 RF2

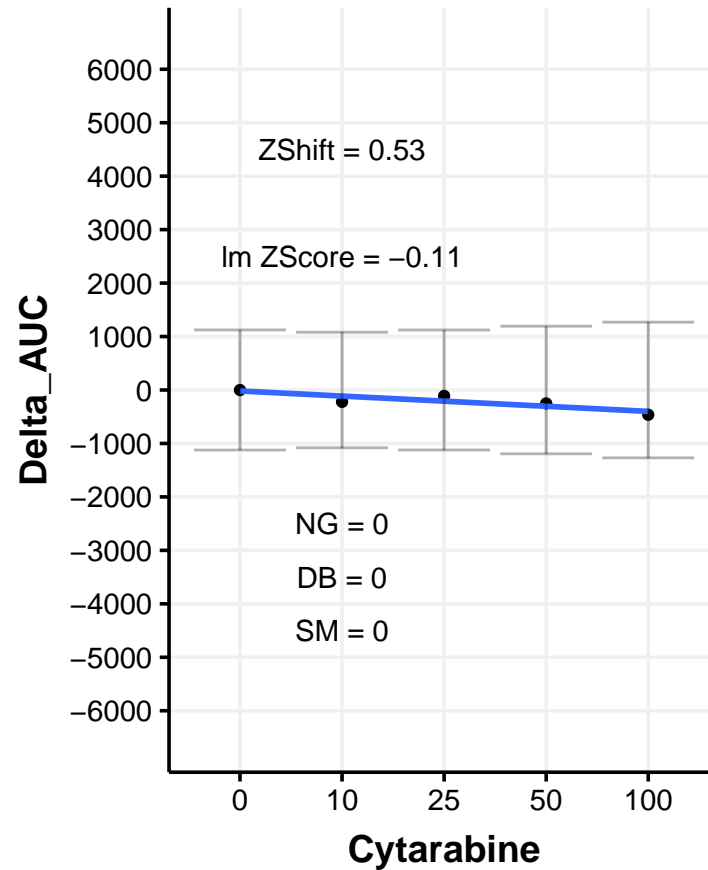



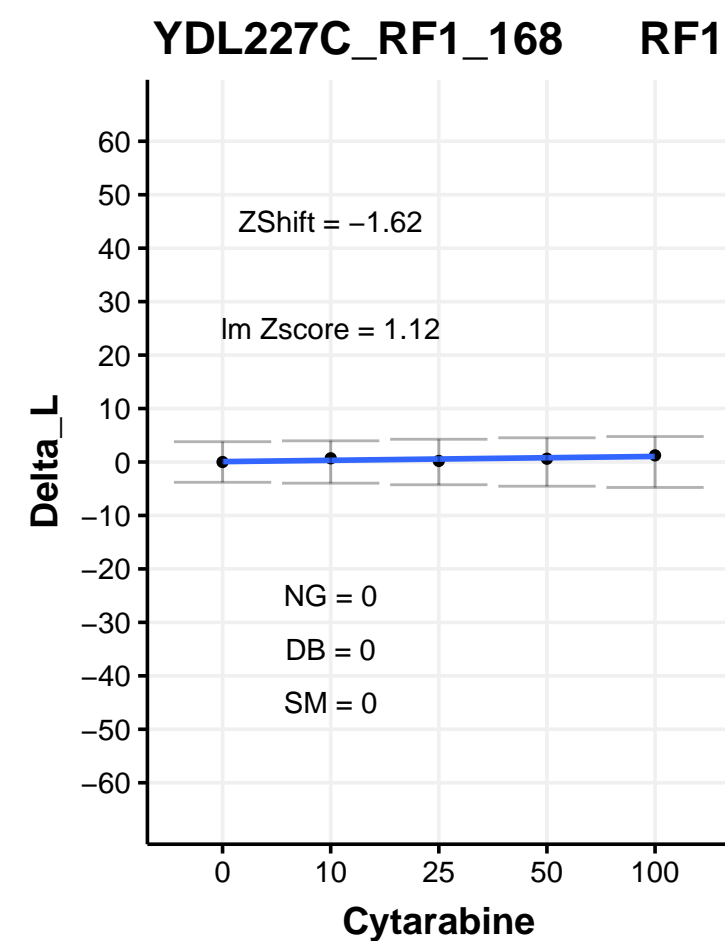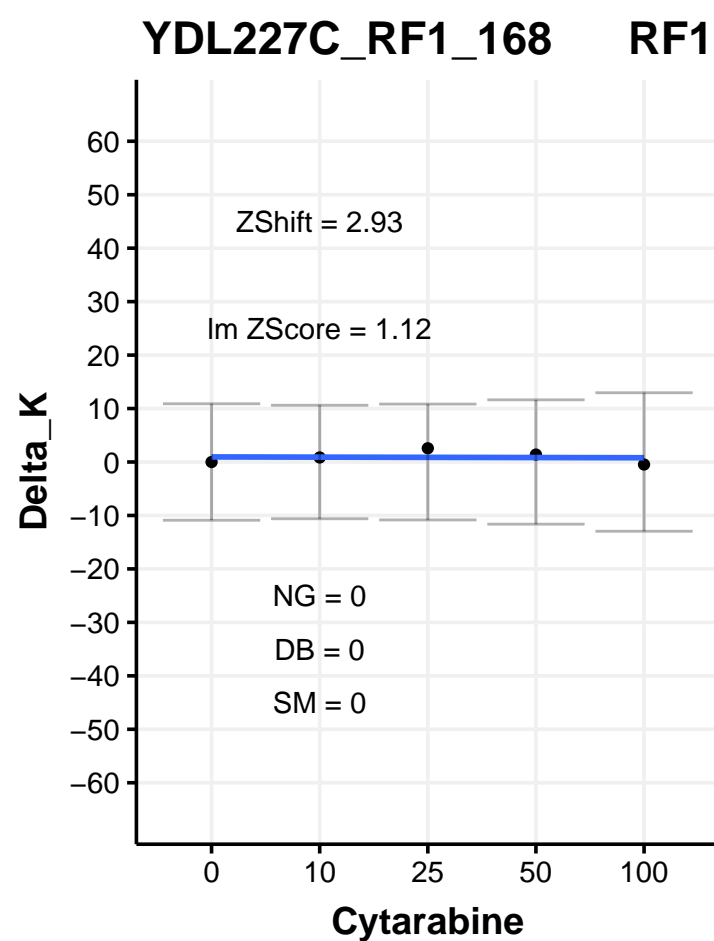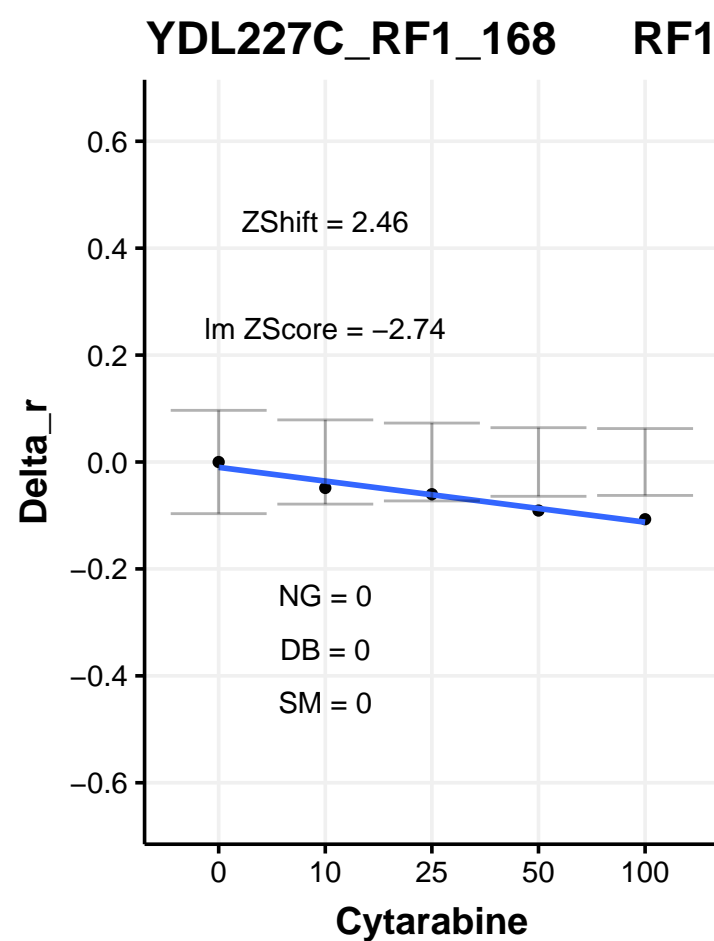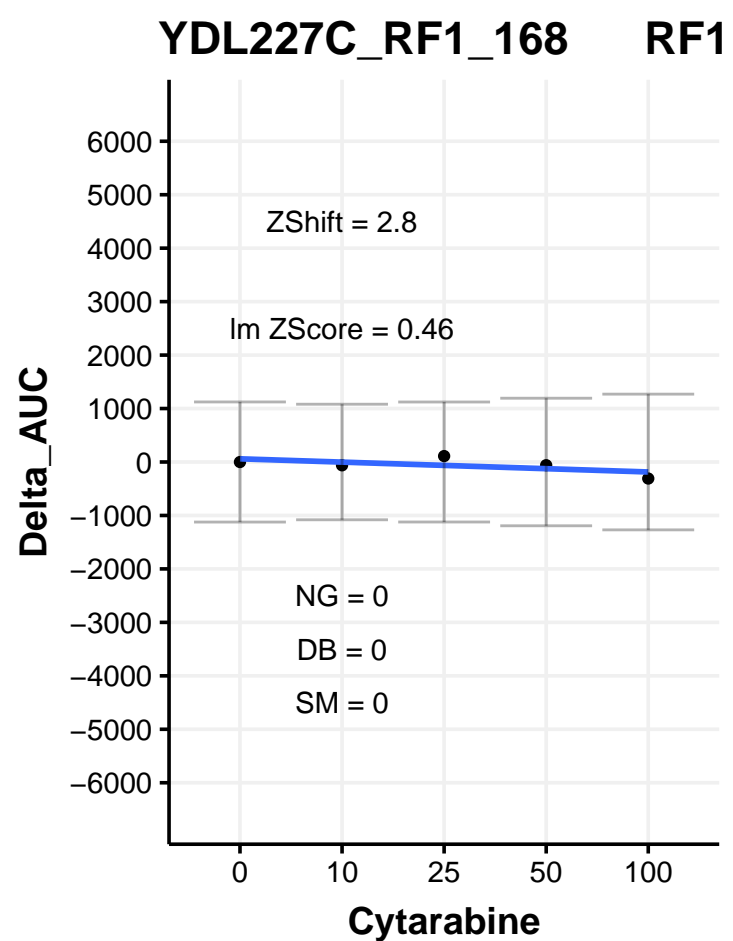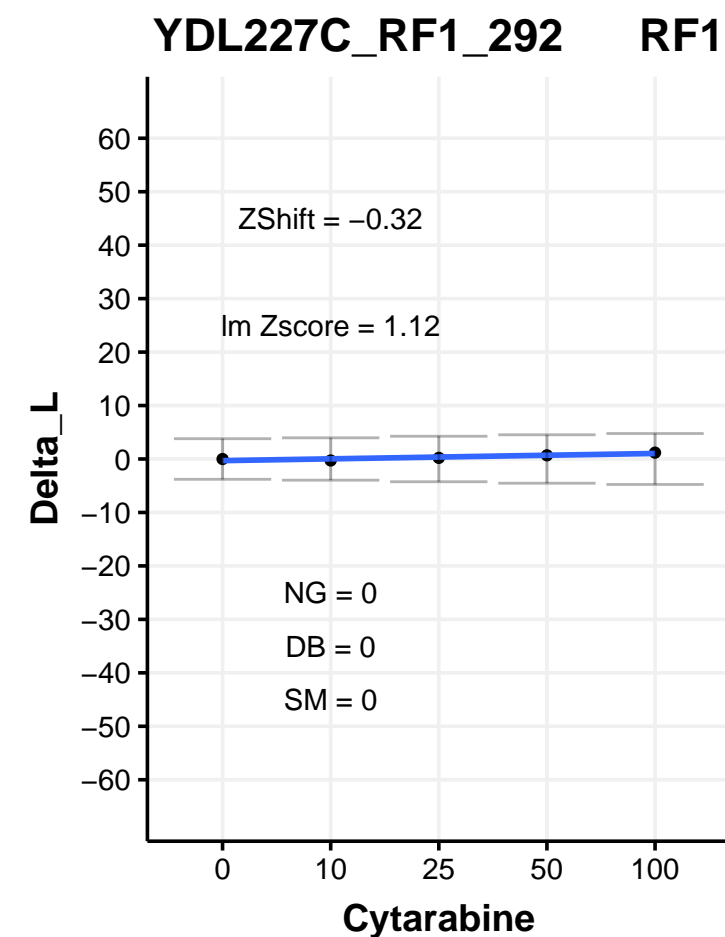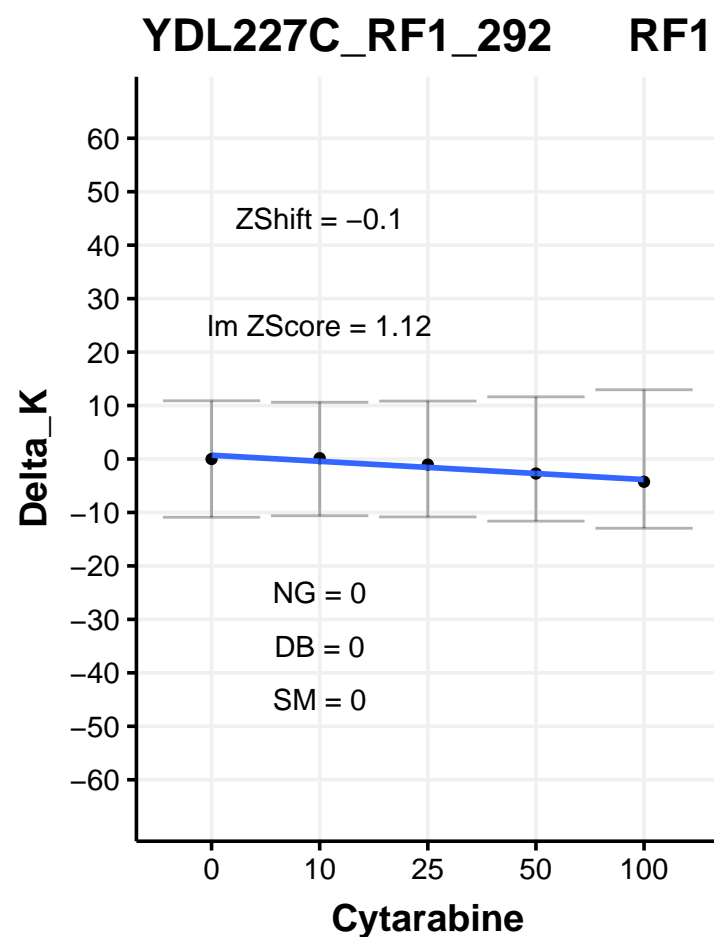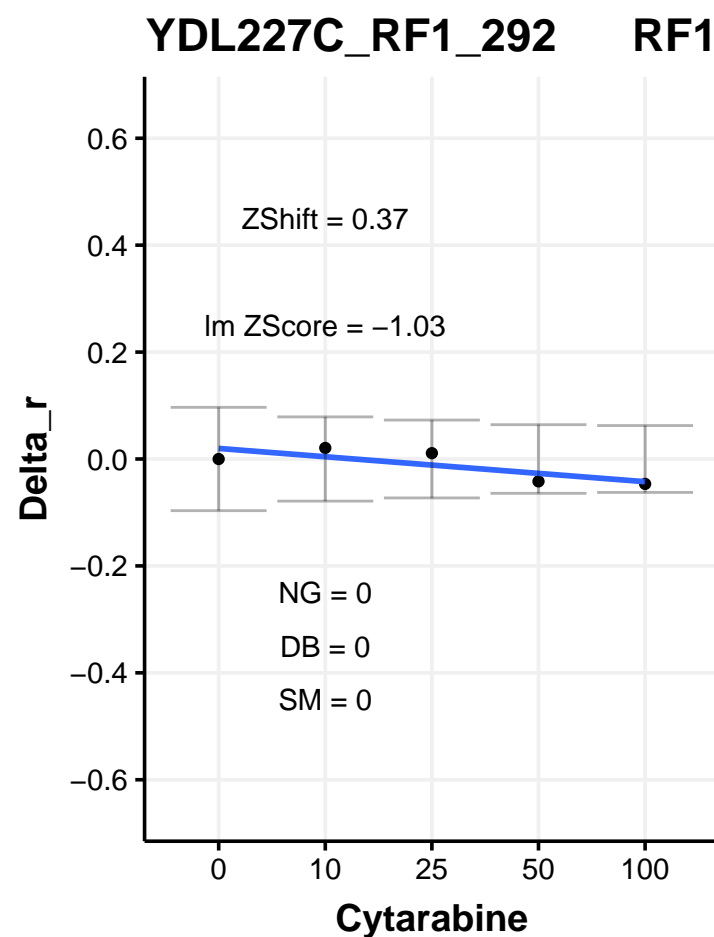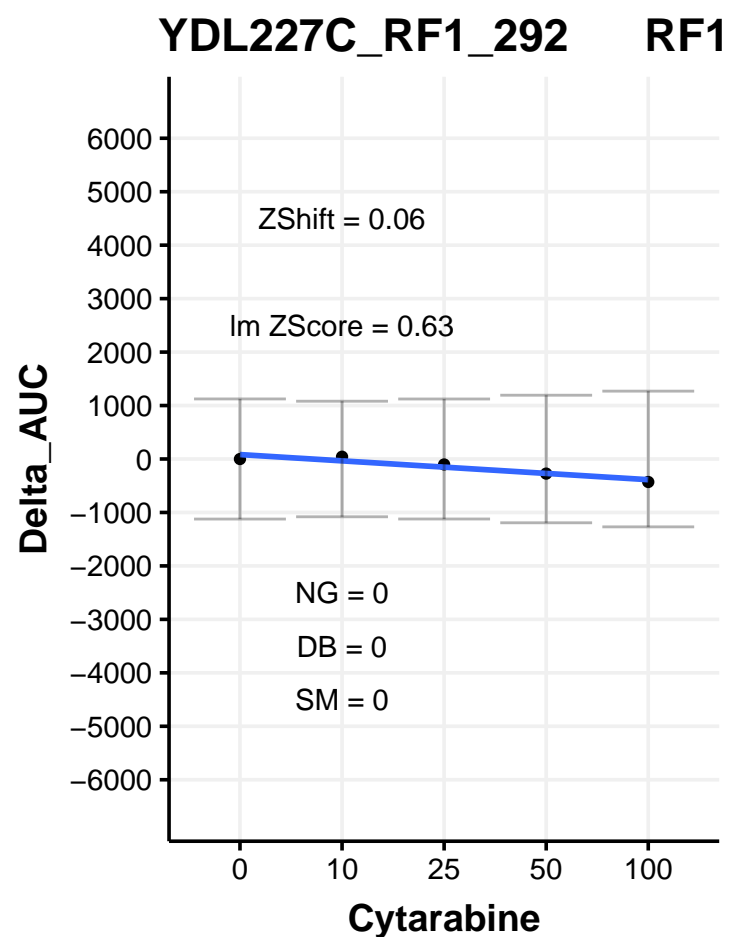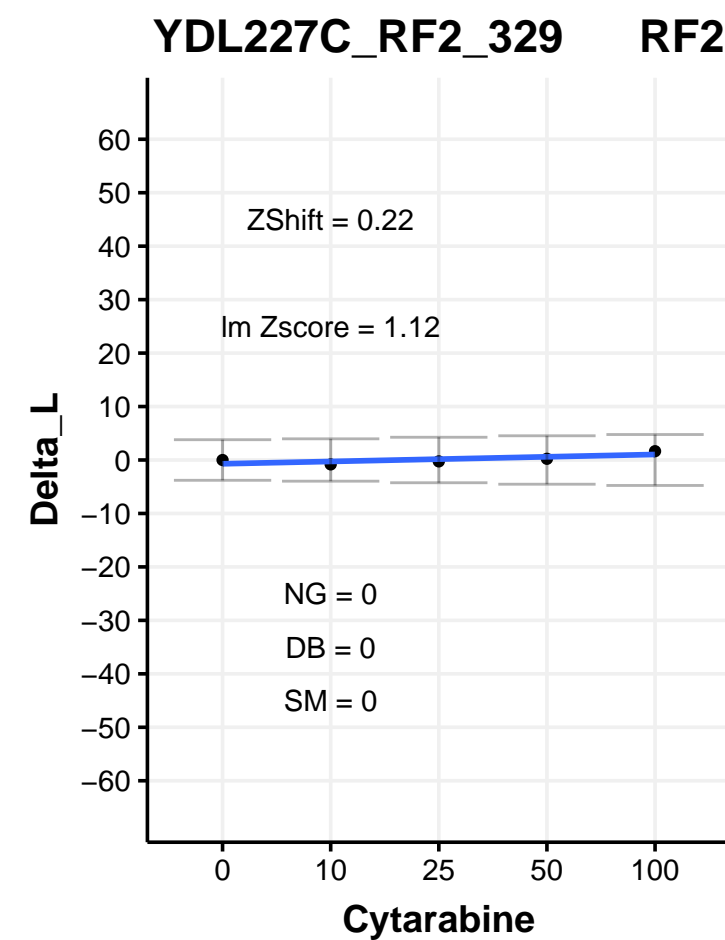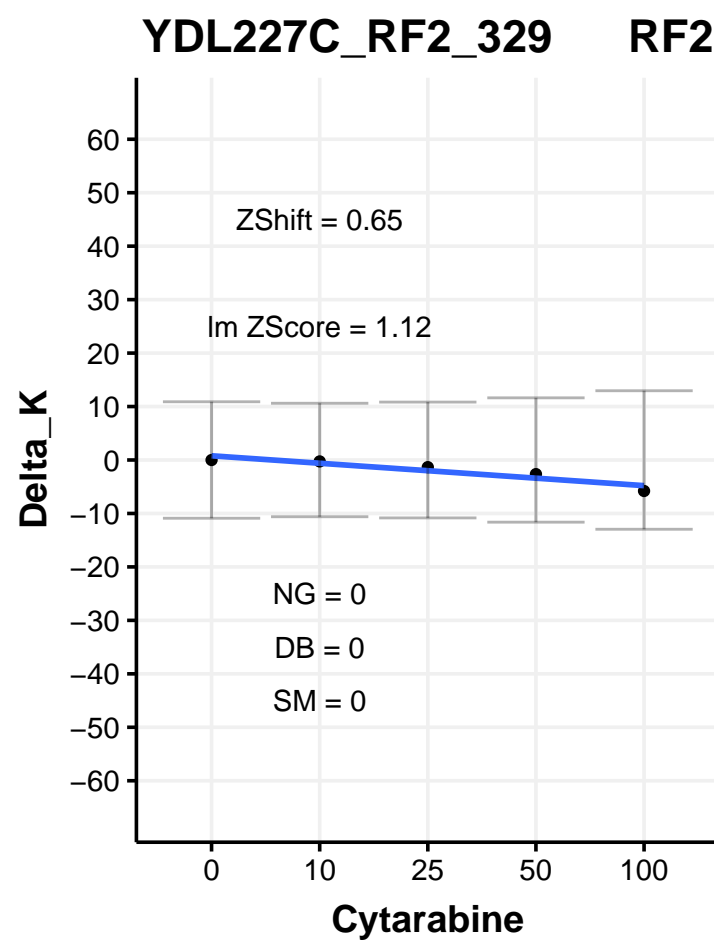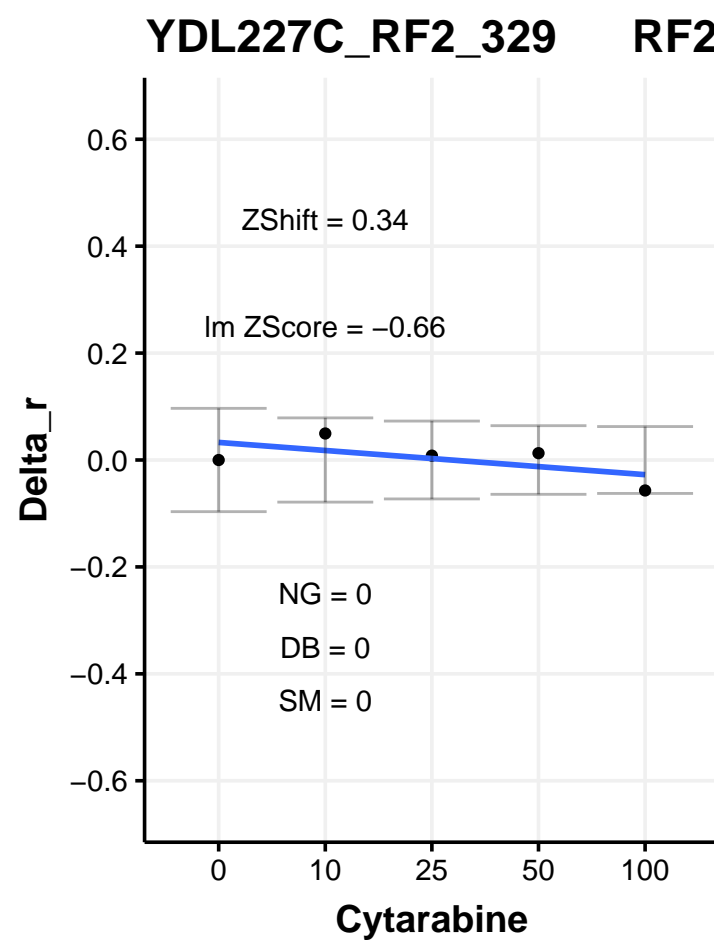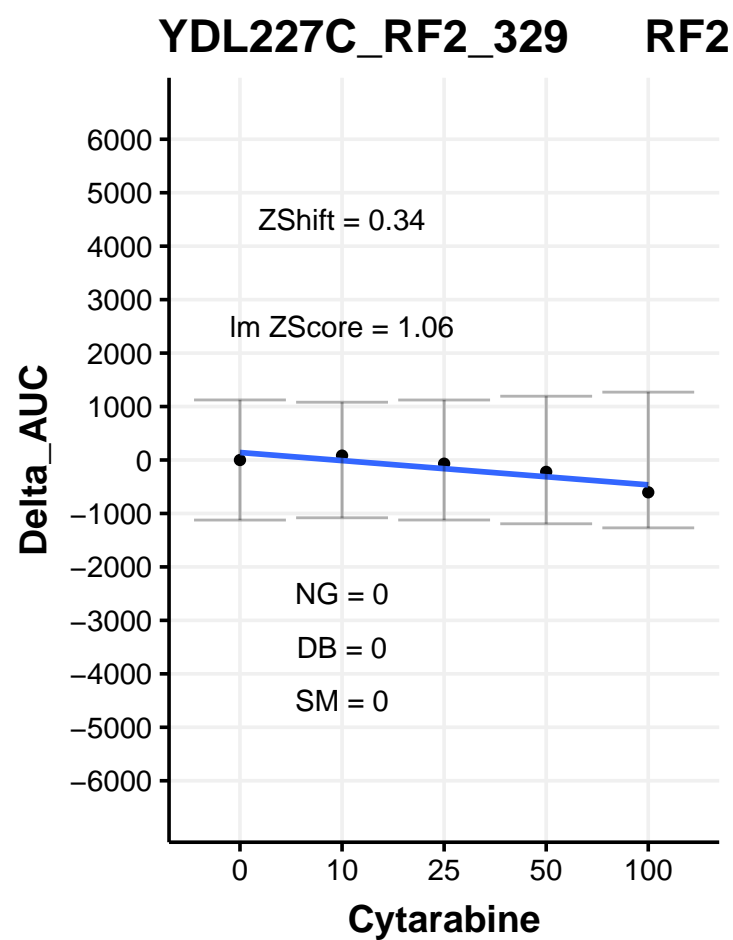



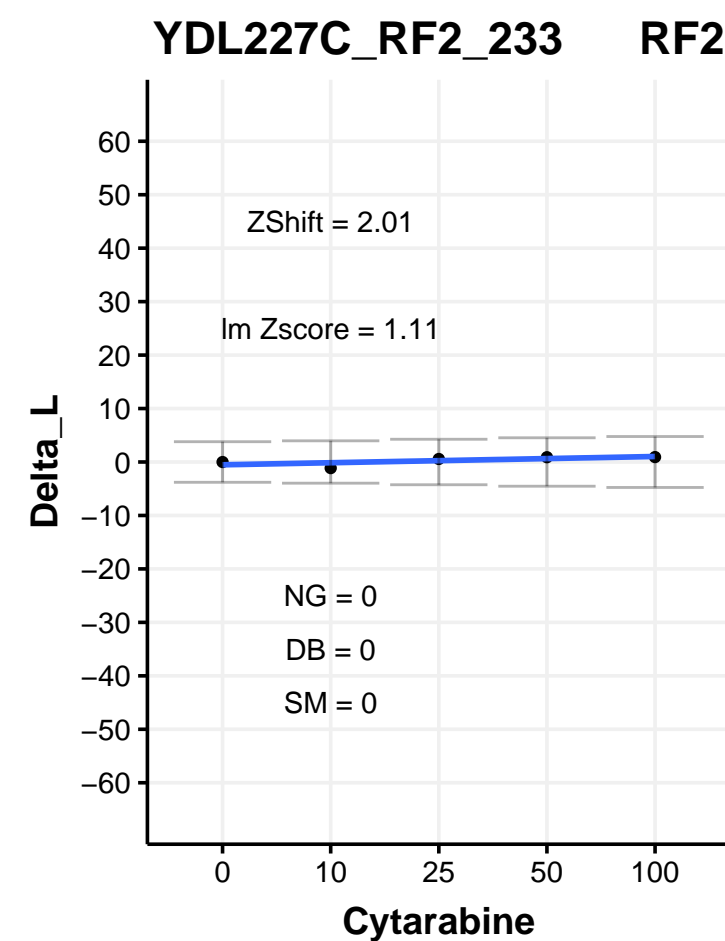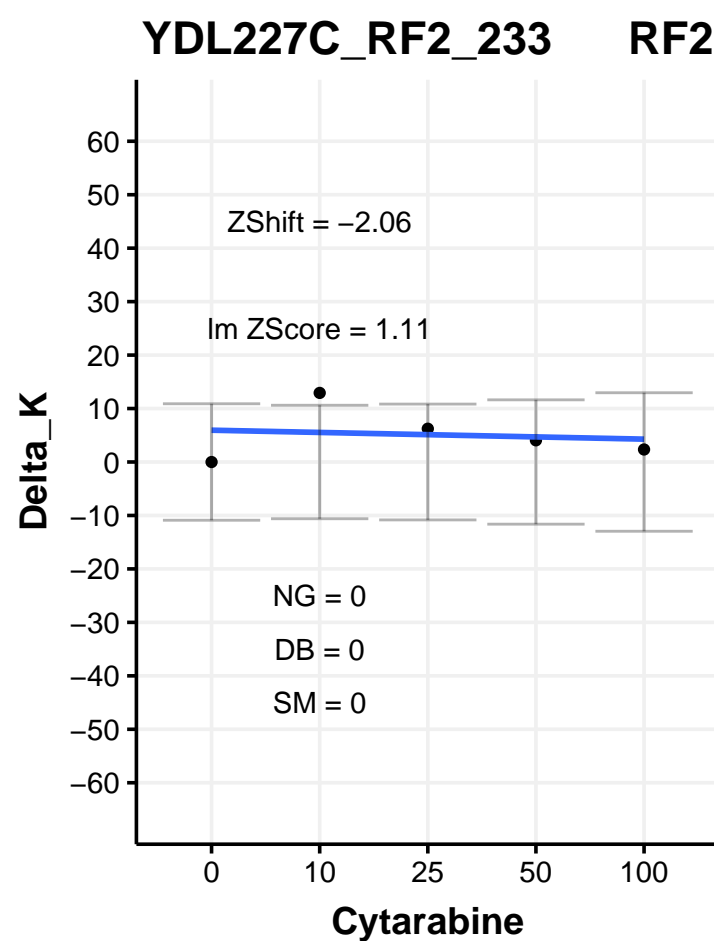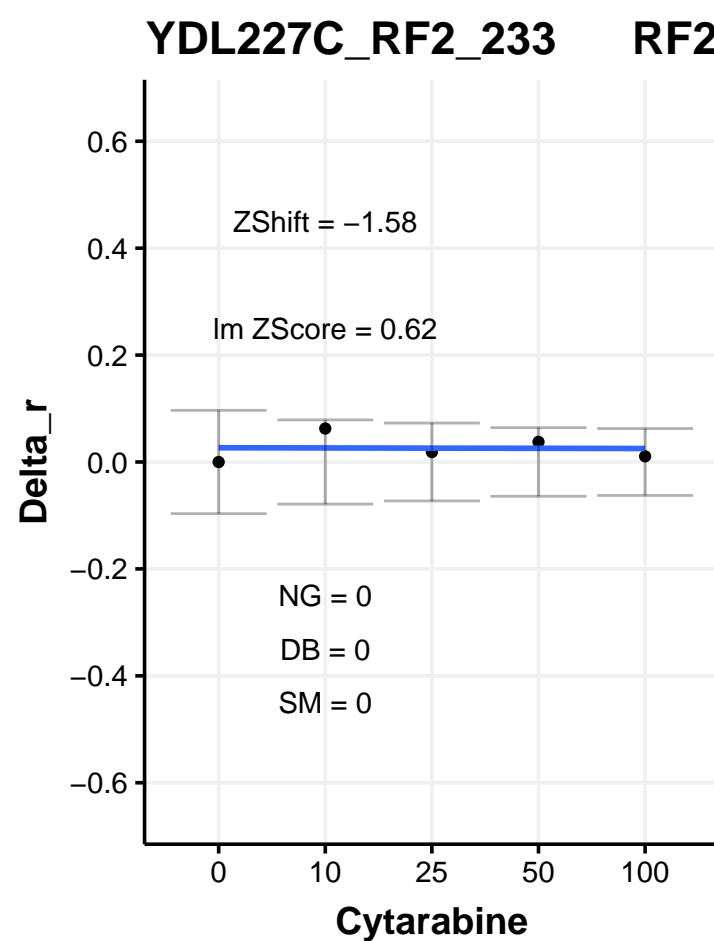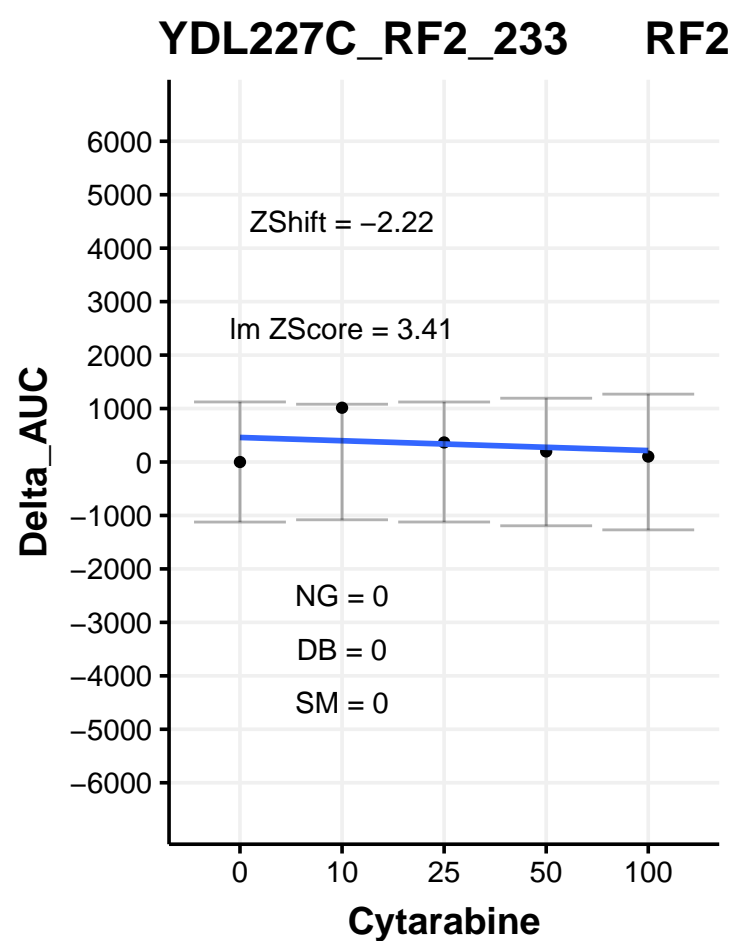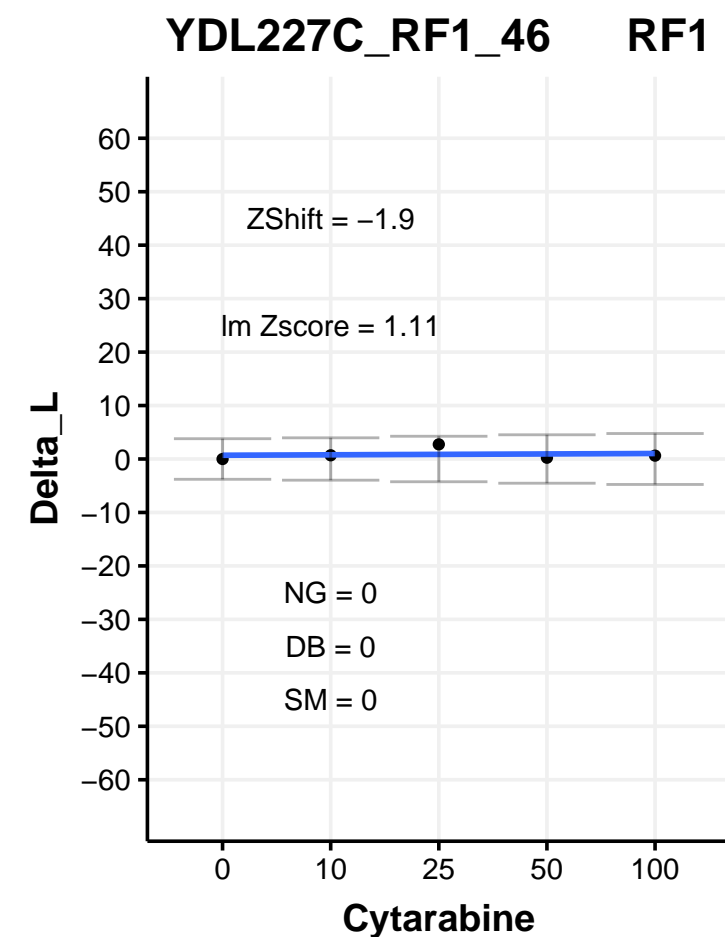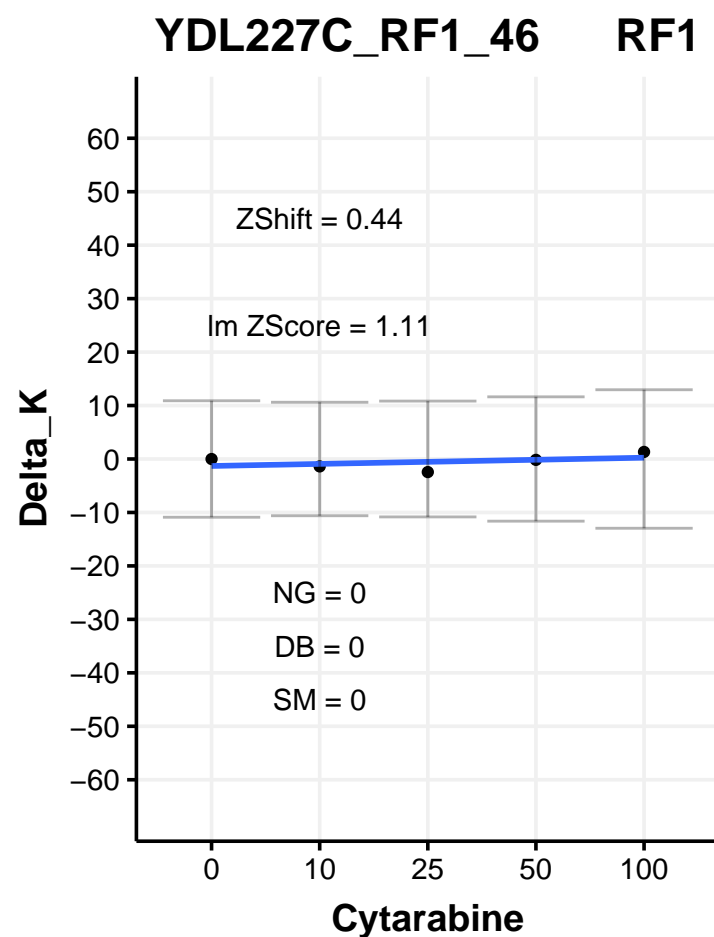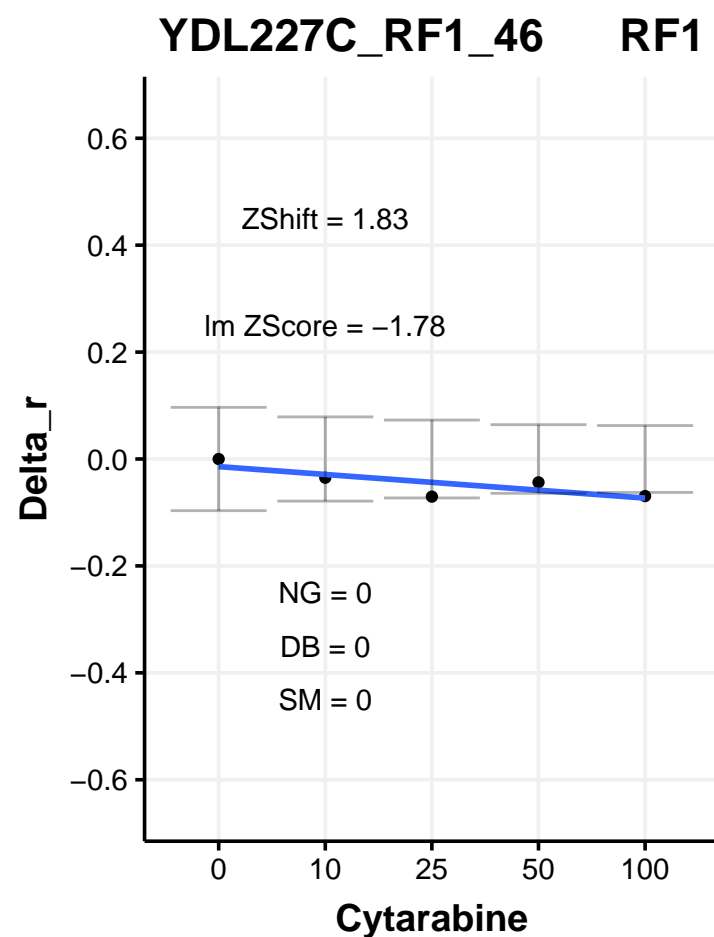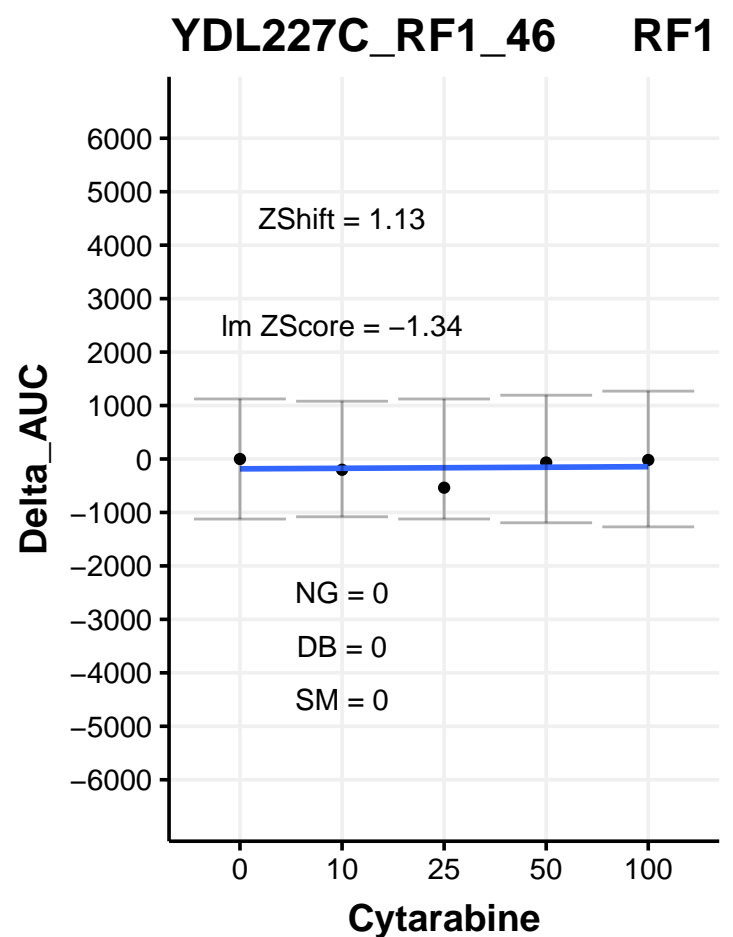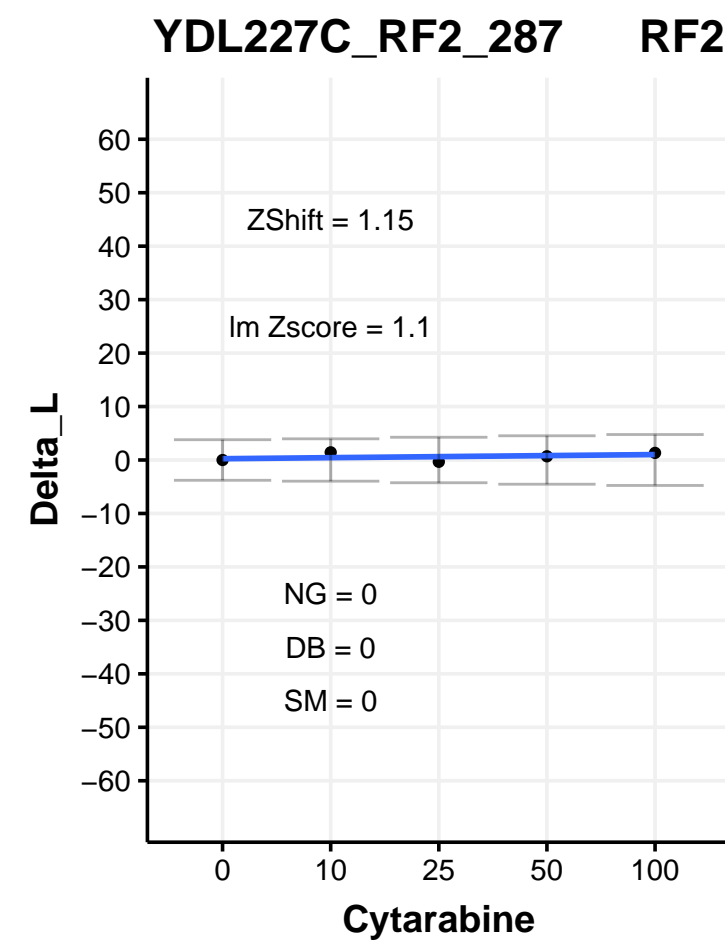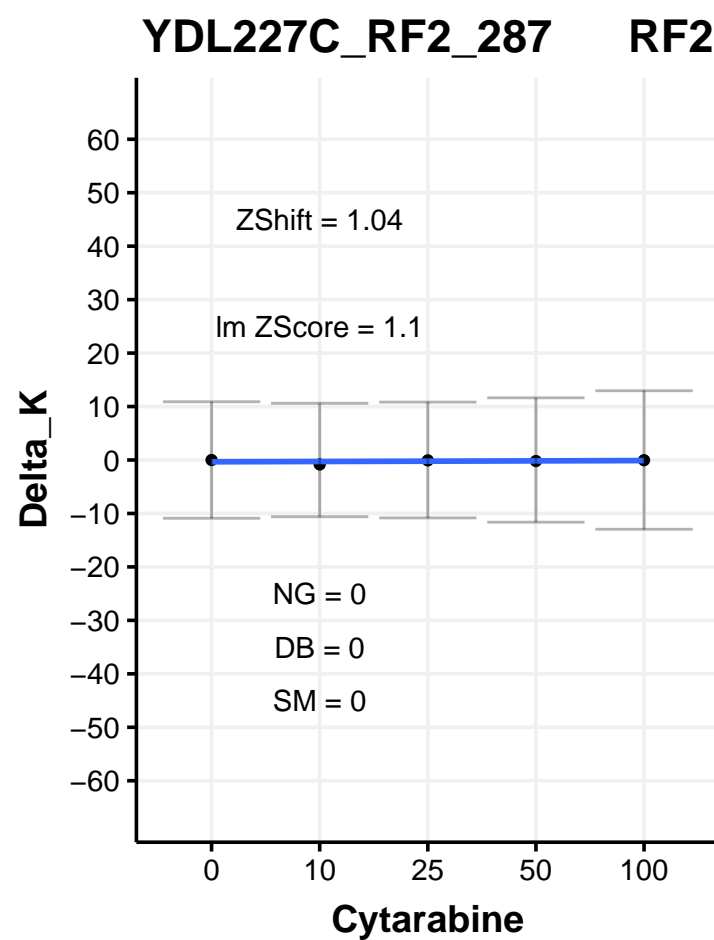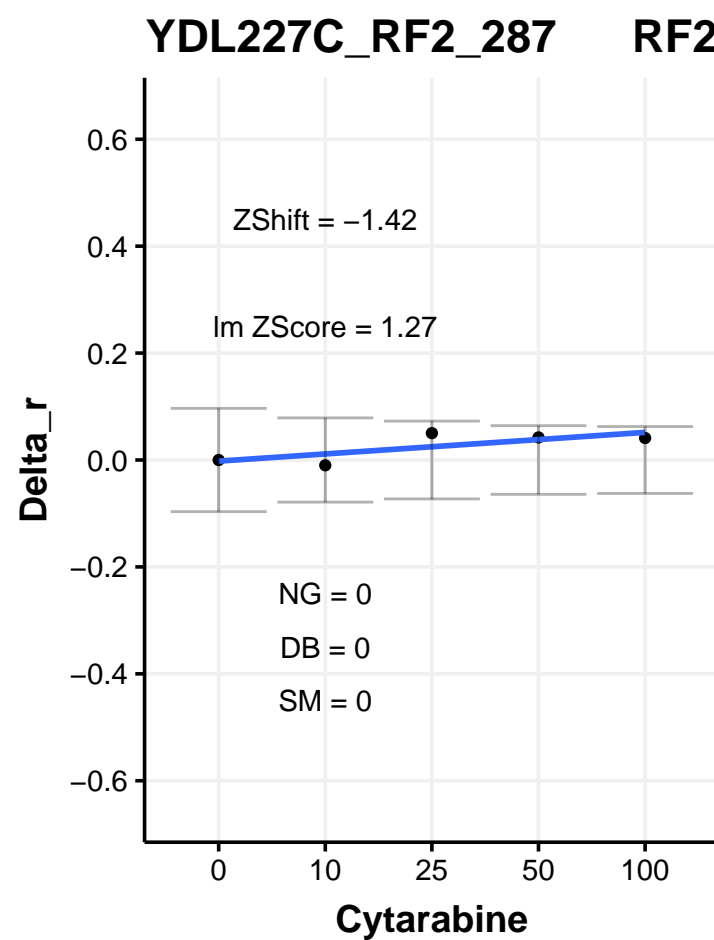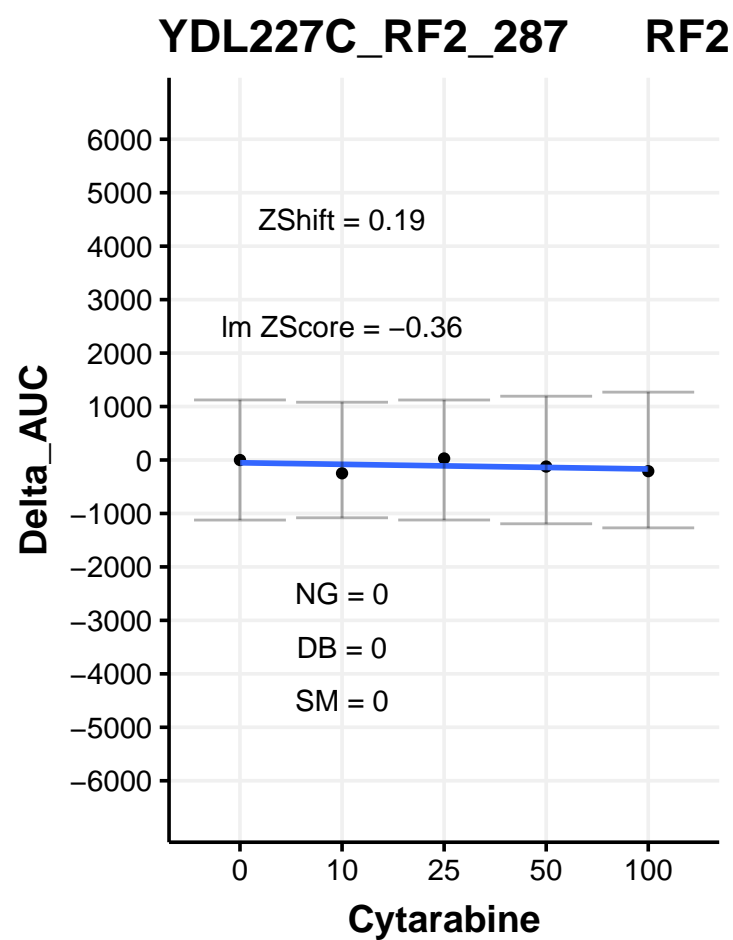

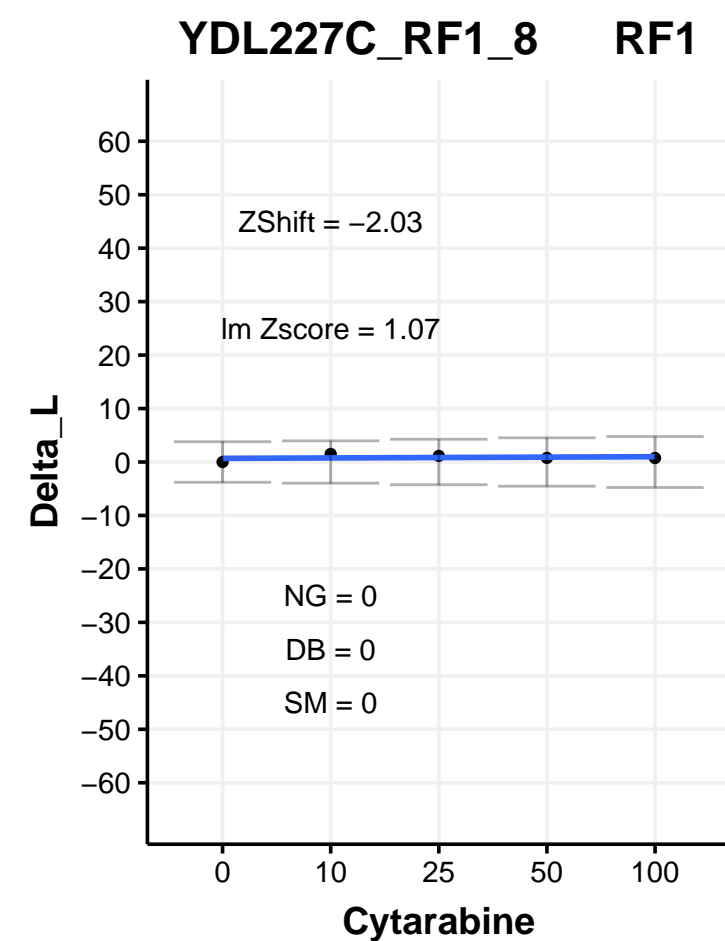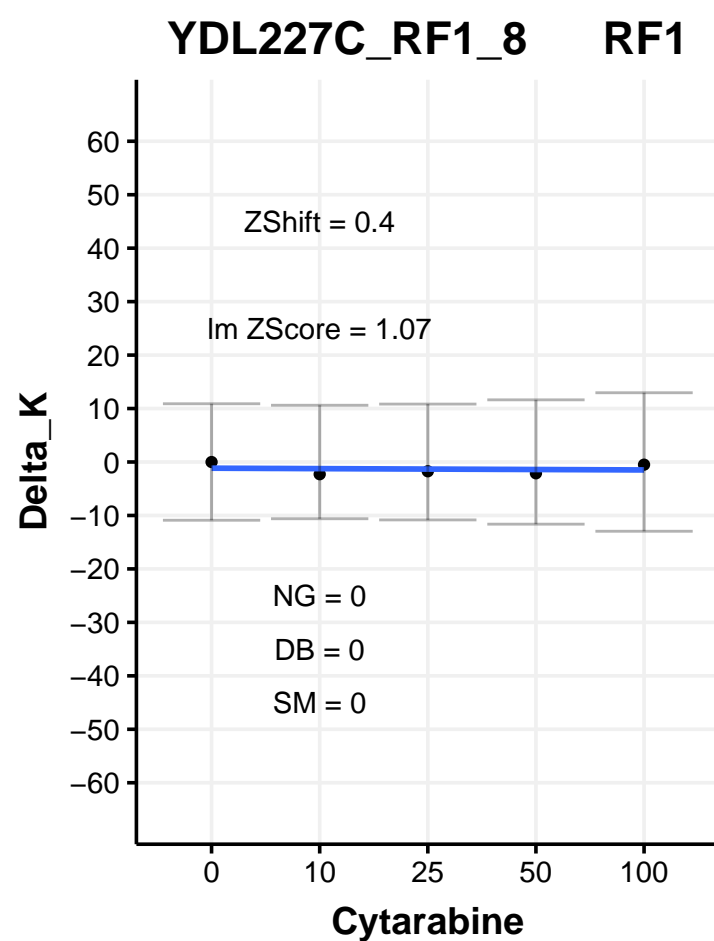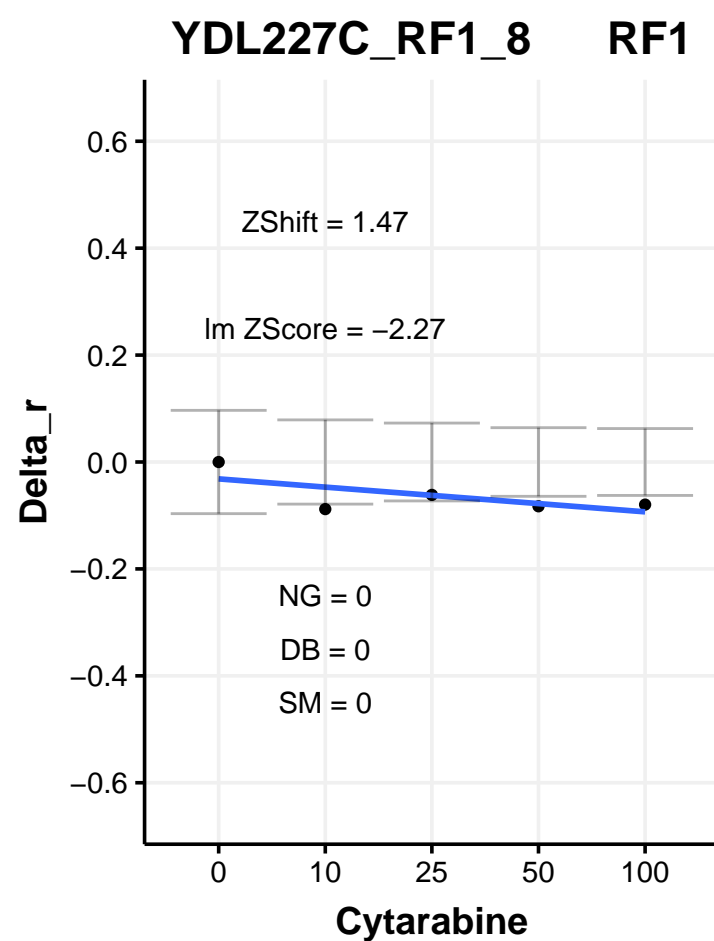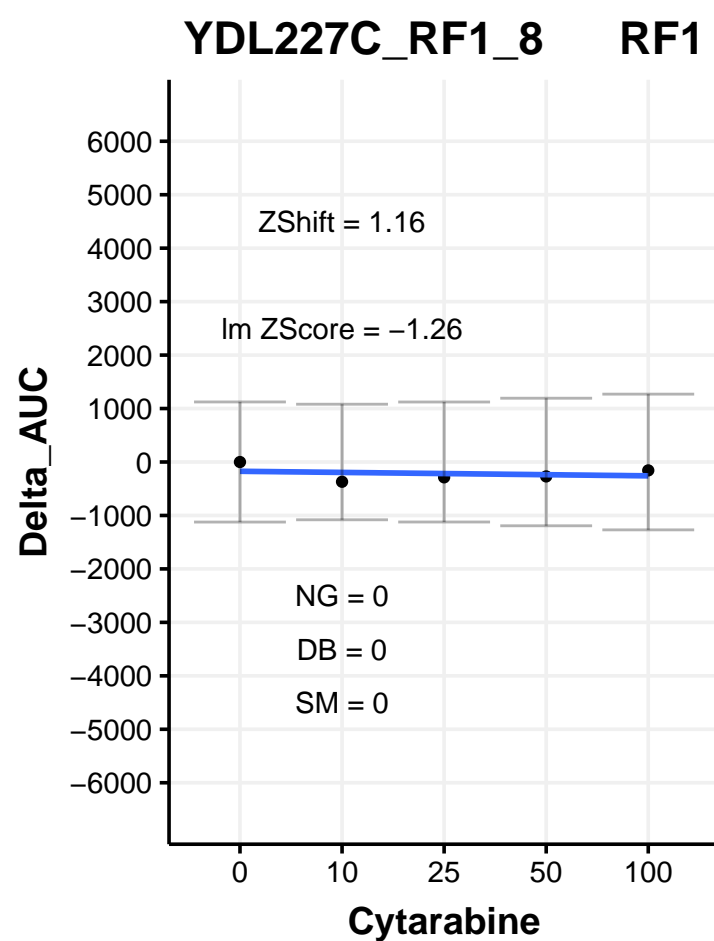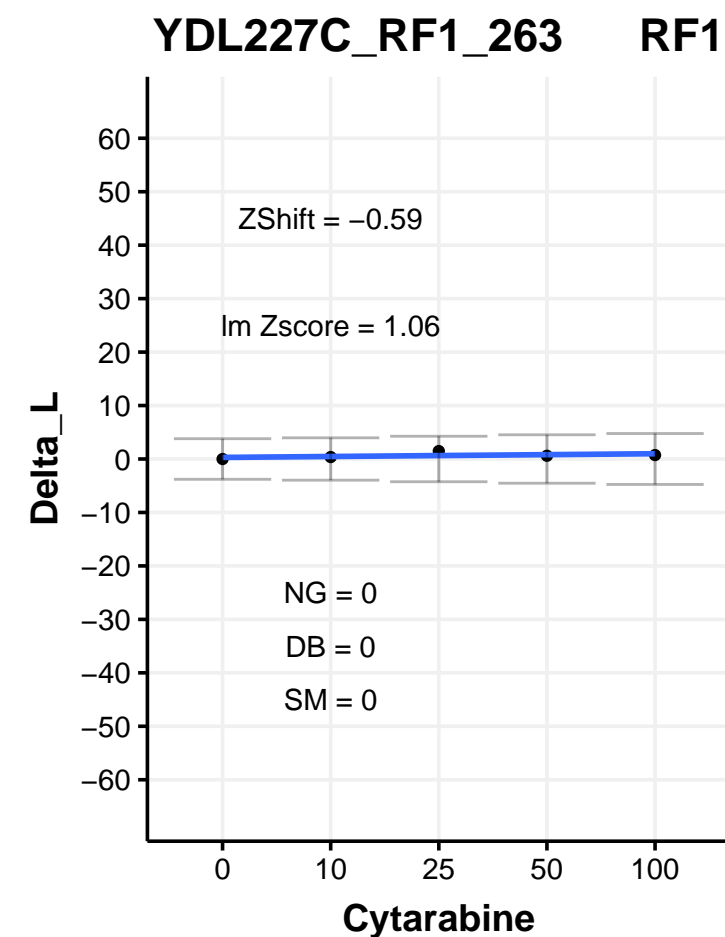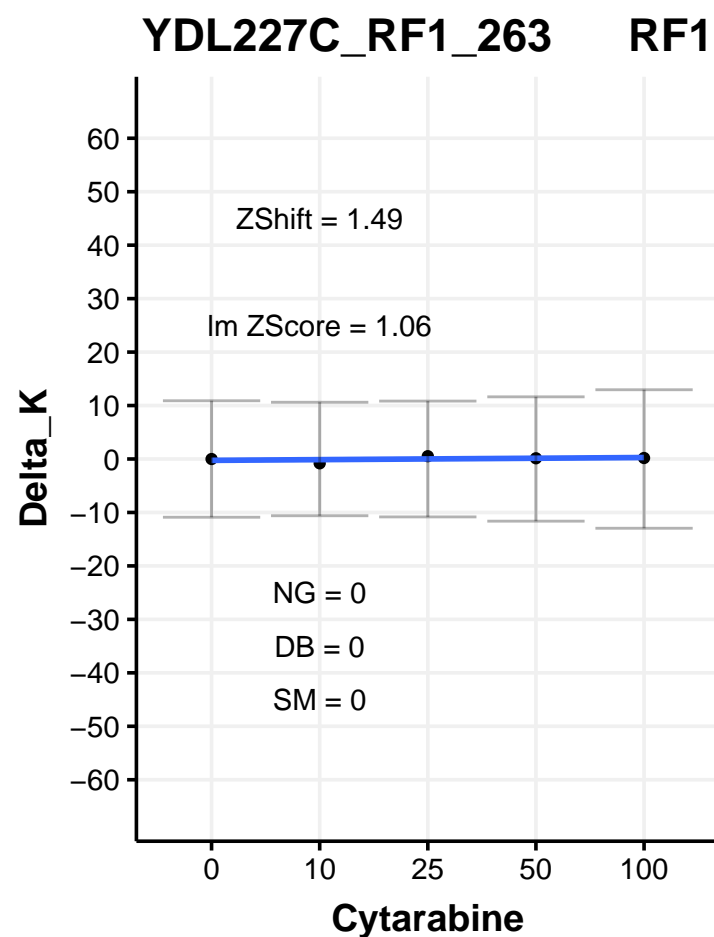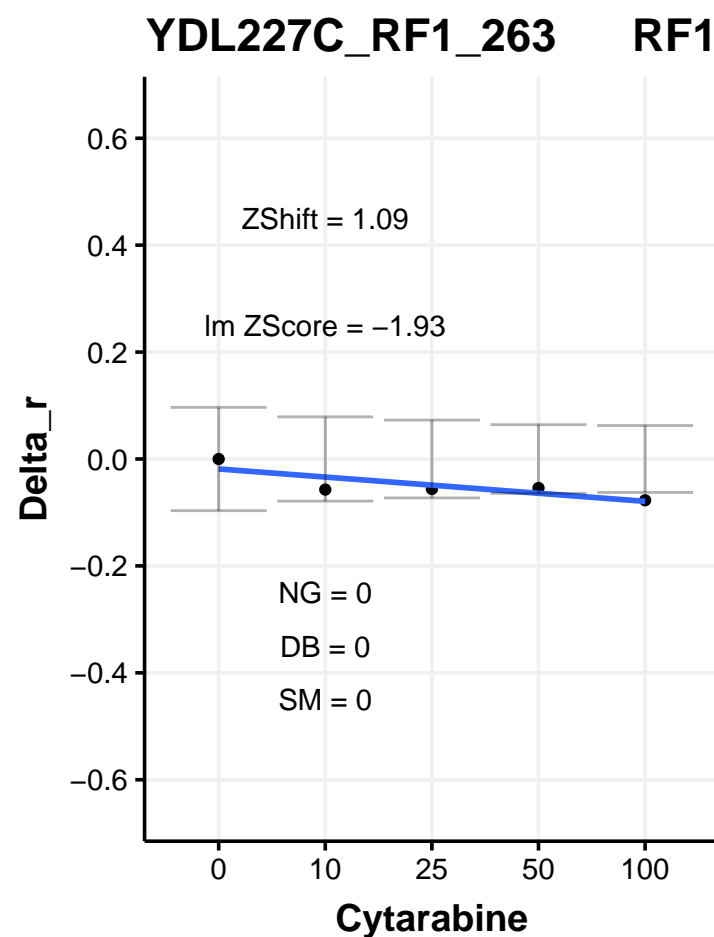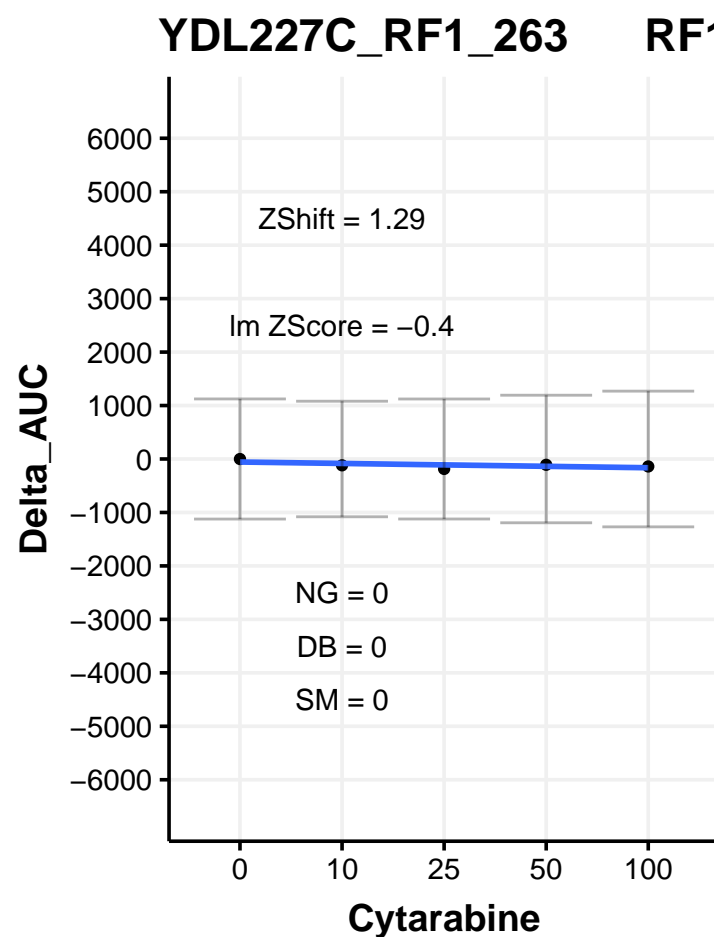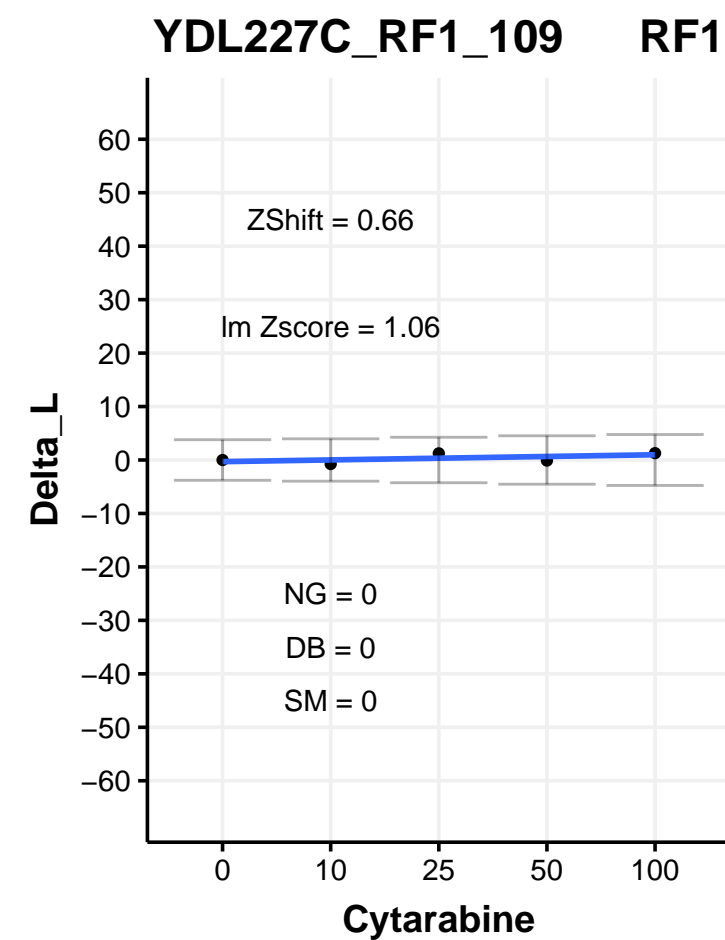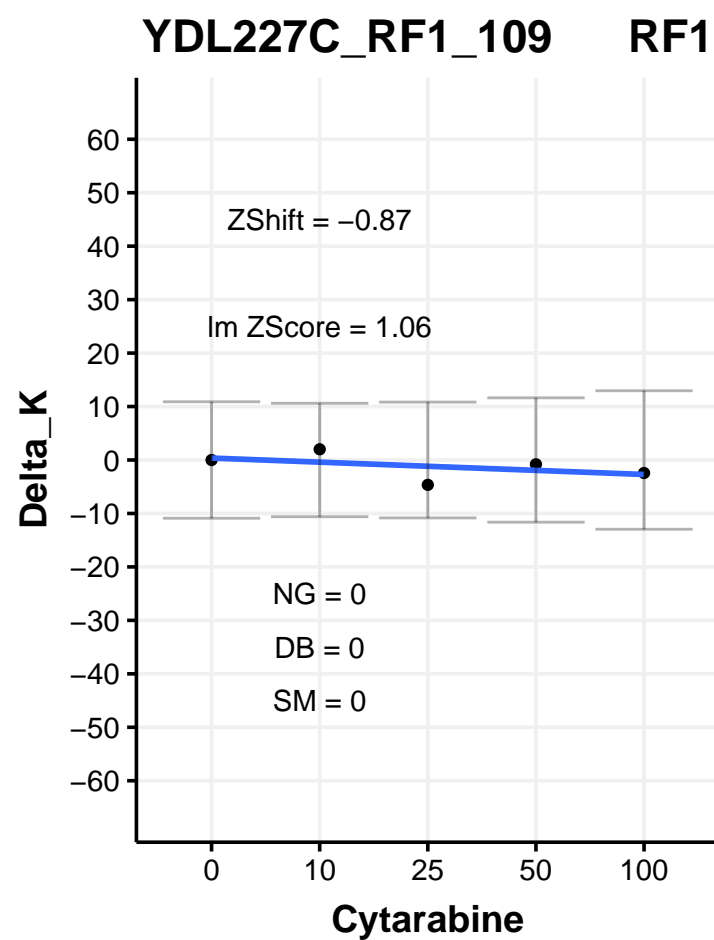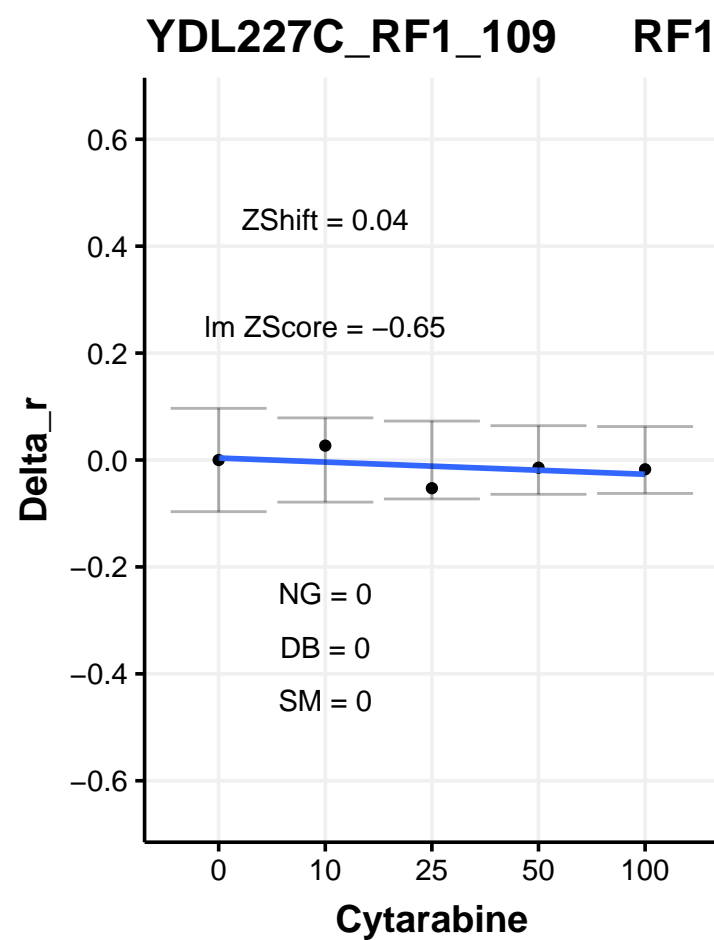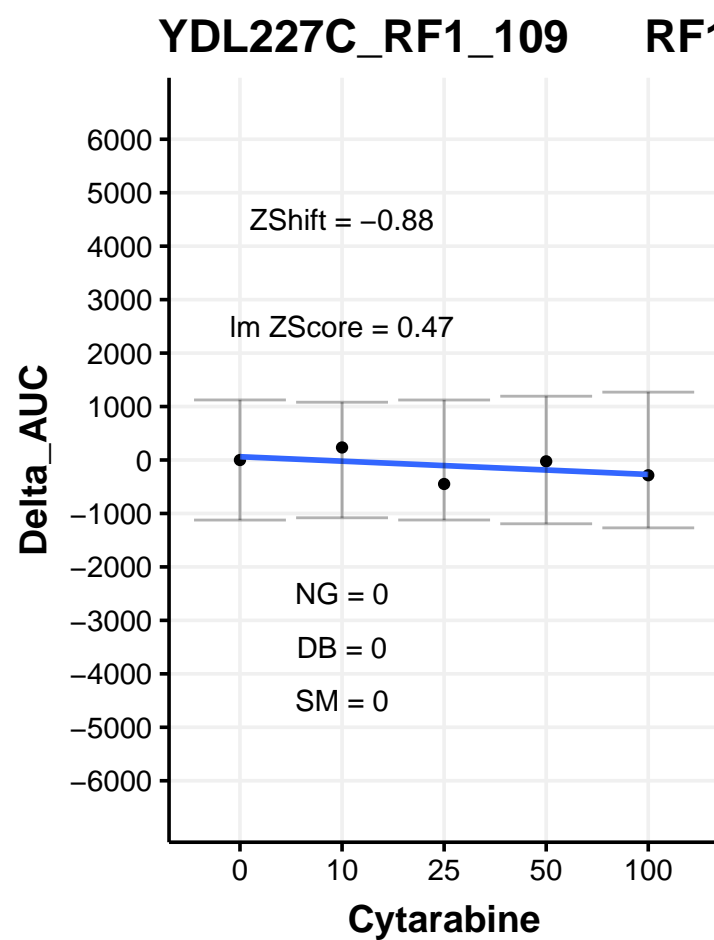

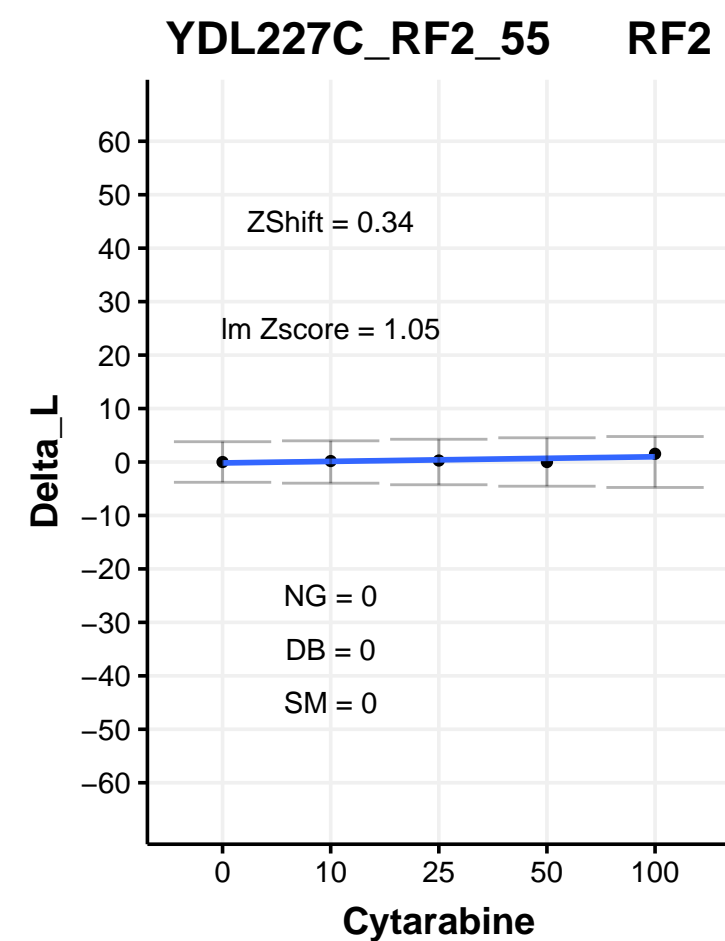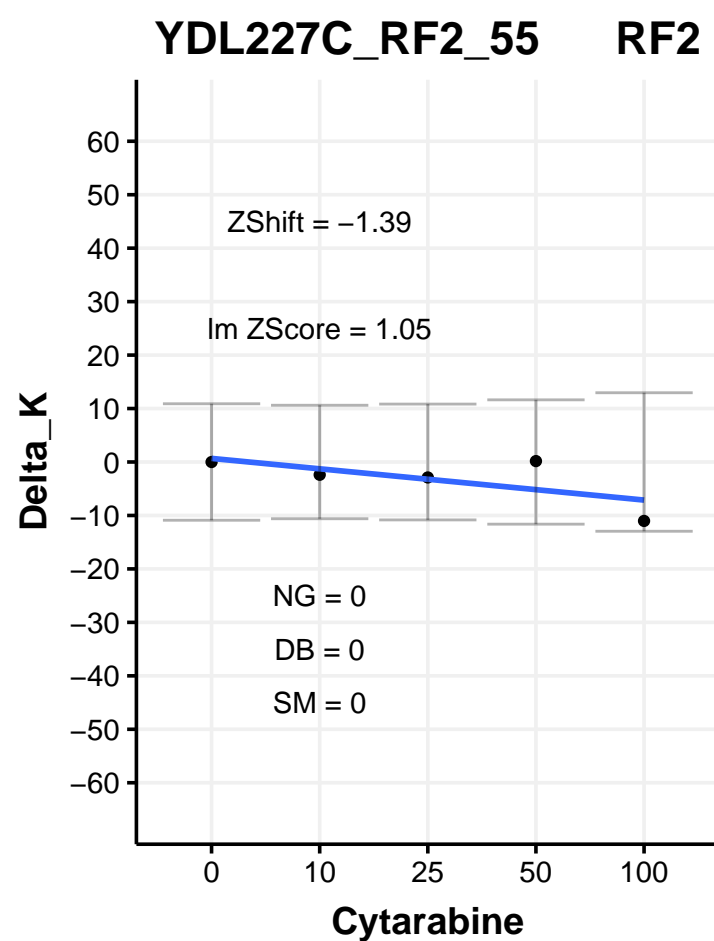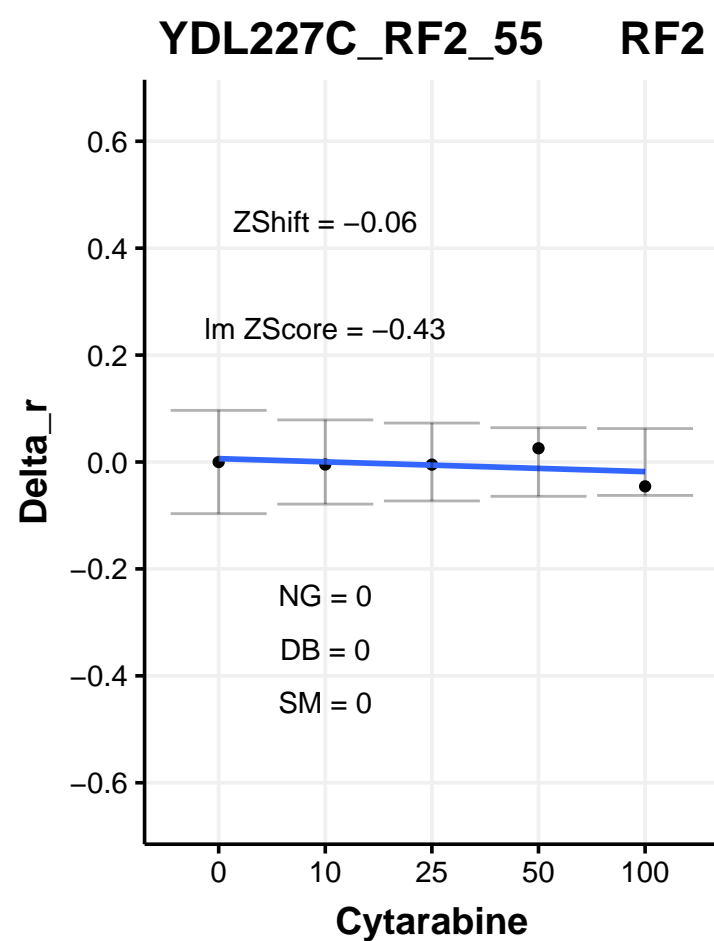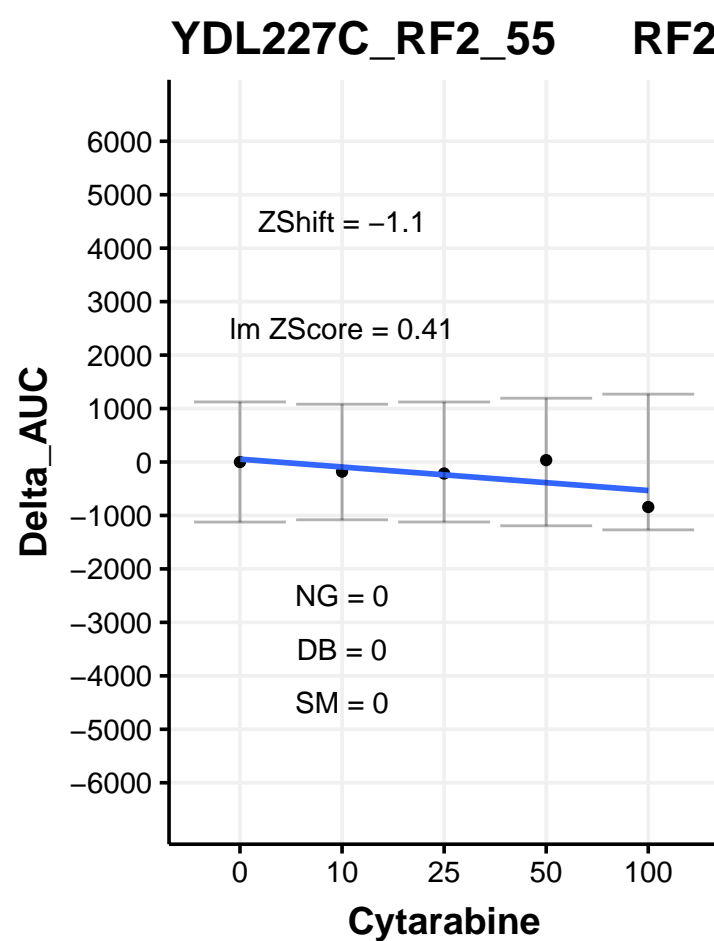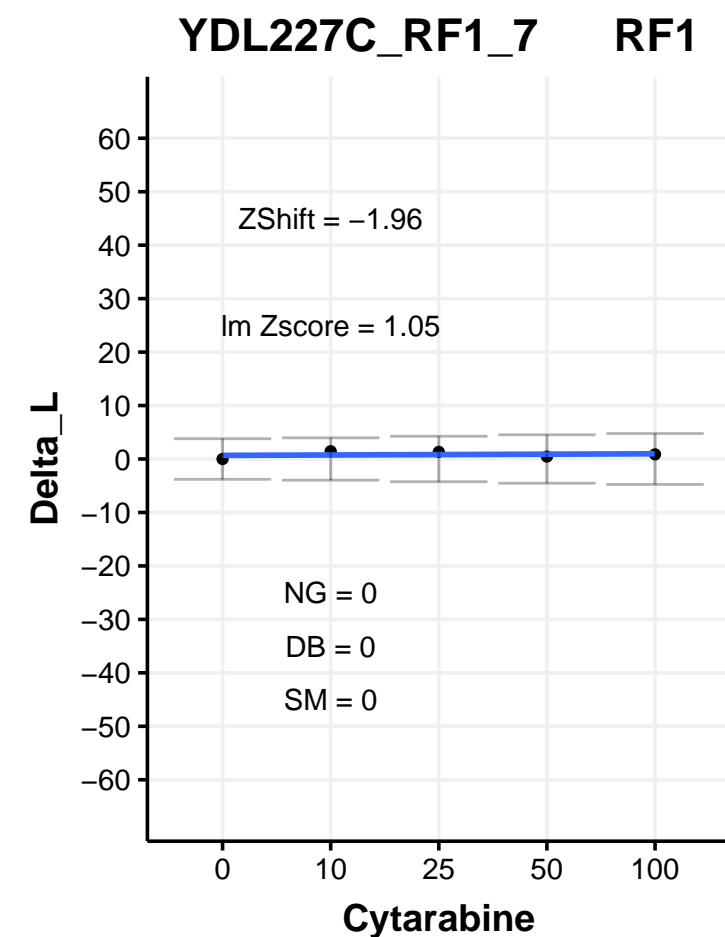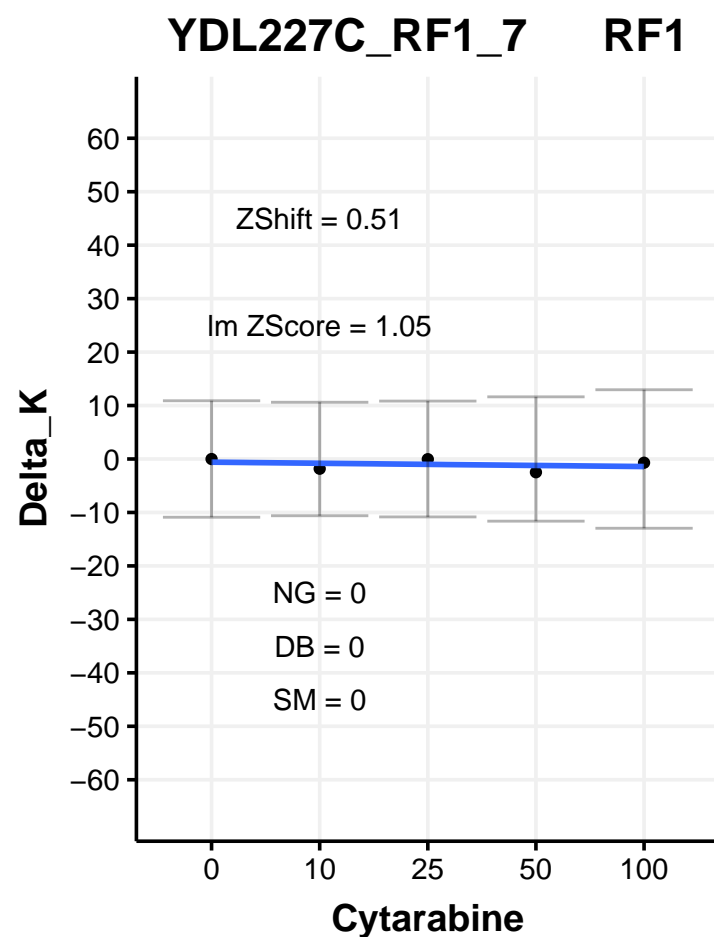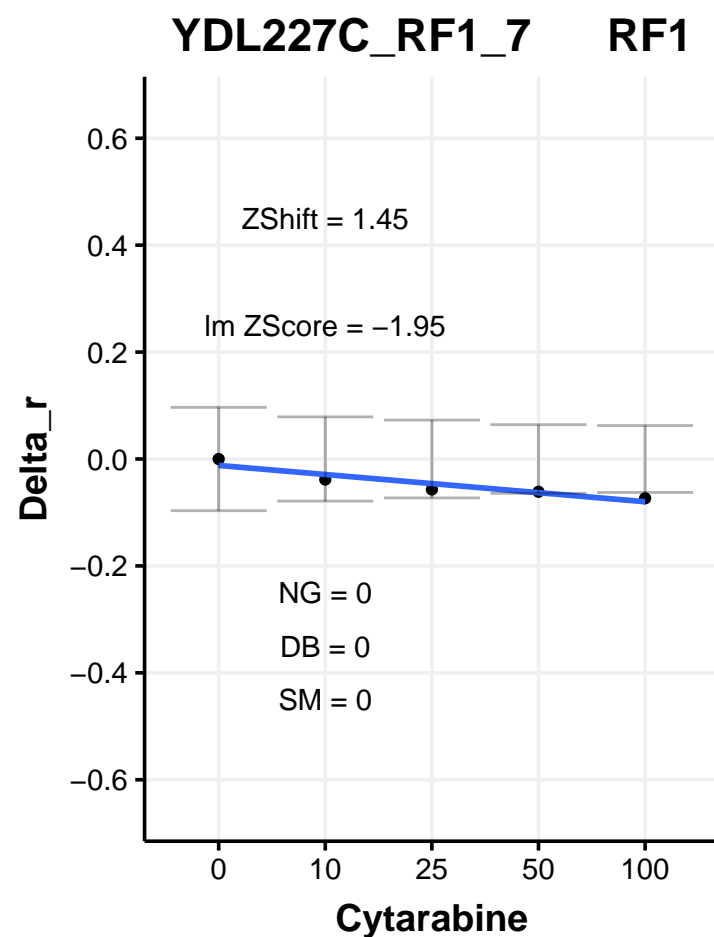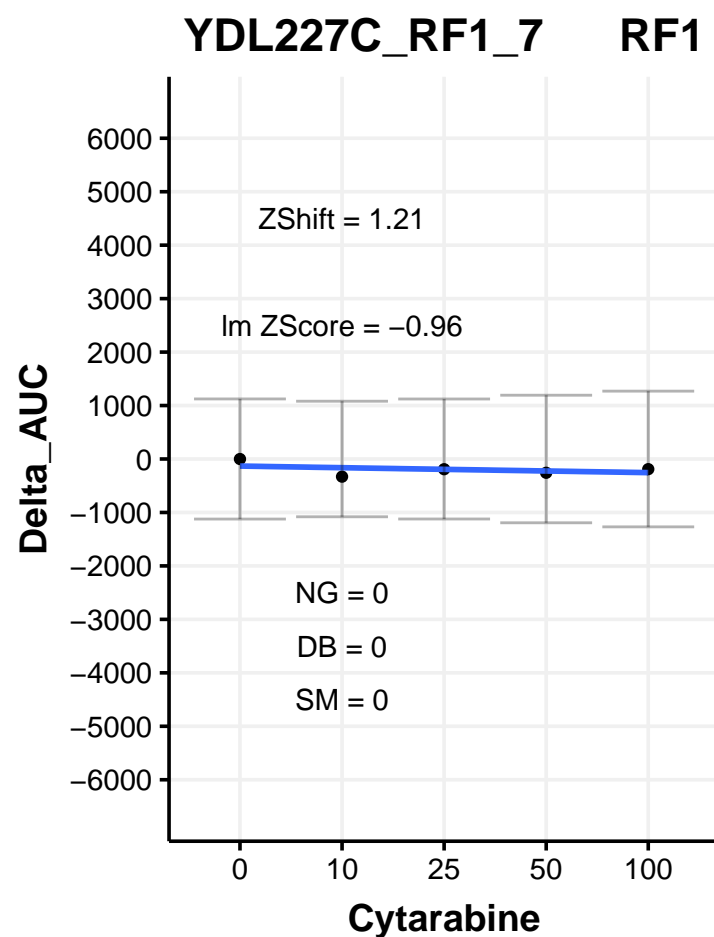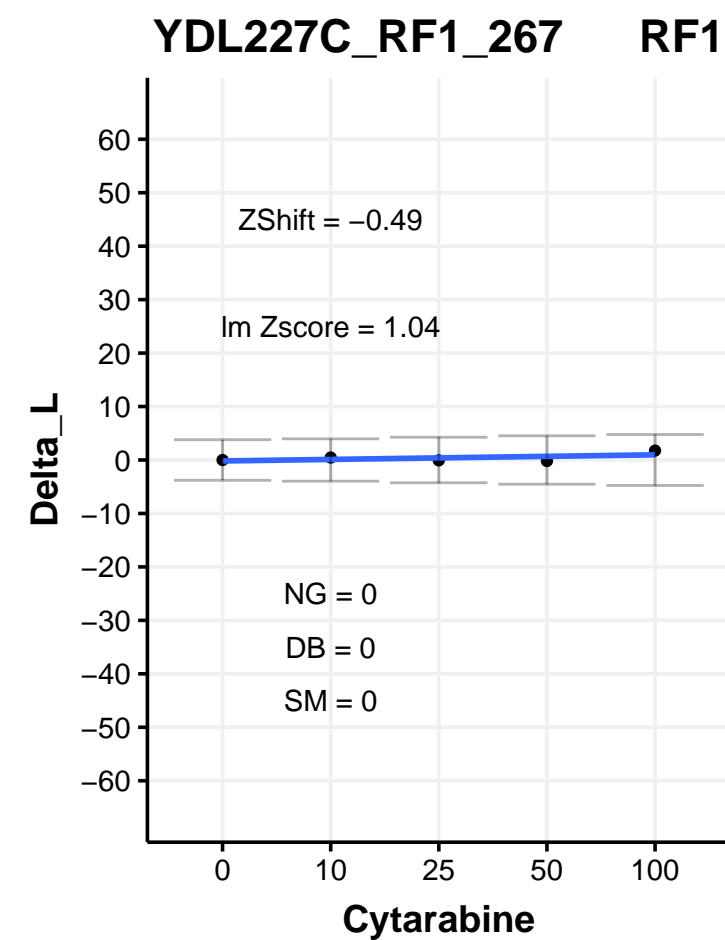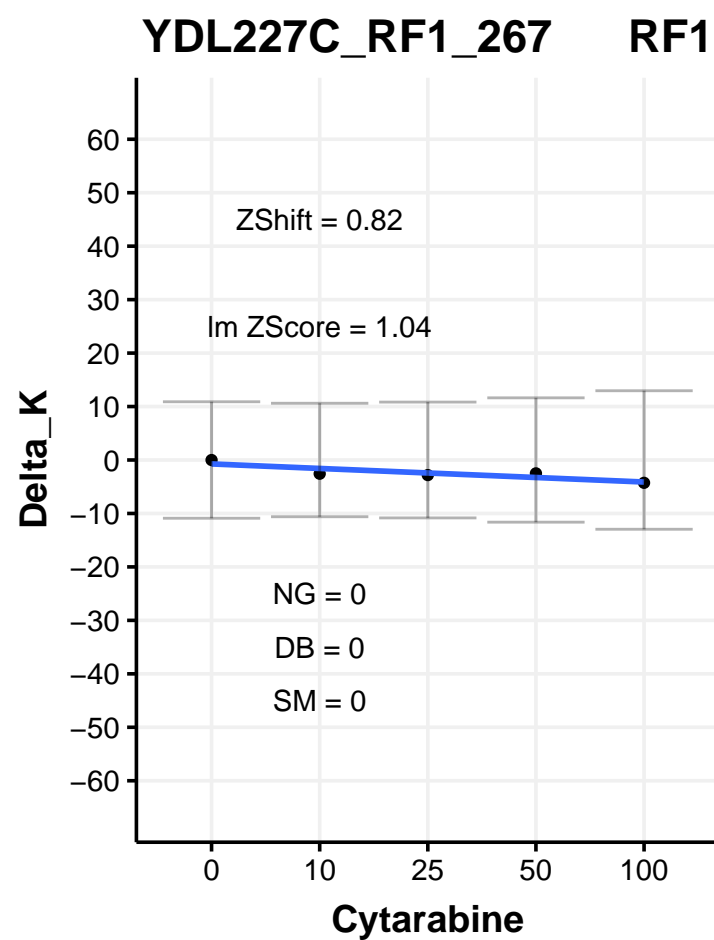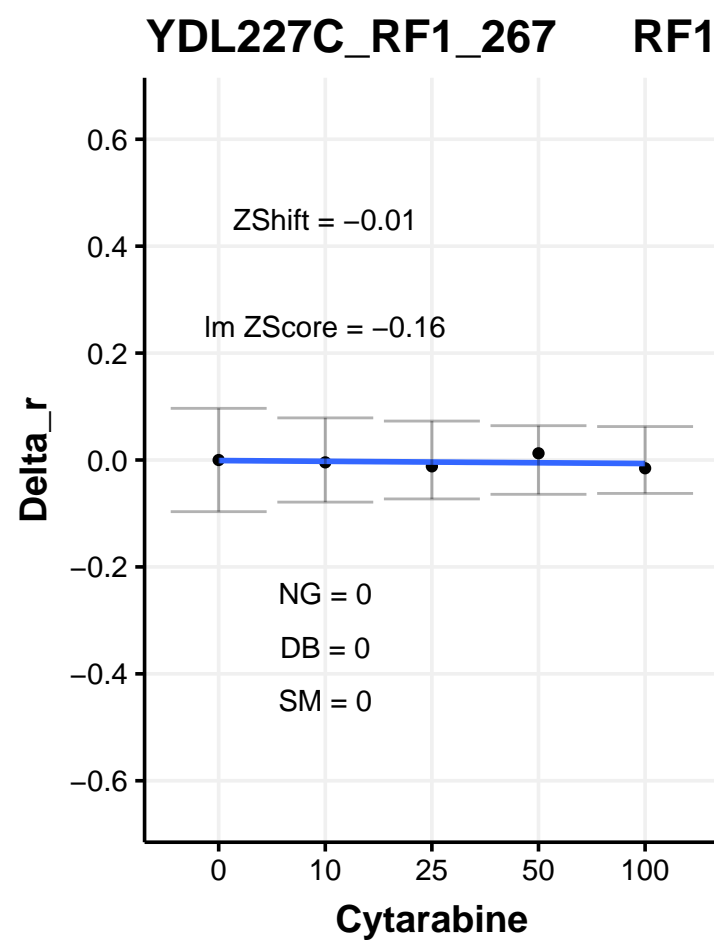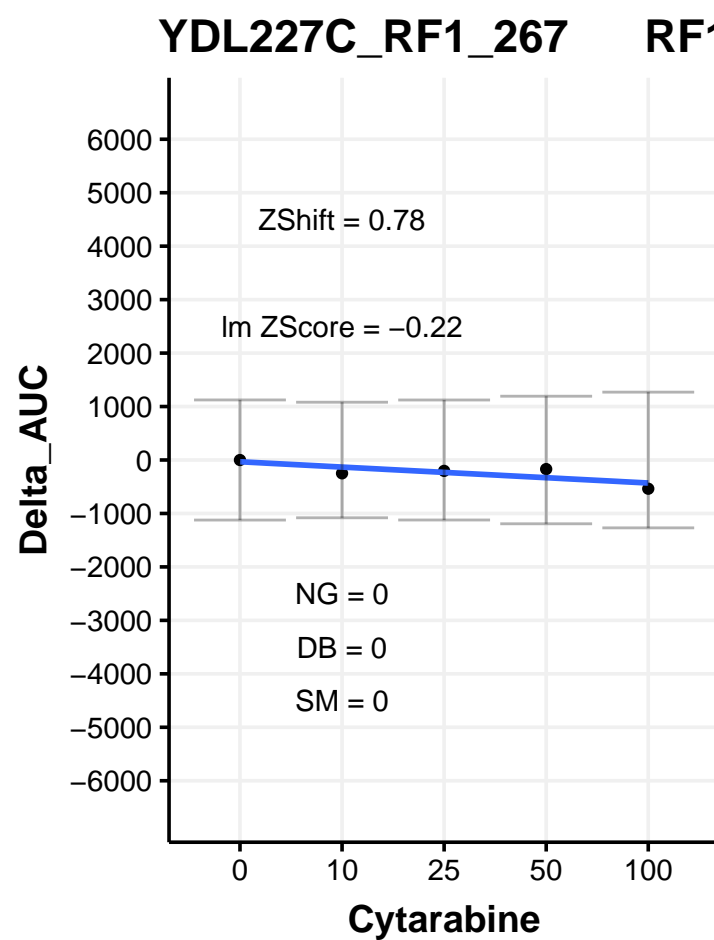

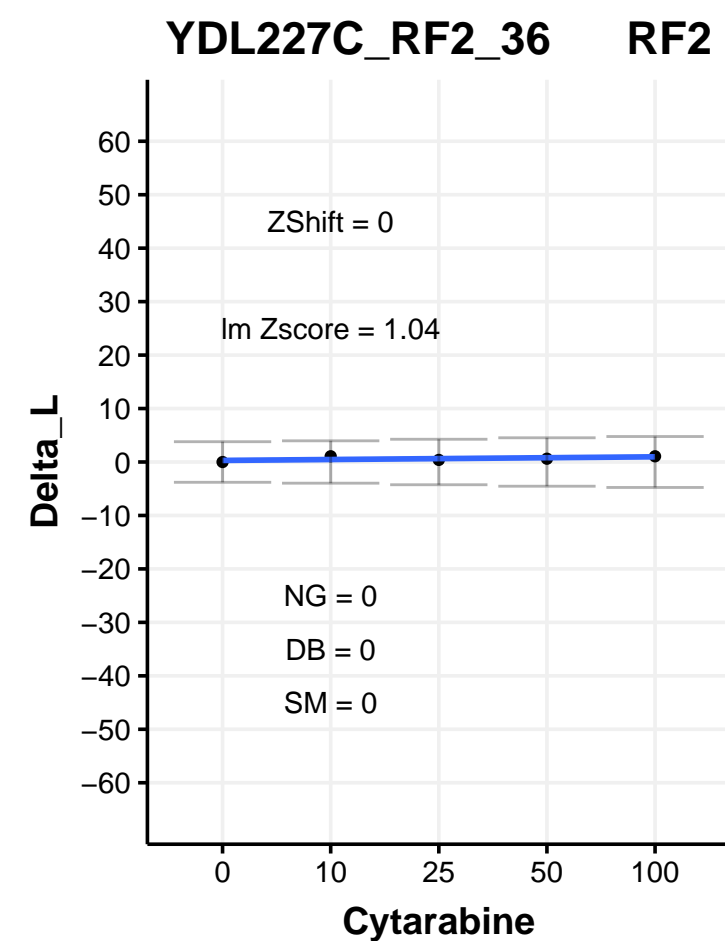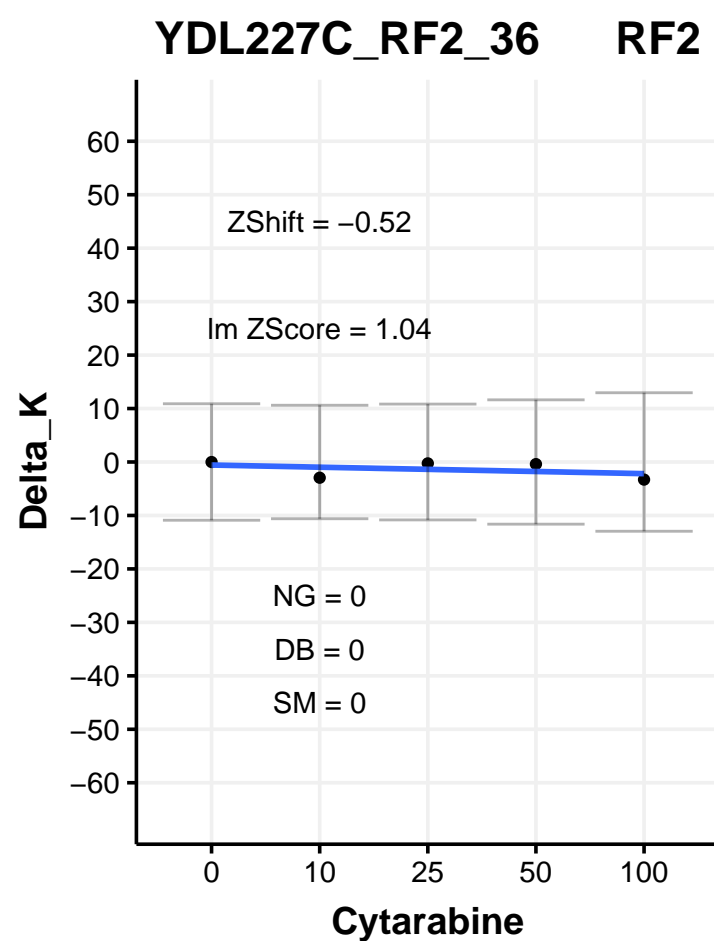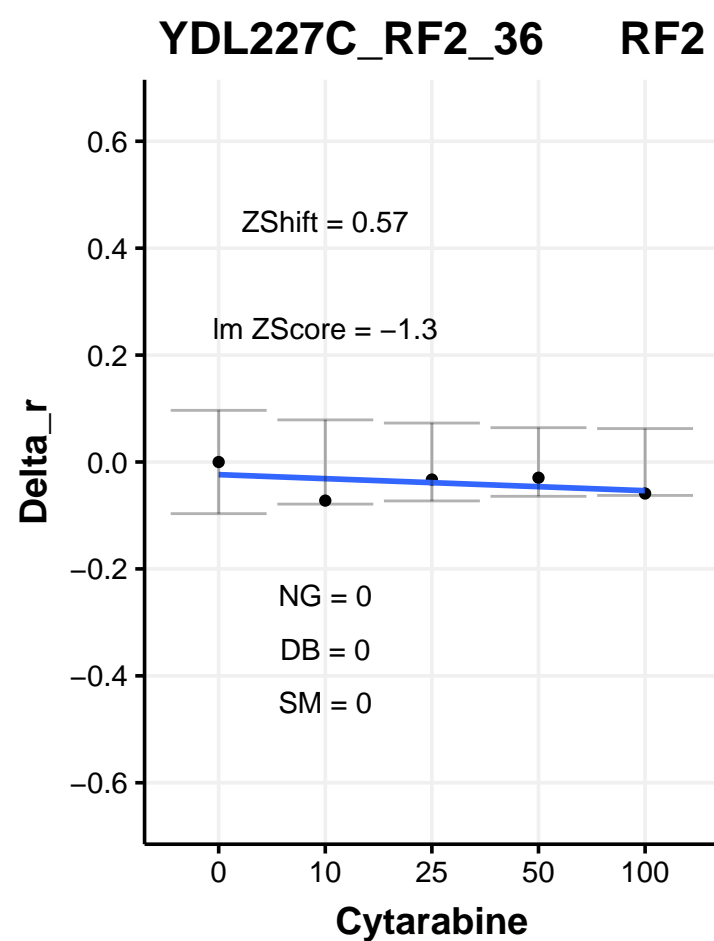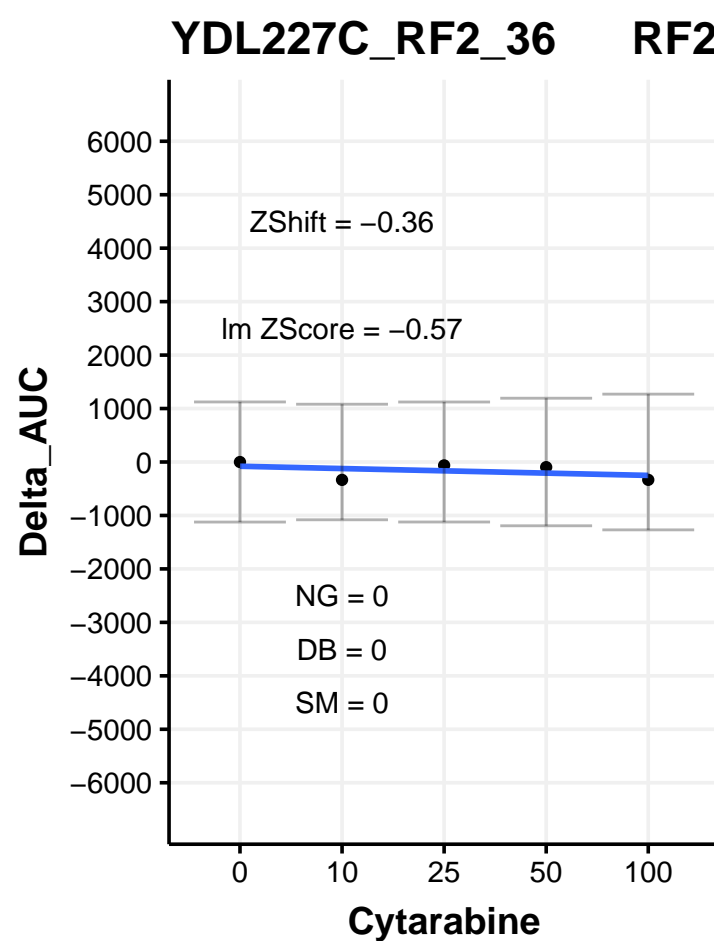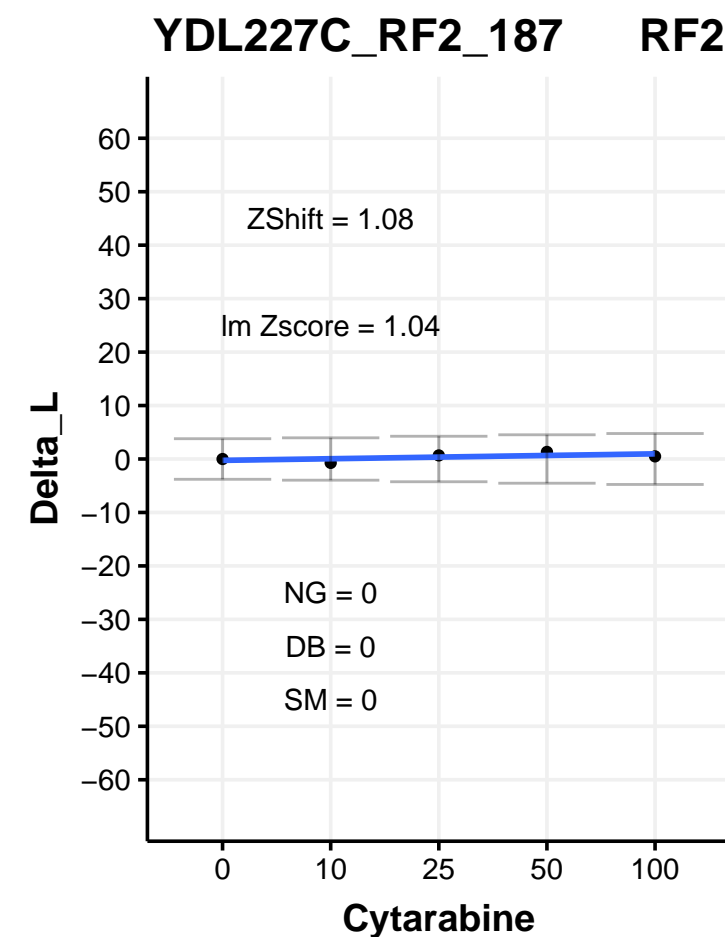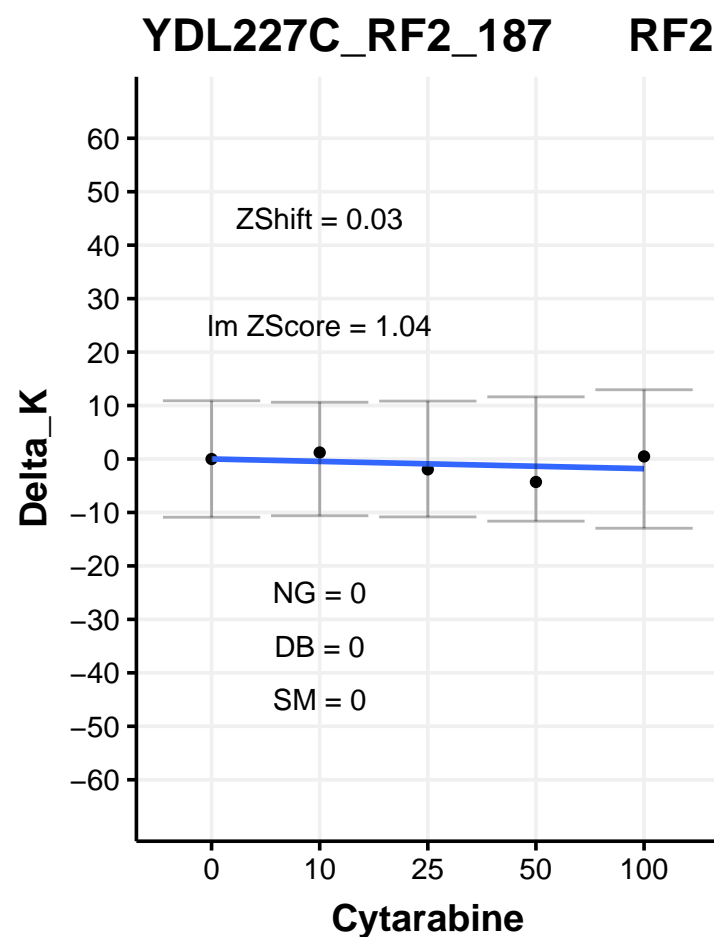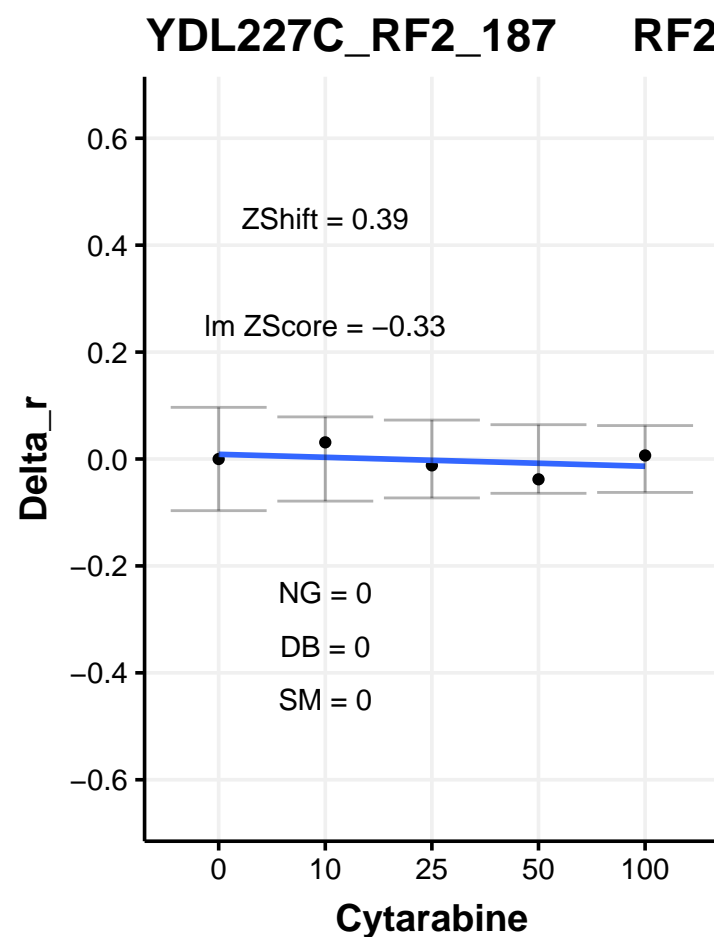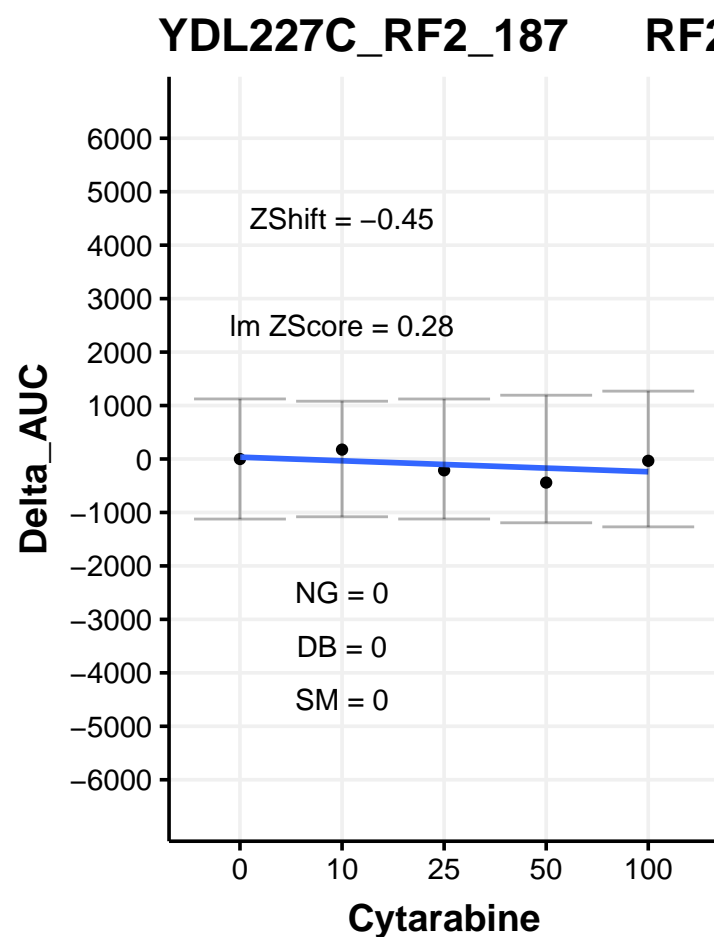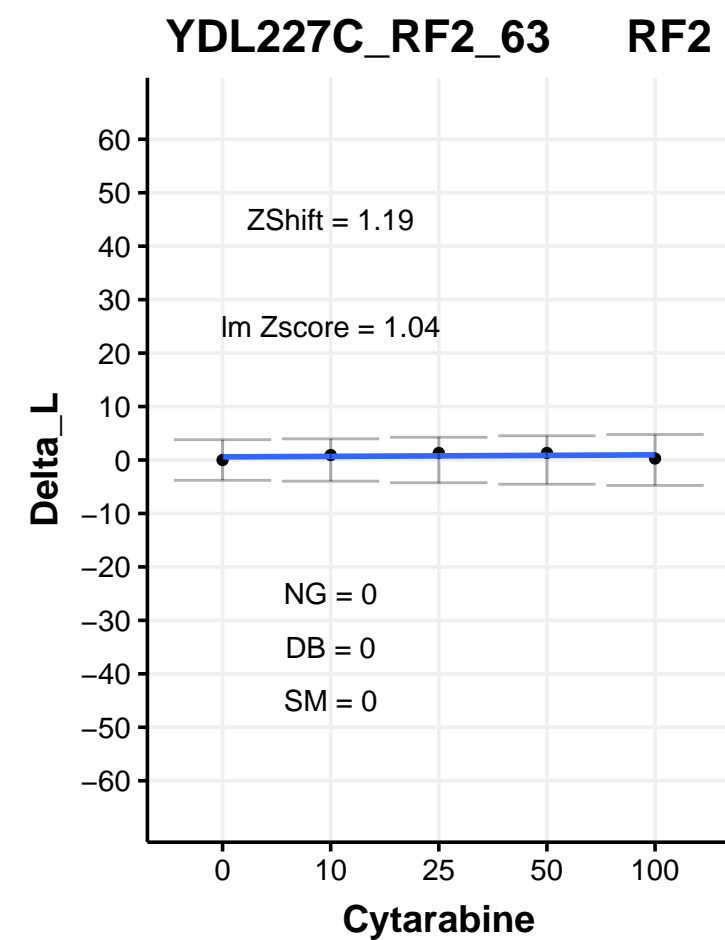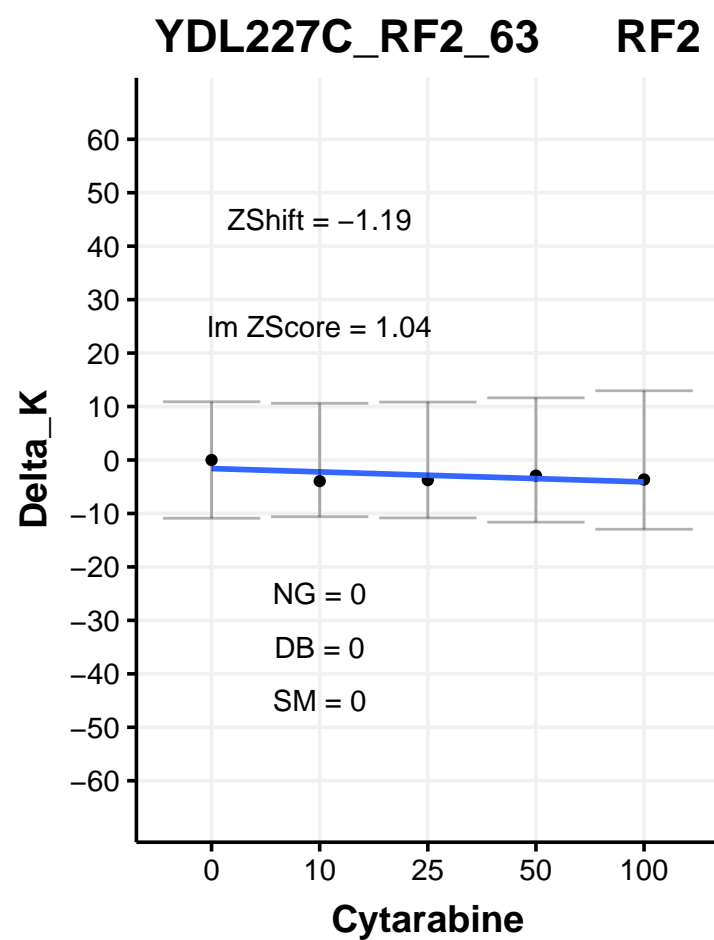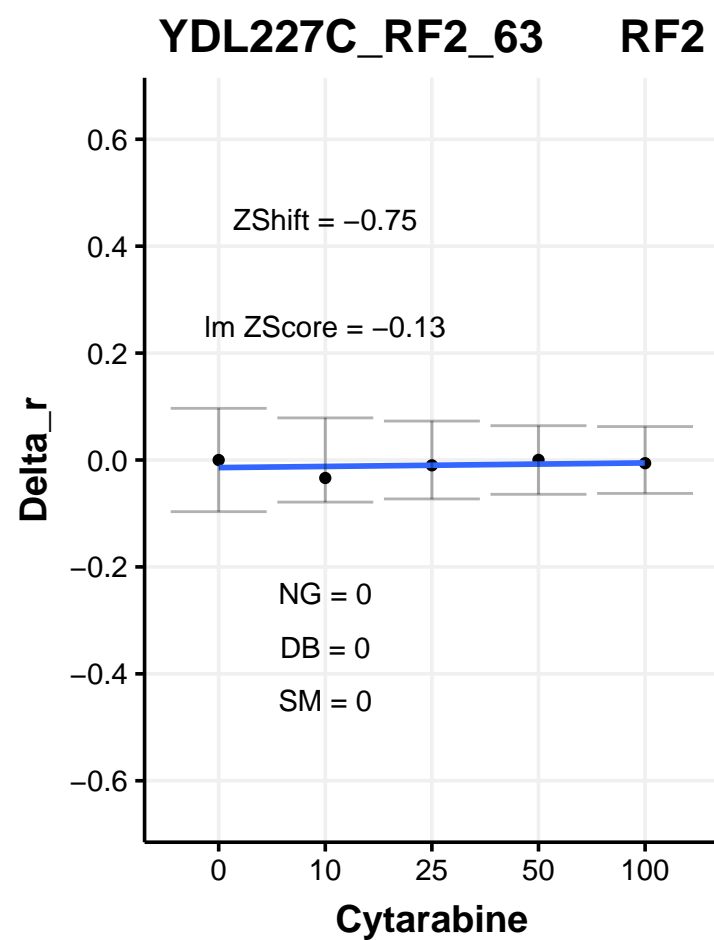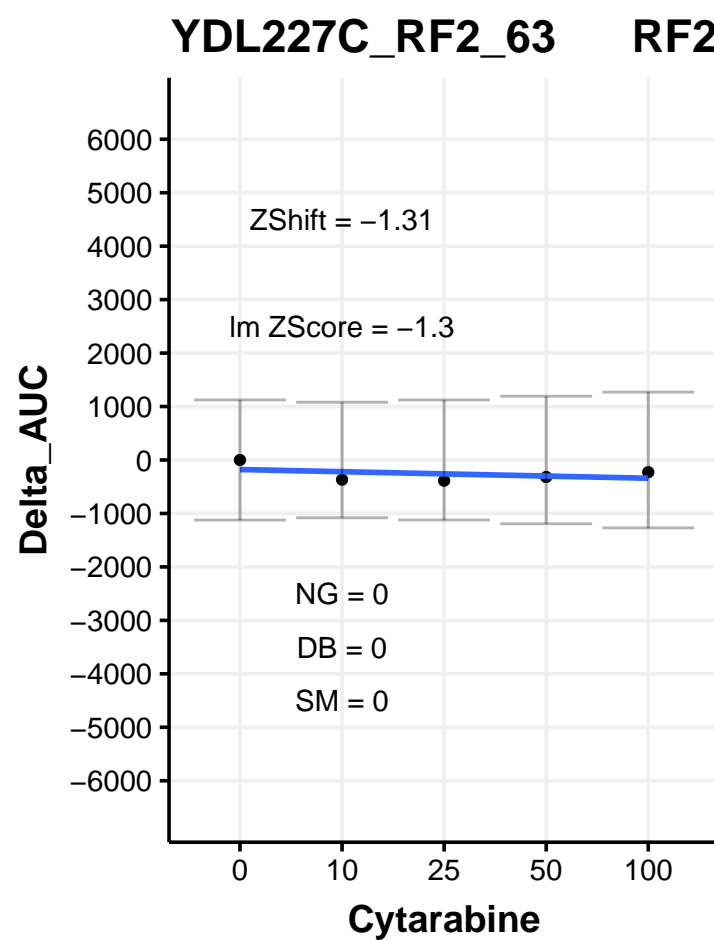

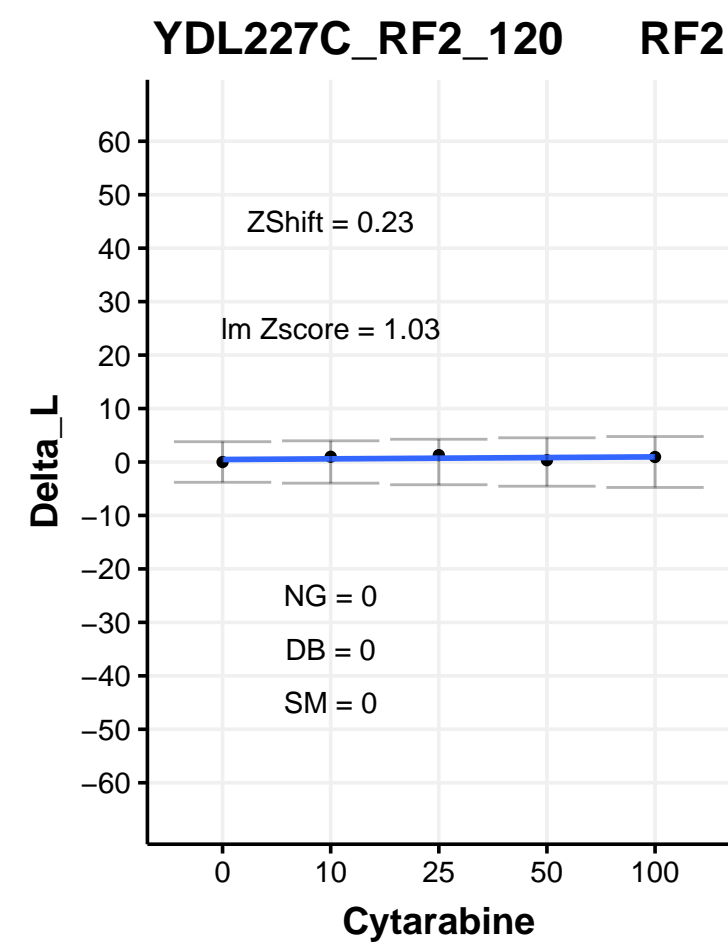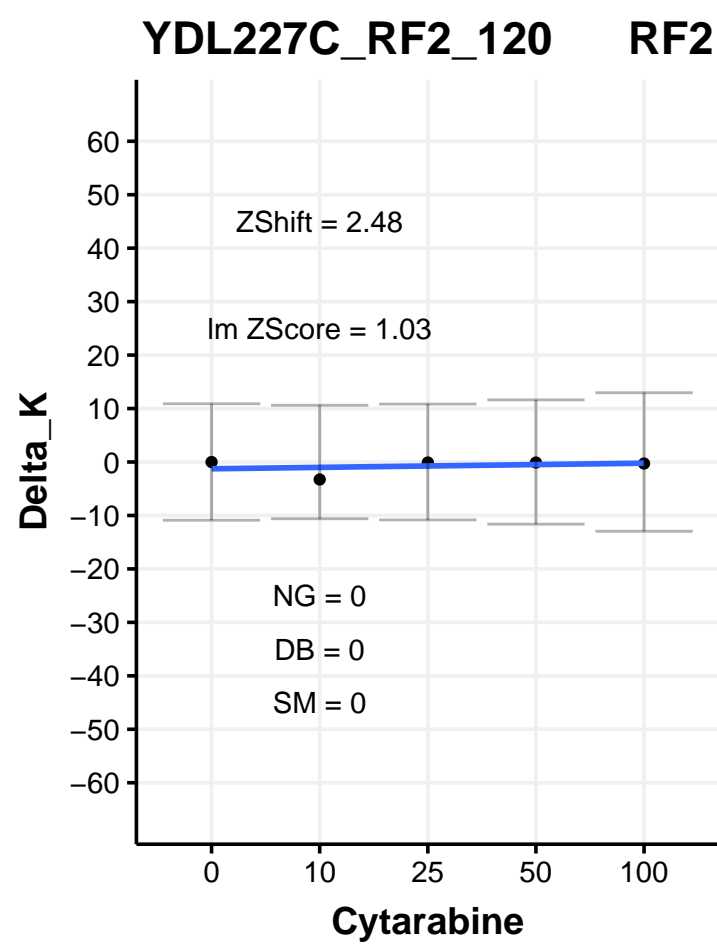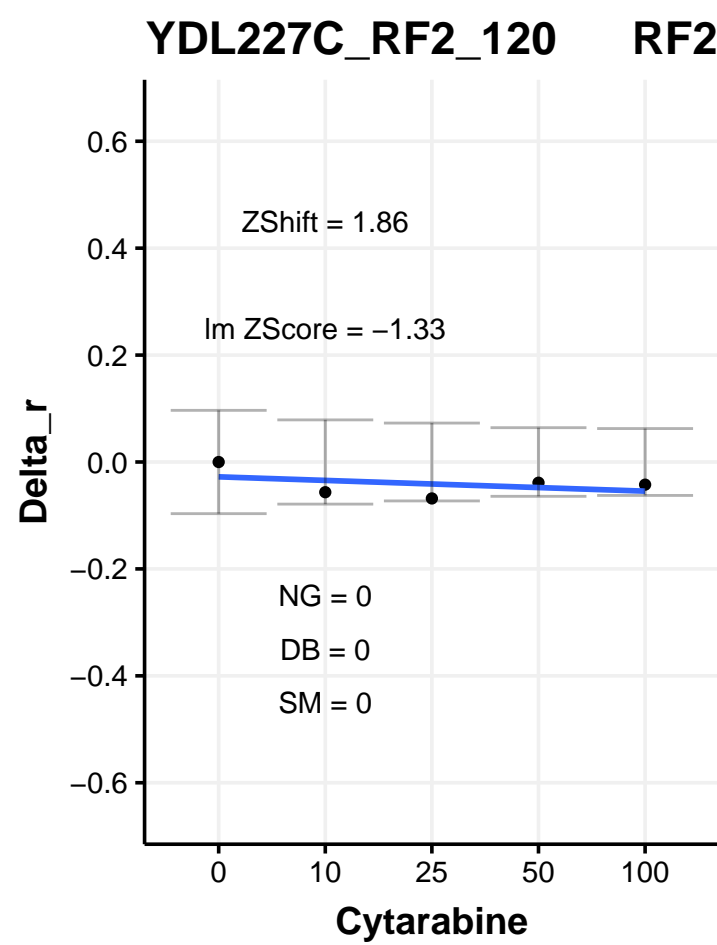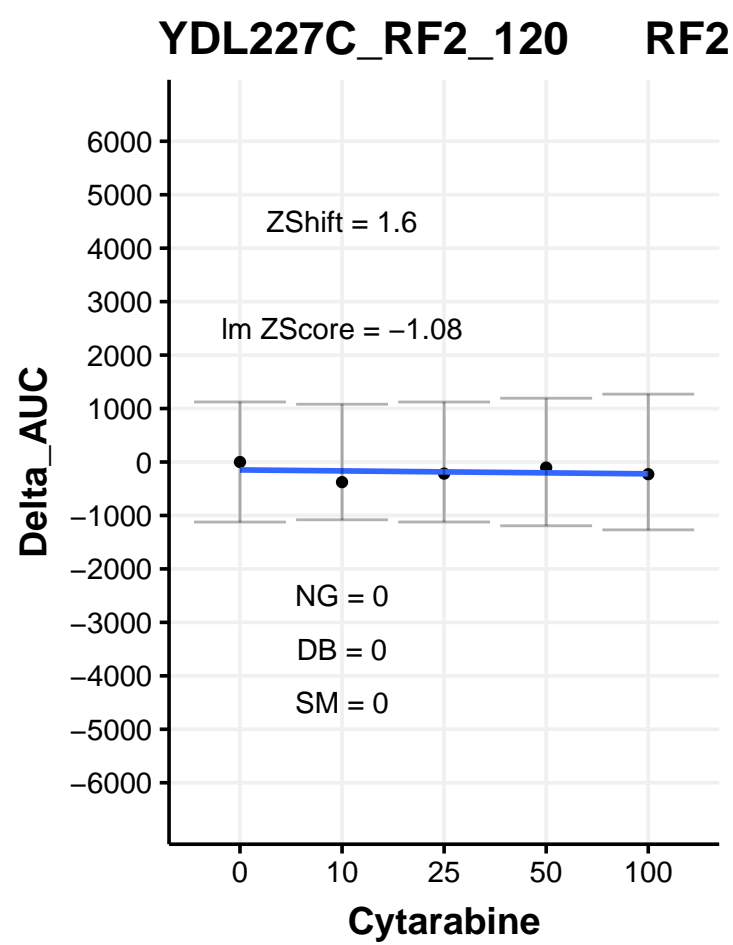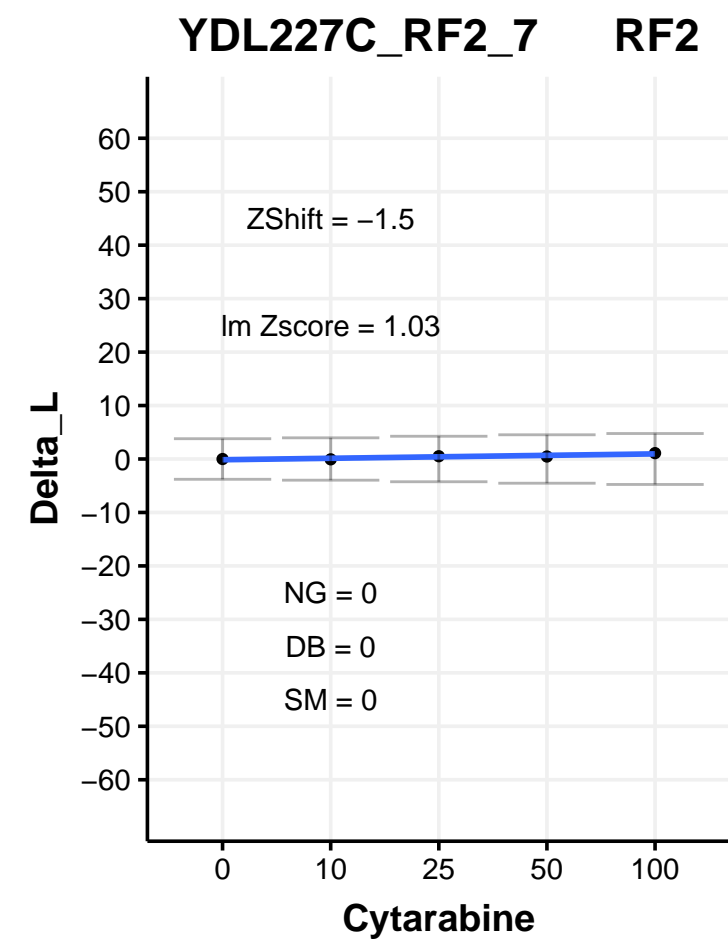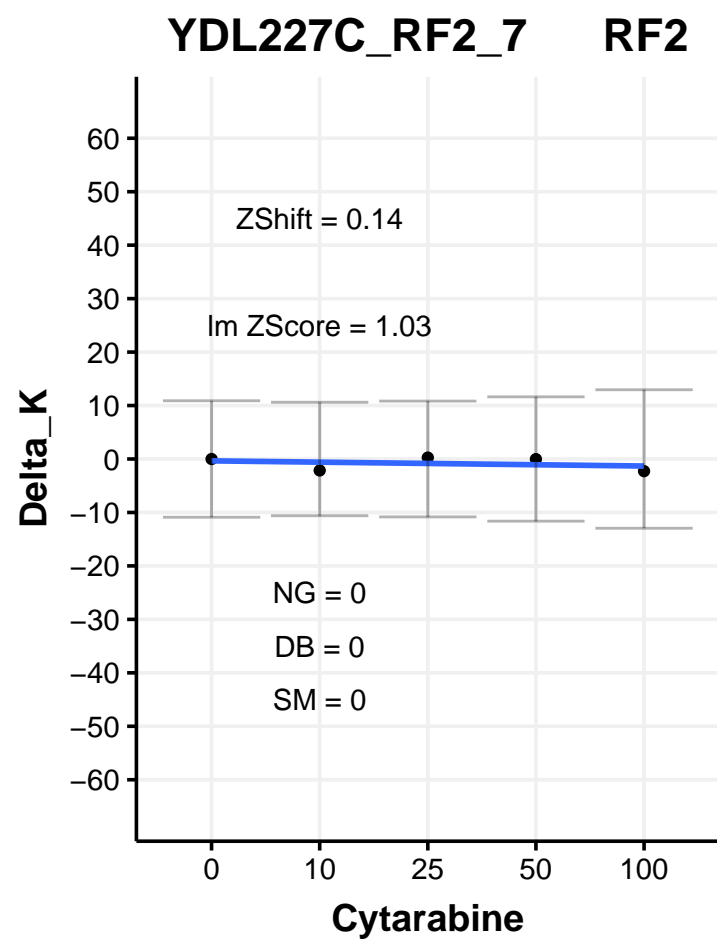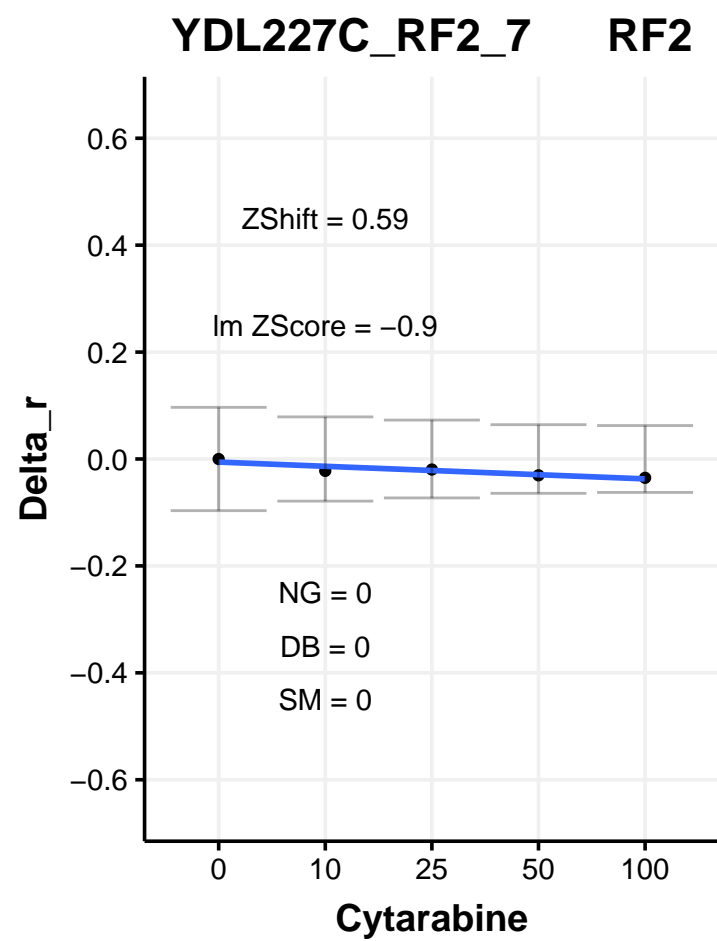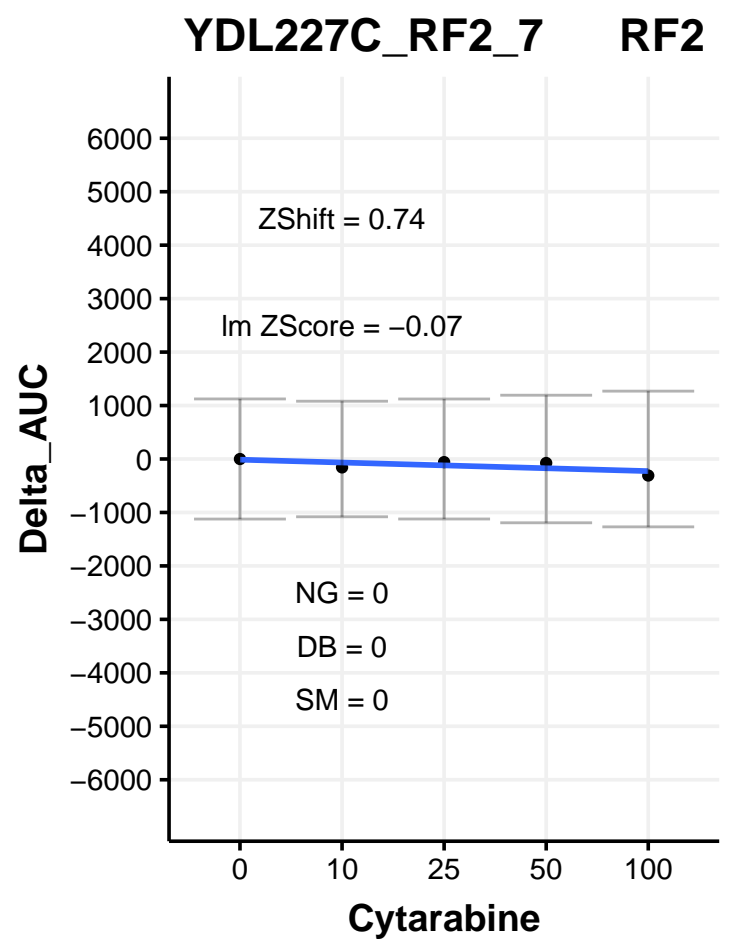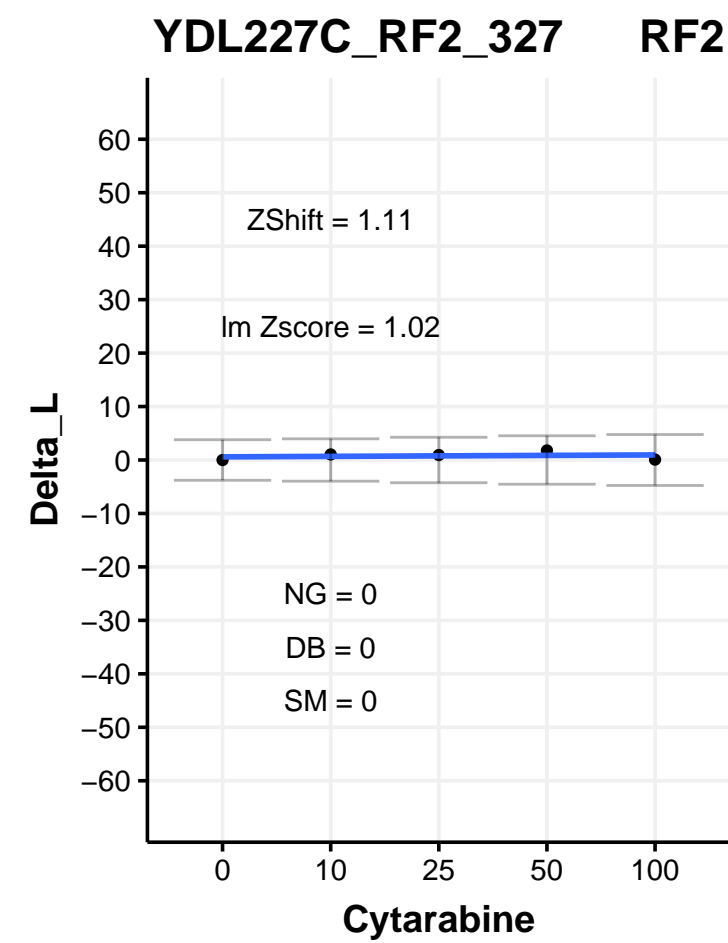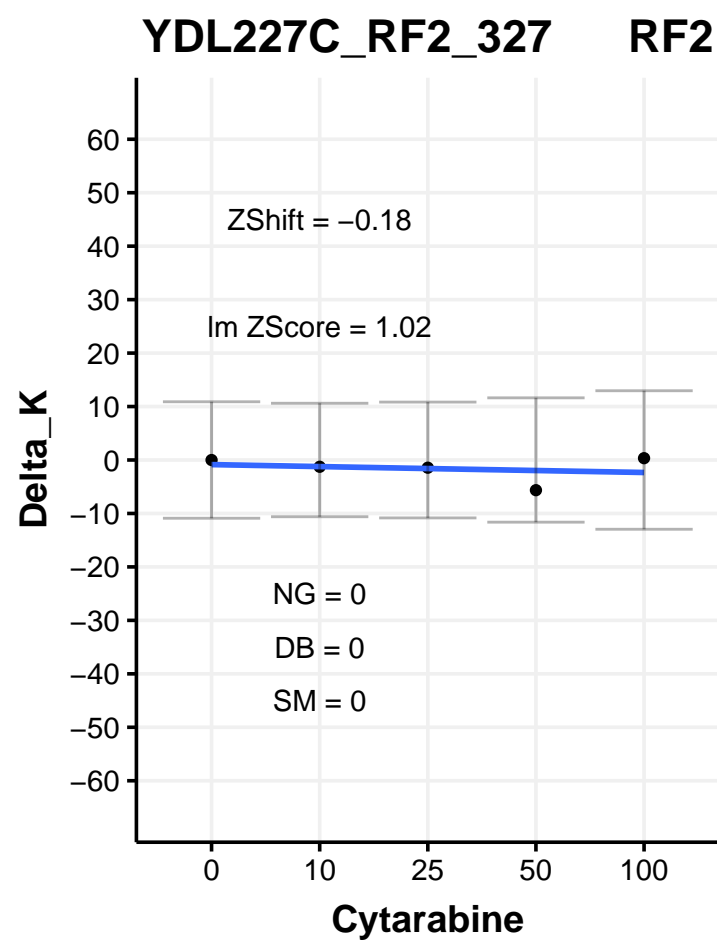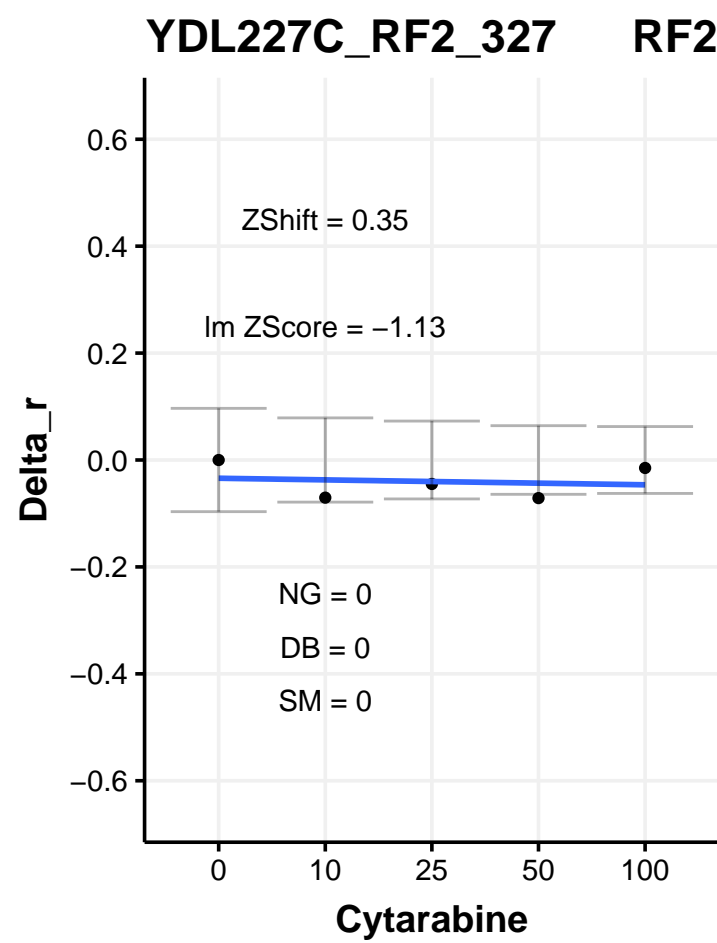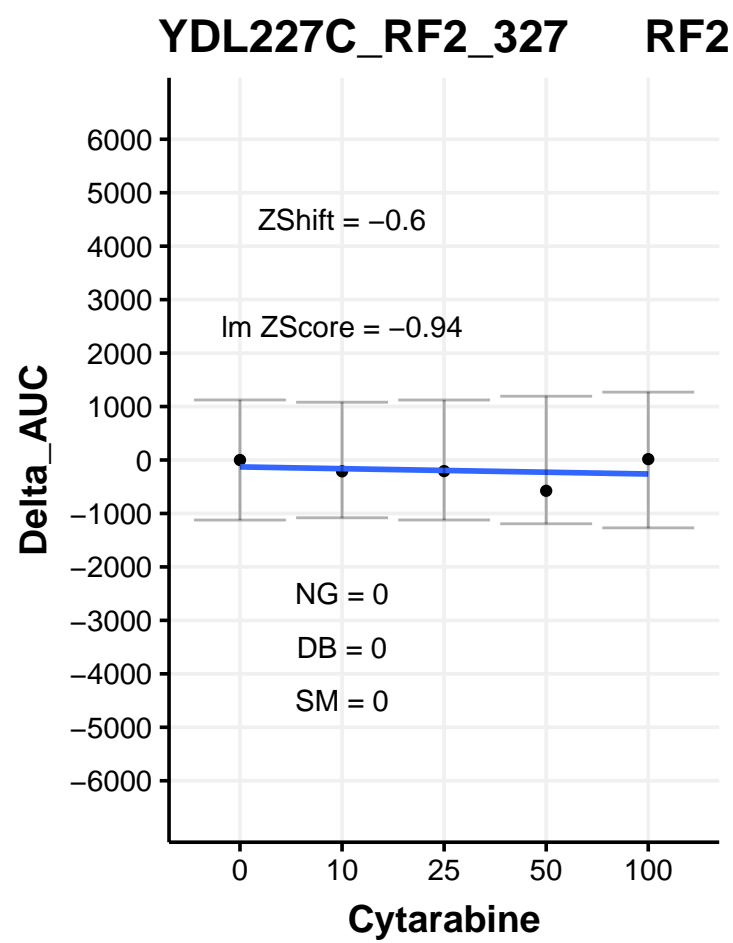

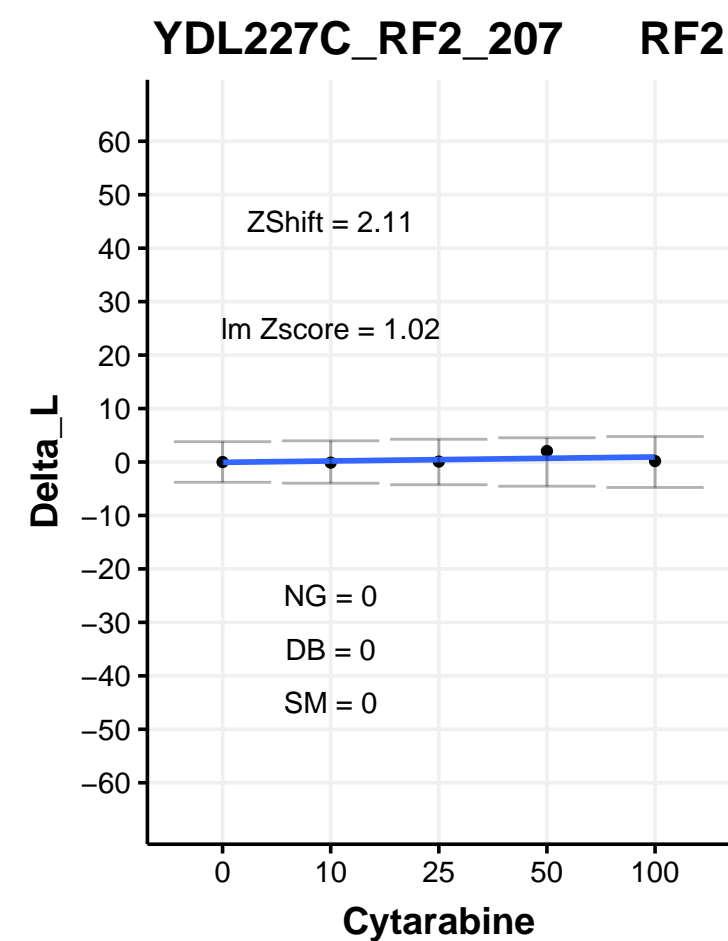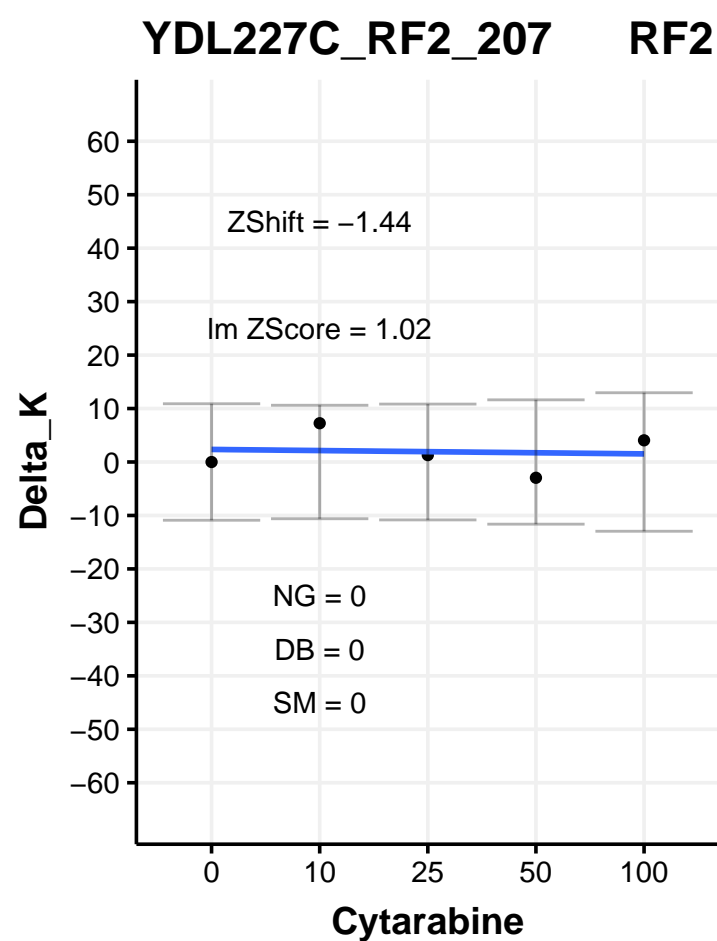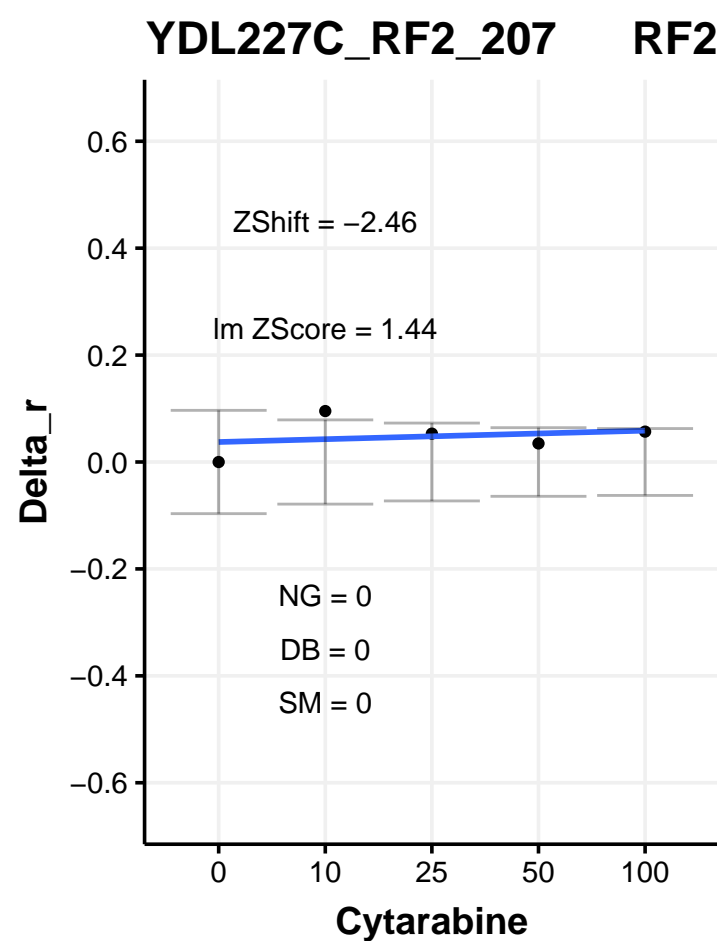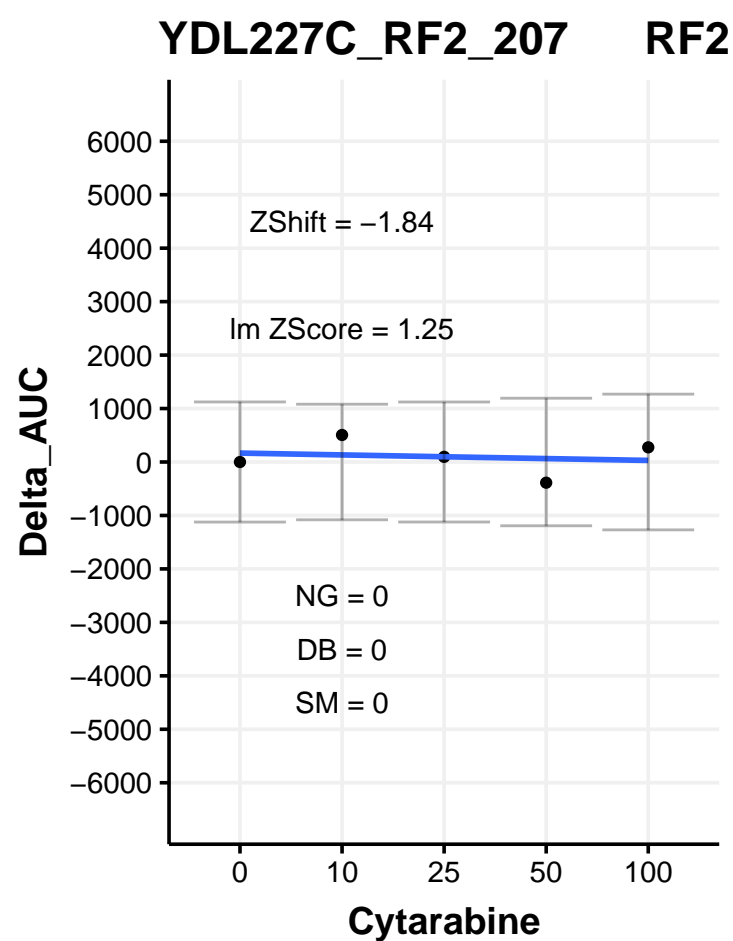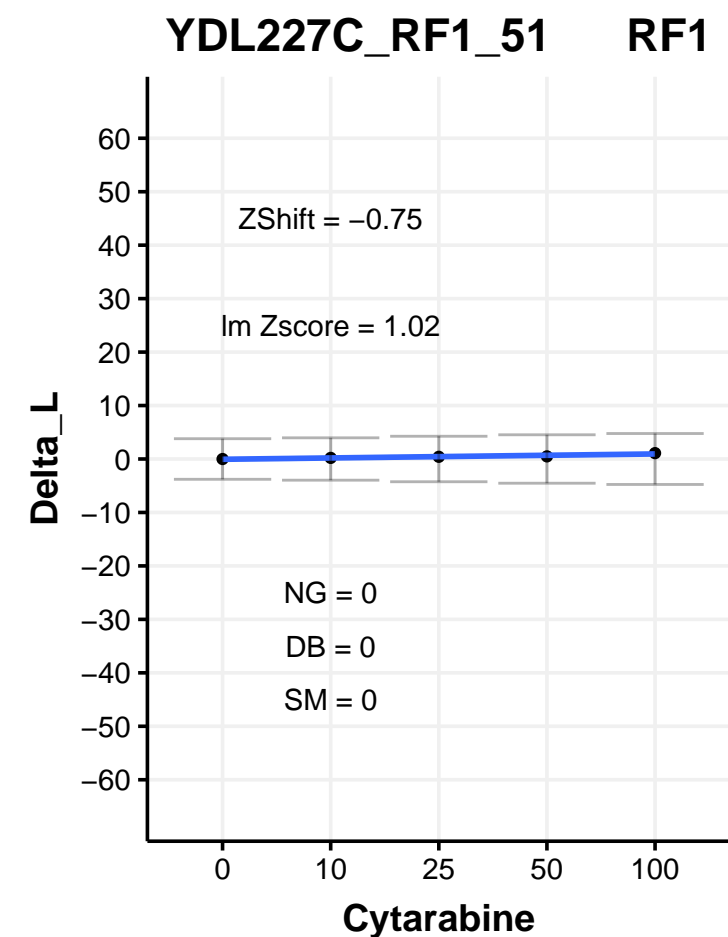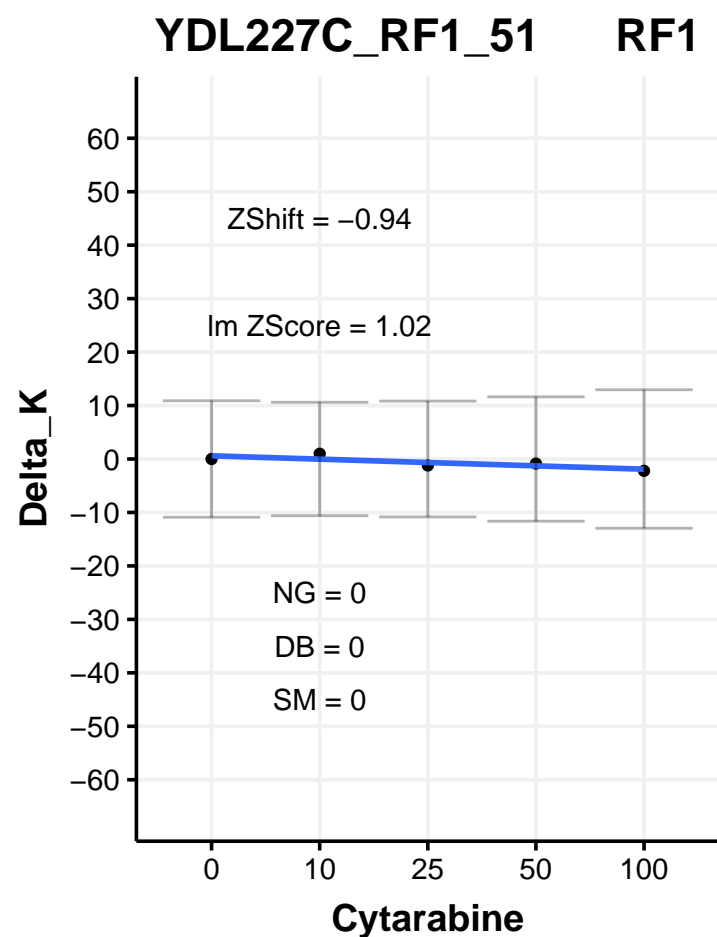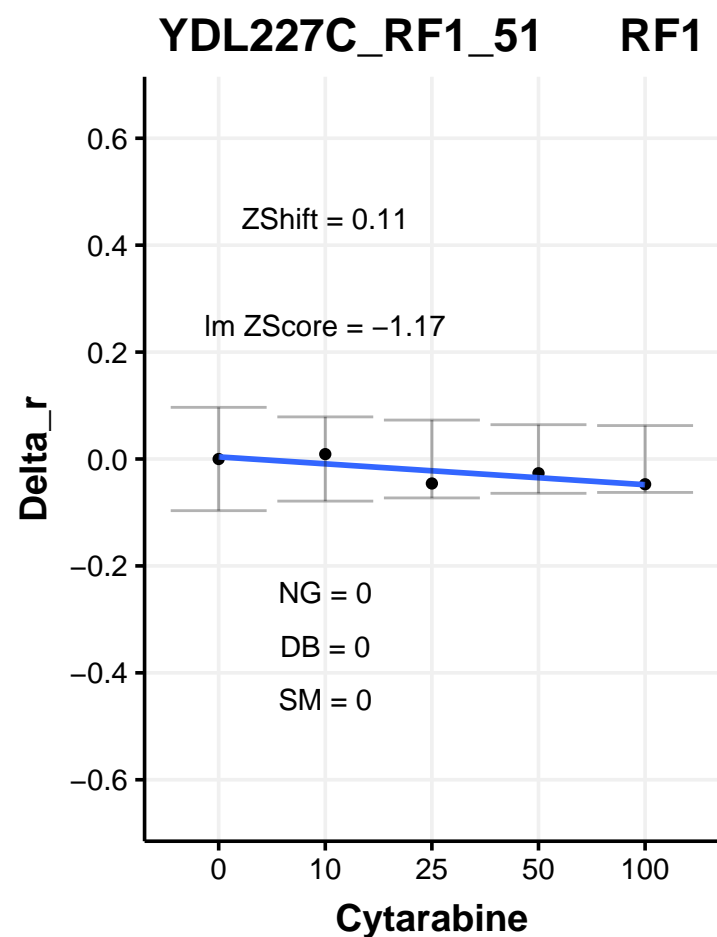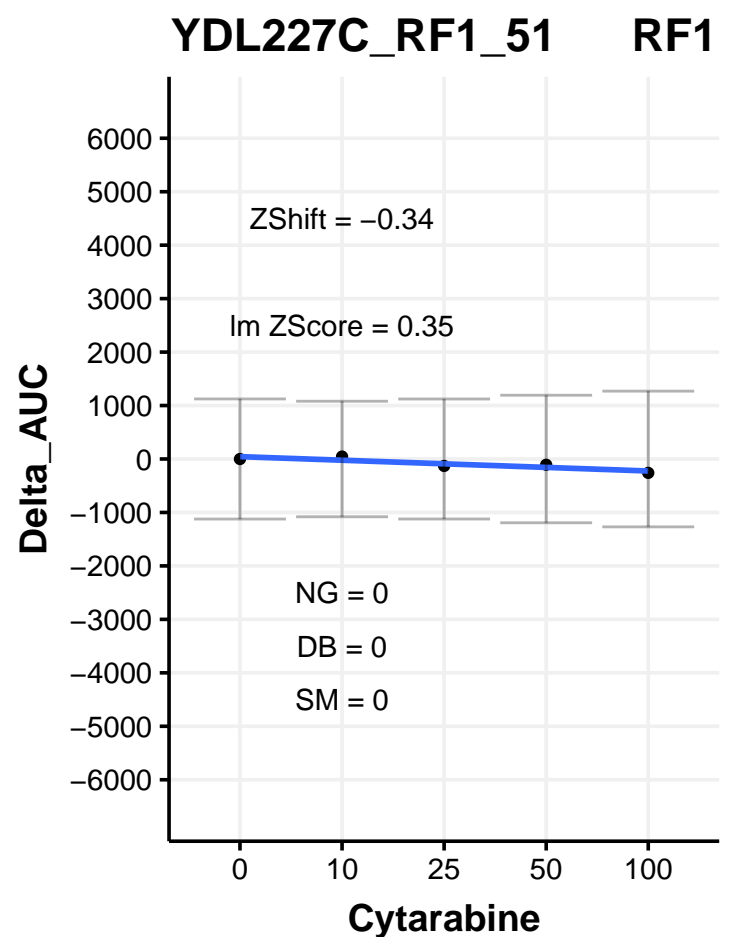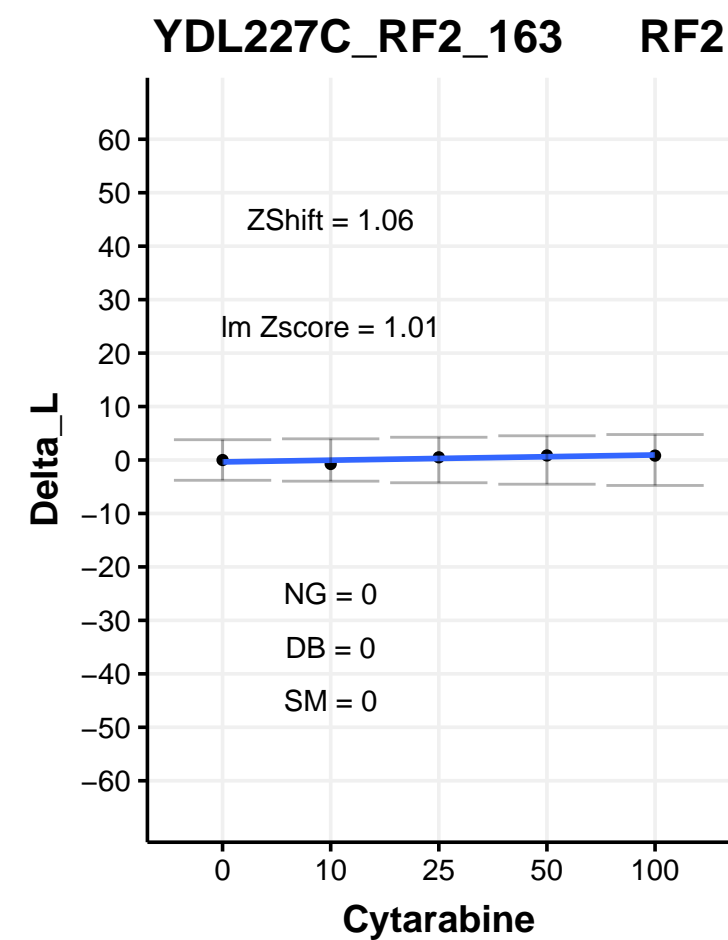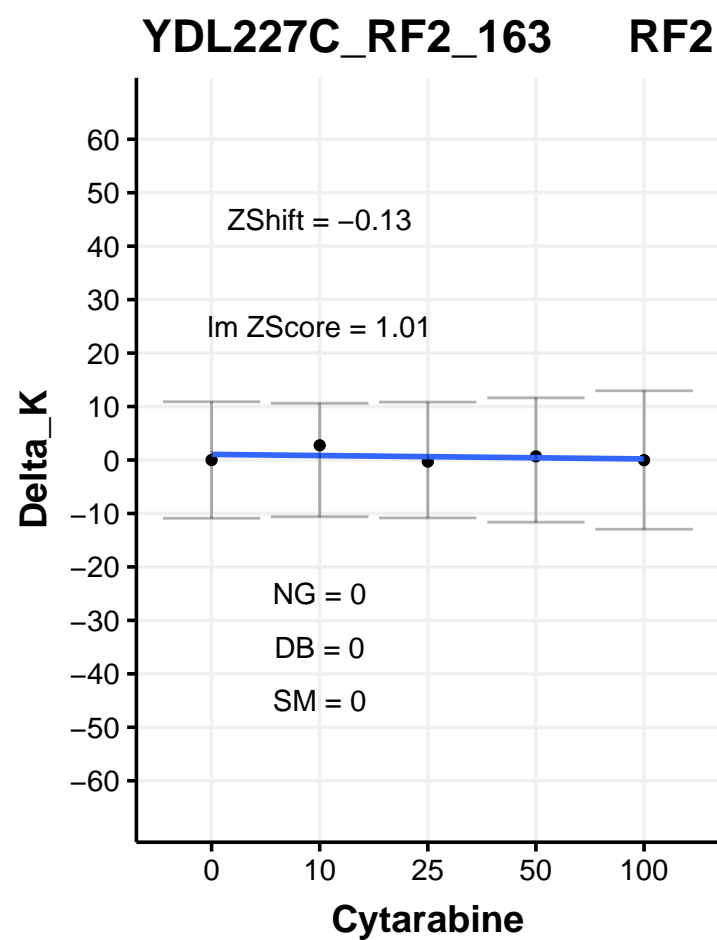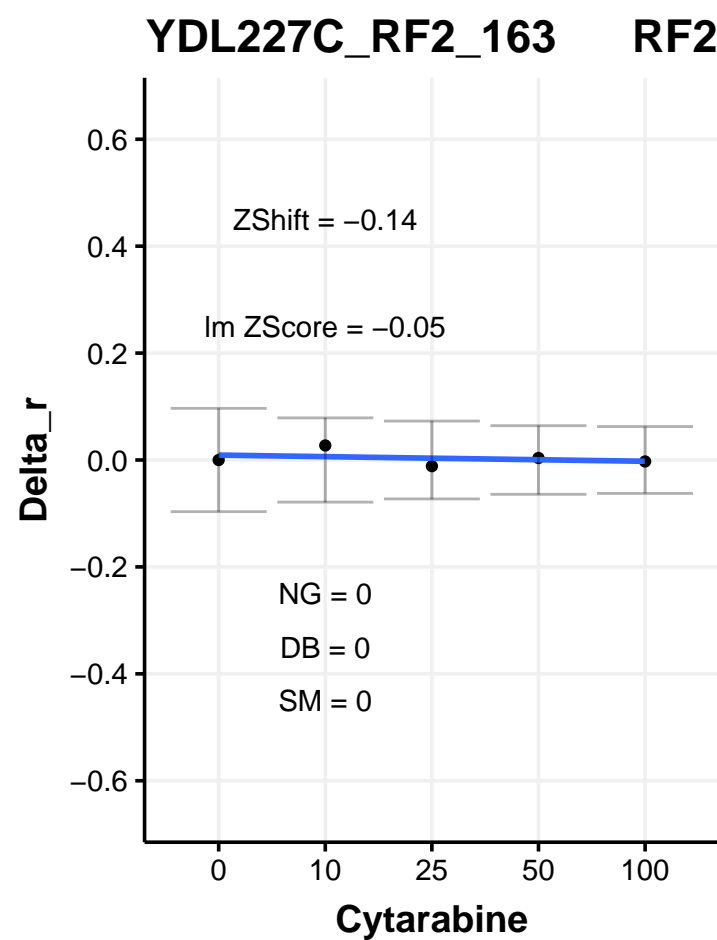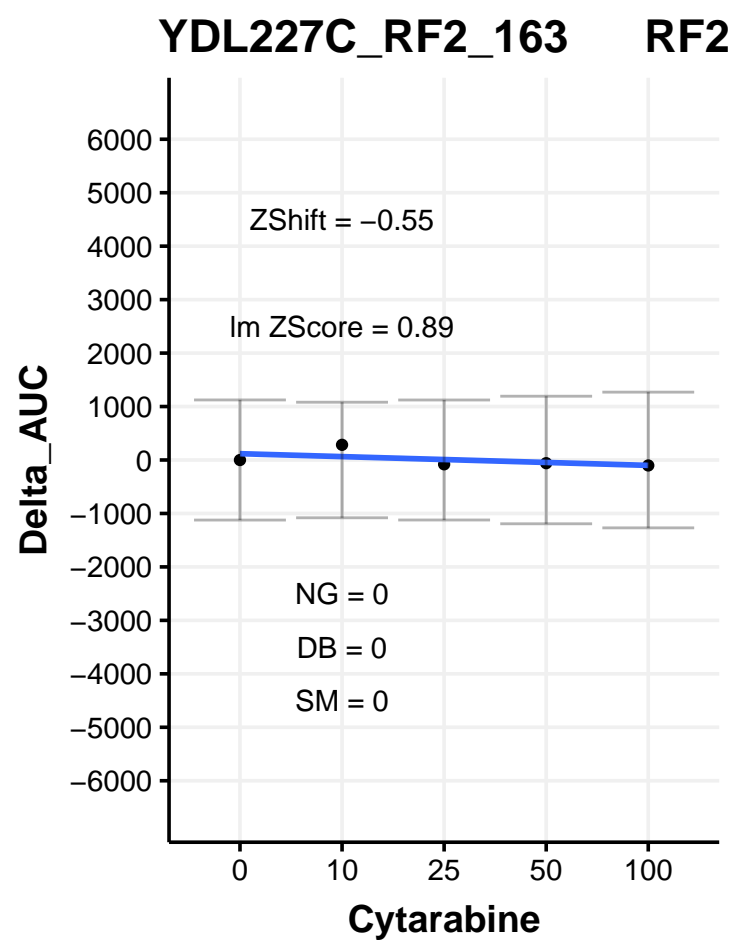

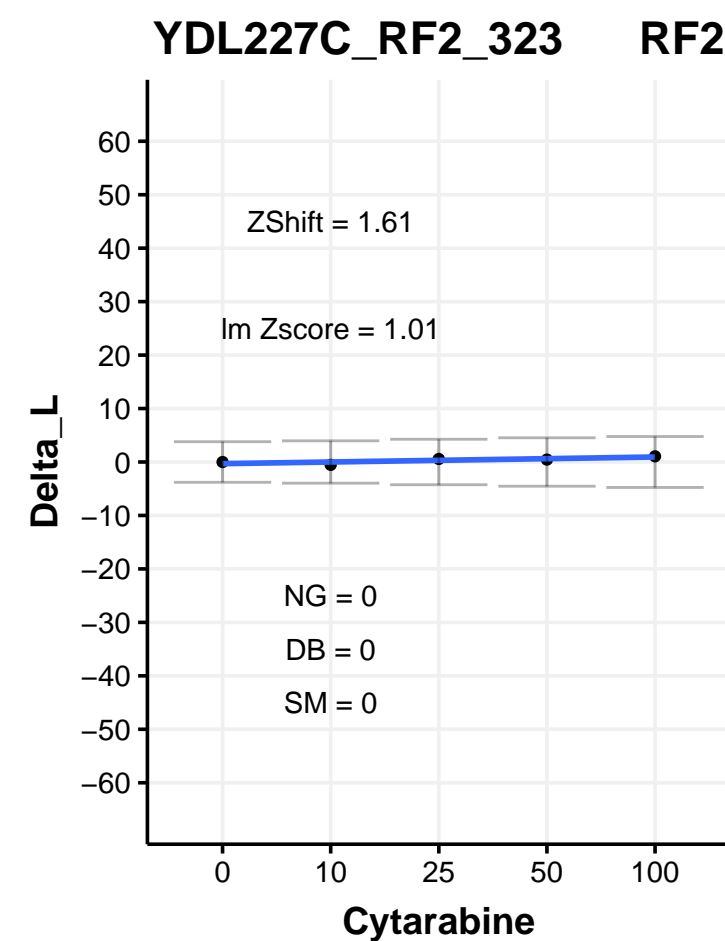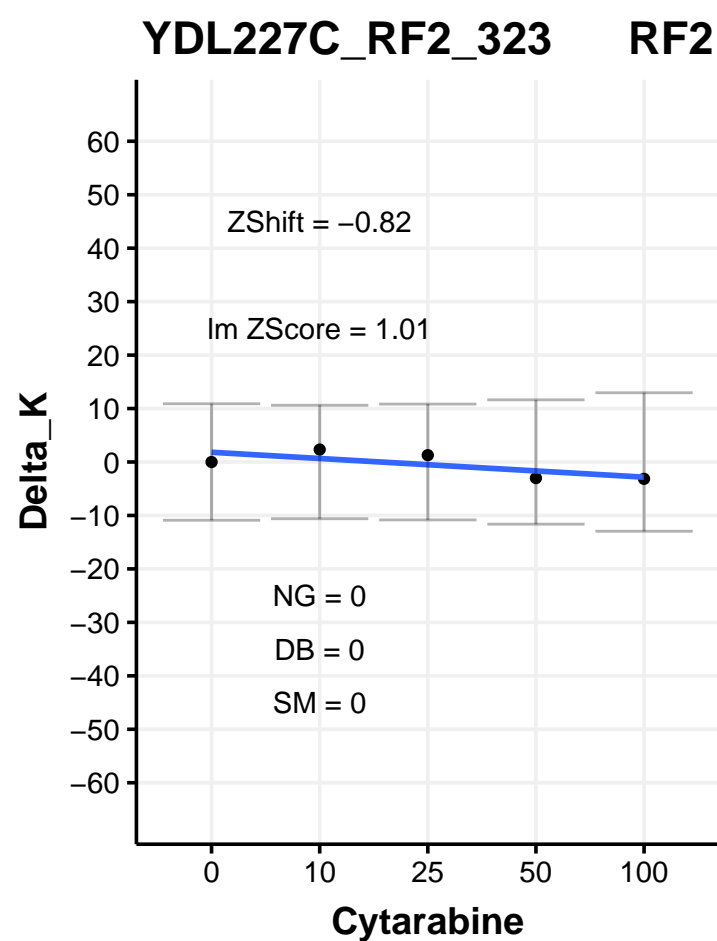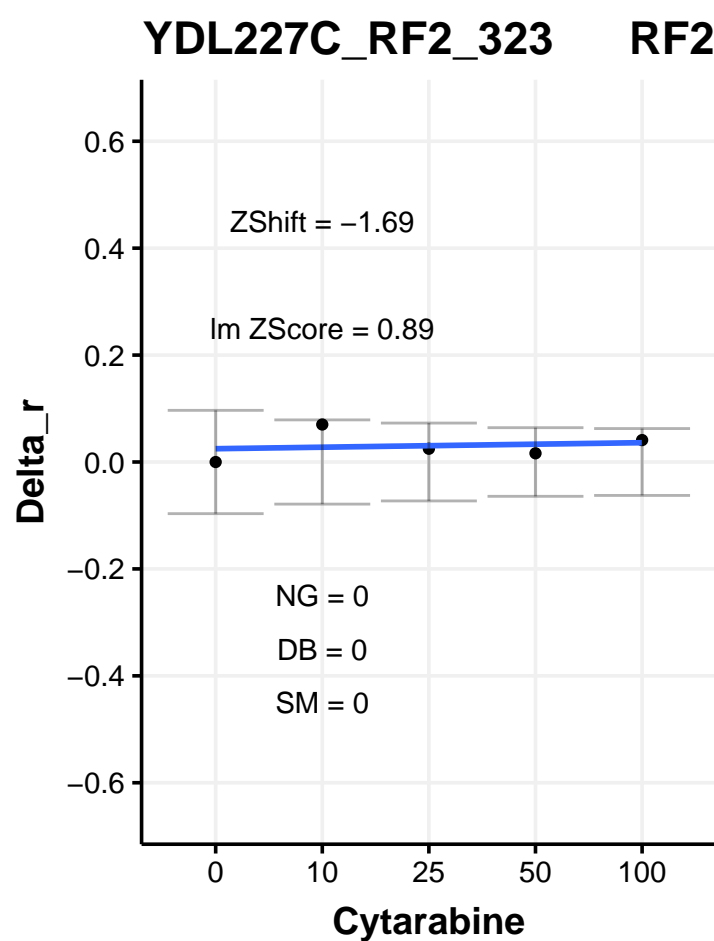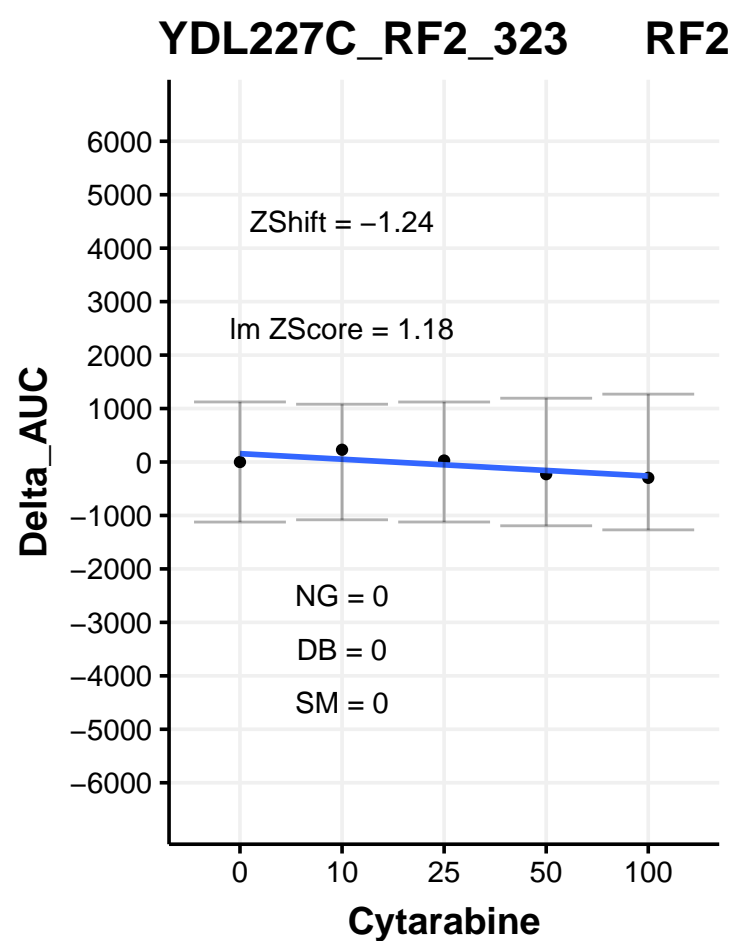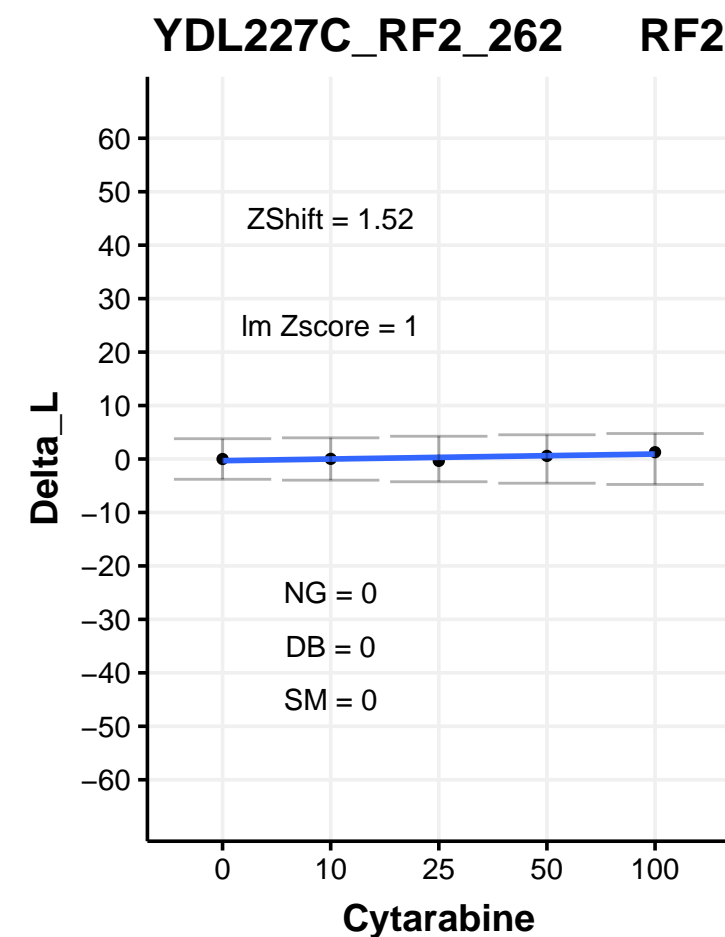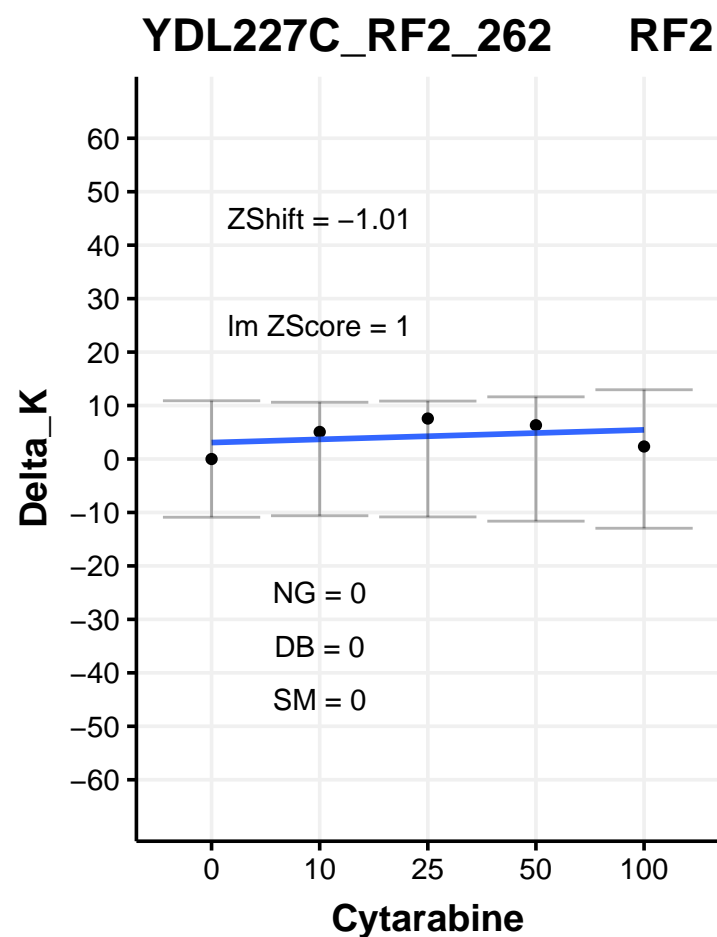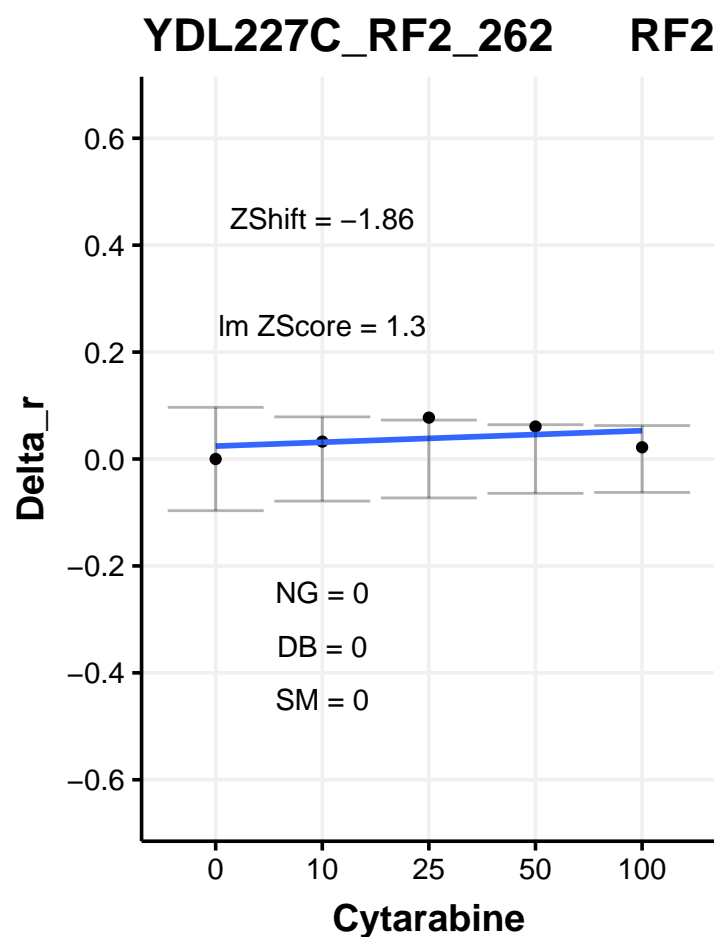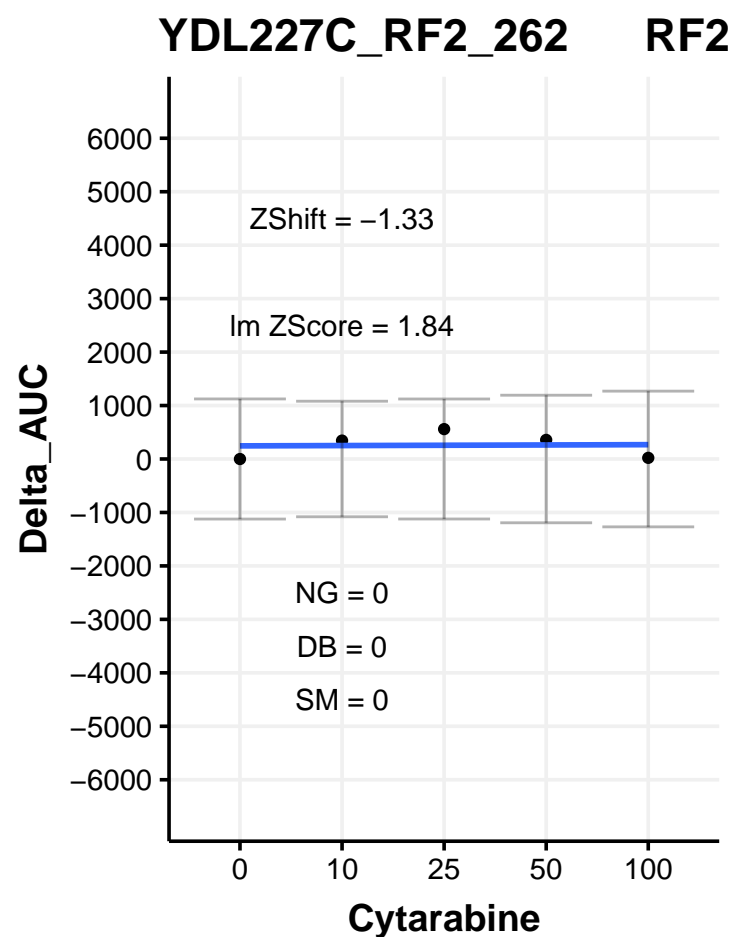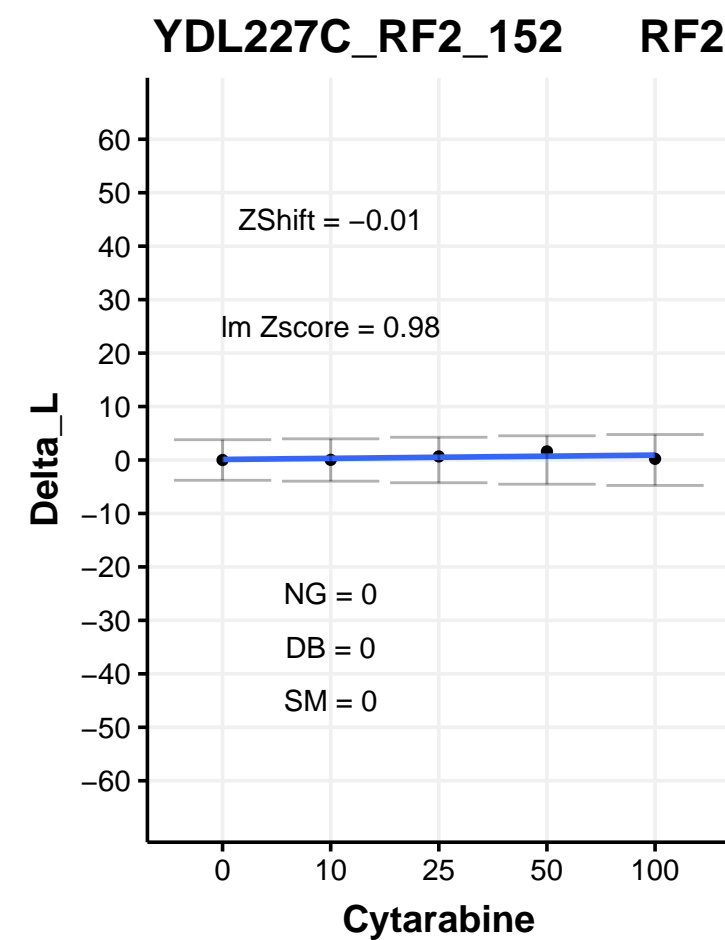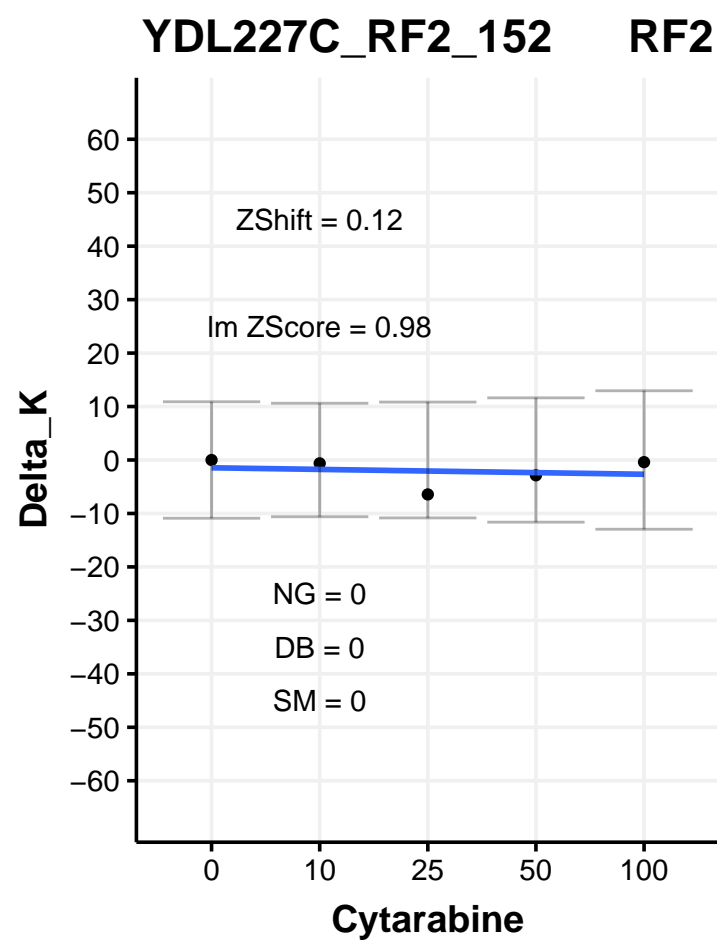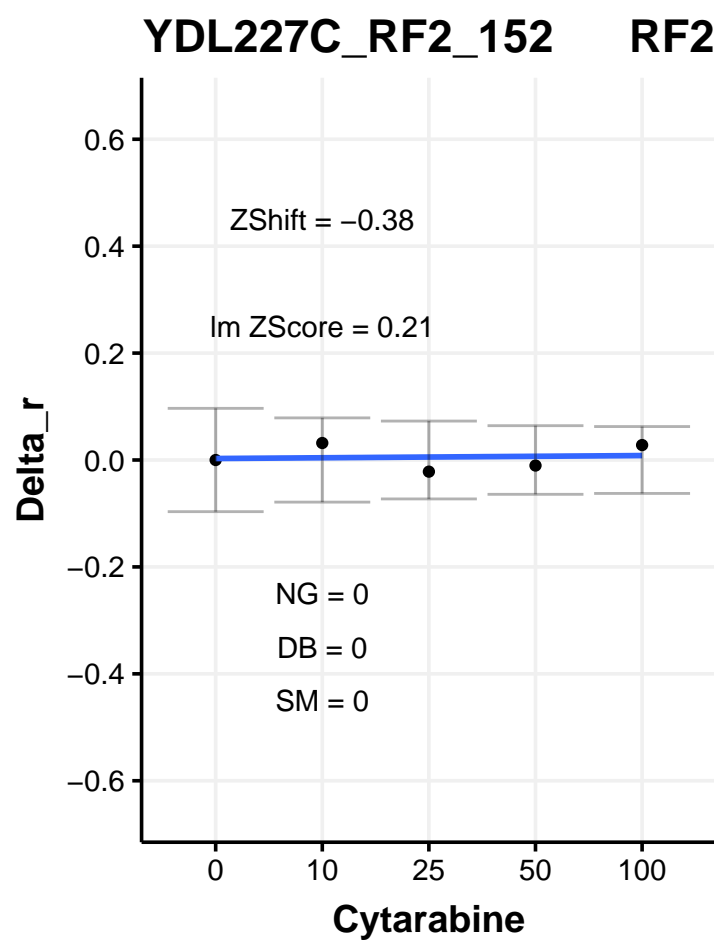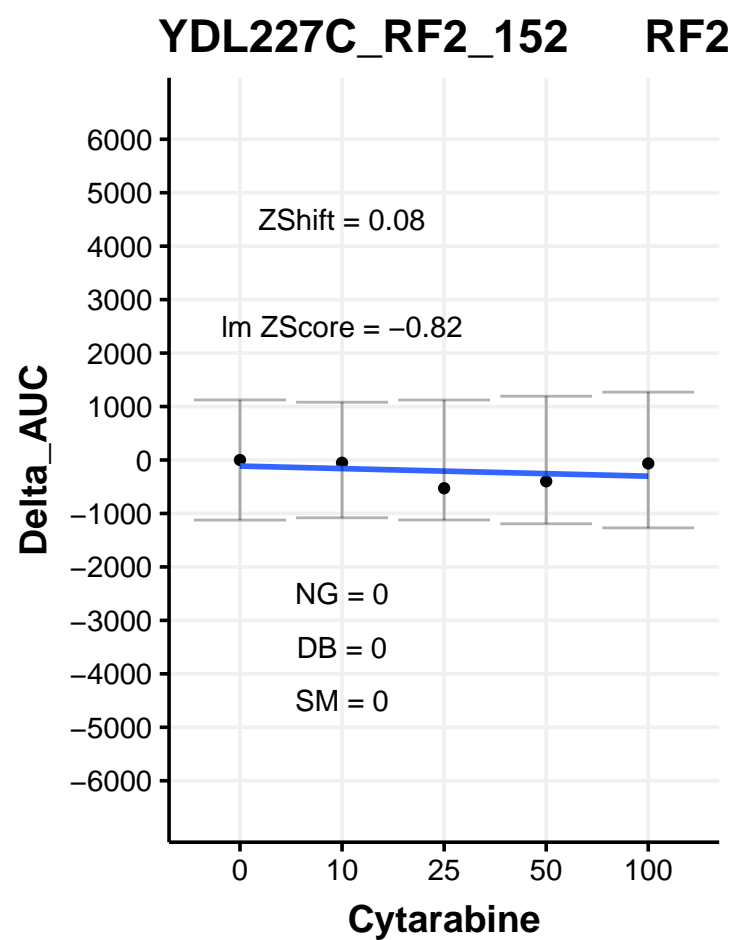

YDL227C\_RF1\_64 RF1

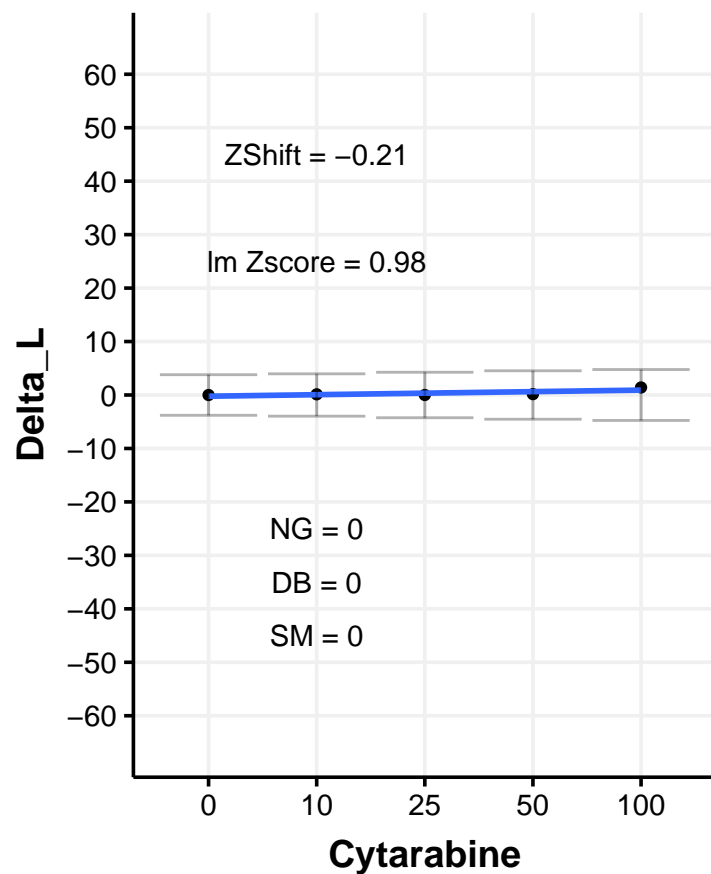

YDL227C\_RF1\_64 RF1

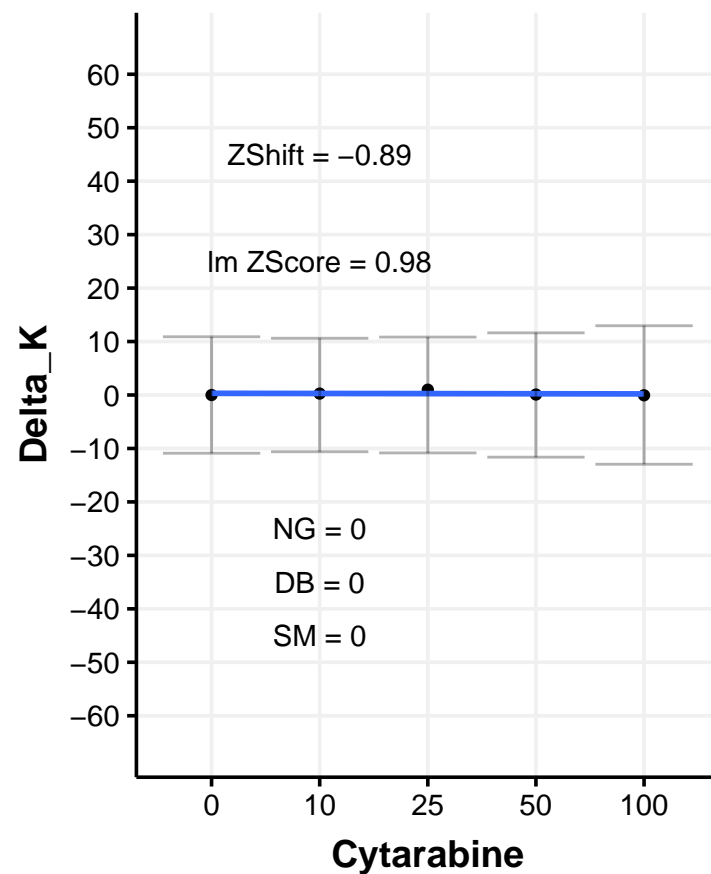

YDL227C\_RF1\_64 RF1

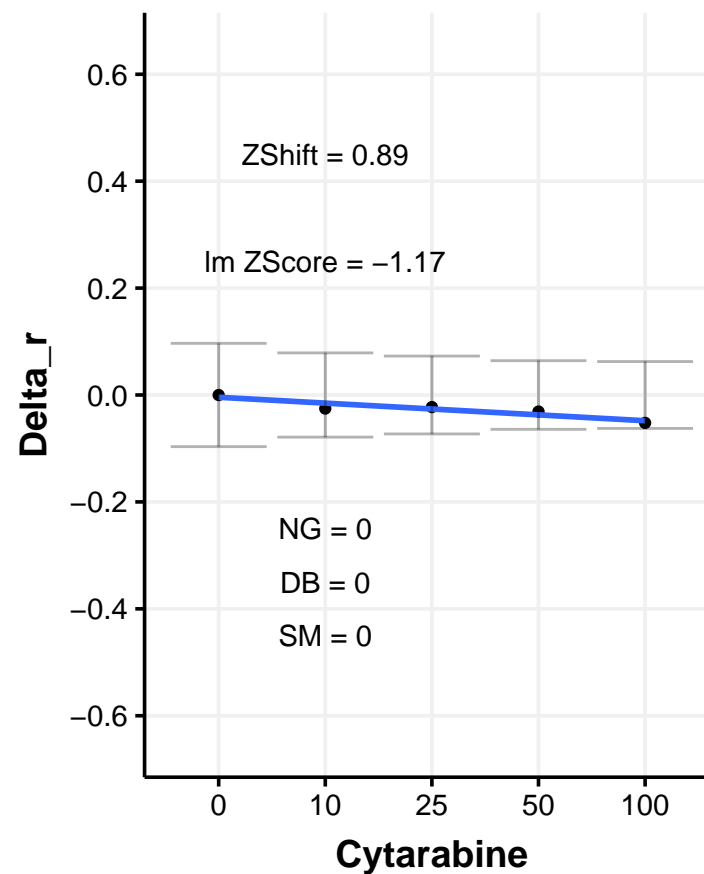

YDL227C\_RF1\_64 RF1

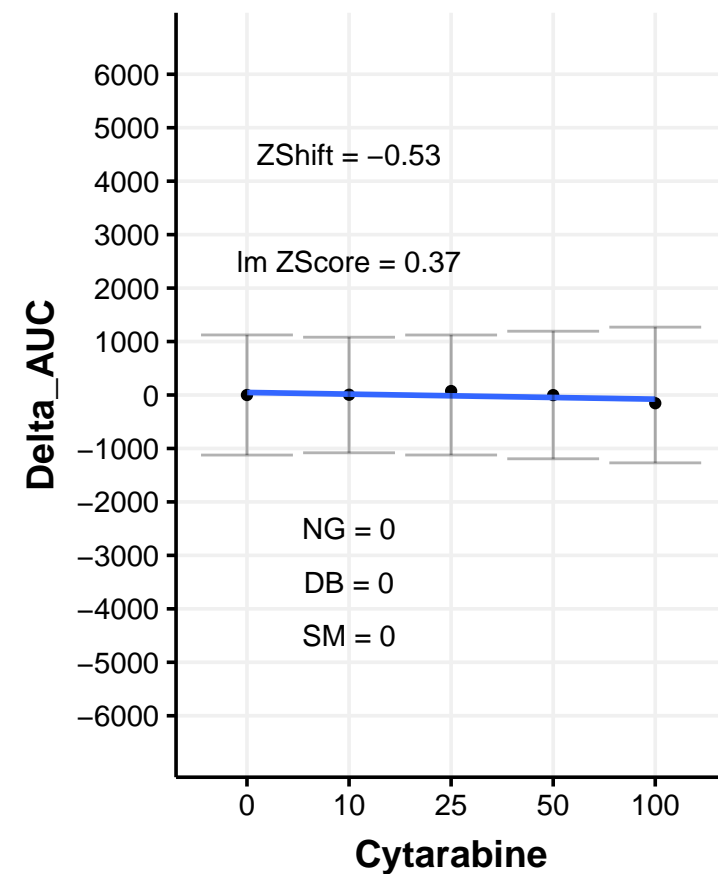

YDL227C\_RF2\_255 RF2

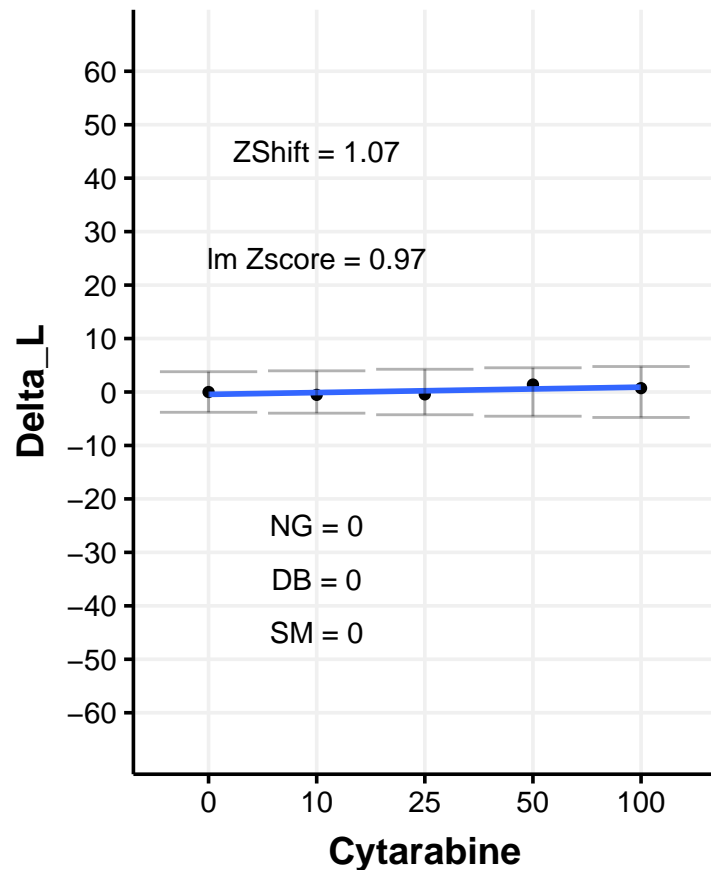

YDL227C\_RF2\_255 RF2

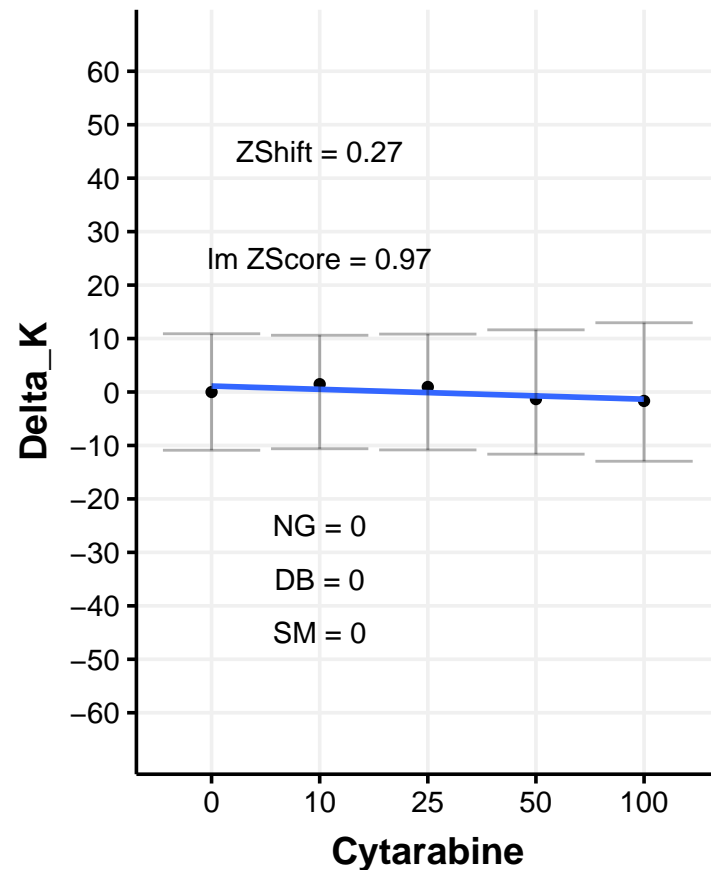

YDL227C\_RF2\_255 RF2

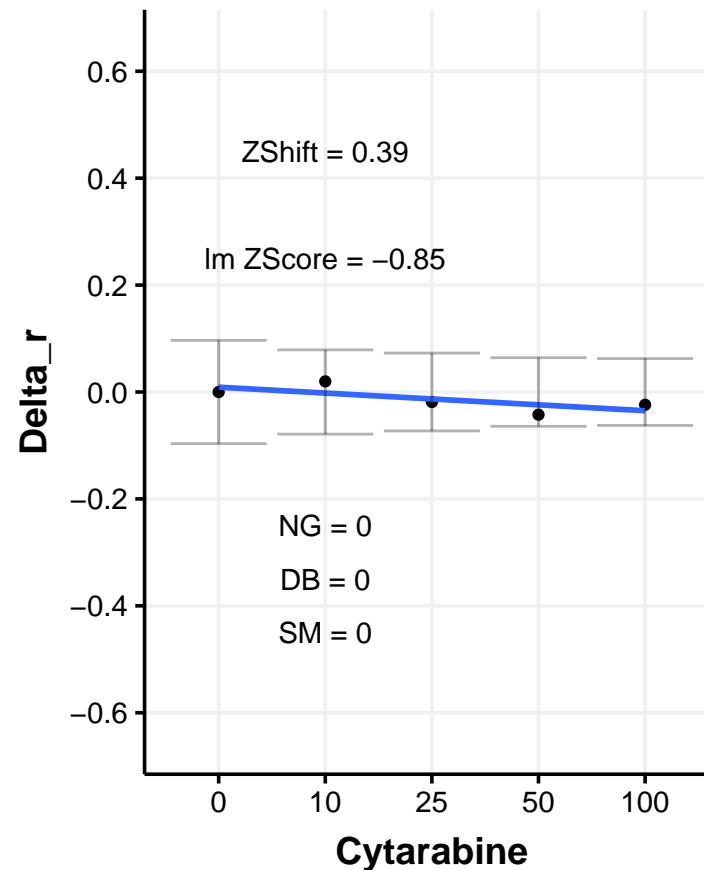

YDL227C\_RF2\_255 RF2

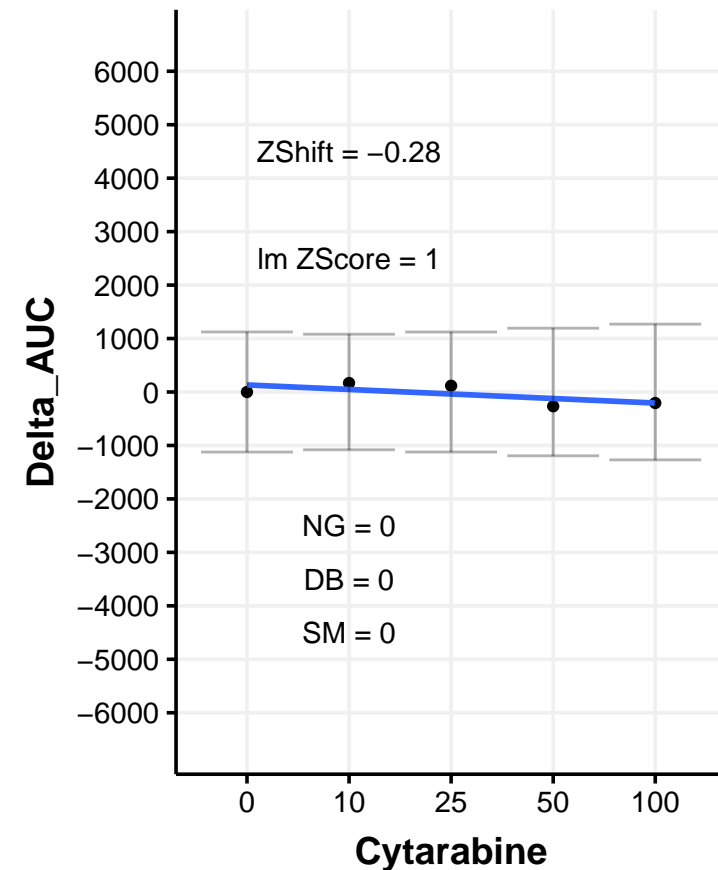

YDL227C\_RF1\_205 RF1

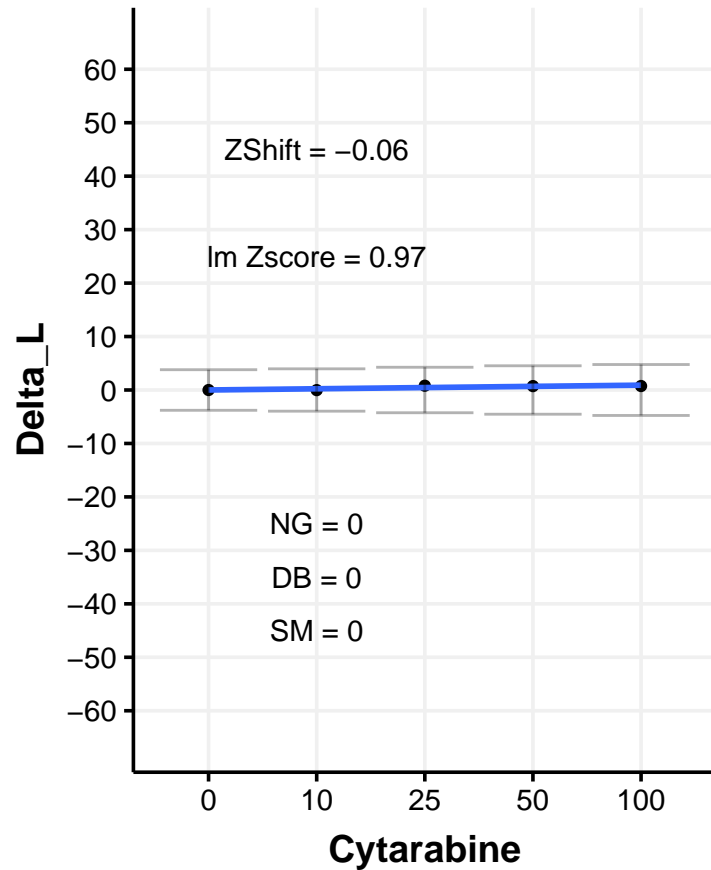

YDL227C\_RF1\_205 RF1

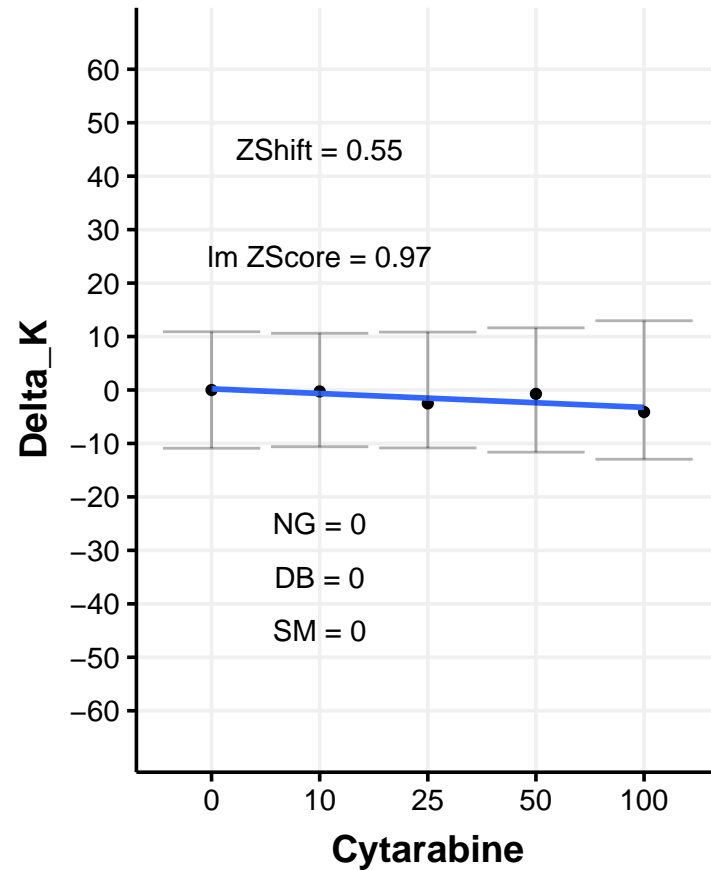

YDL227C\_RF1\_205 RF1

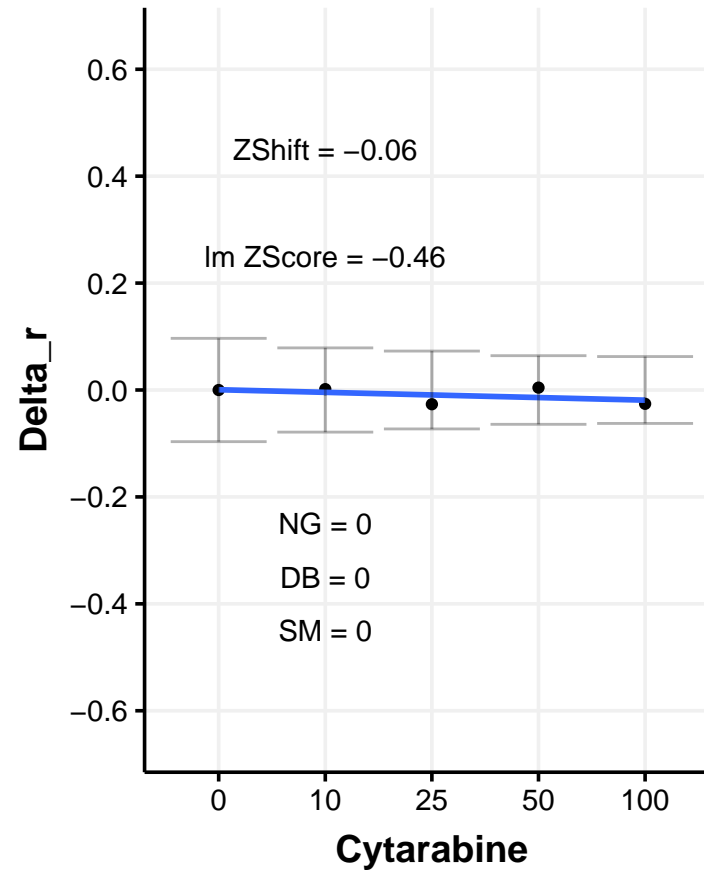

YDL227C\_RF1\_205 RF1

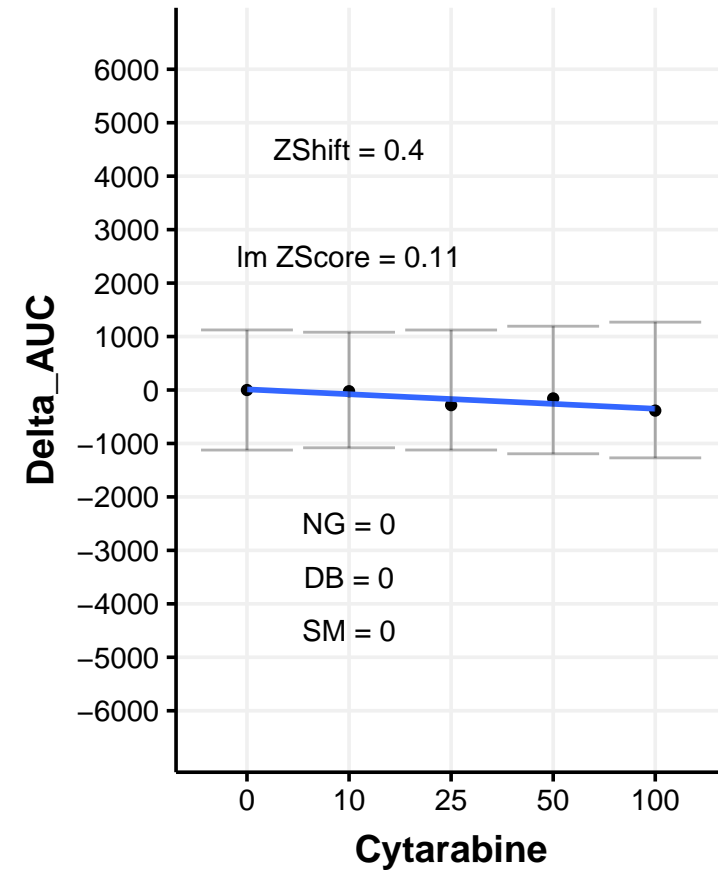



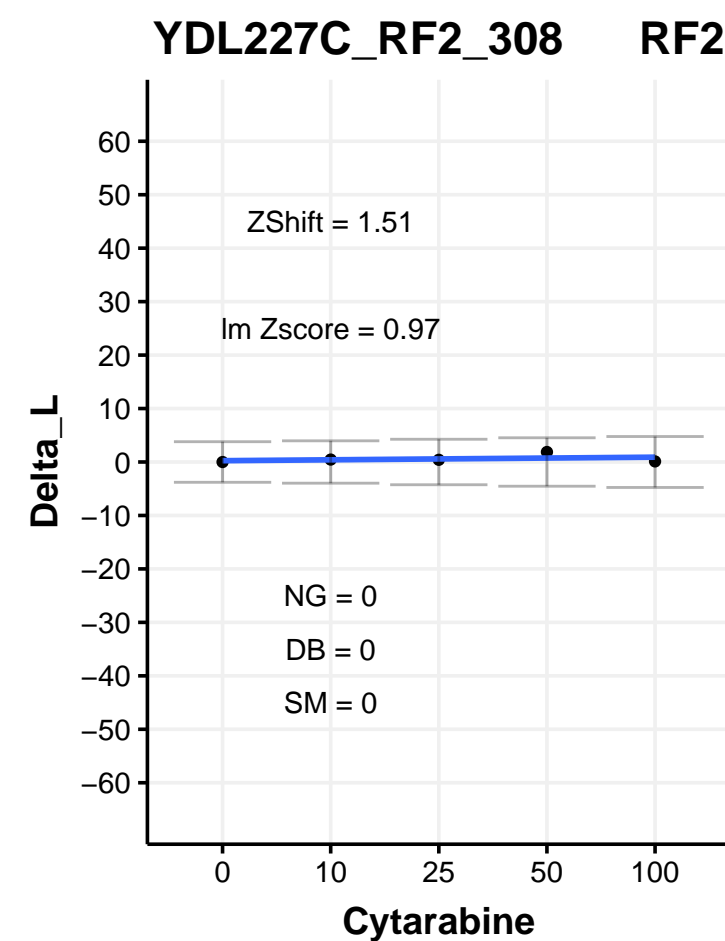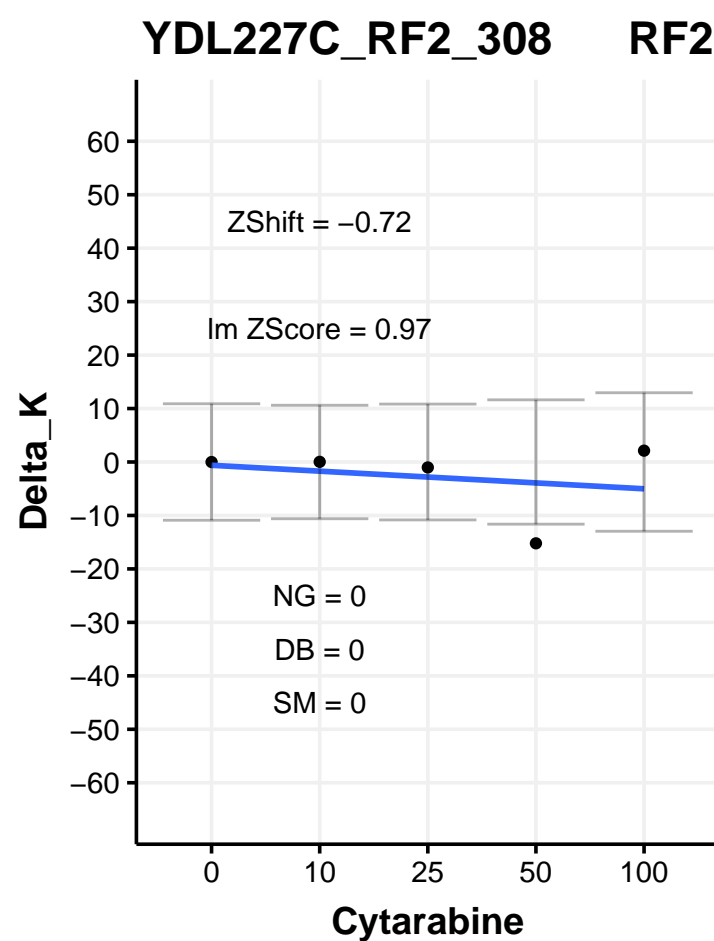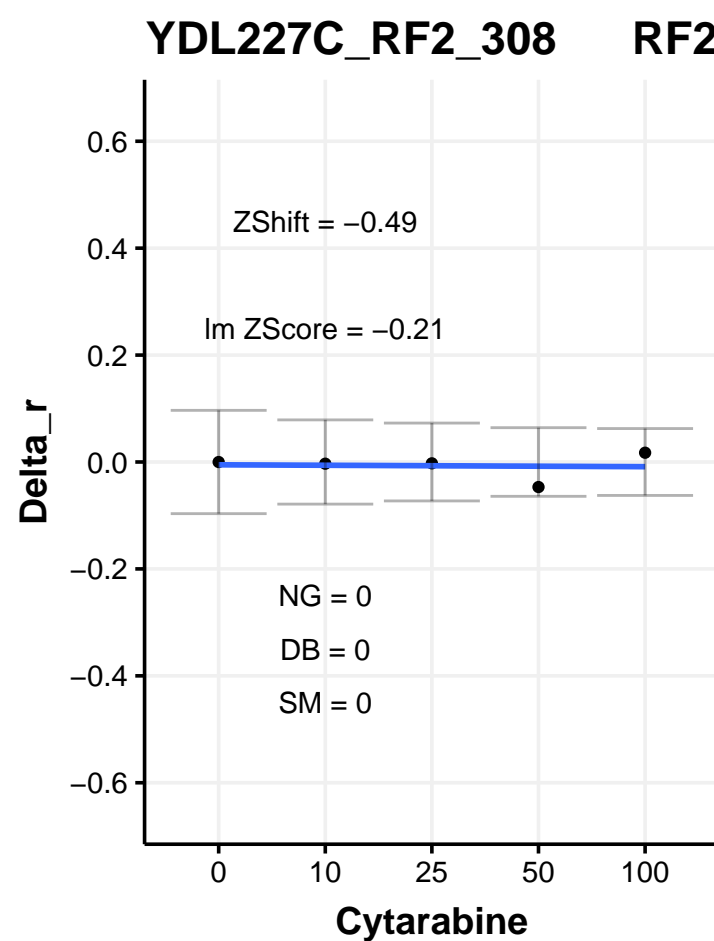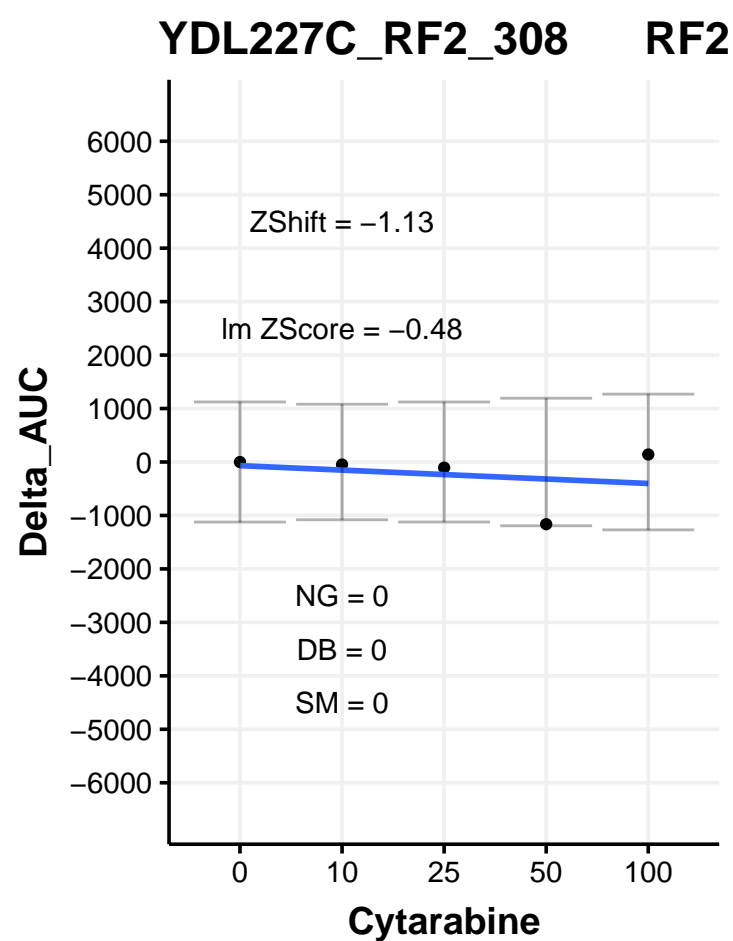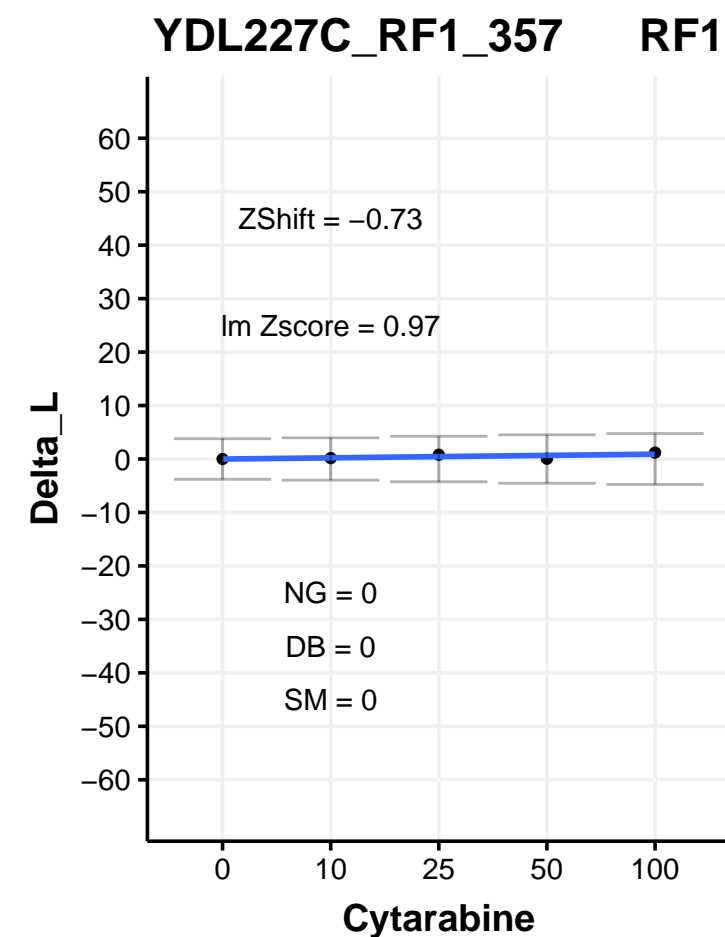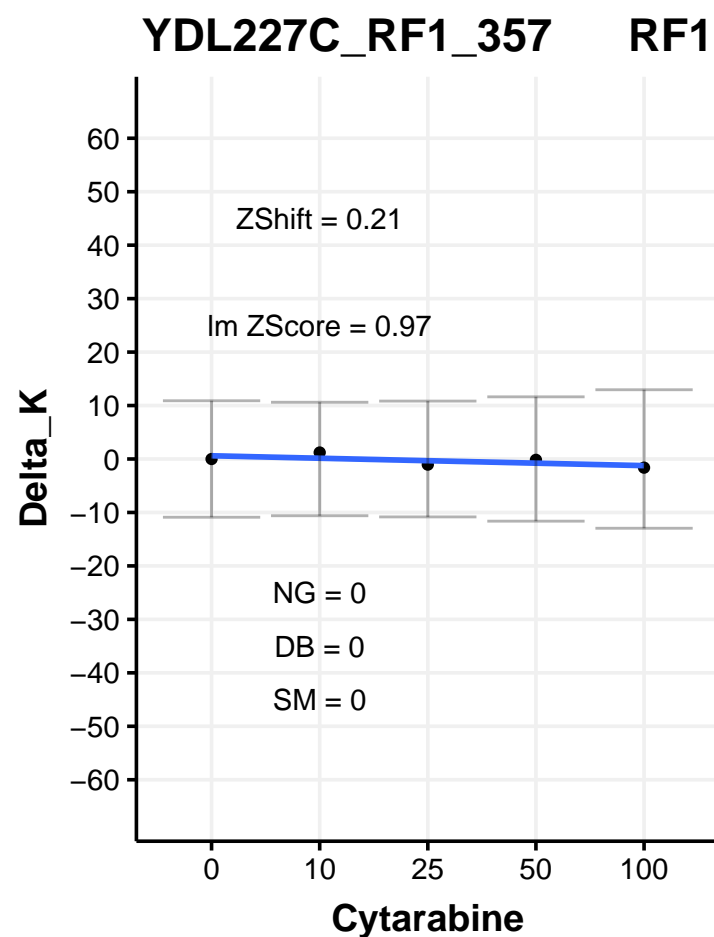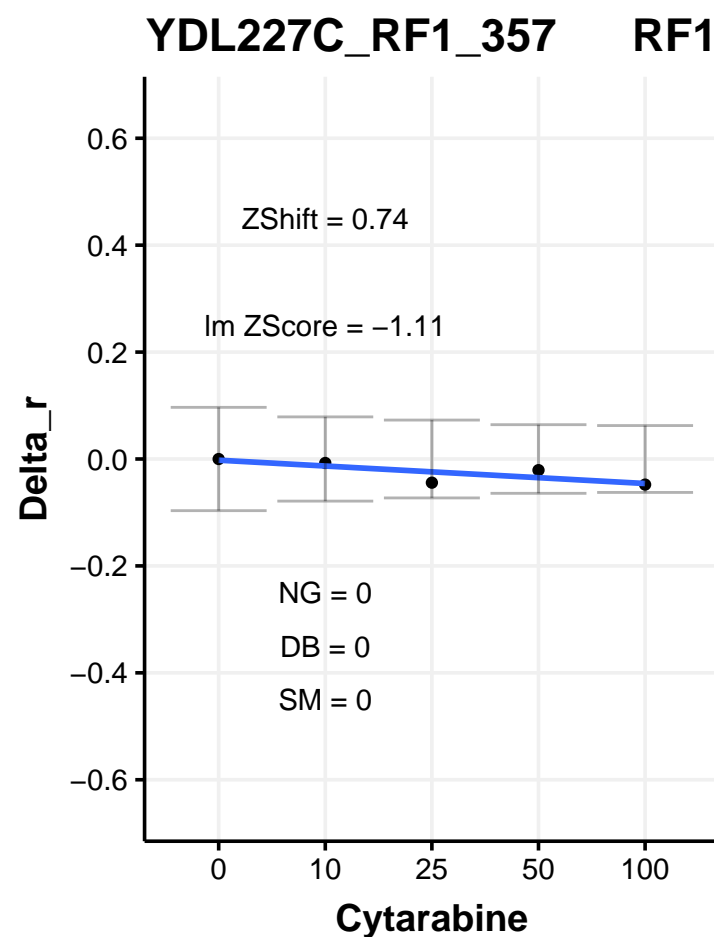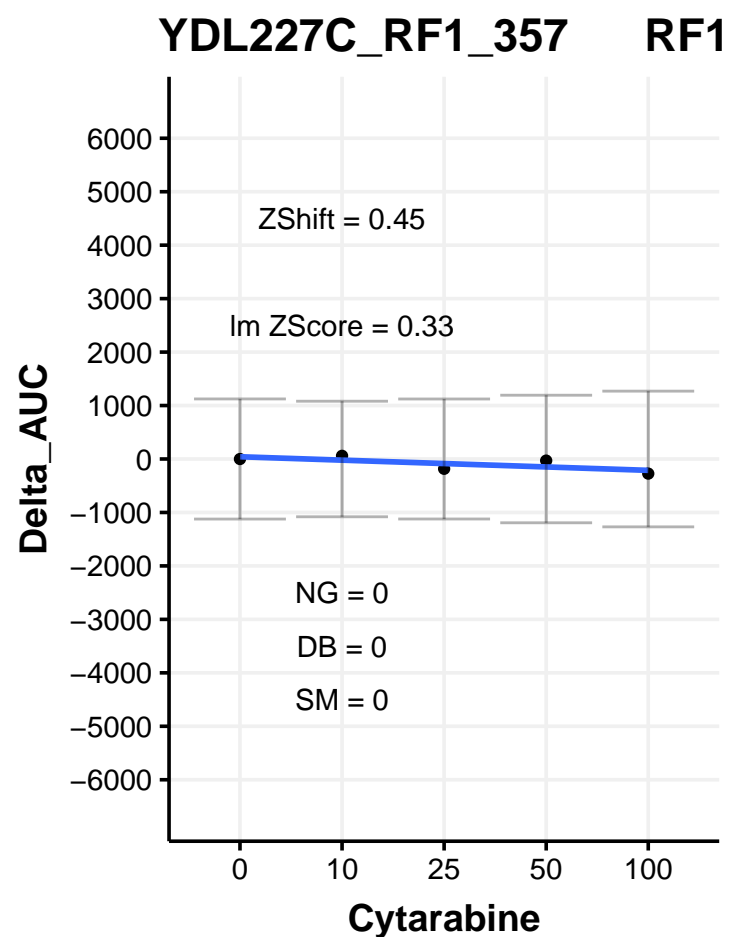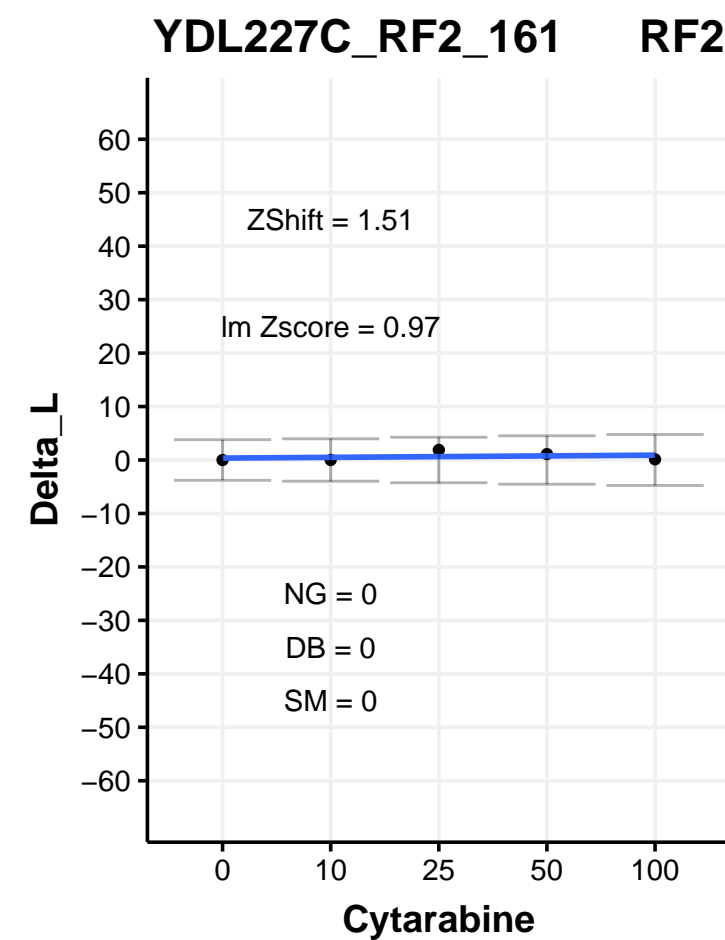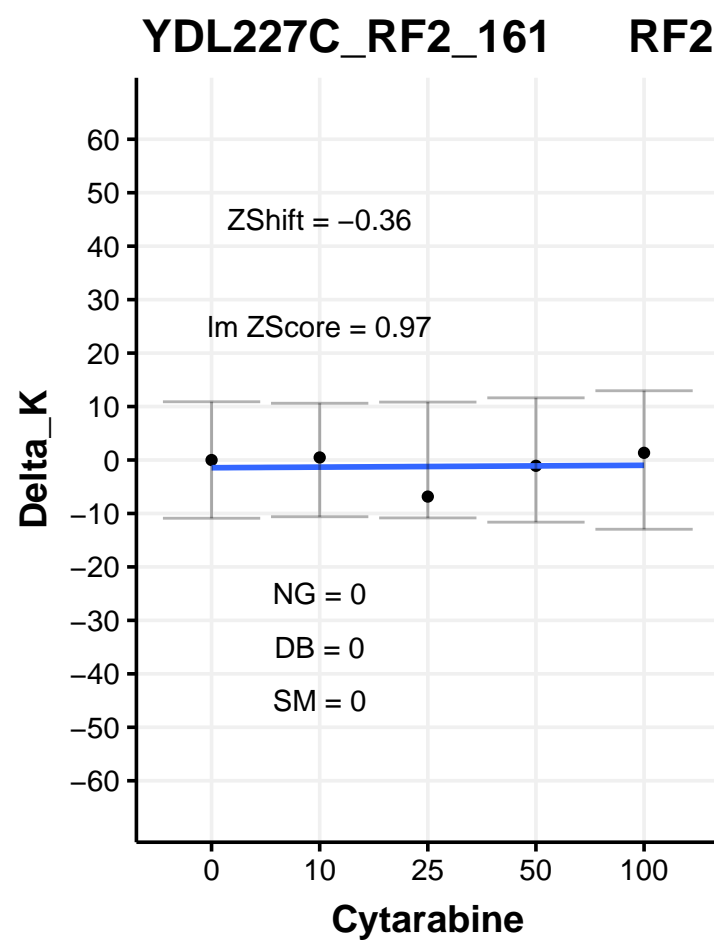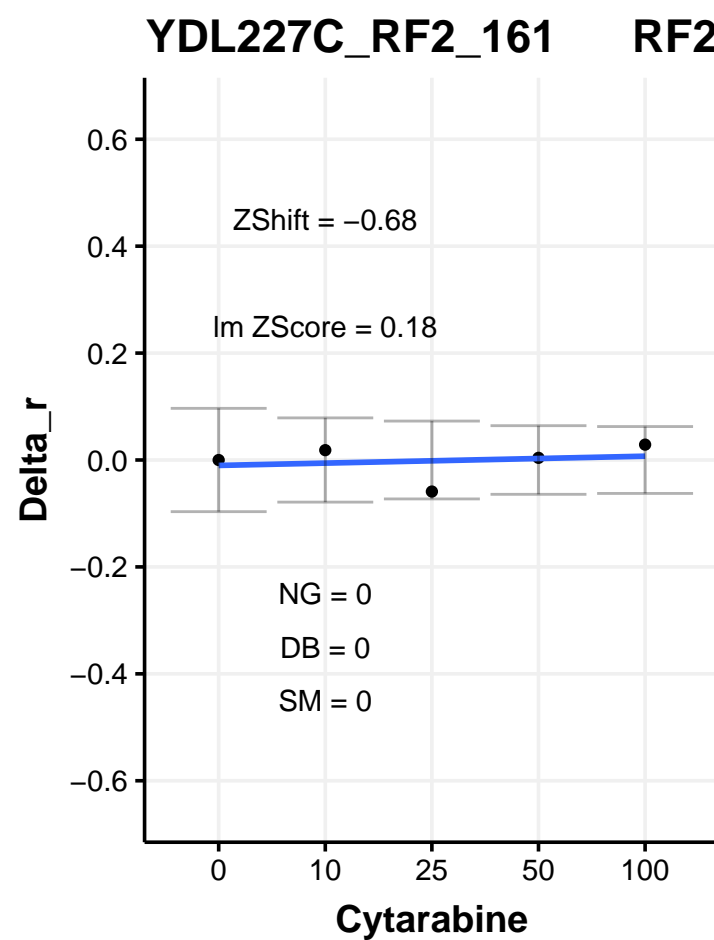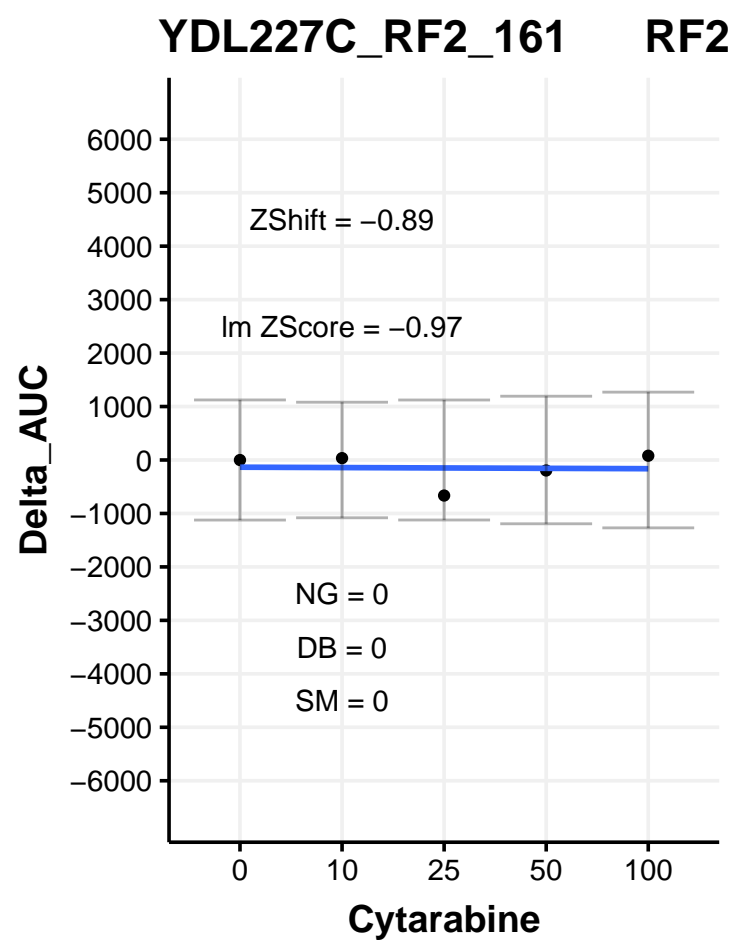

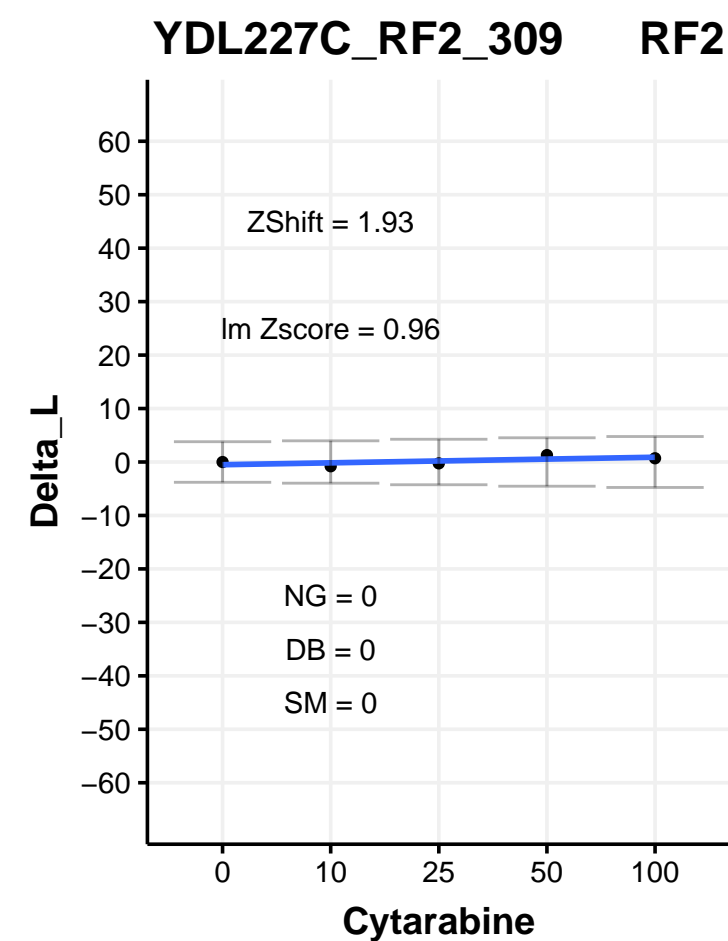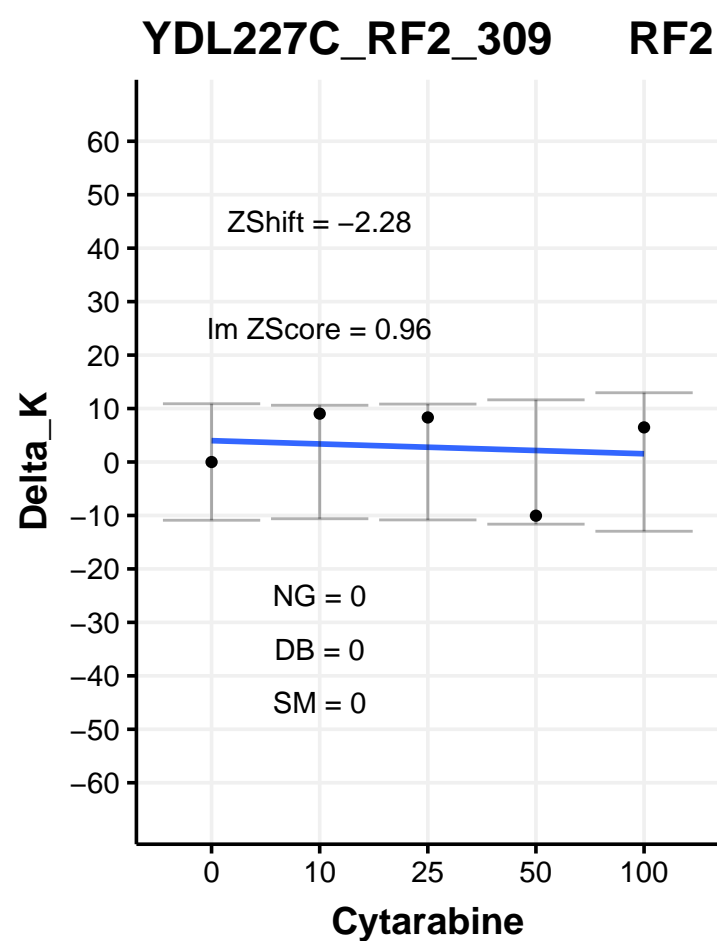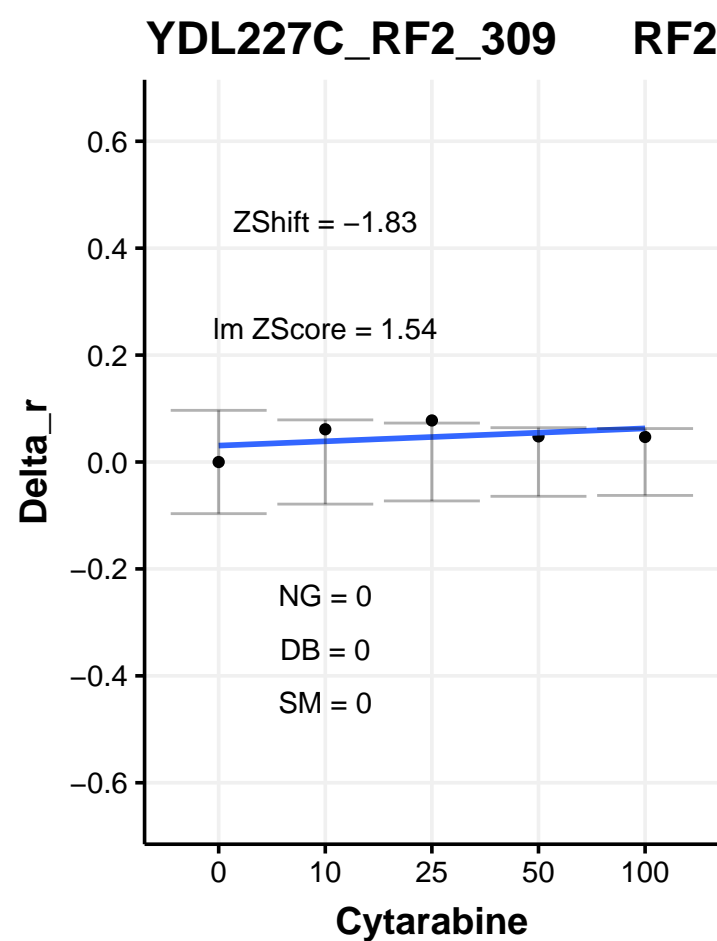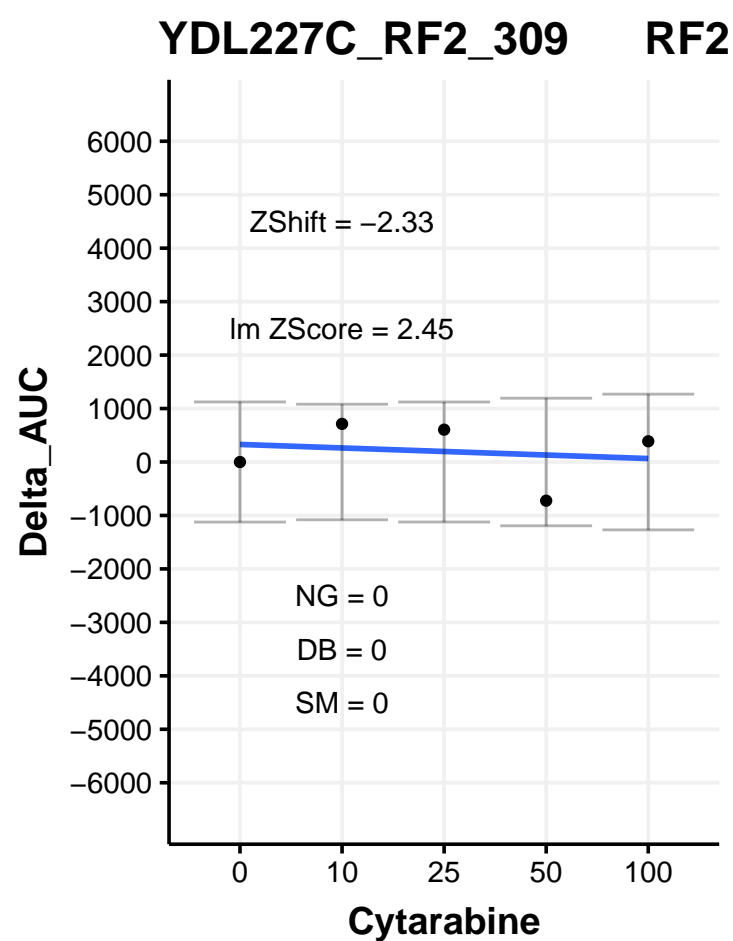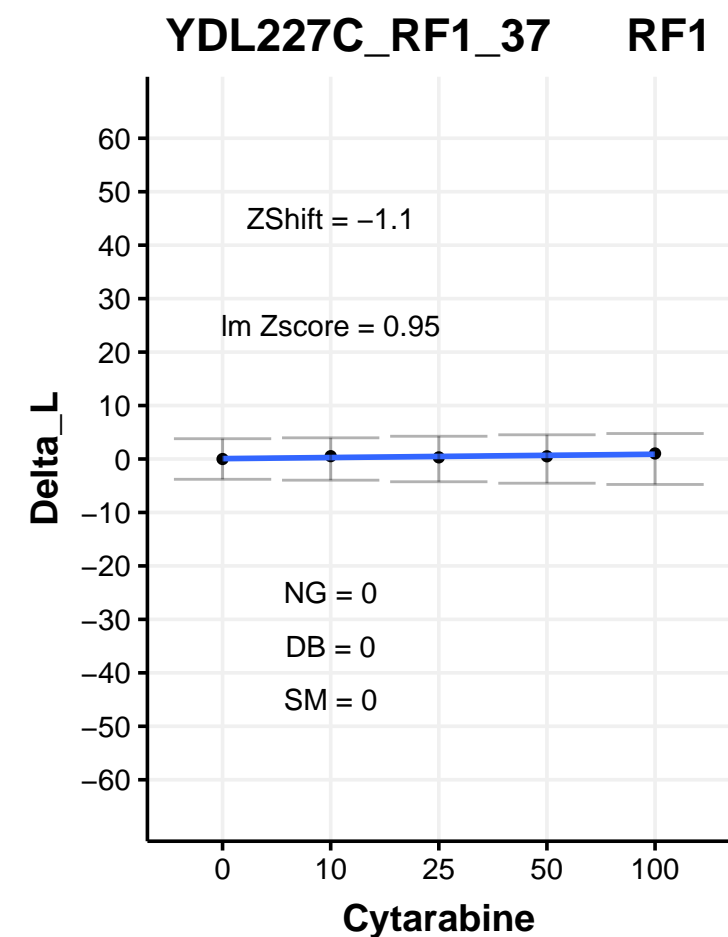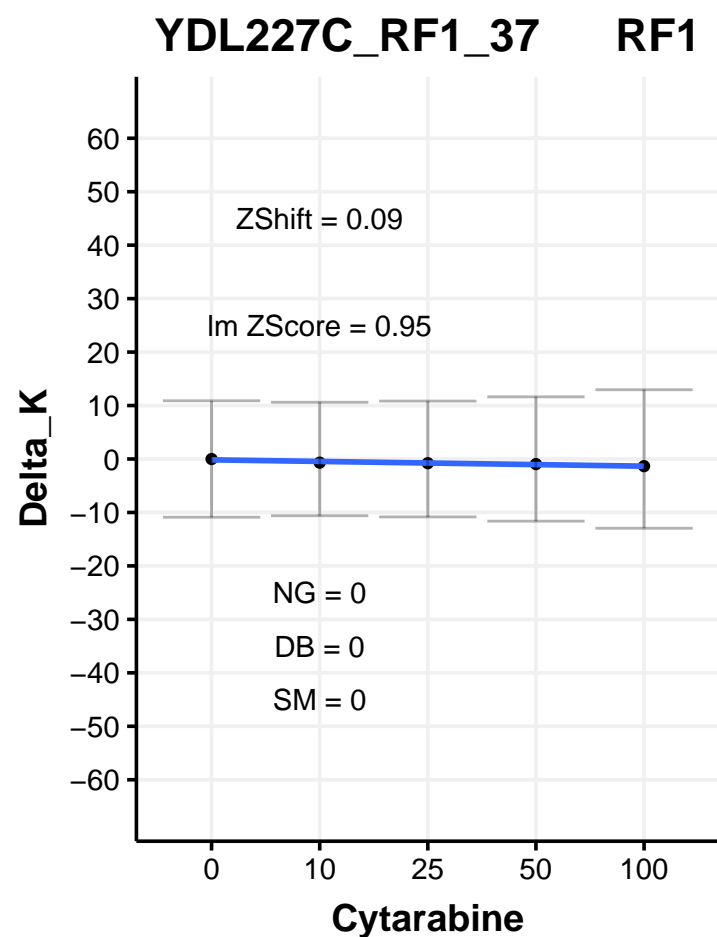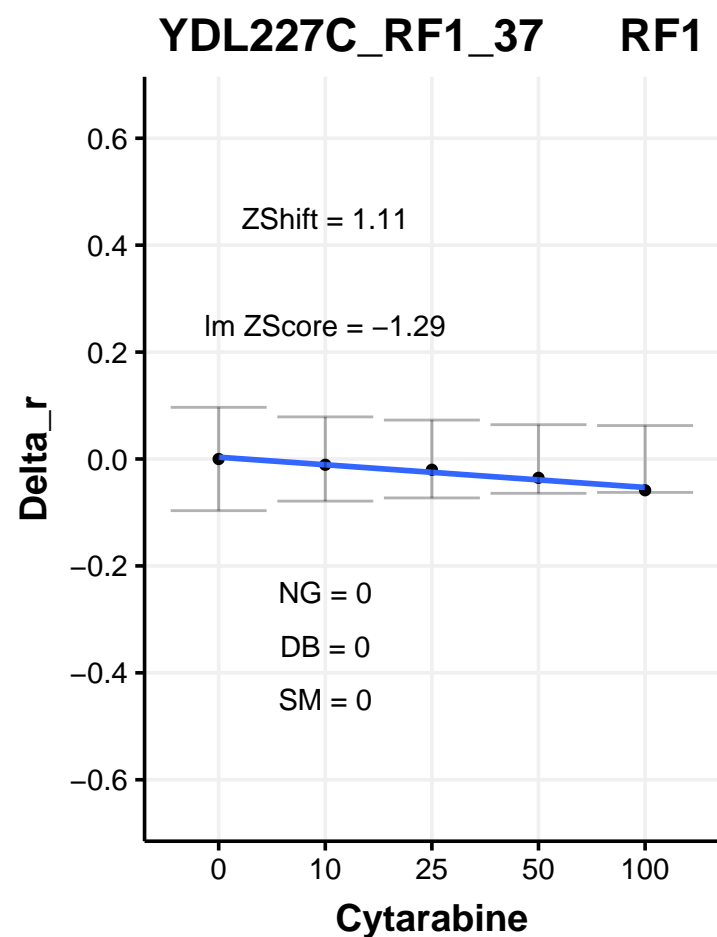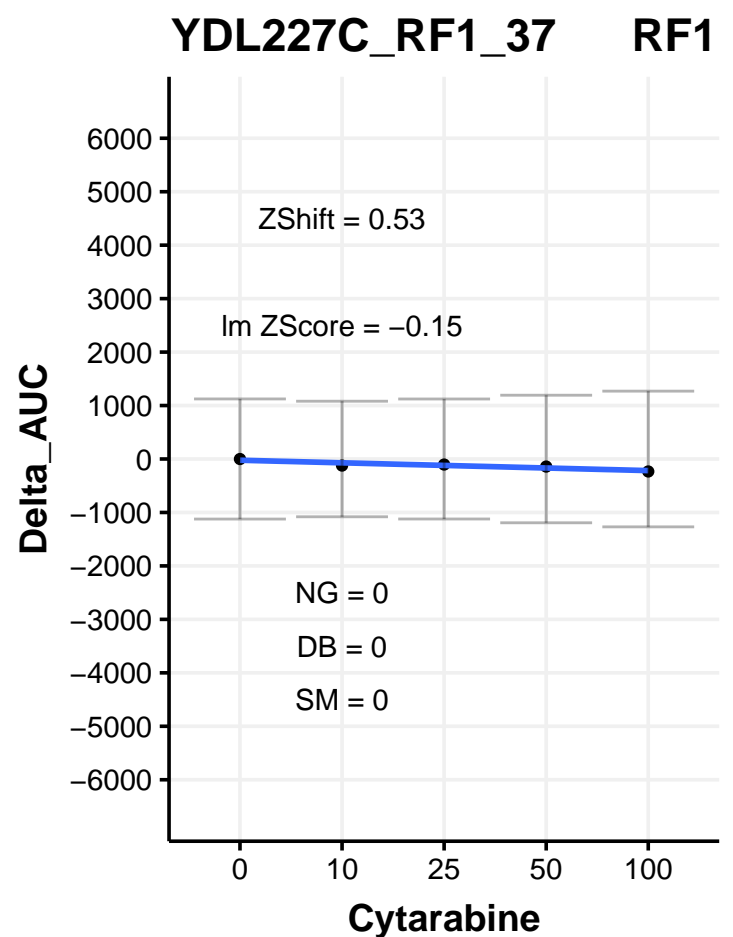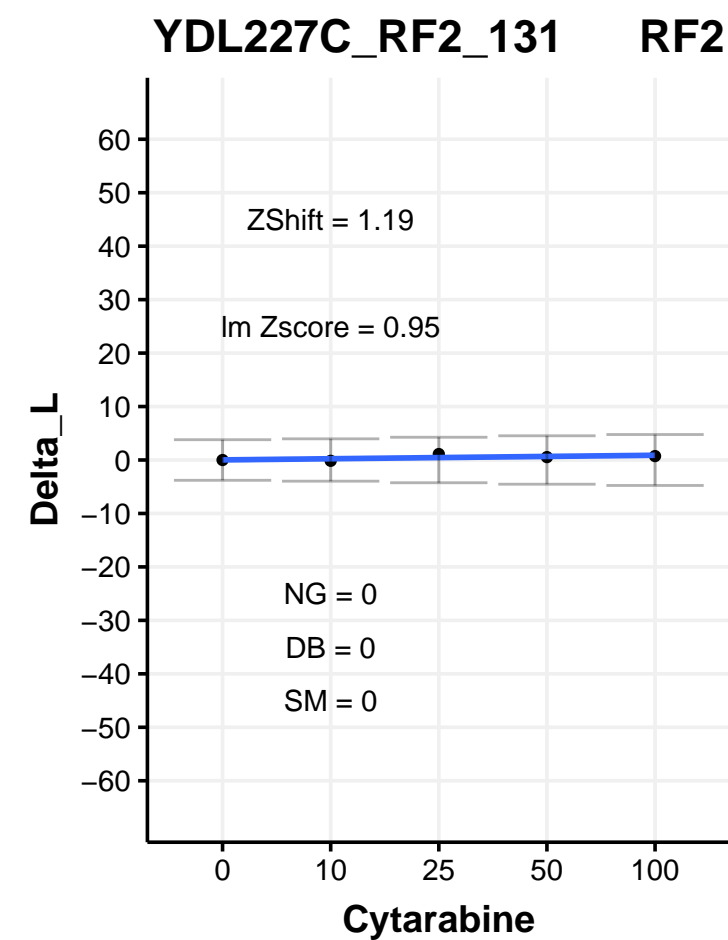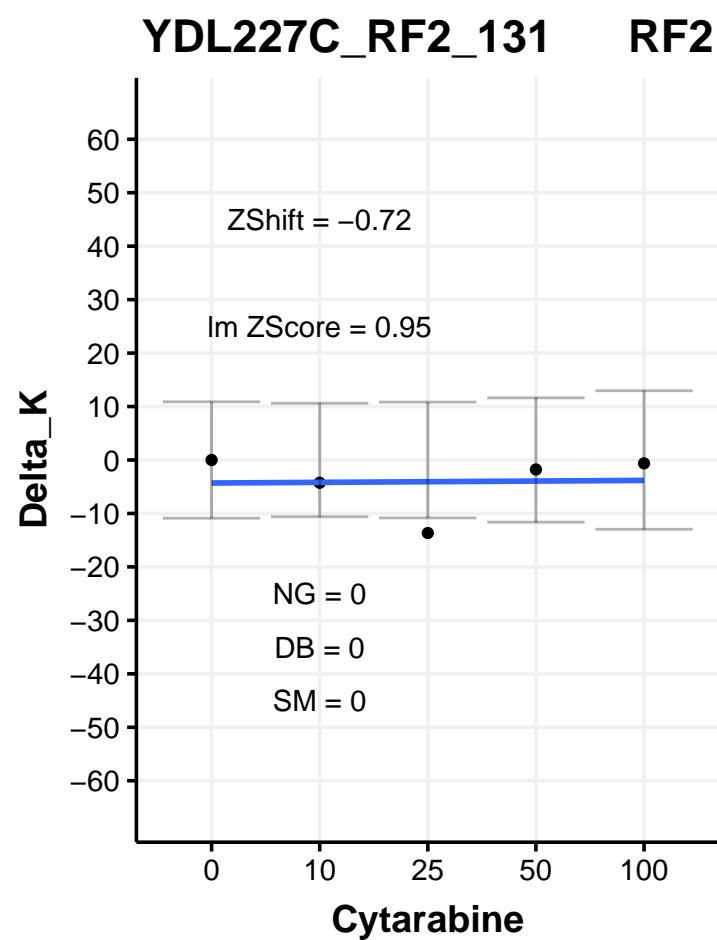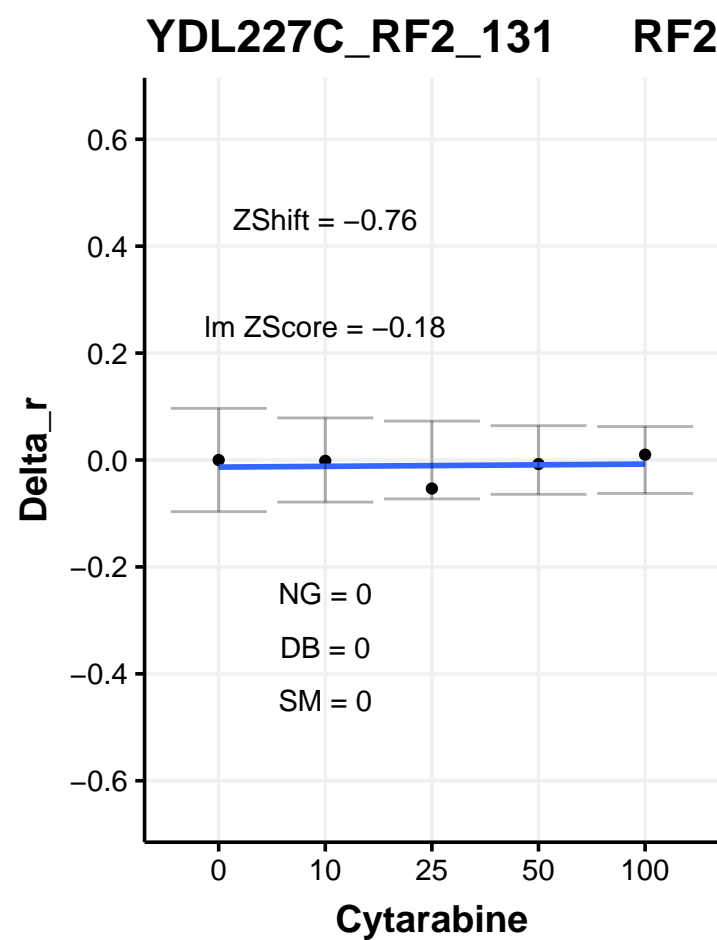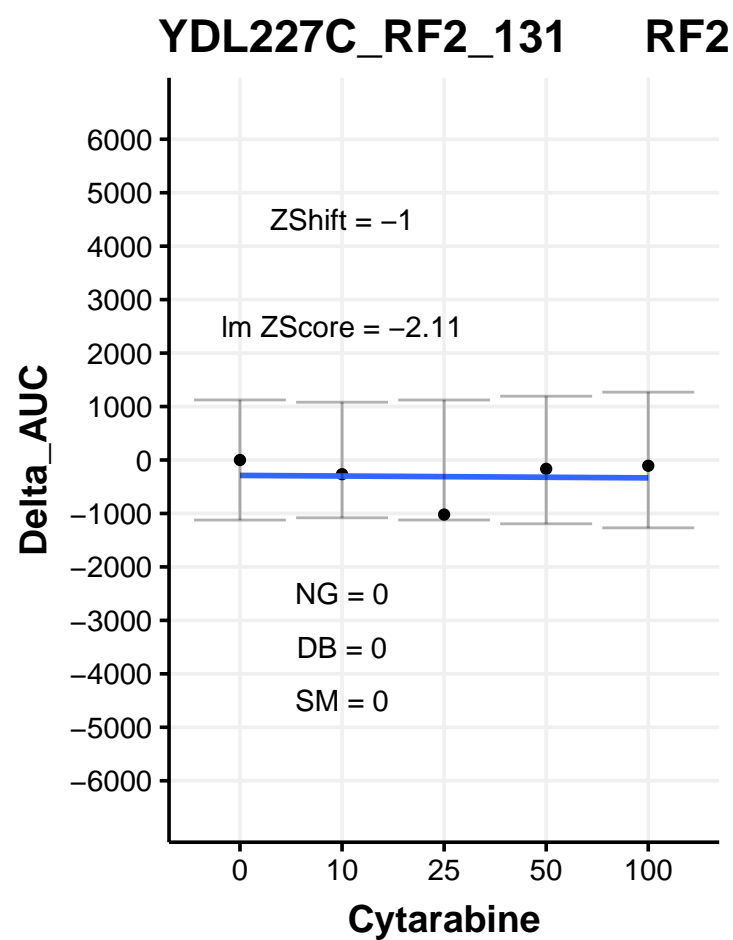

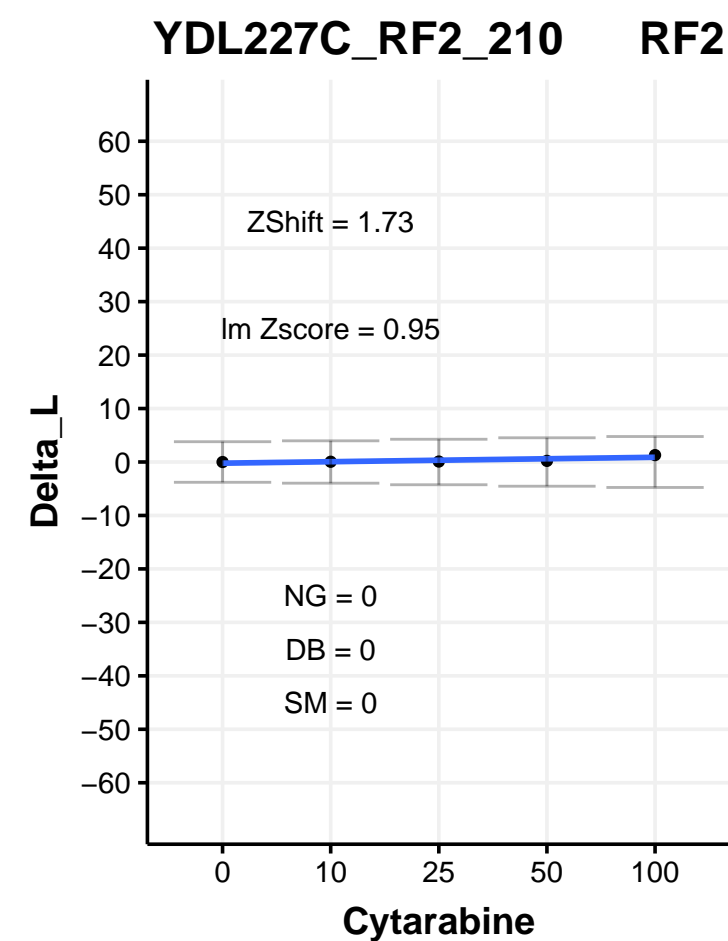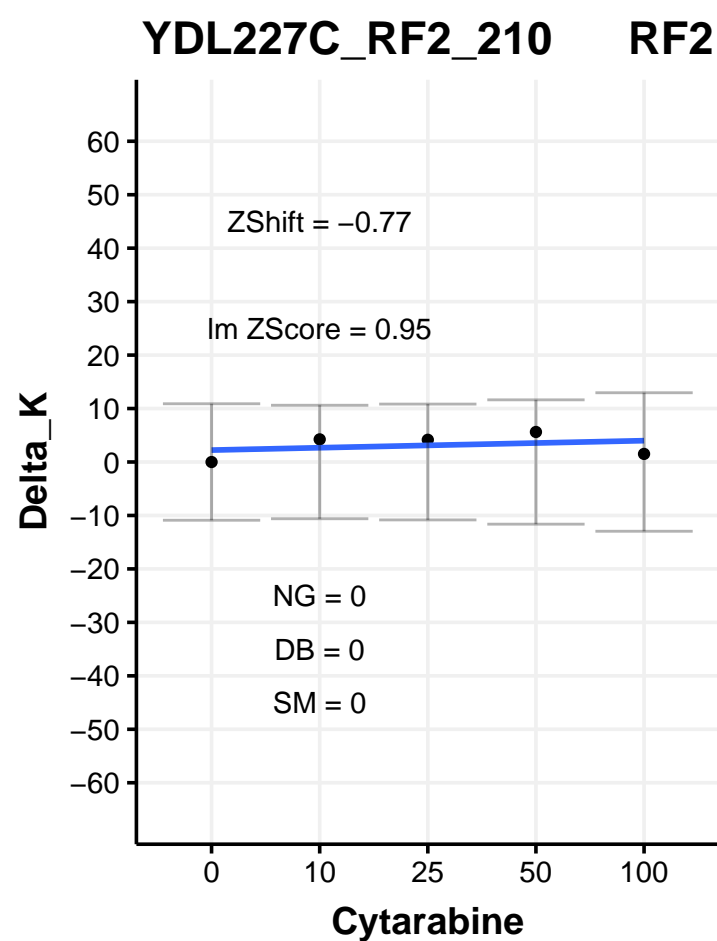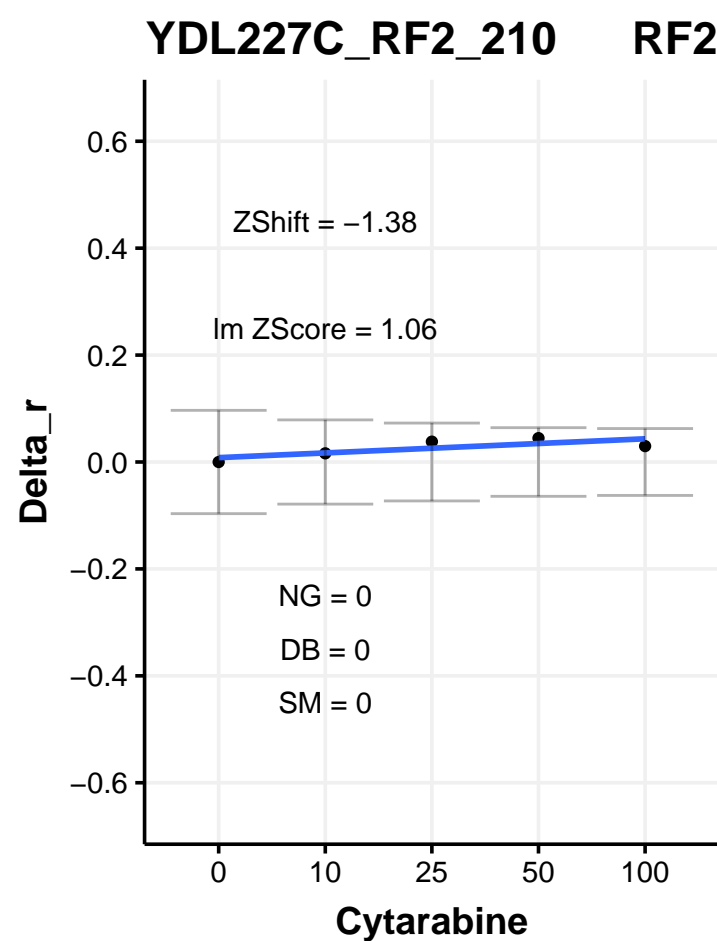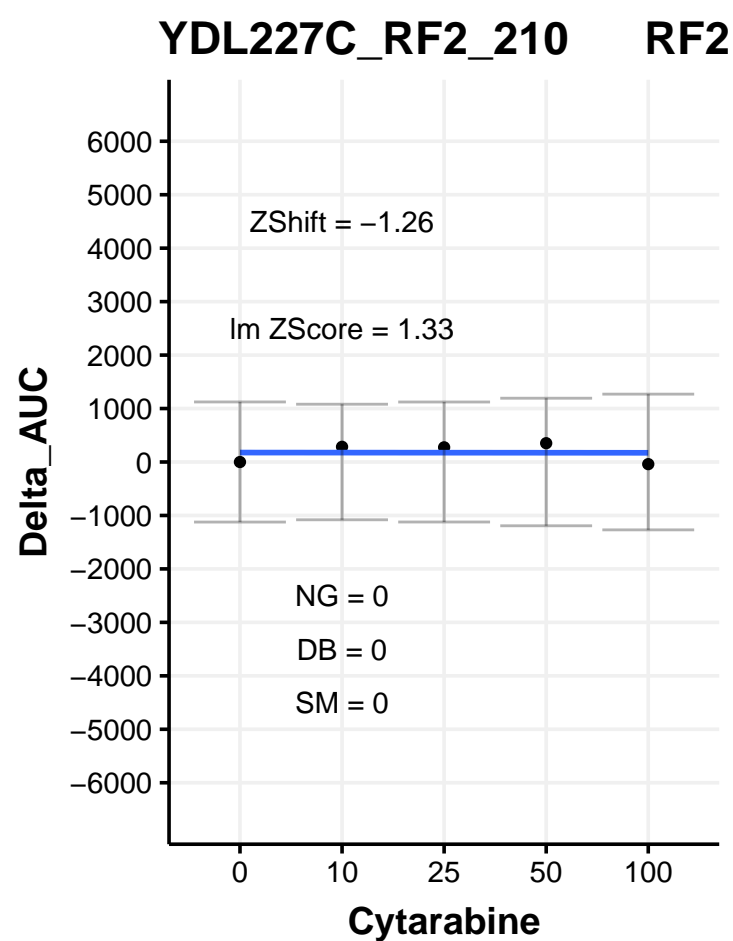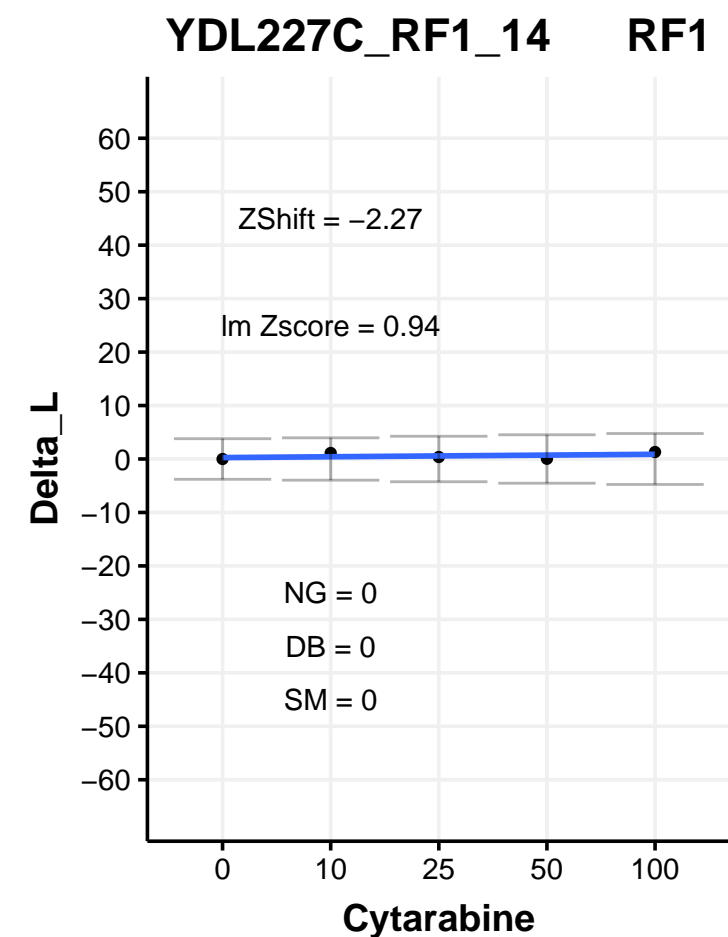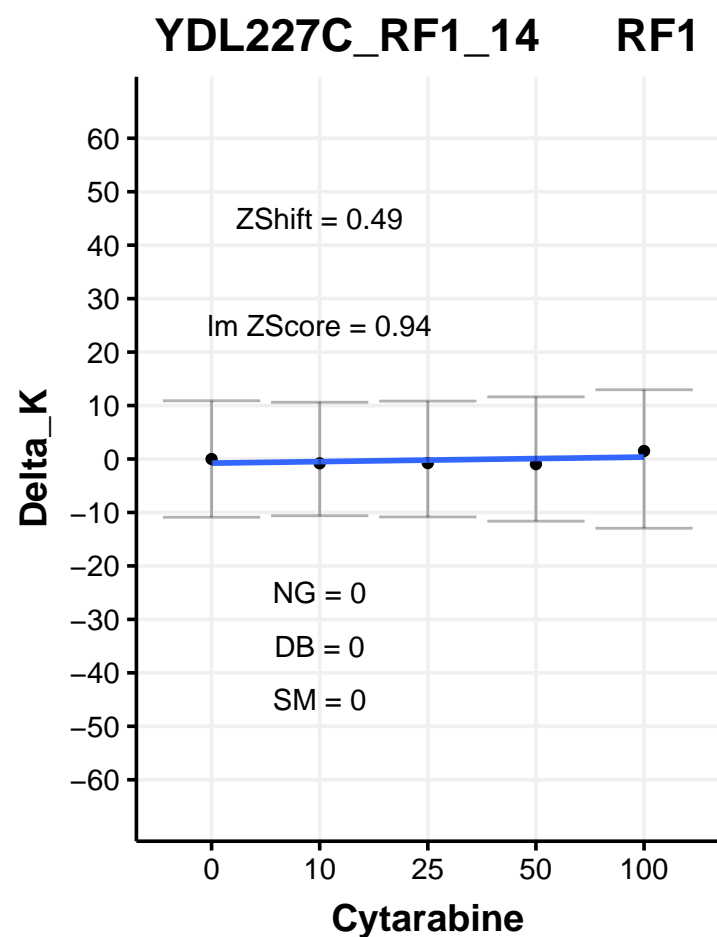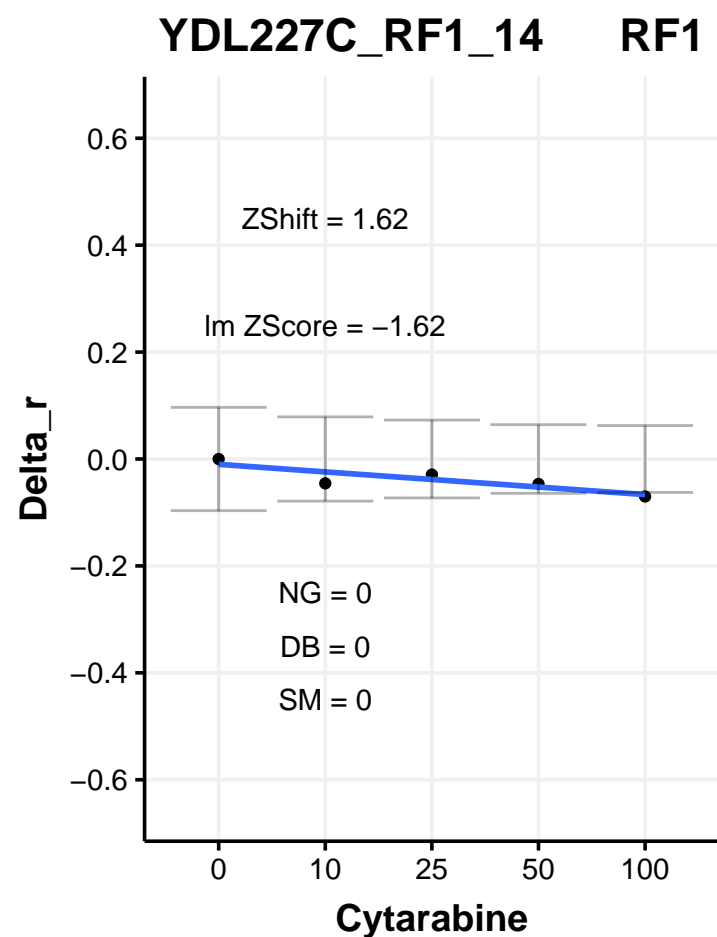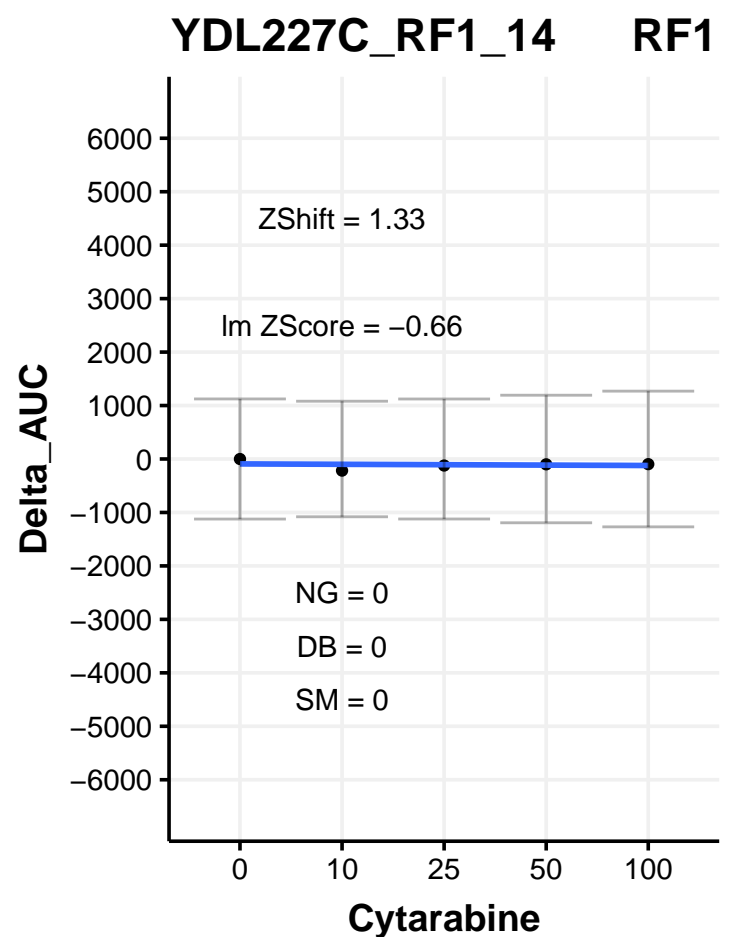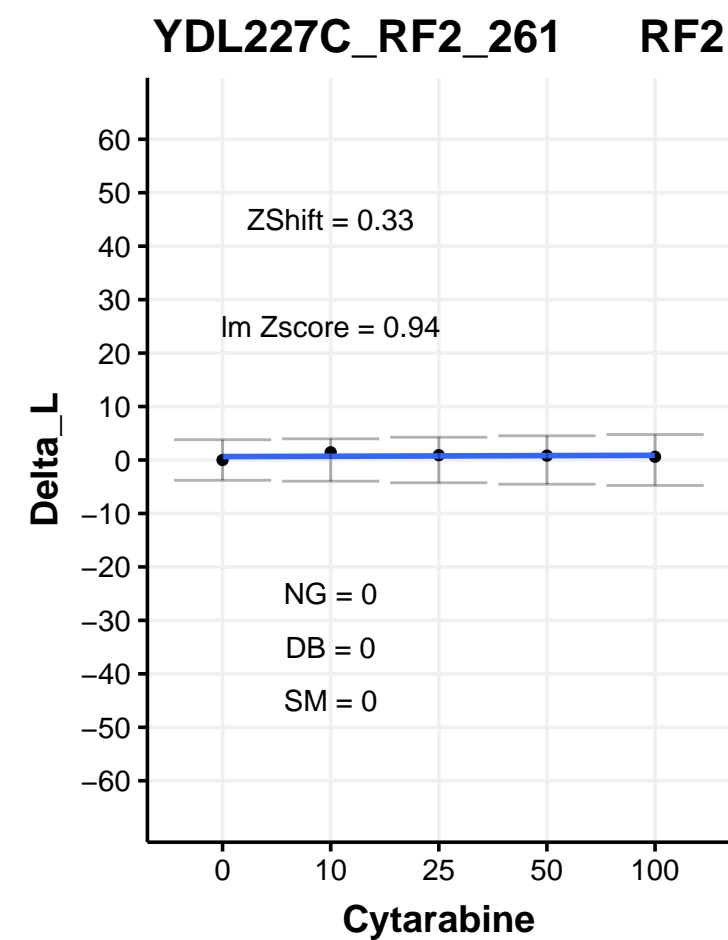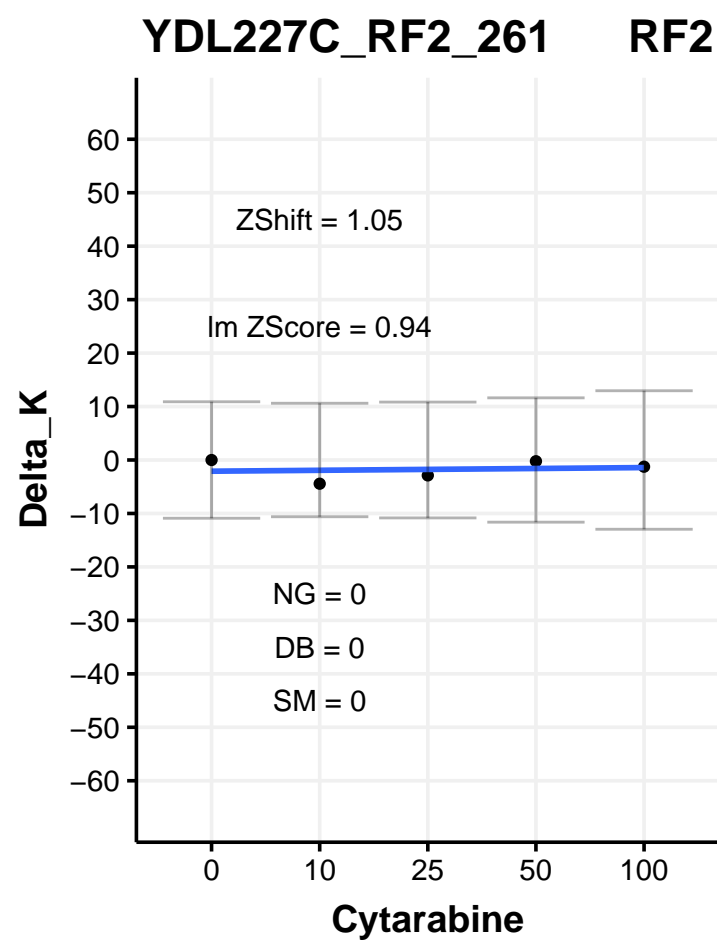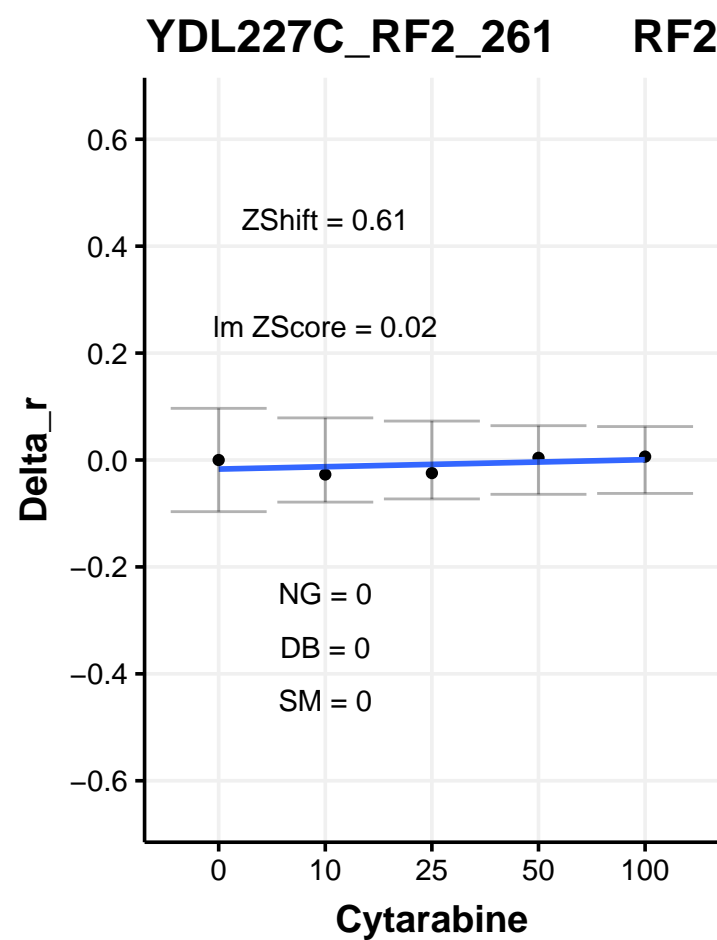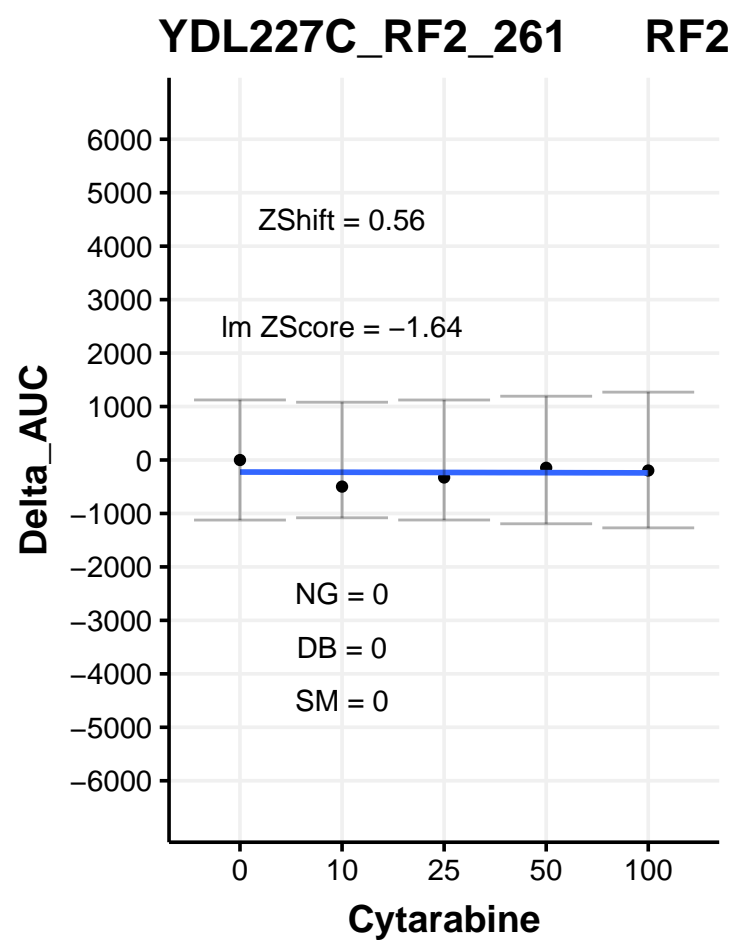

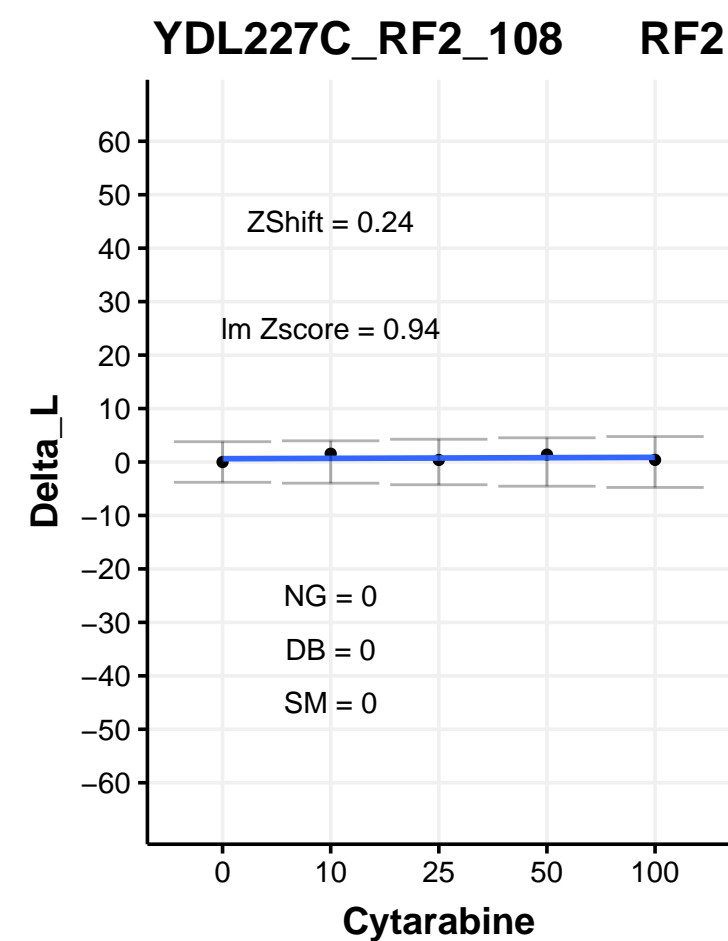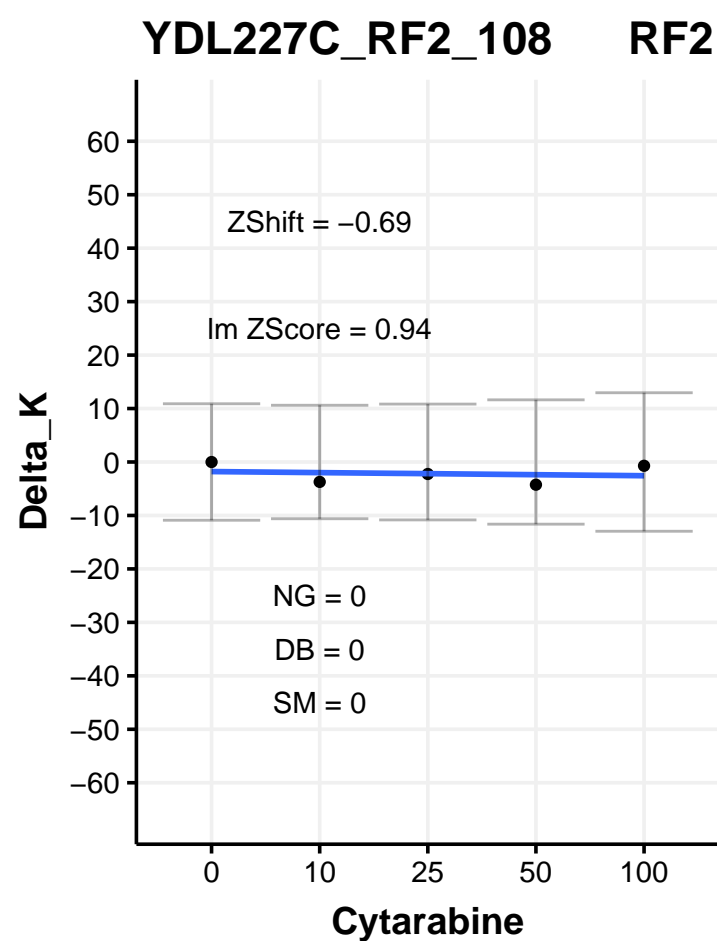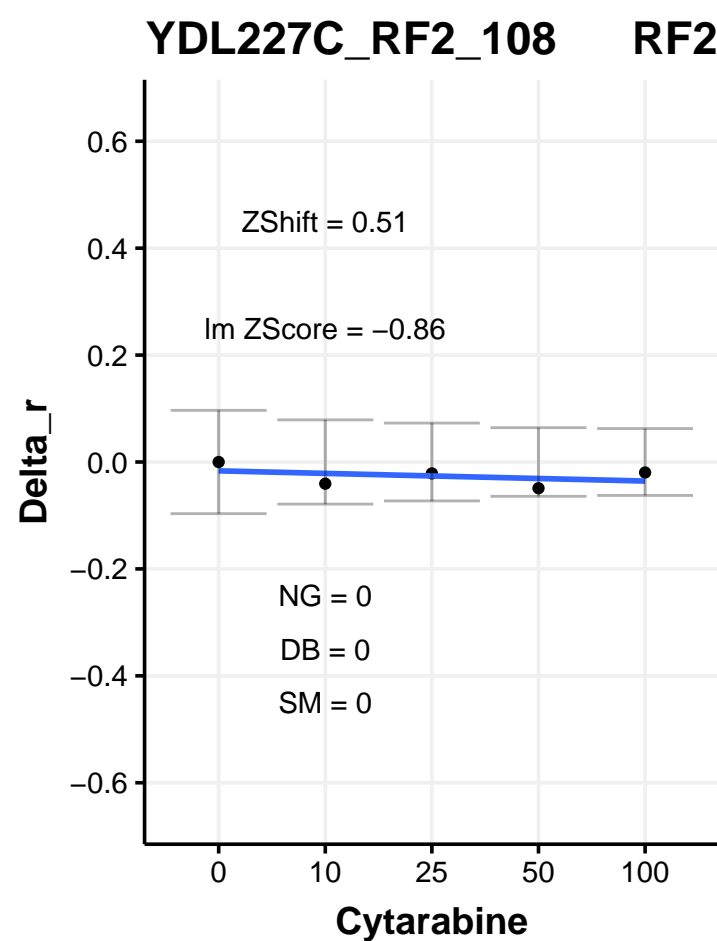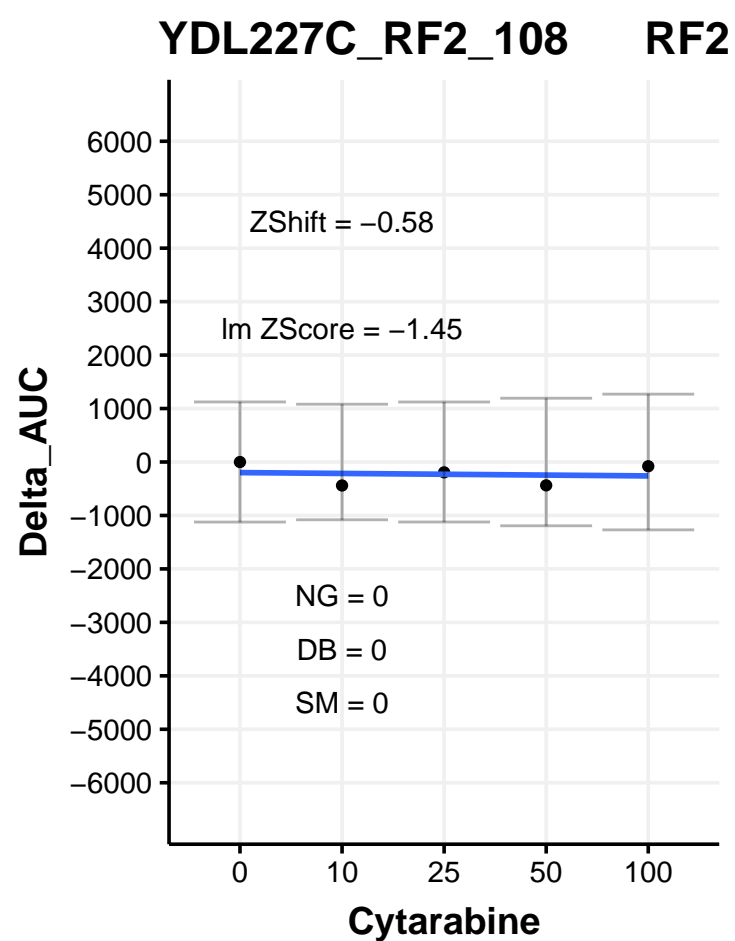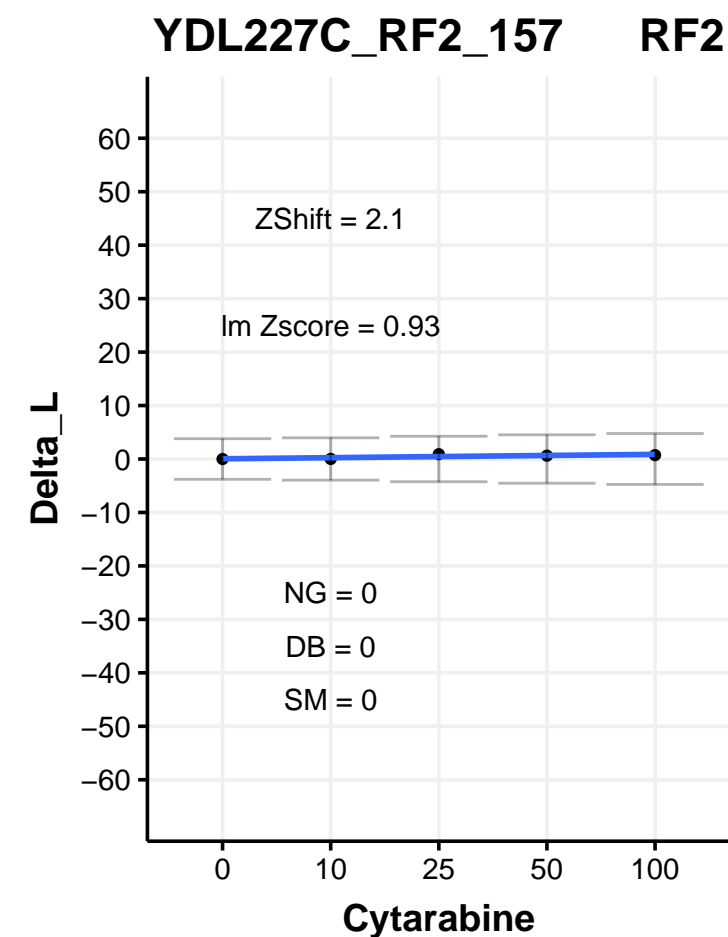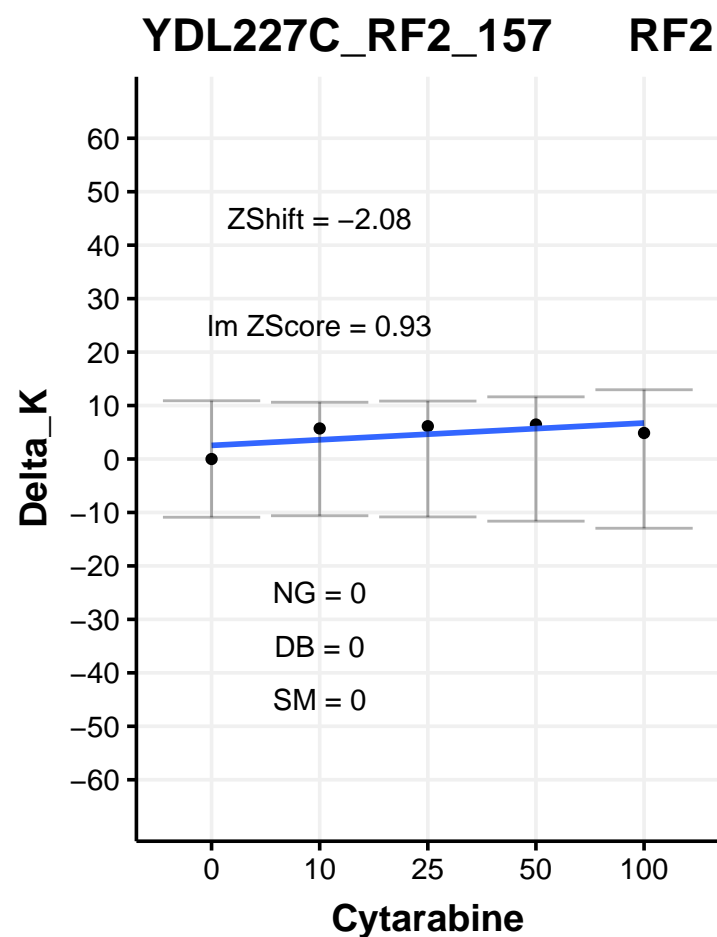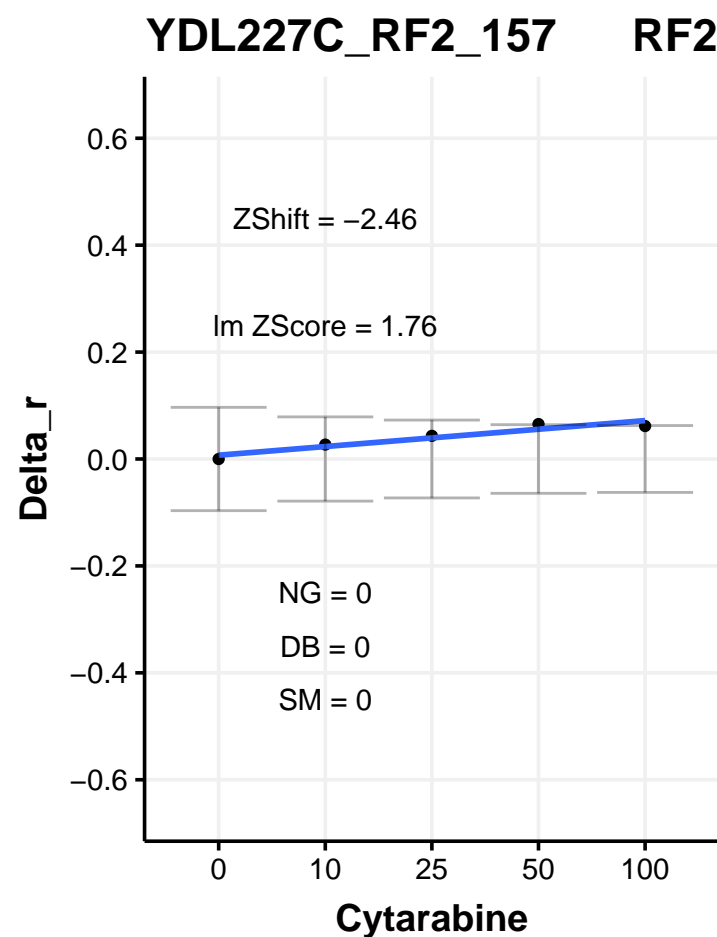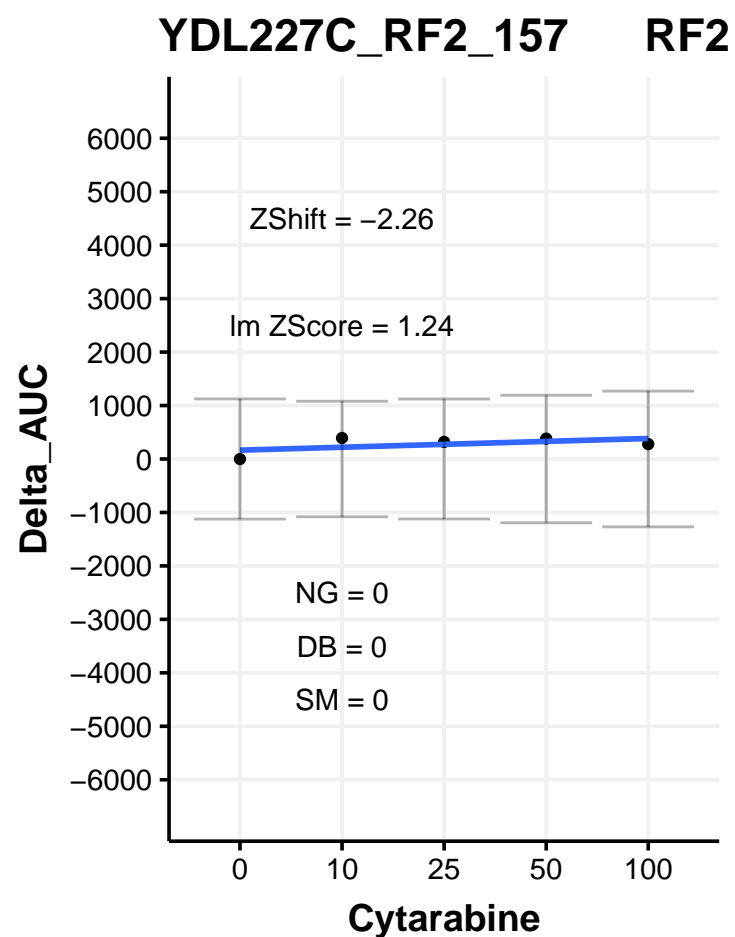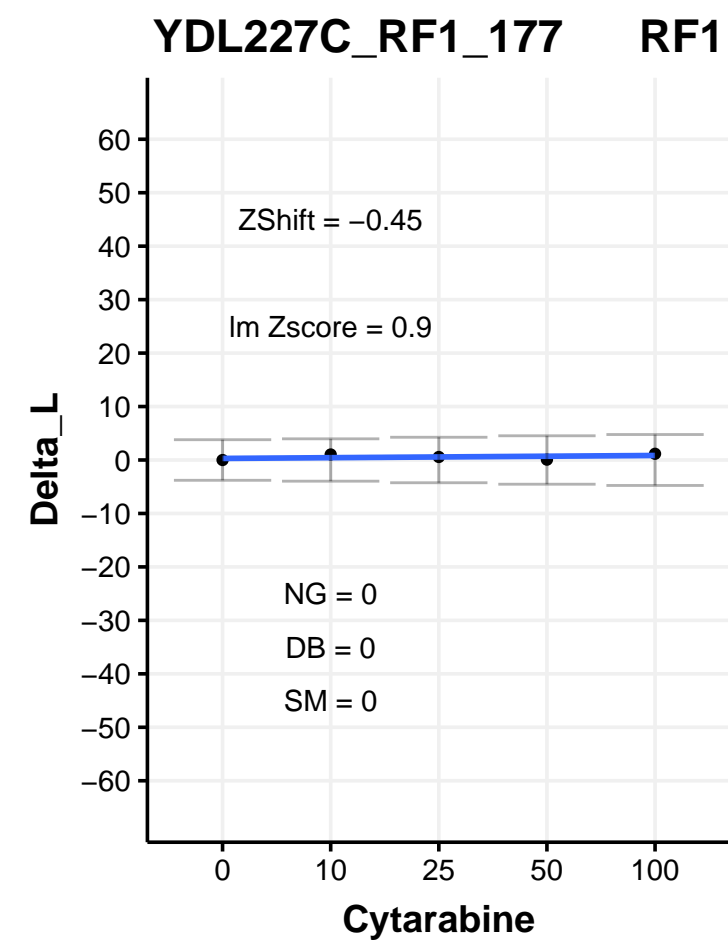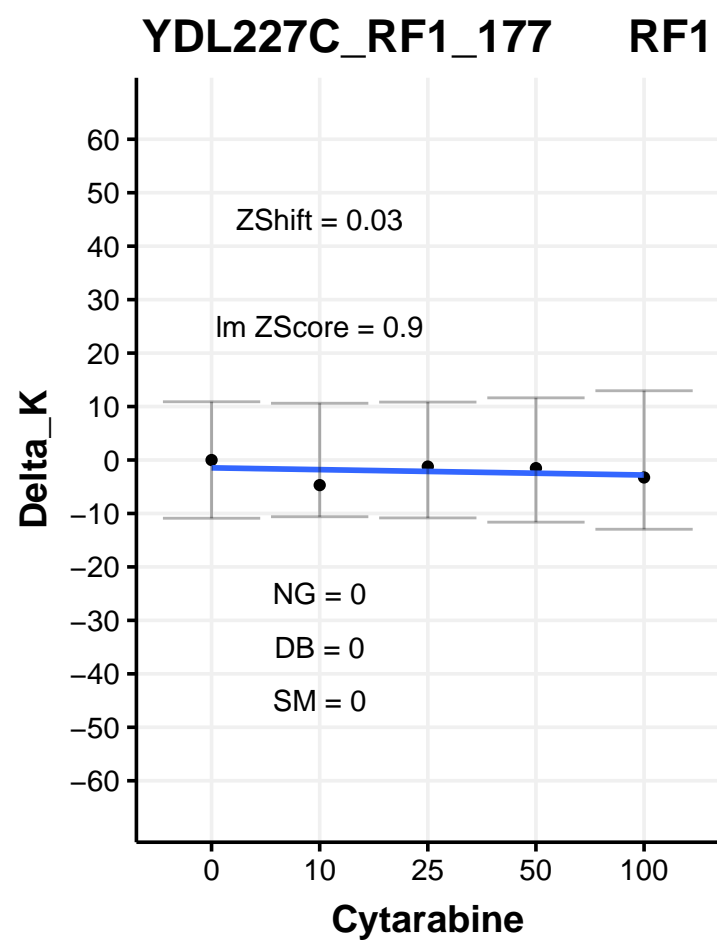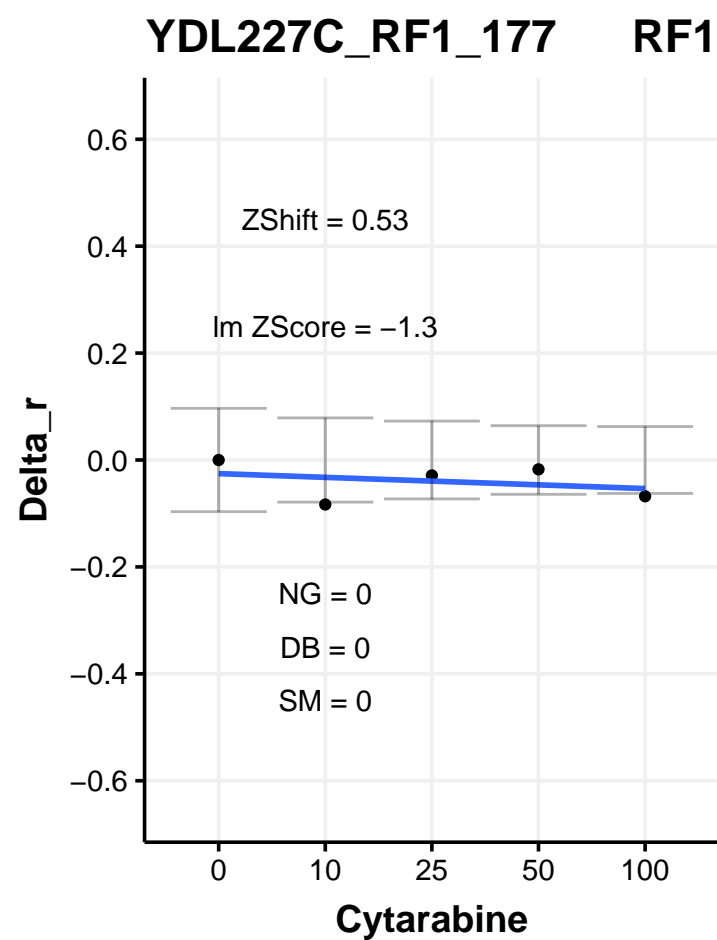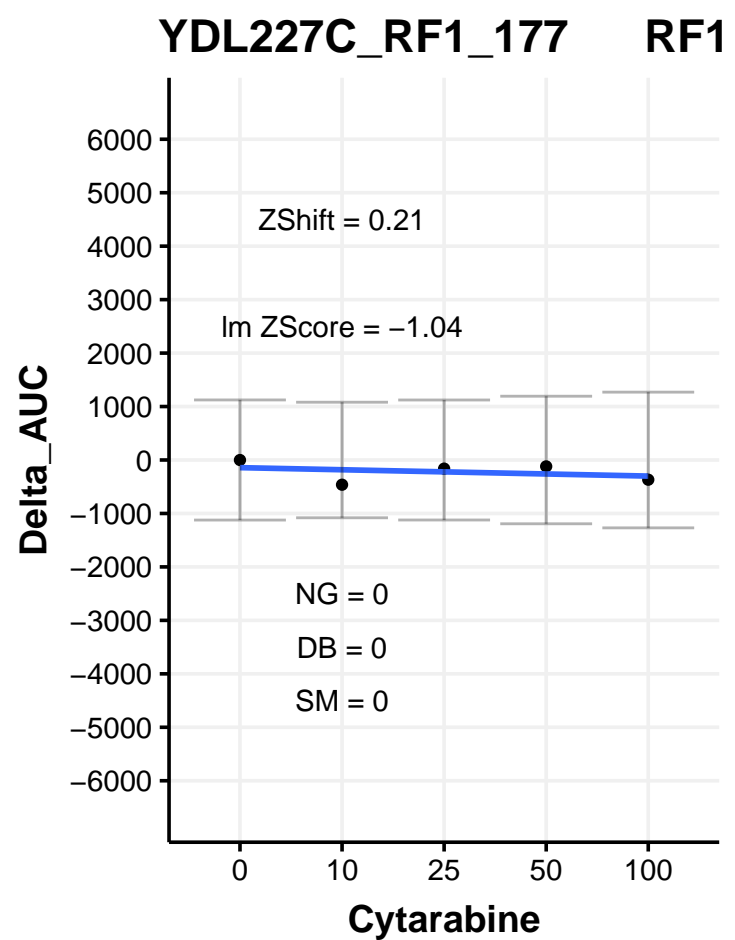

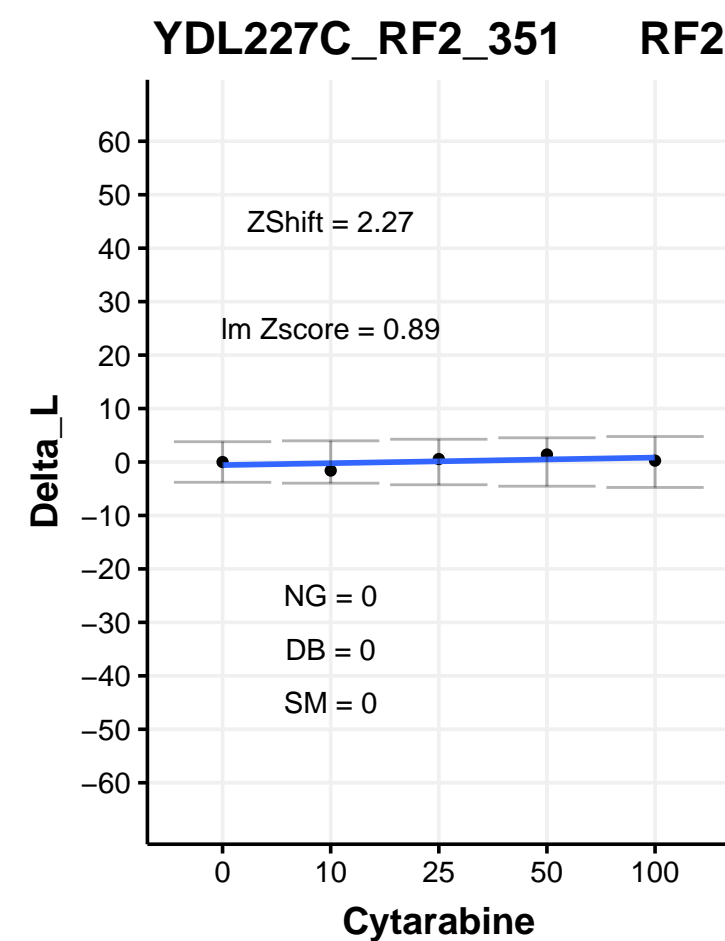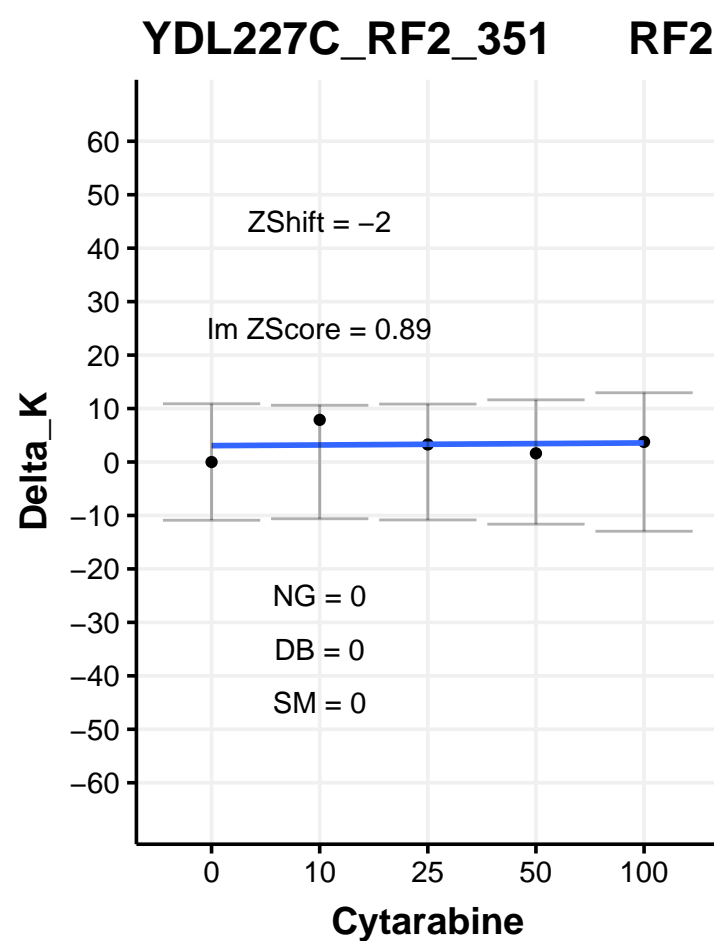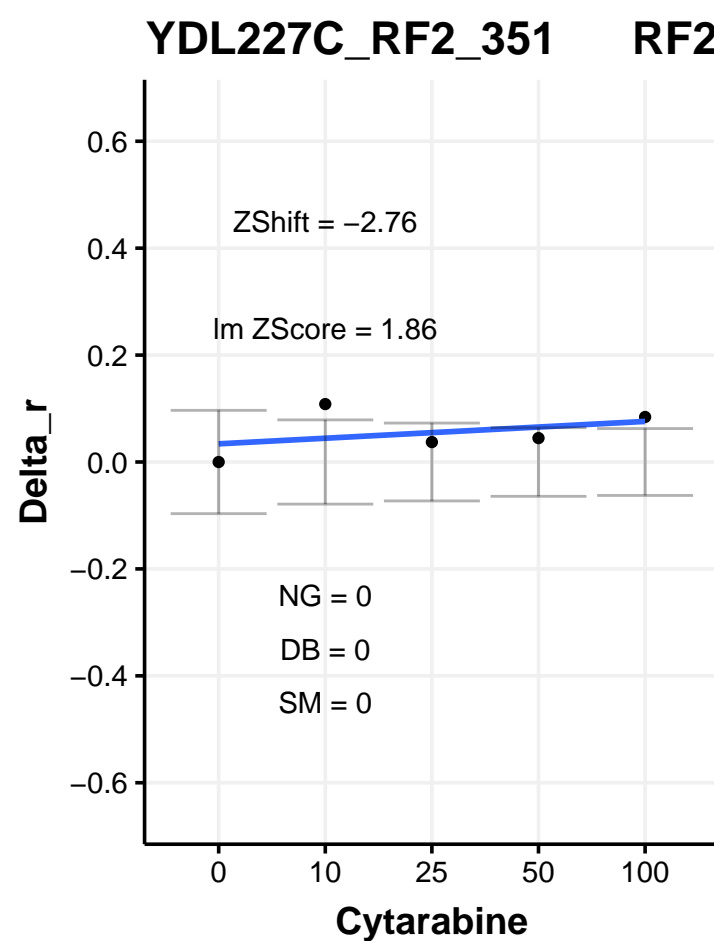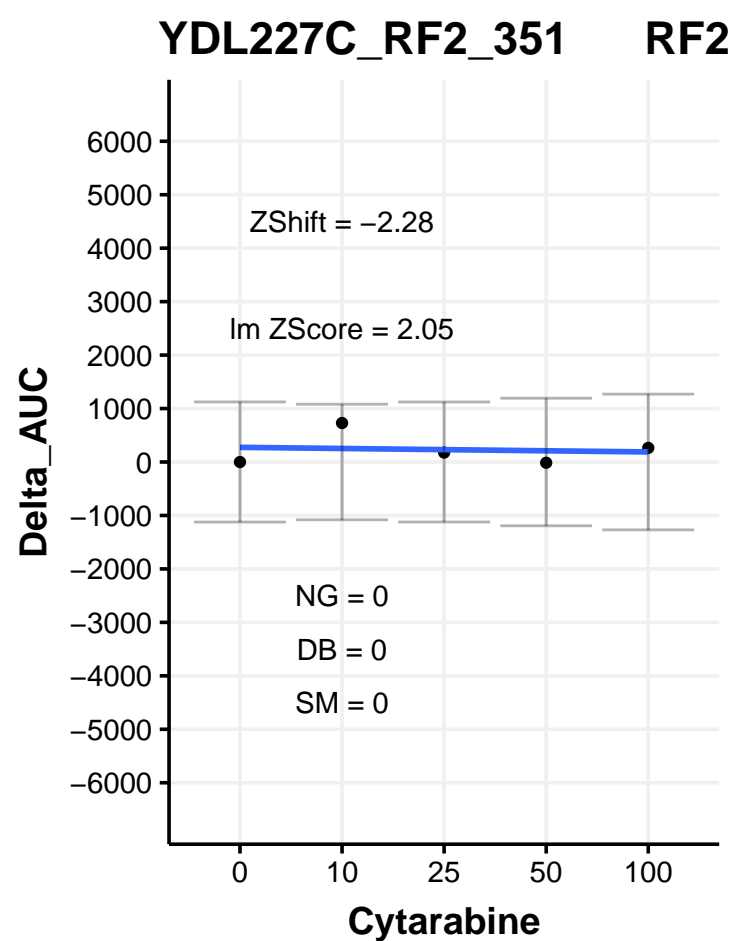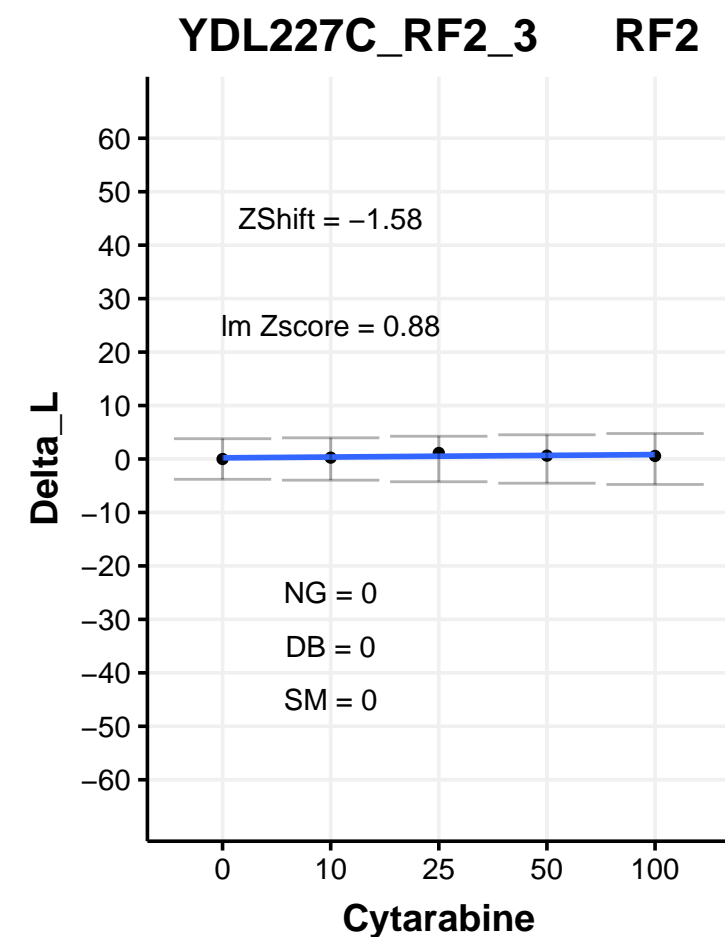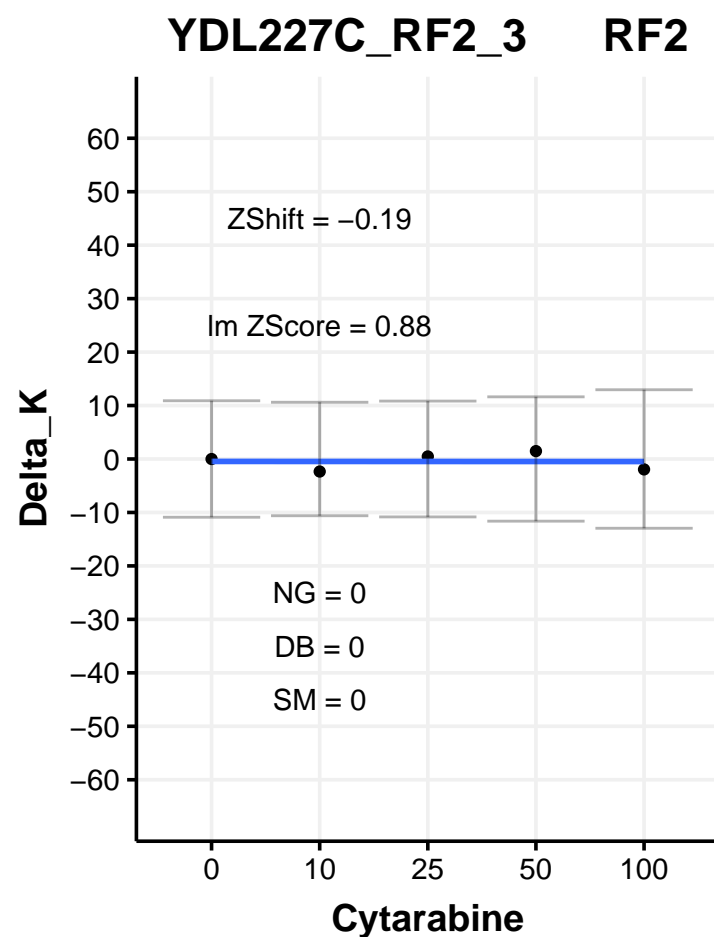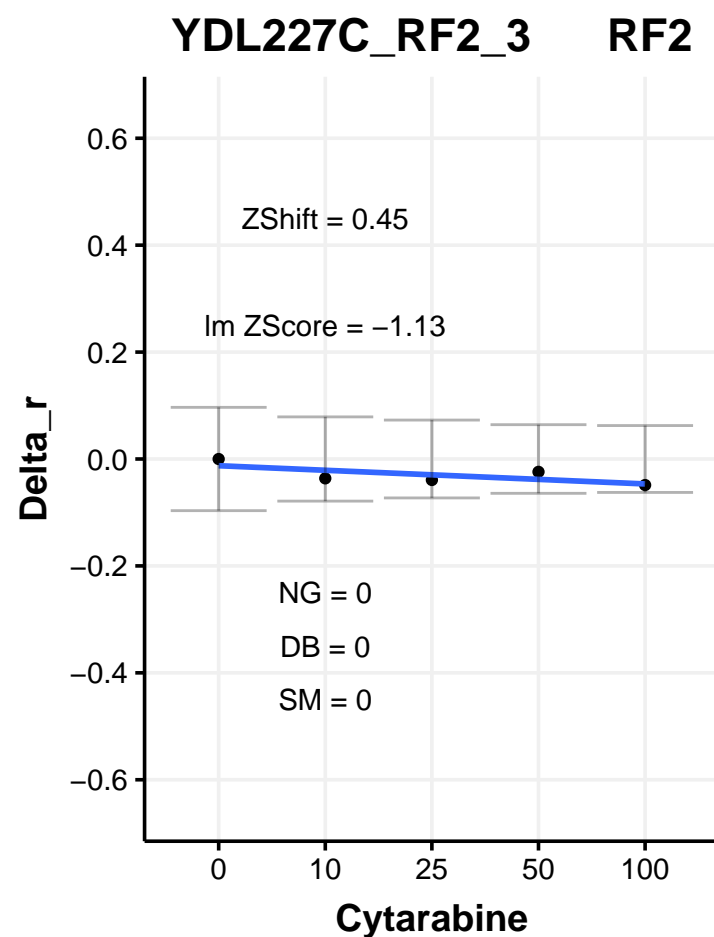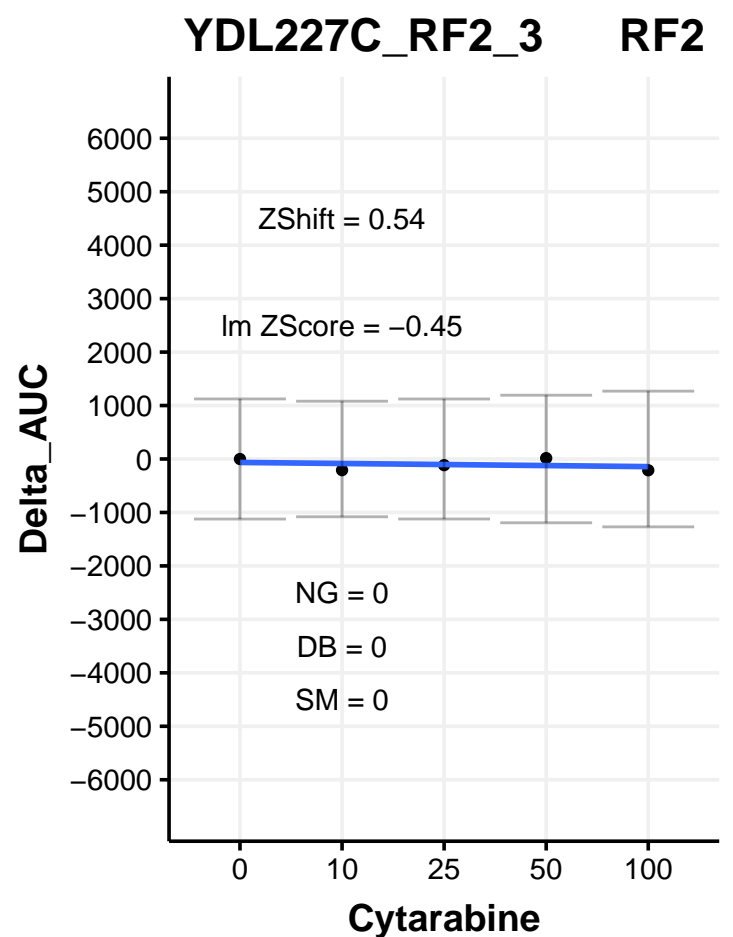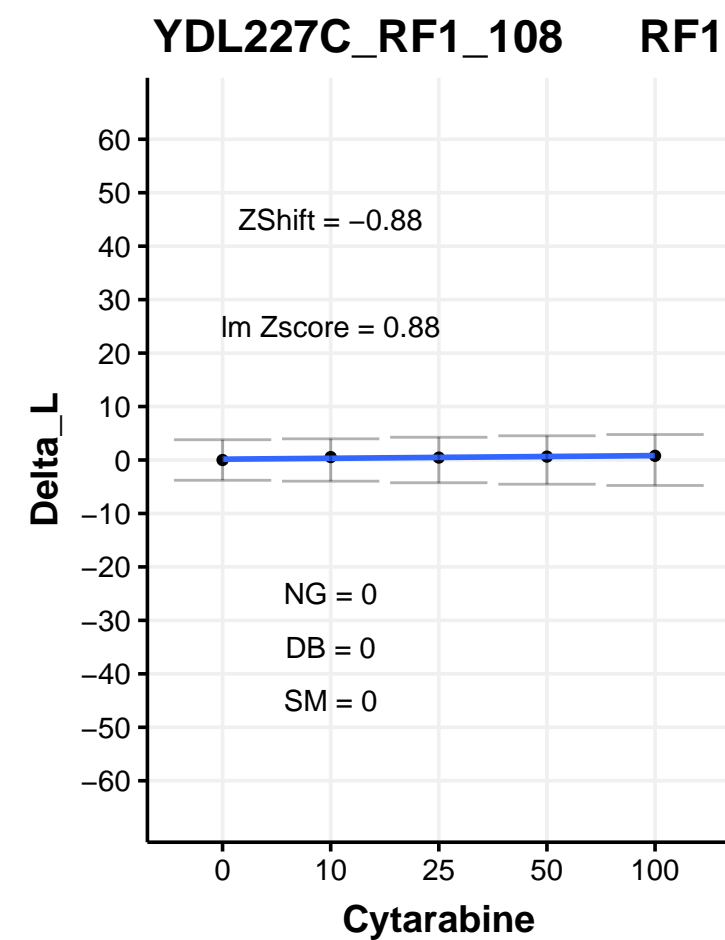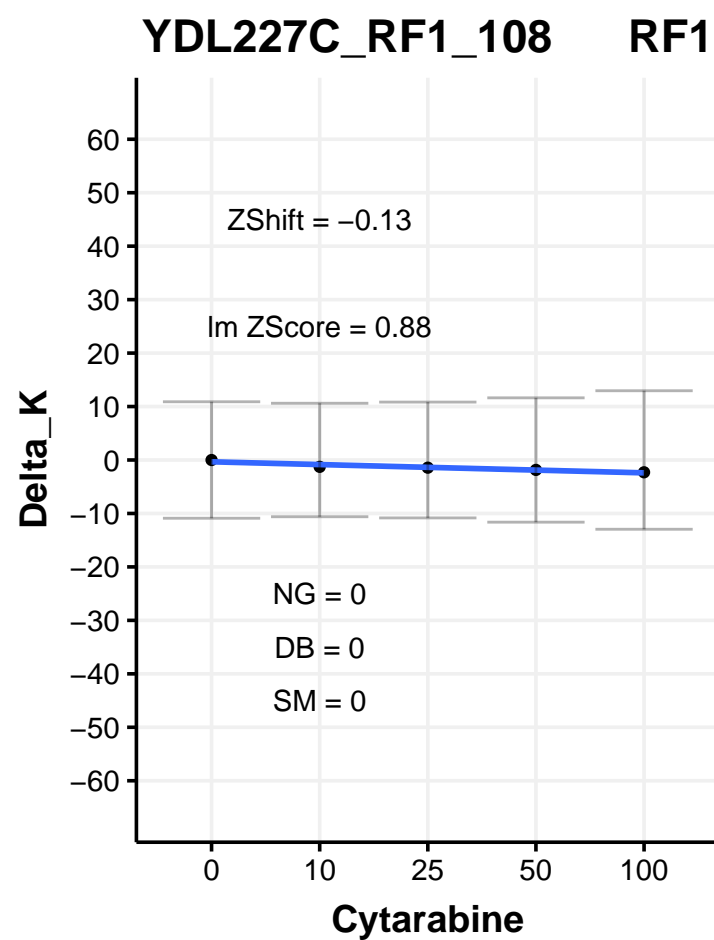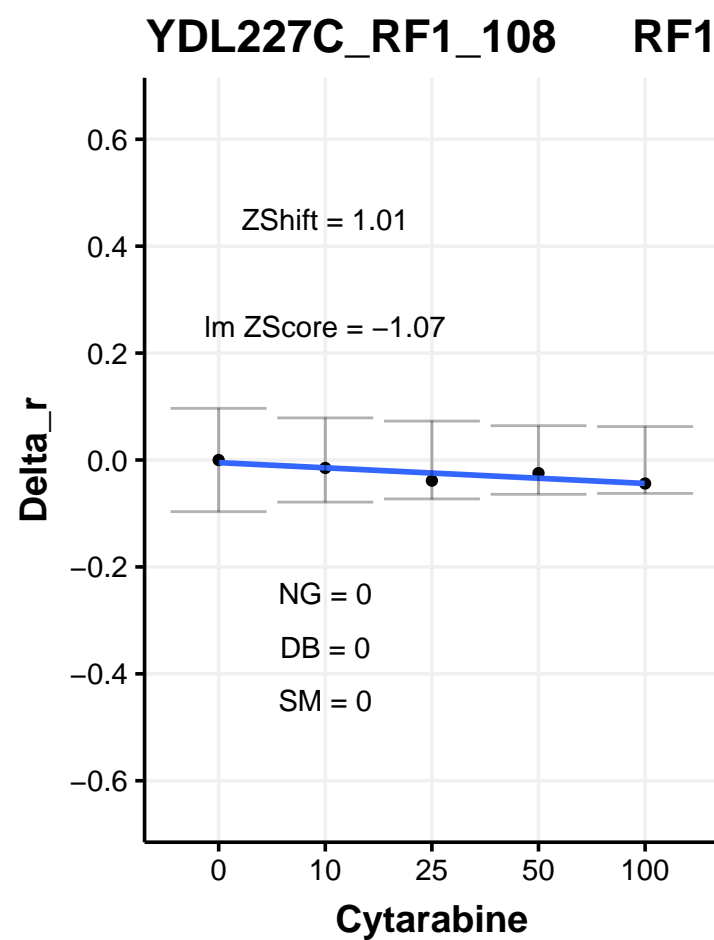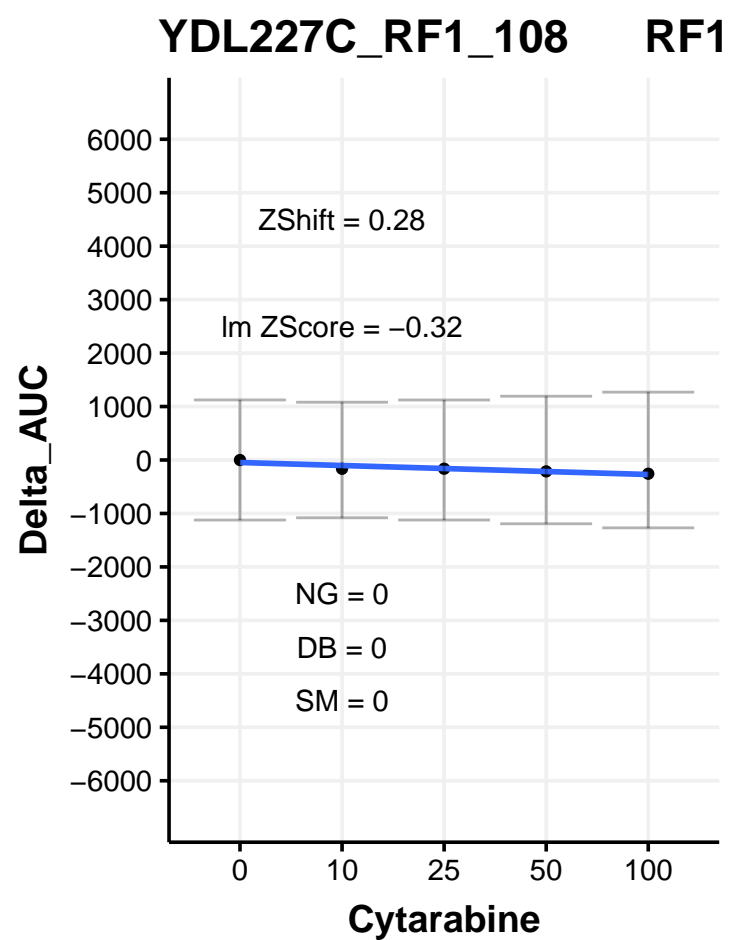

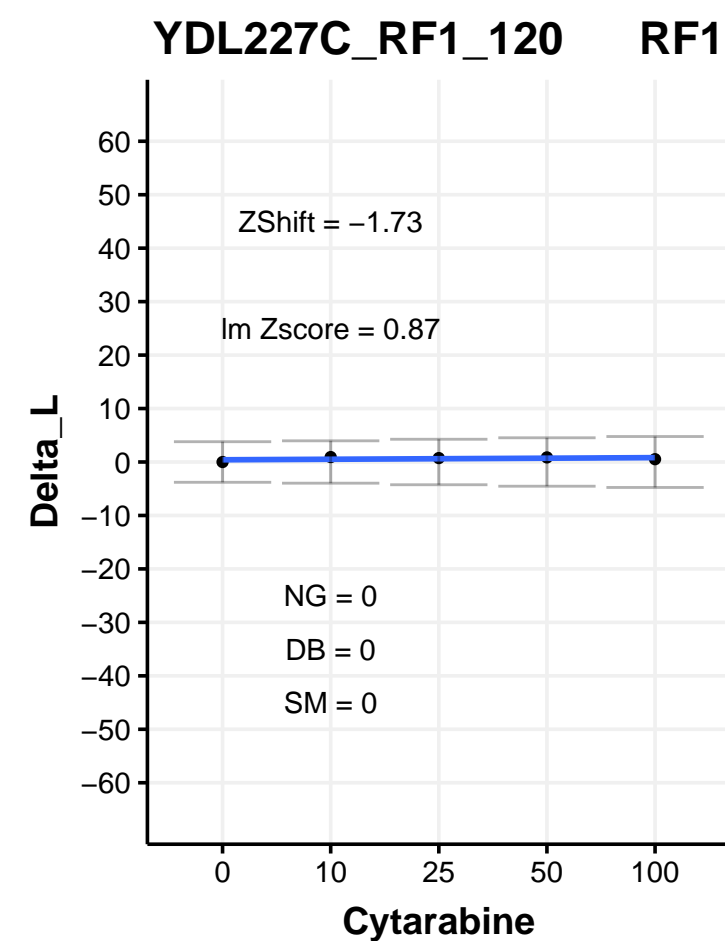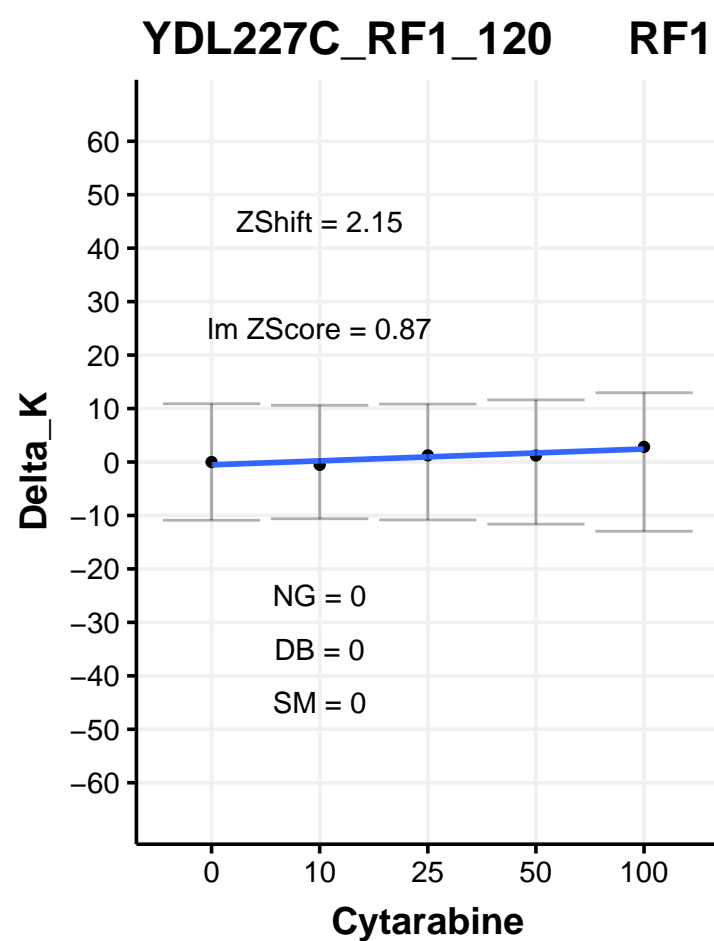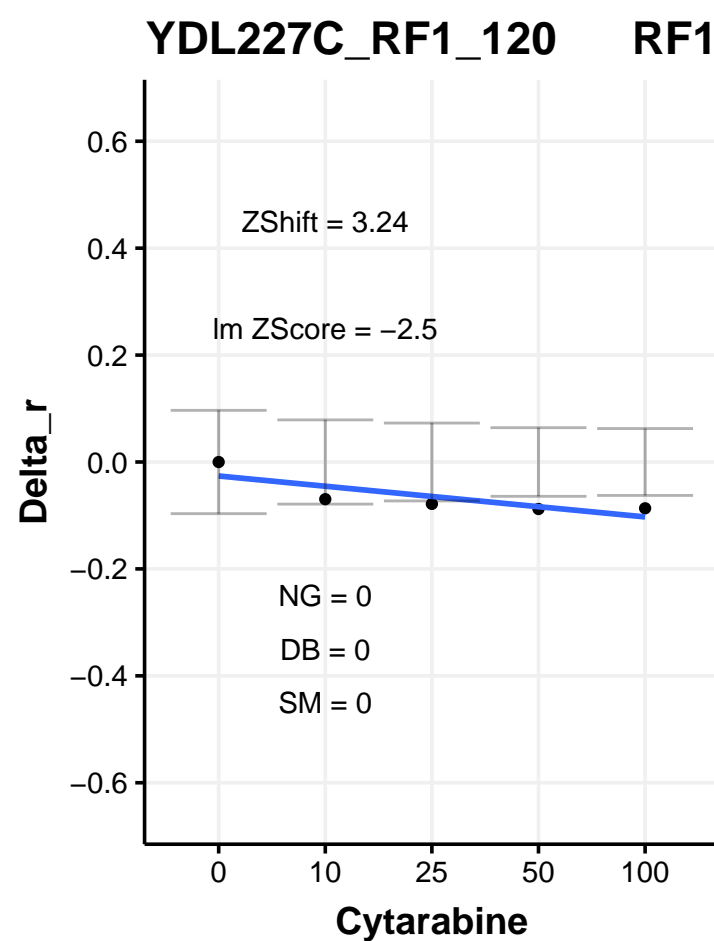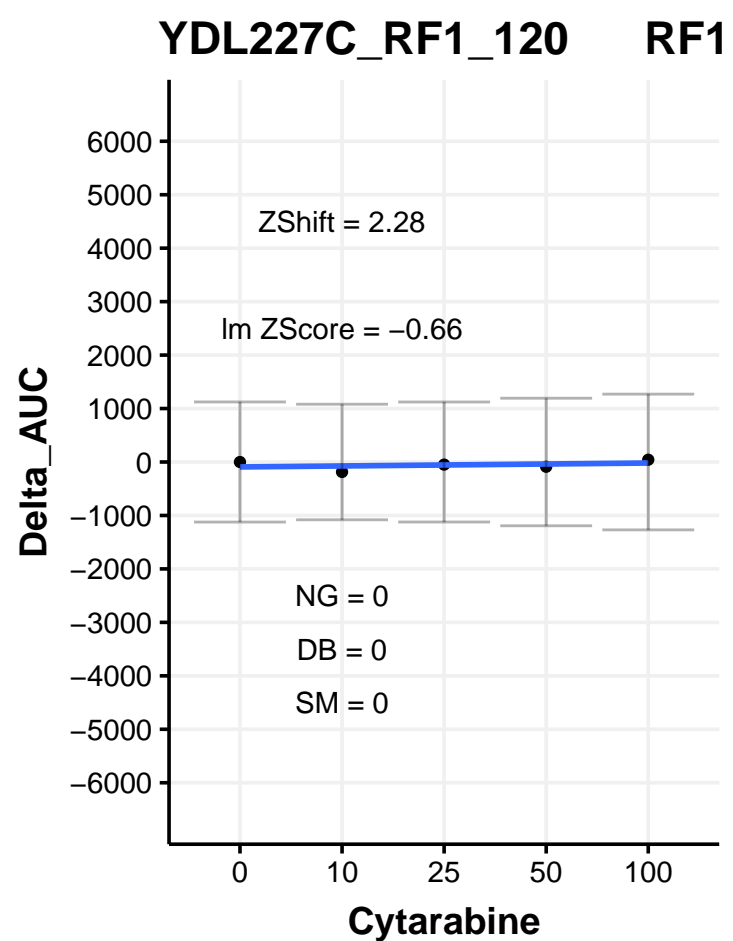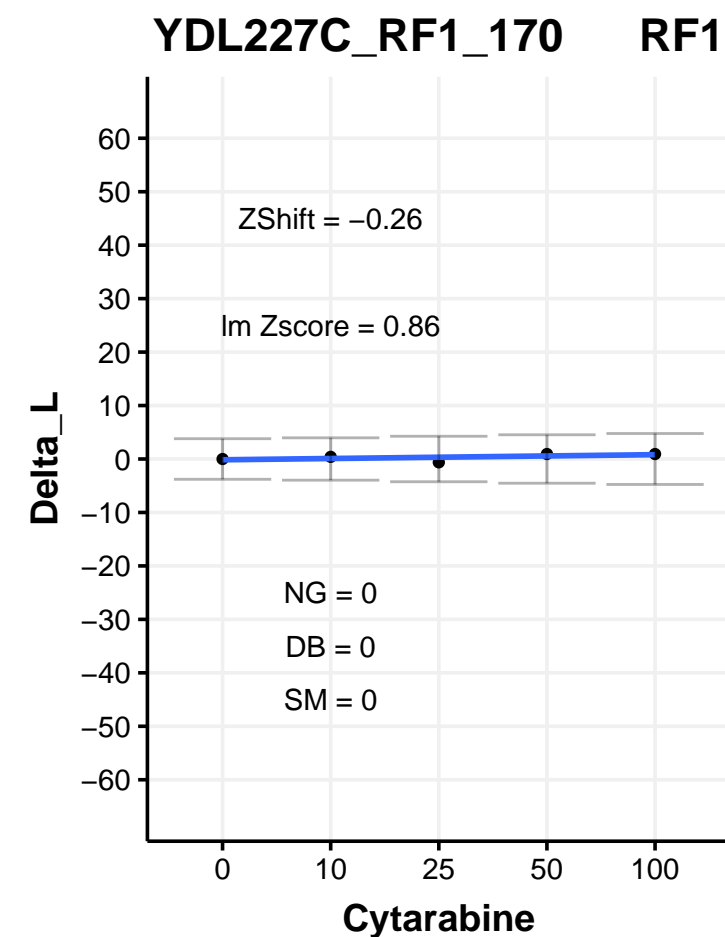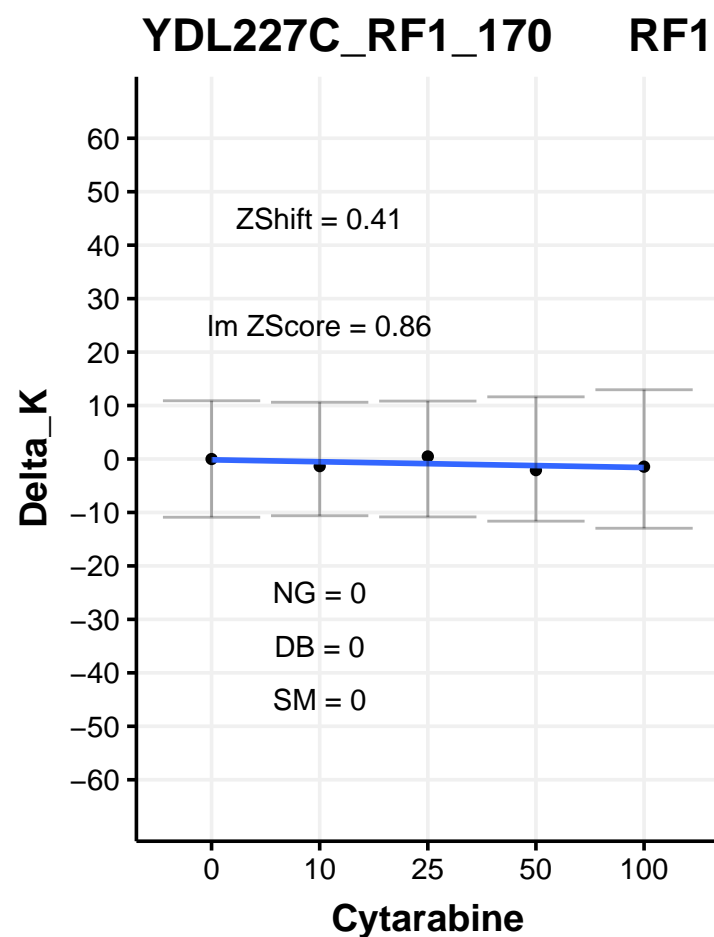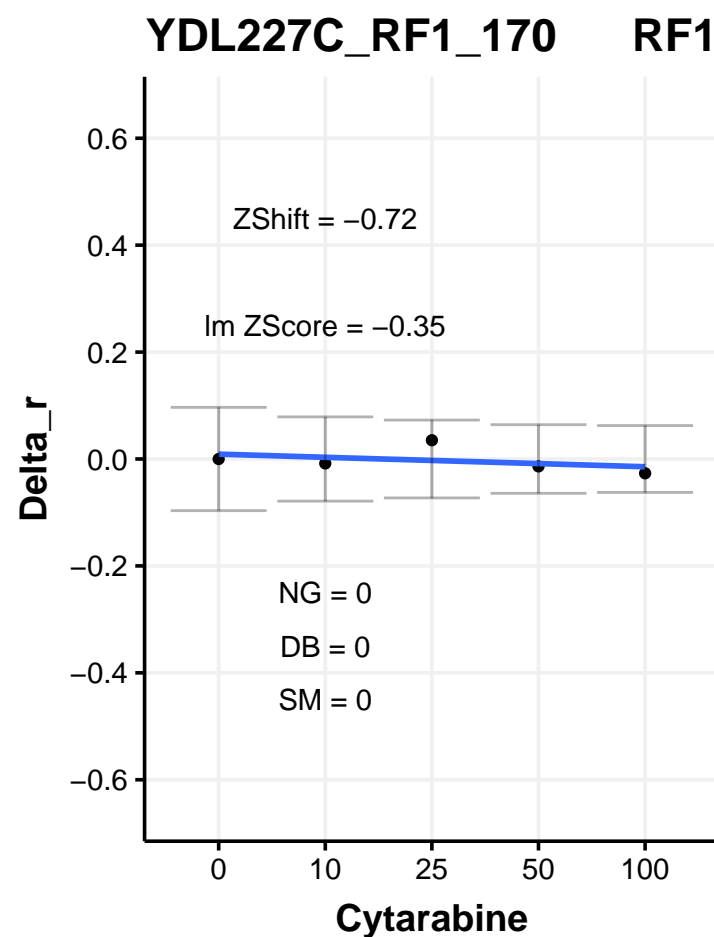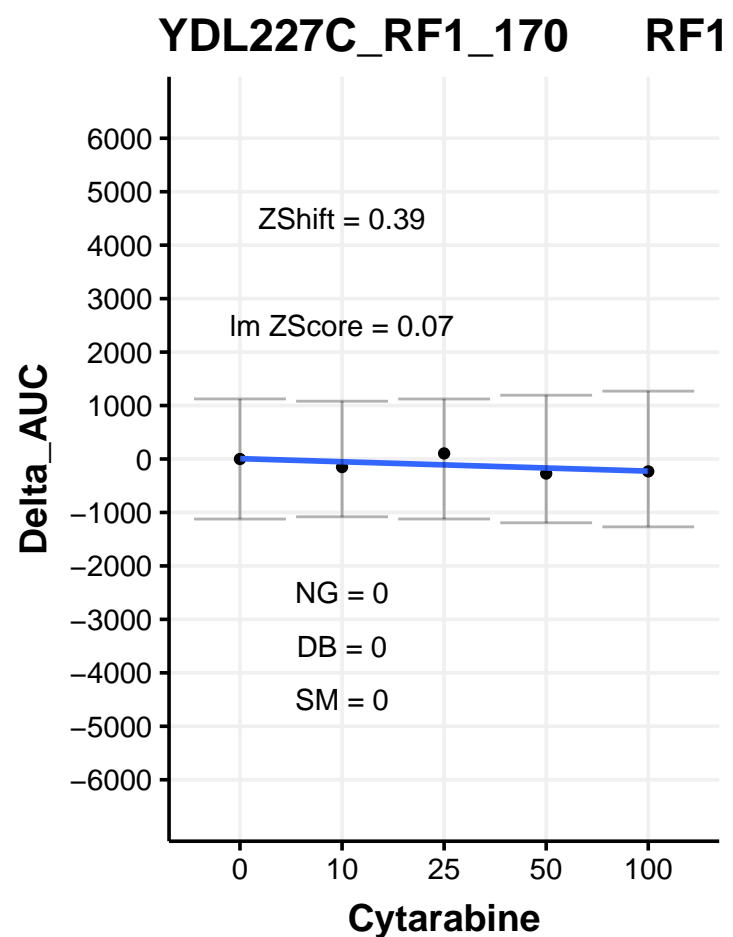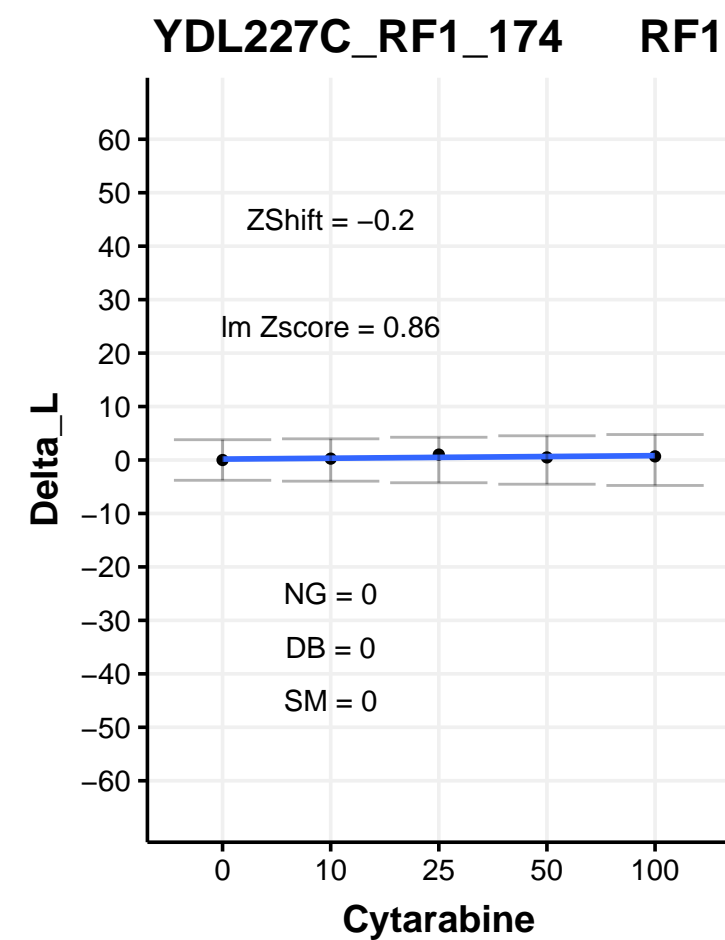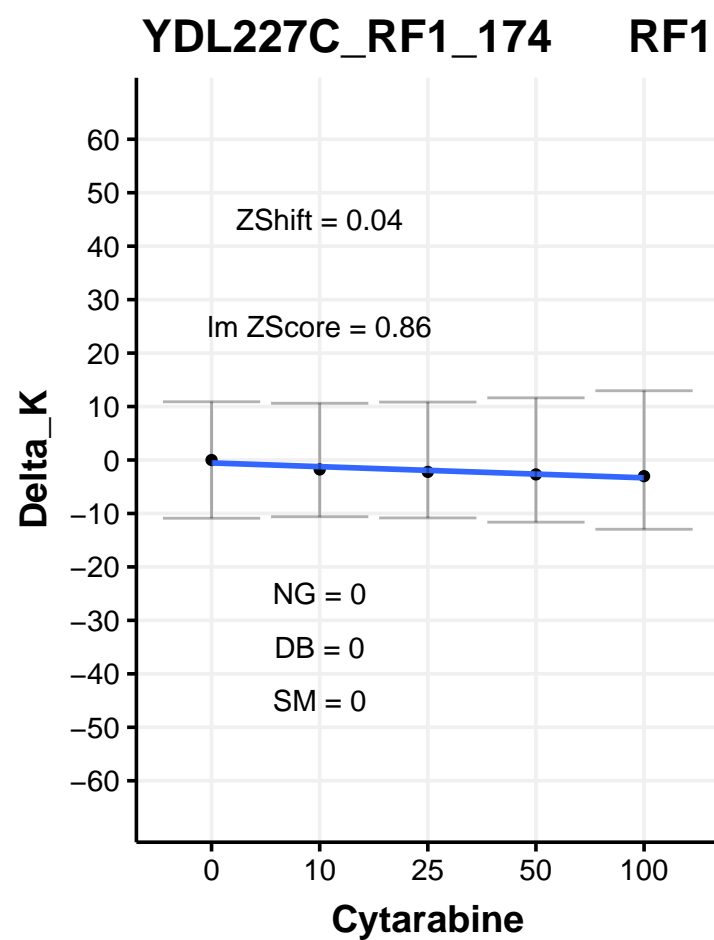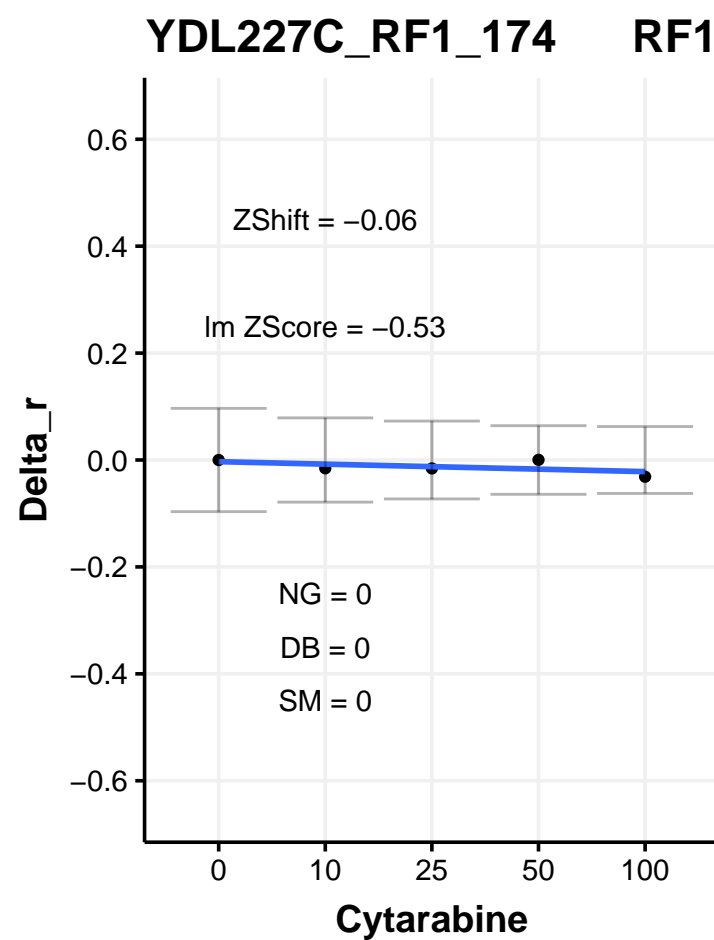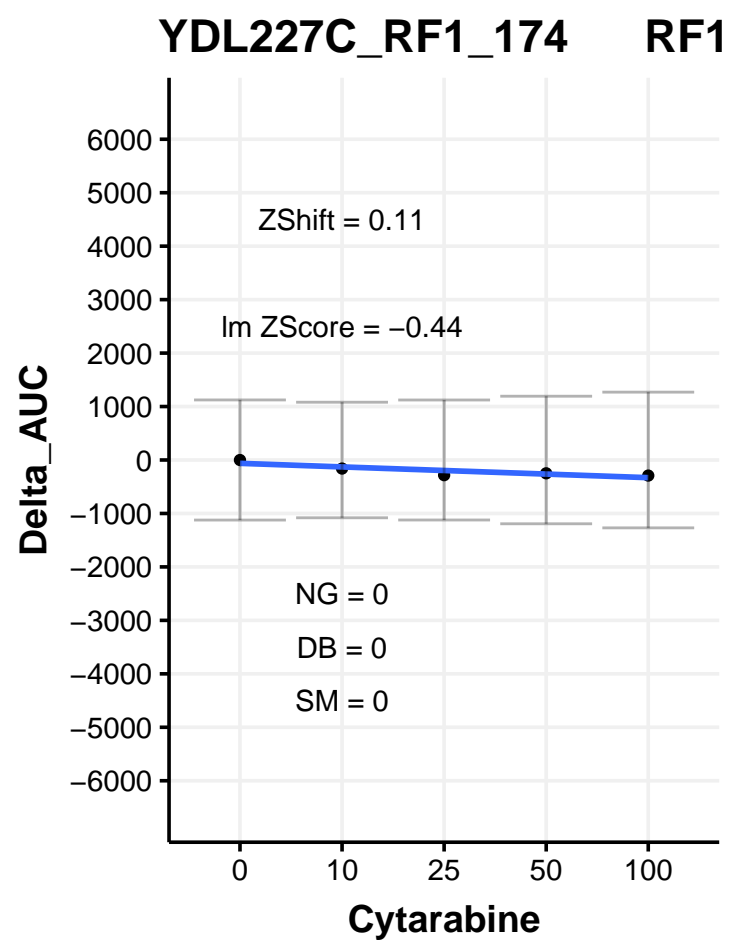

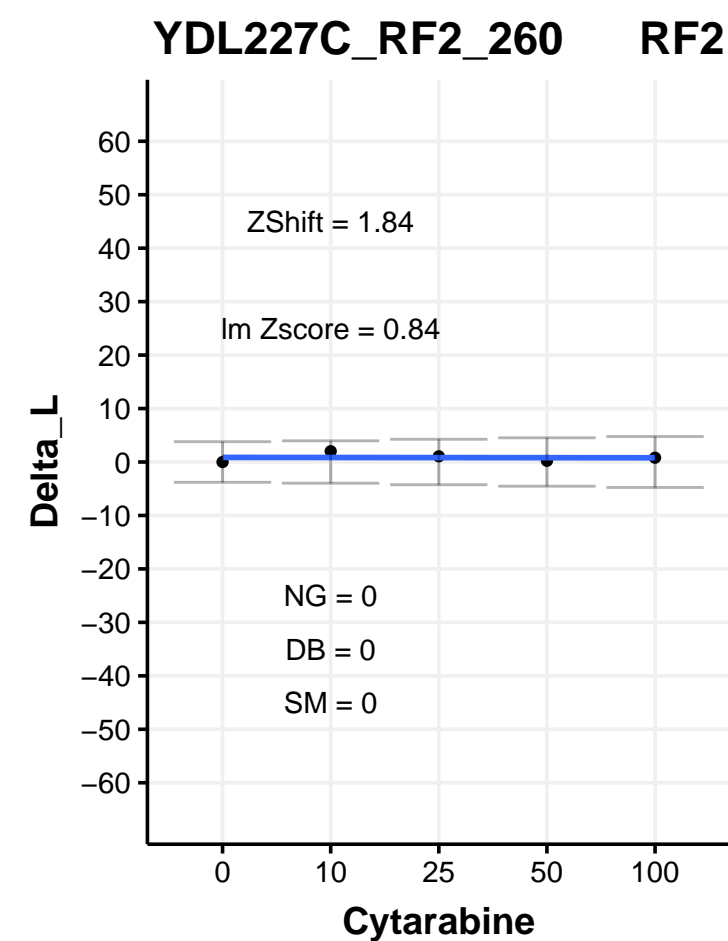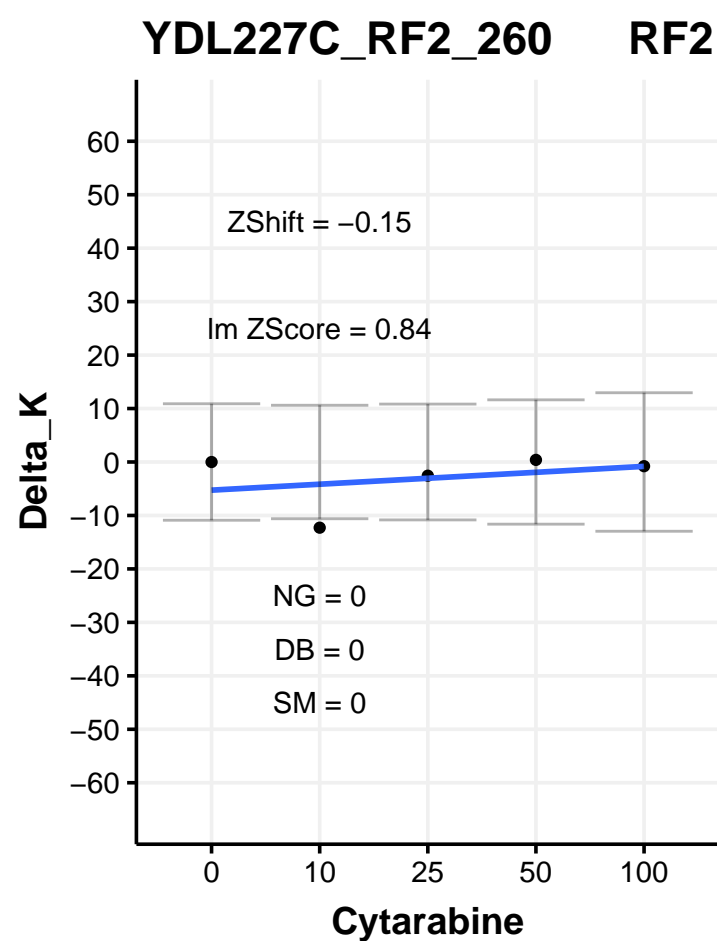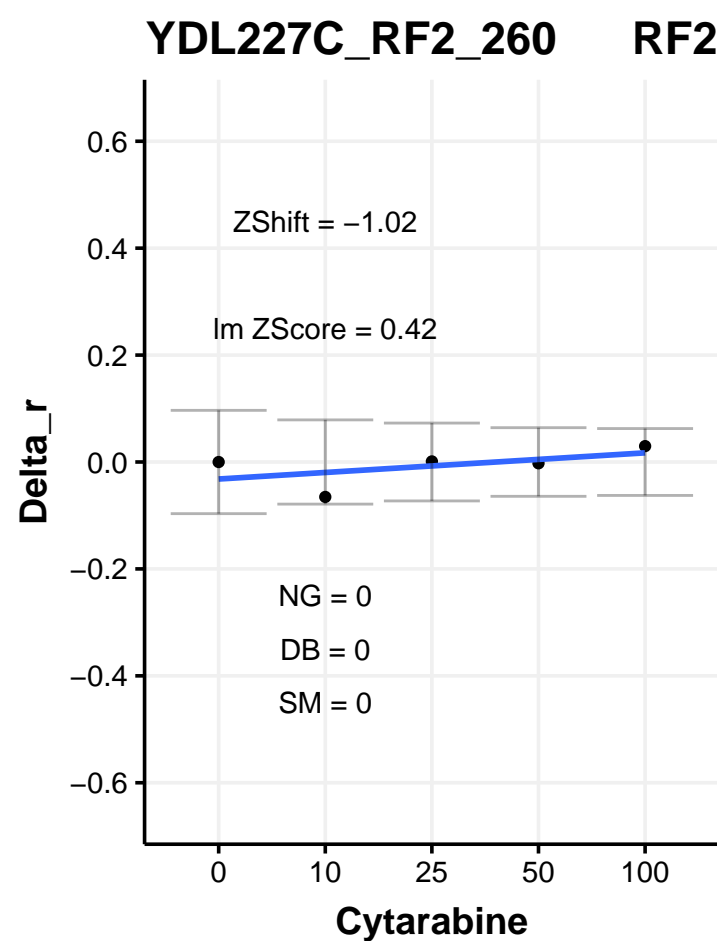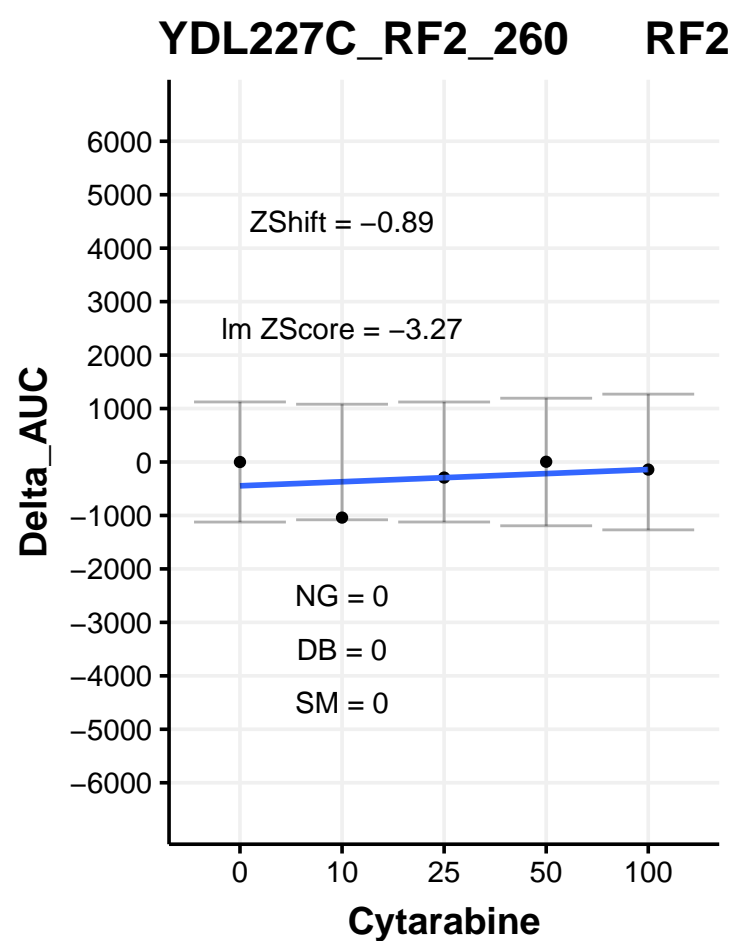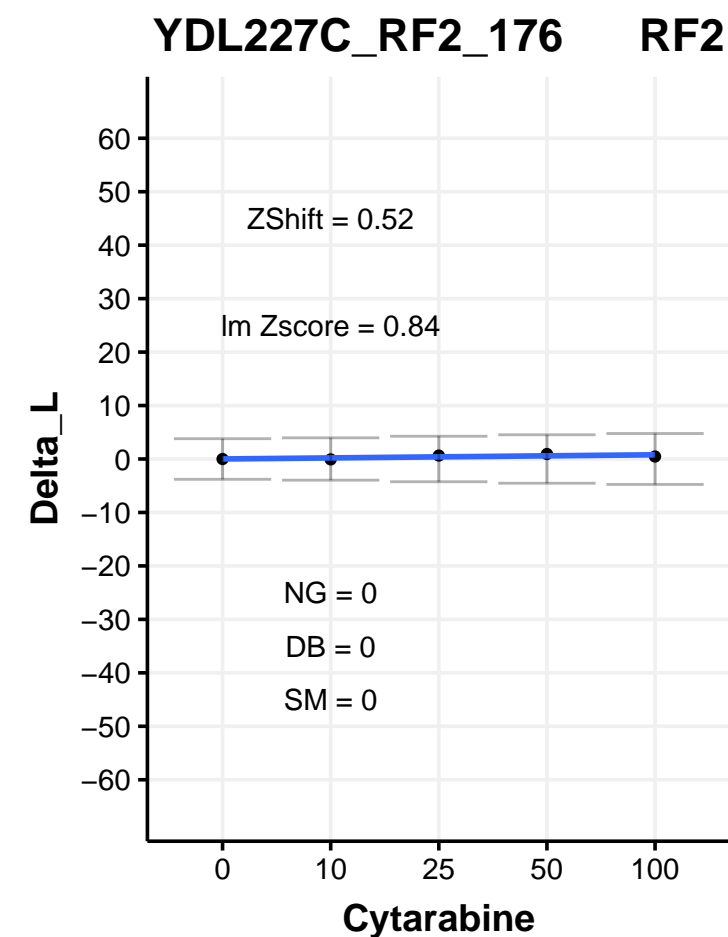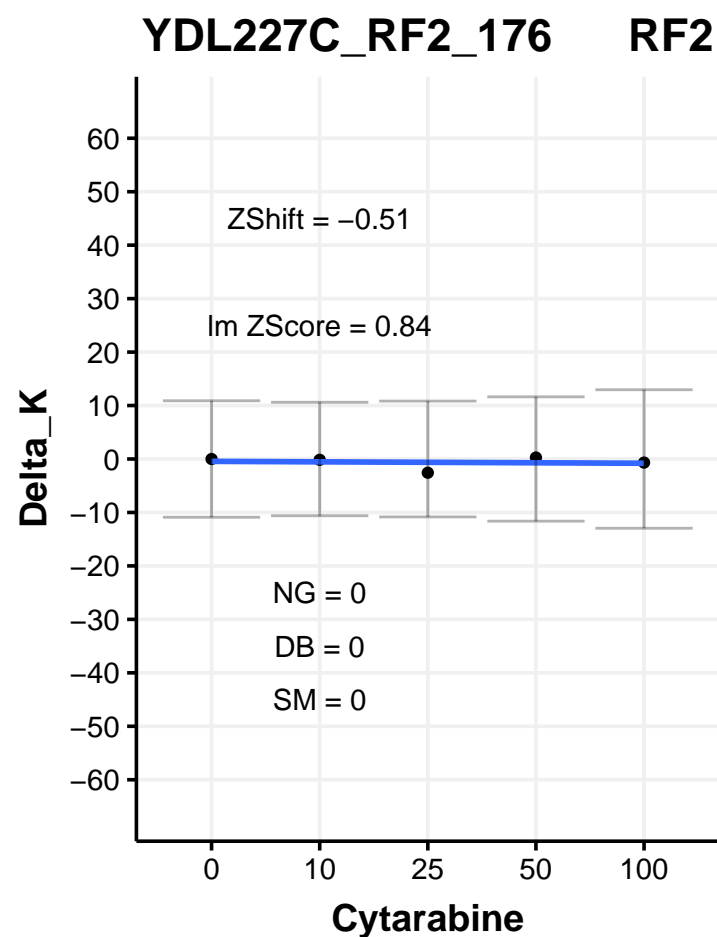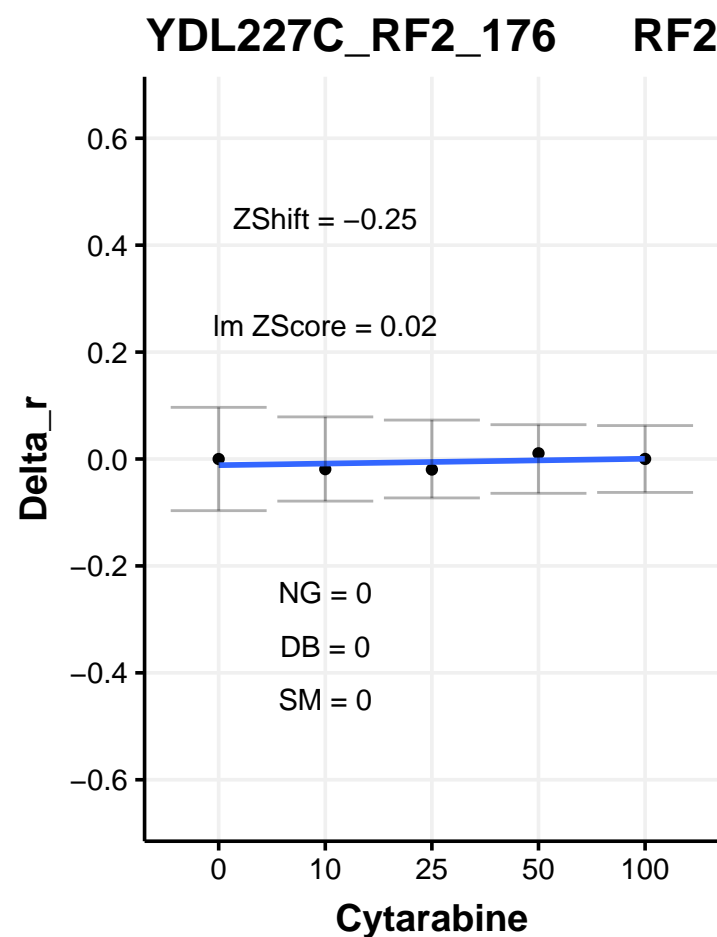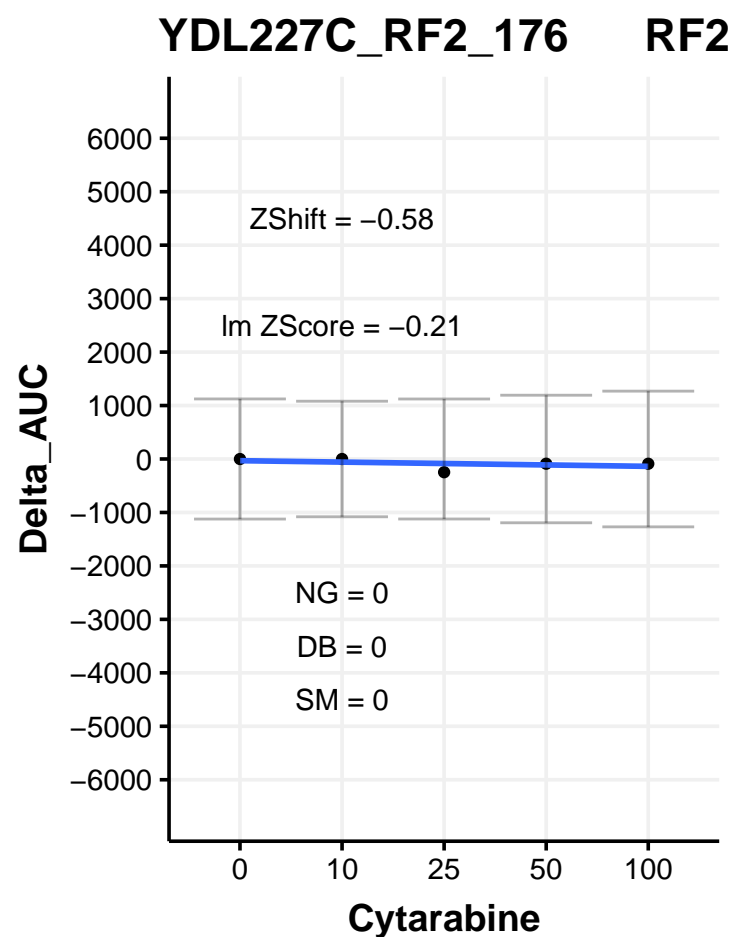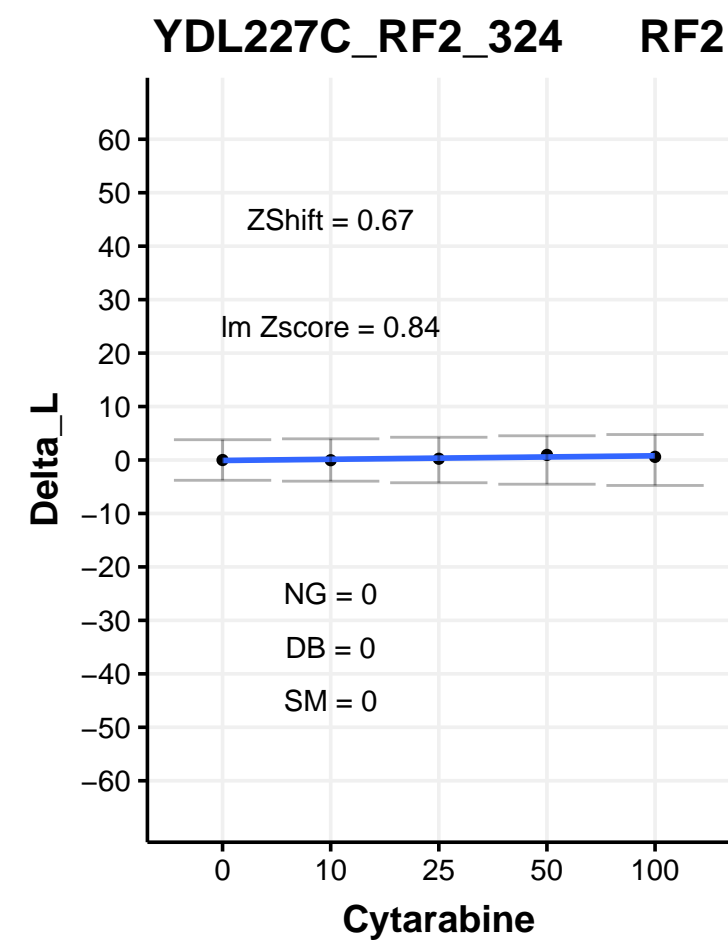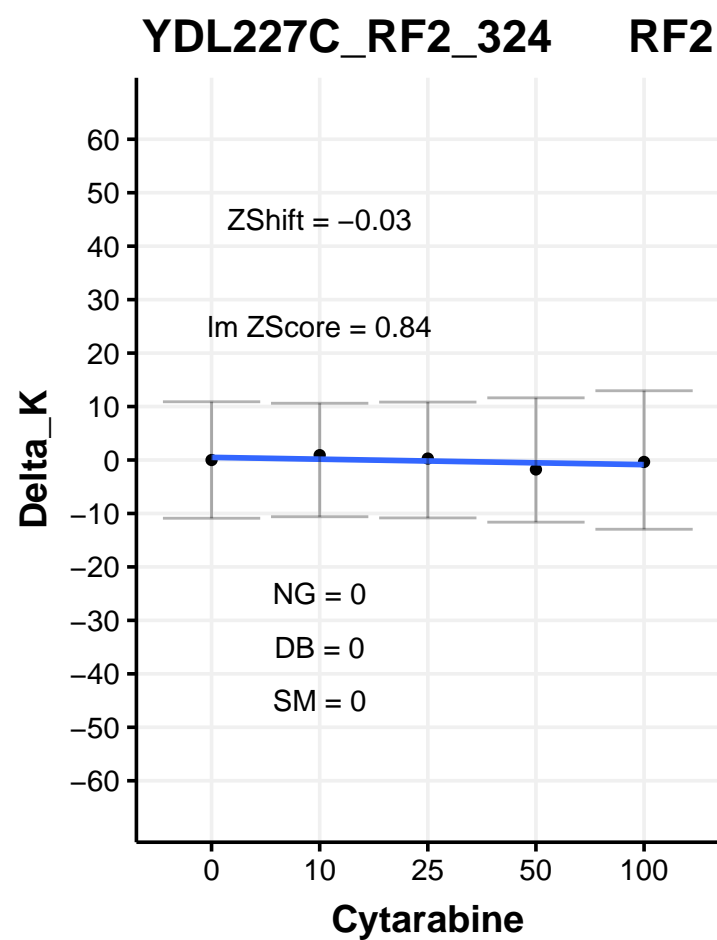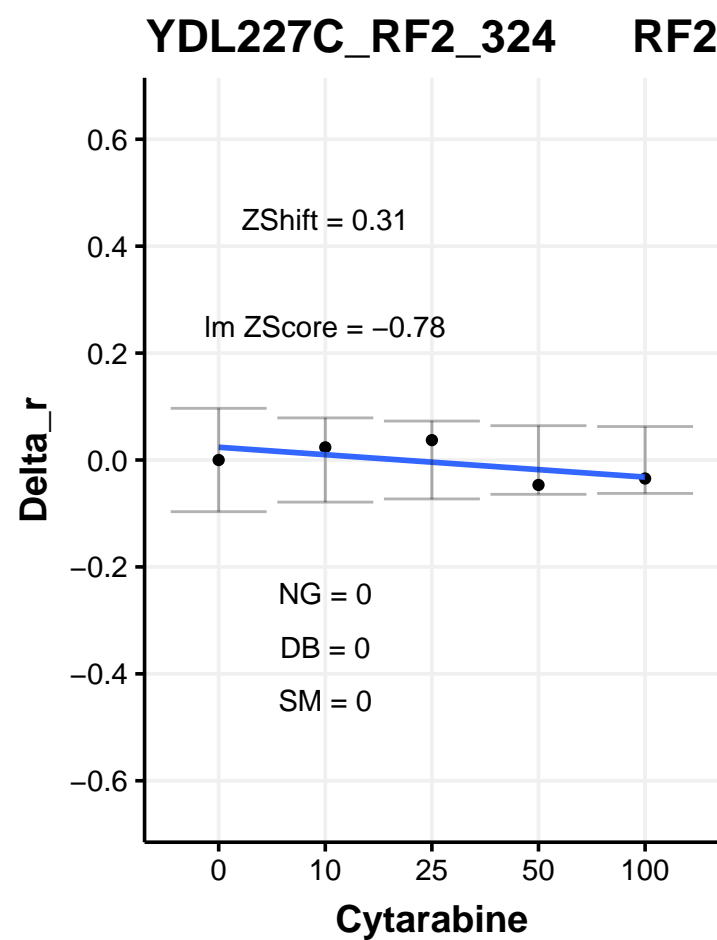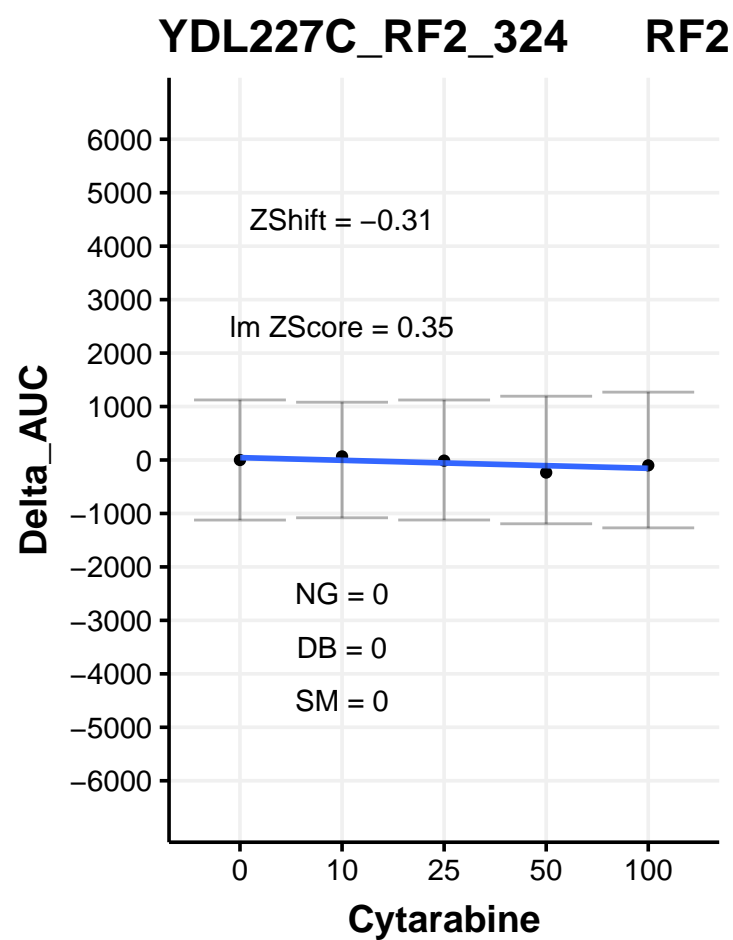



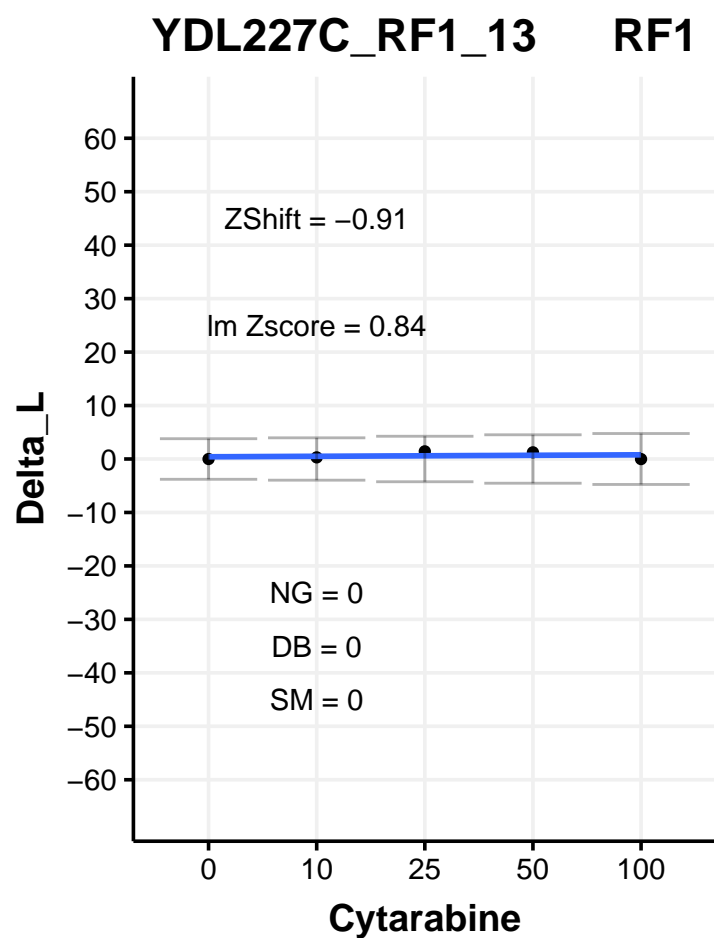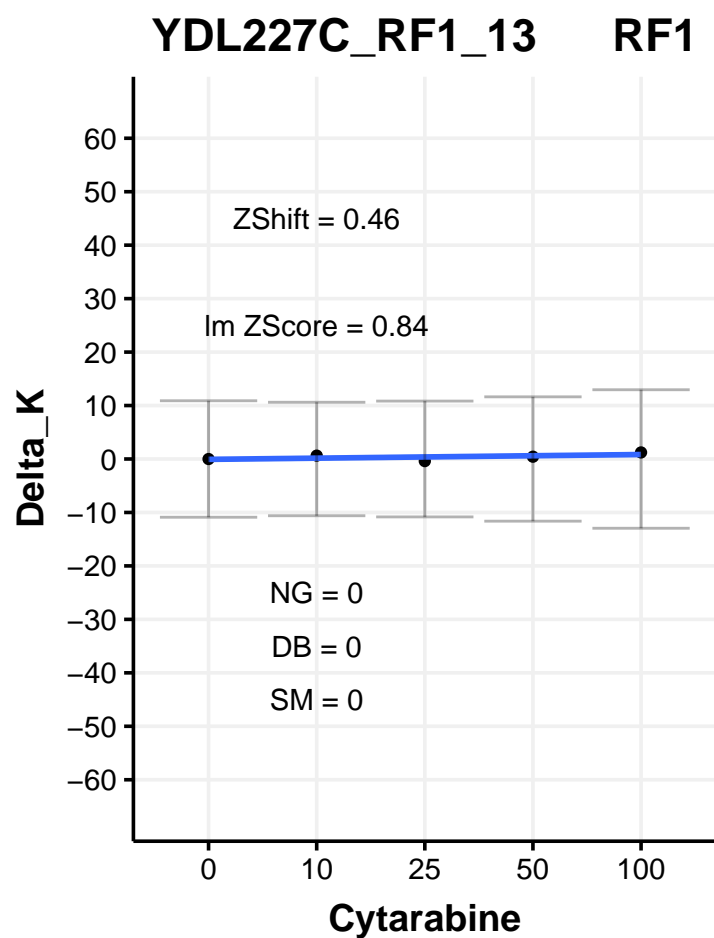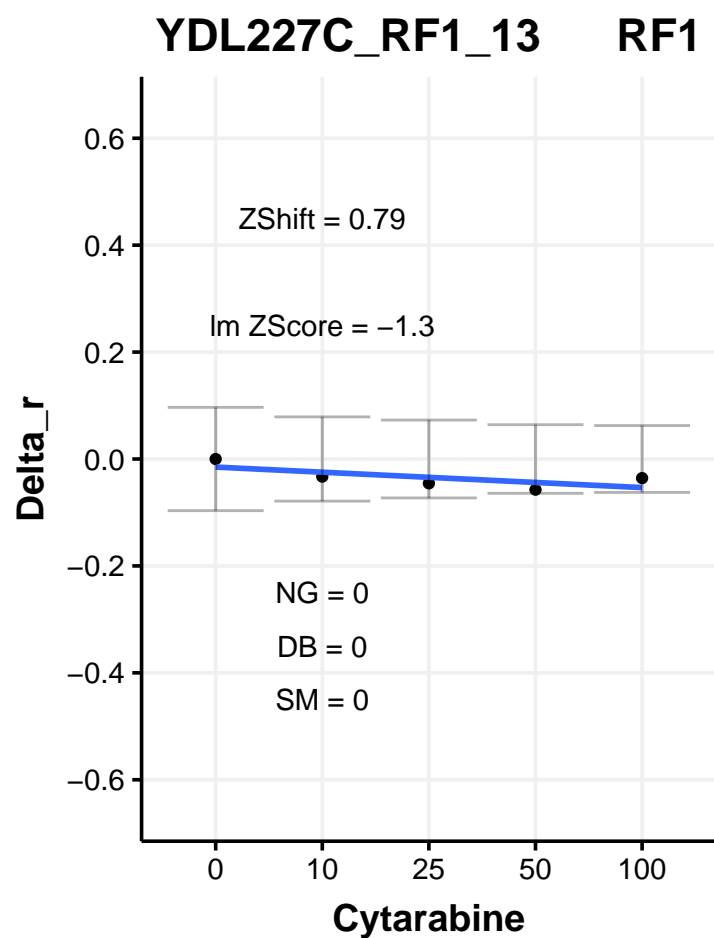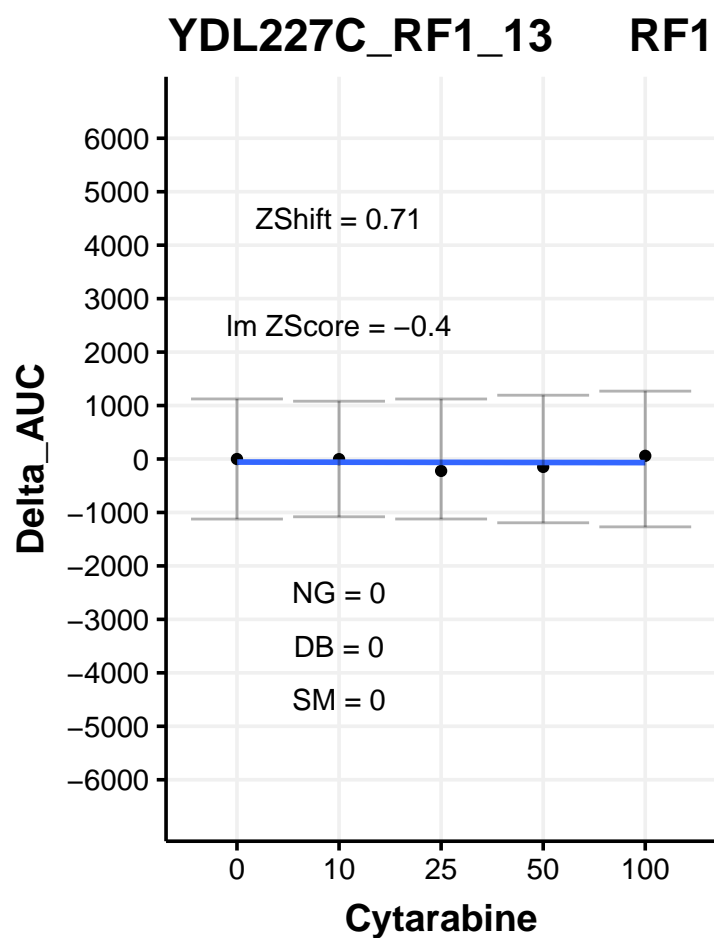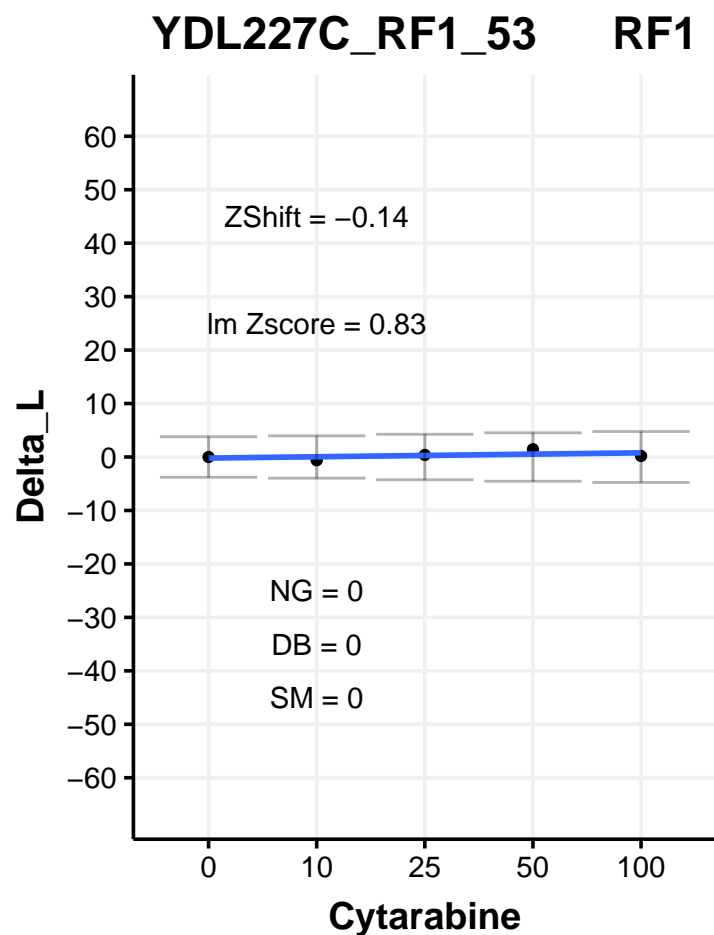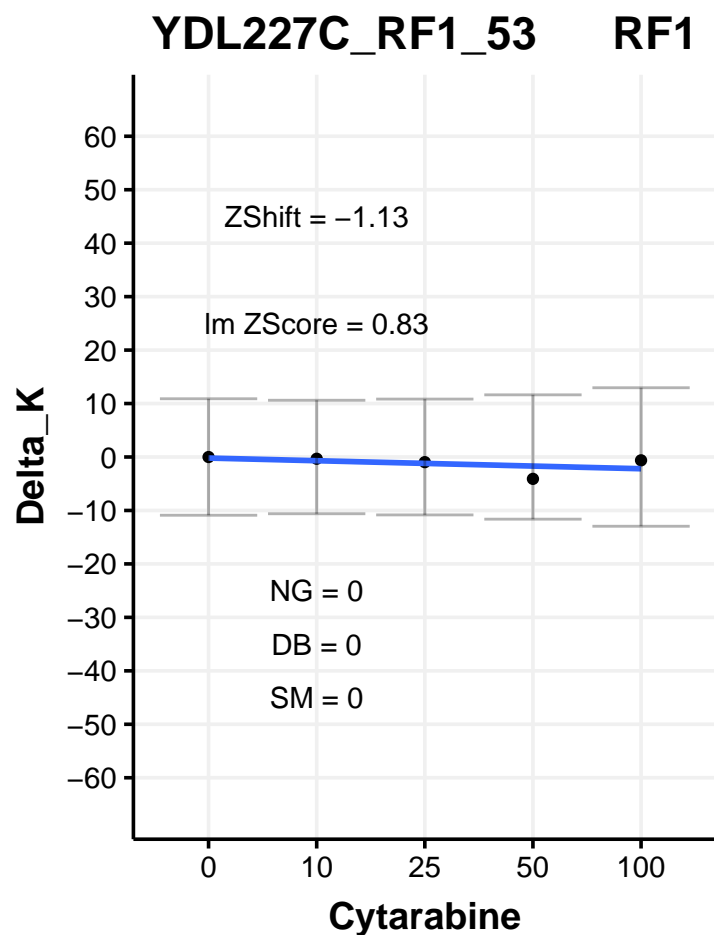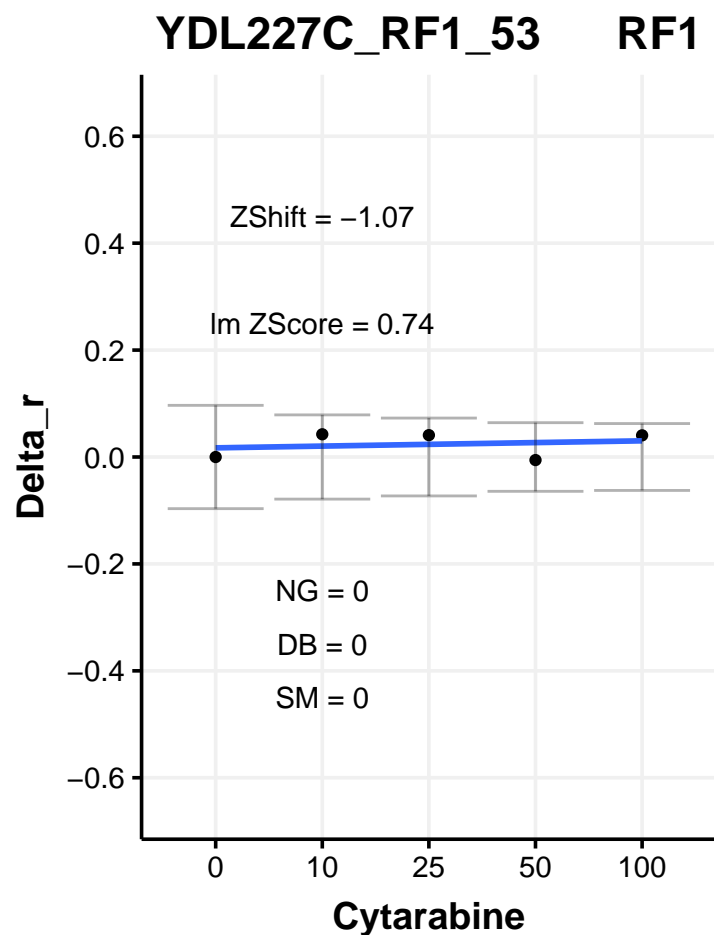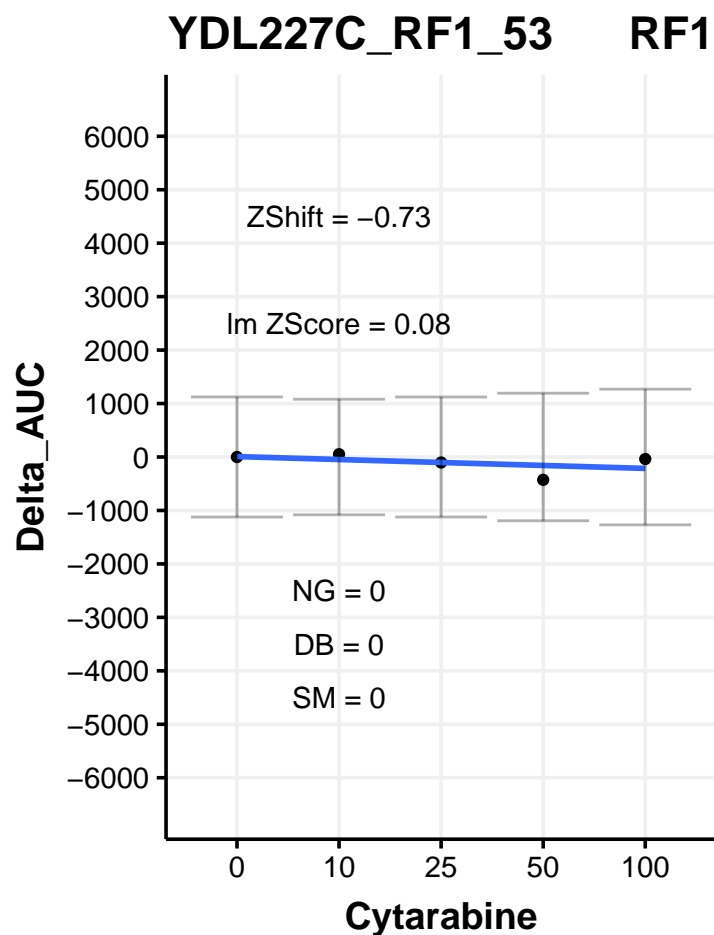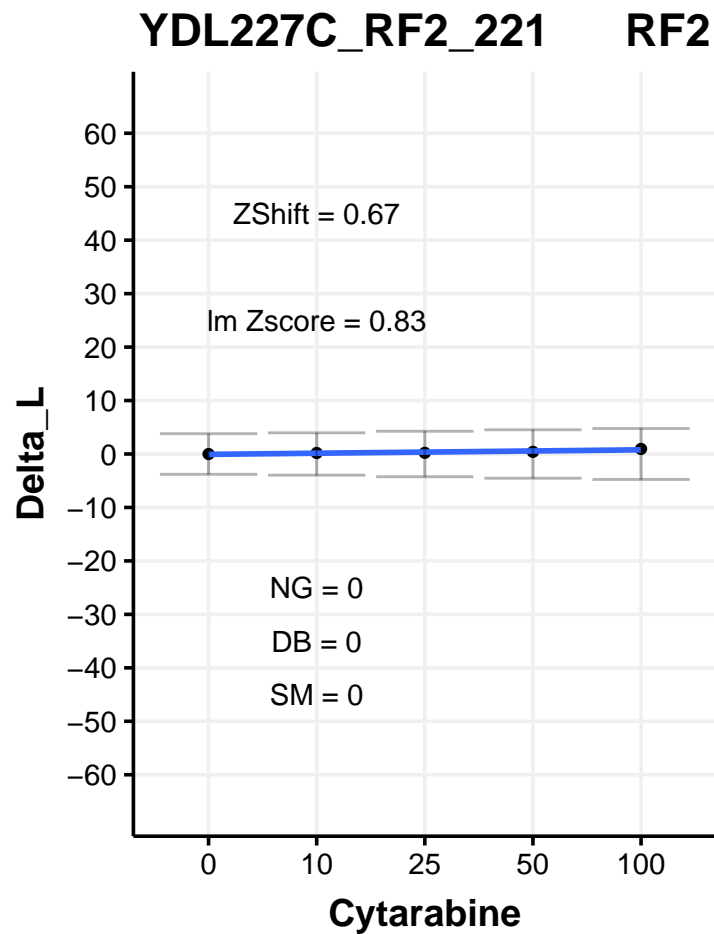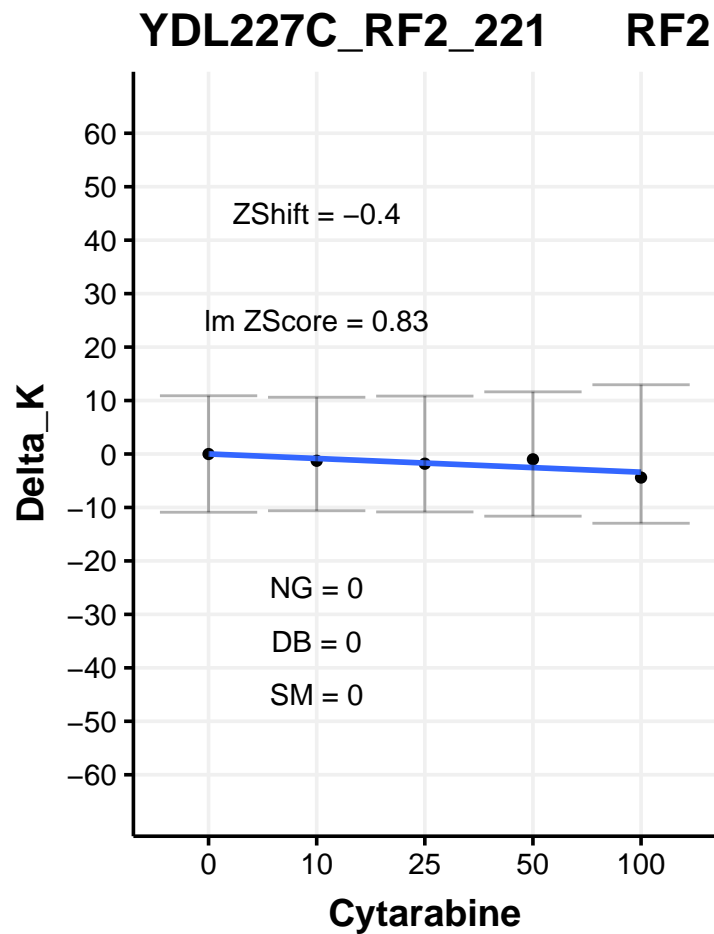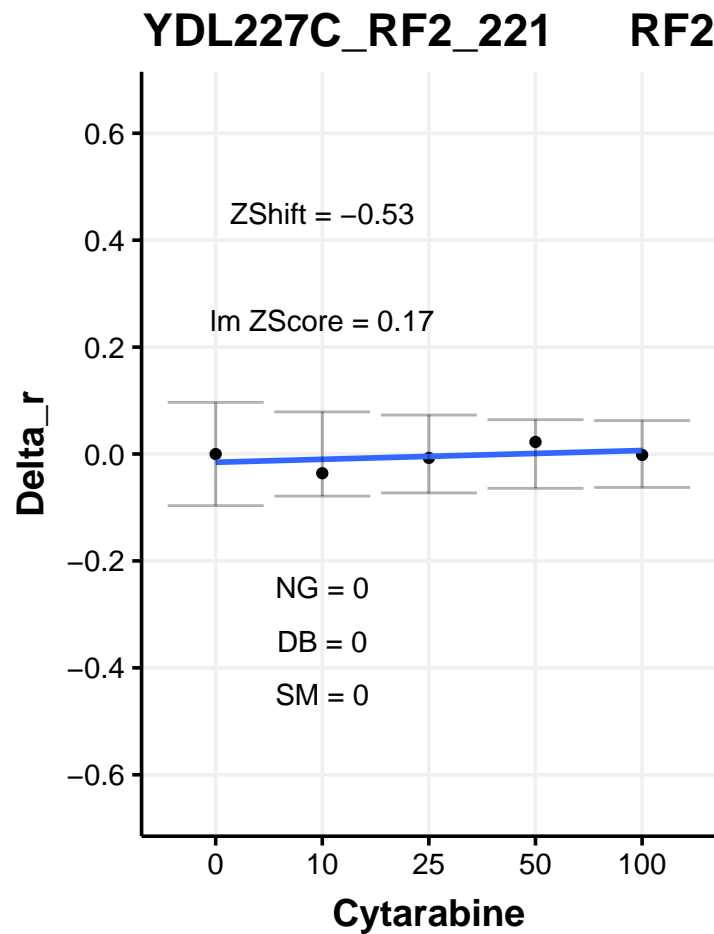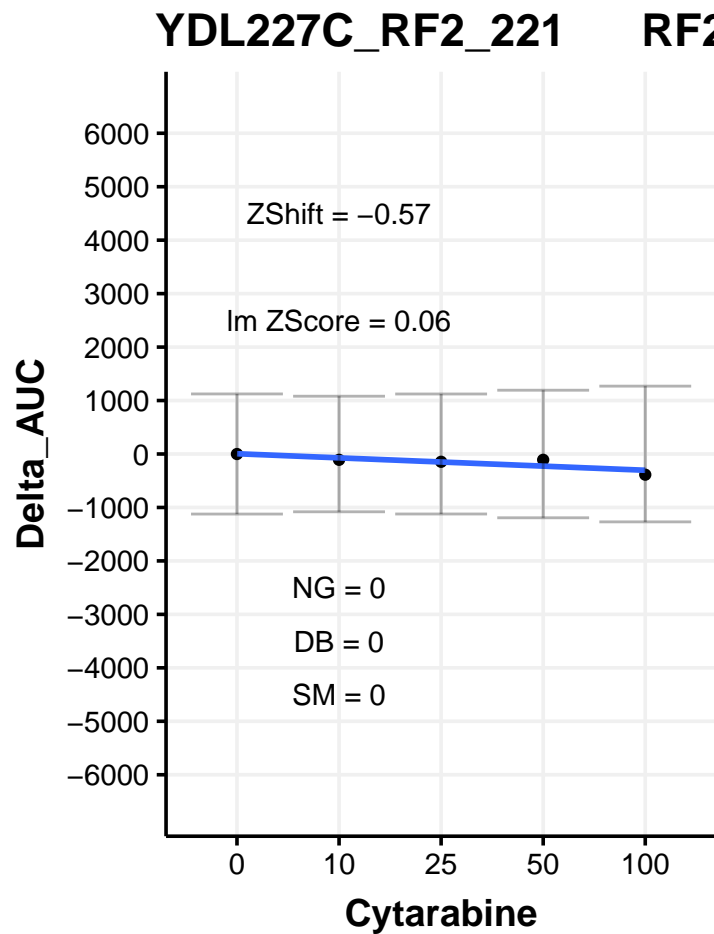



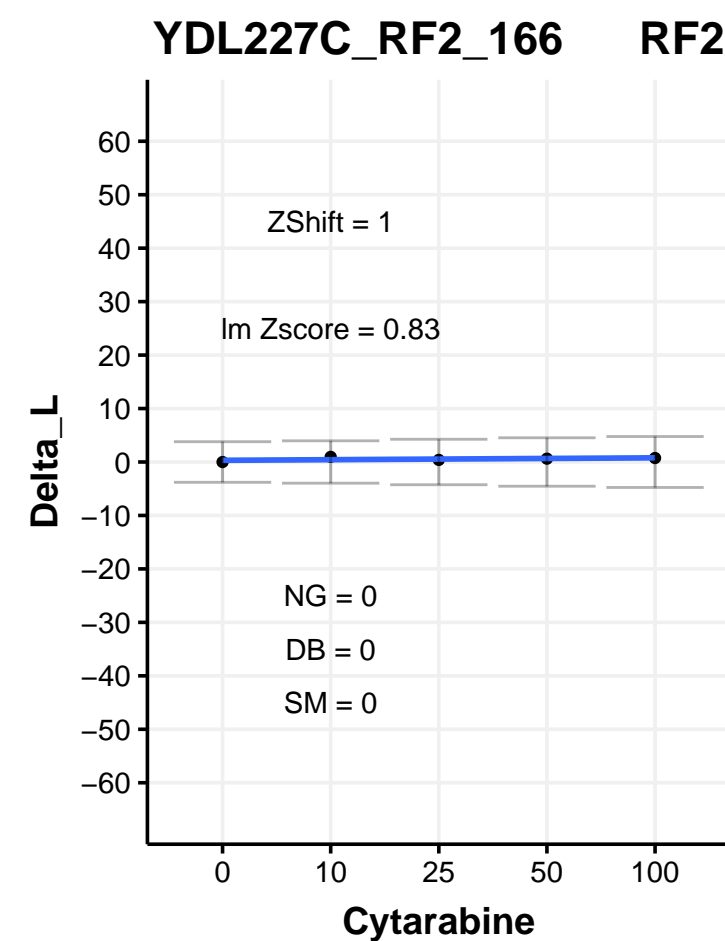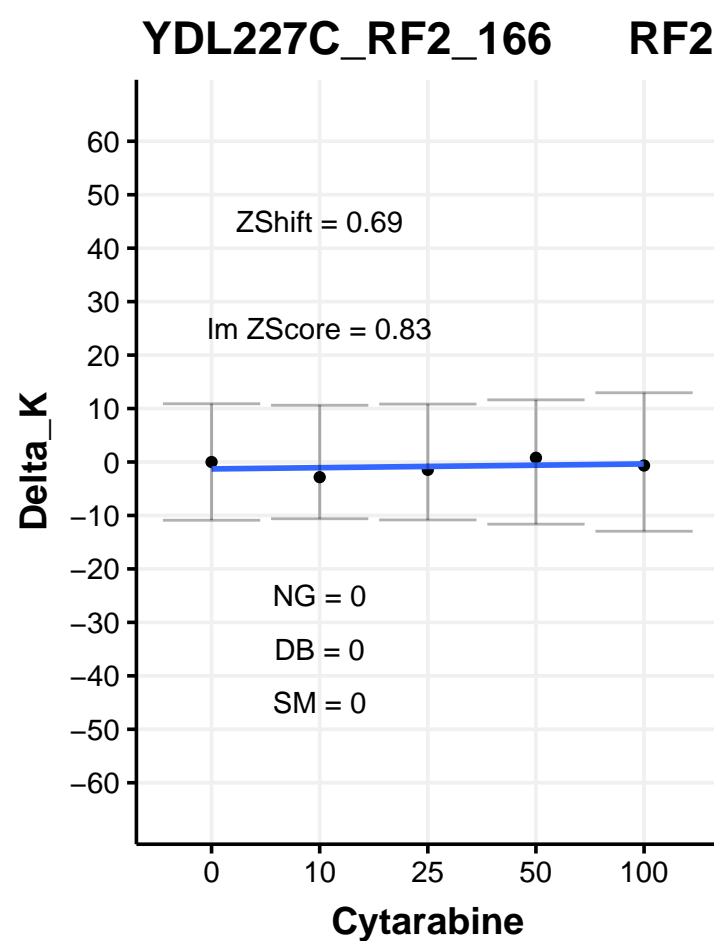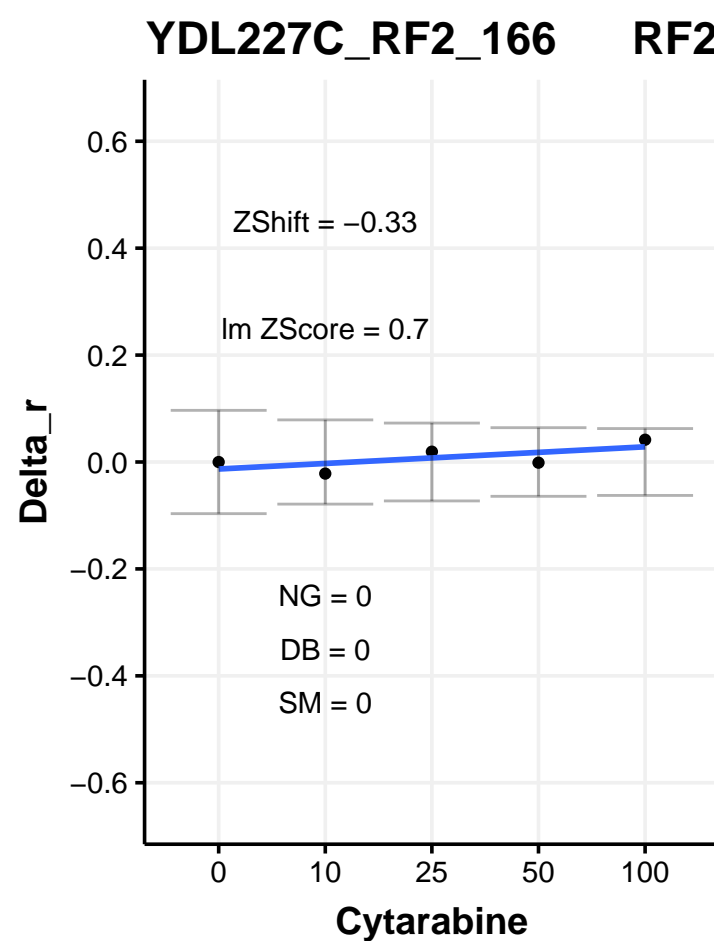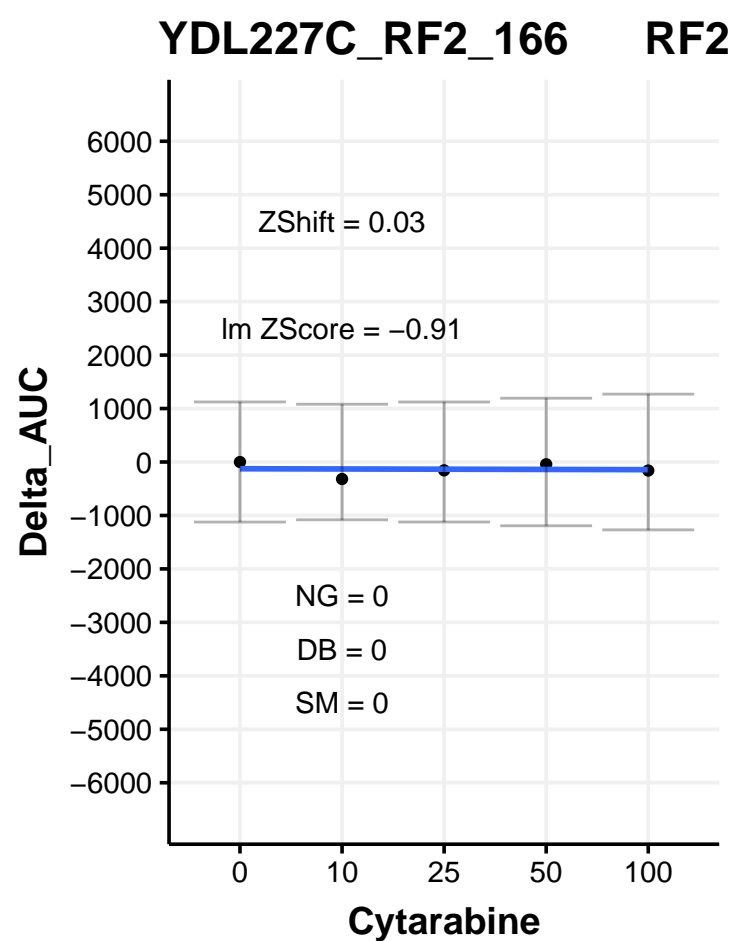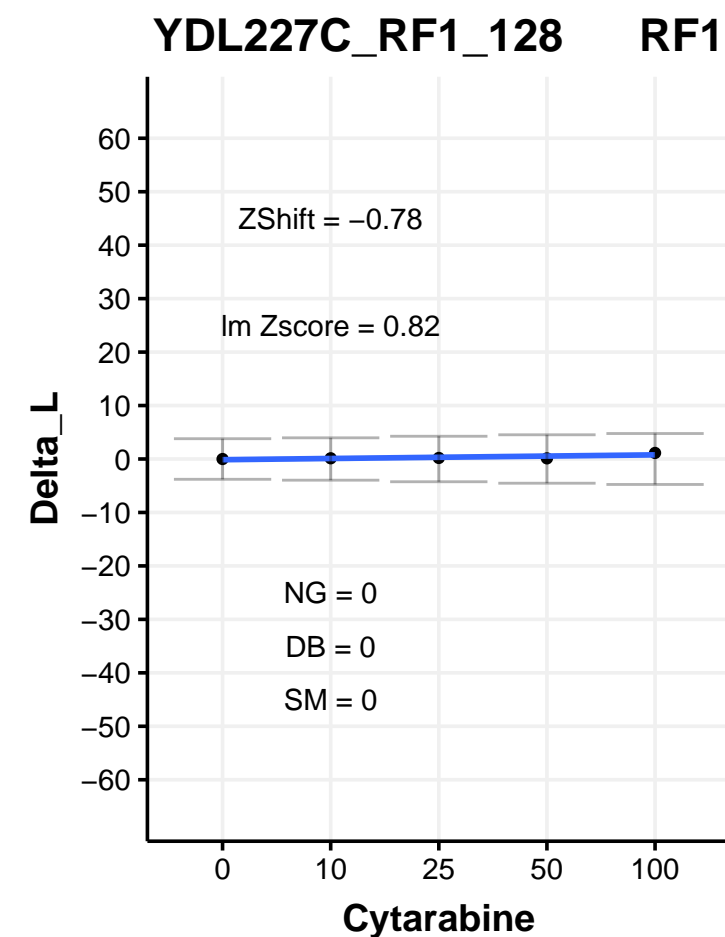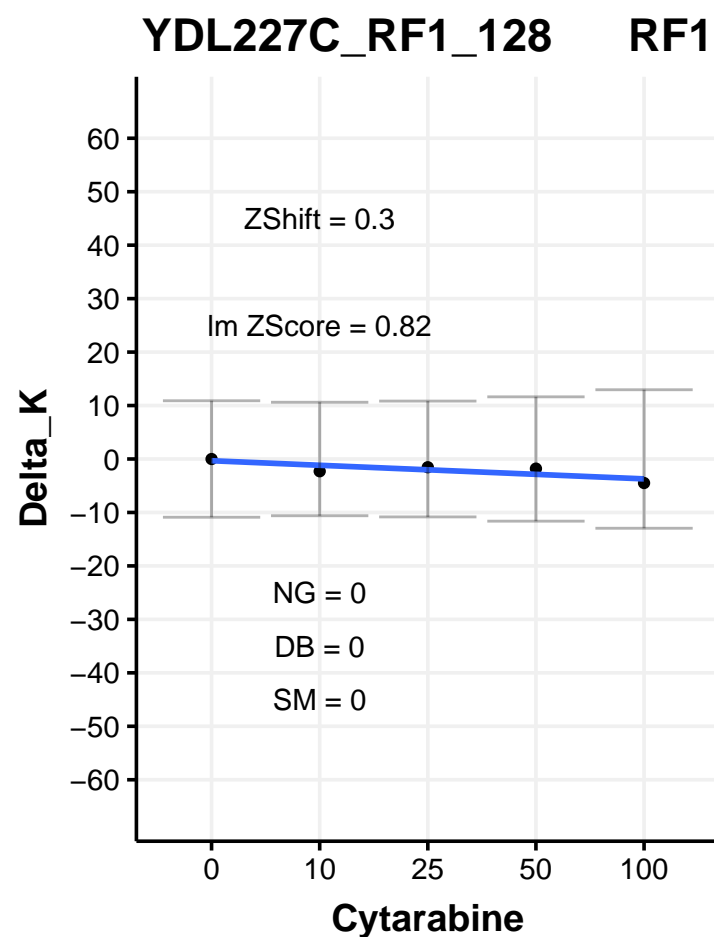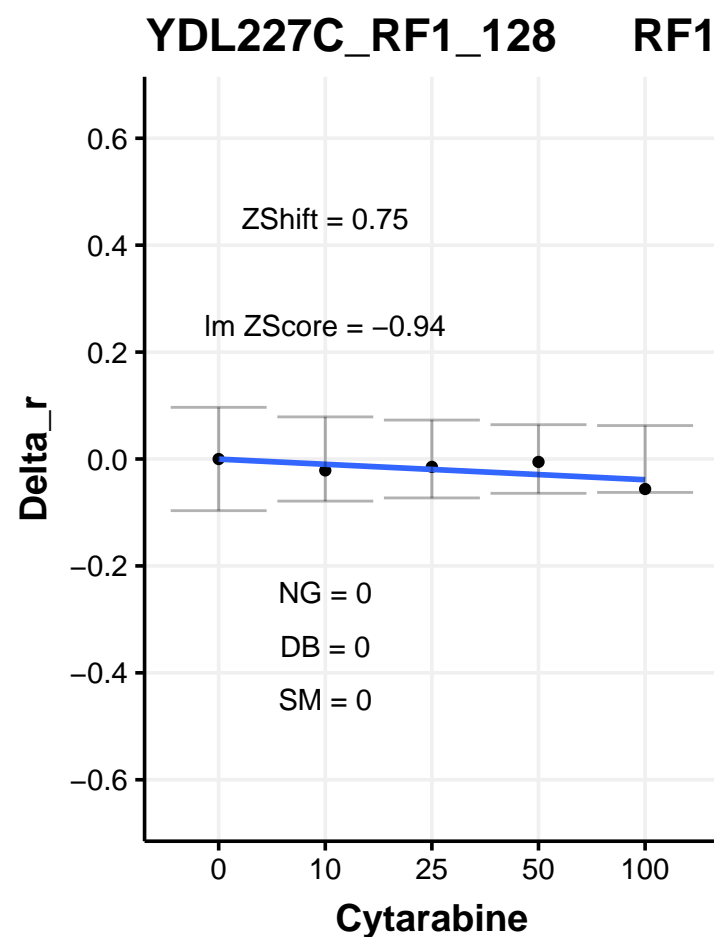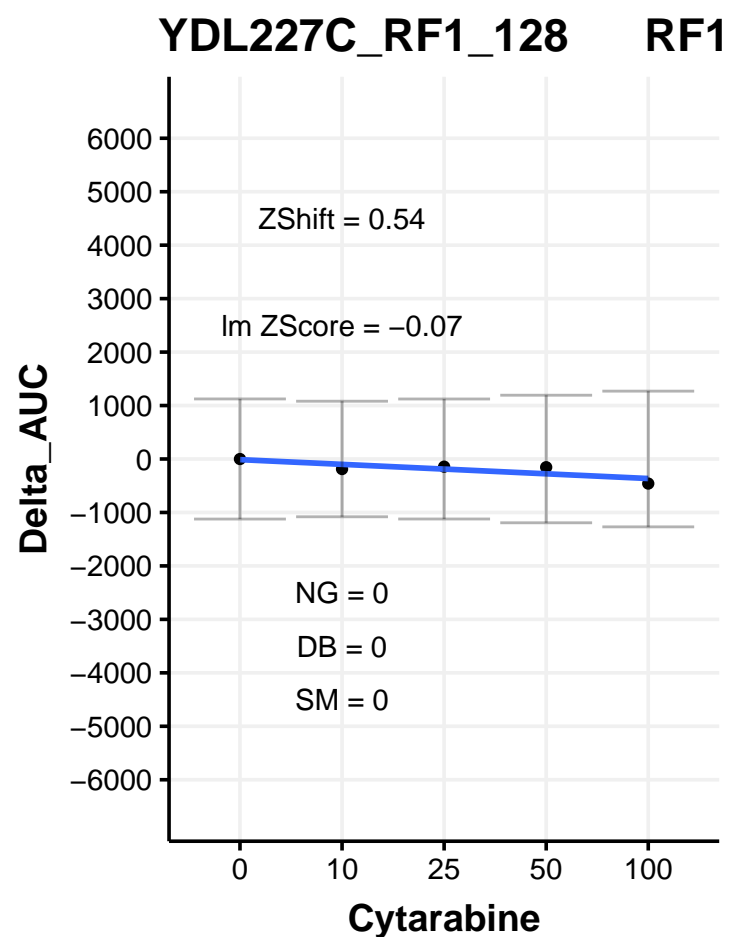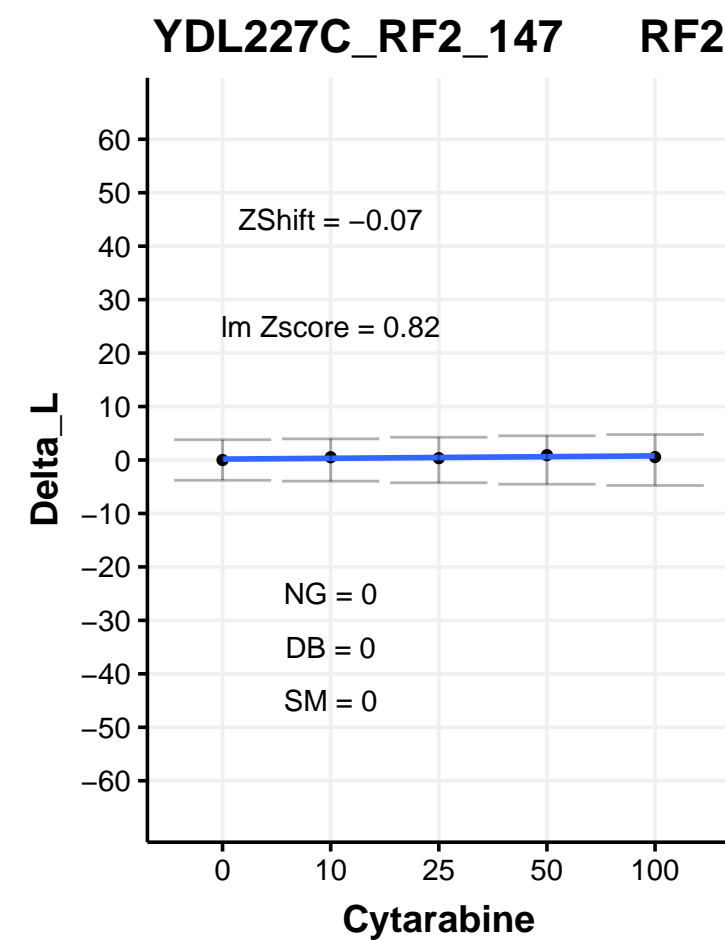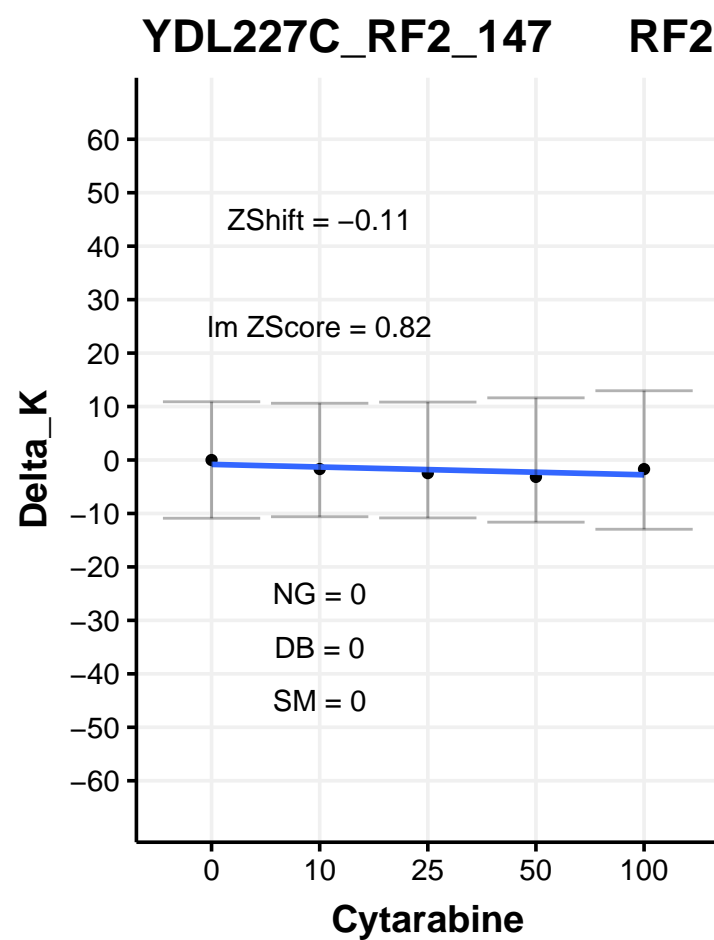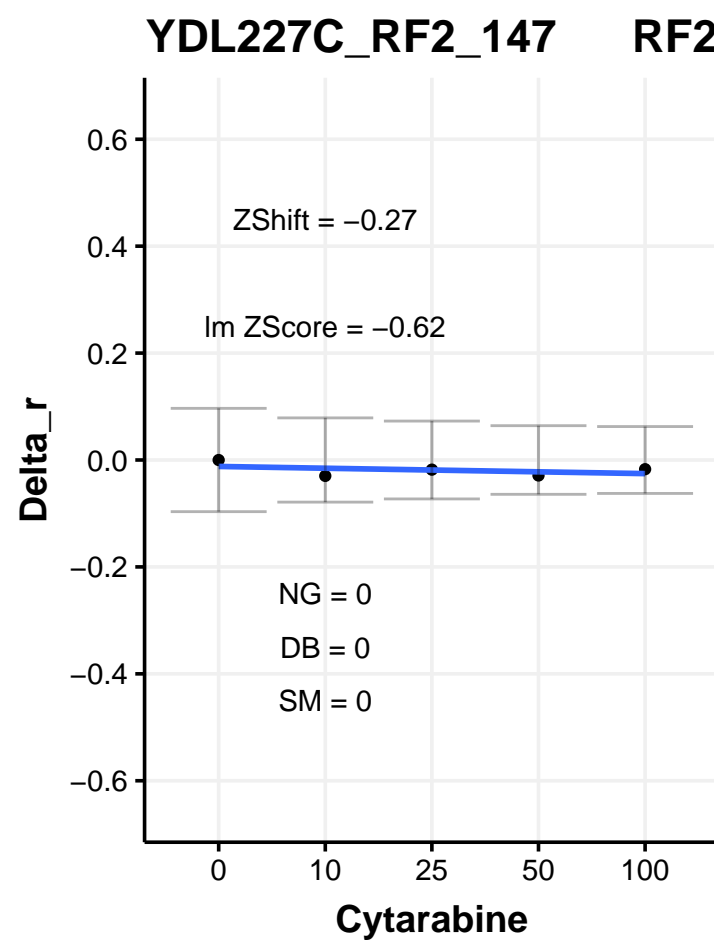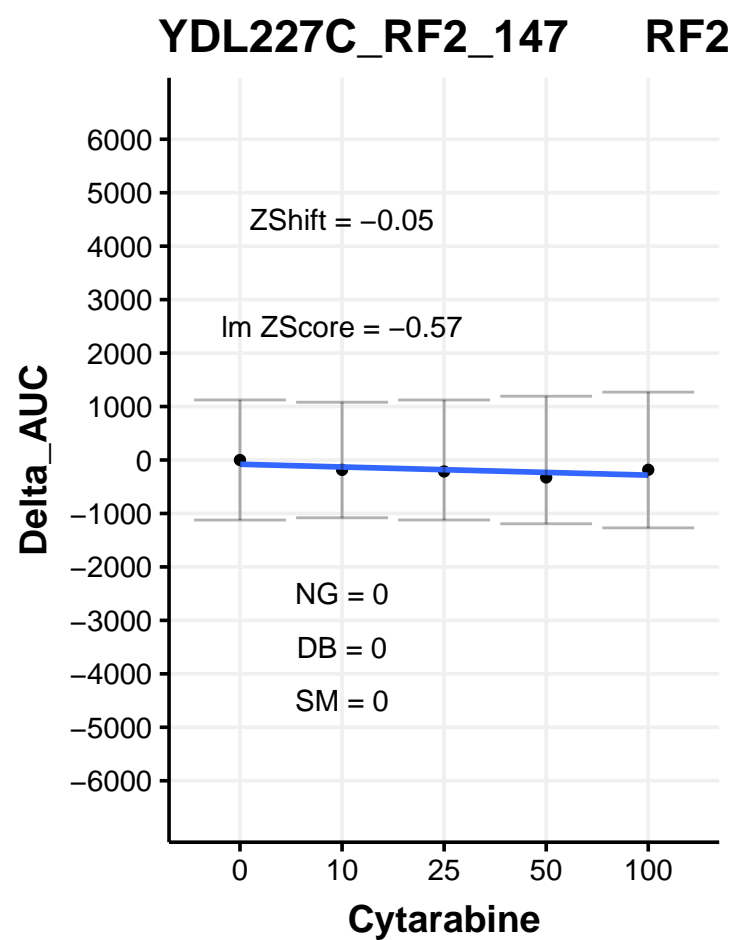

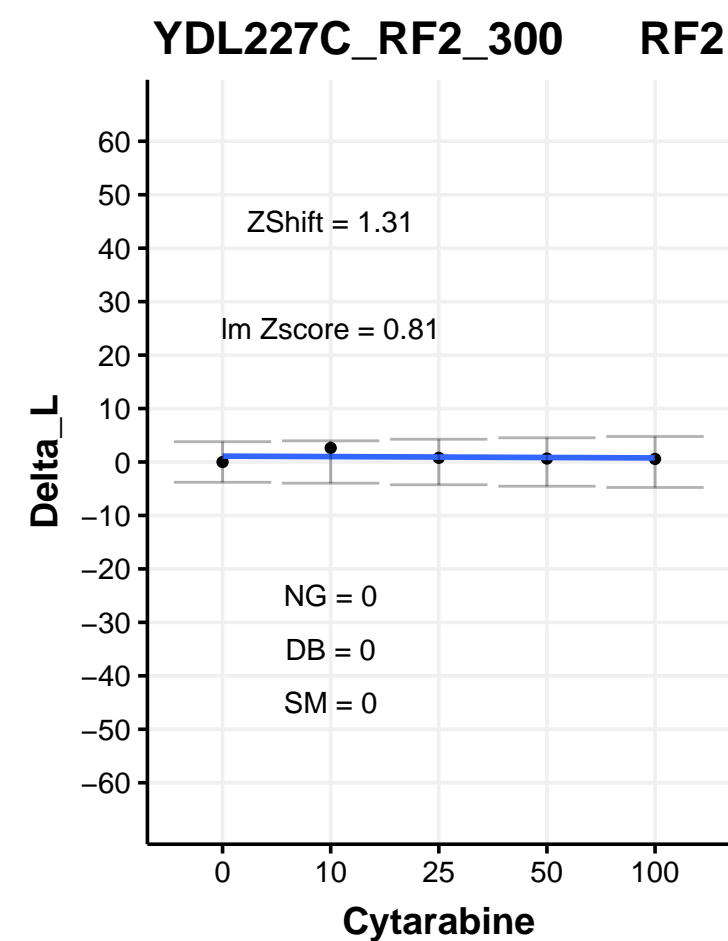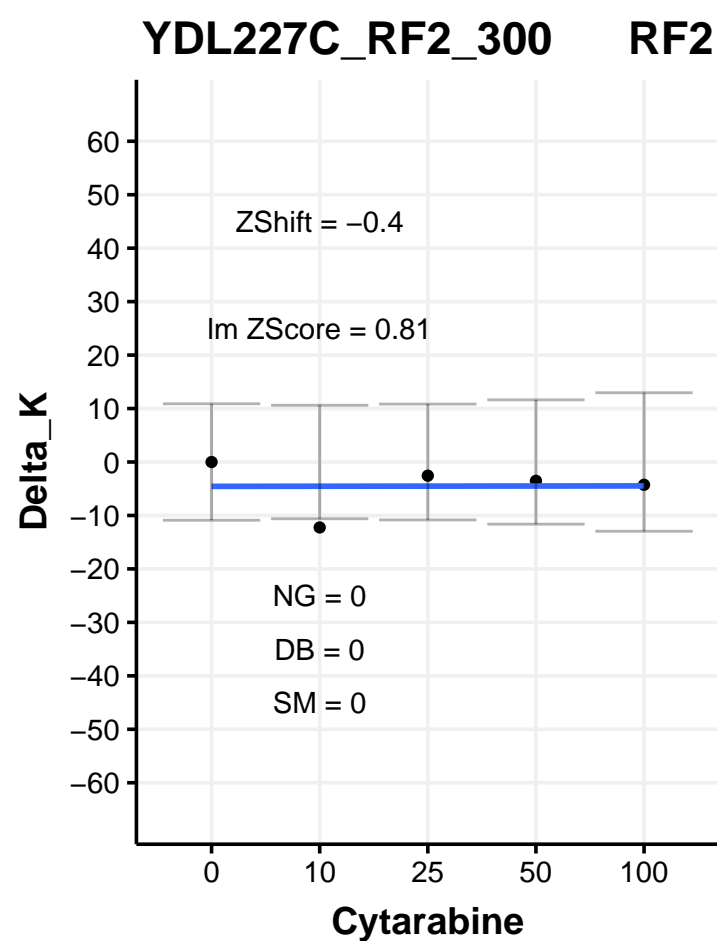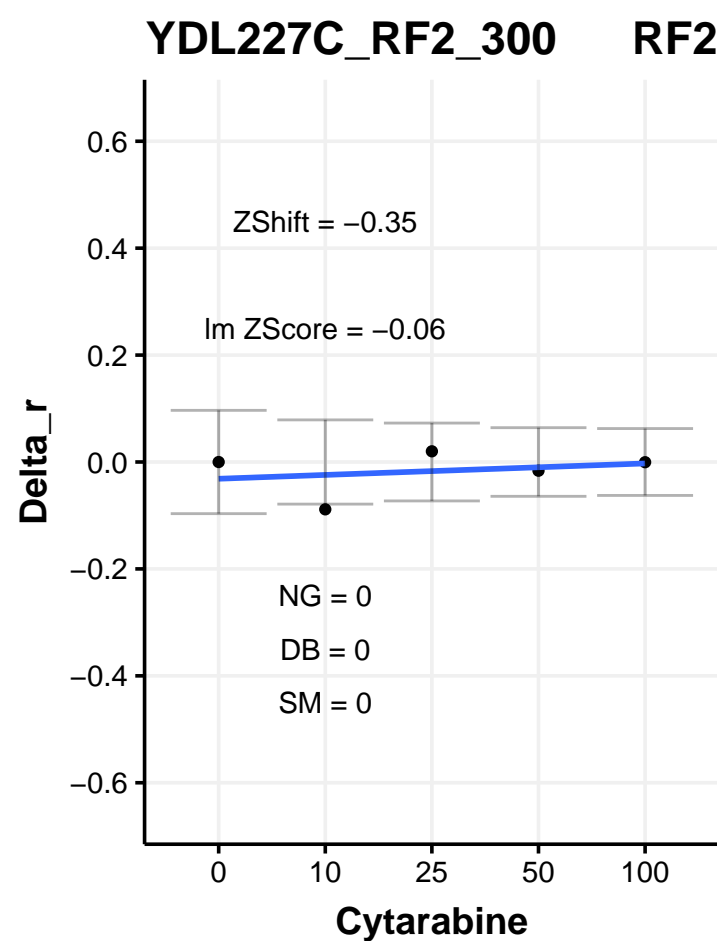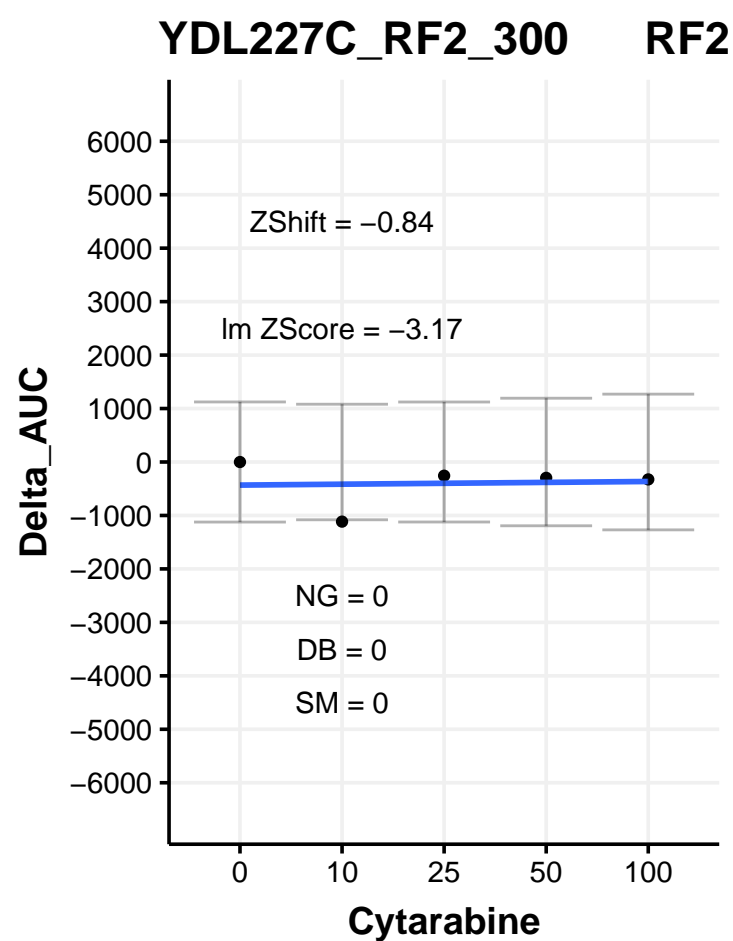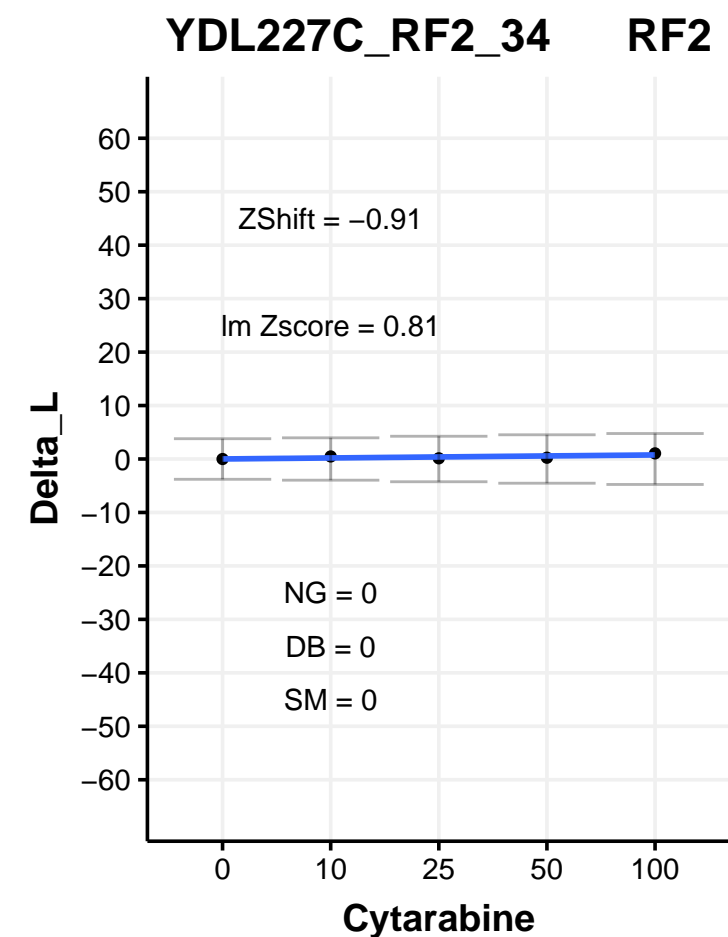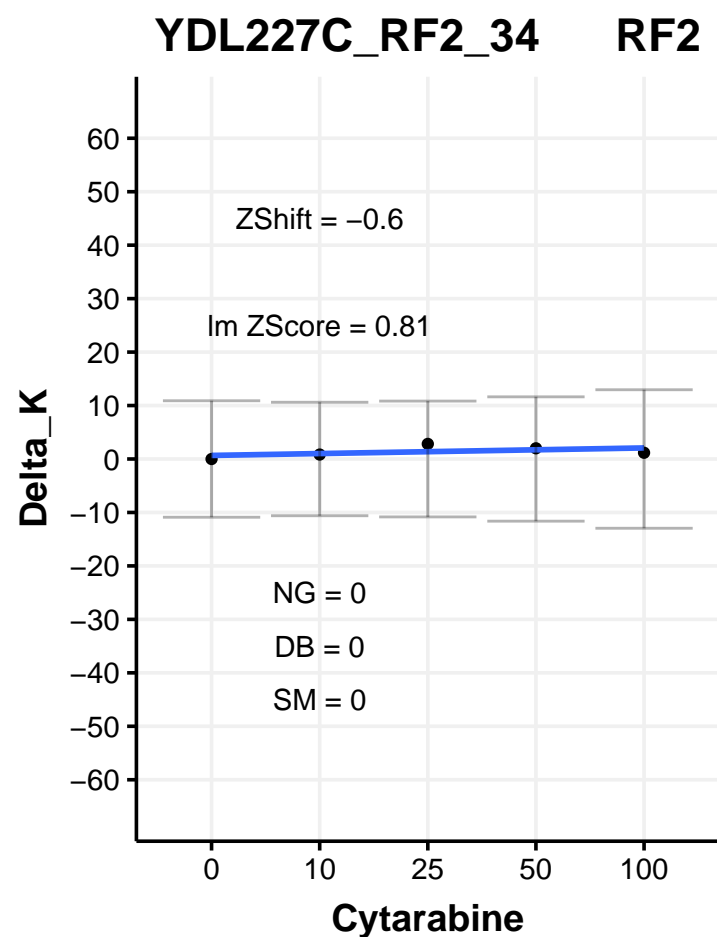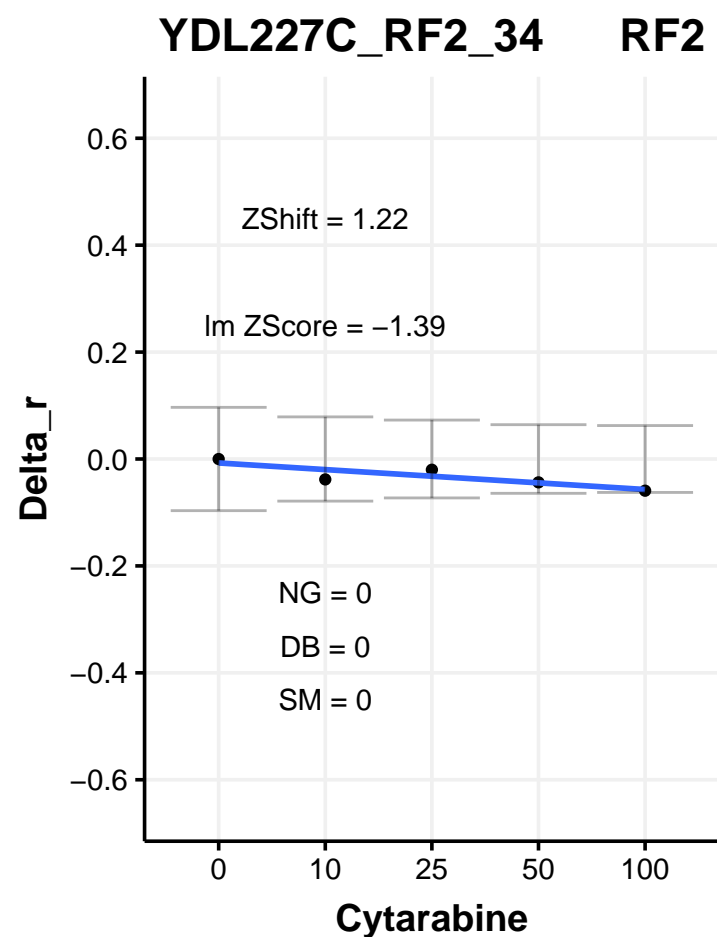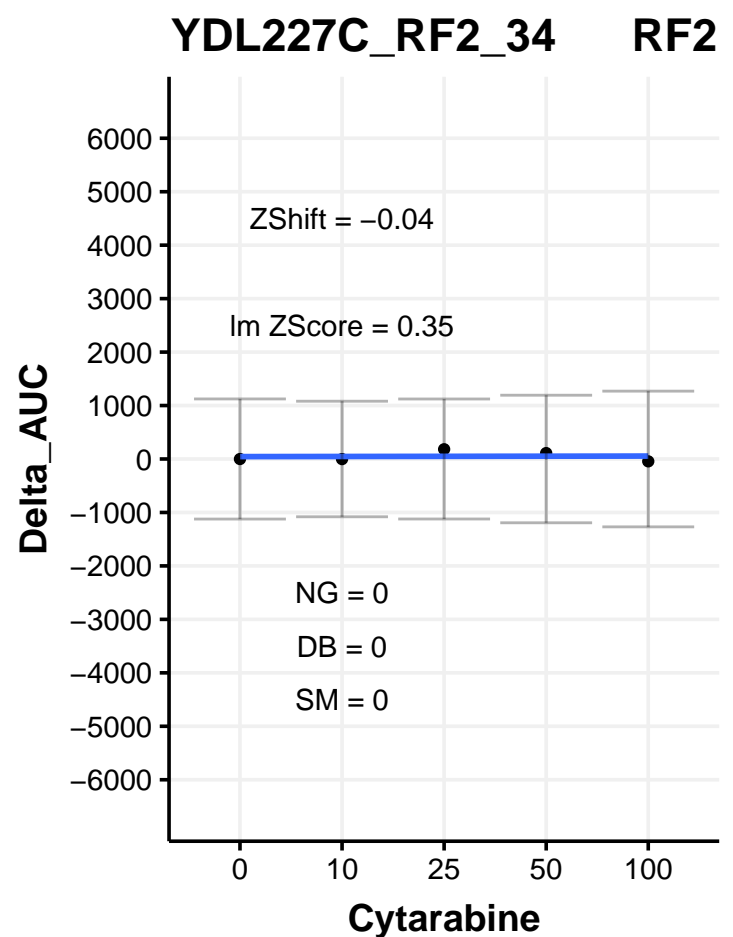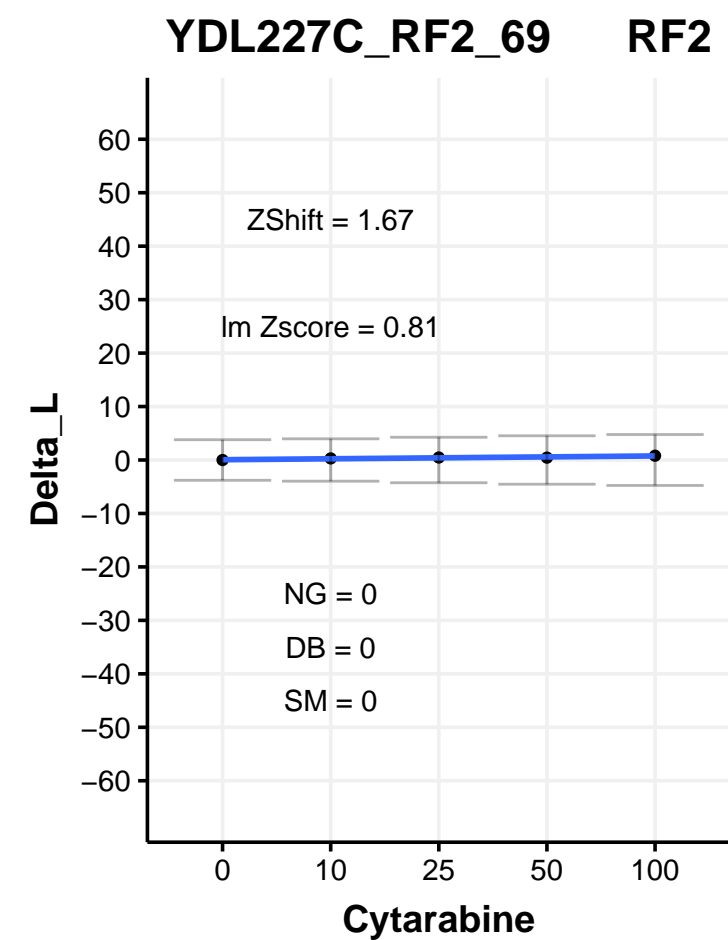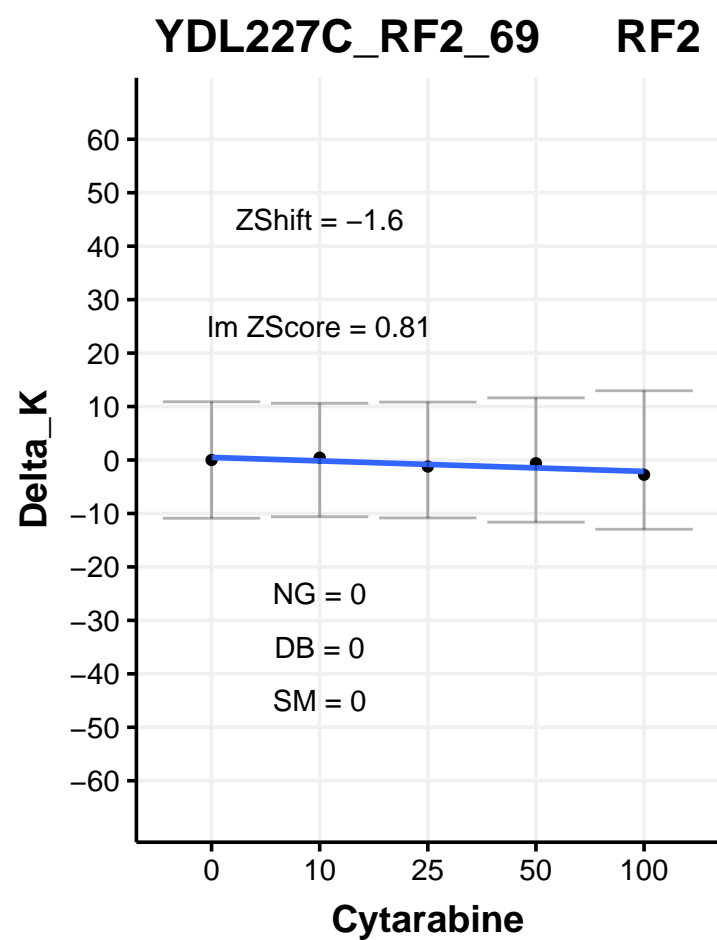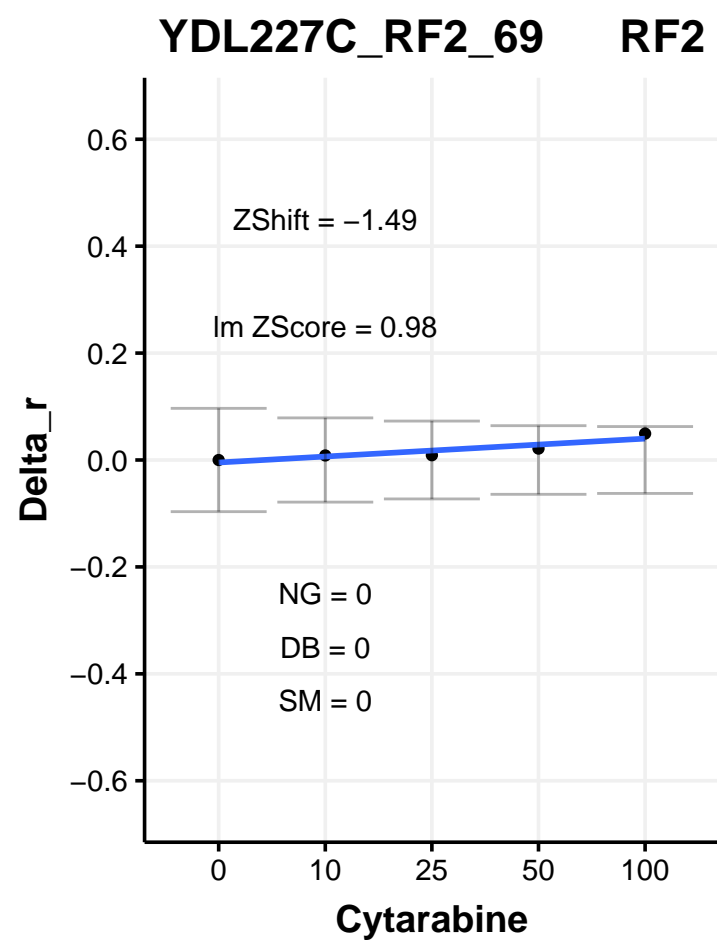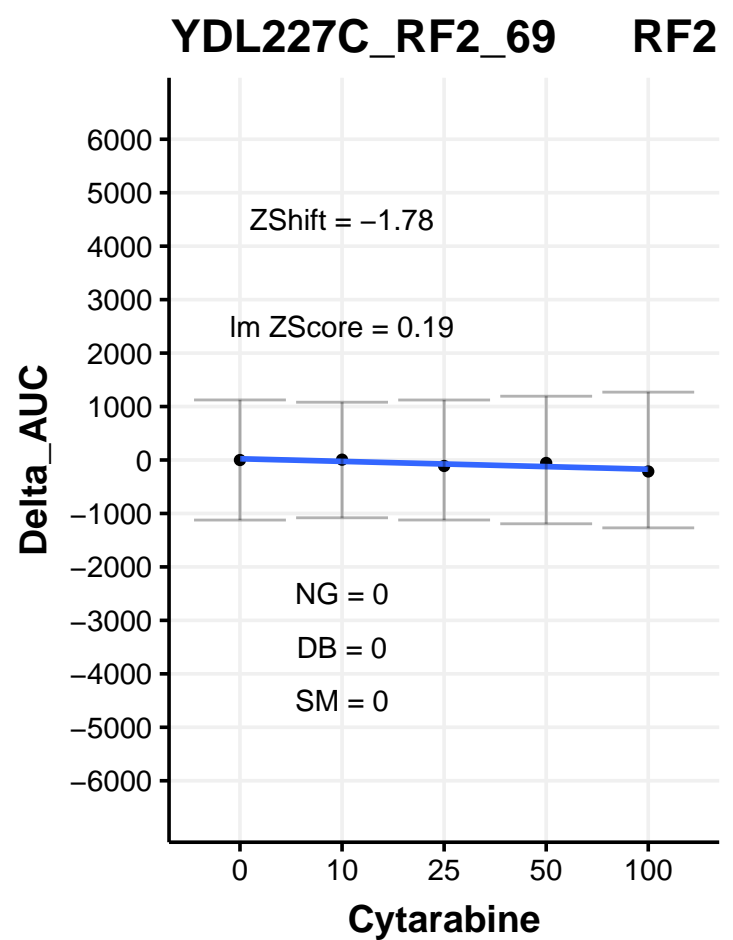

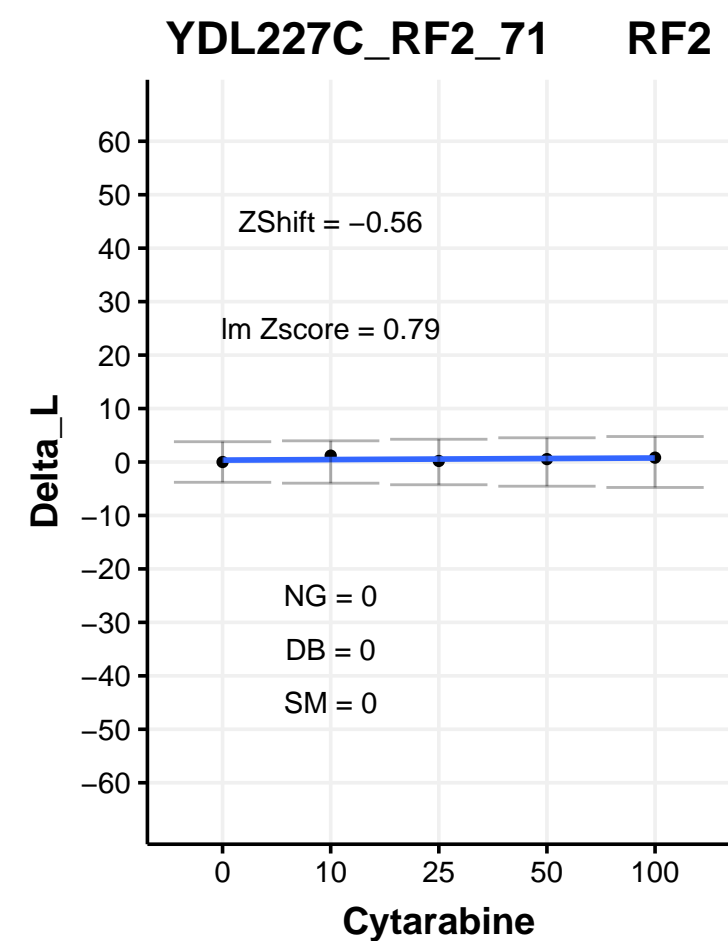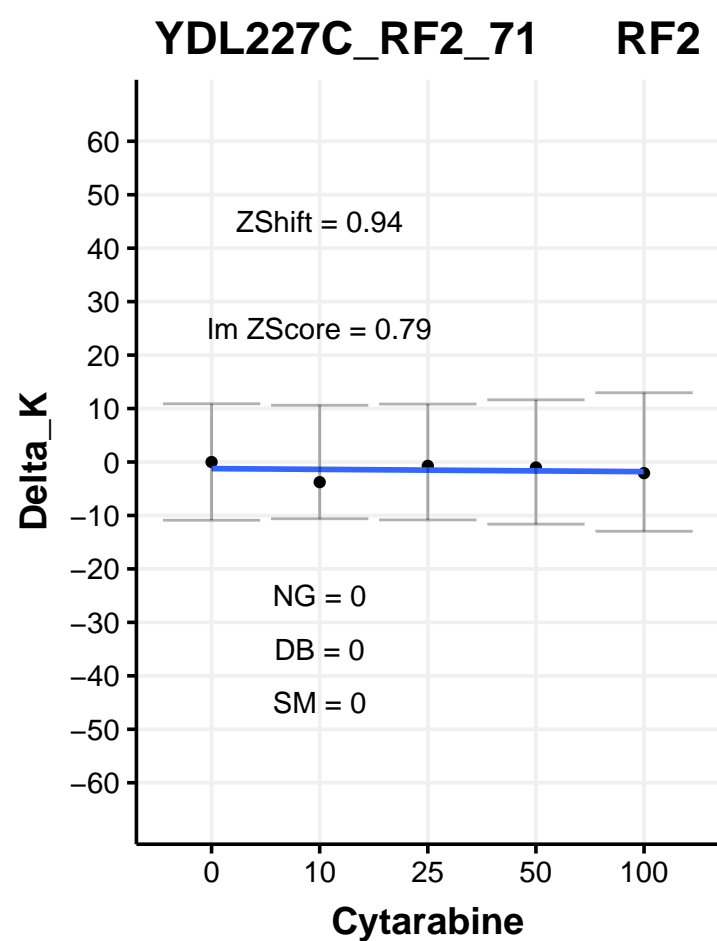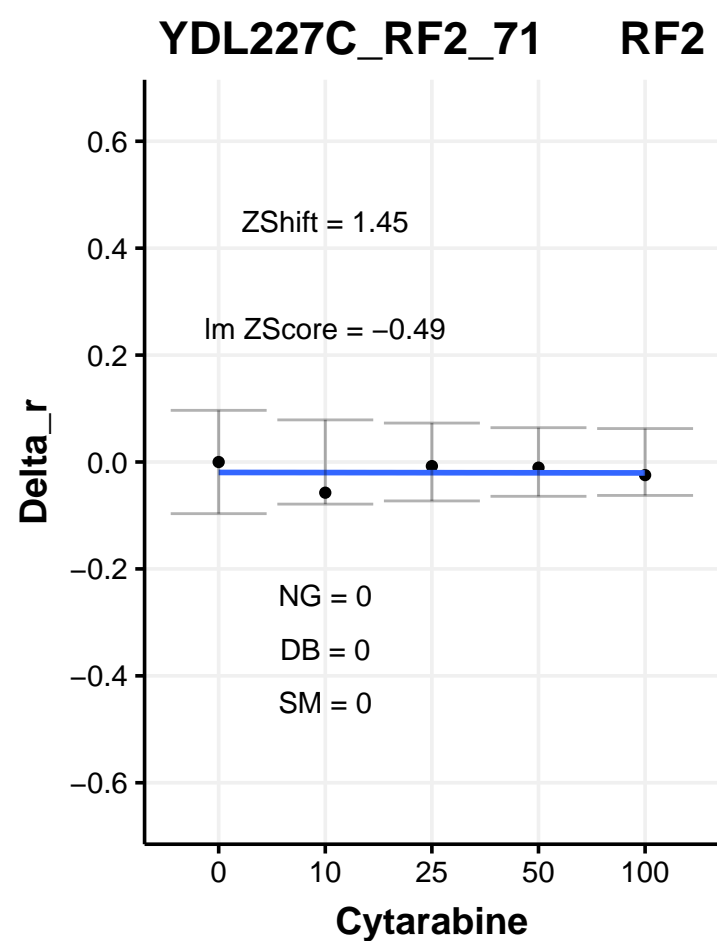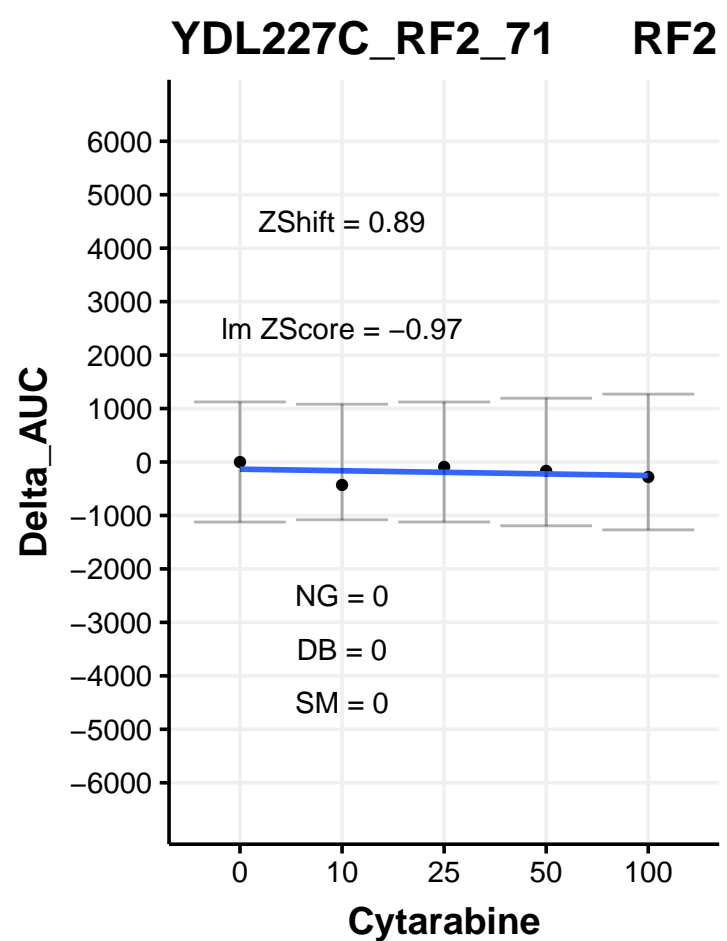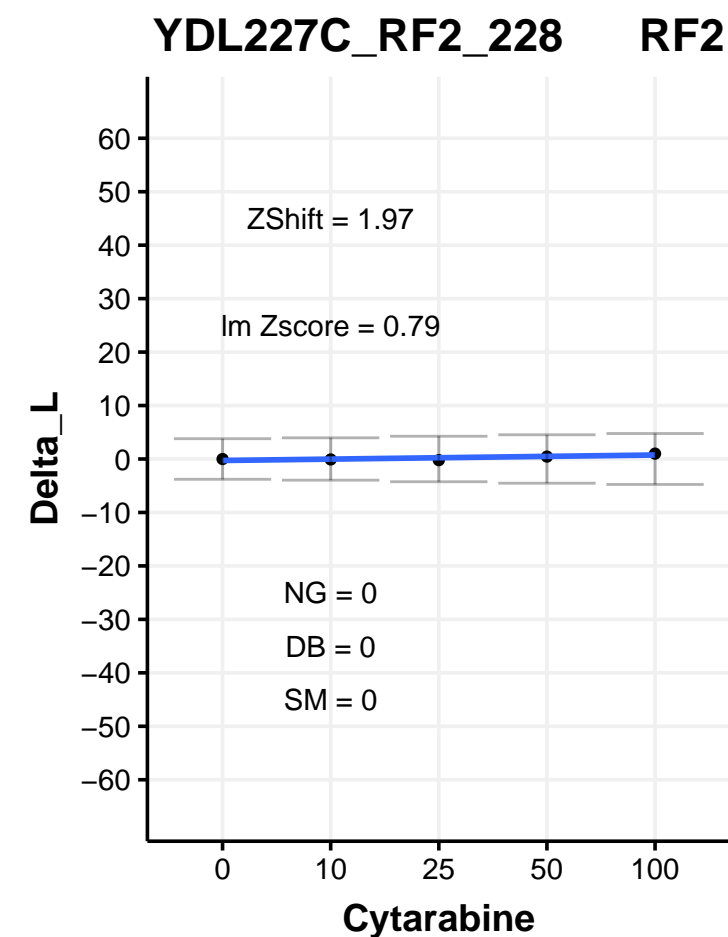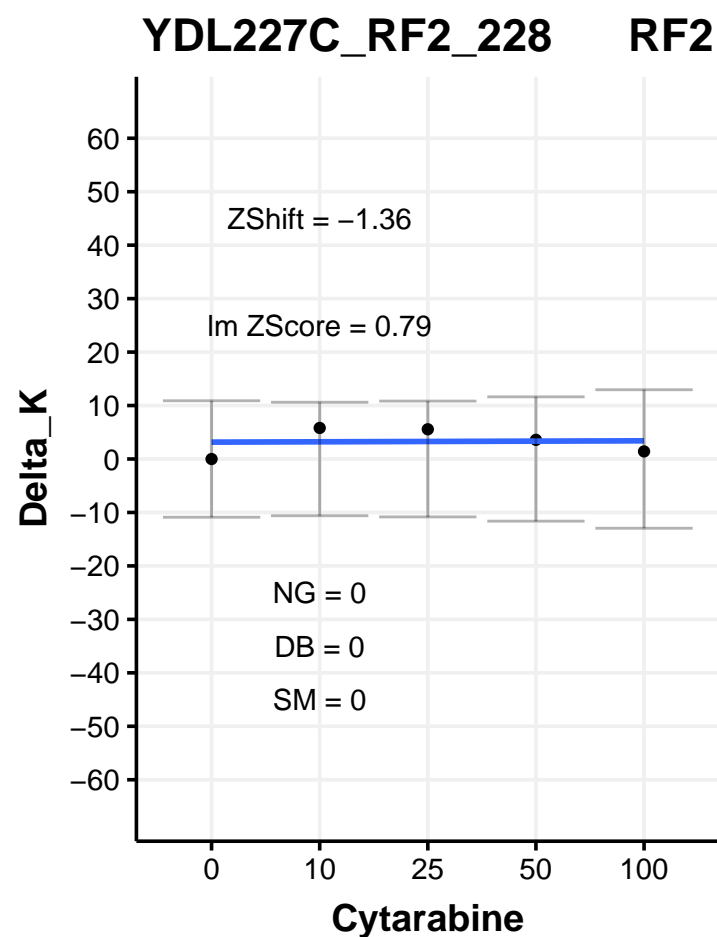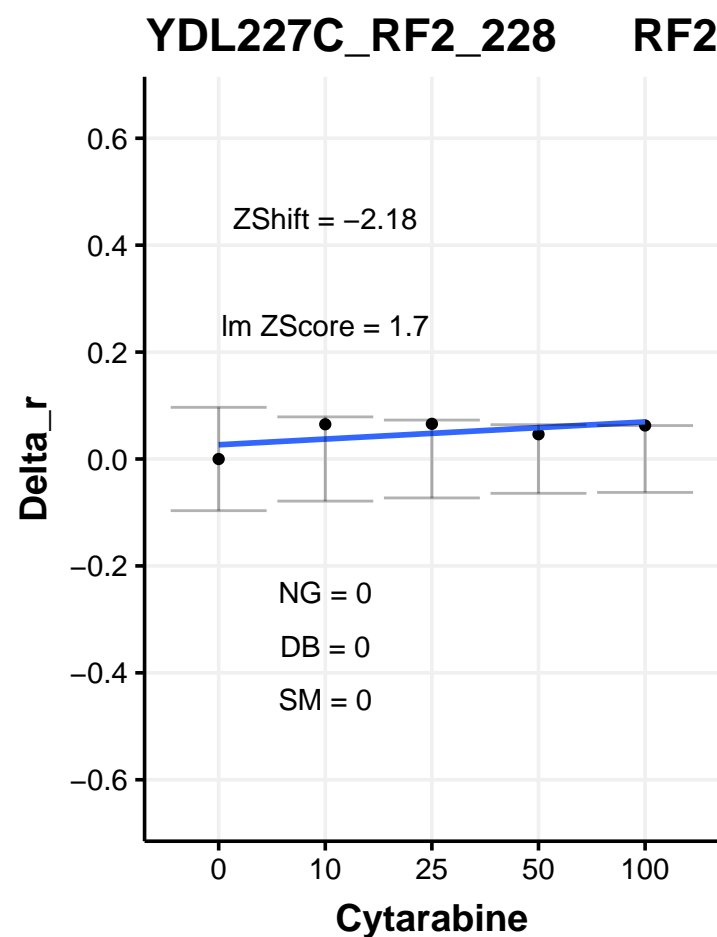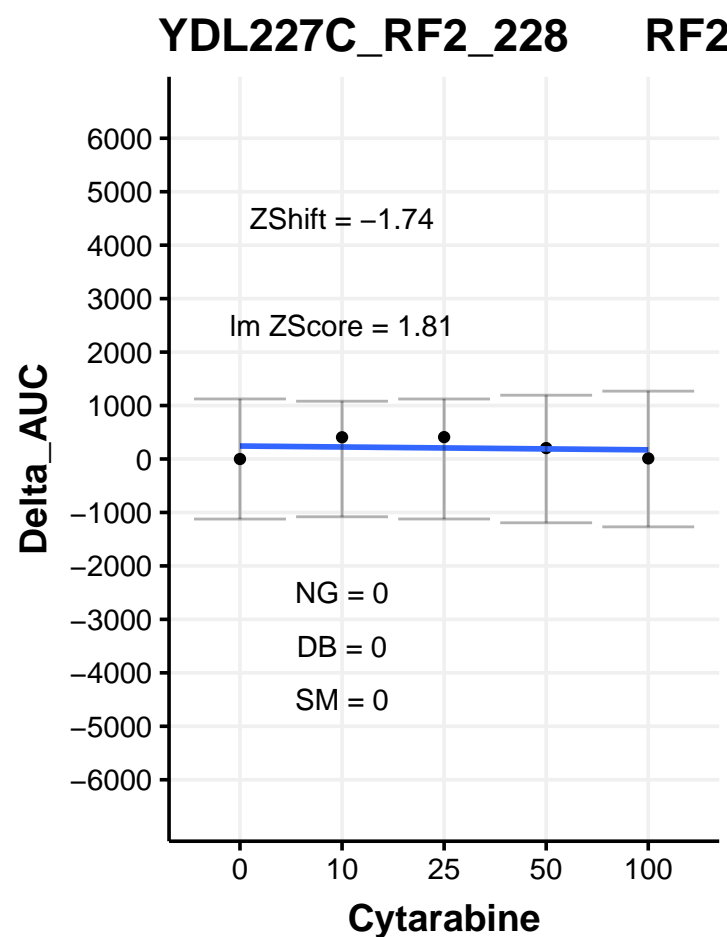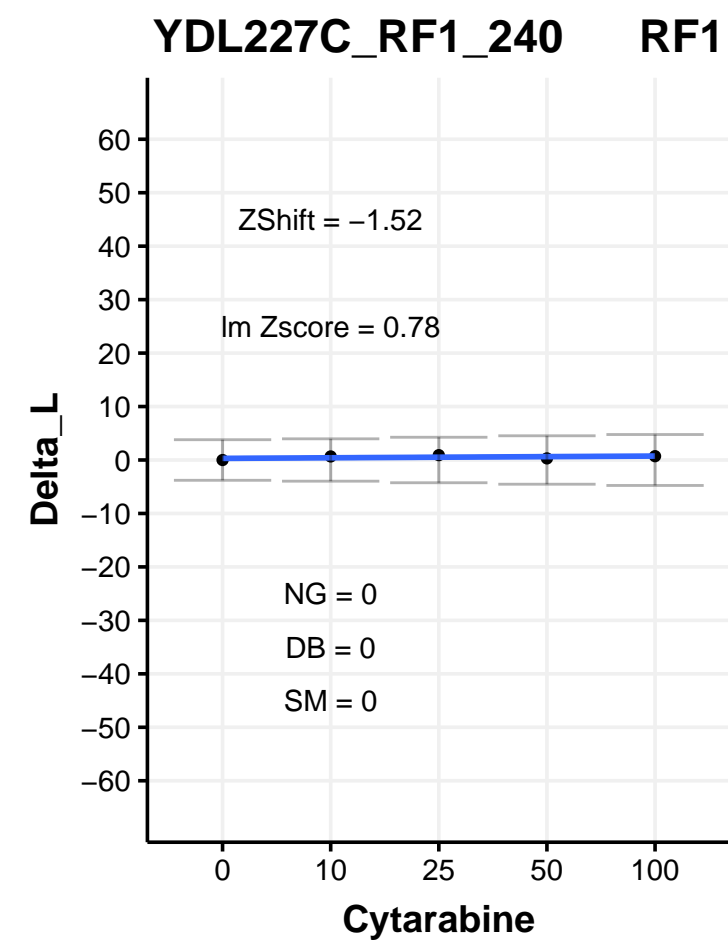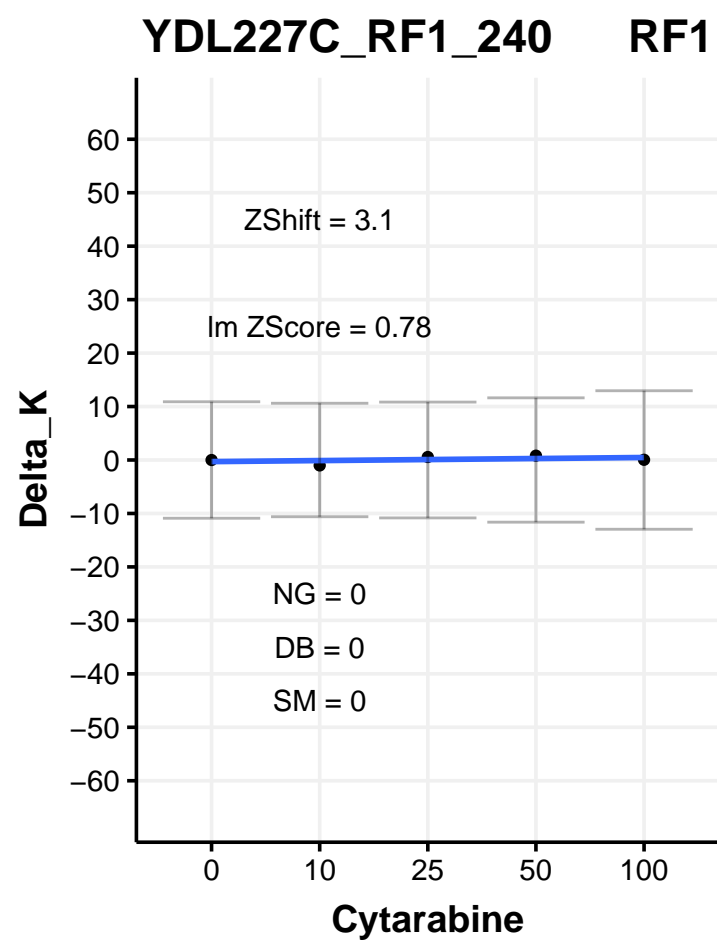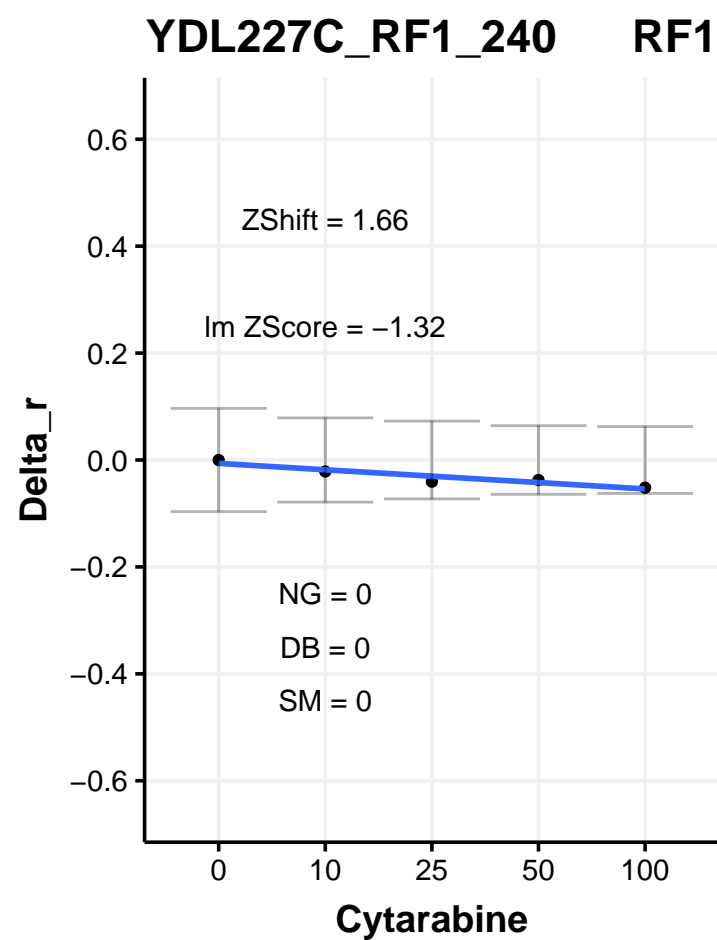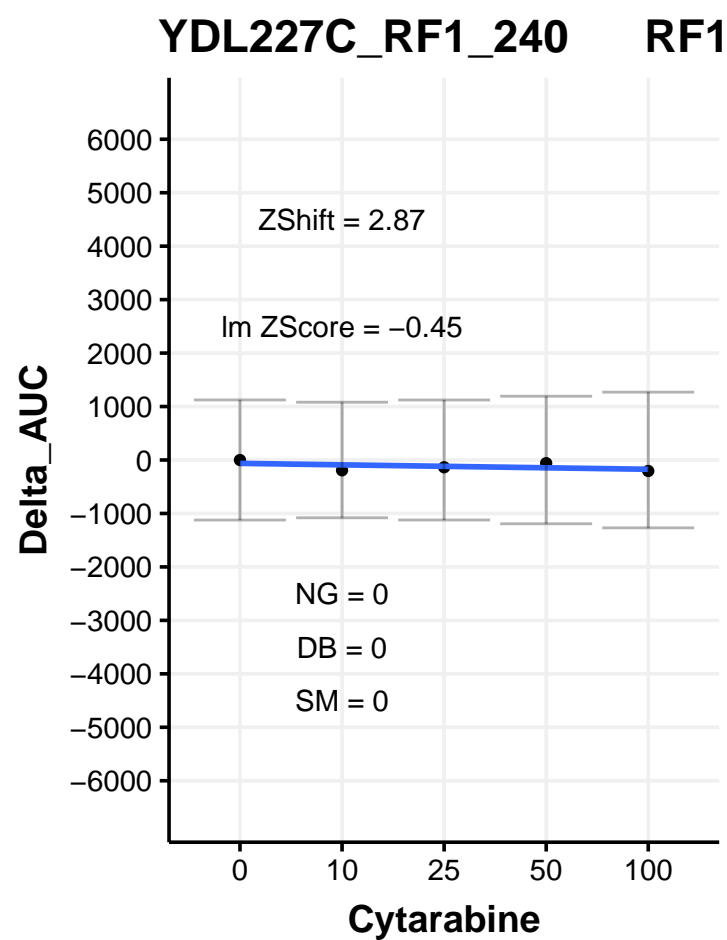

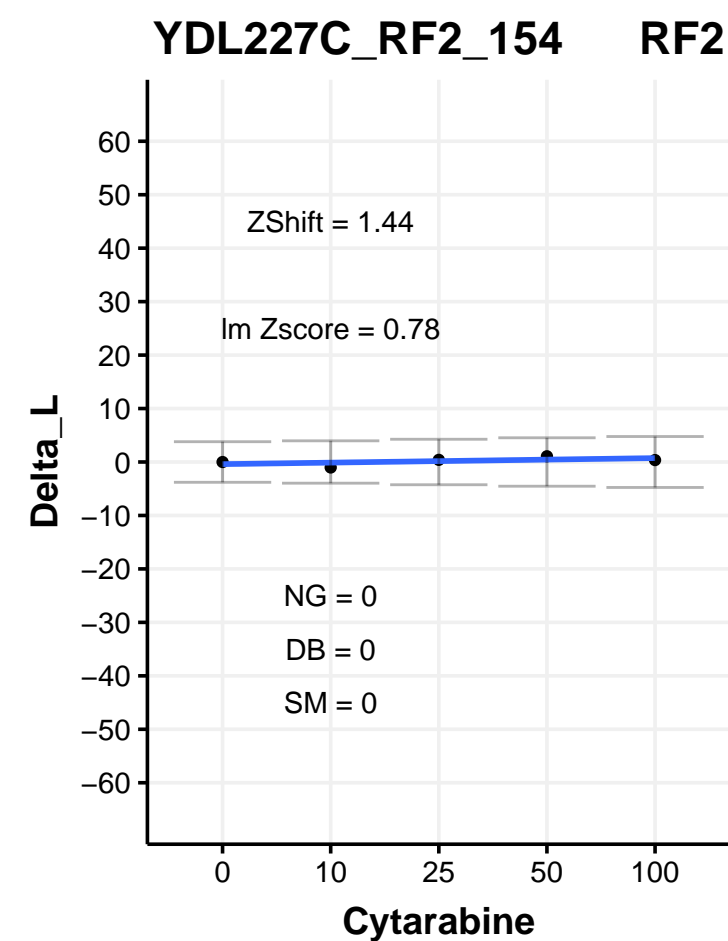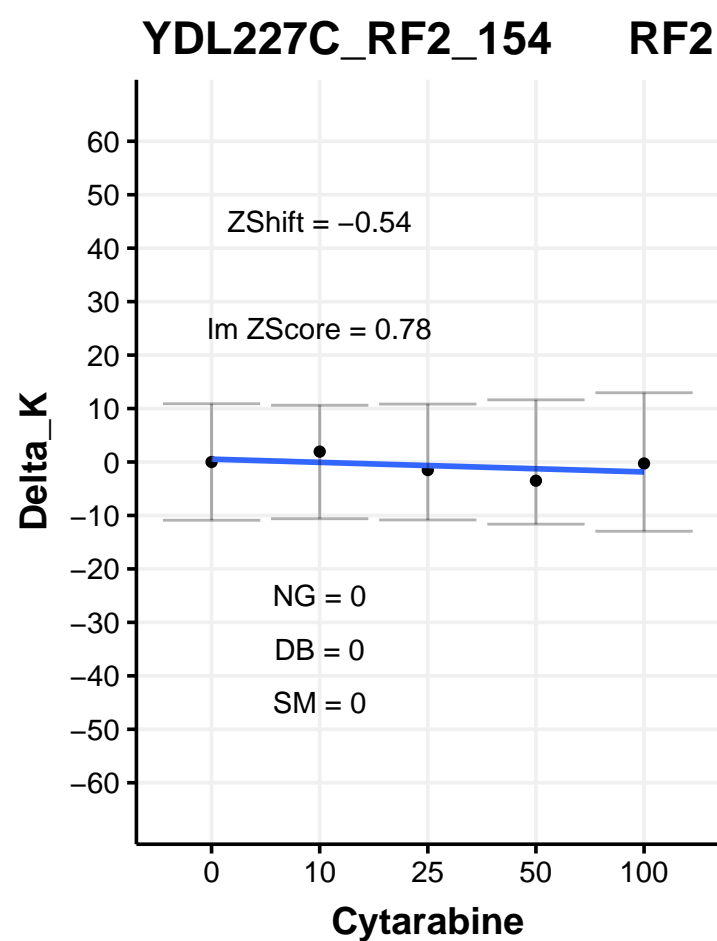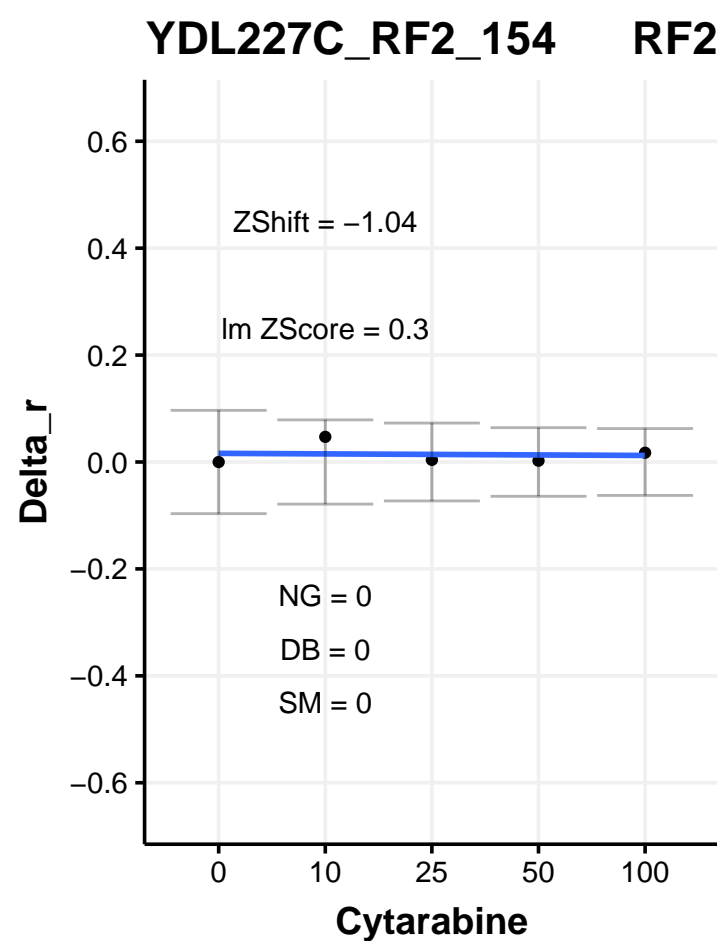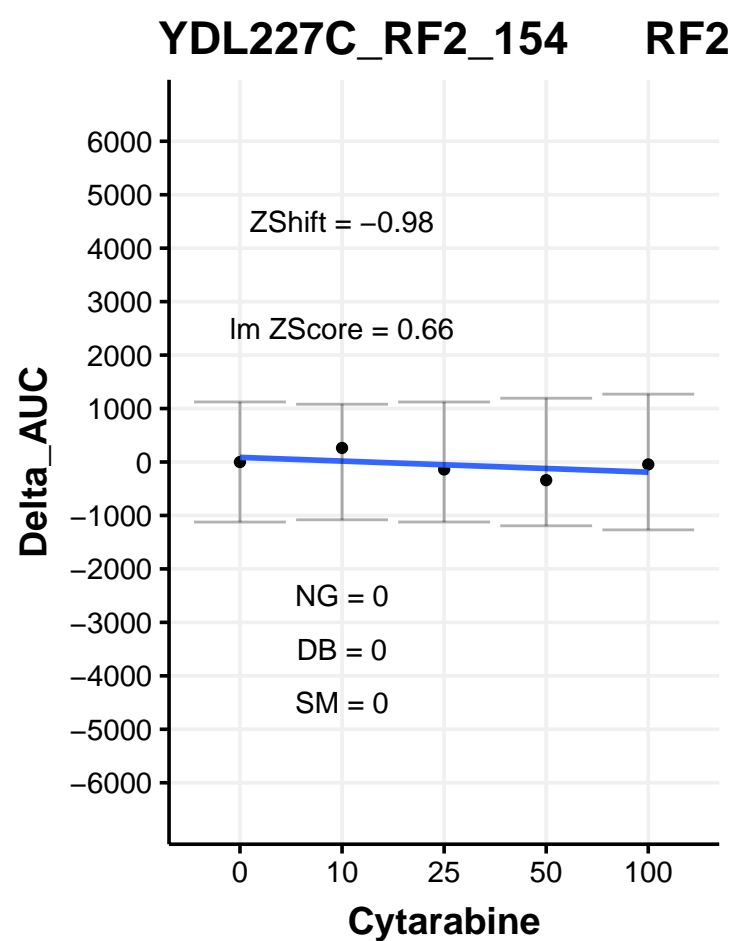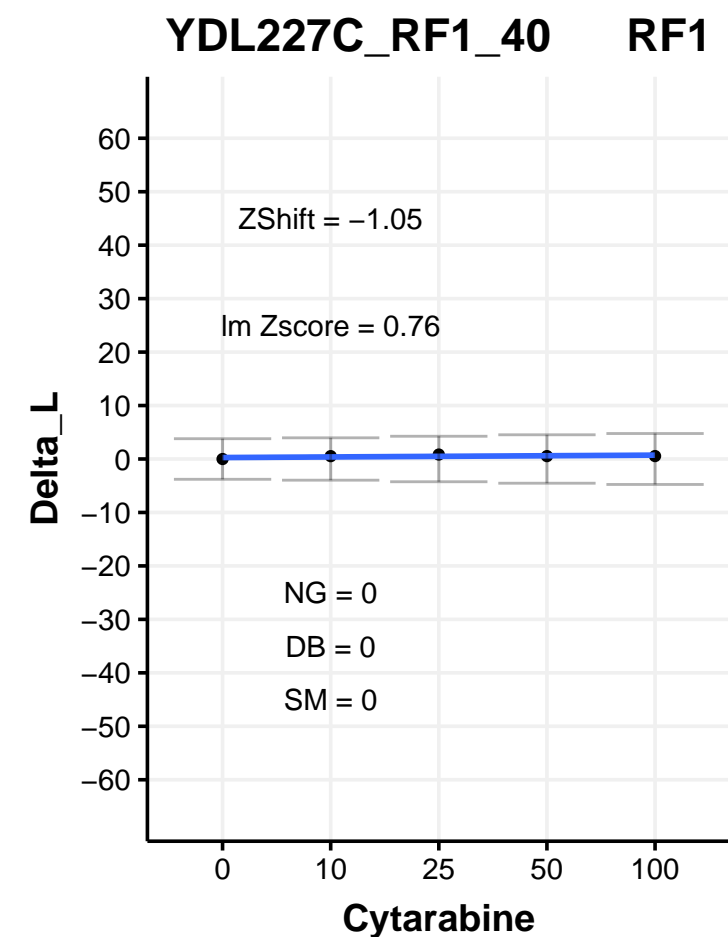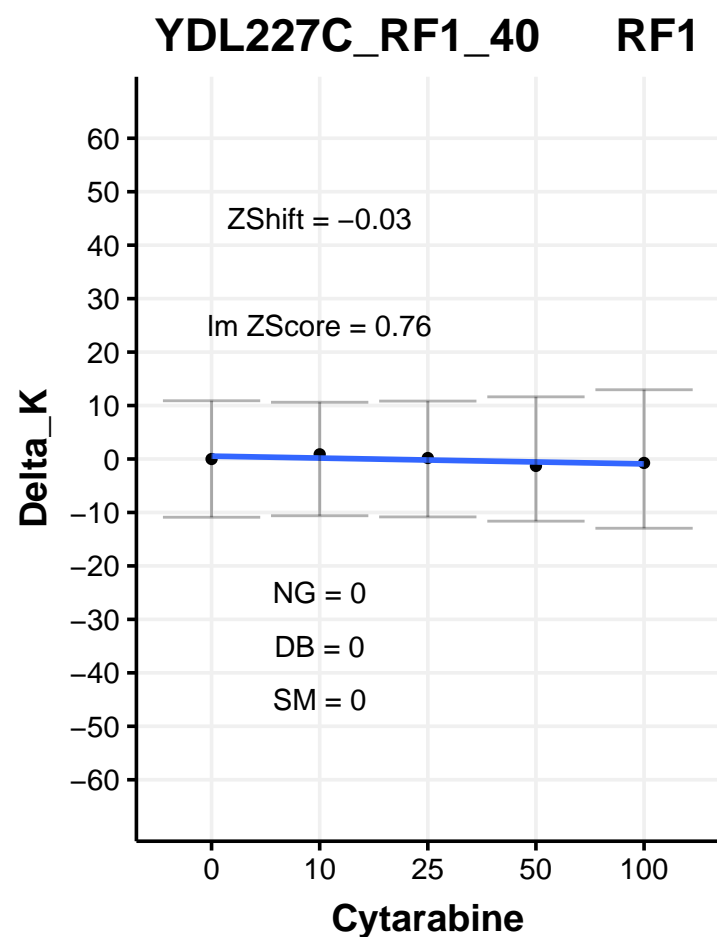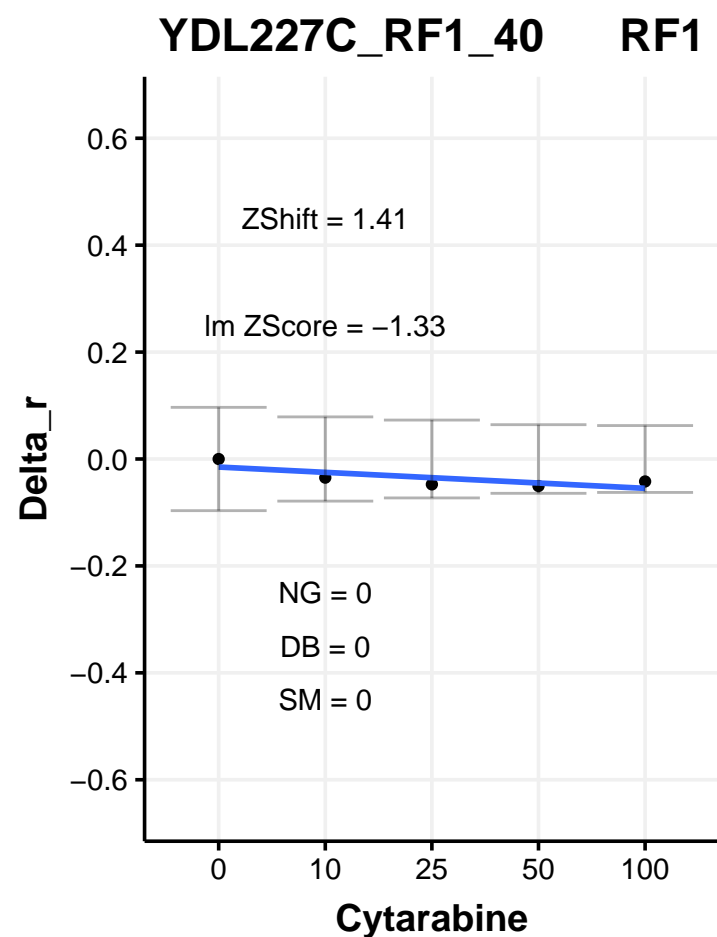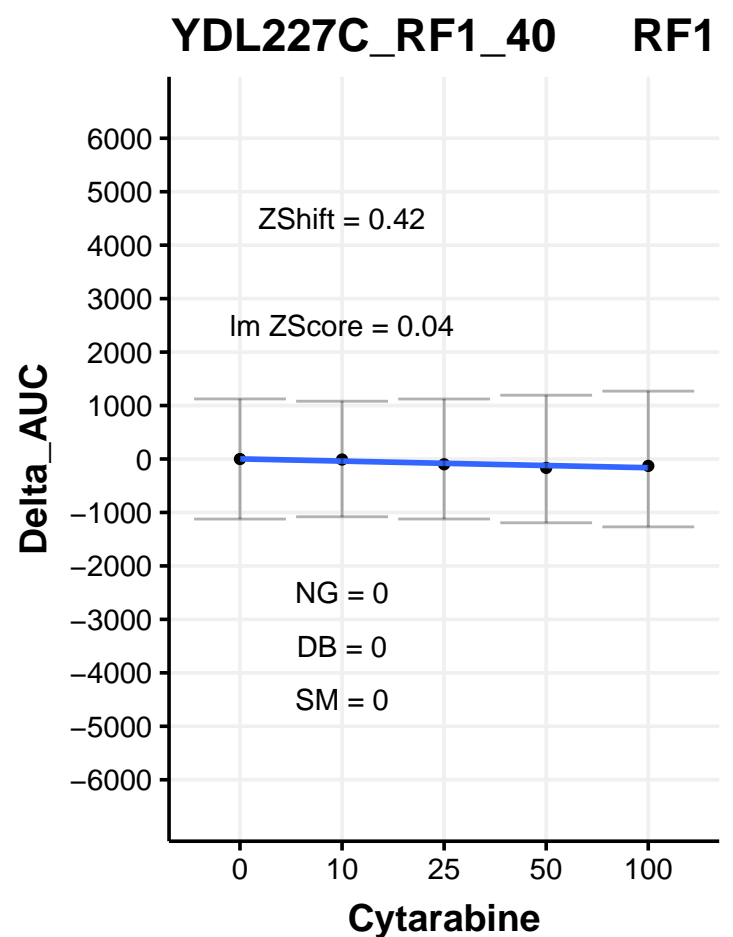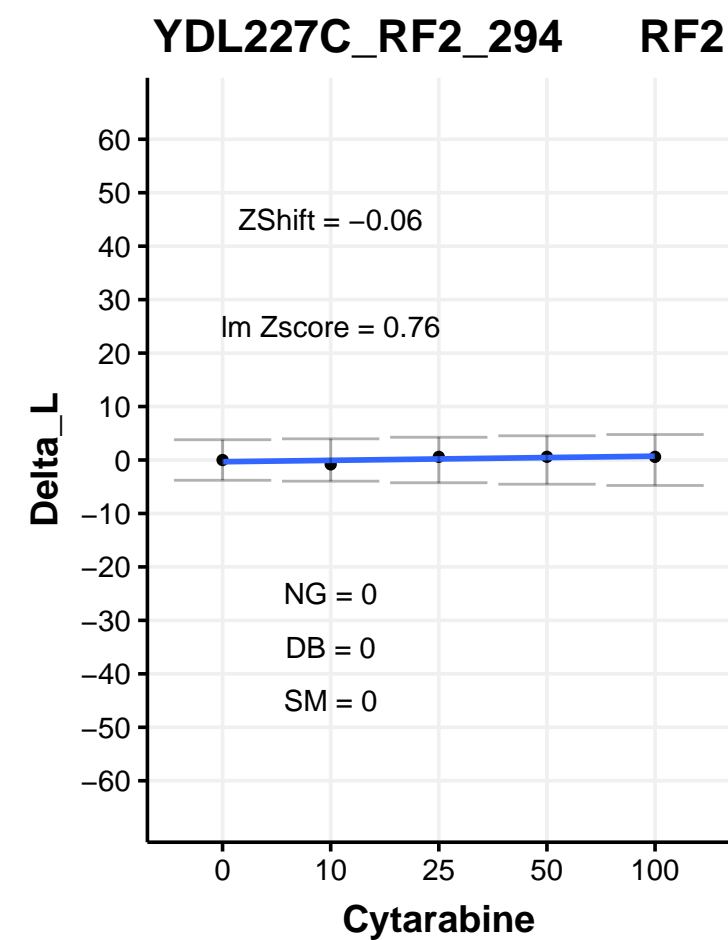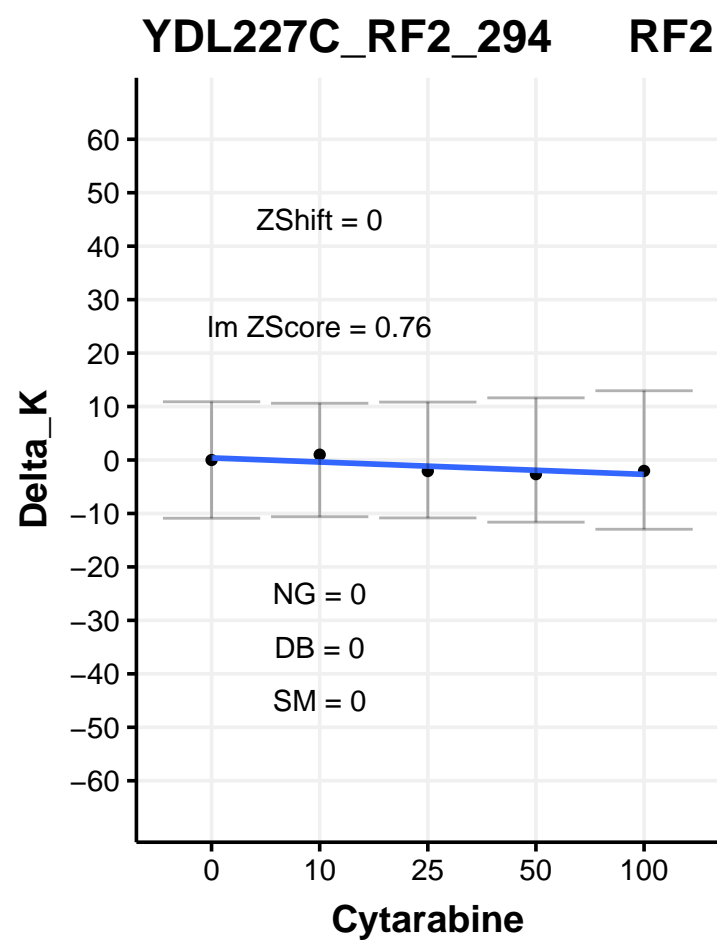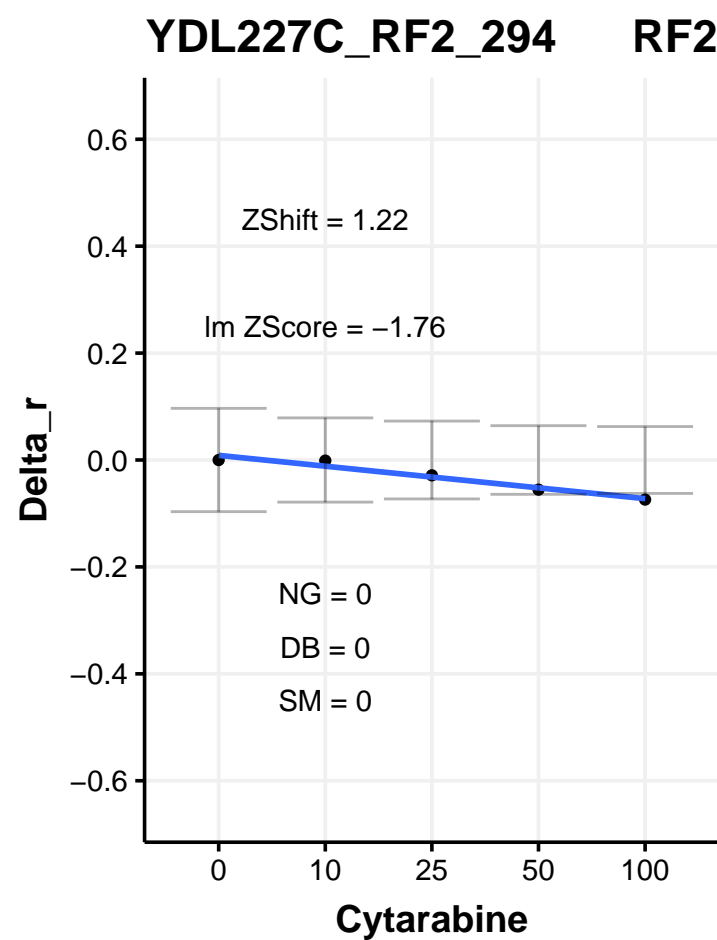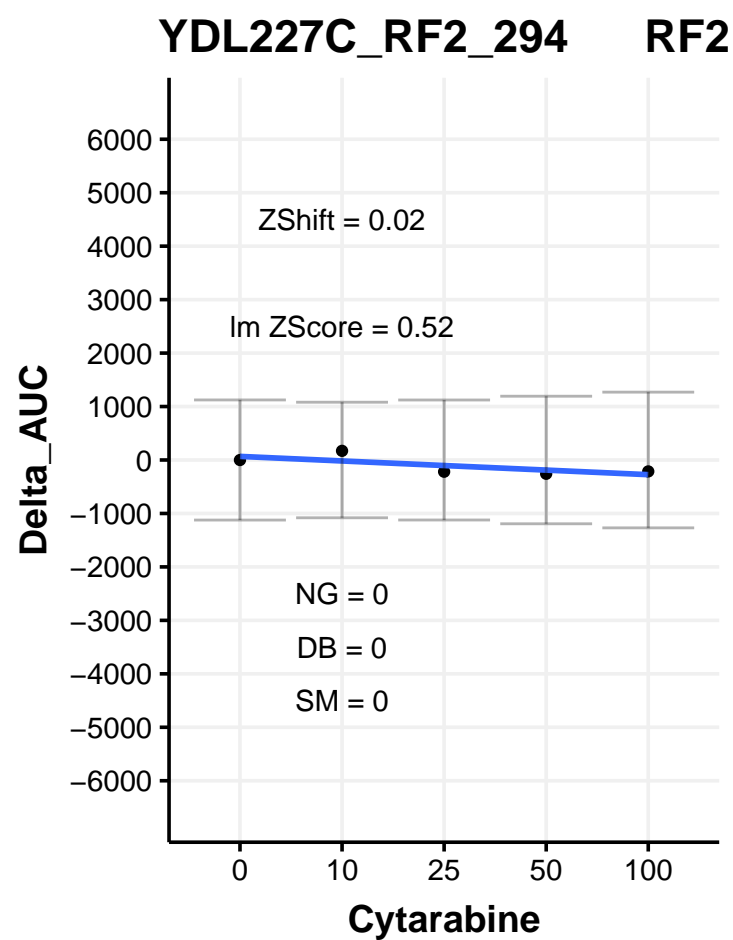

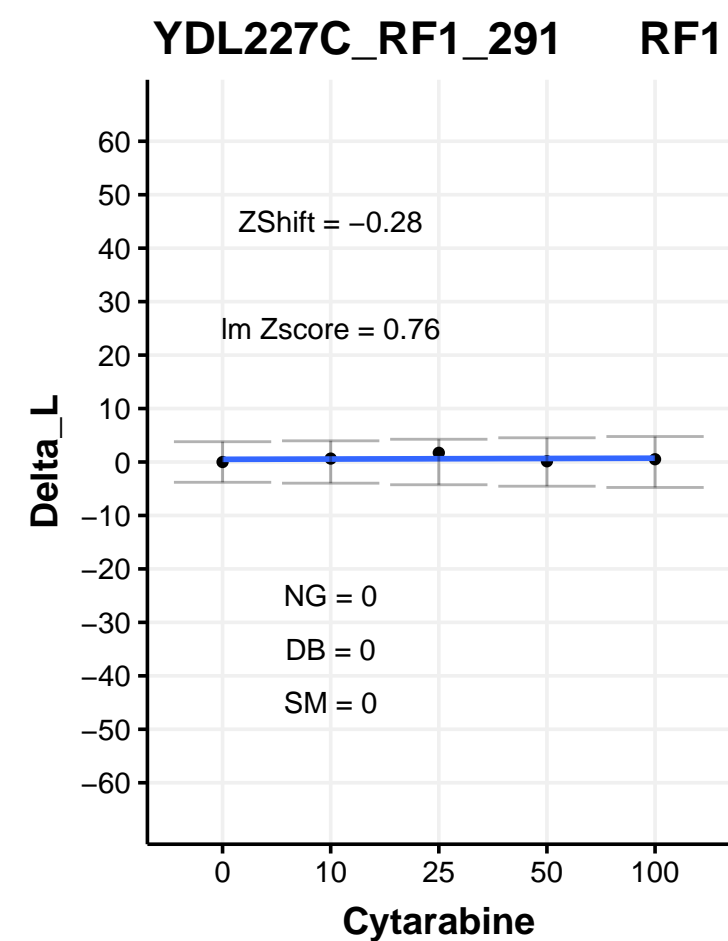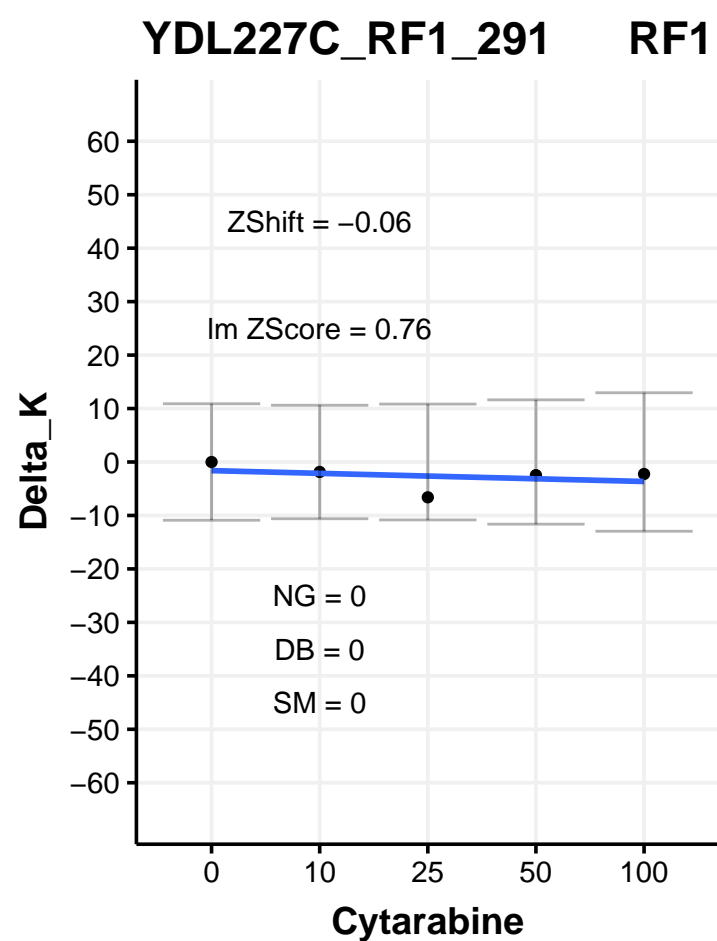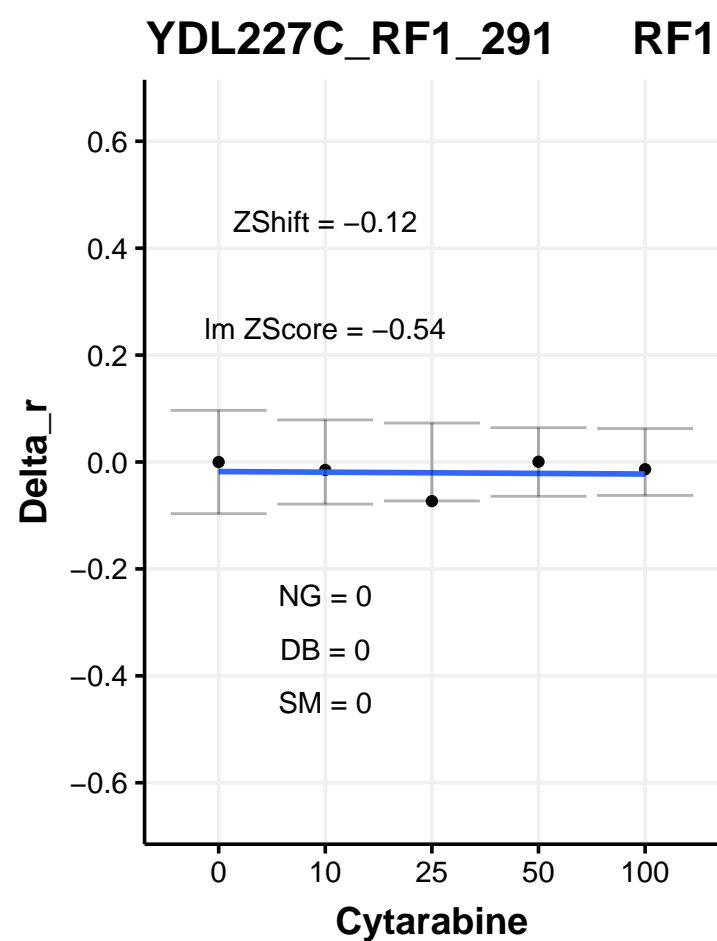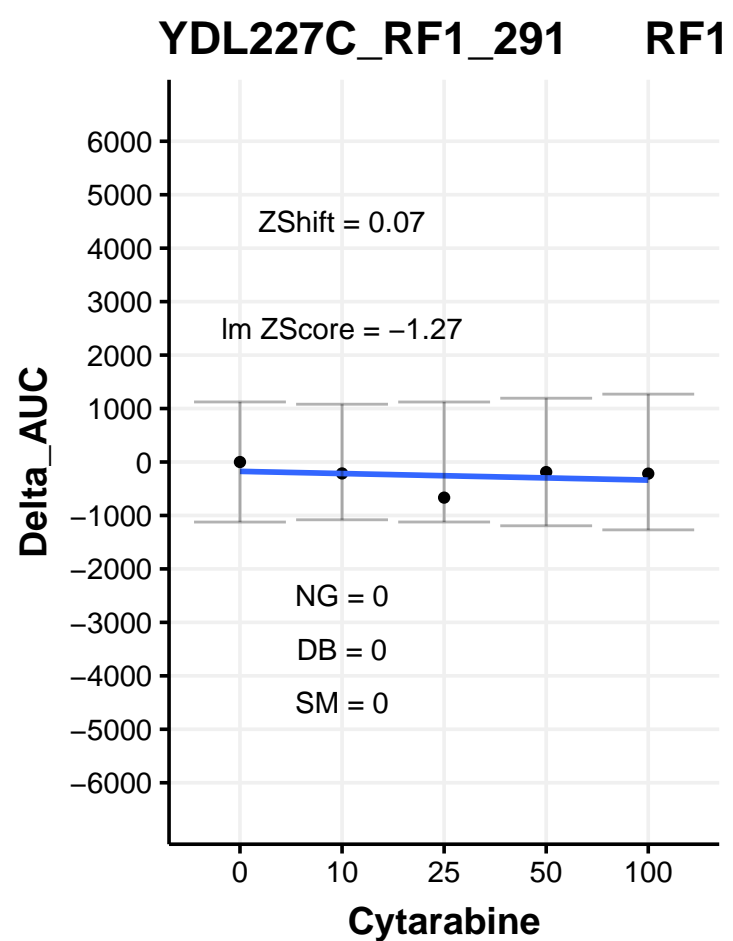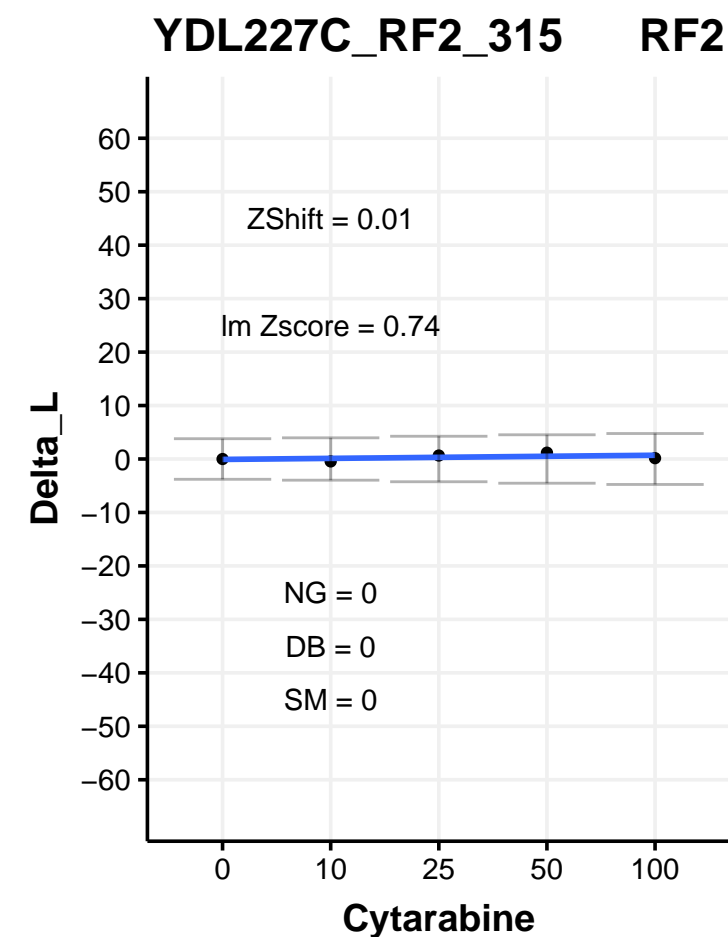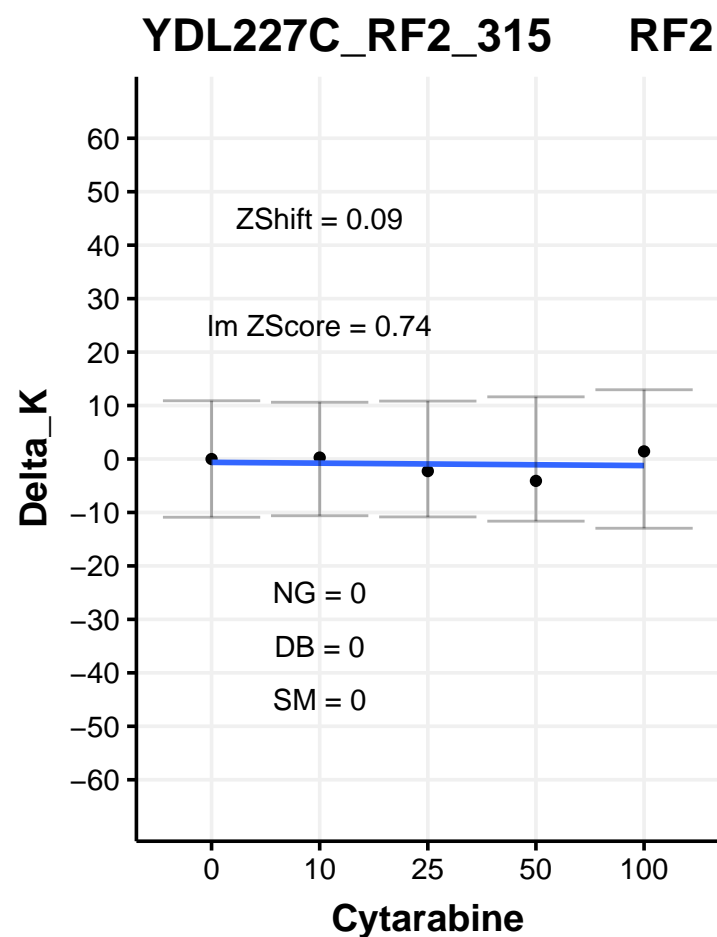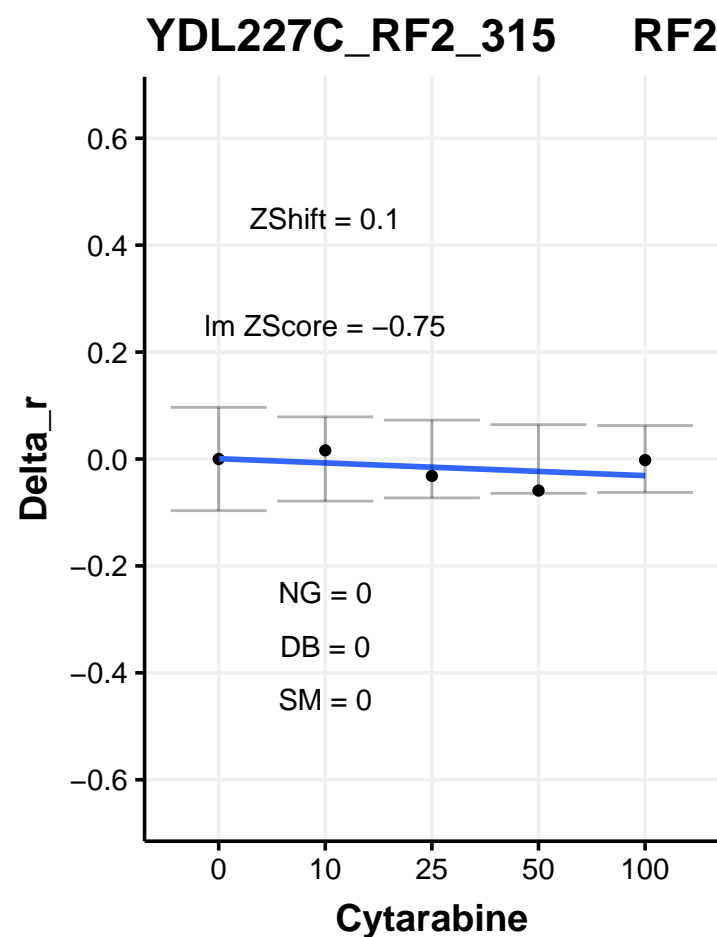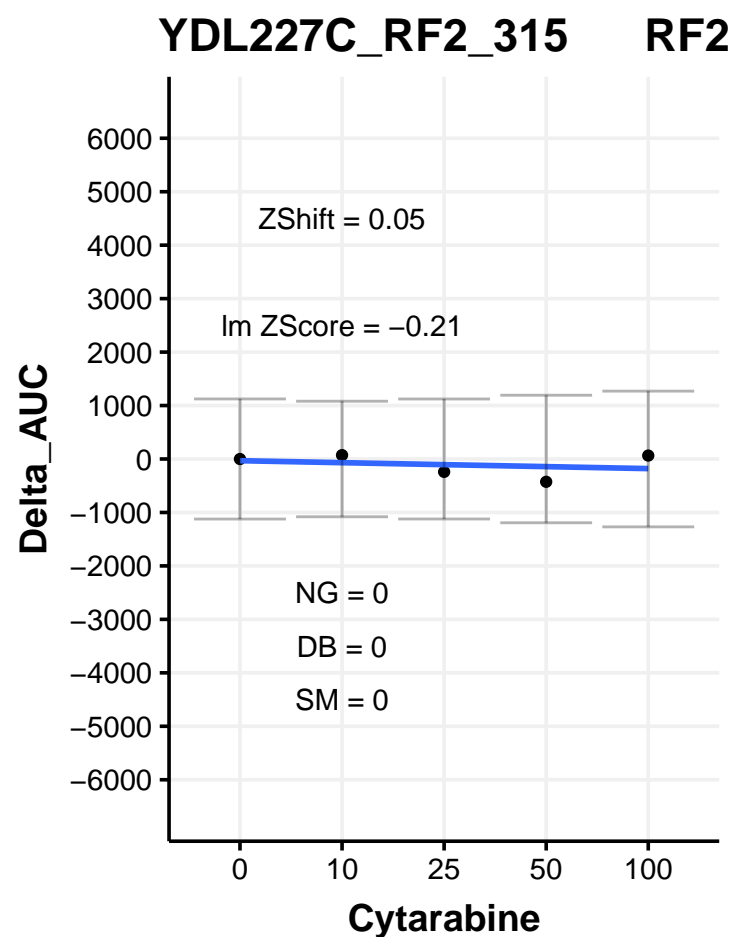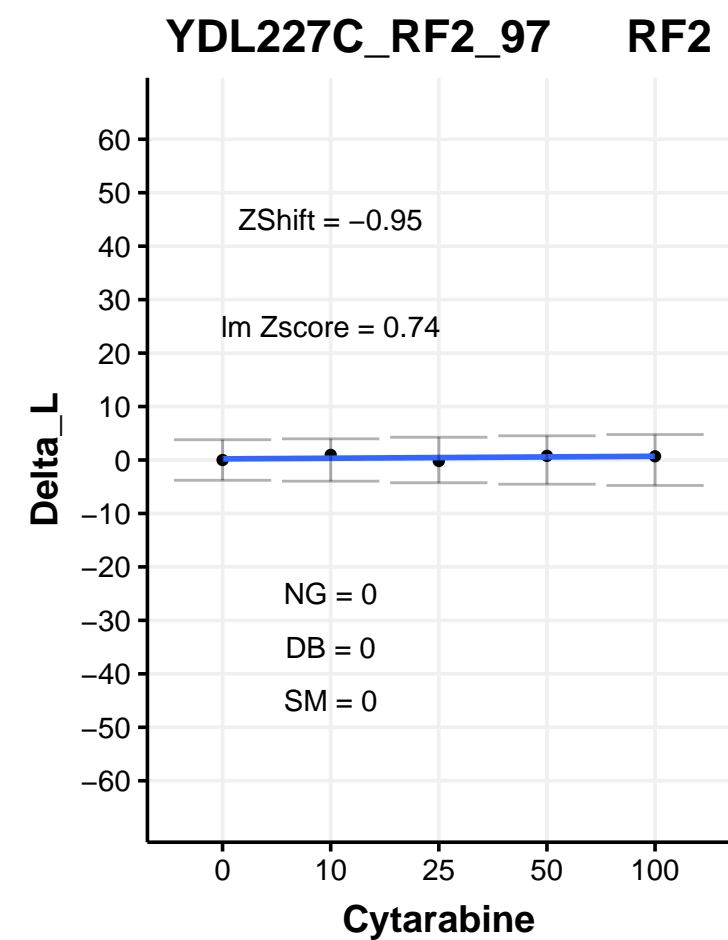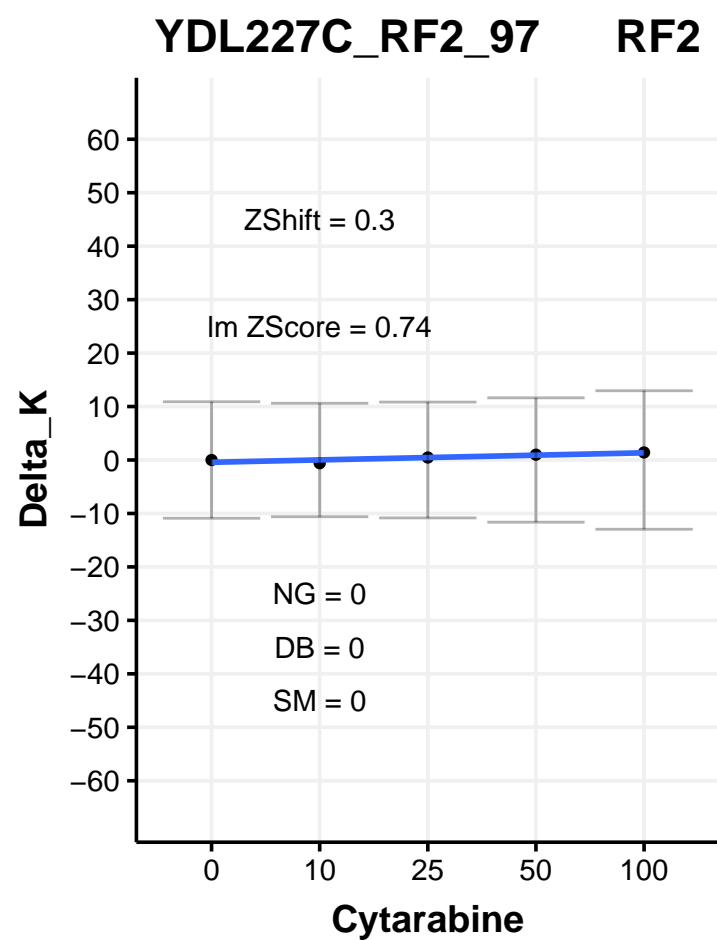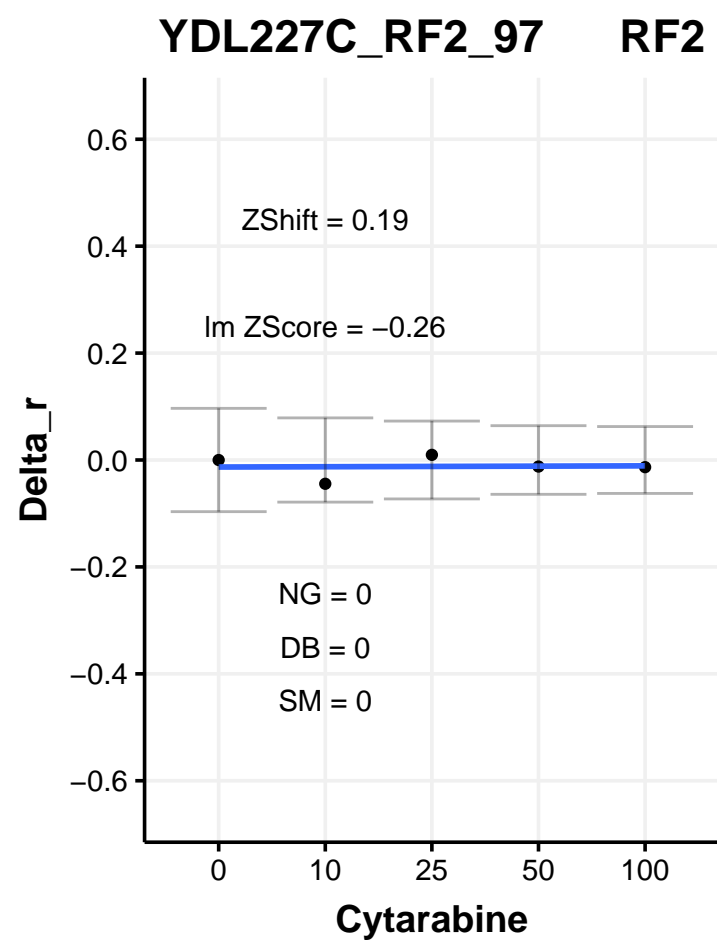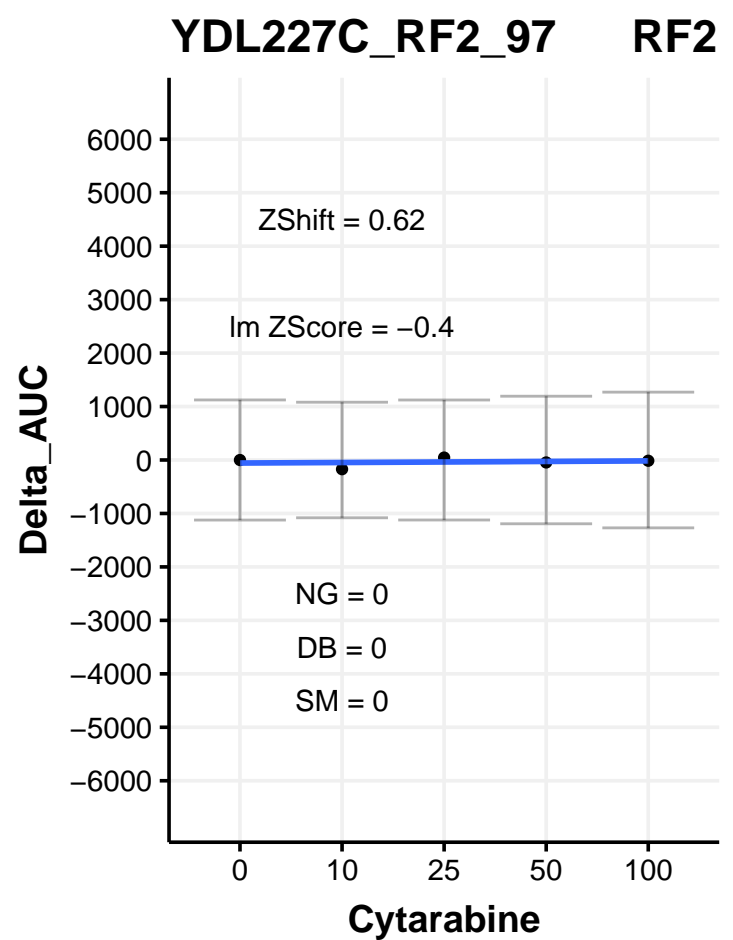

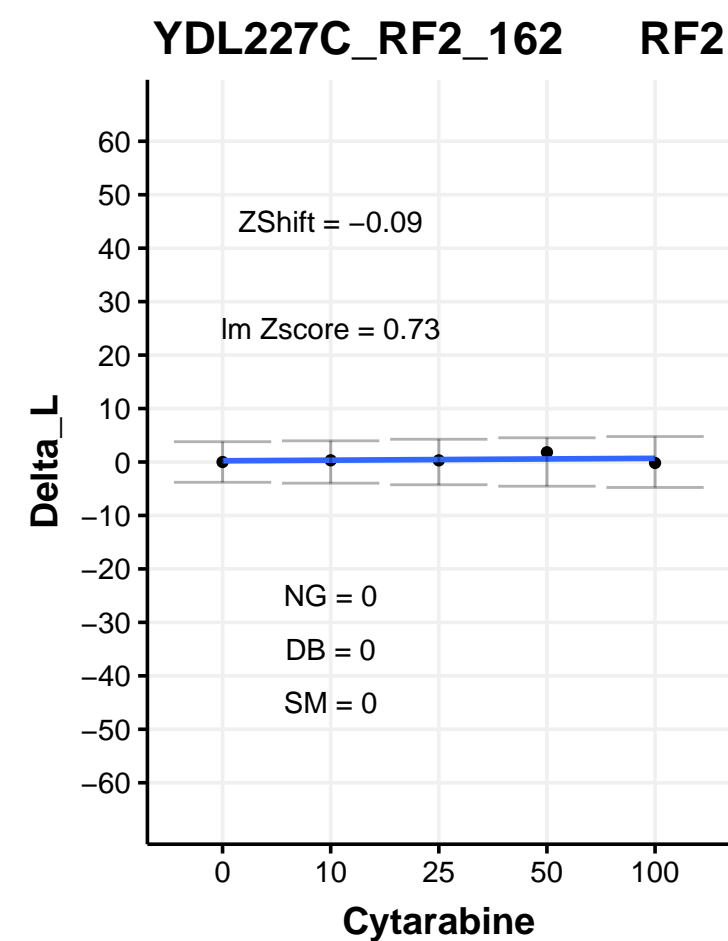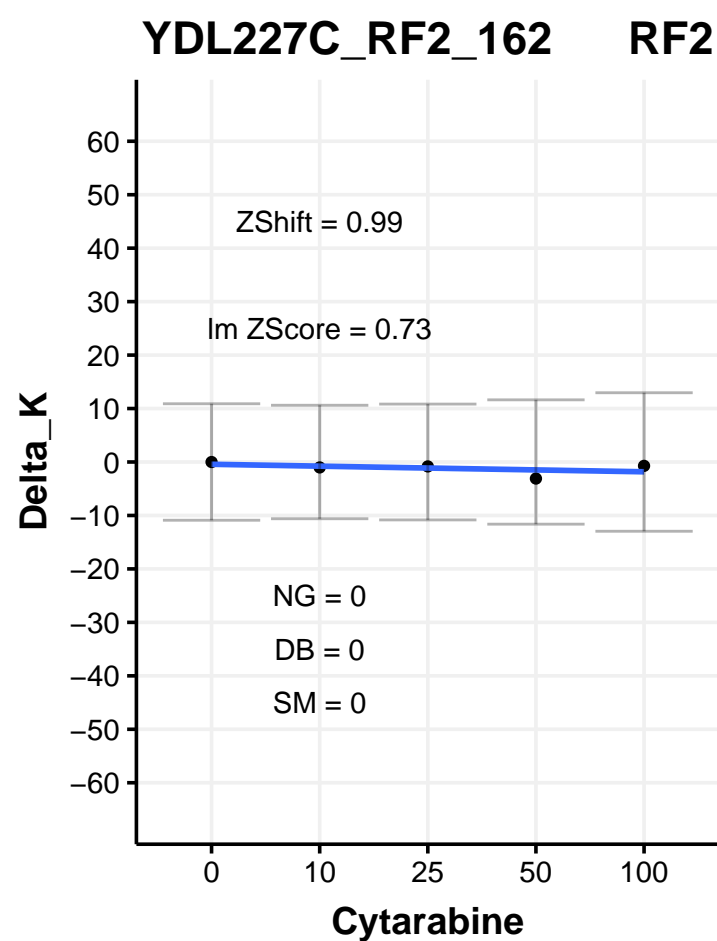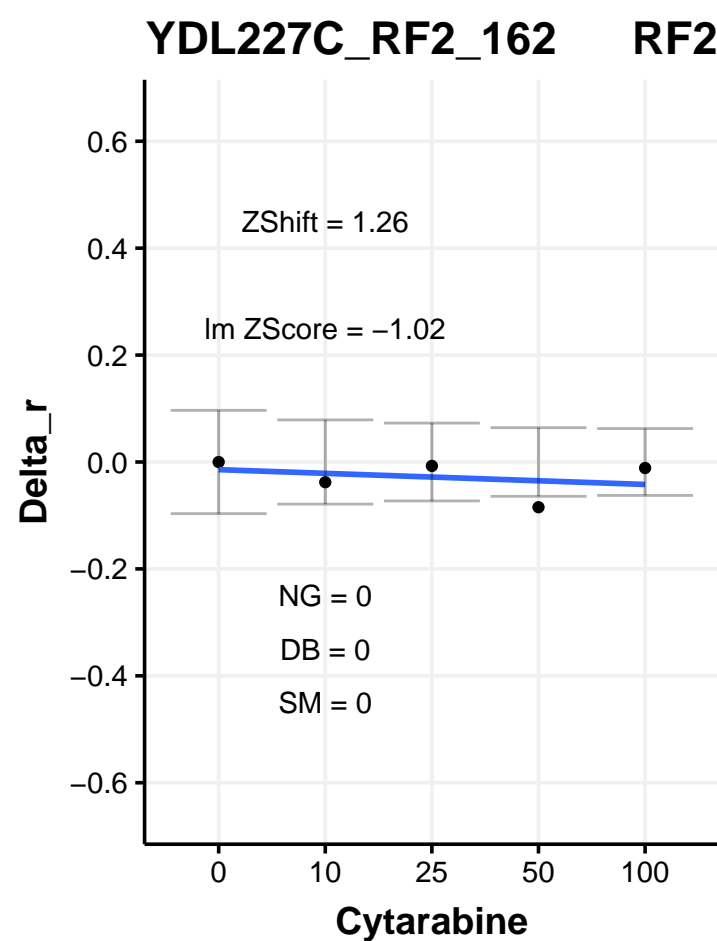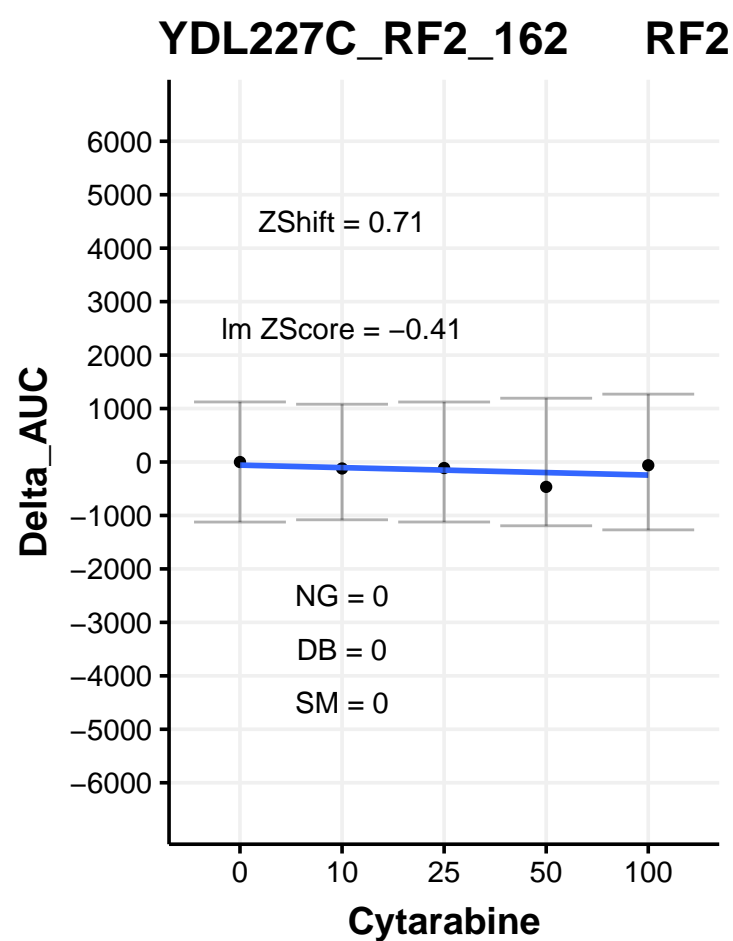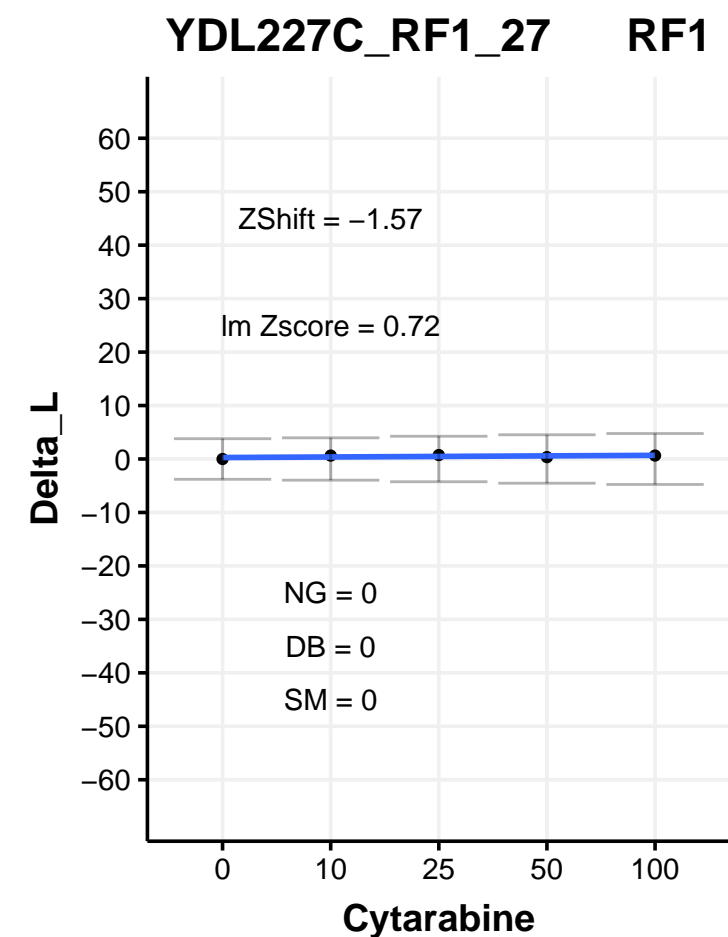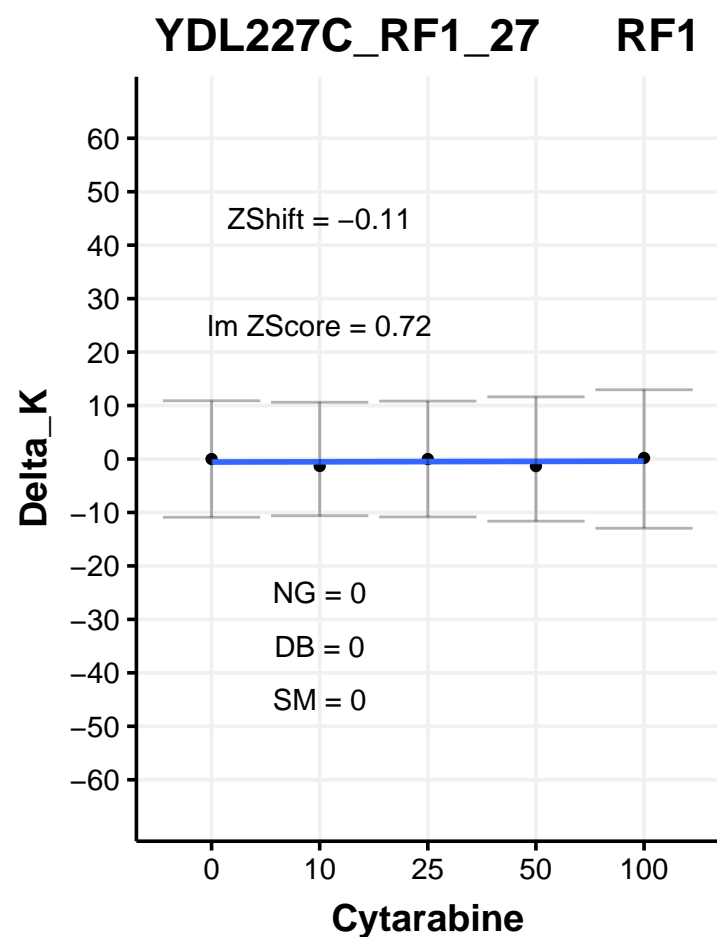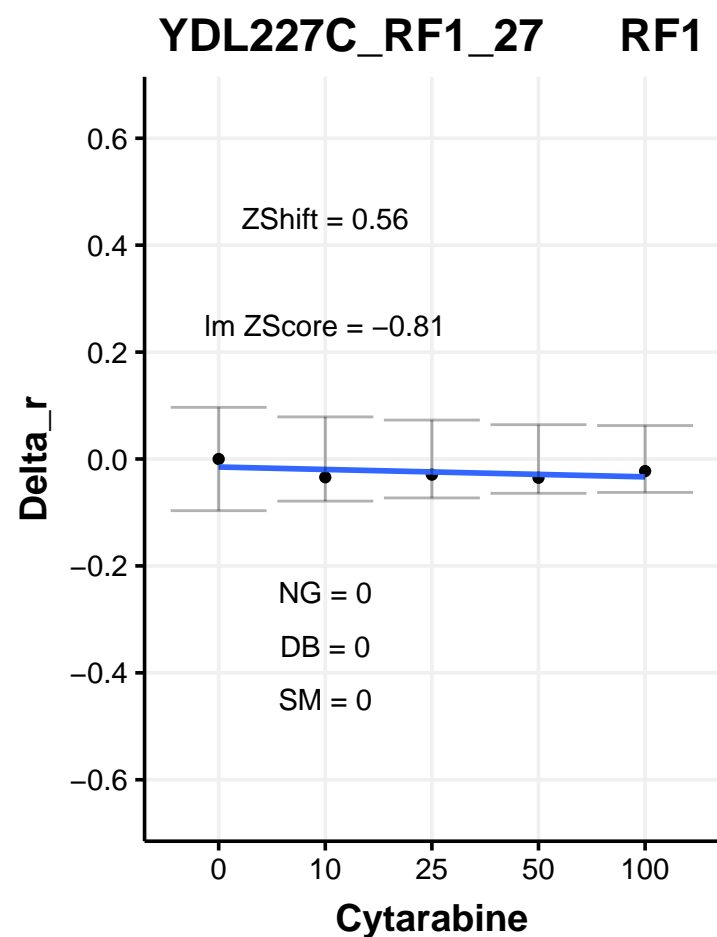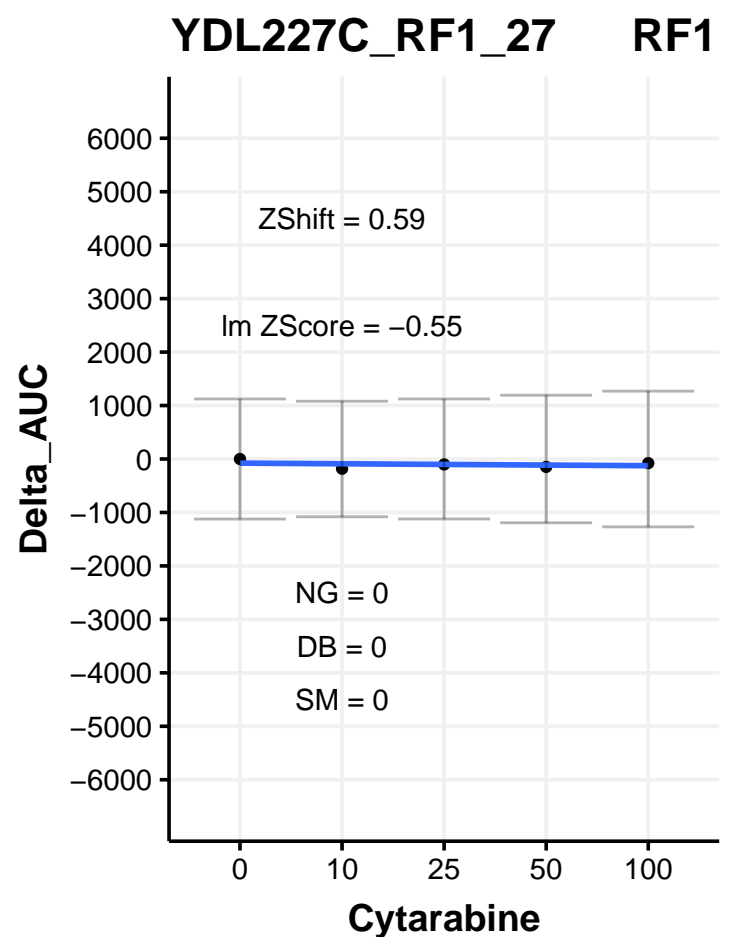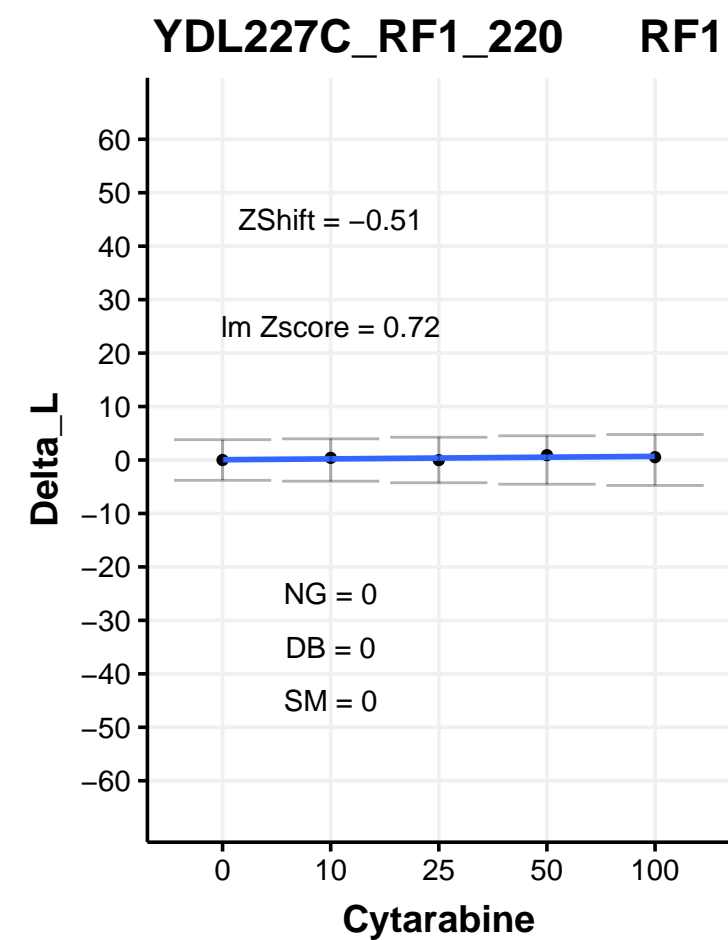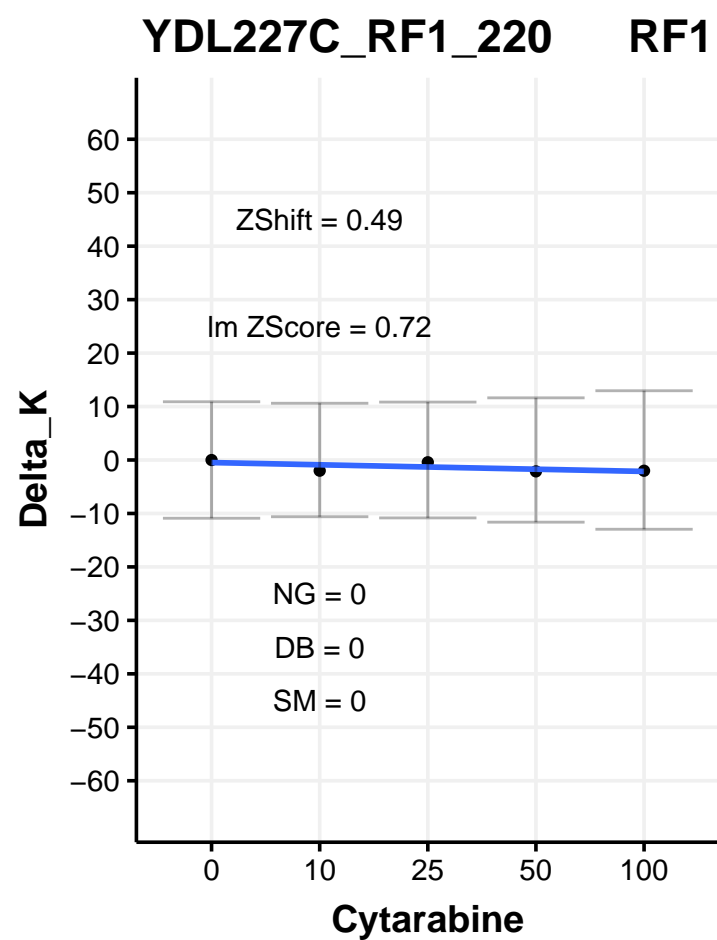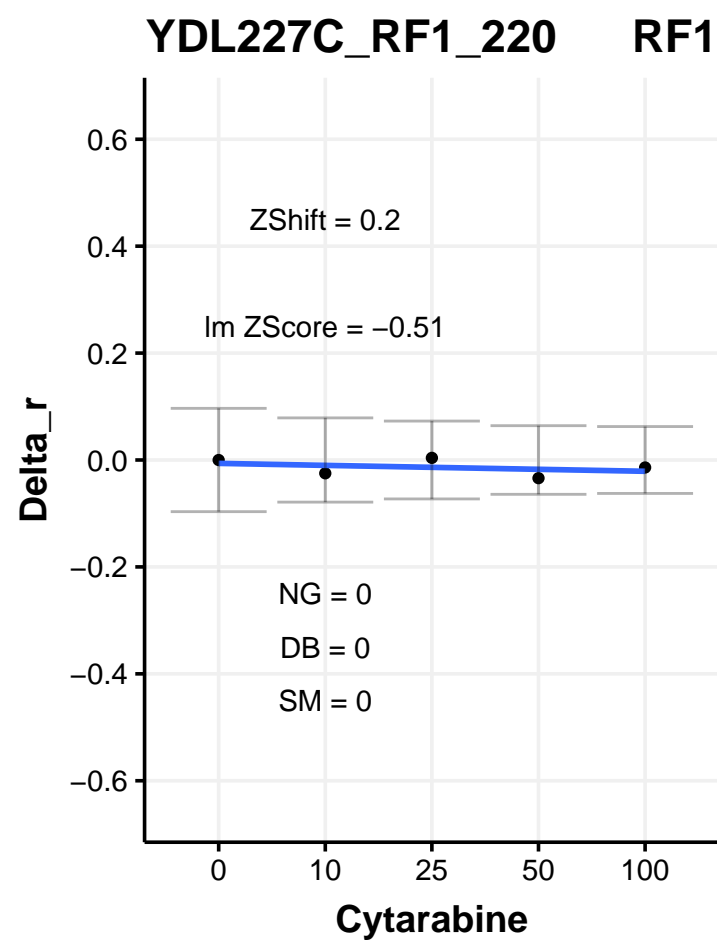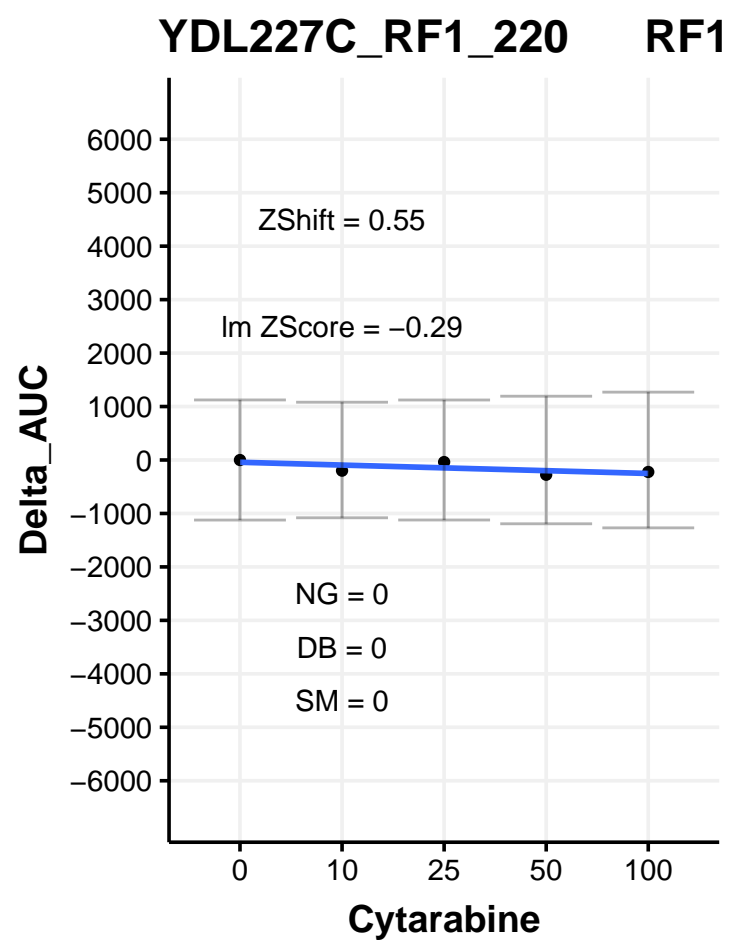

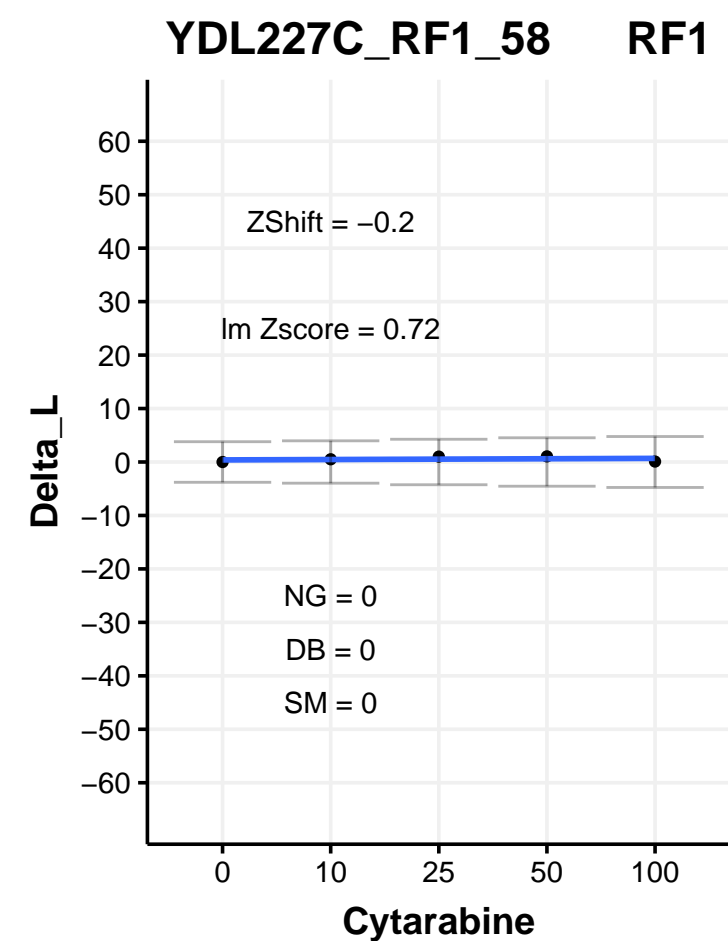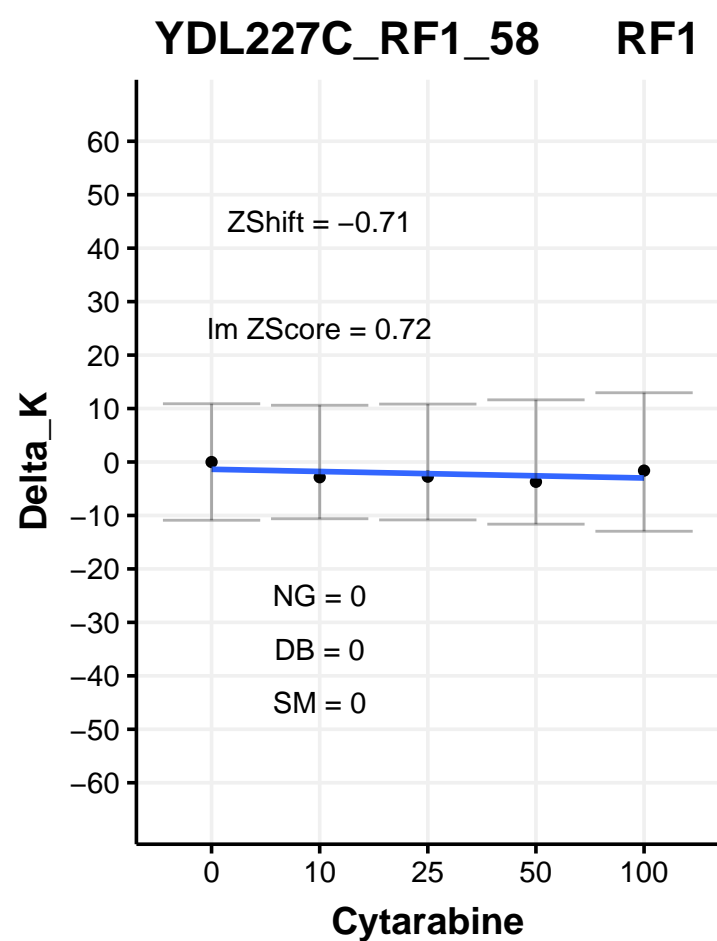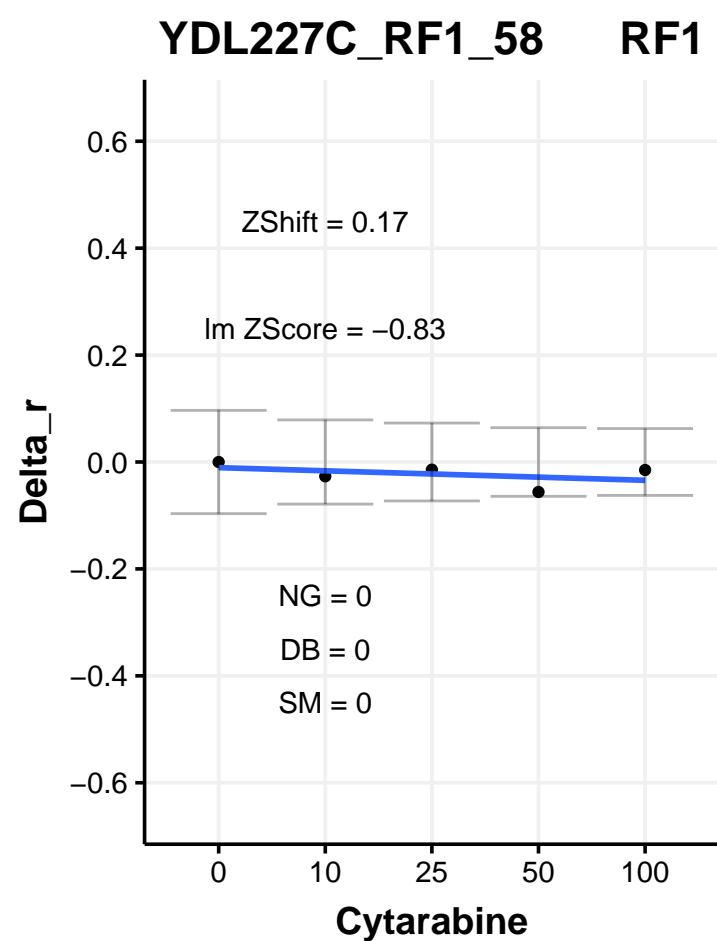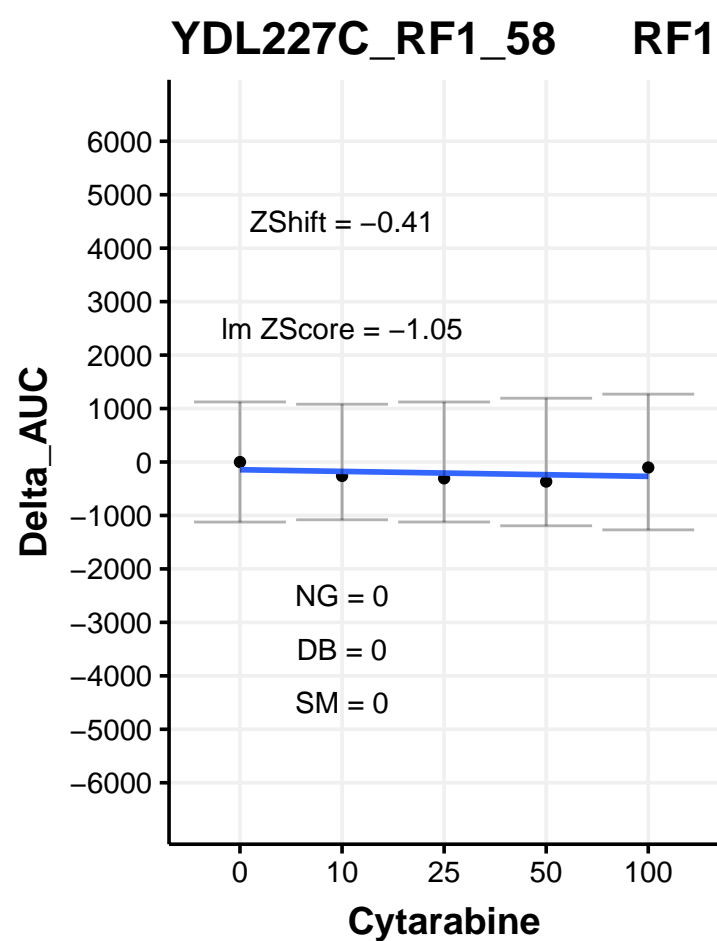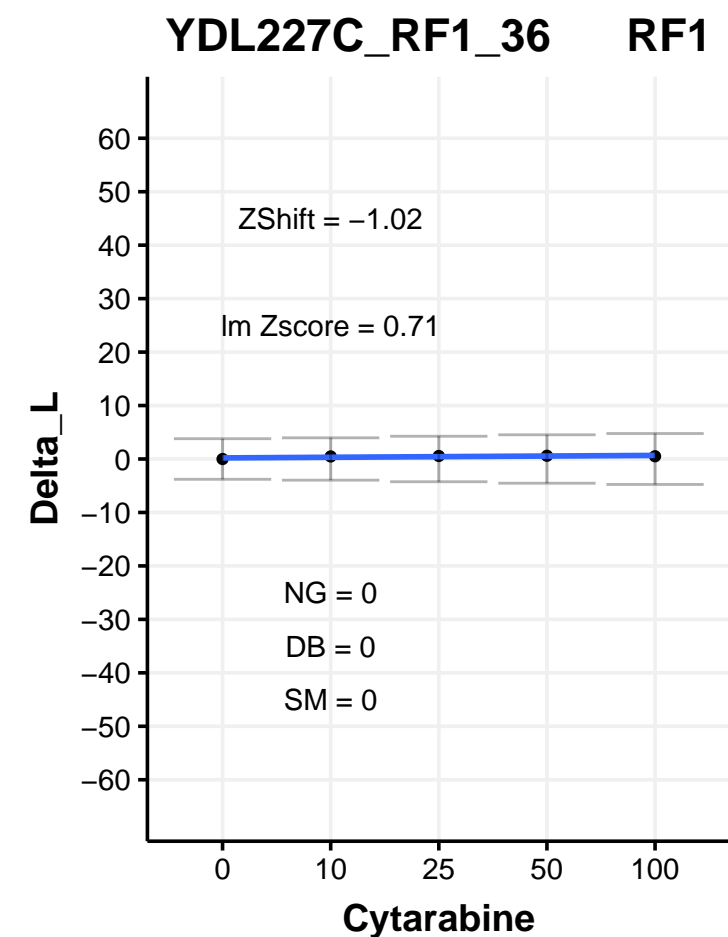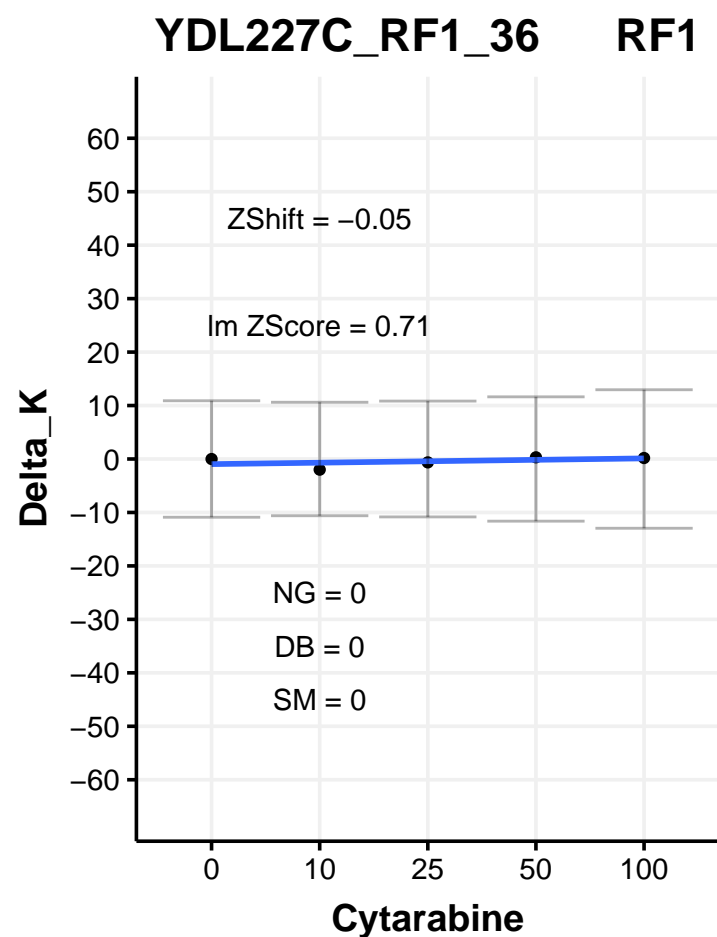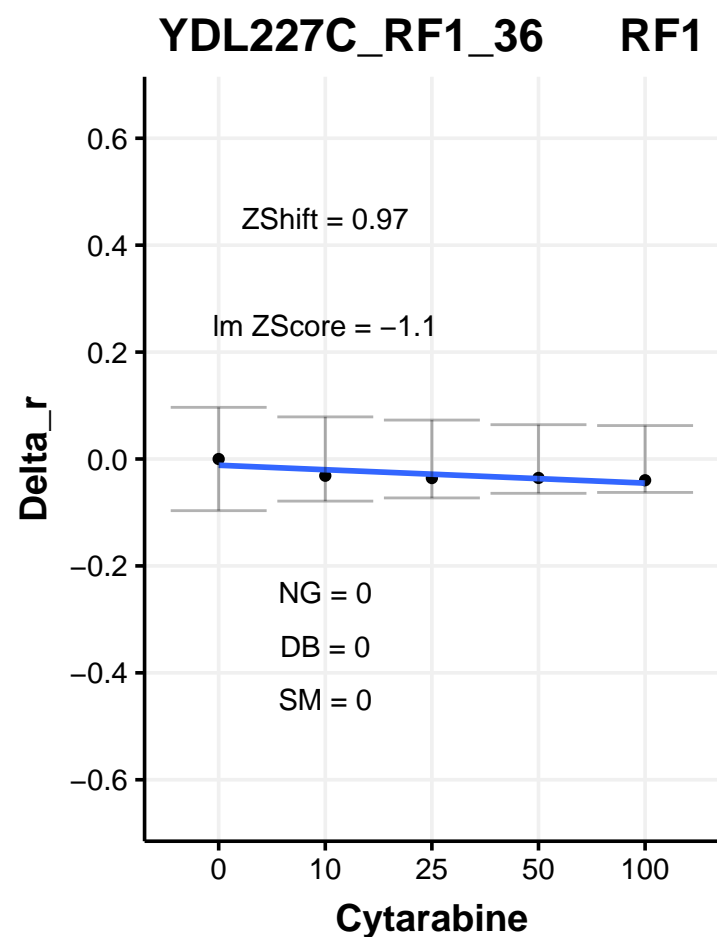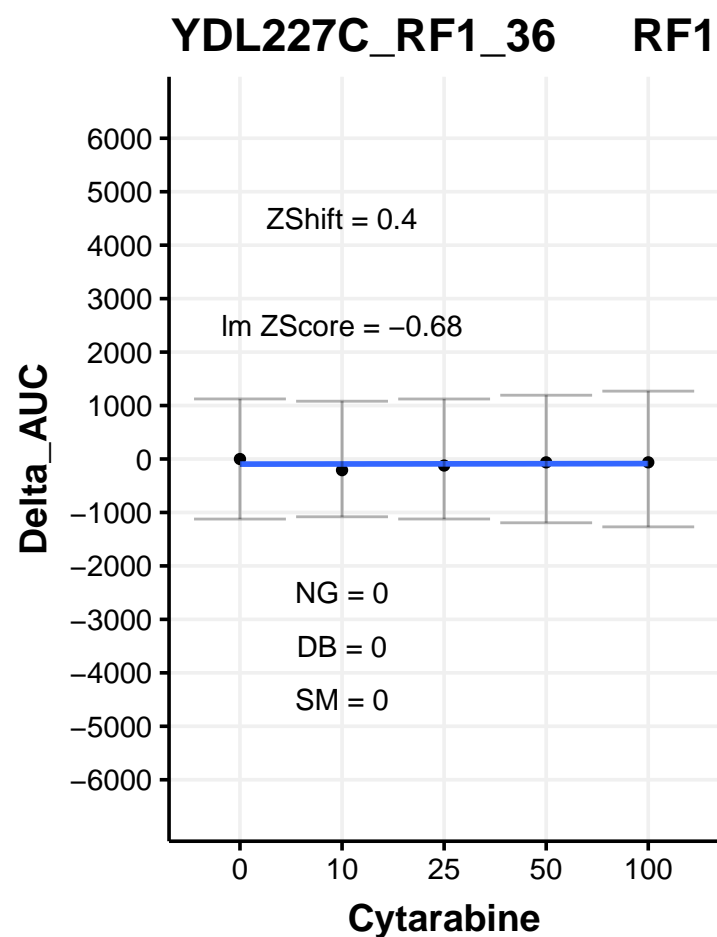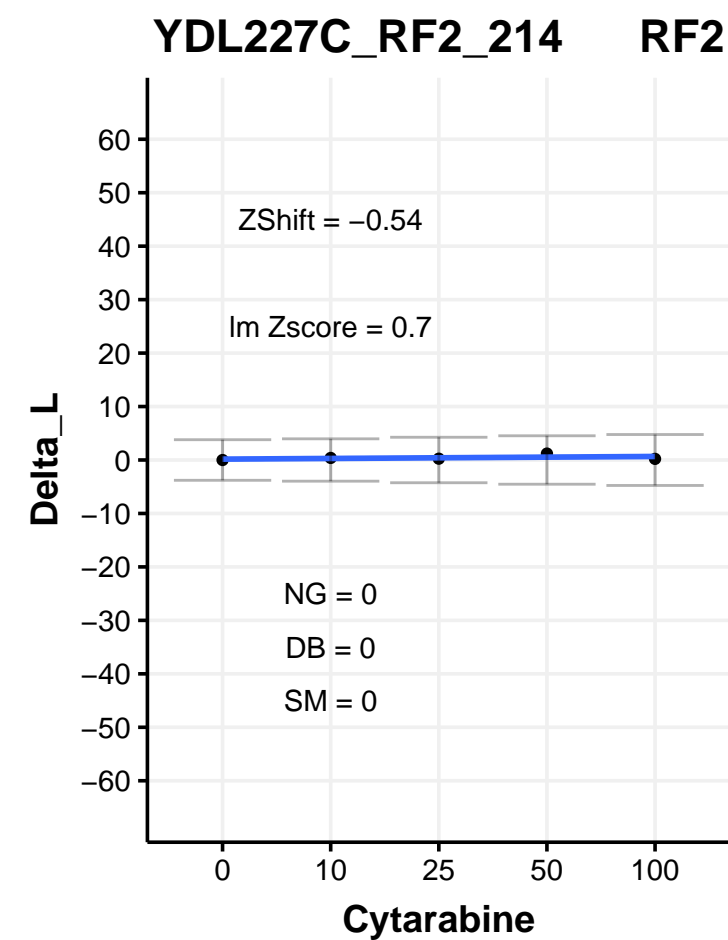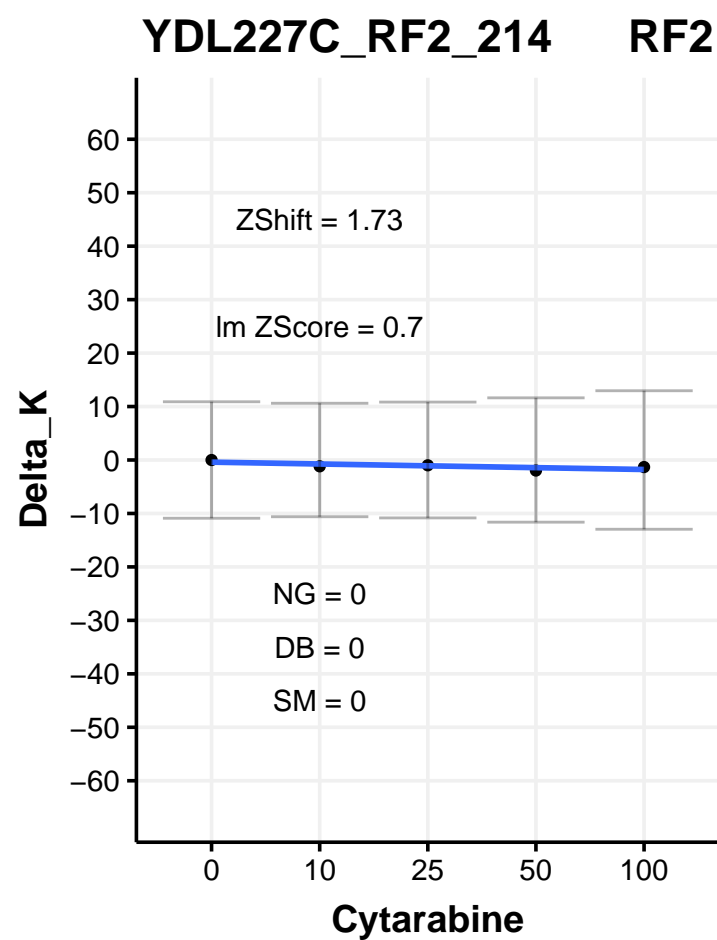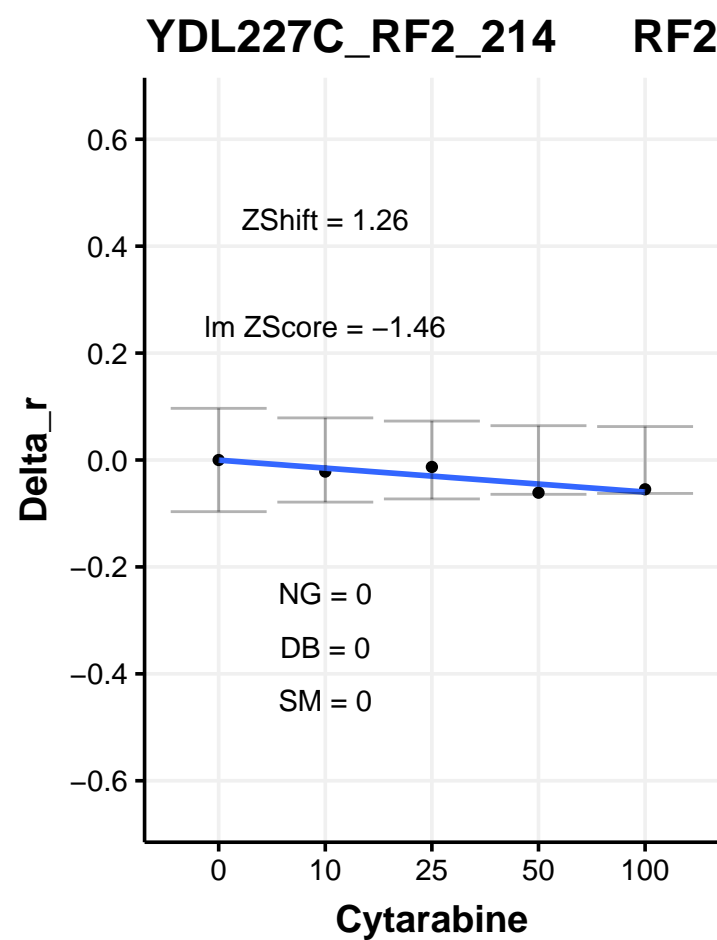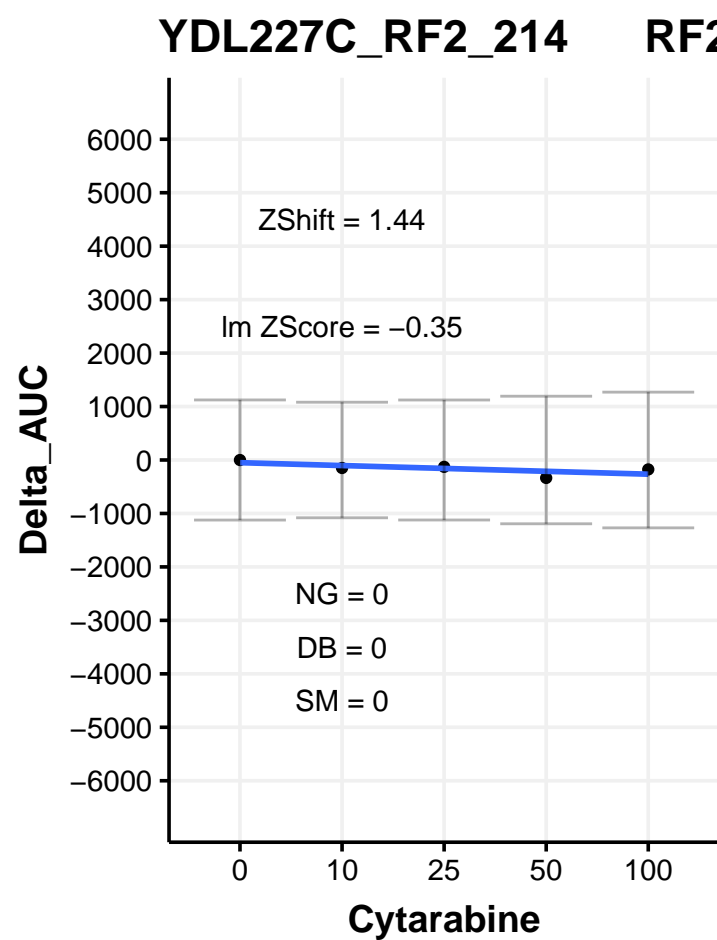

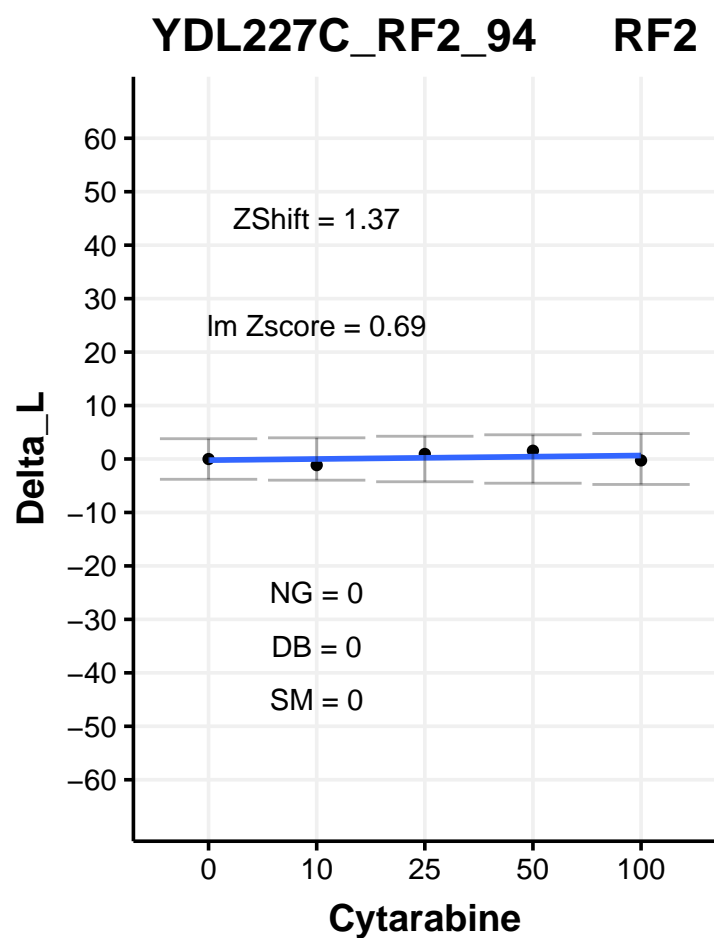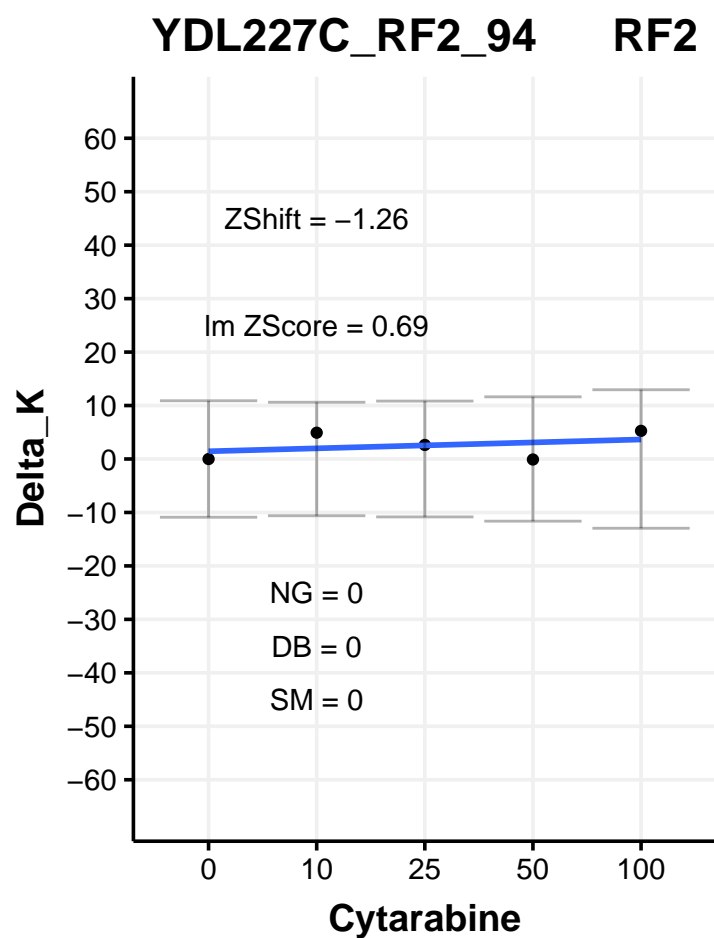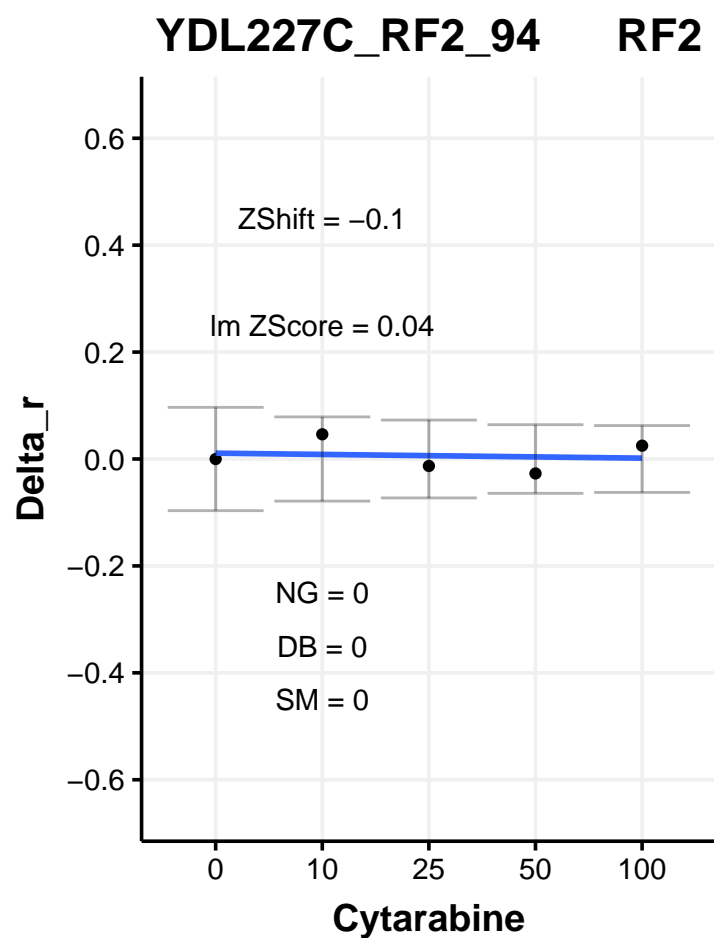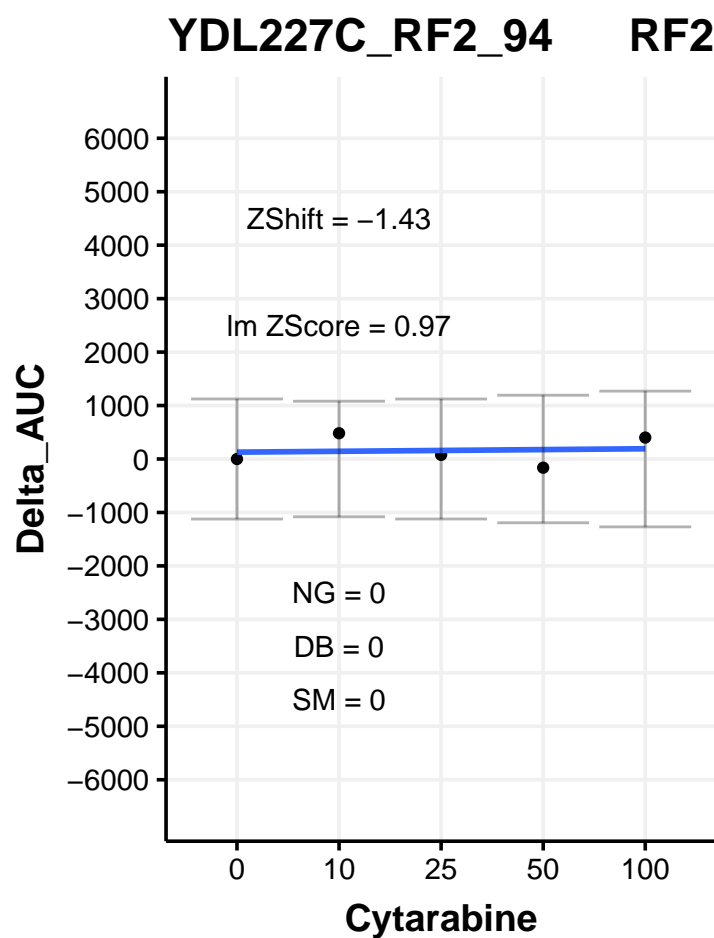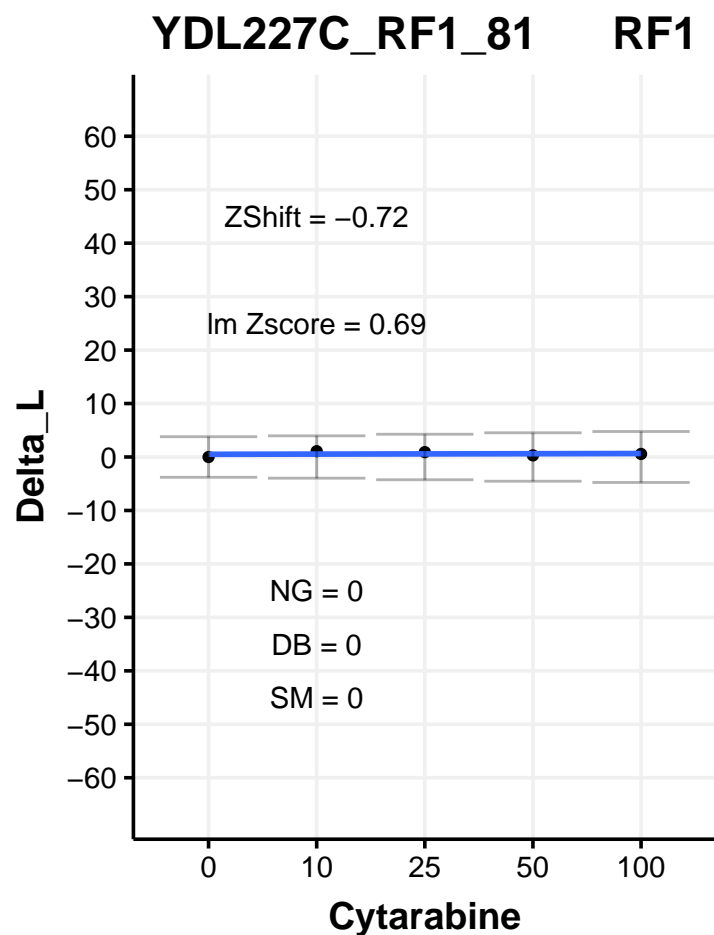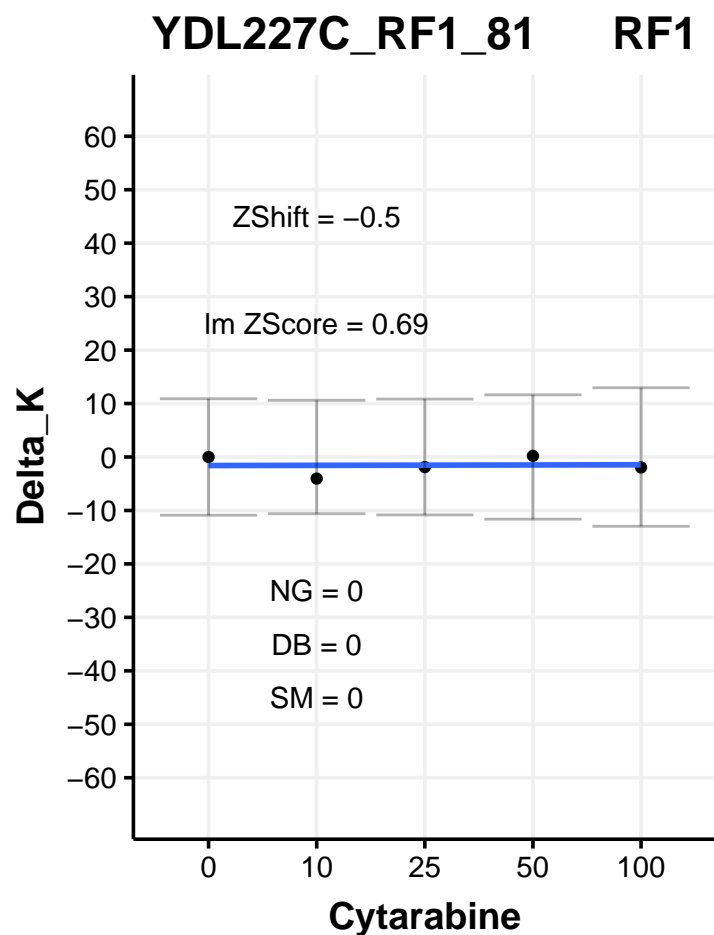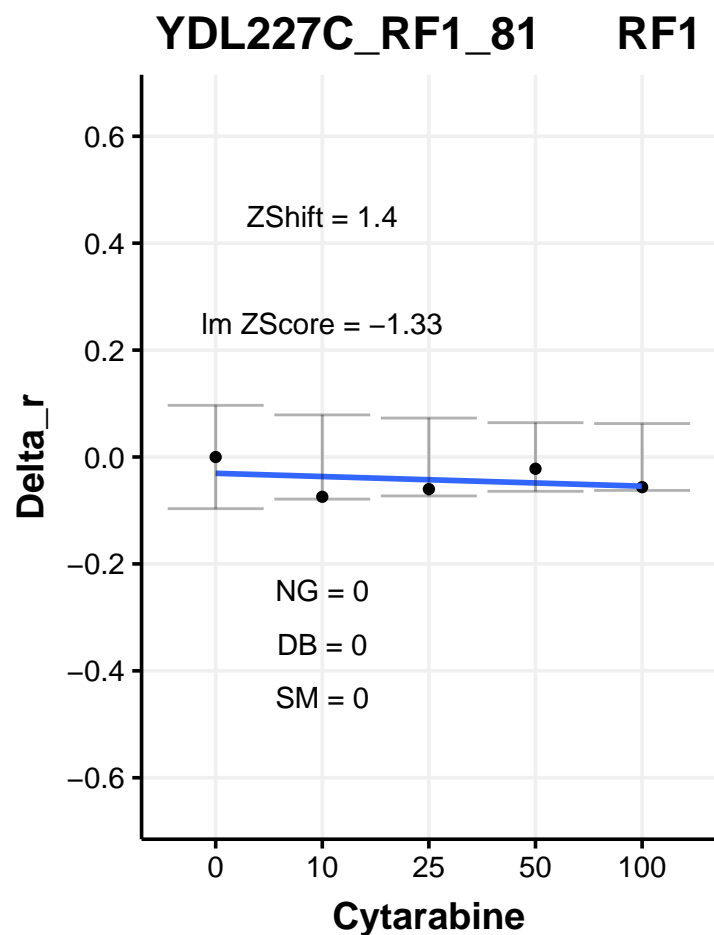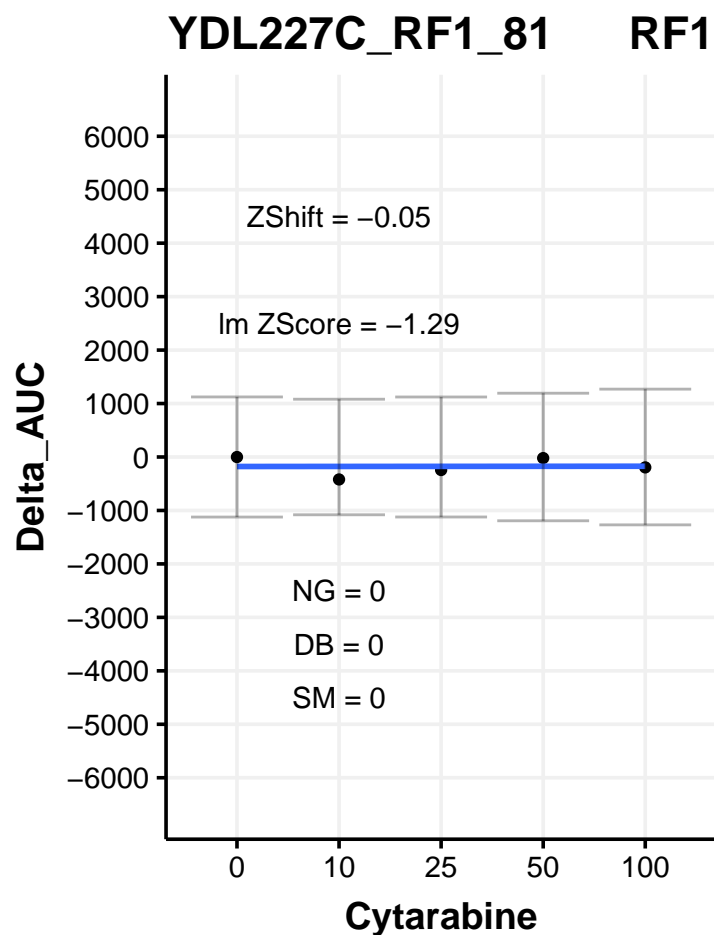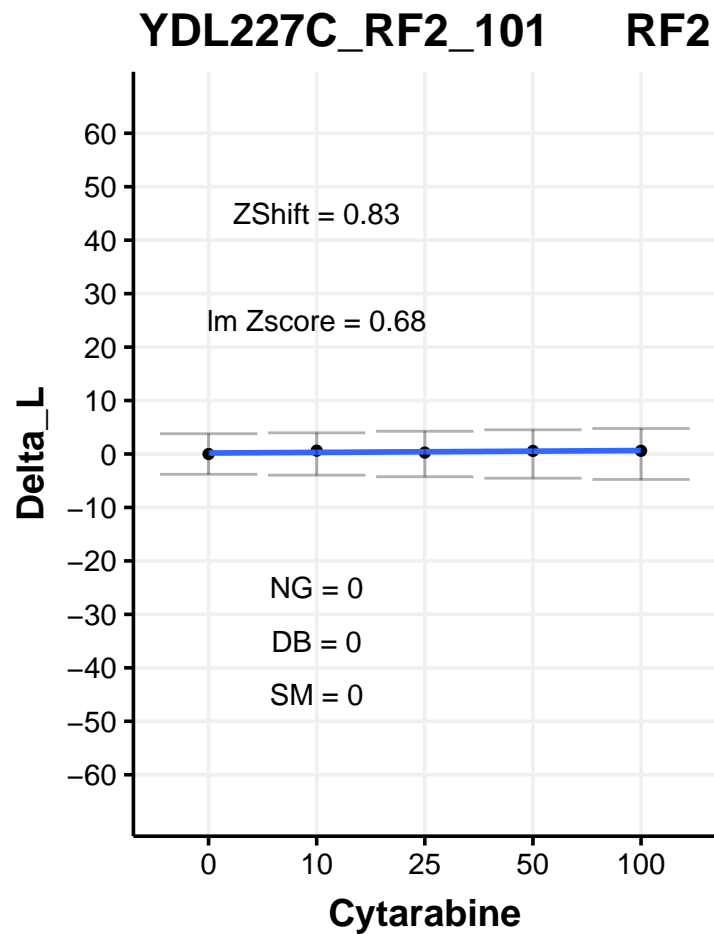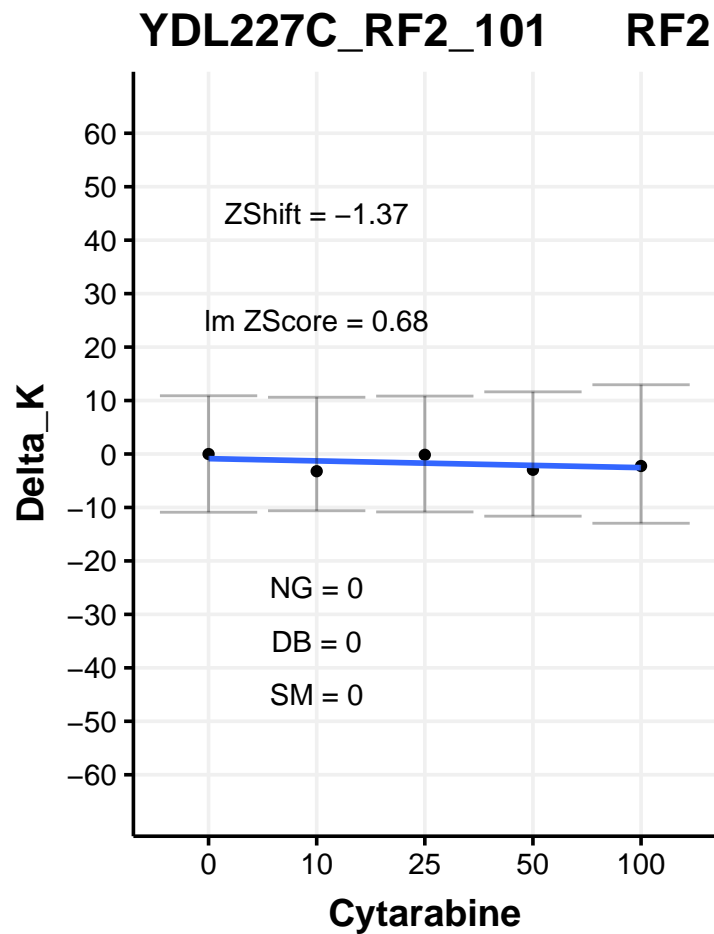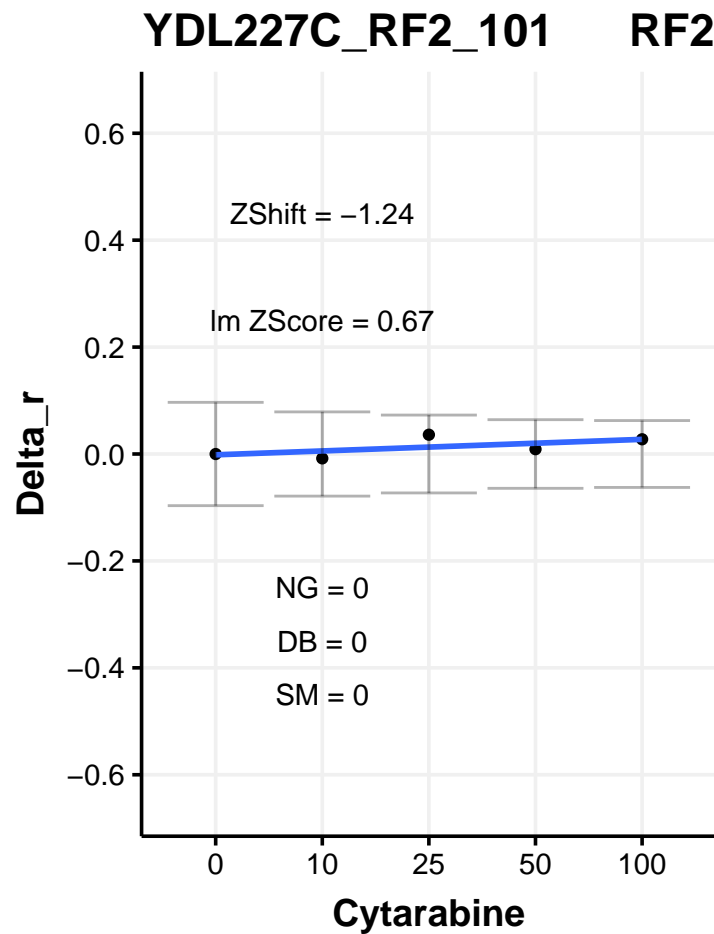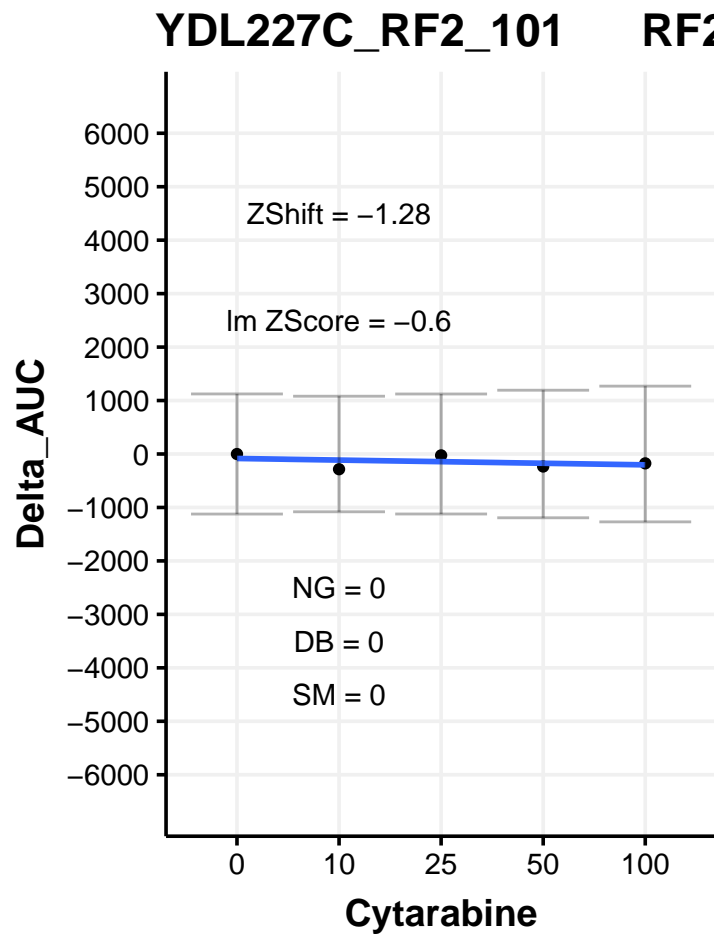



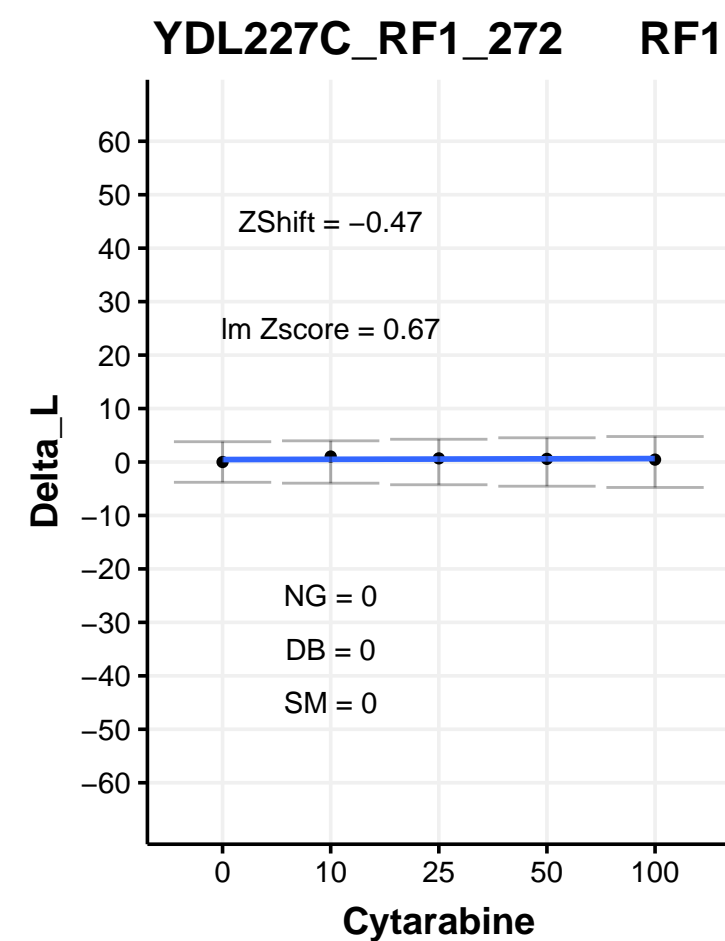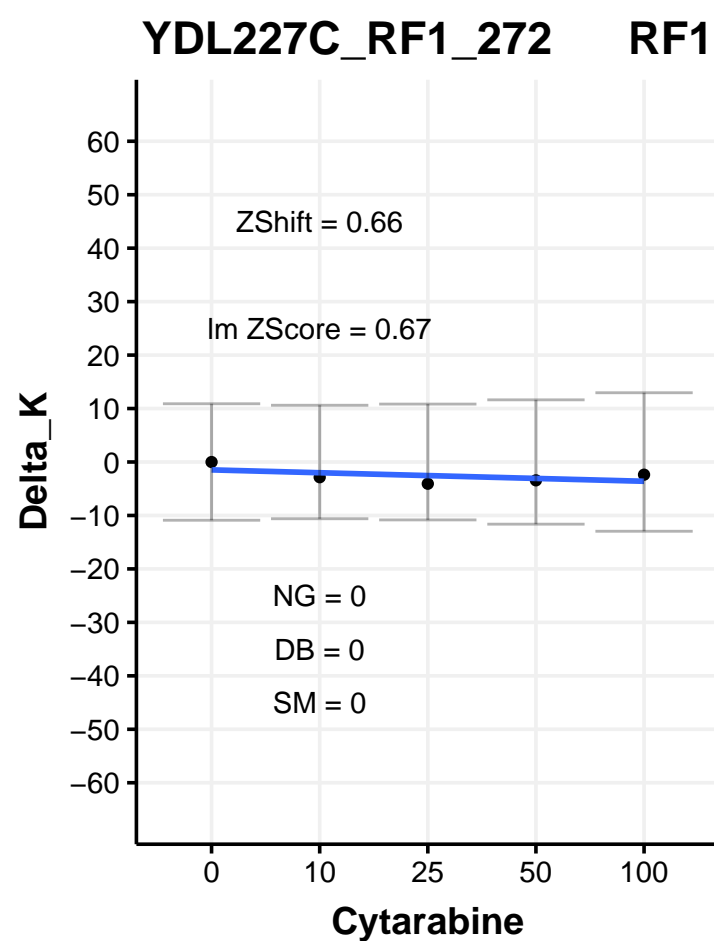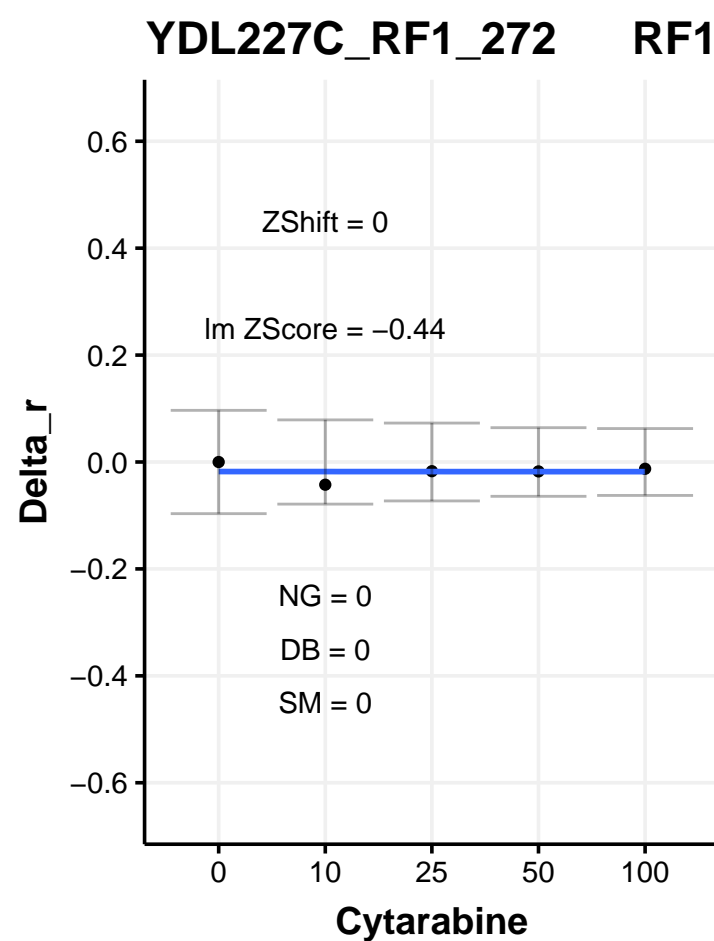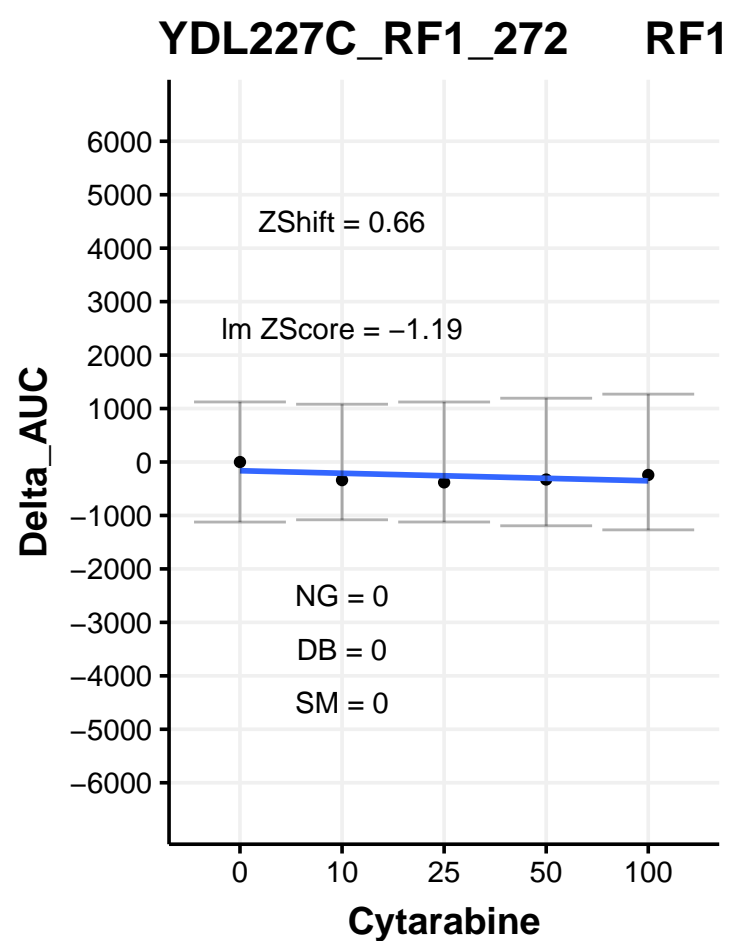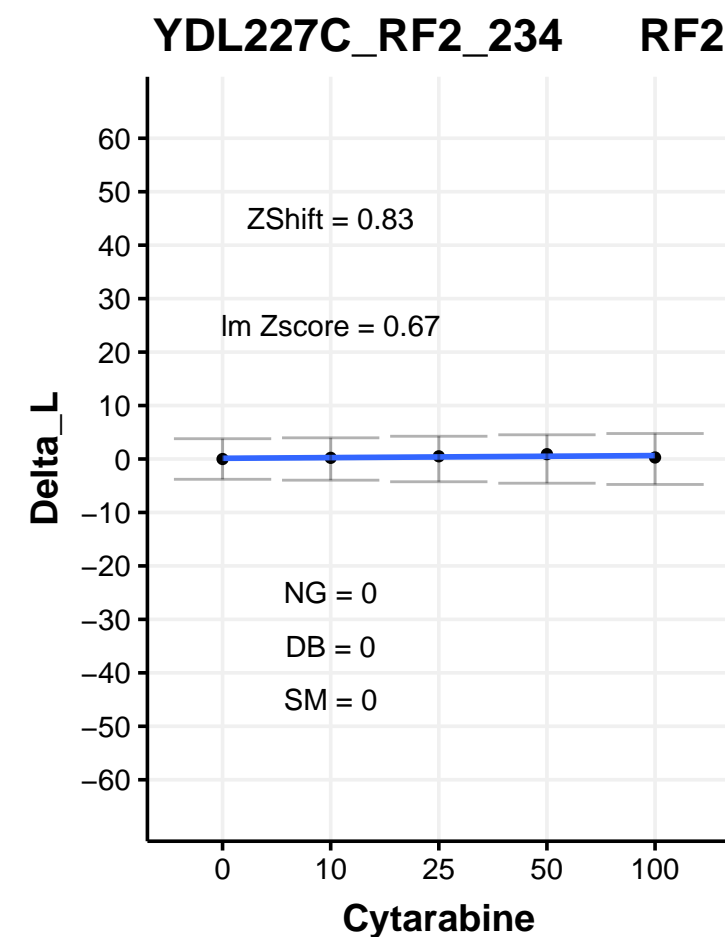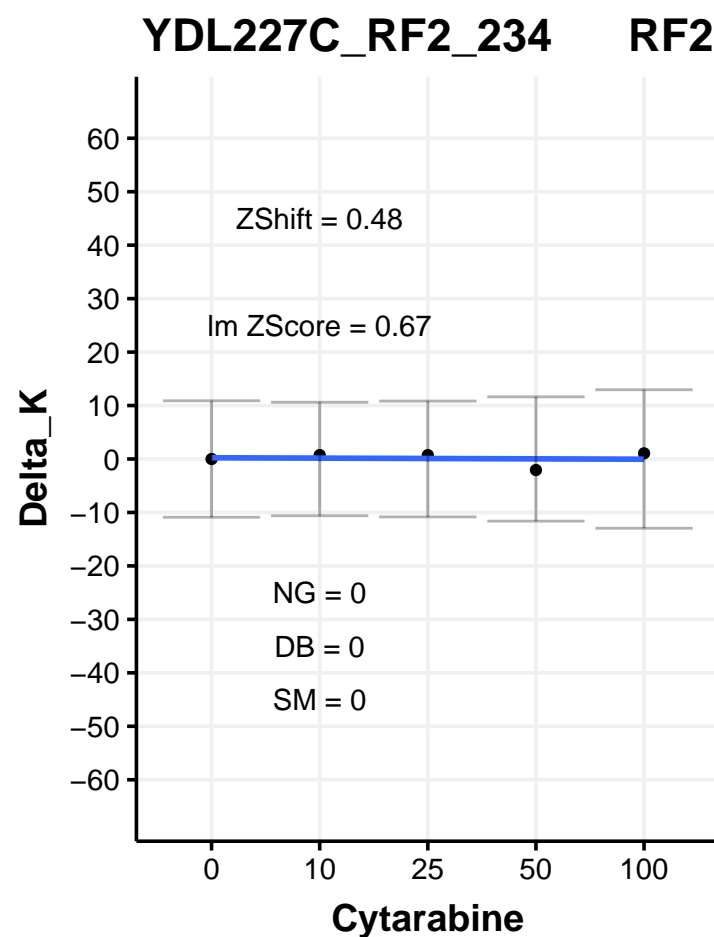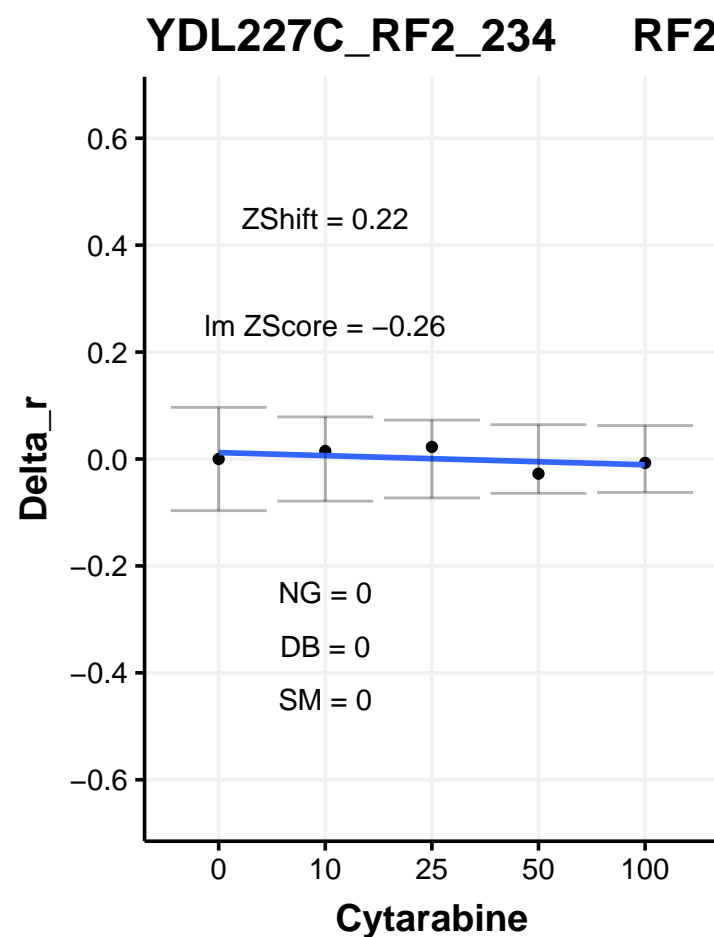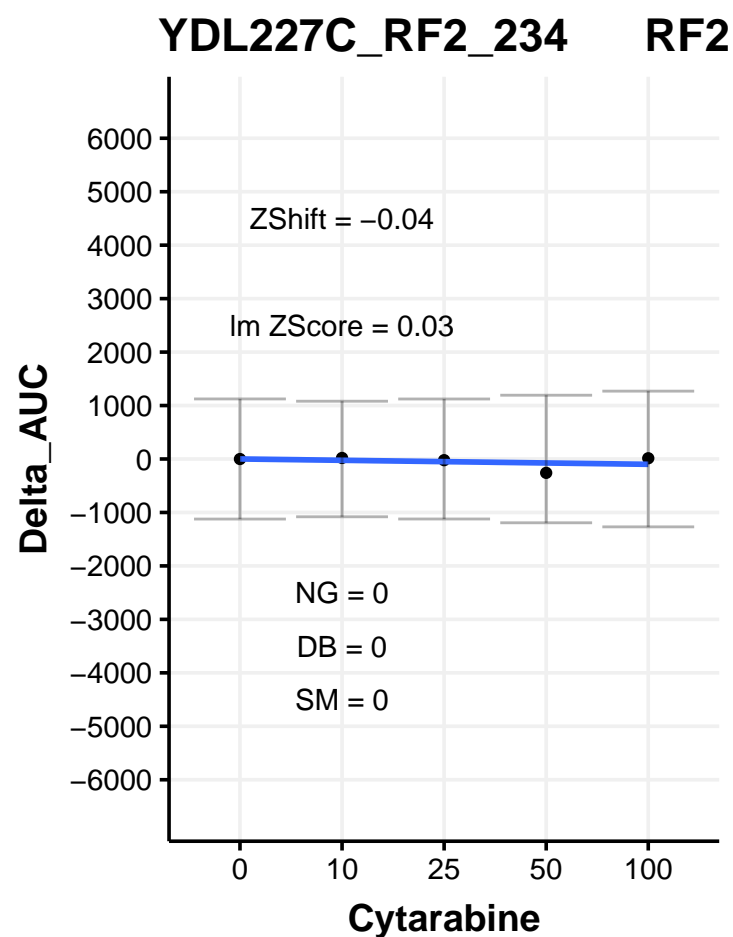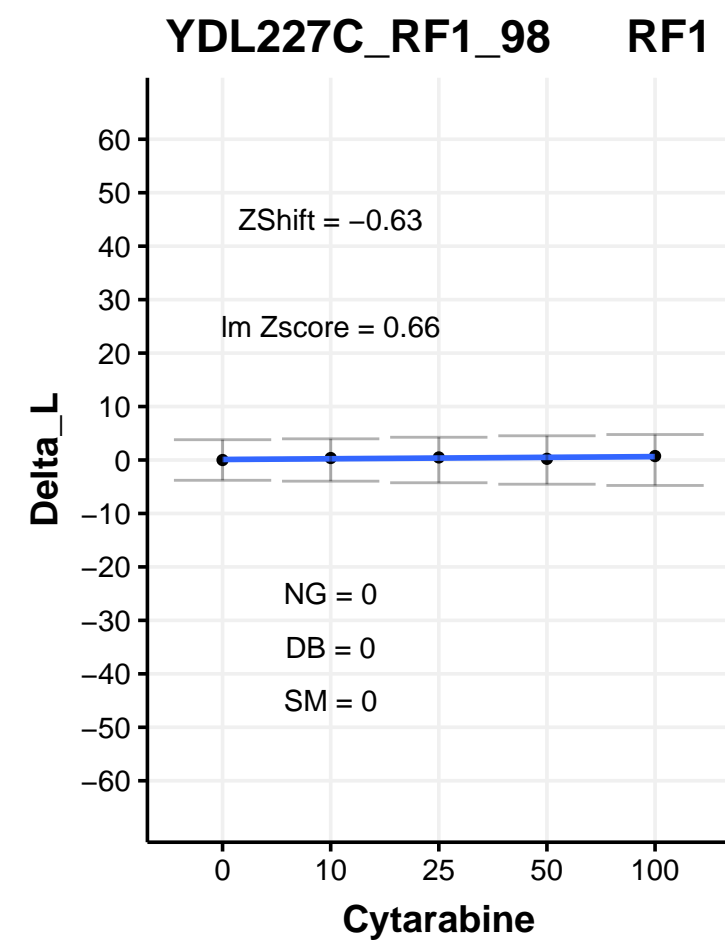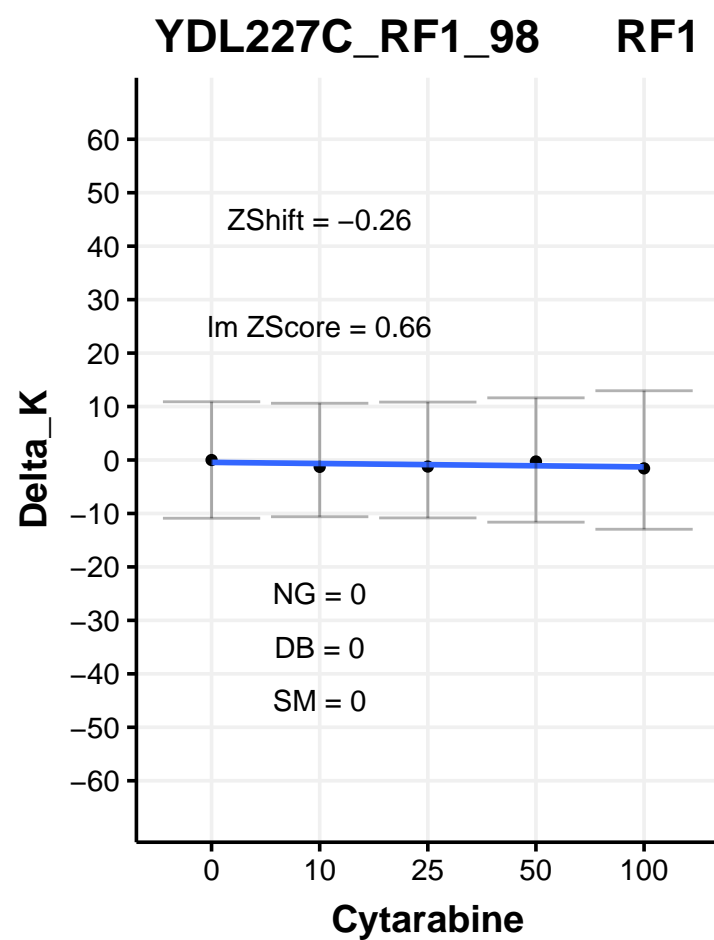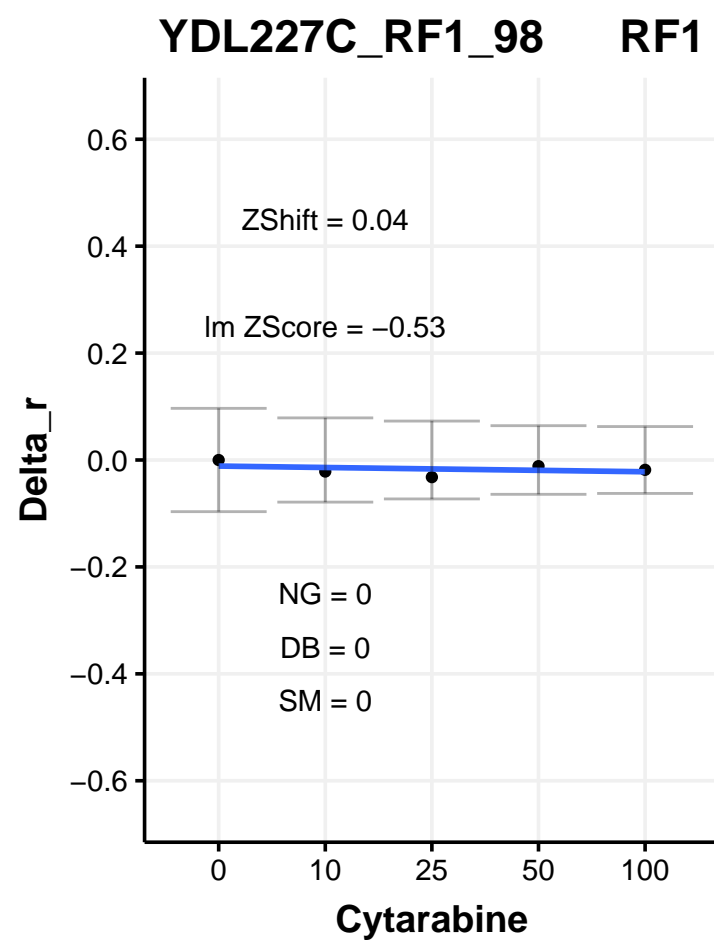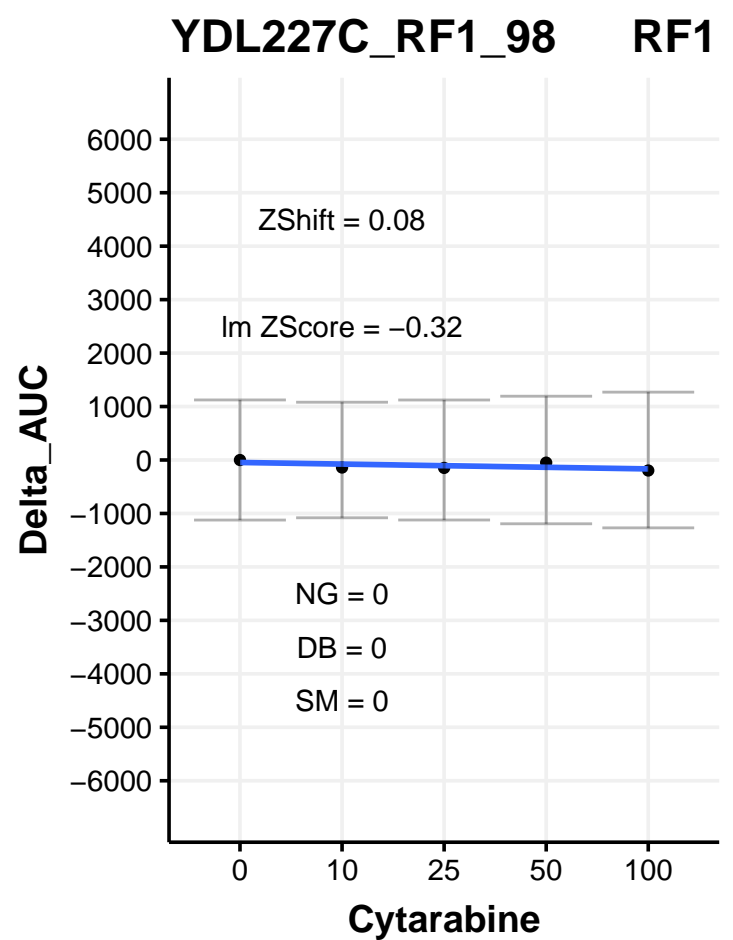

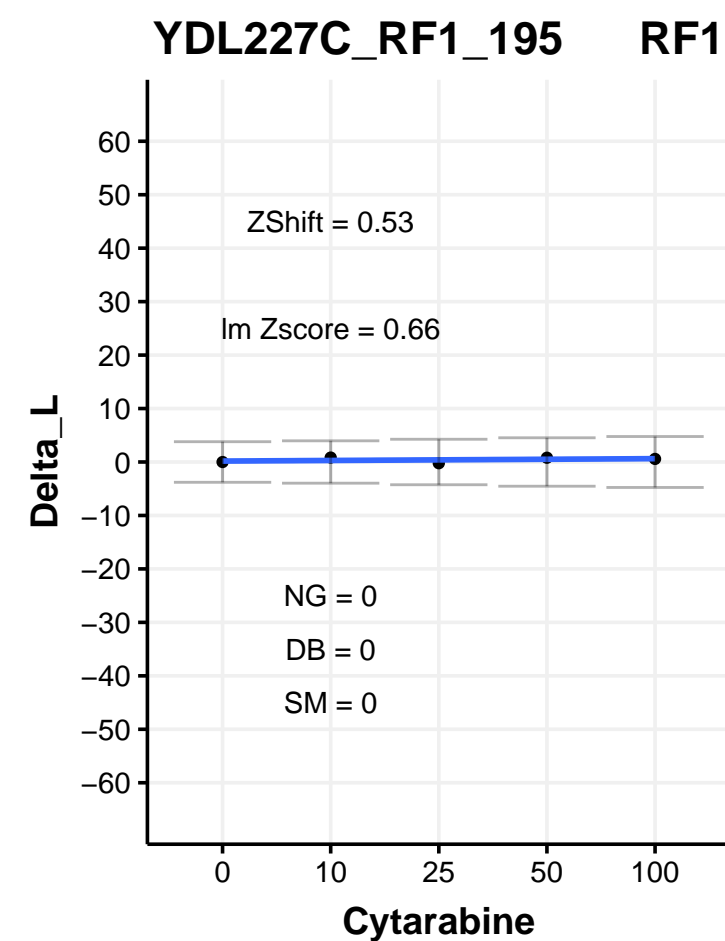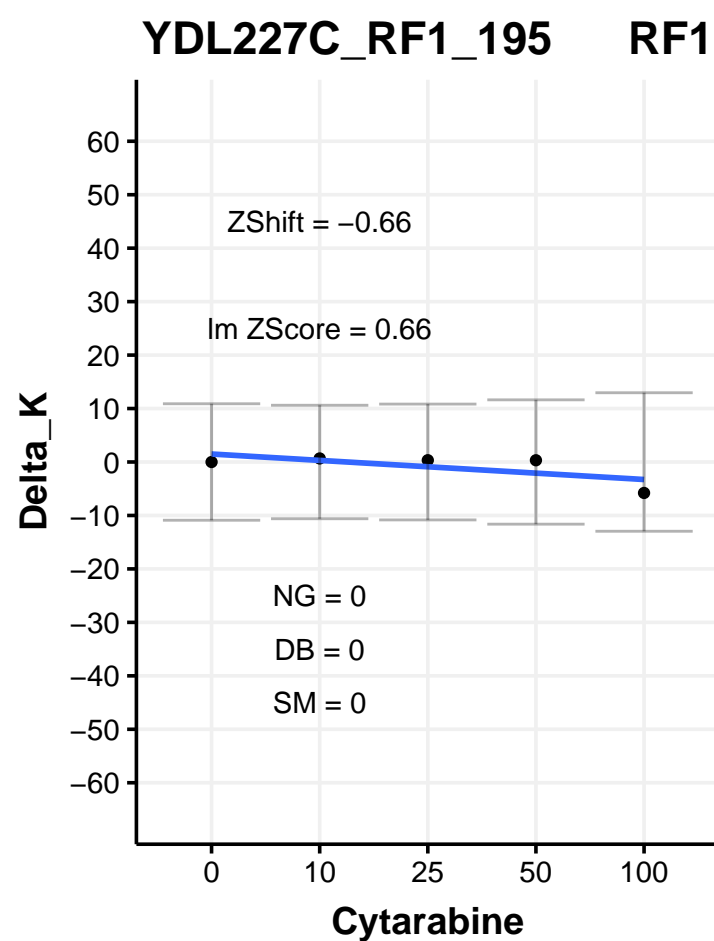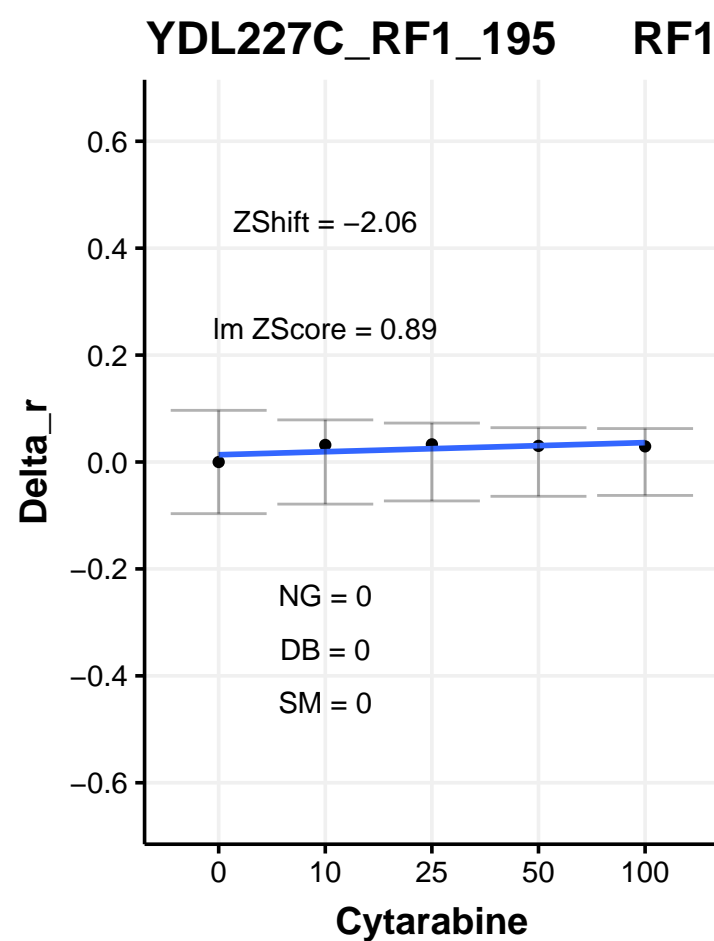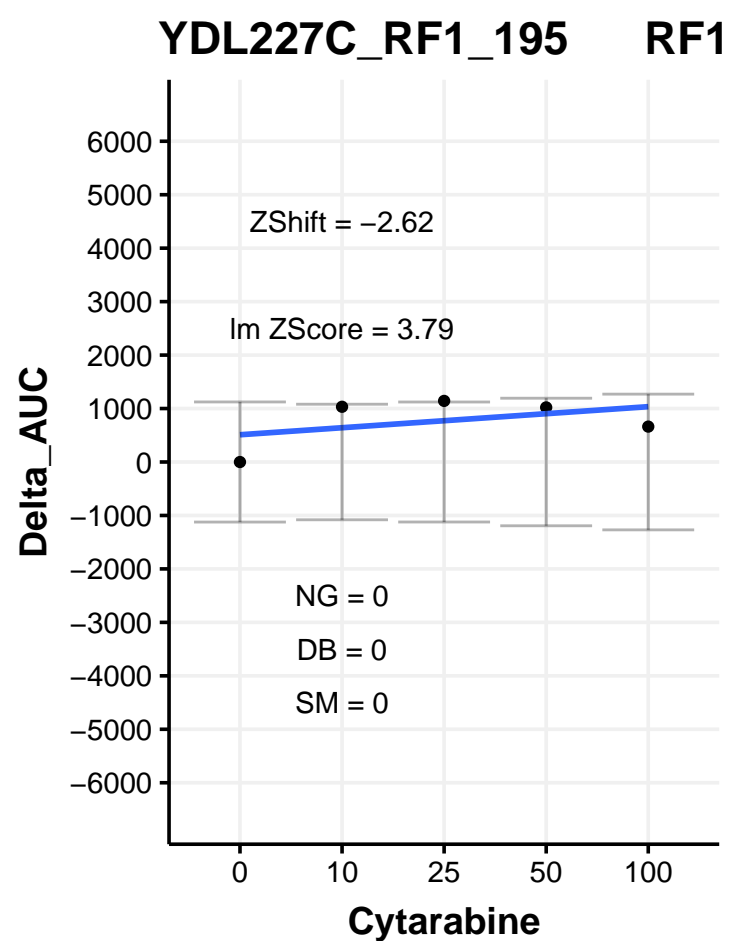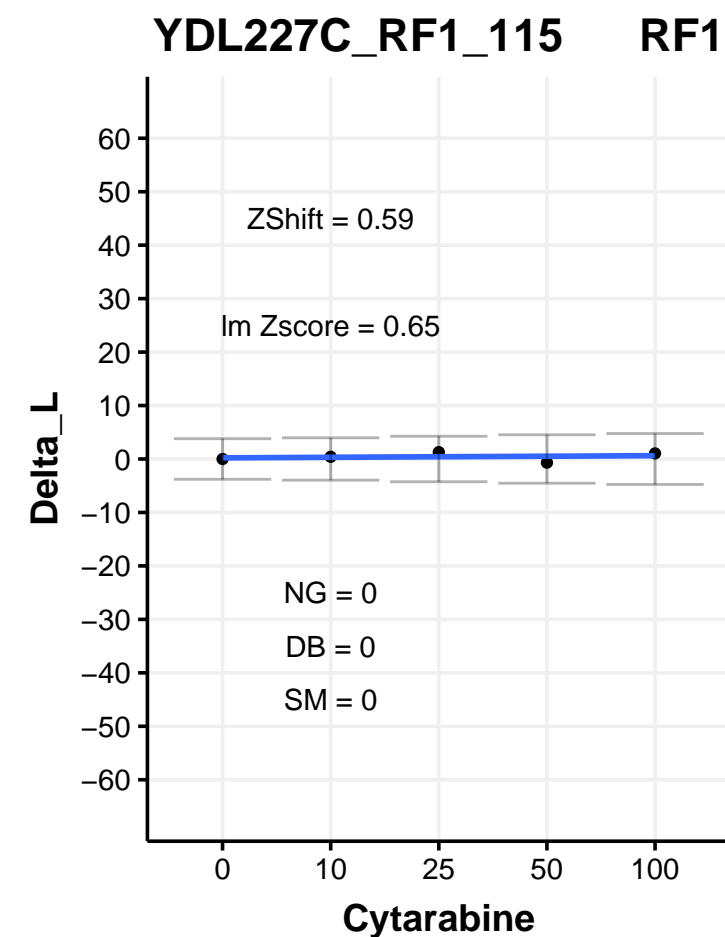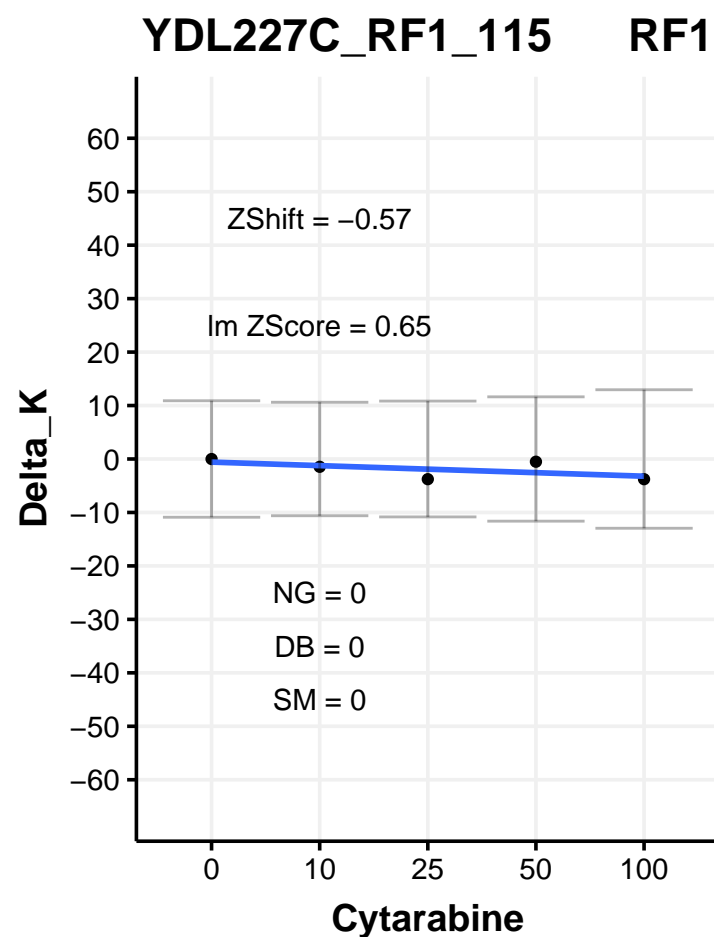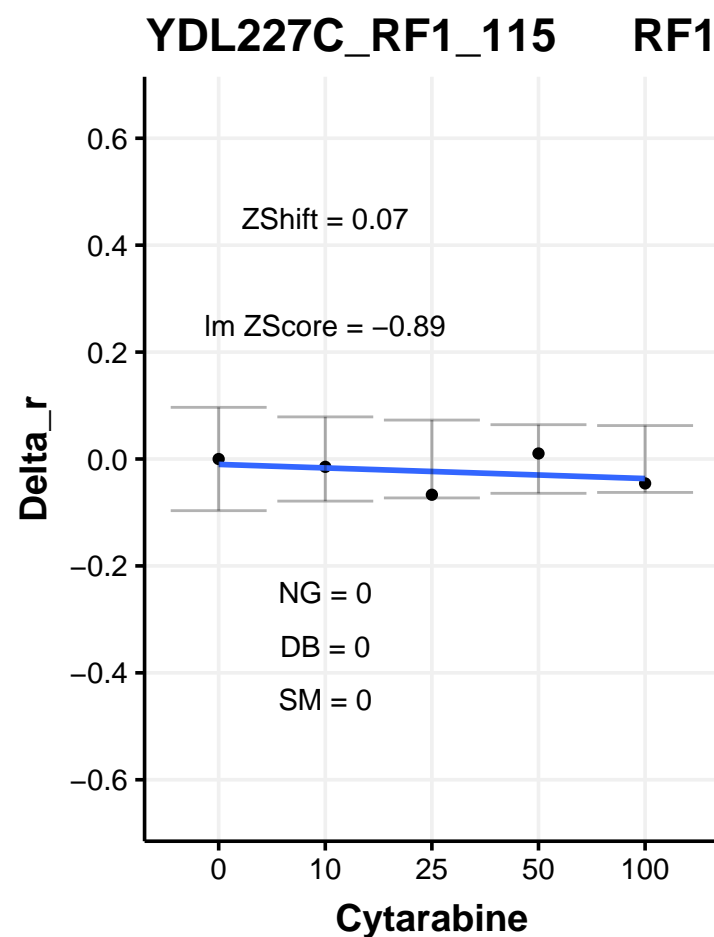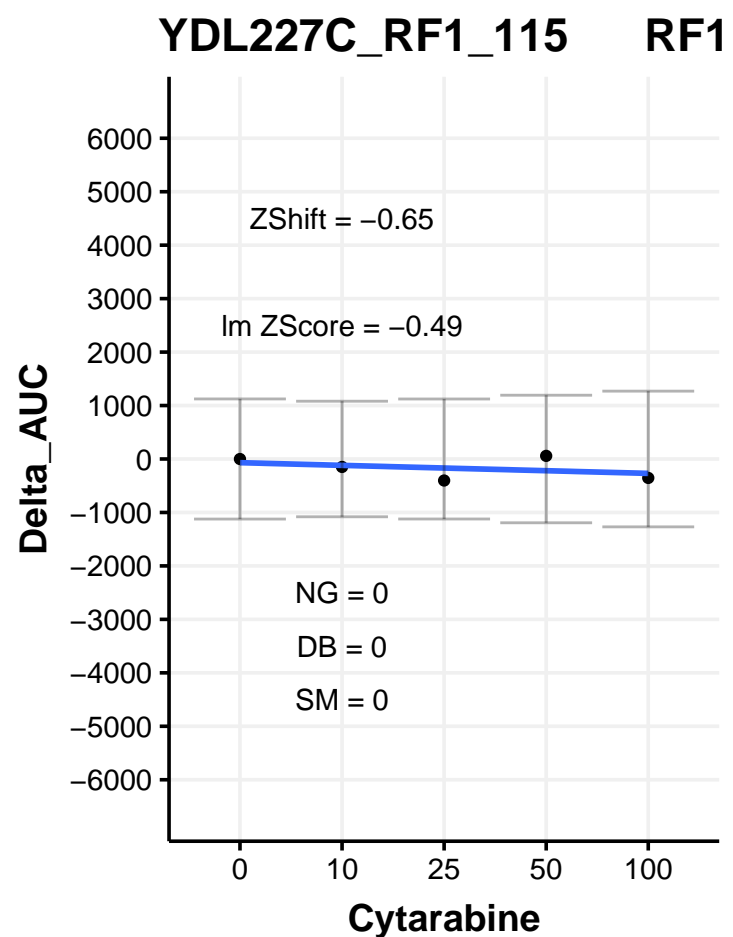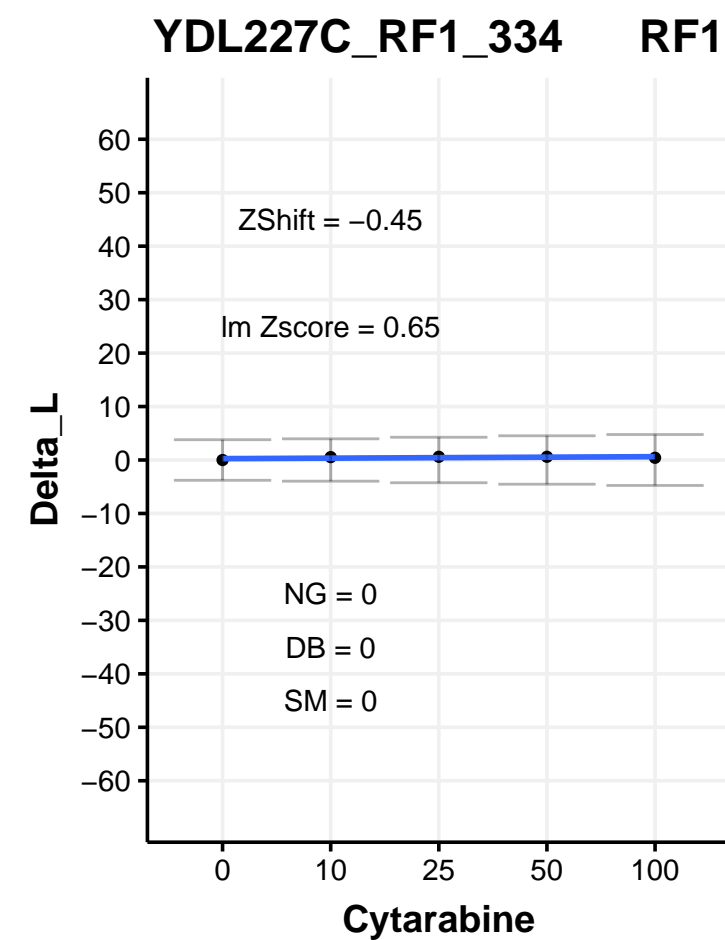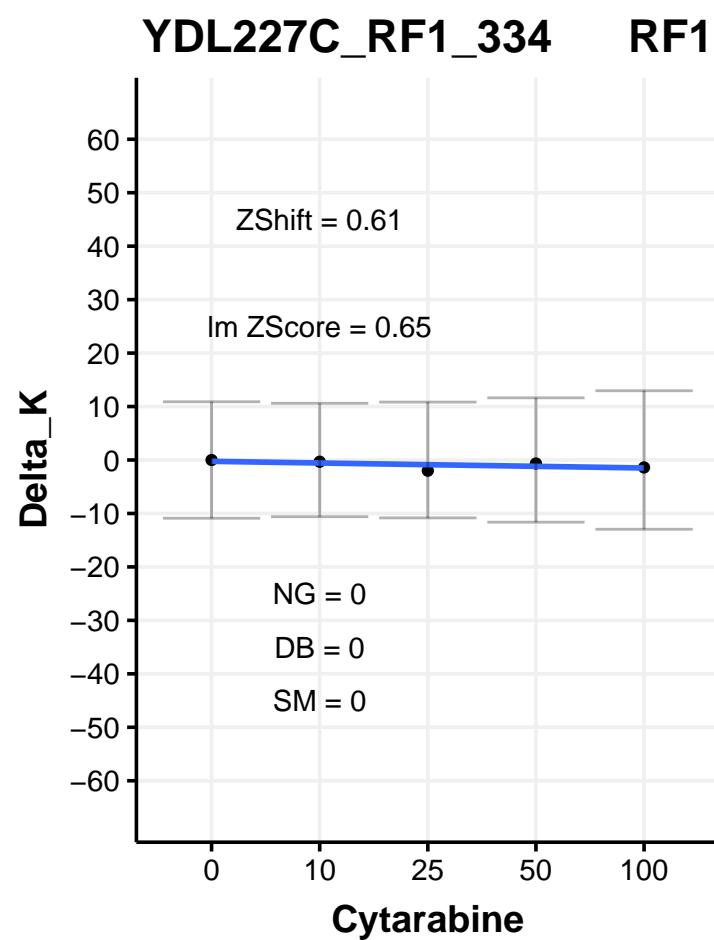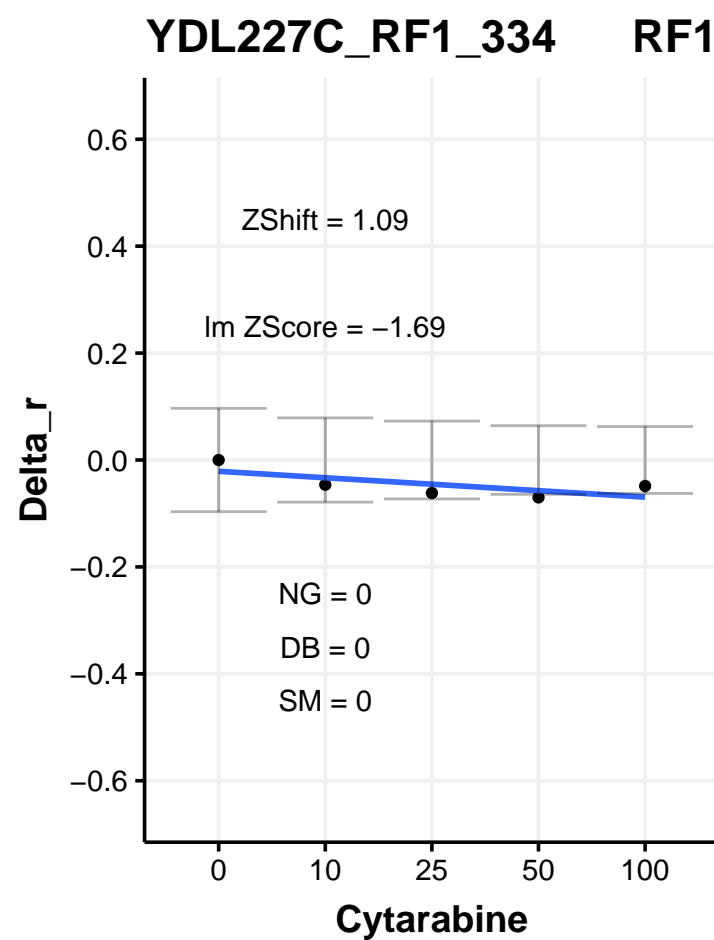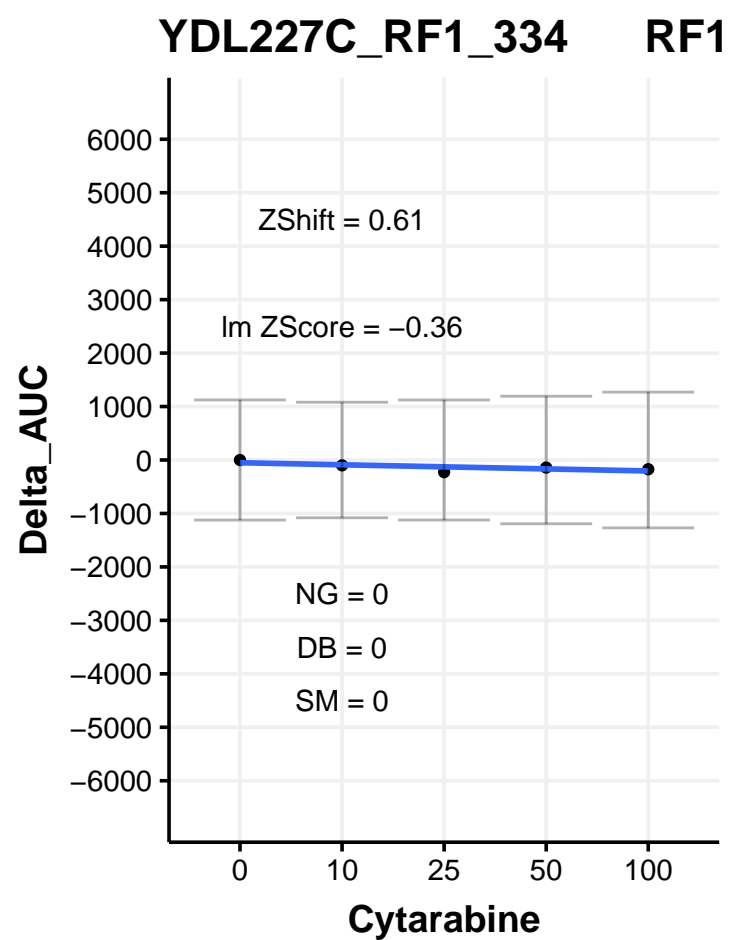

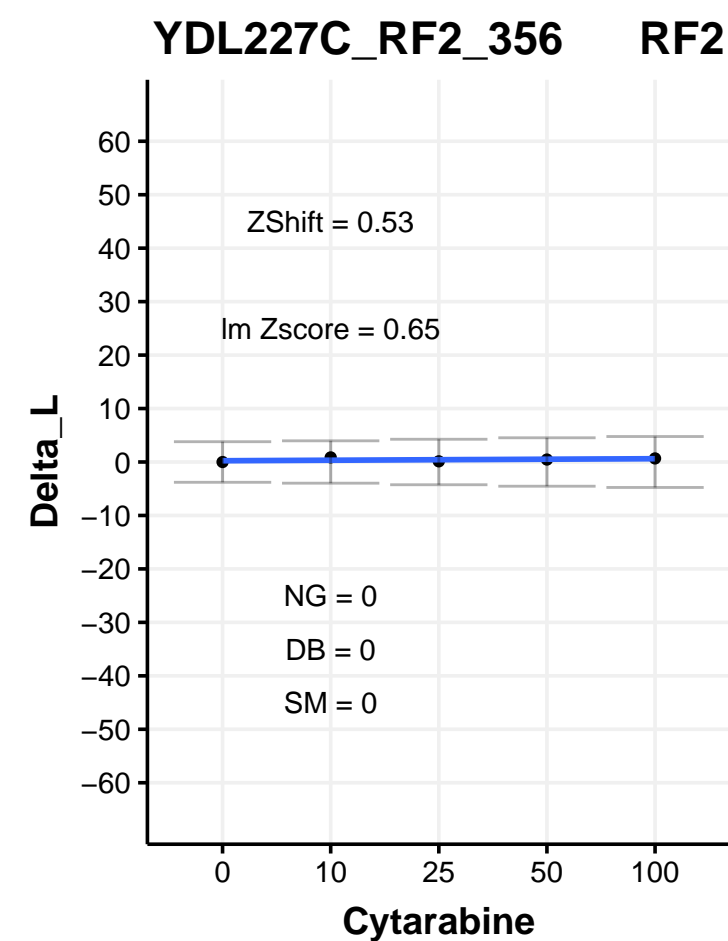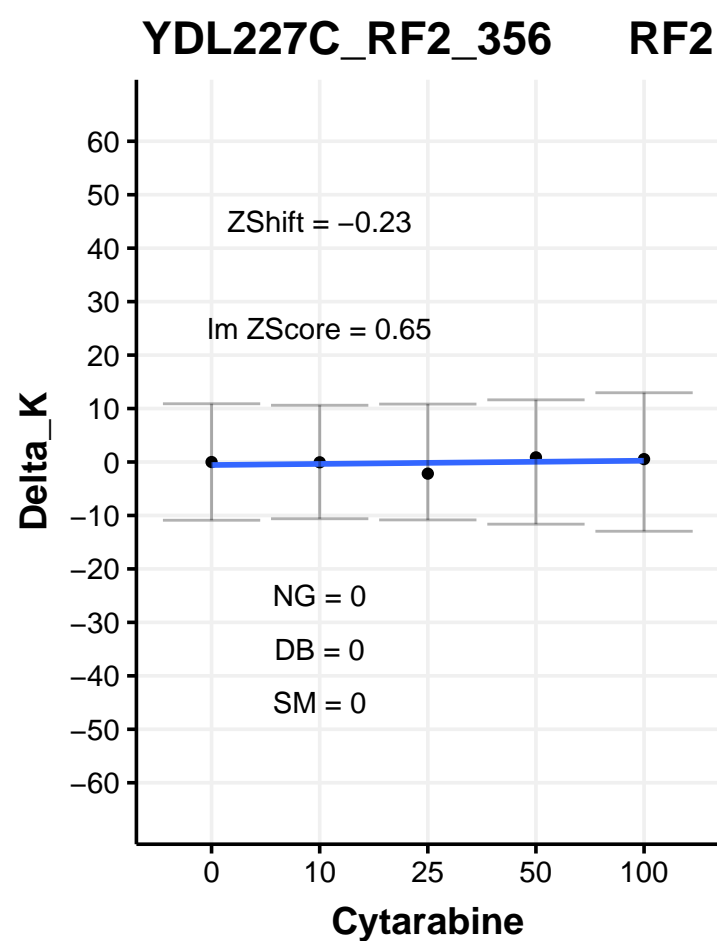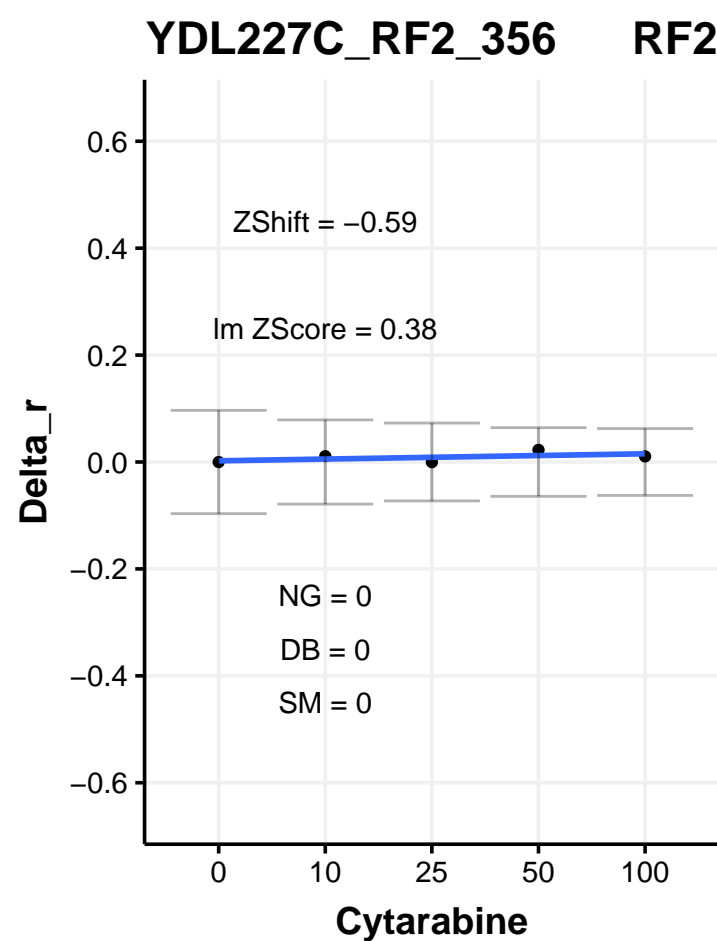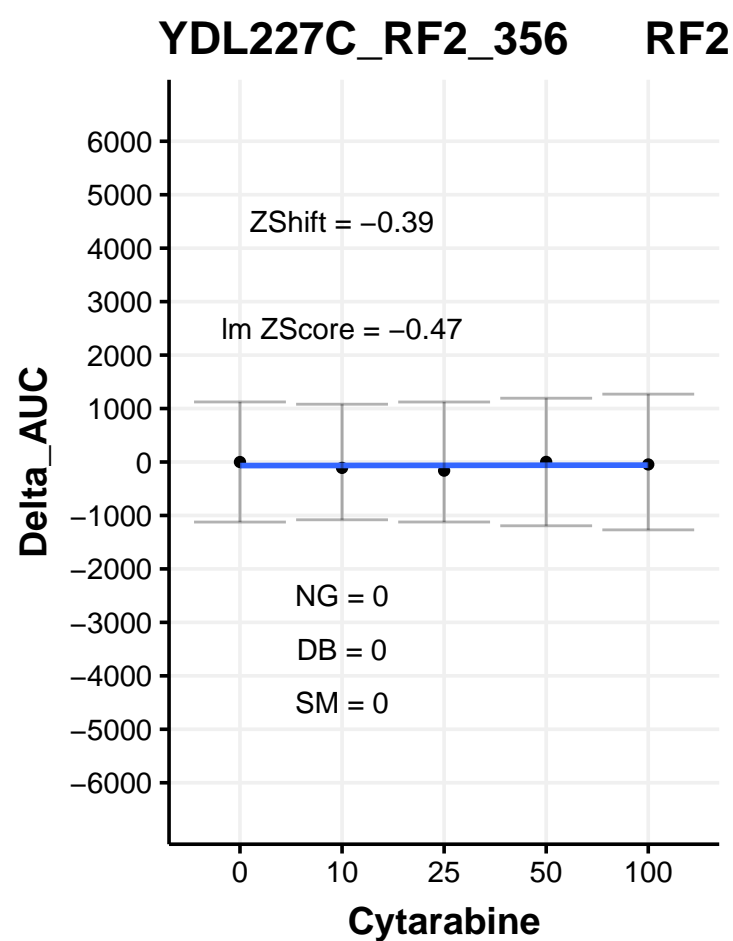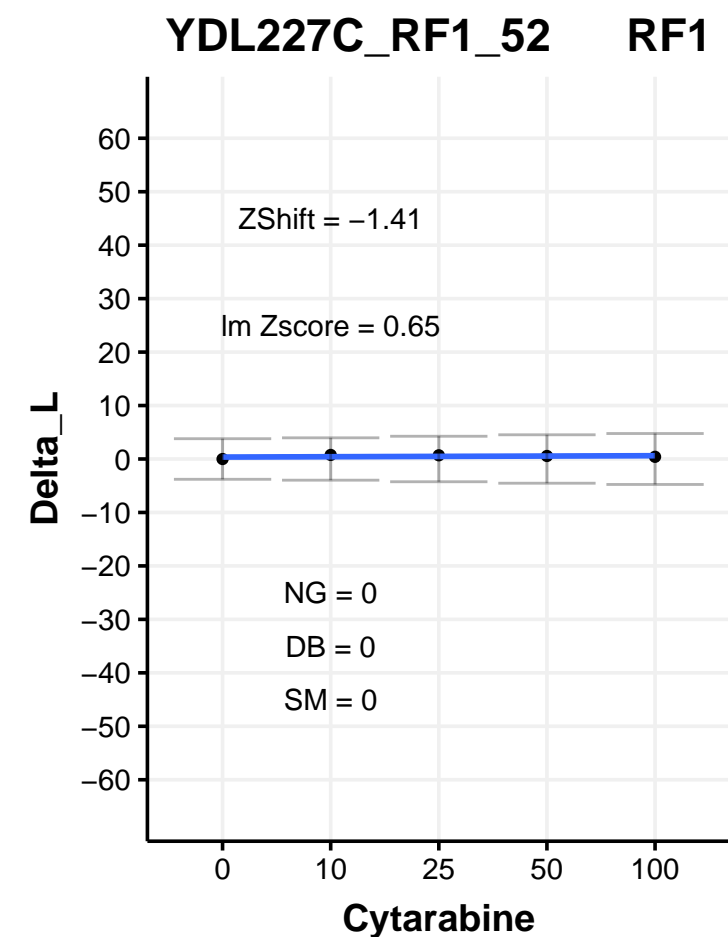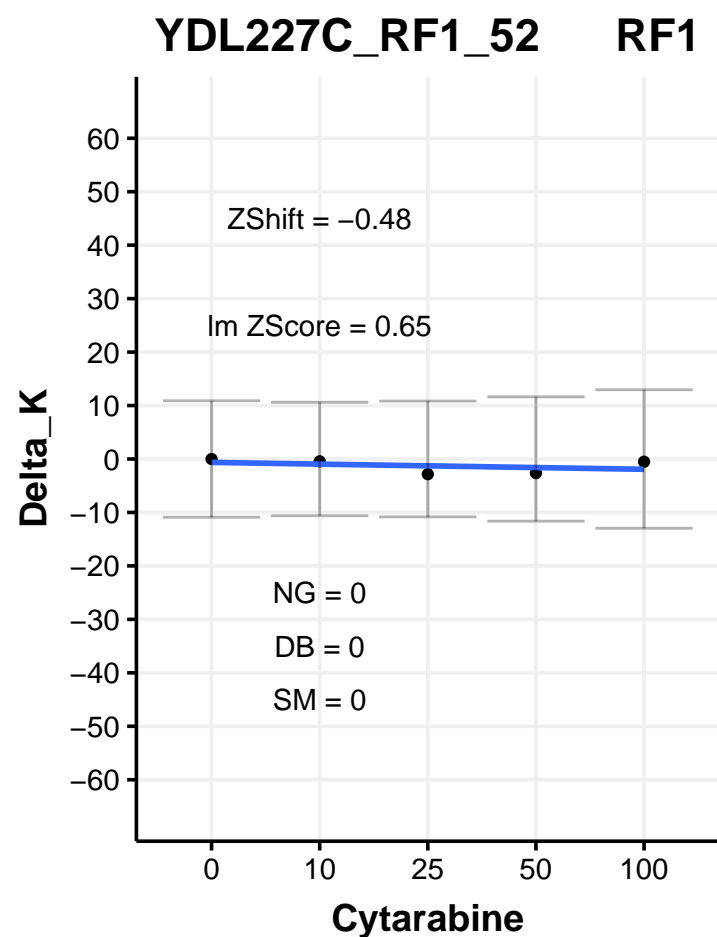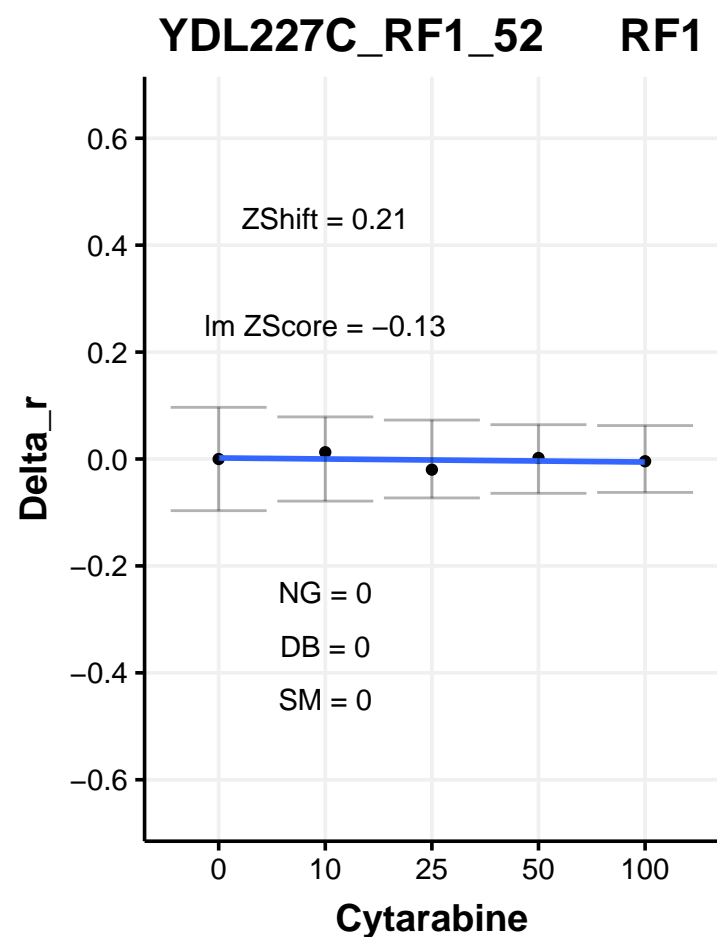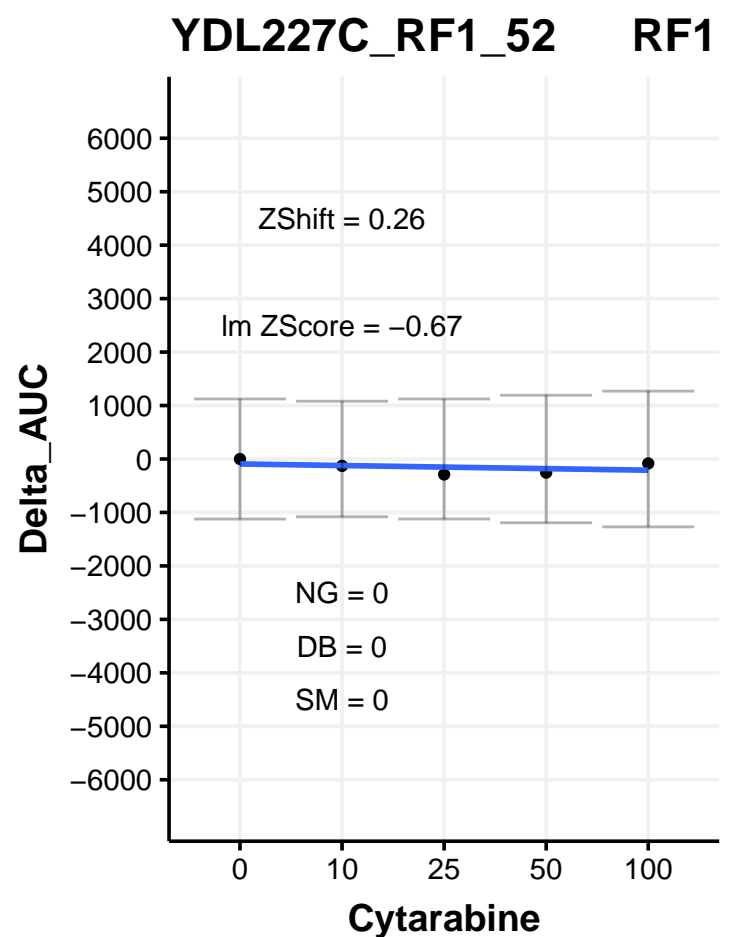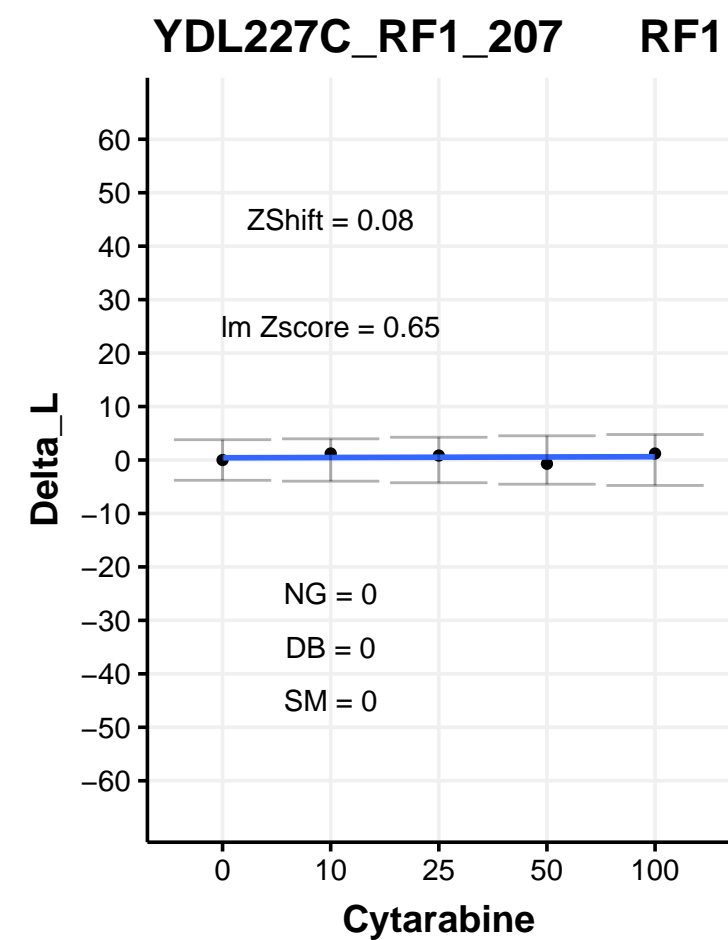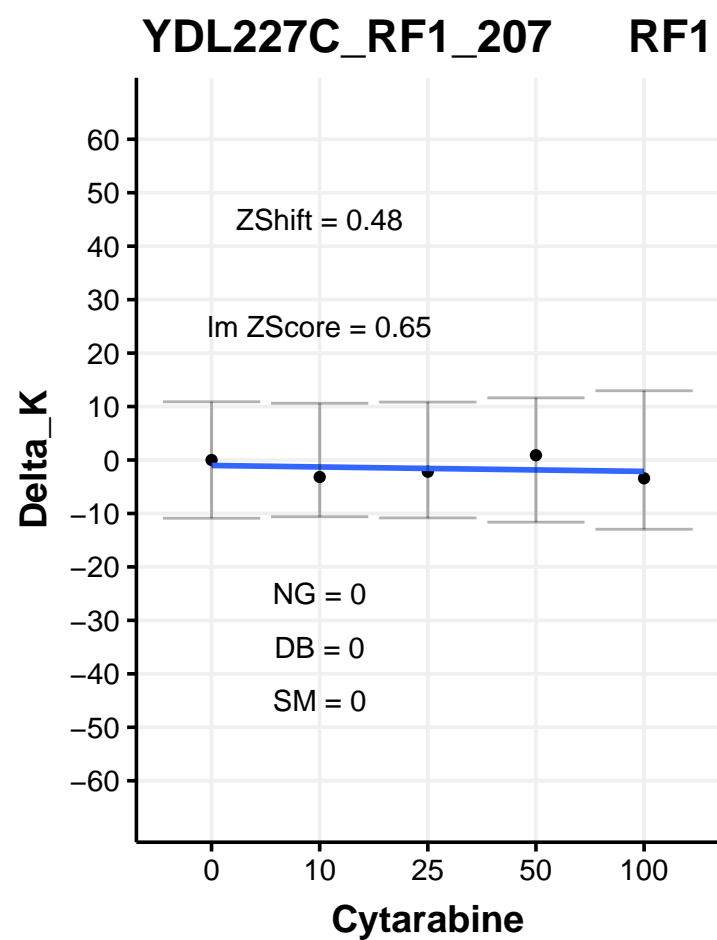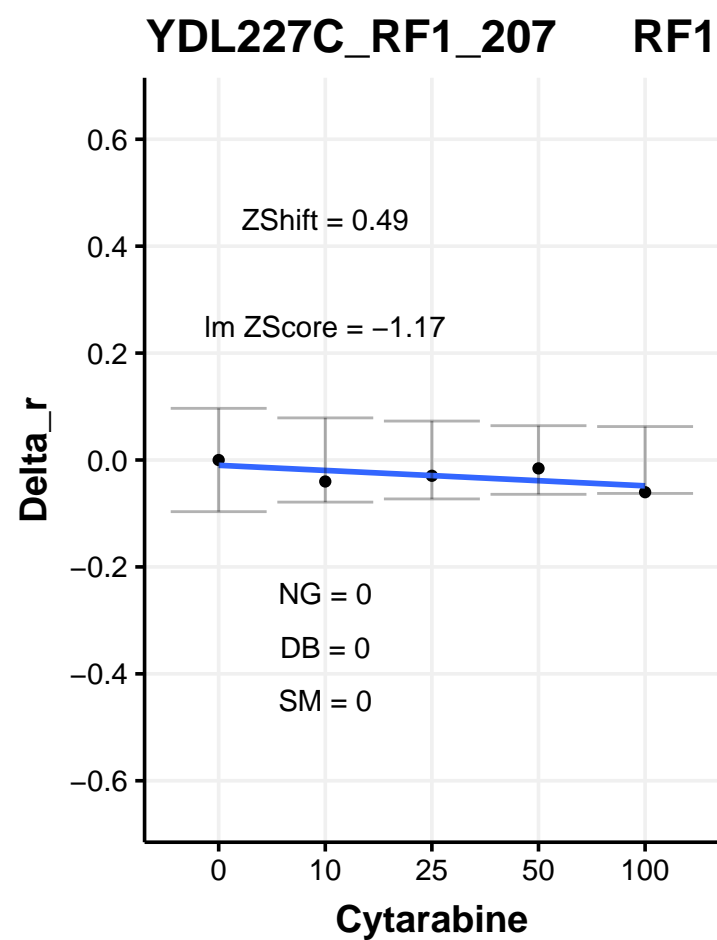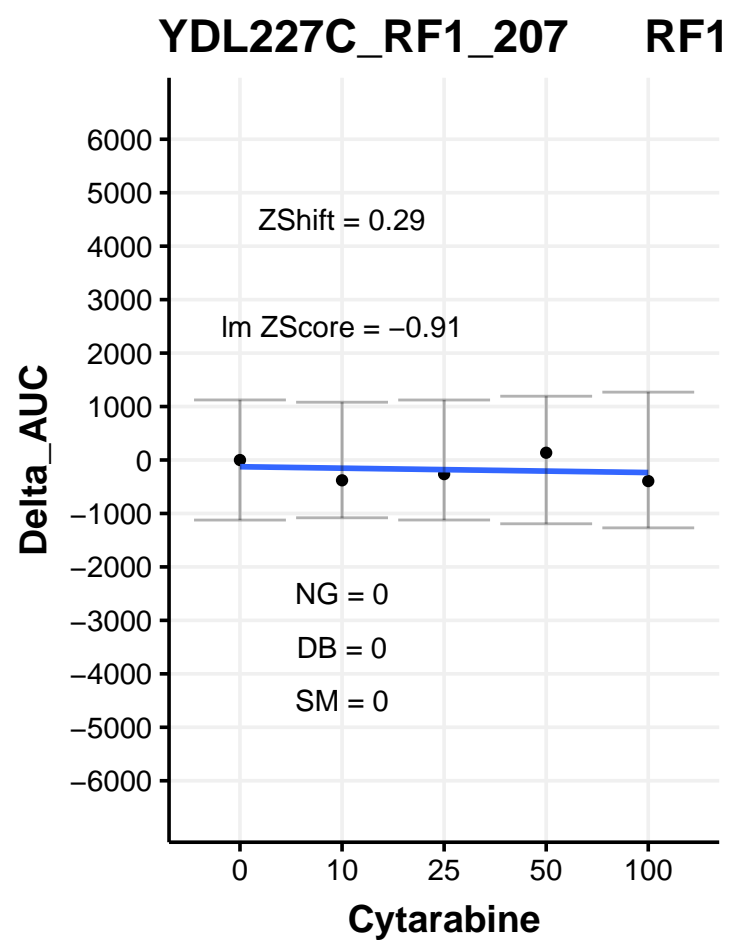

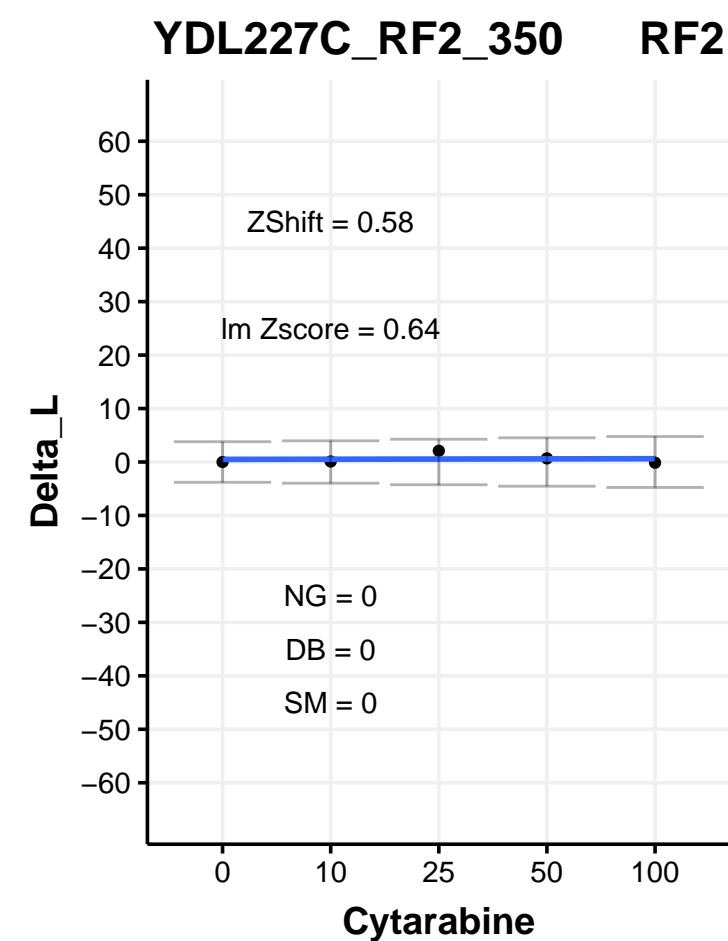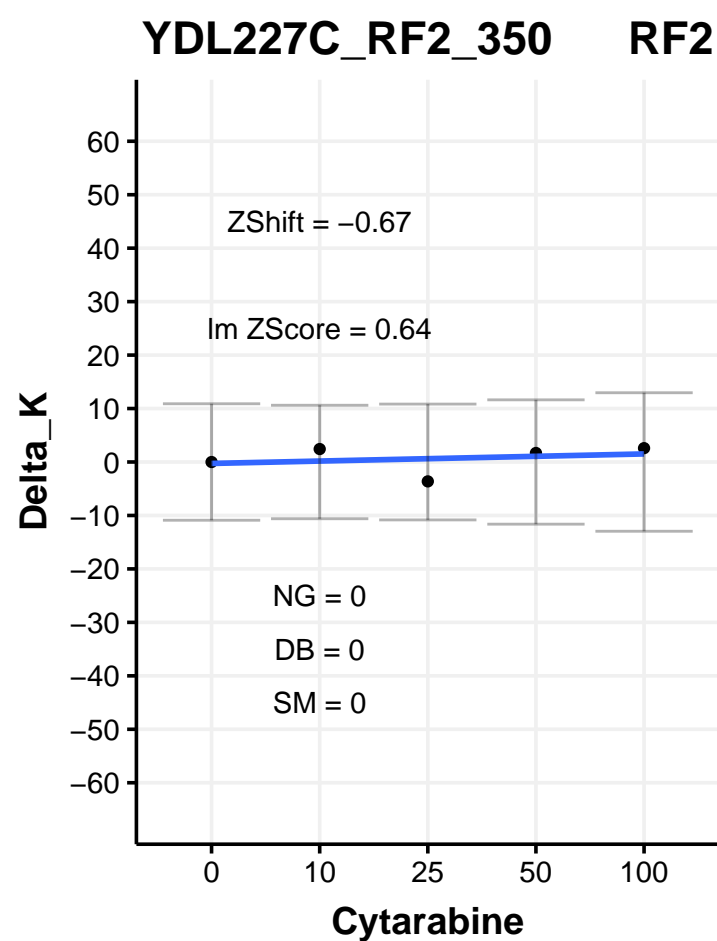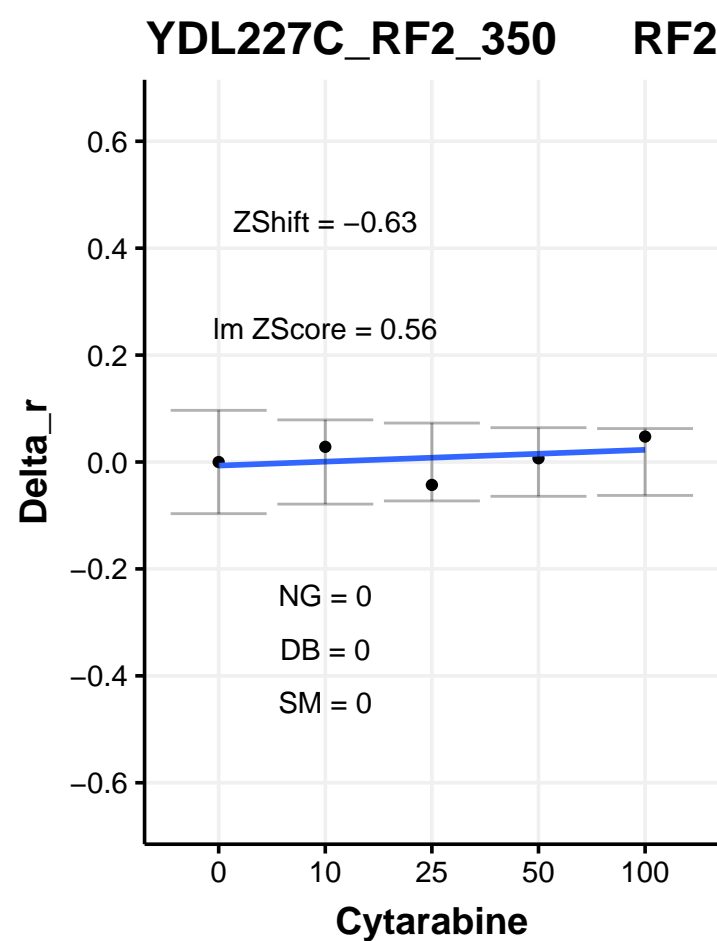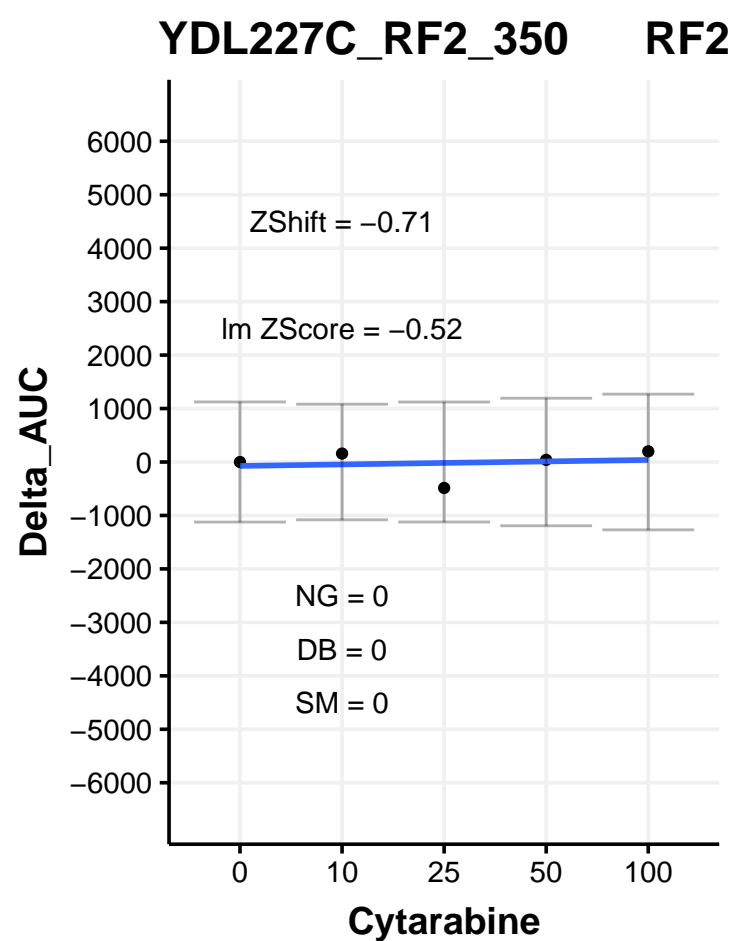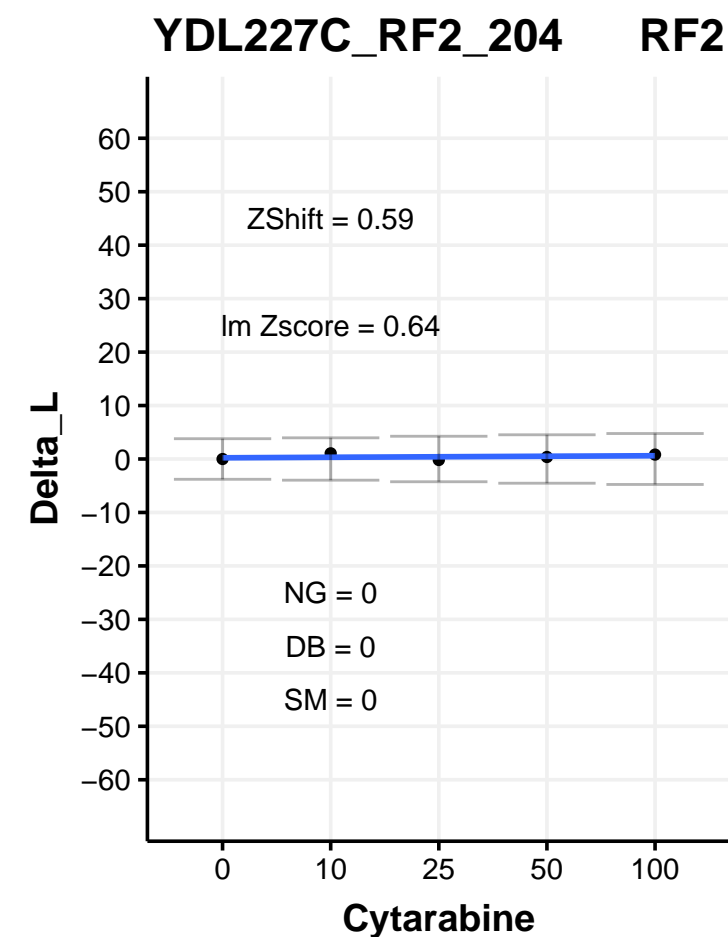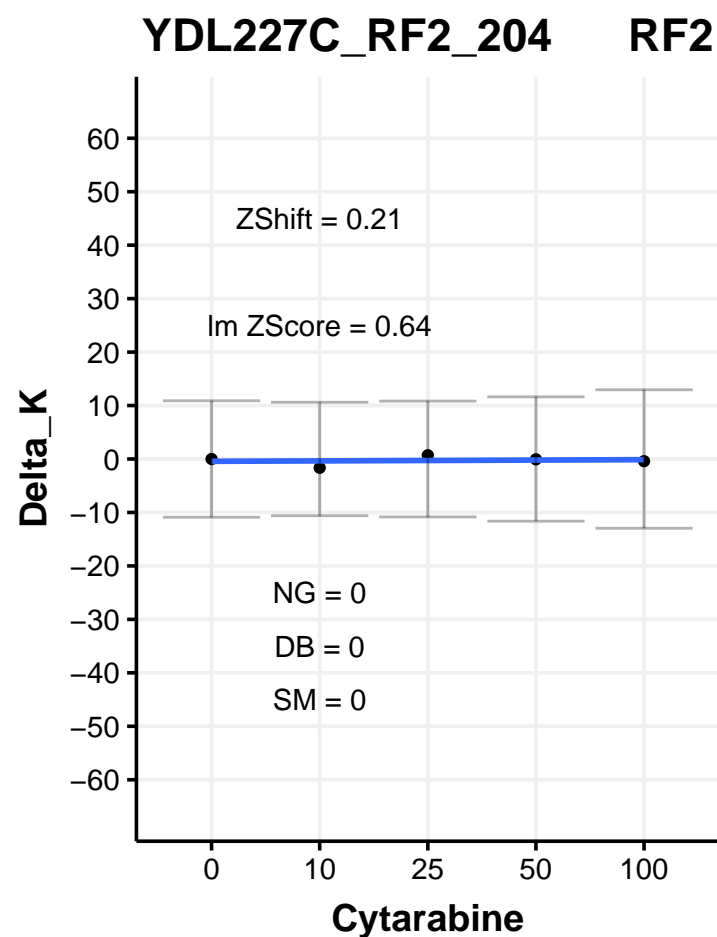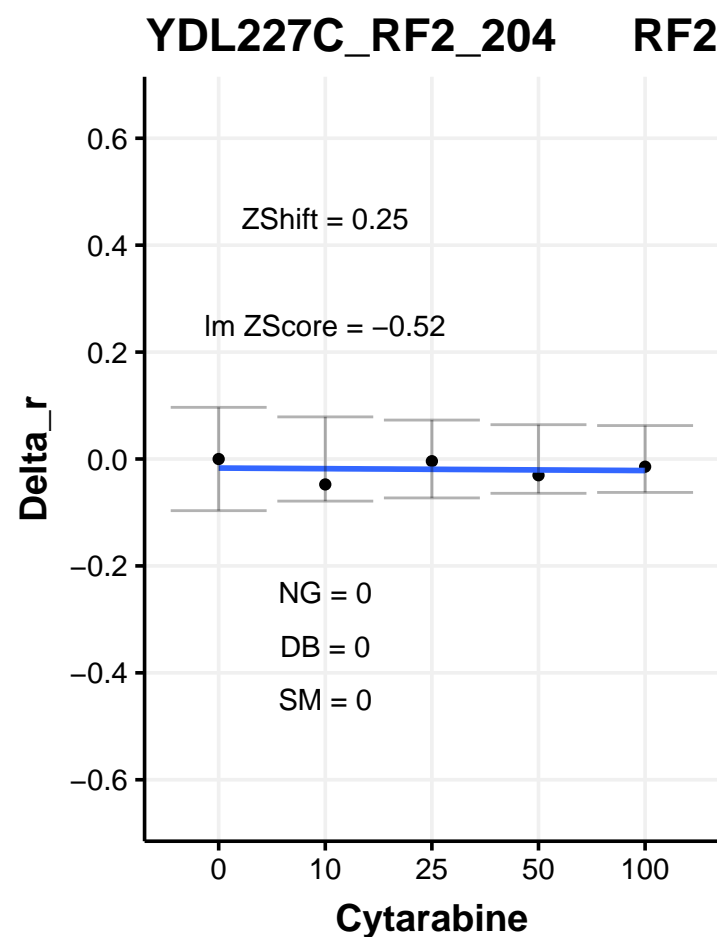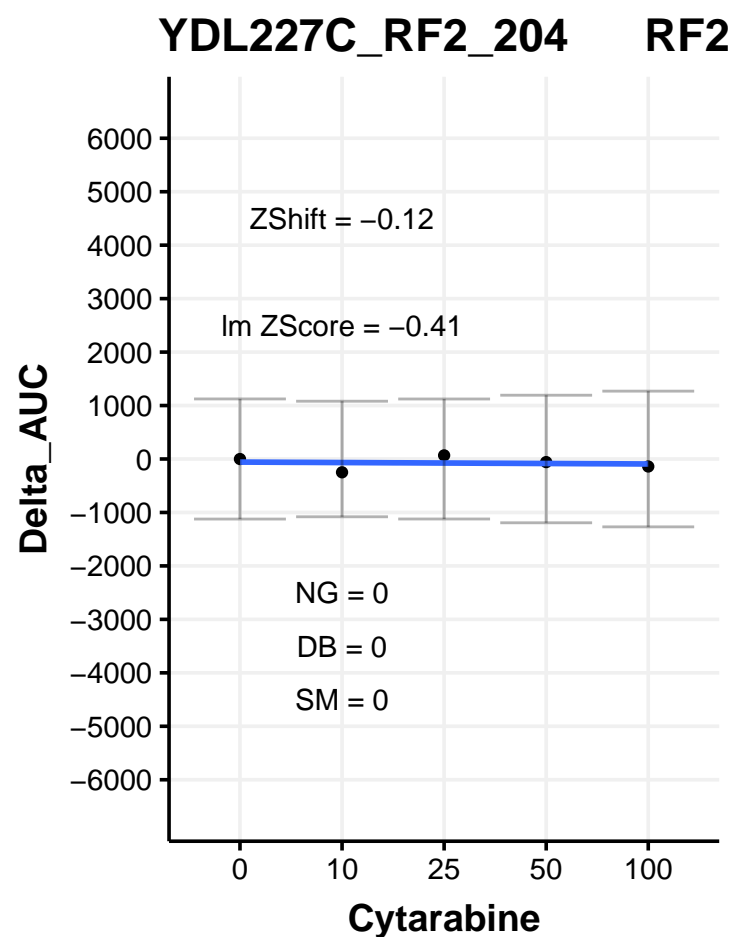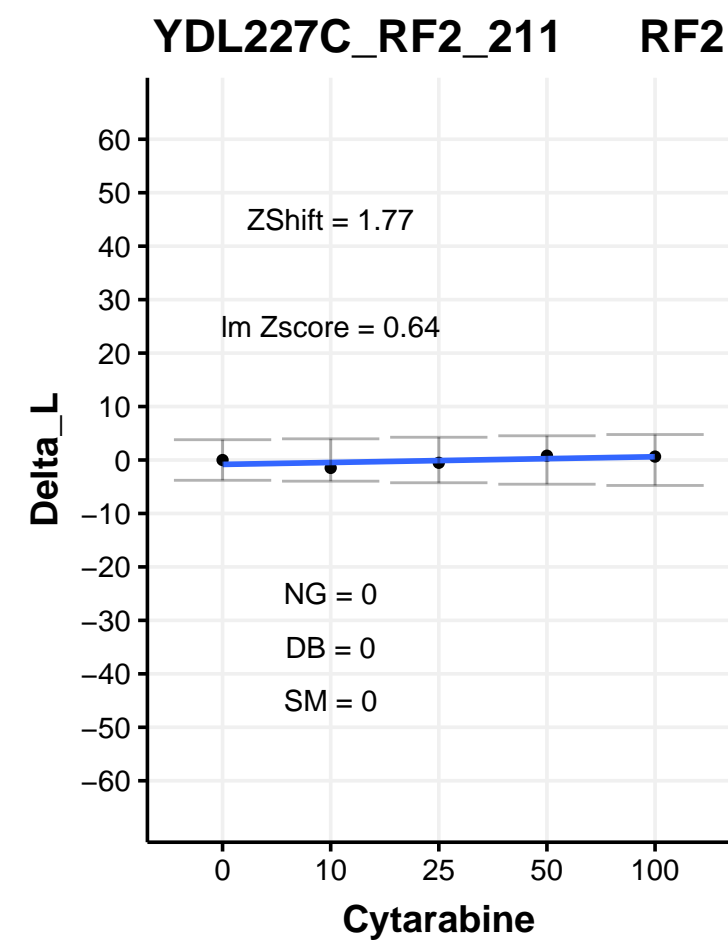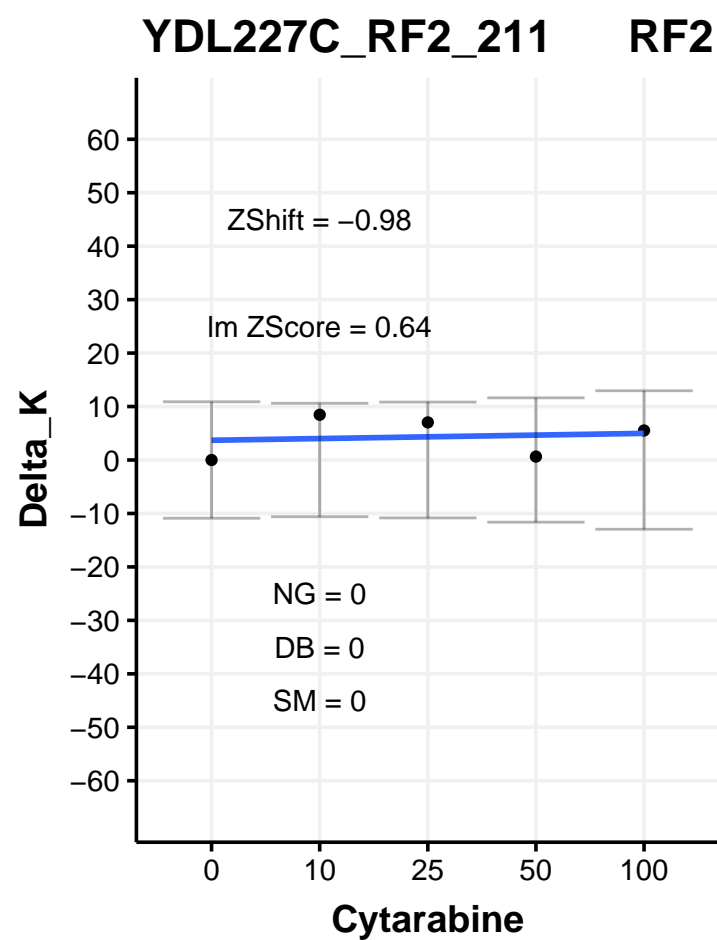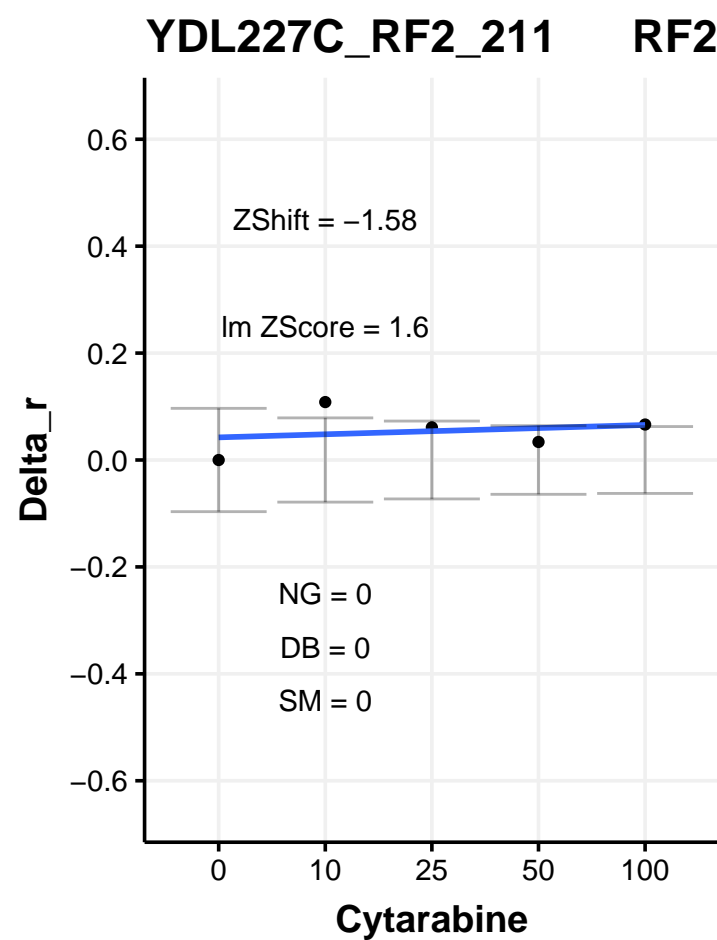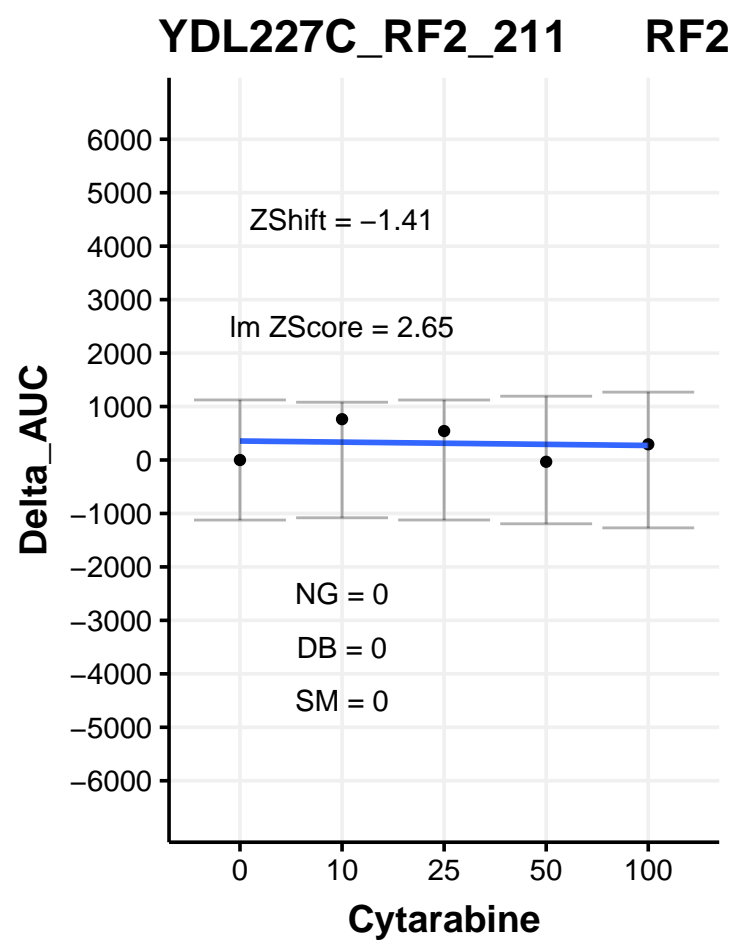

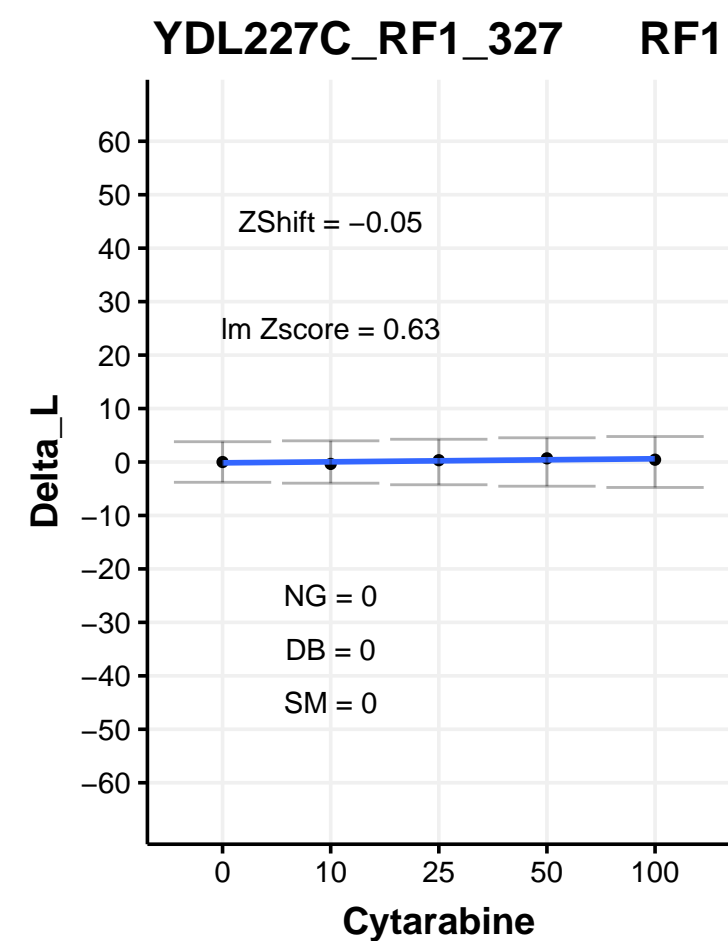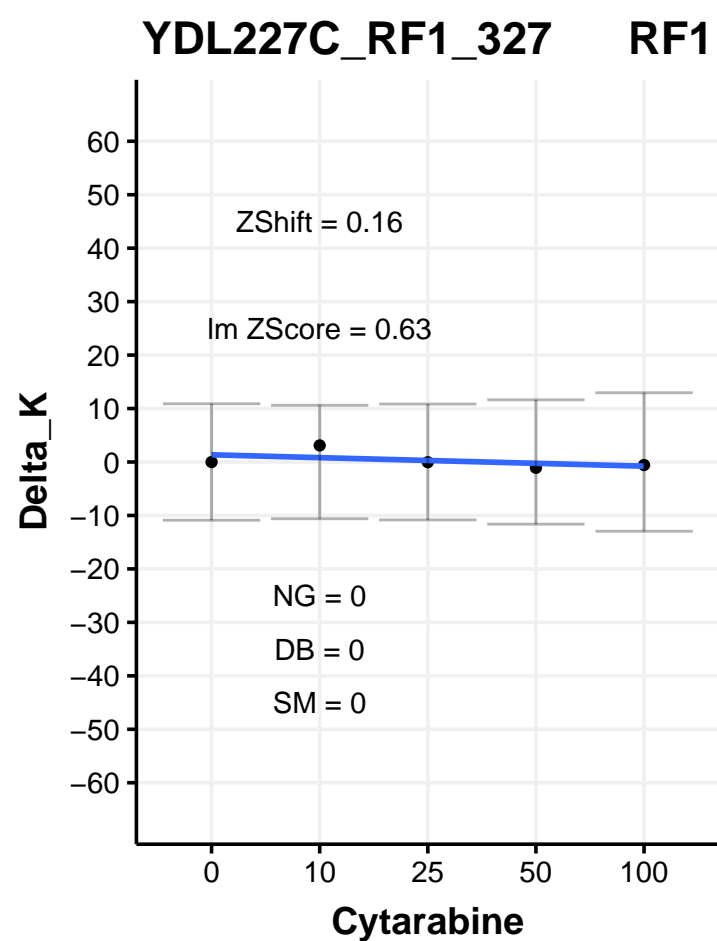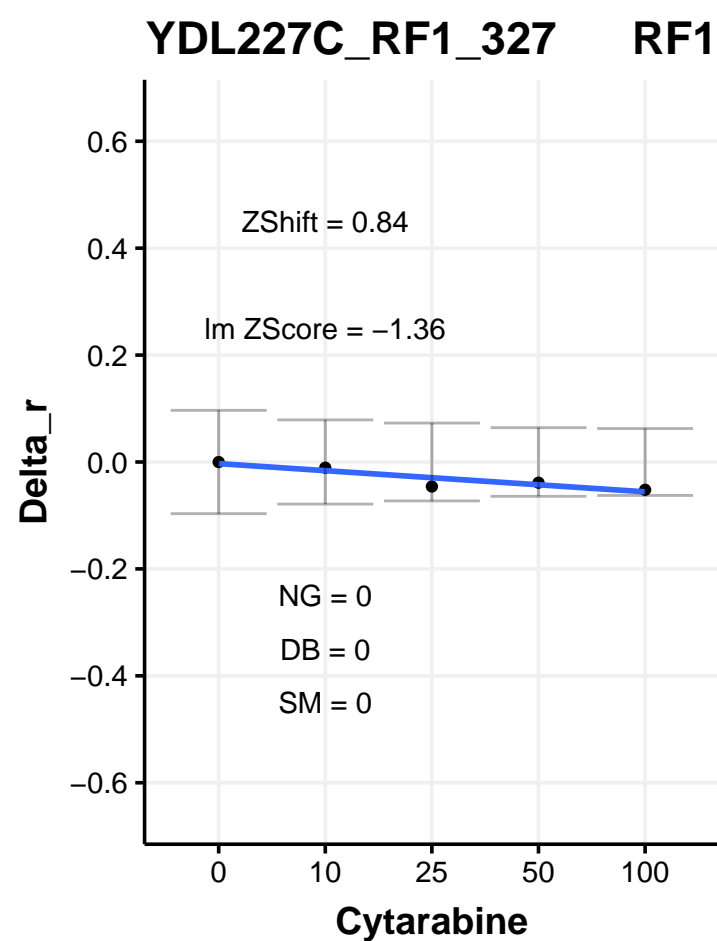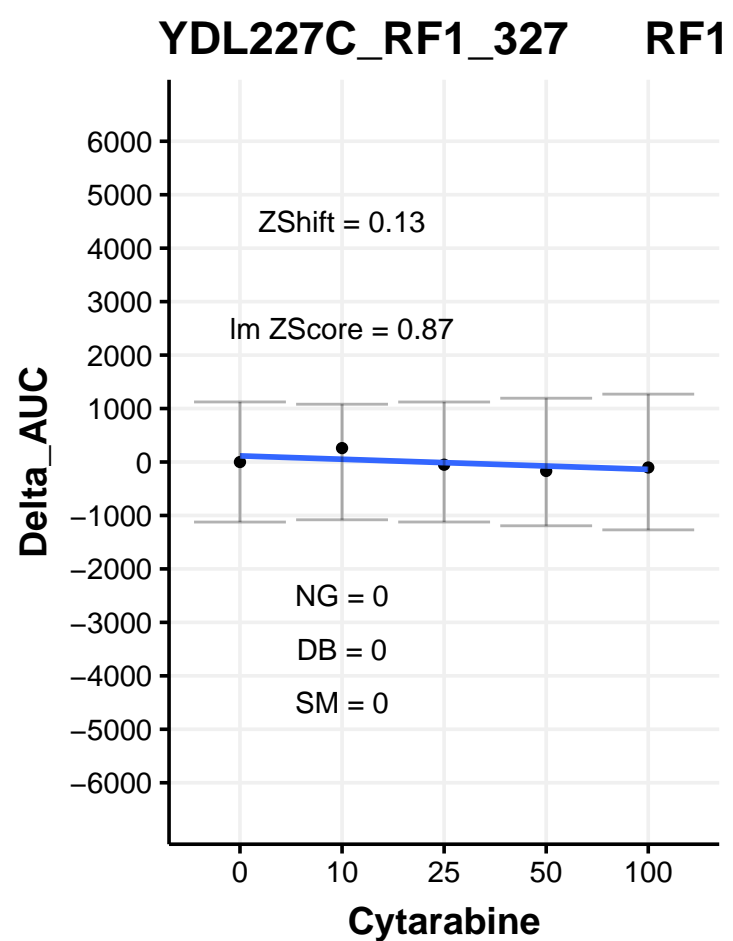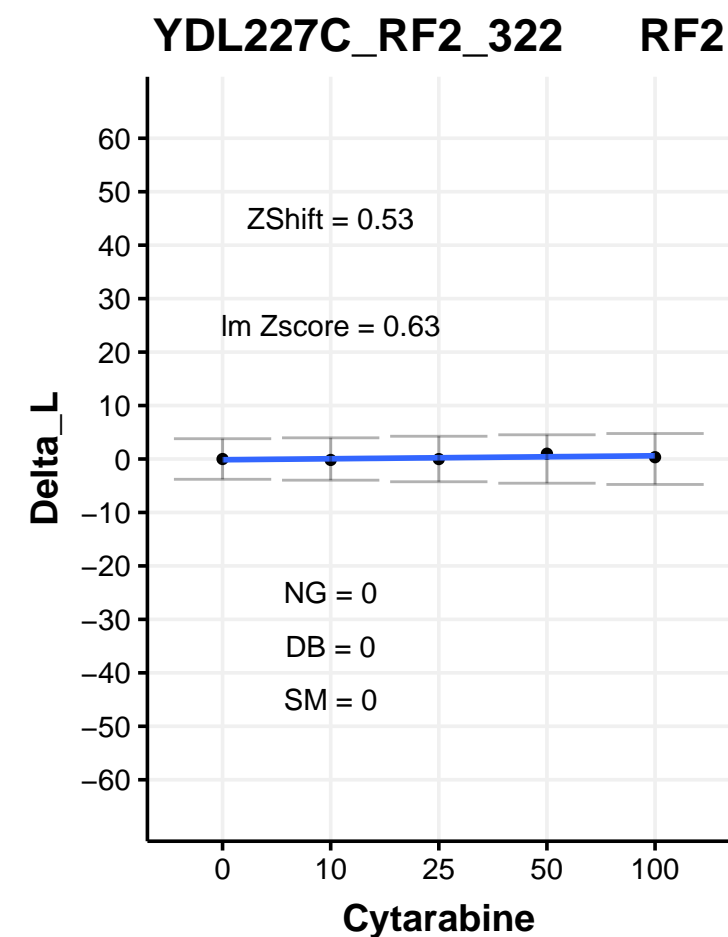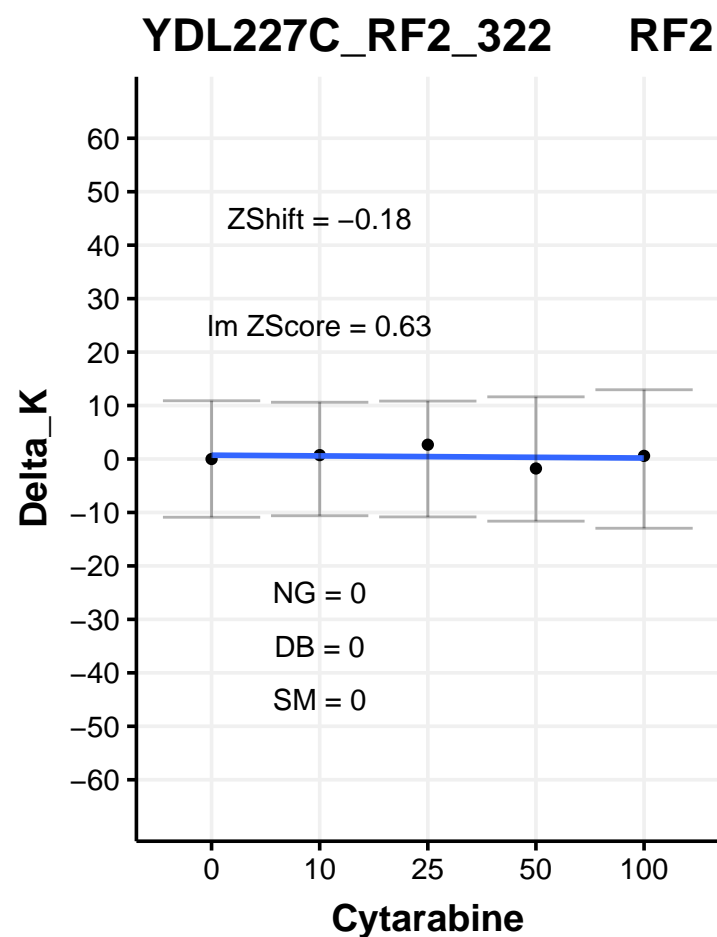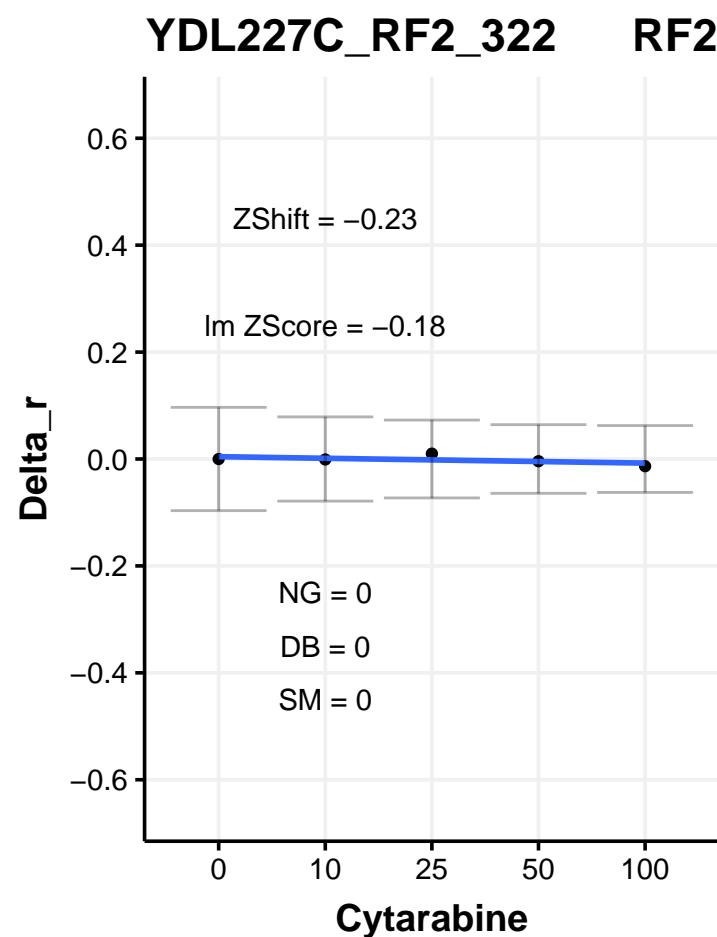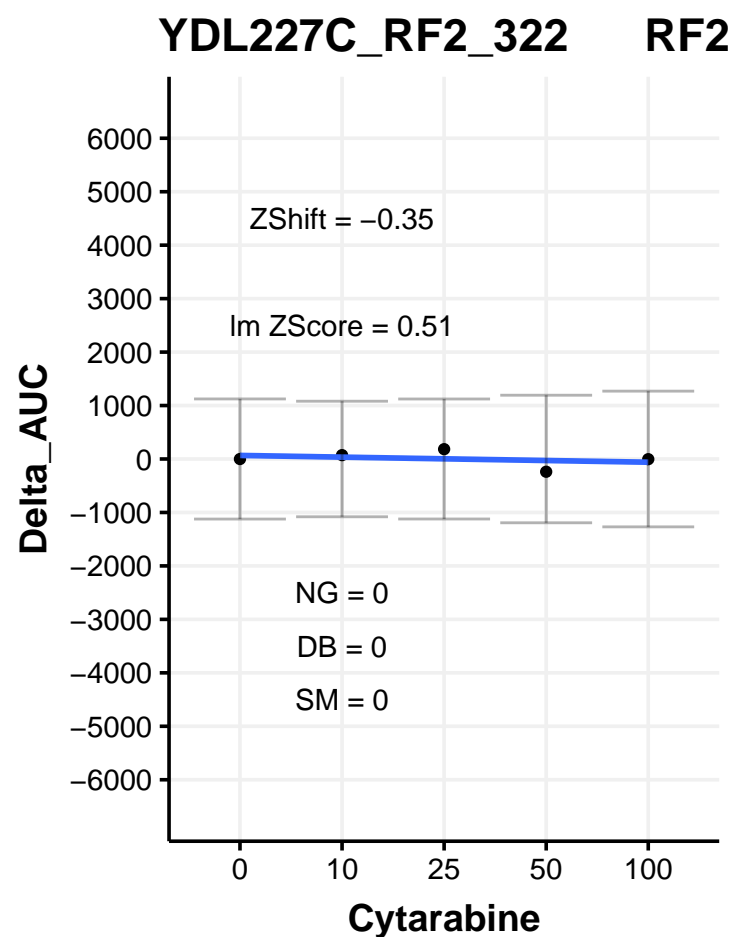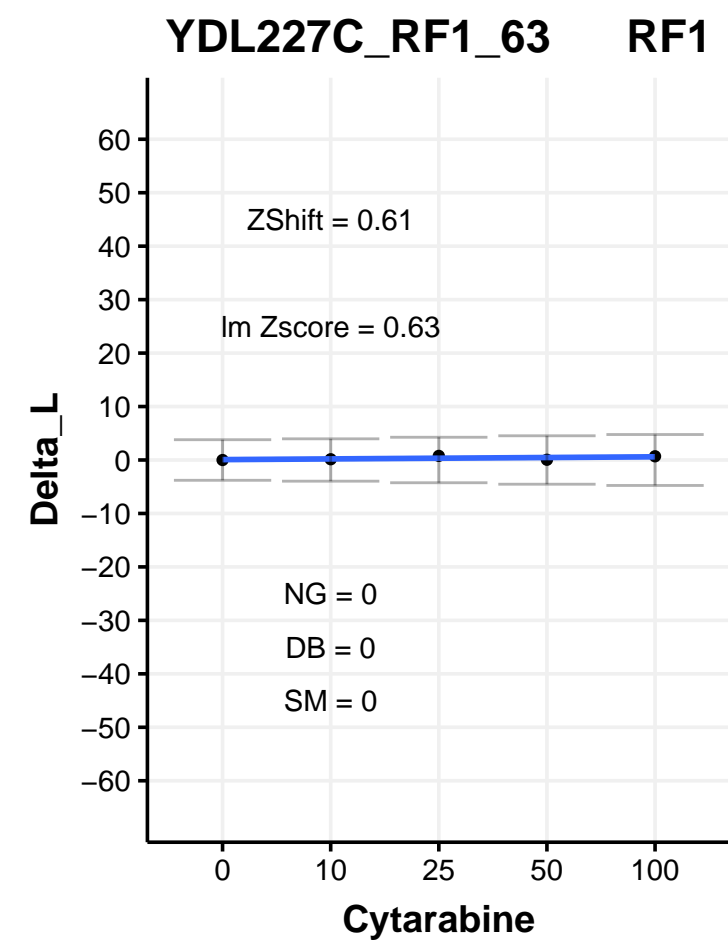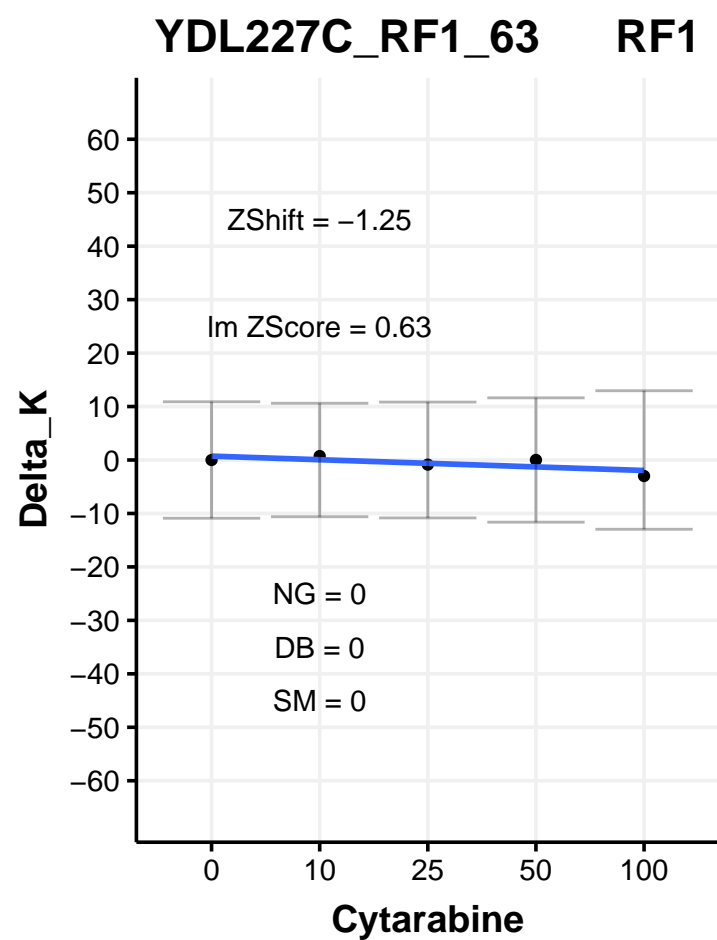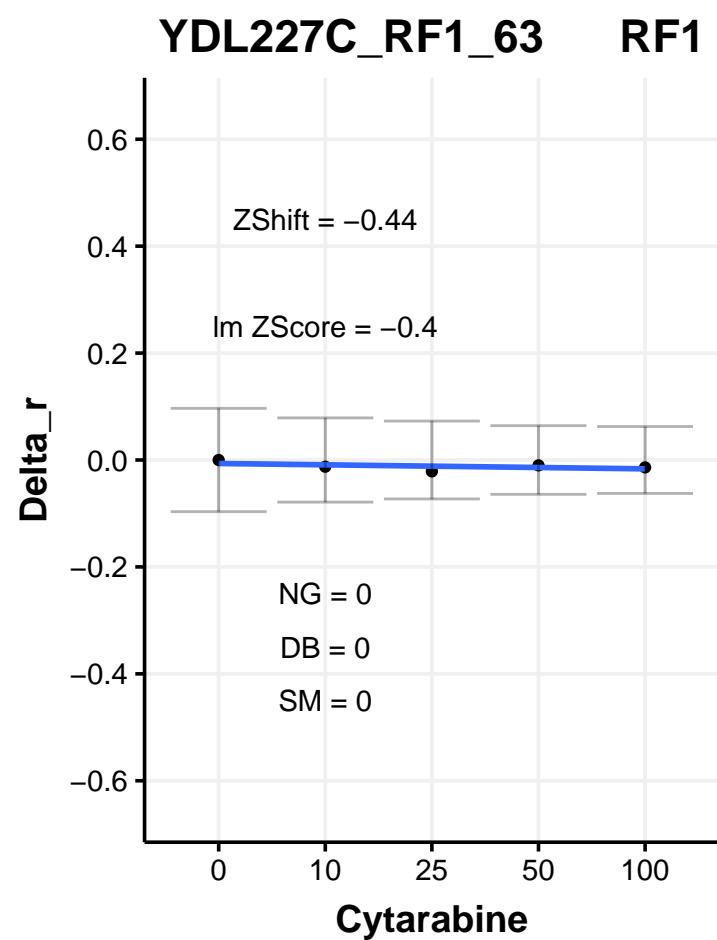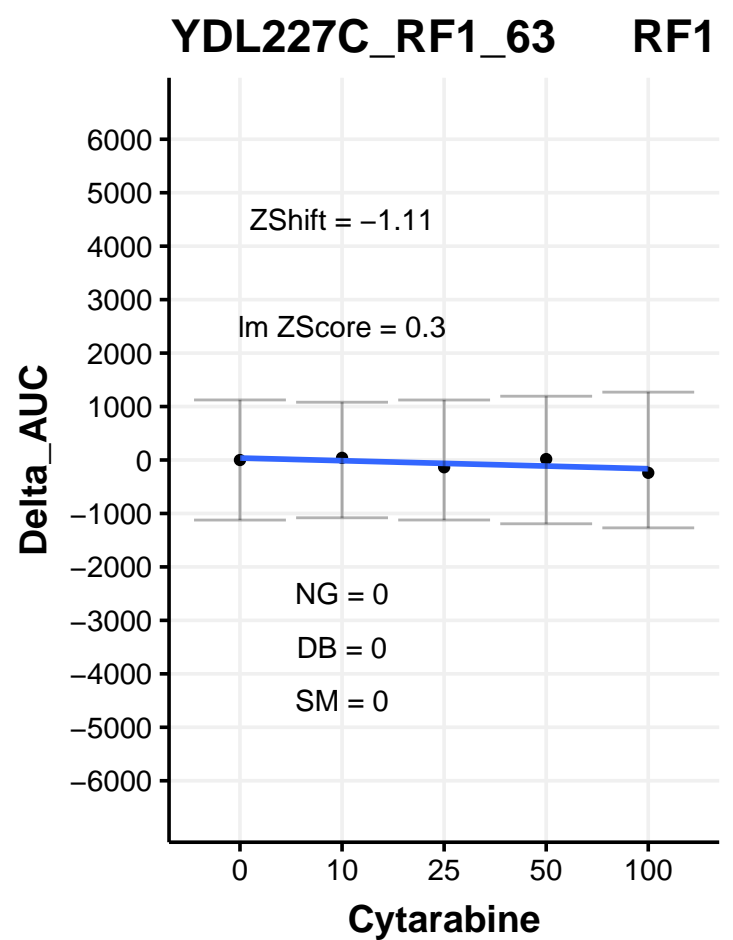

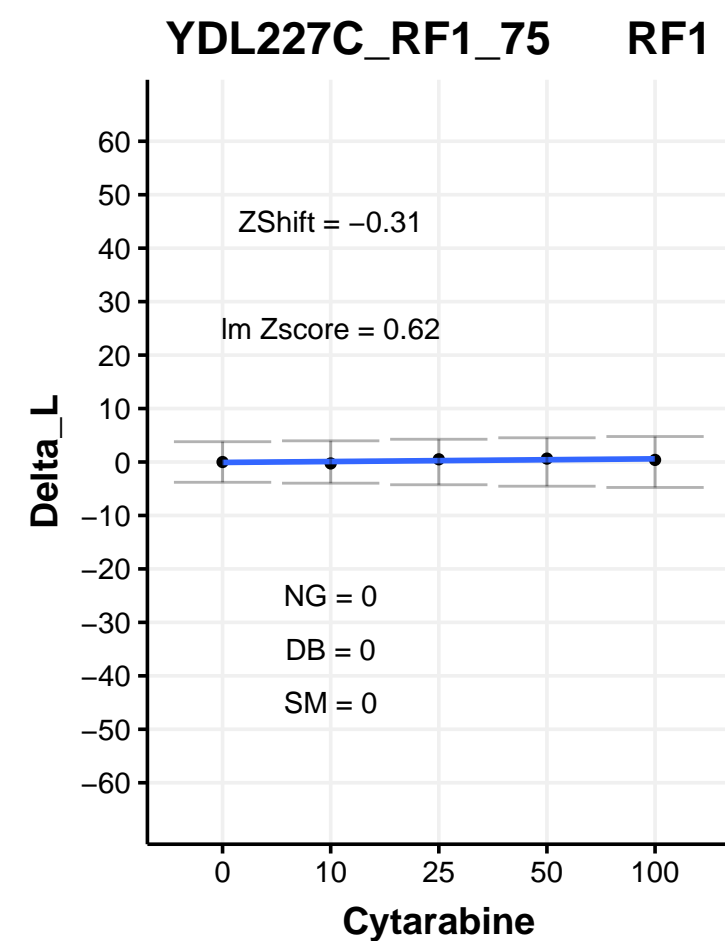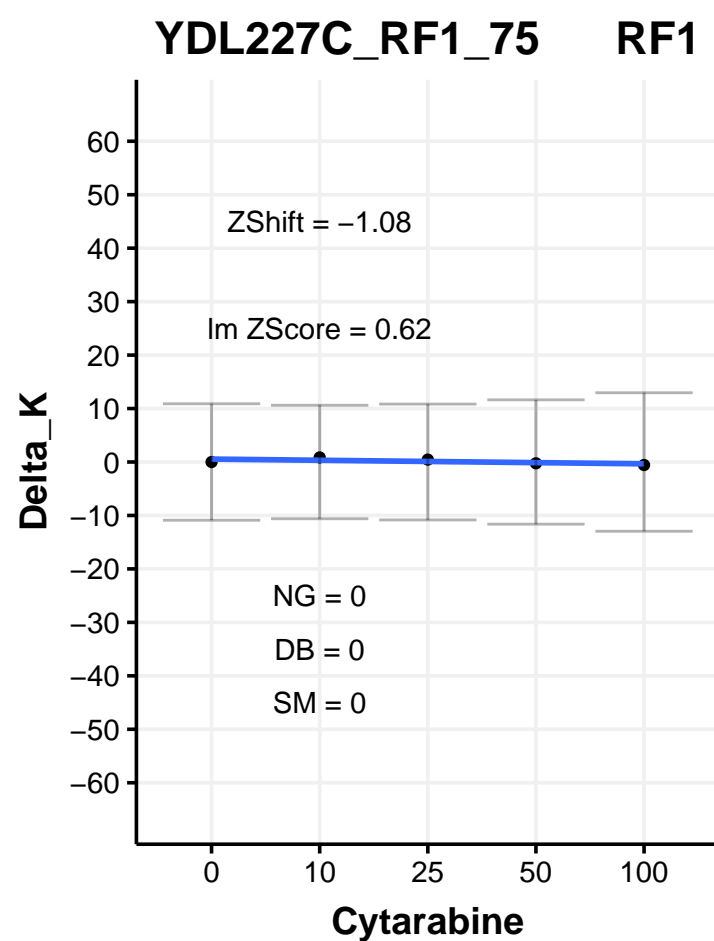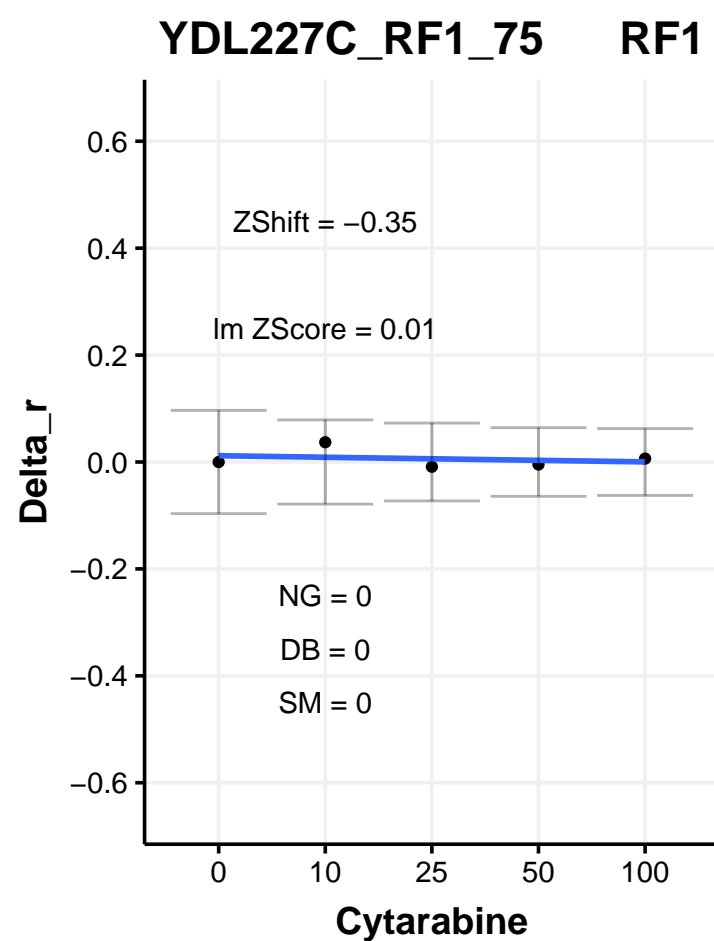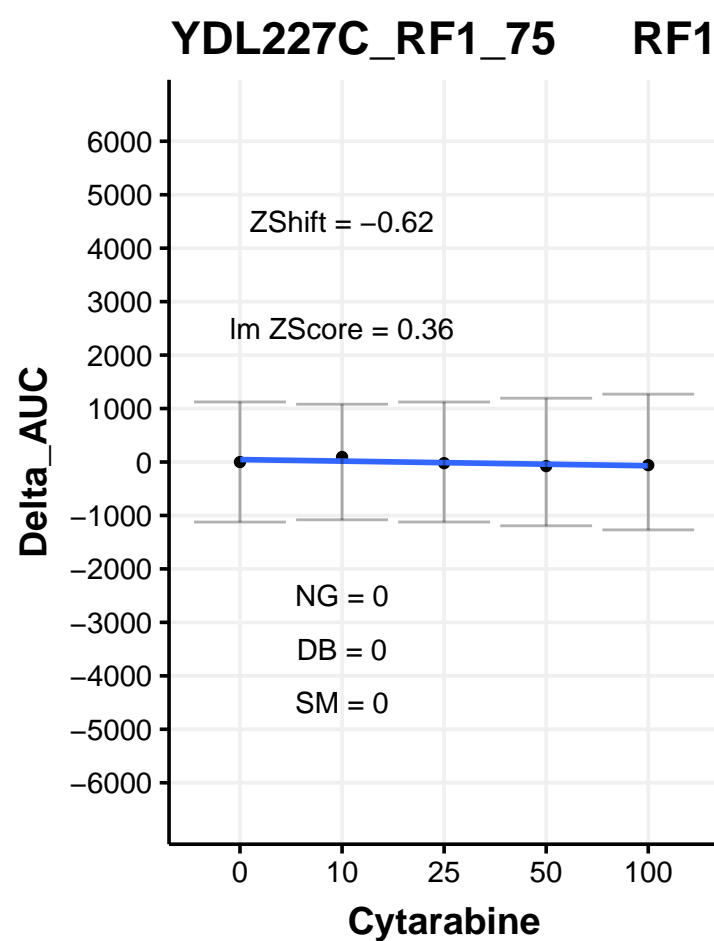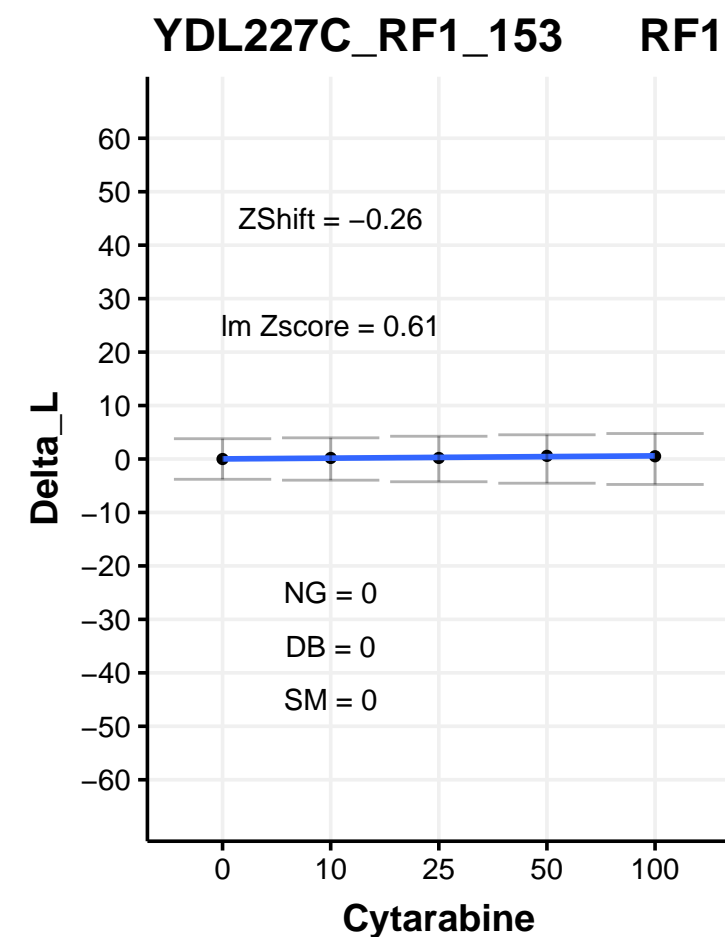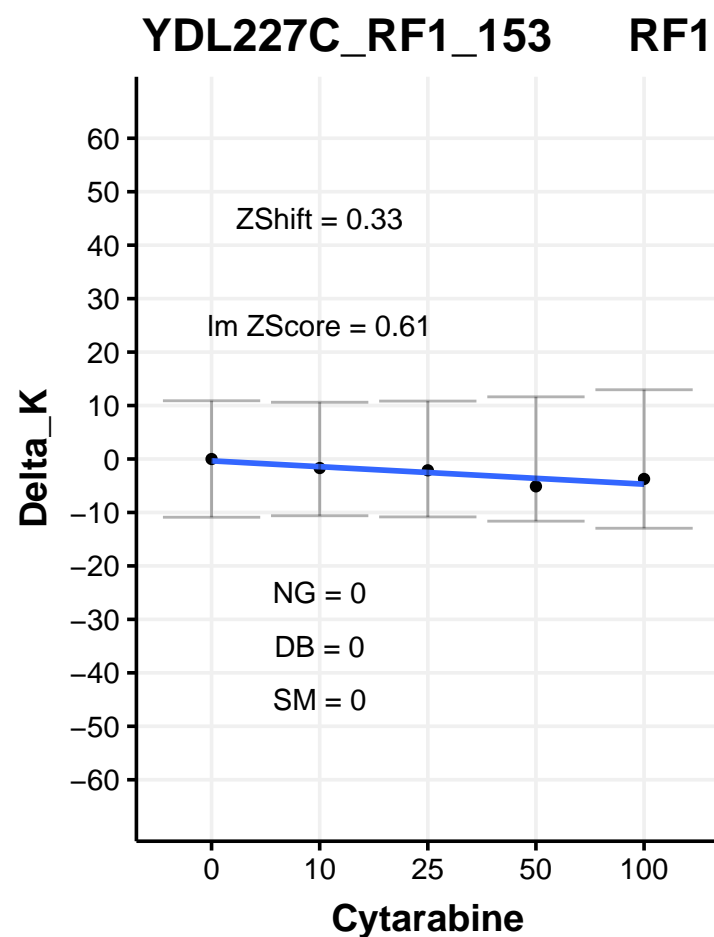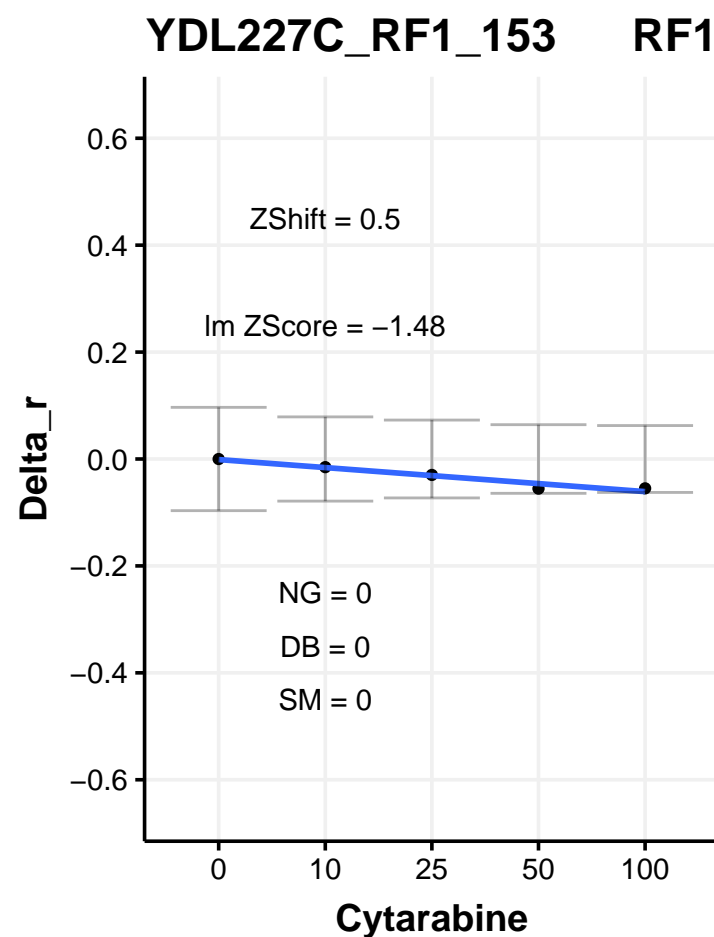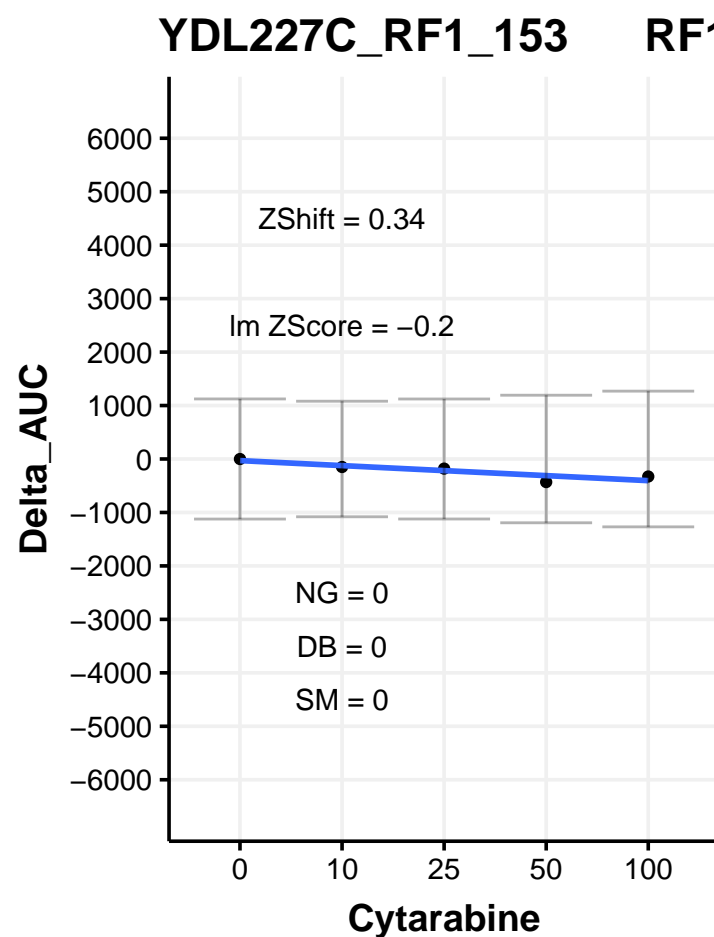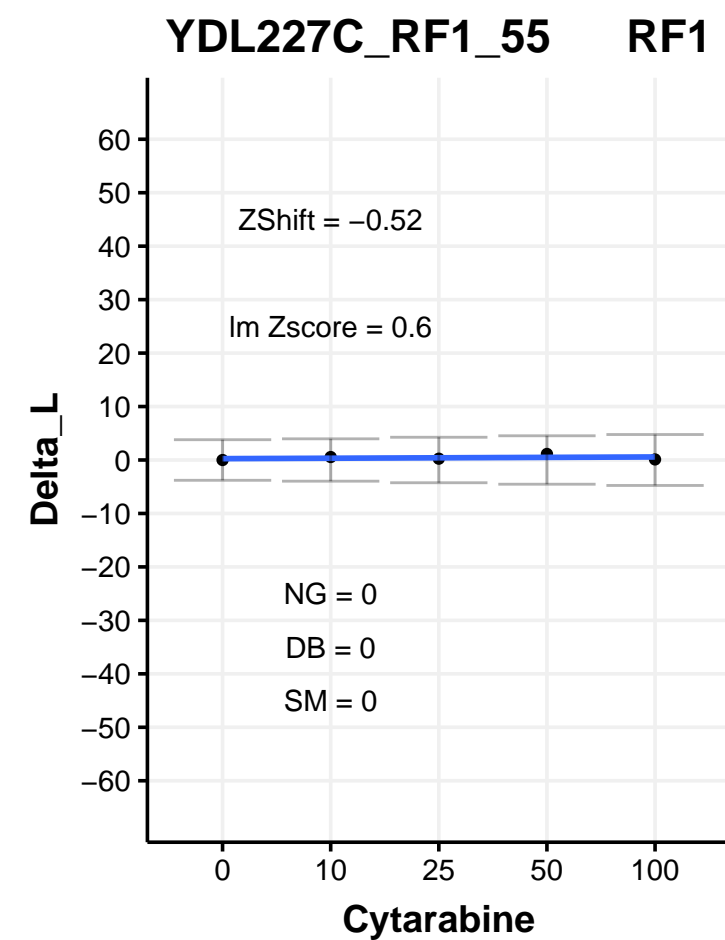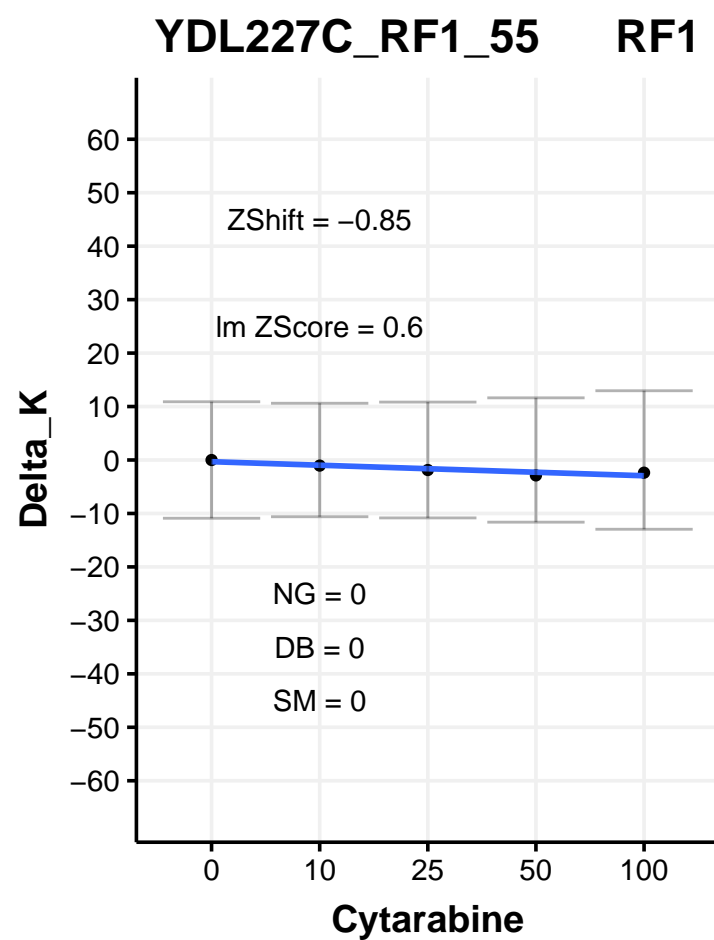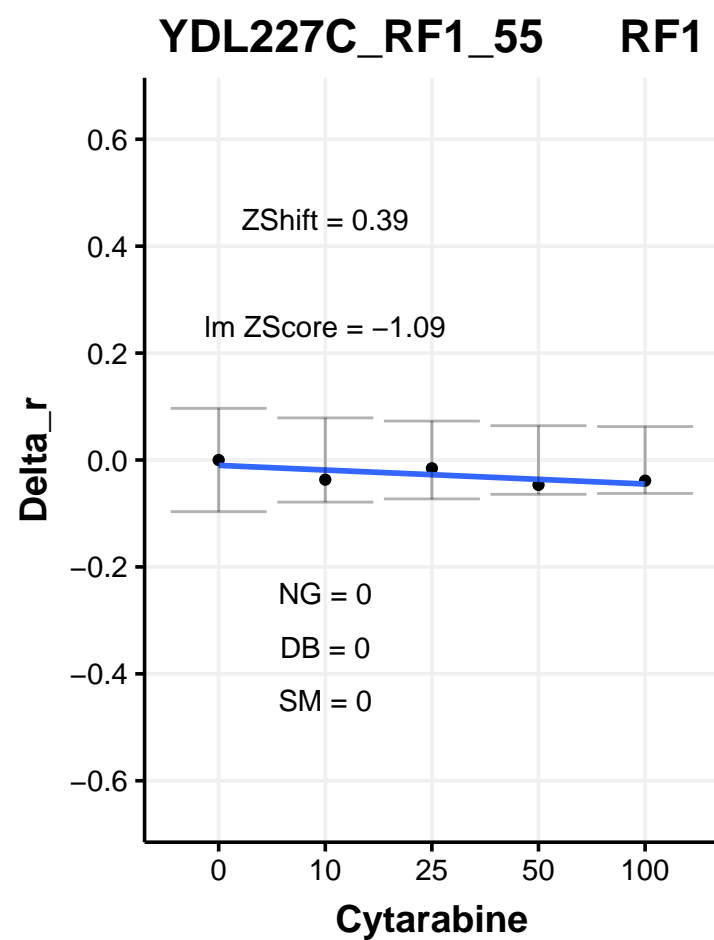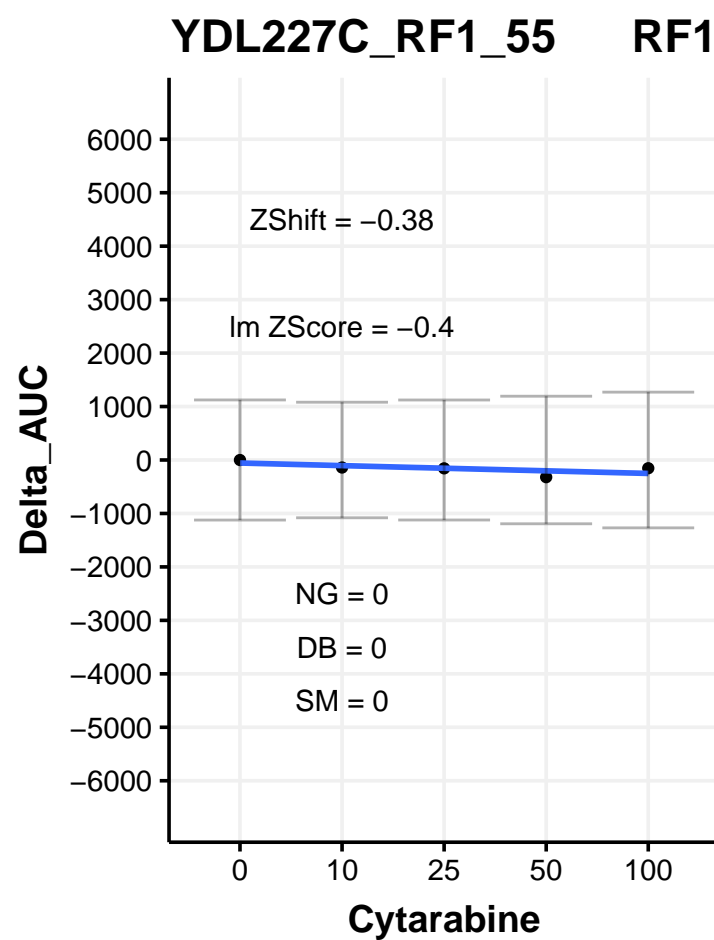

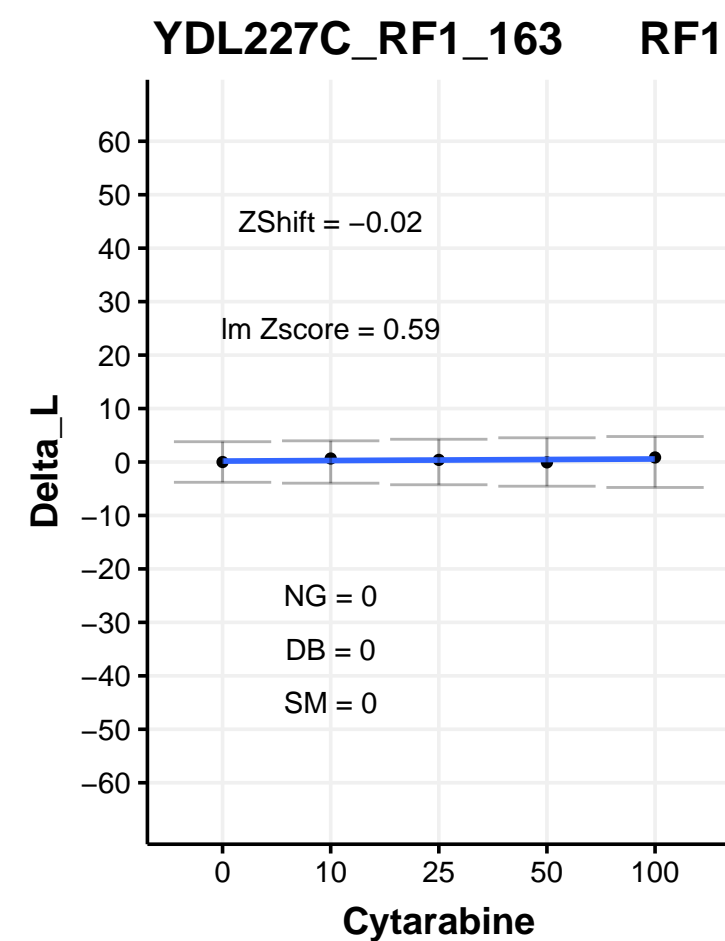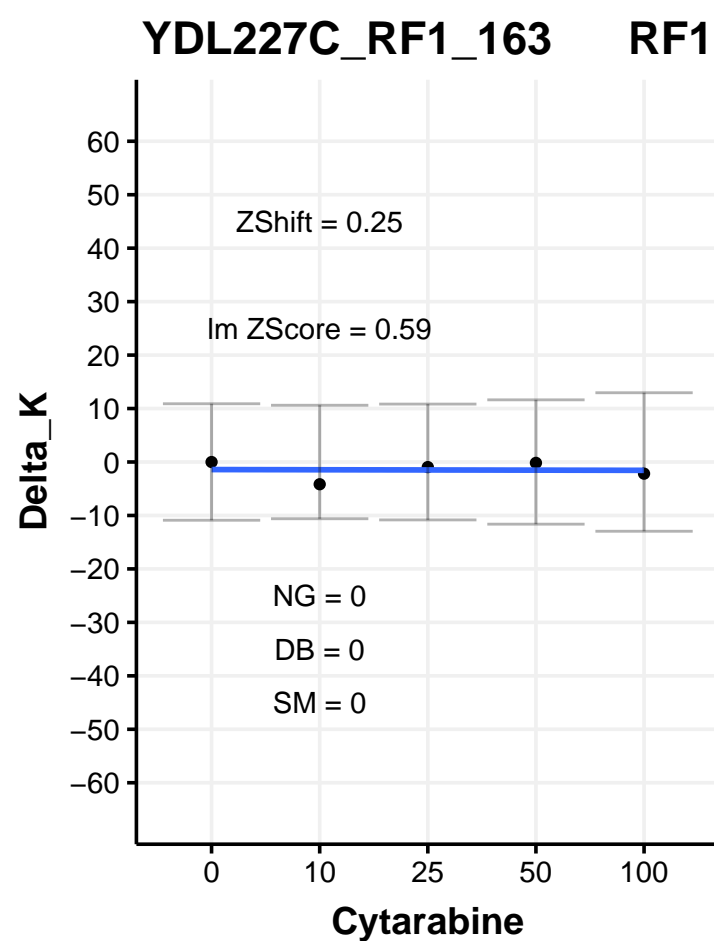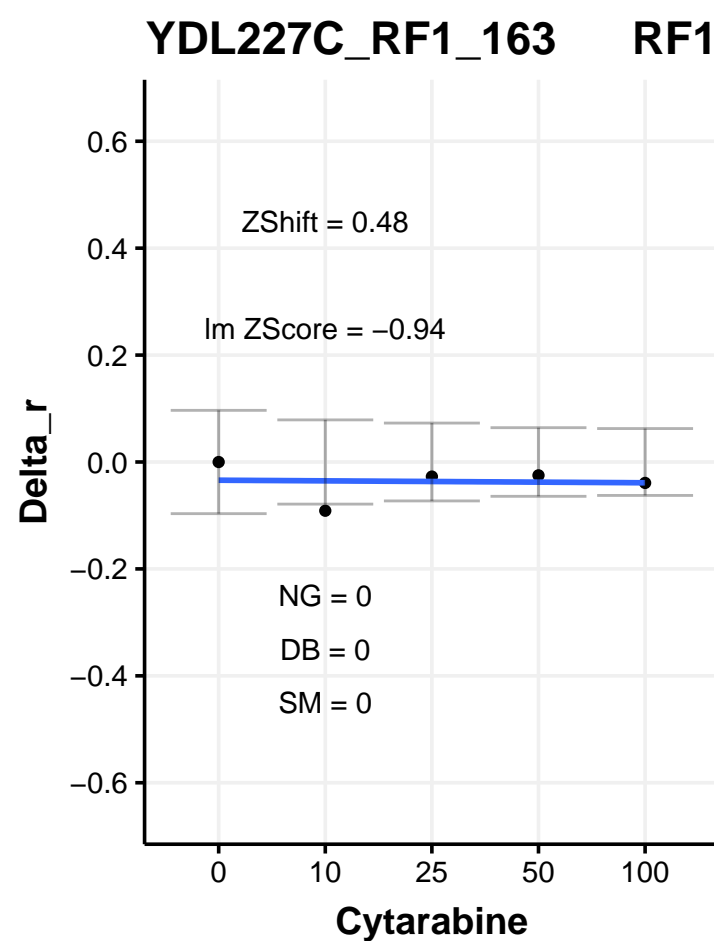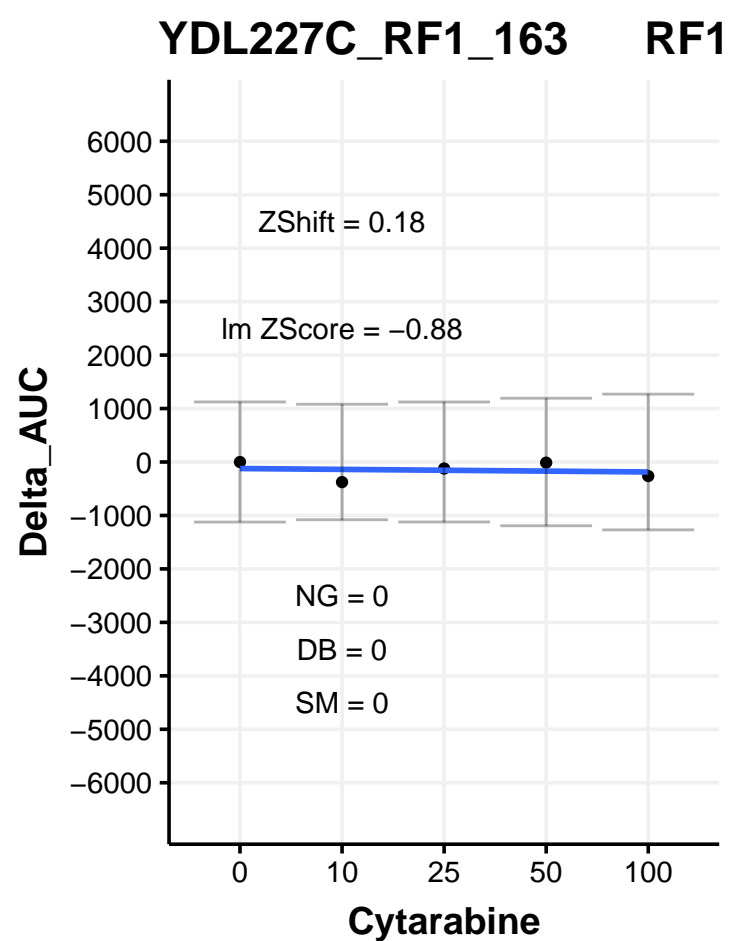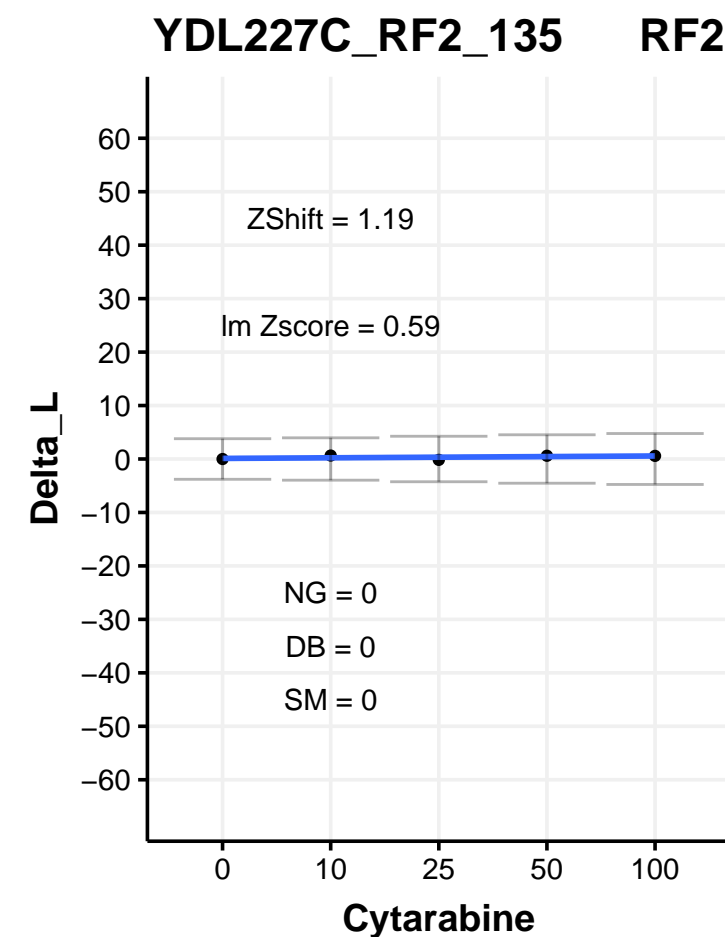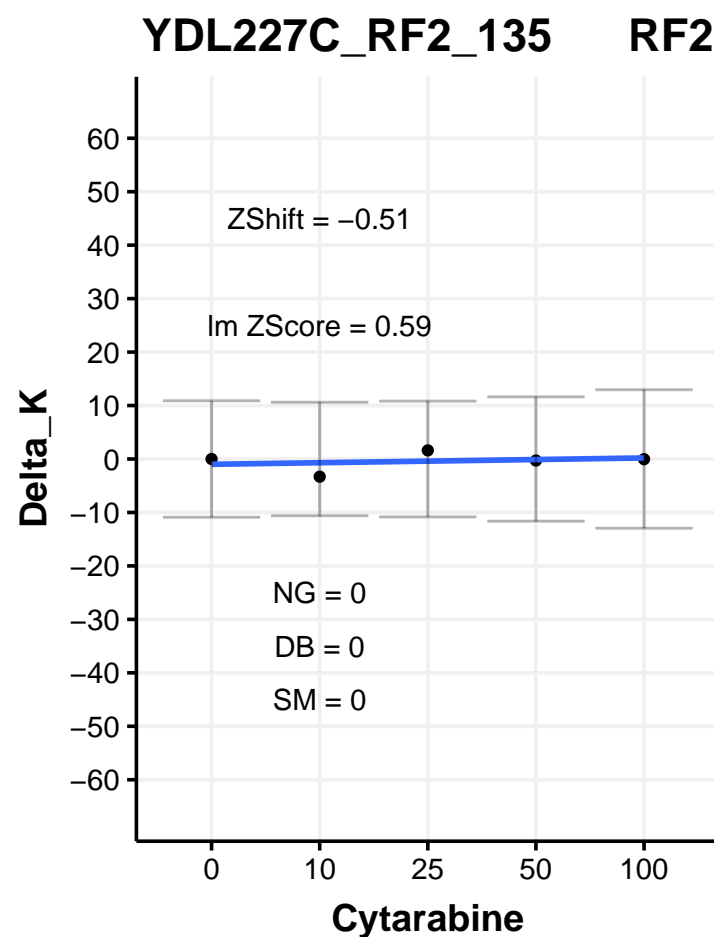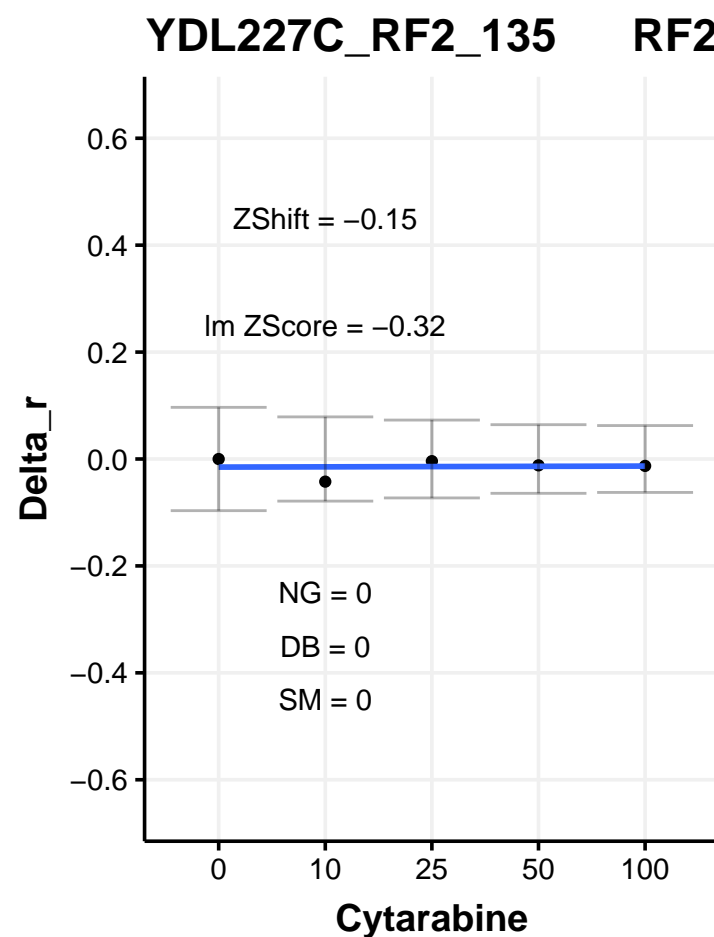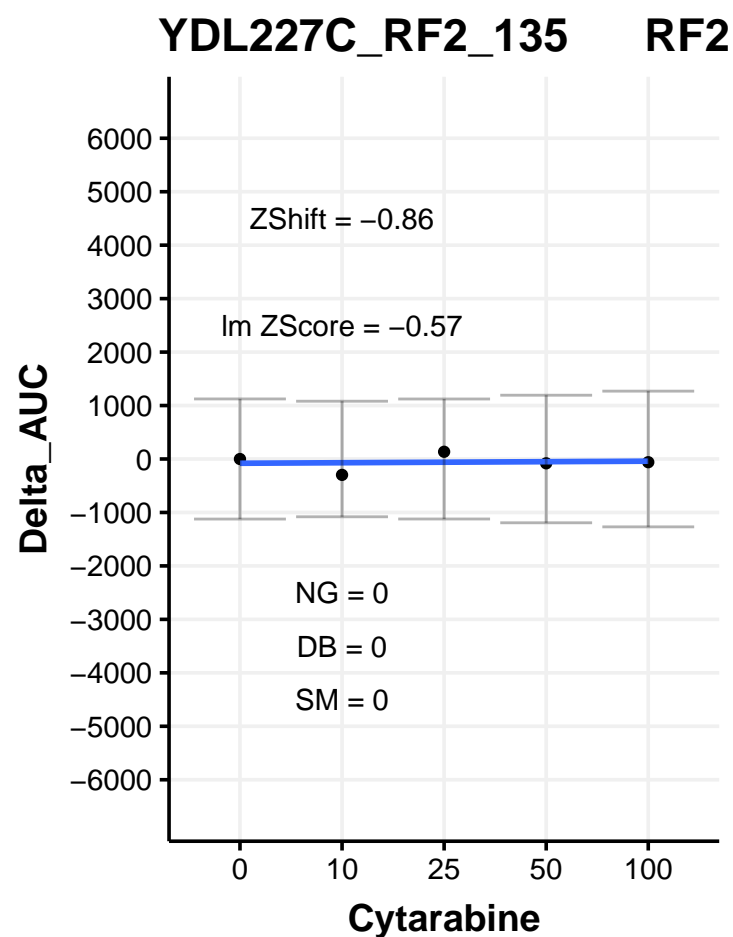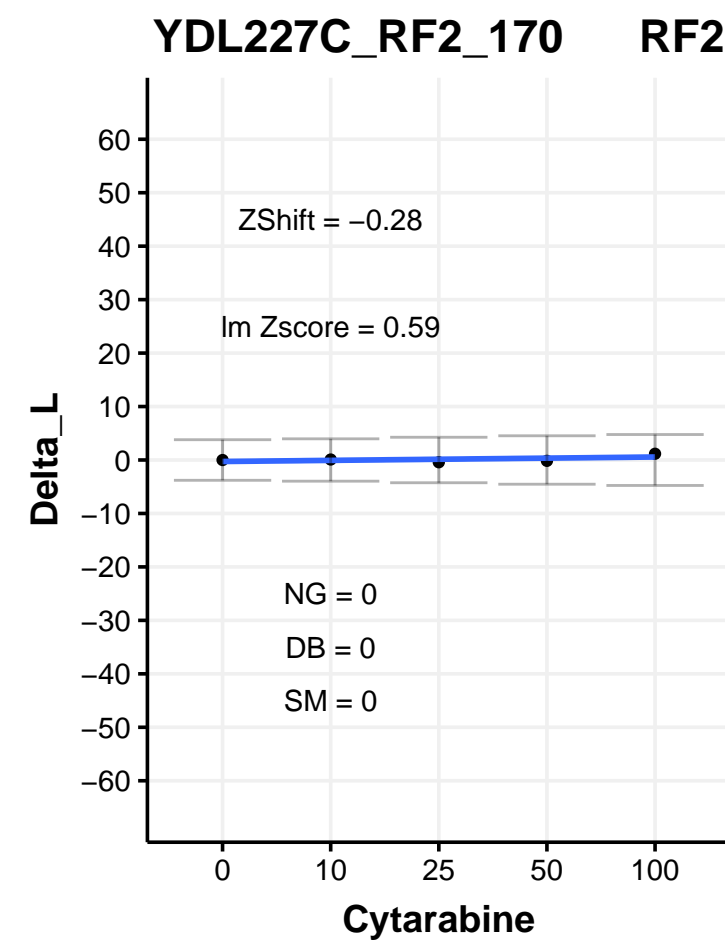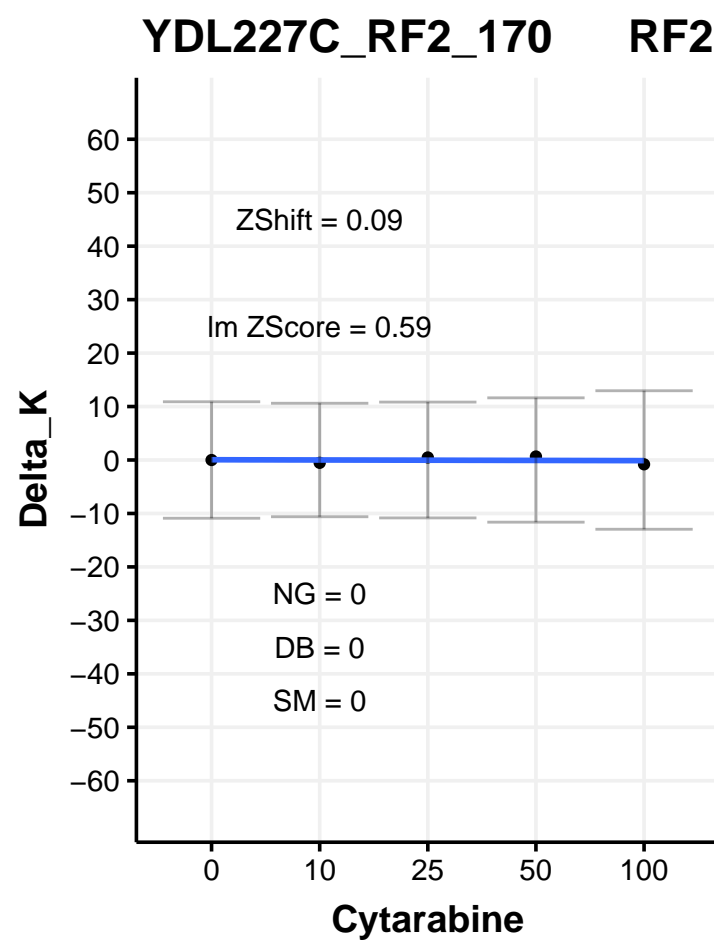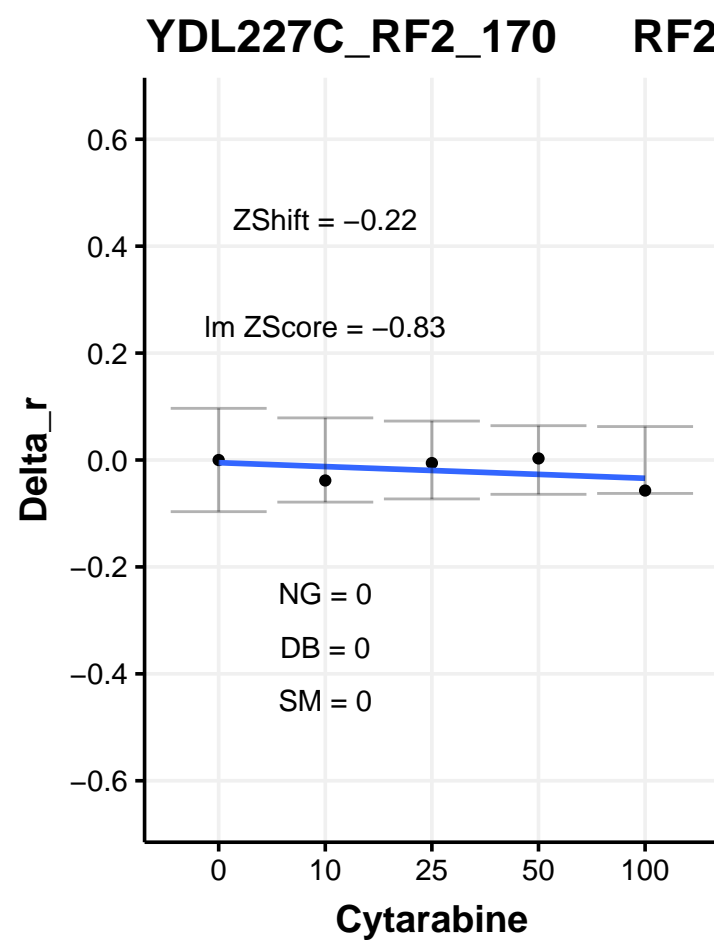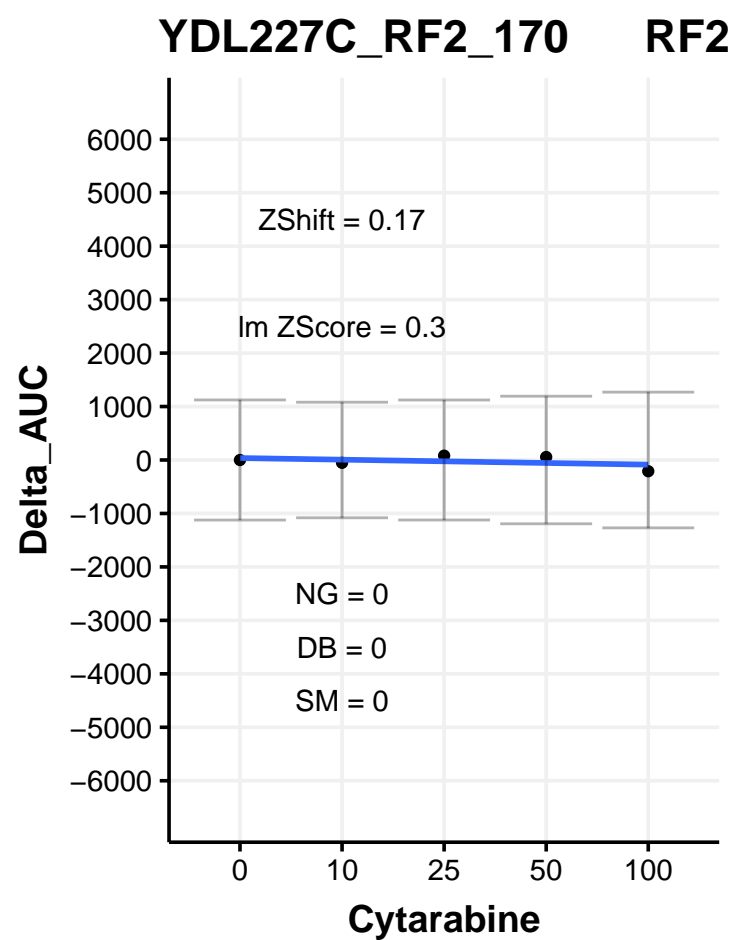



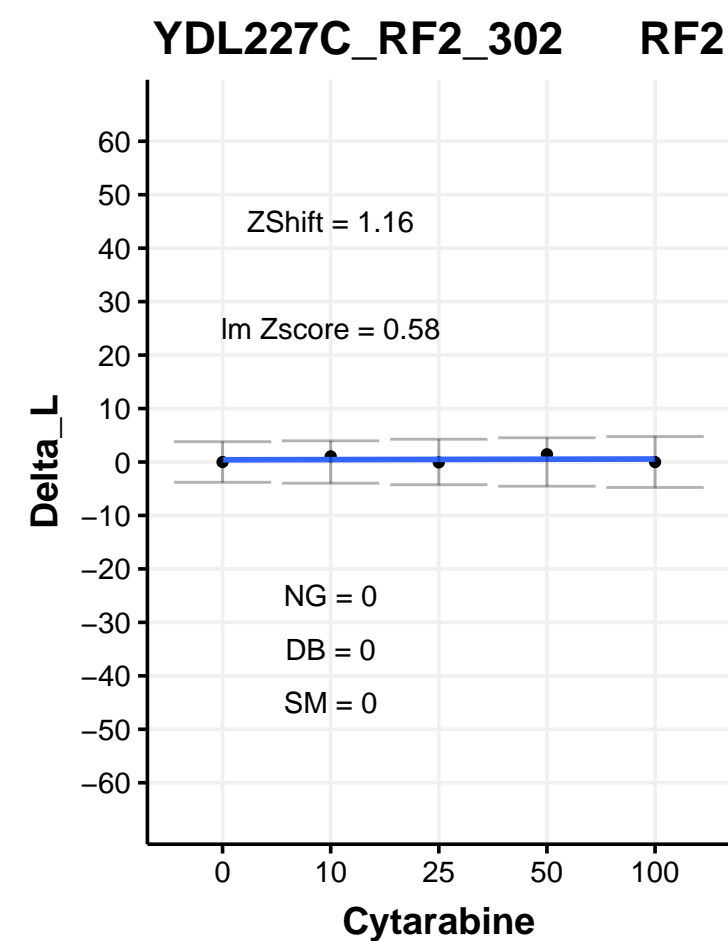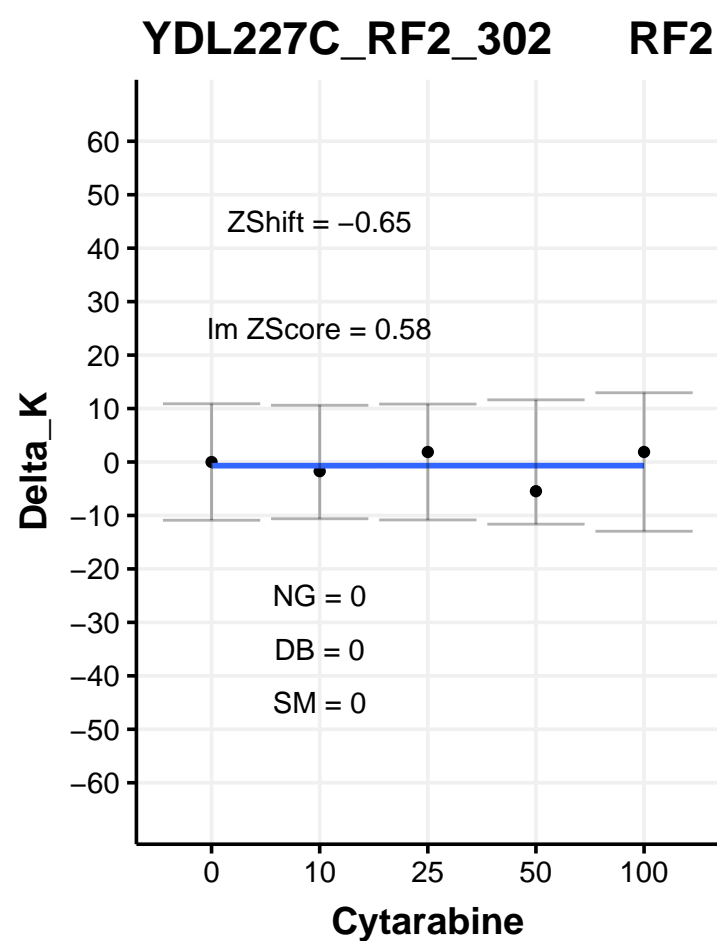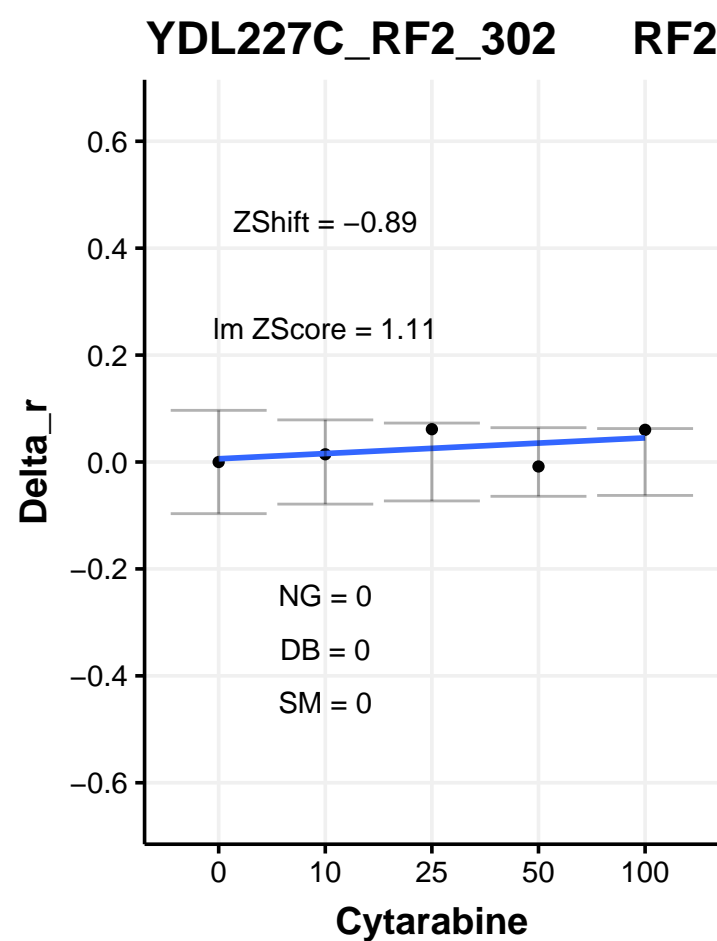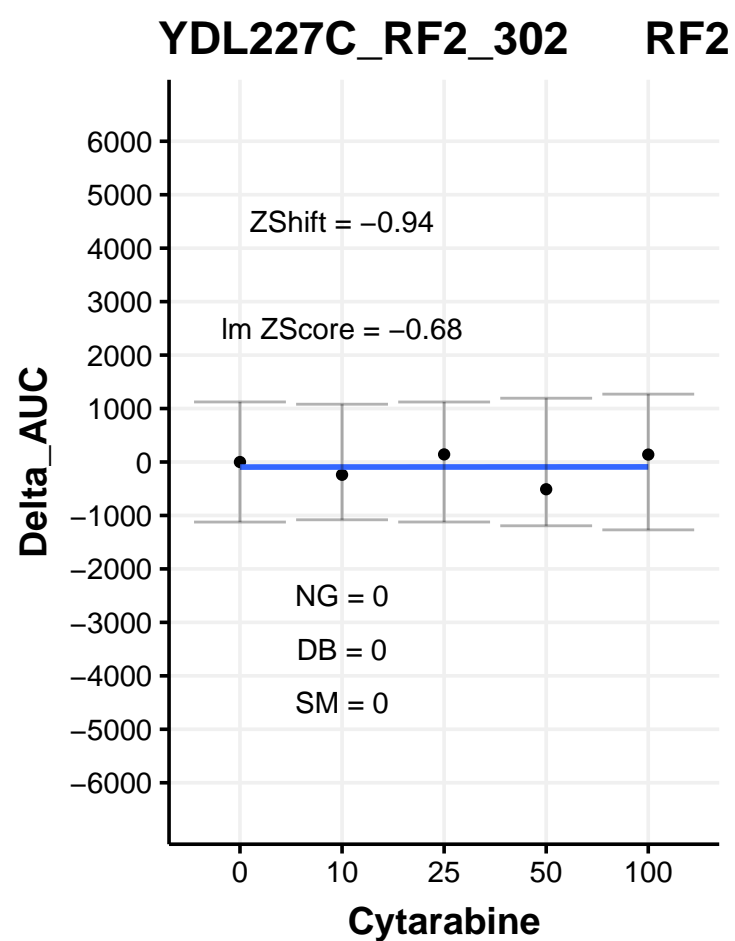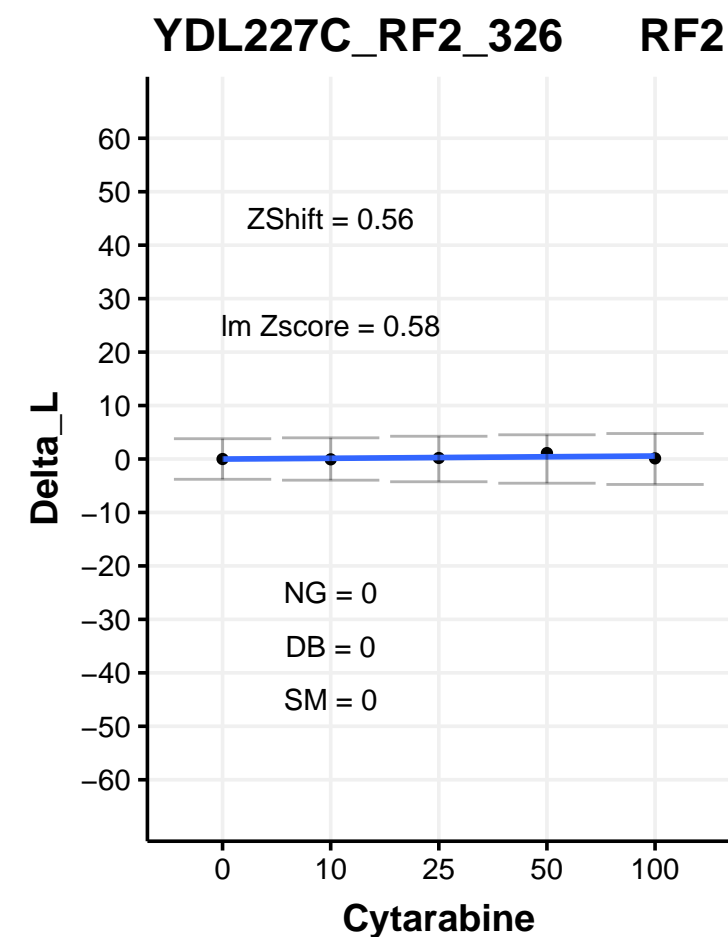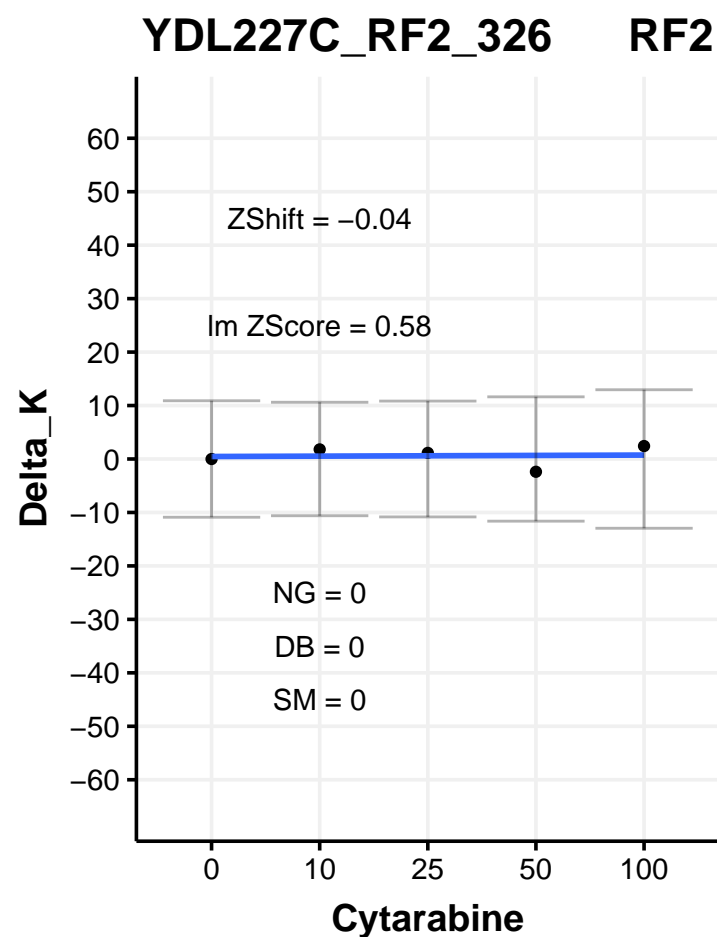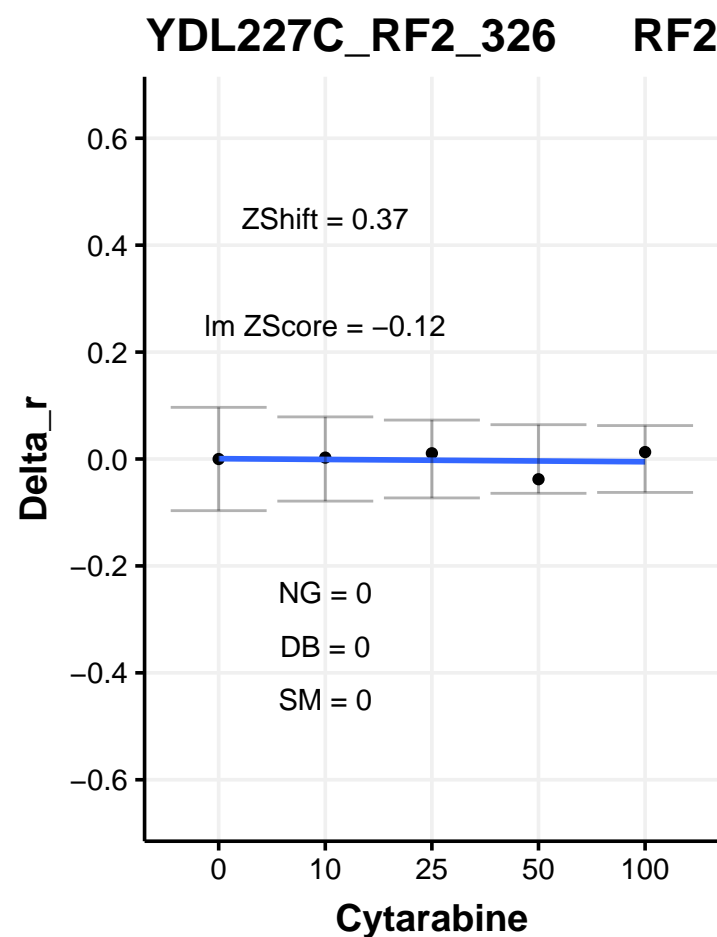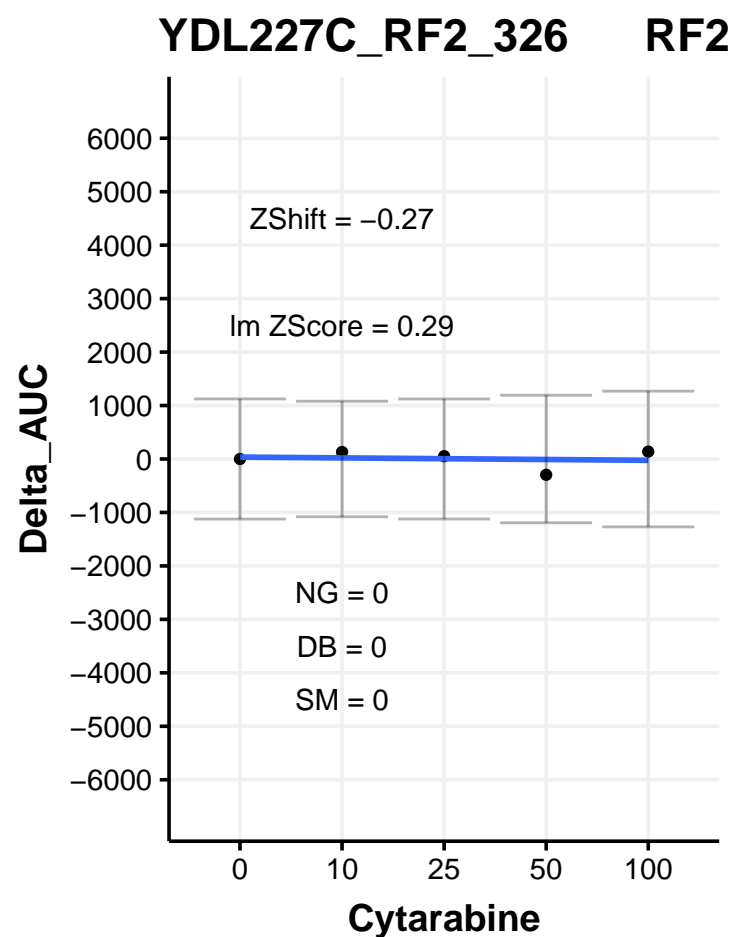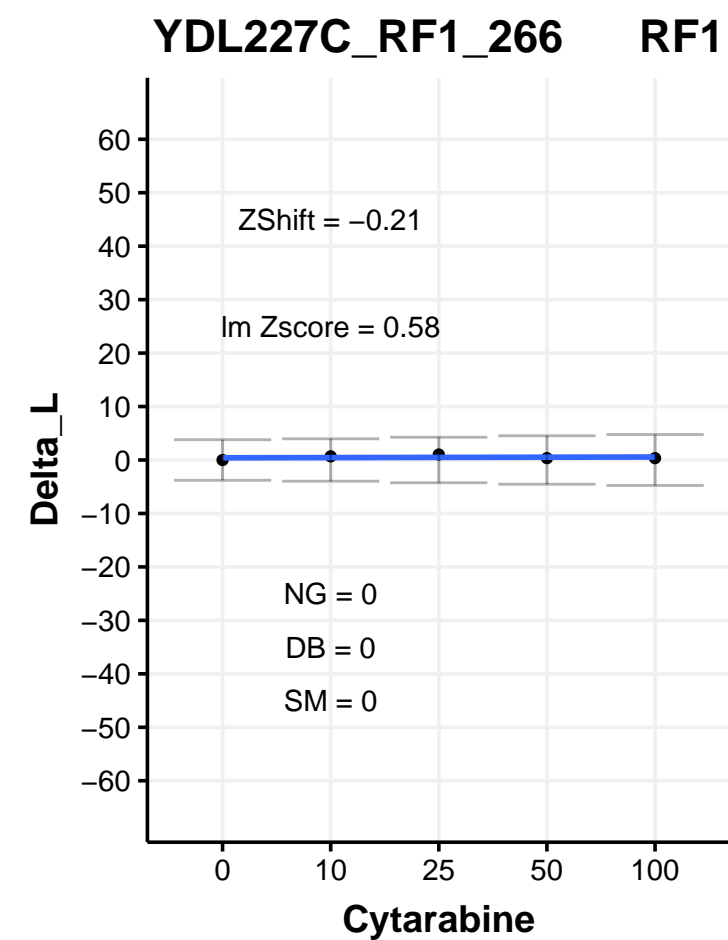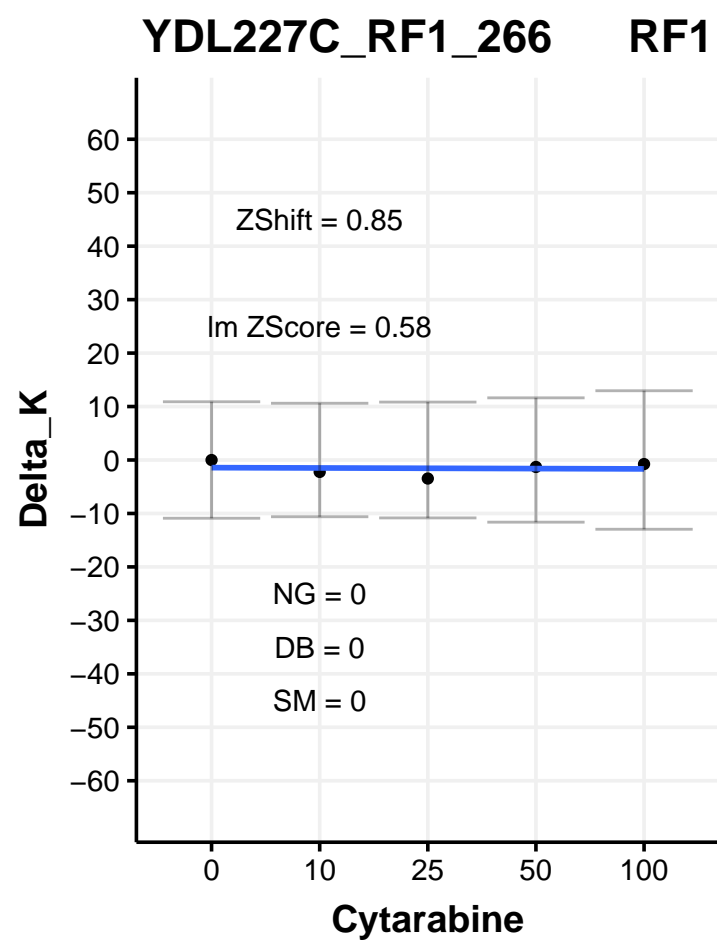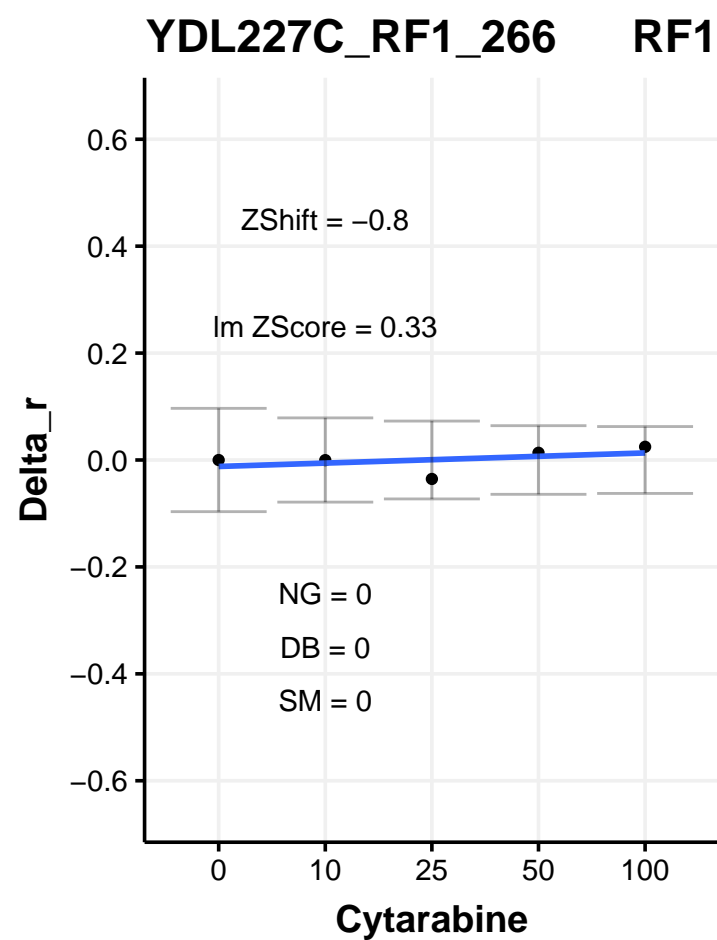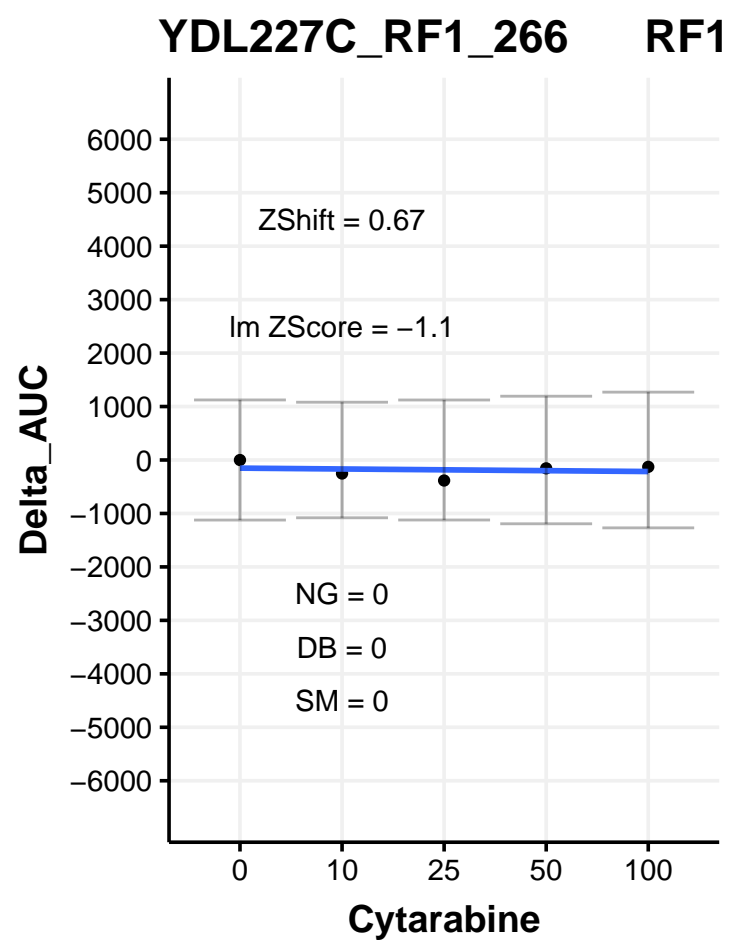



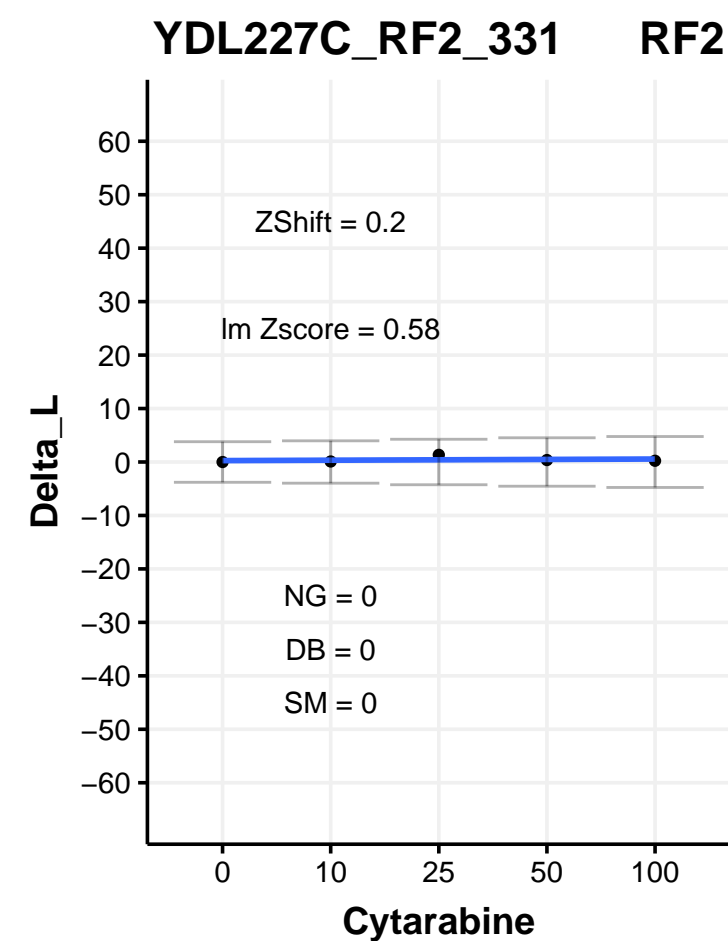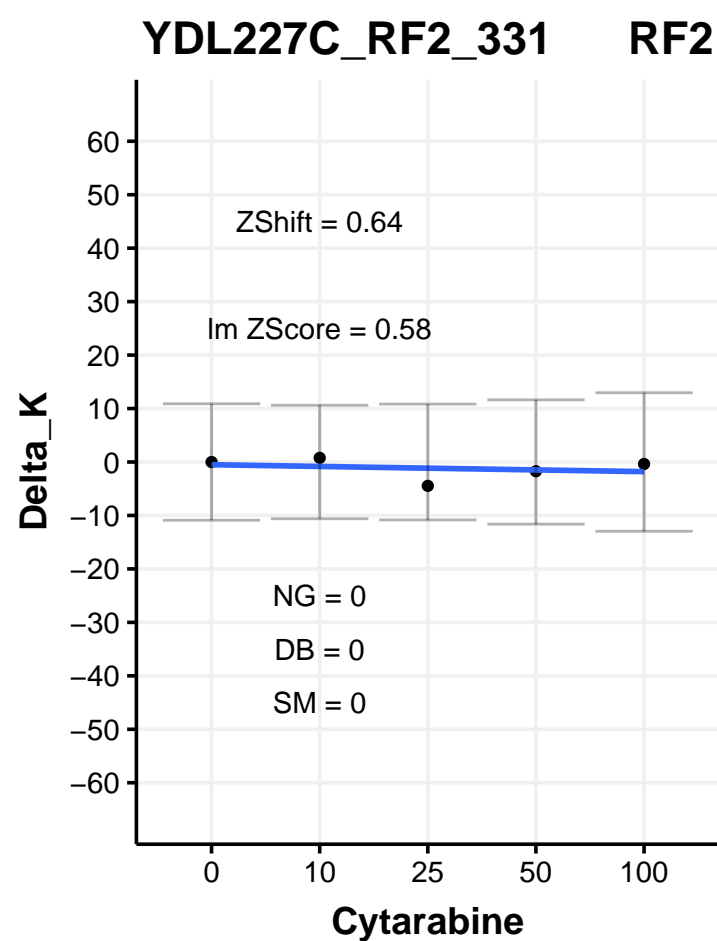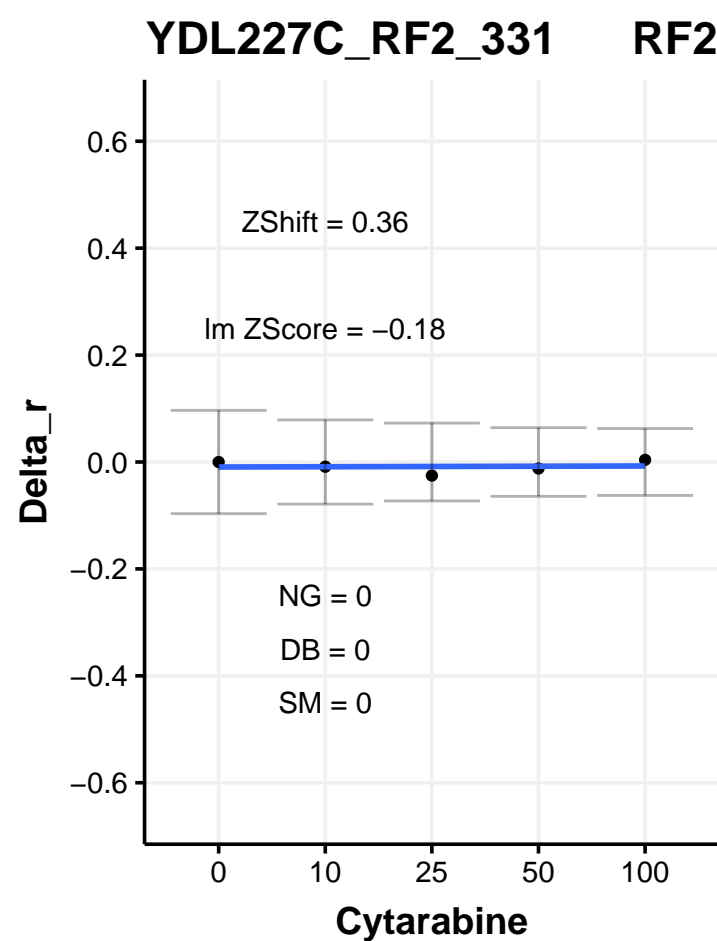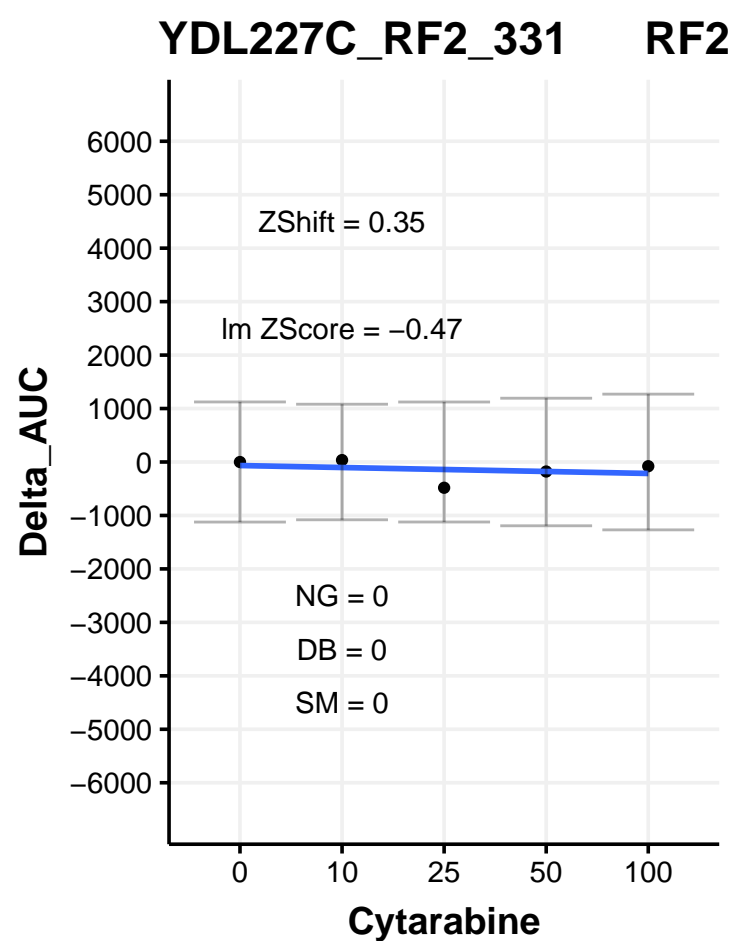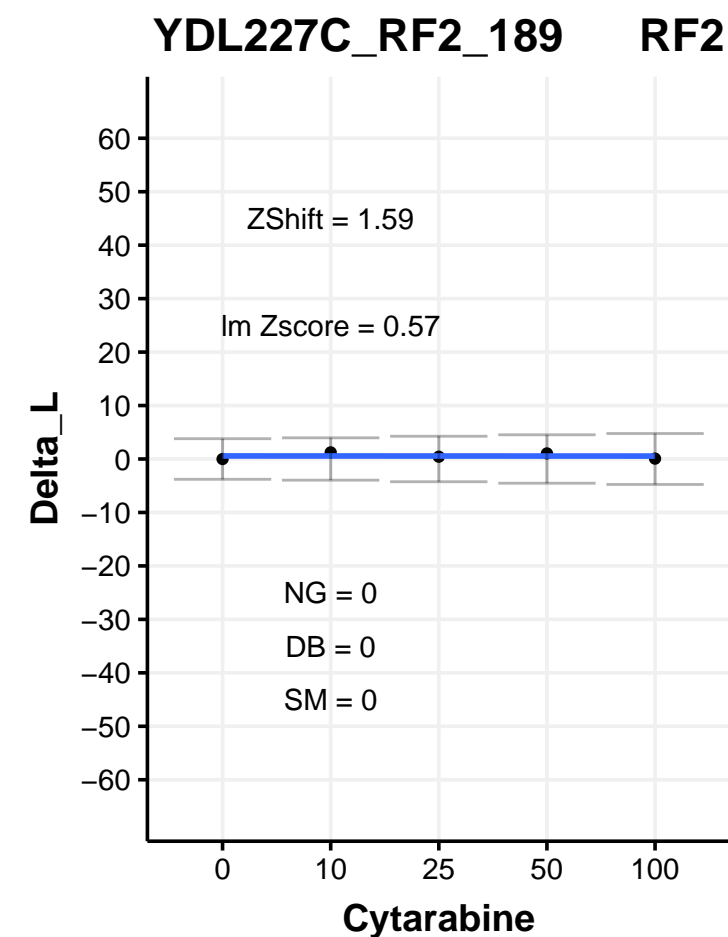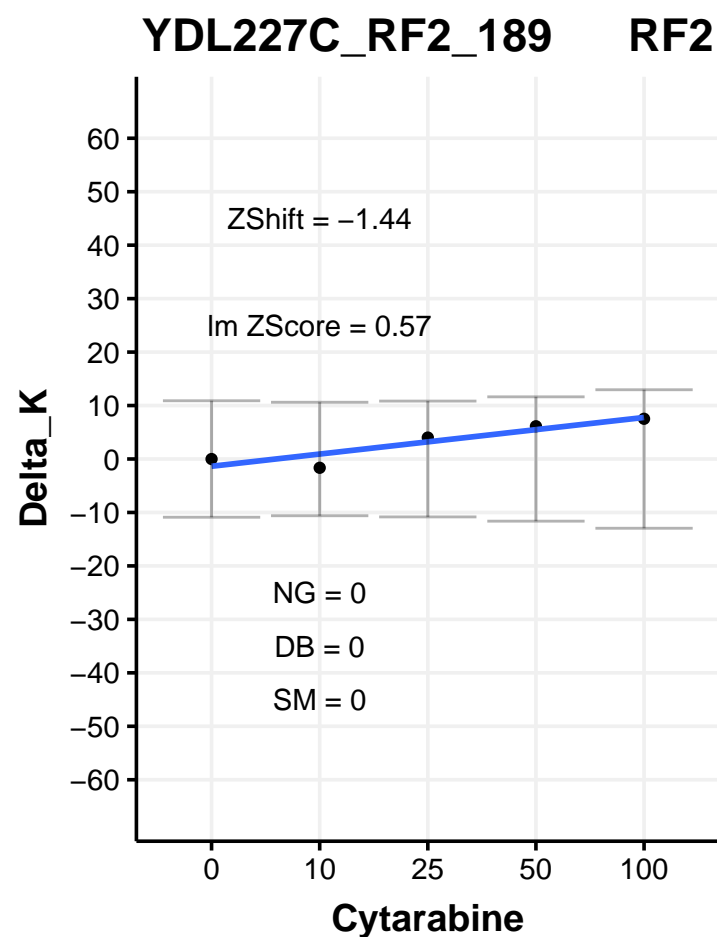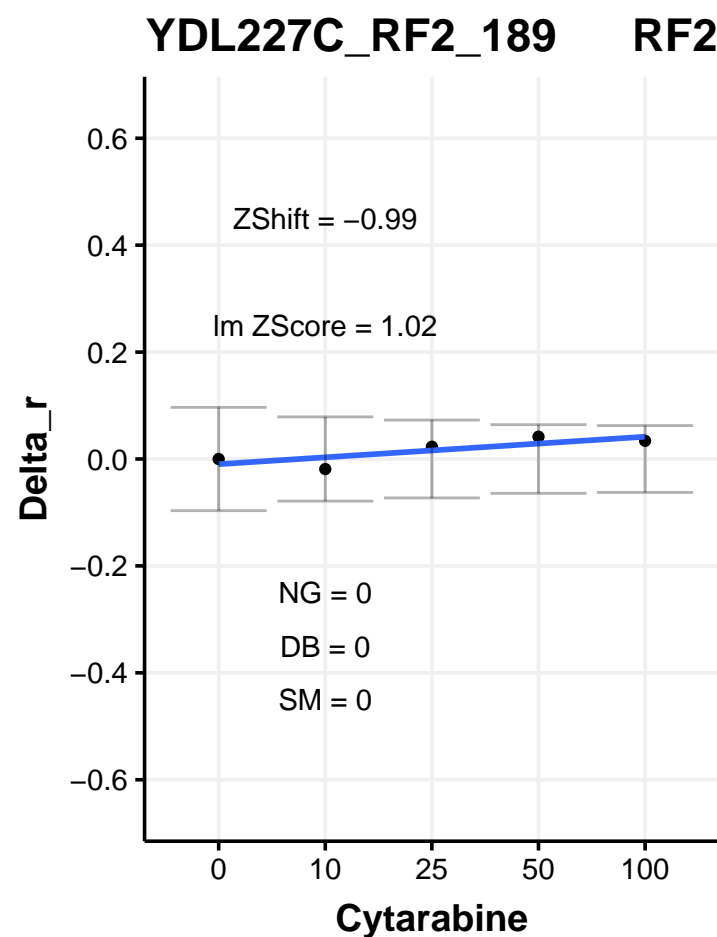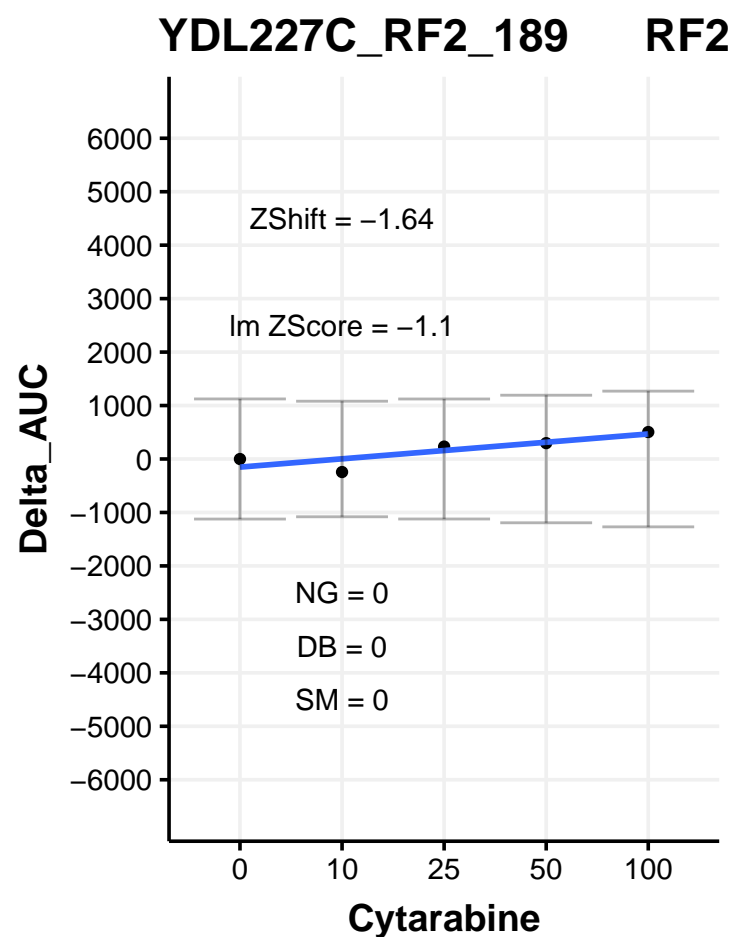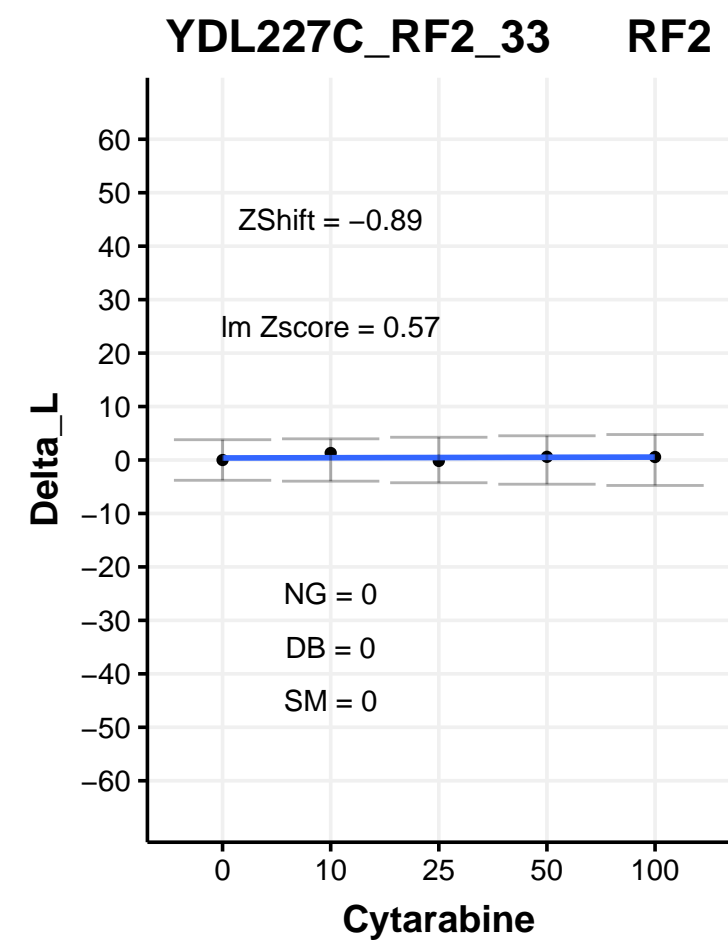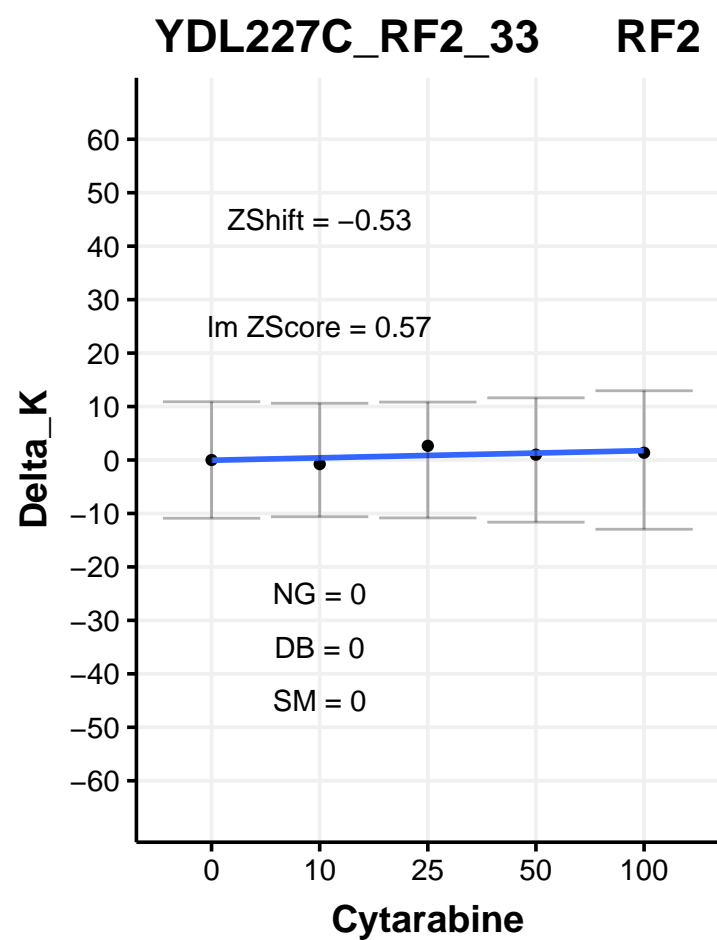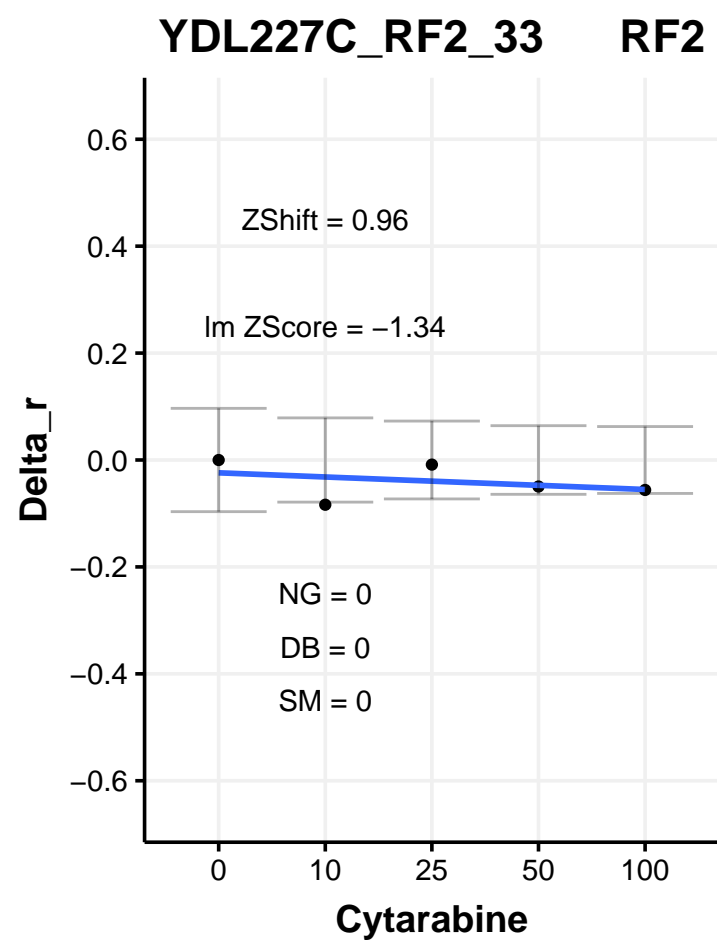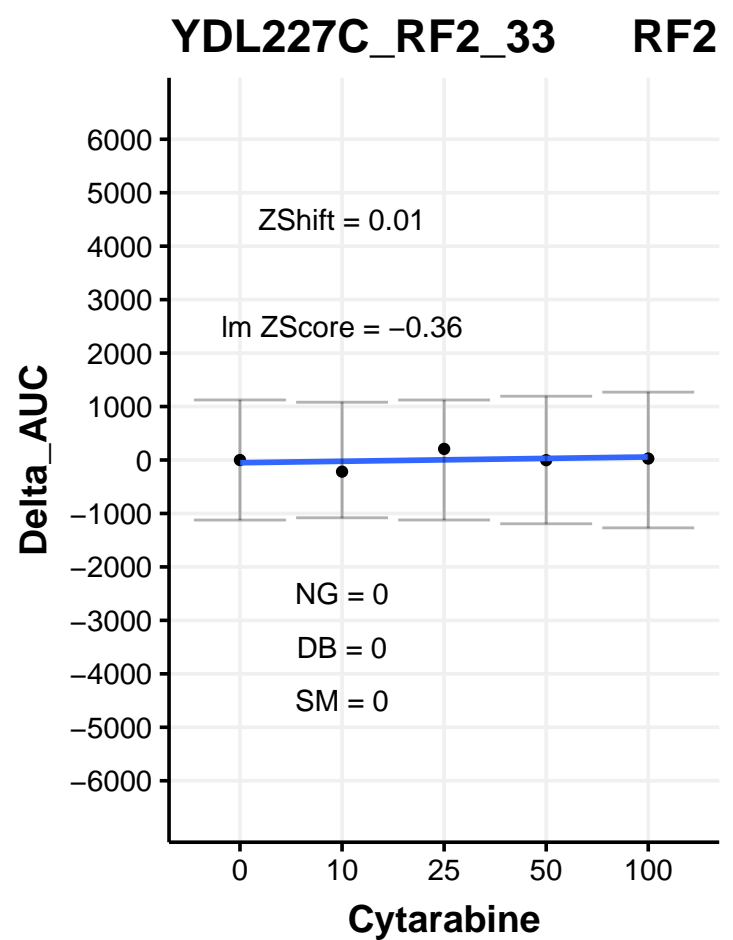

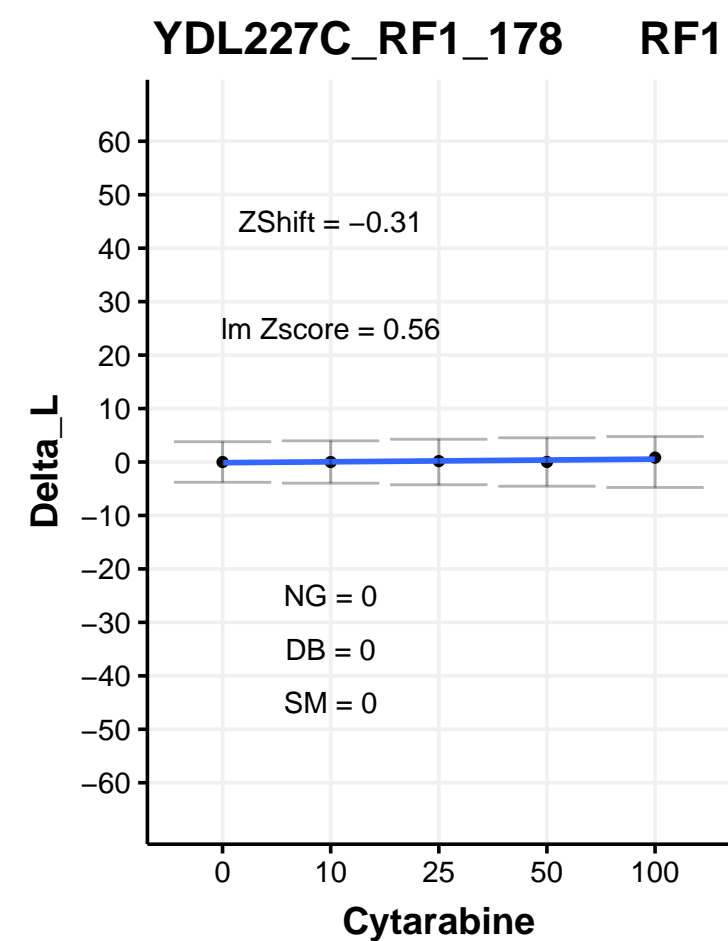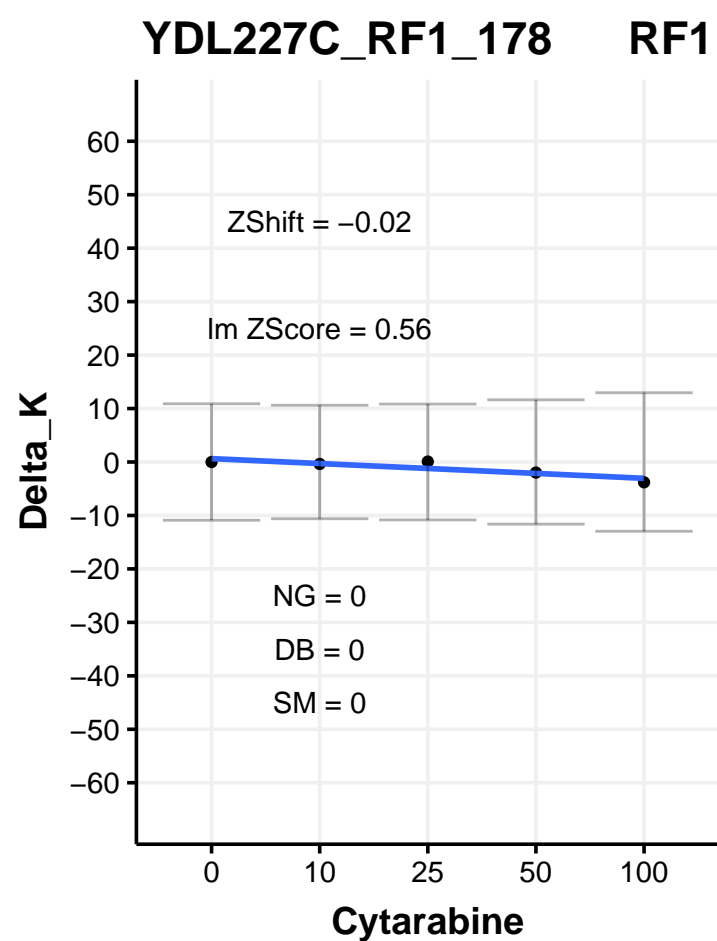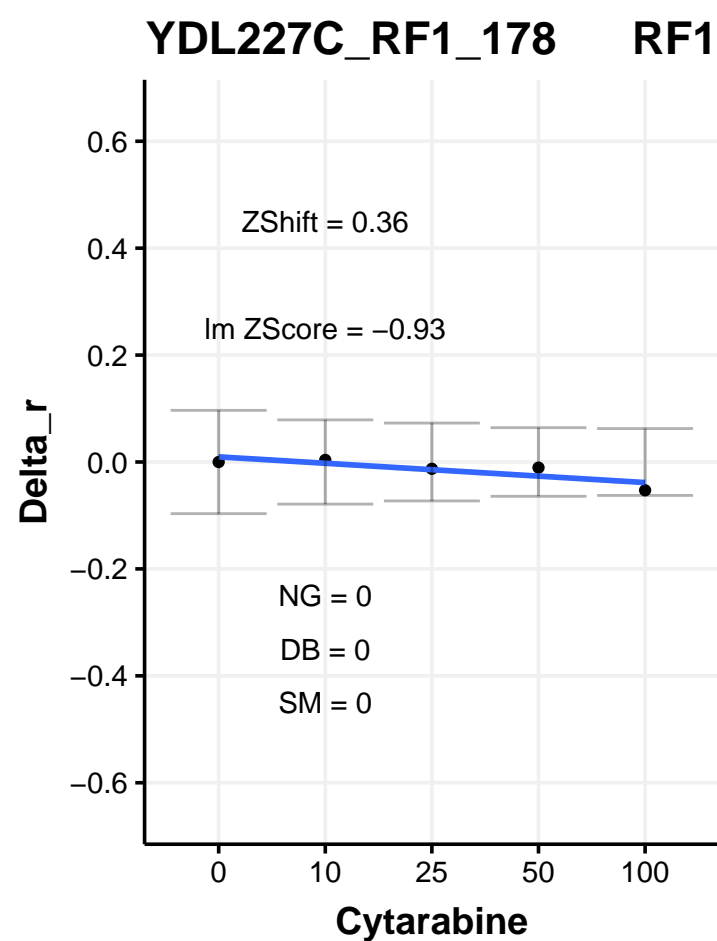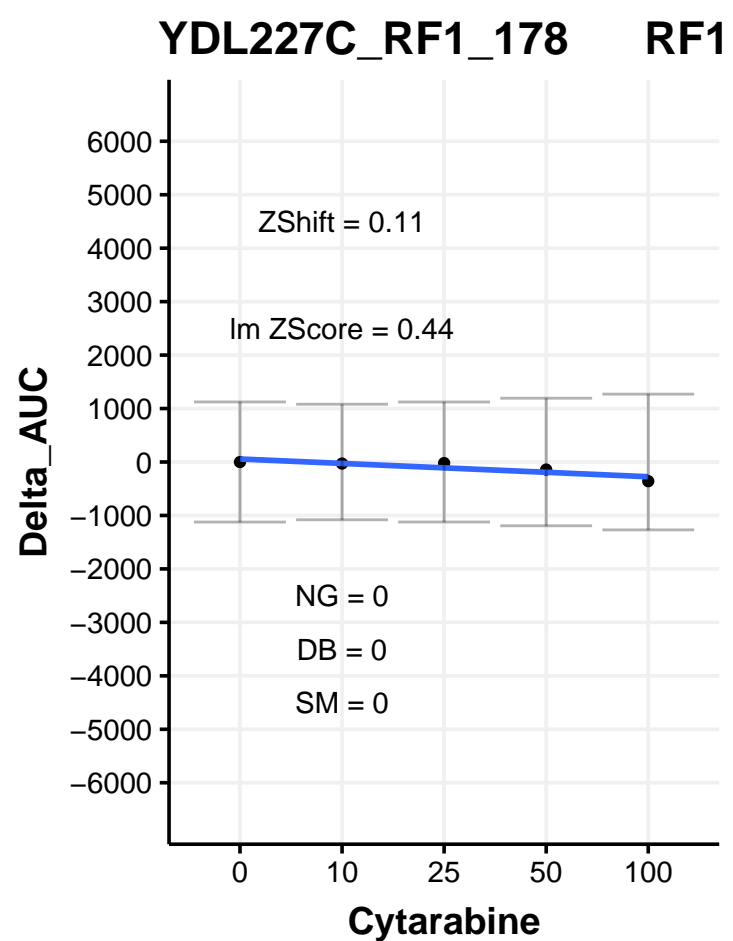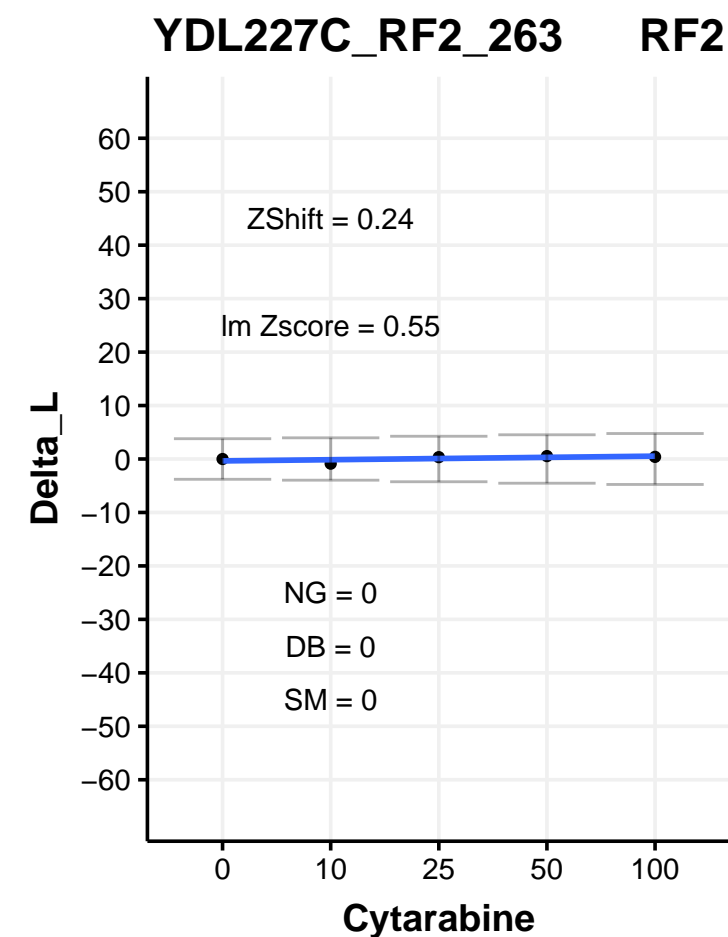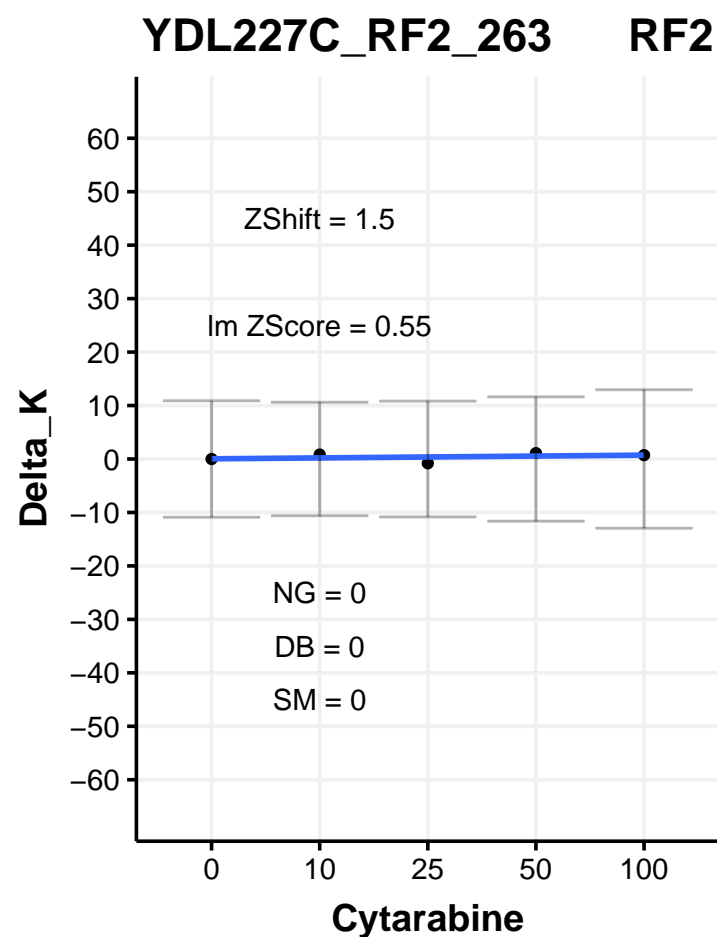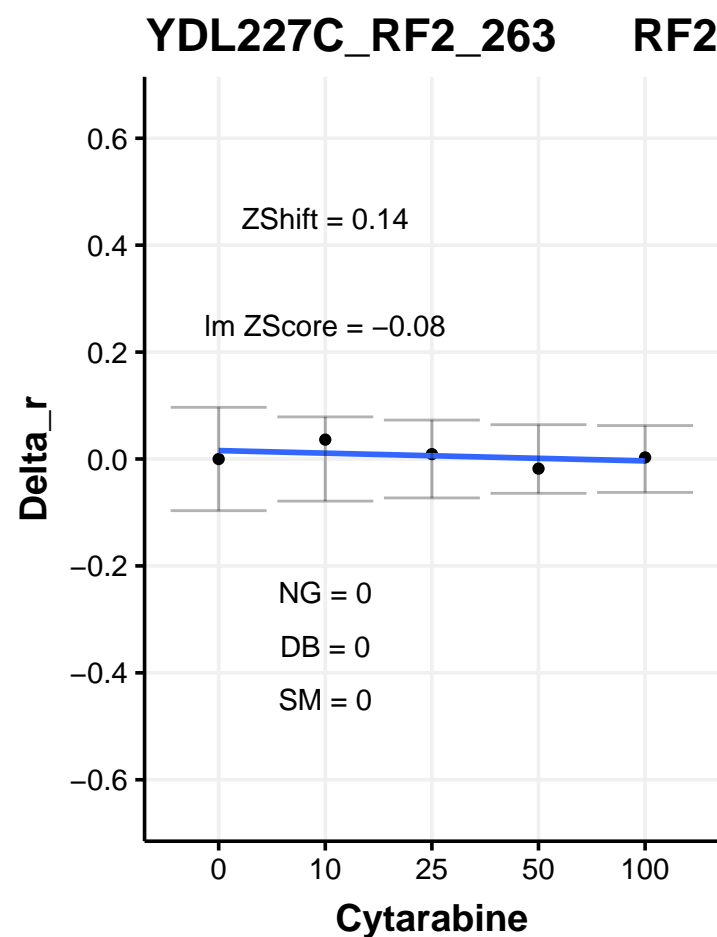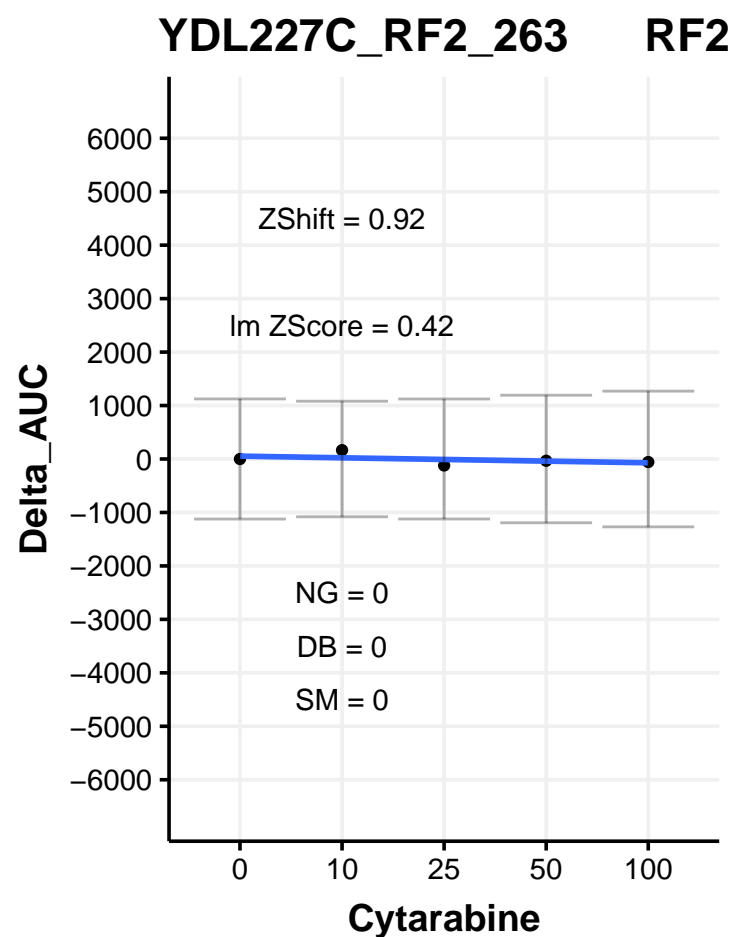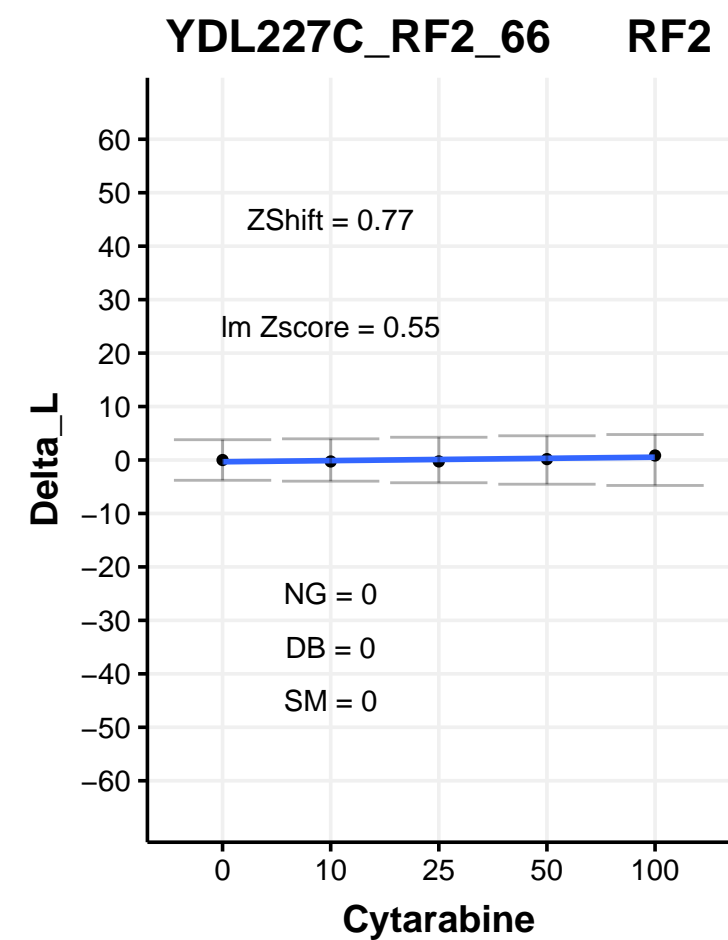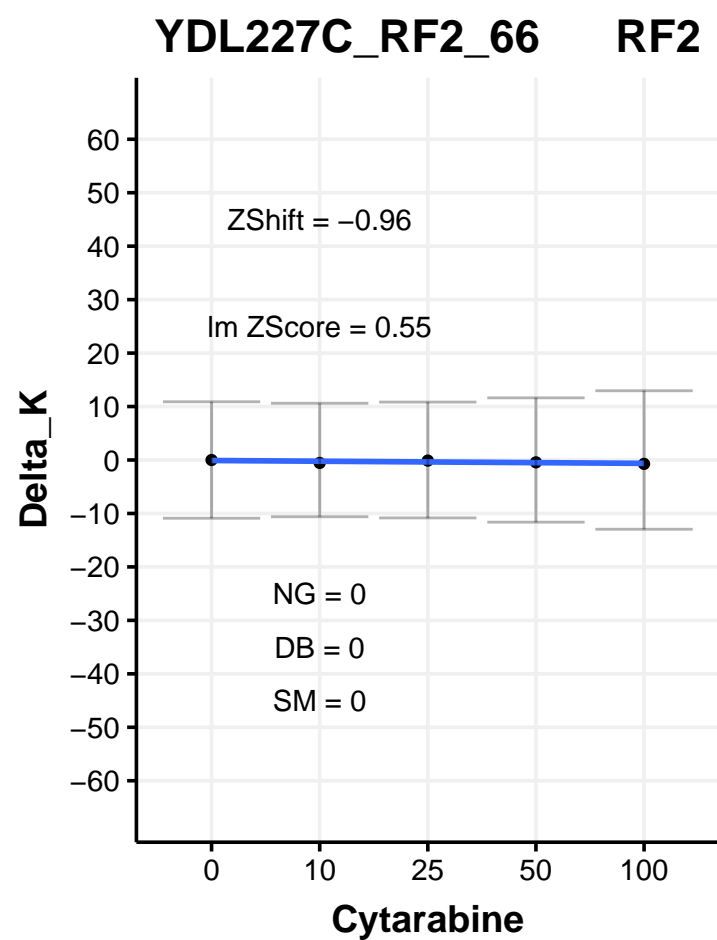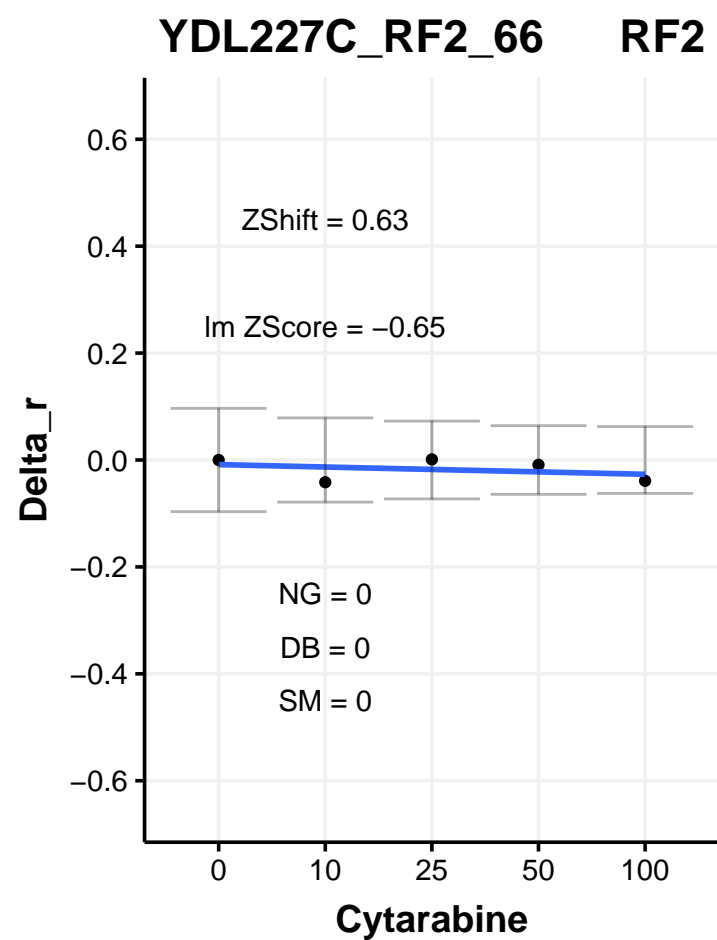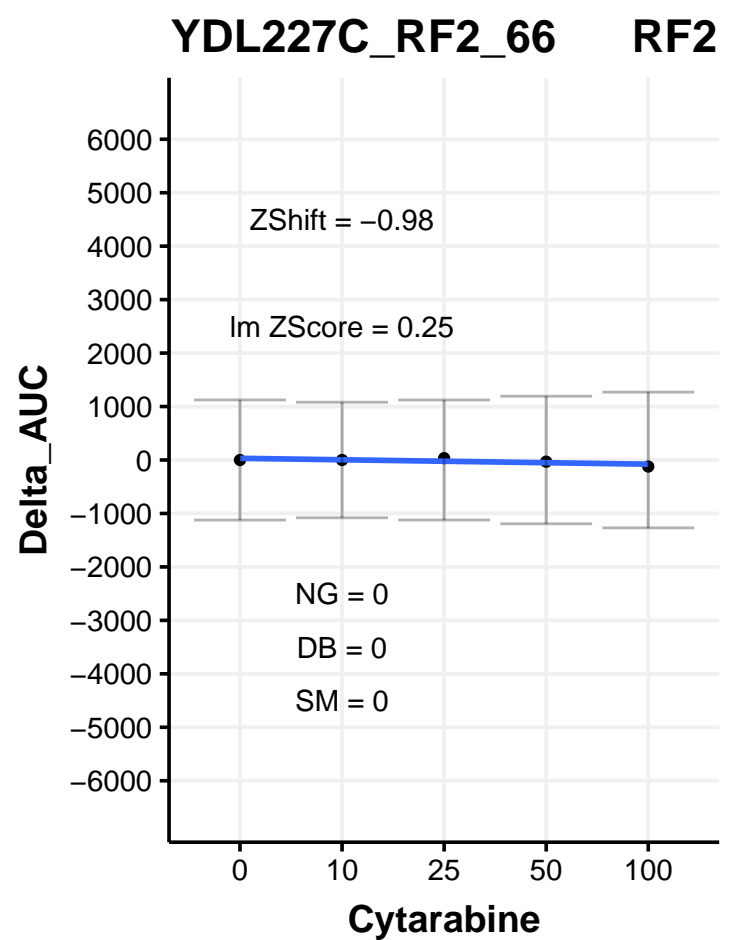

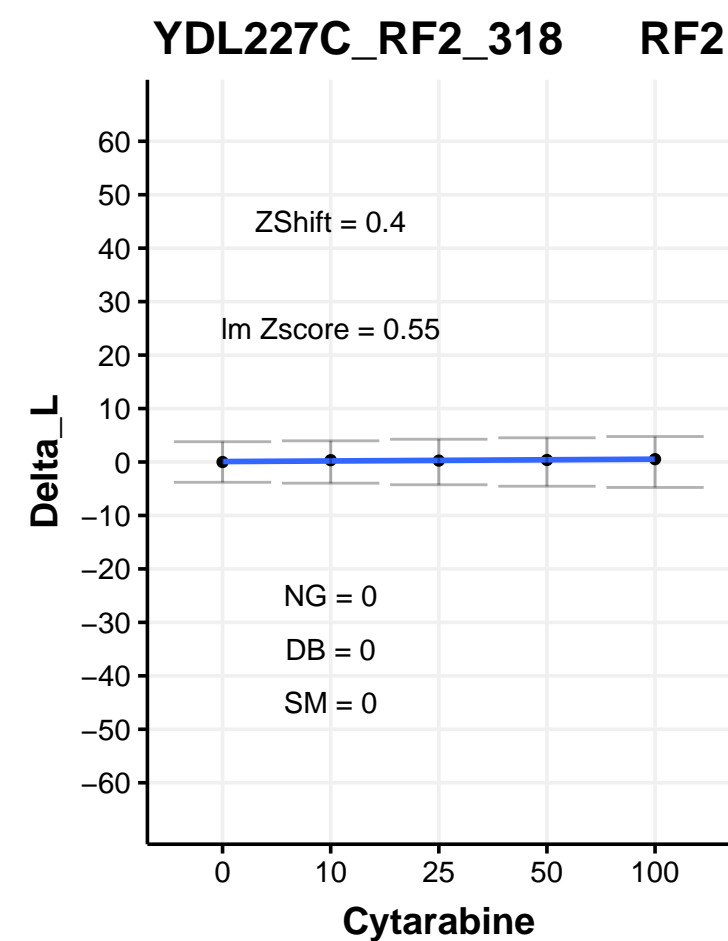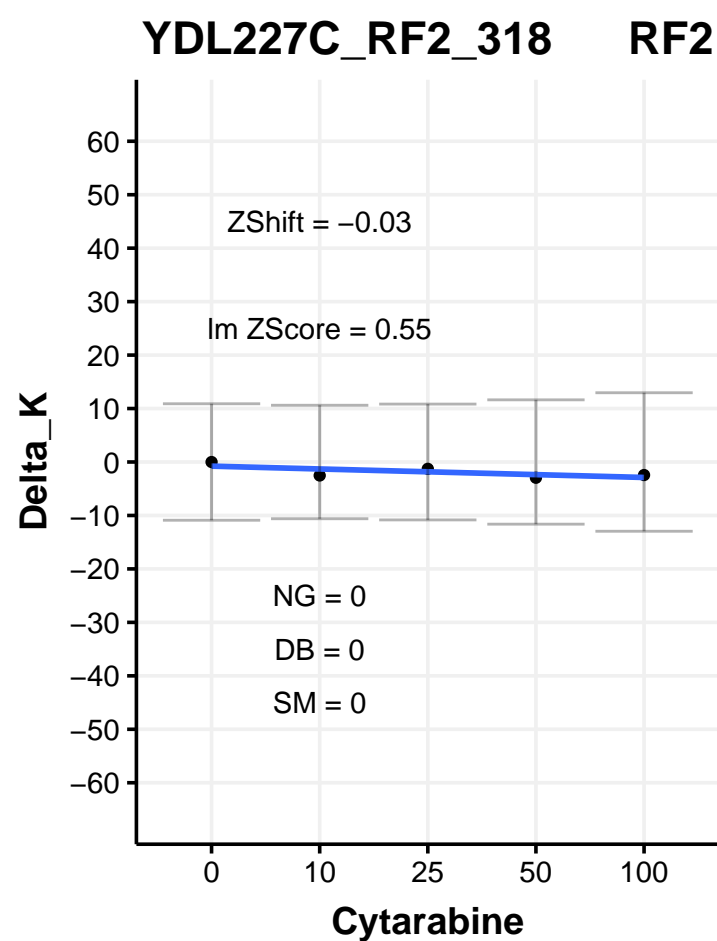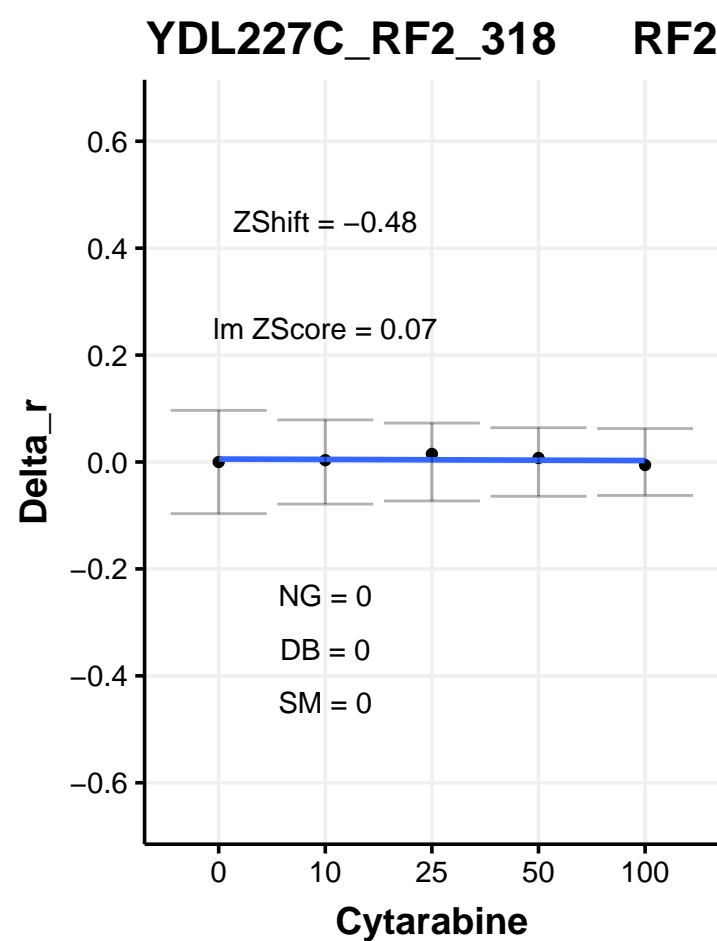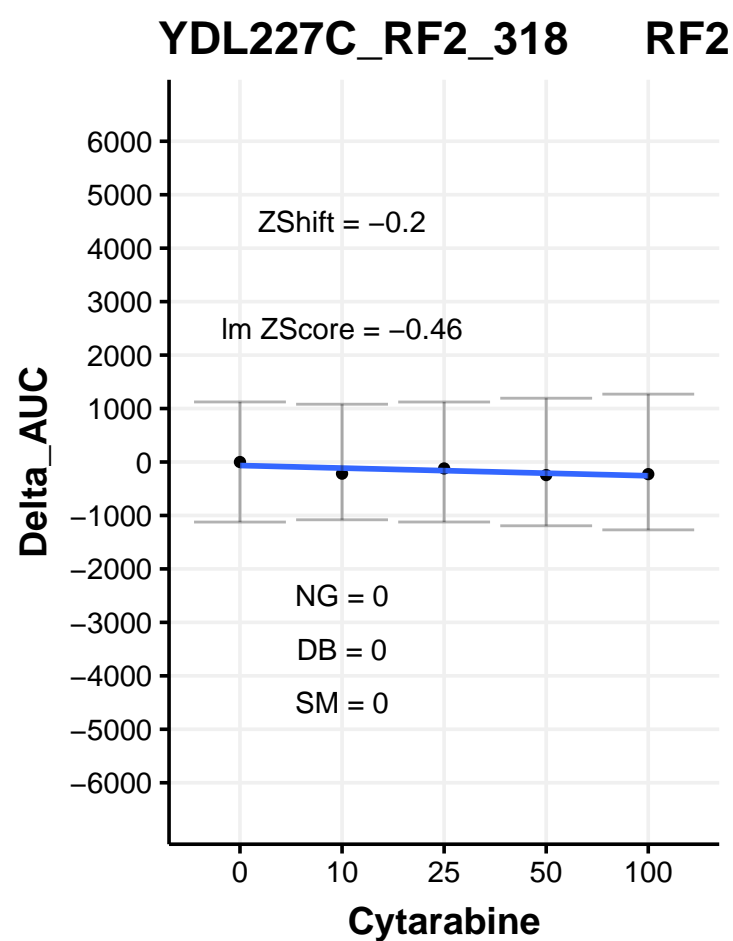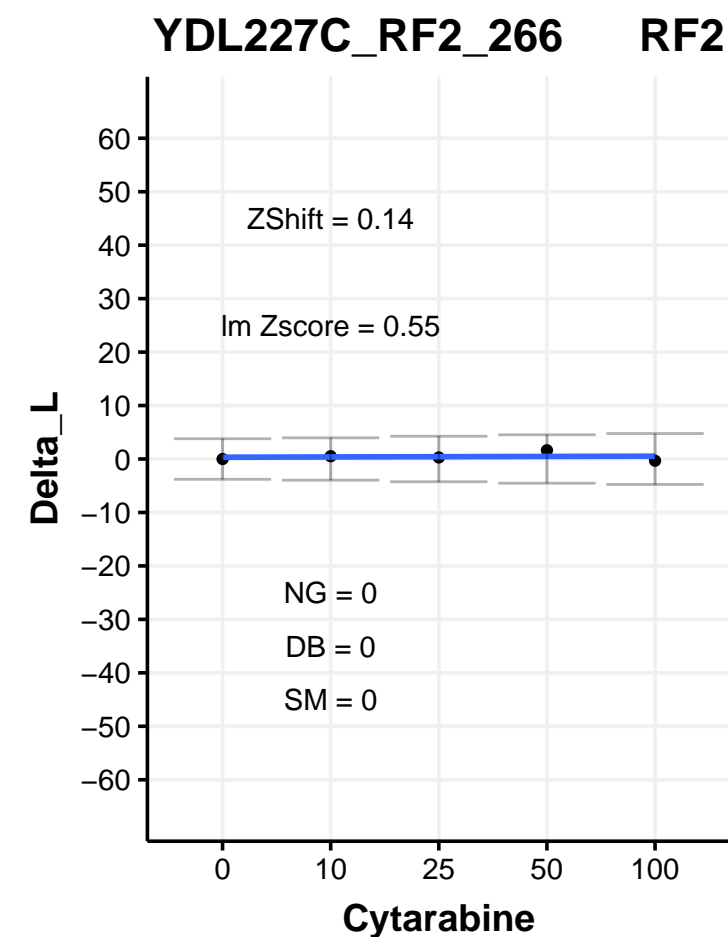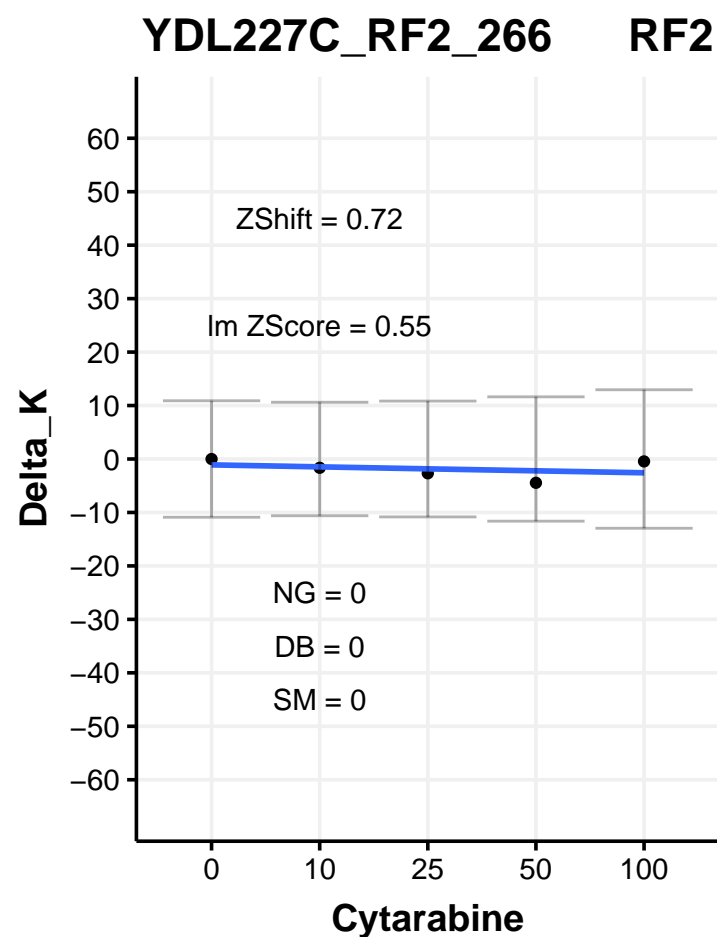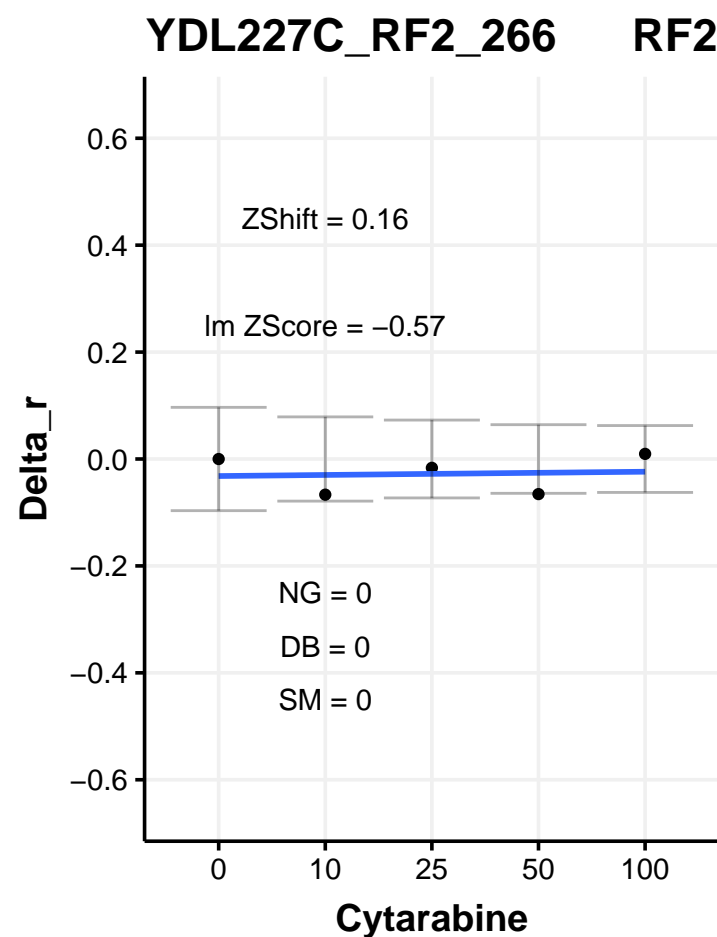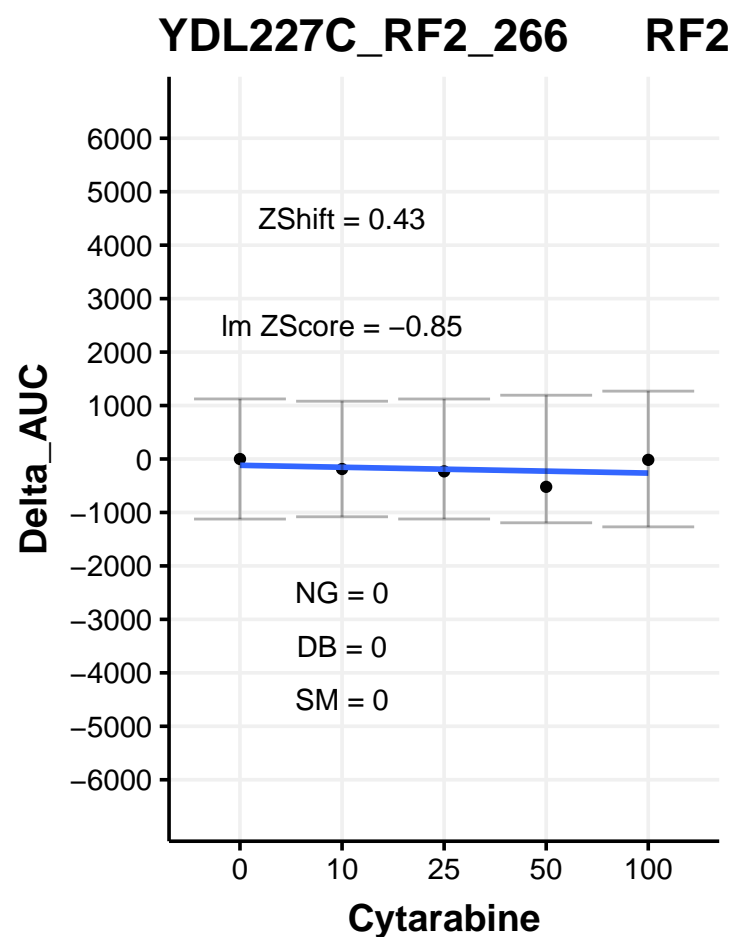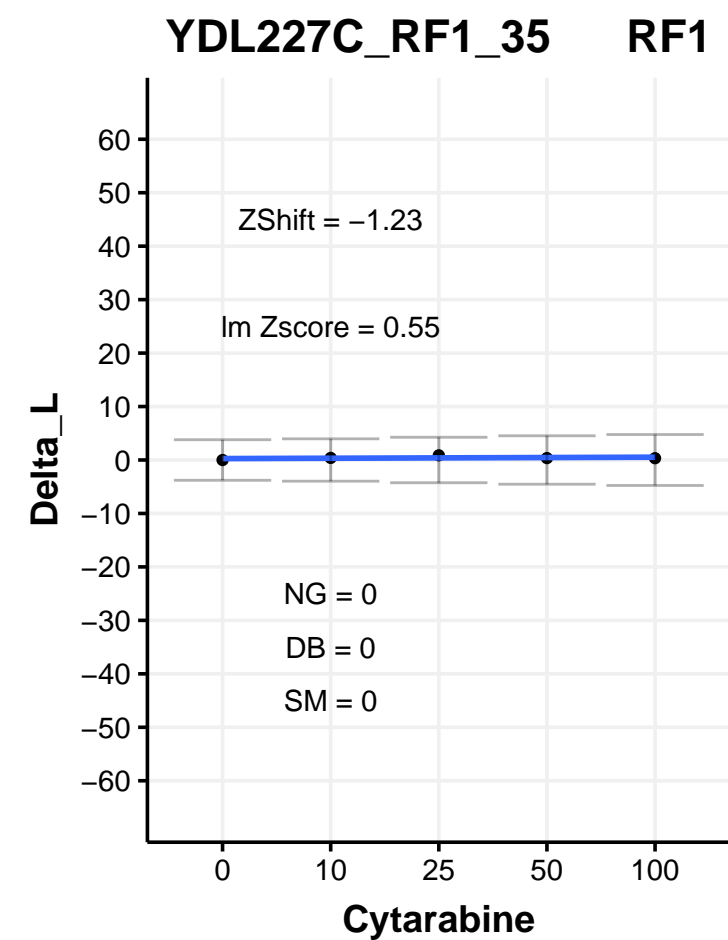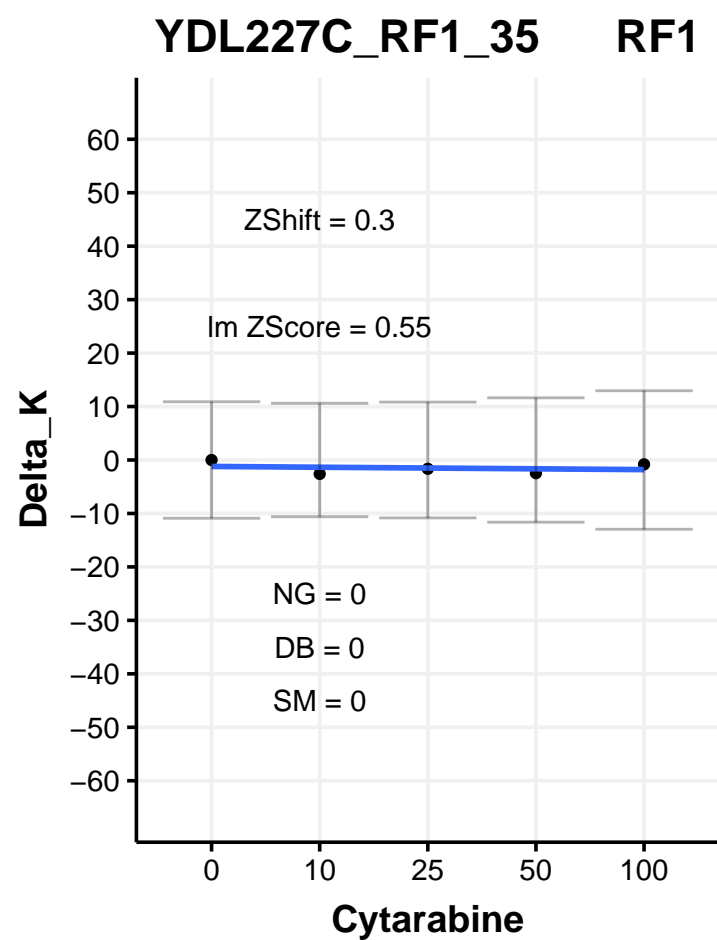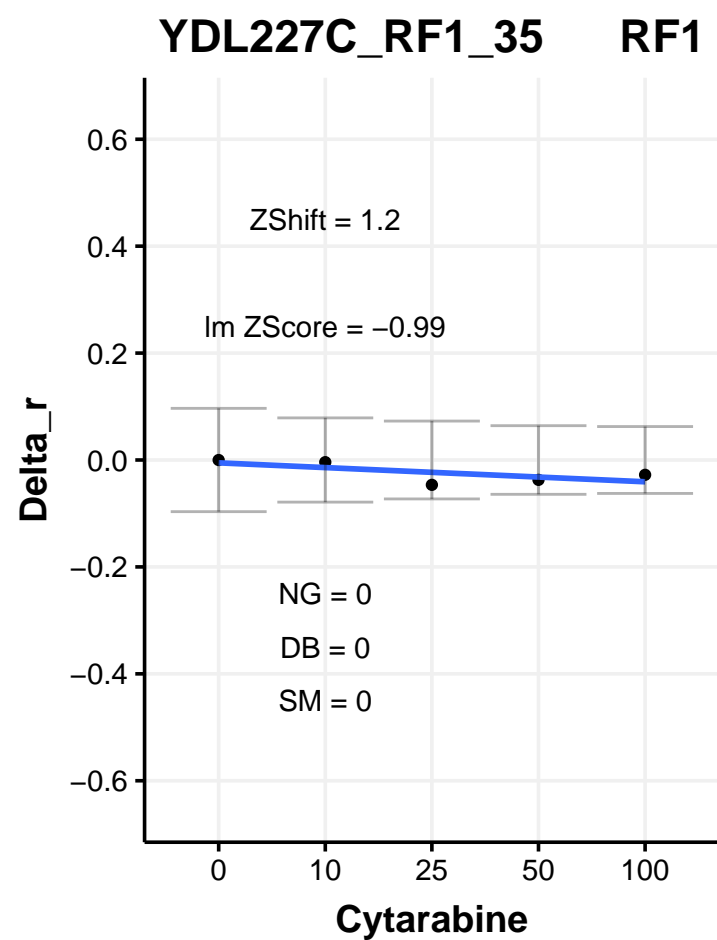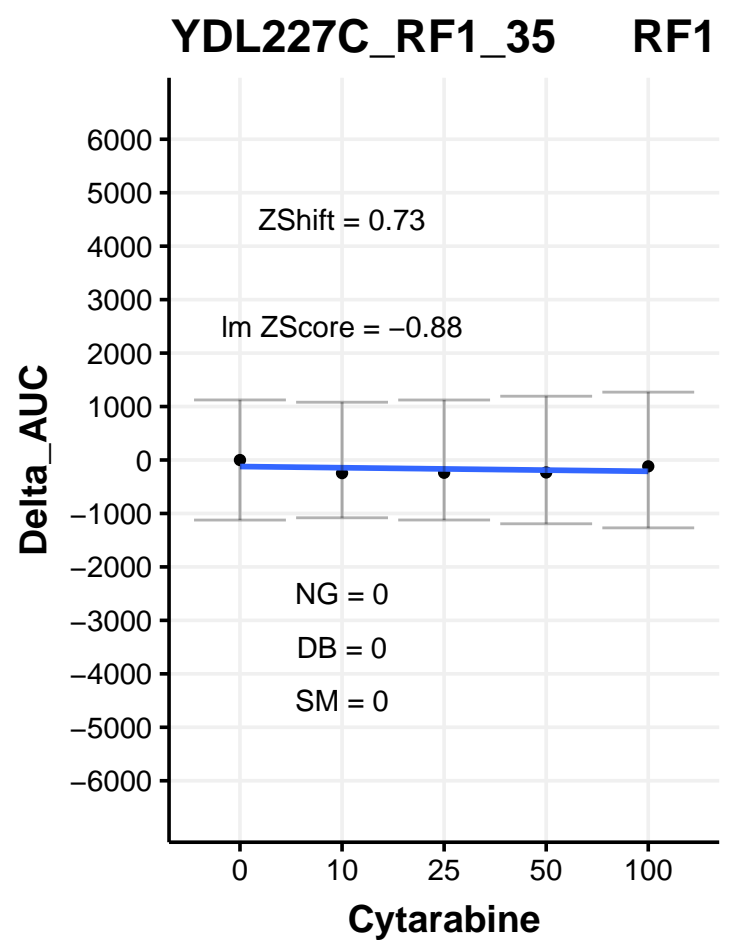

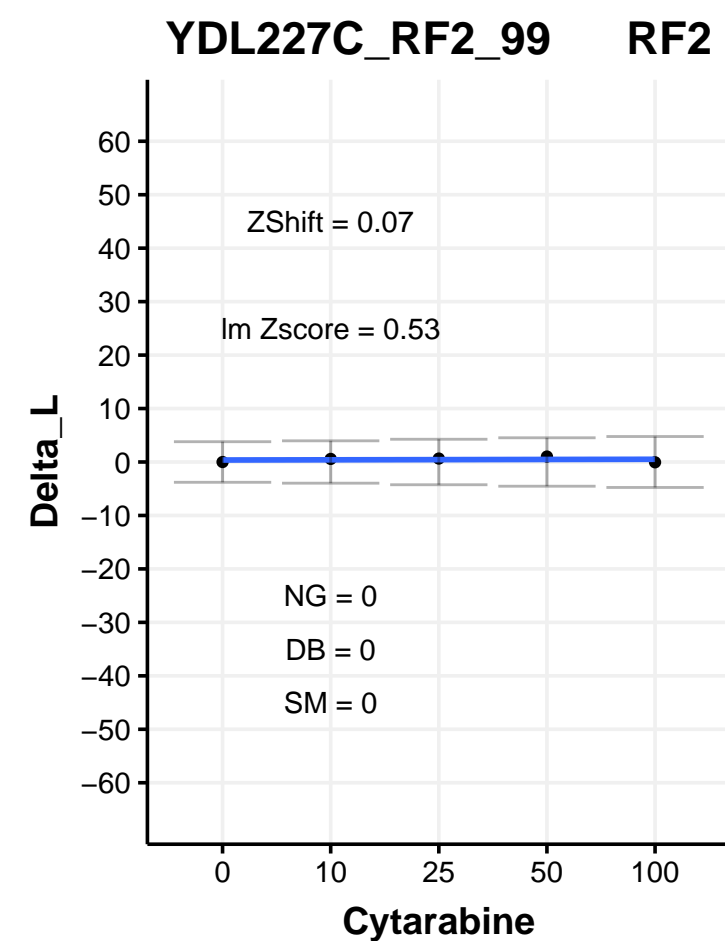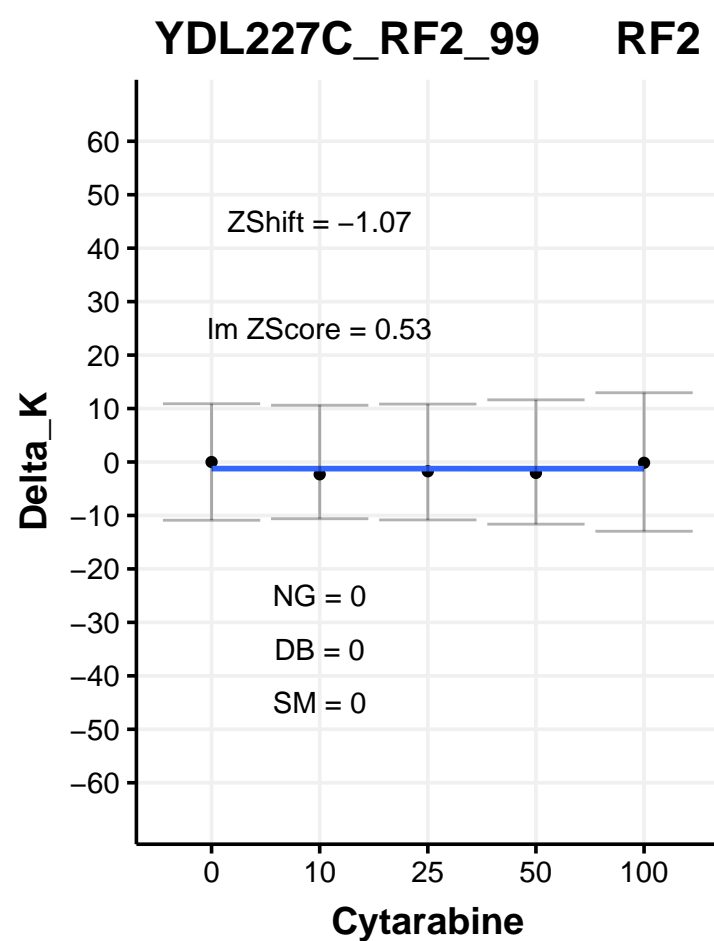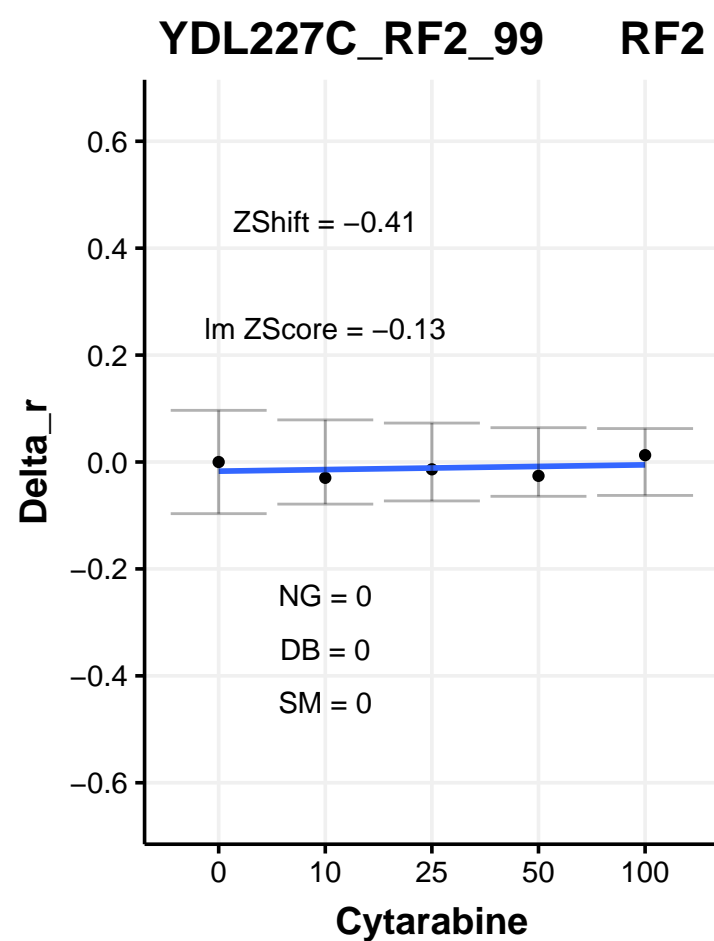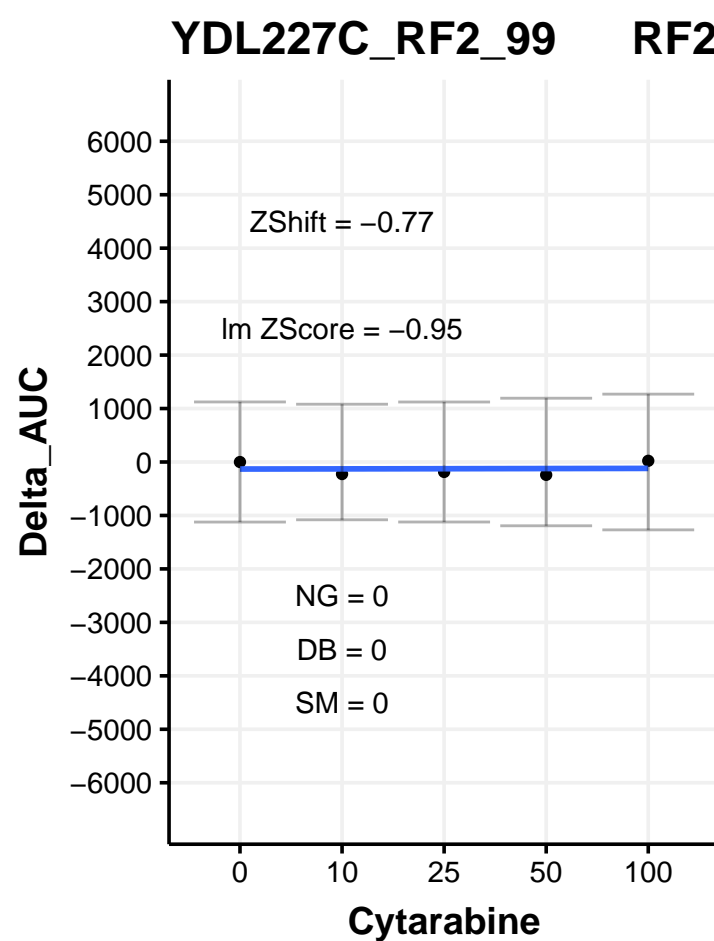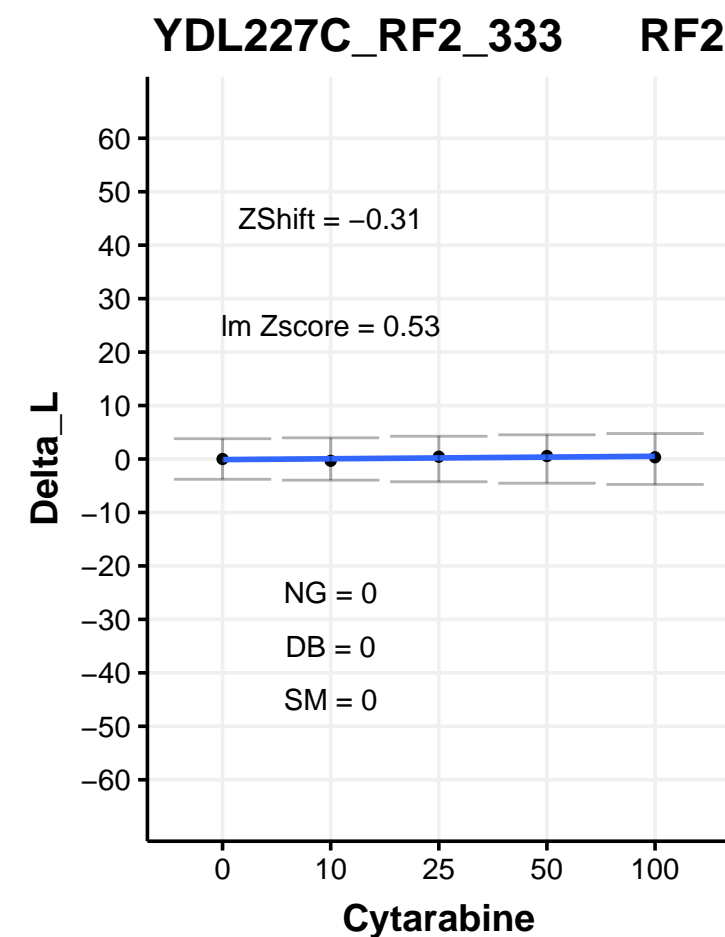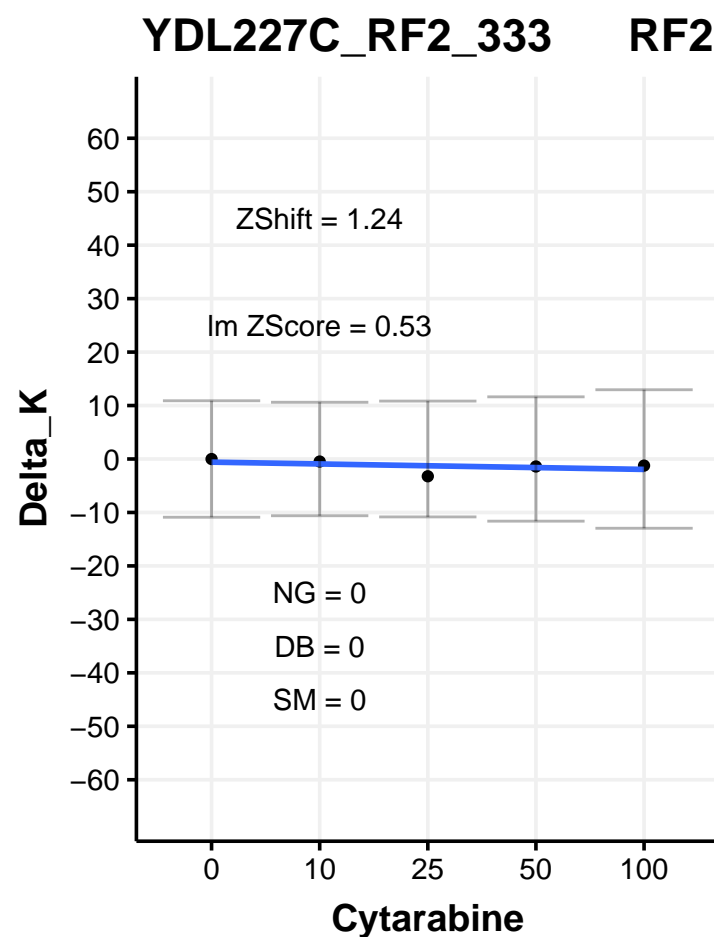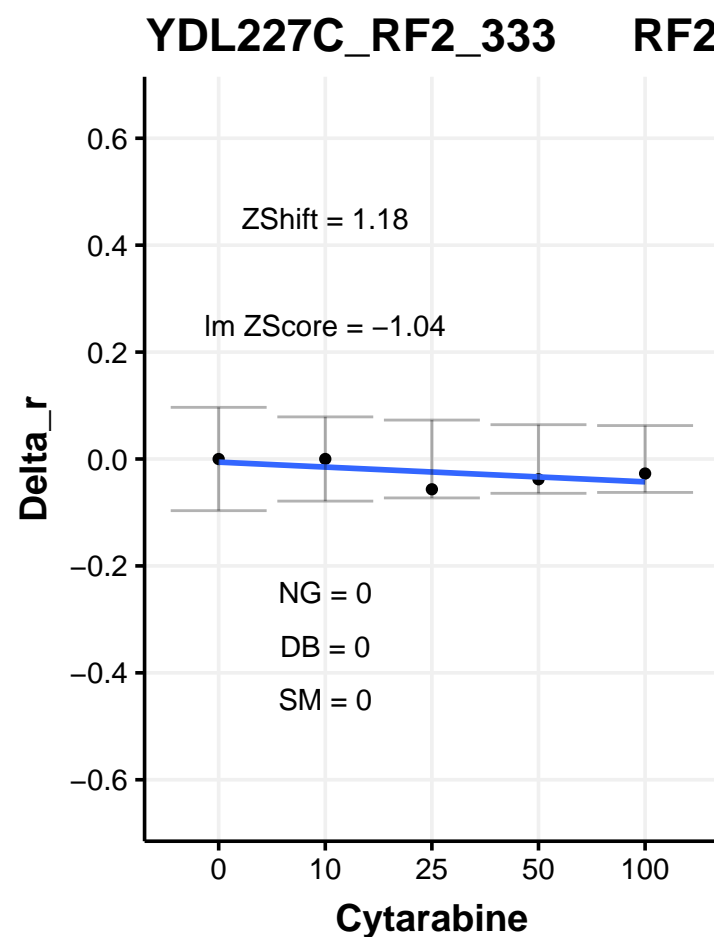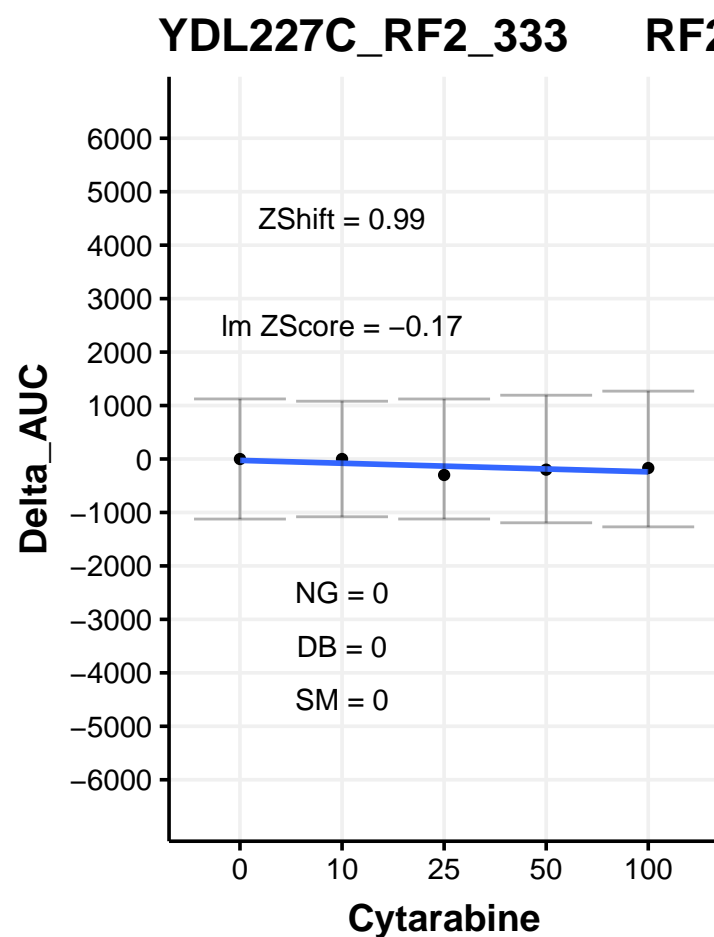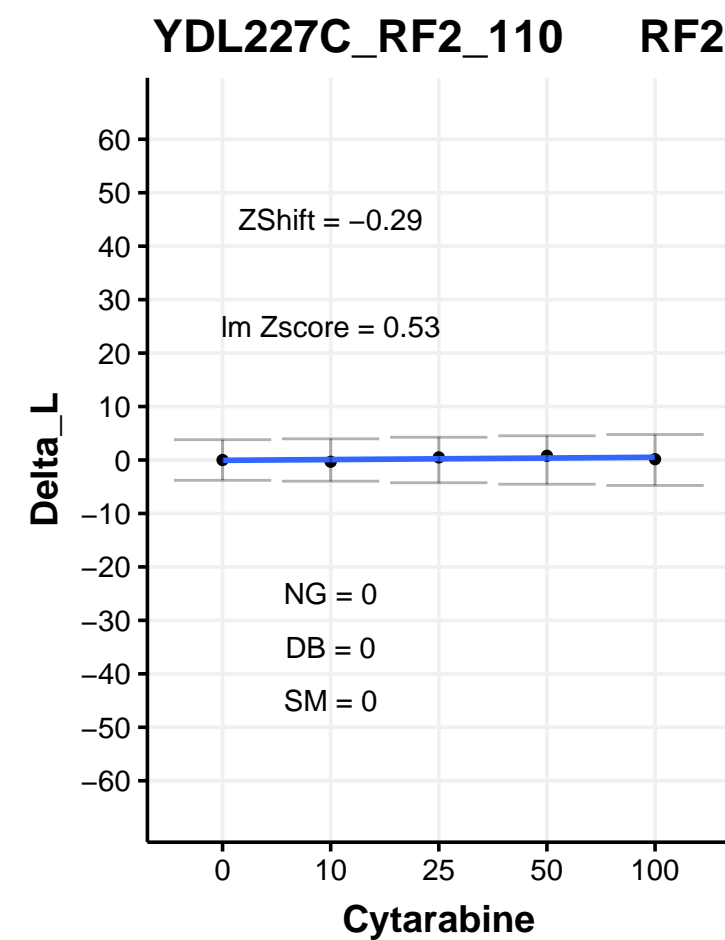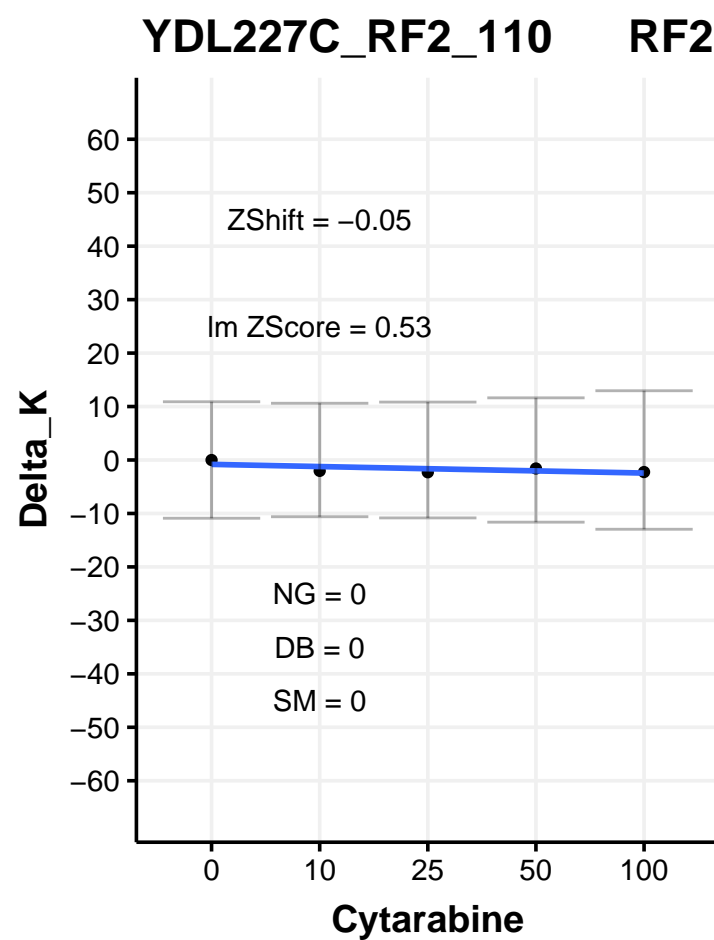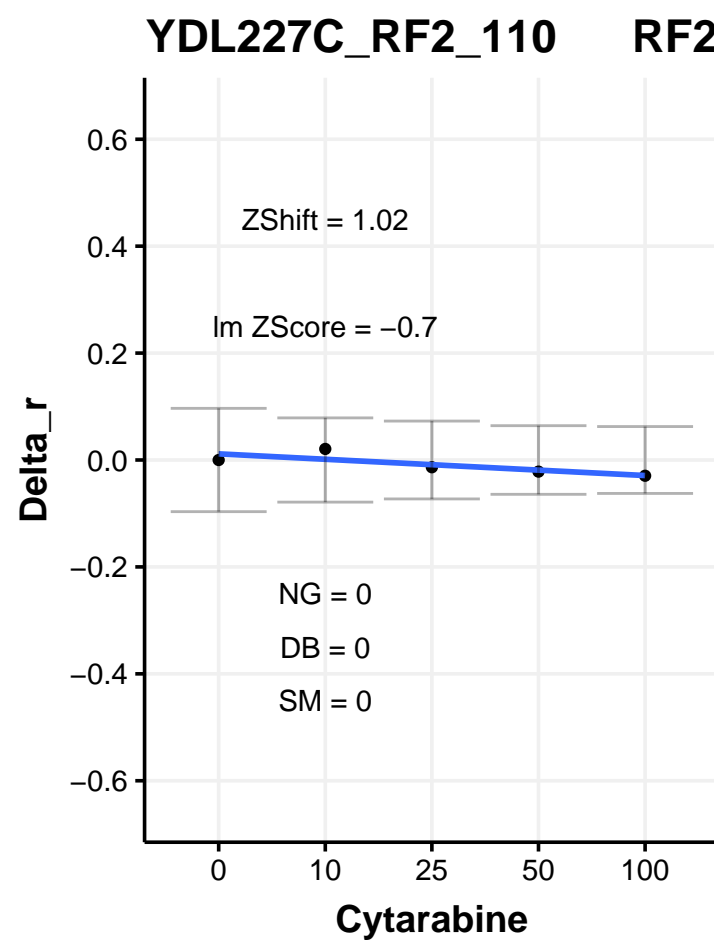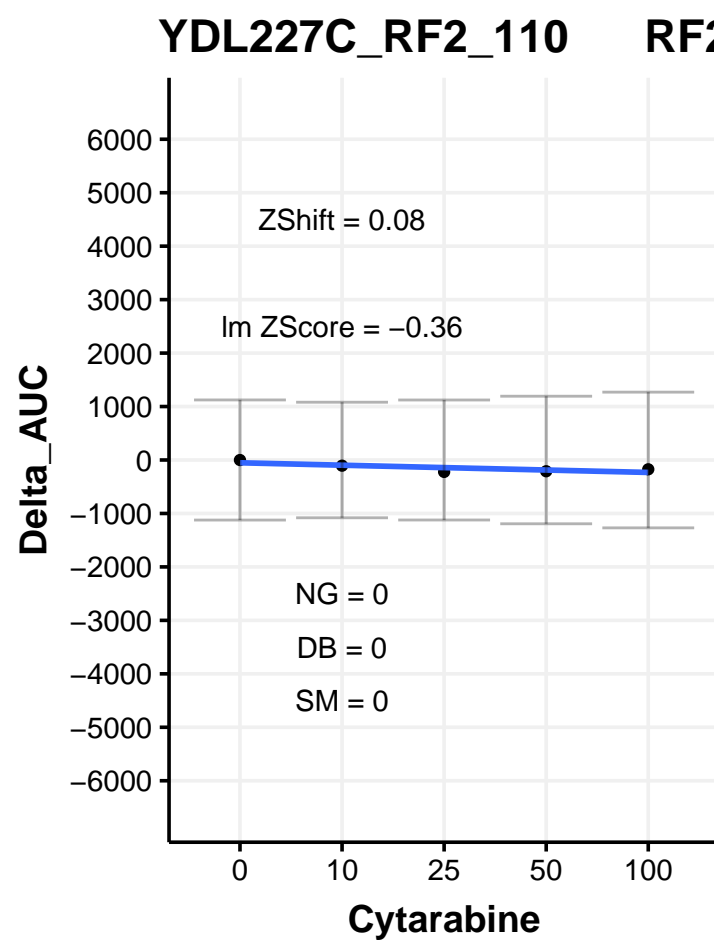

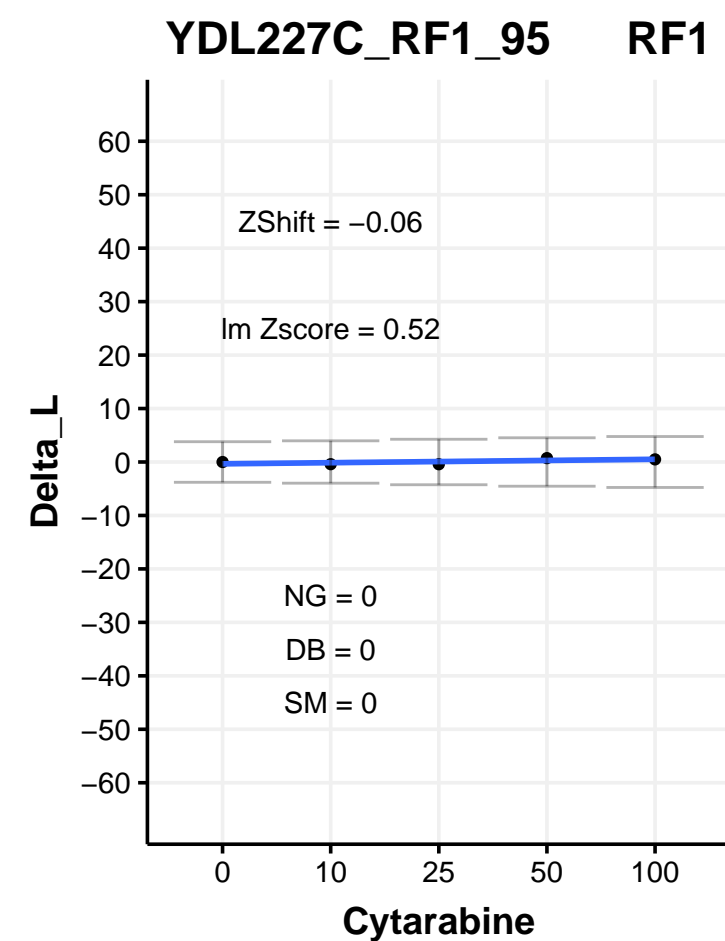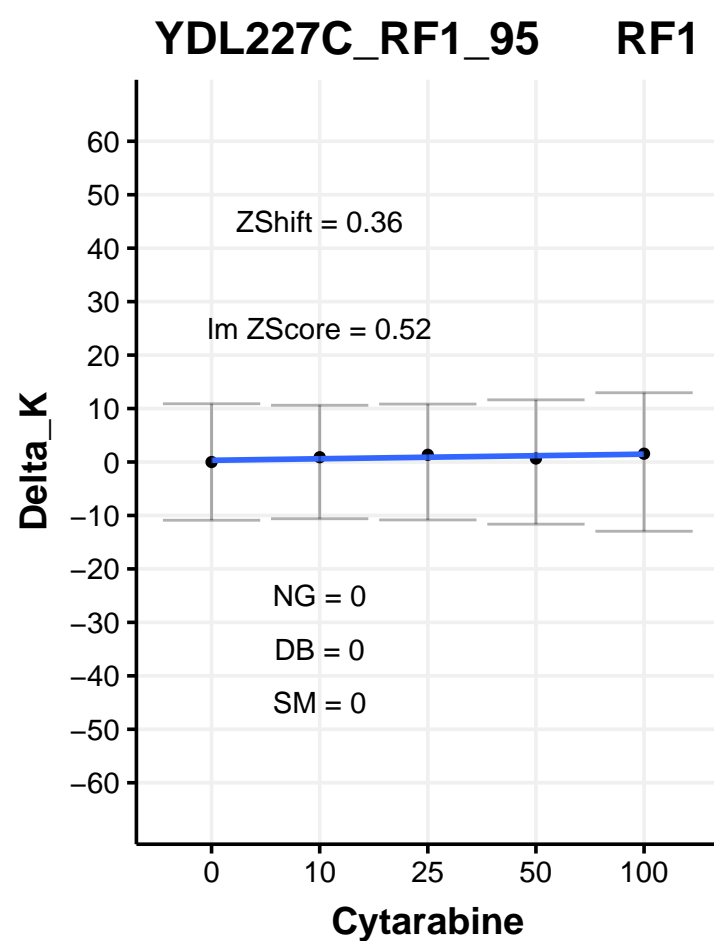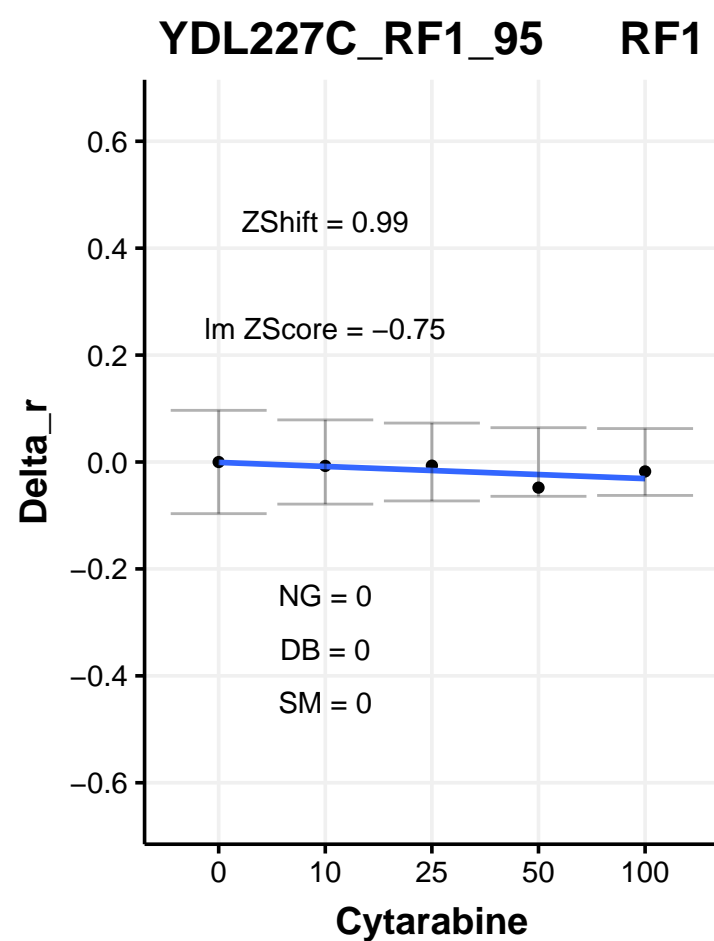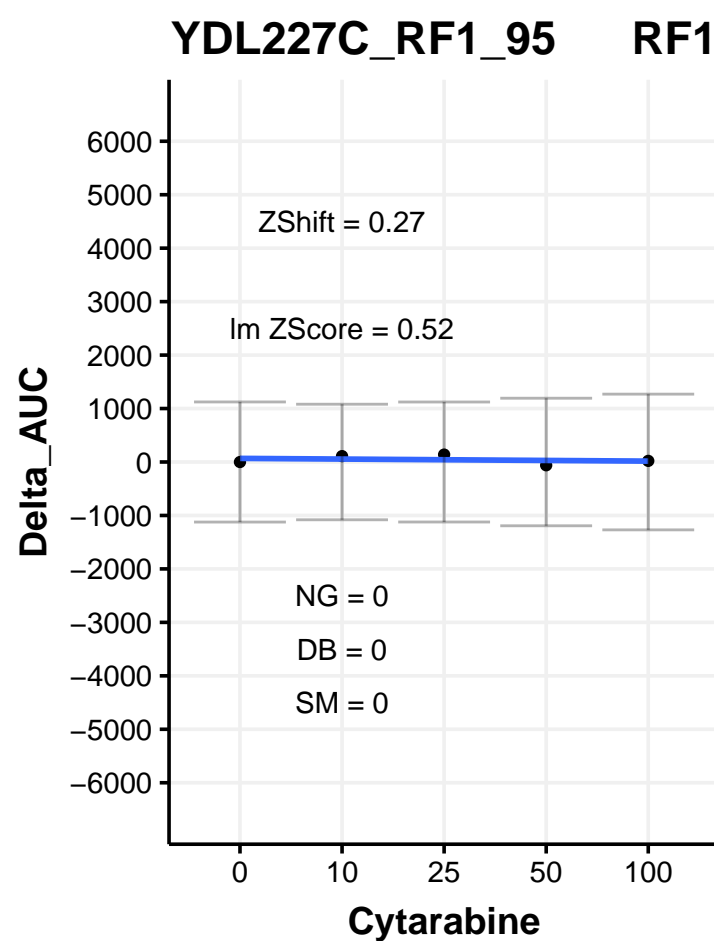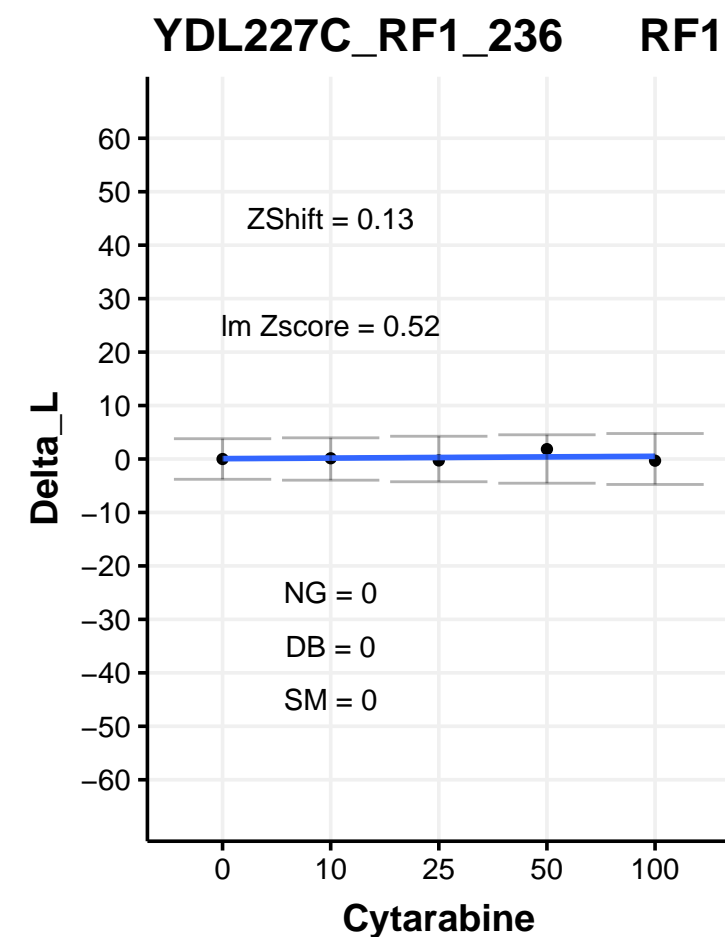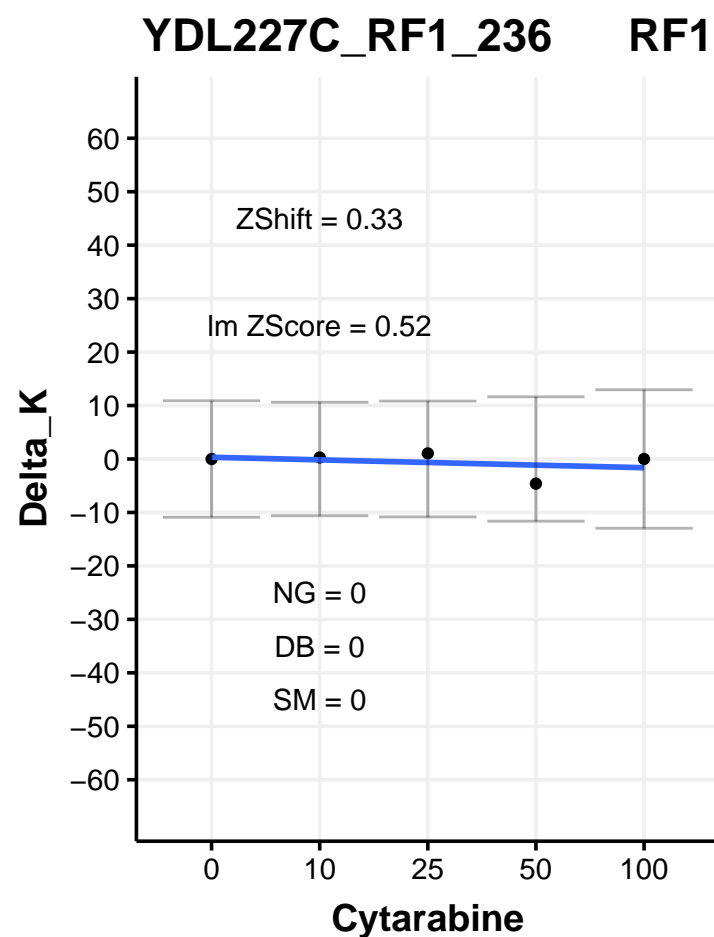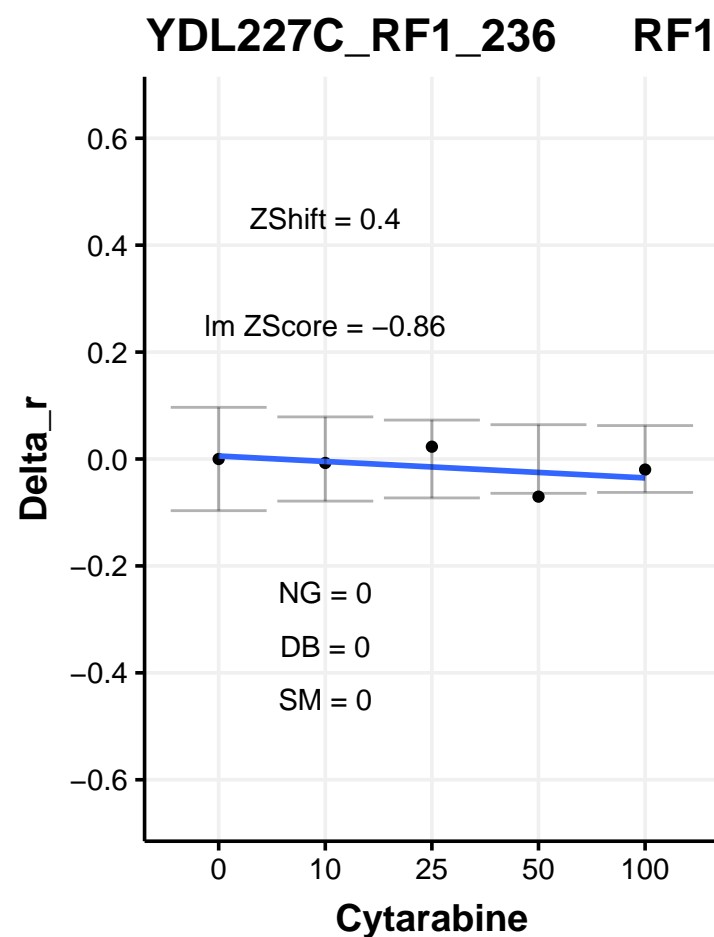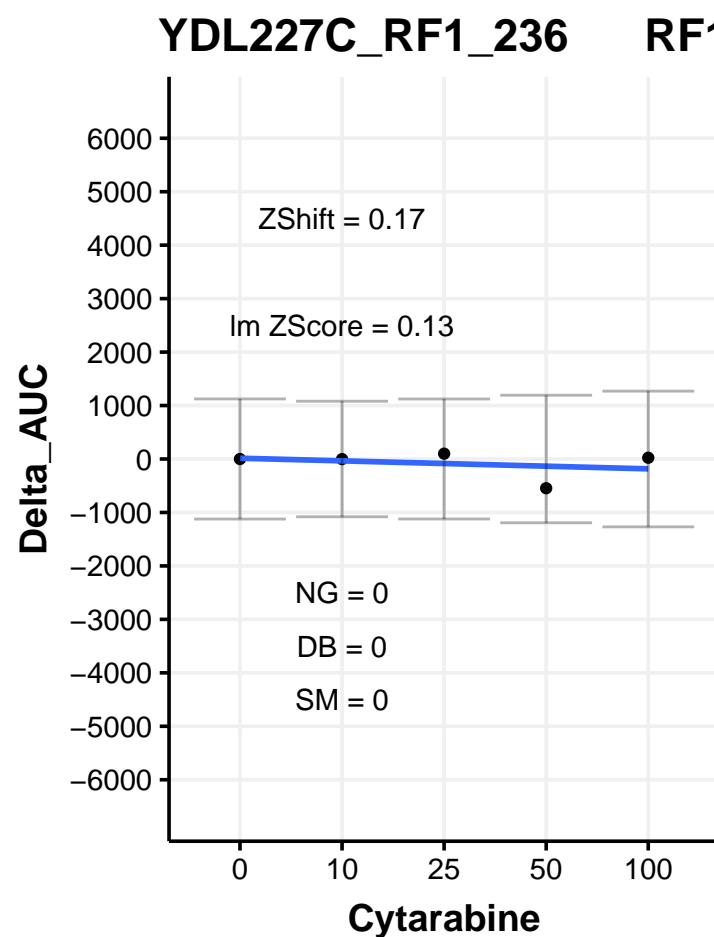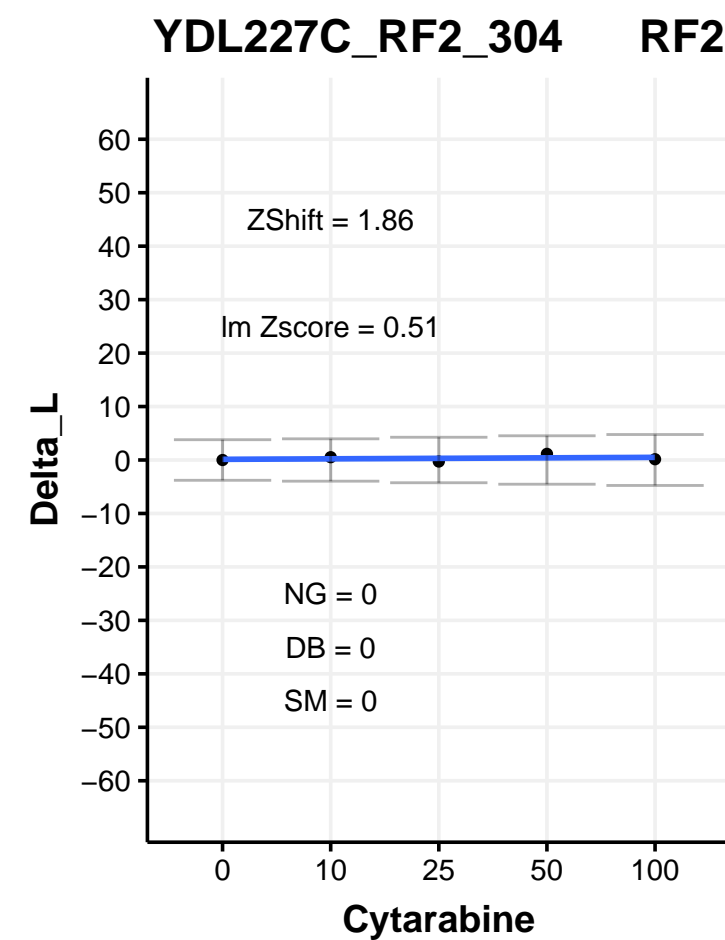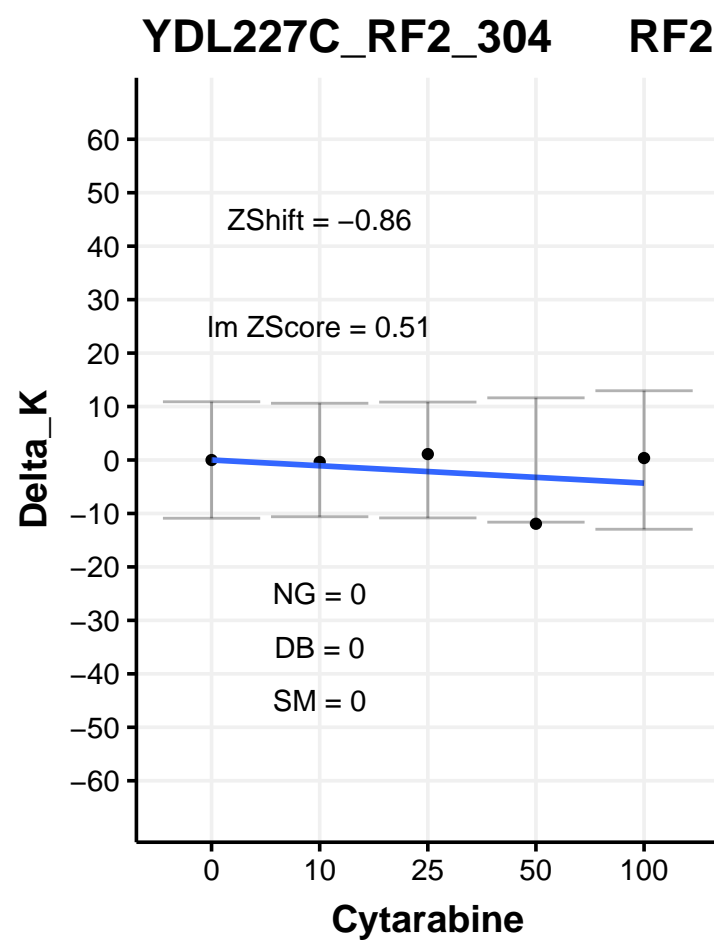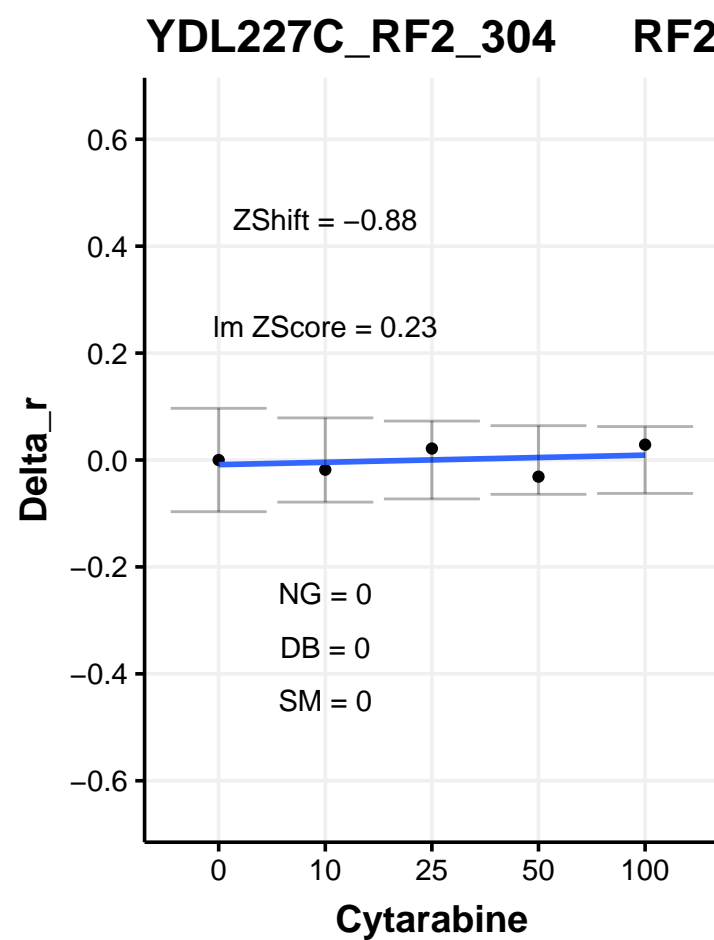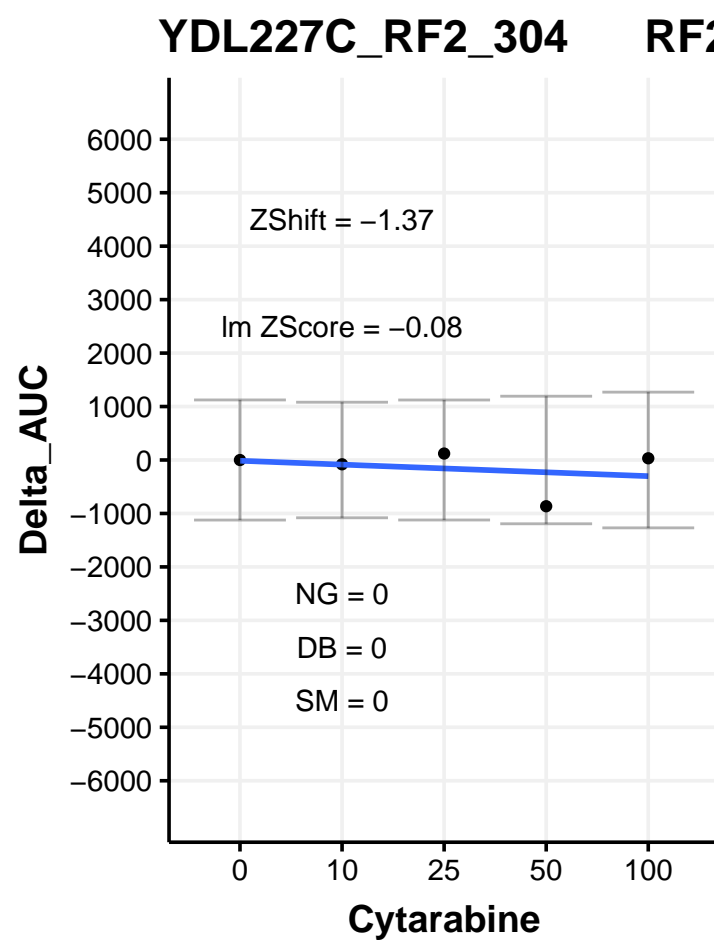

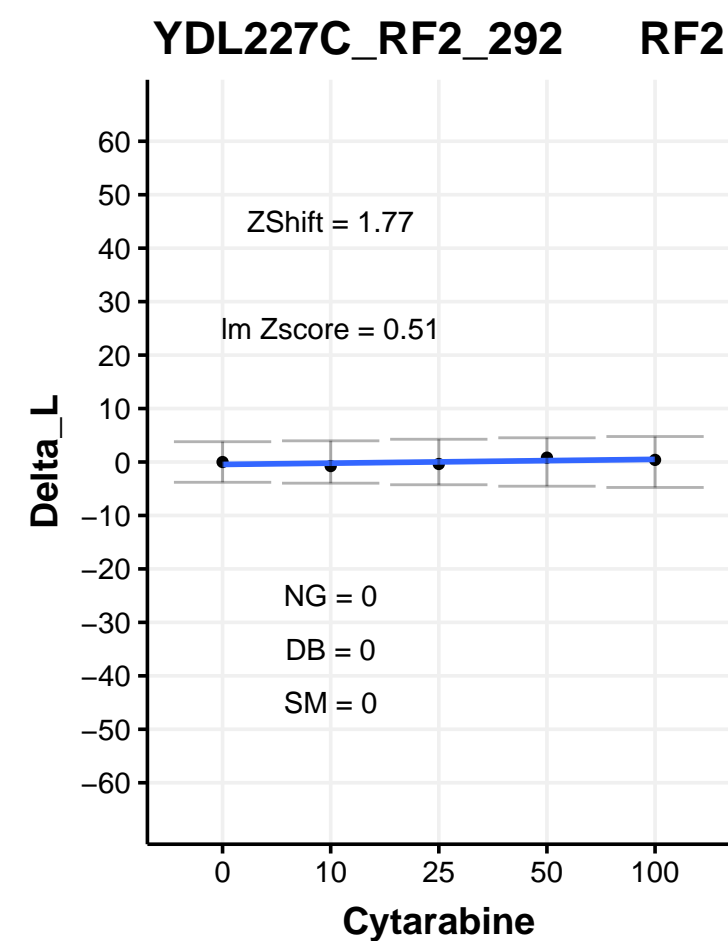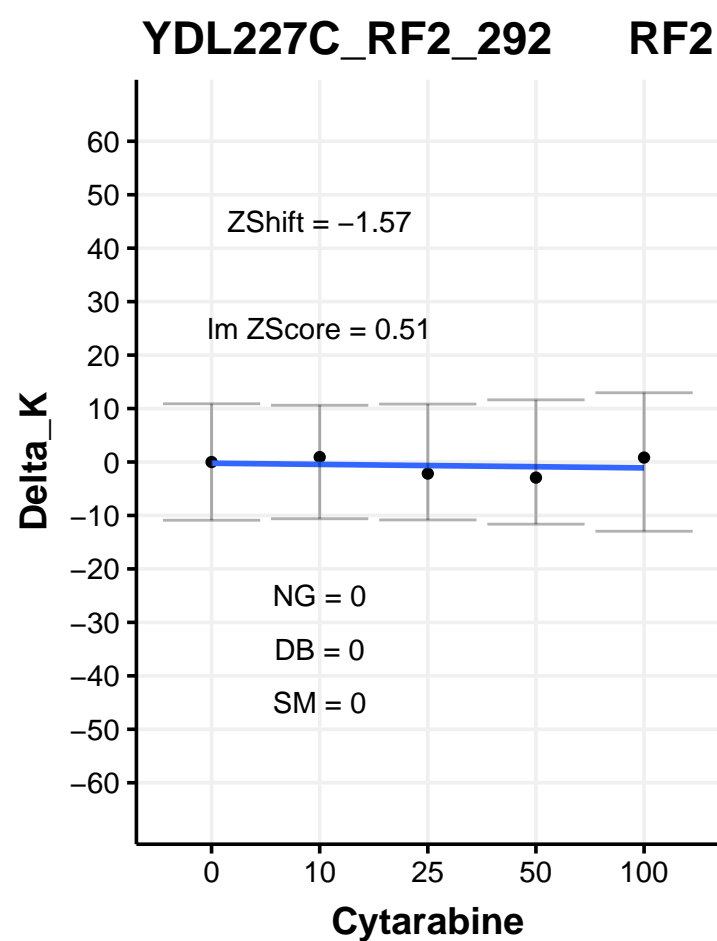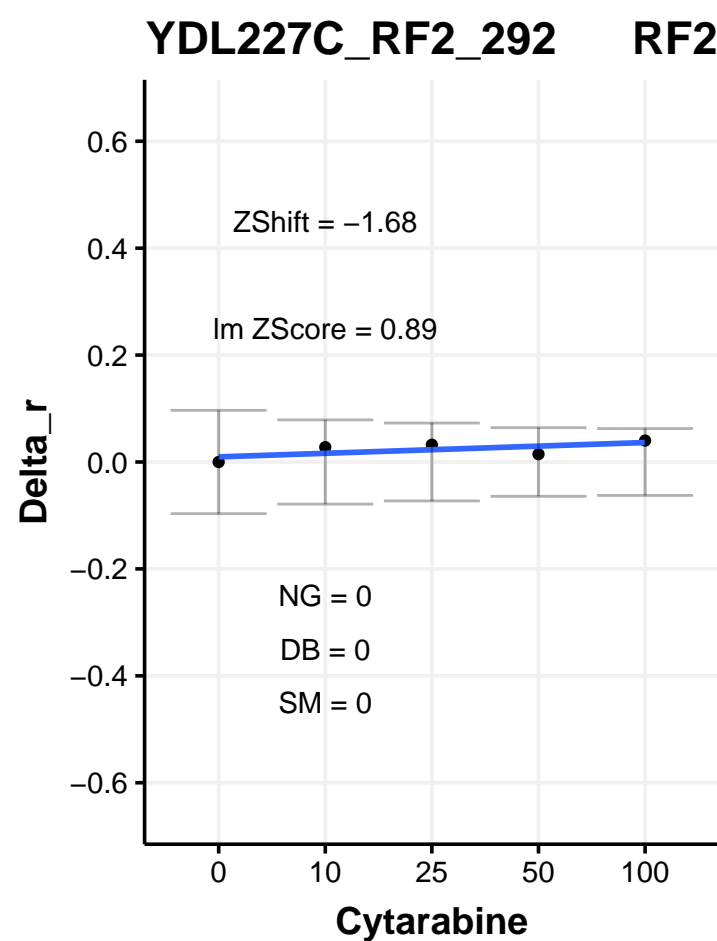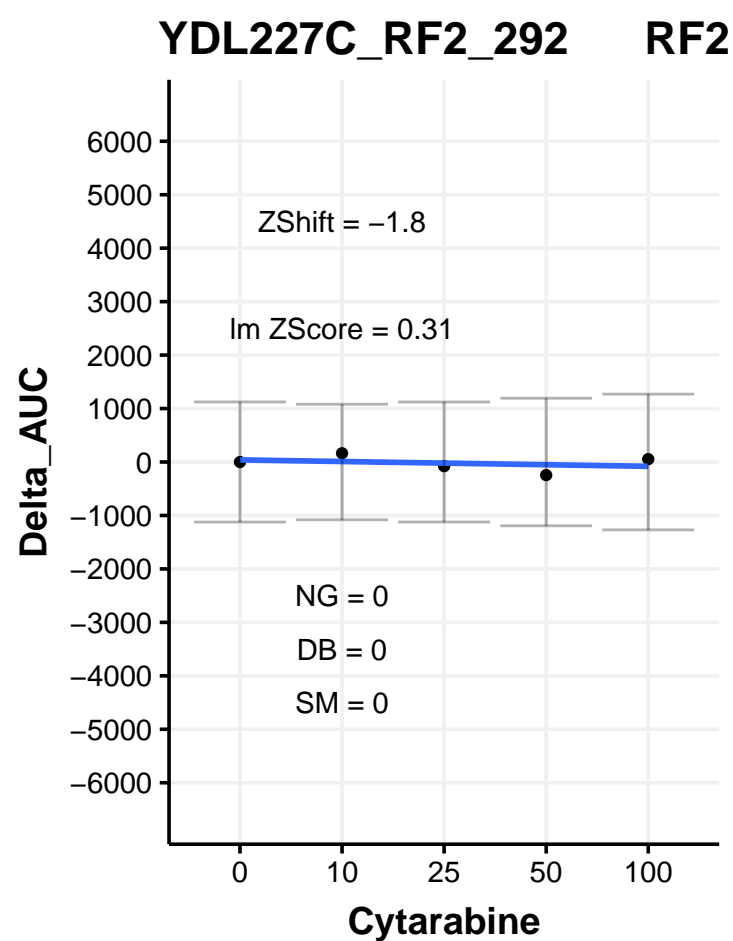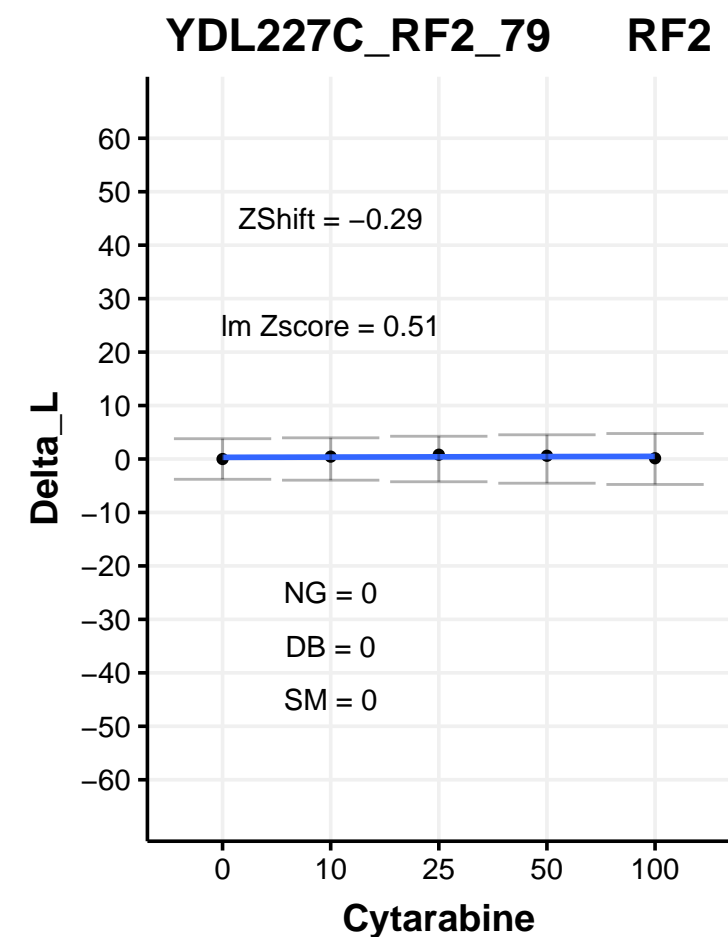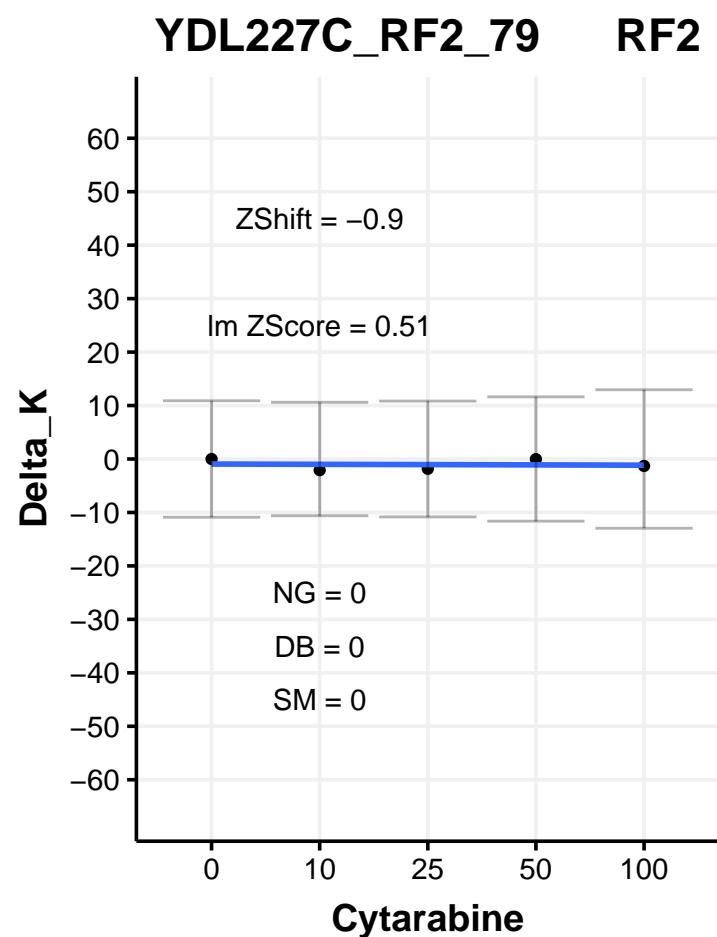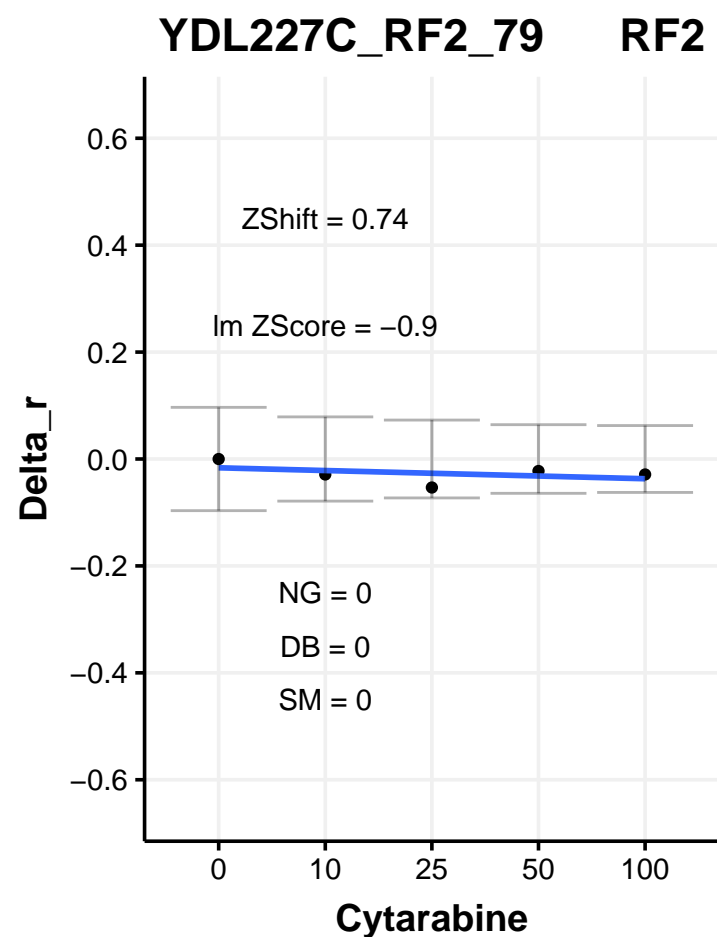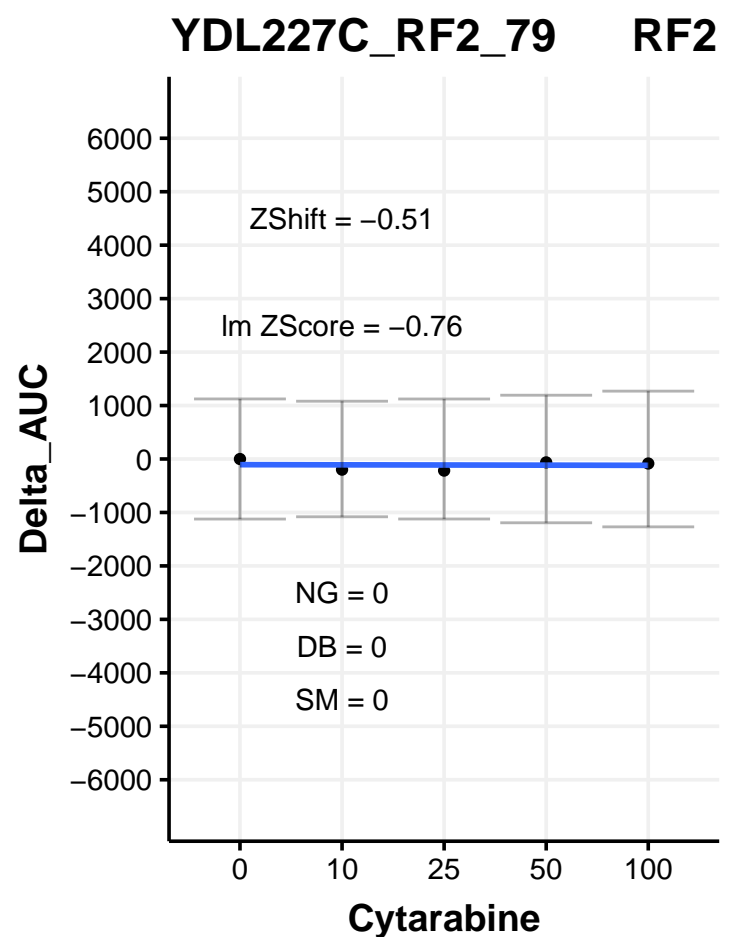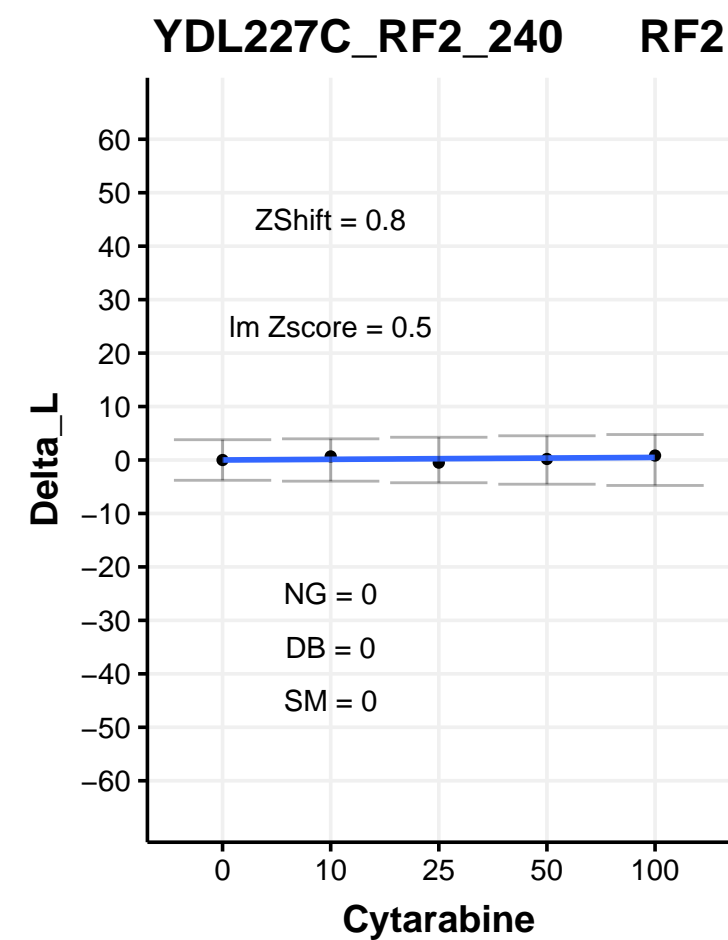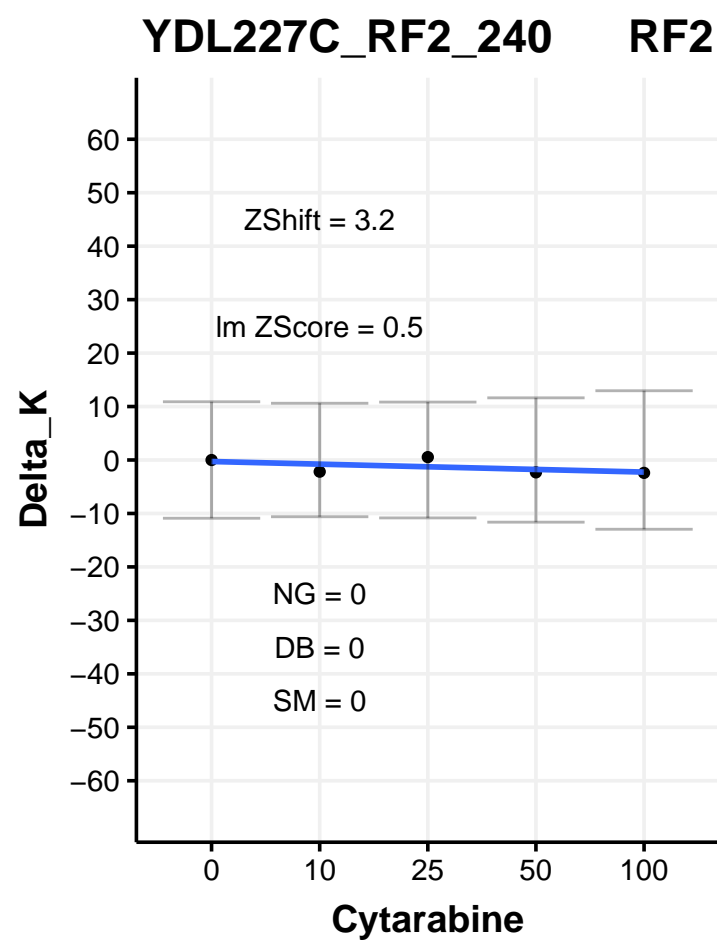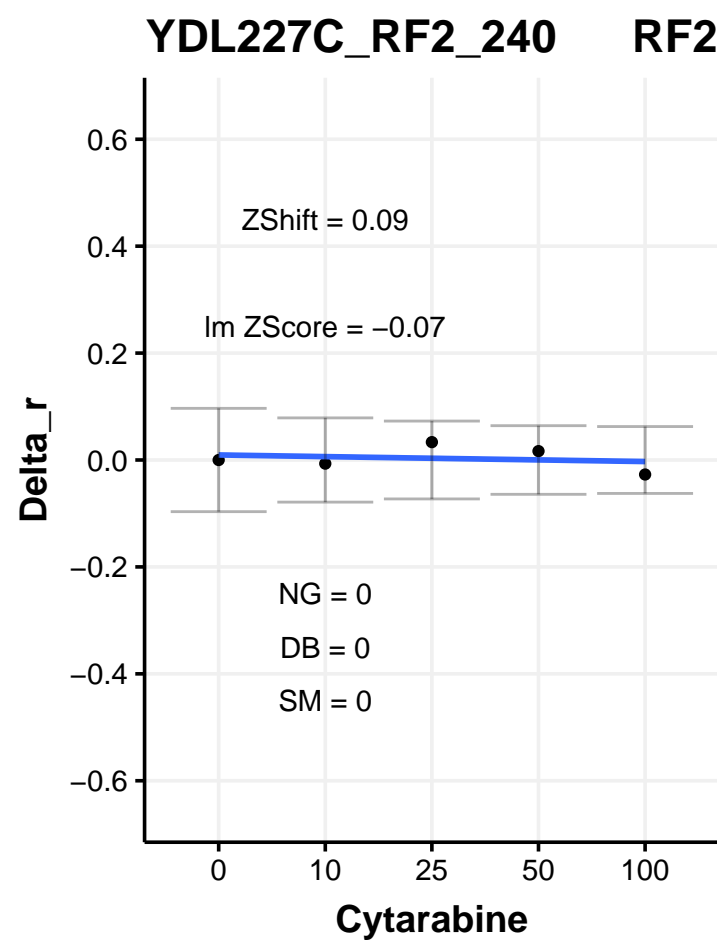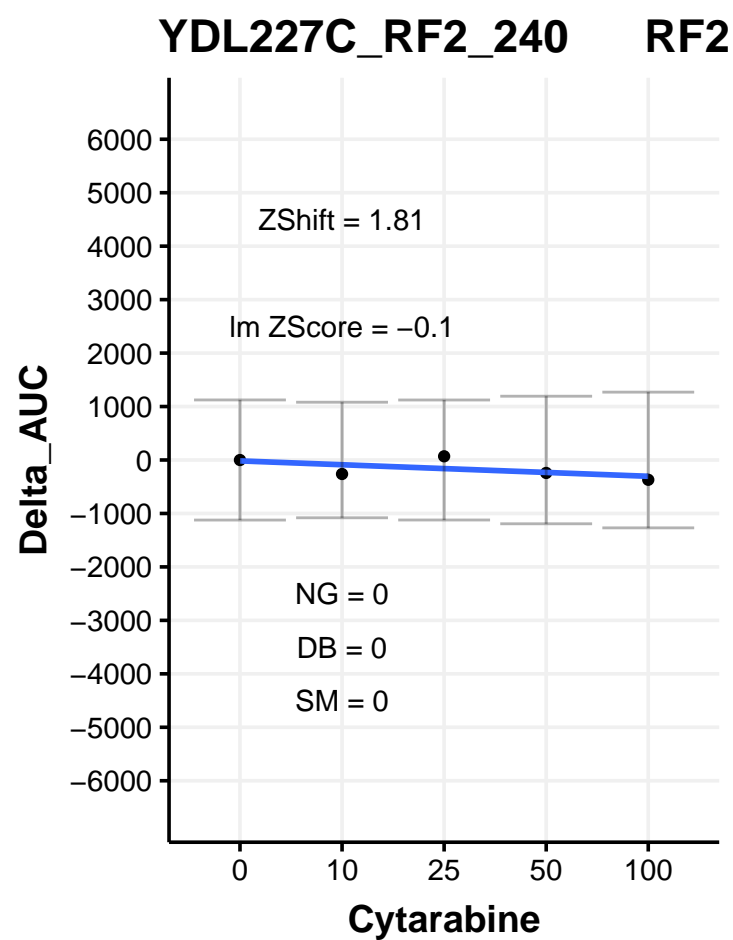

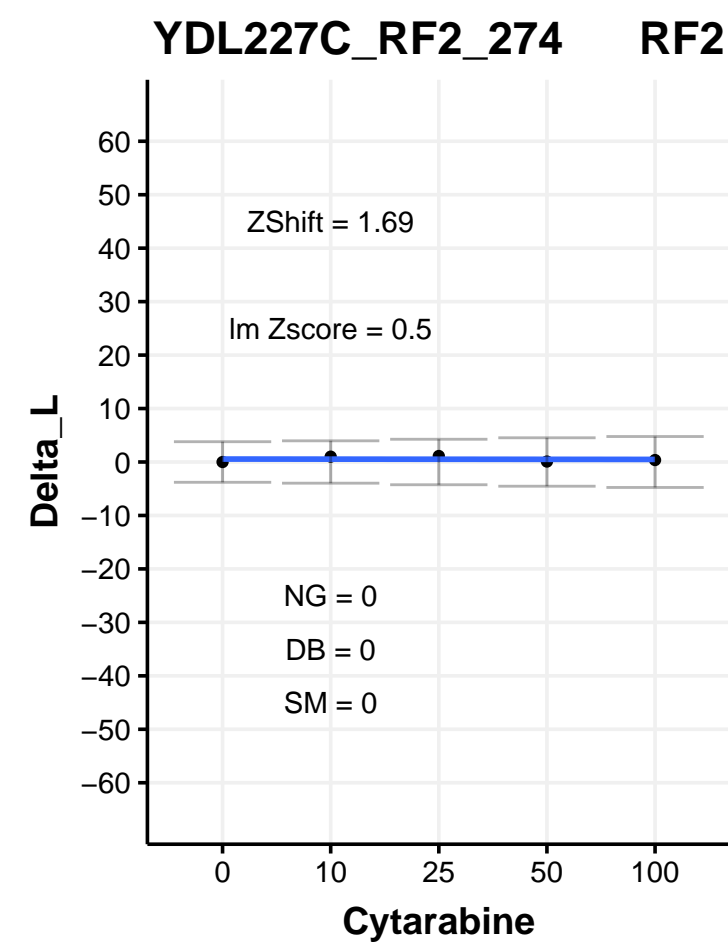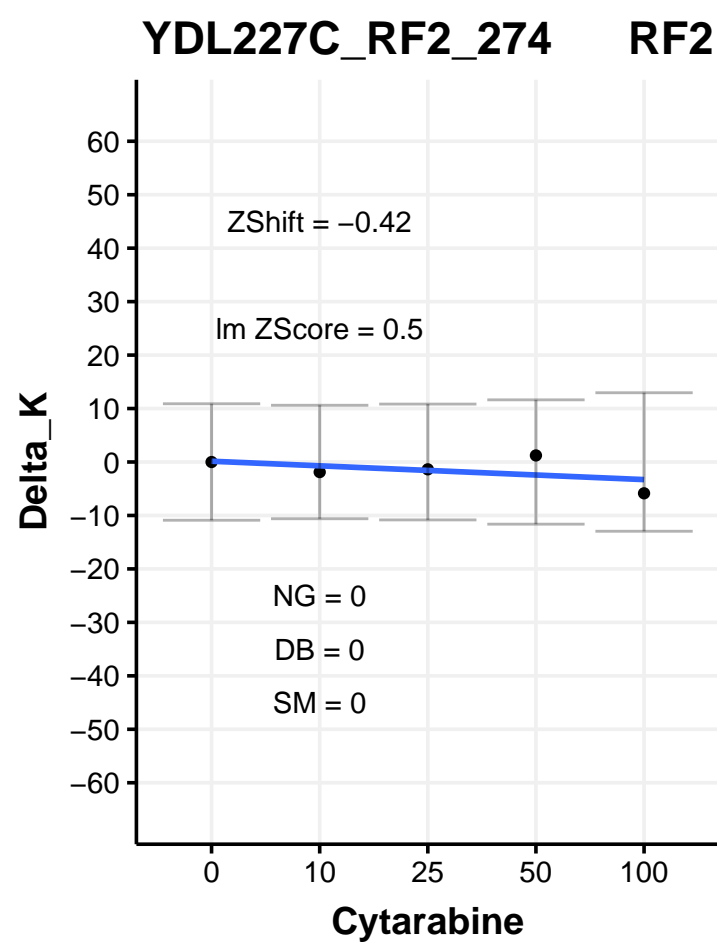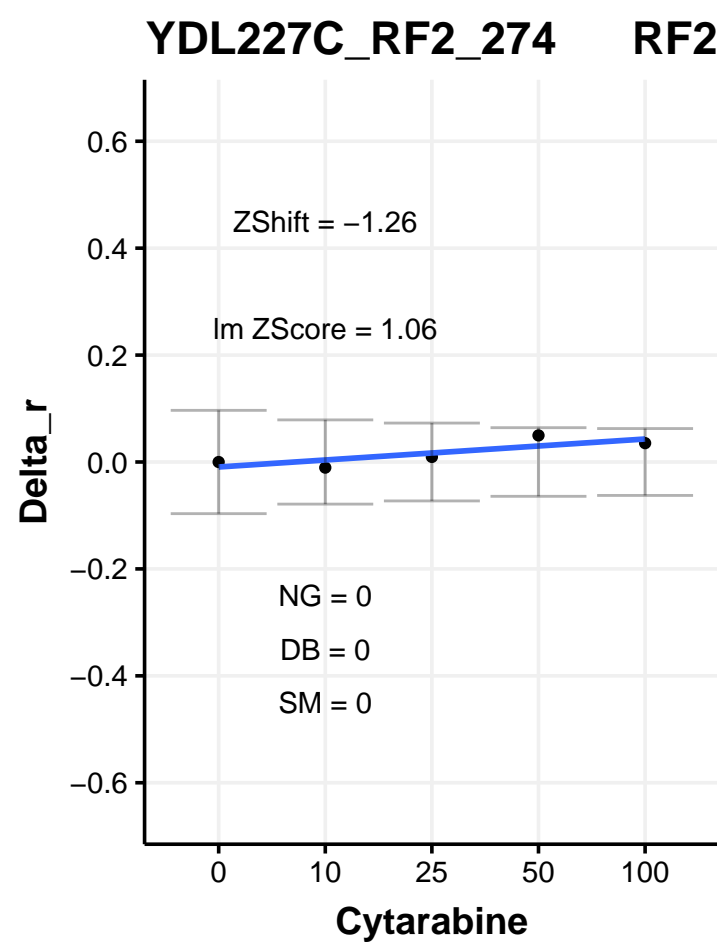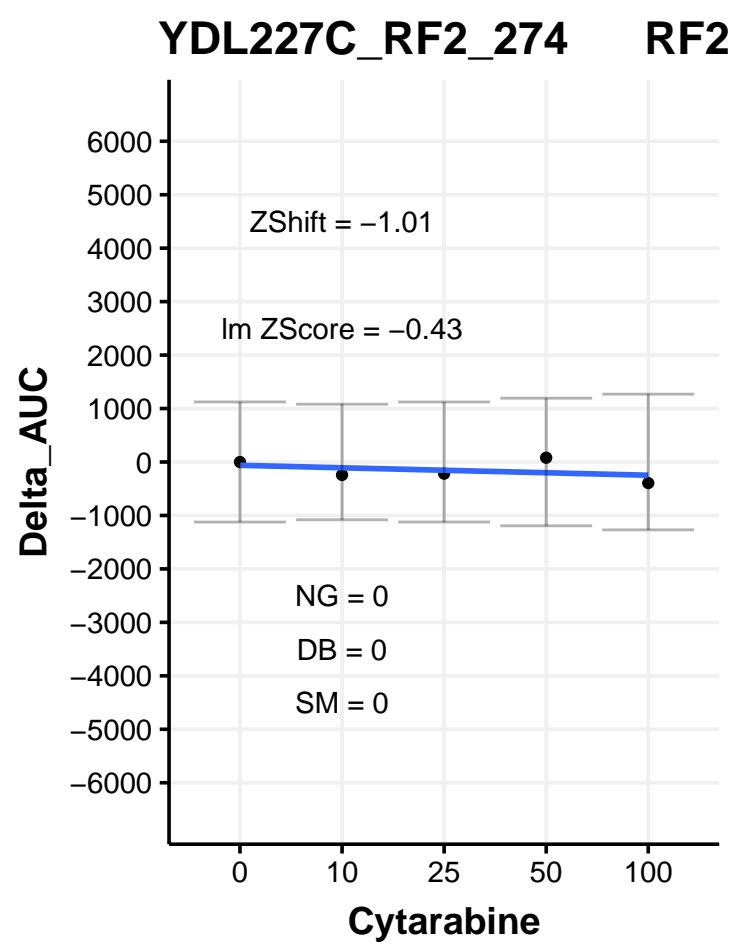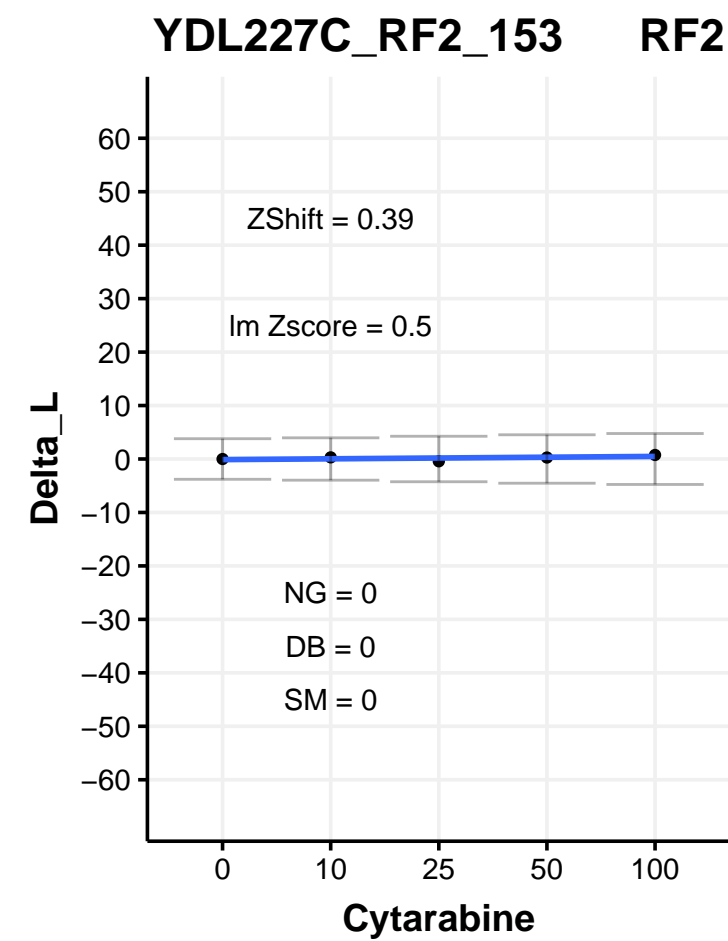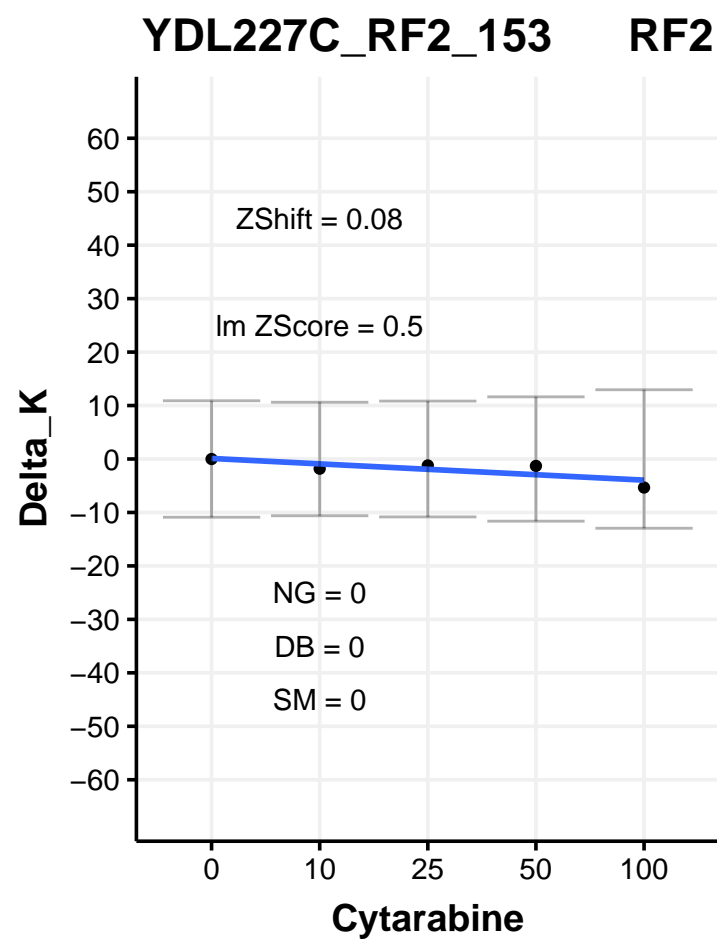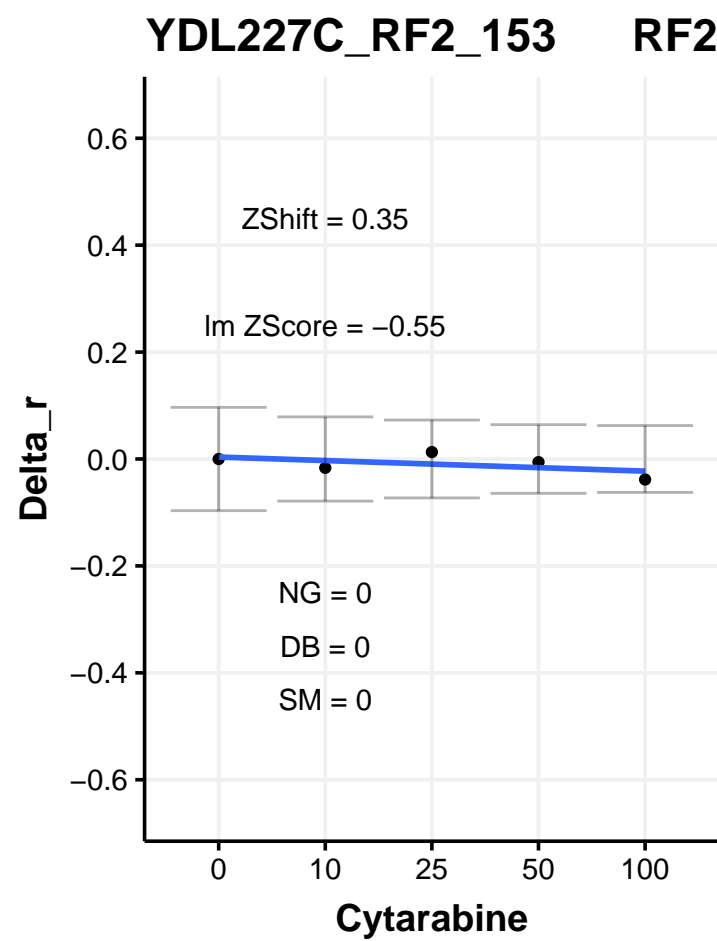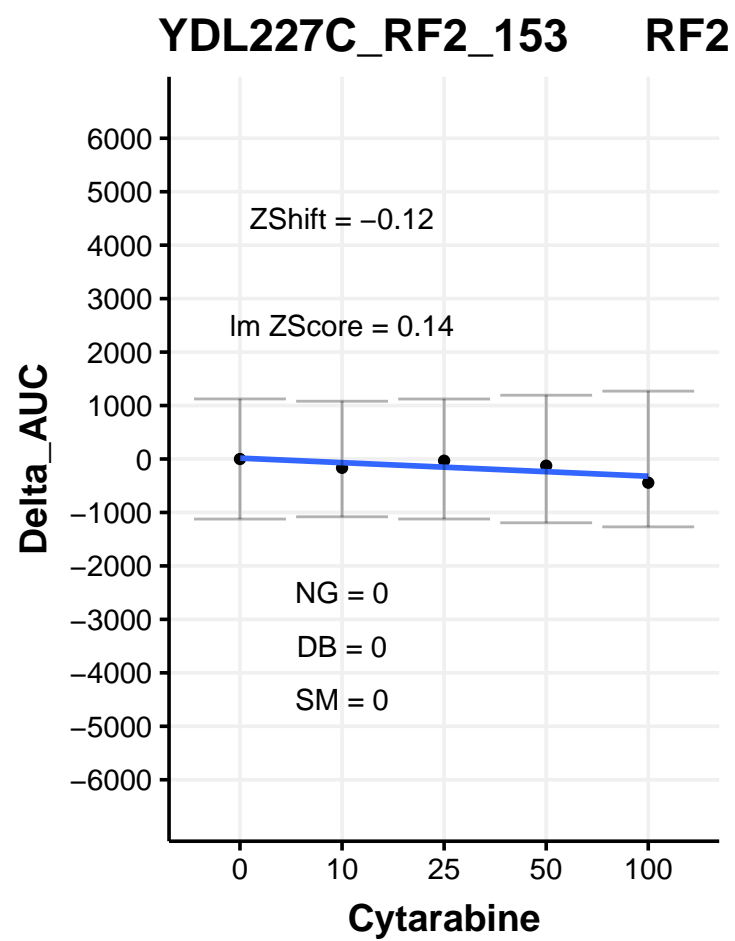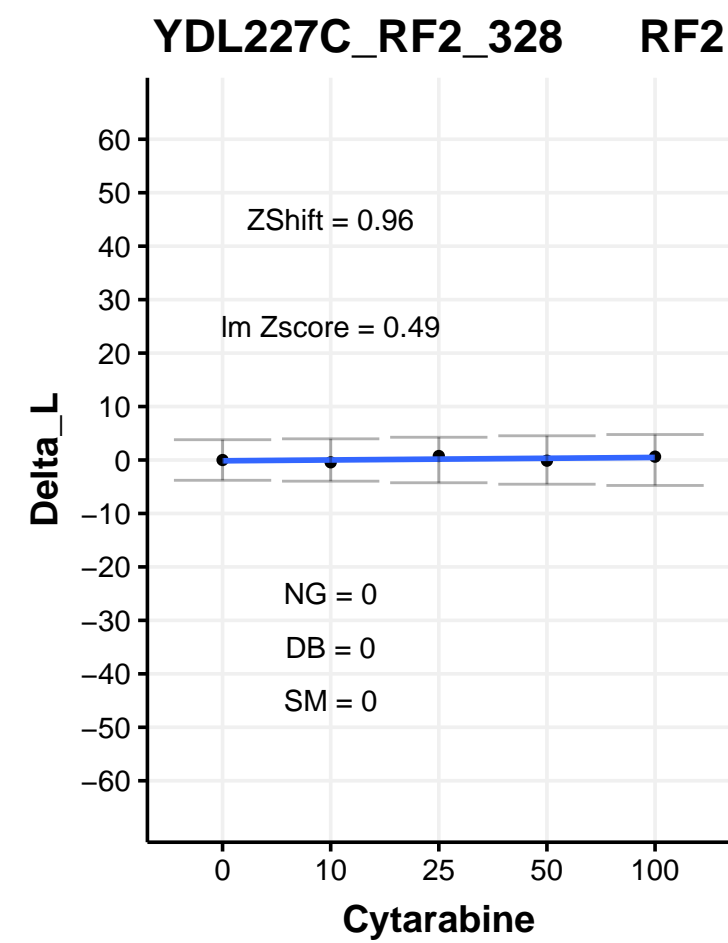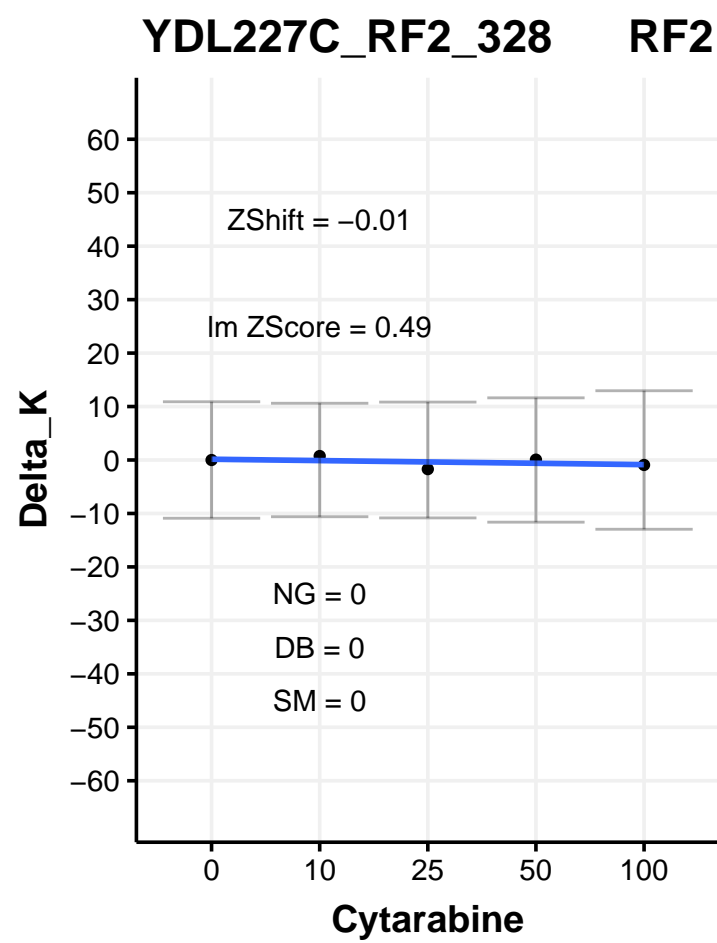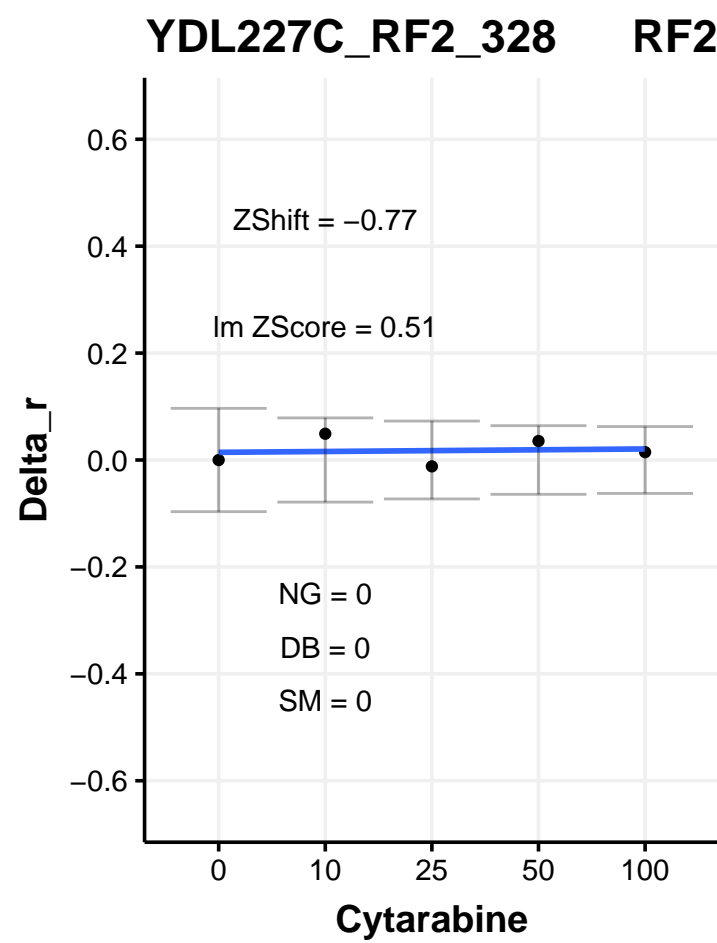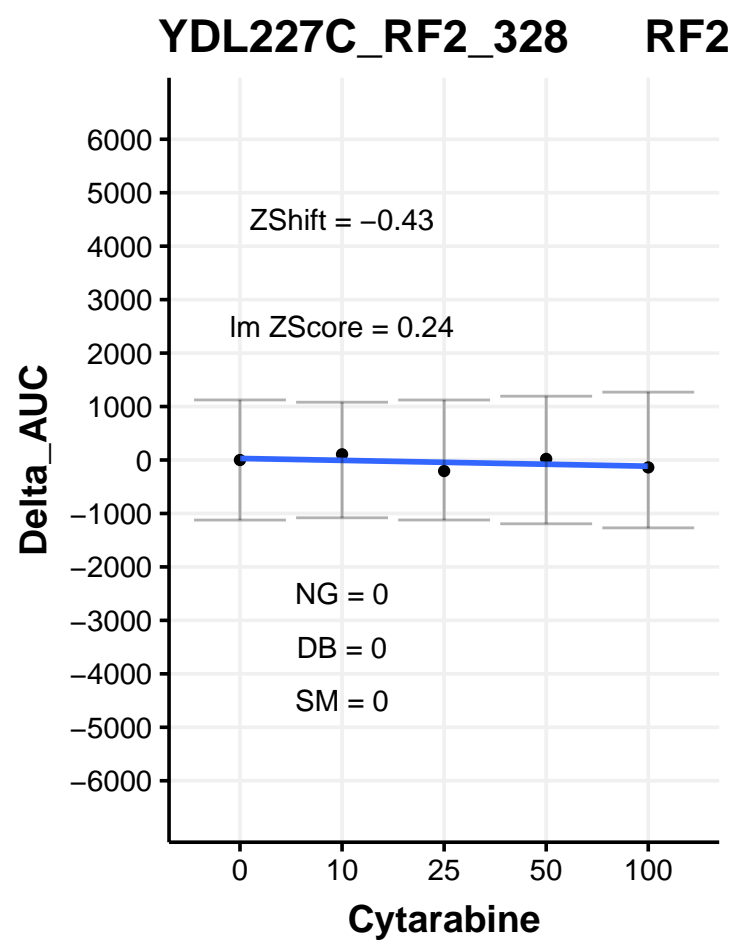



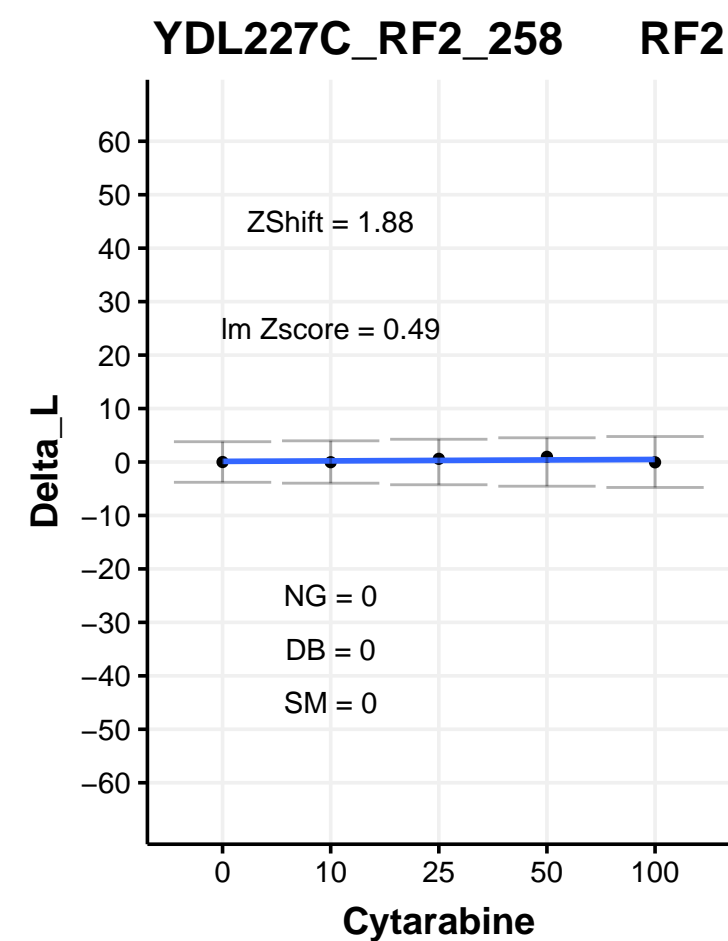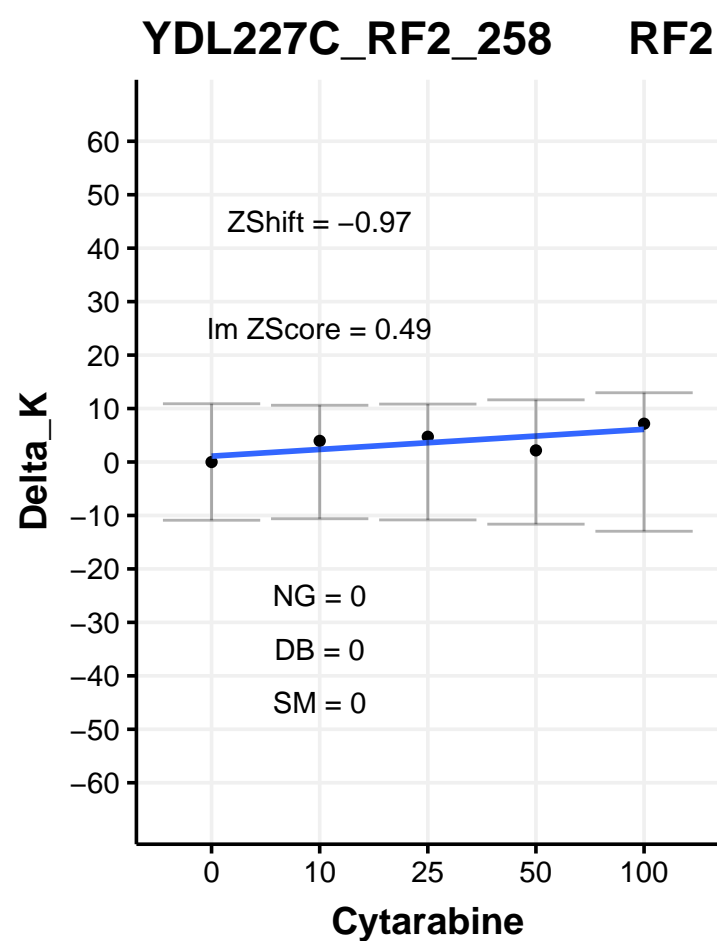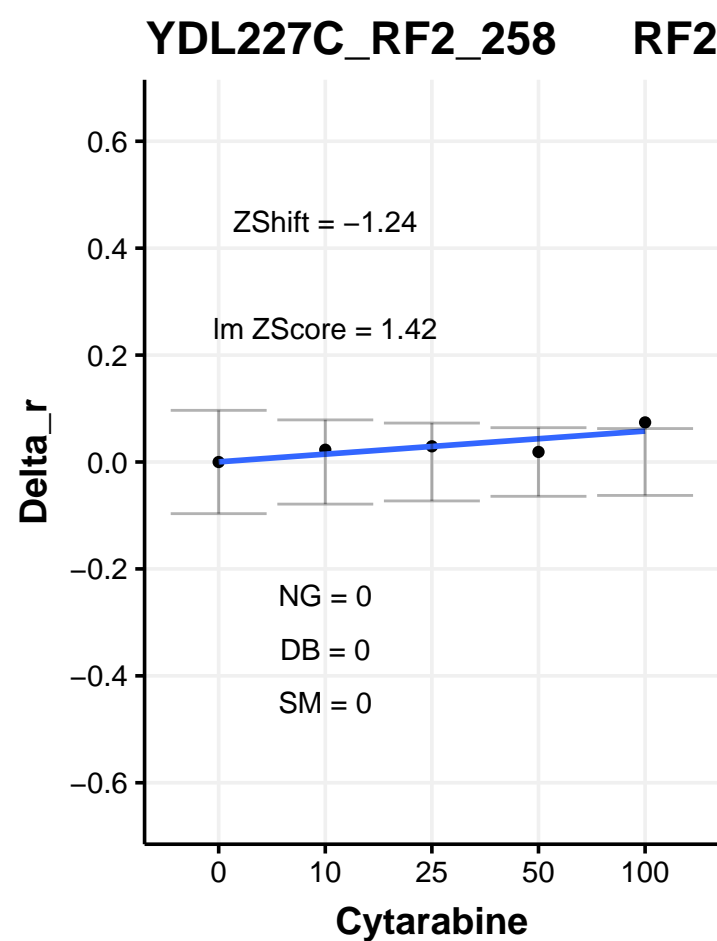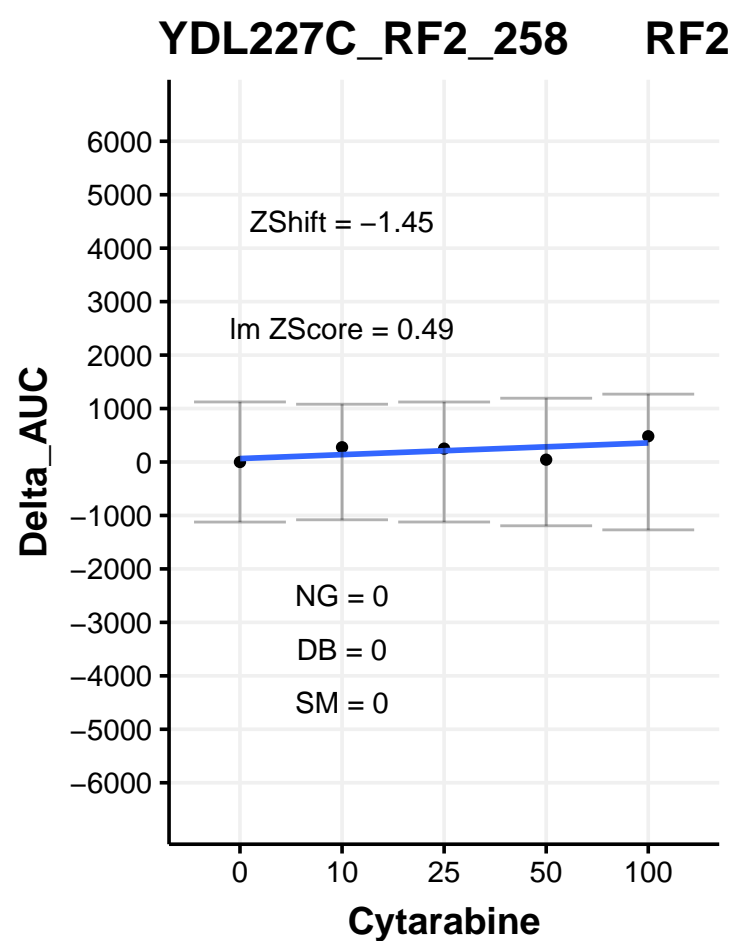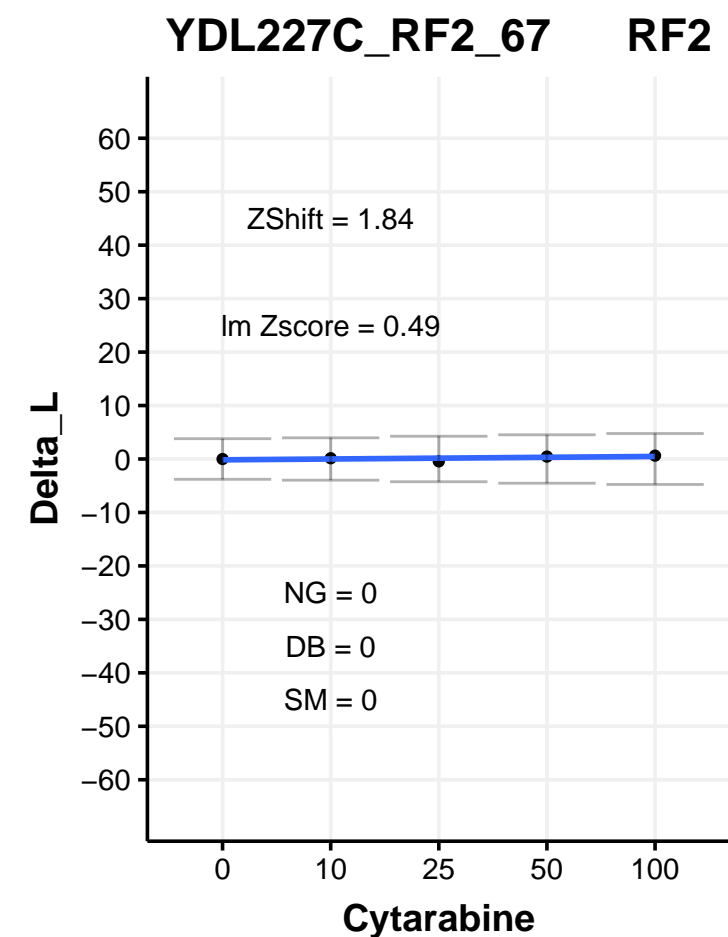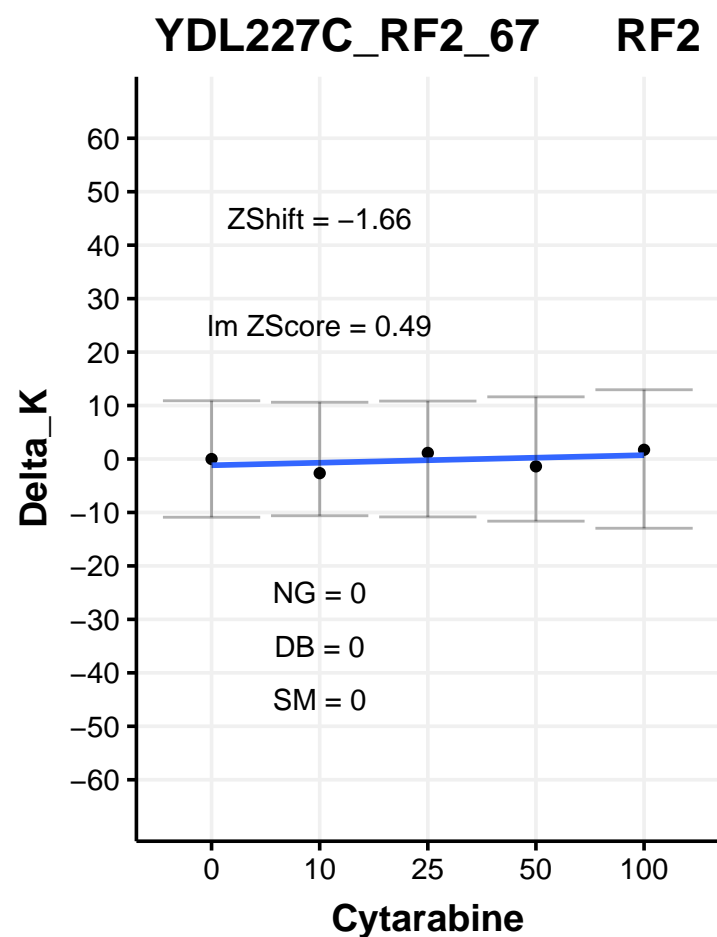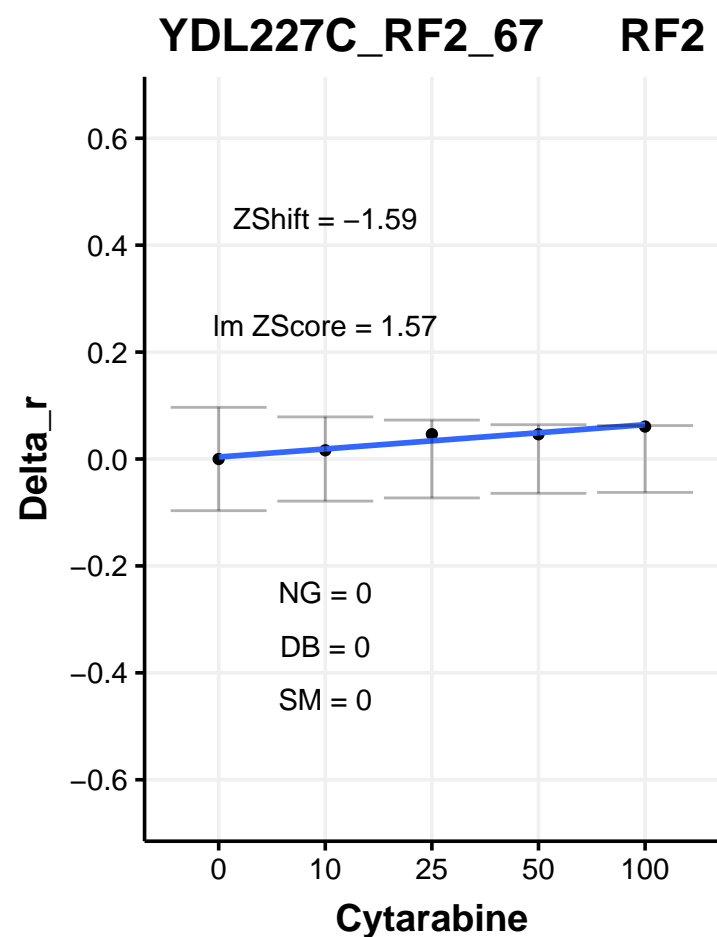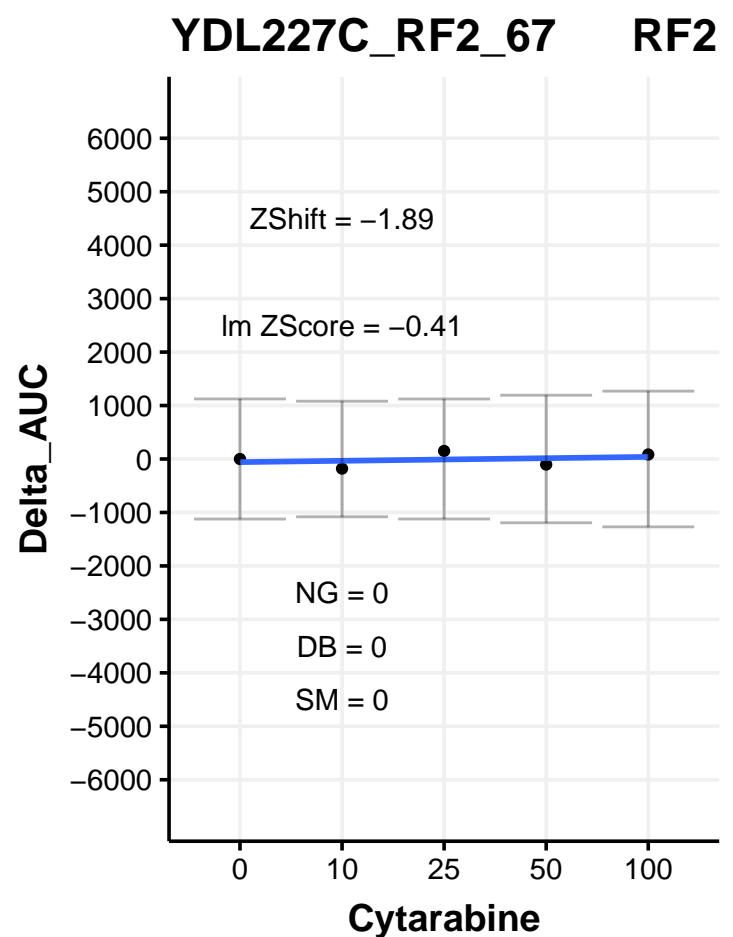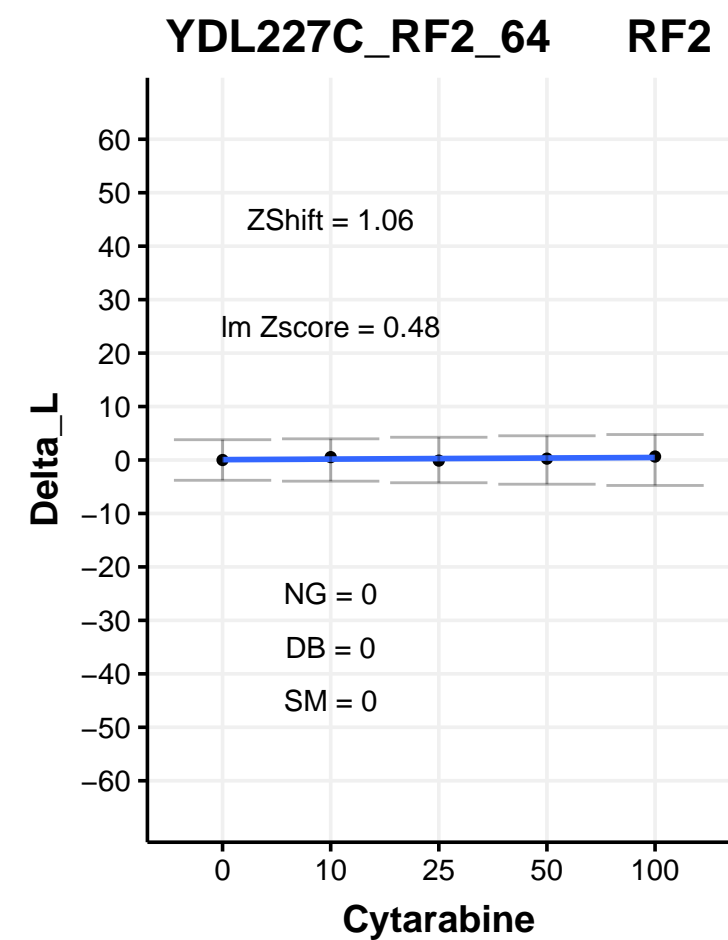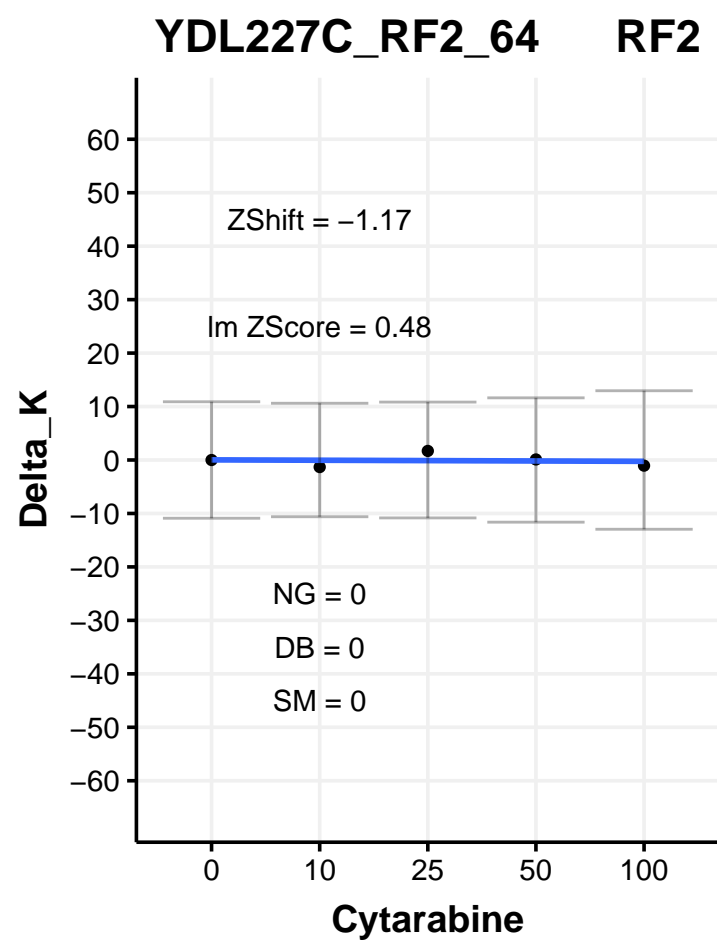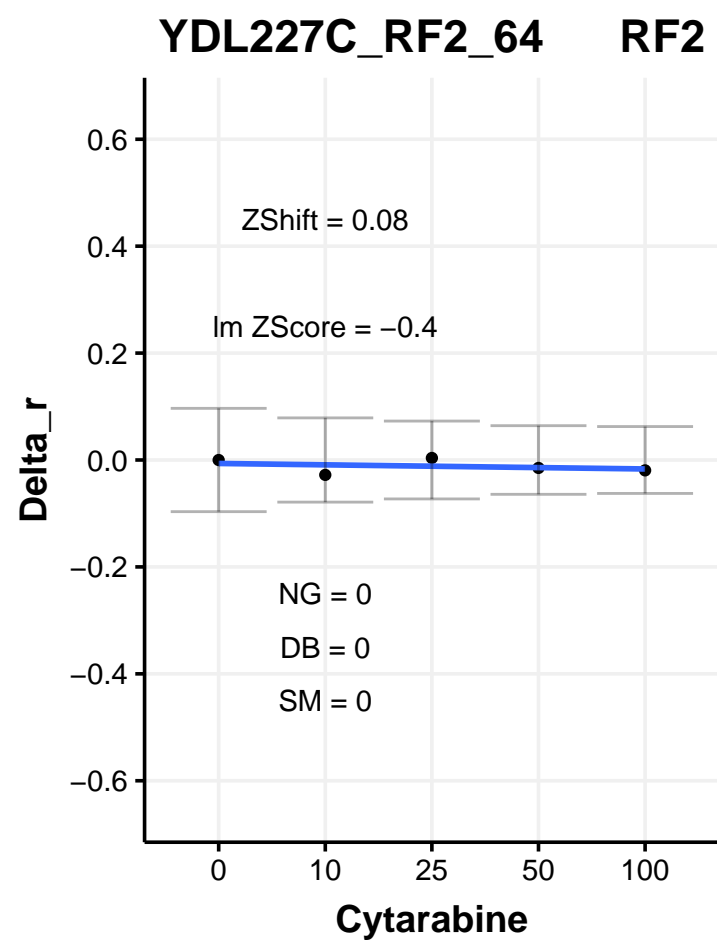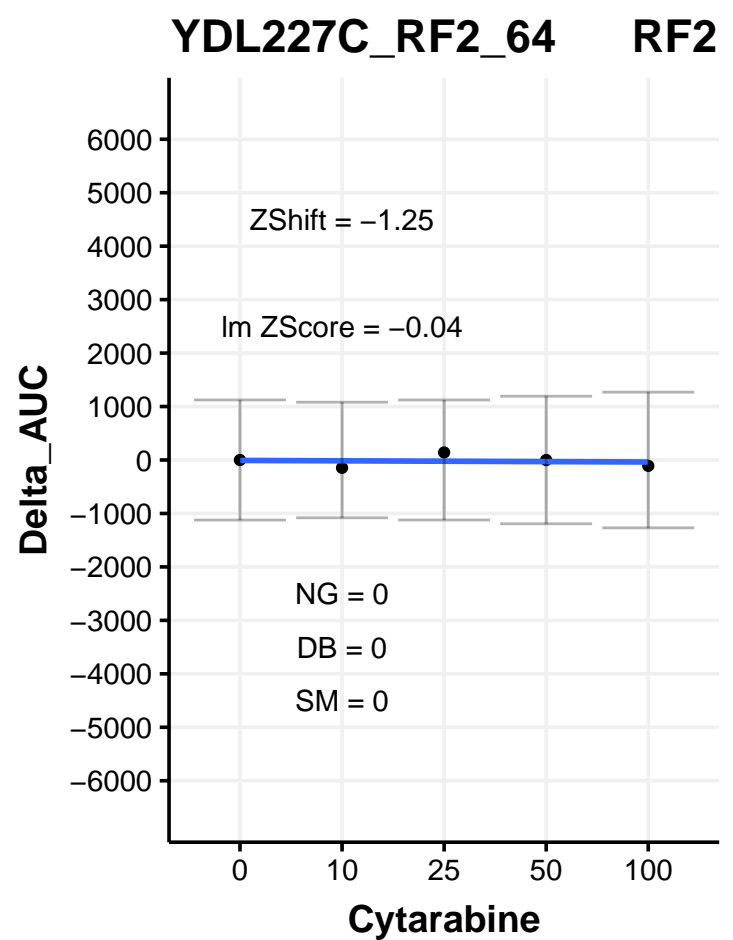



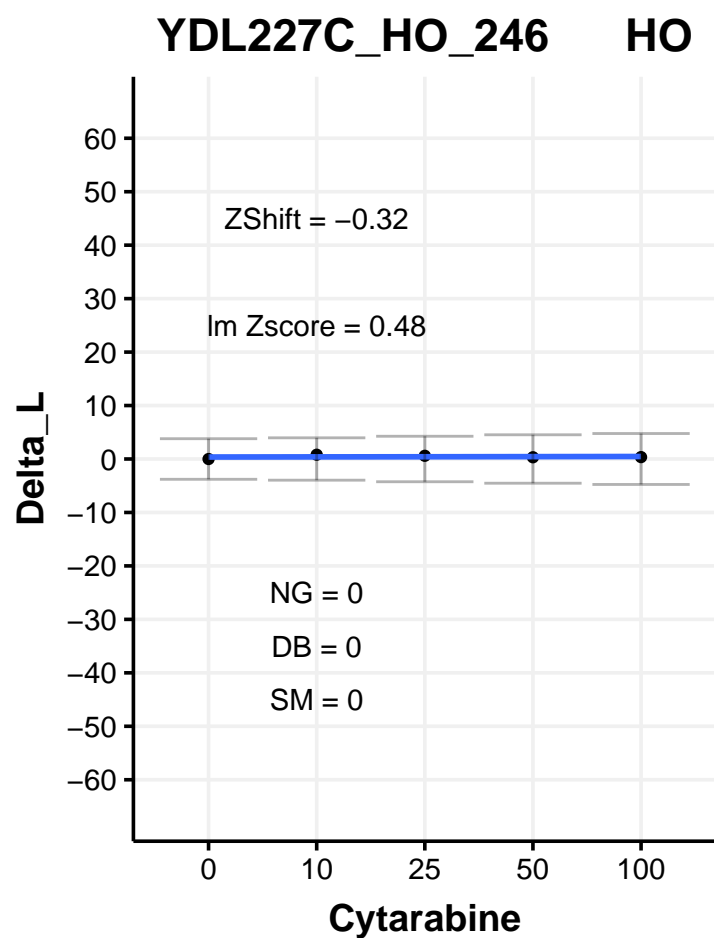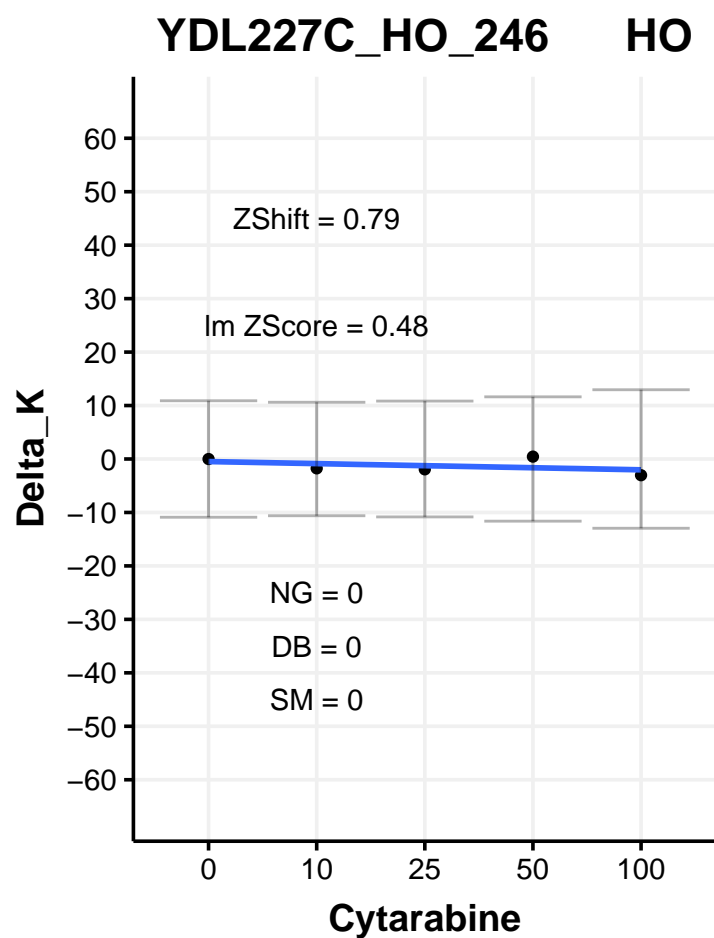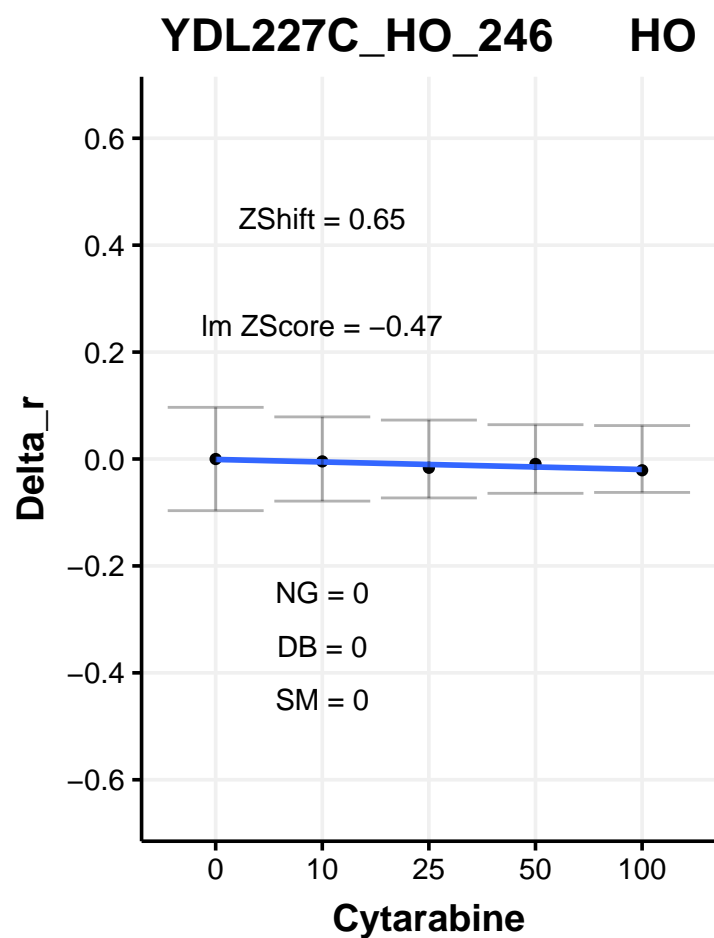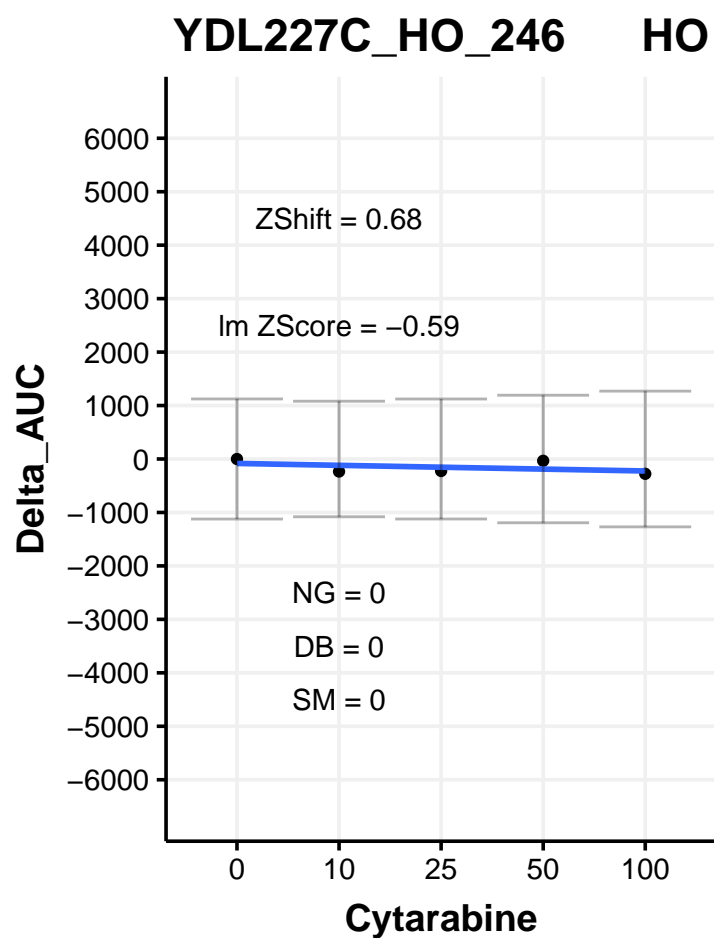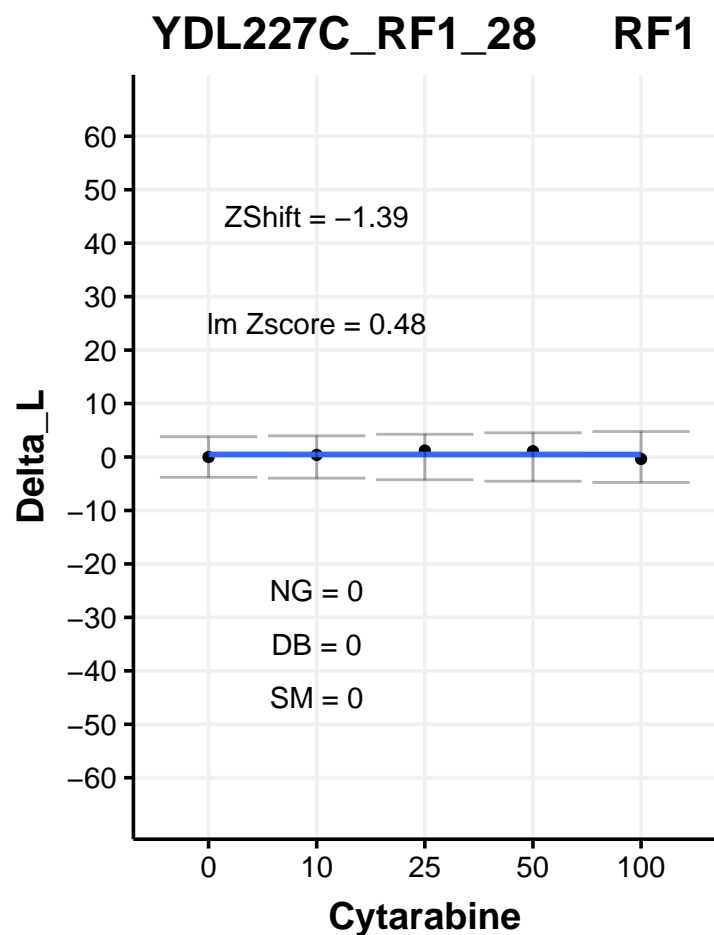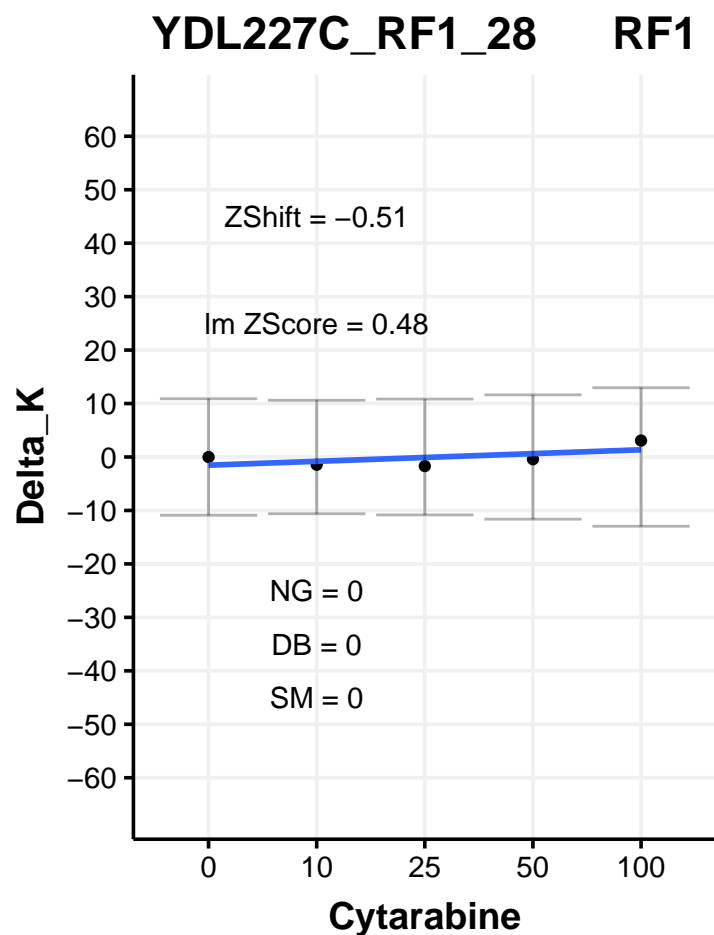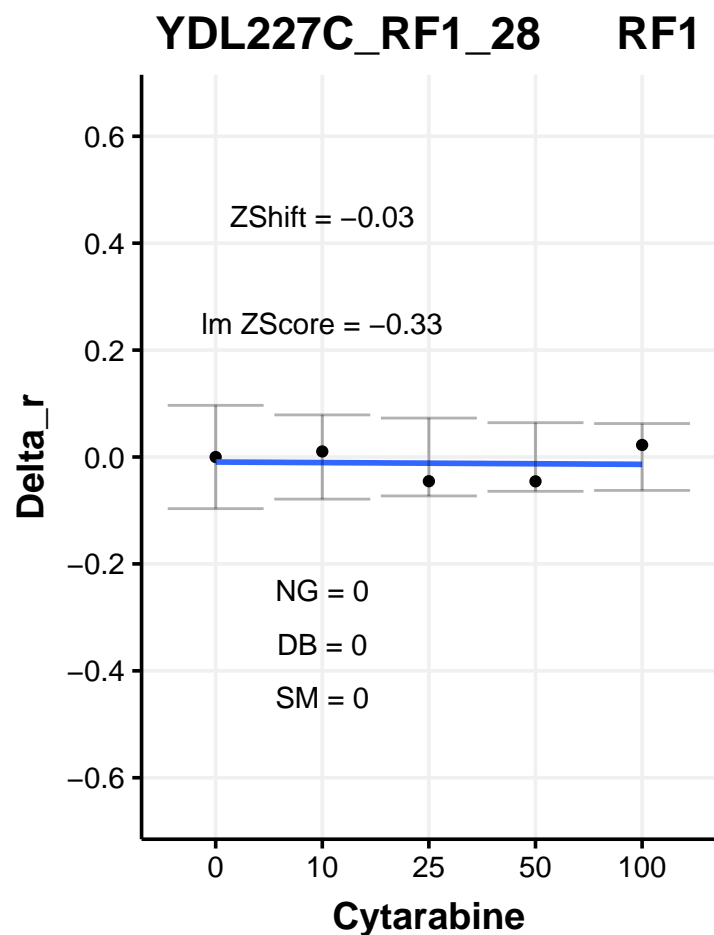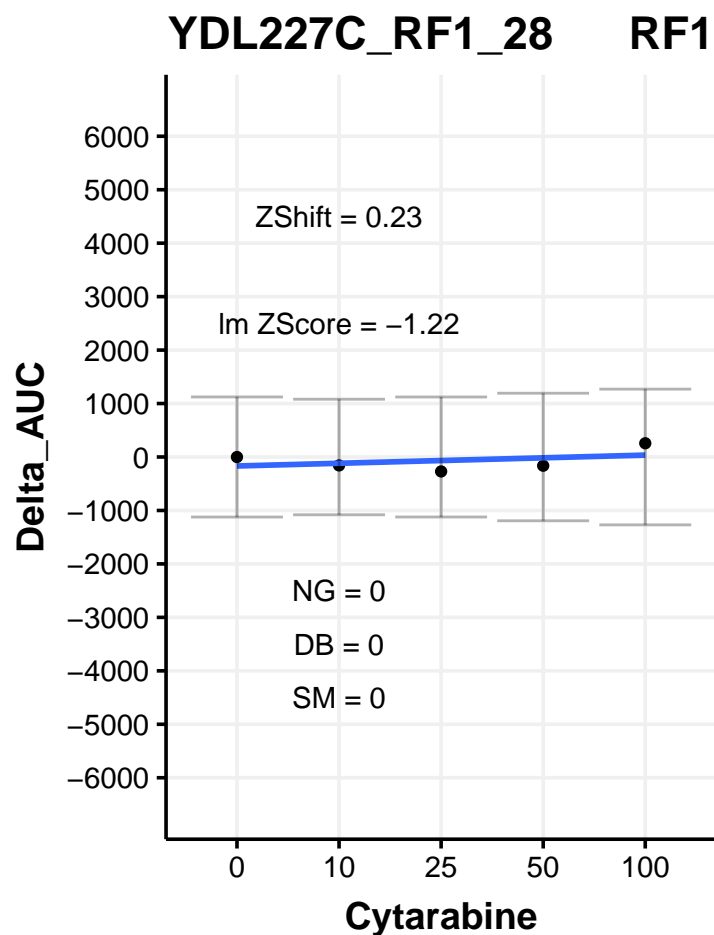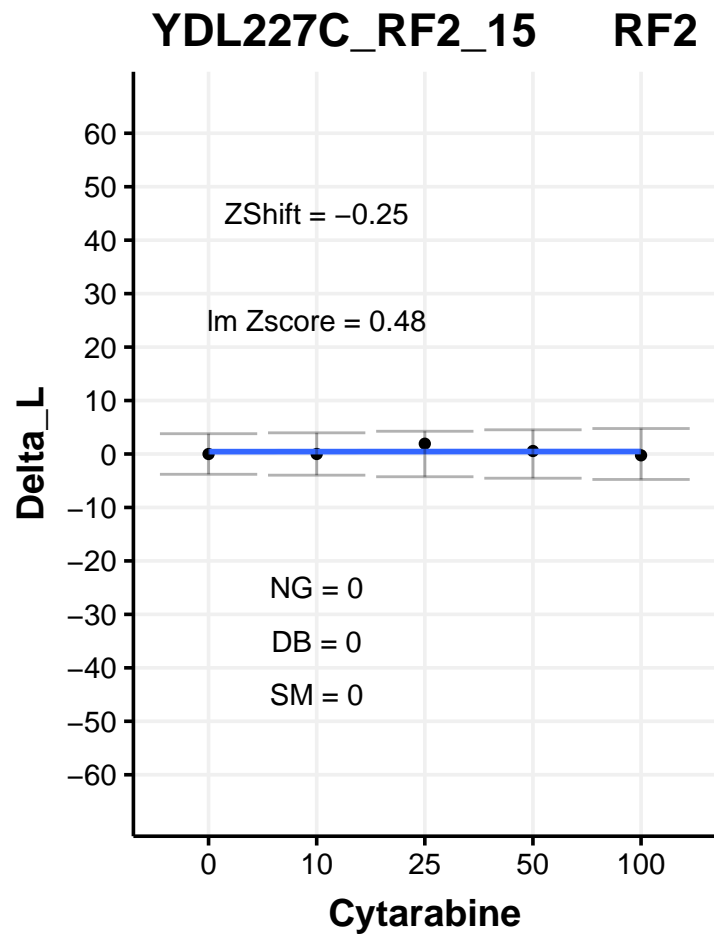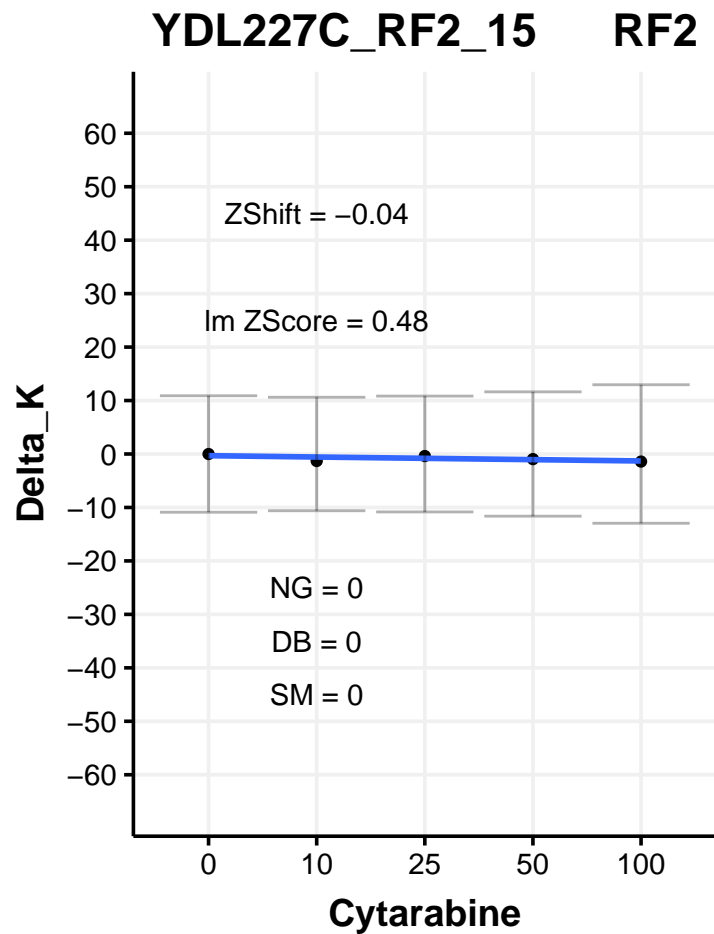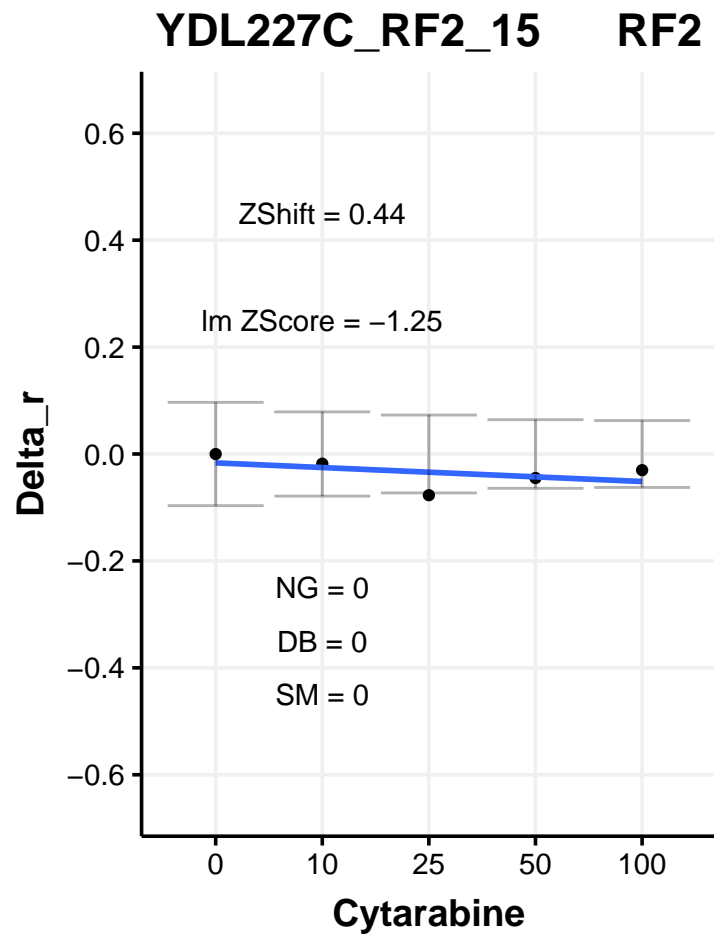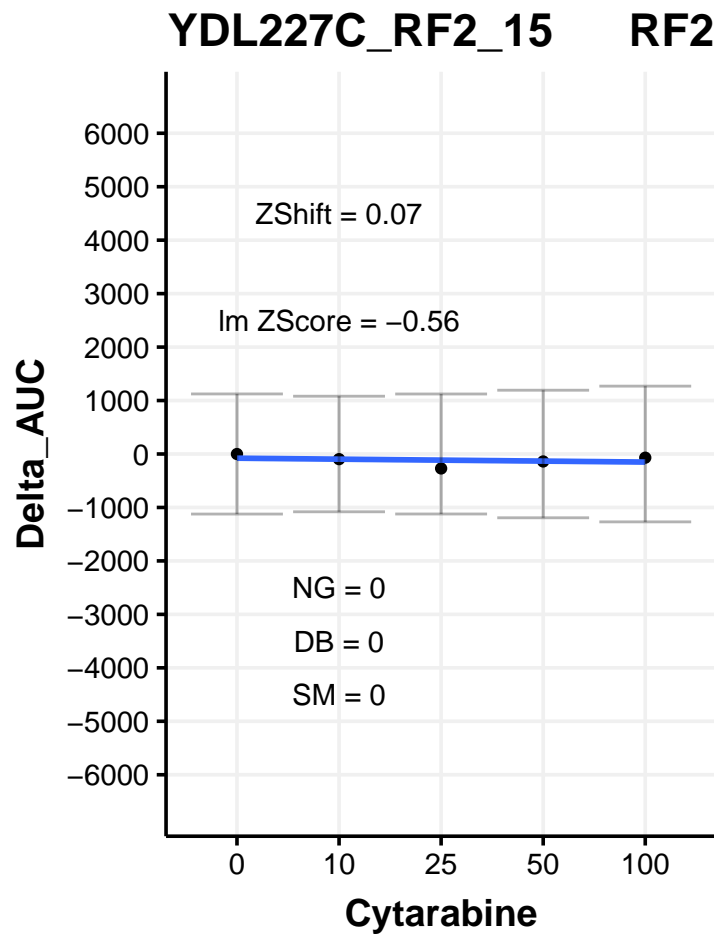

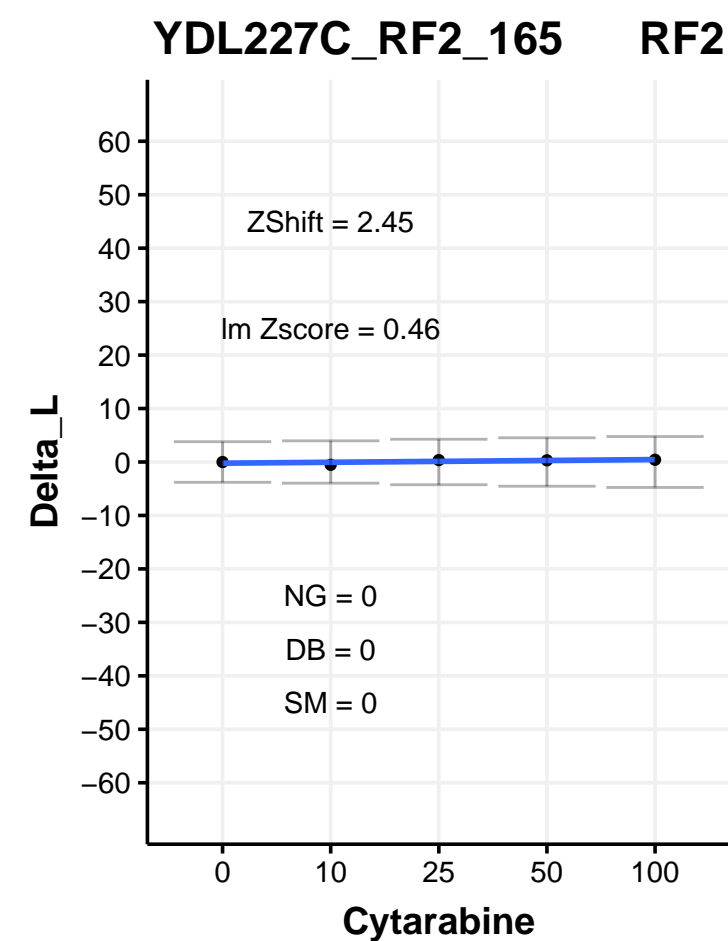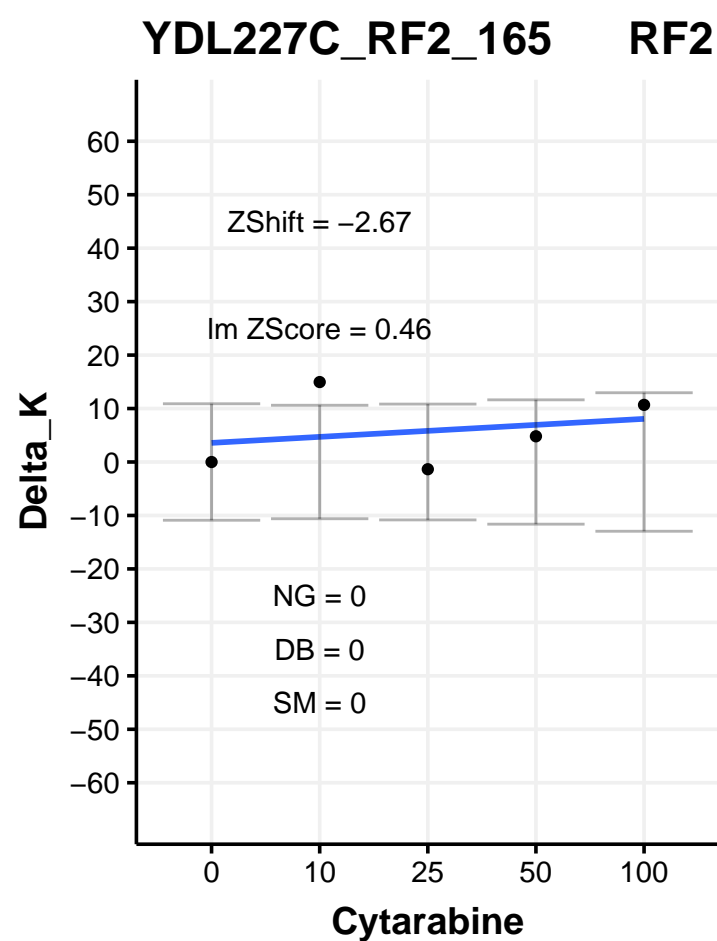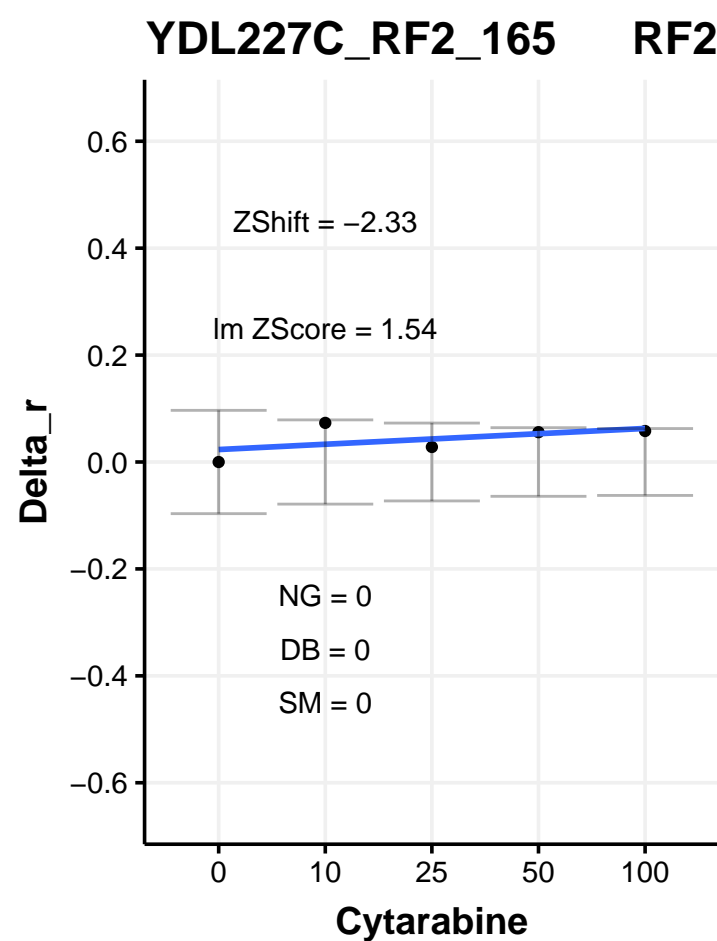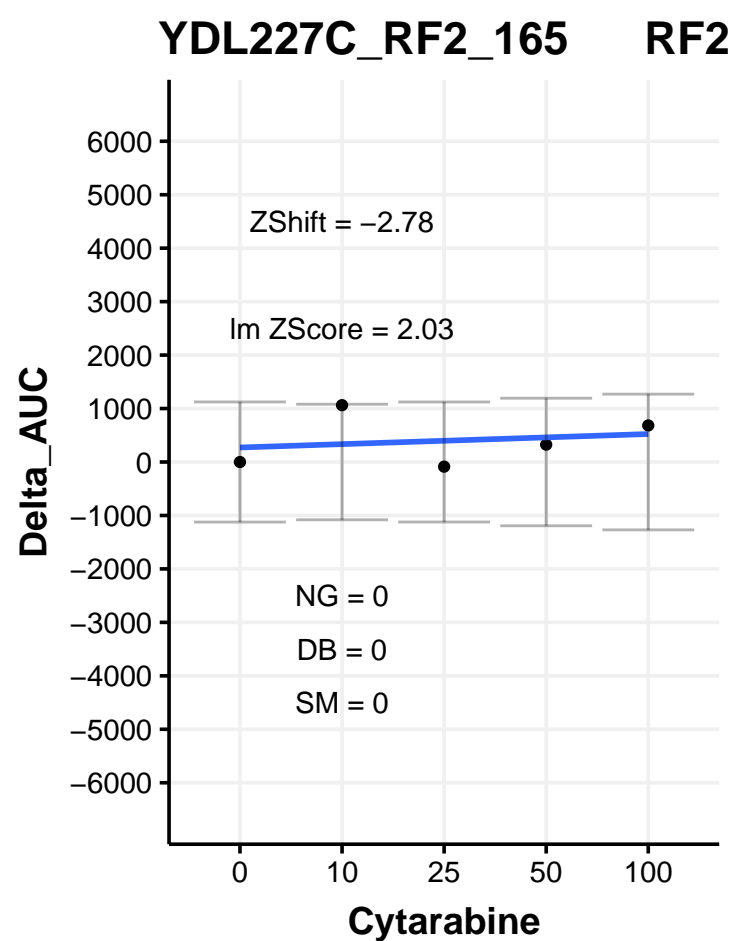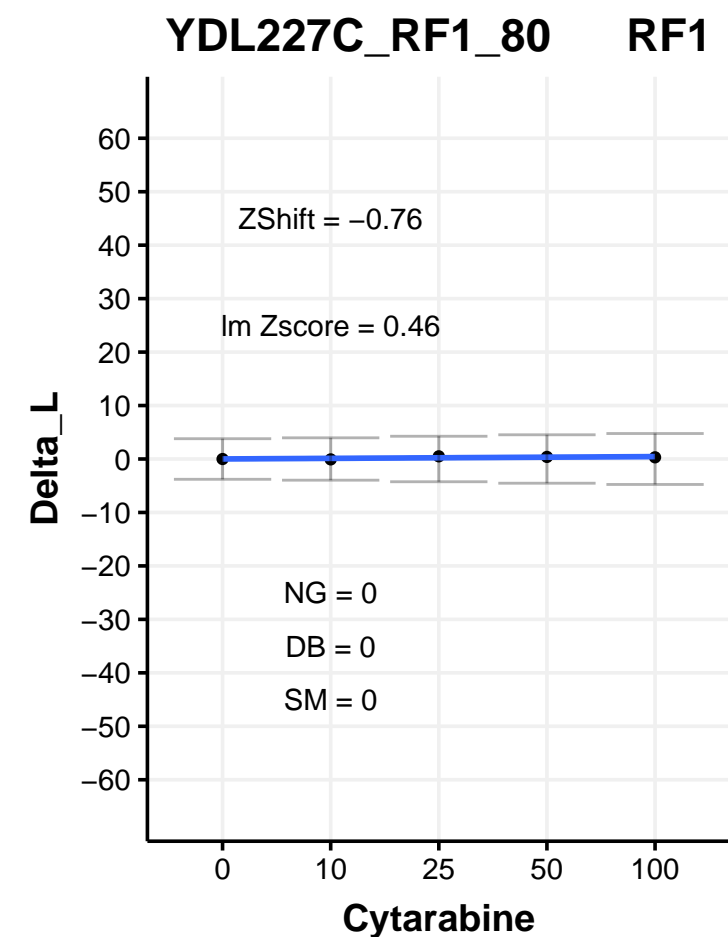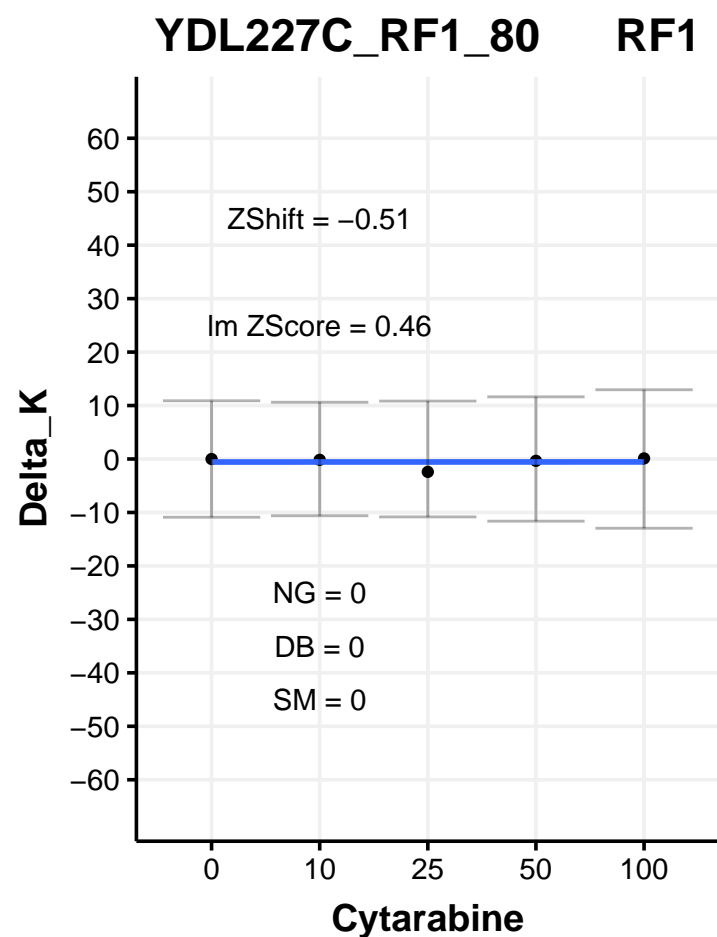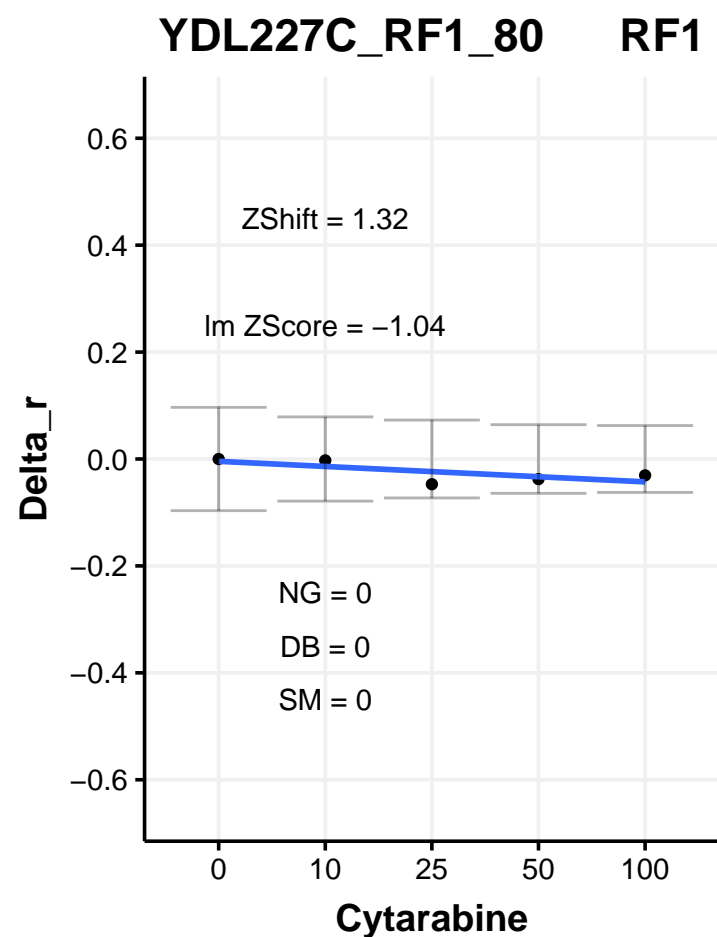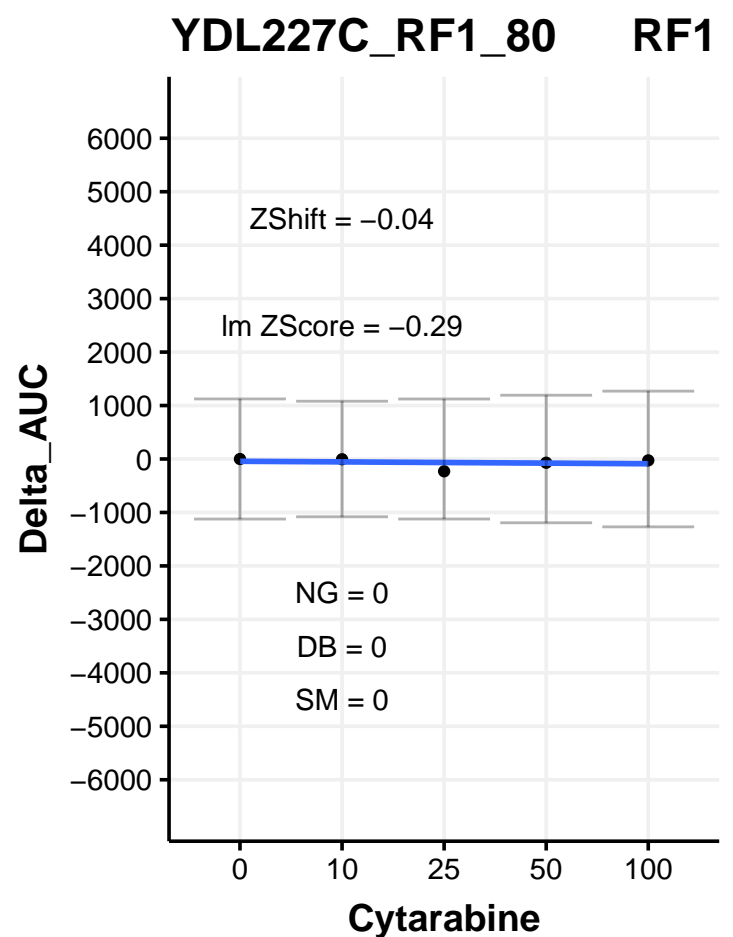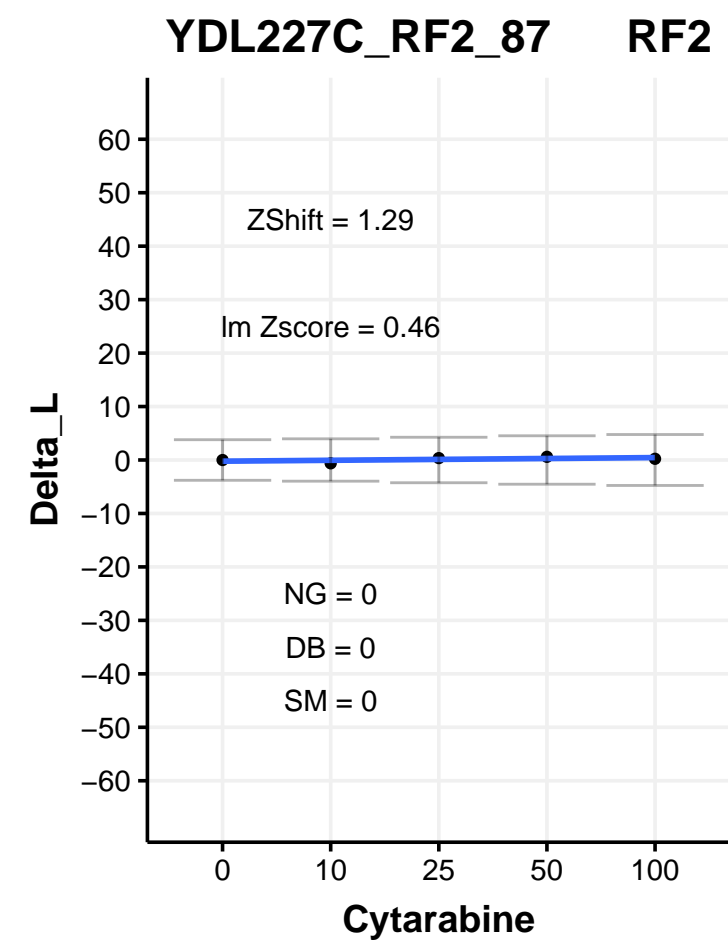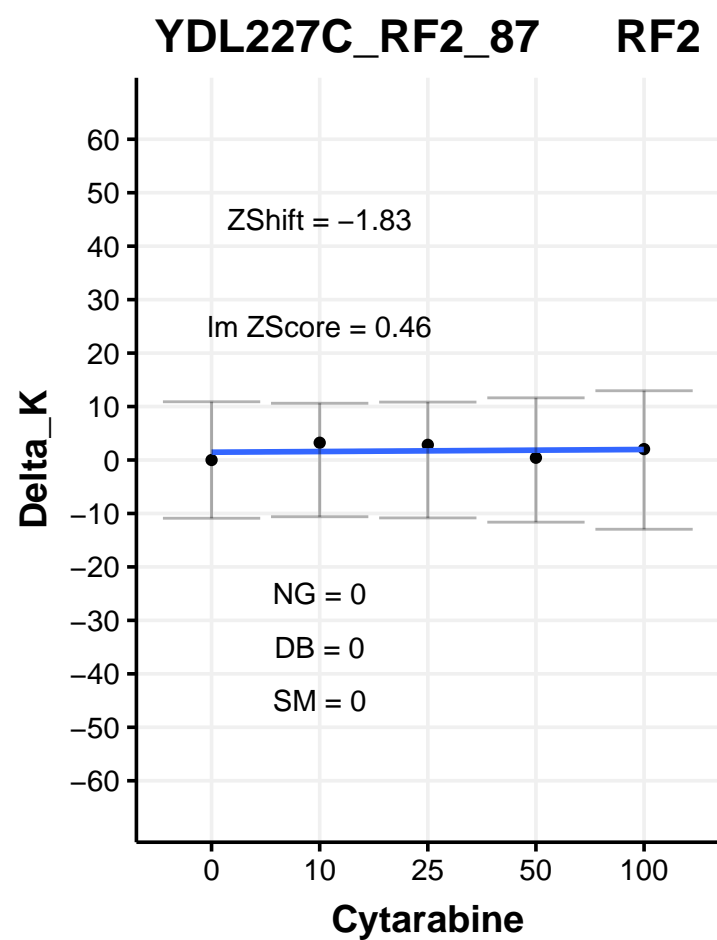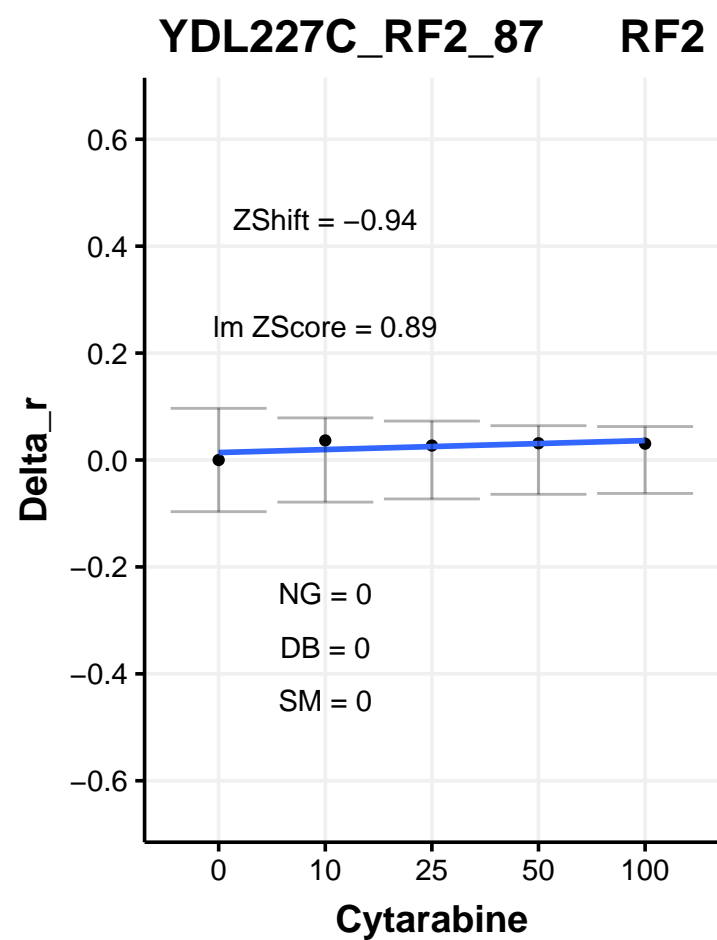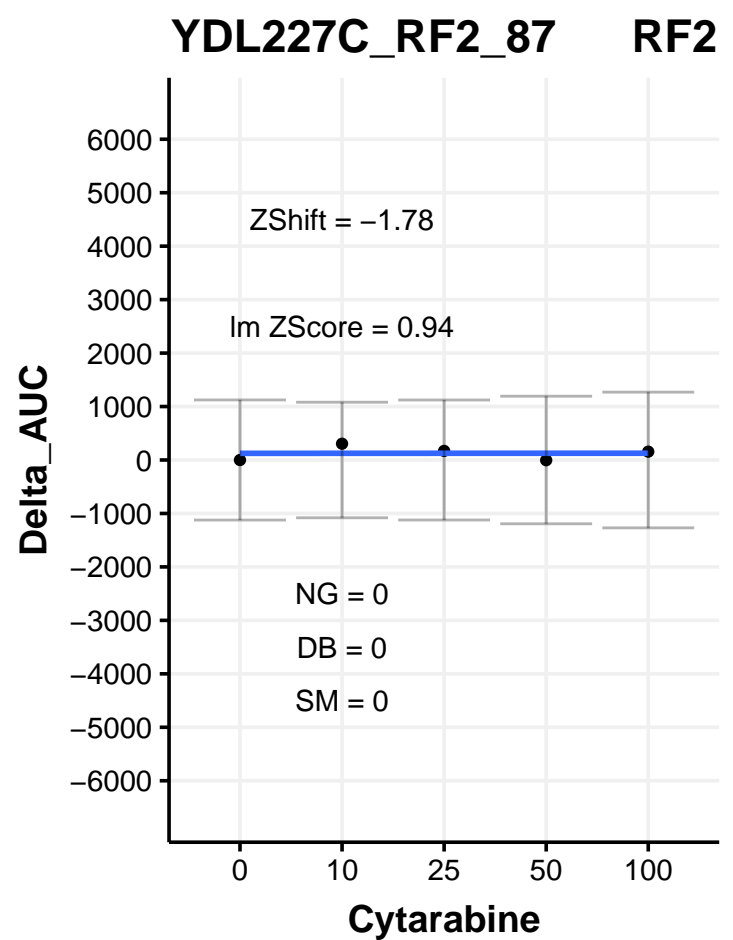

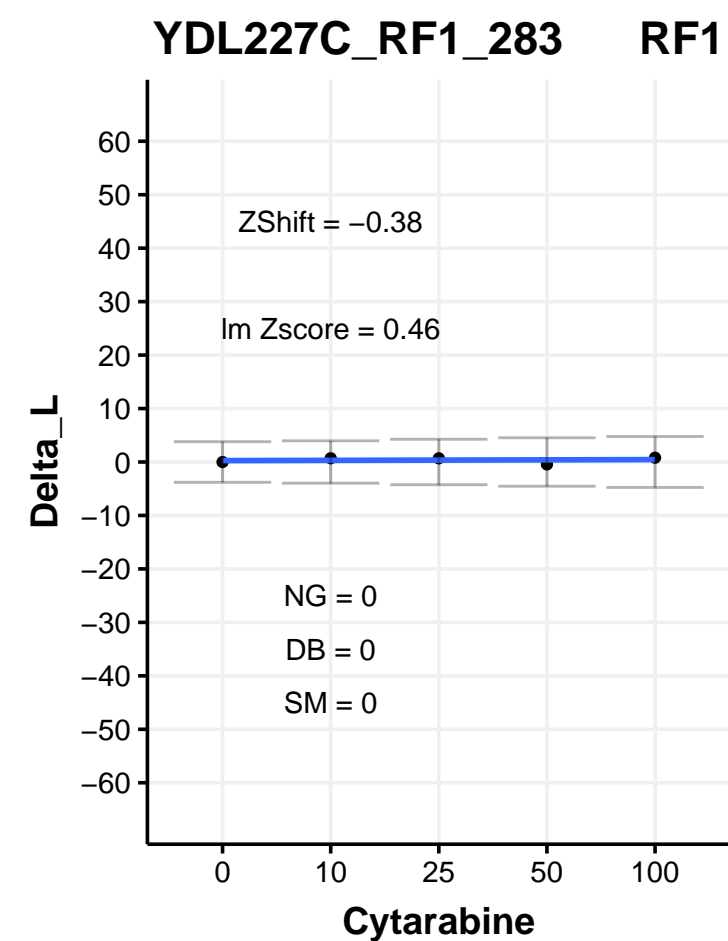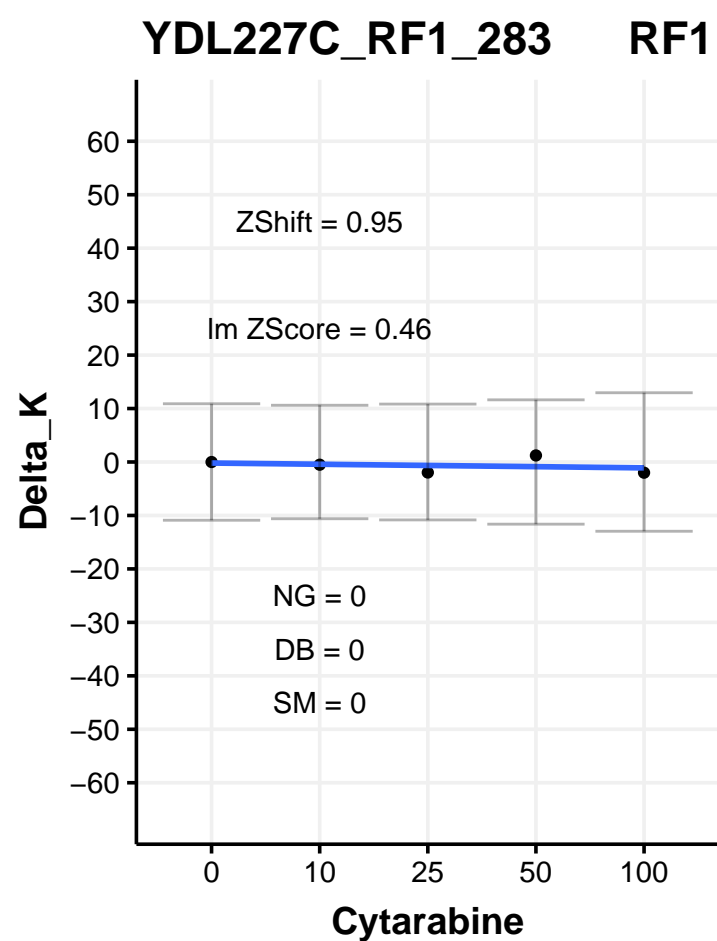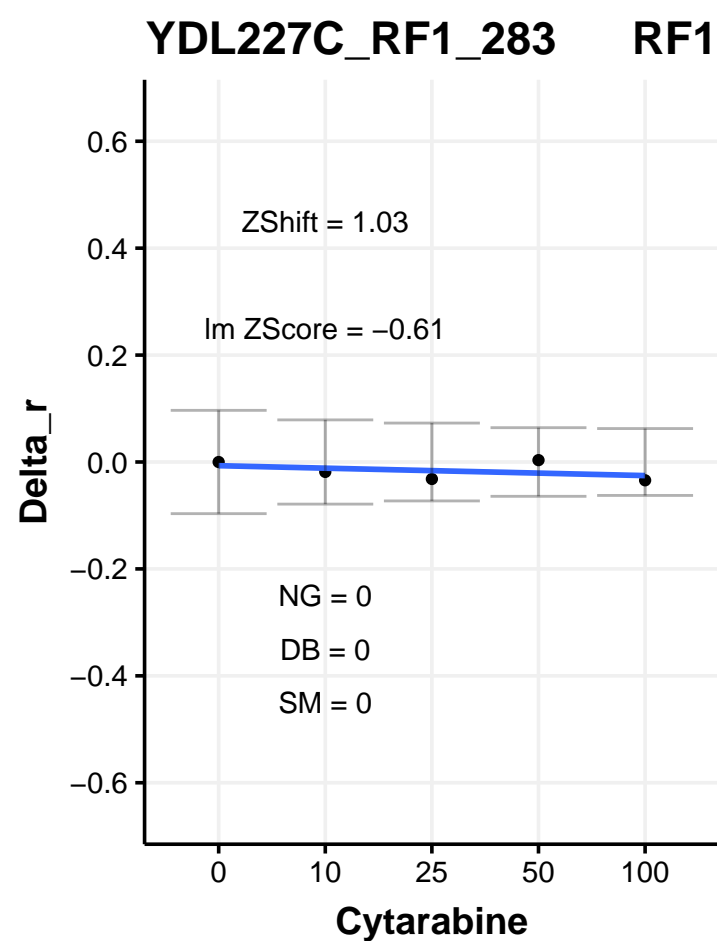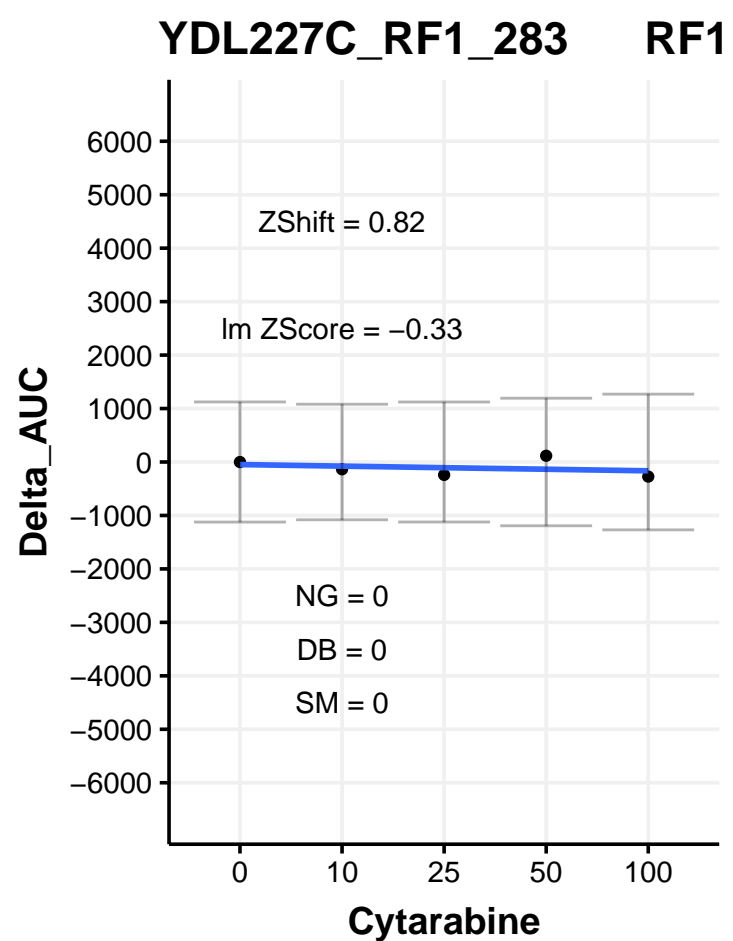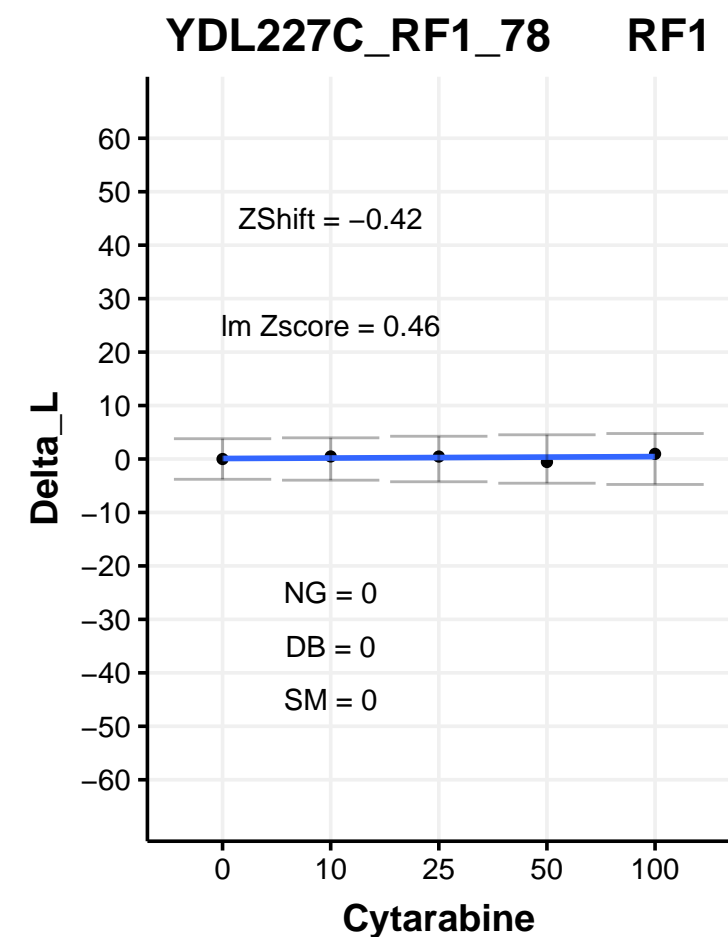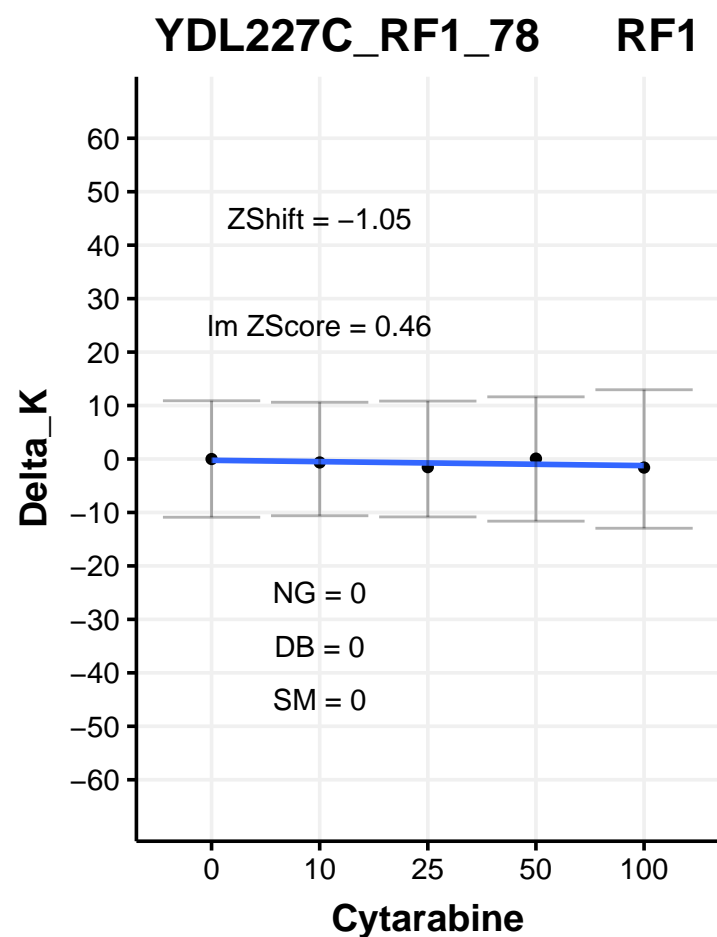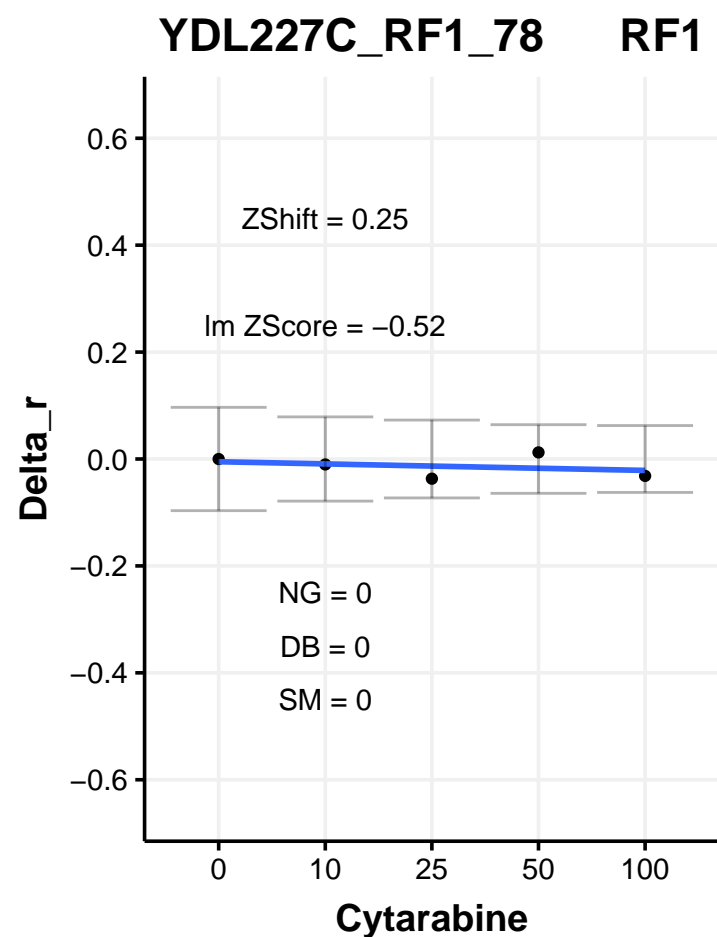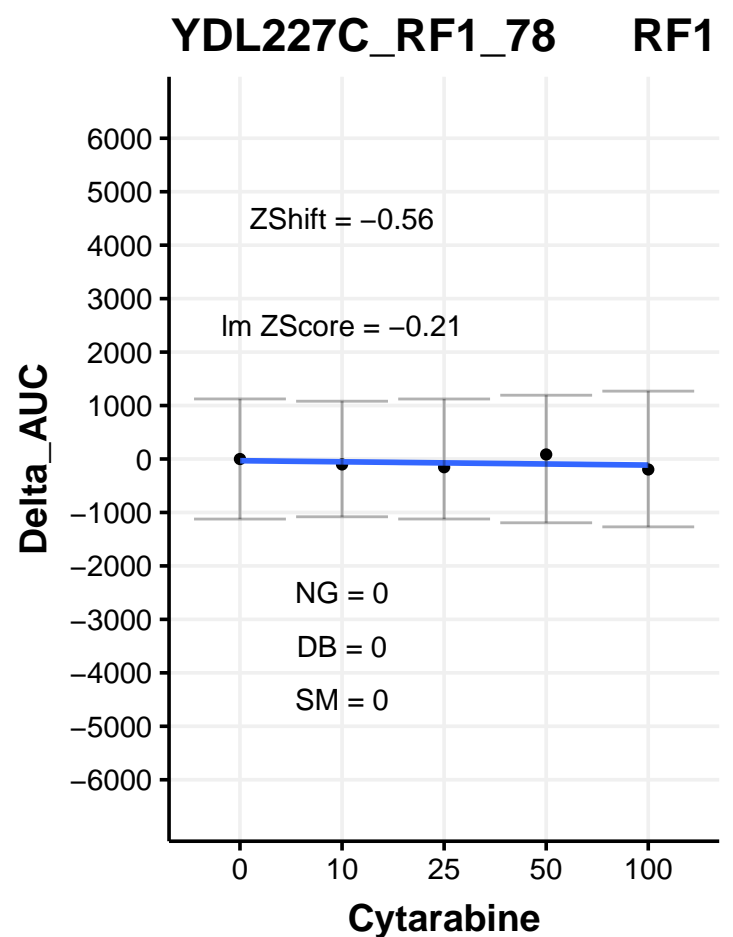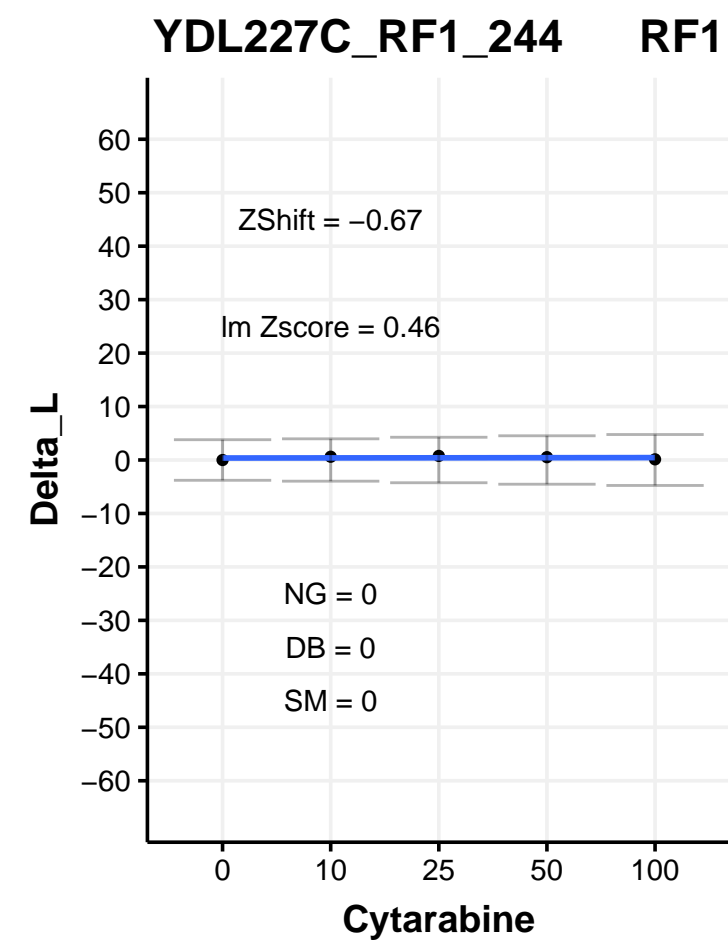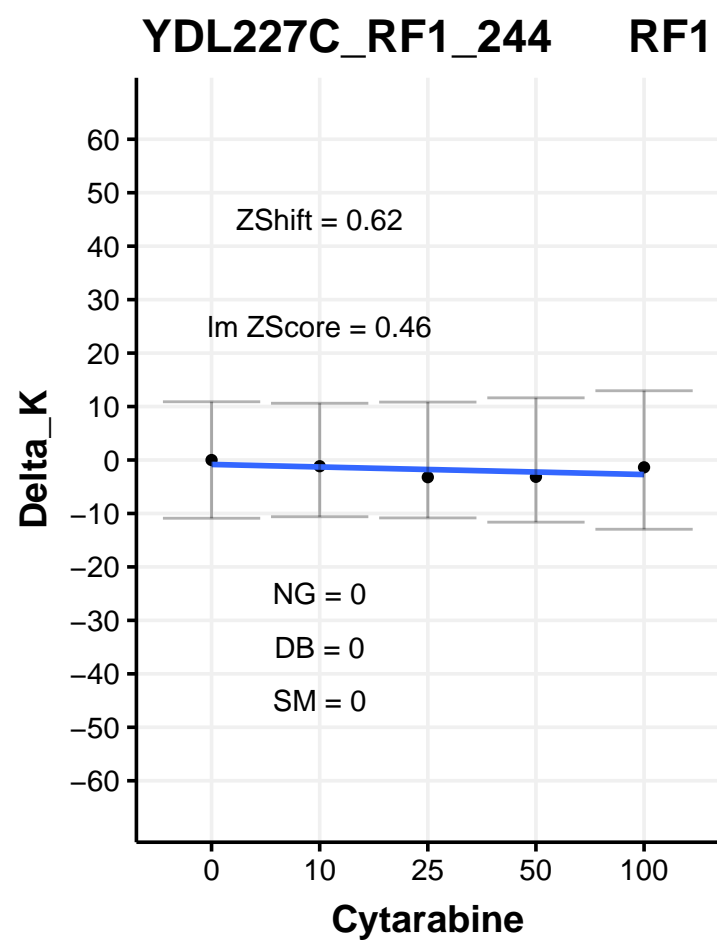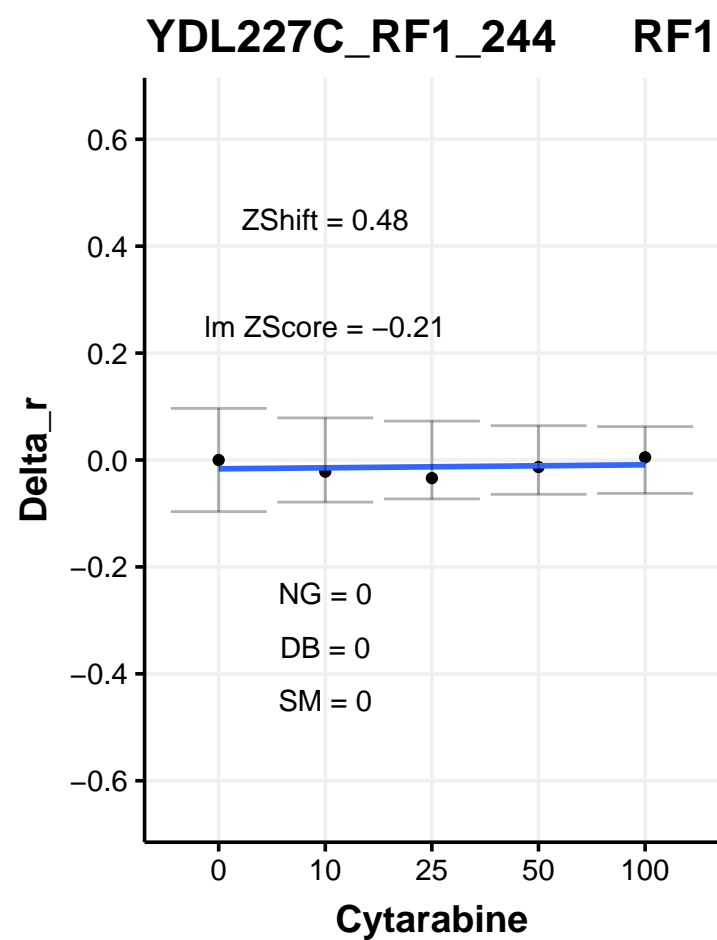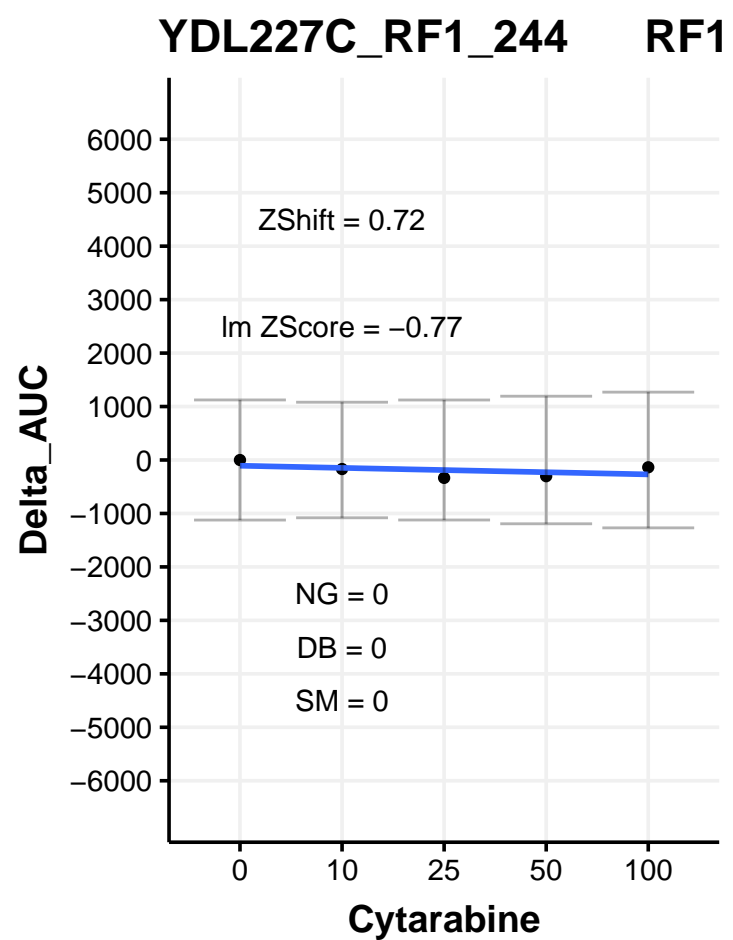

YDL227C\_RF2\_72 RF2

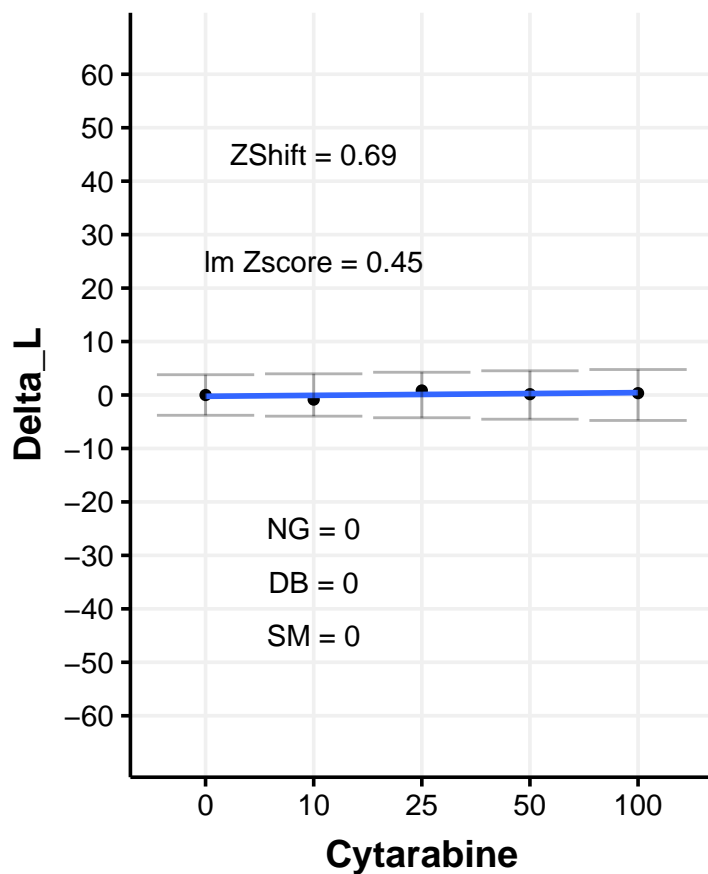

YDL227C\_RF2\_72 RF2

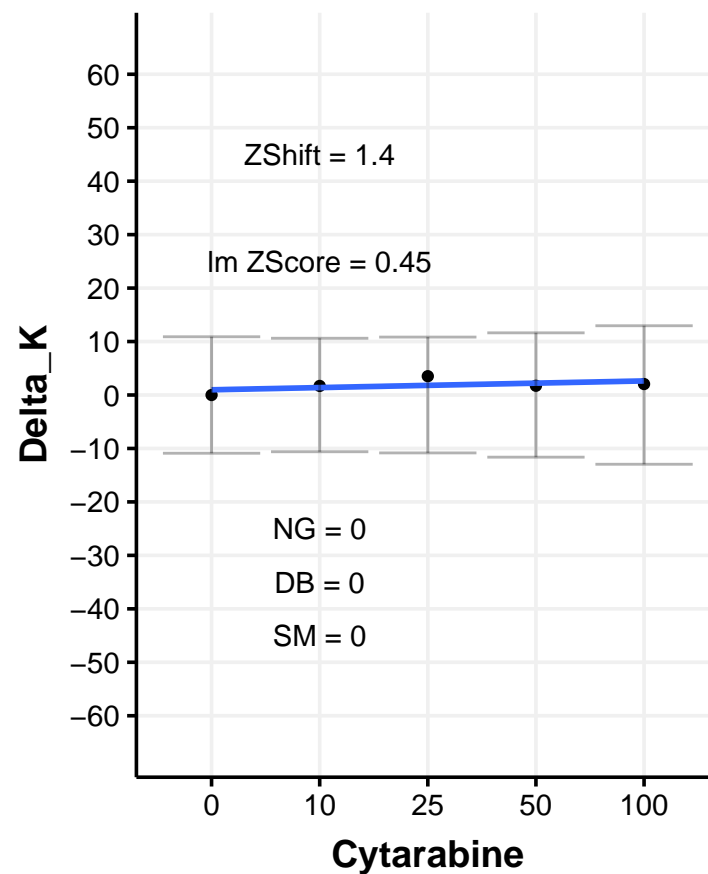

YDL227C\_RF2\_72 RF2

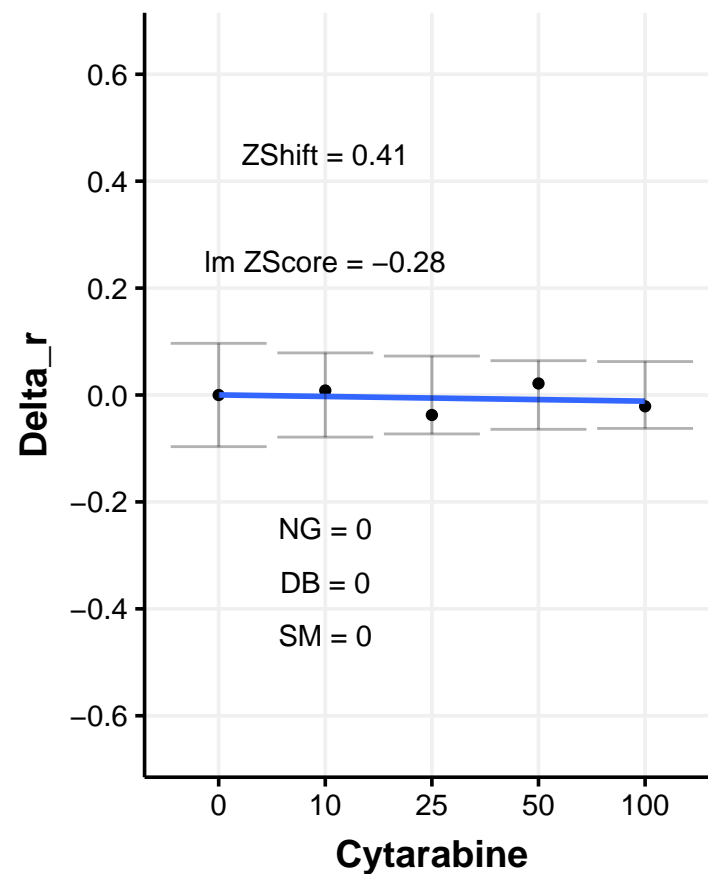

YDL227C\_RF2\_72 RF2

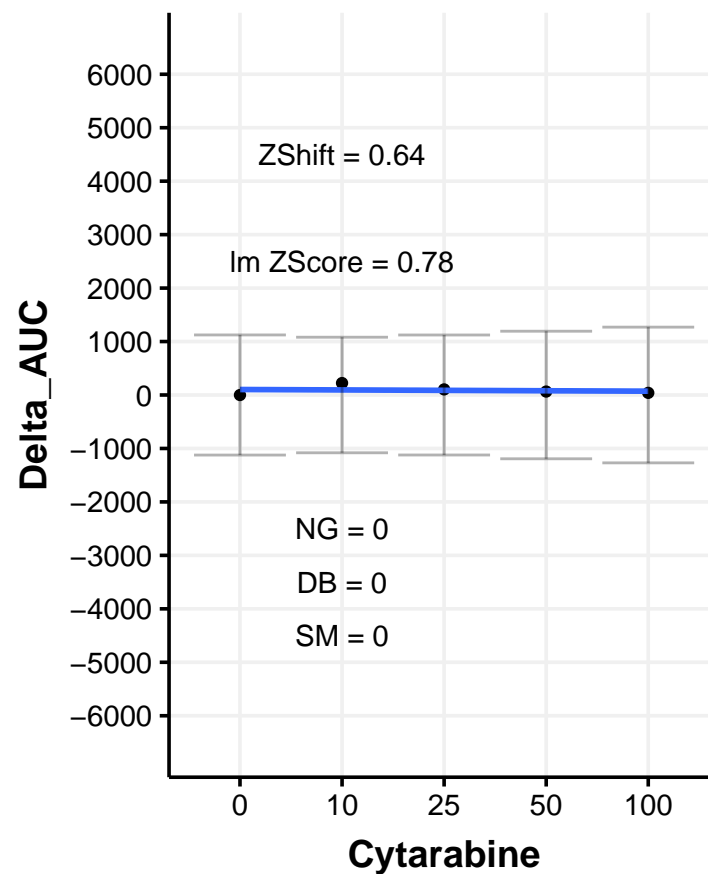

YDL227C\_RF1\_354 RF1

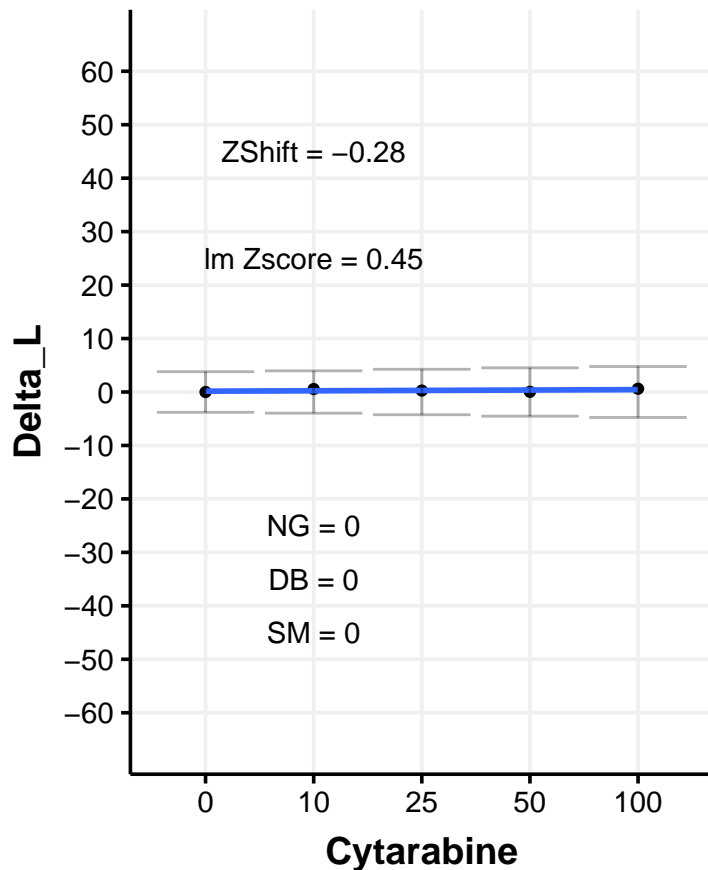

YDL227C\_RF1\_354 RF1

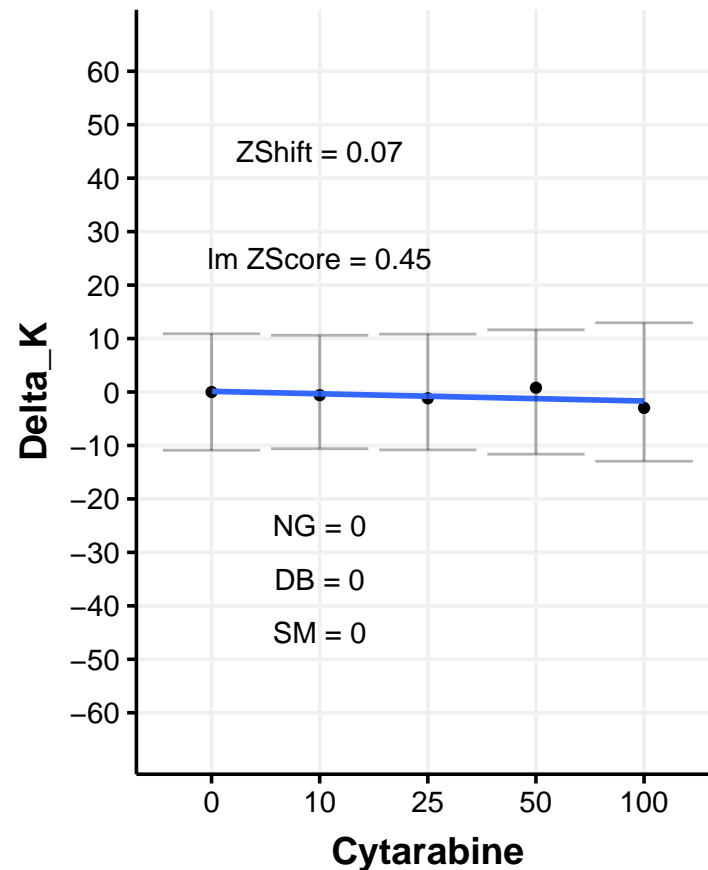

YDL227C\_RF1\_354 RF1

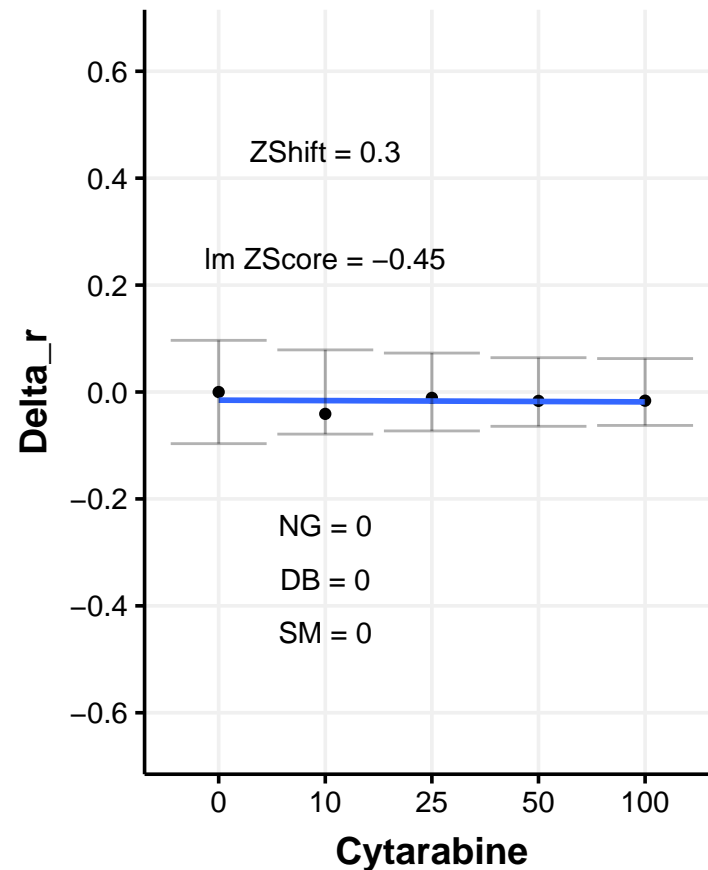

YDL227C\_RF1\_354 RF1

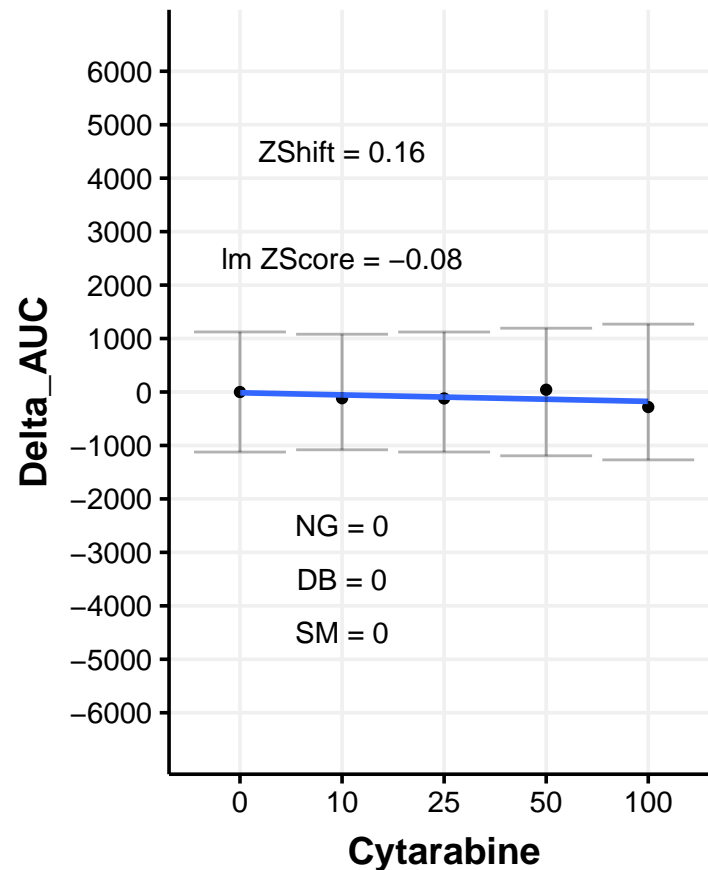

YDL227C\_RF1\_71 RF1

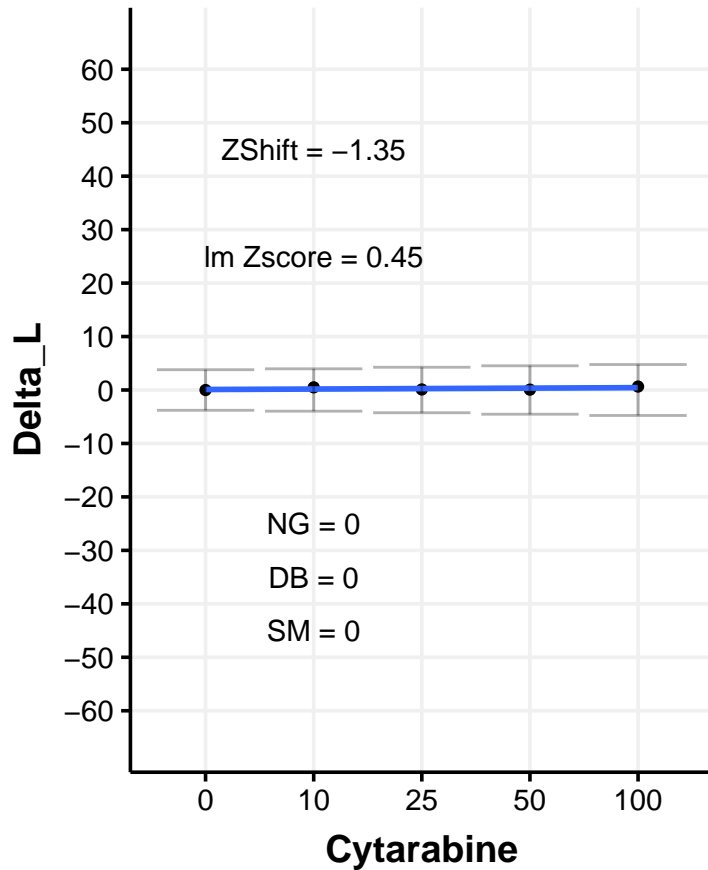

YDL227C\_RF1\_71 RF1

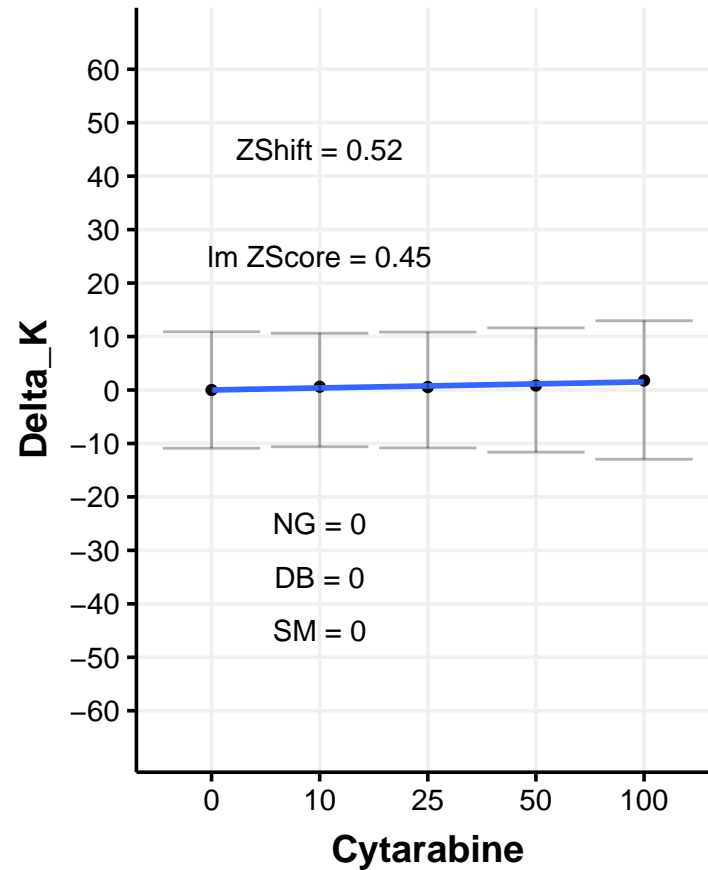

YDL227C\_RF1\_71 RF1

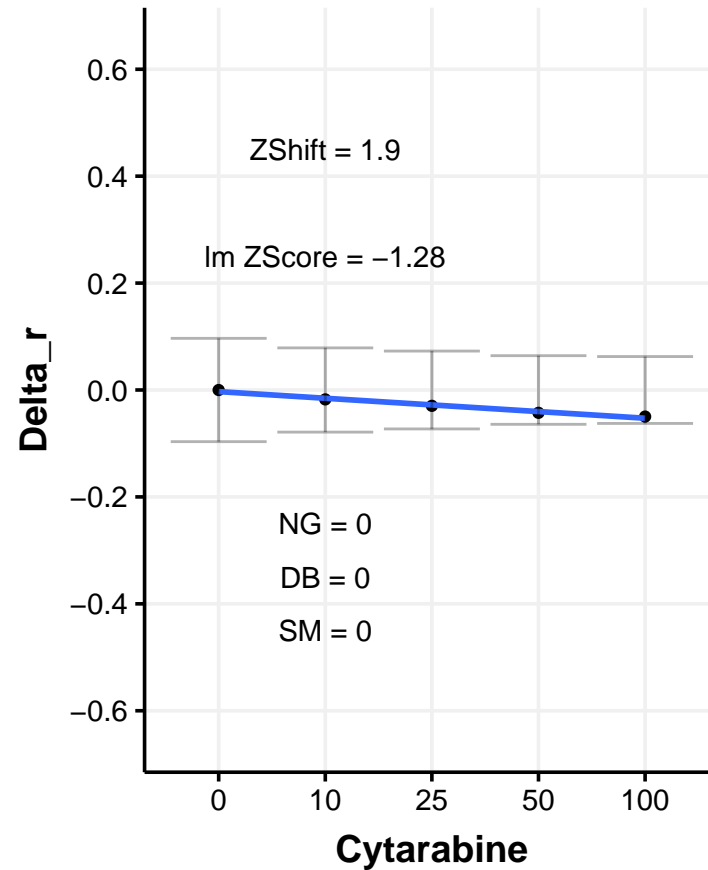

YDL227C\_RF1\_71 RF1

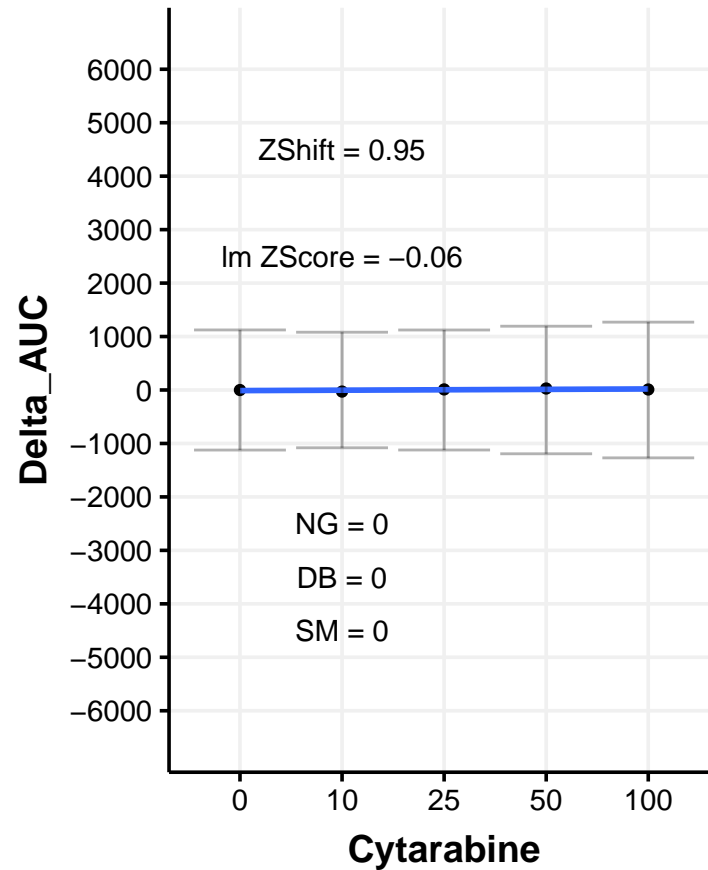

YDL227C\_RF2\_37 RF2

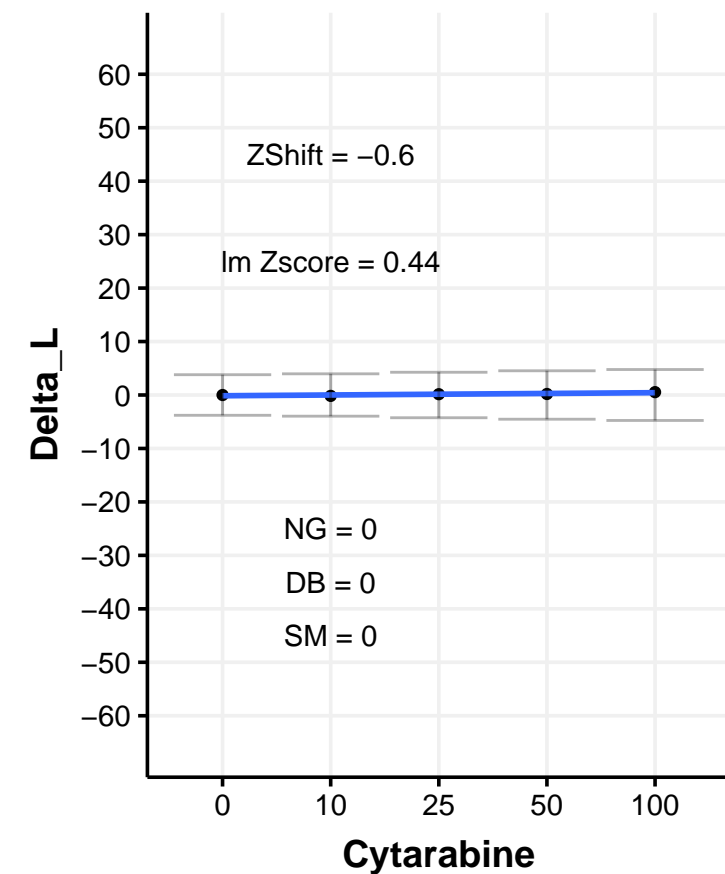

YDL227C\_RF2\_37 RF2

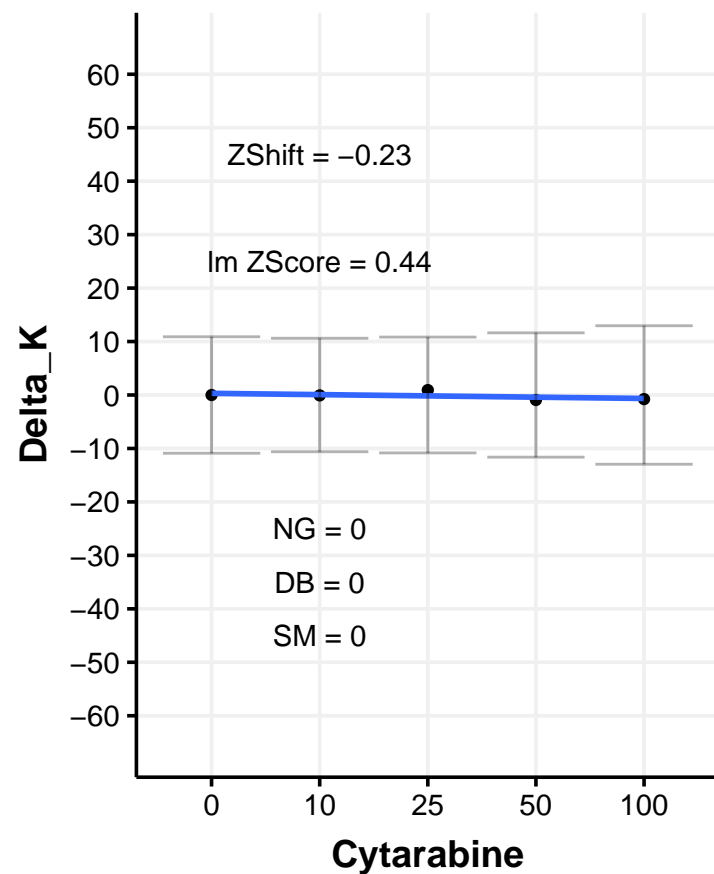

YDL227C\_RF2\_37 RF2

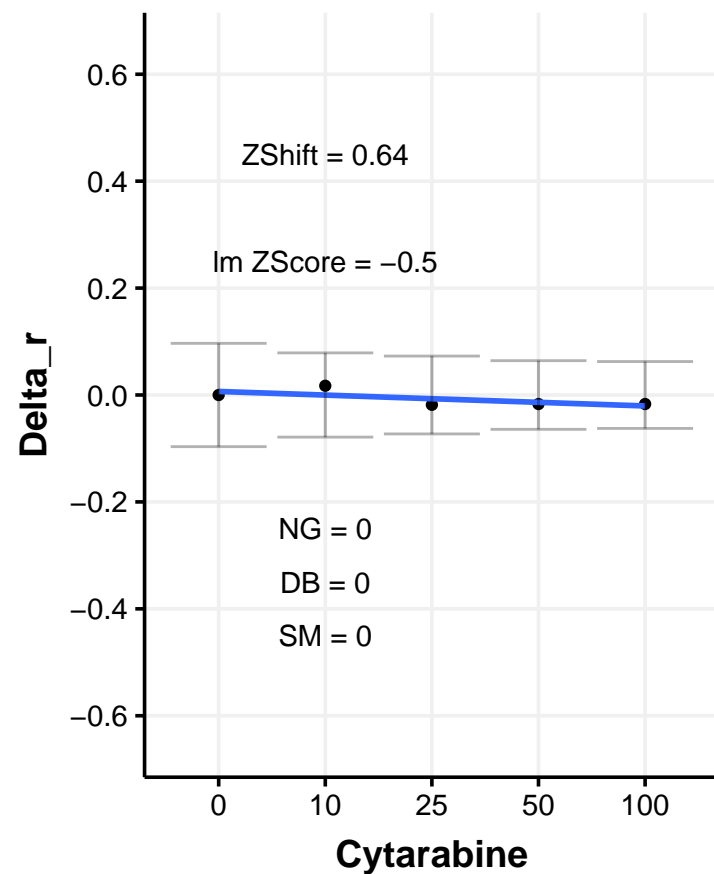

YDL227C\_RF2\_37 RF2

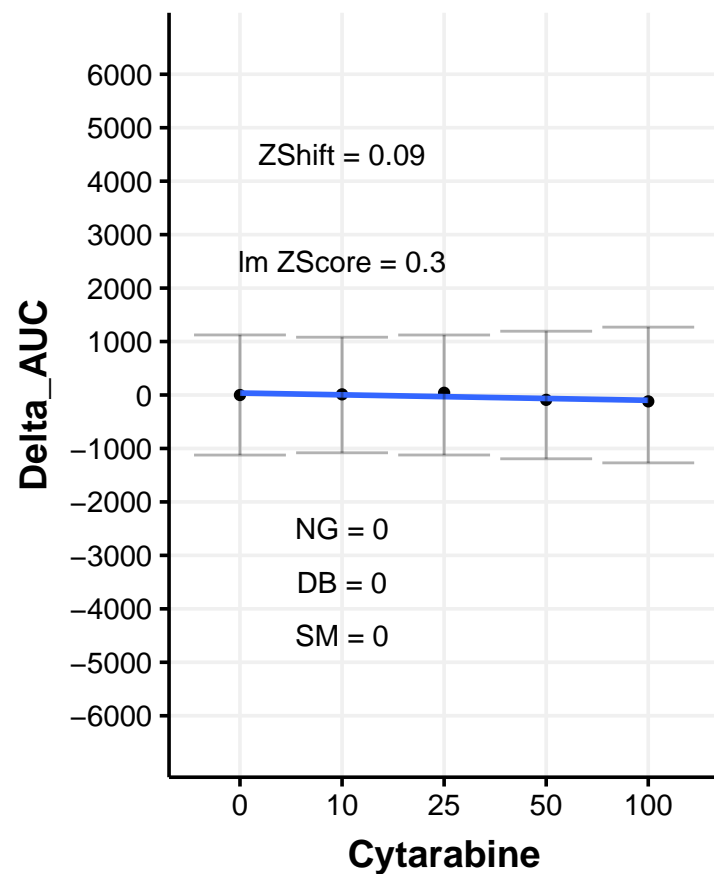

YDL227C\_RF1\_164 RF1

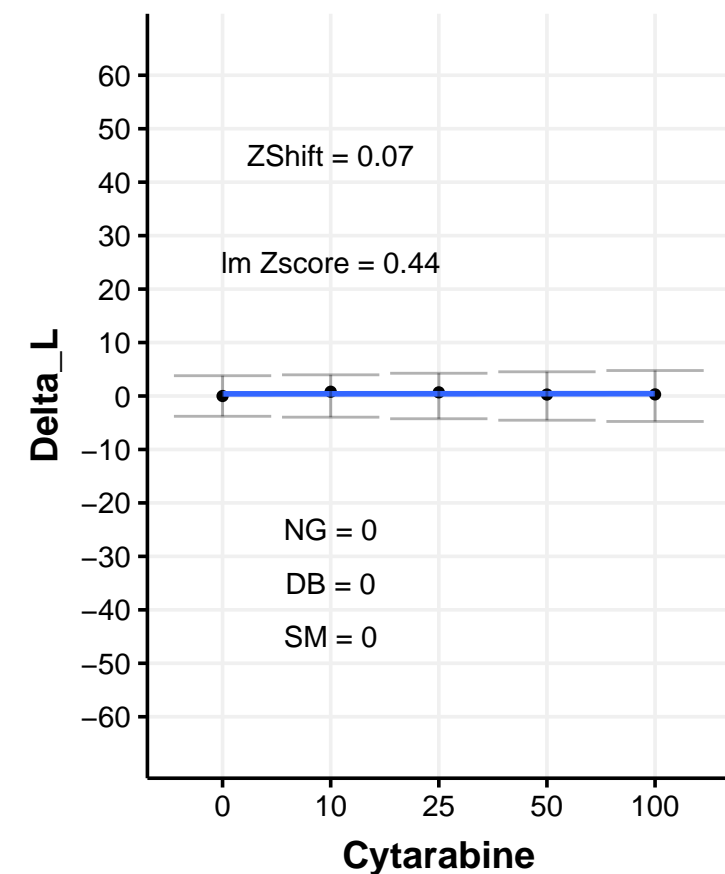

YDL227C\_RF1\_164 RF1

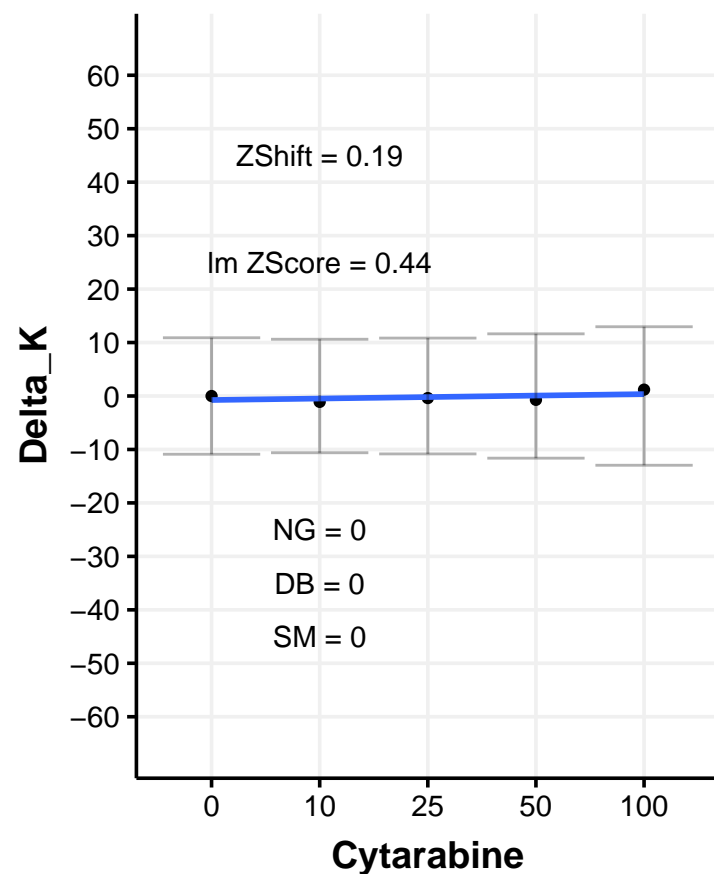

YDL227C\_RF1\_164 RF1

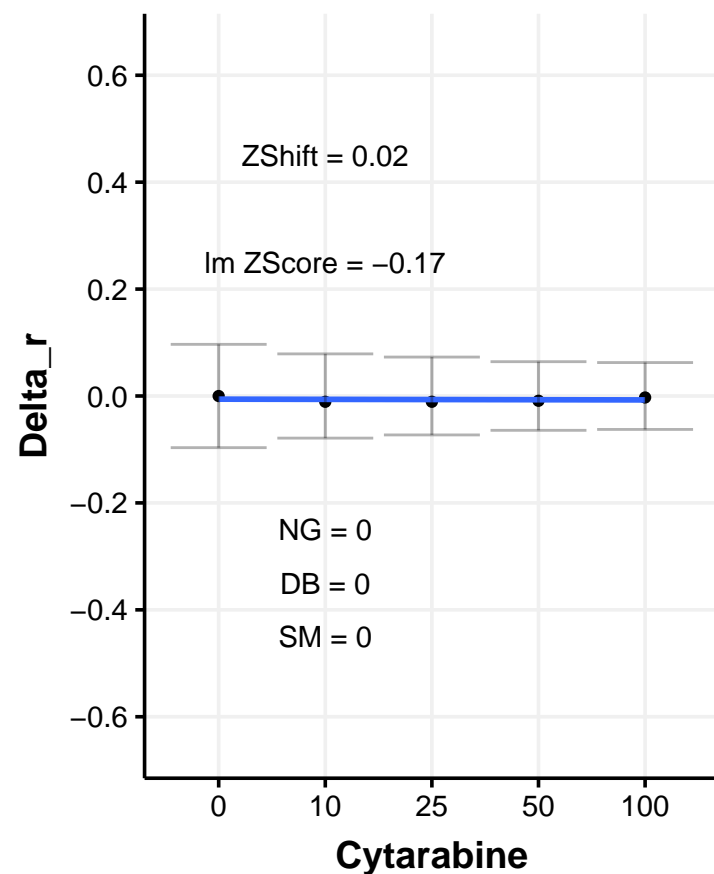

YDL227C\_RF1\_164 RF1

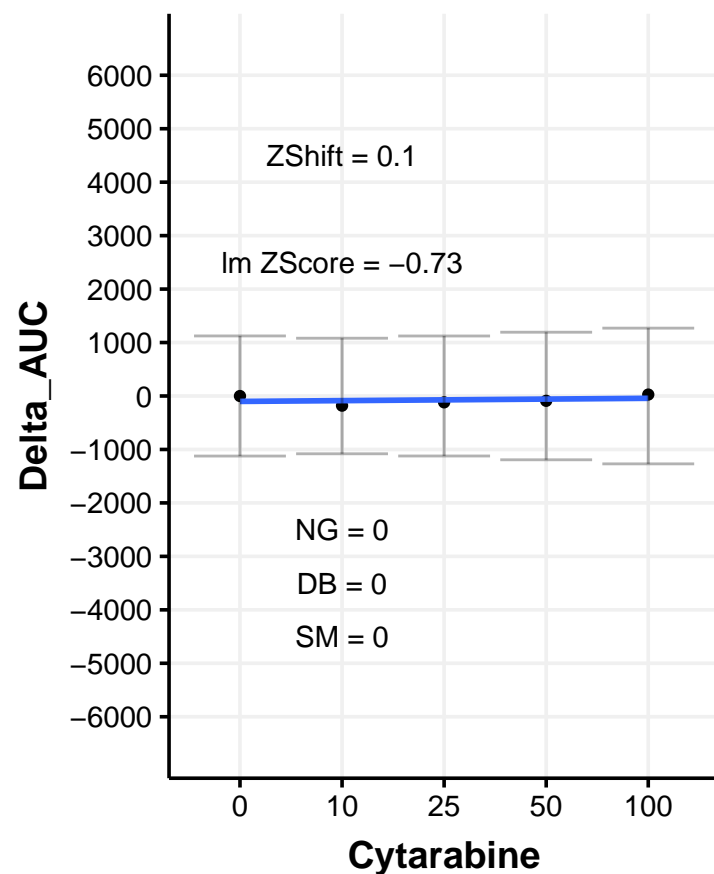

YDL227C\_RF2\_127 RF2

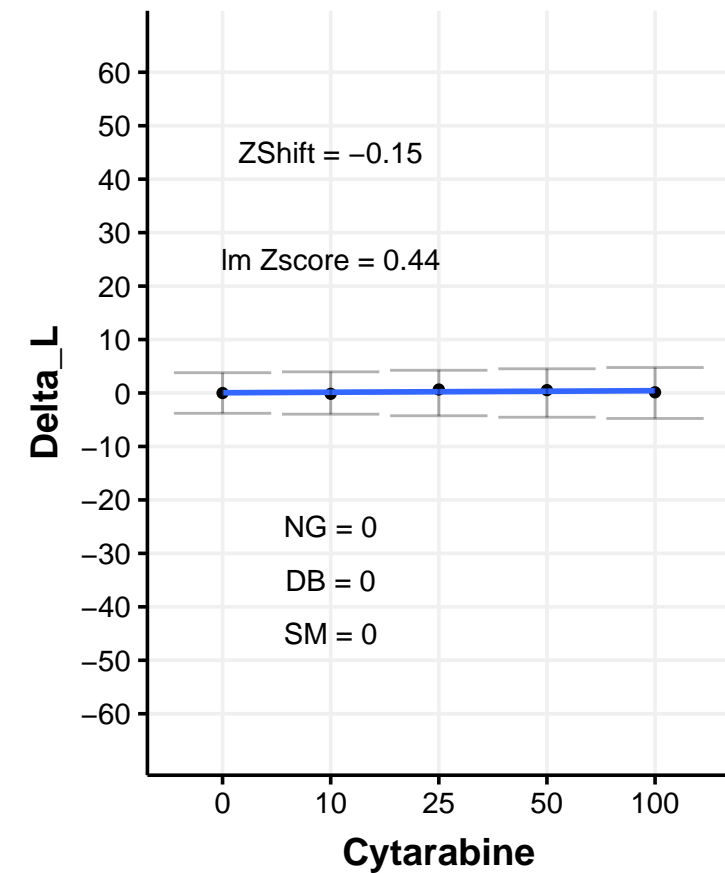

YDL227C\_RF2\_127 RF2

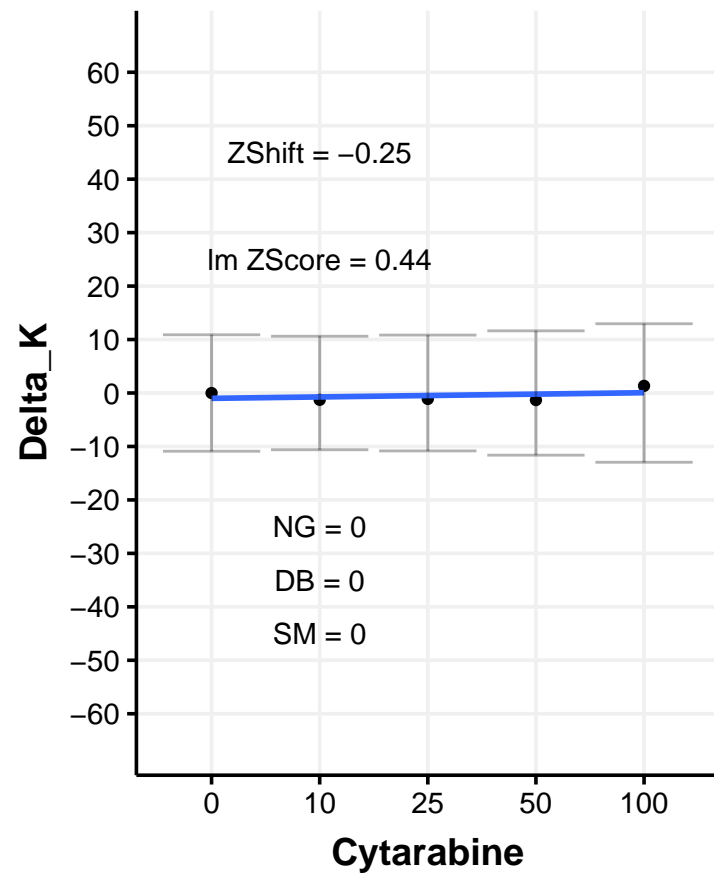

YDL227C\_RF2\_127 RF2

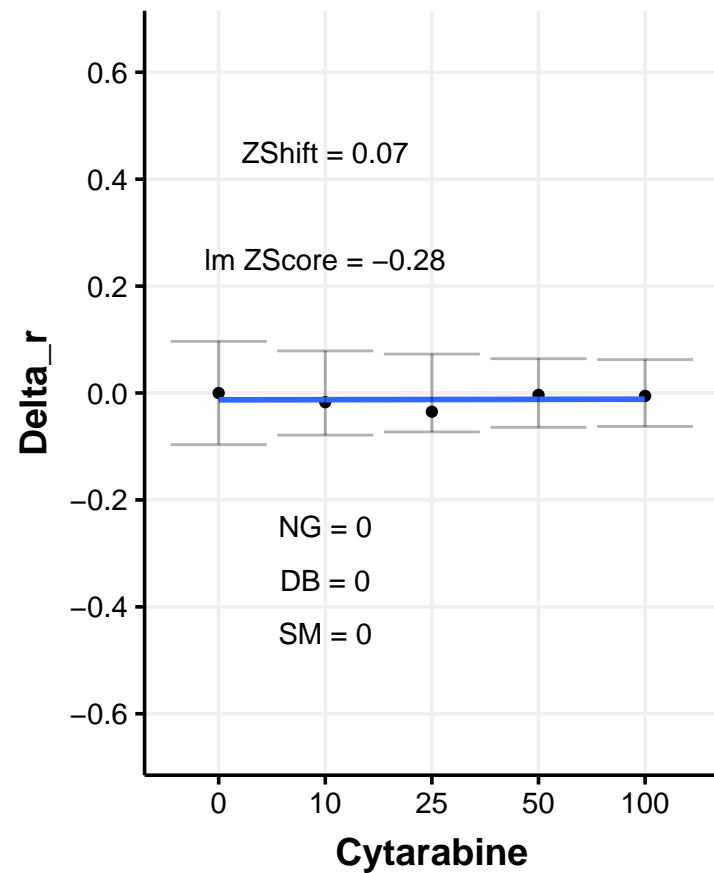

YDL227C\_RF2\_127 RF2

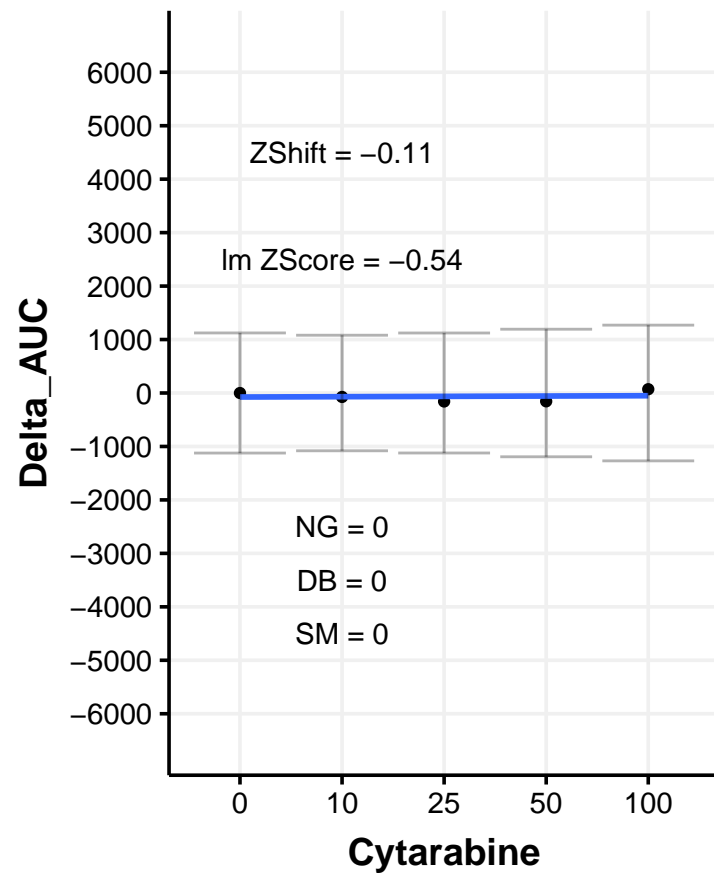

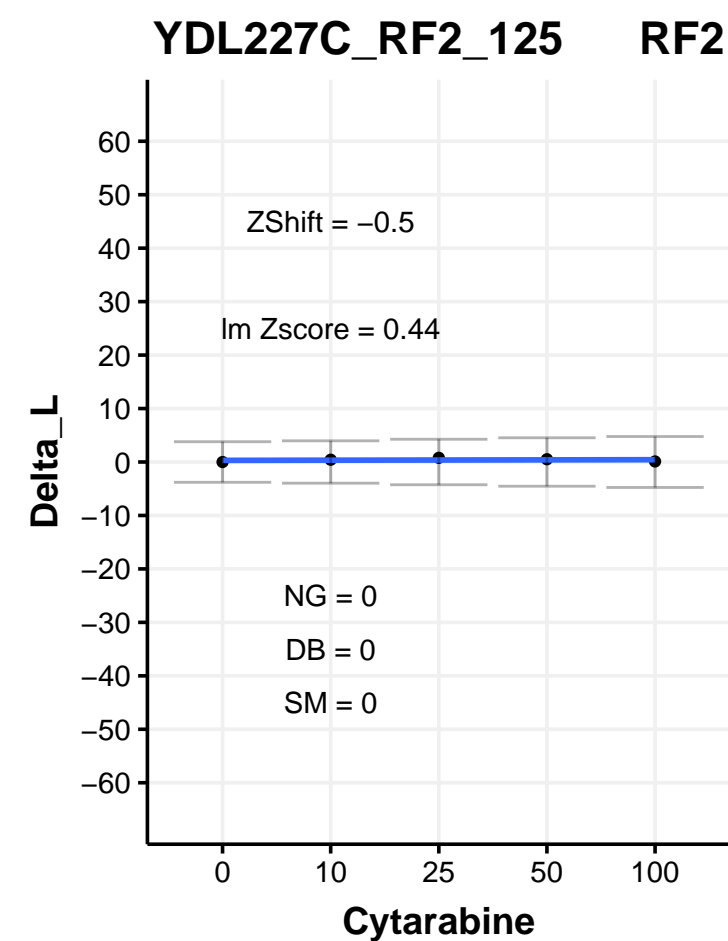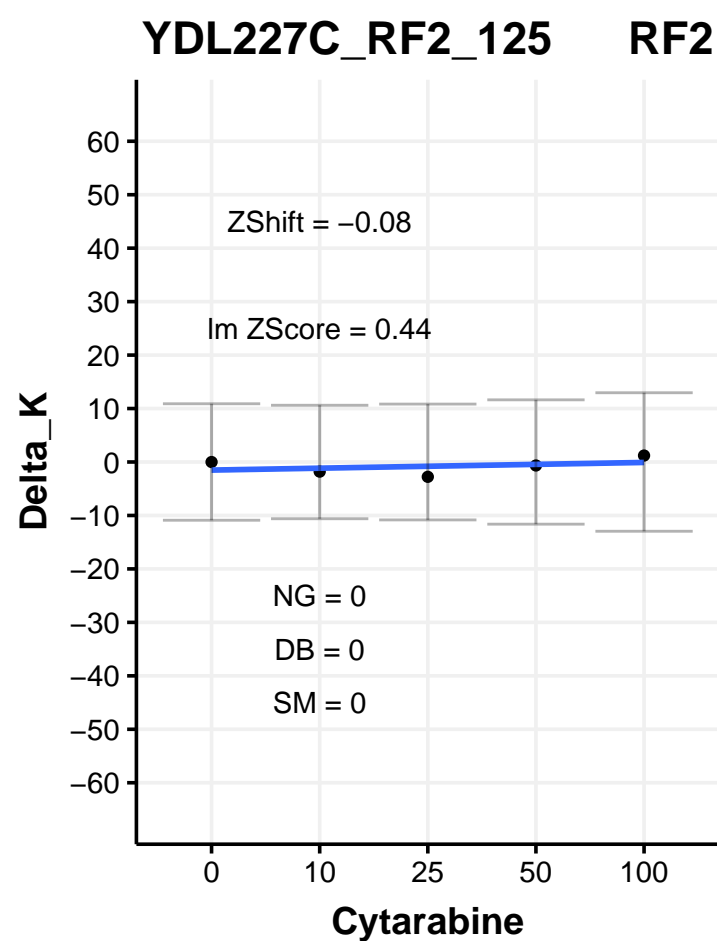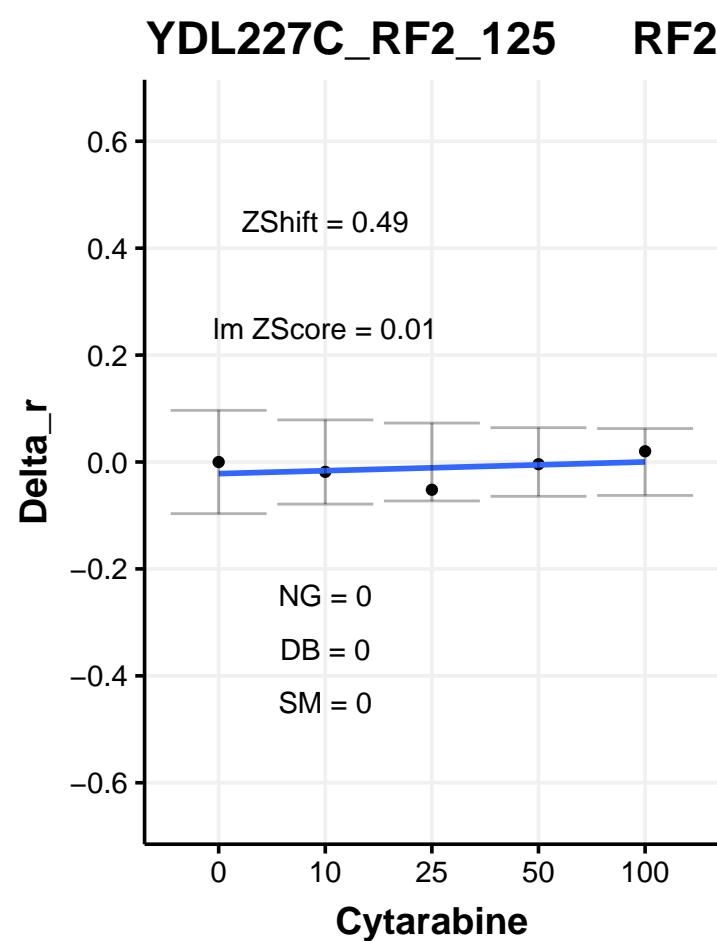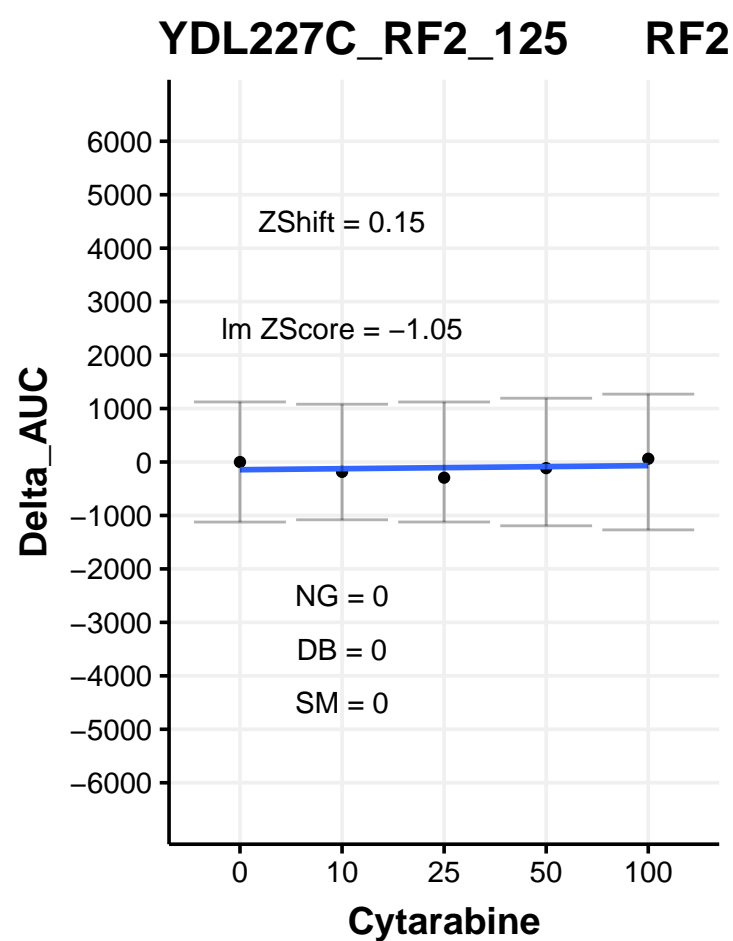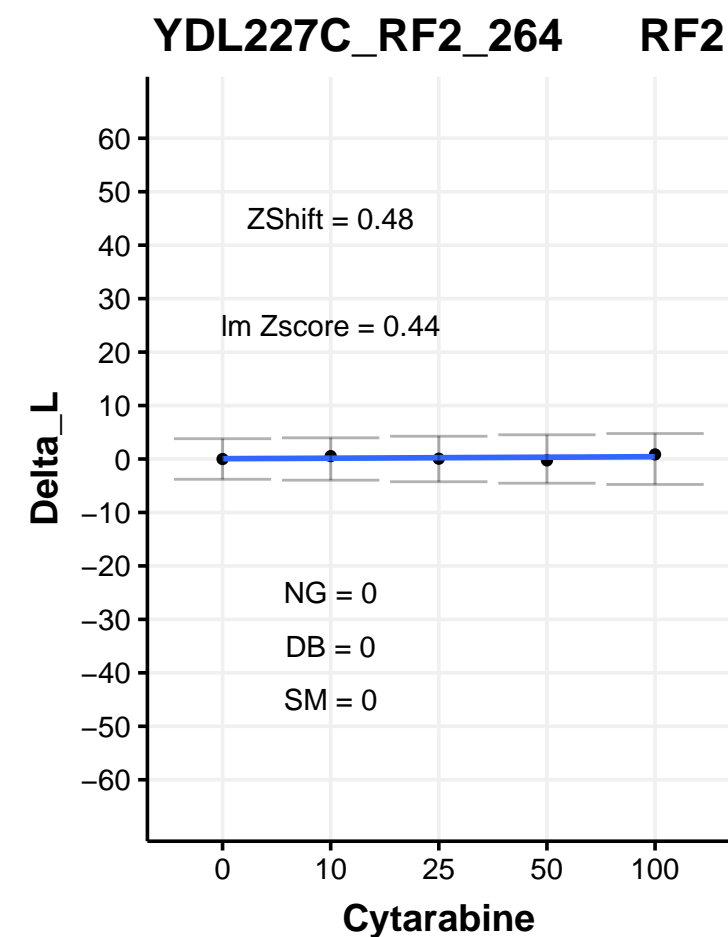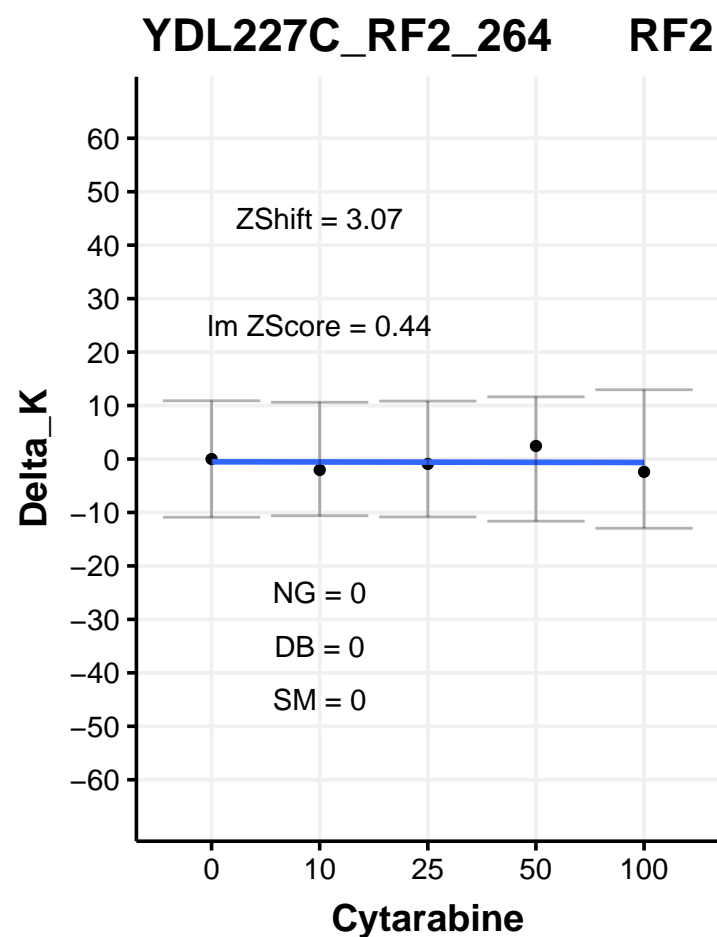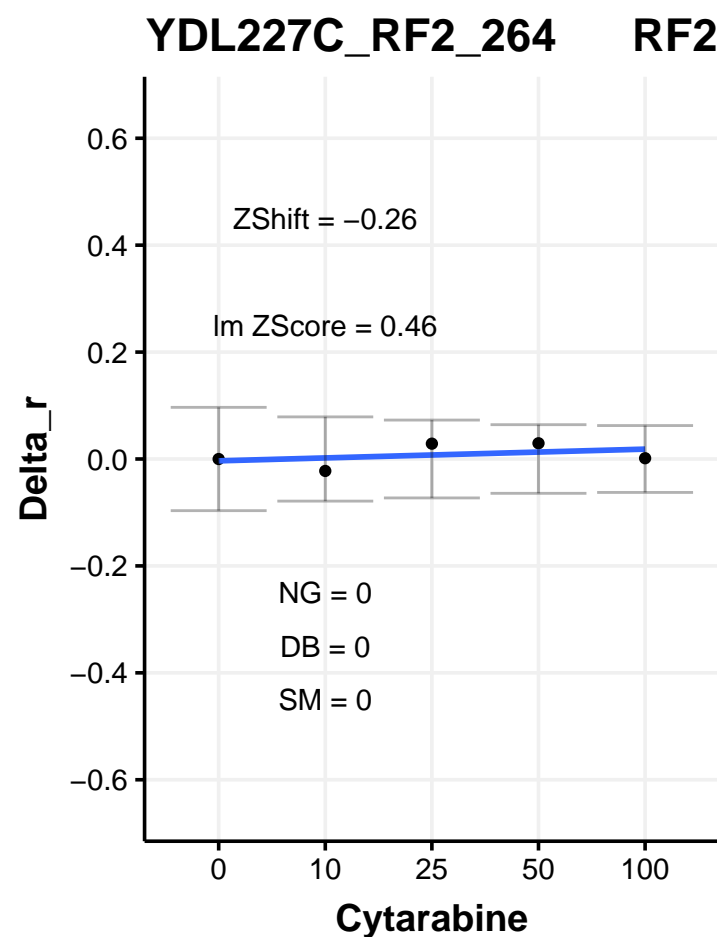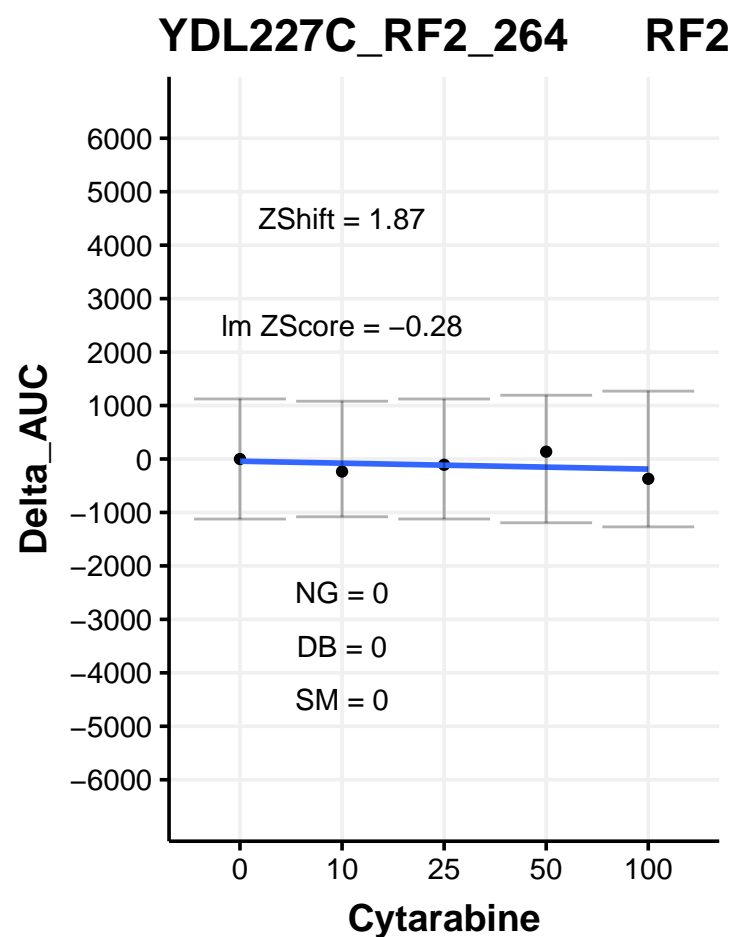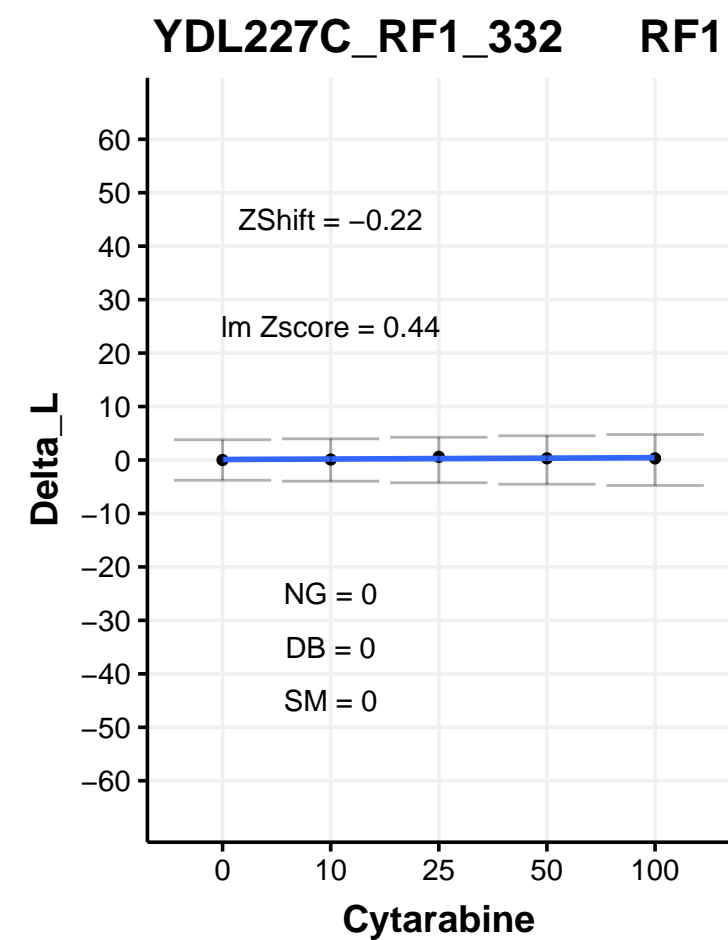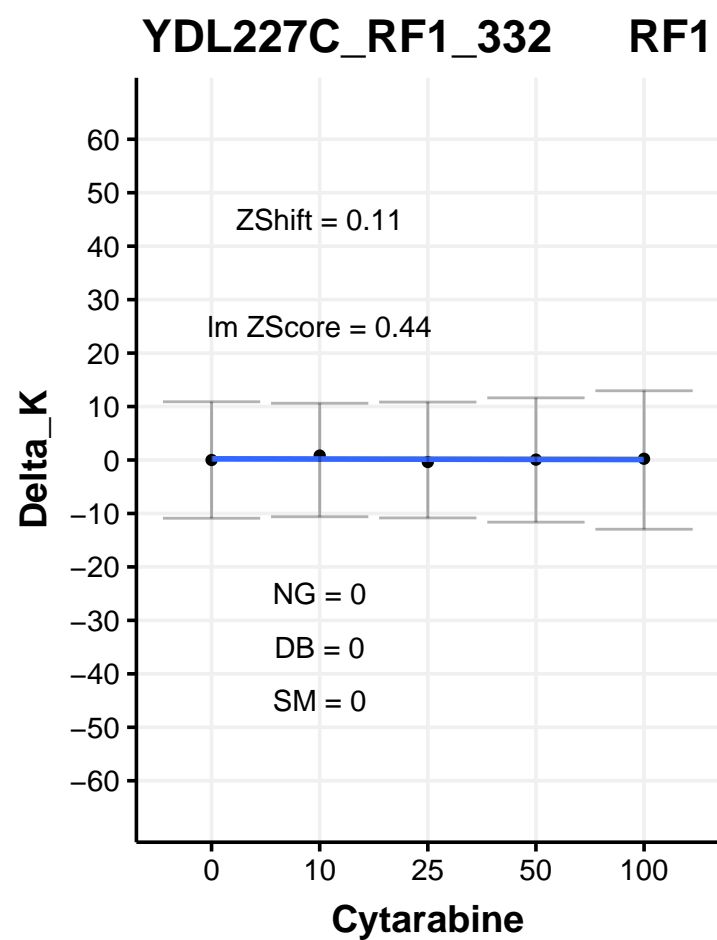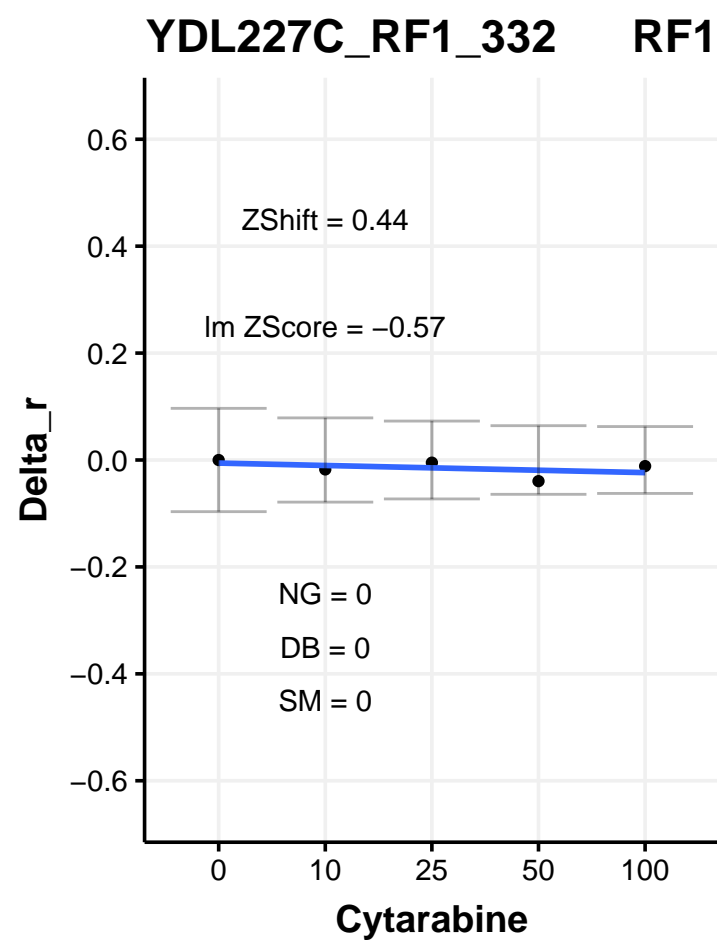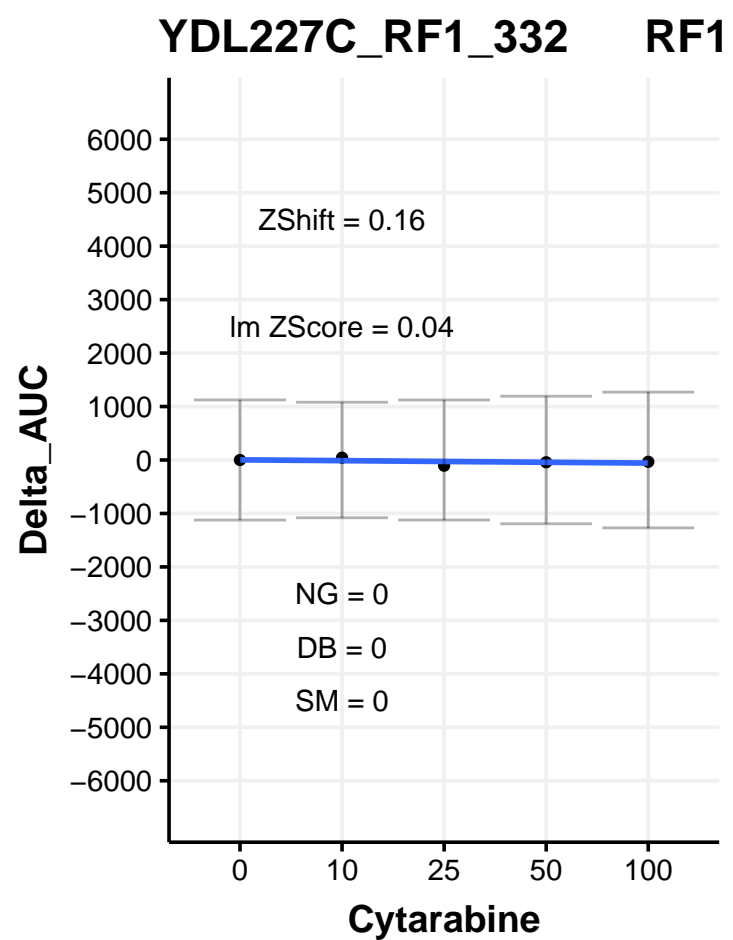

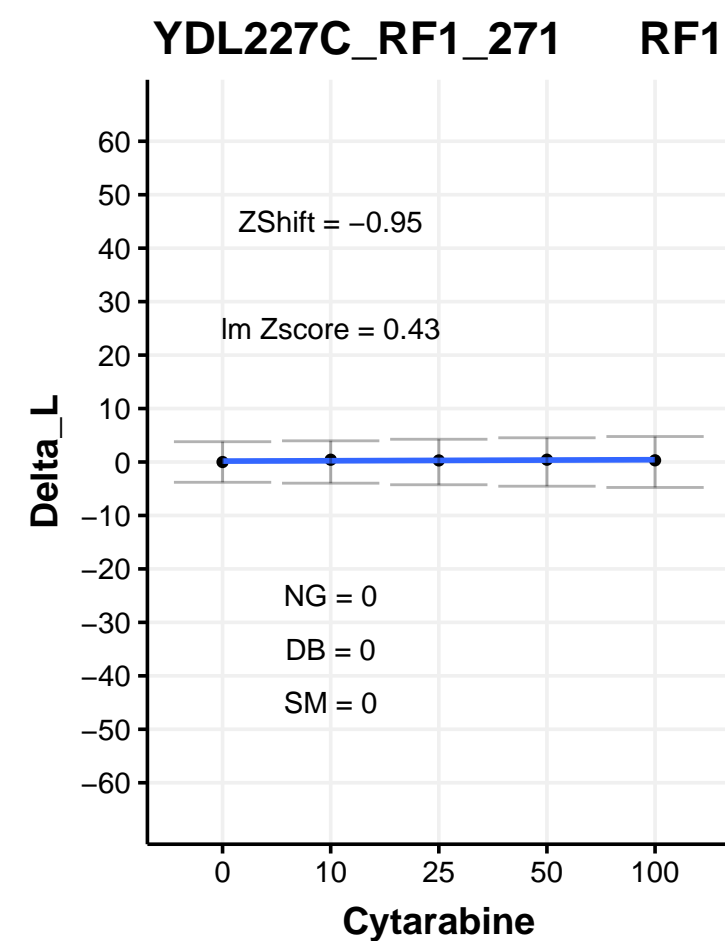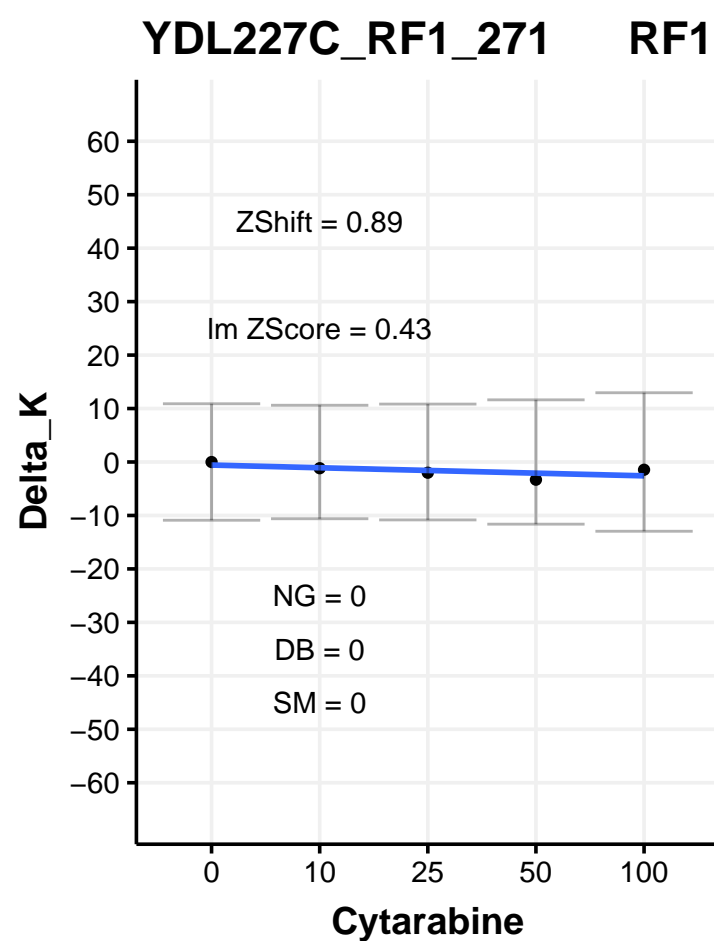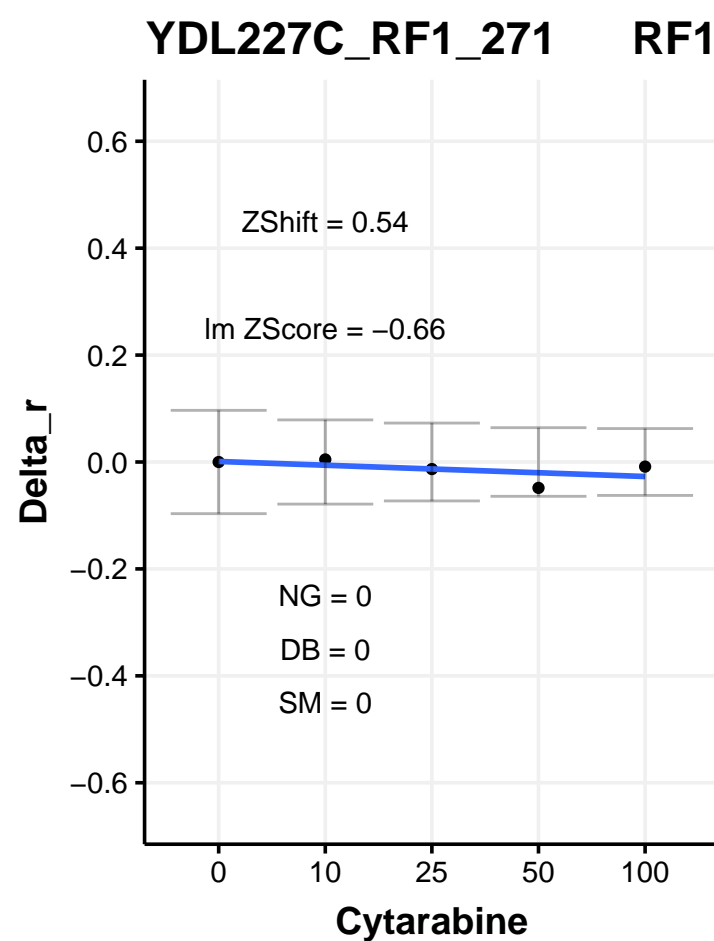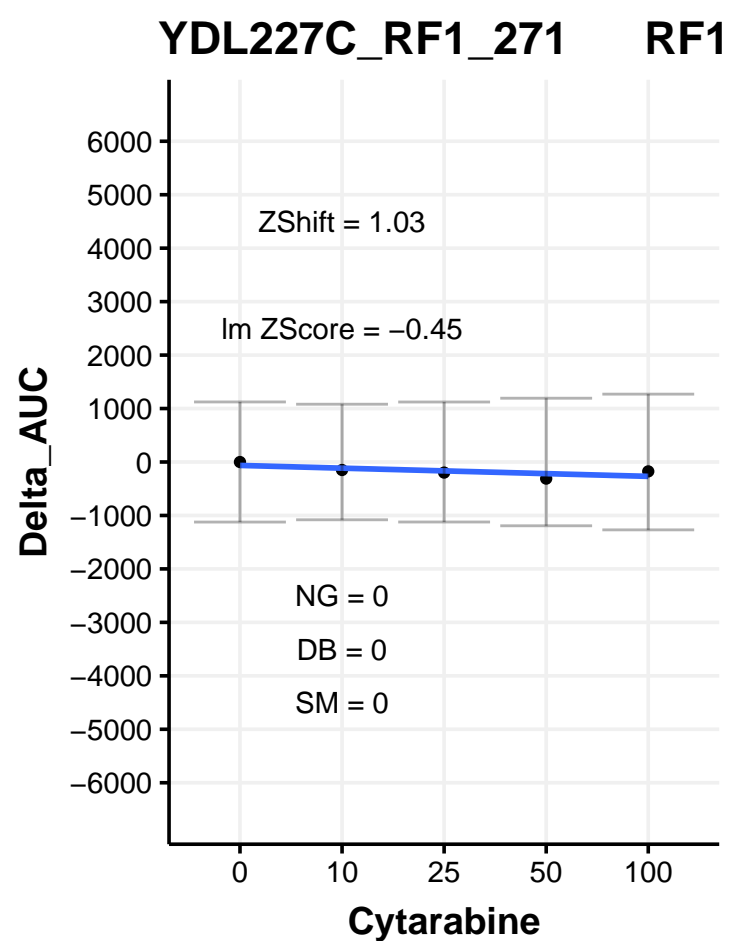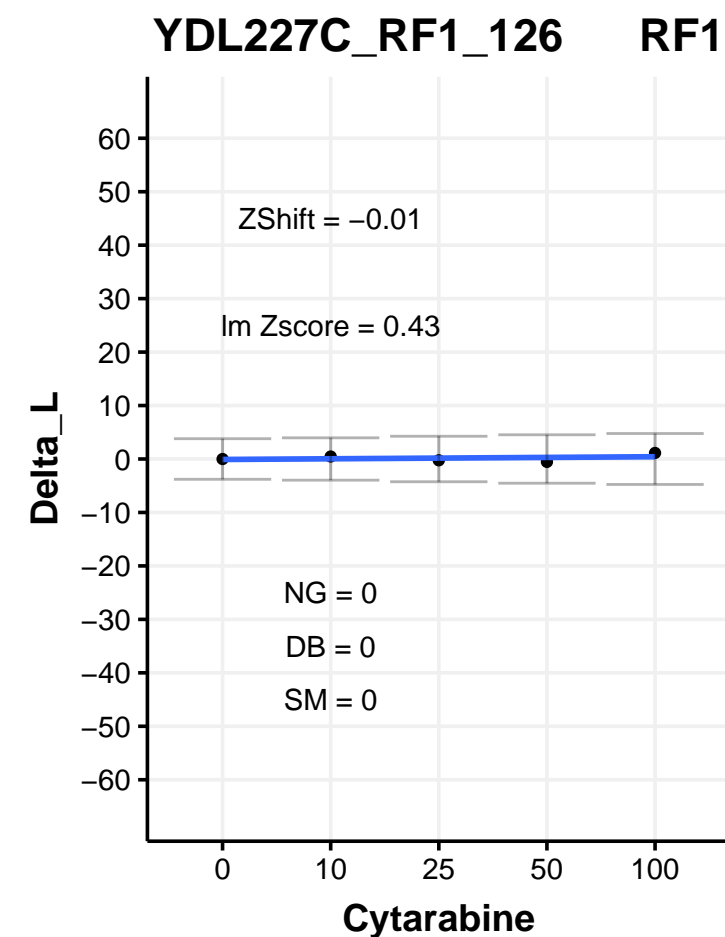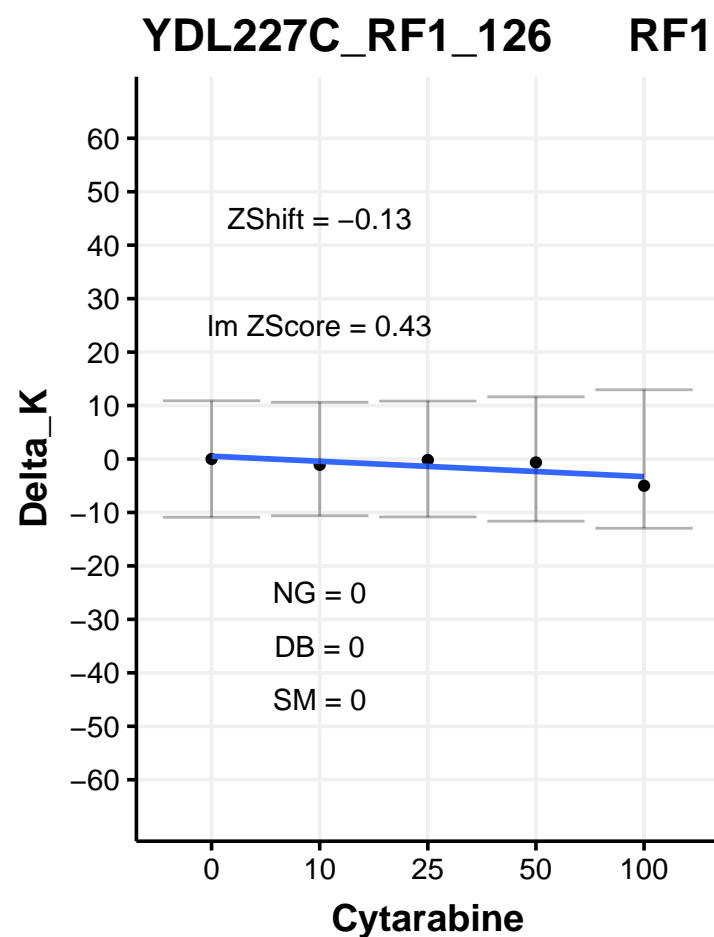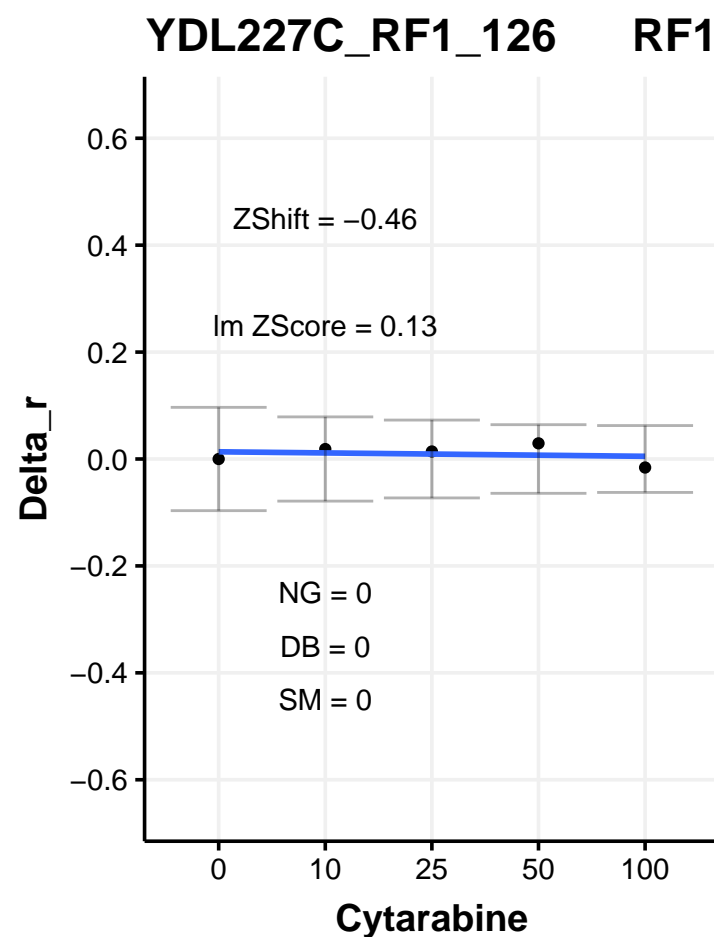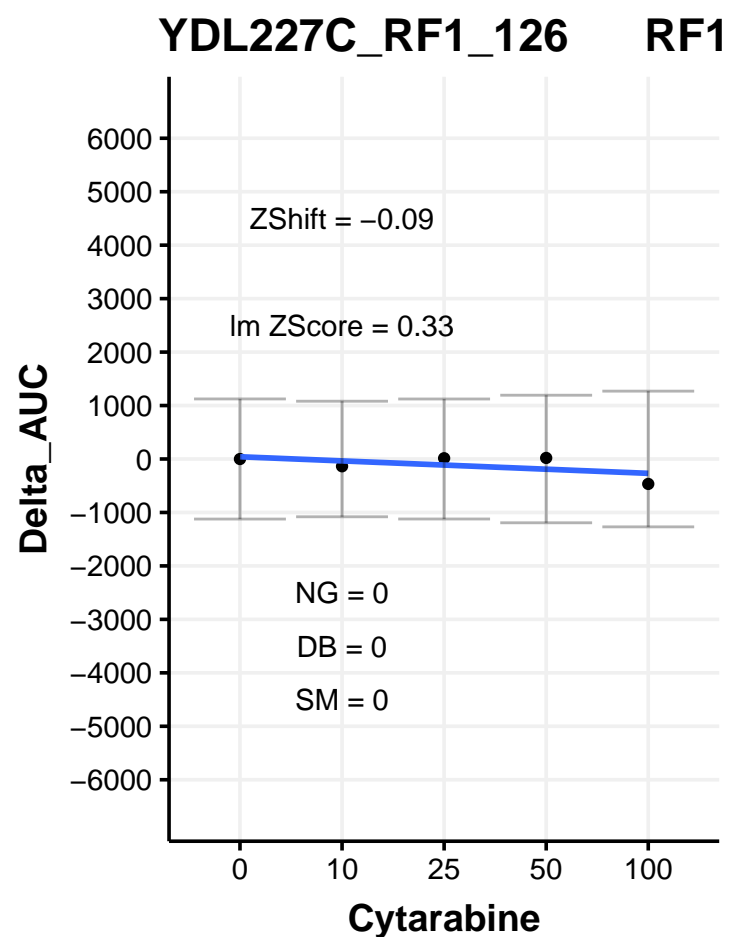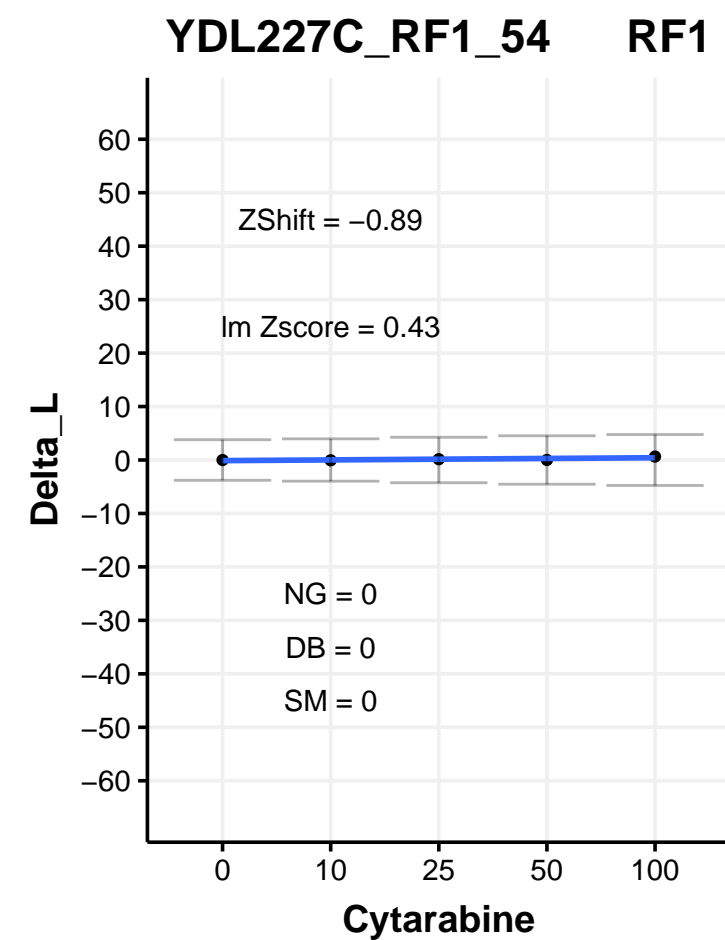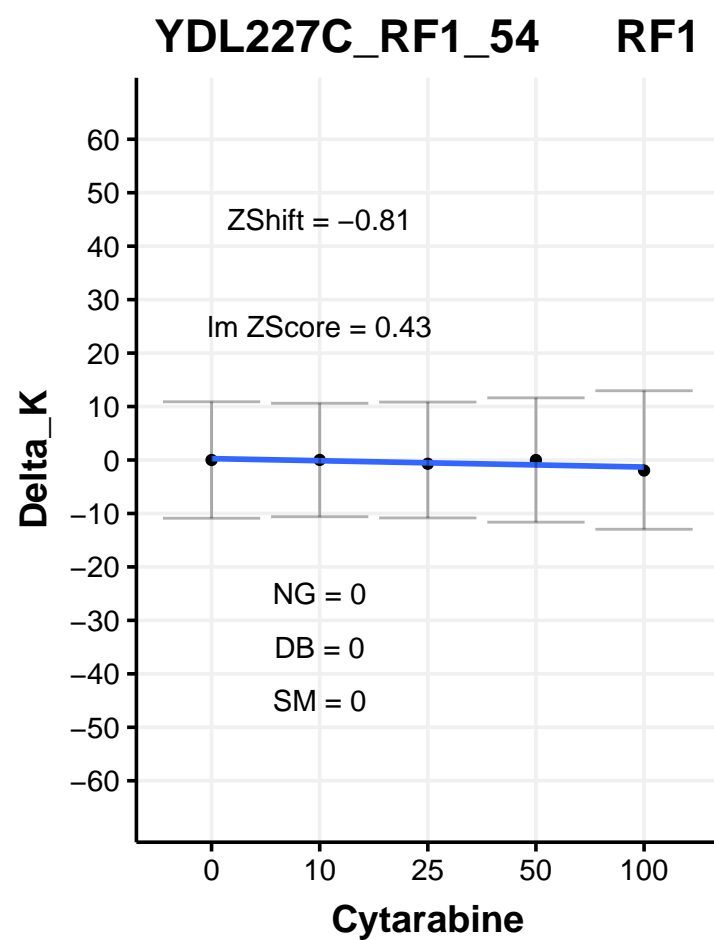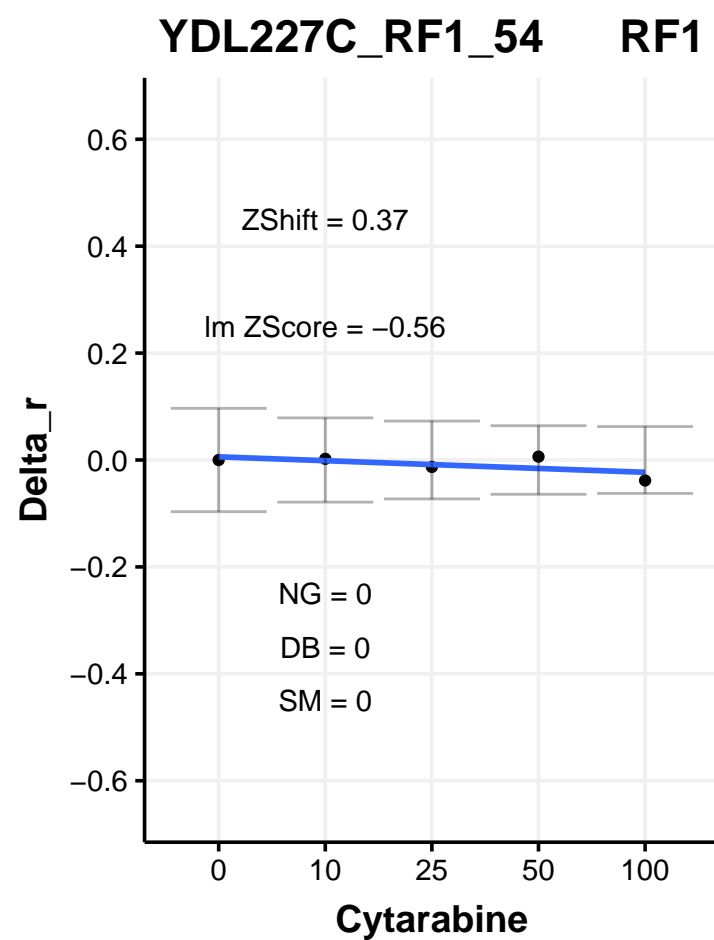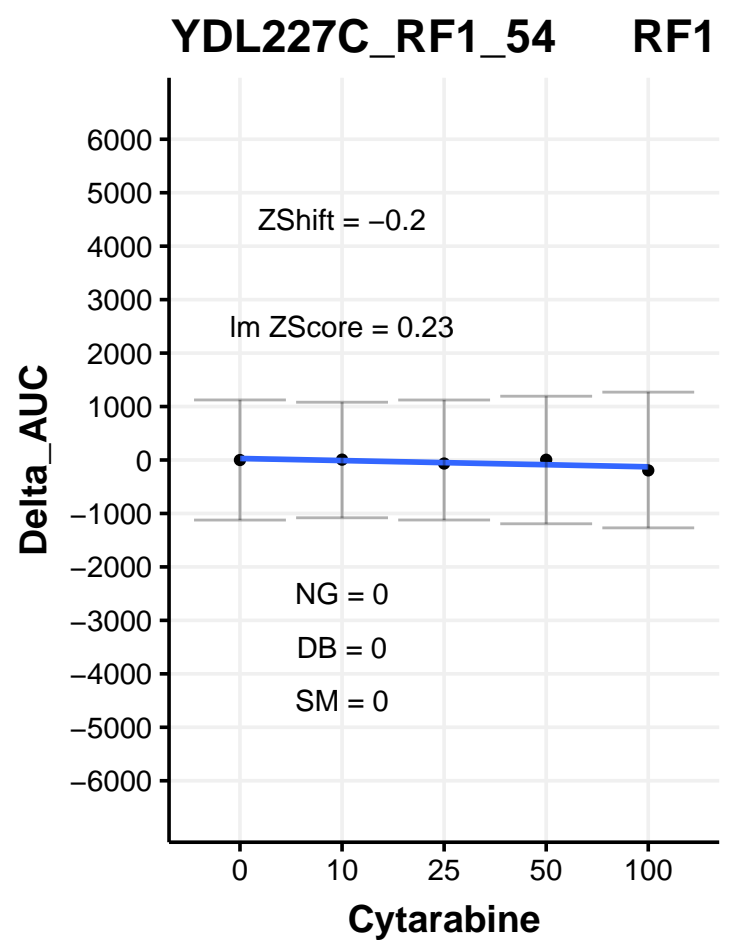

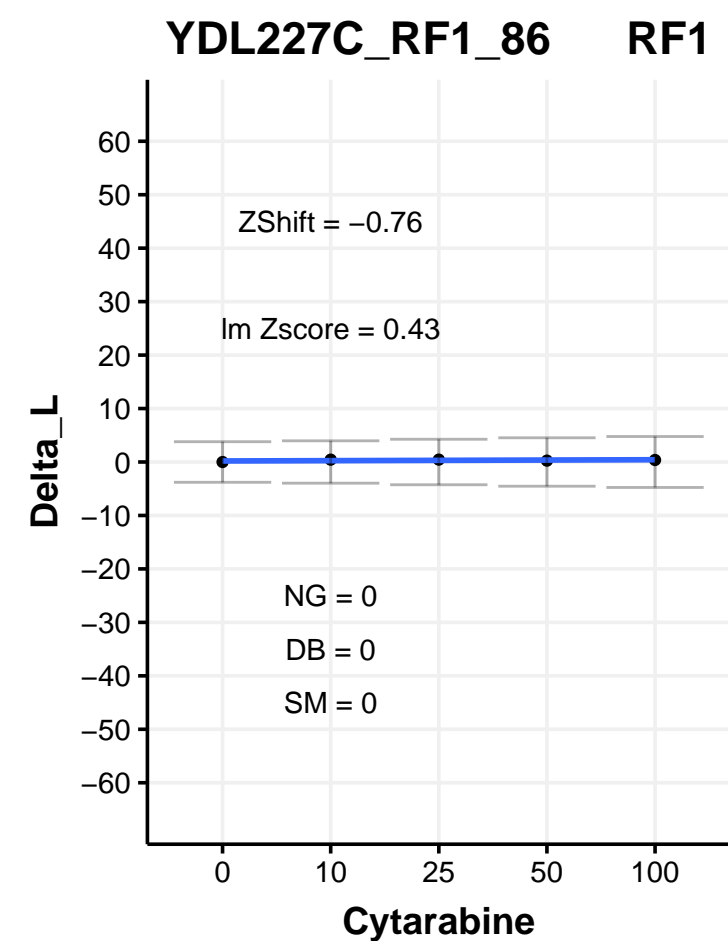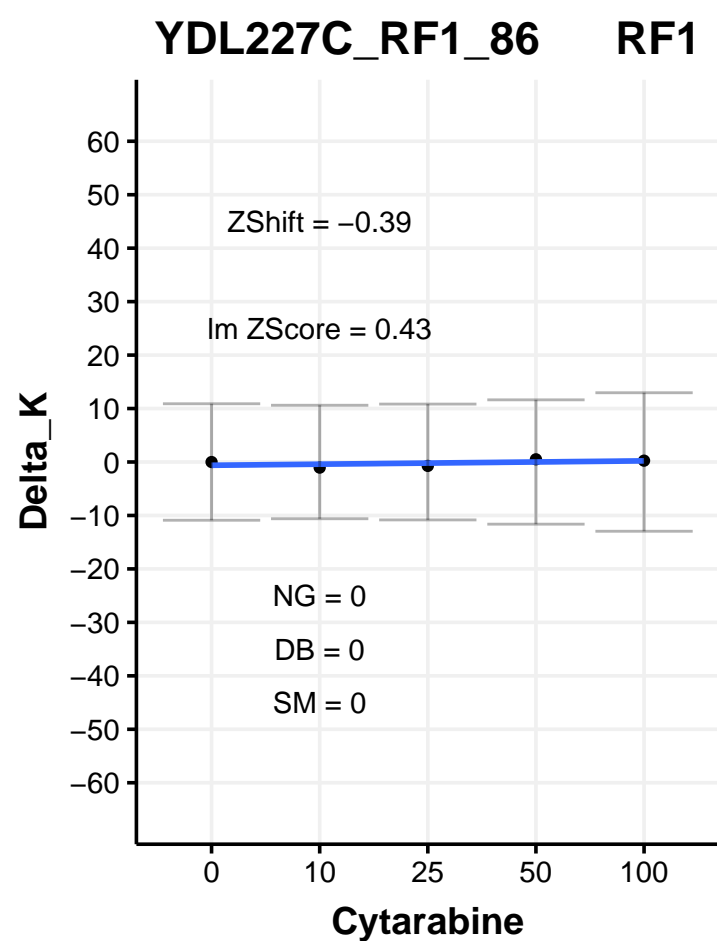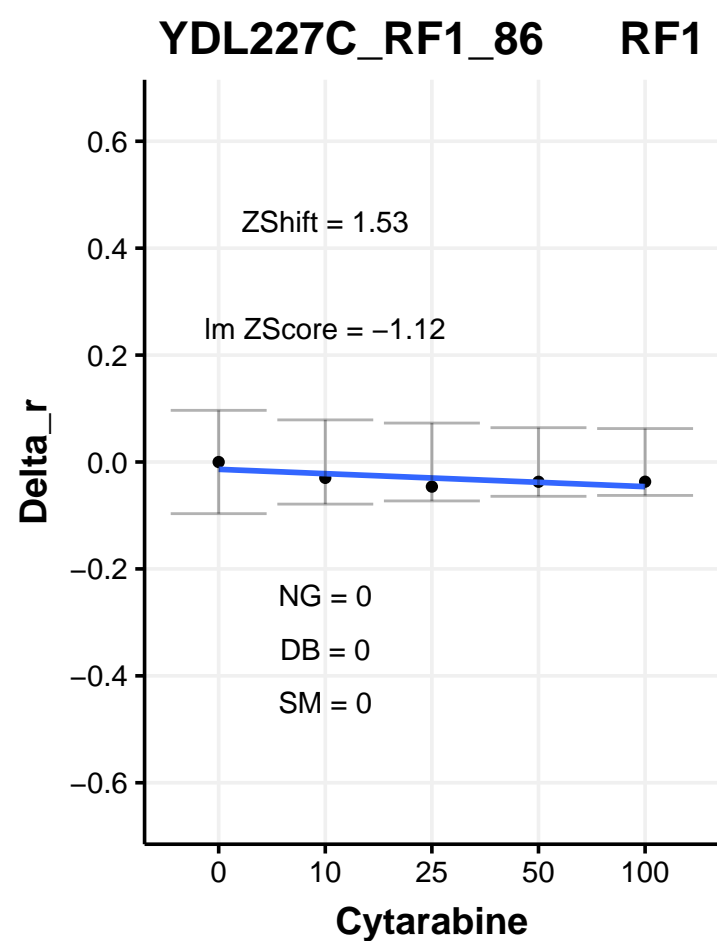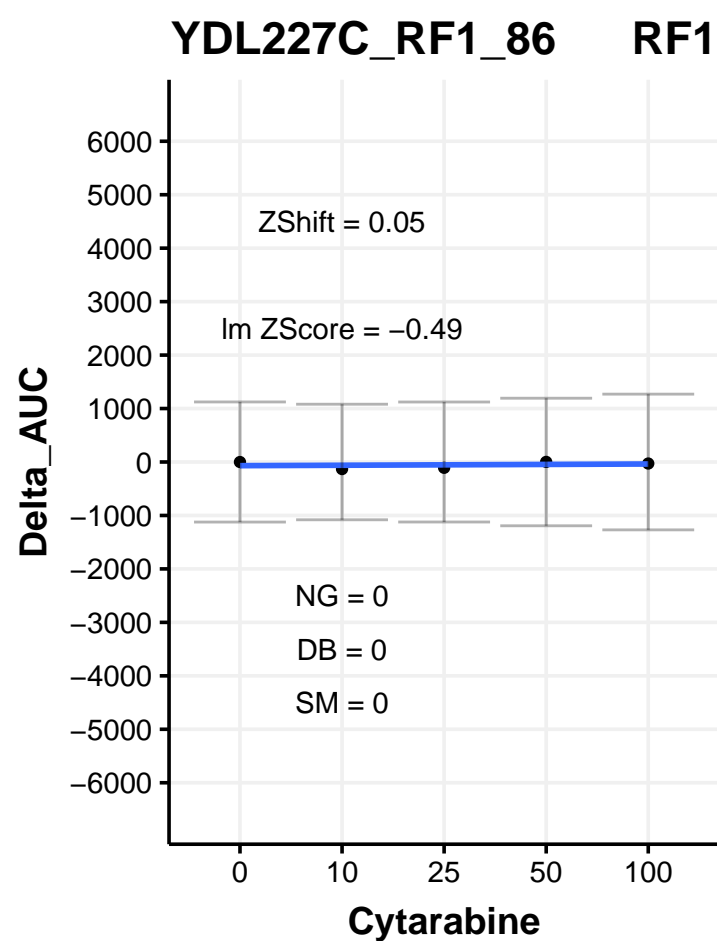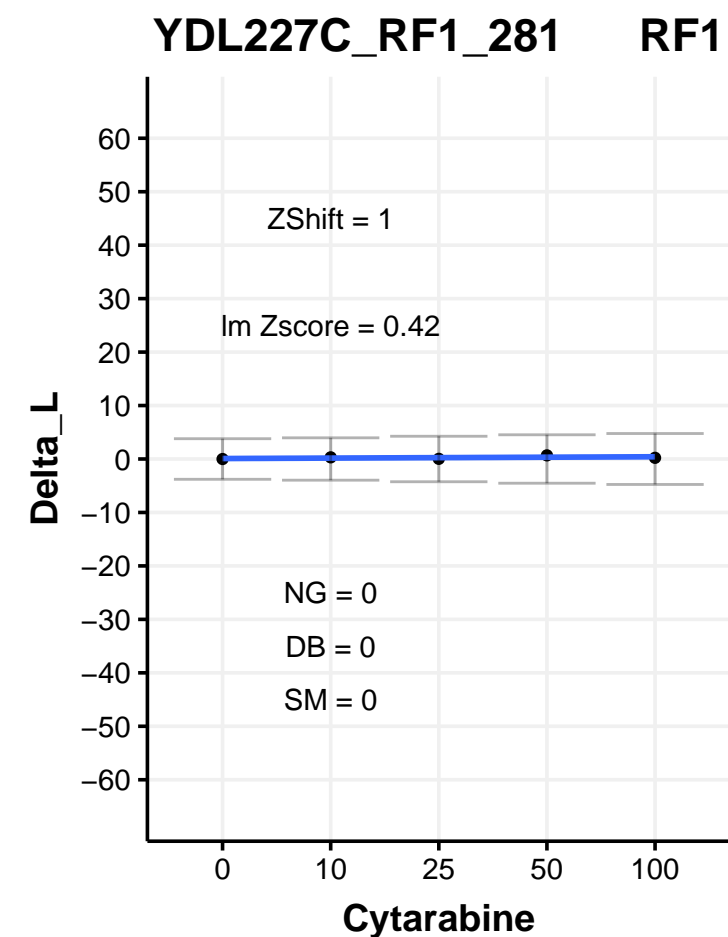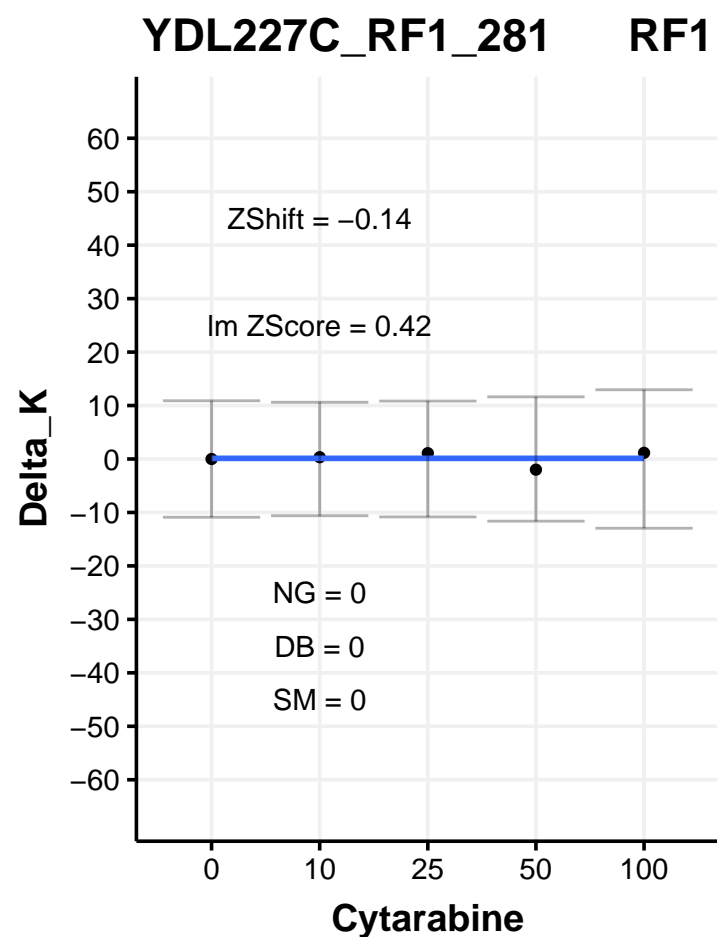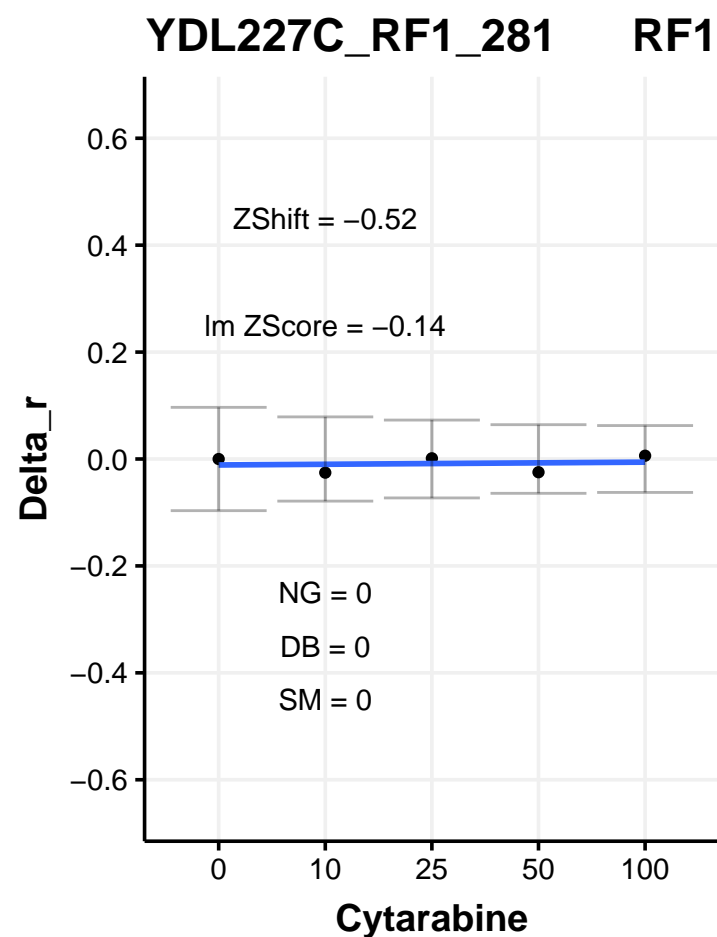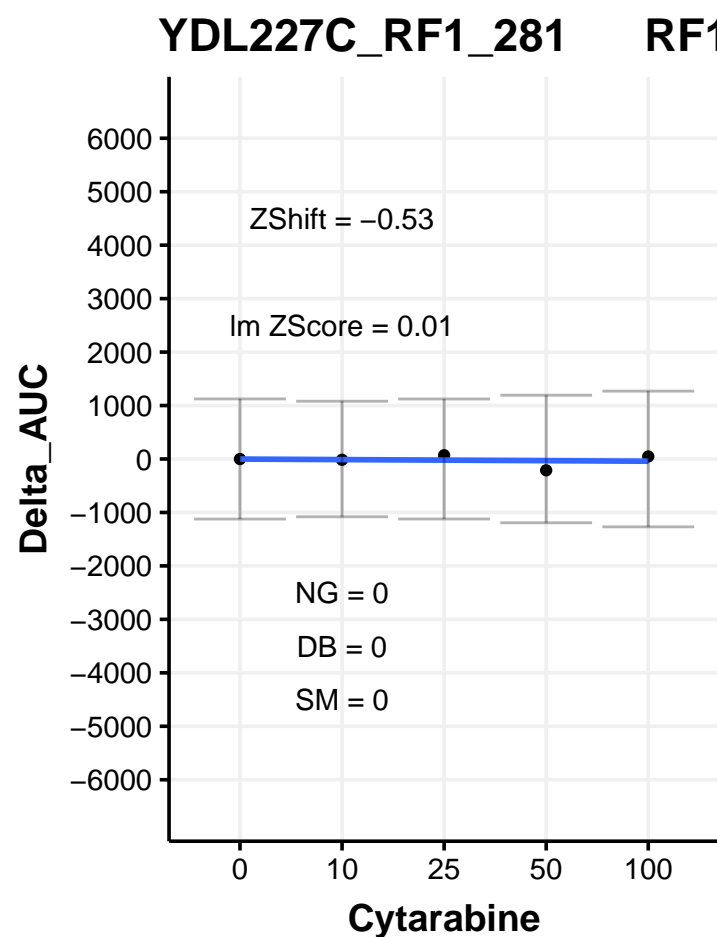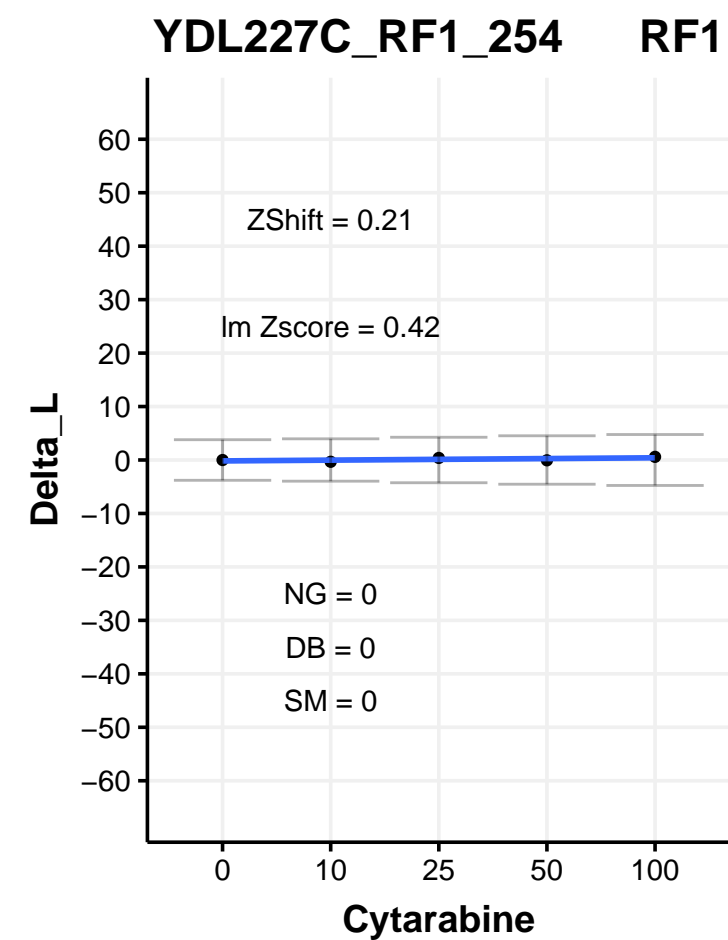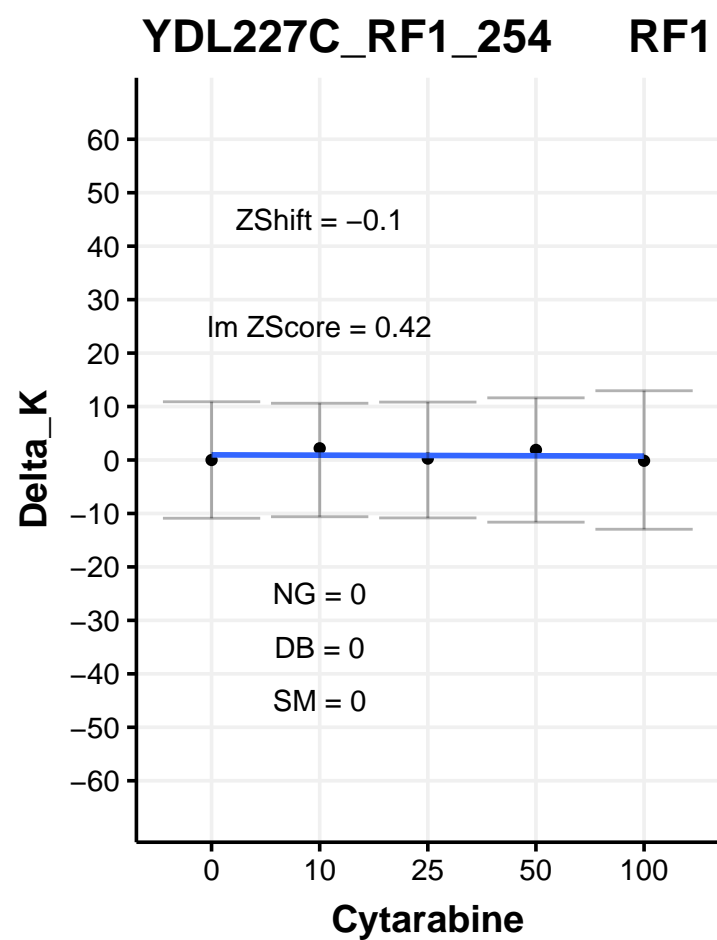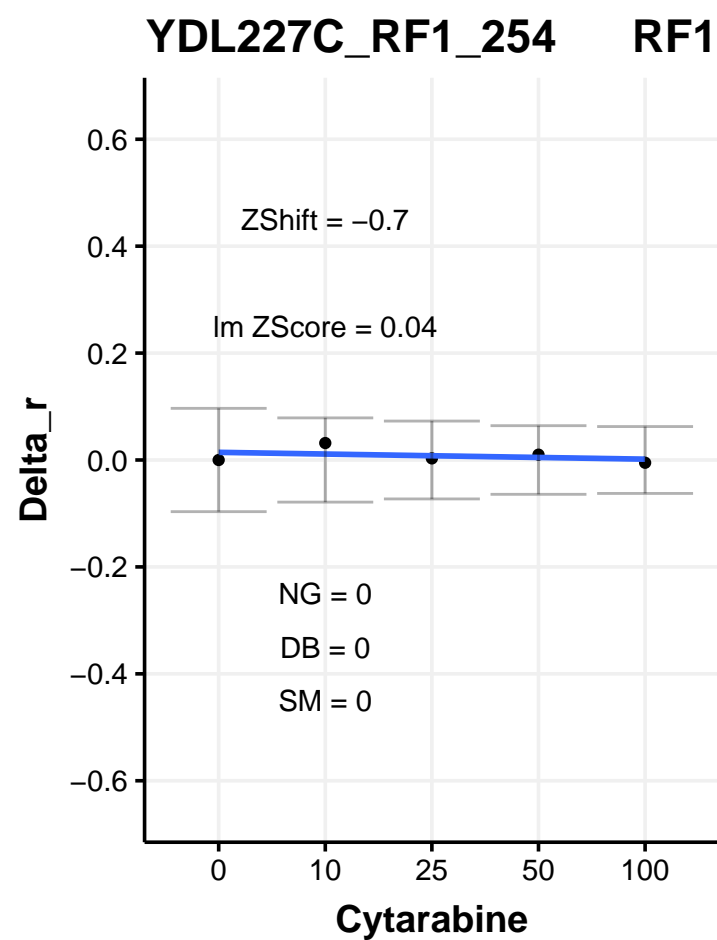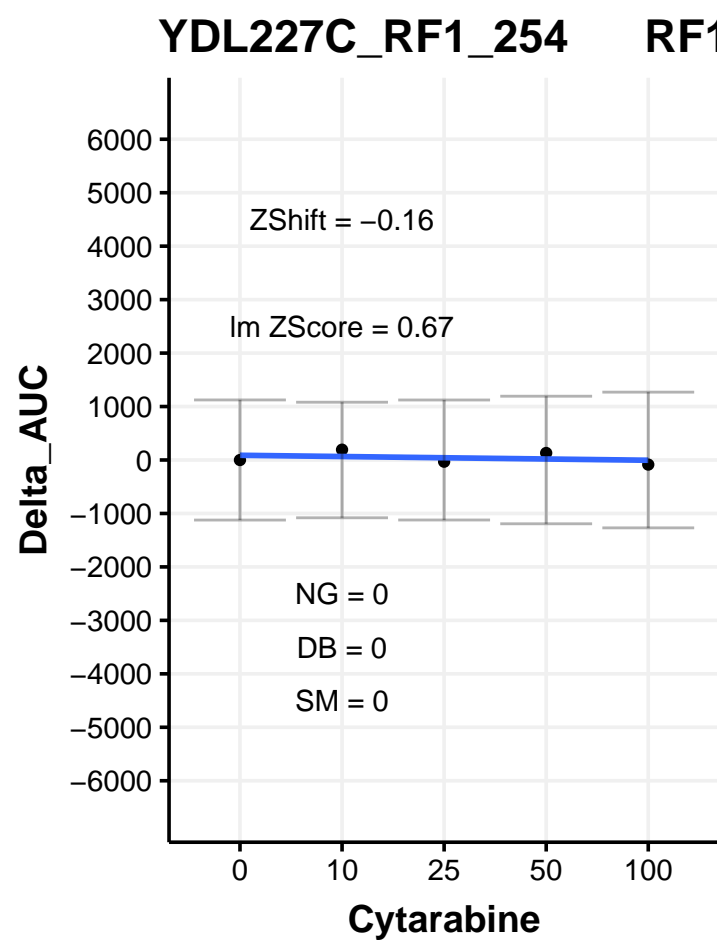



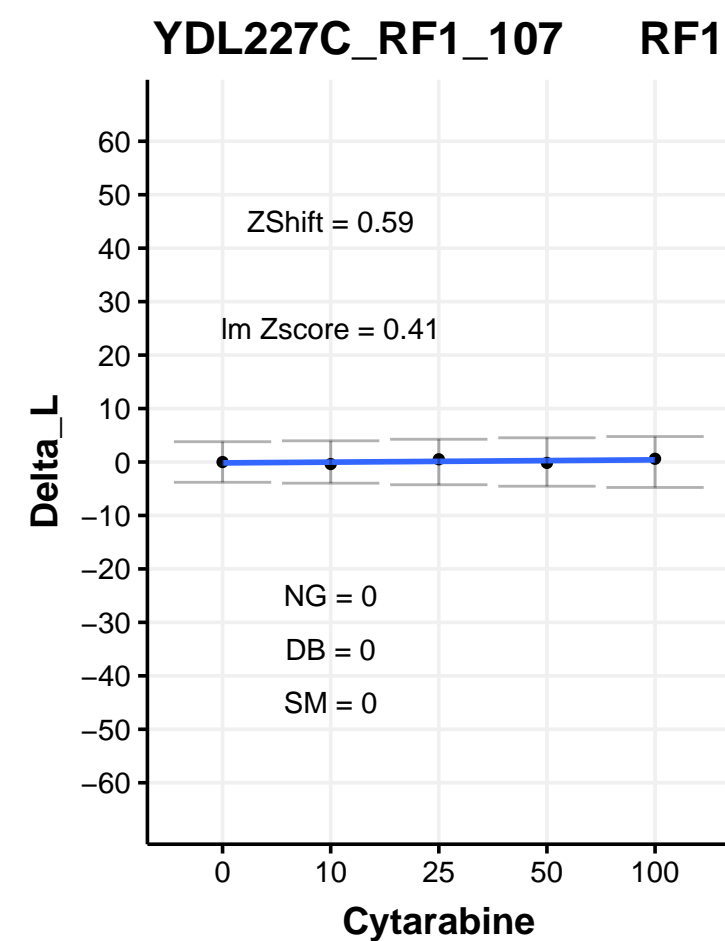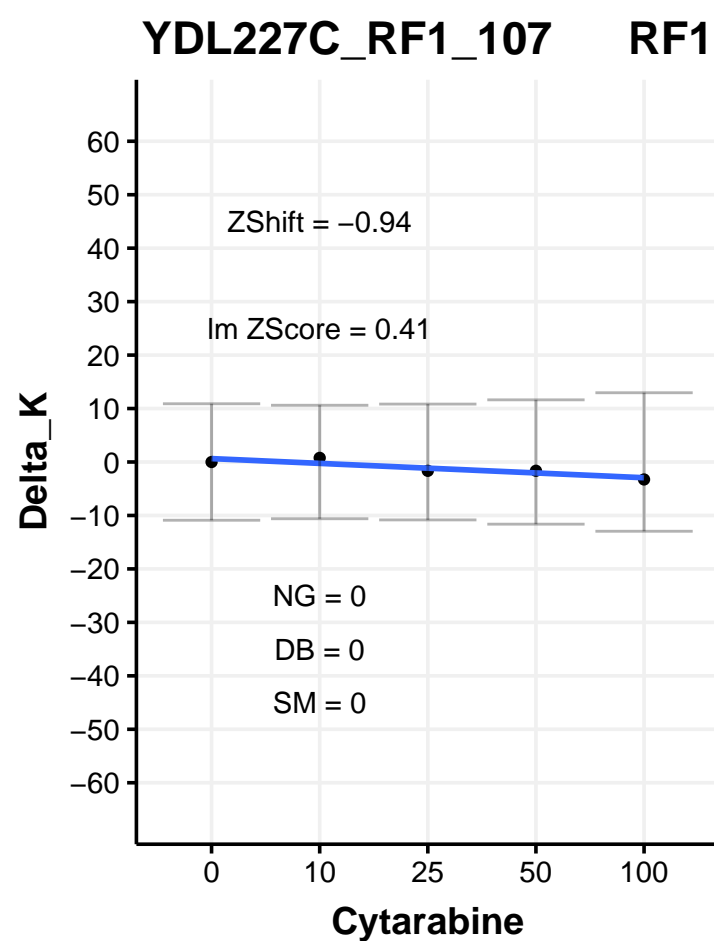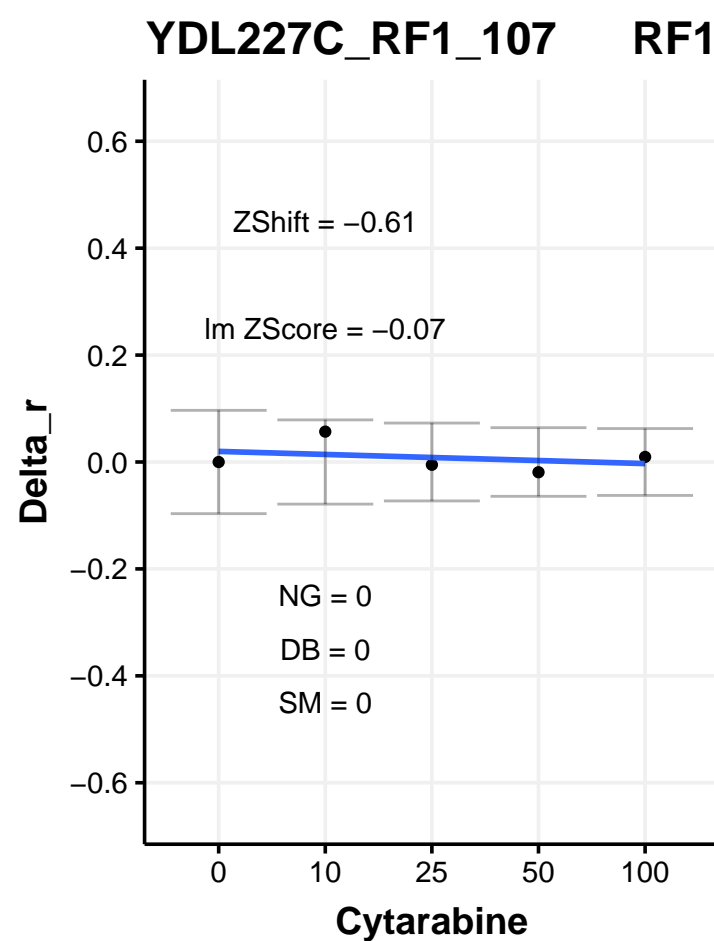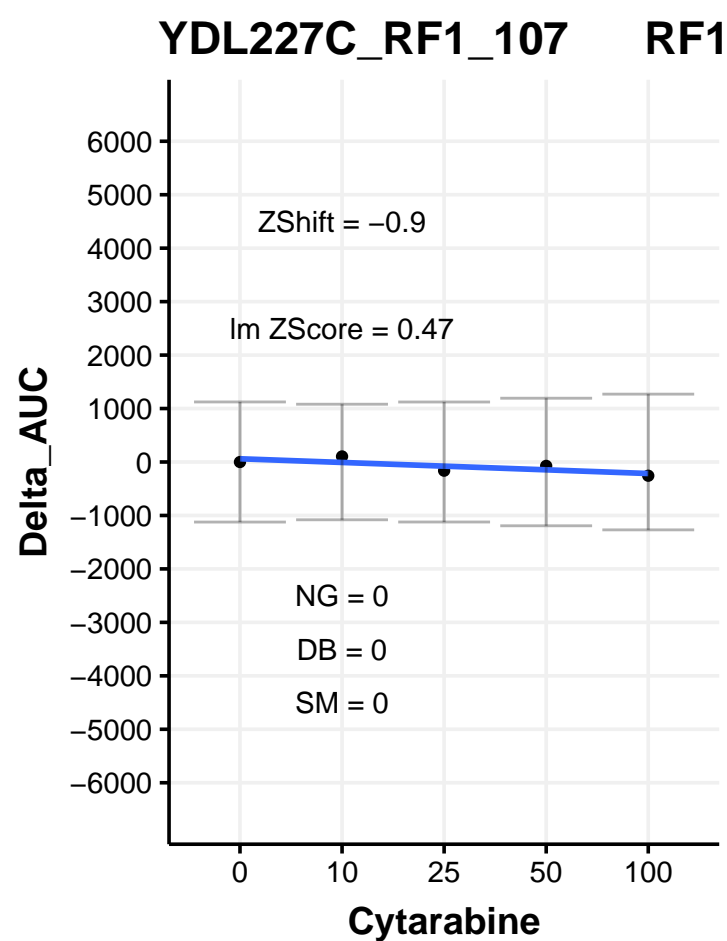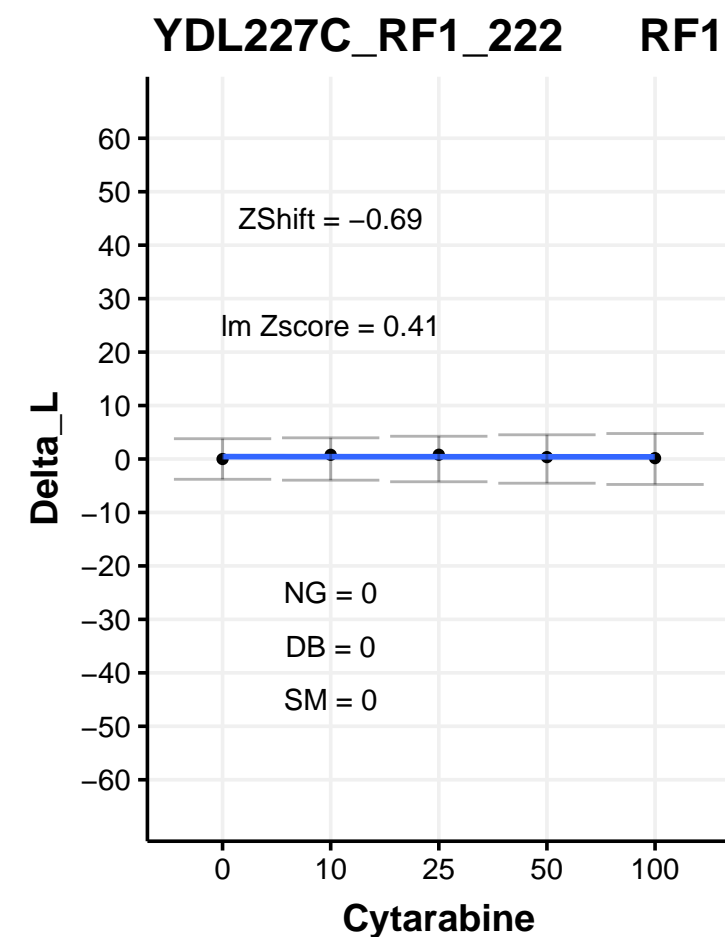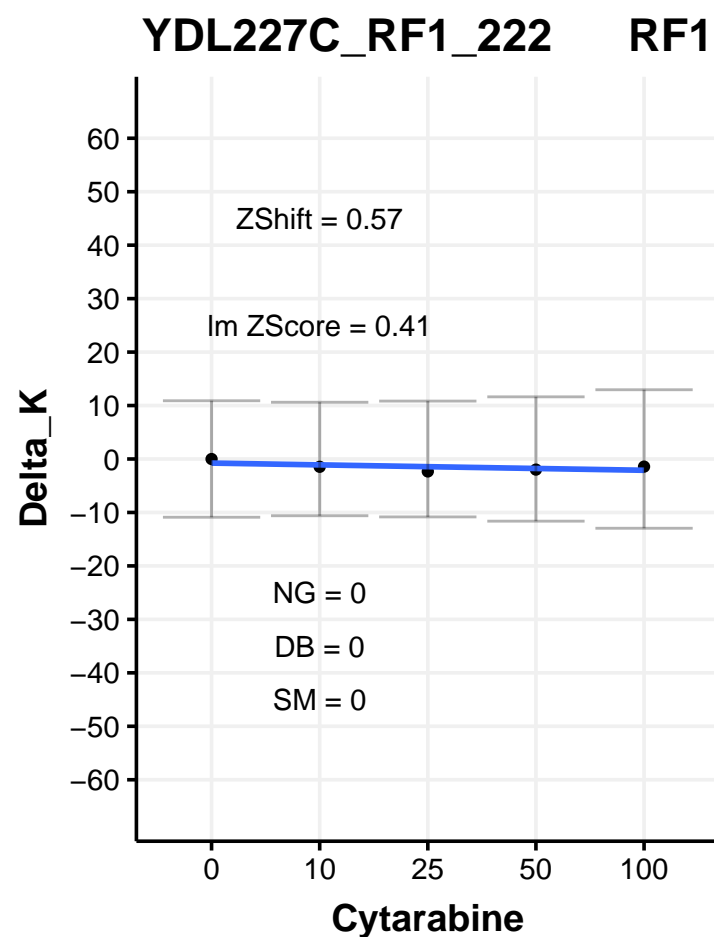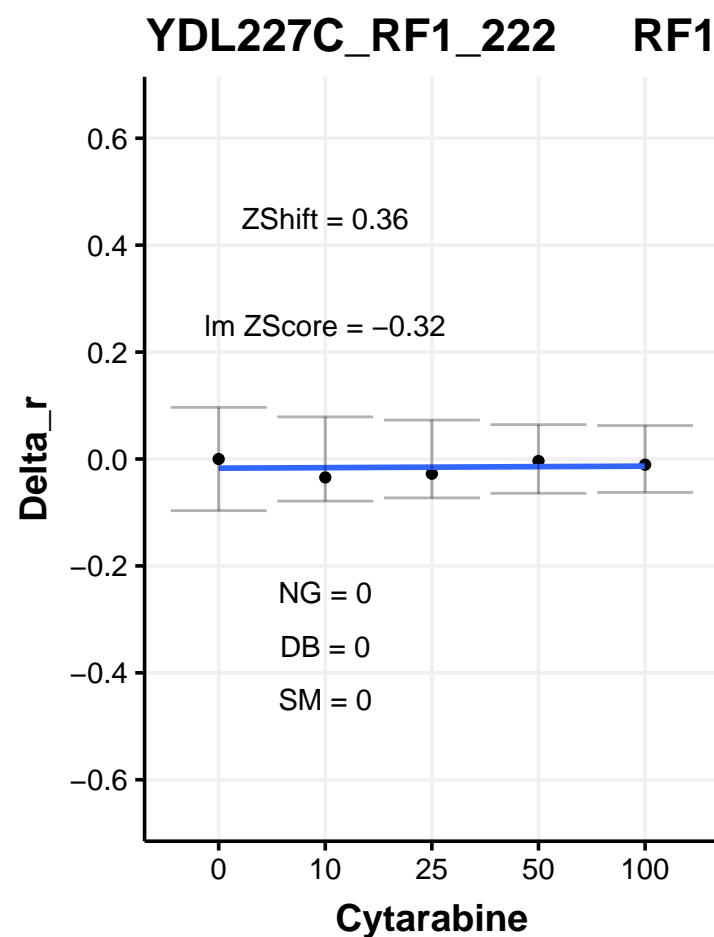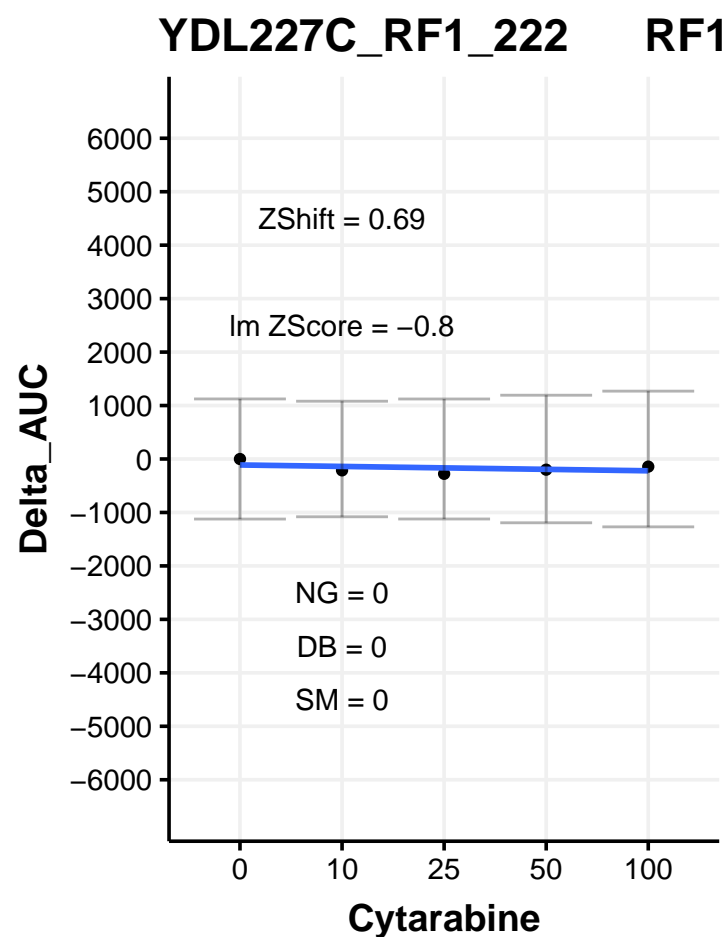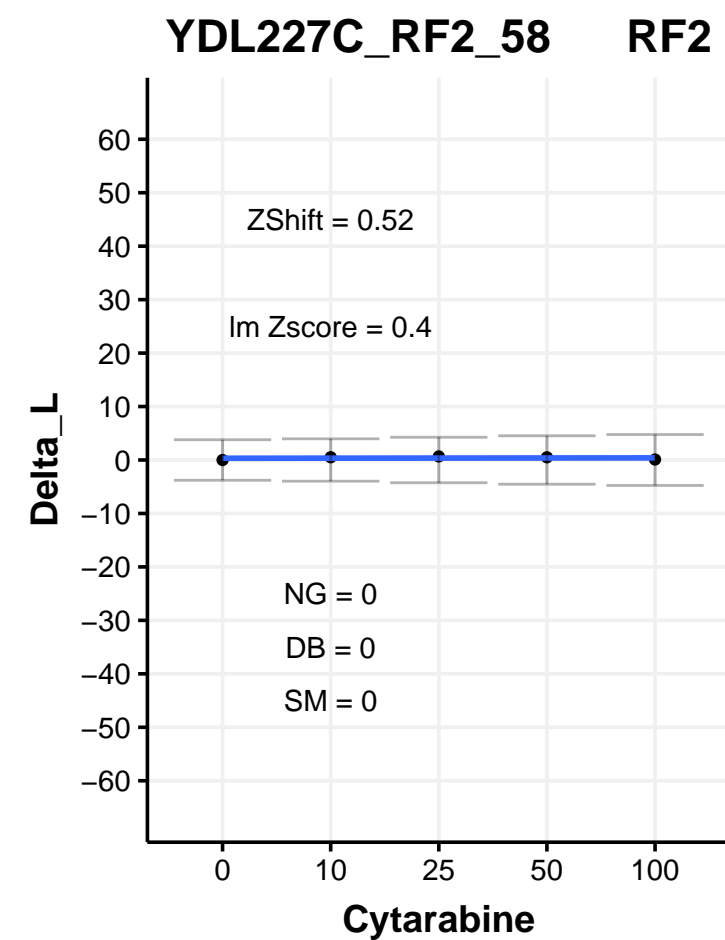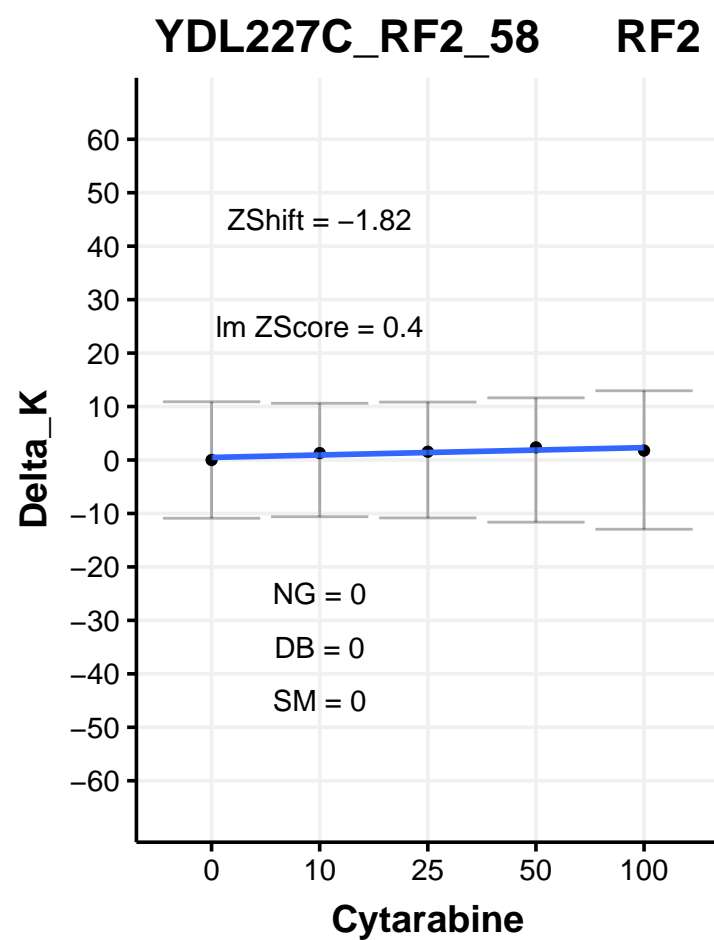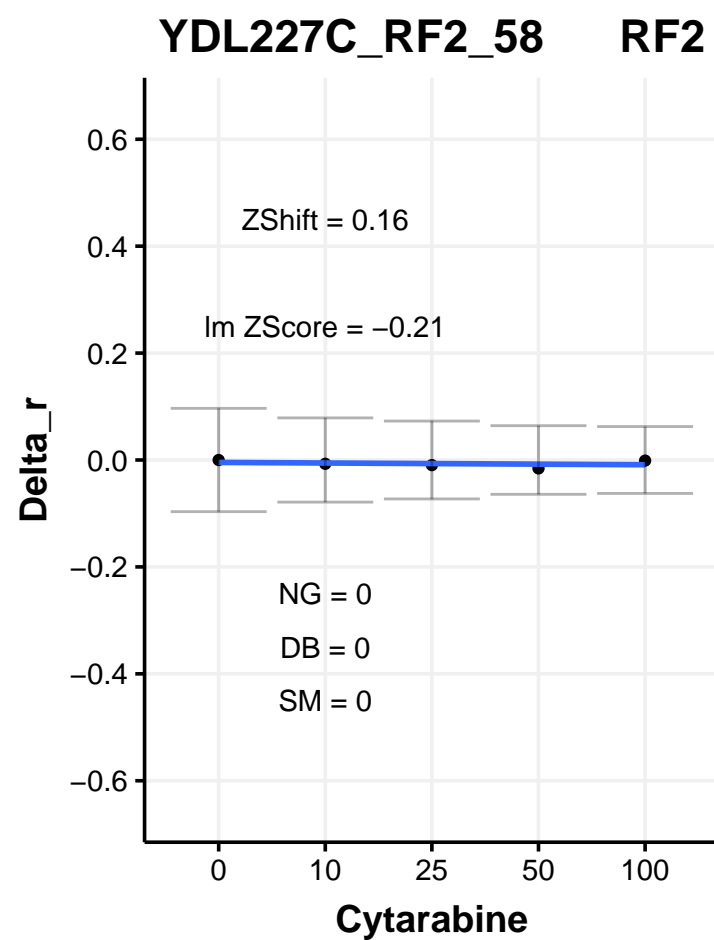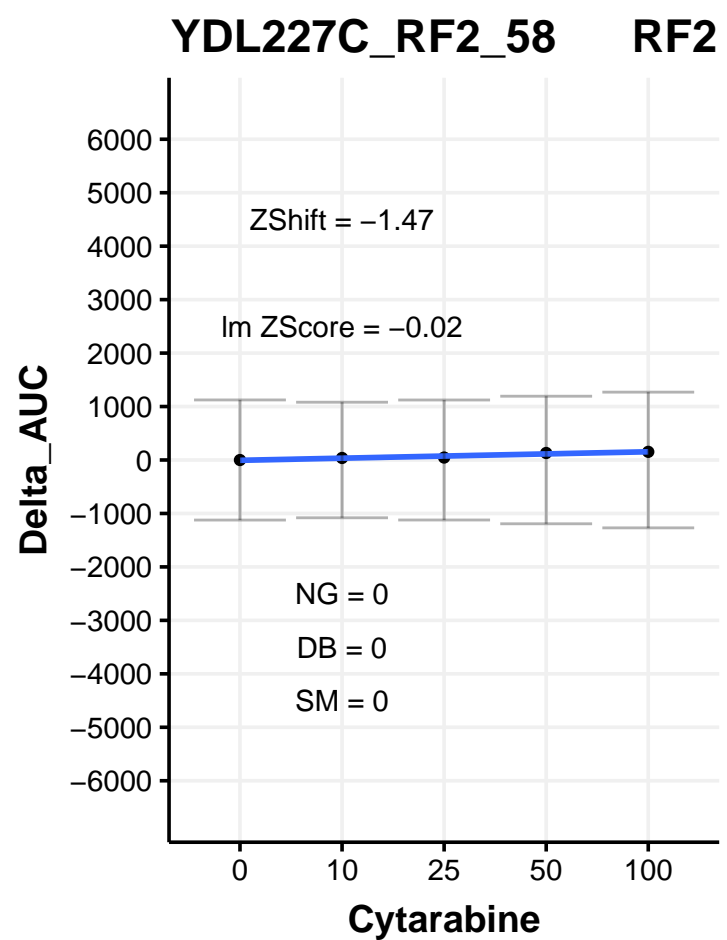

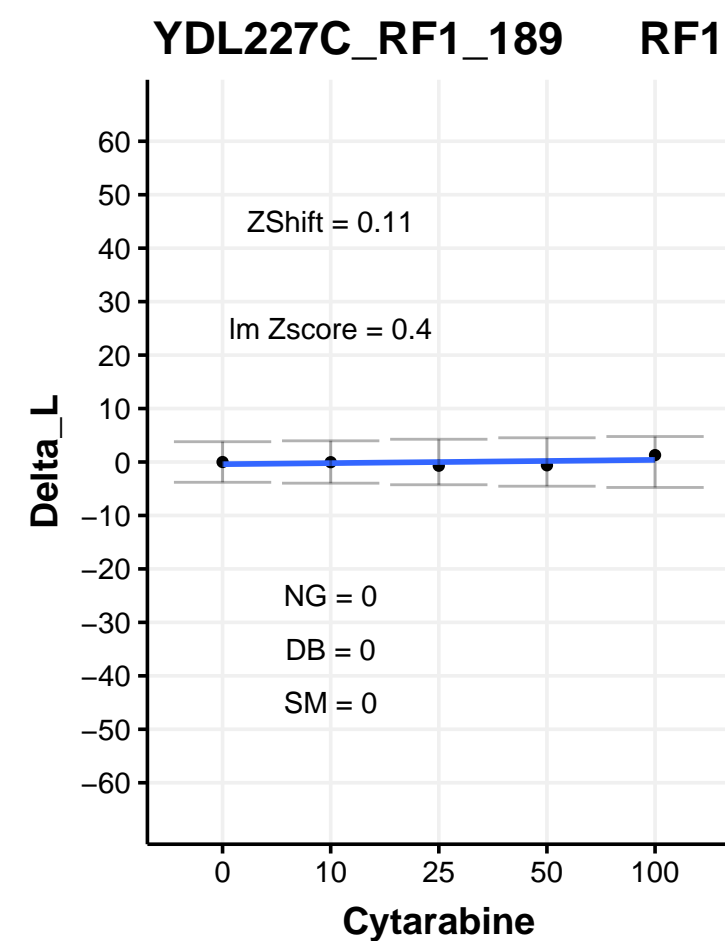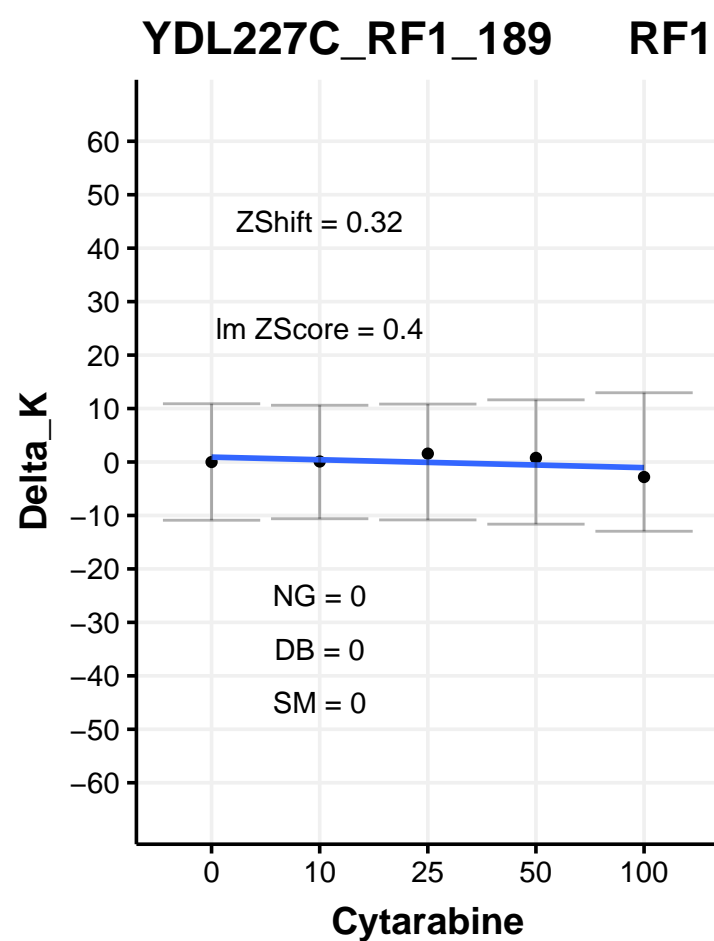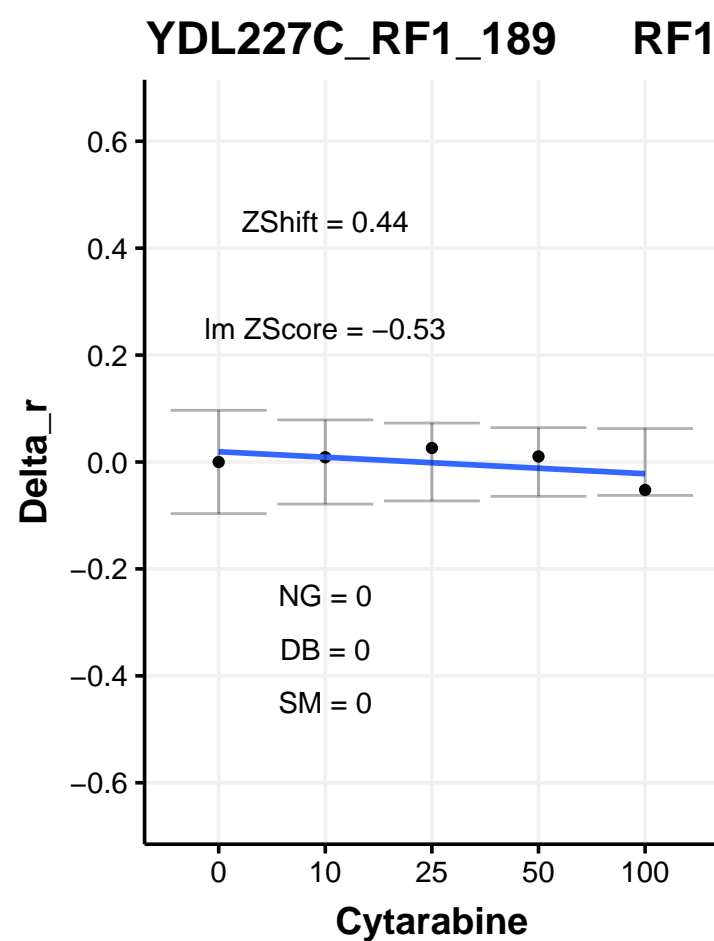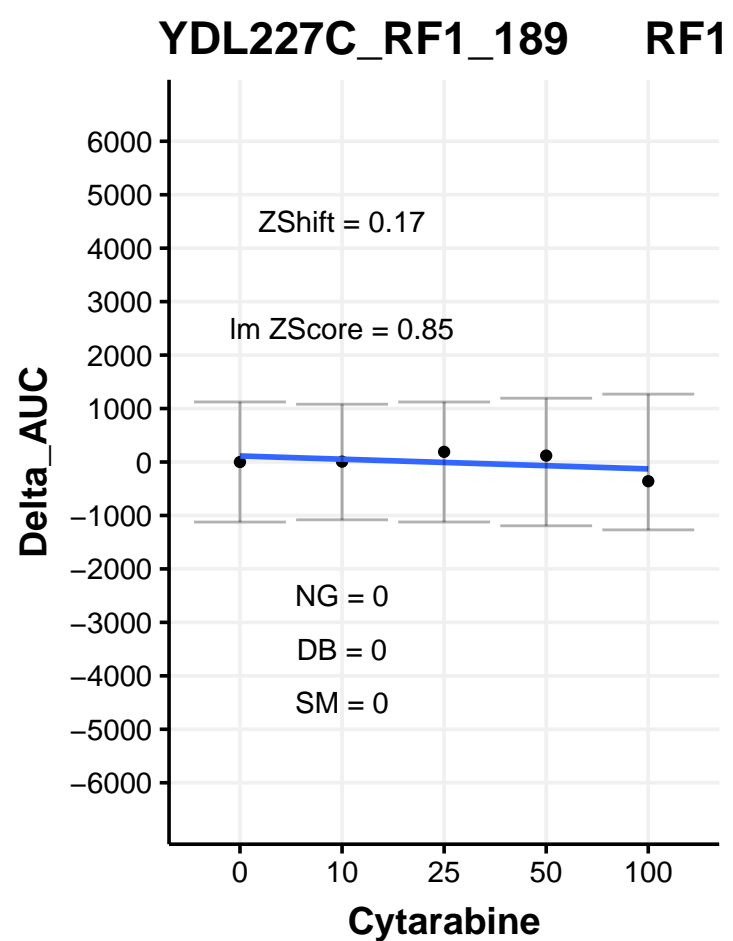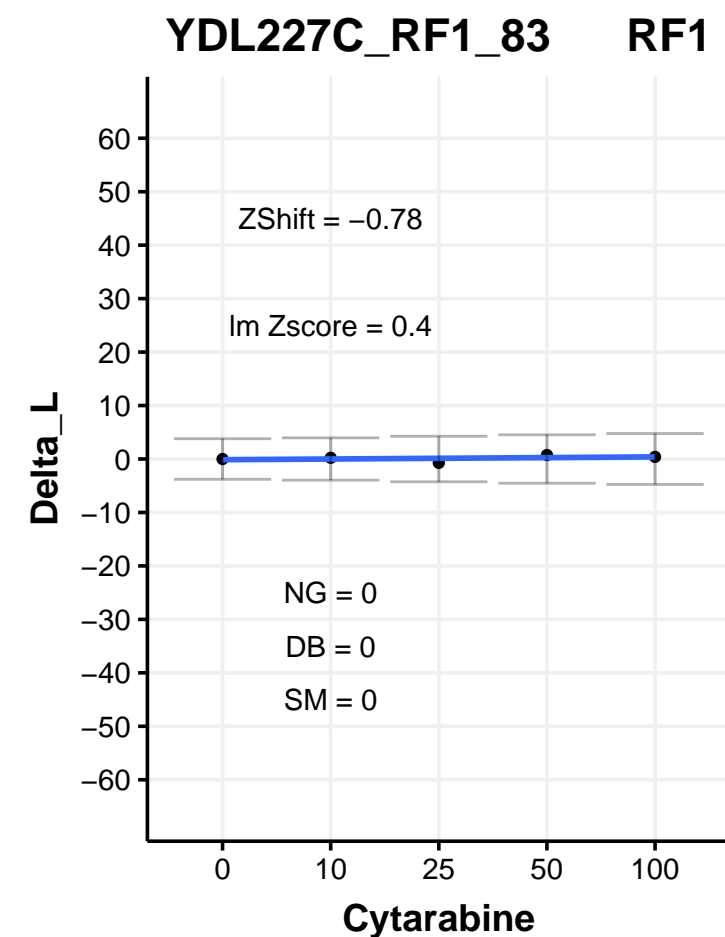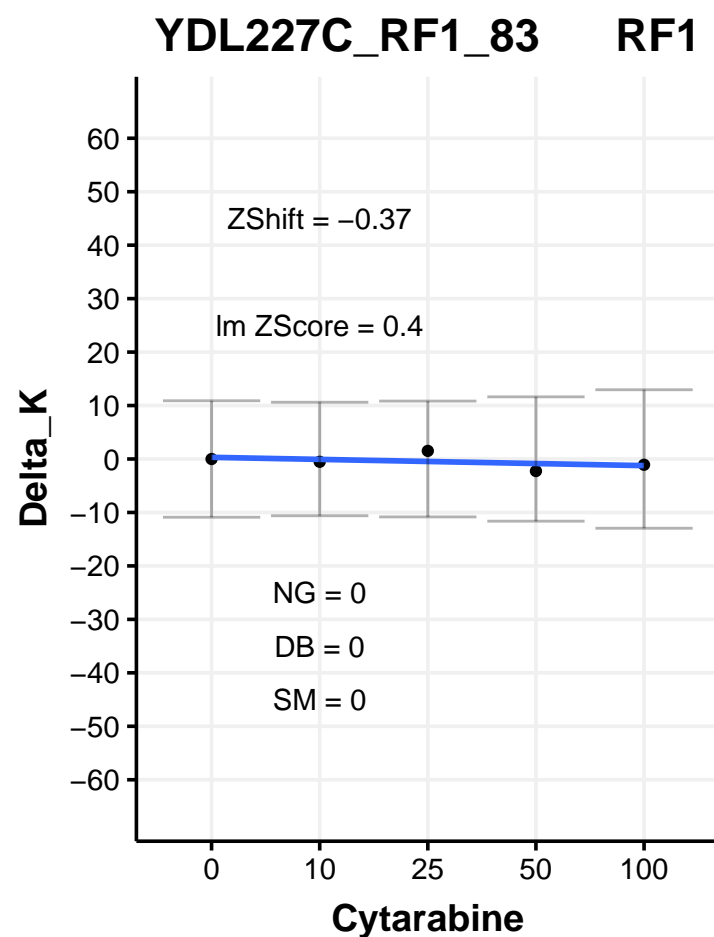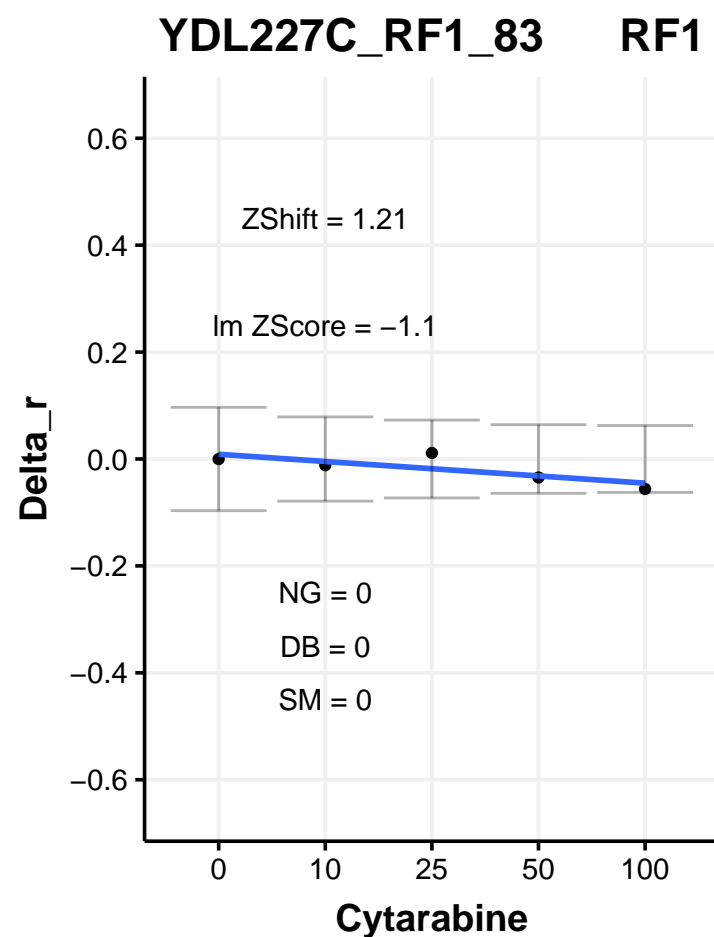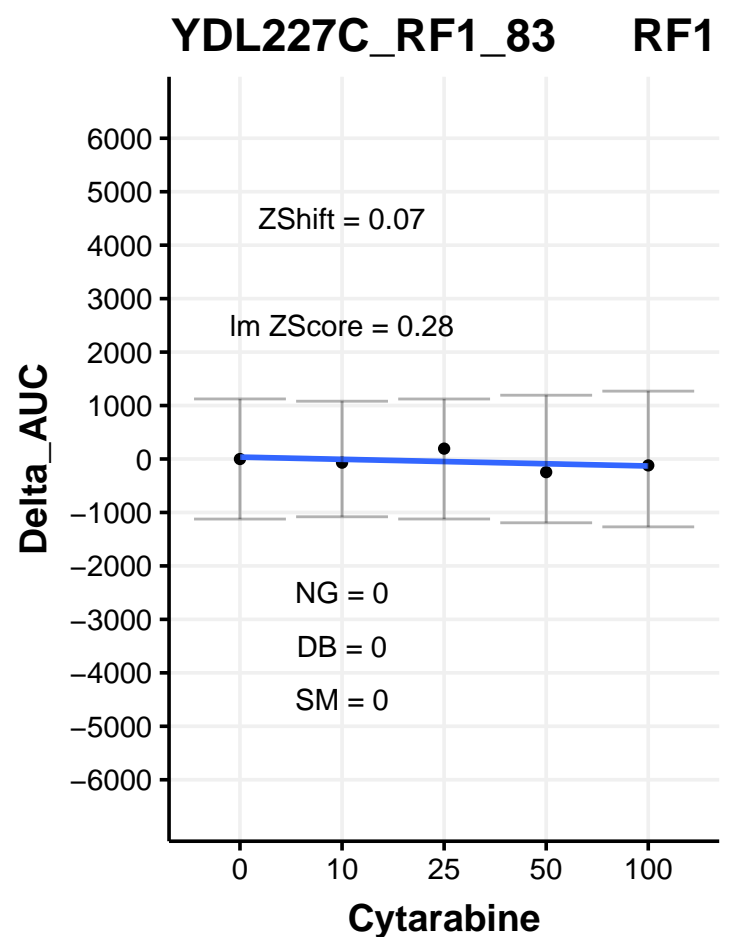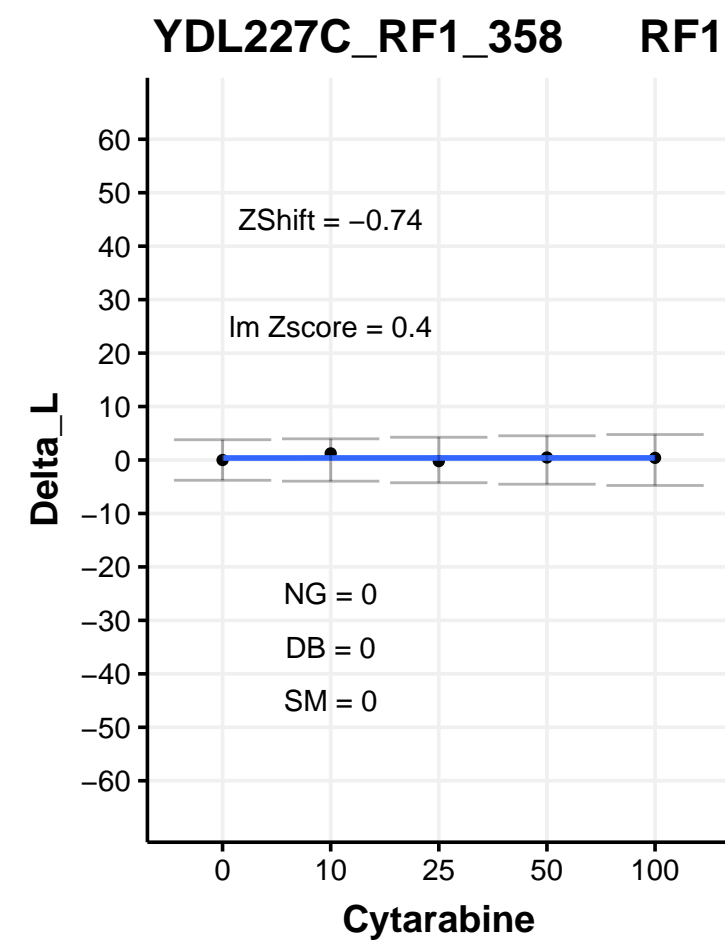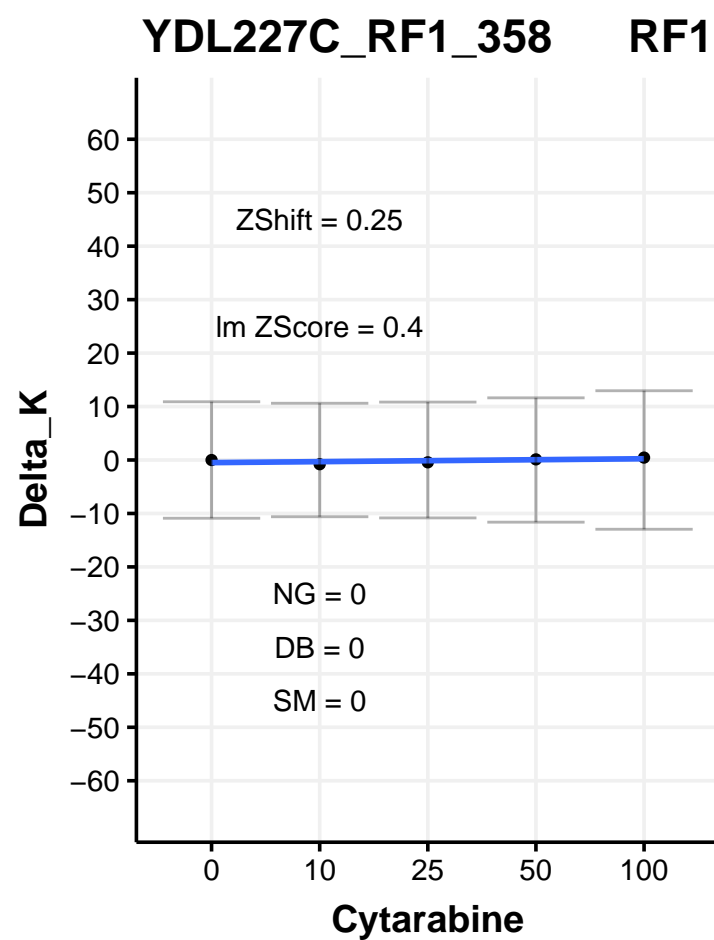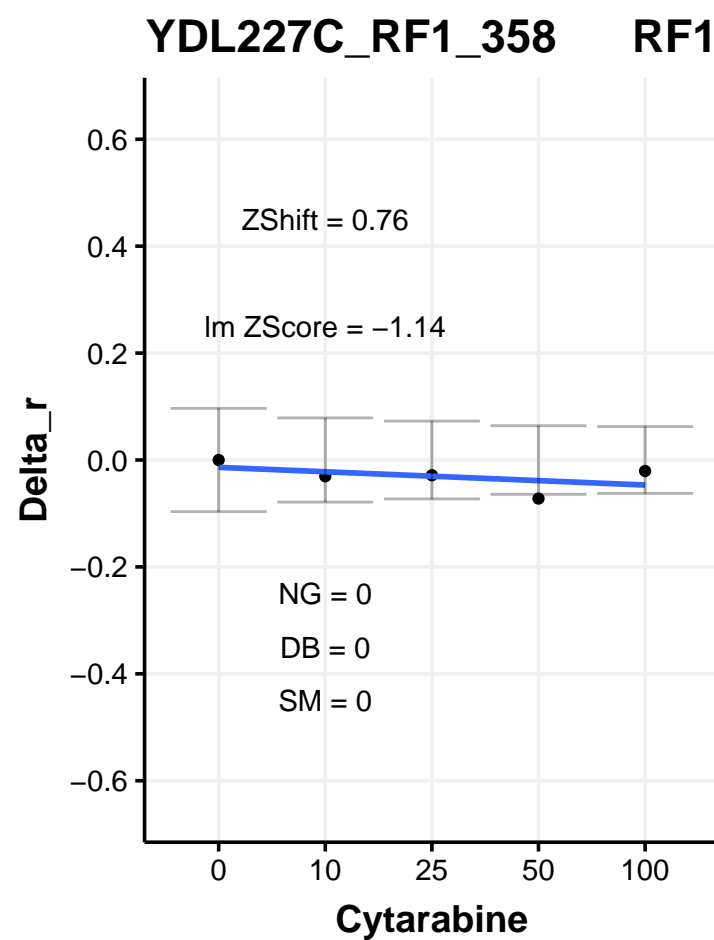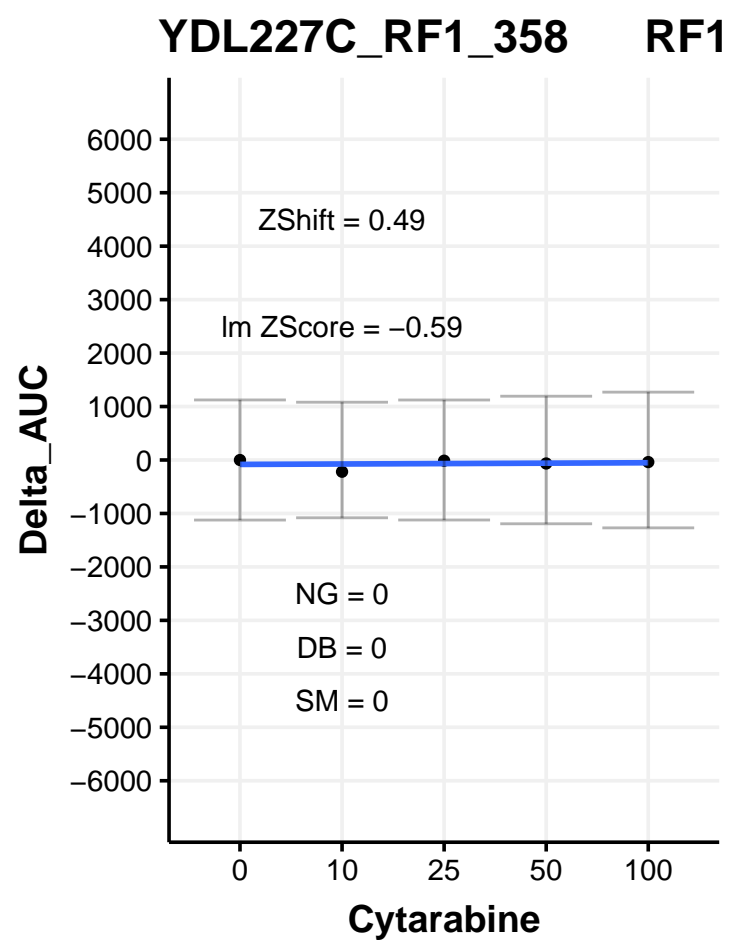

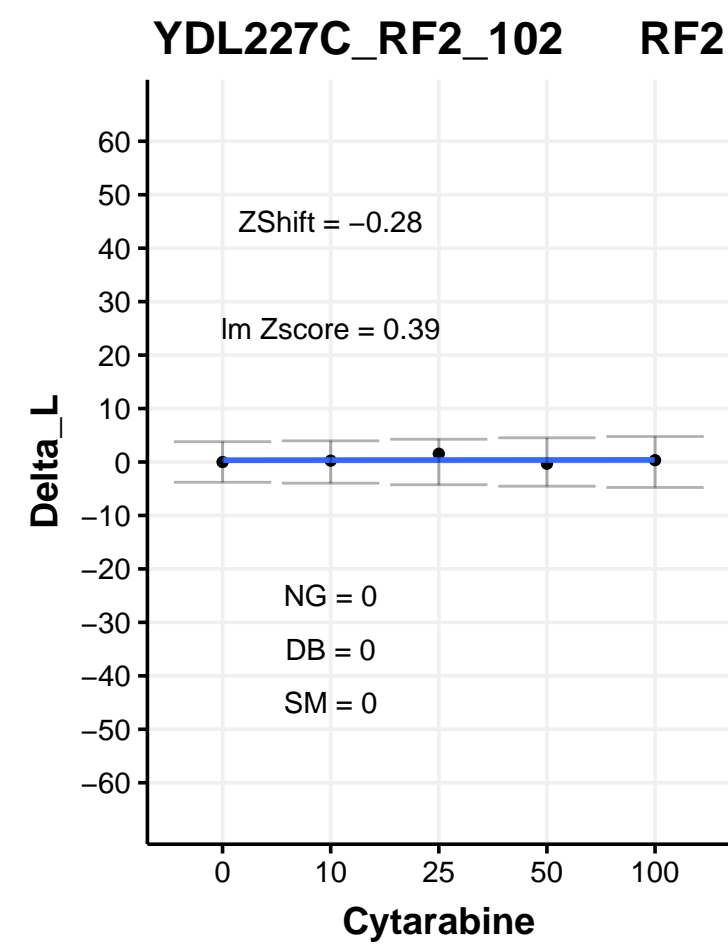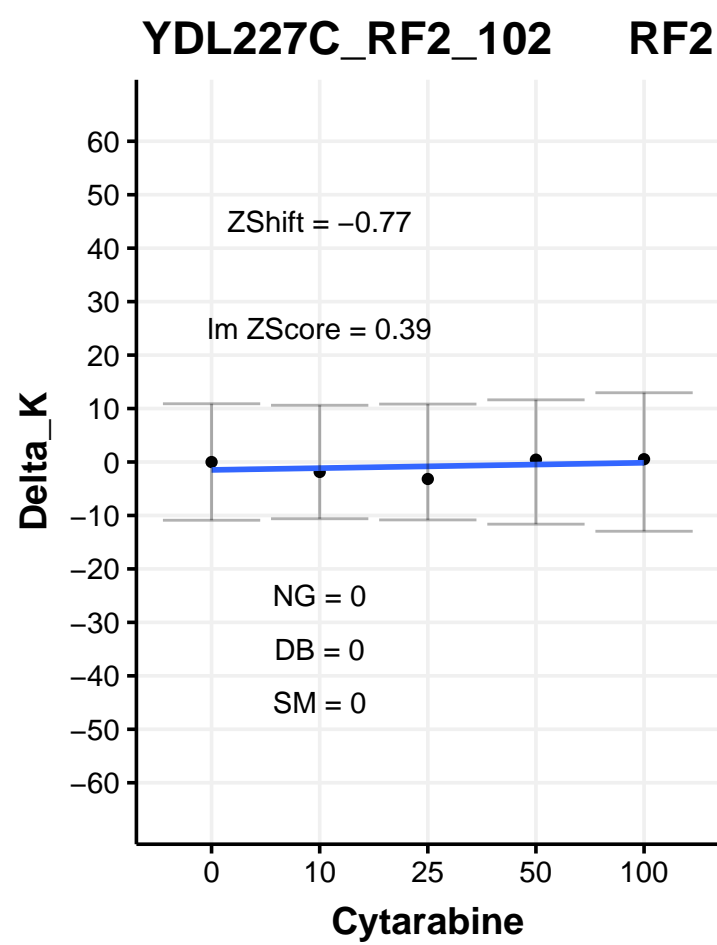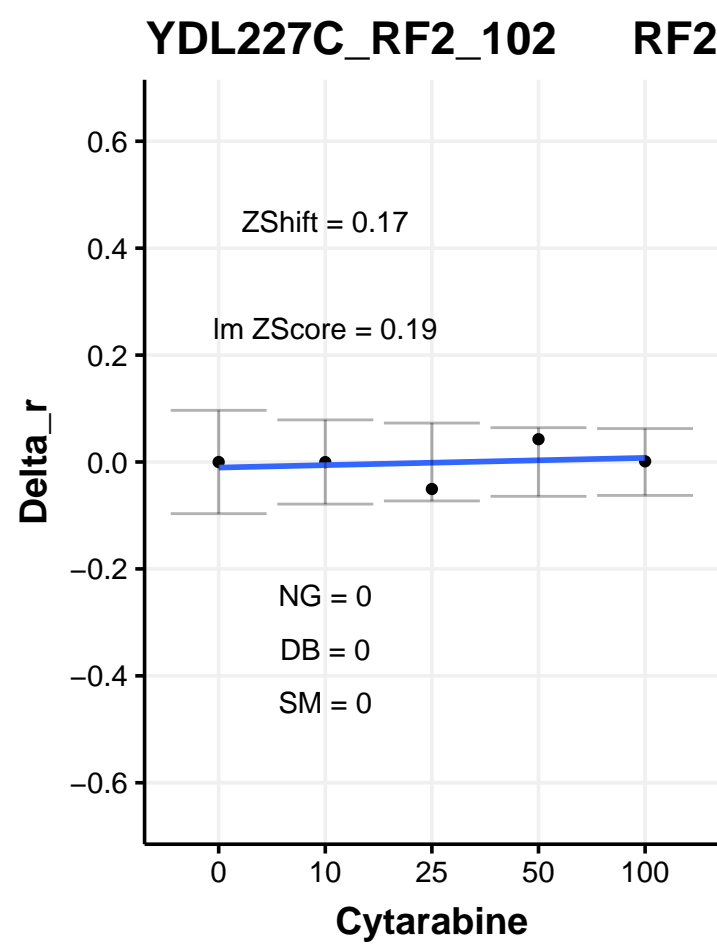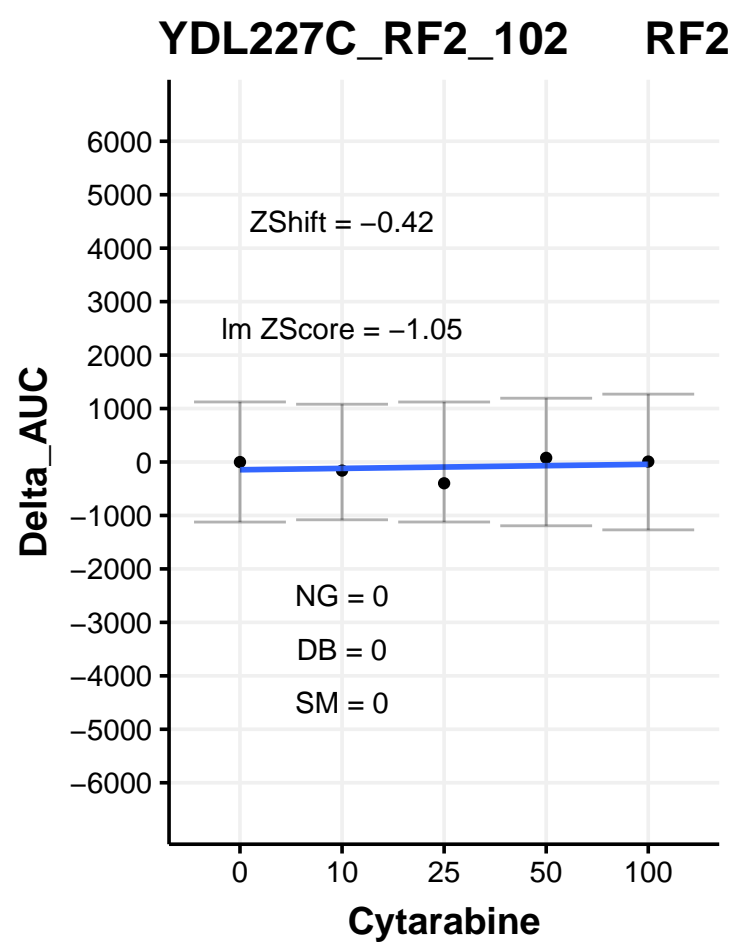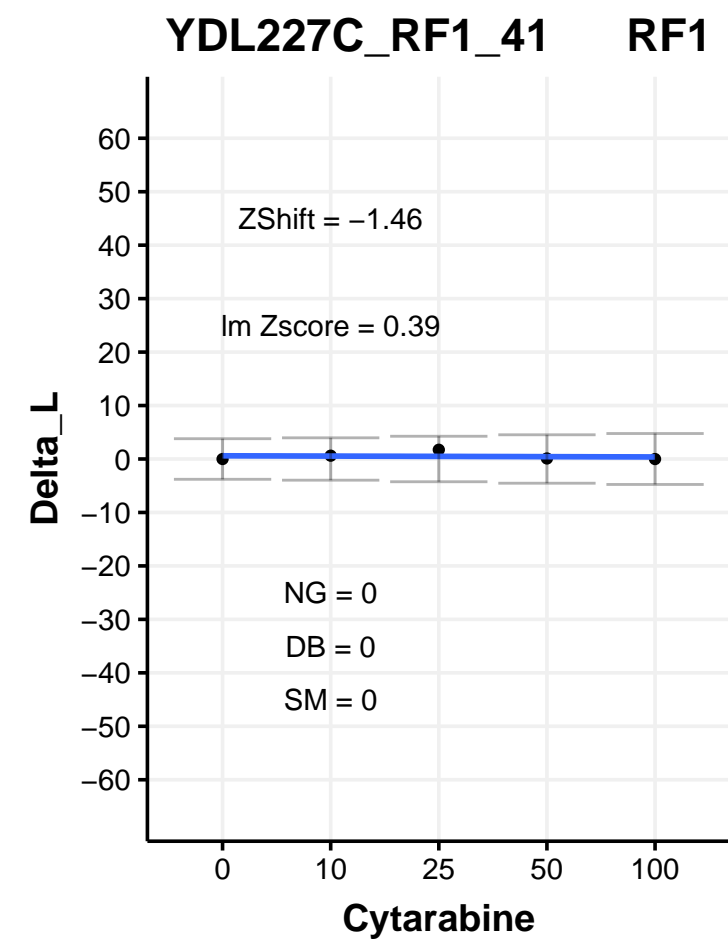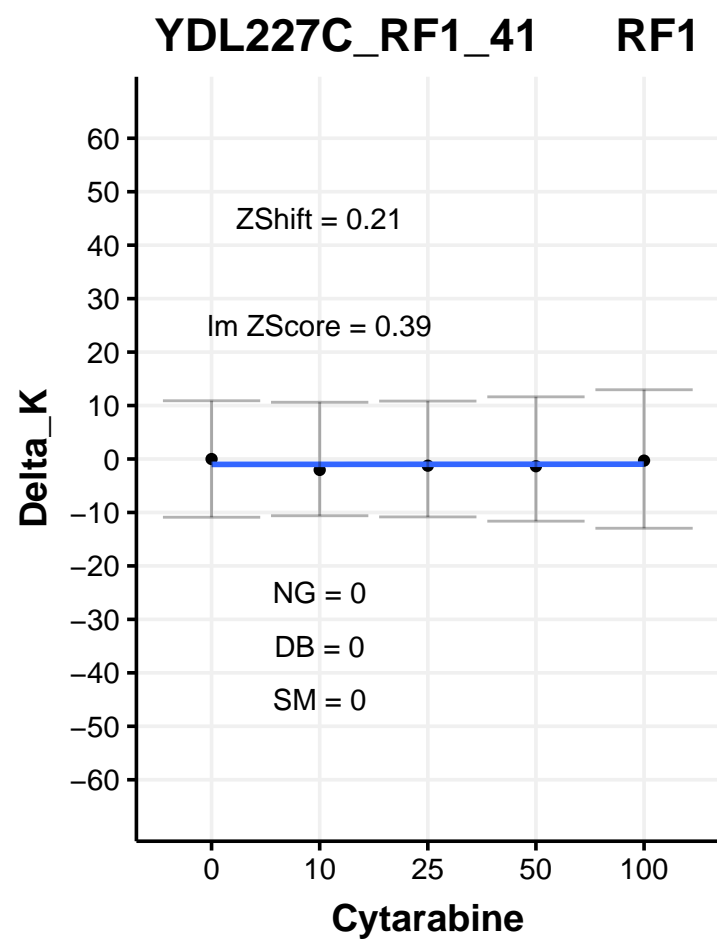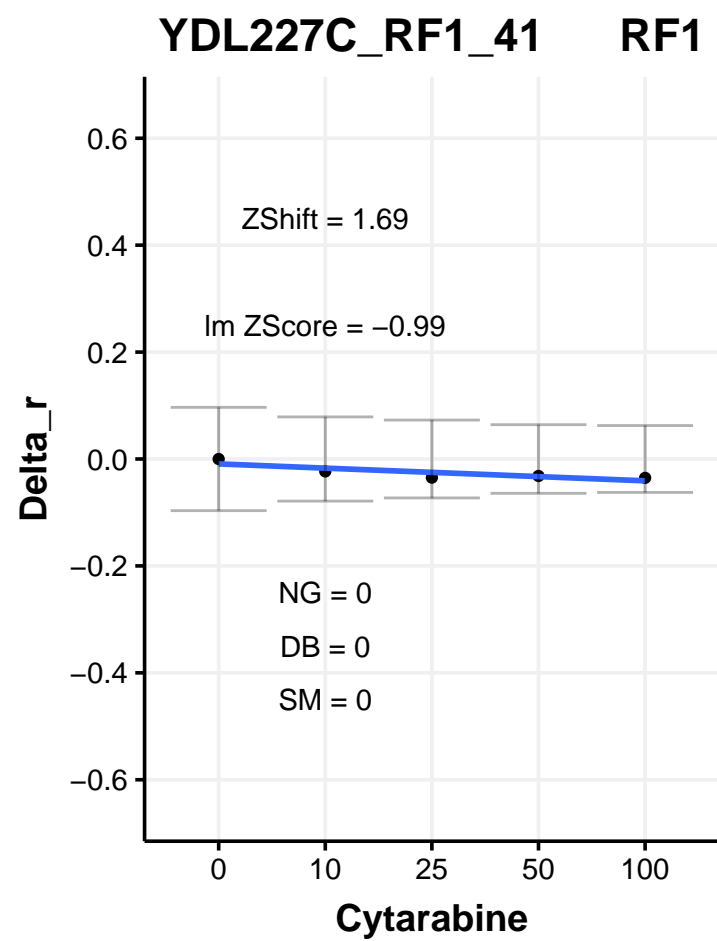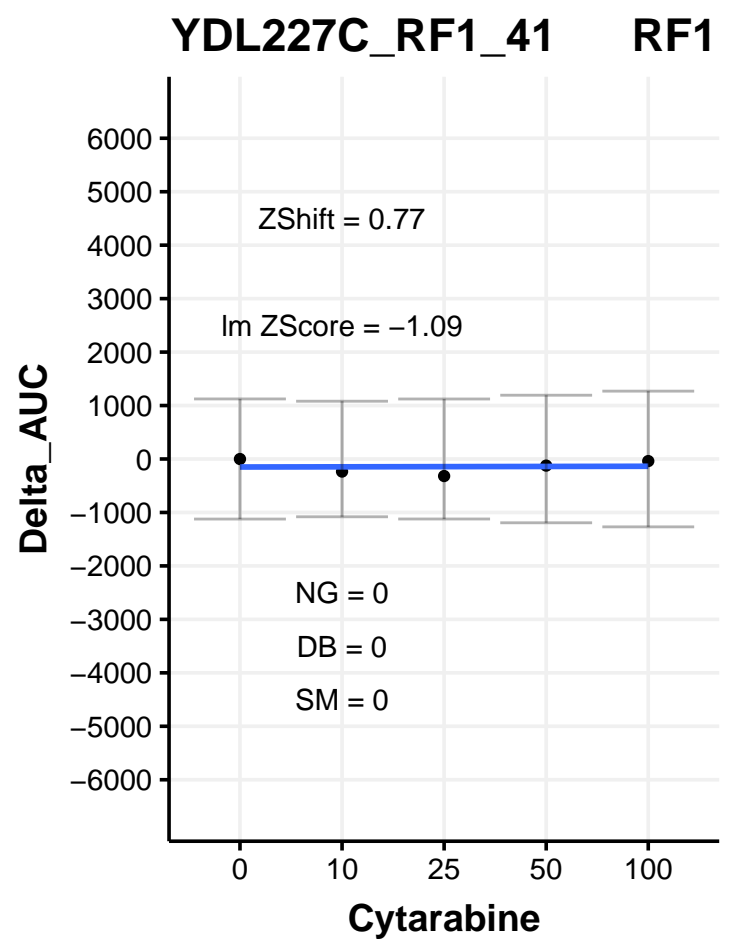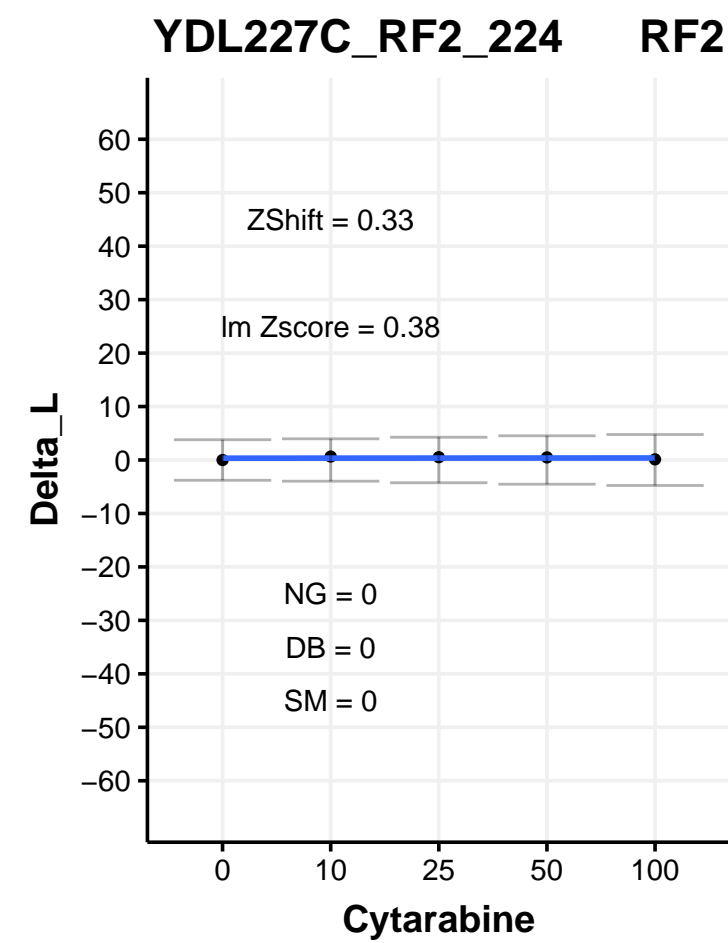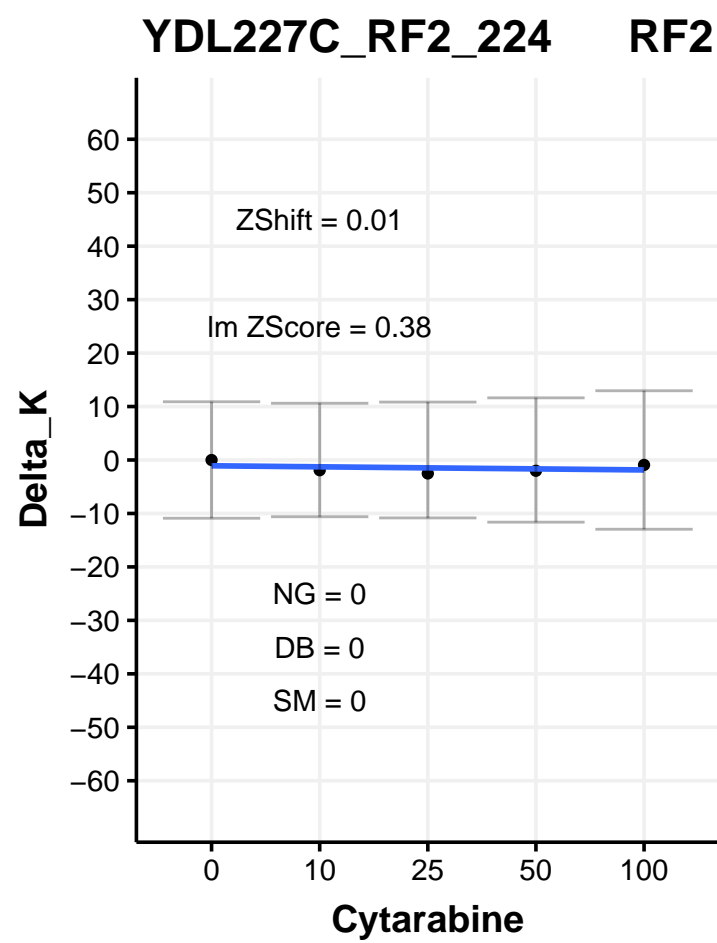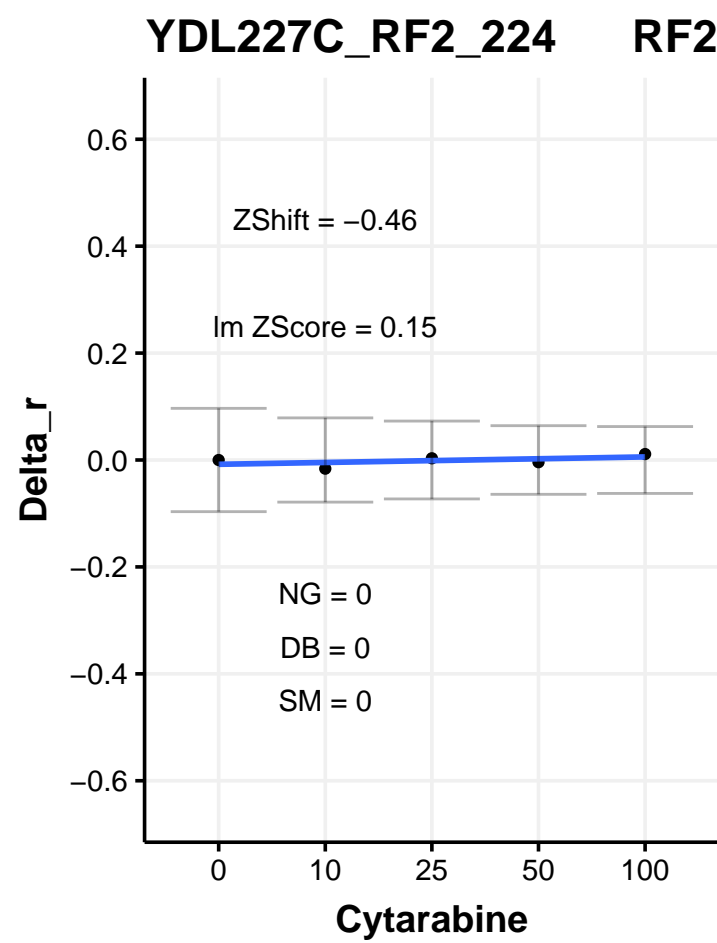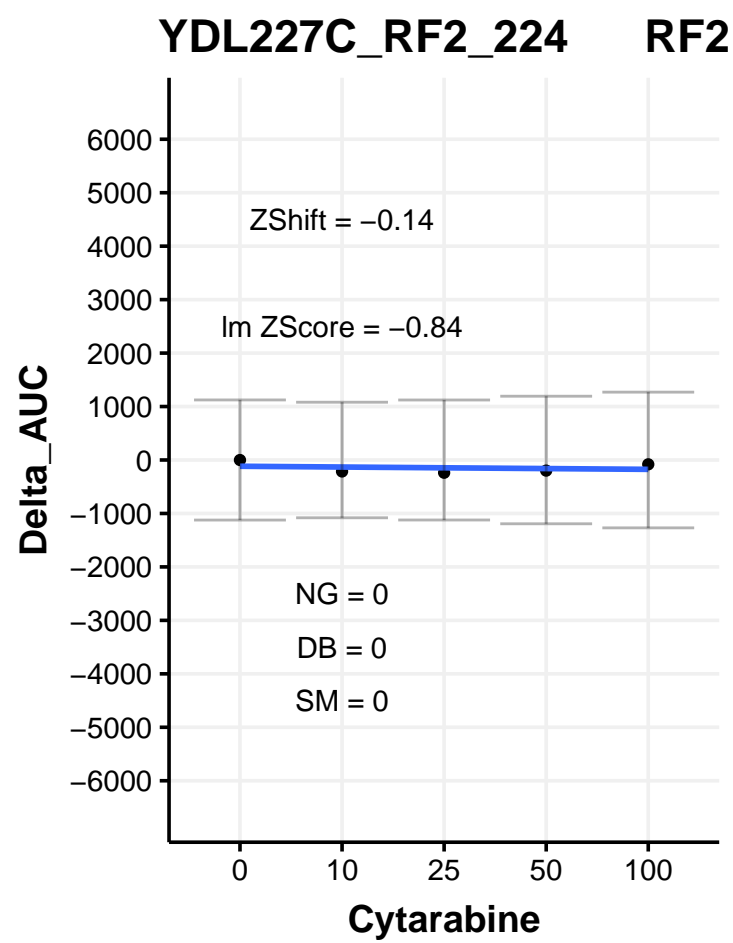

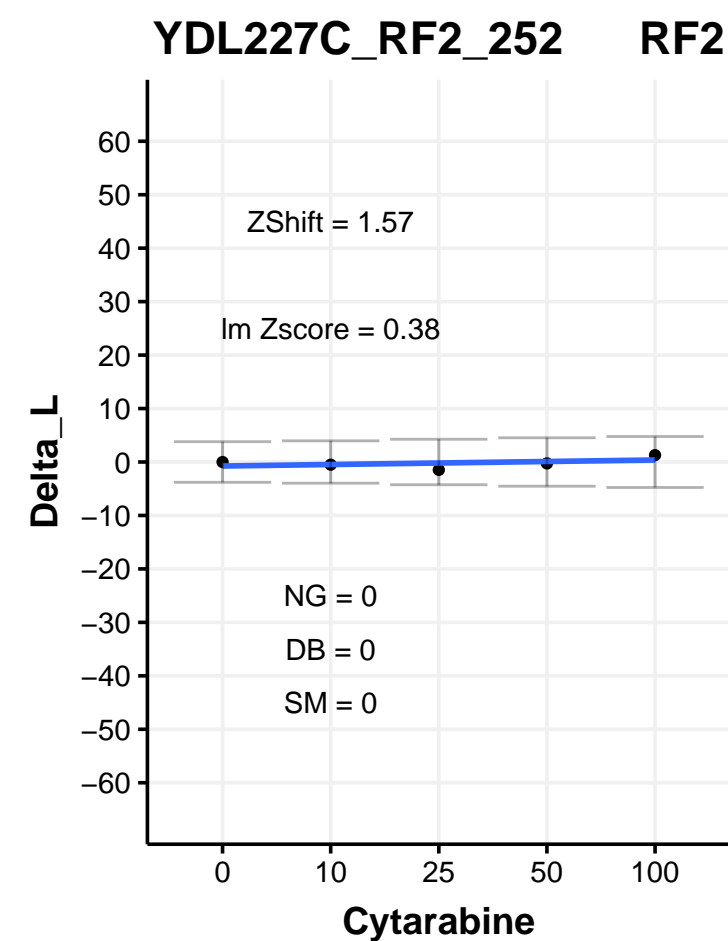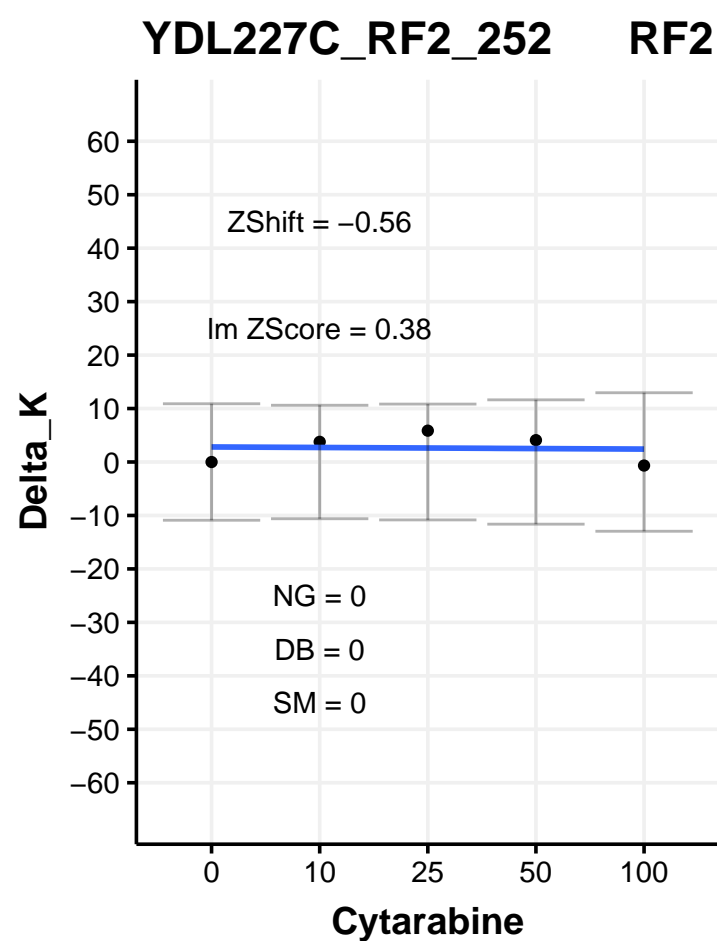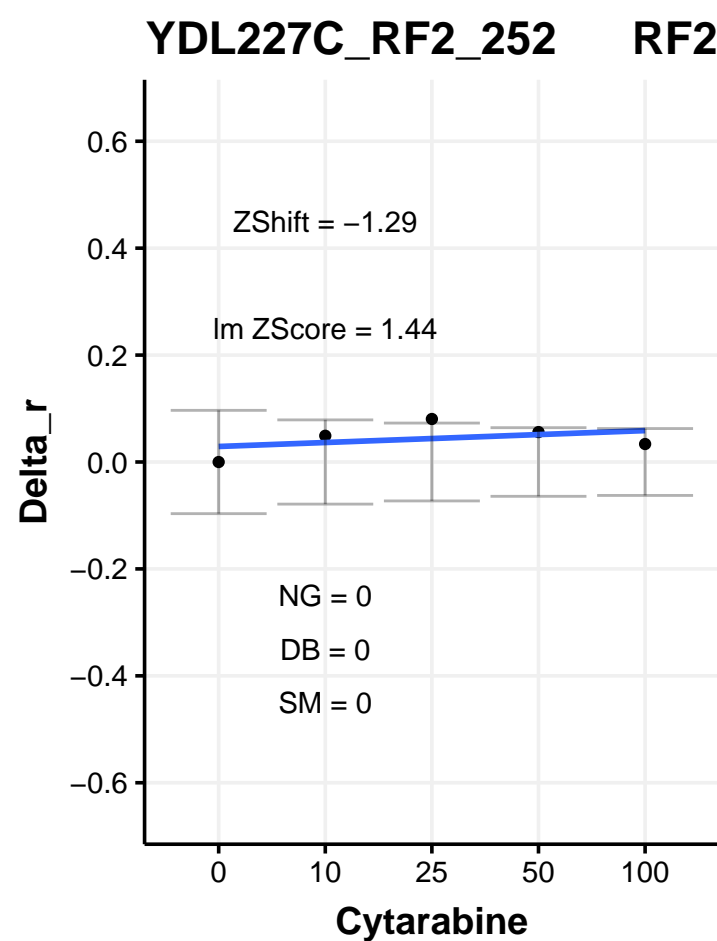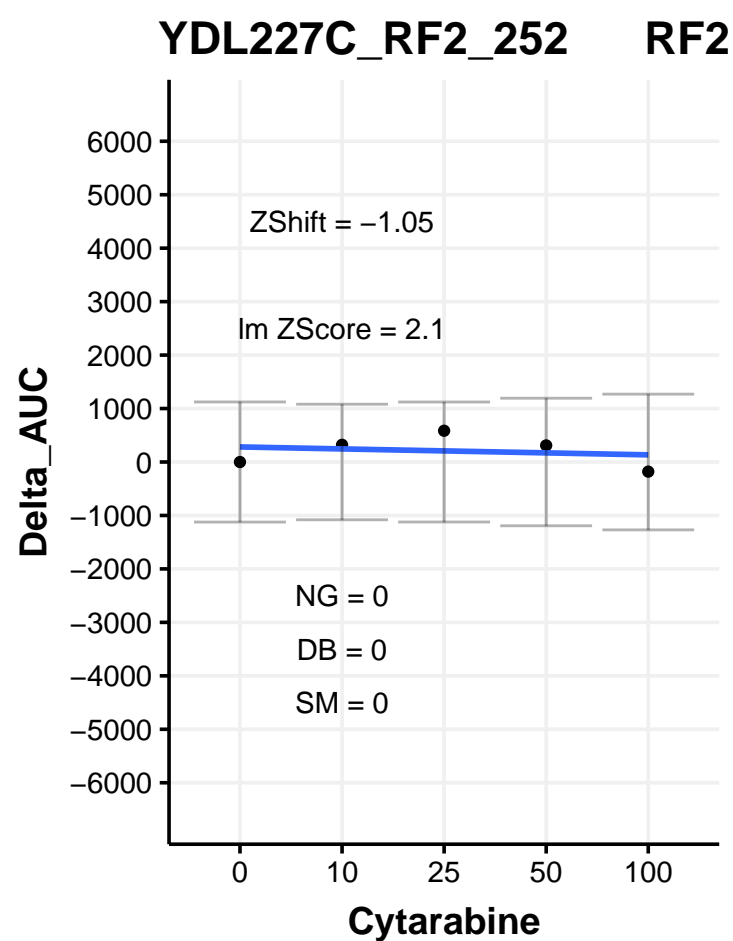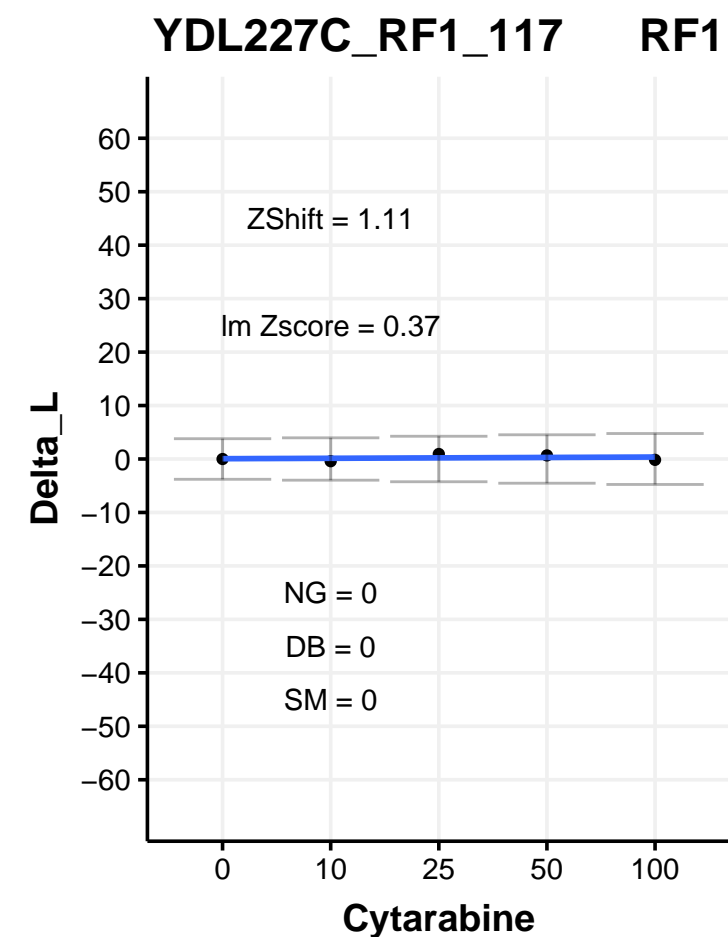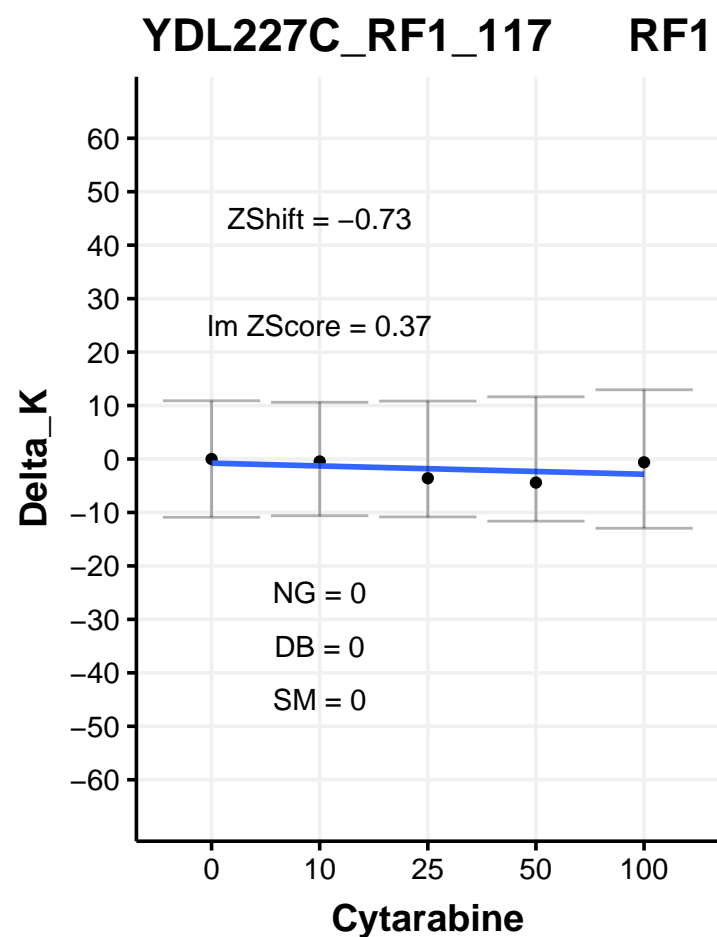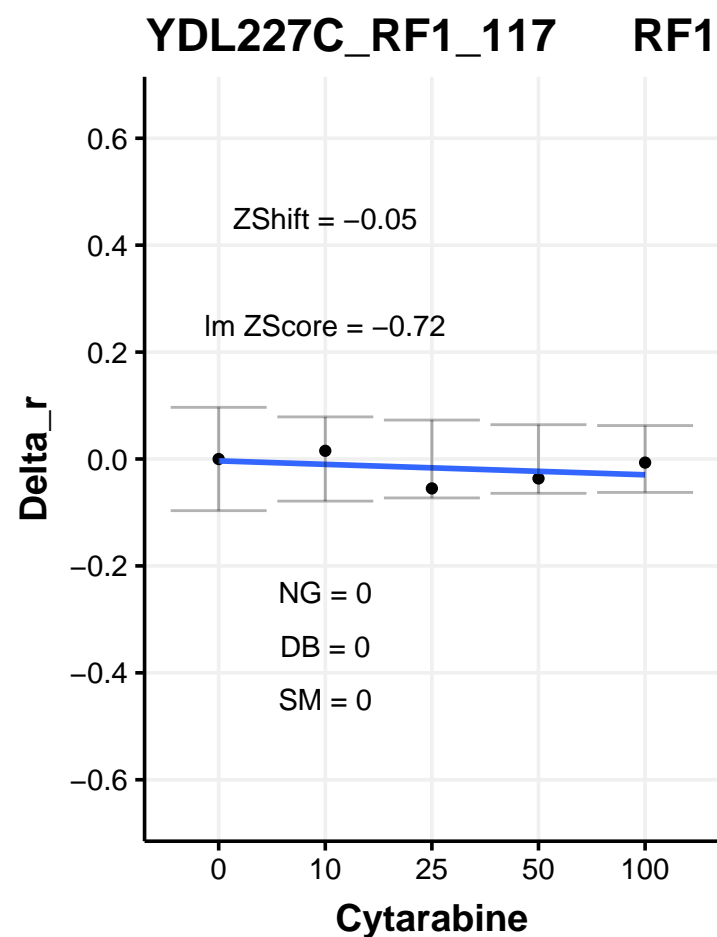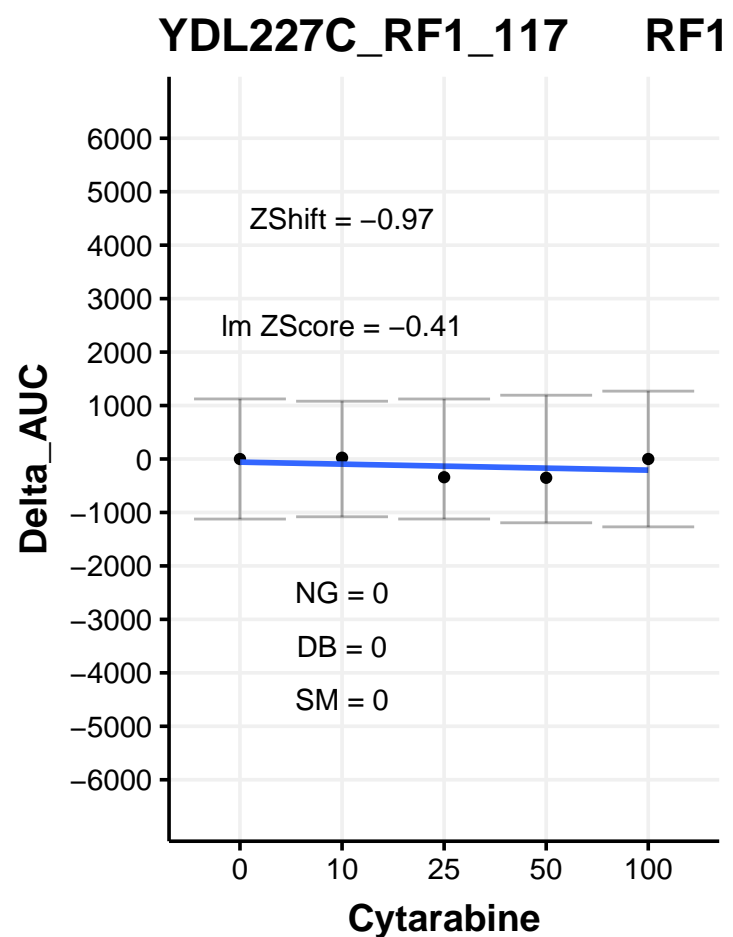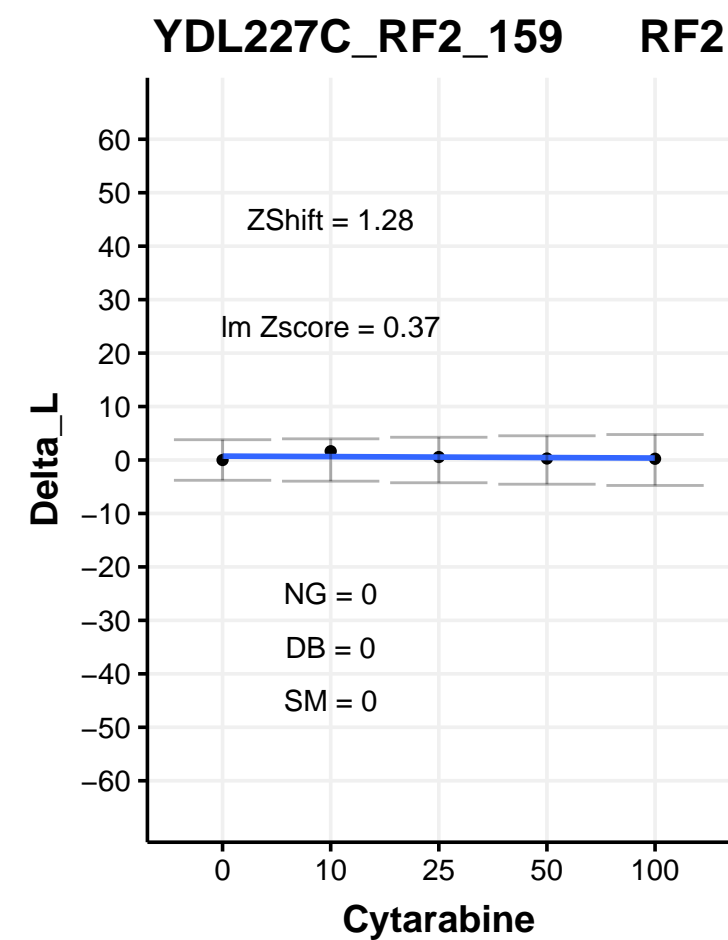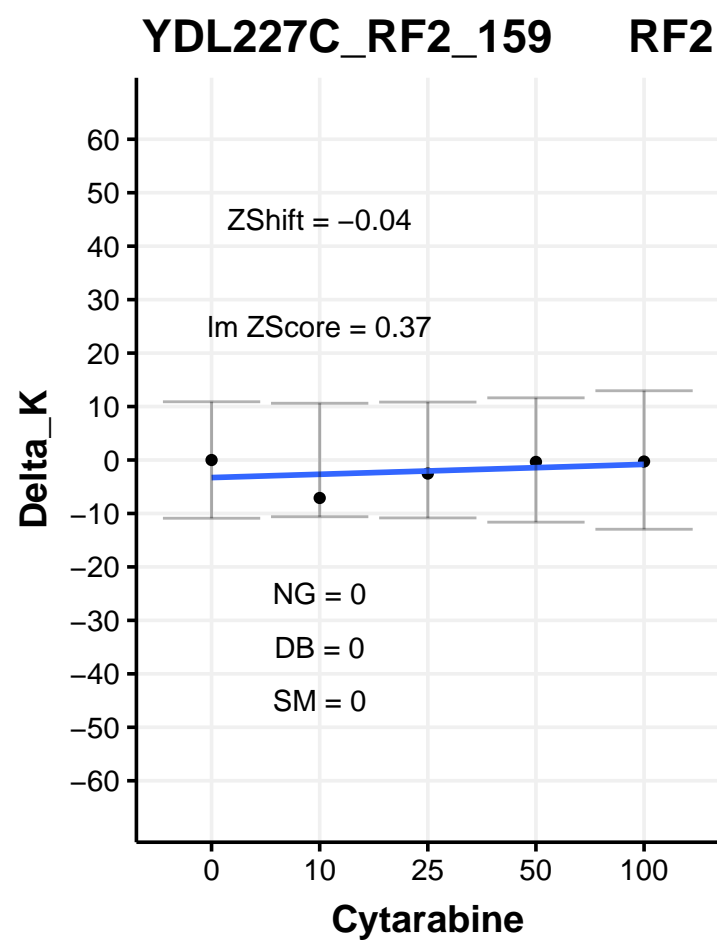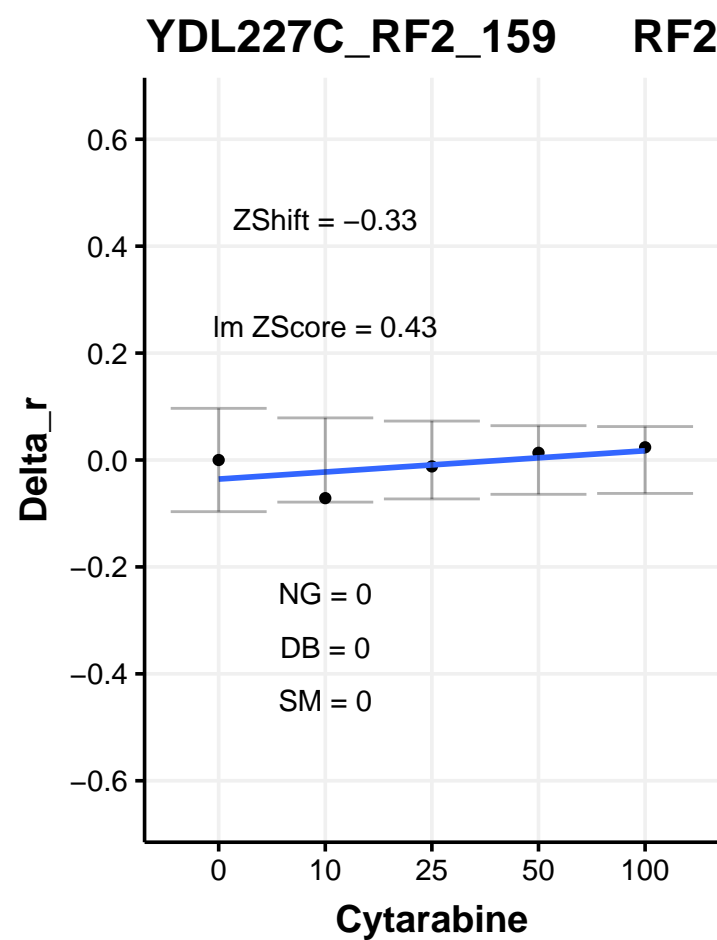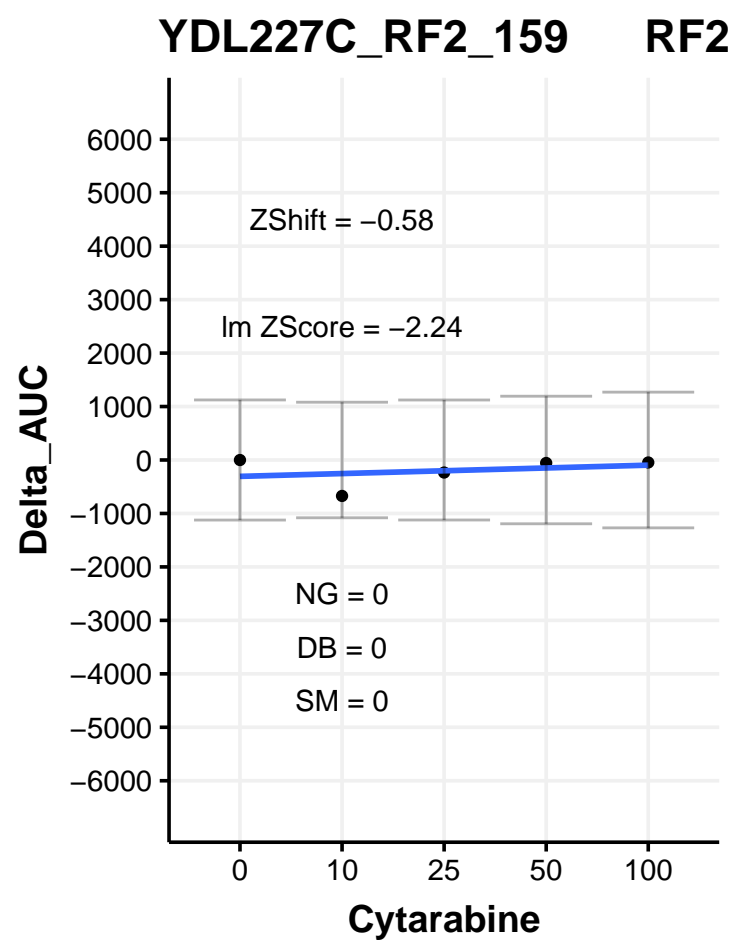

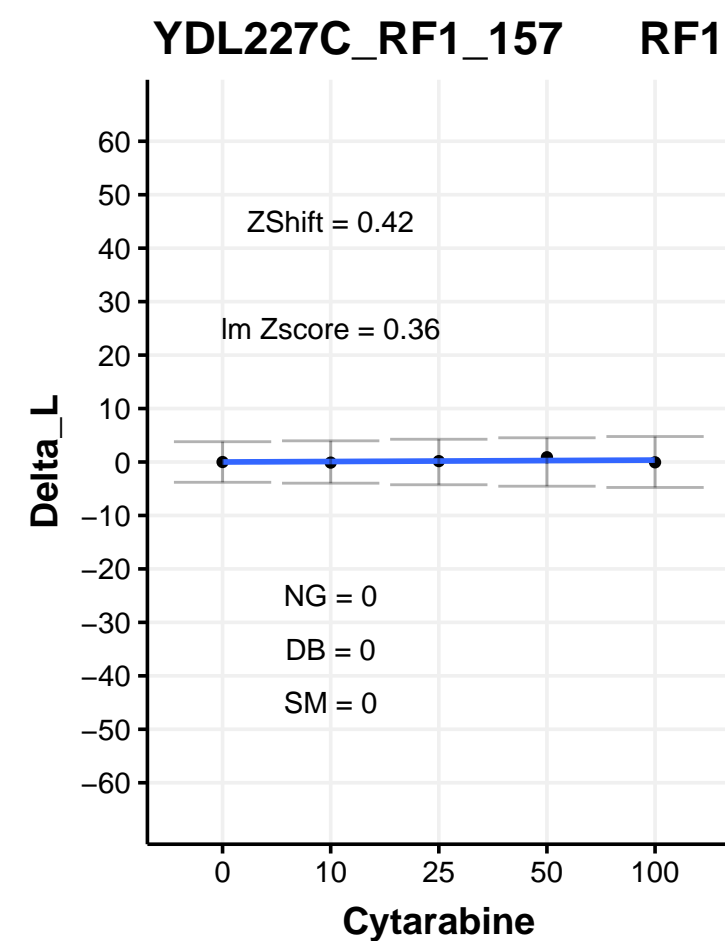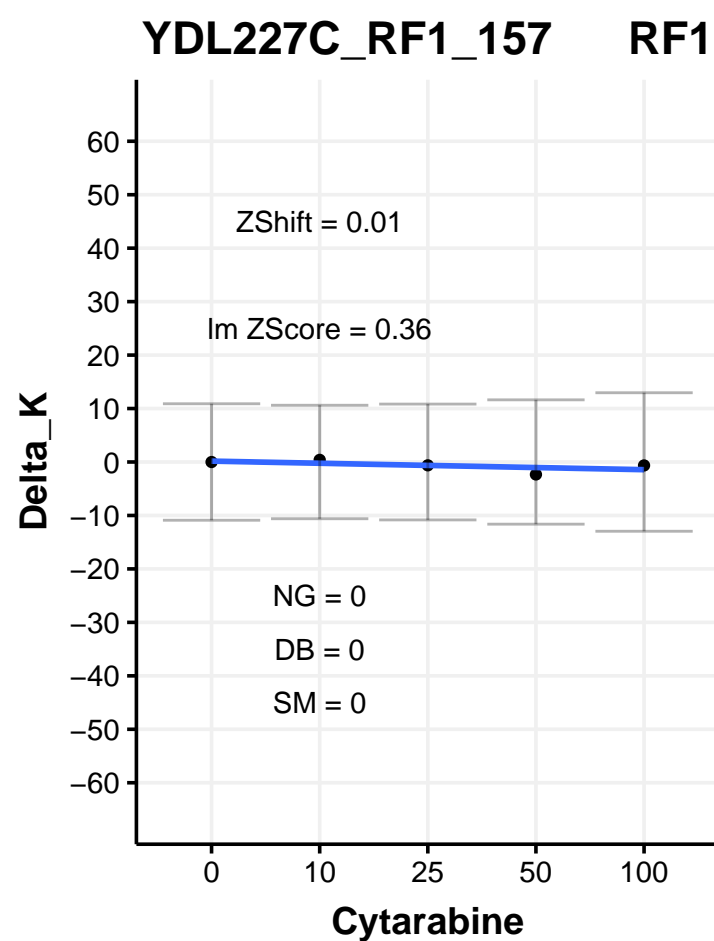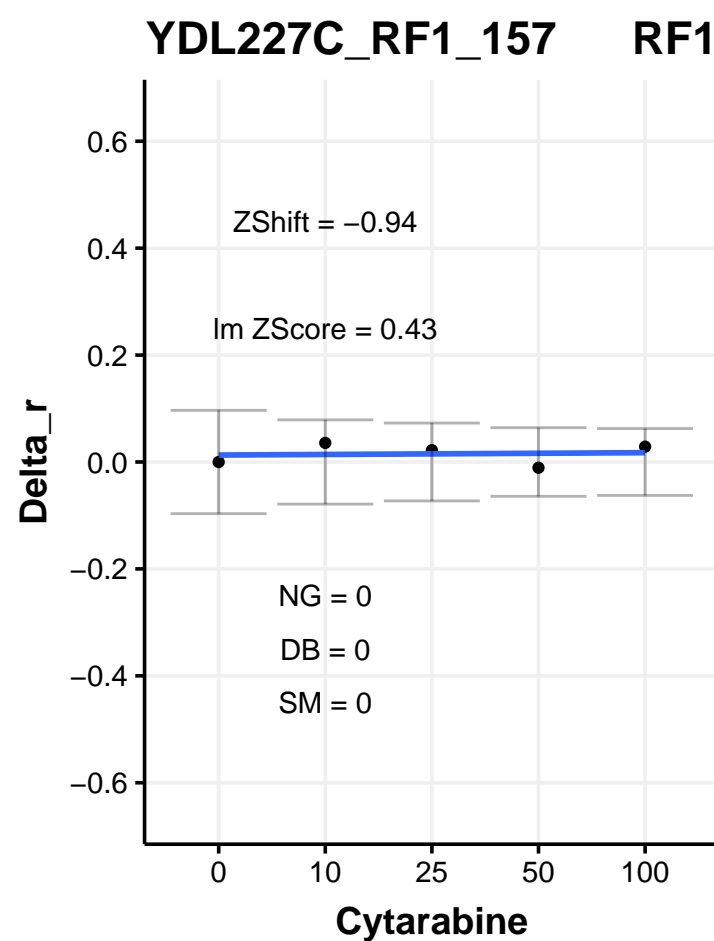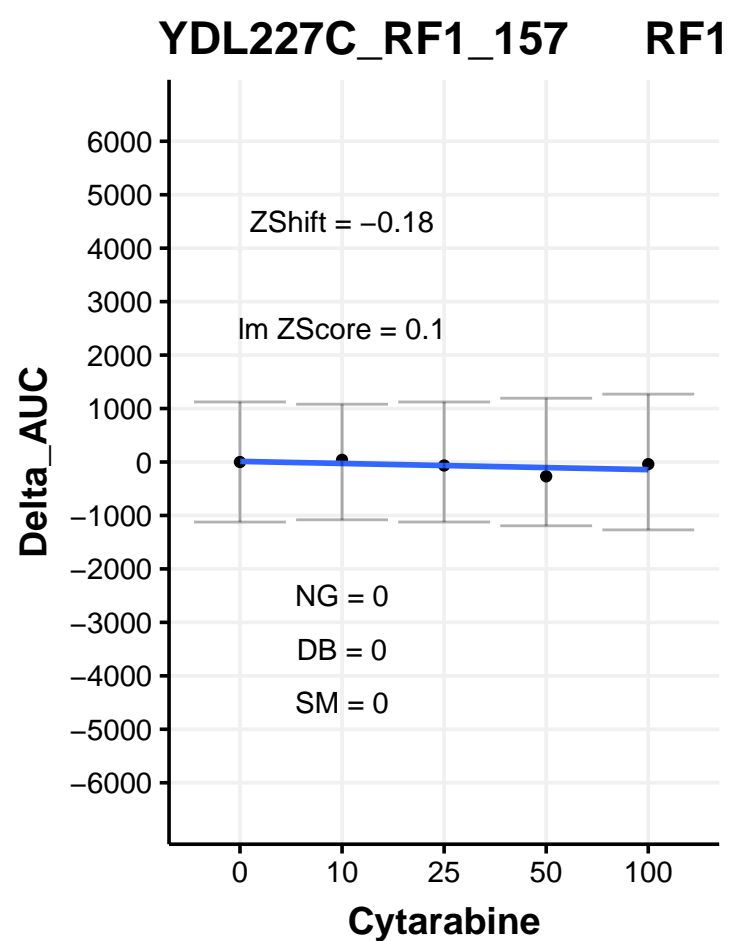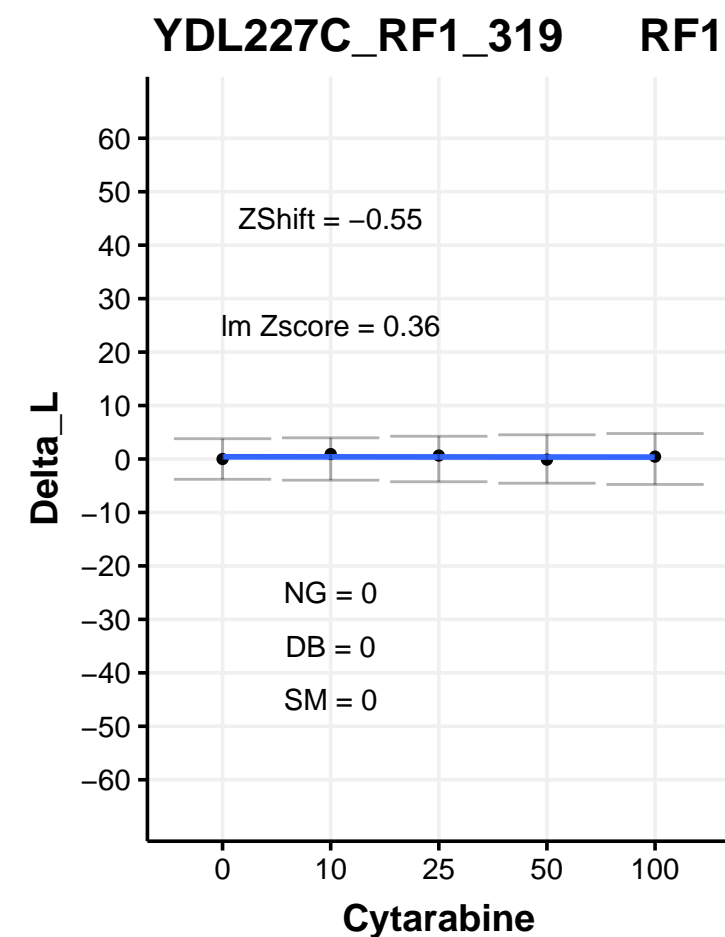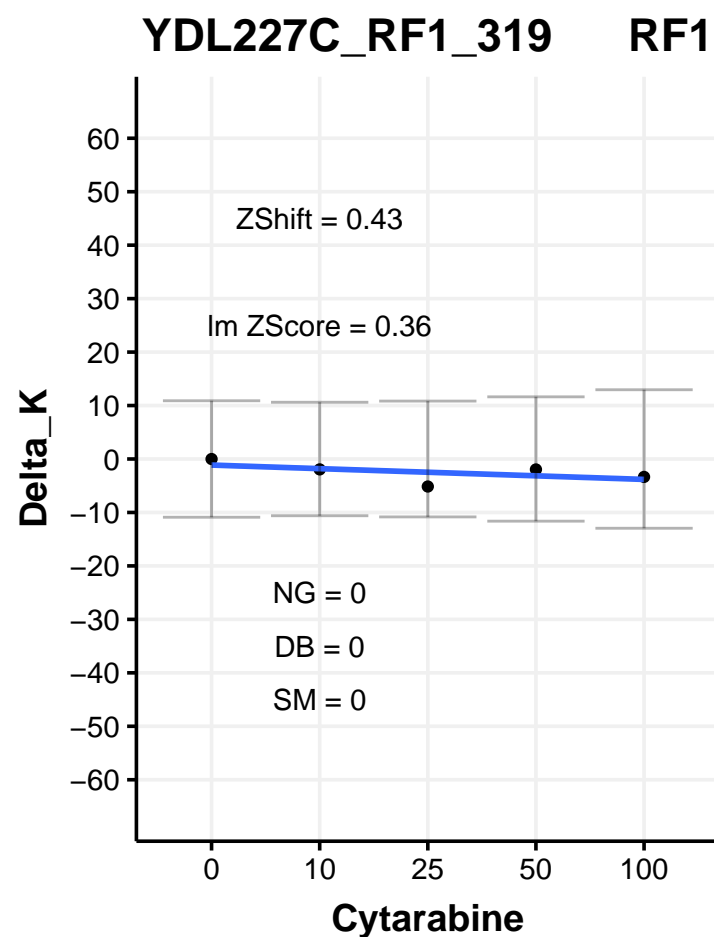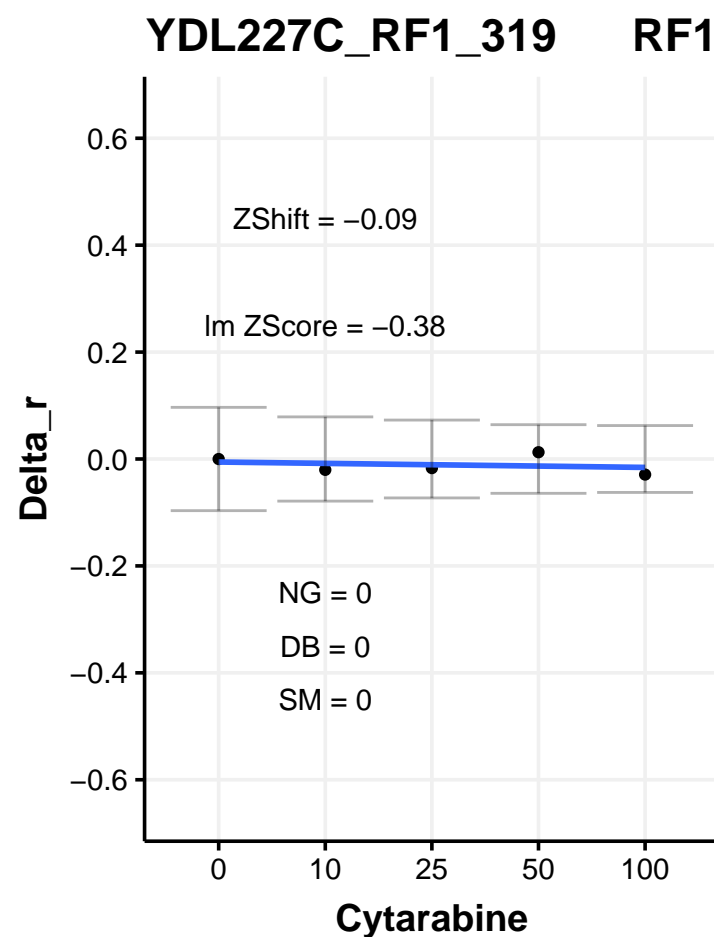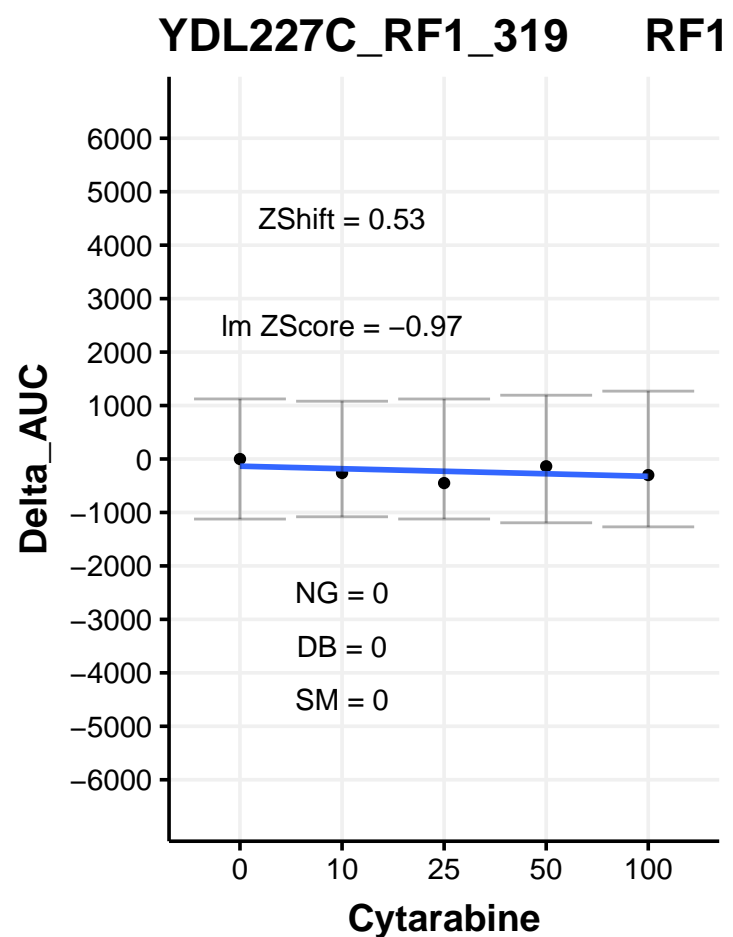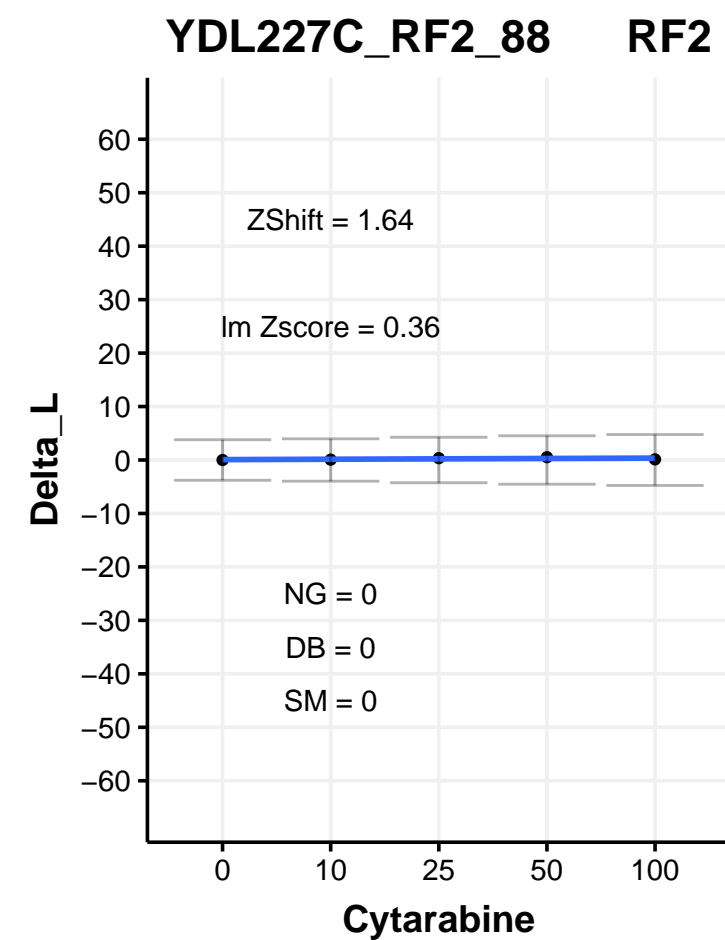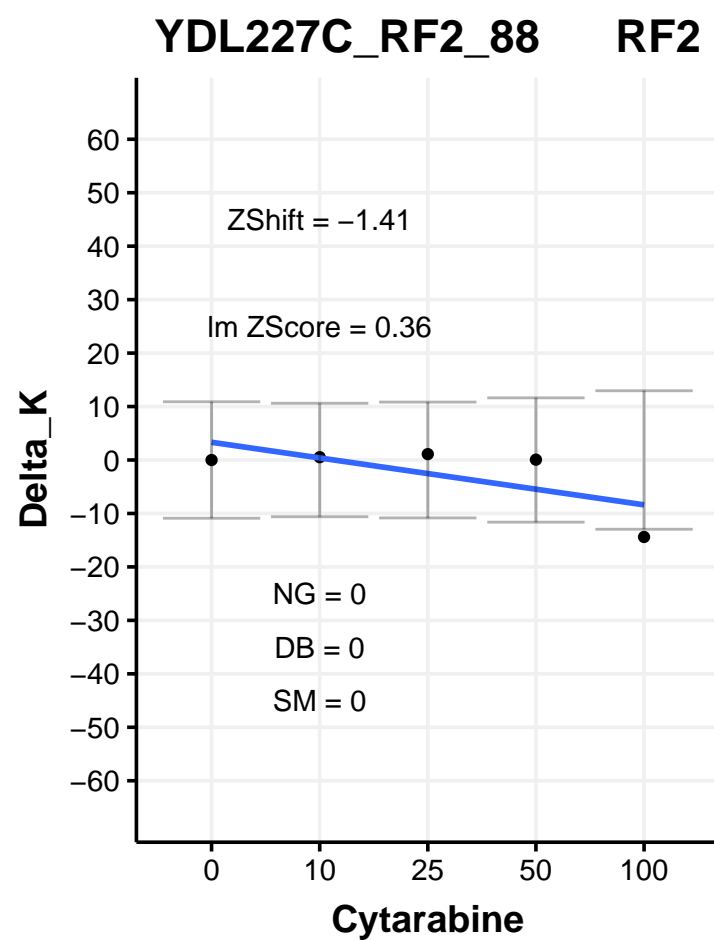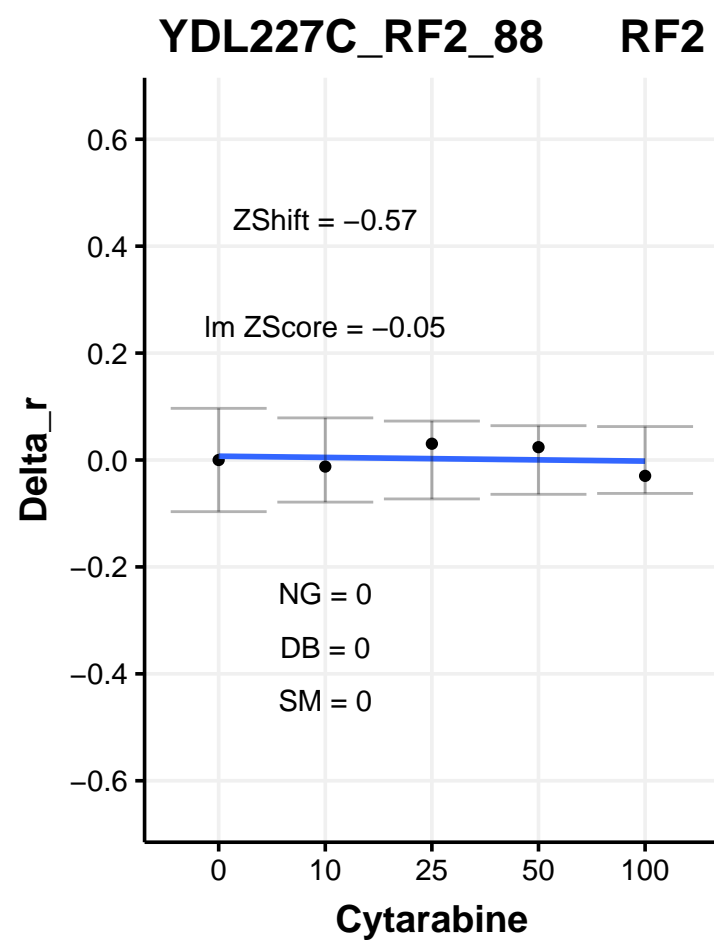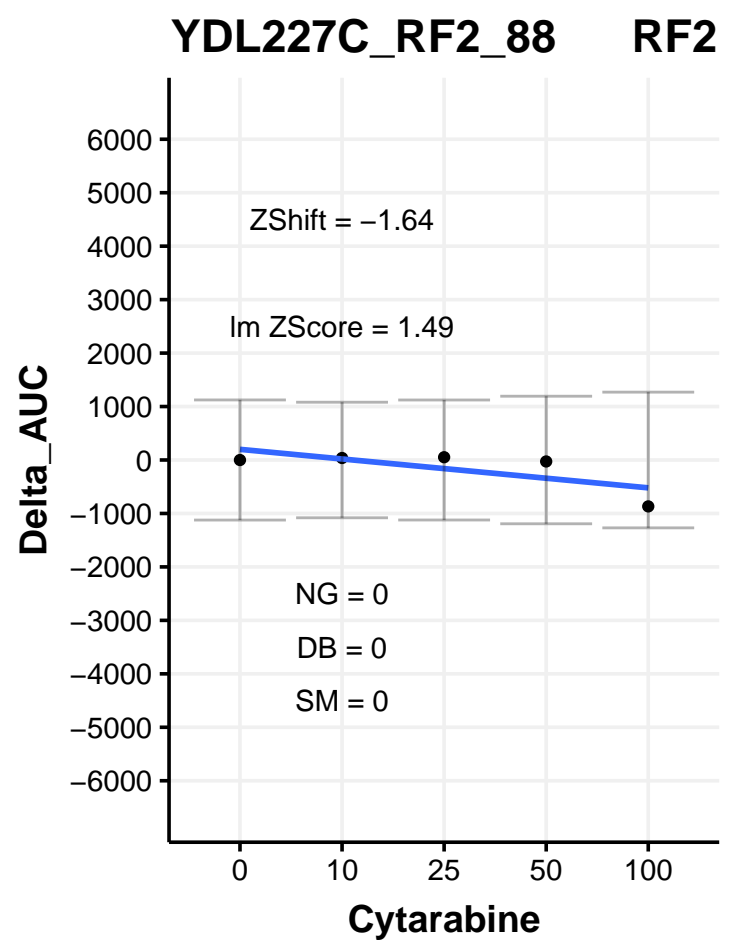

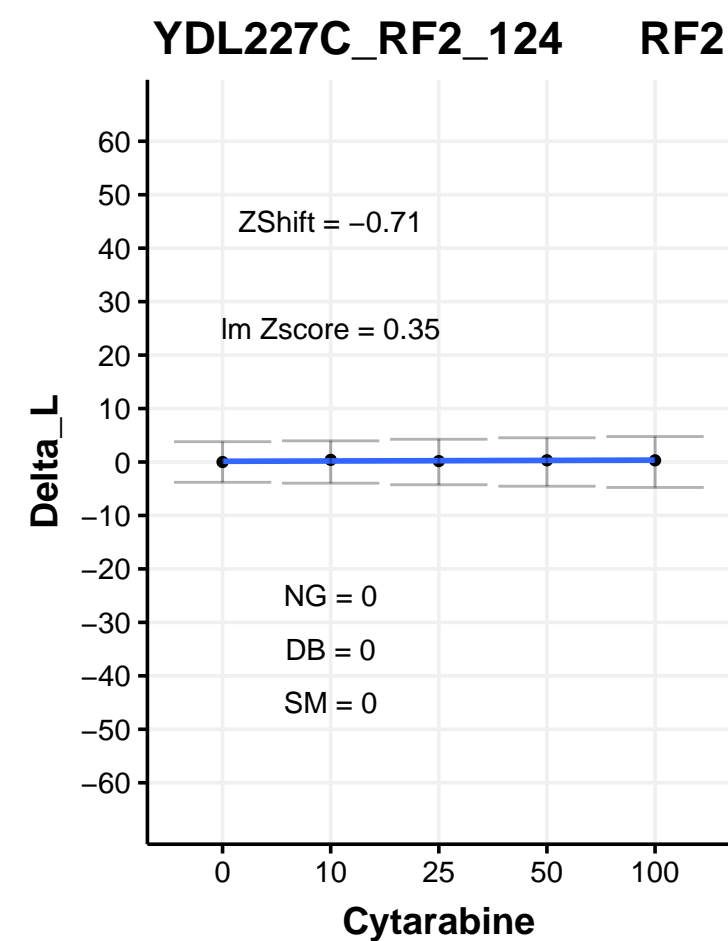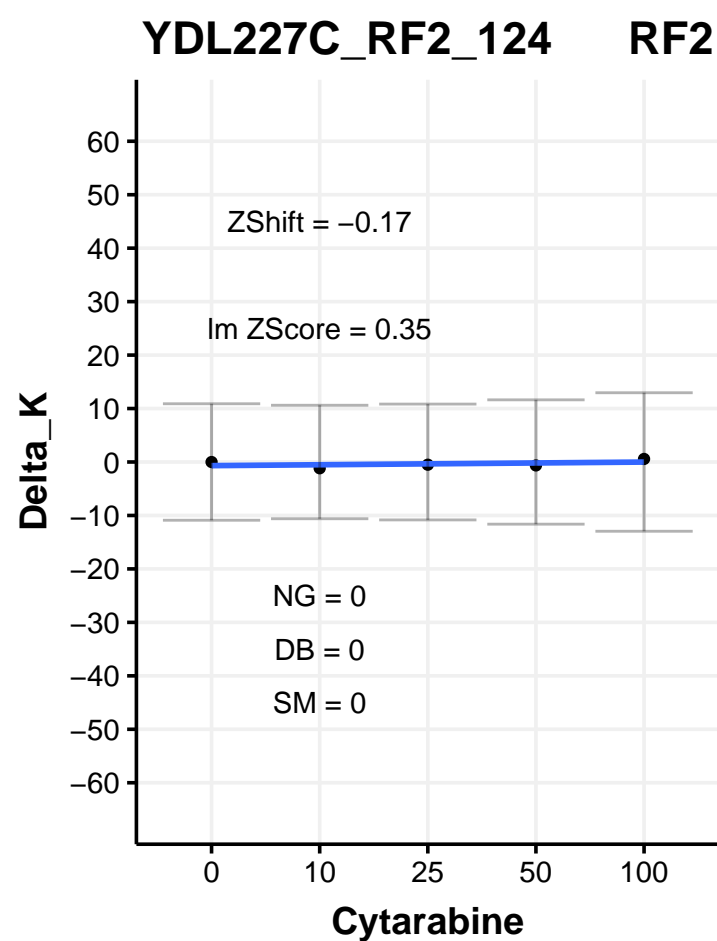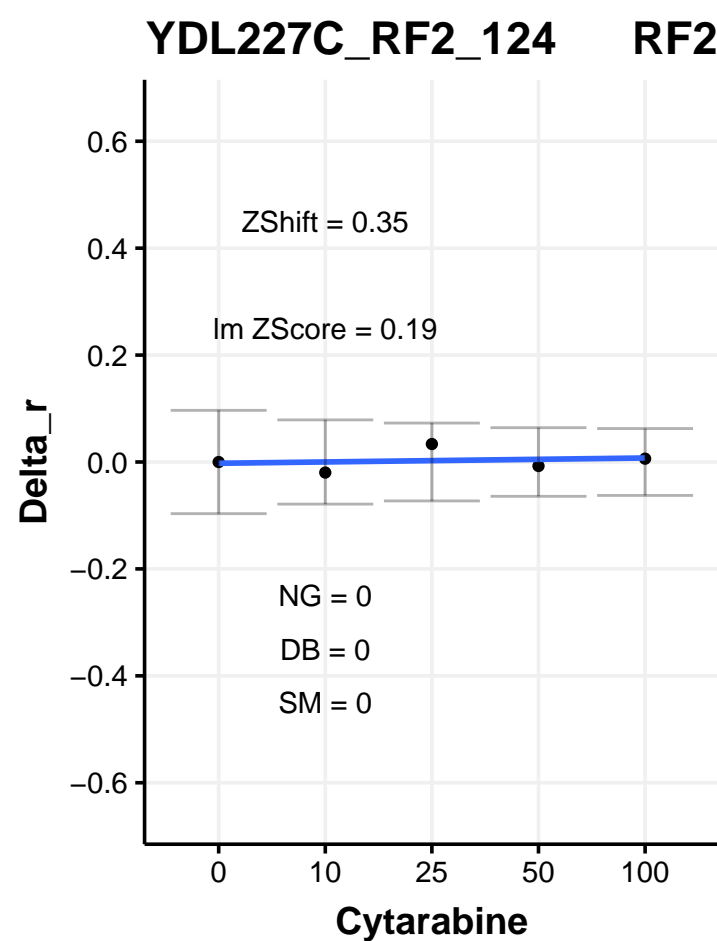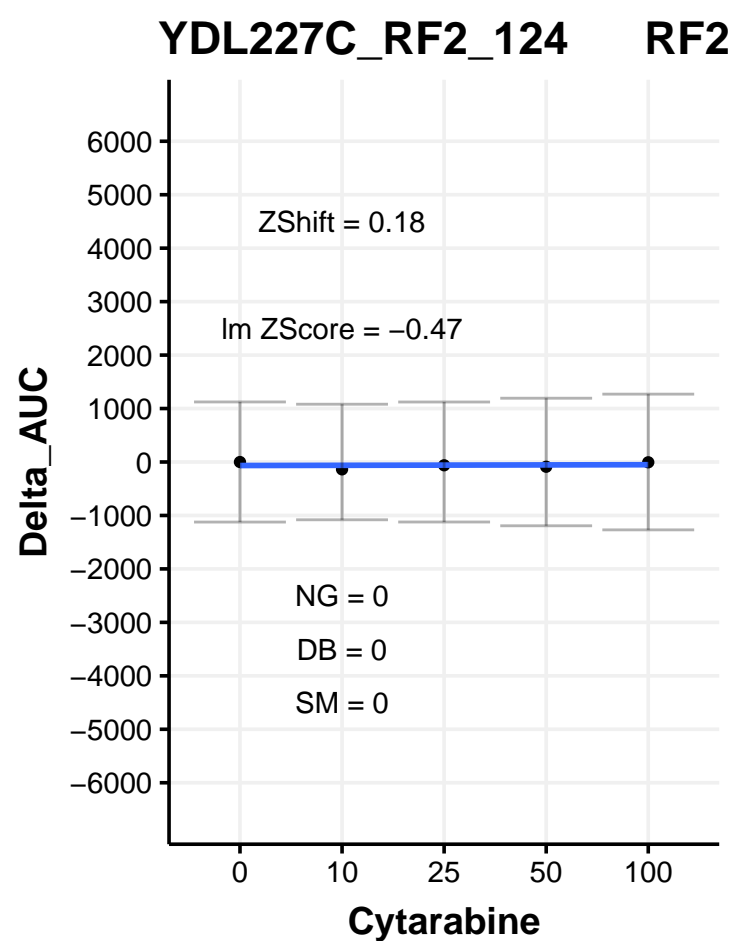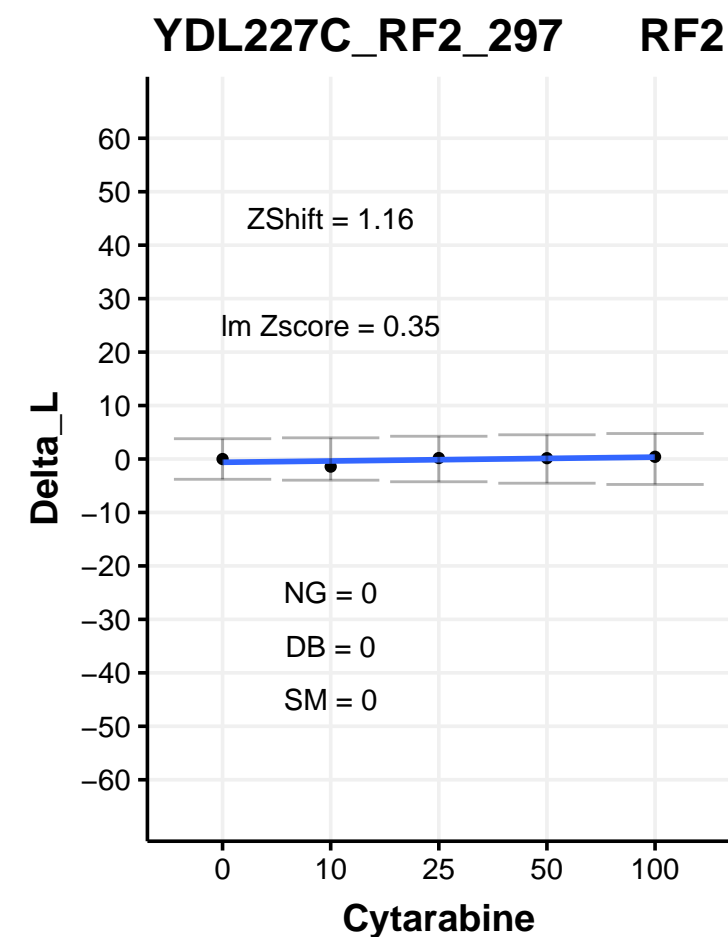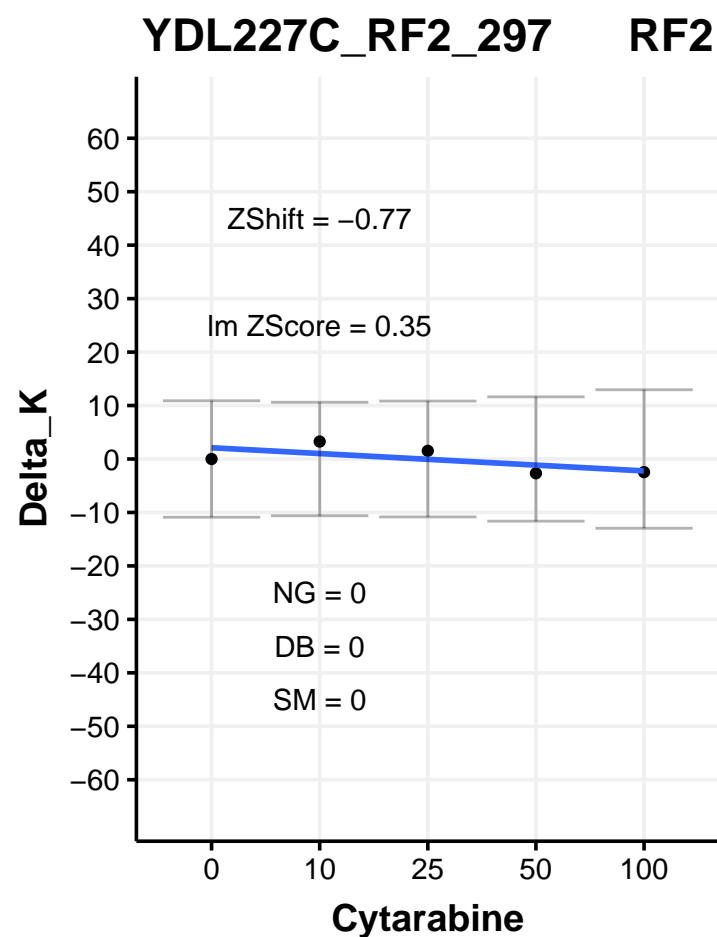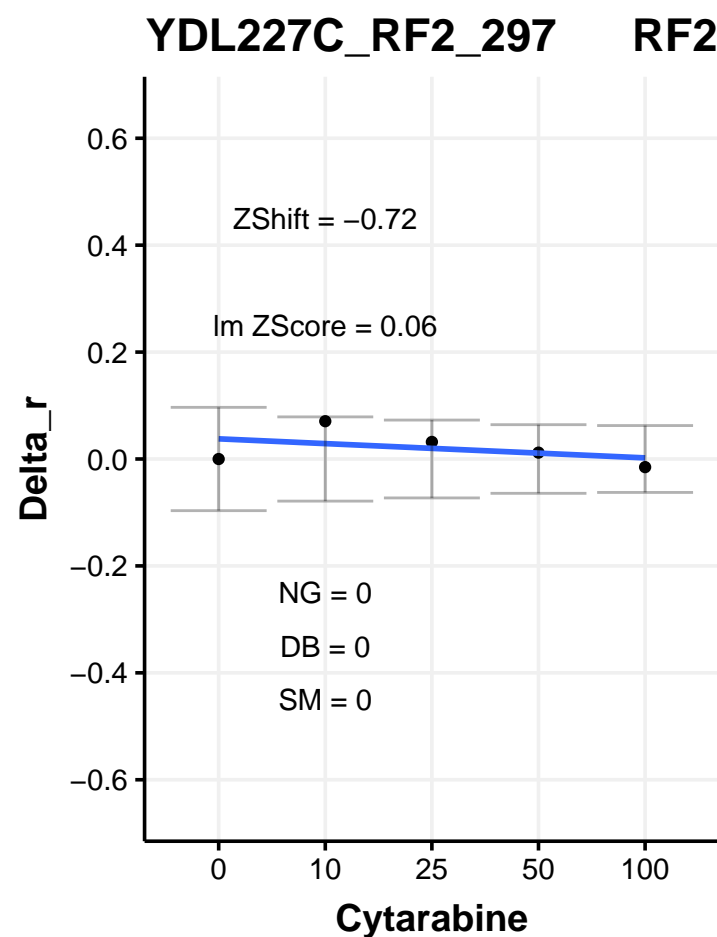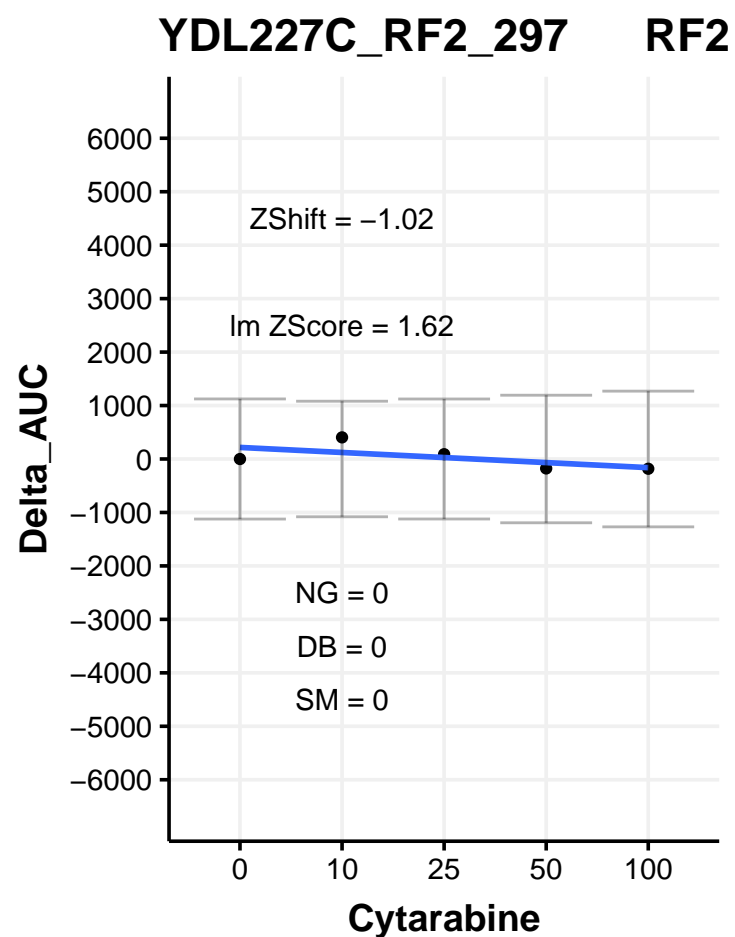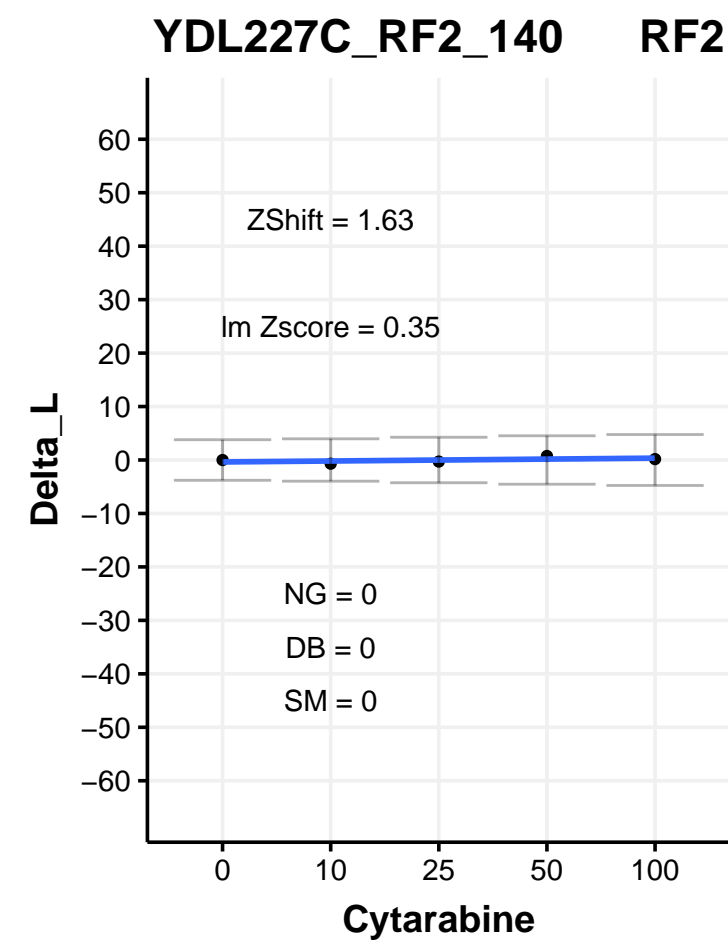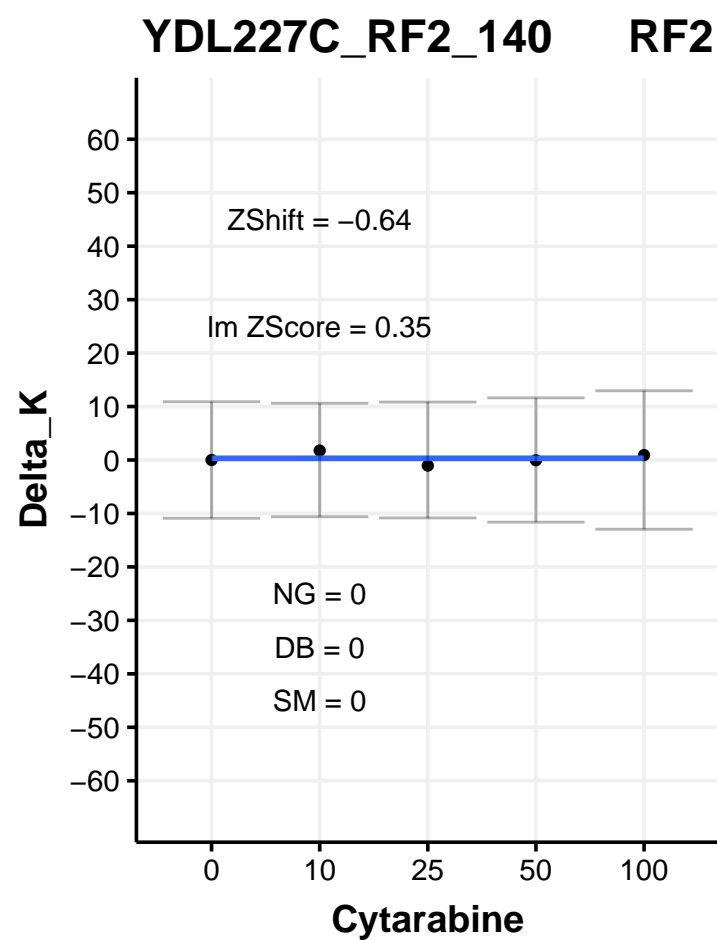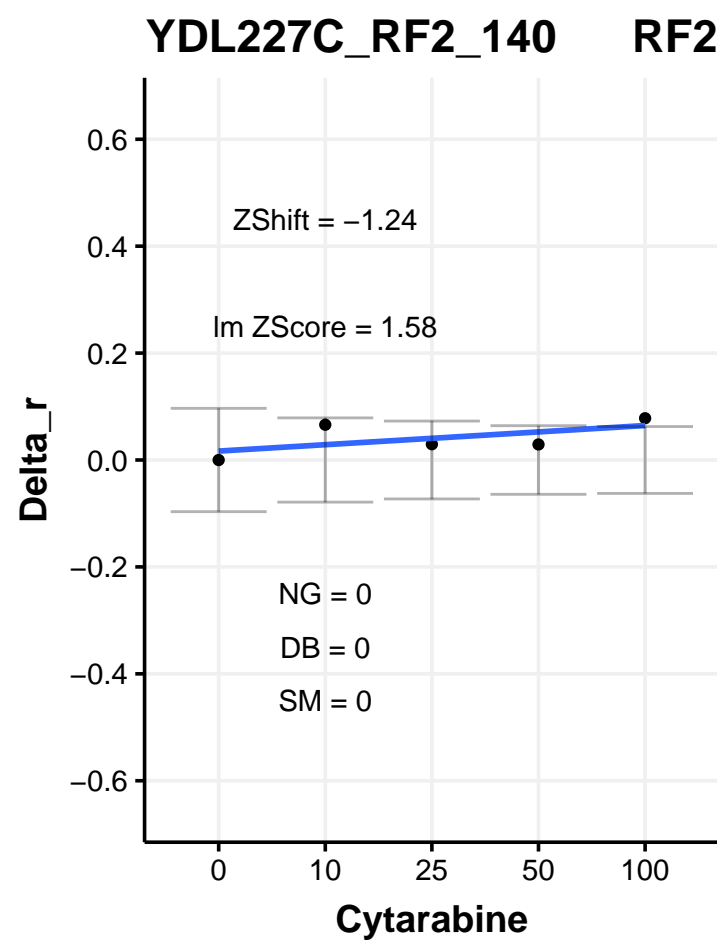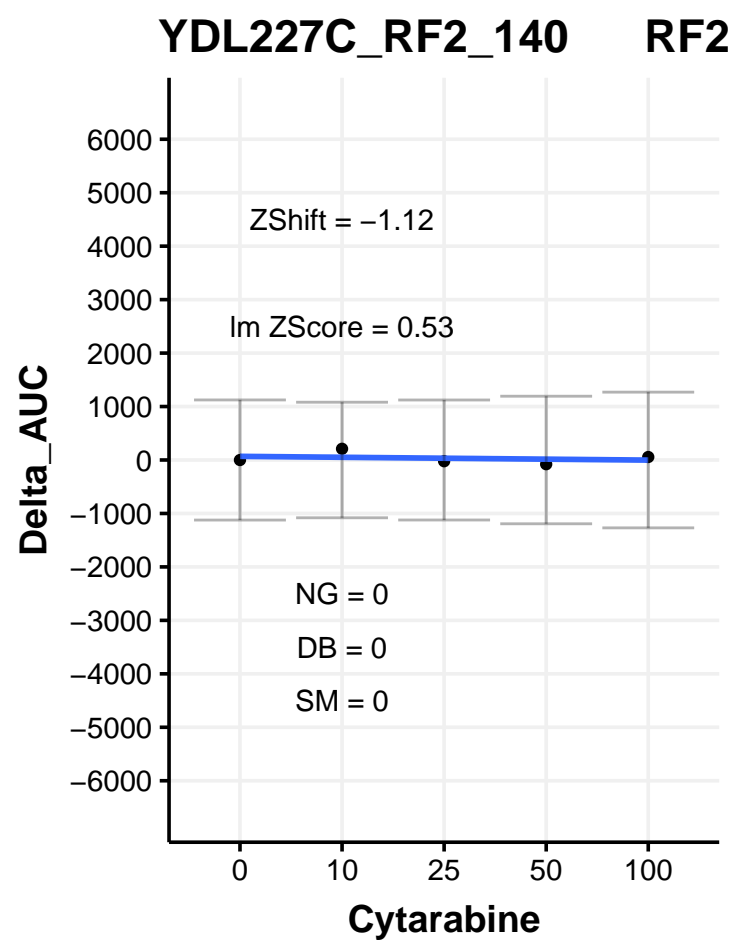

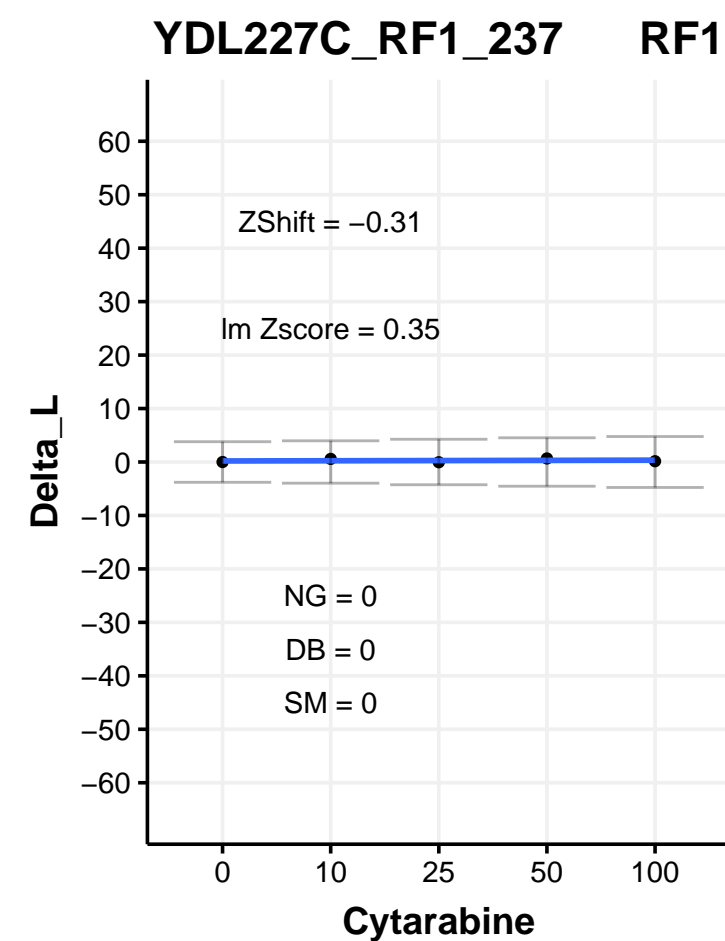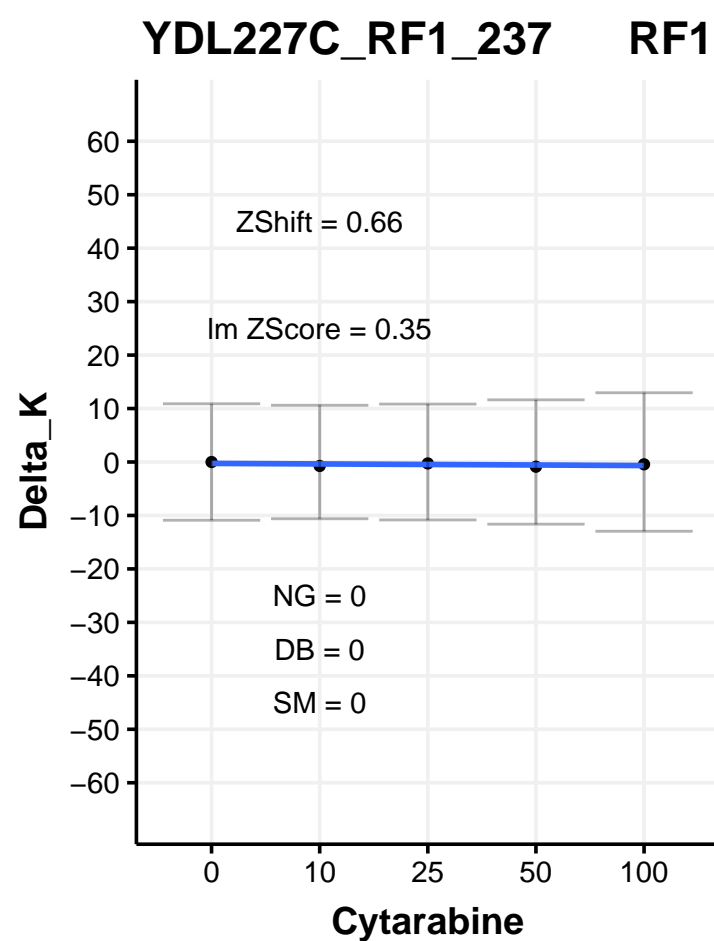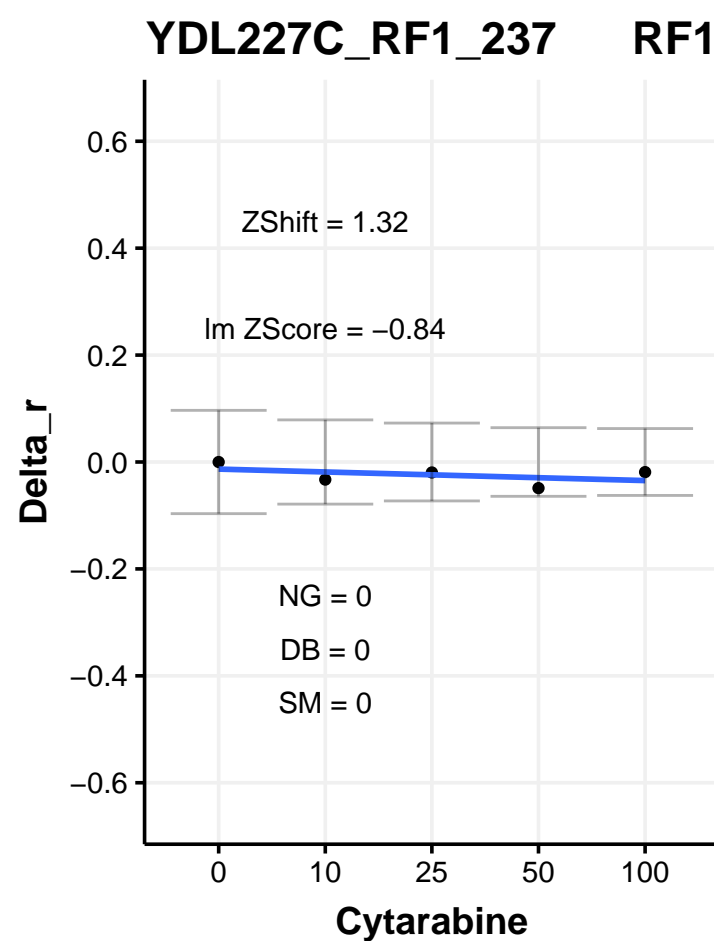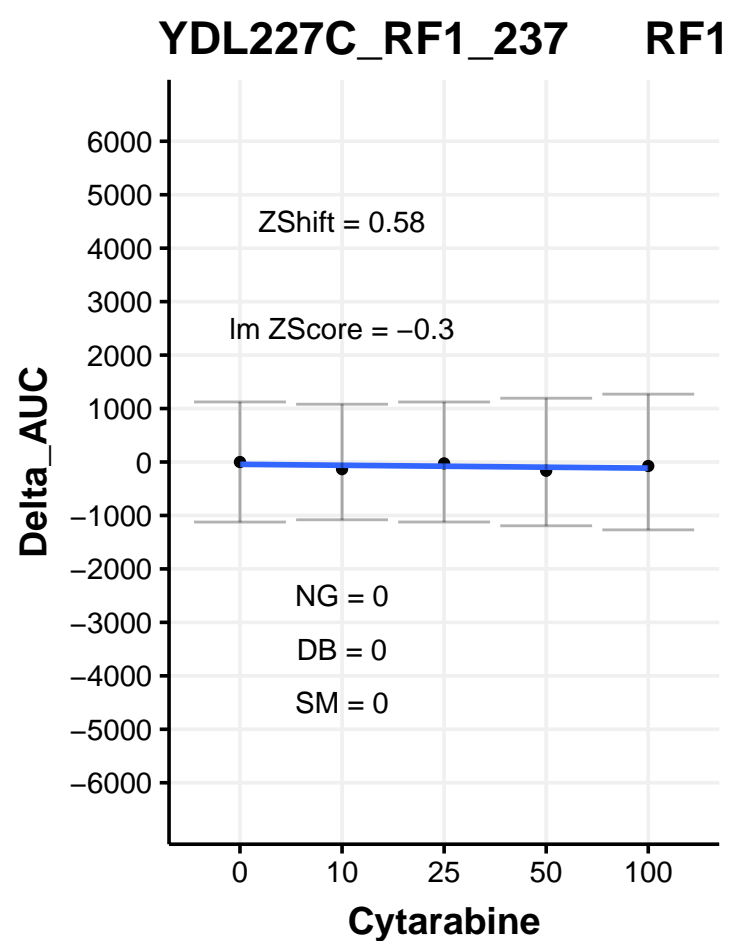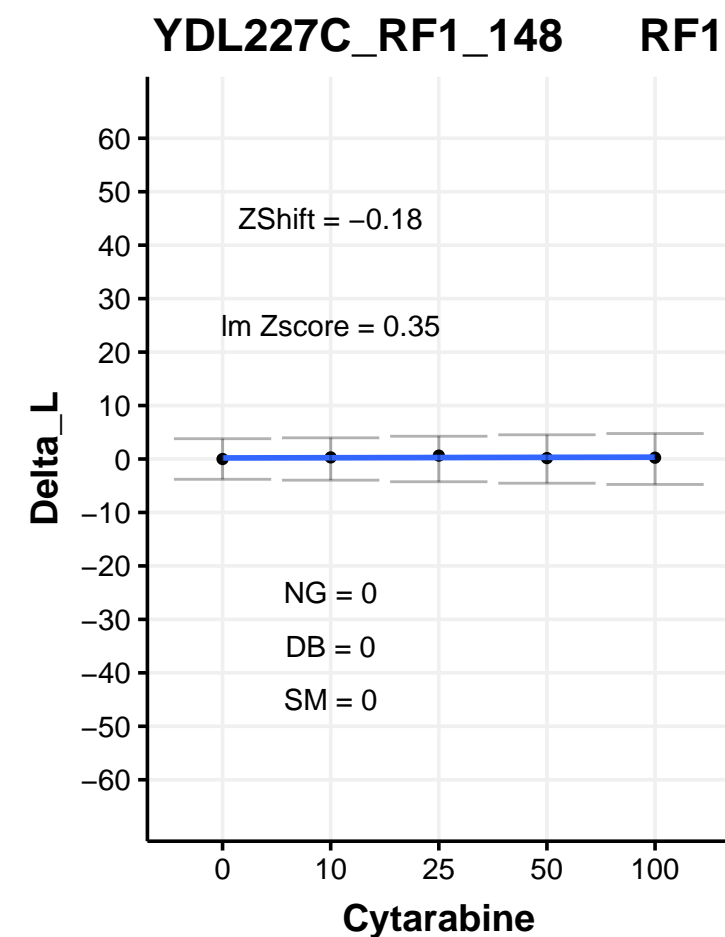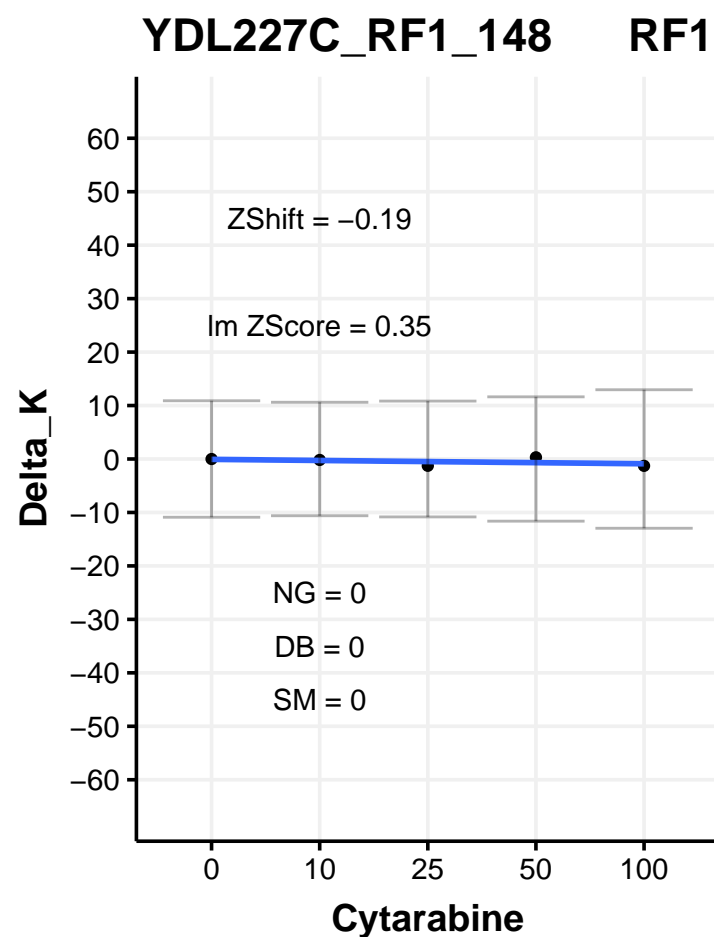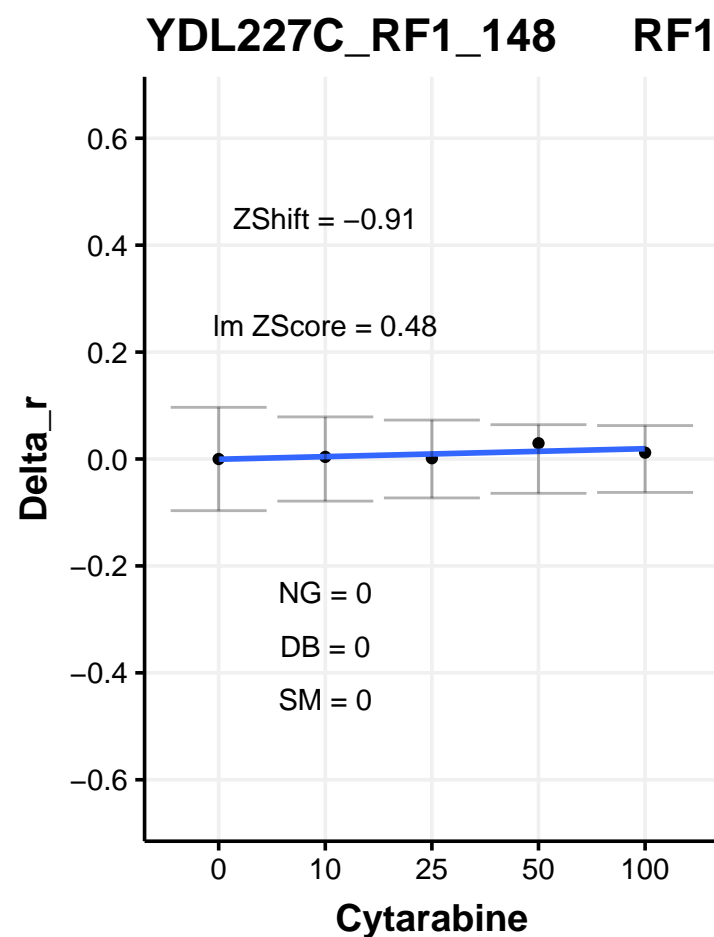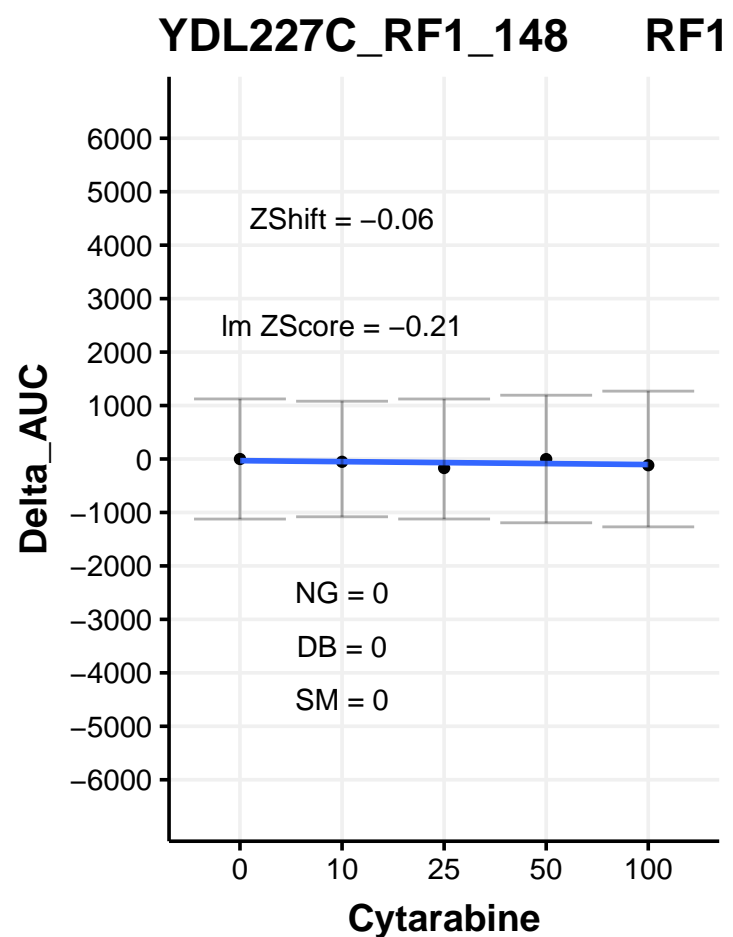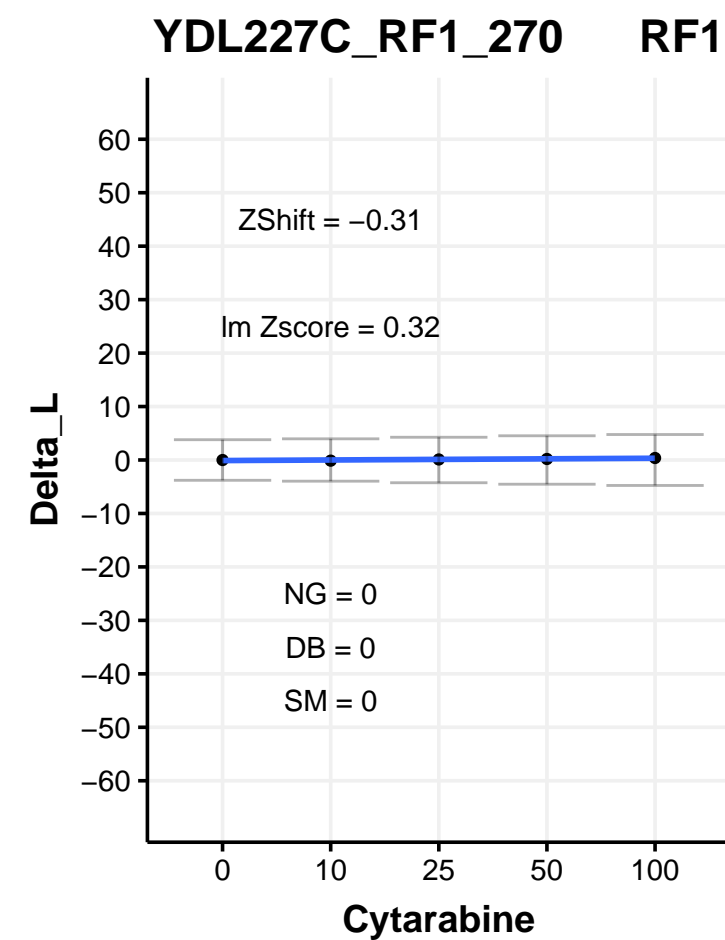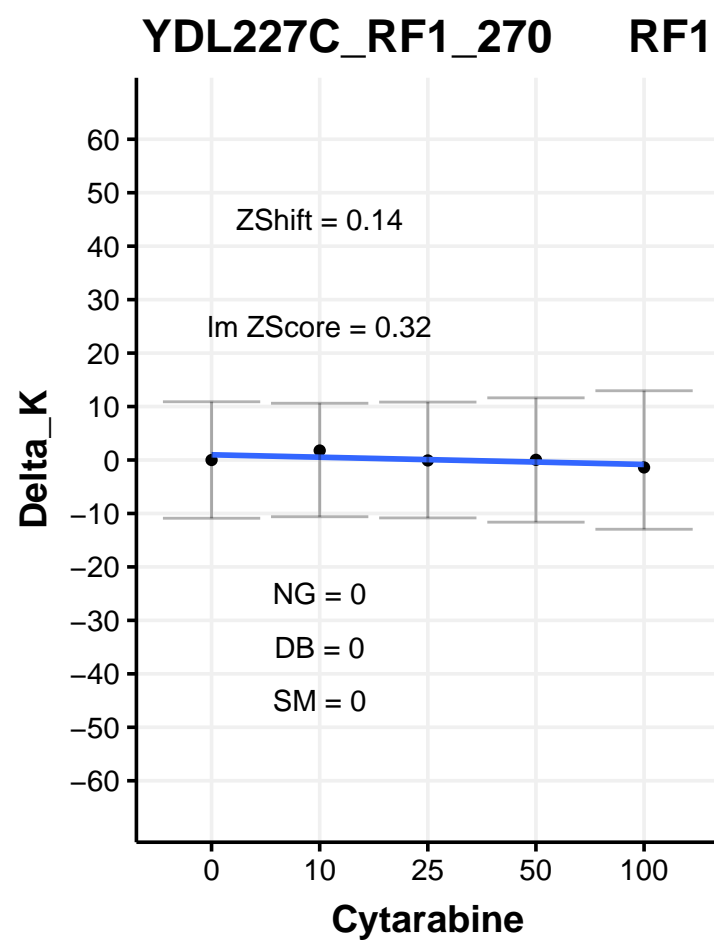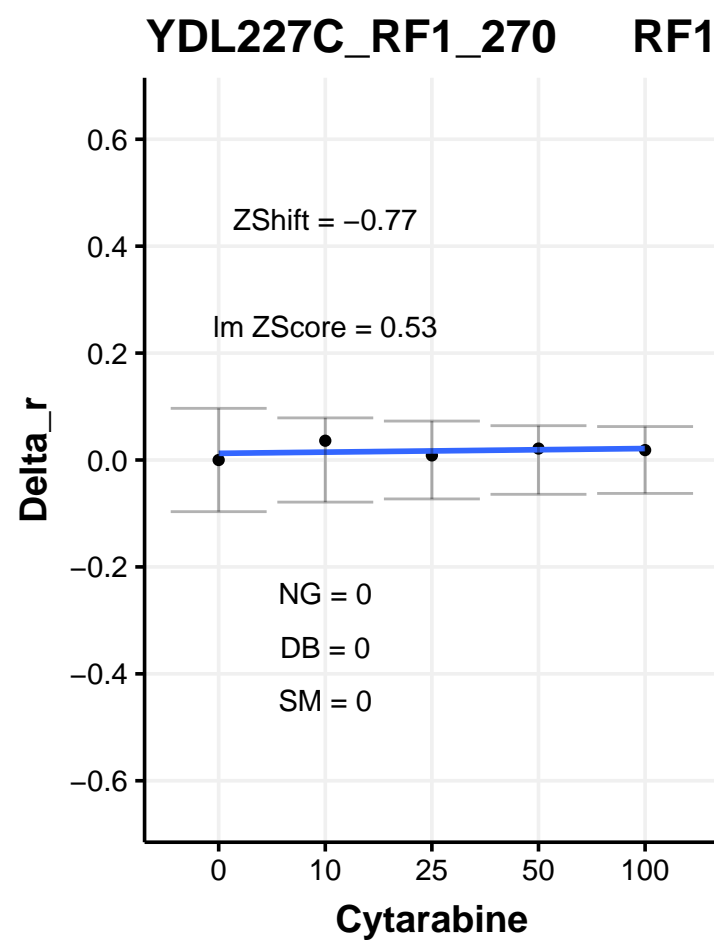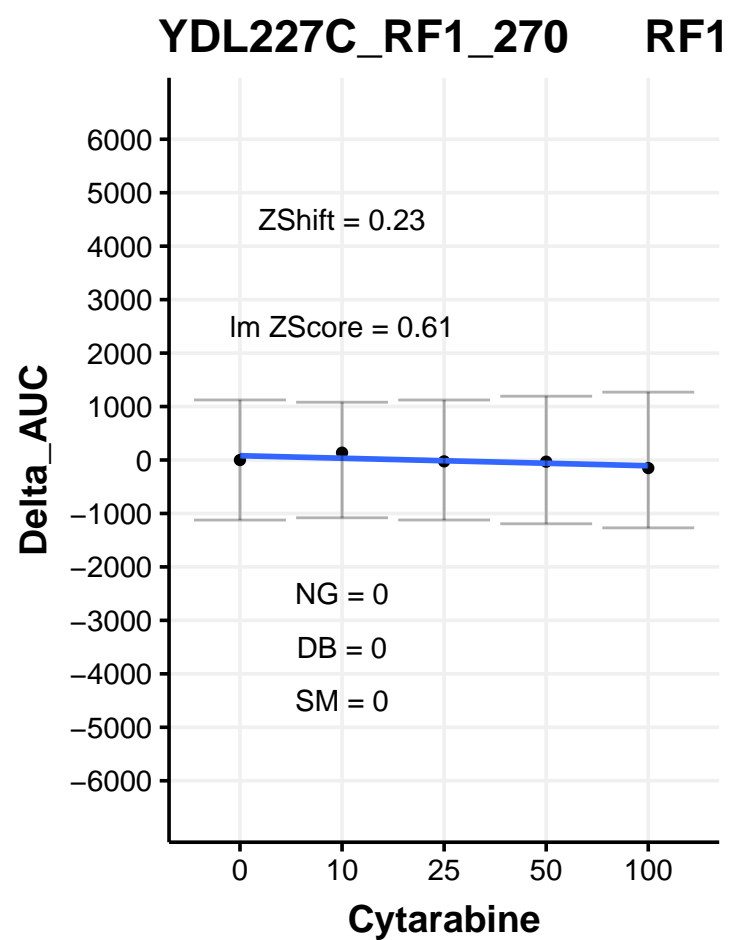

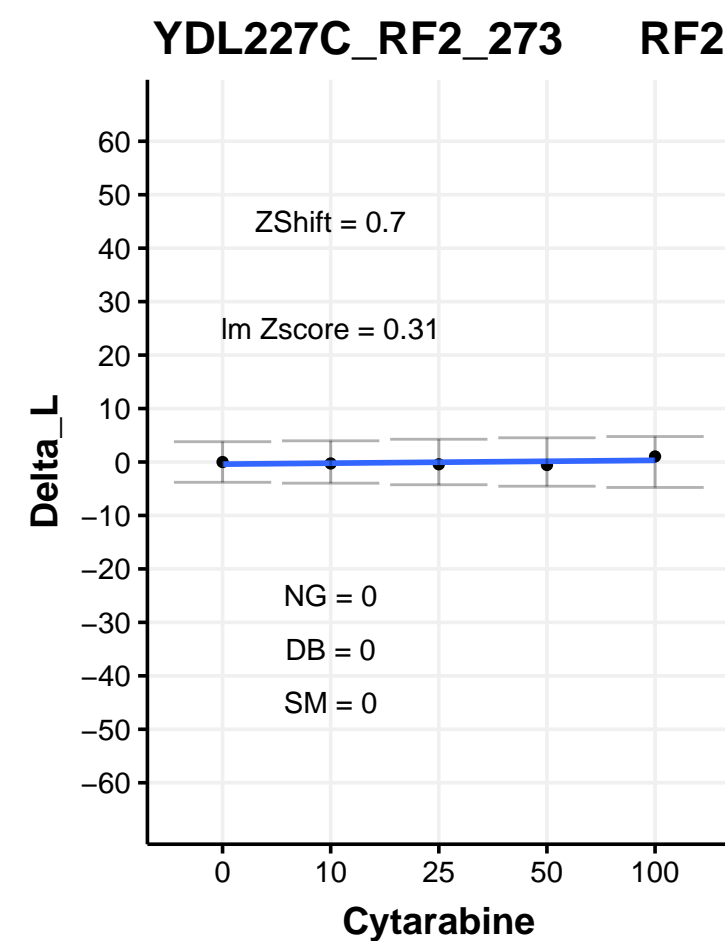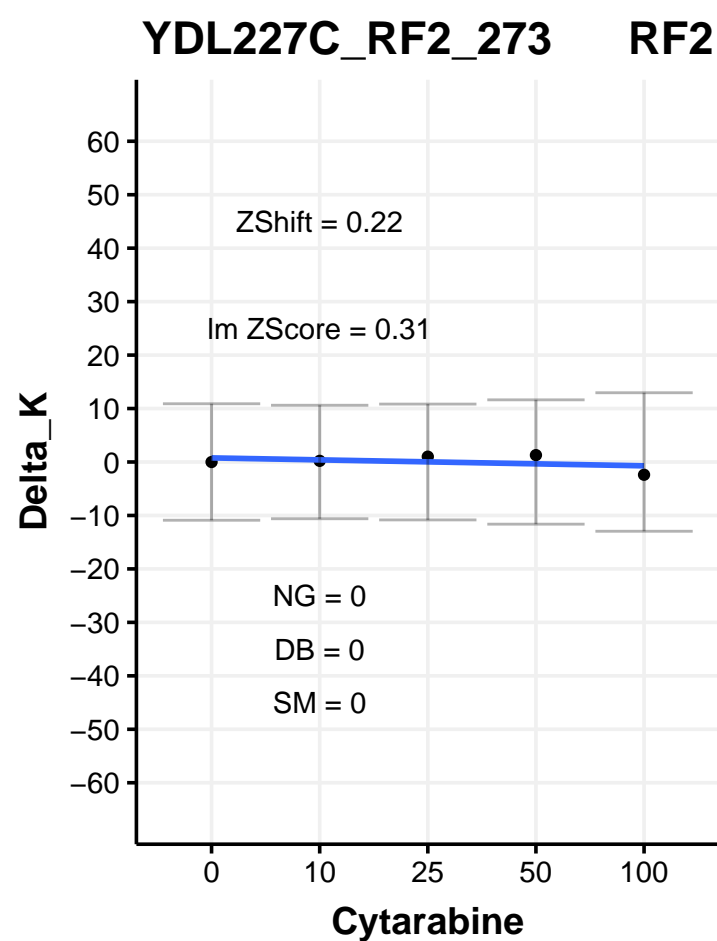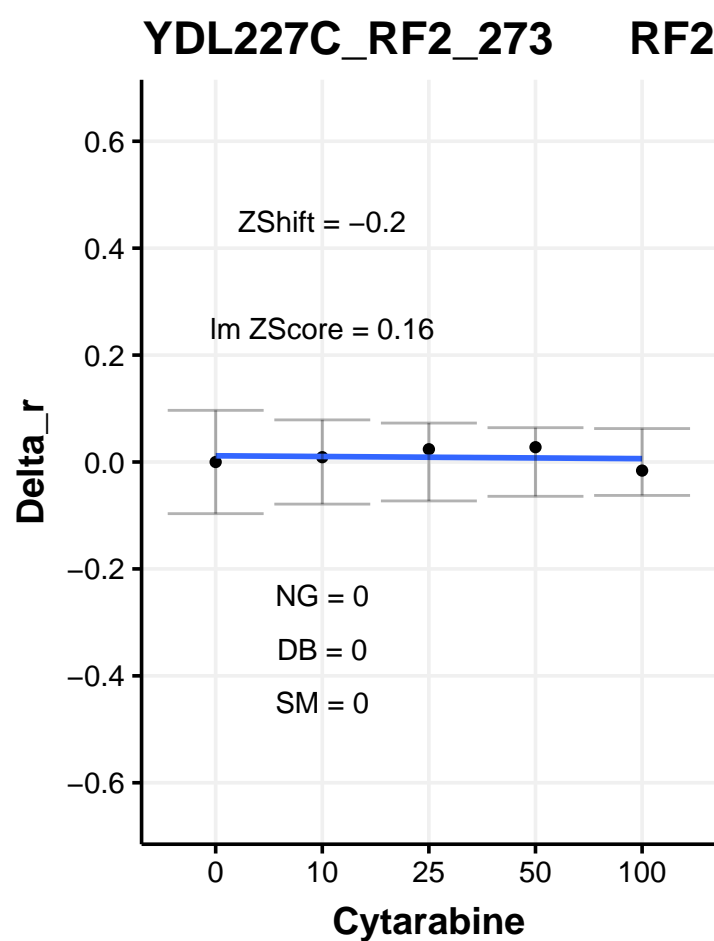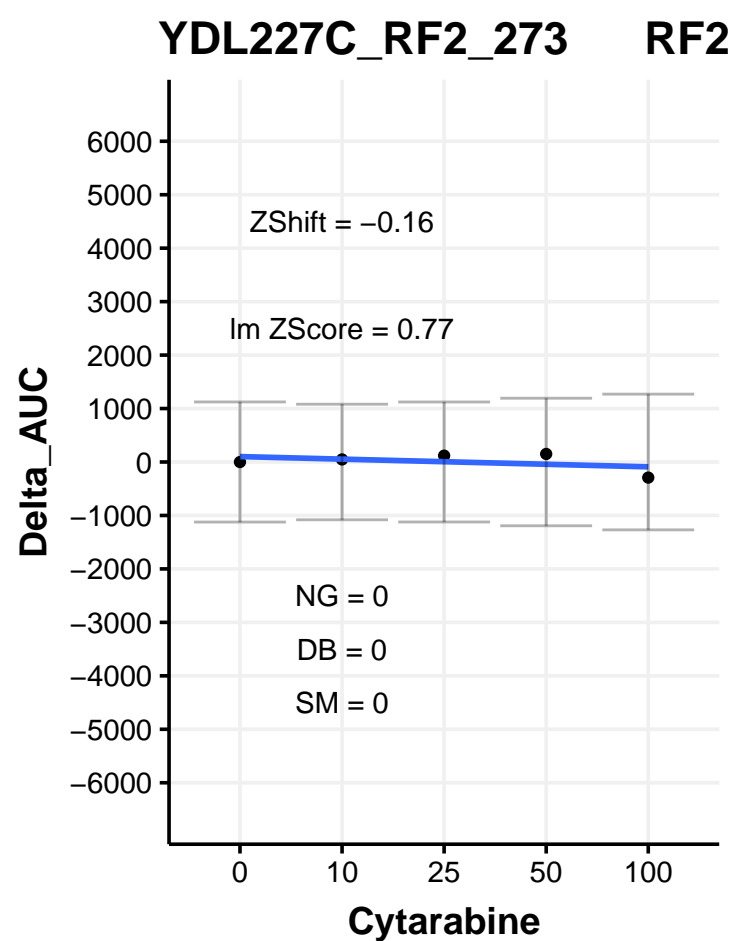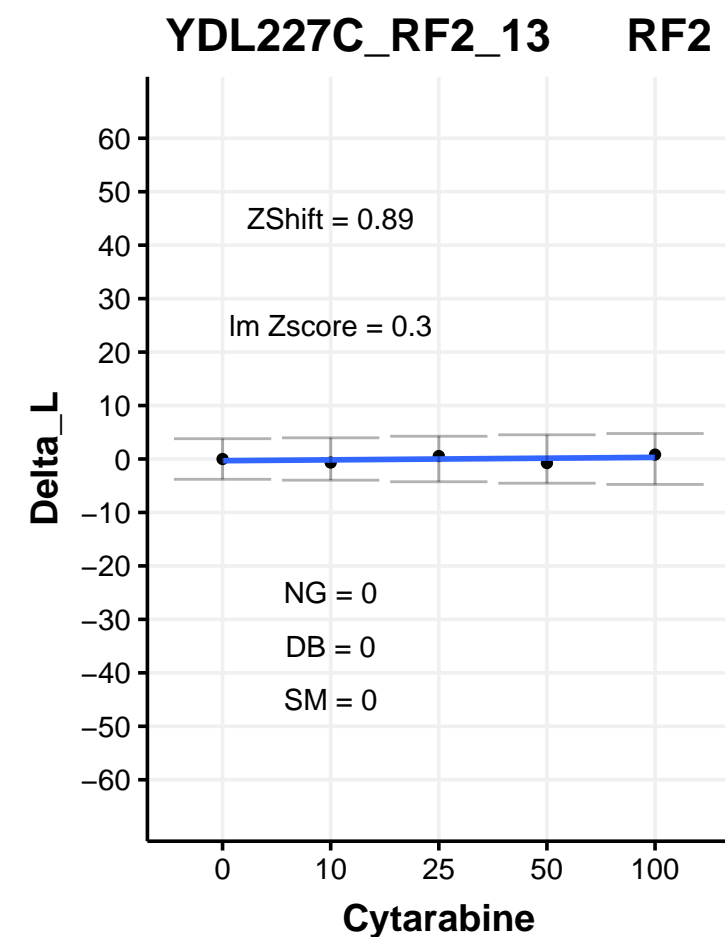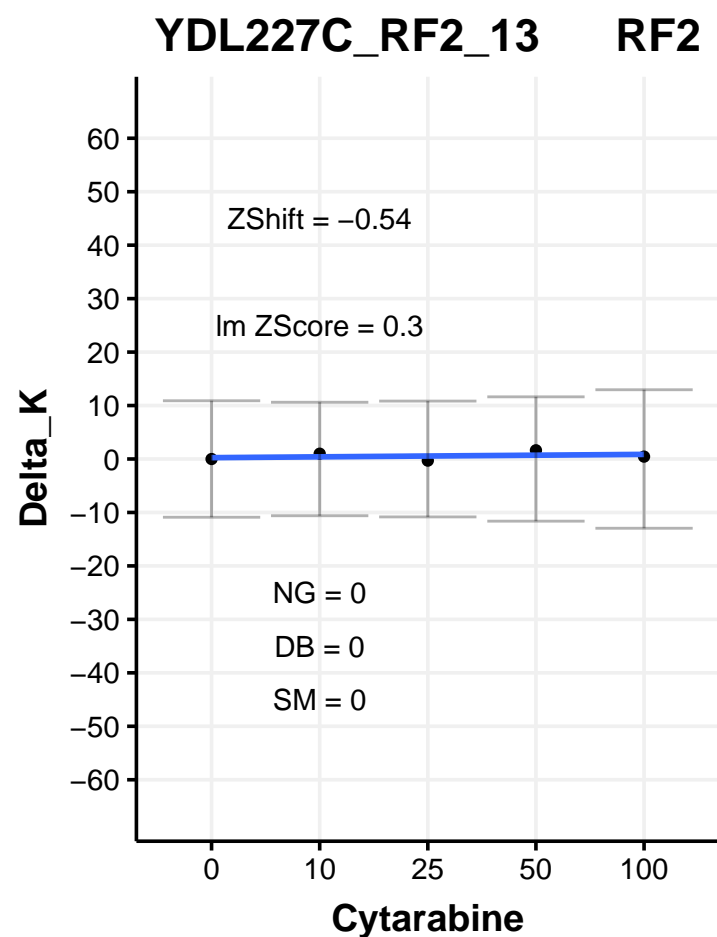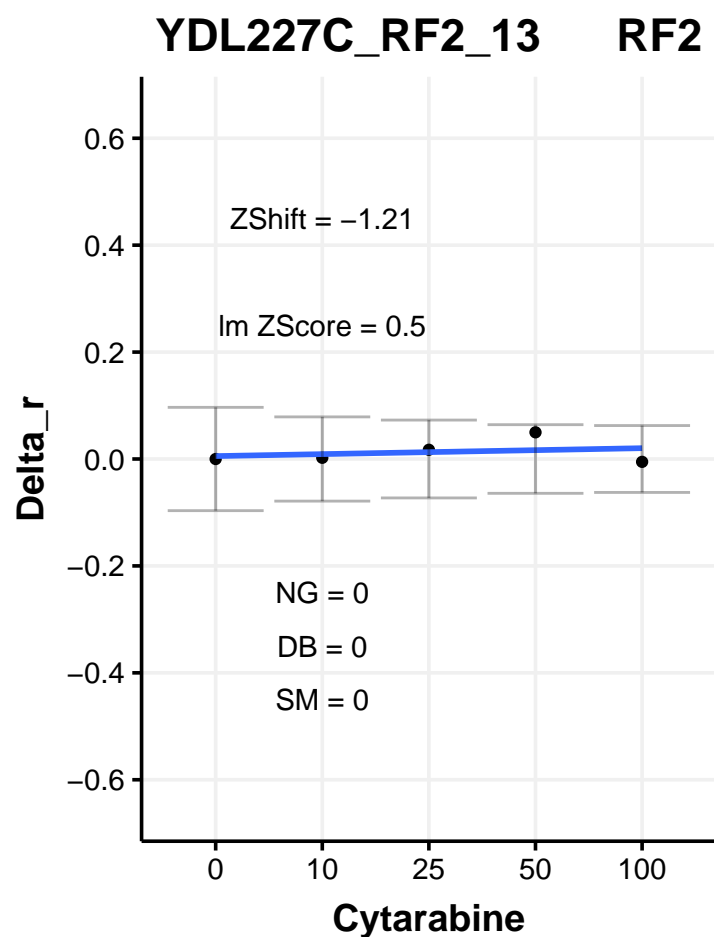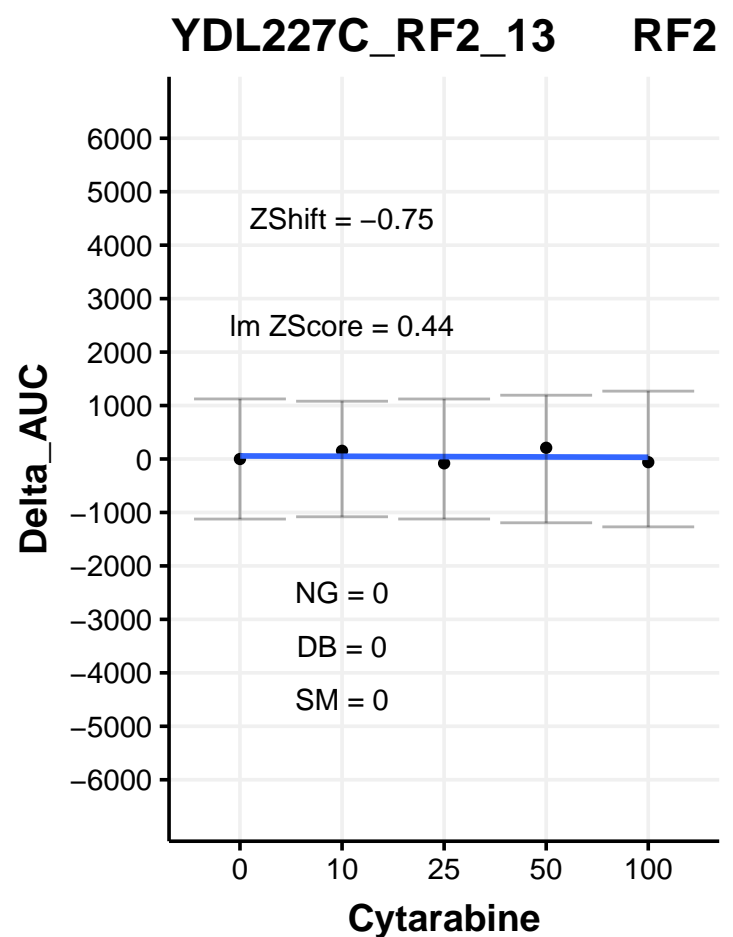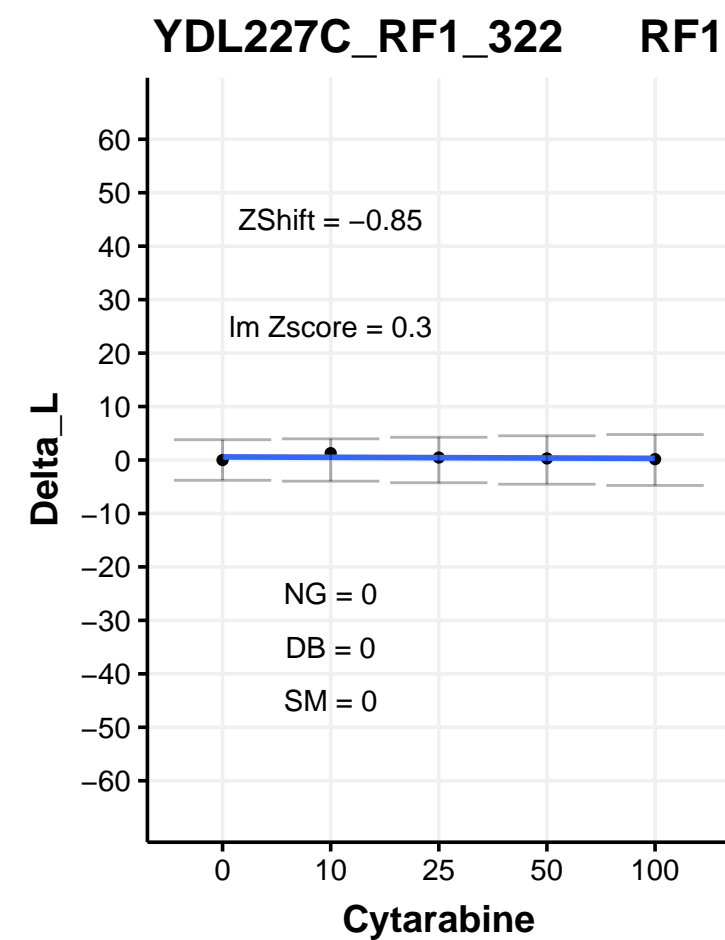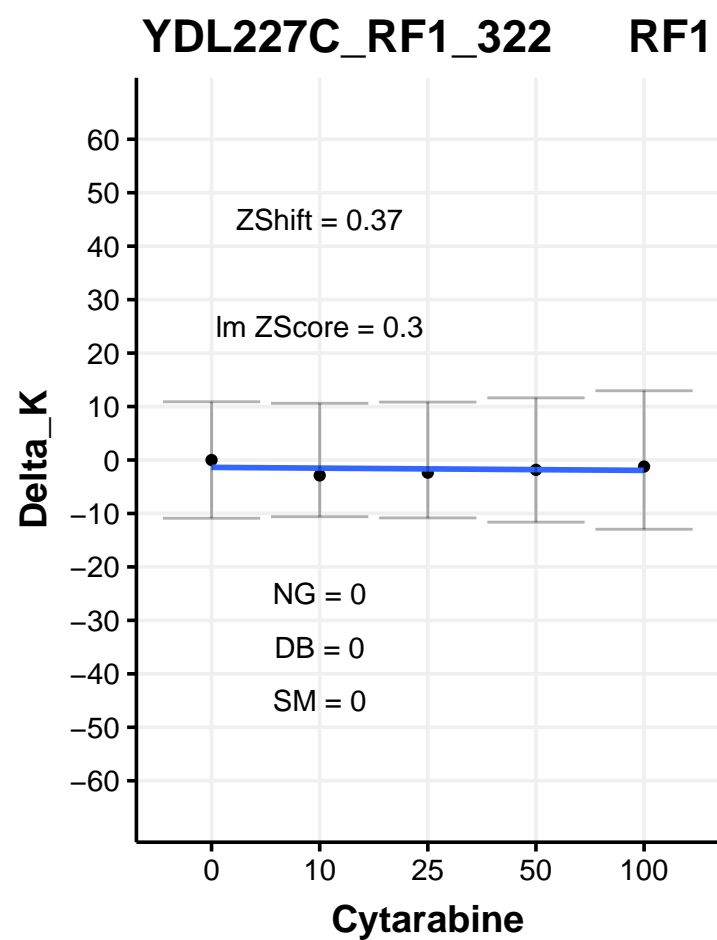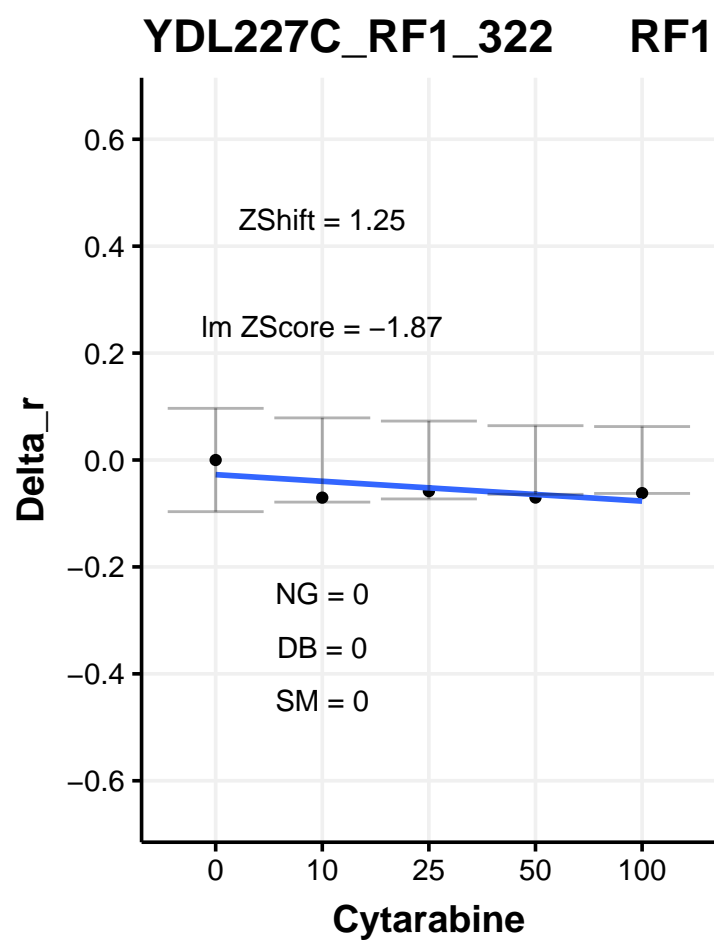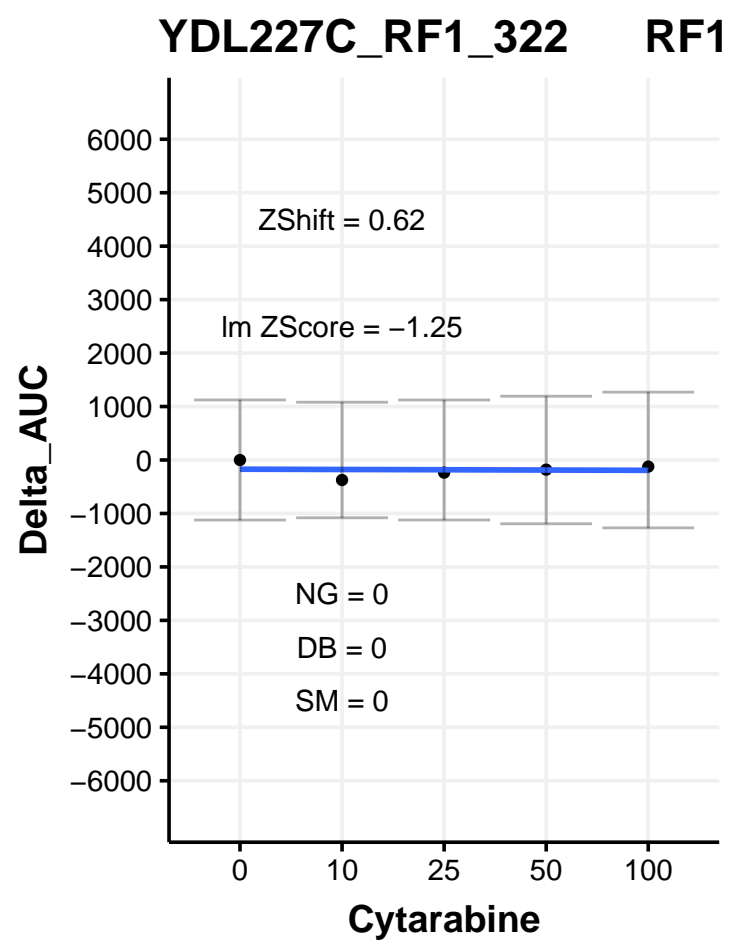



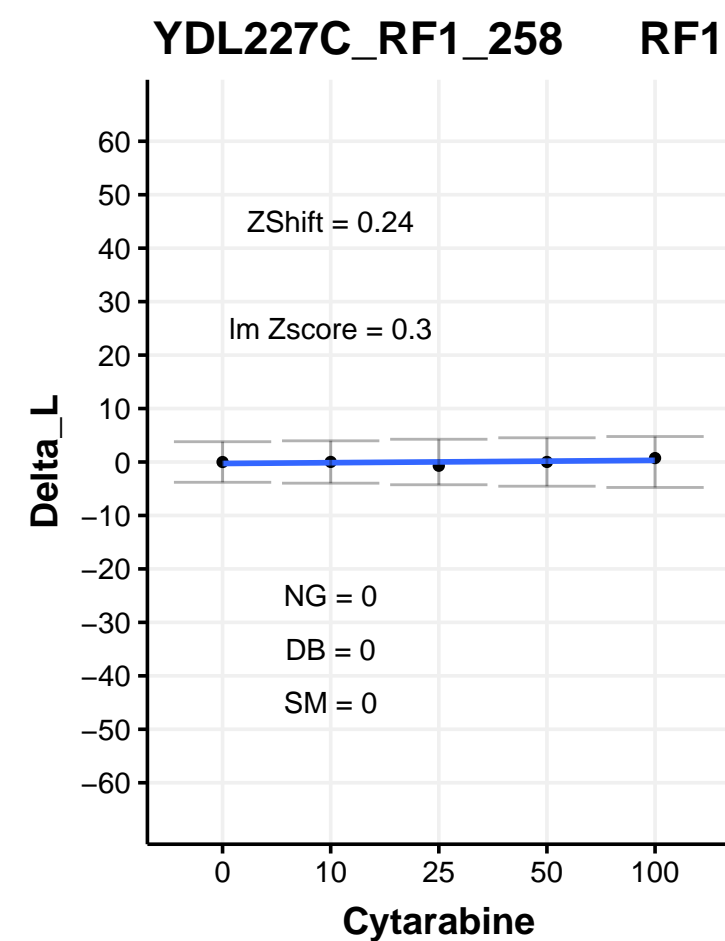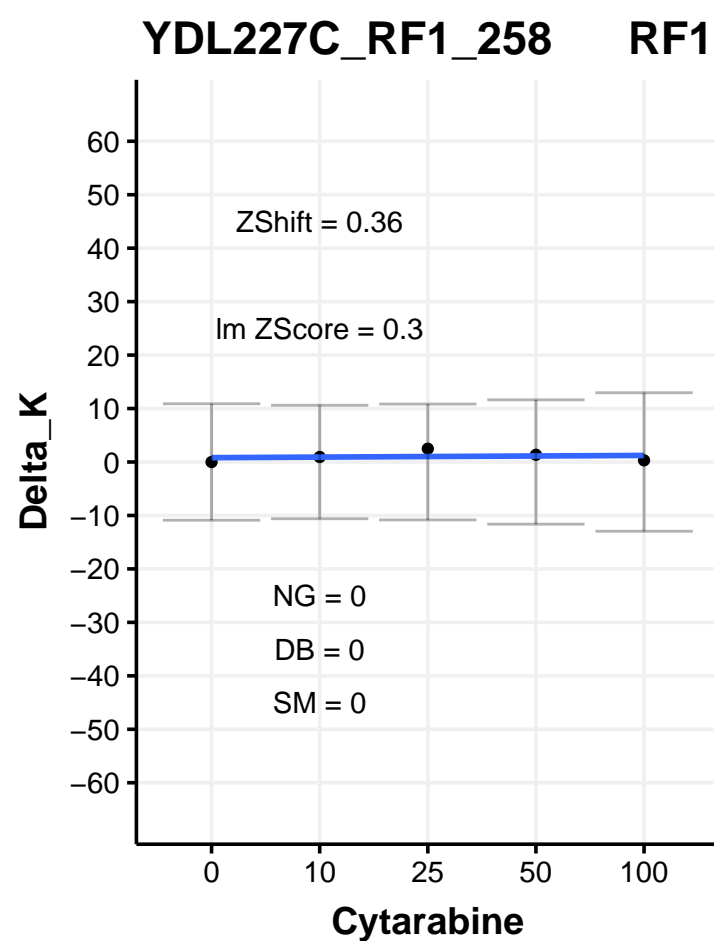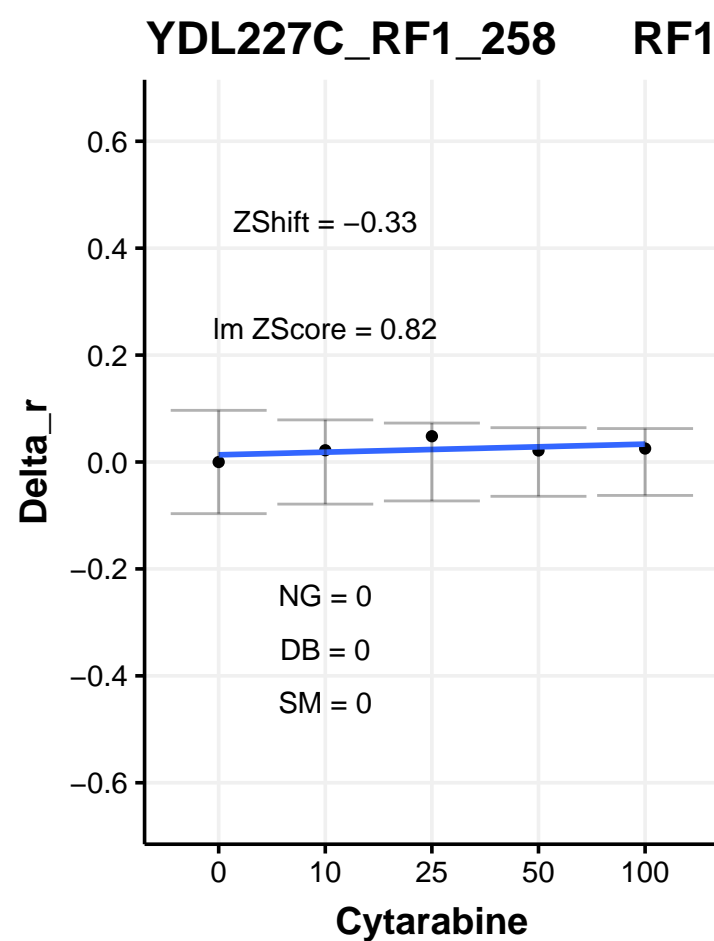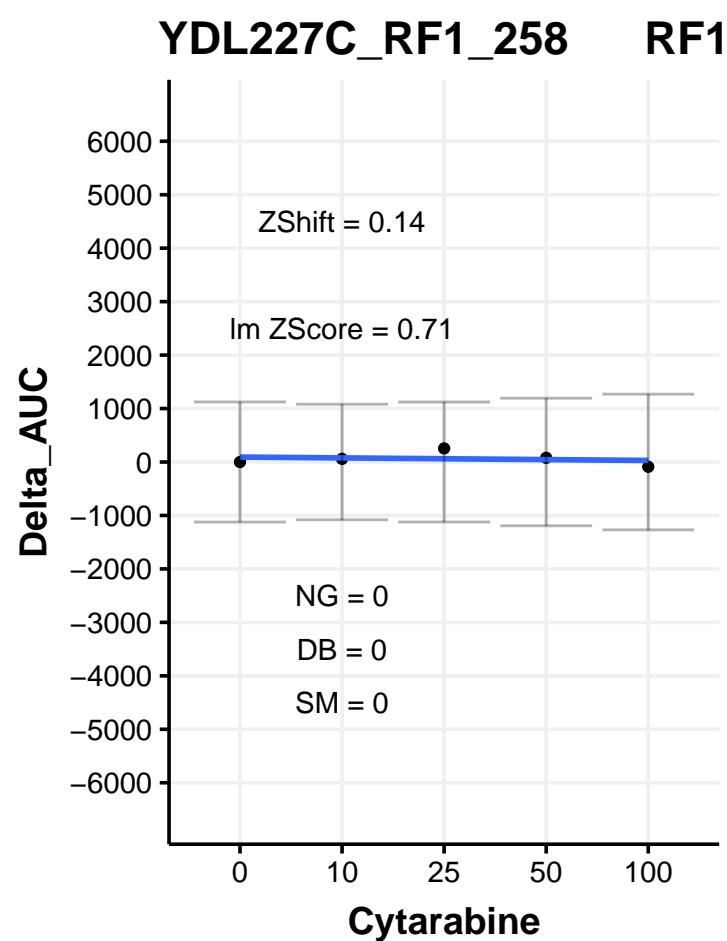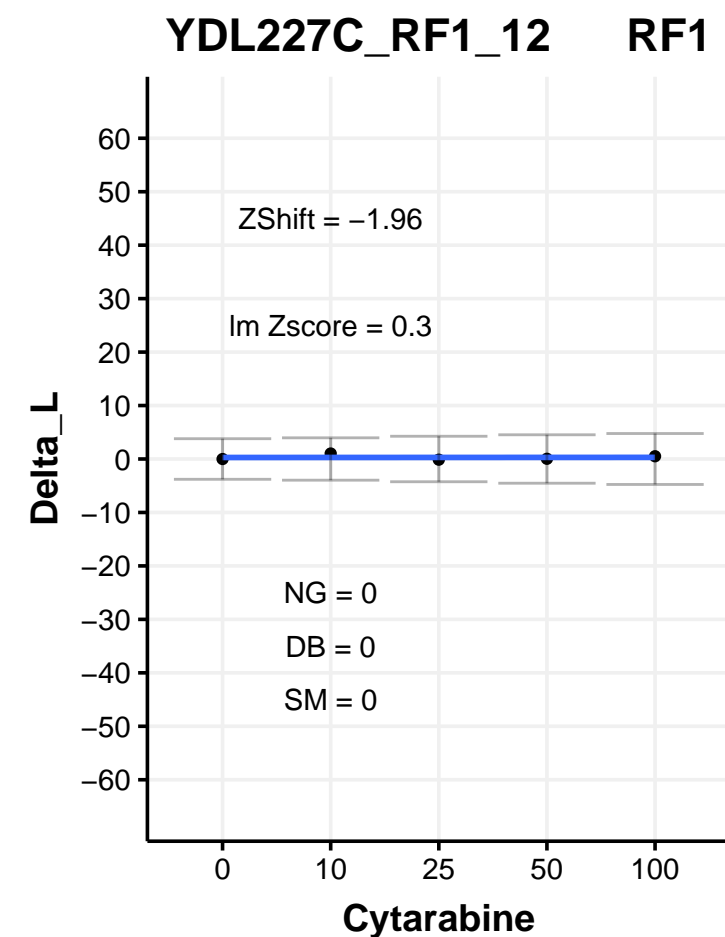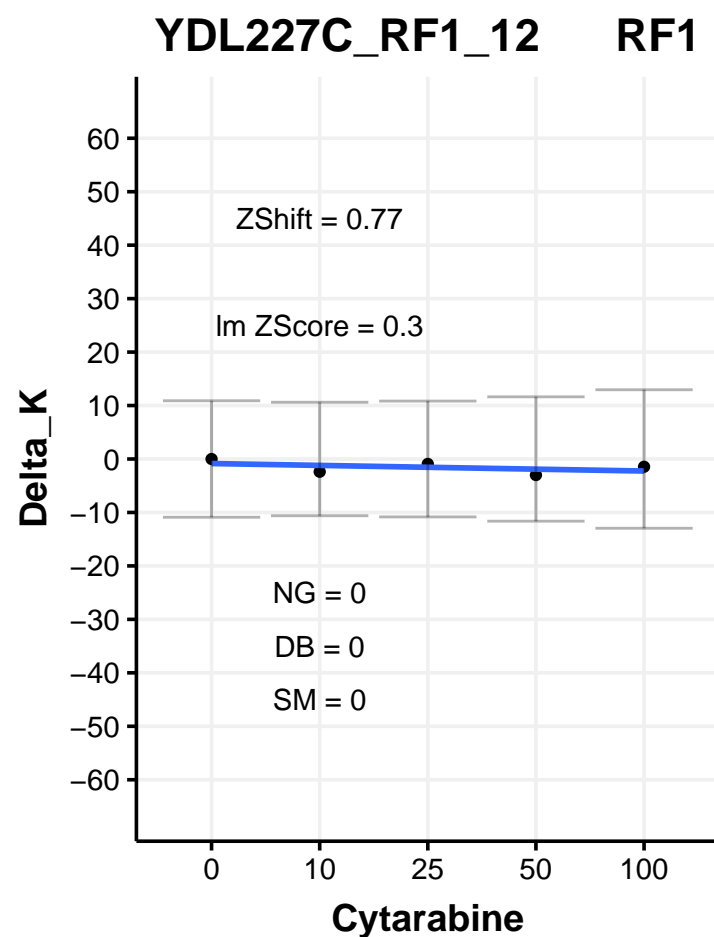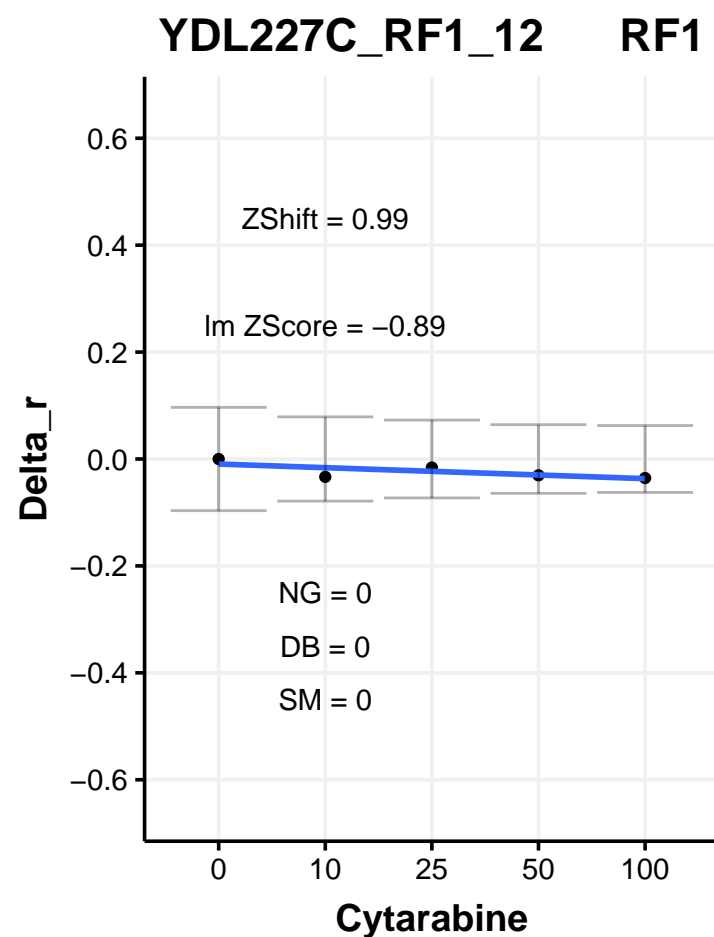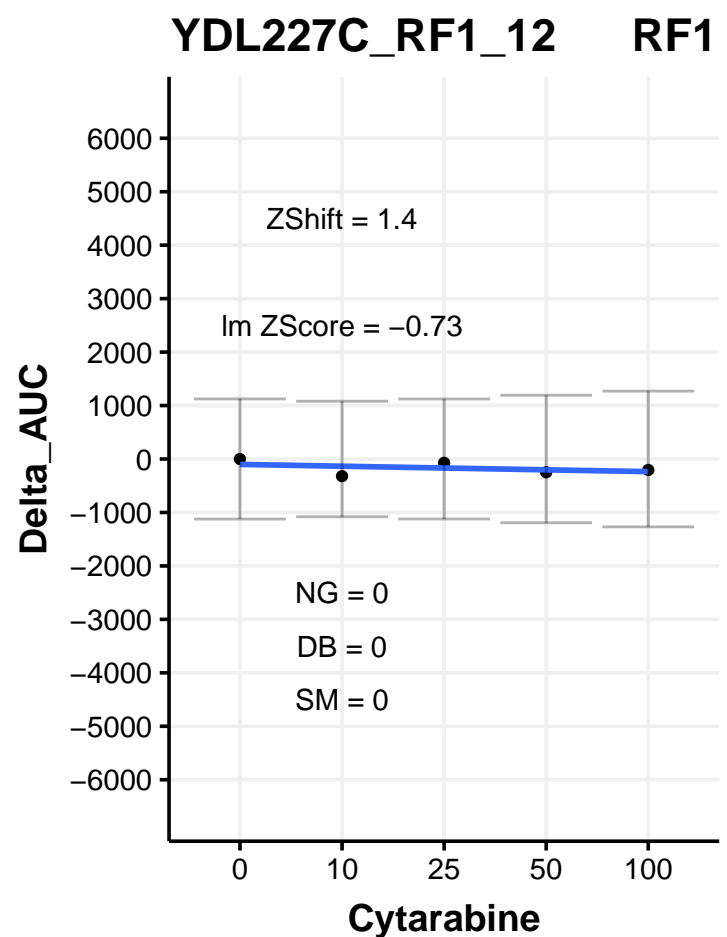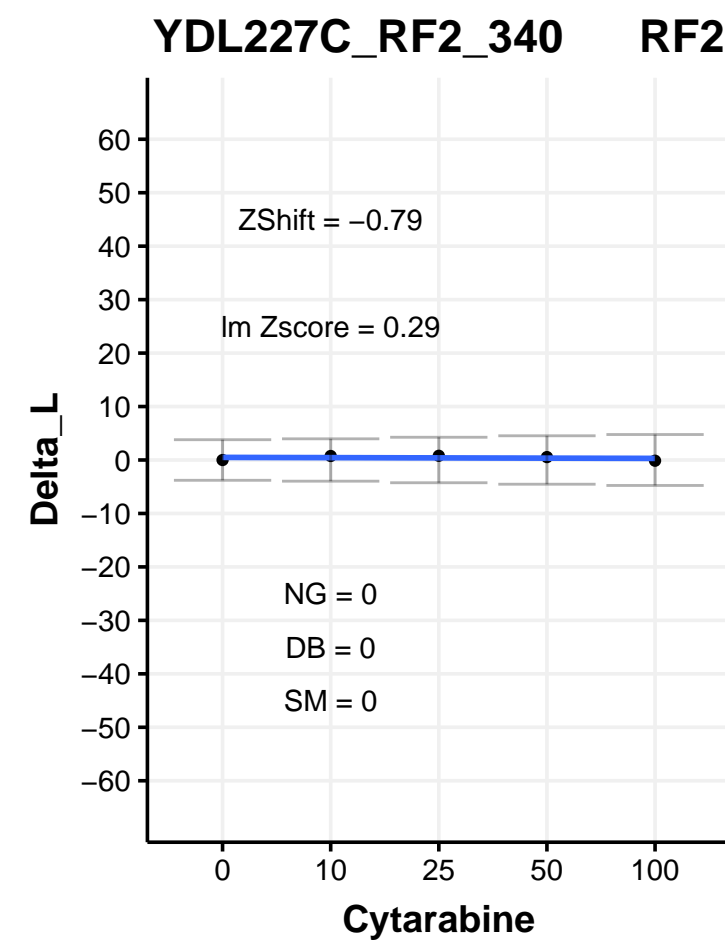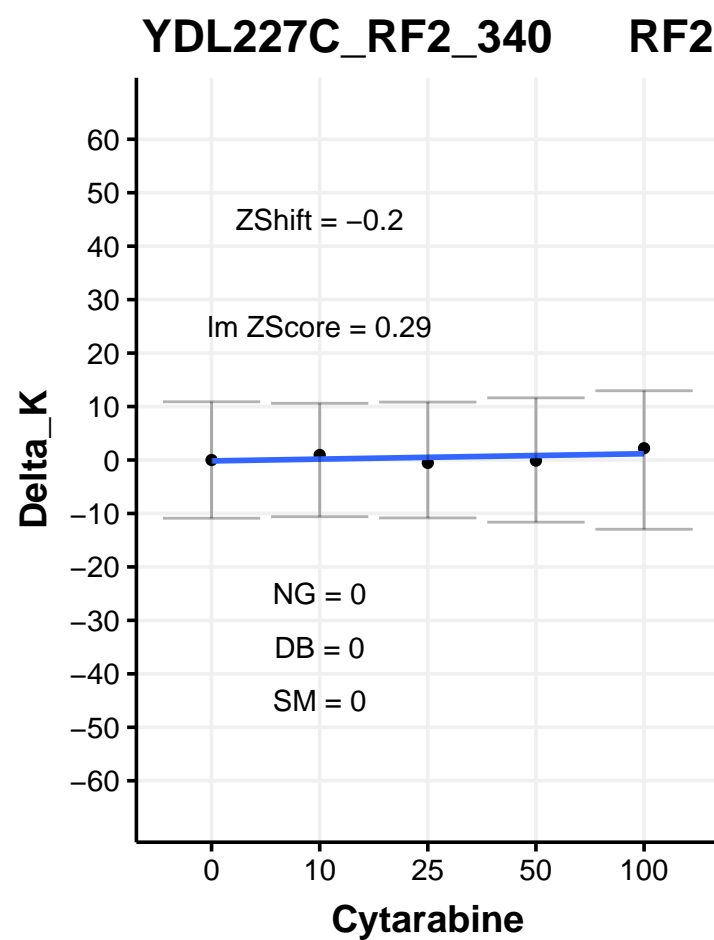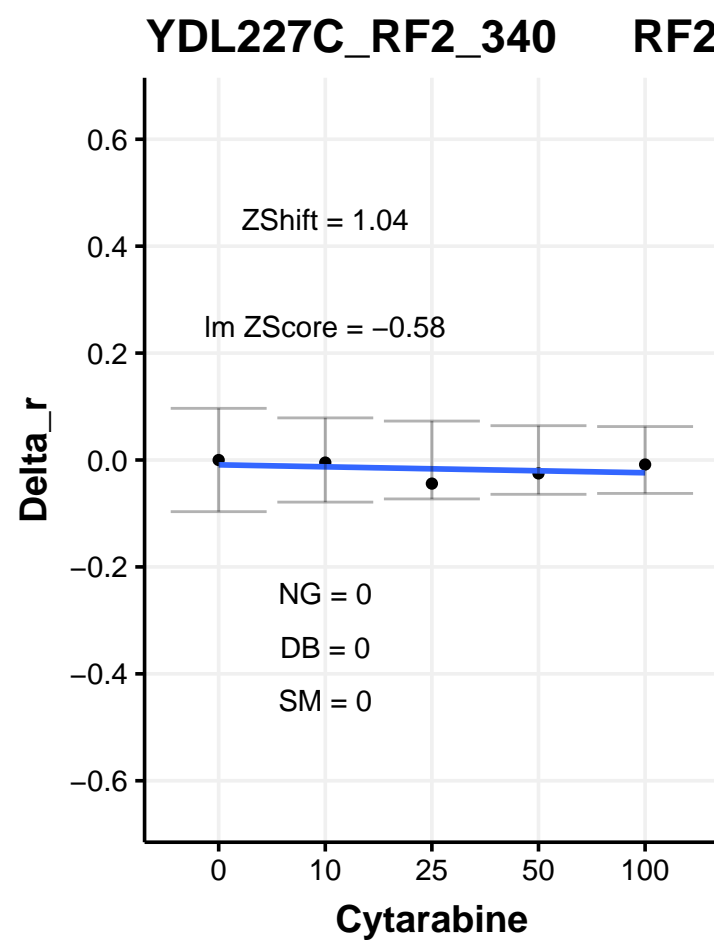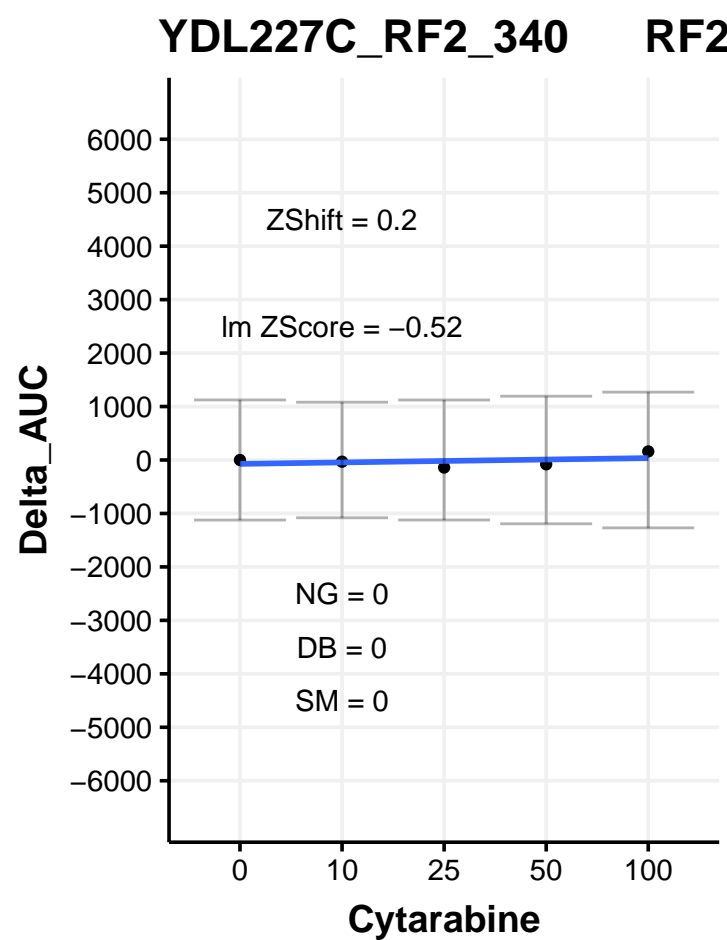

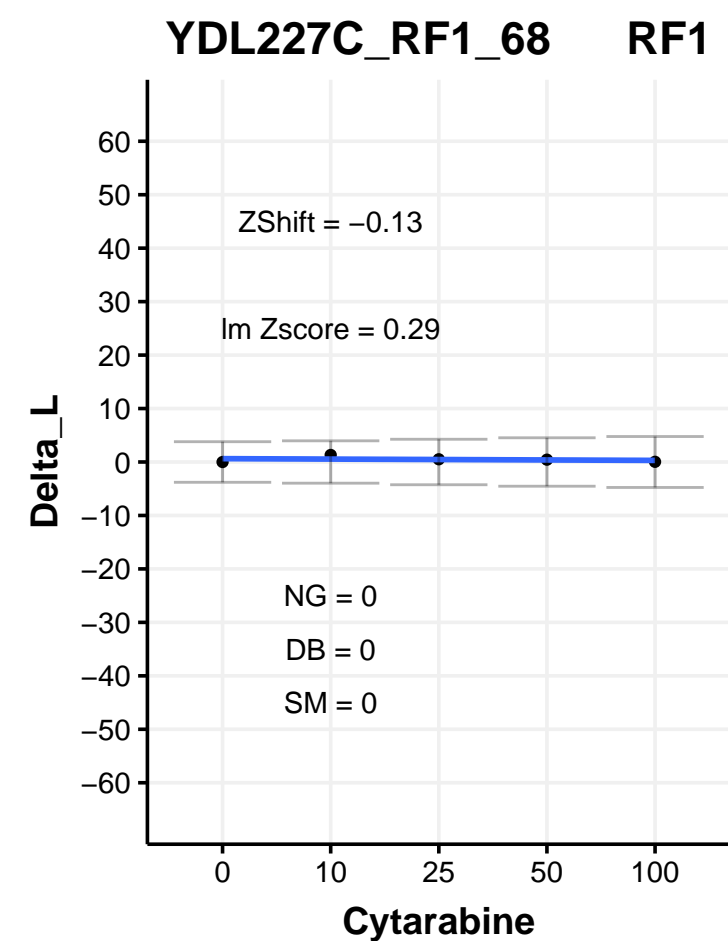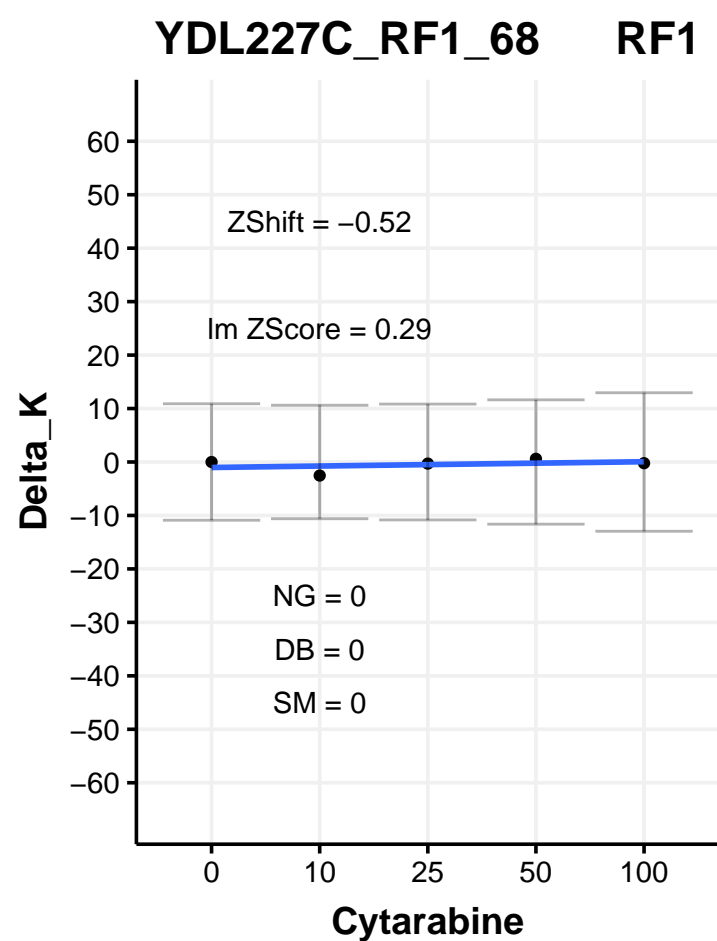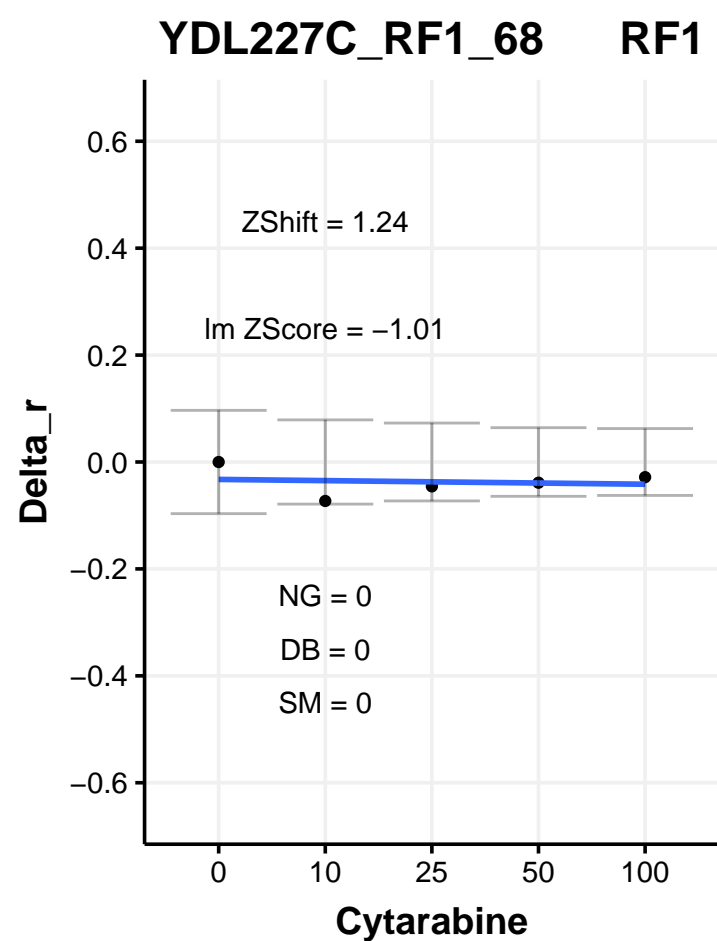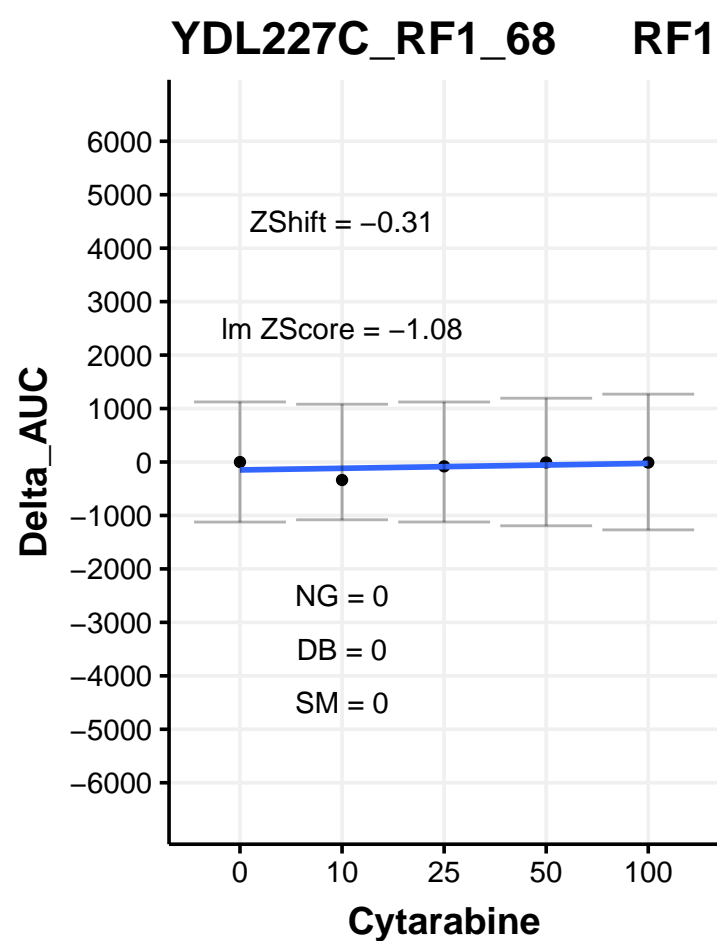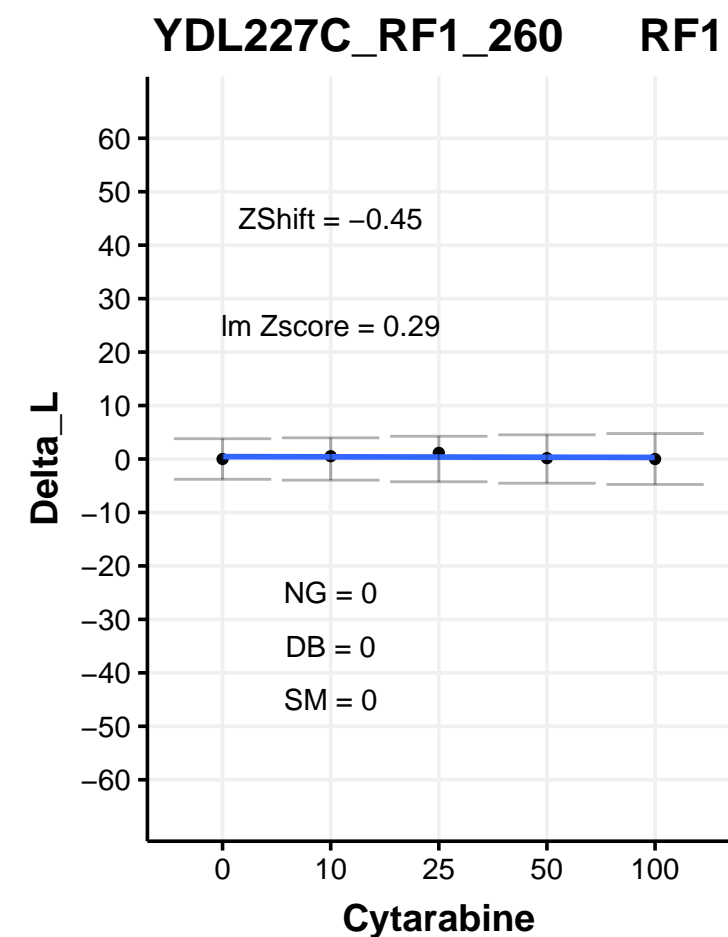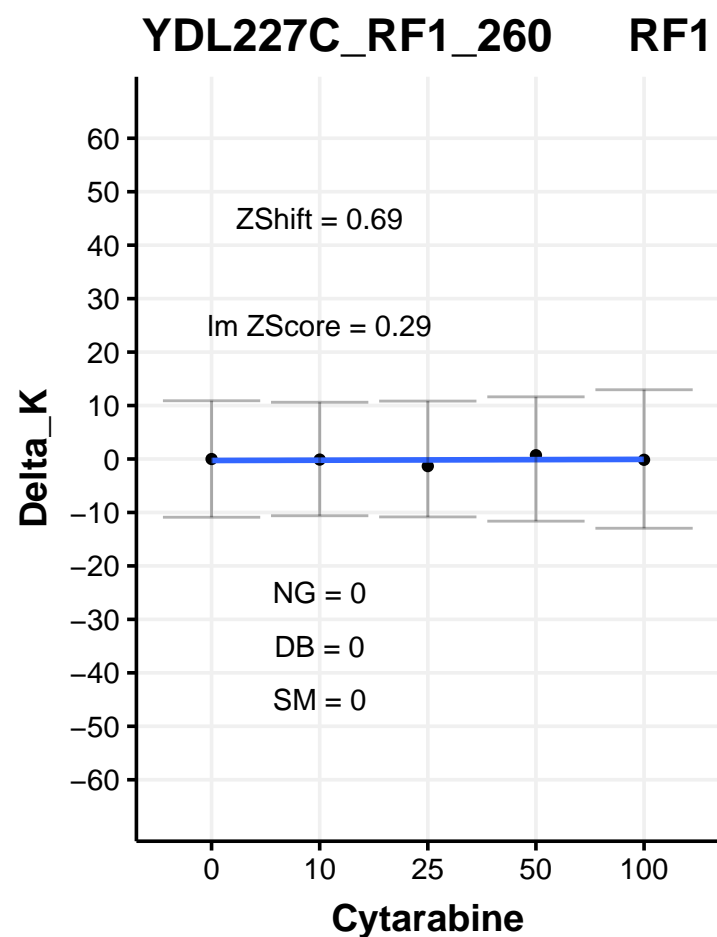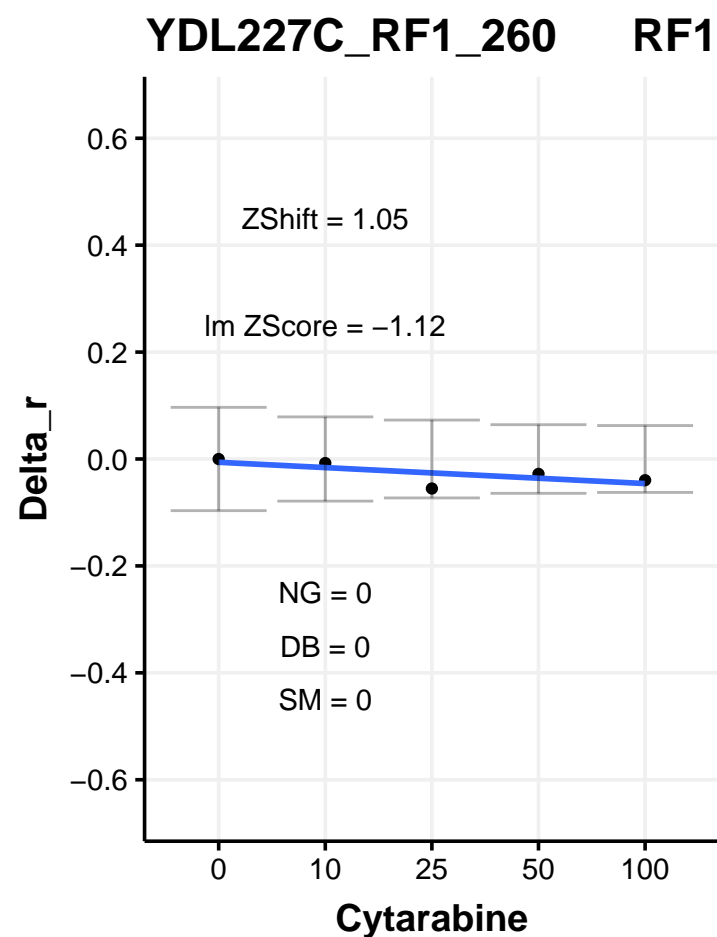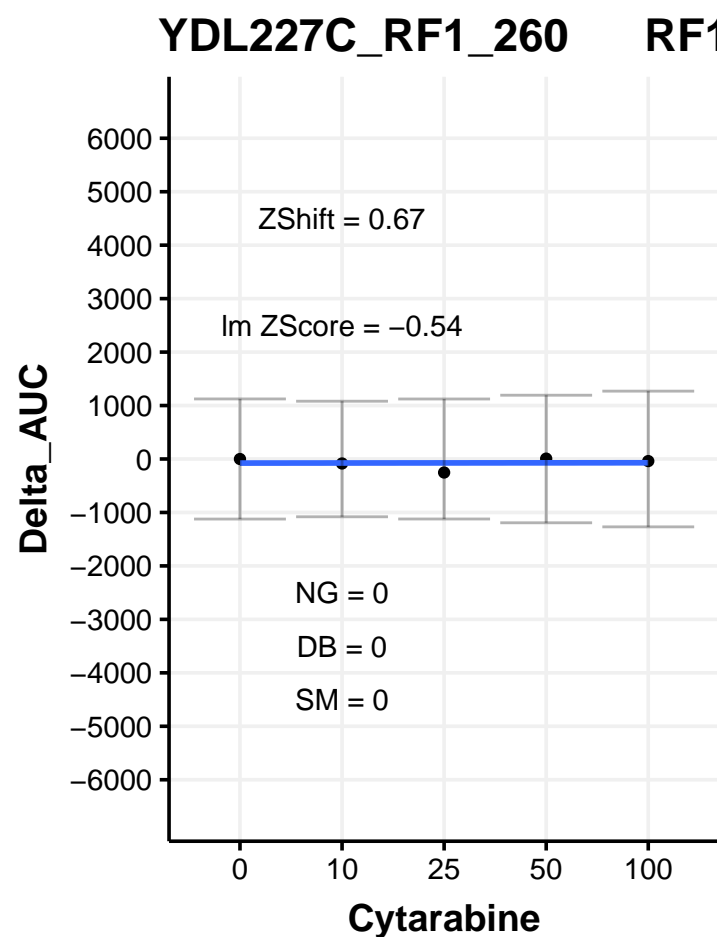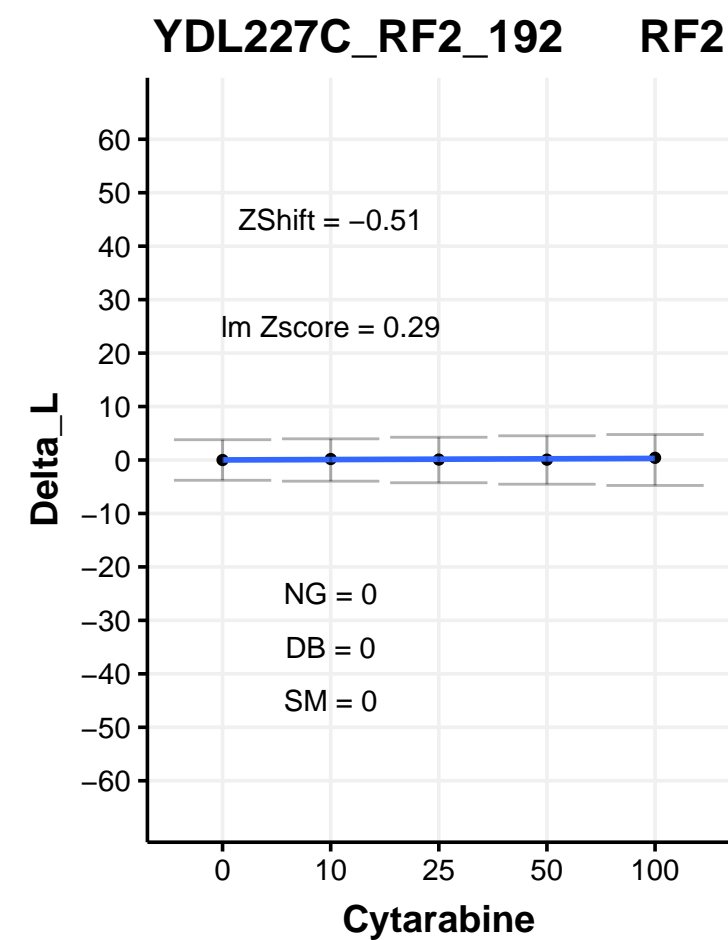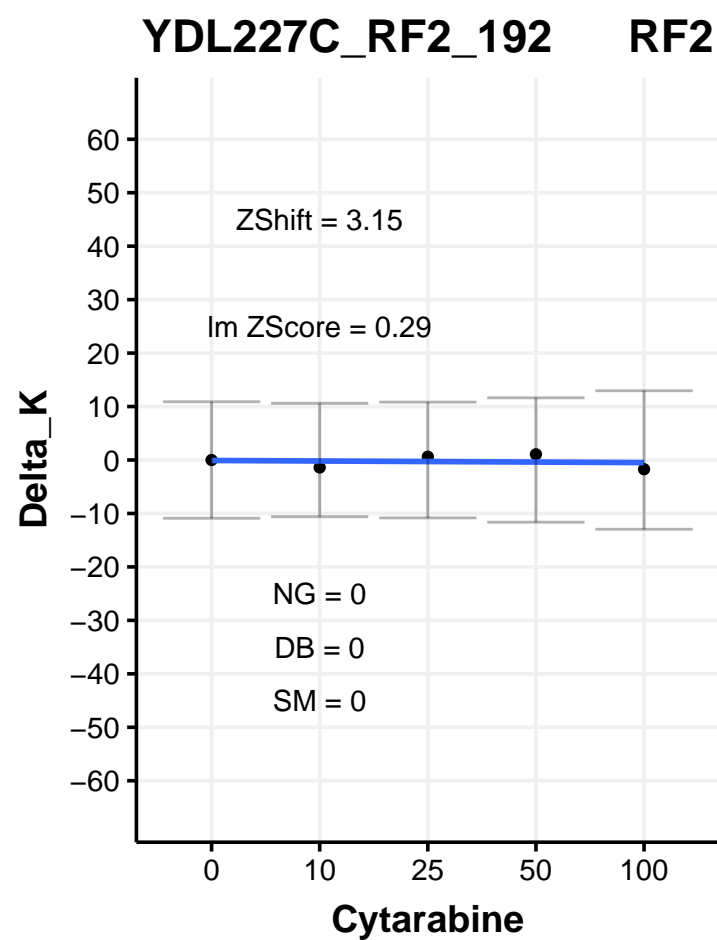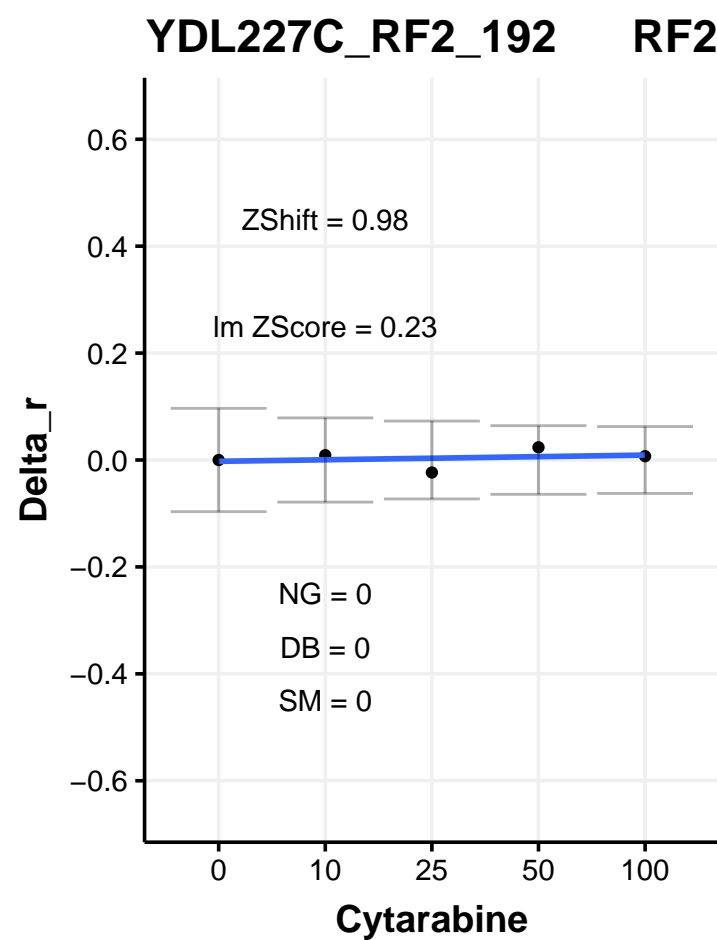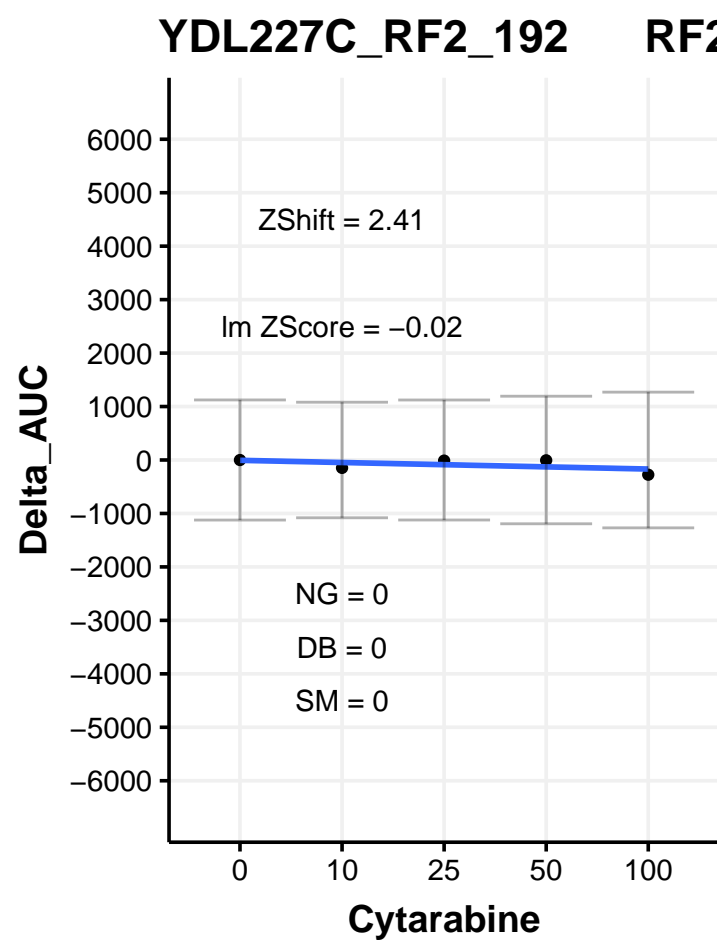

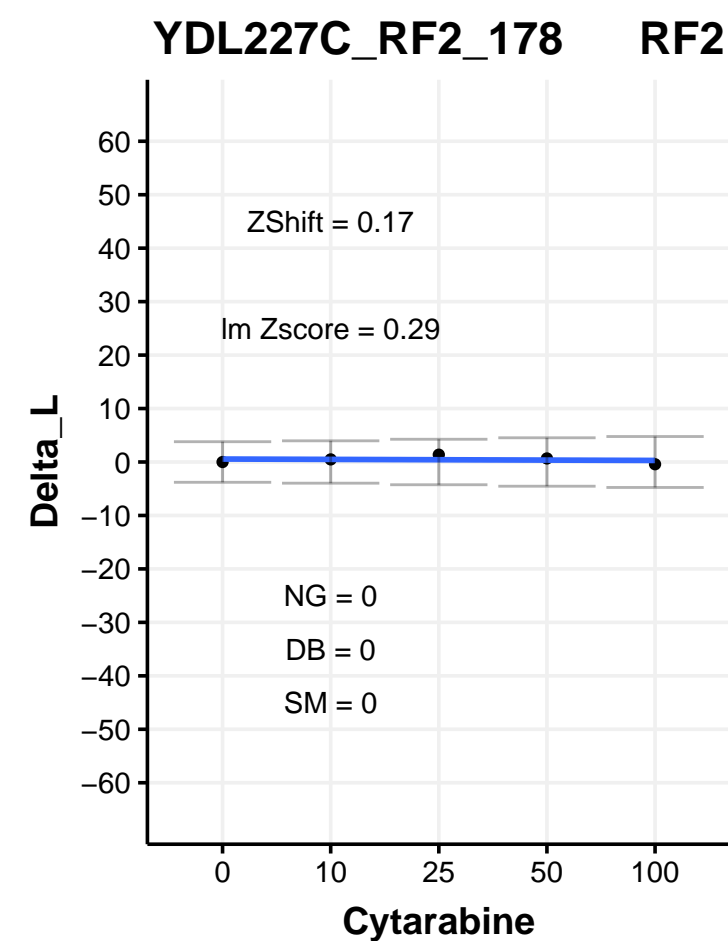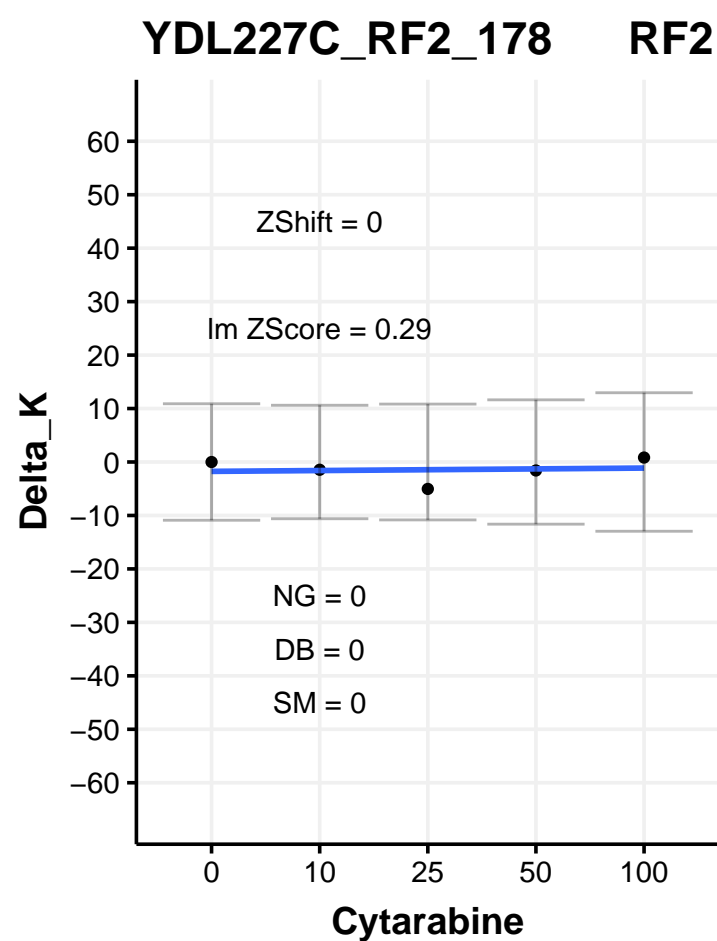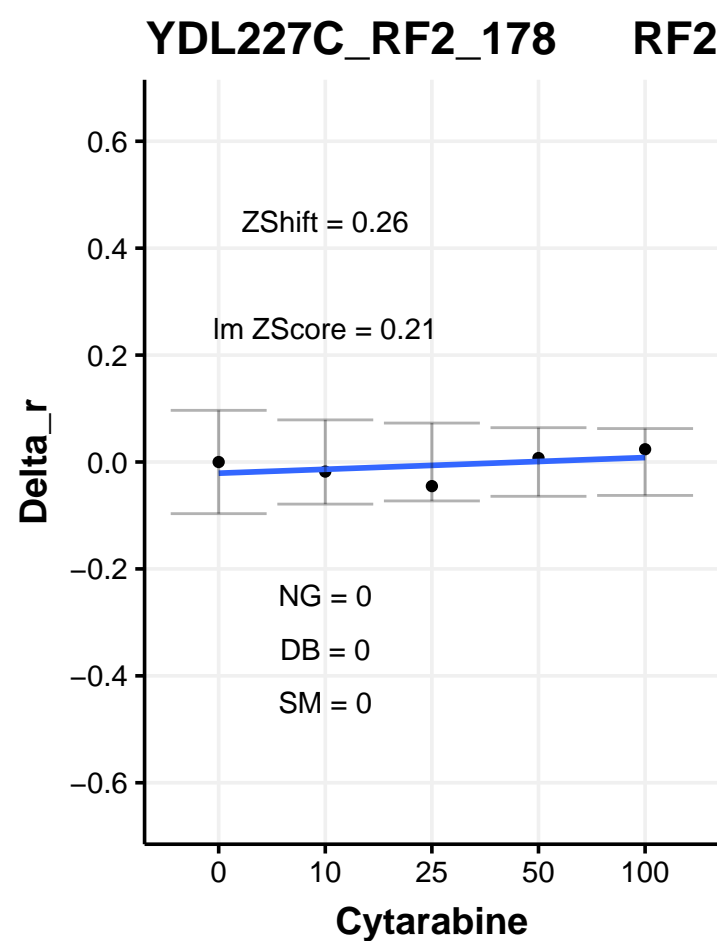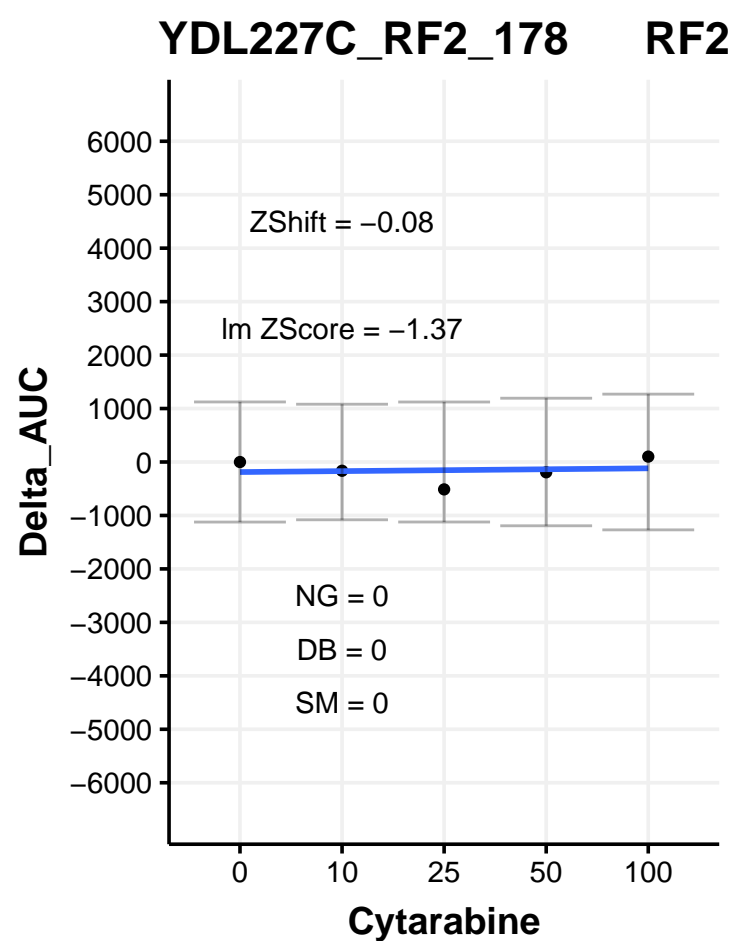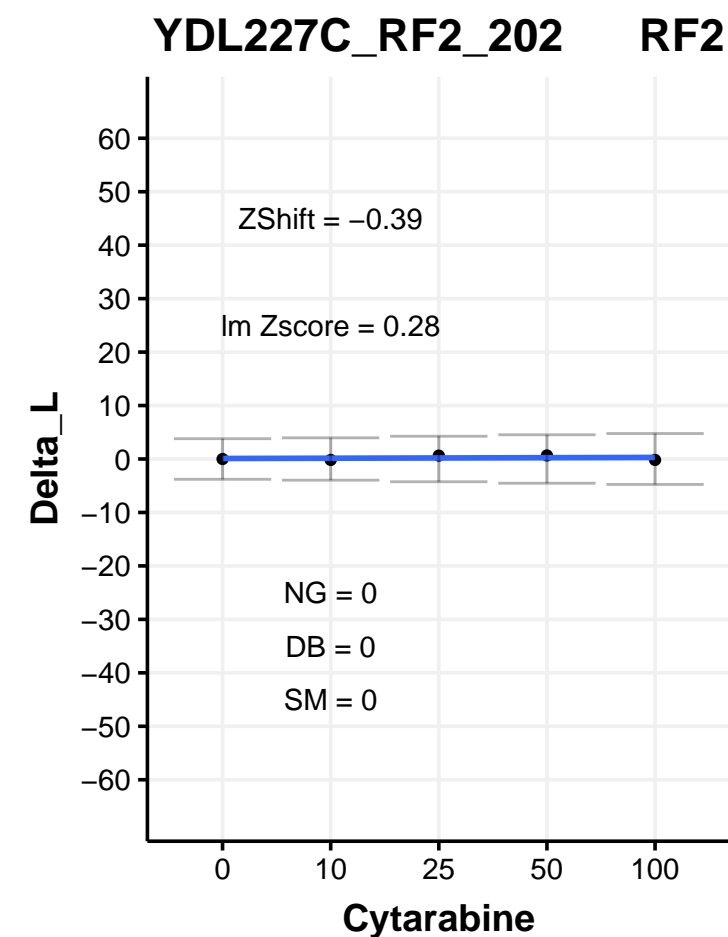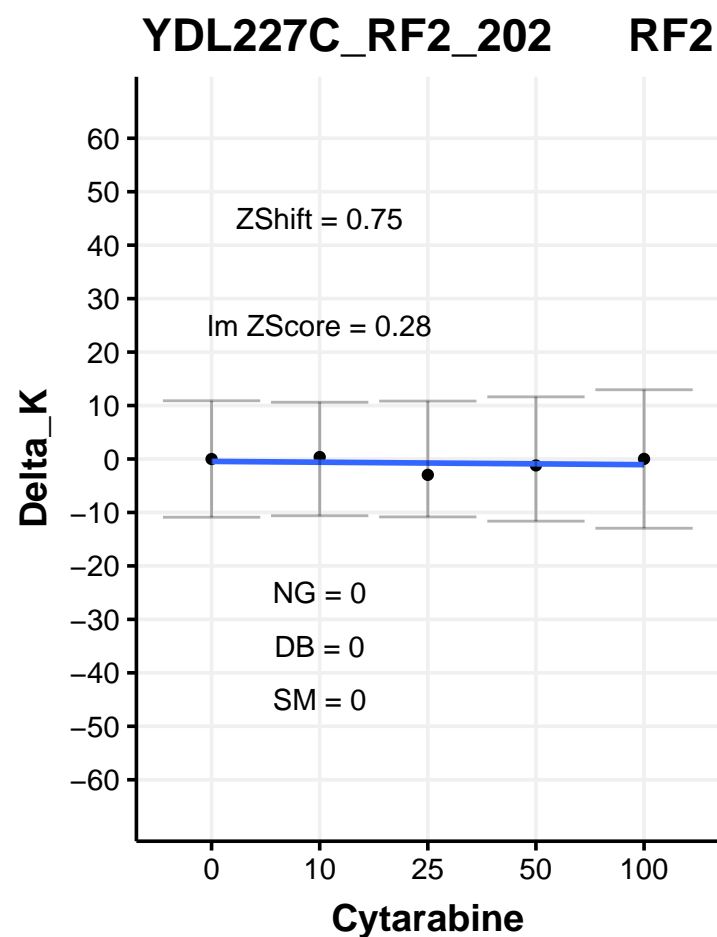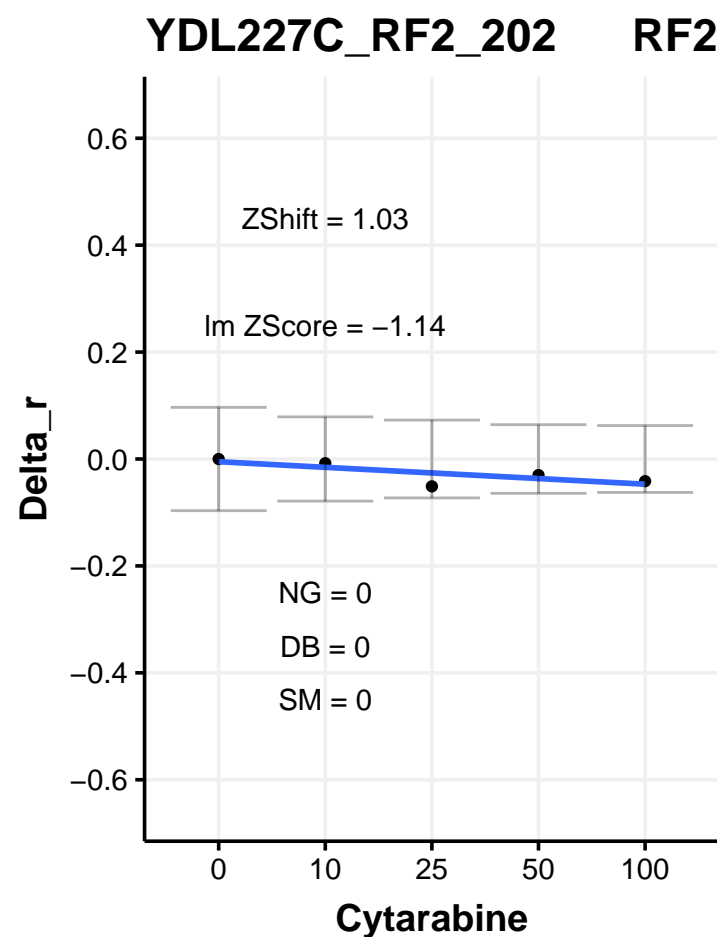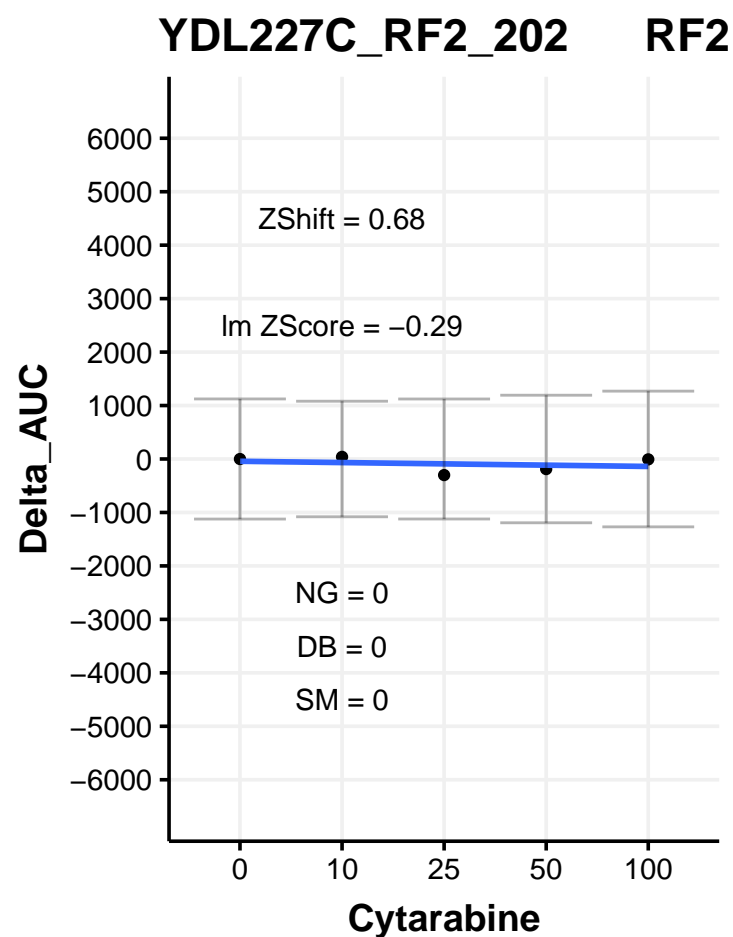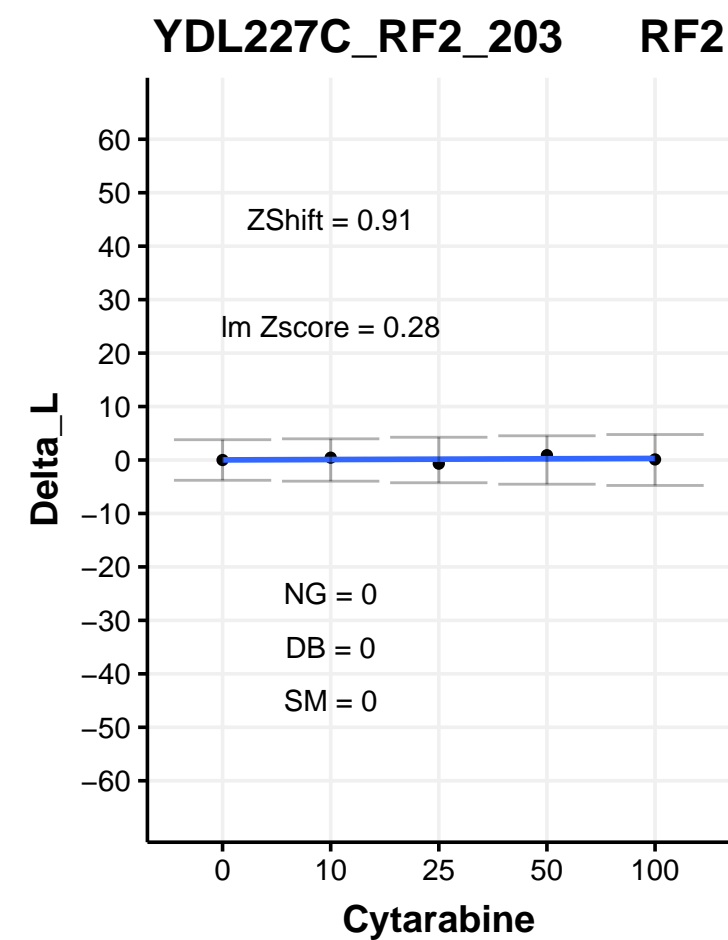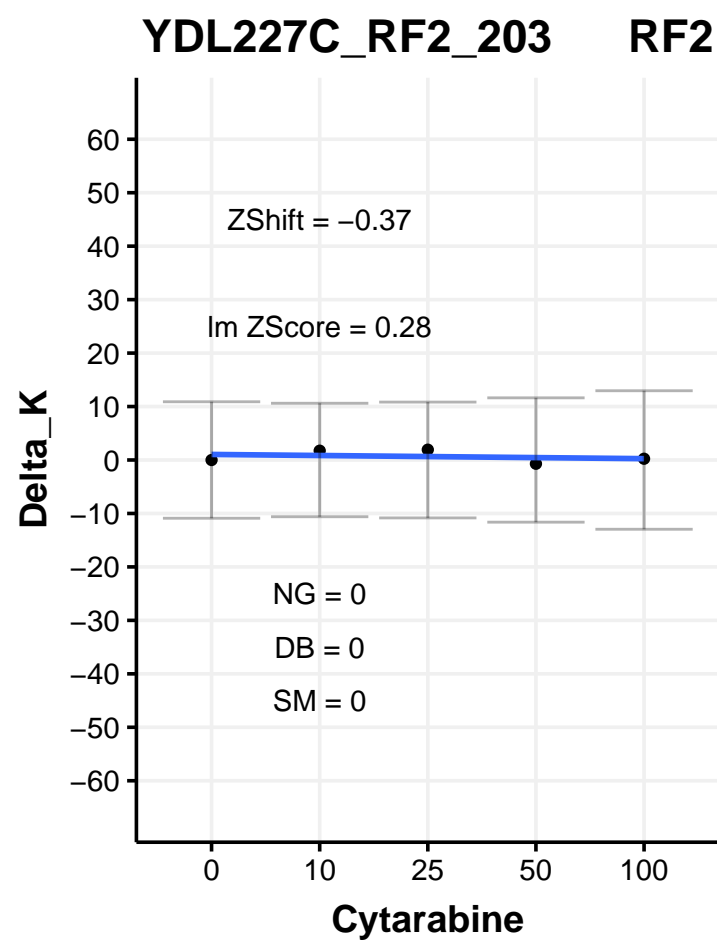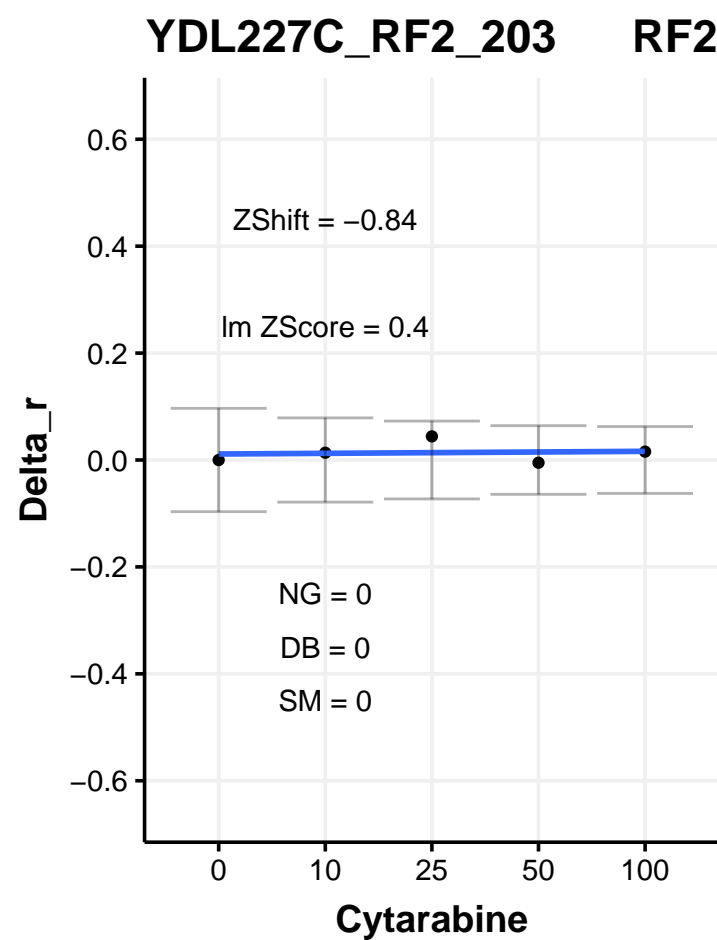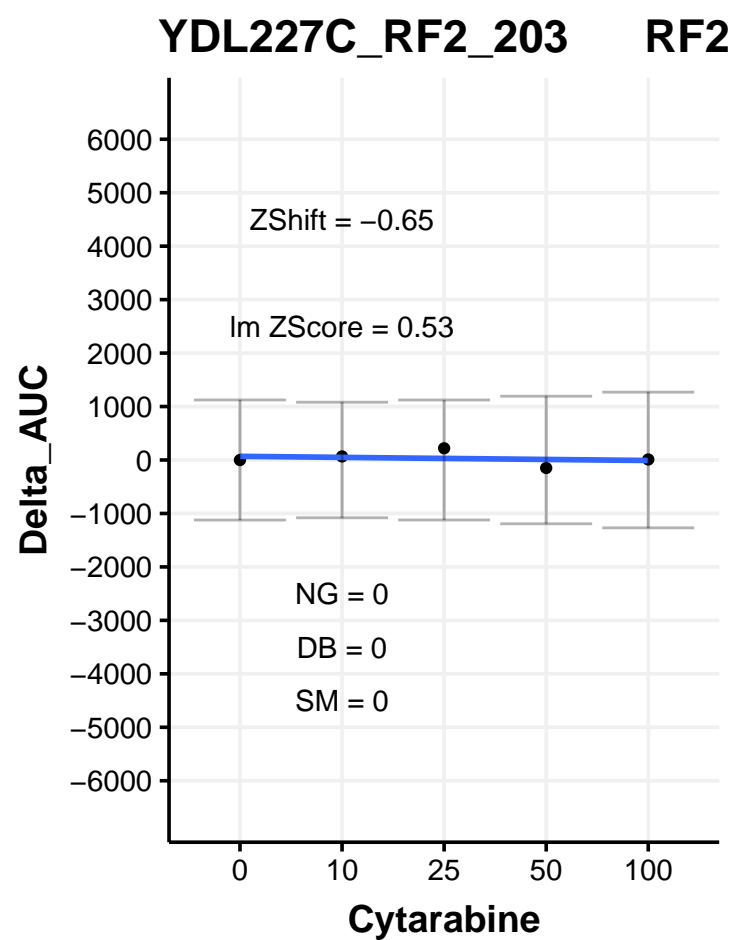

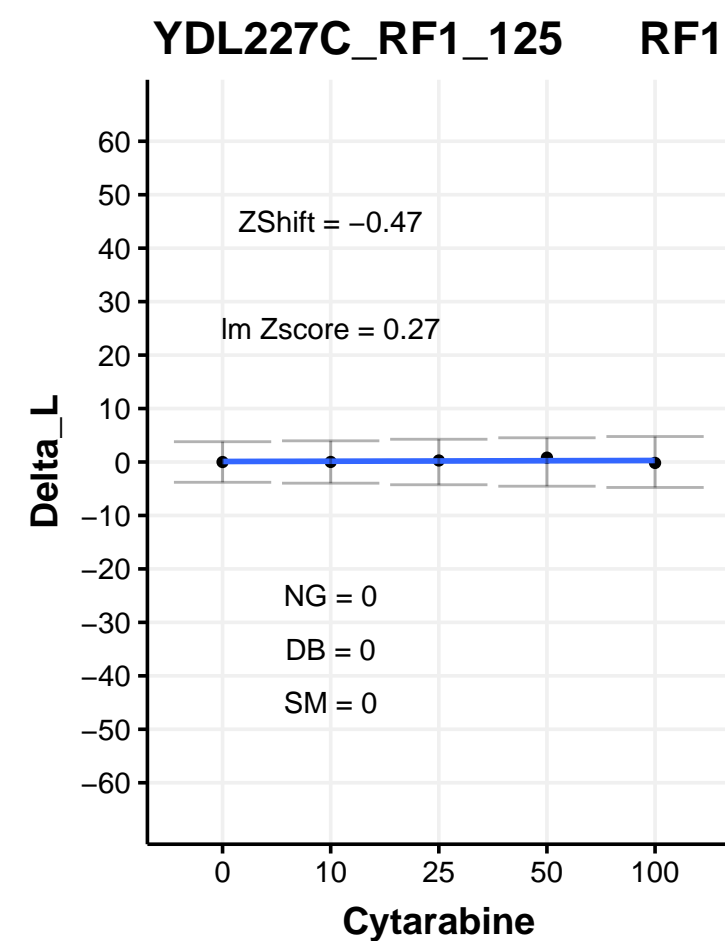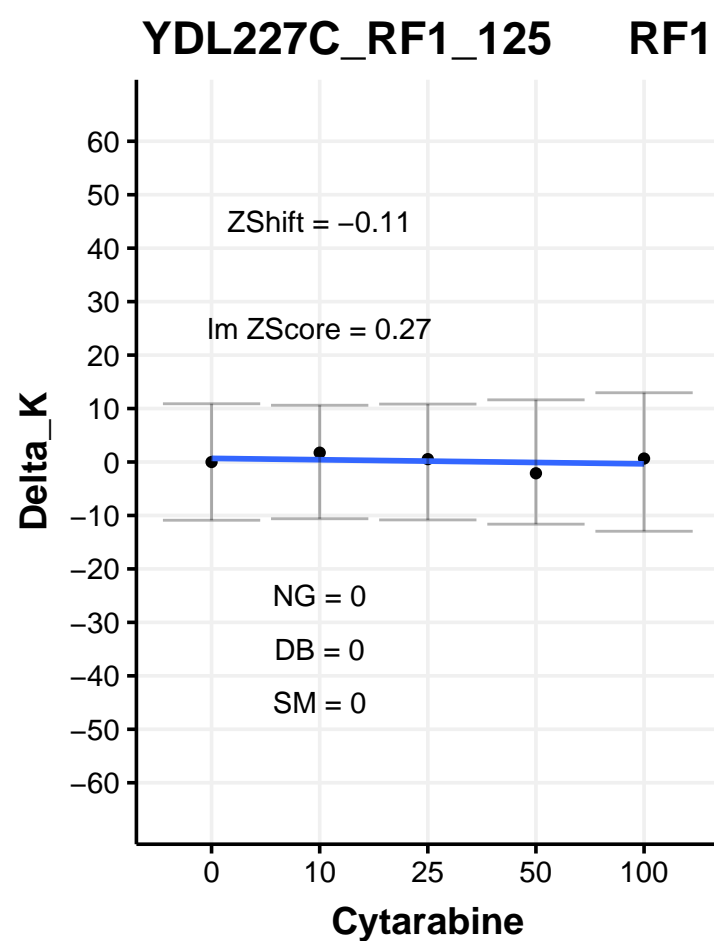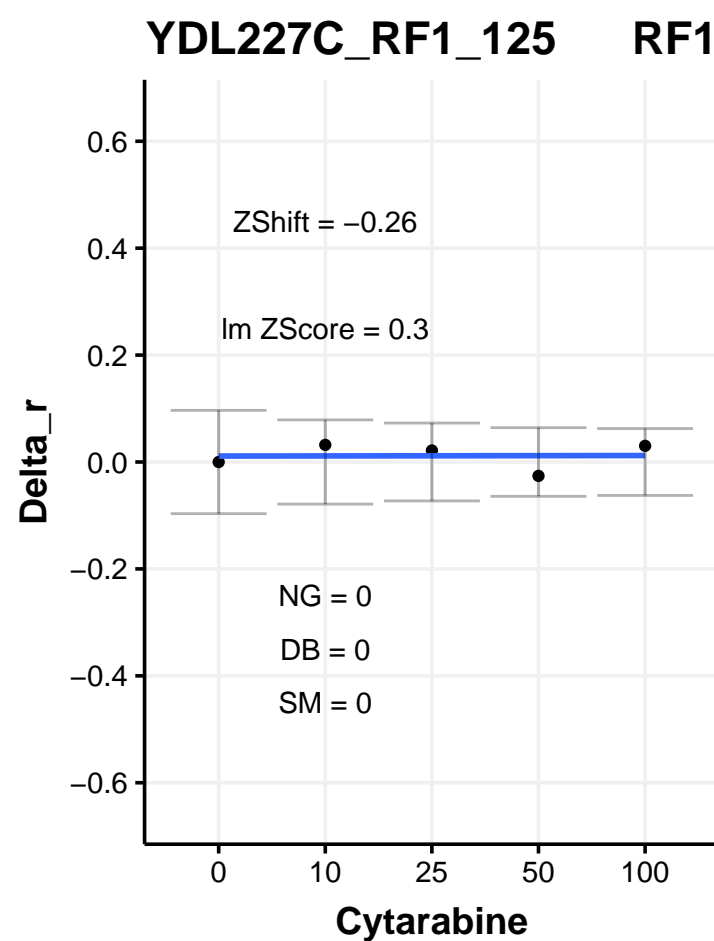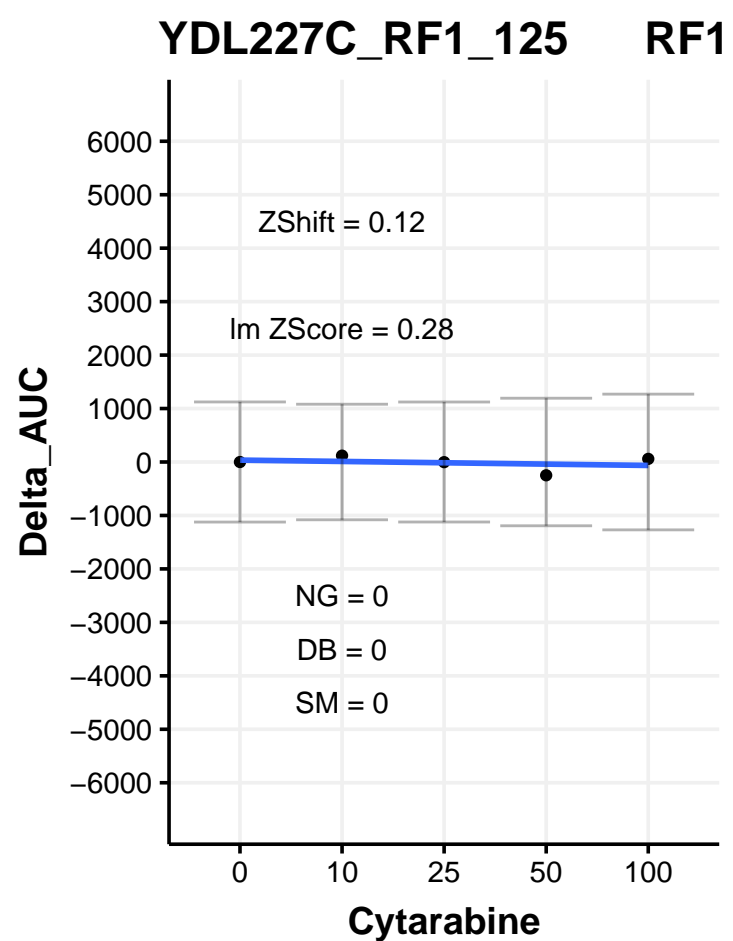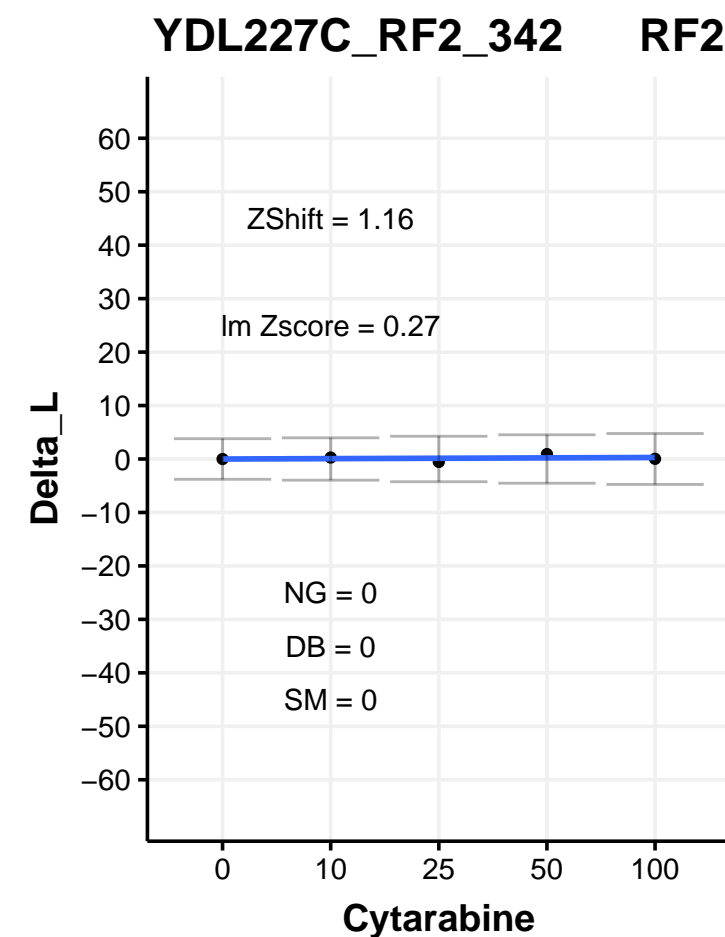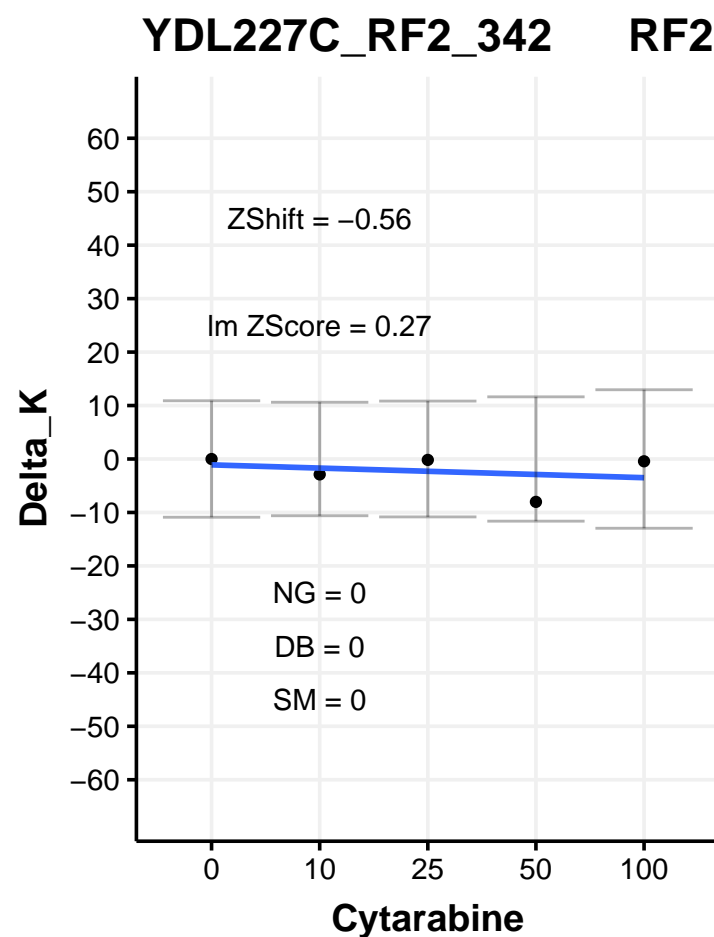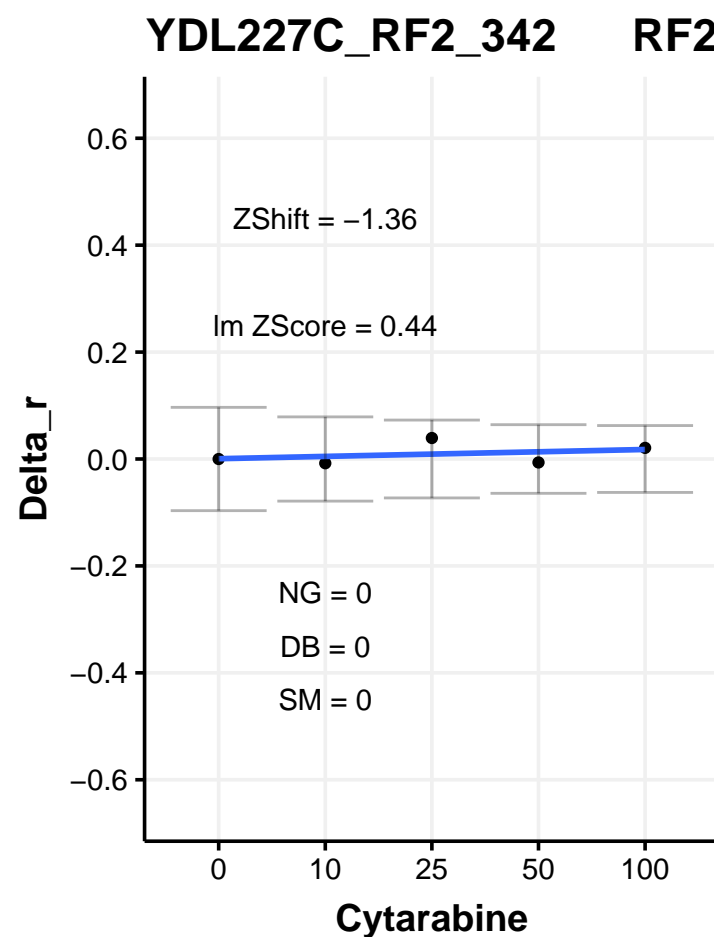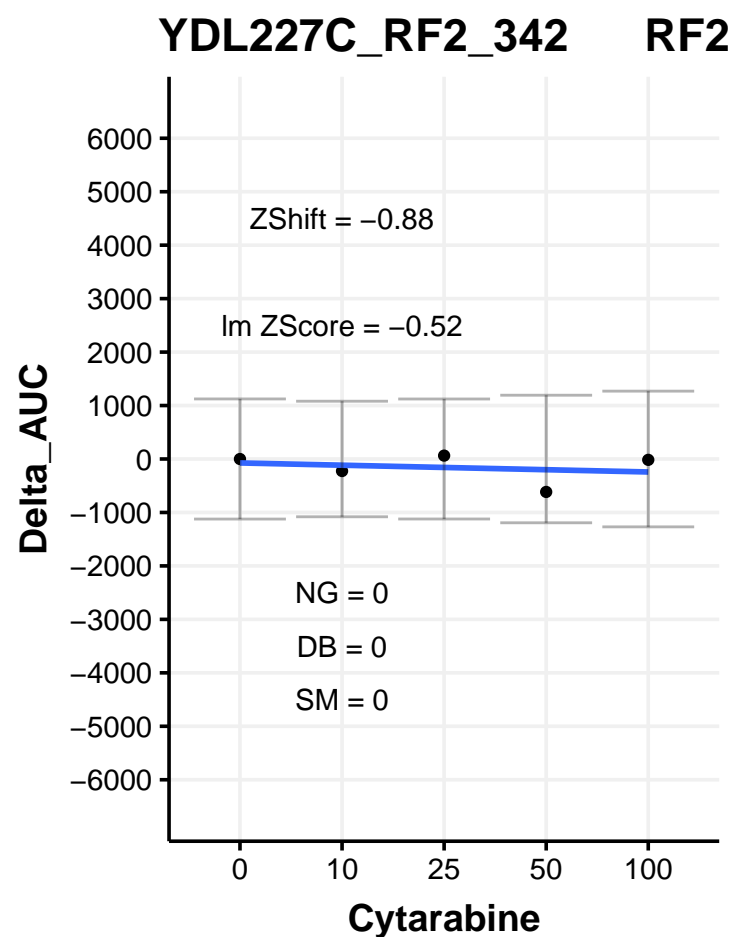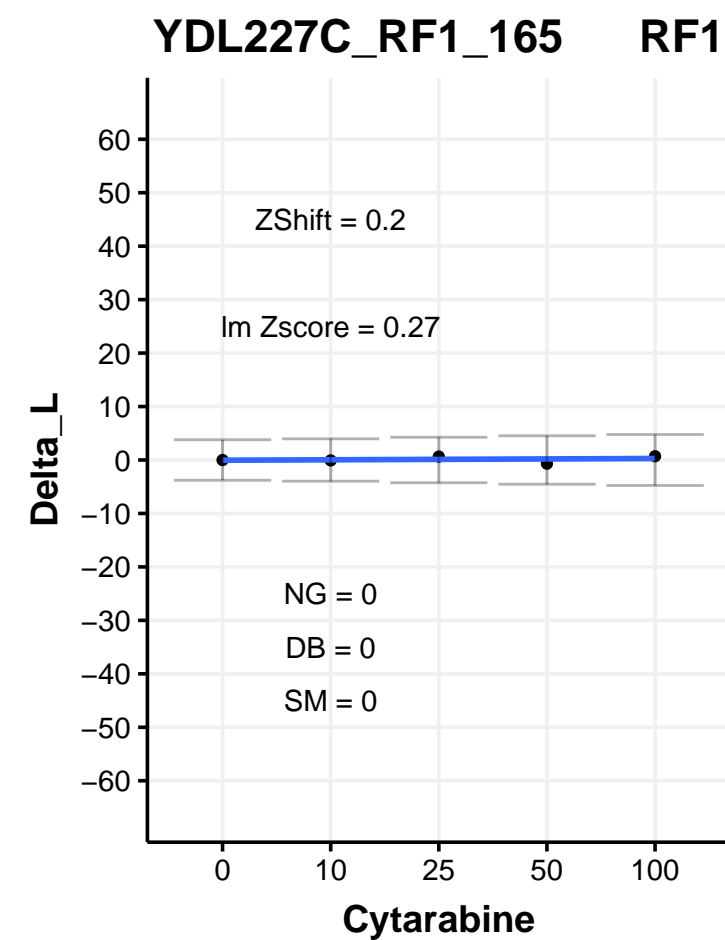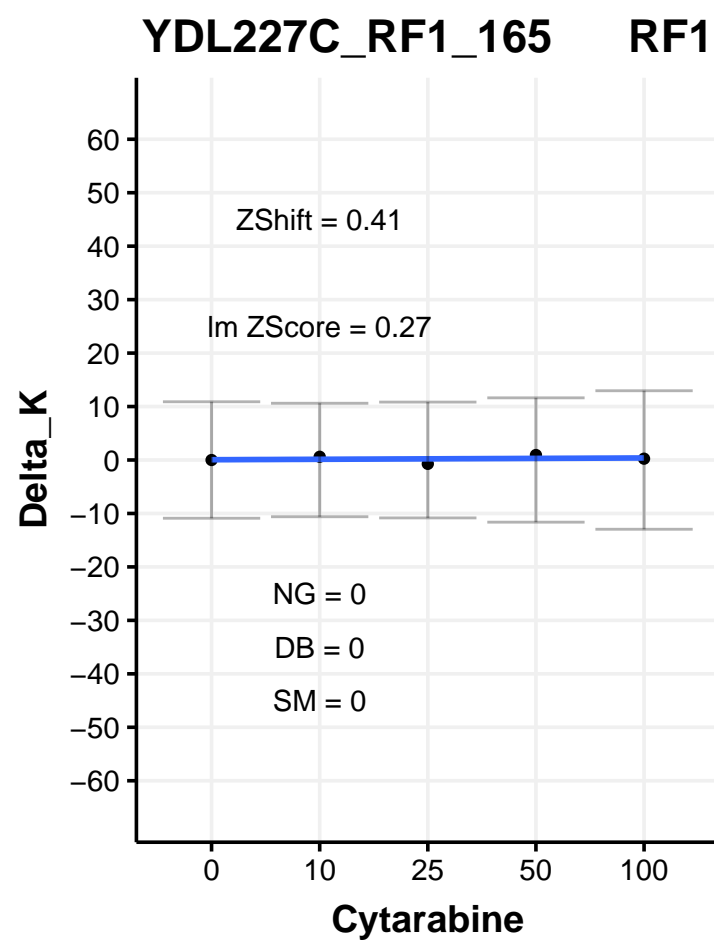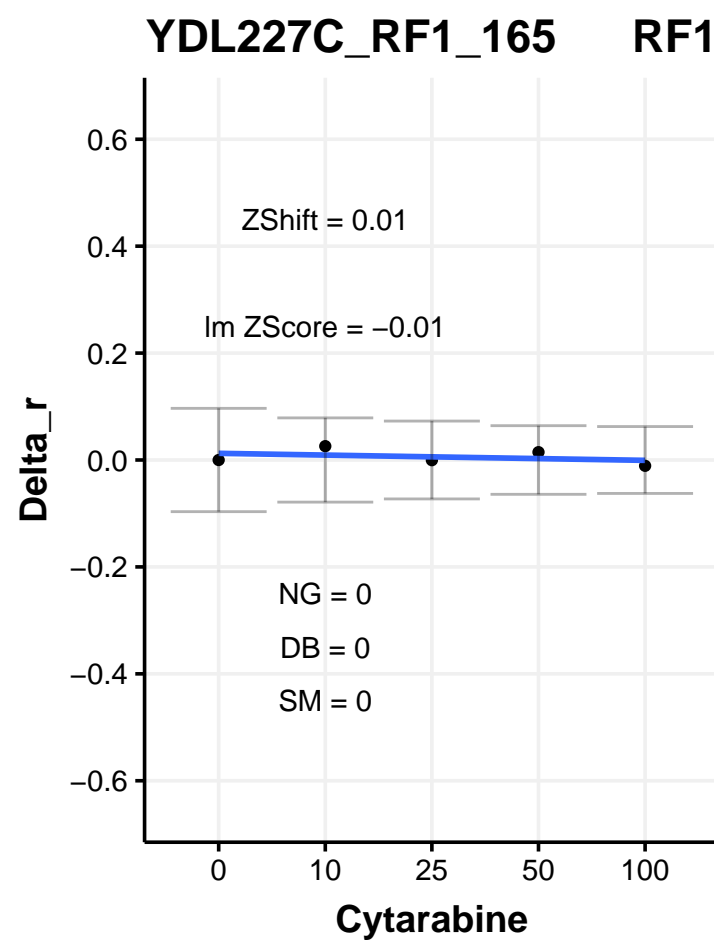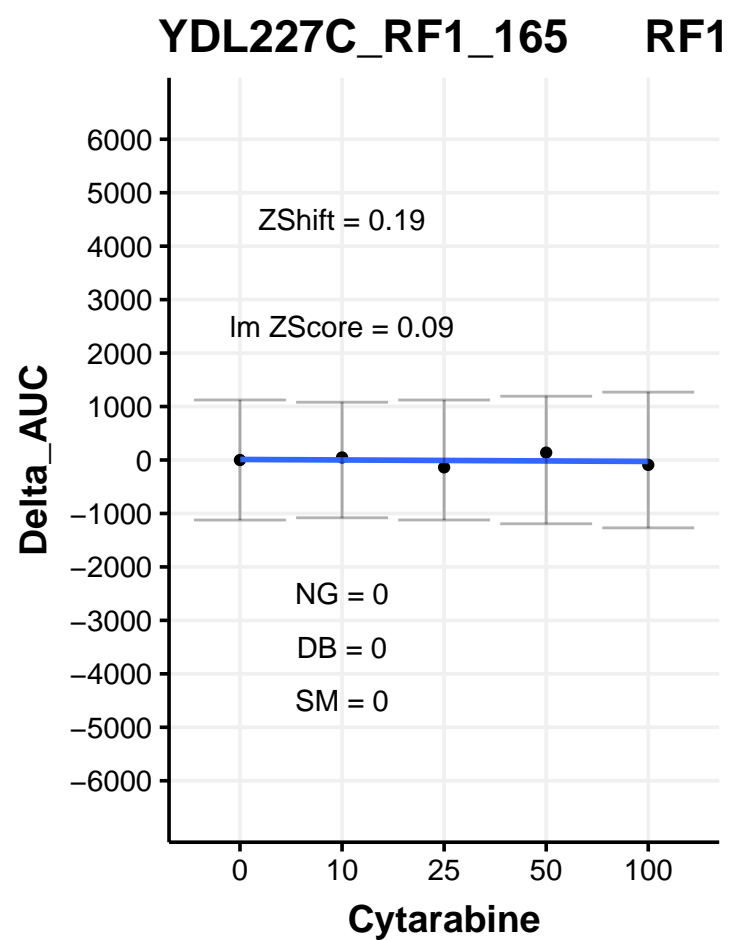

YDL227C\_RF2\_73 RF2

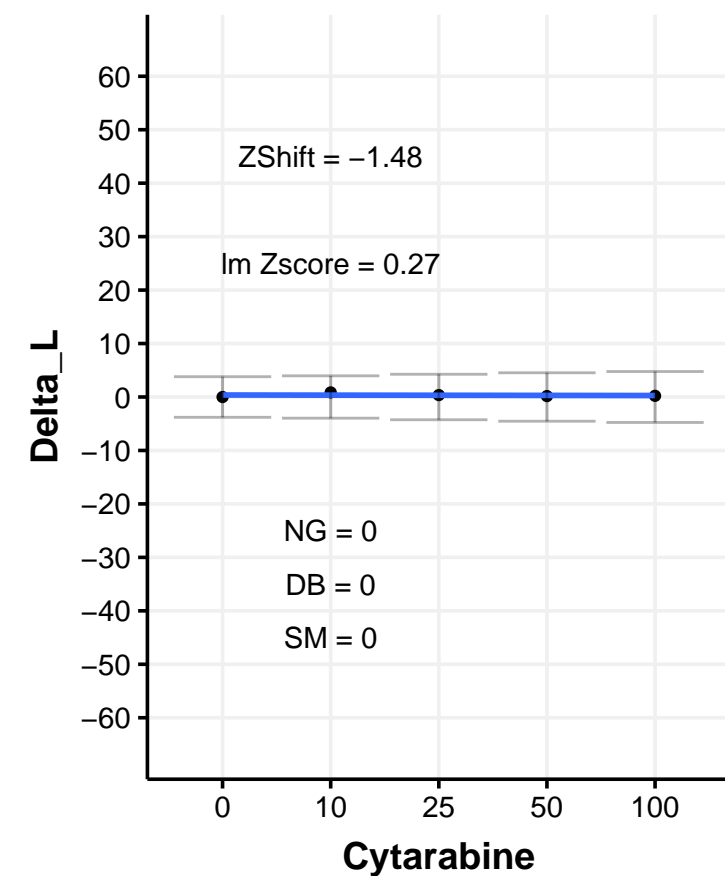

YDL227C\_RF2\_73 RF2

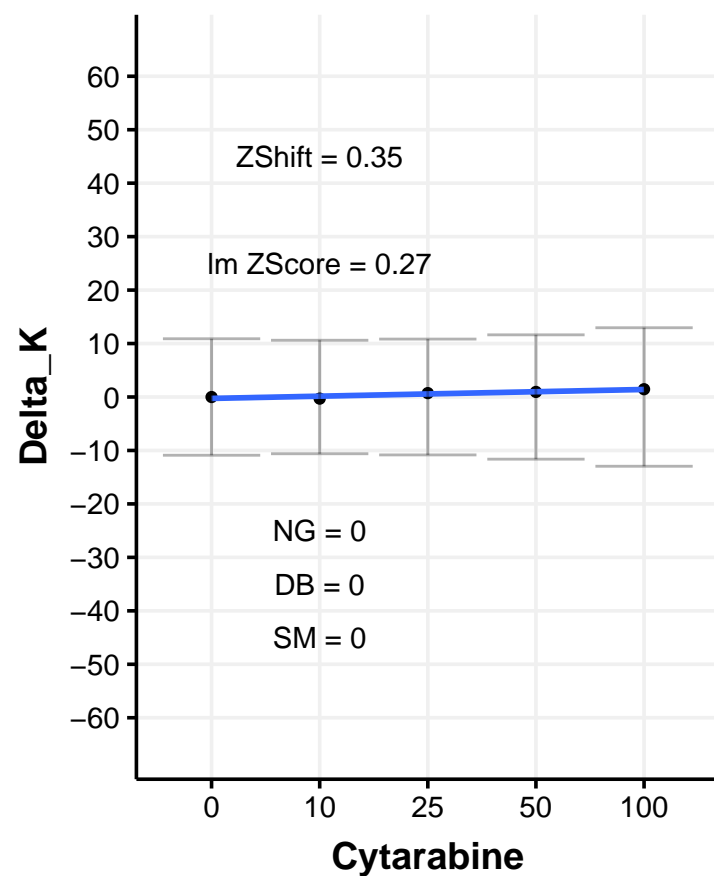

YDL227C\_RF2\_73 RF2

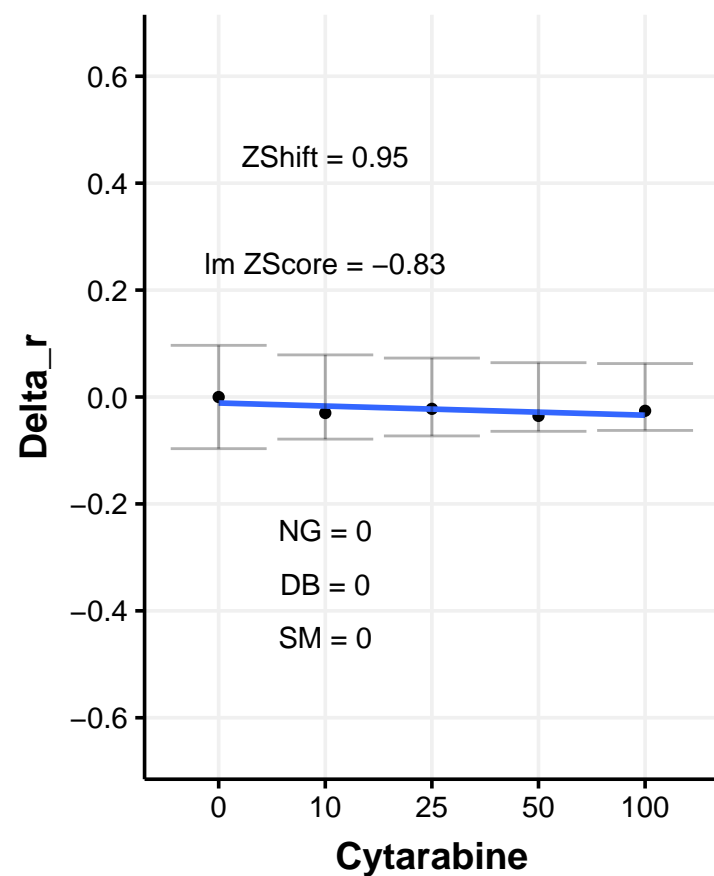

YDL227C\_RF2\_73 RF2

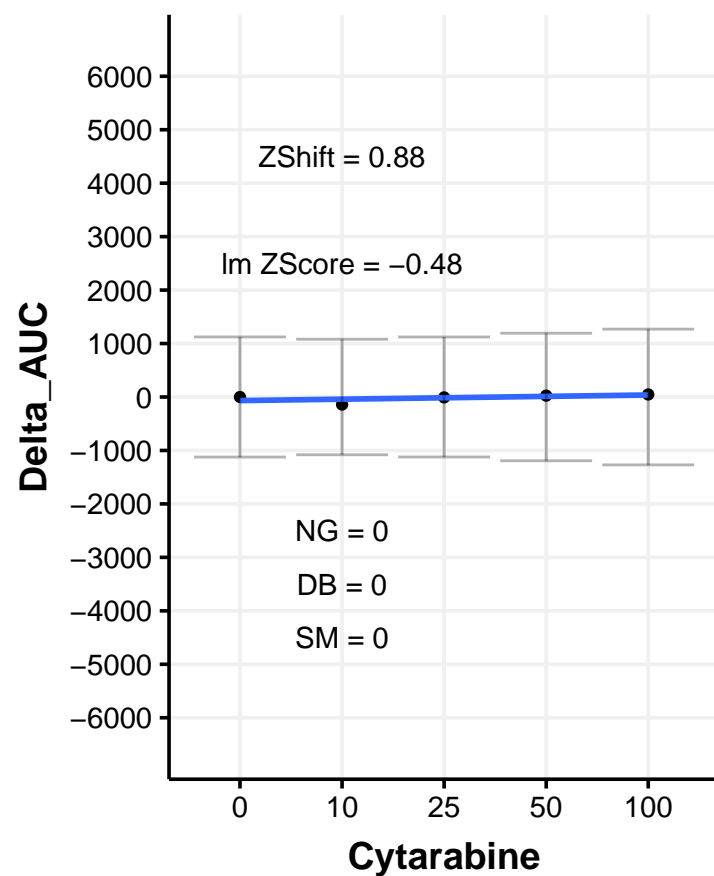

YDL227C\_RF2\_91 RF2

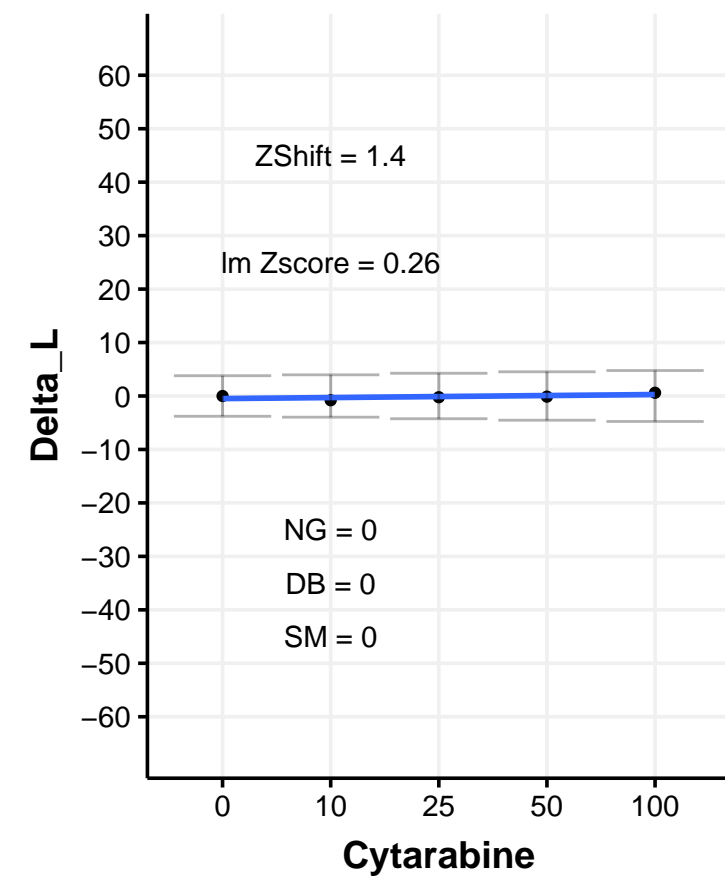

YDL227C\_RF2\_91 RF2

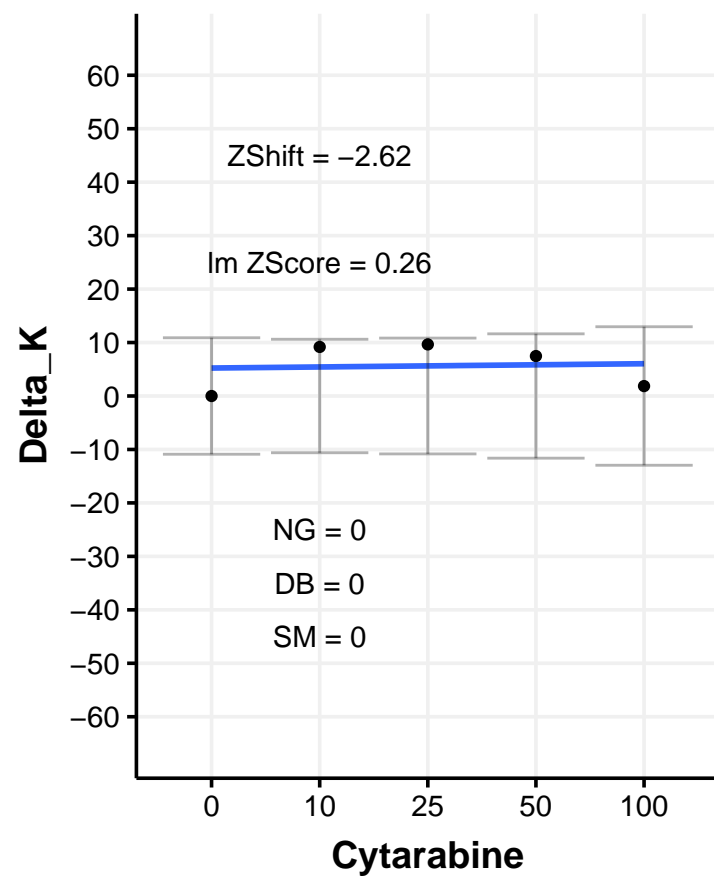

YDL227C\_RF2\_91 RF2

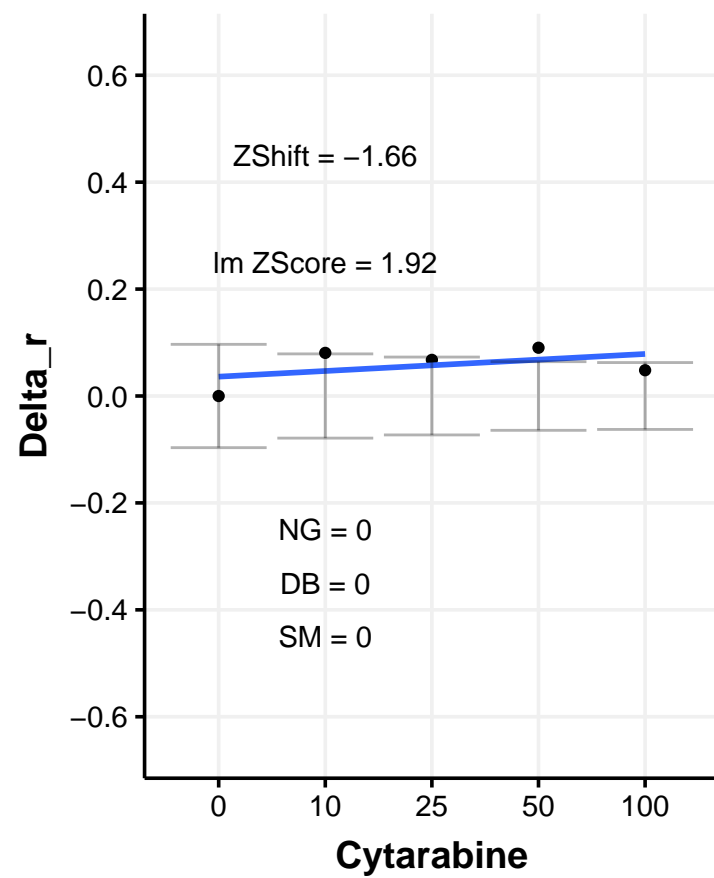

YDL227C\_RF2\_91 RF2

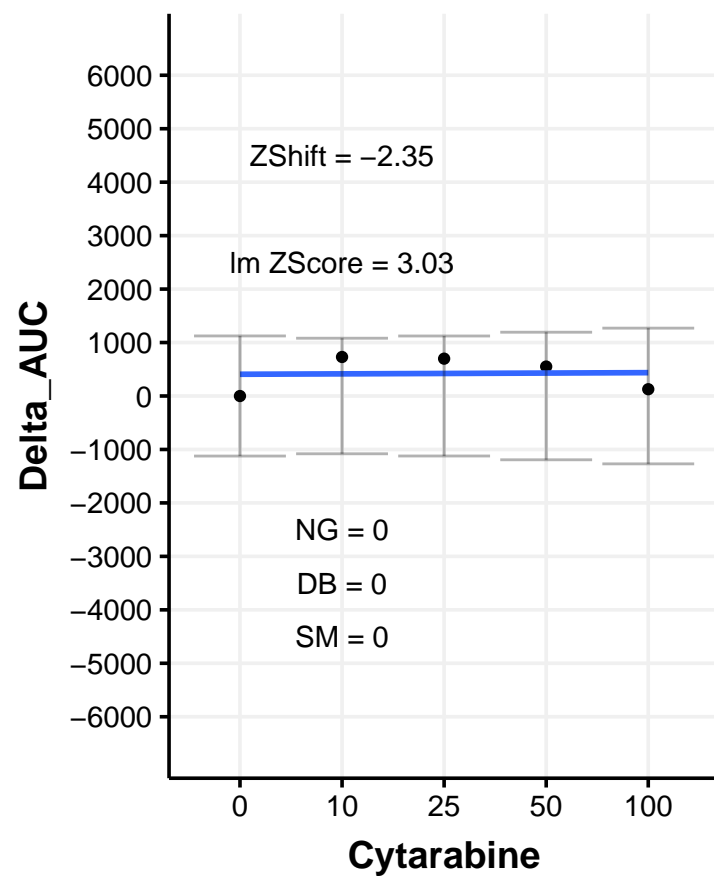

YDL227C\_RF2\_278 RF2

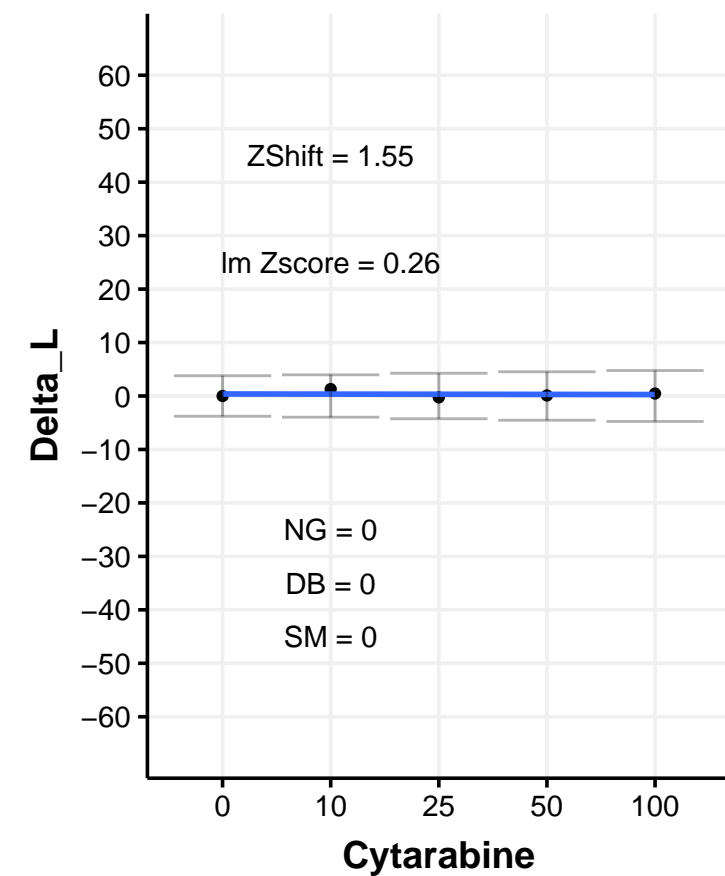

YDL227C\_RF2\_278 RF2

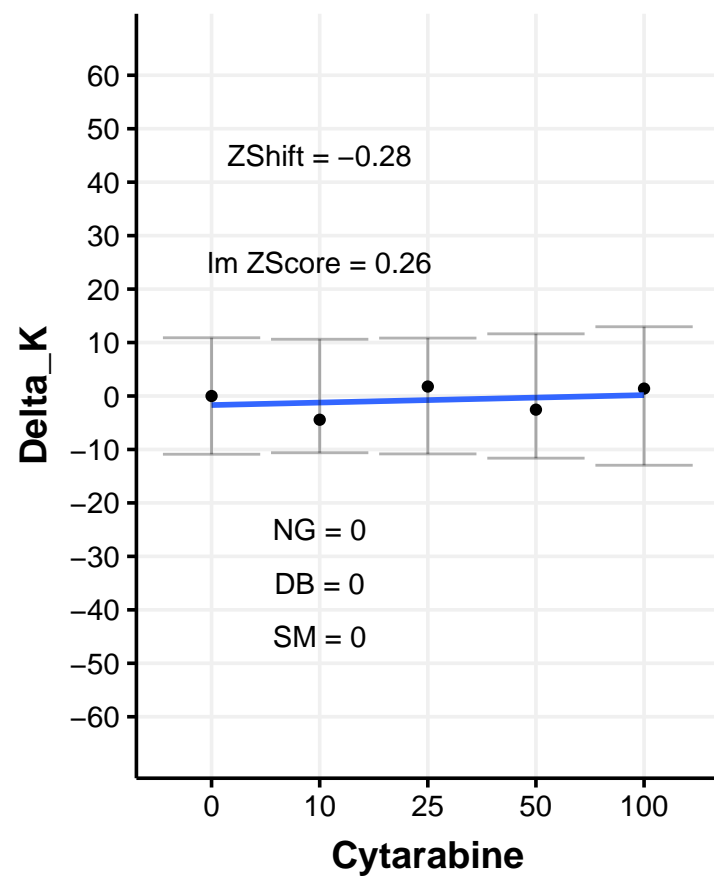

YDL227C\_RF2\_278 RF2

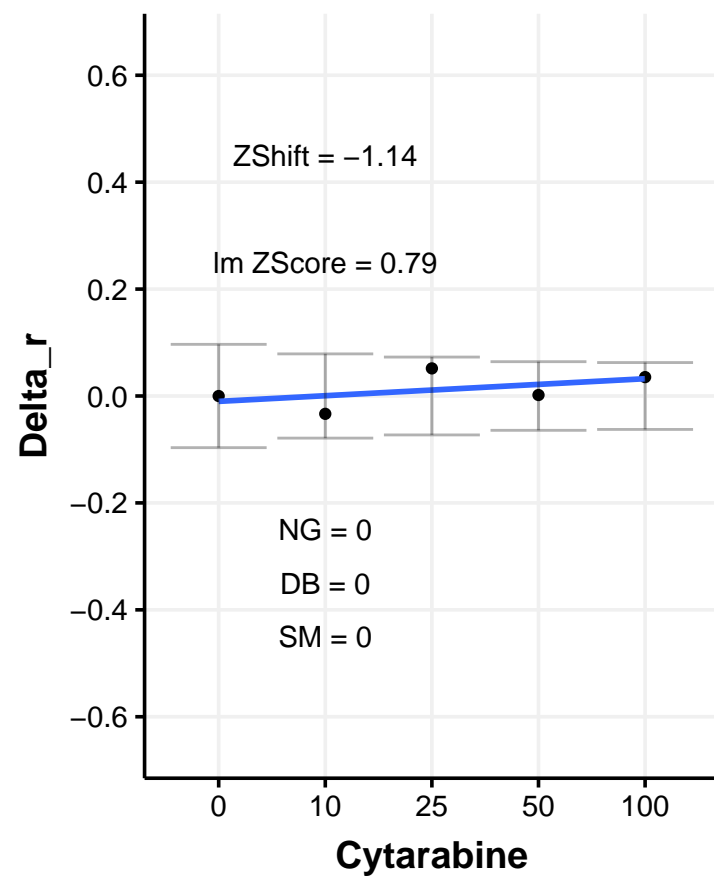

YDL227C\_RF2\_278 RF2

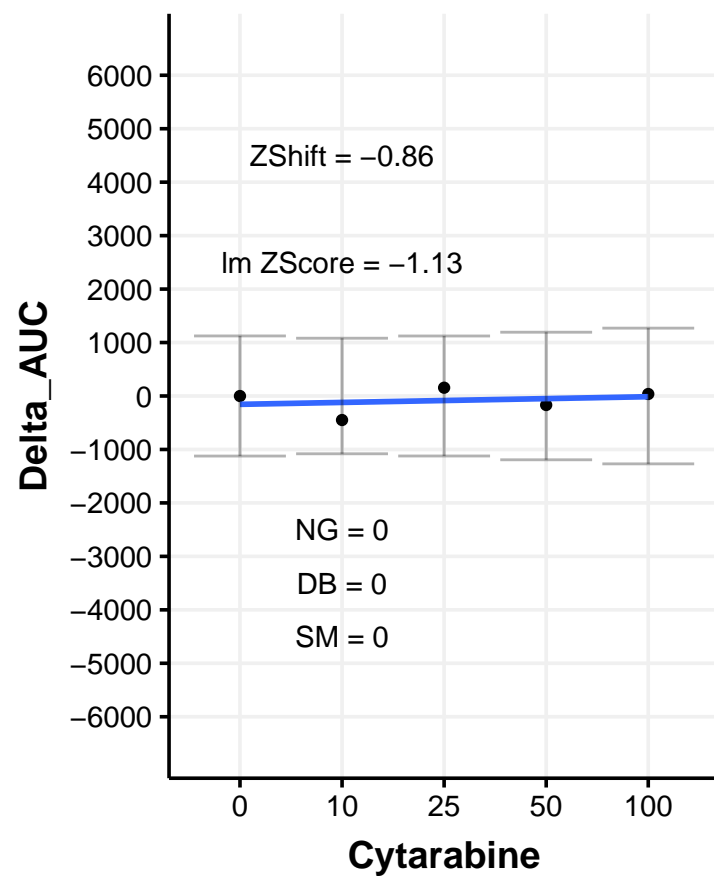

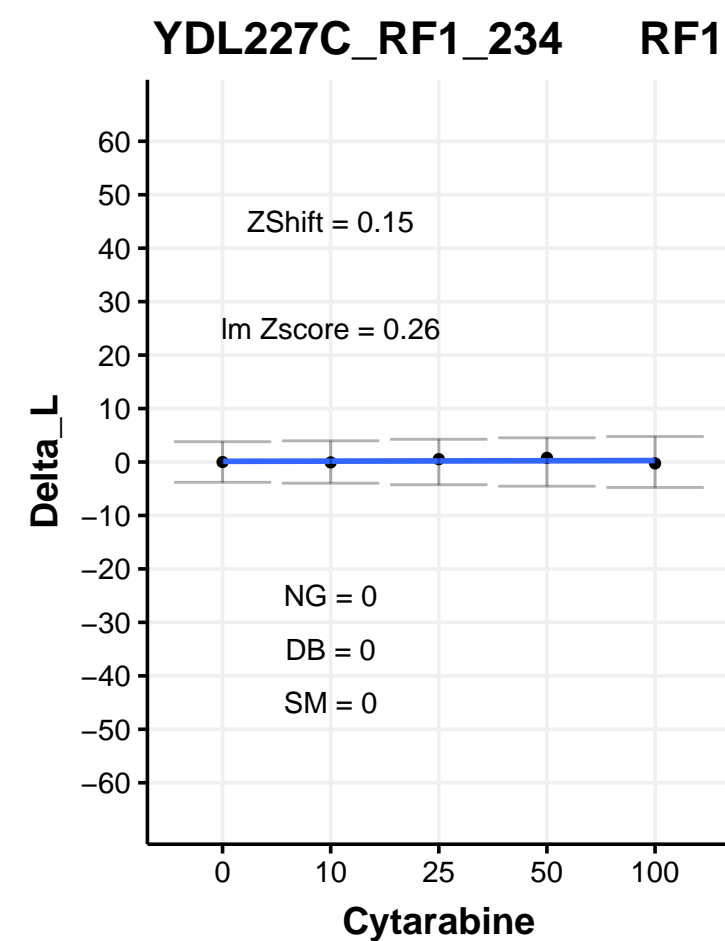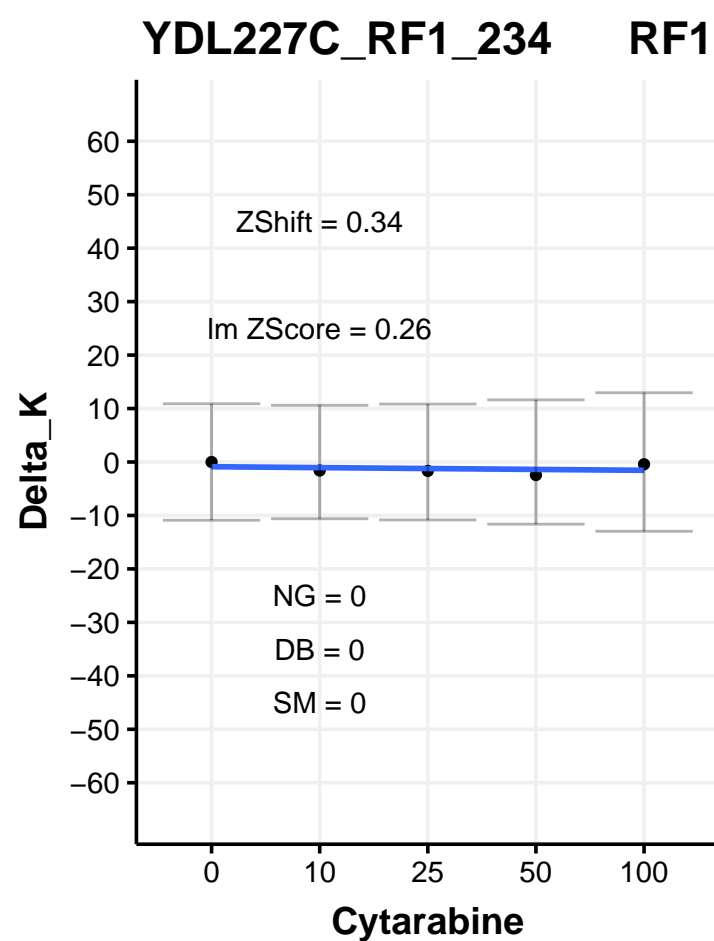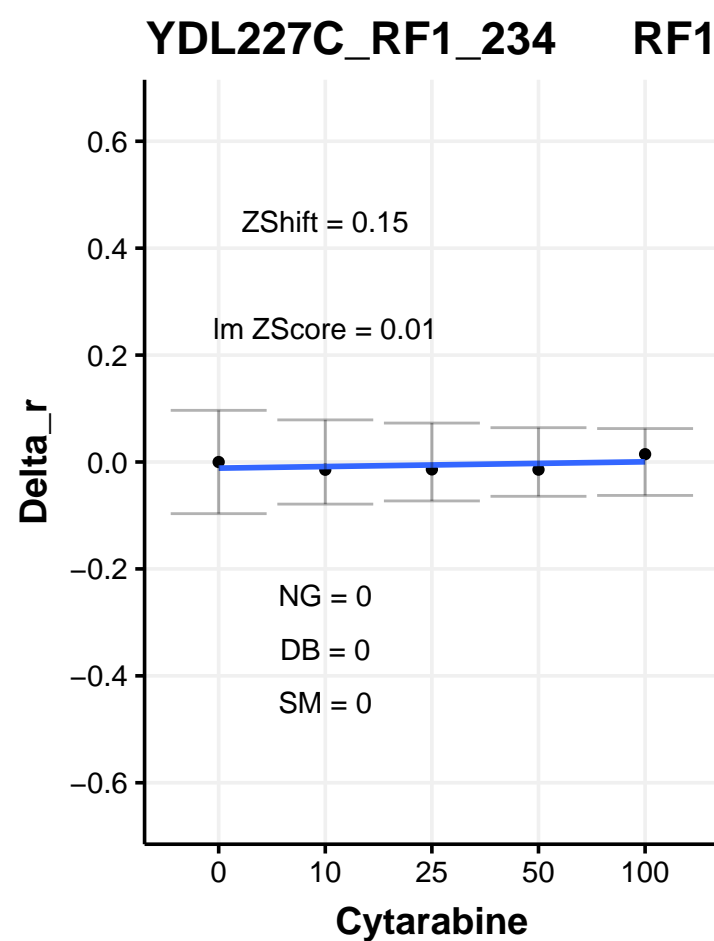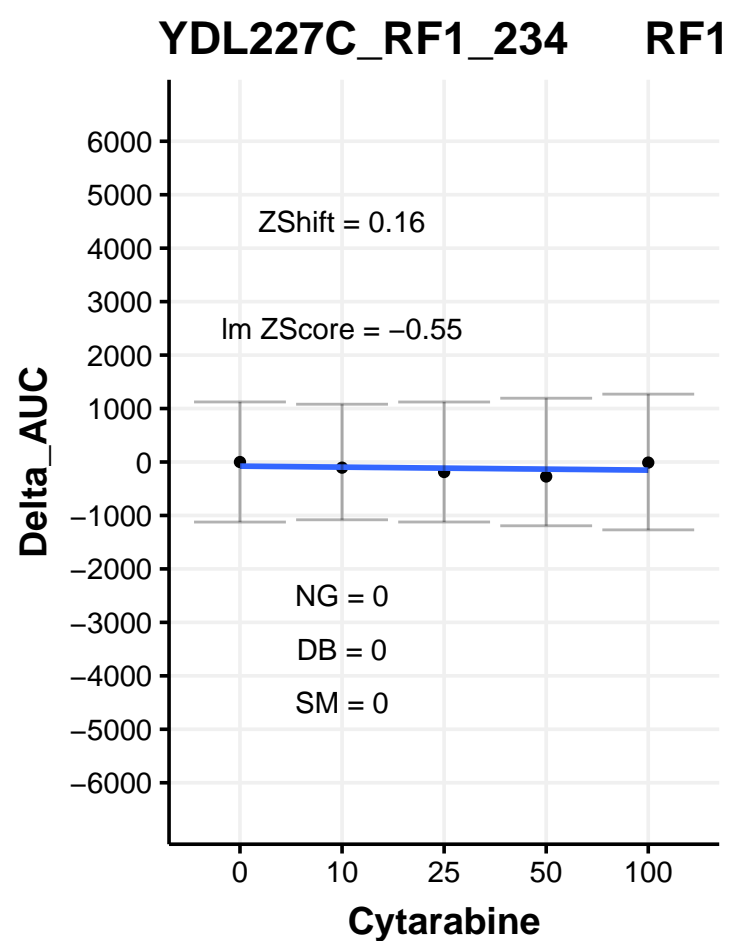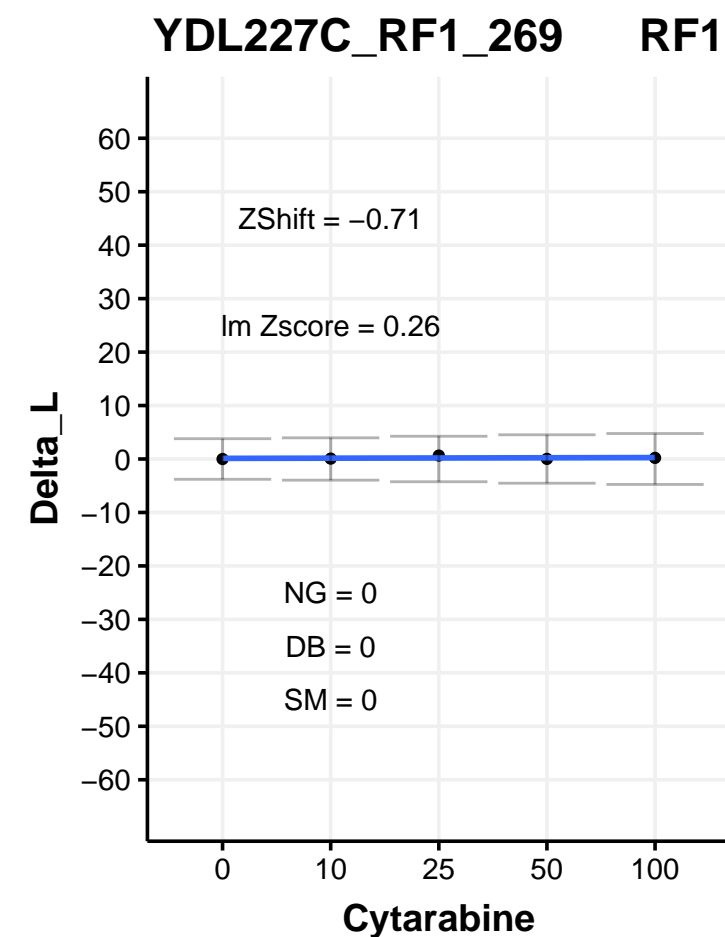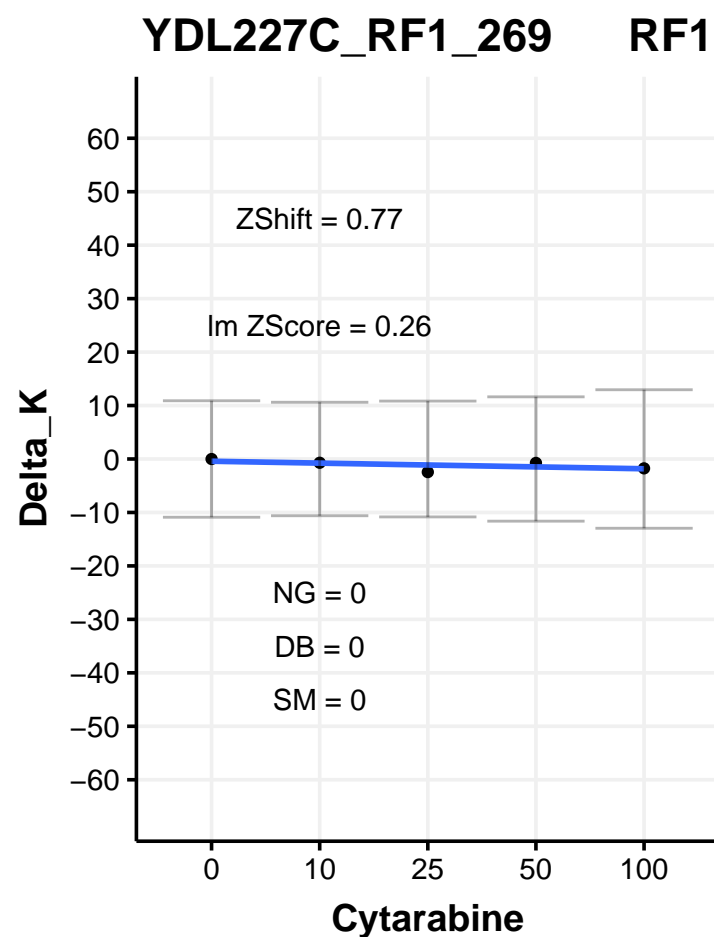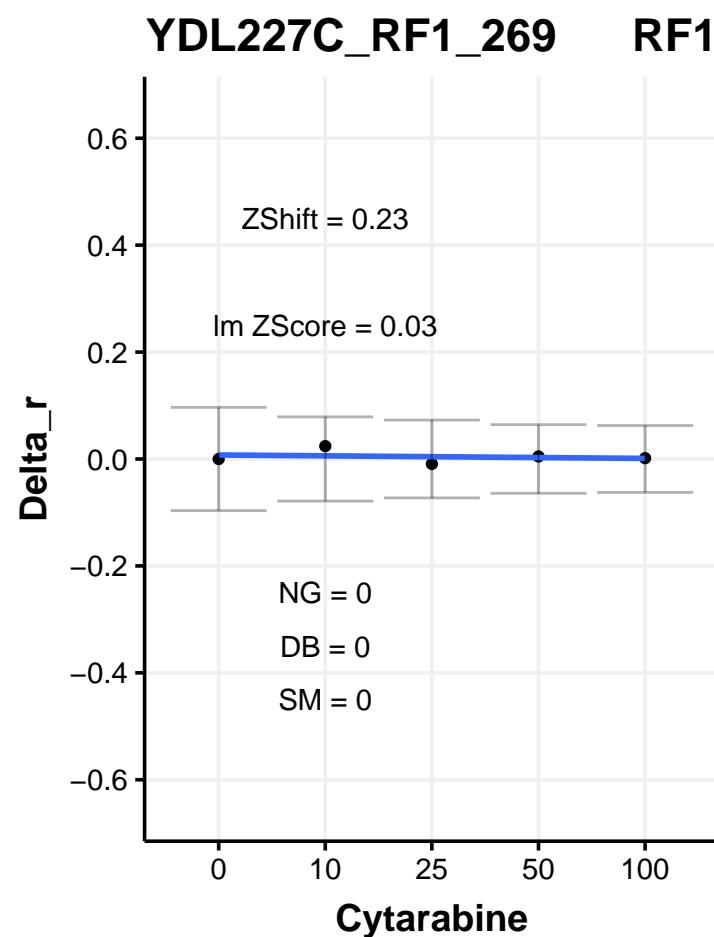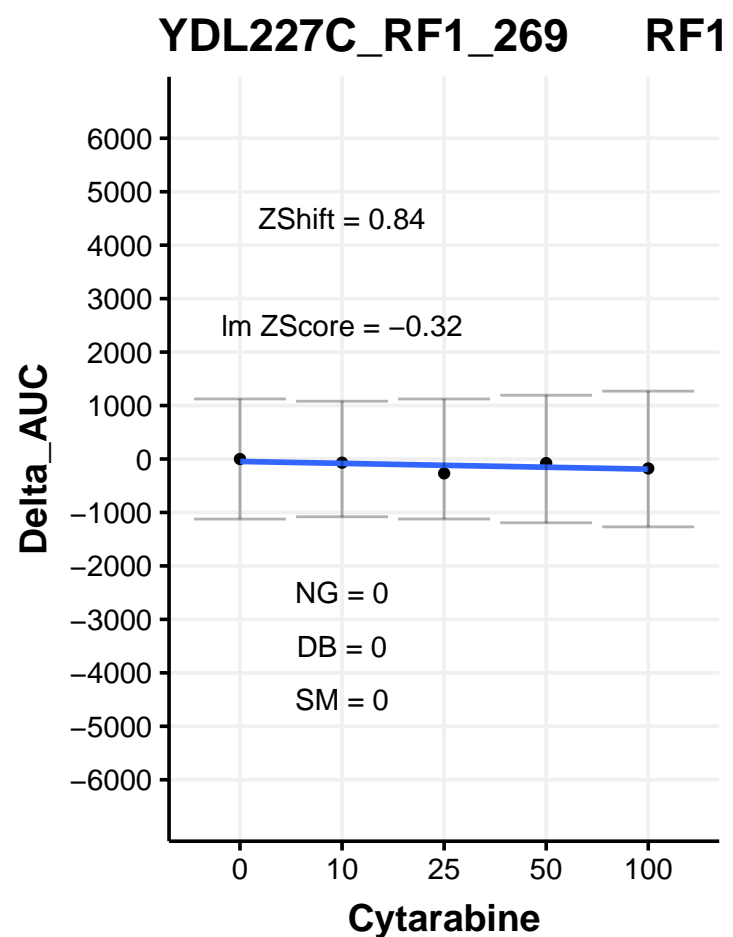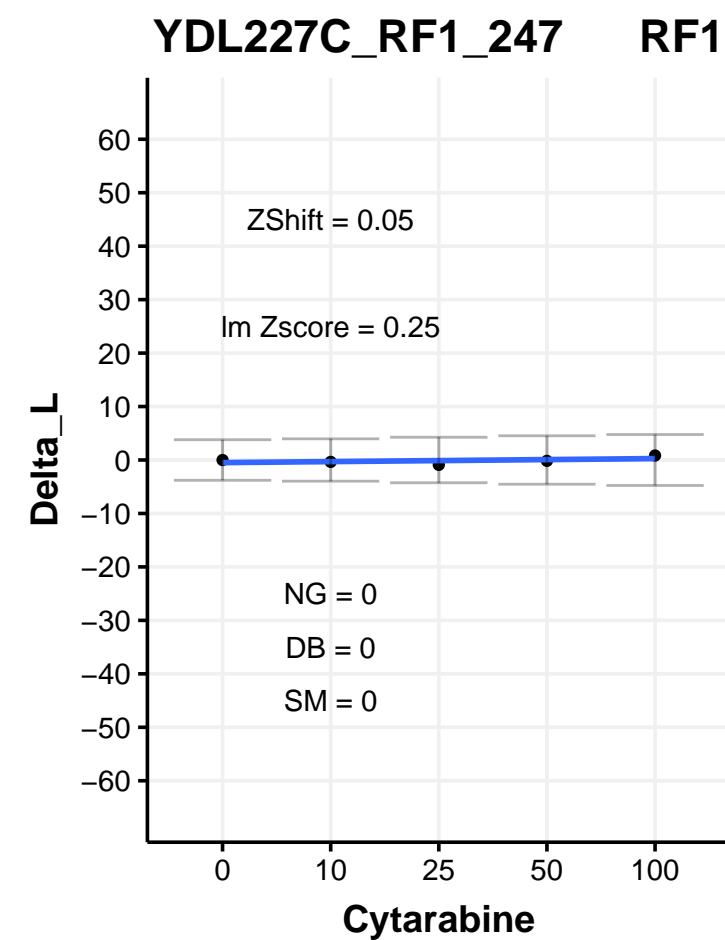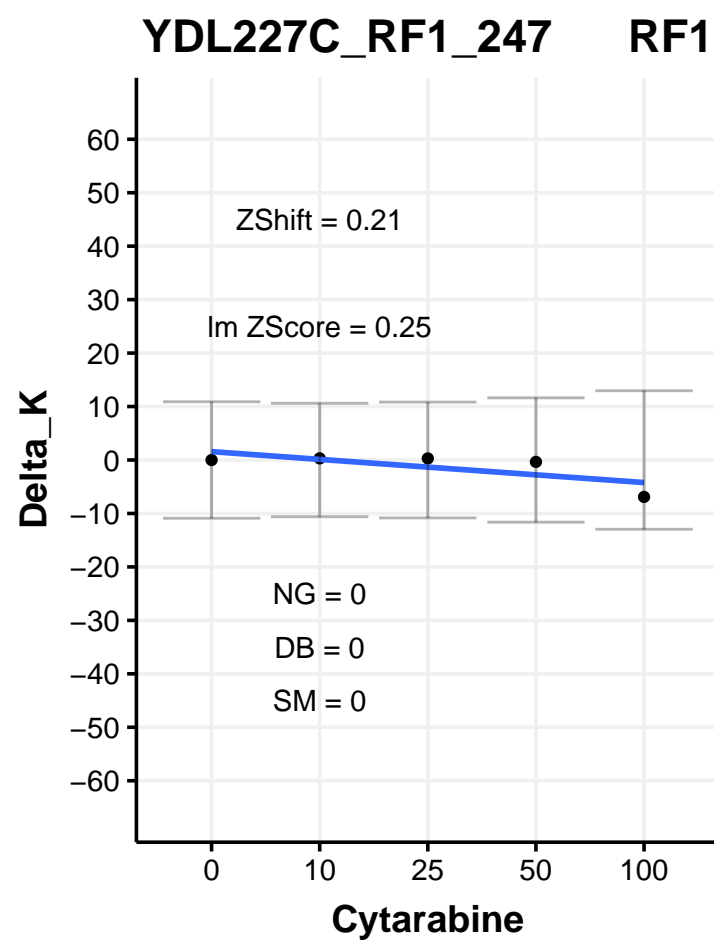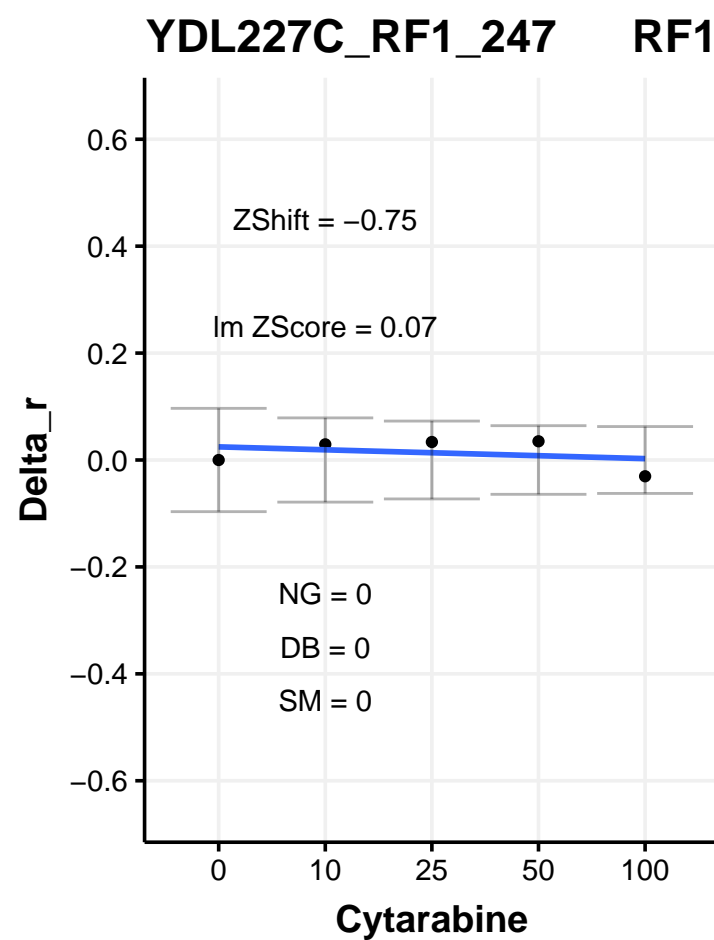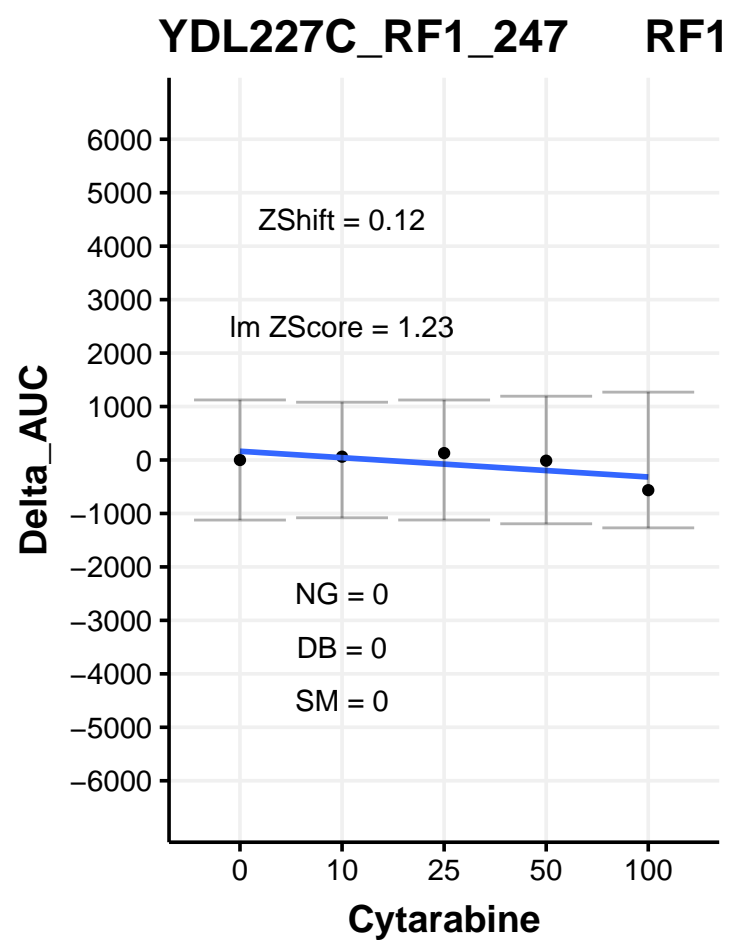

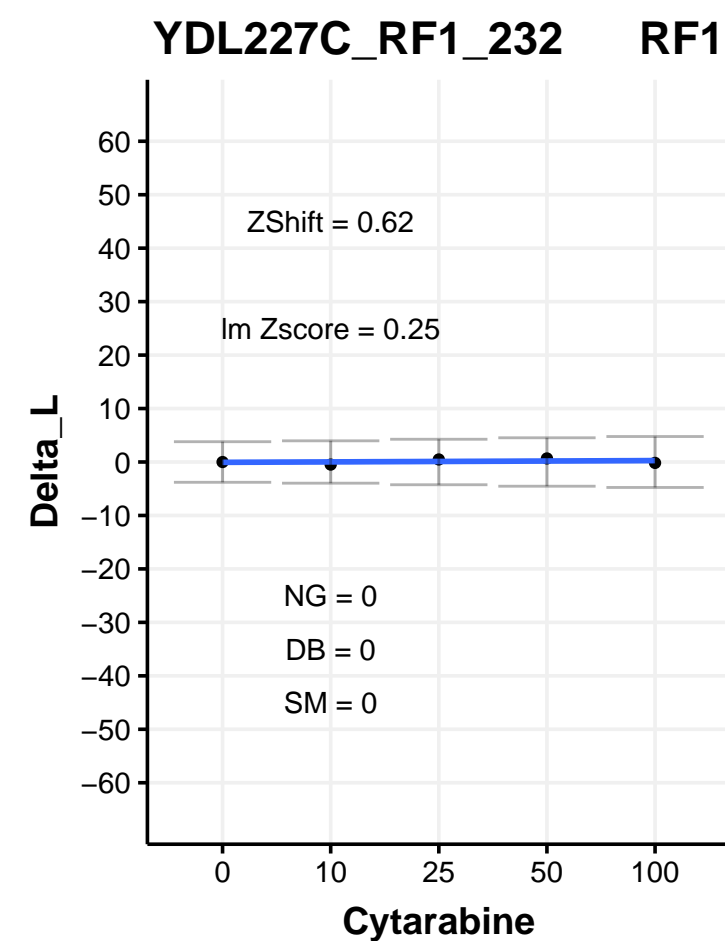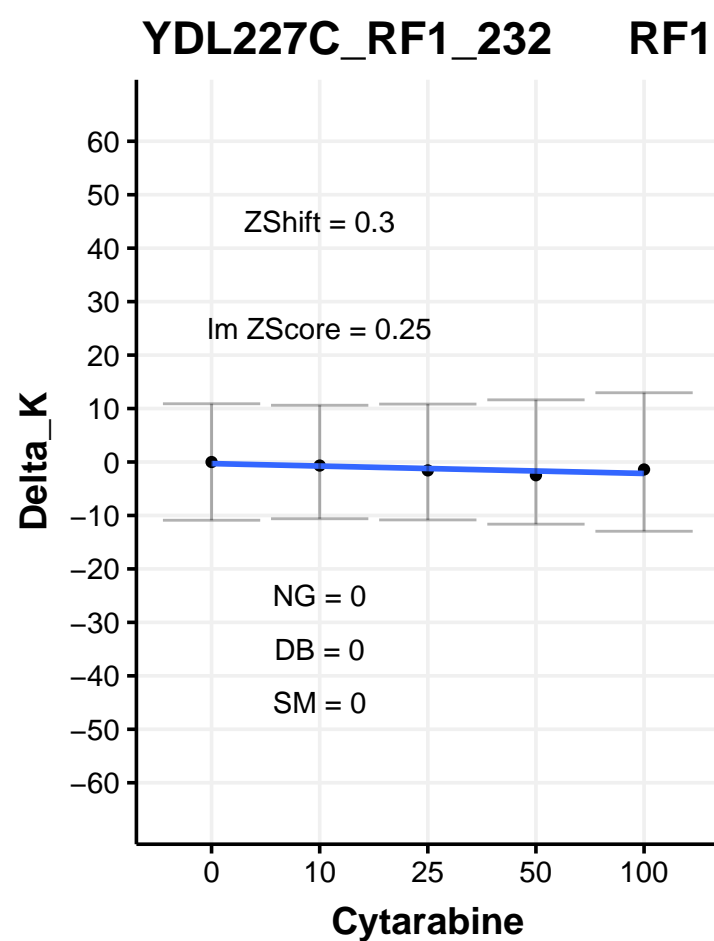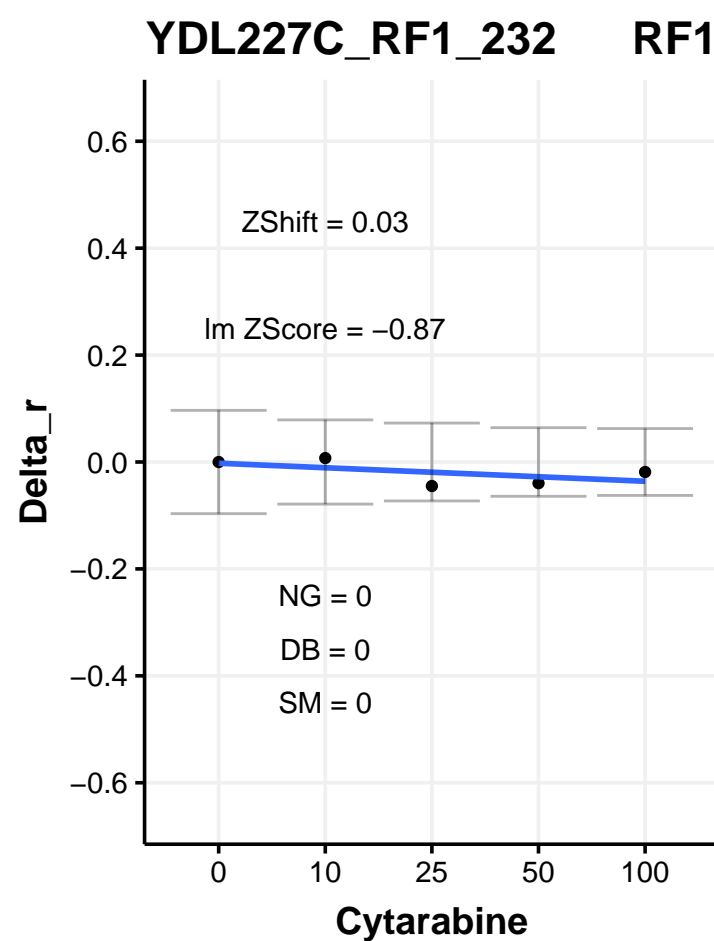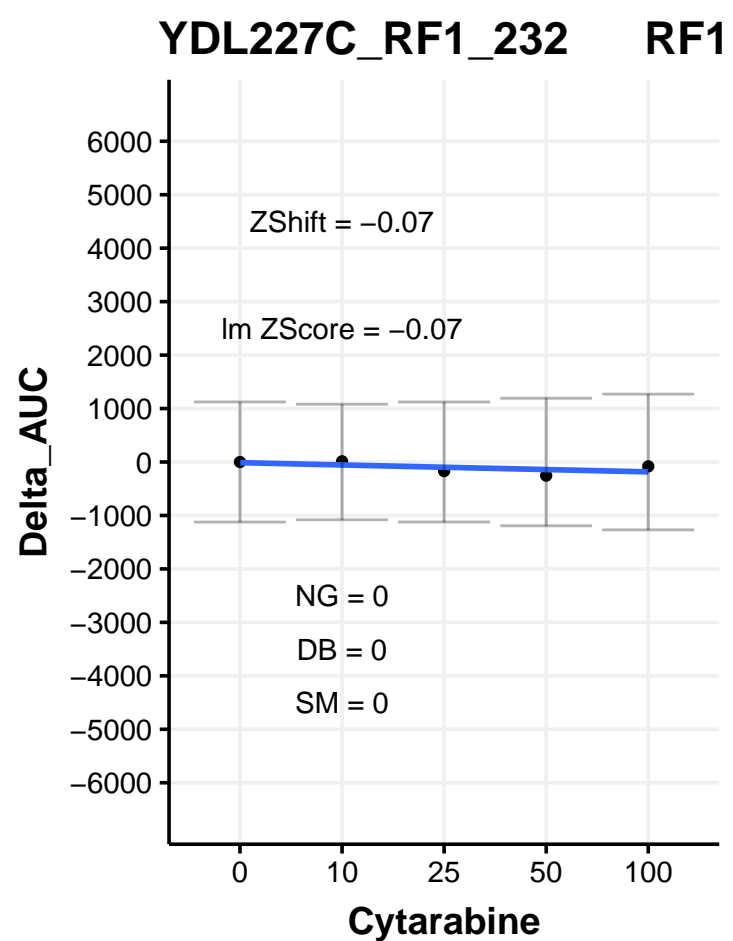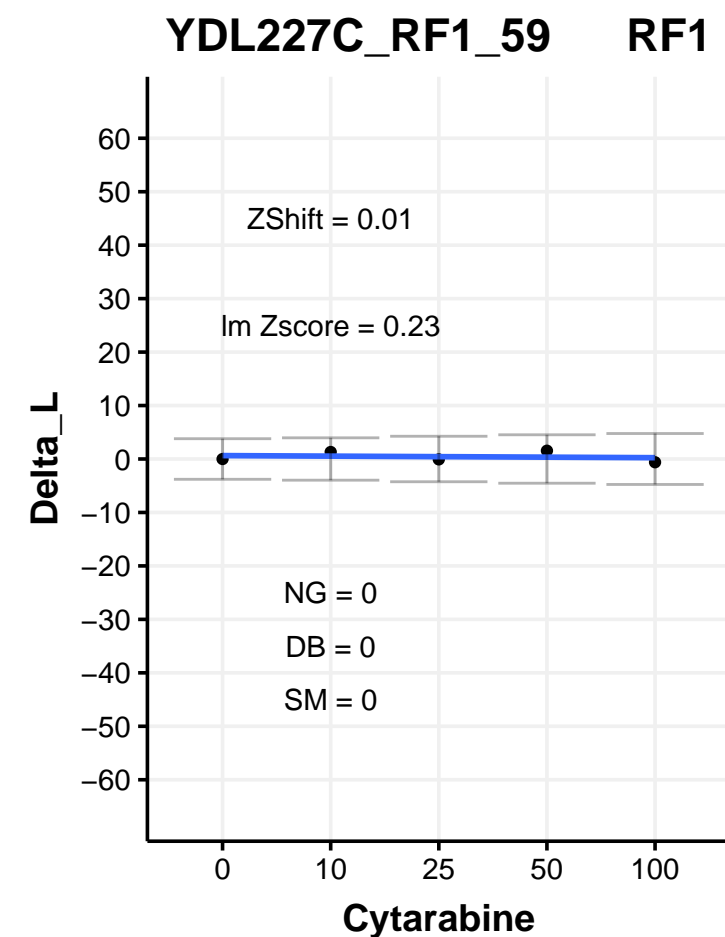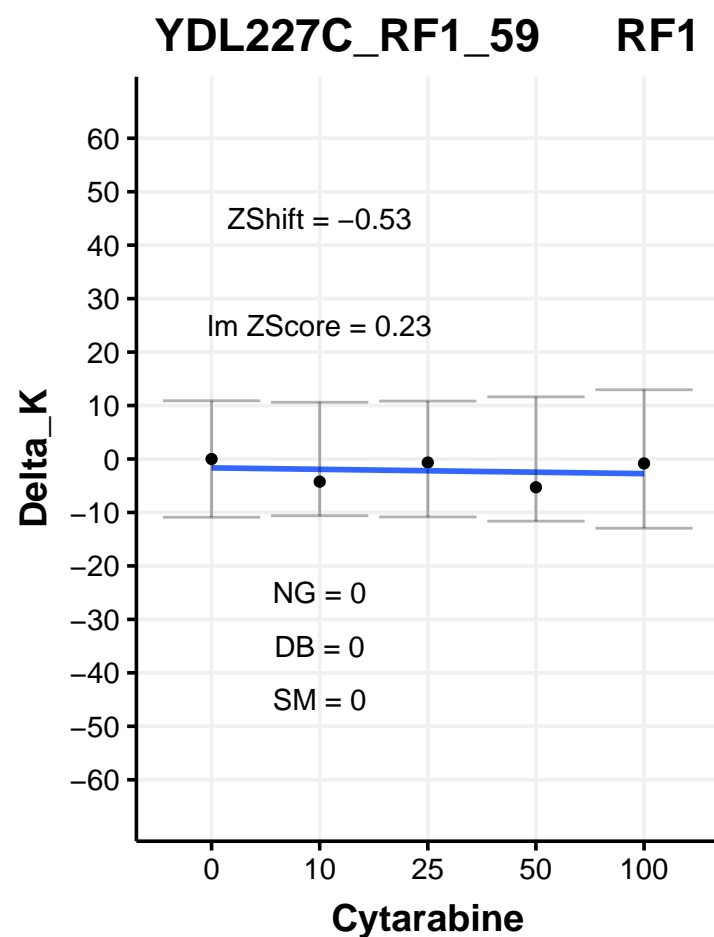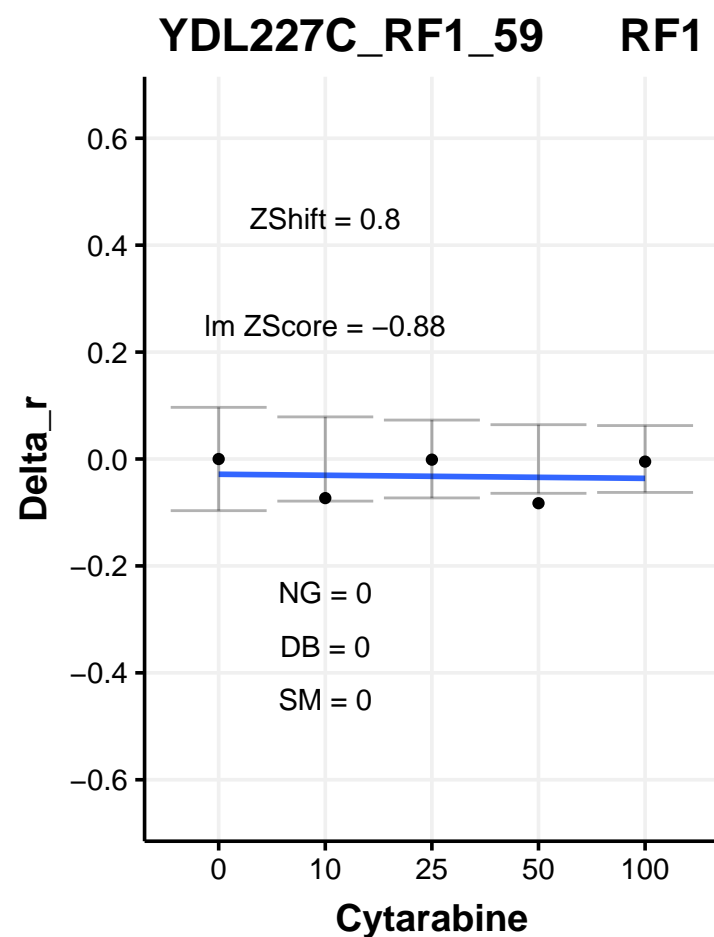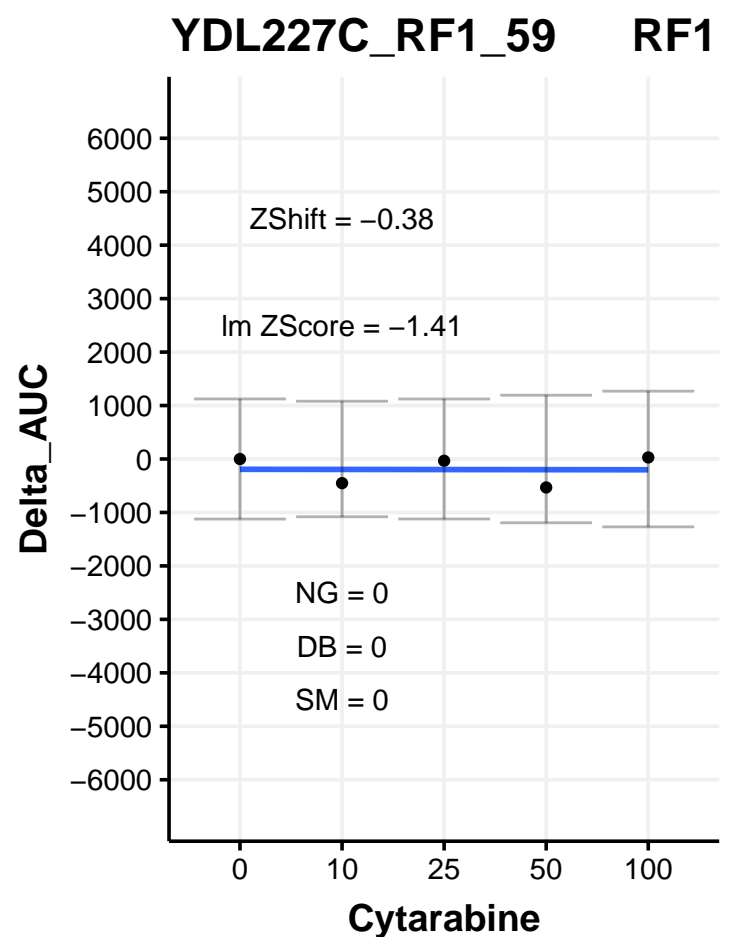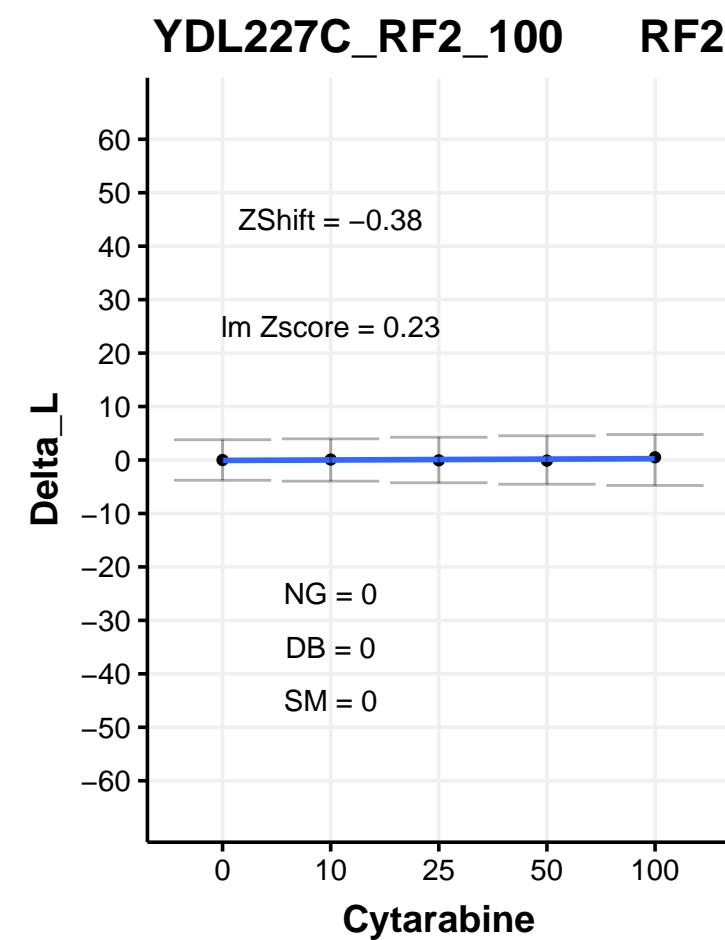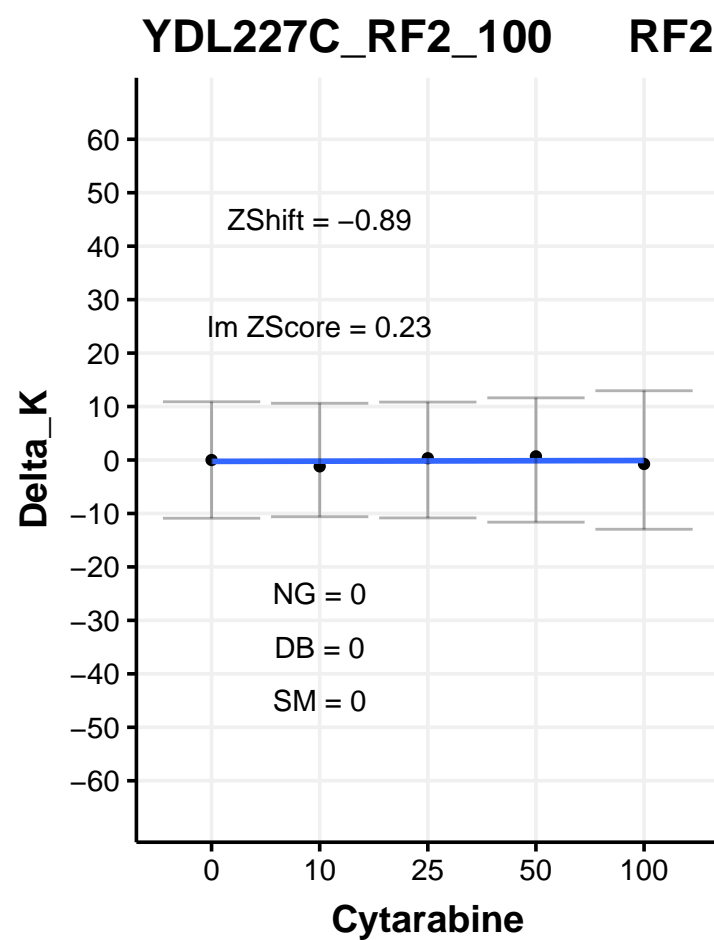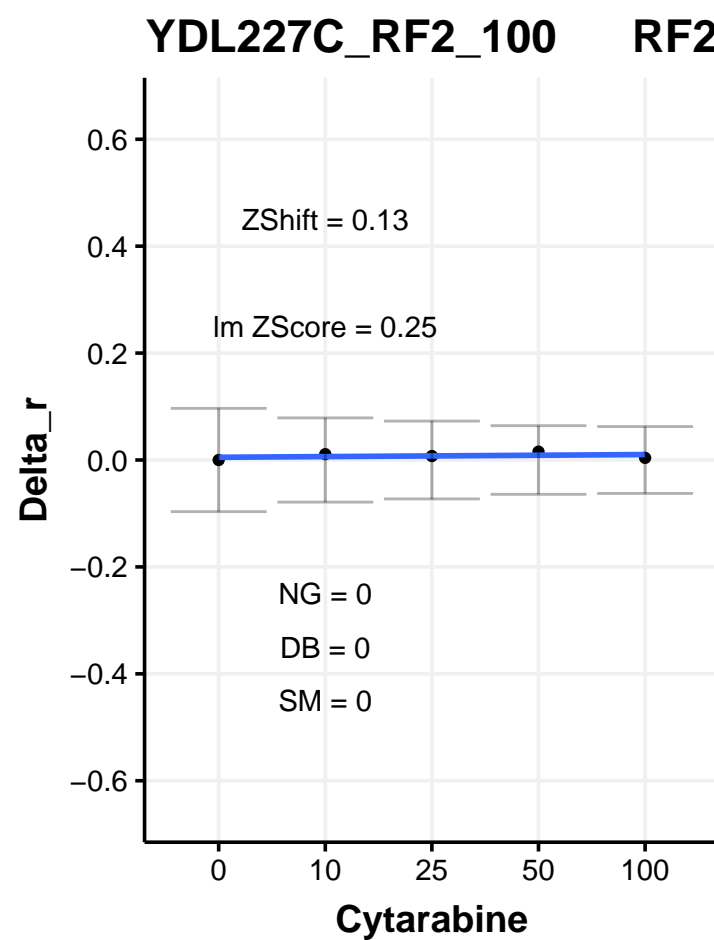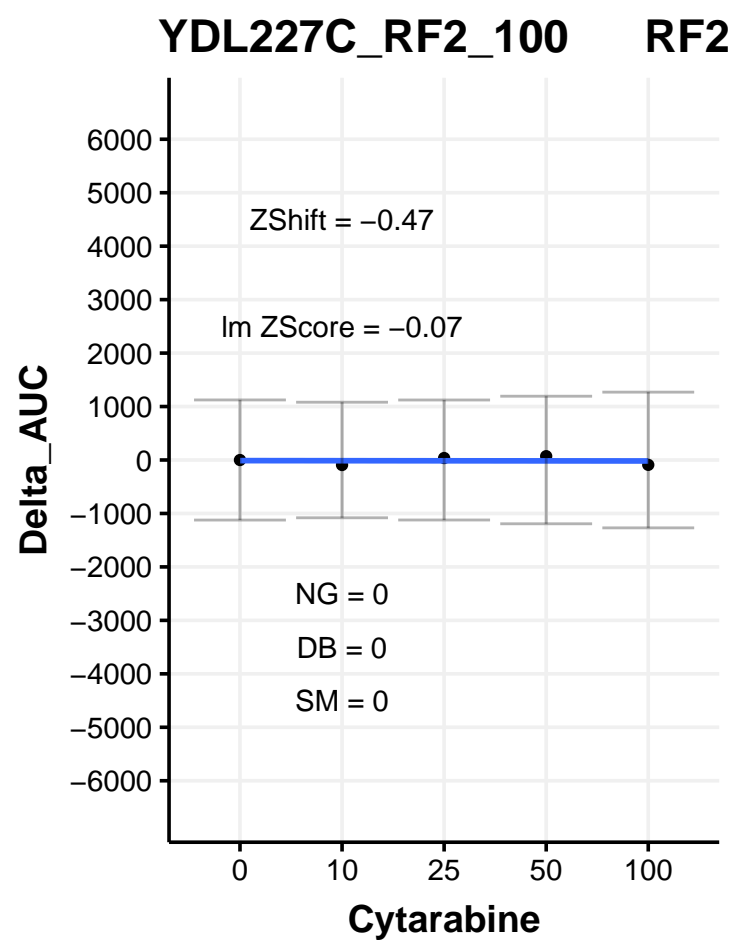

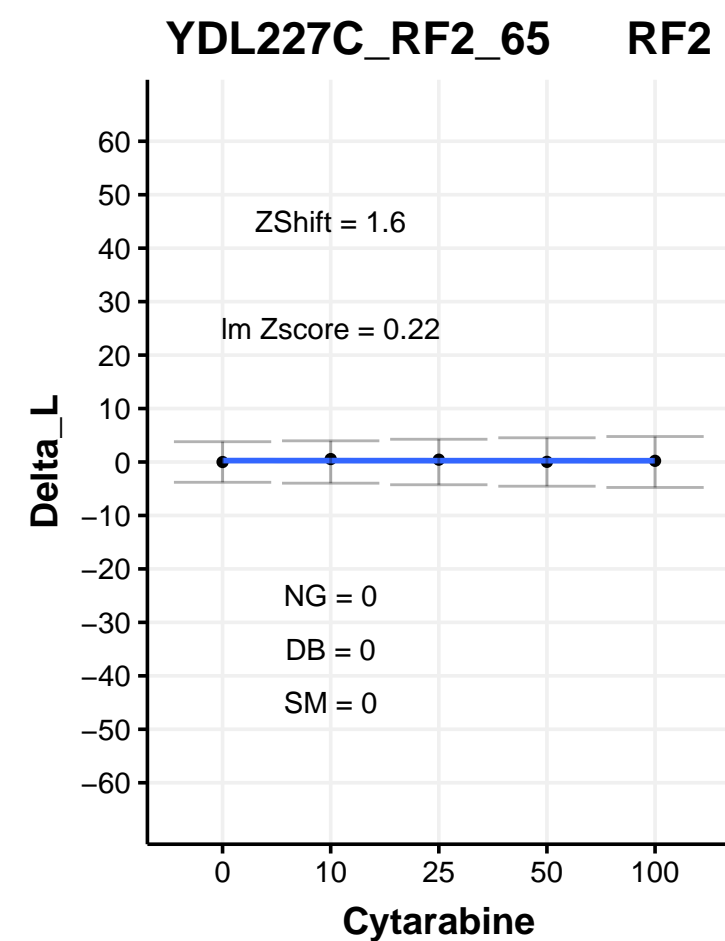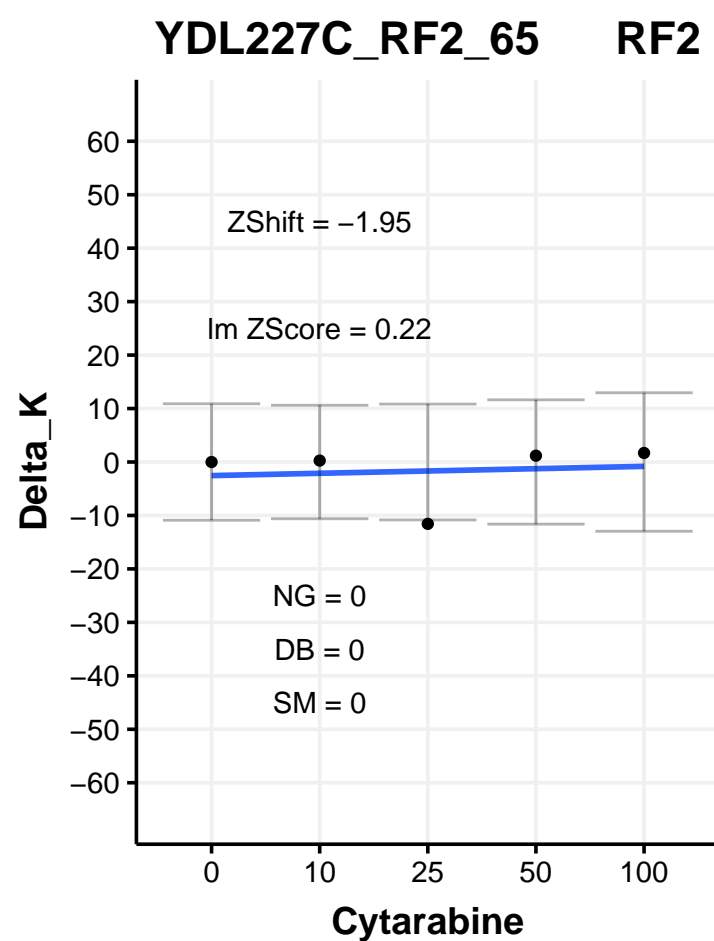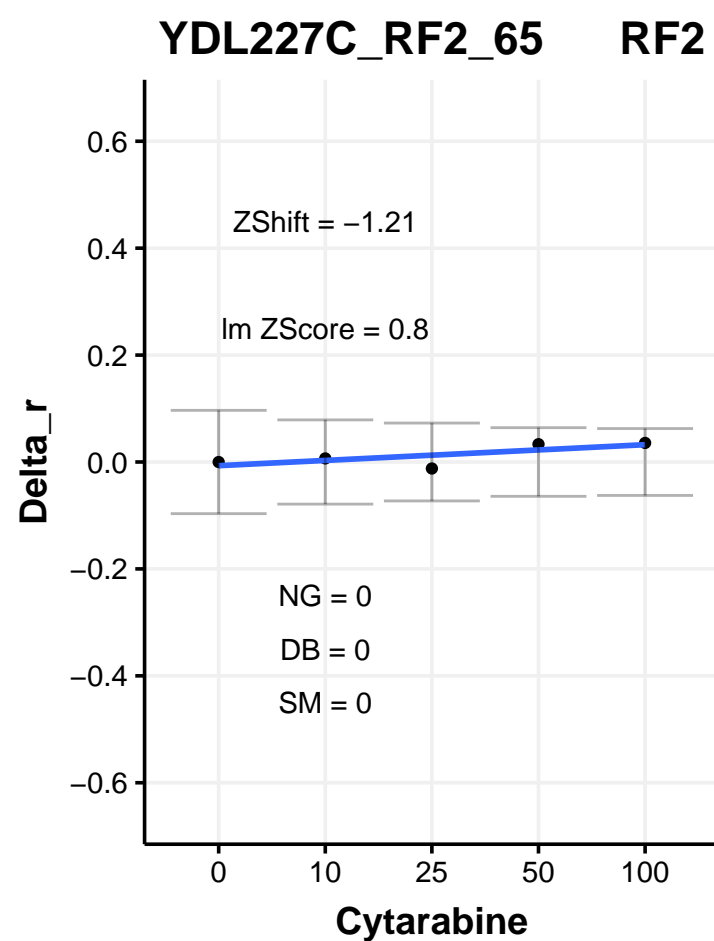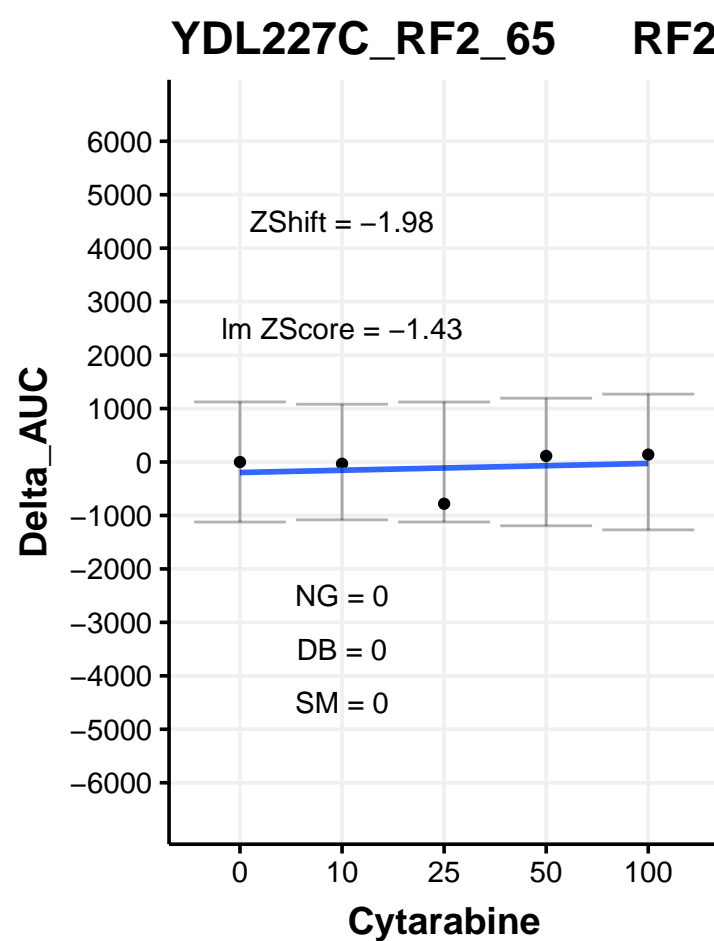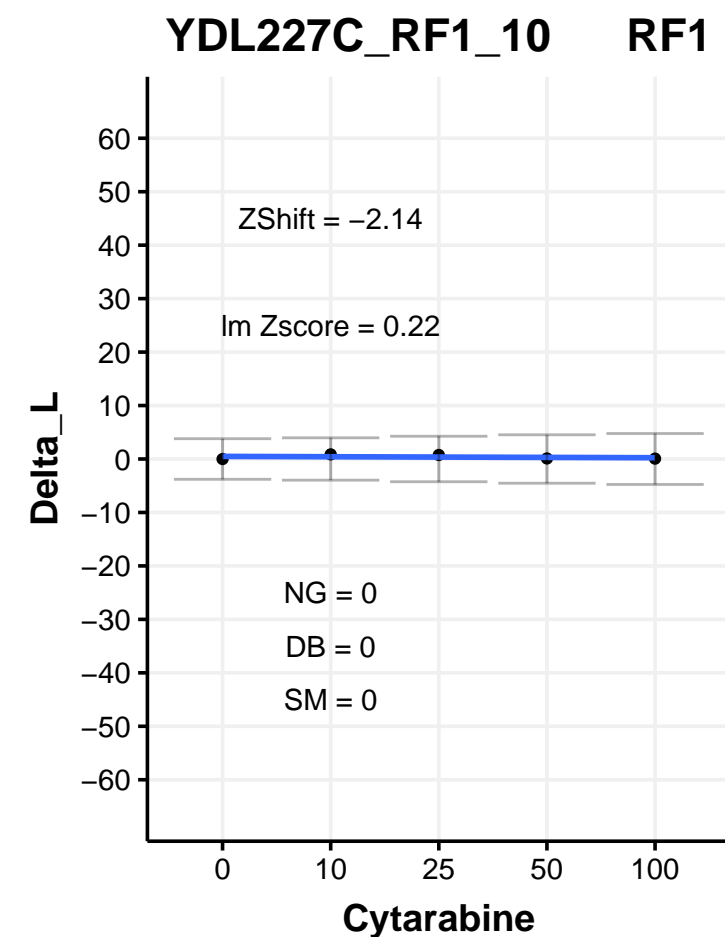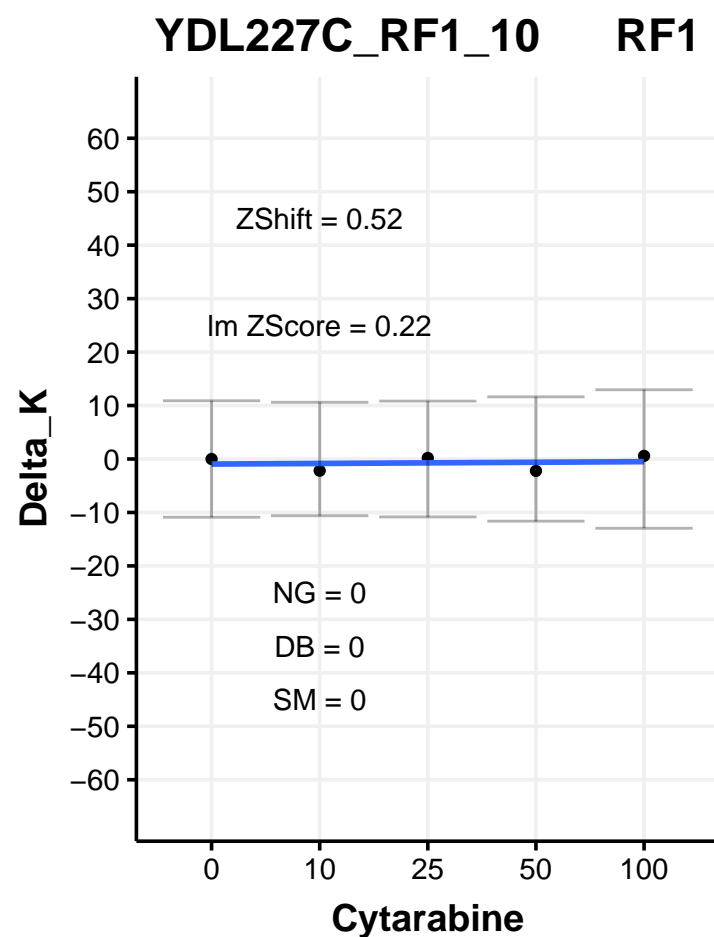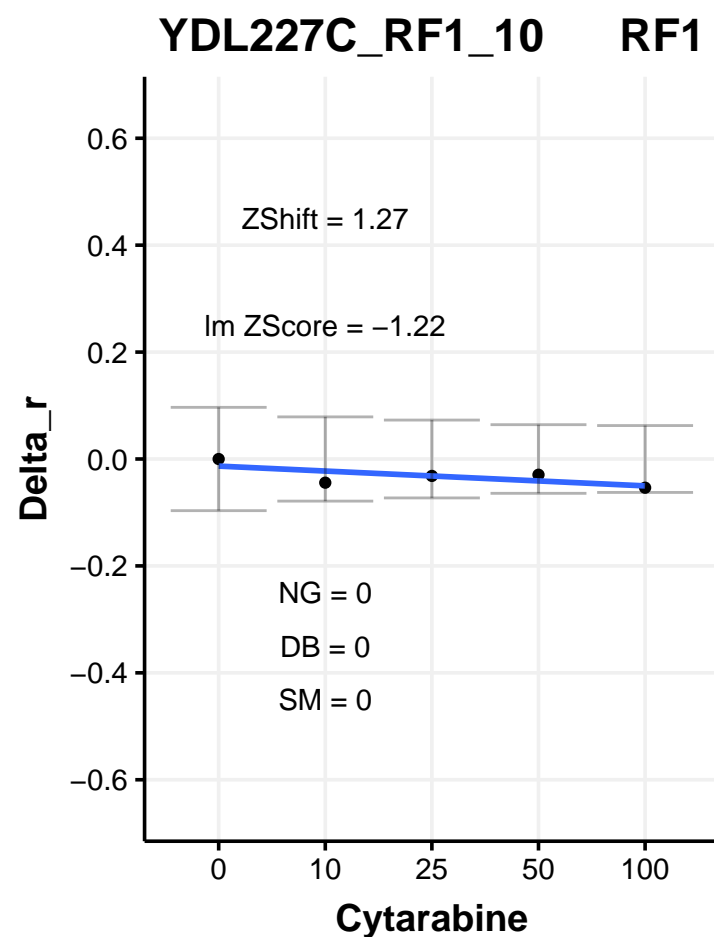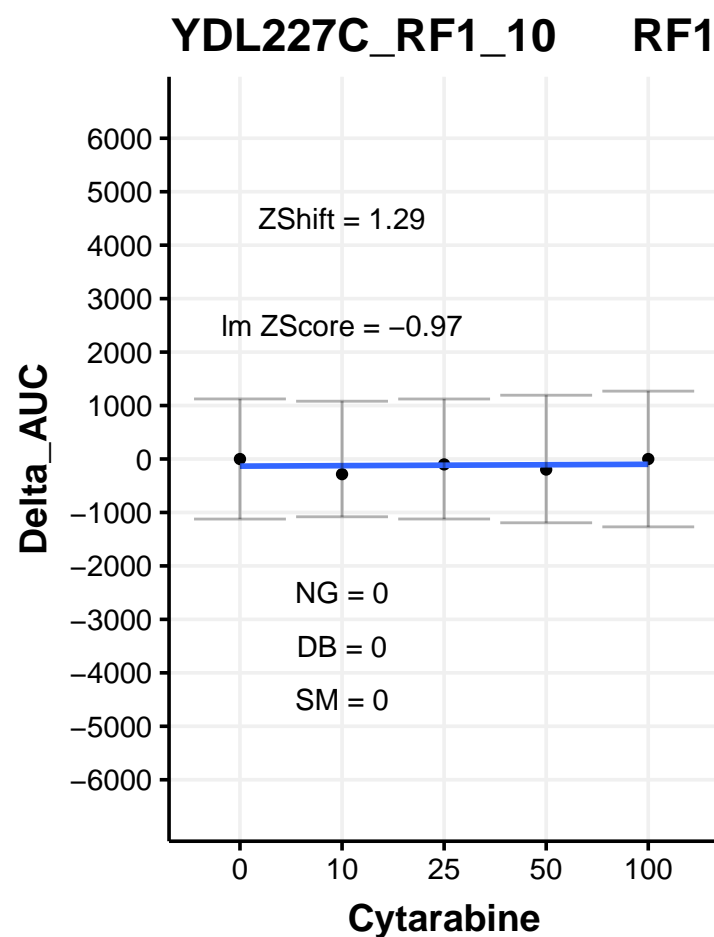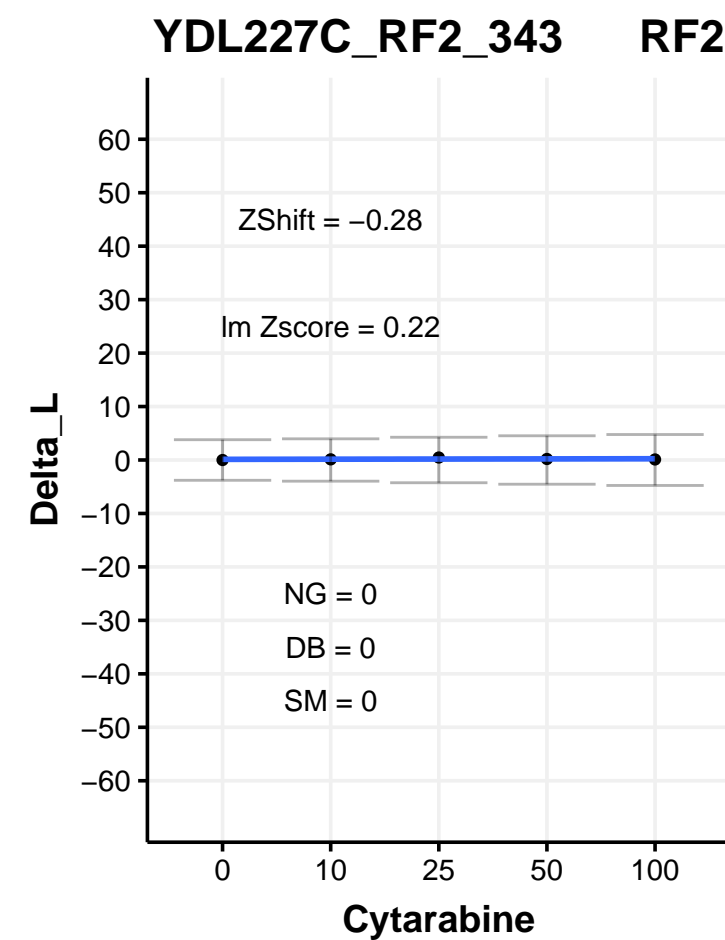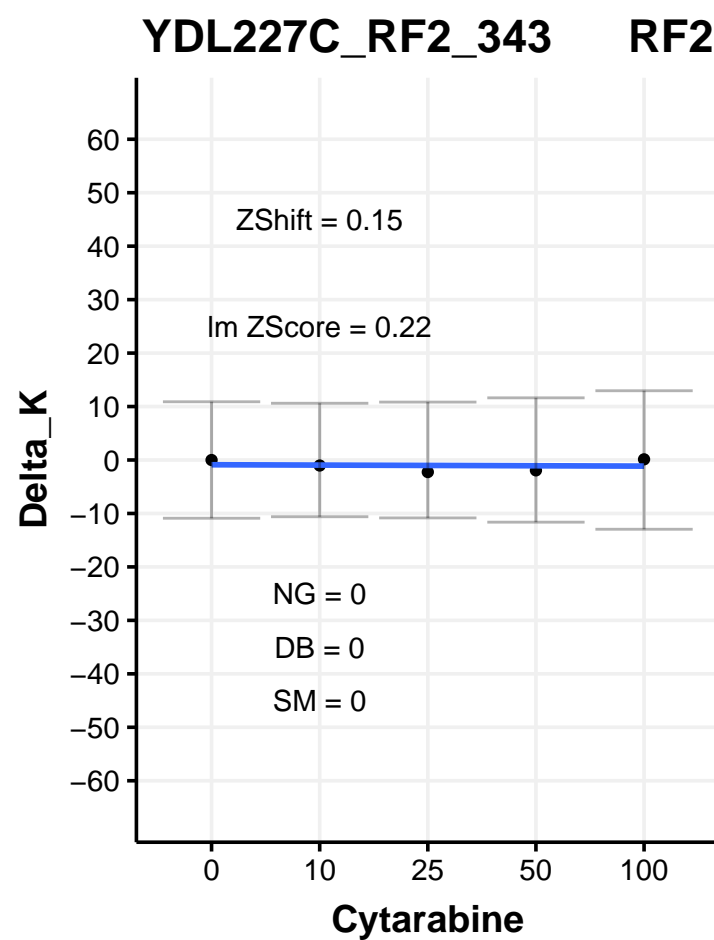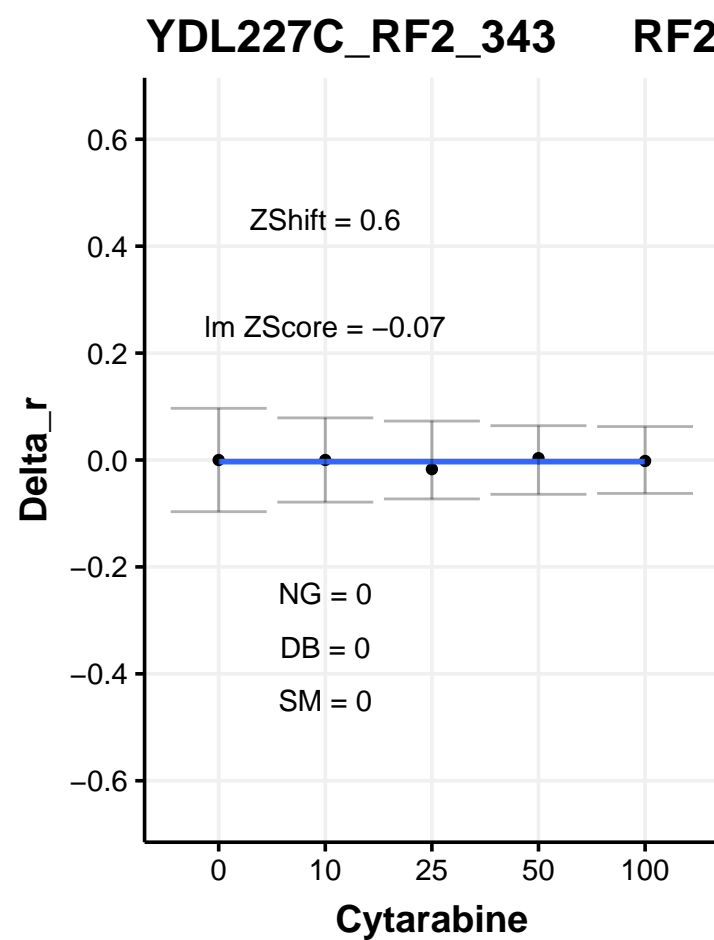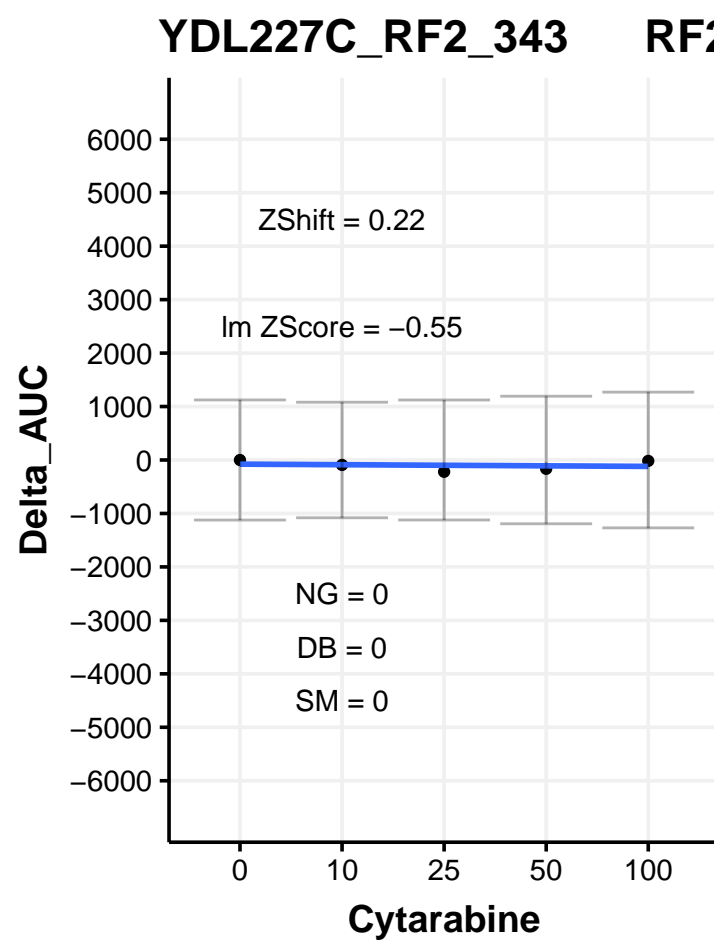



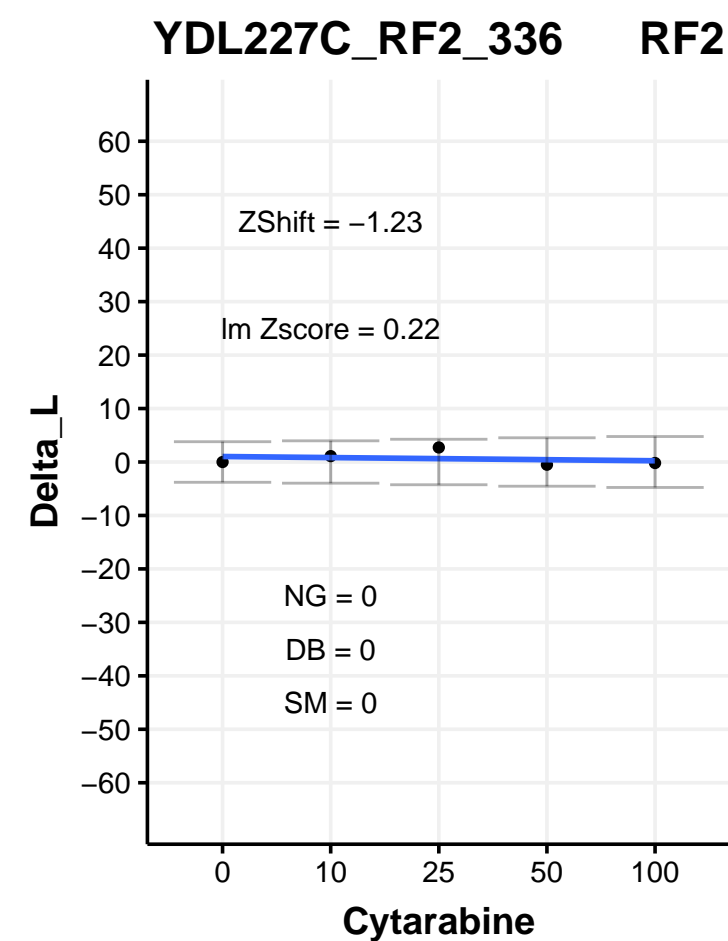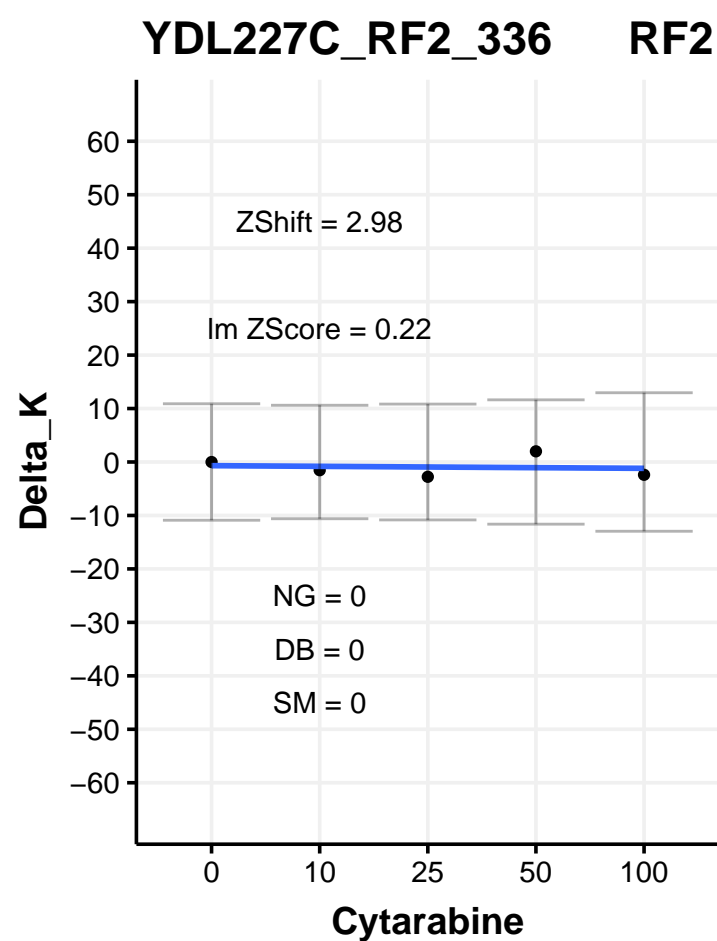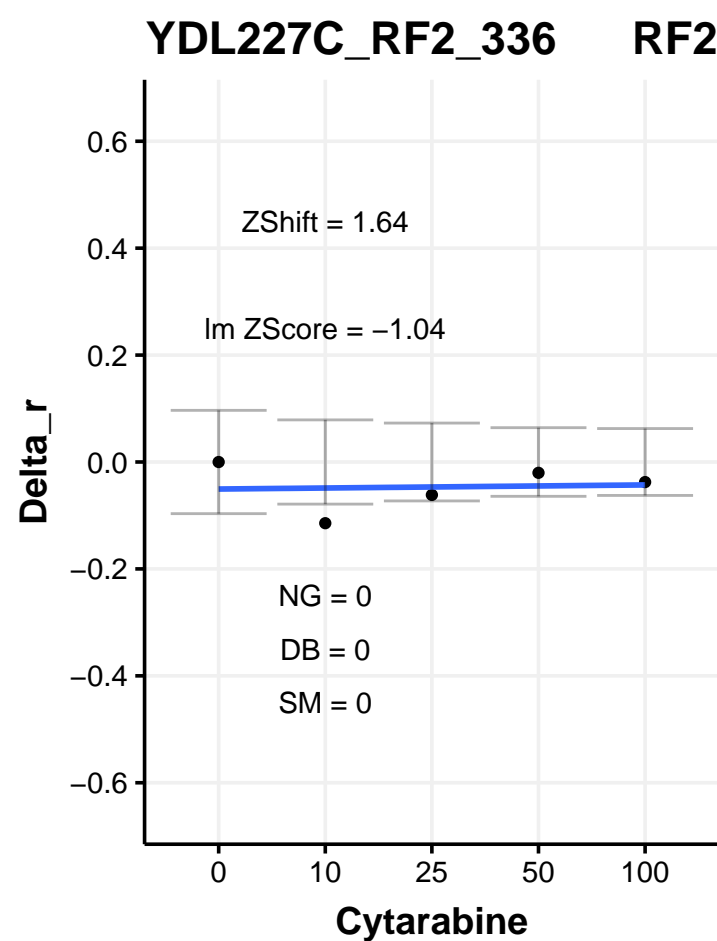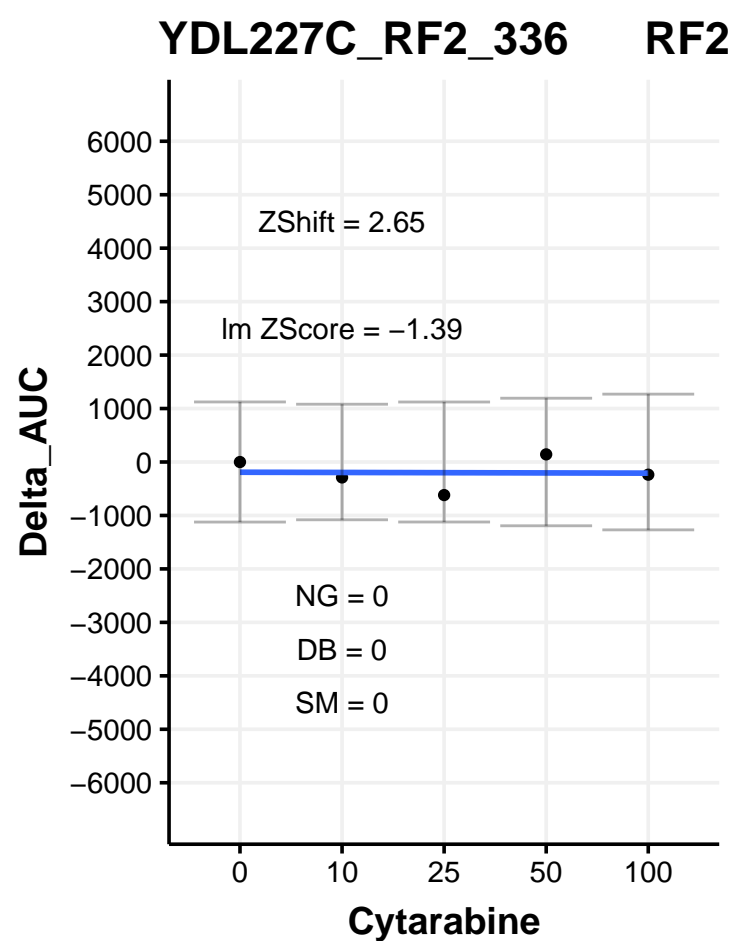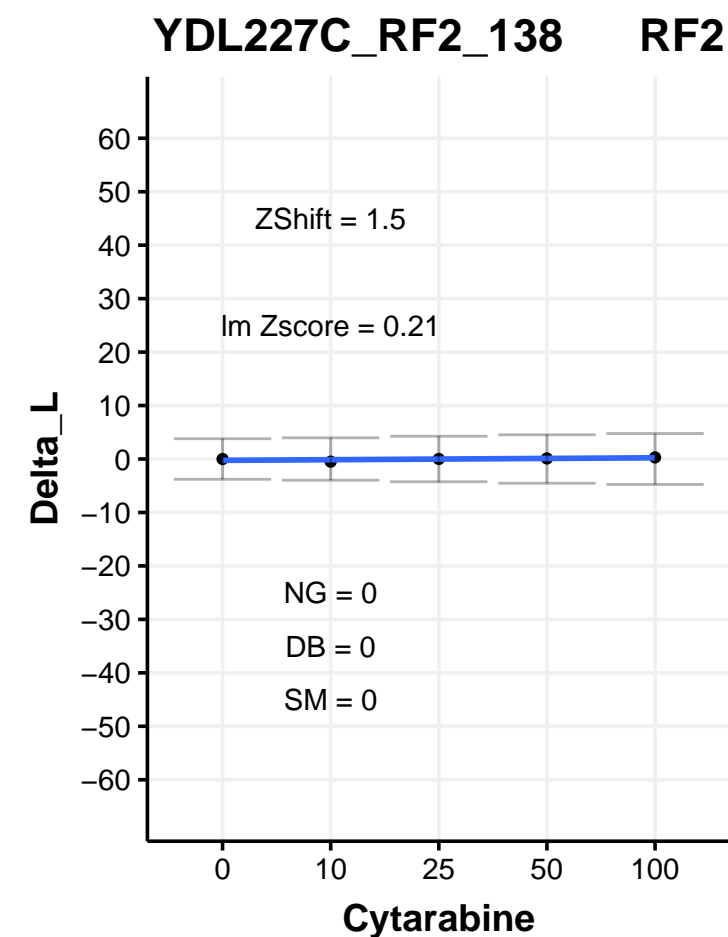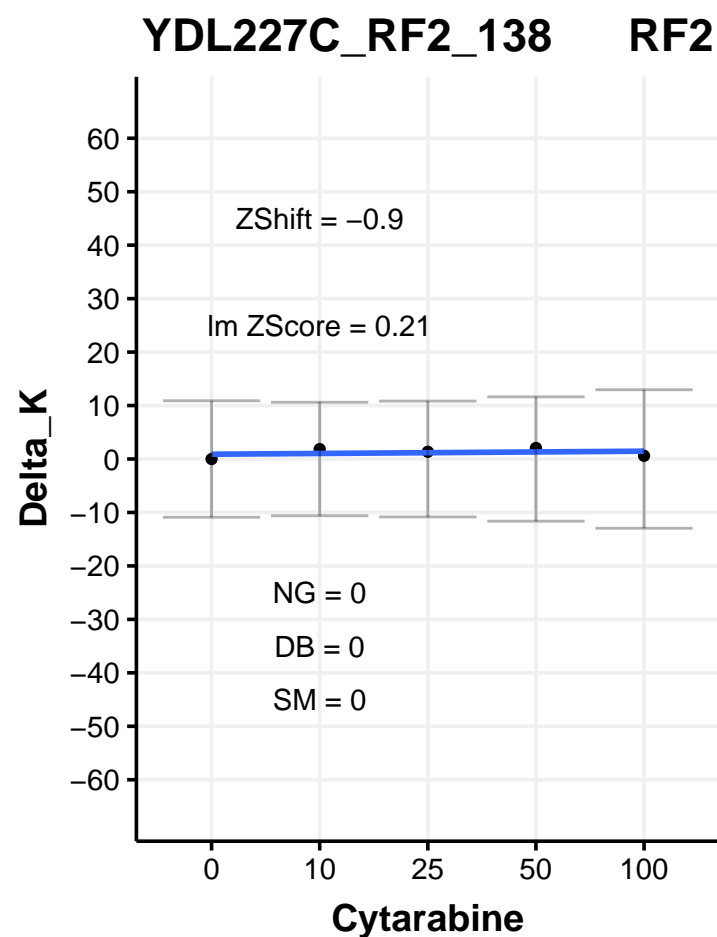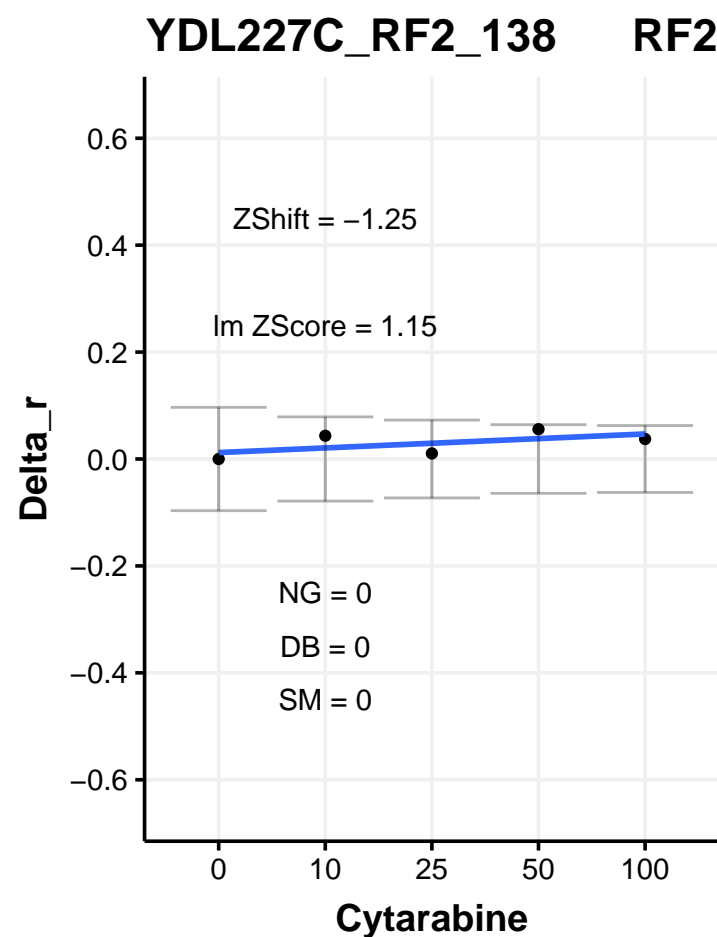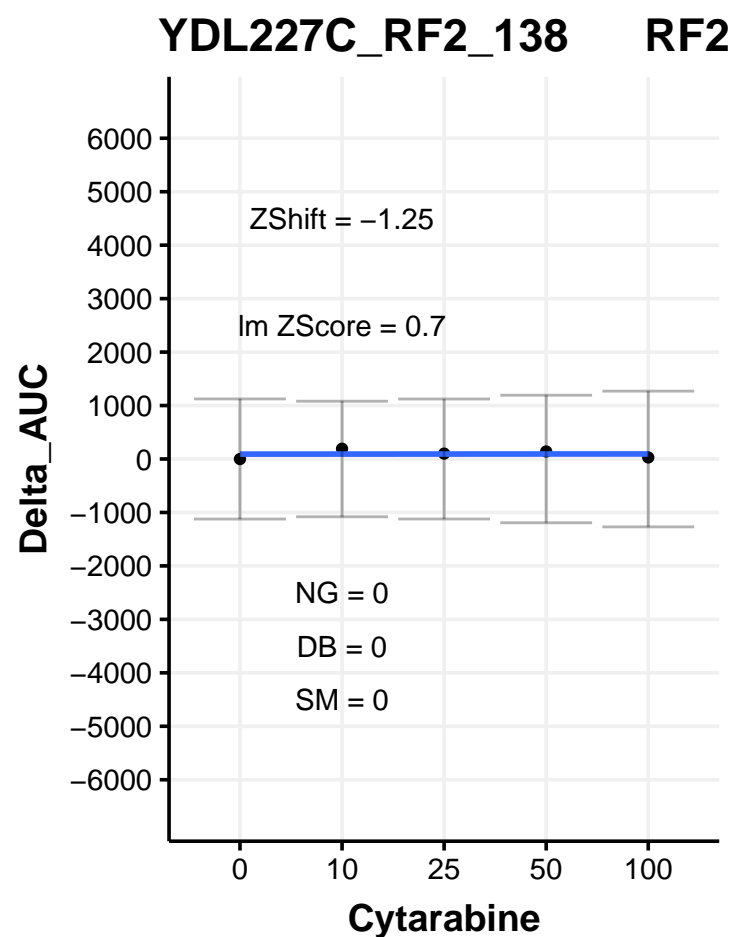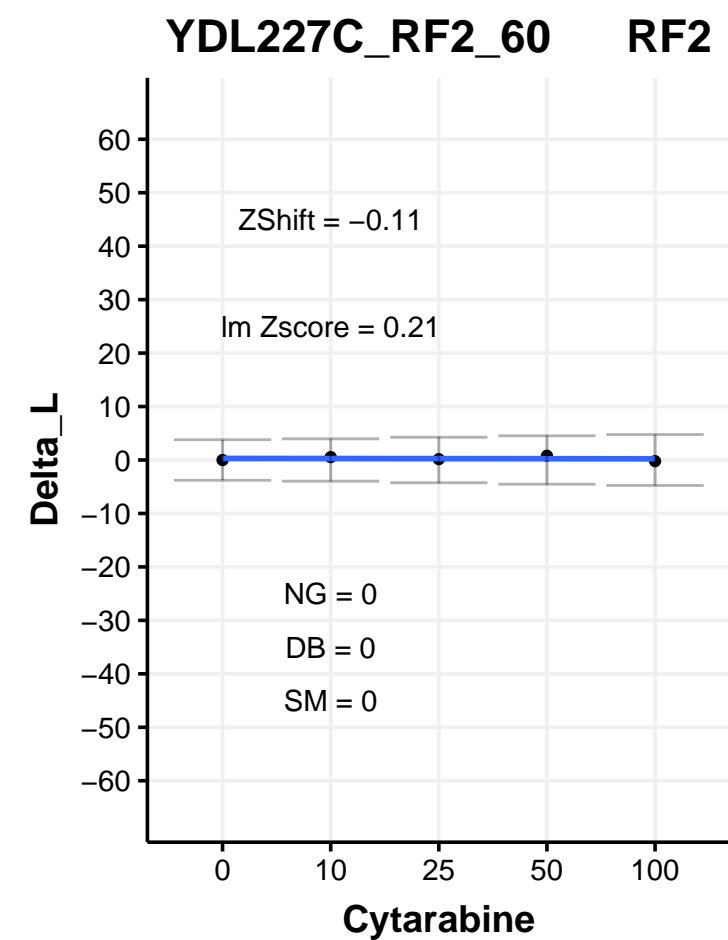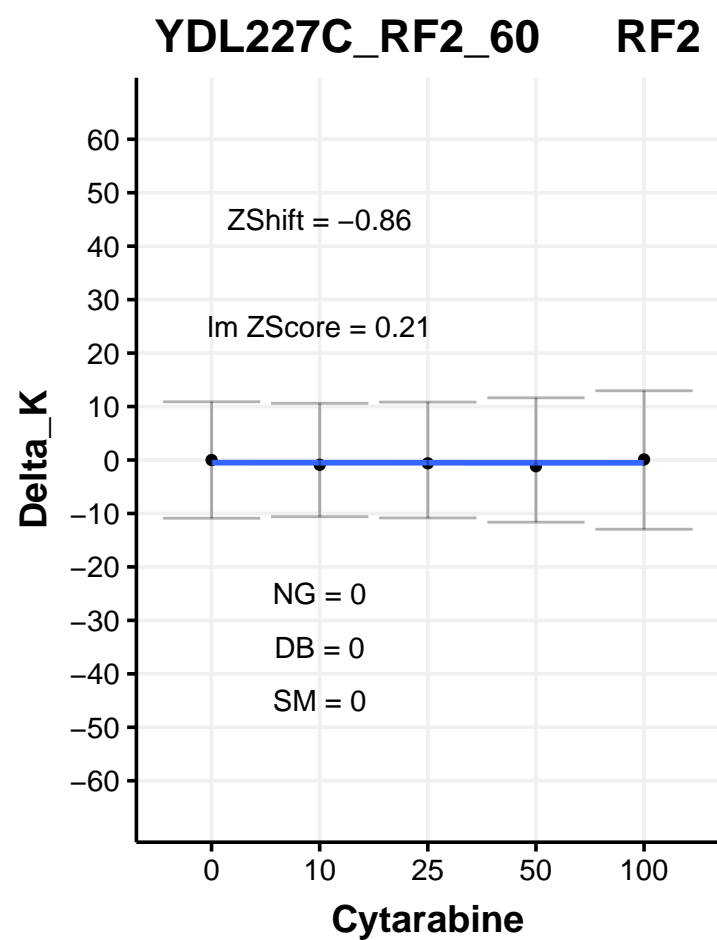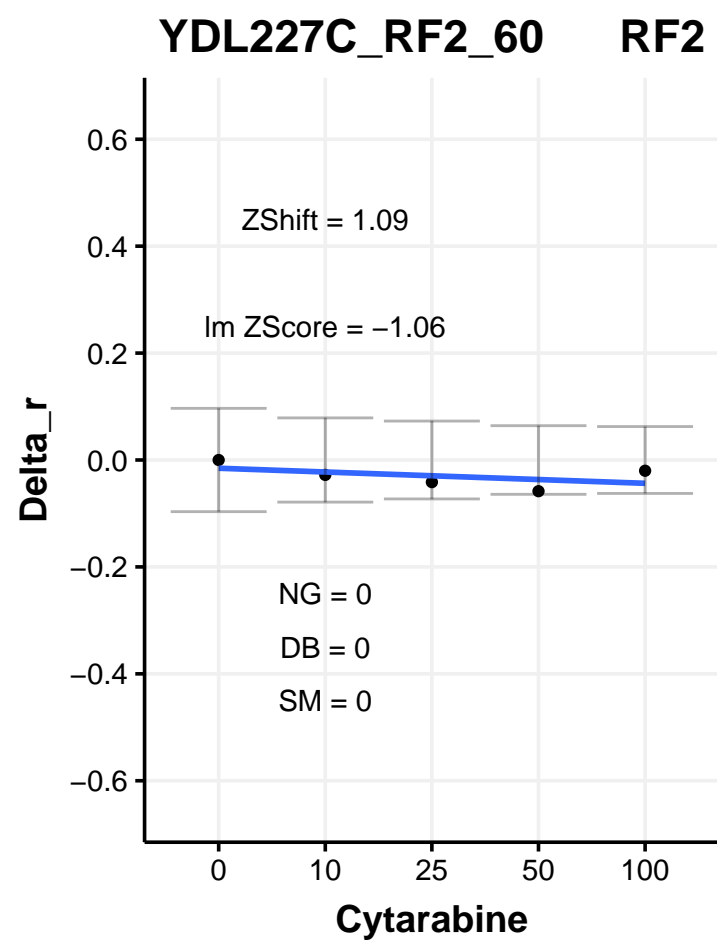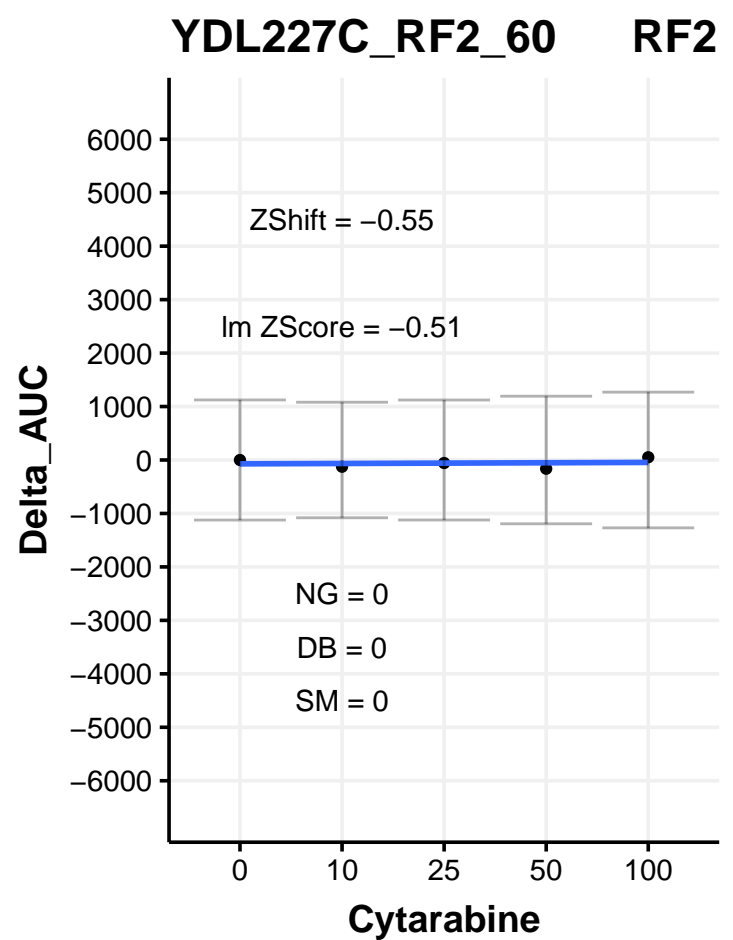

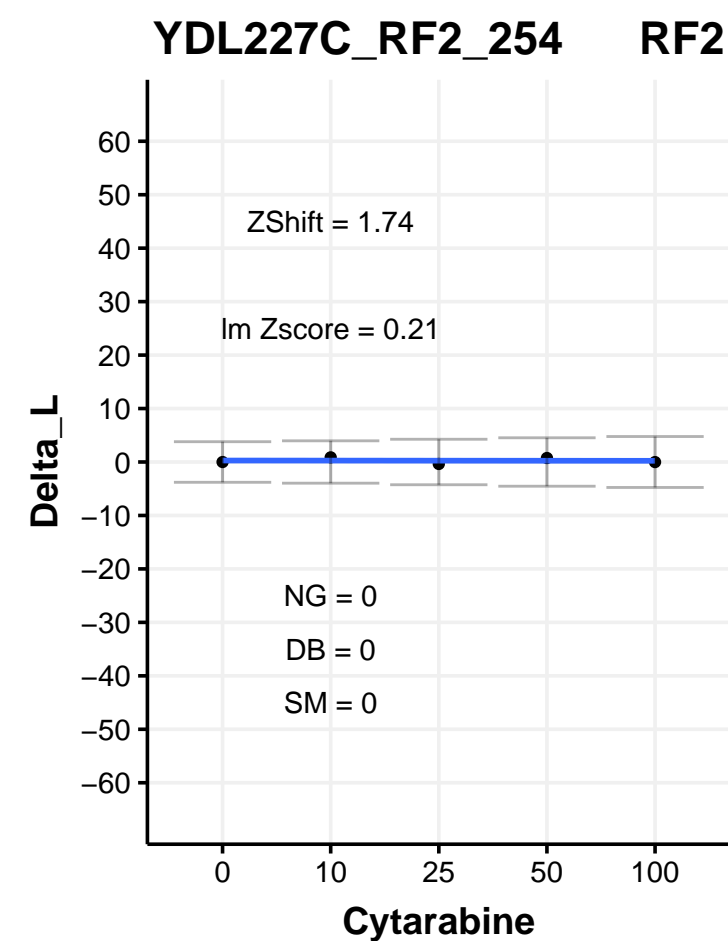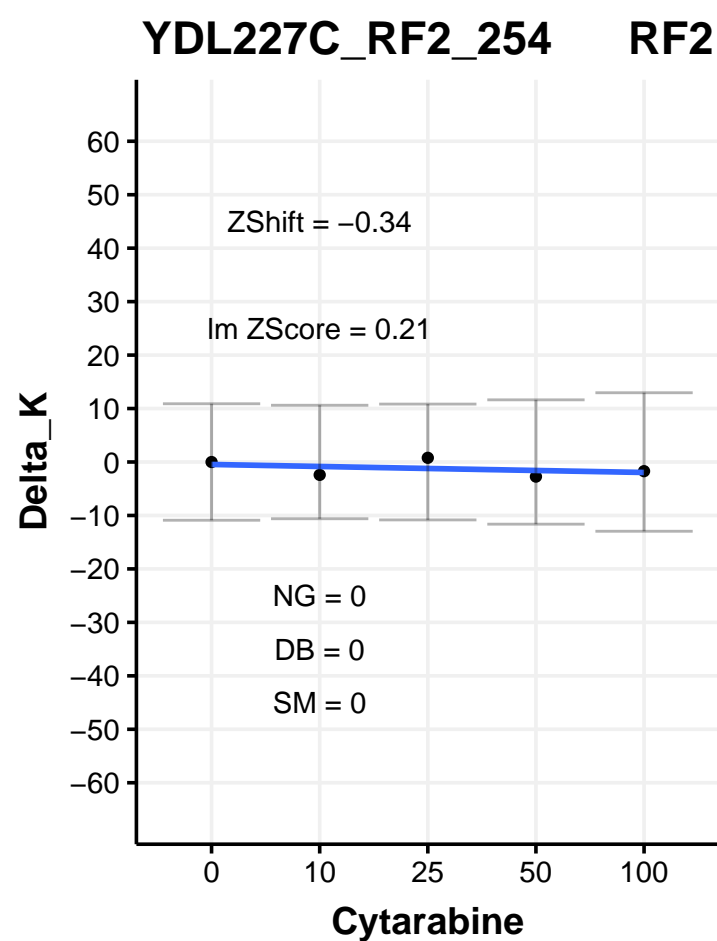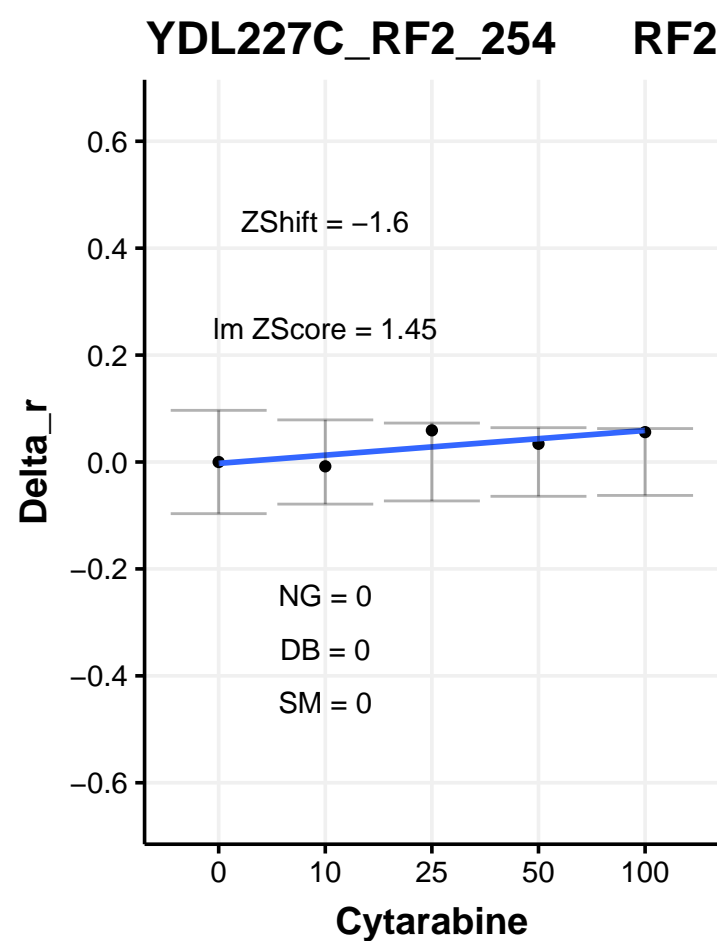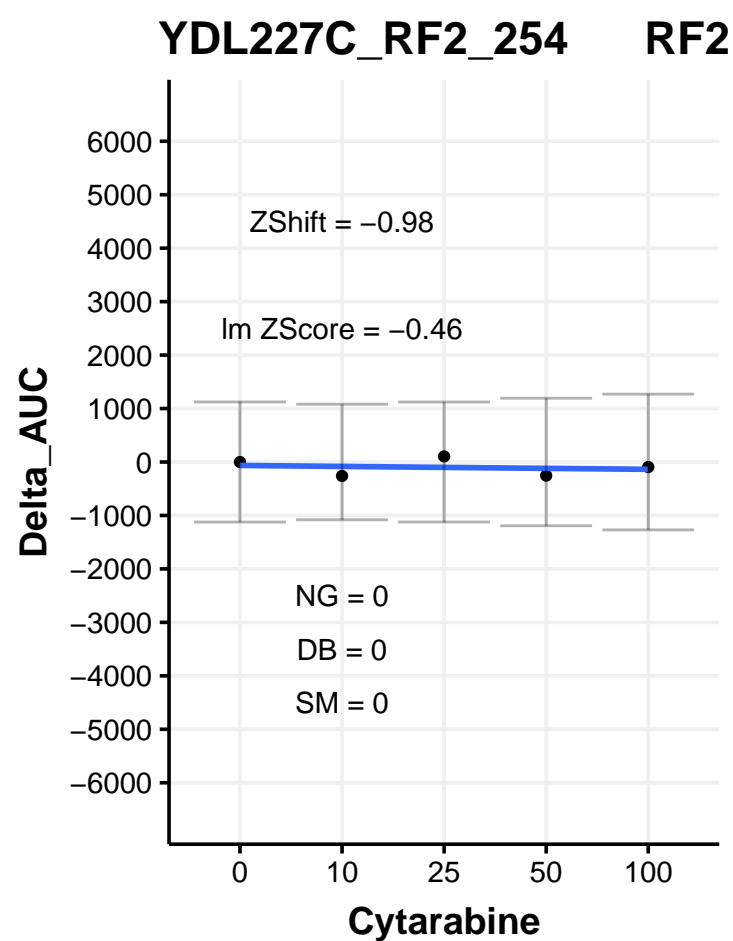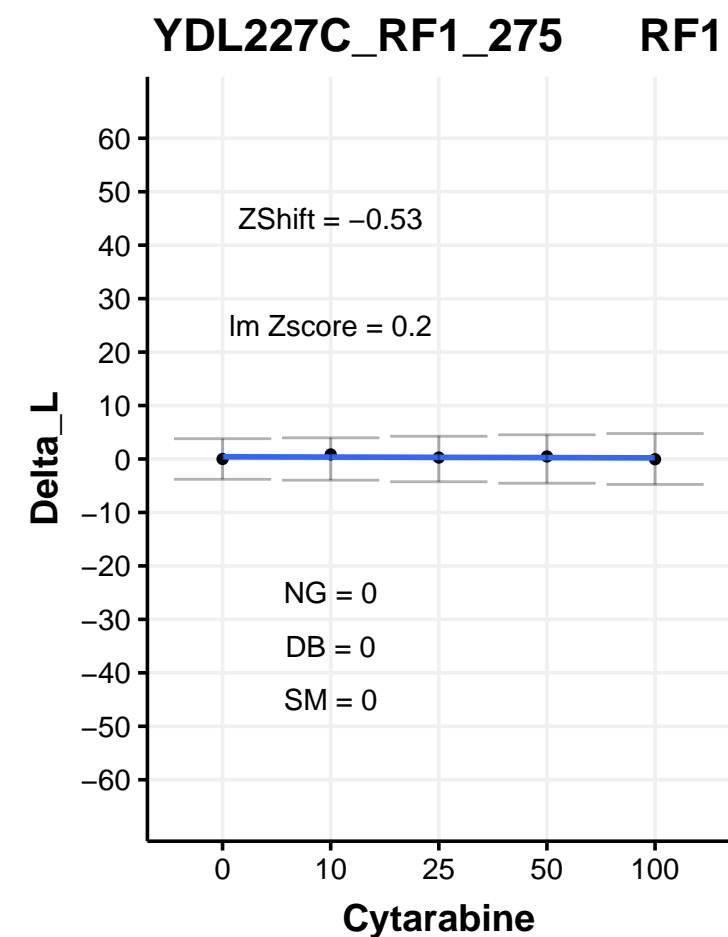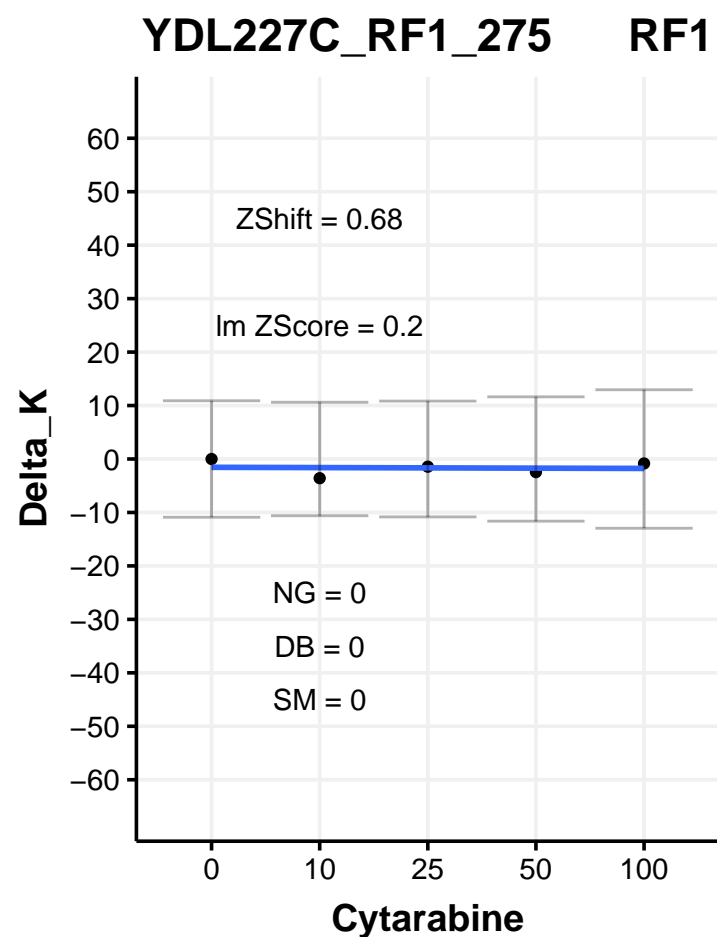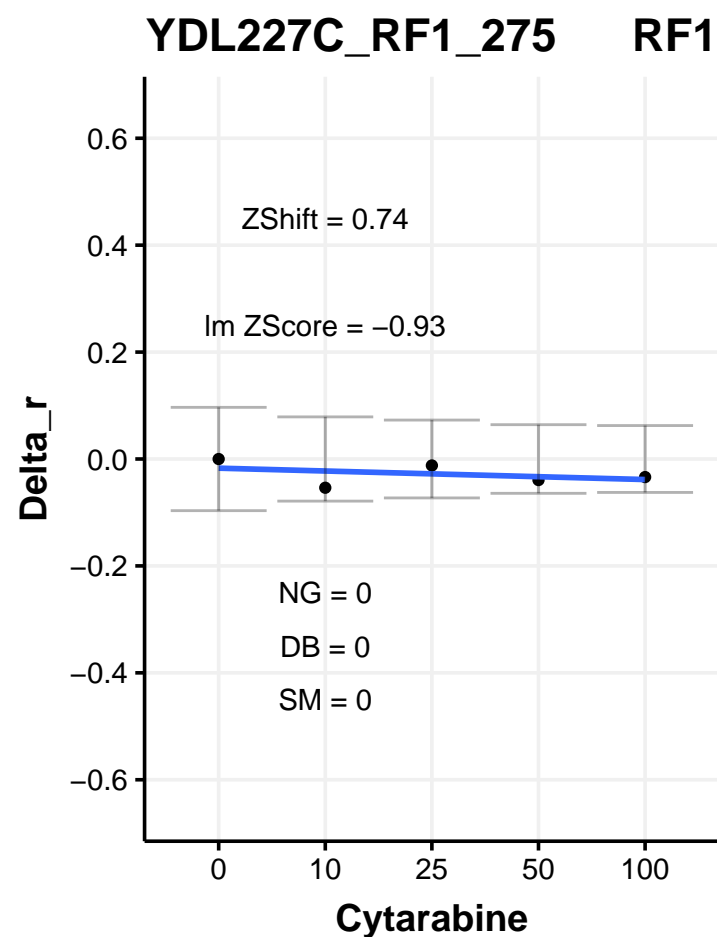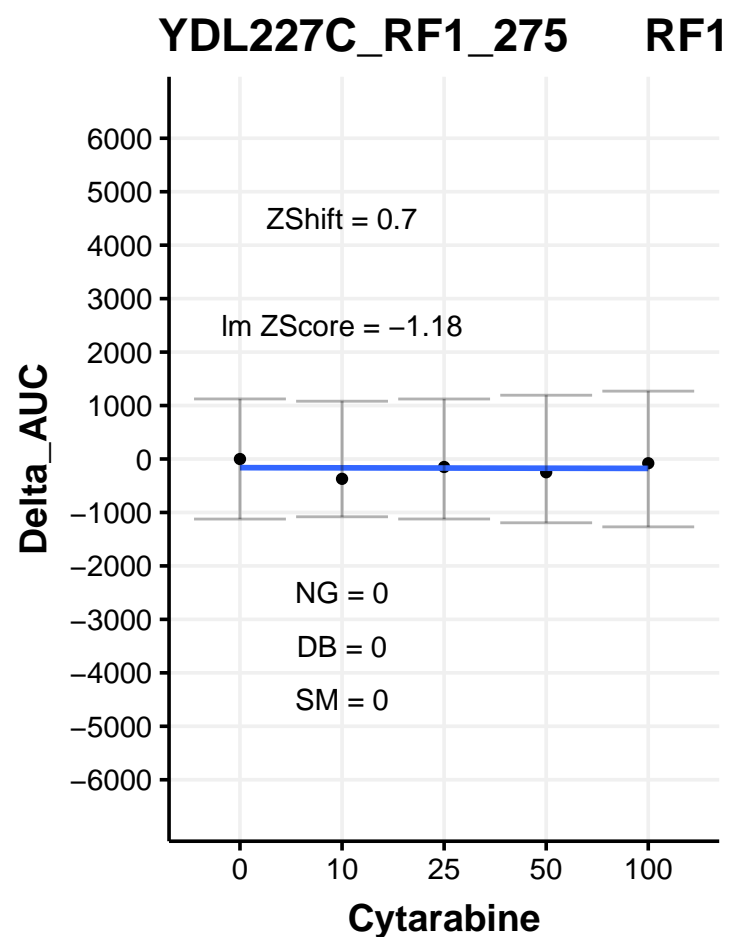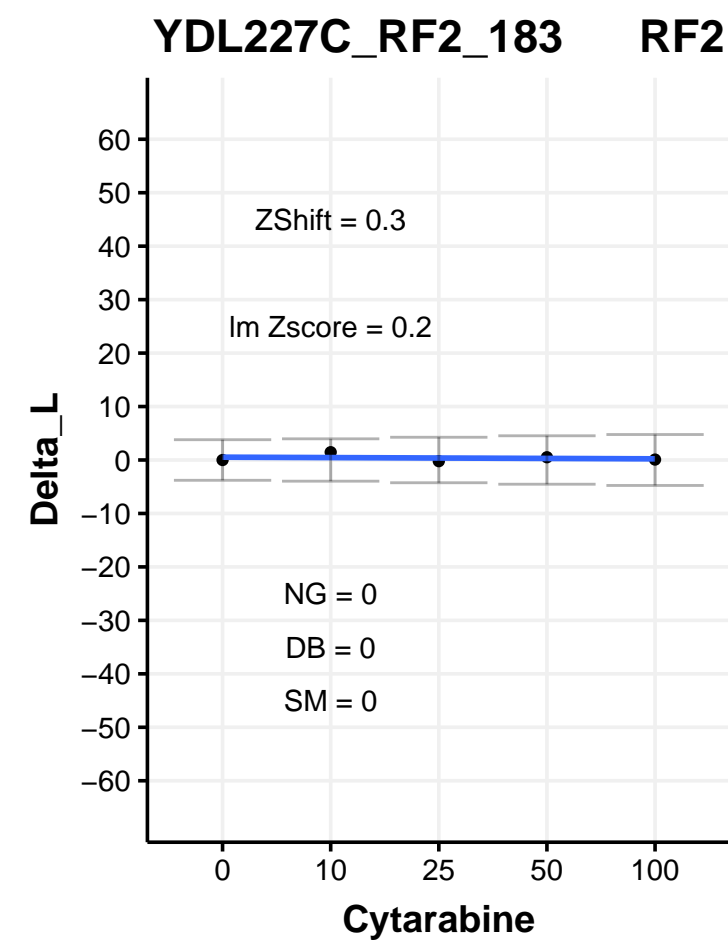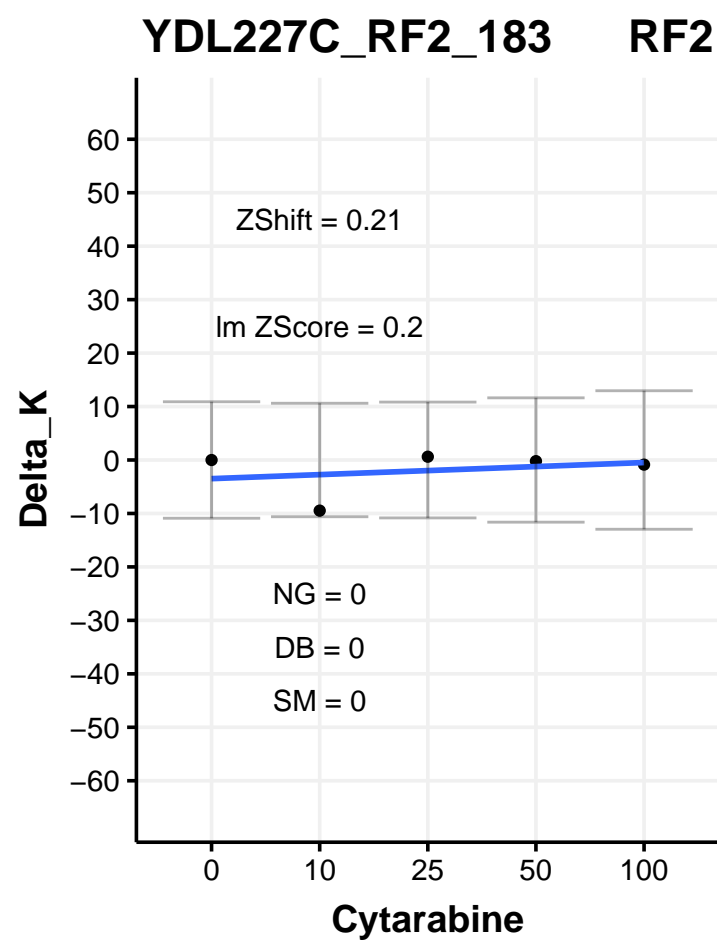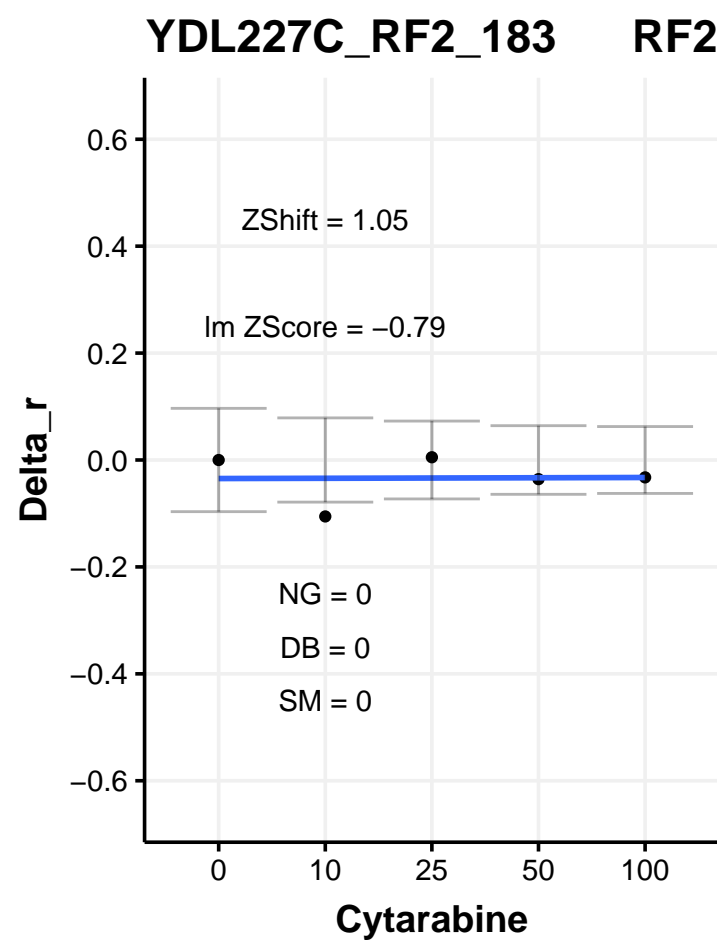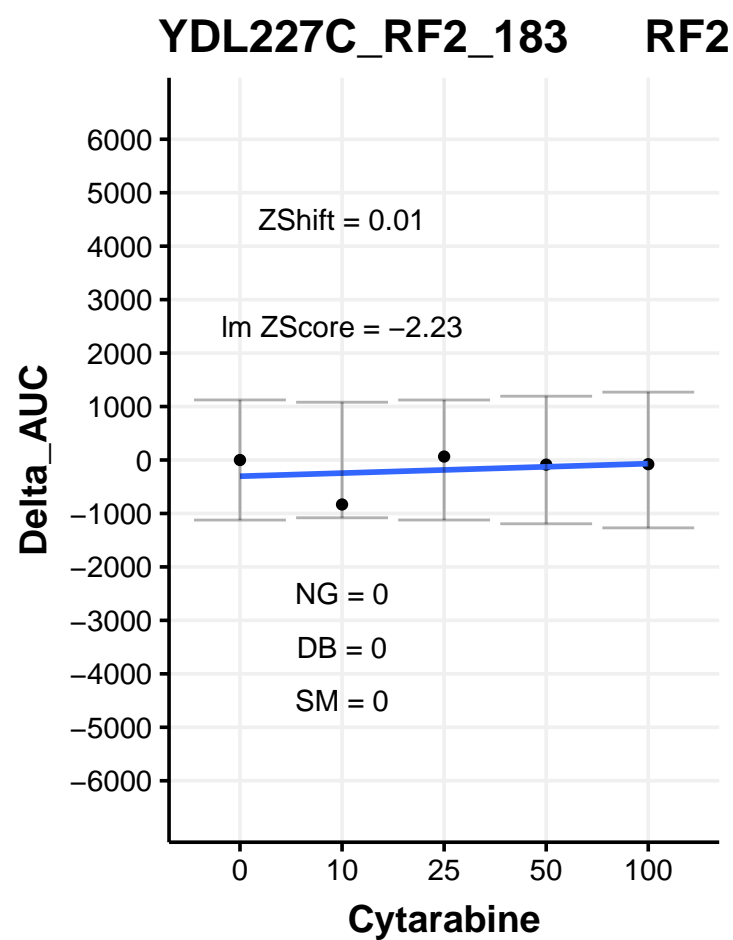

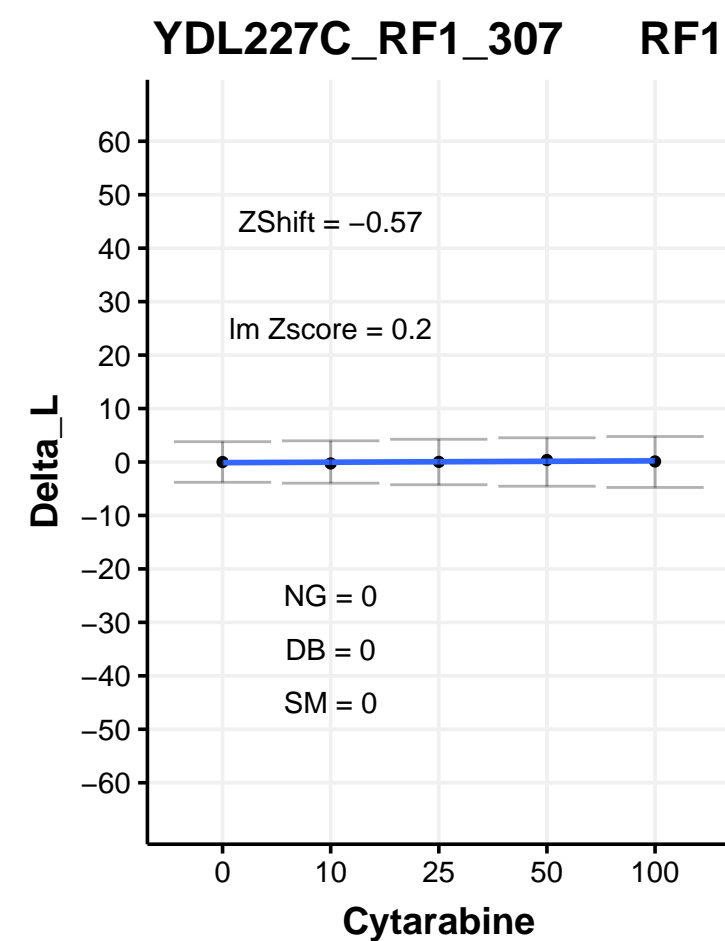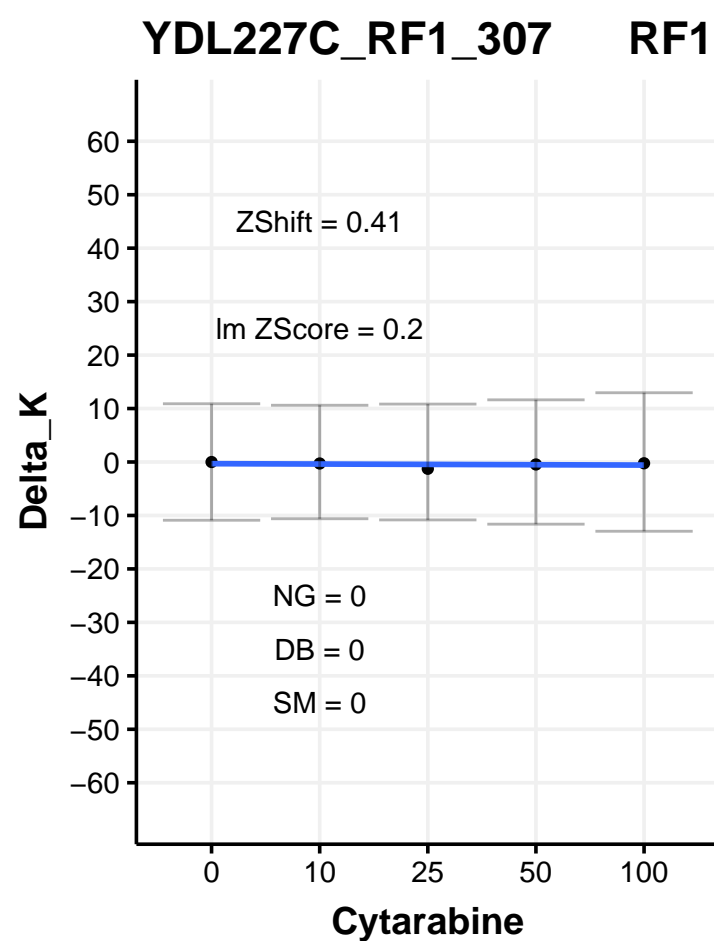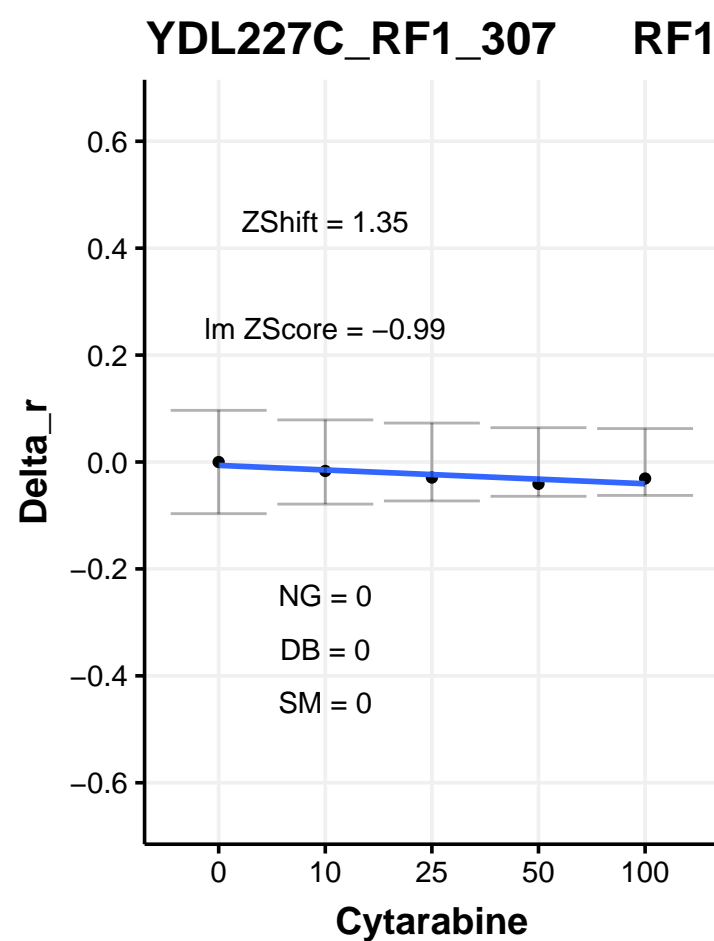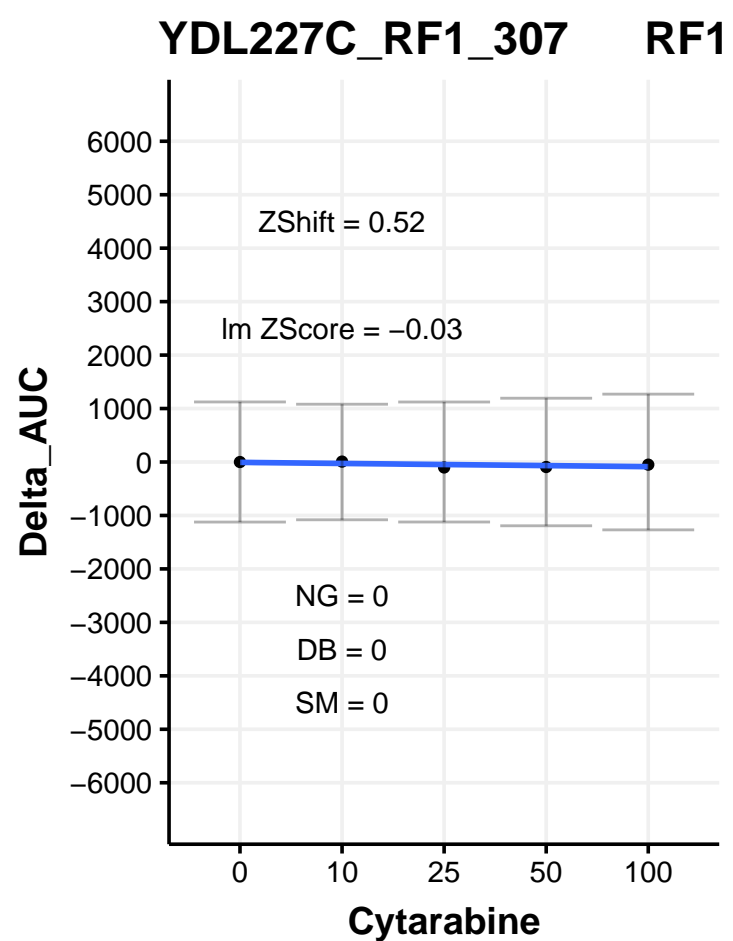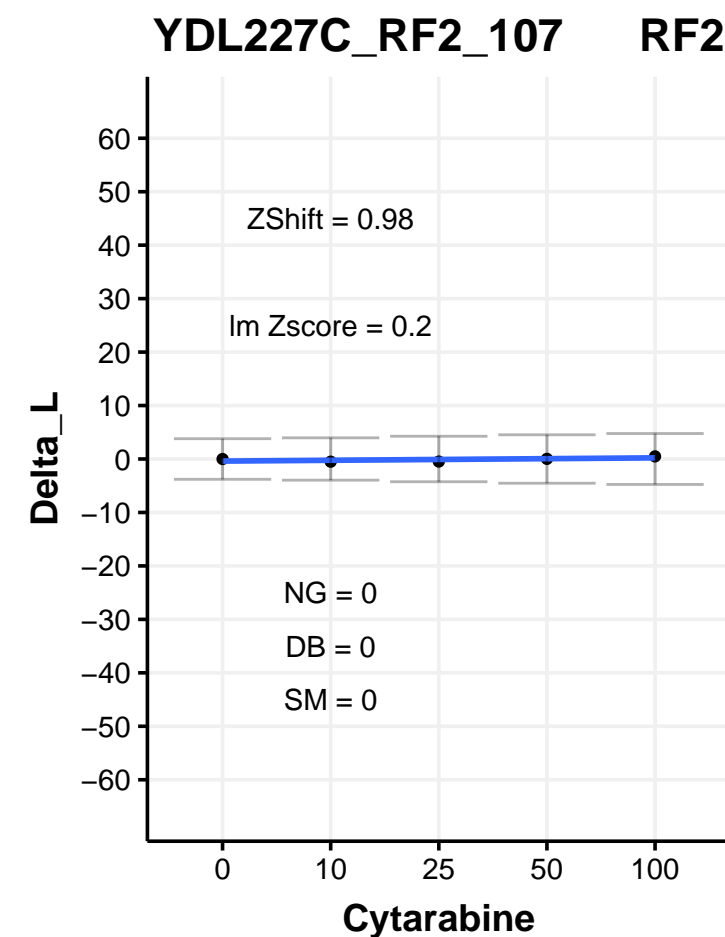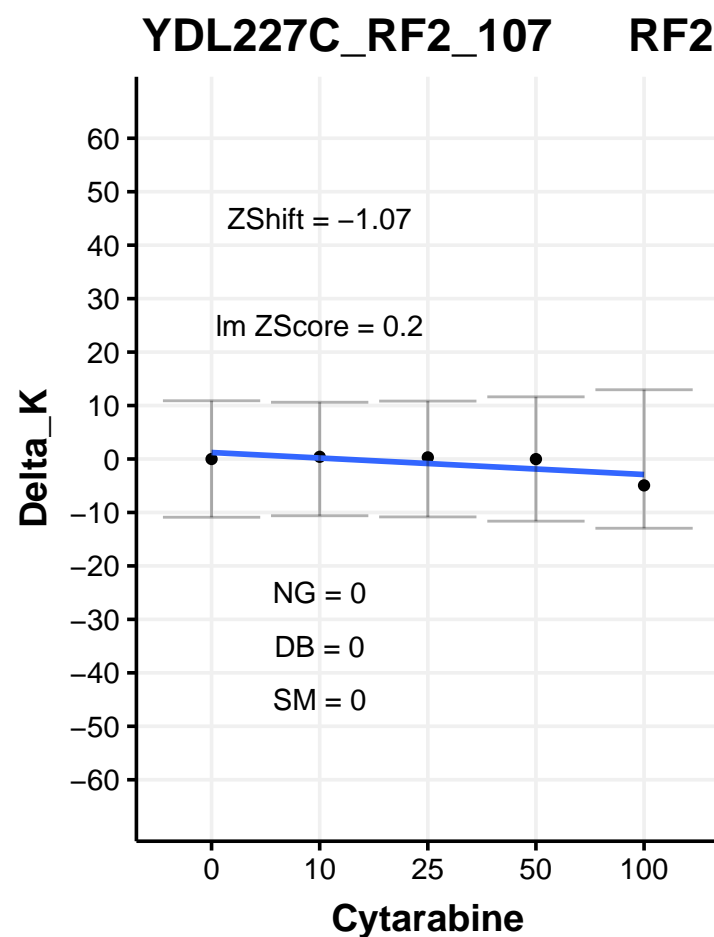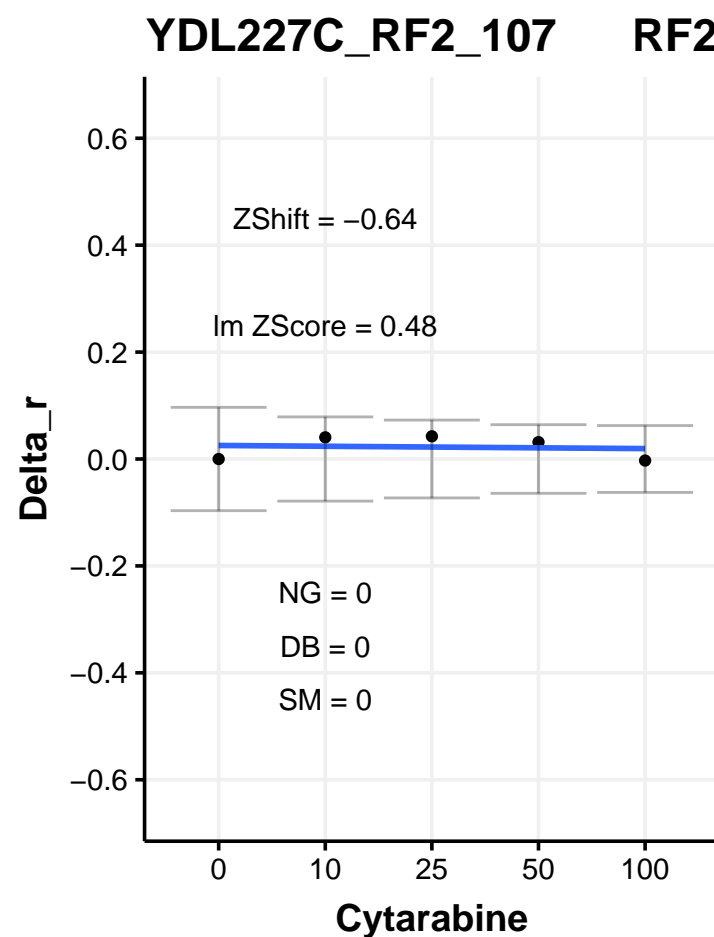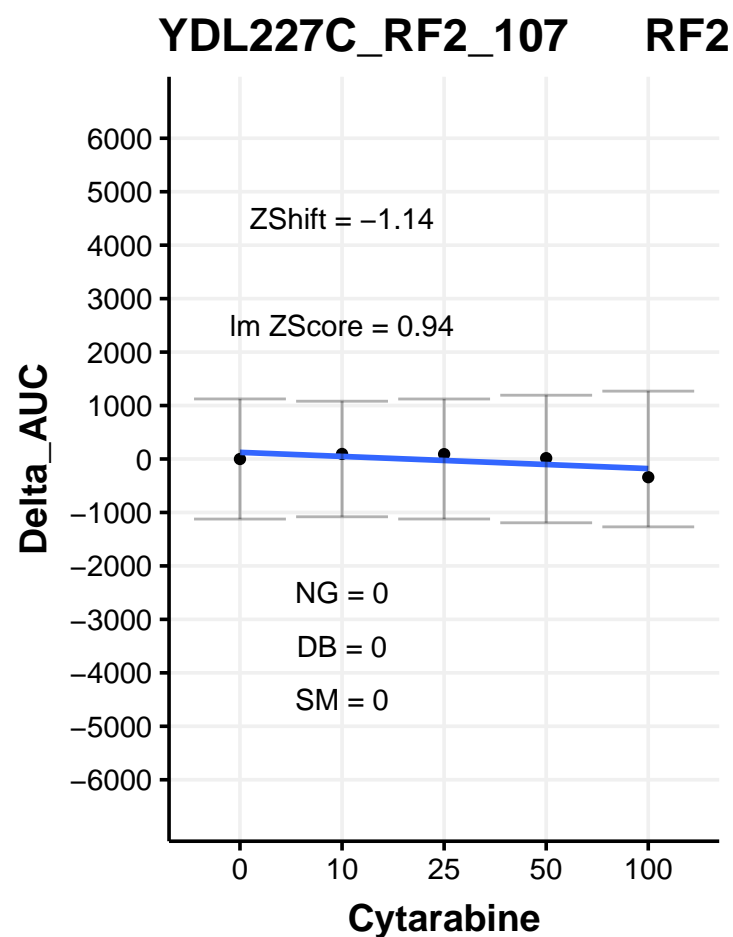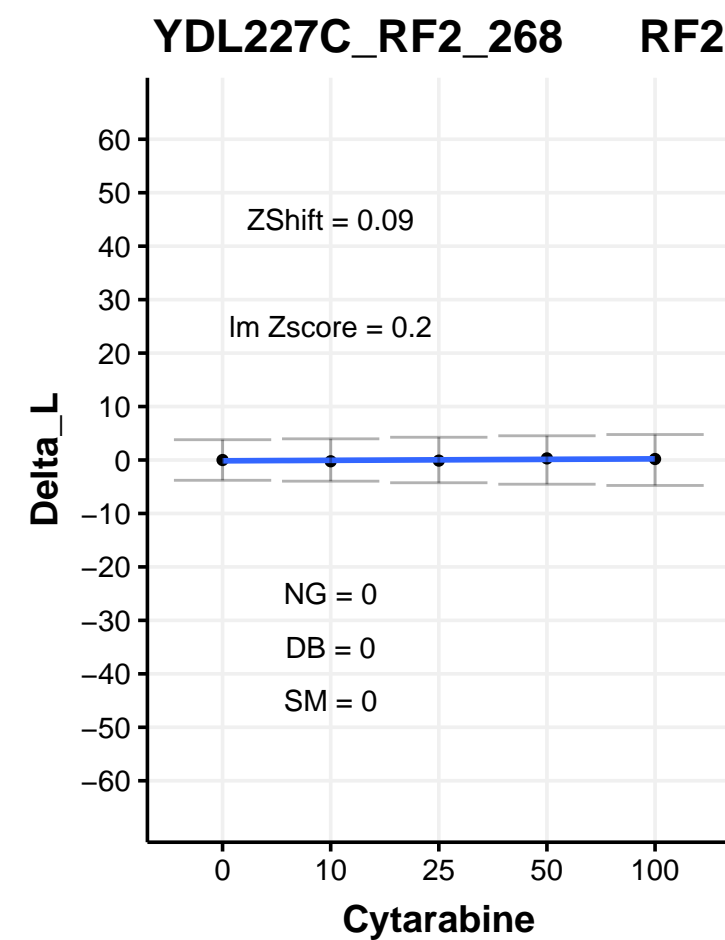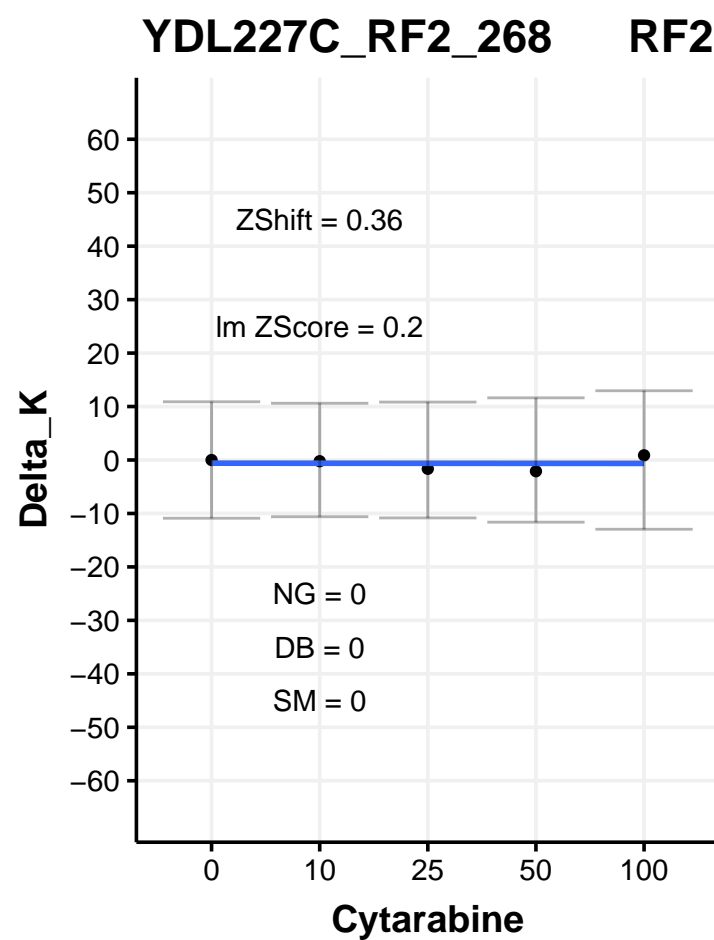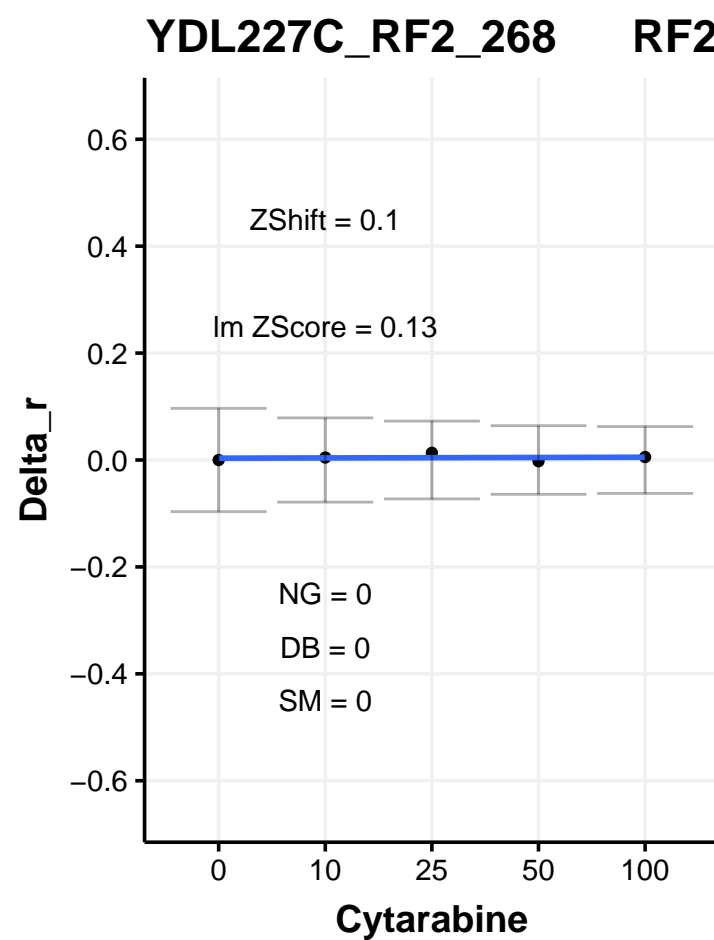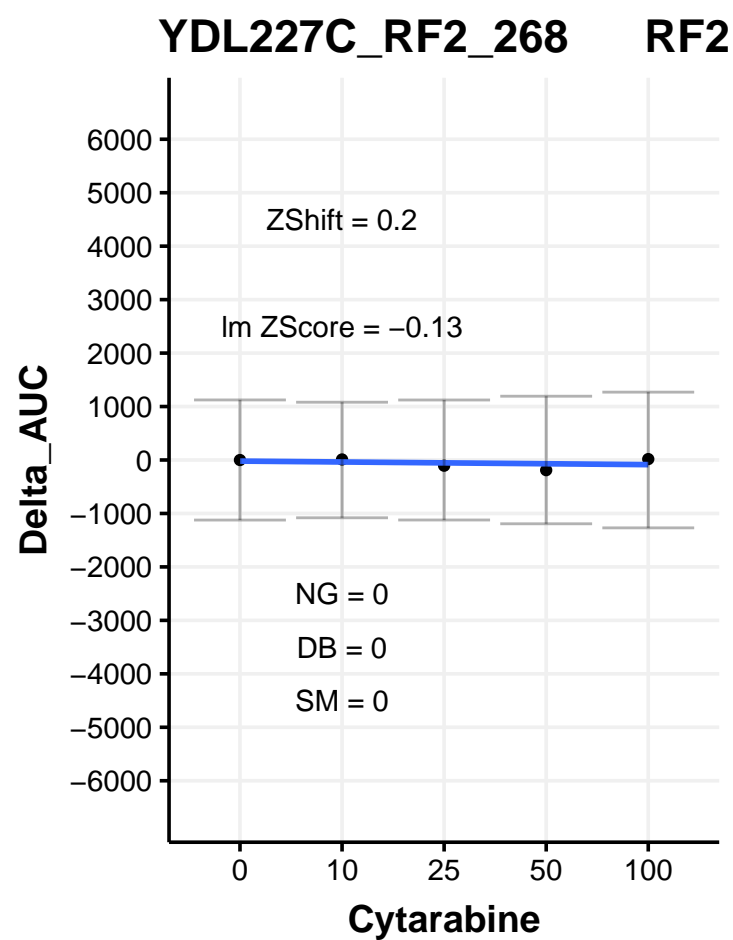

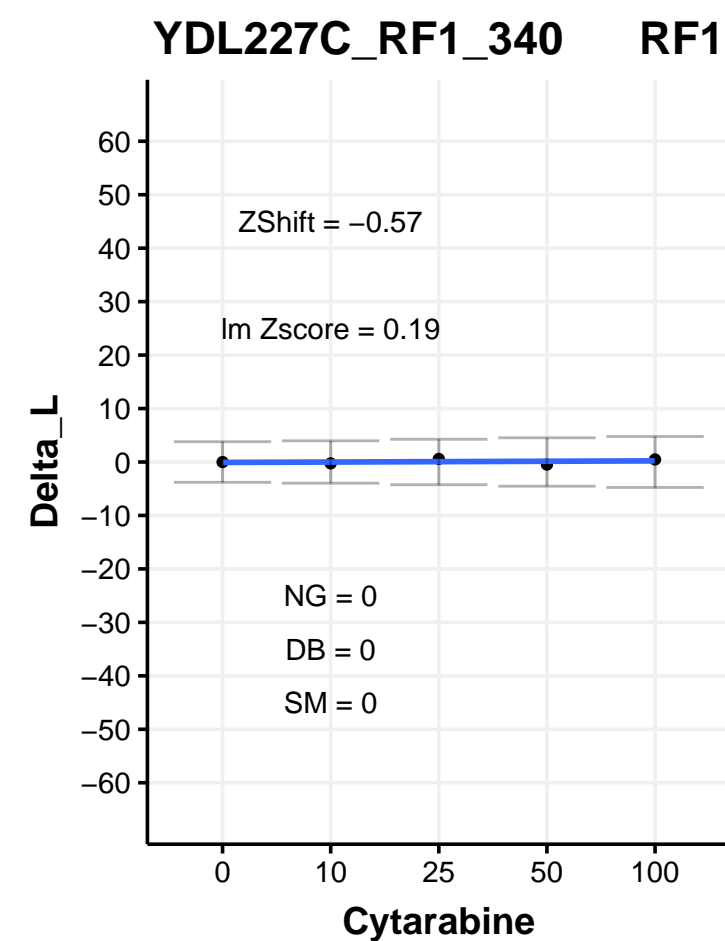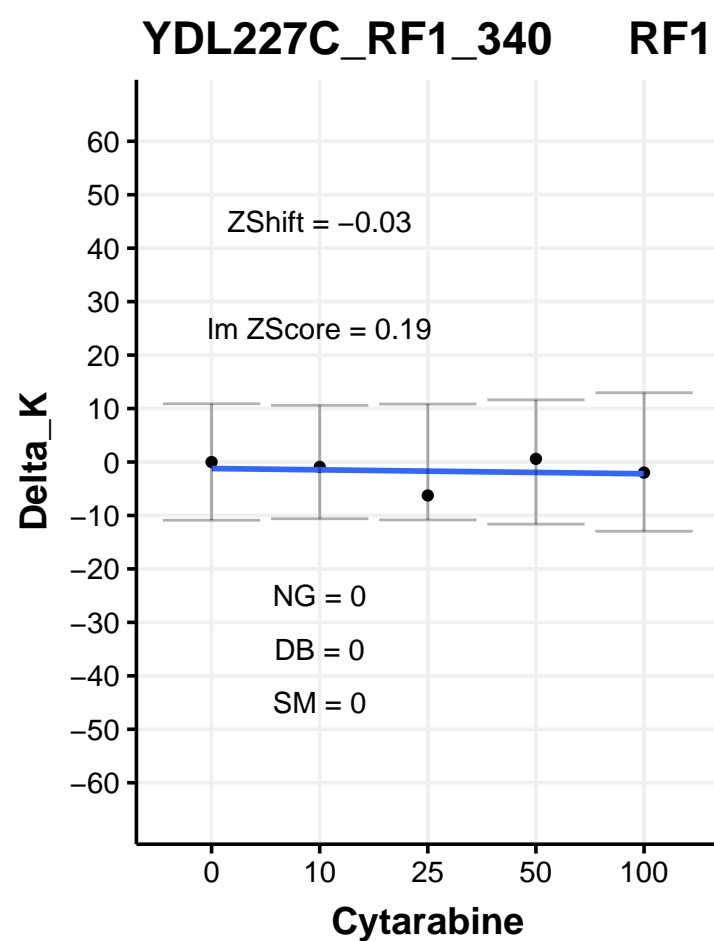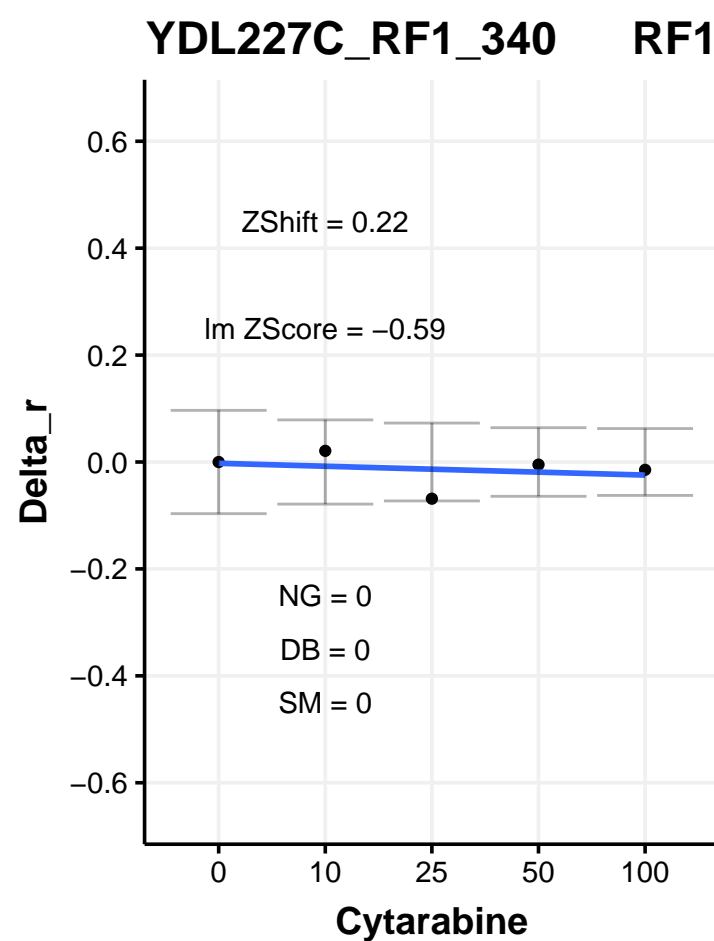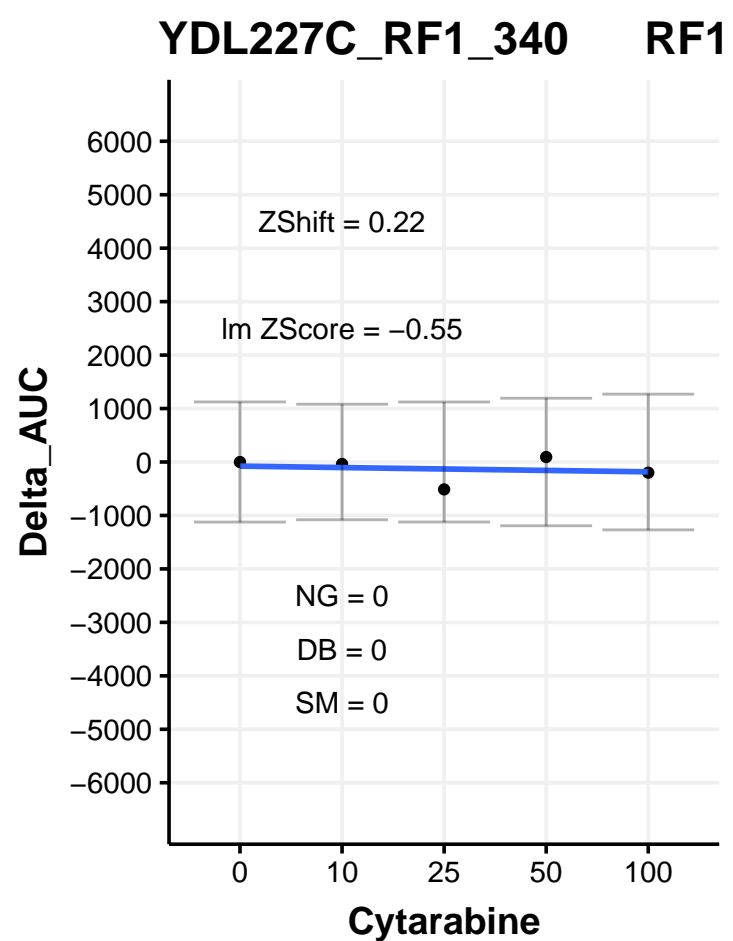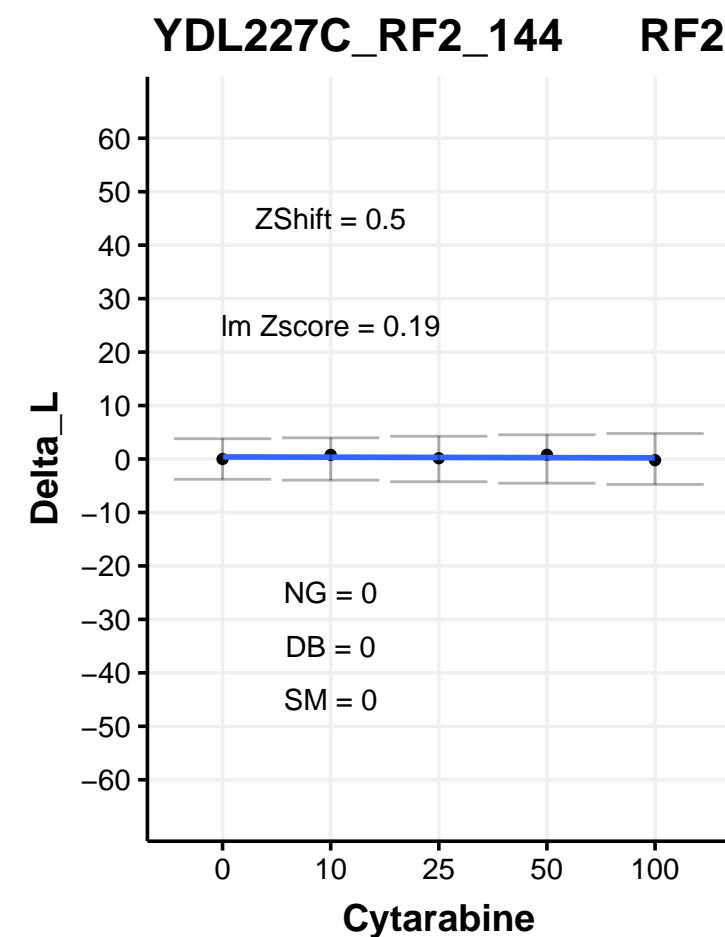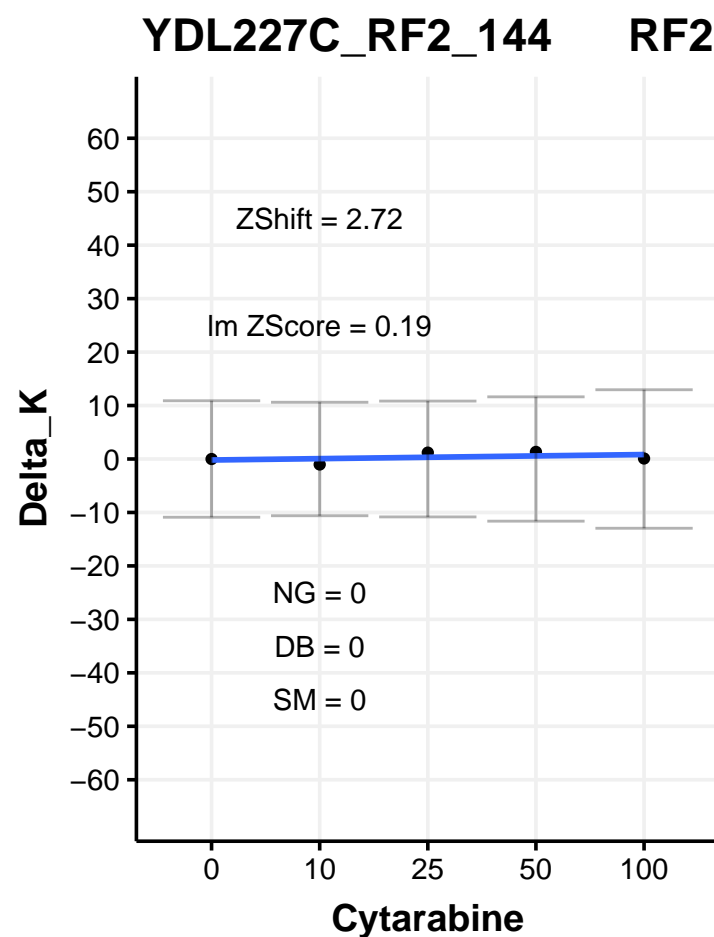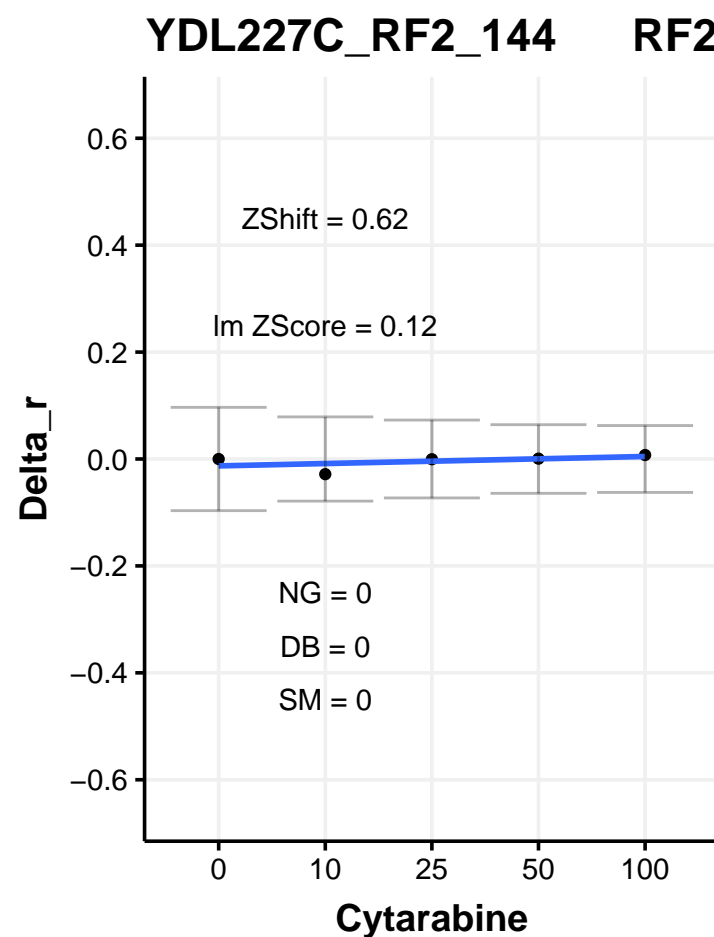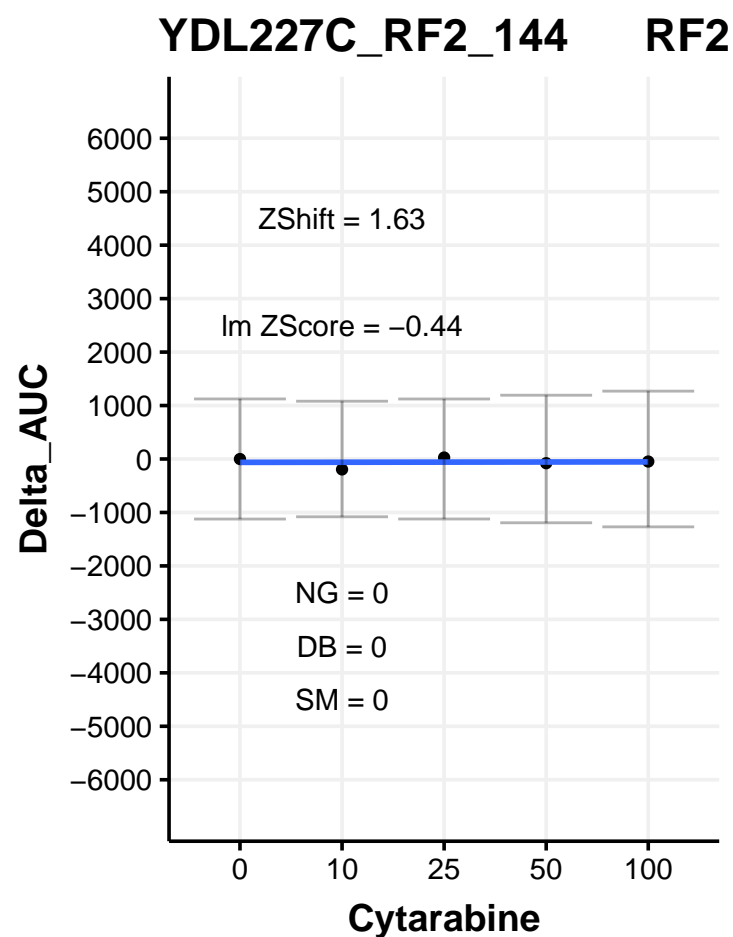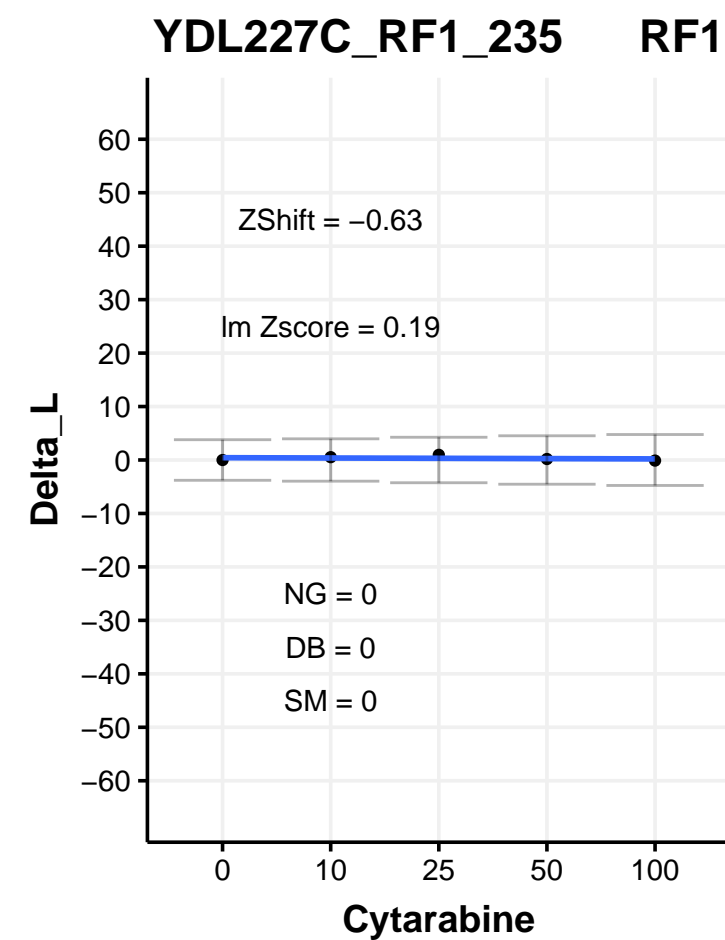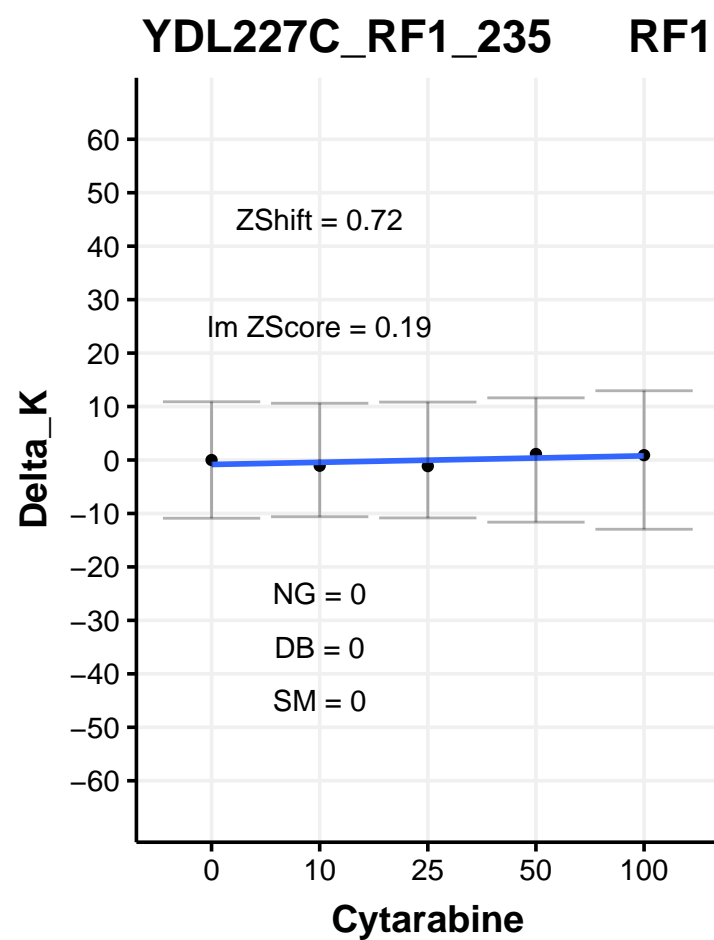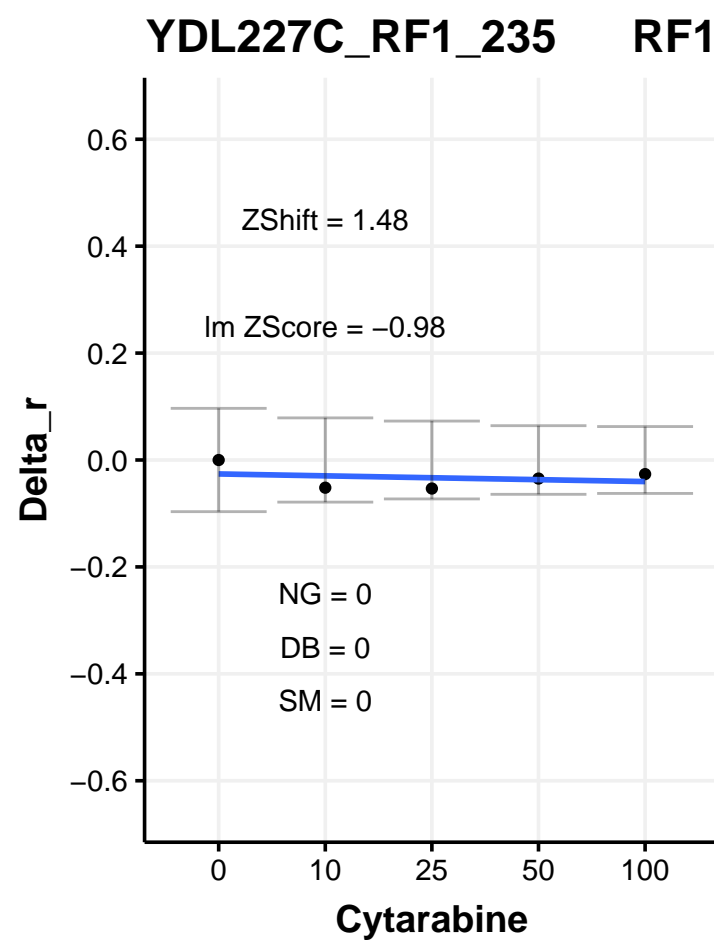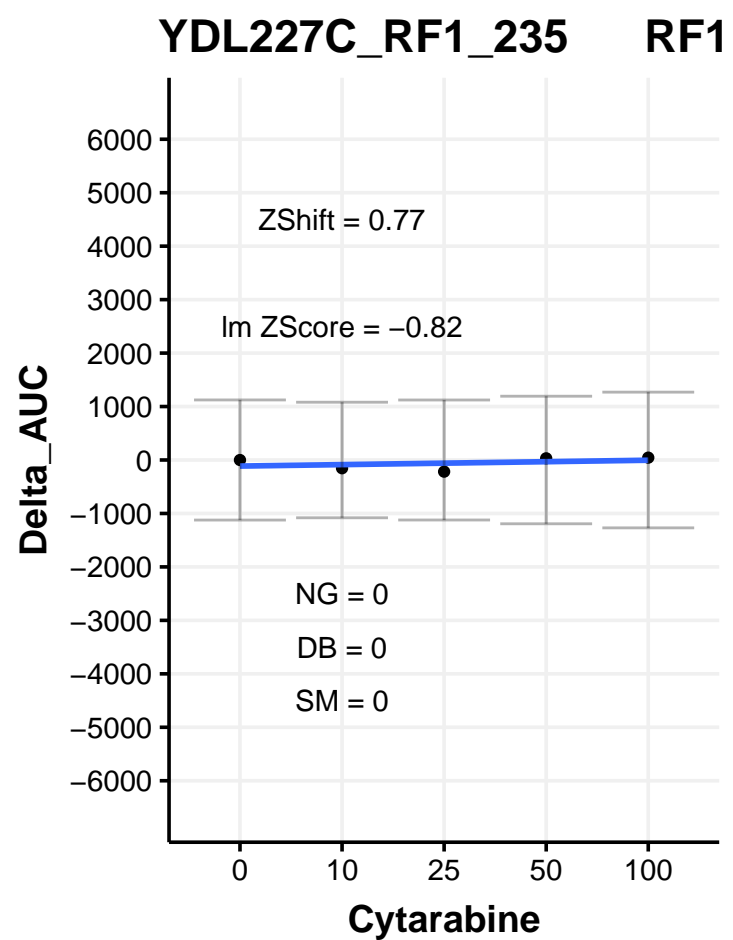

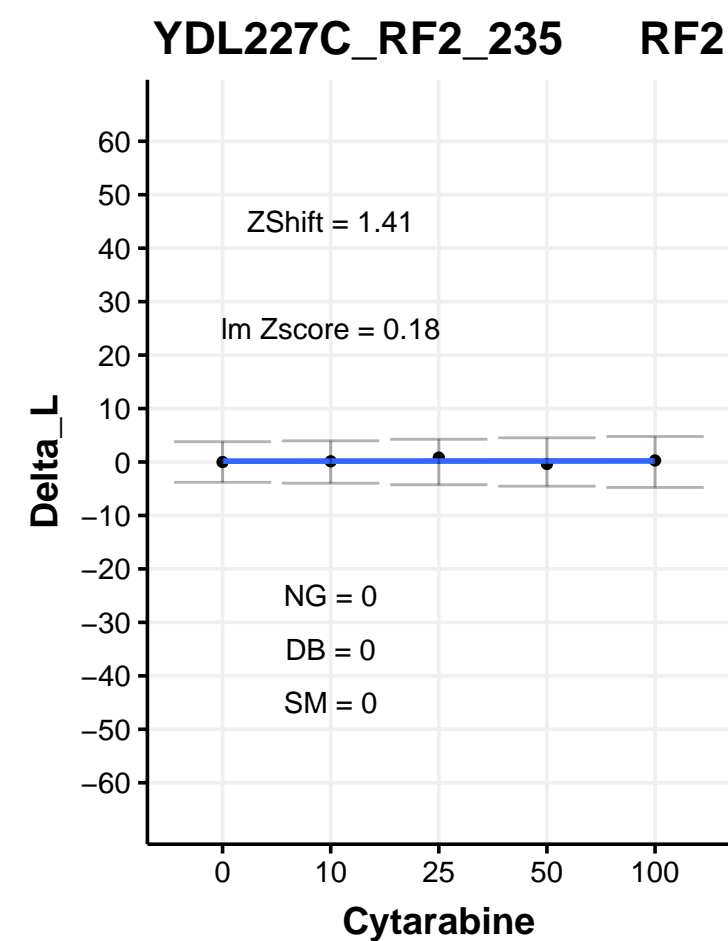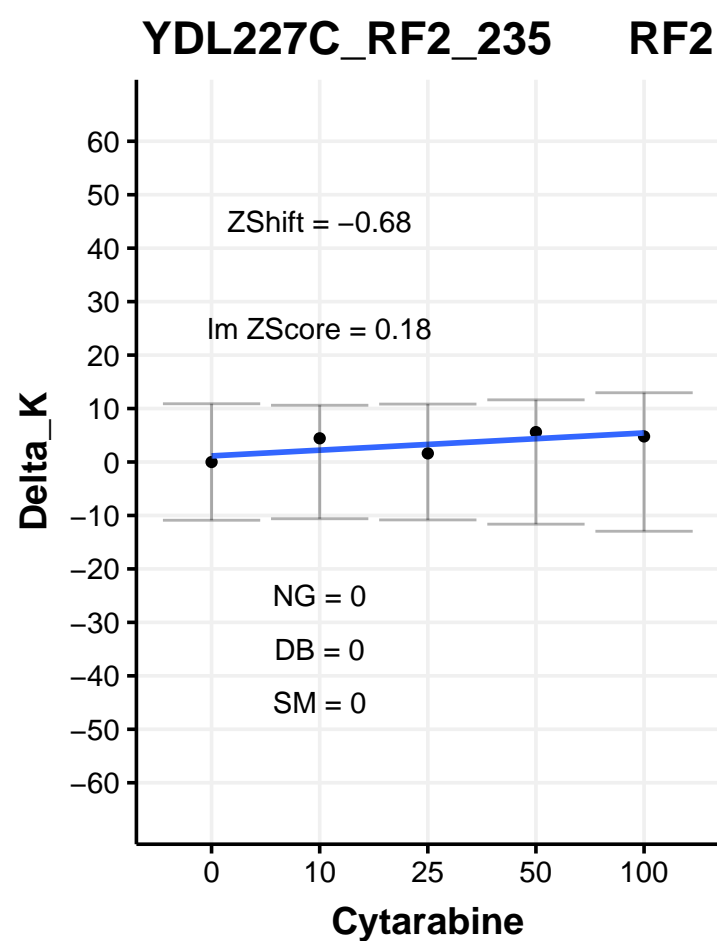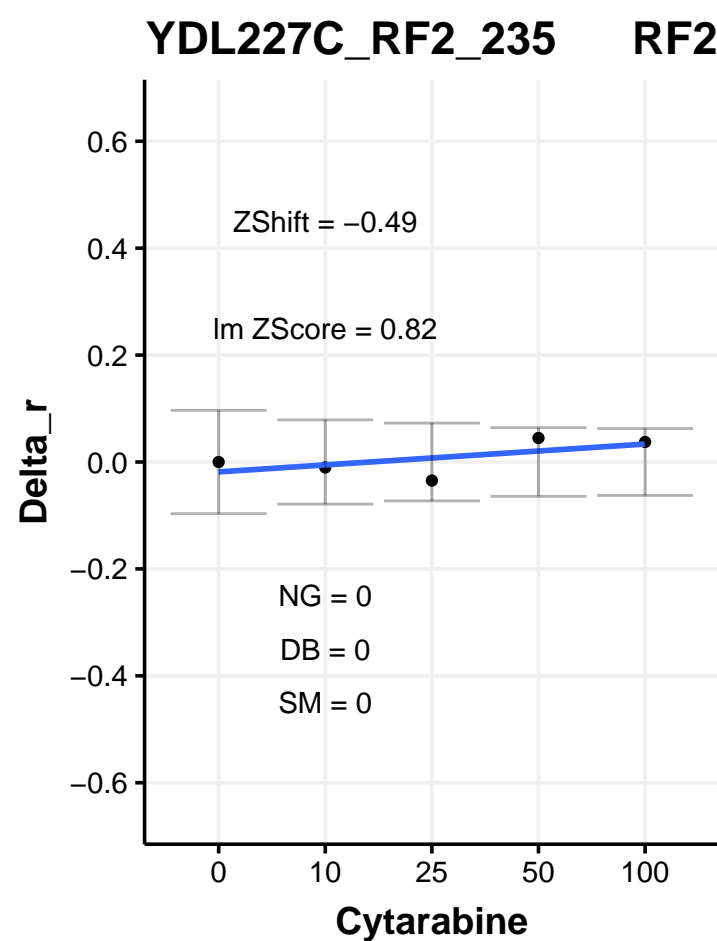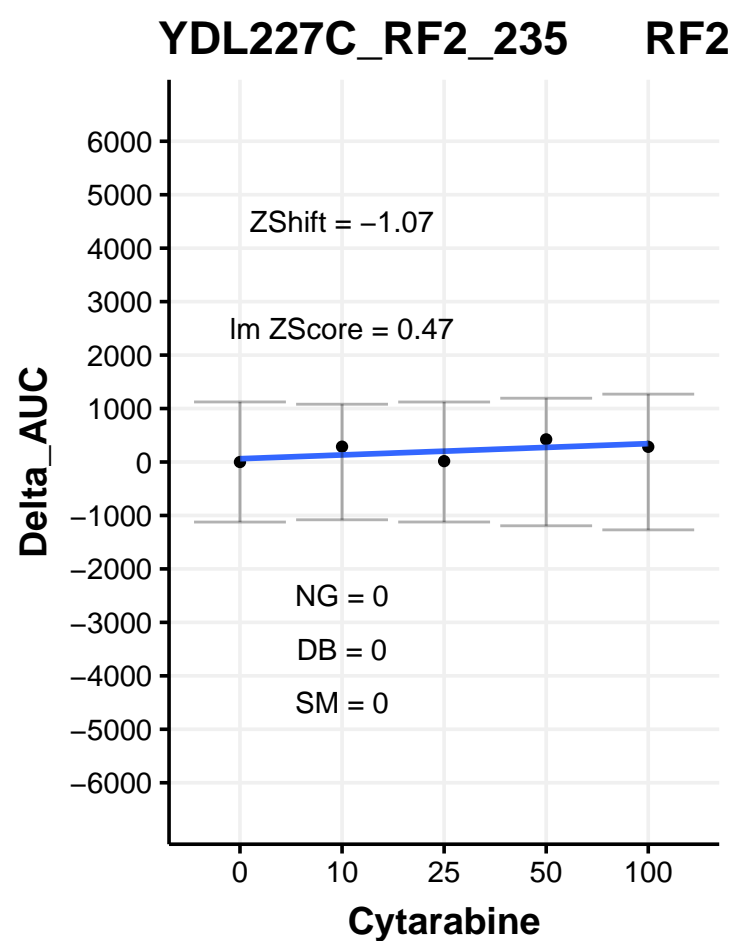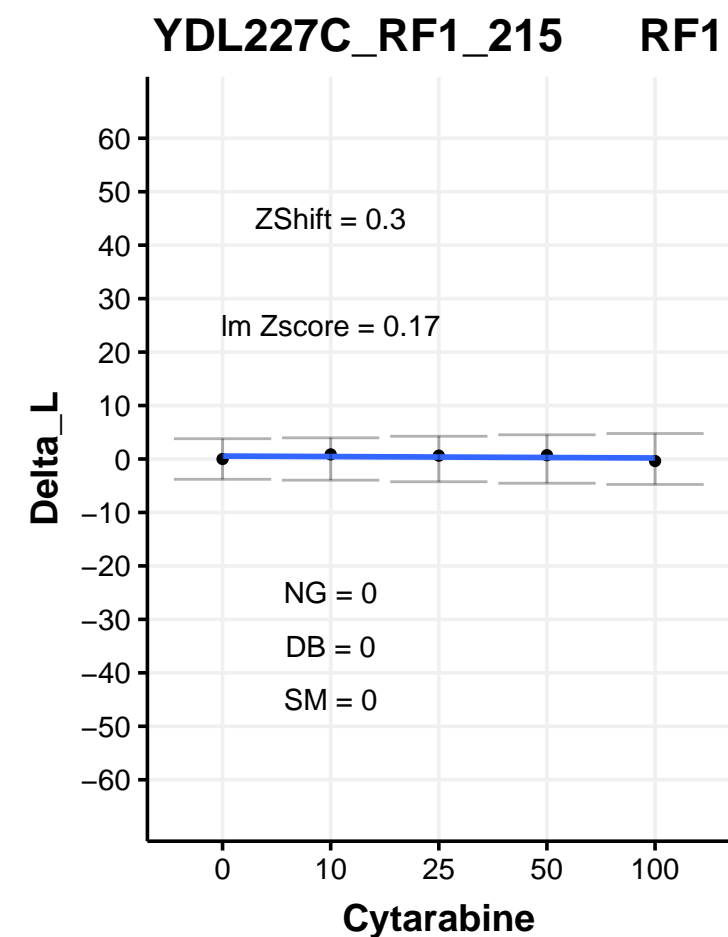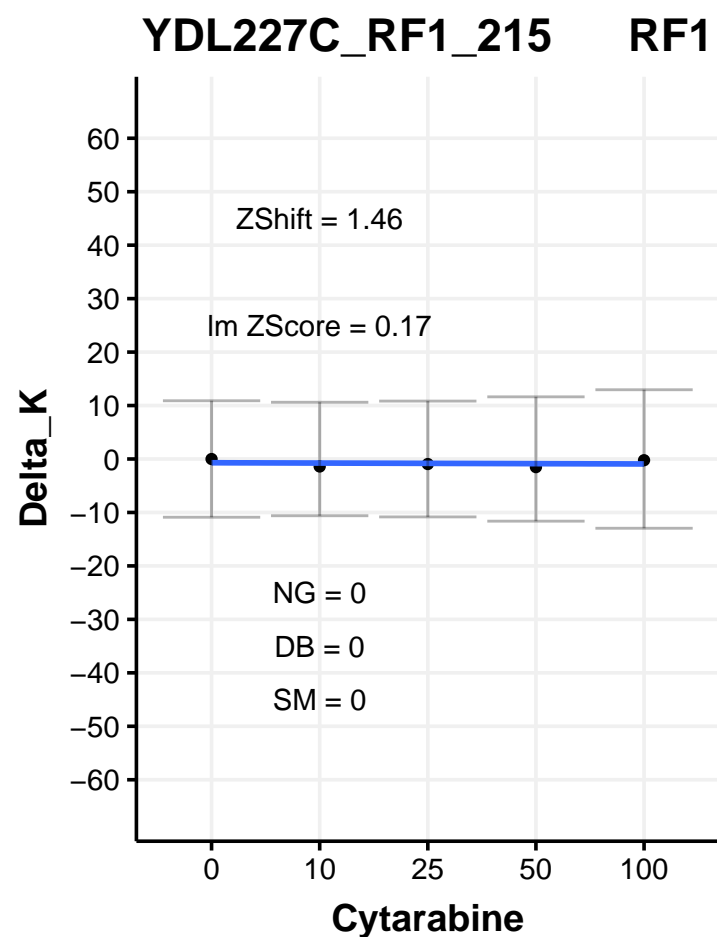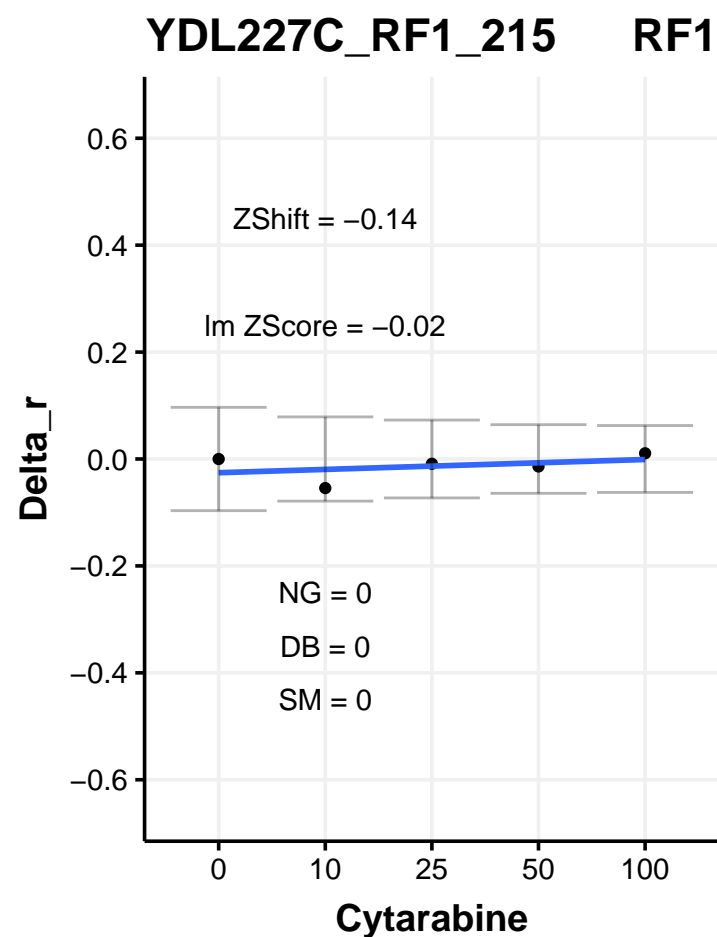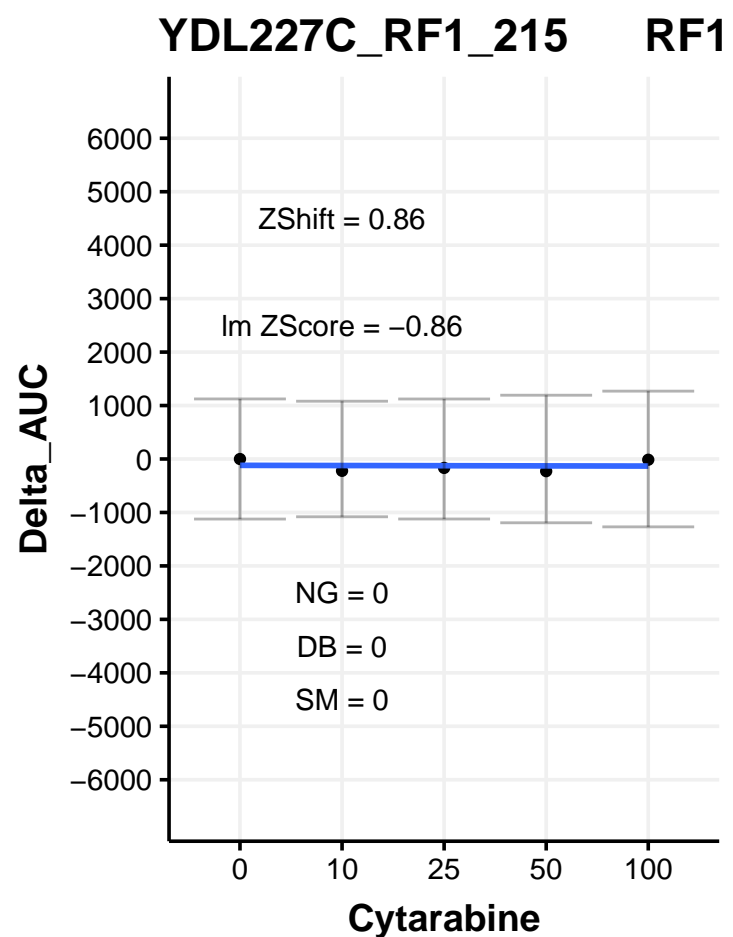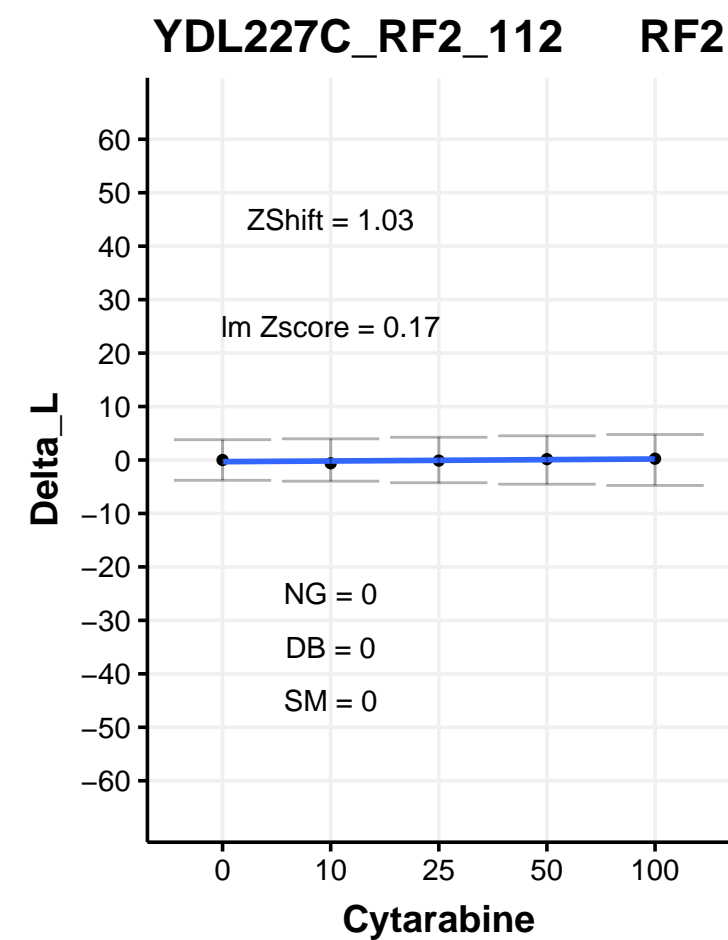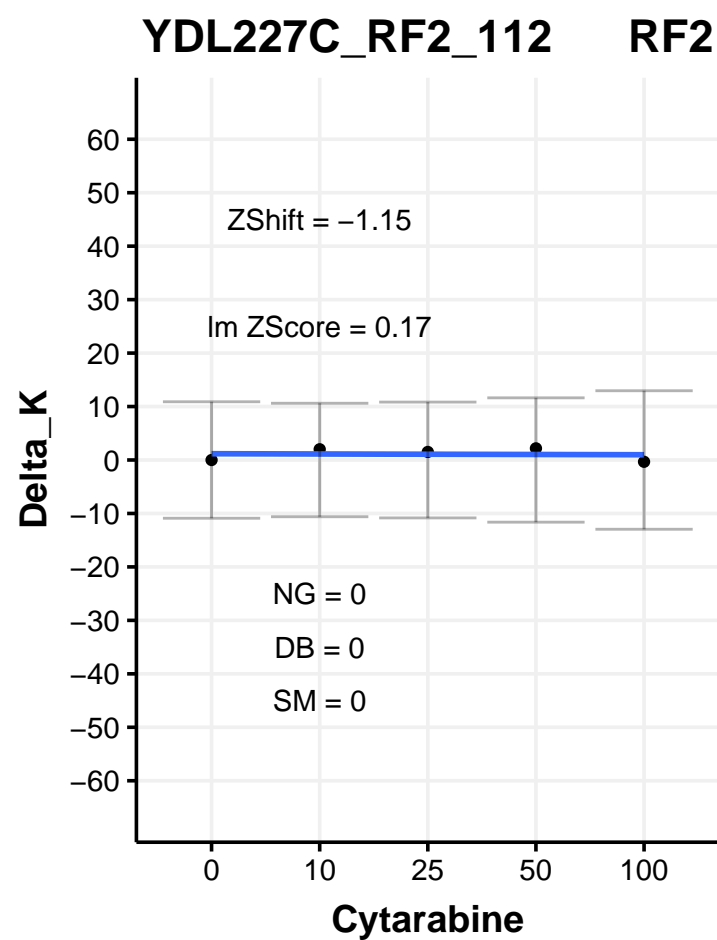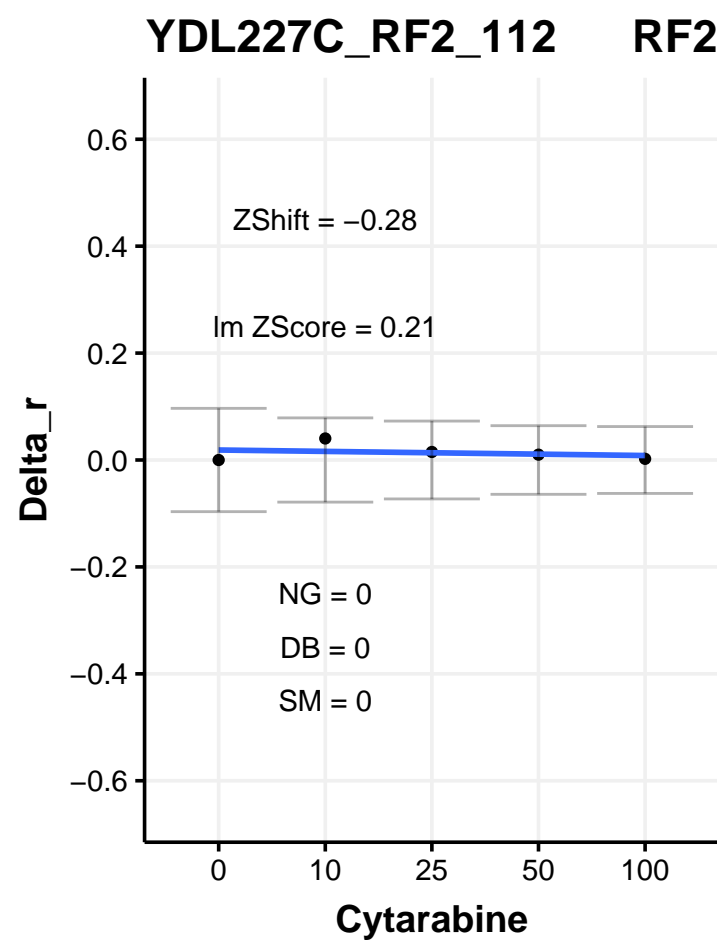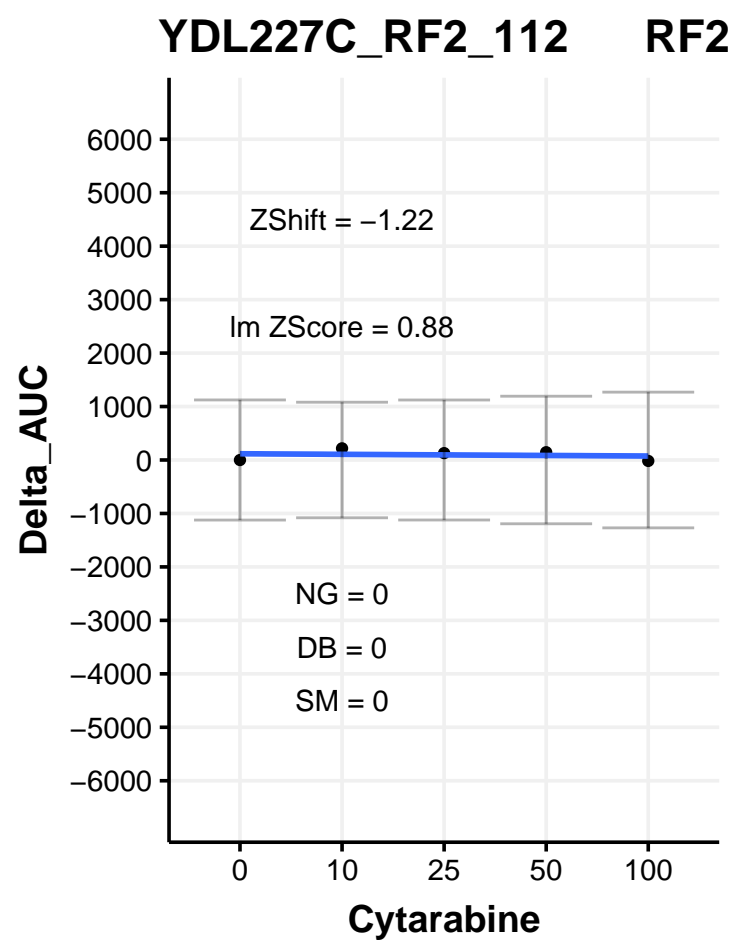

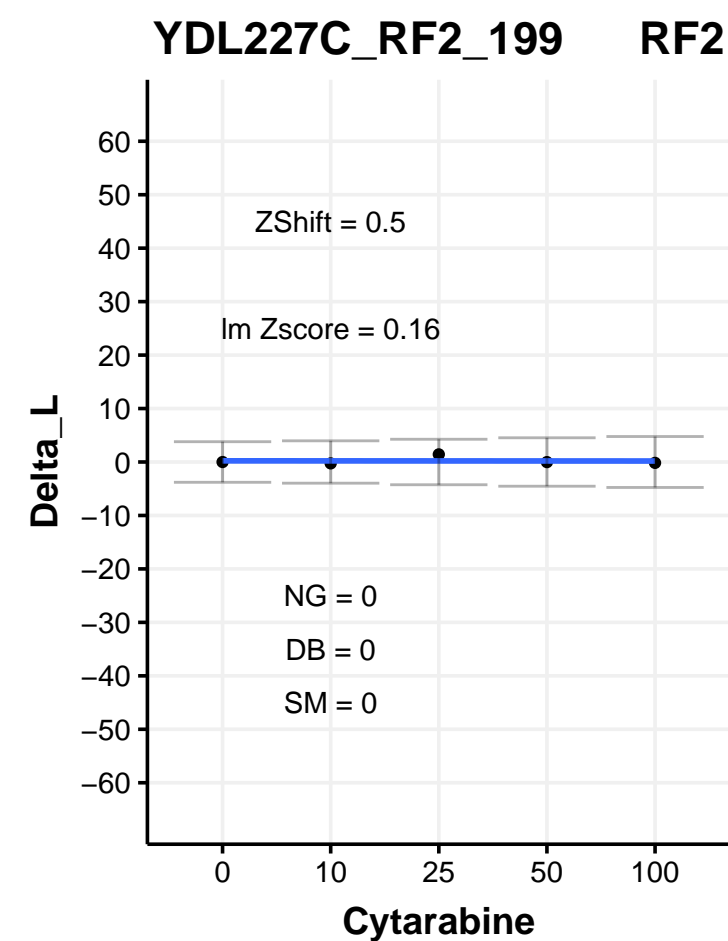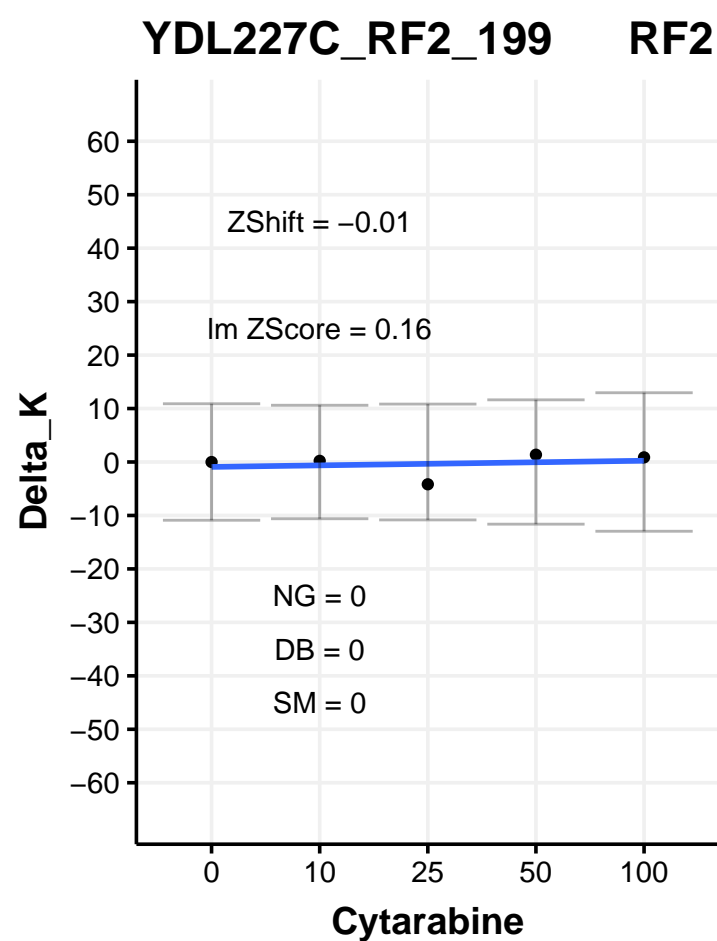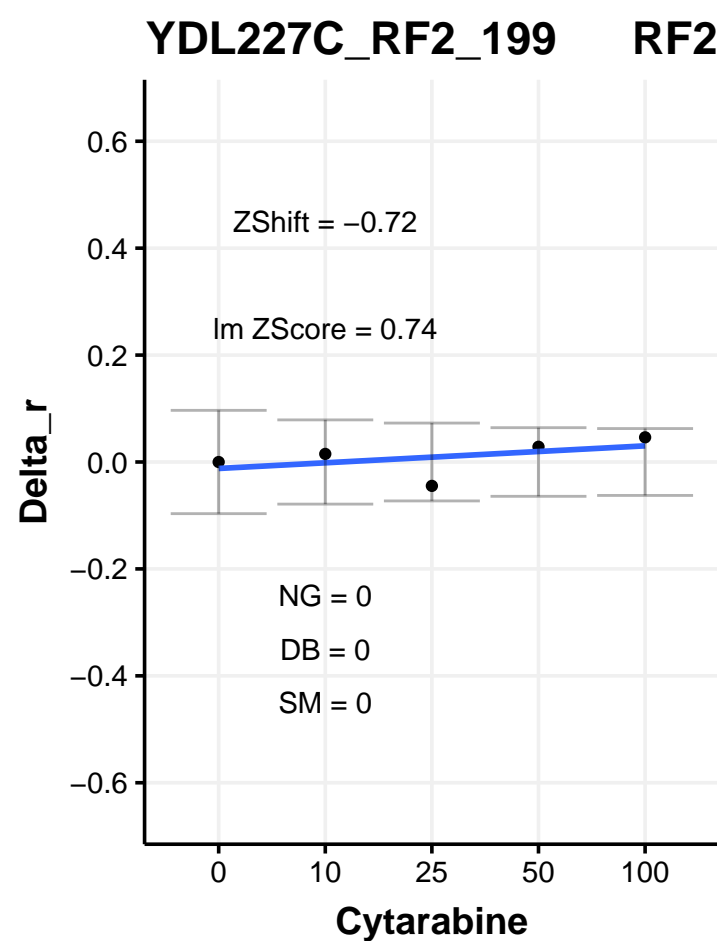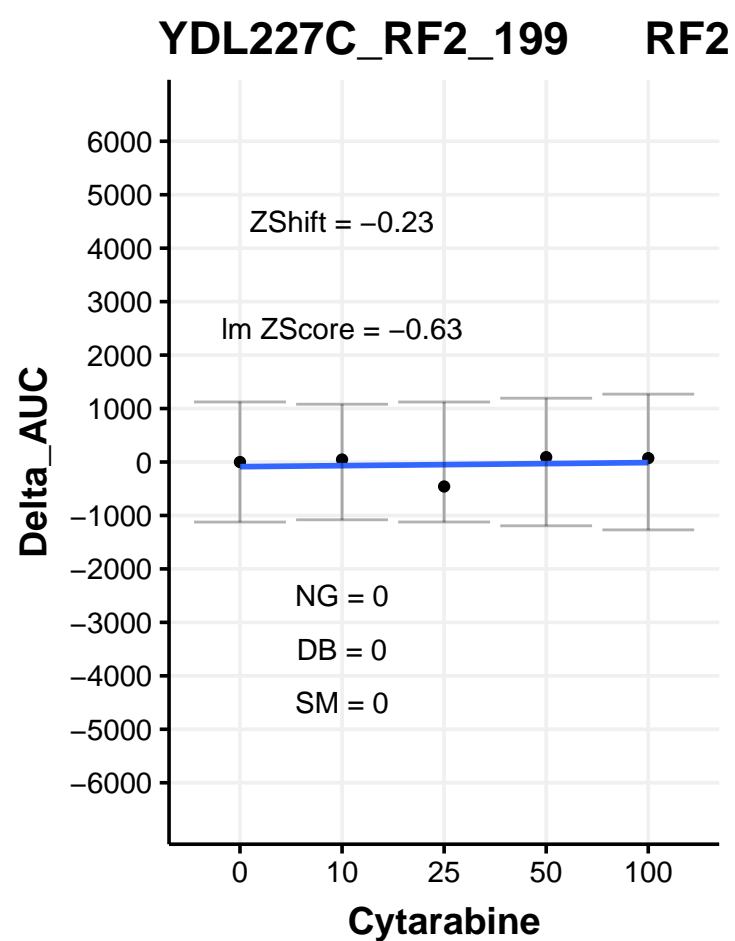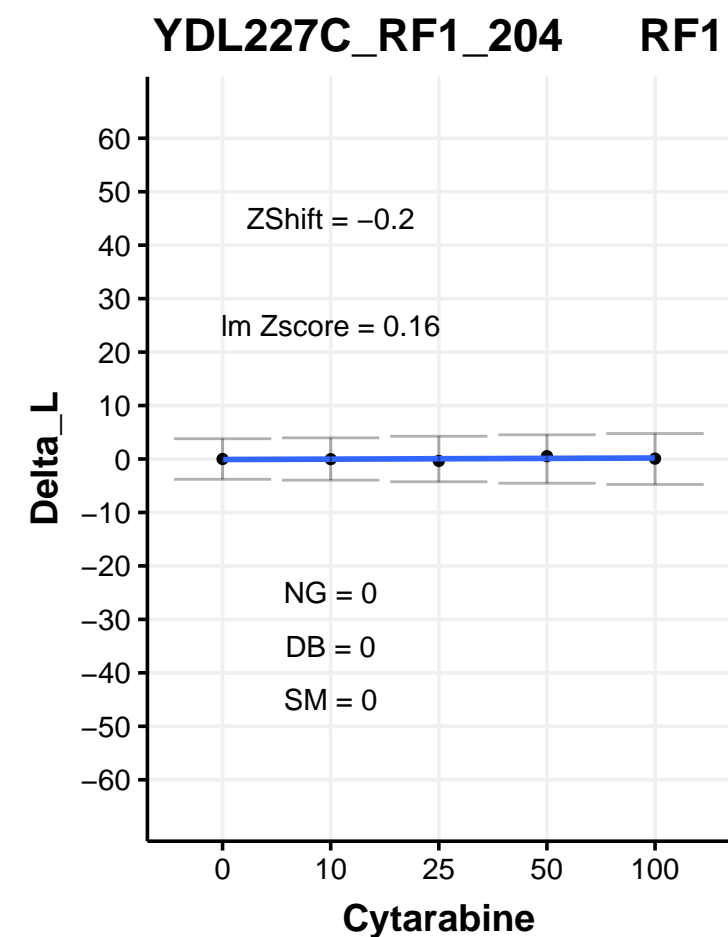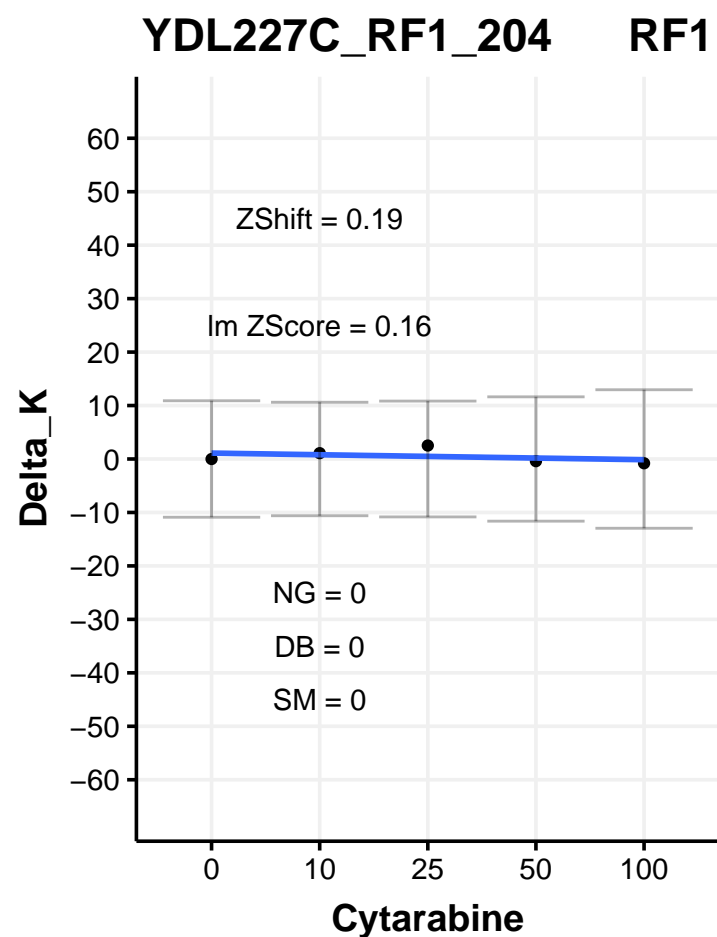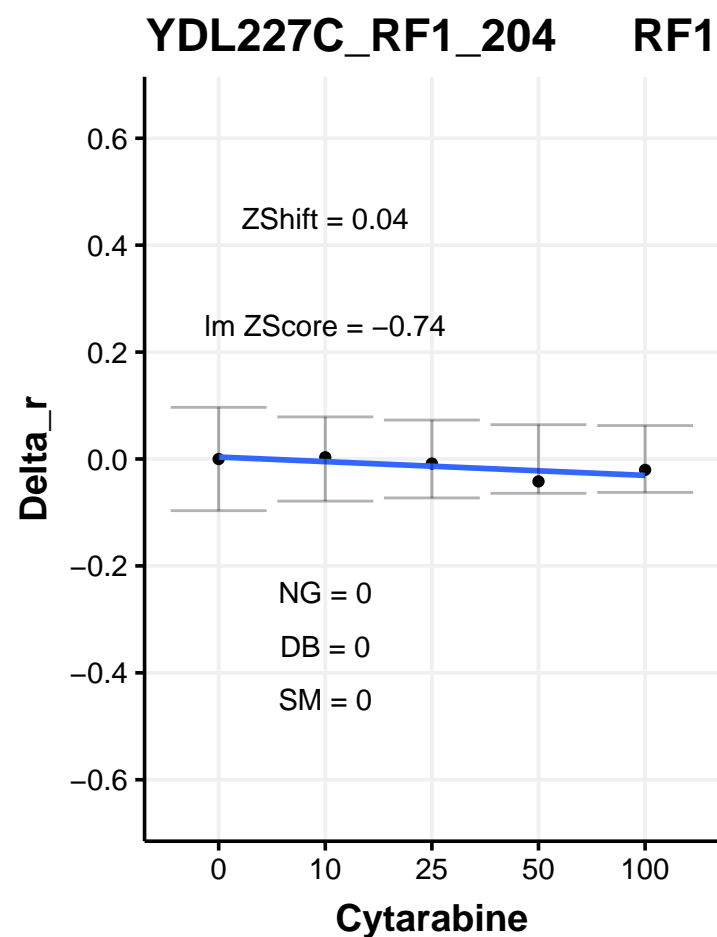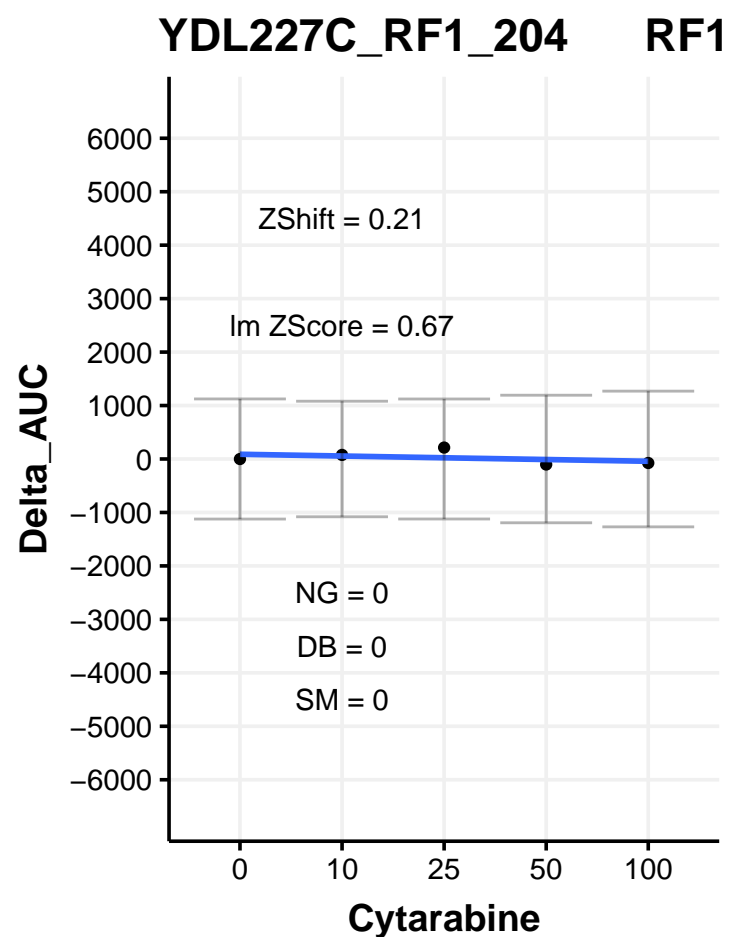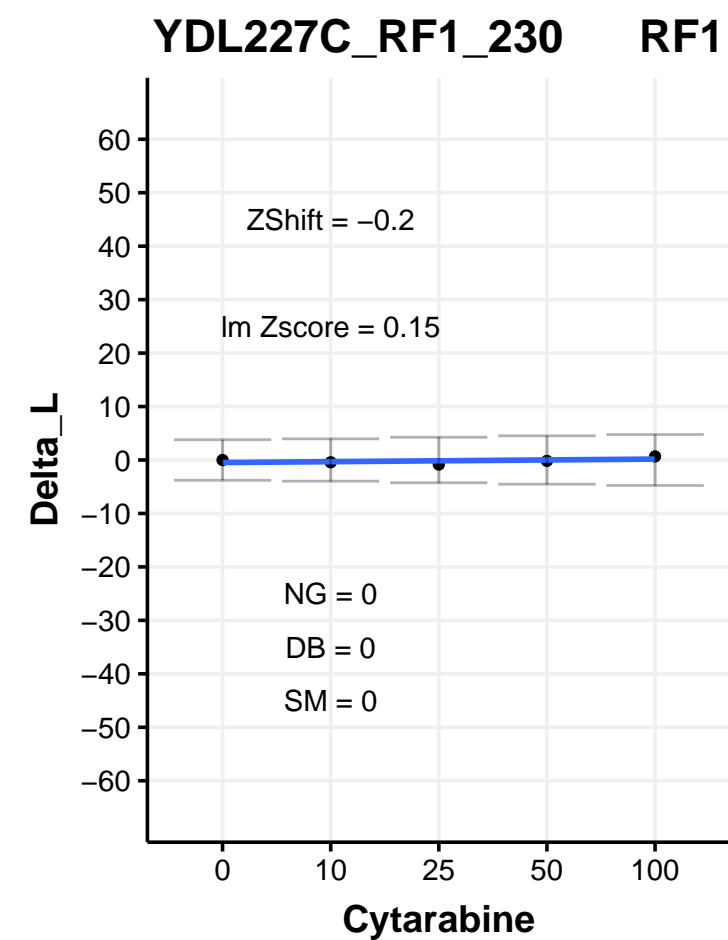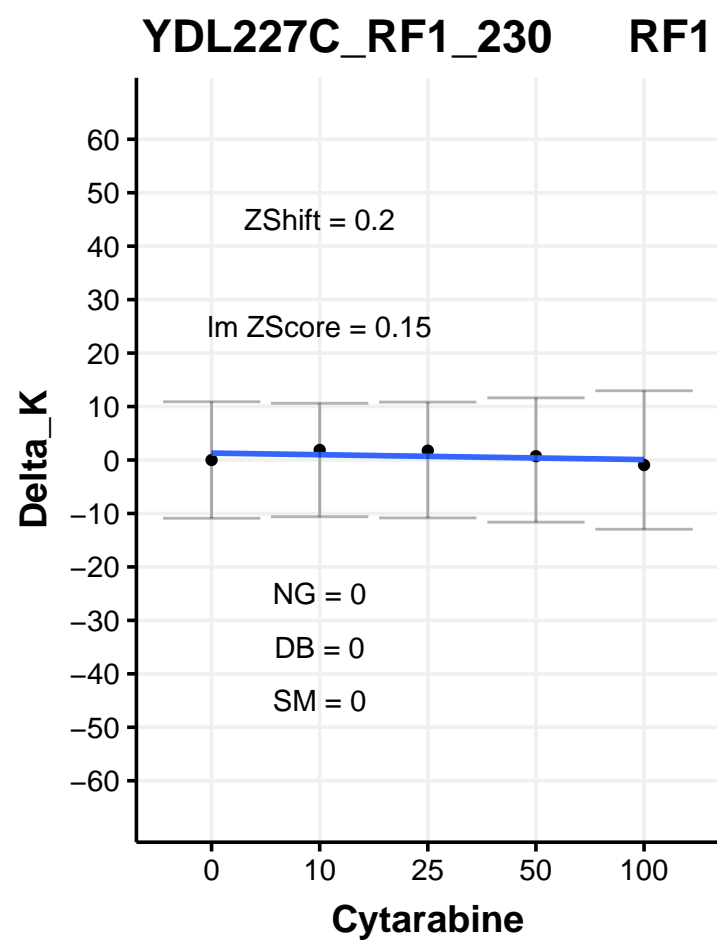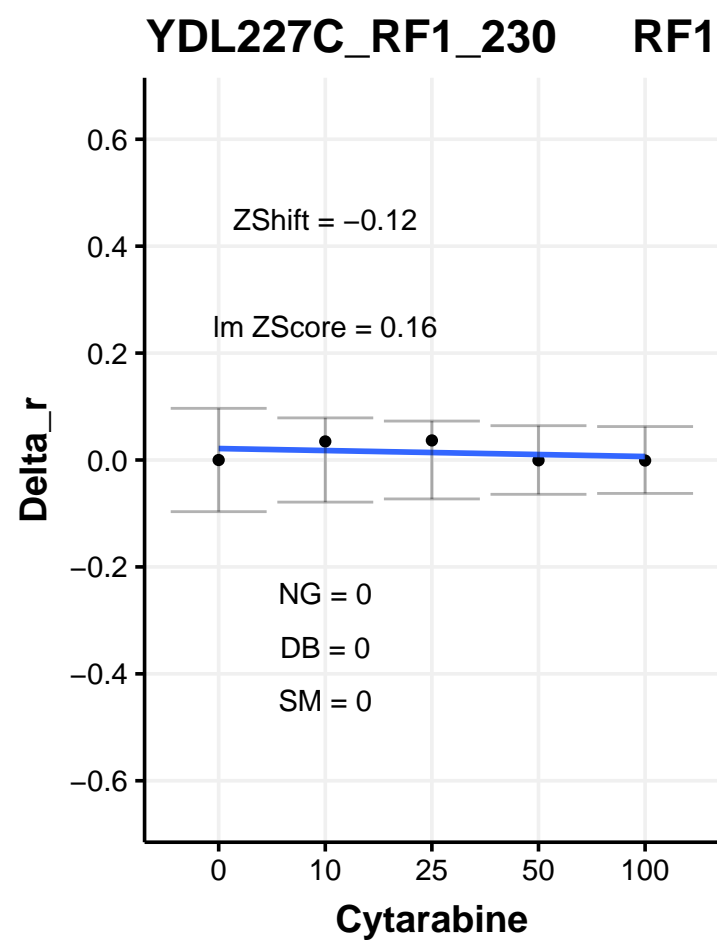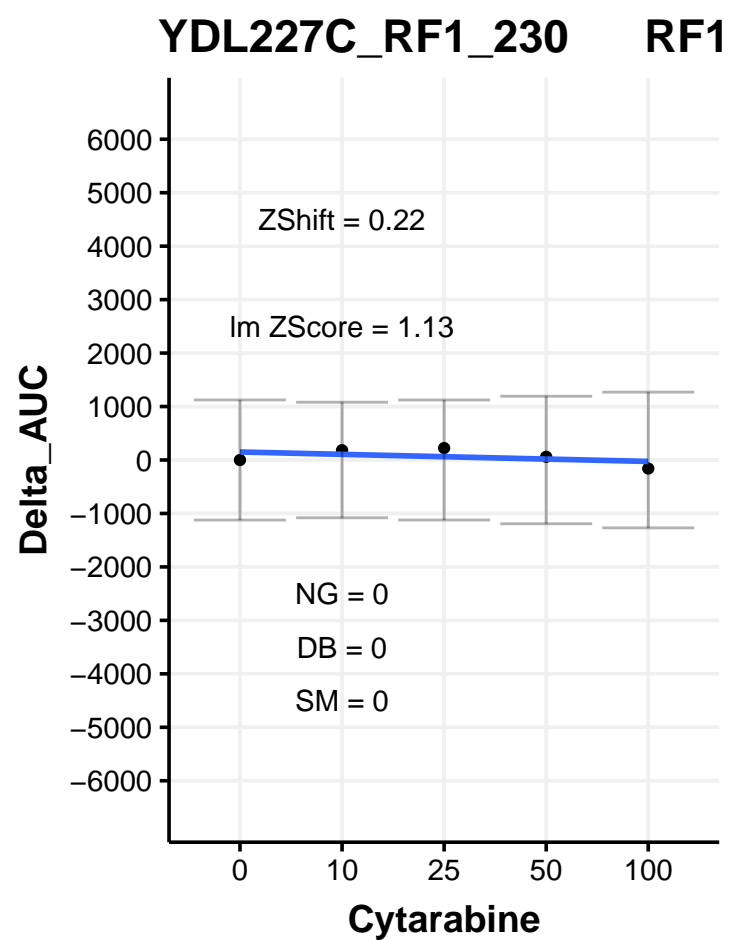

YDL227C\_RF2\_98 RF2

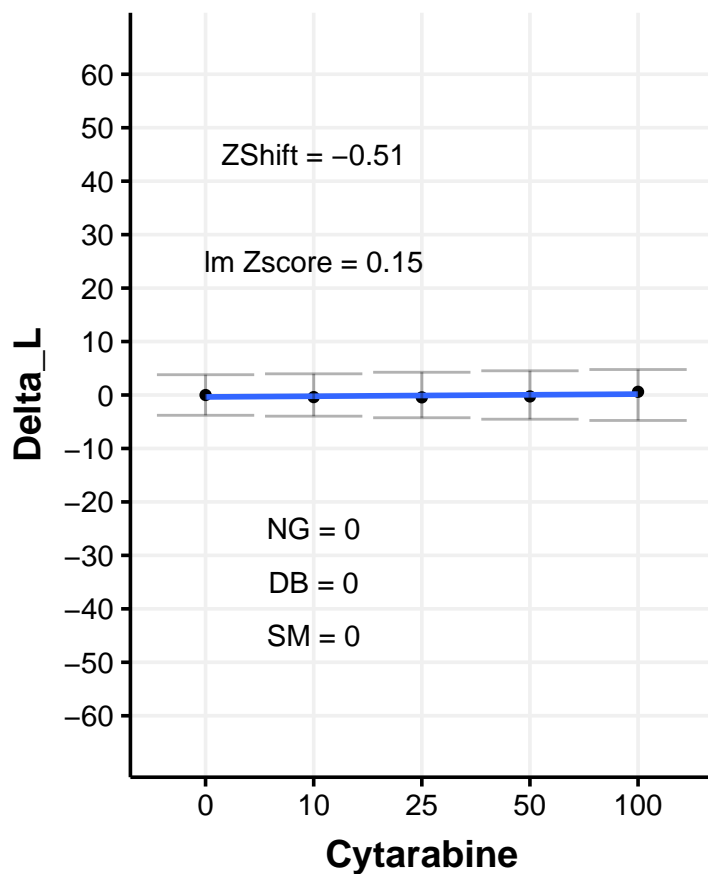

YDL227C\_RF2\_98 RF2

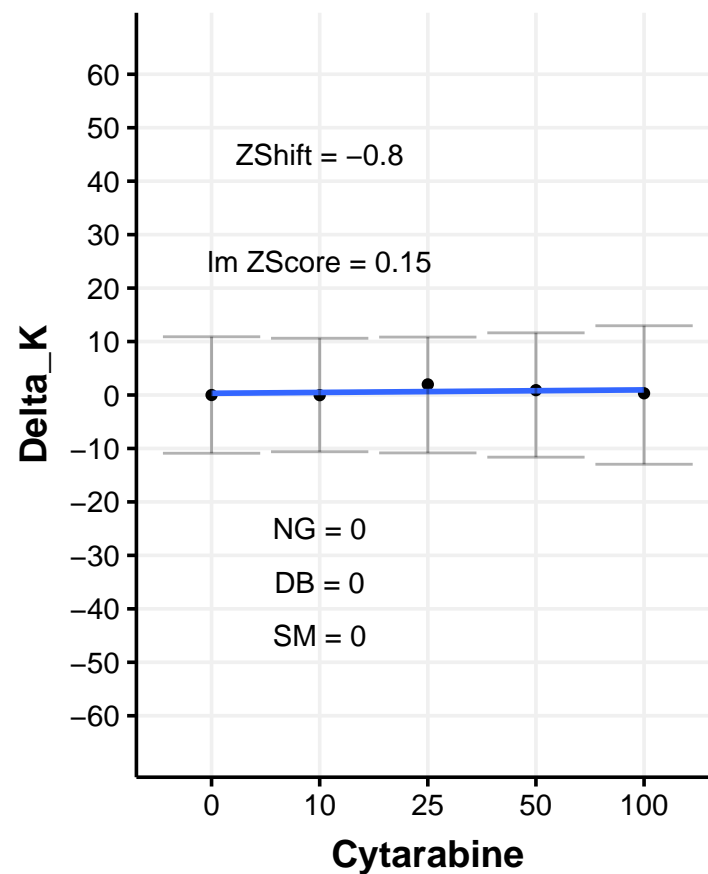

YDL227C\_RF2\_98 RF2

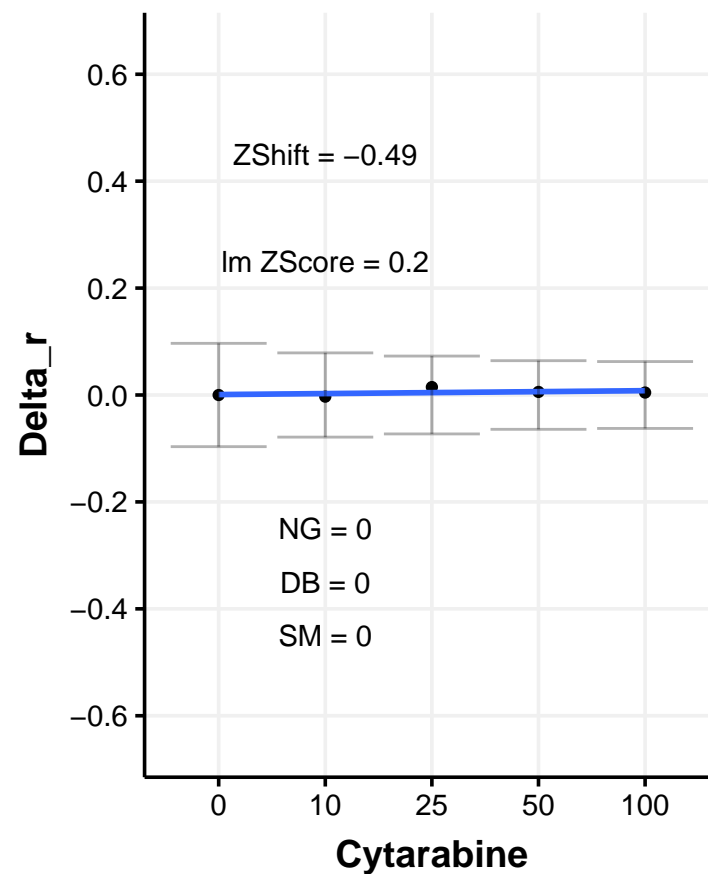

YDL227C\_RF2\_98 RF2

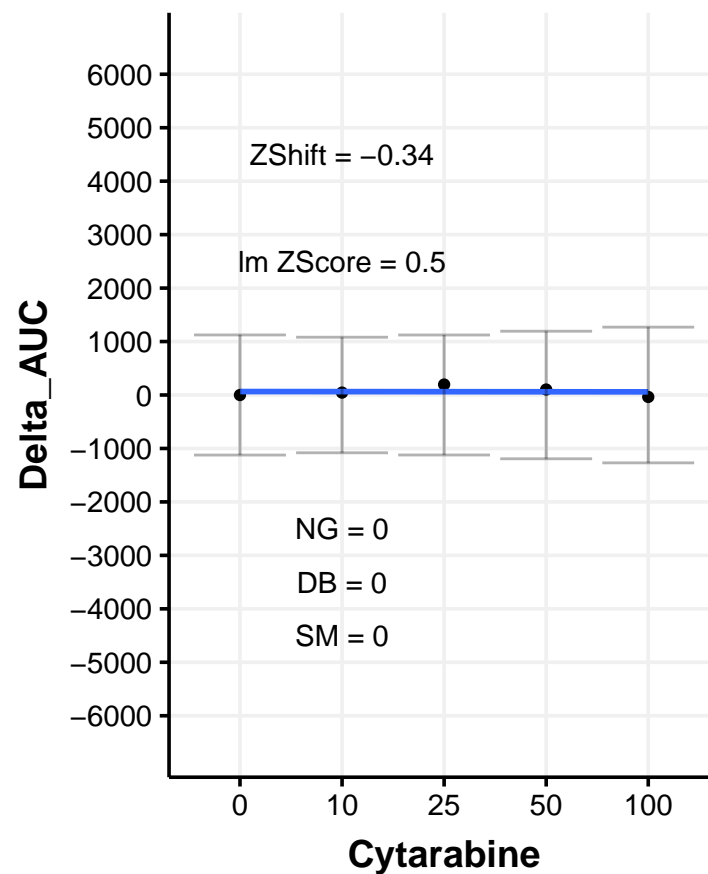

YDL227C\_RF2\_121 RF2

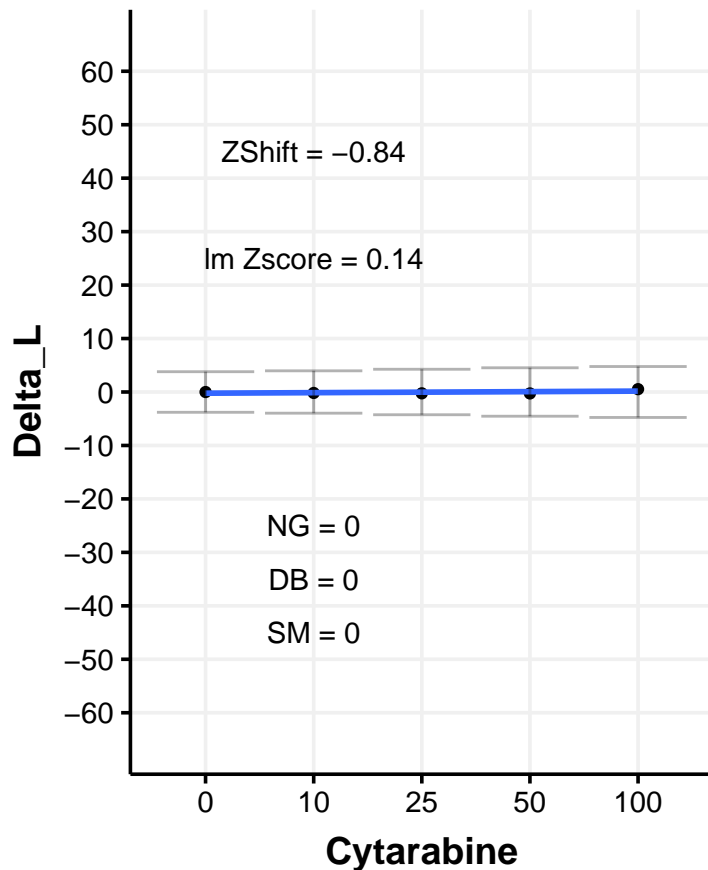

YDL227C\_RF2\_121 RF2

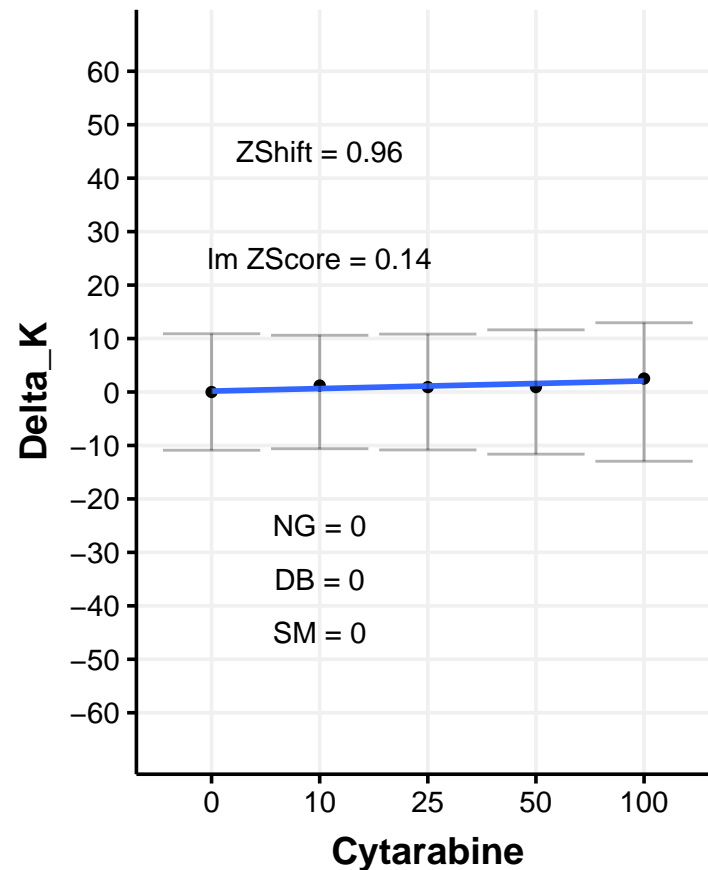

YDL227C\_RF2\_121 RF2

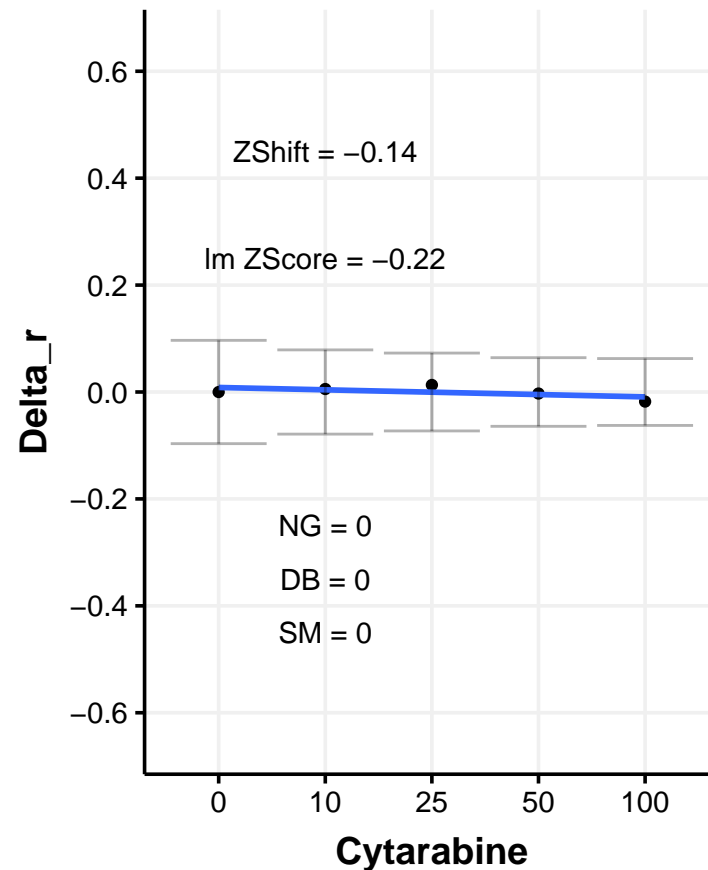

YDL227C\_RF2\_121 RF2

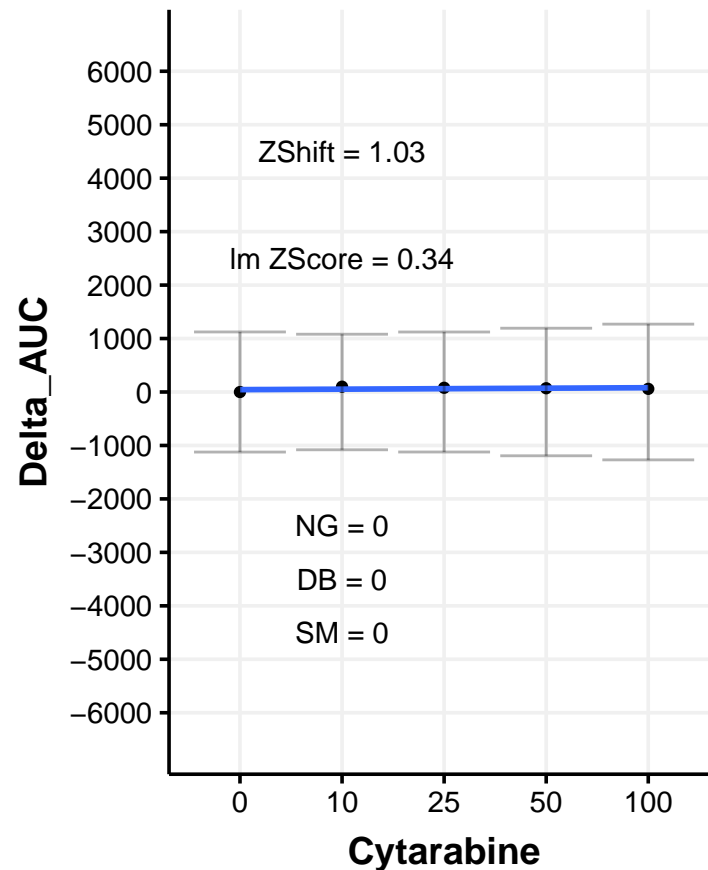

YDL227C\_RF1\_255 RF1

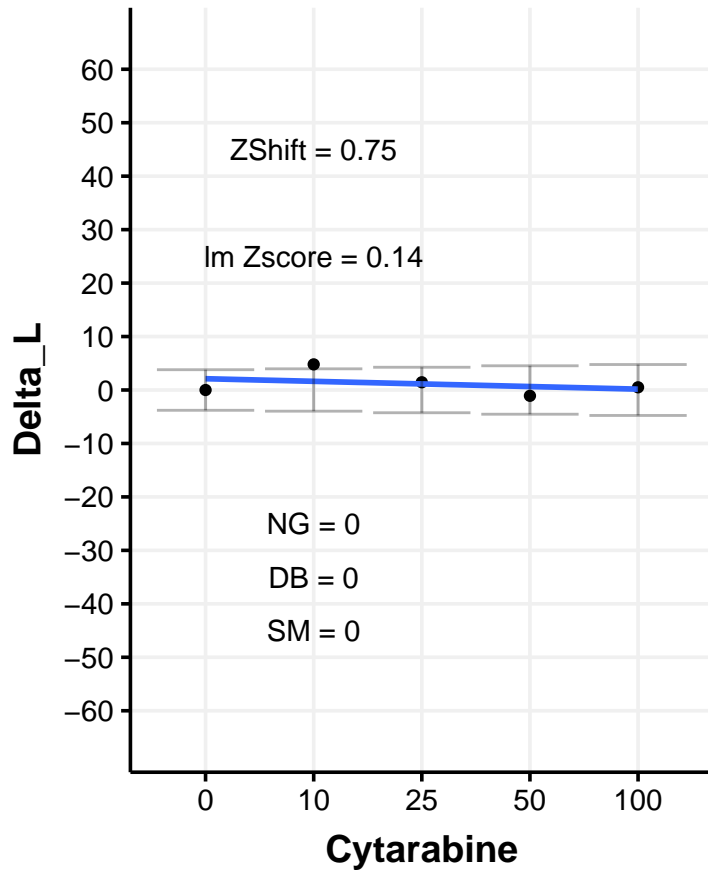

YDL227C\_RF1\_255 RF1

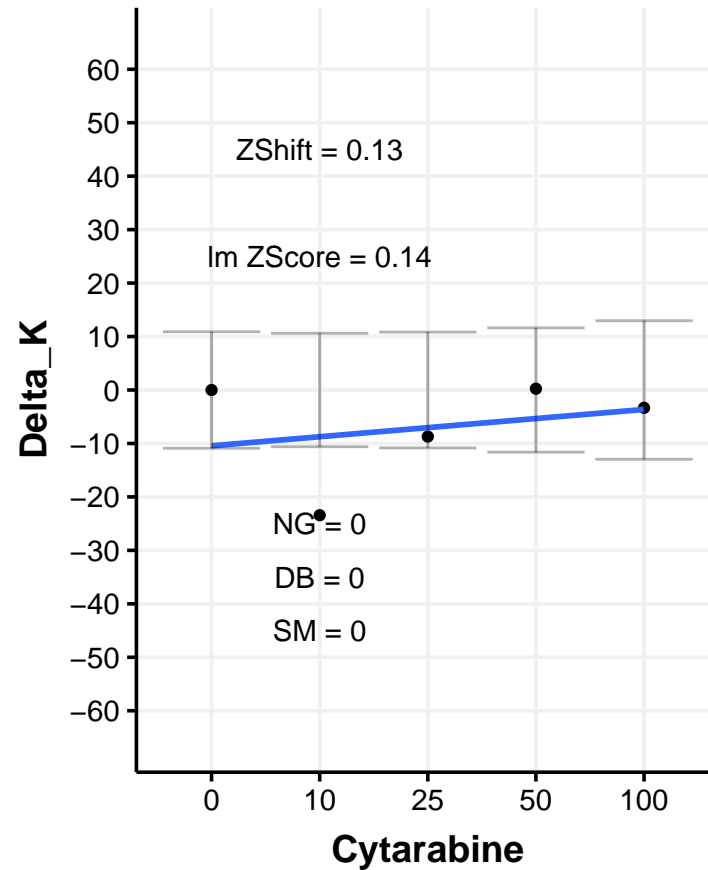

YDL227C\_RF1\_255 RF1

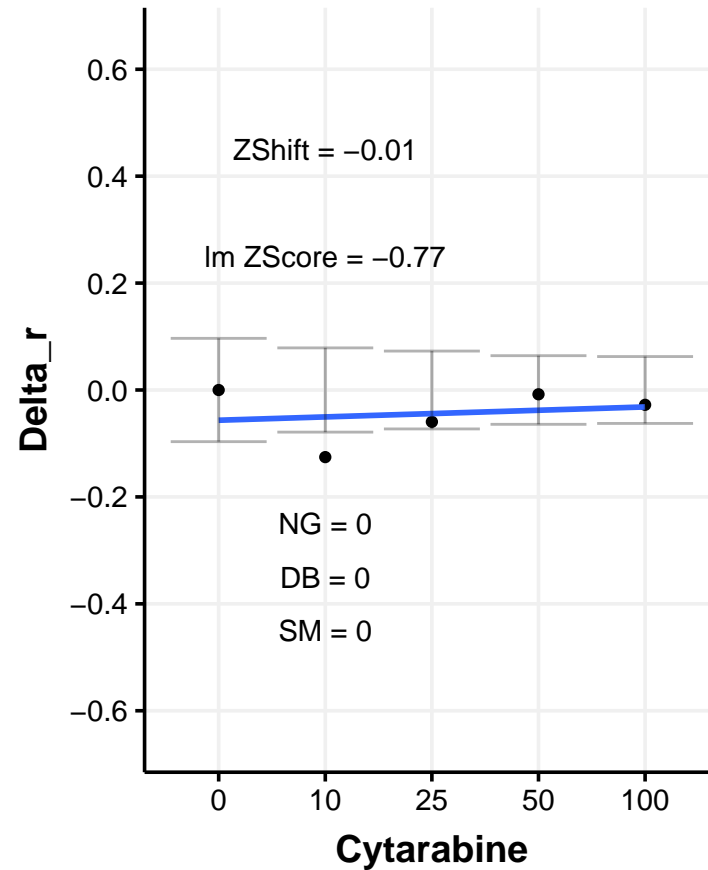

YDL227C\_RF1\_255 RF1

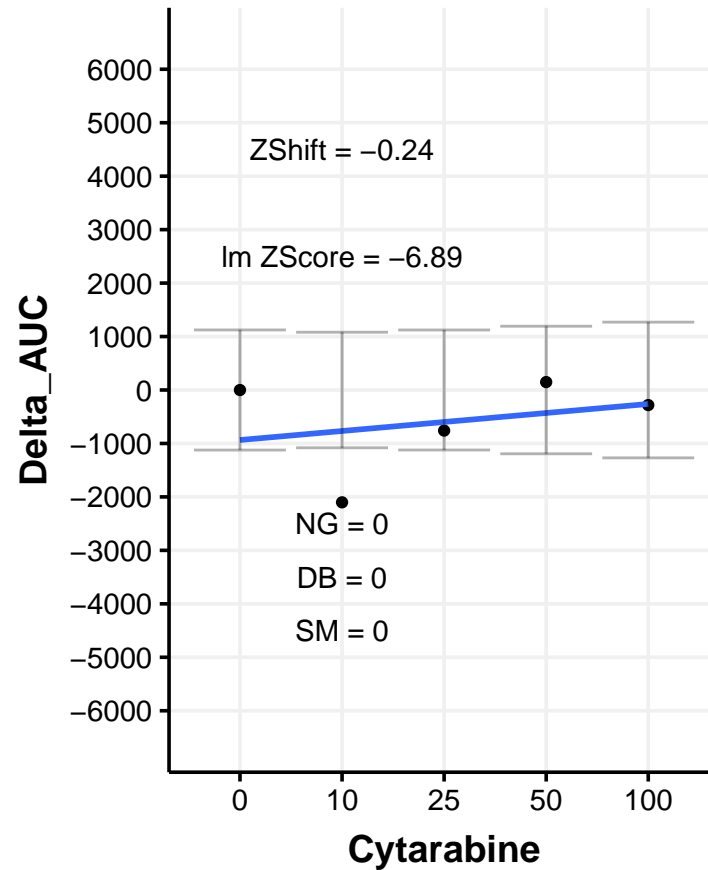

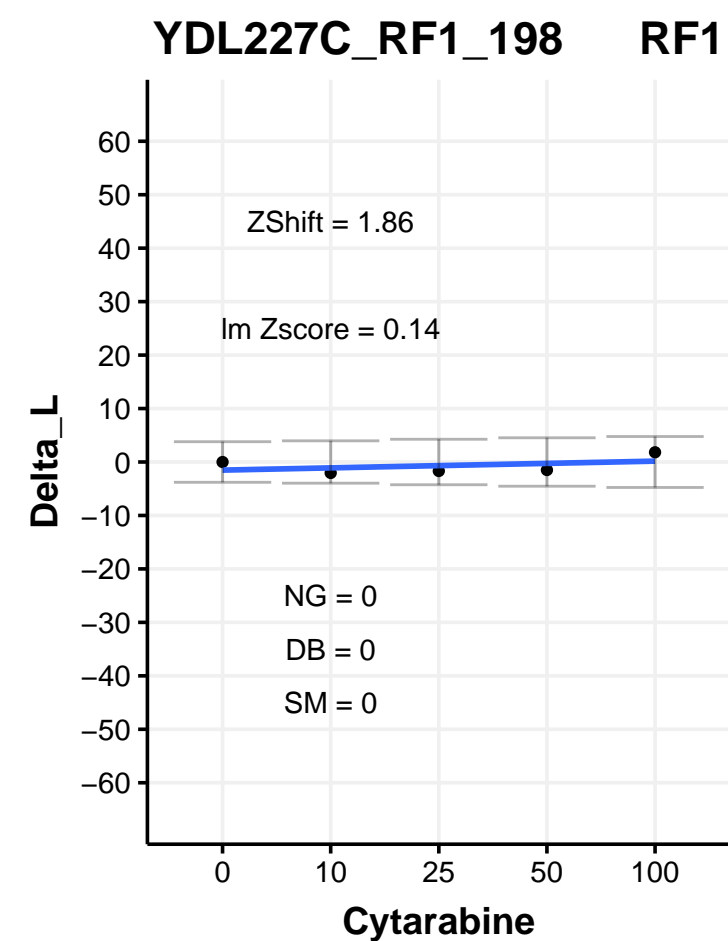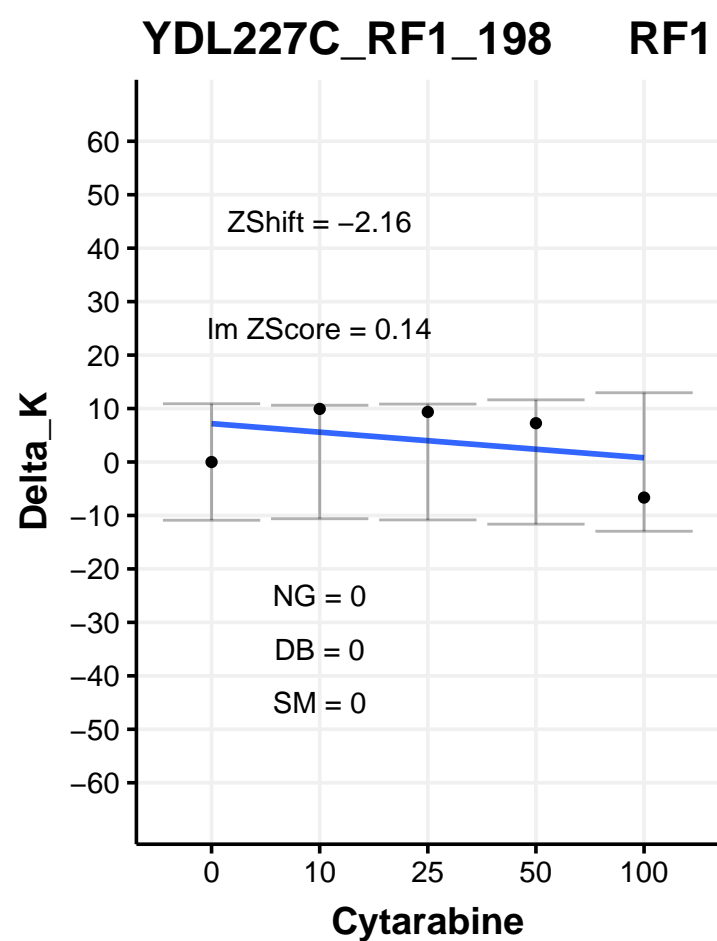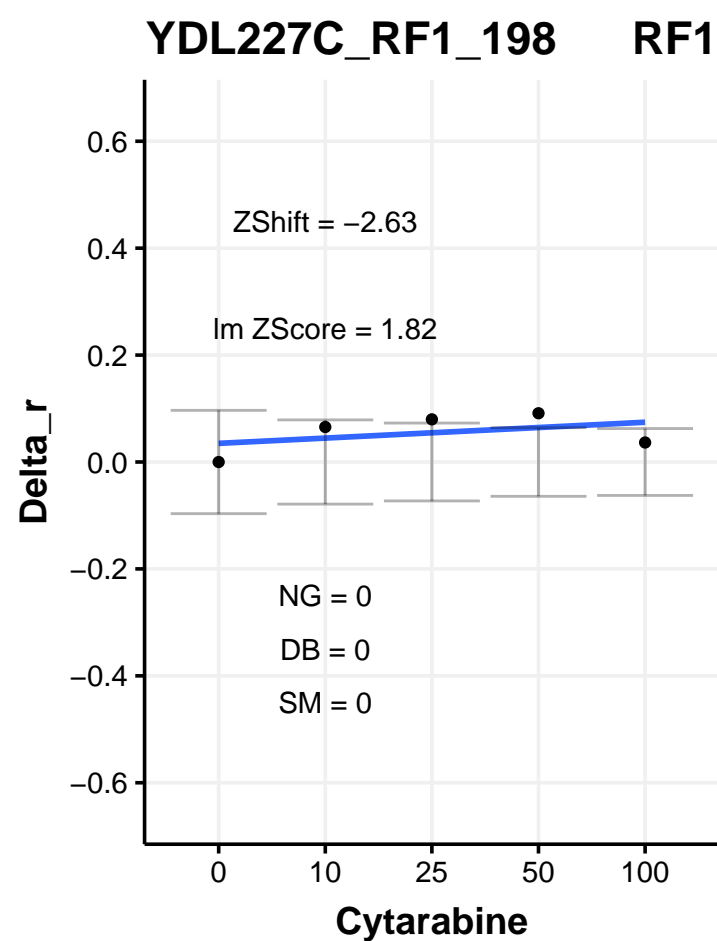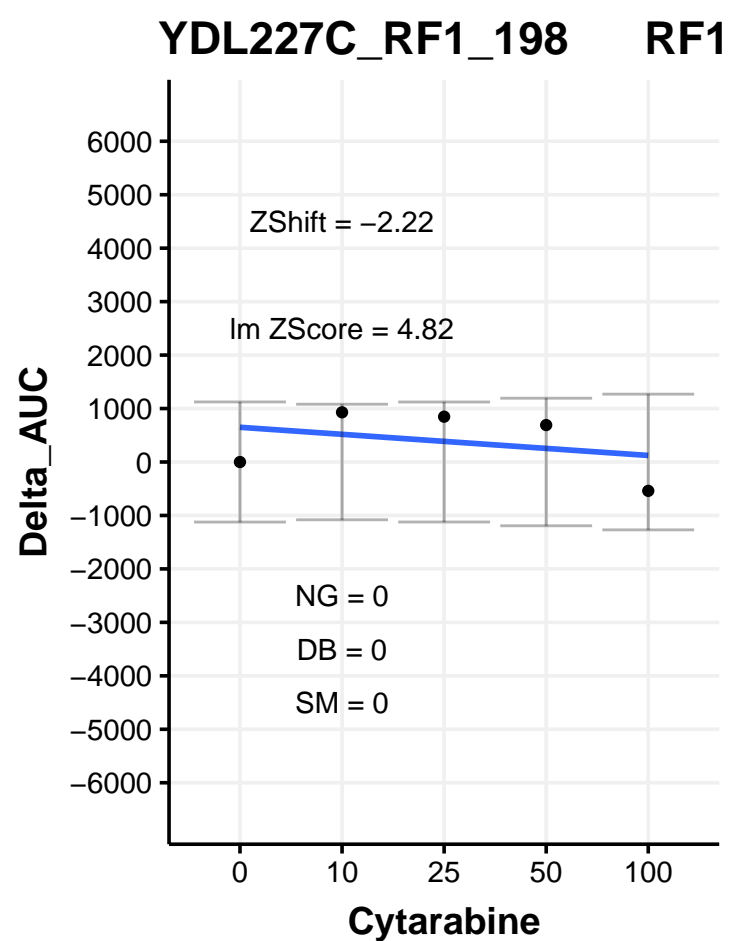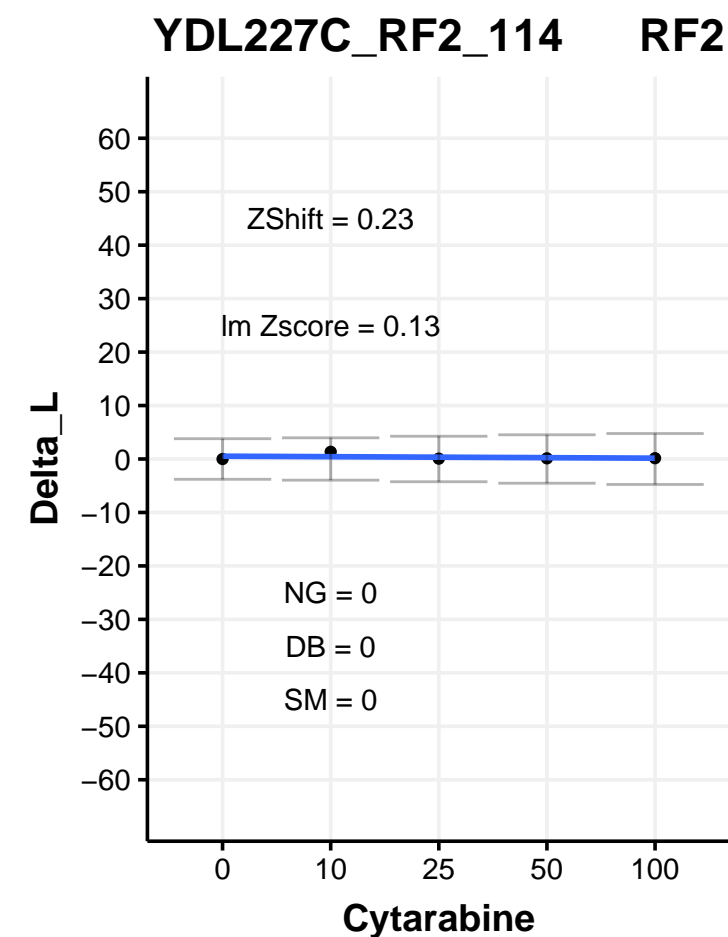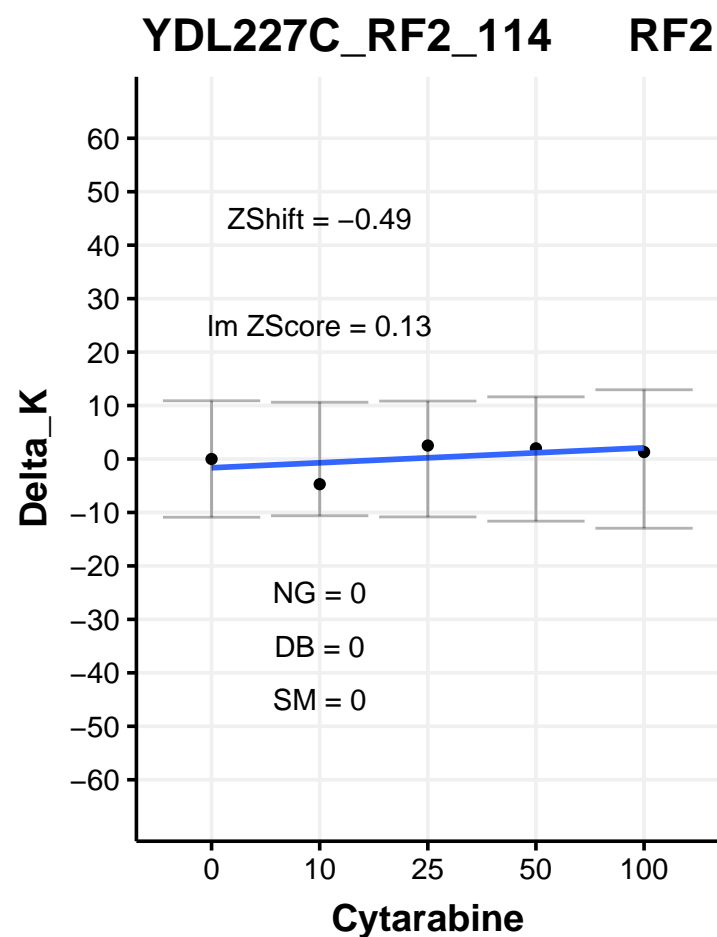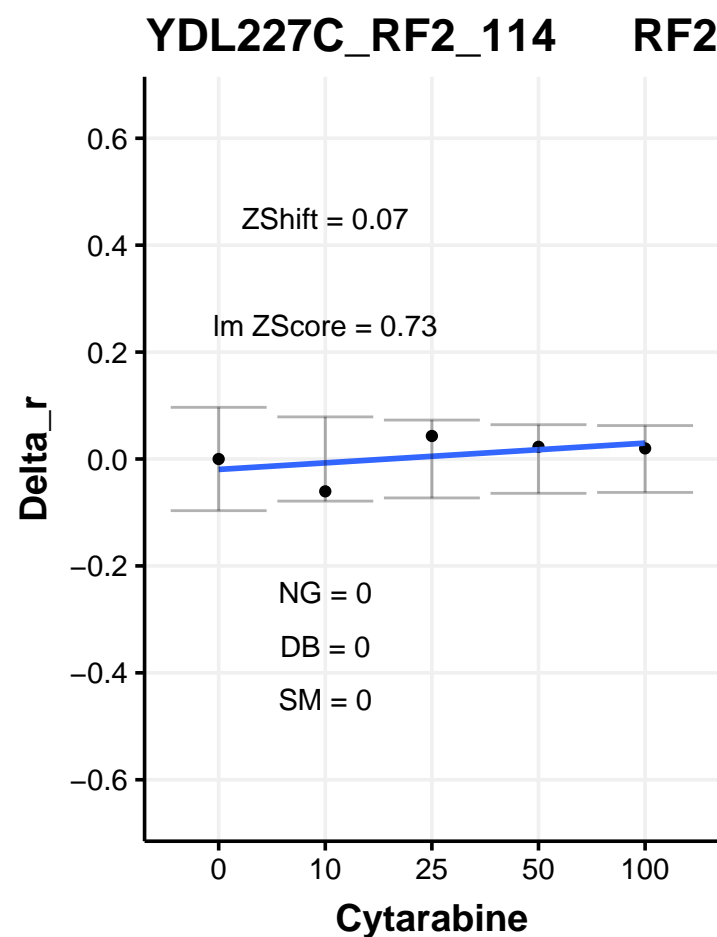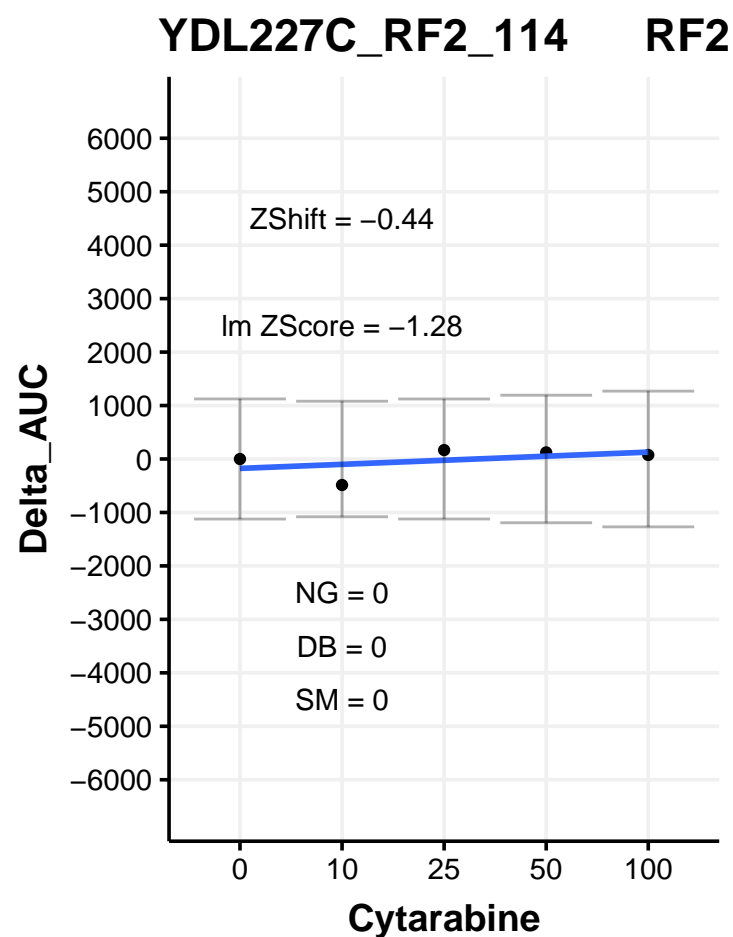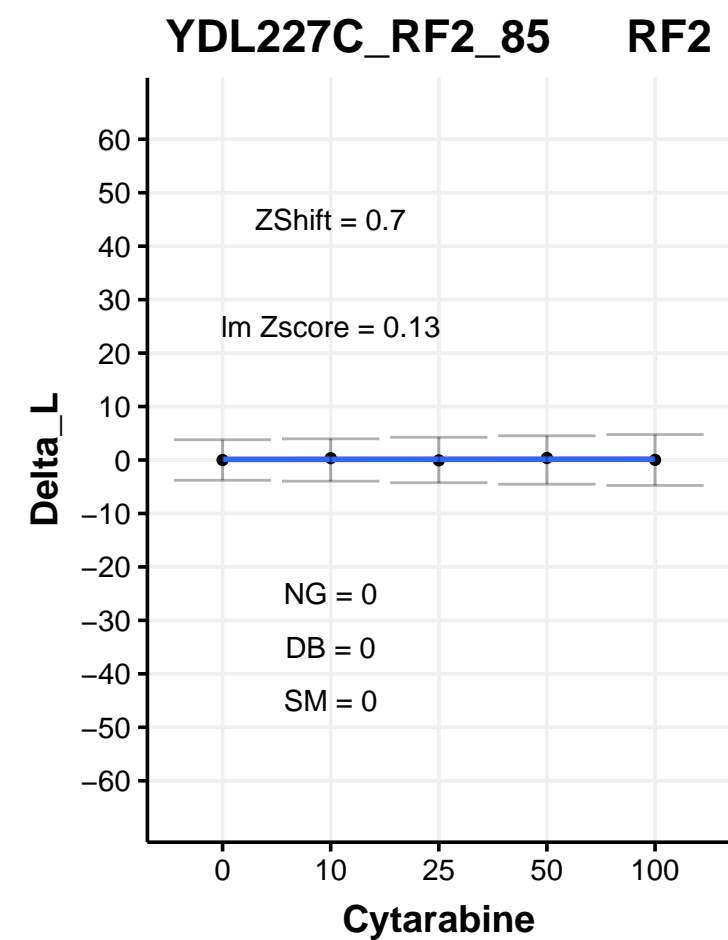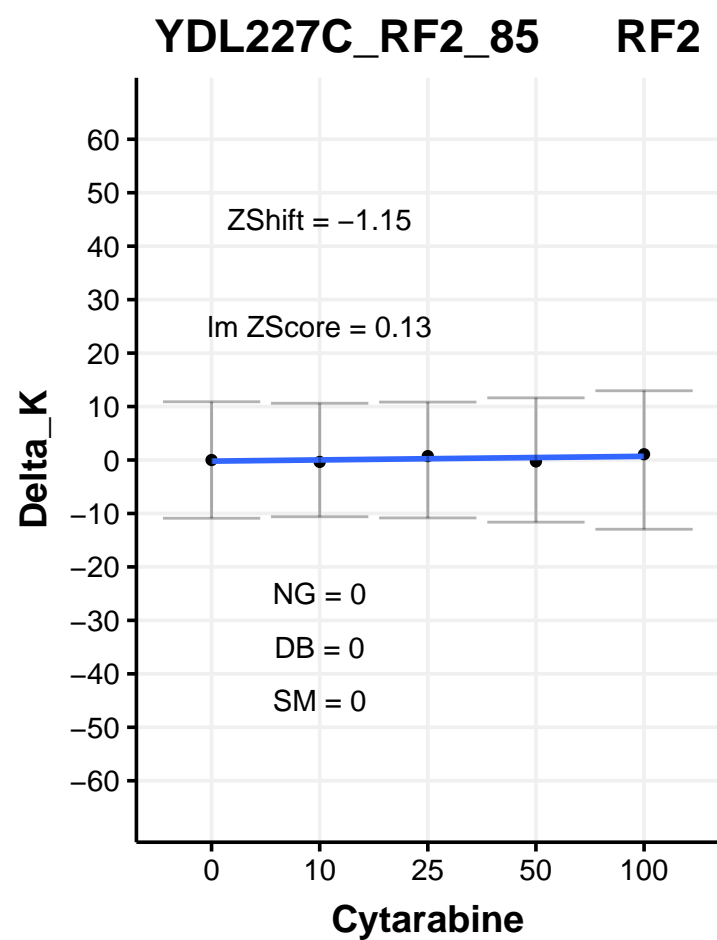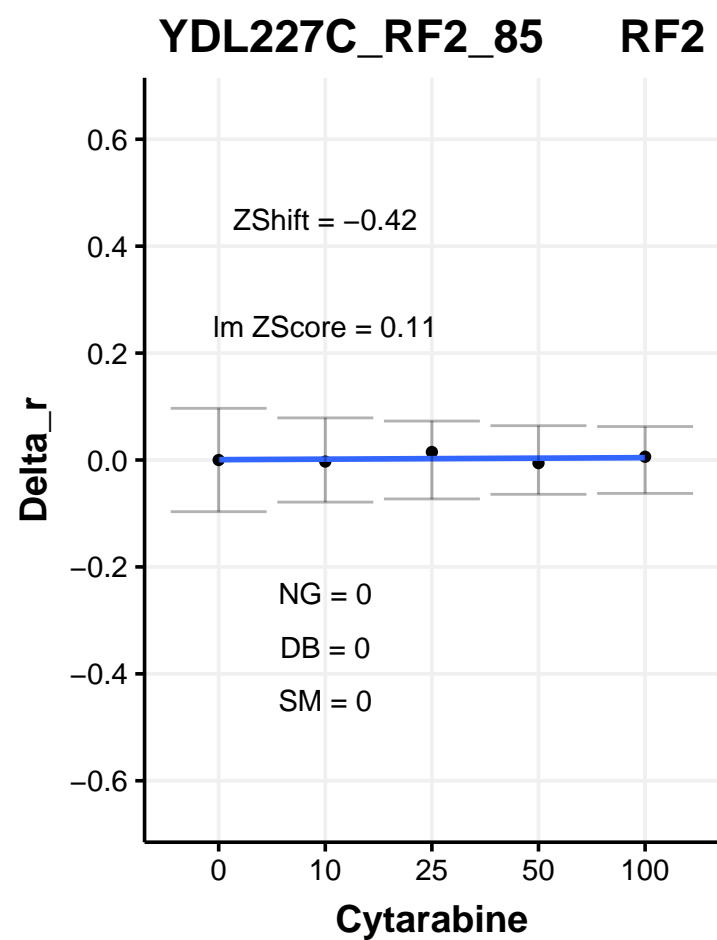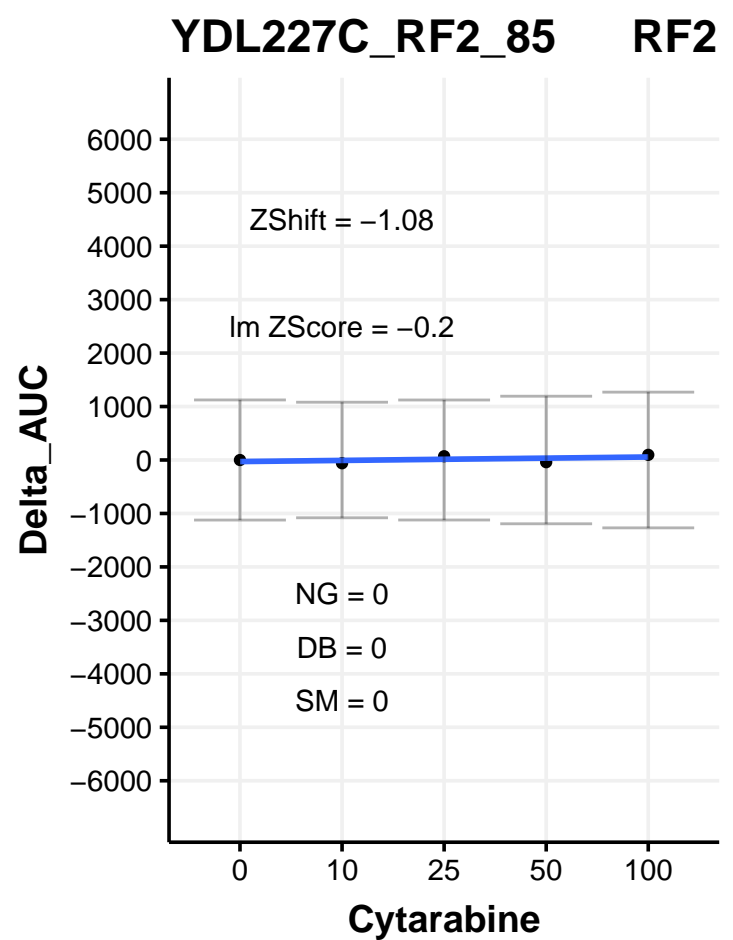



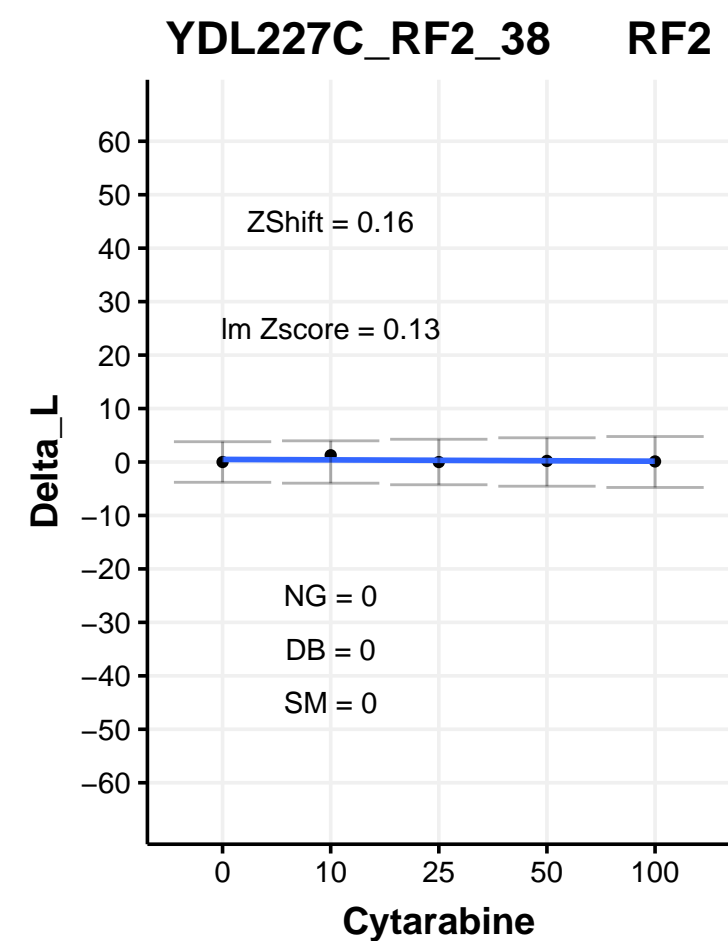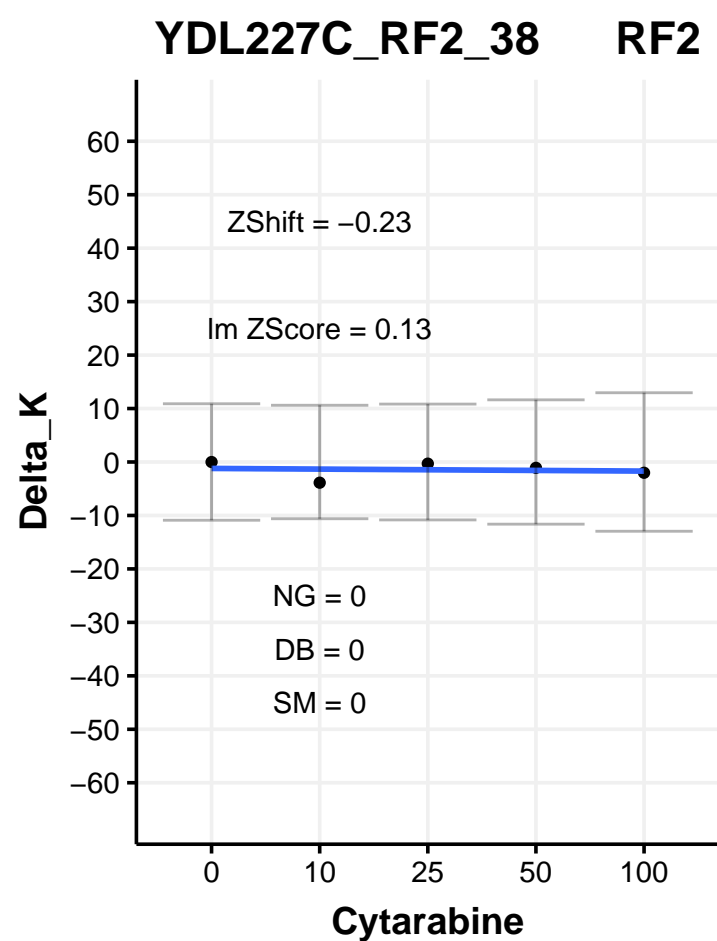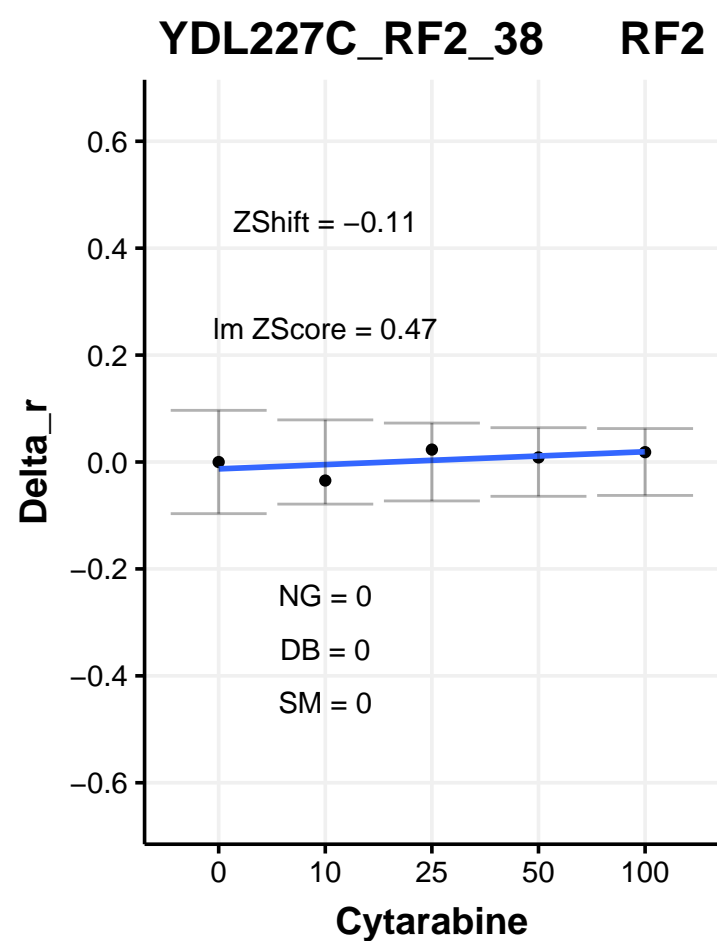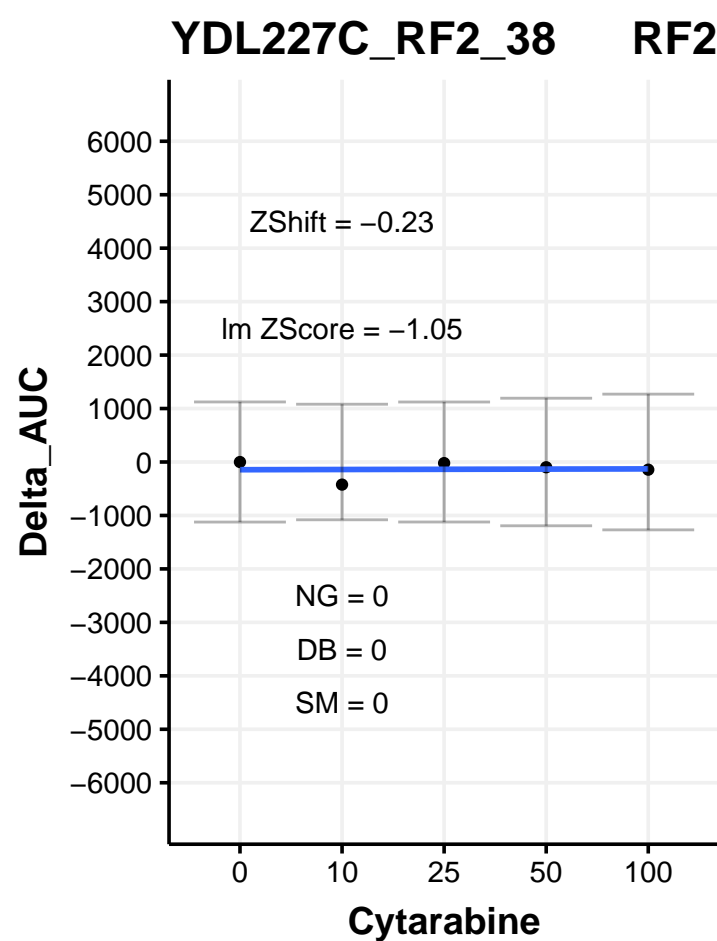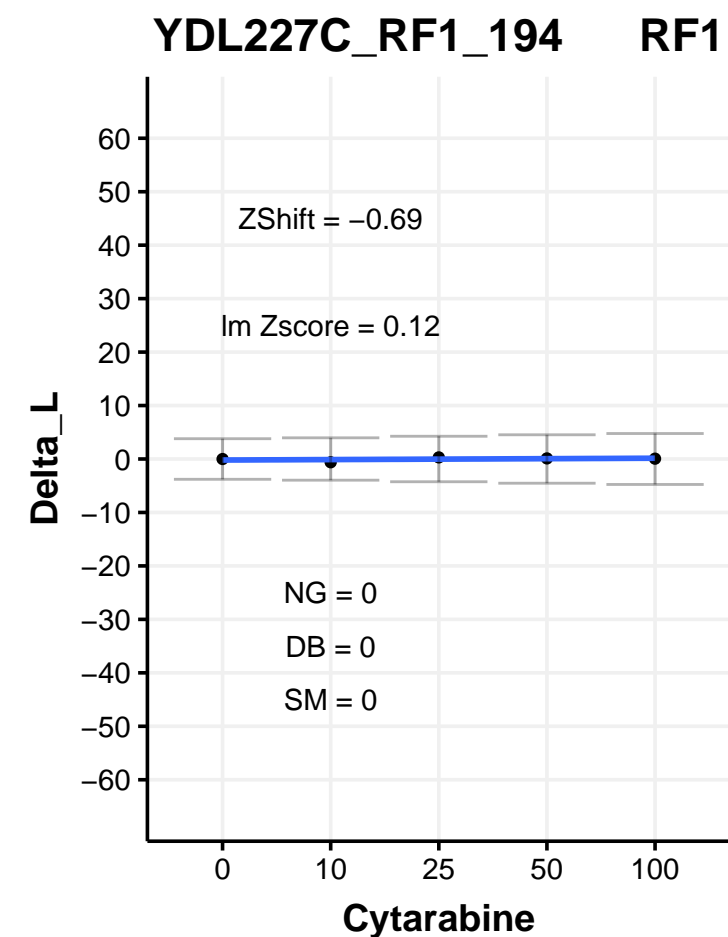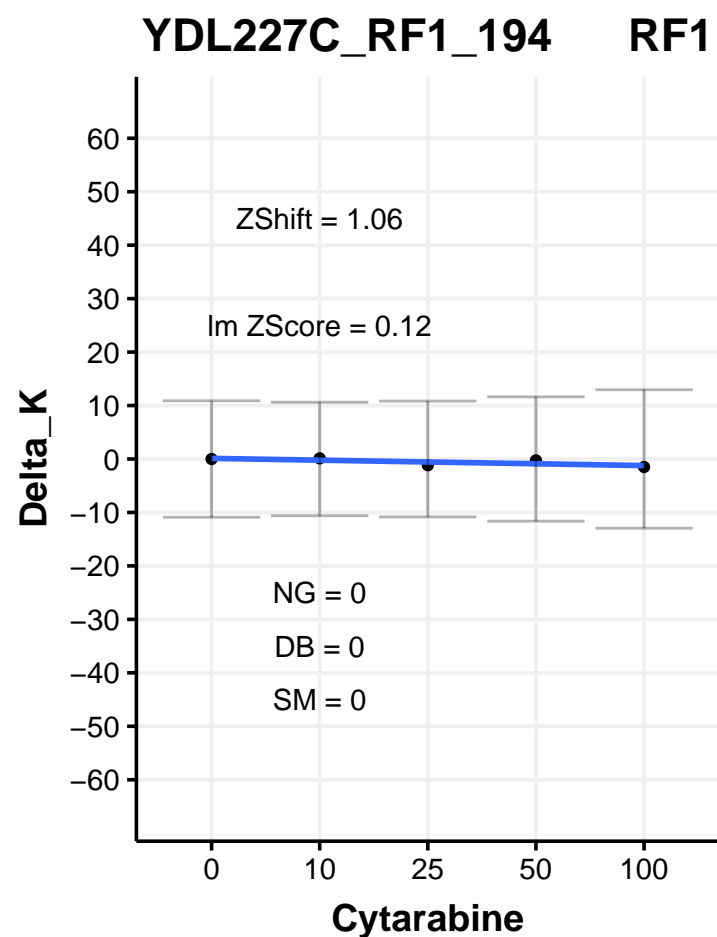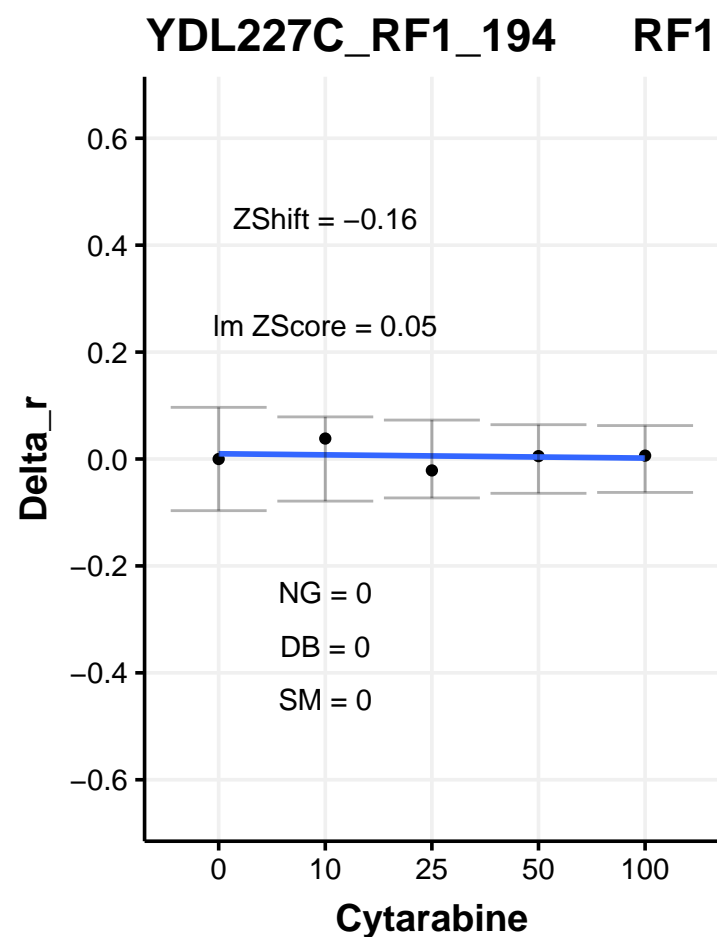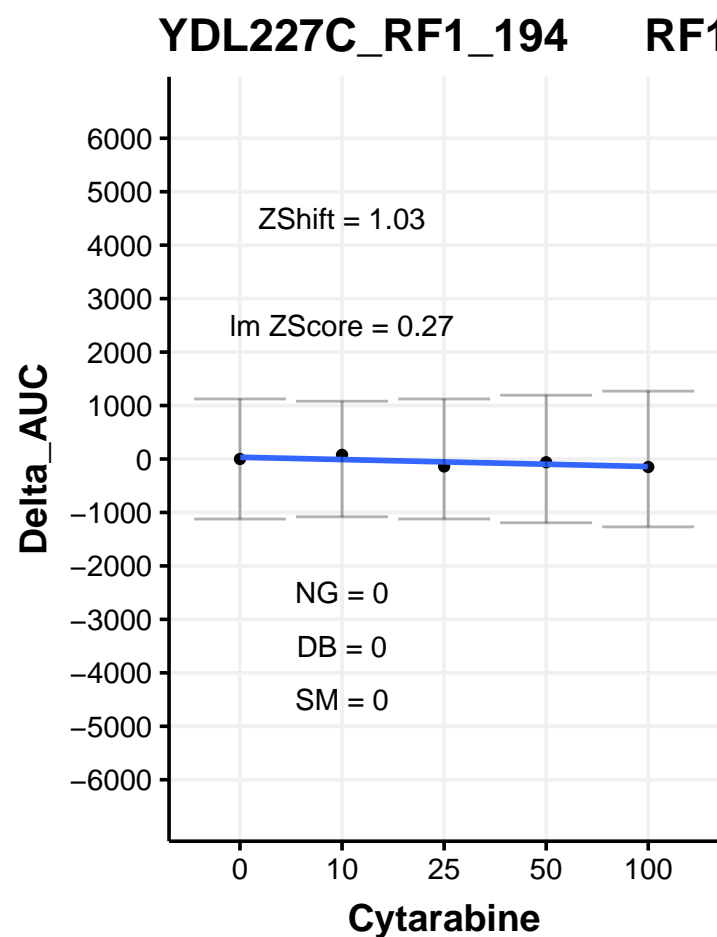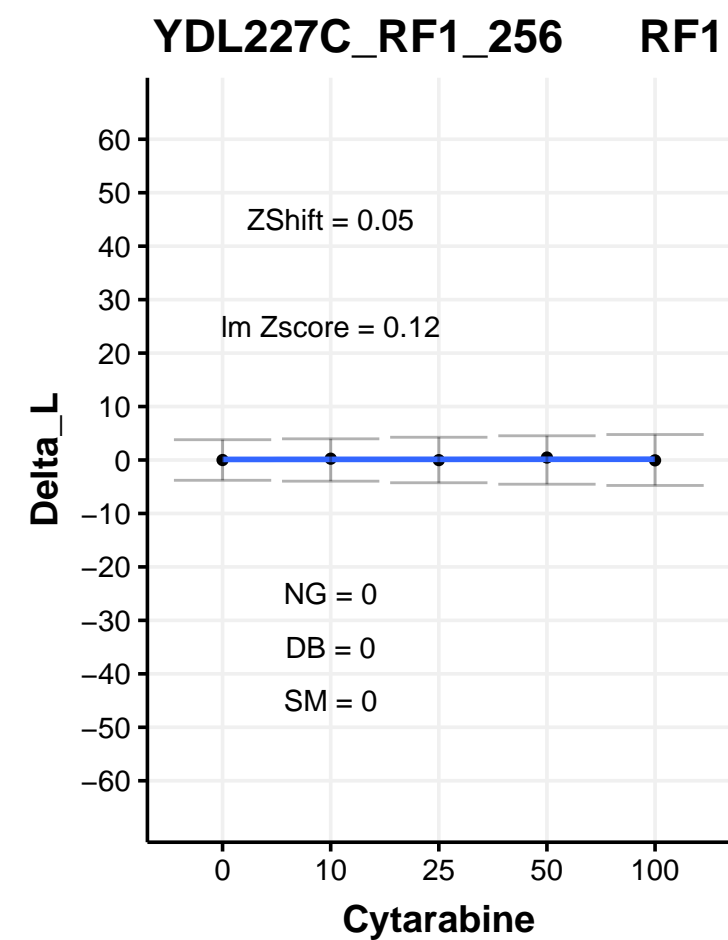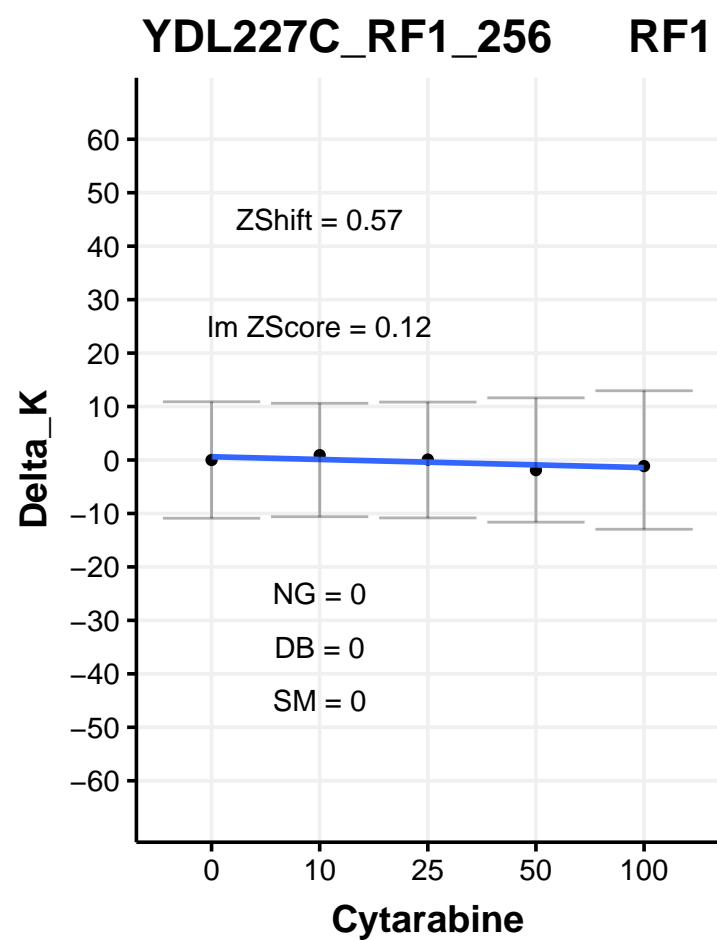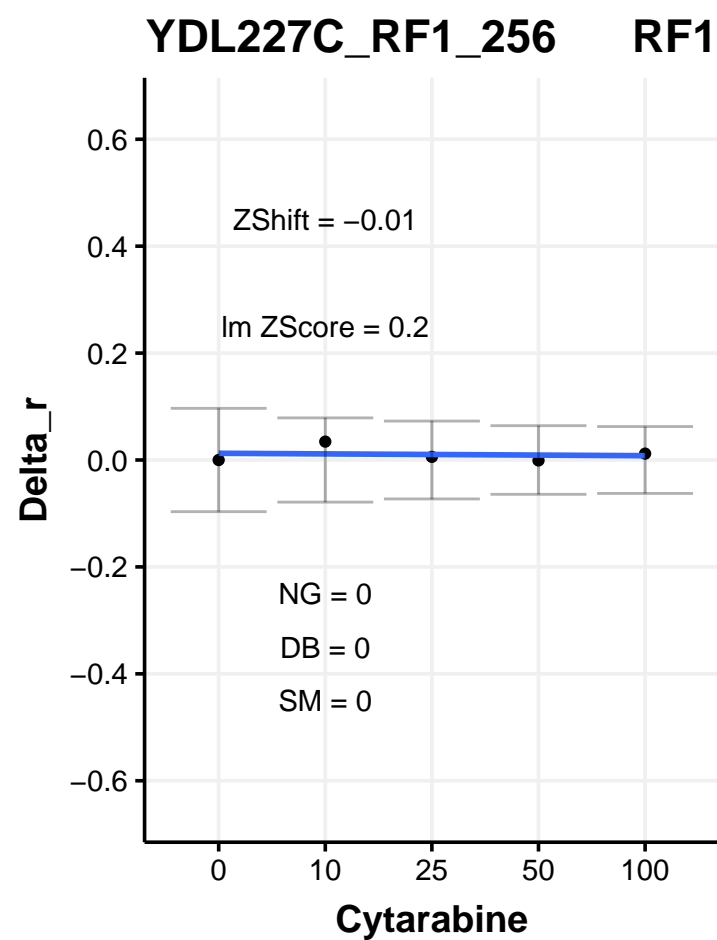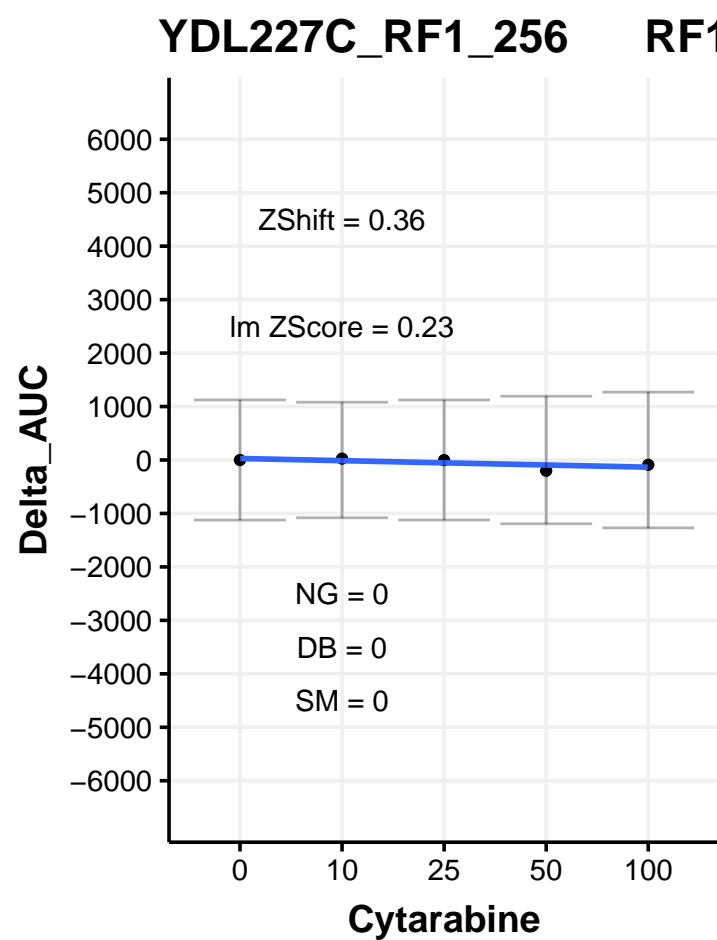

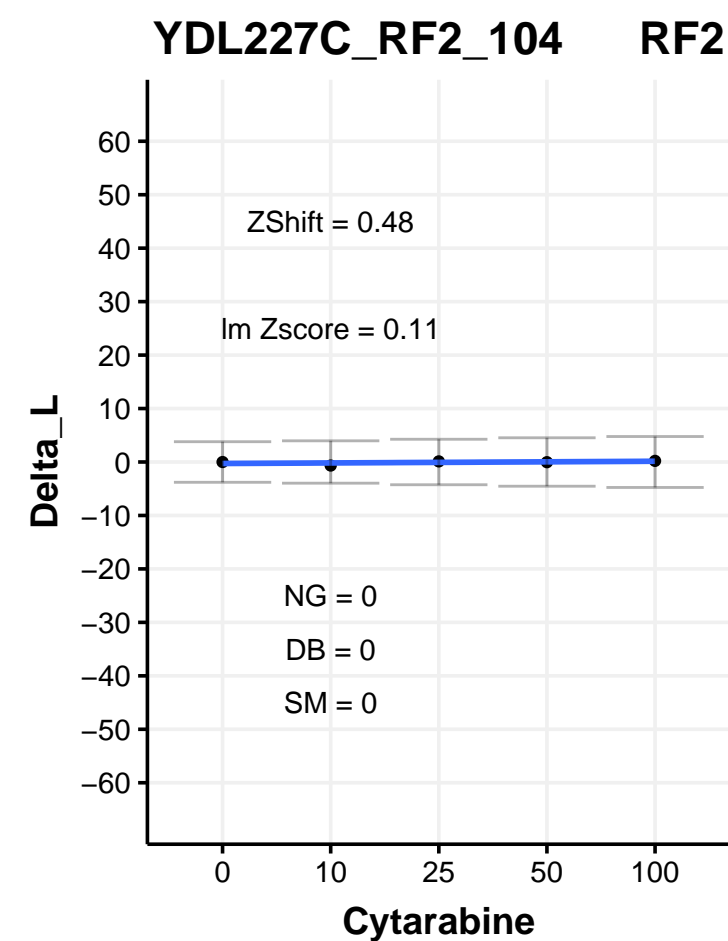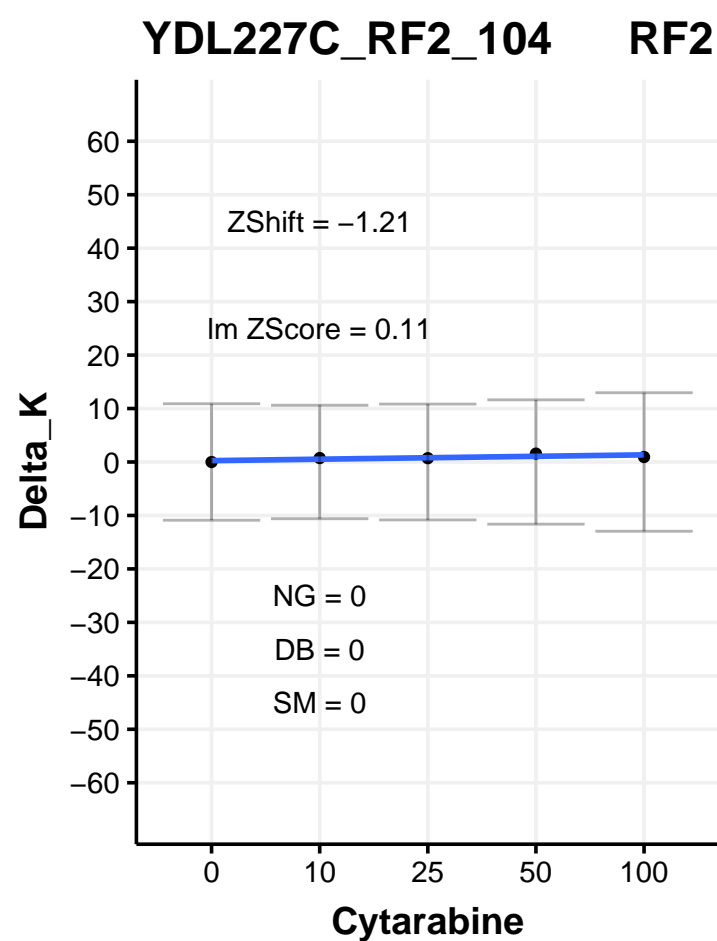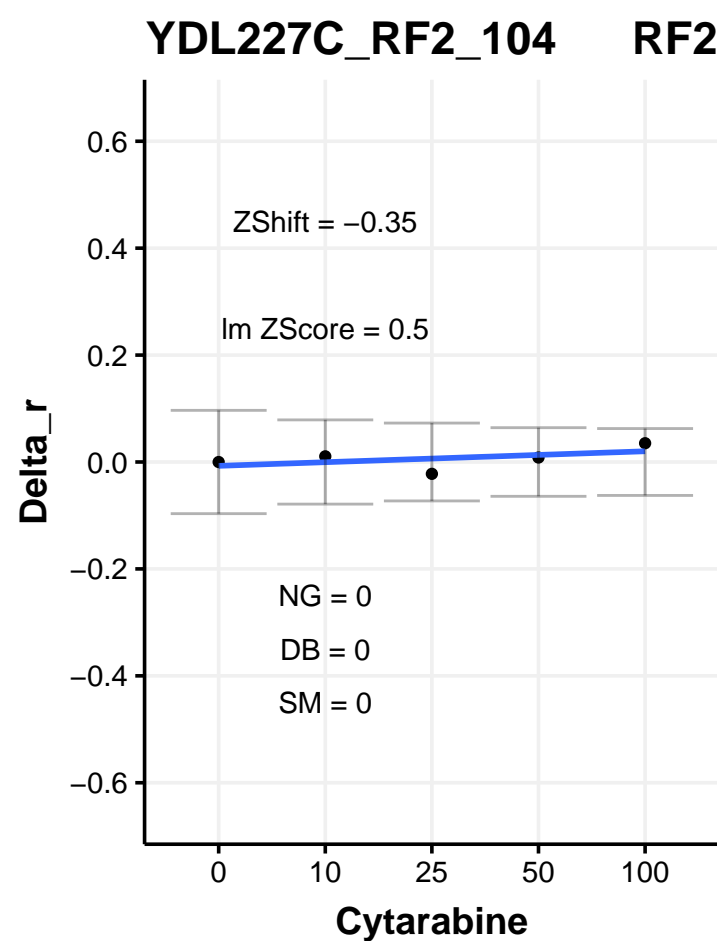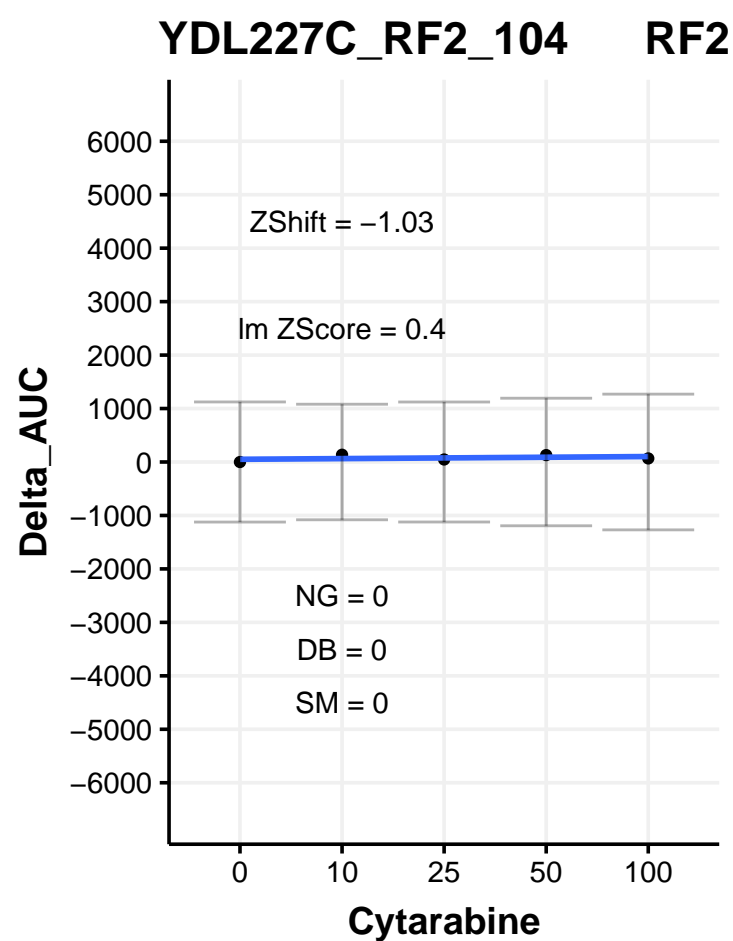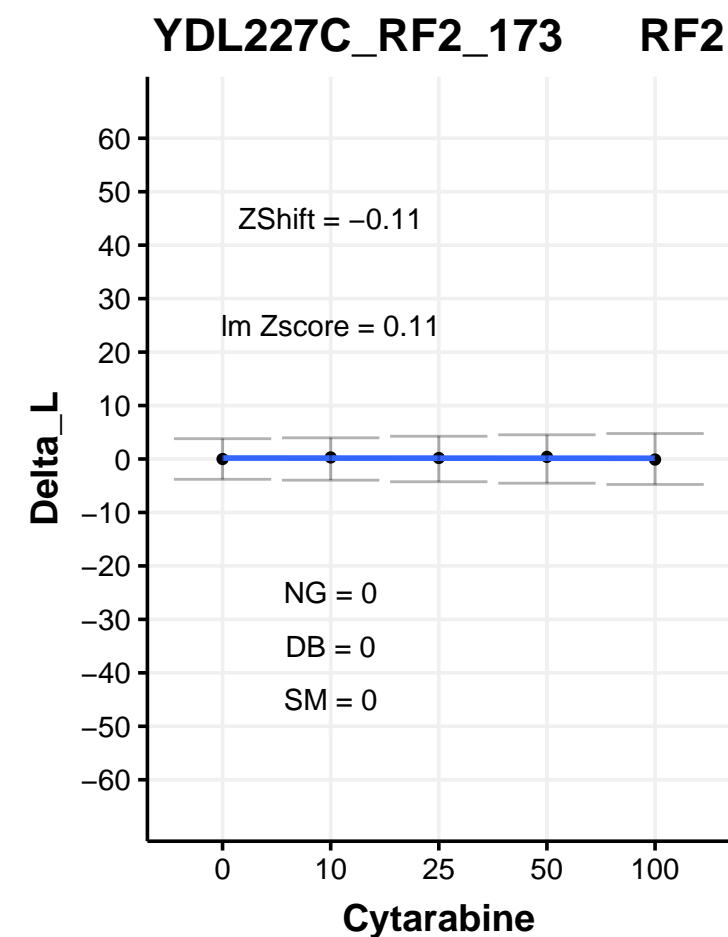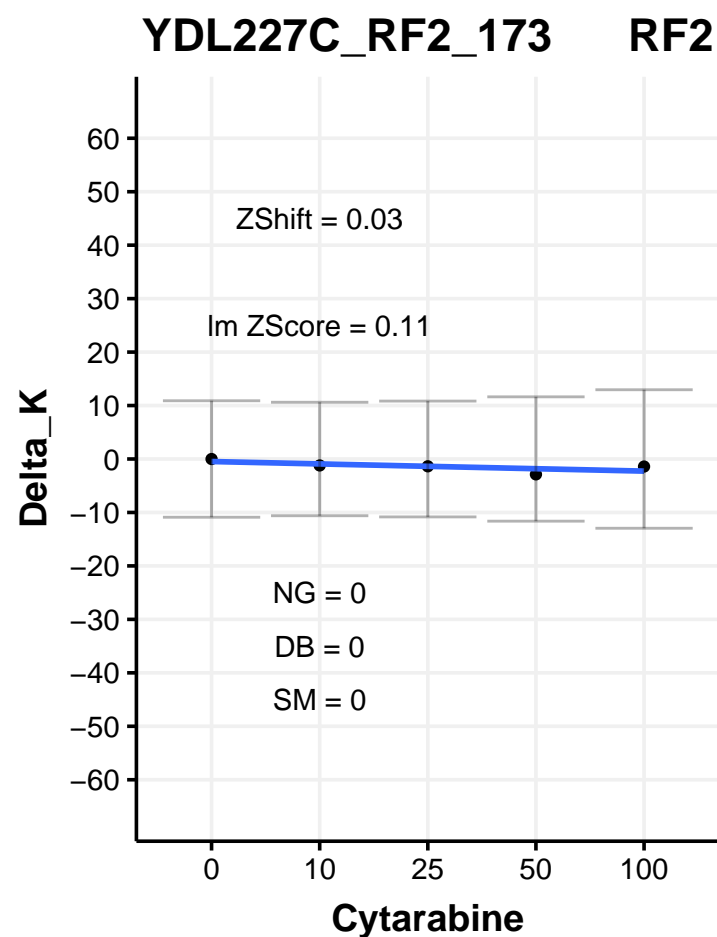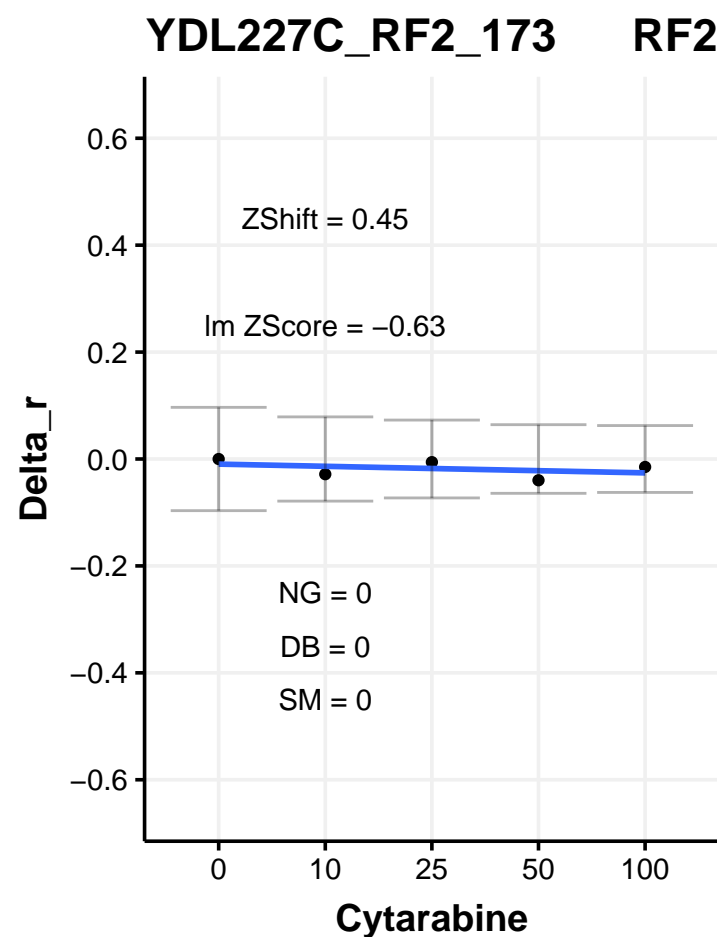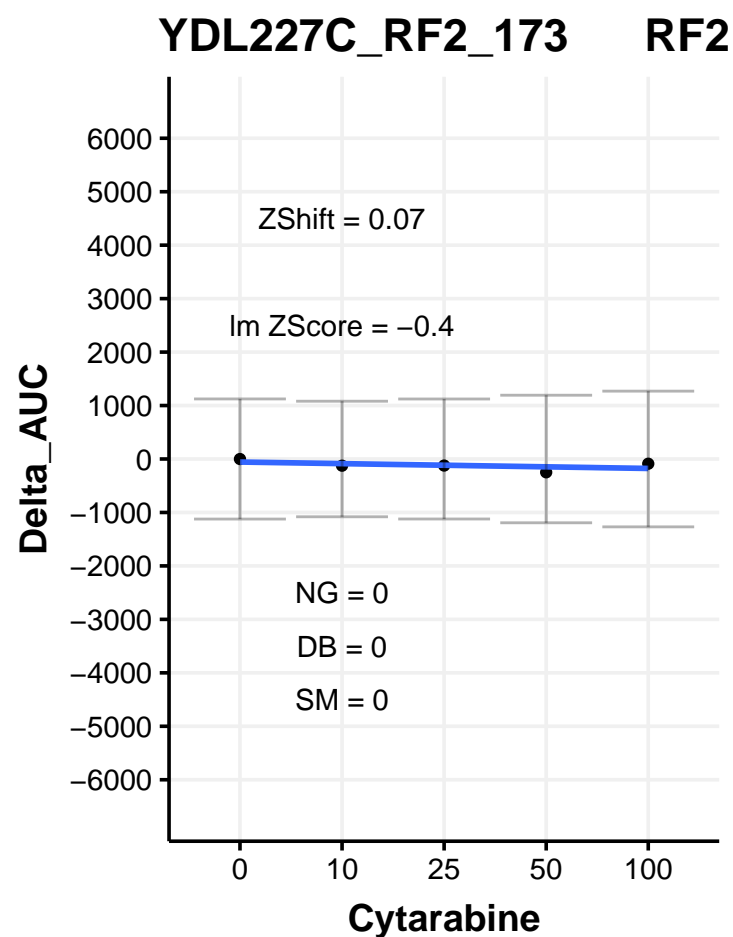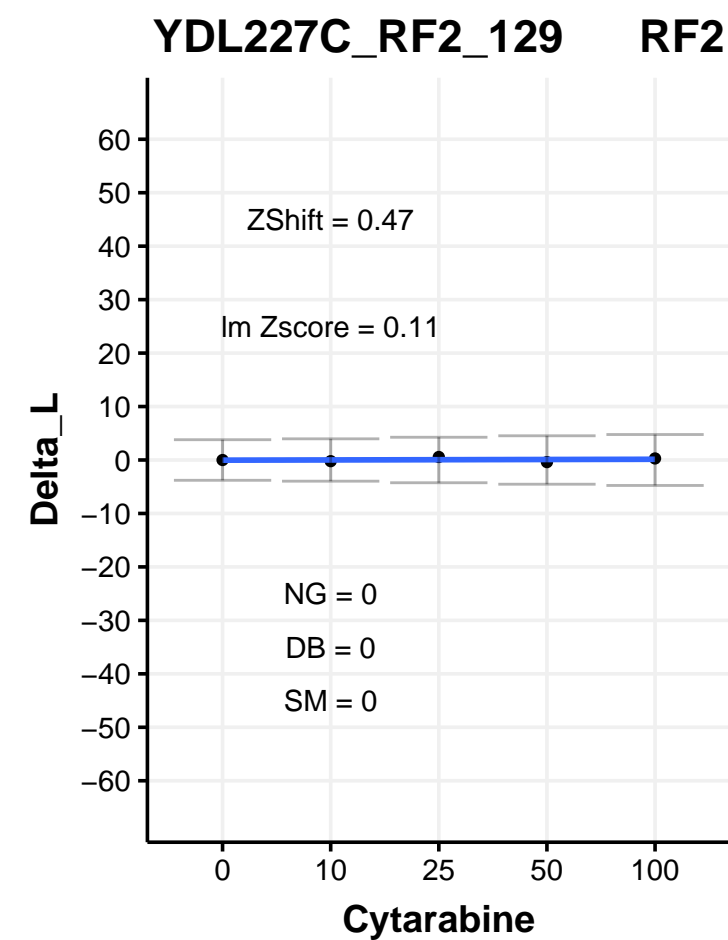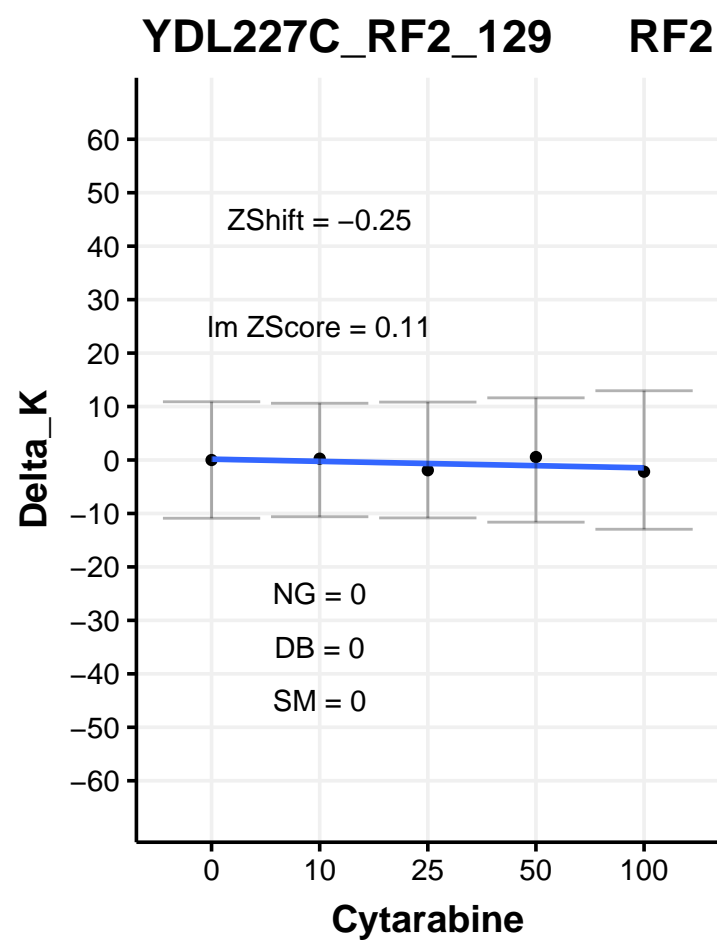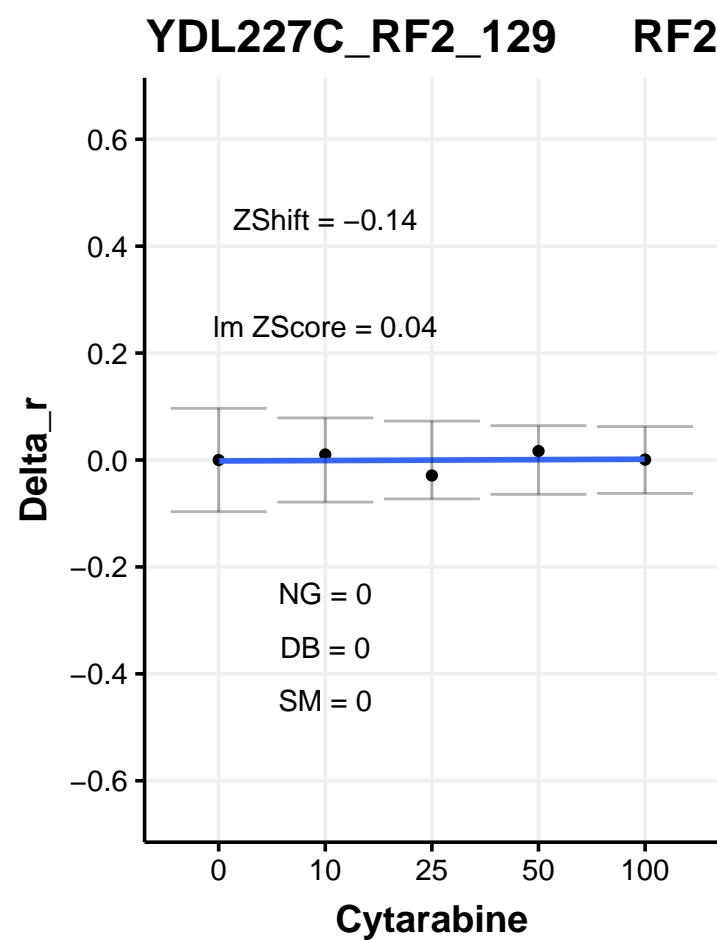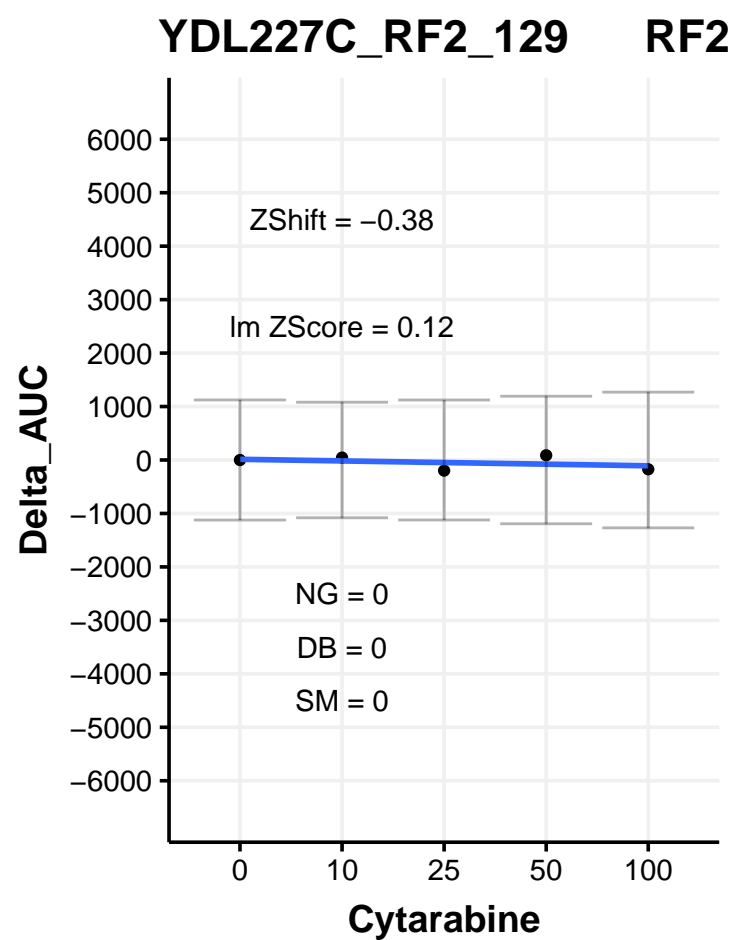

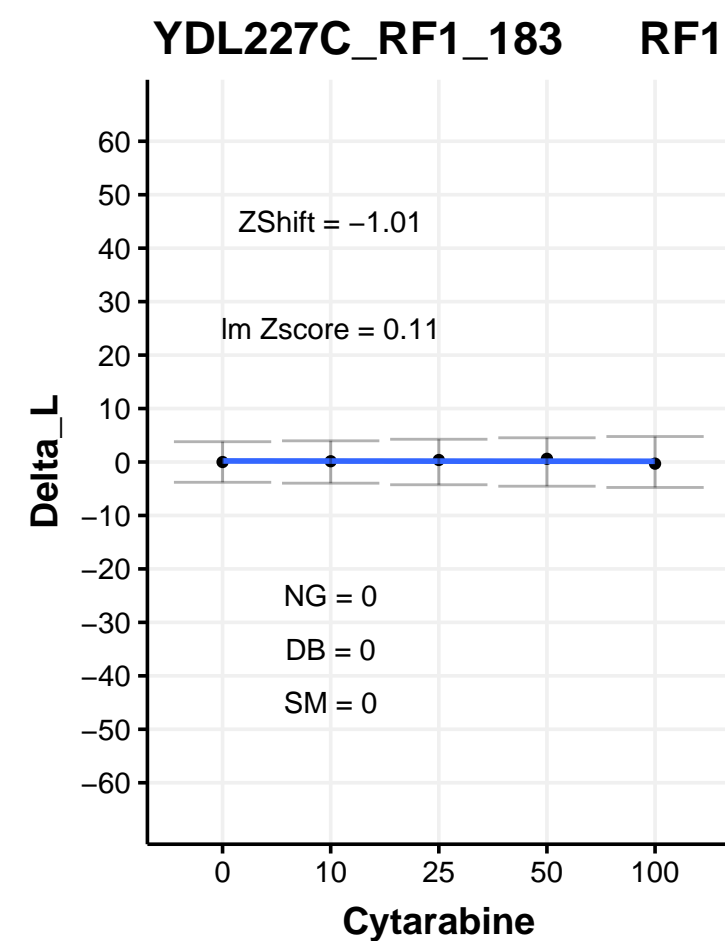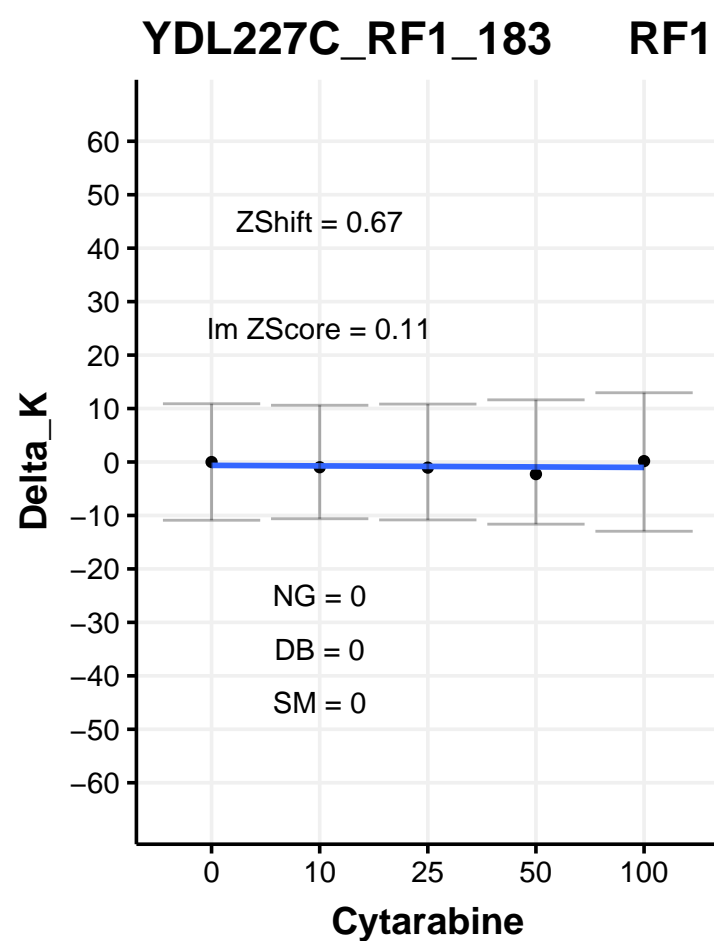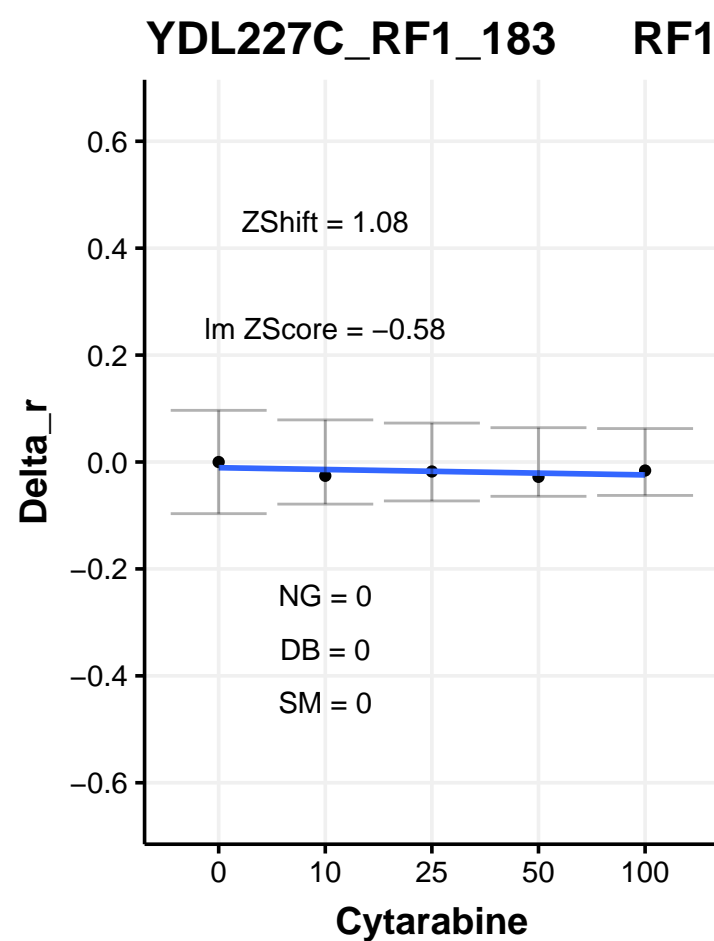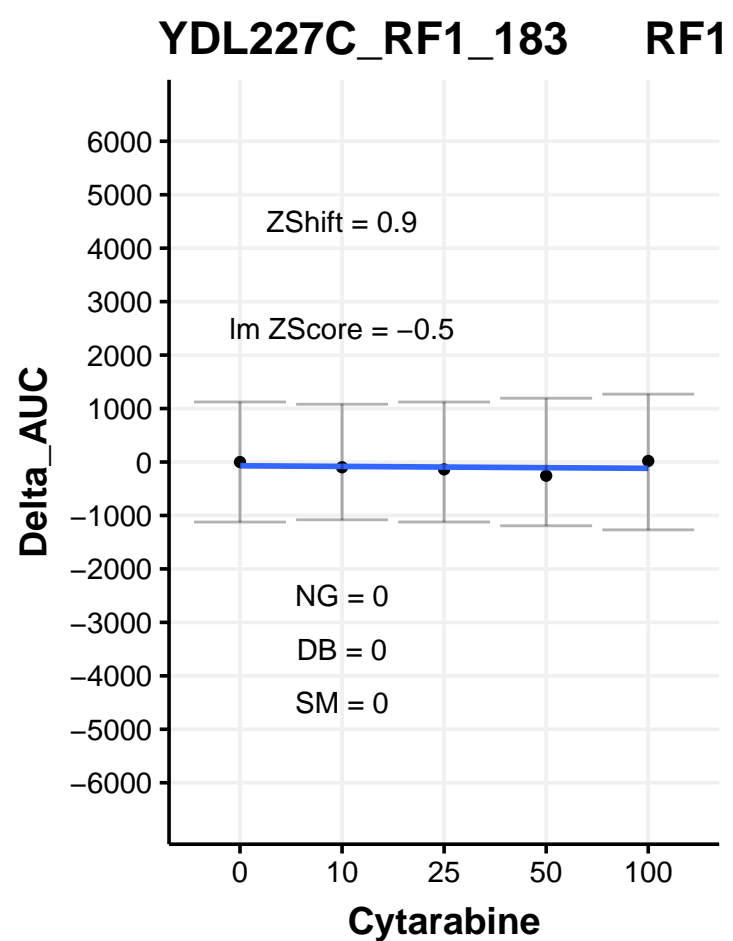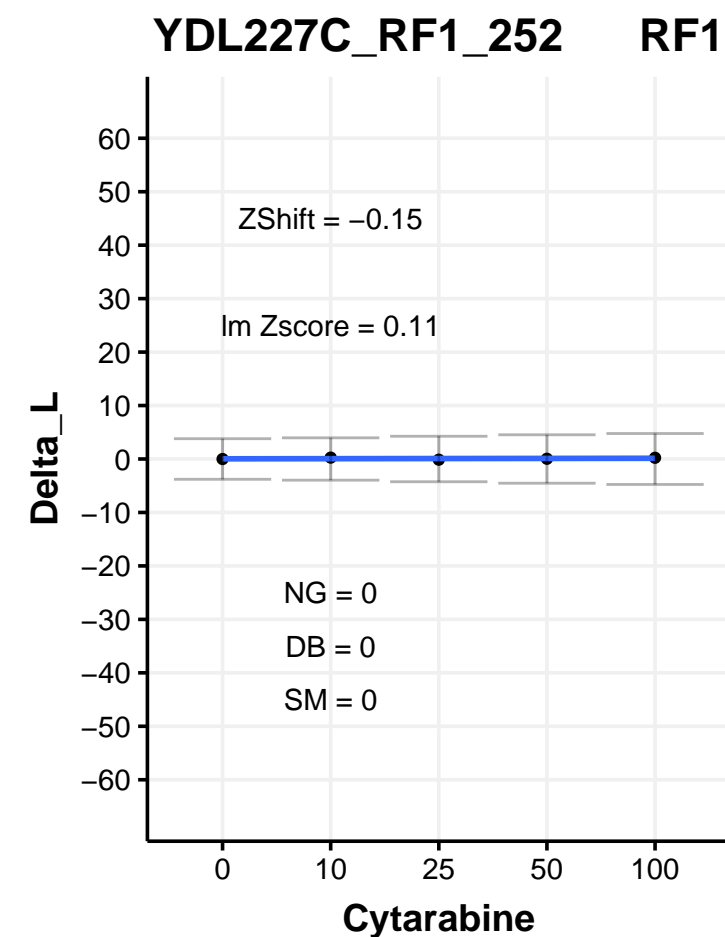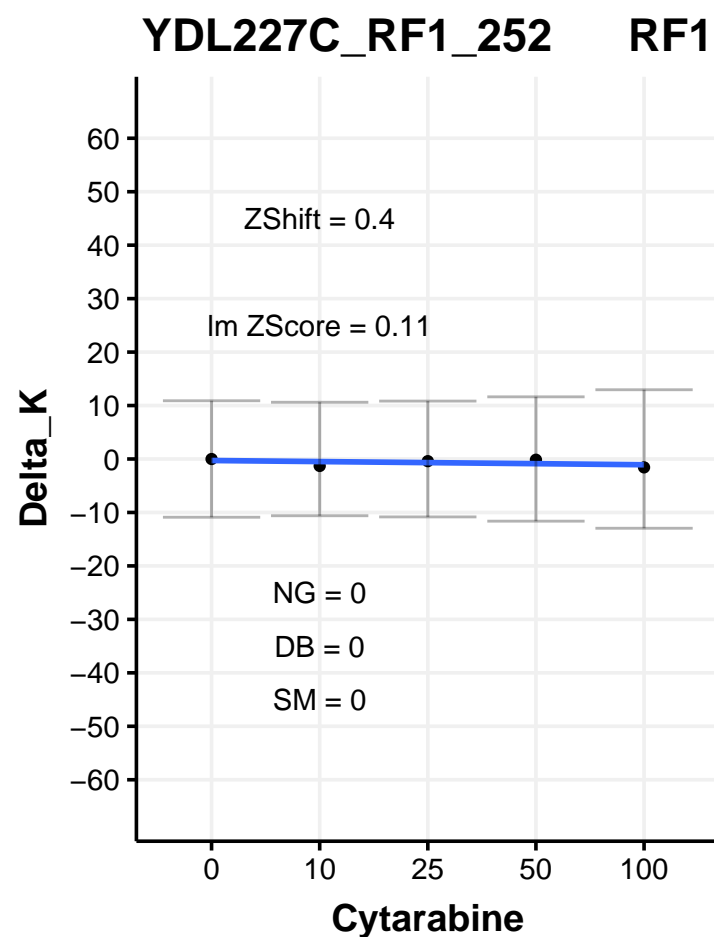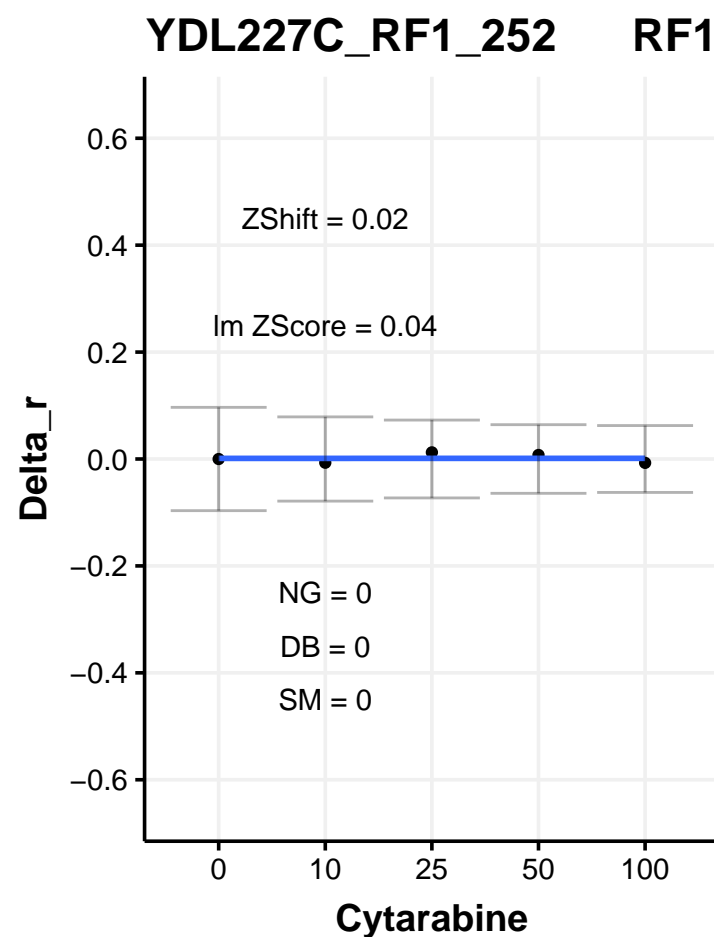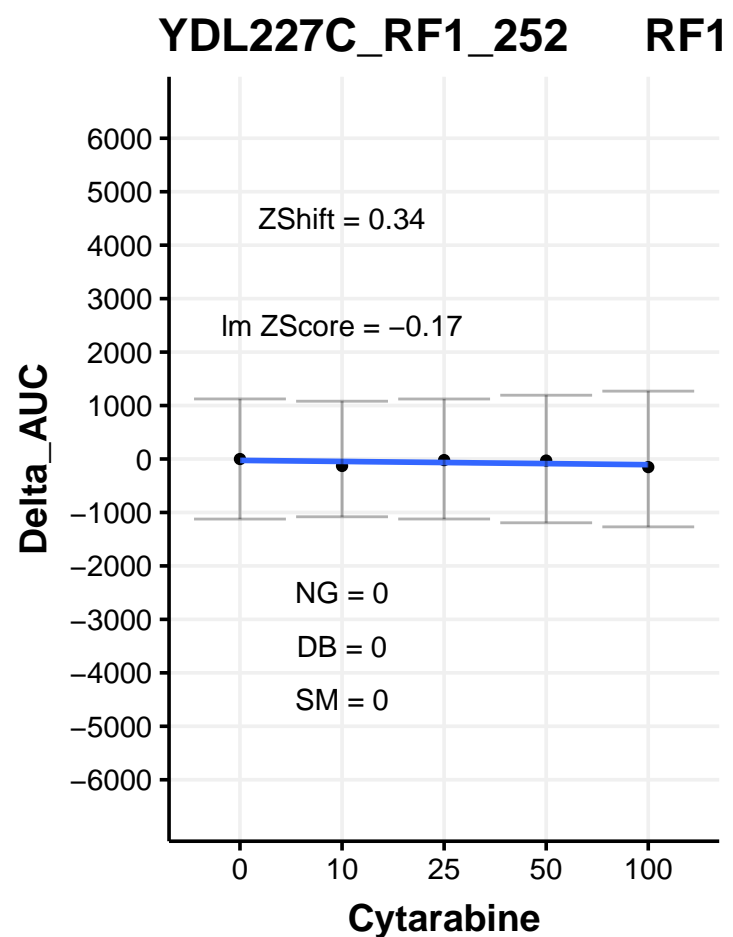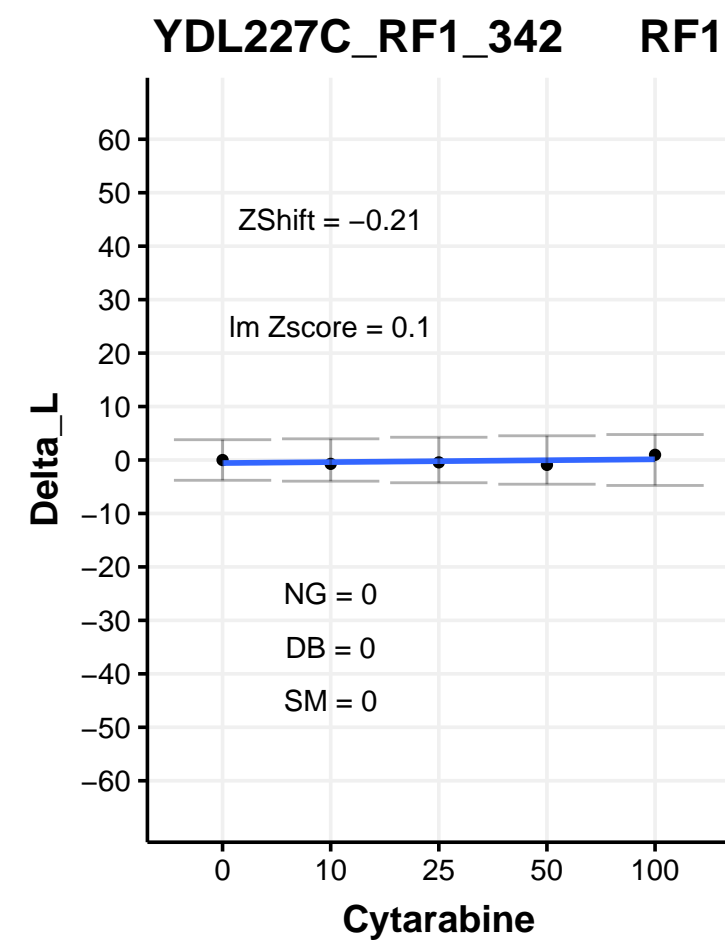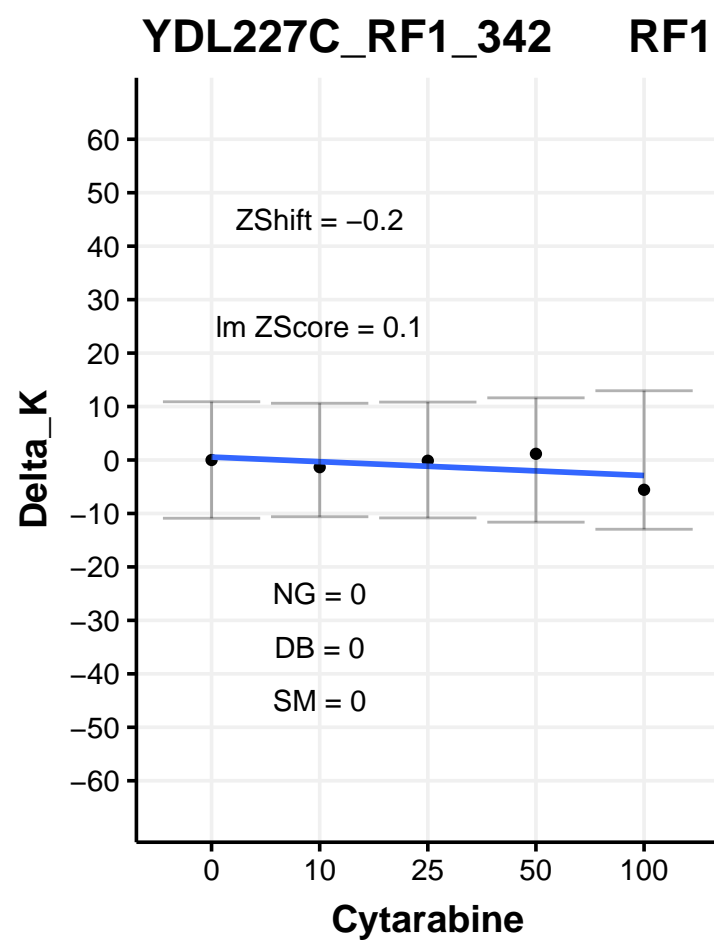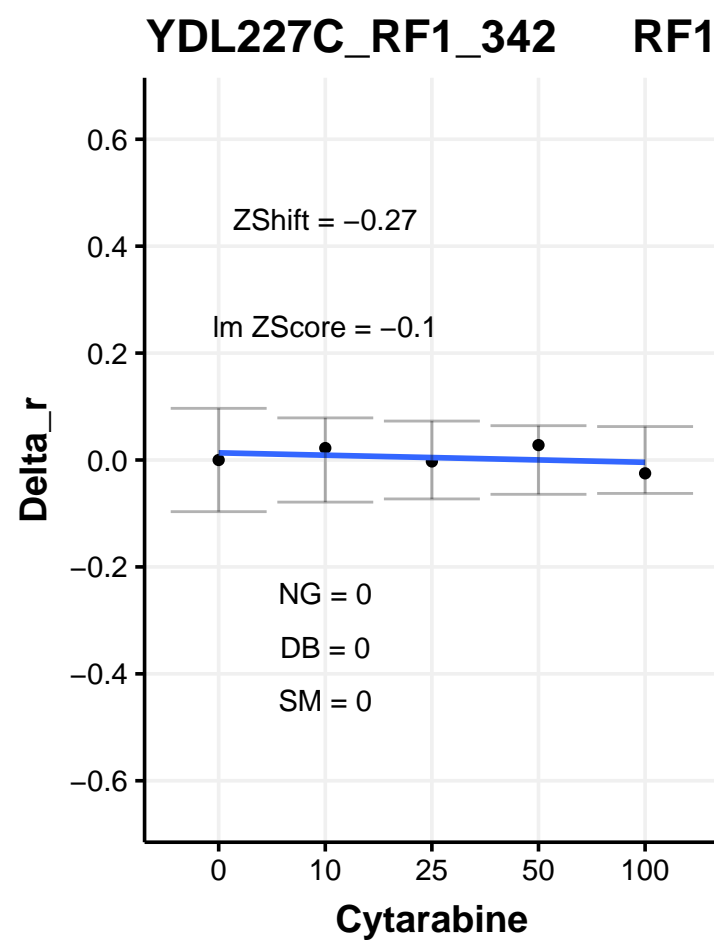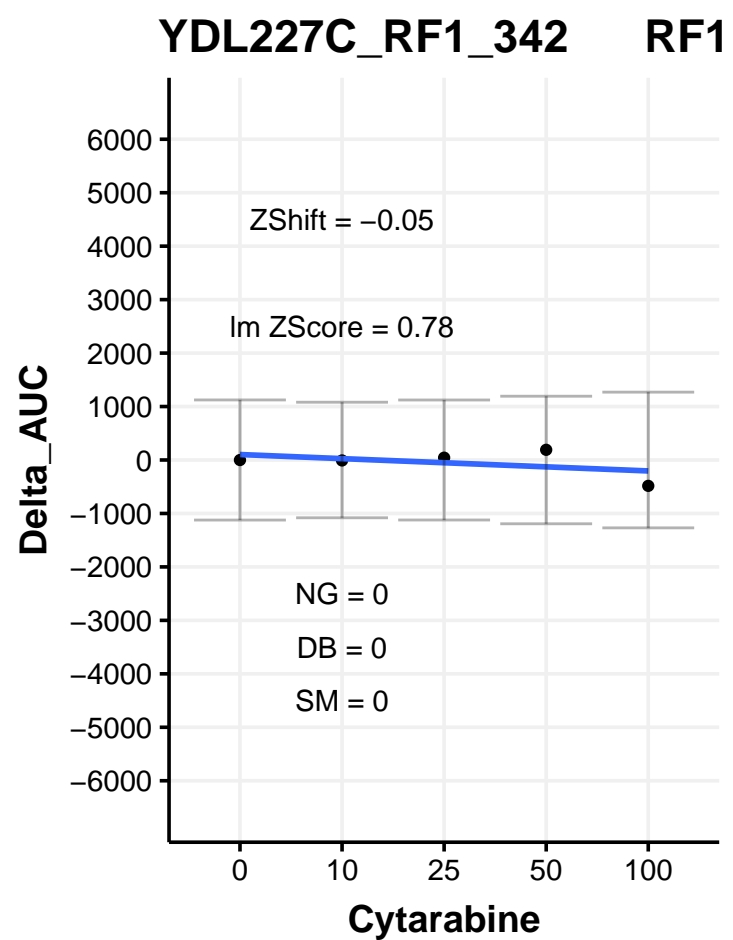

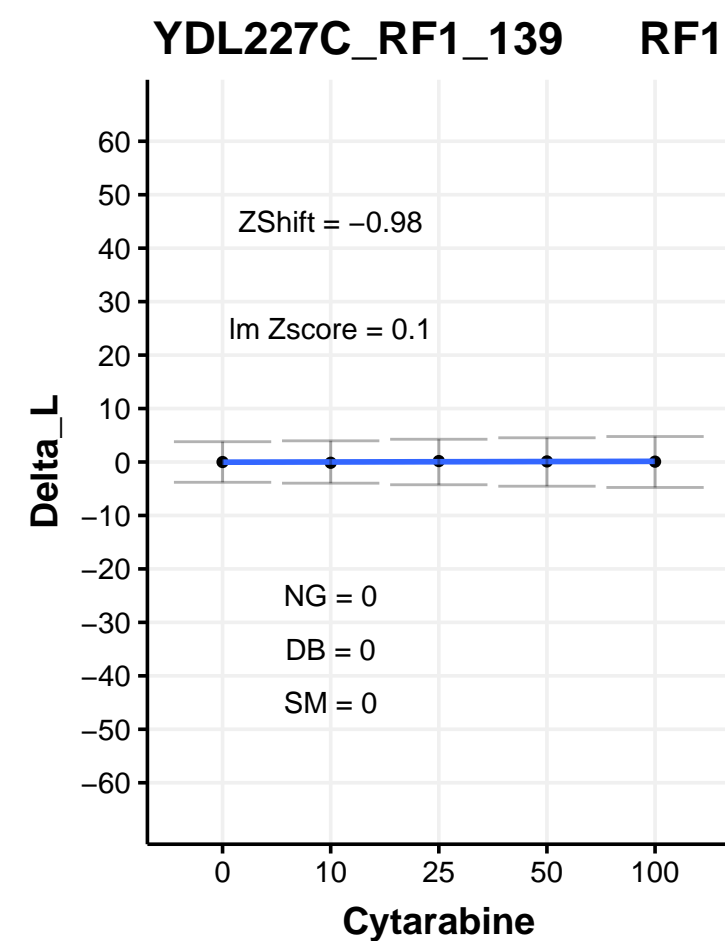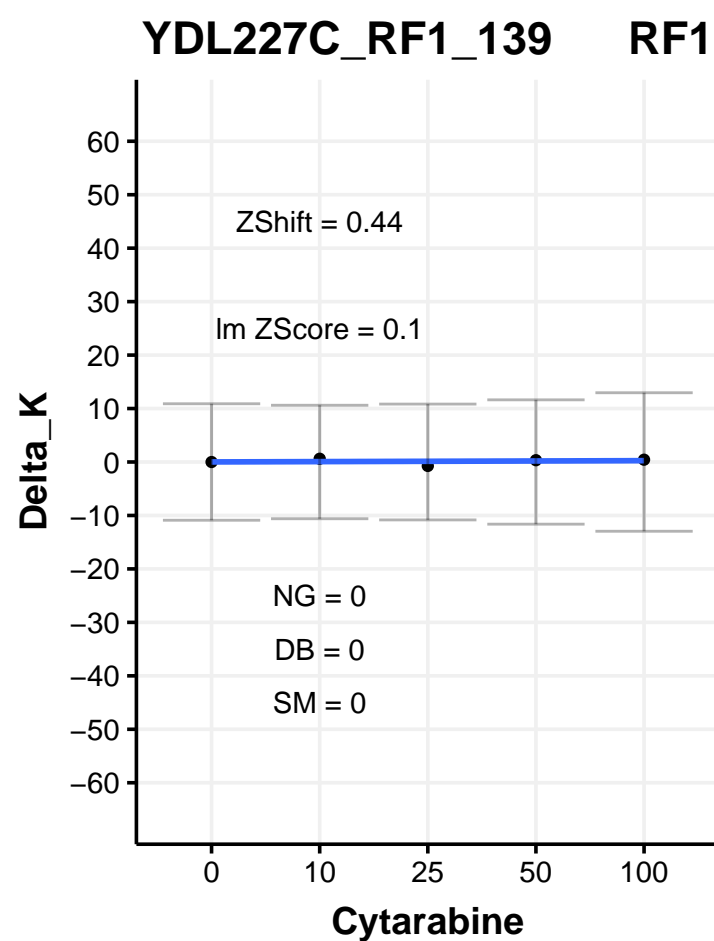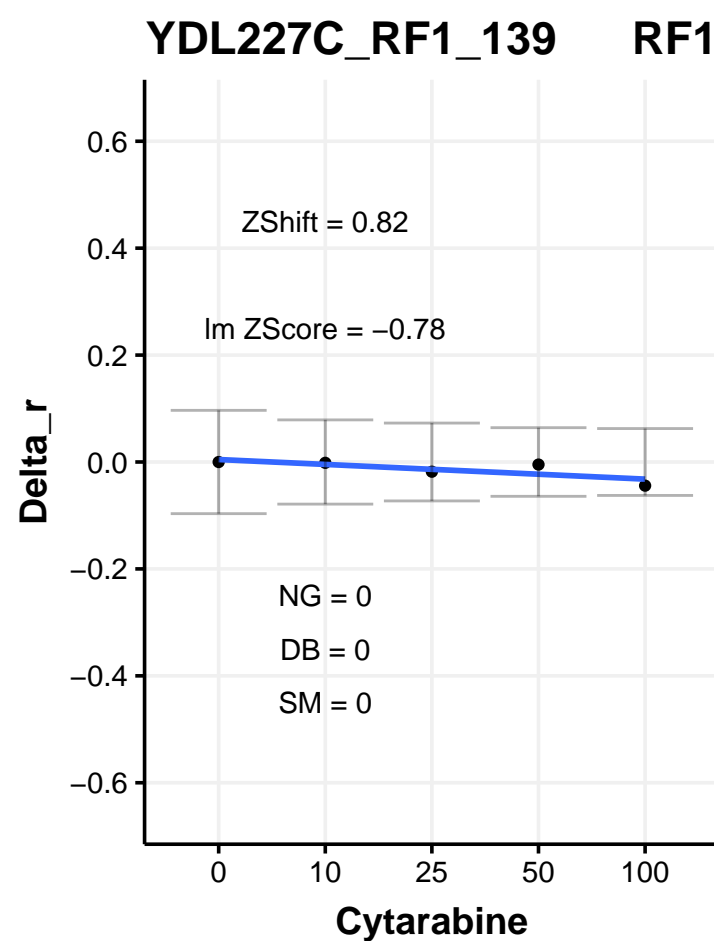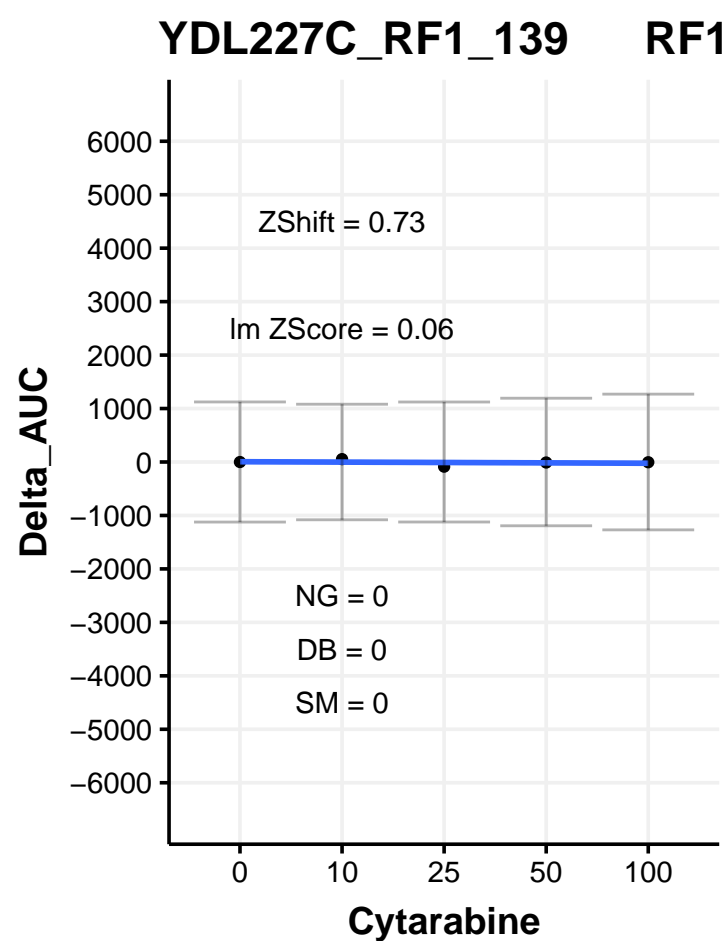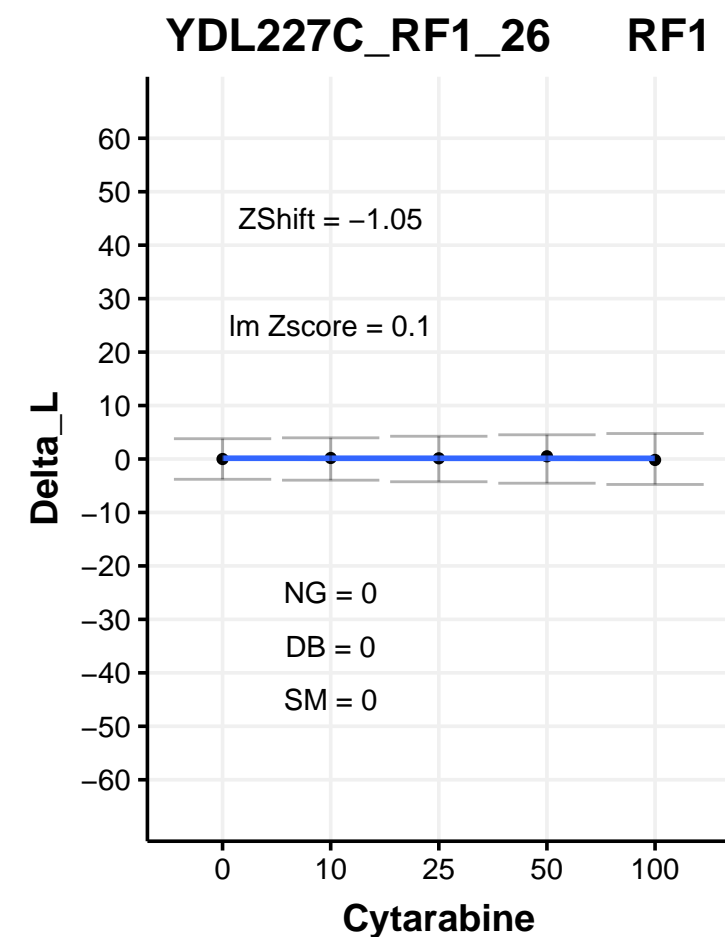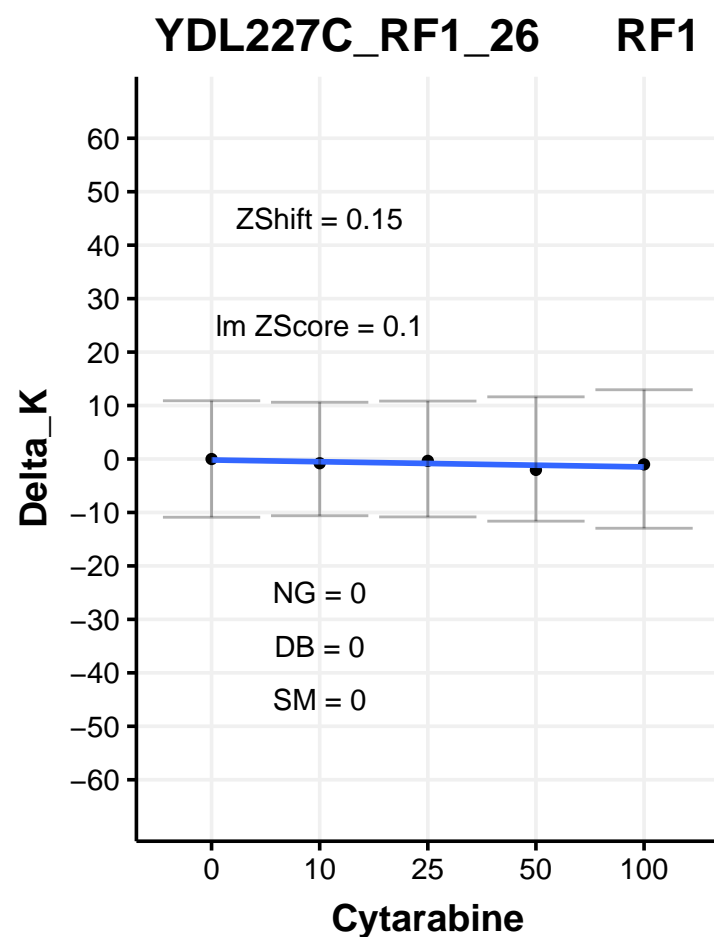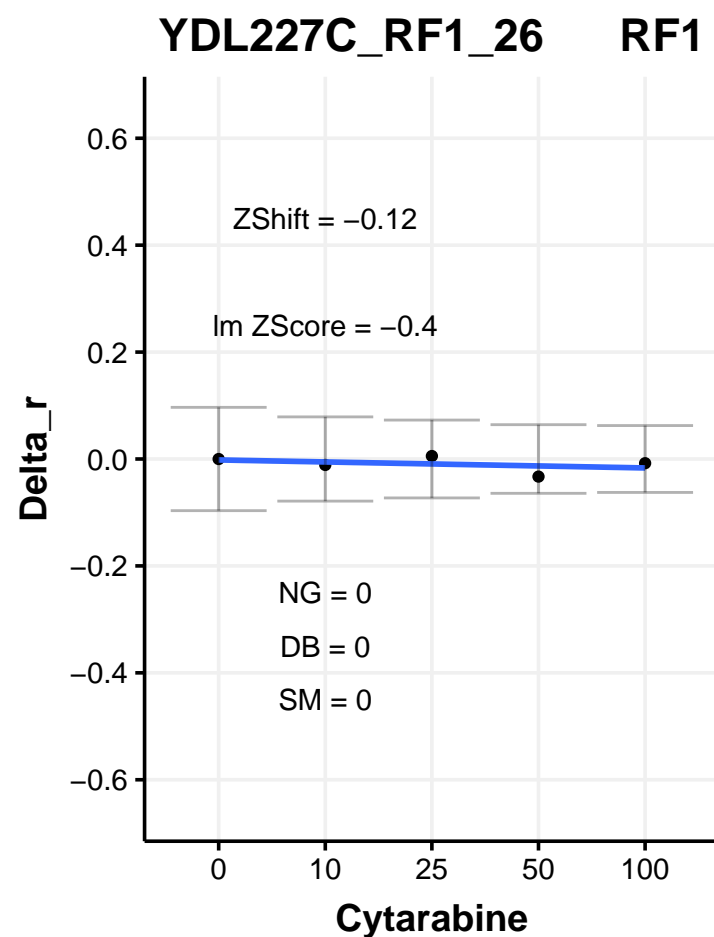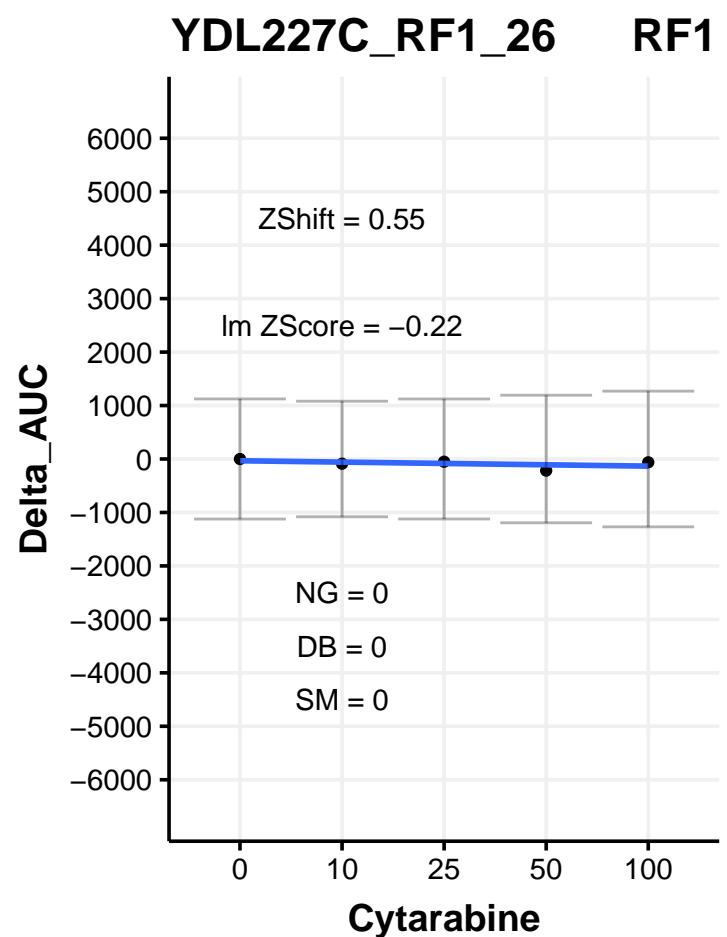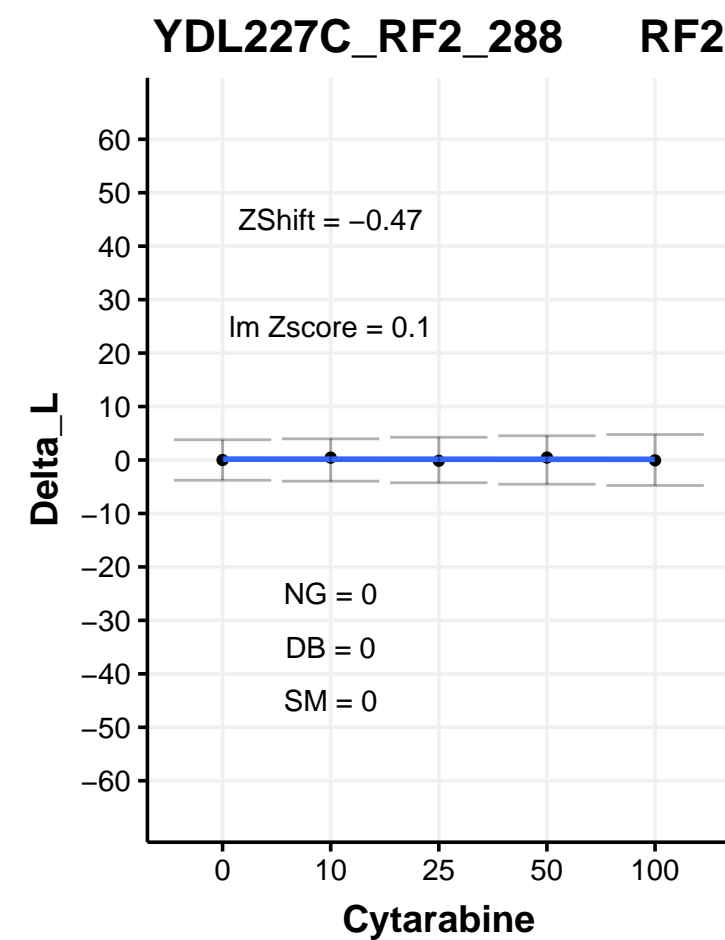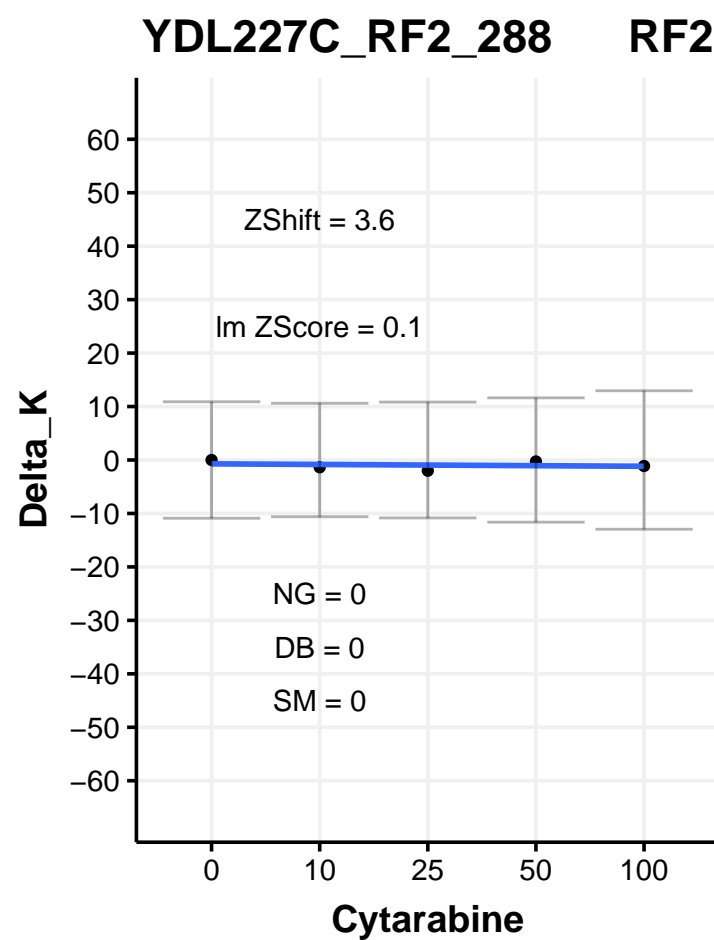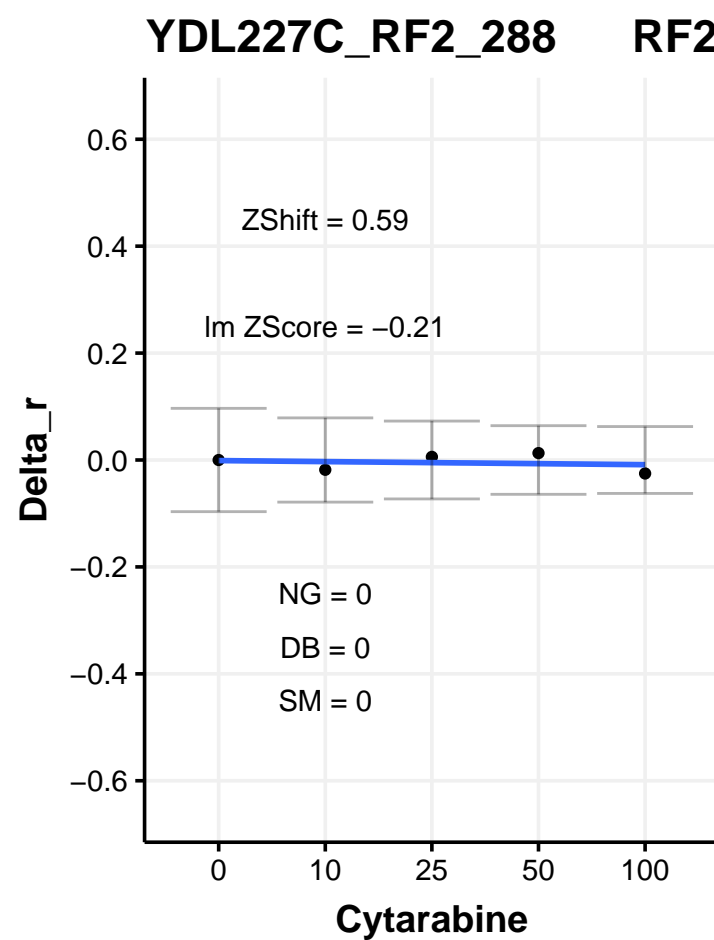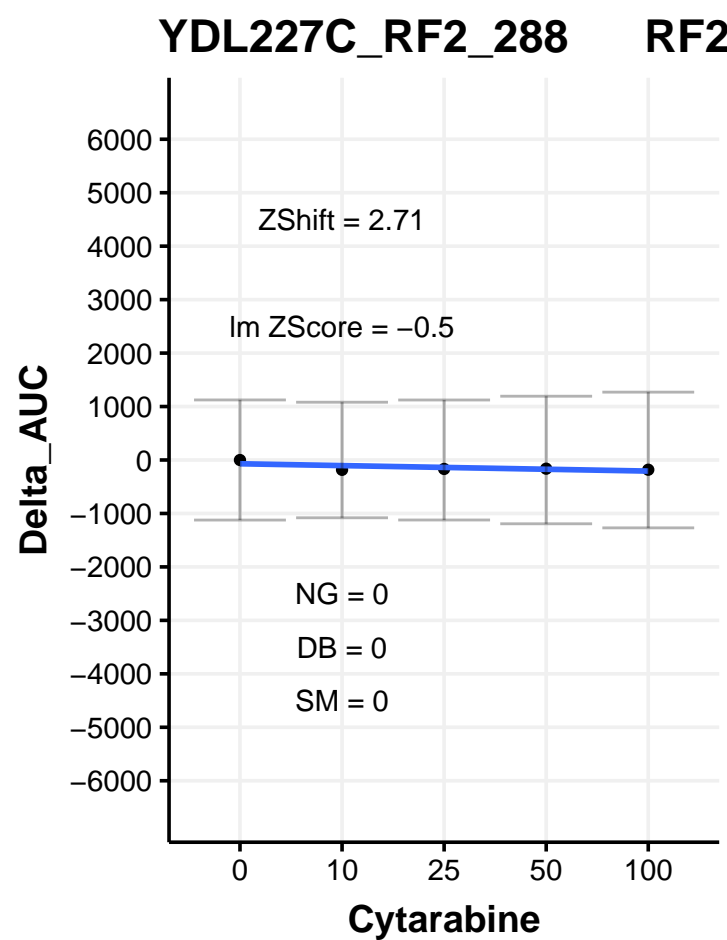

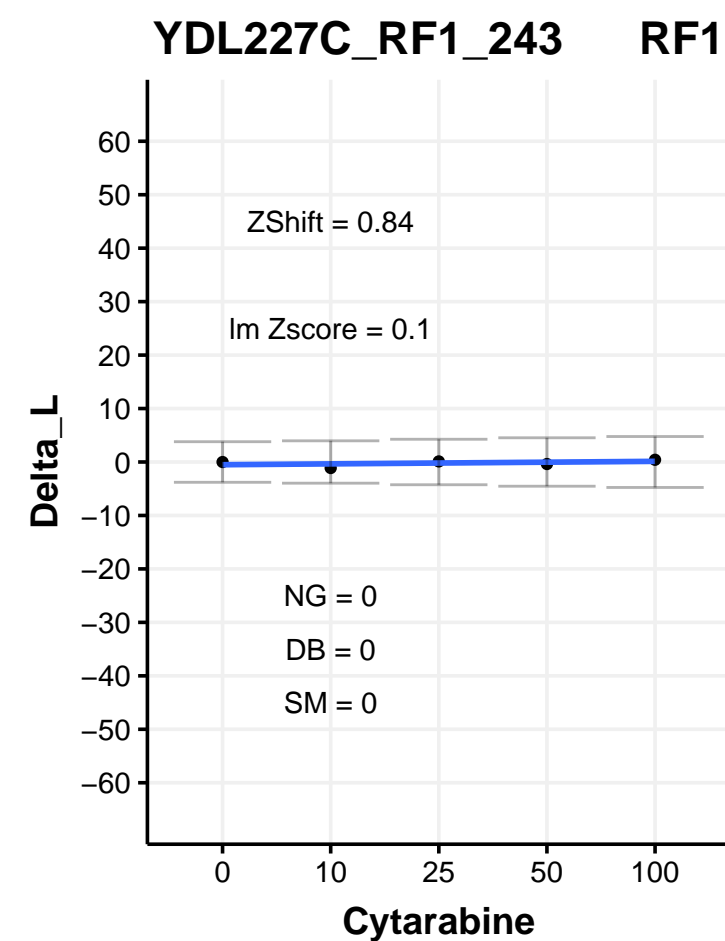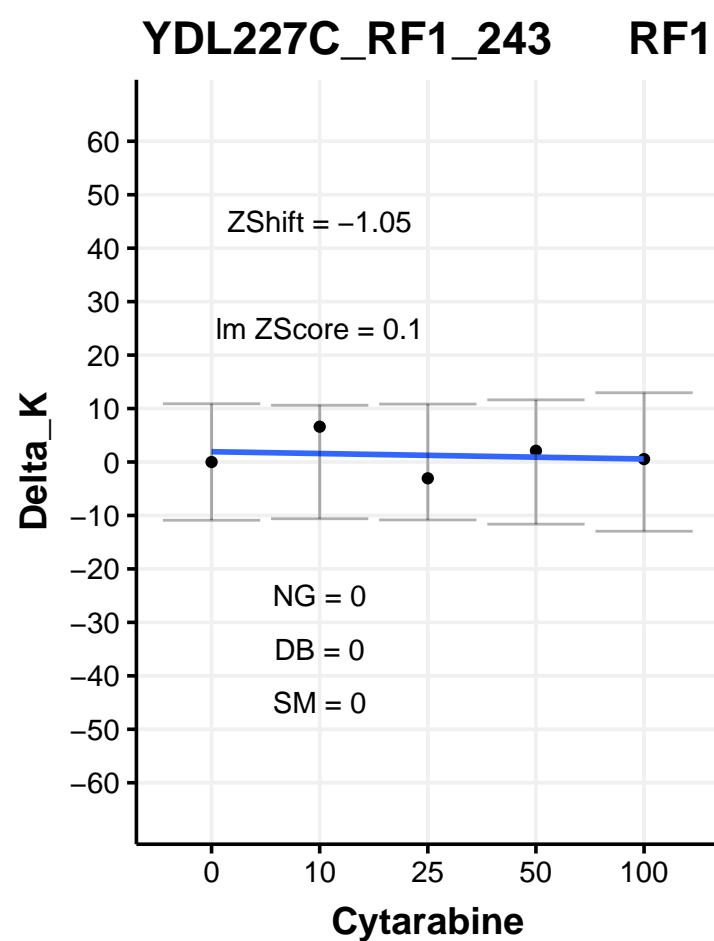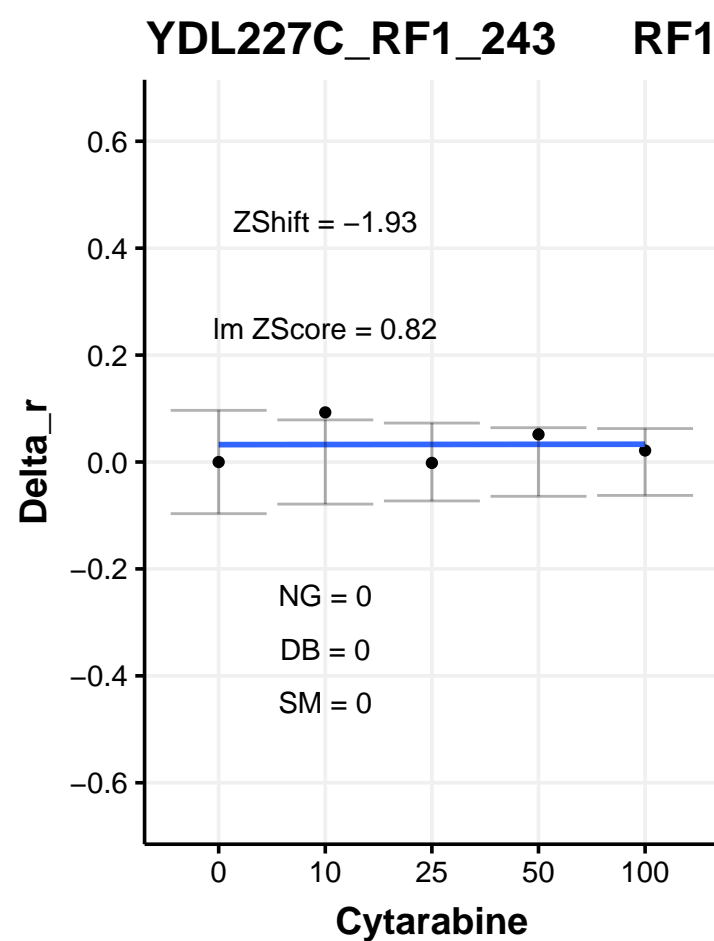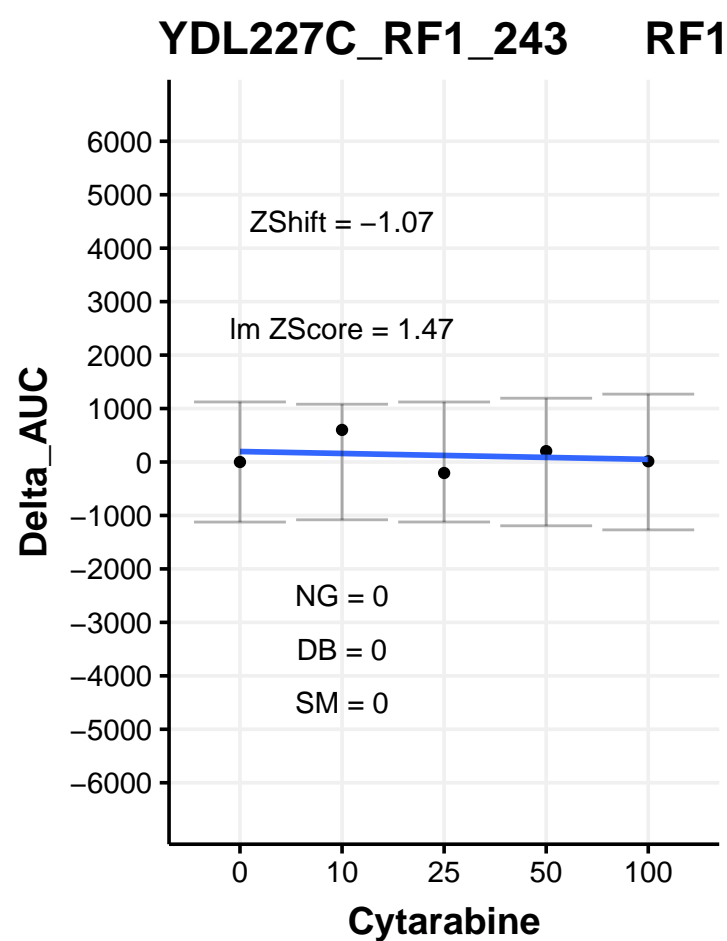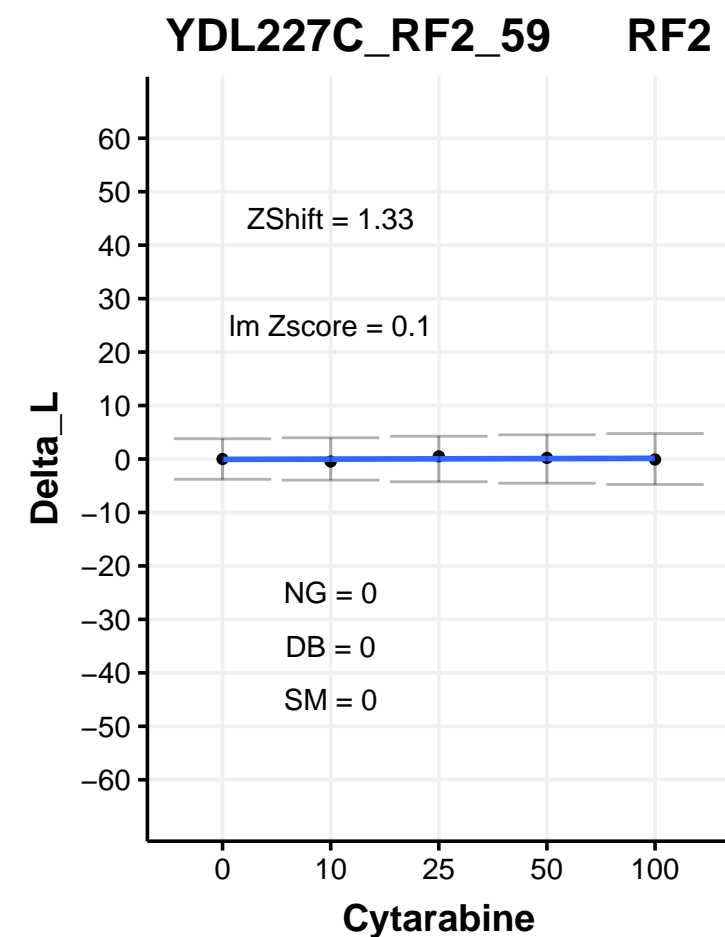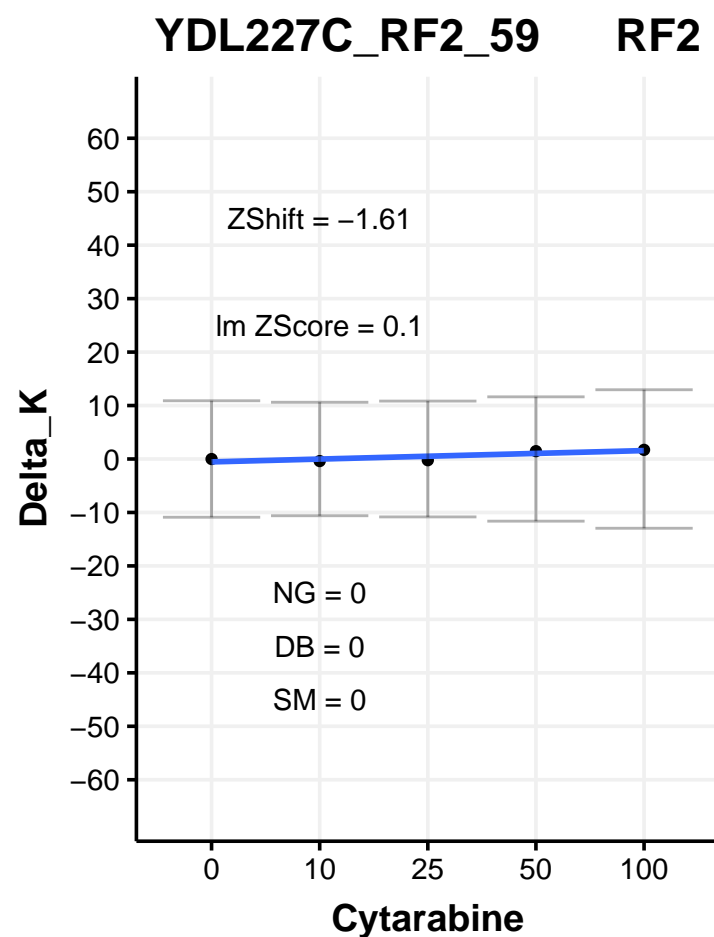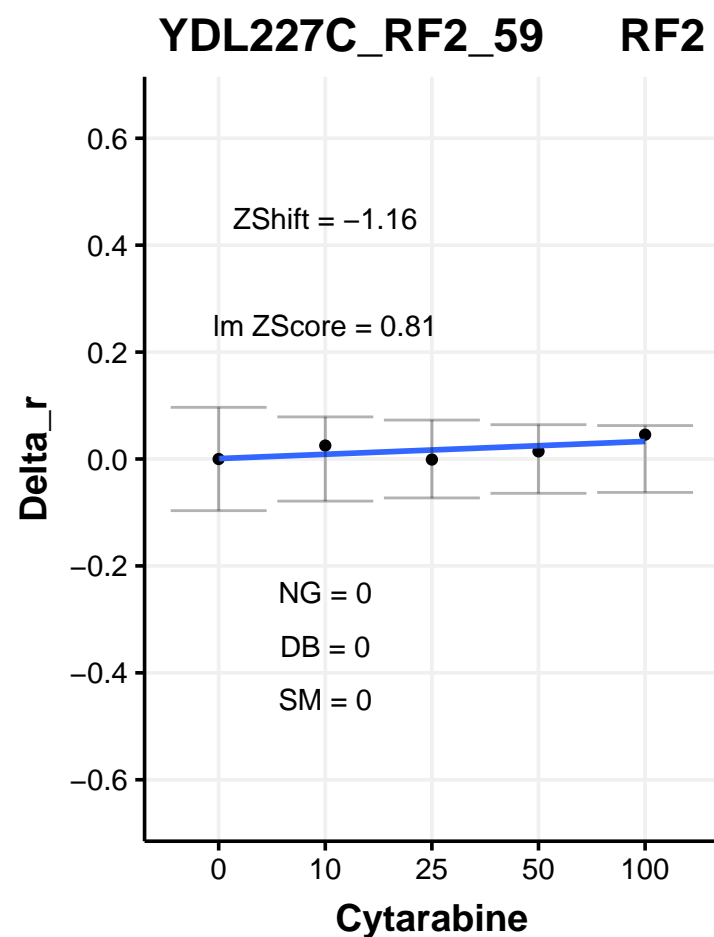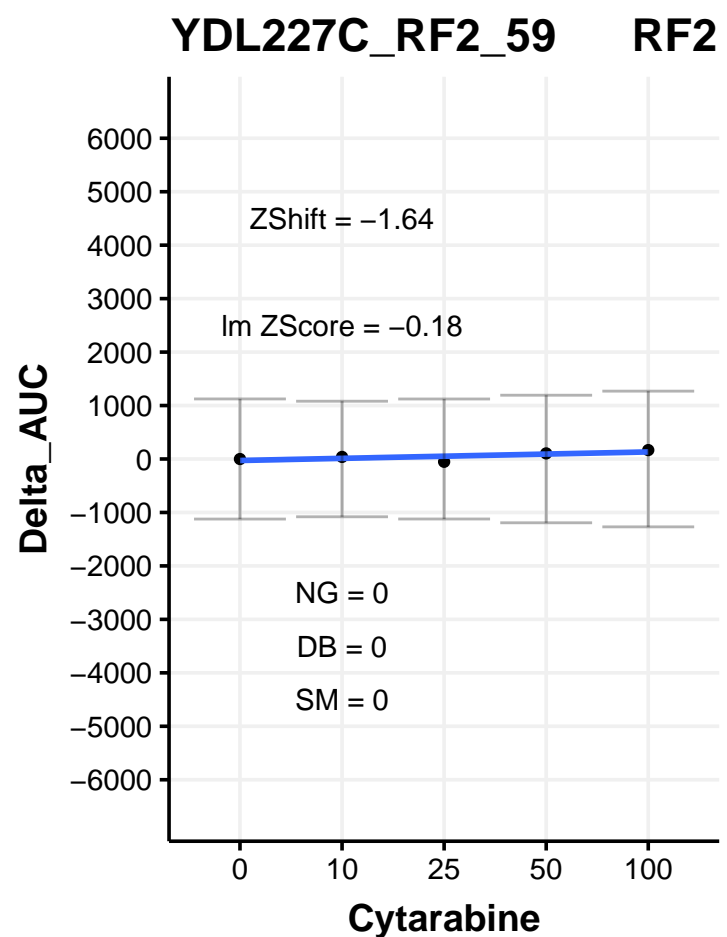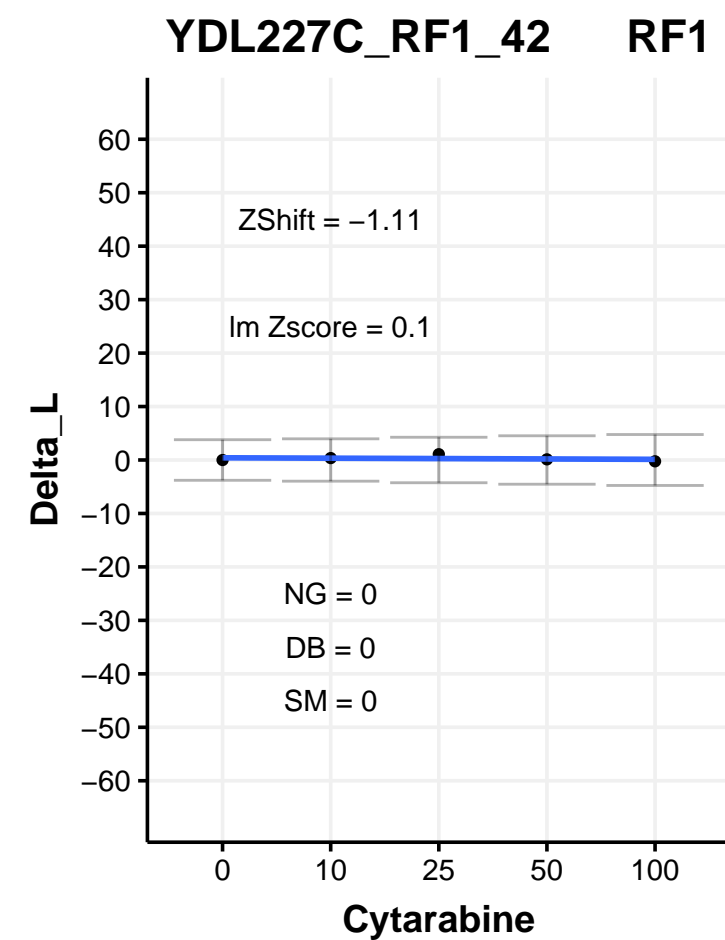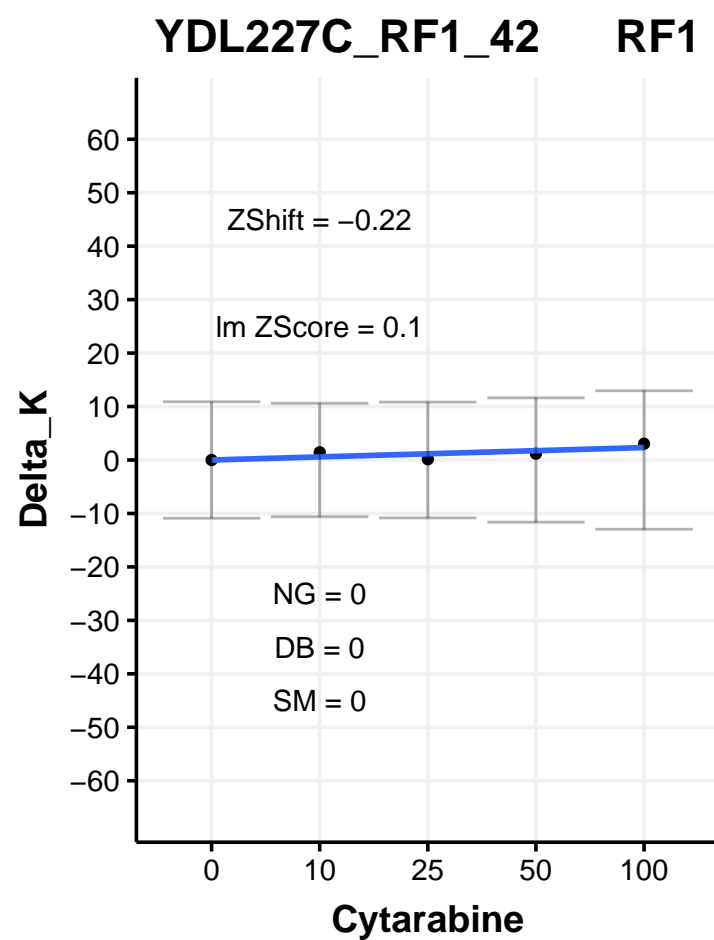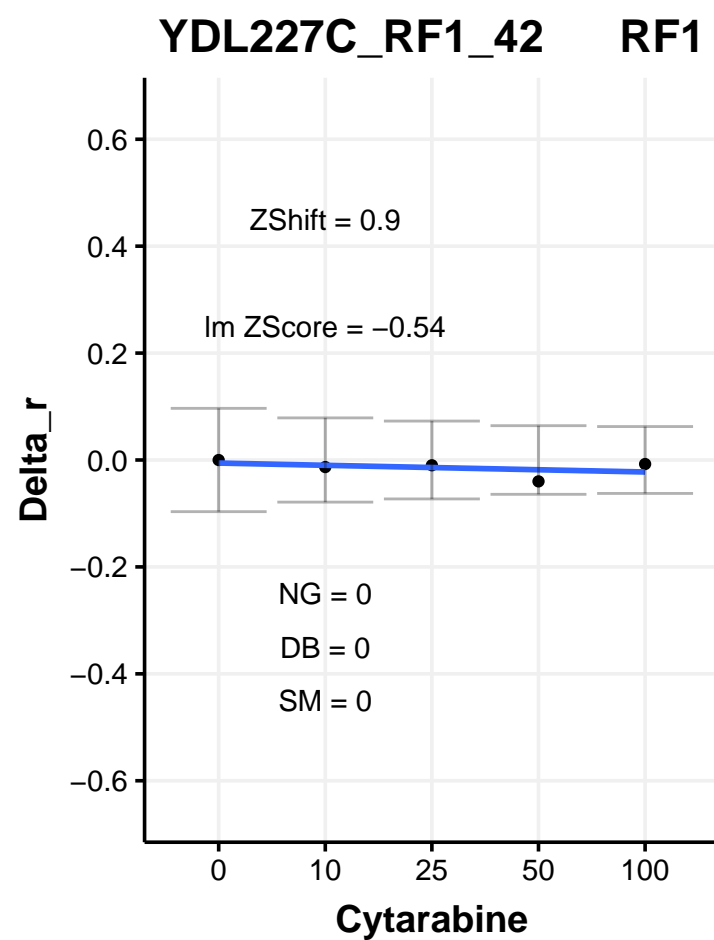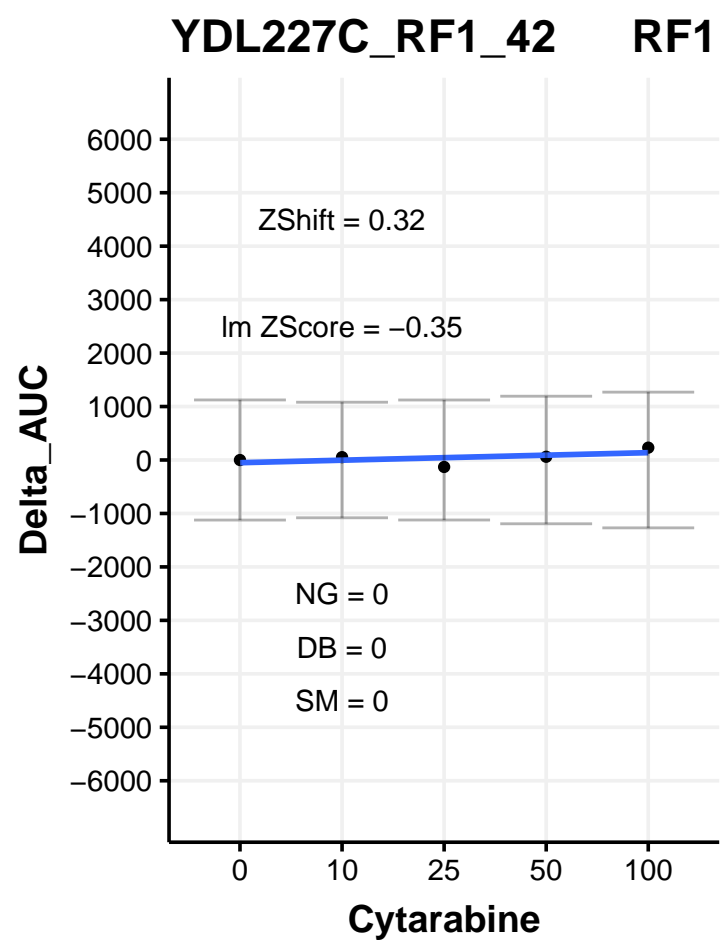

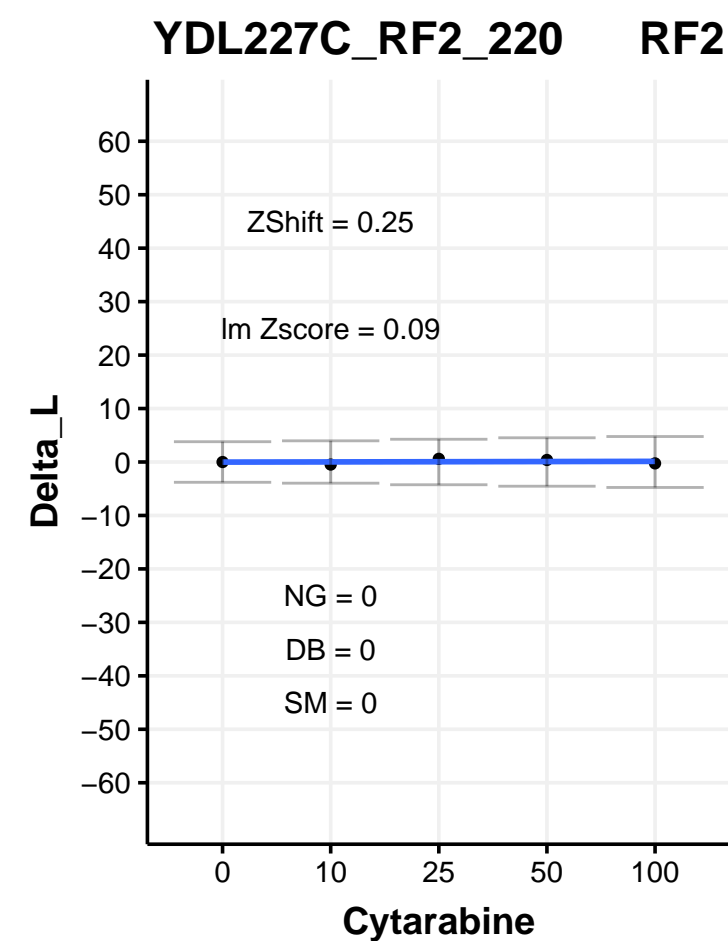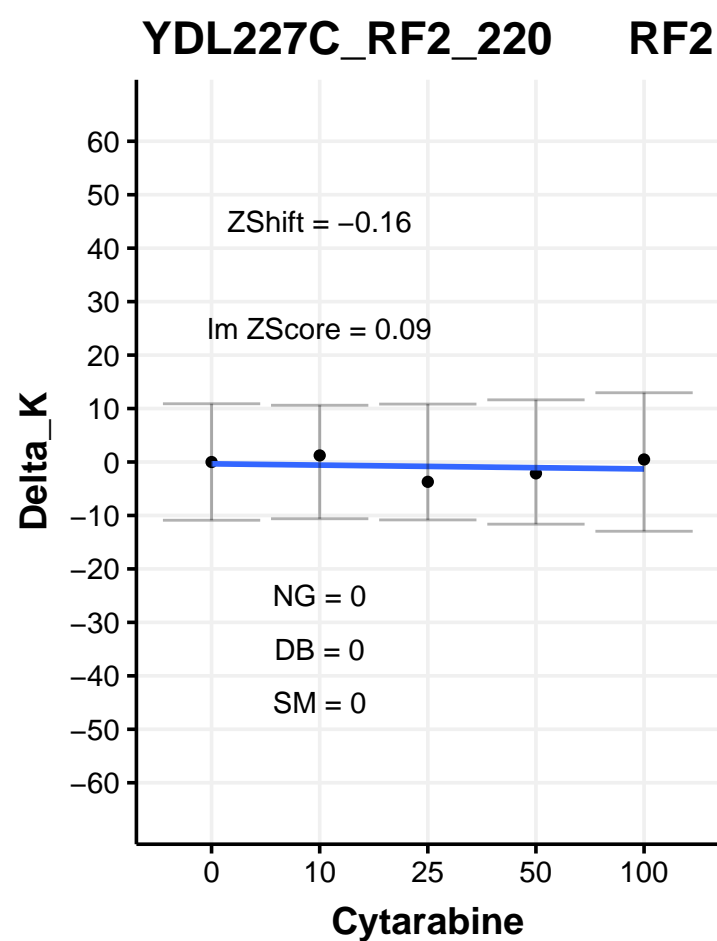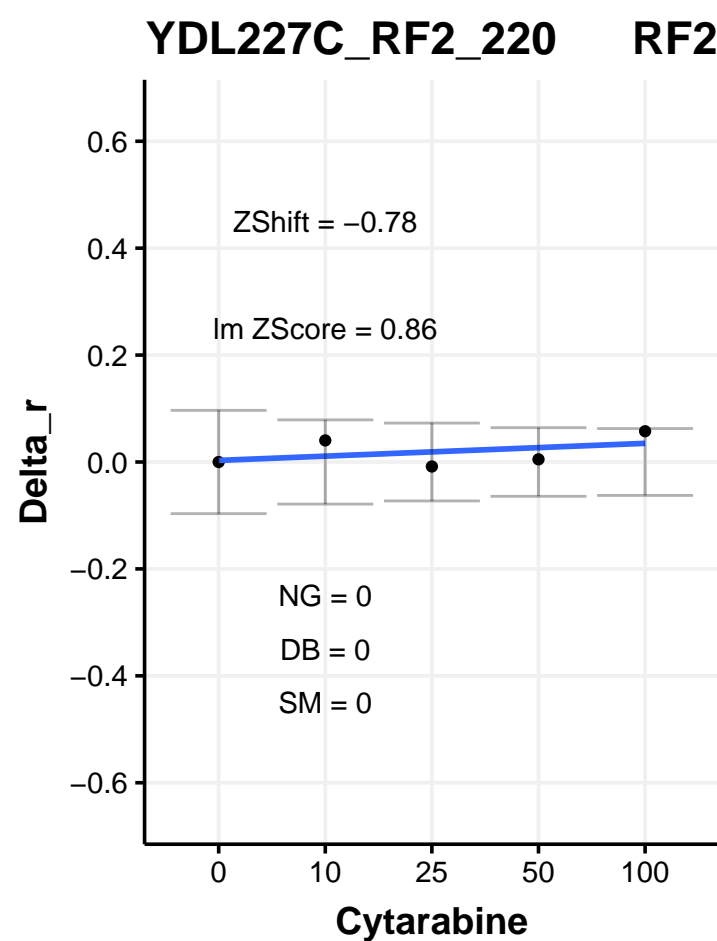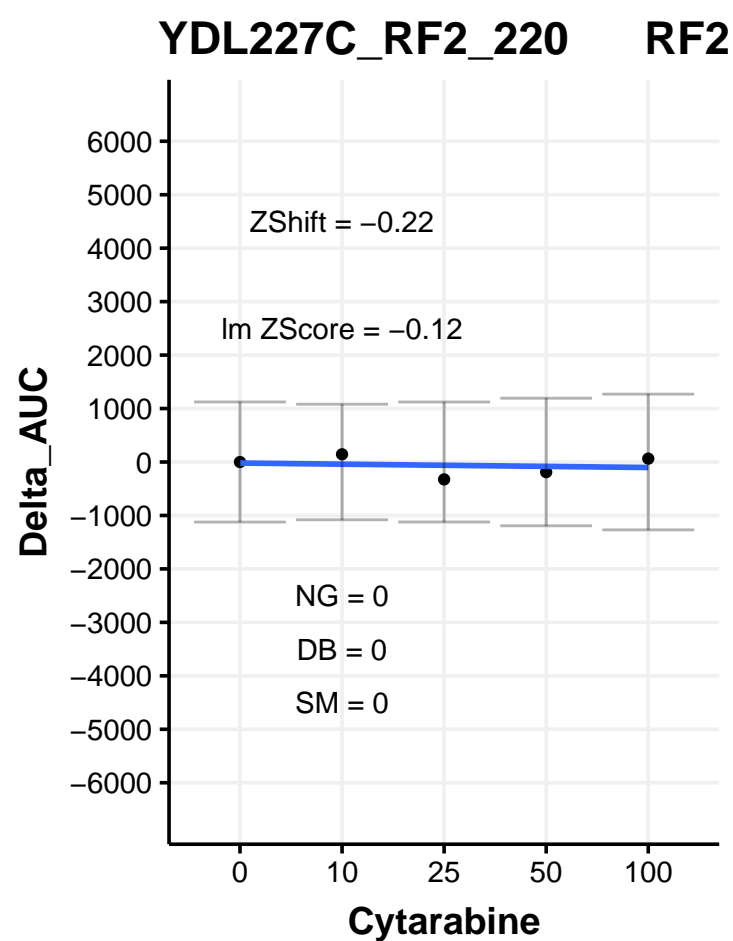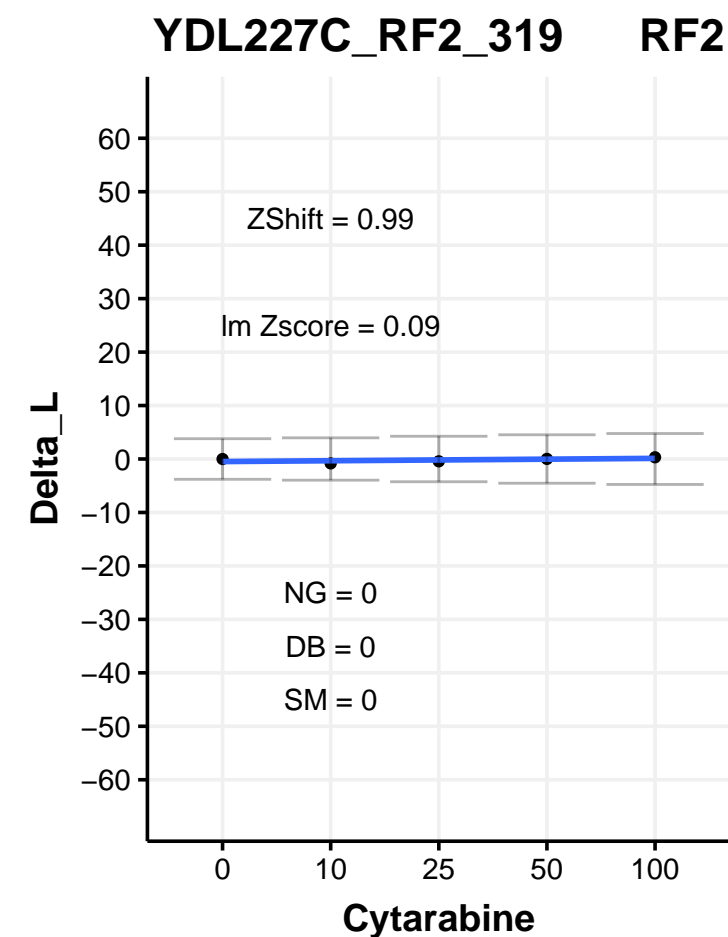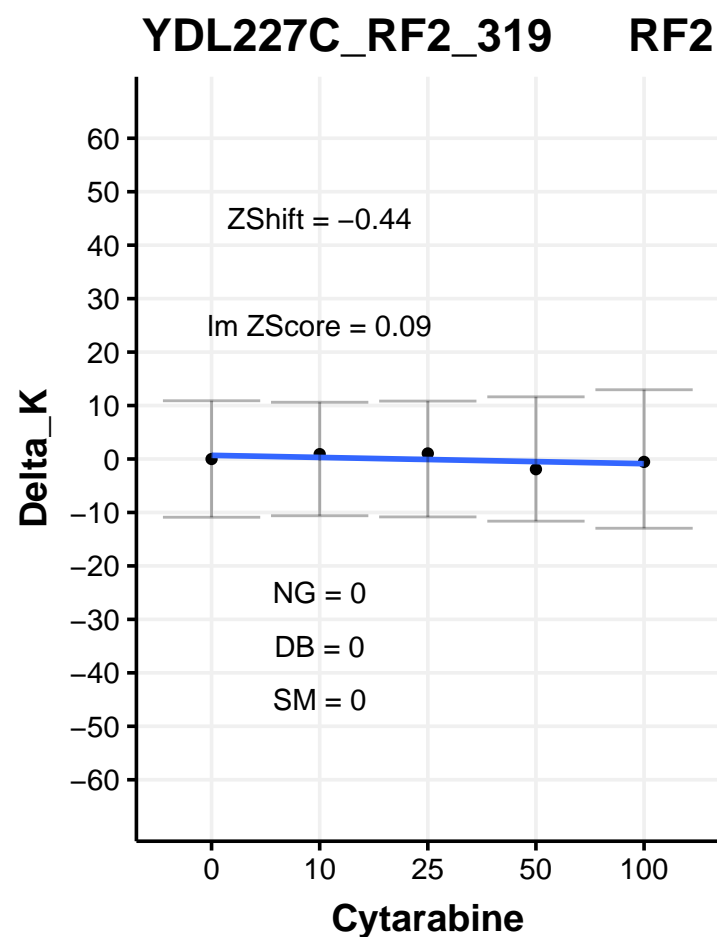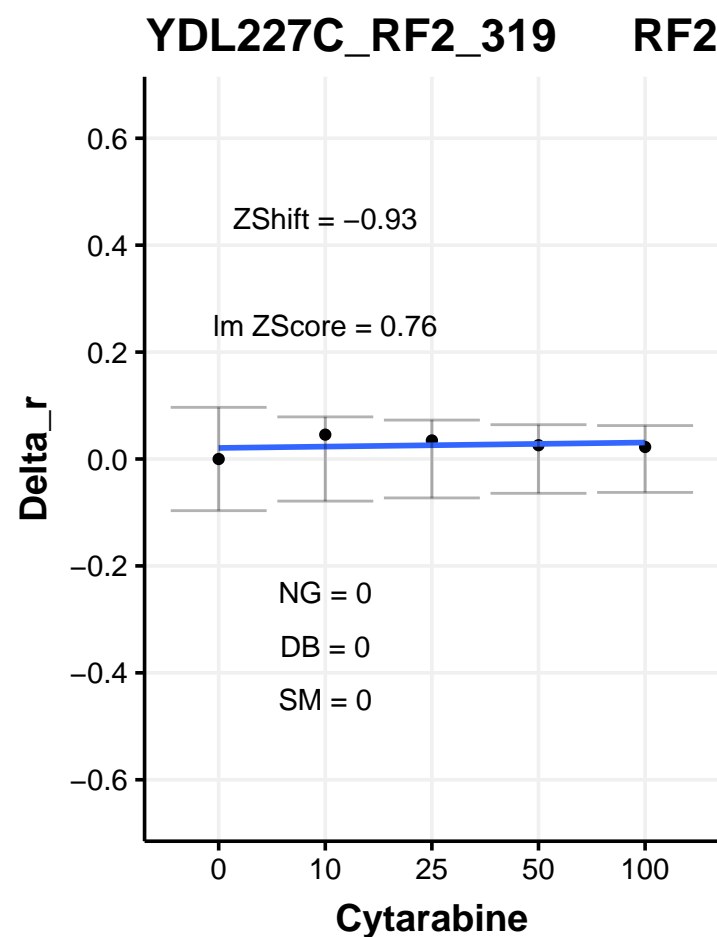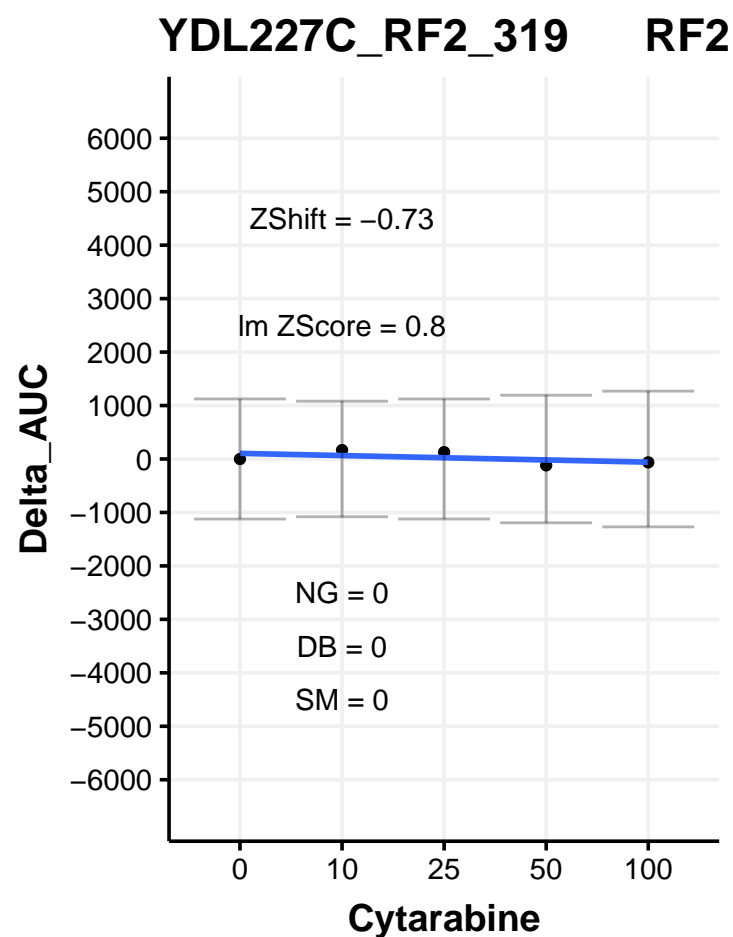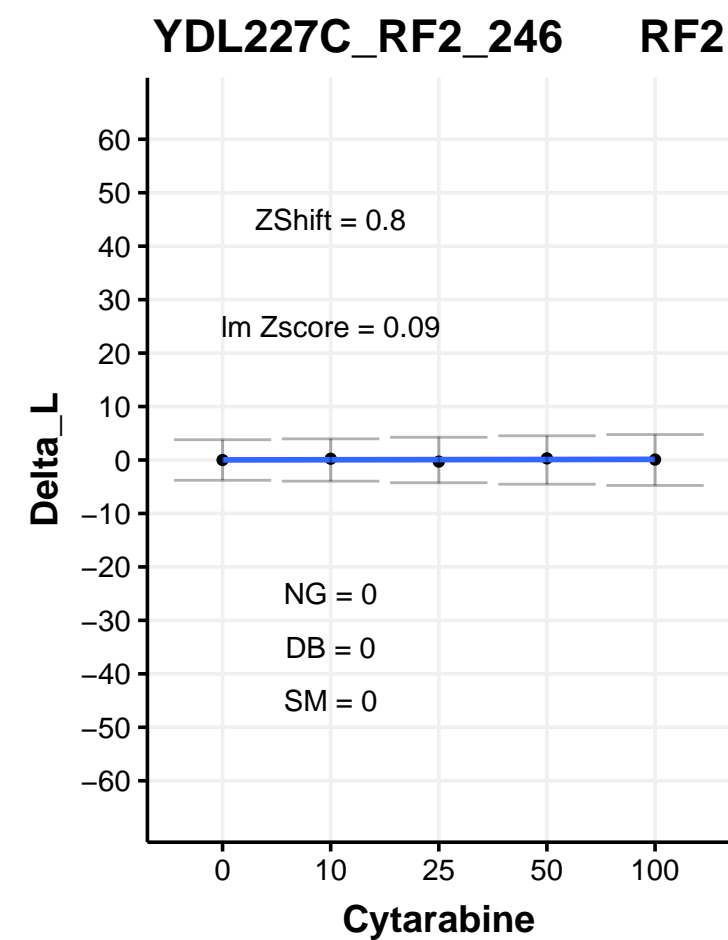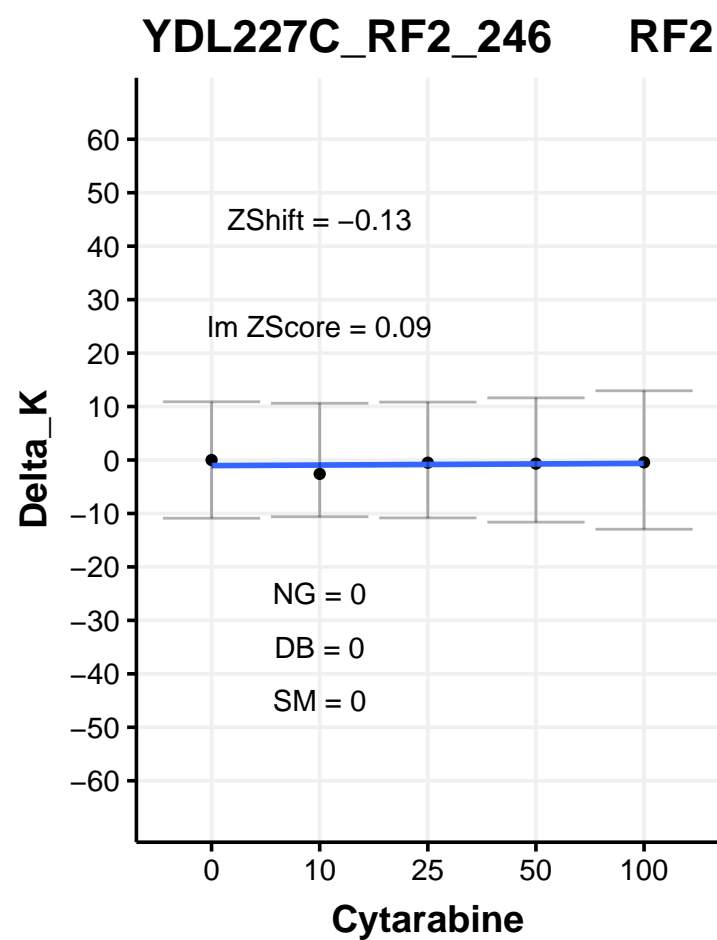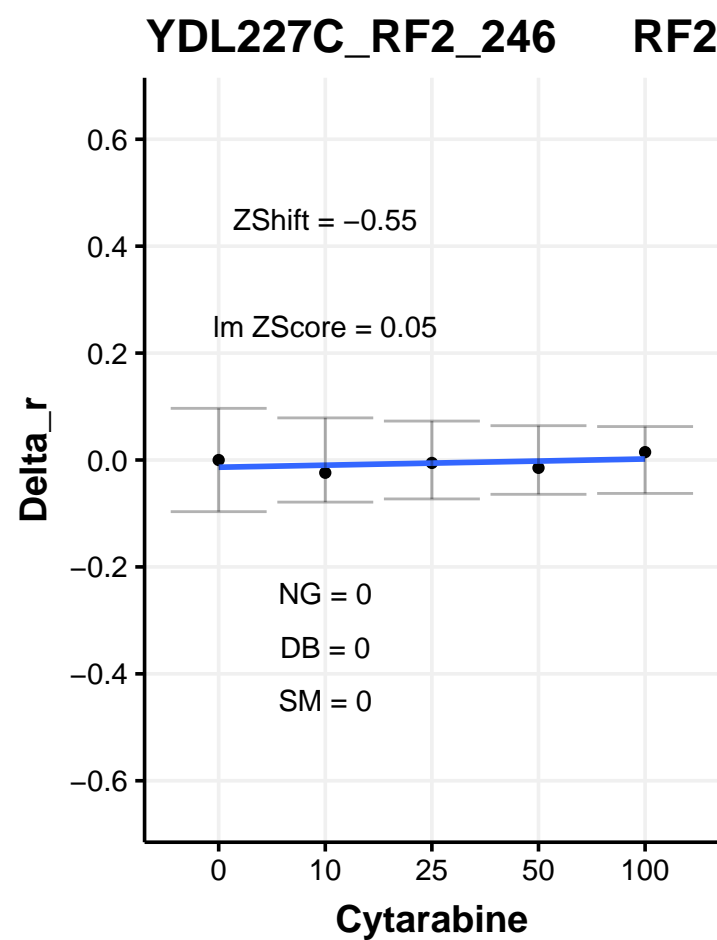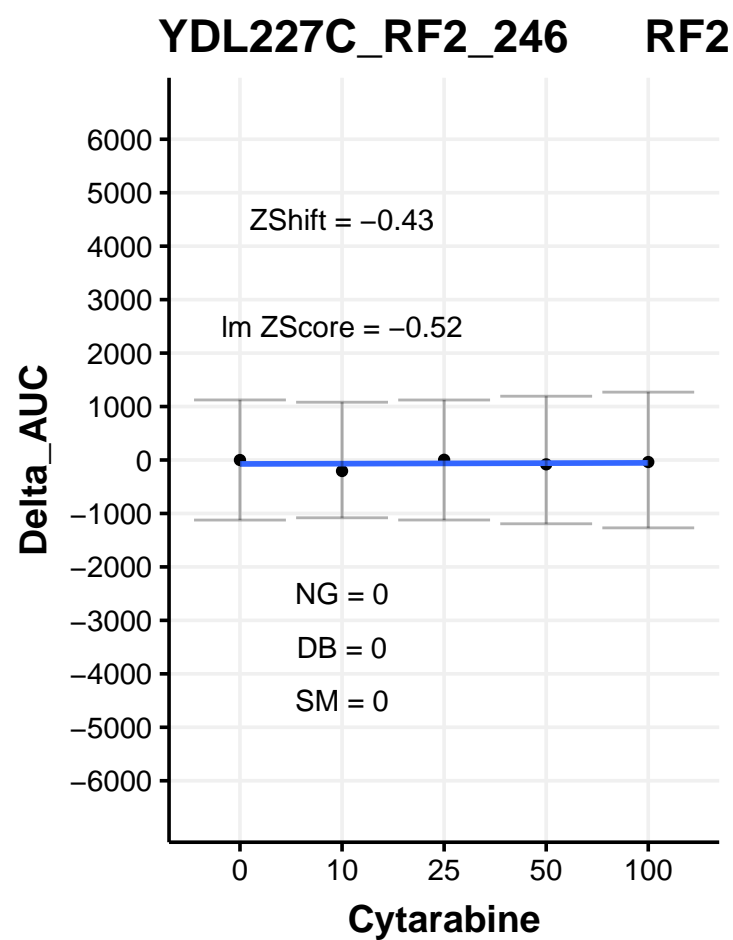

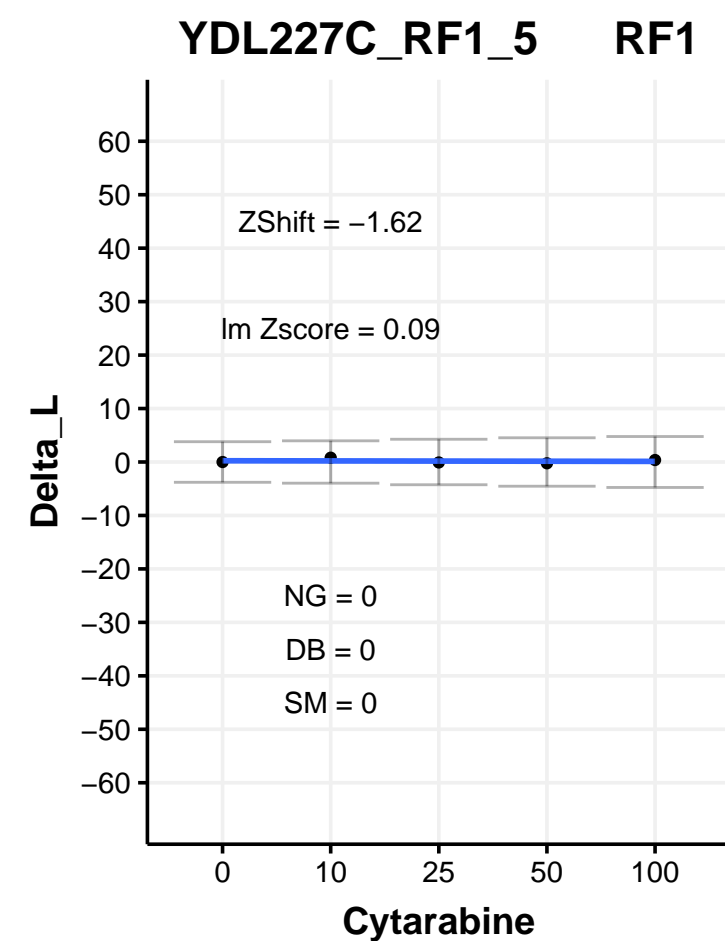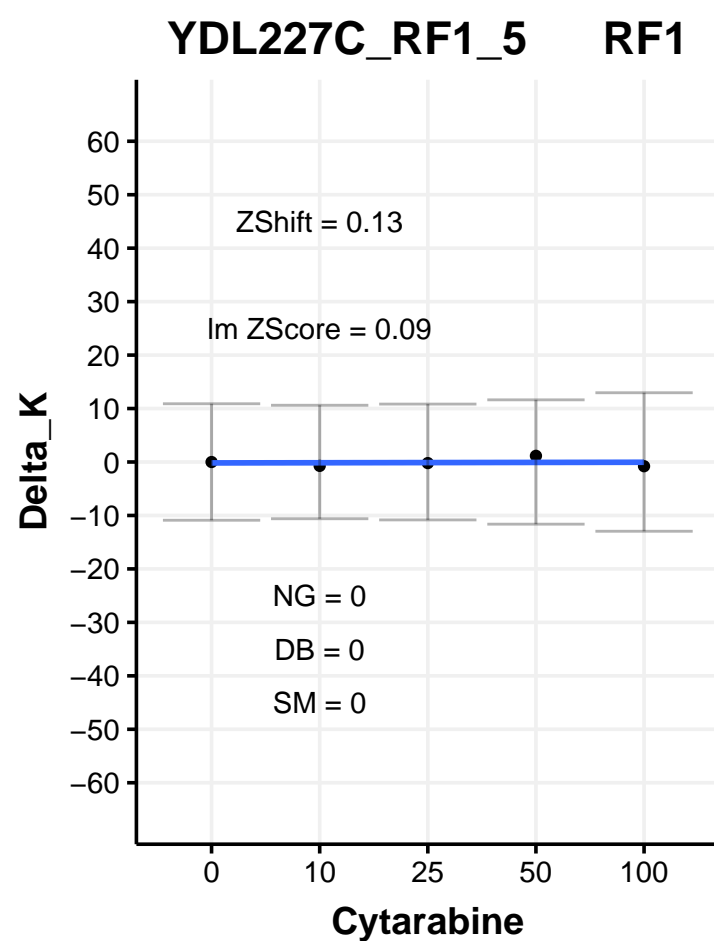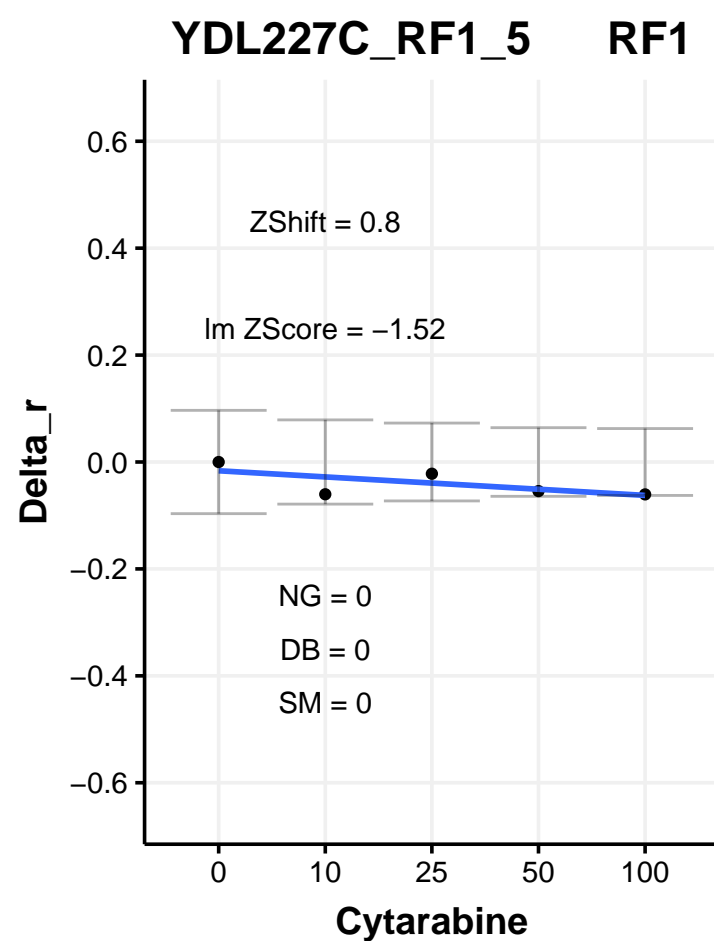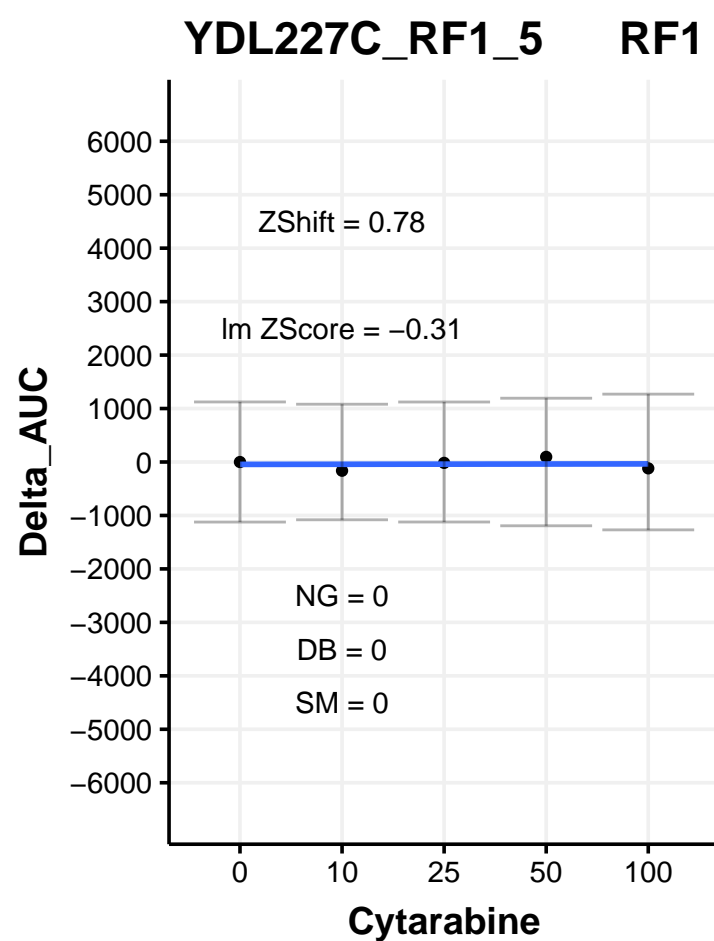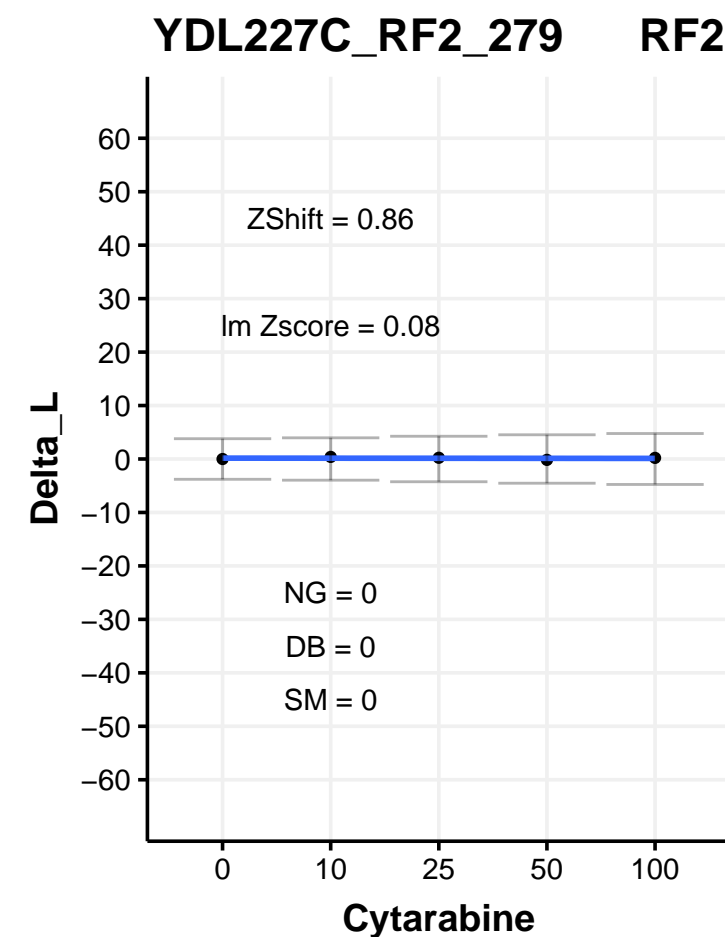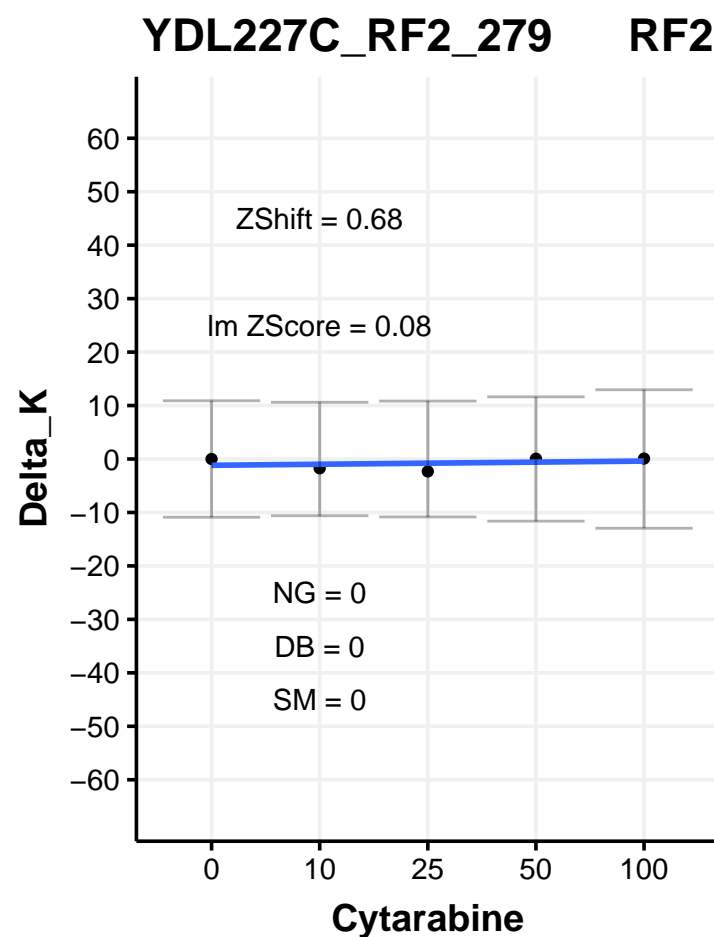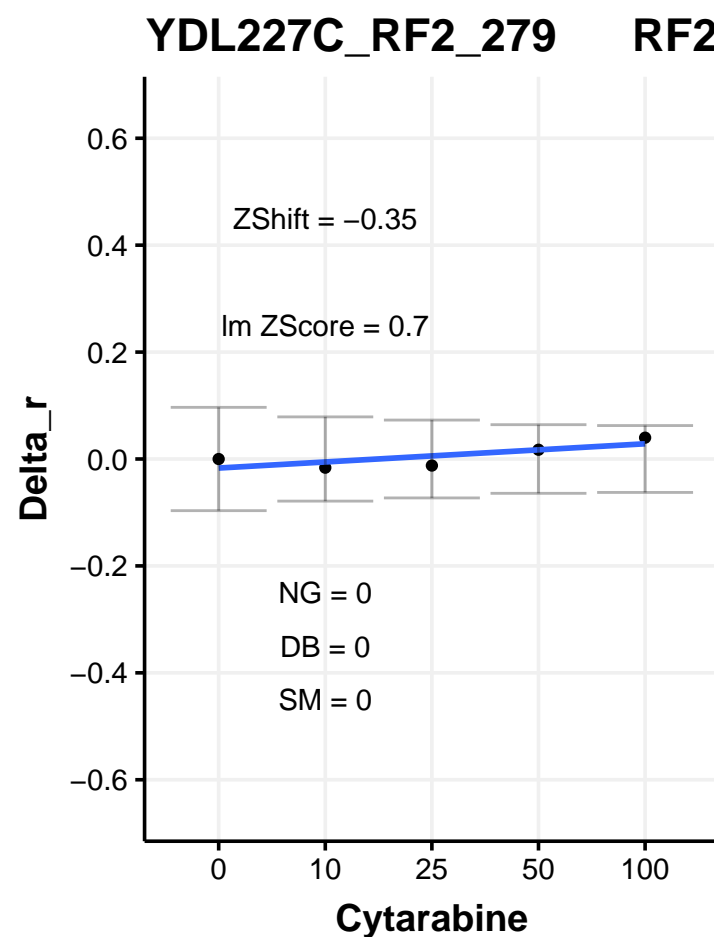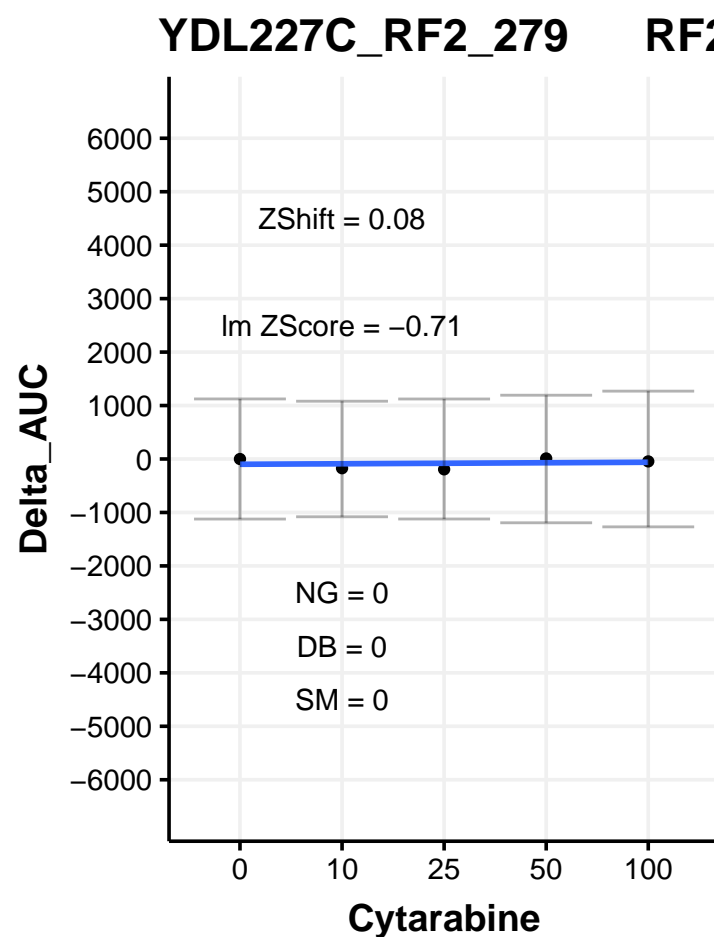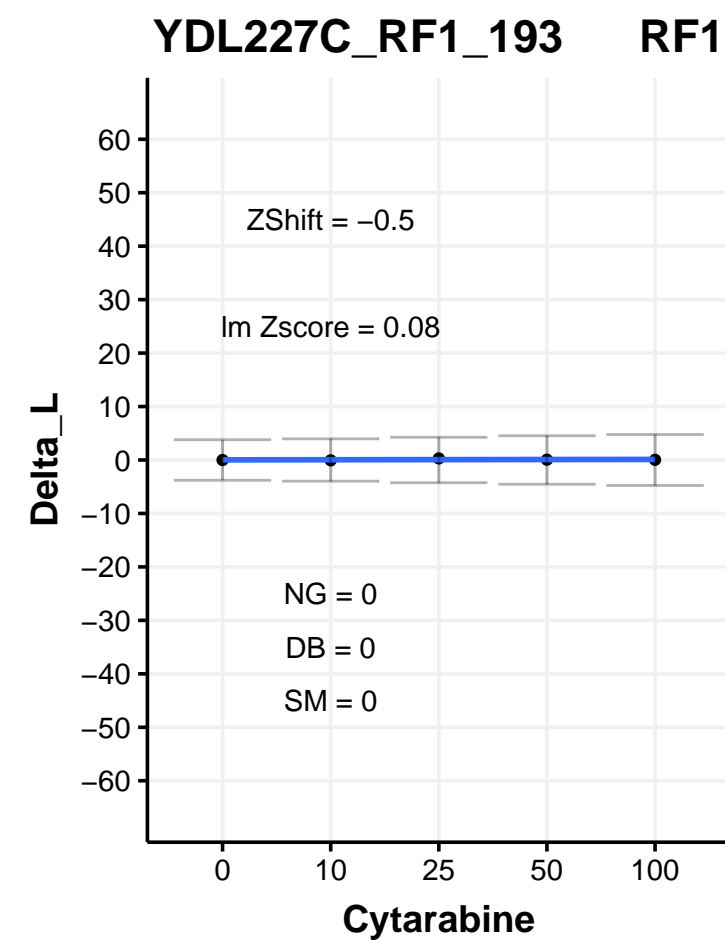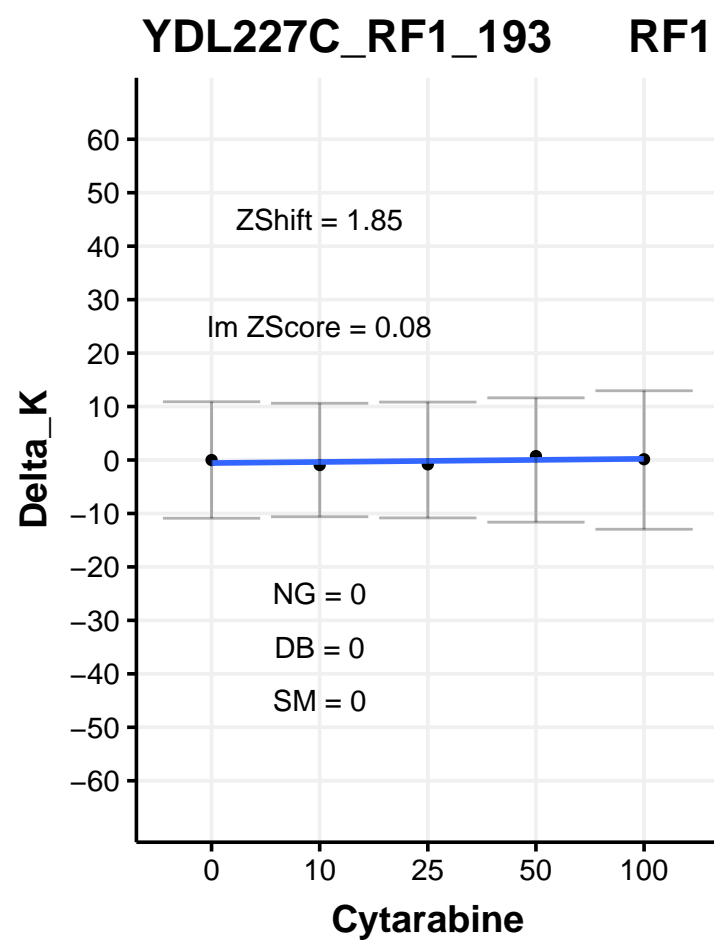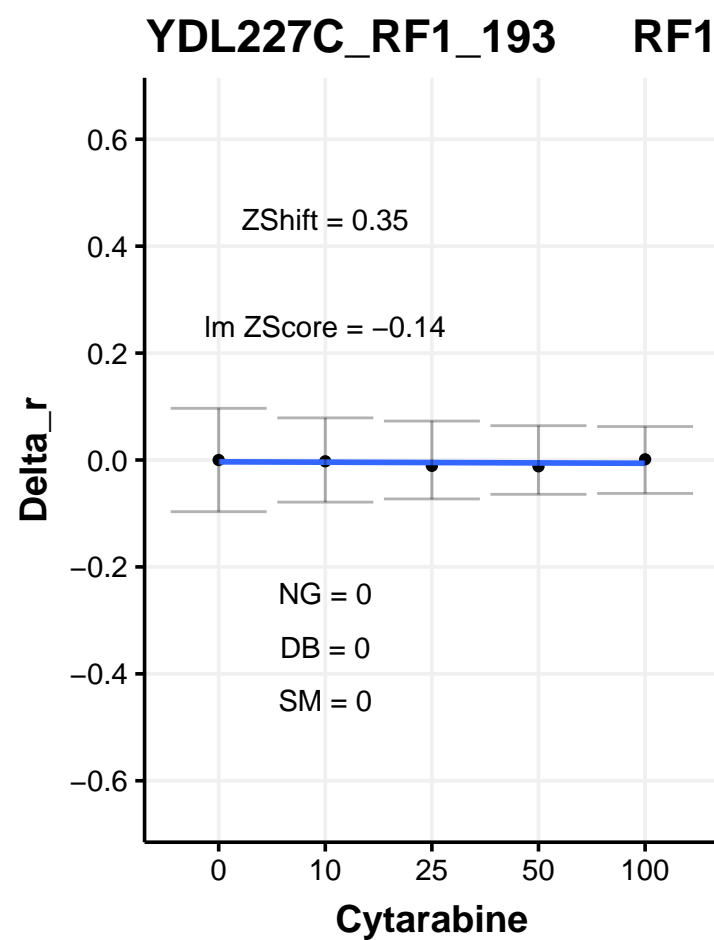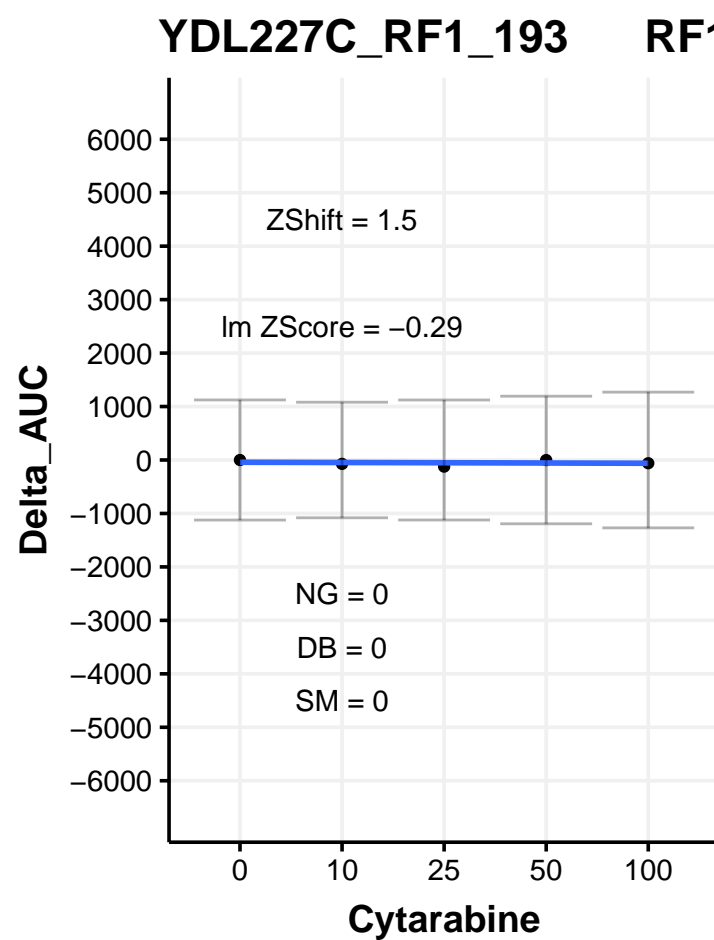

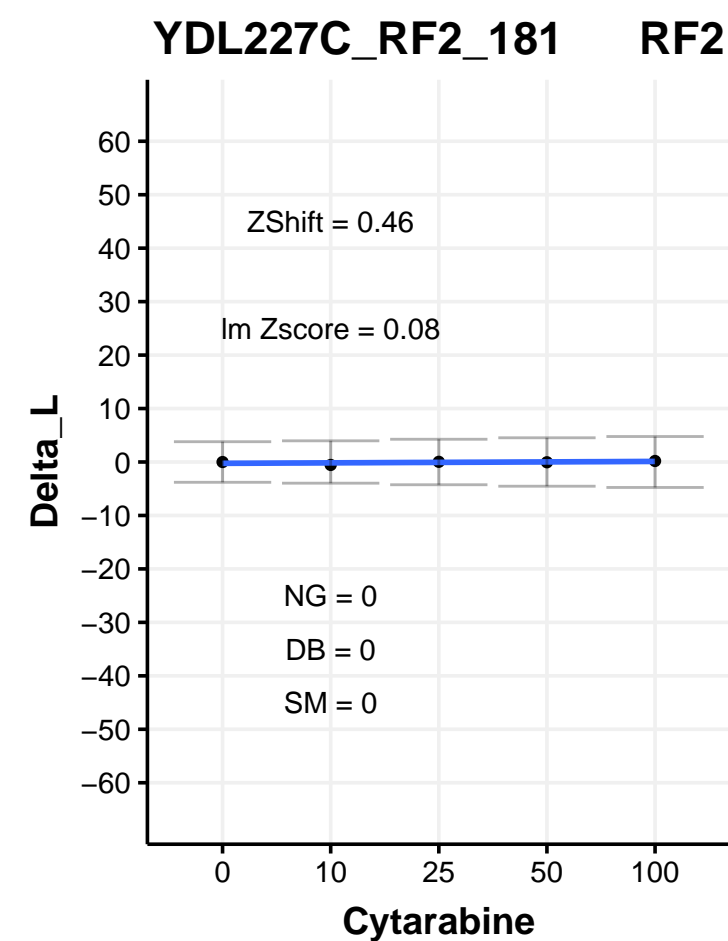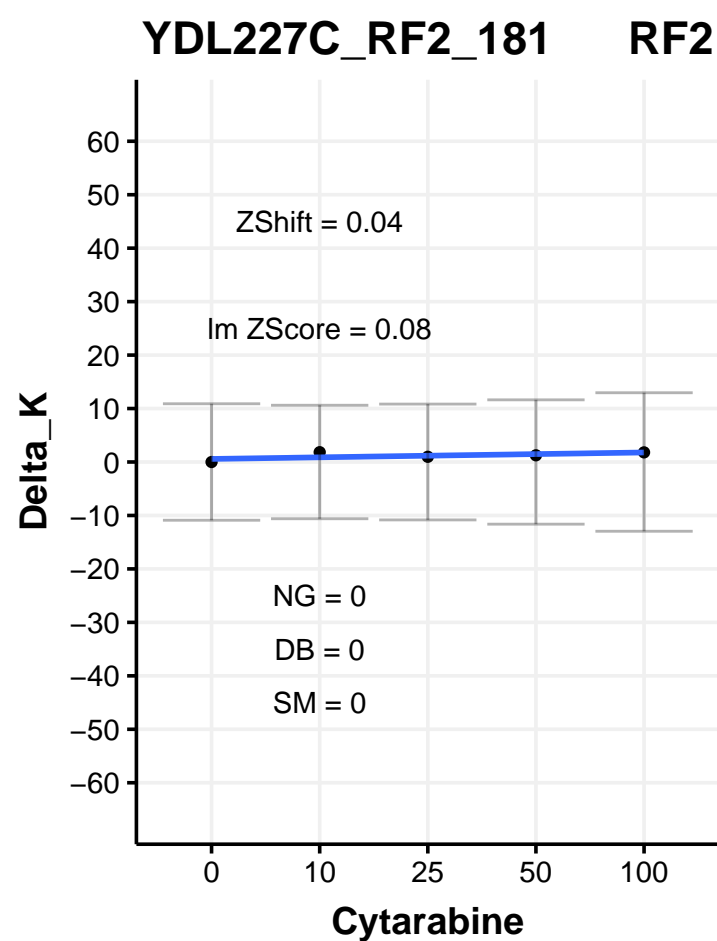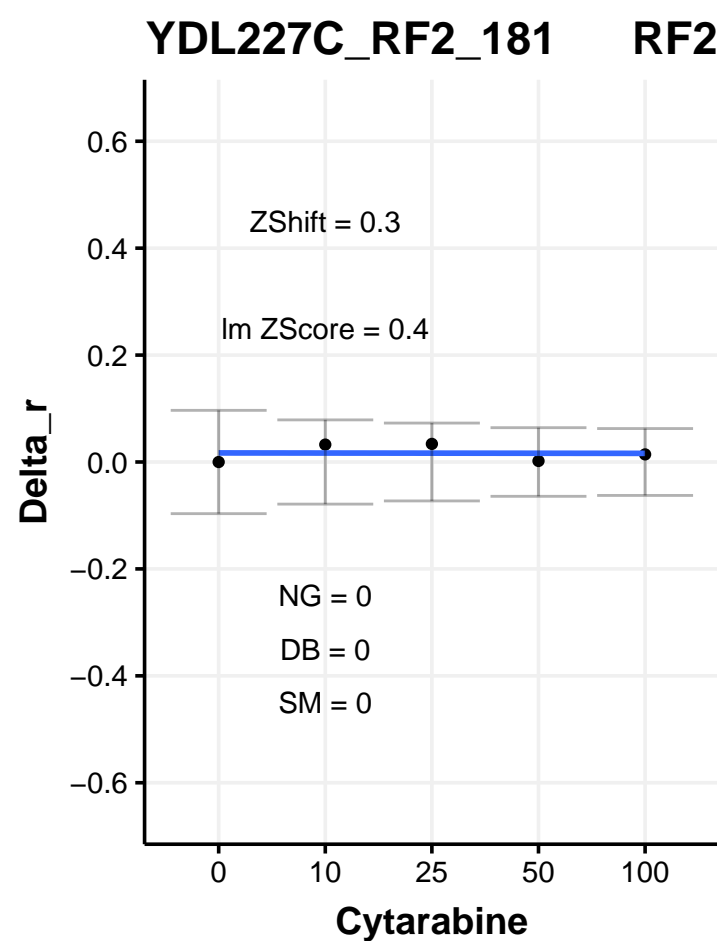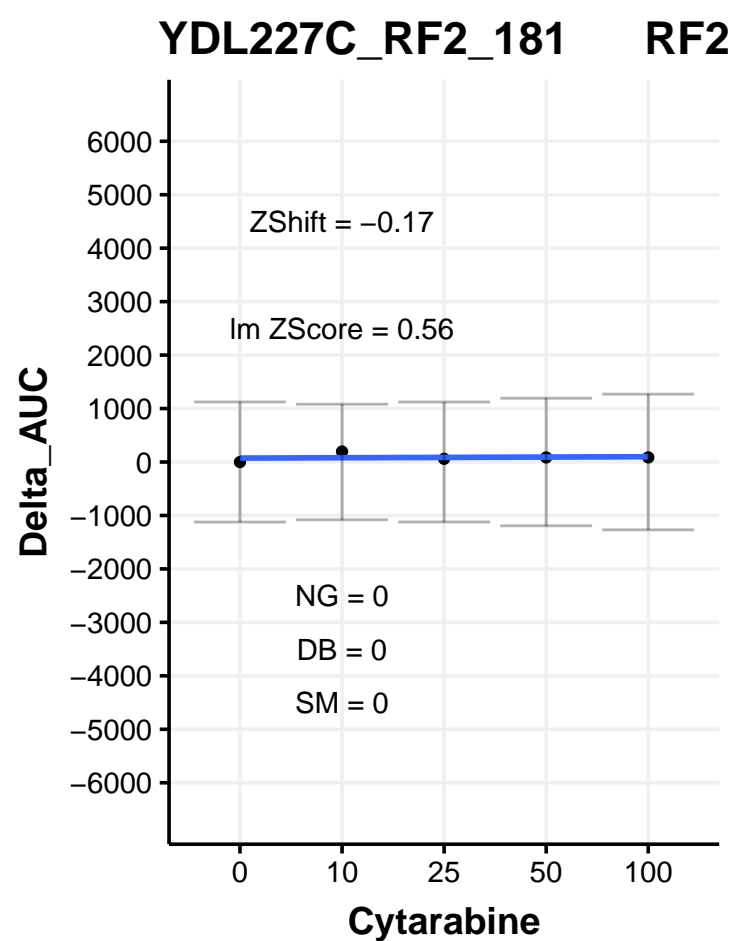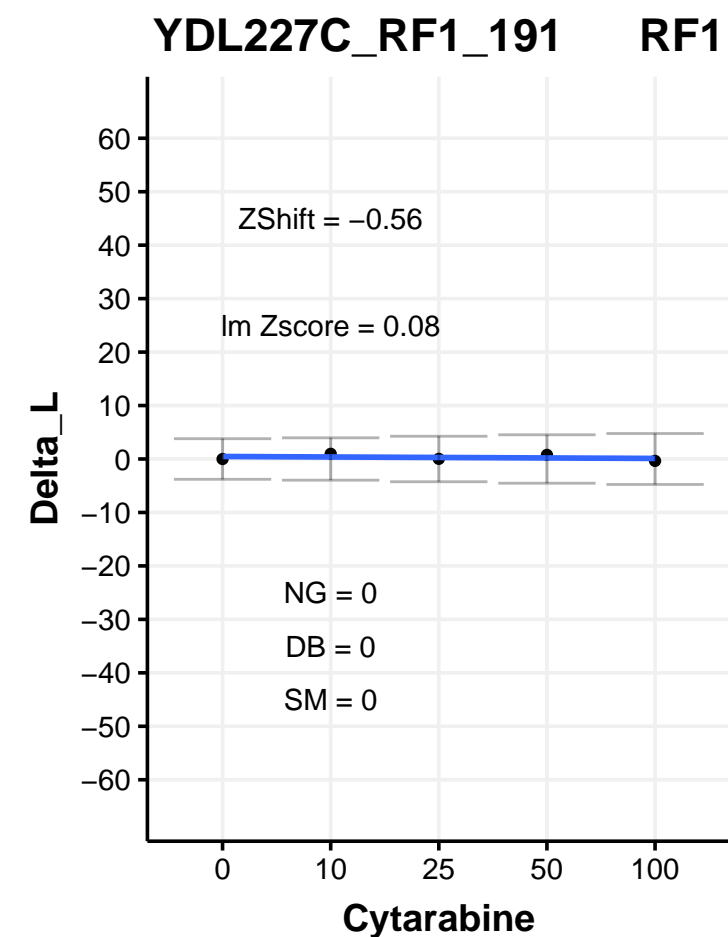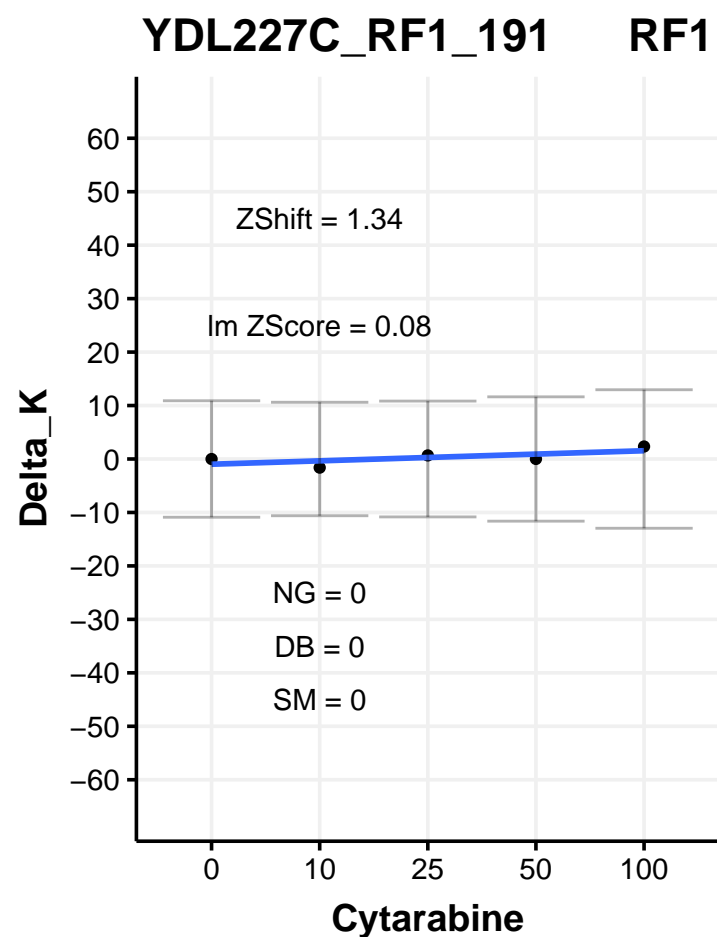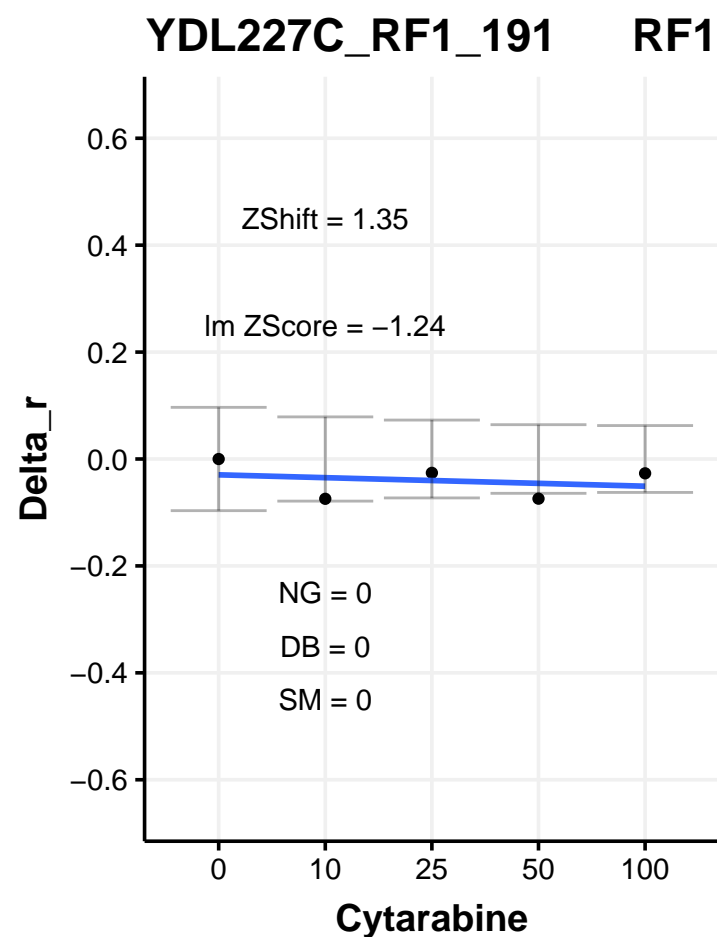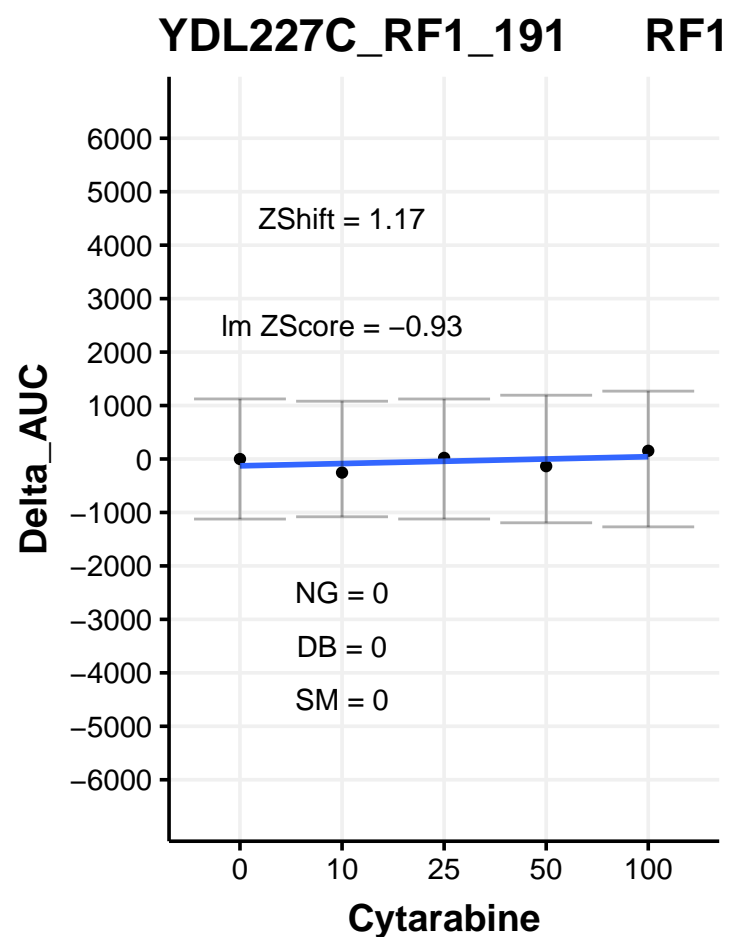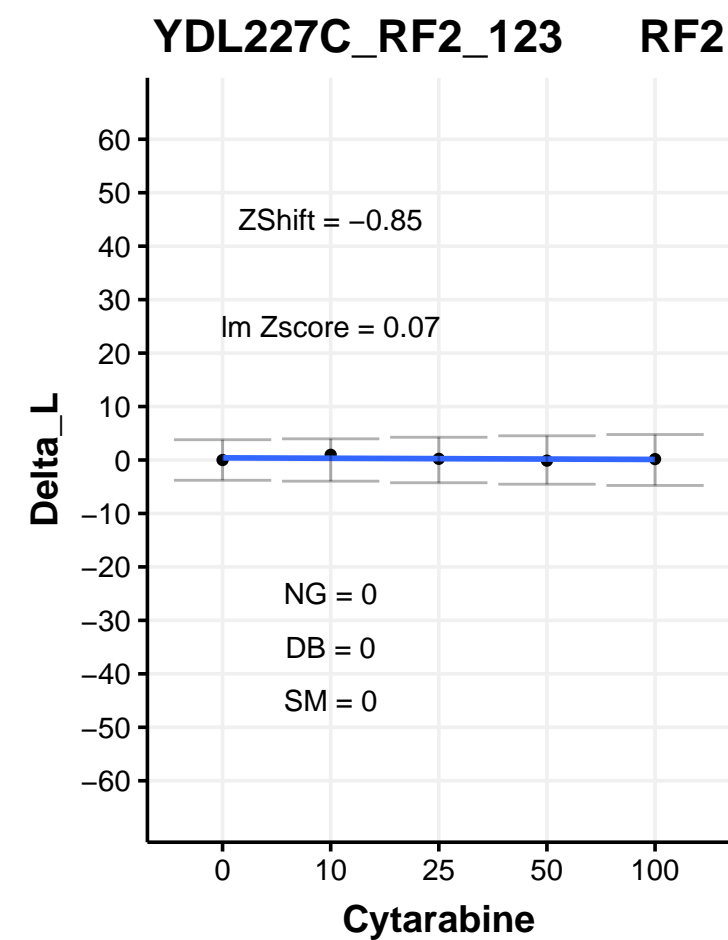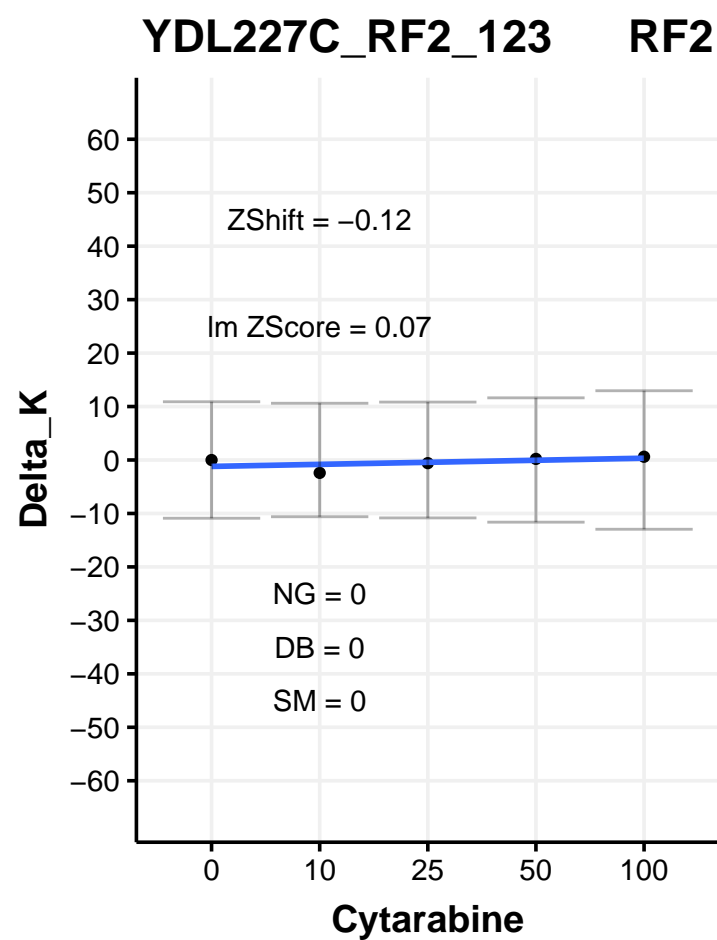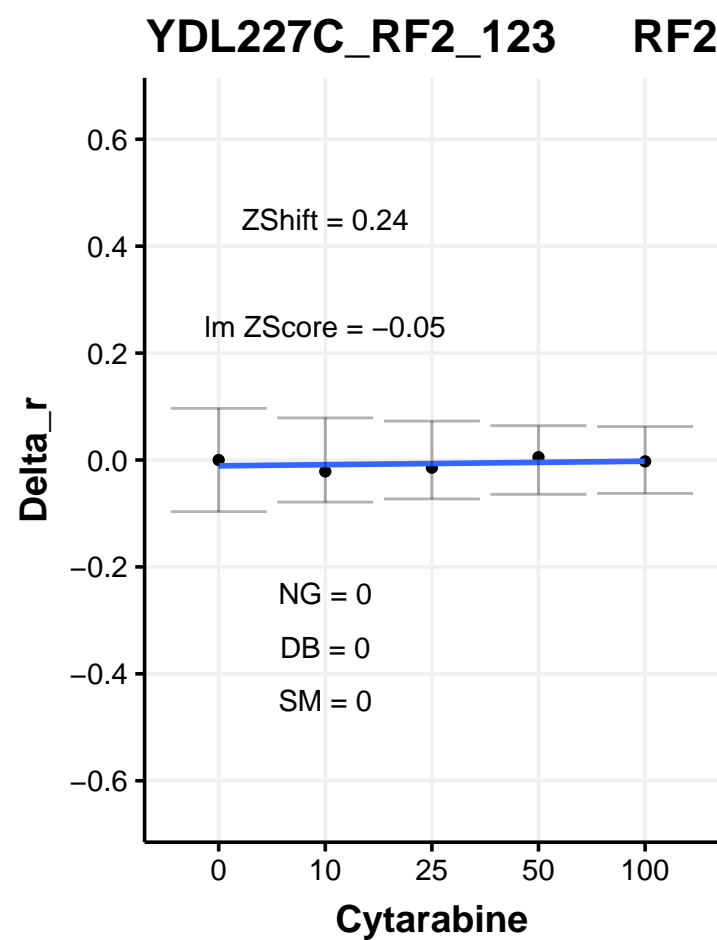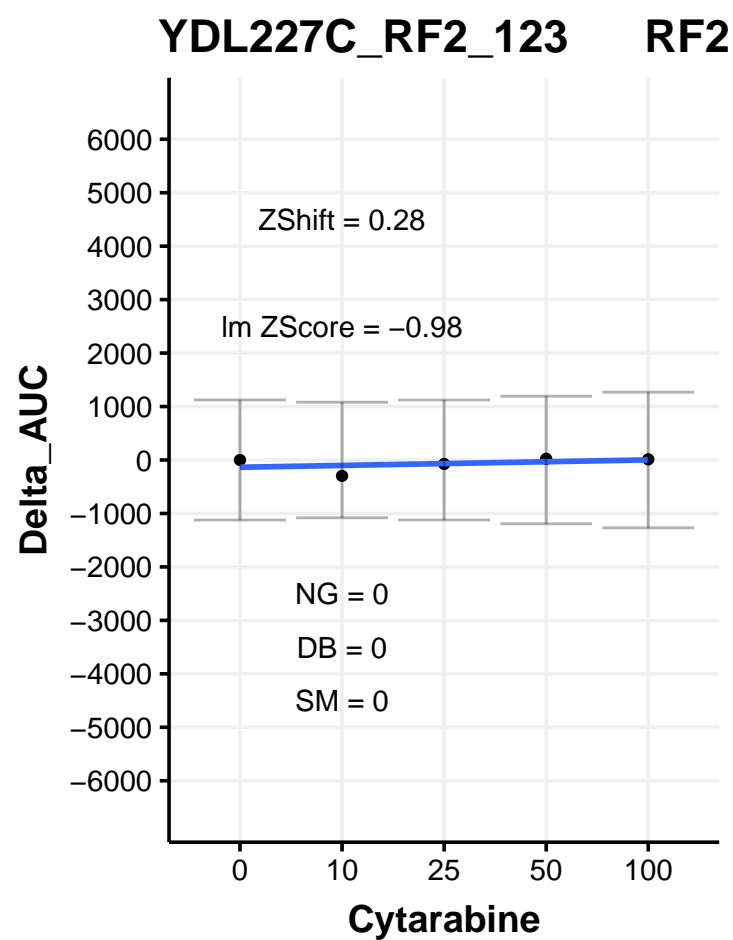



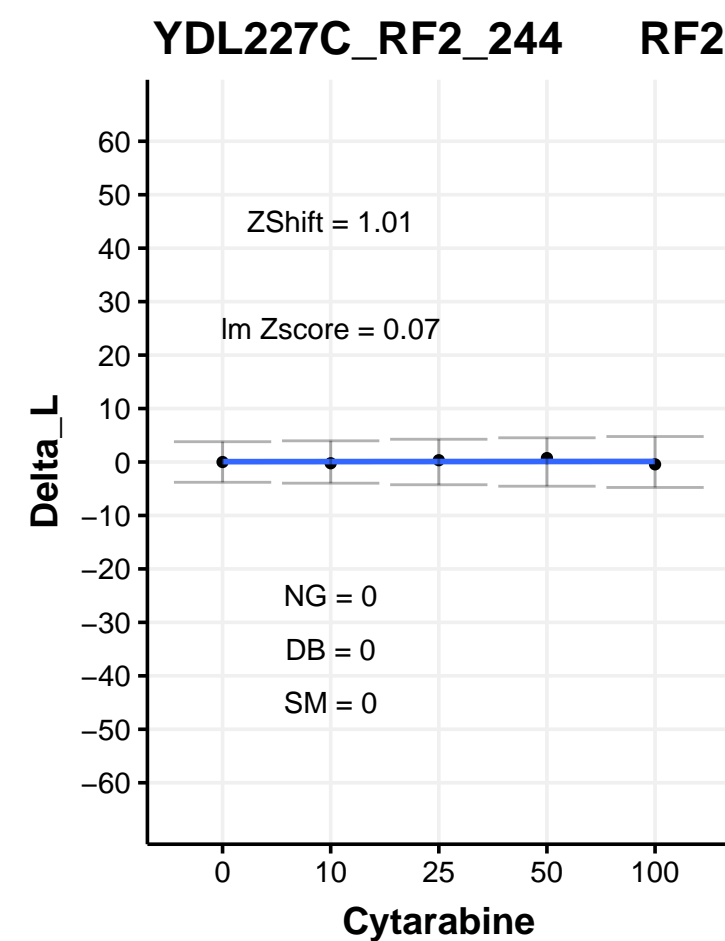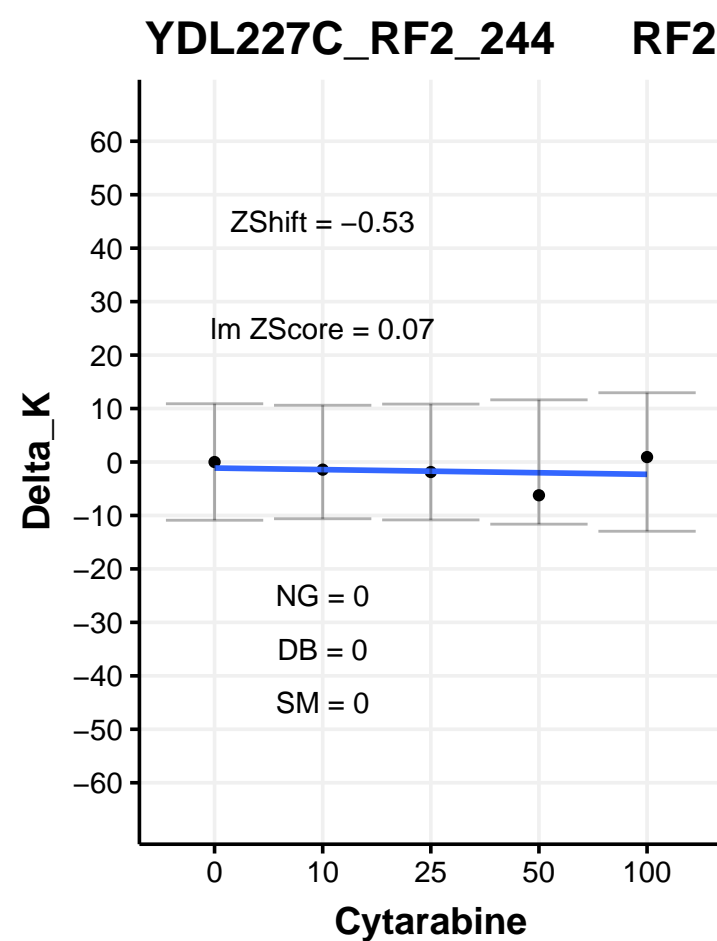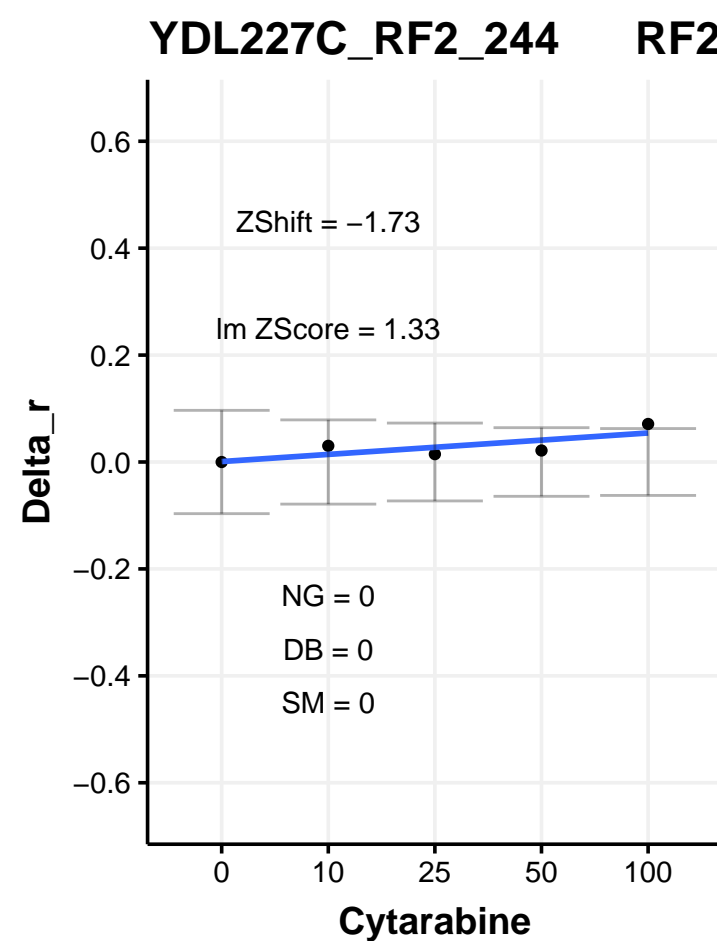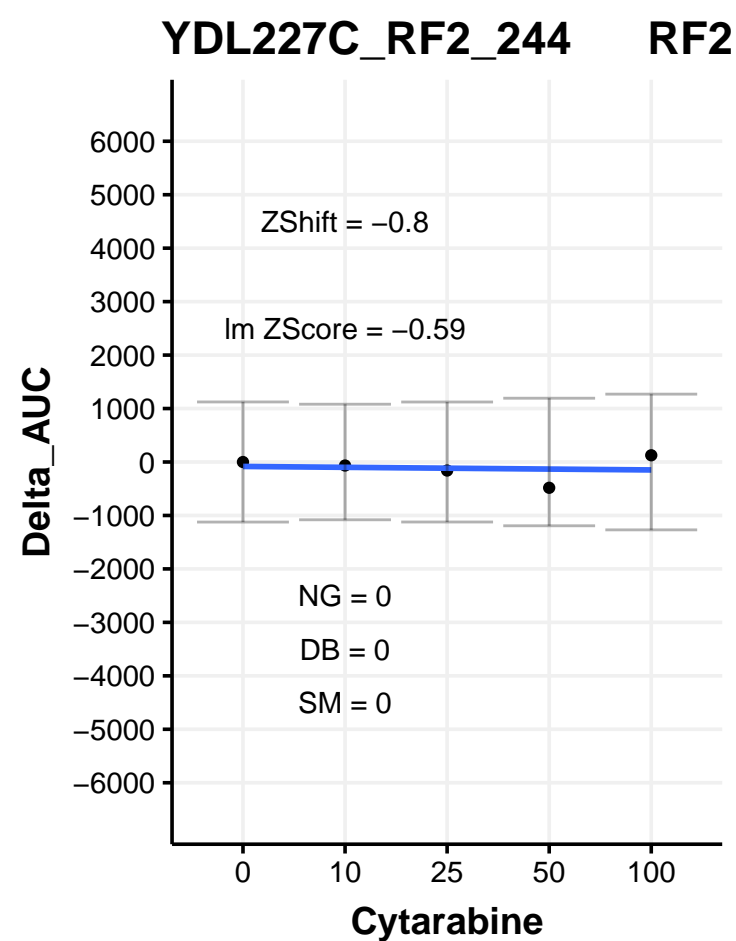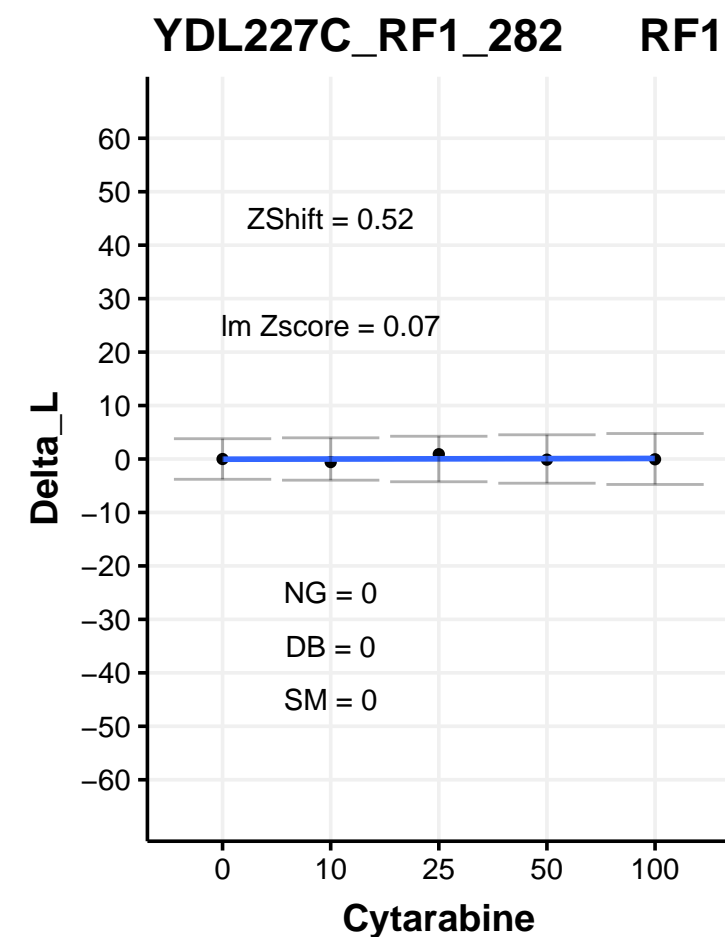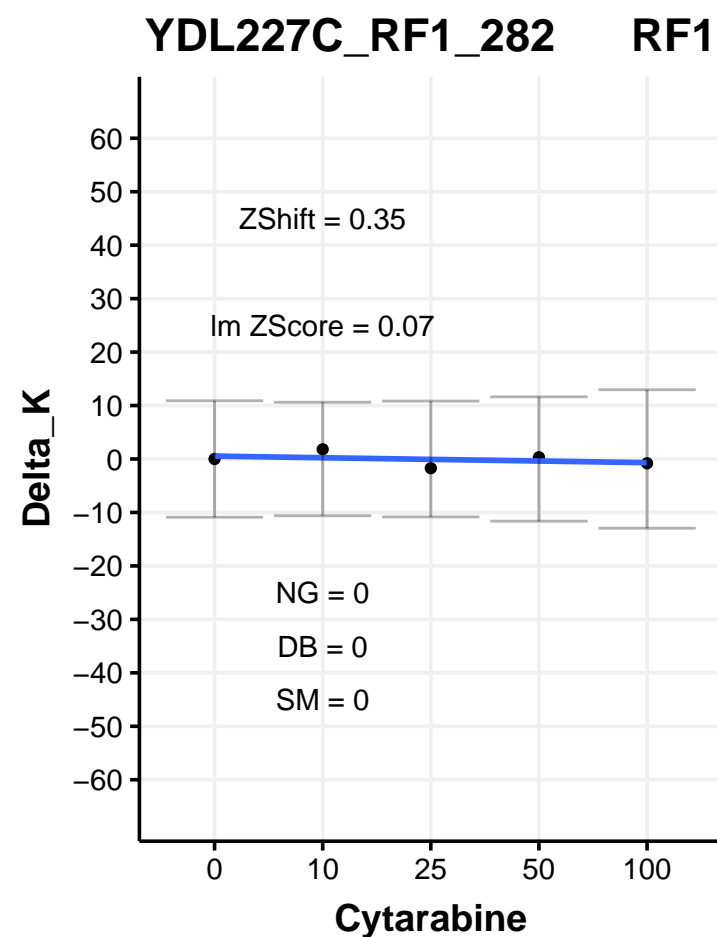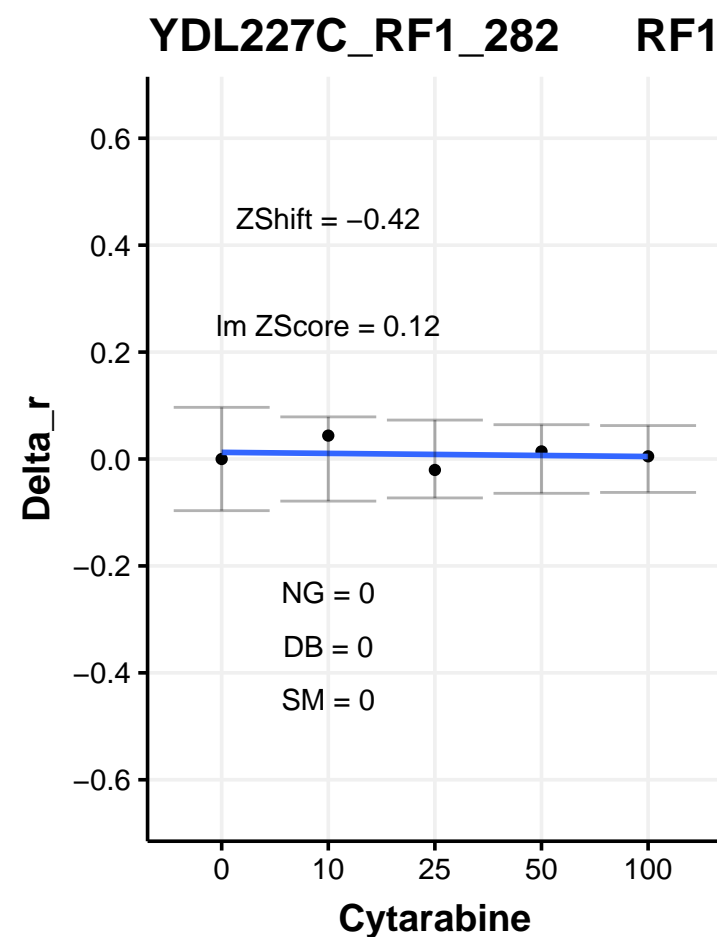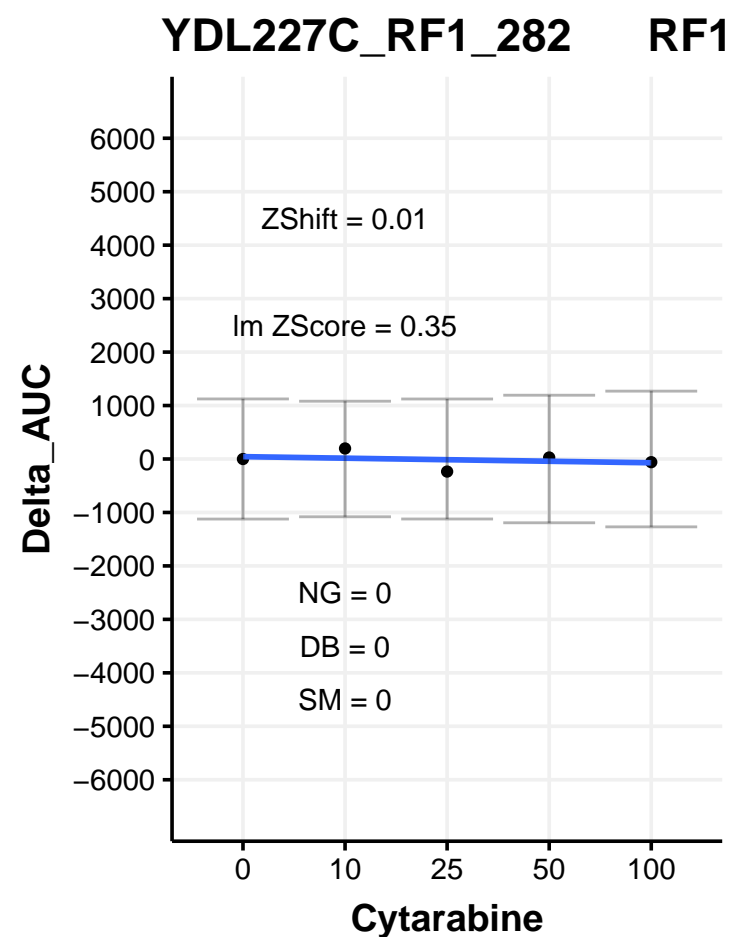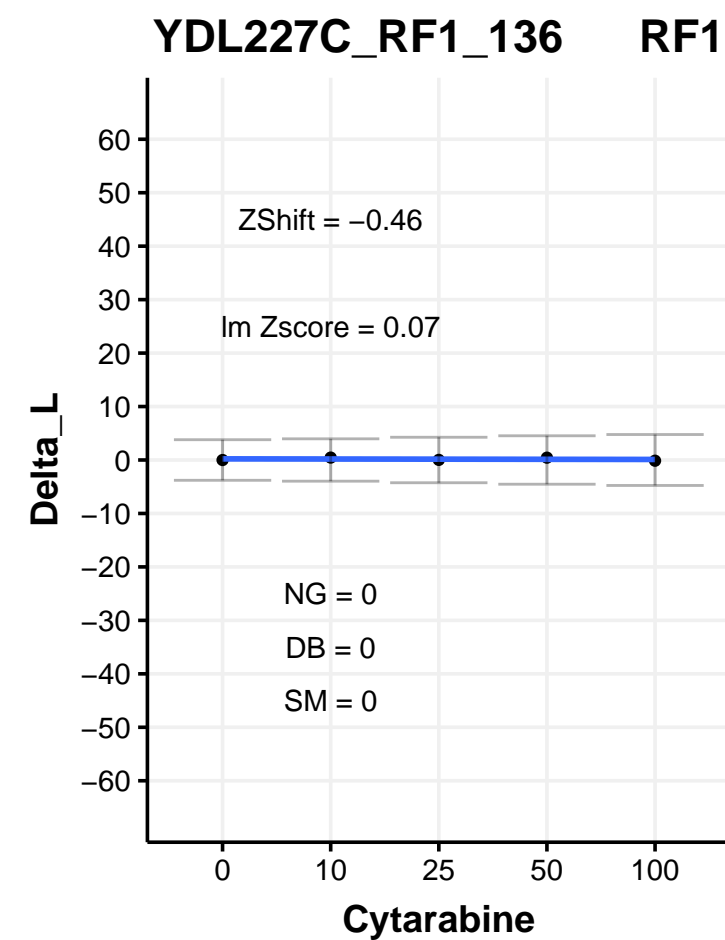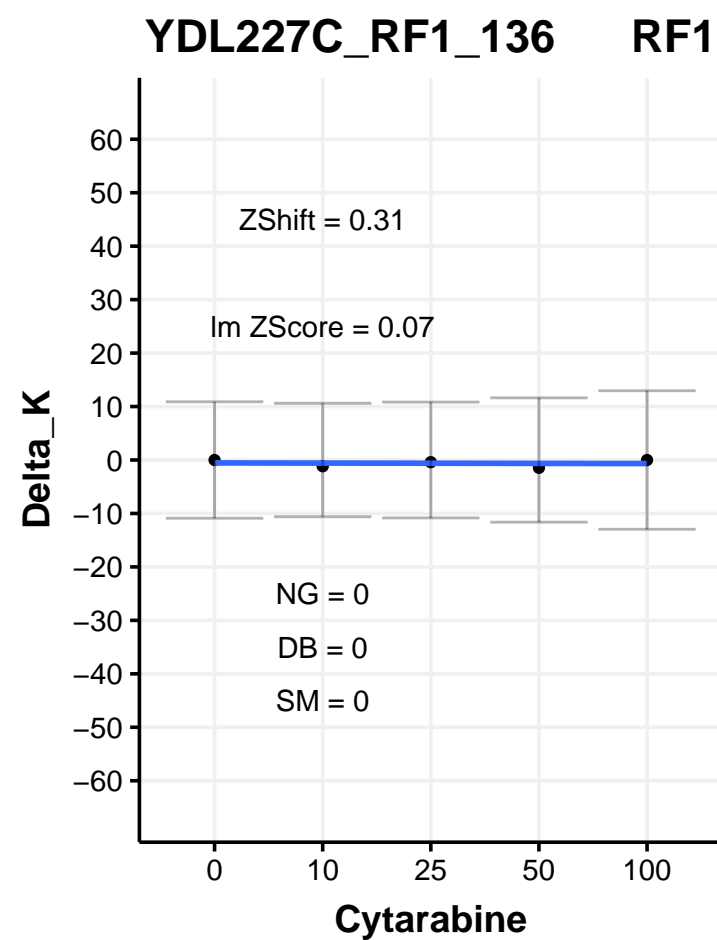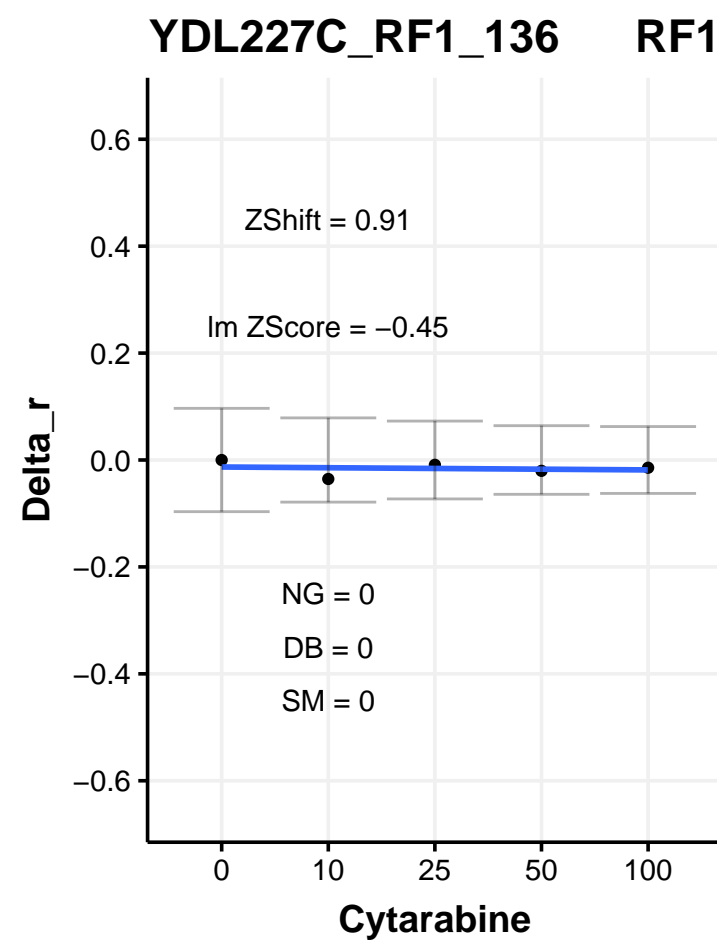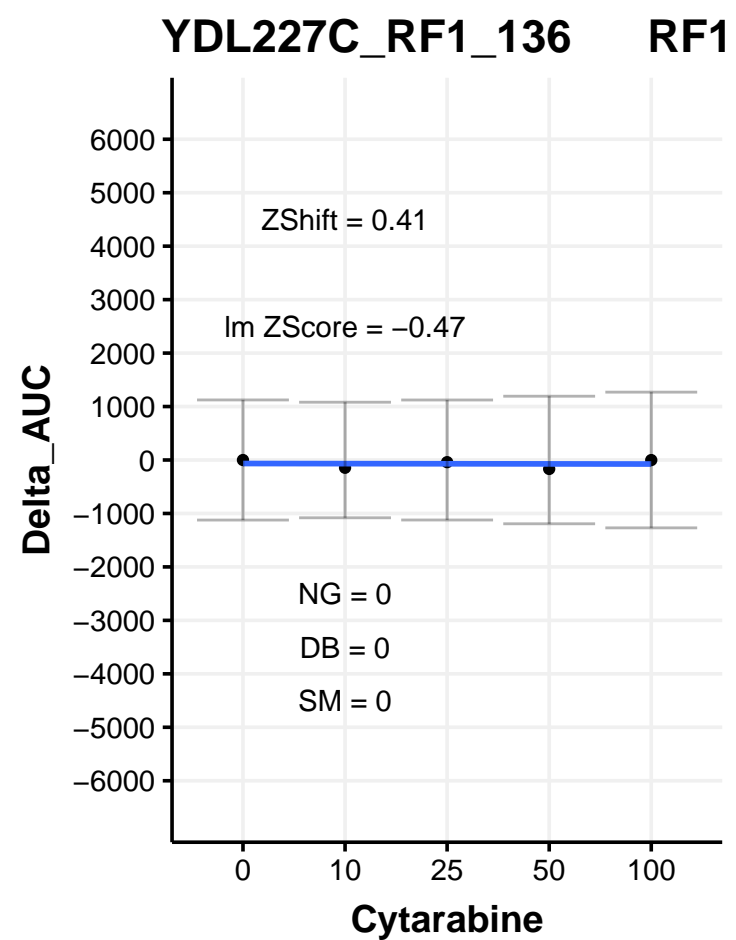

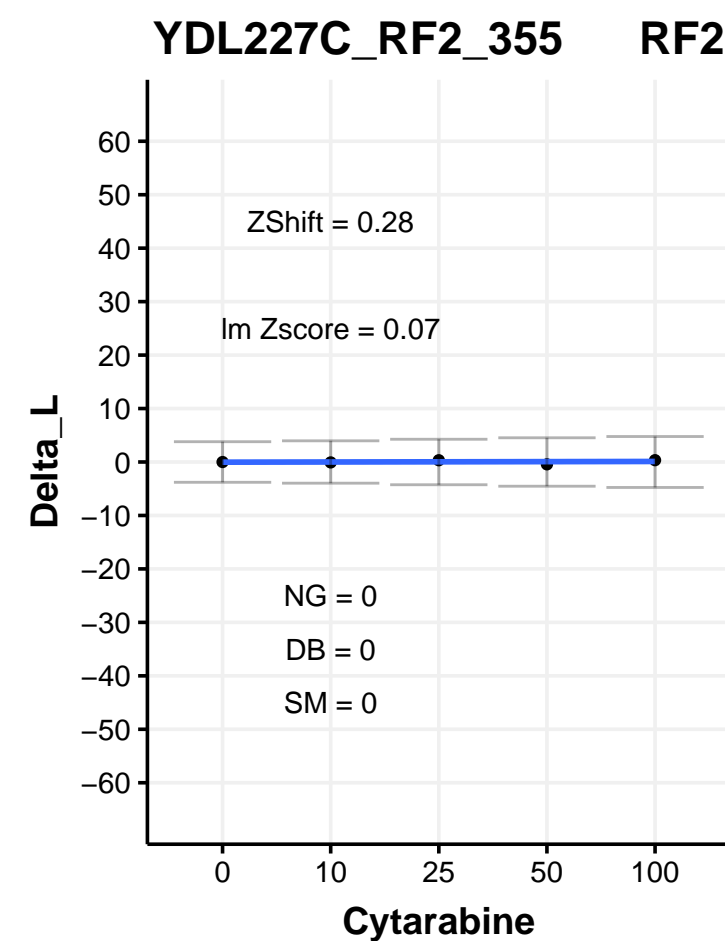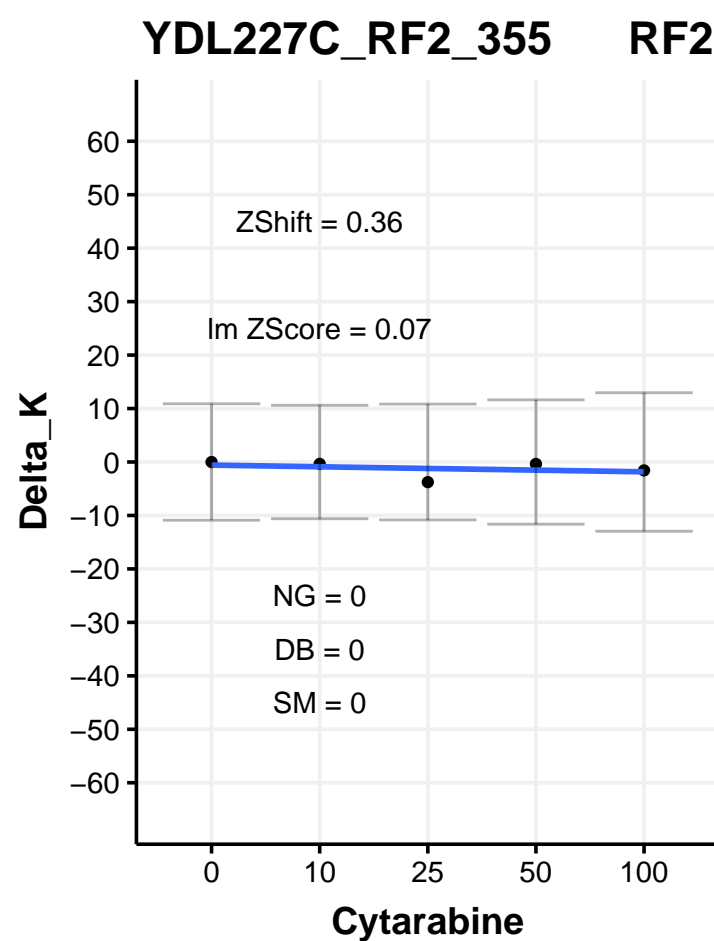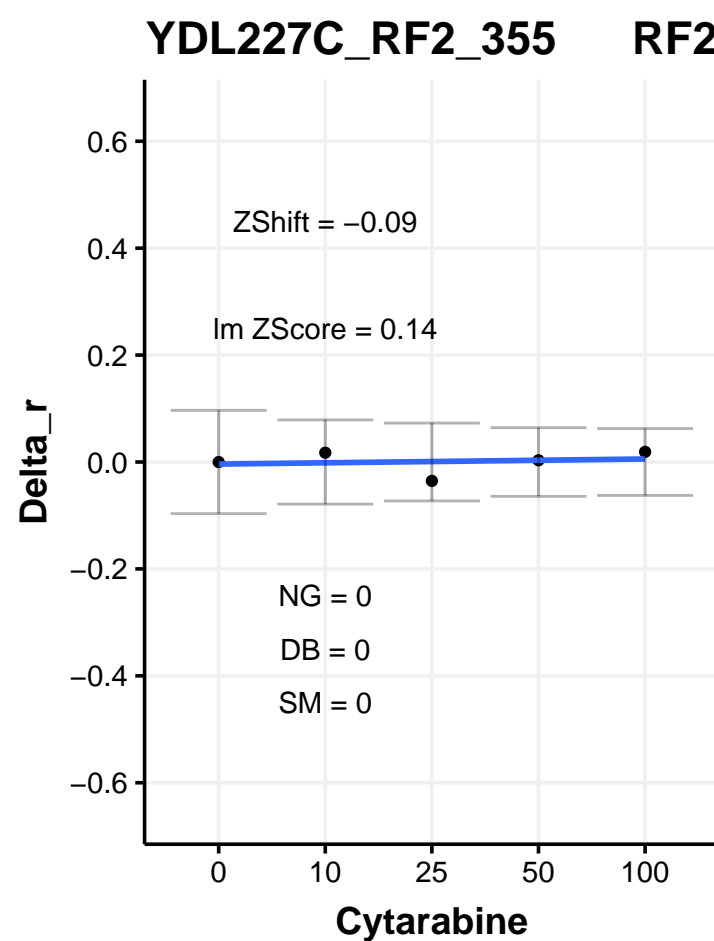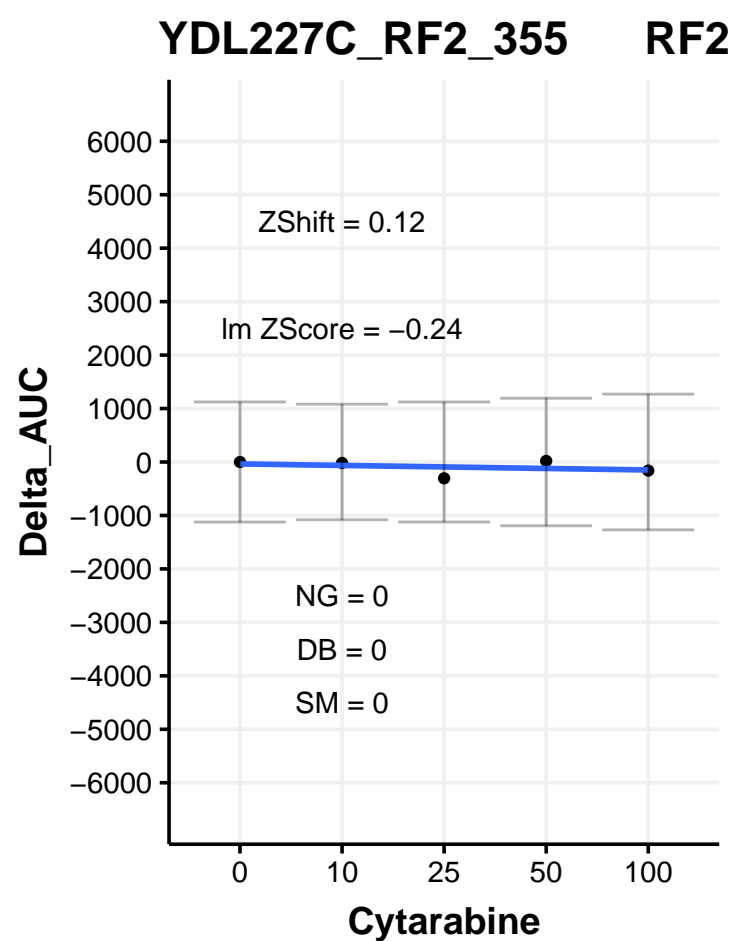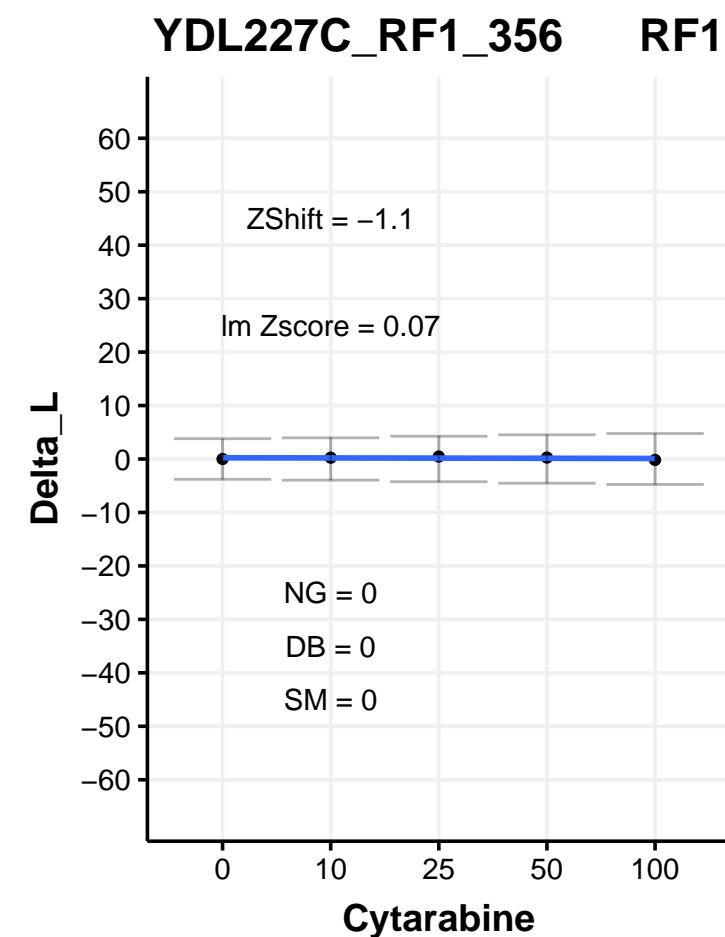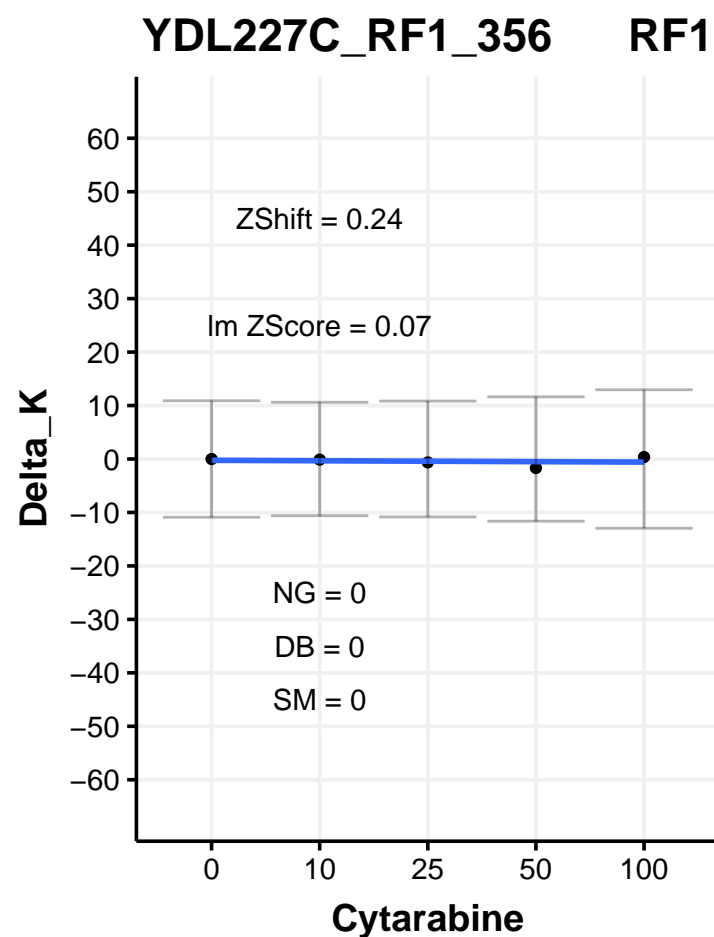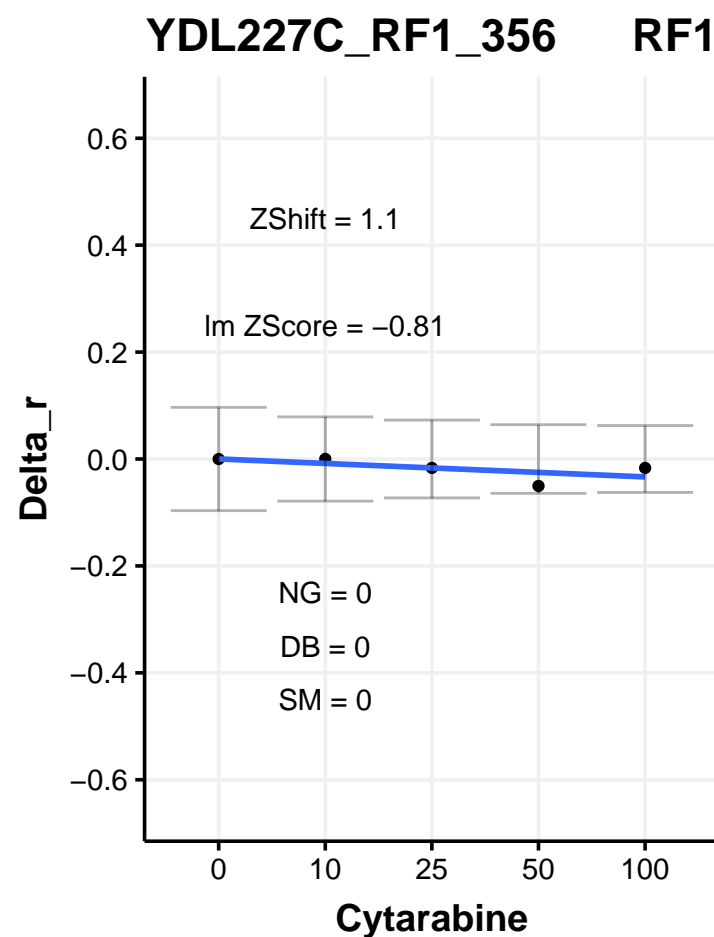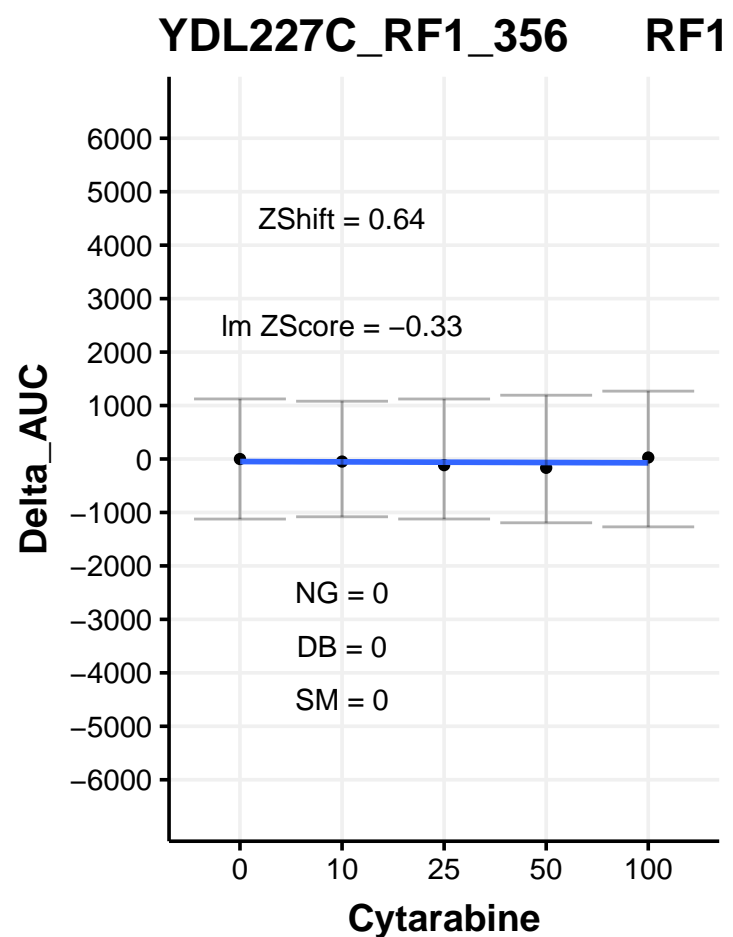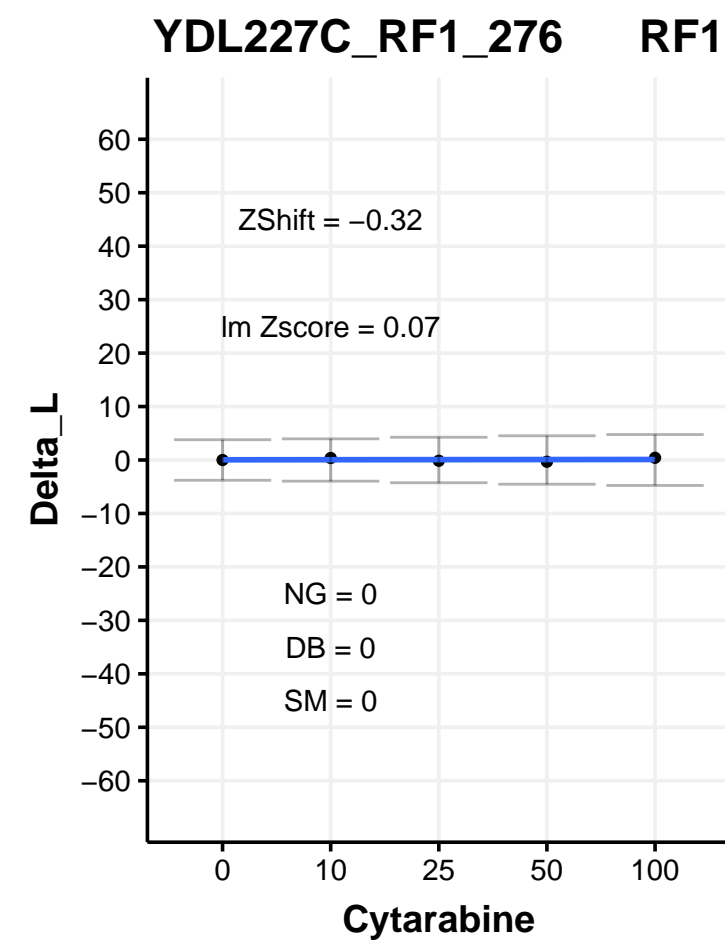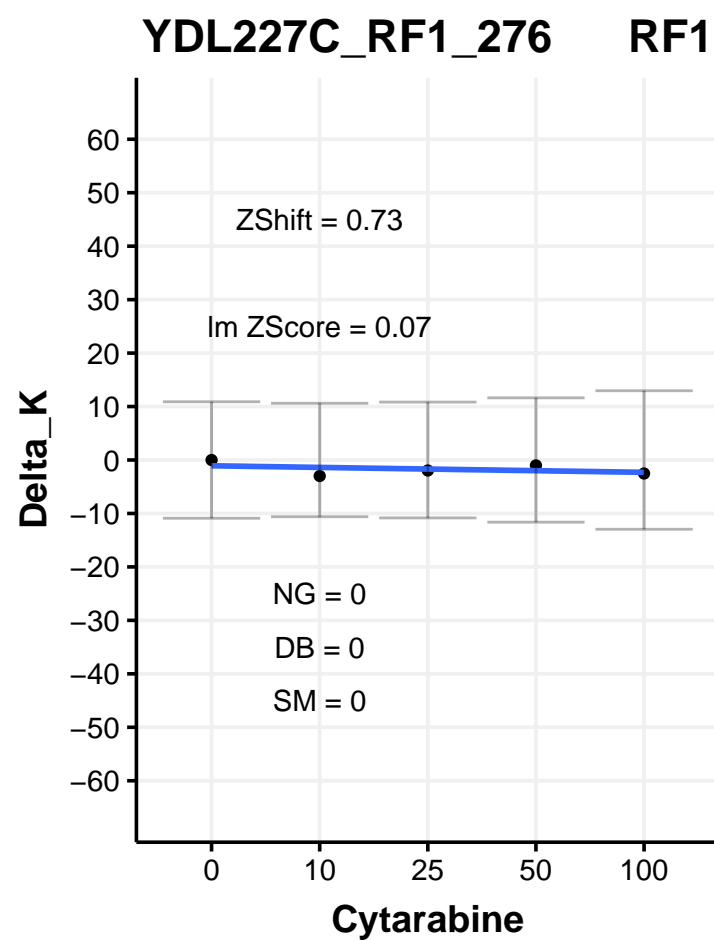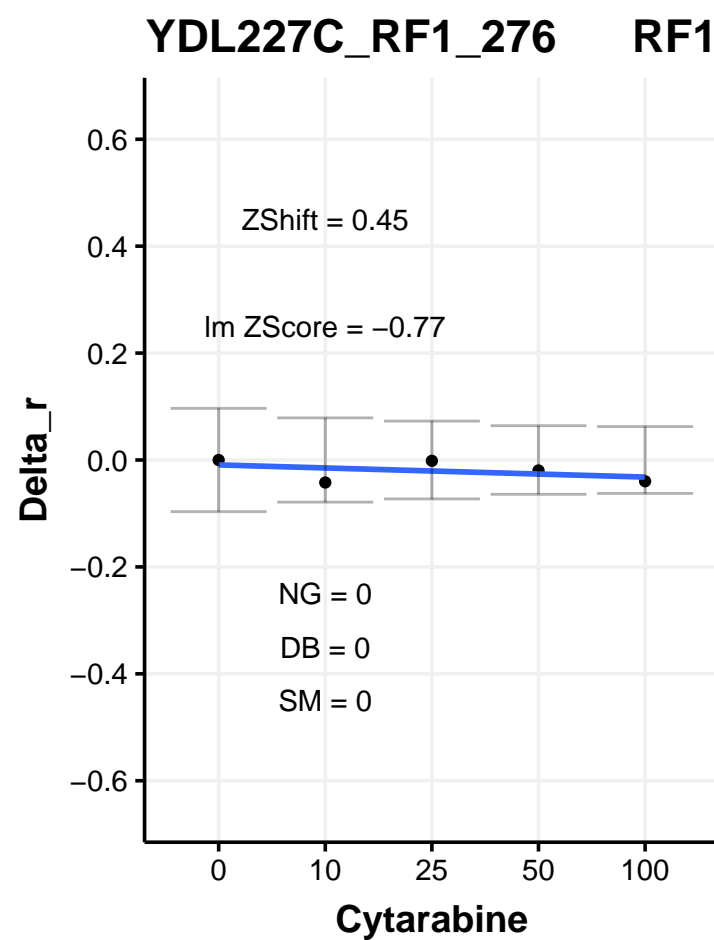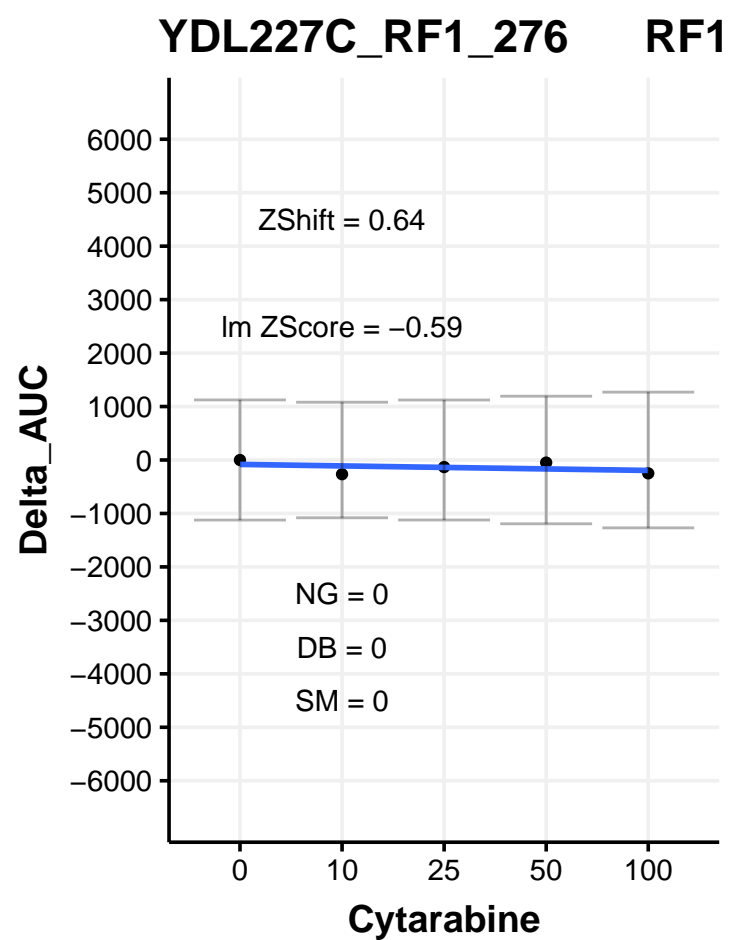

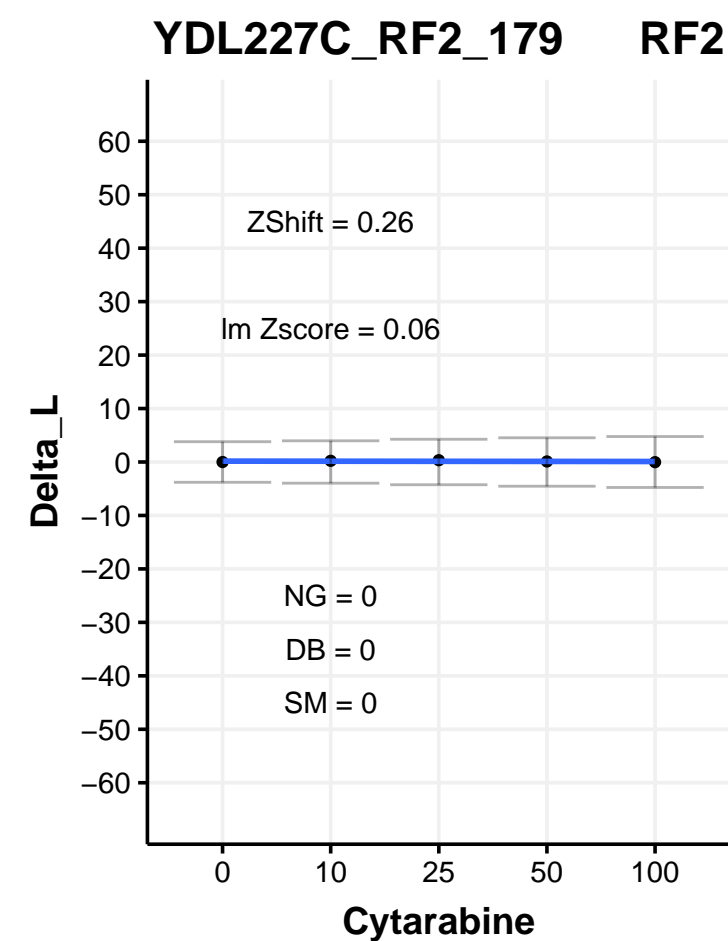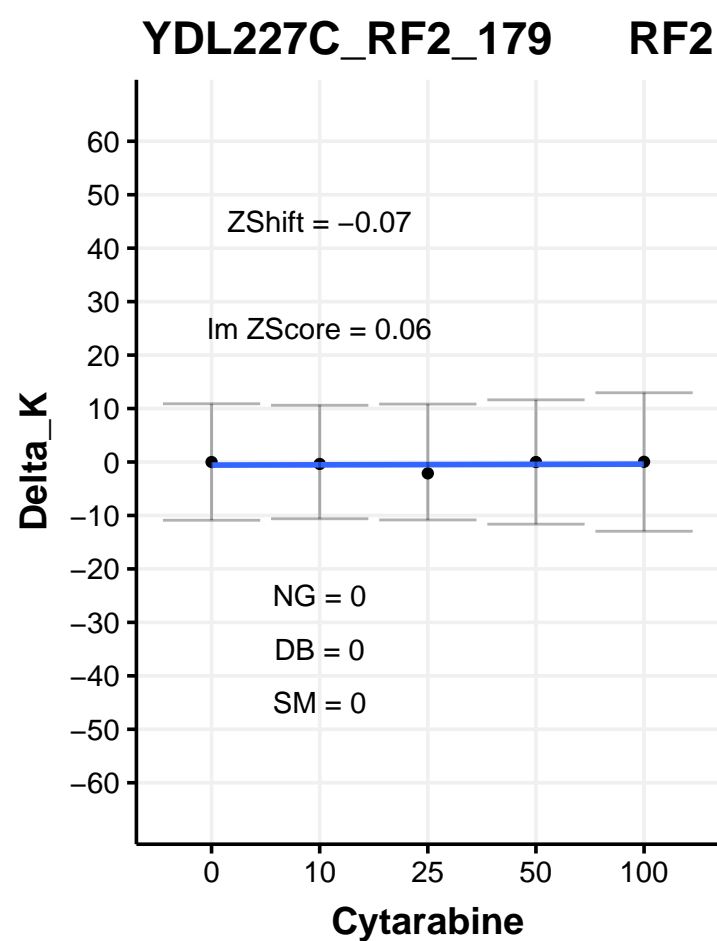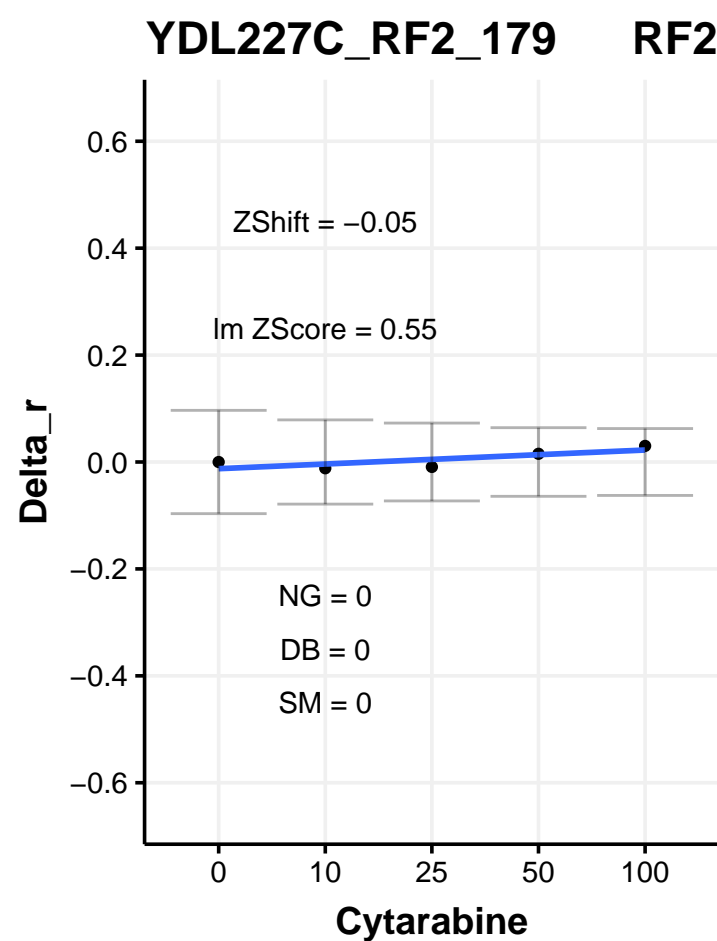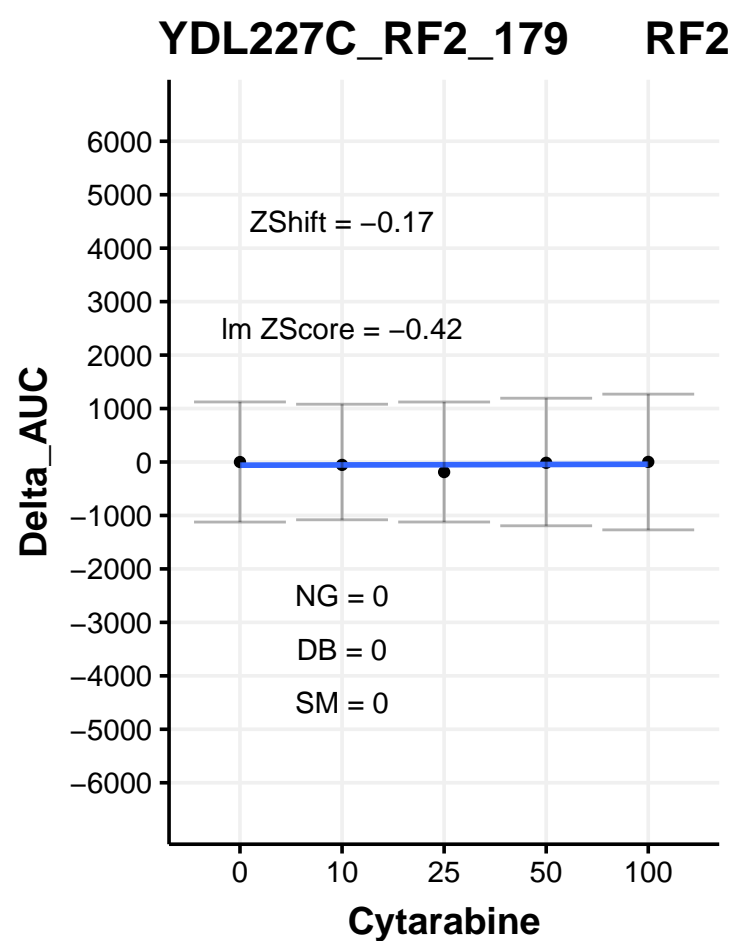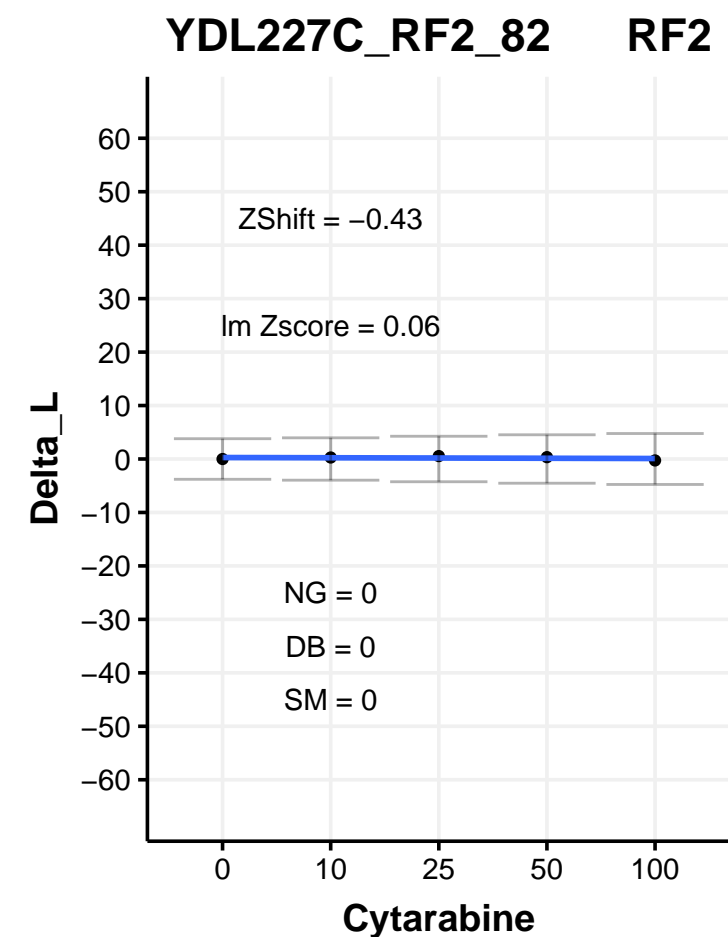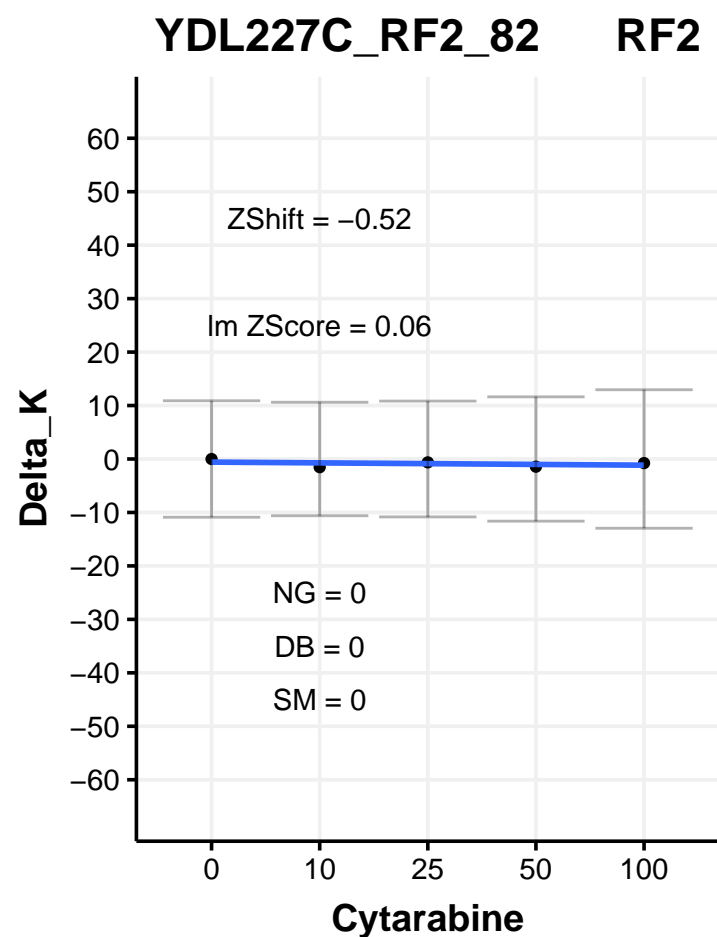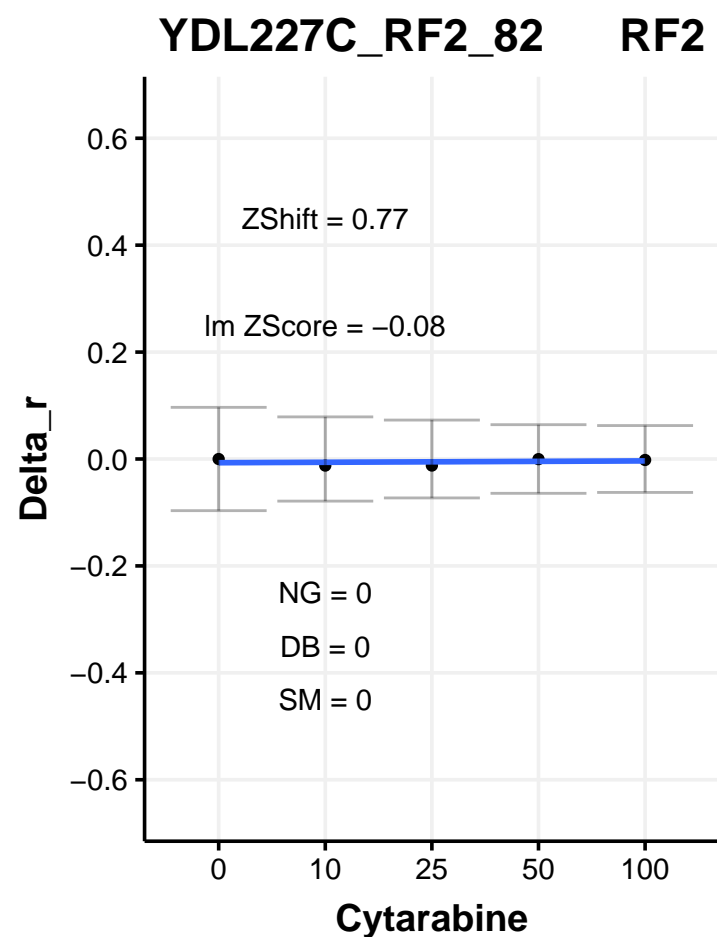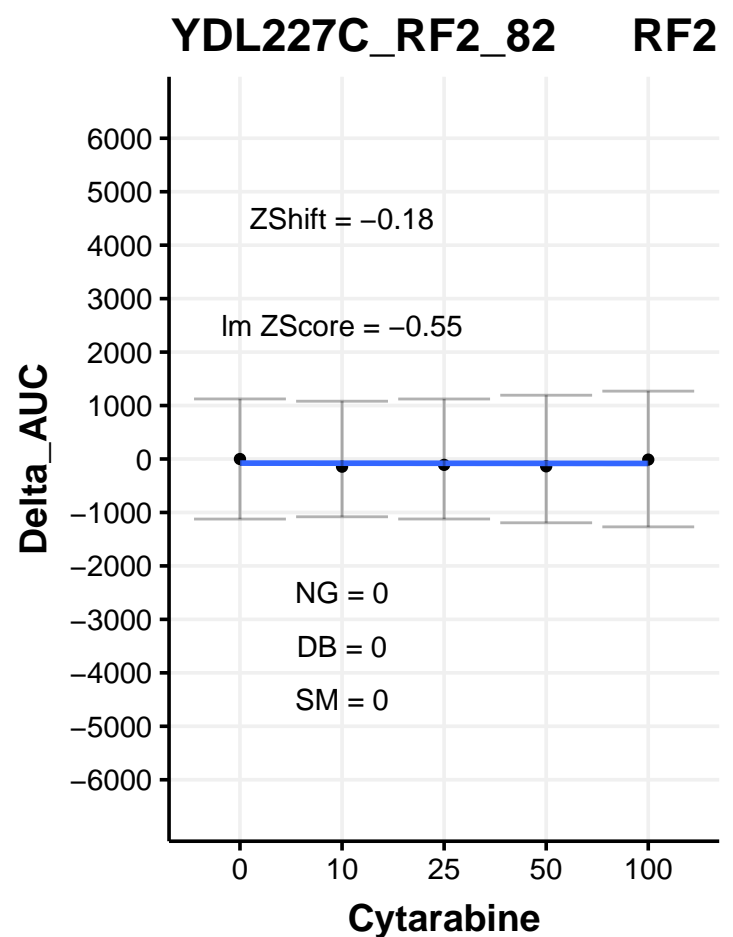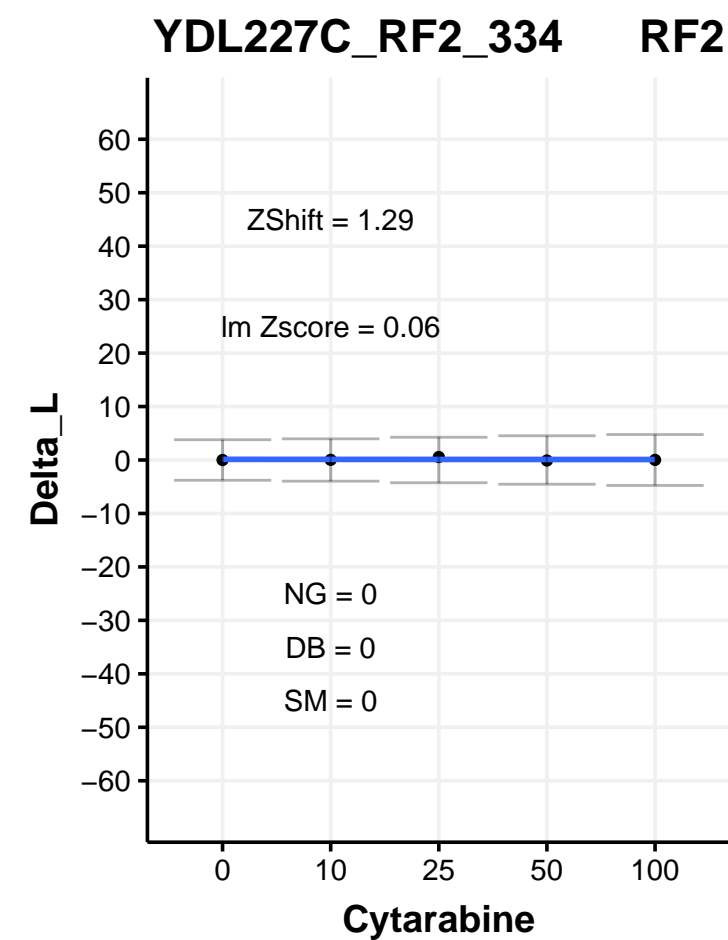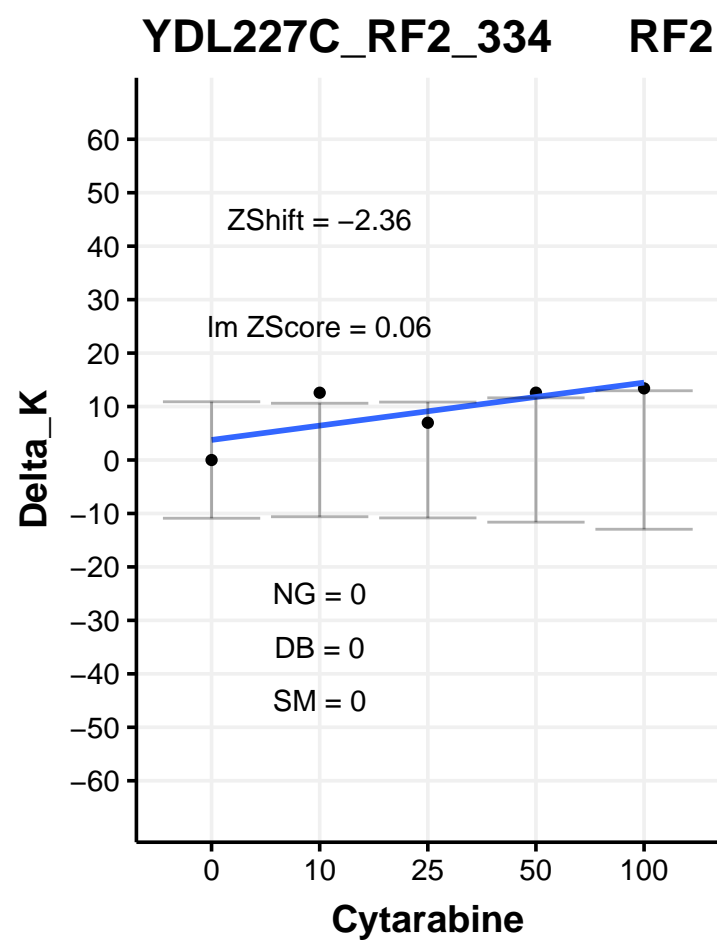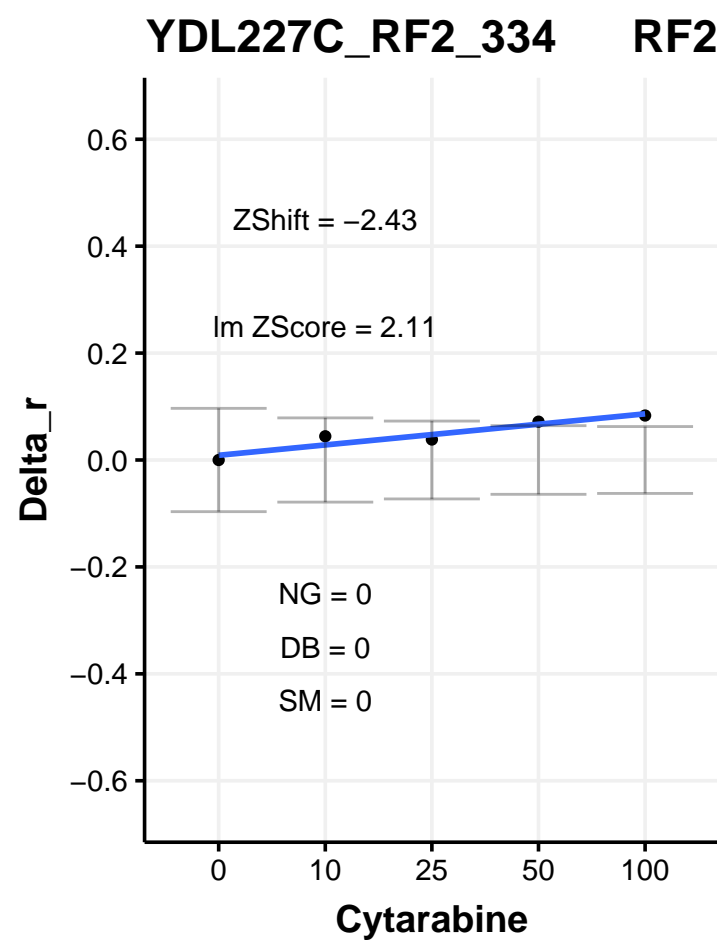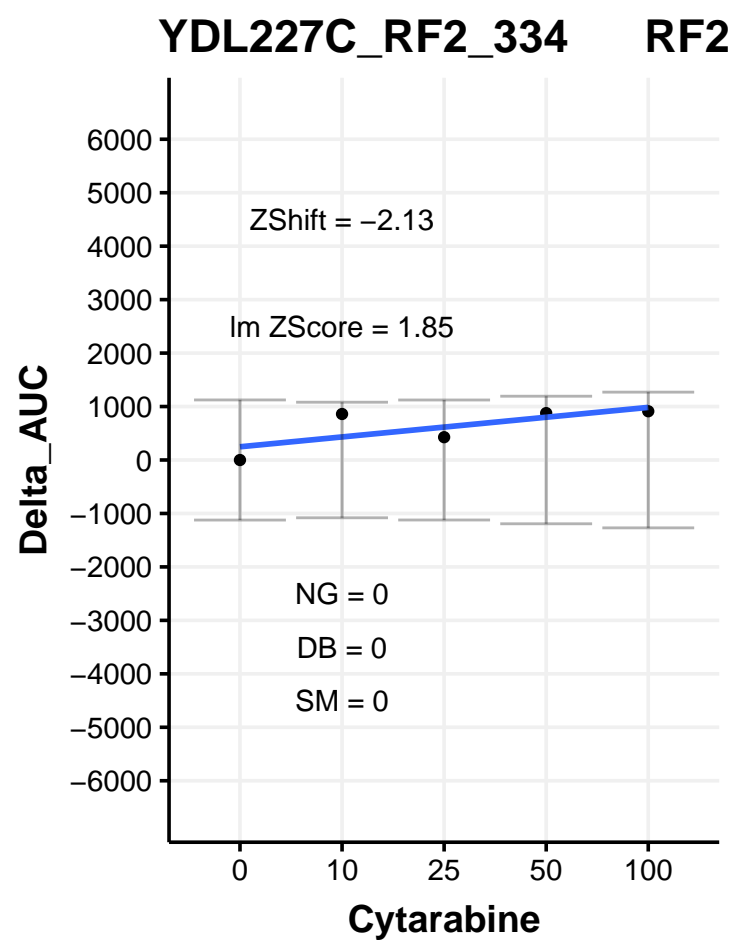

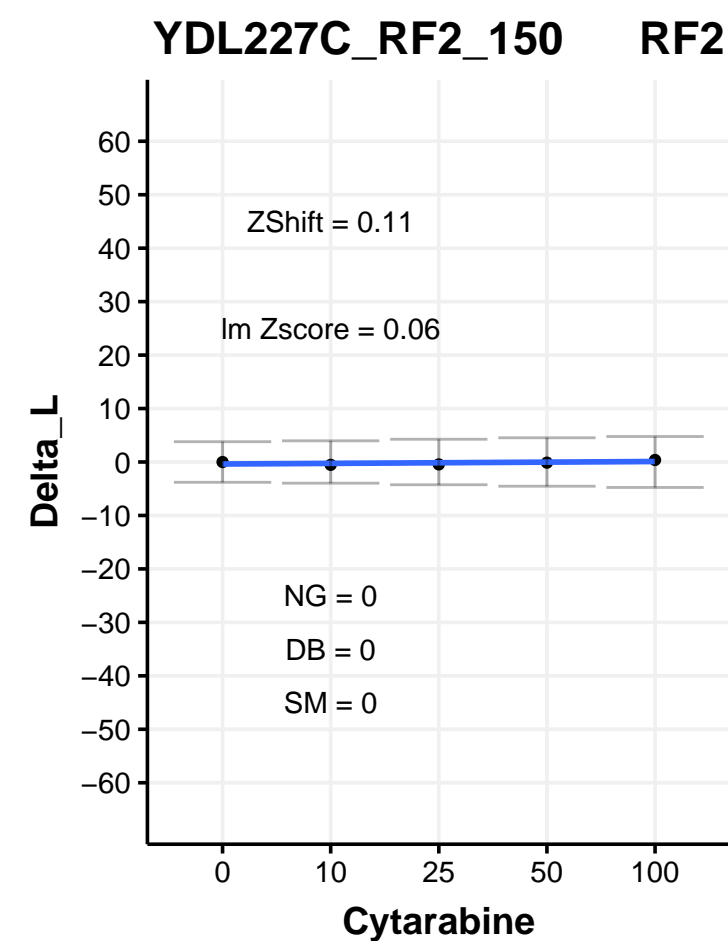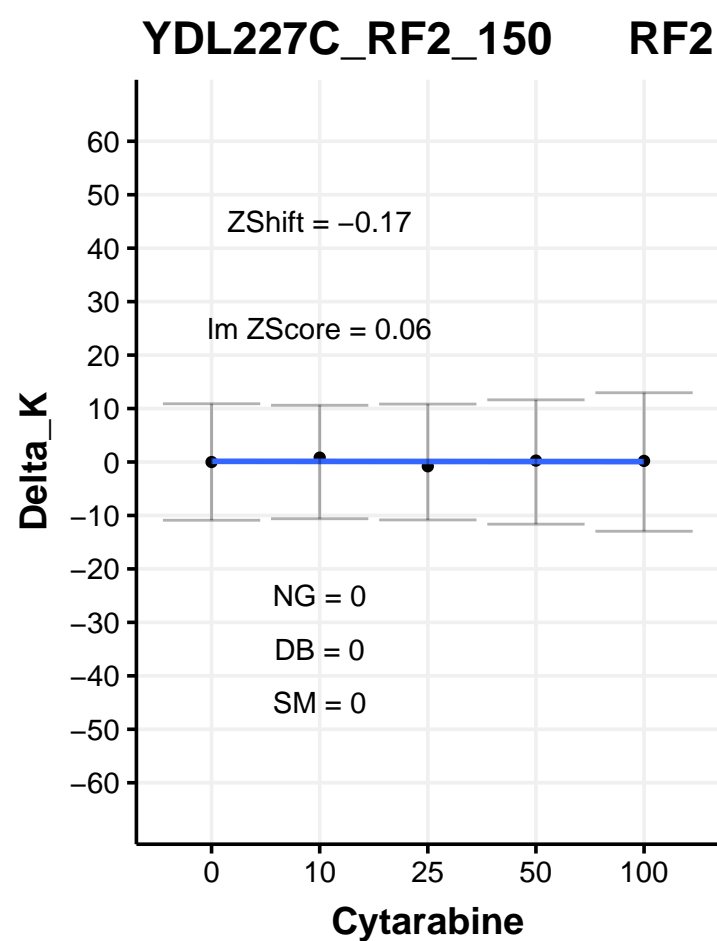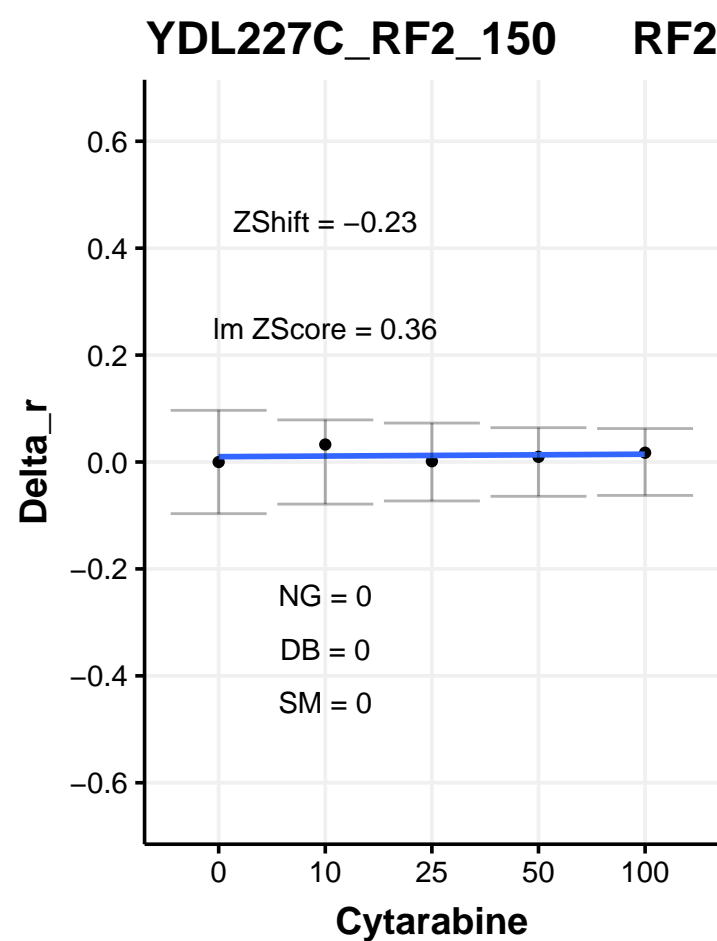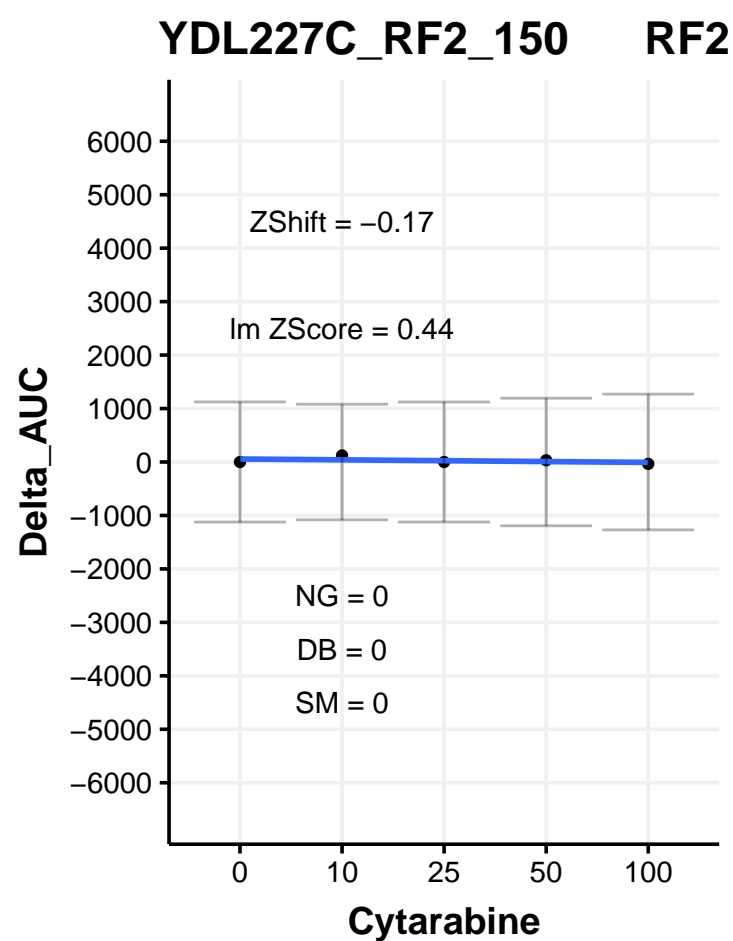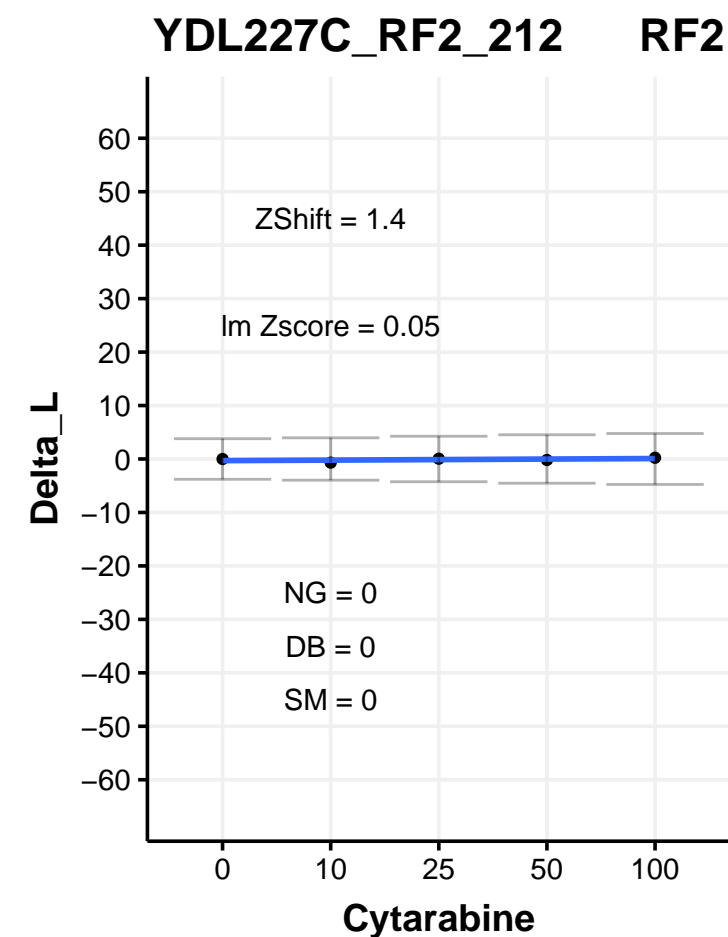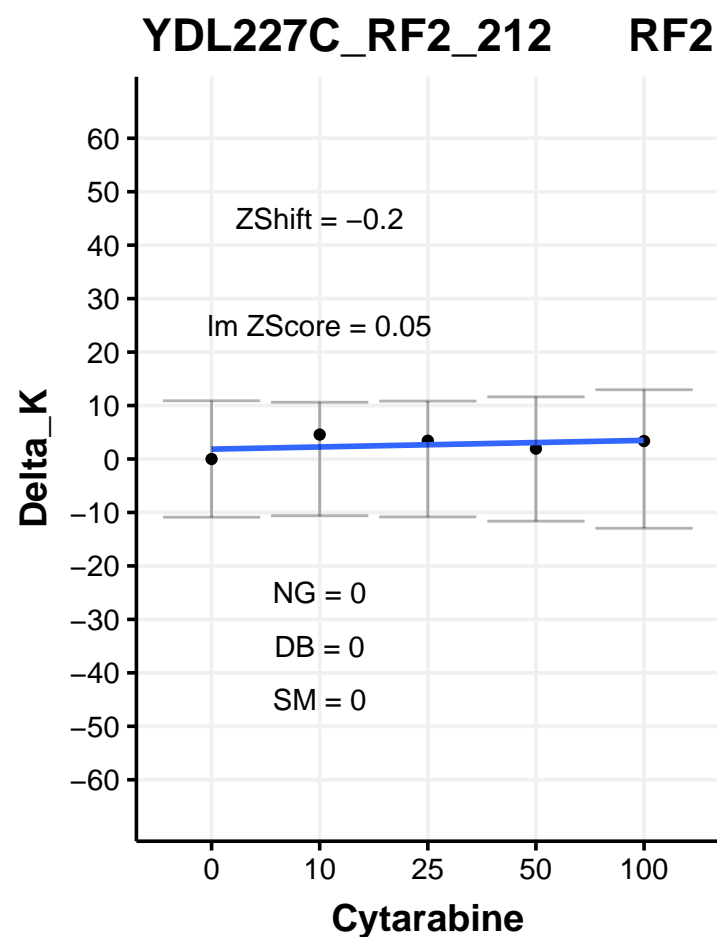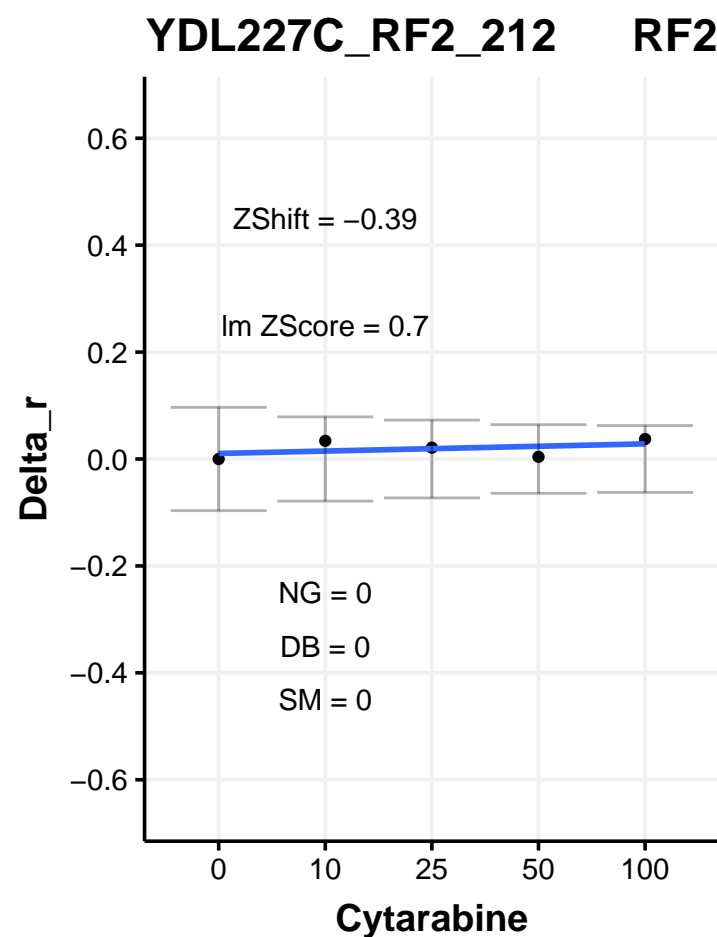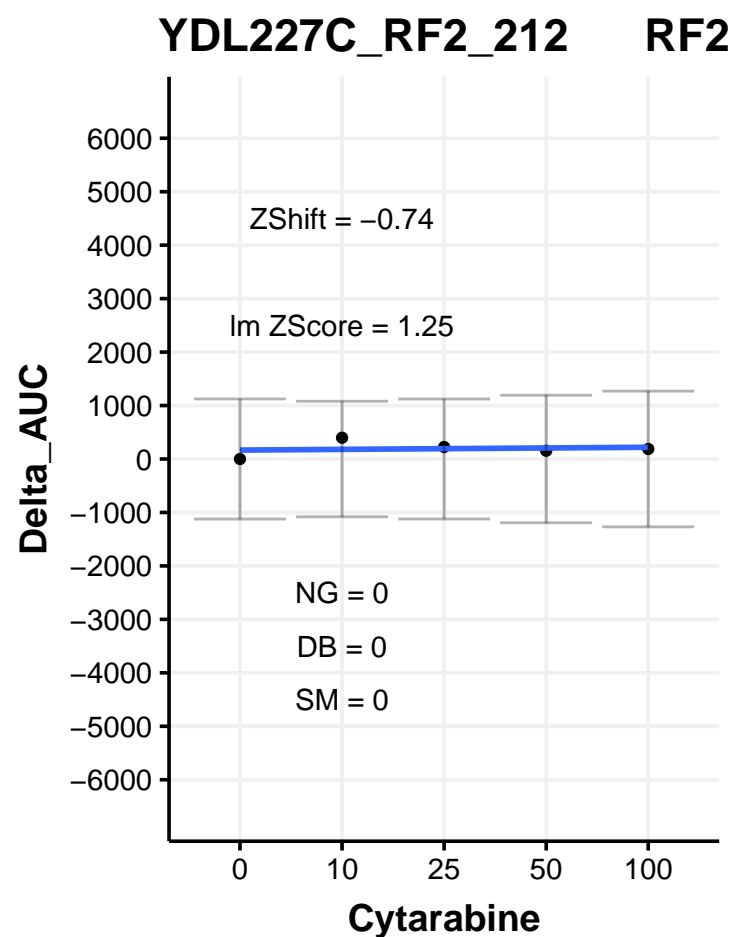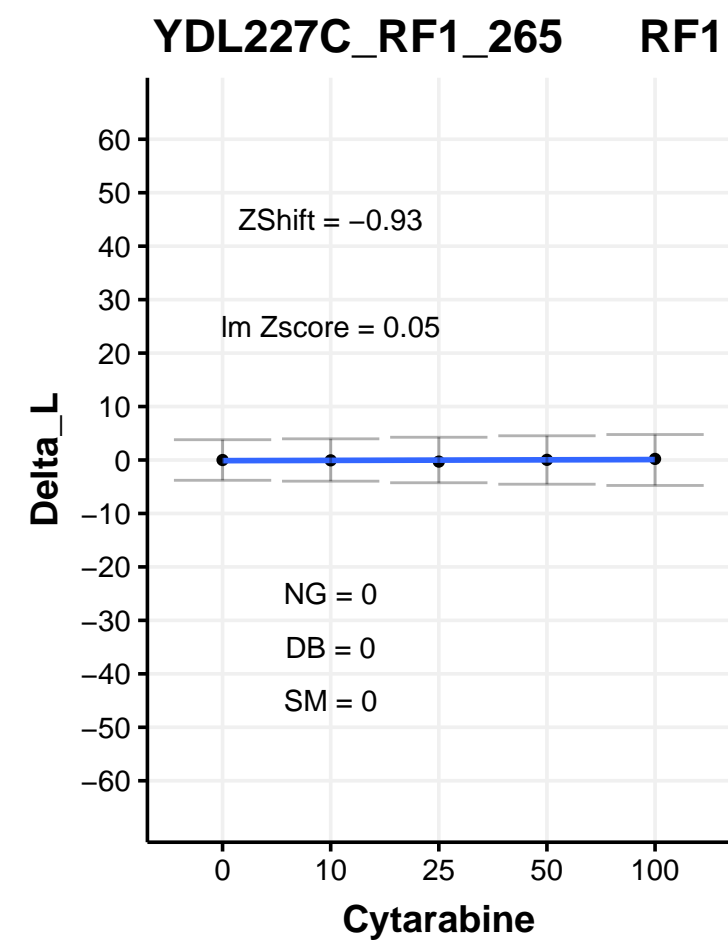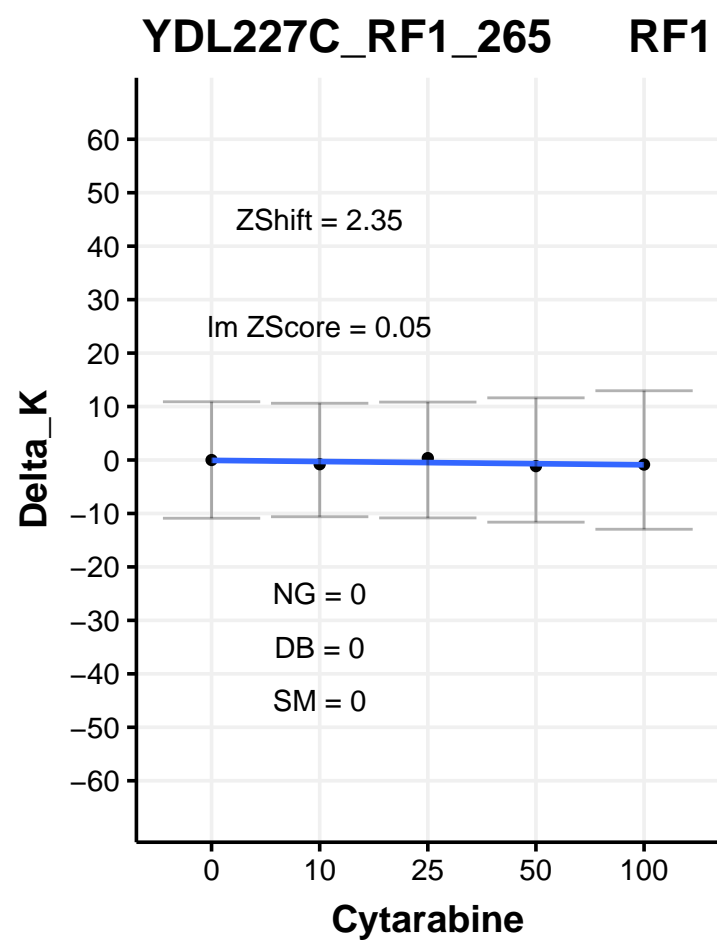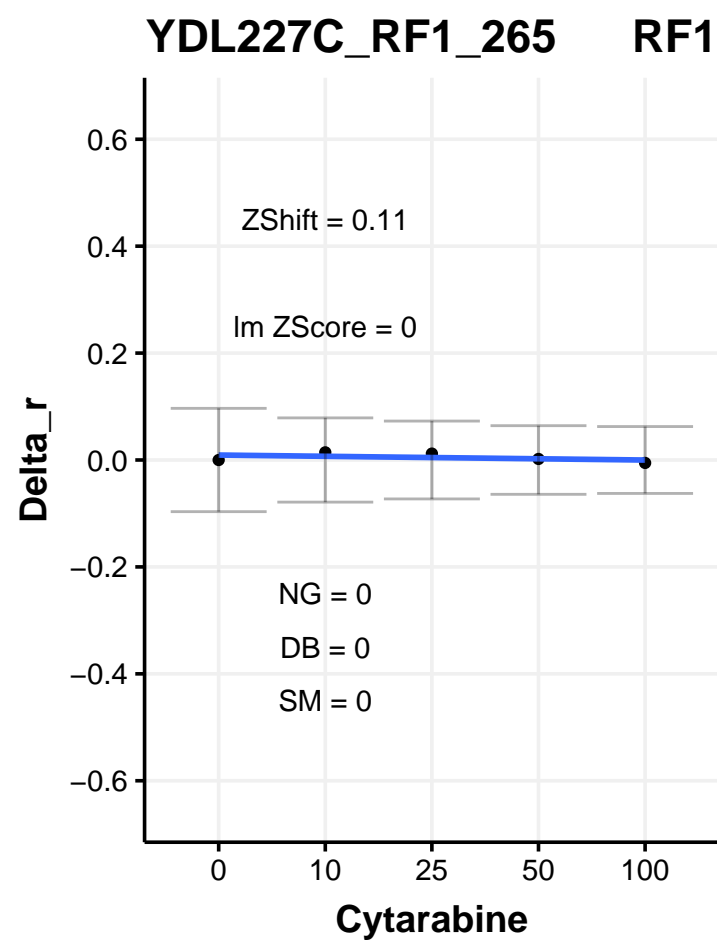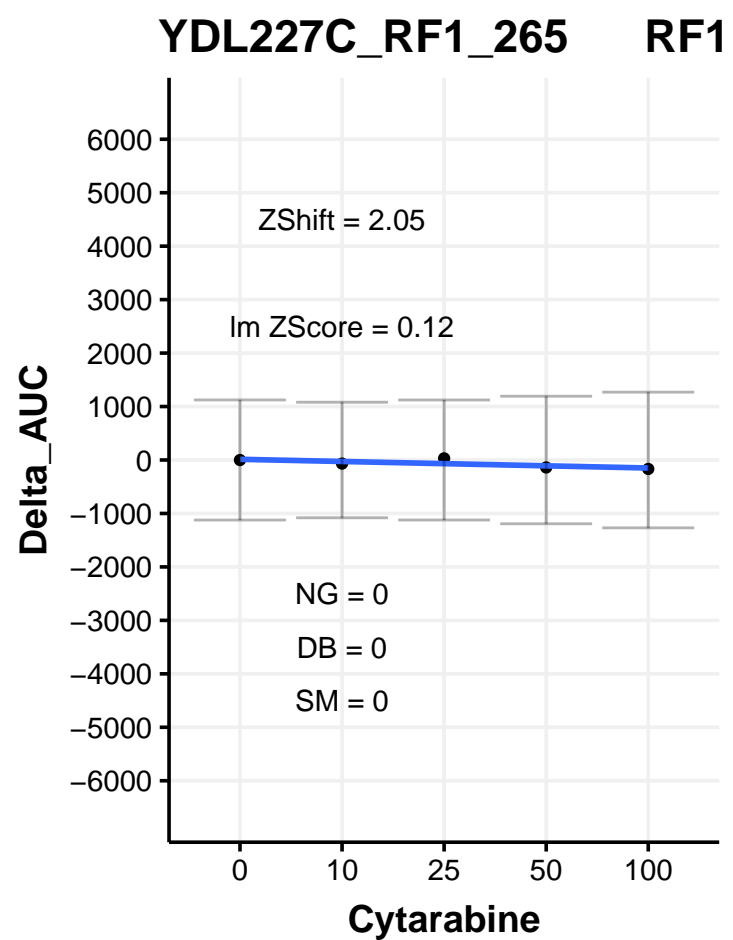

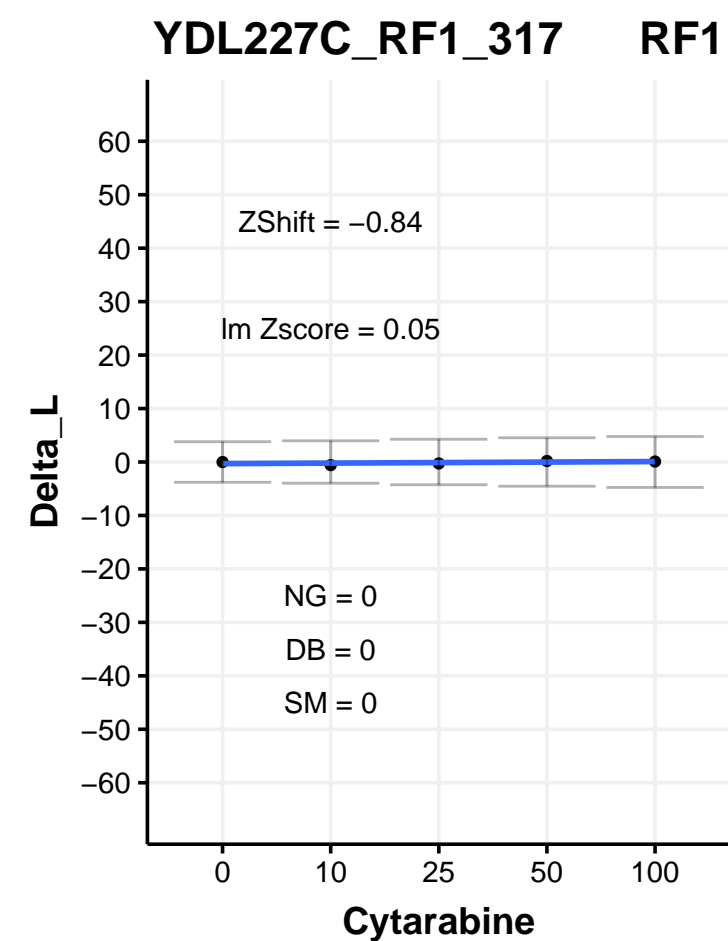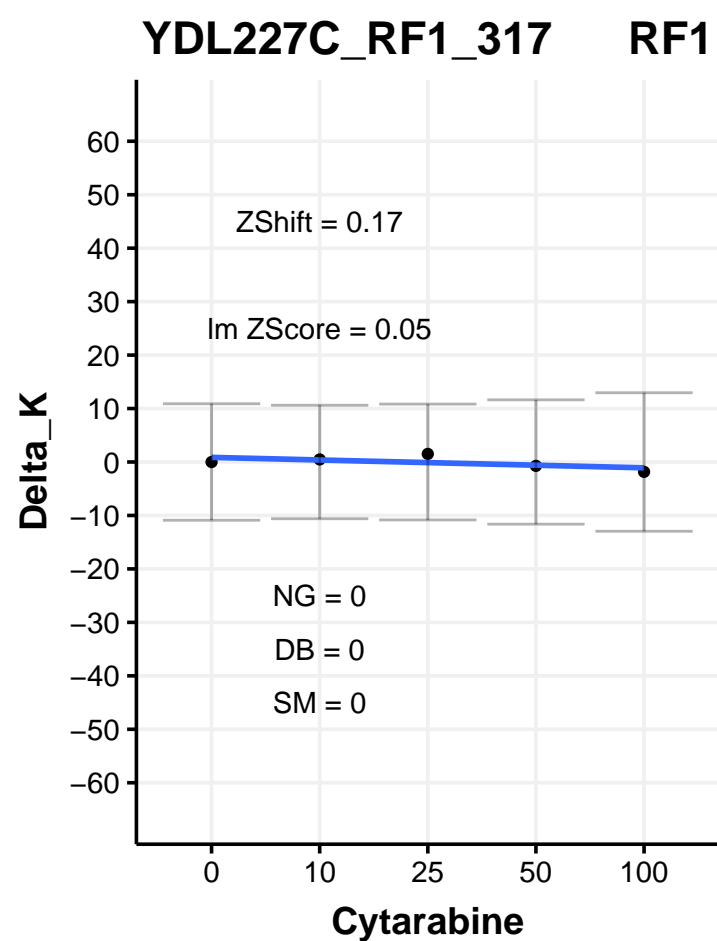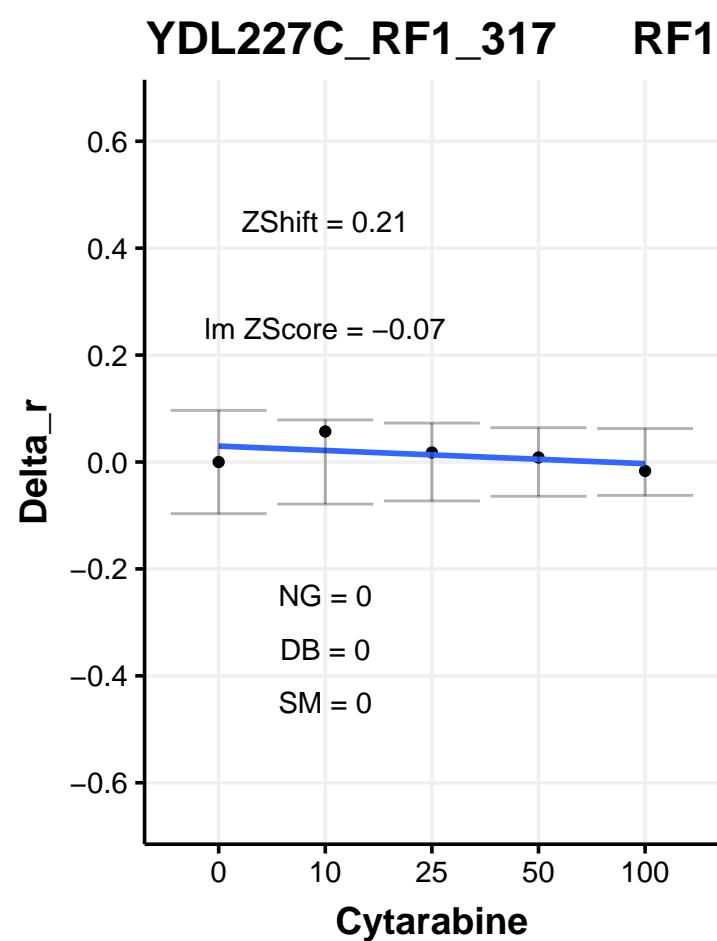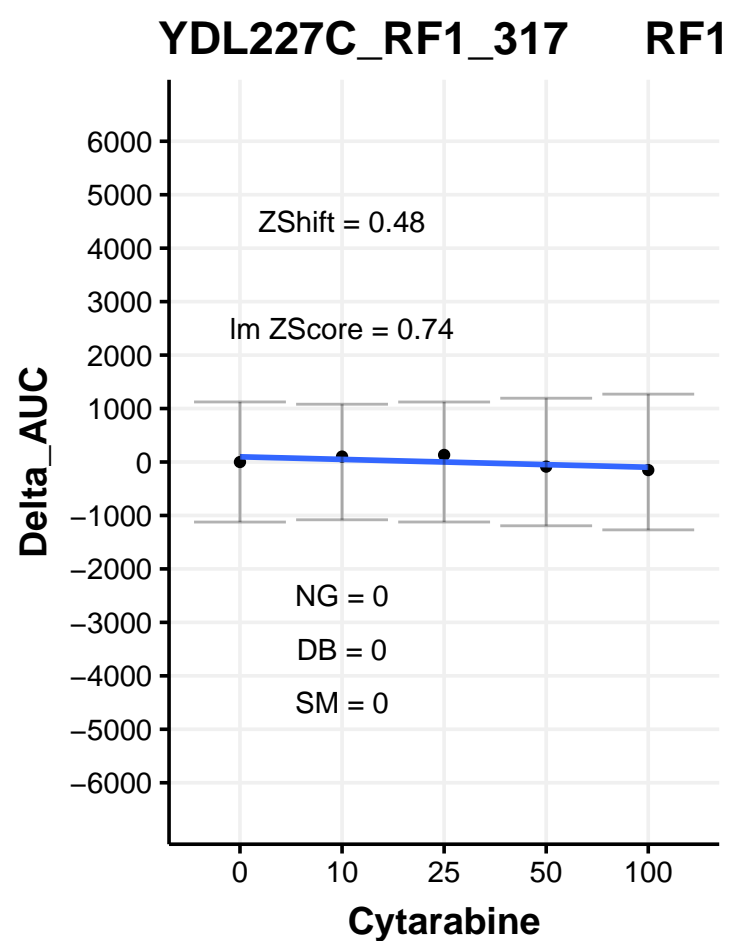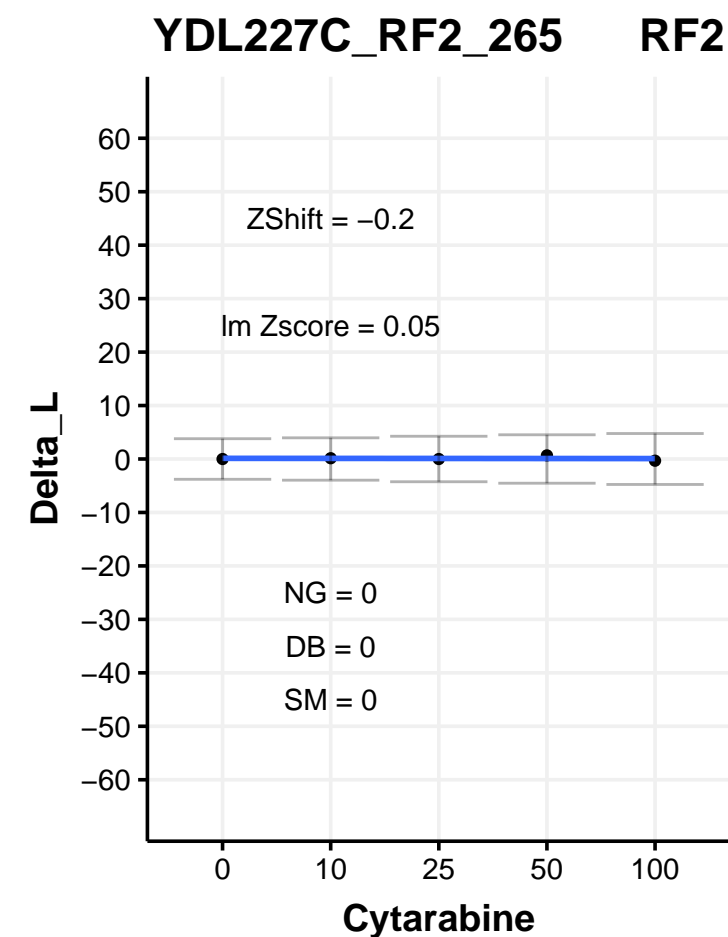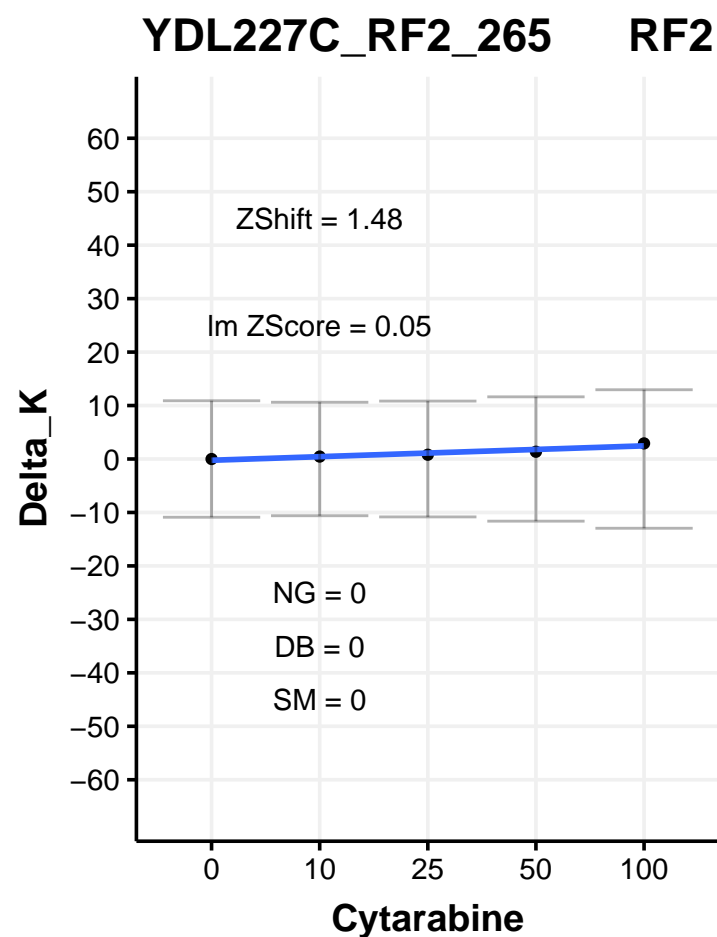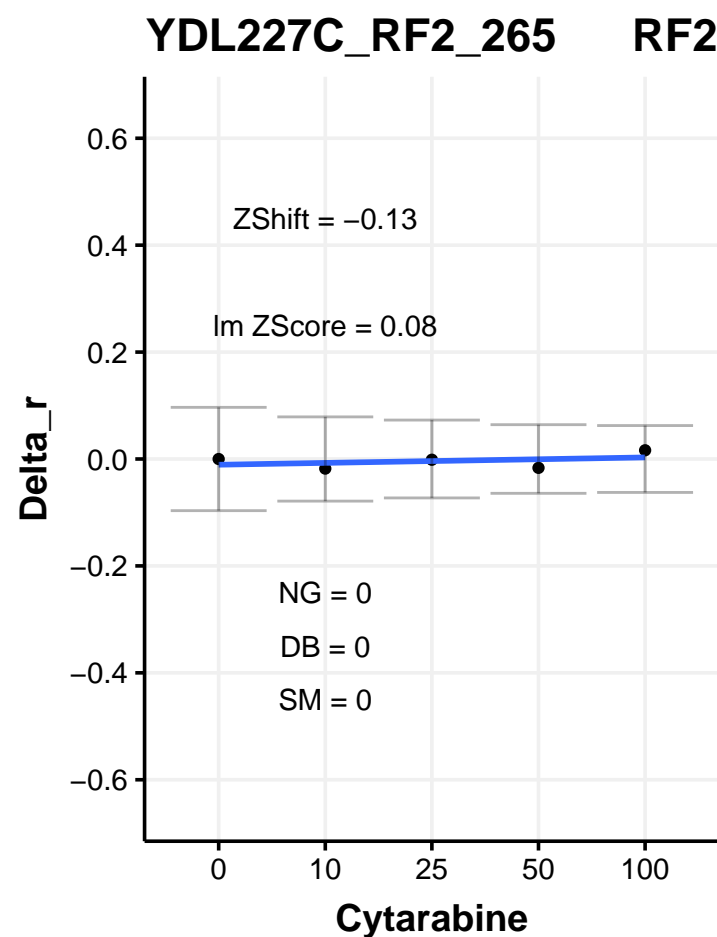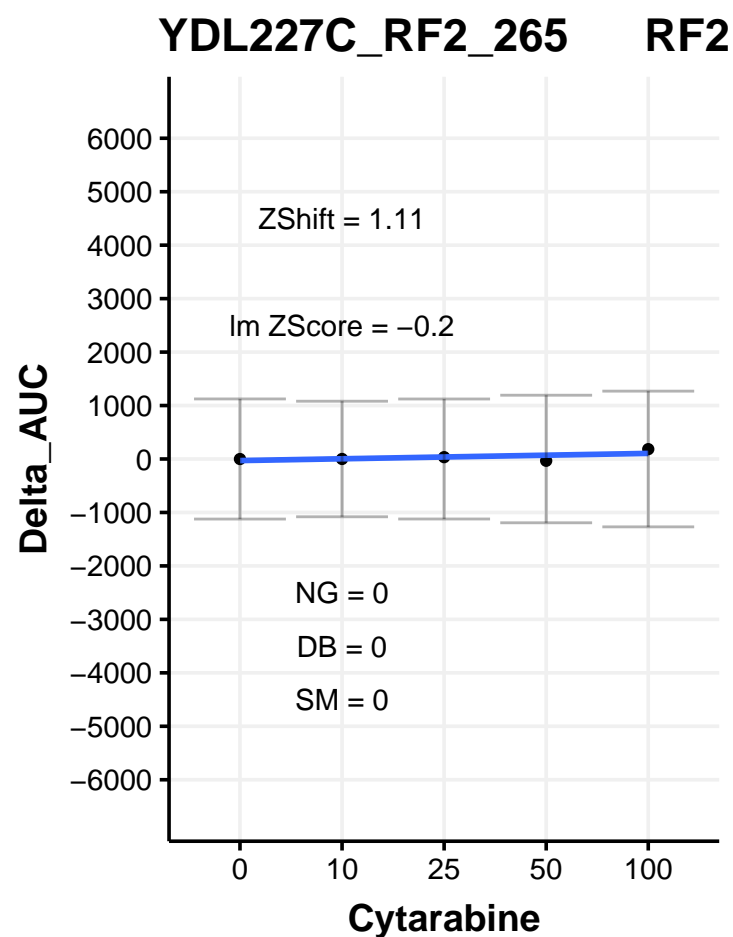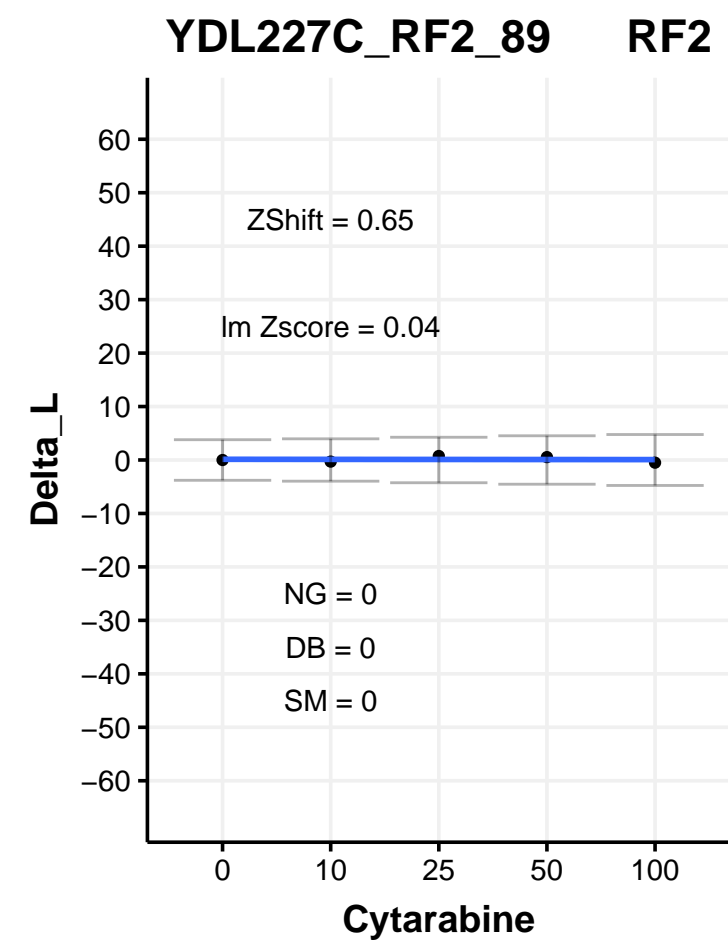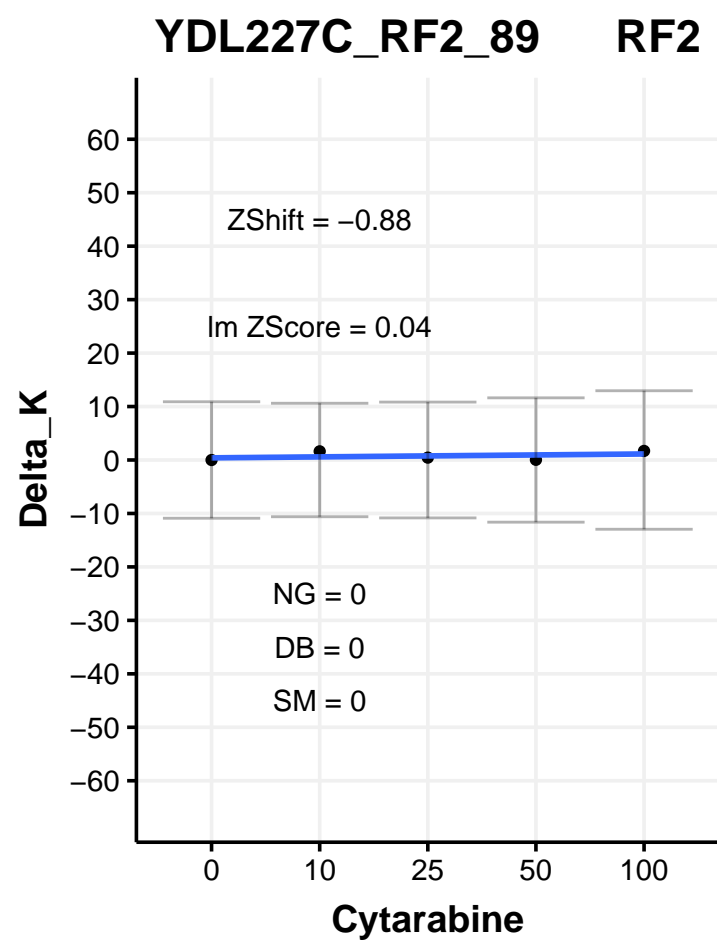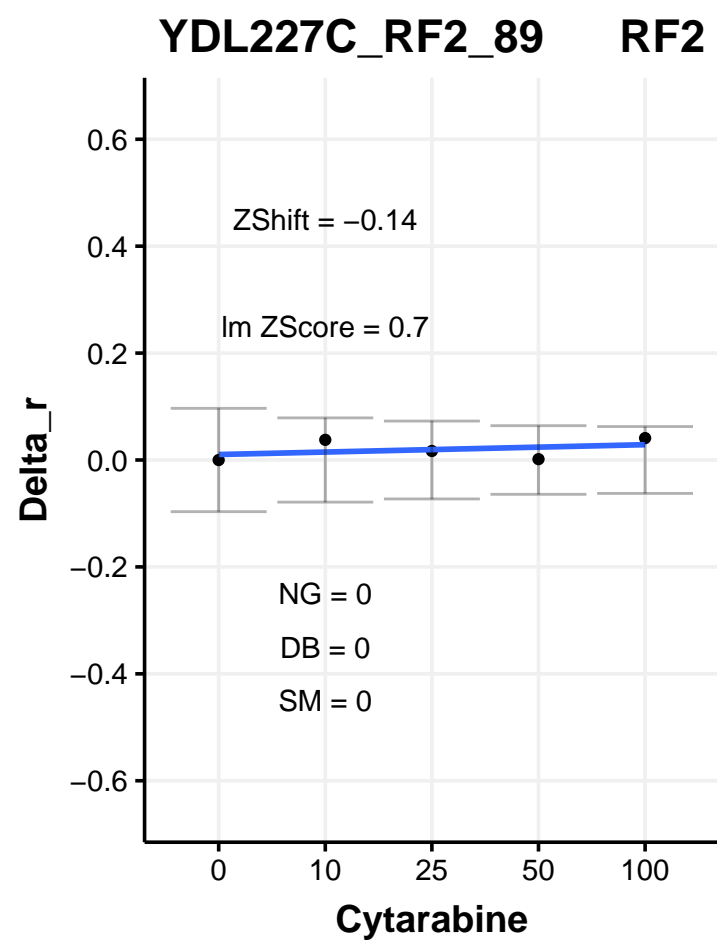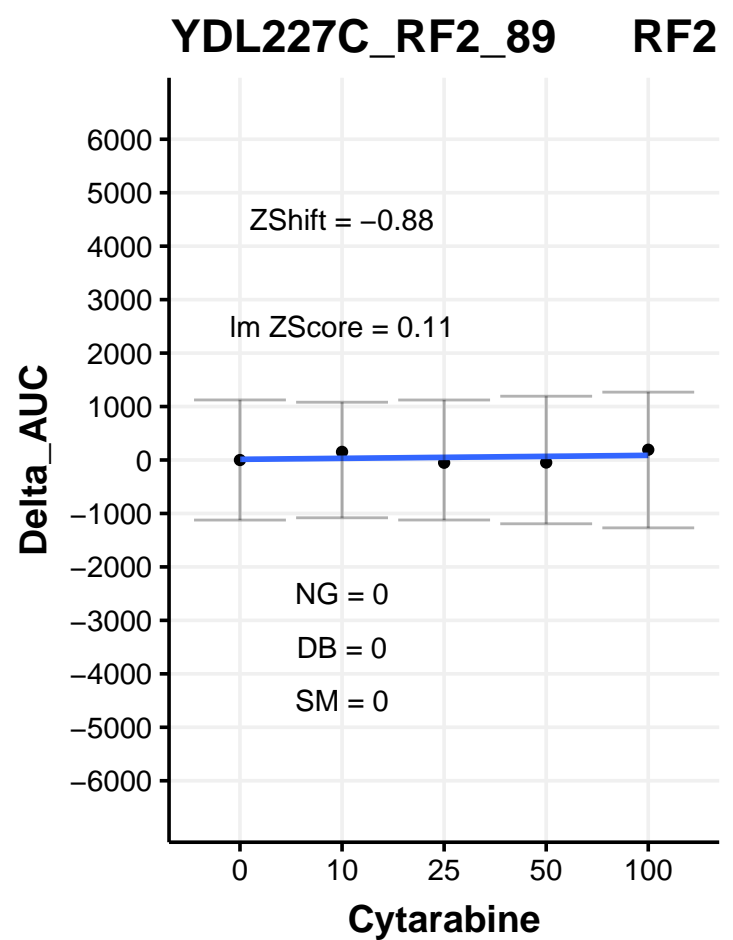

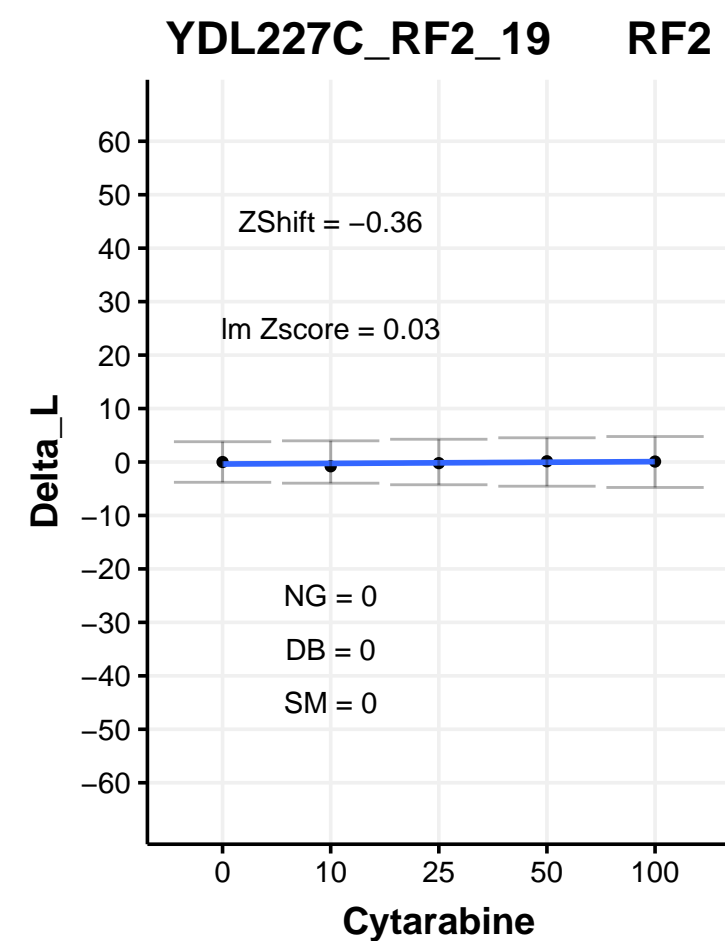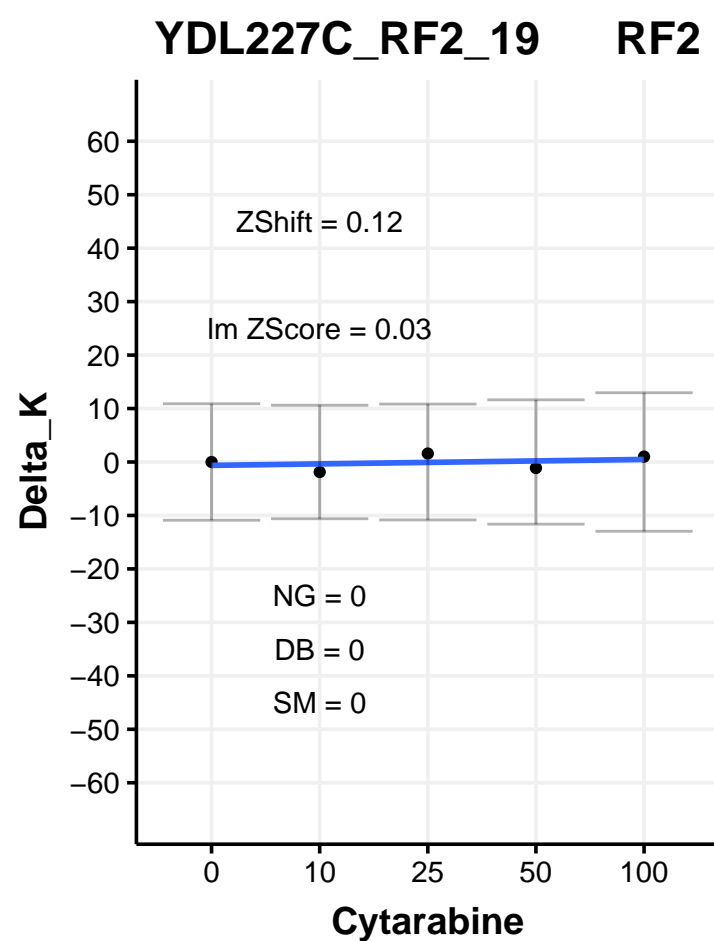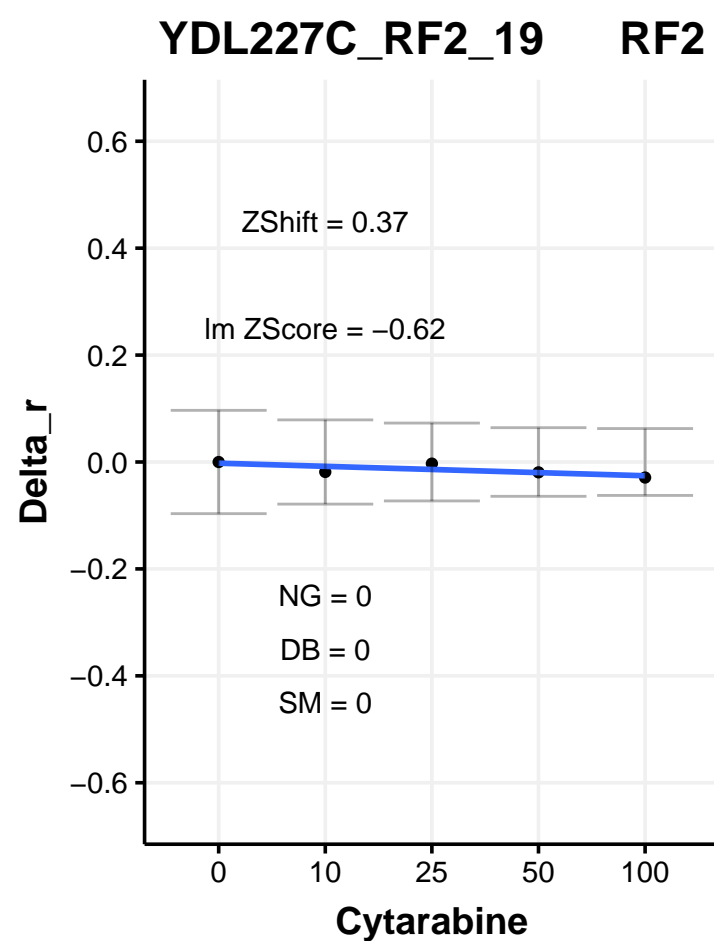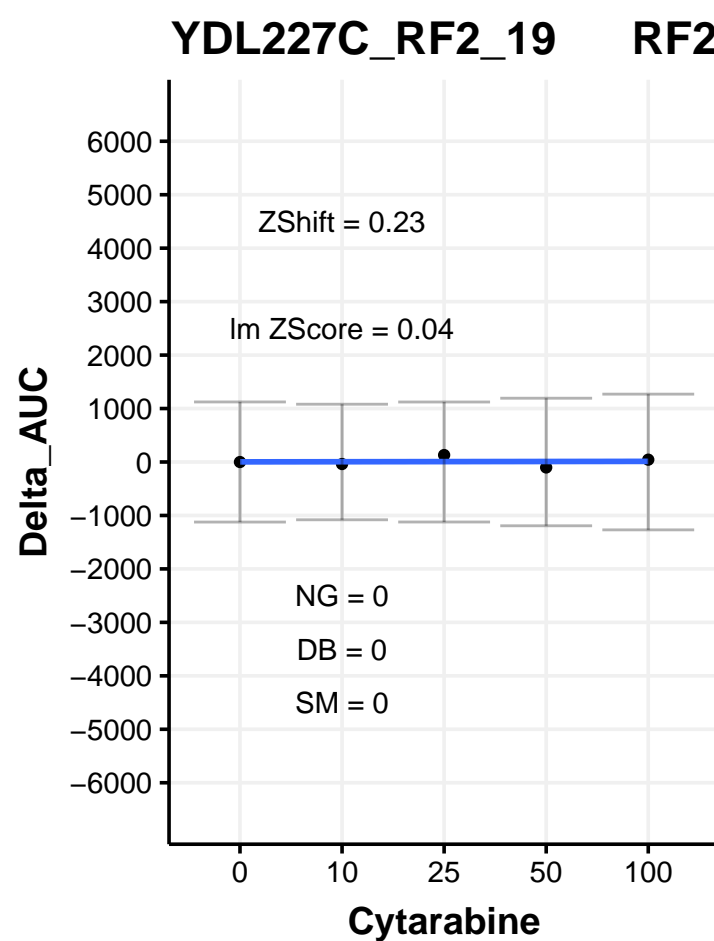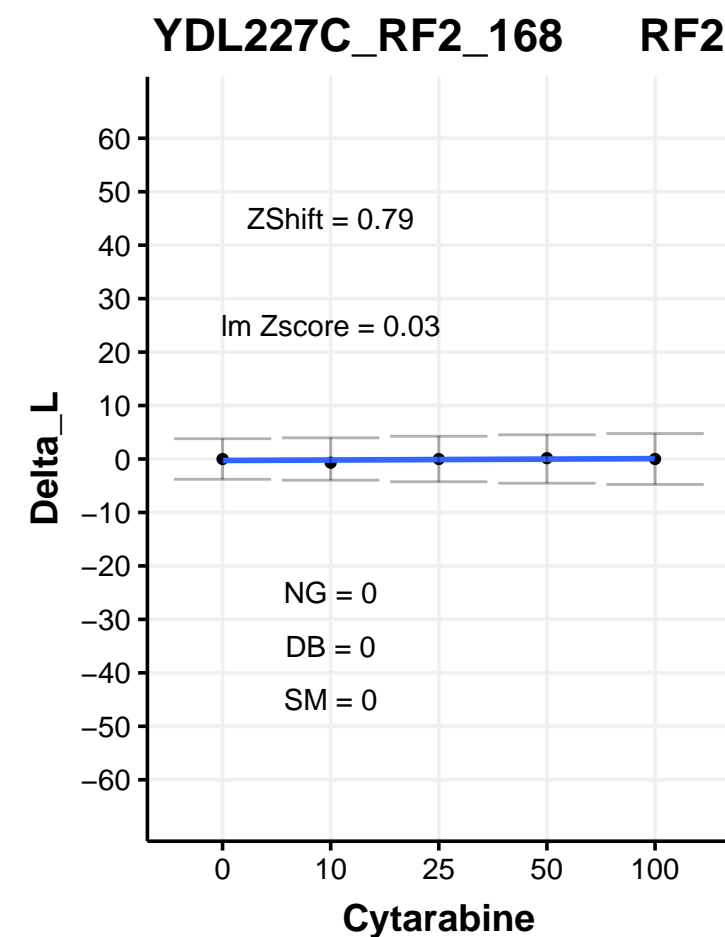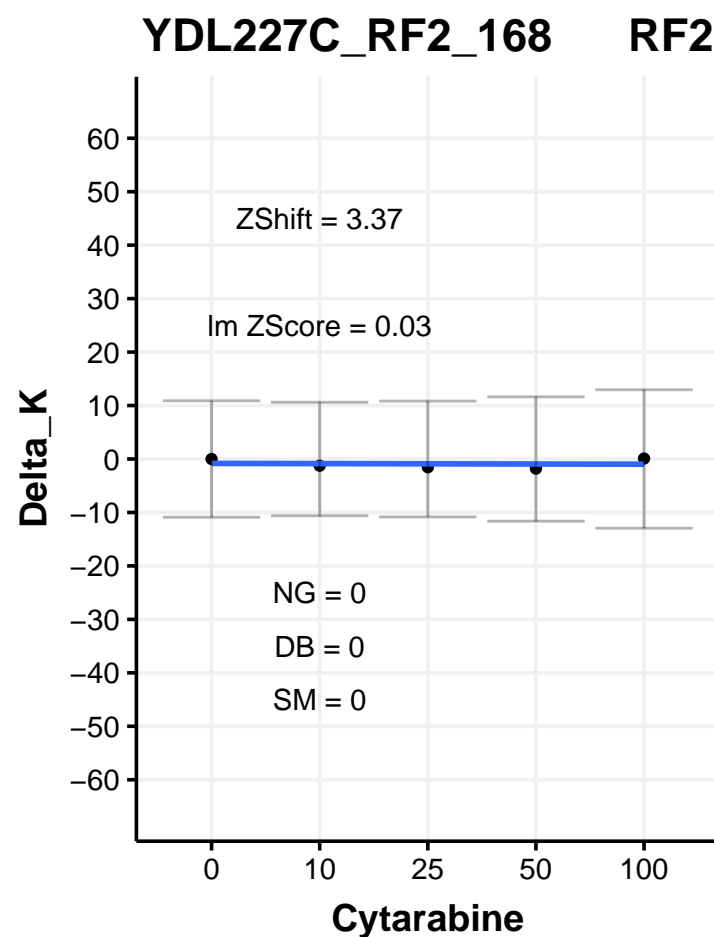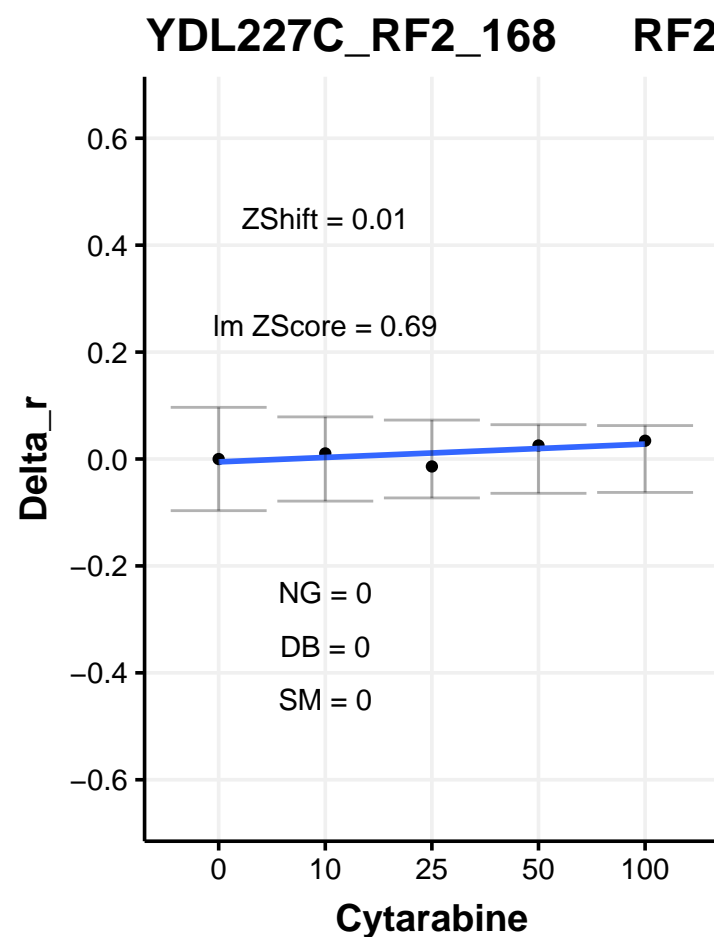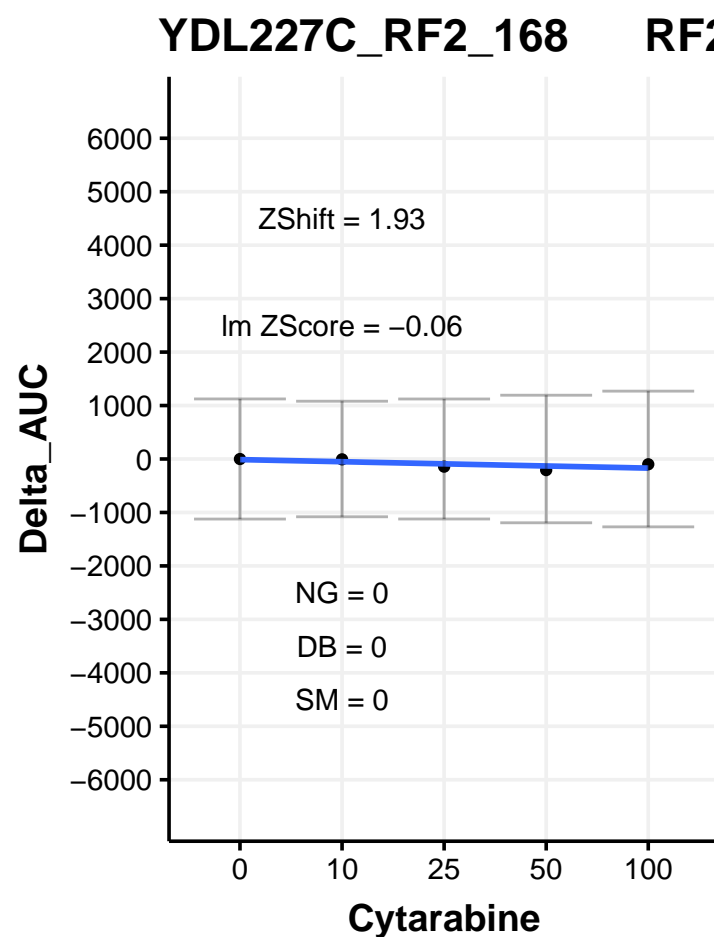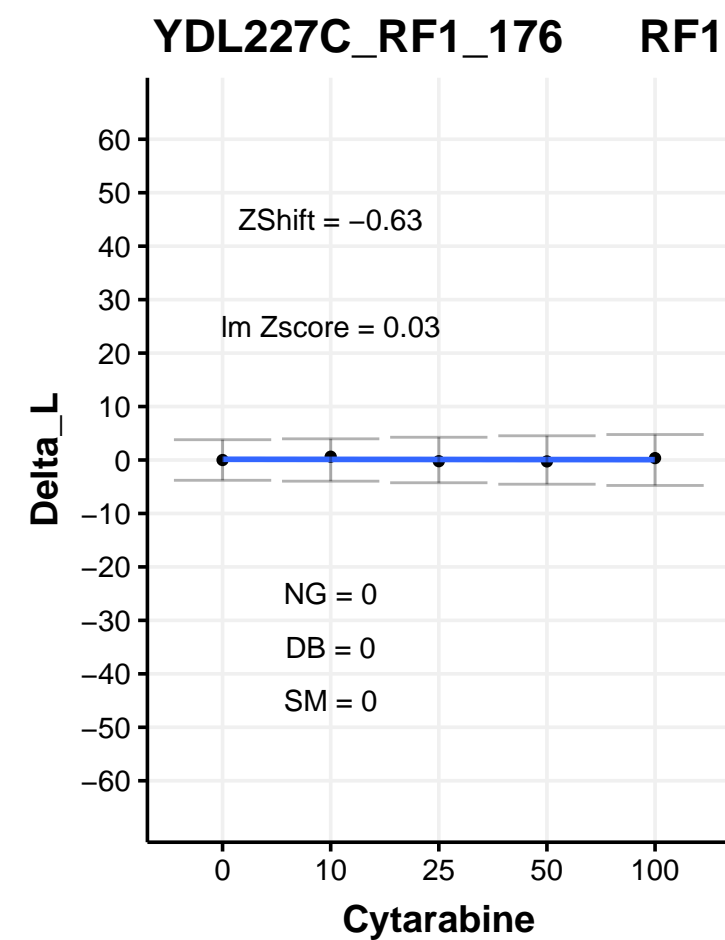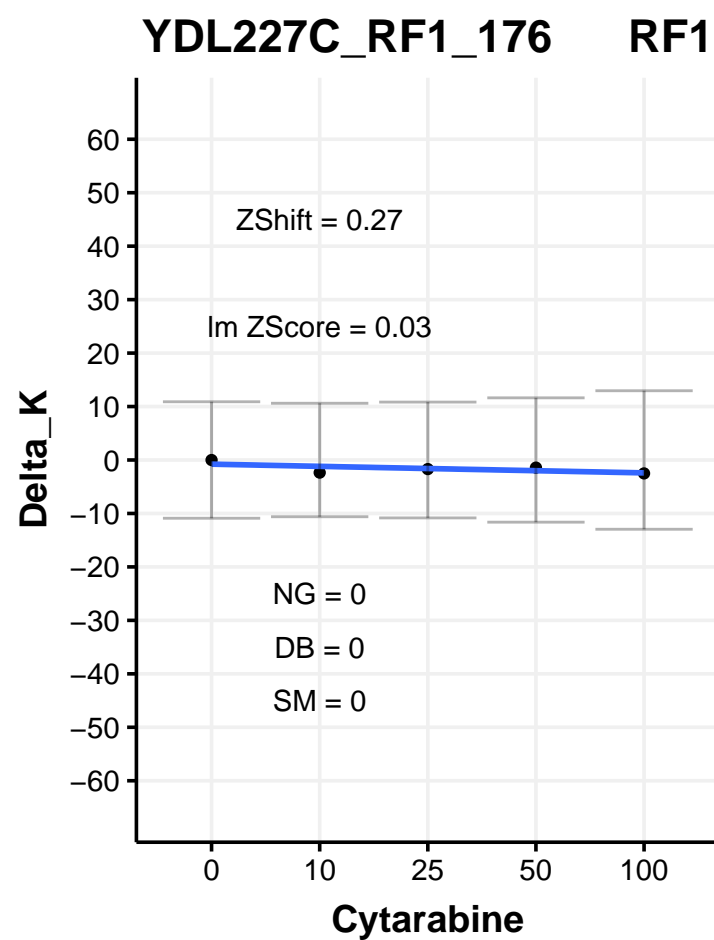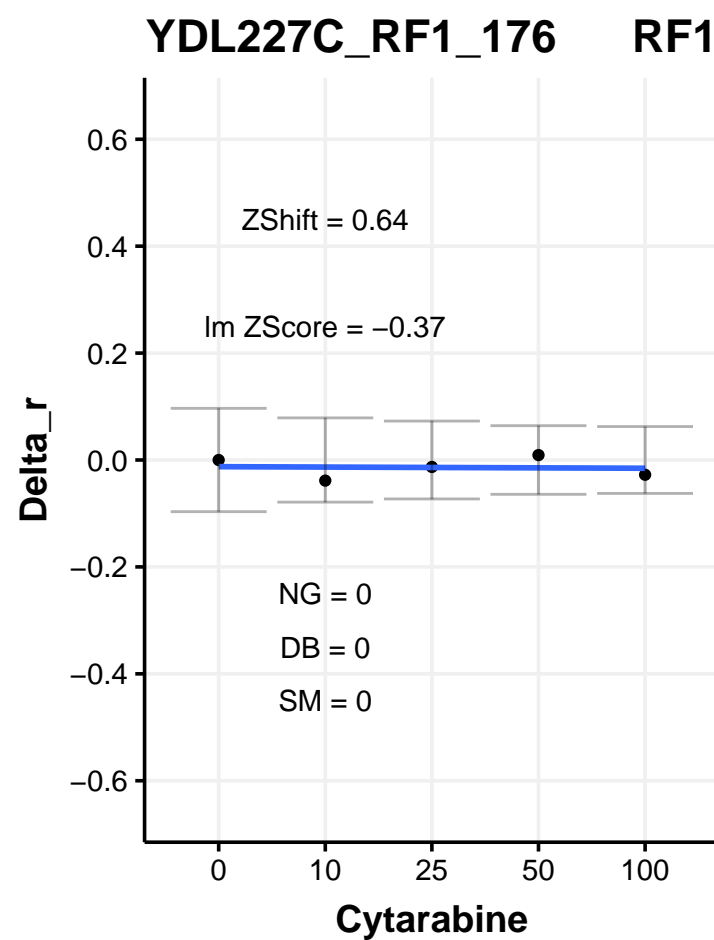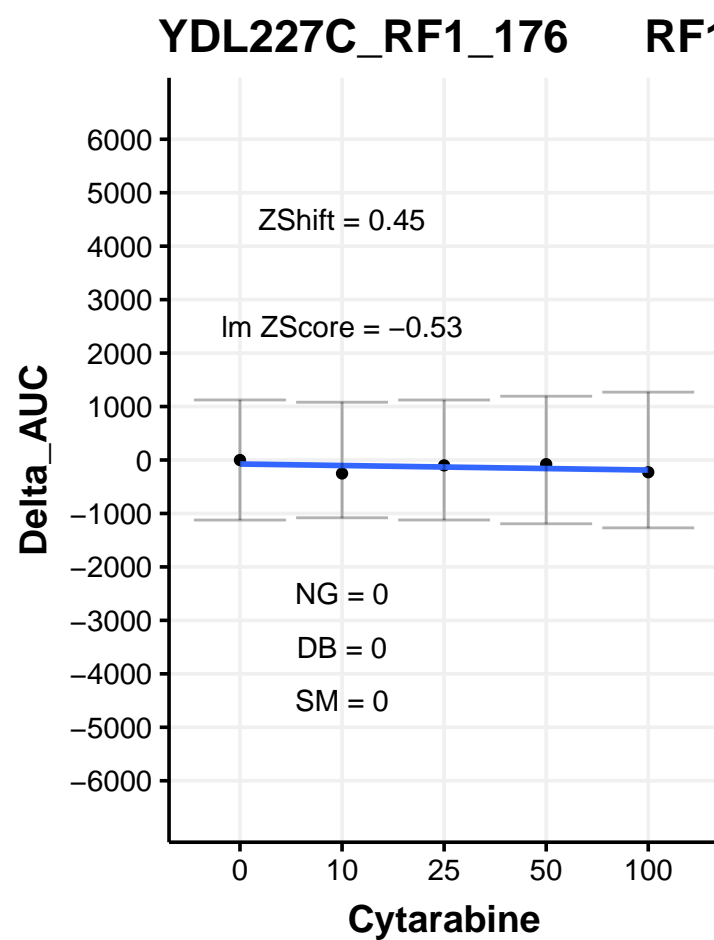

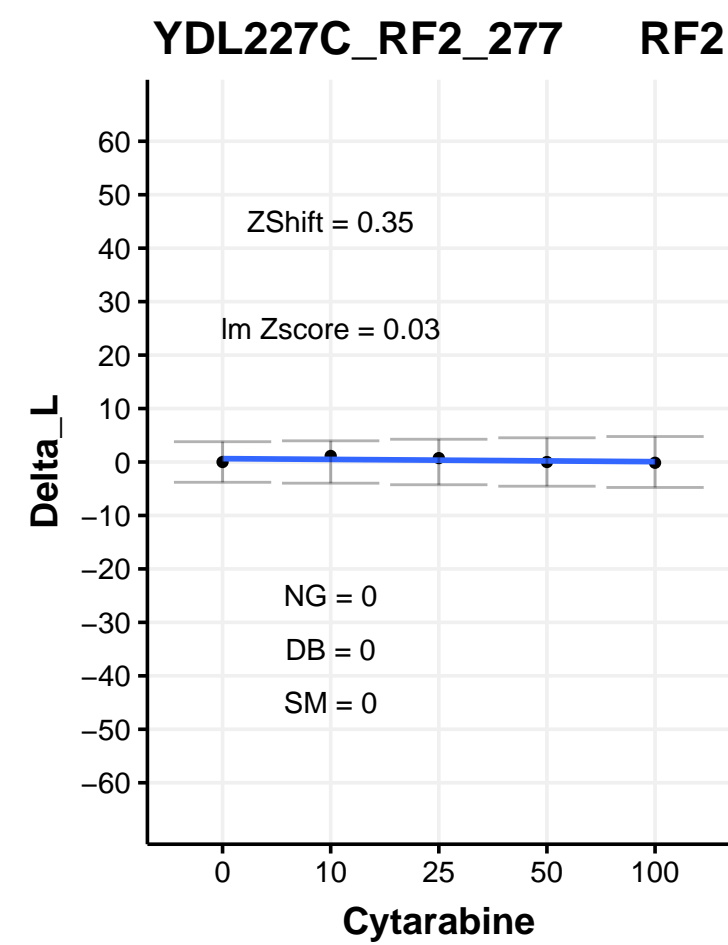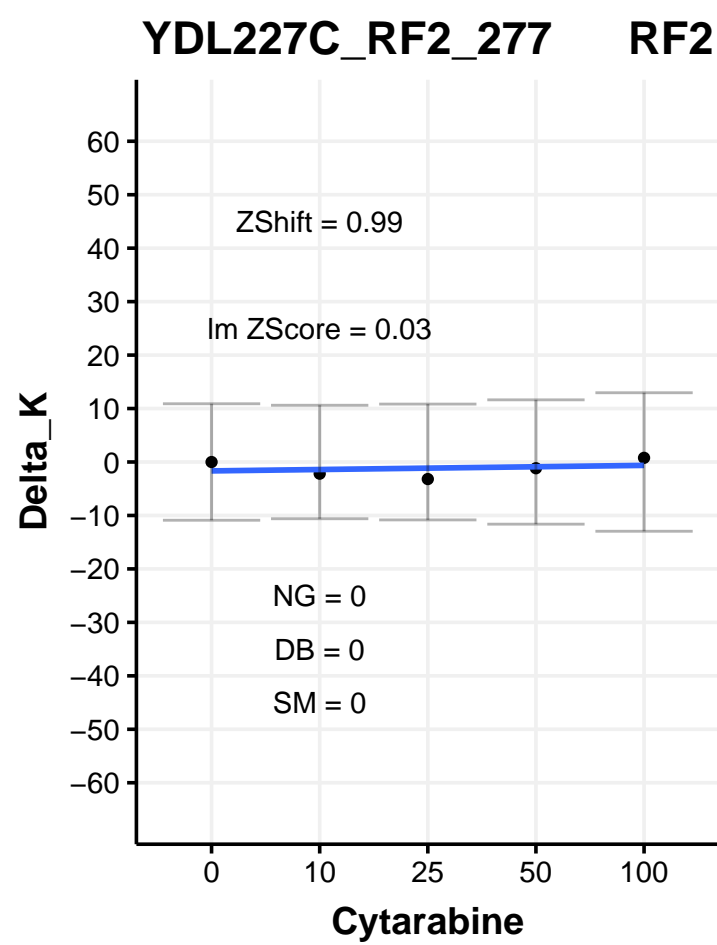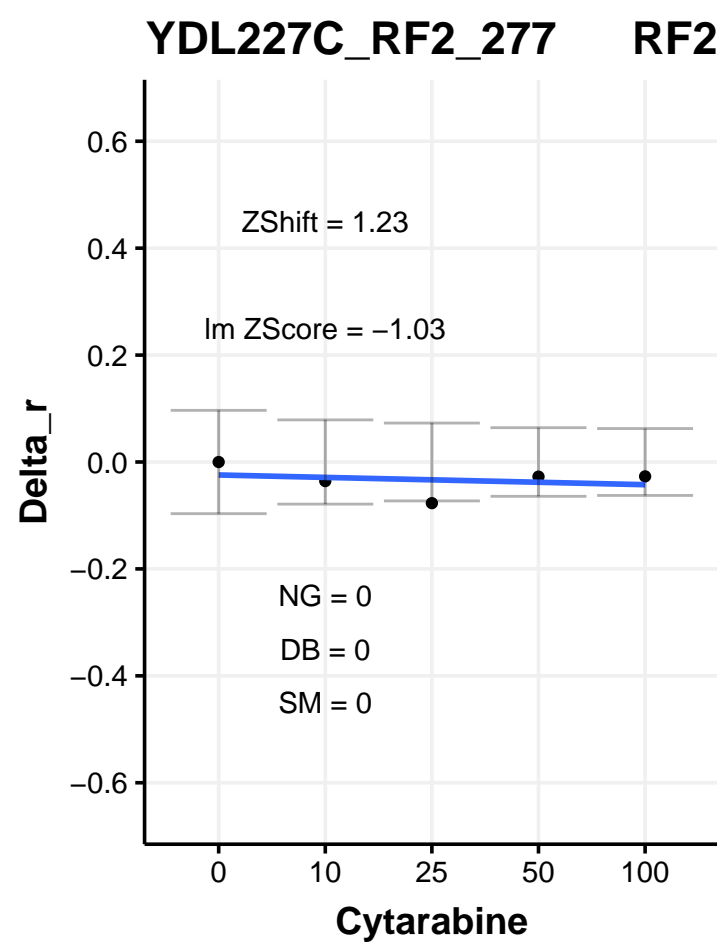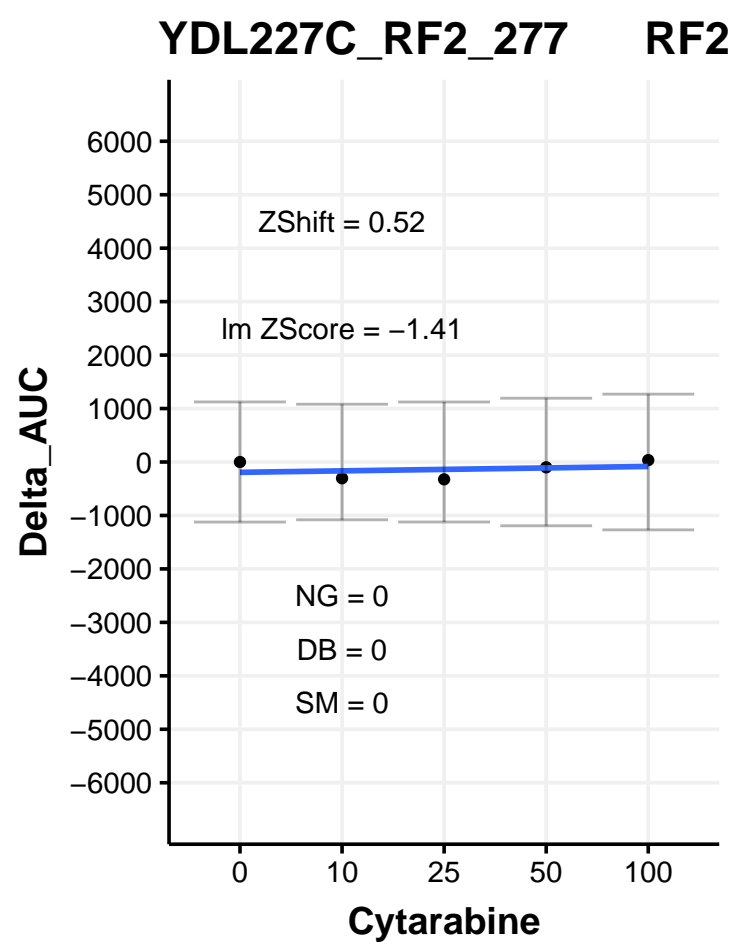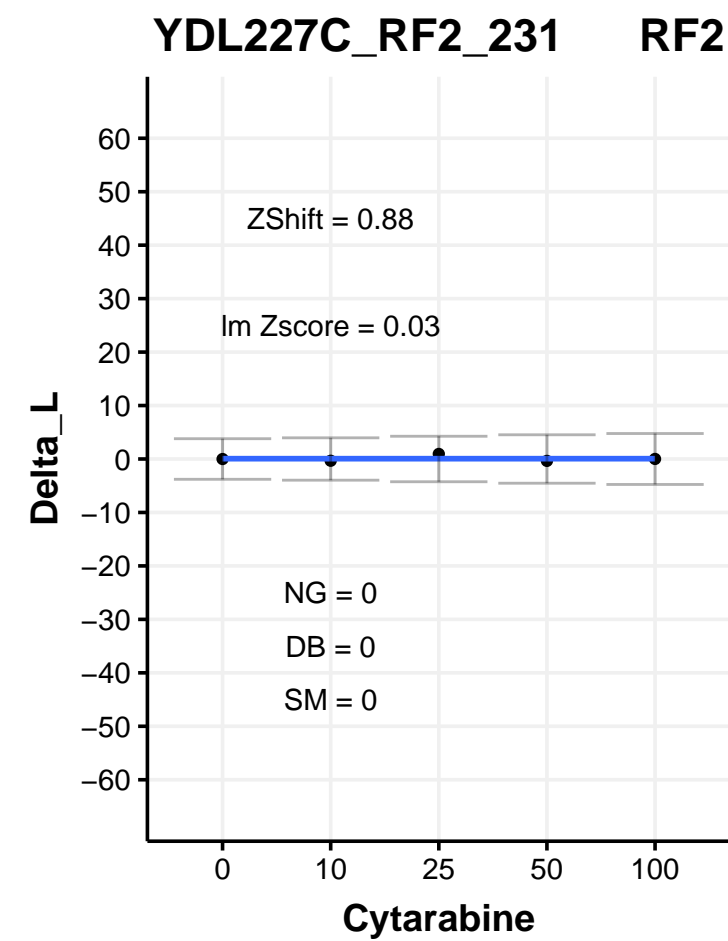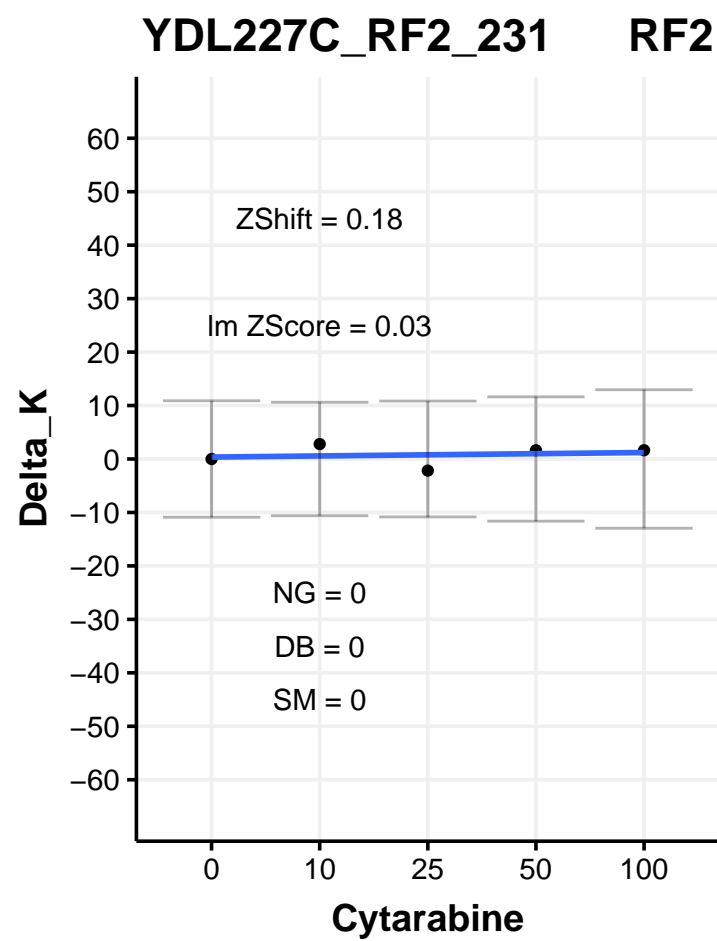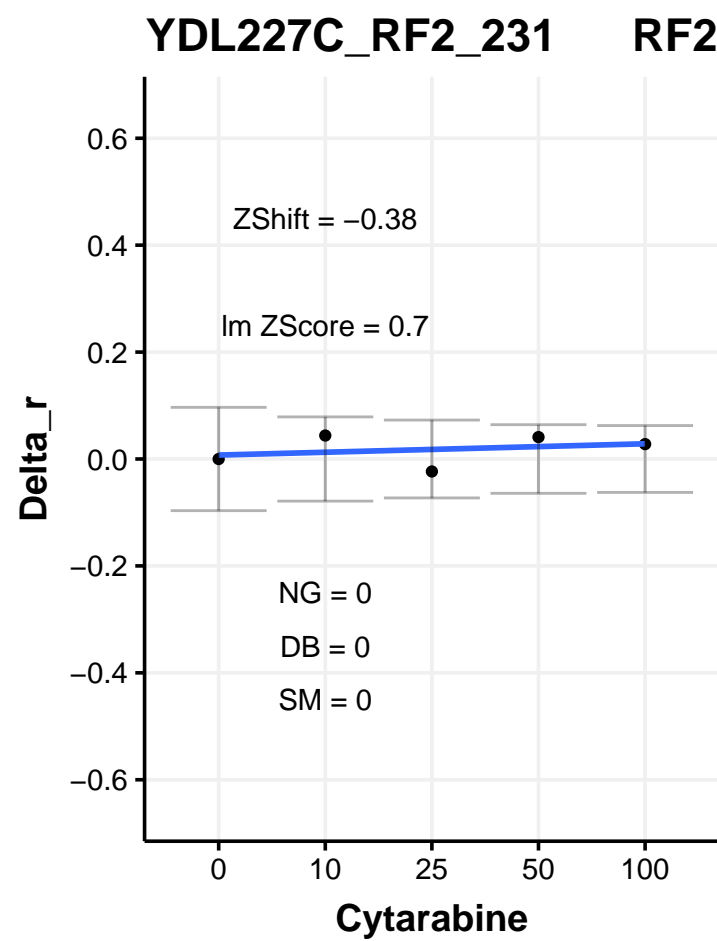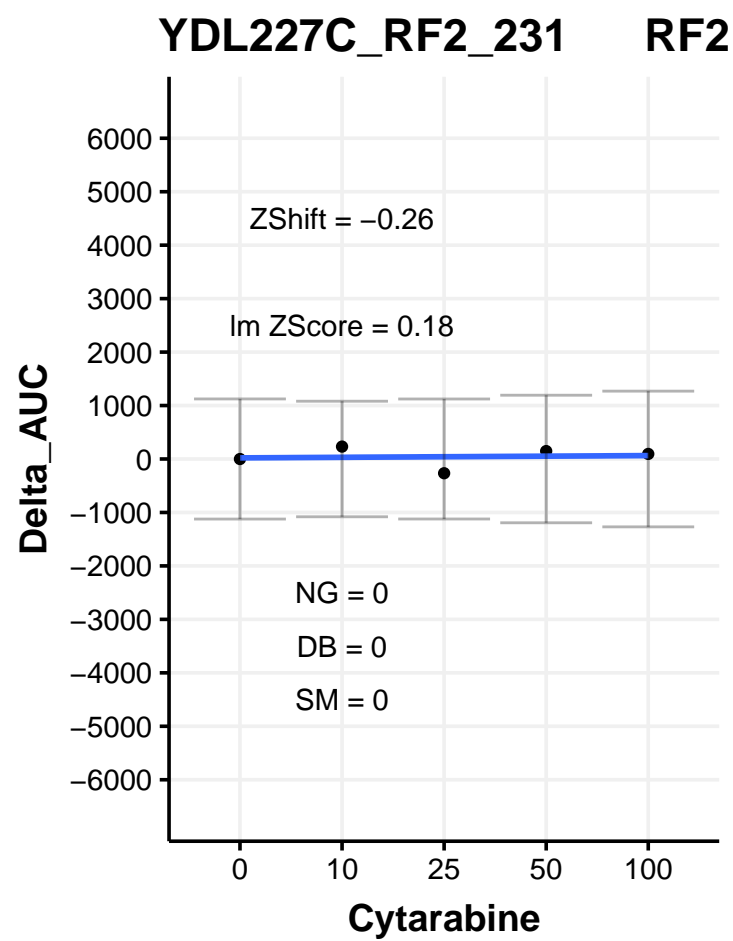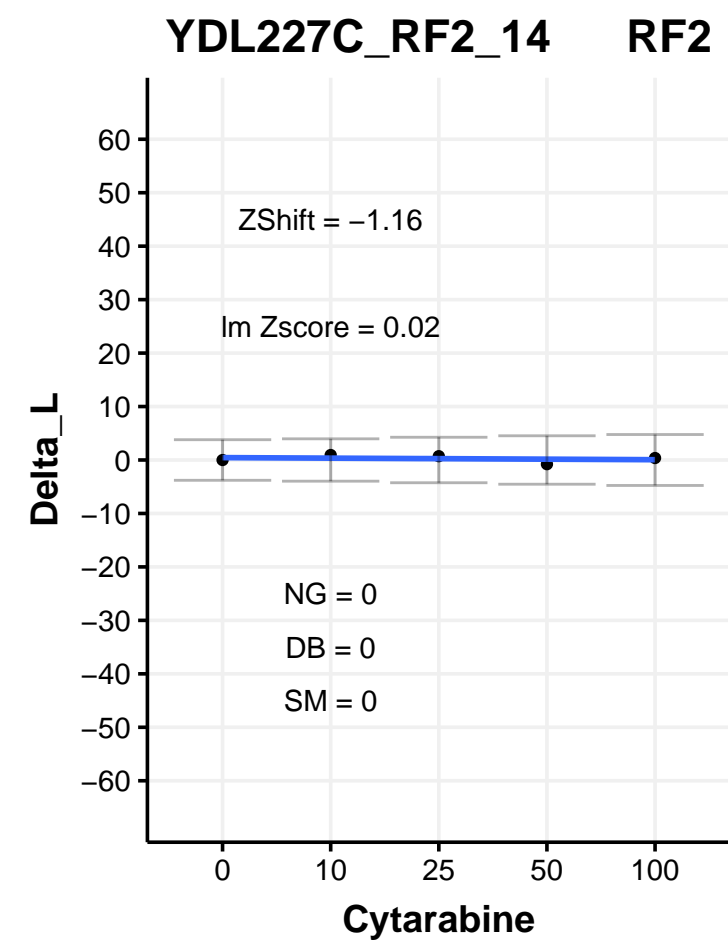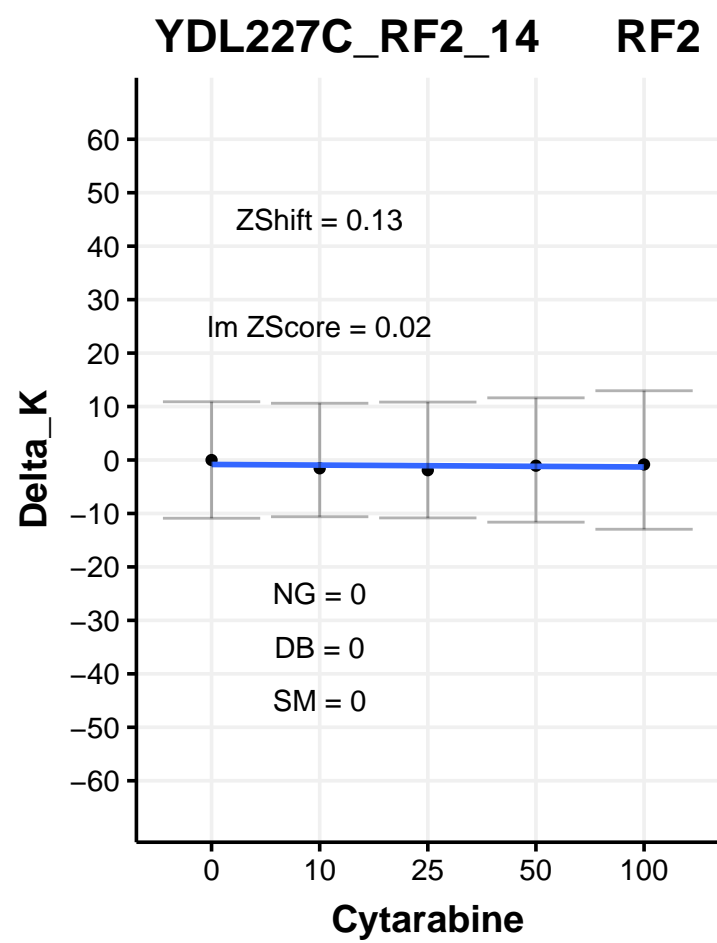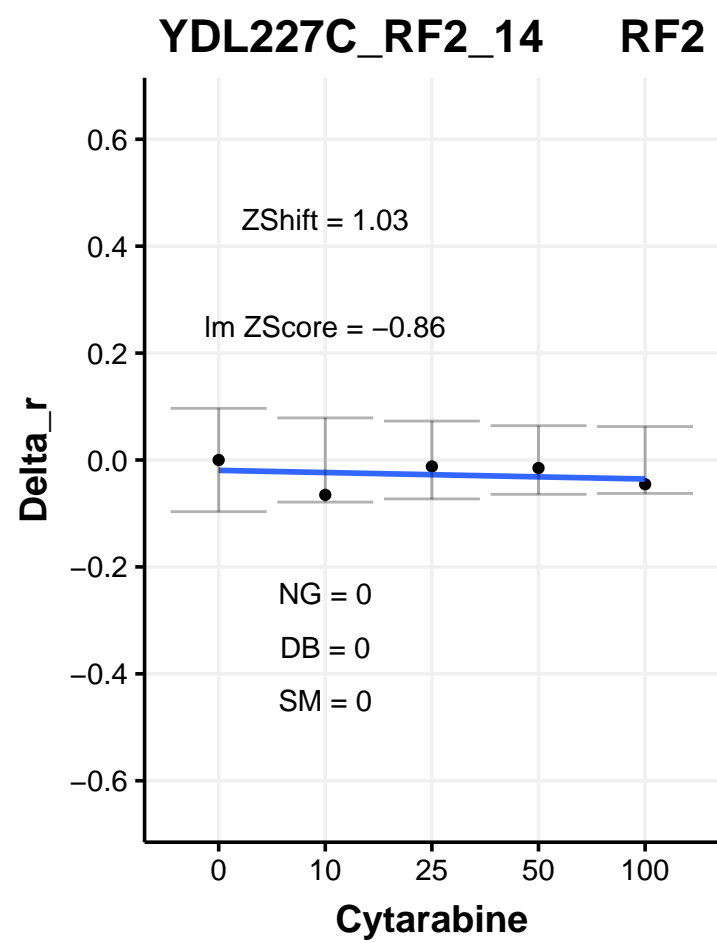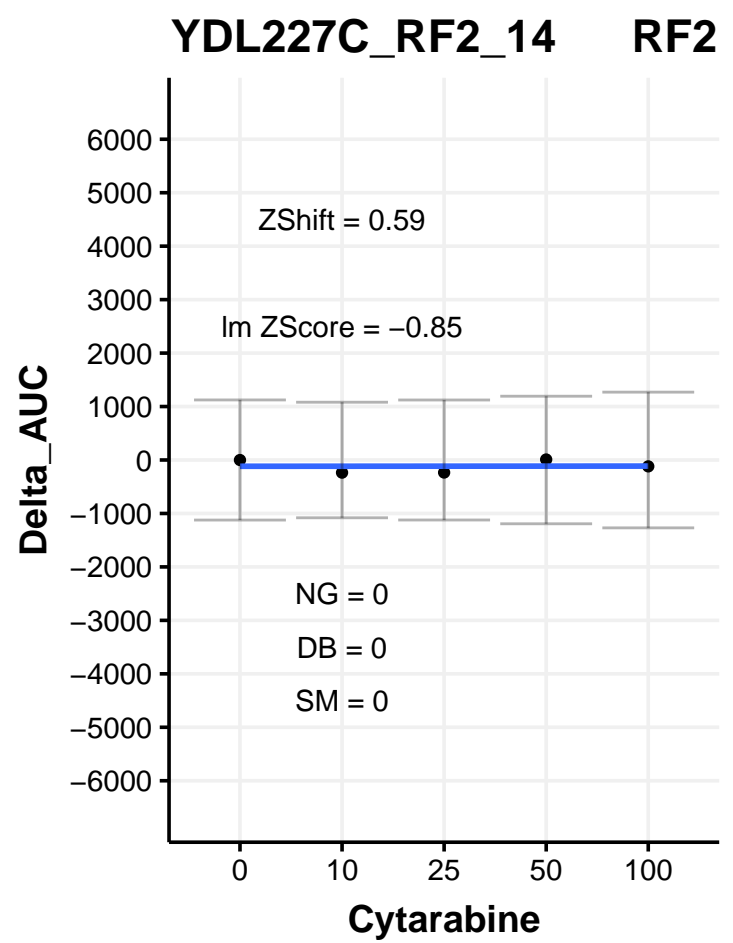

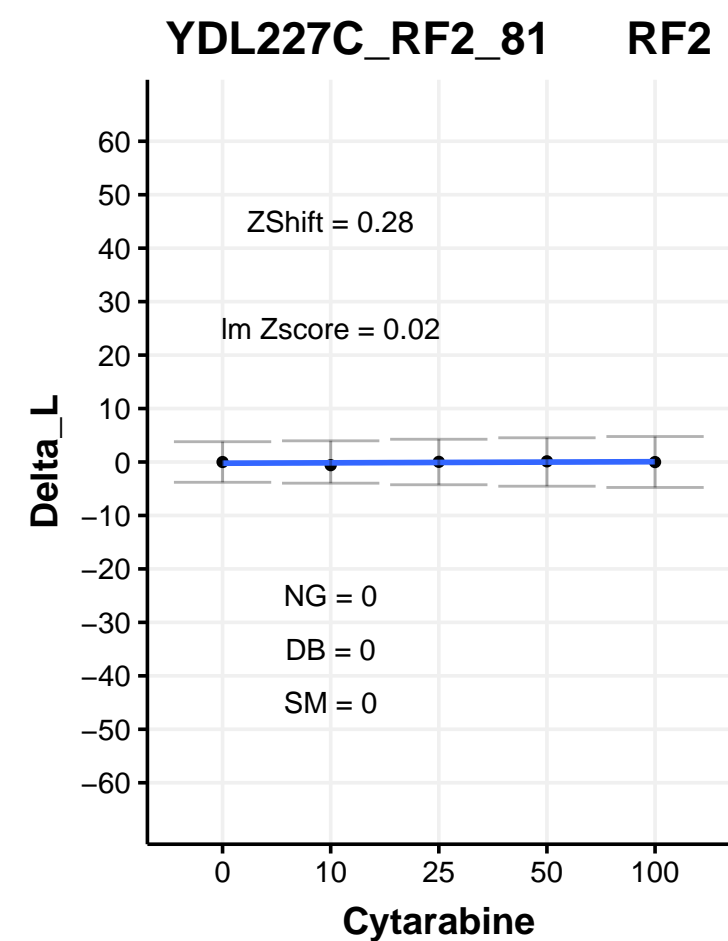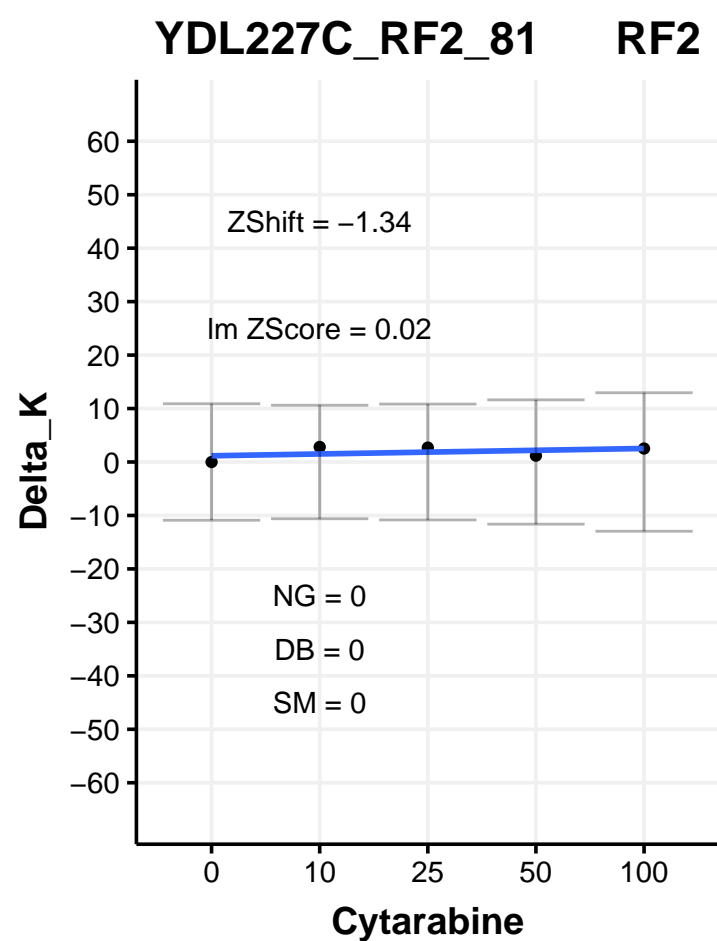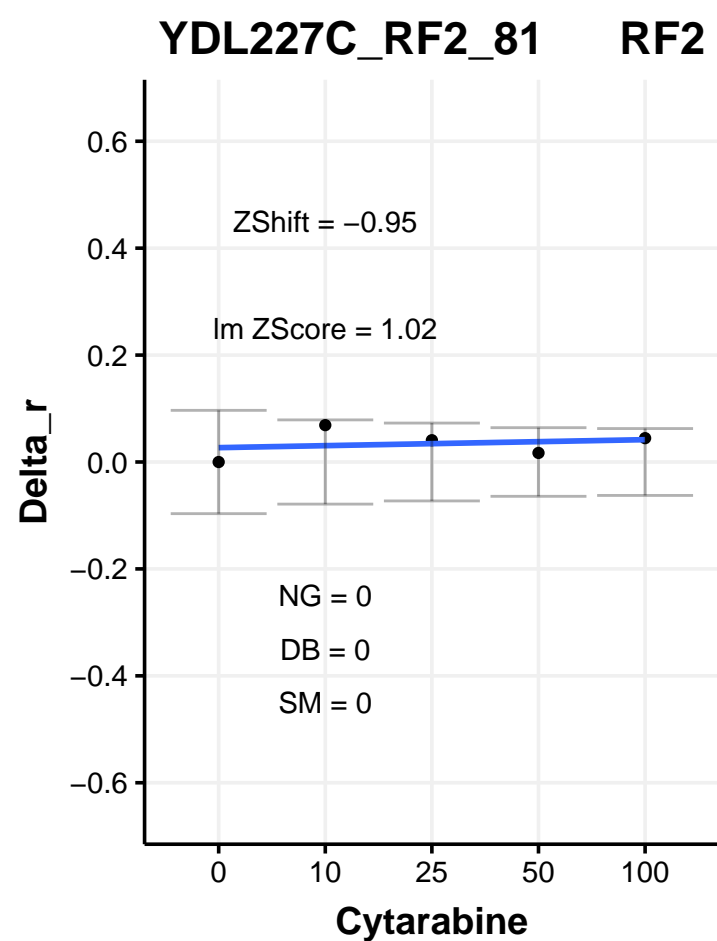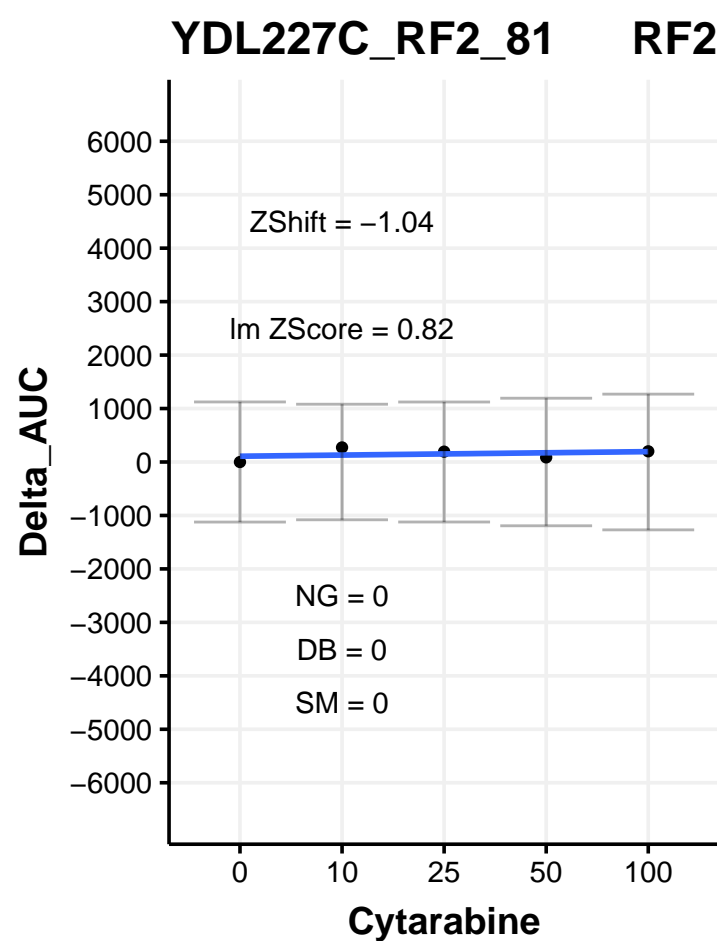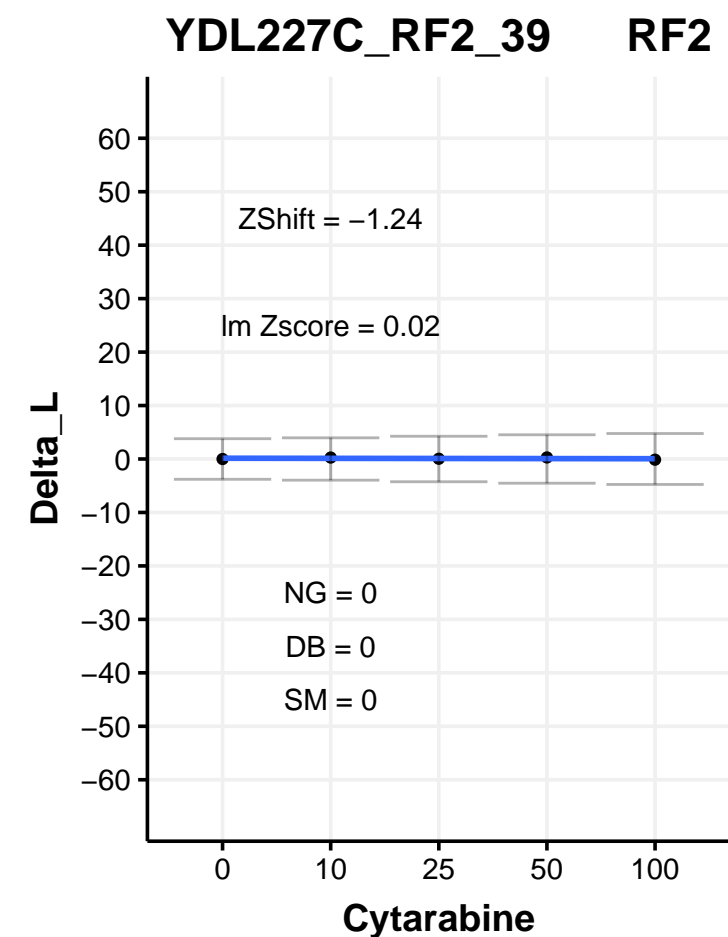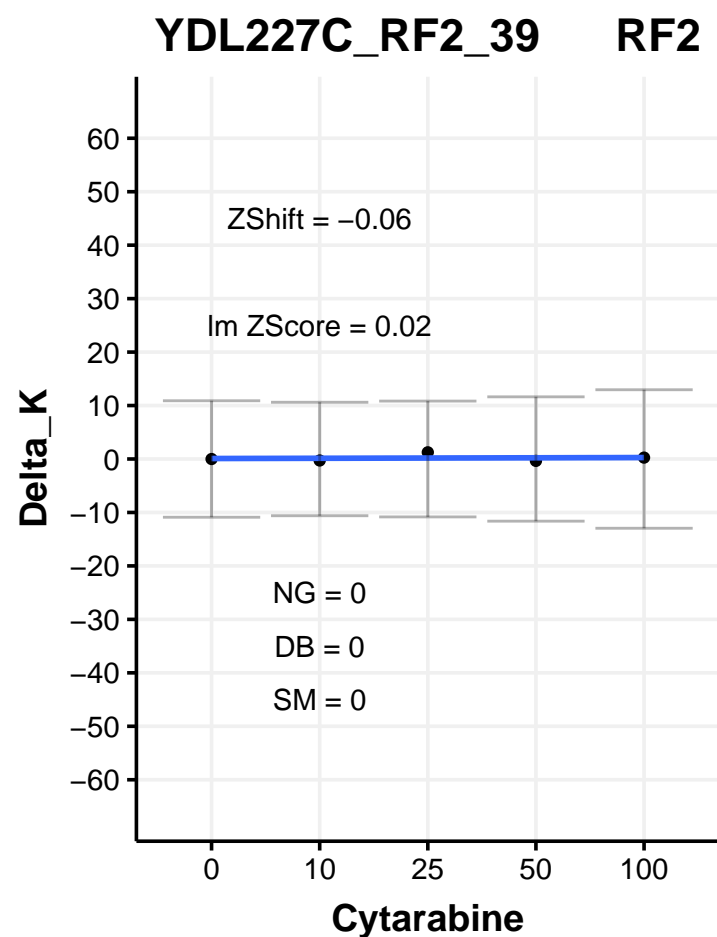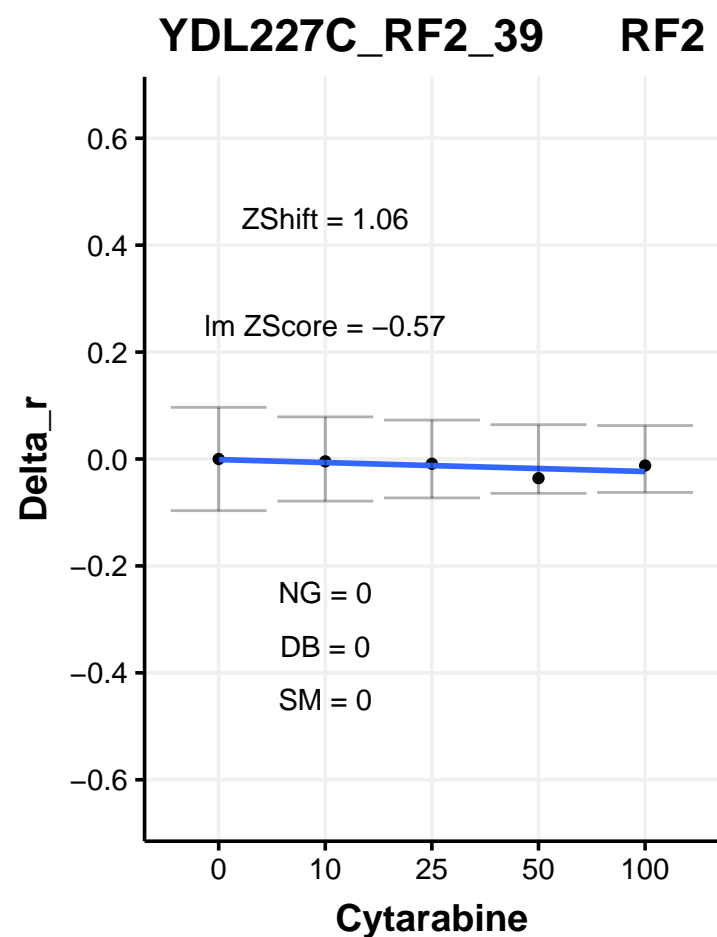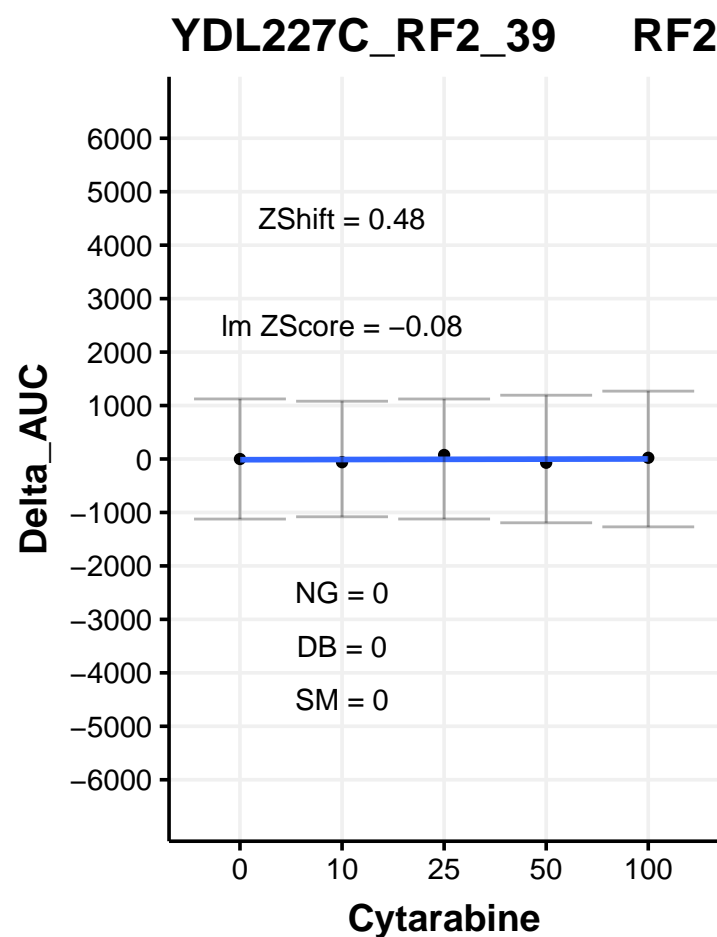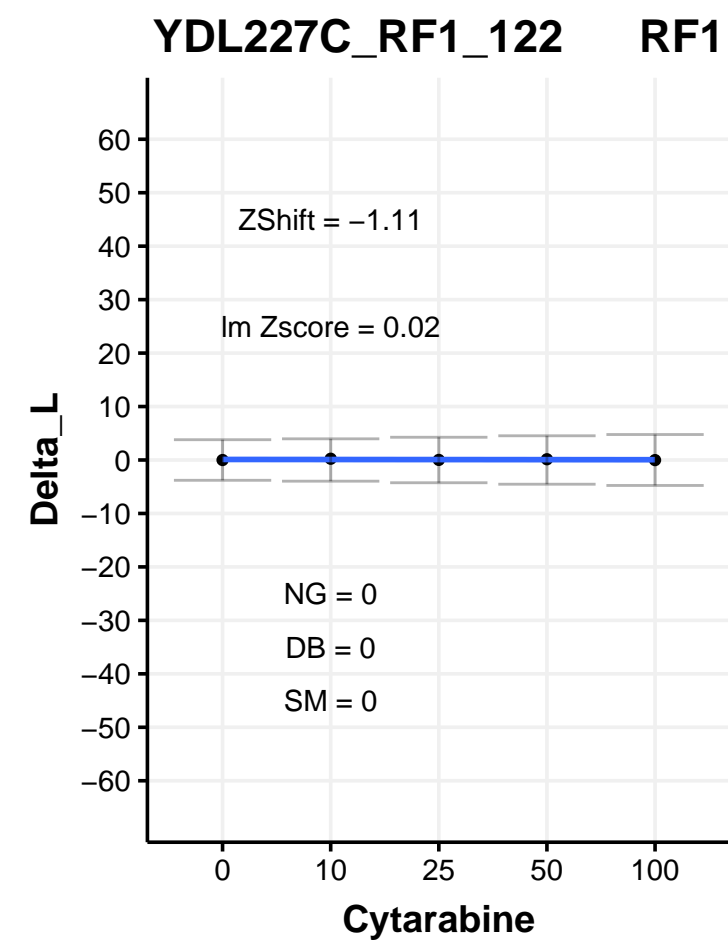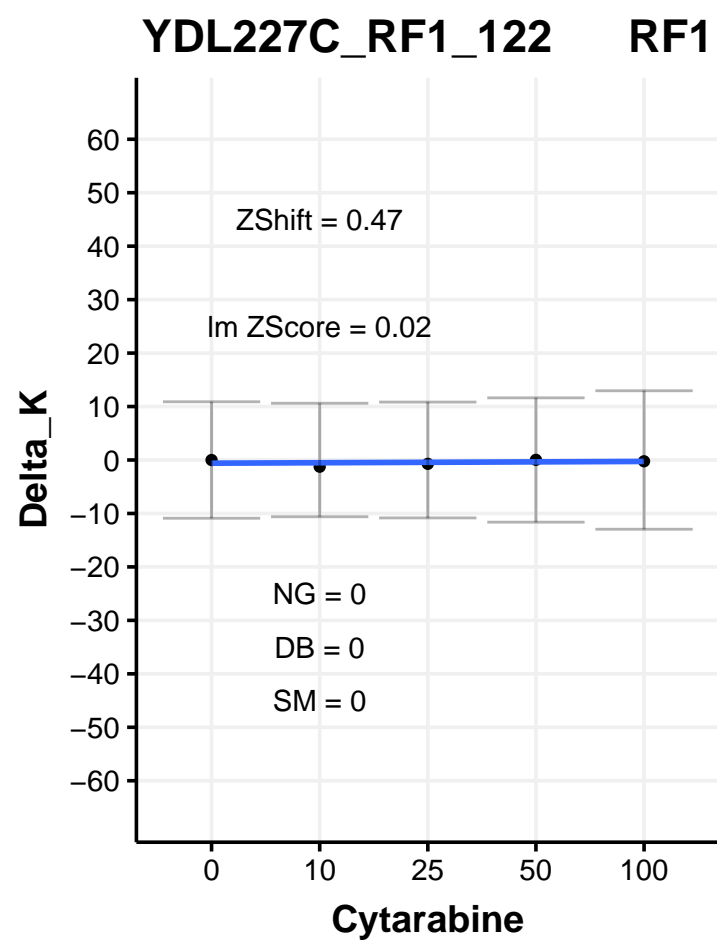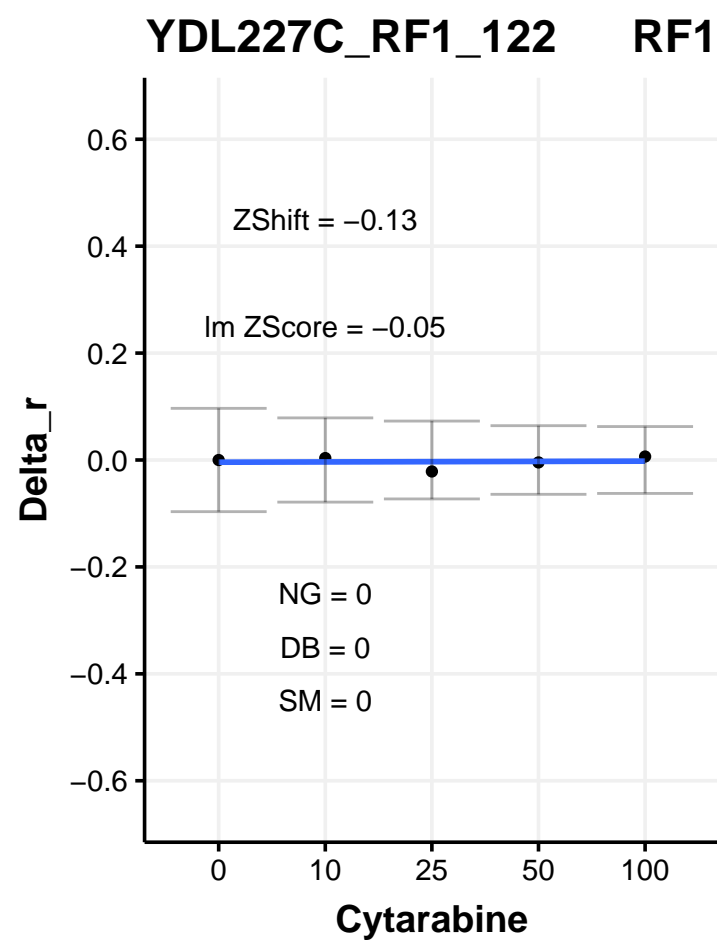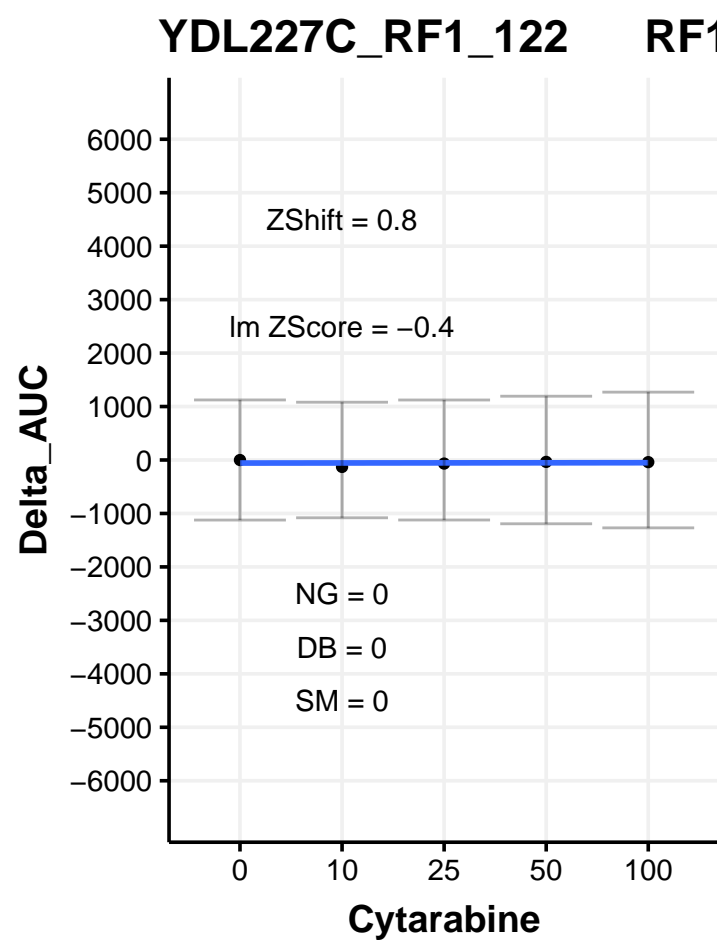



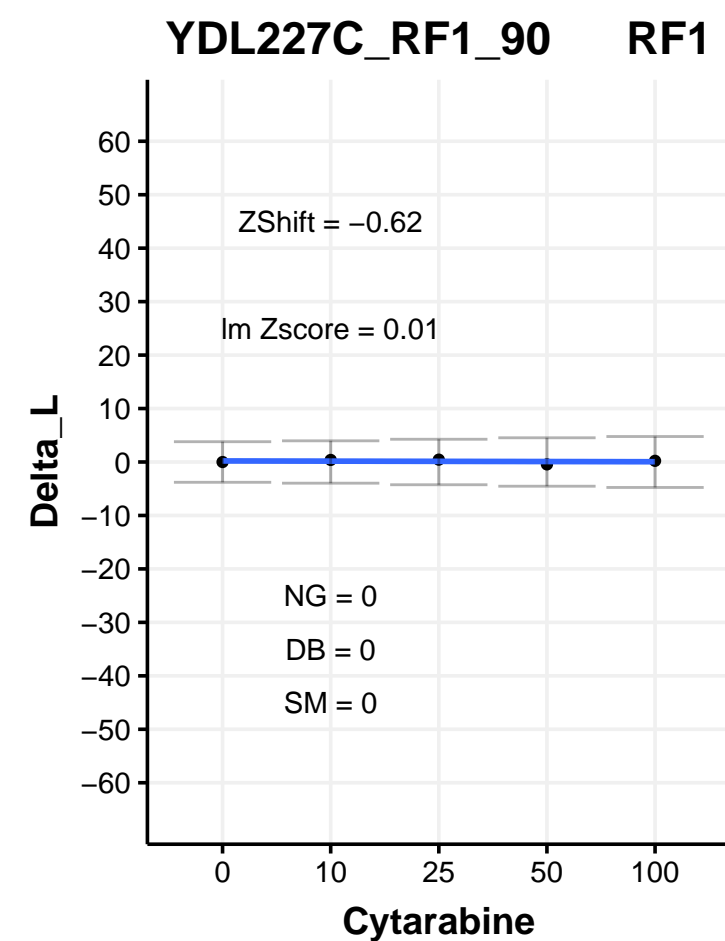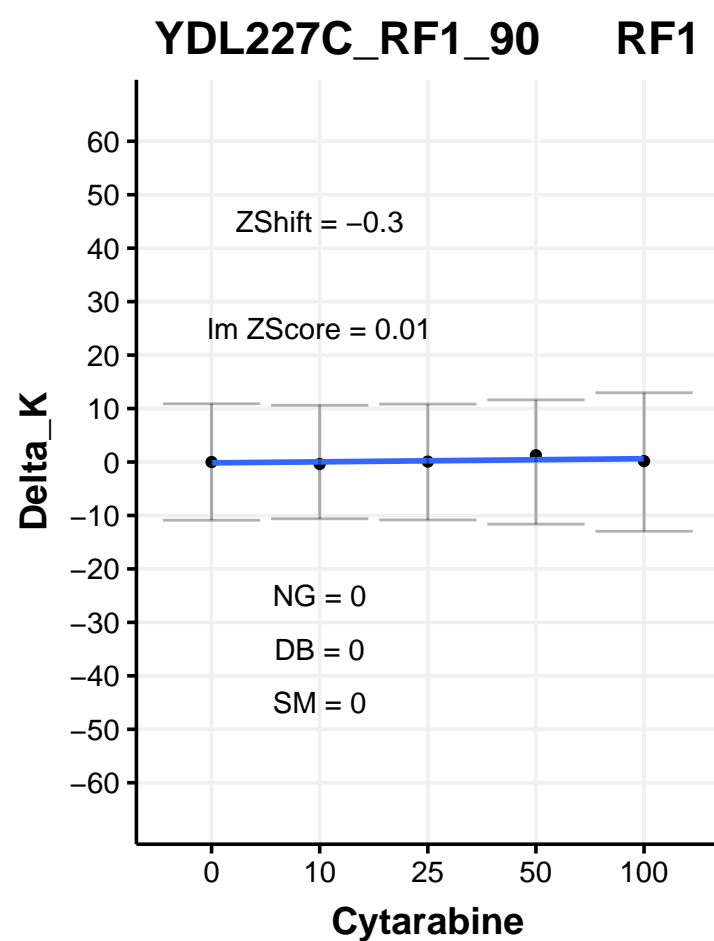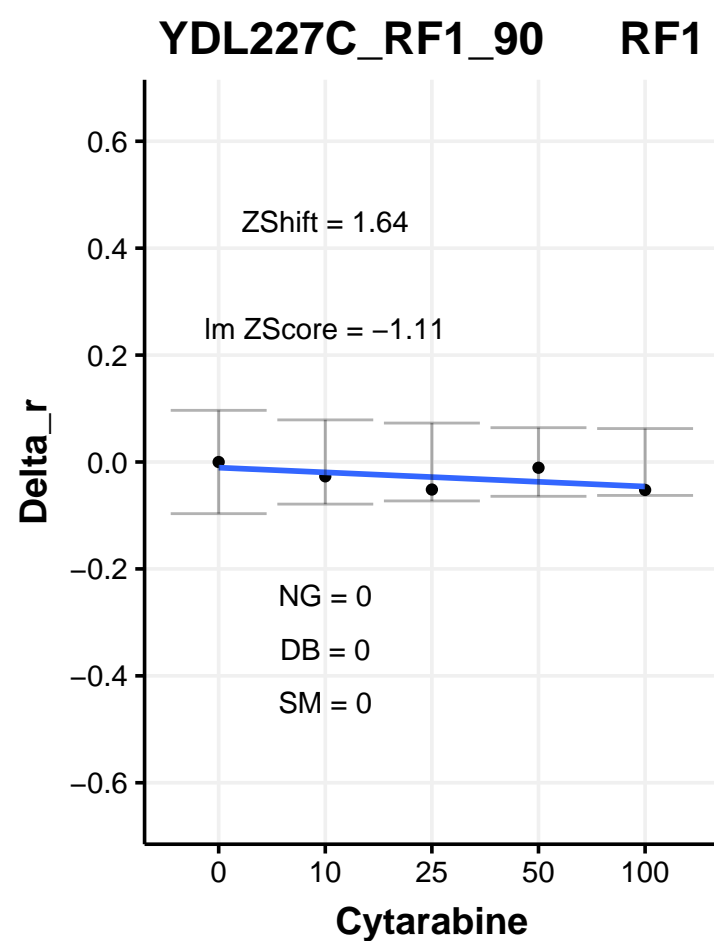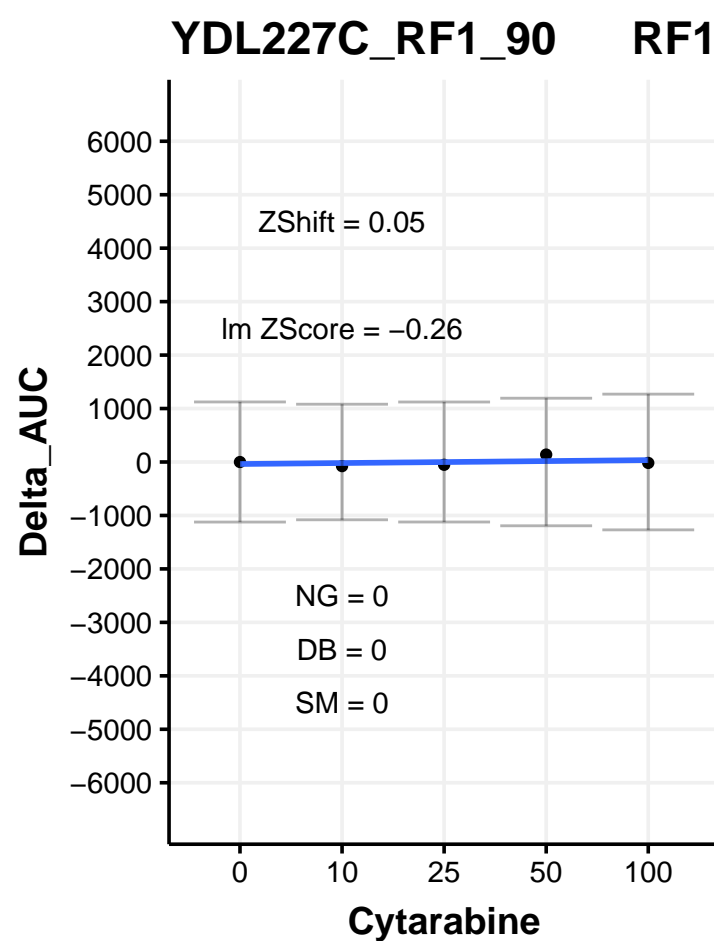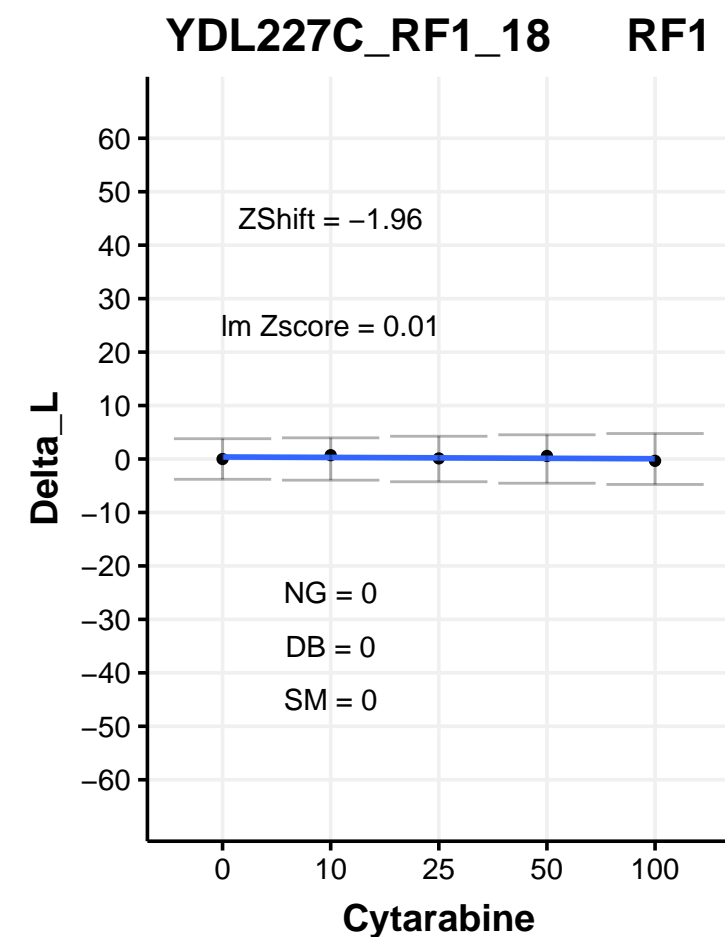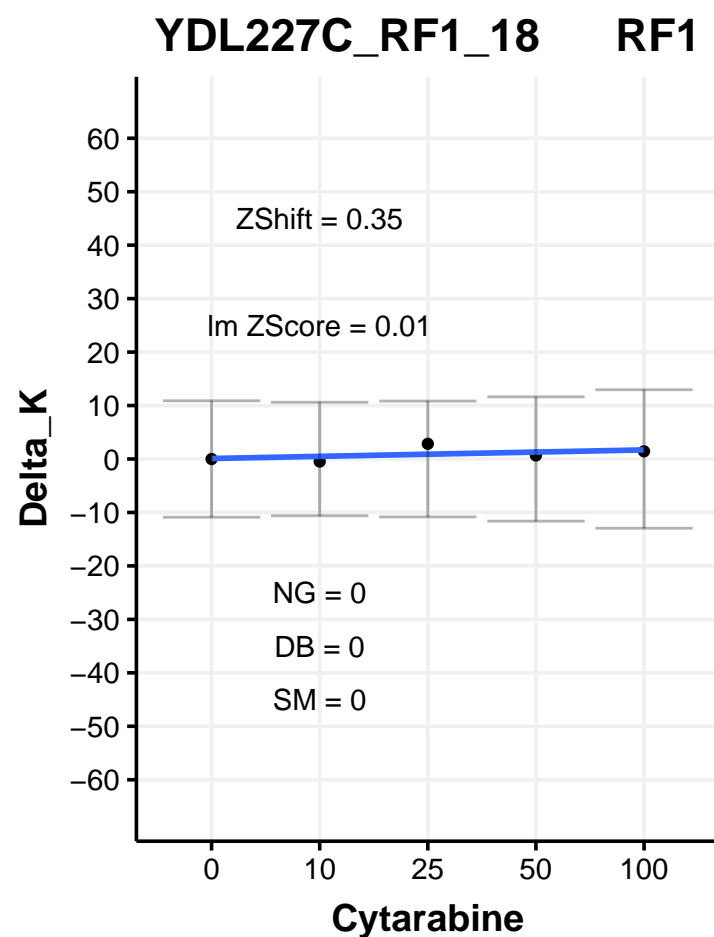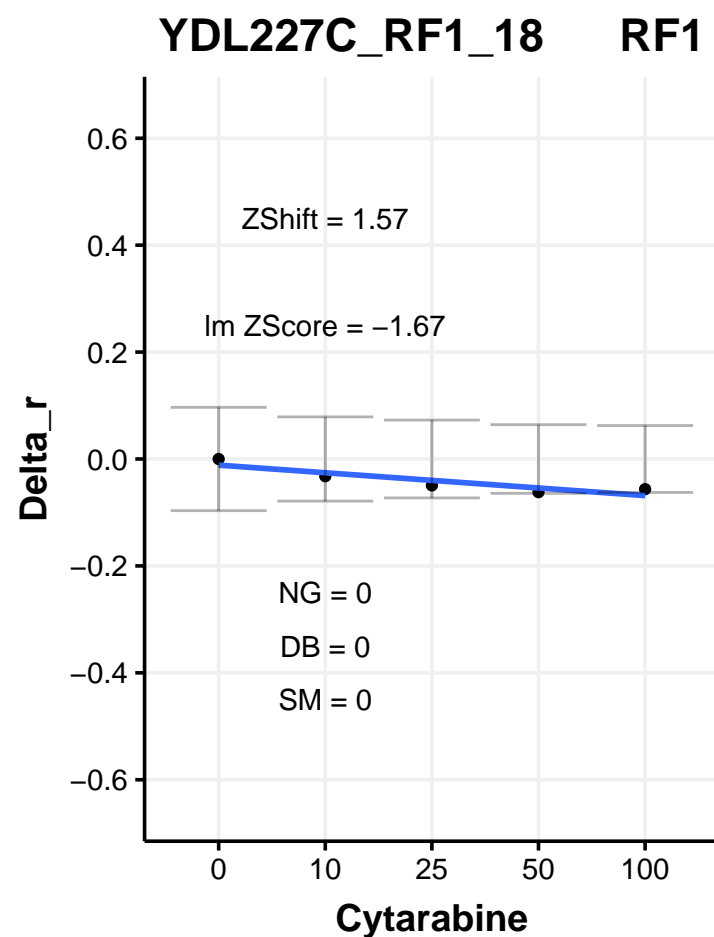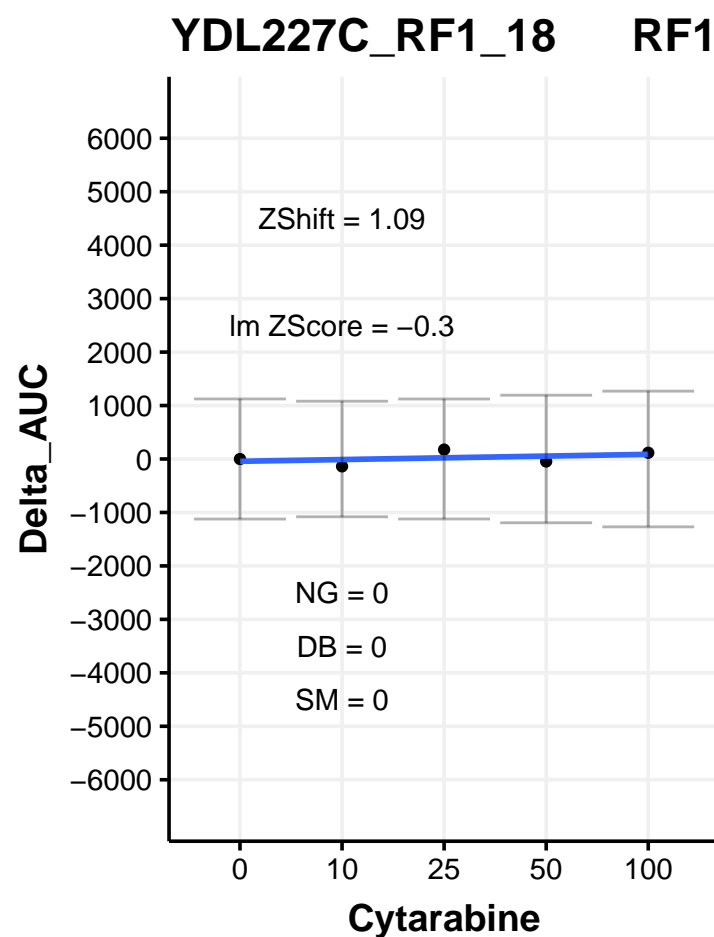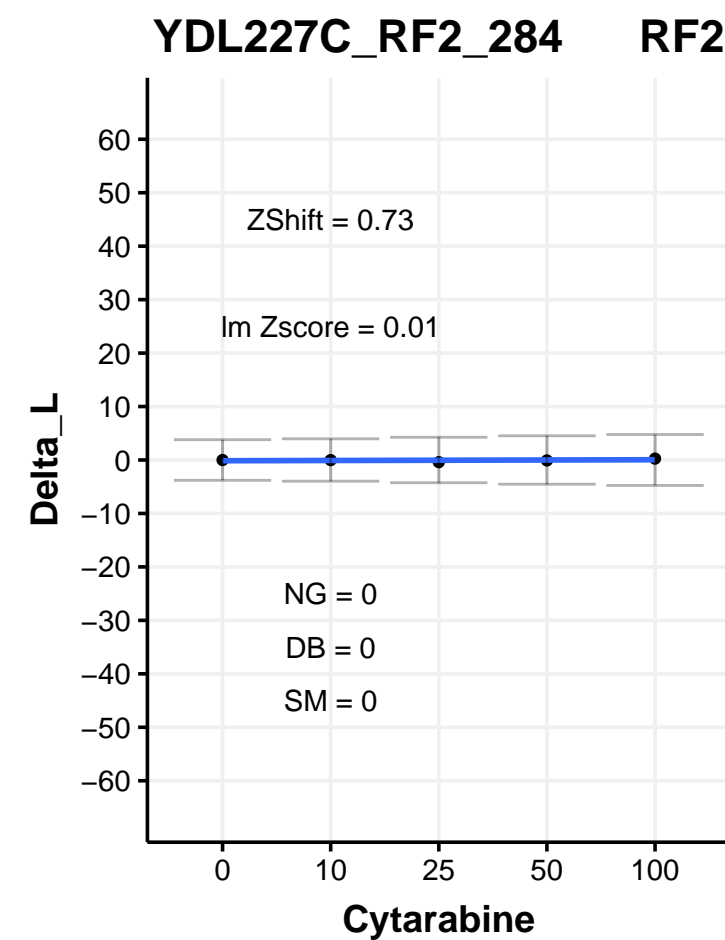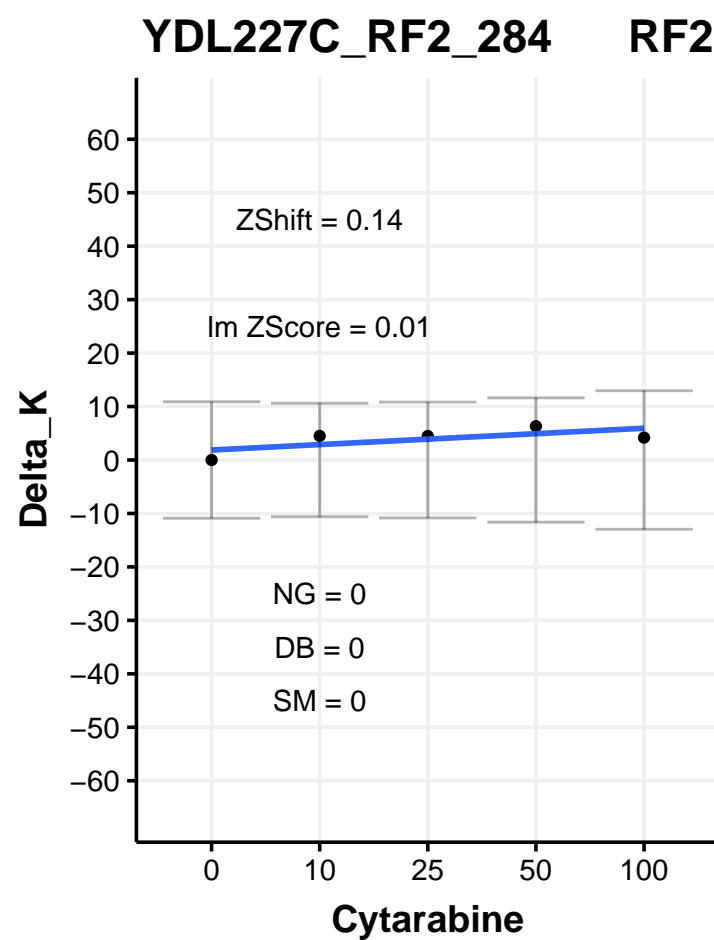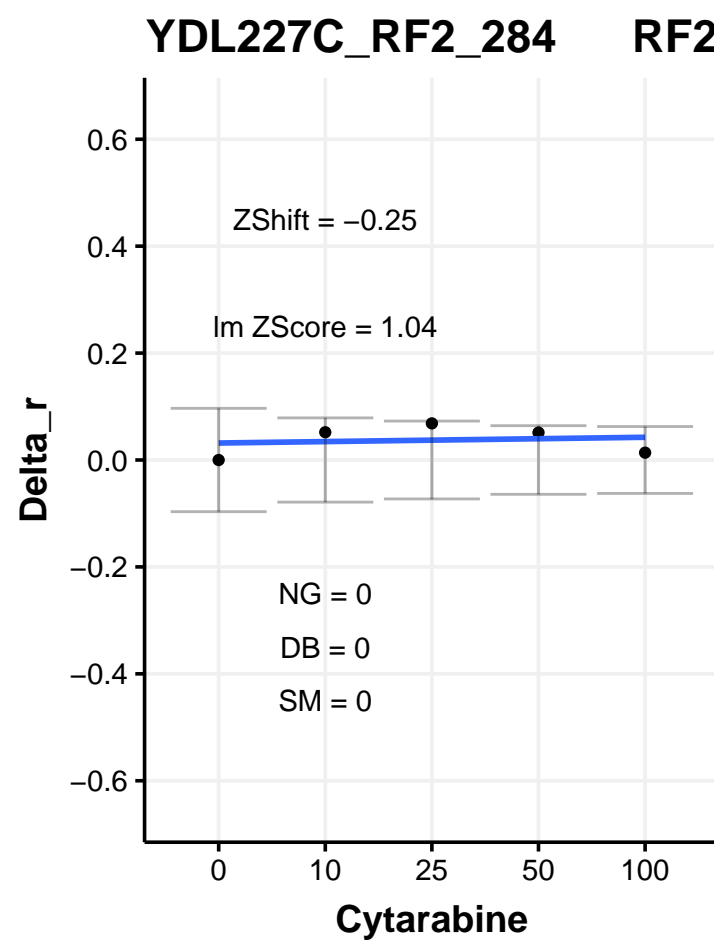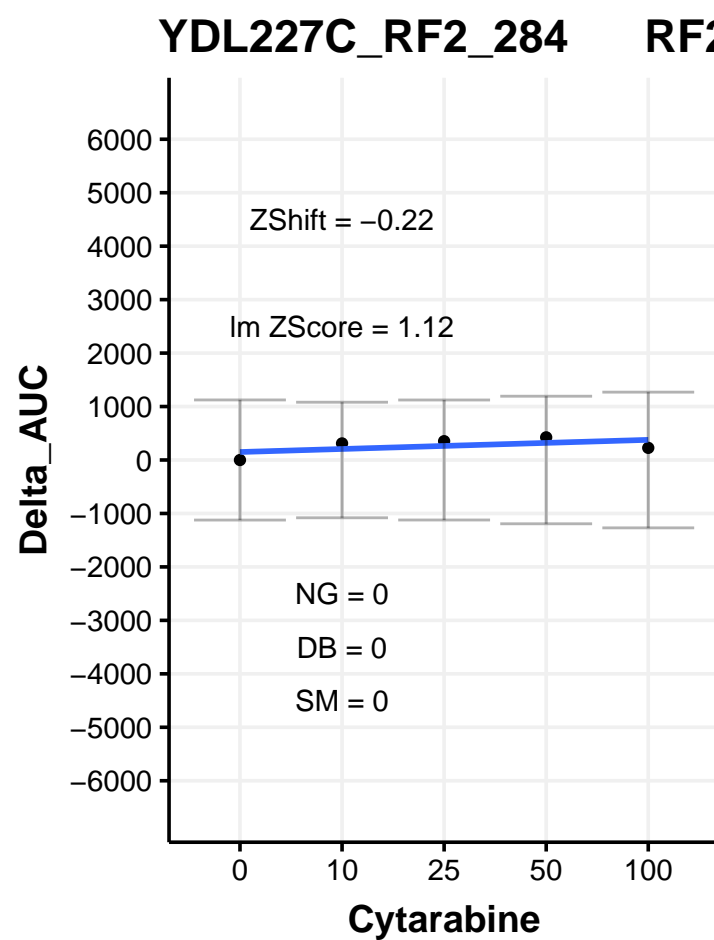

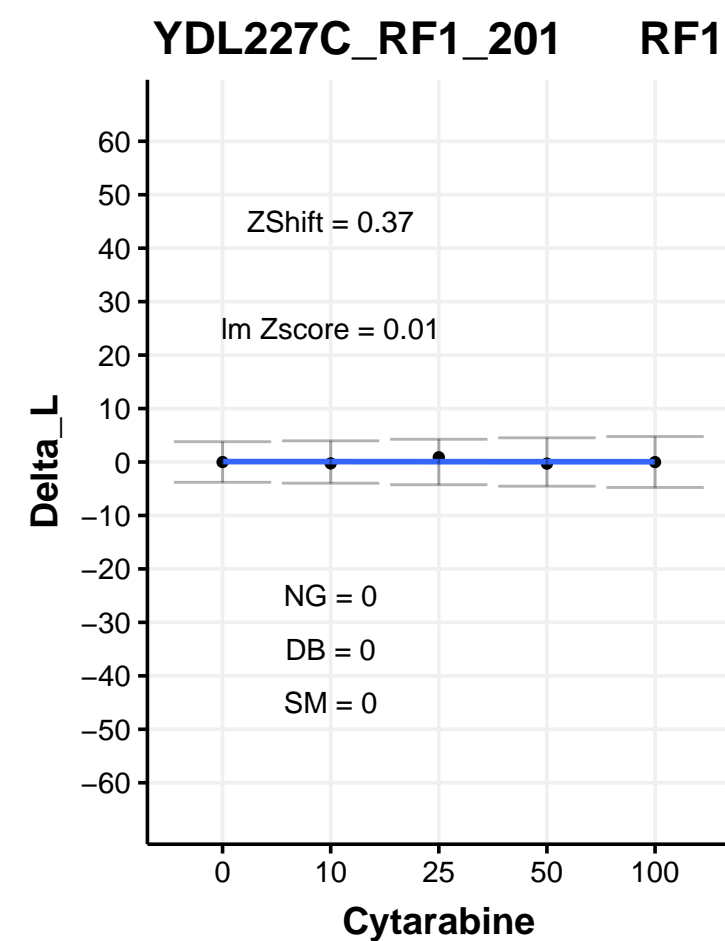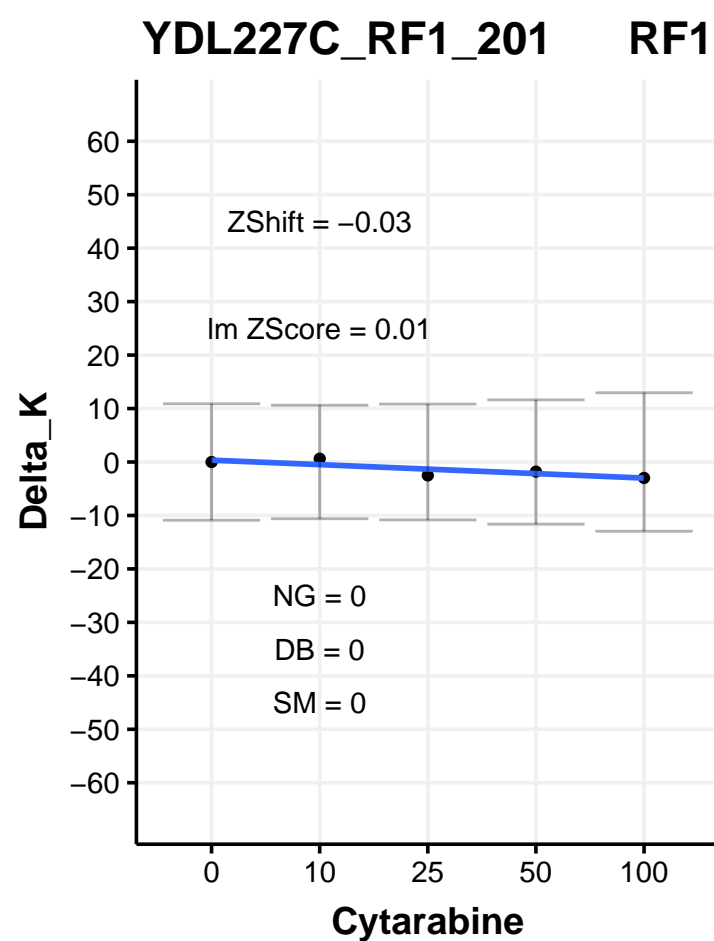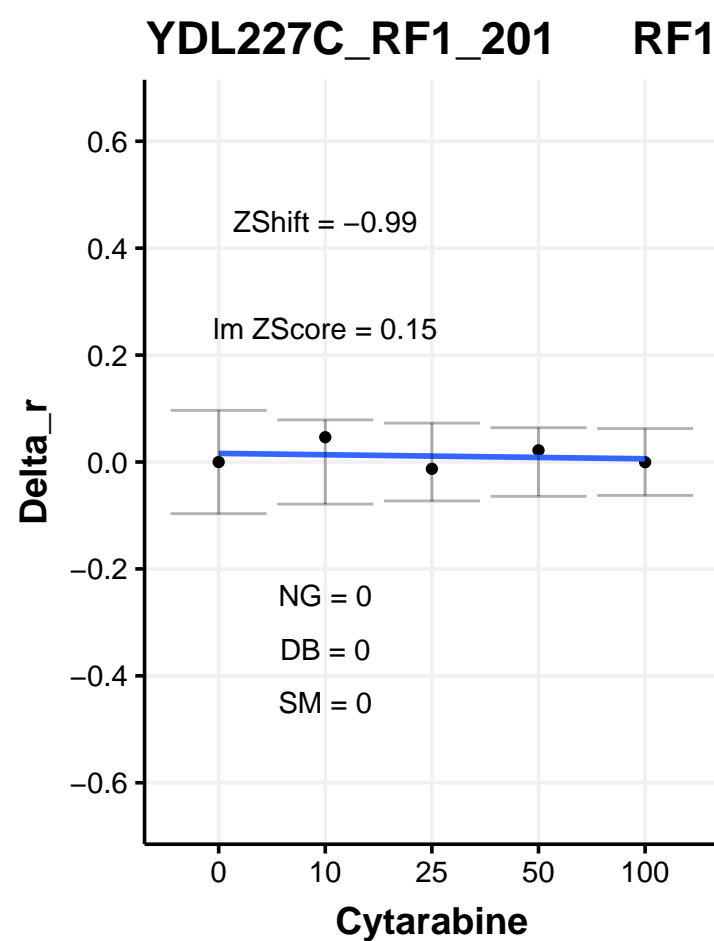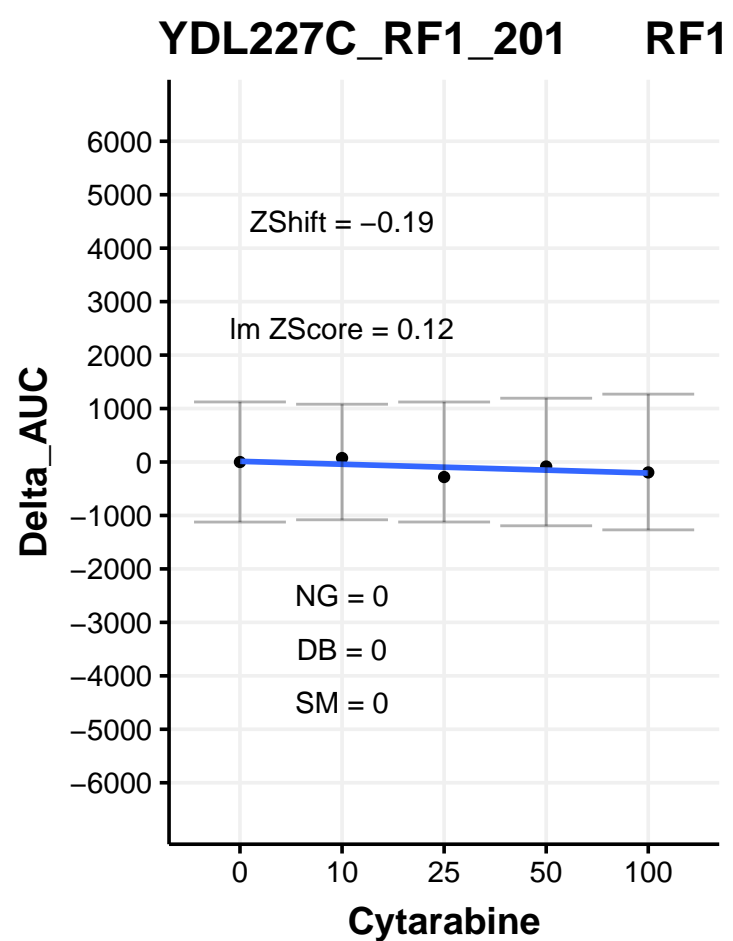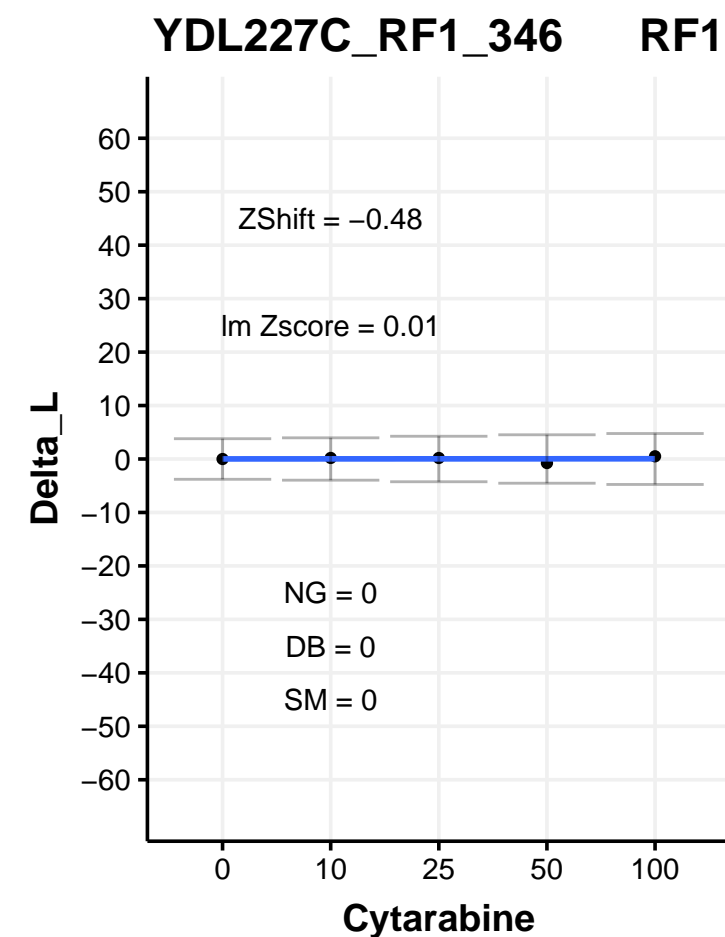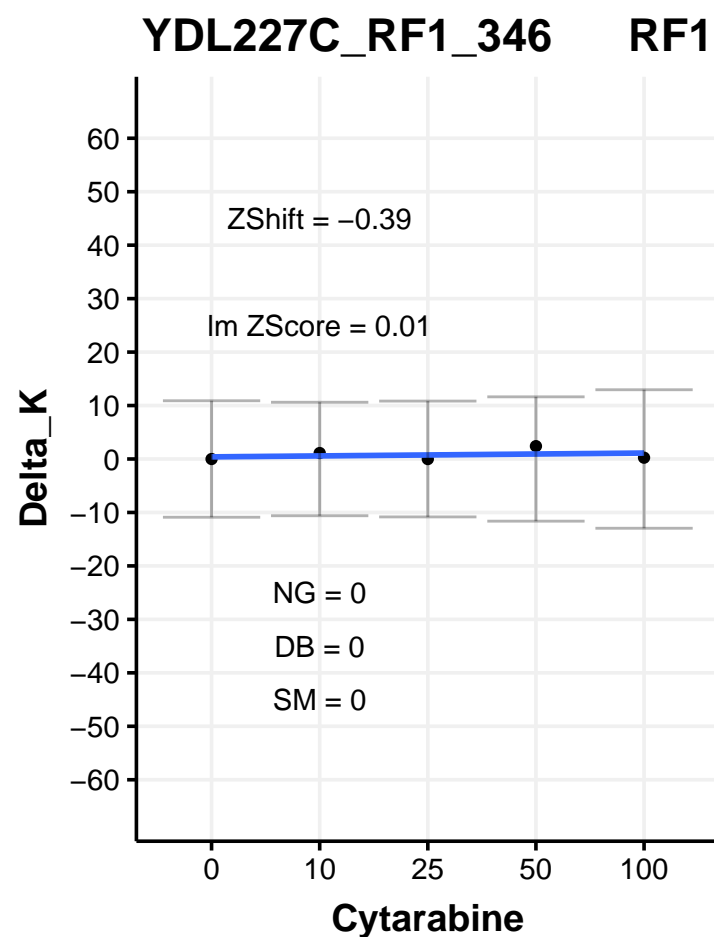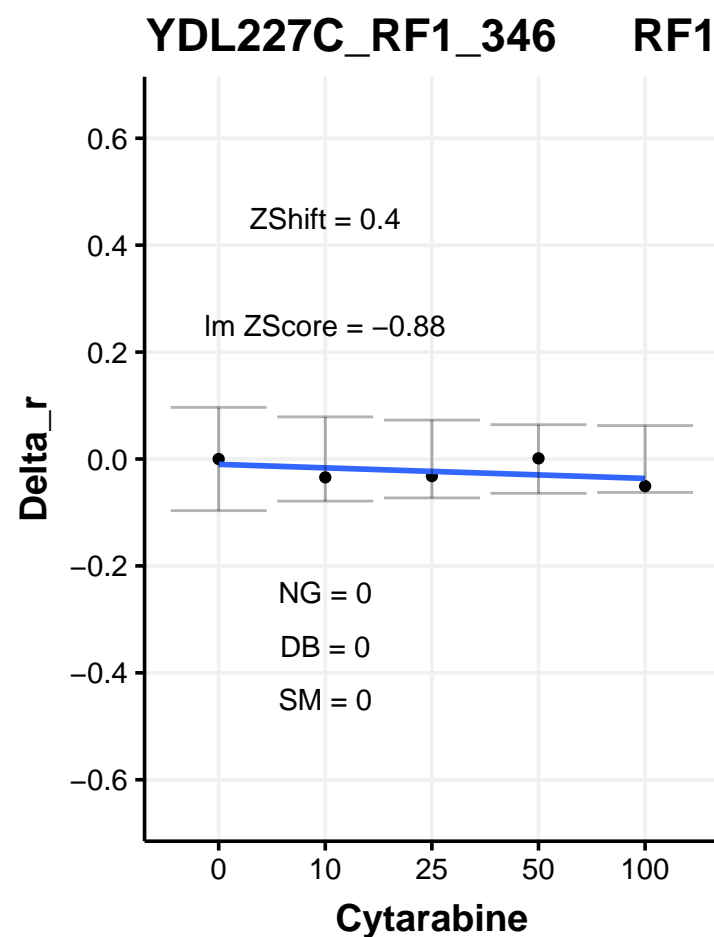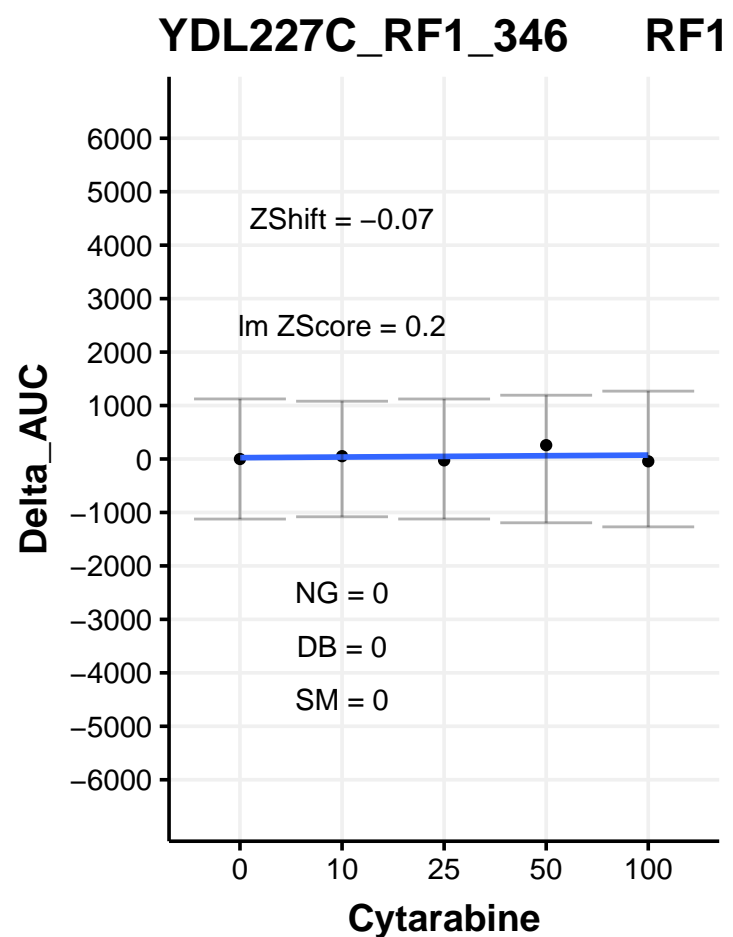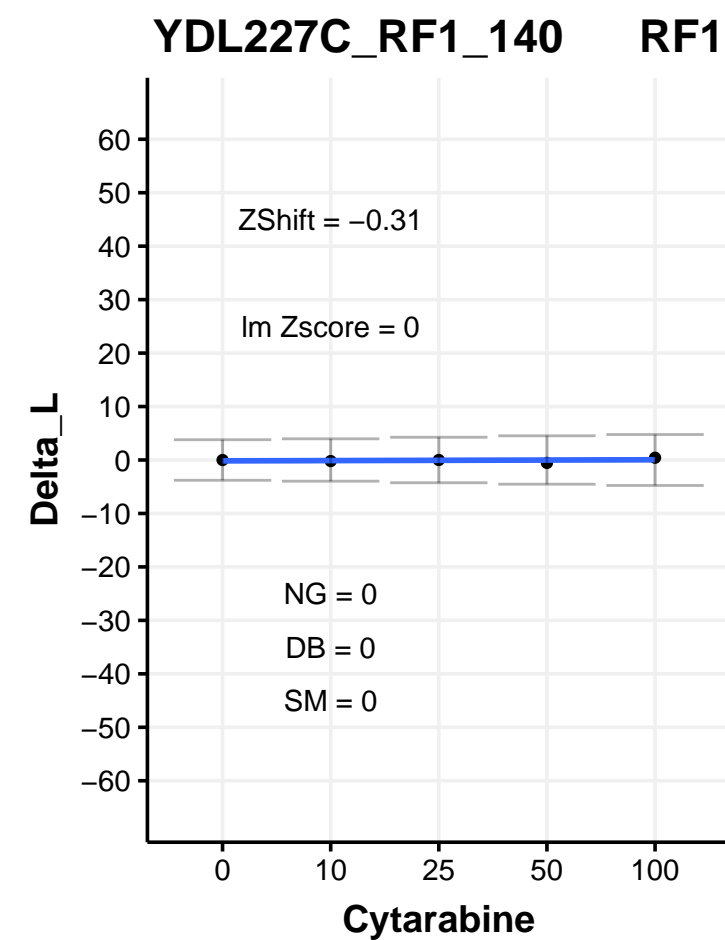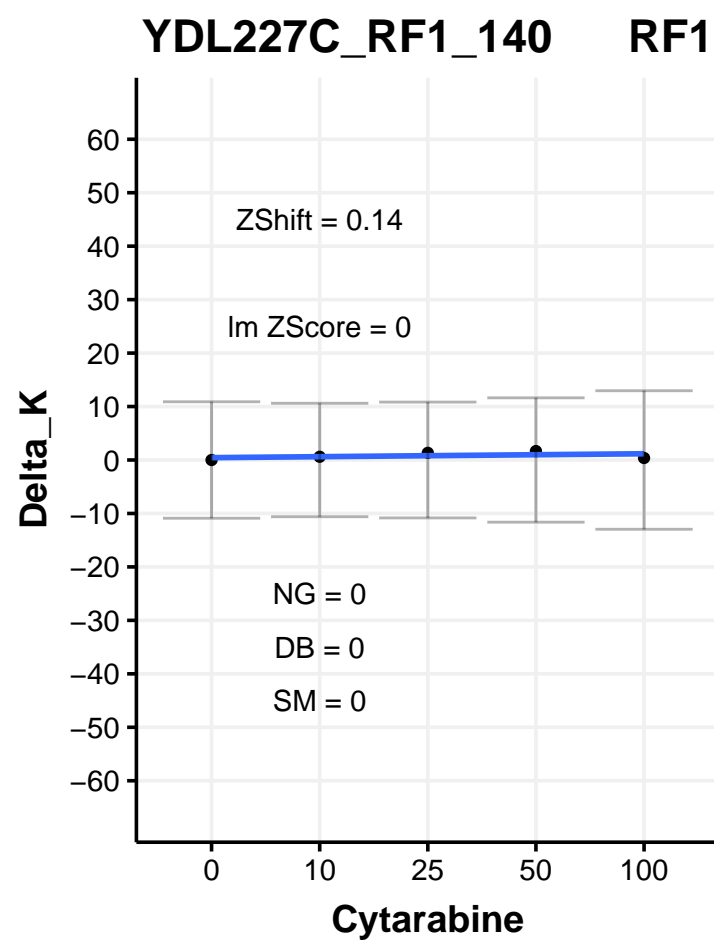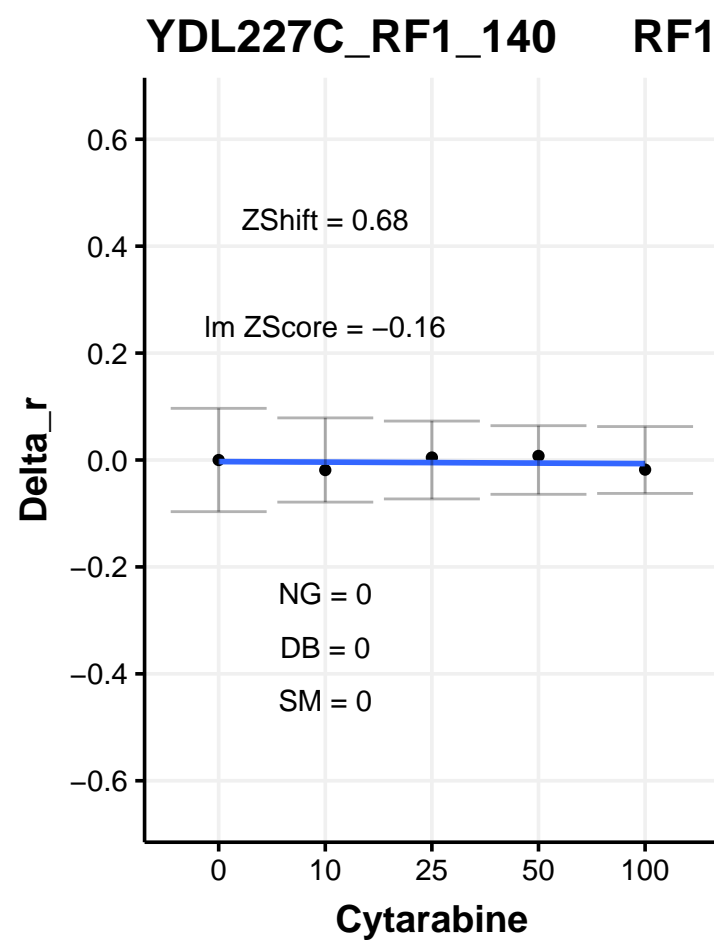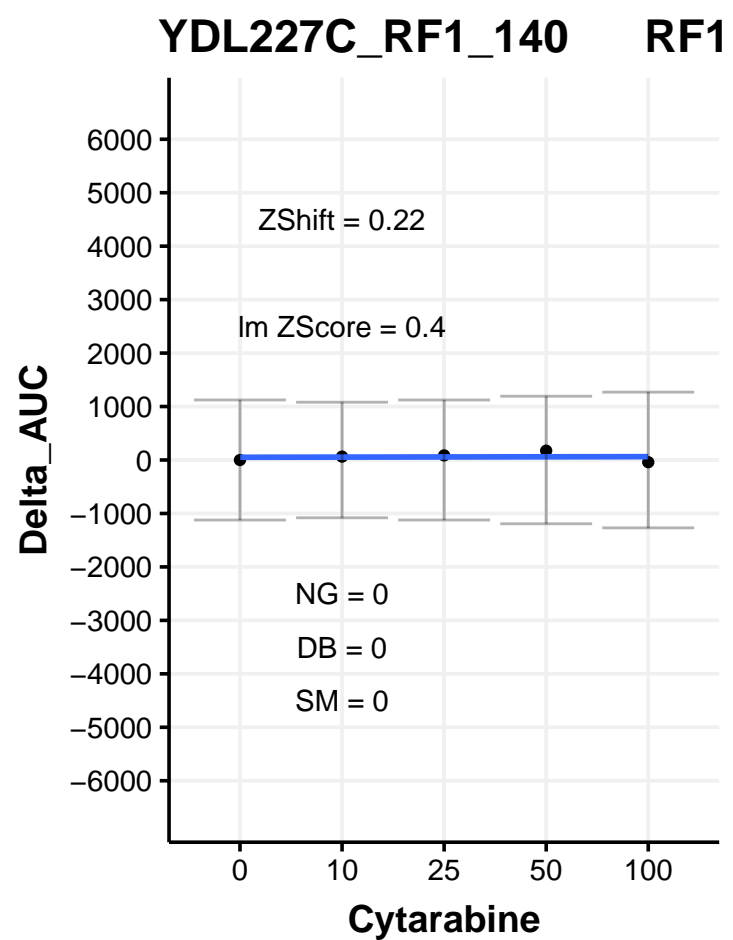

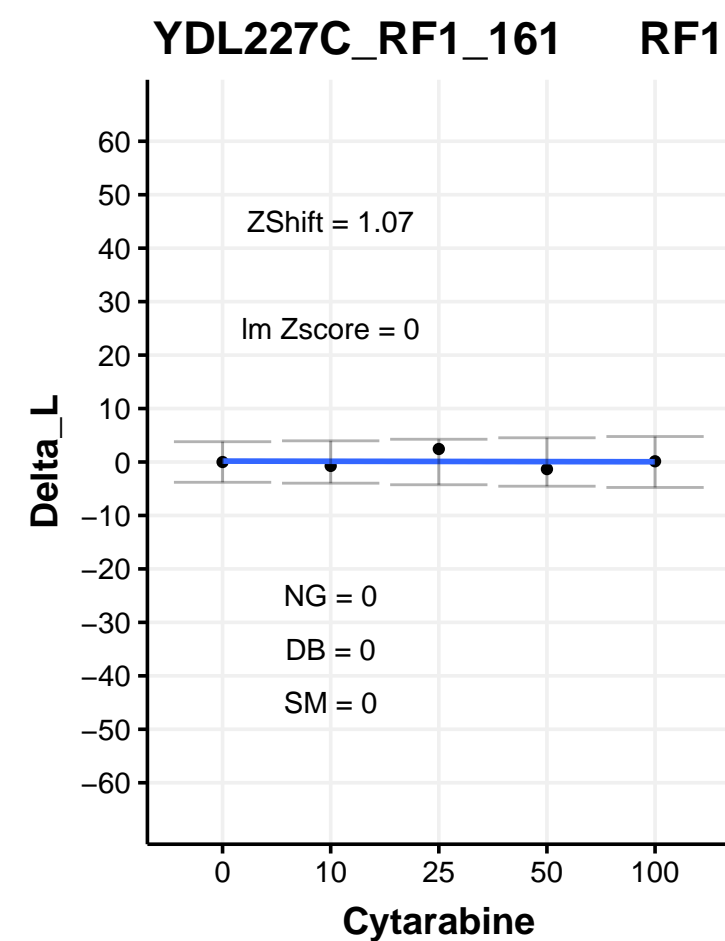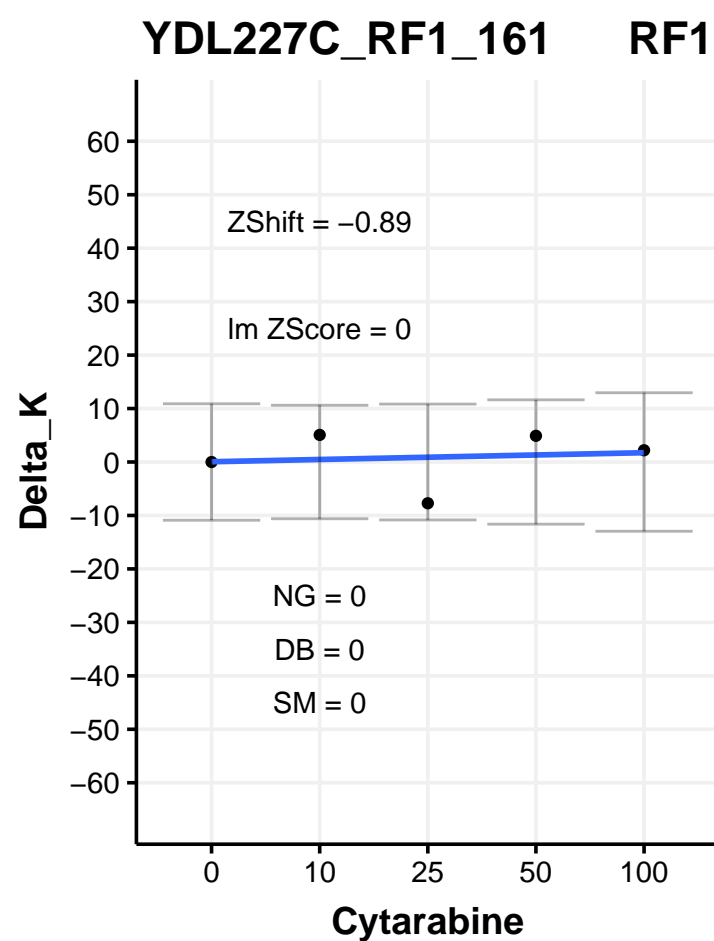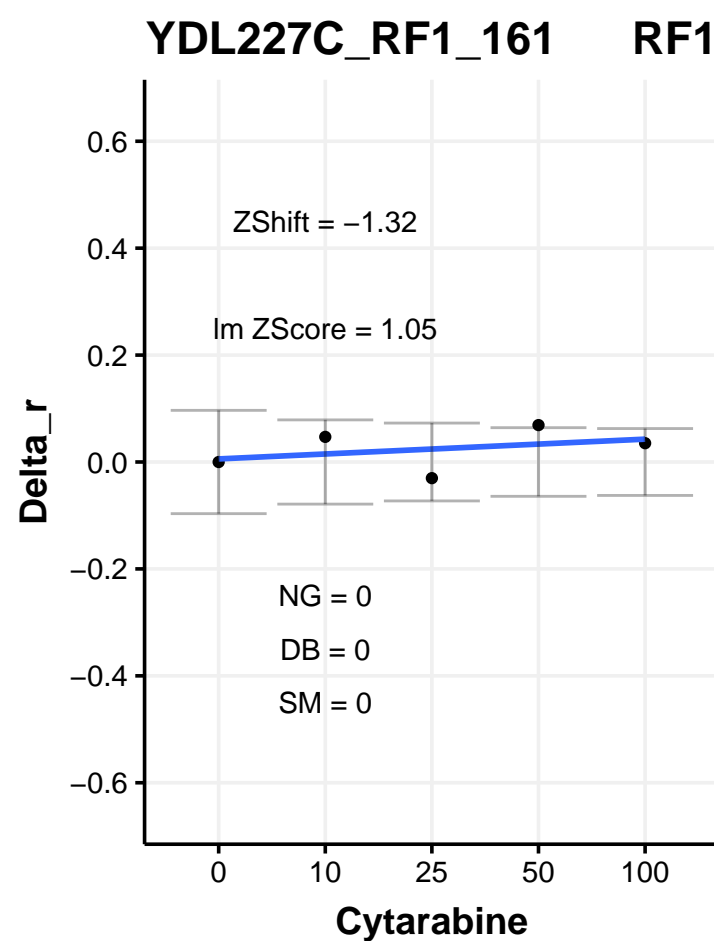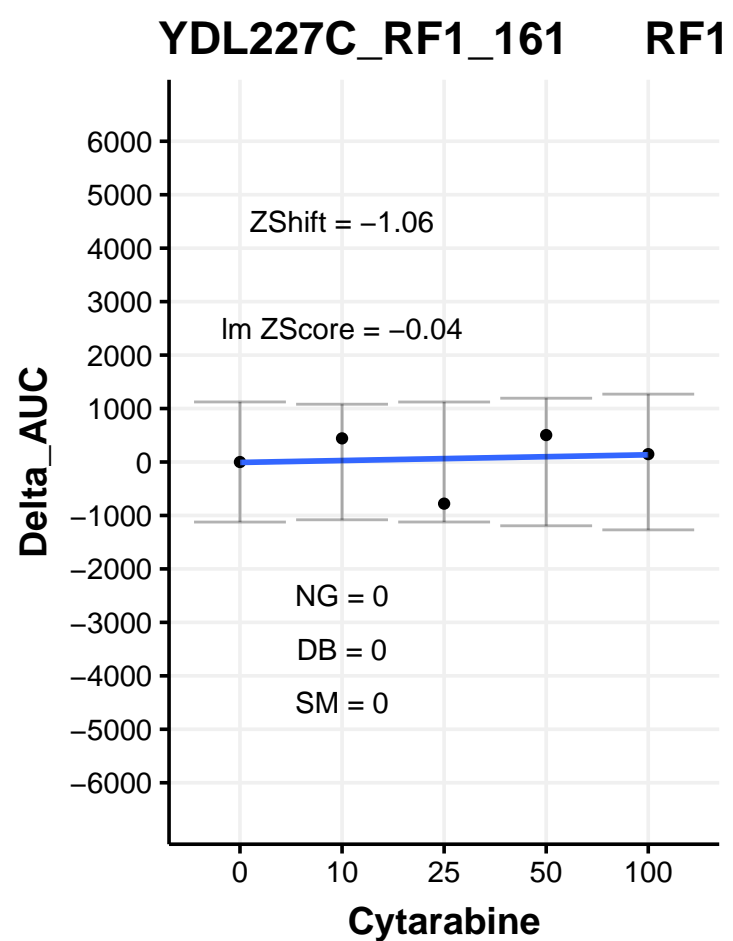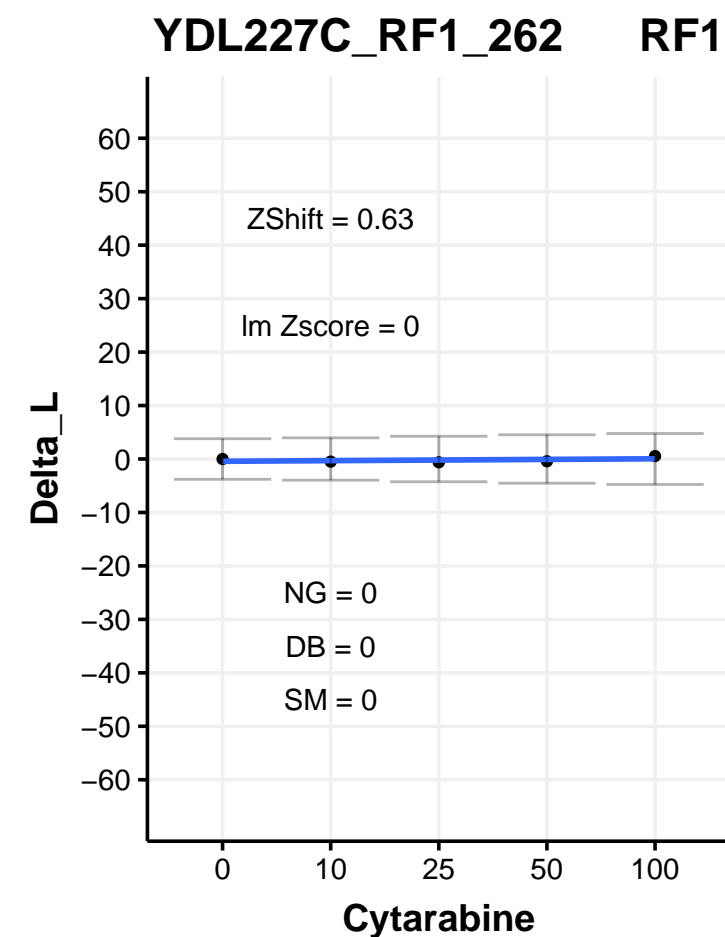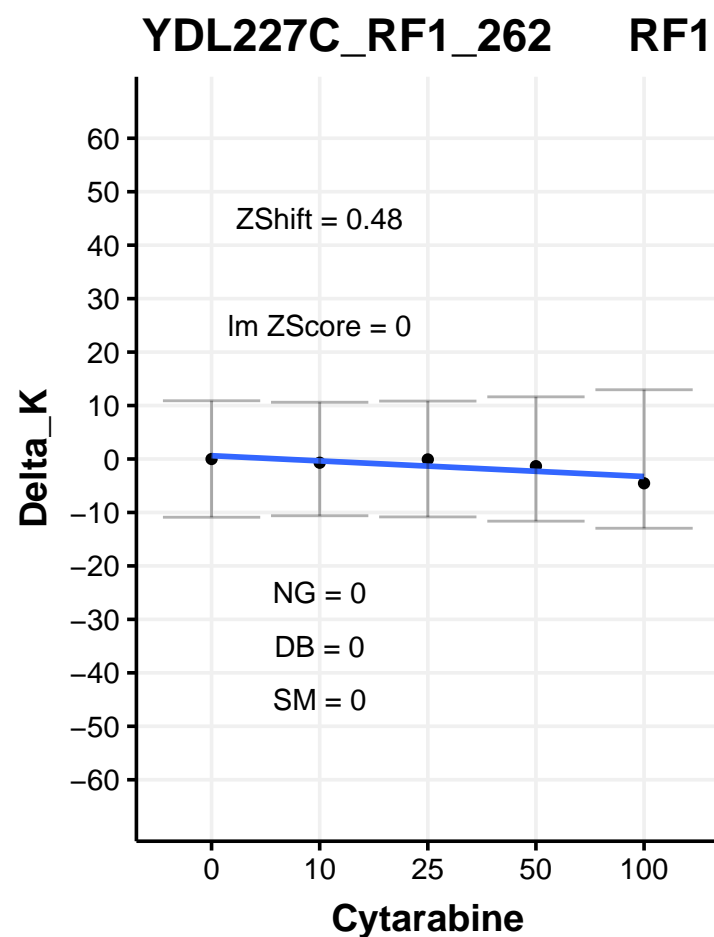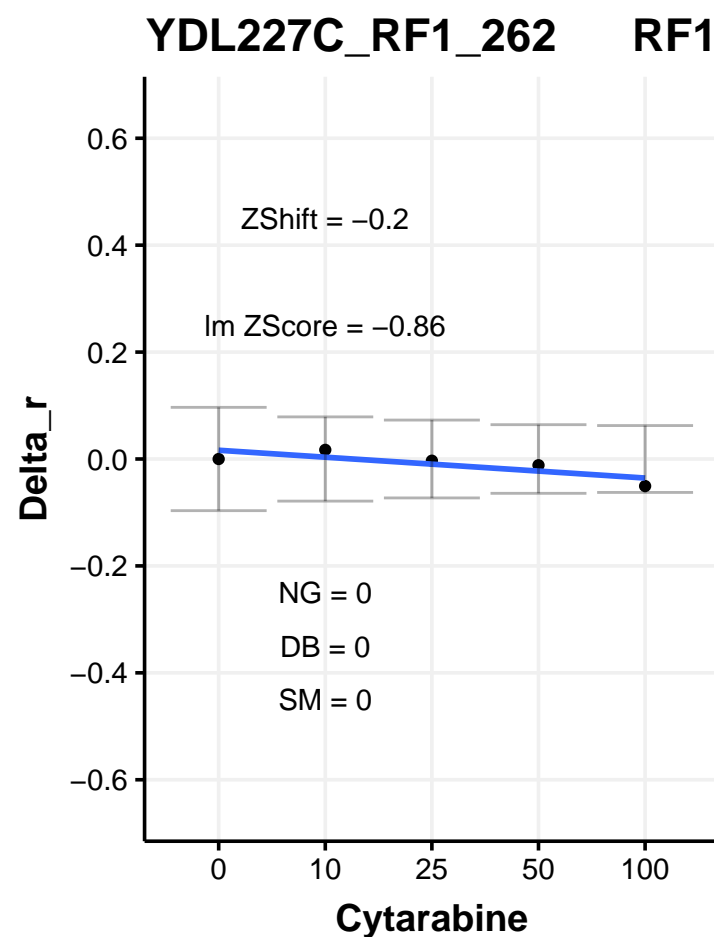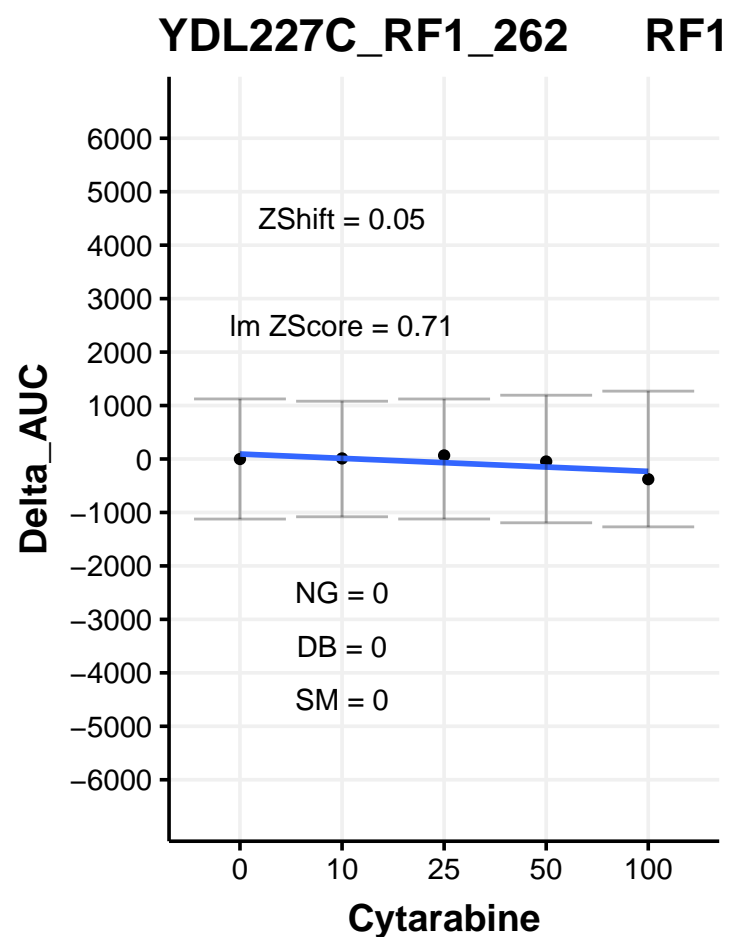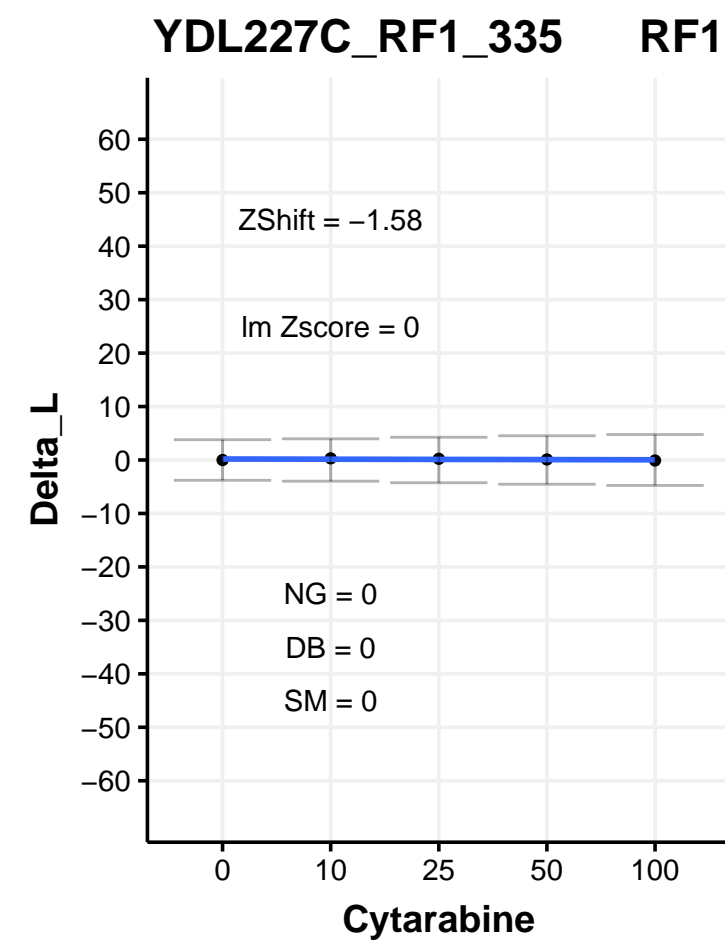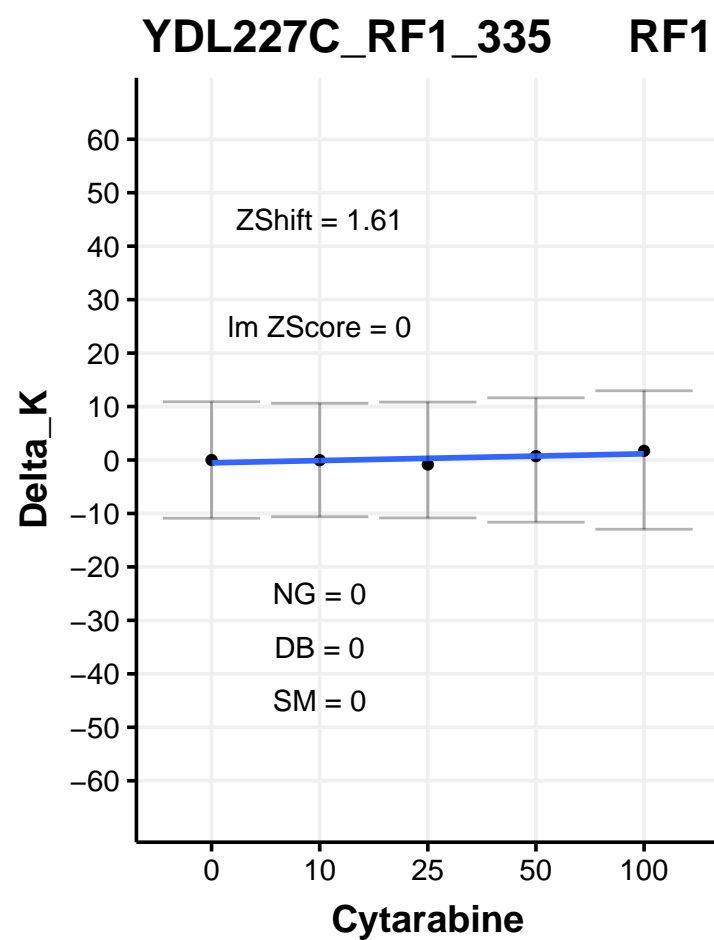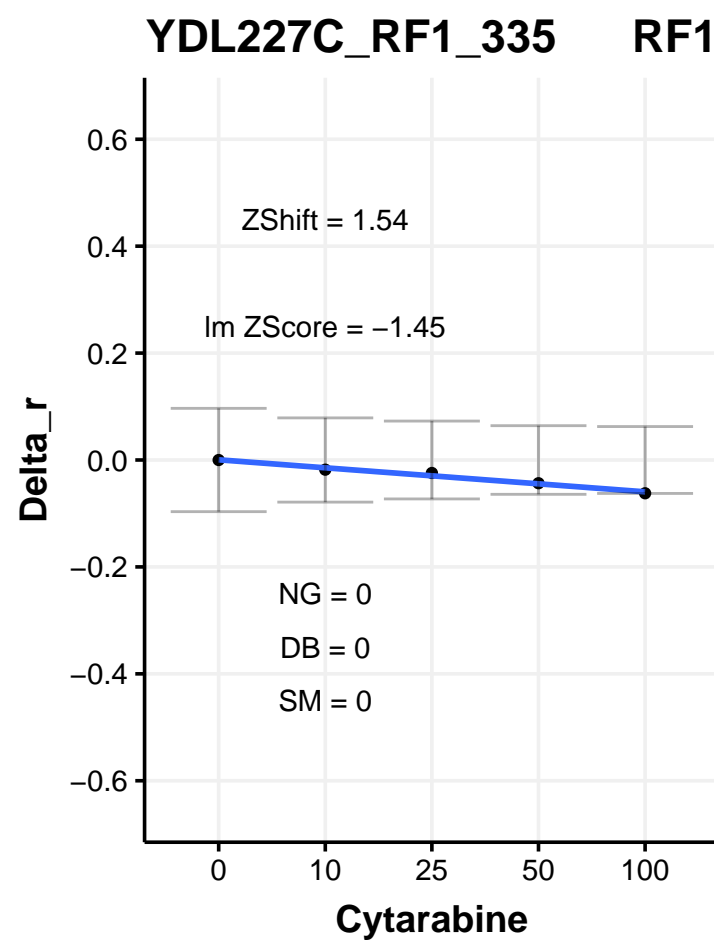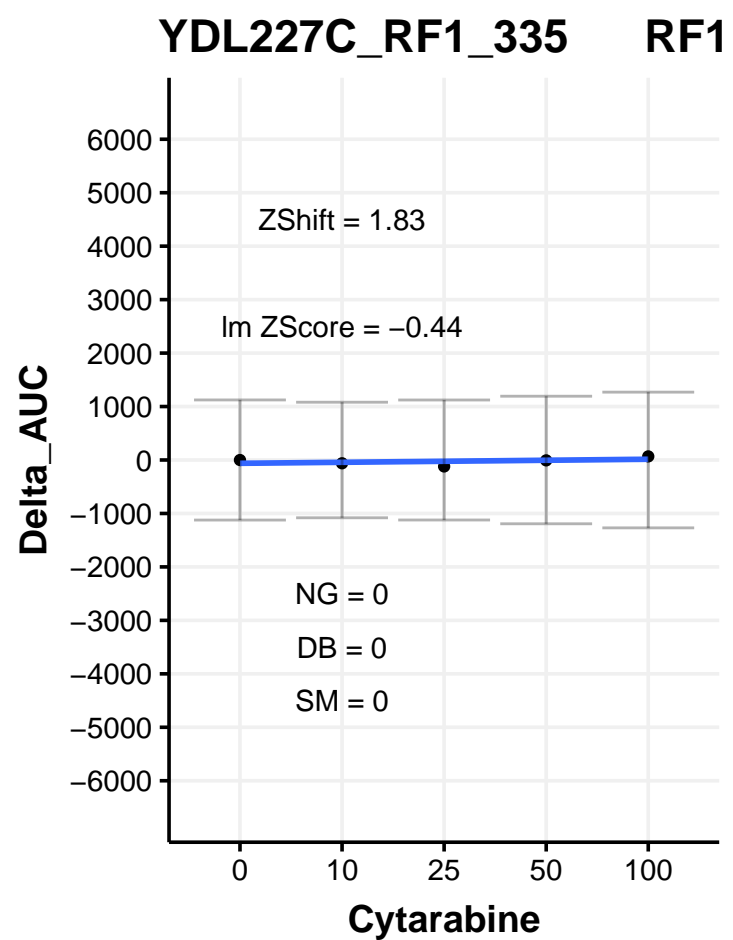

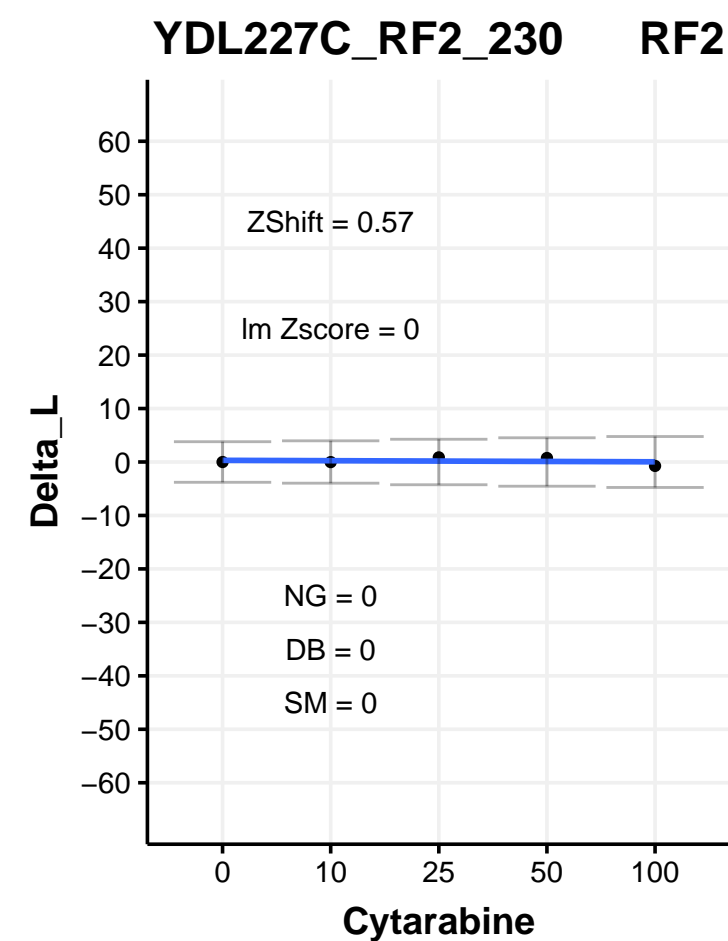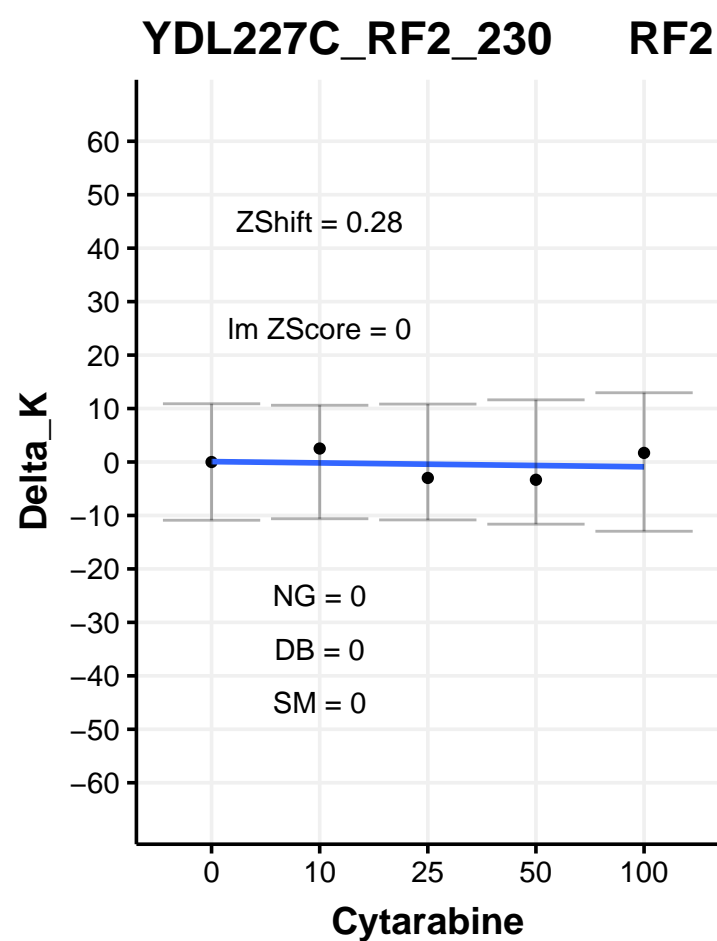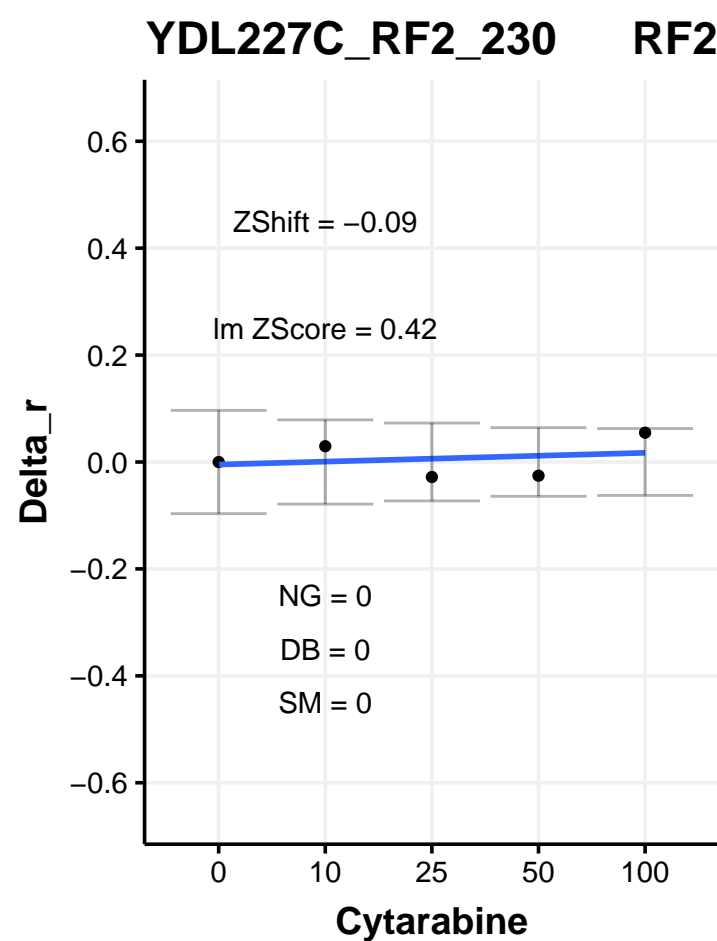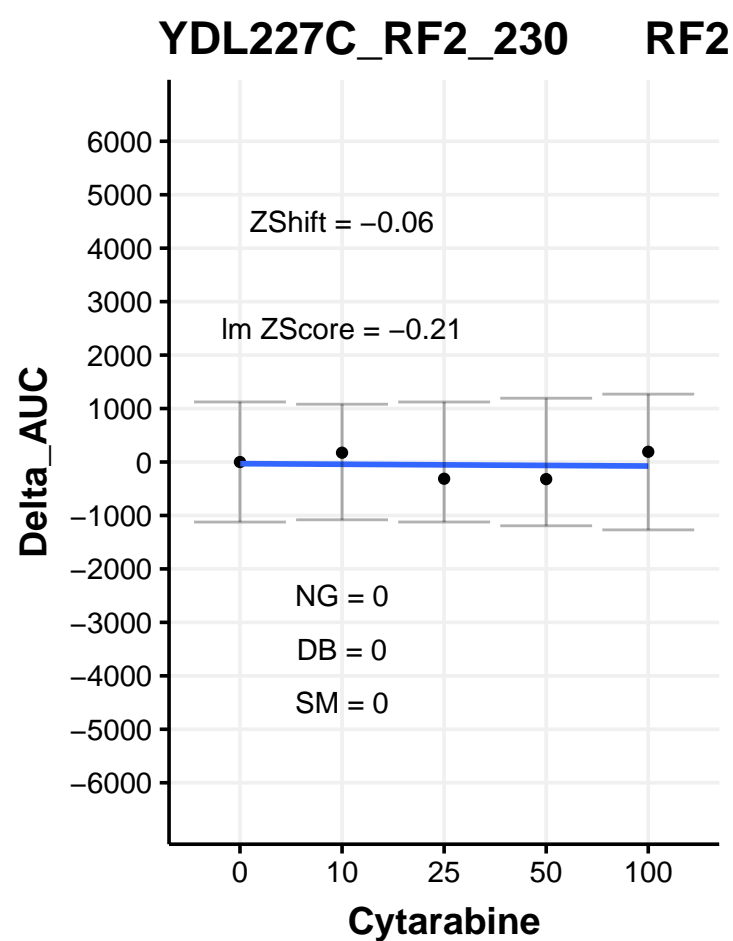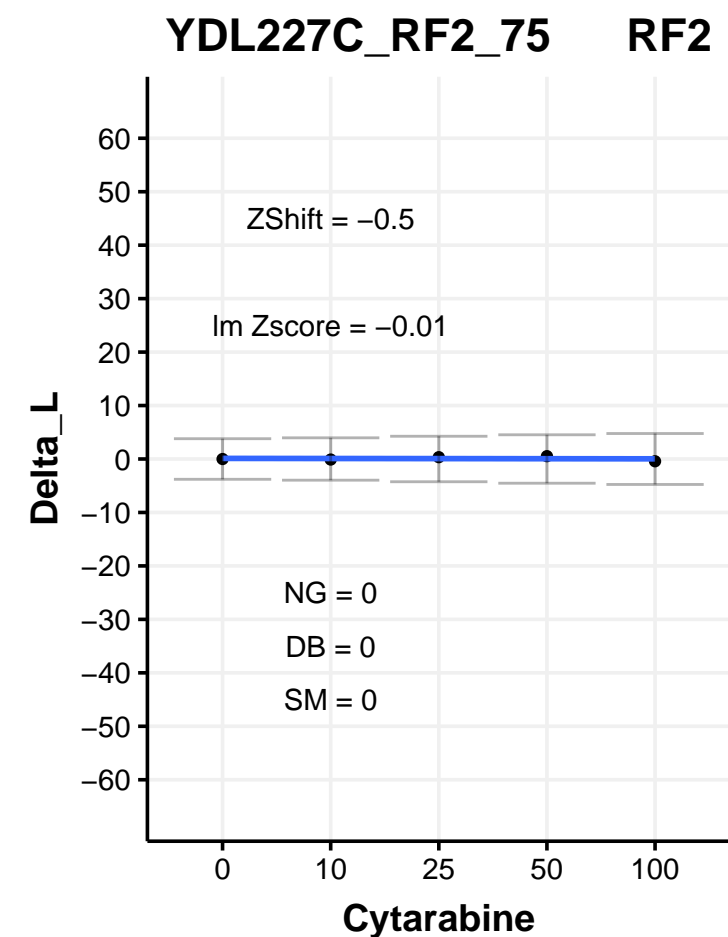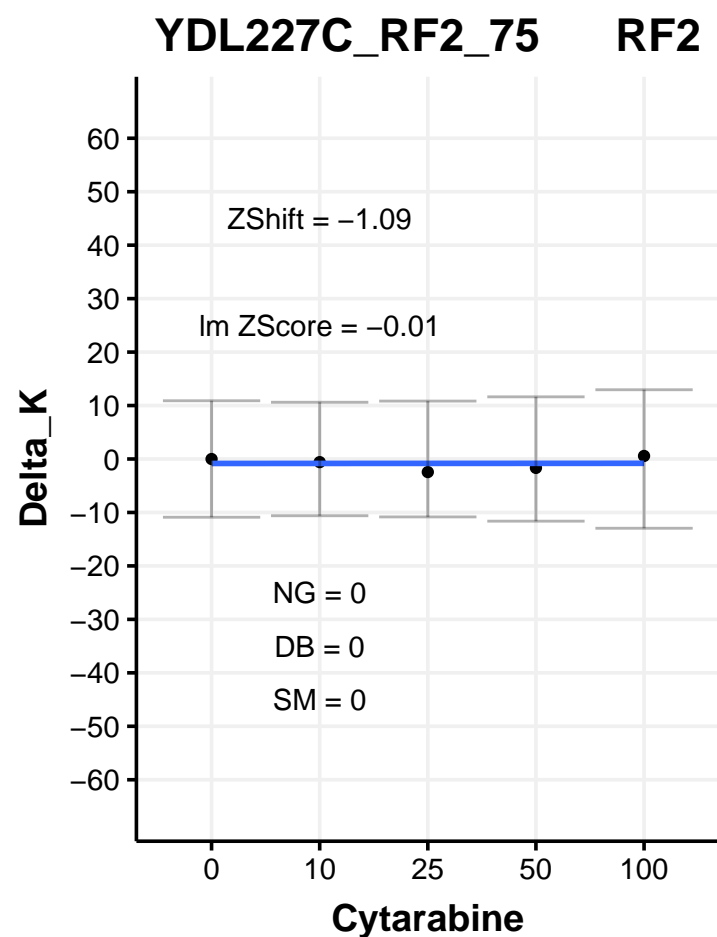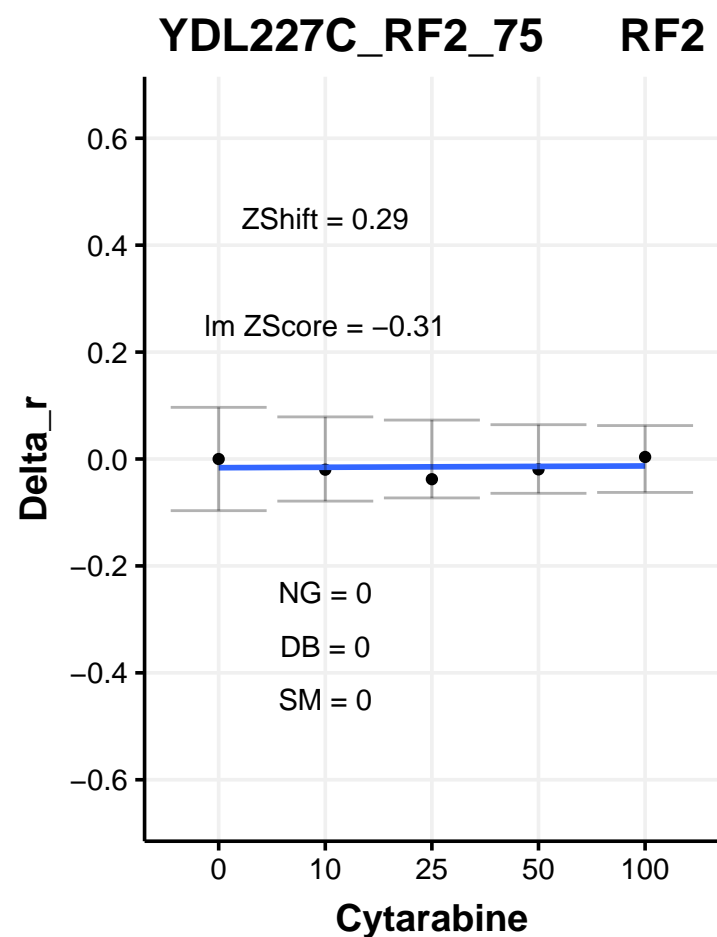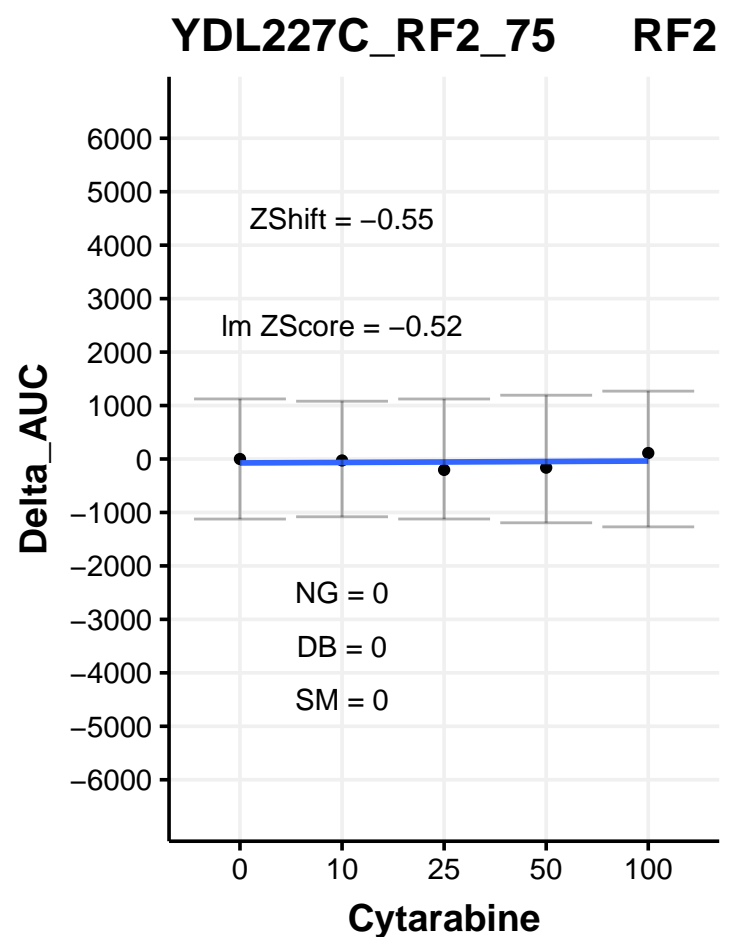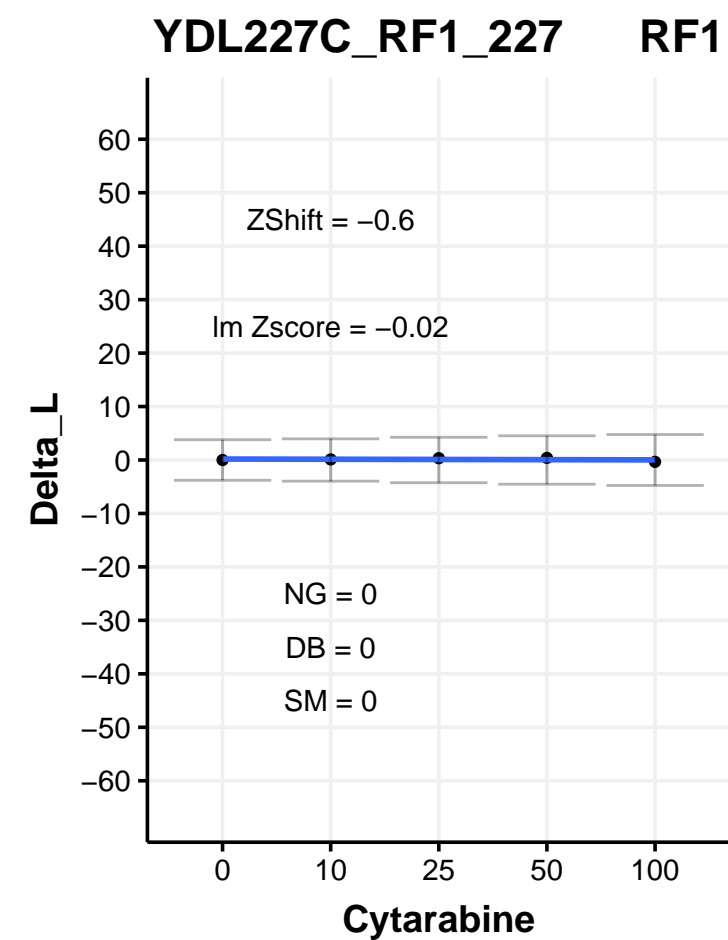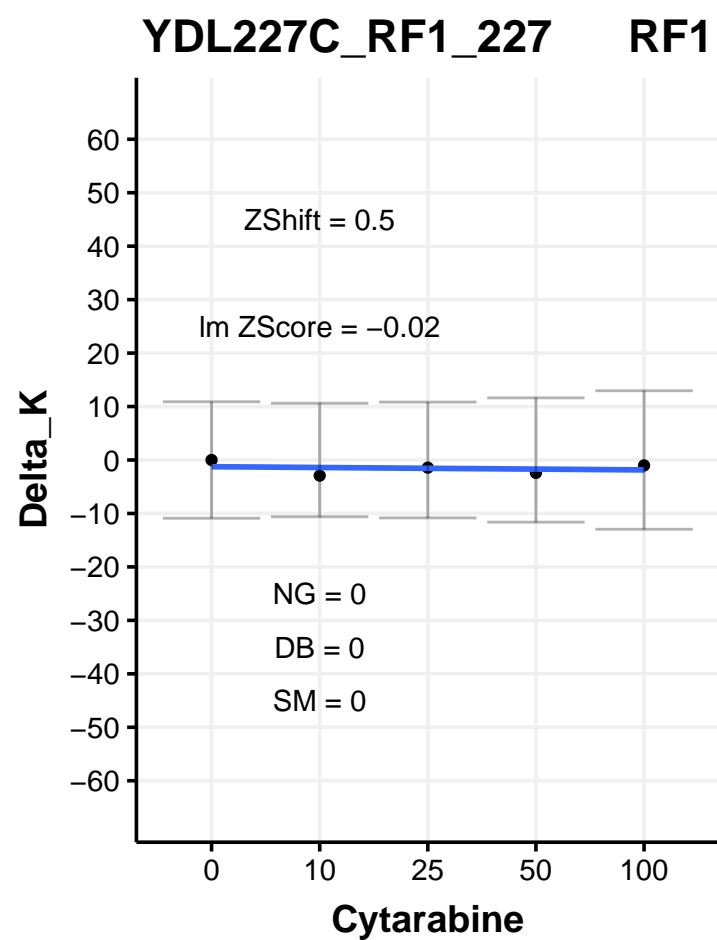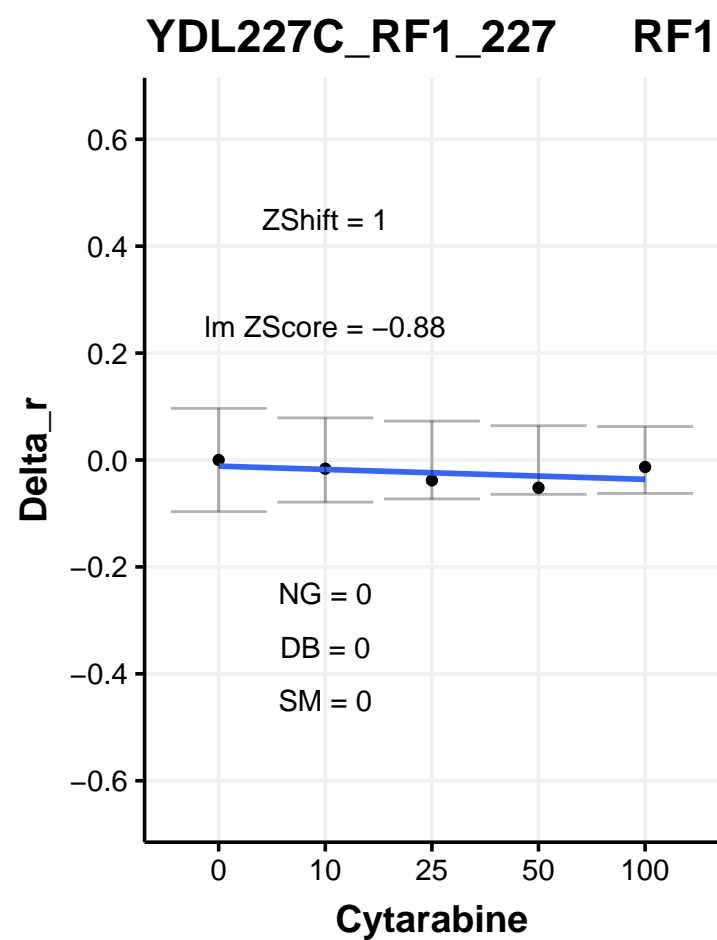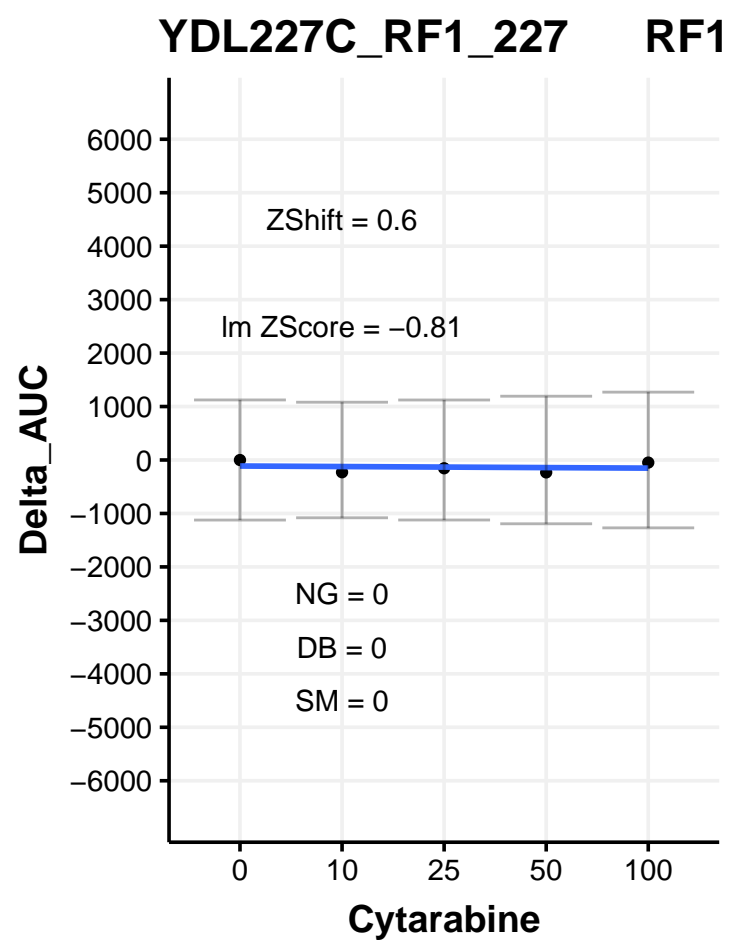

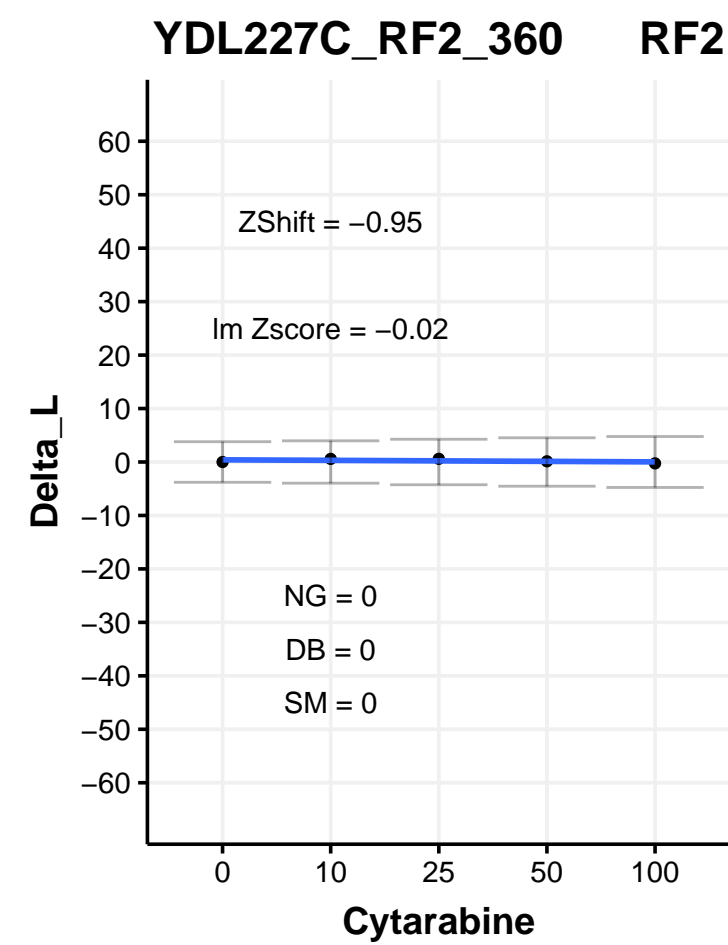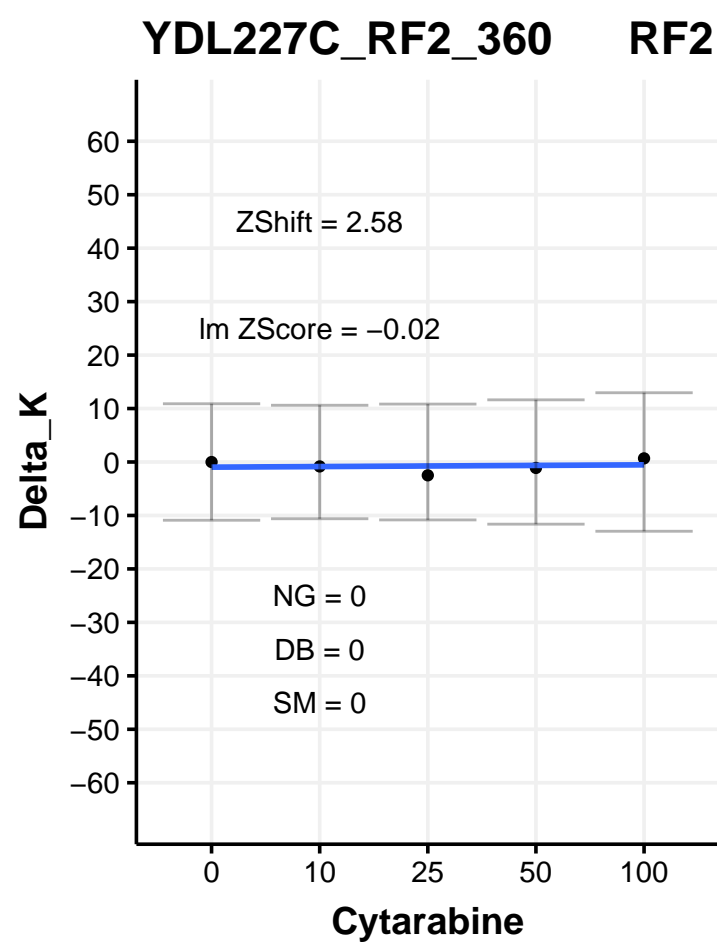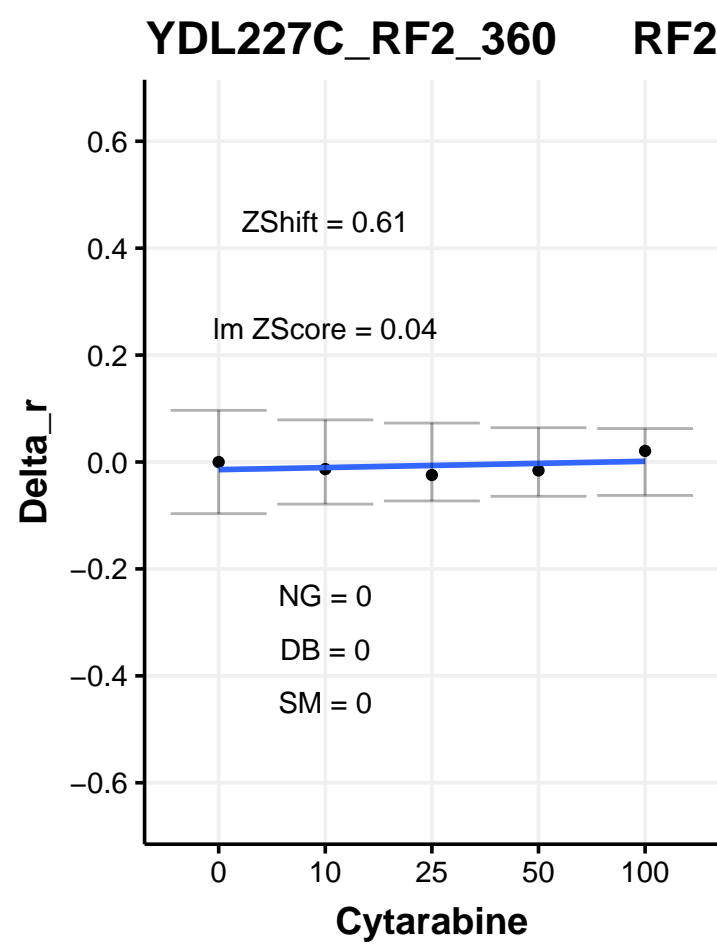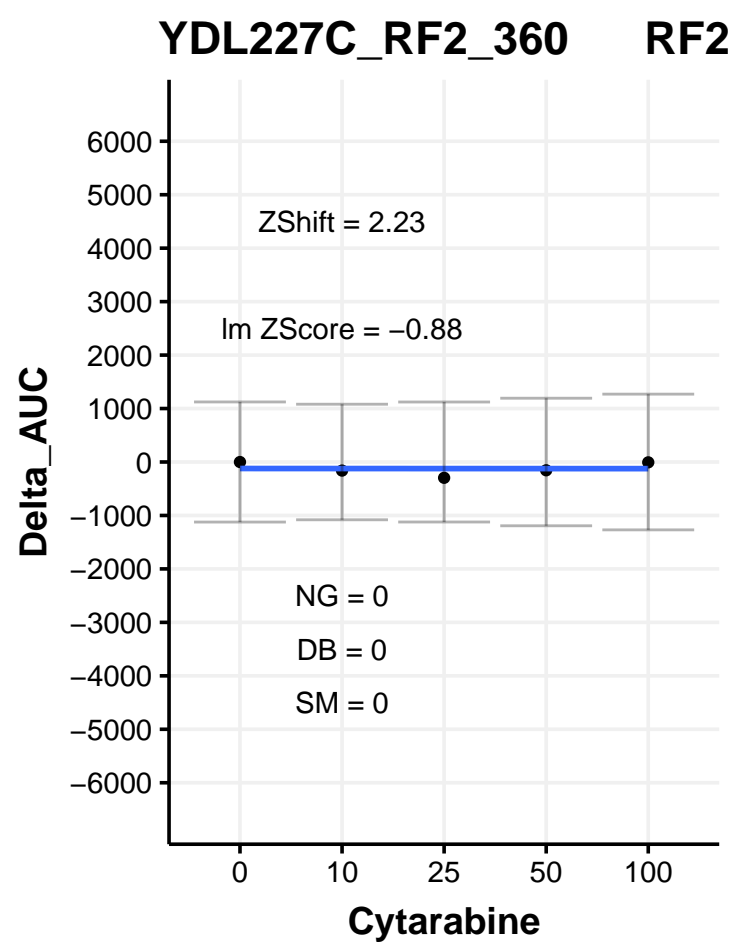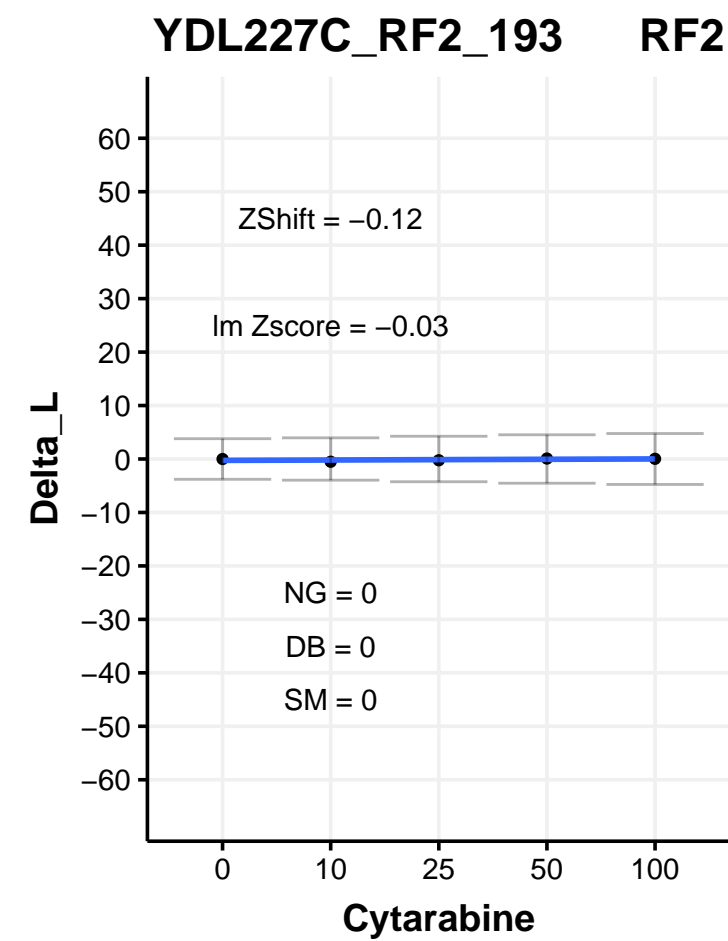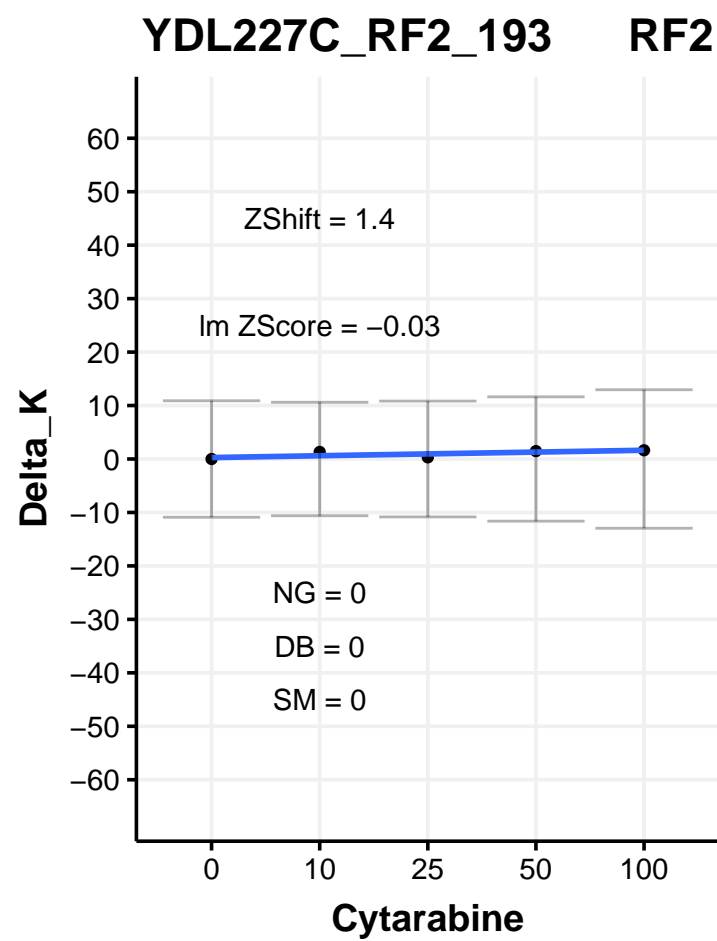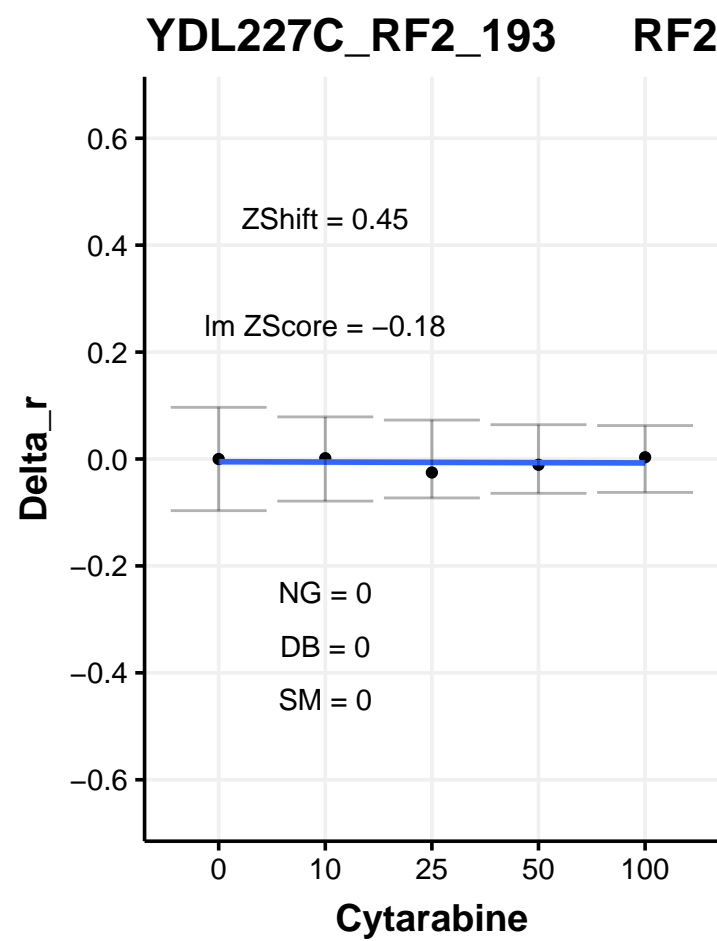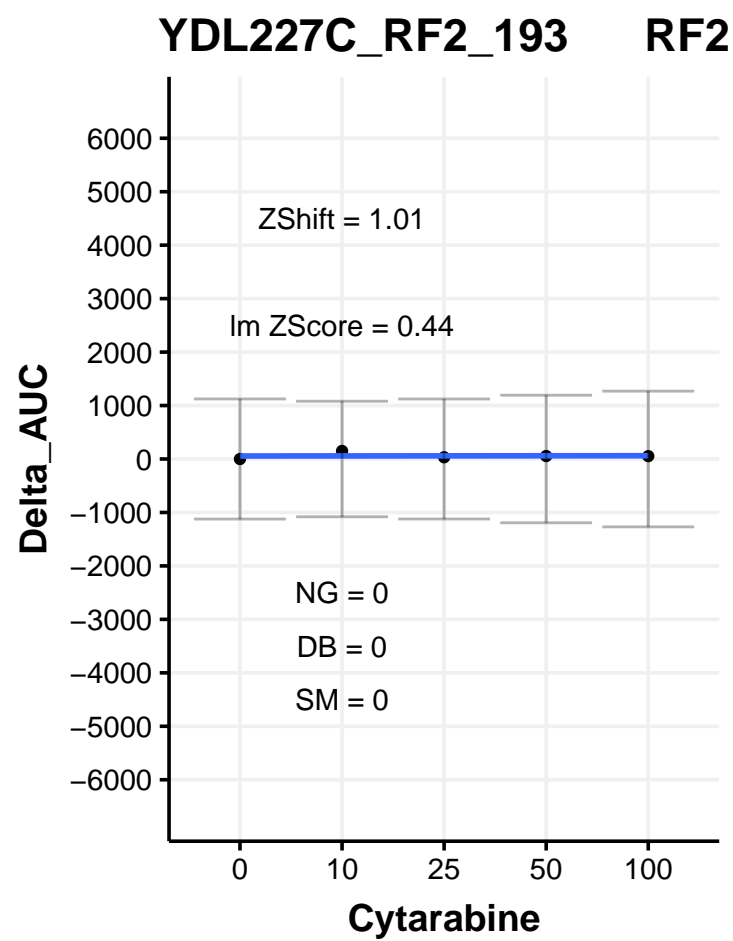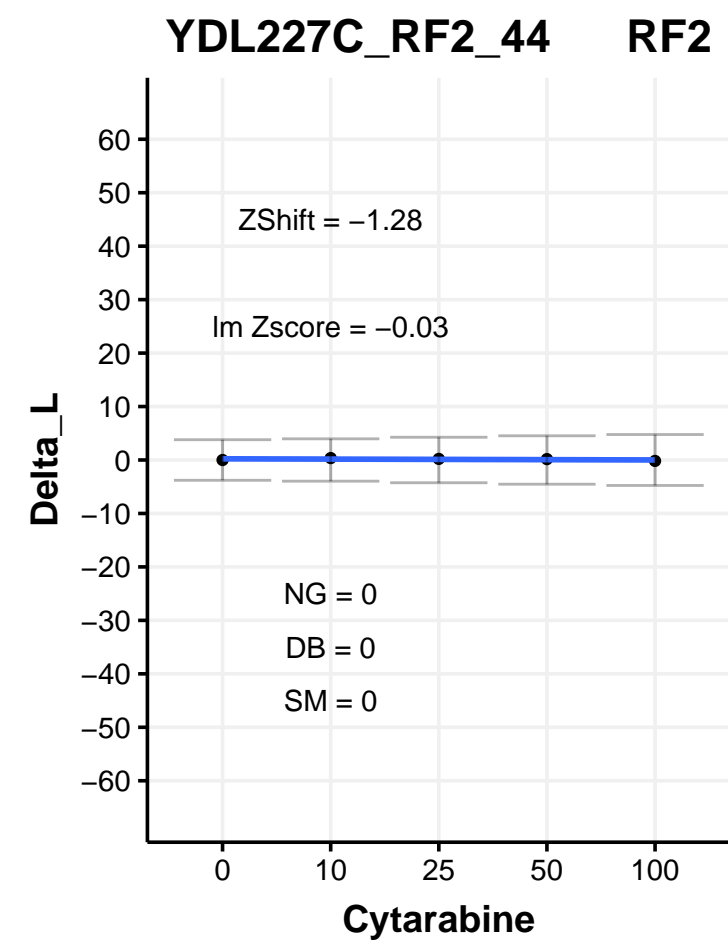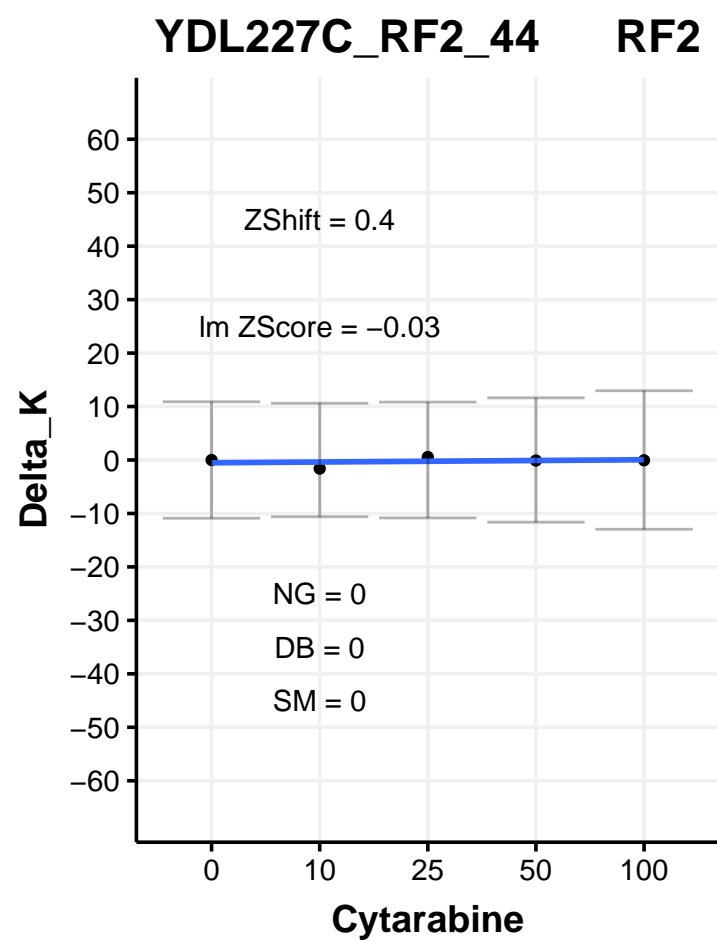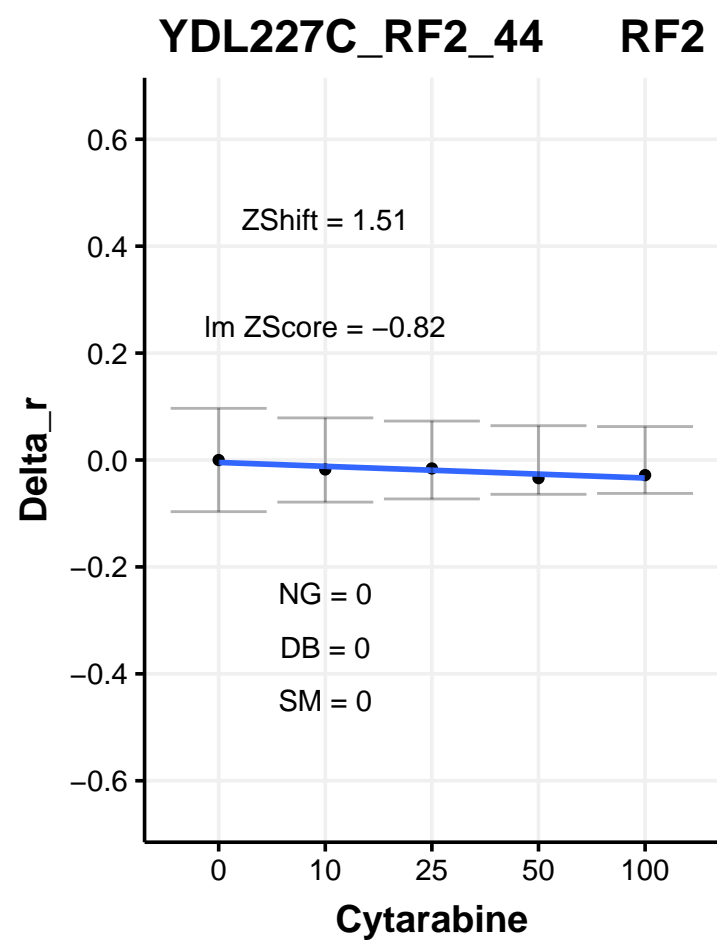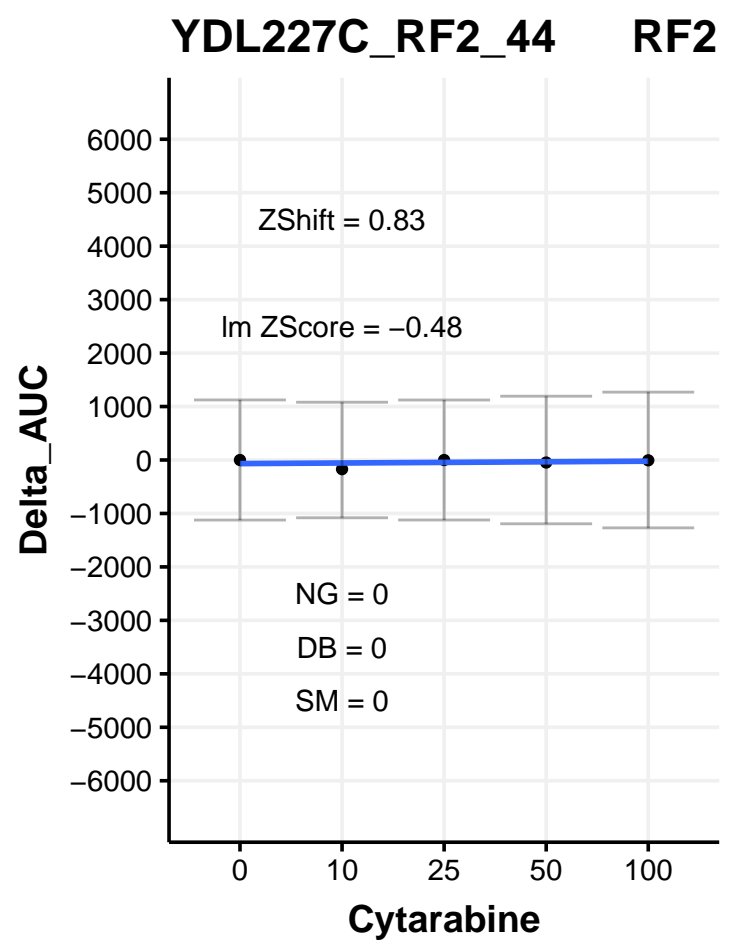

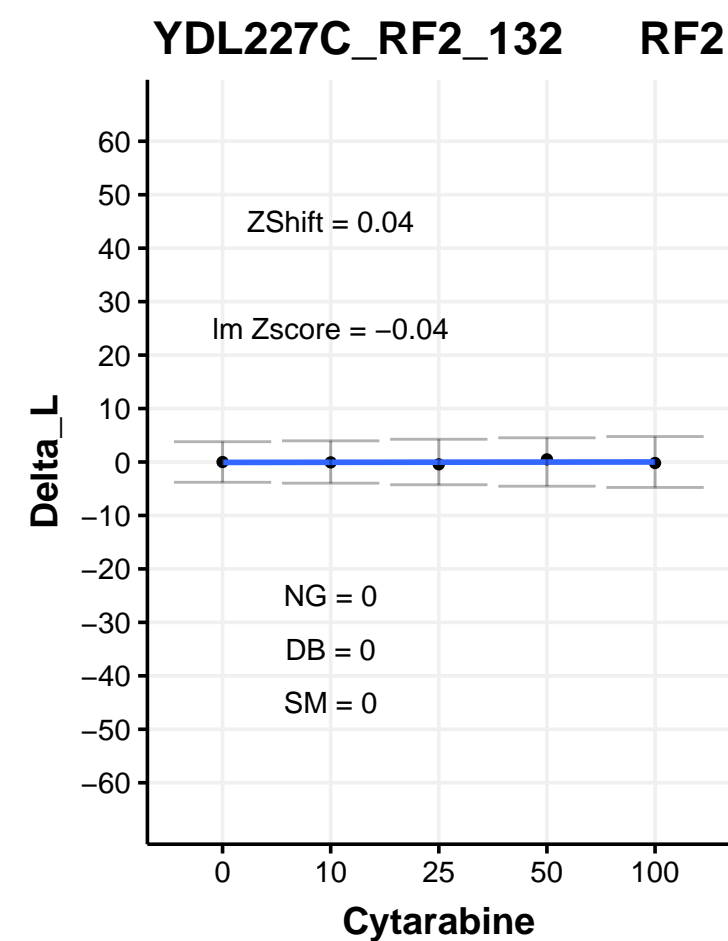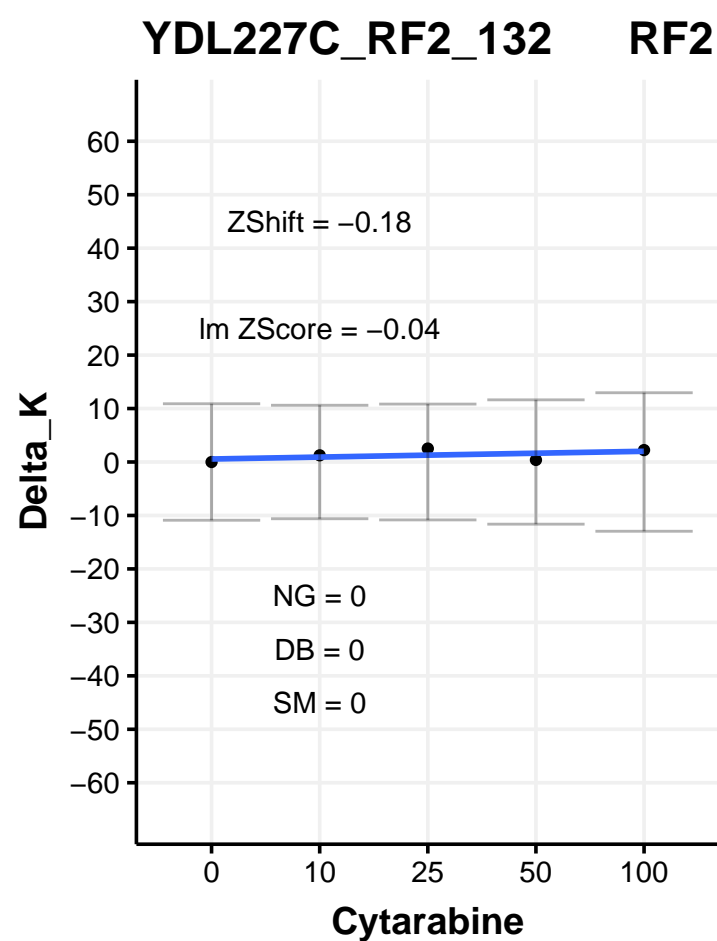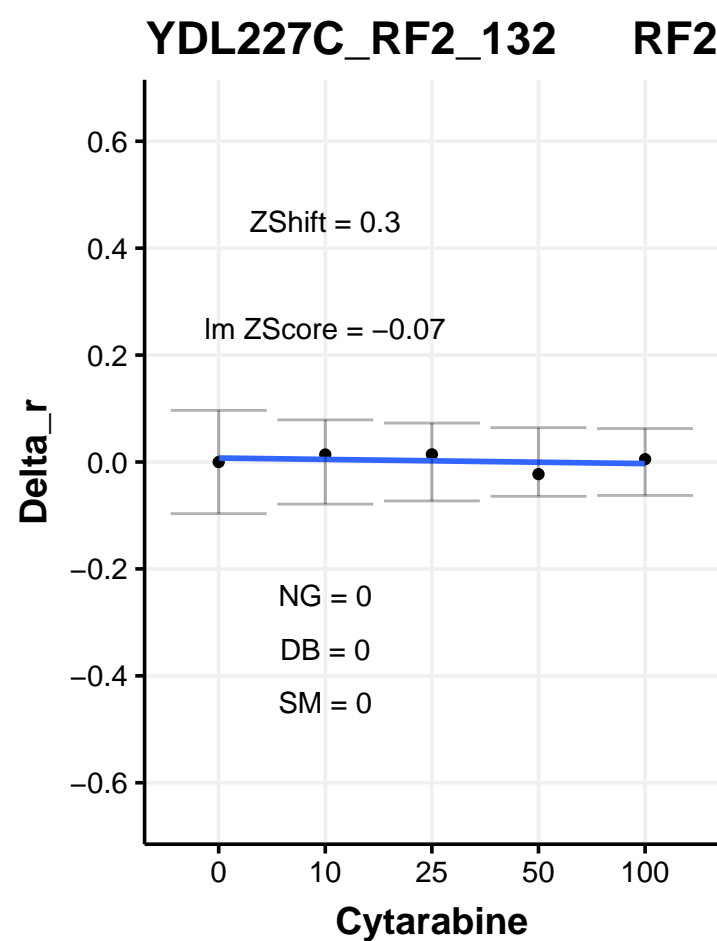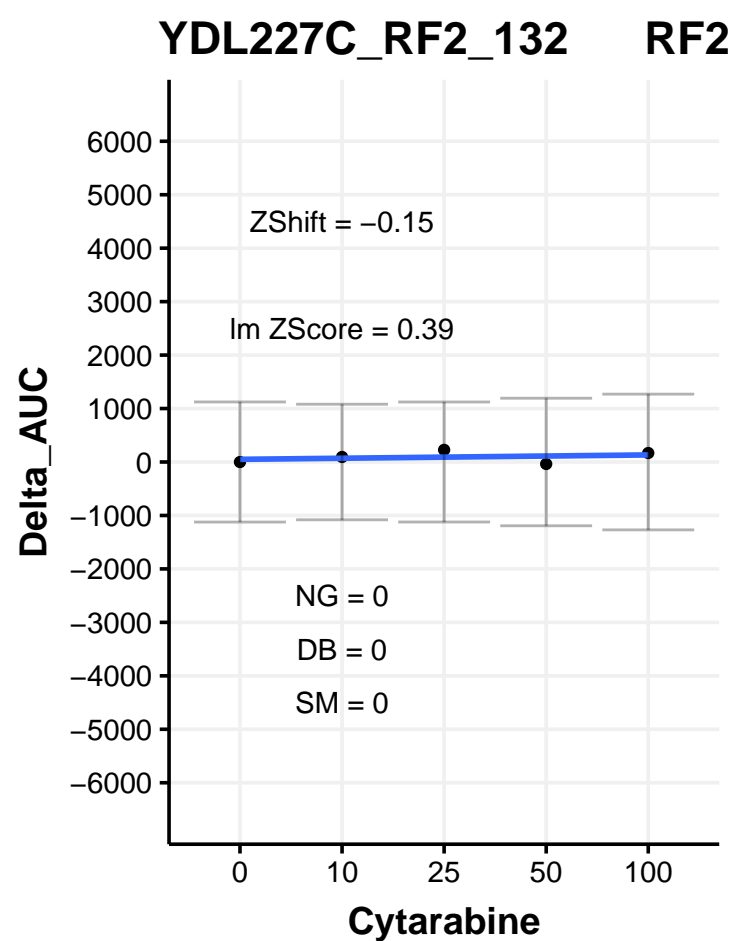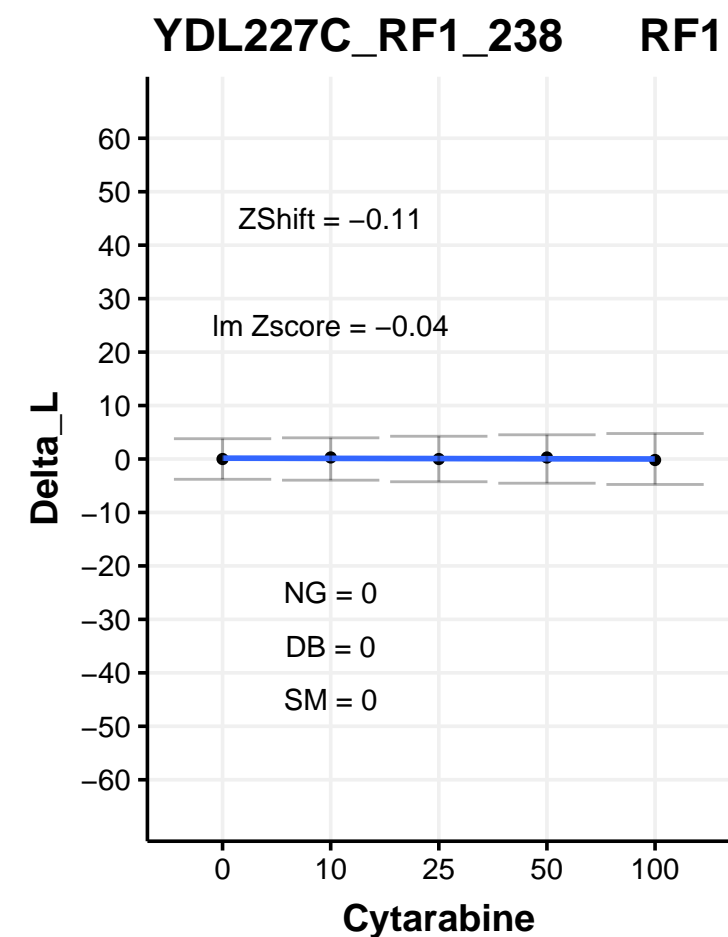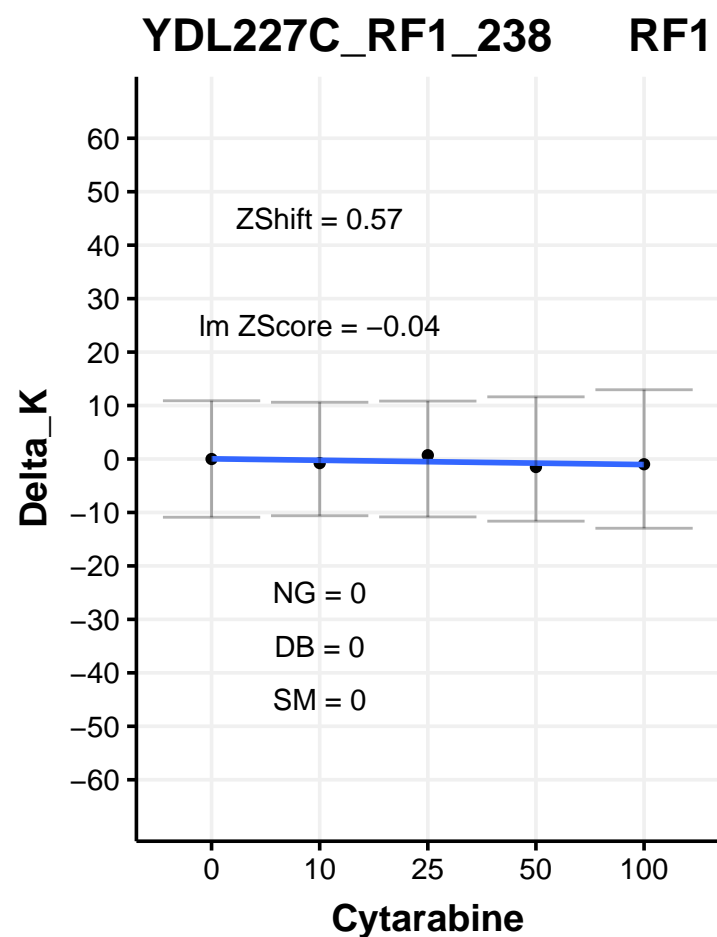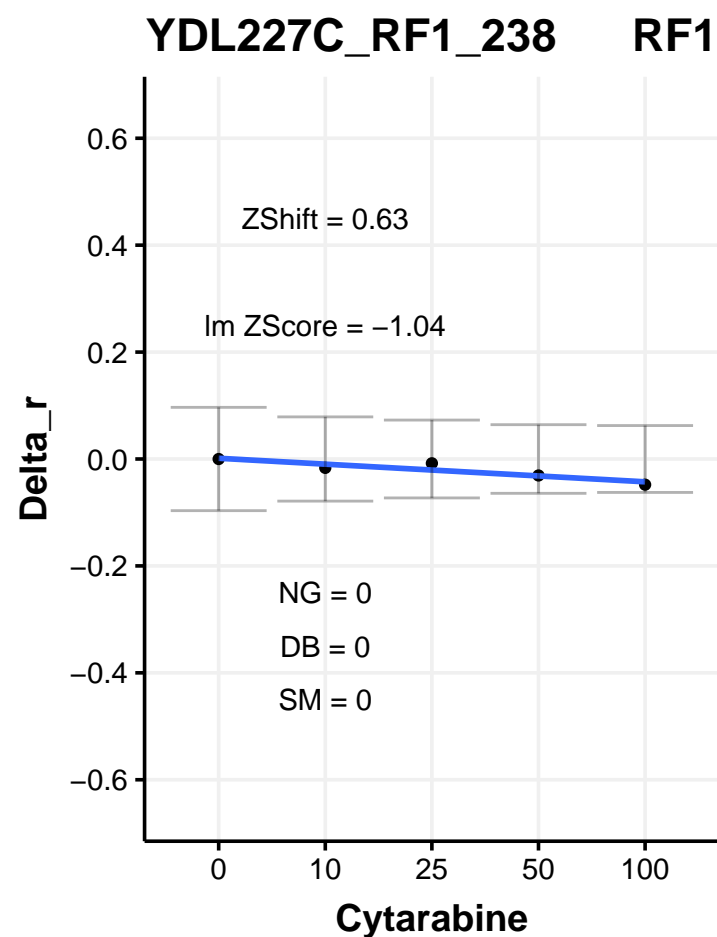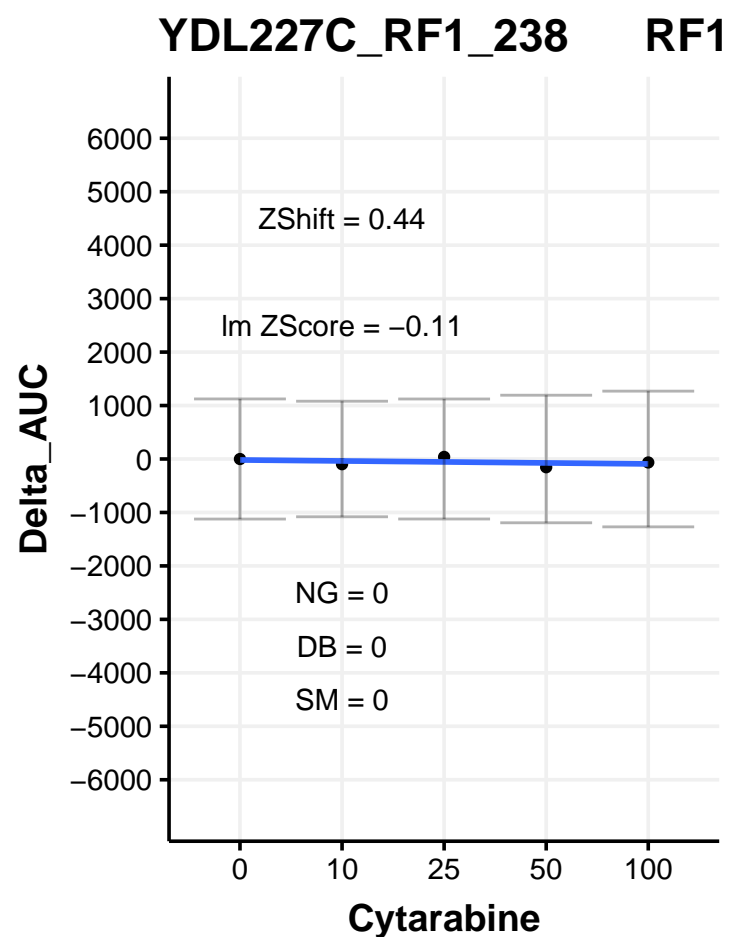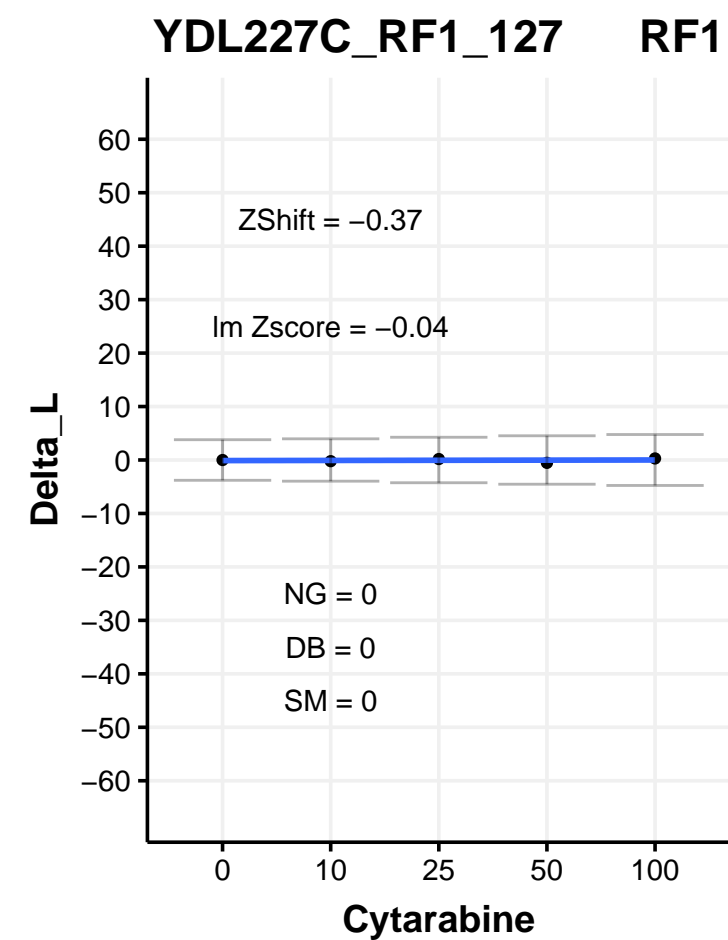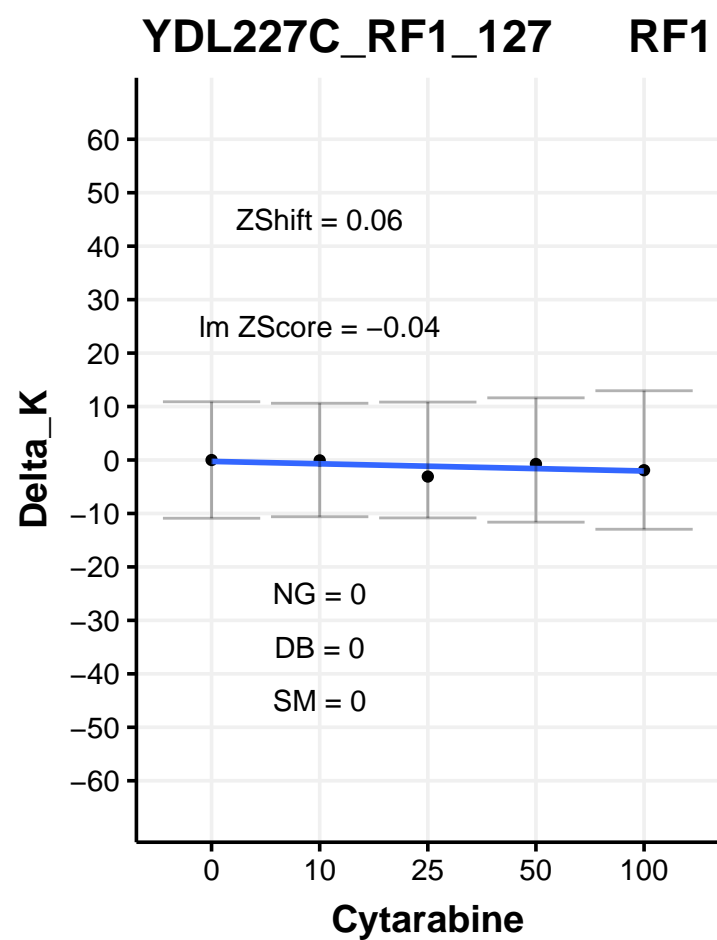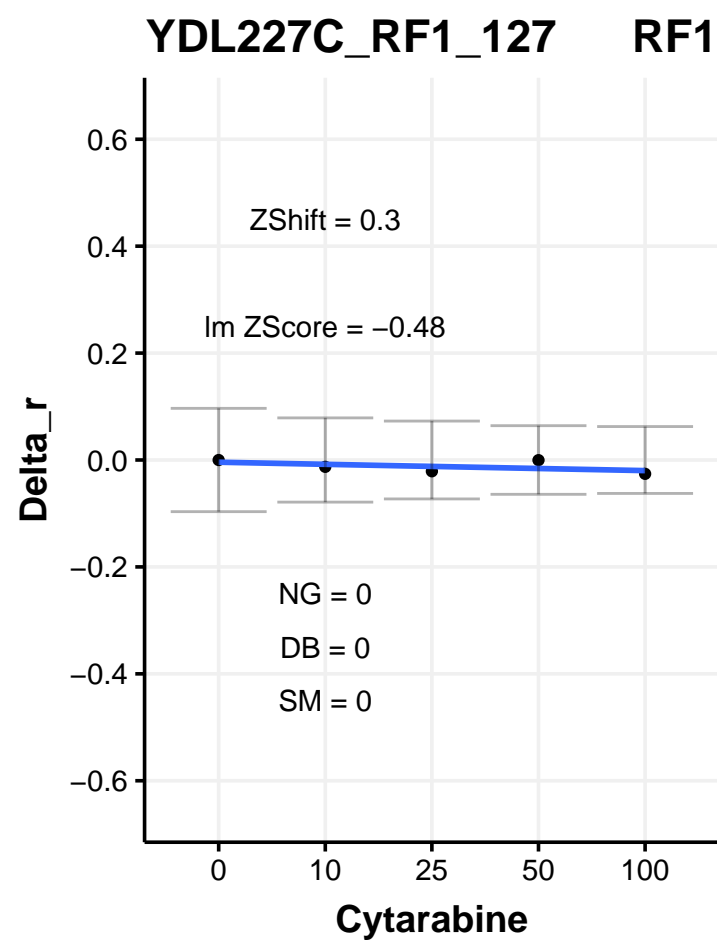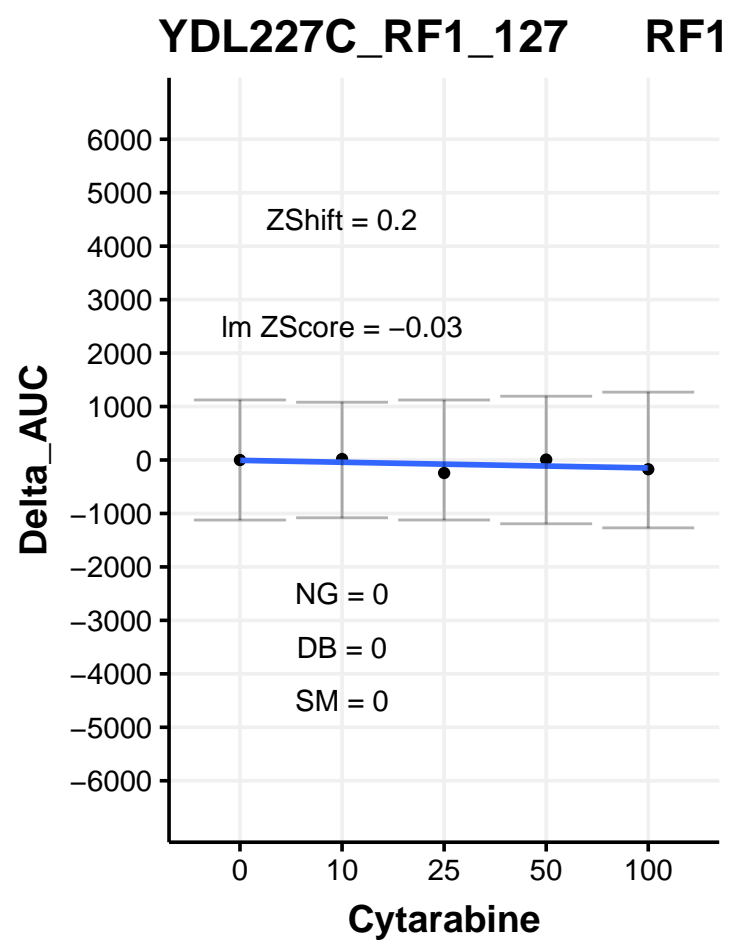

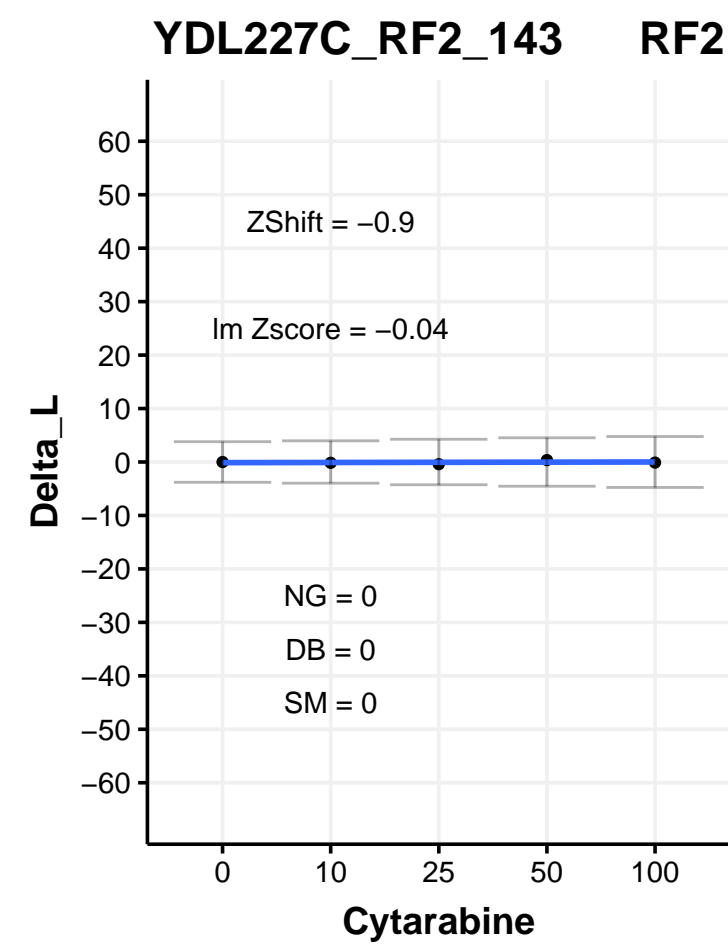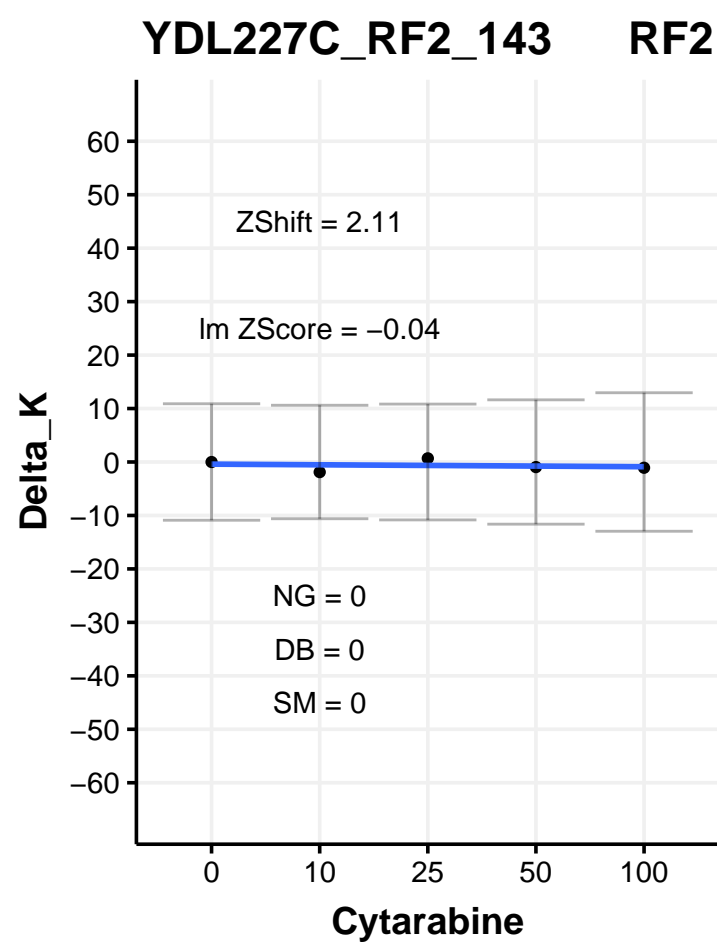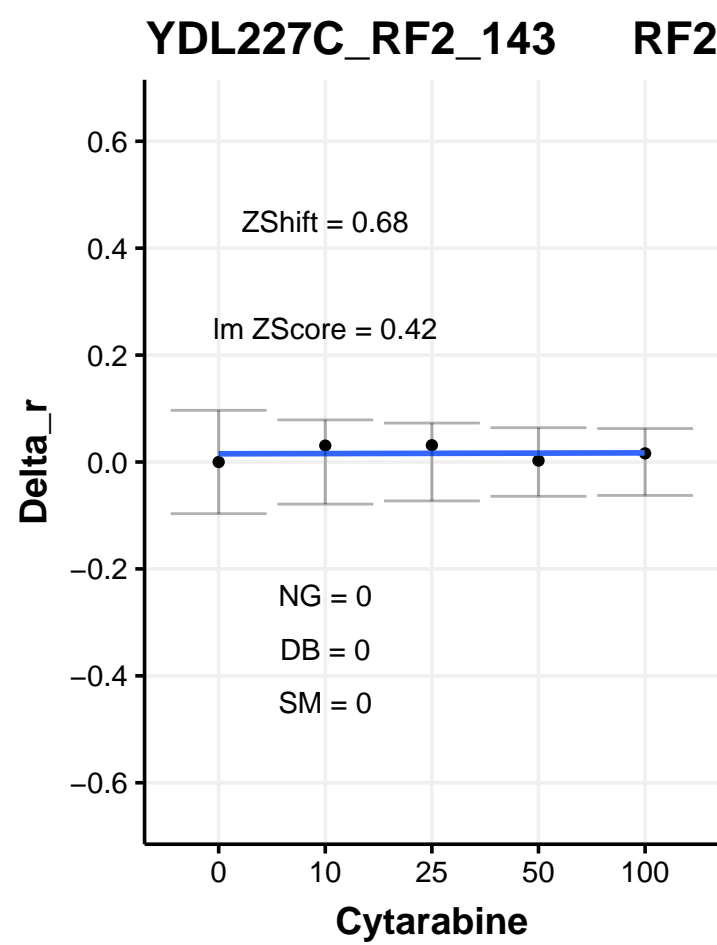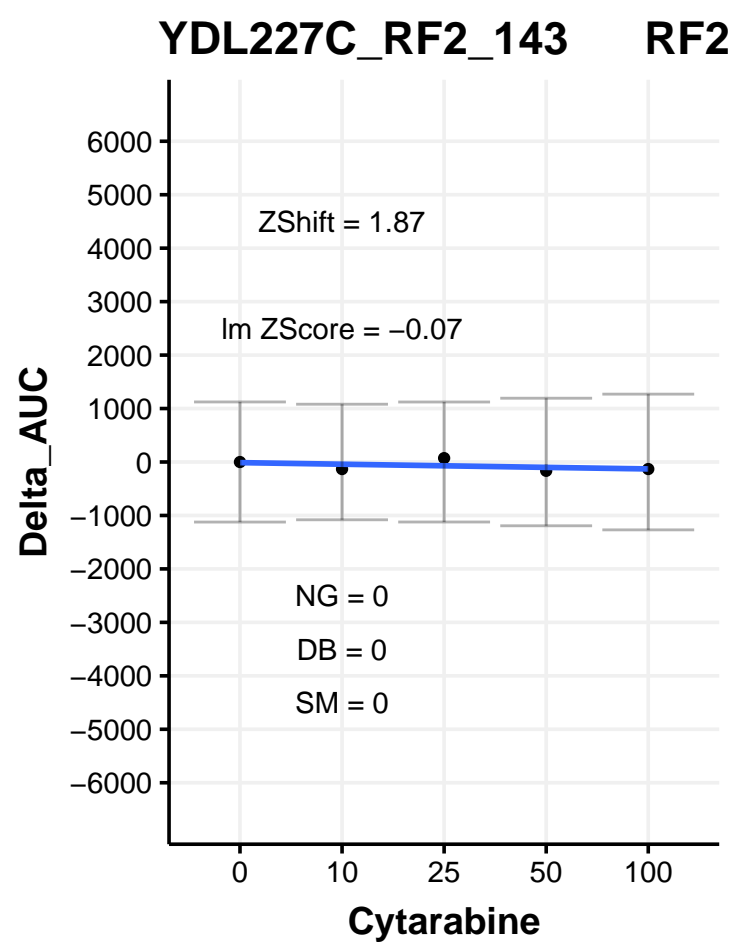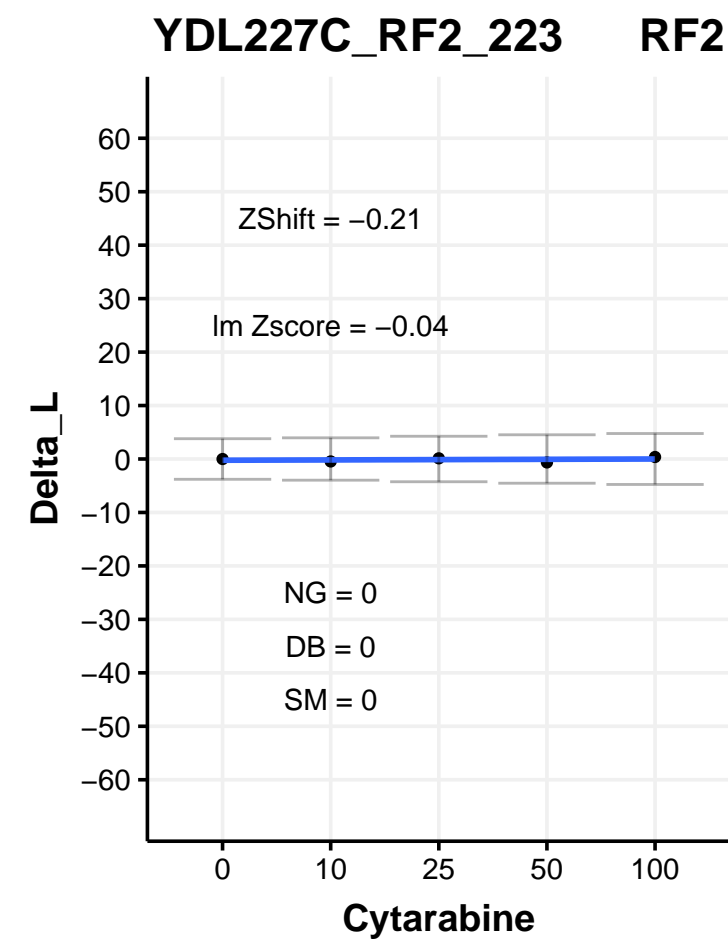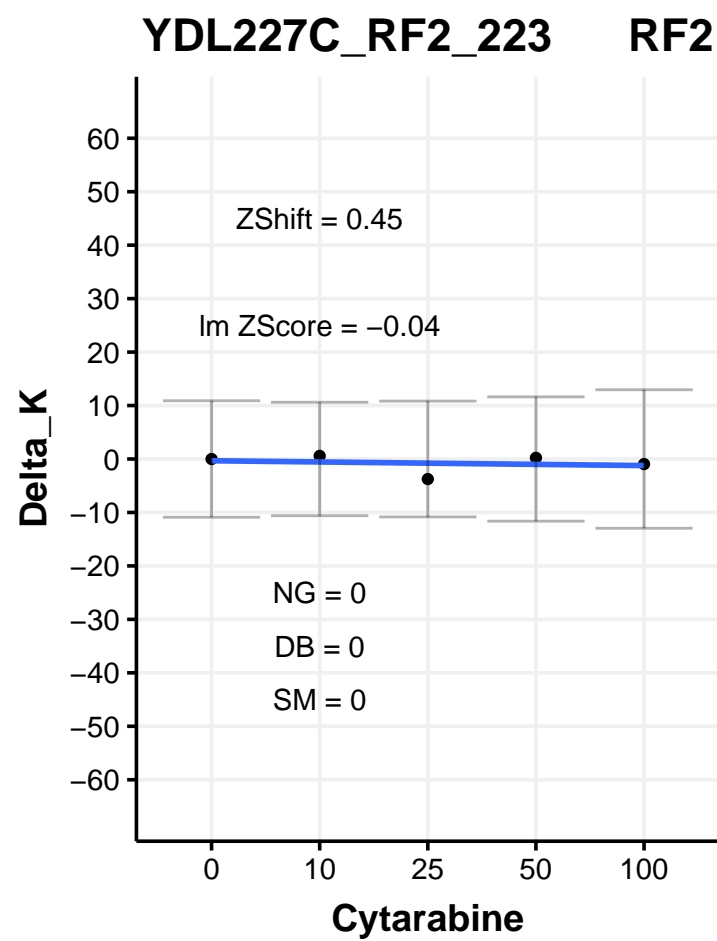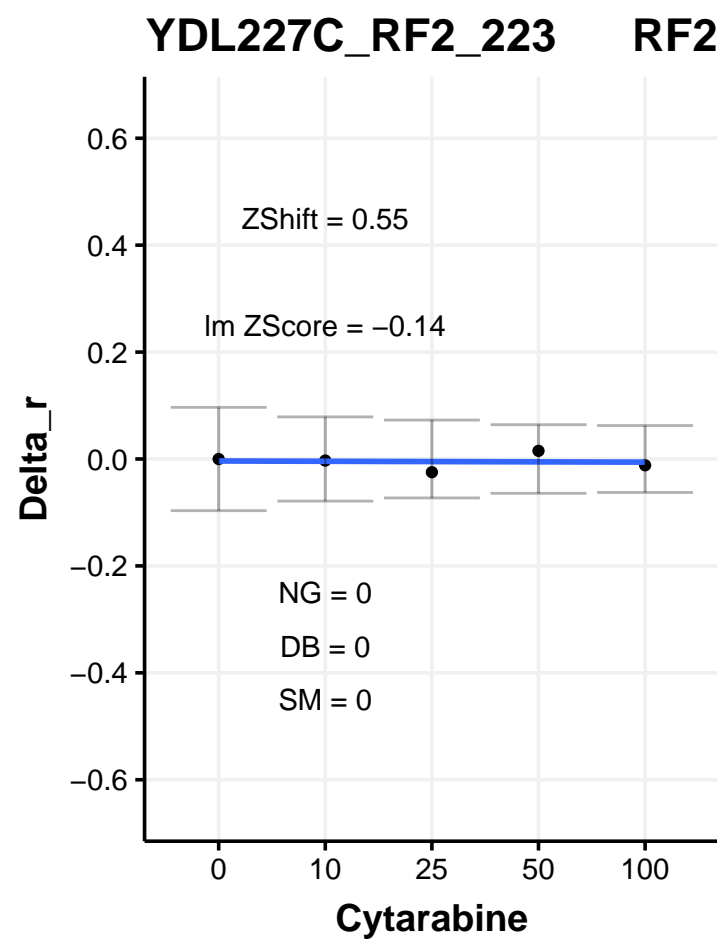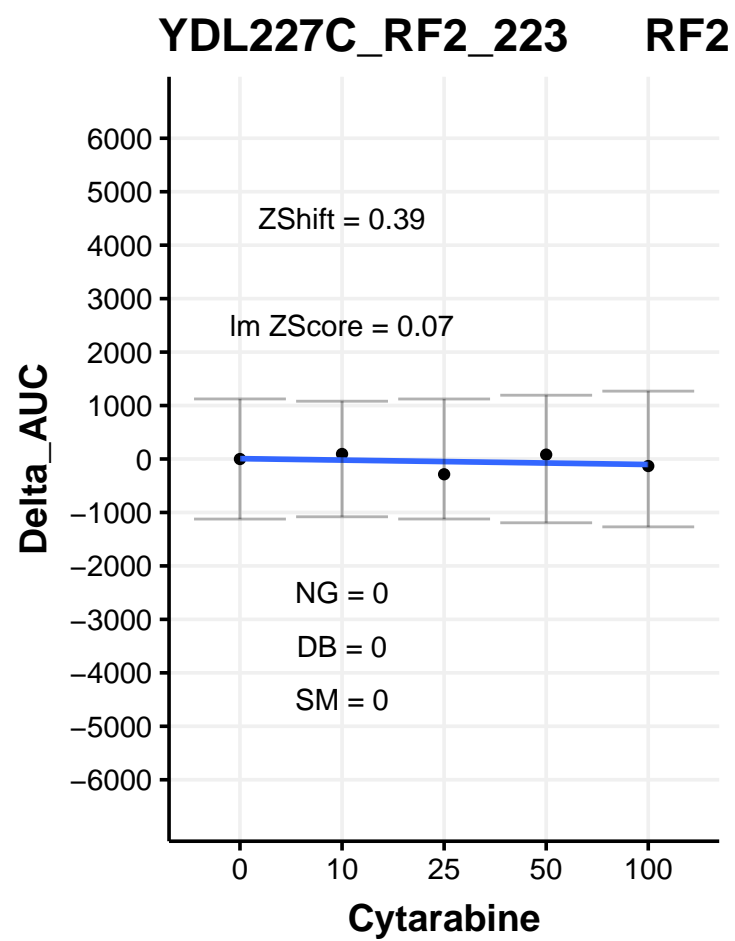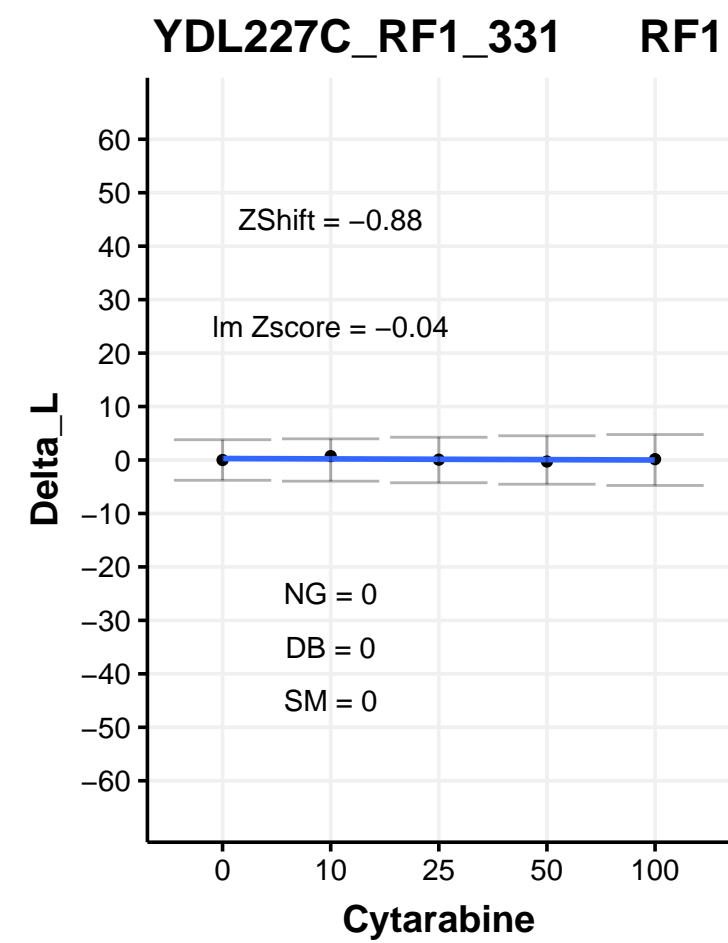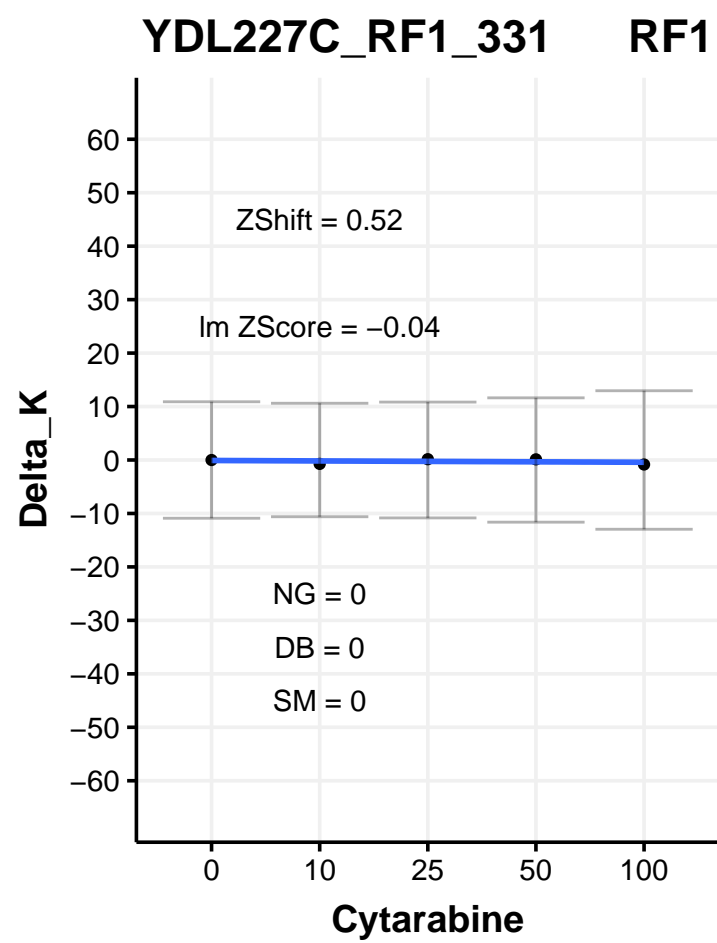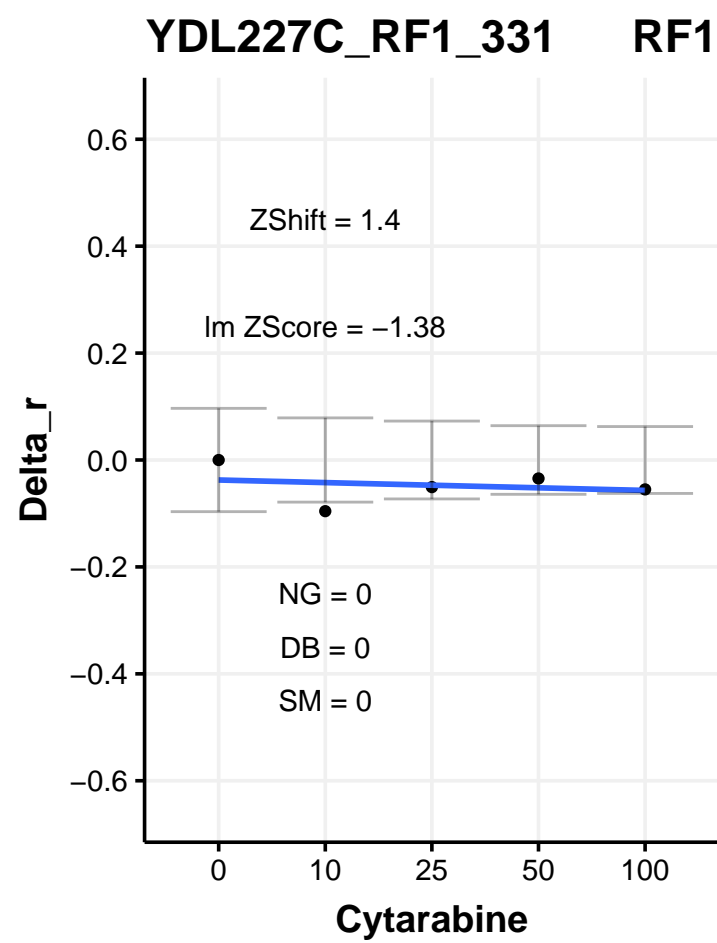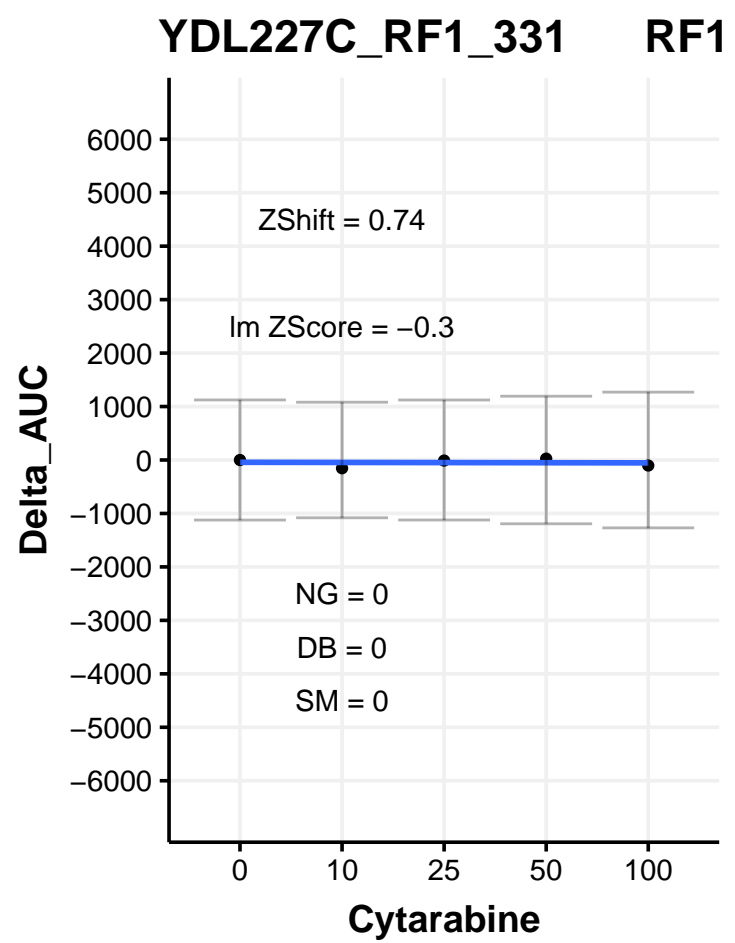

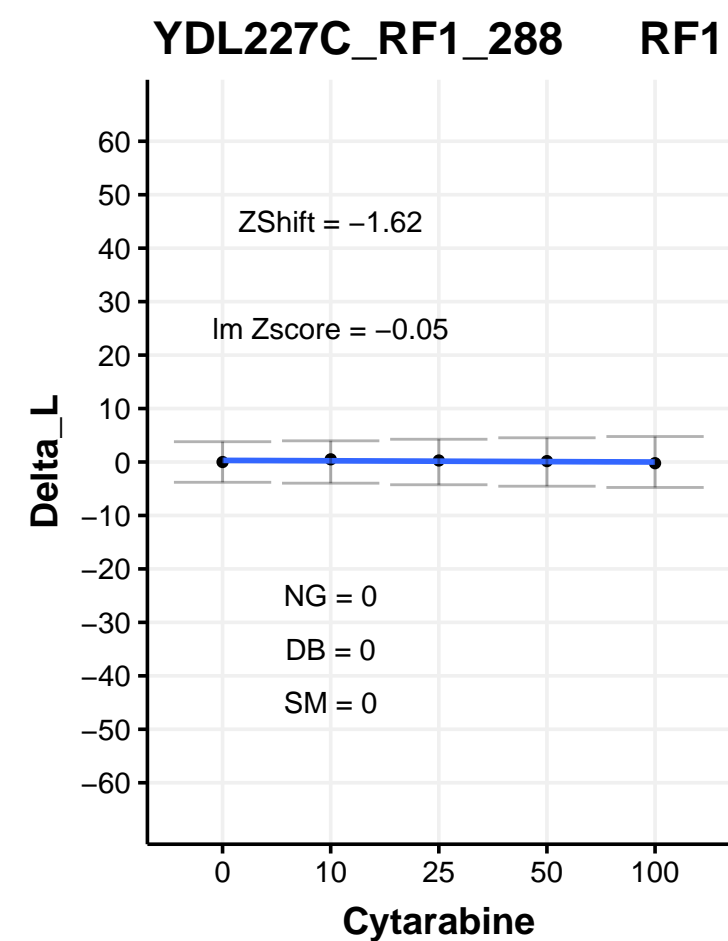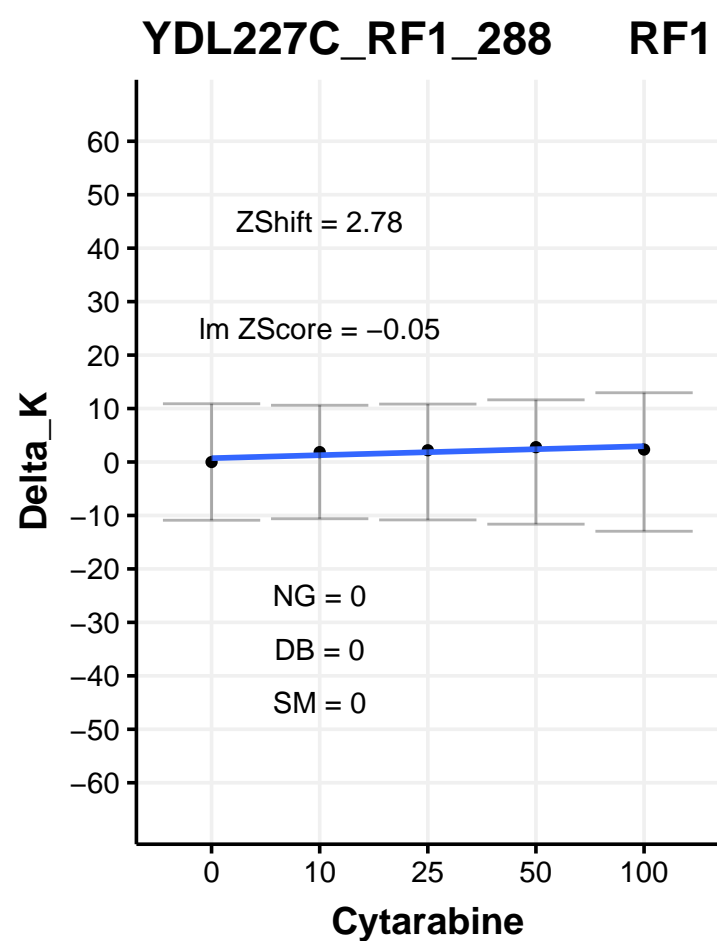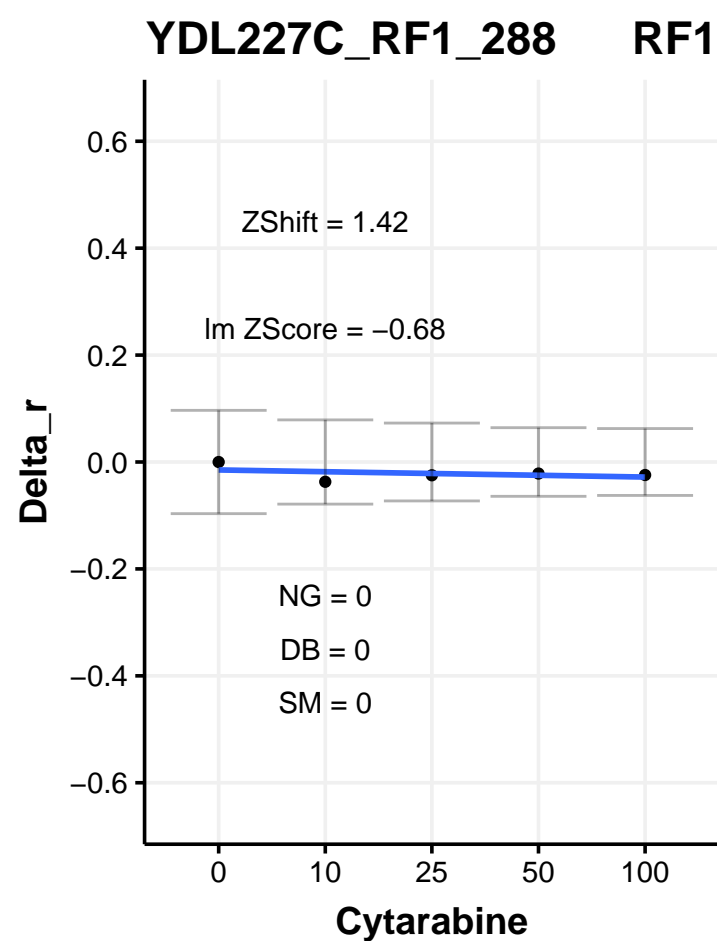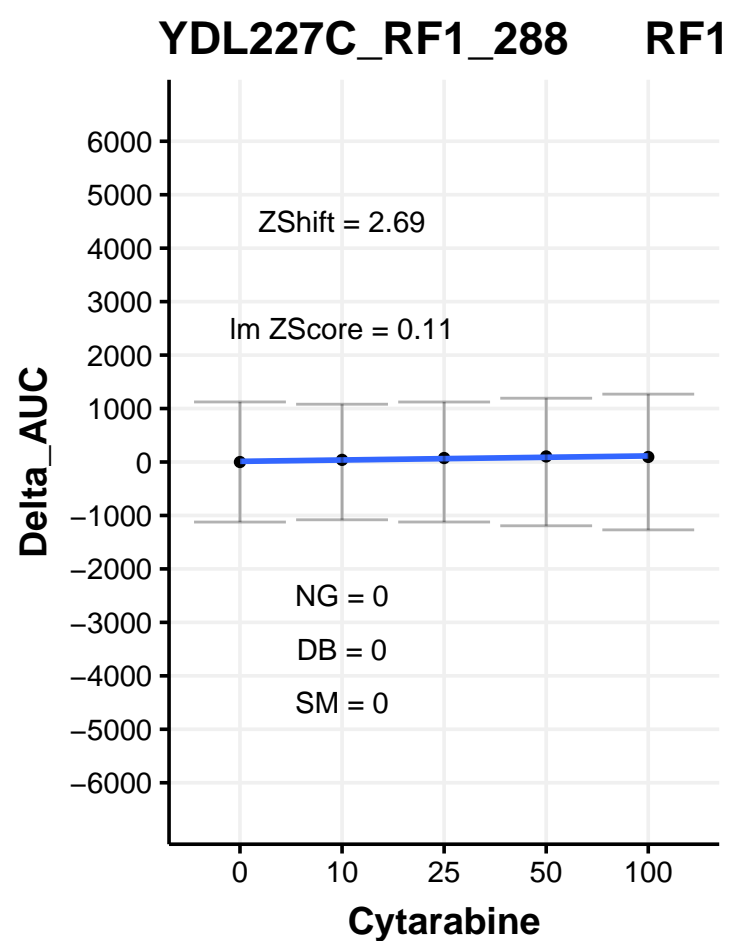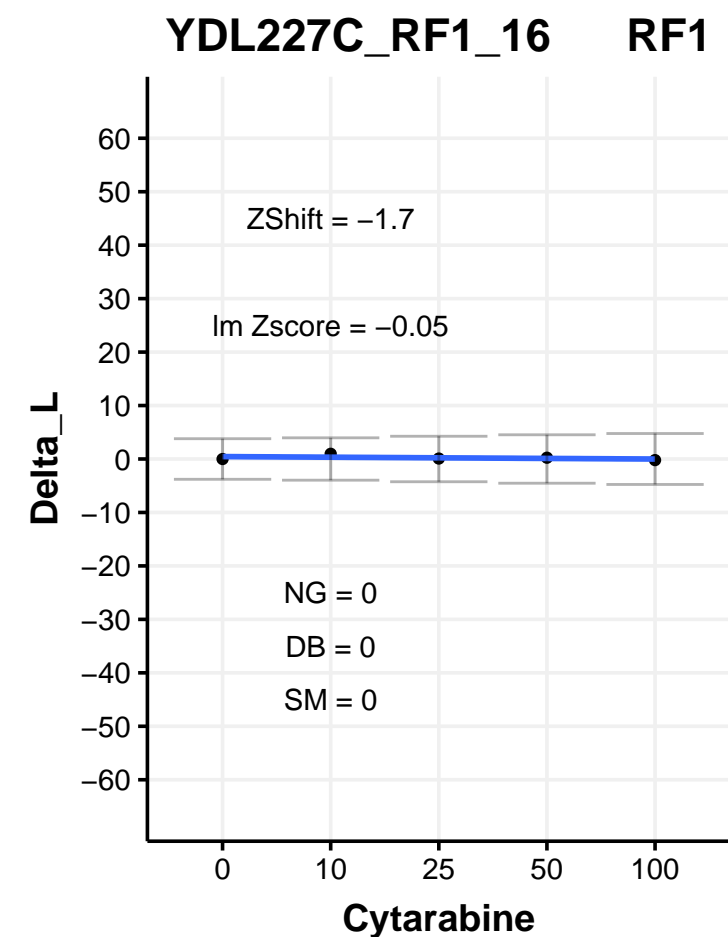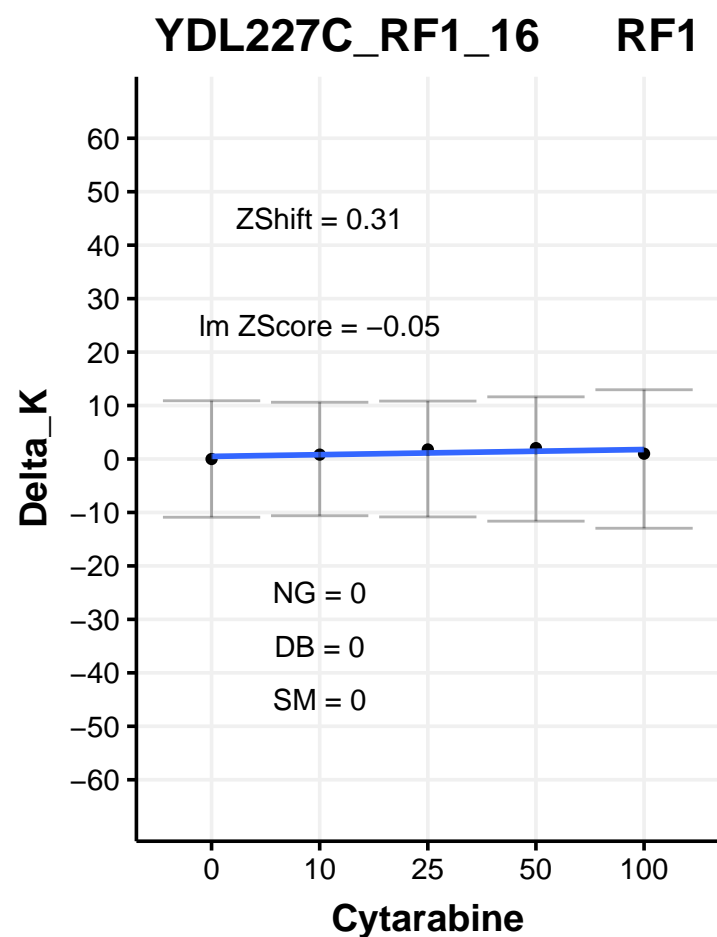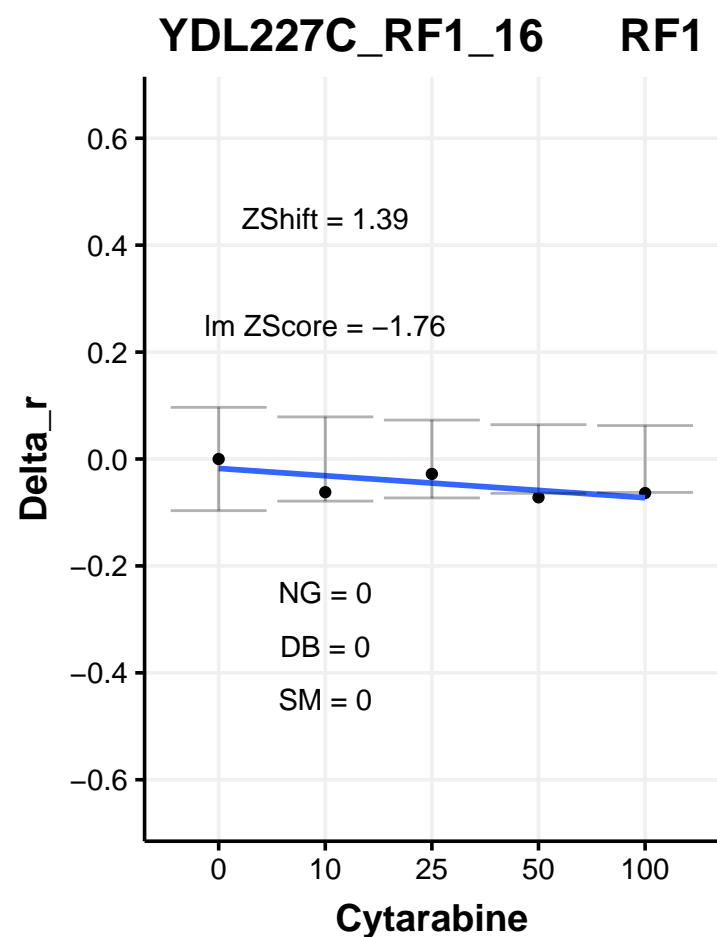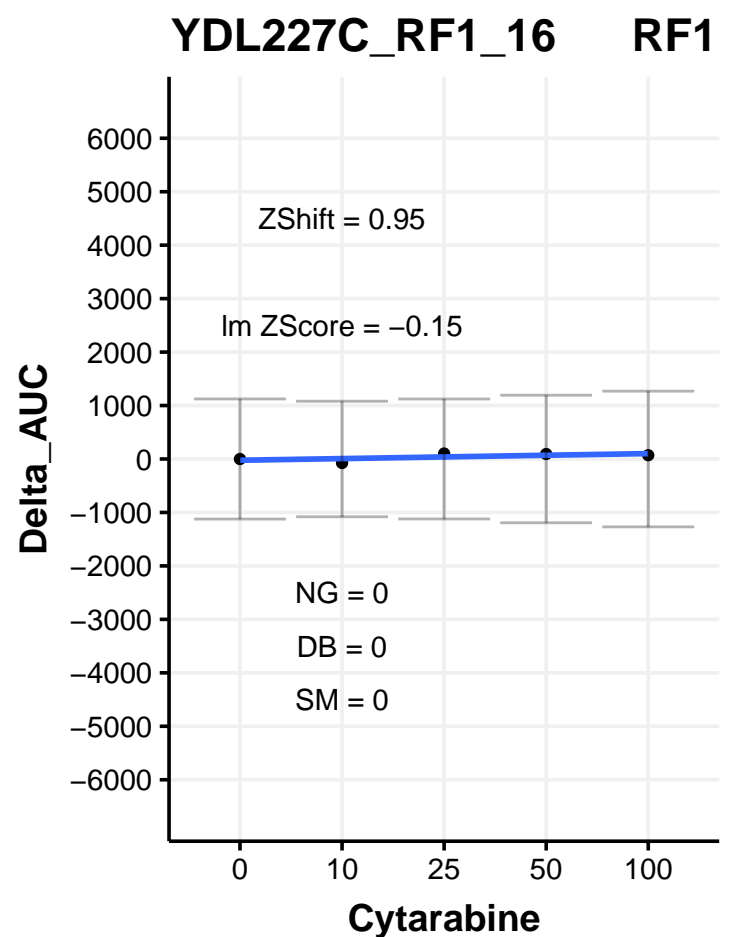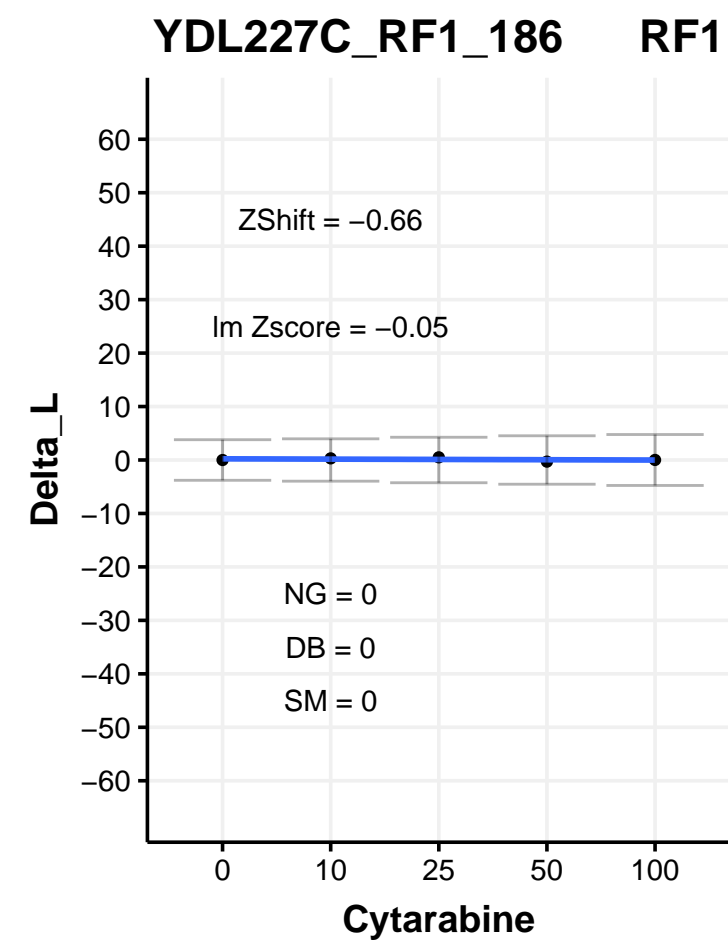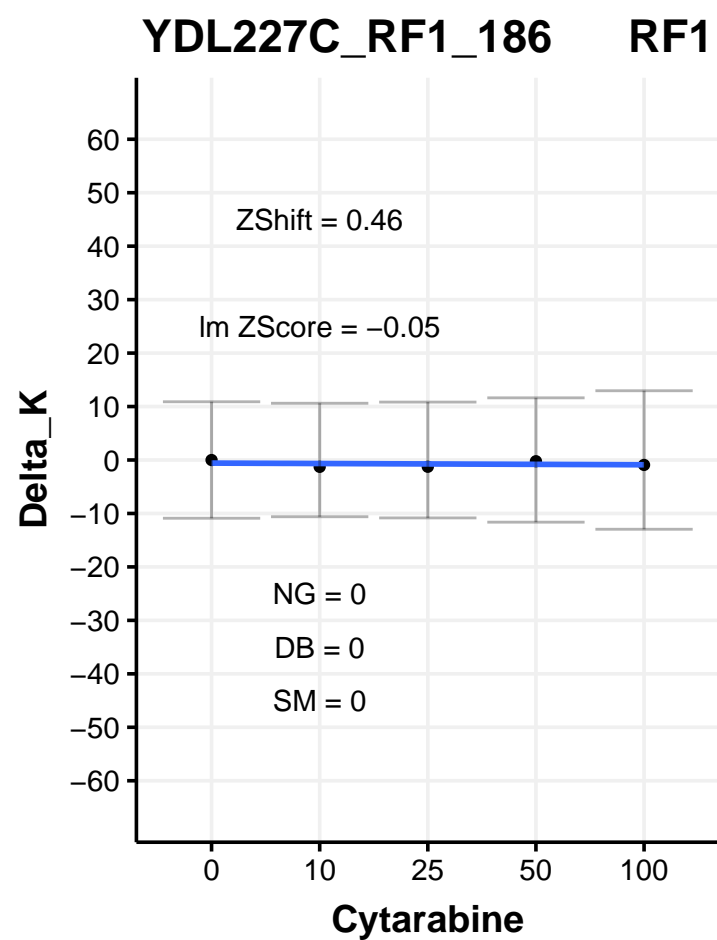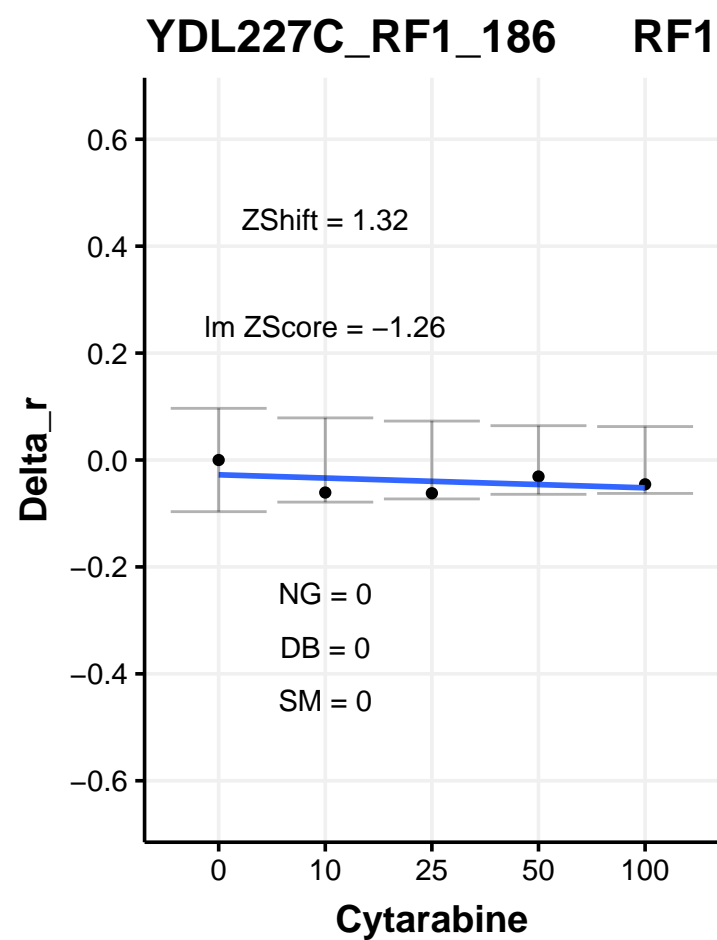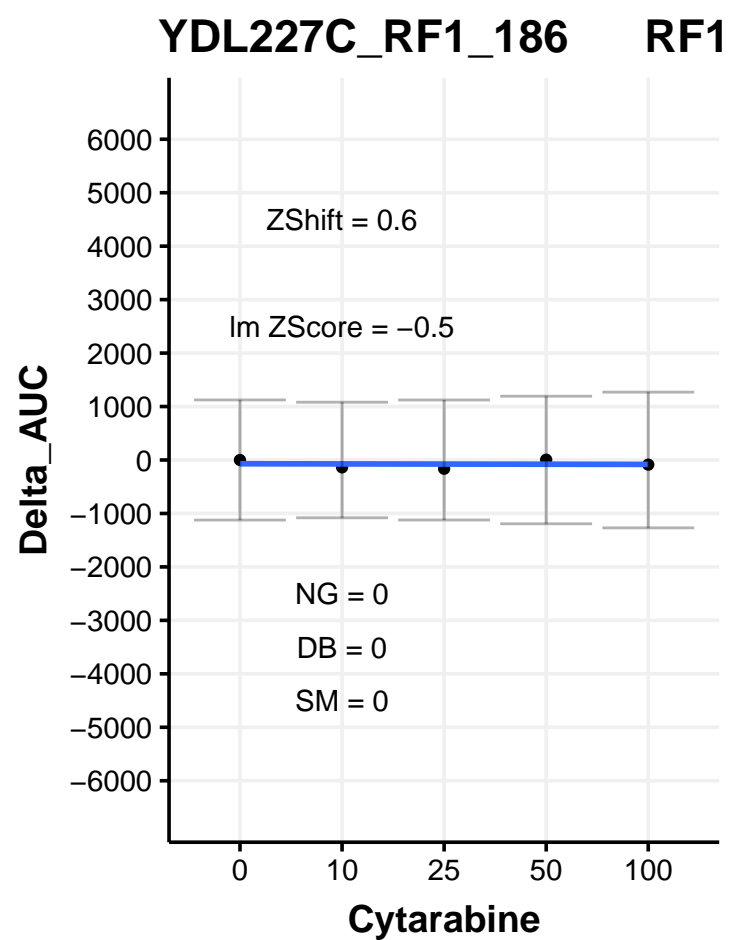



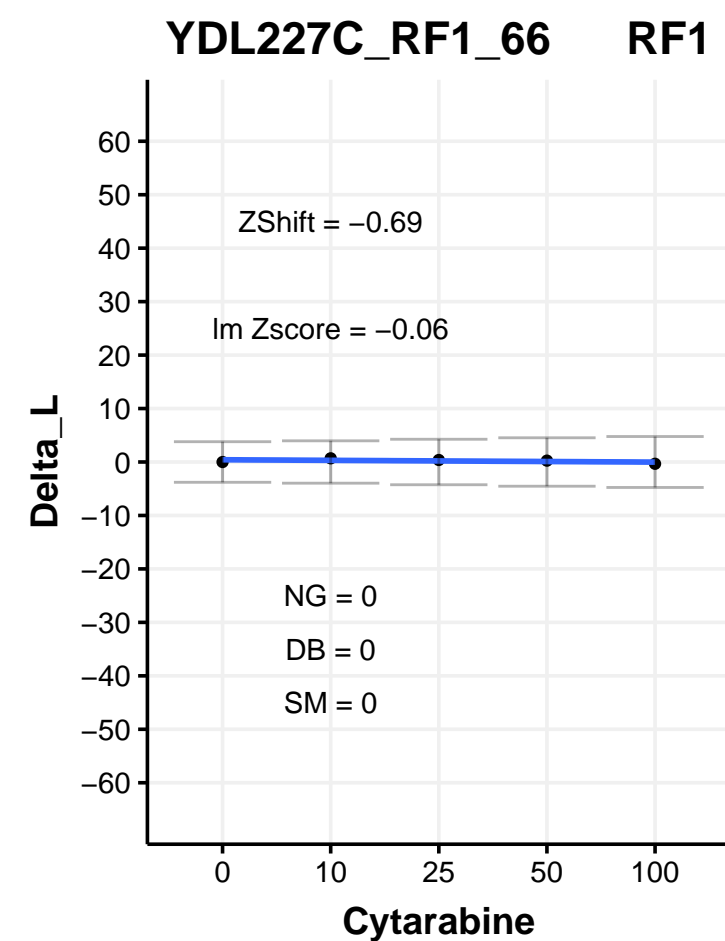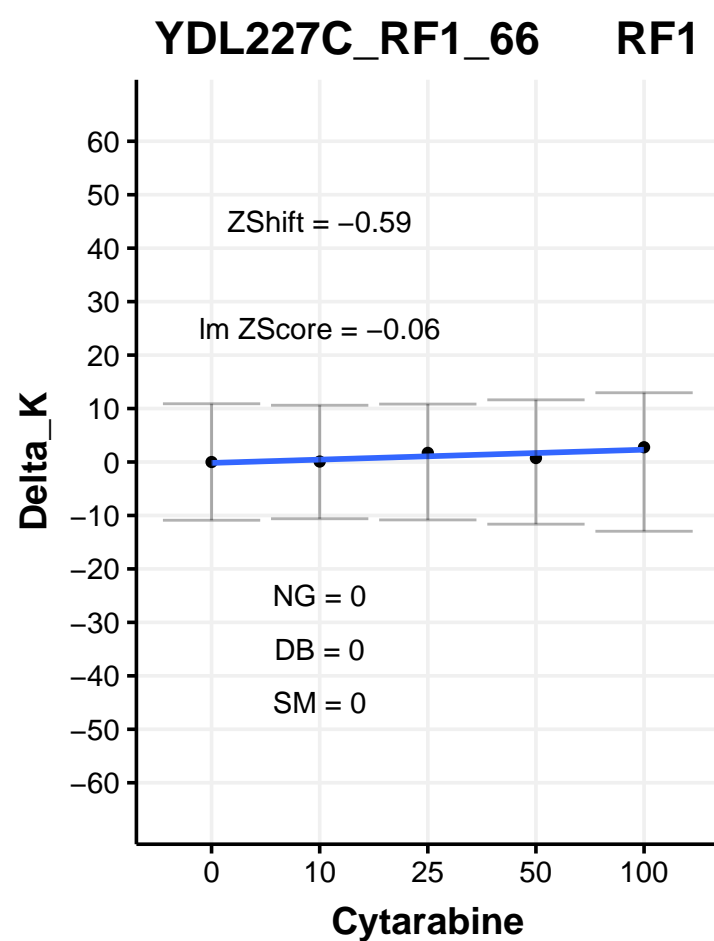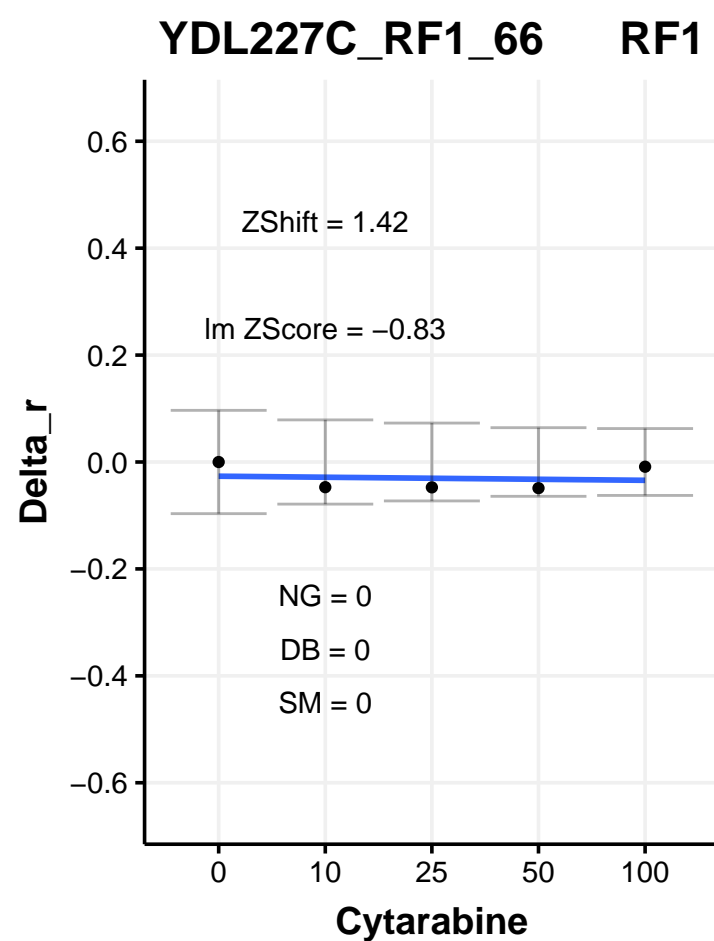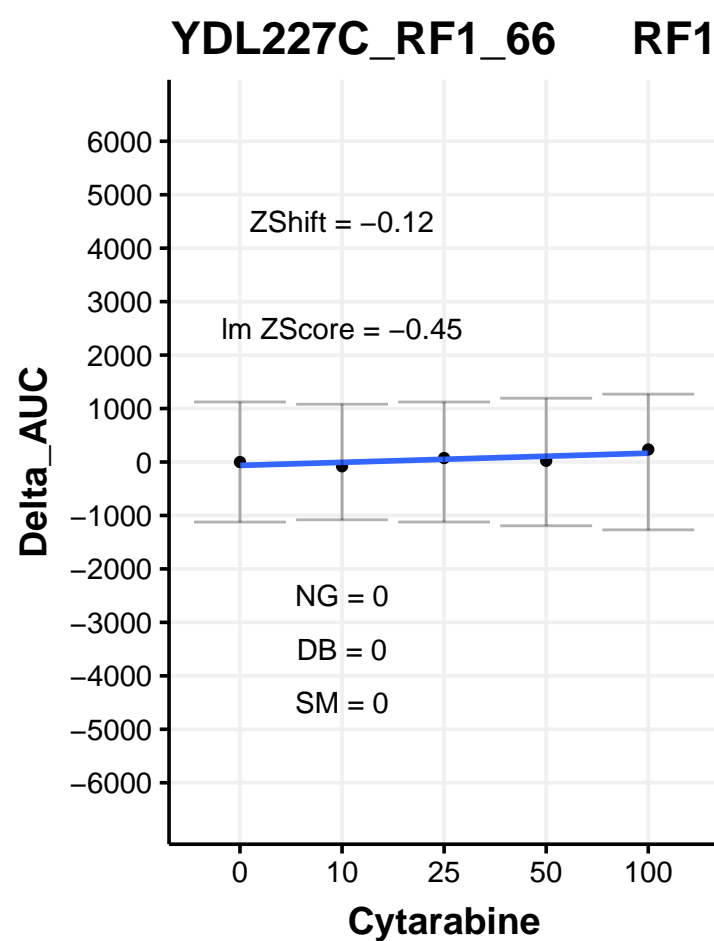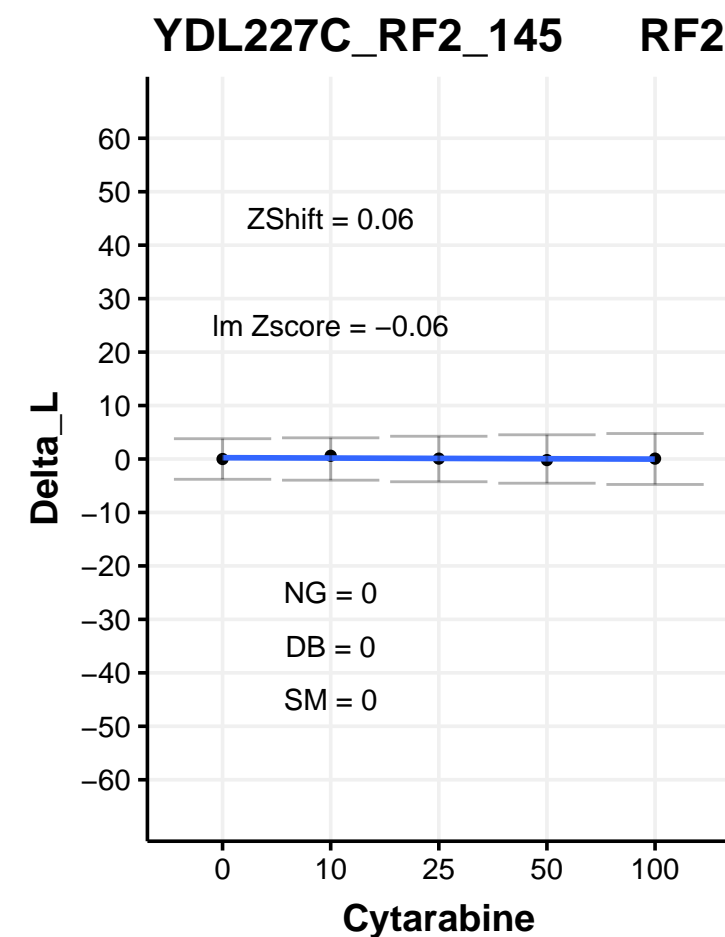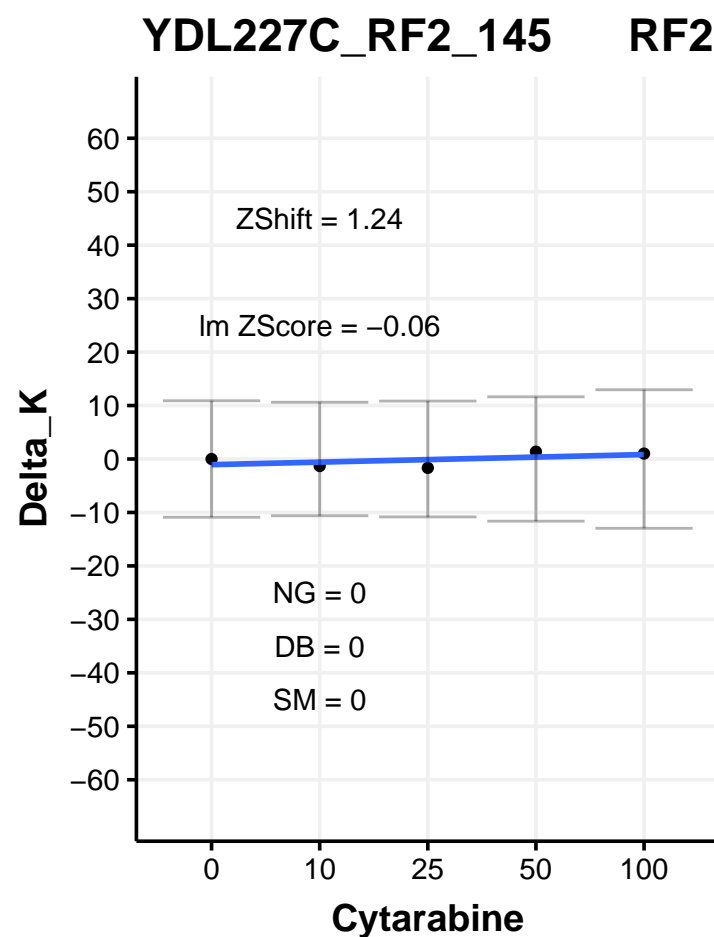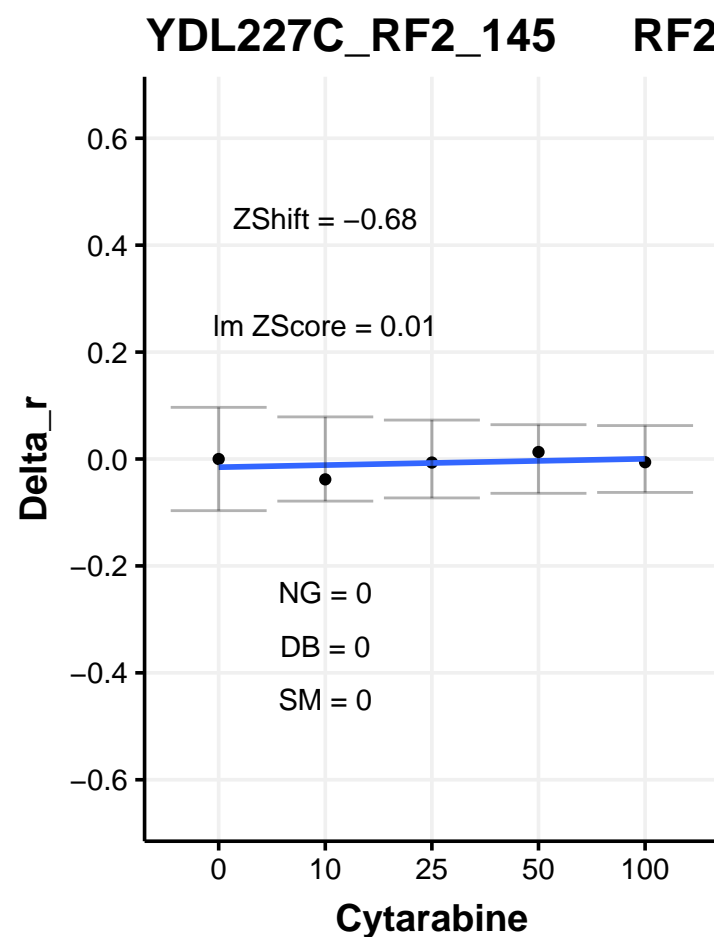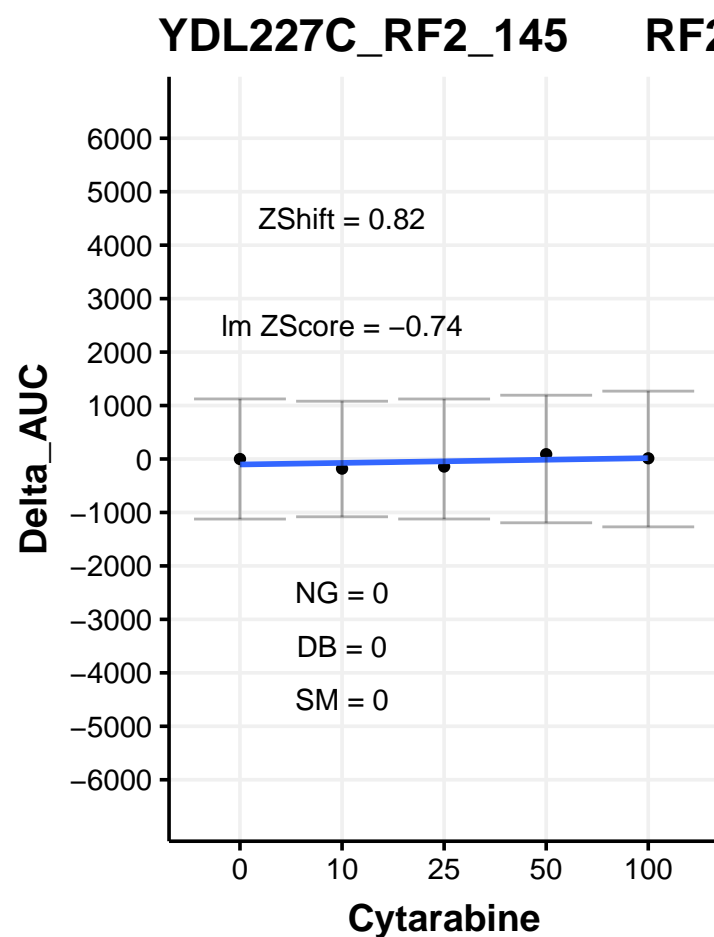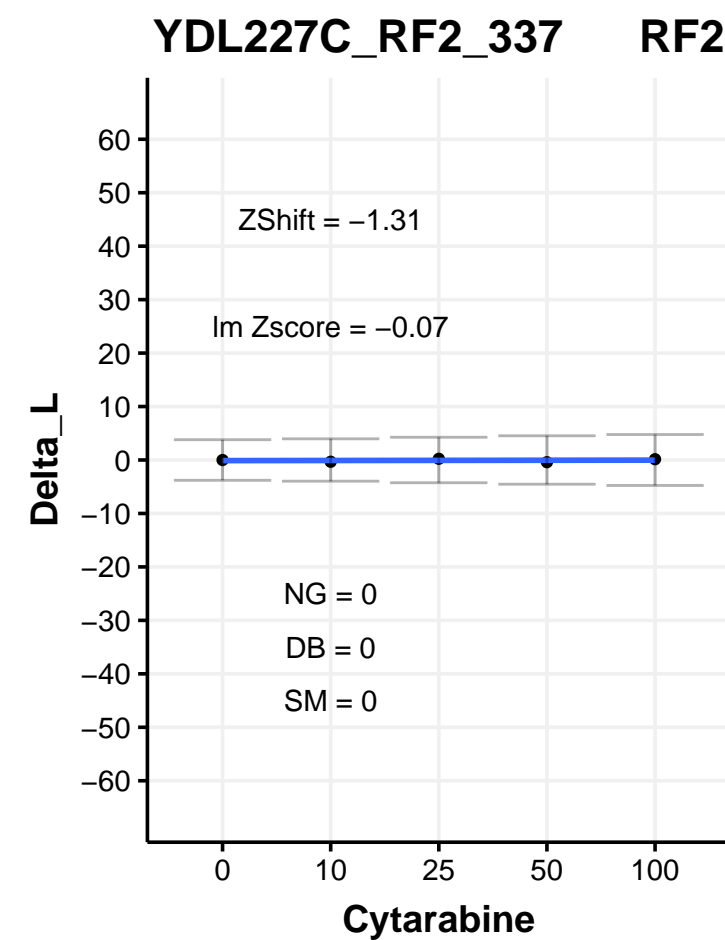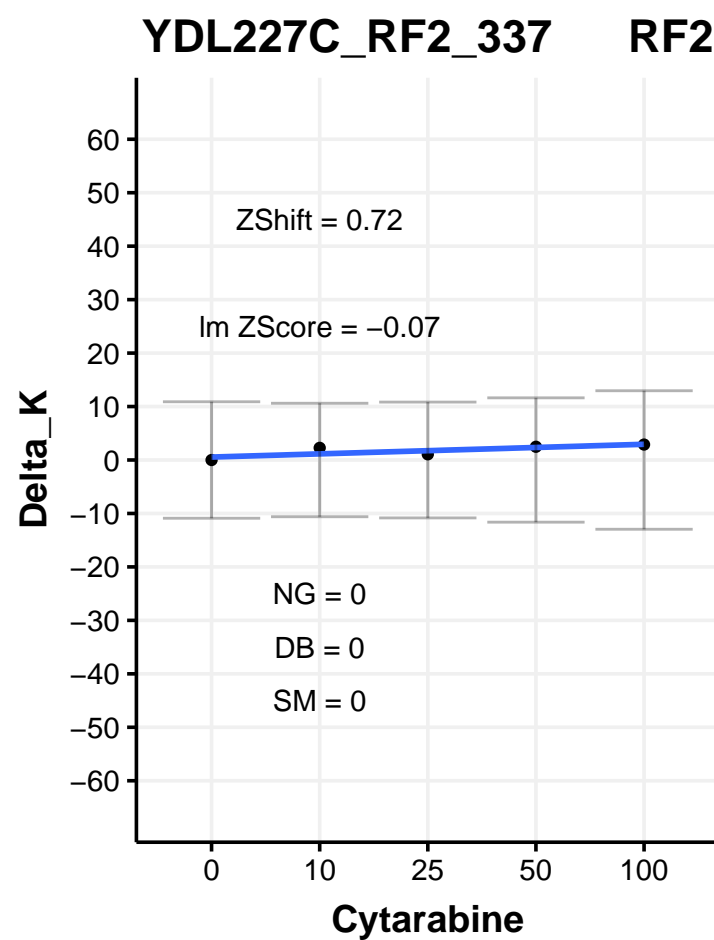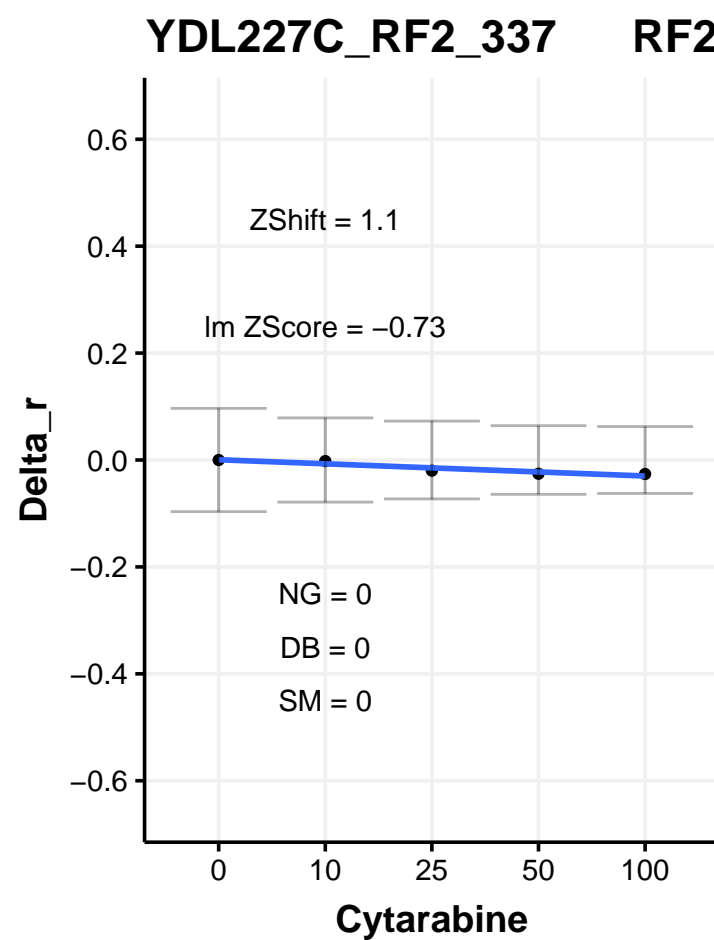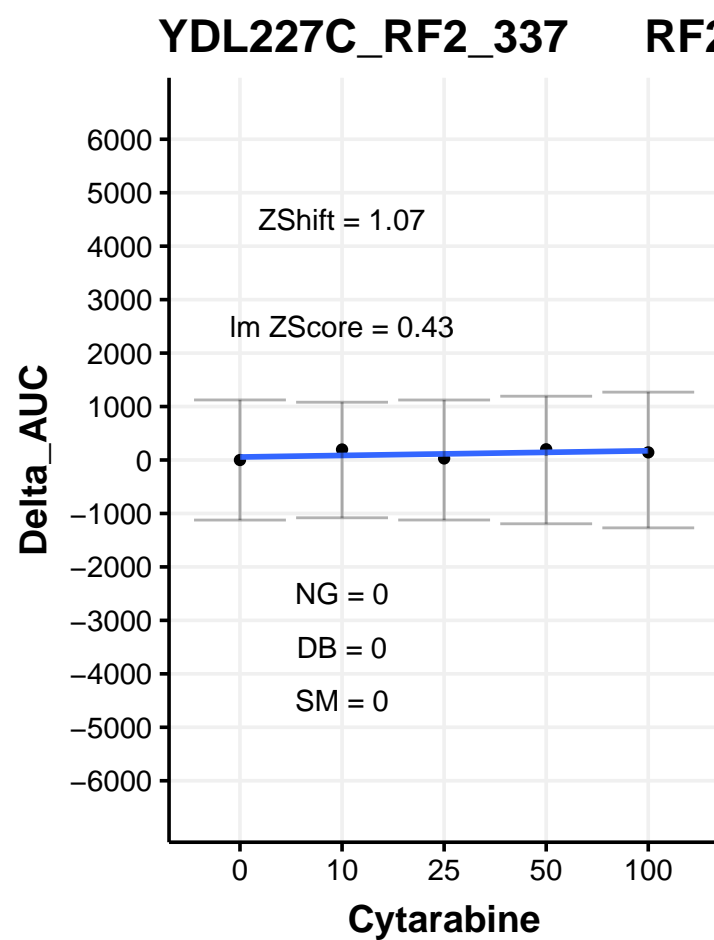

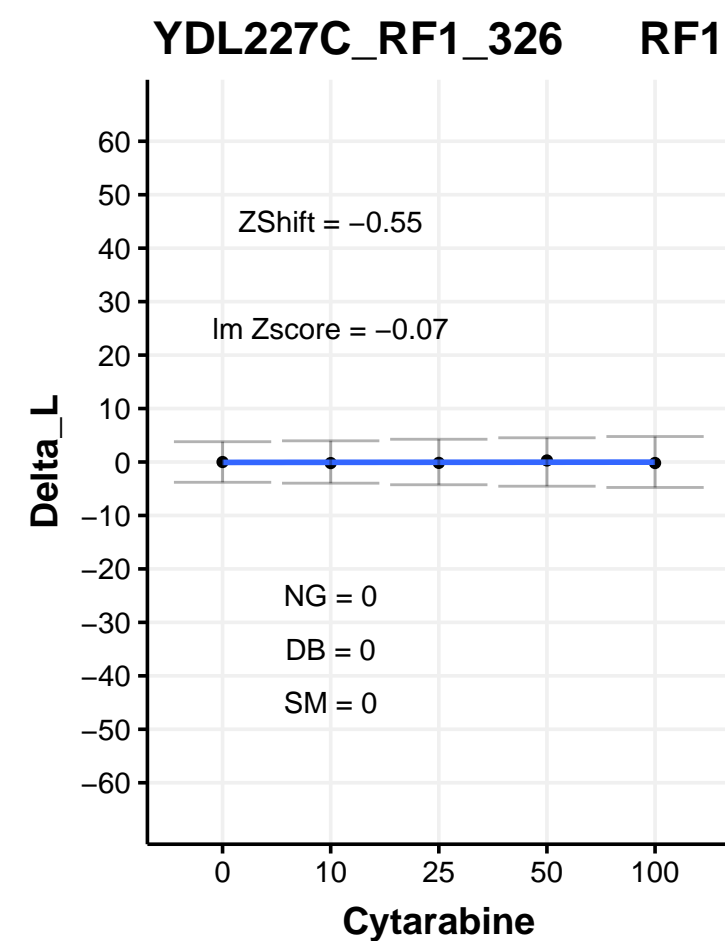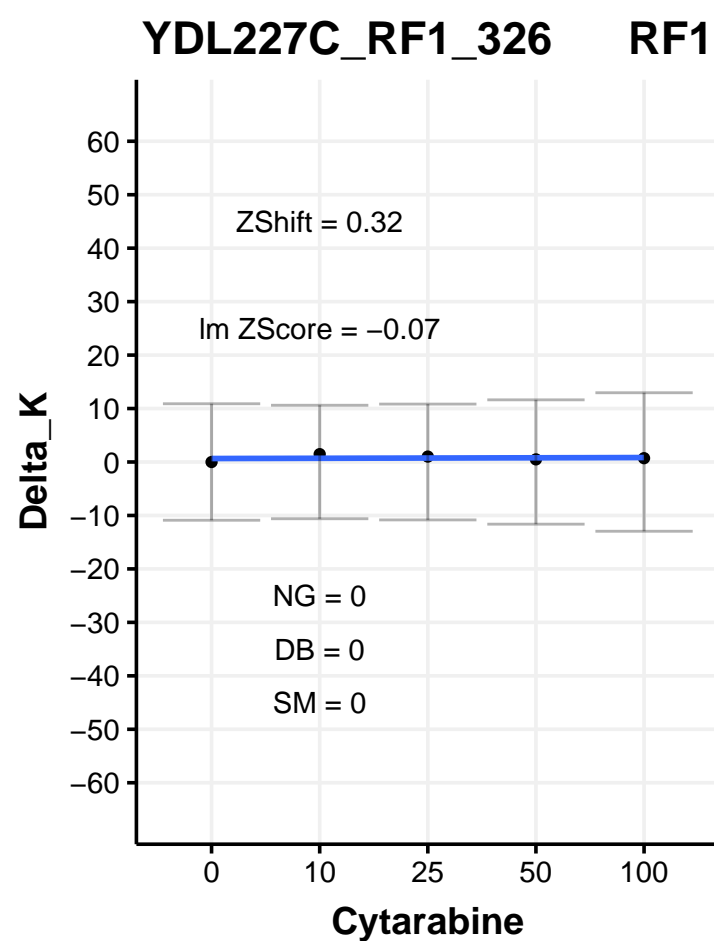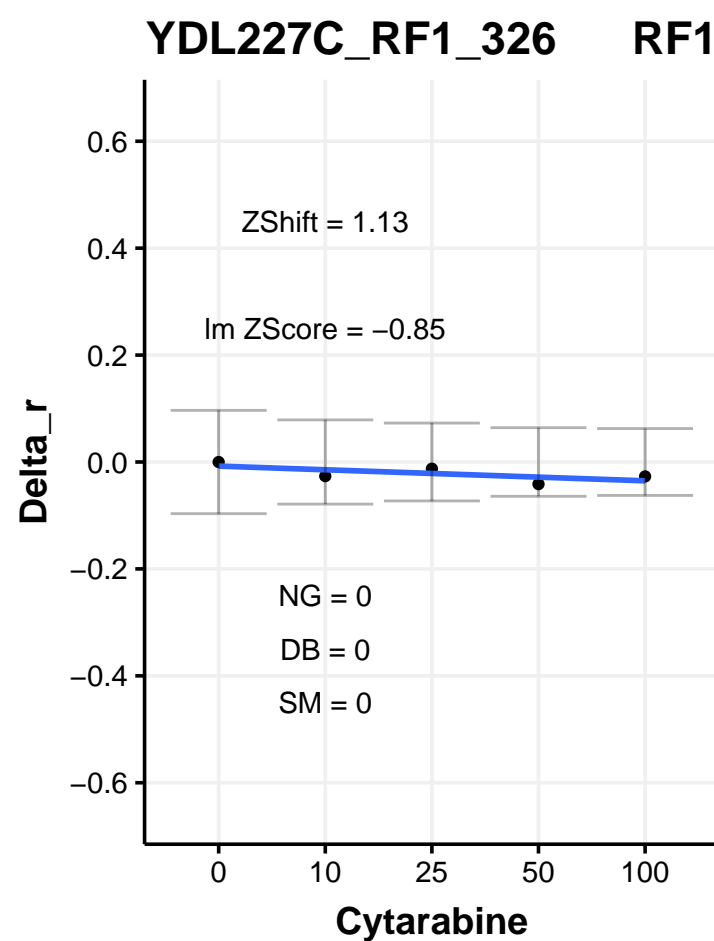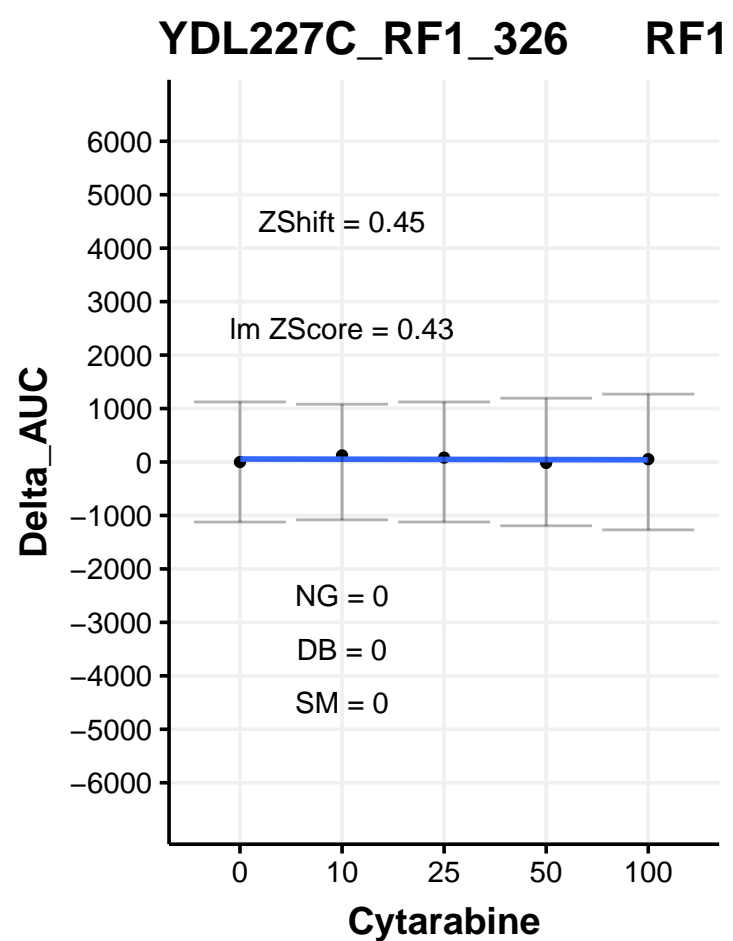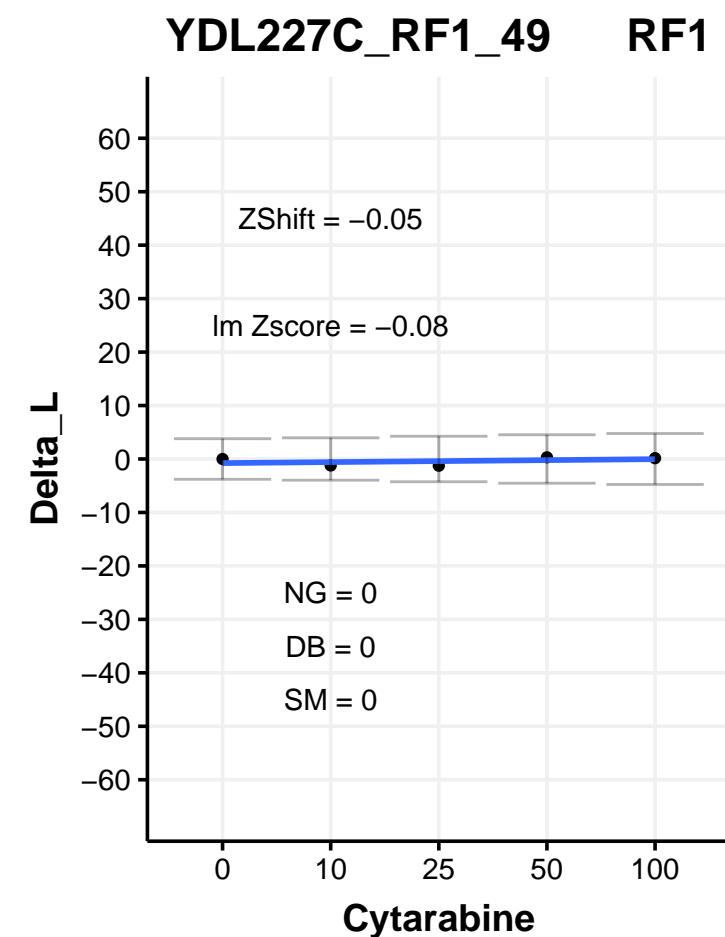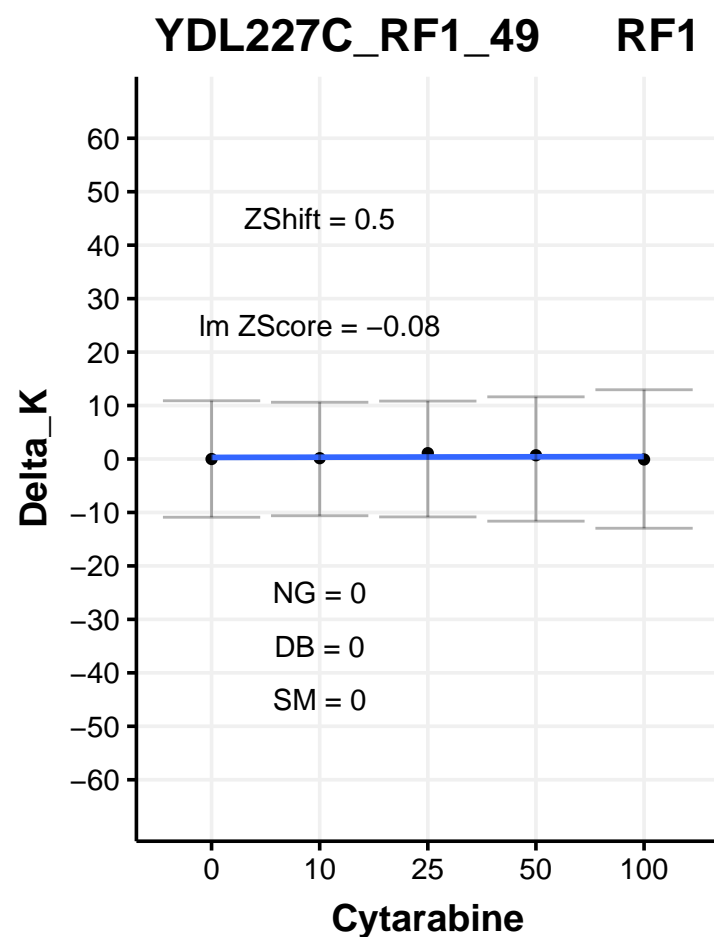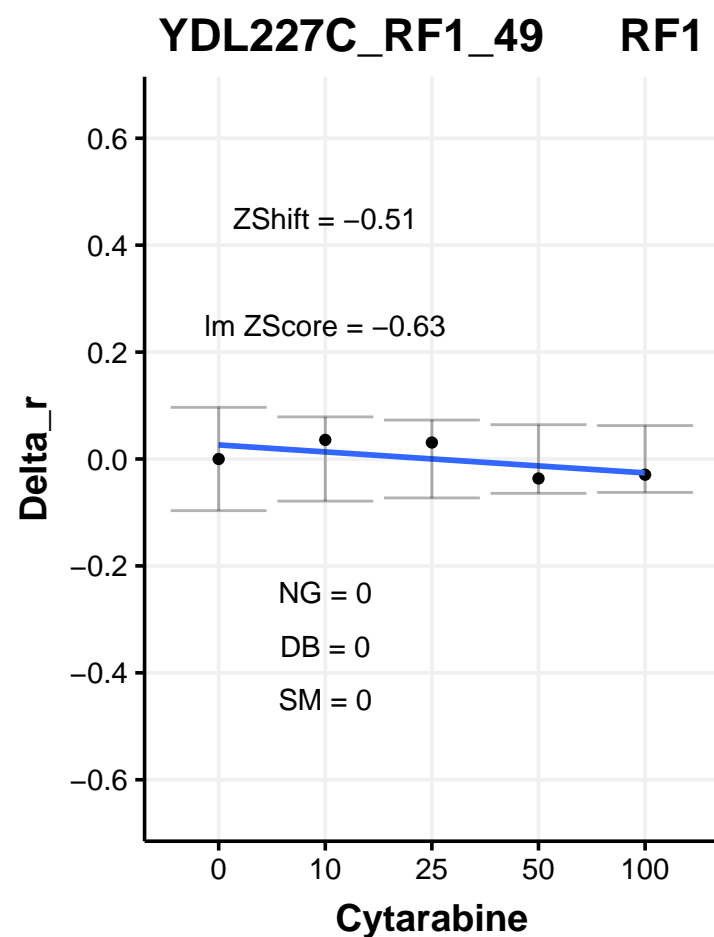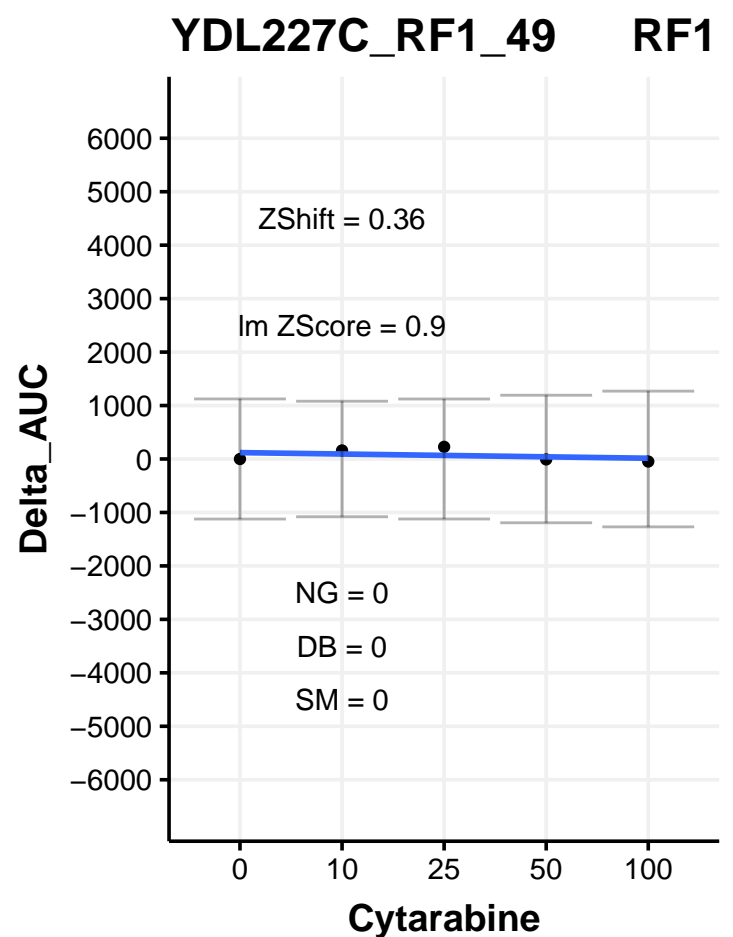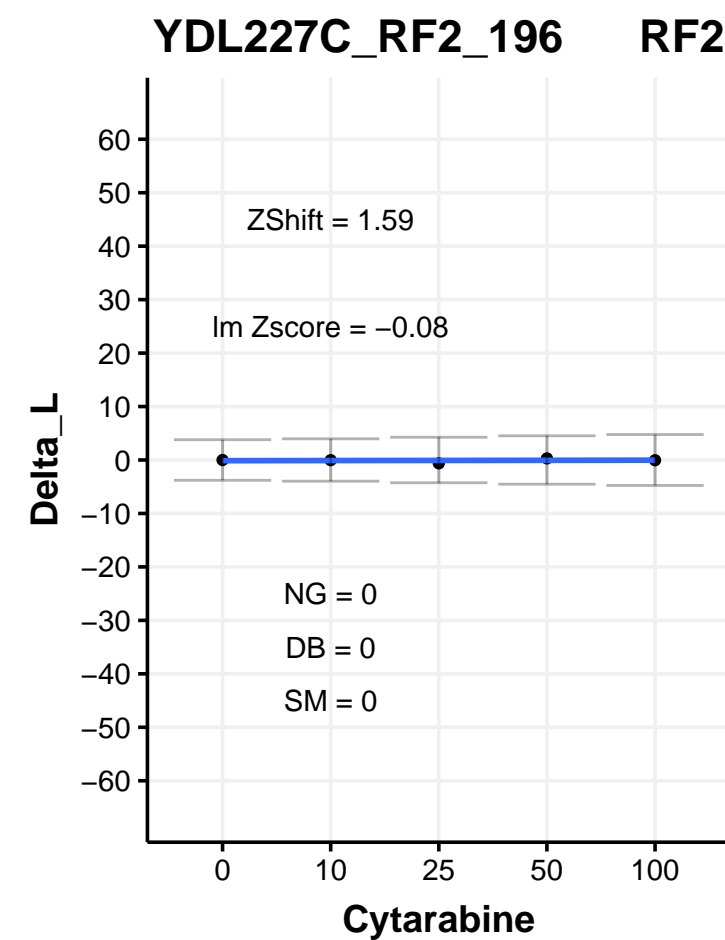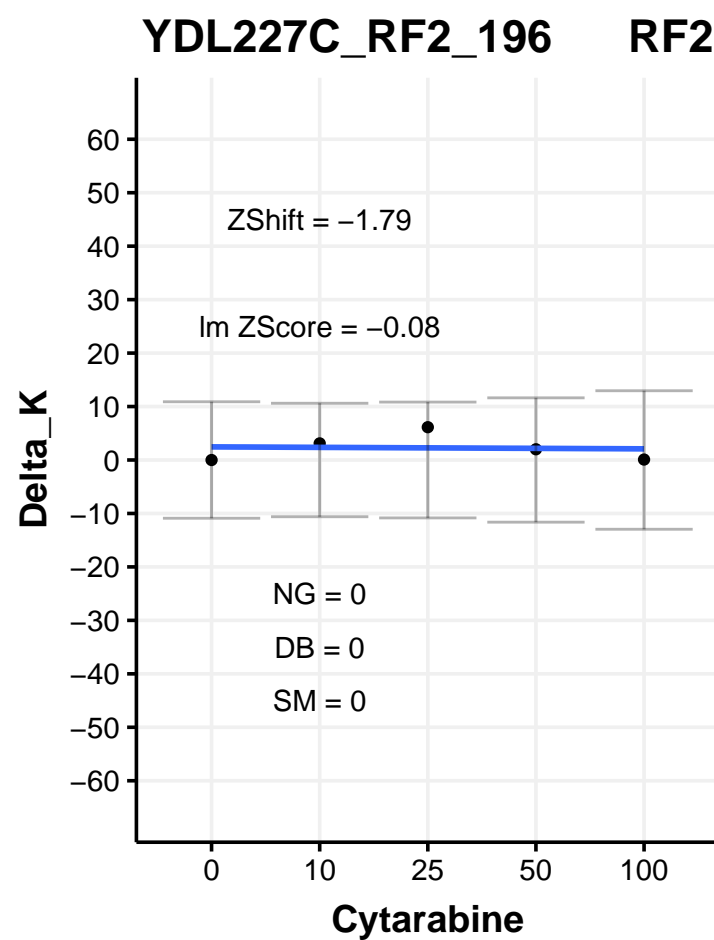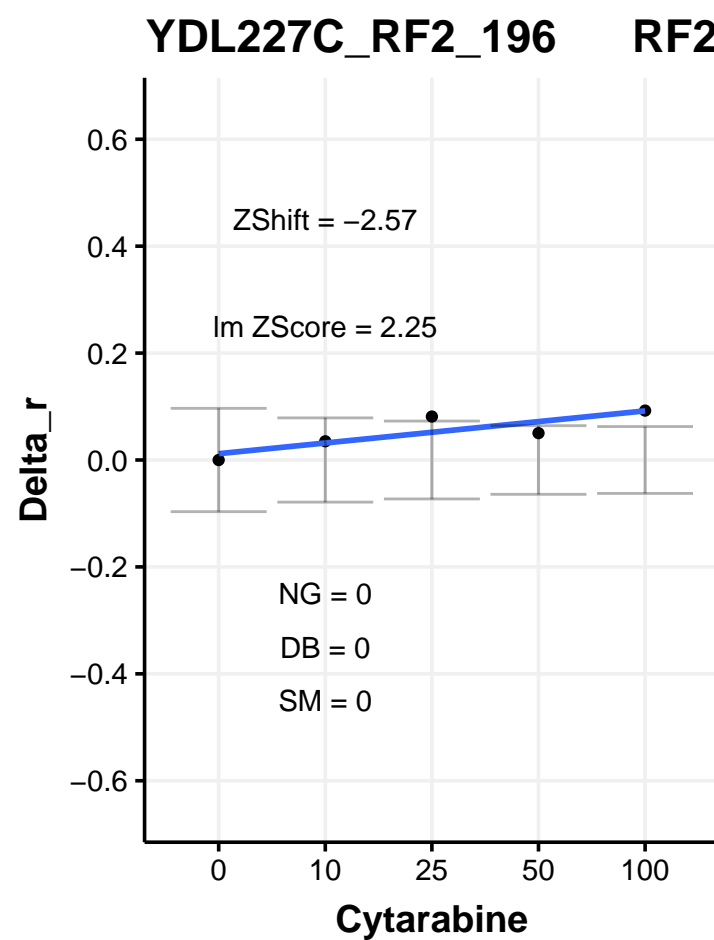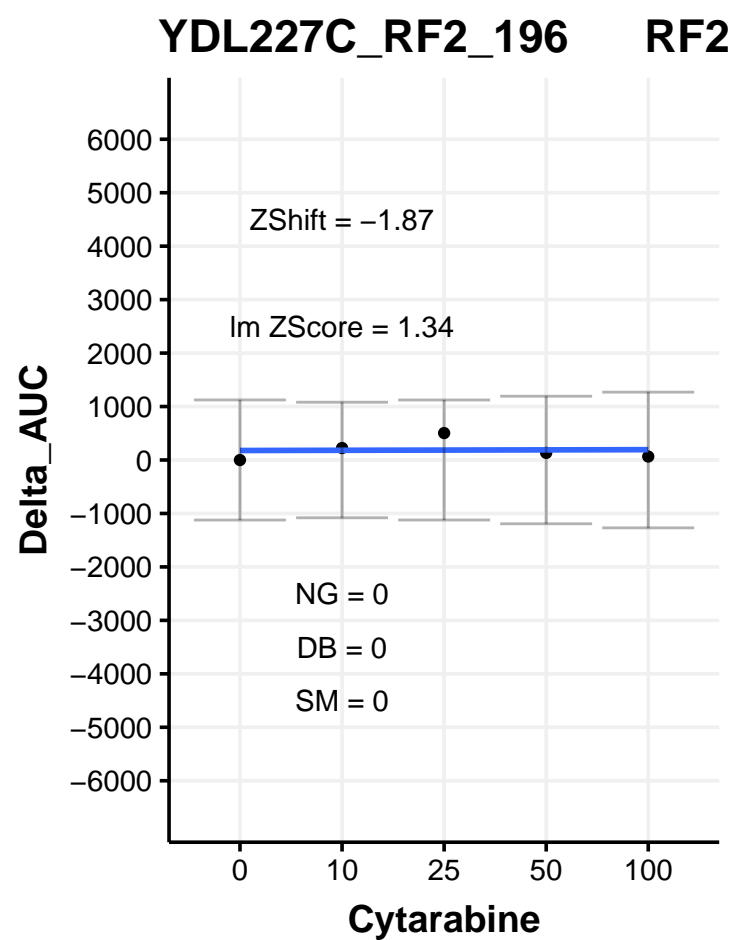

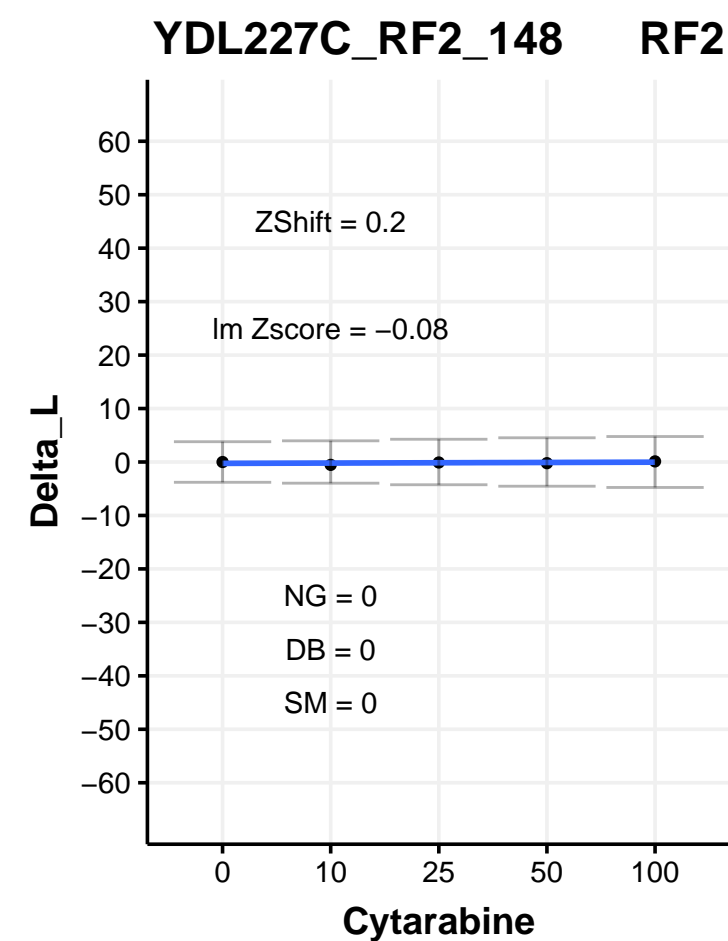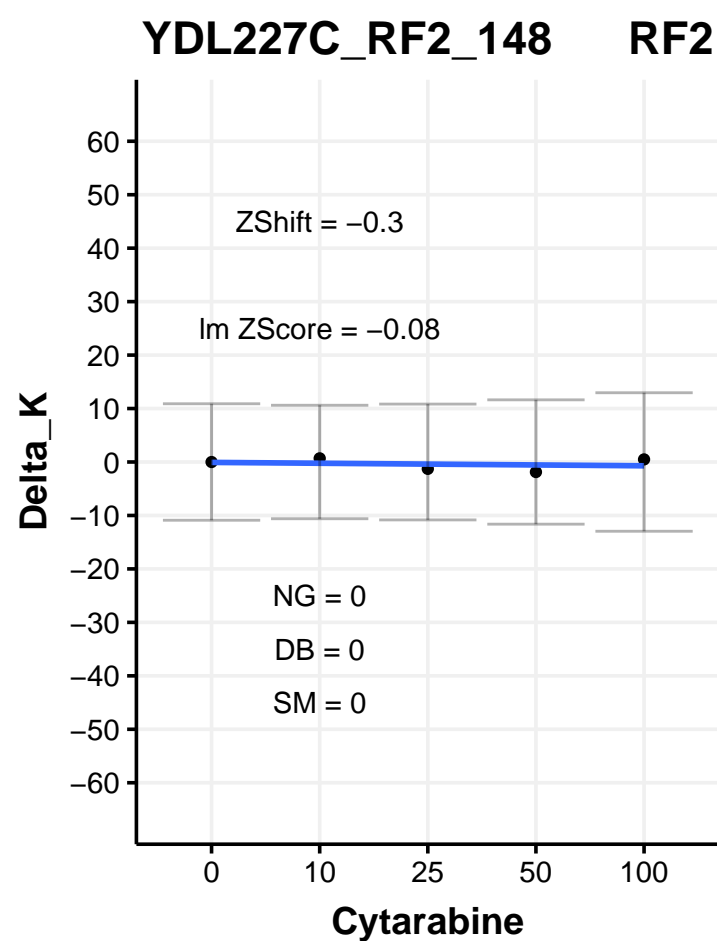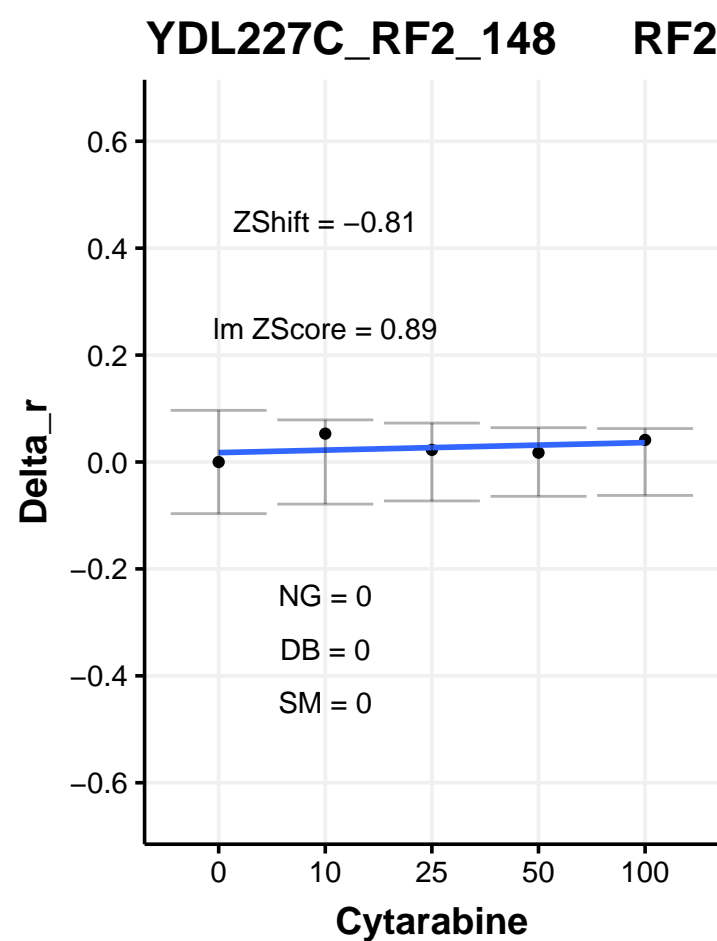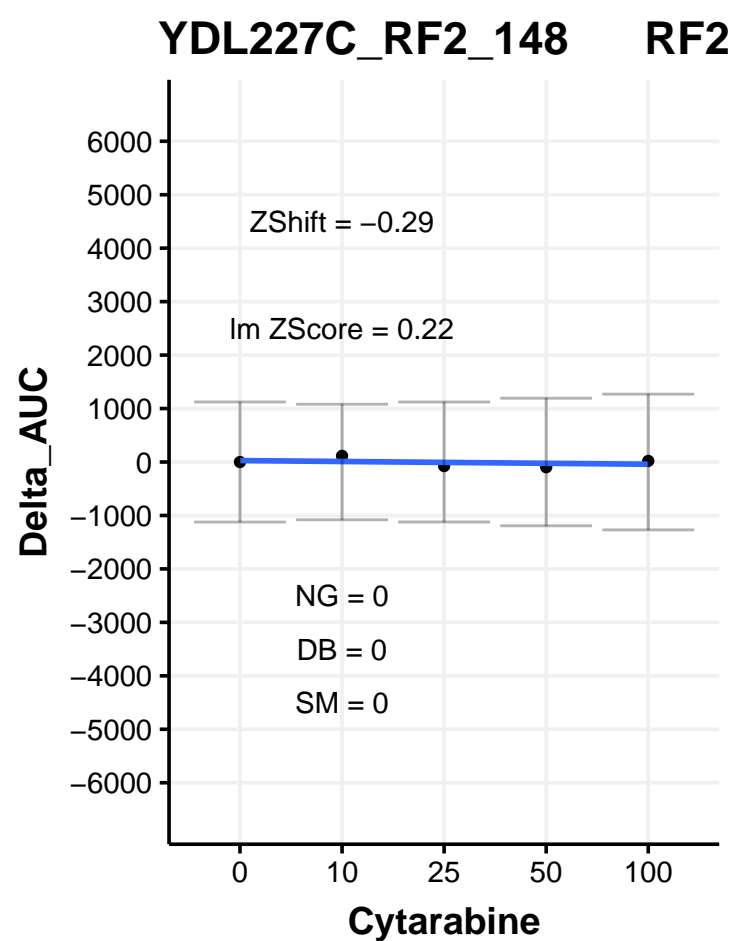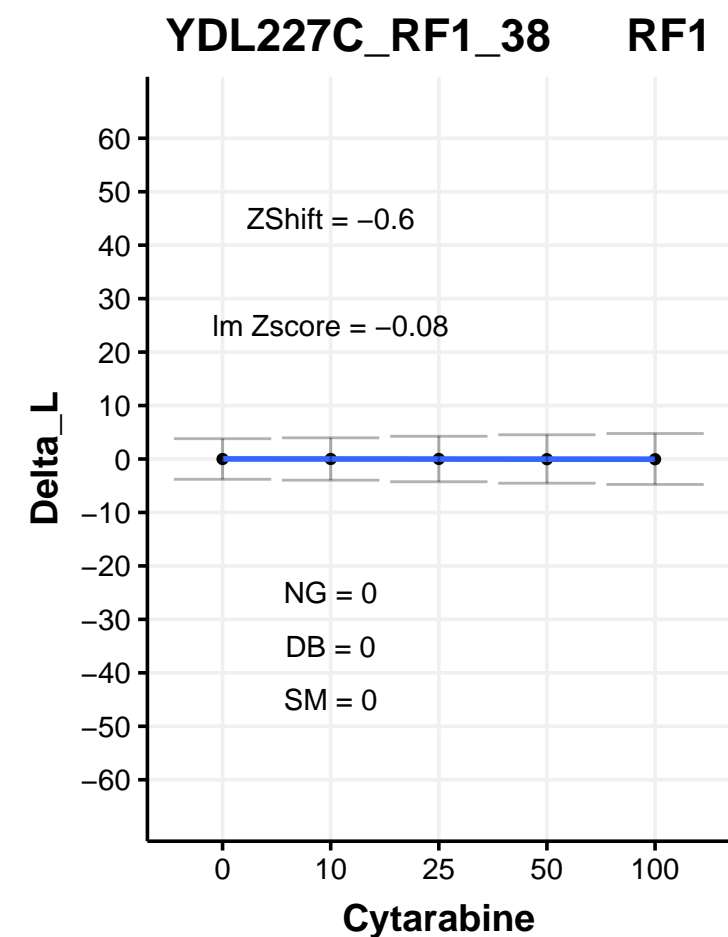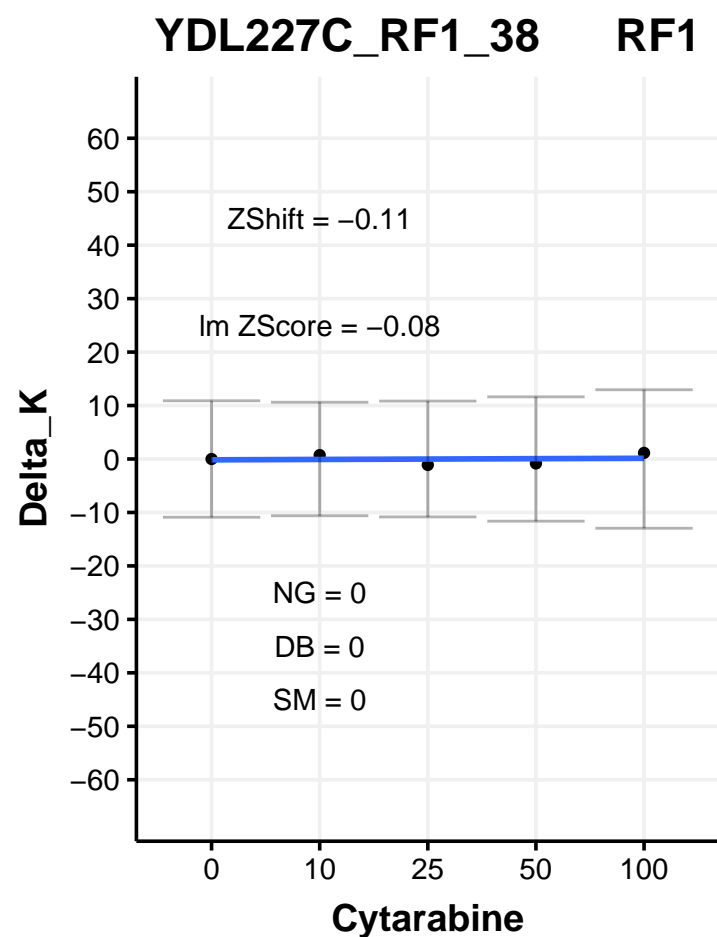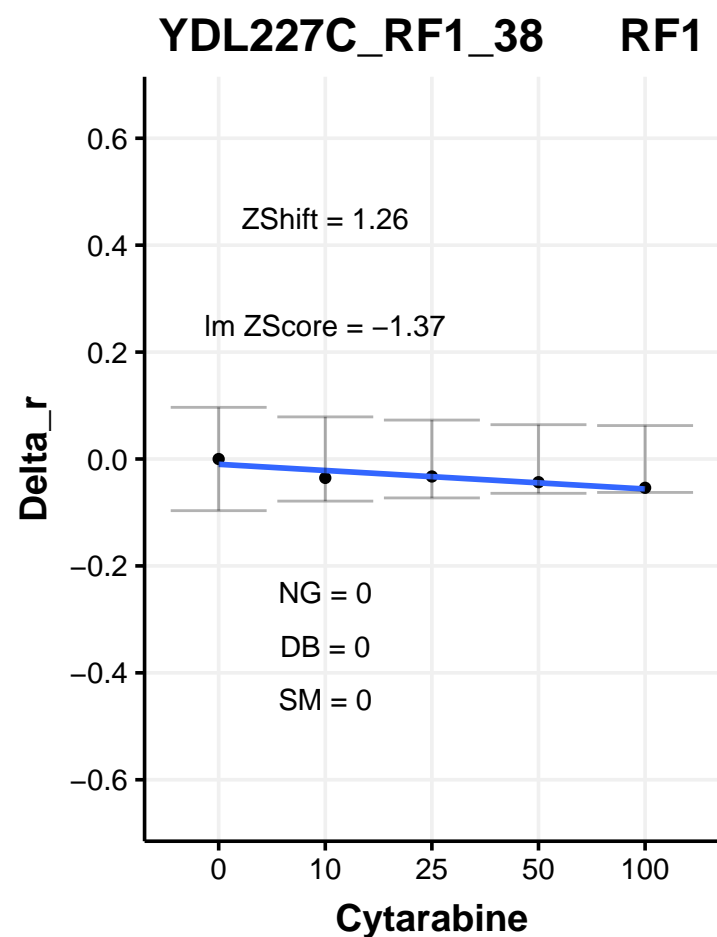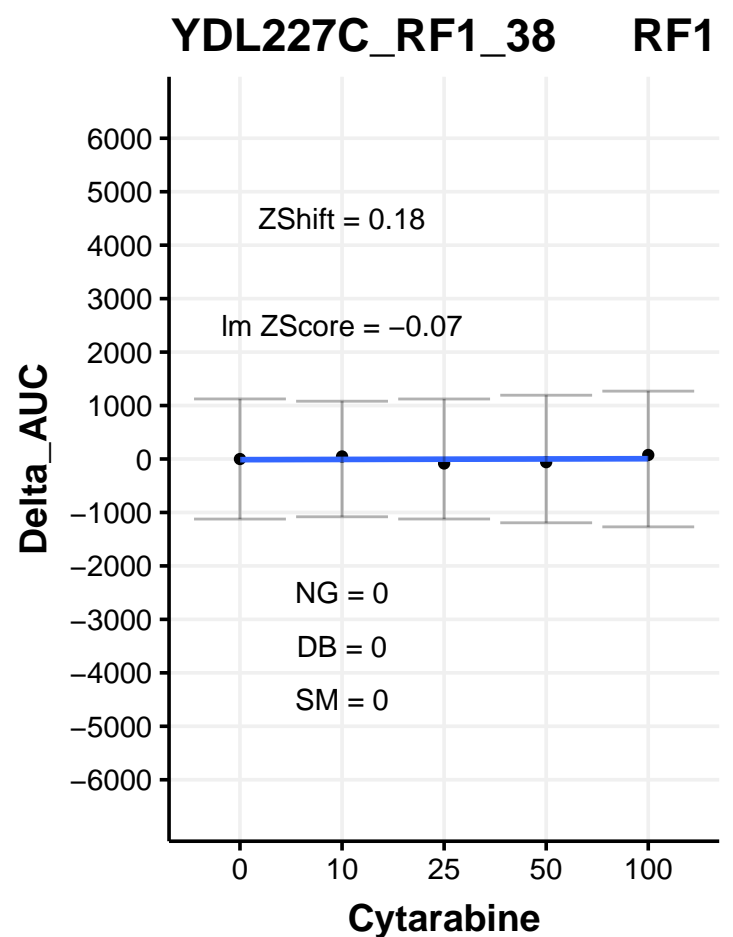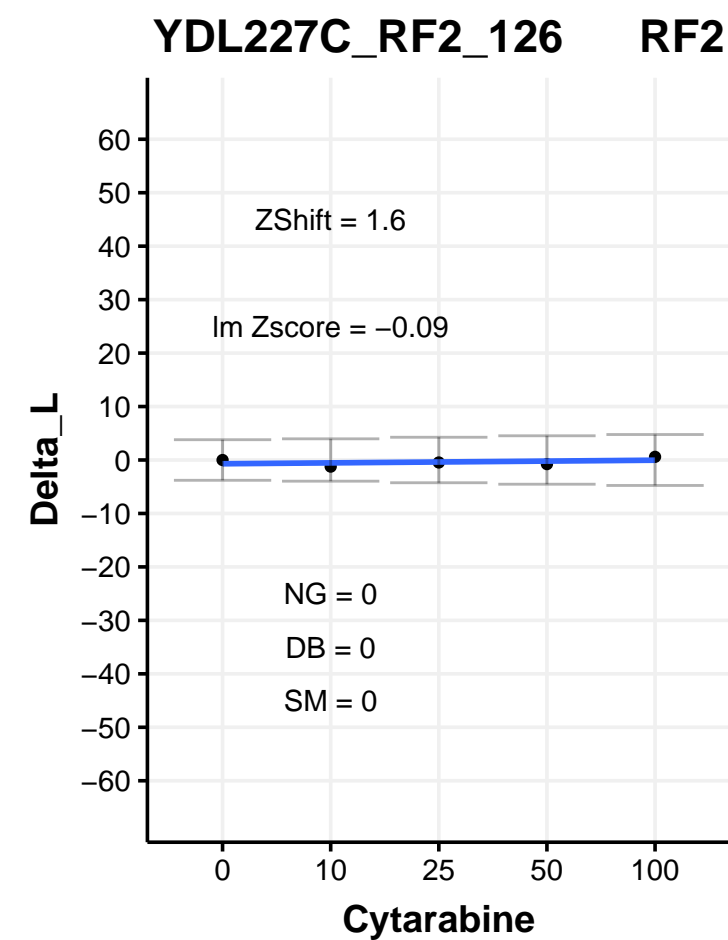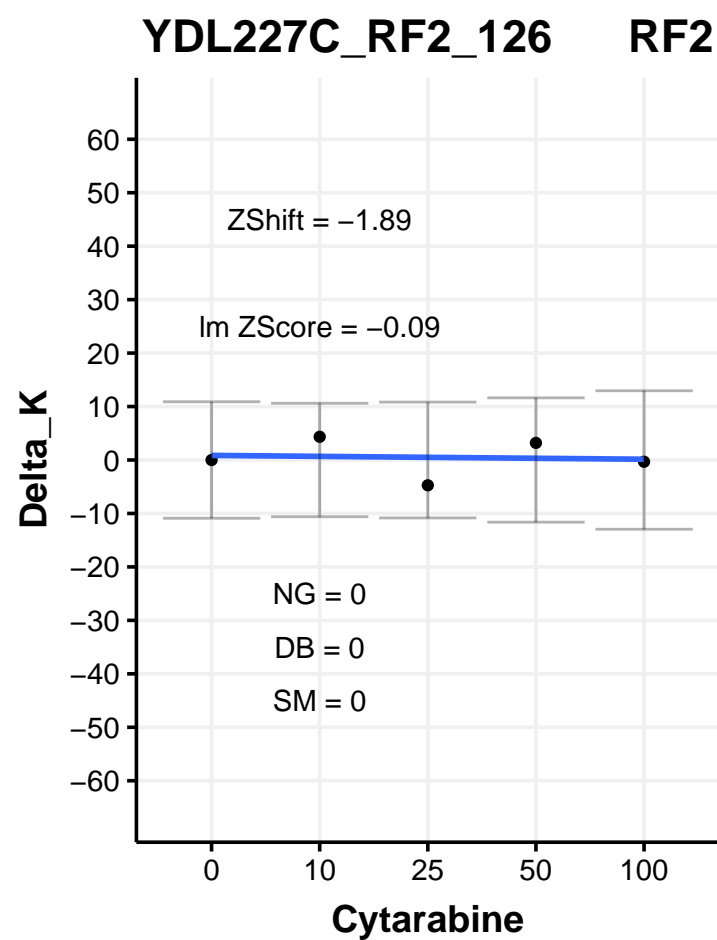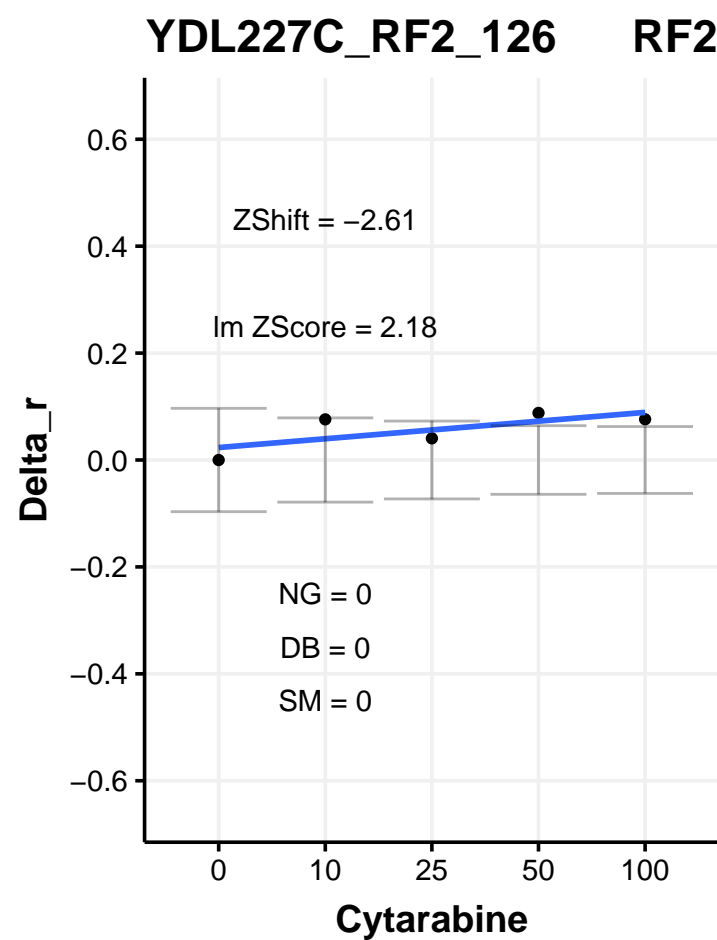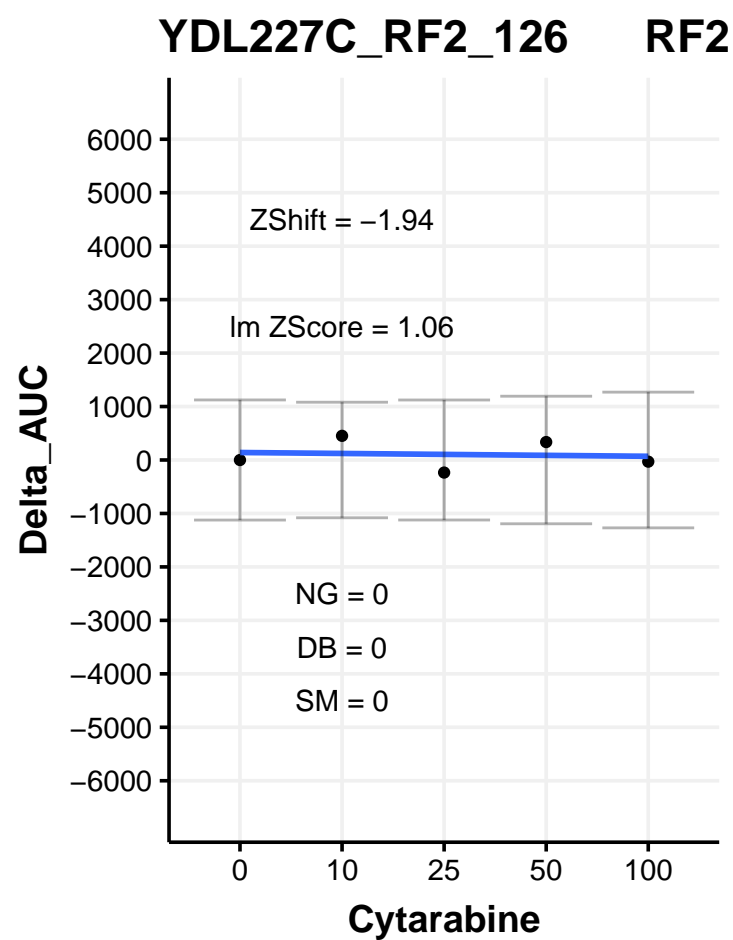

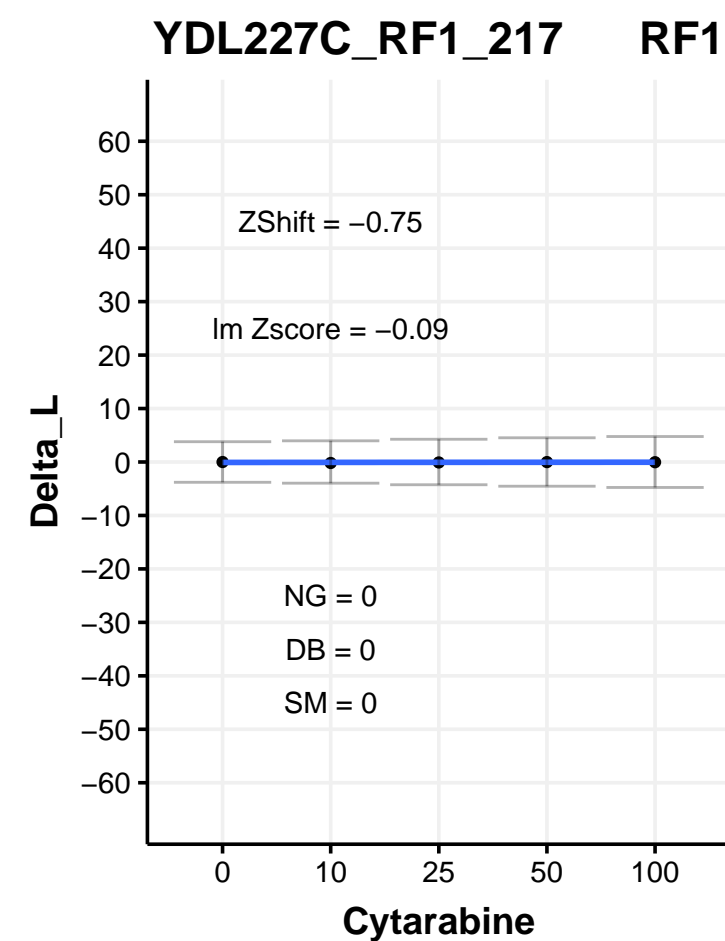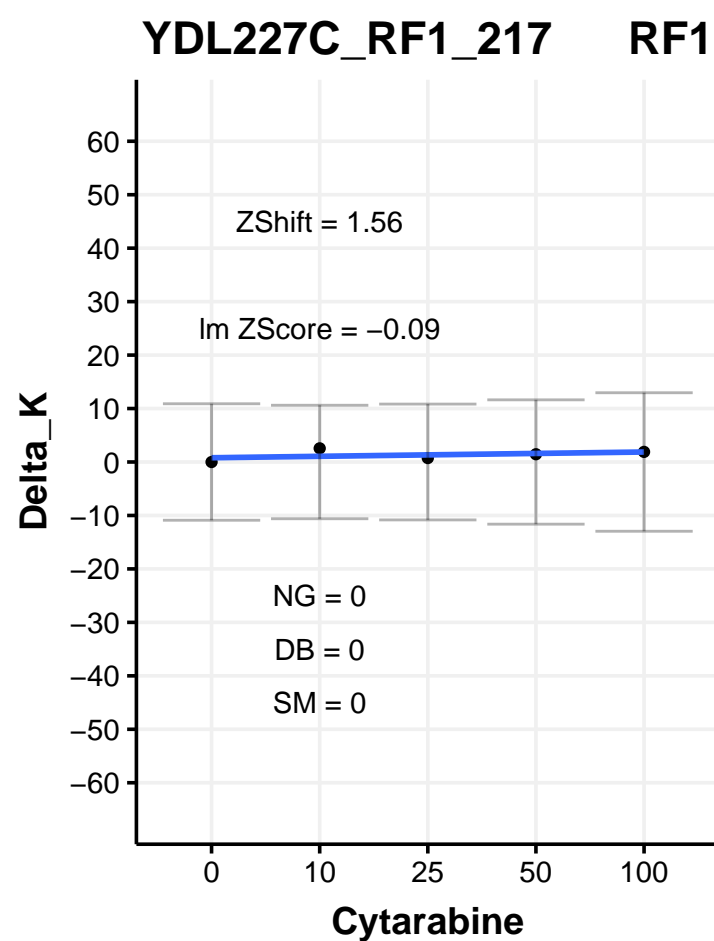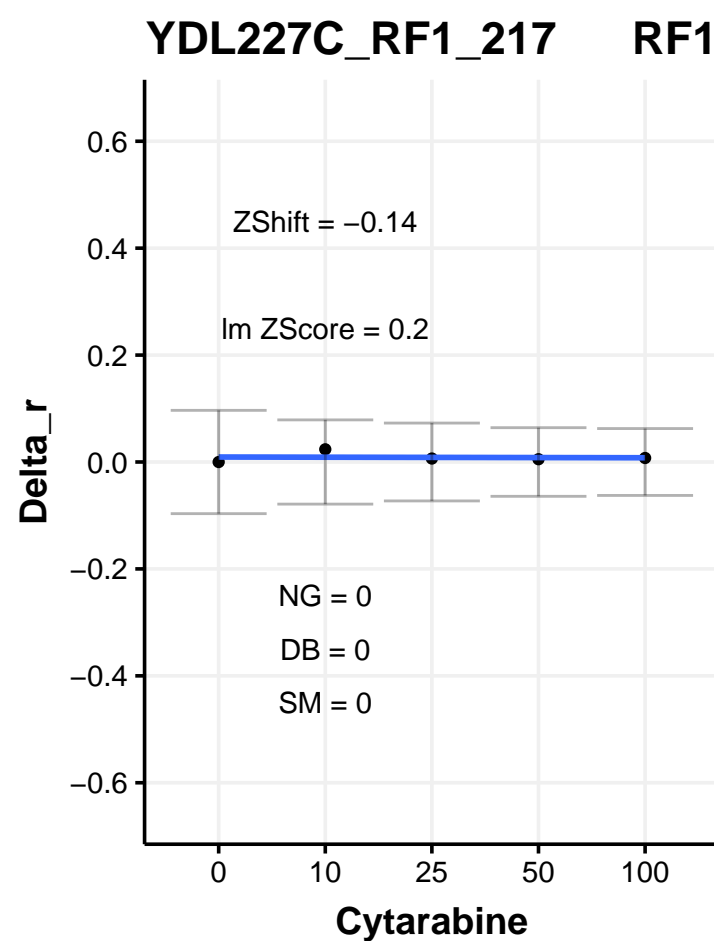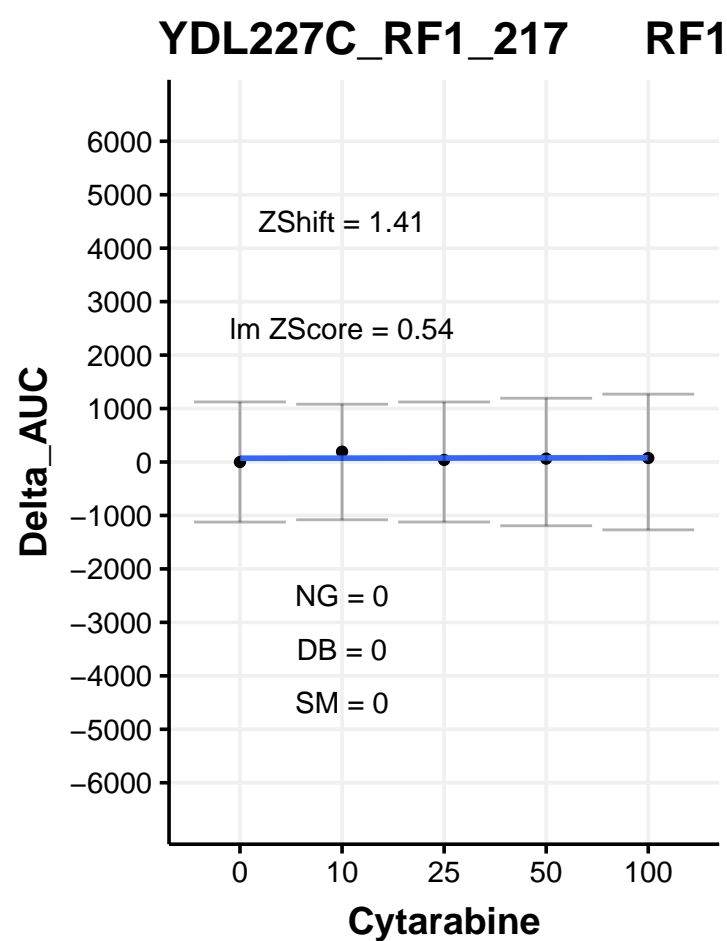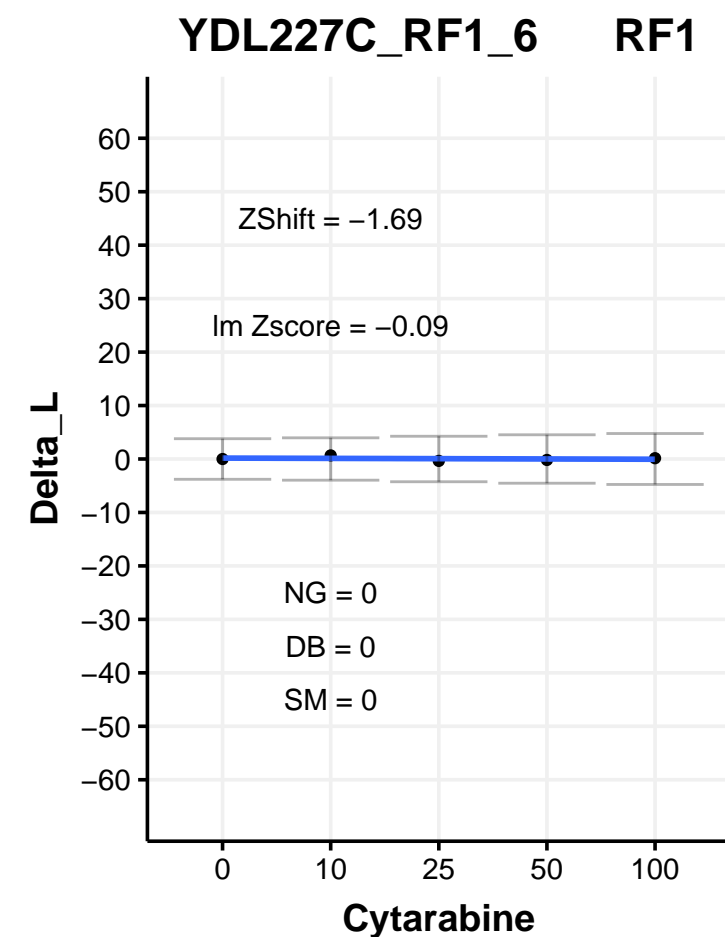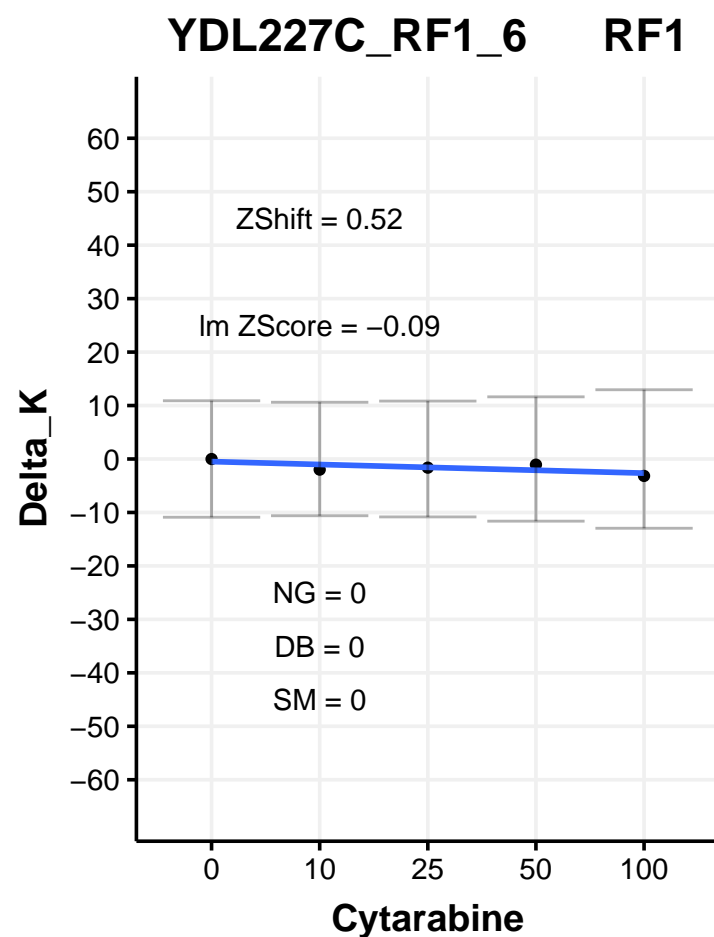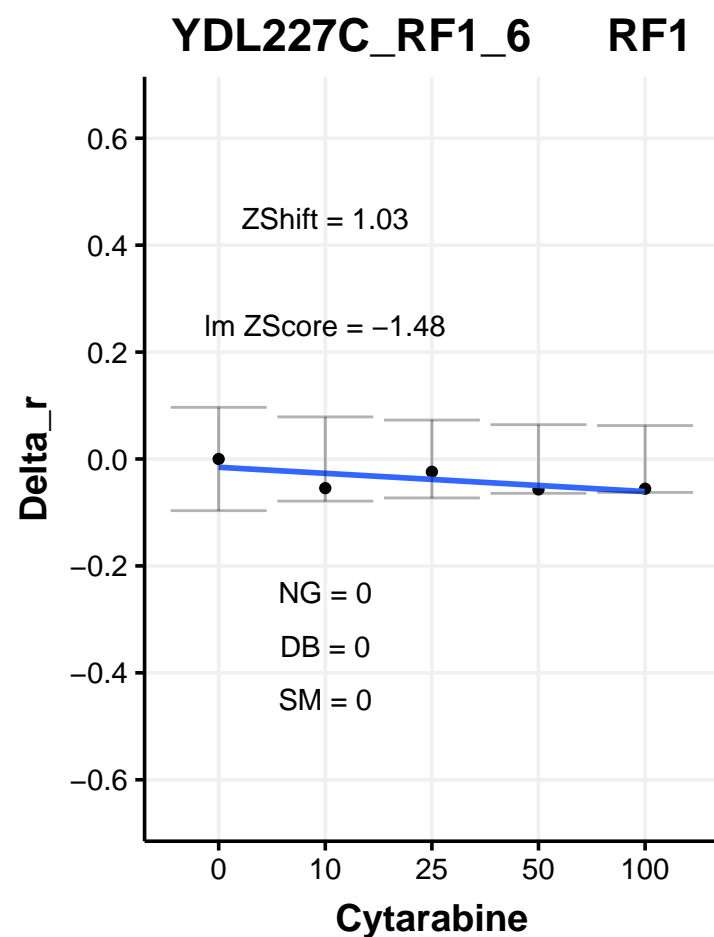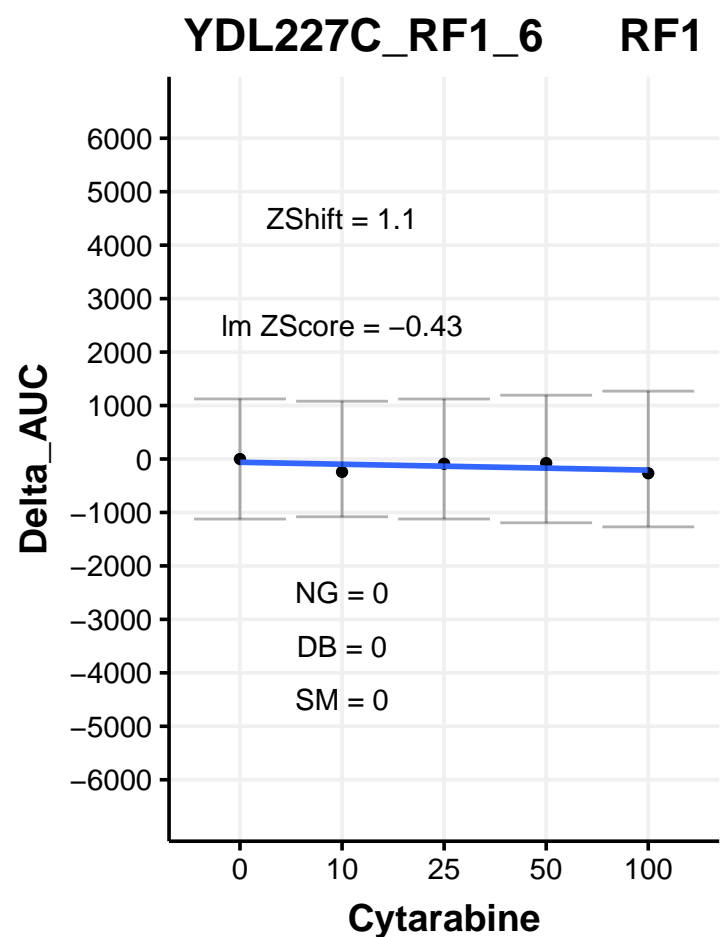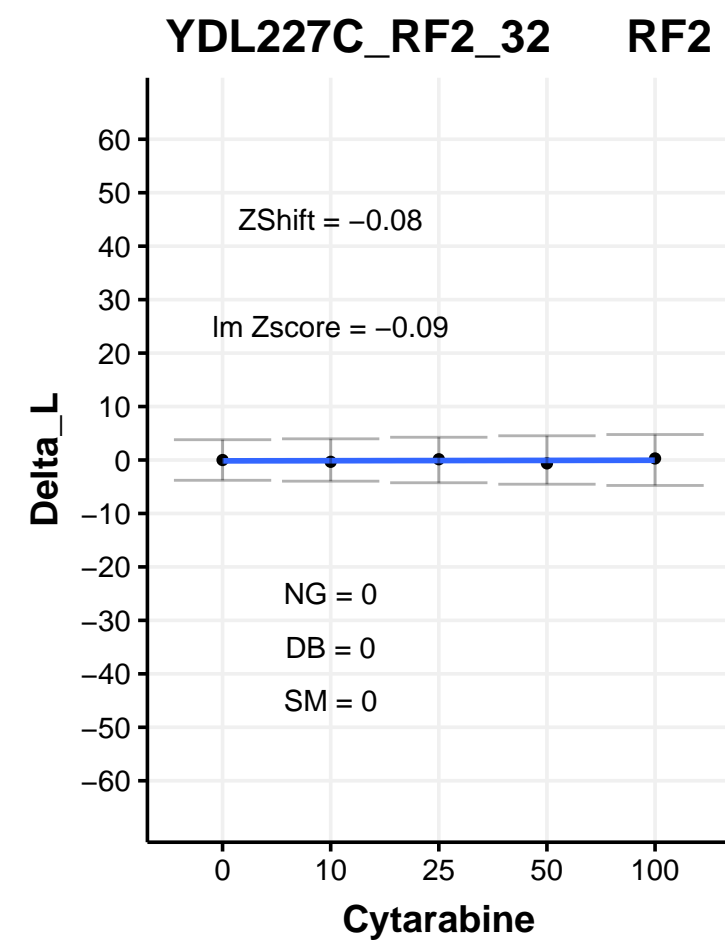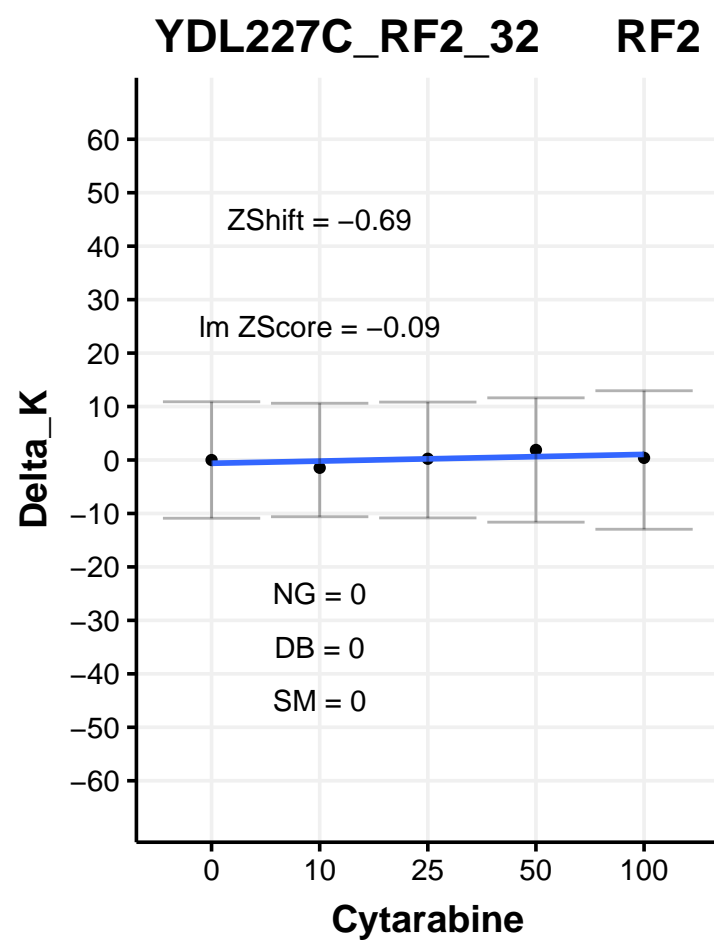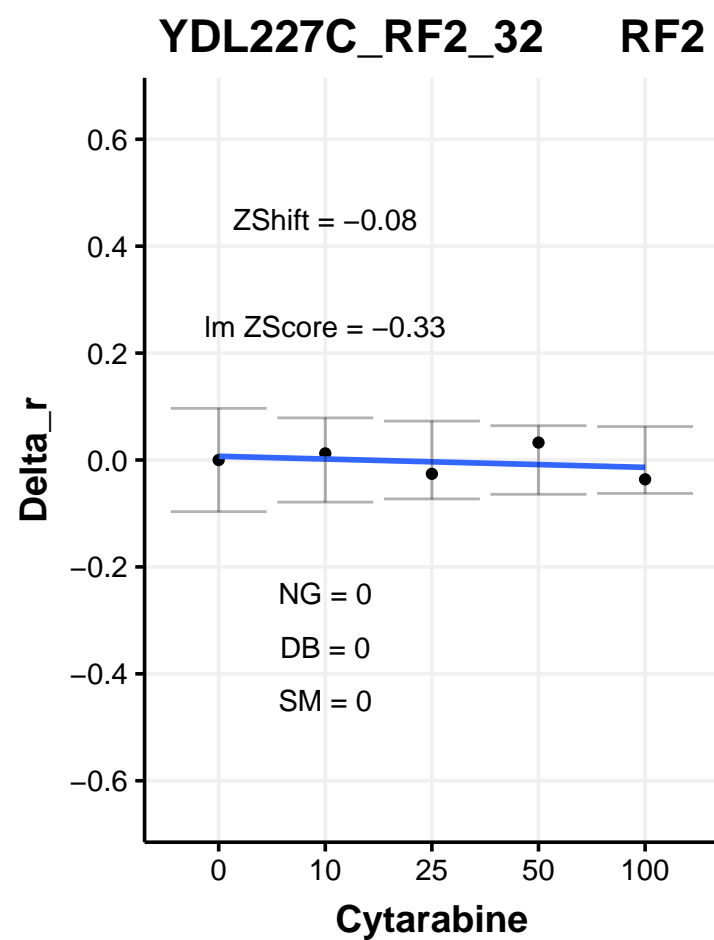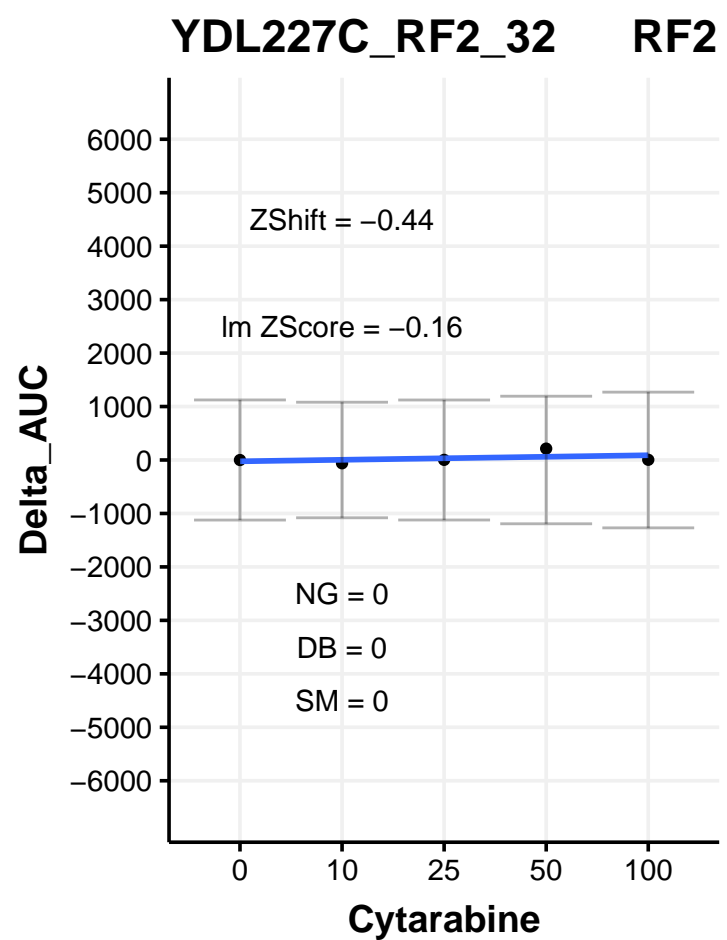

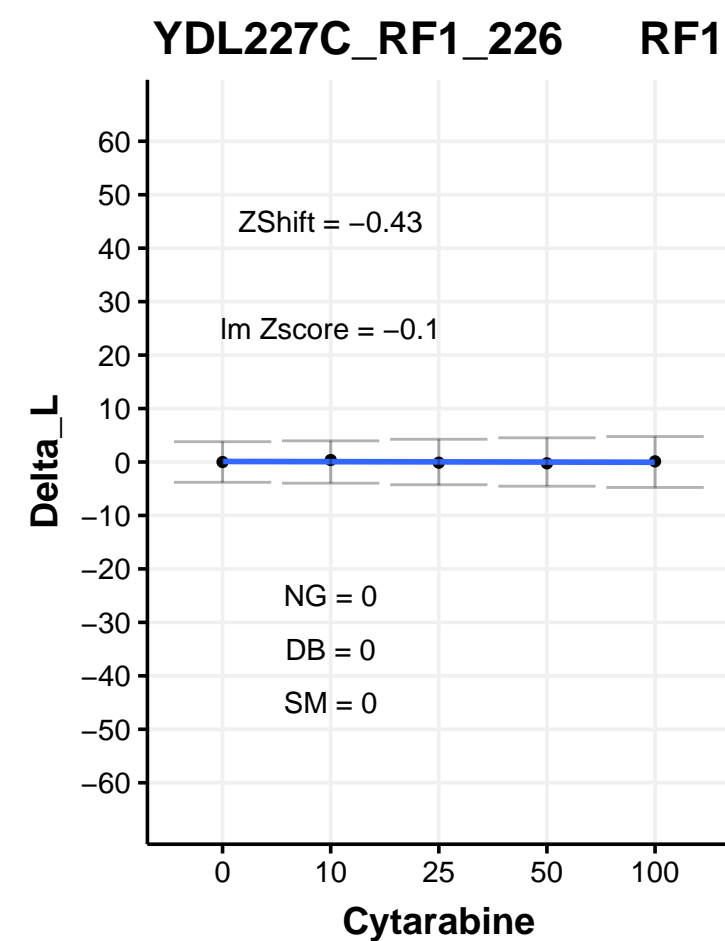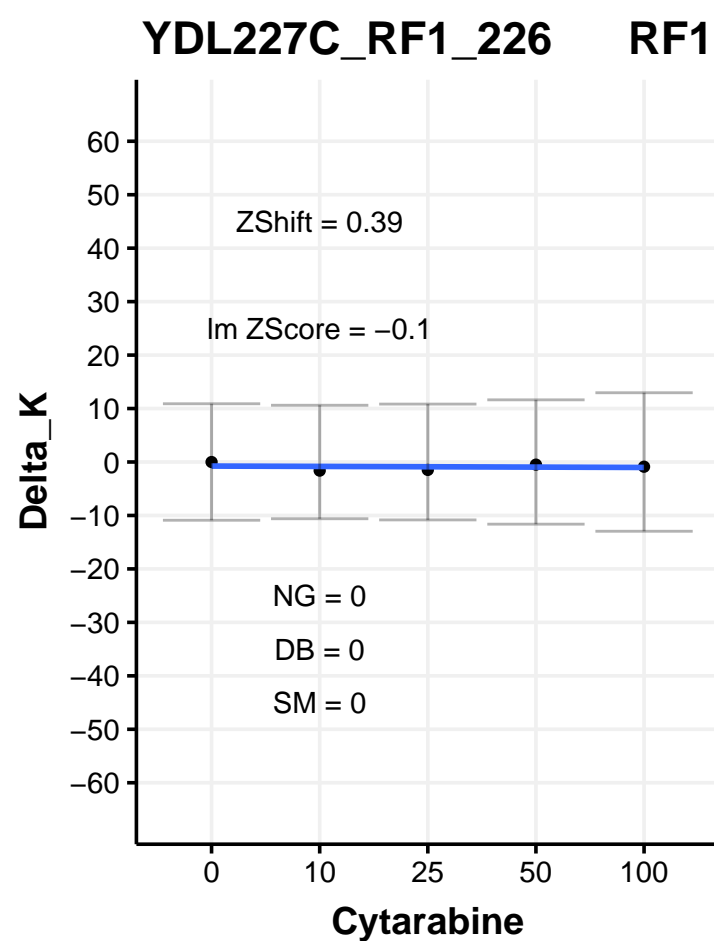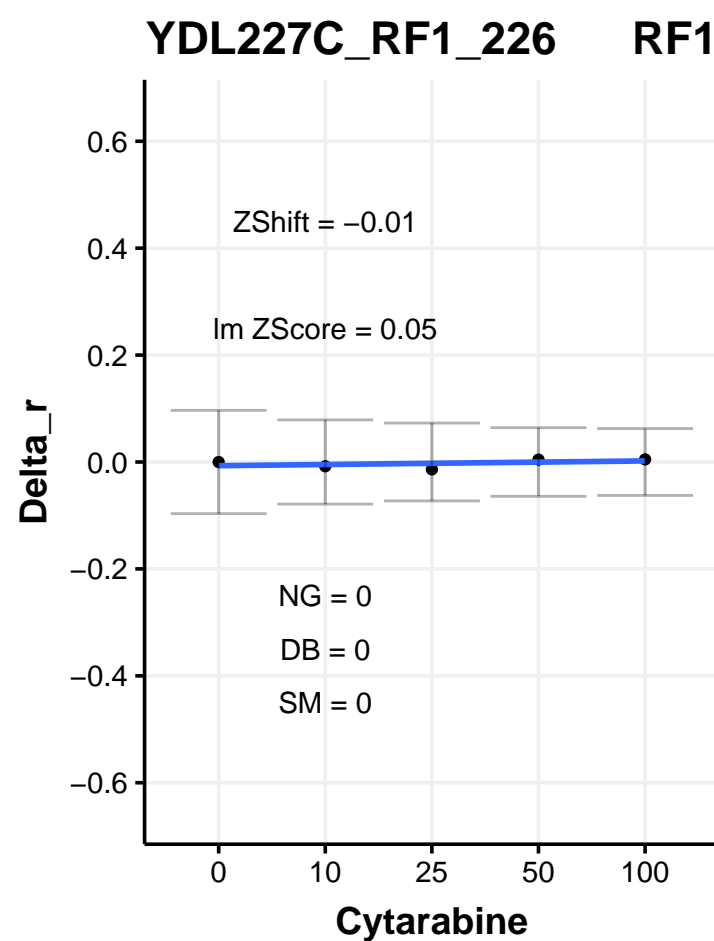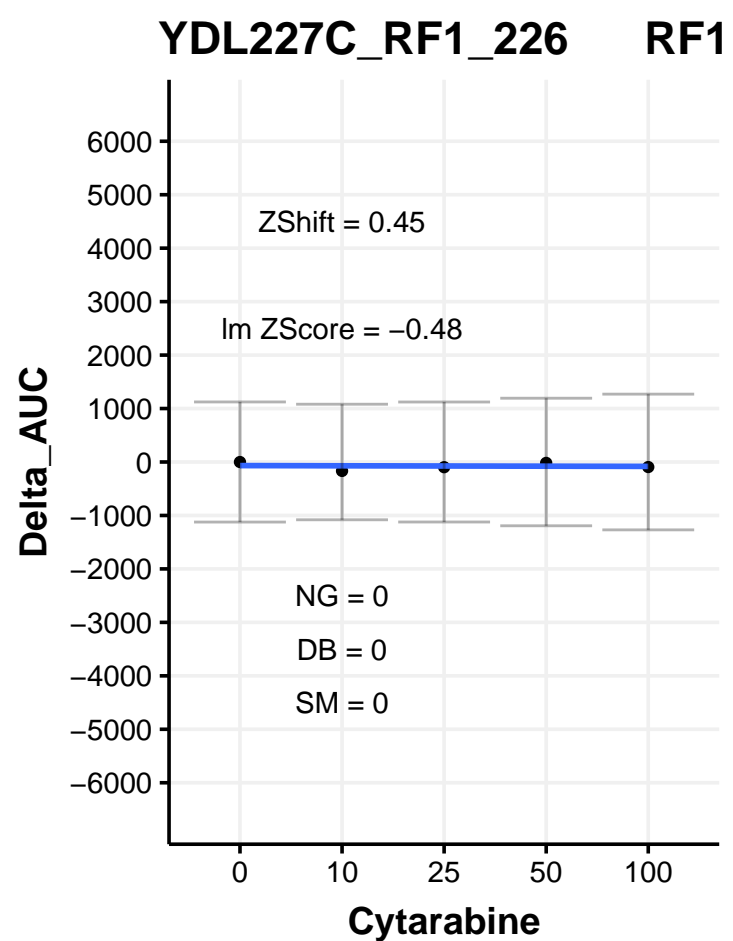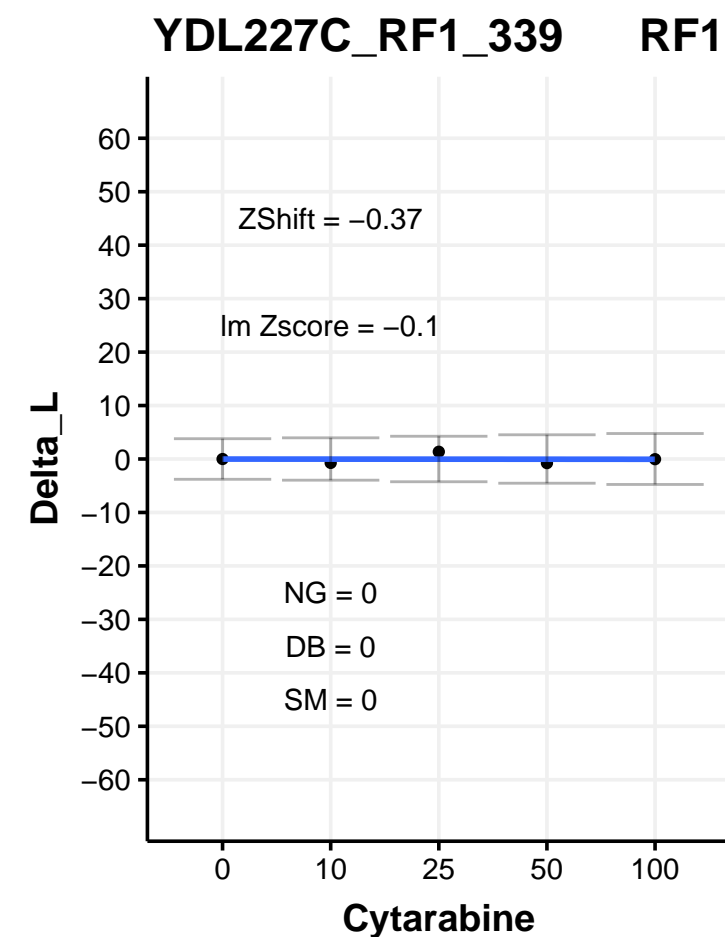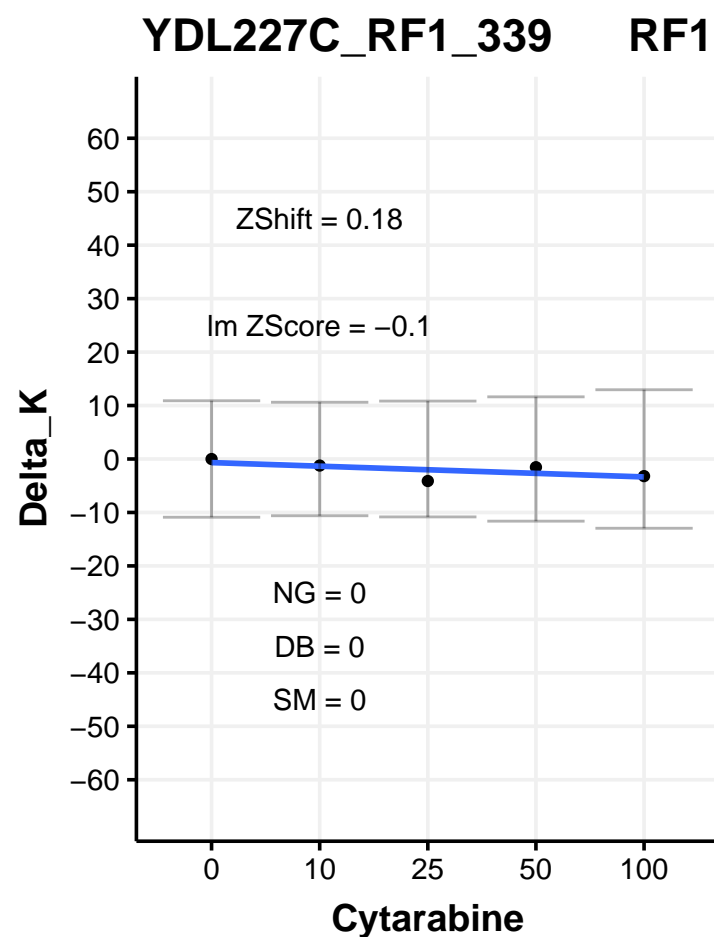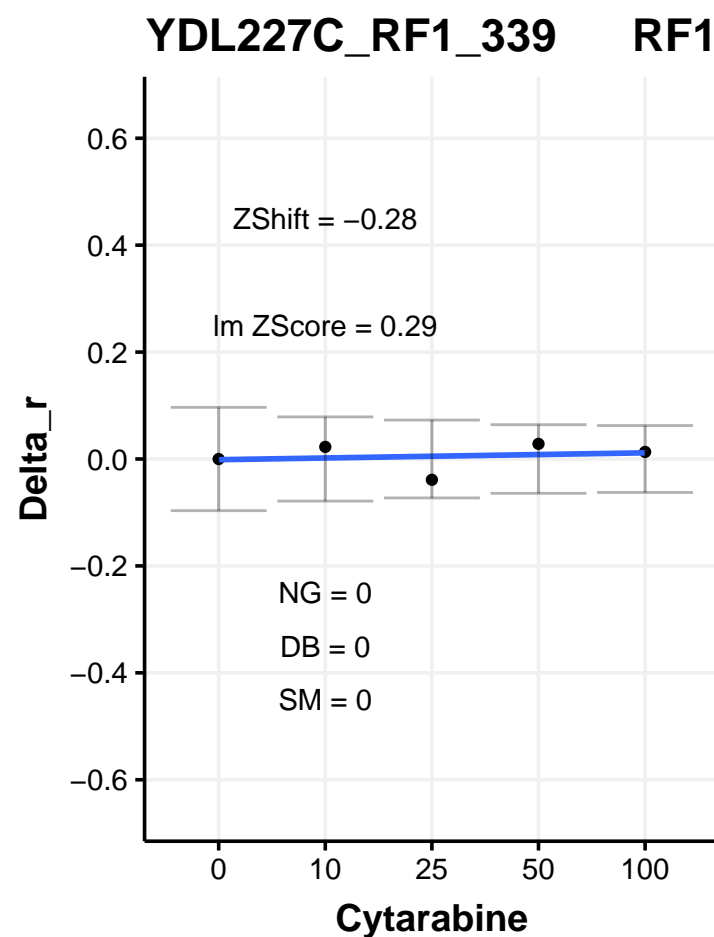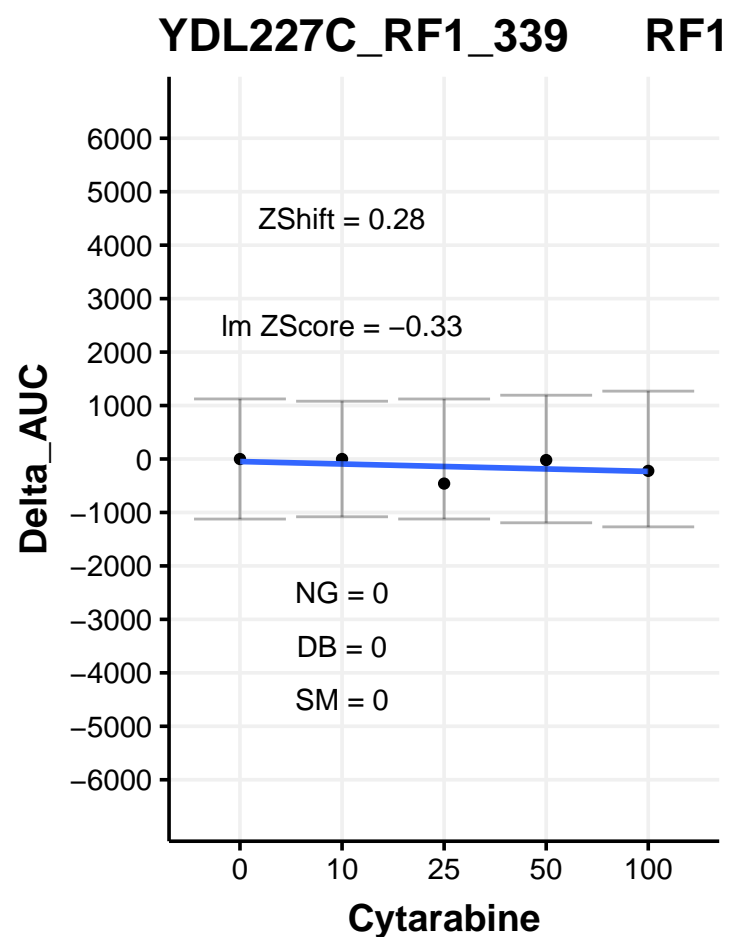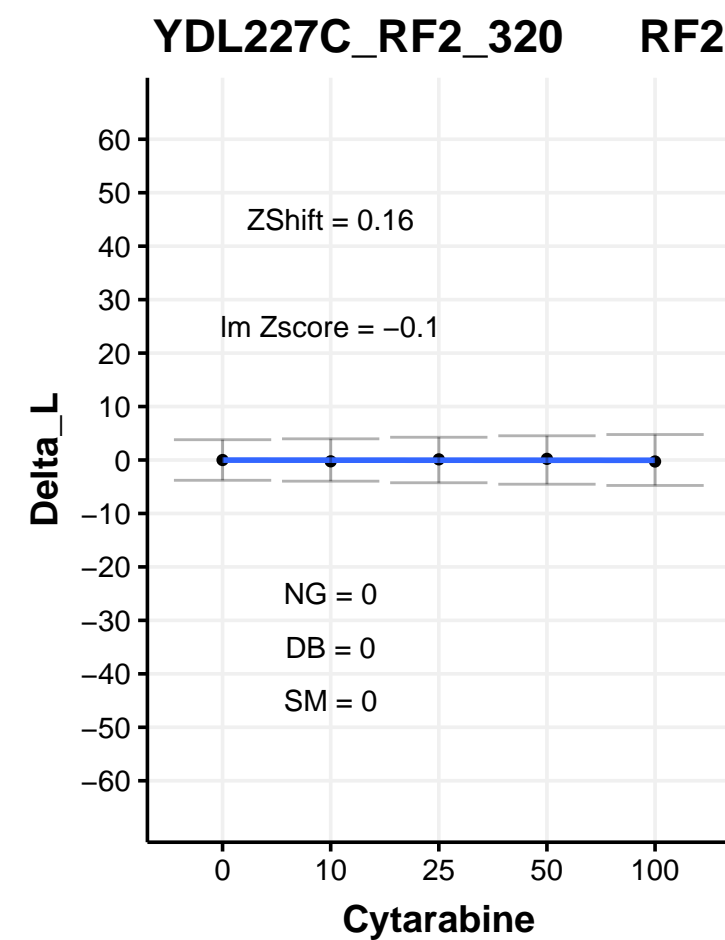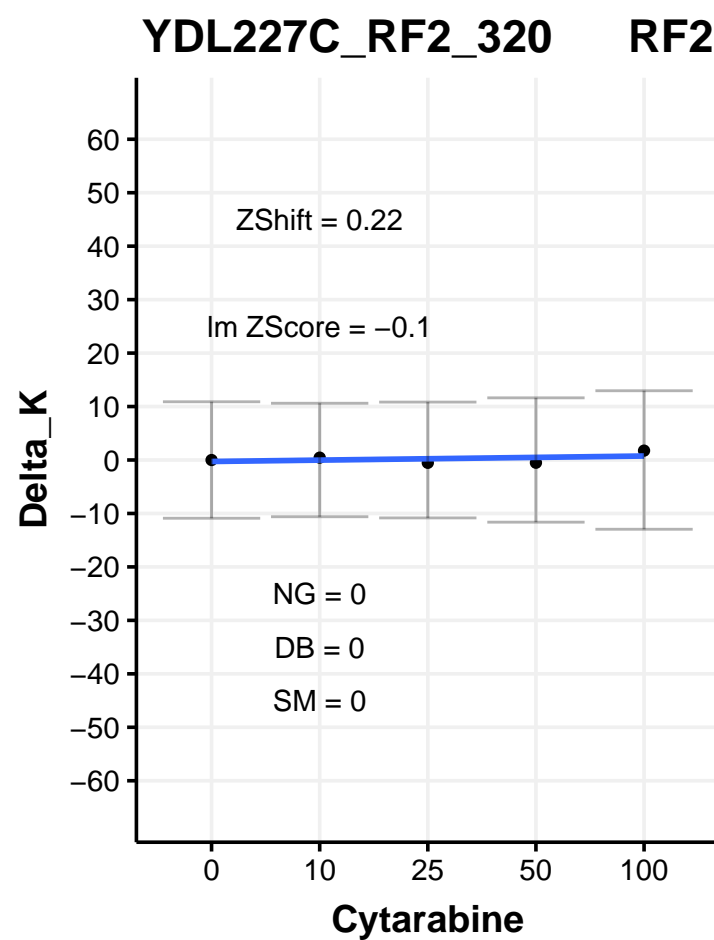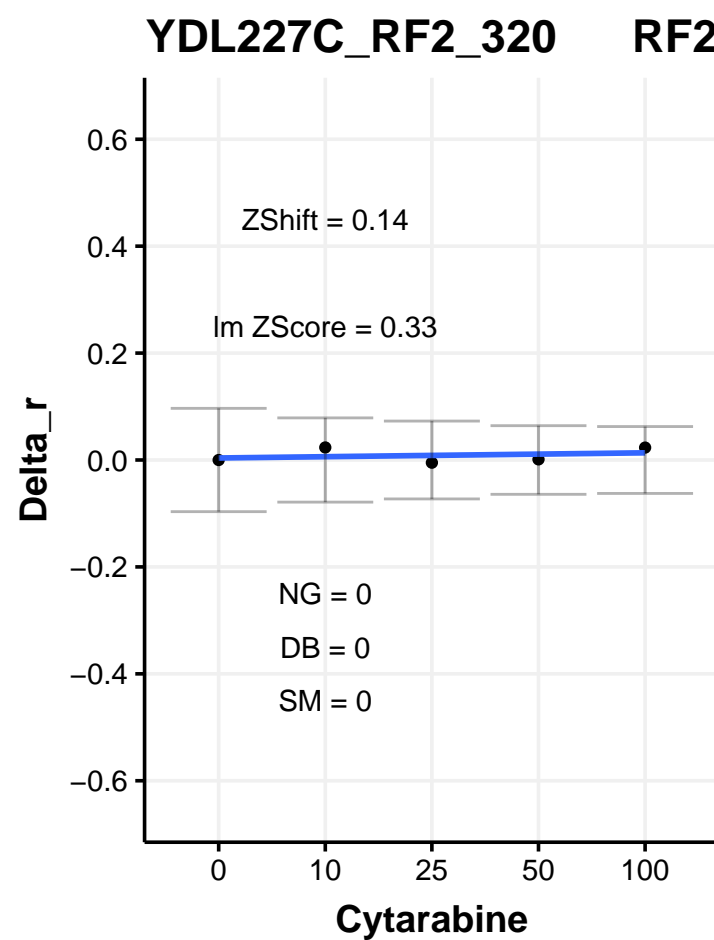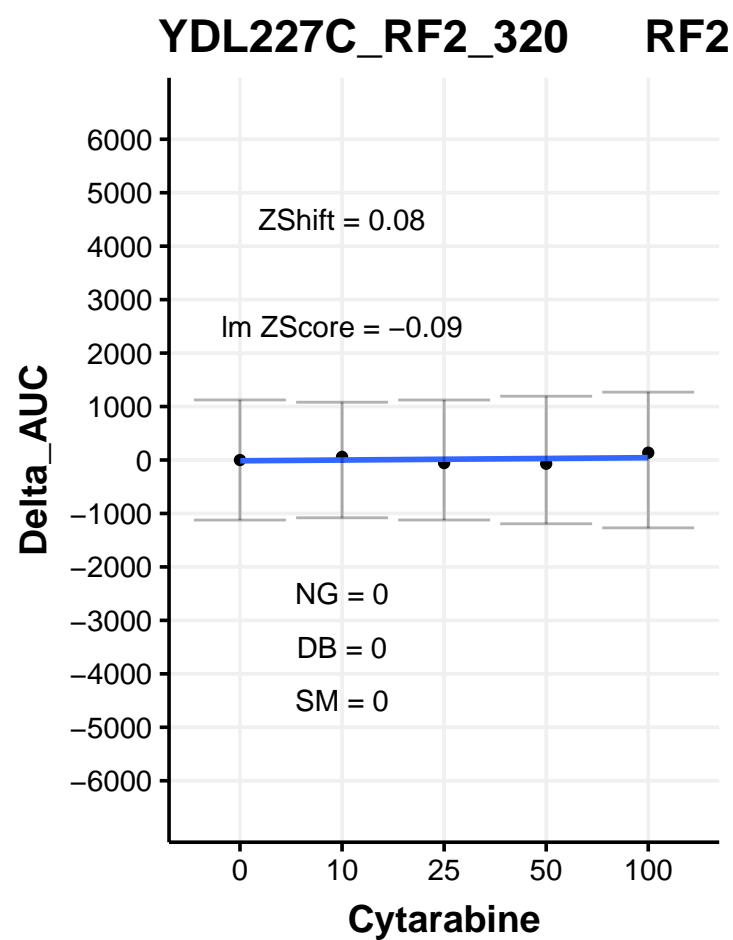

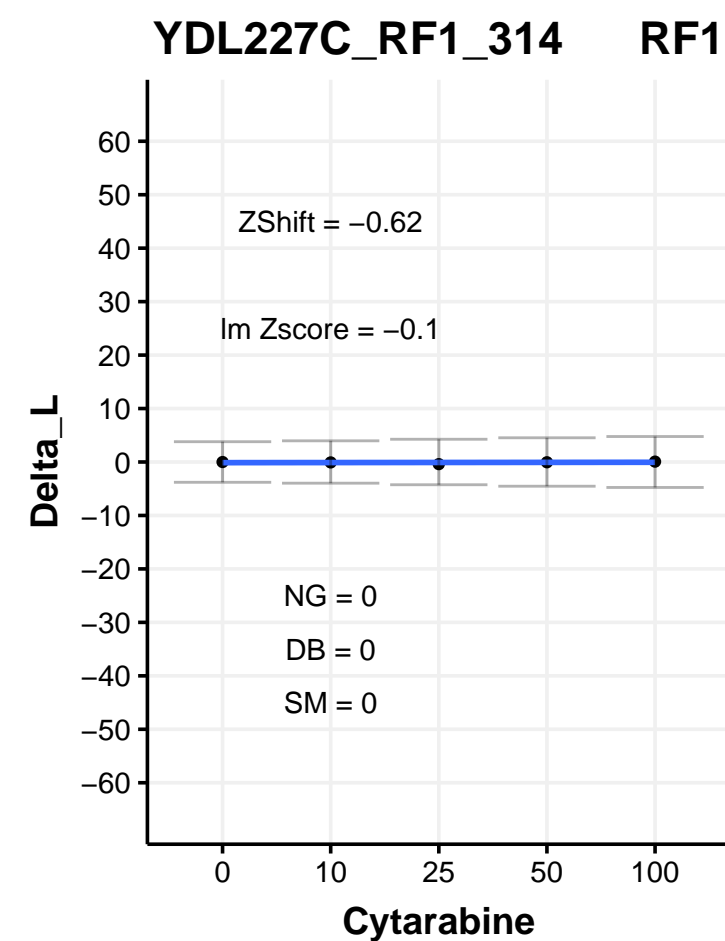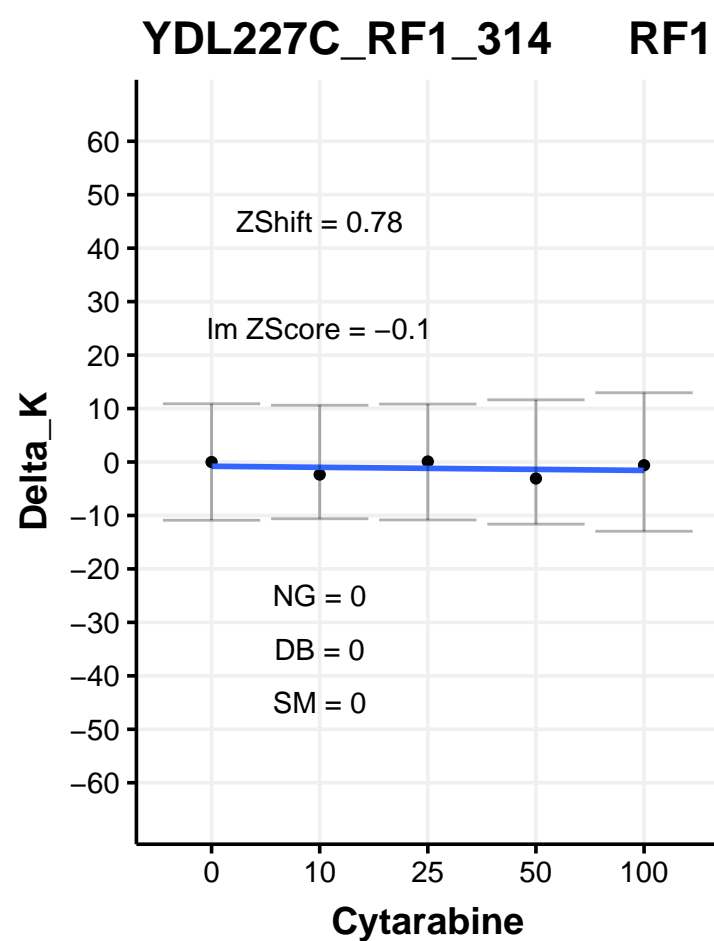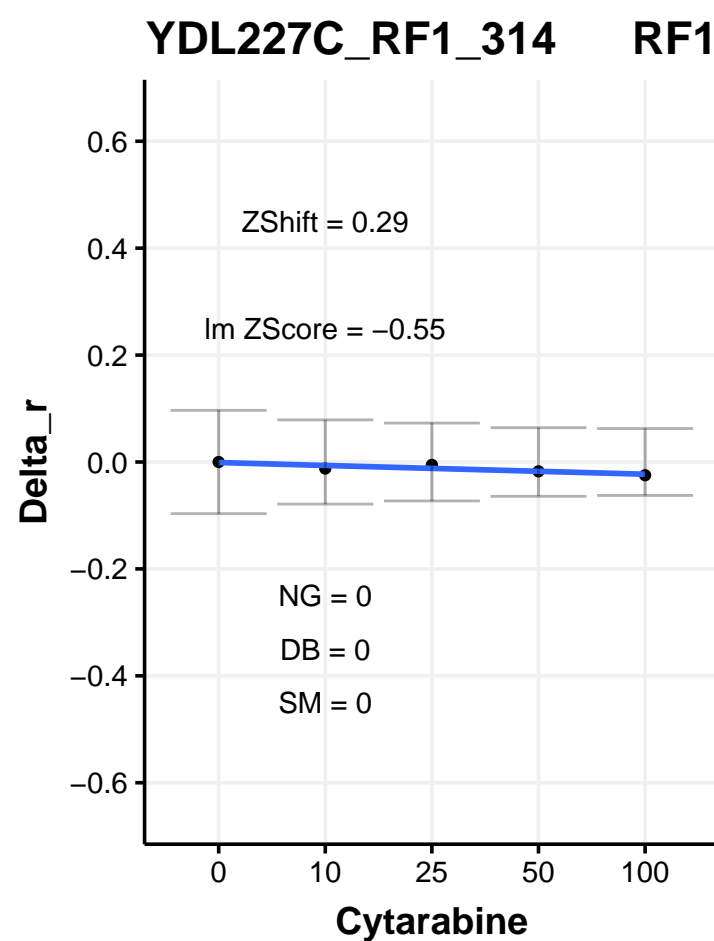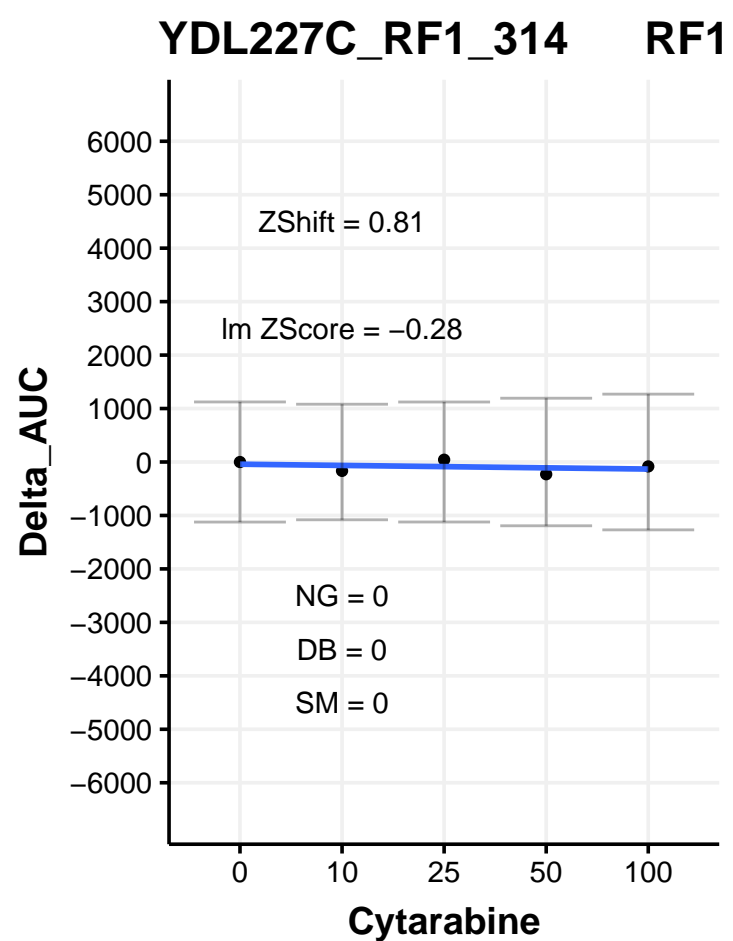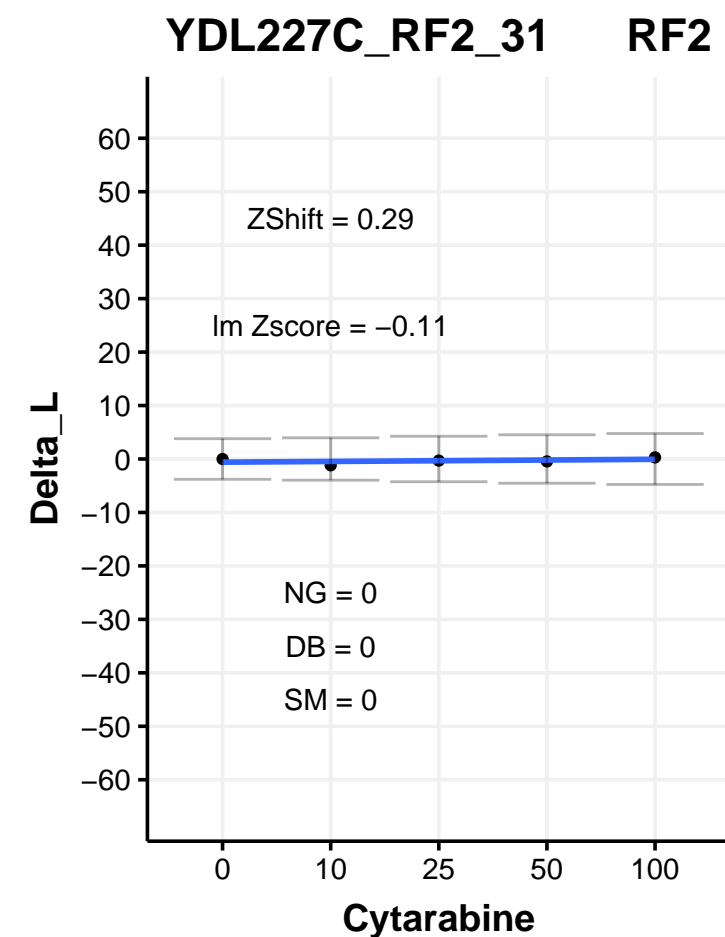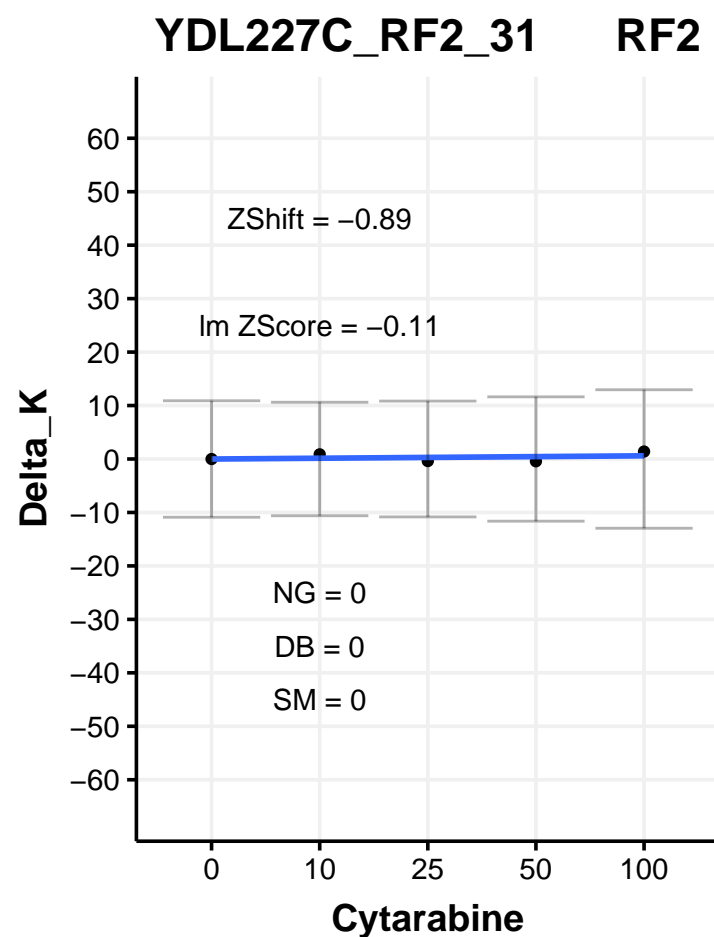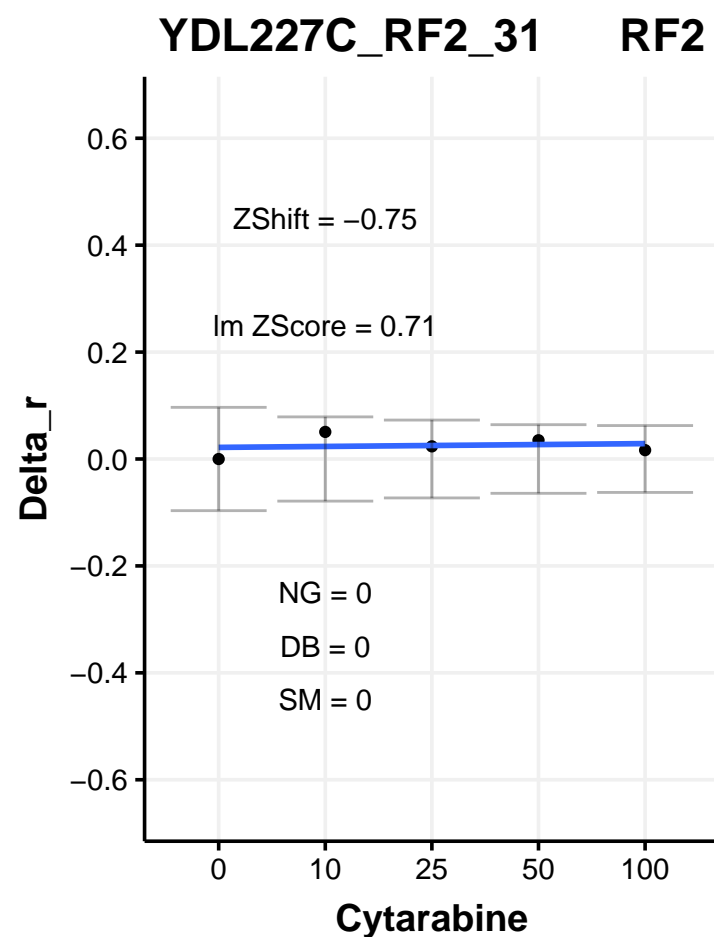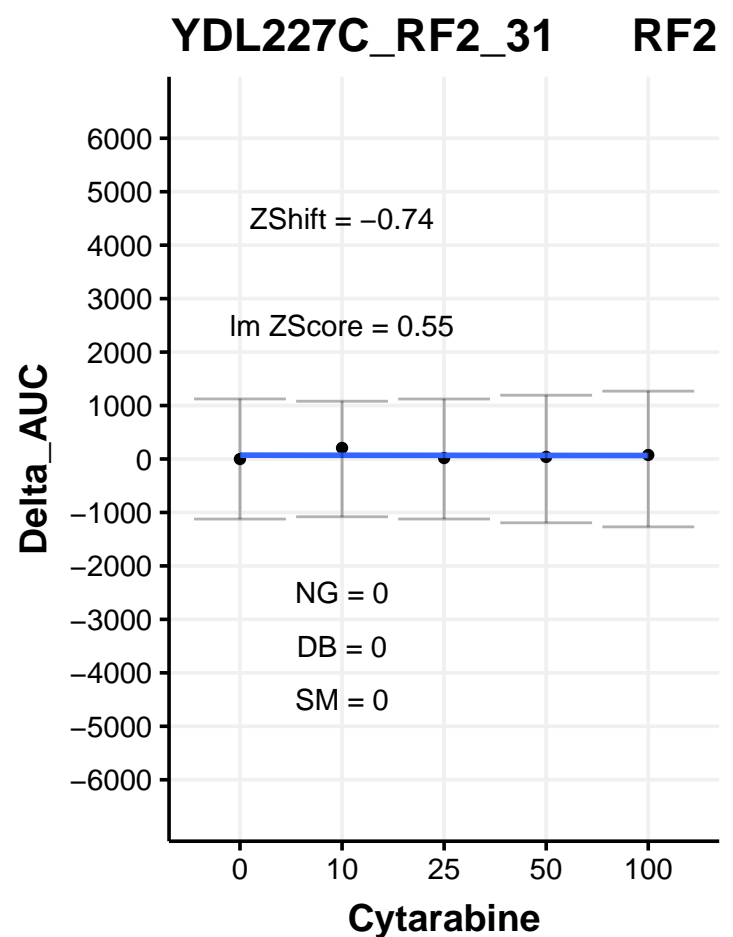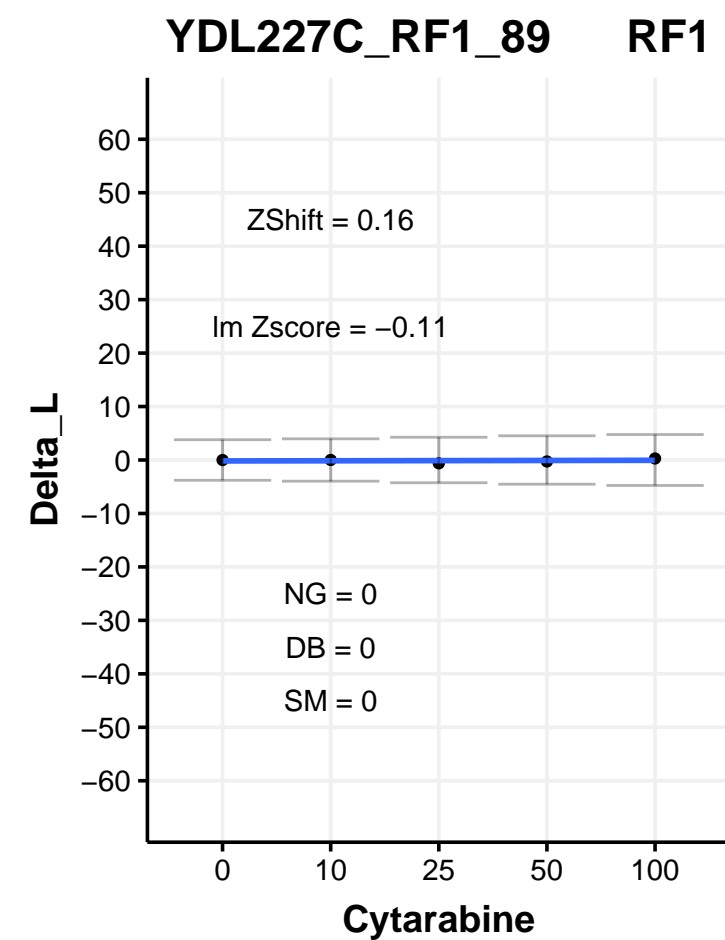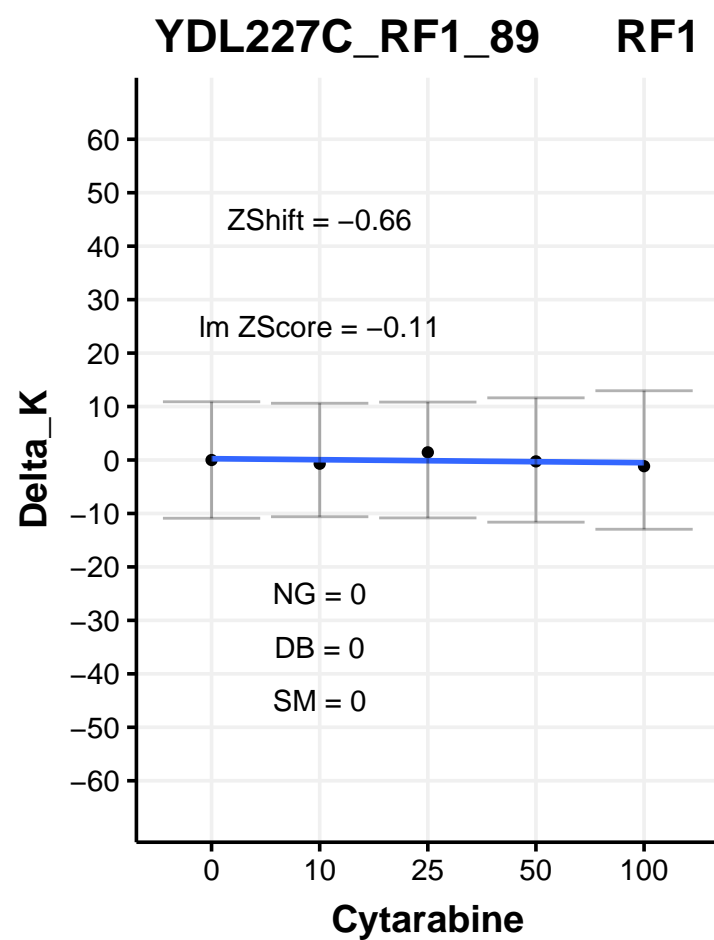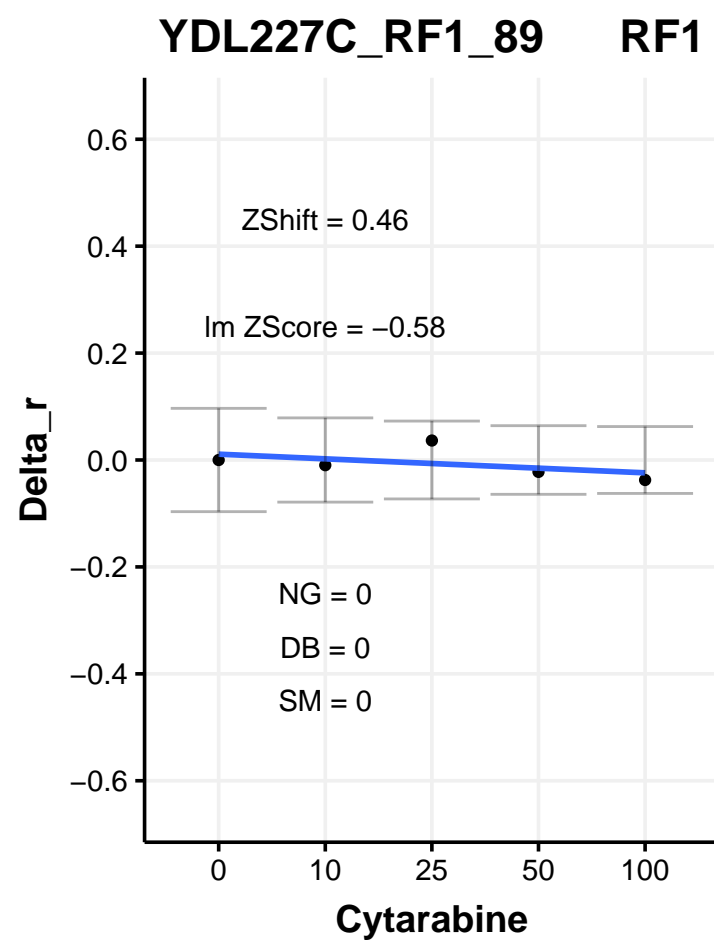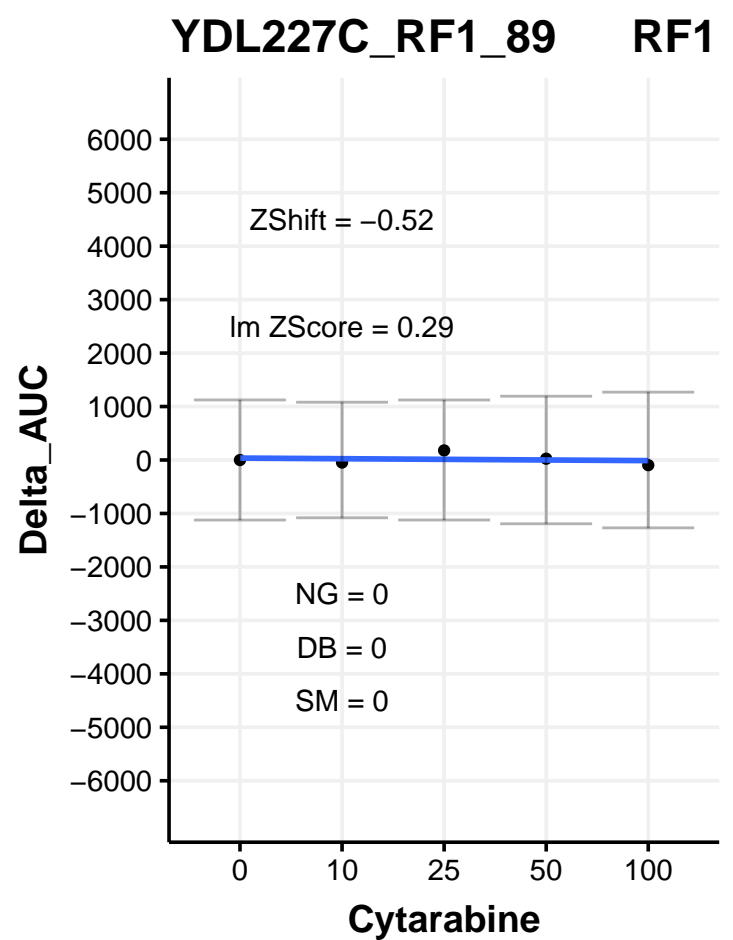

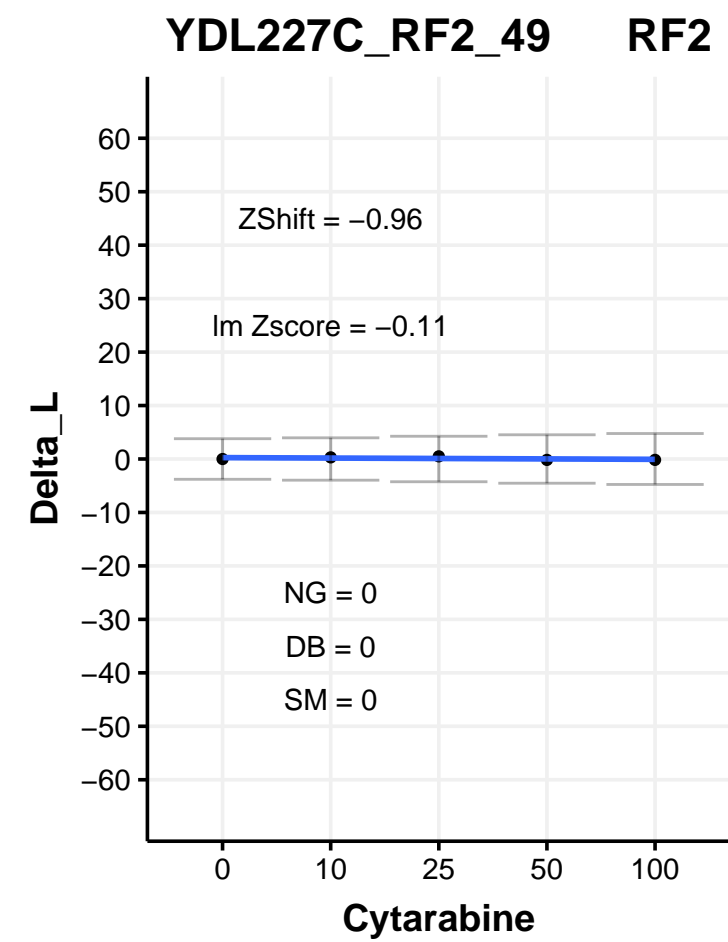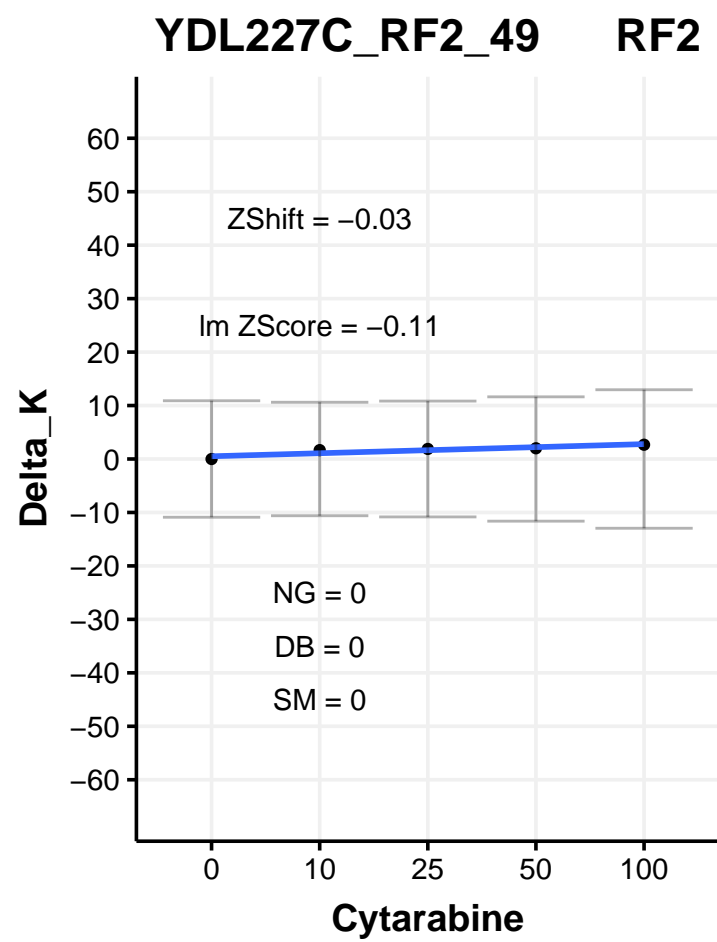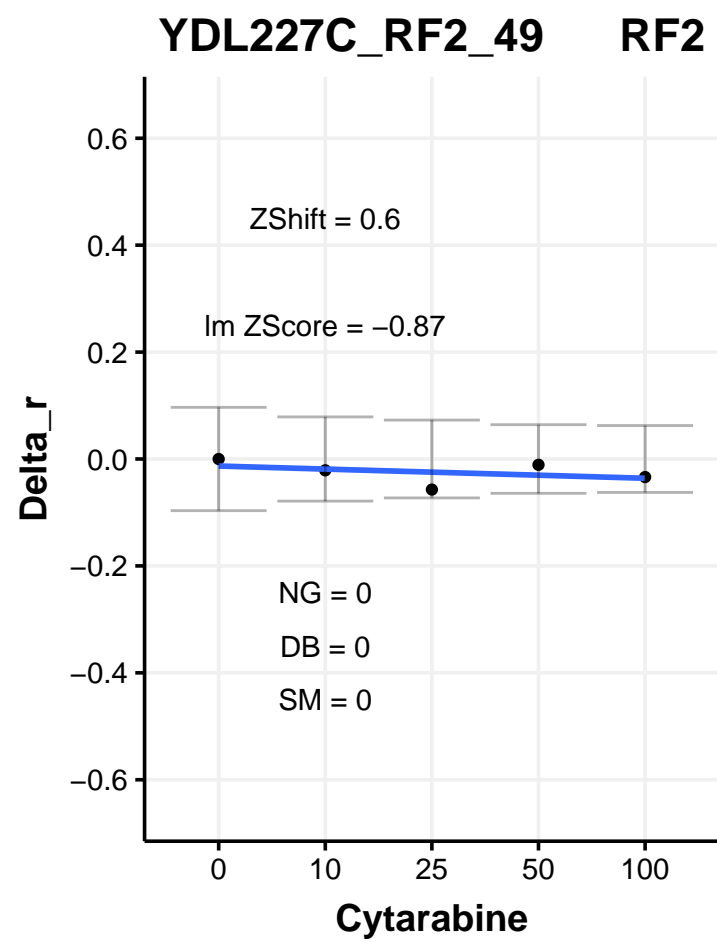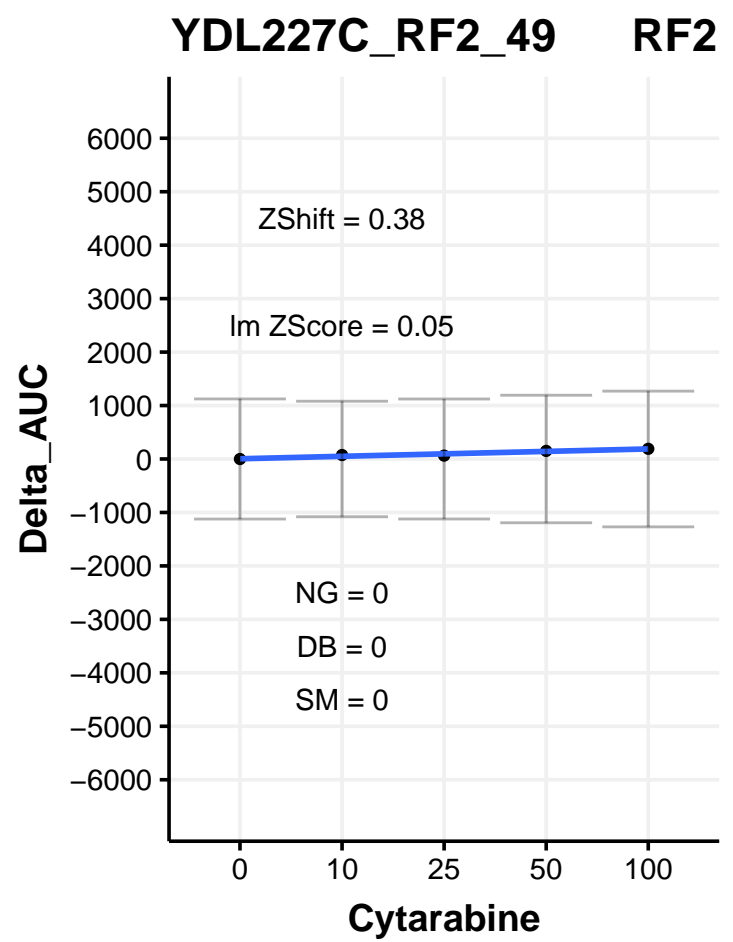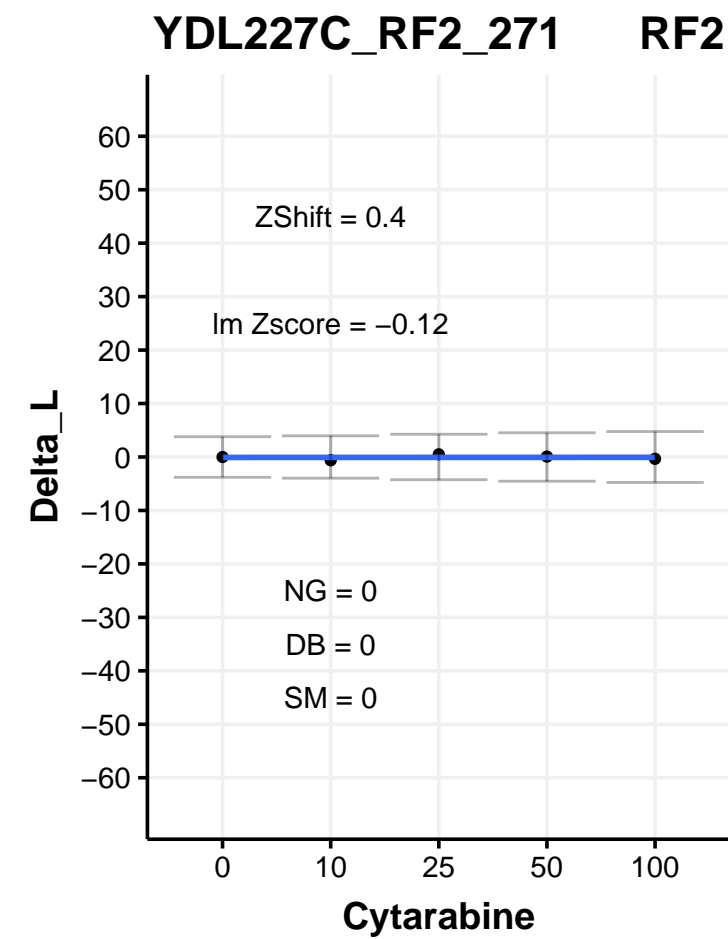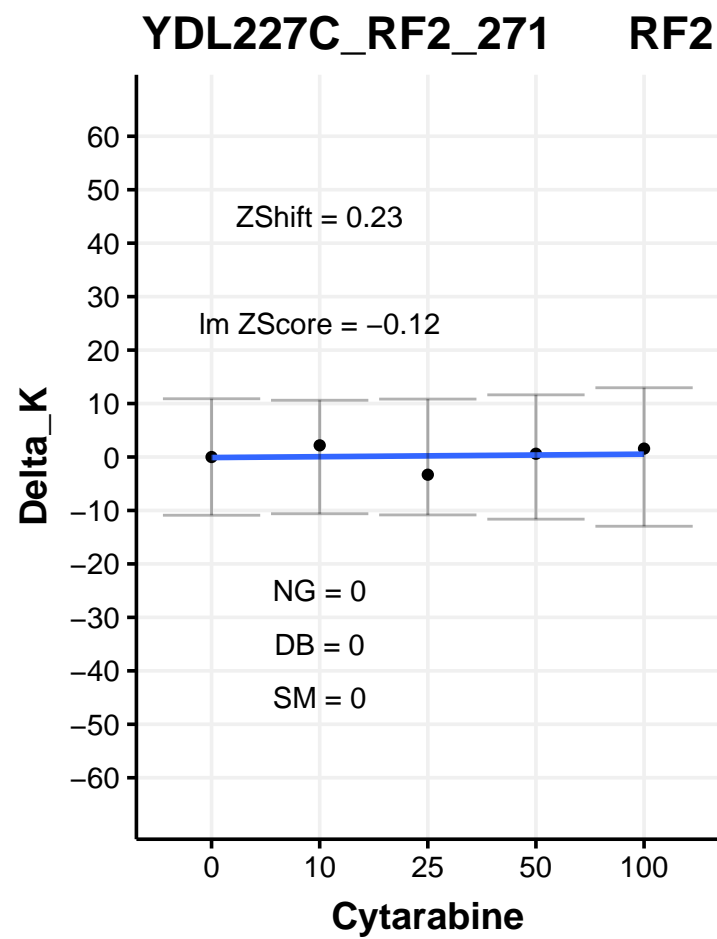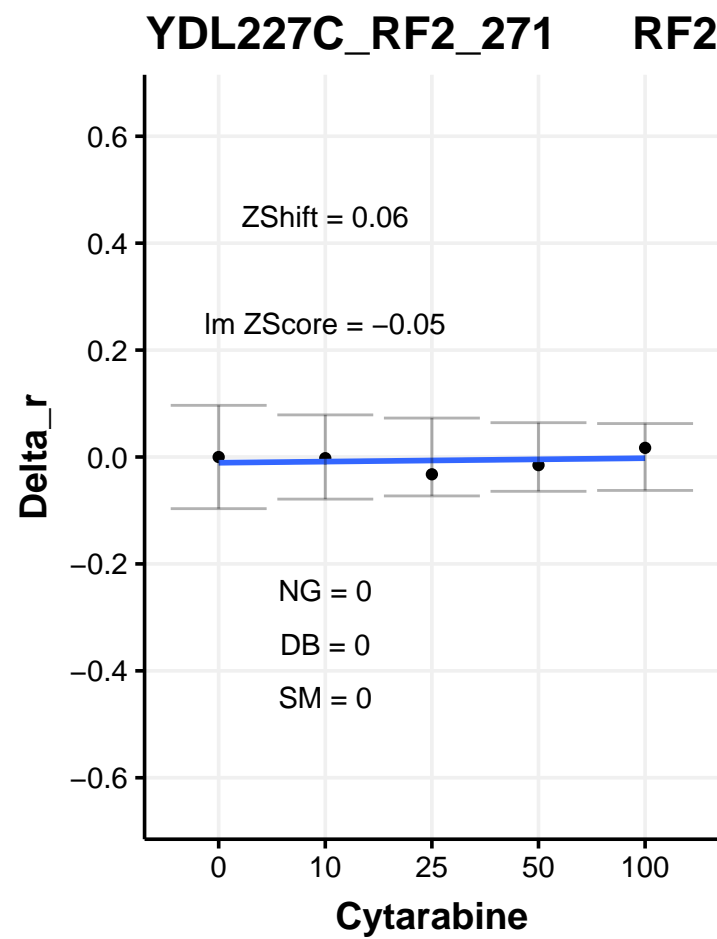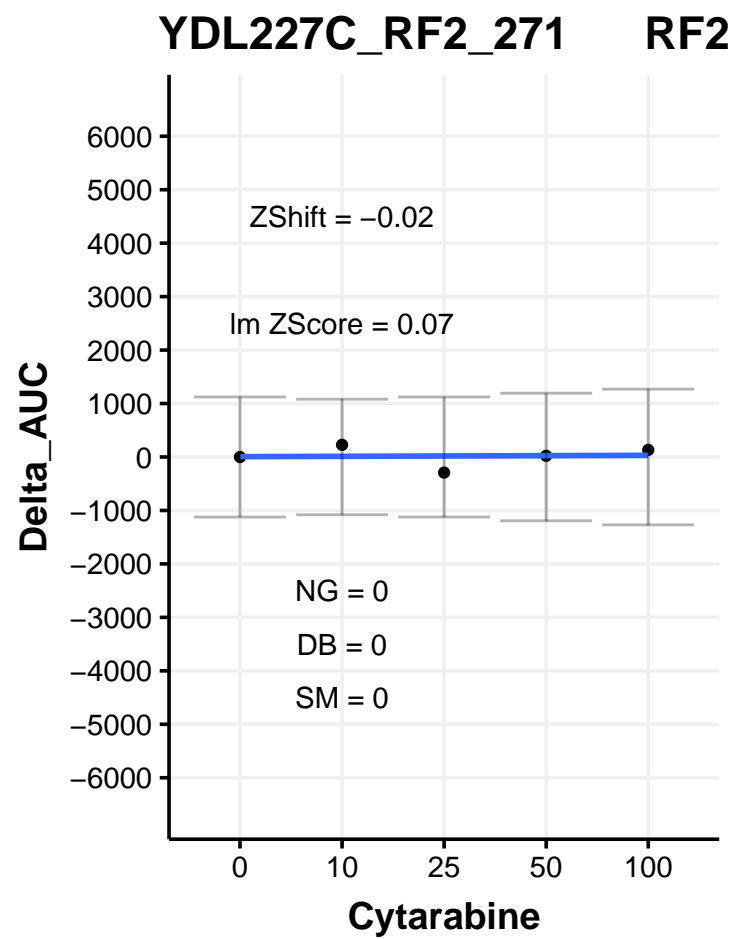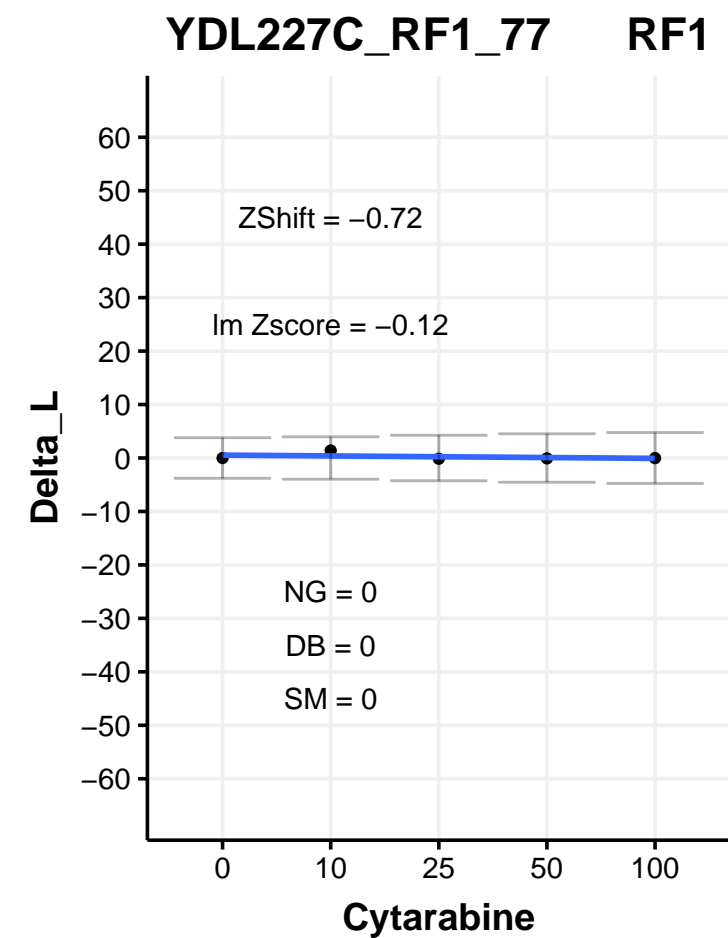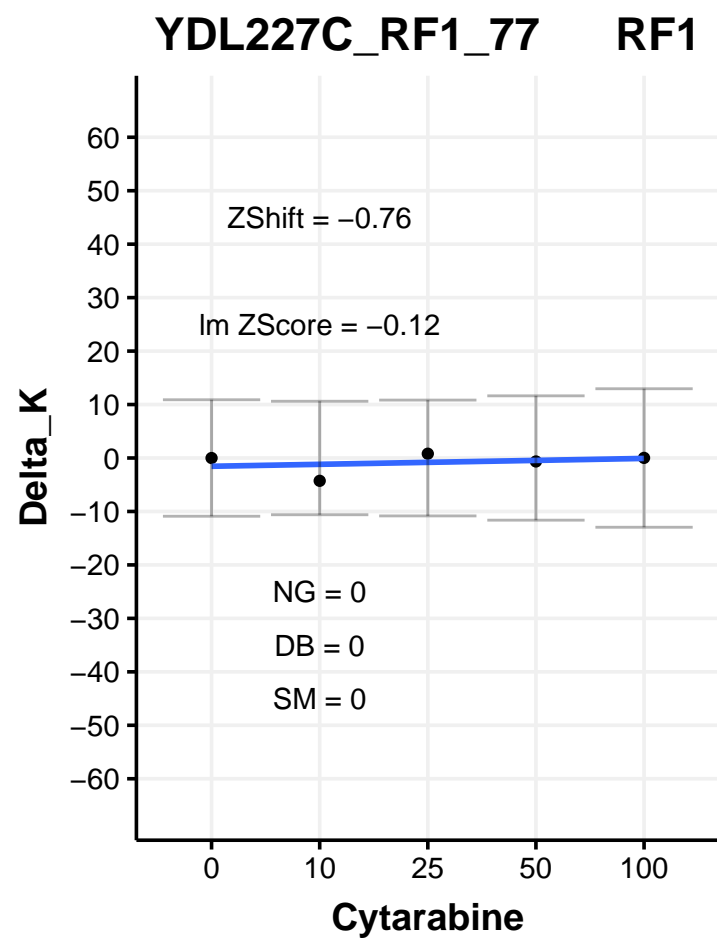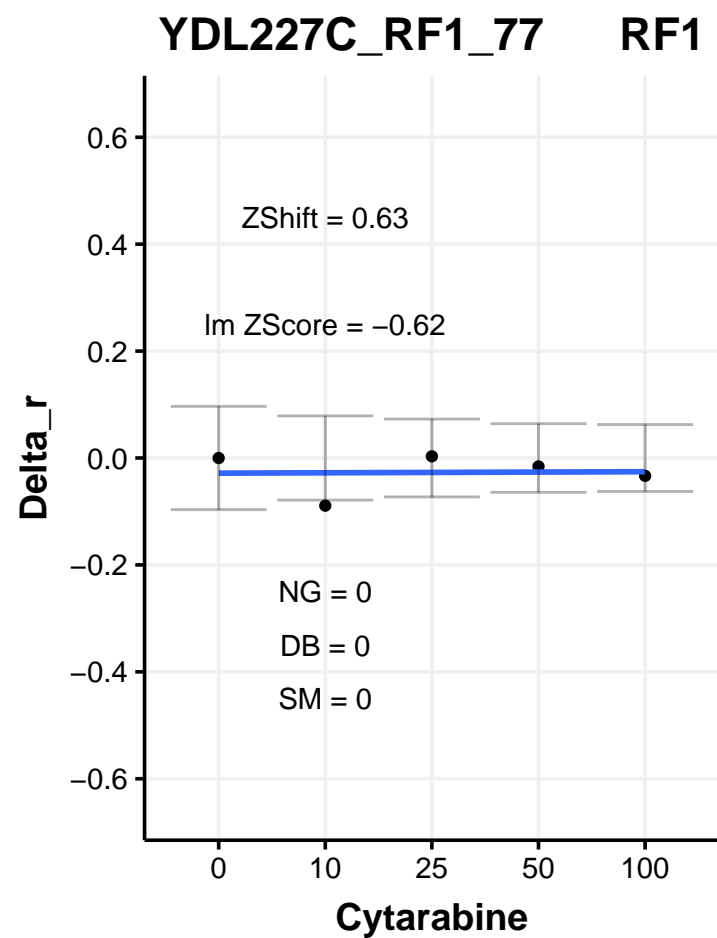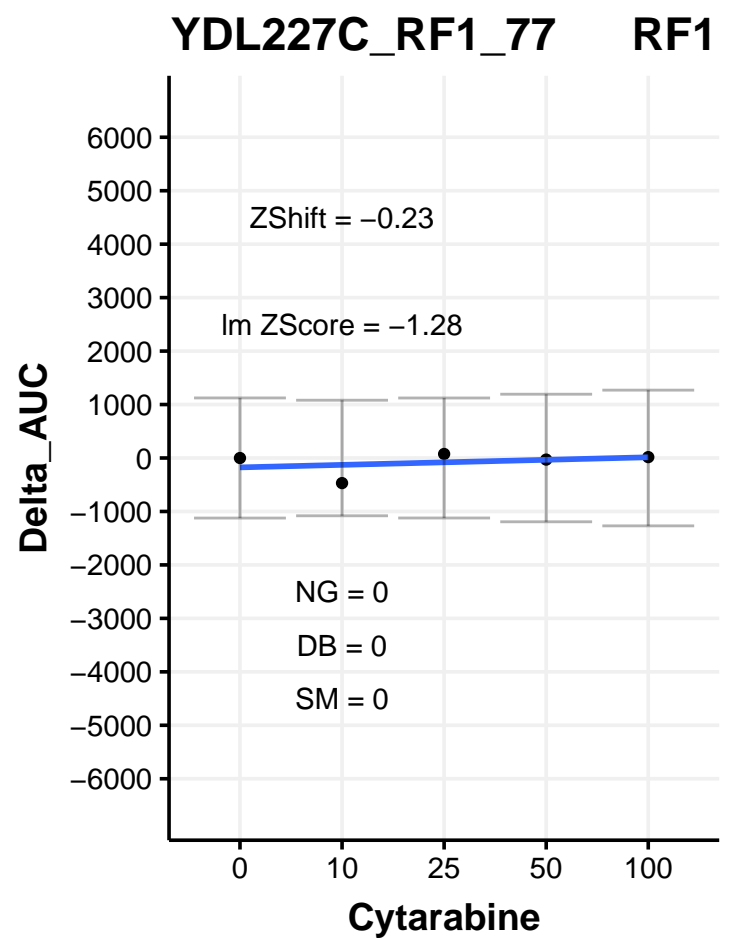

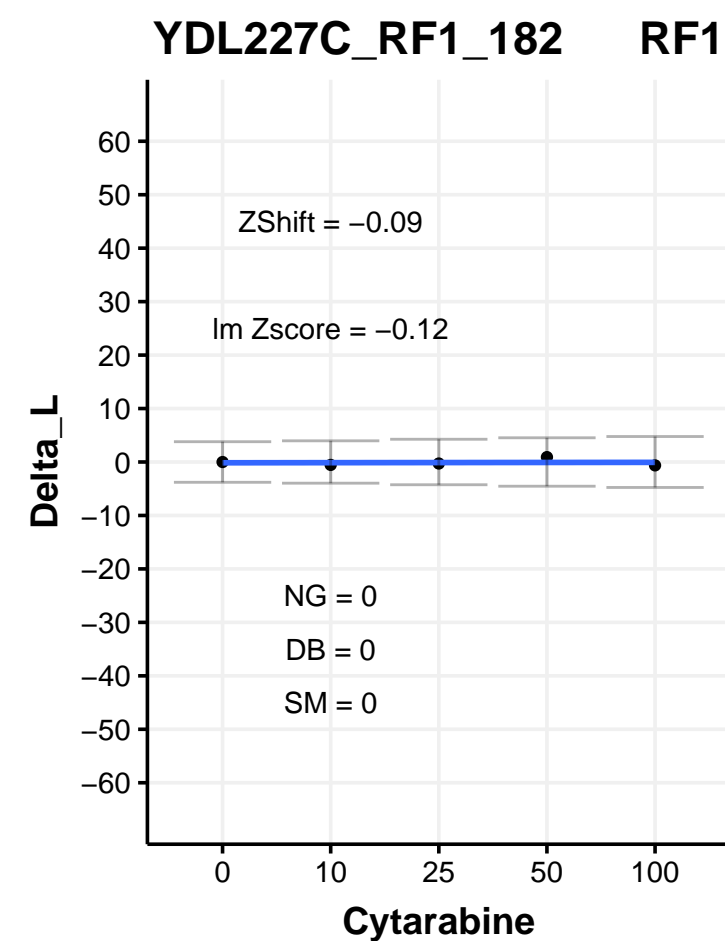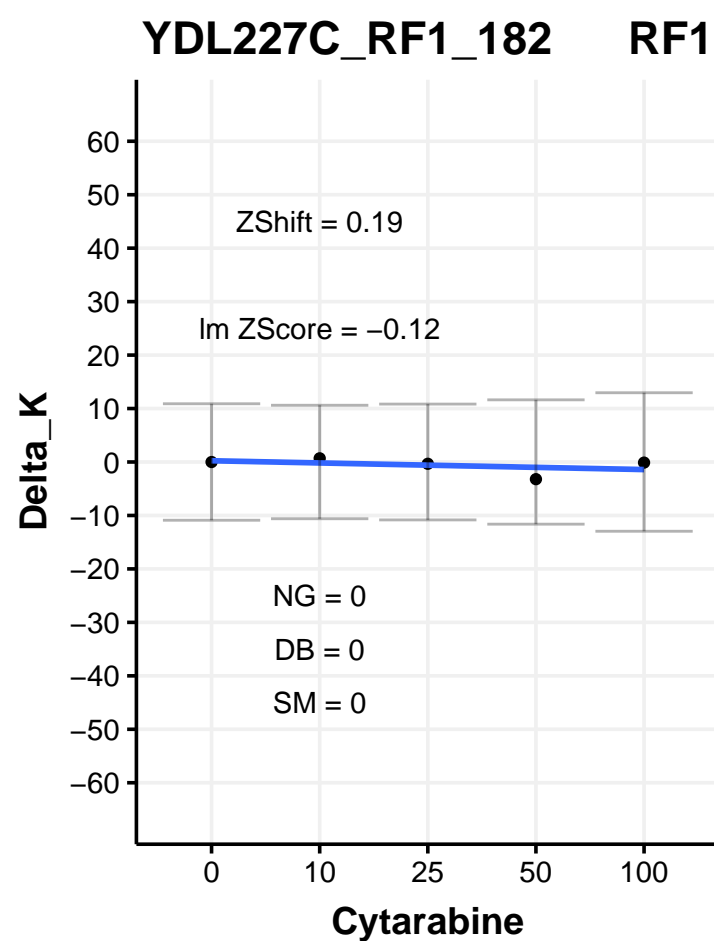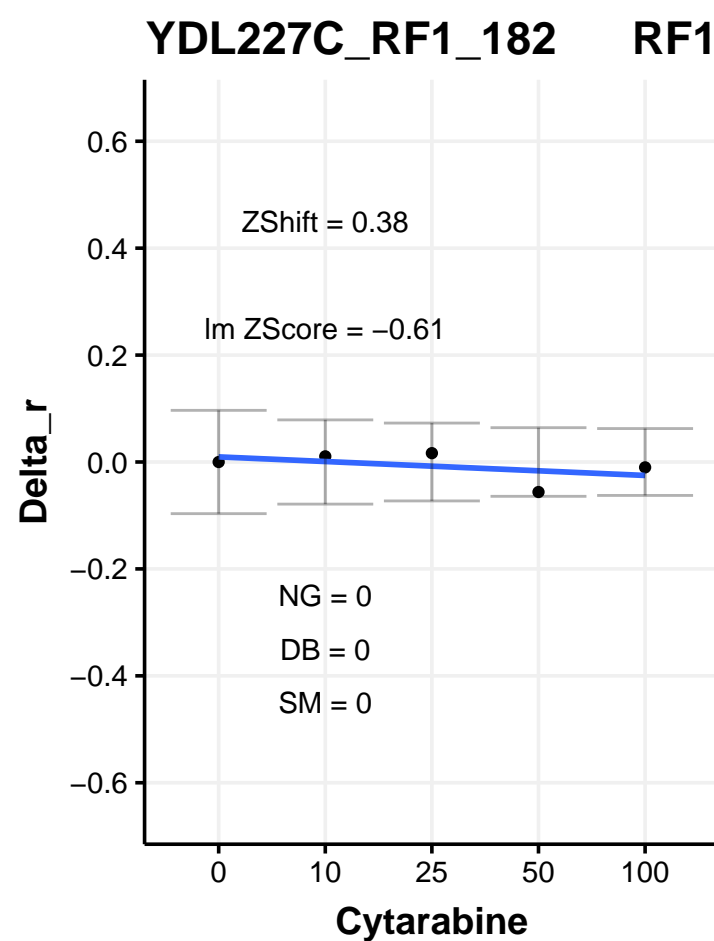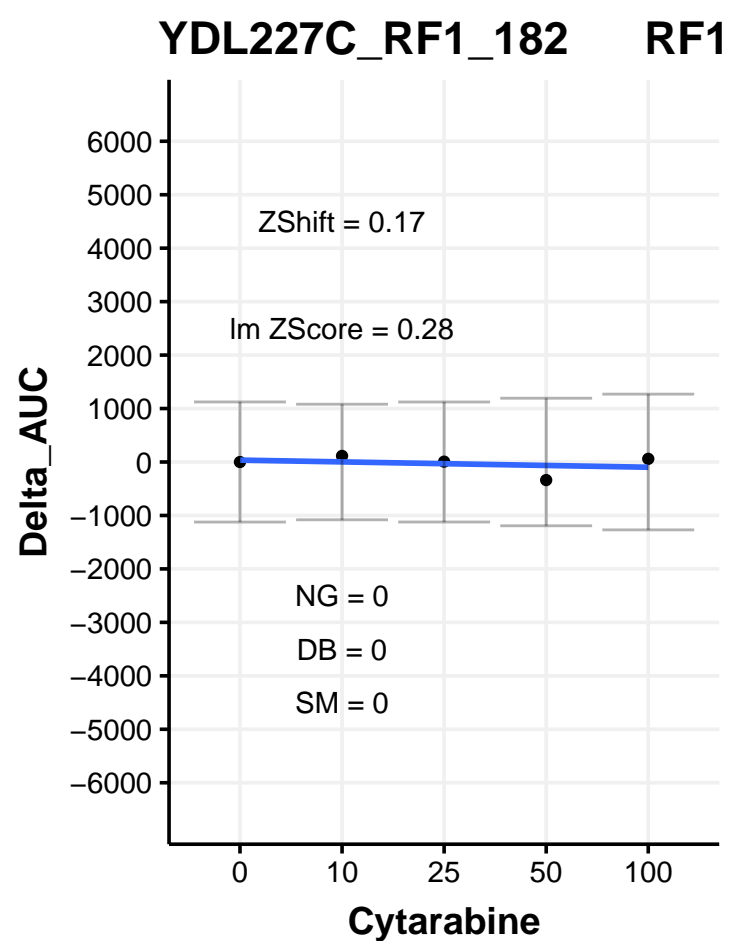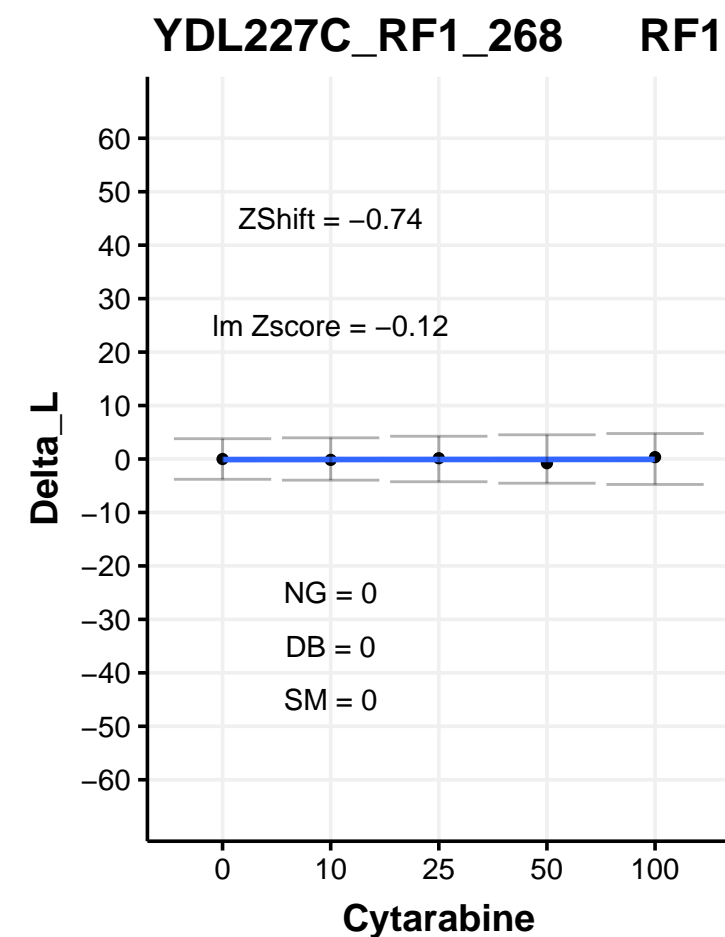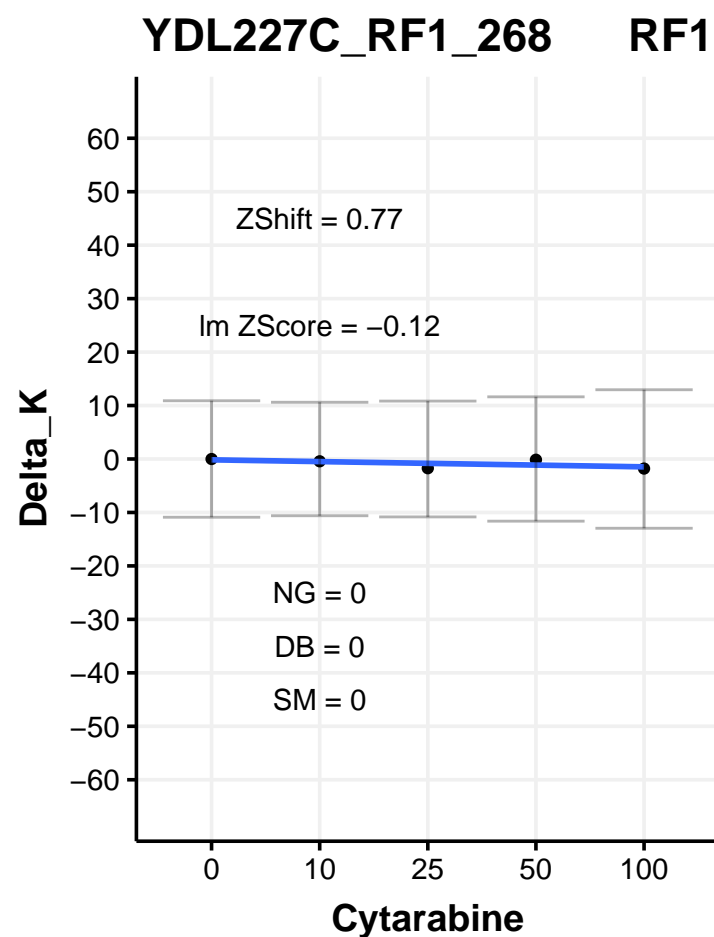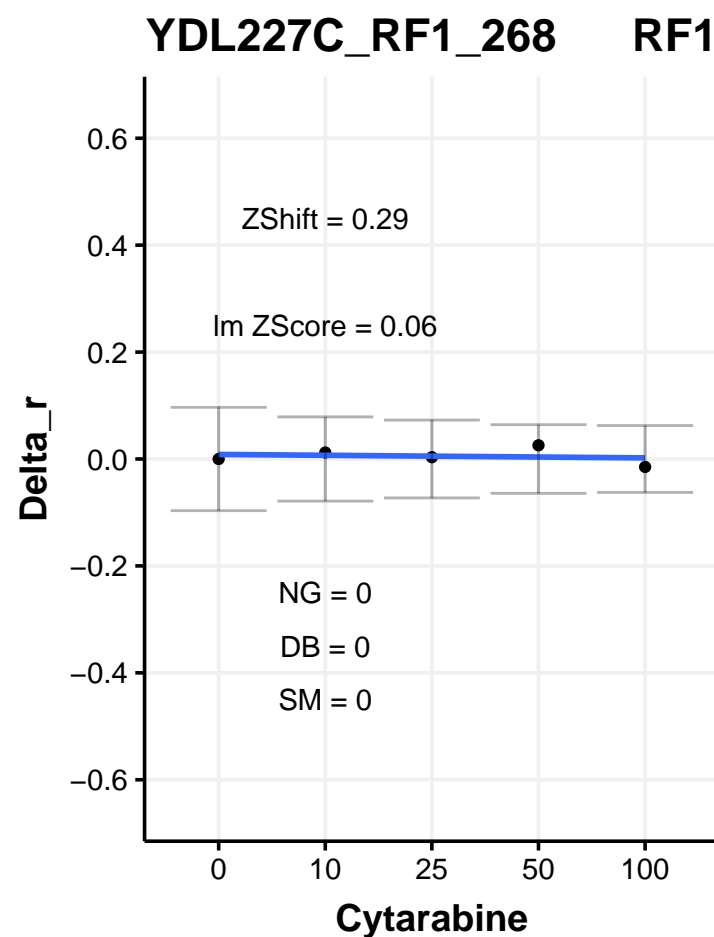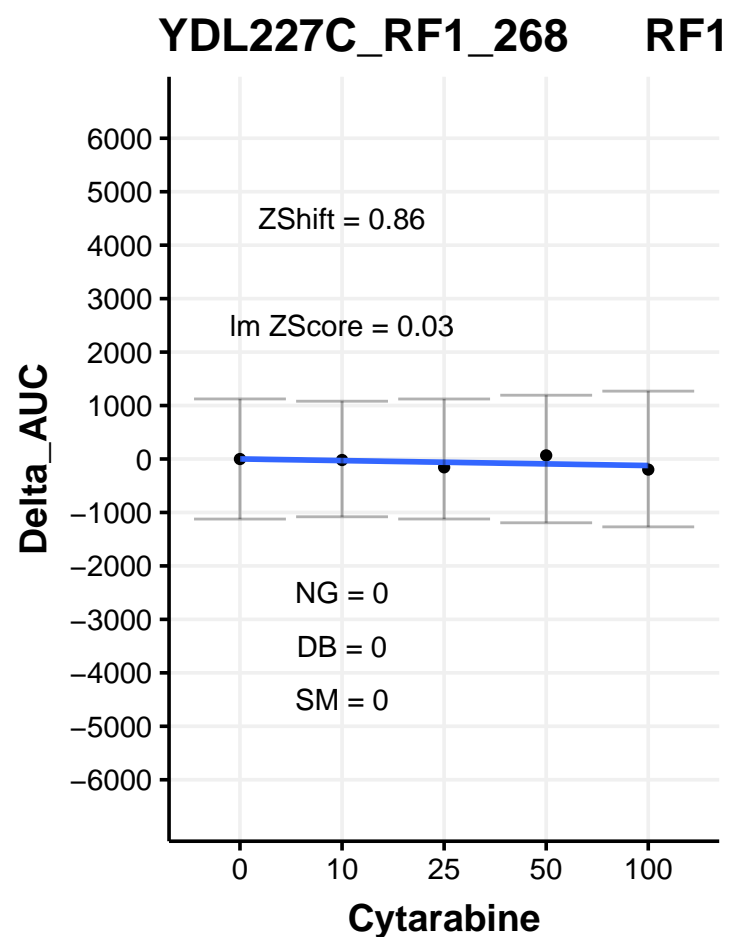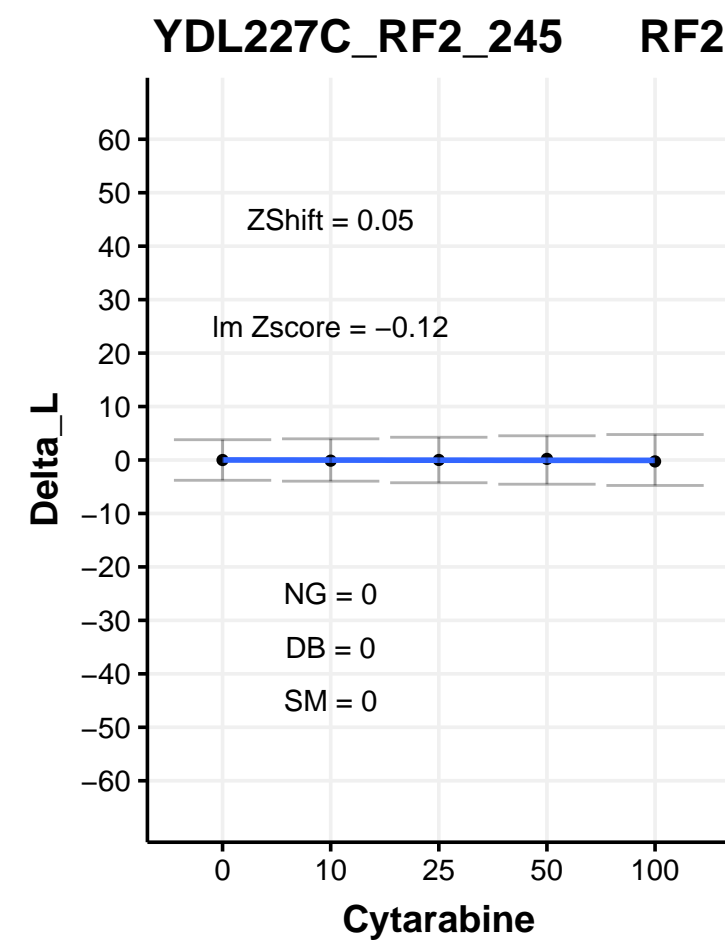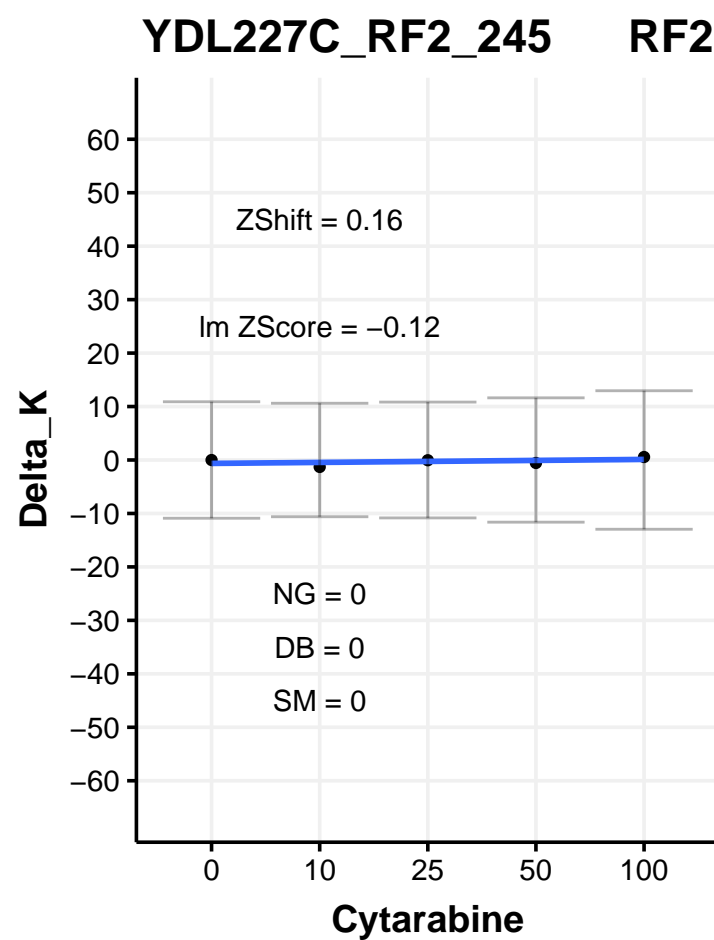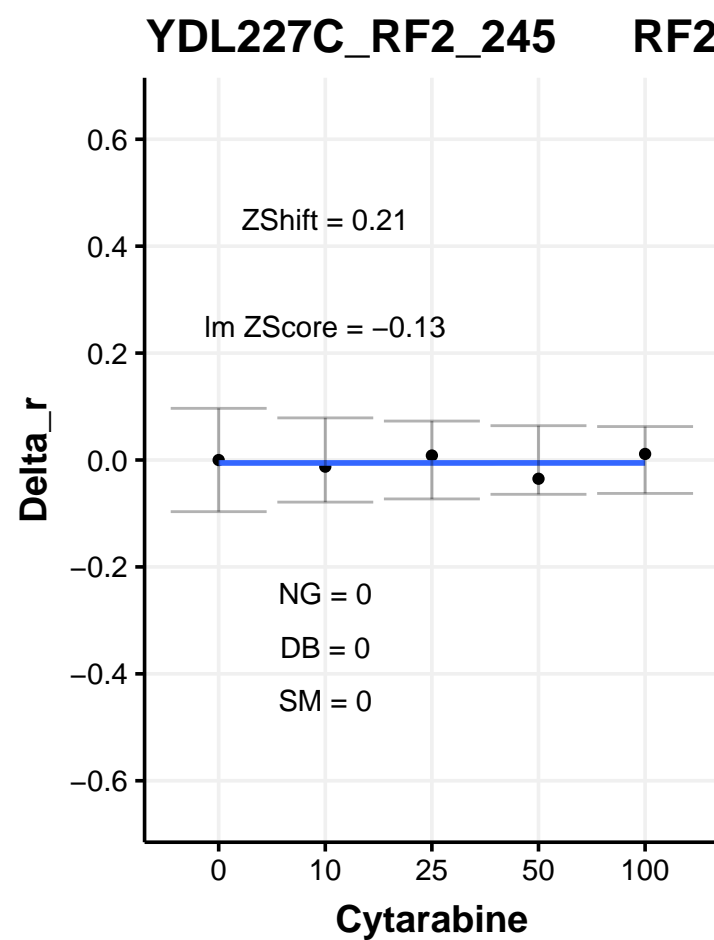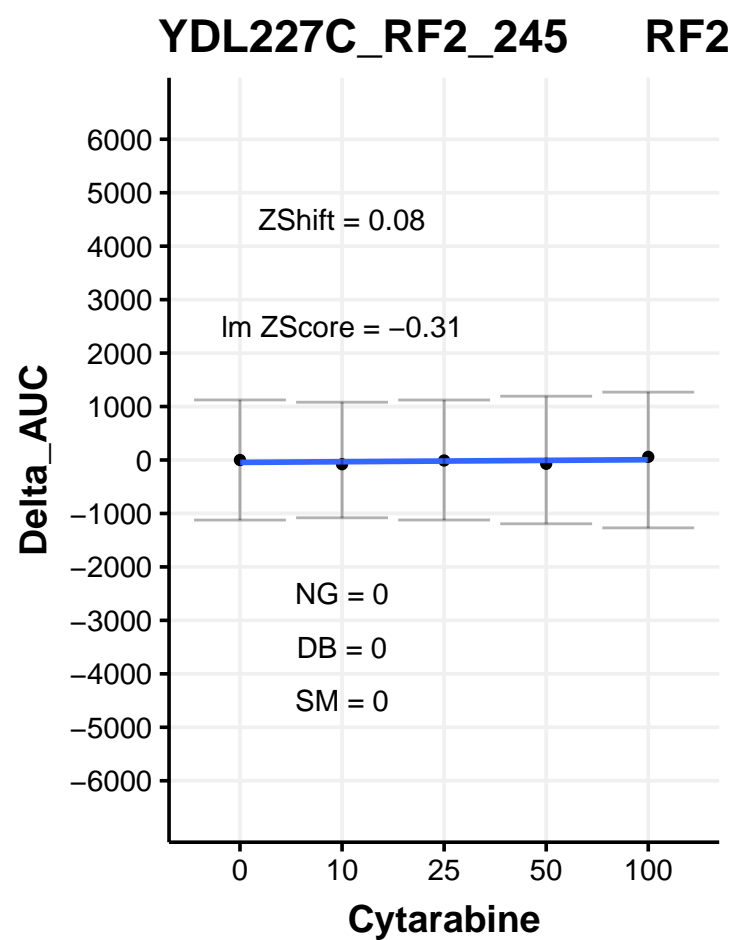



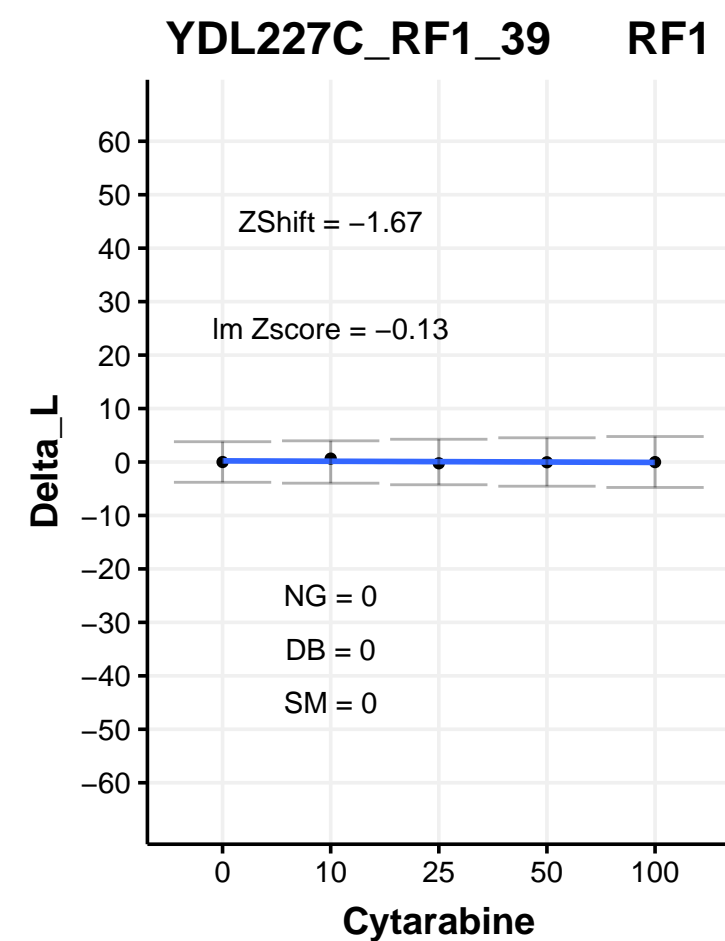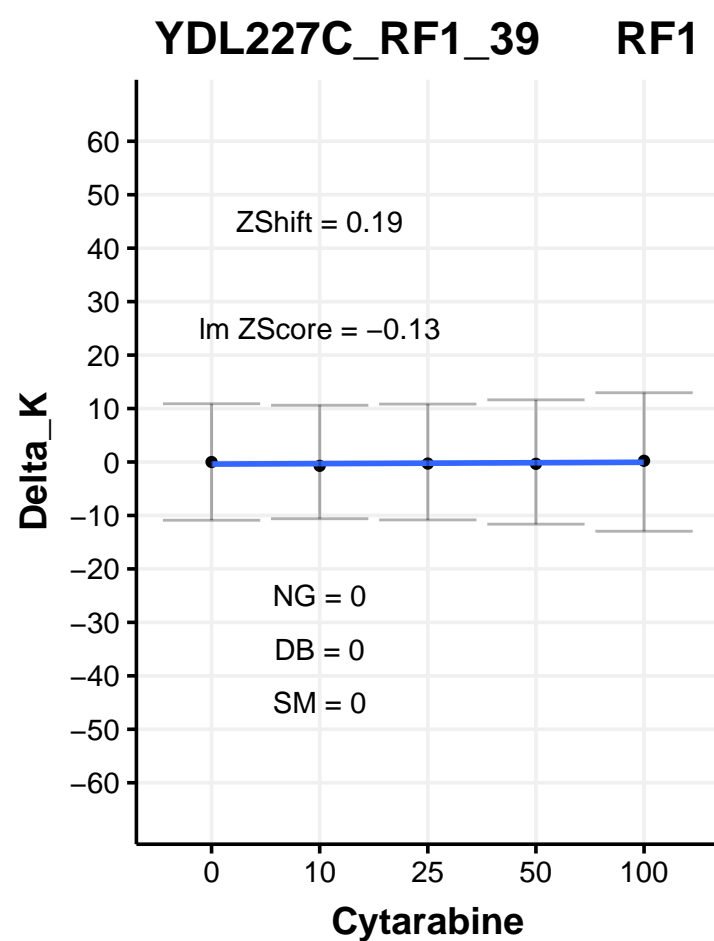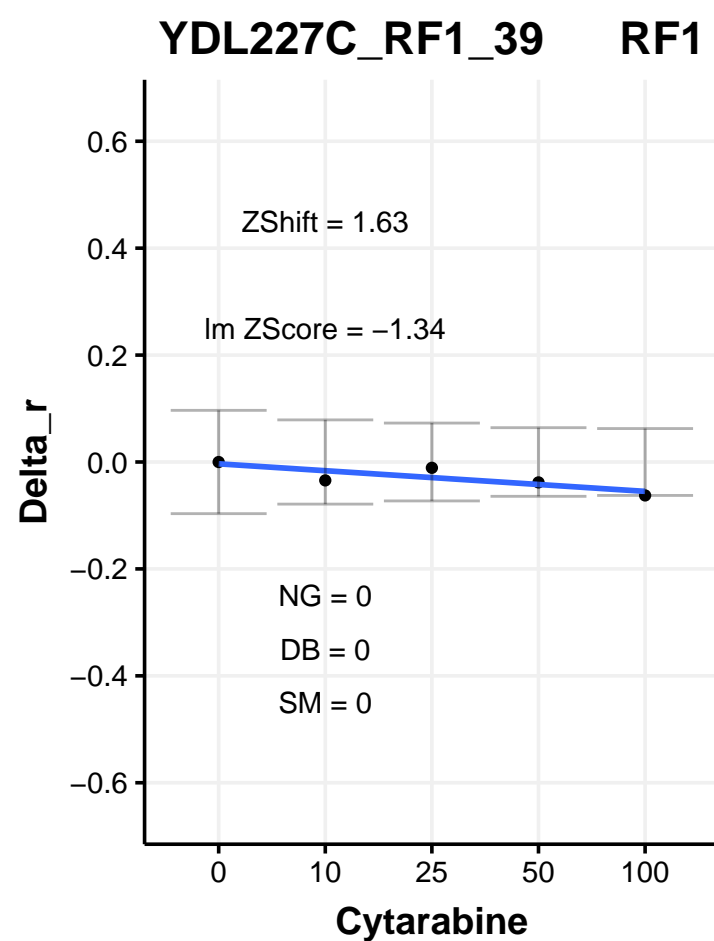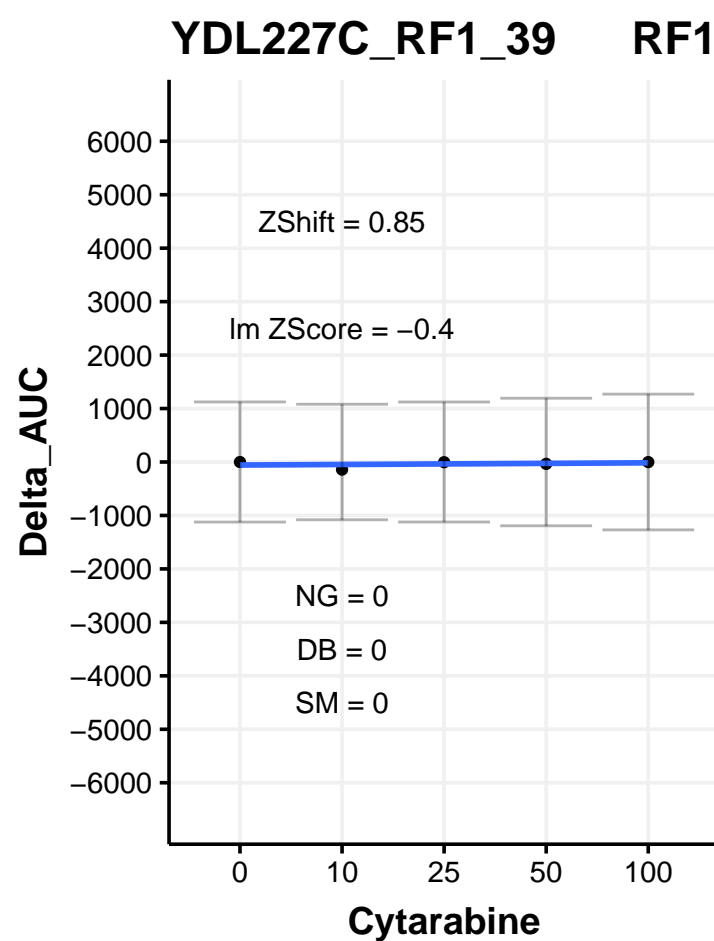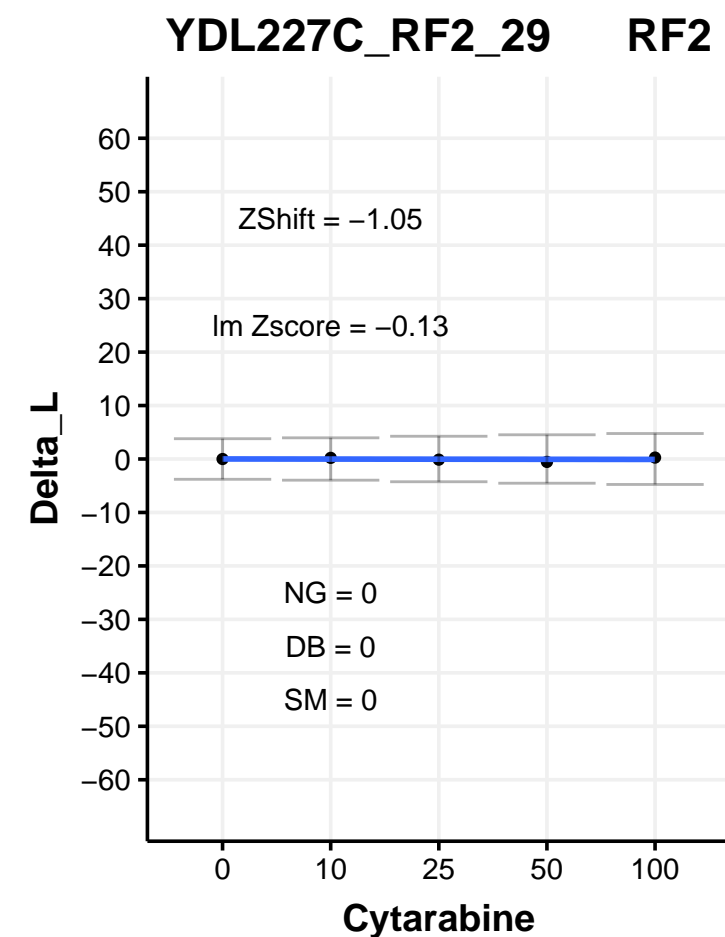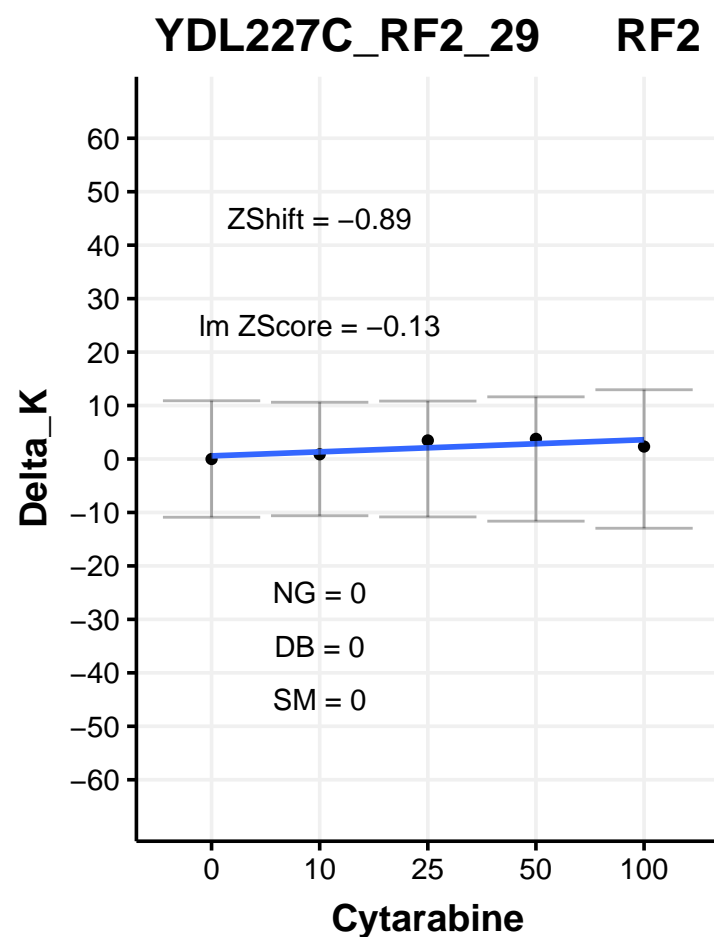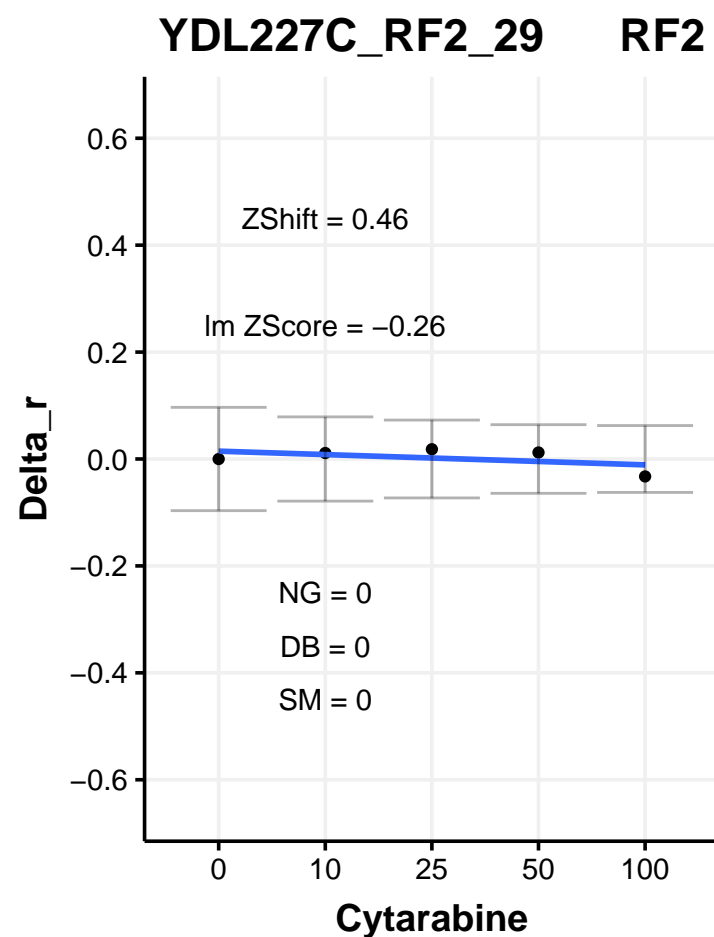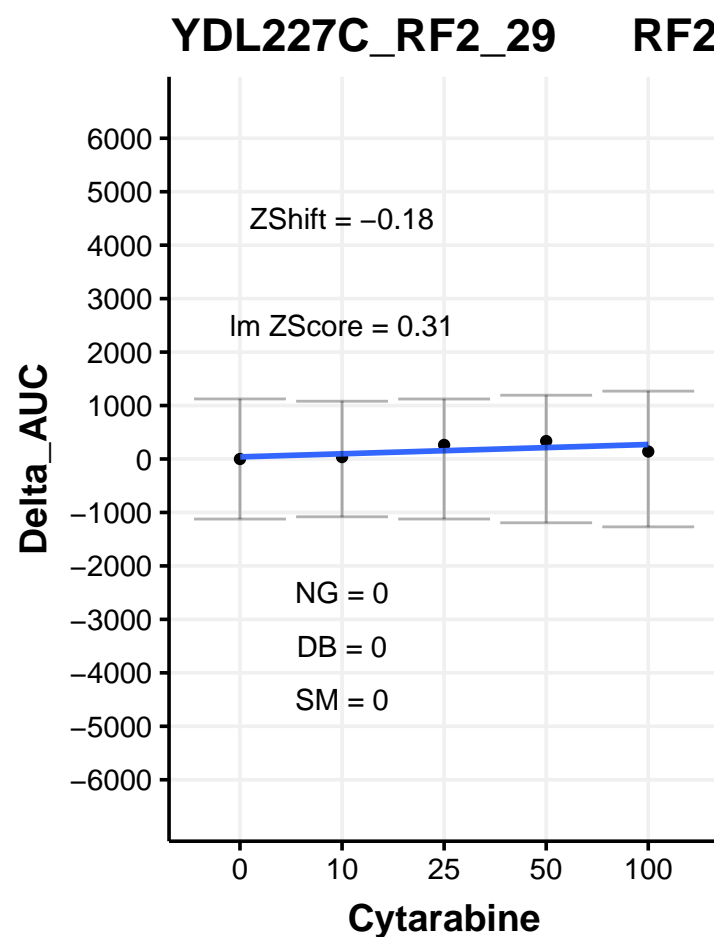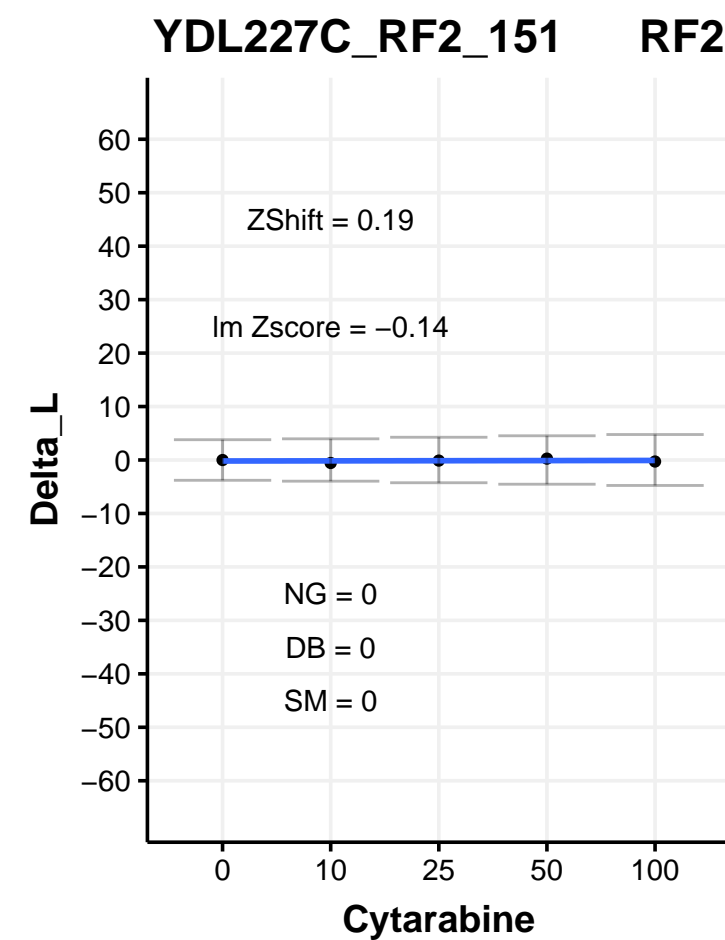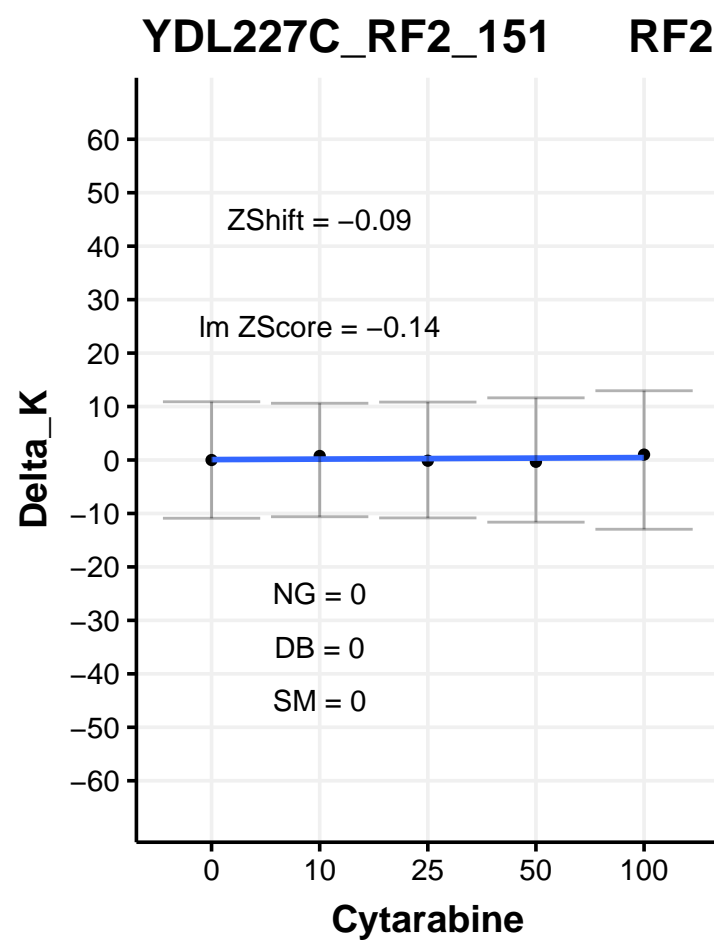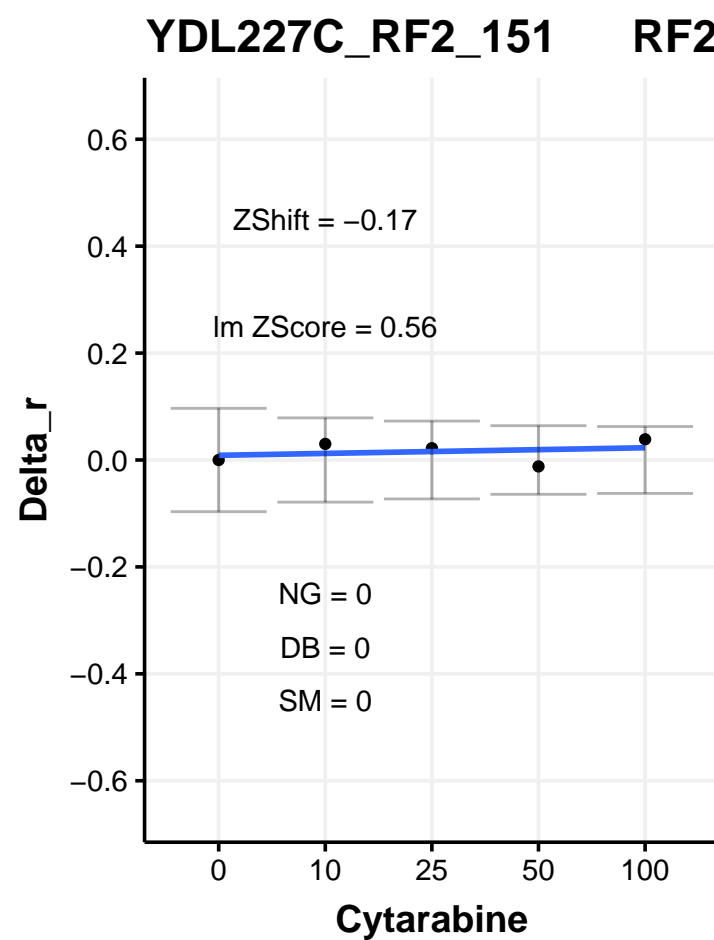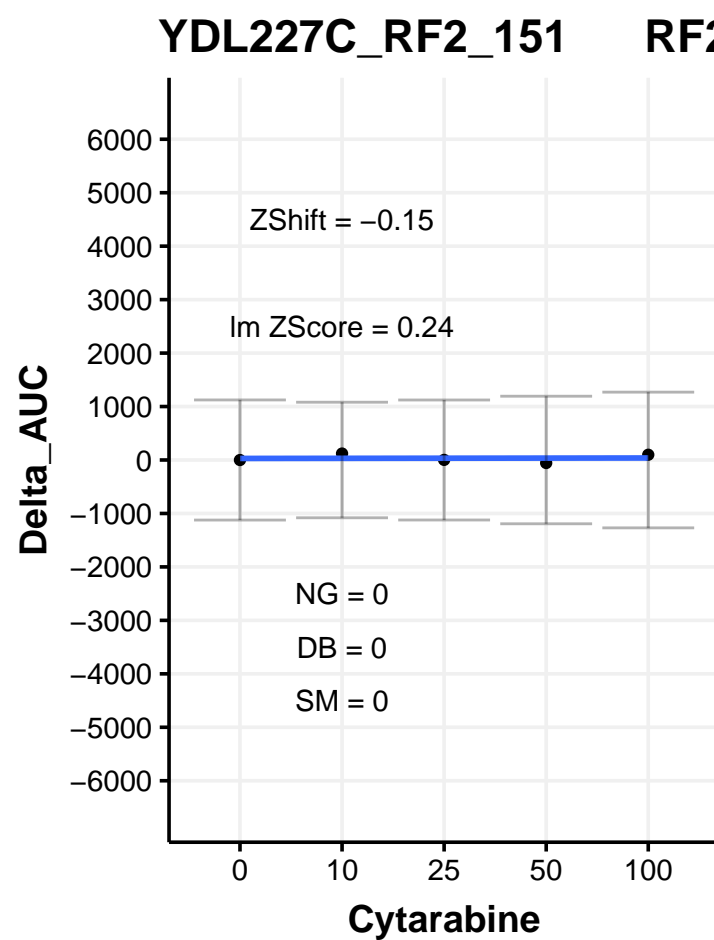

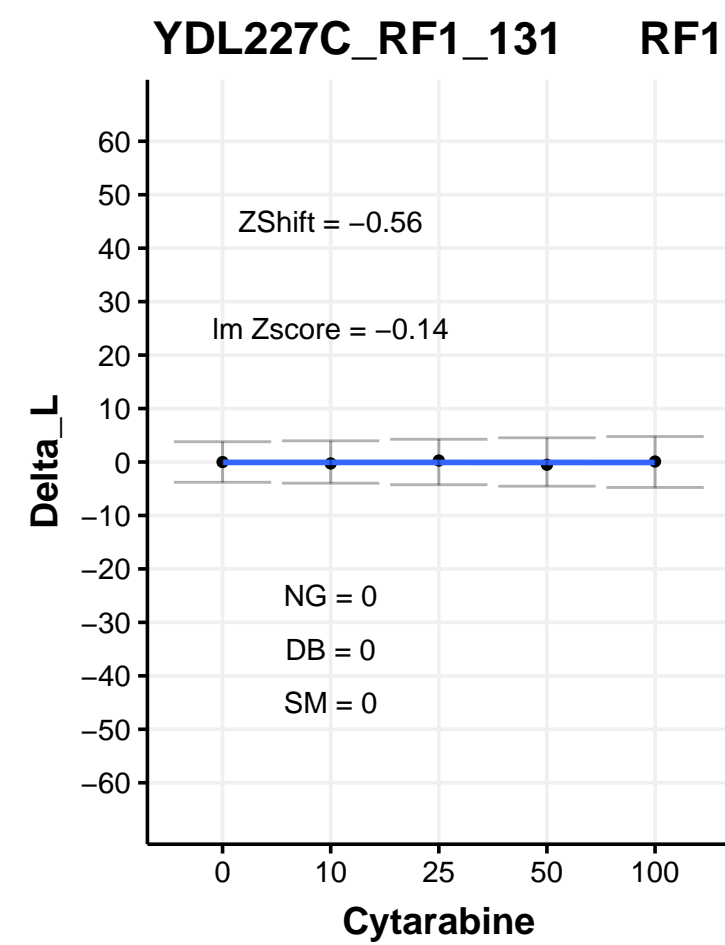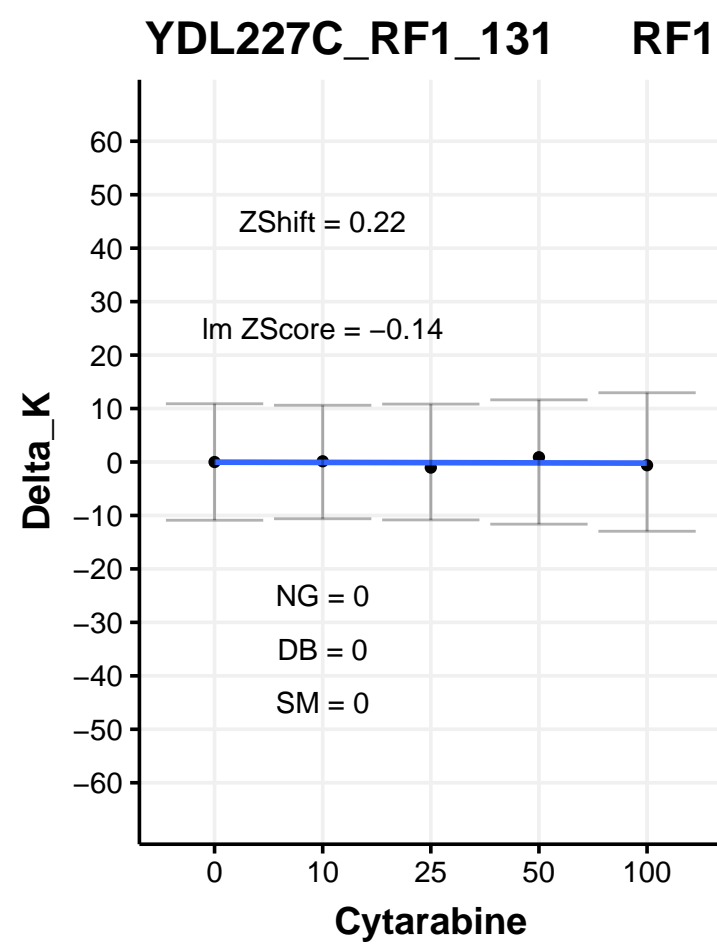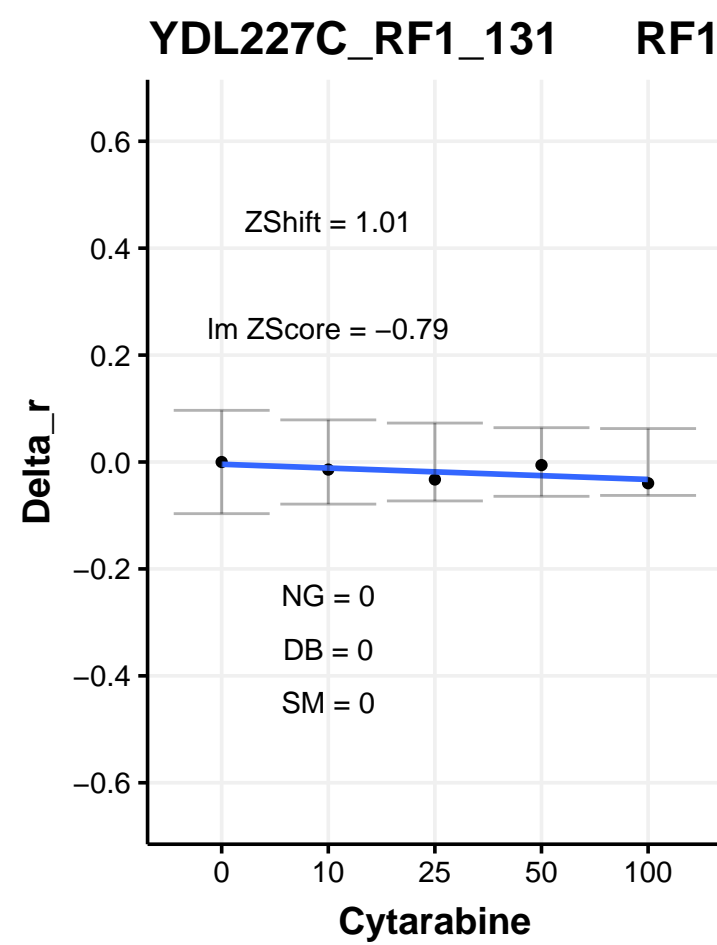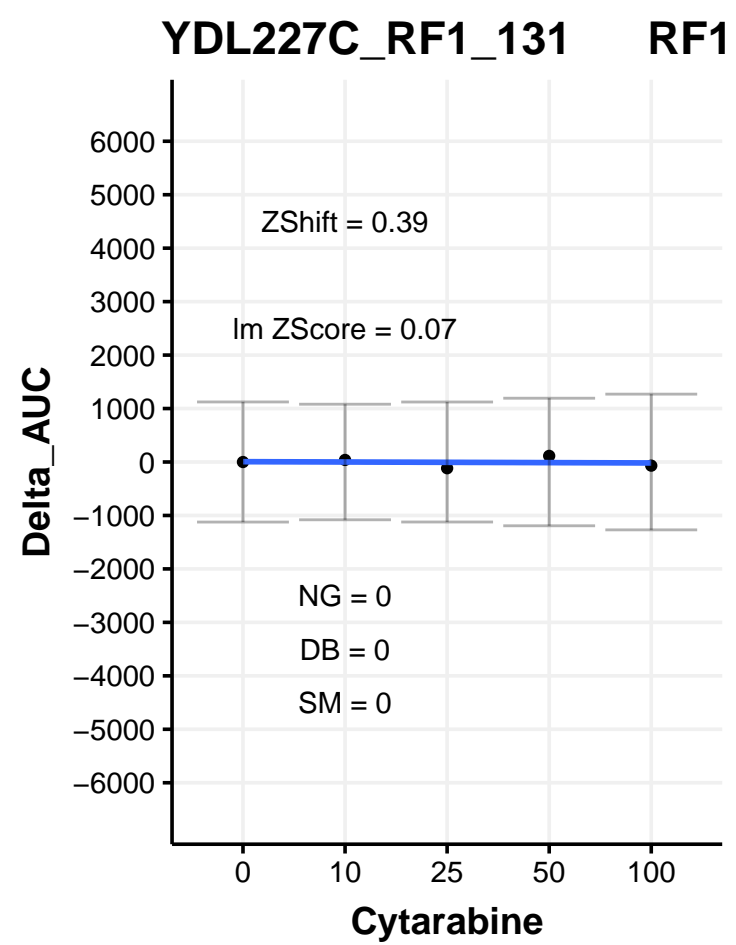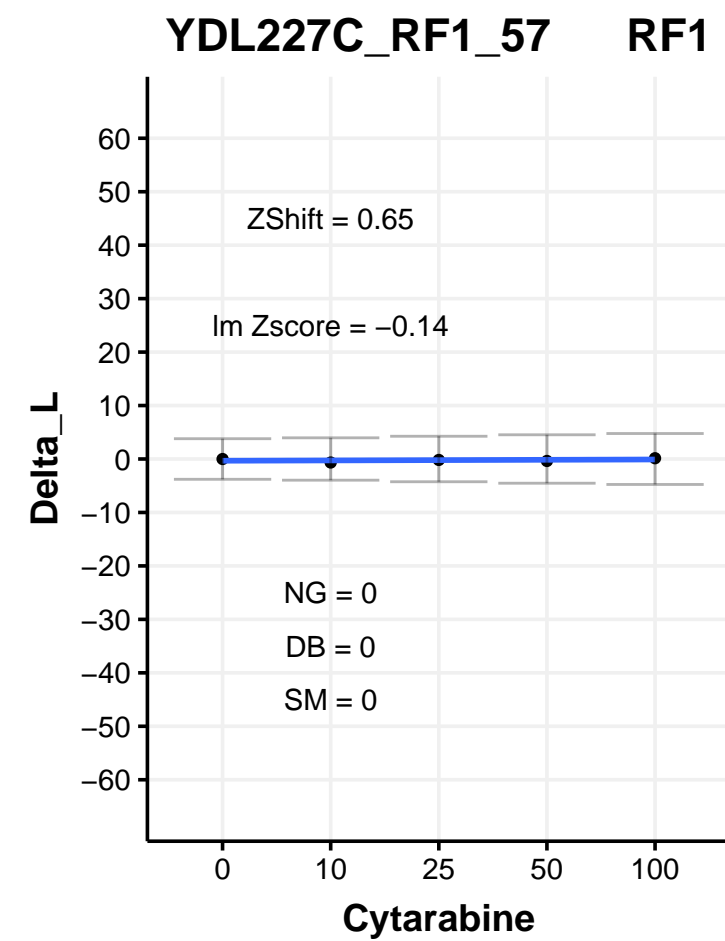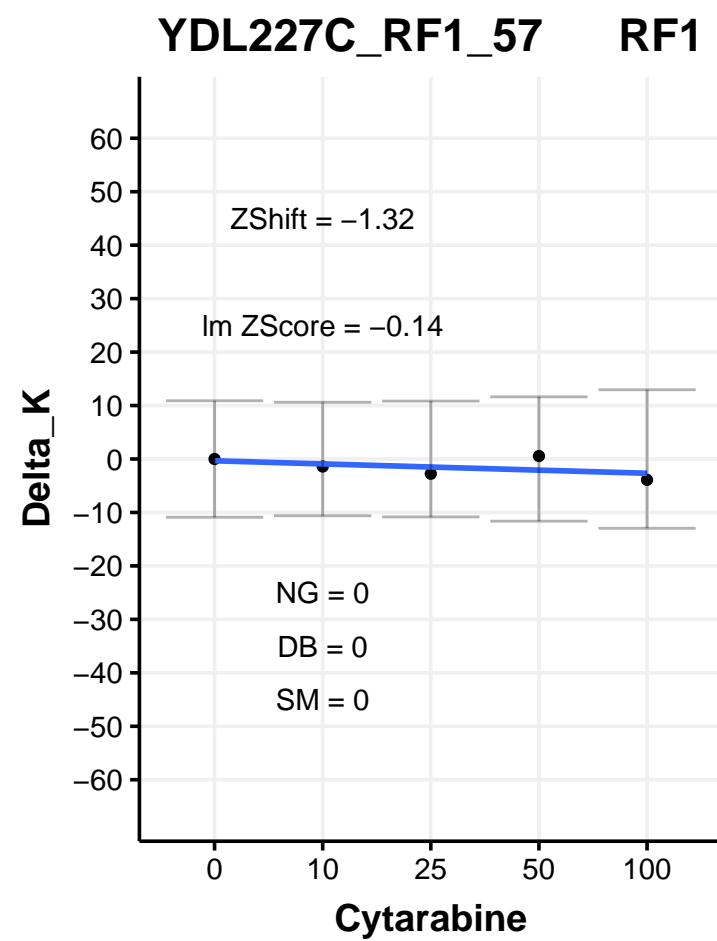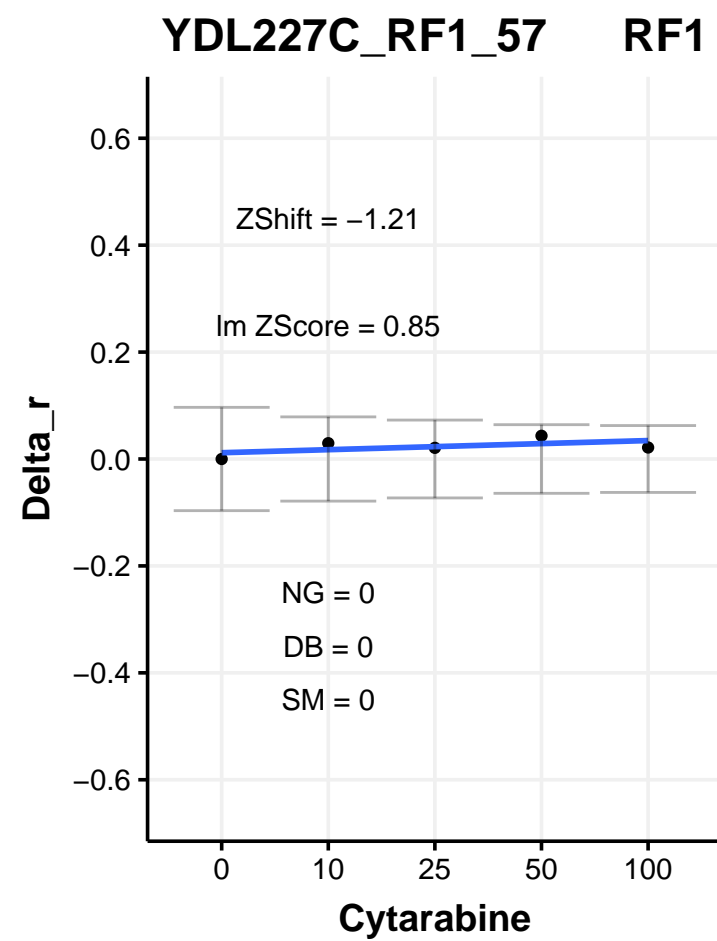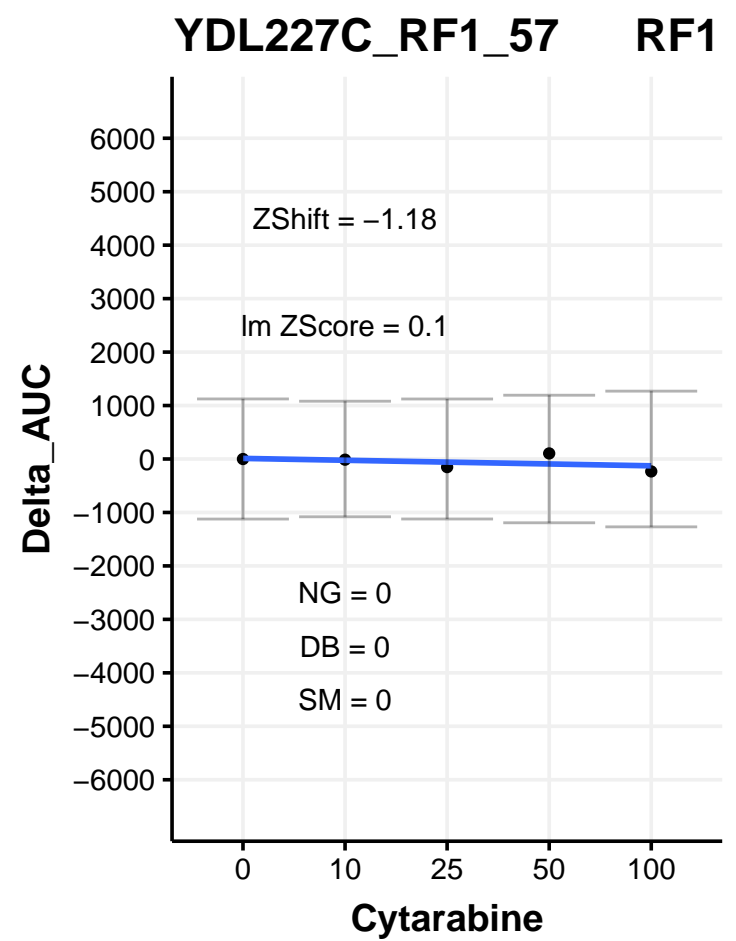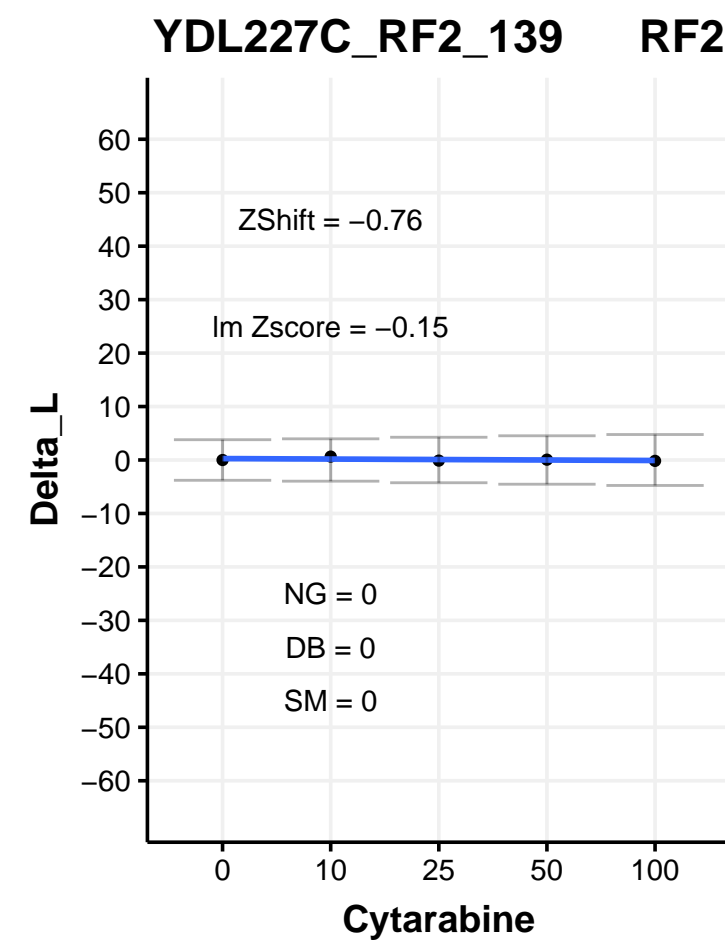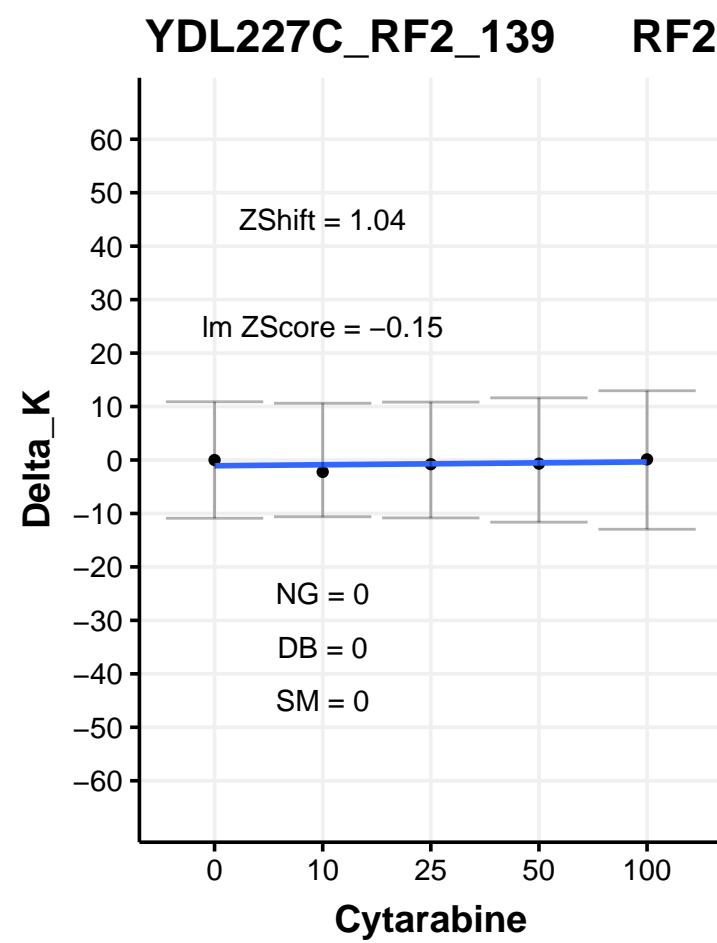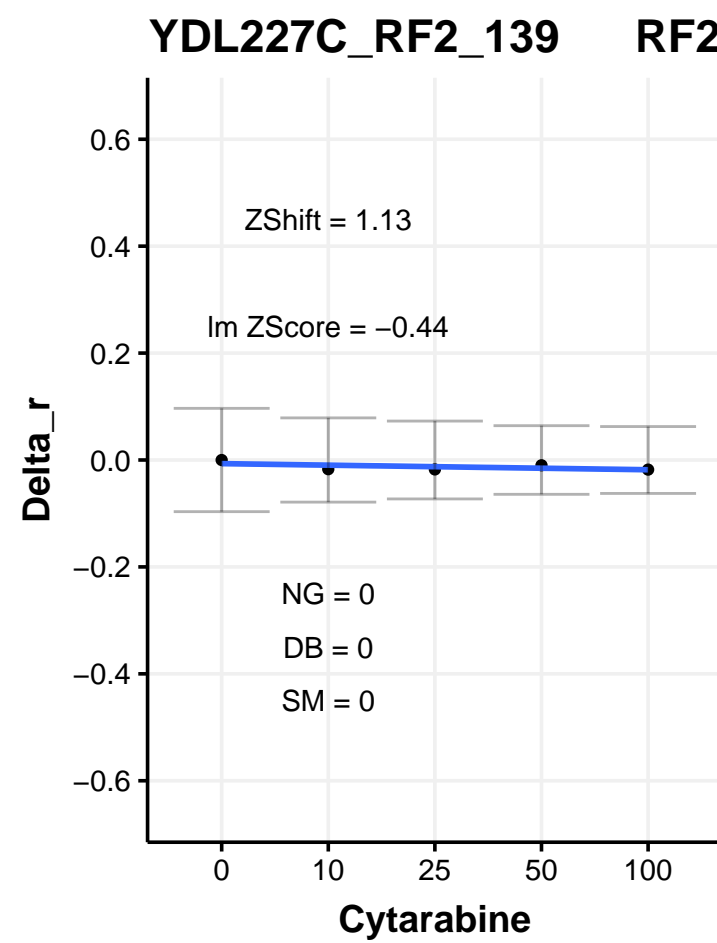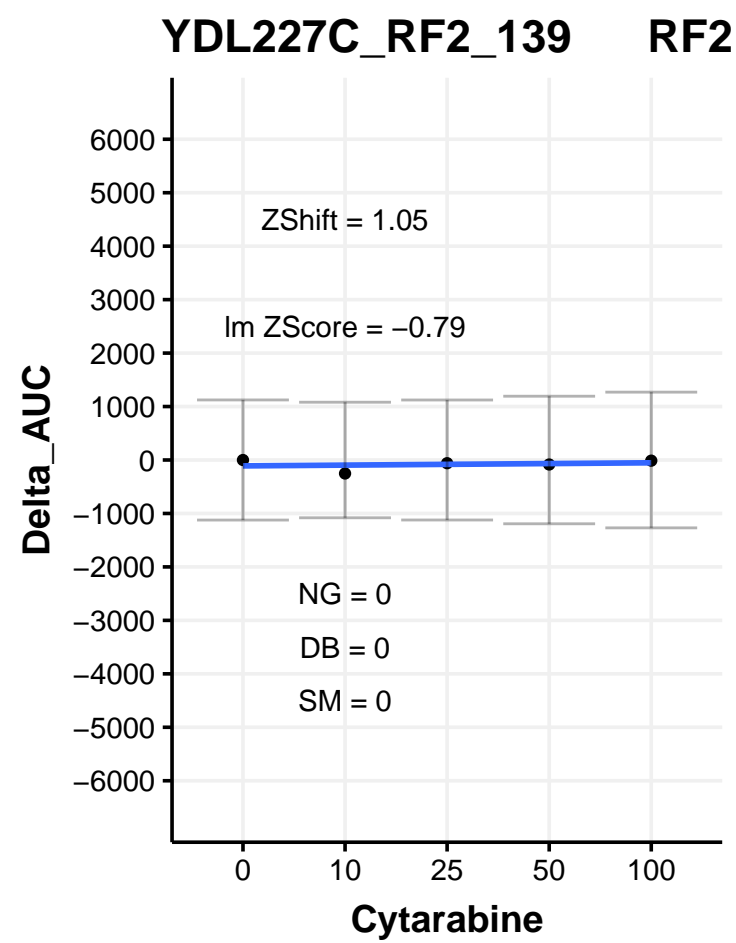

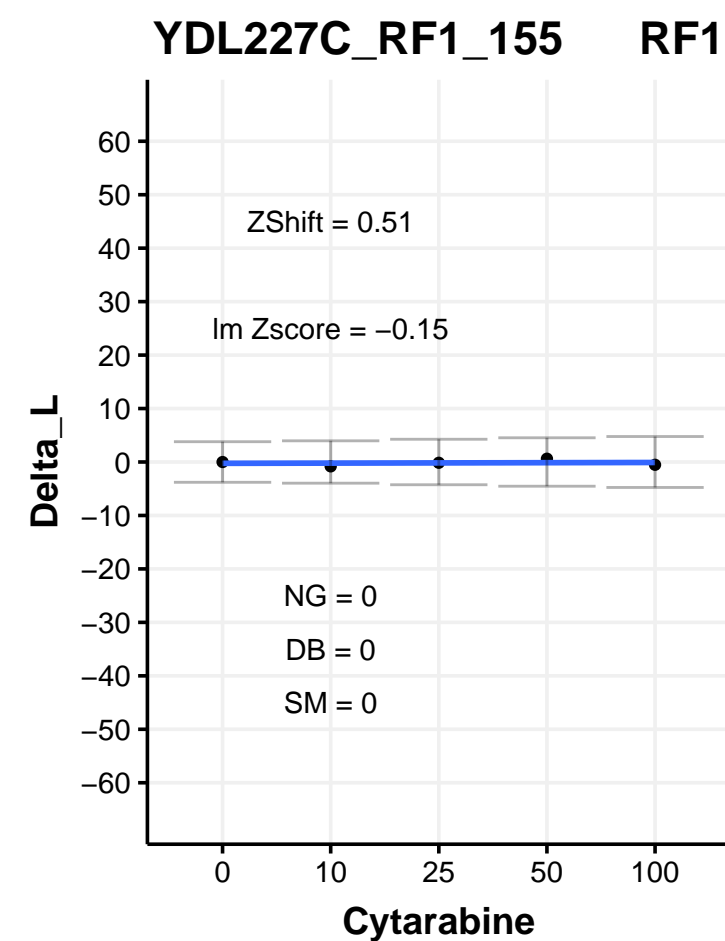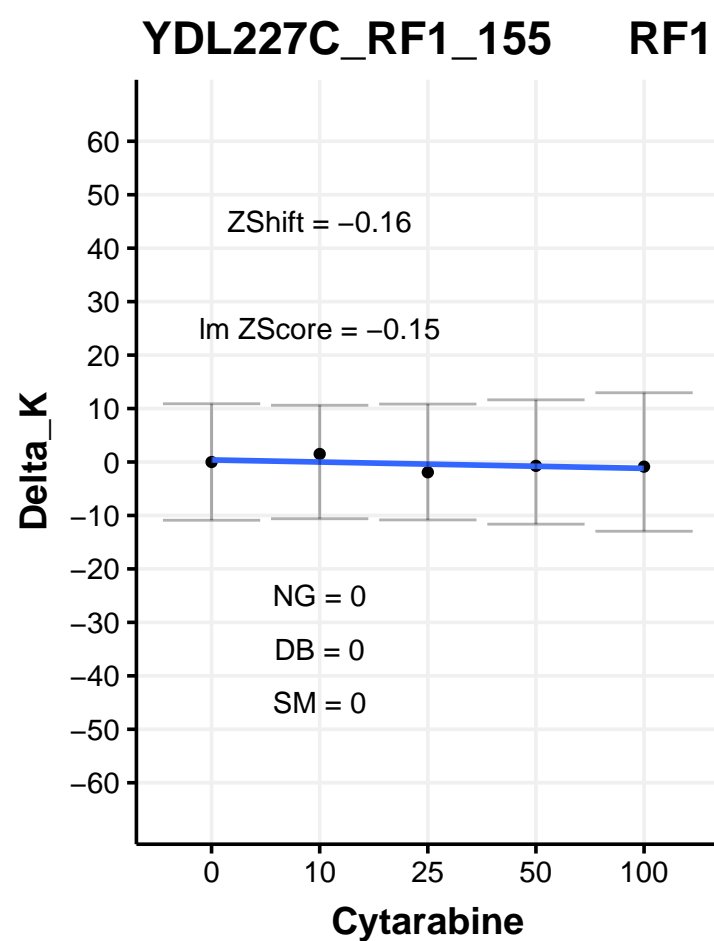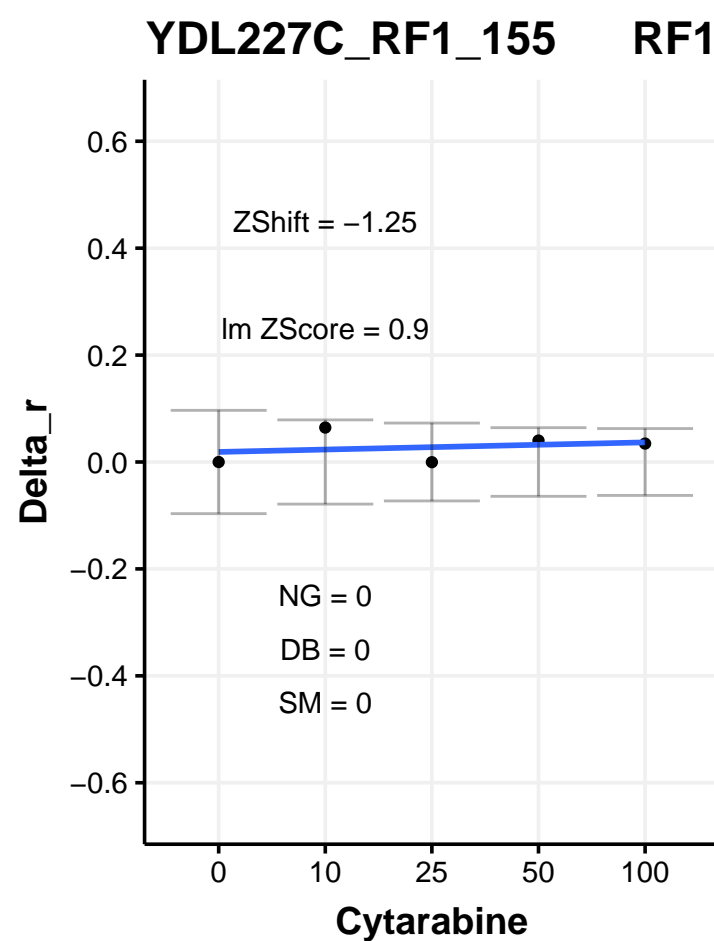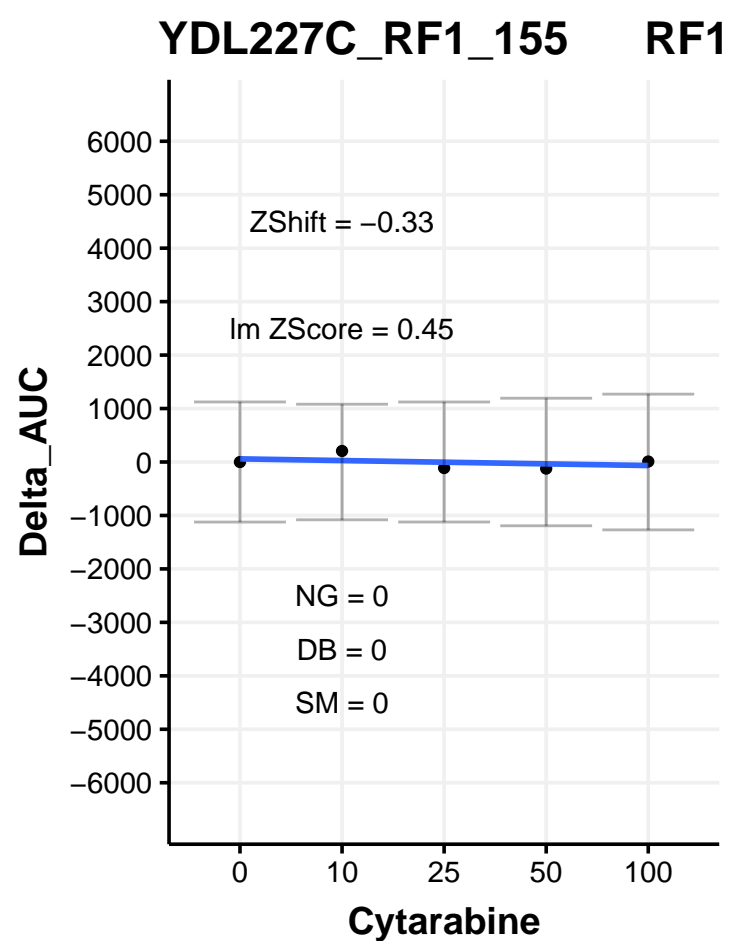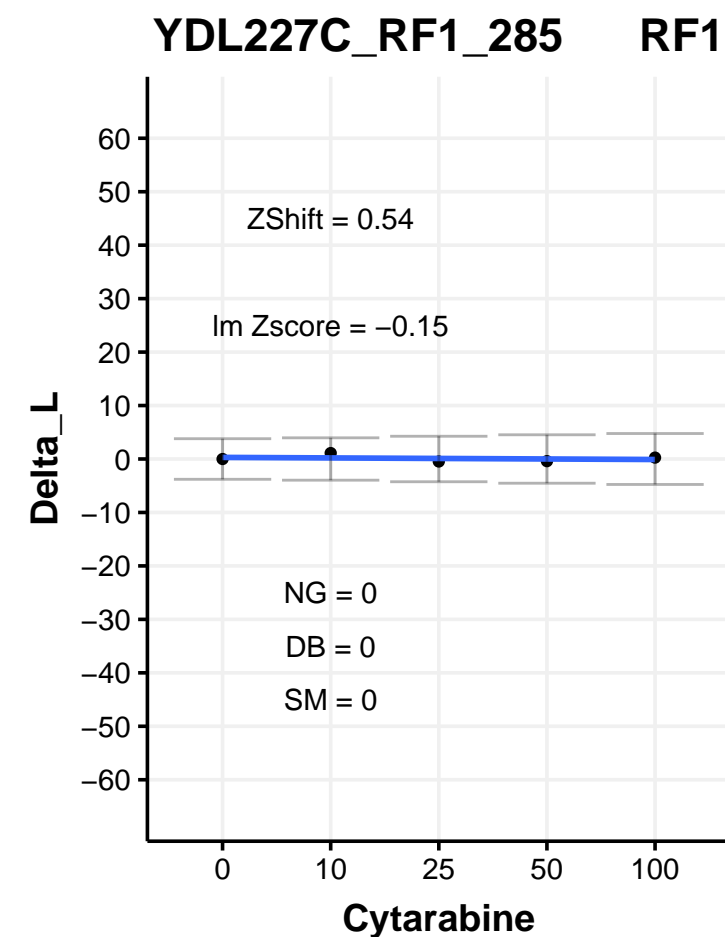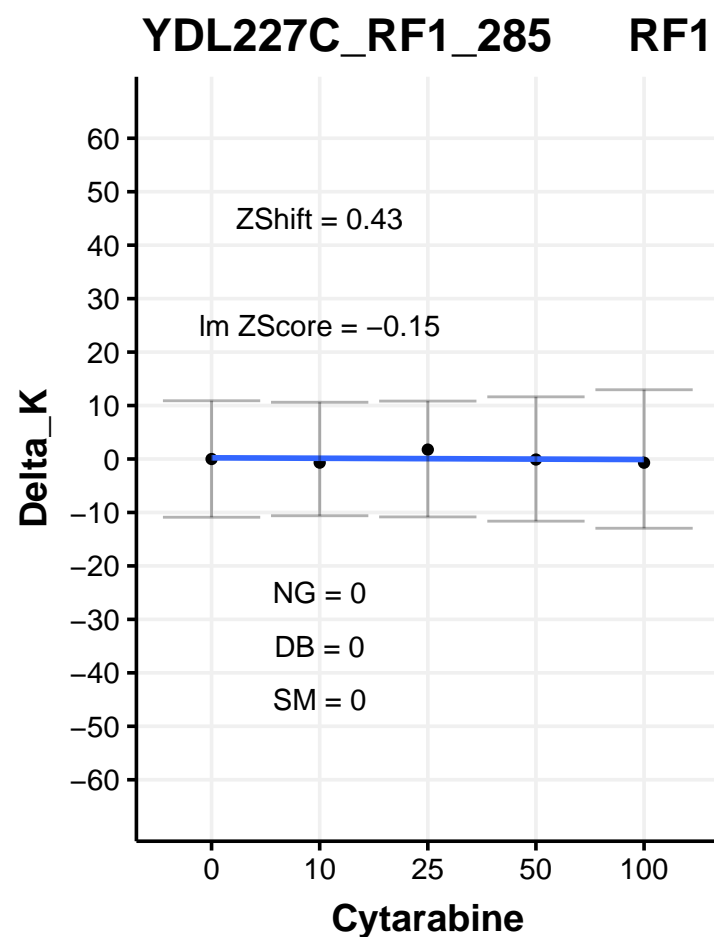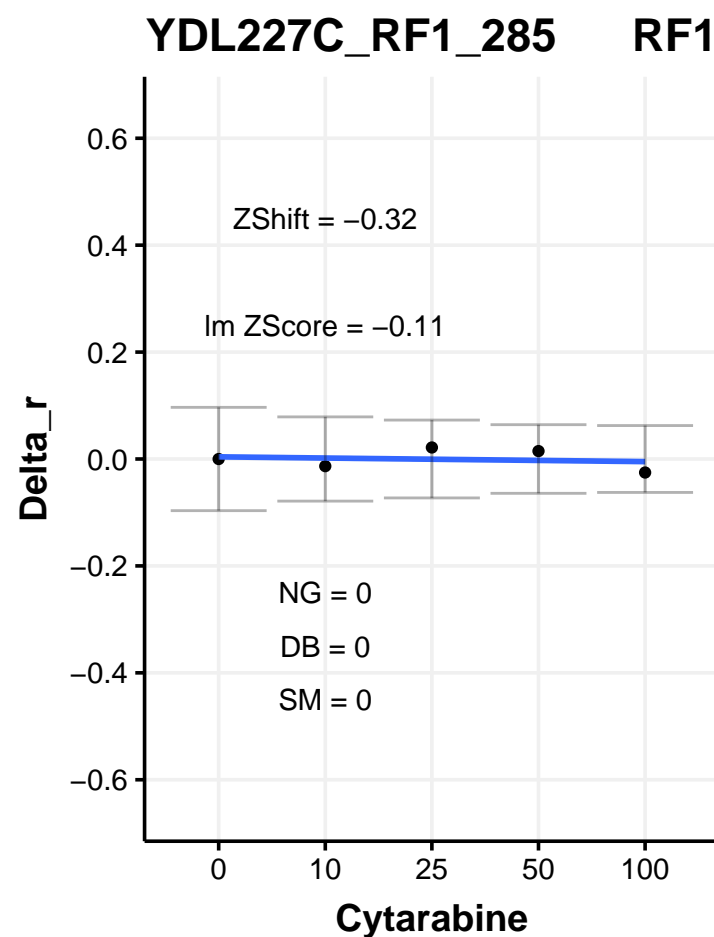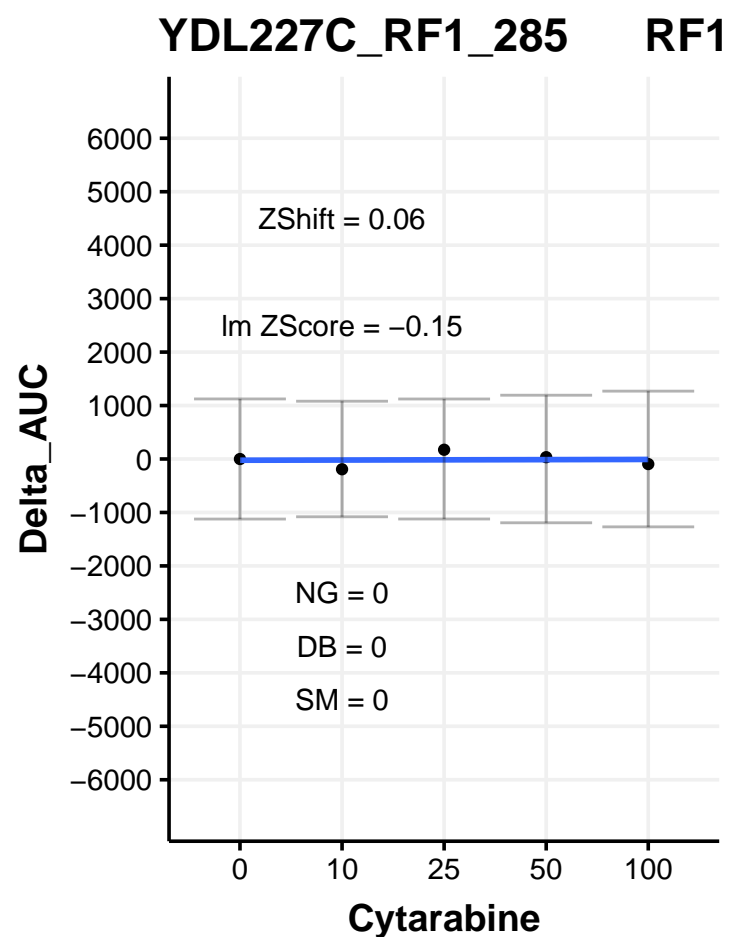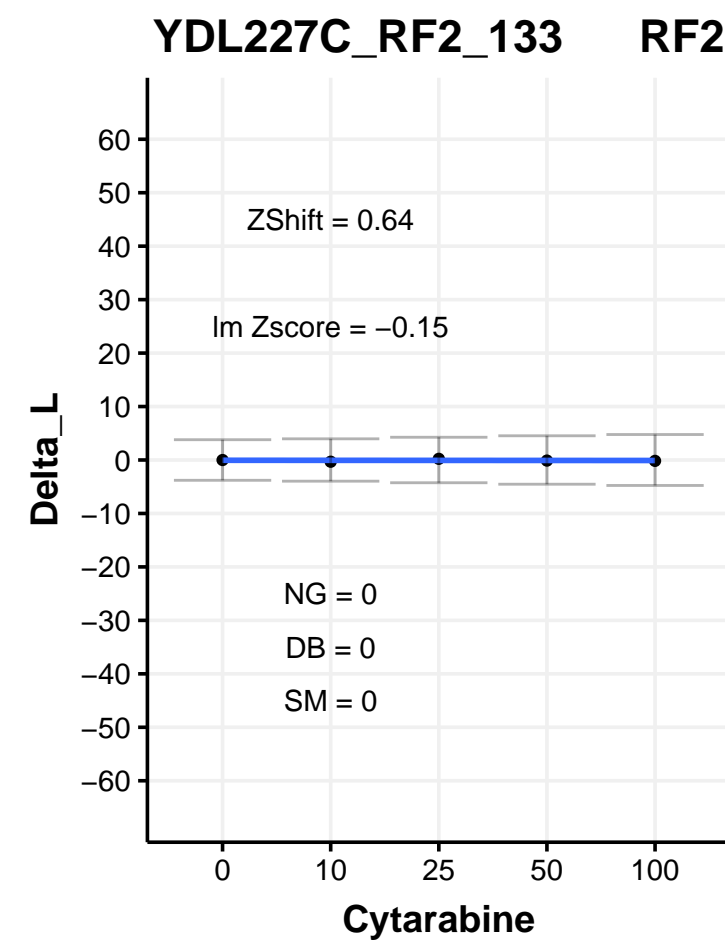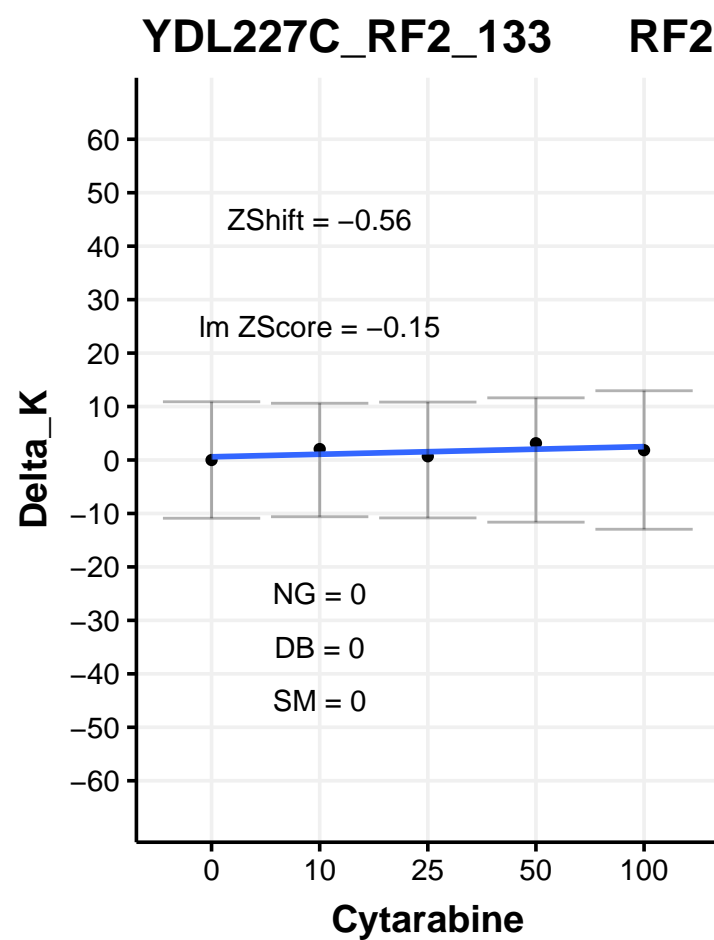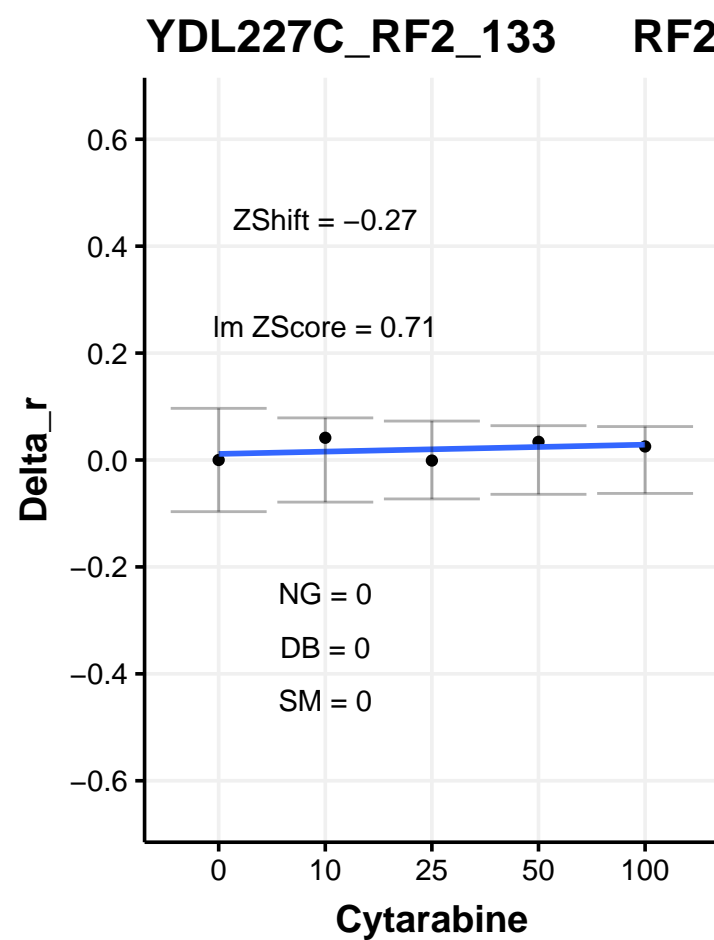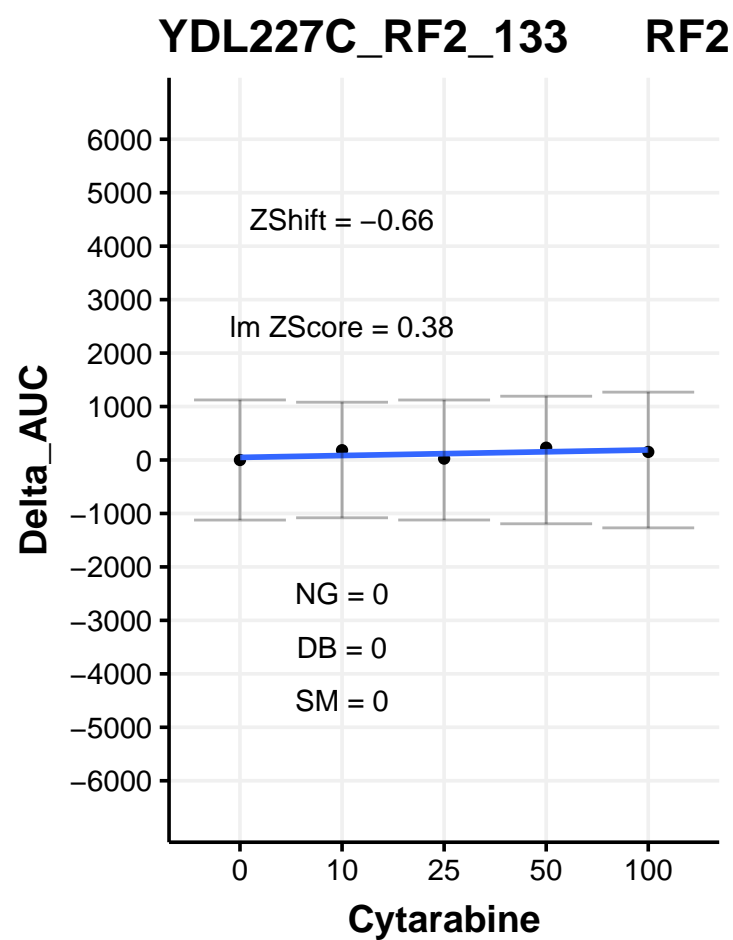

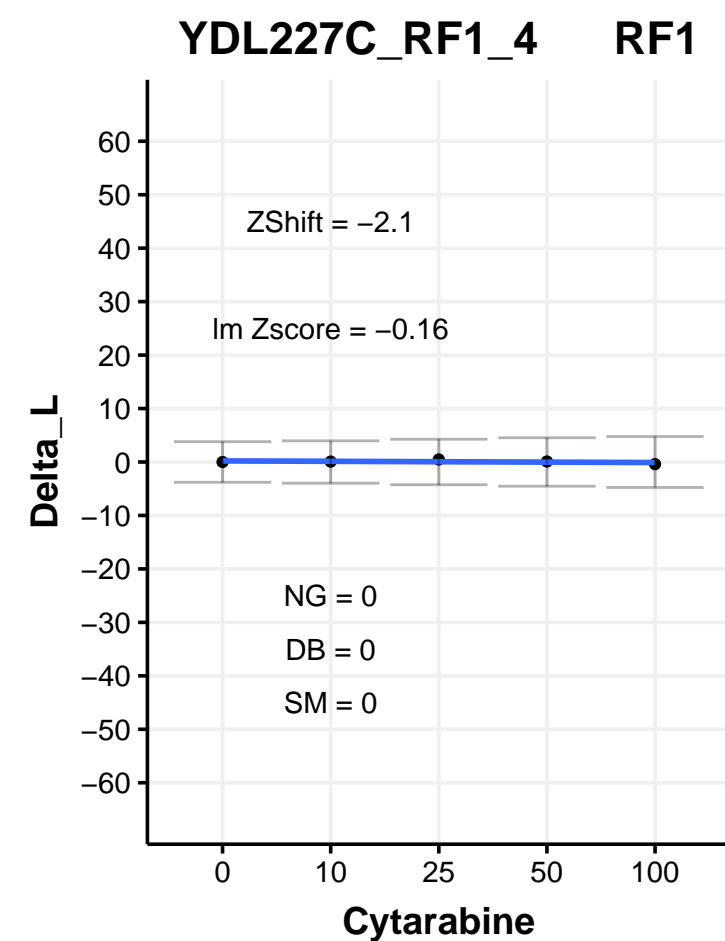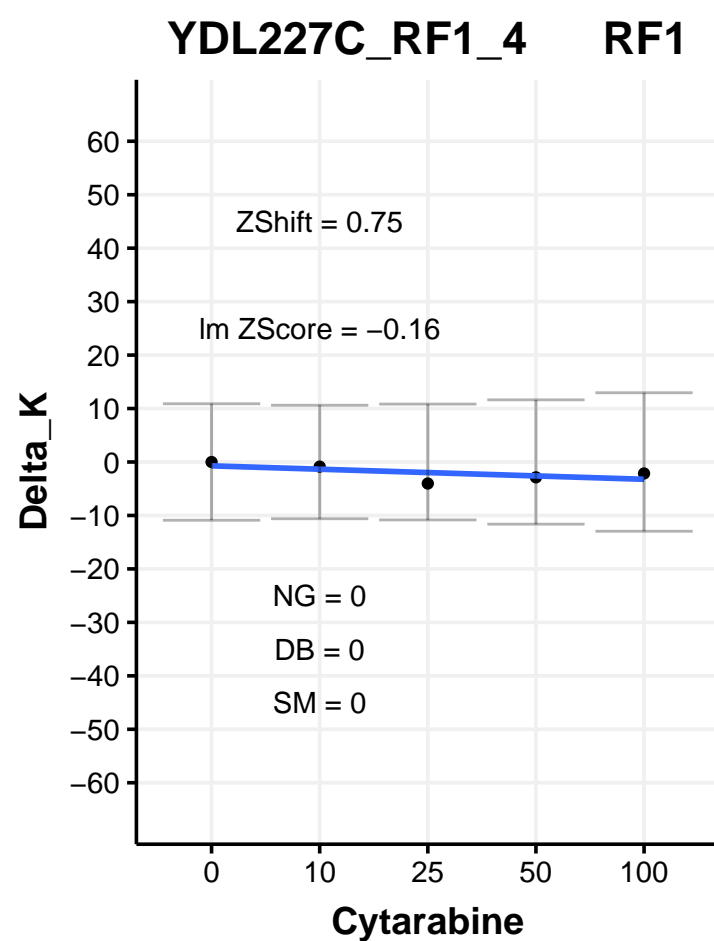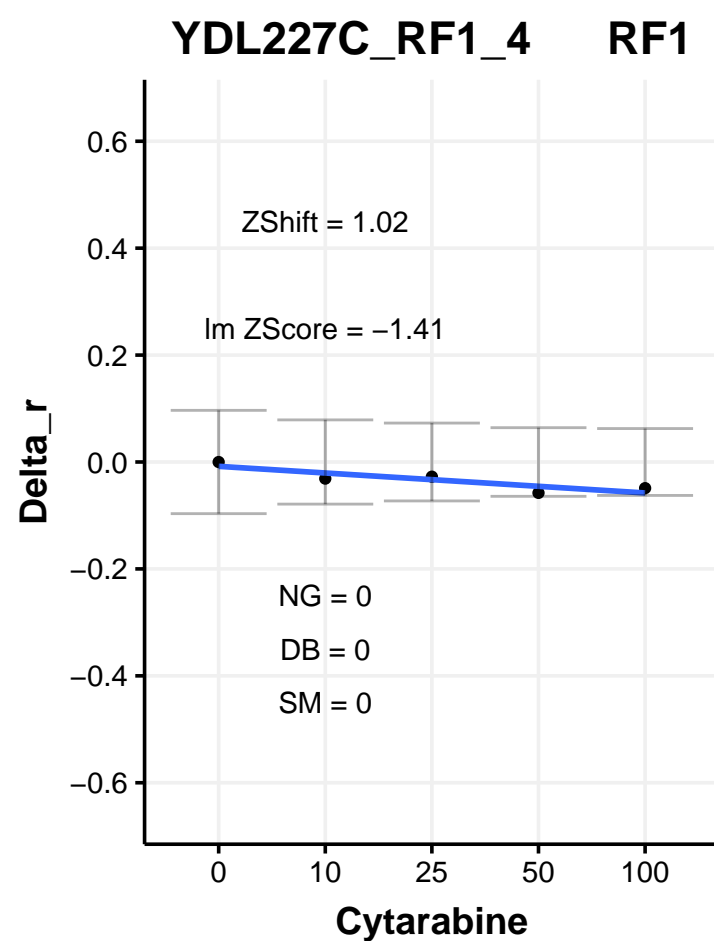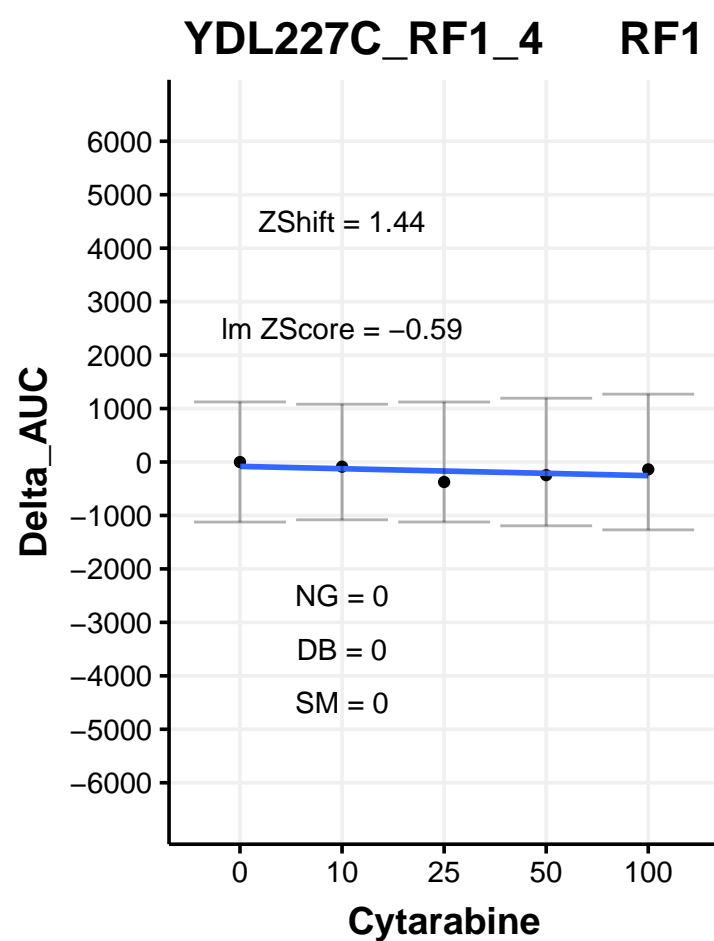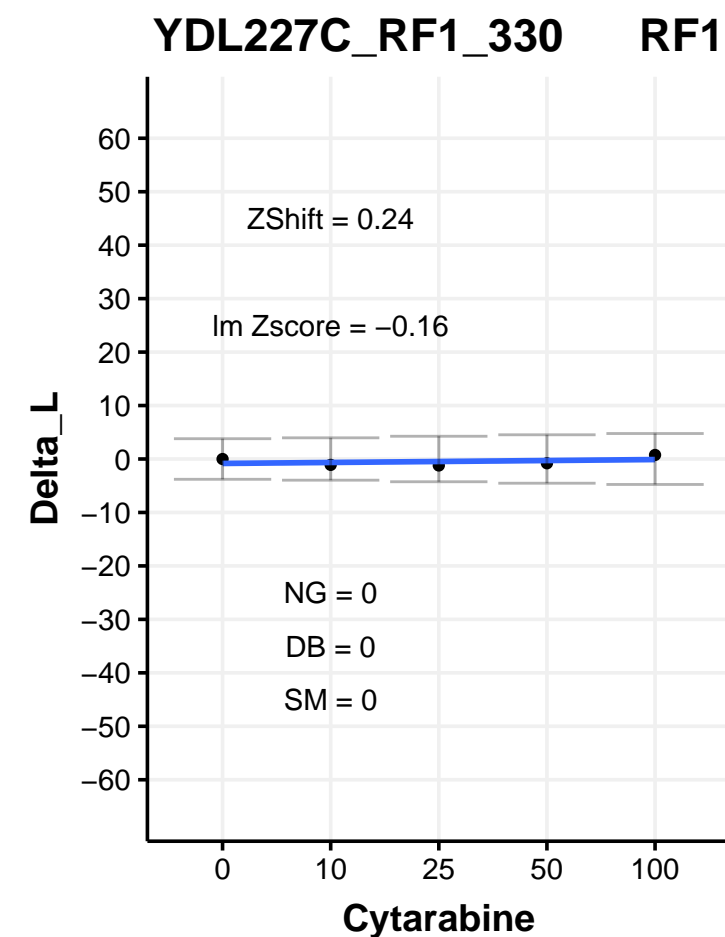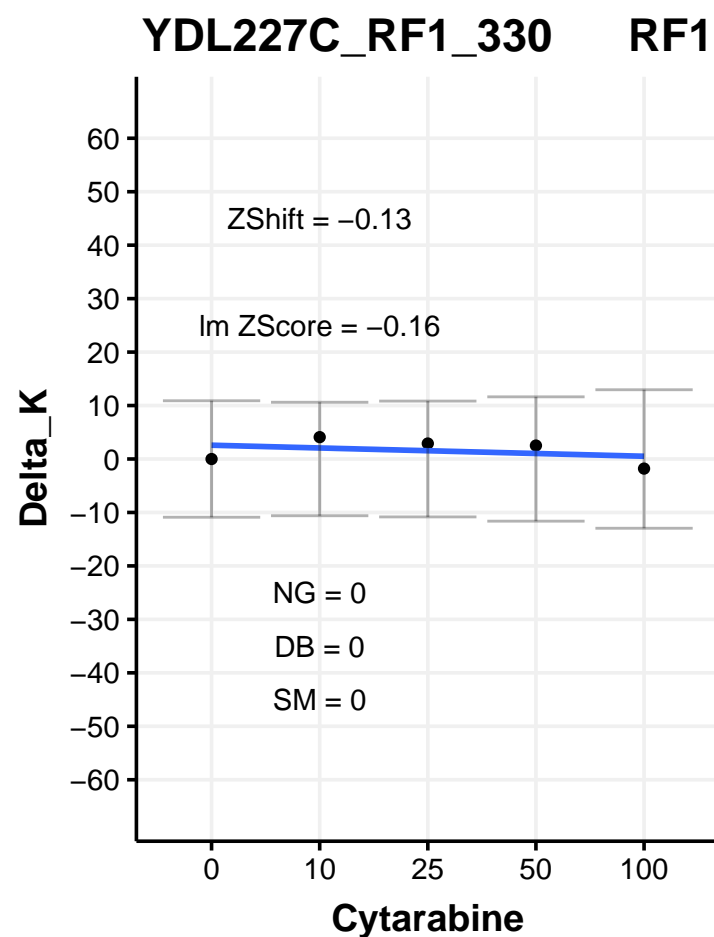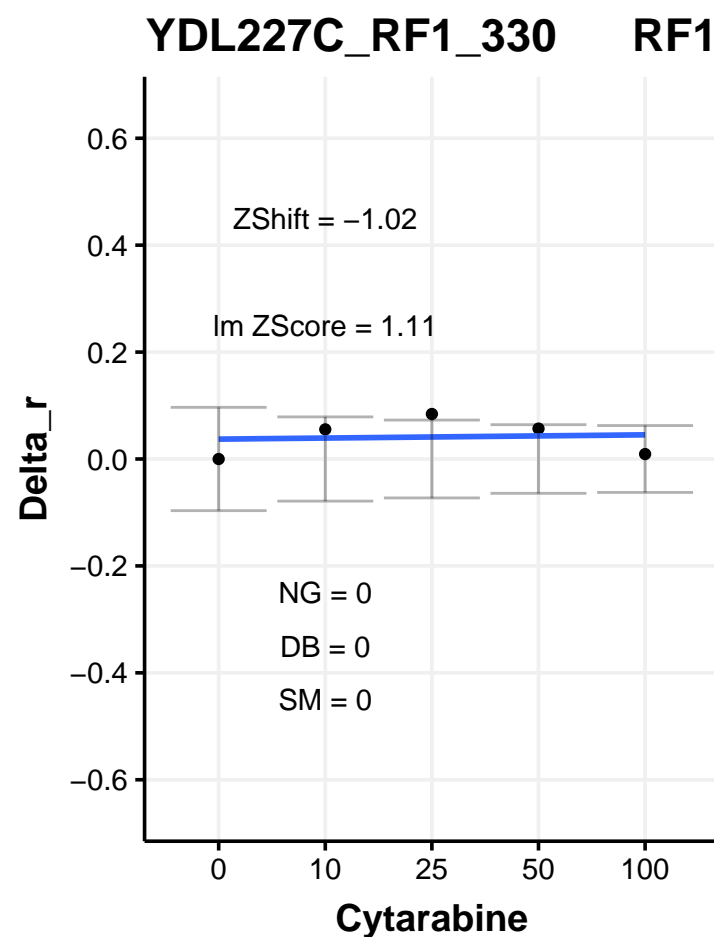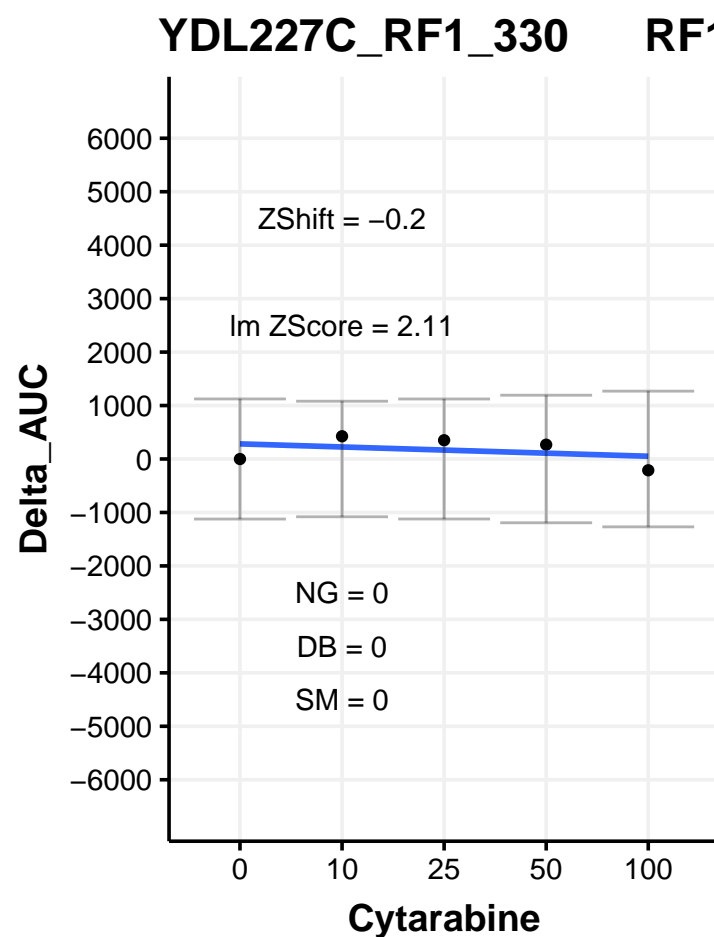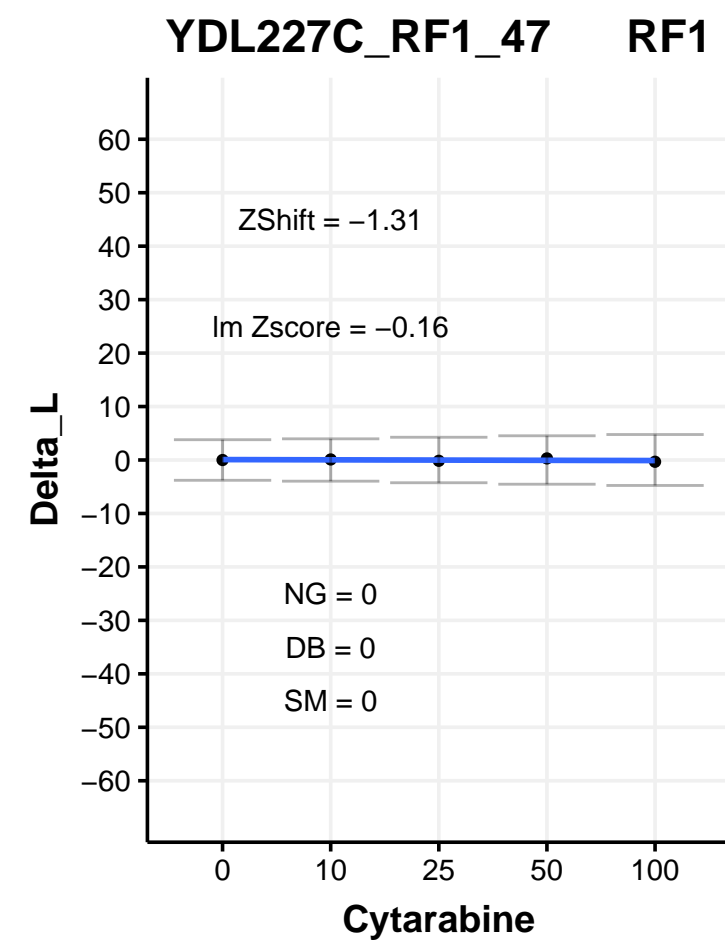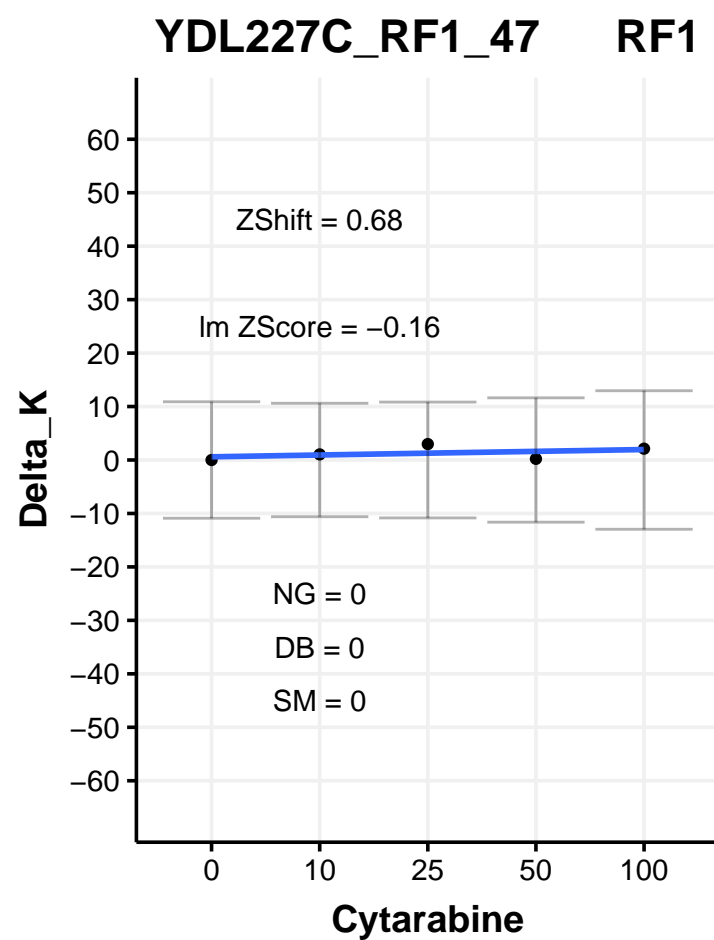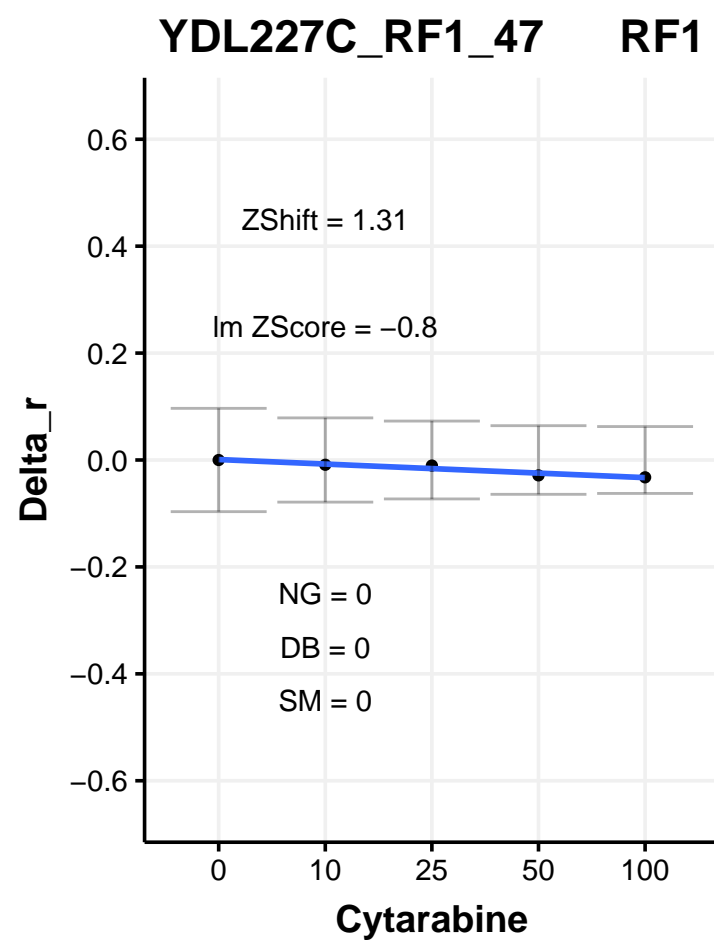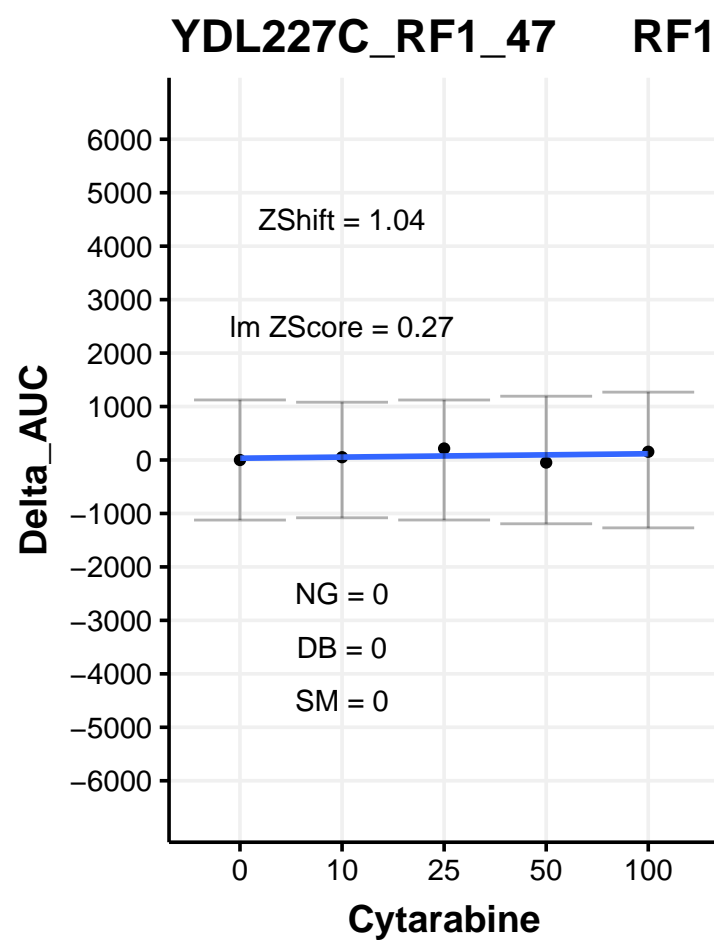

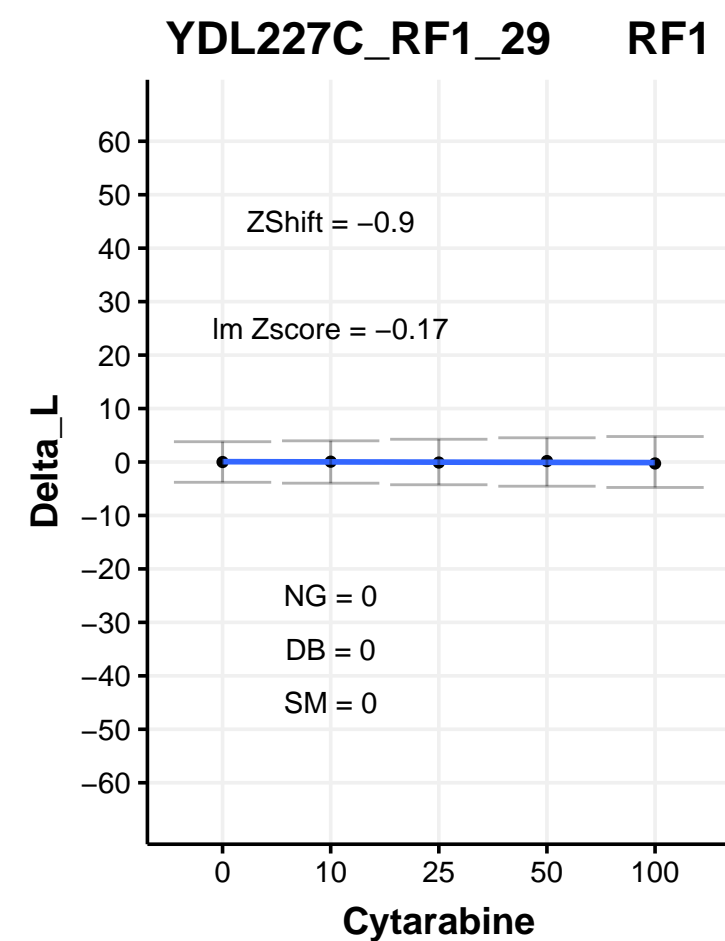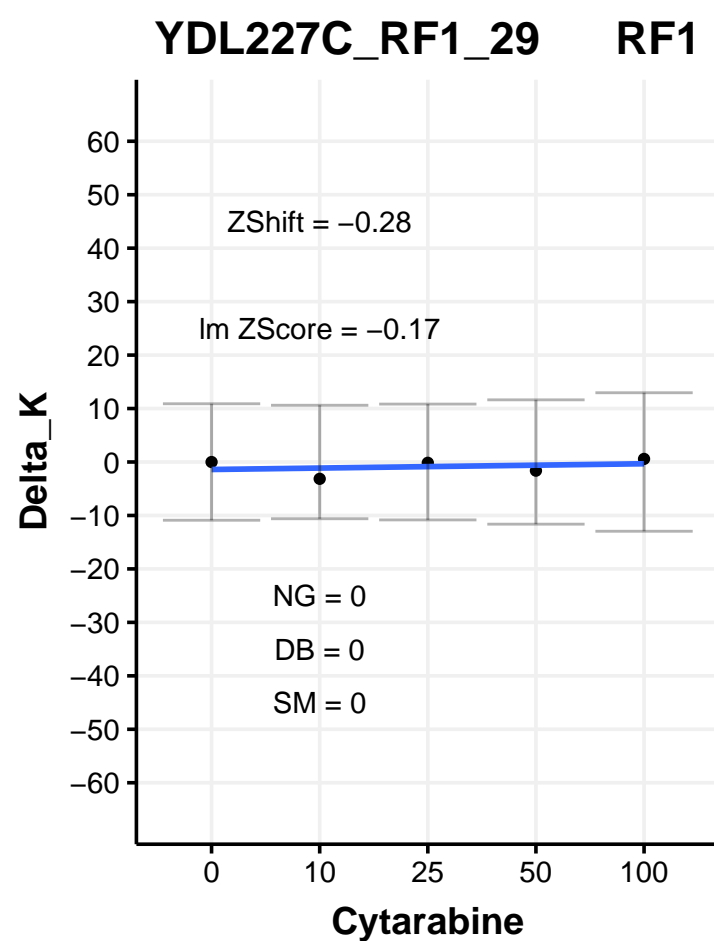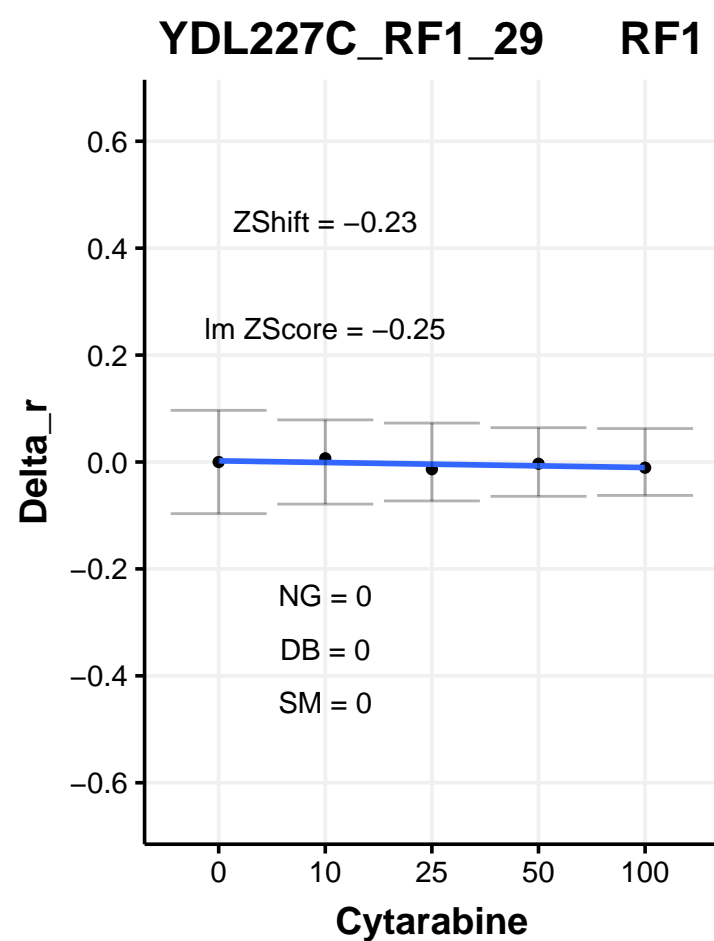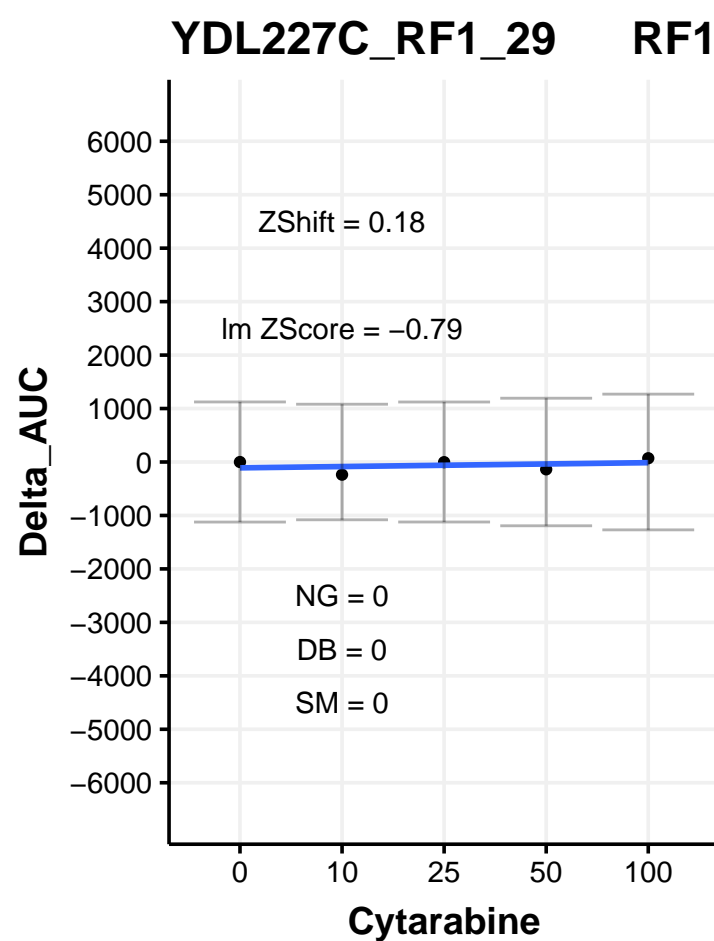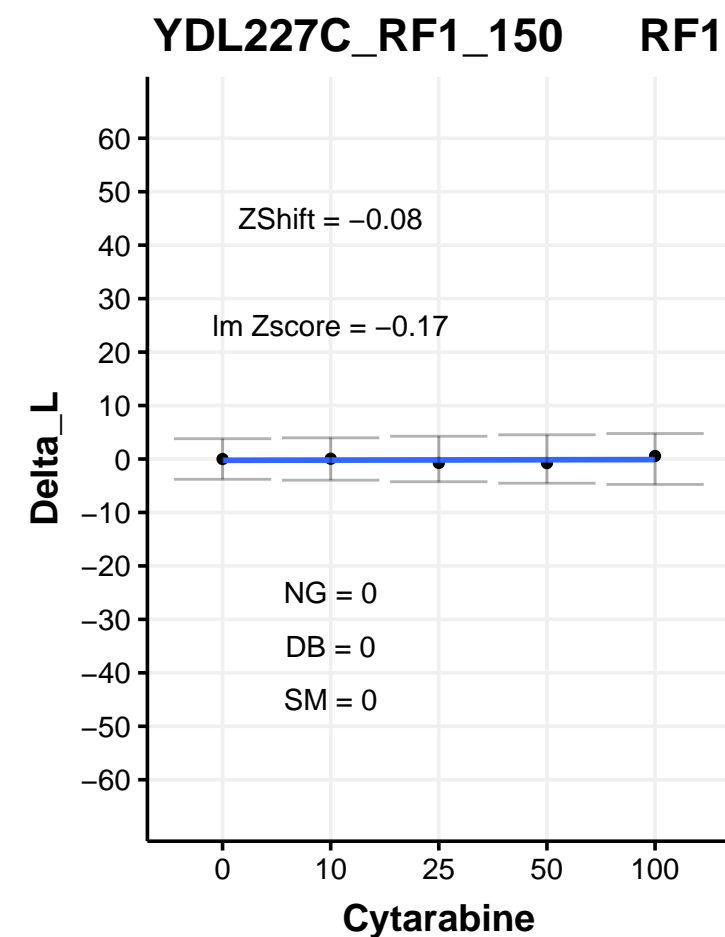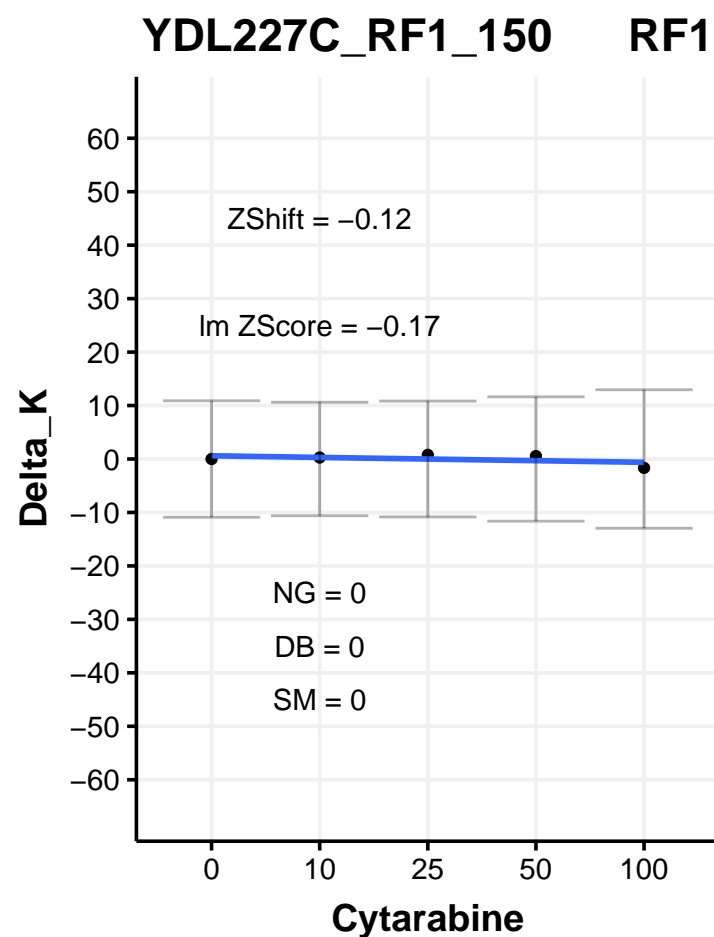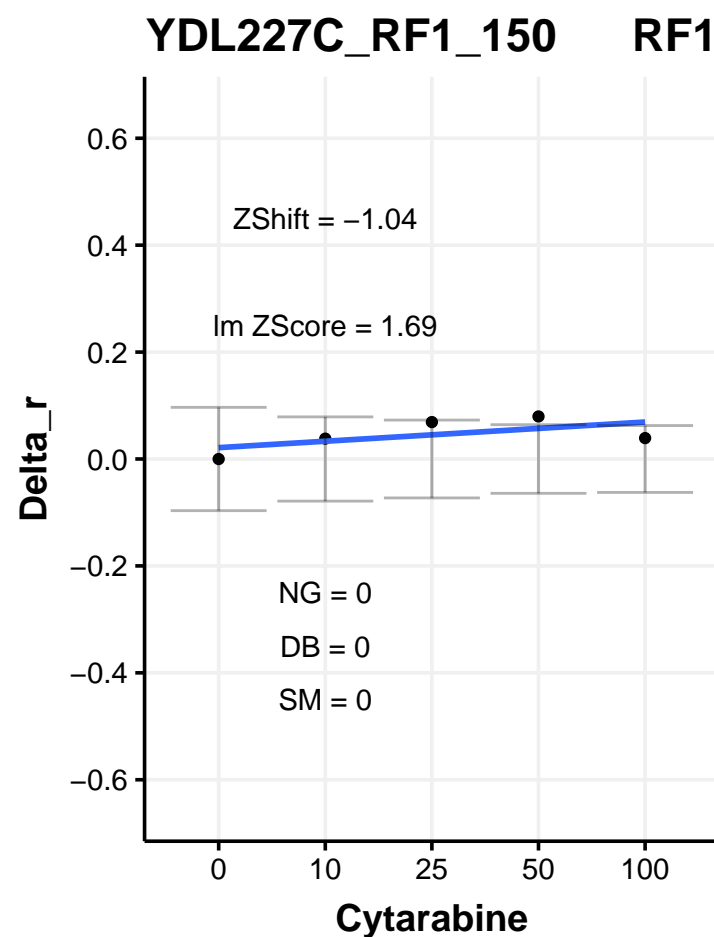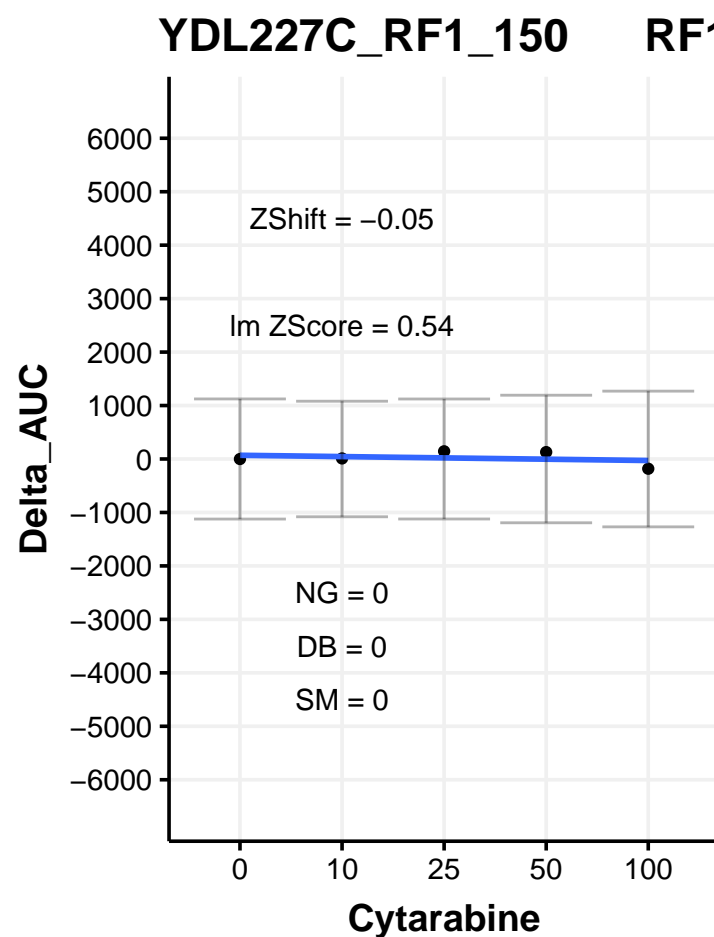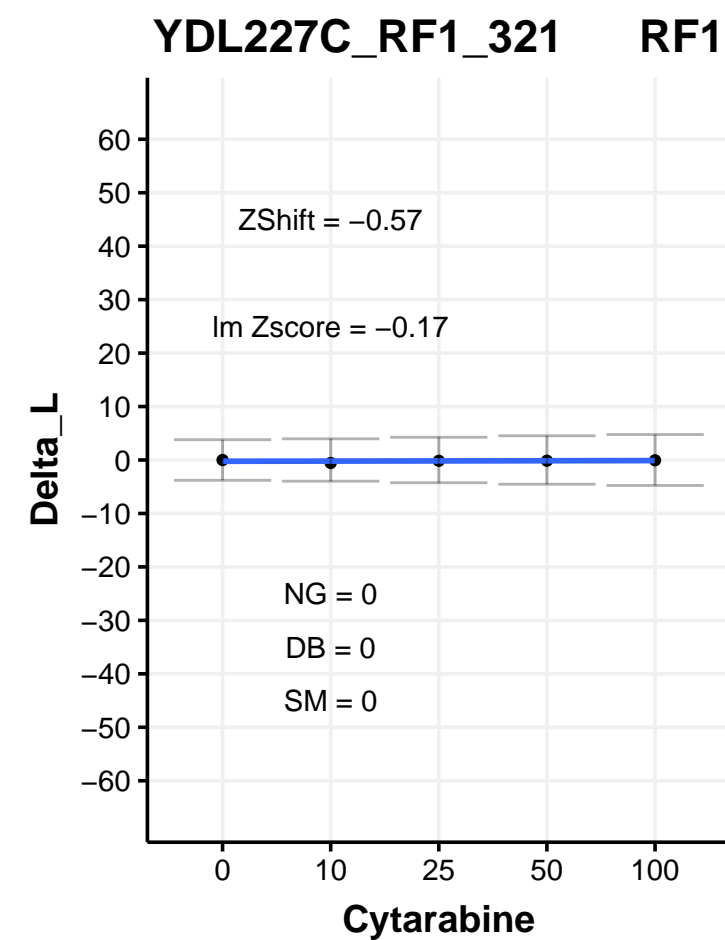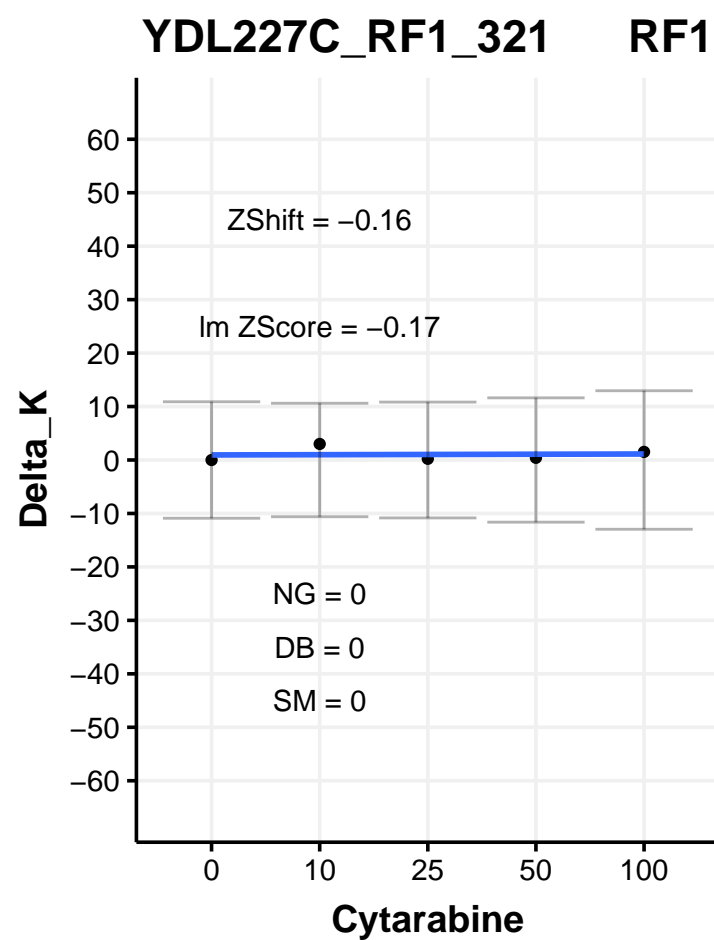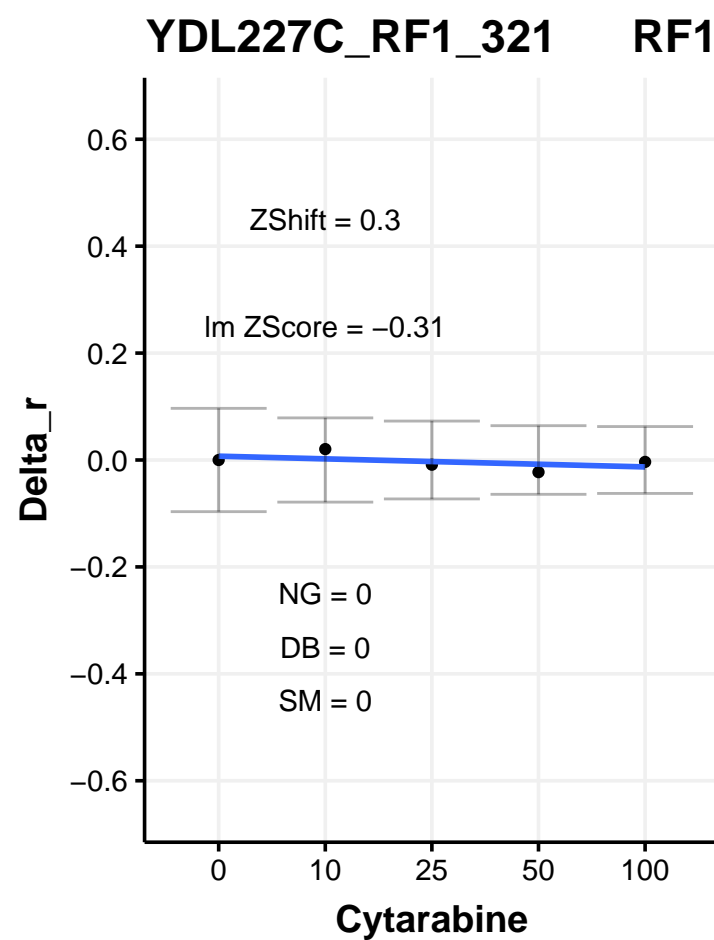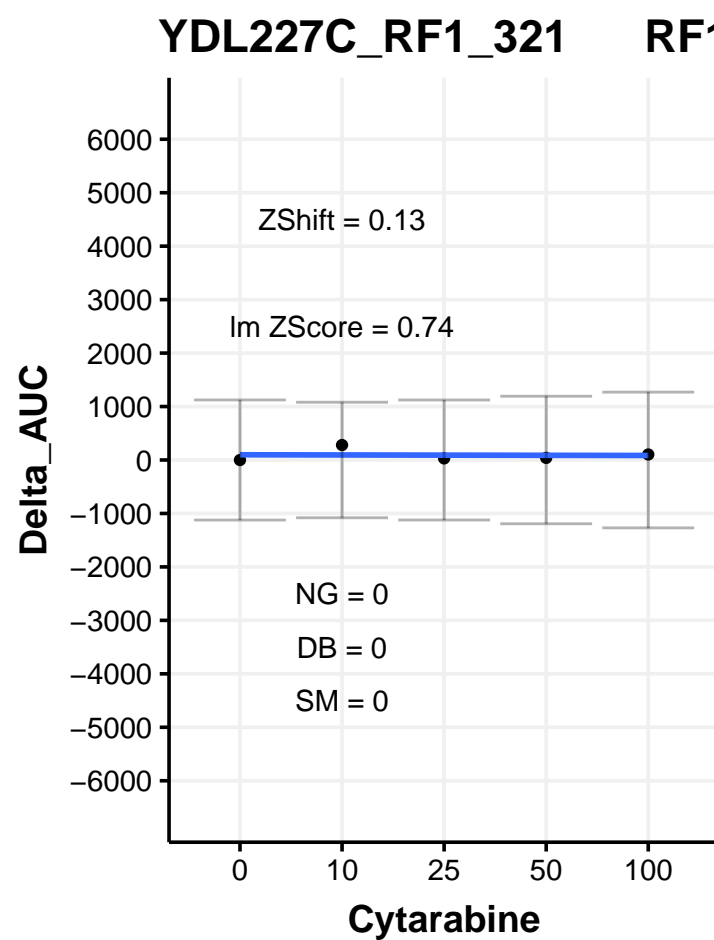

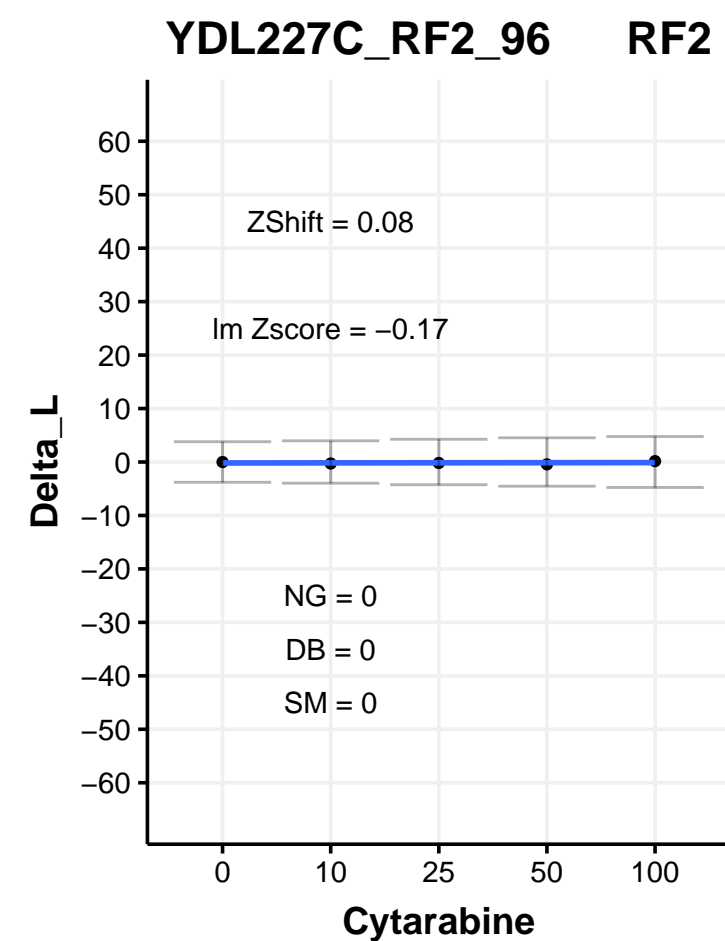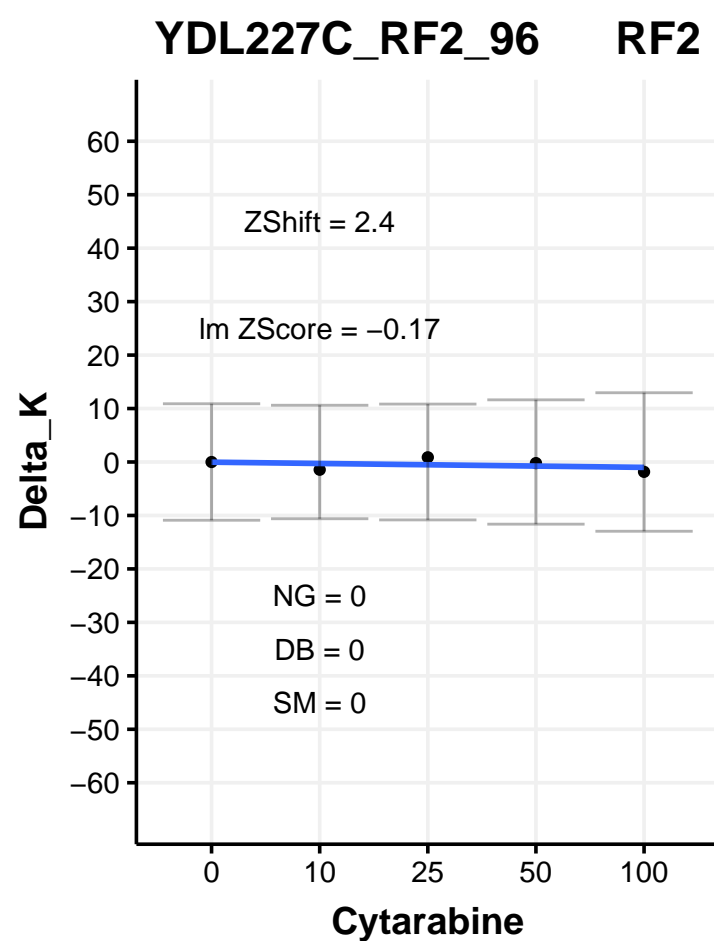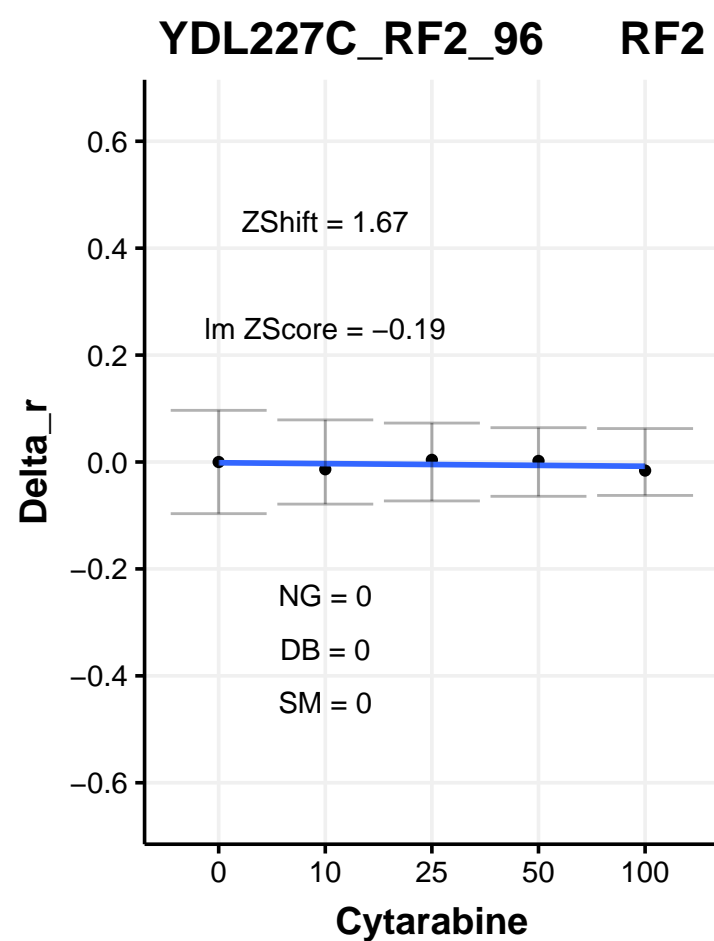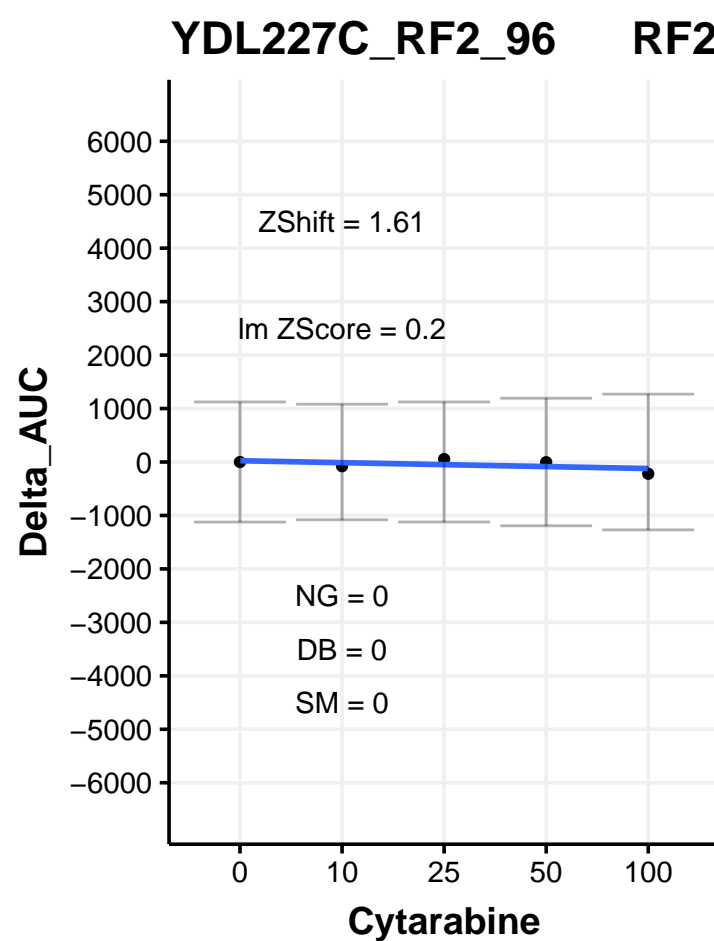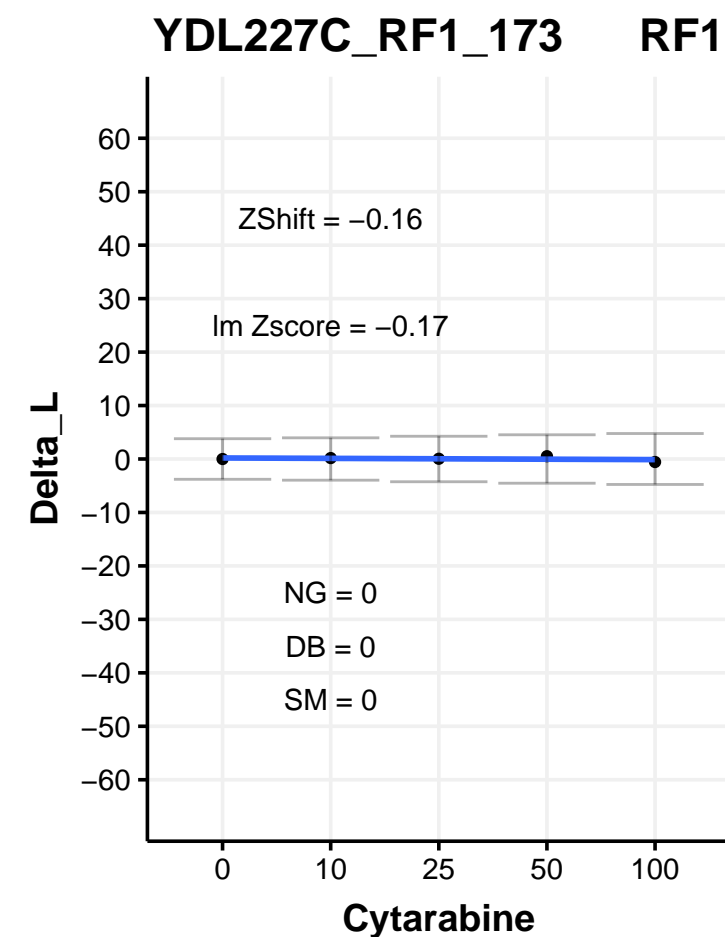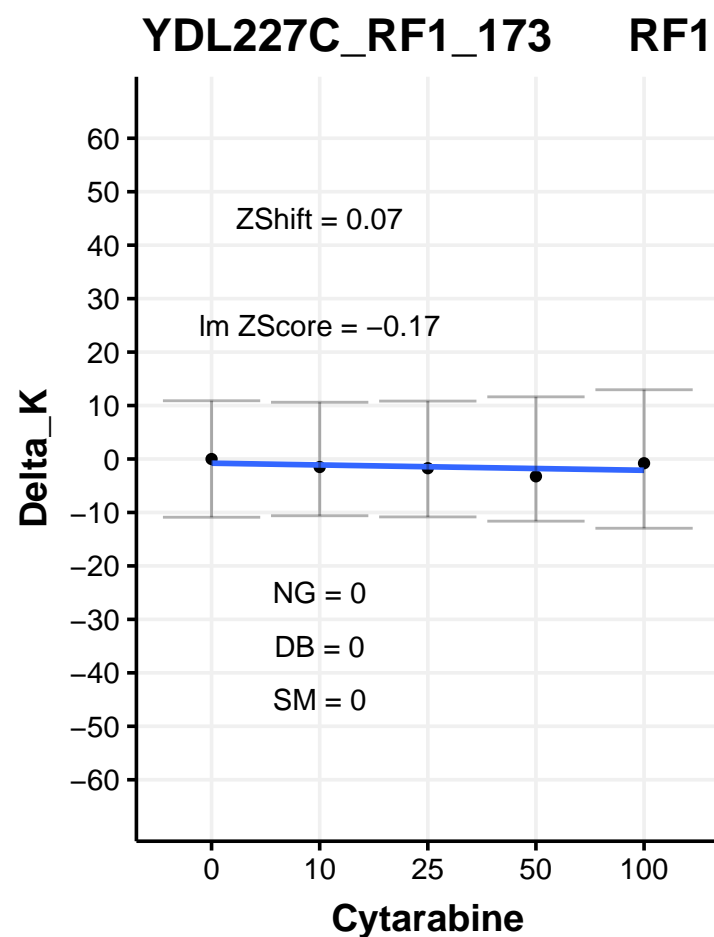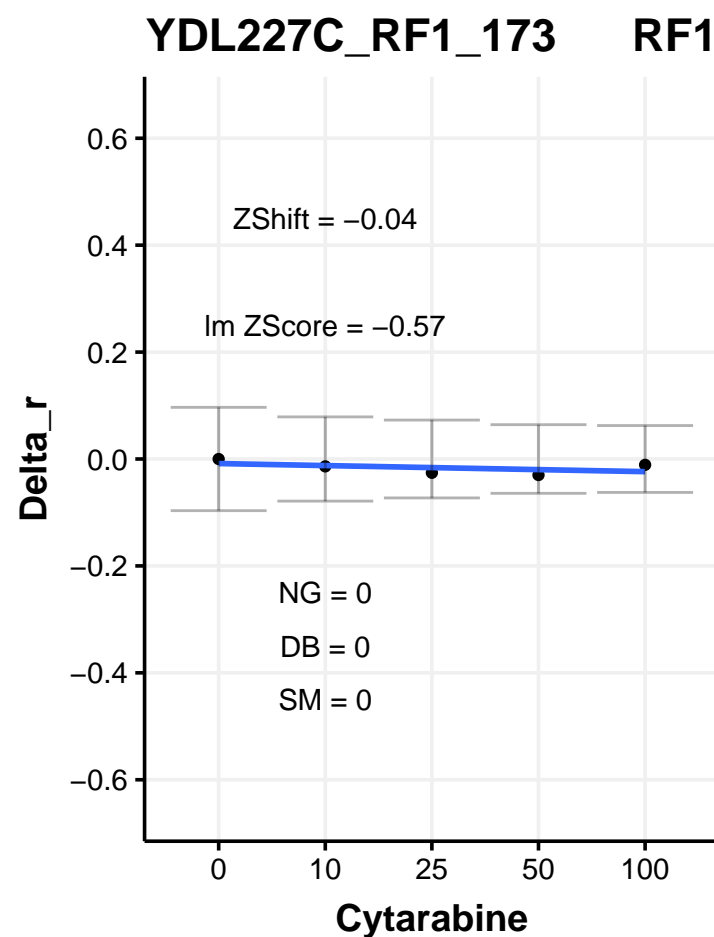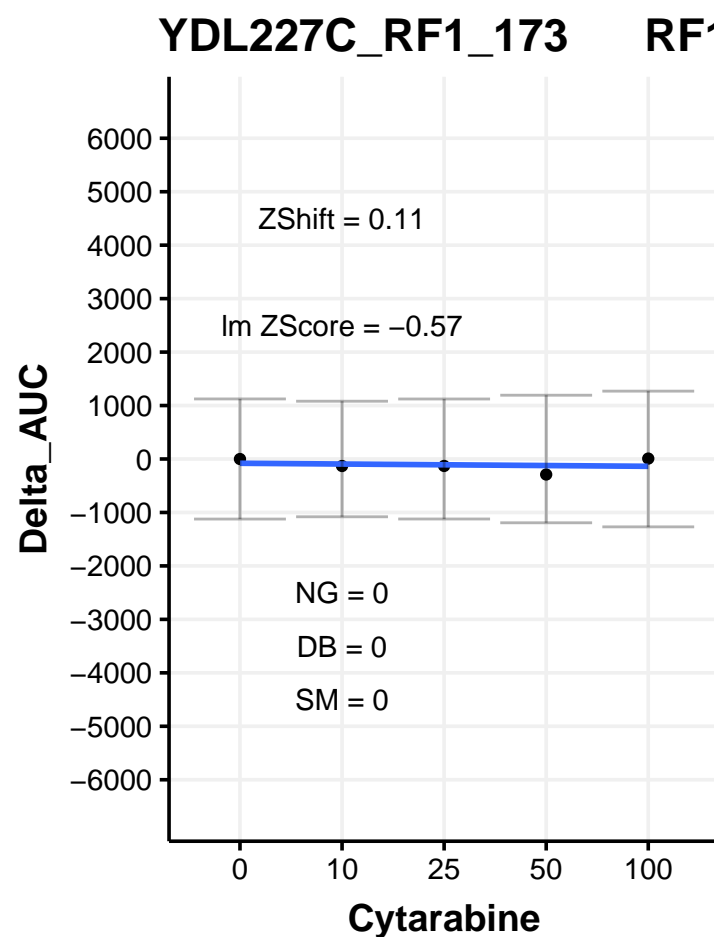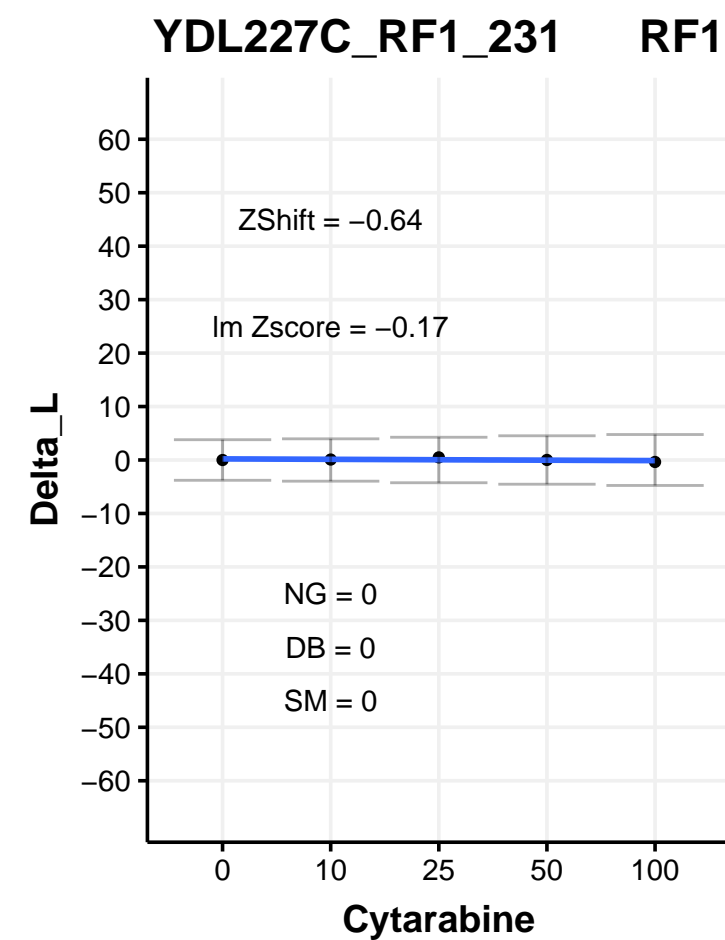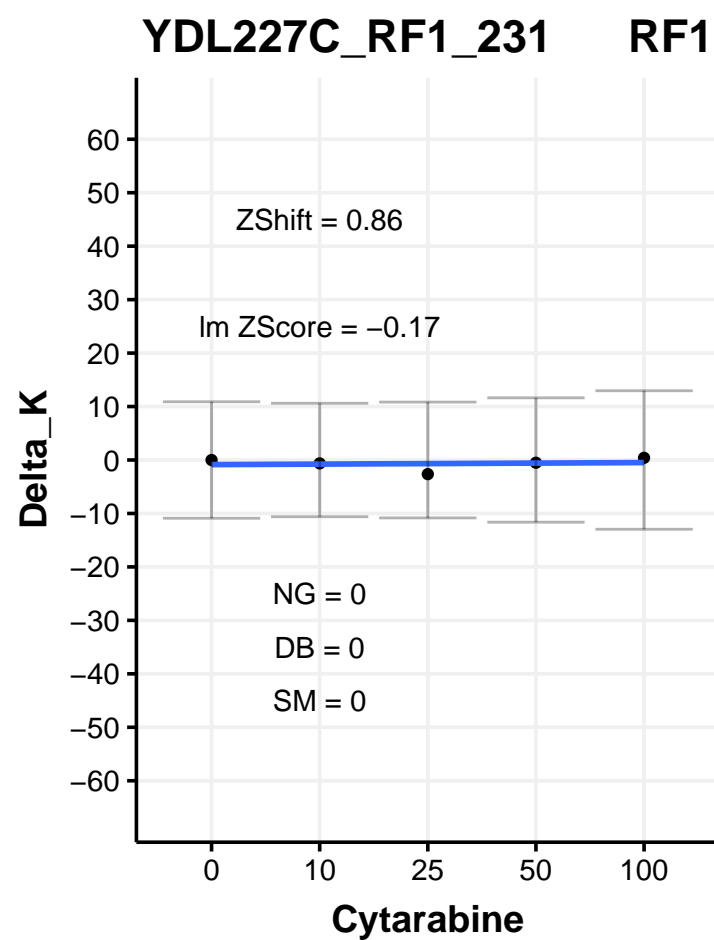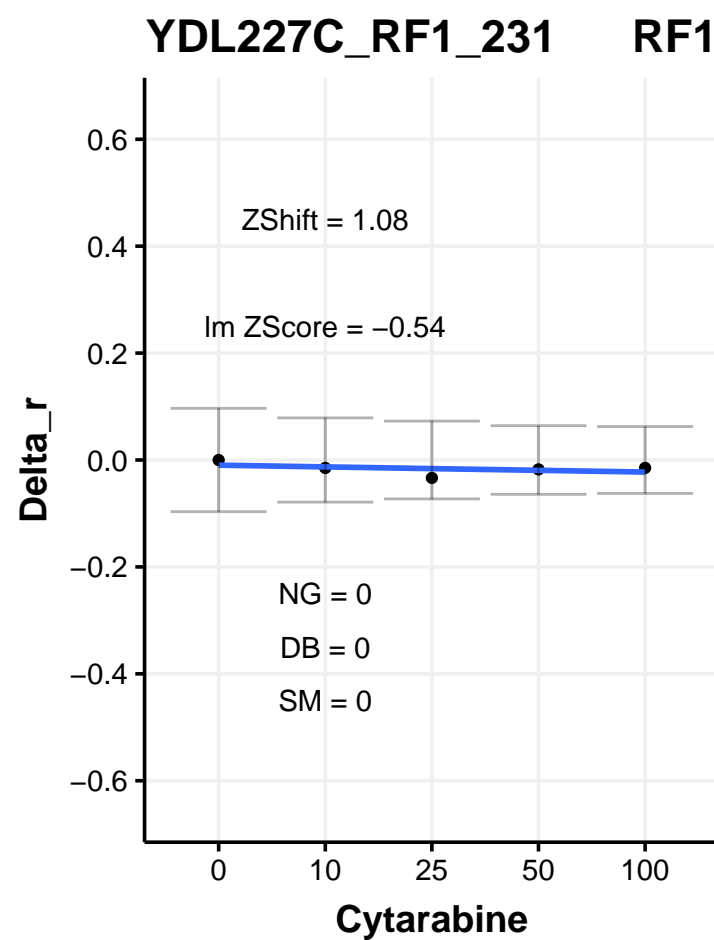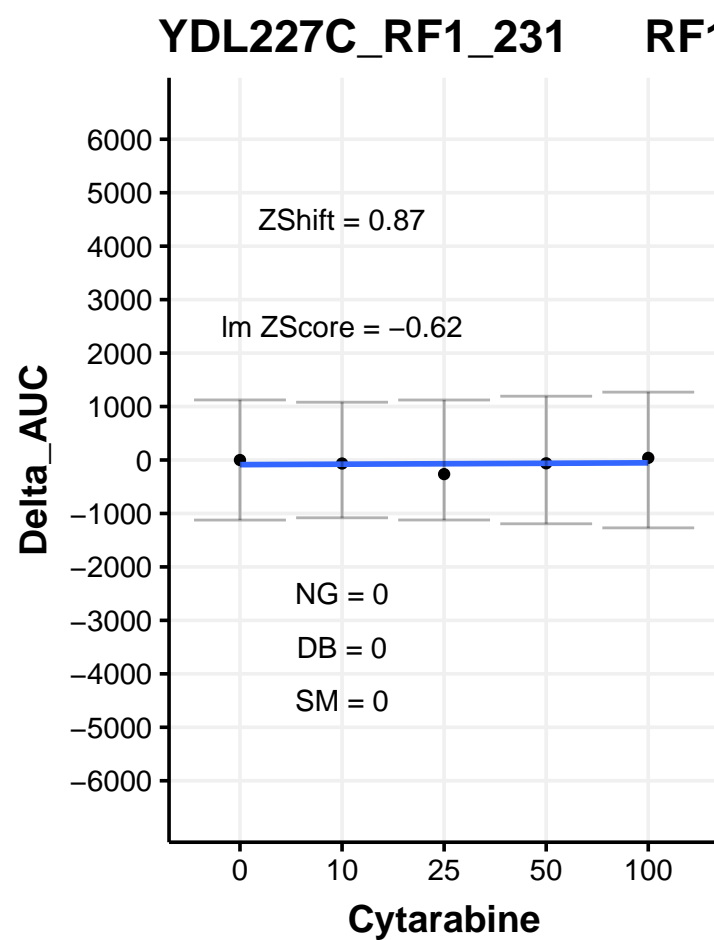

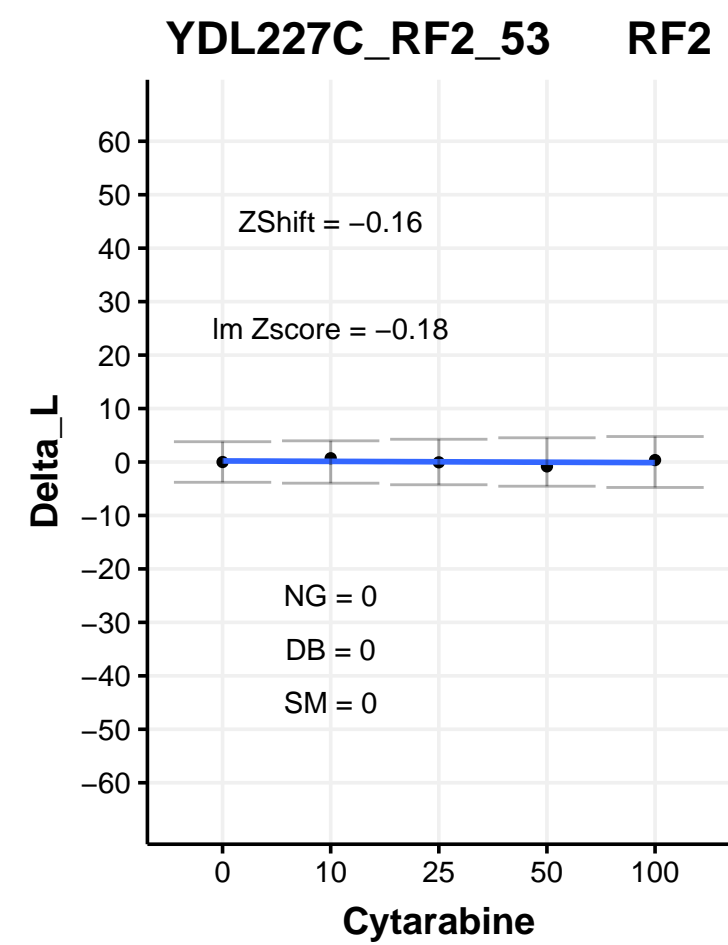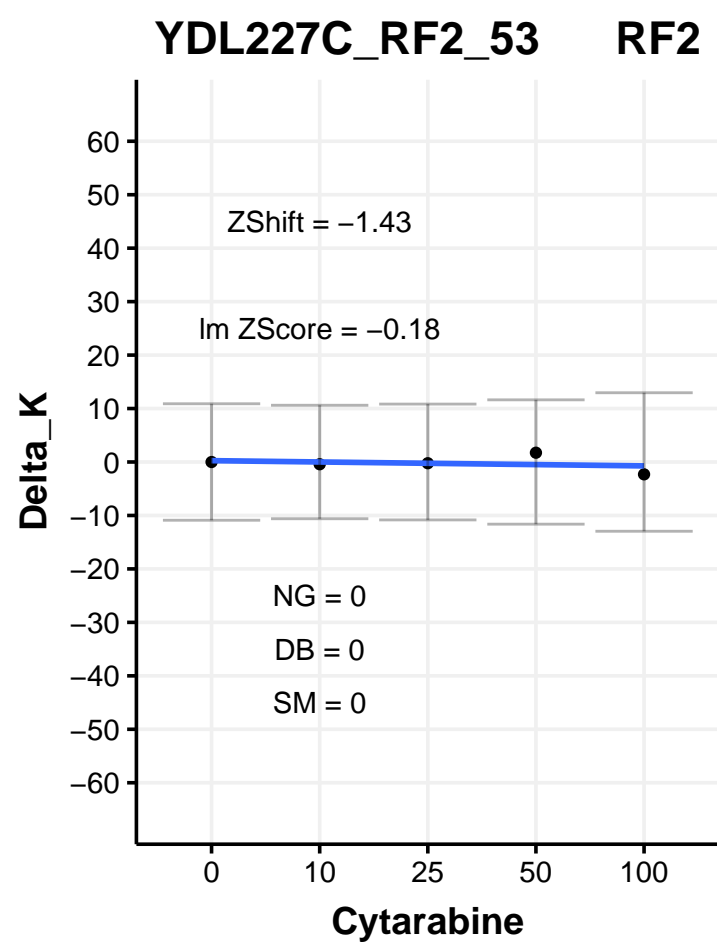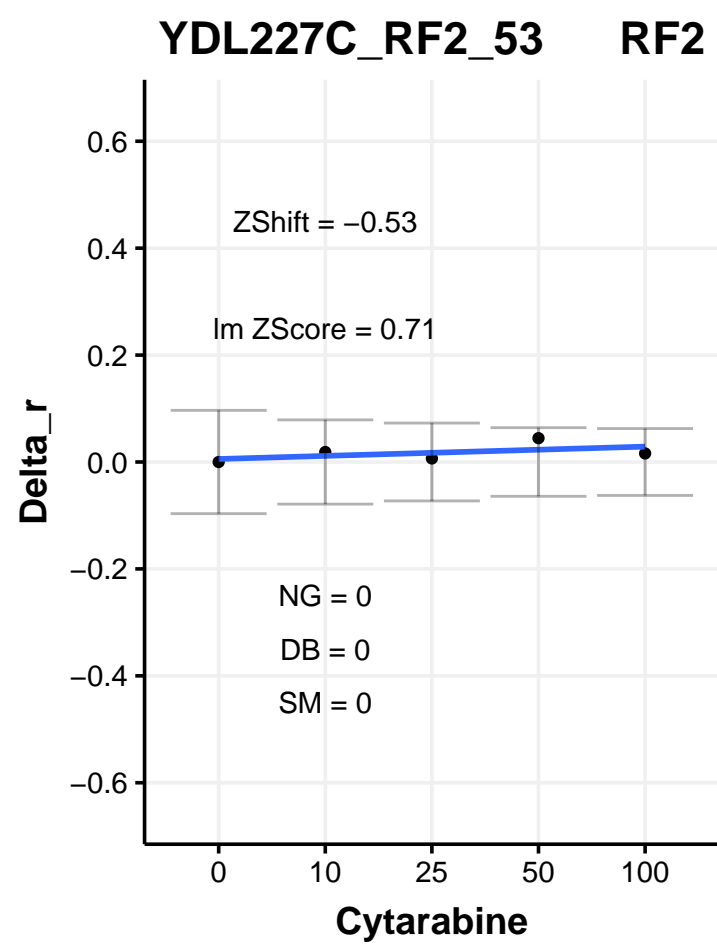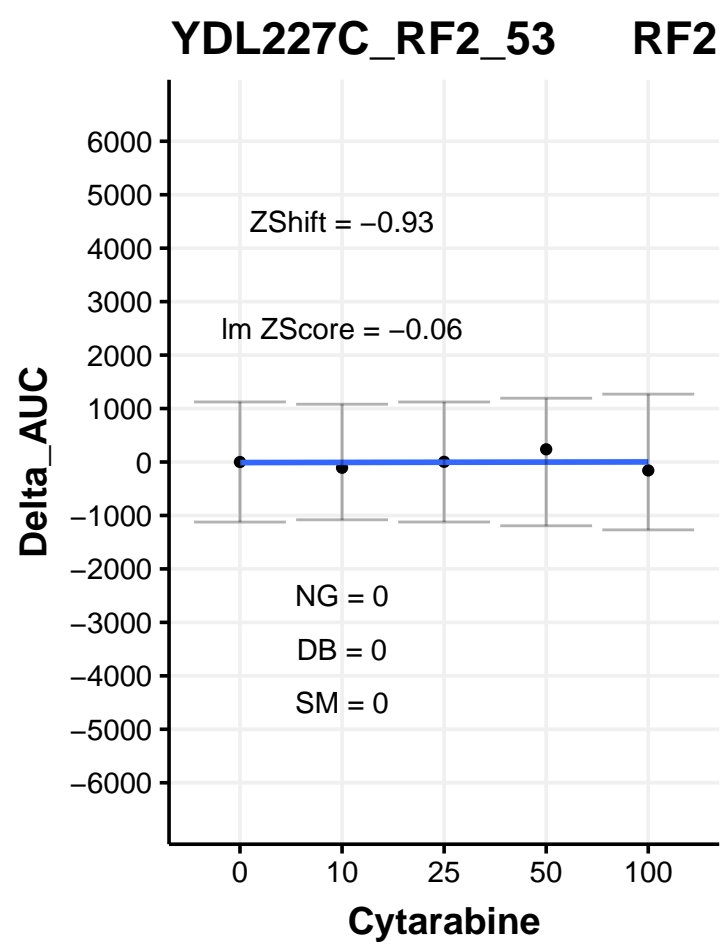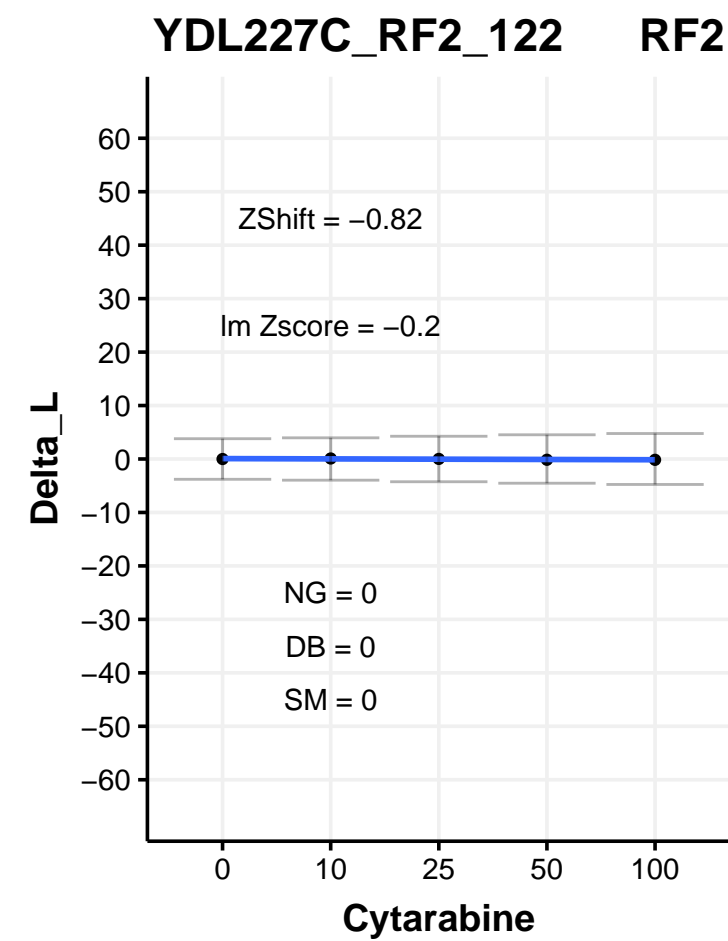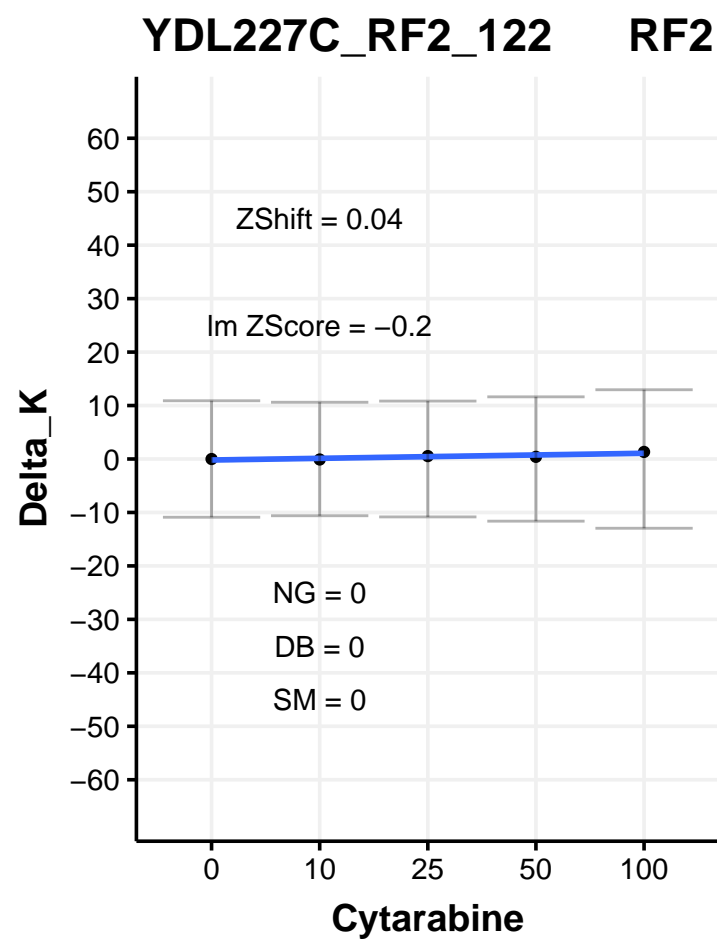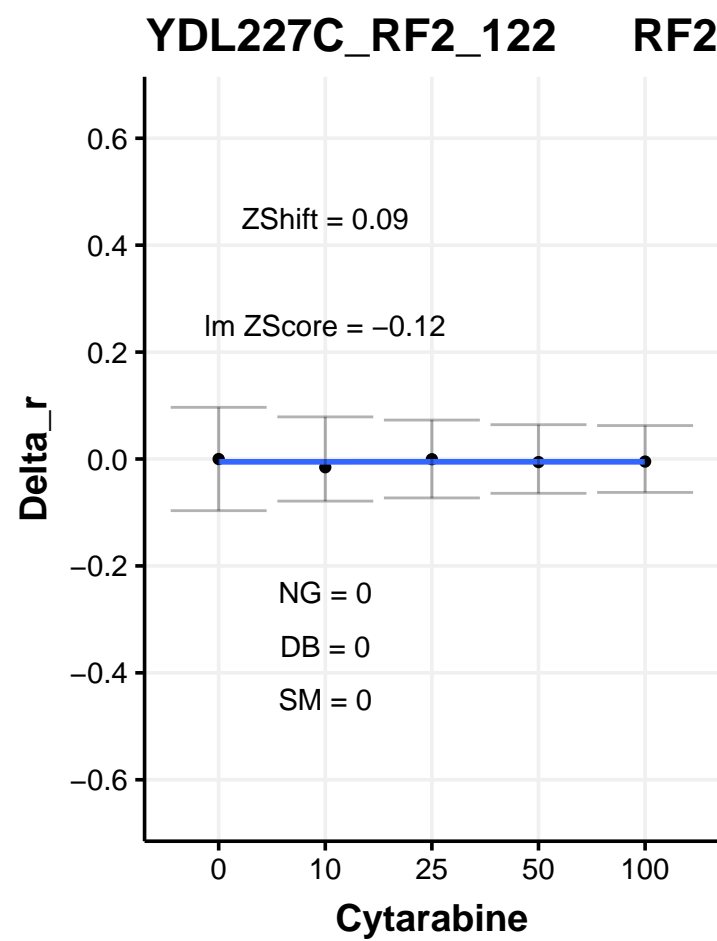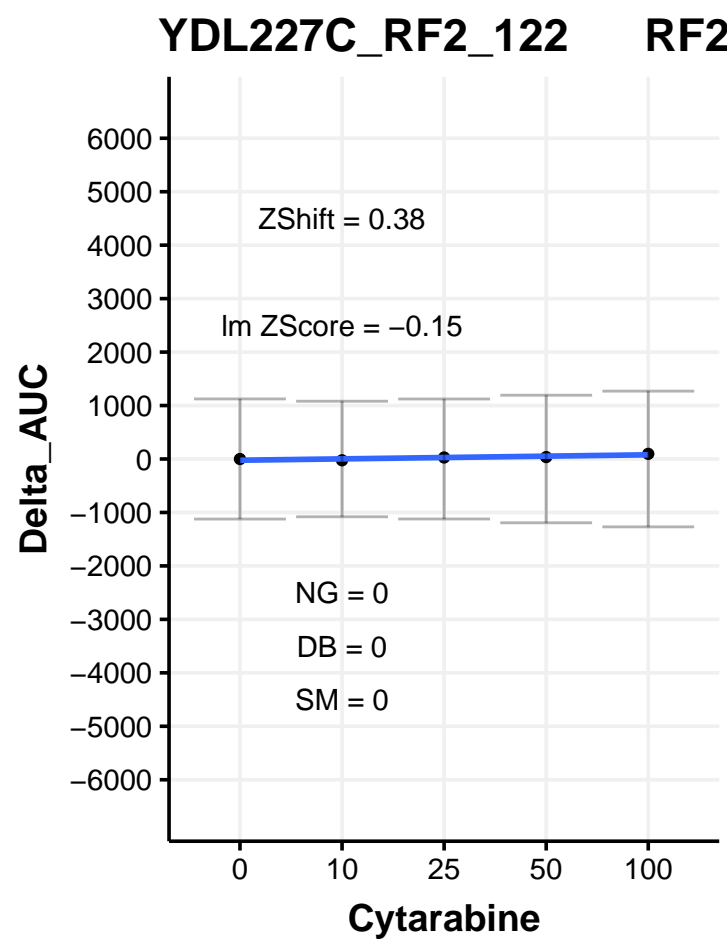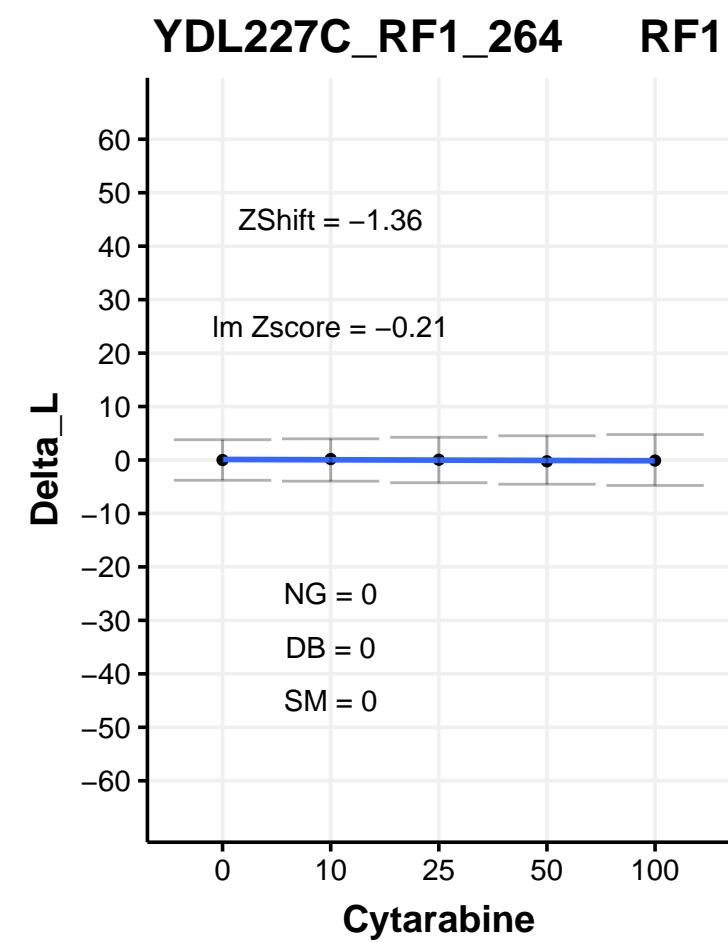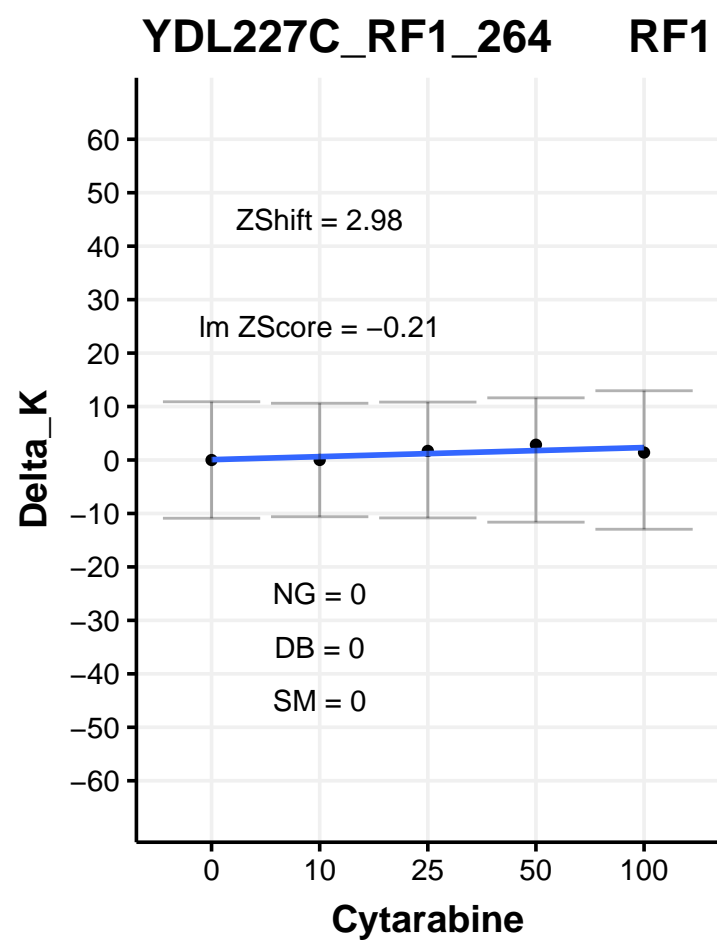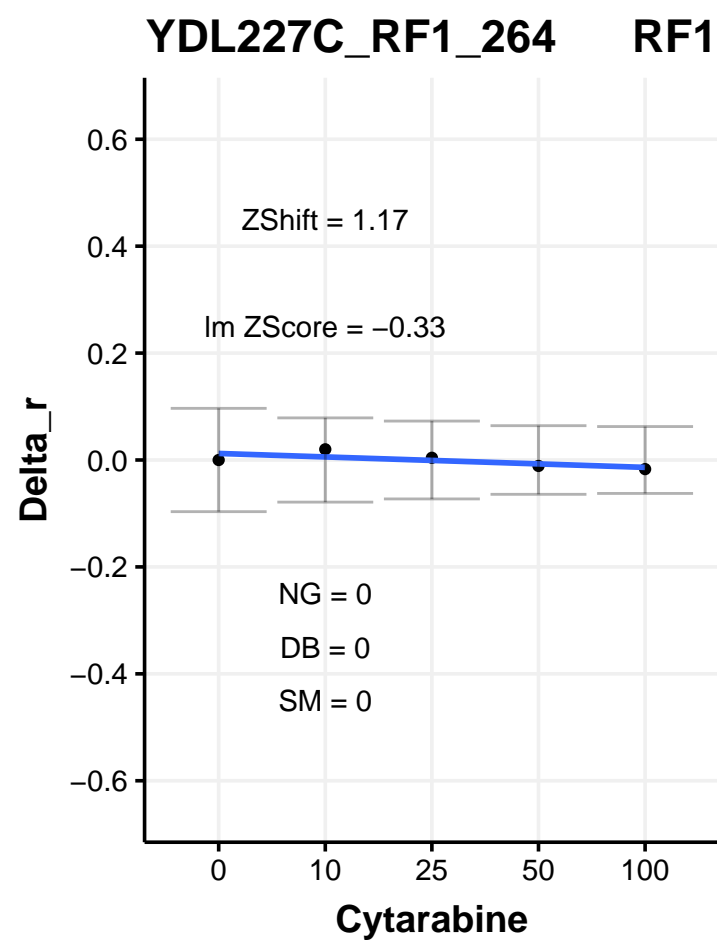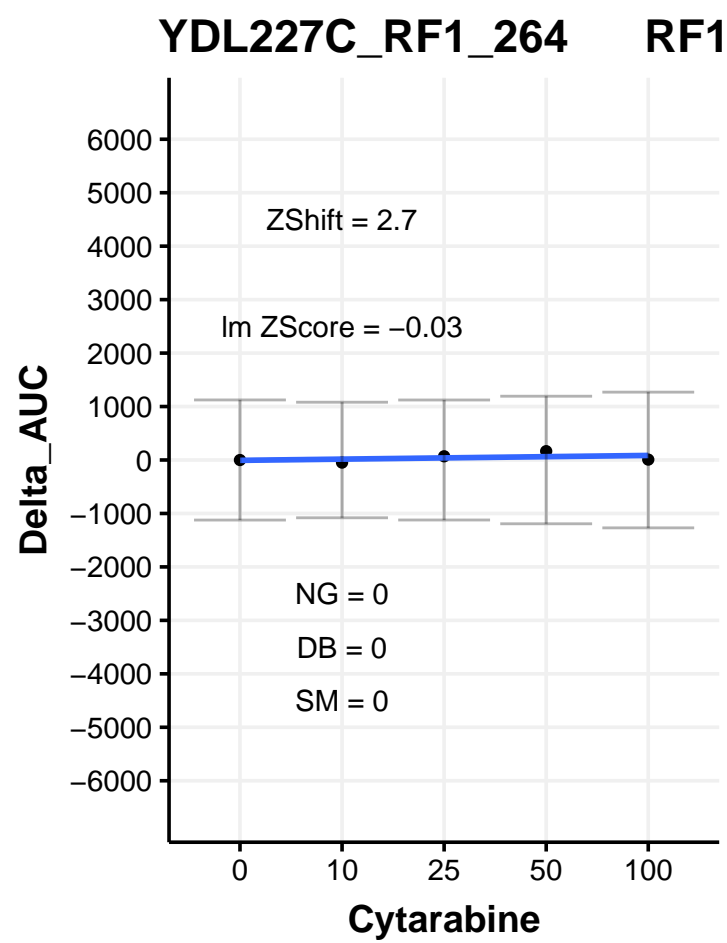

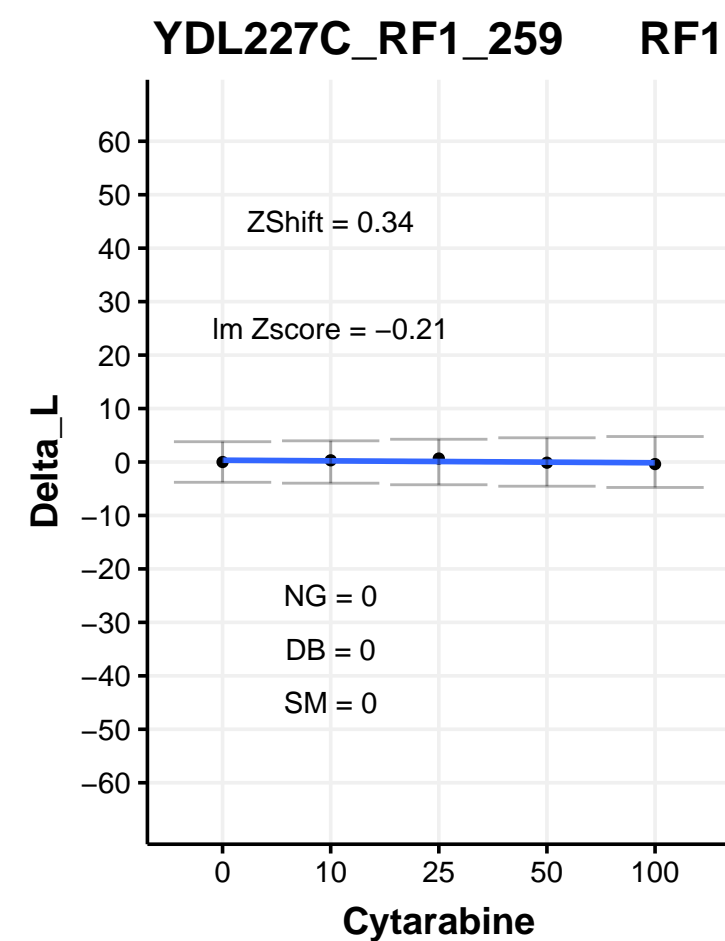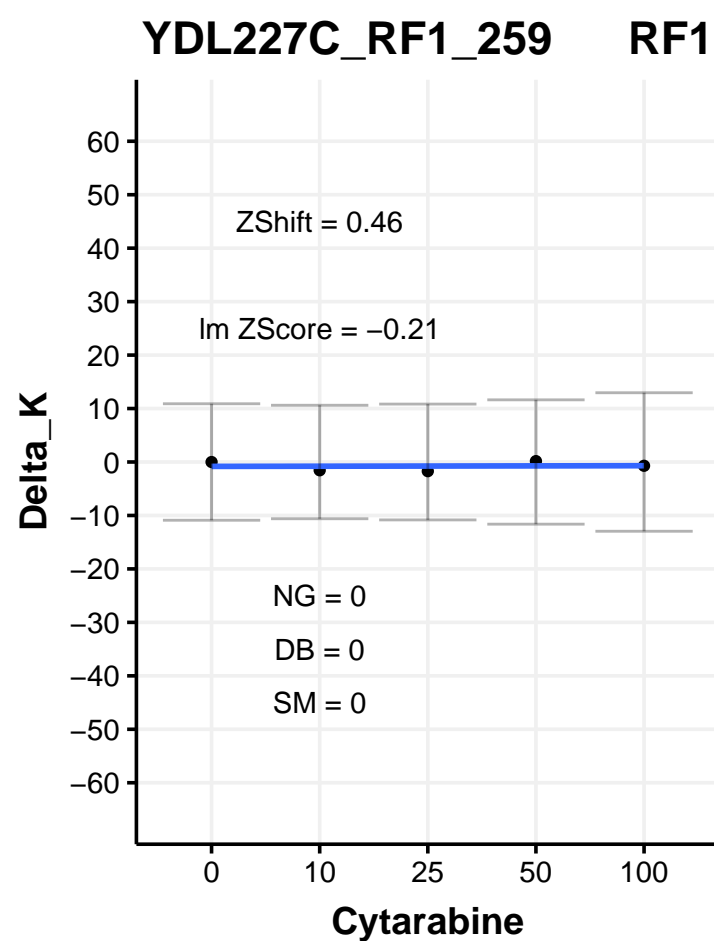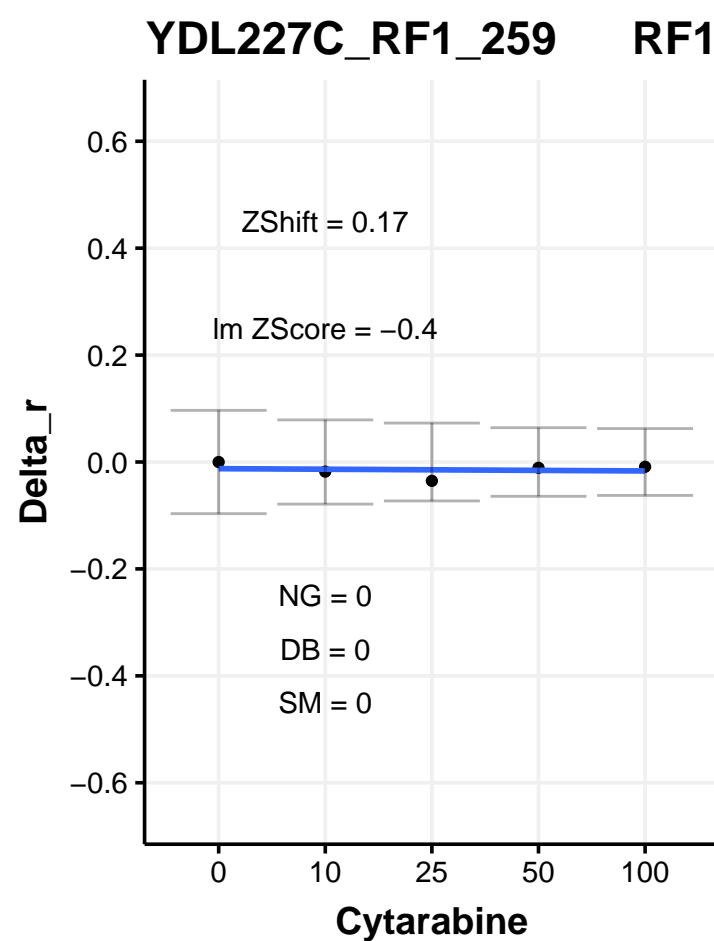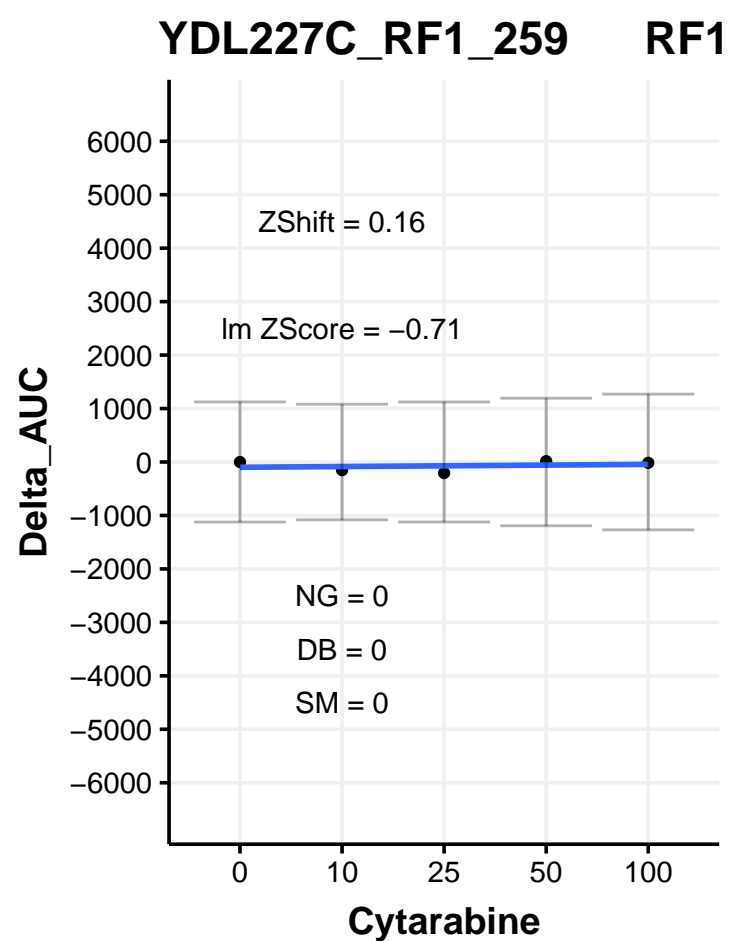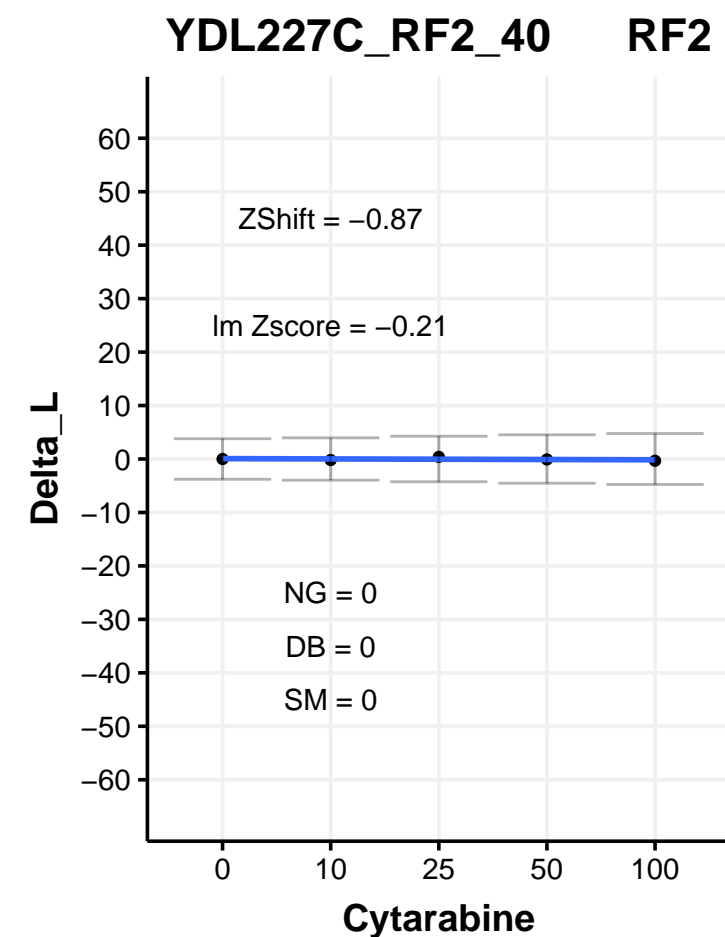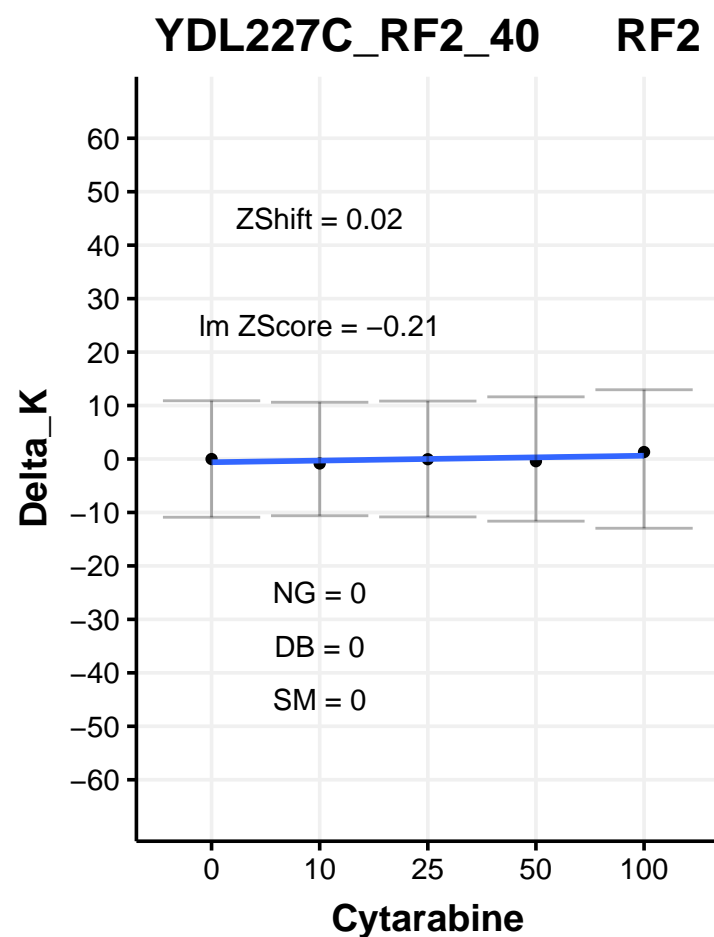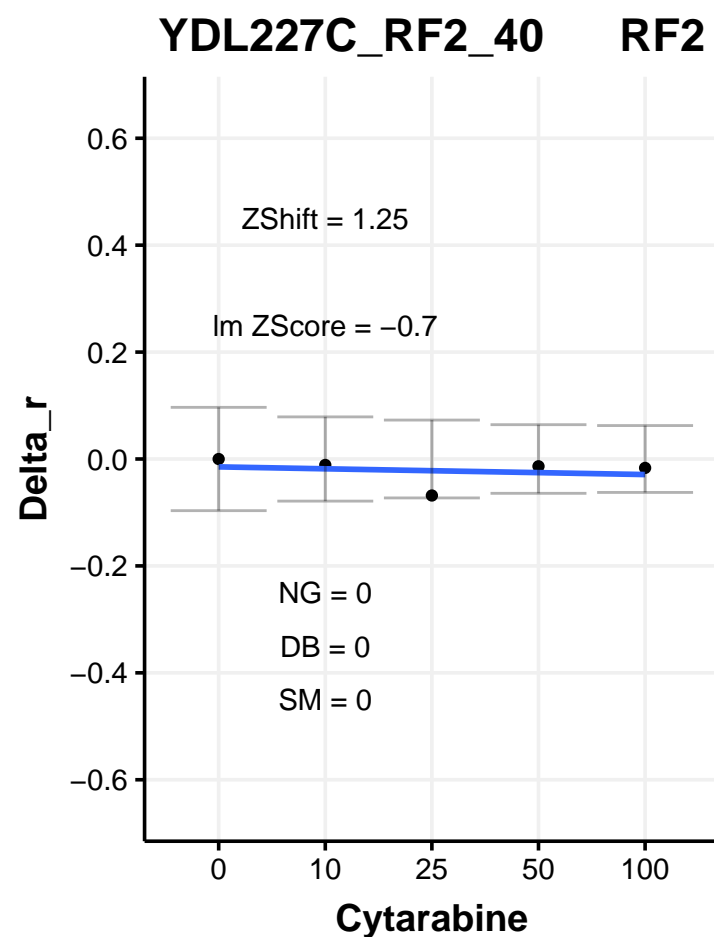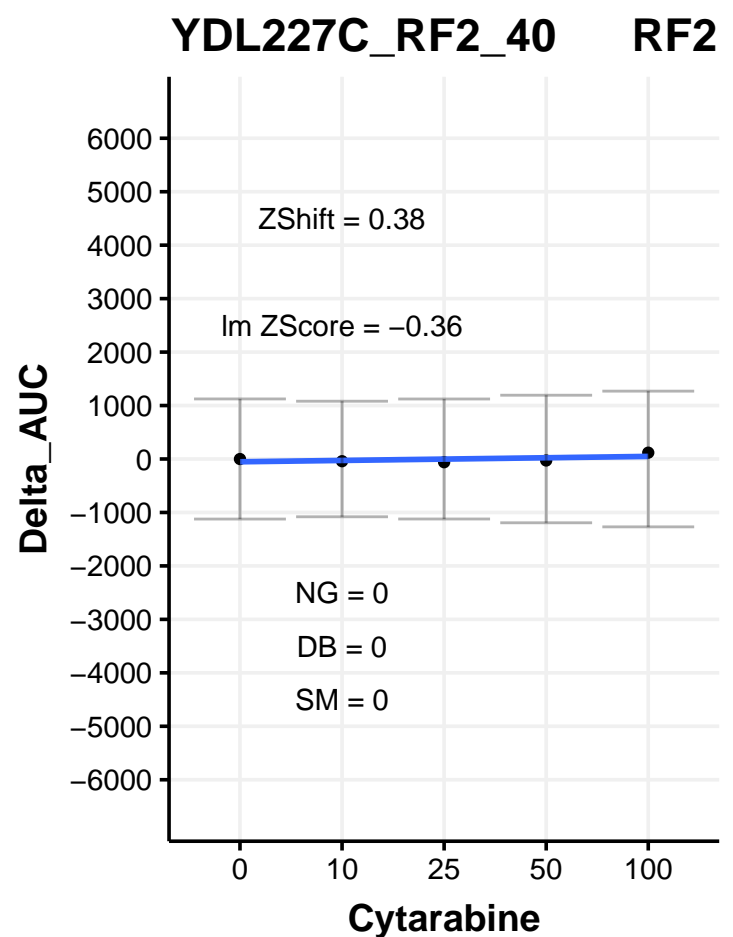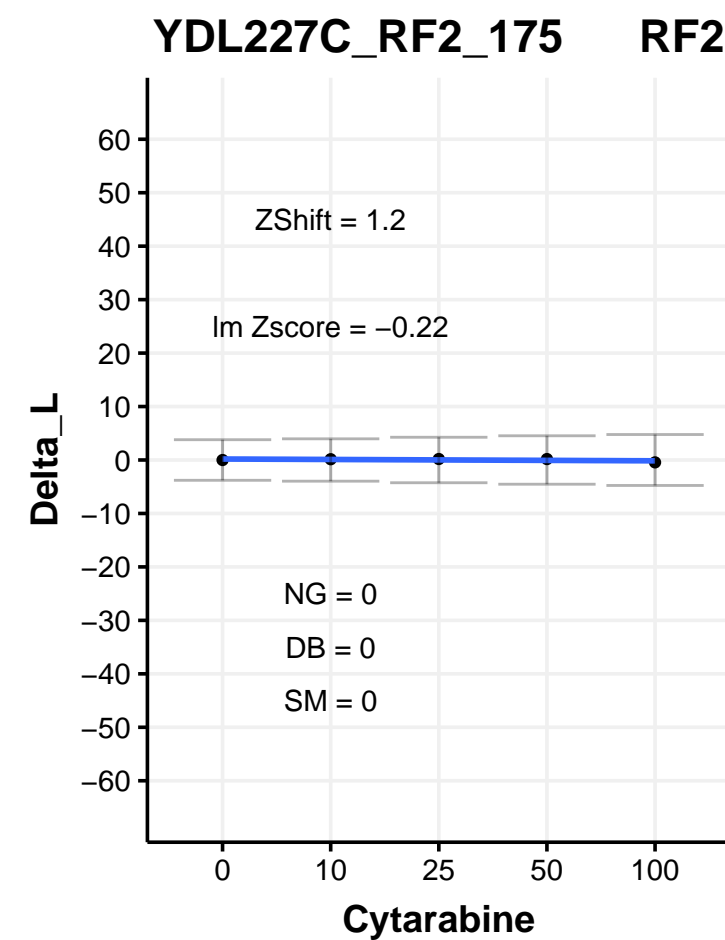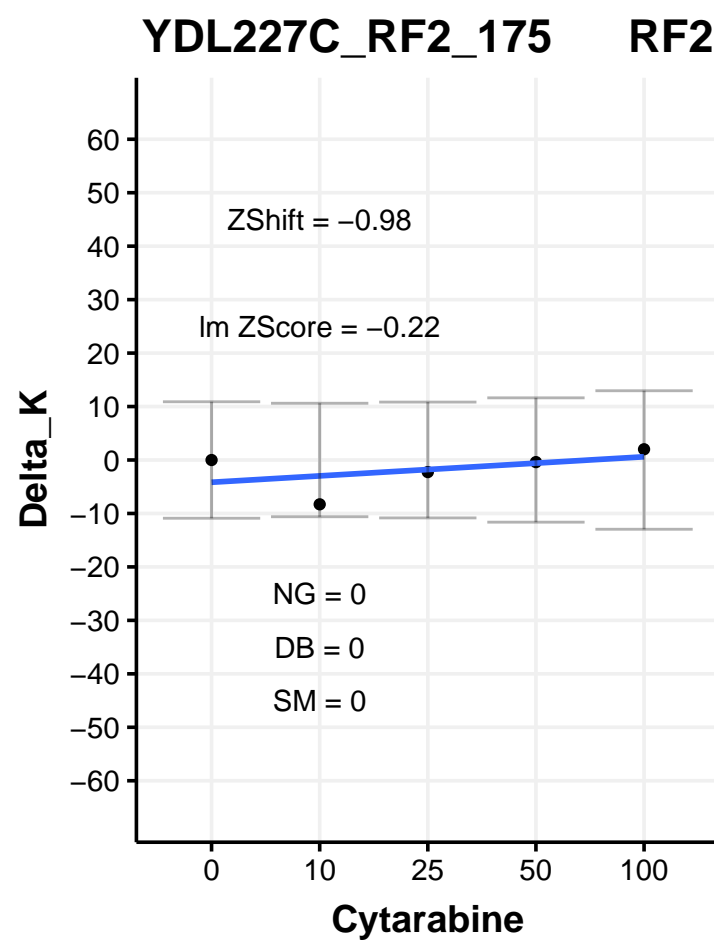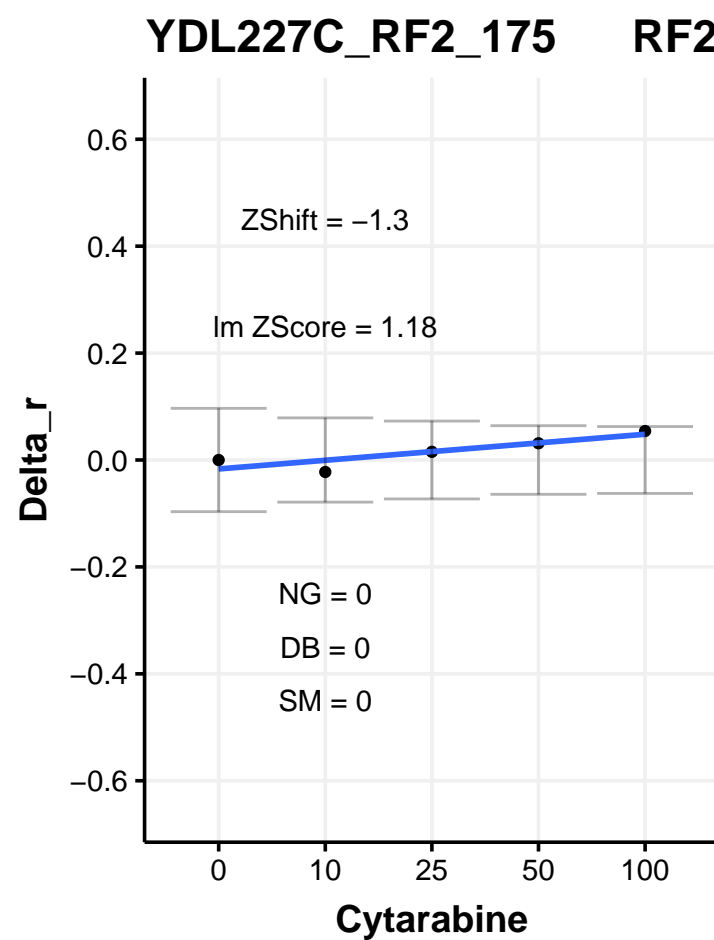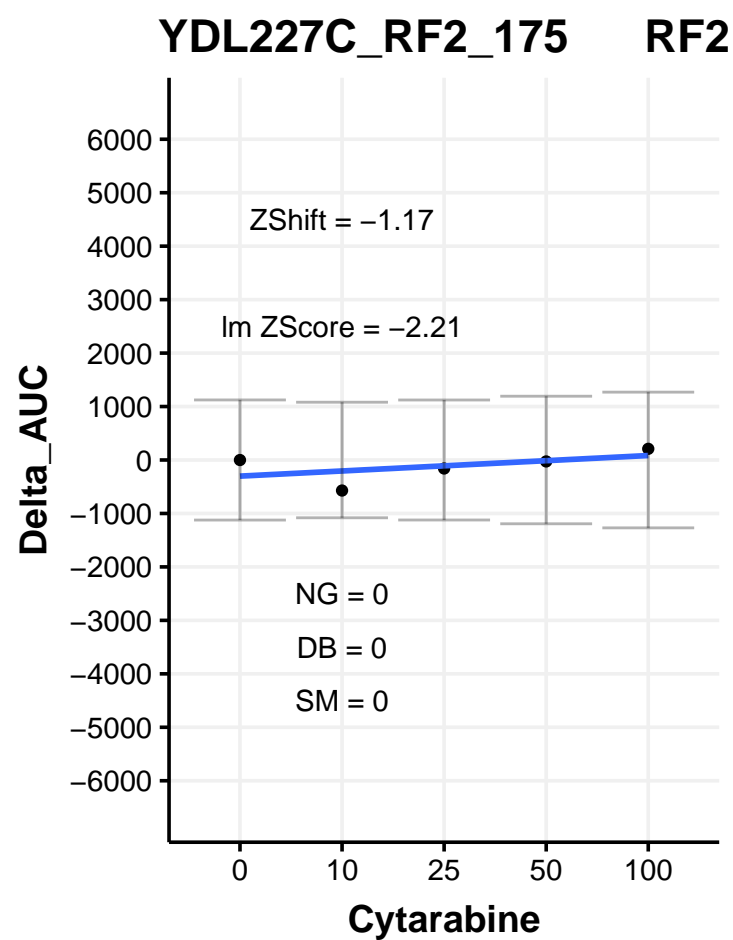



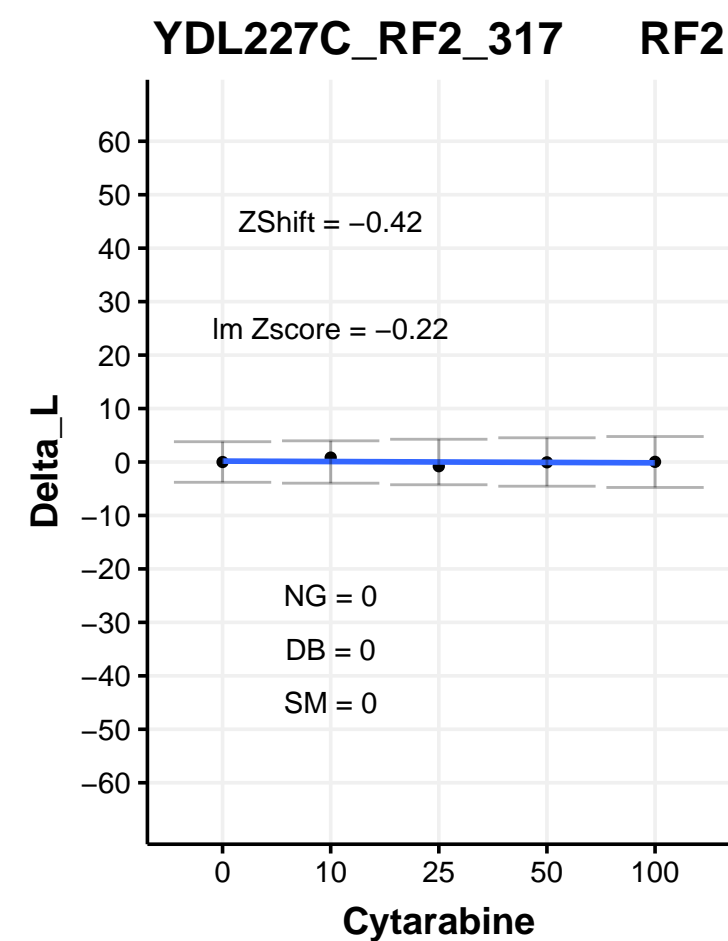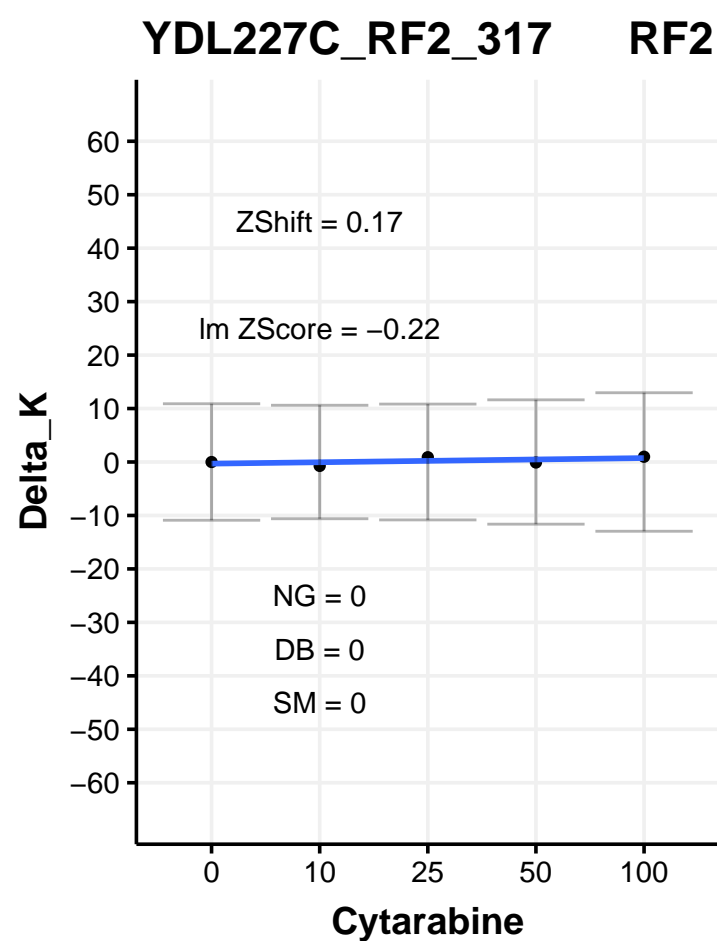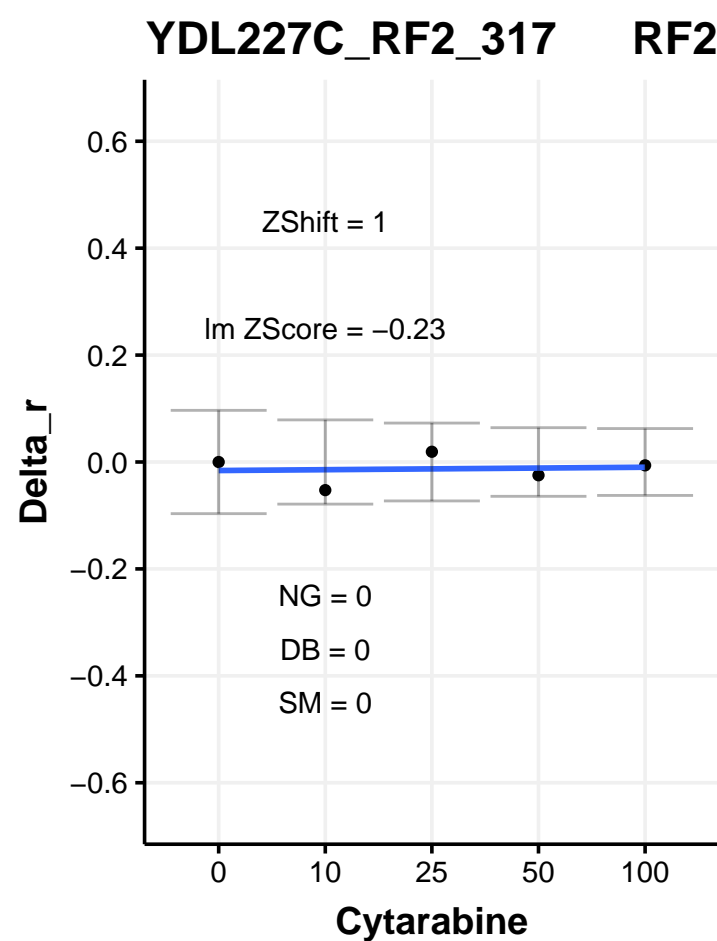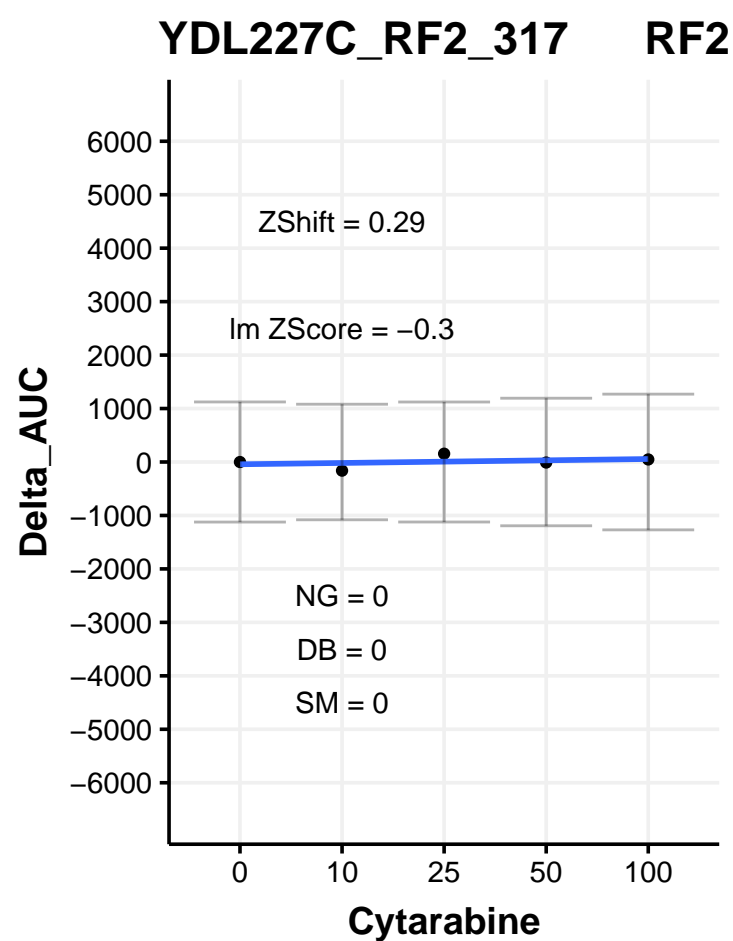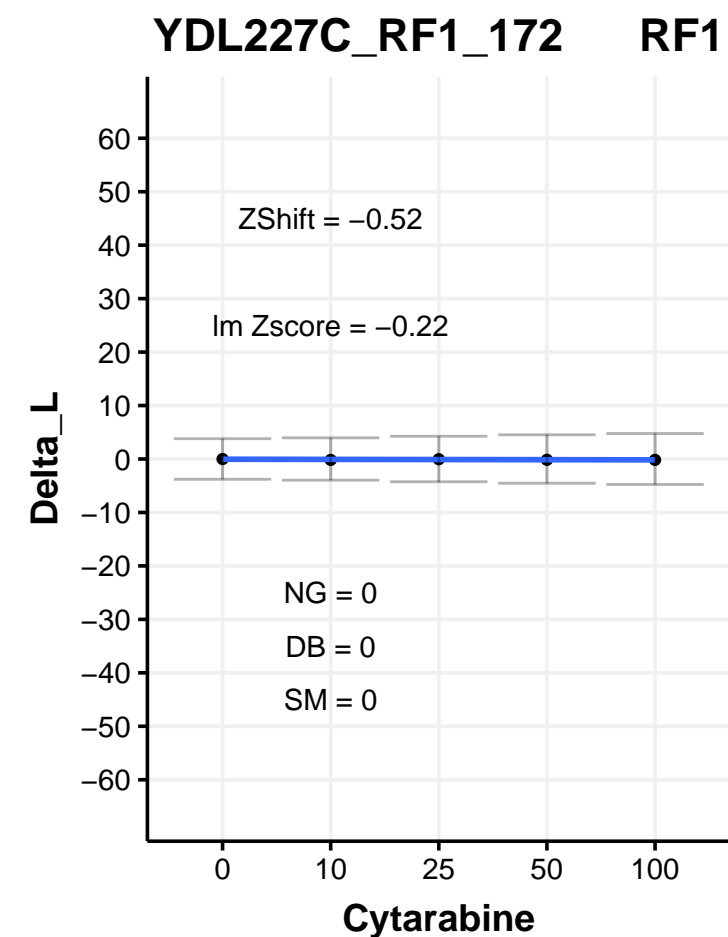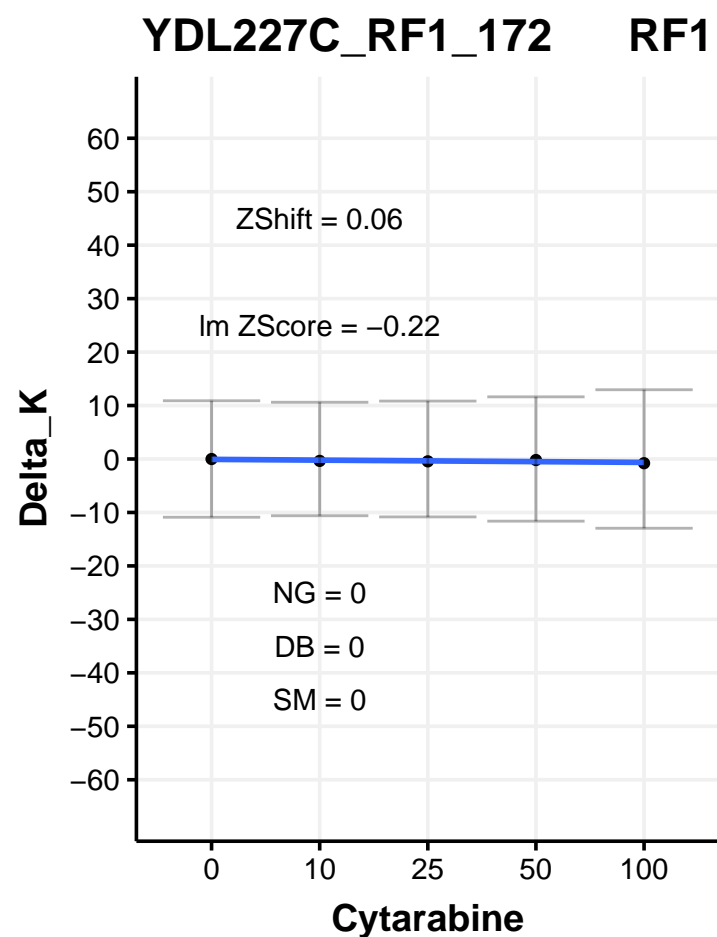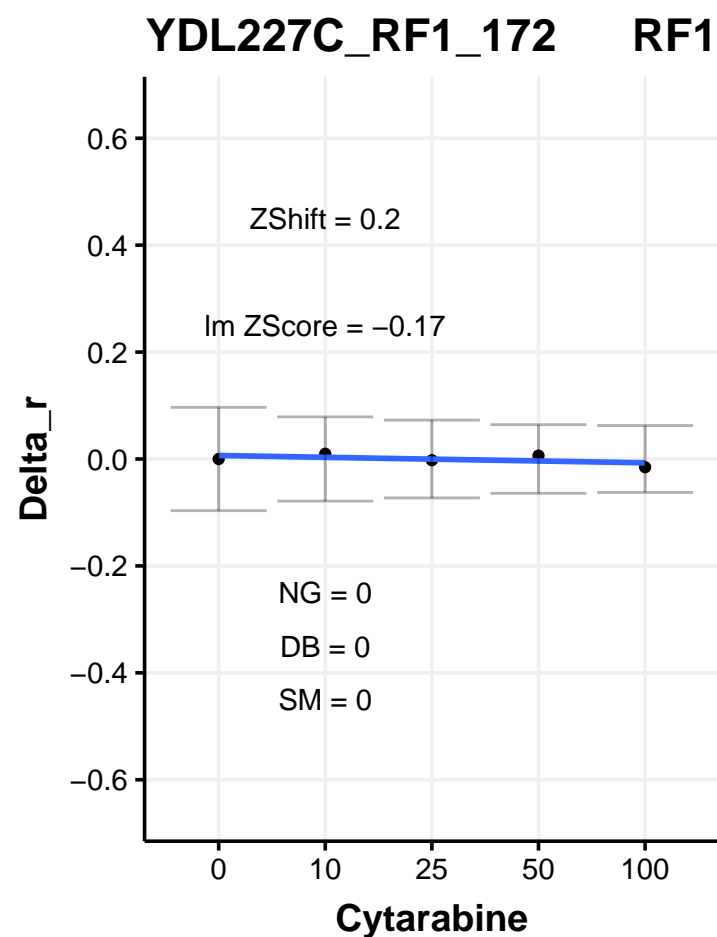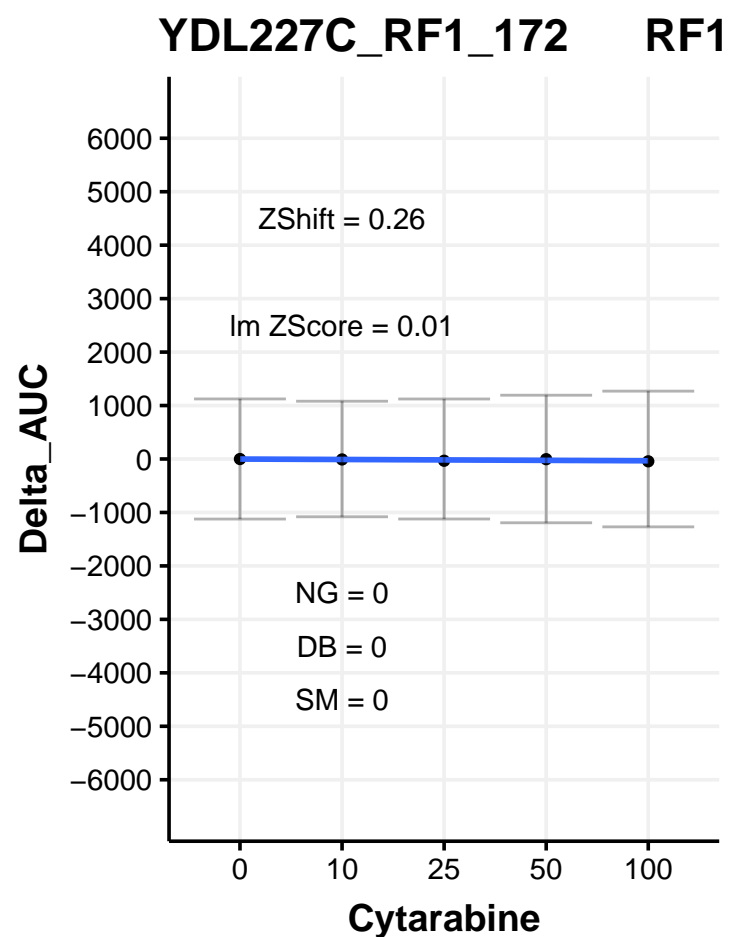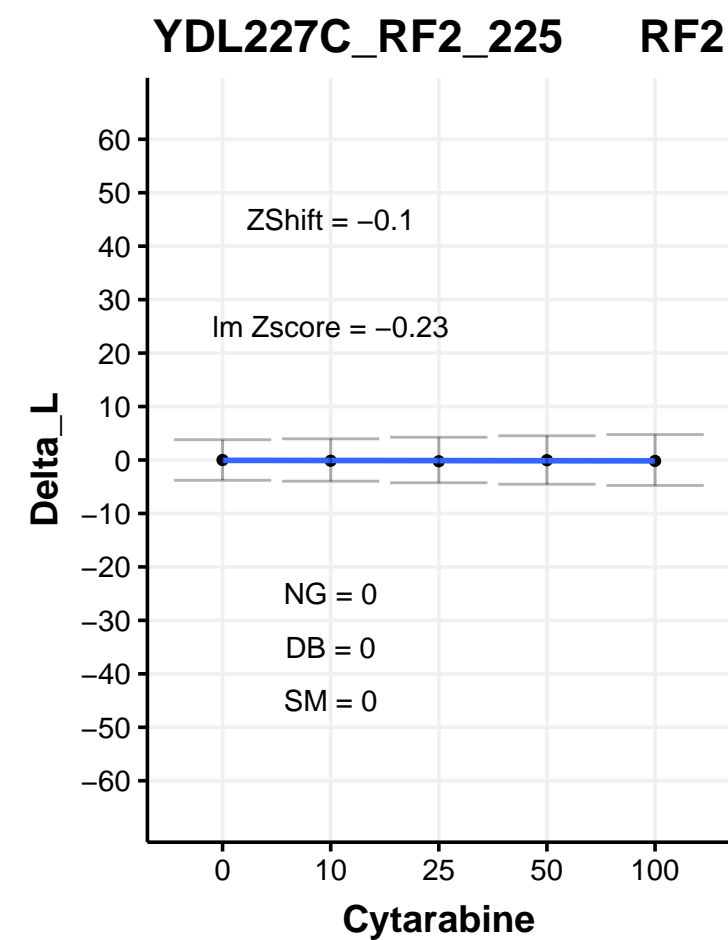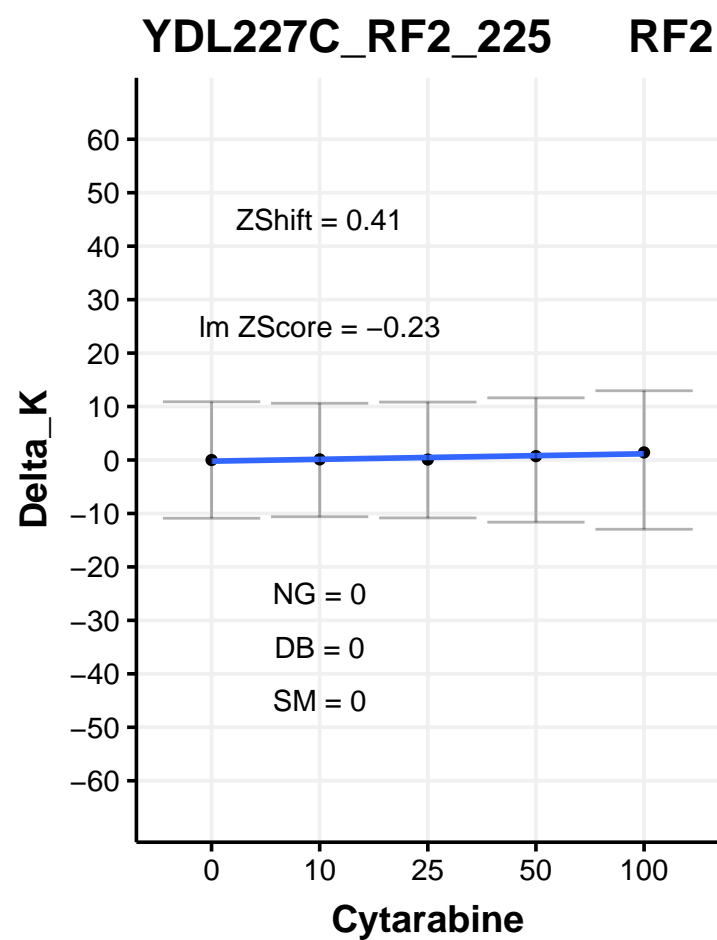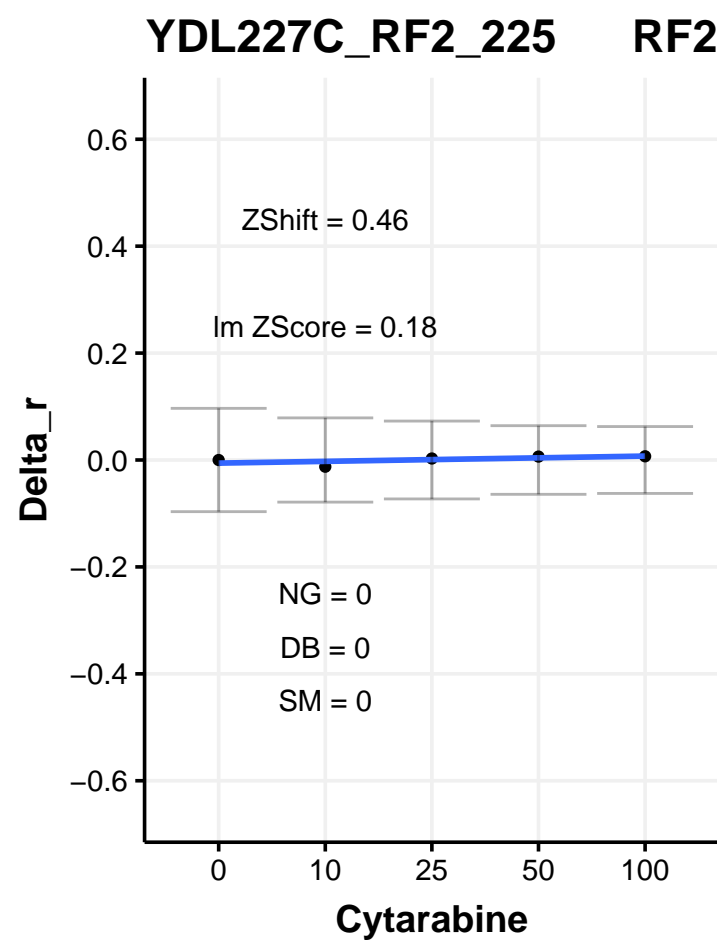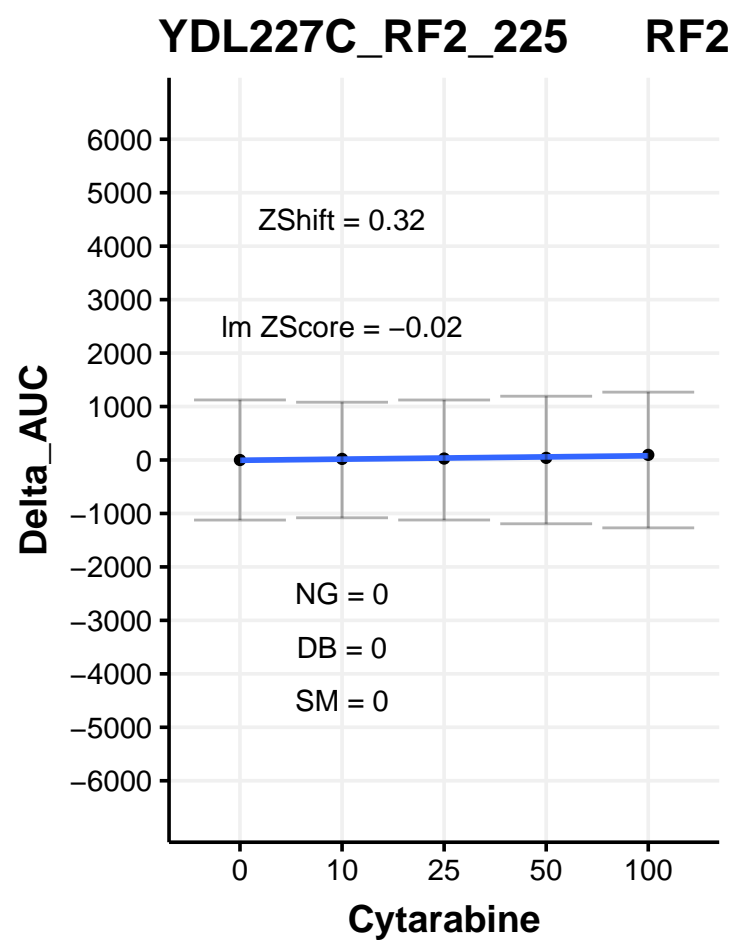

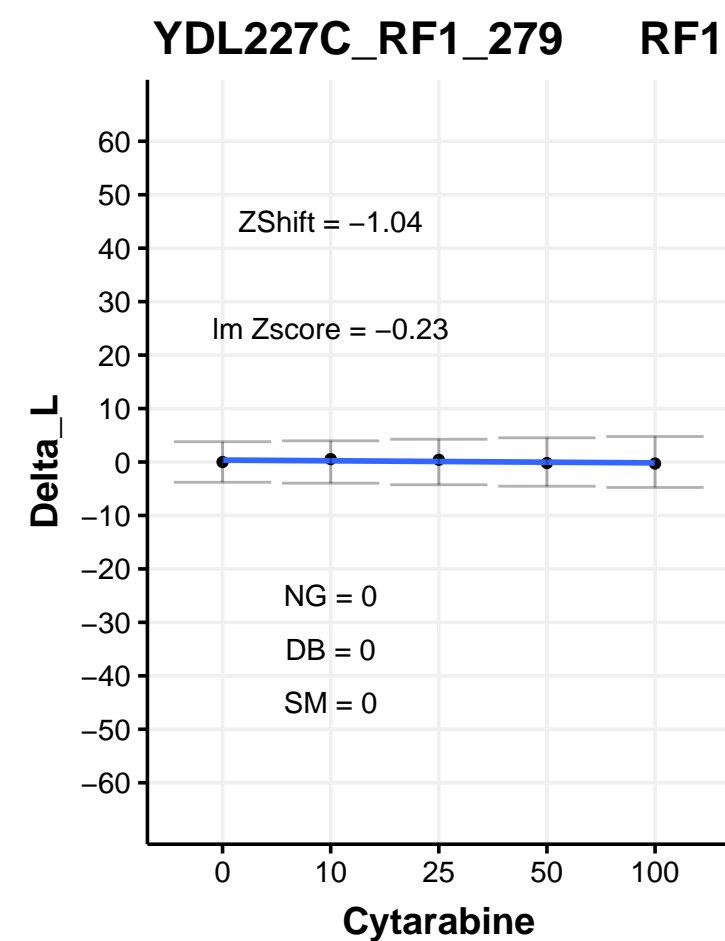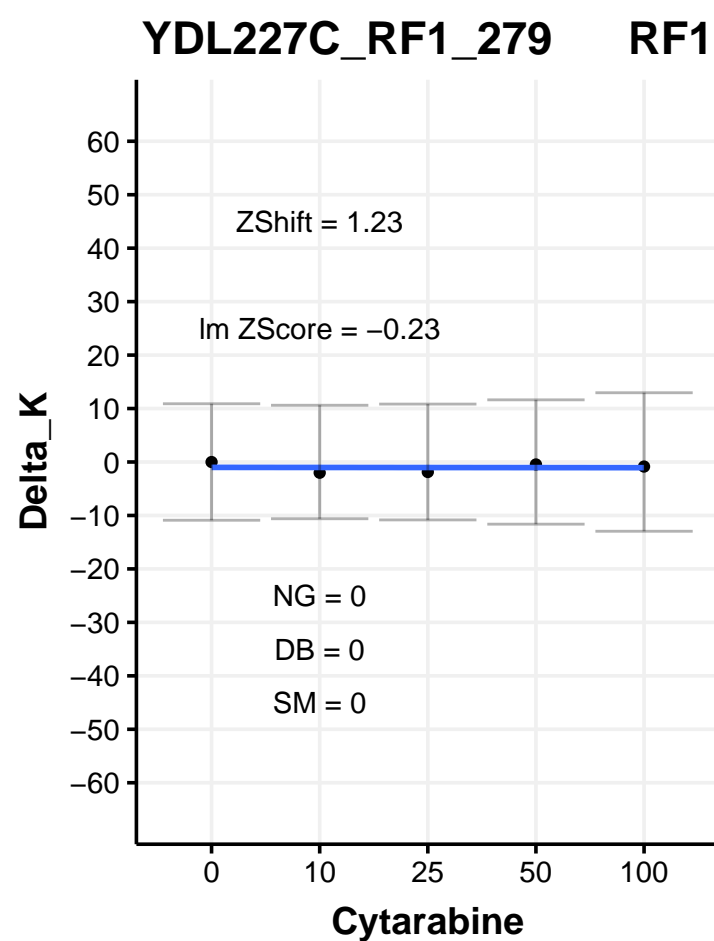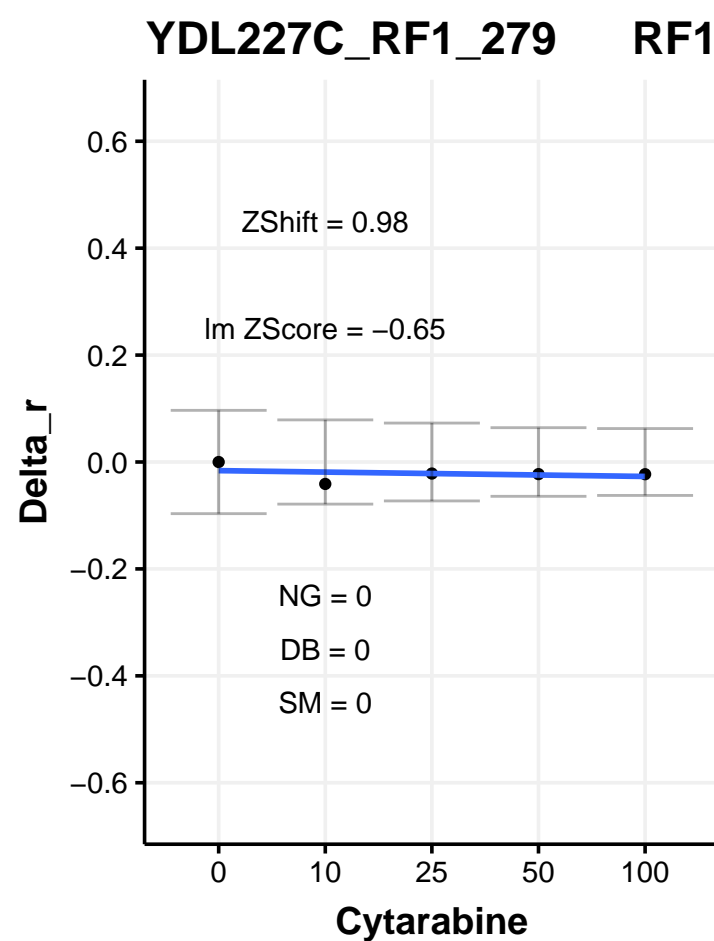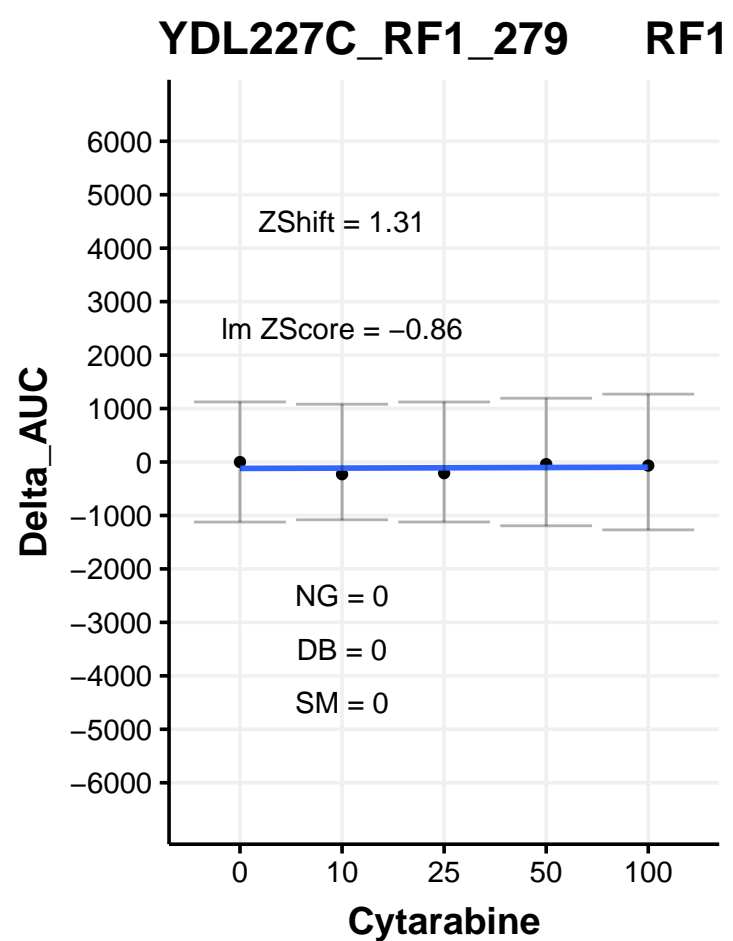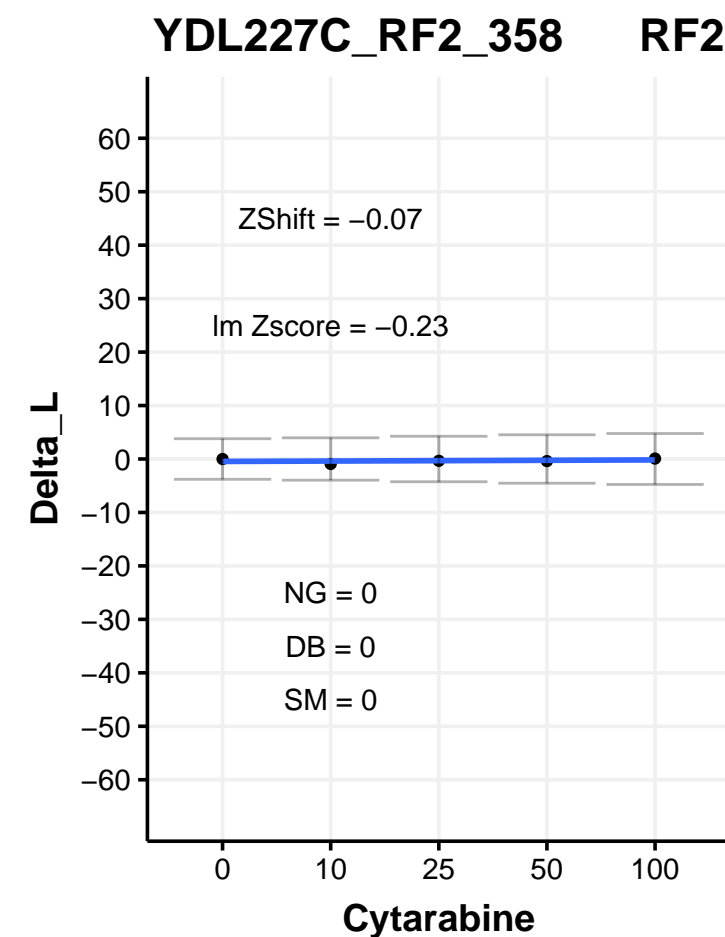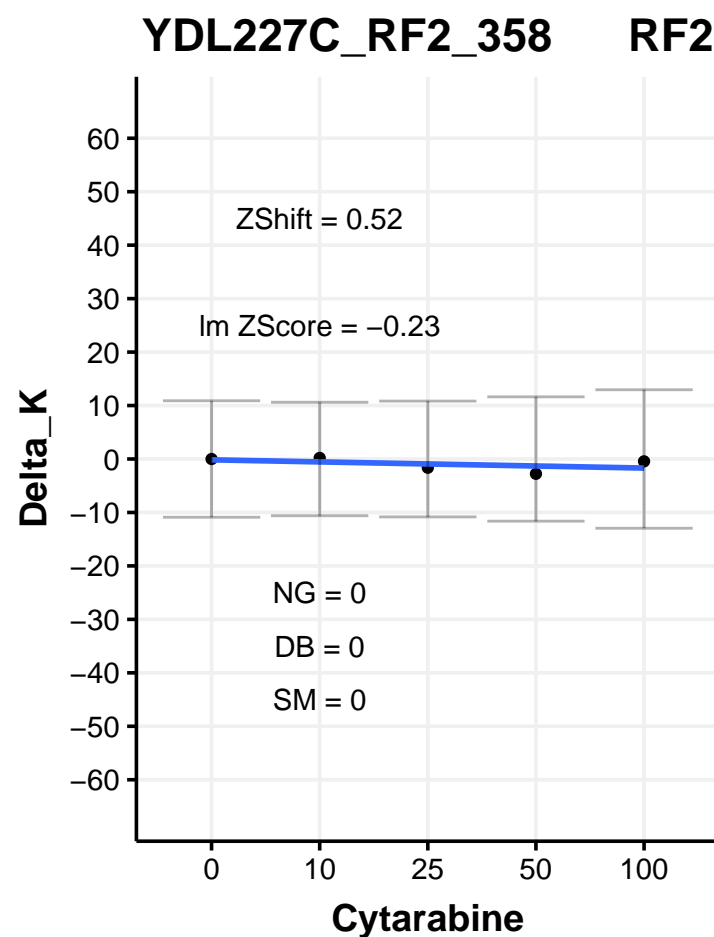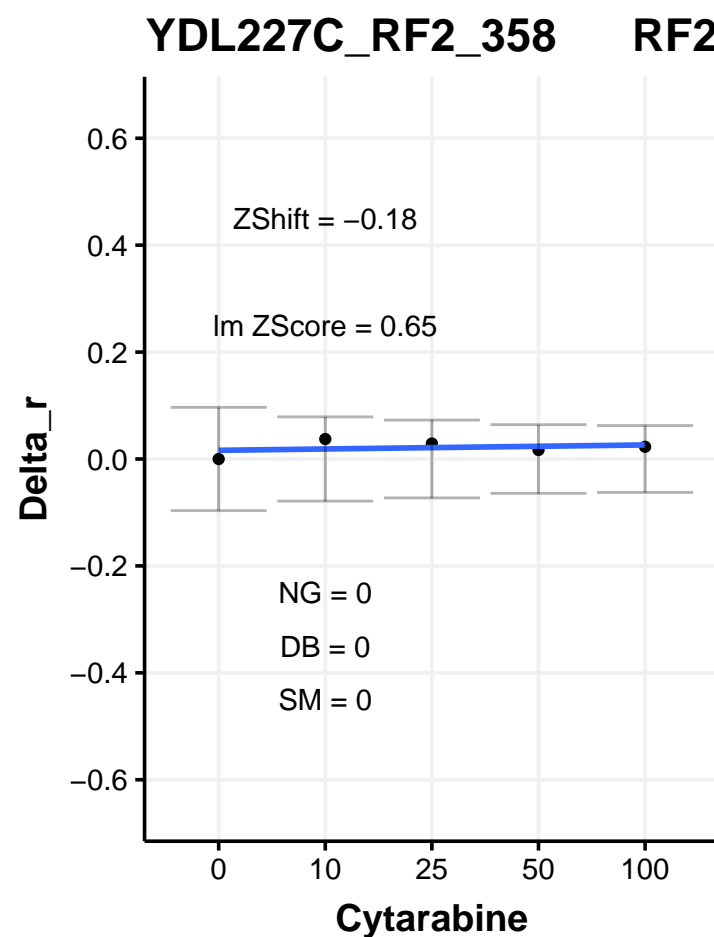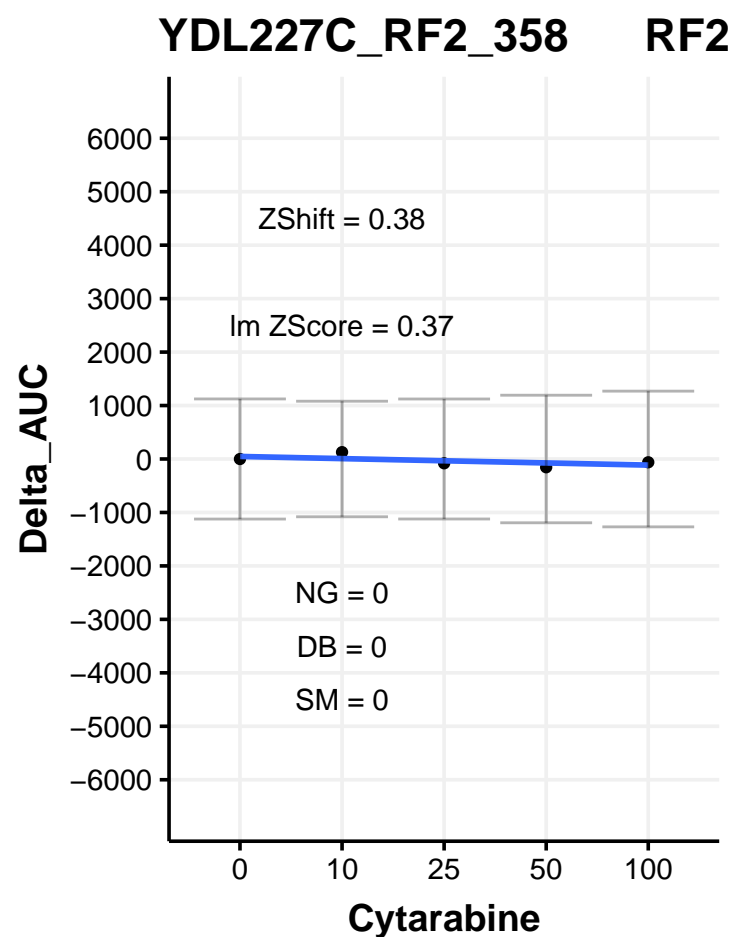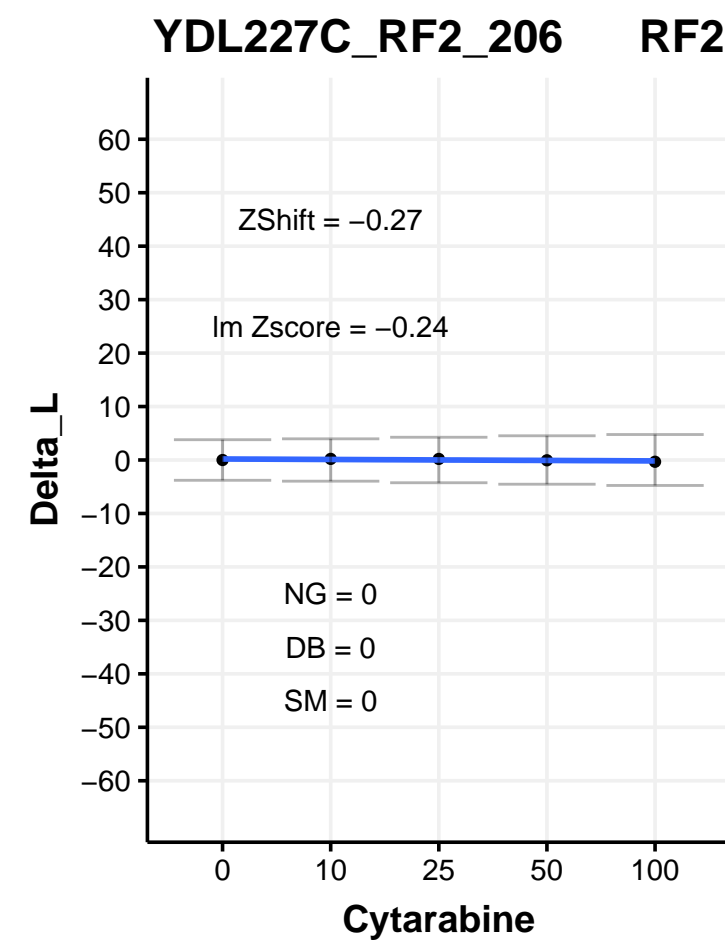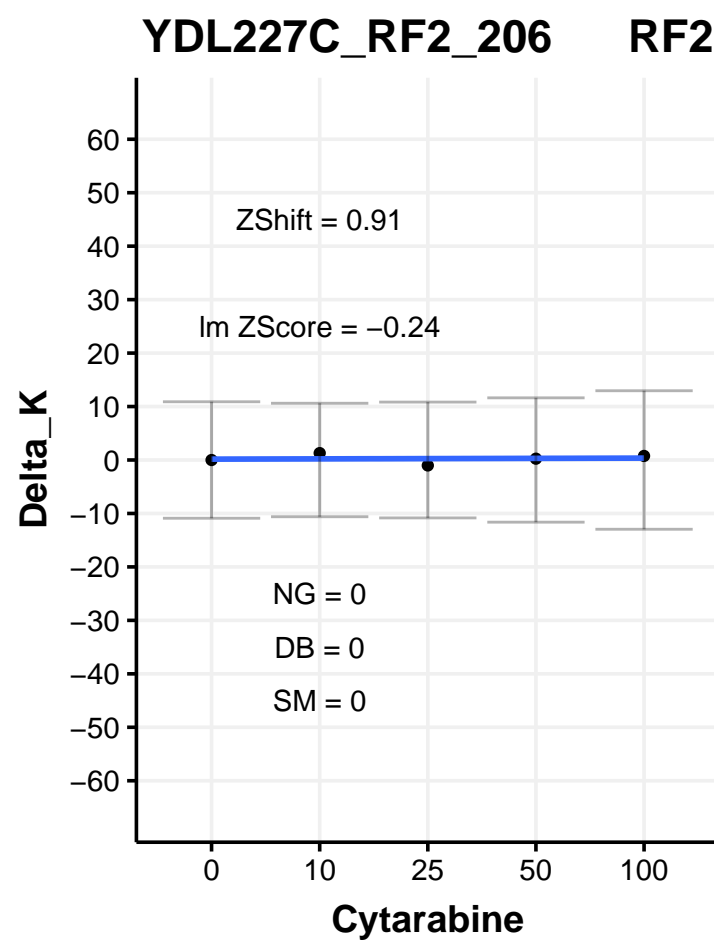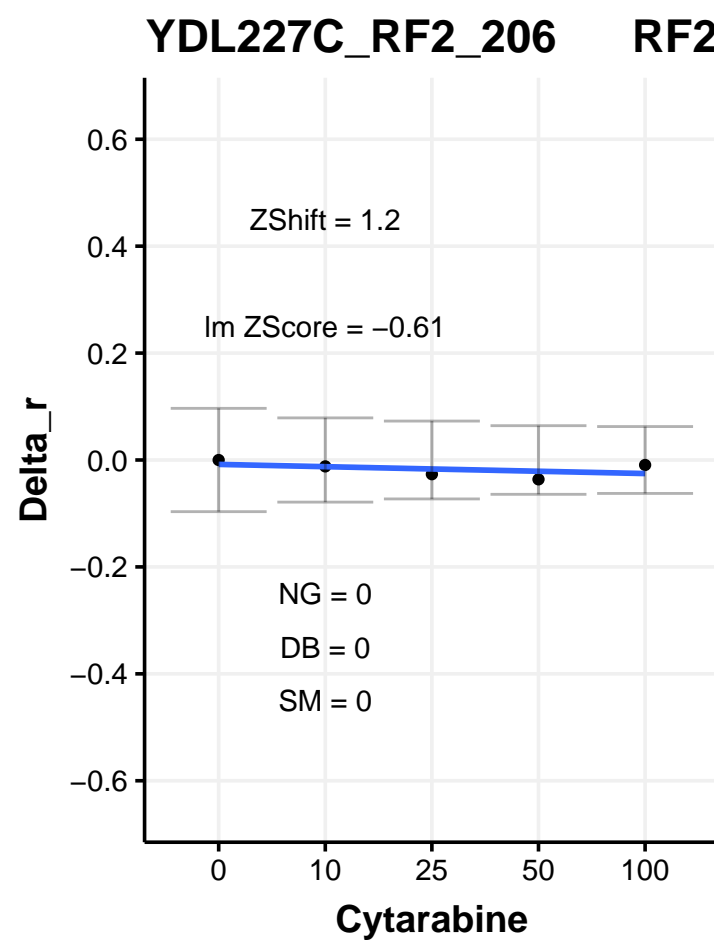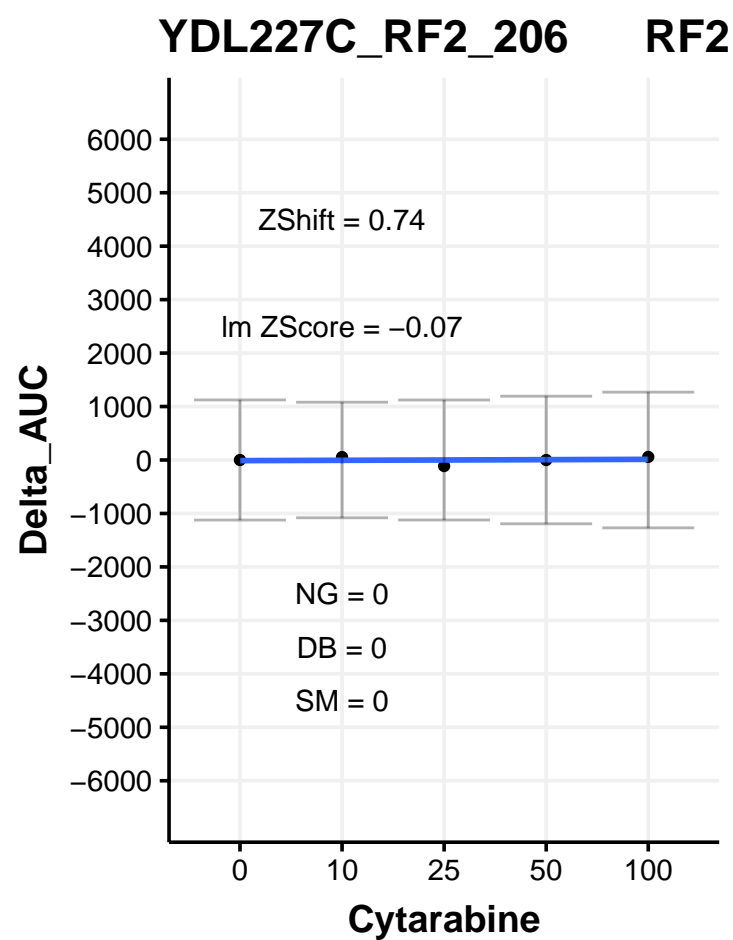

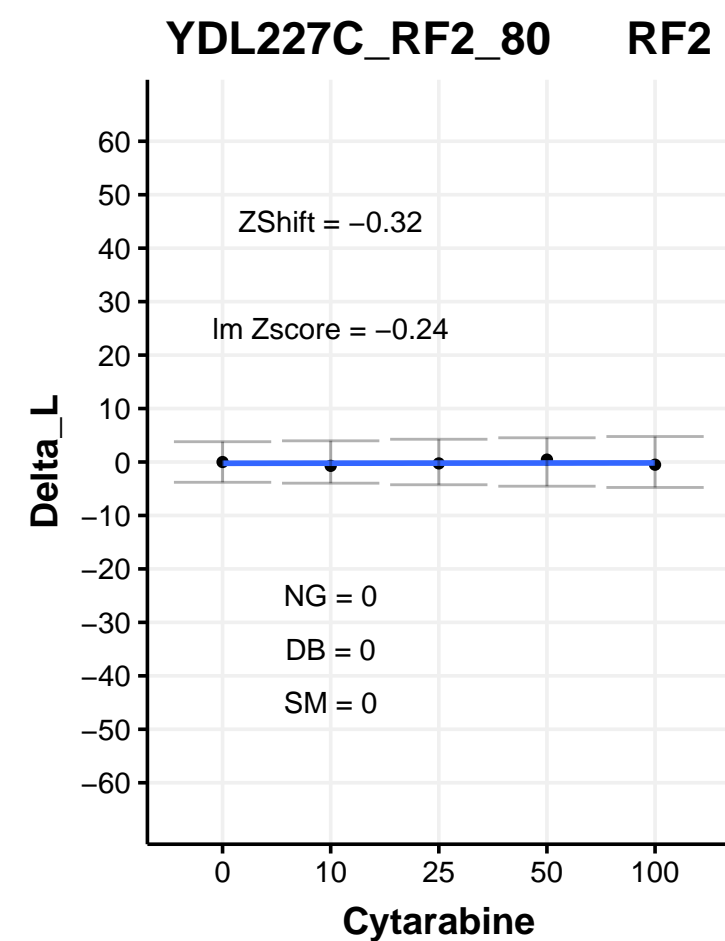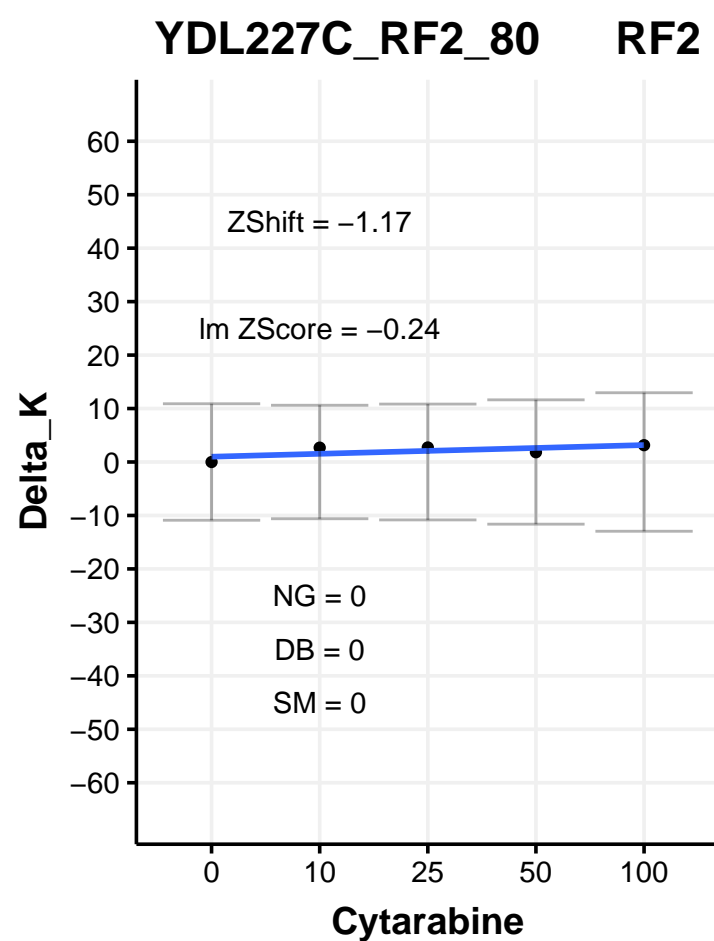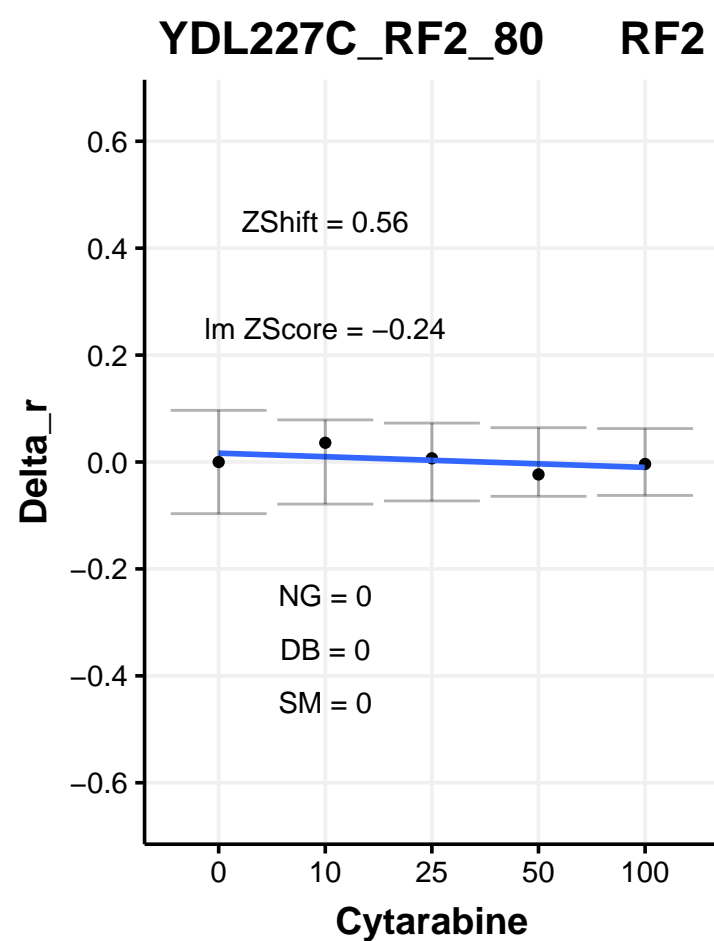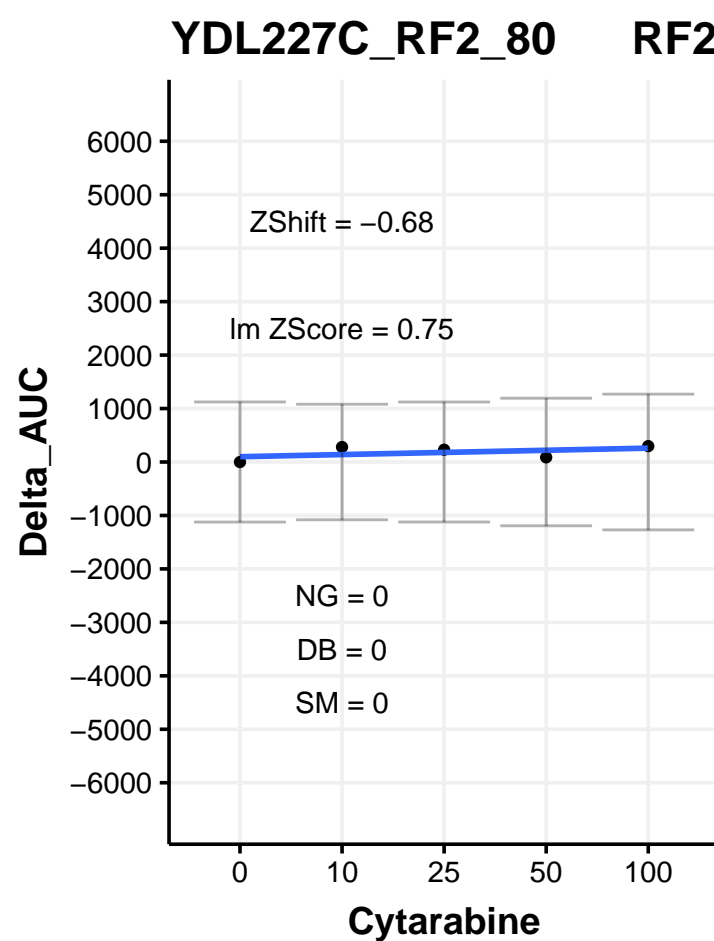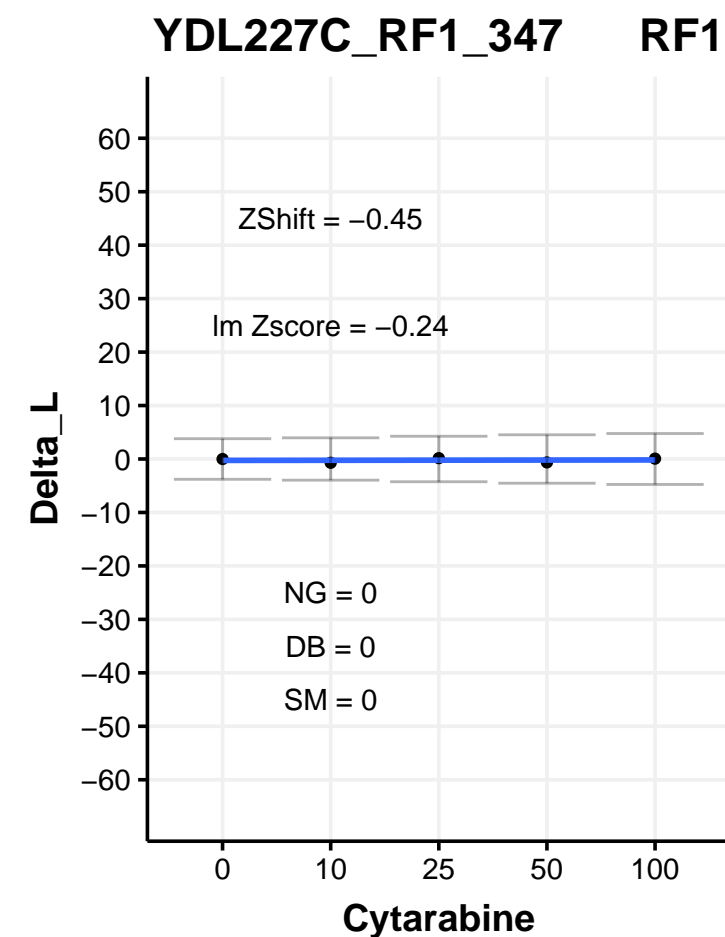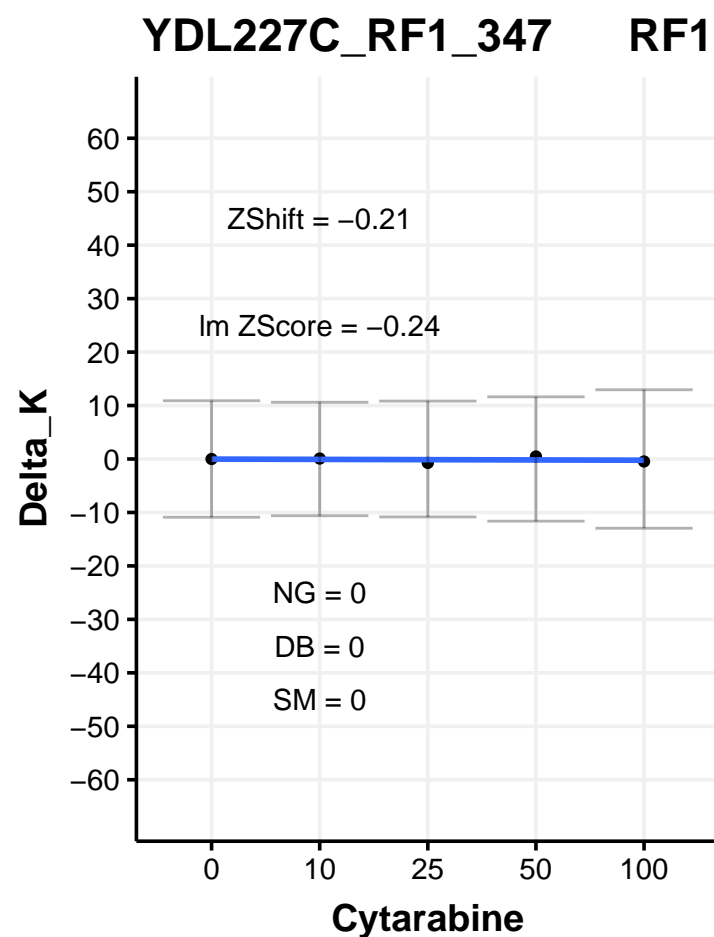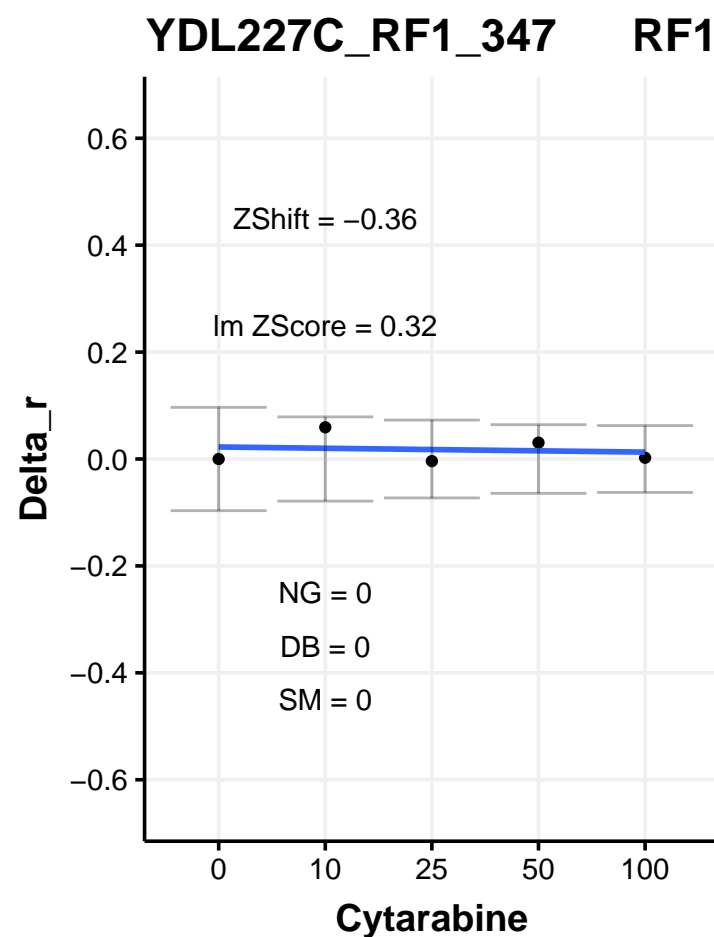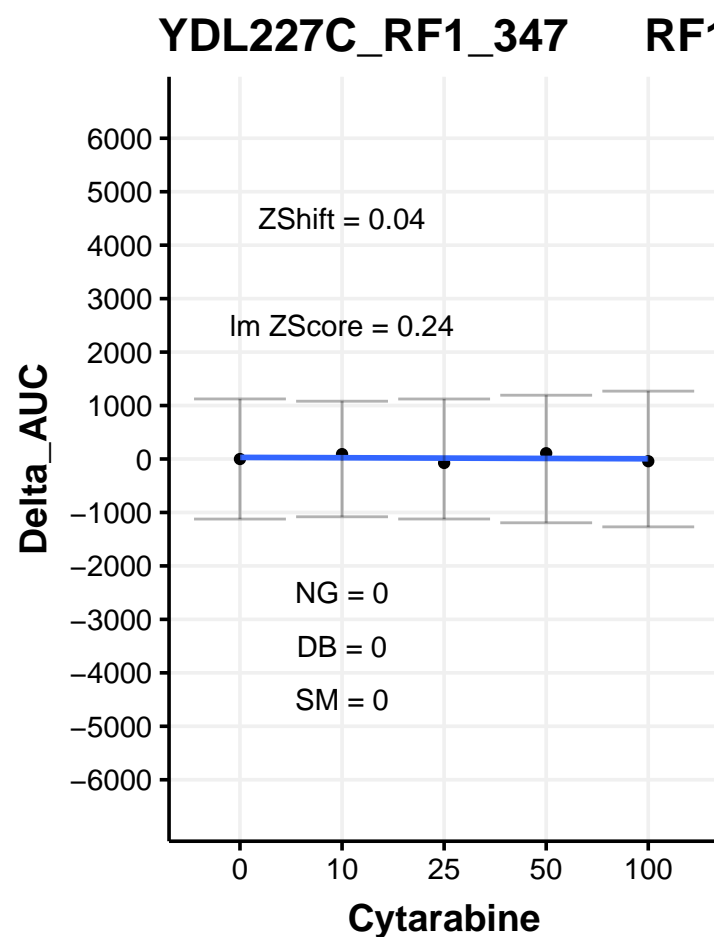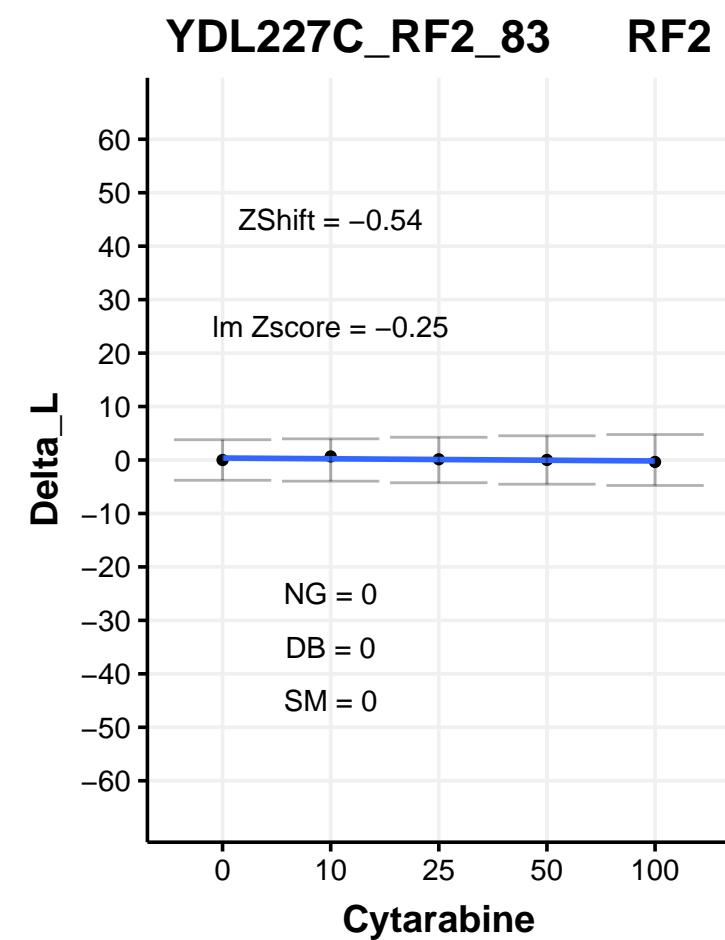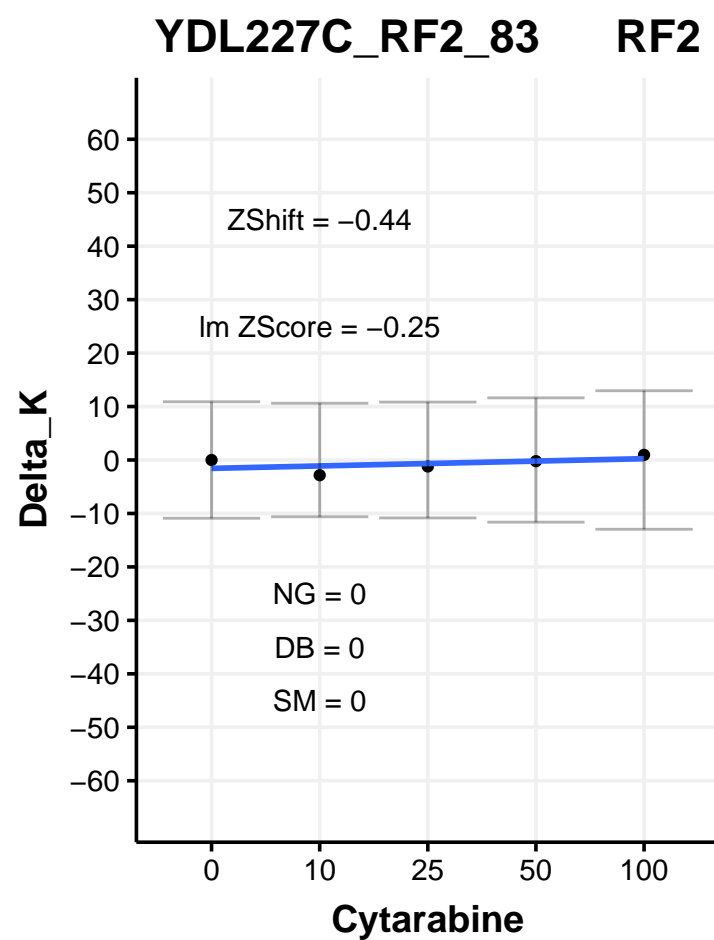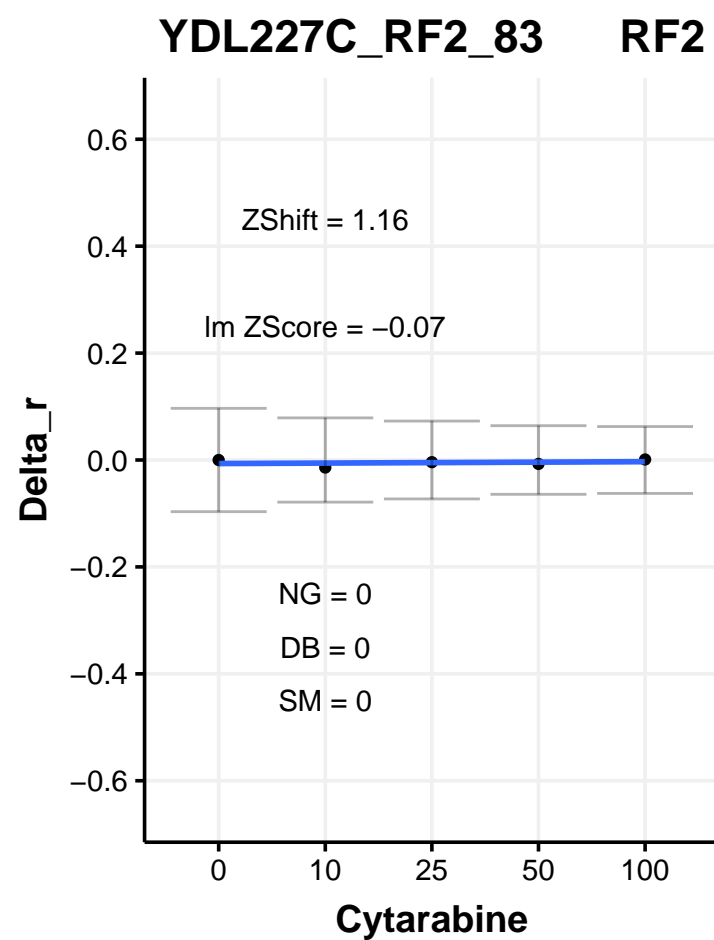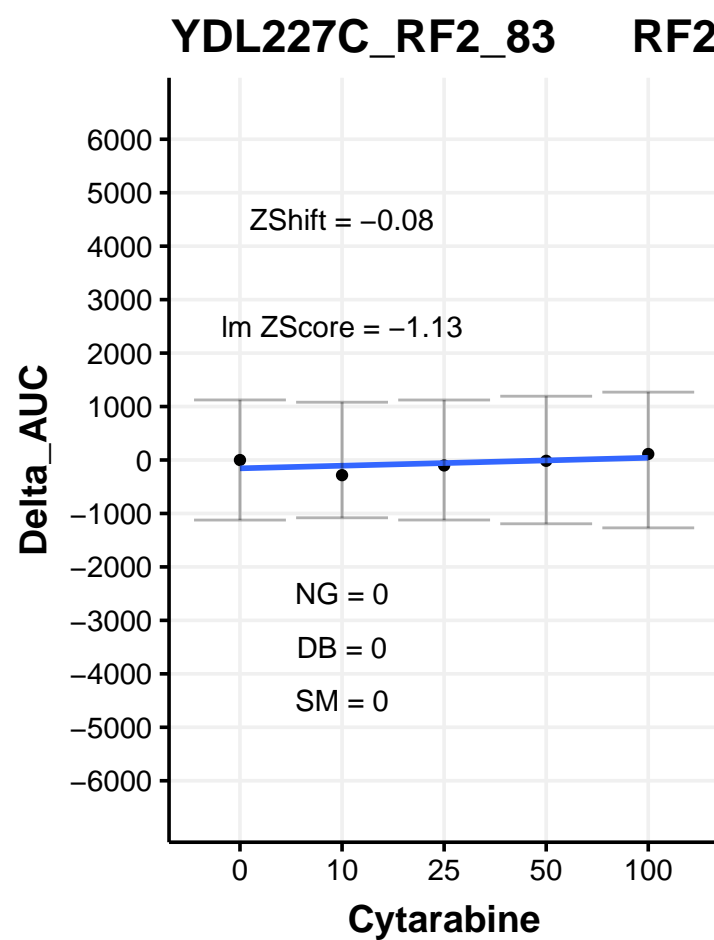

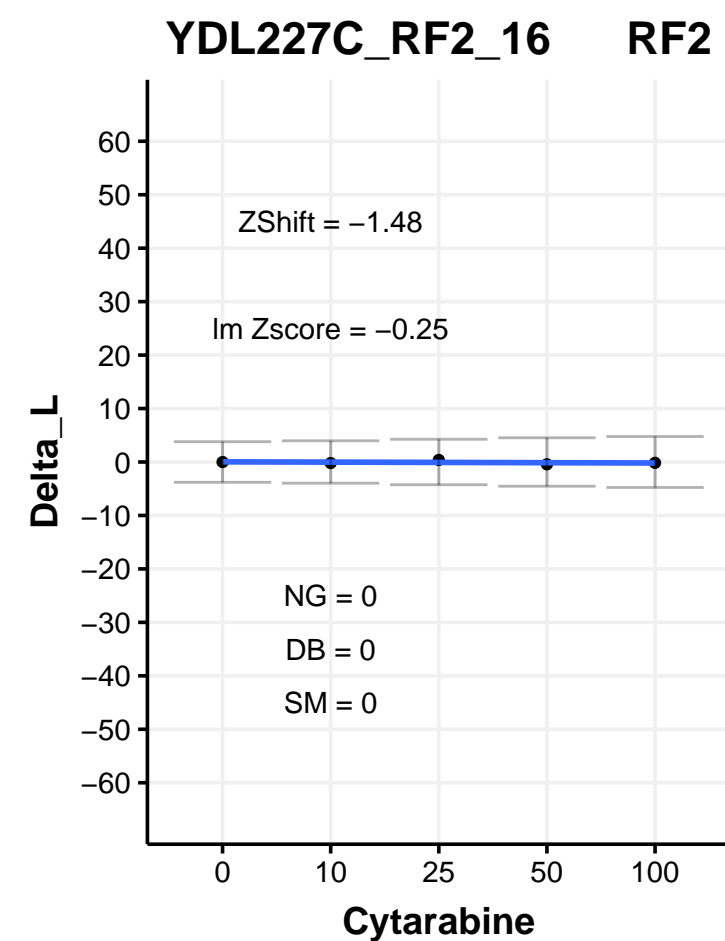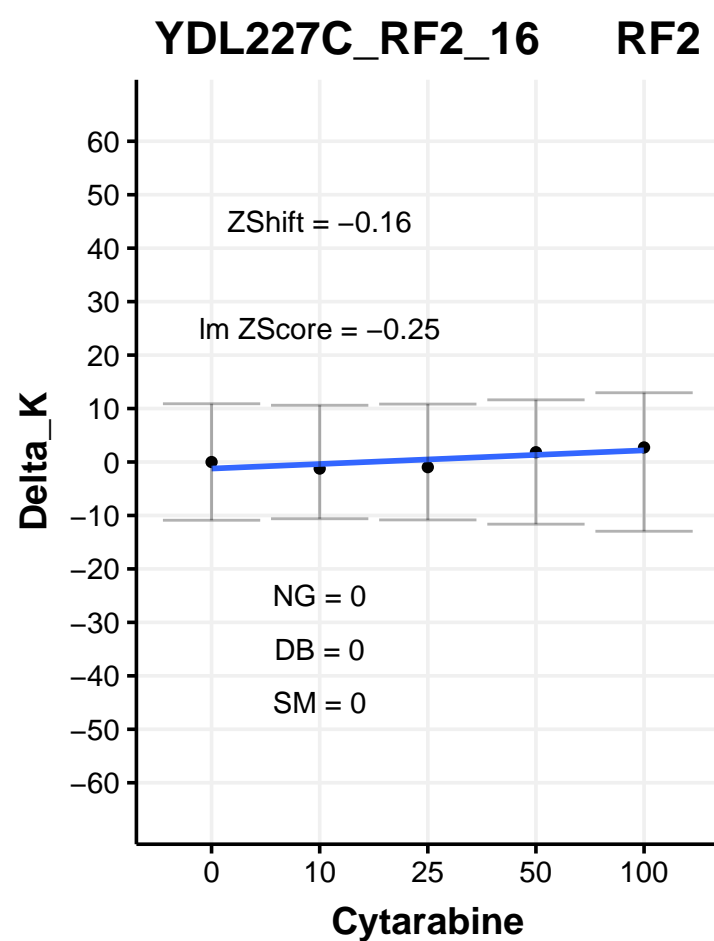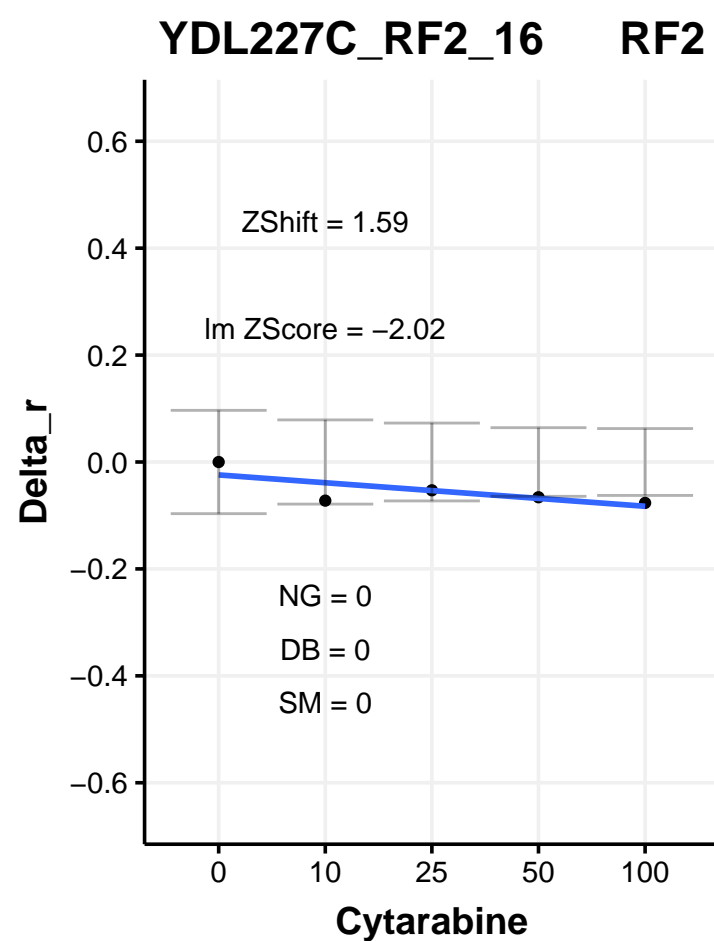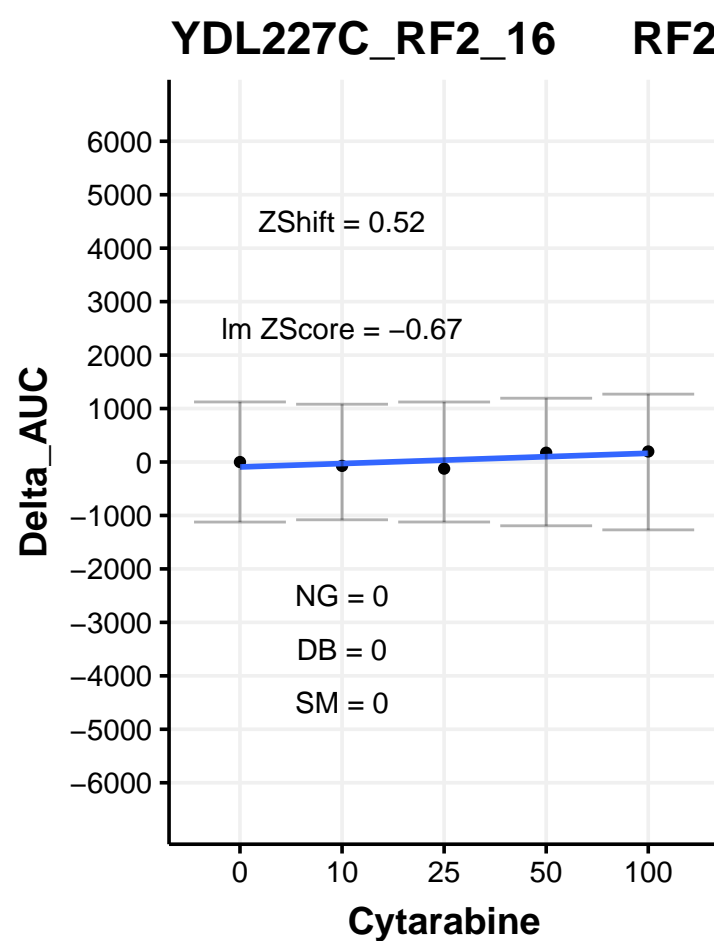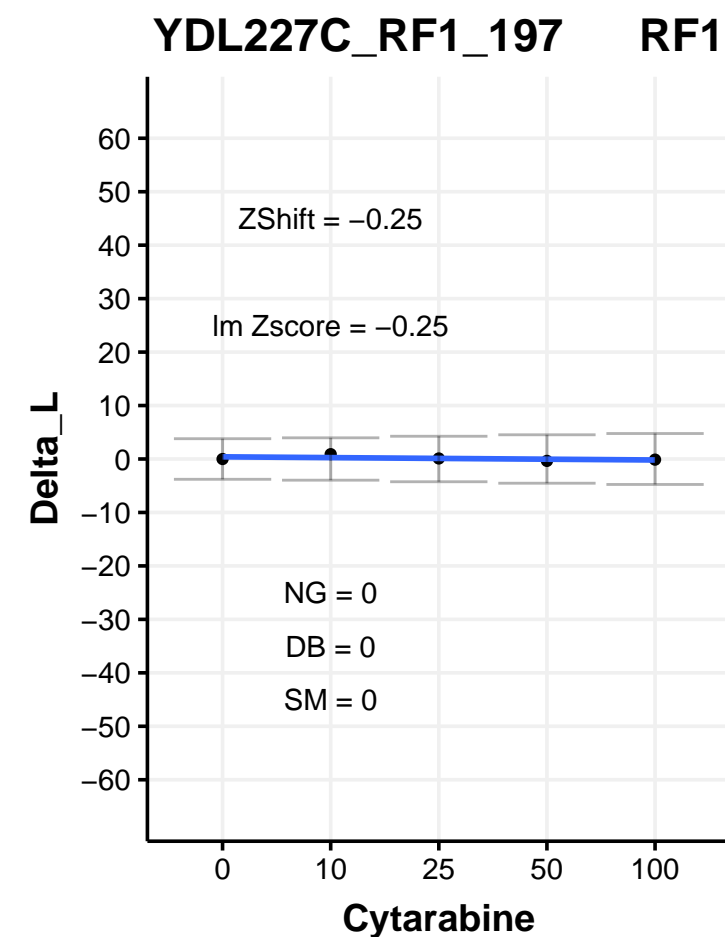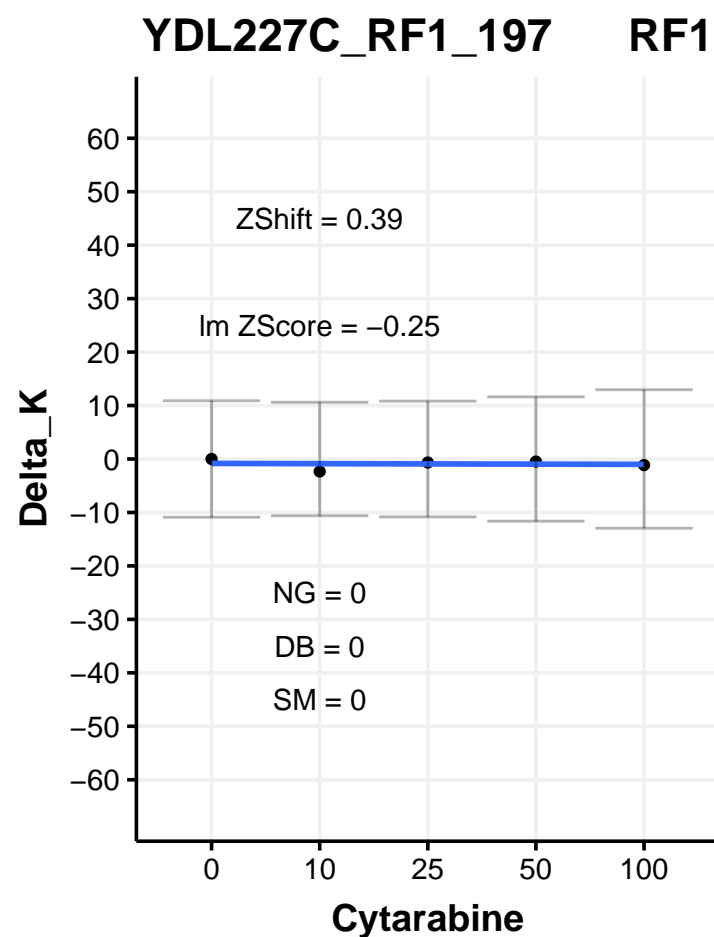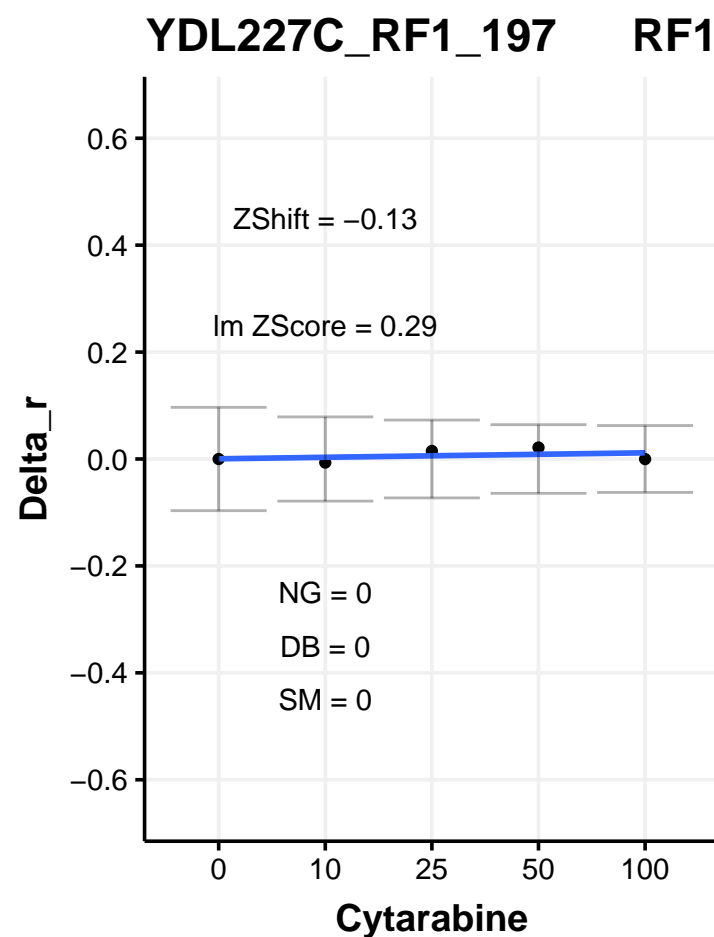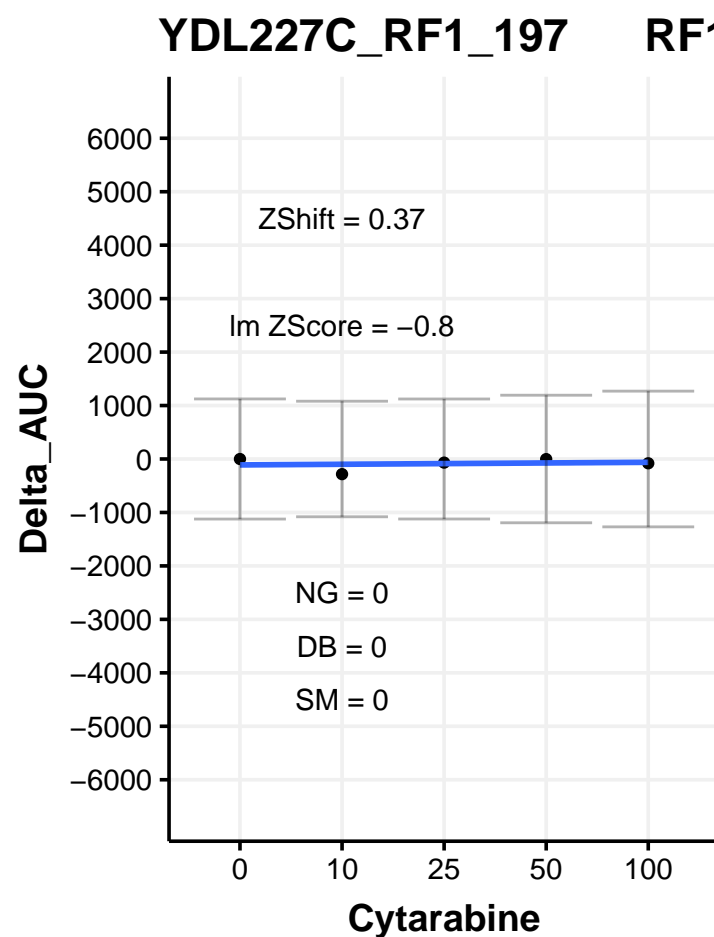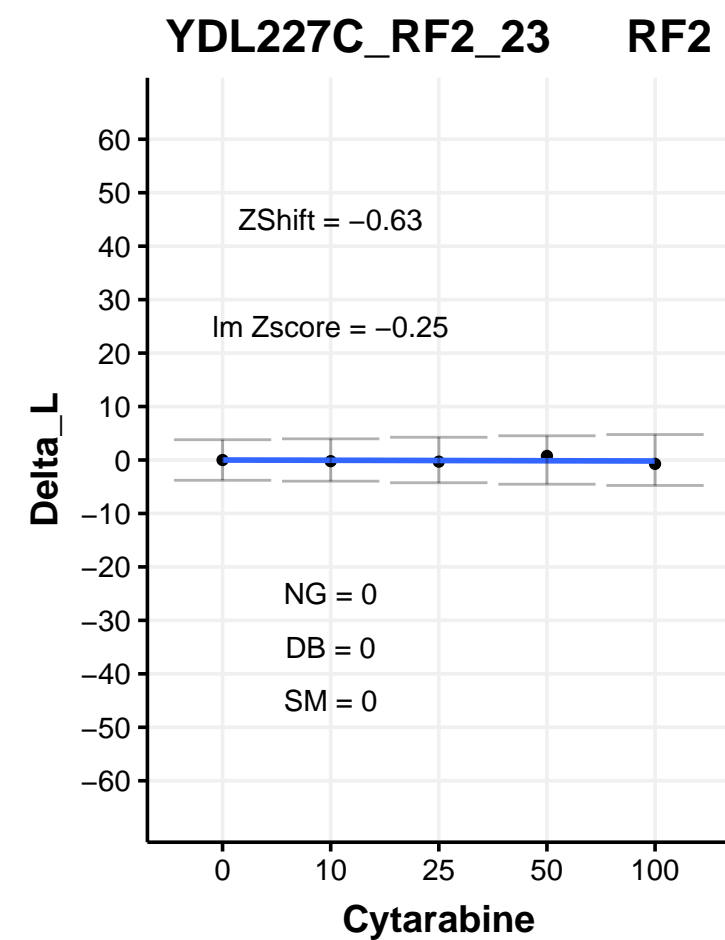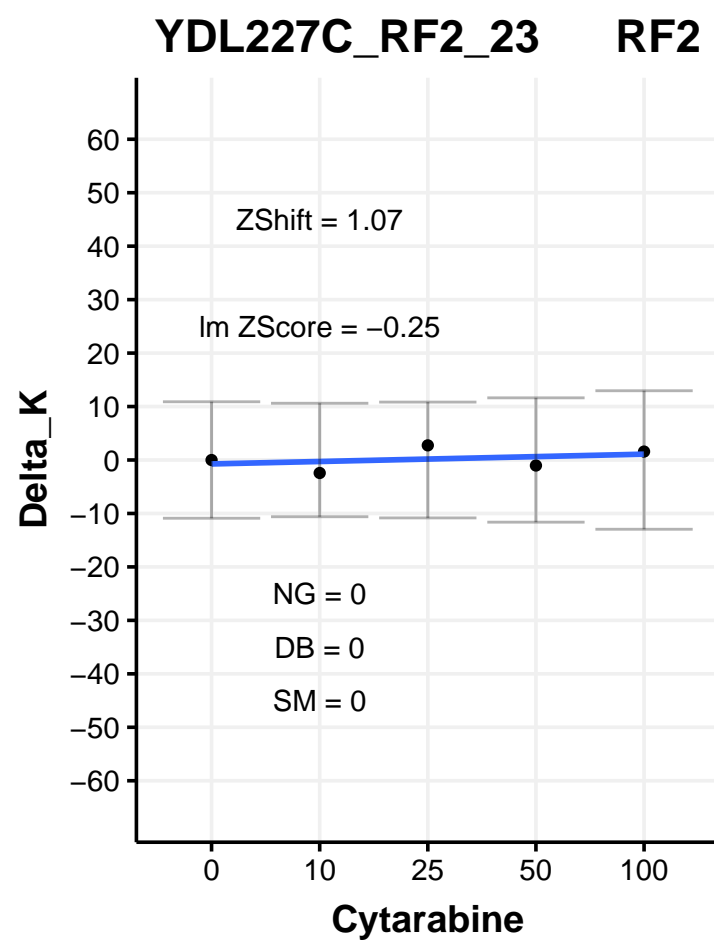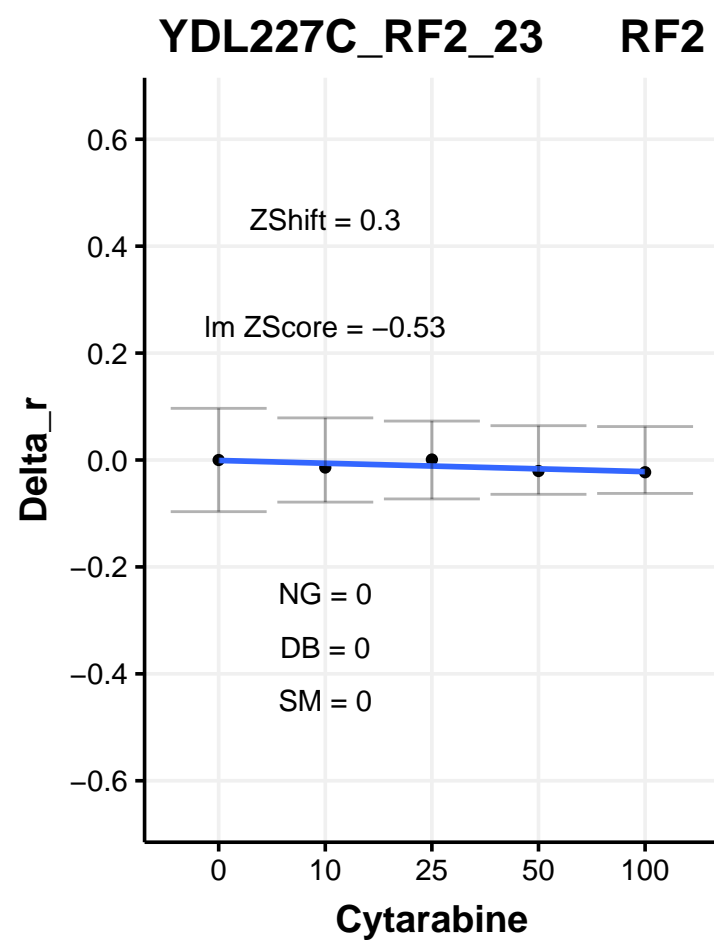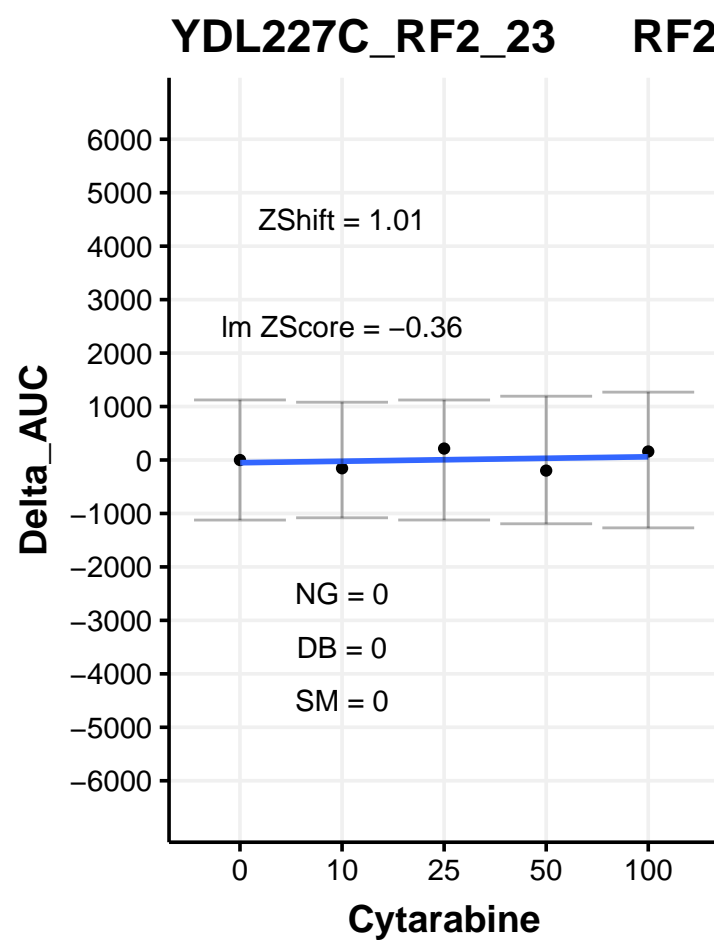

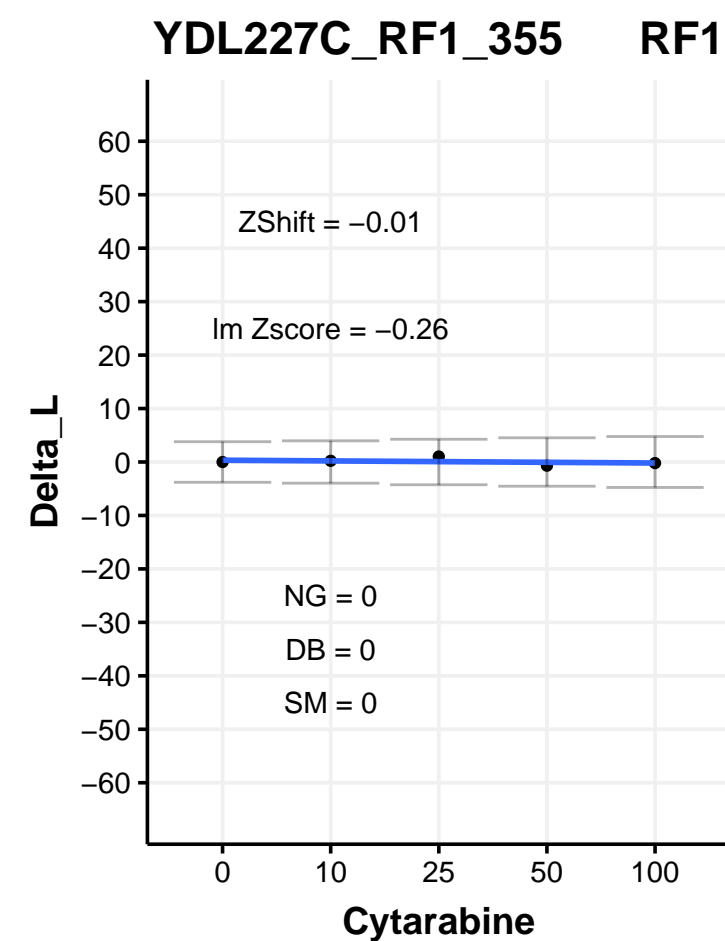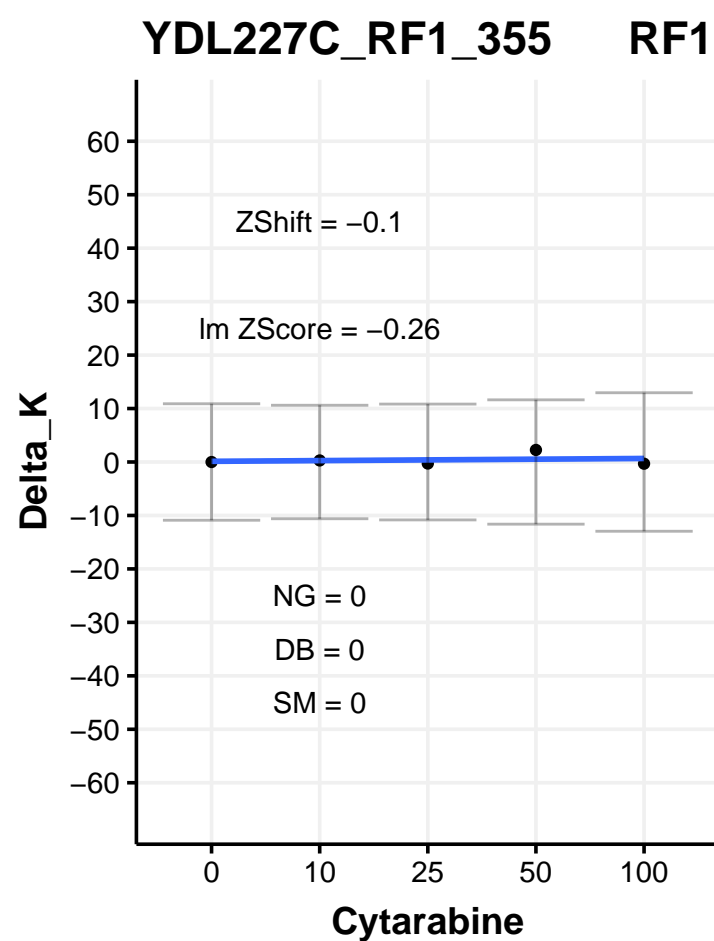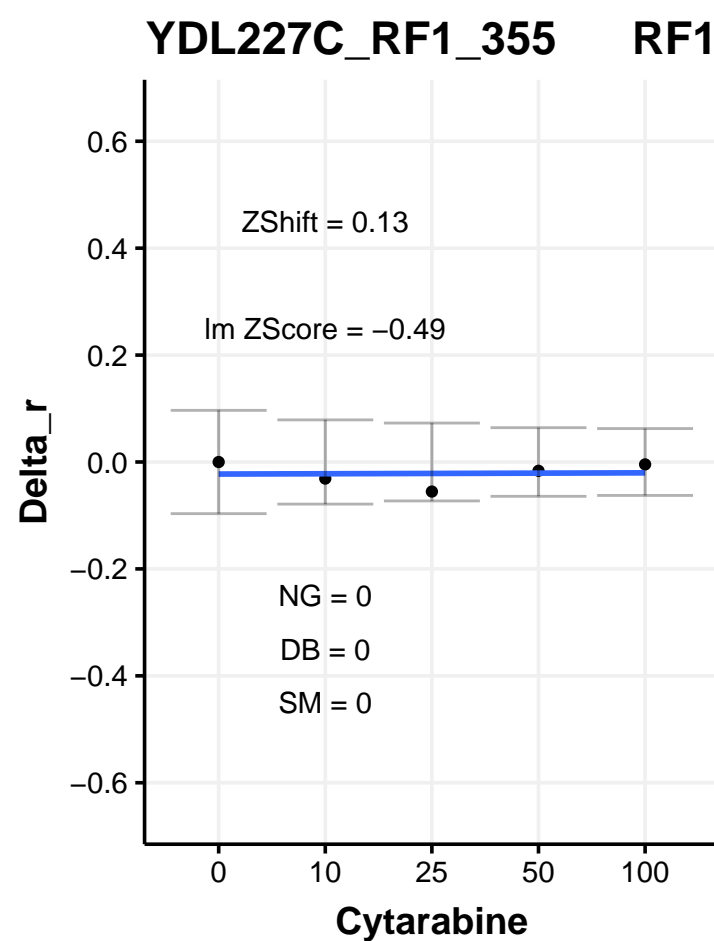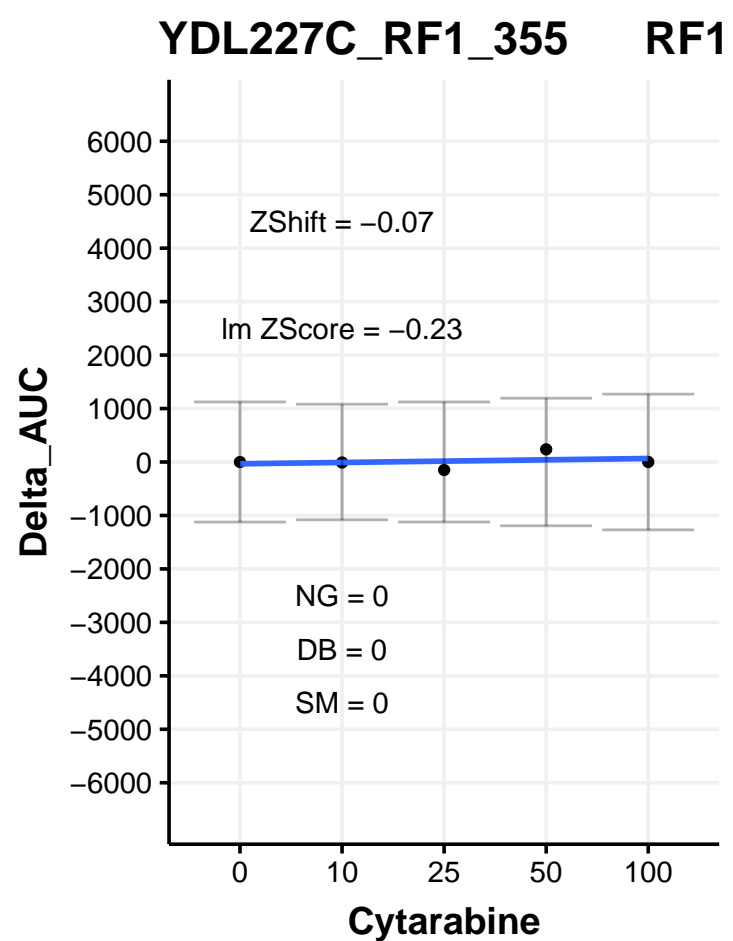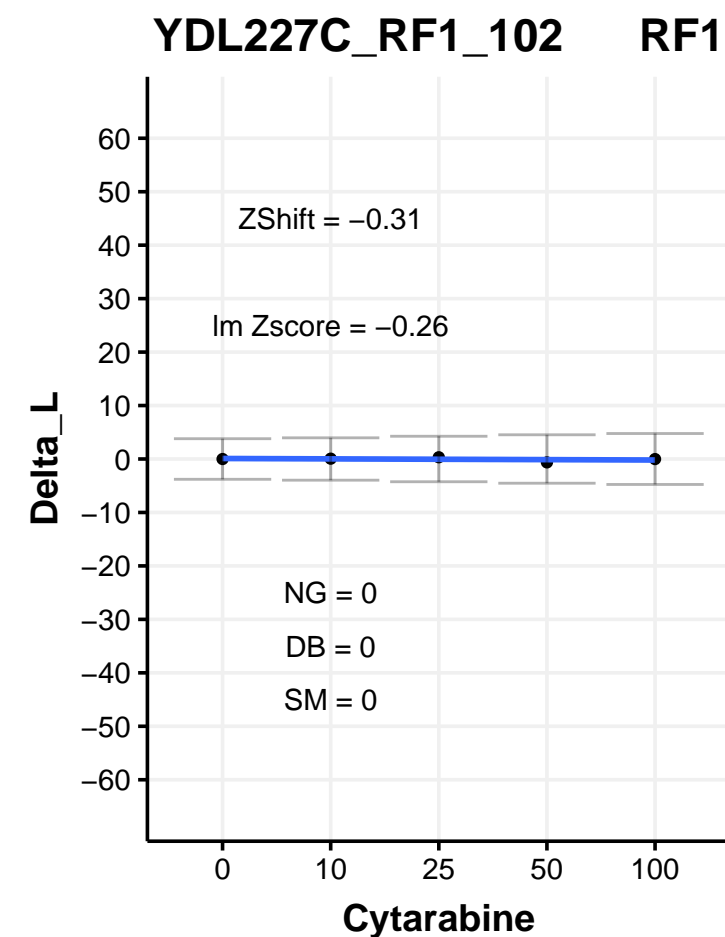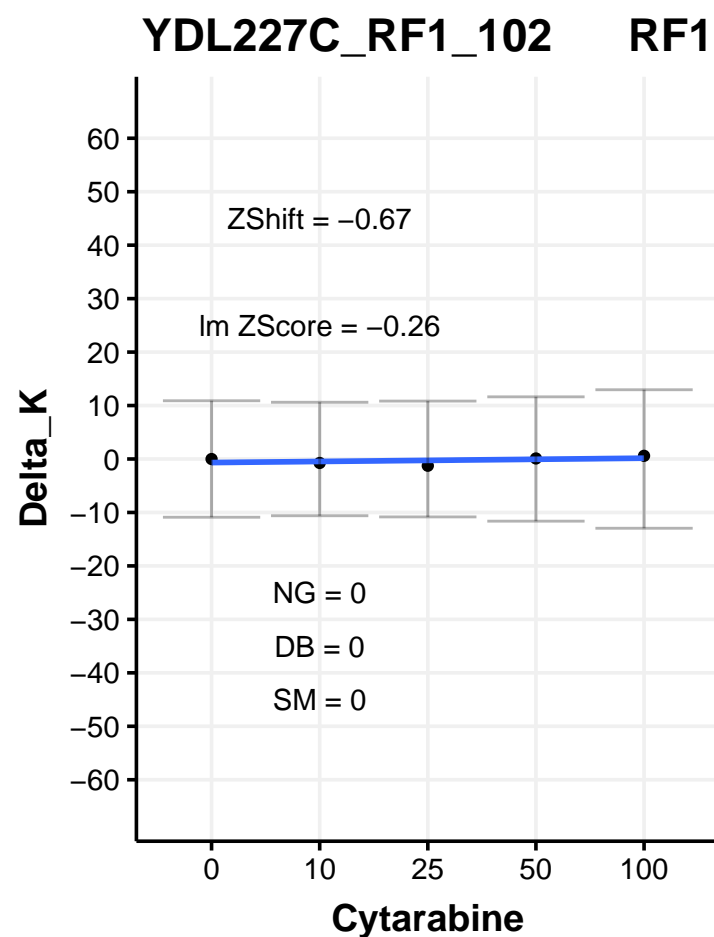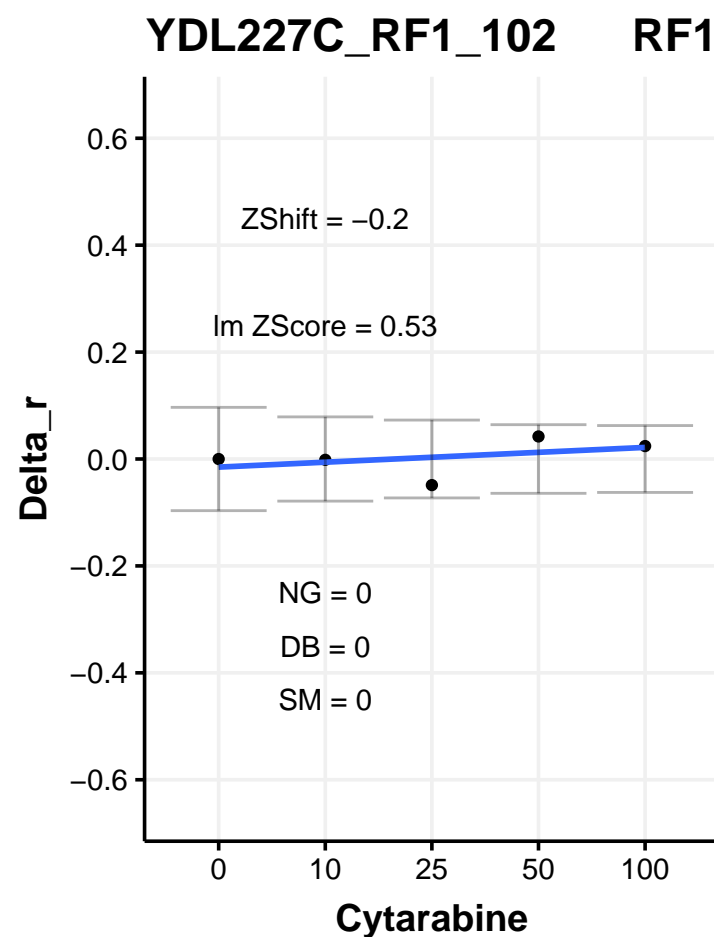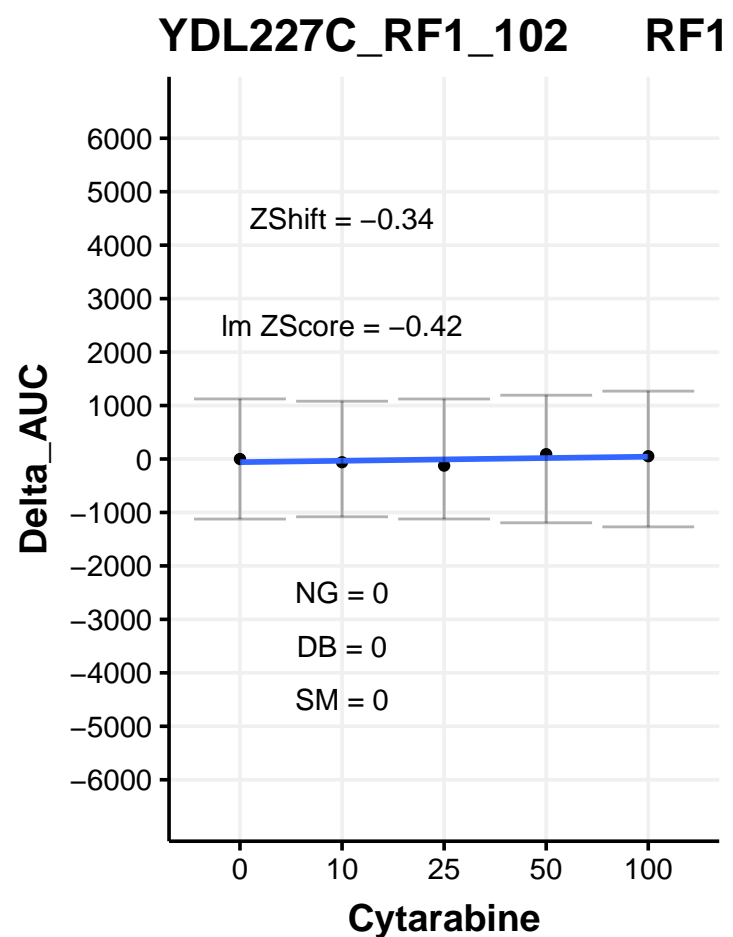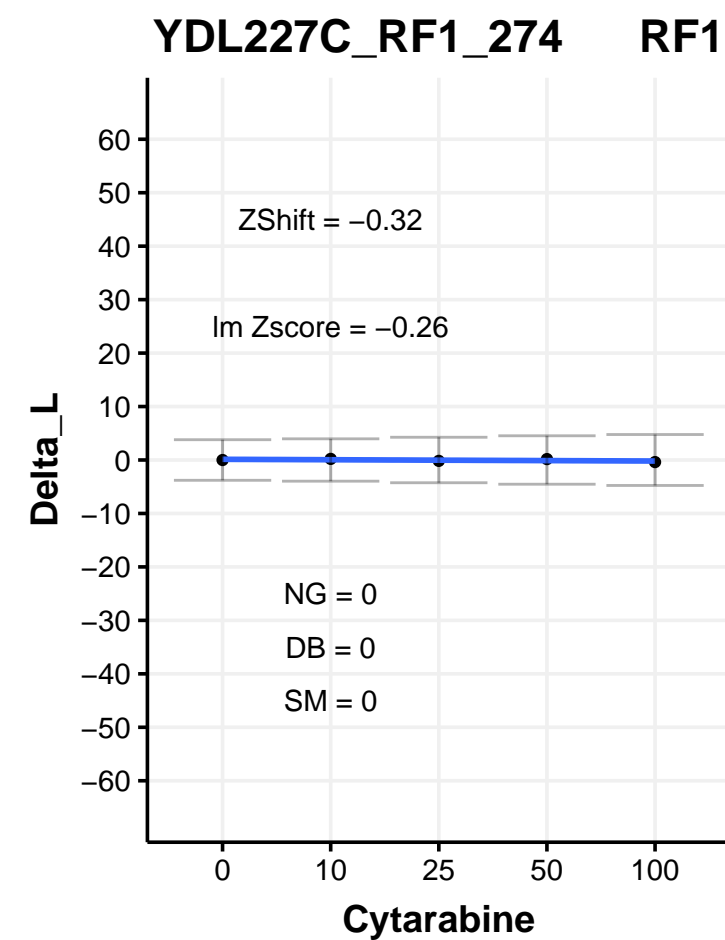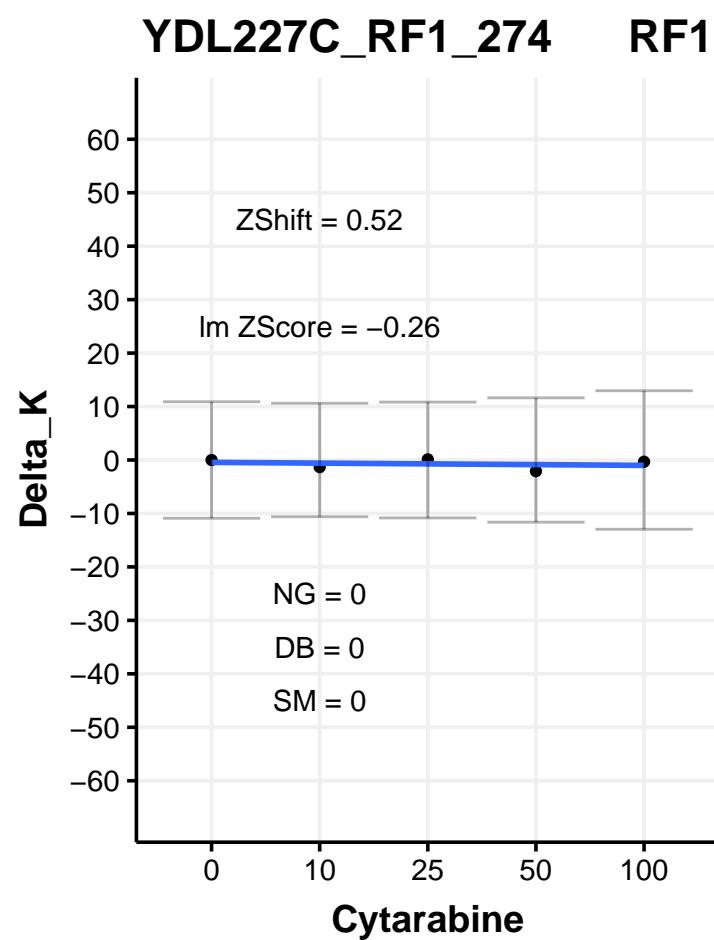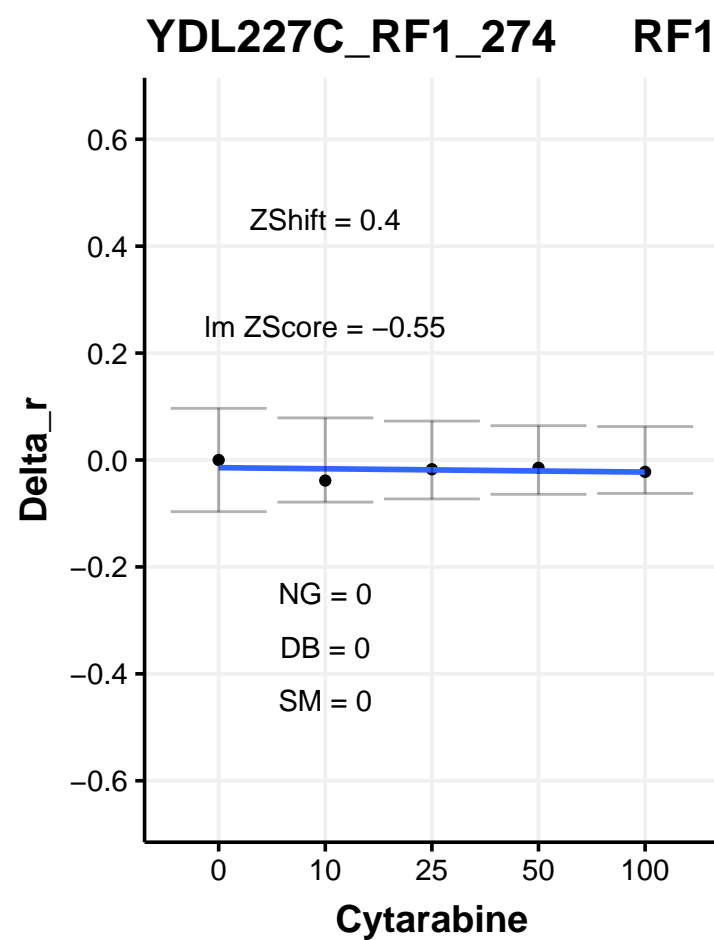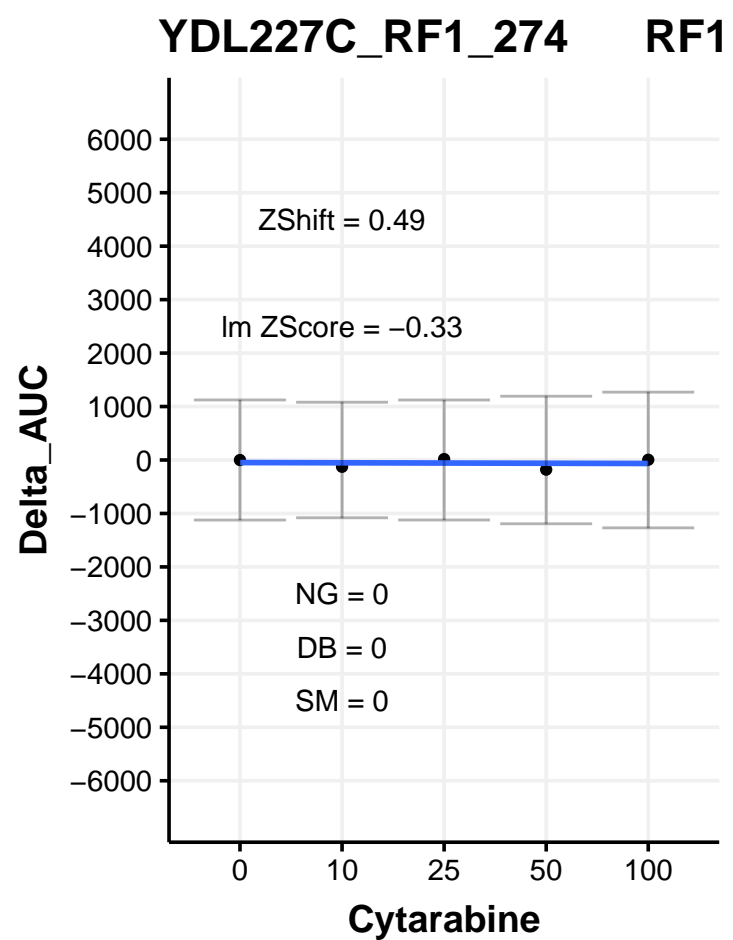

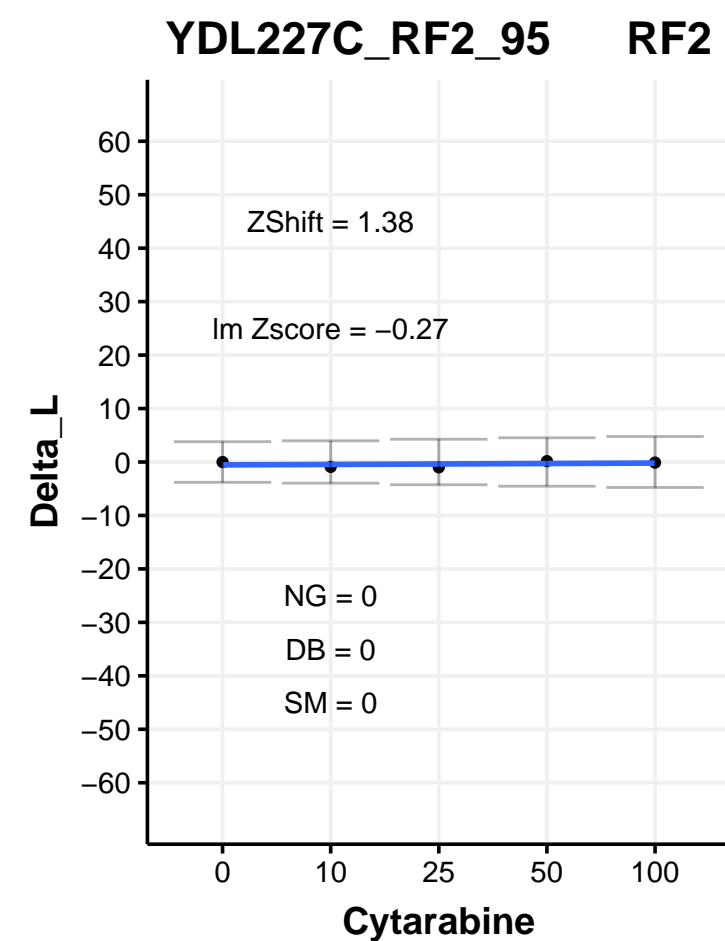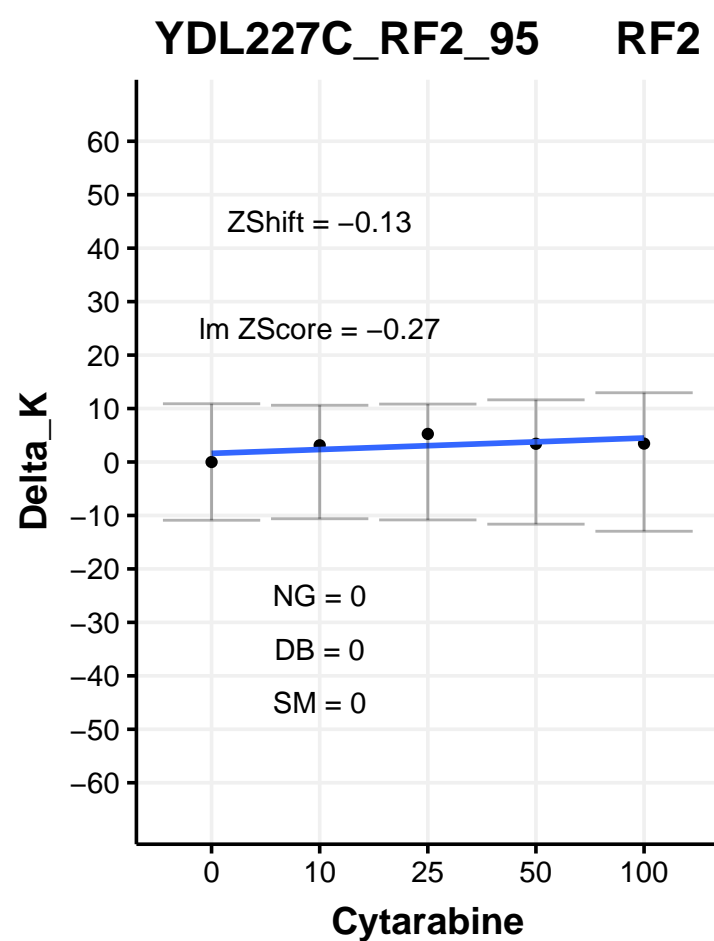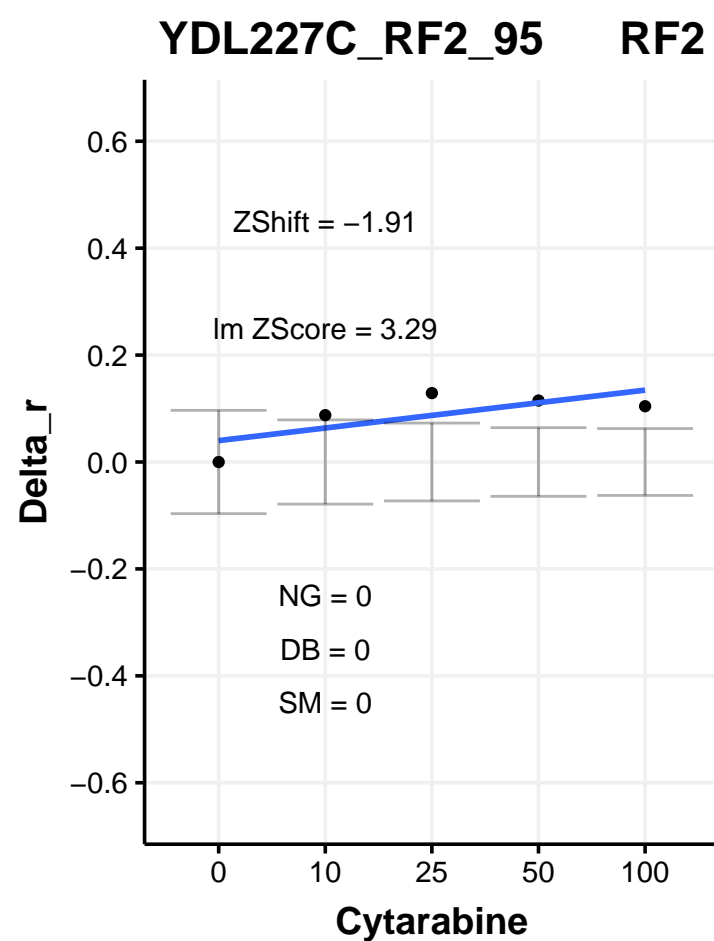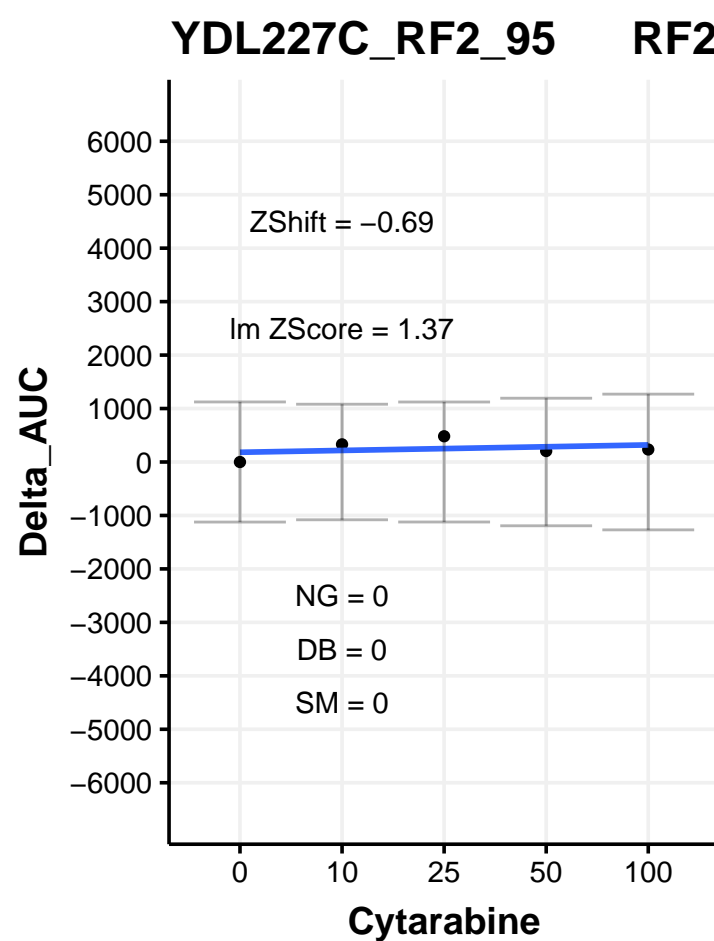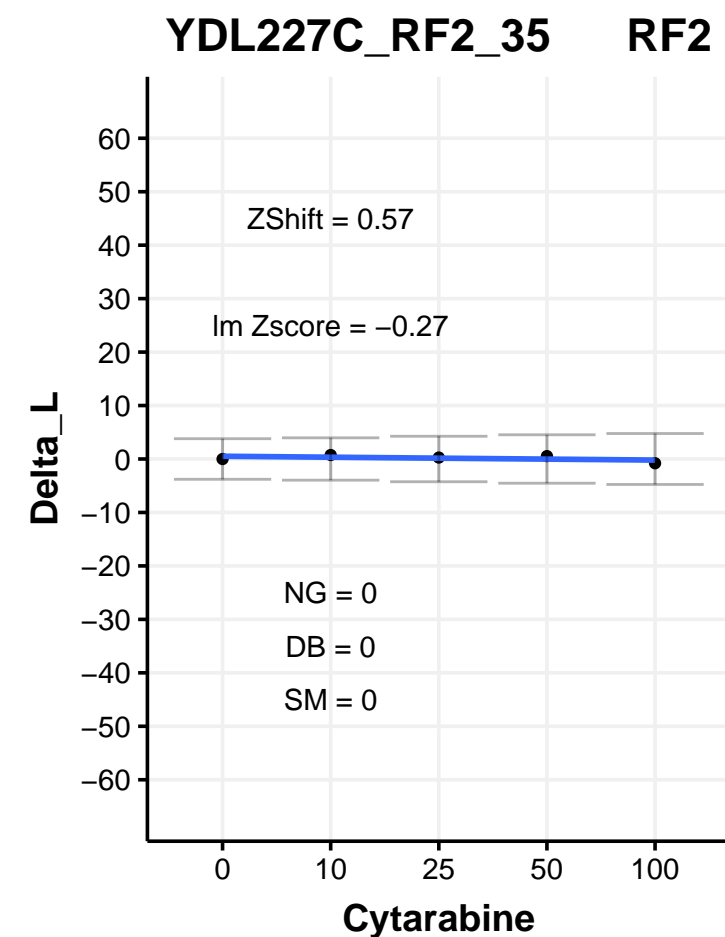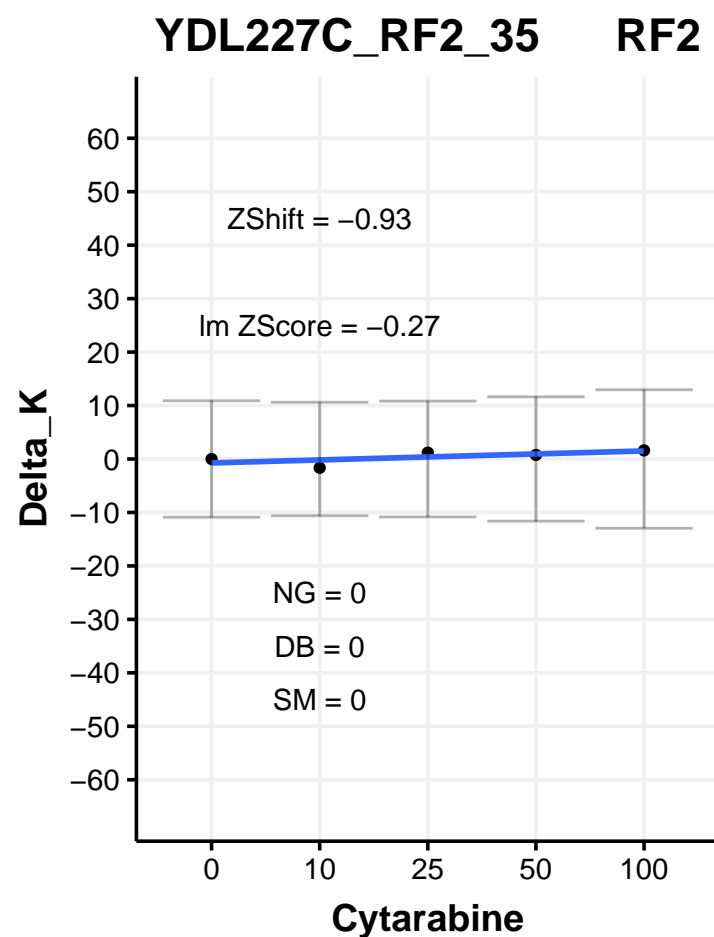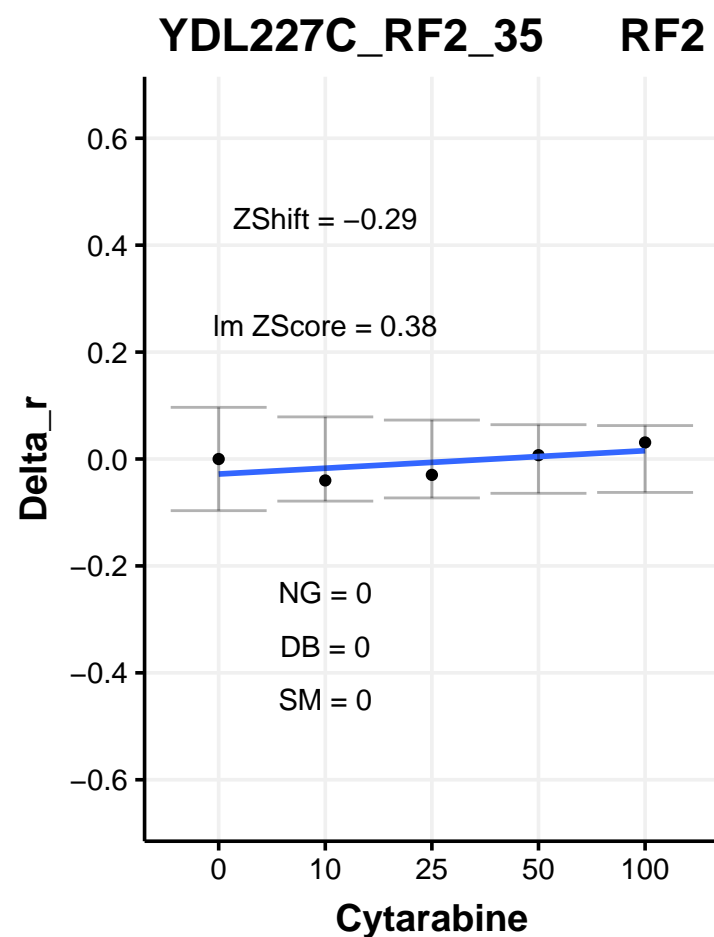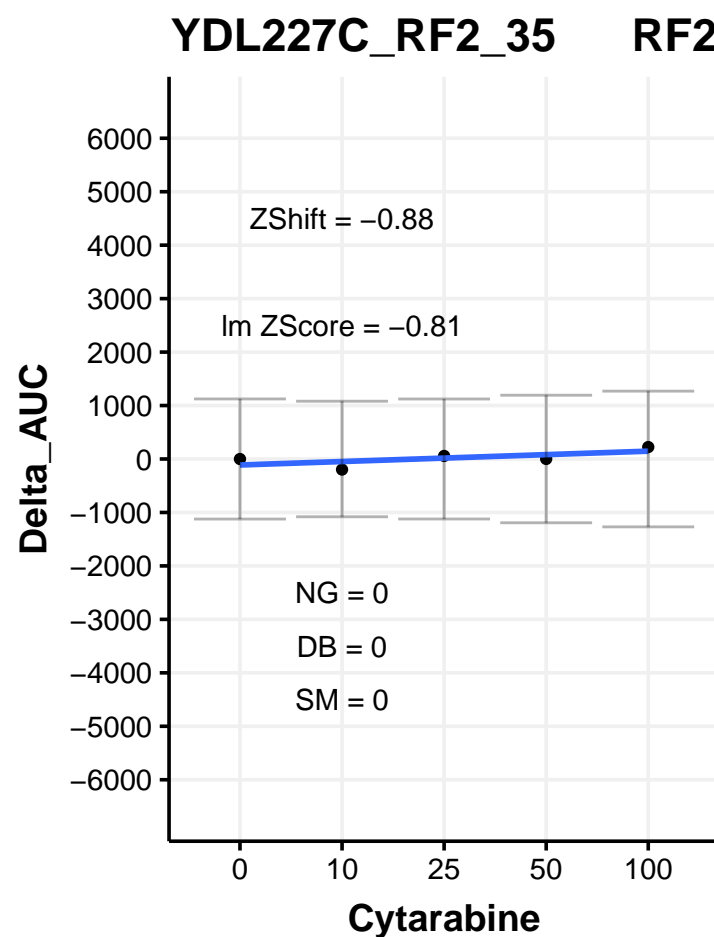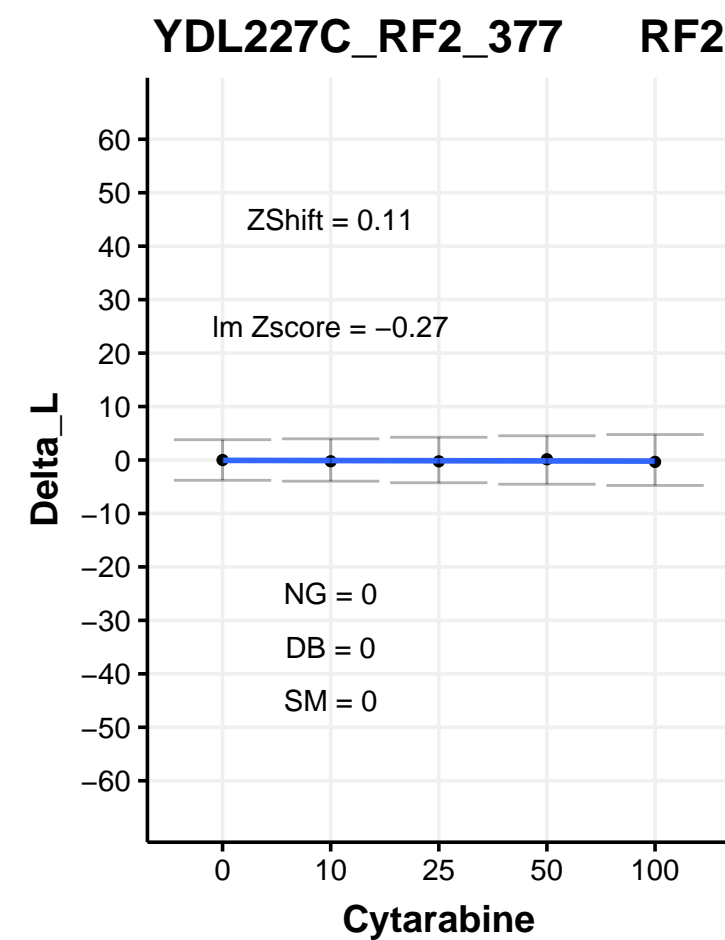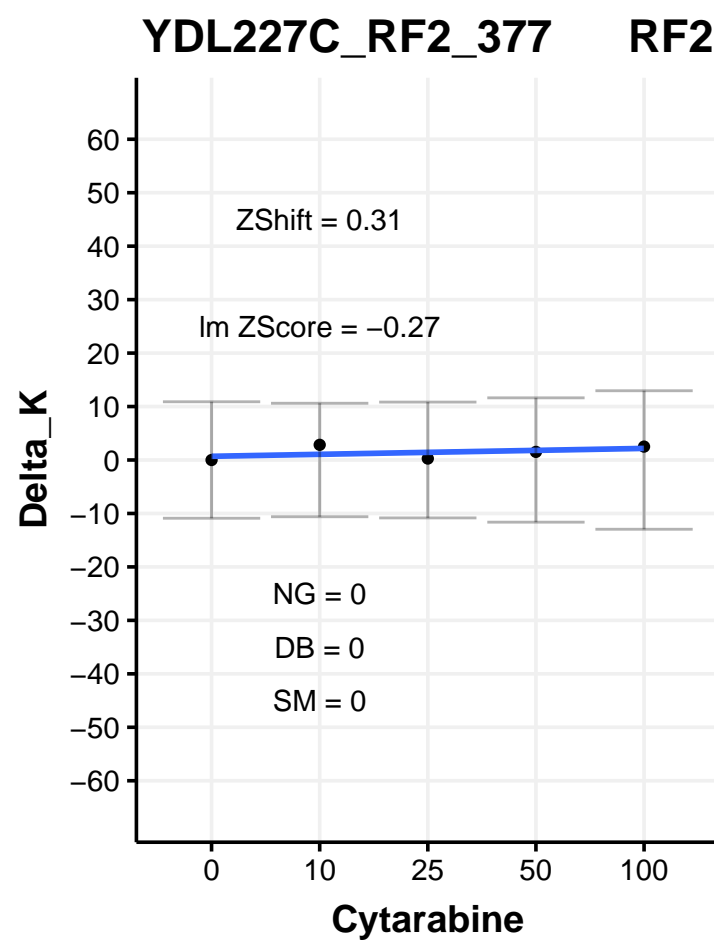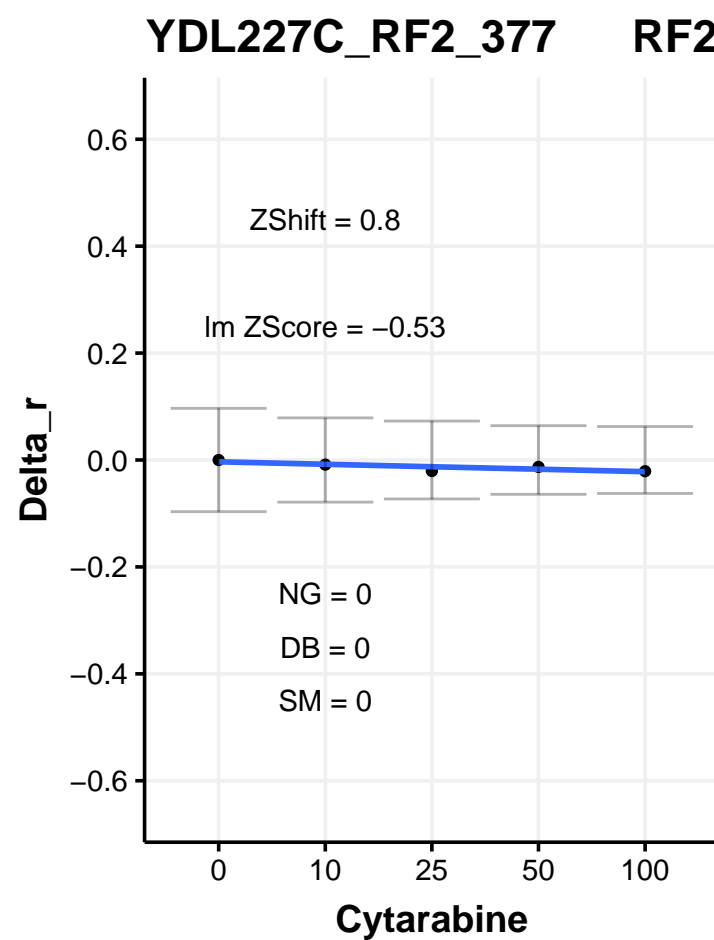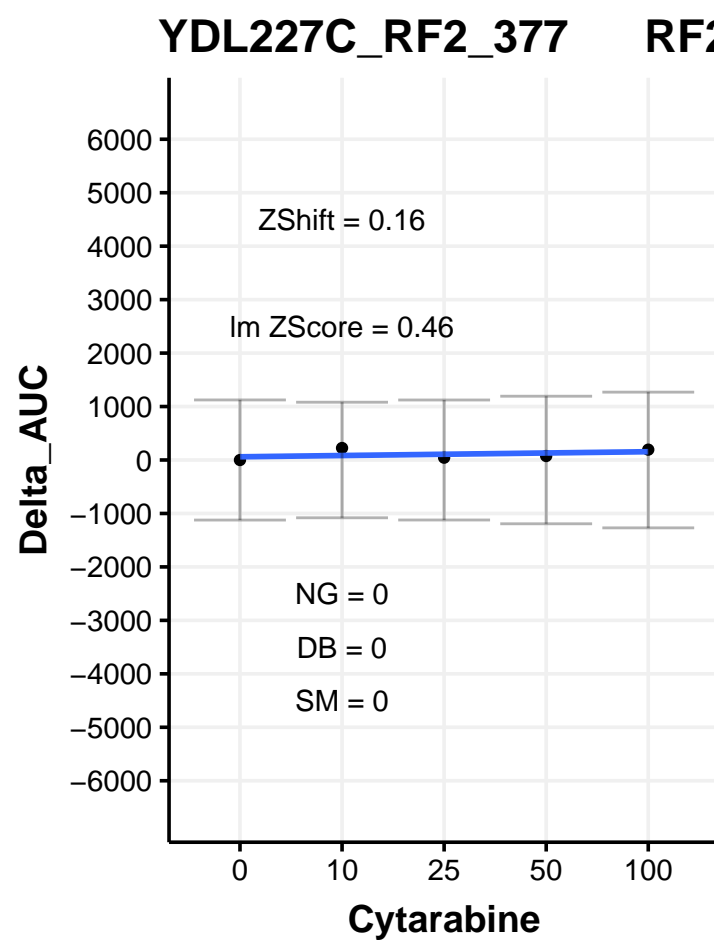

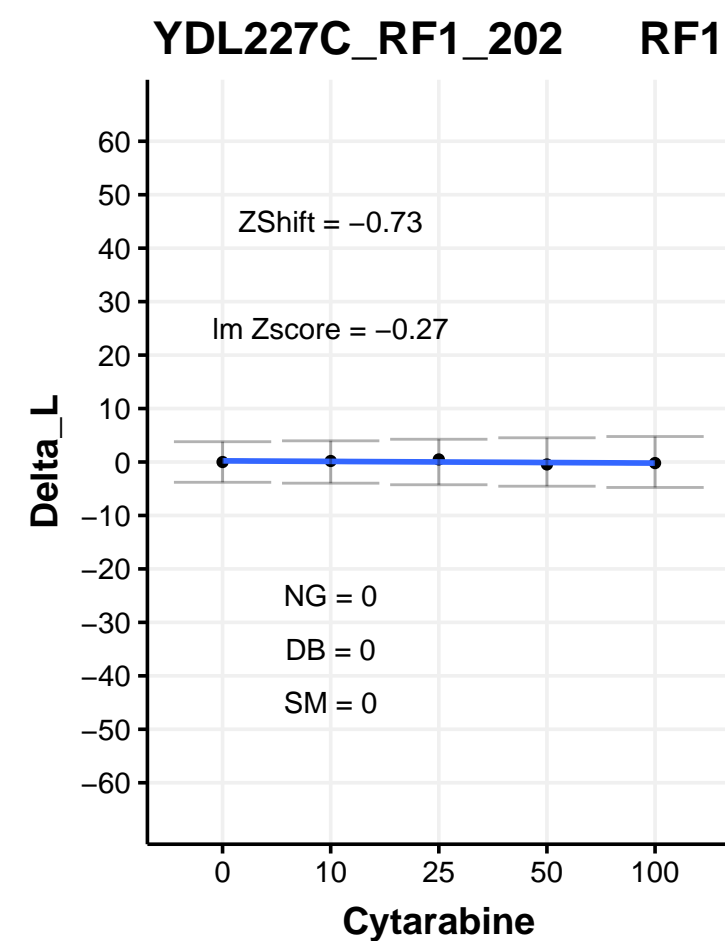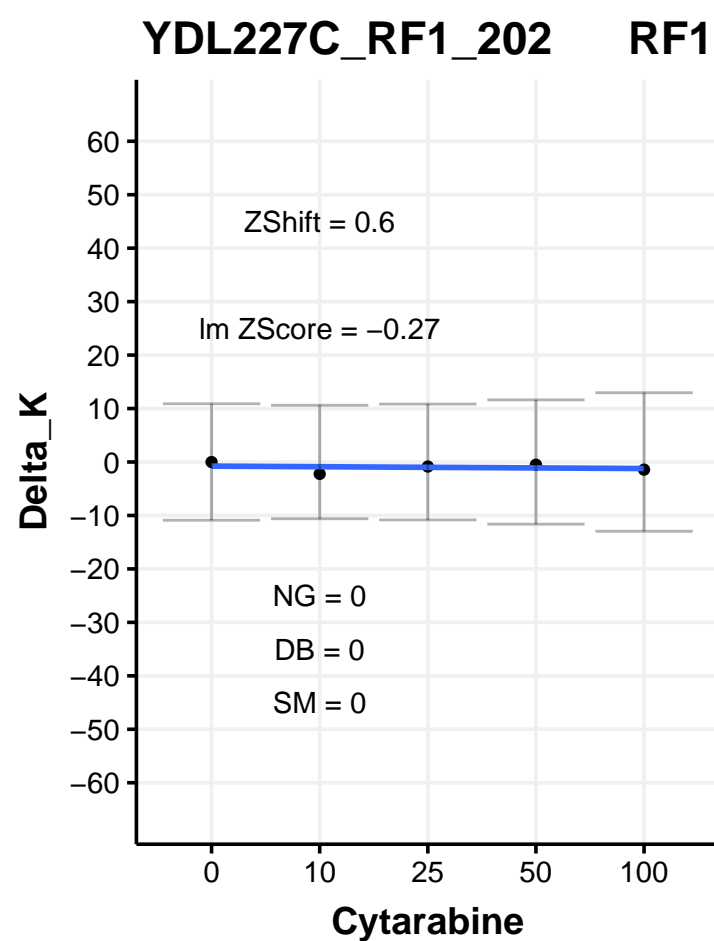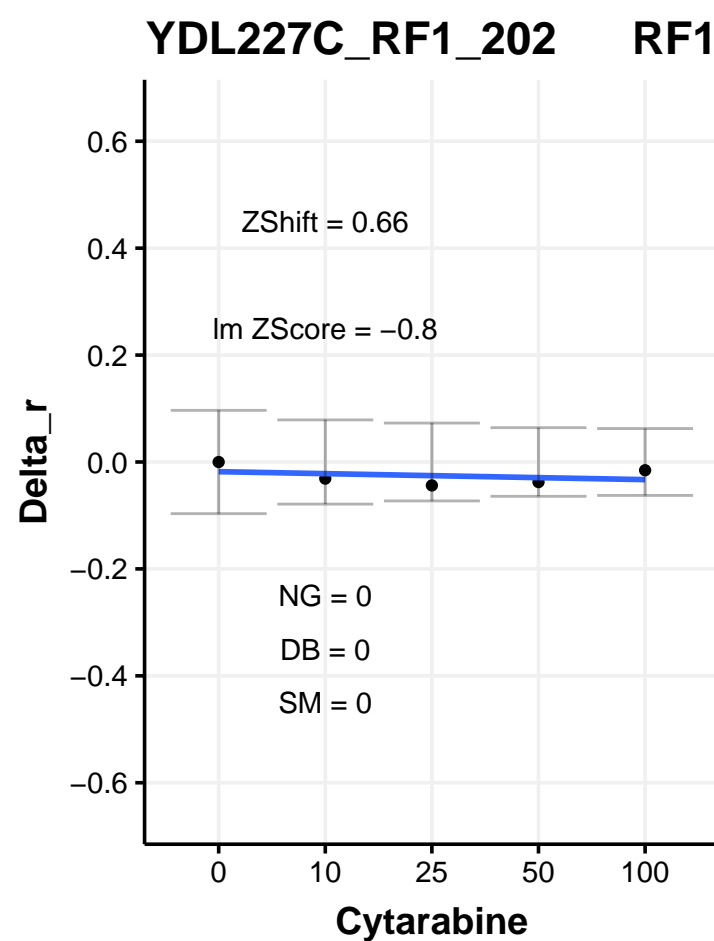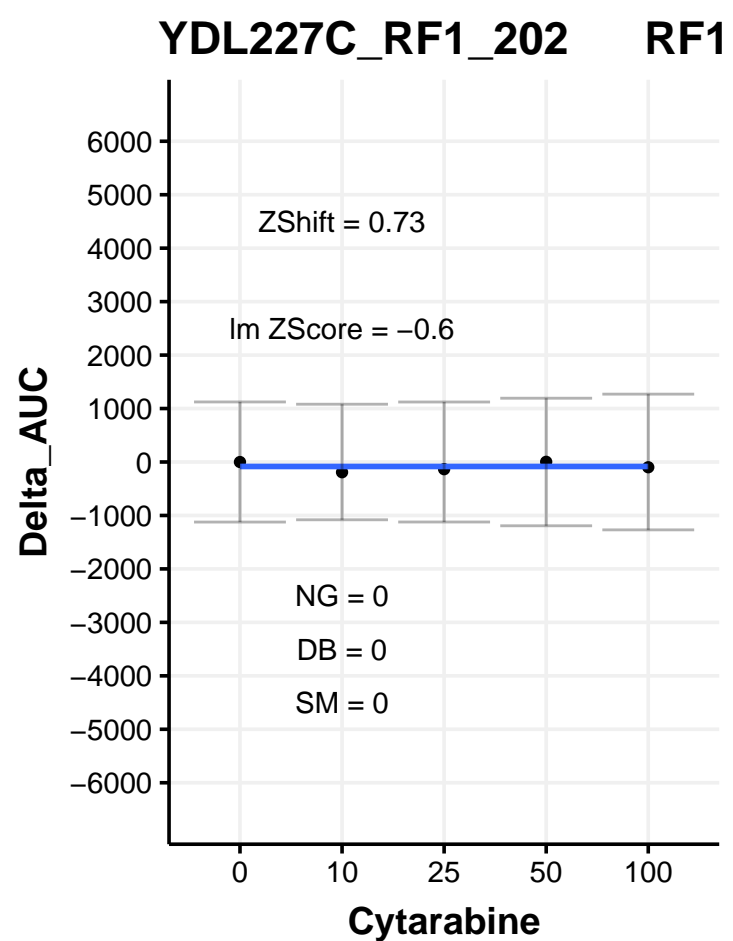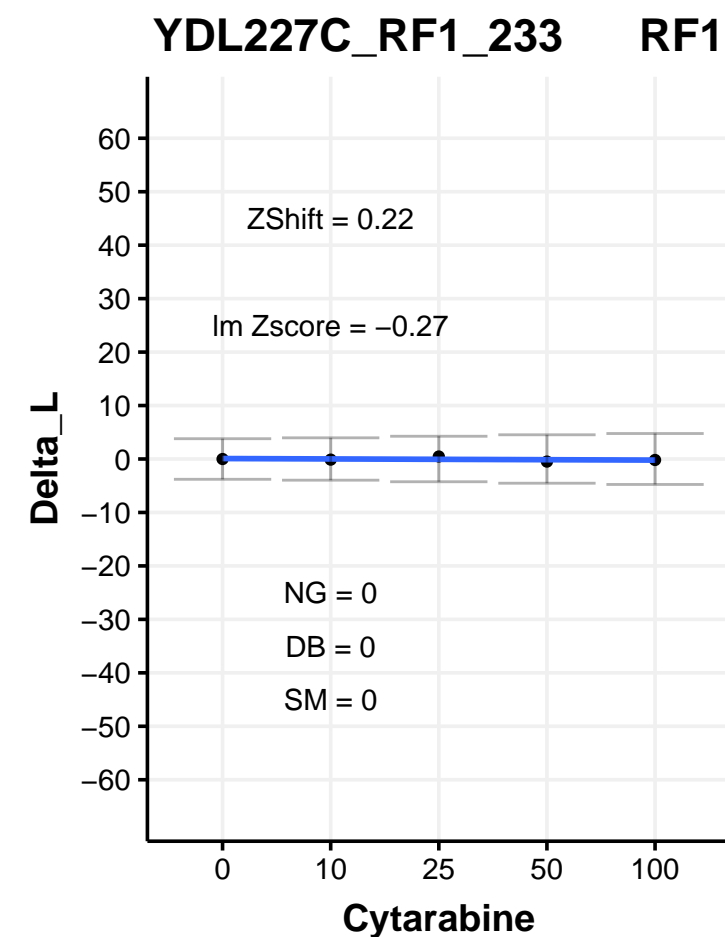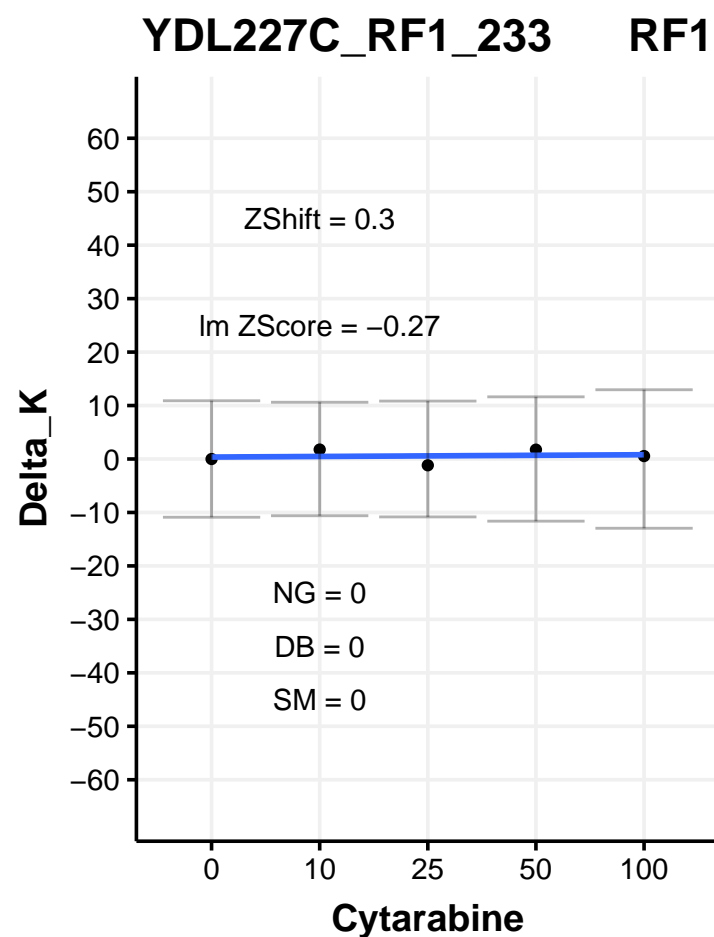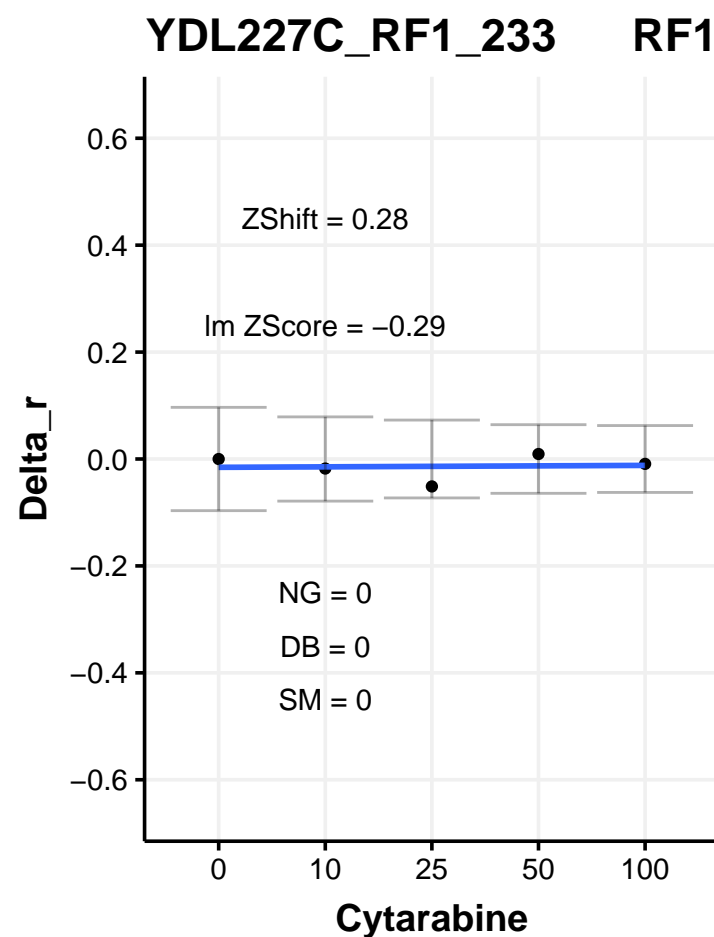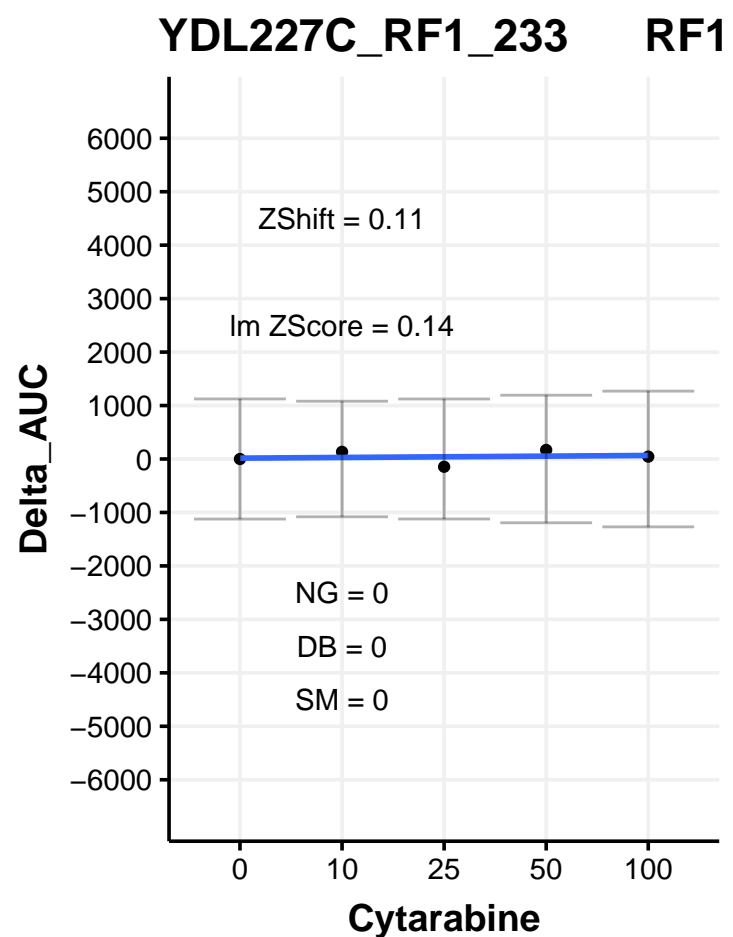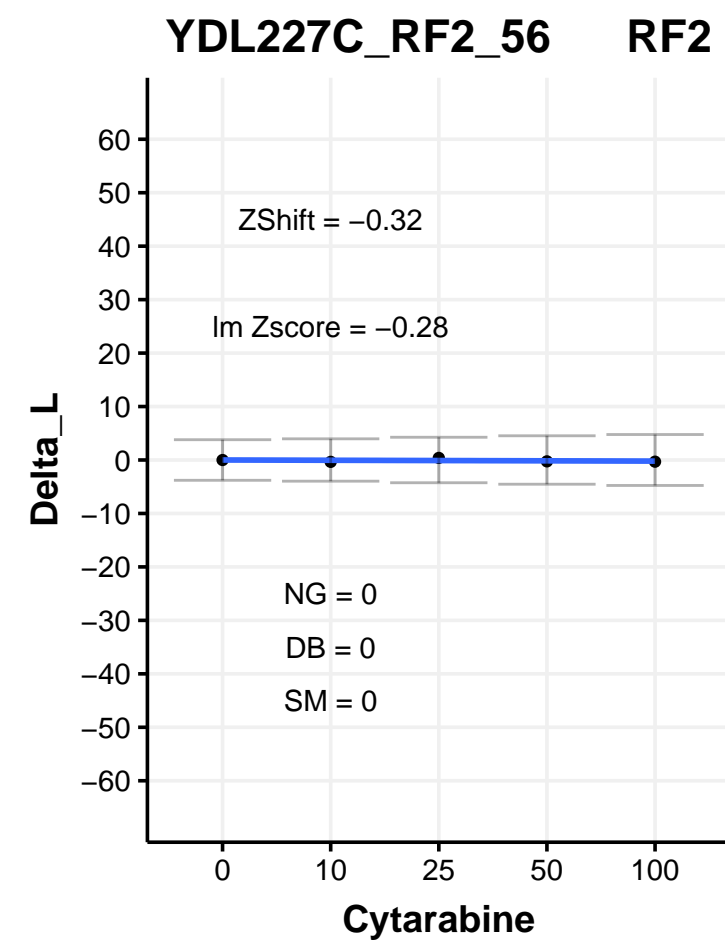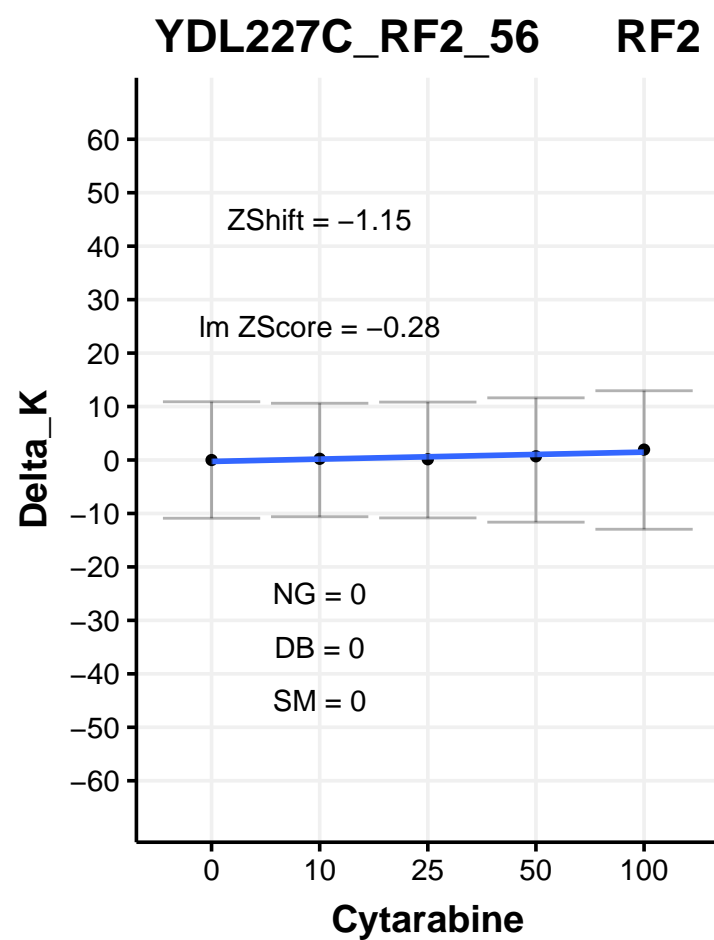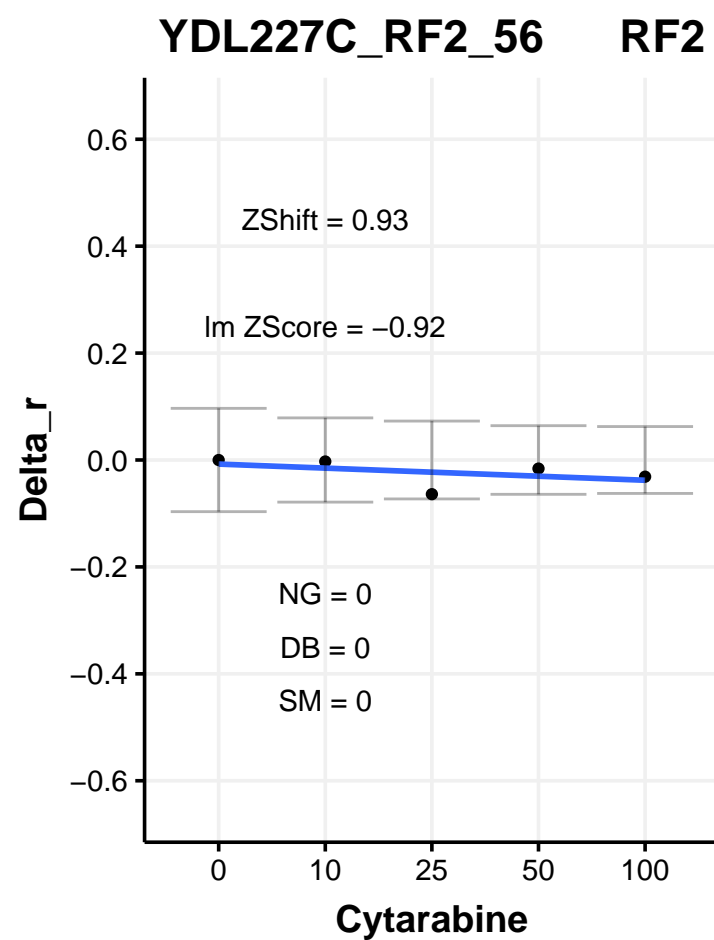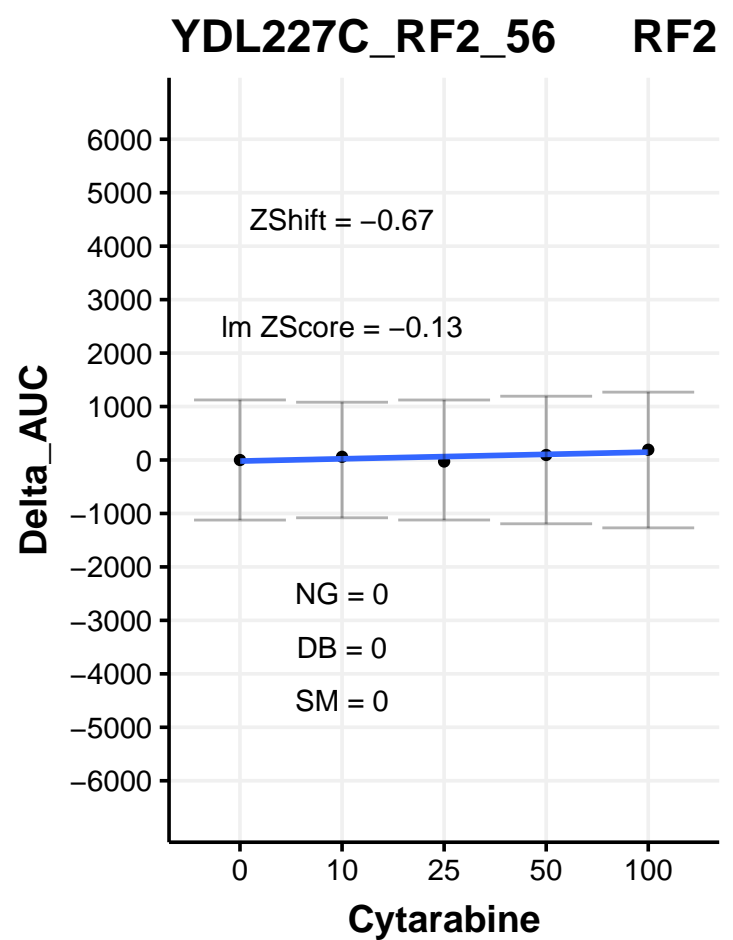



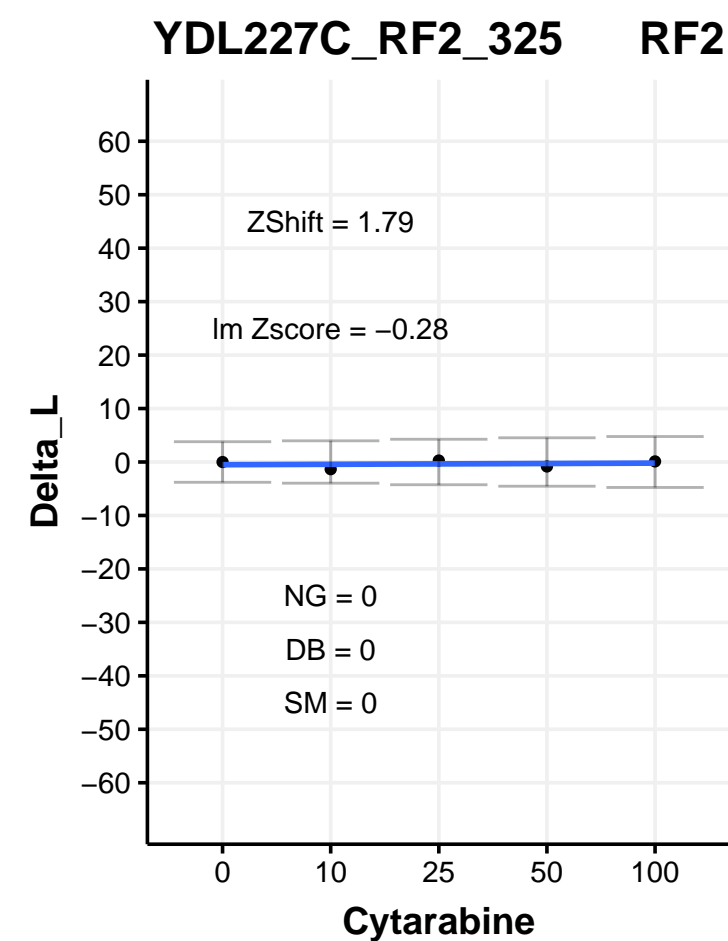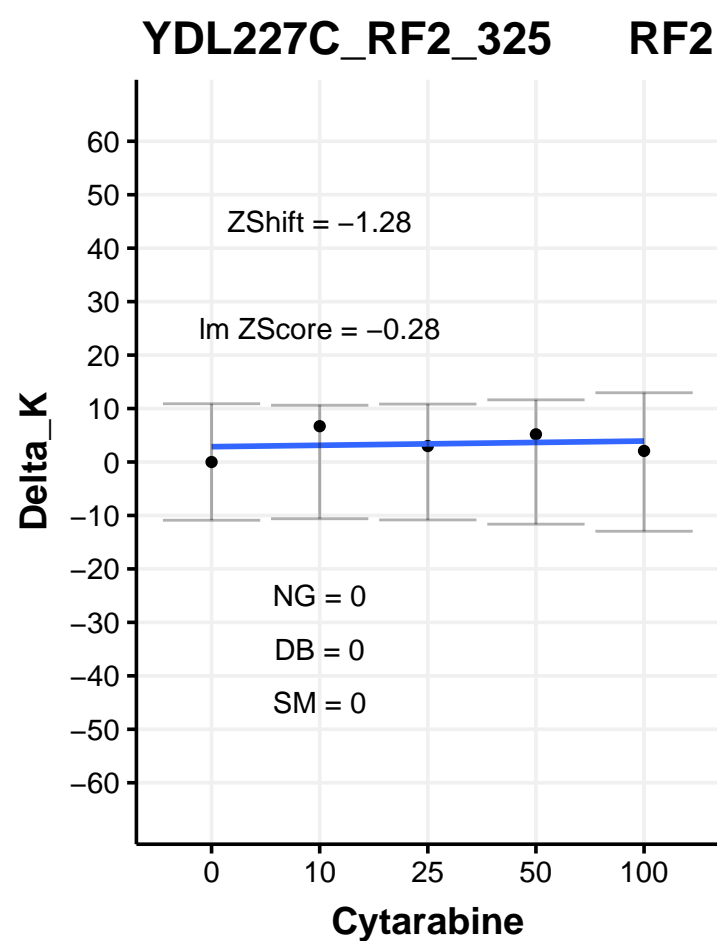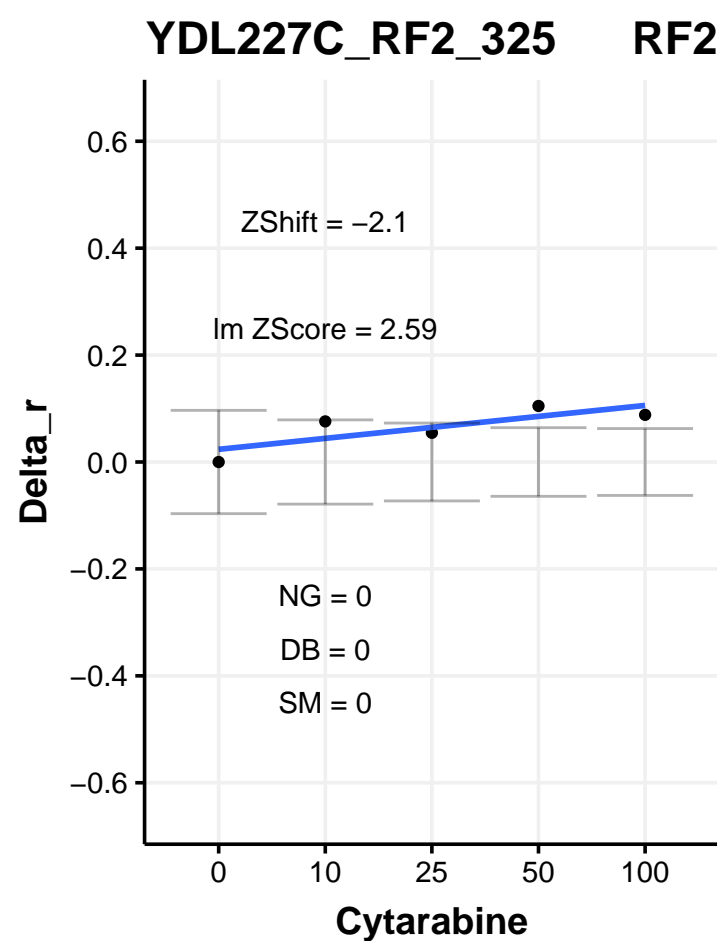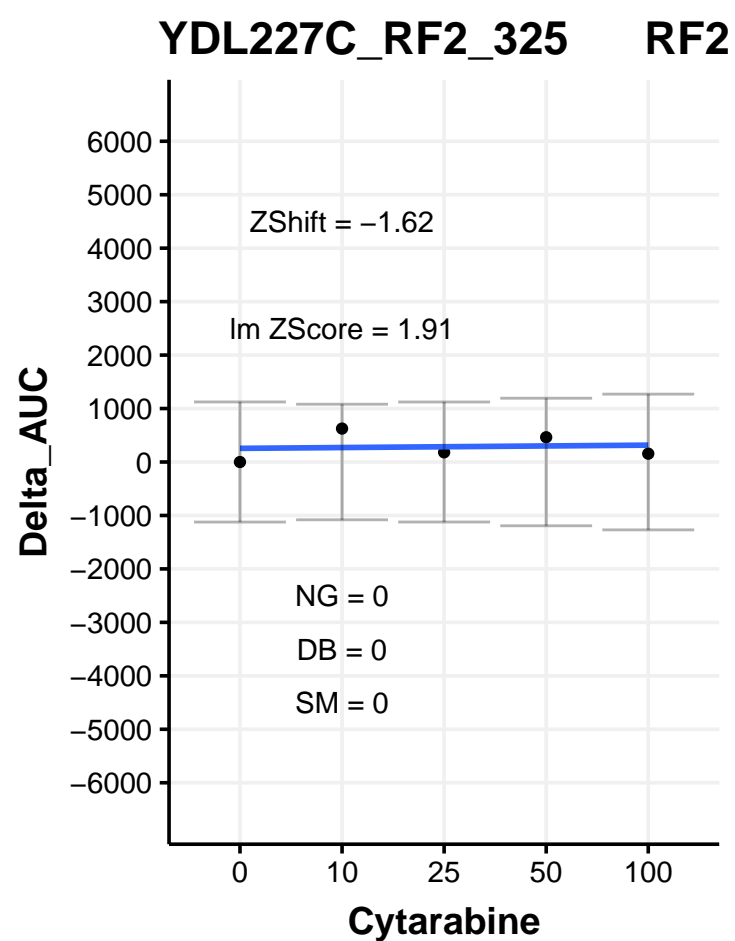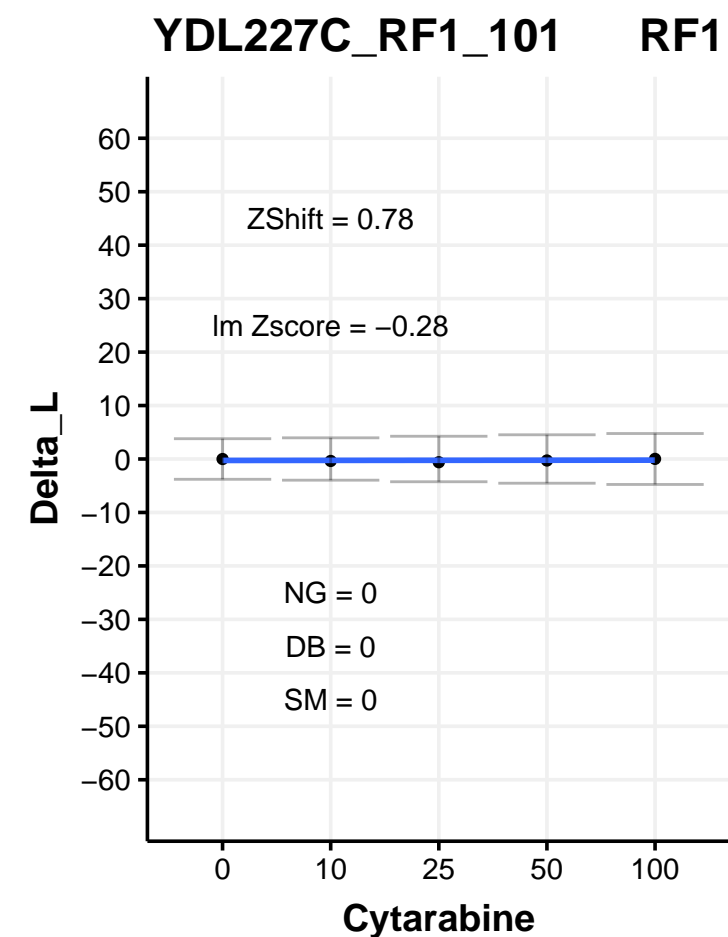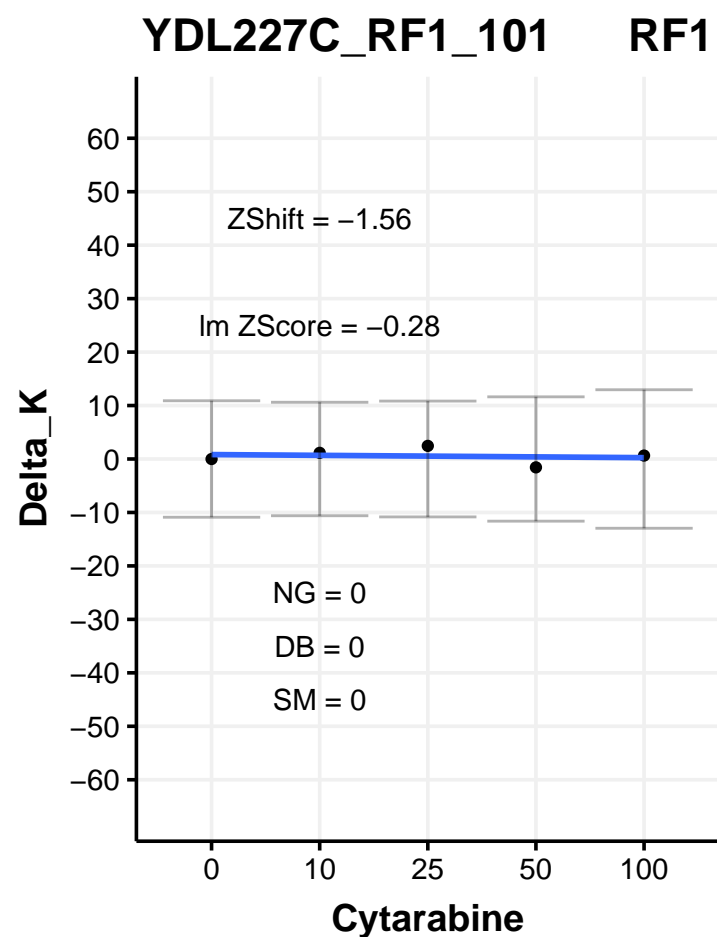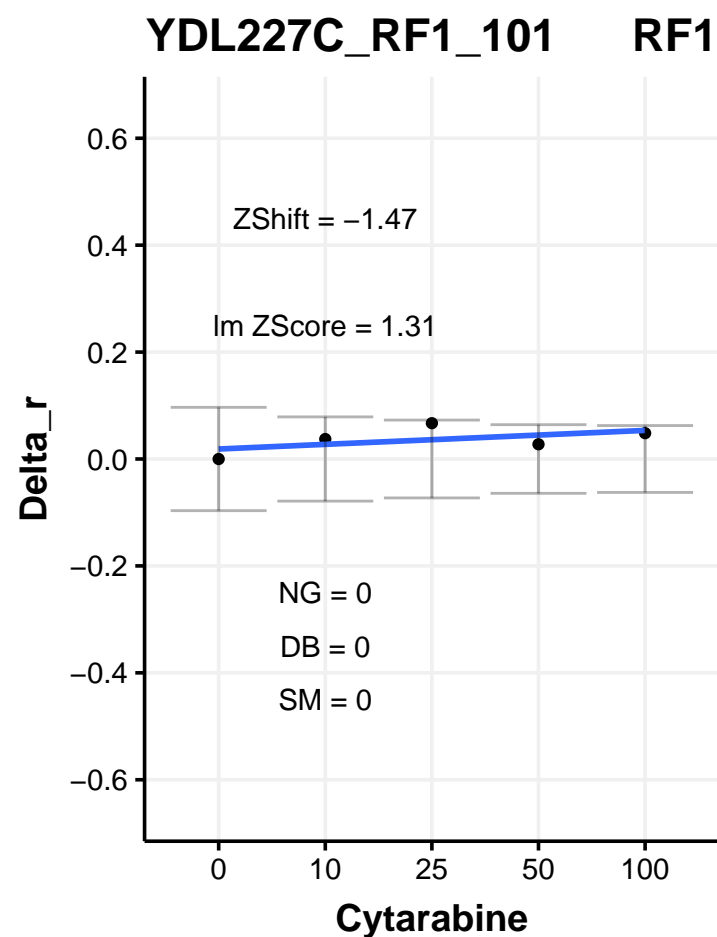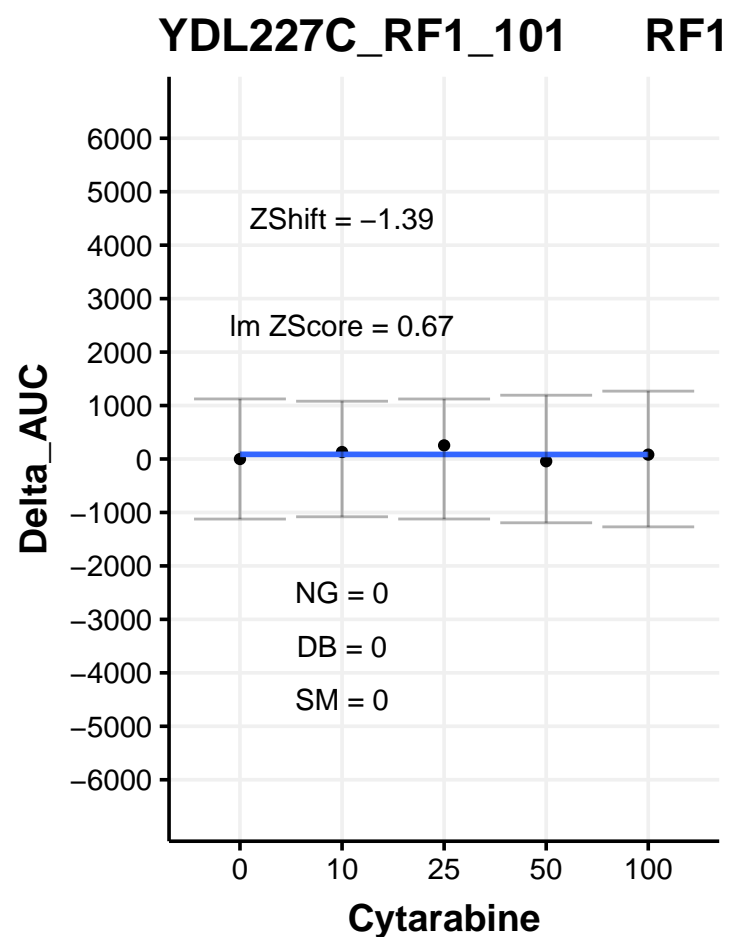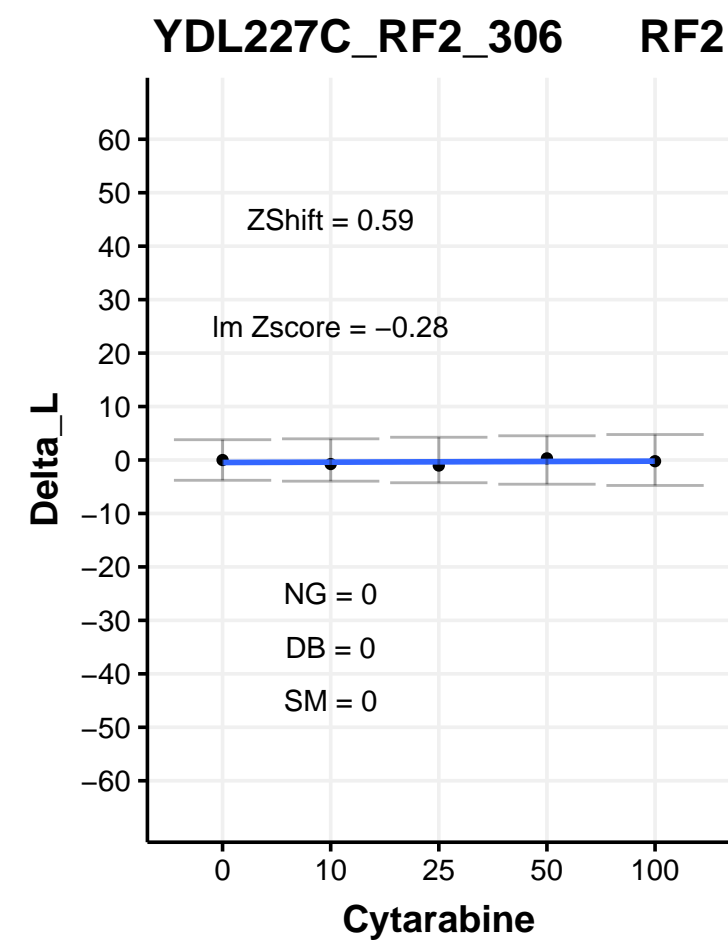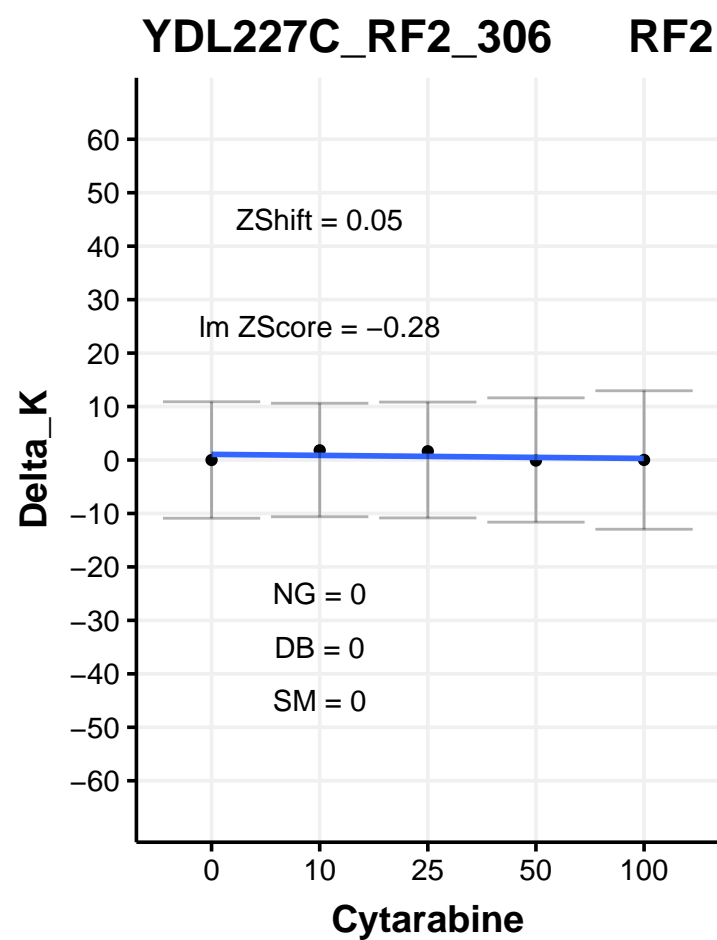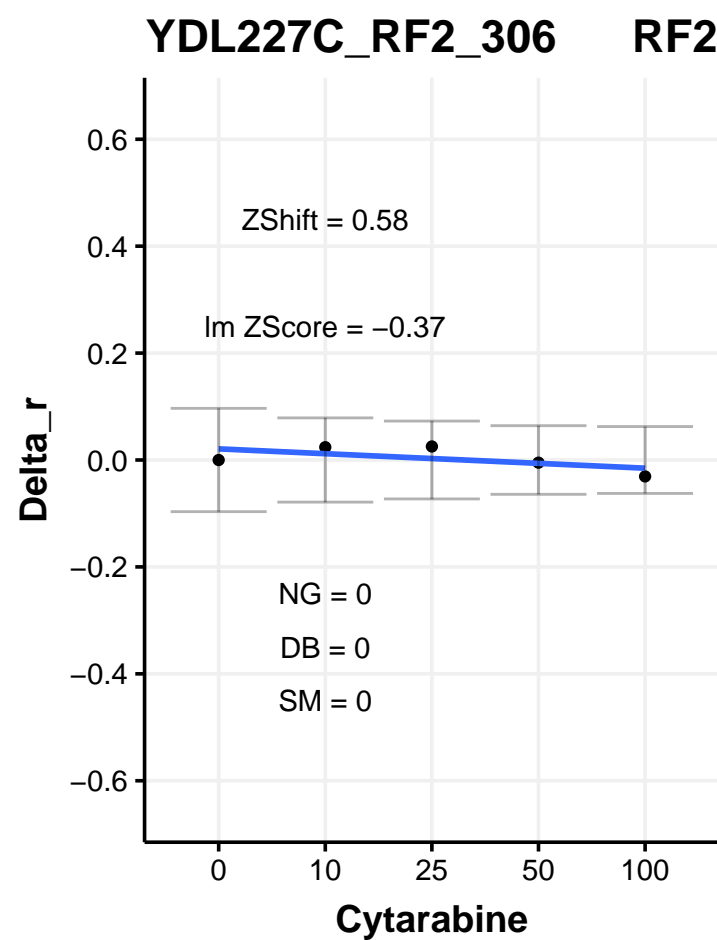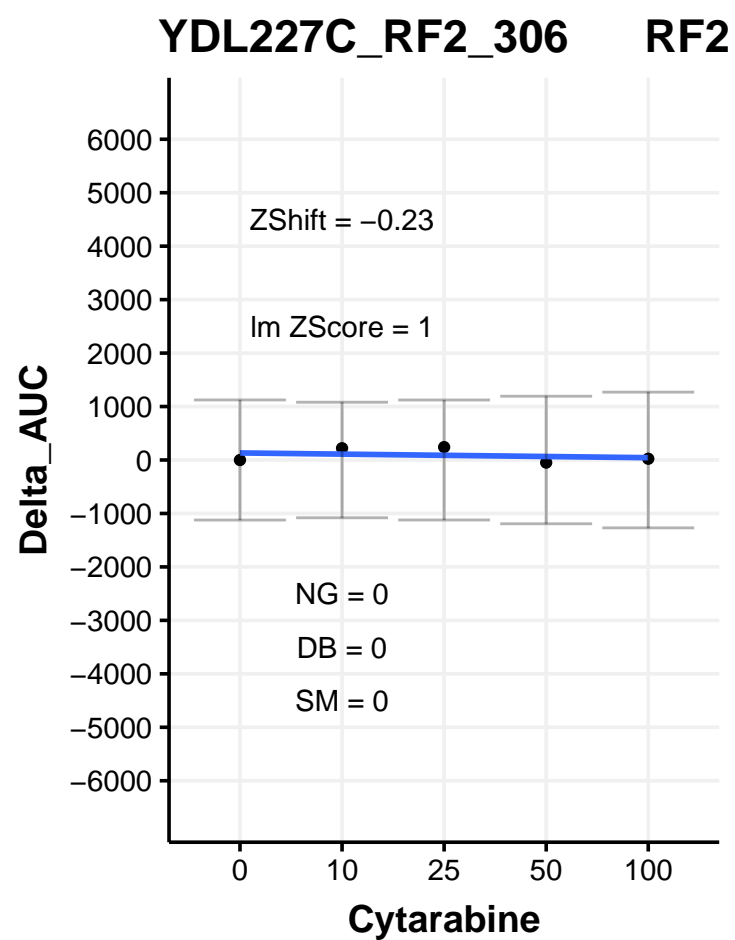



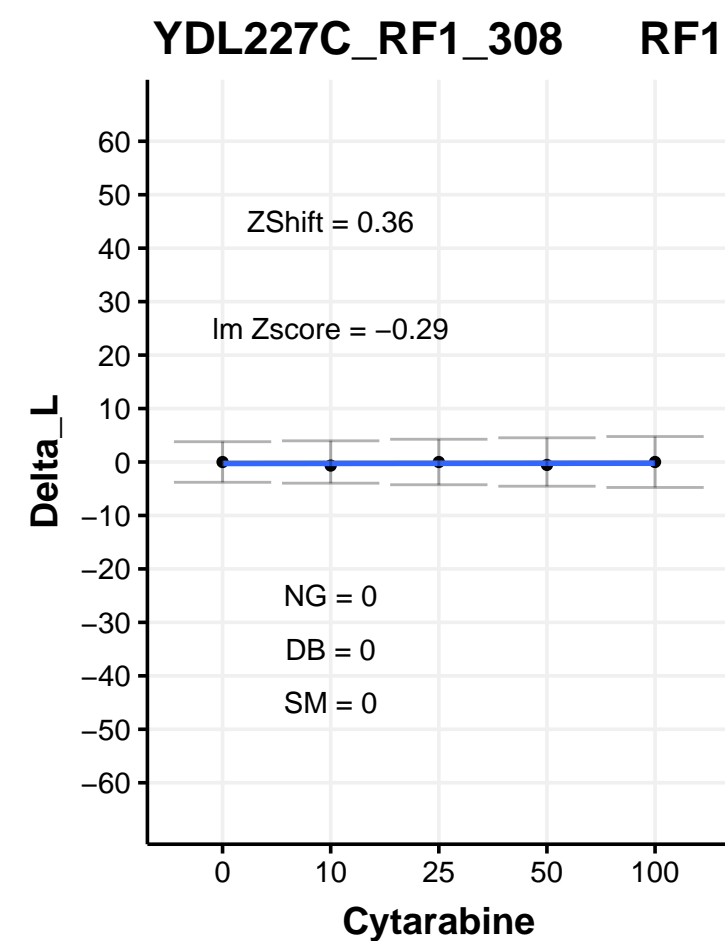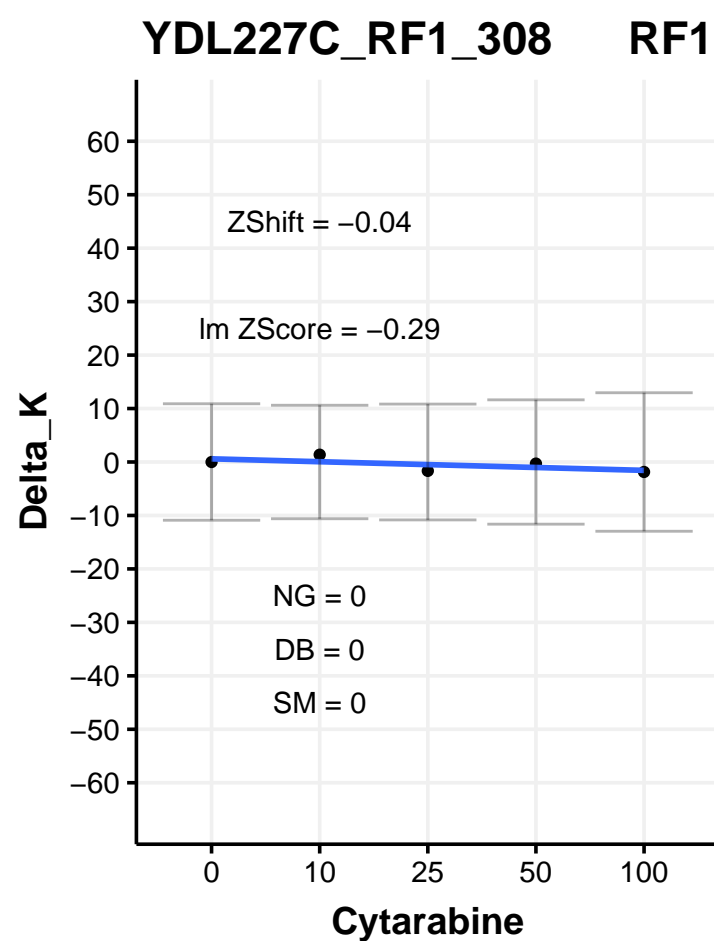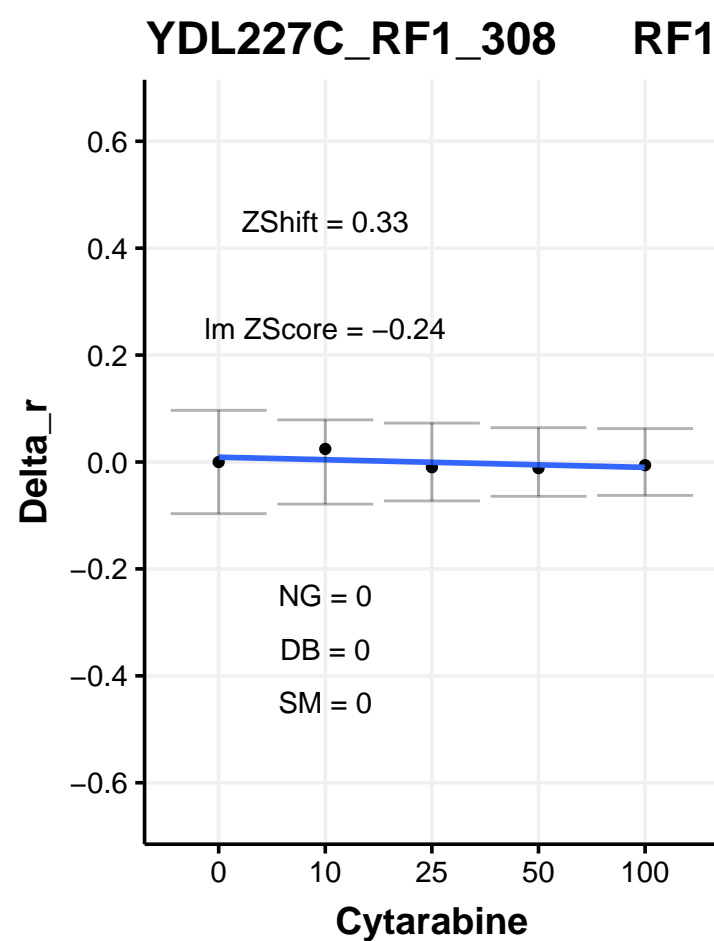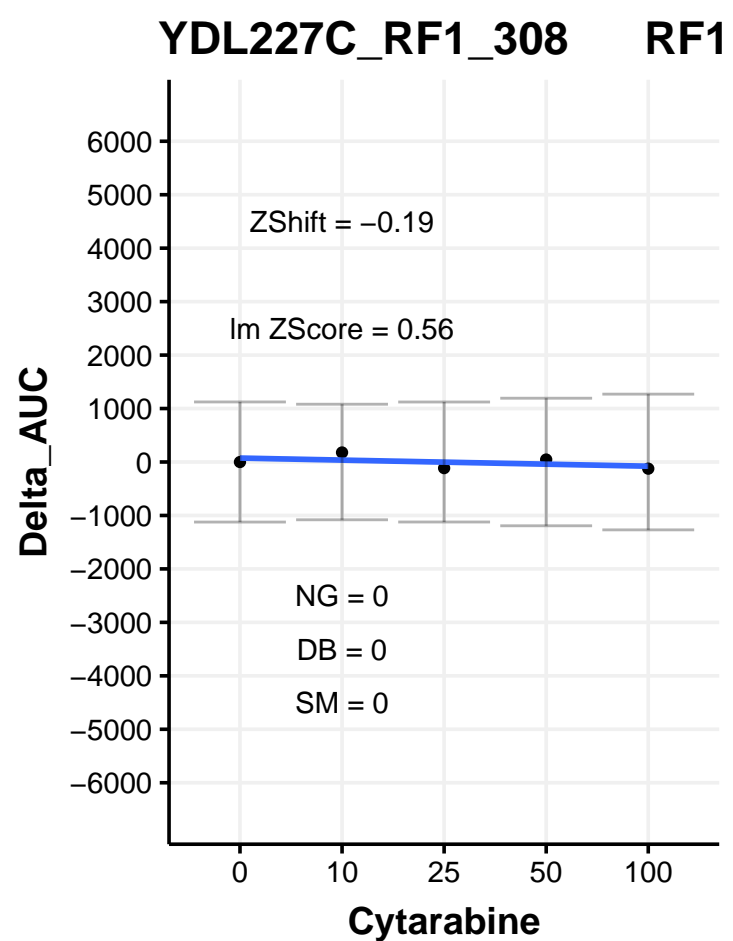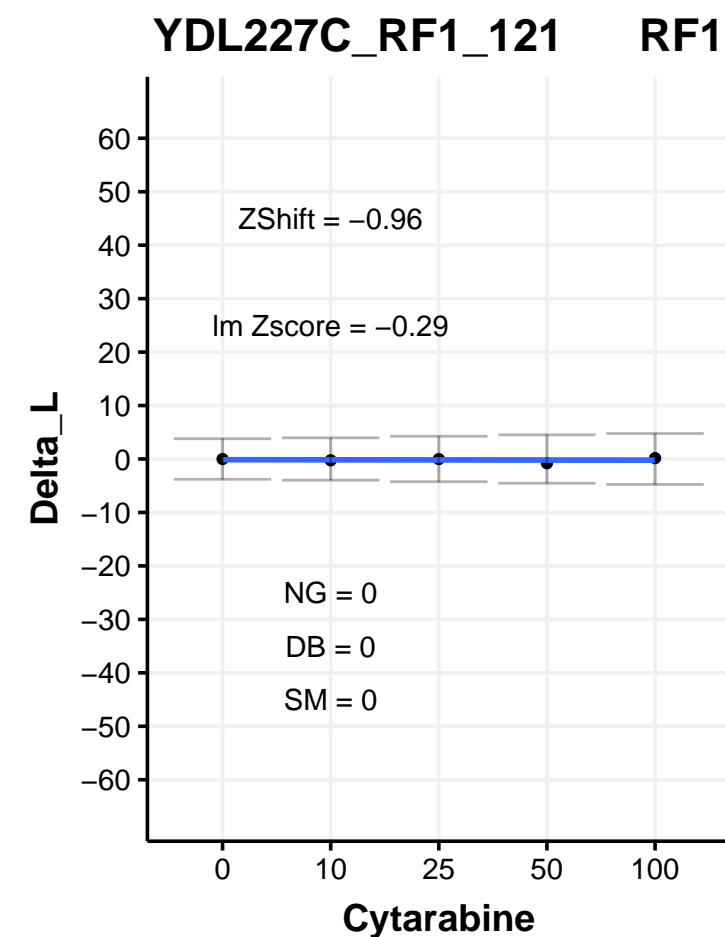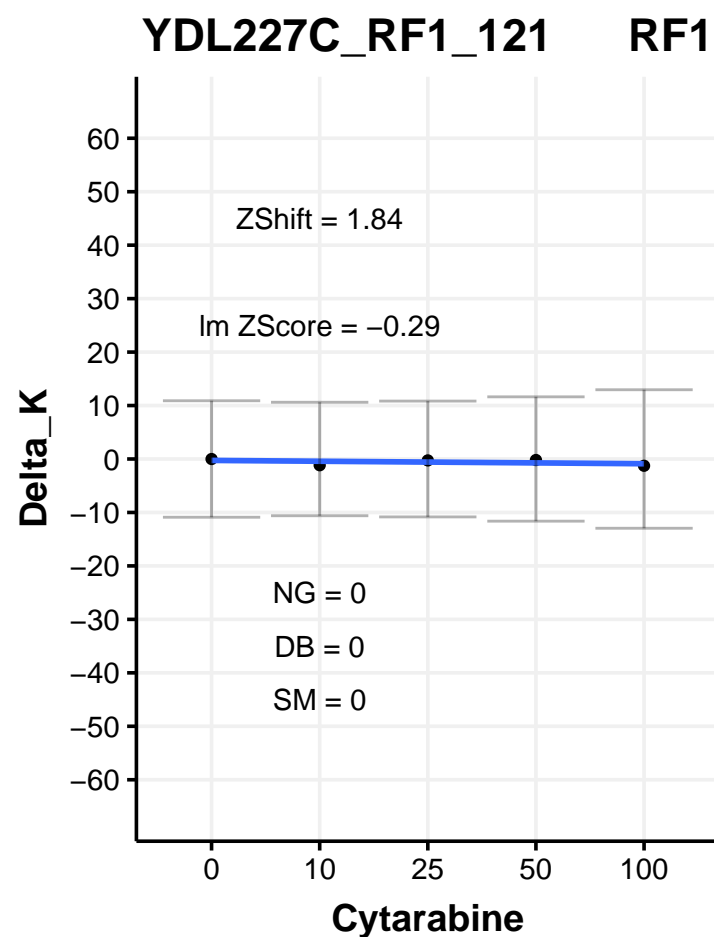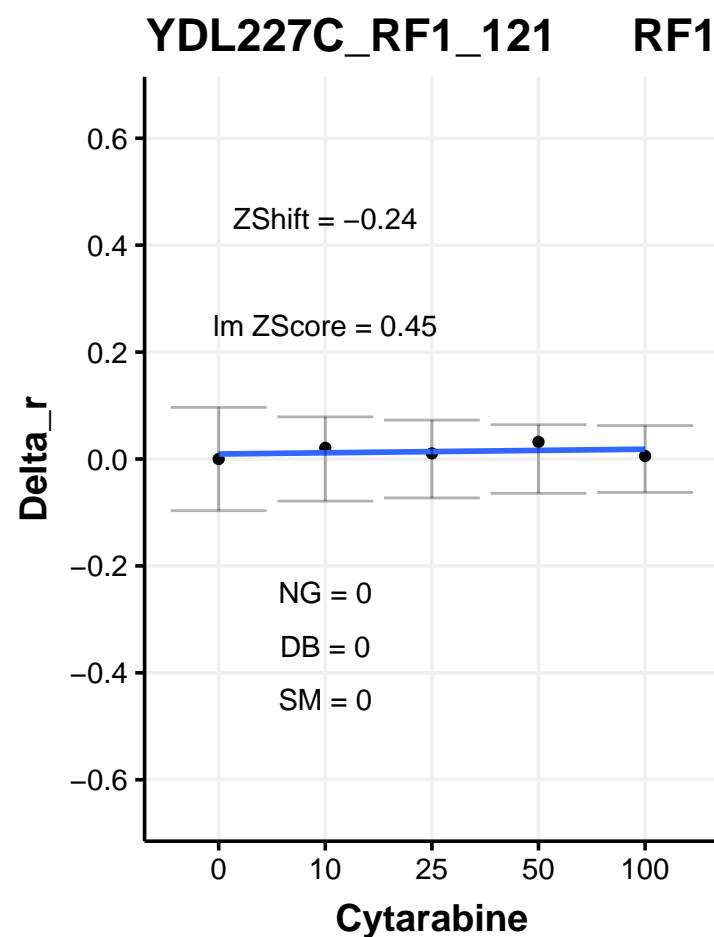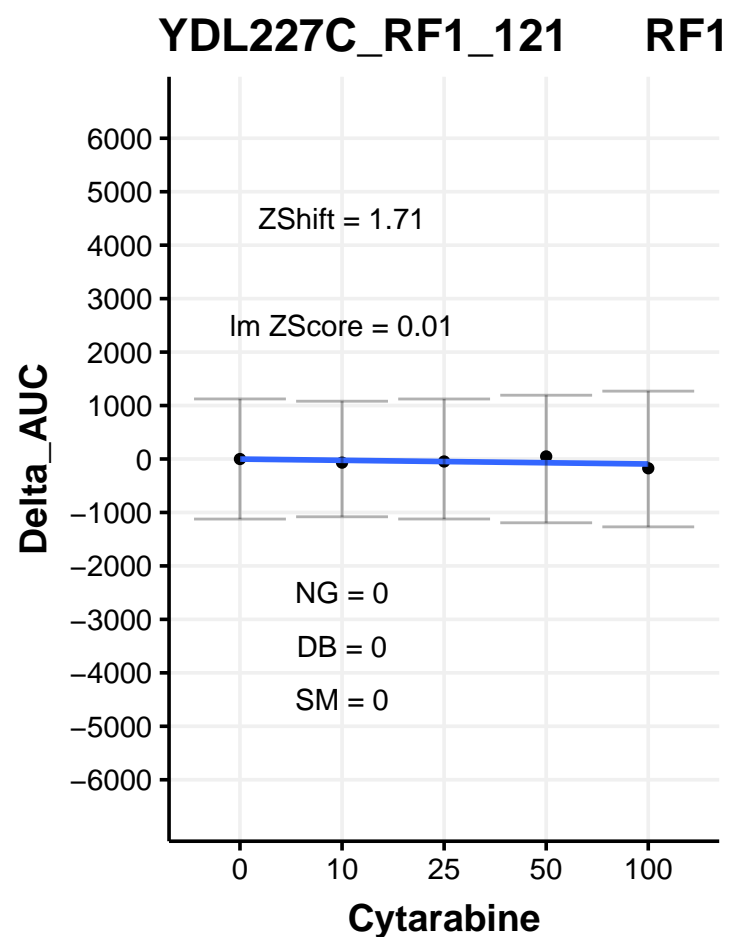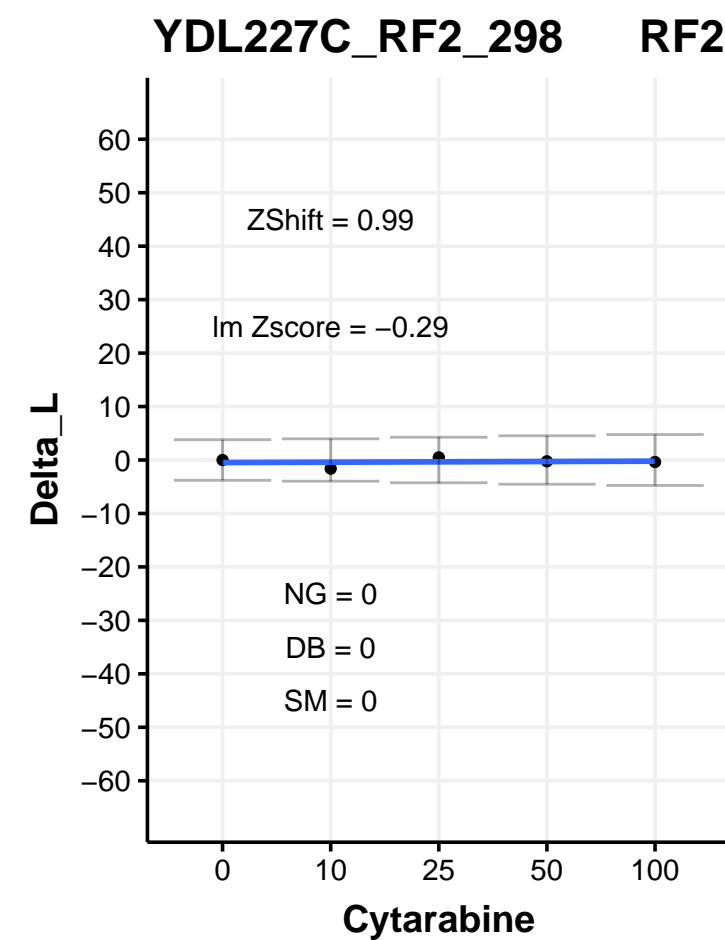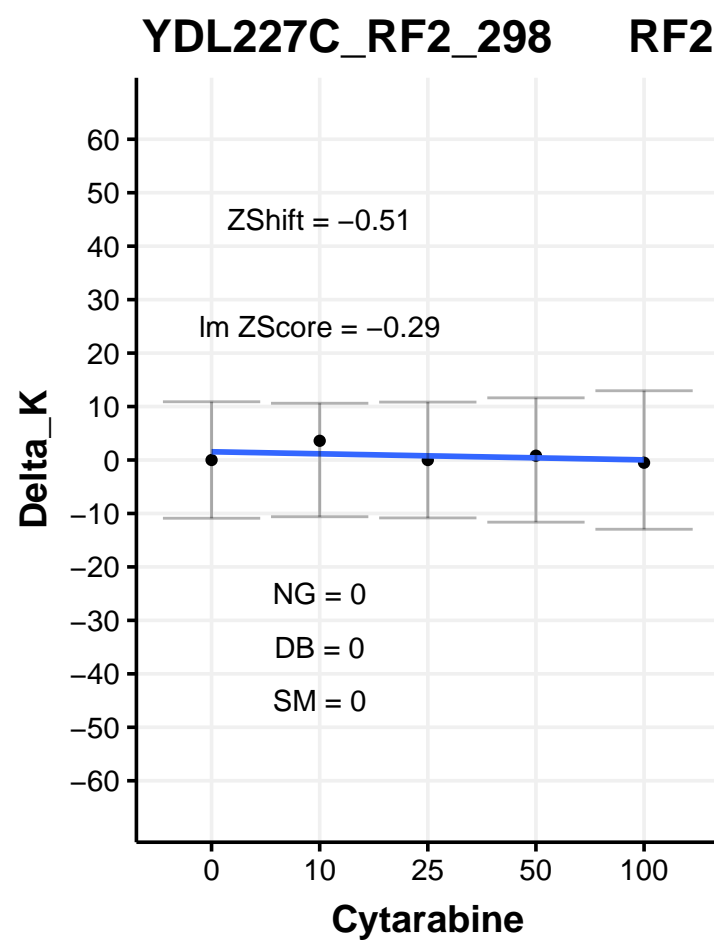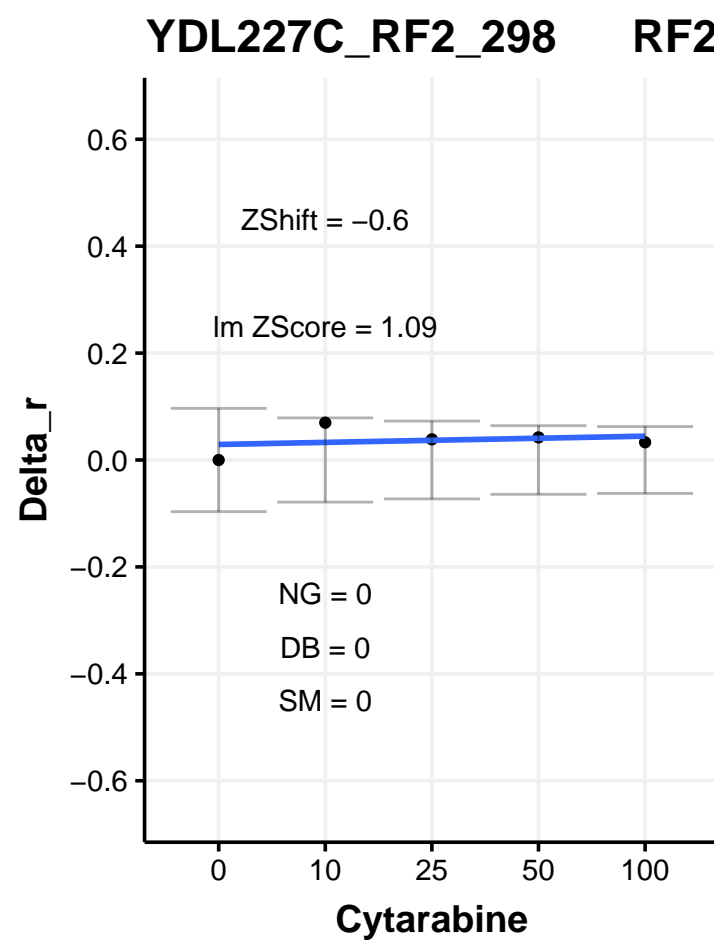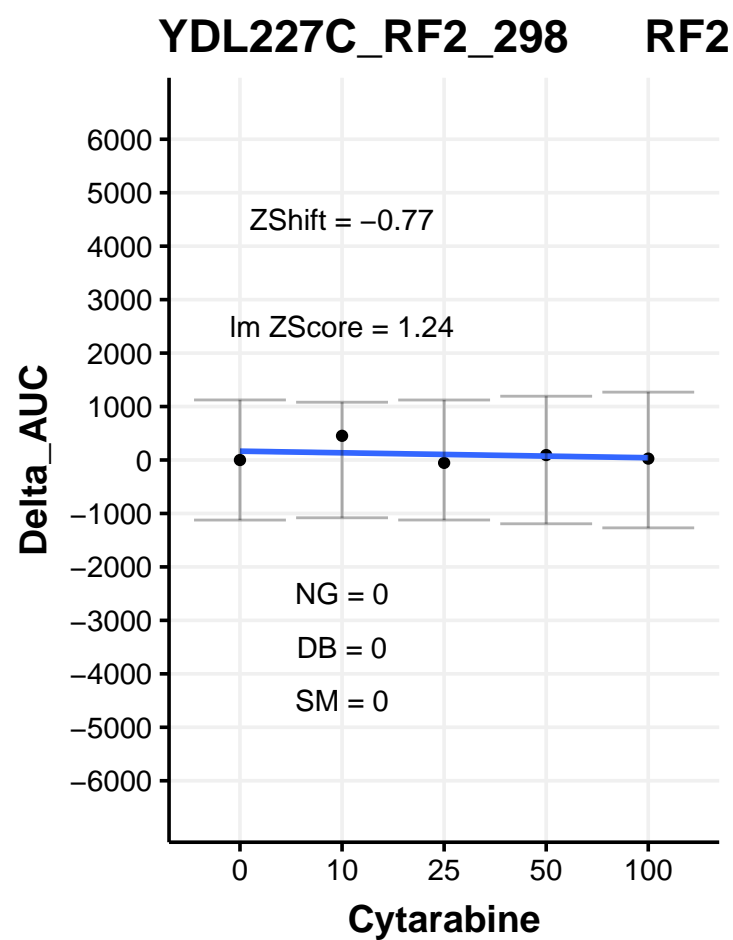

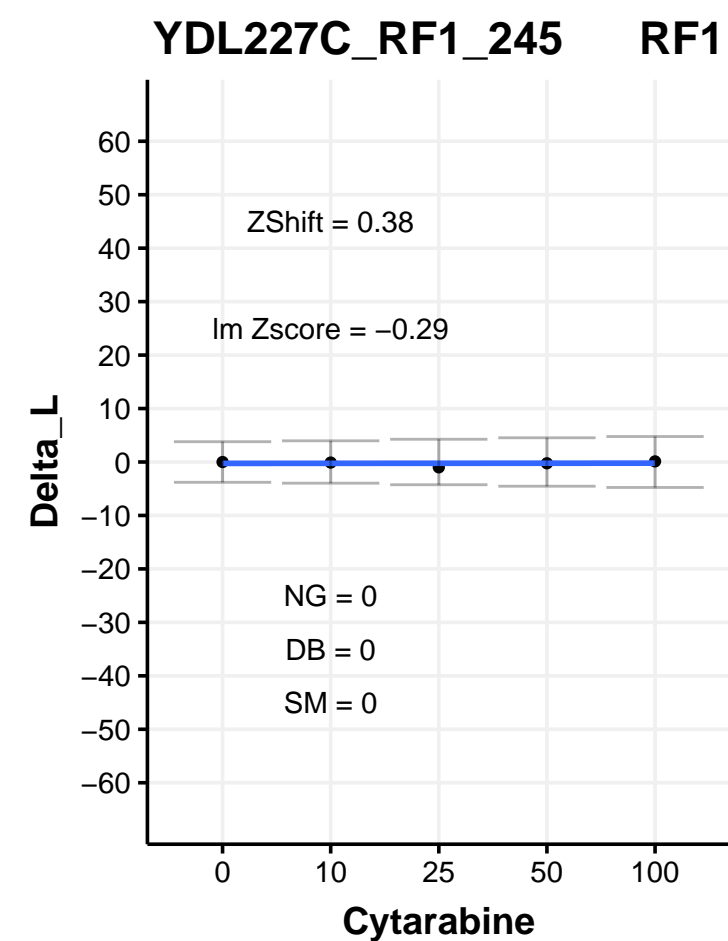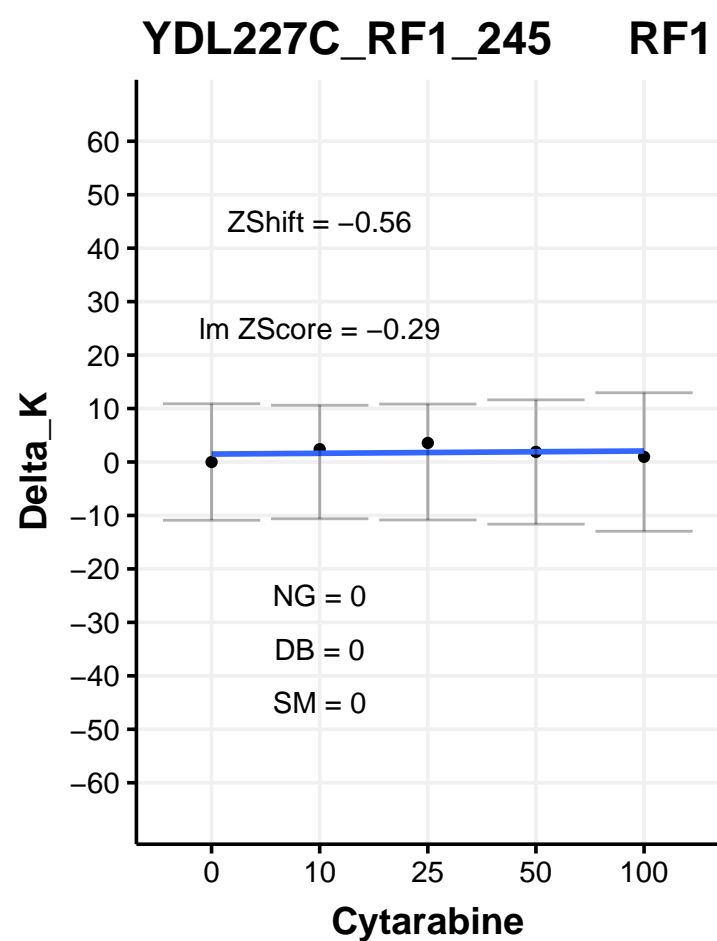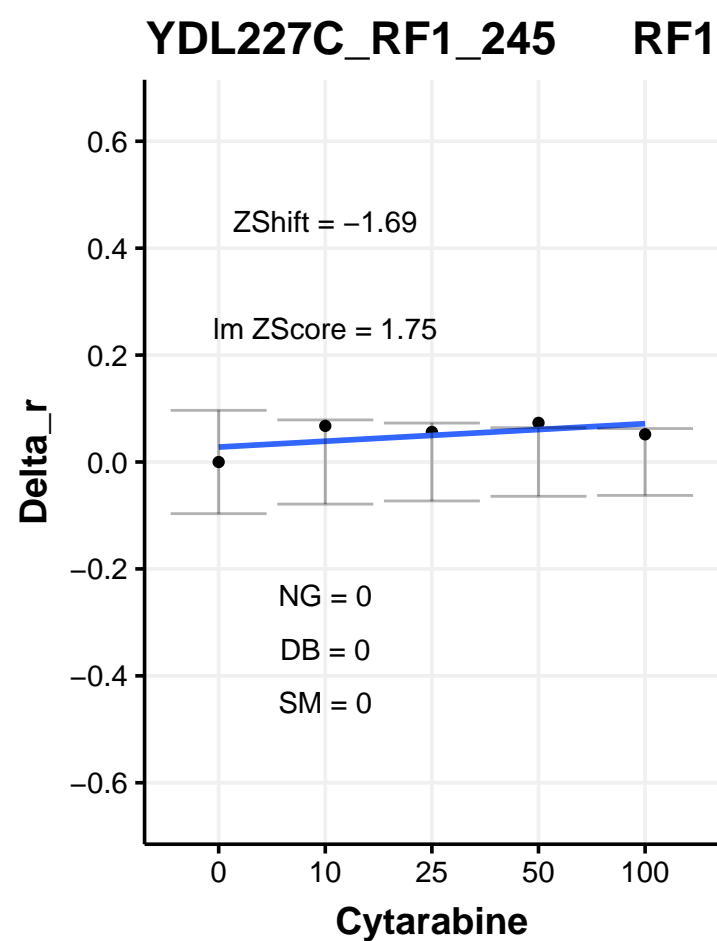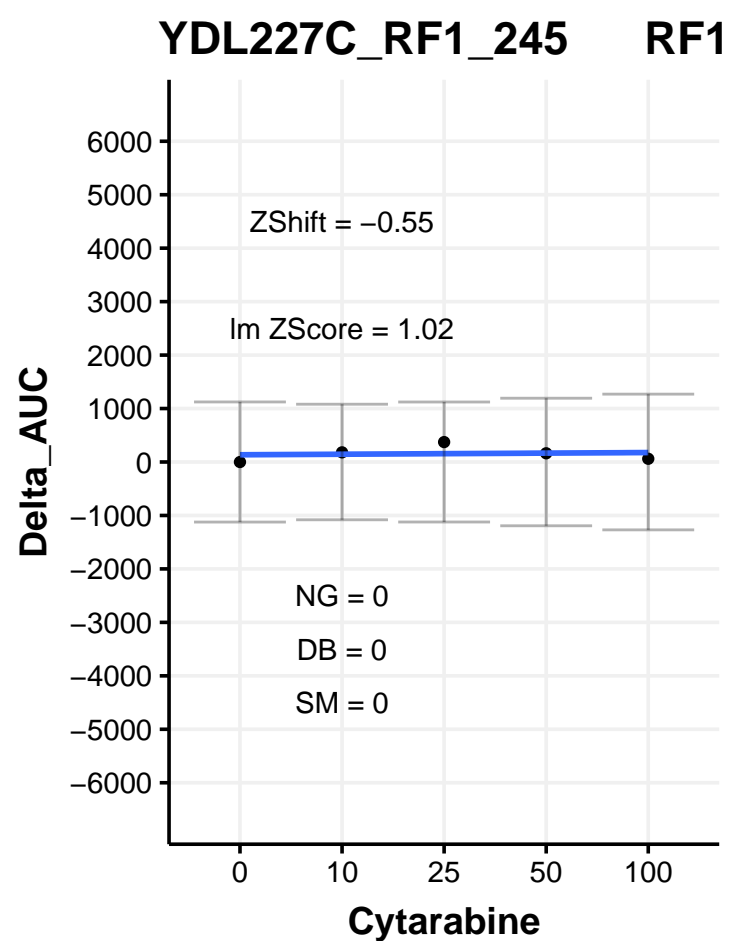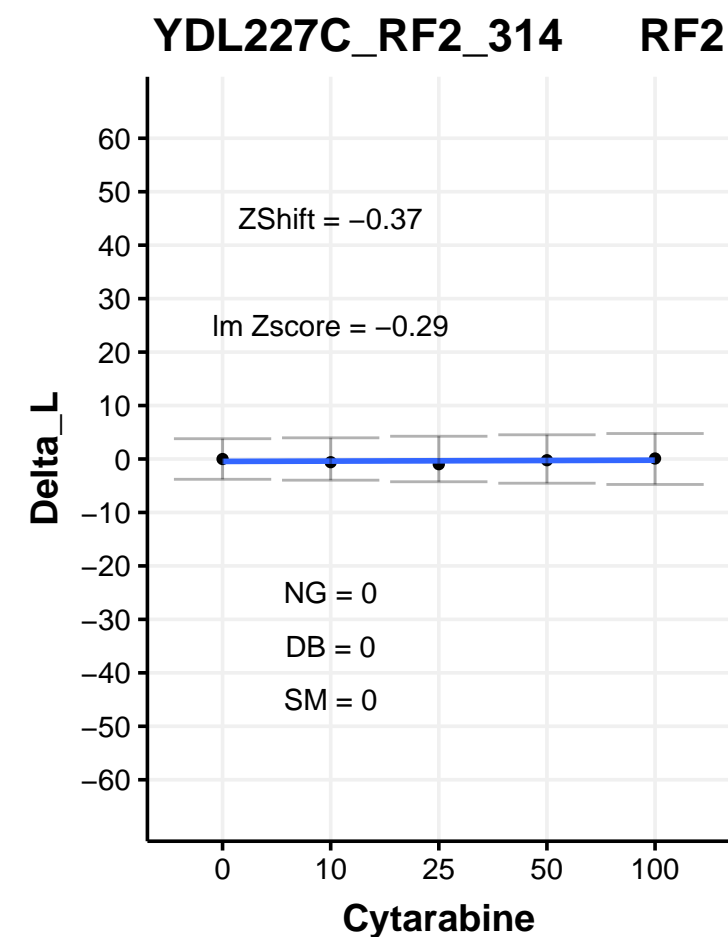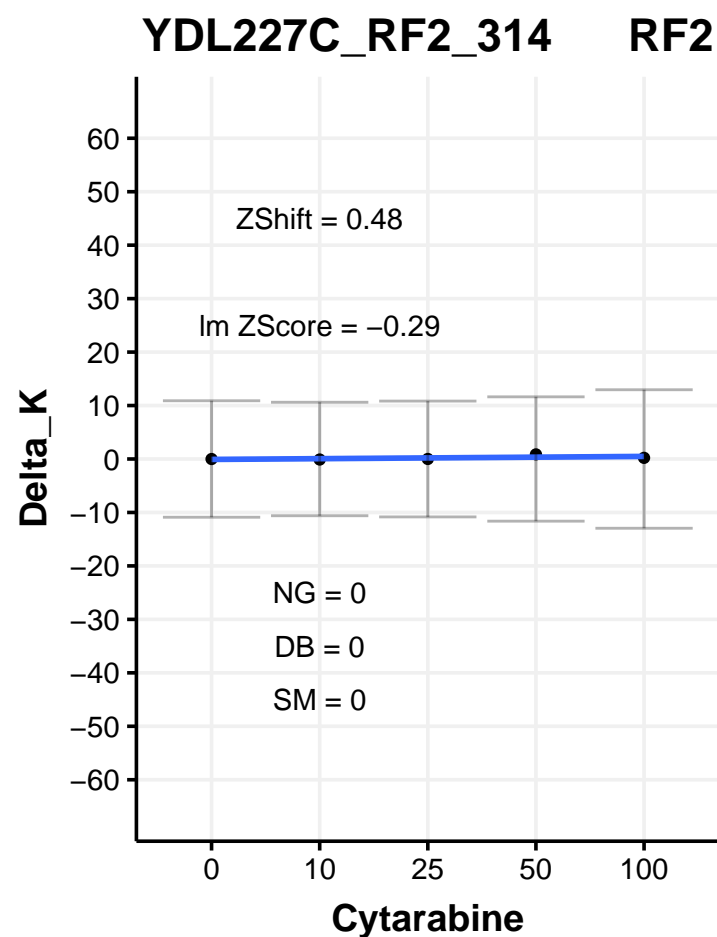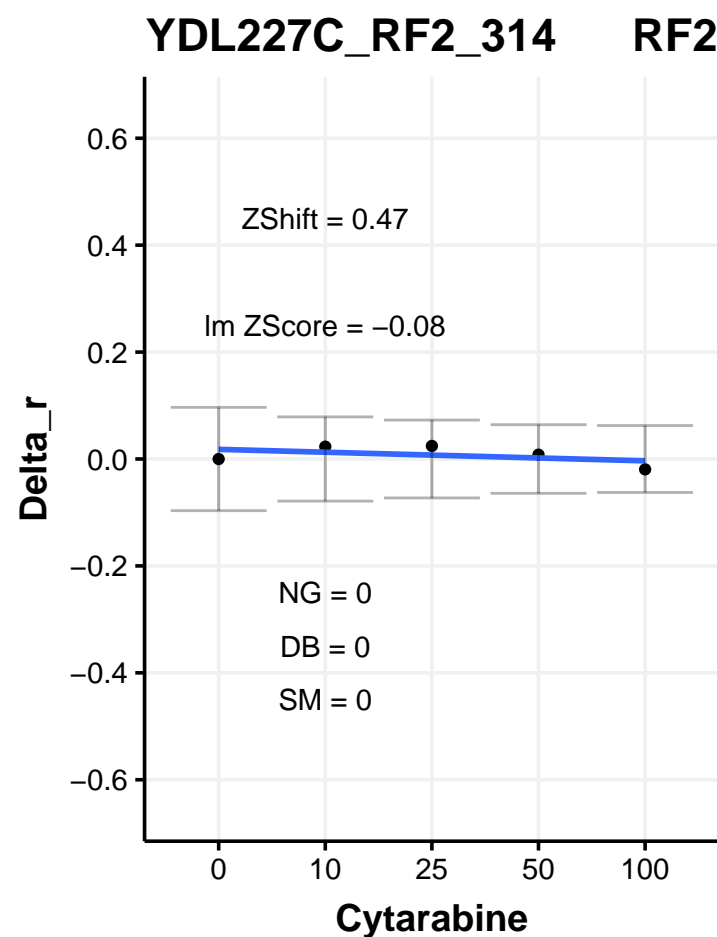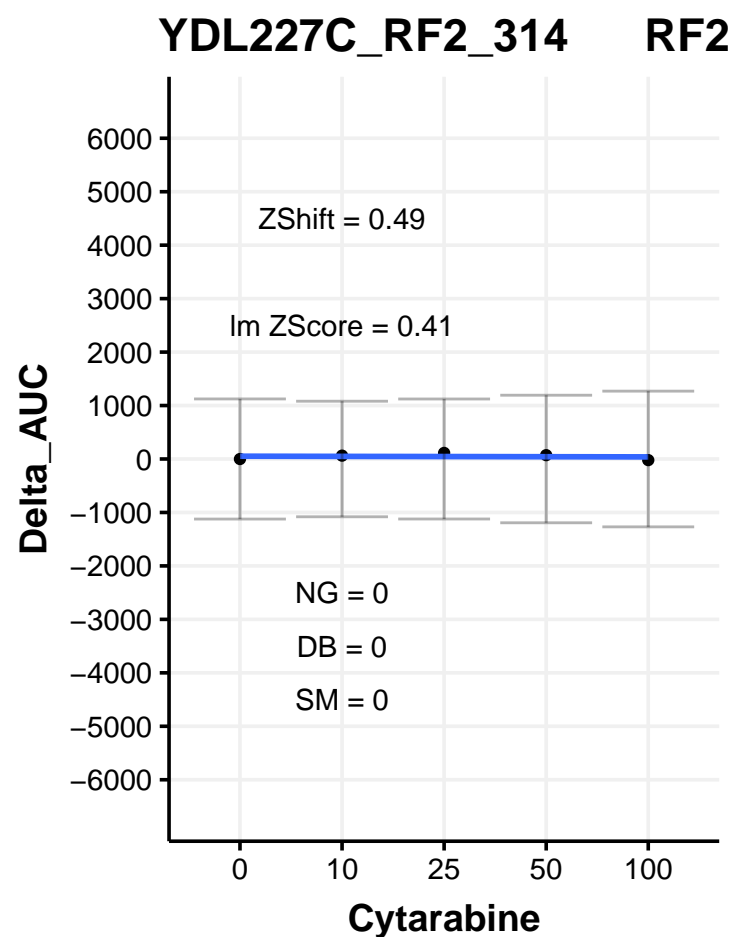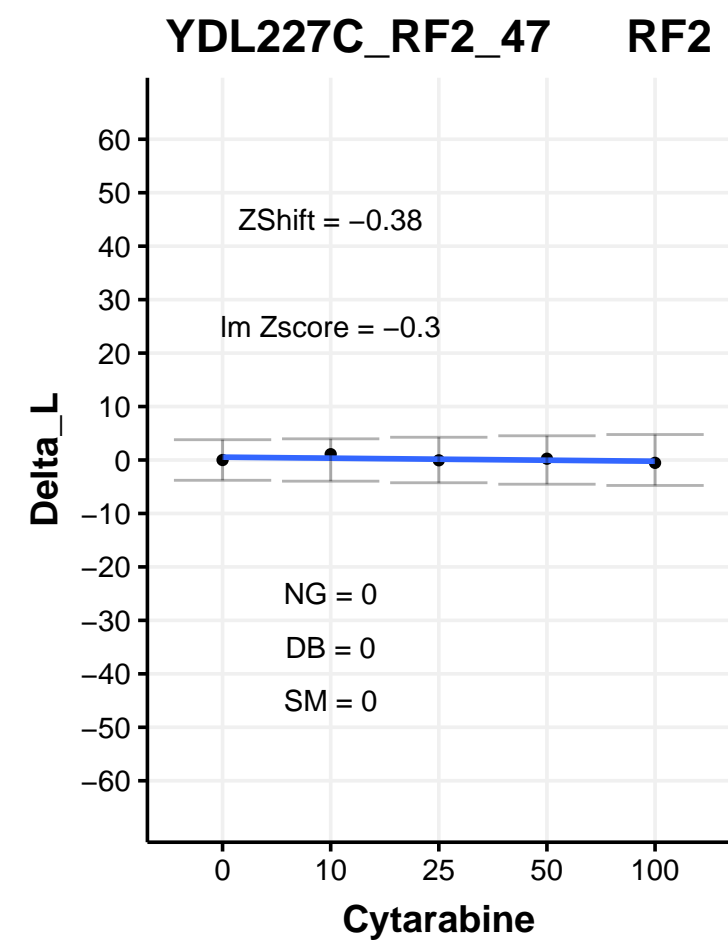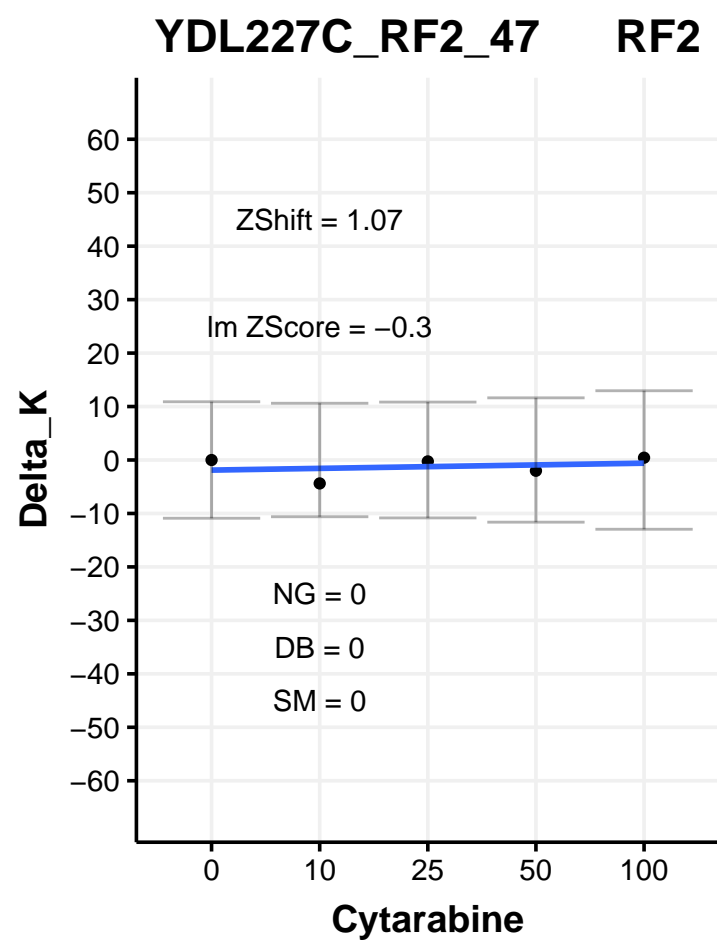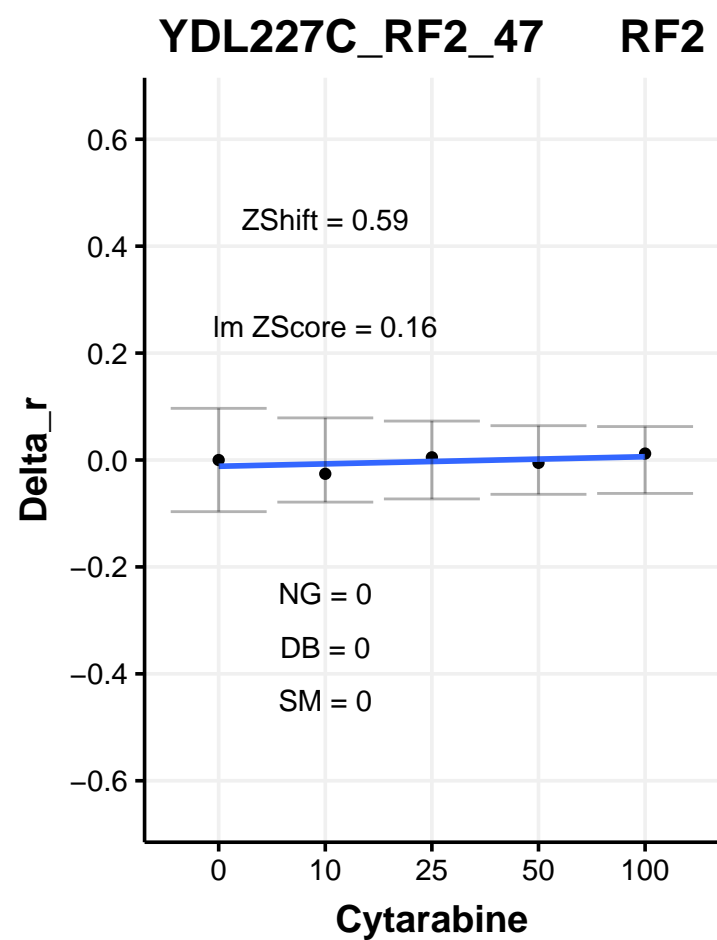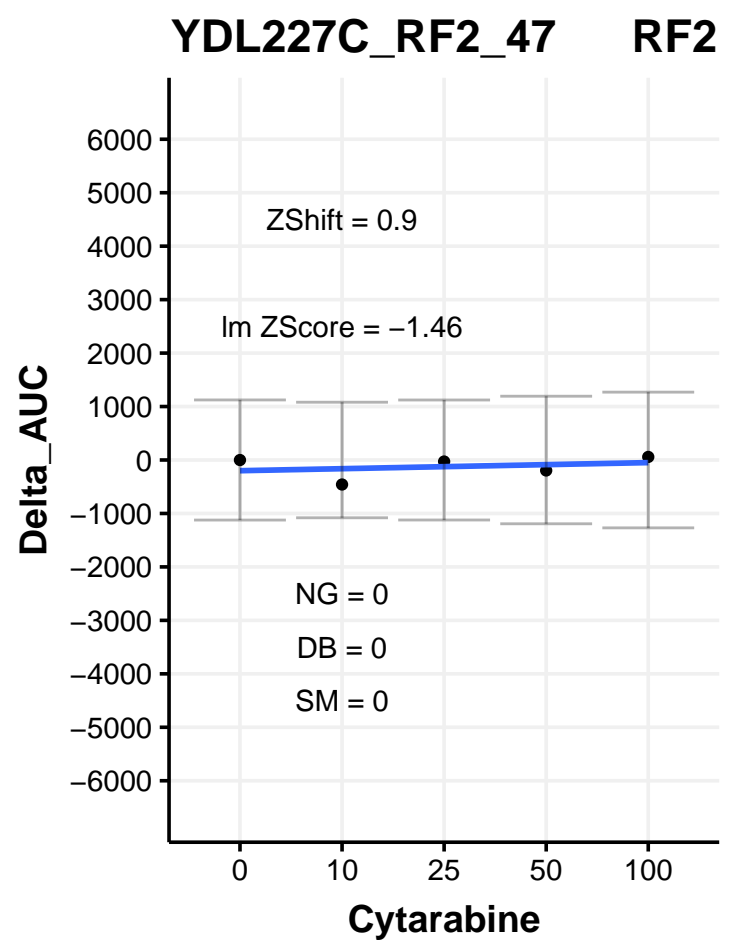

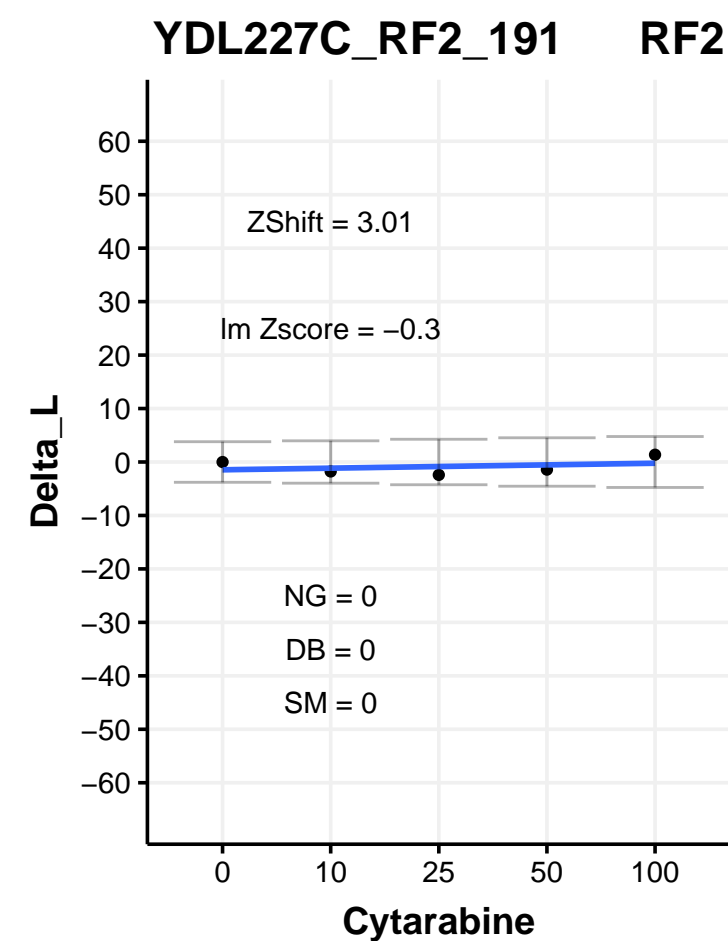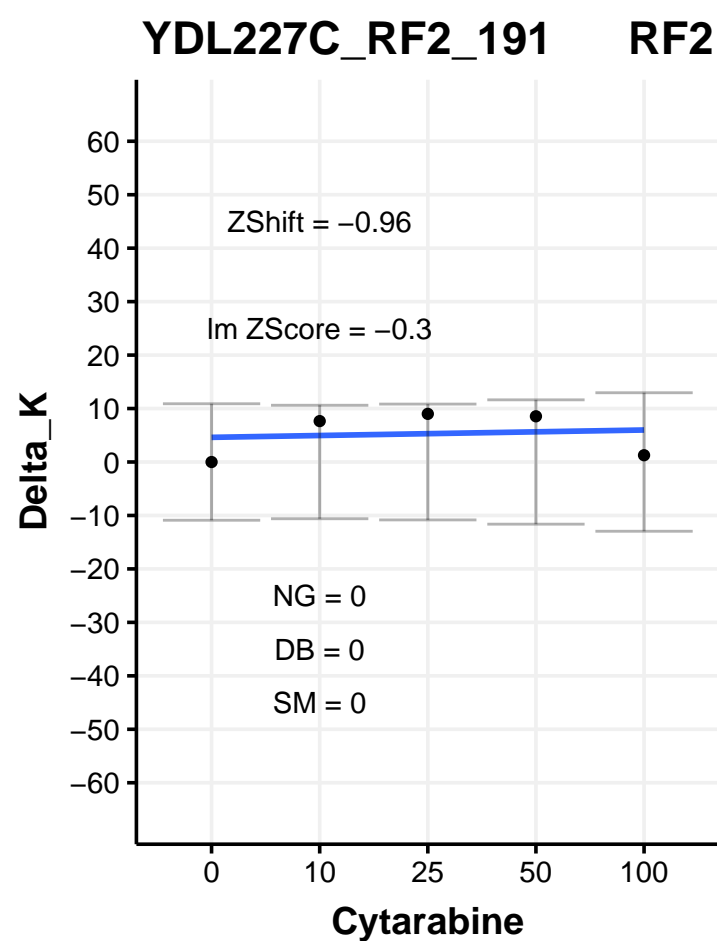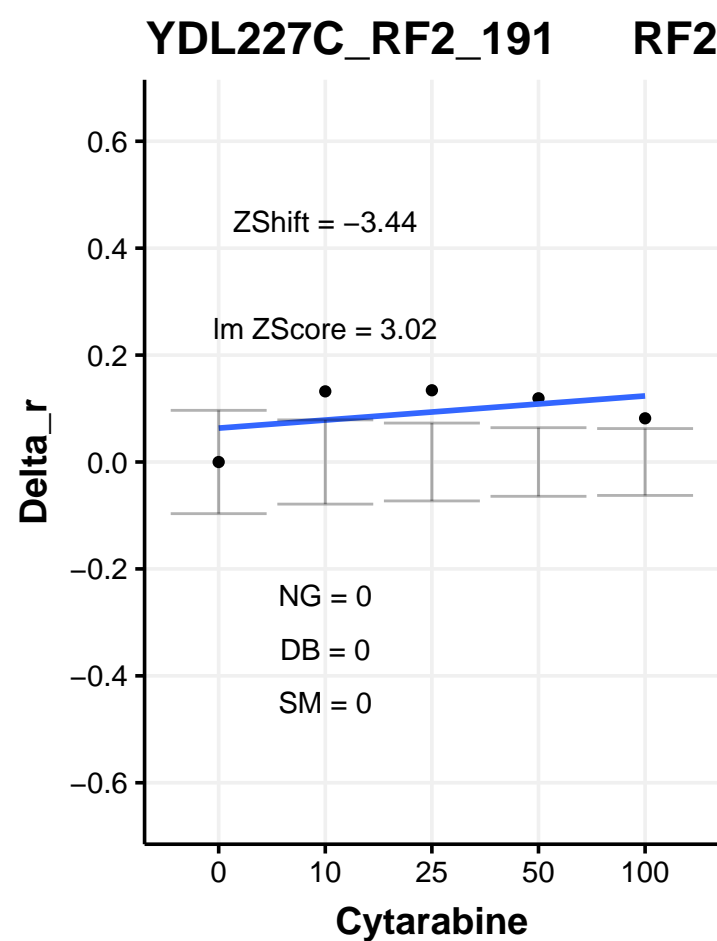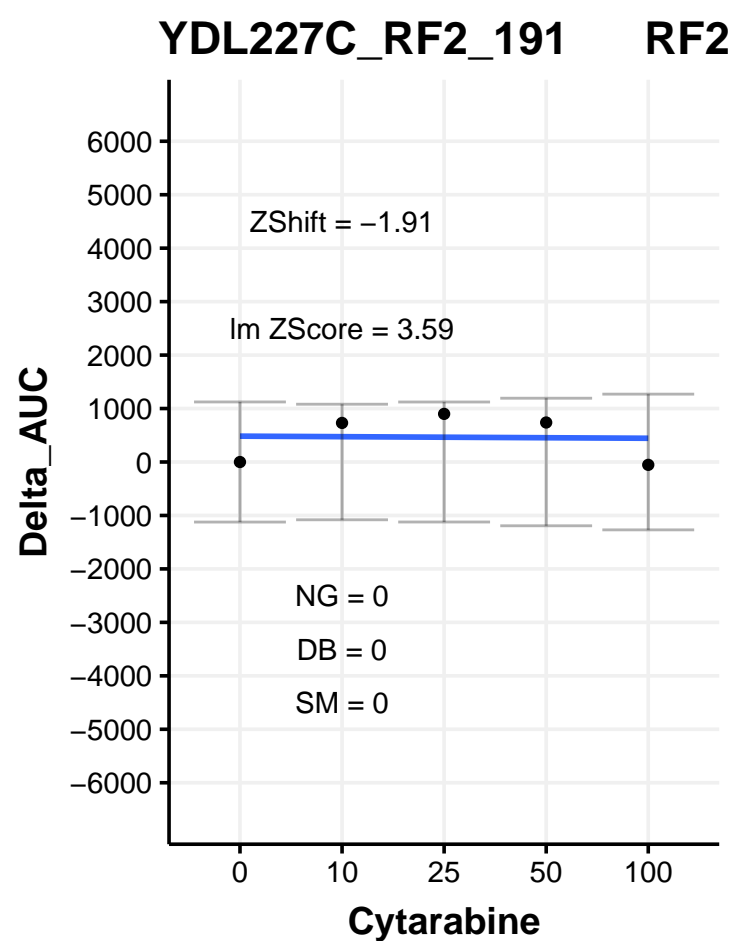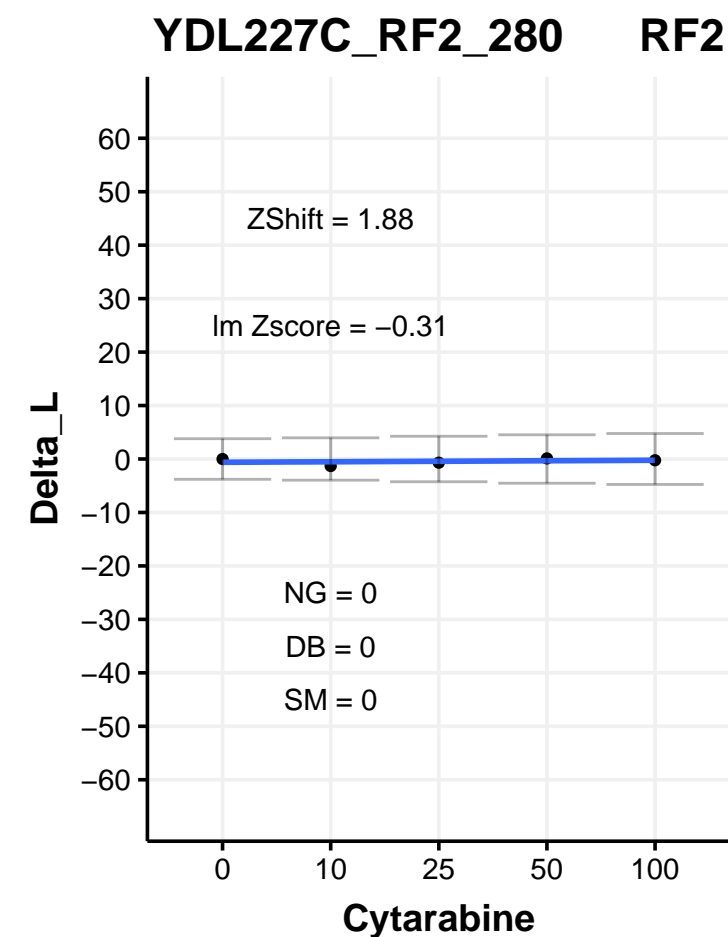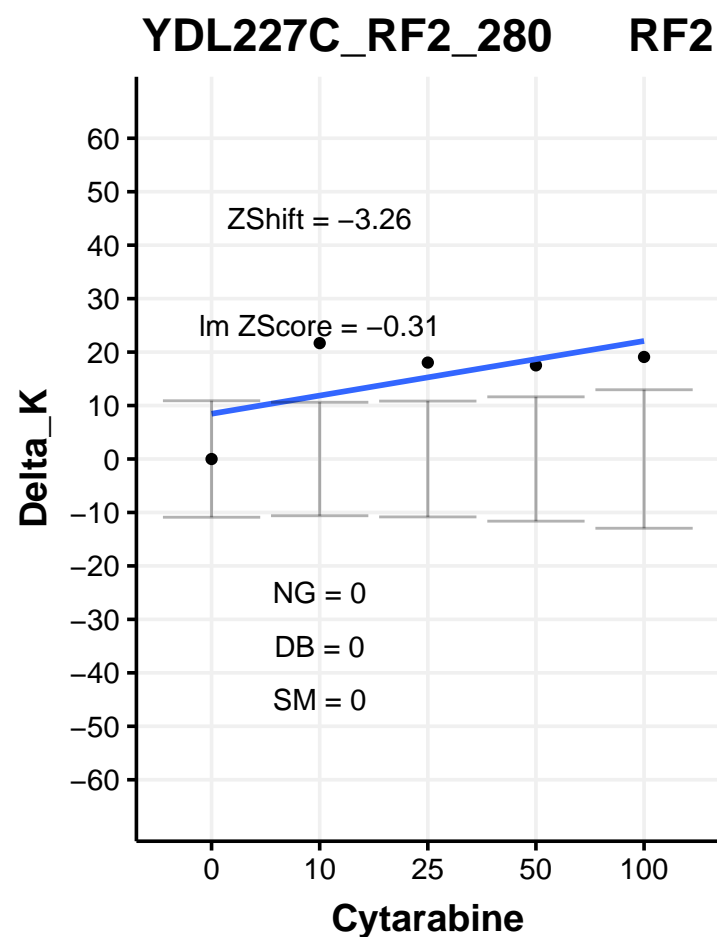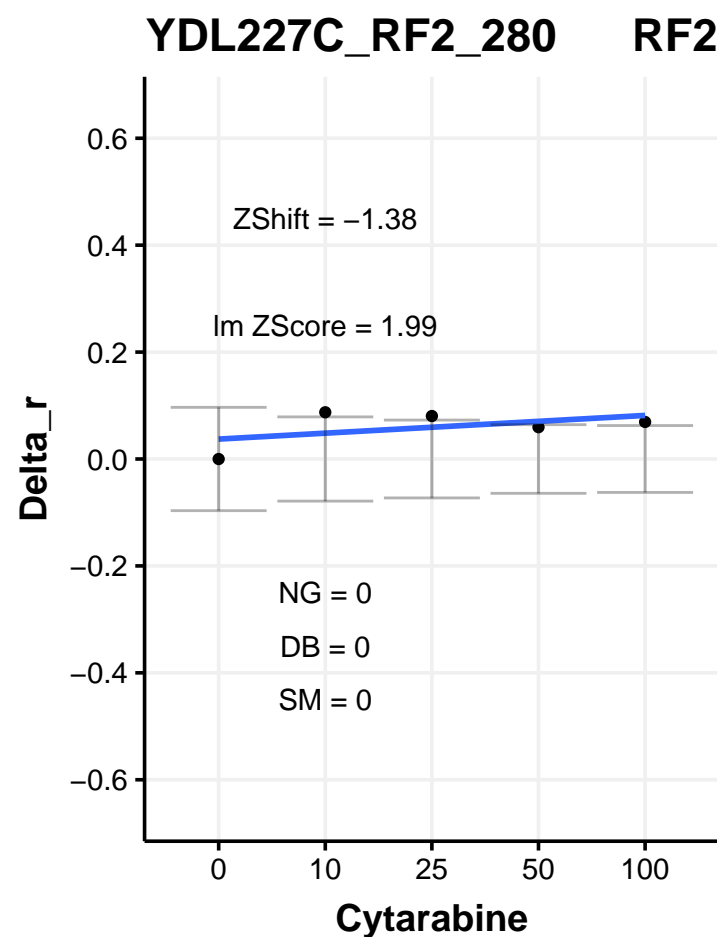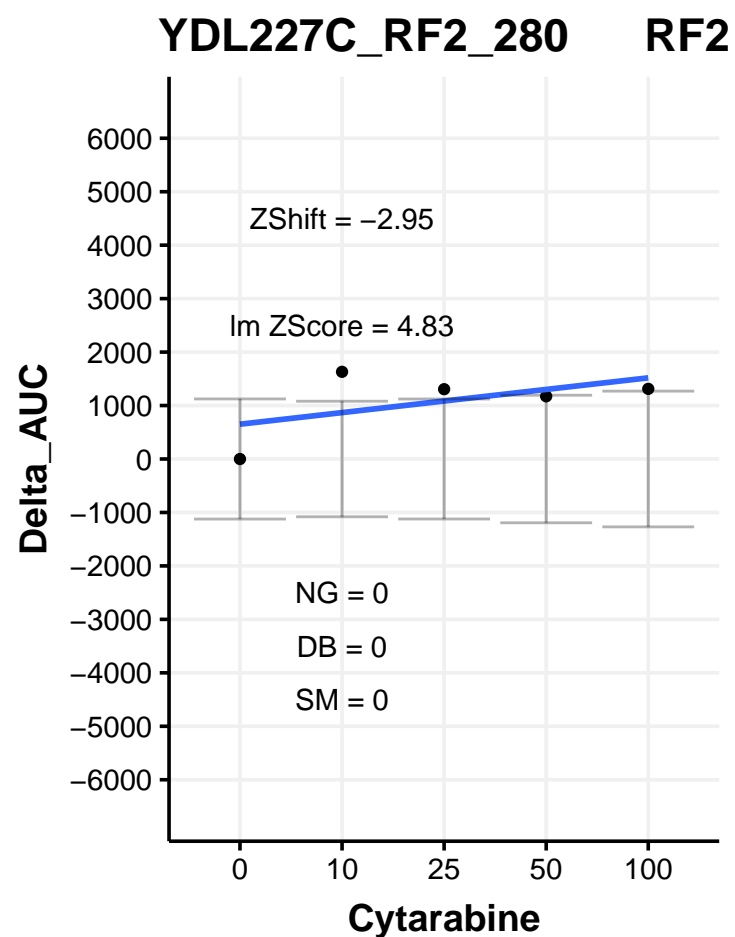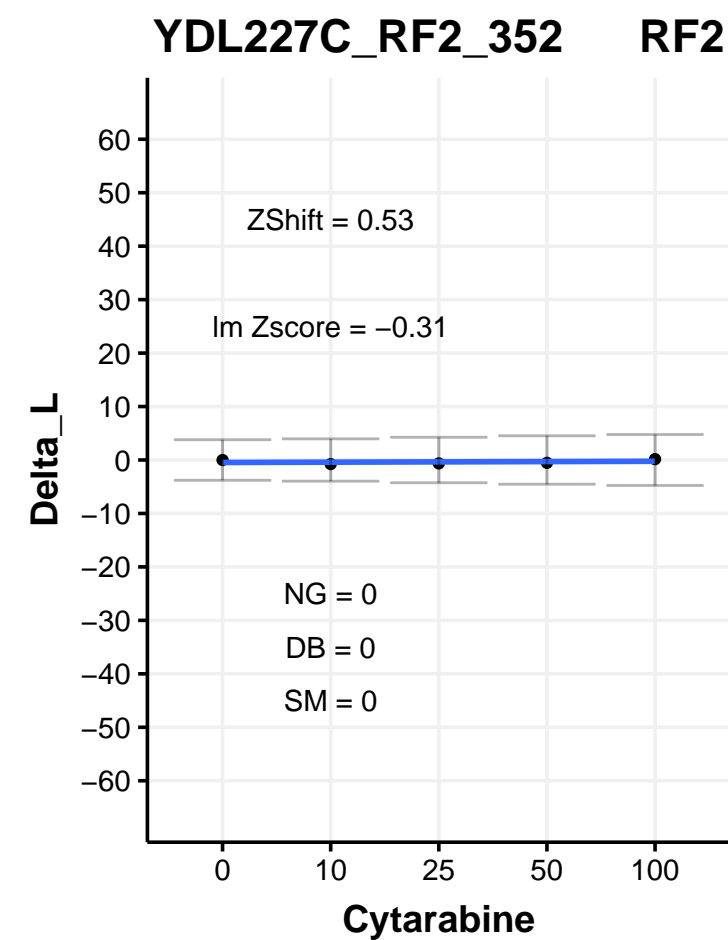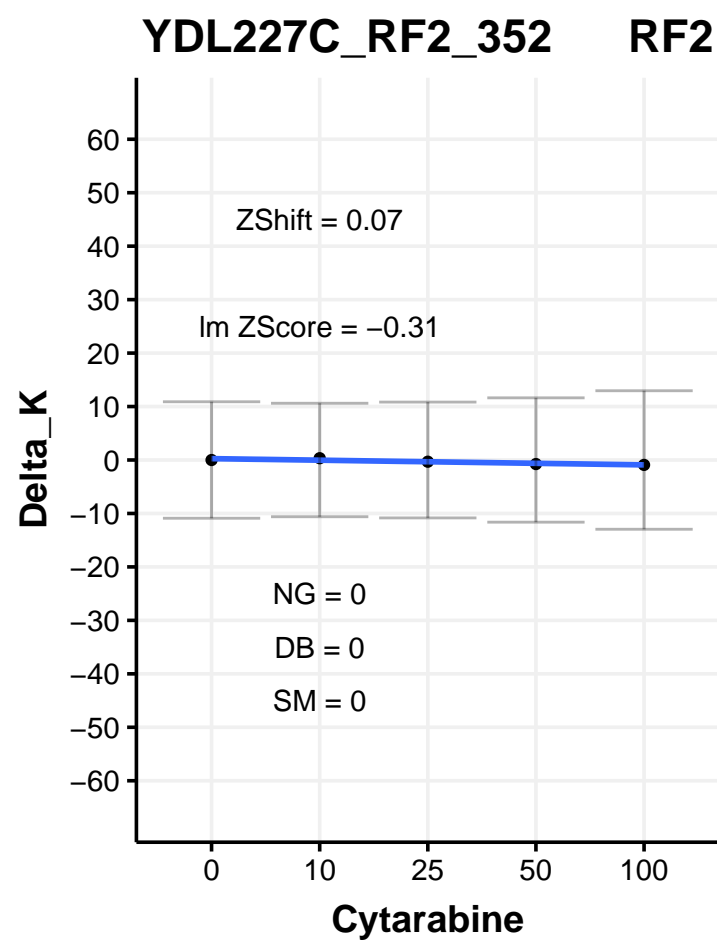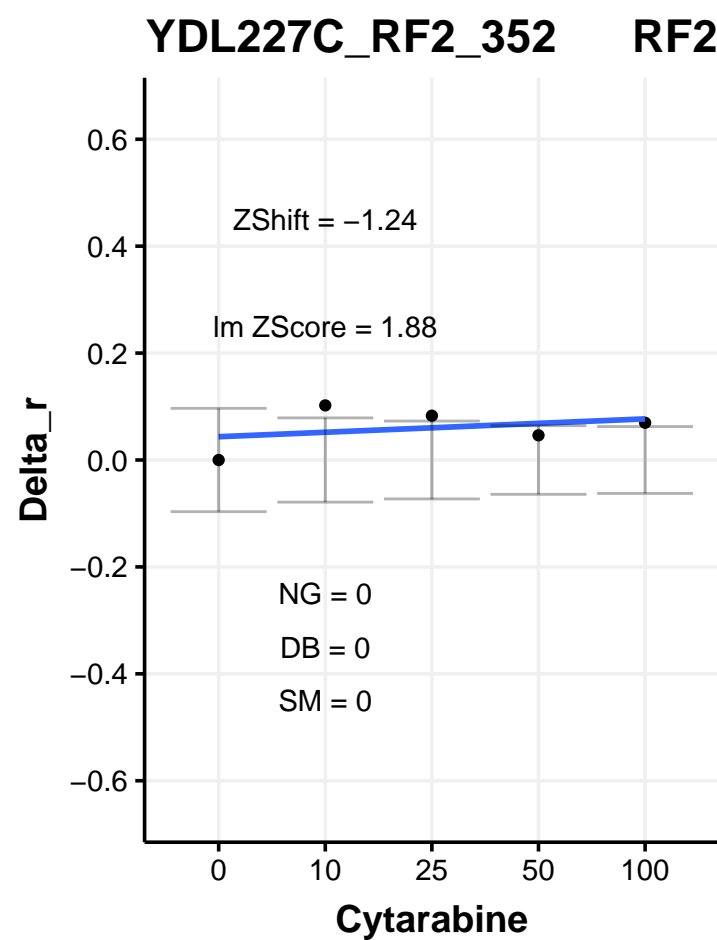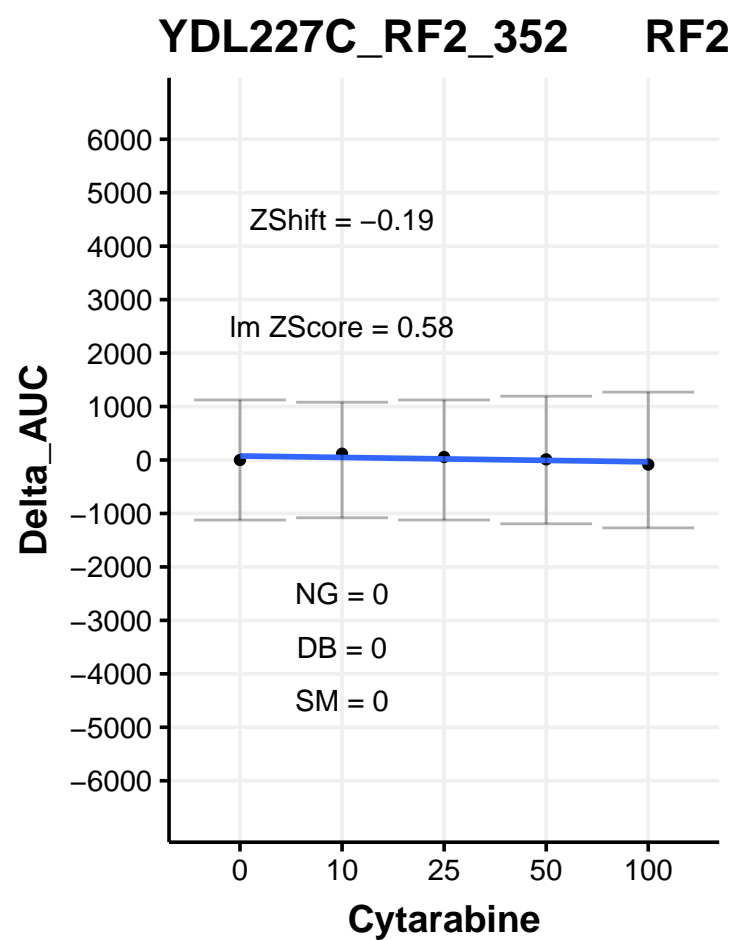

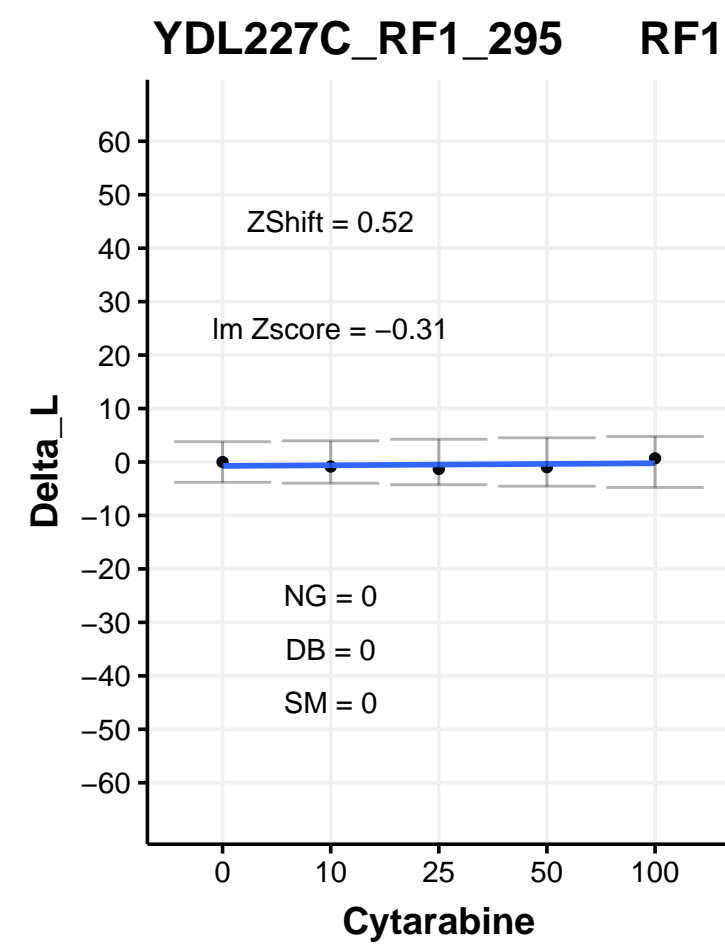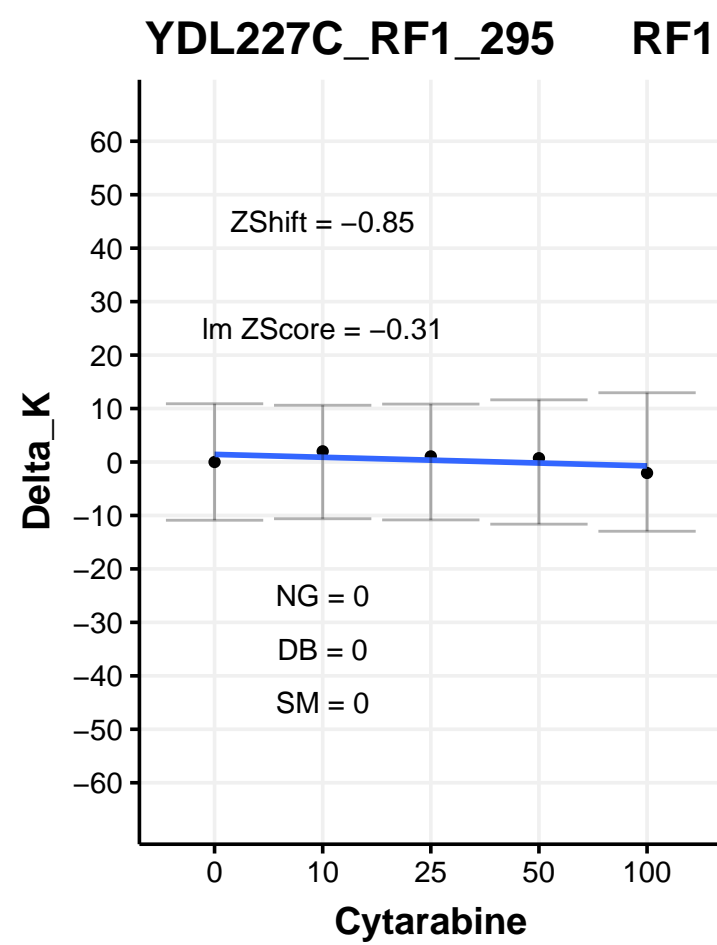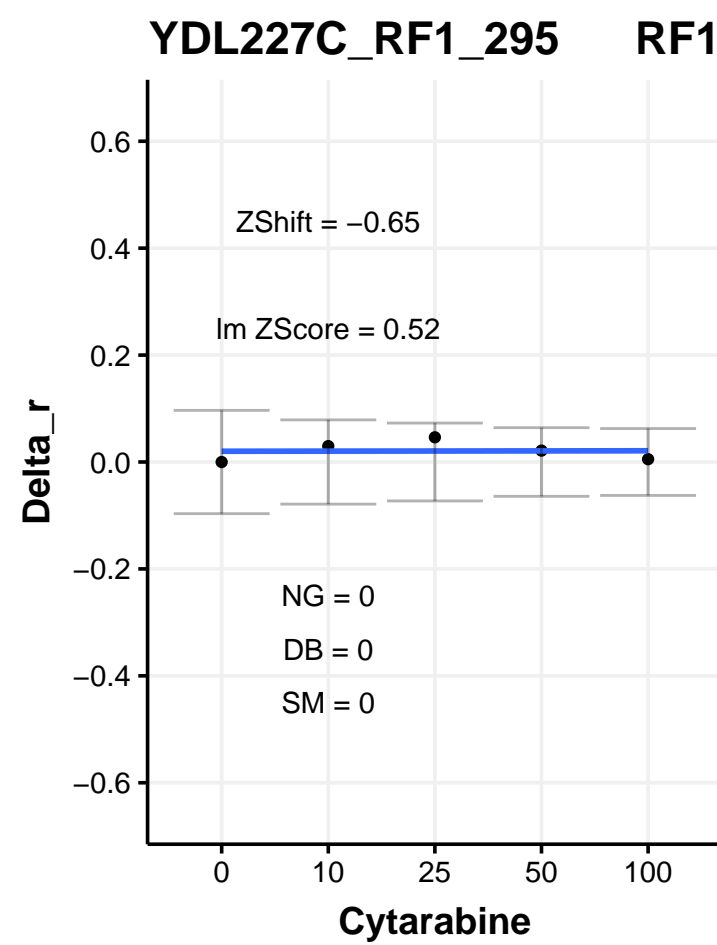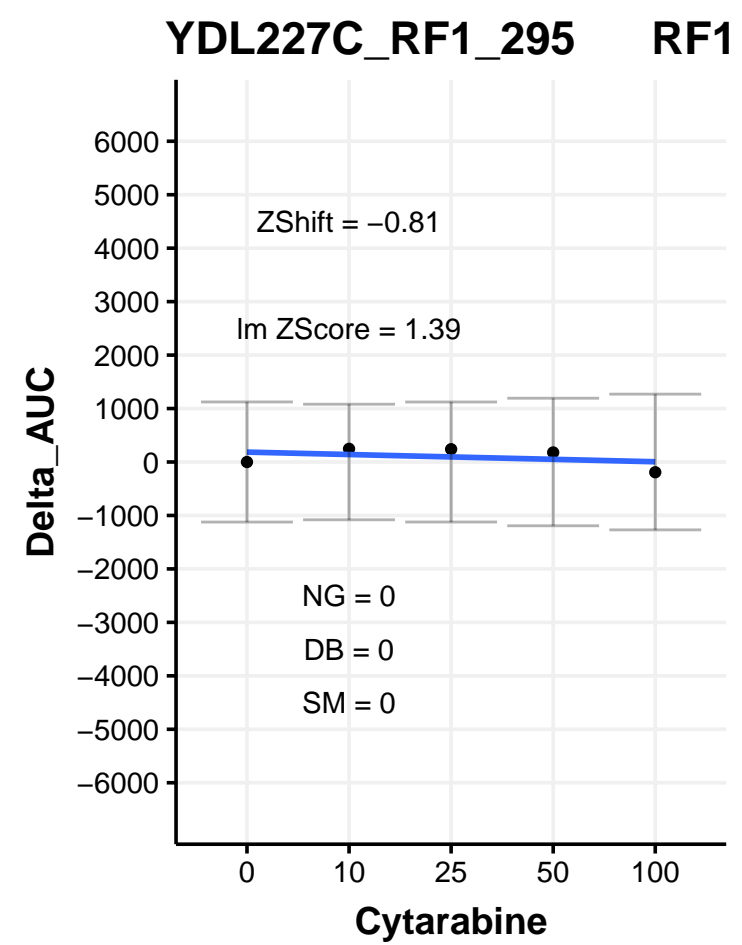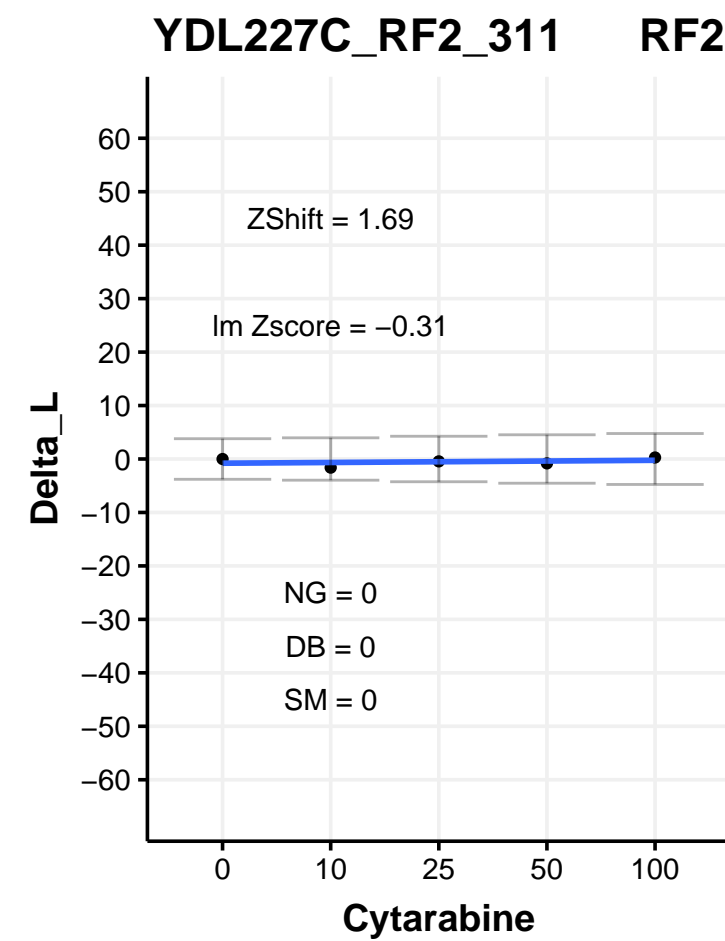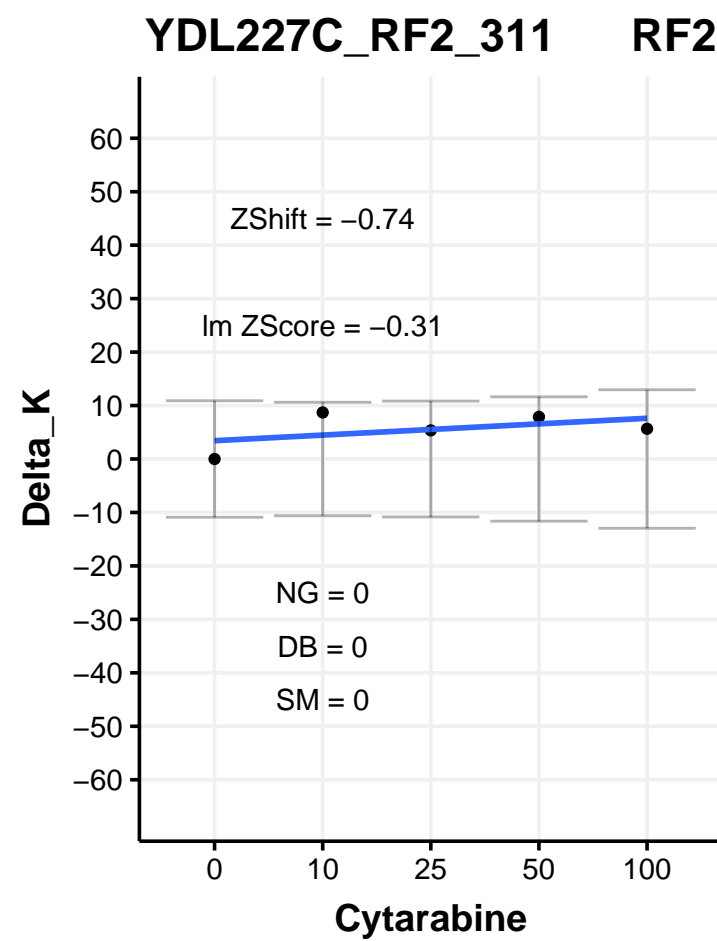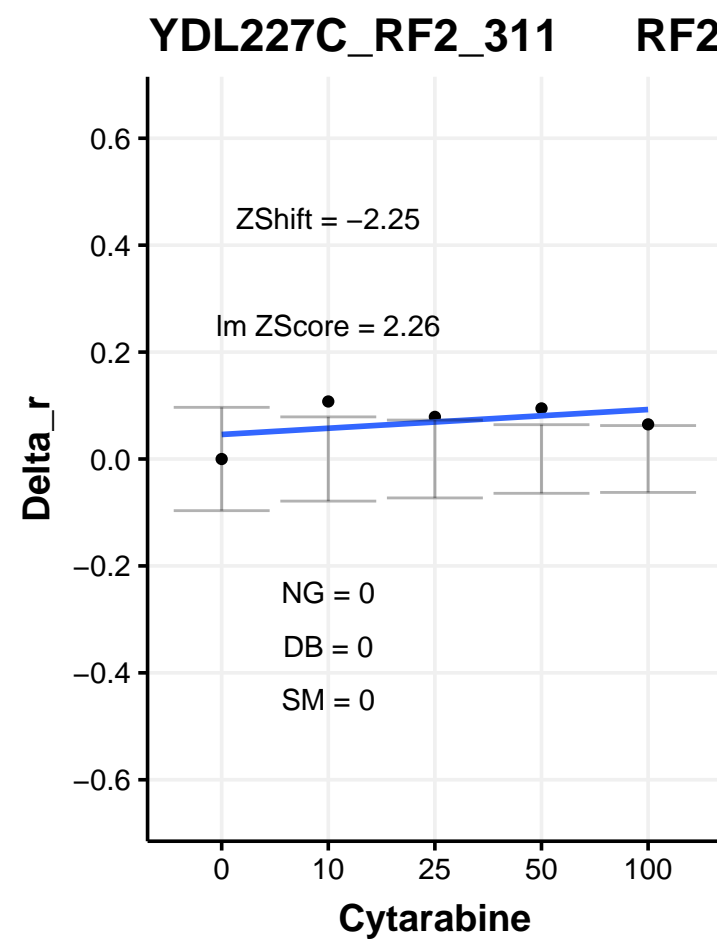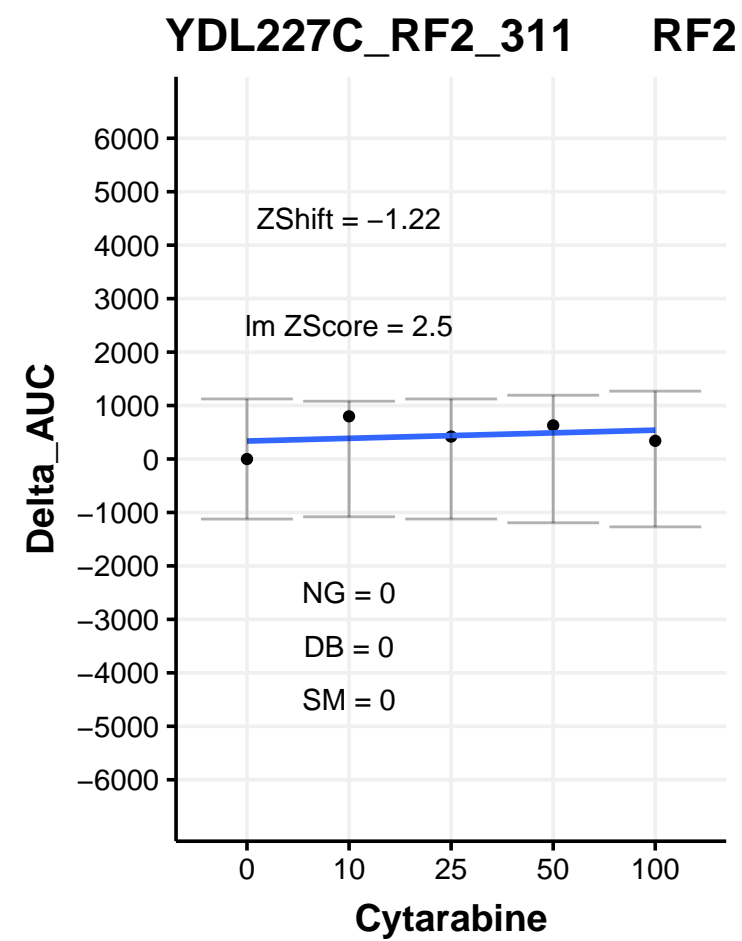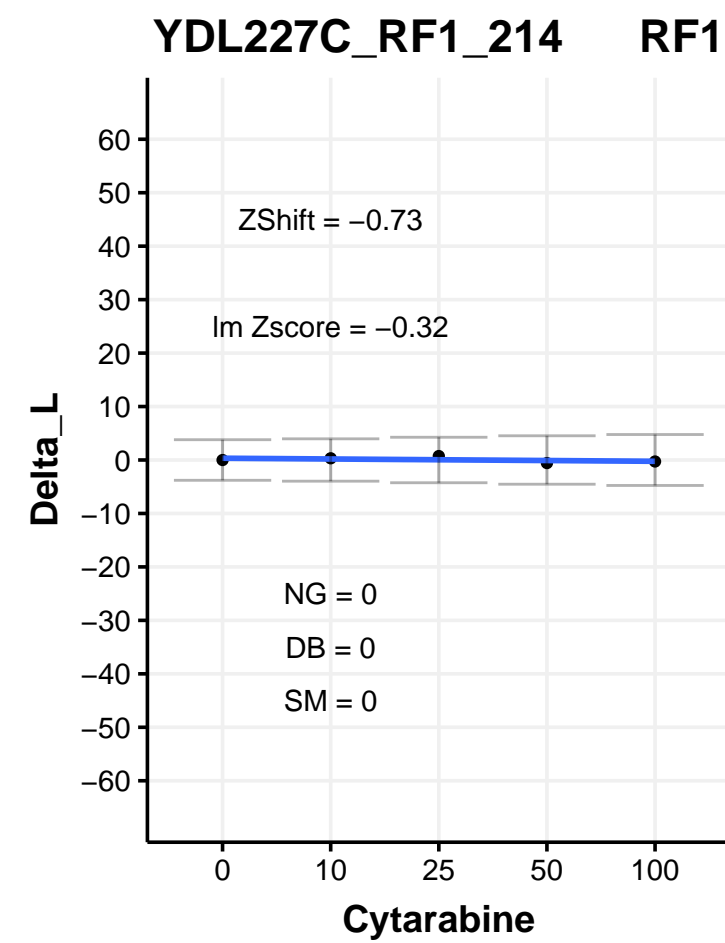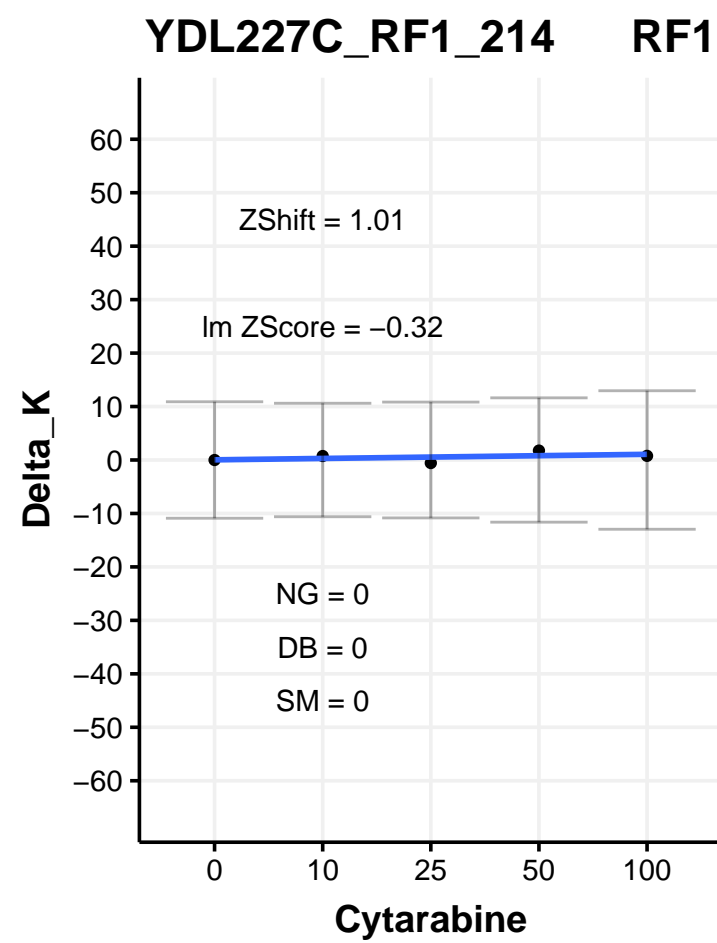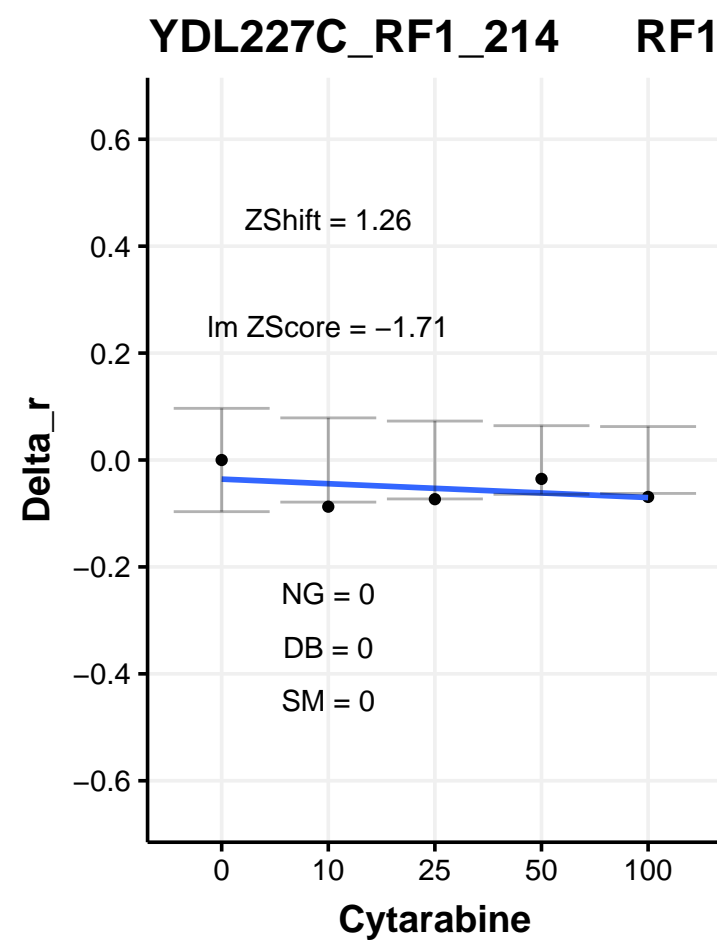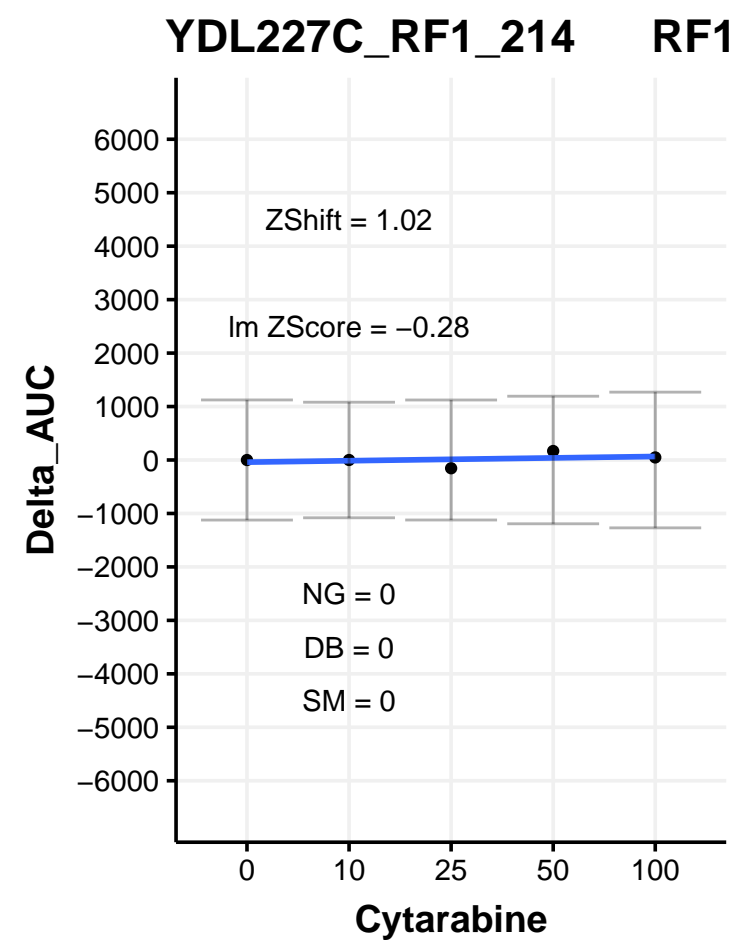

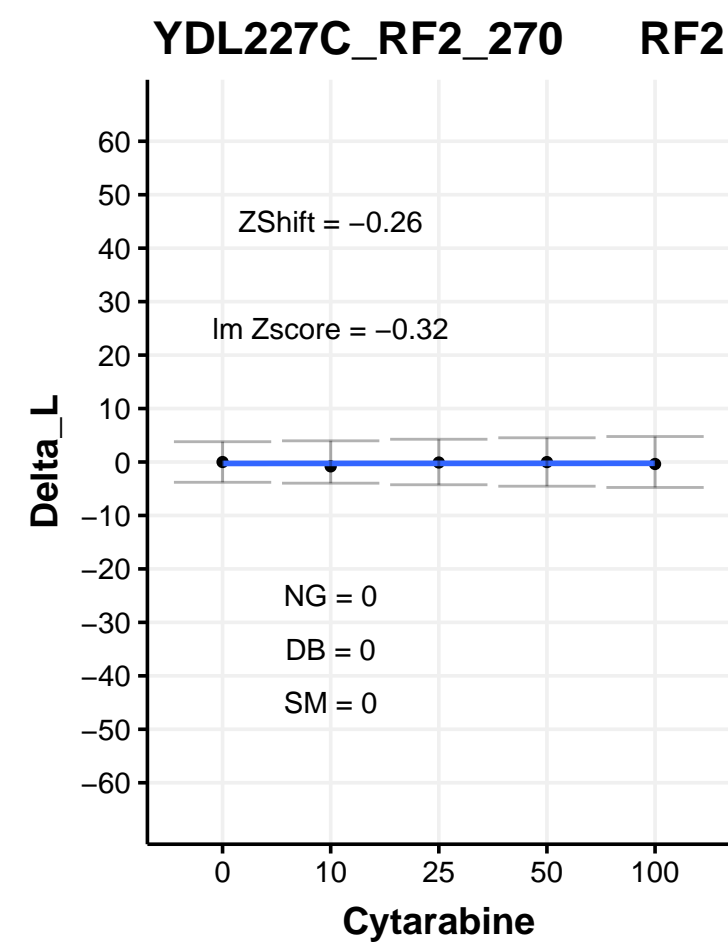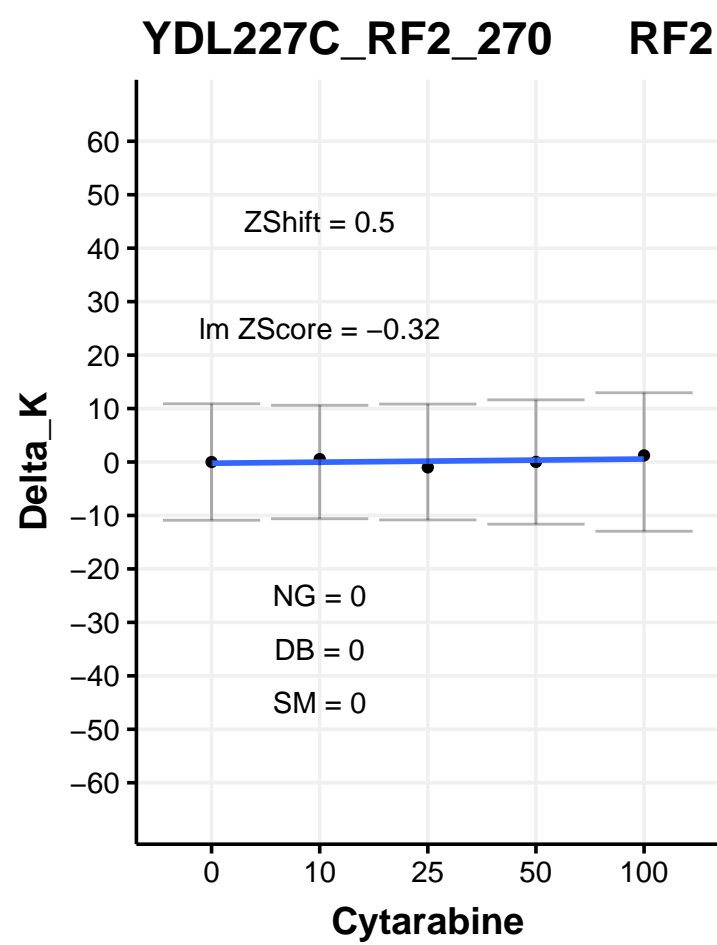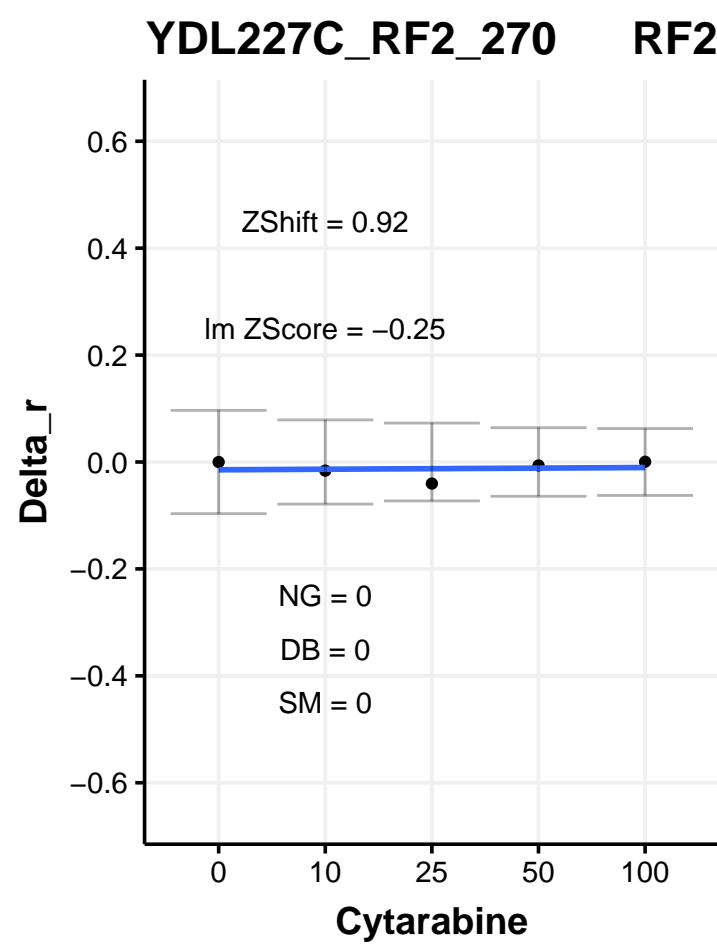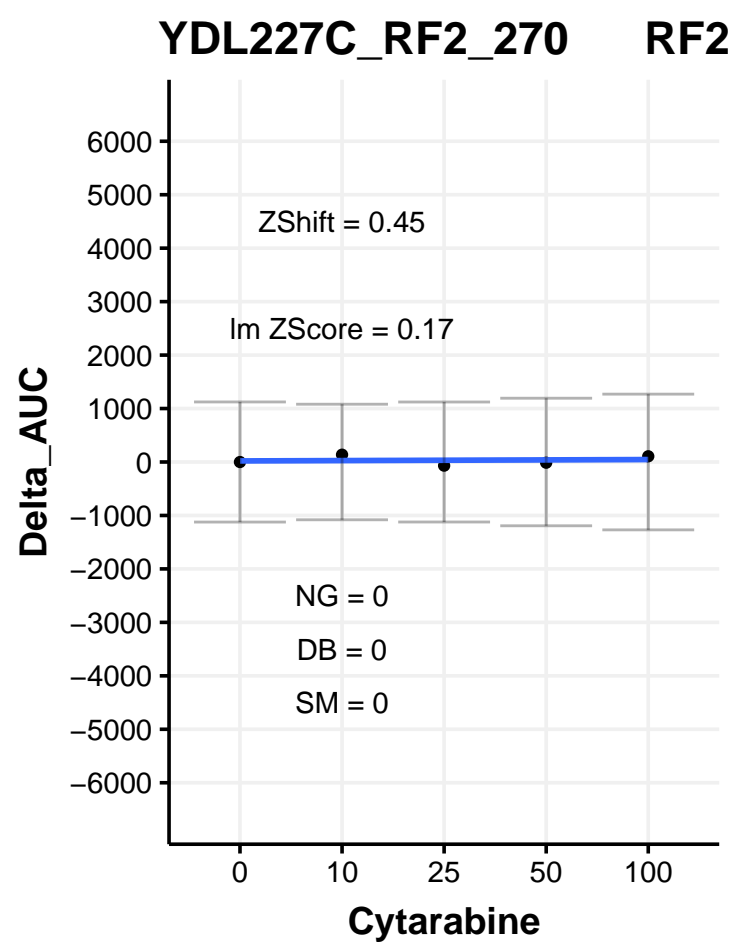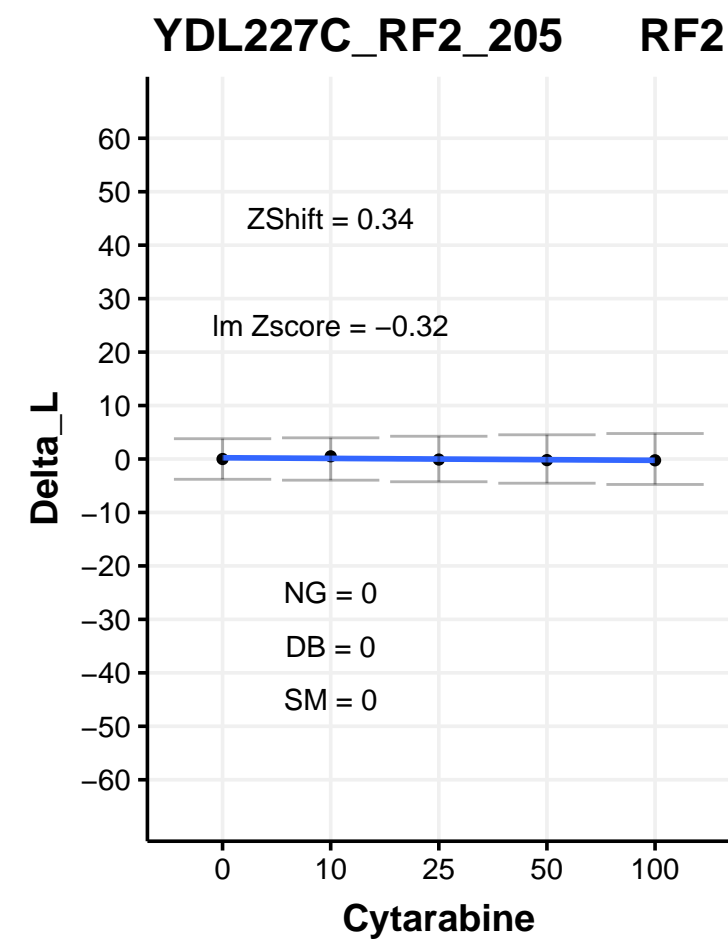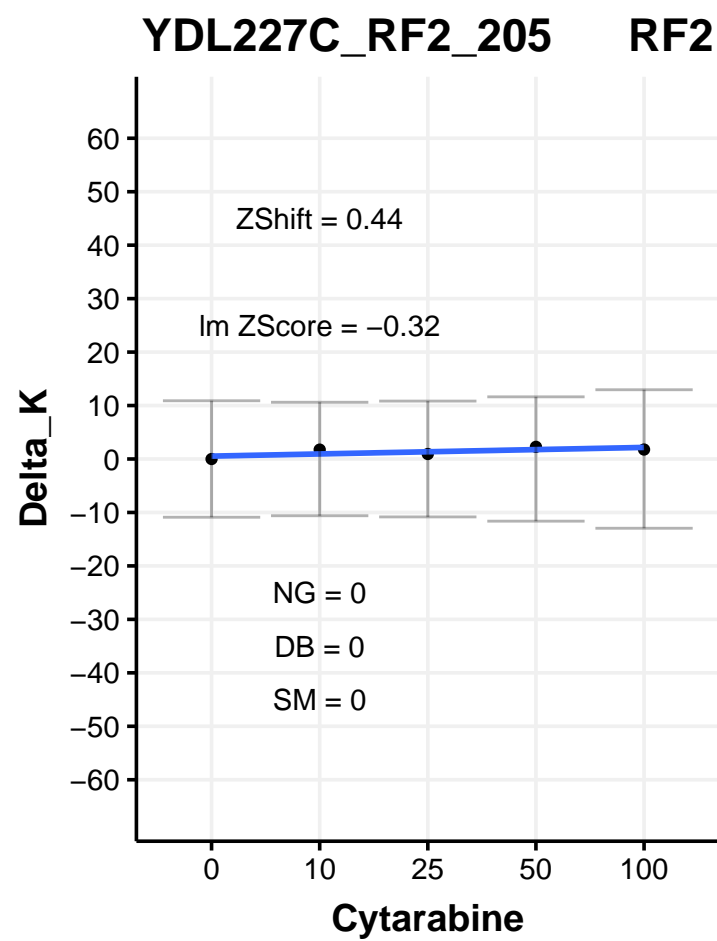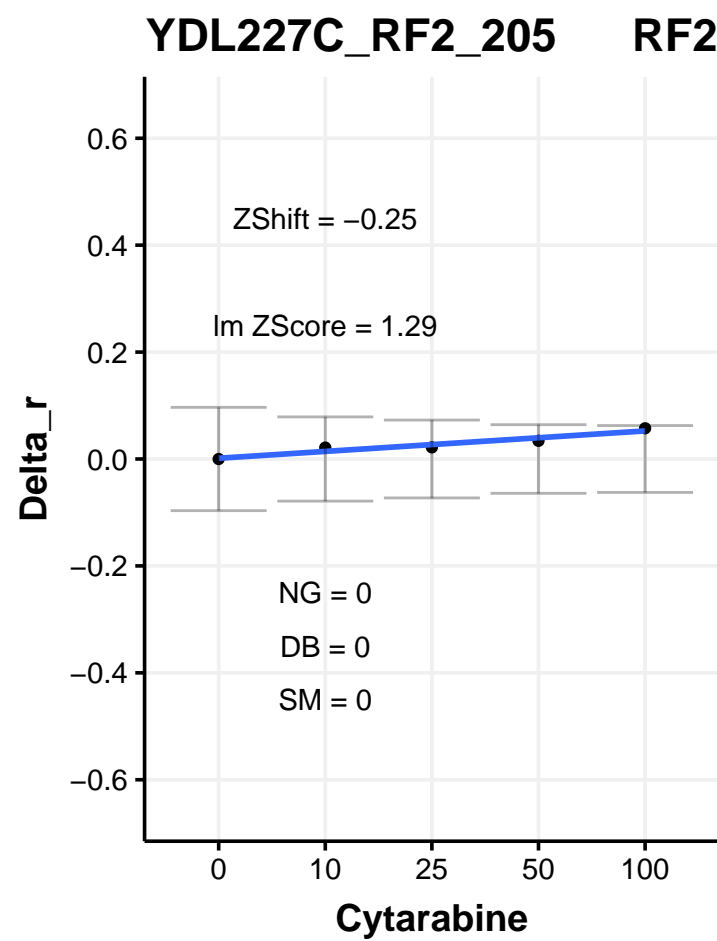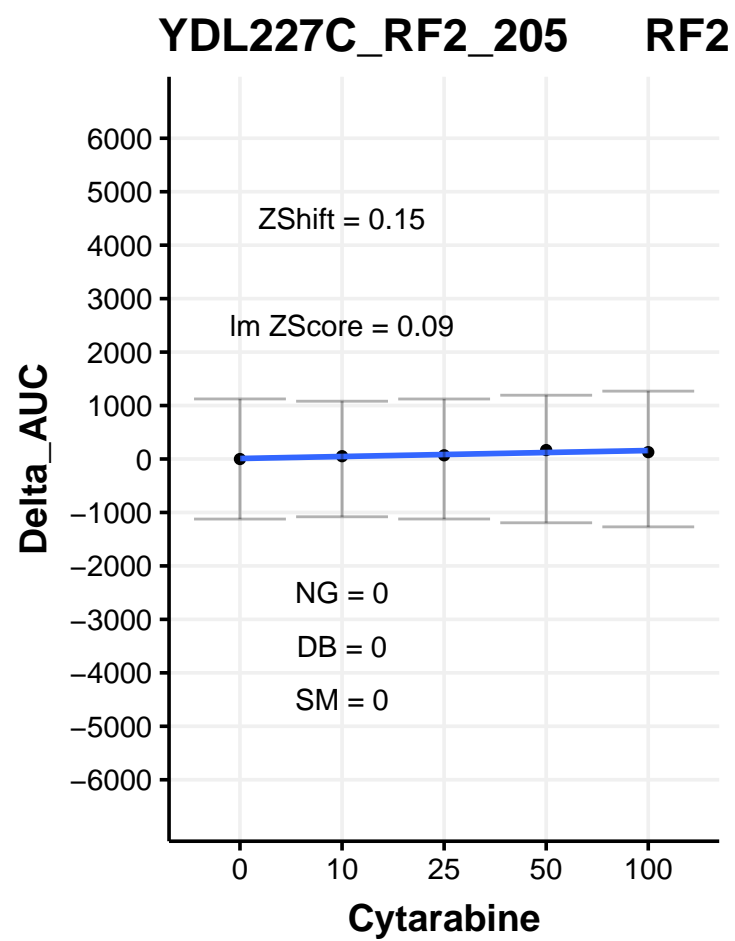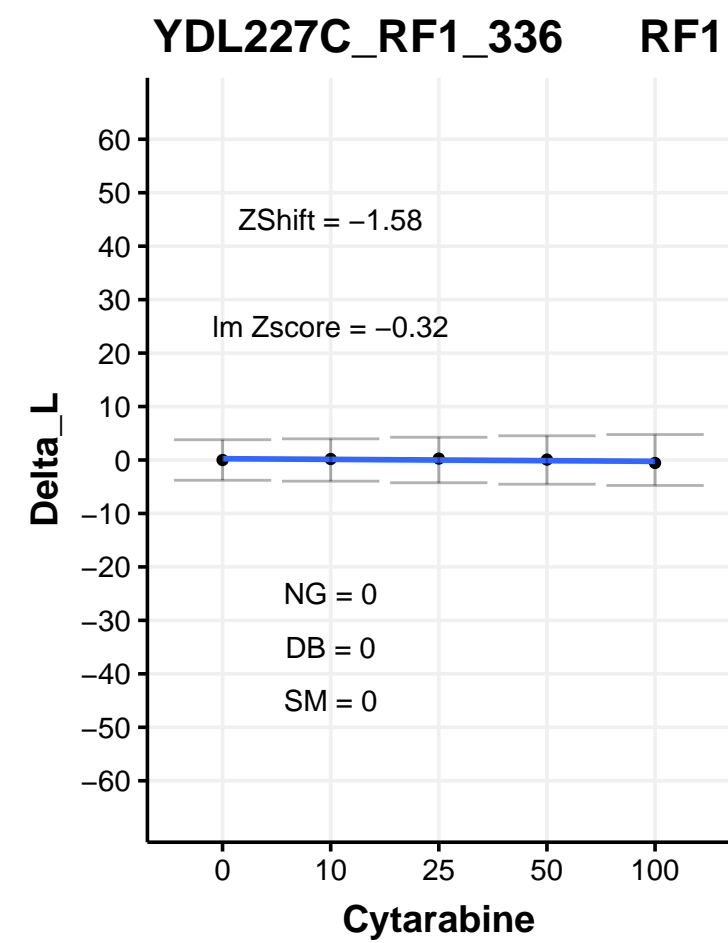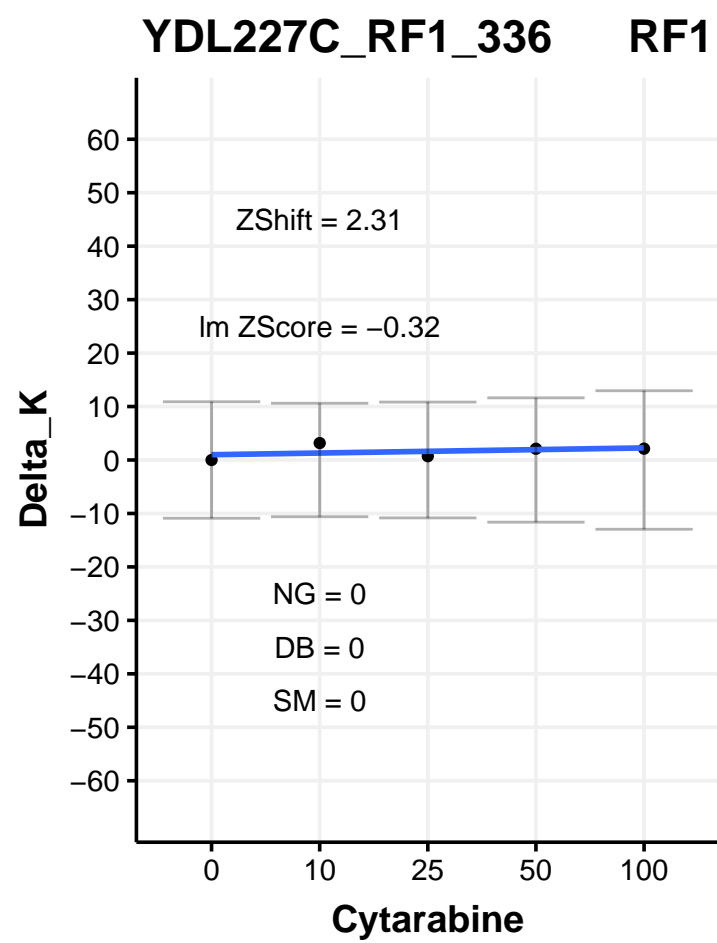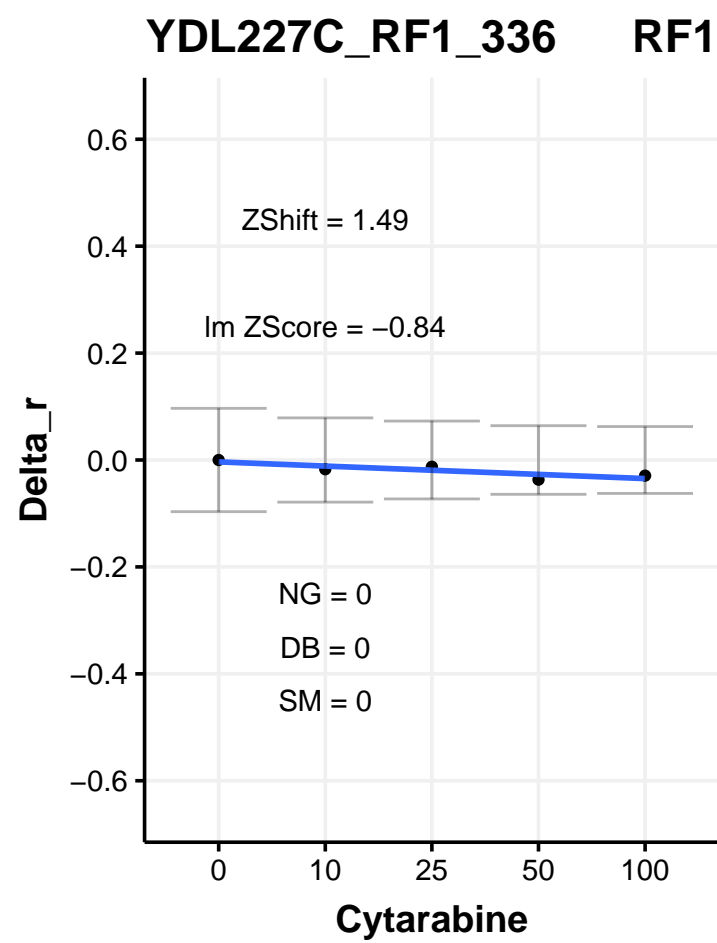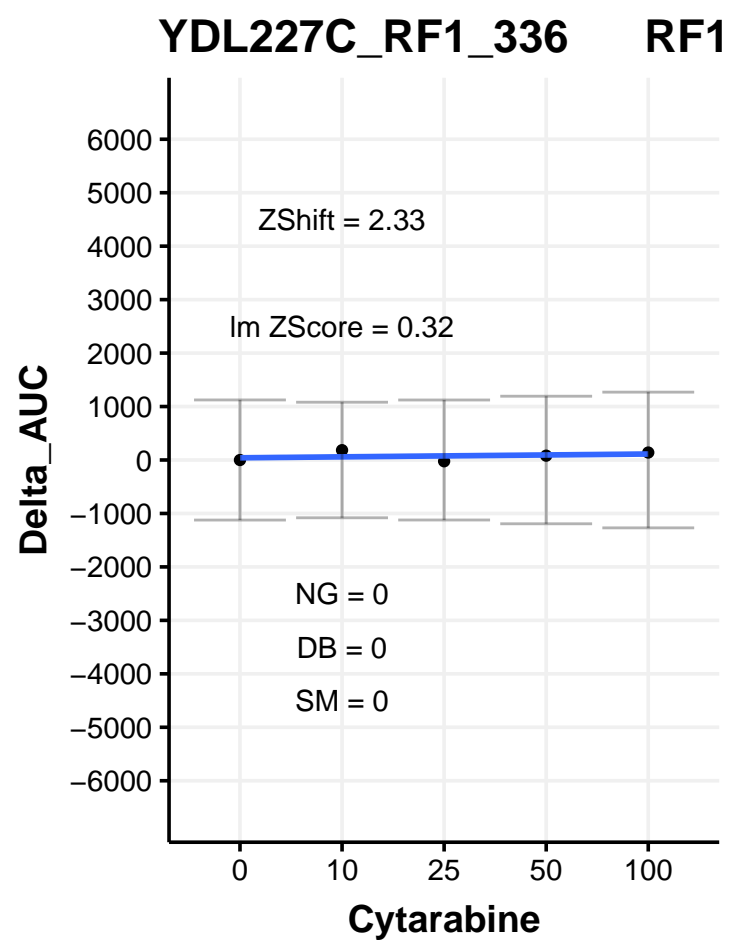

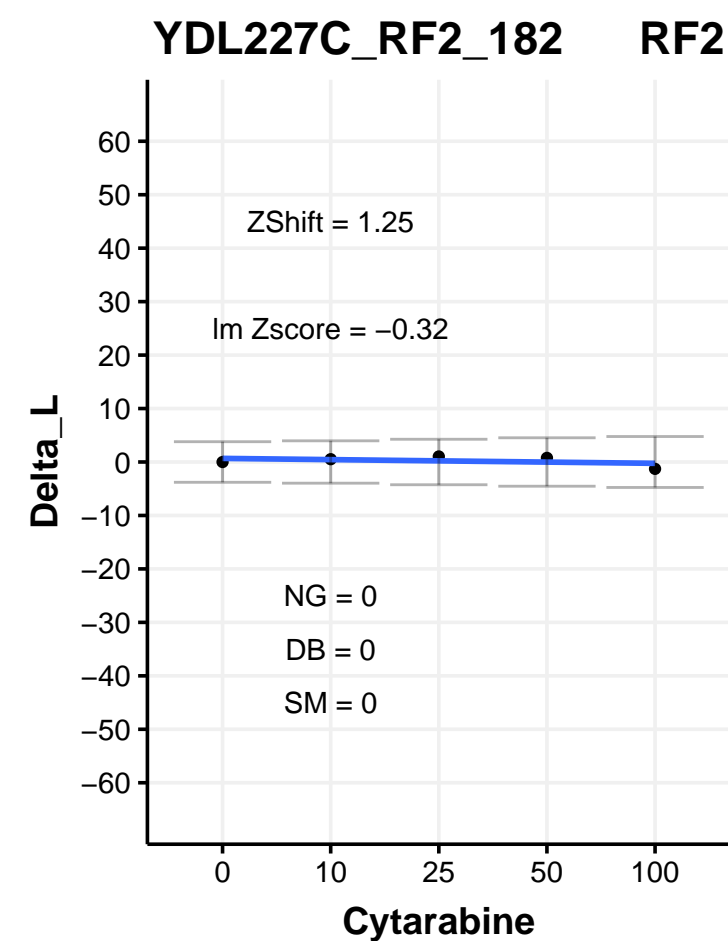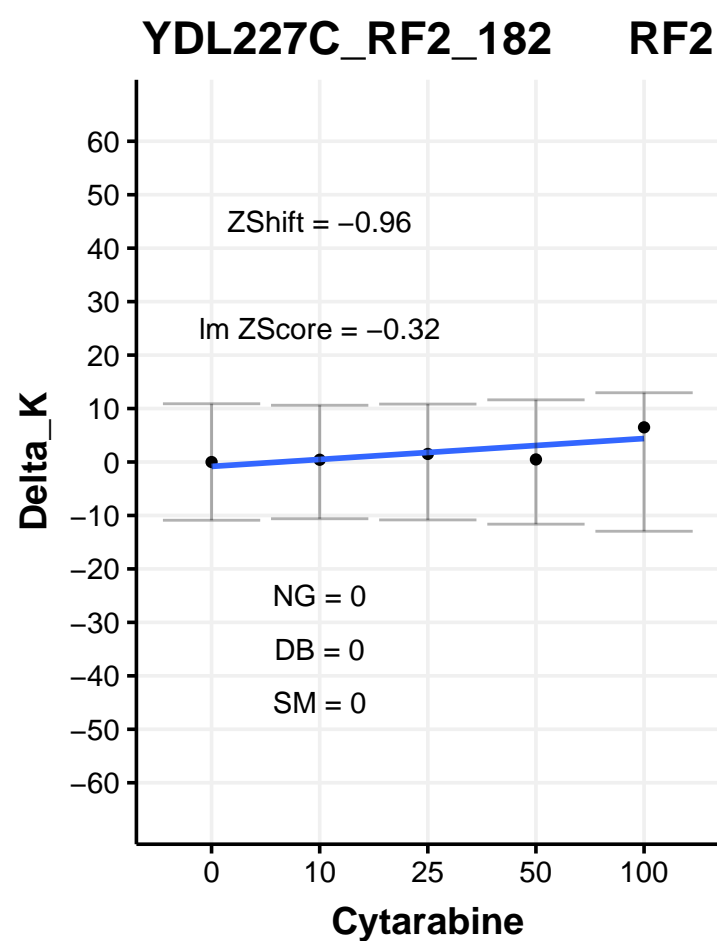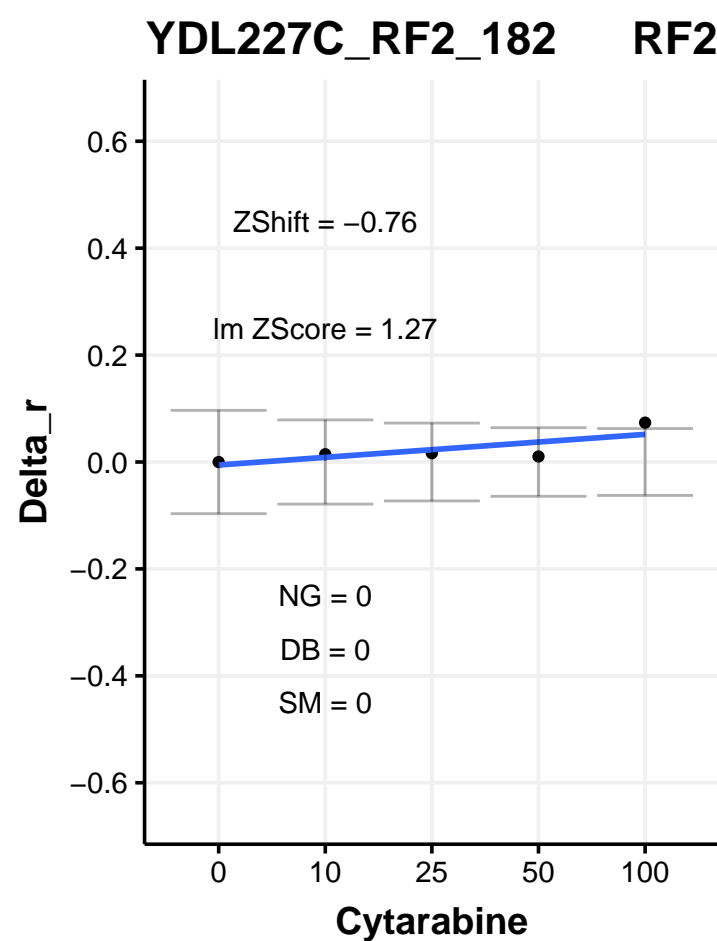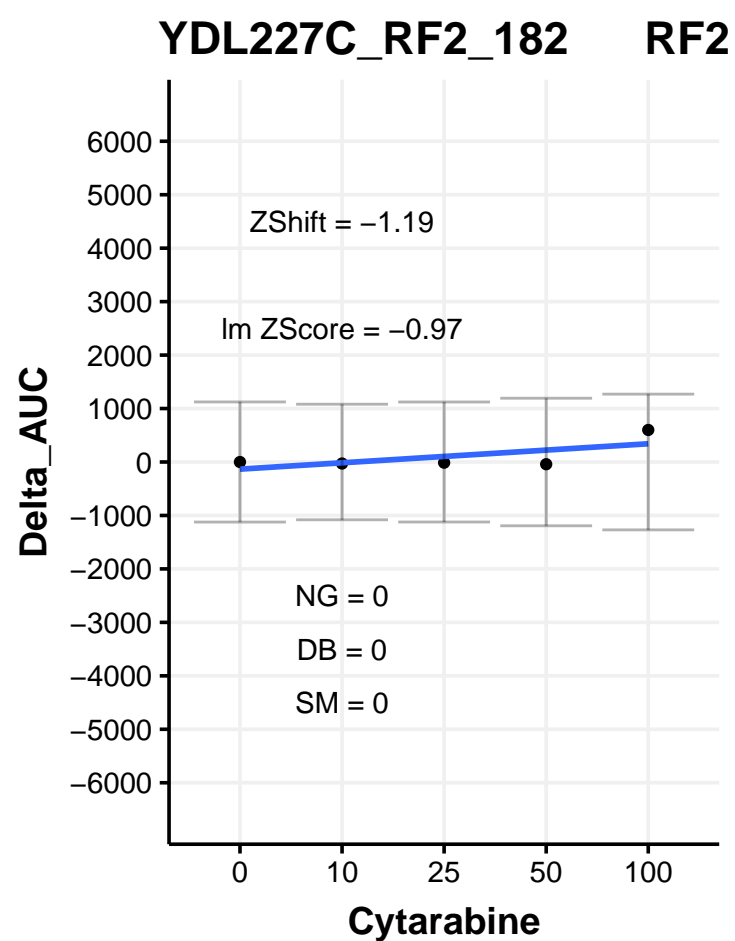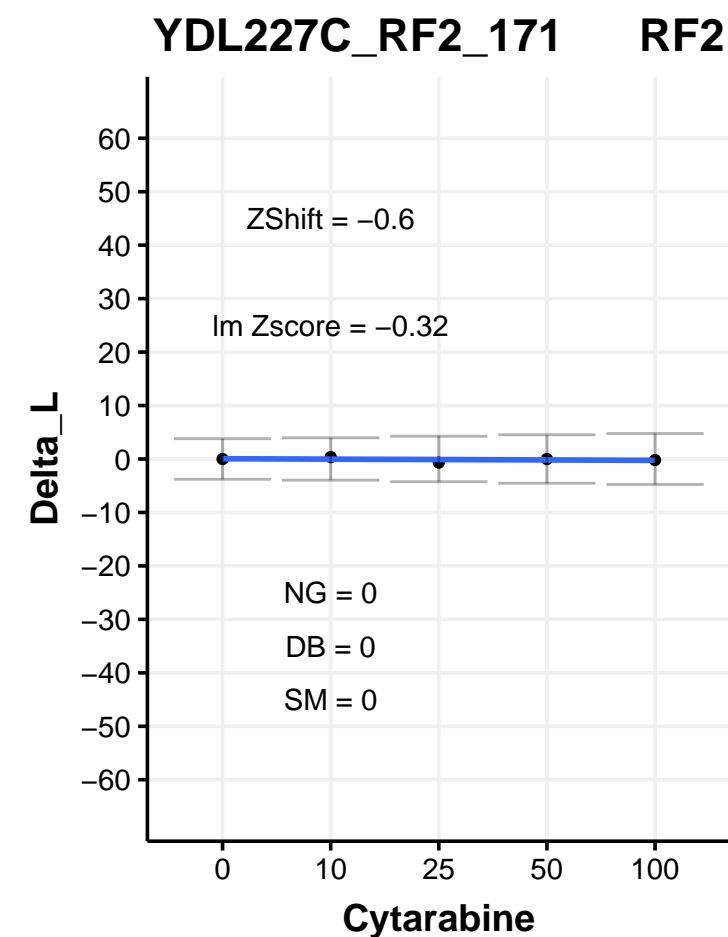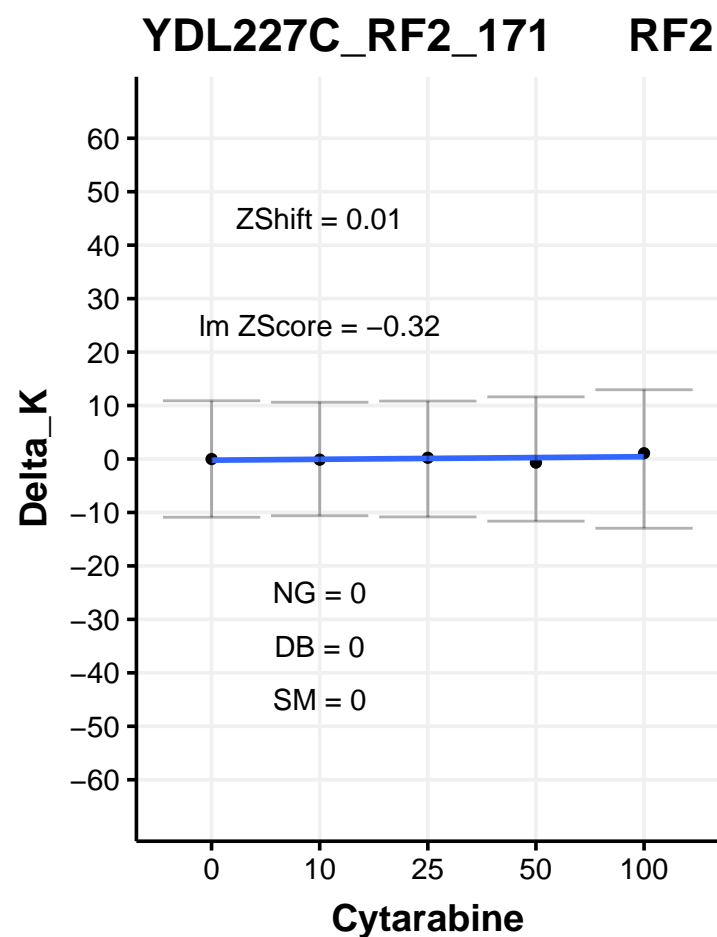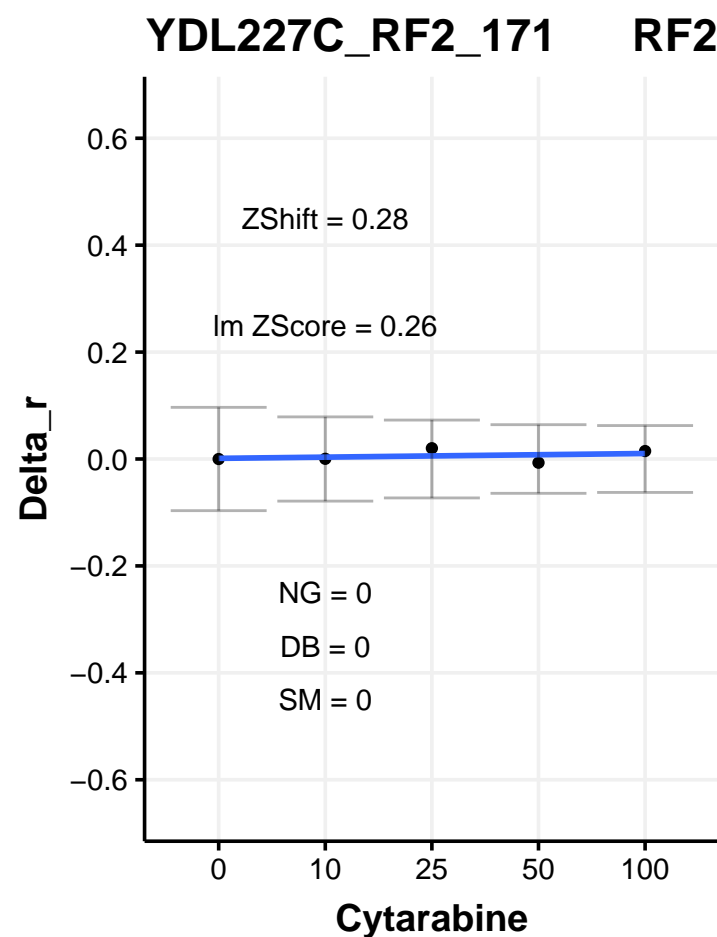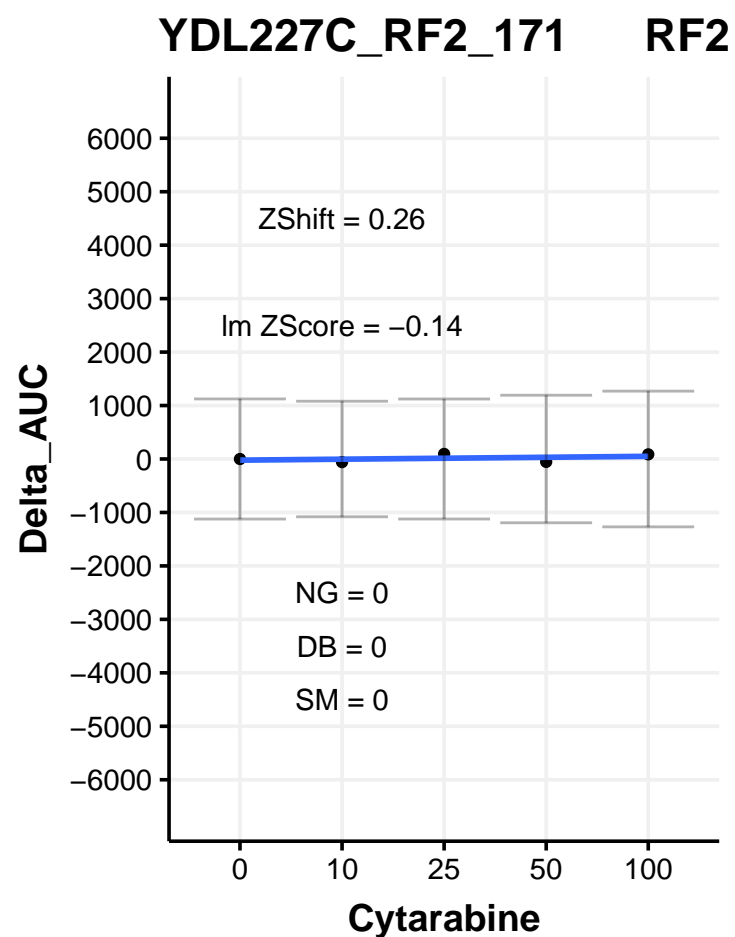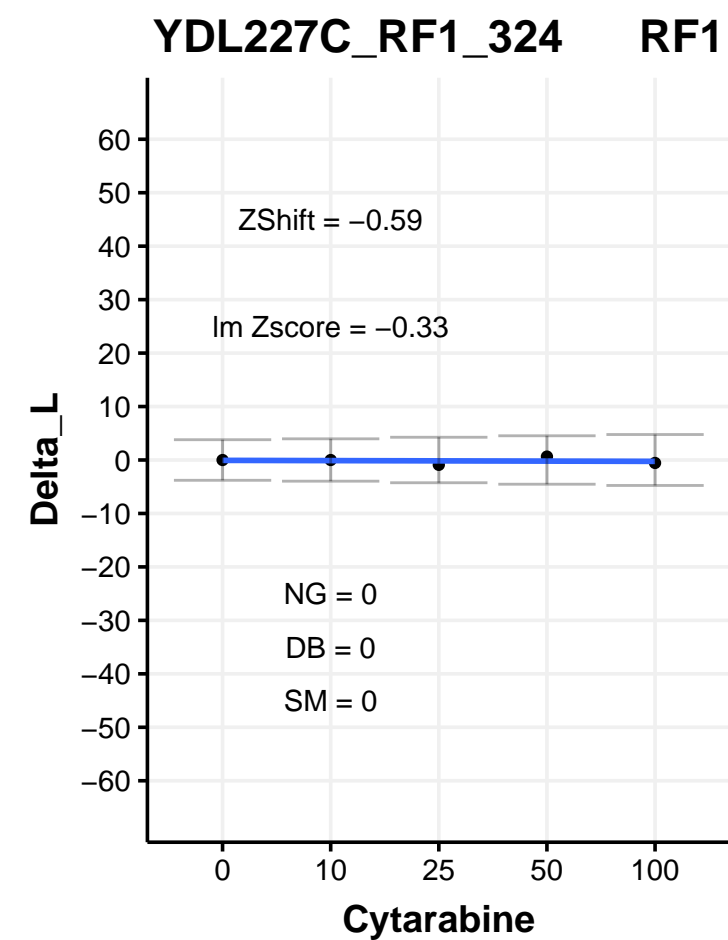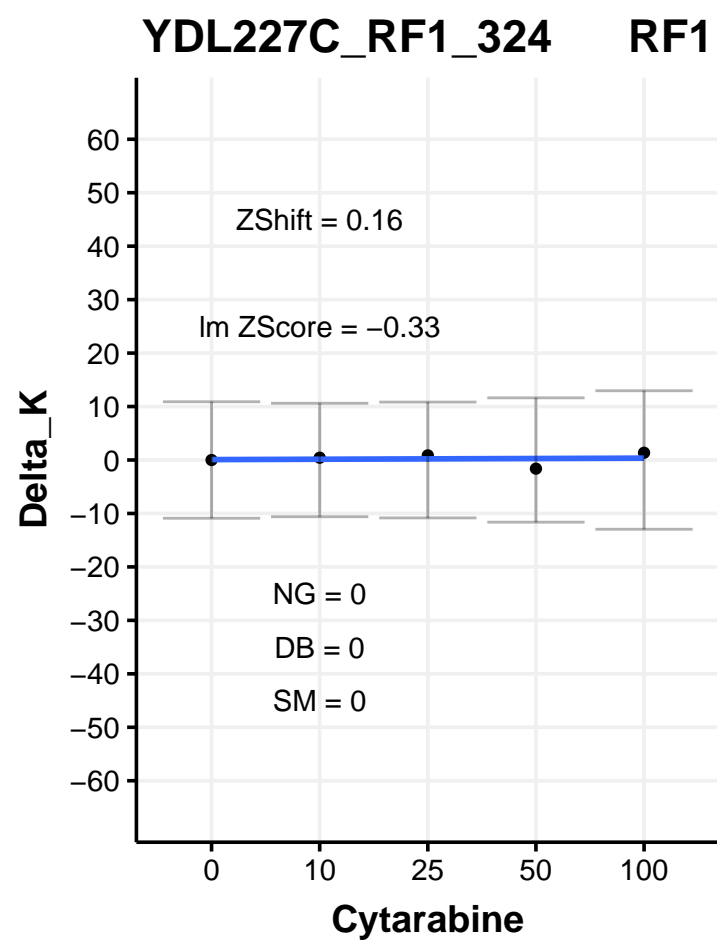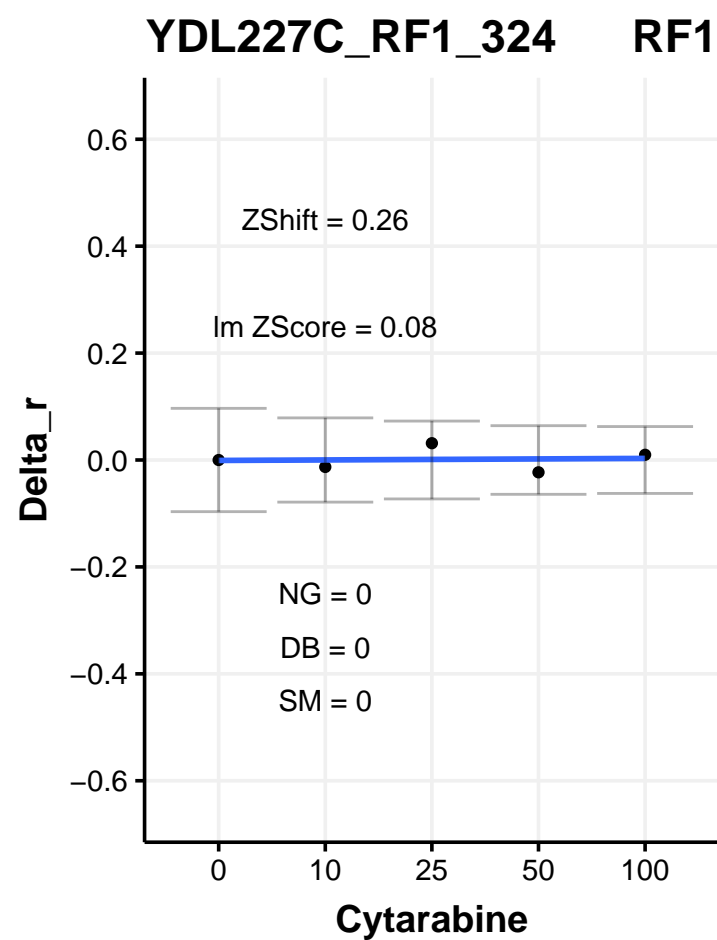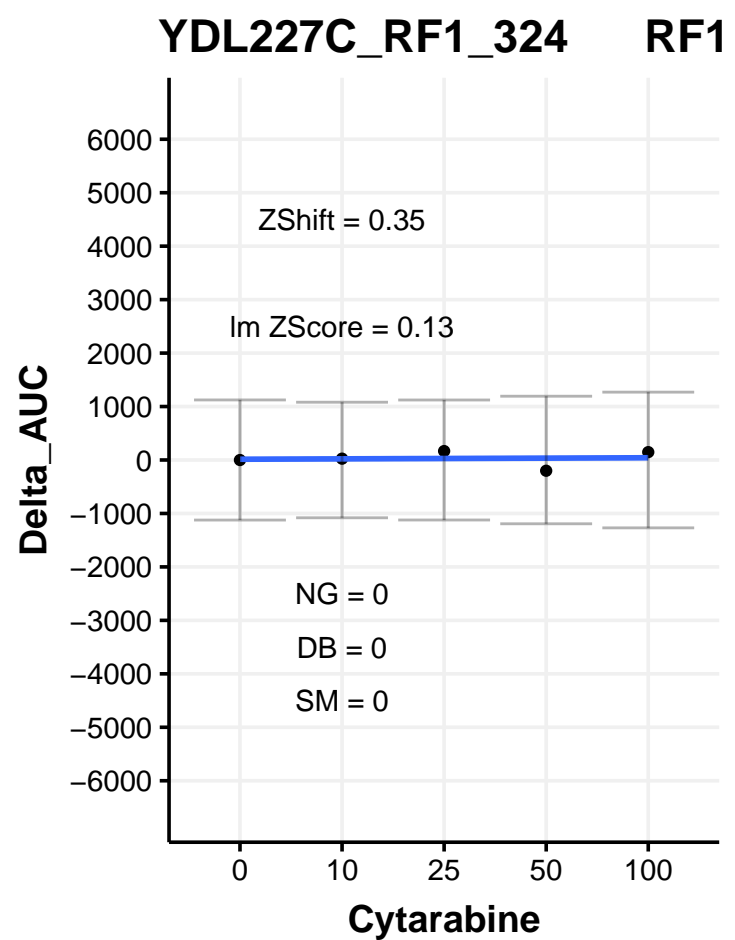

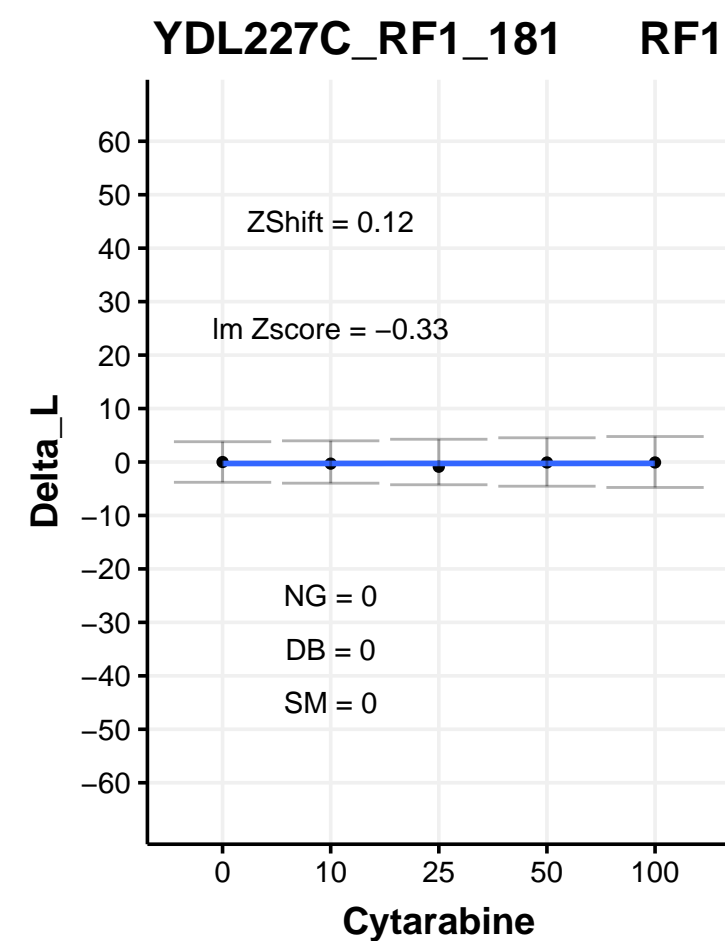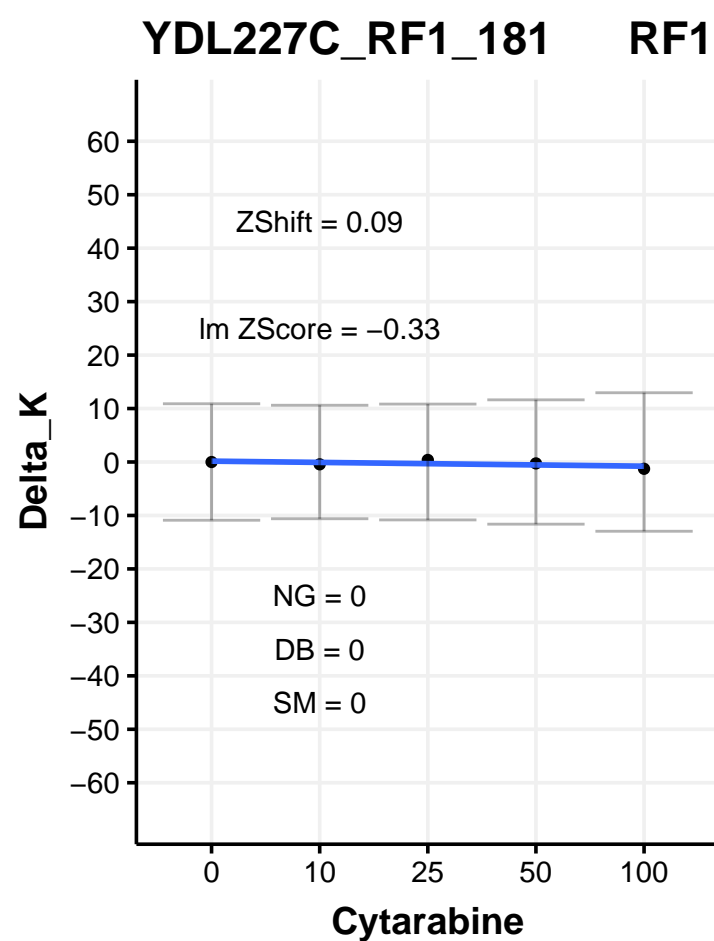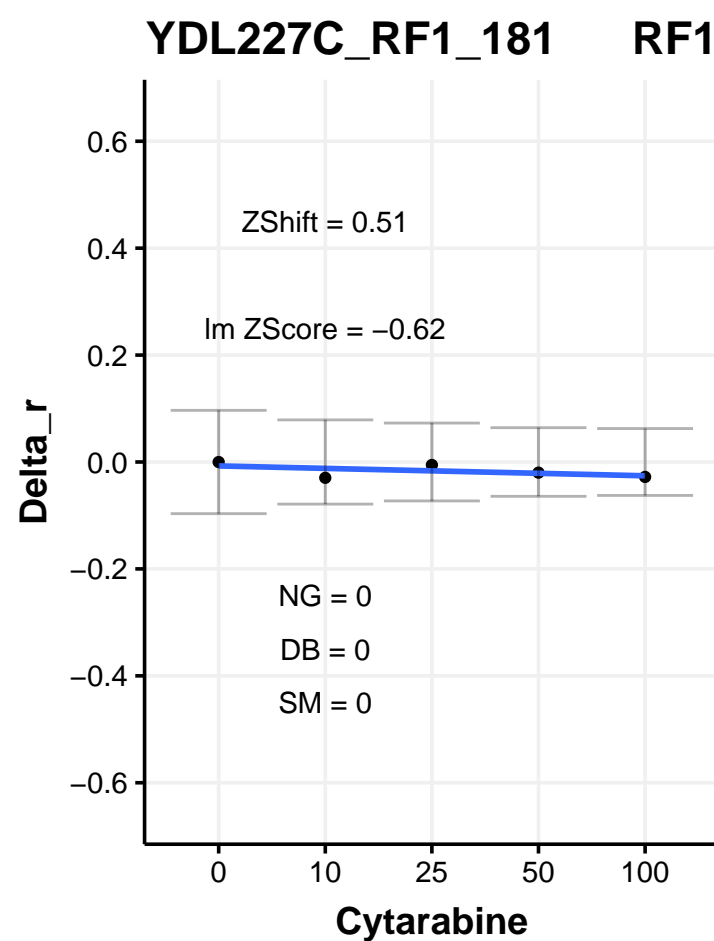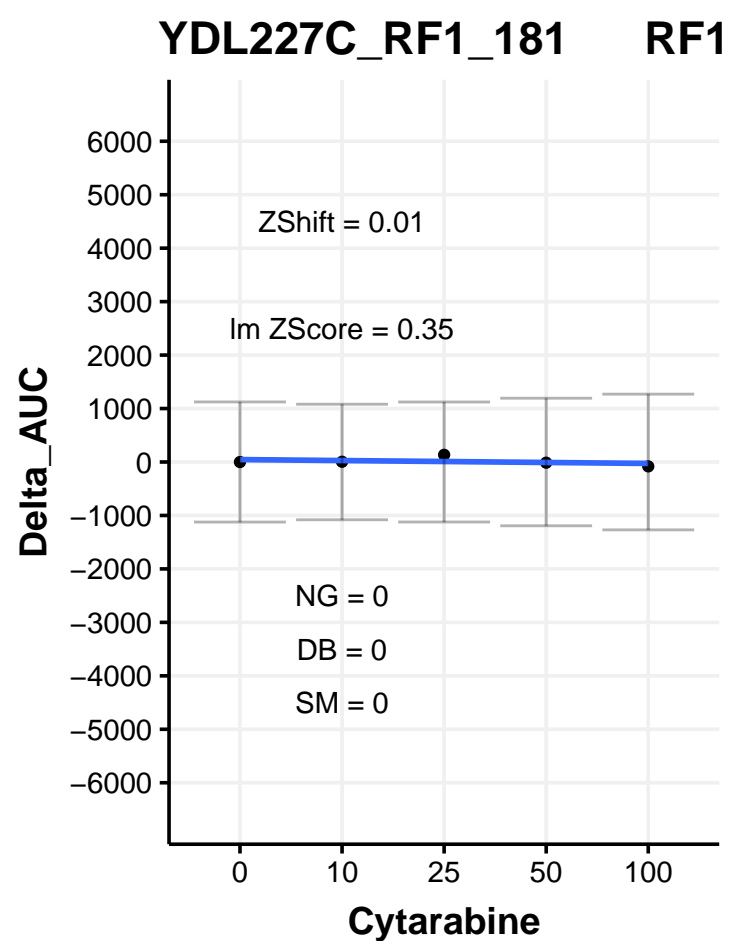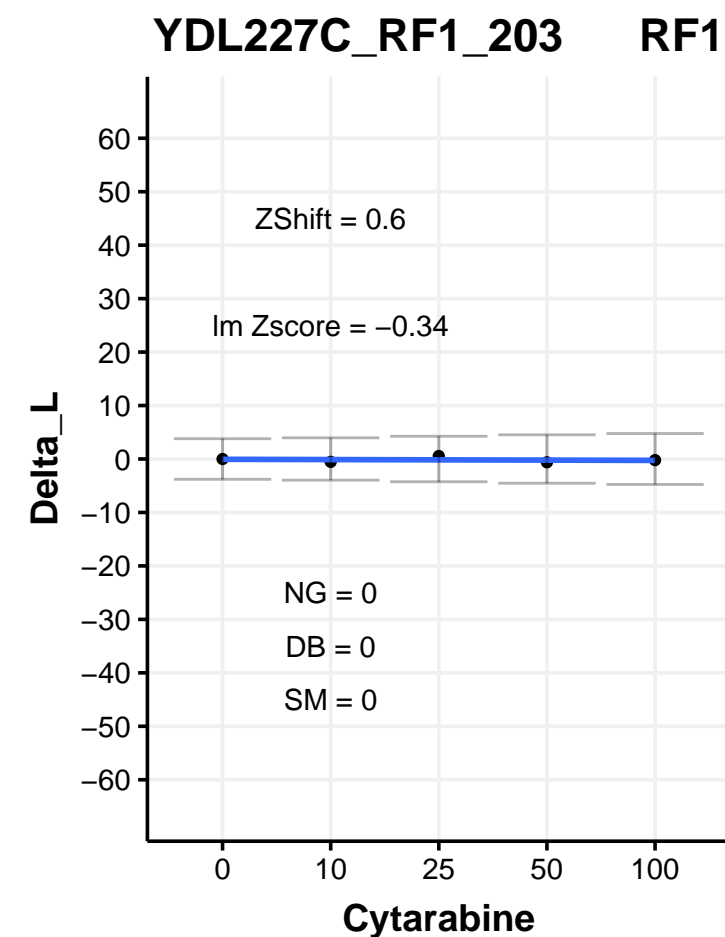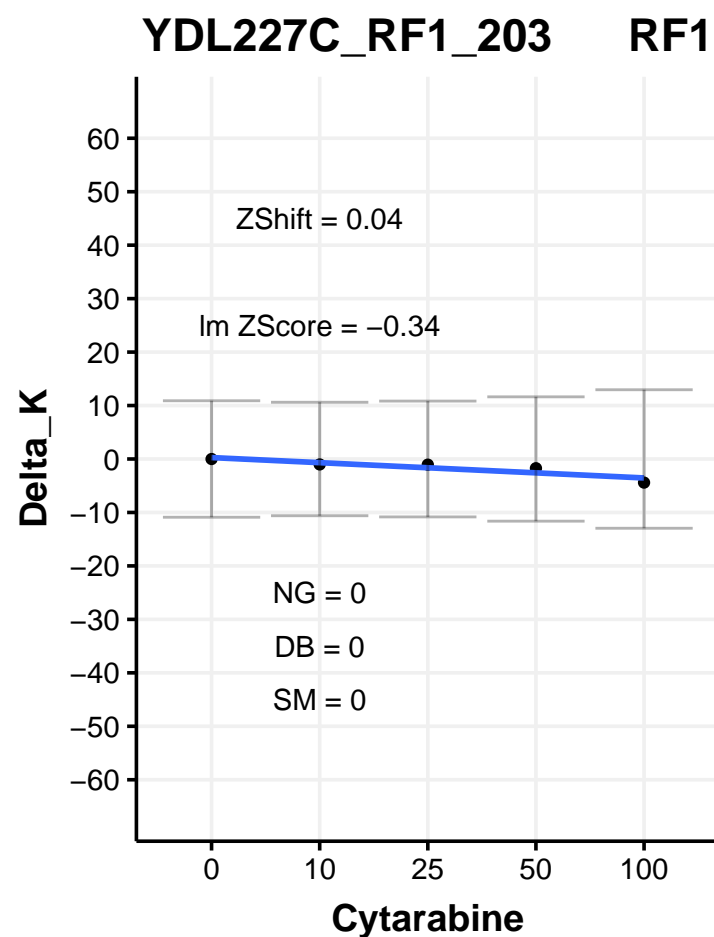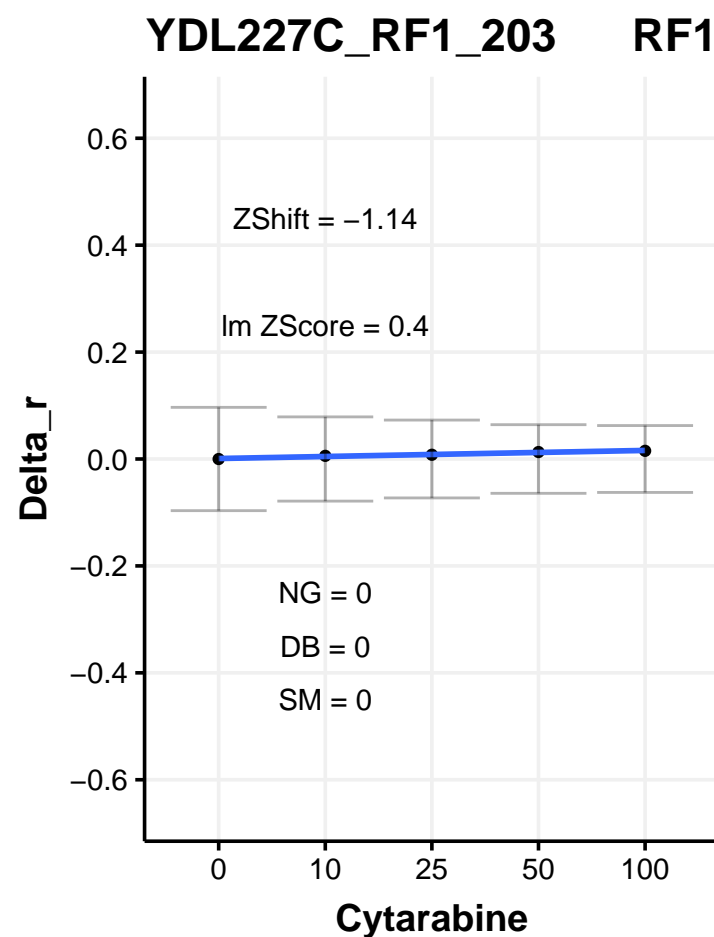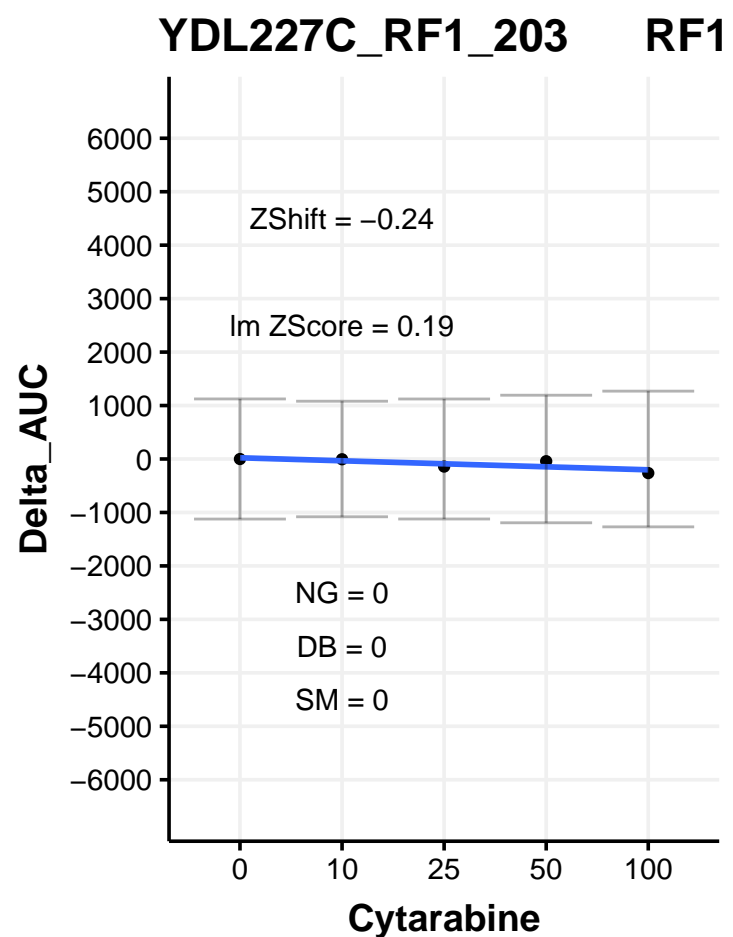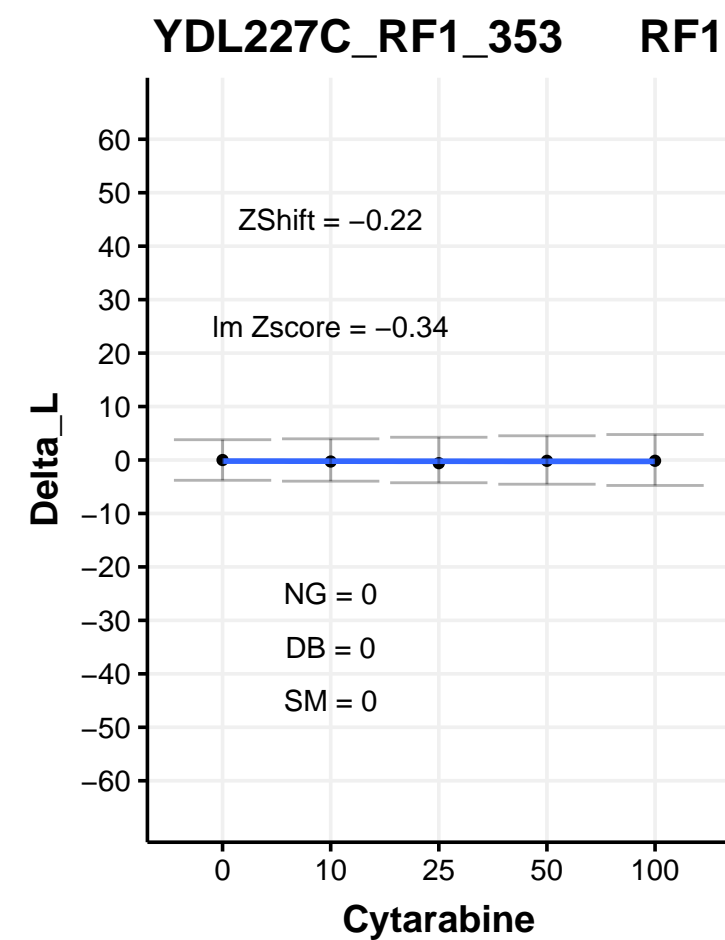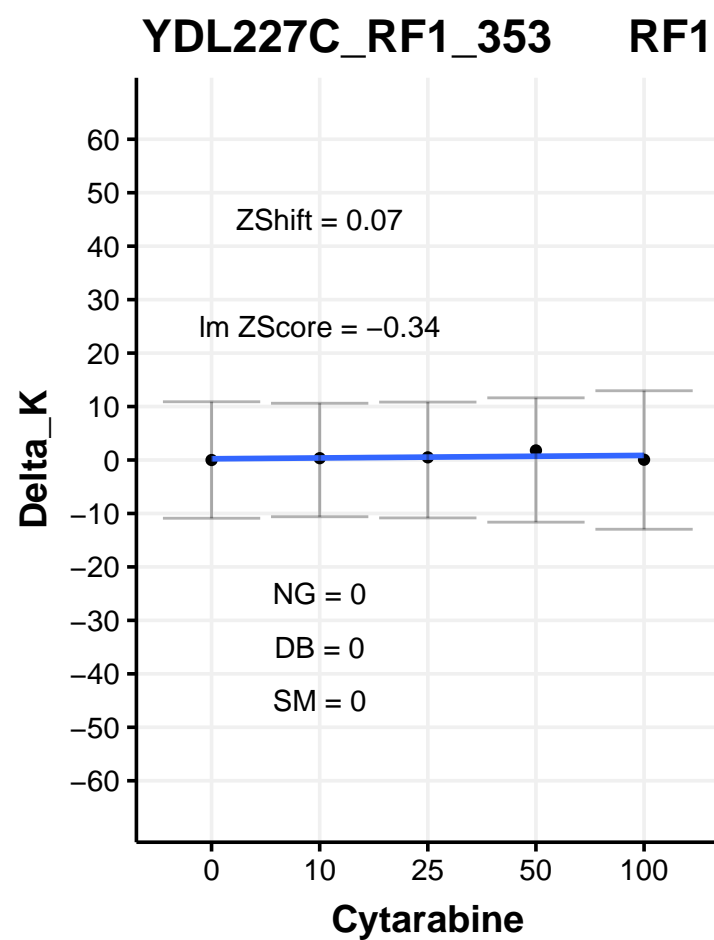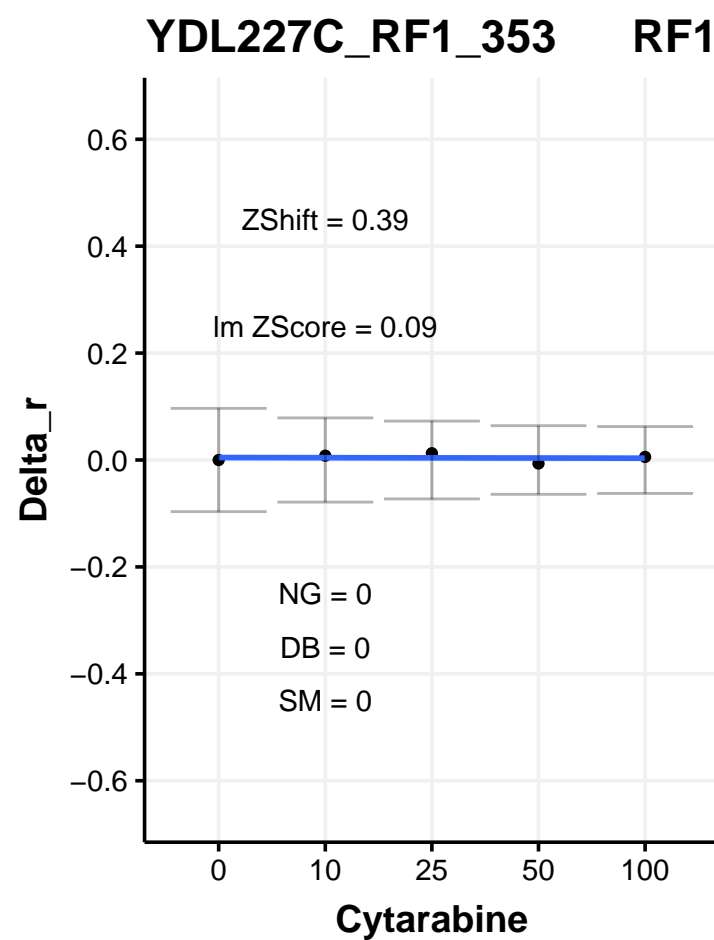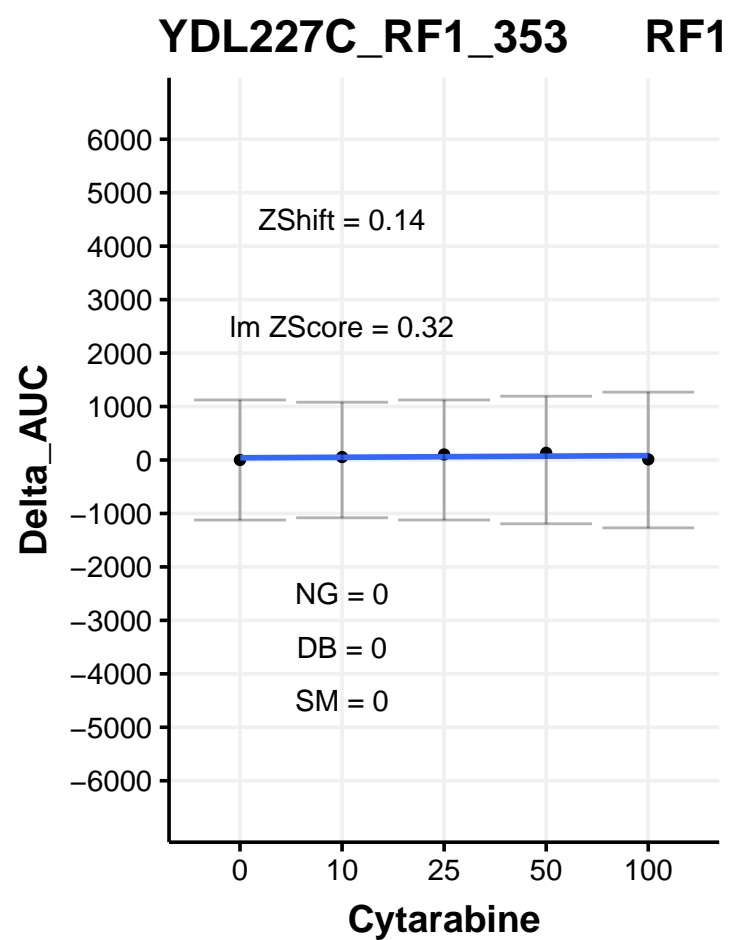



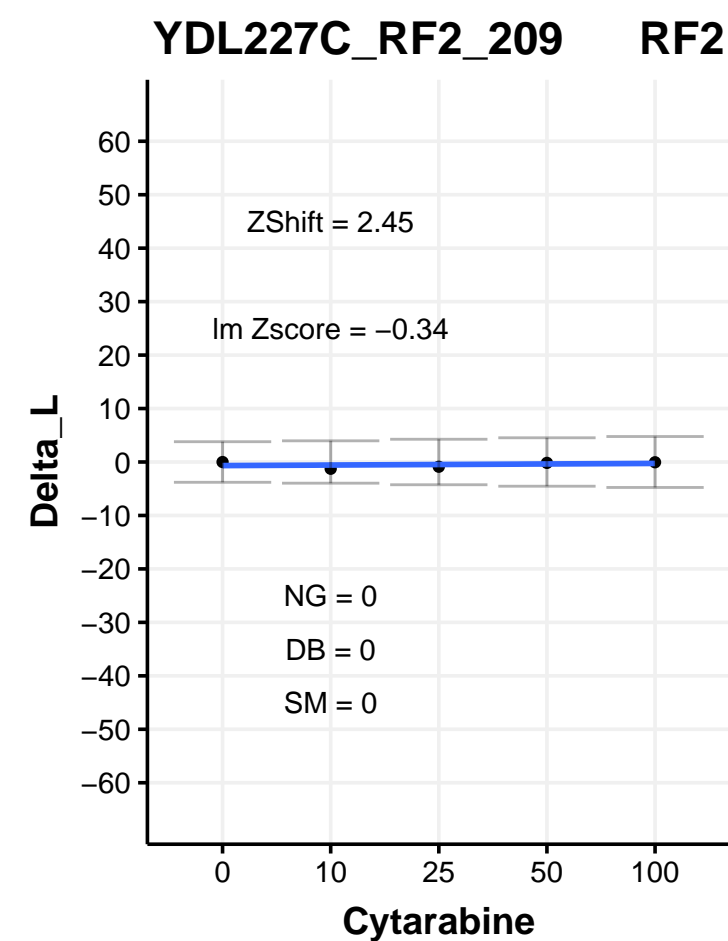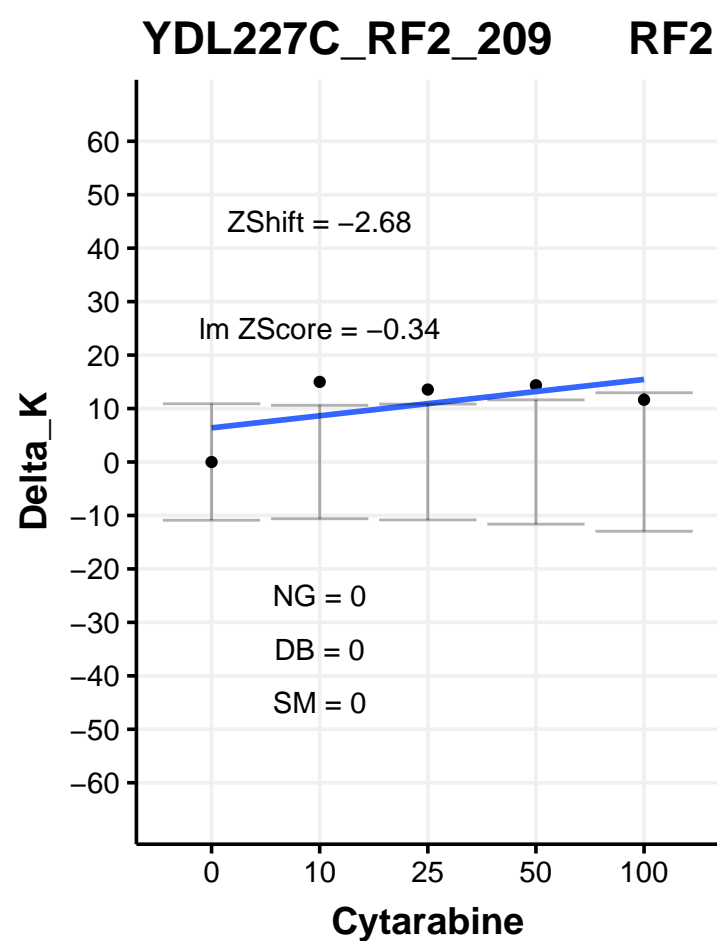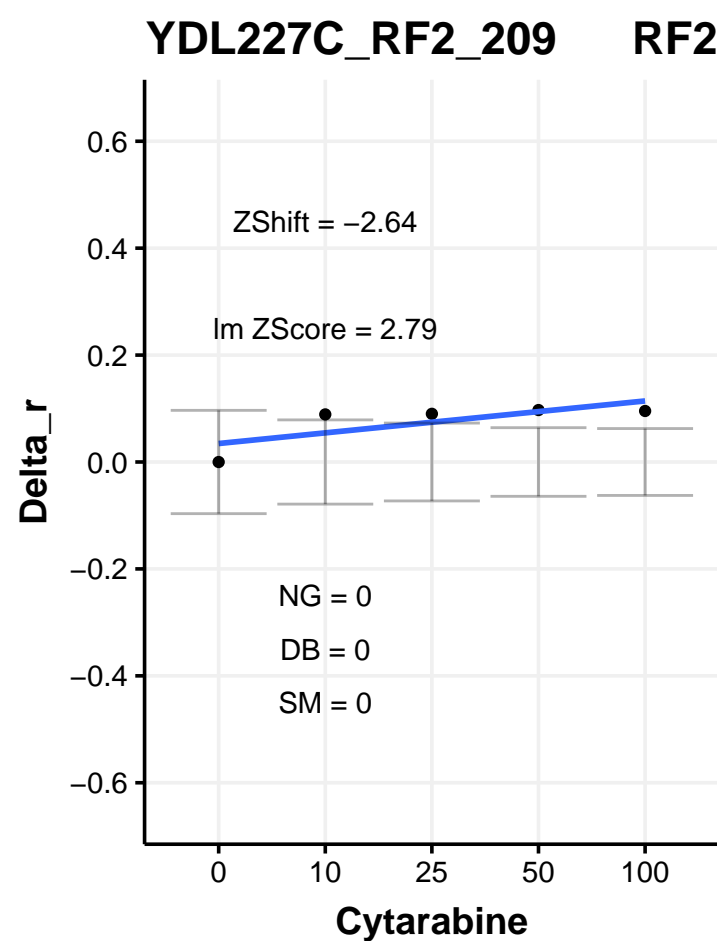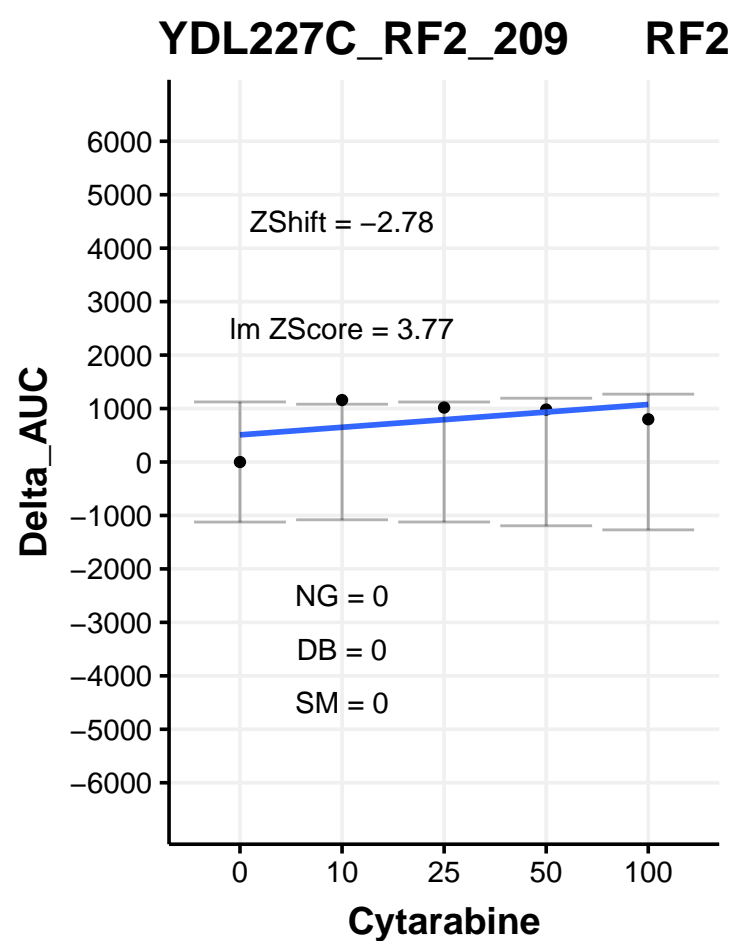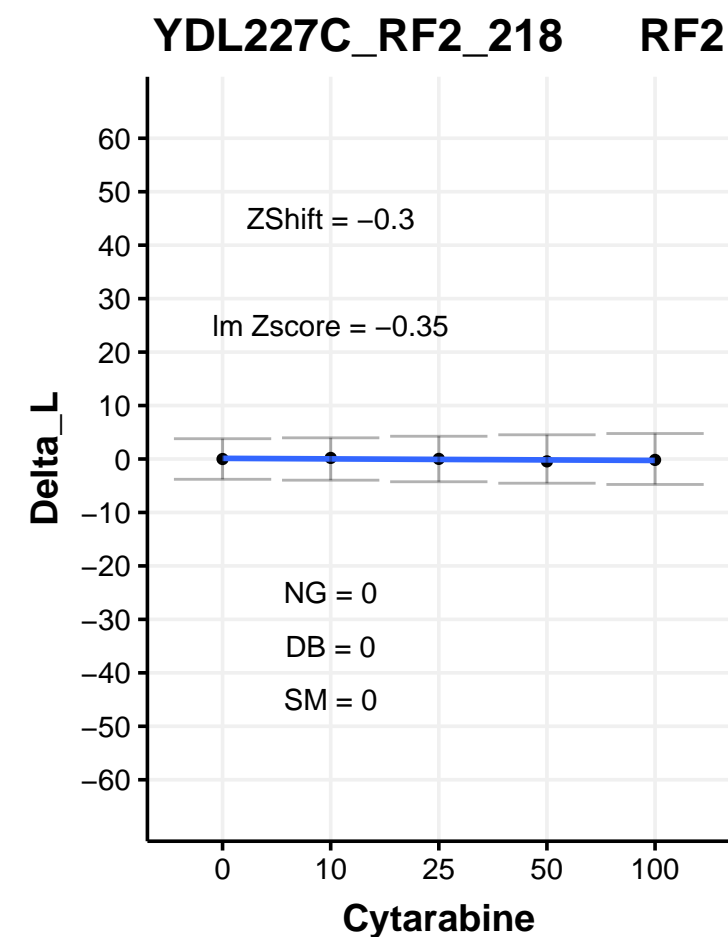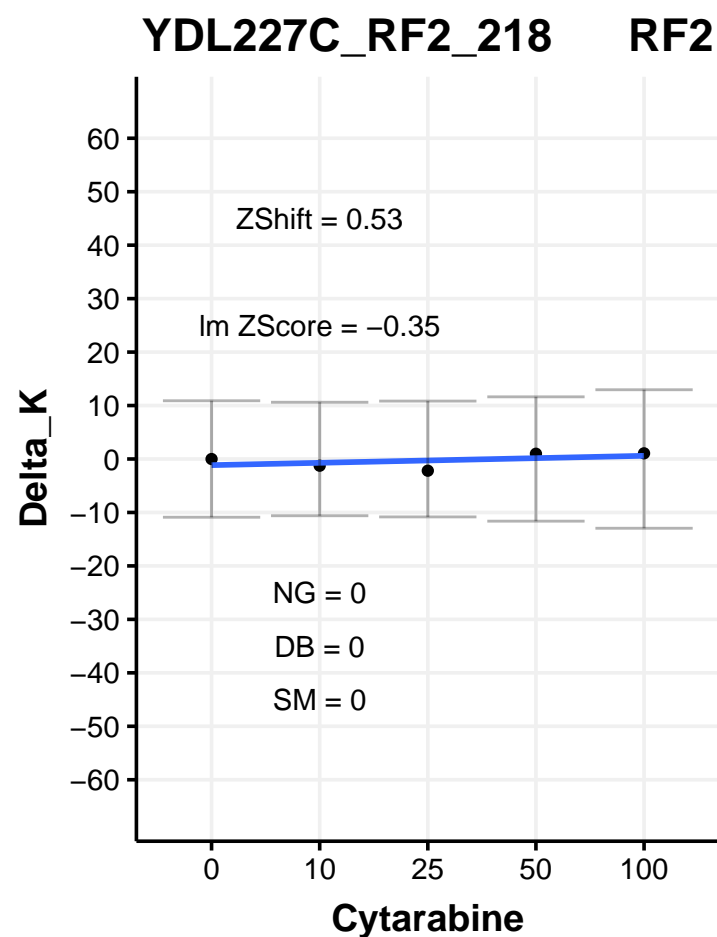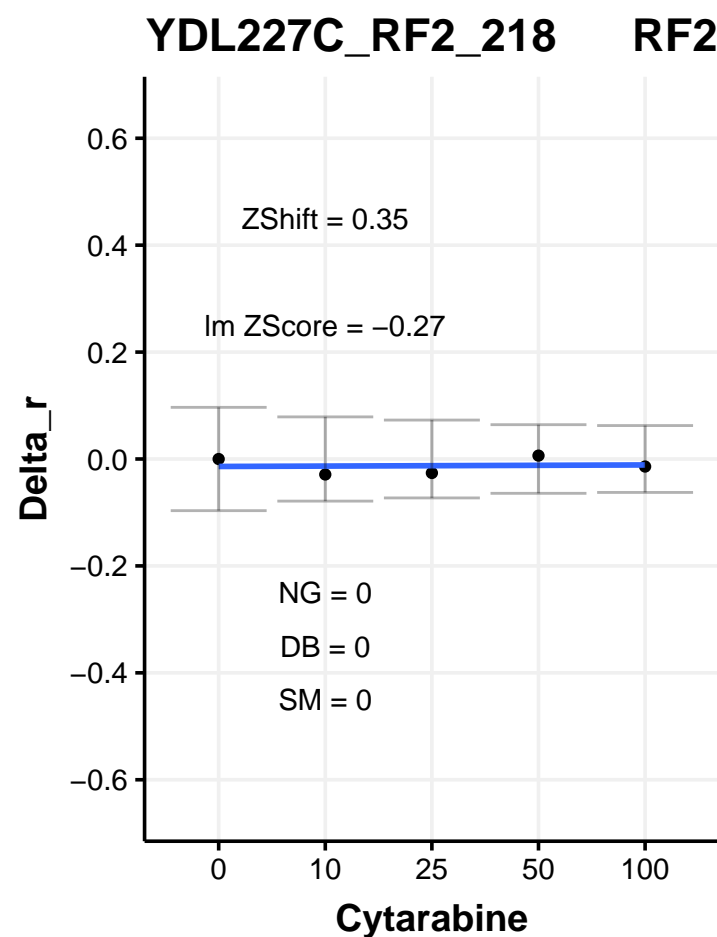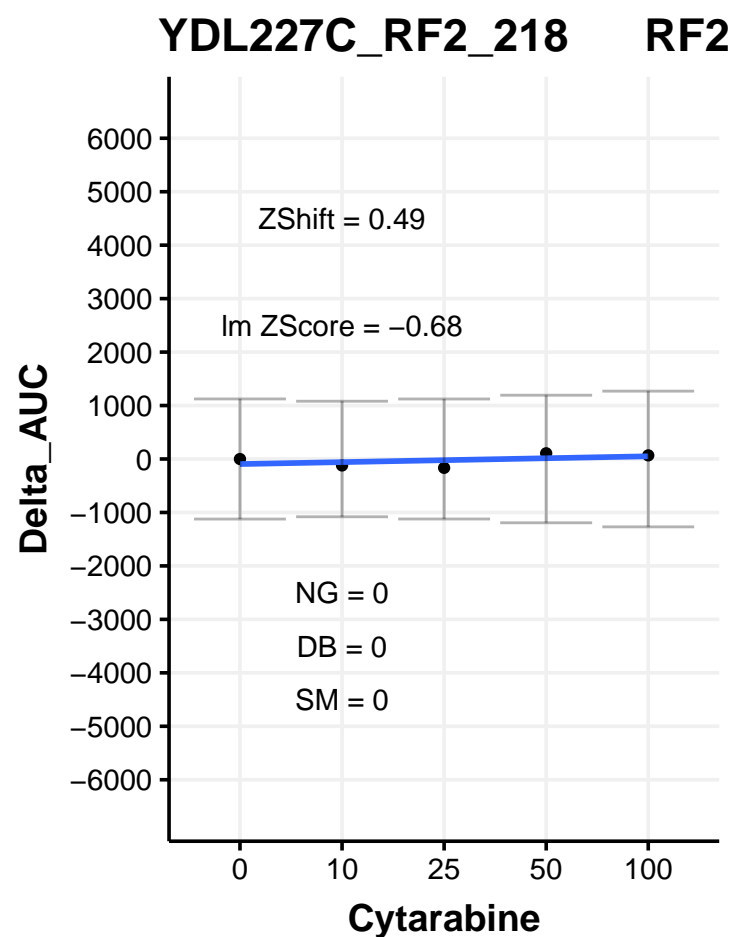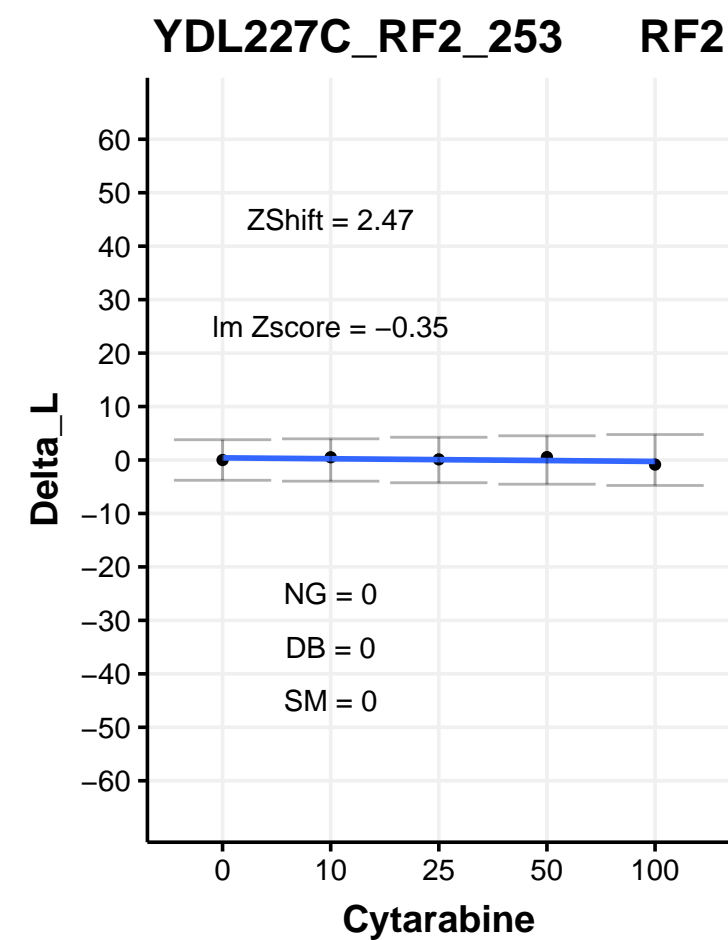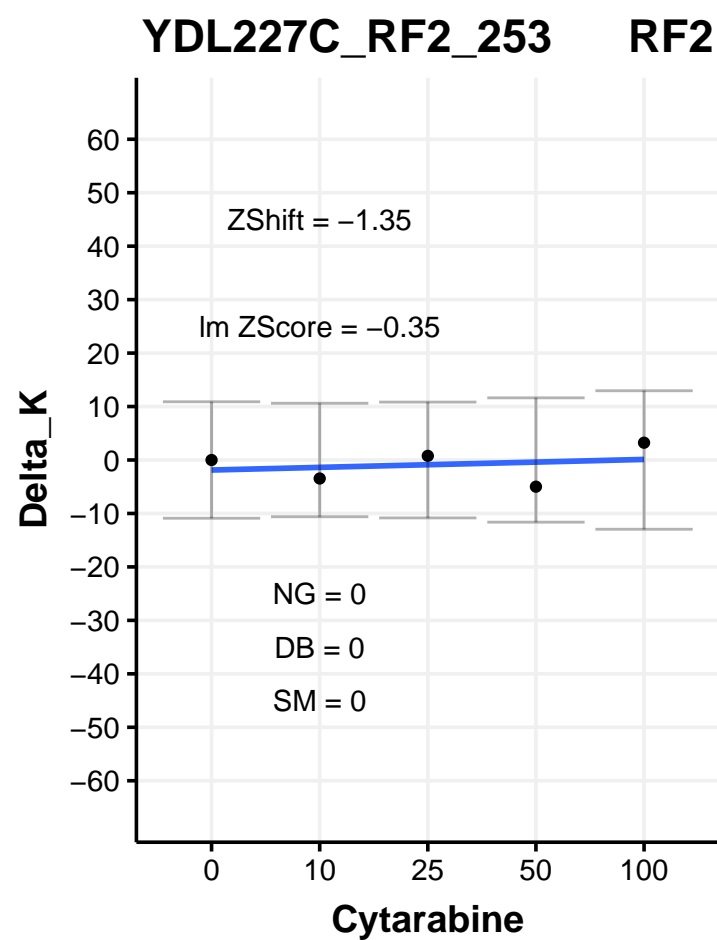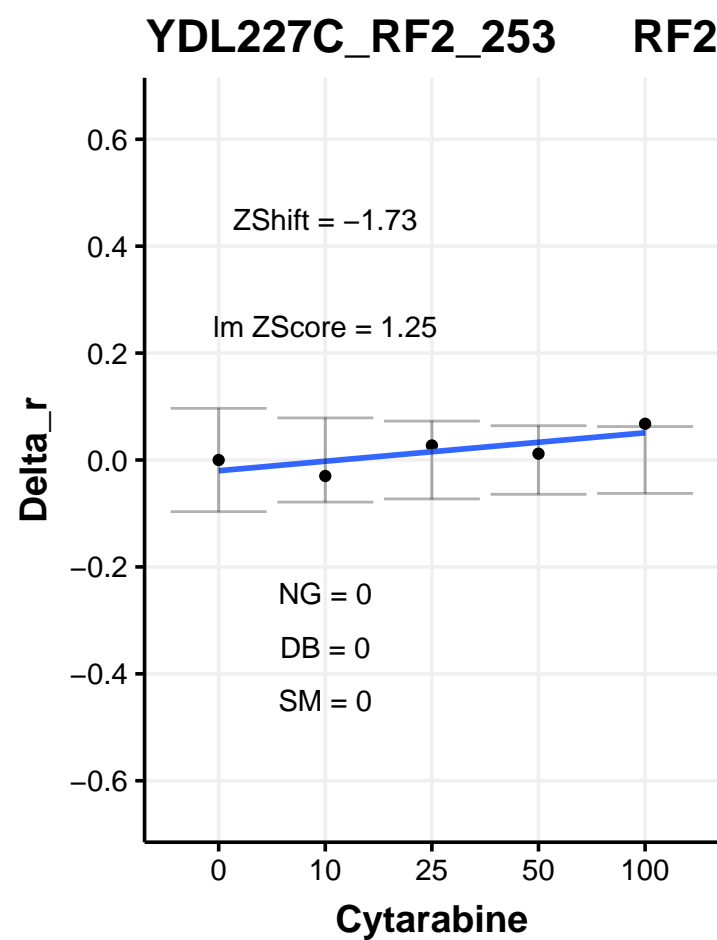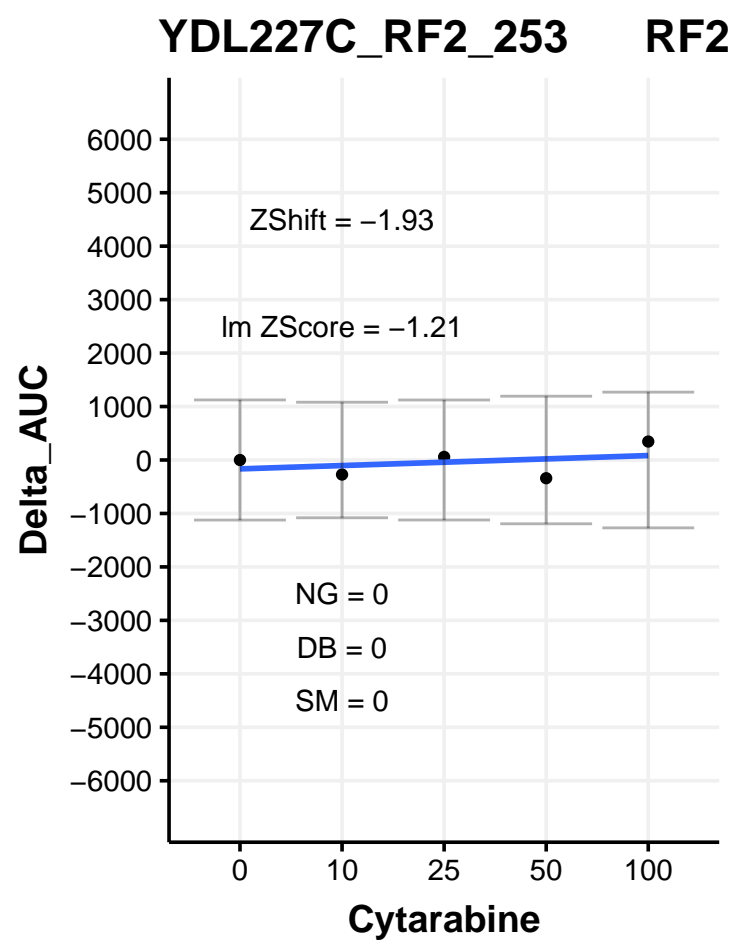



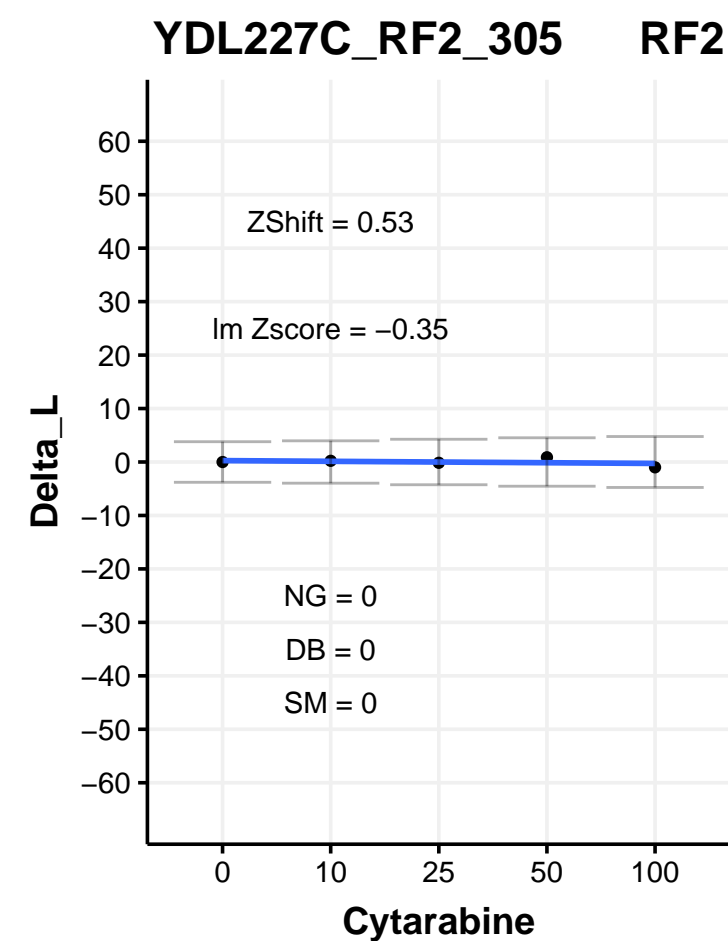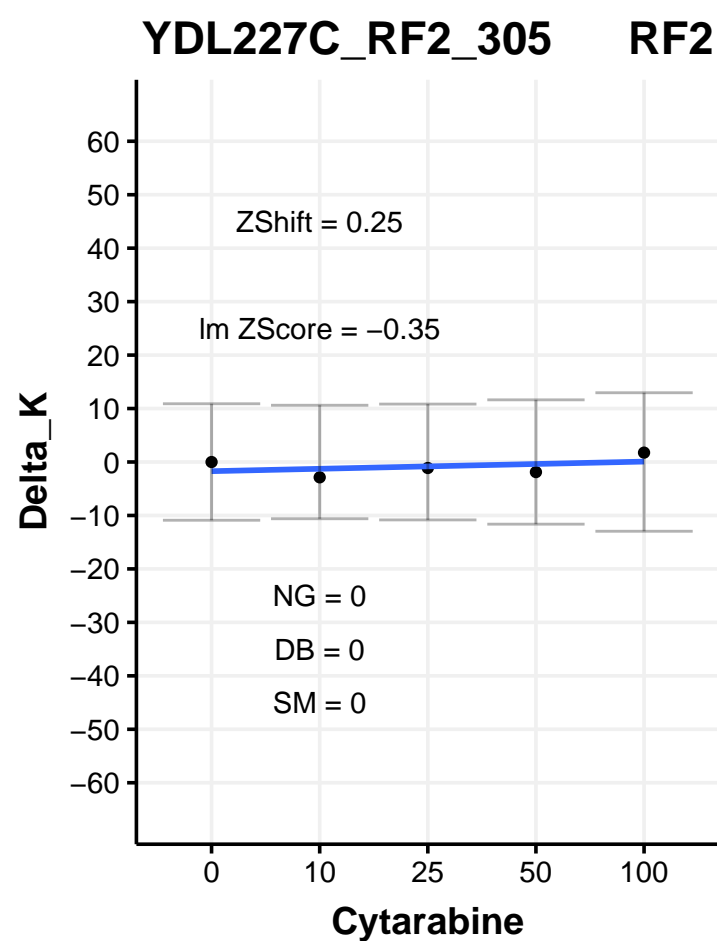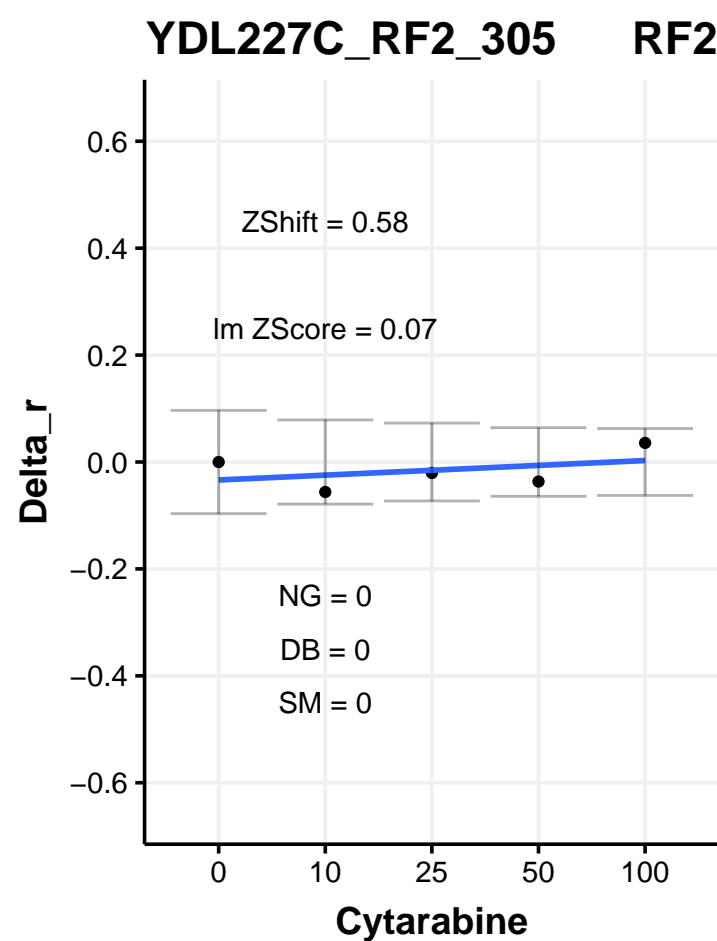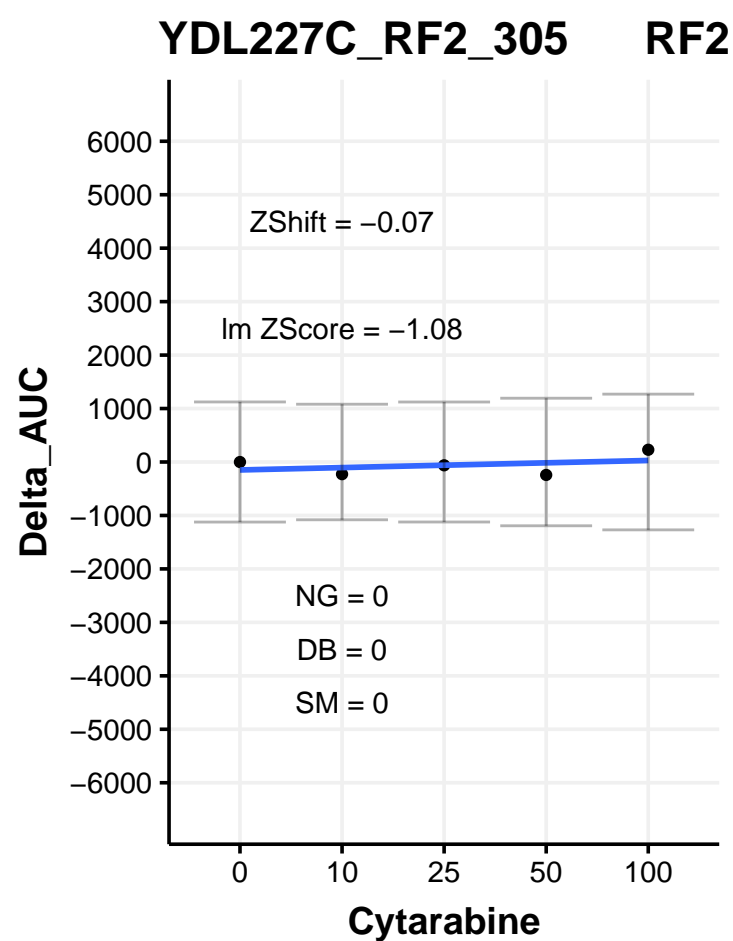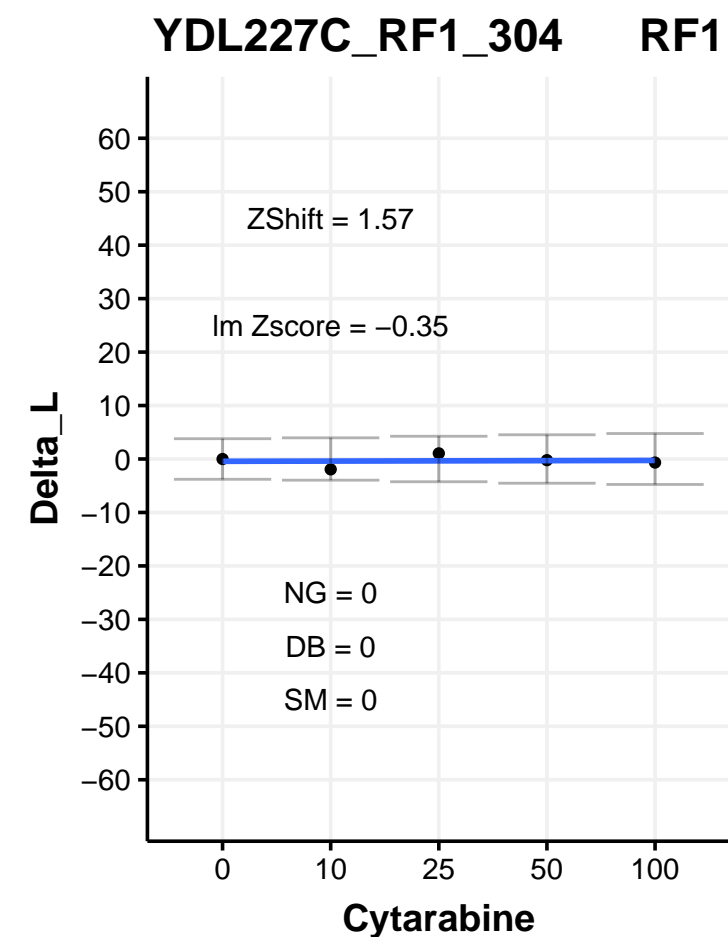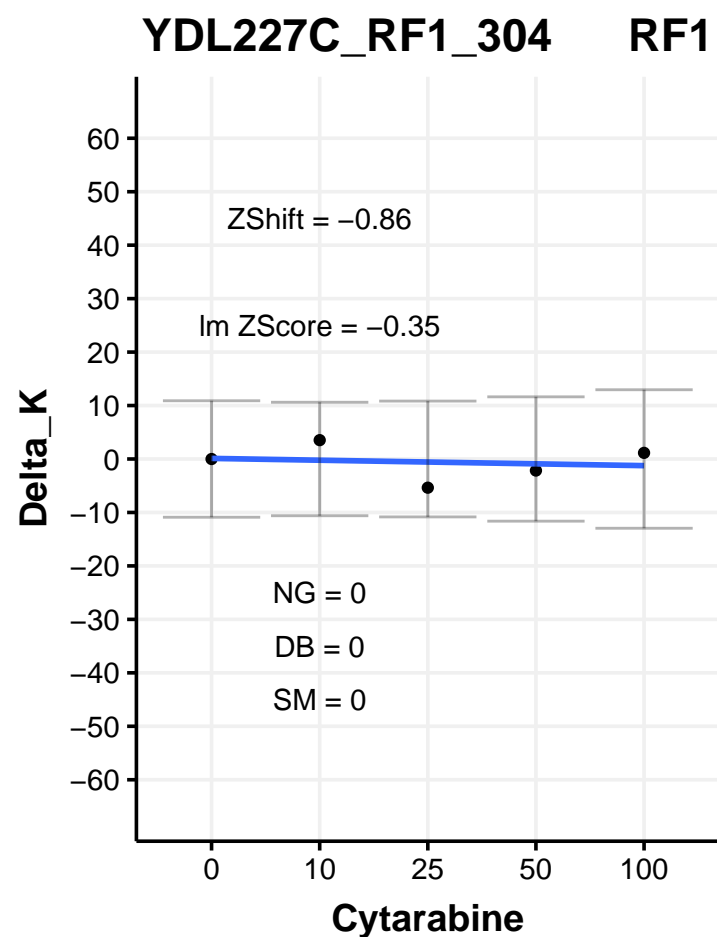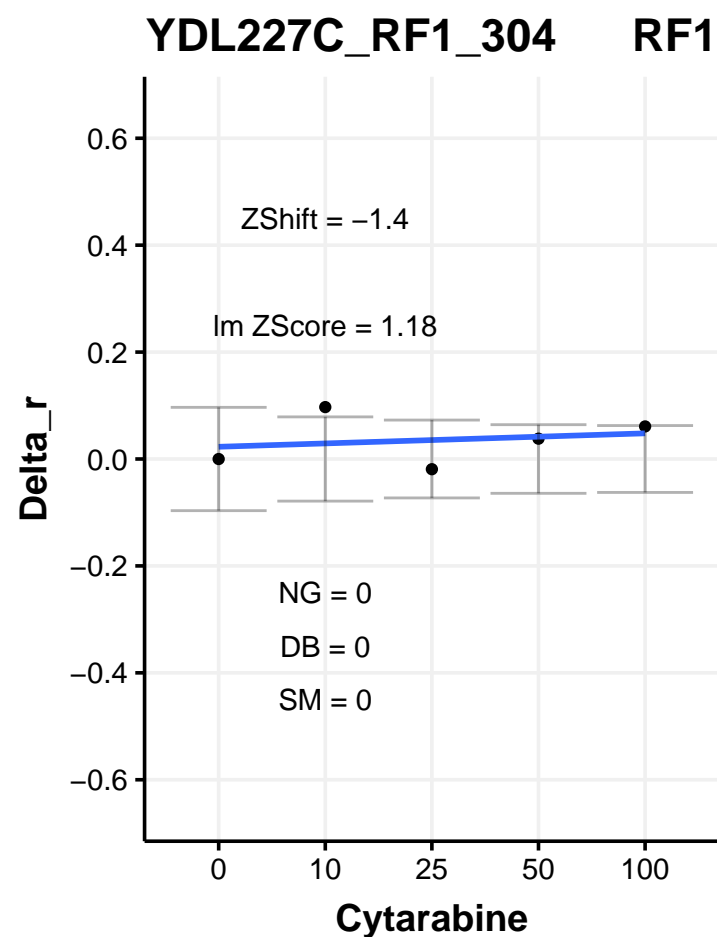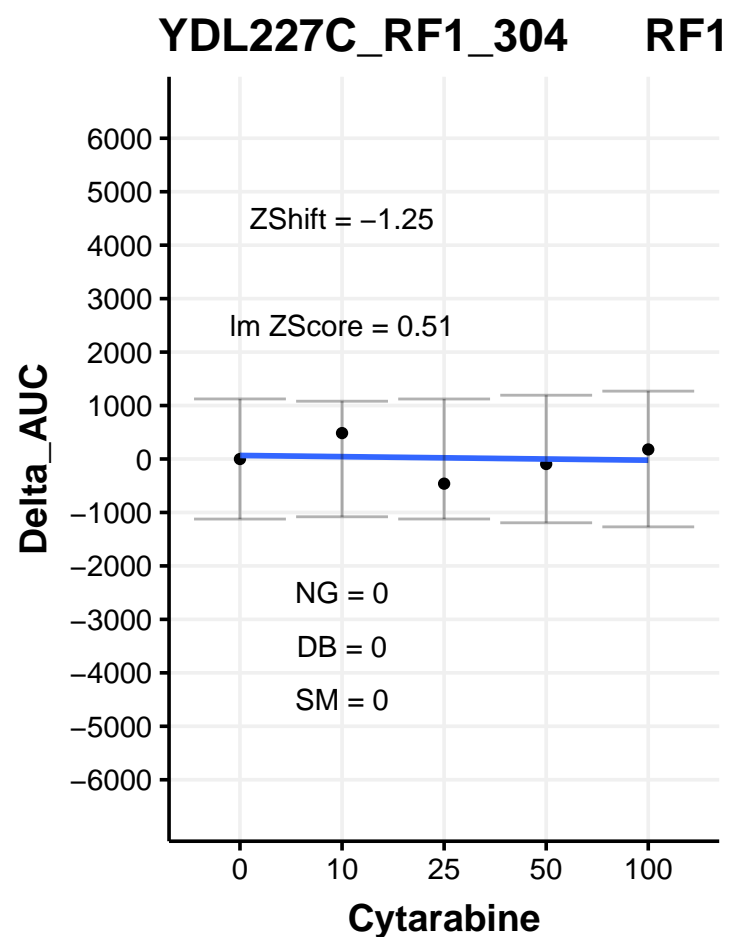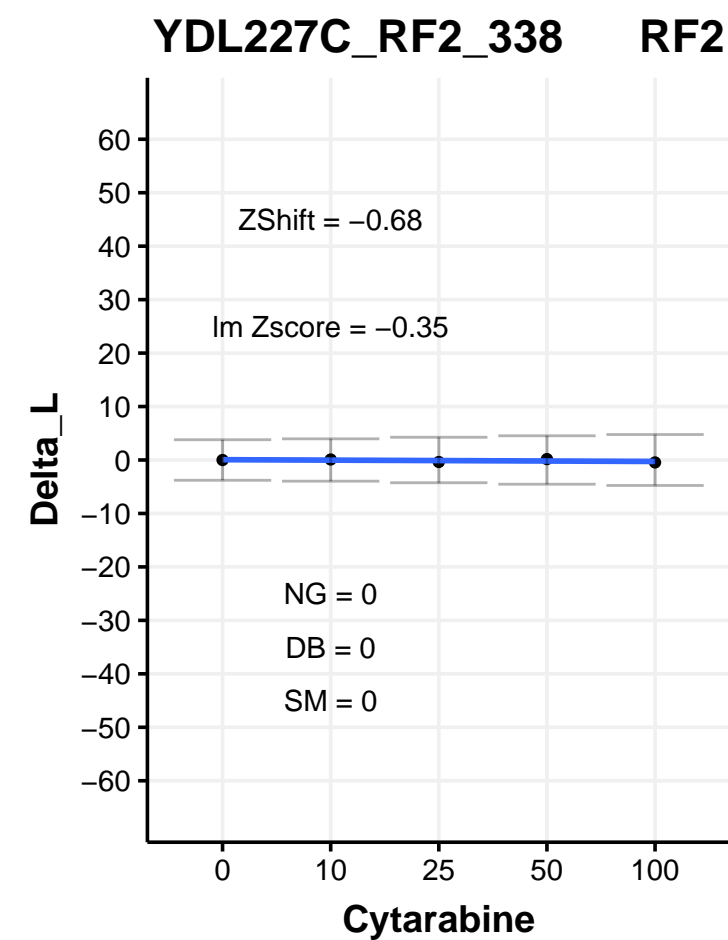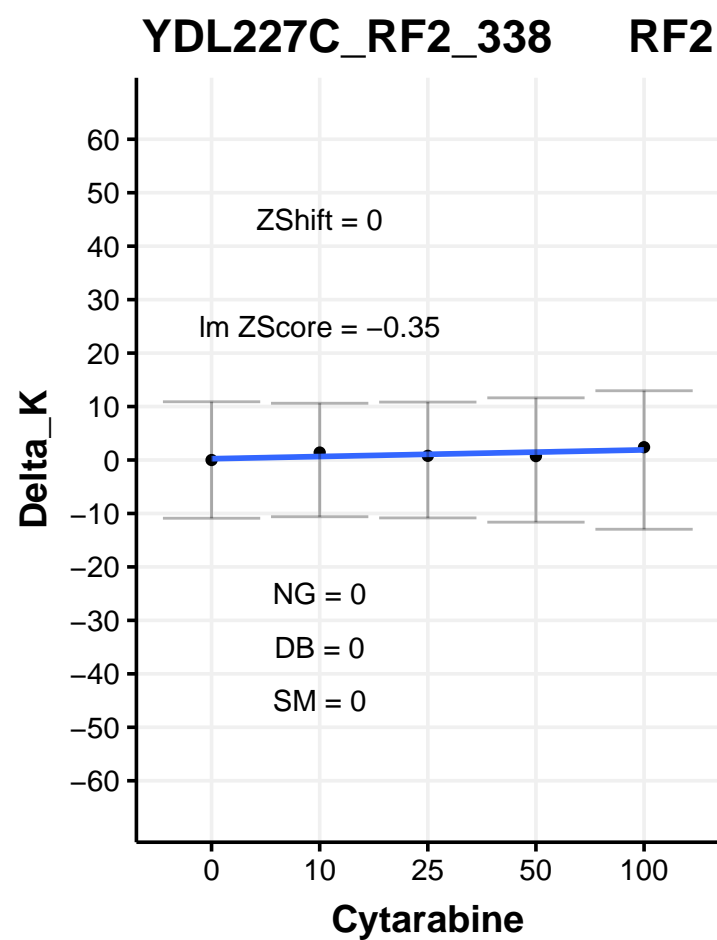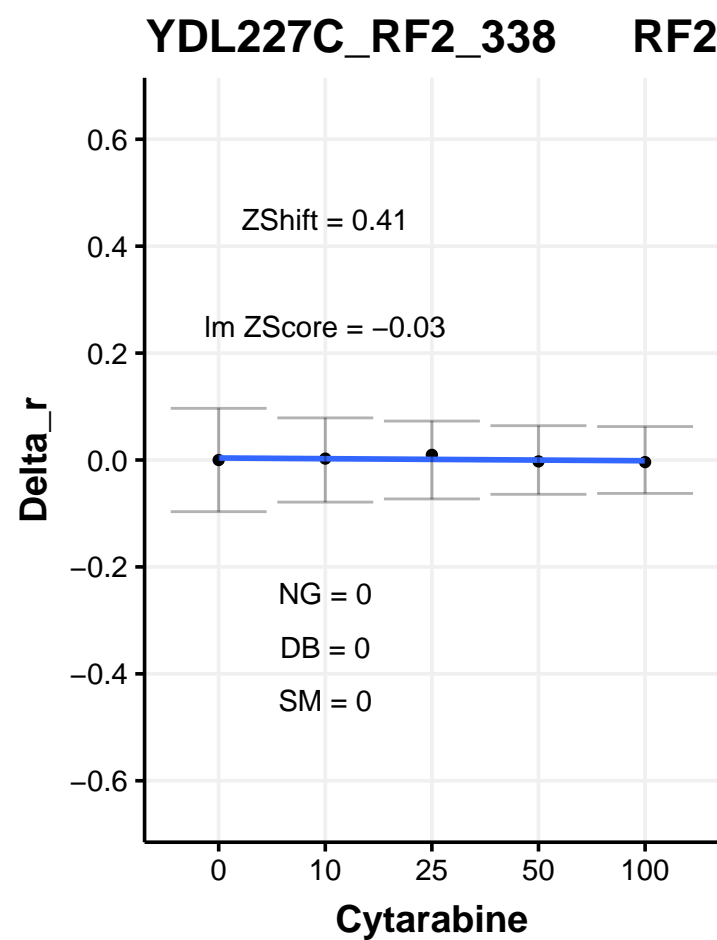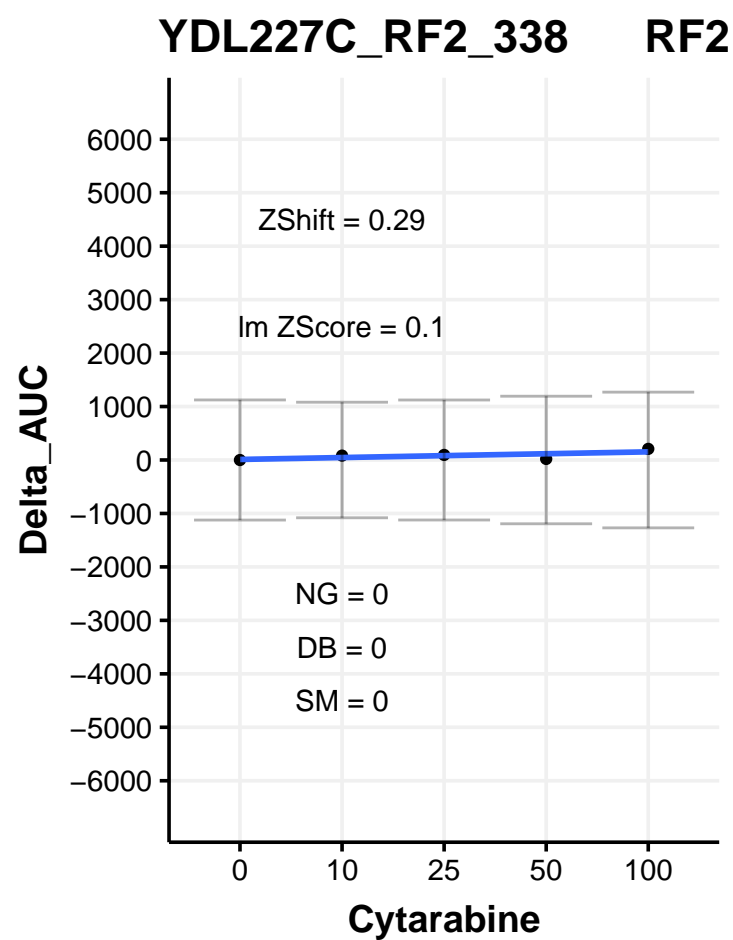

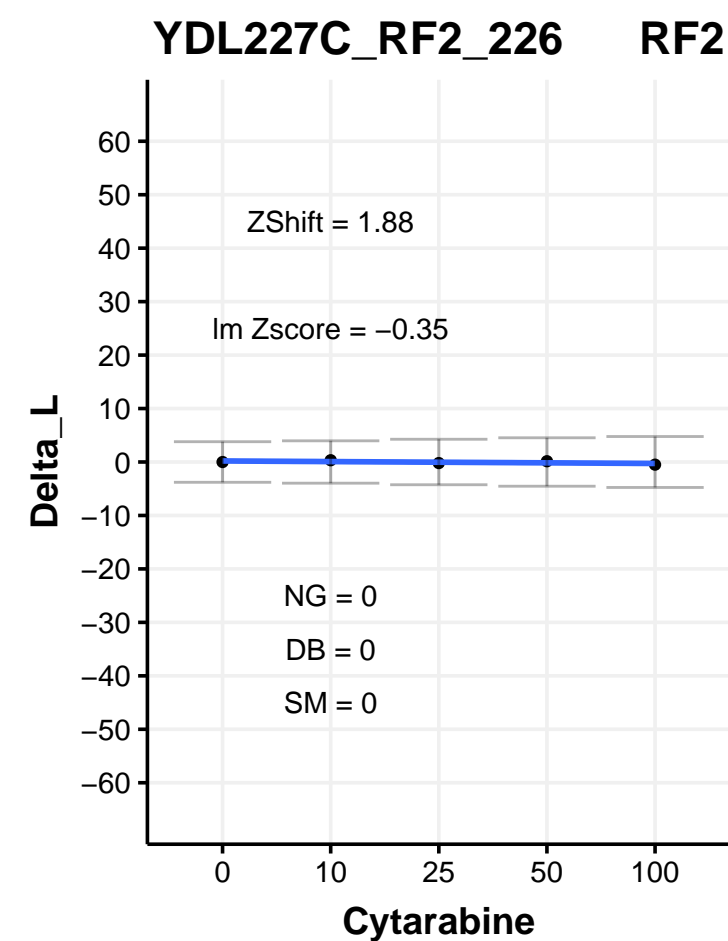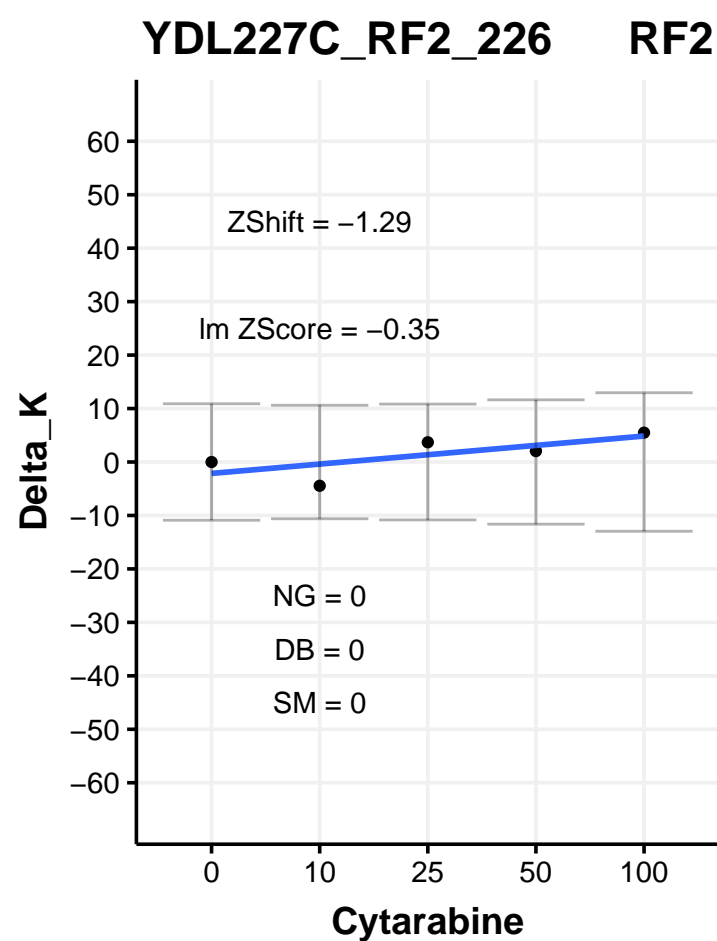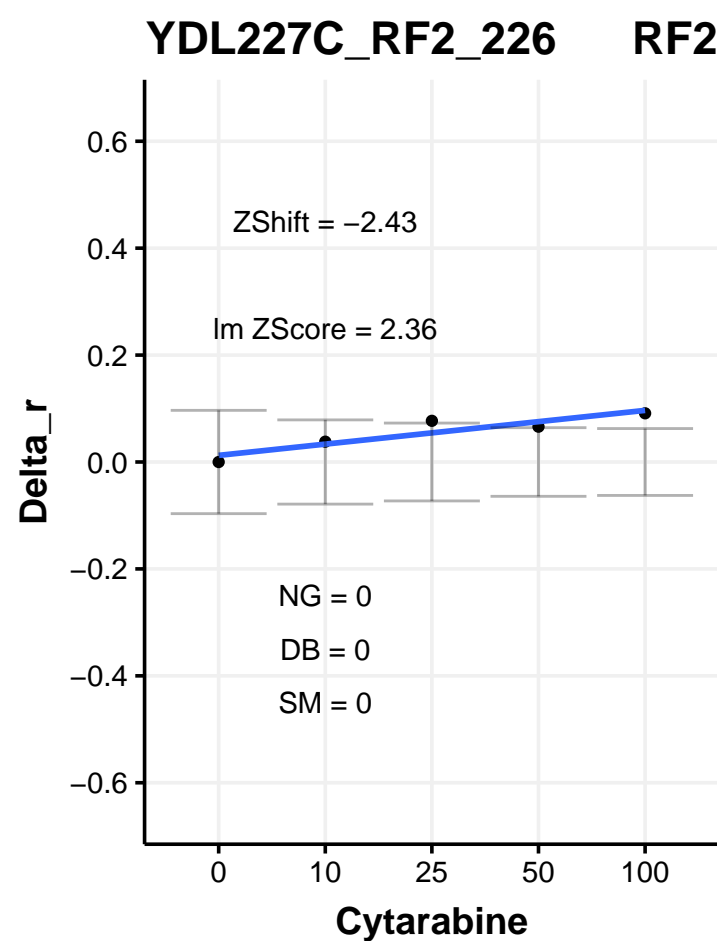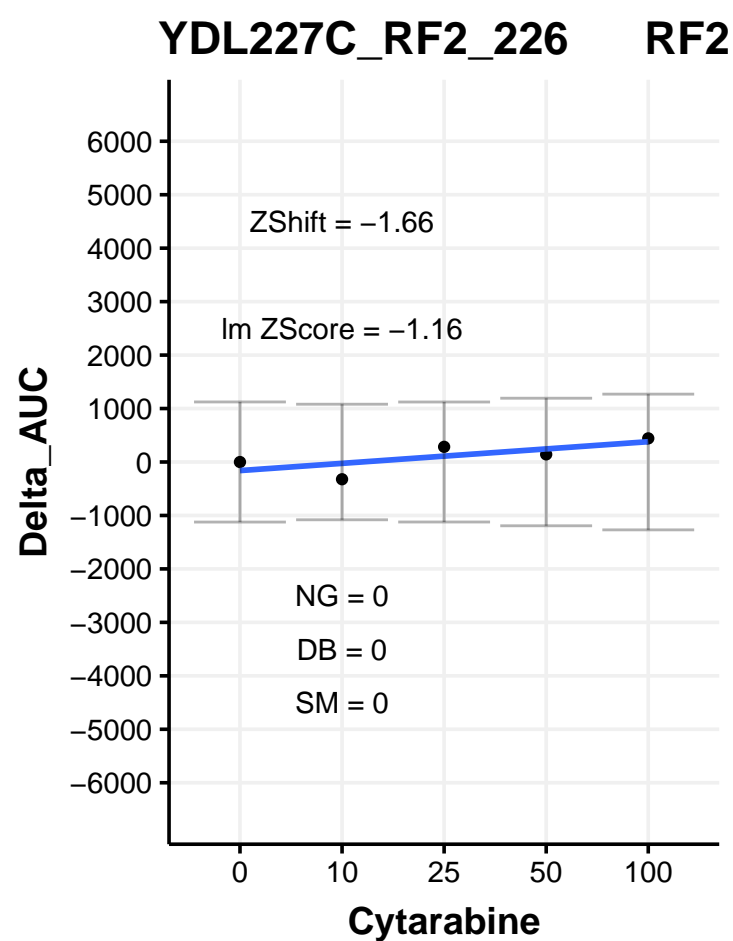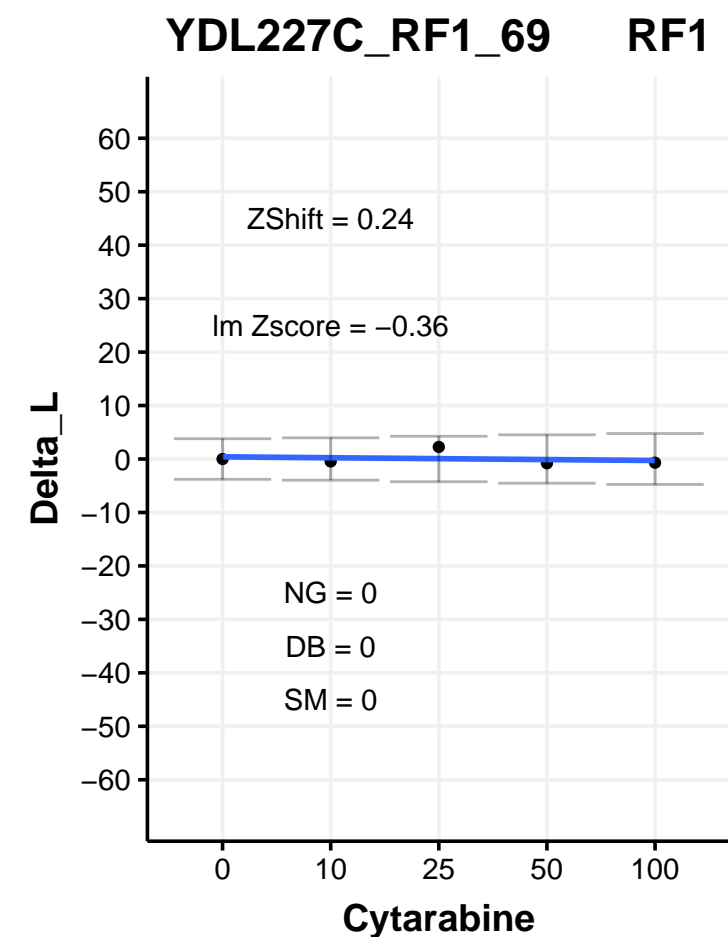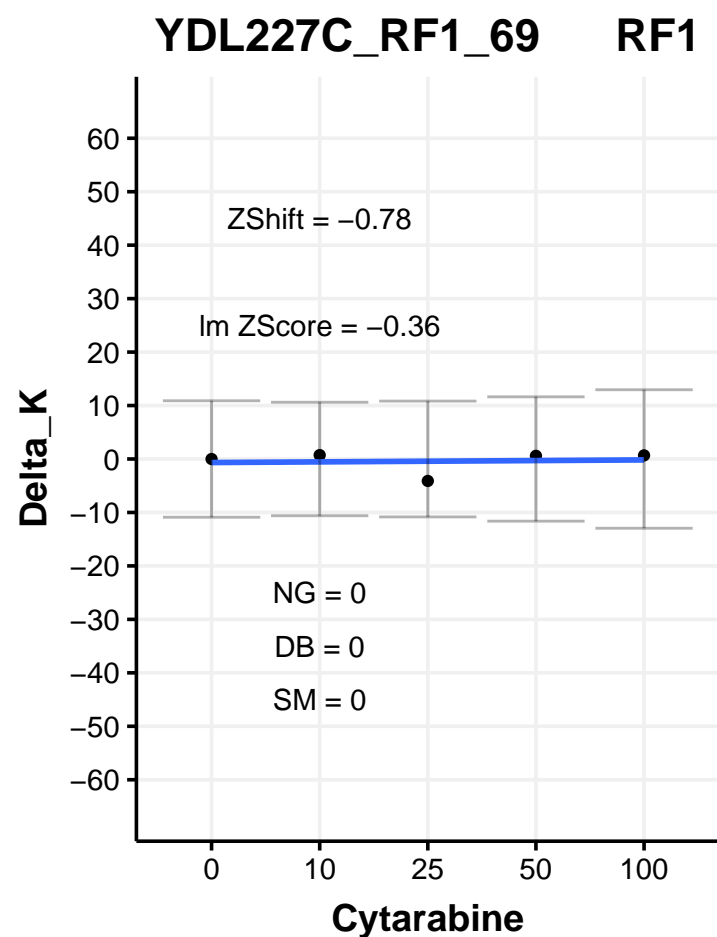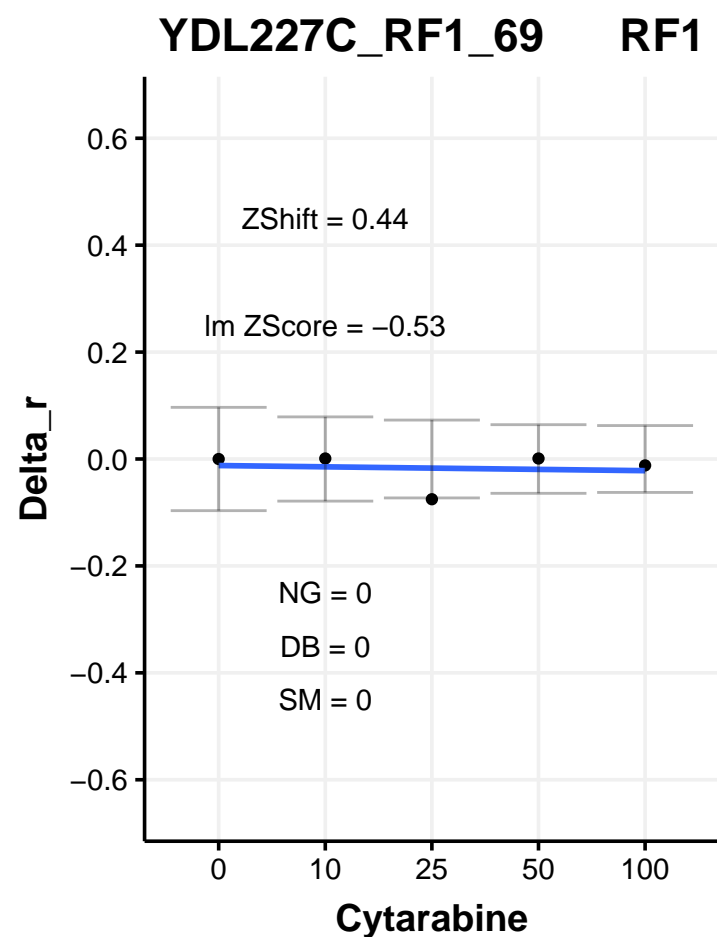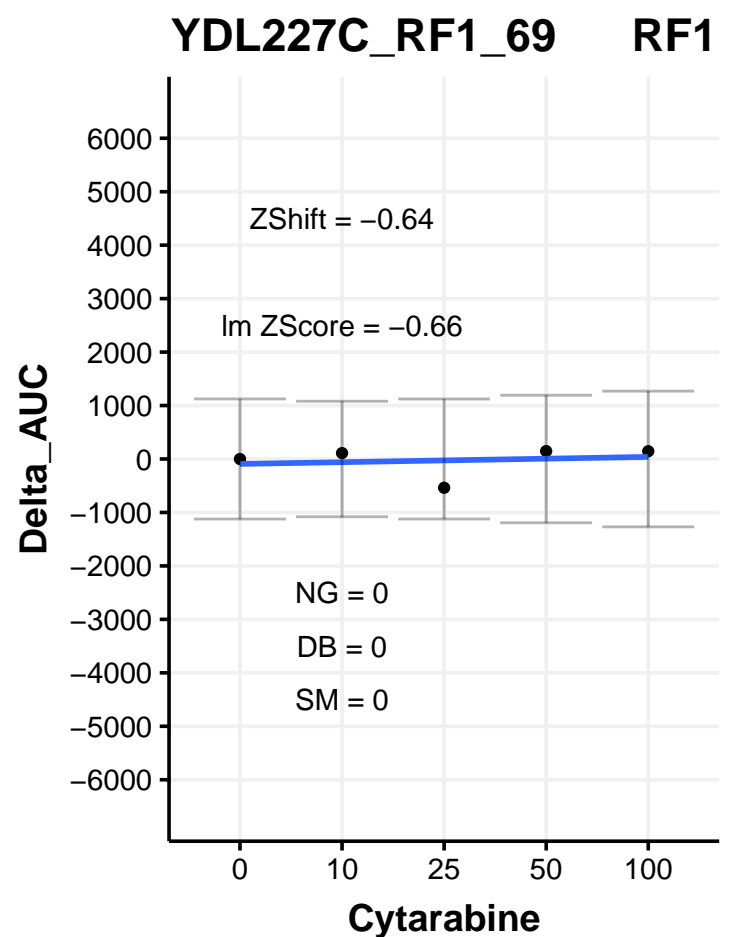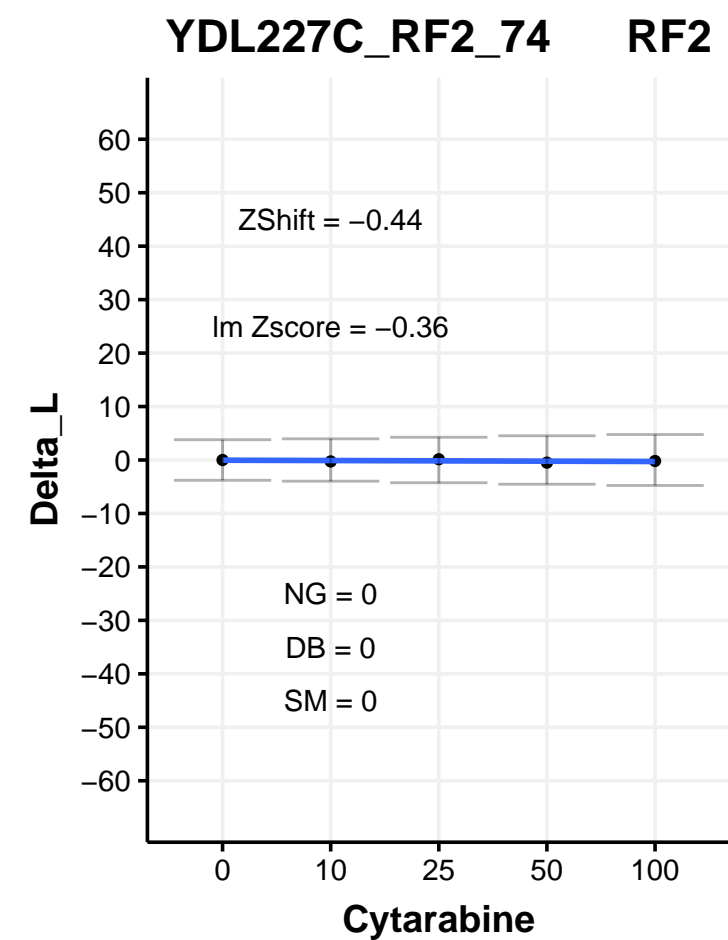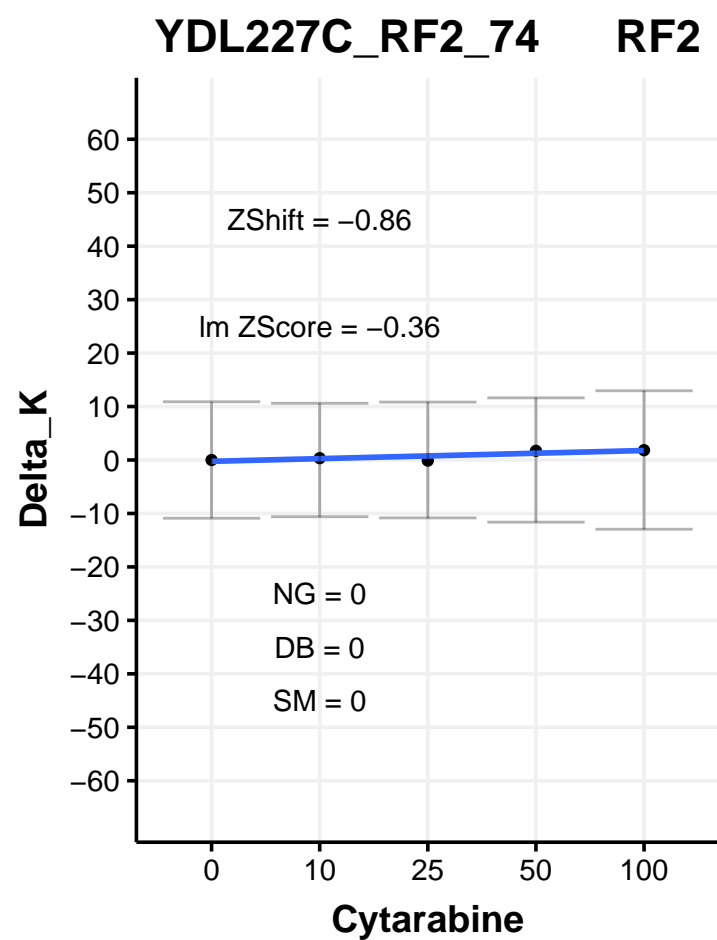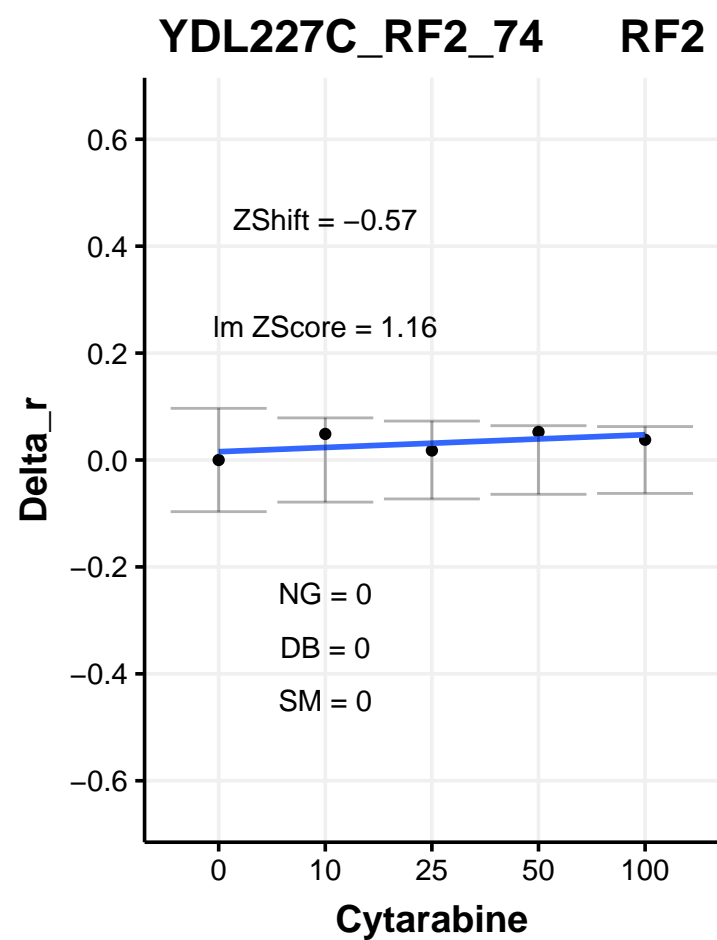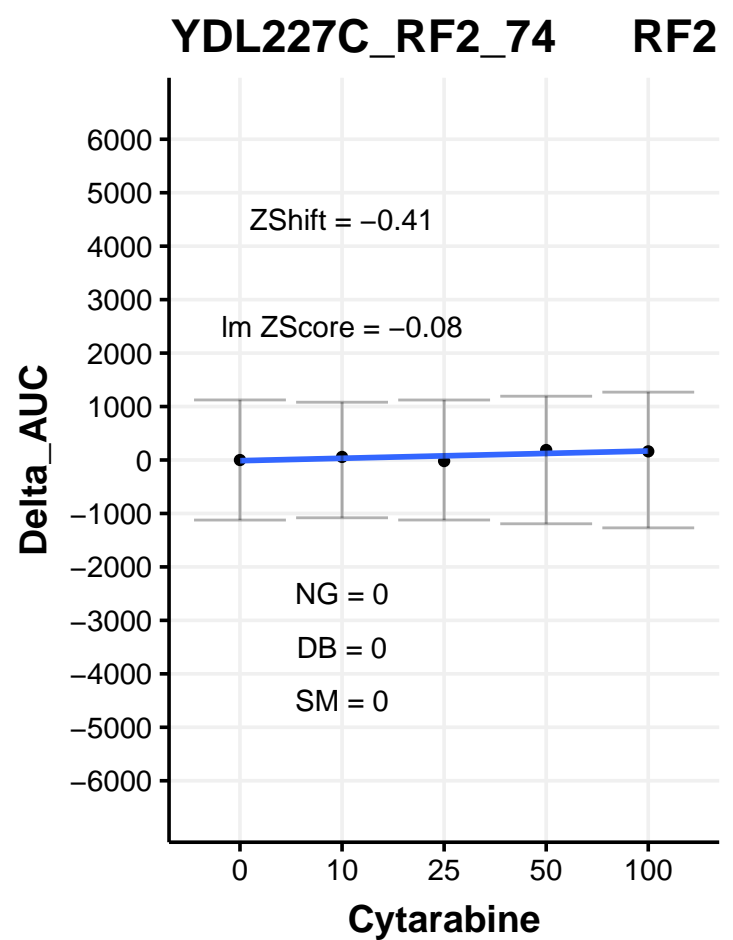

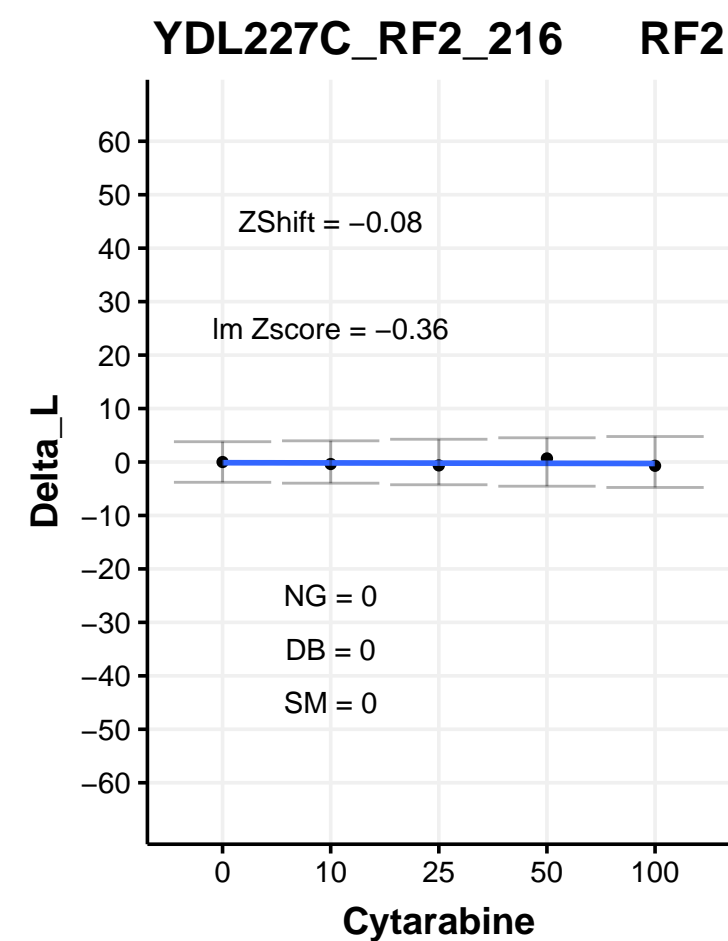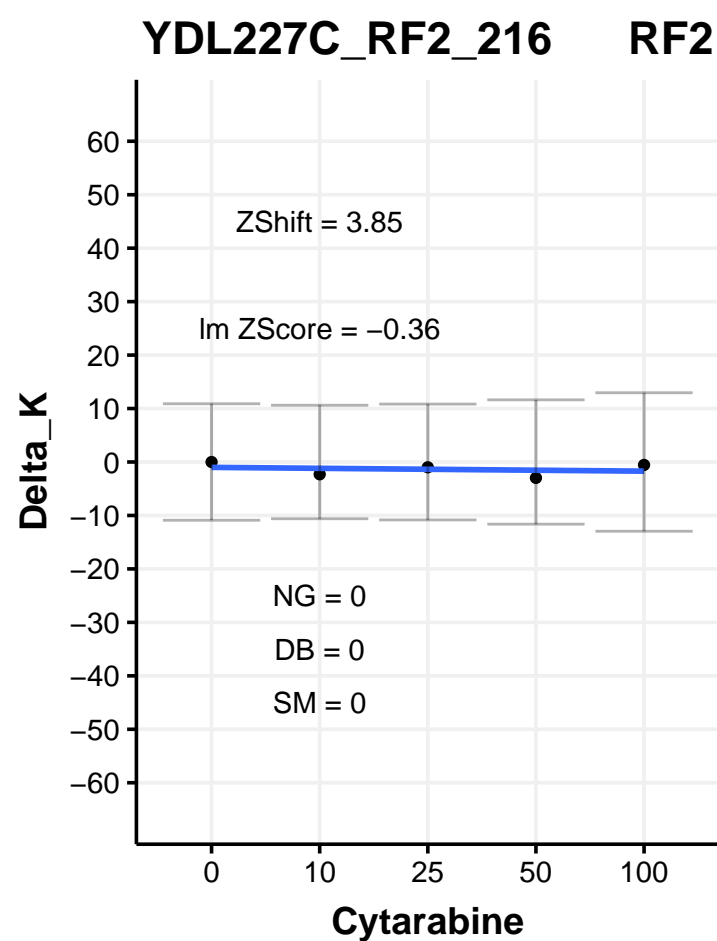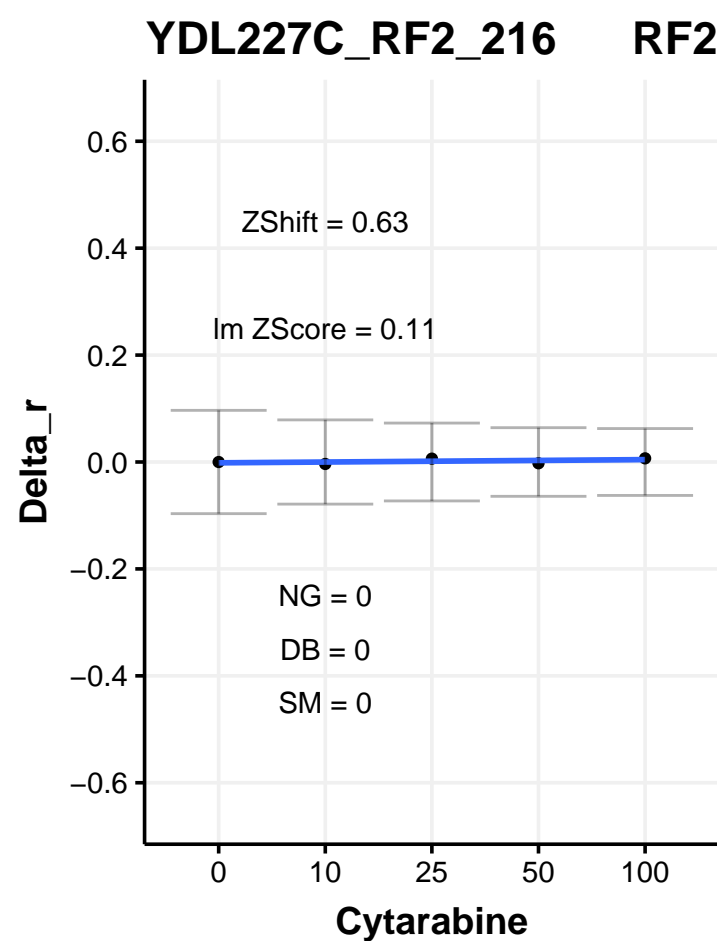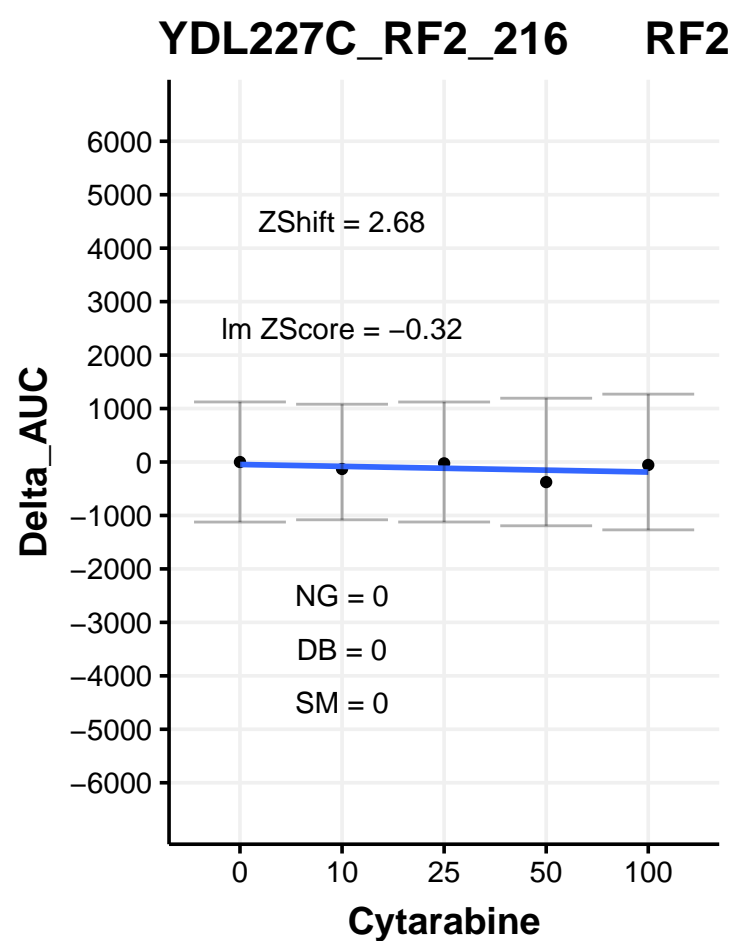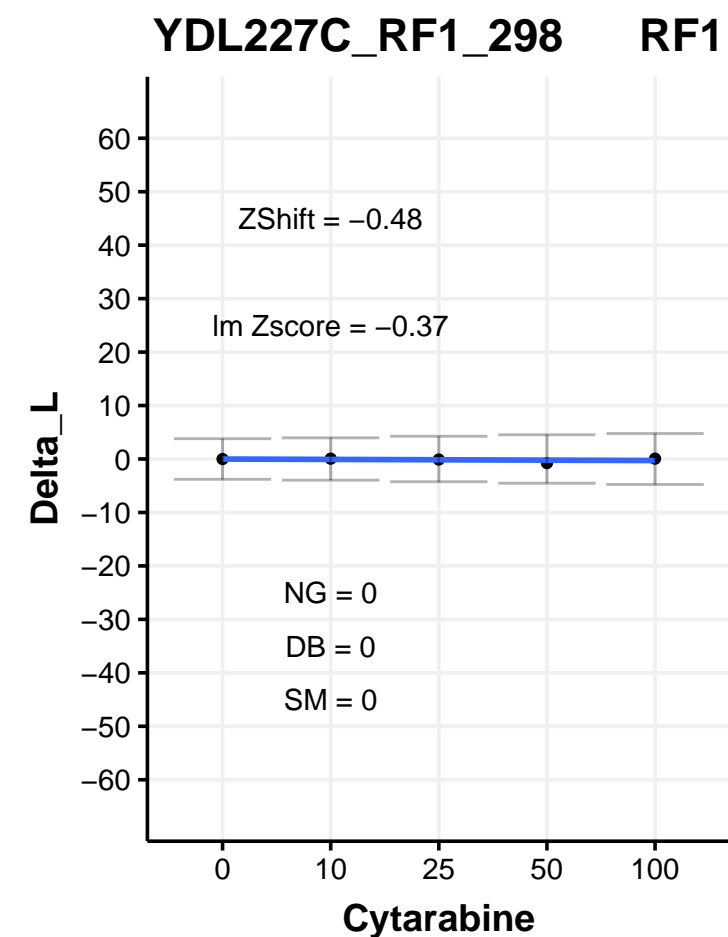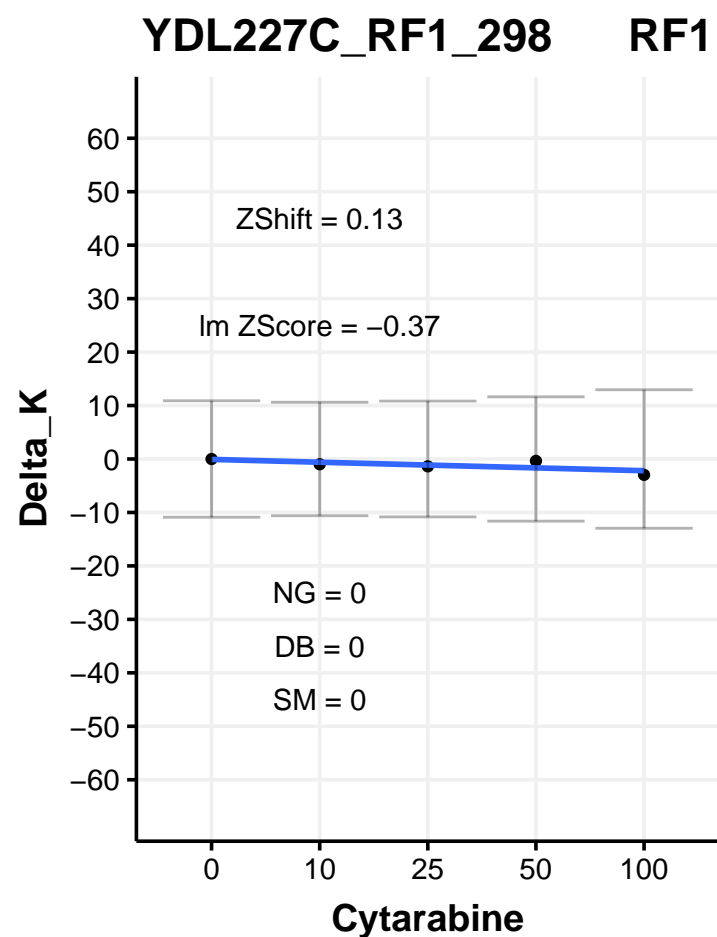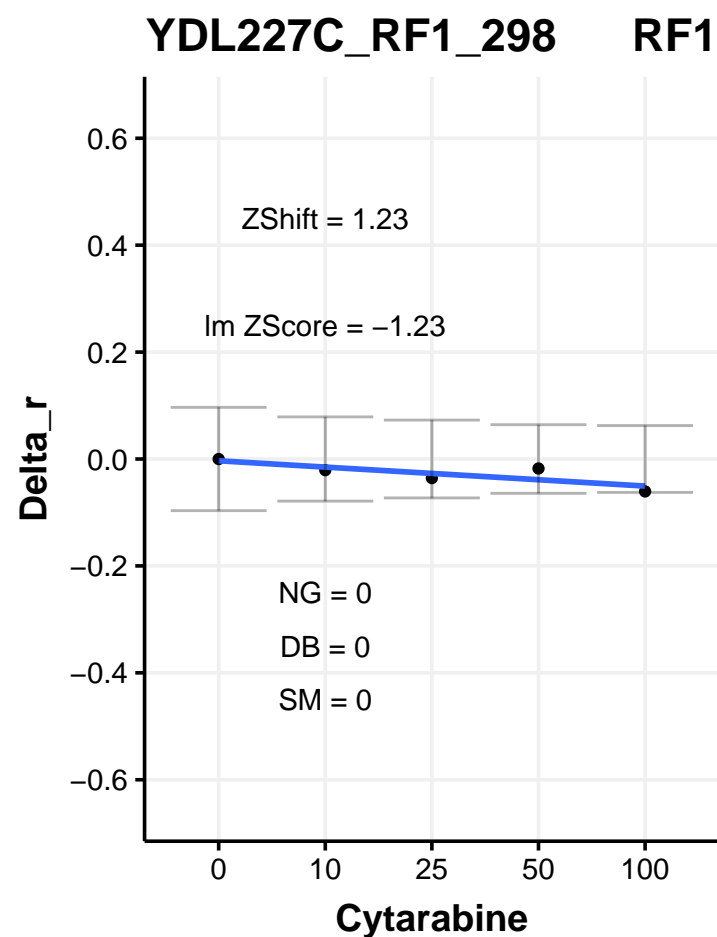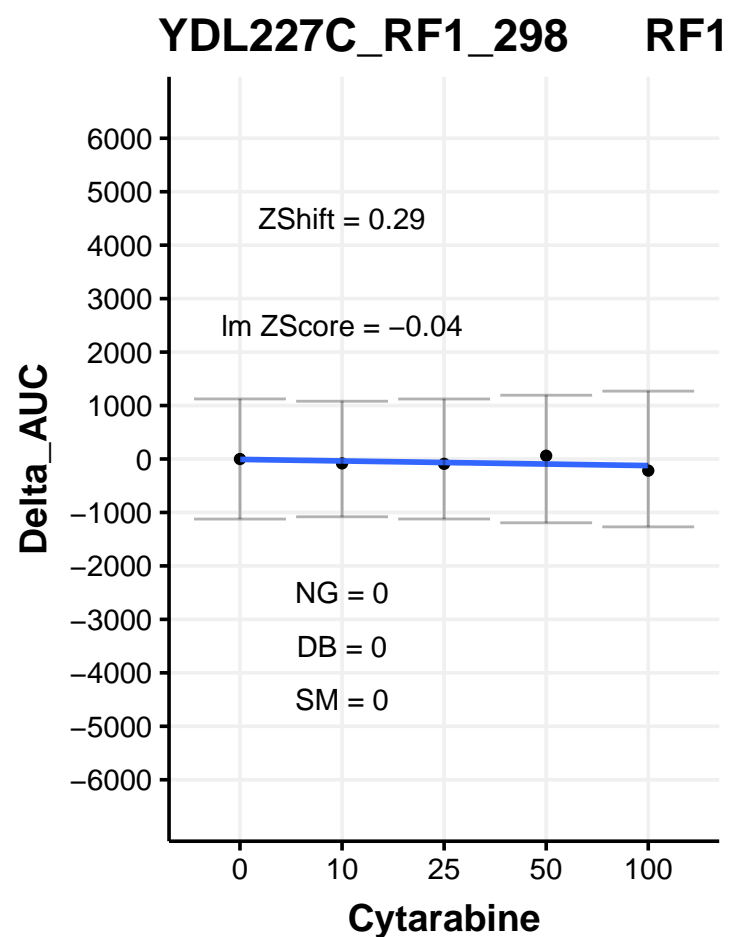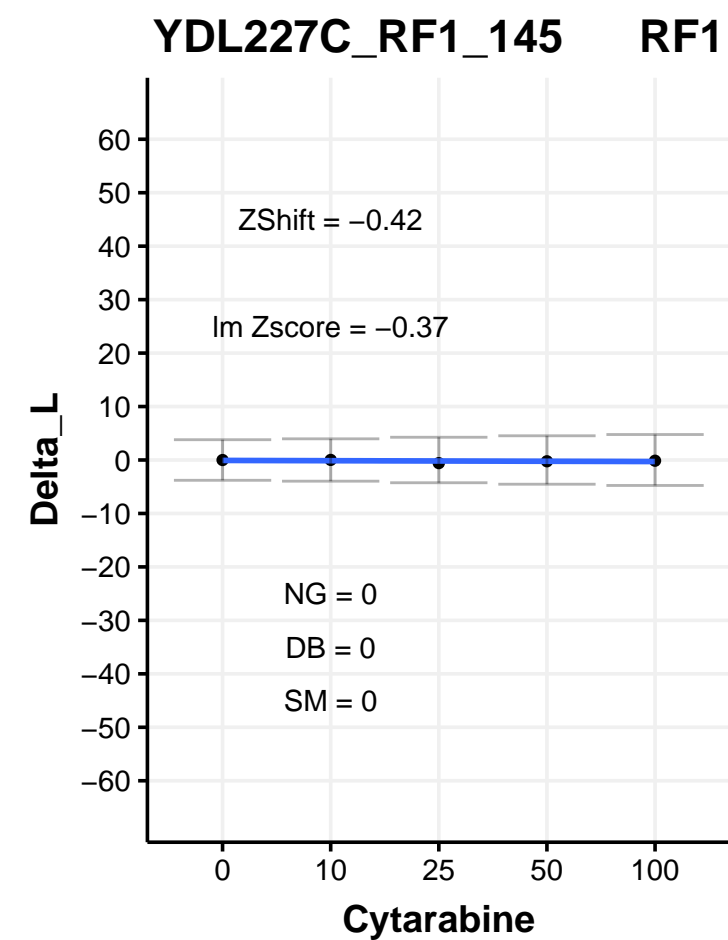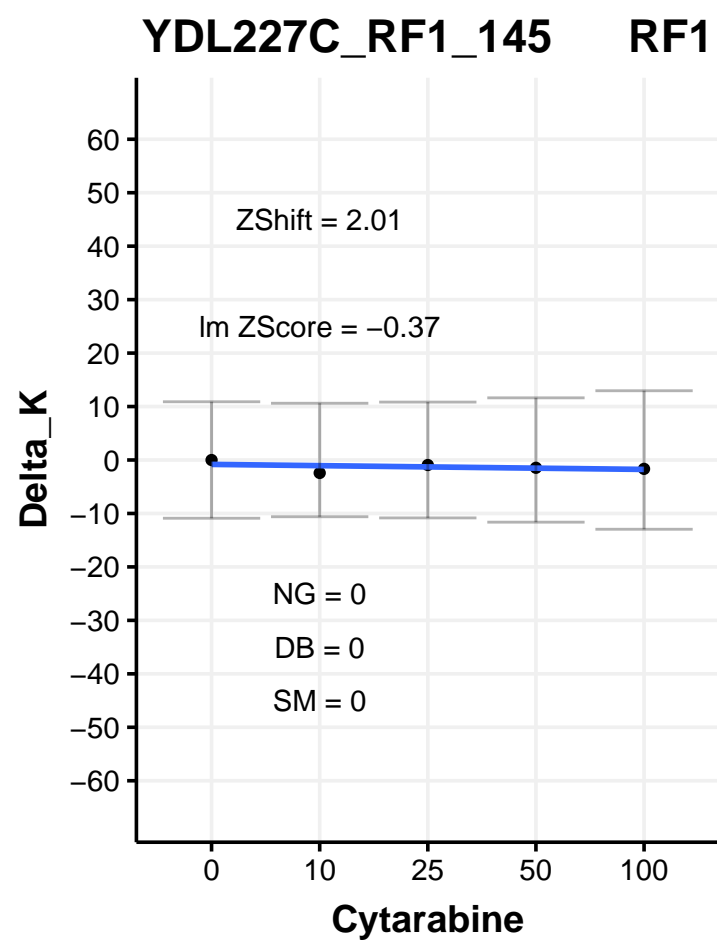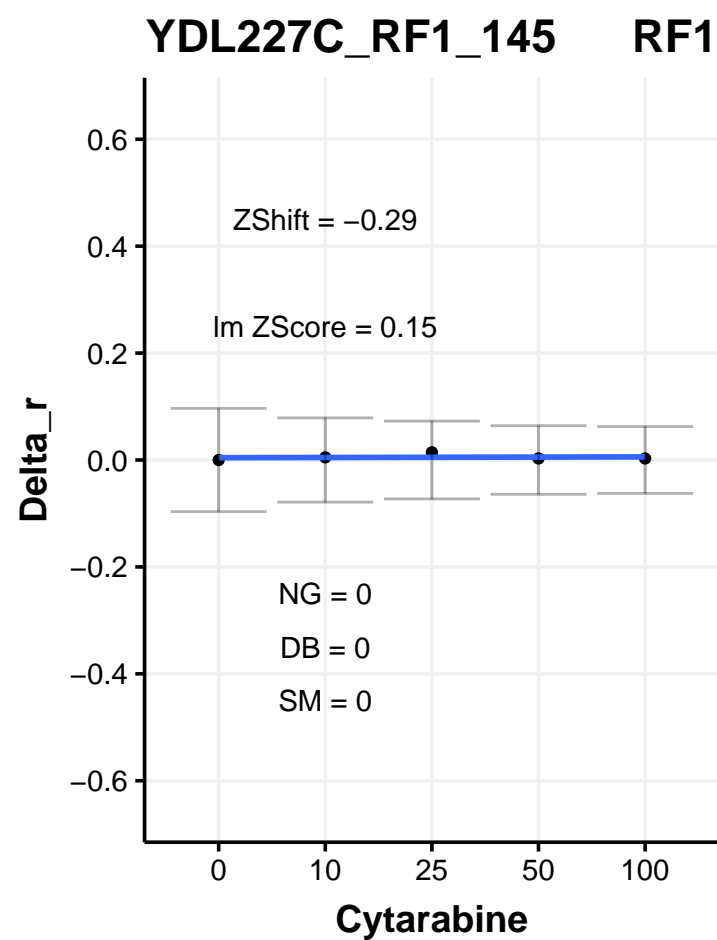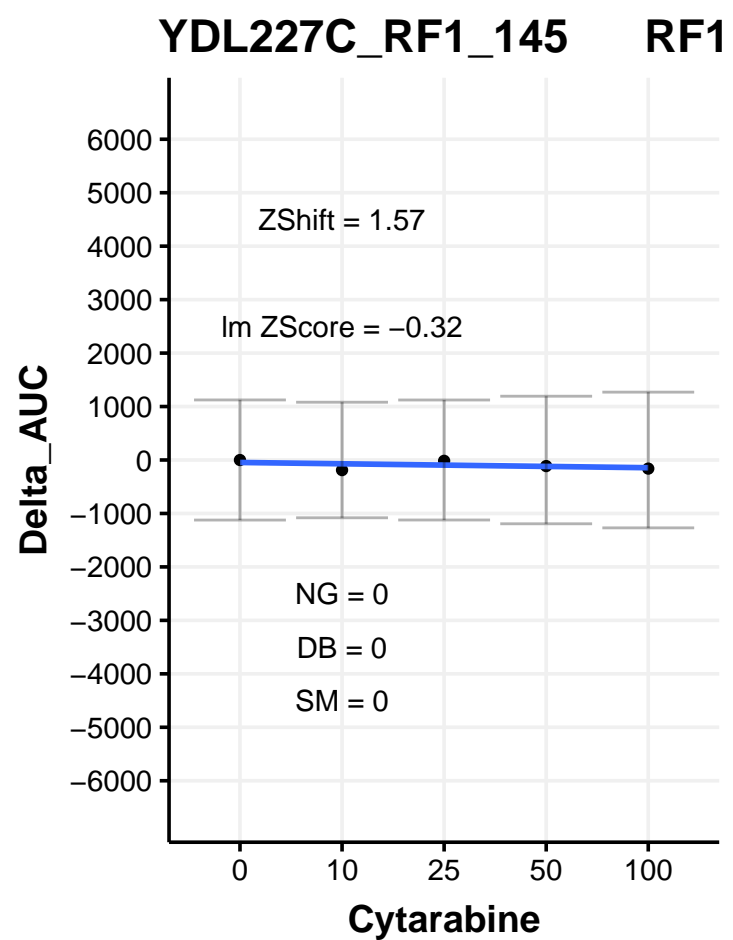

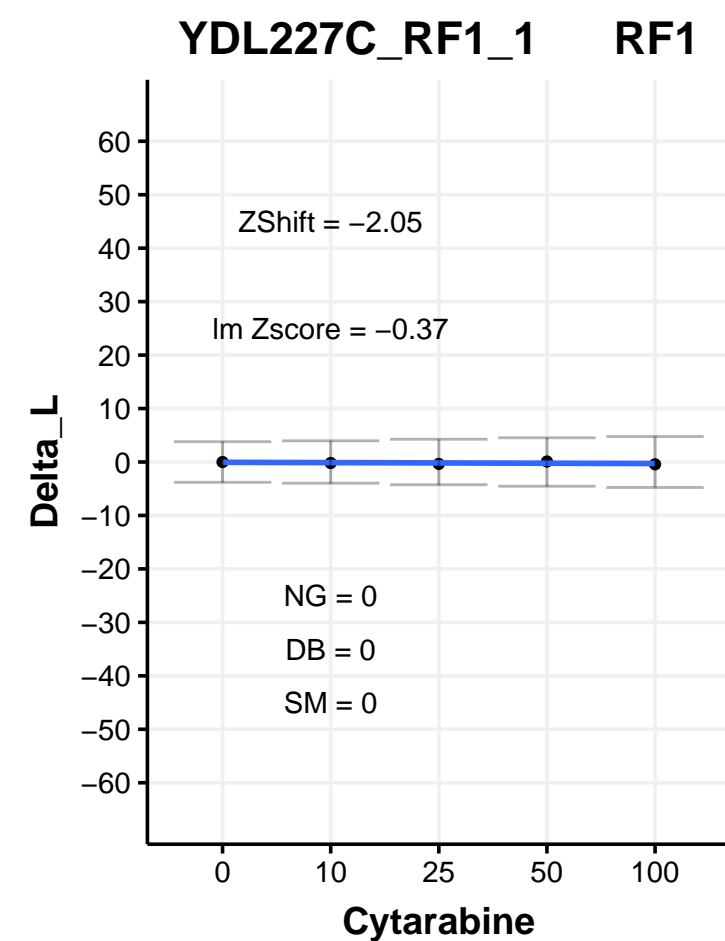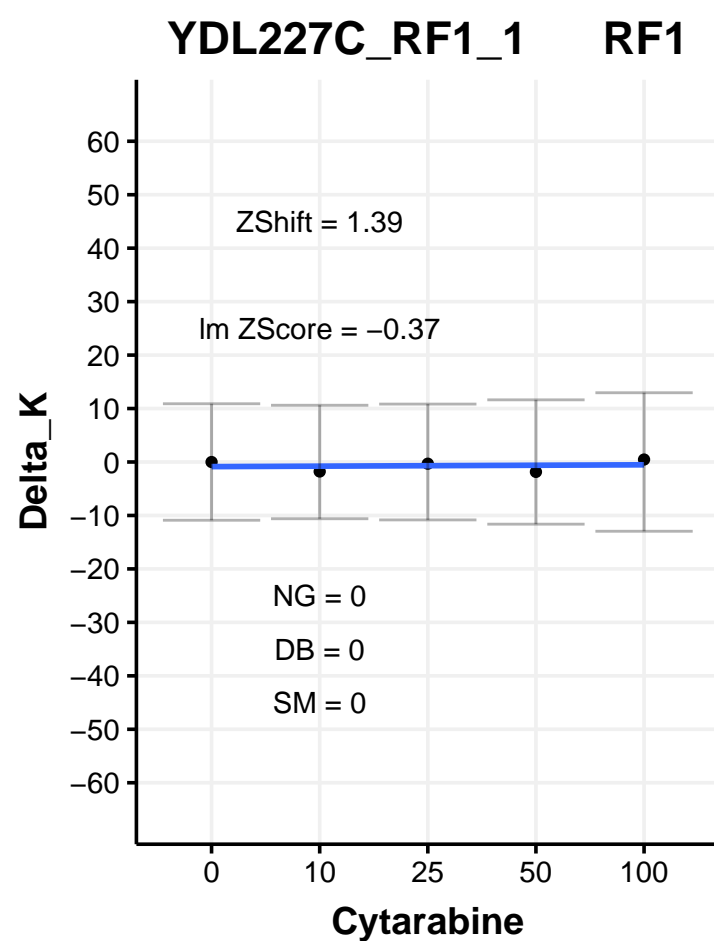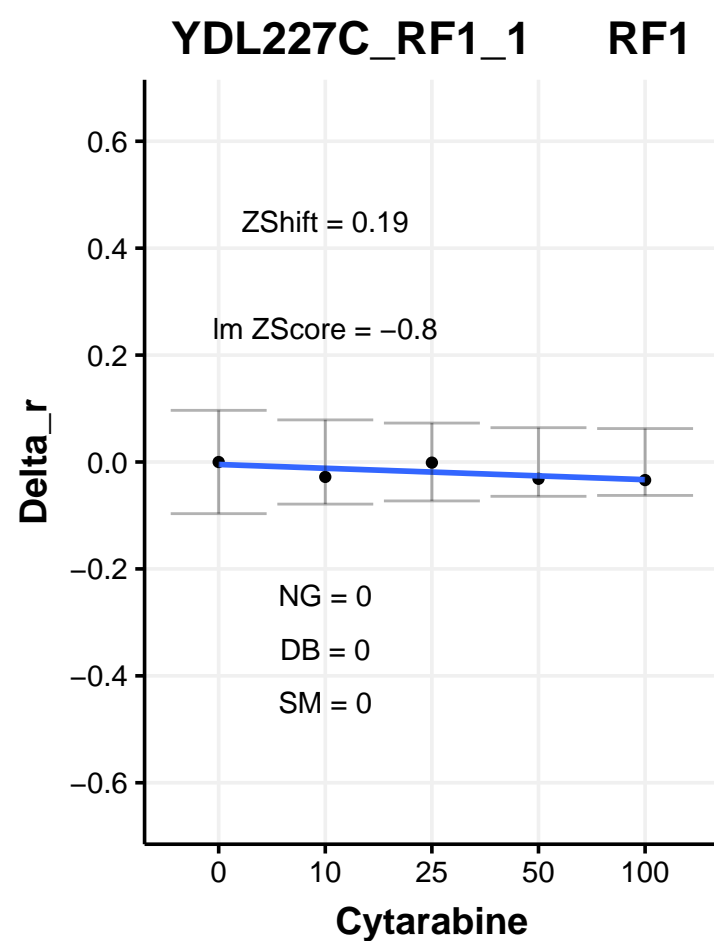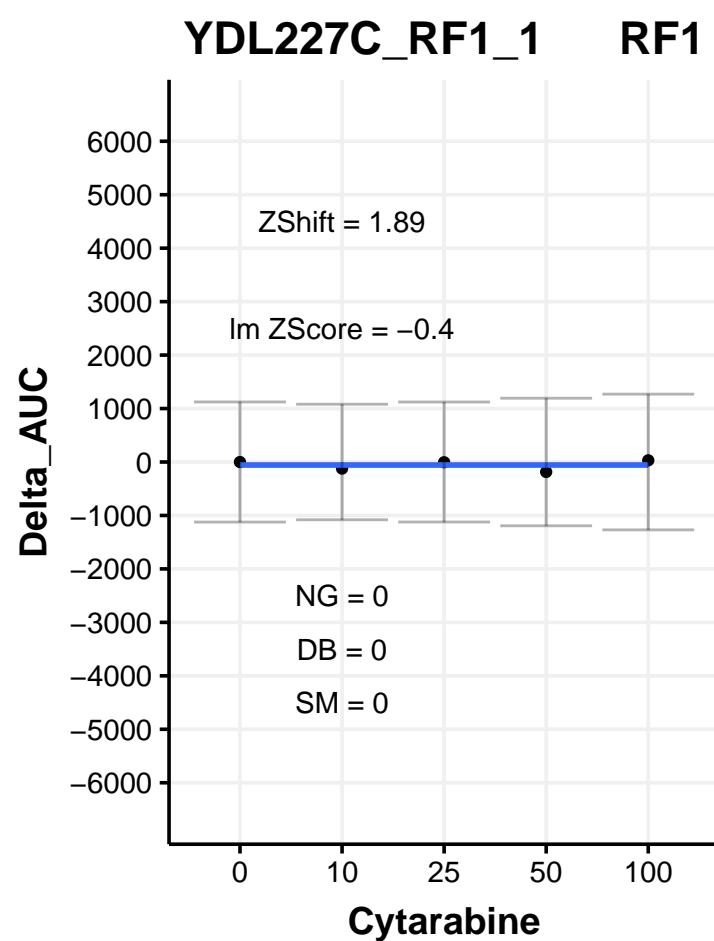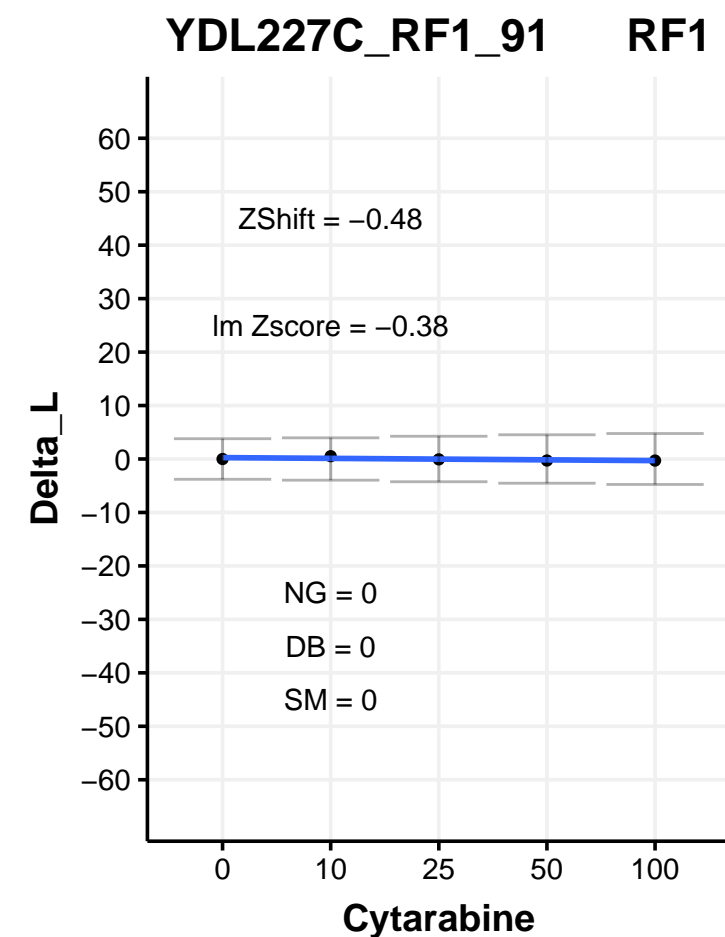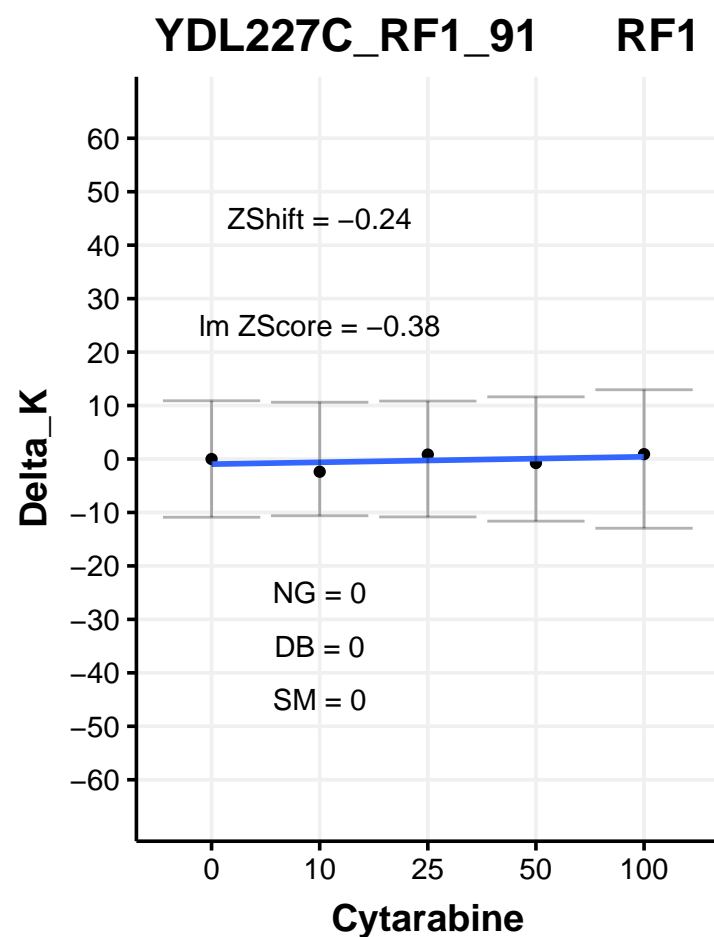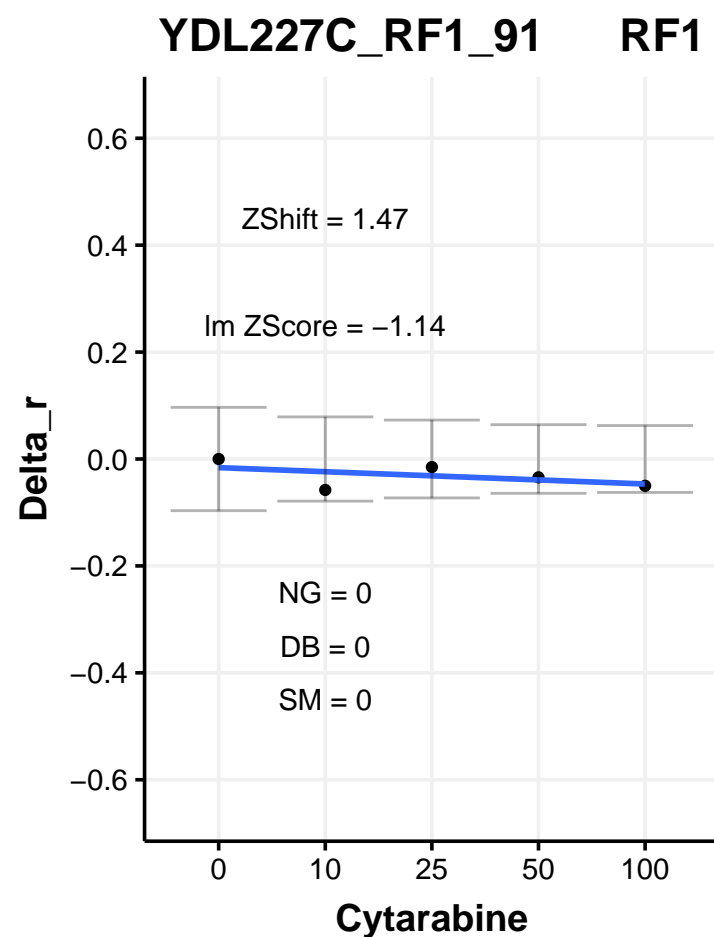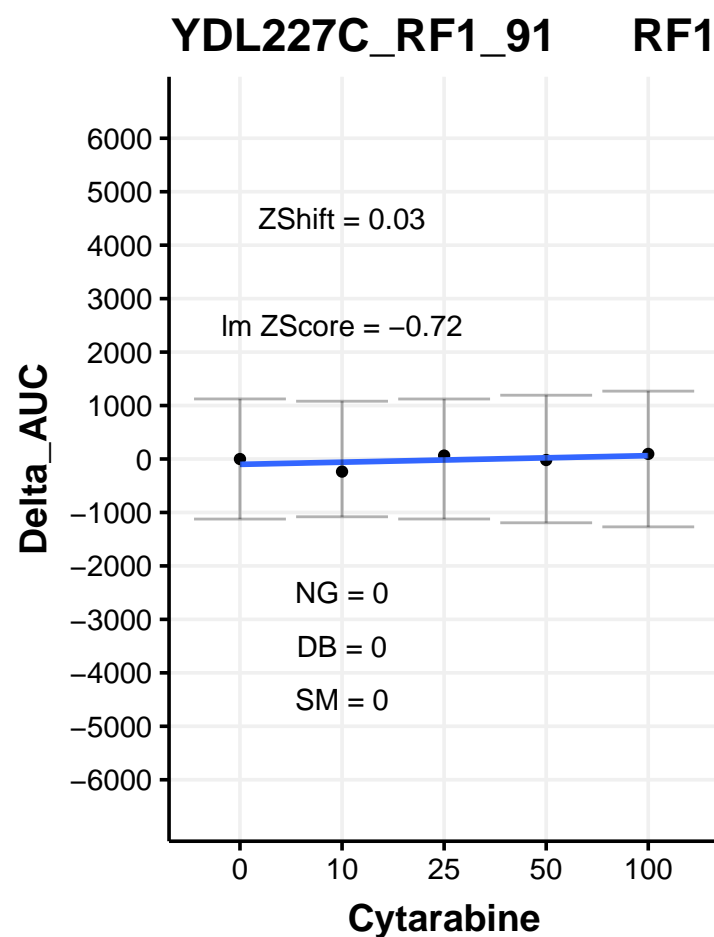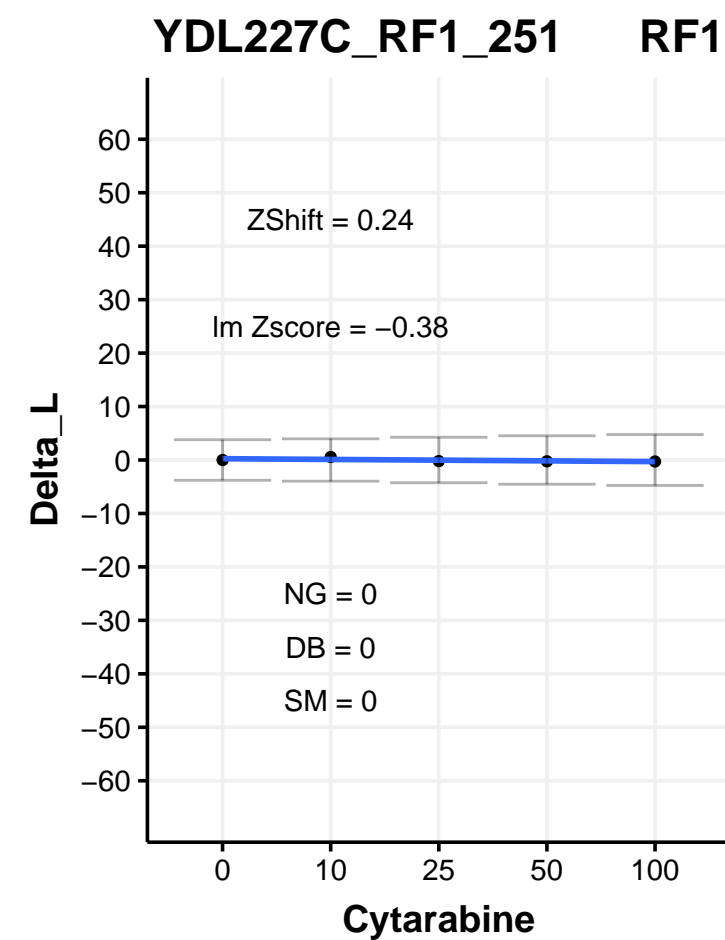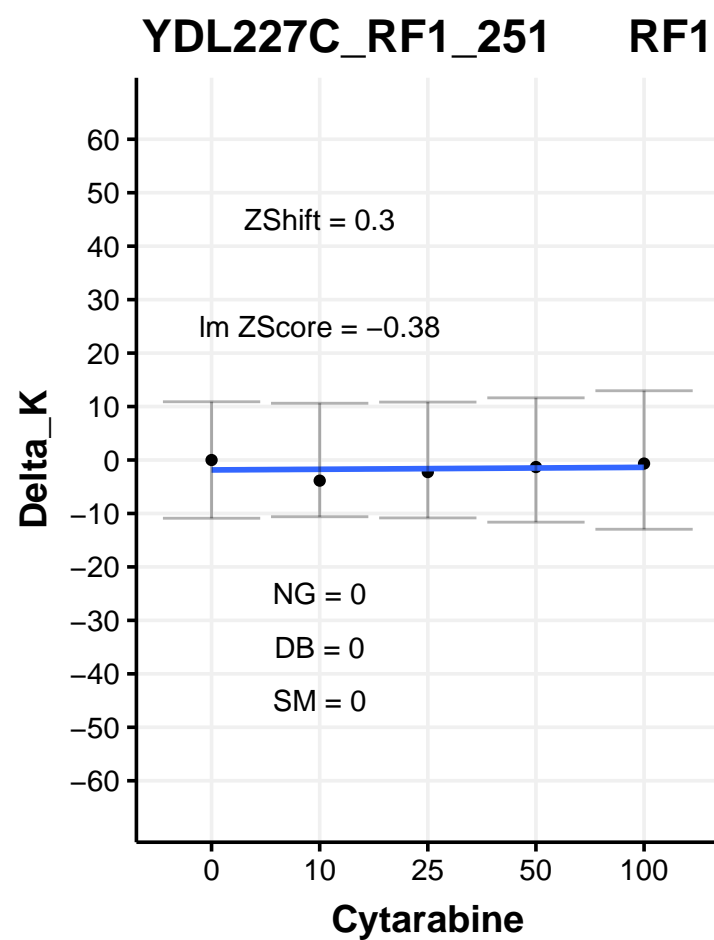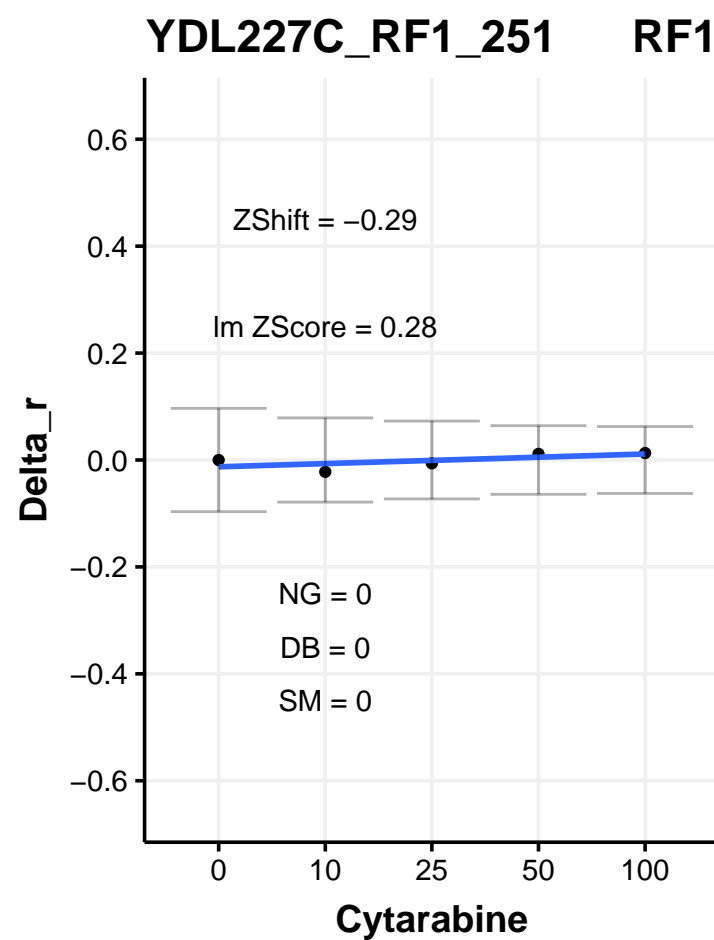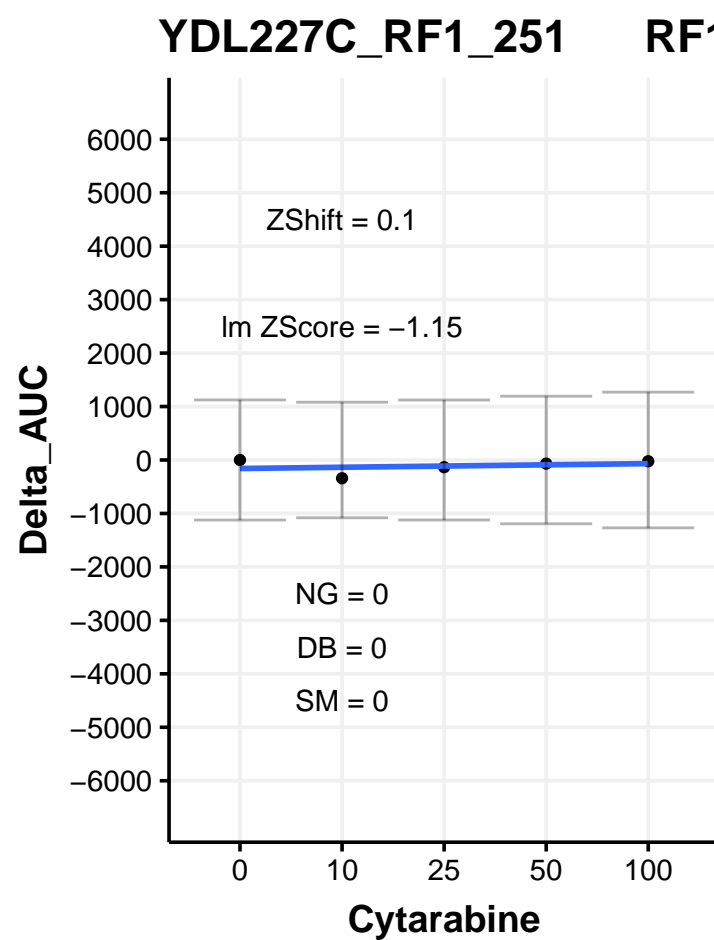

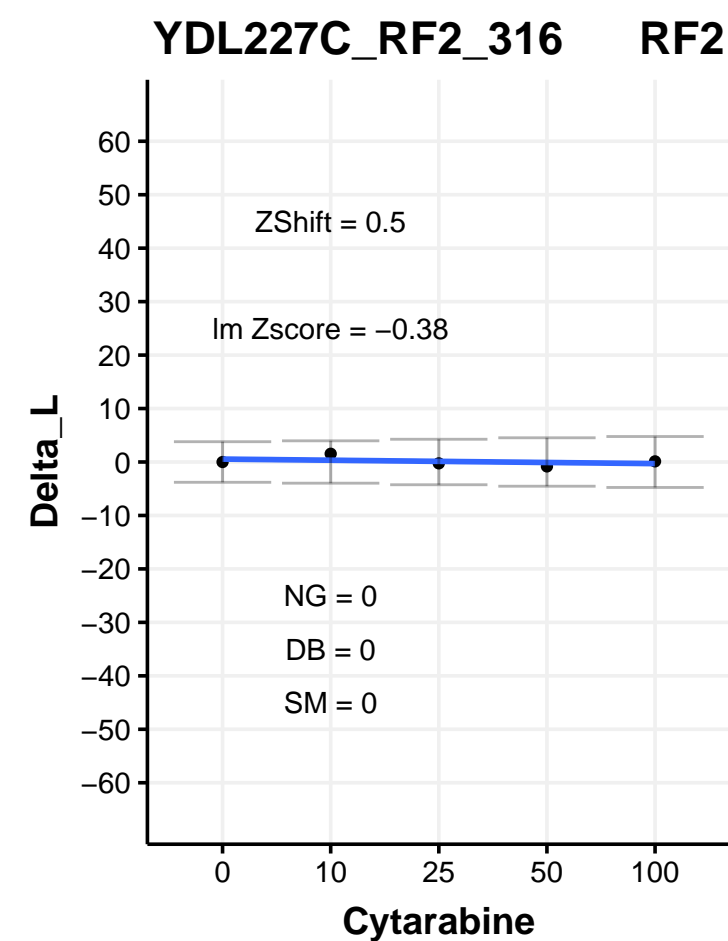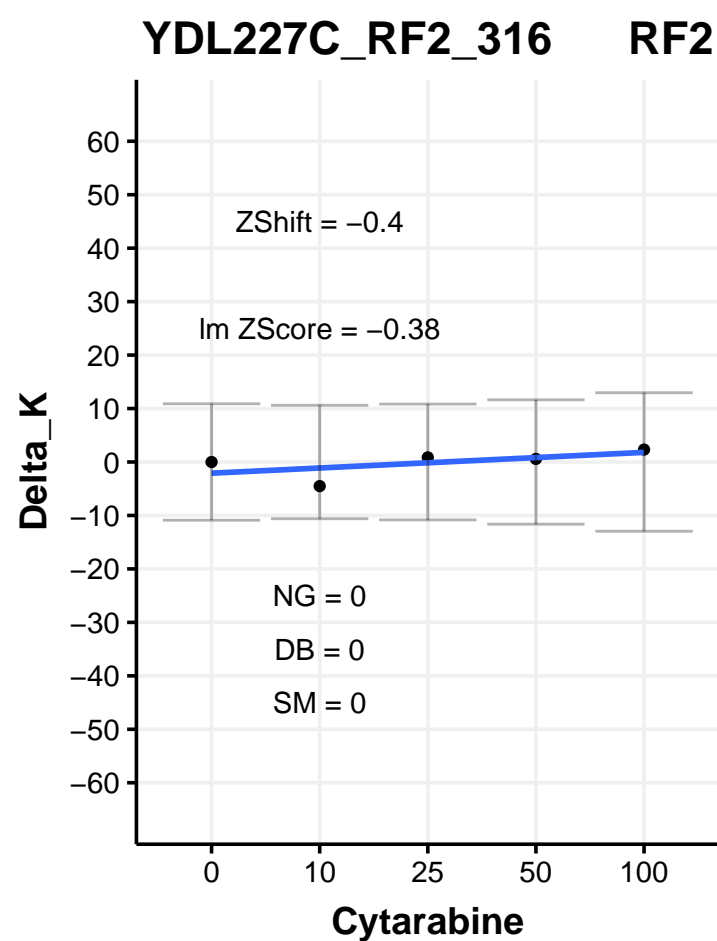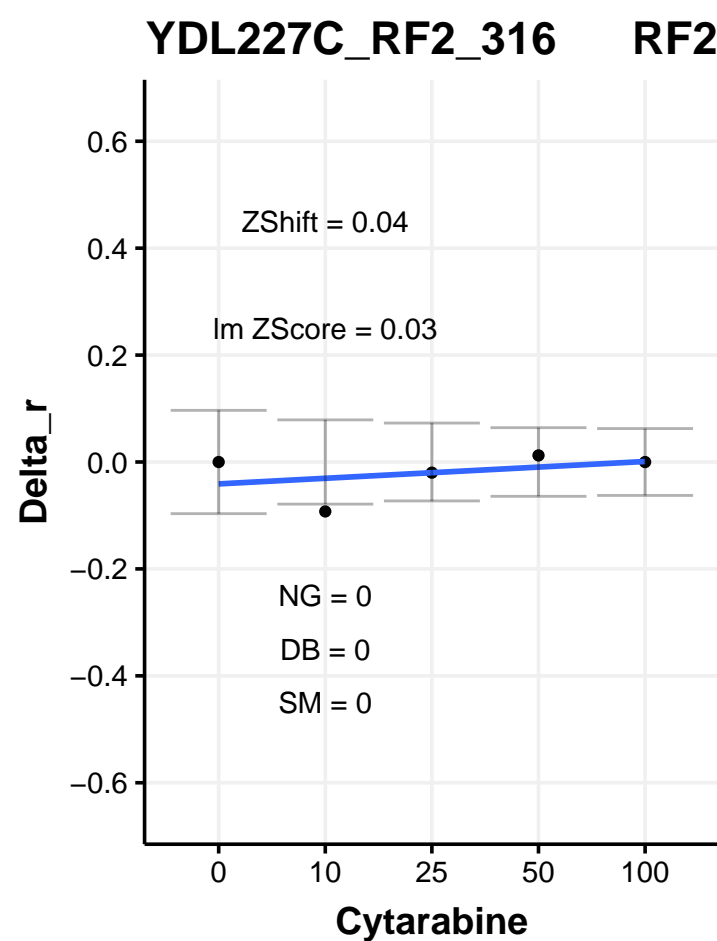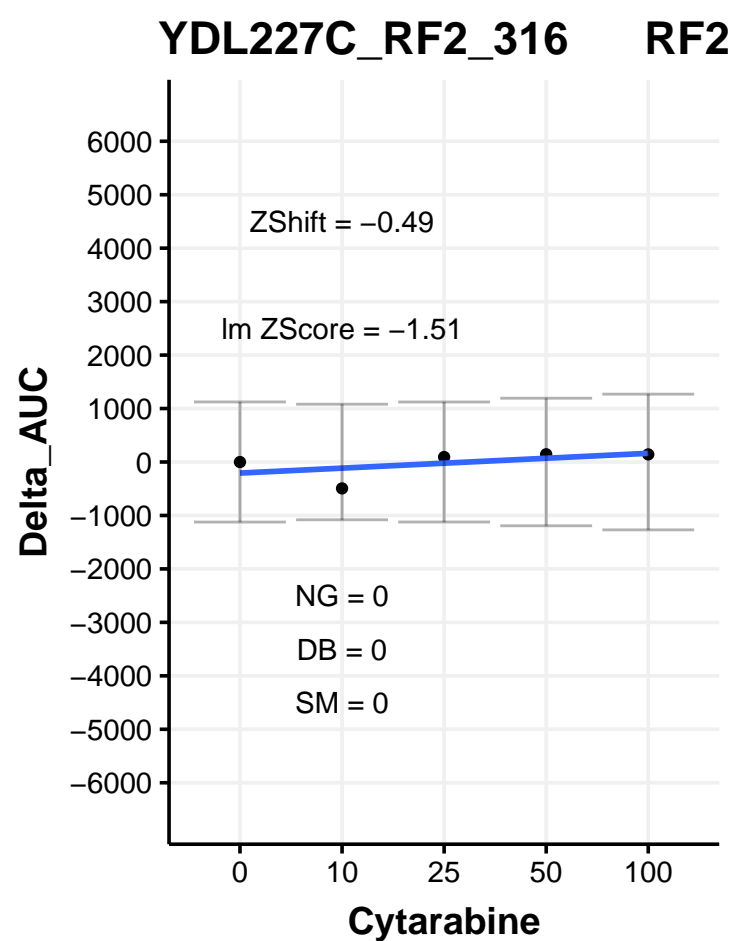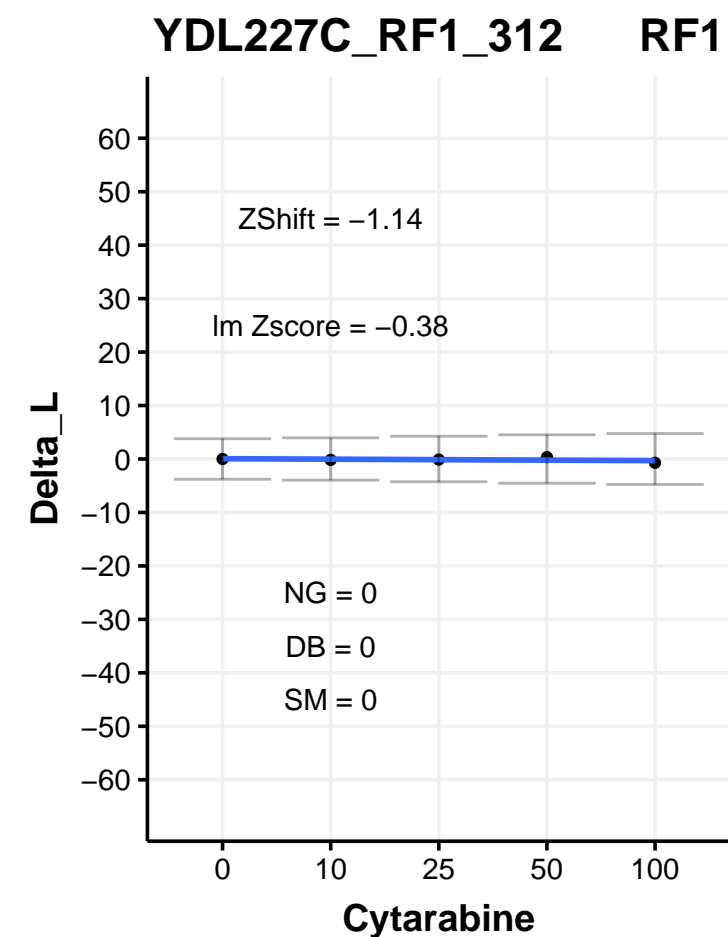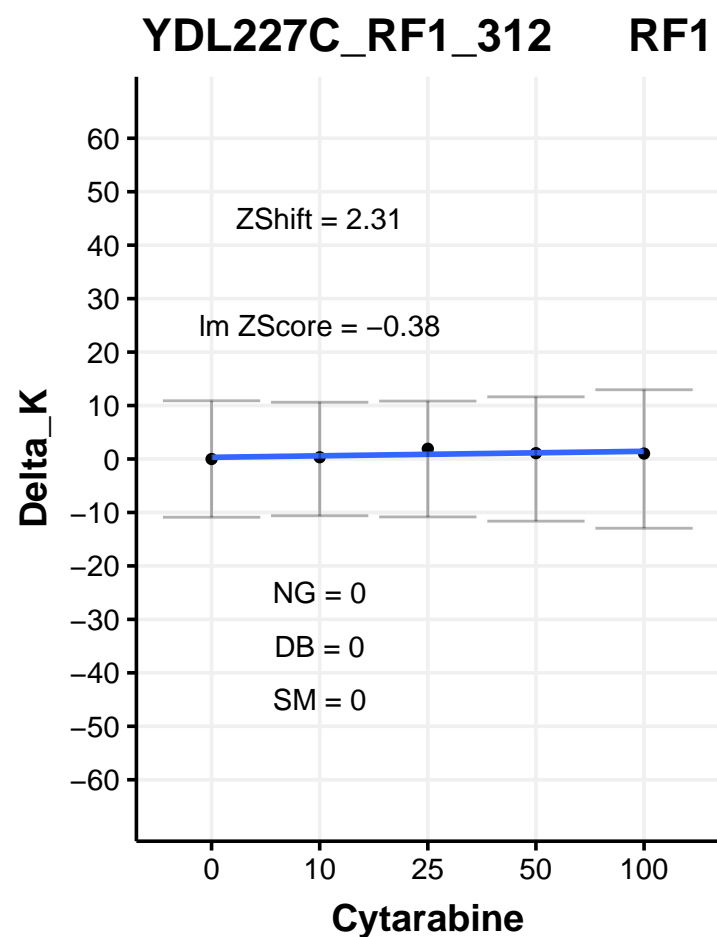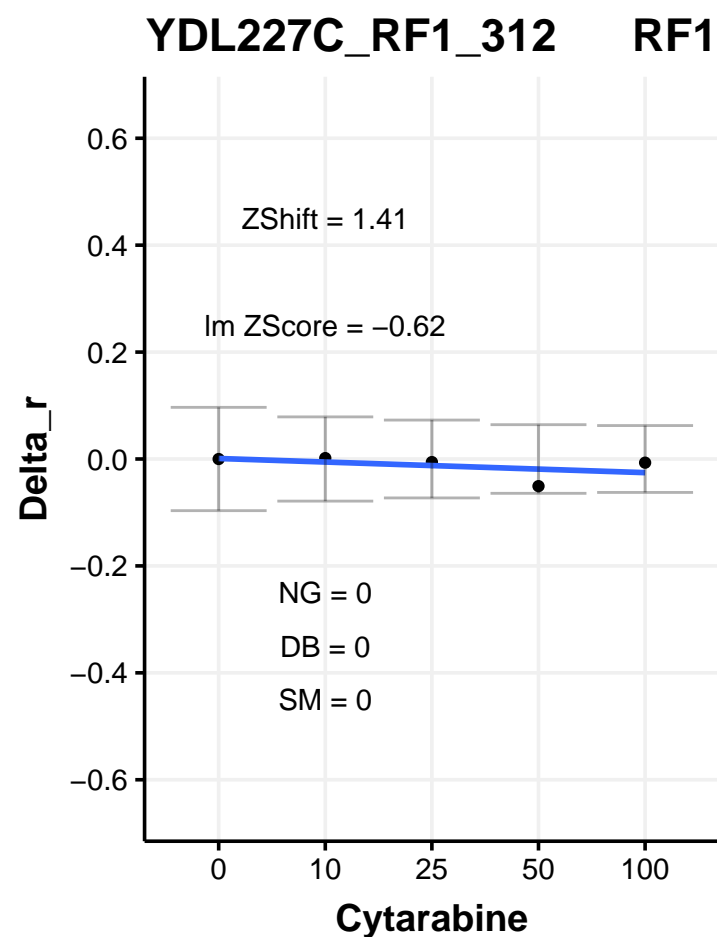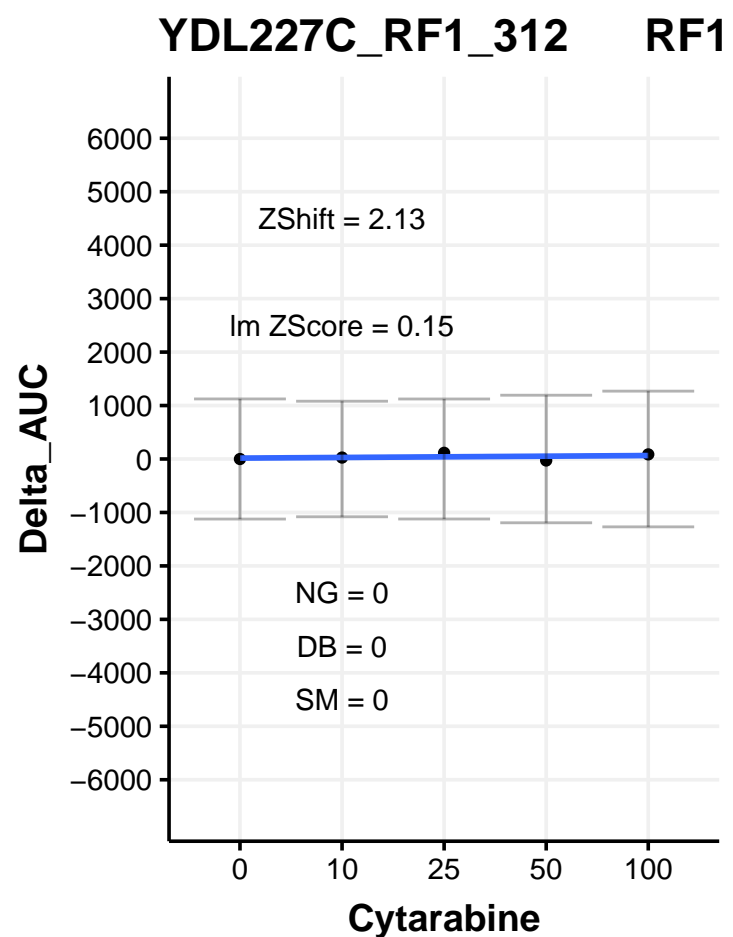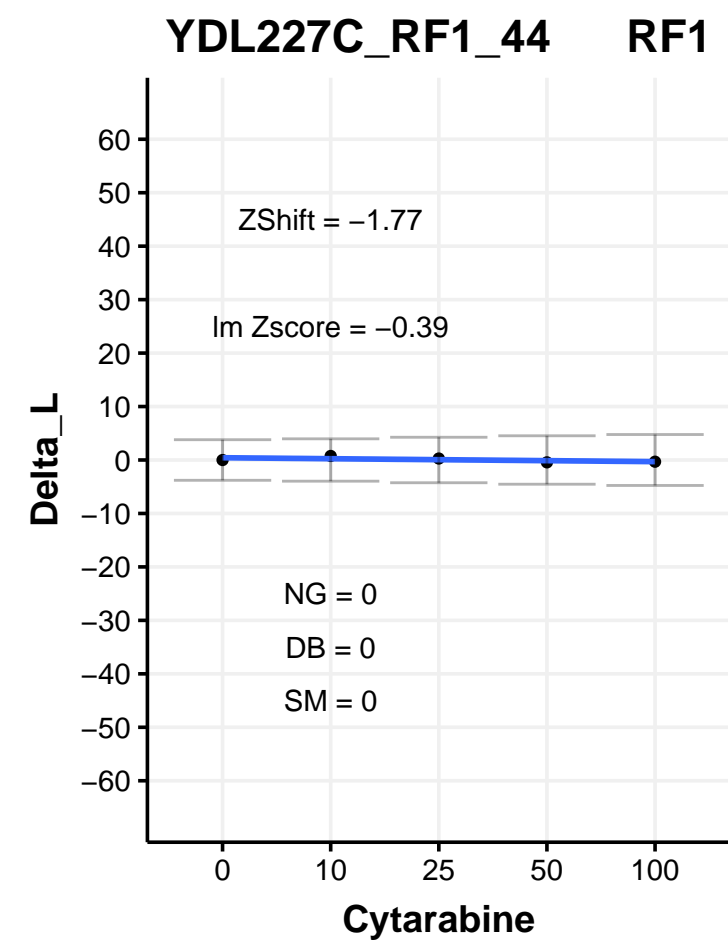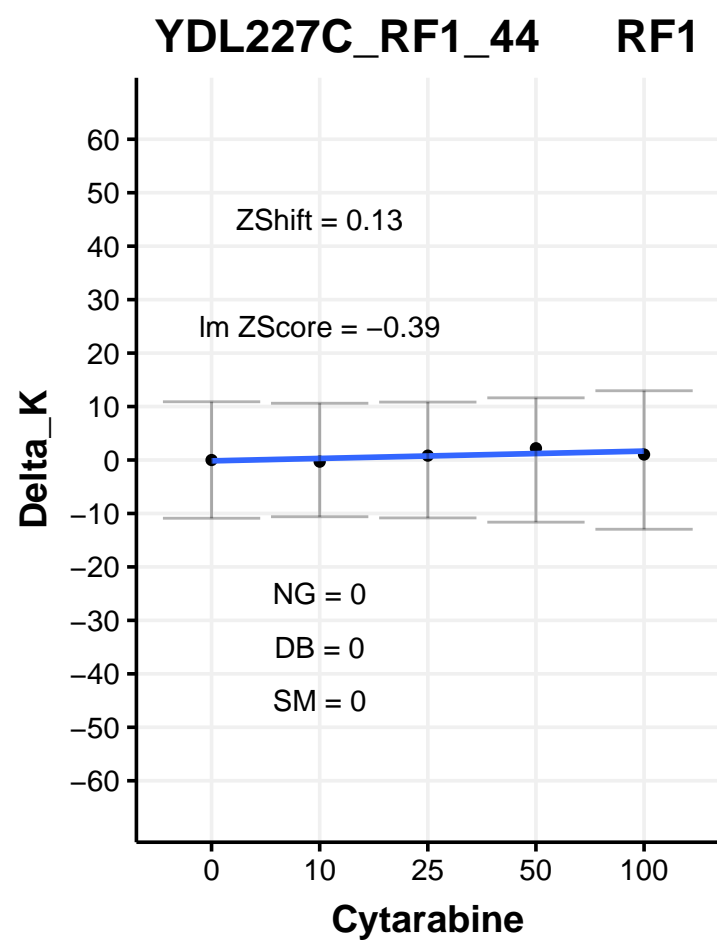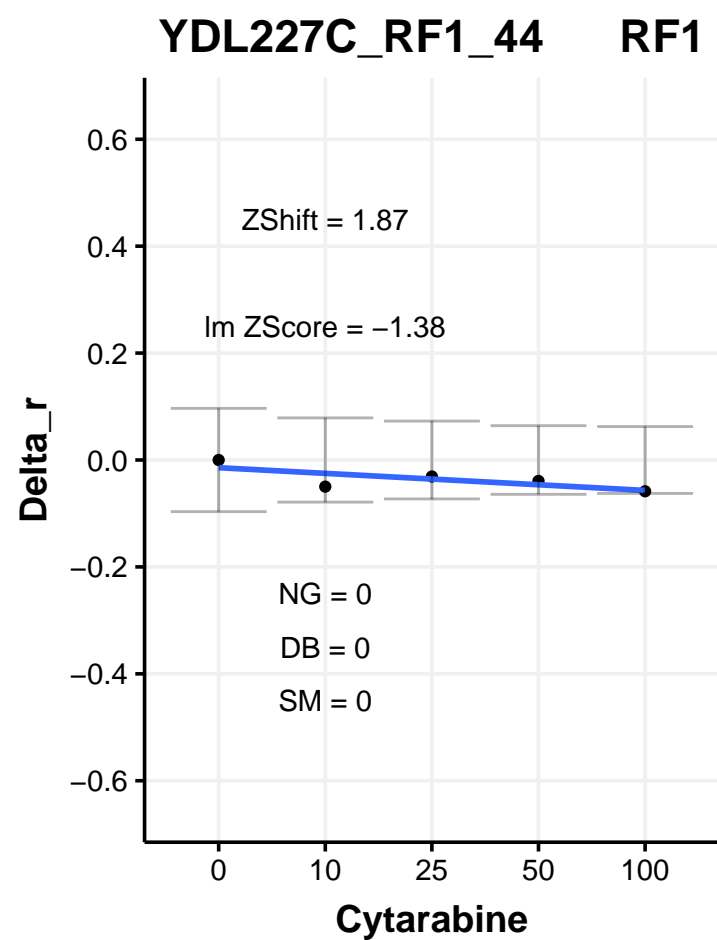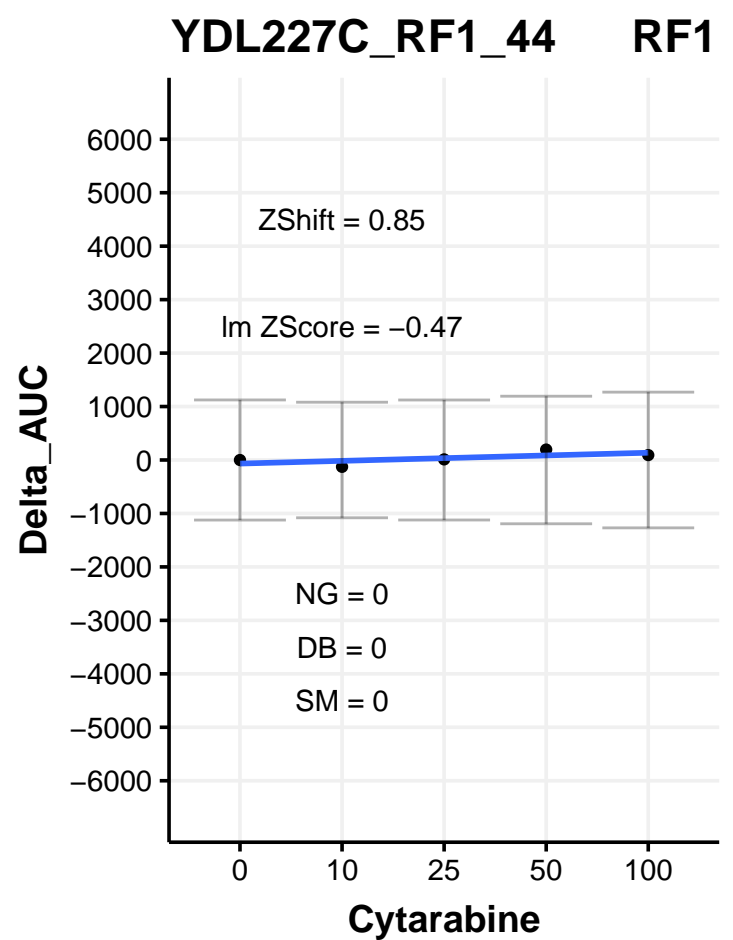

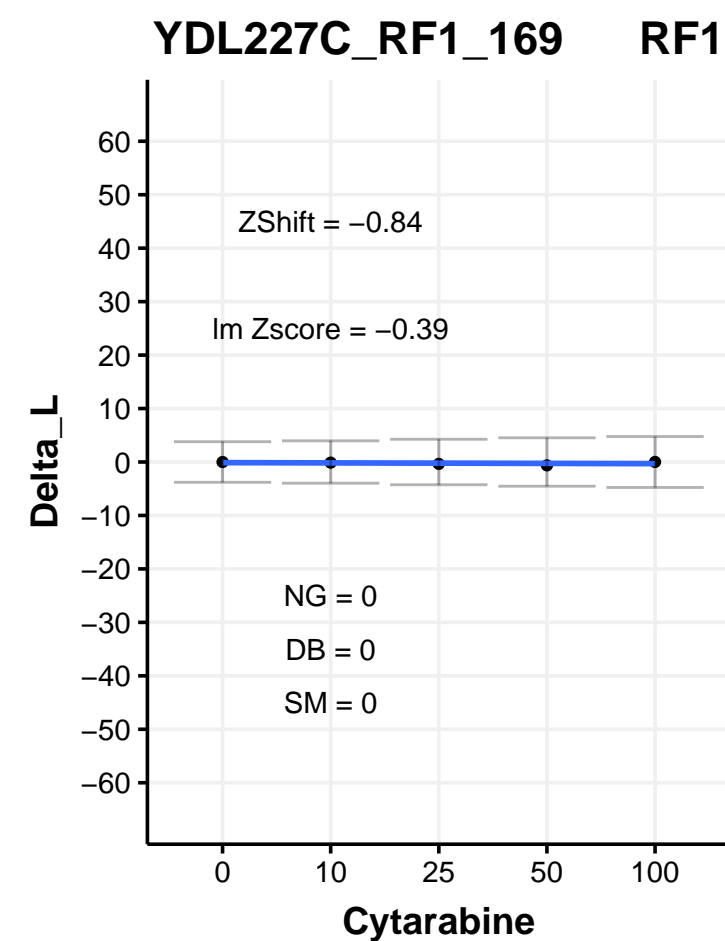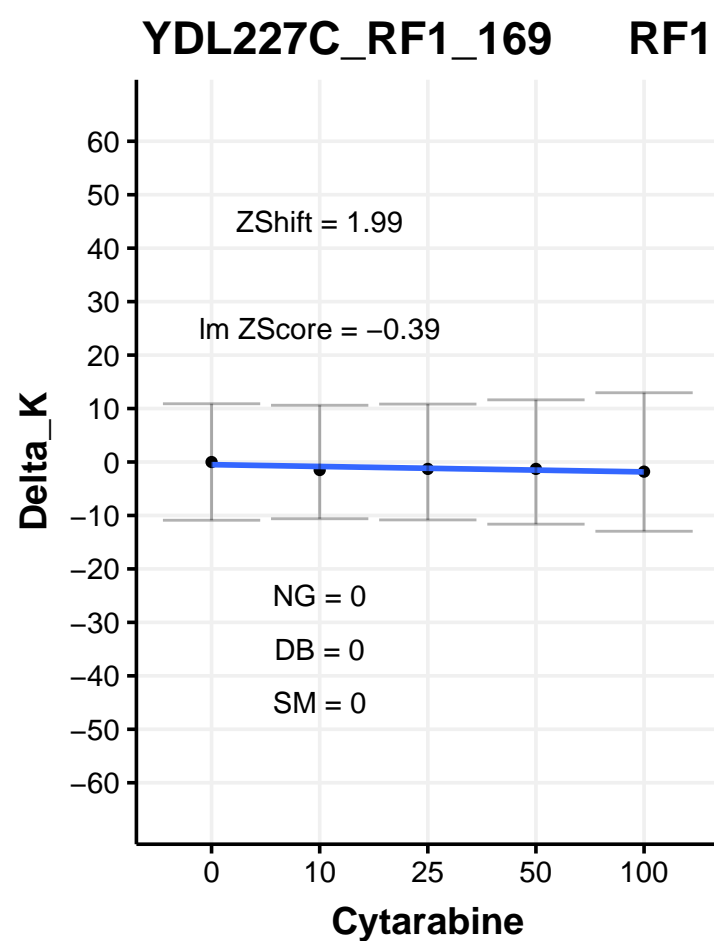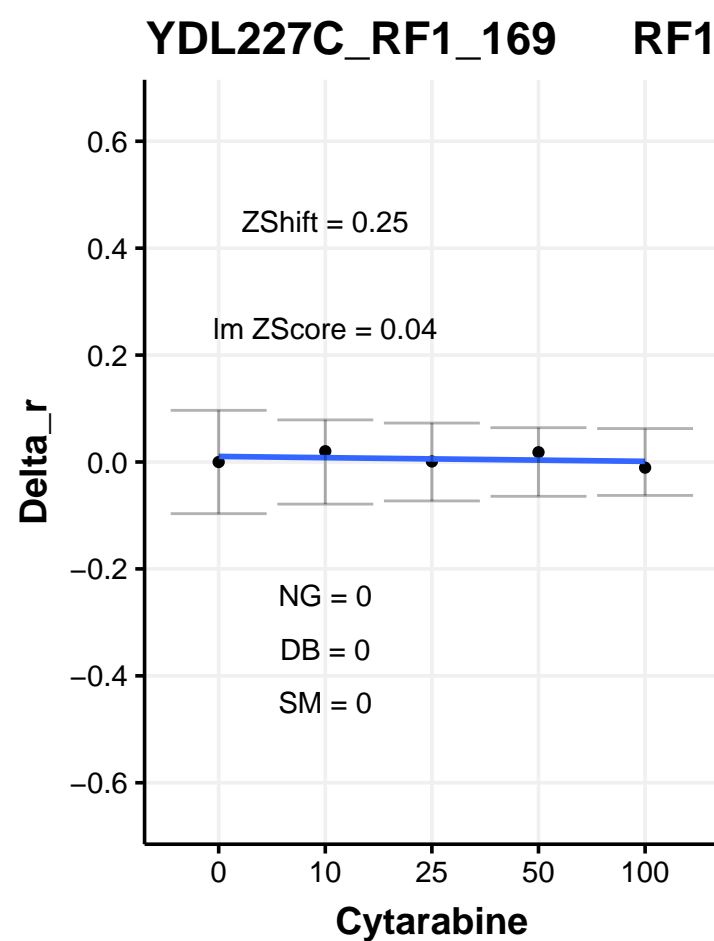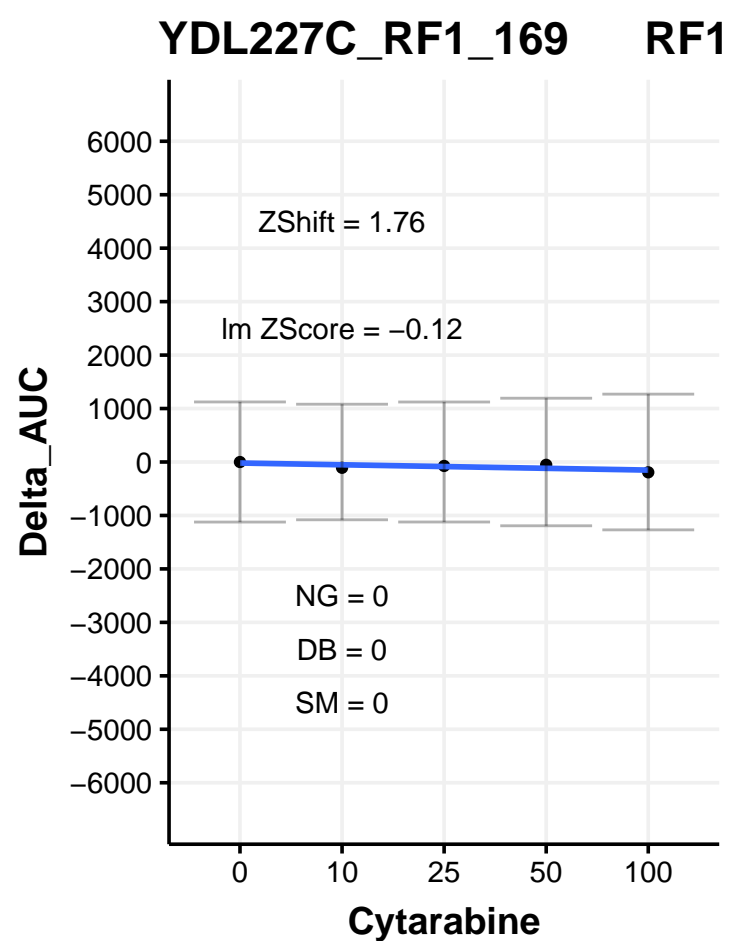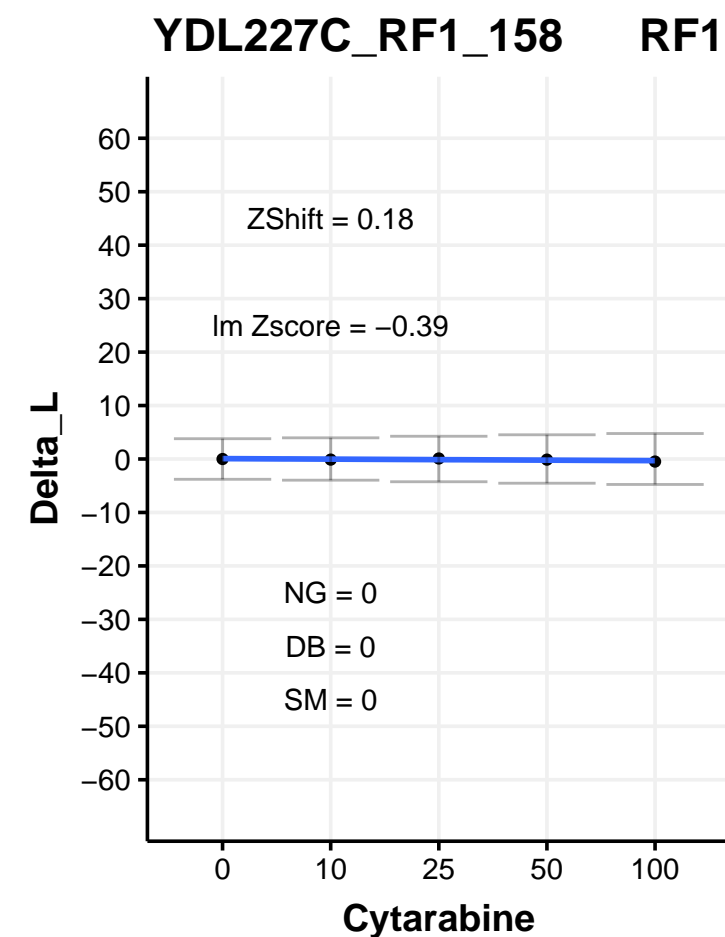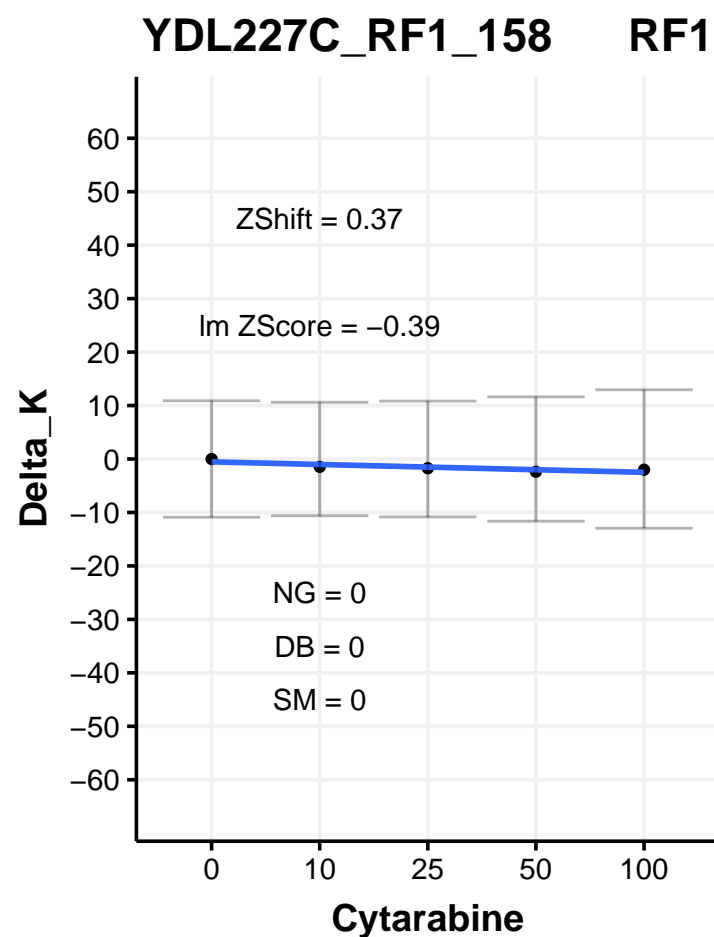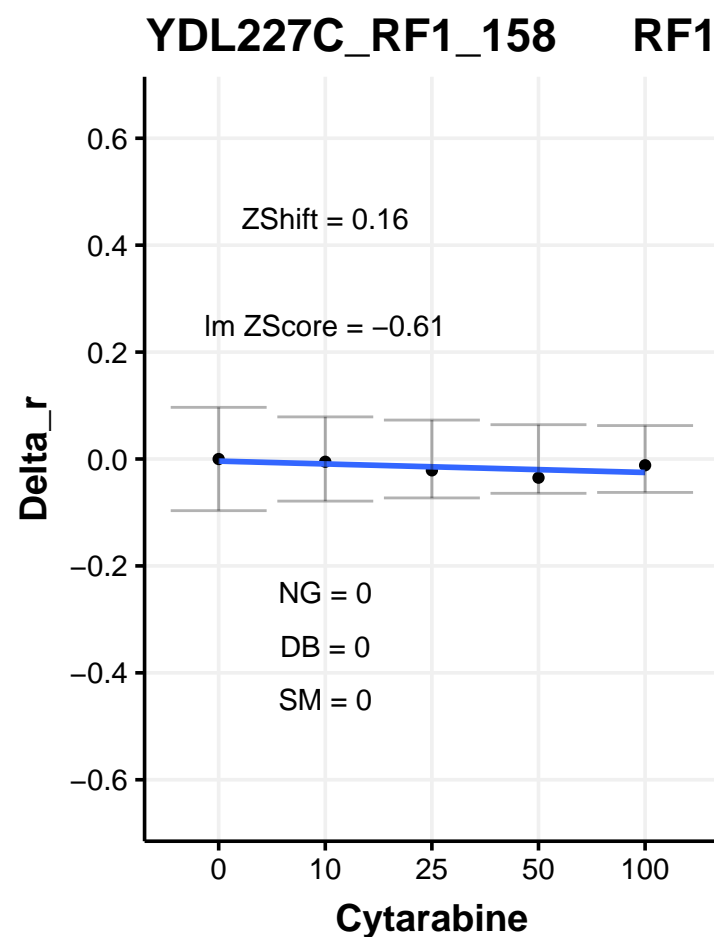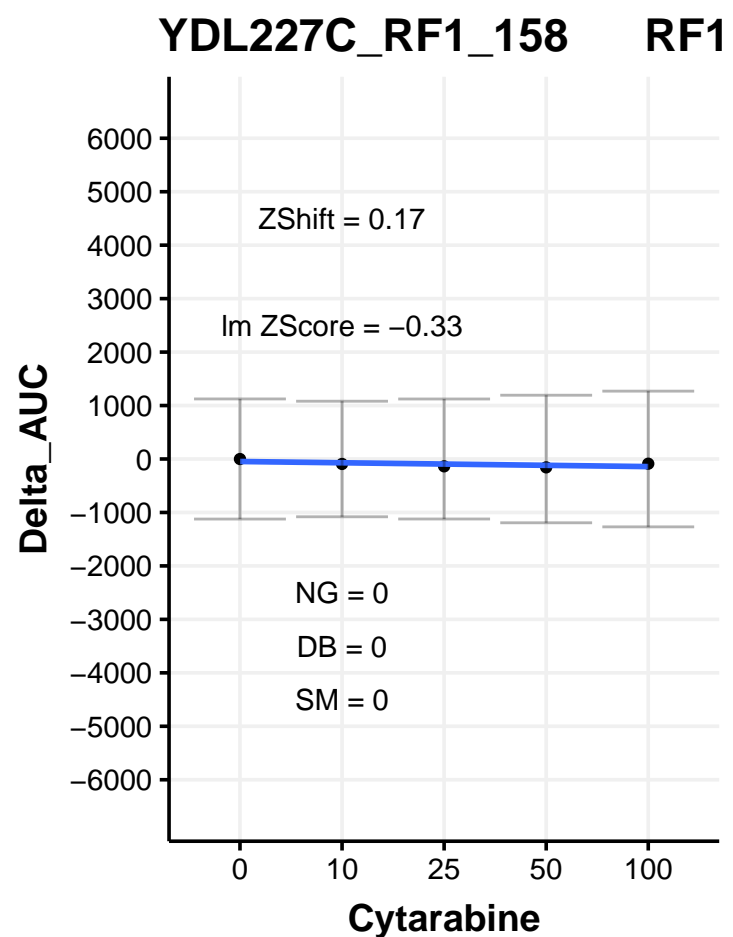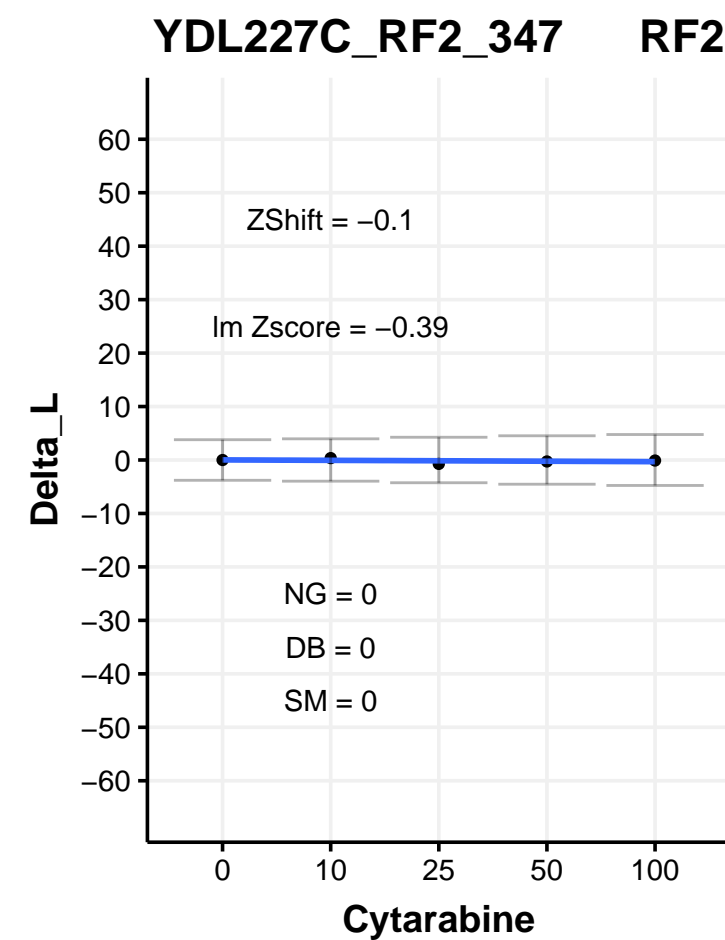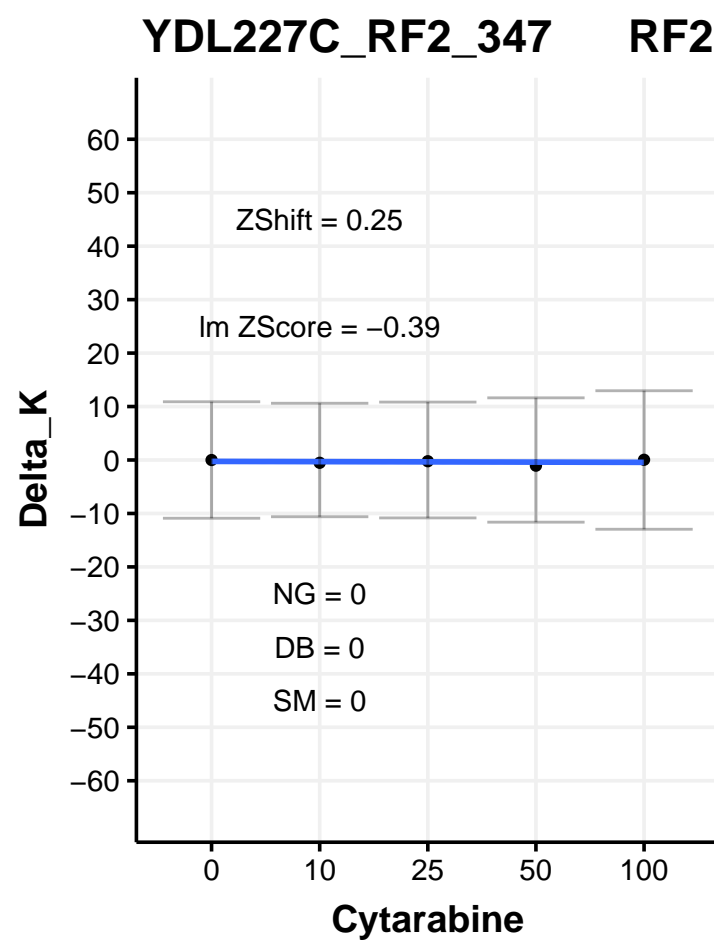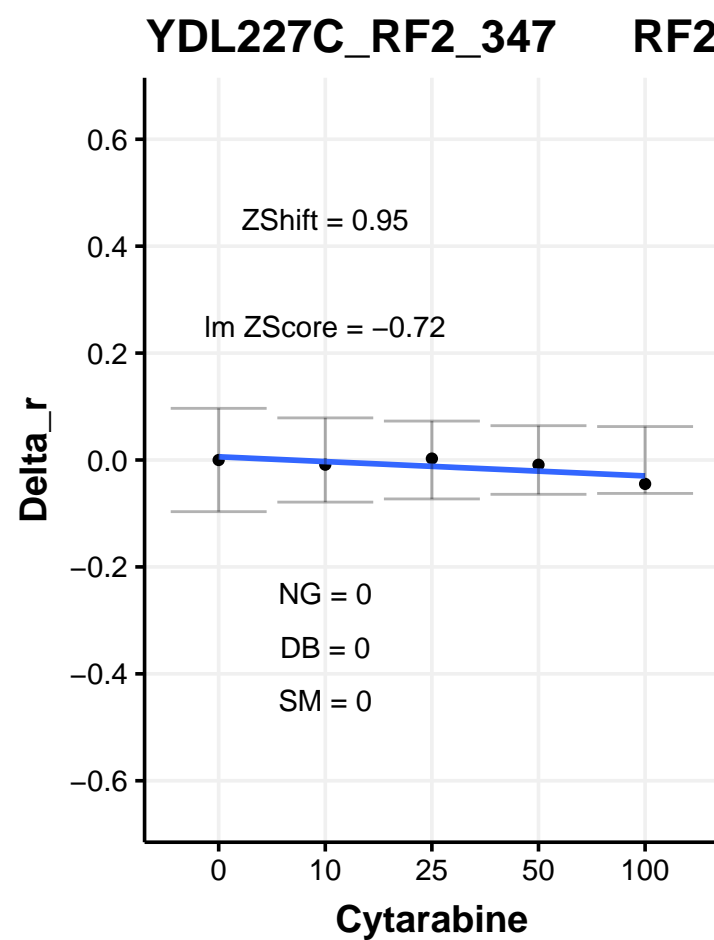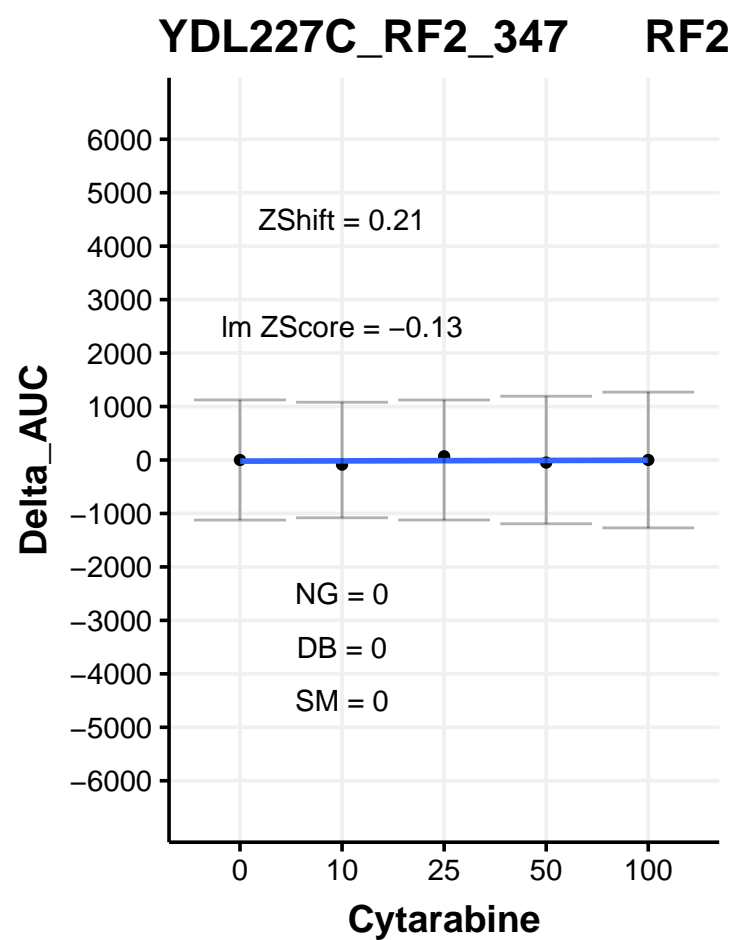

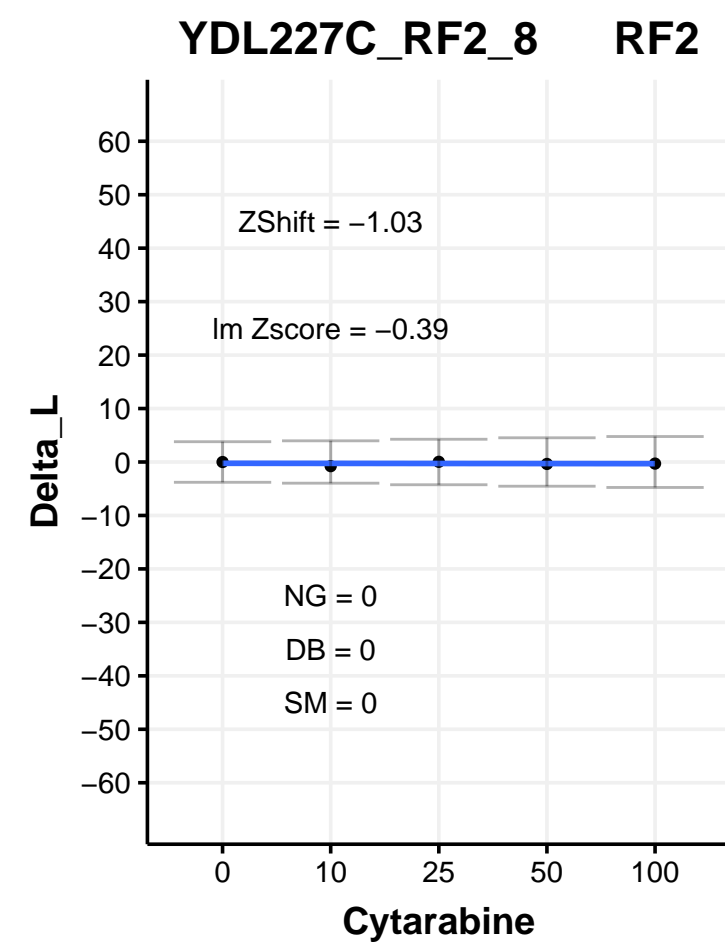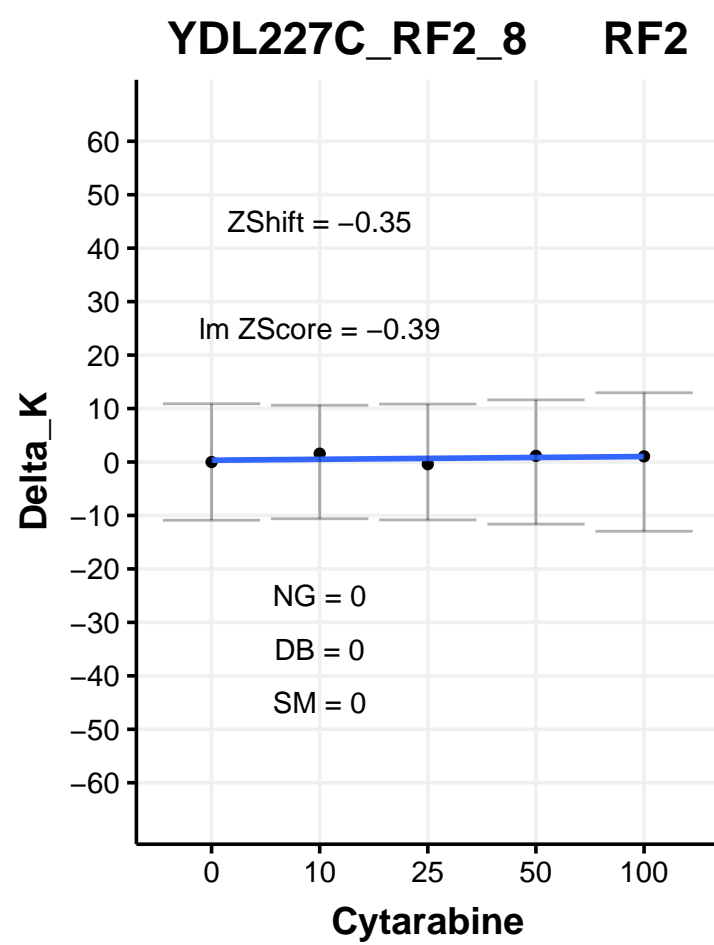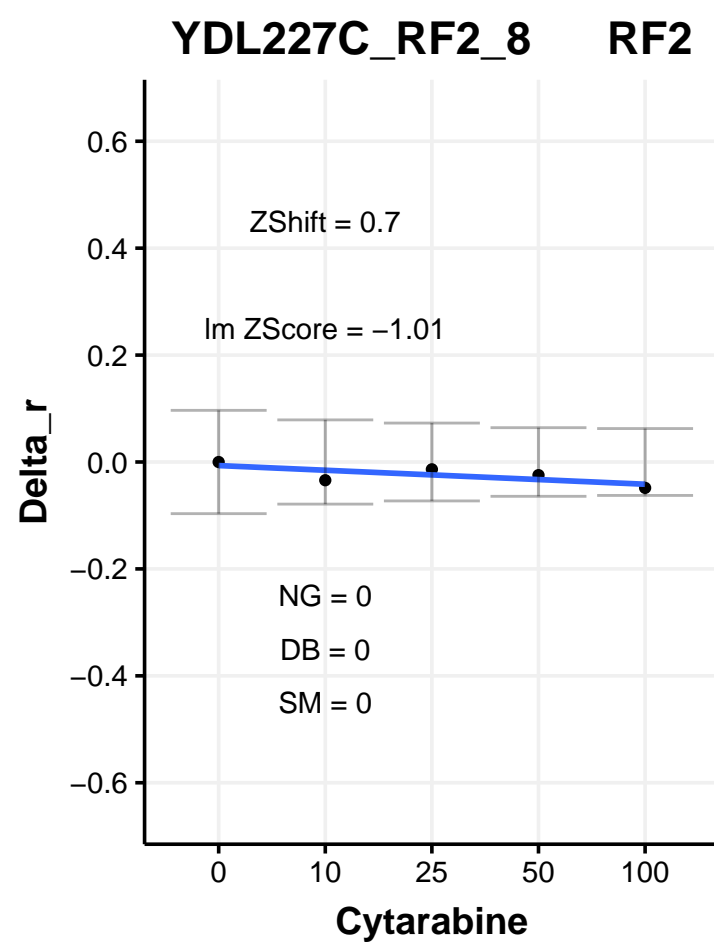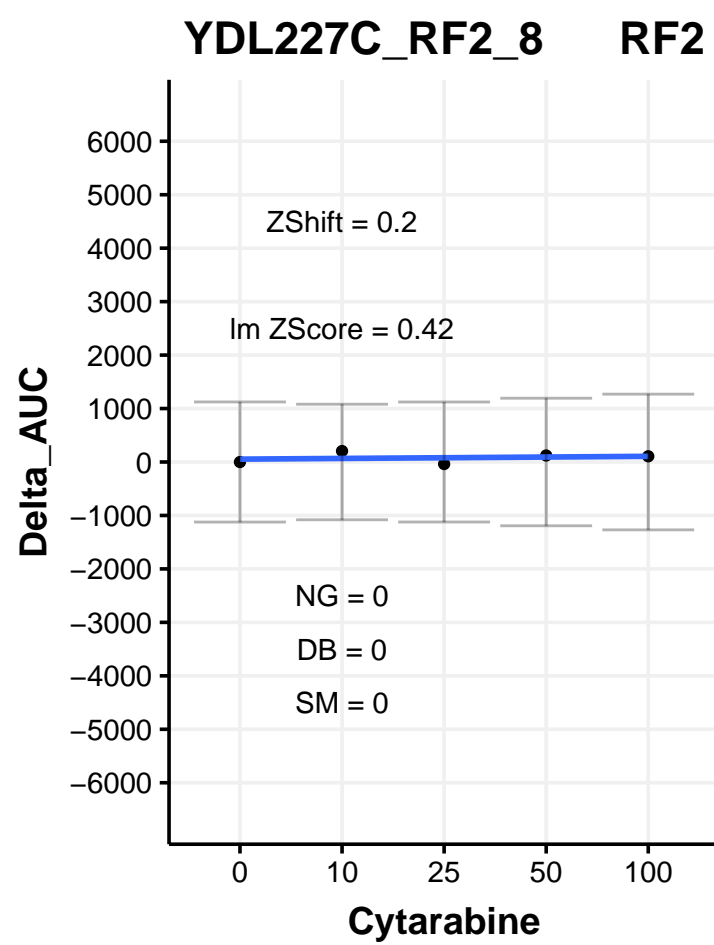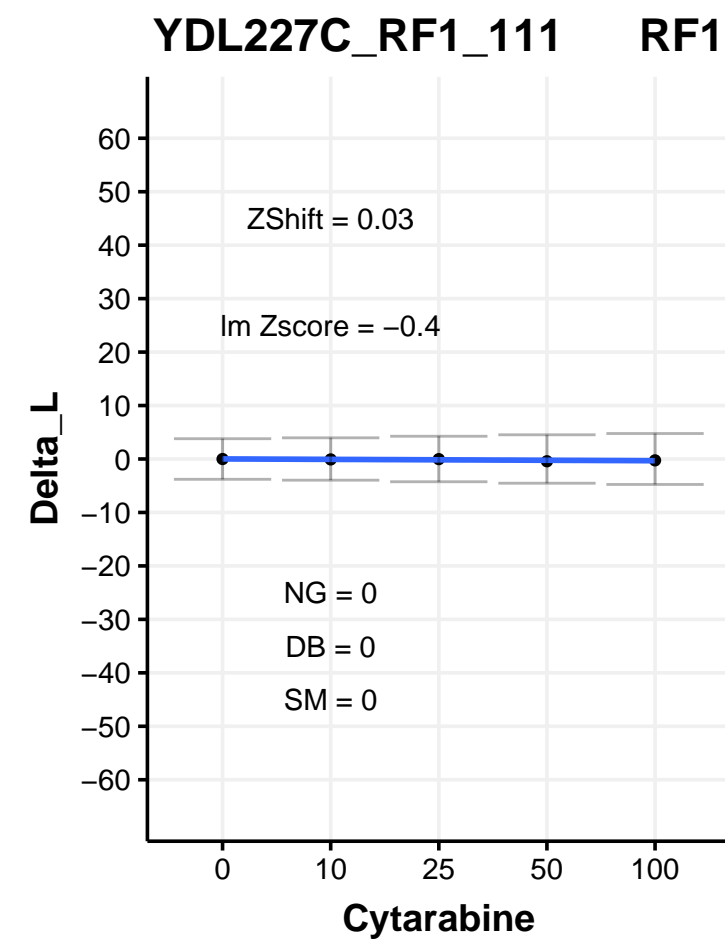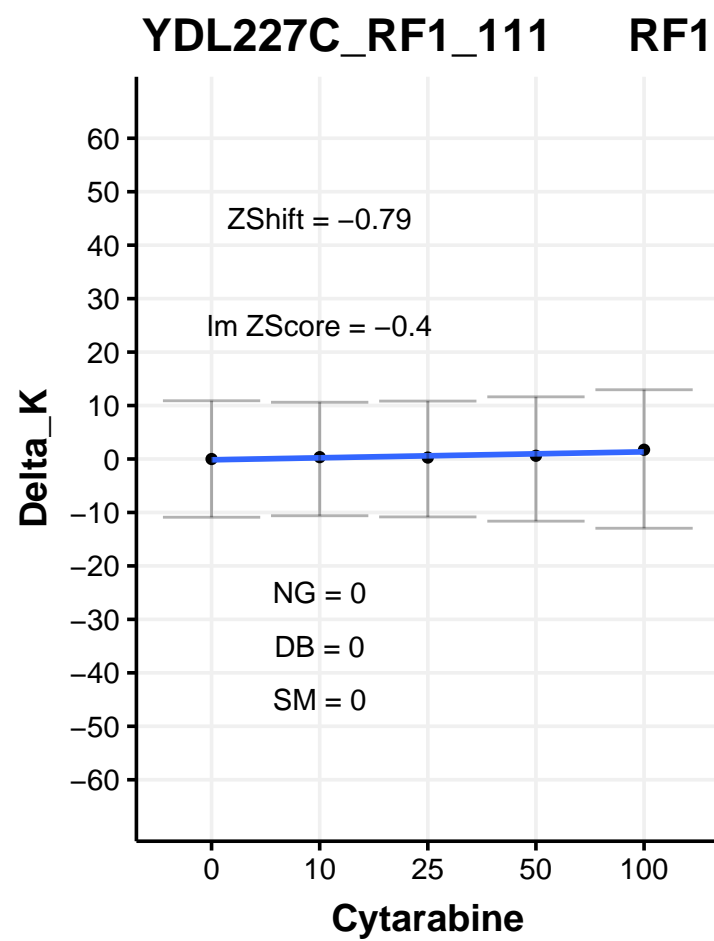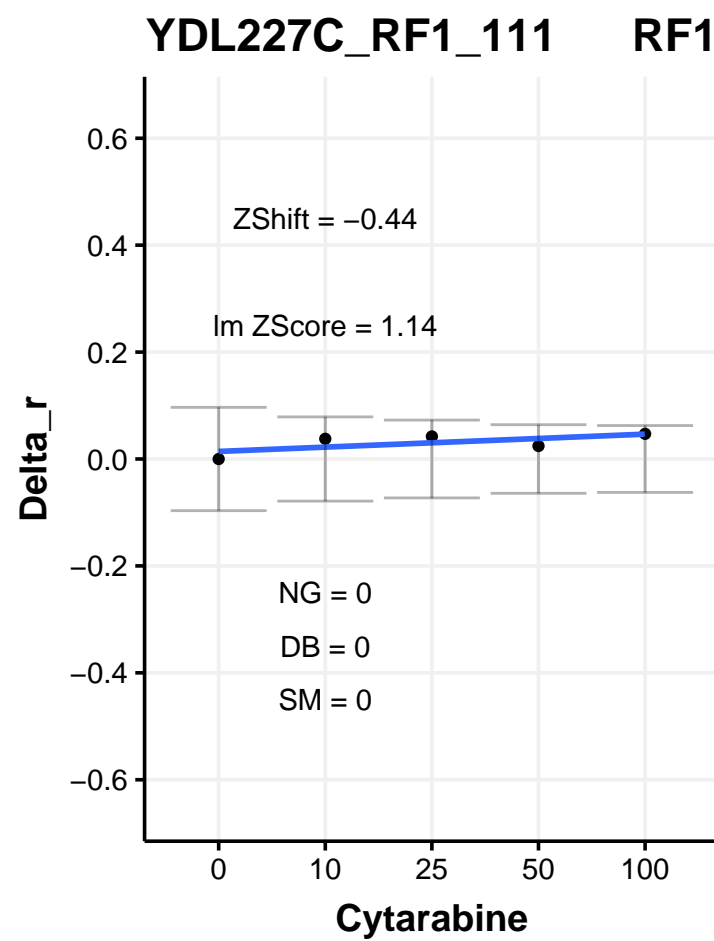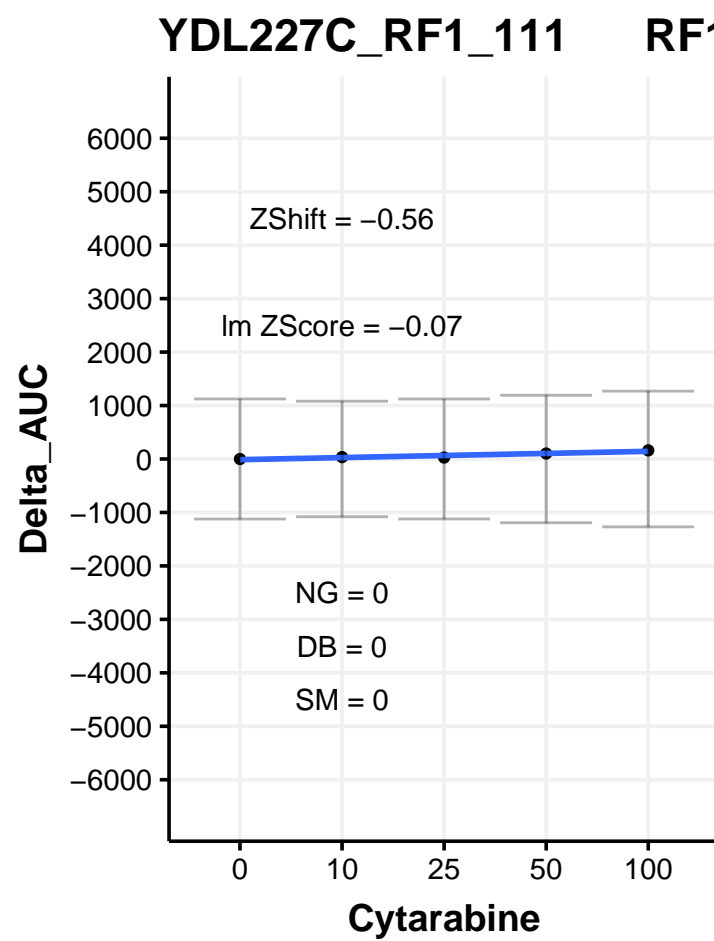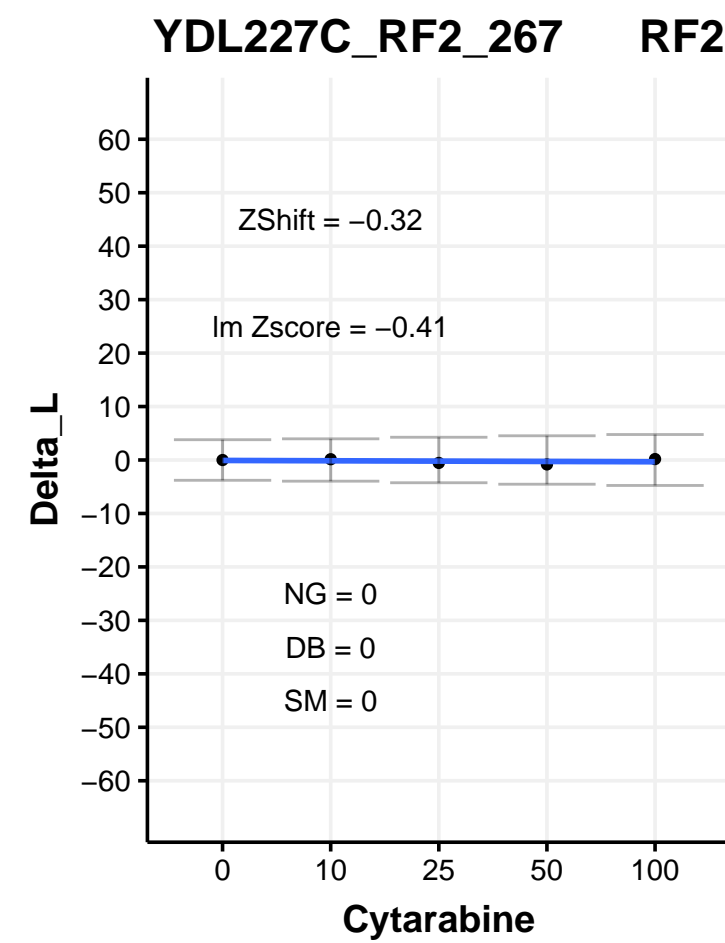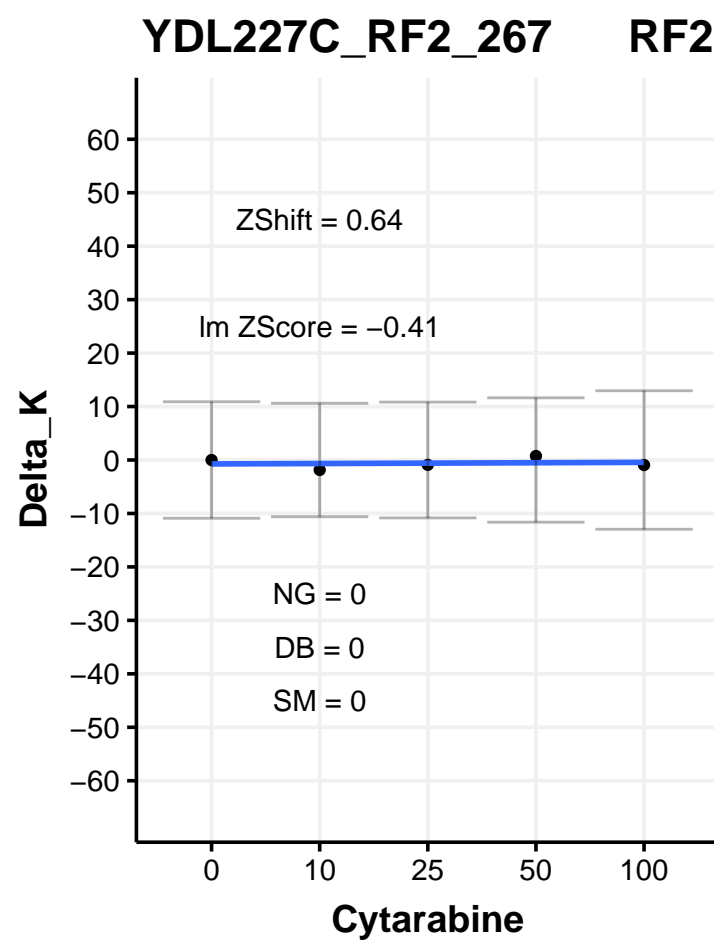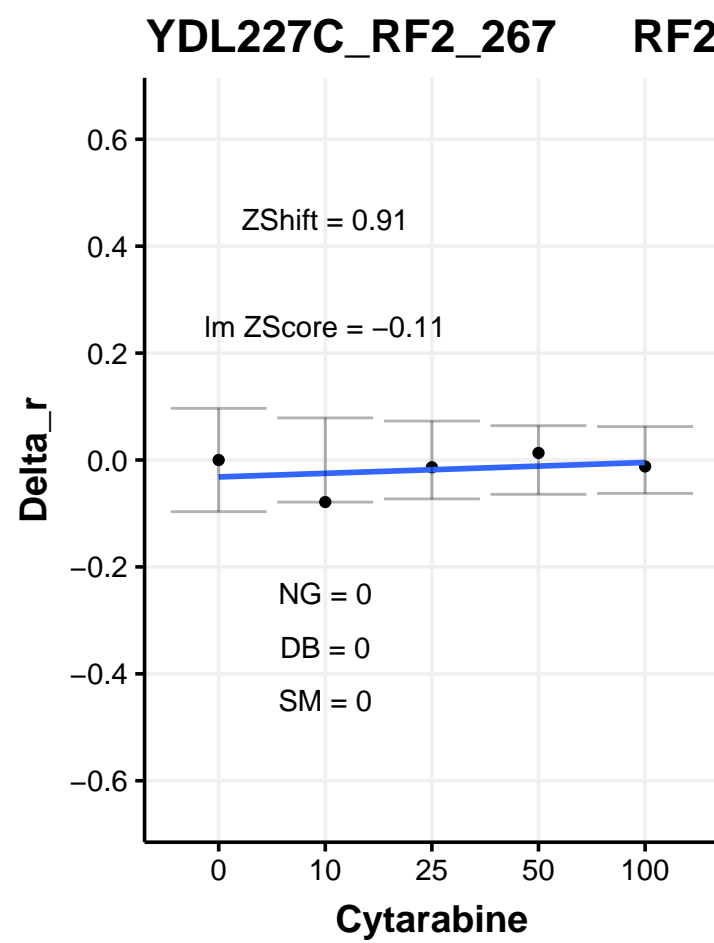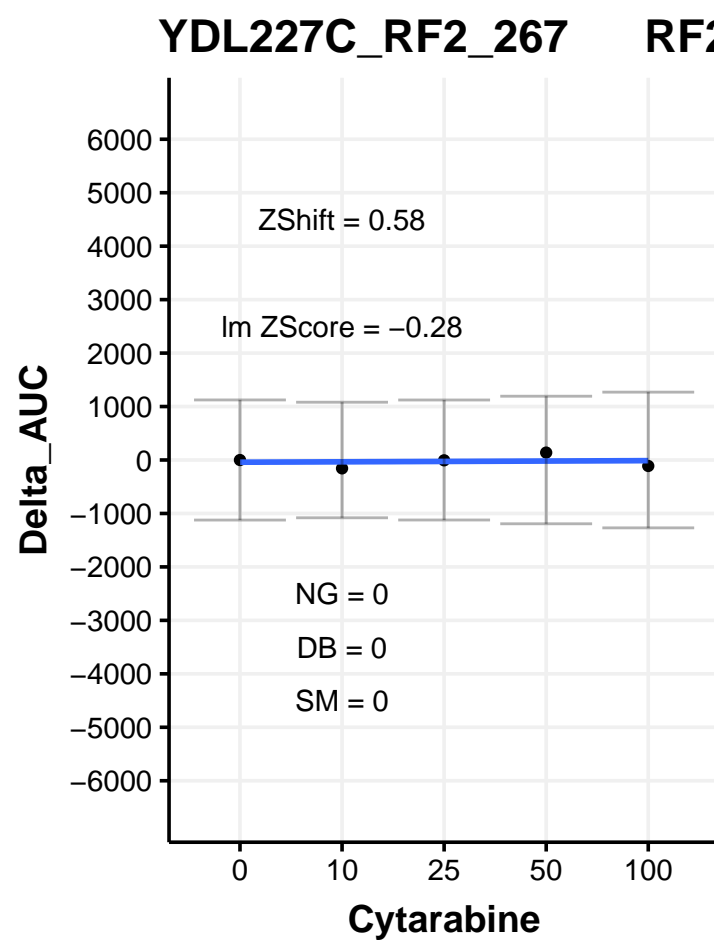



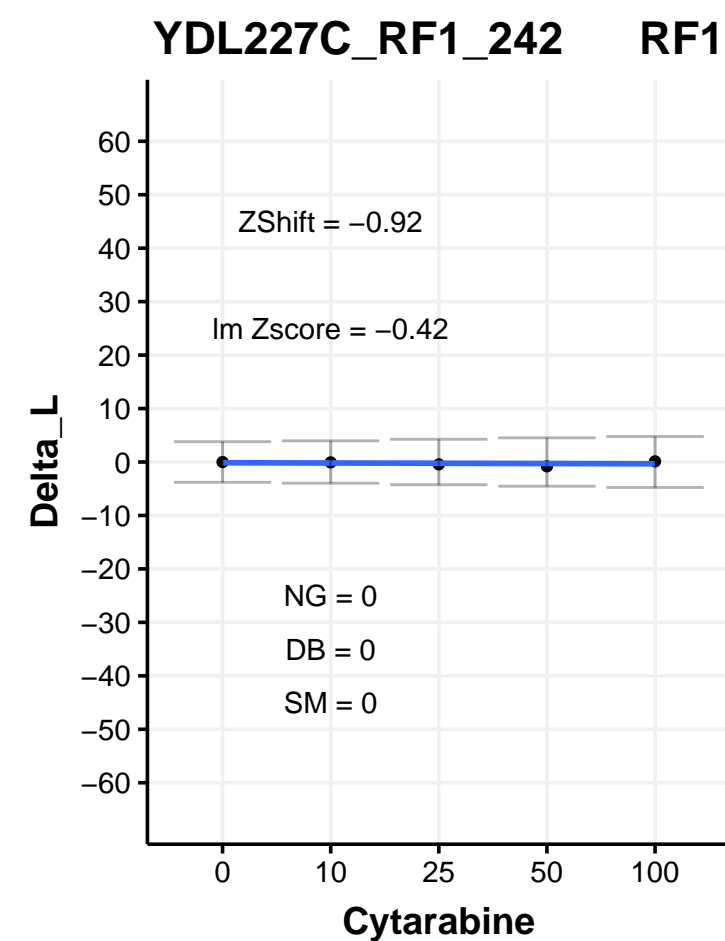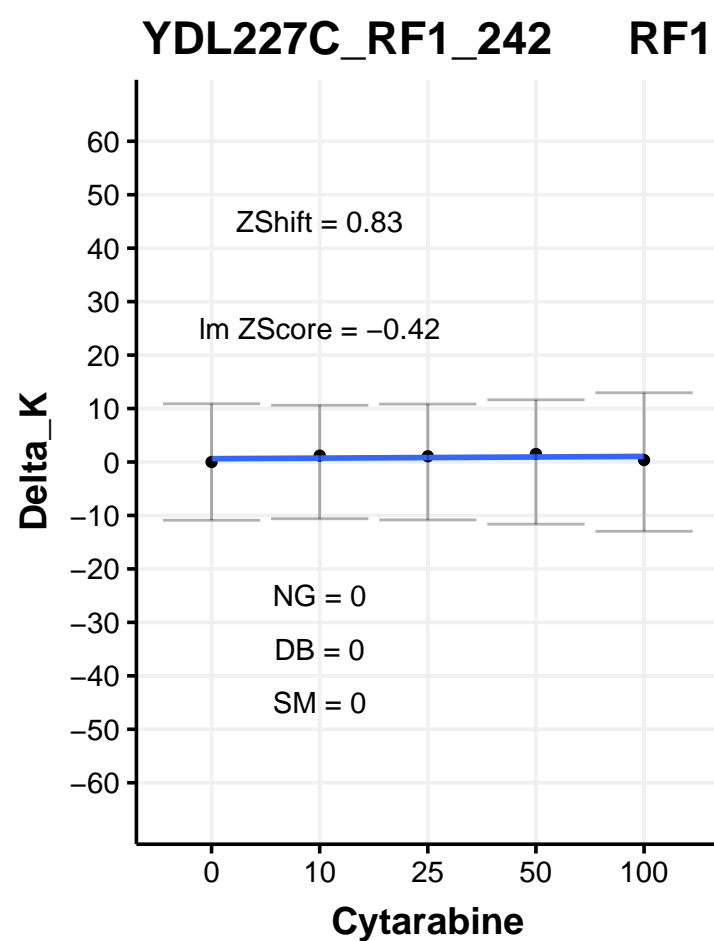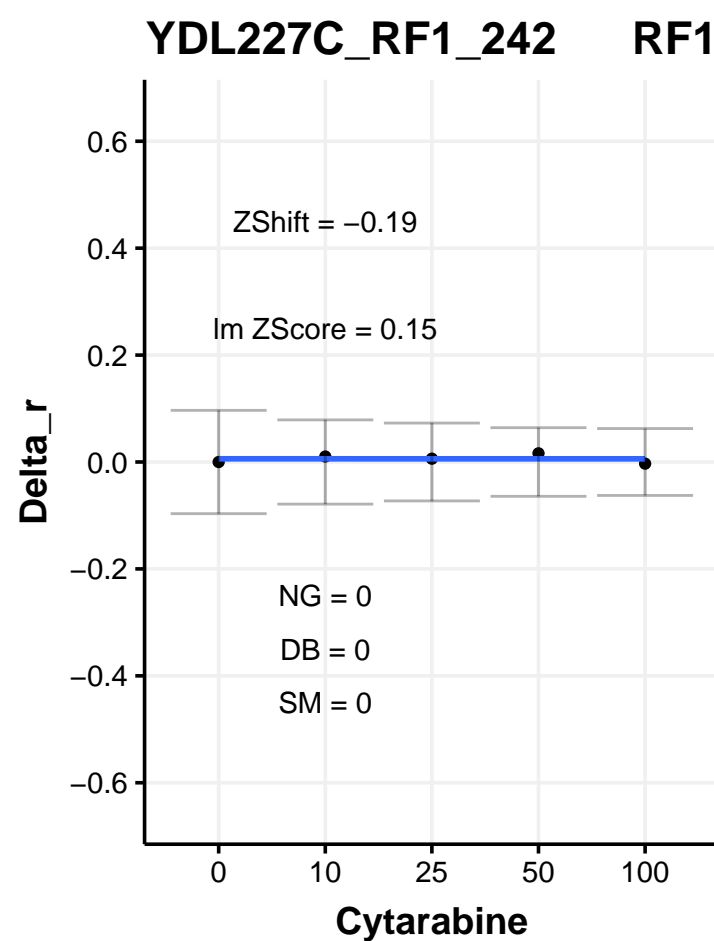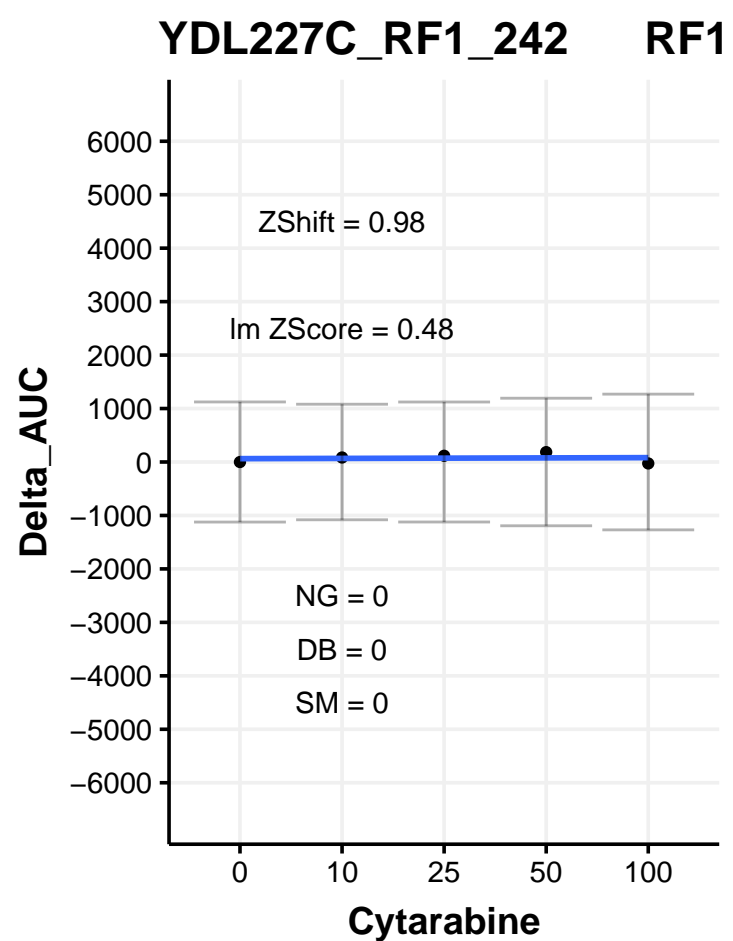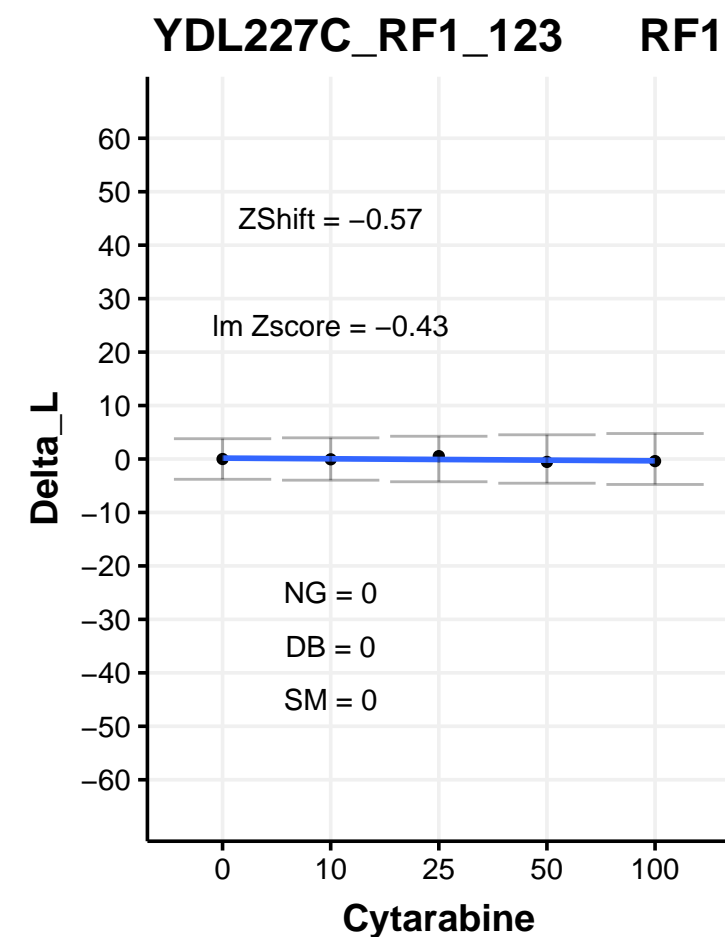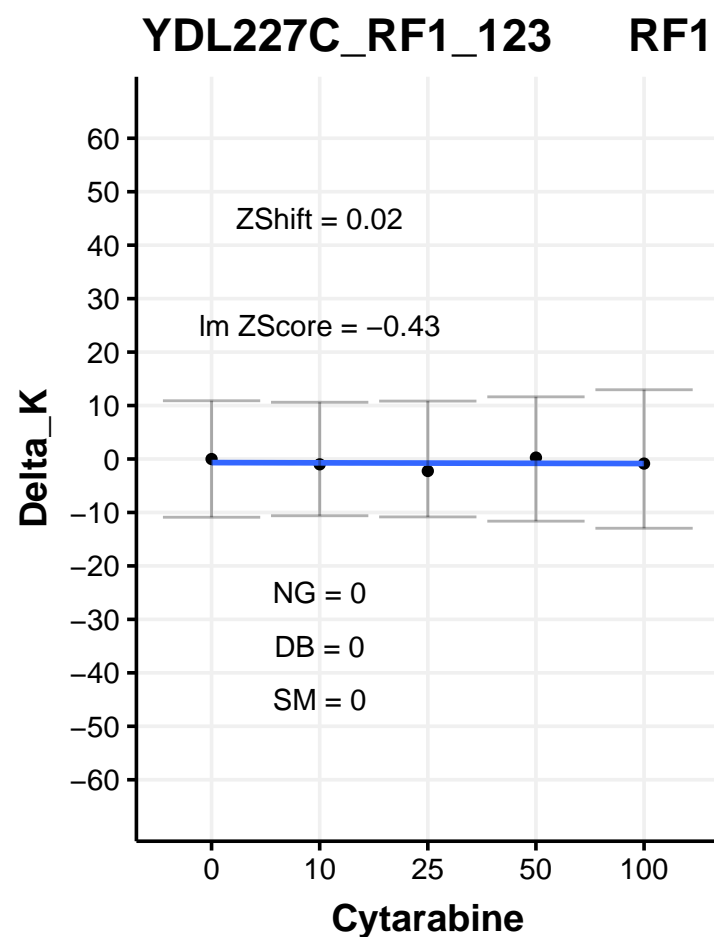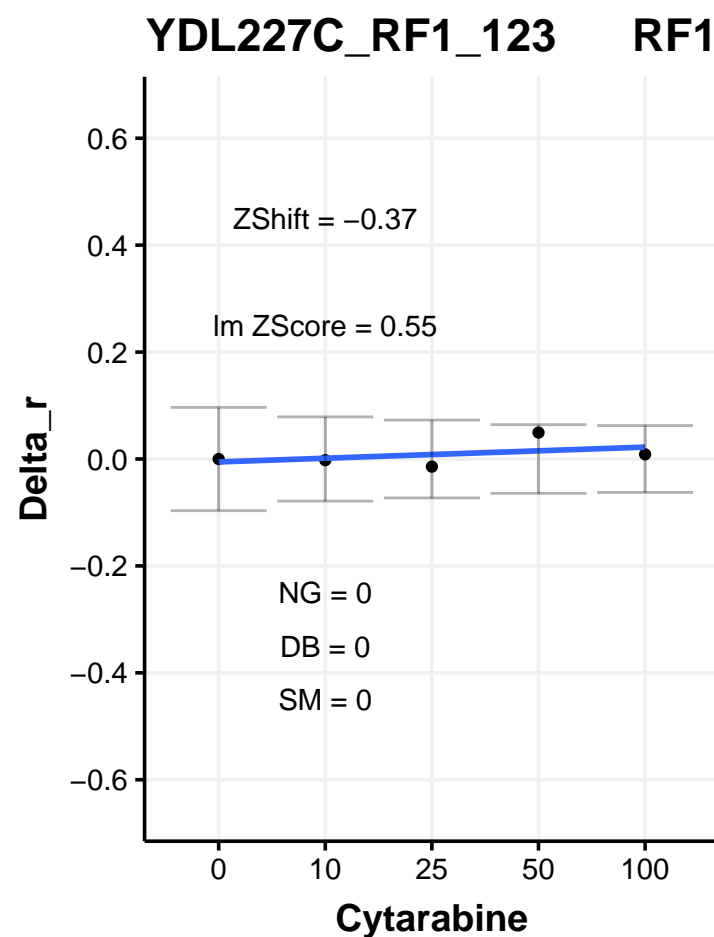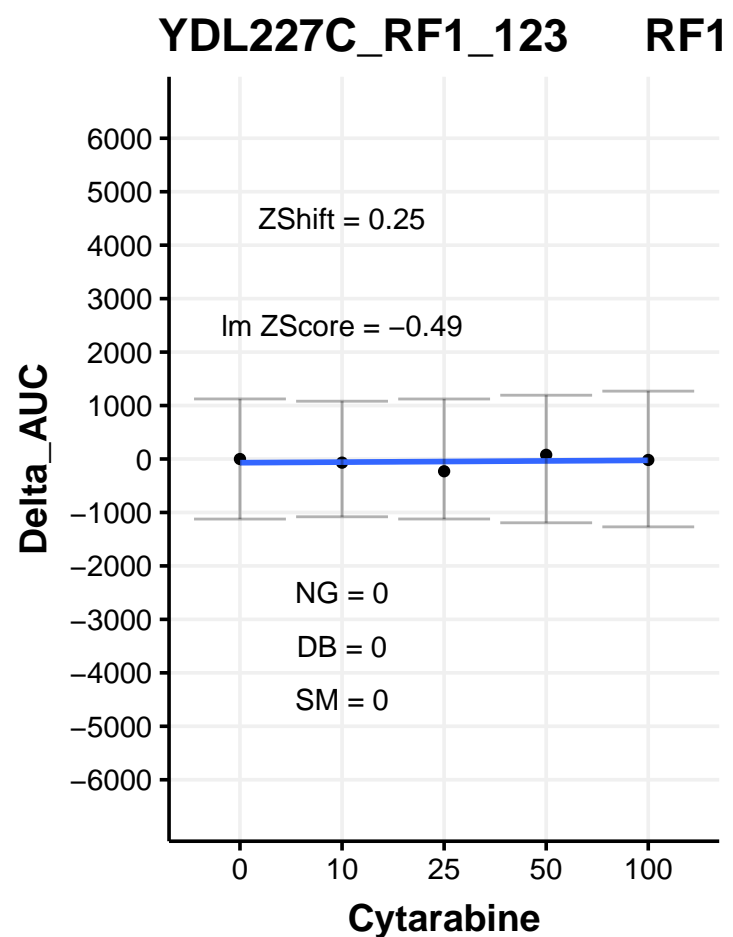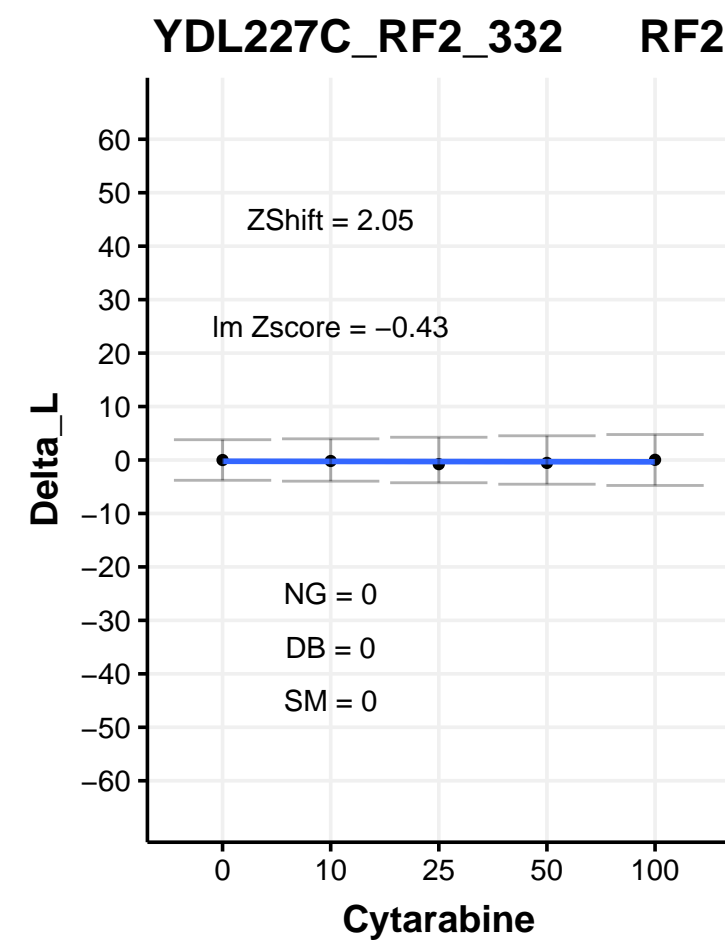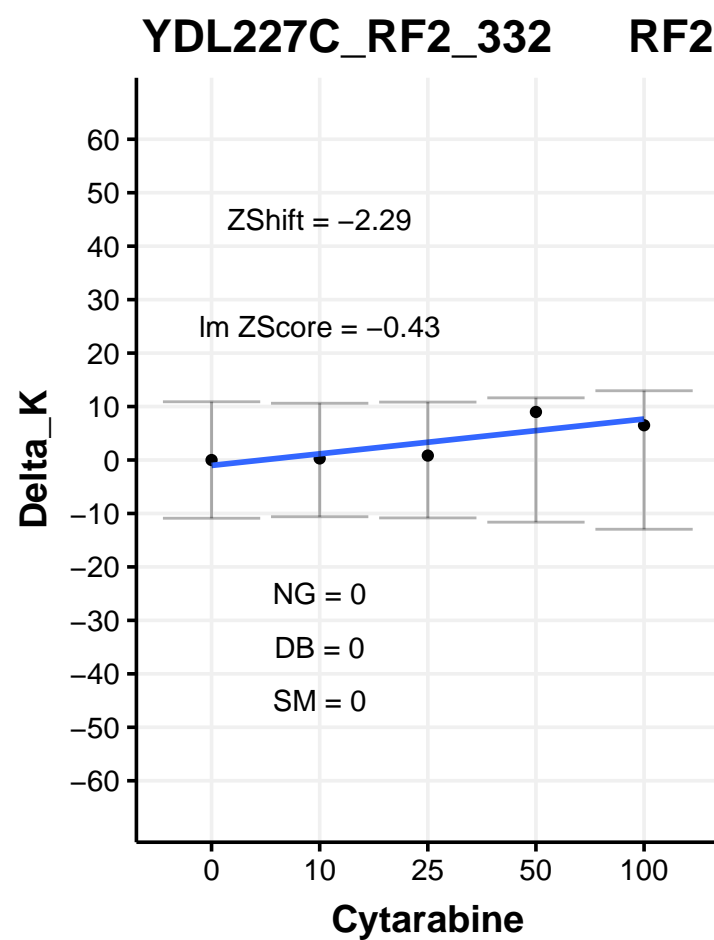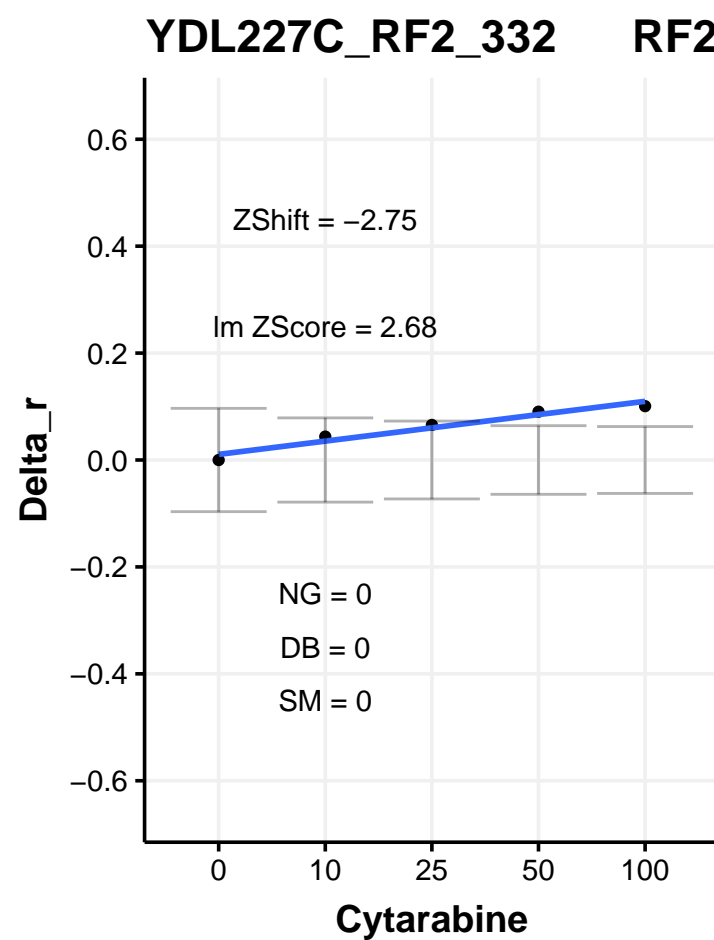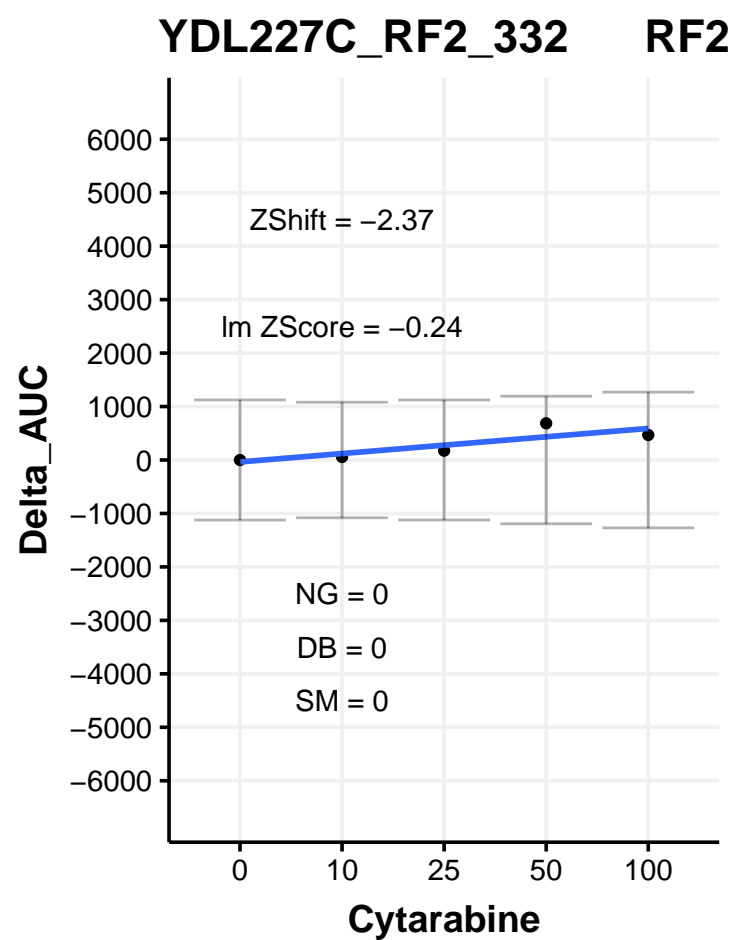



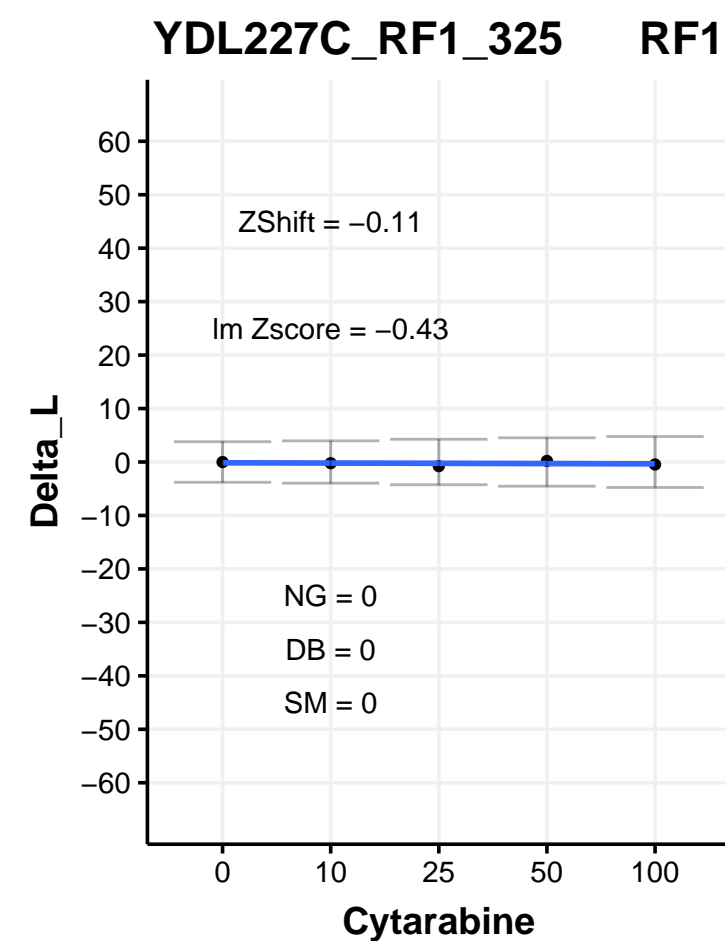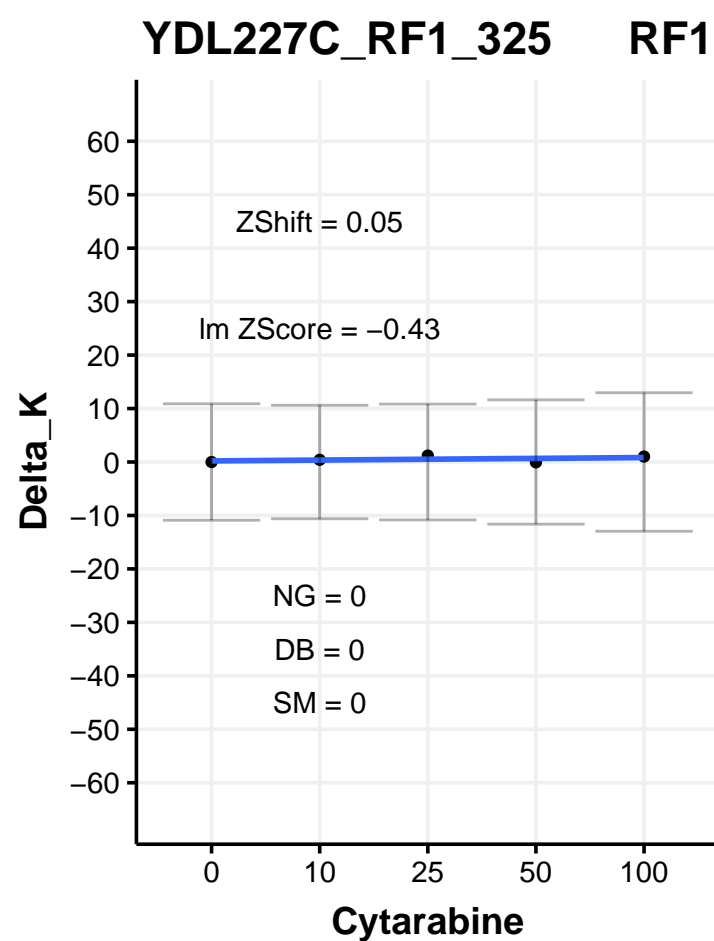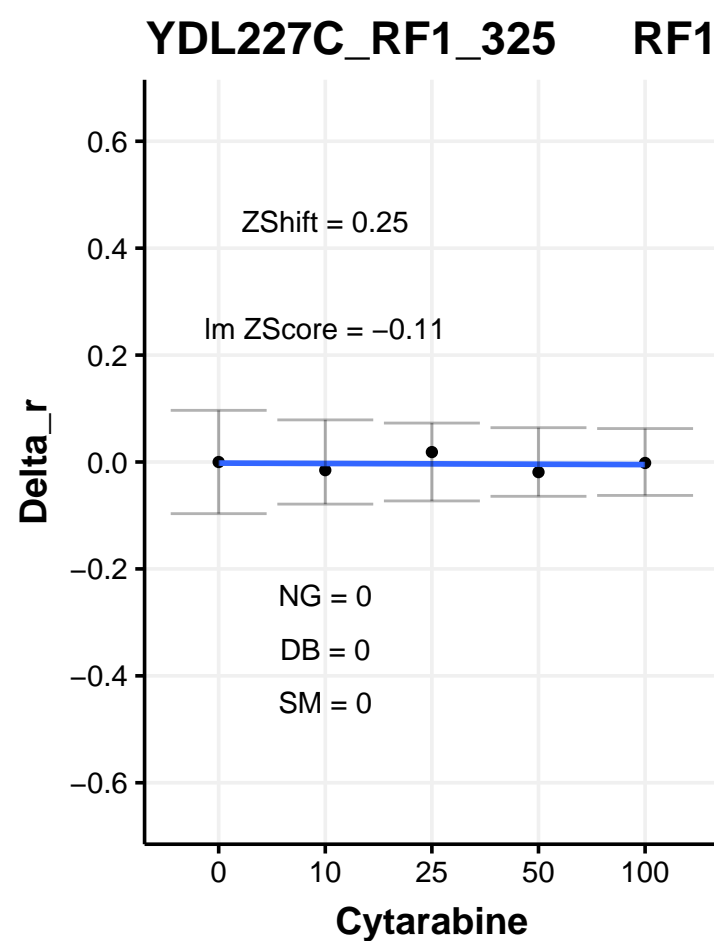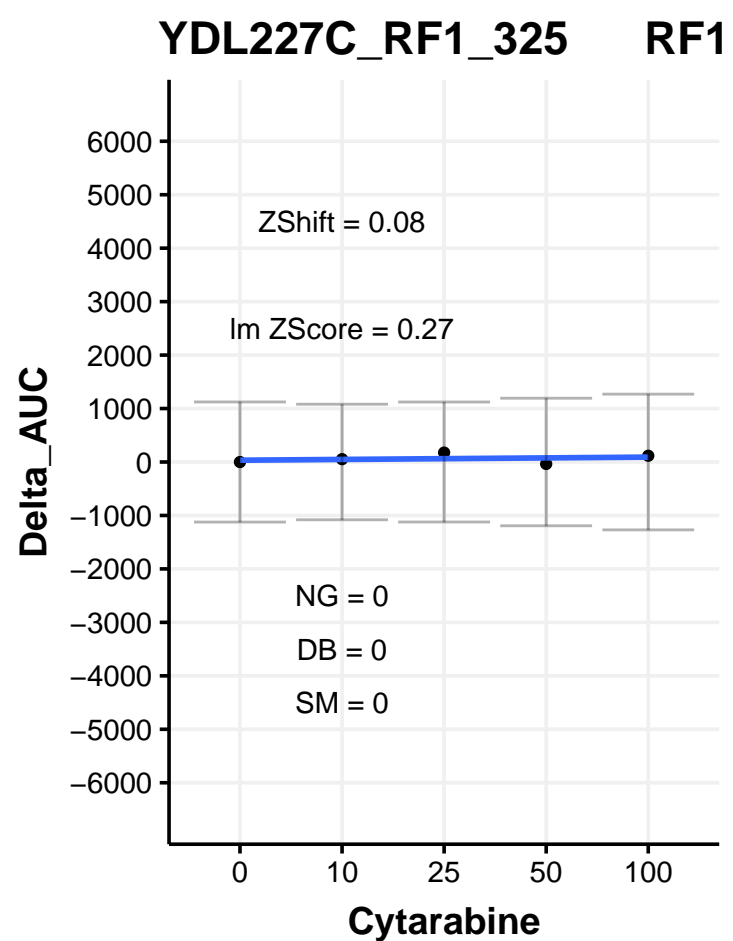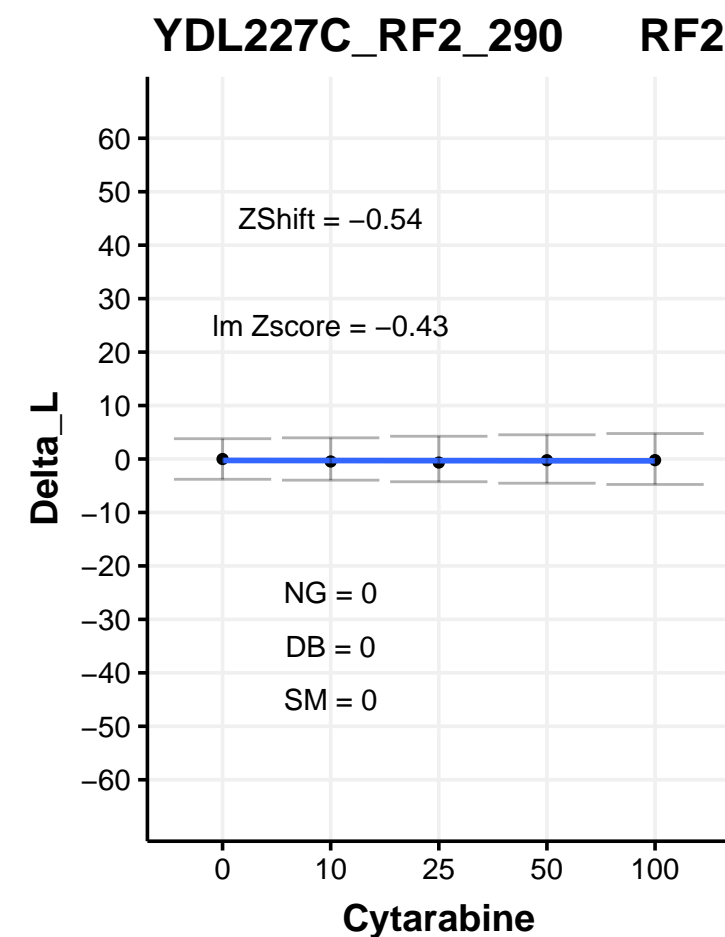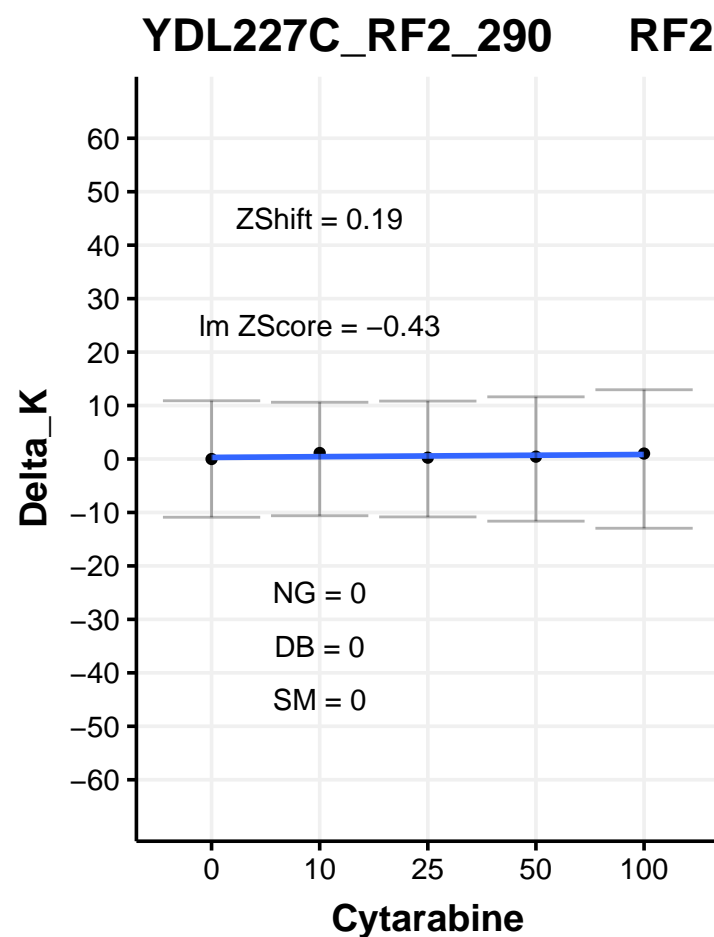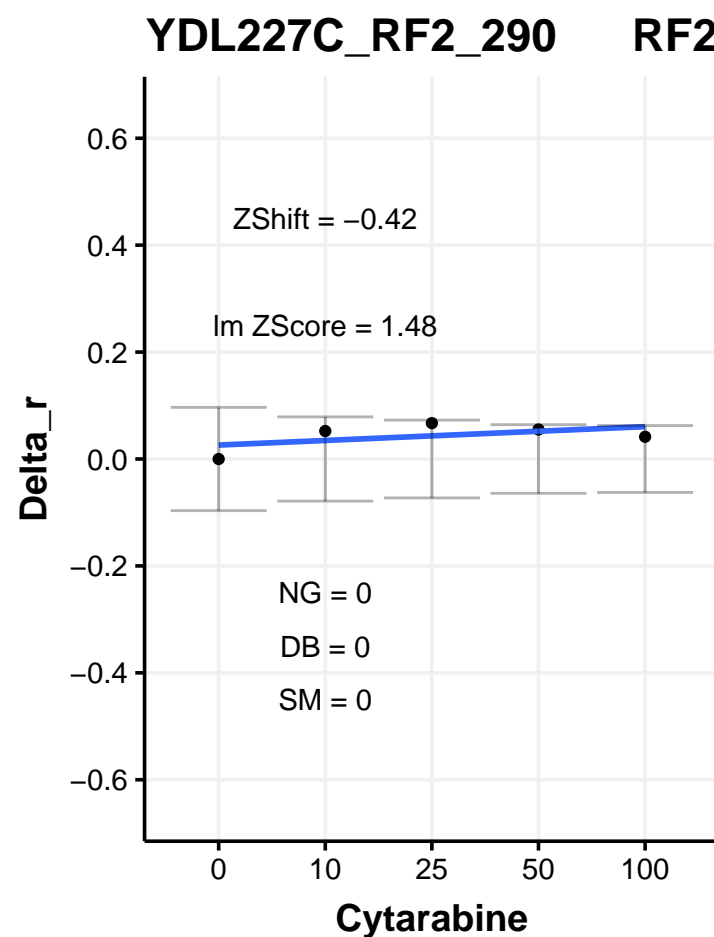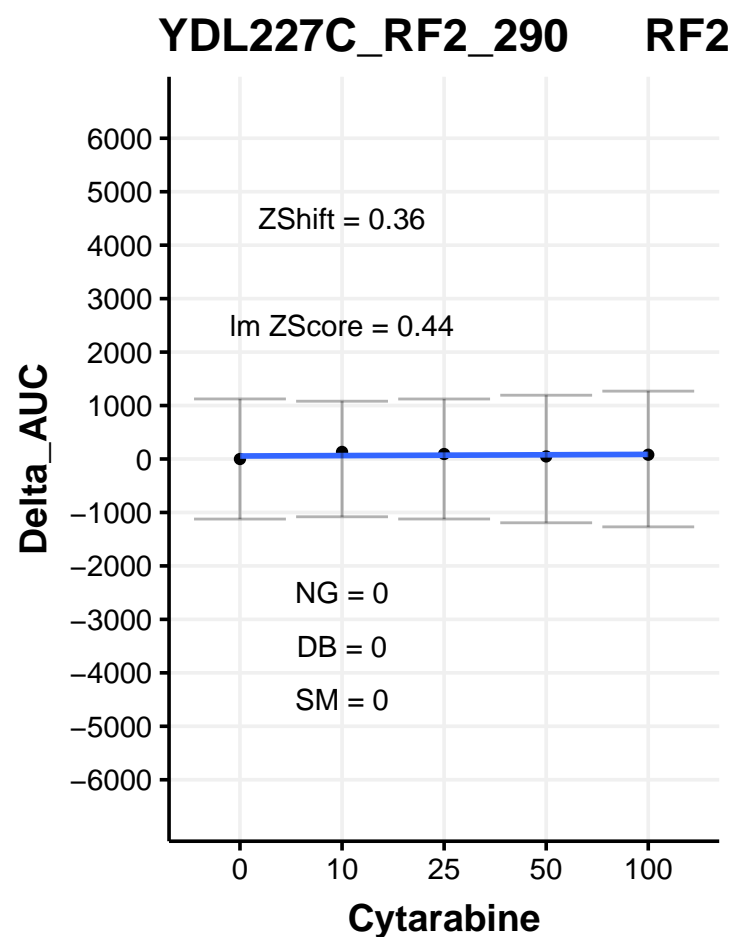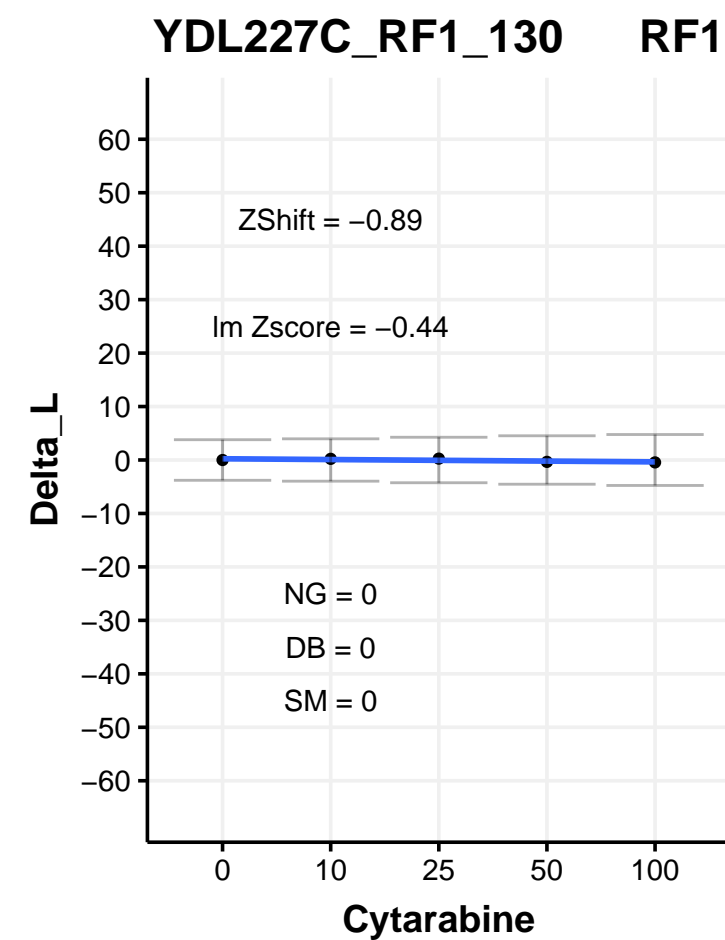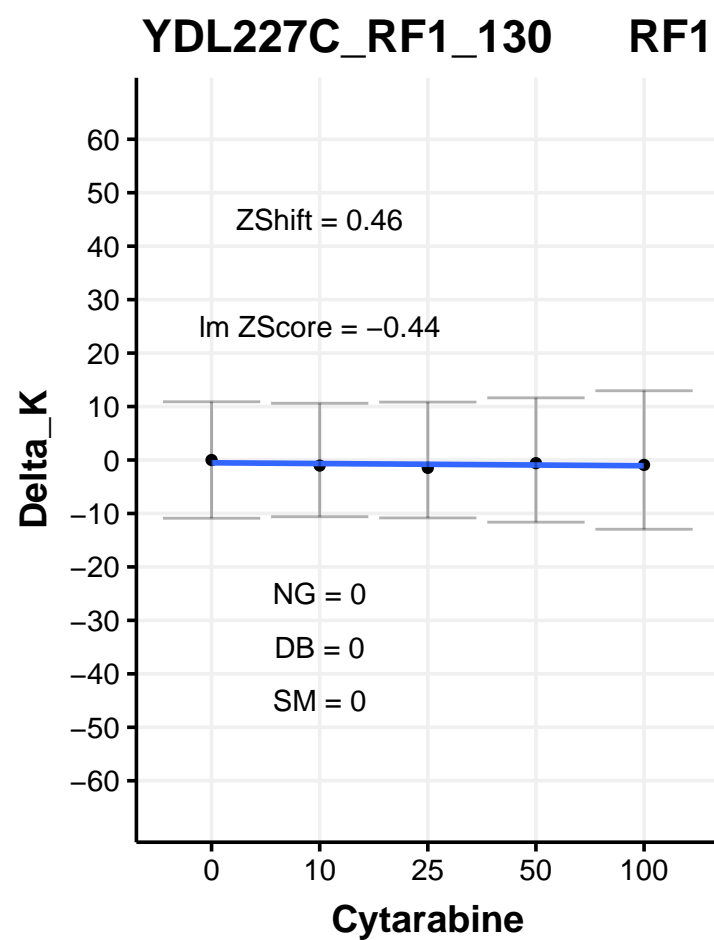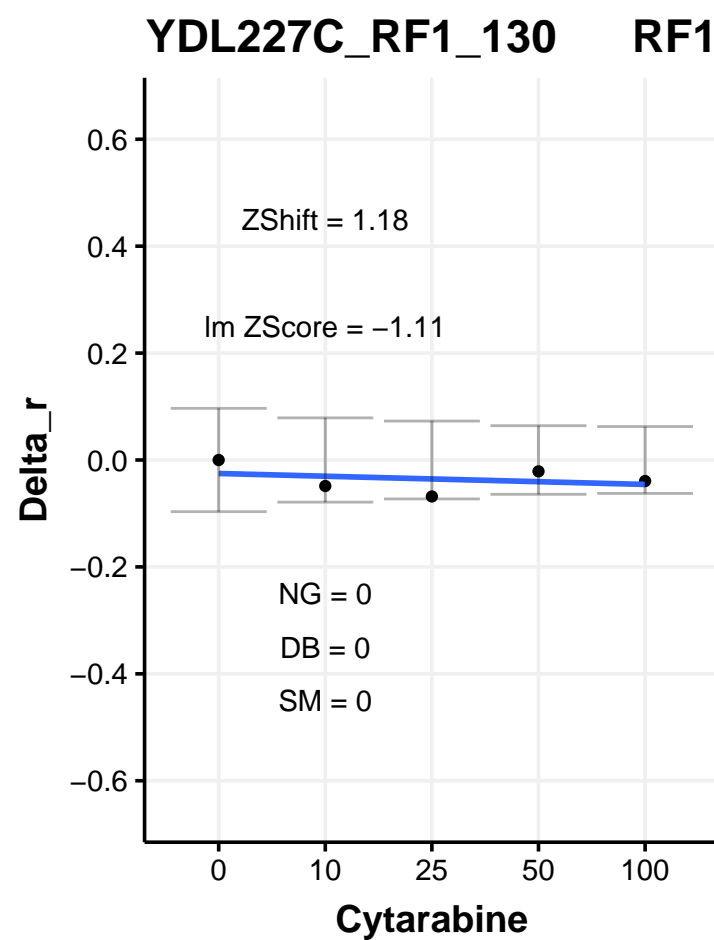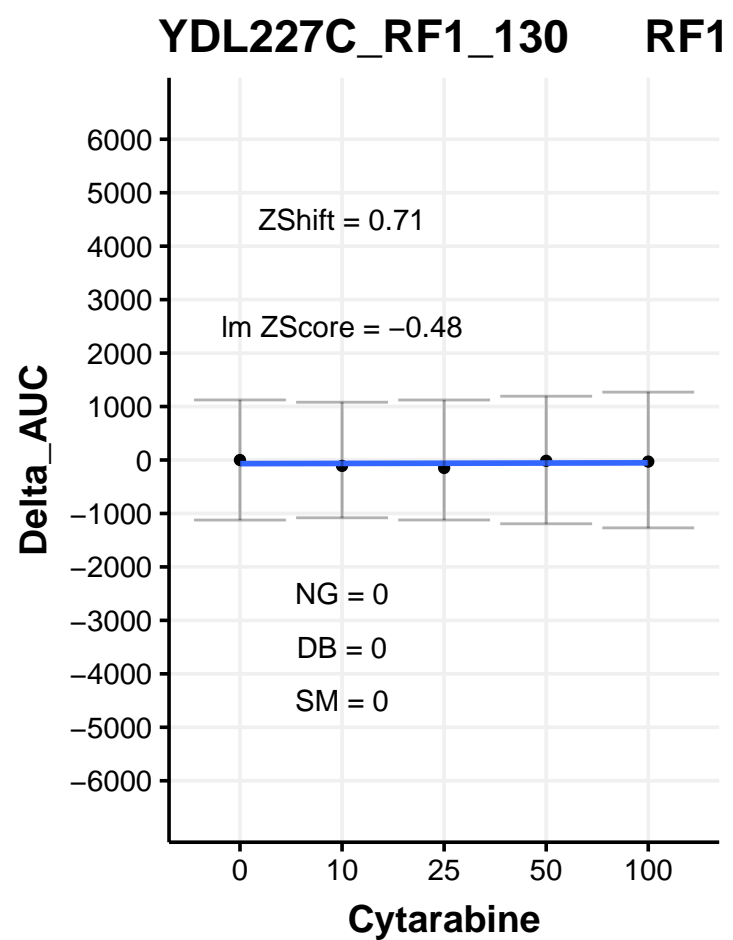

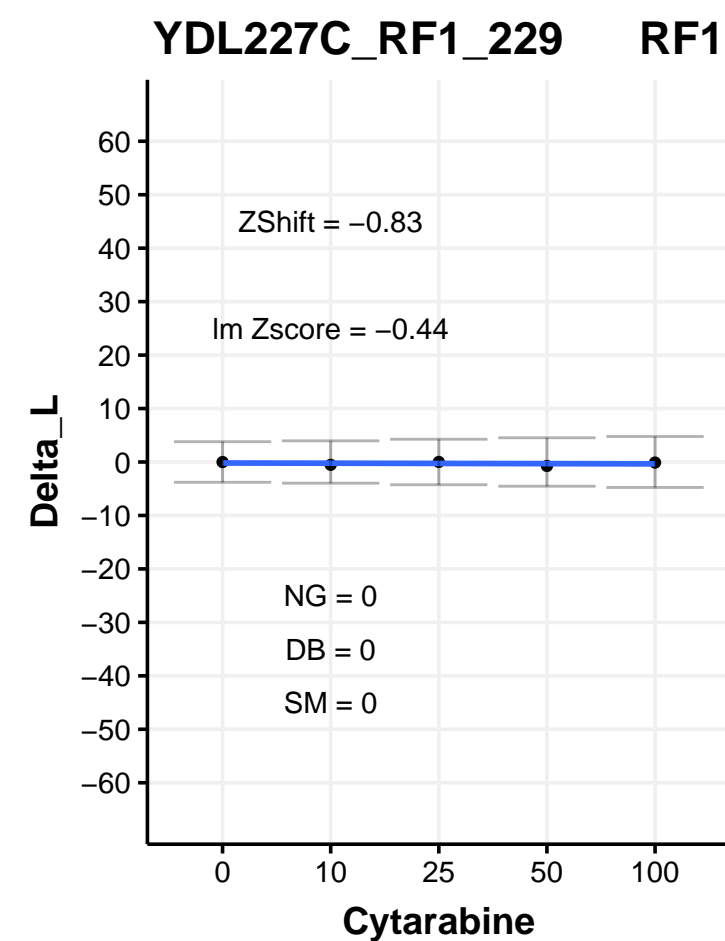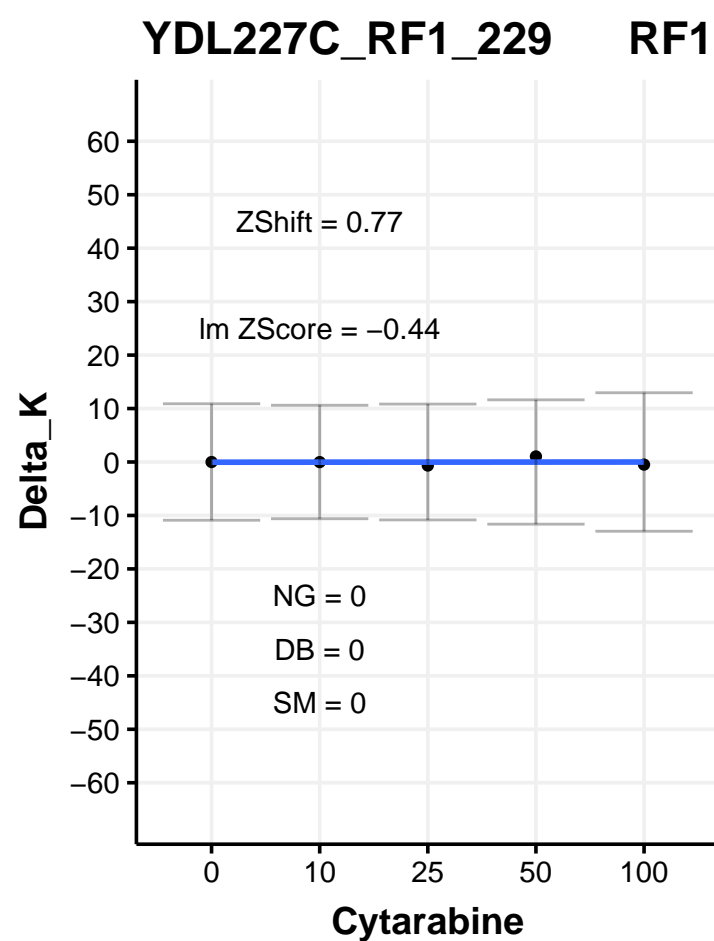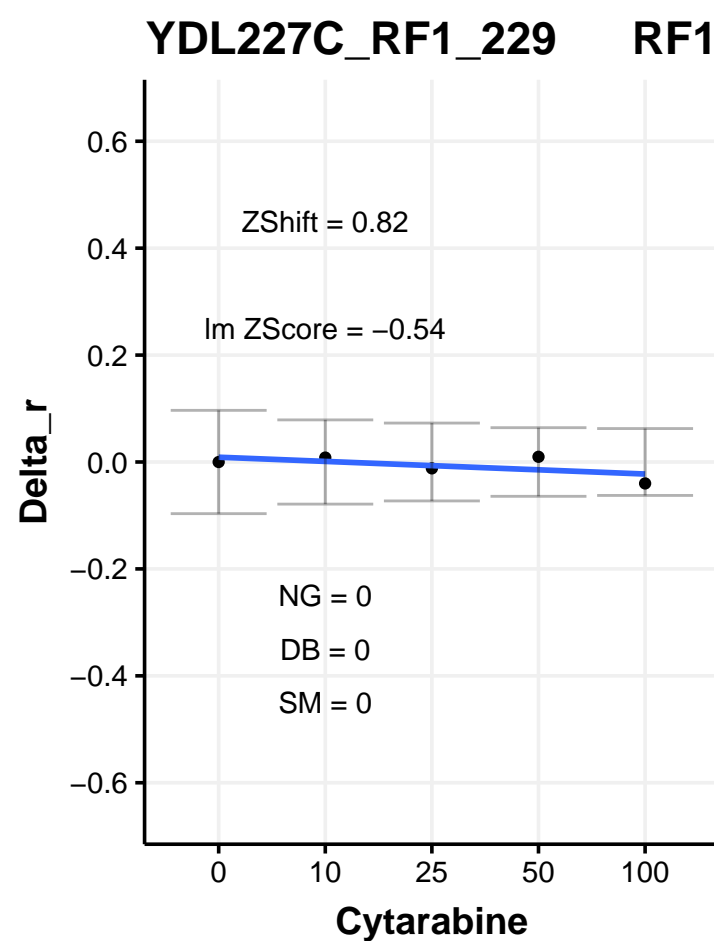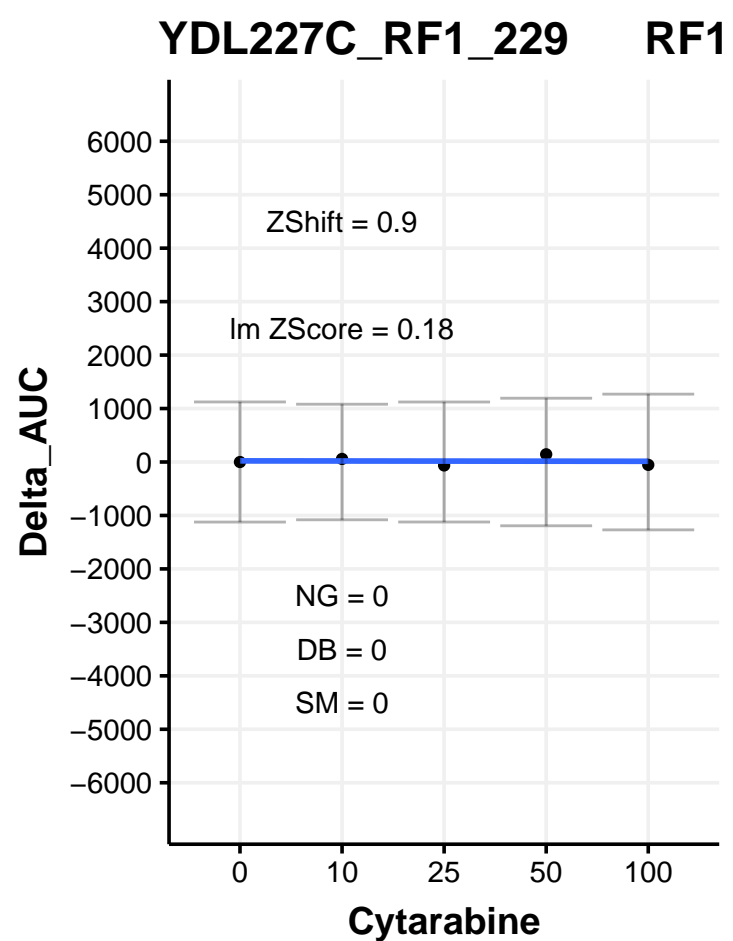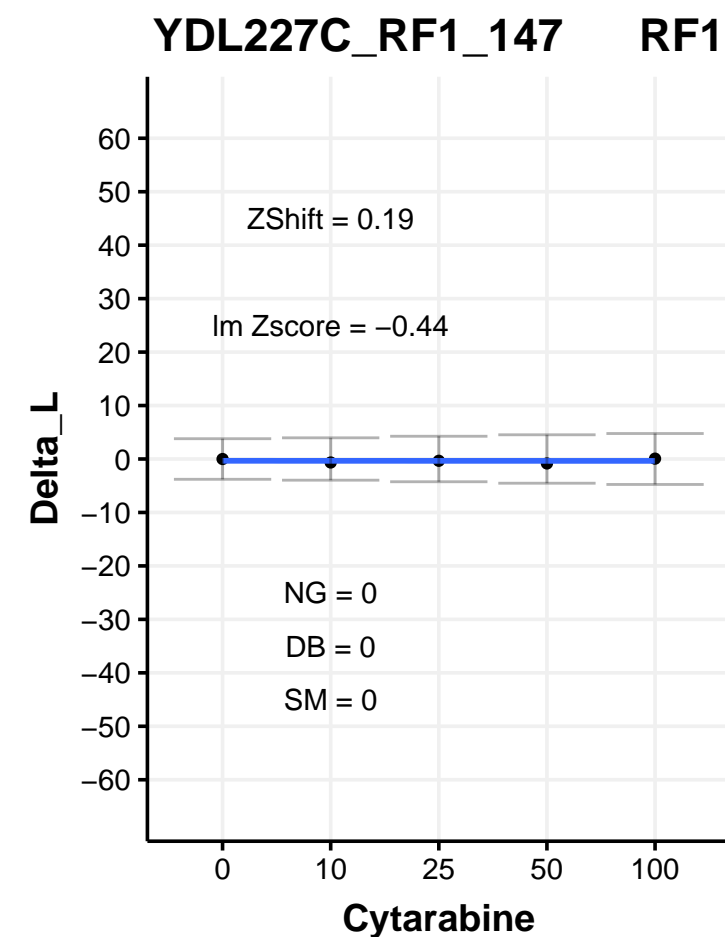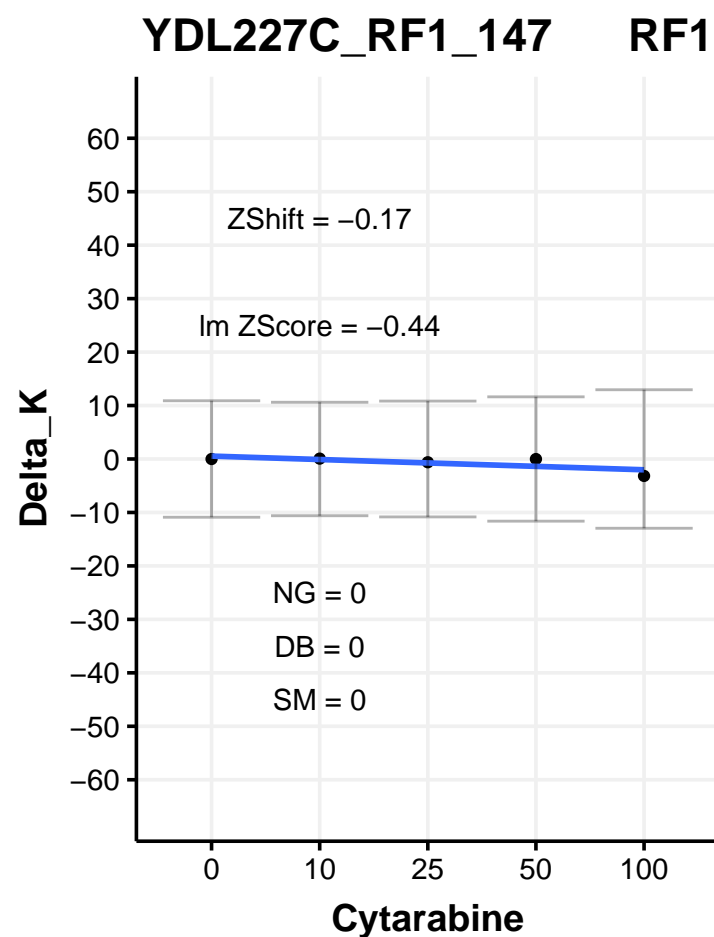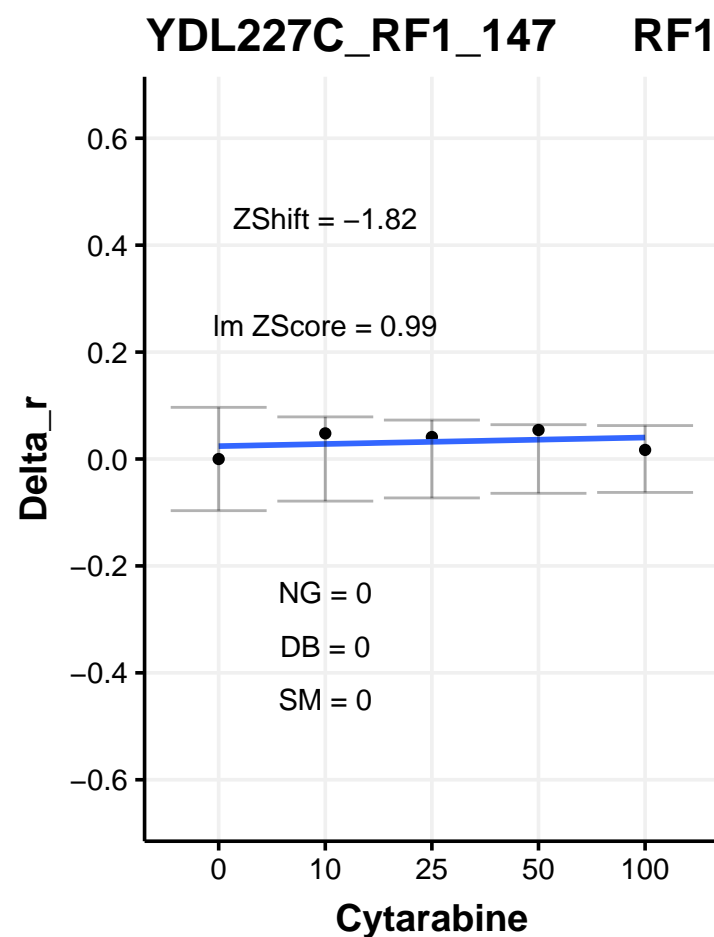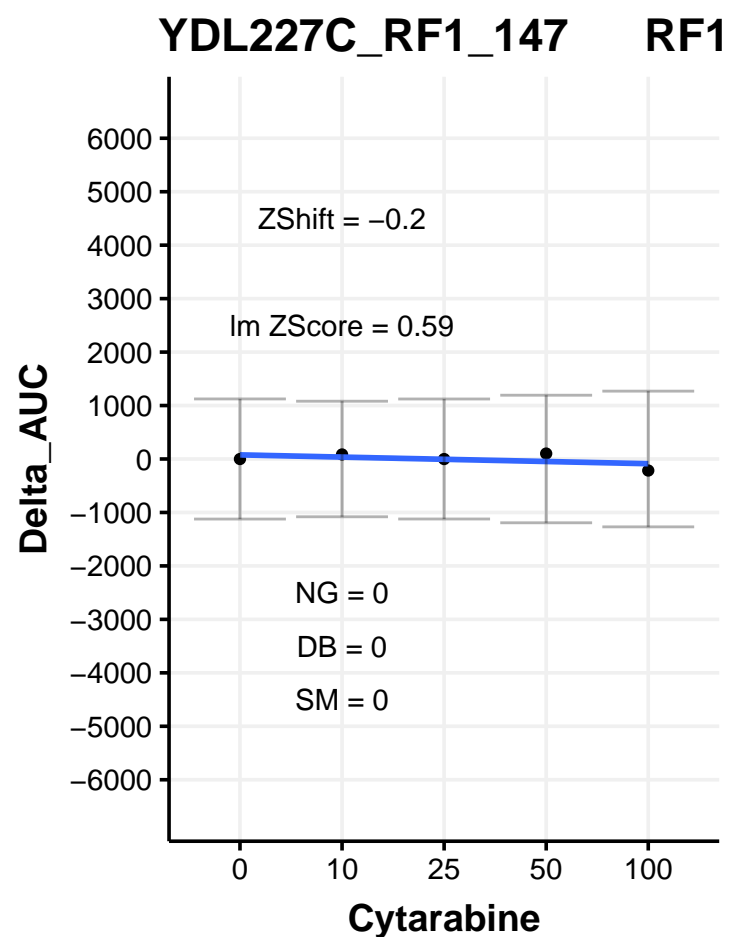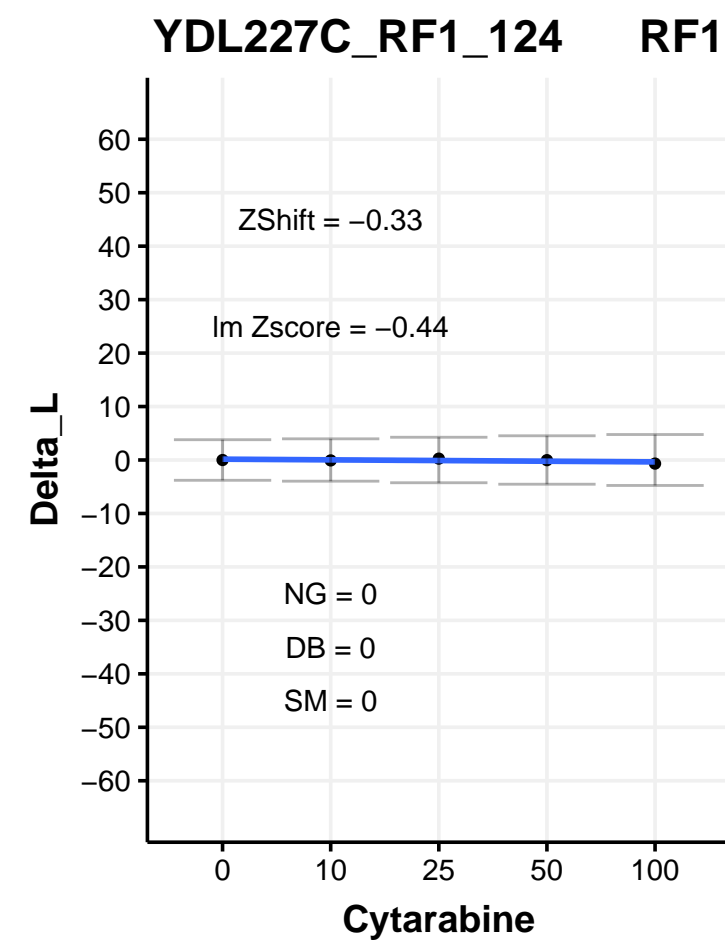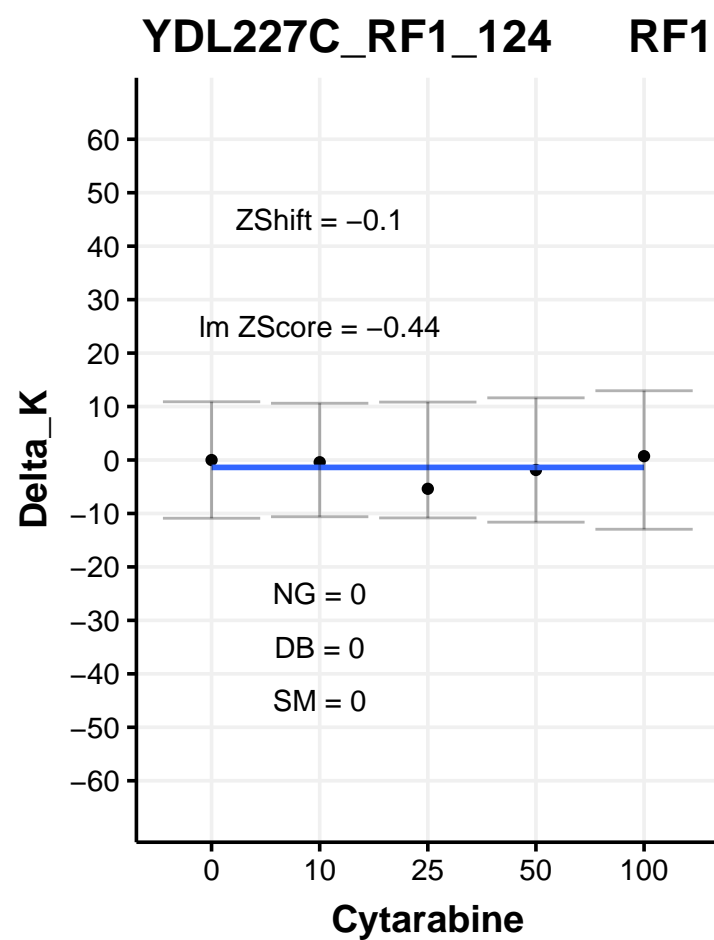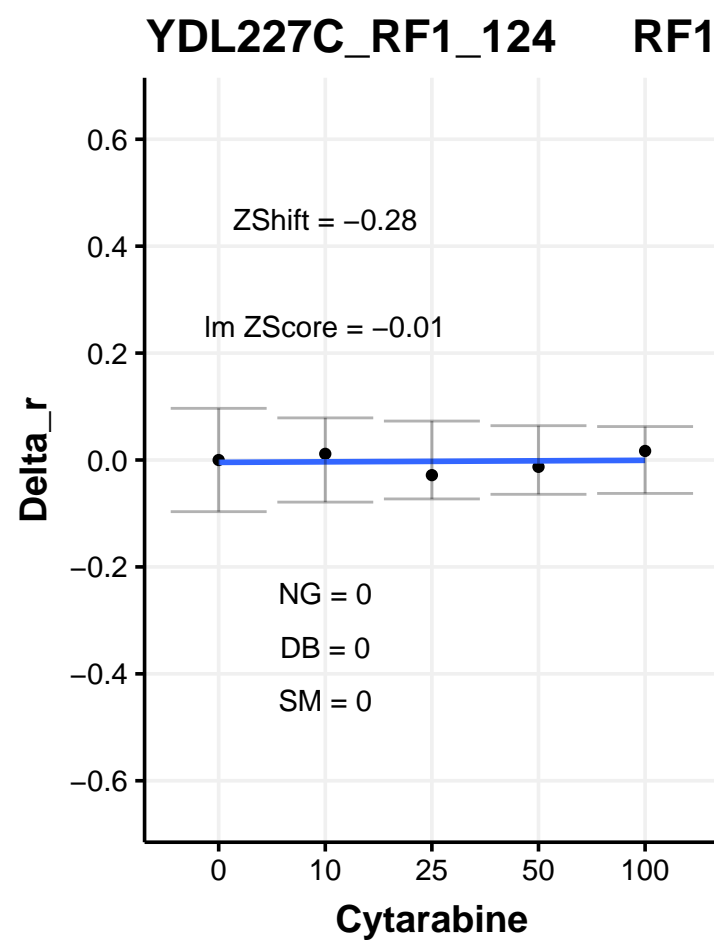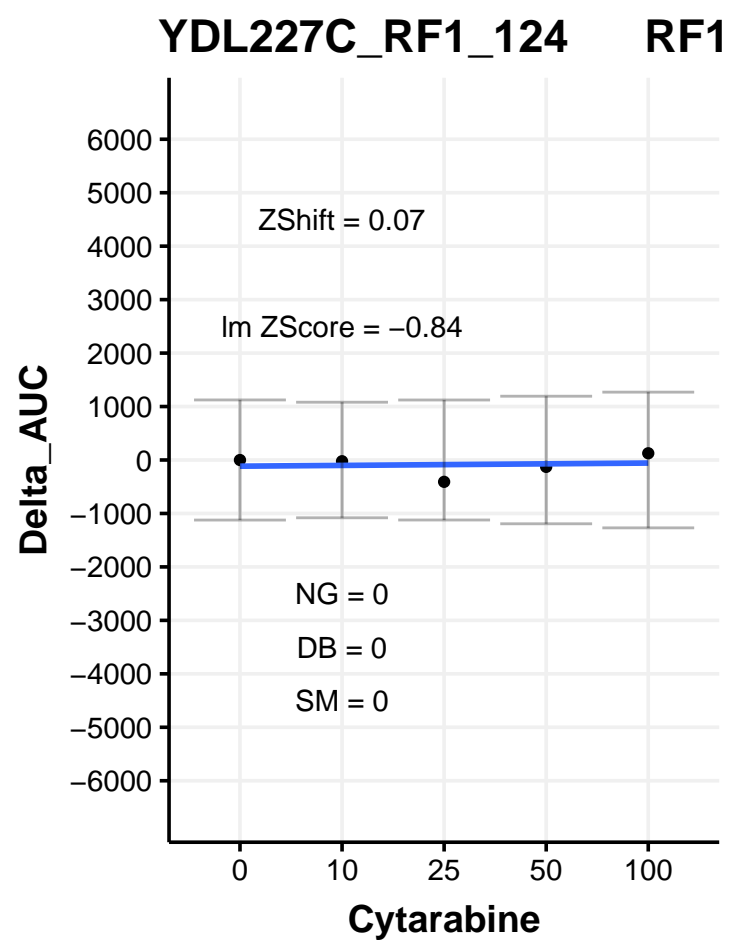

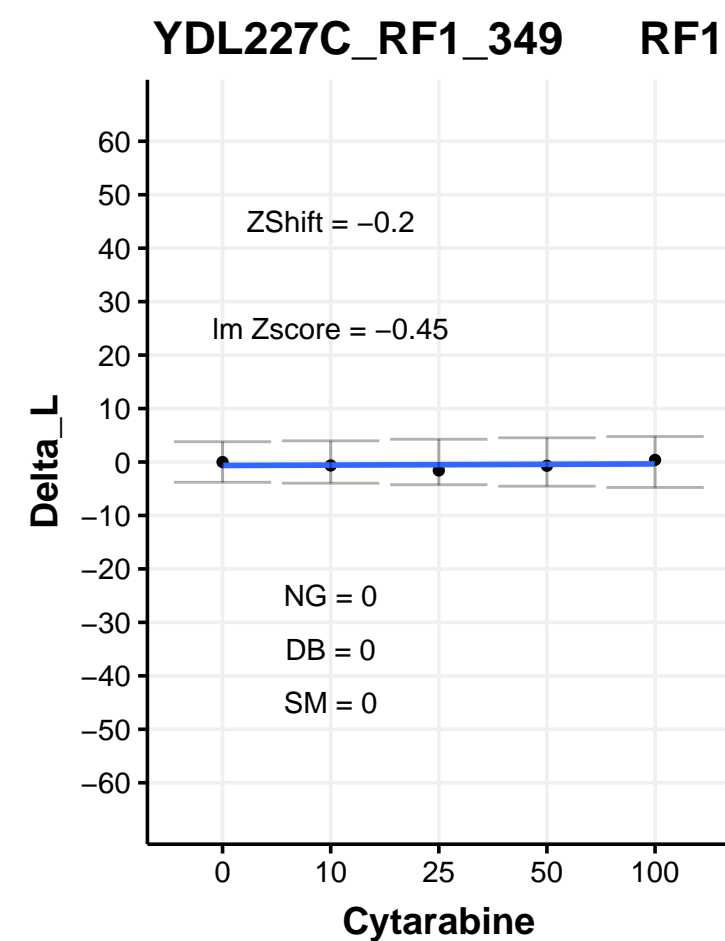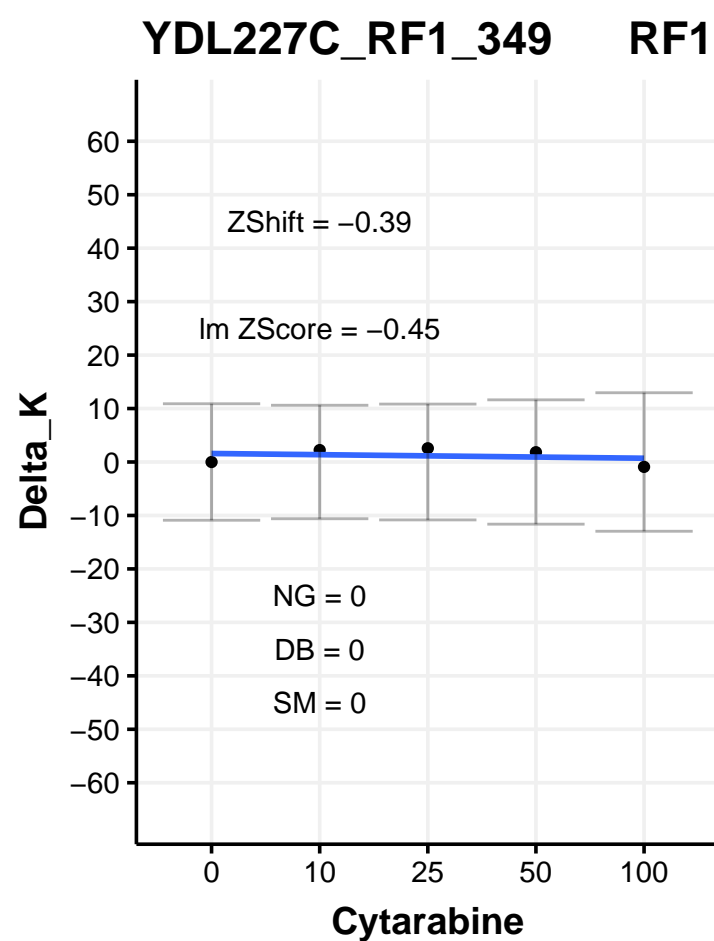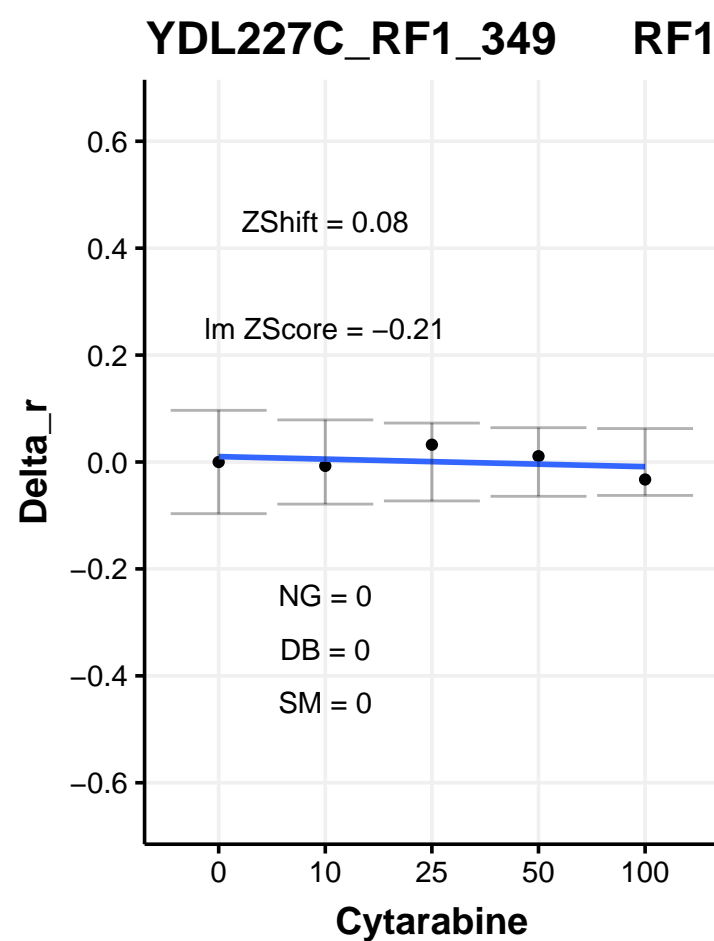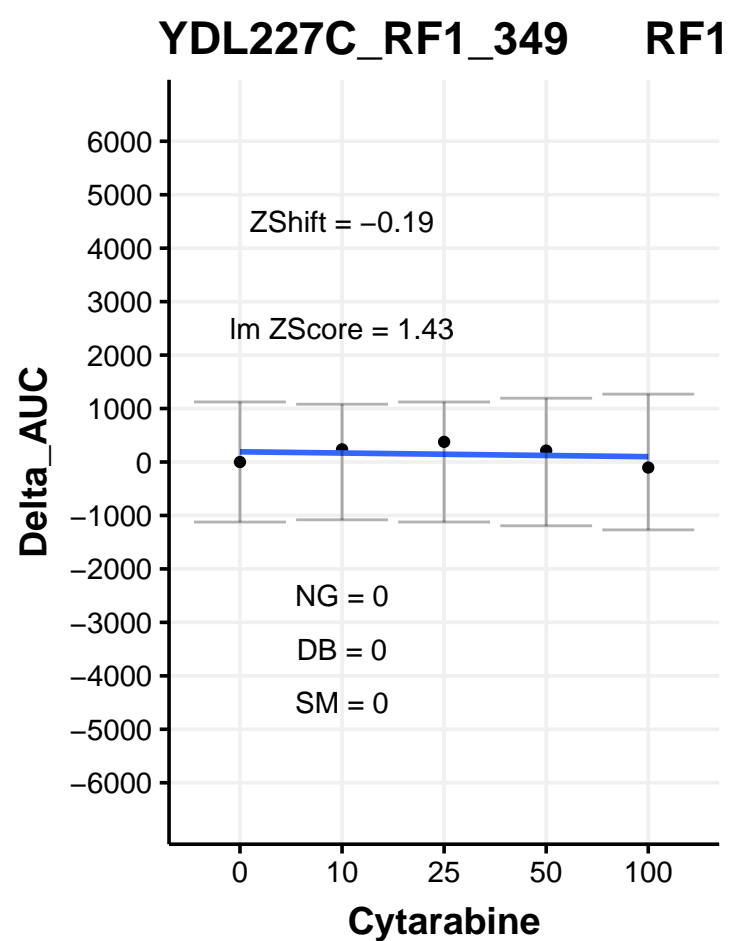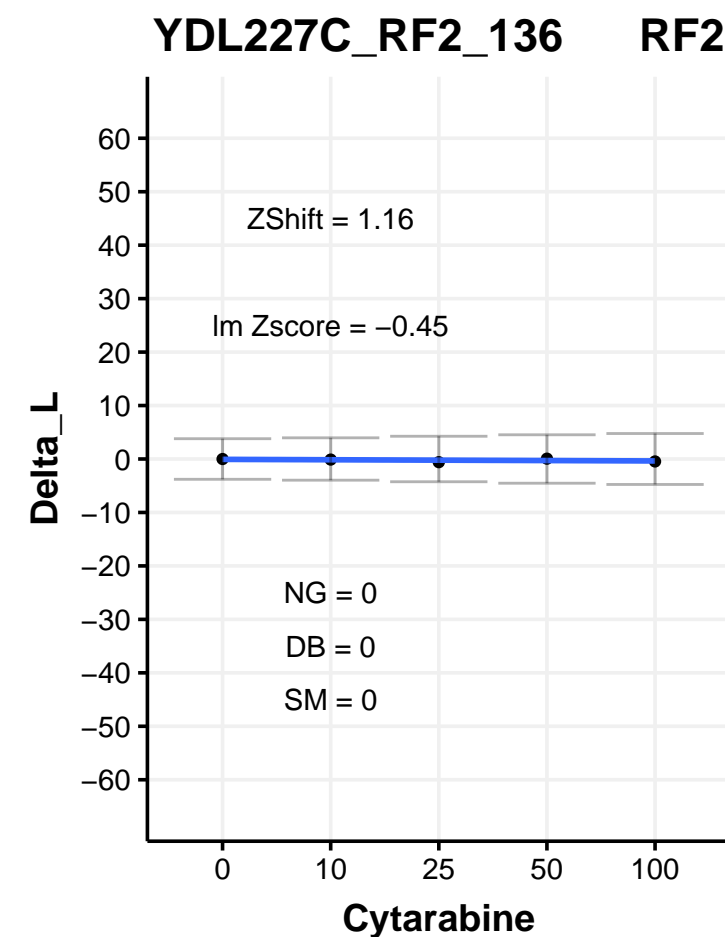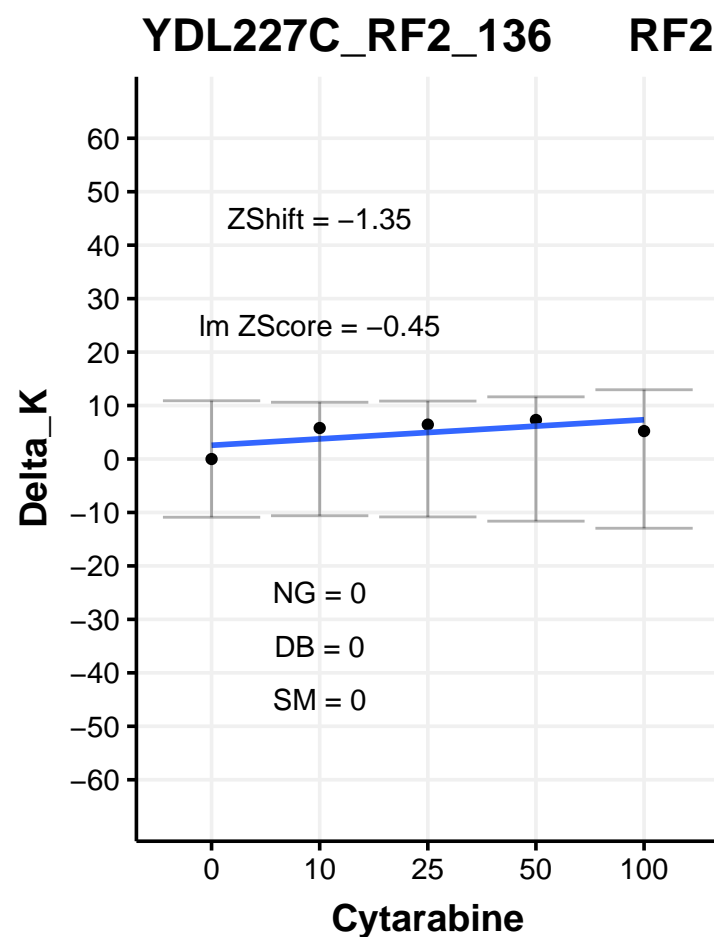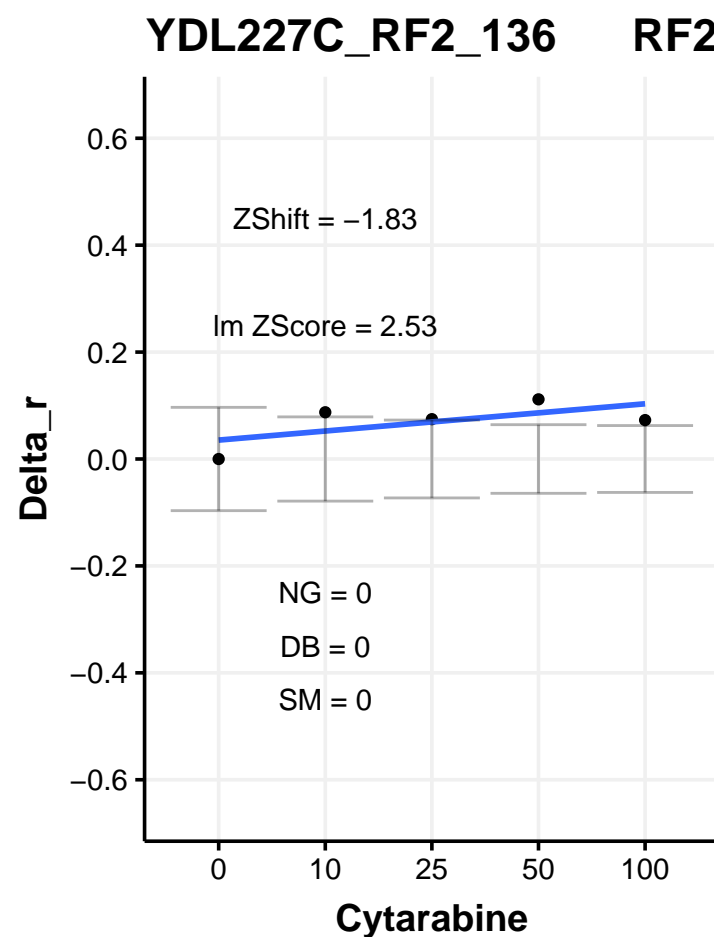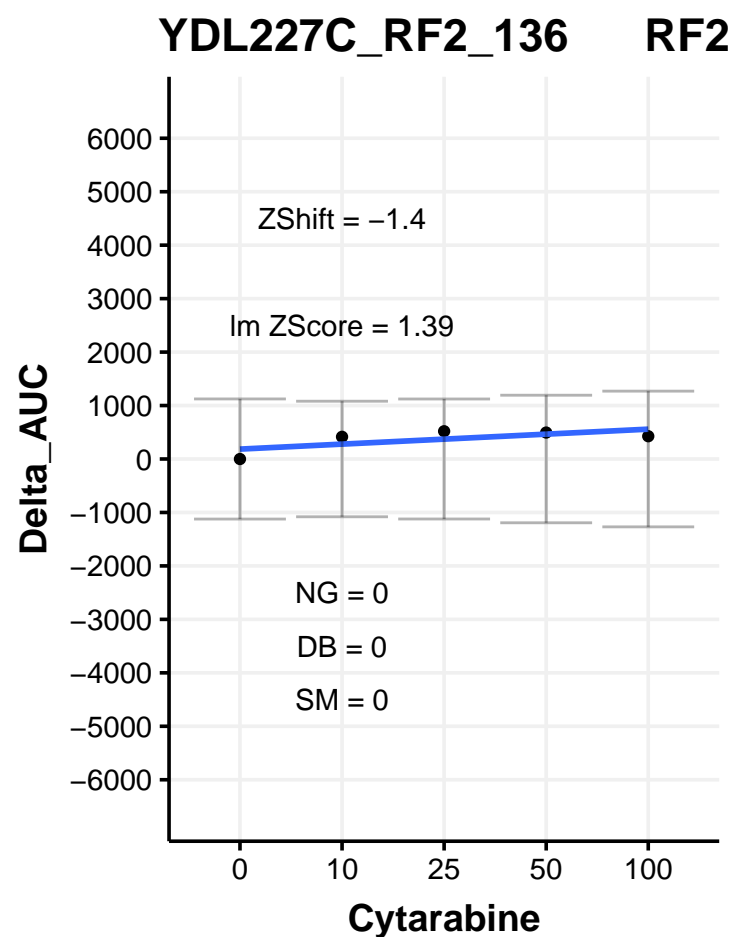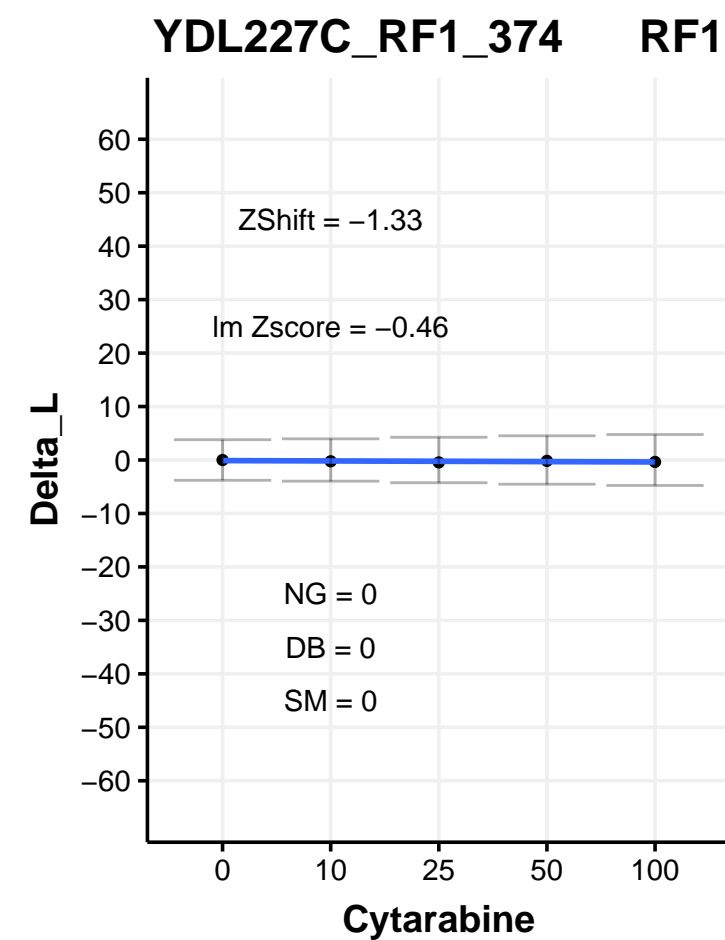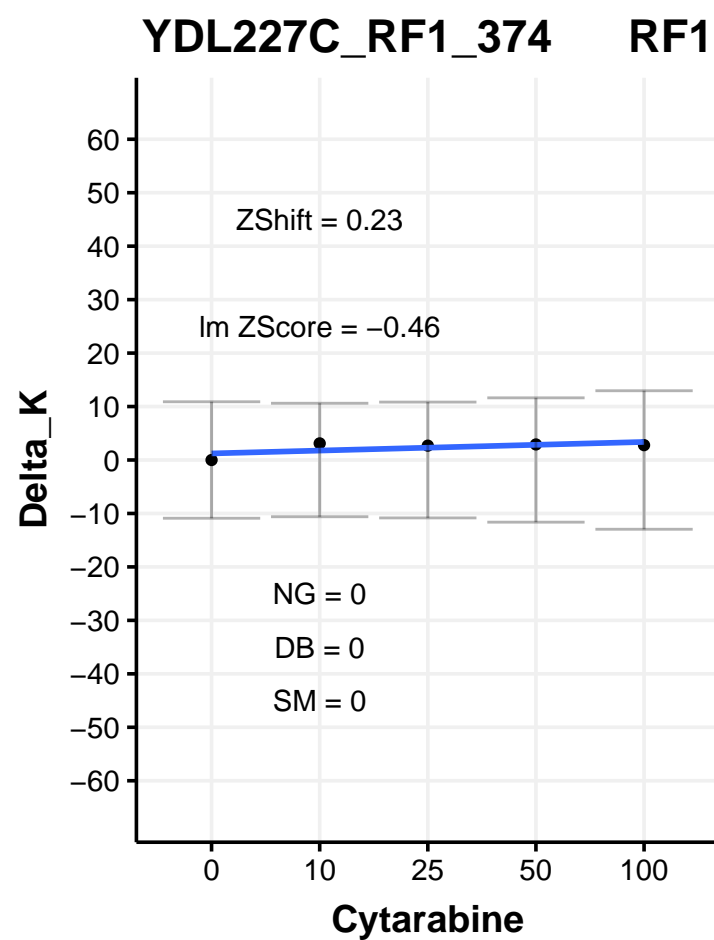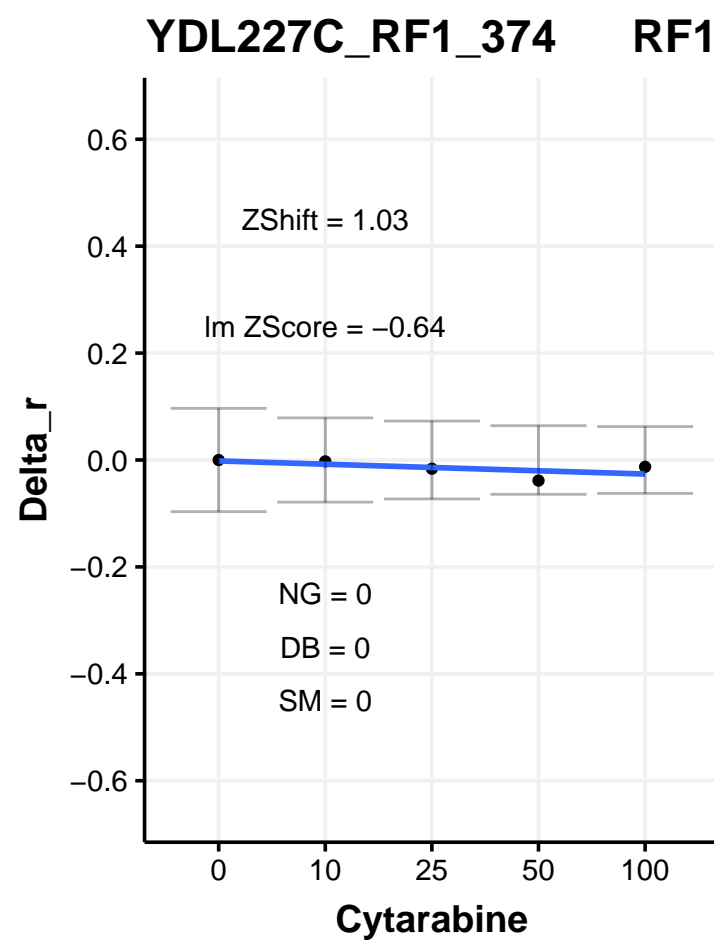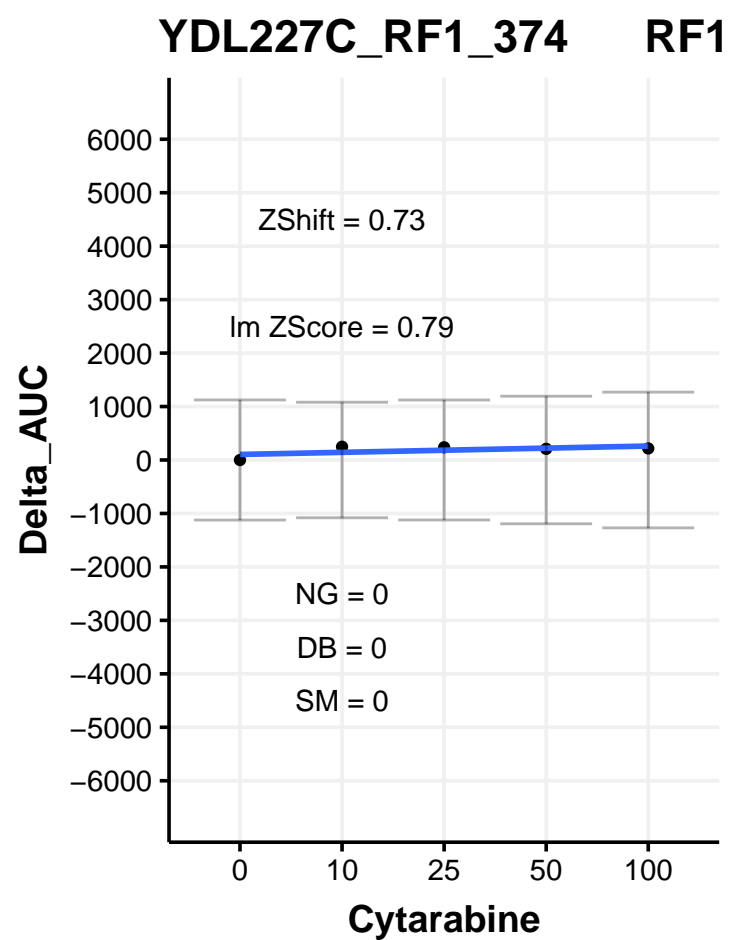

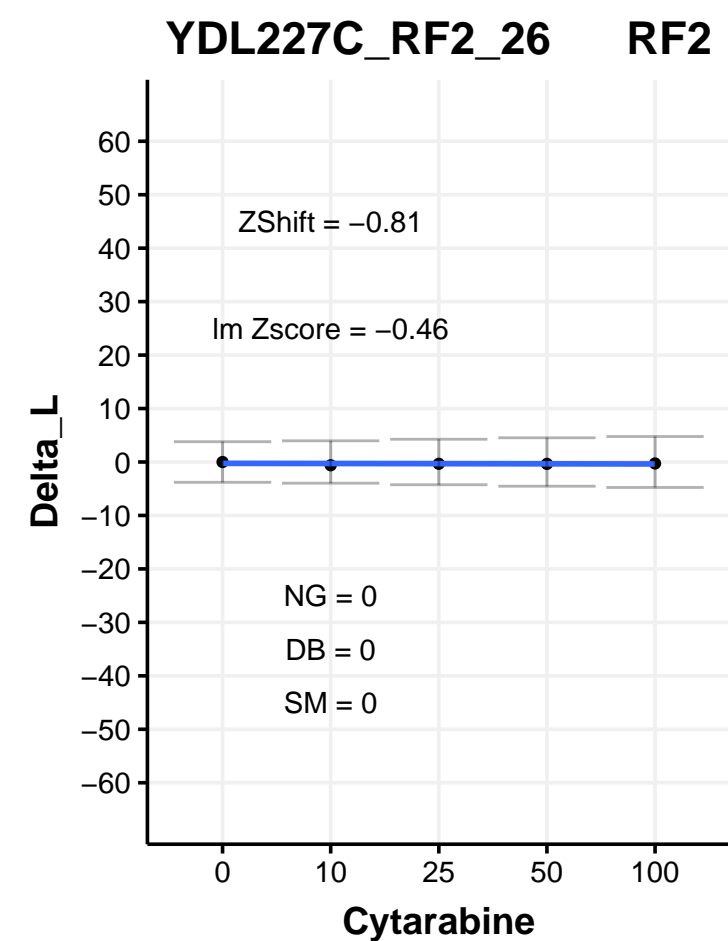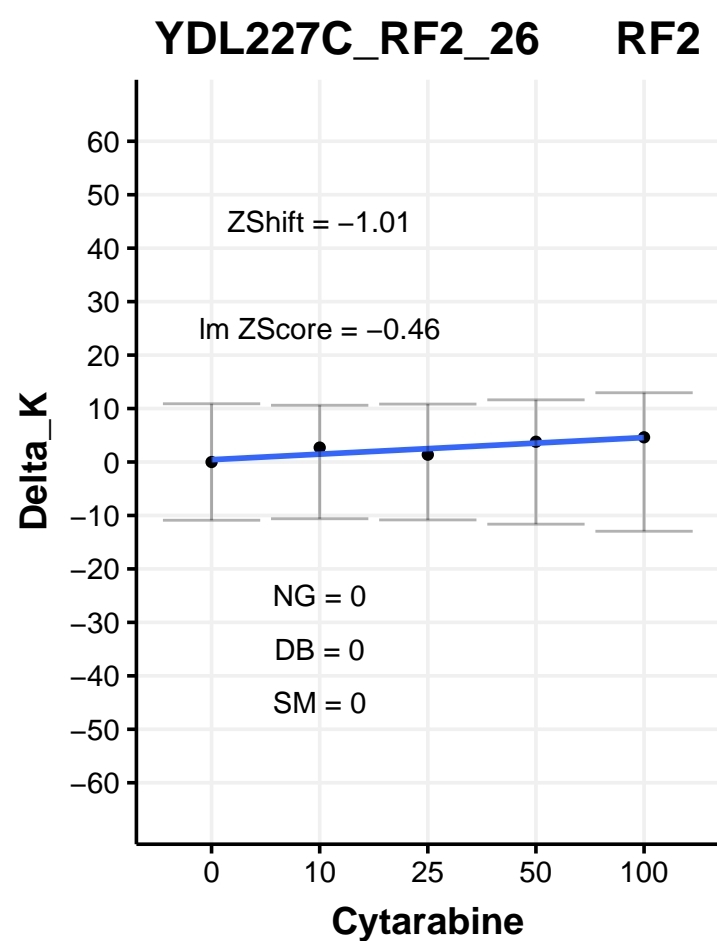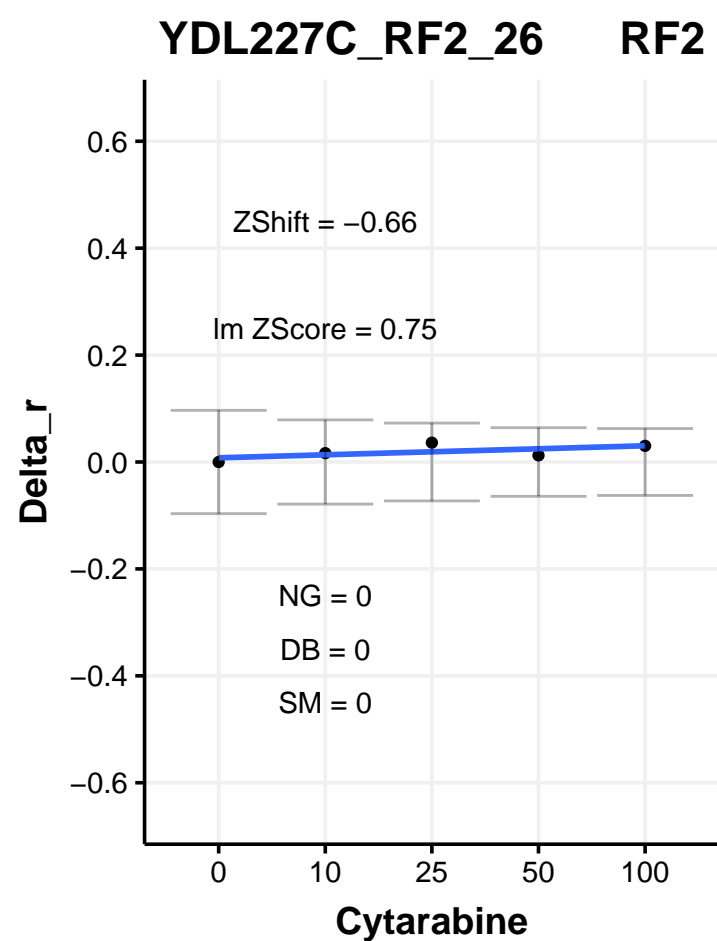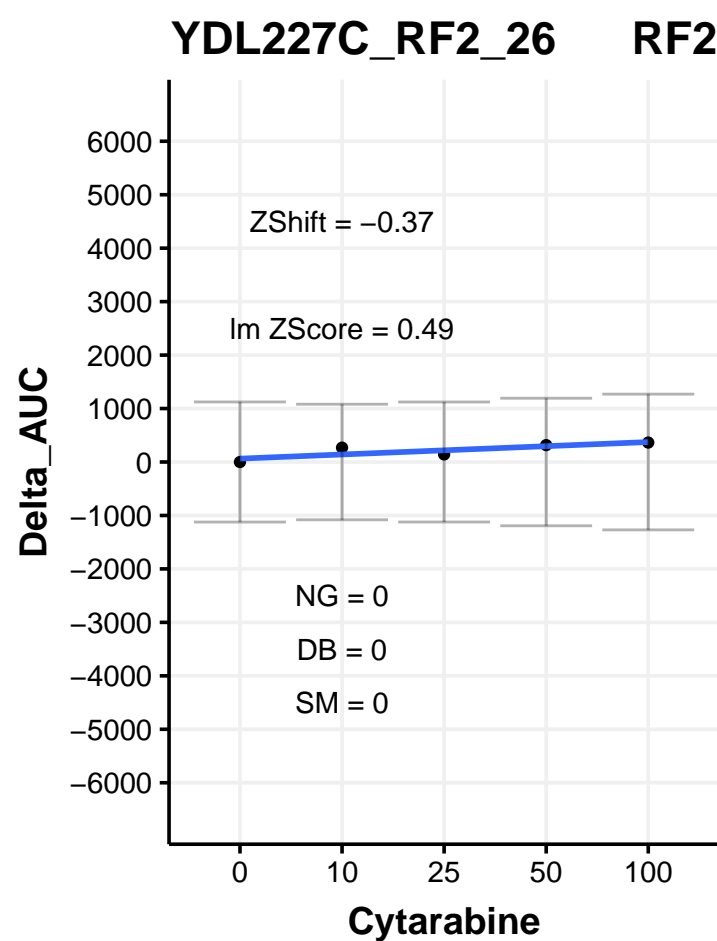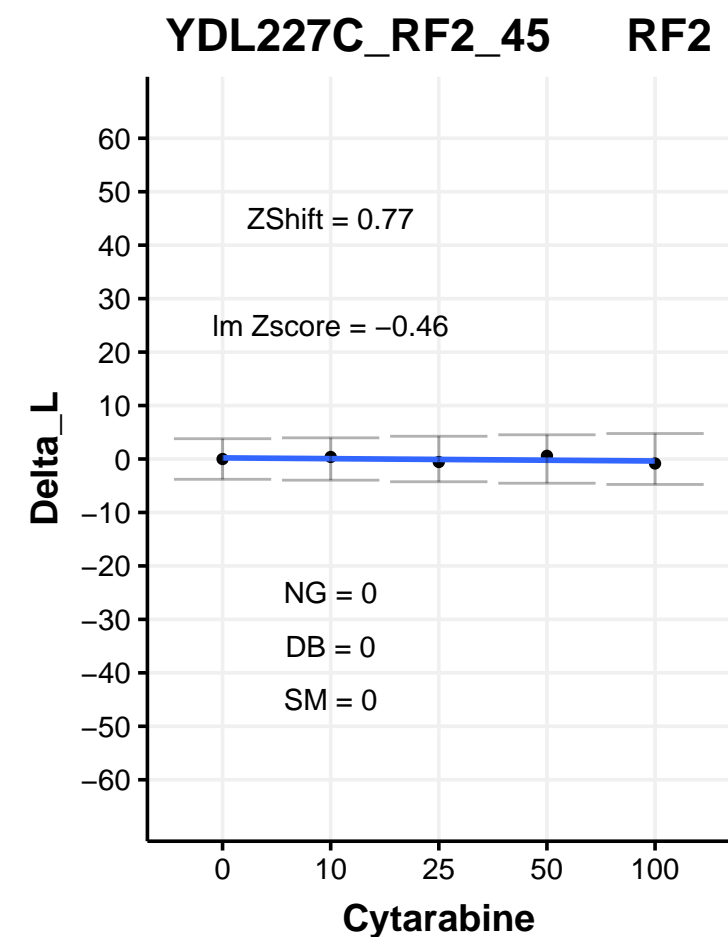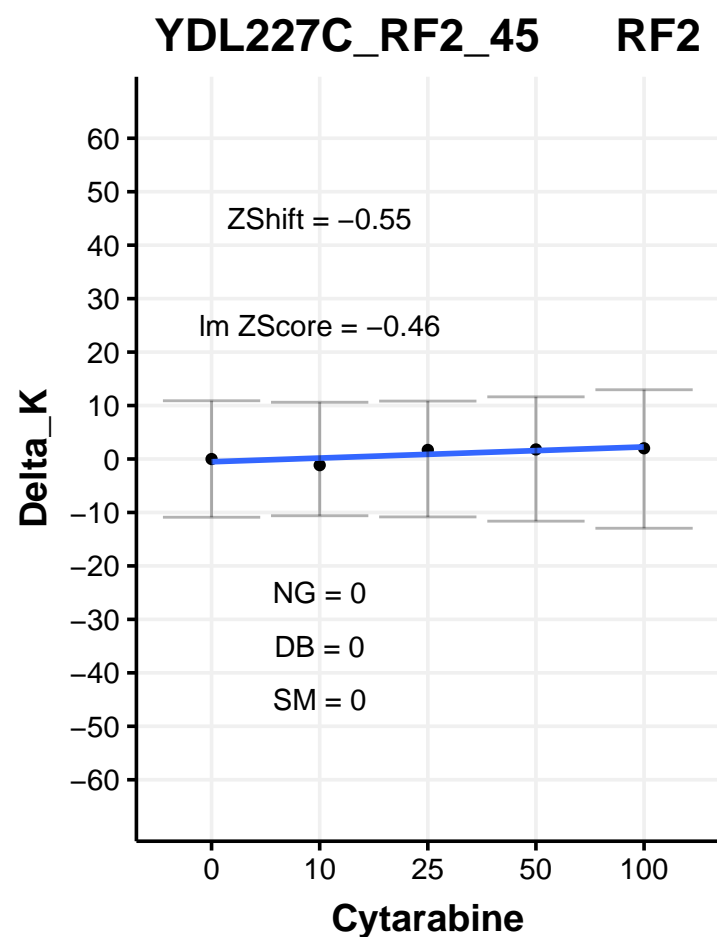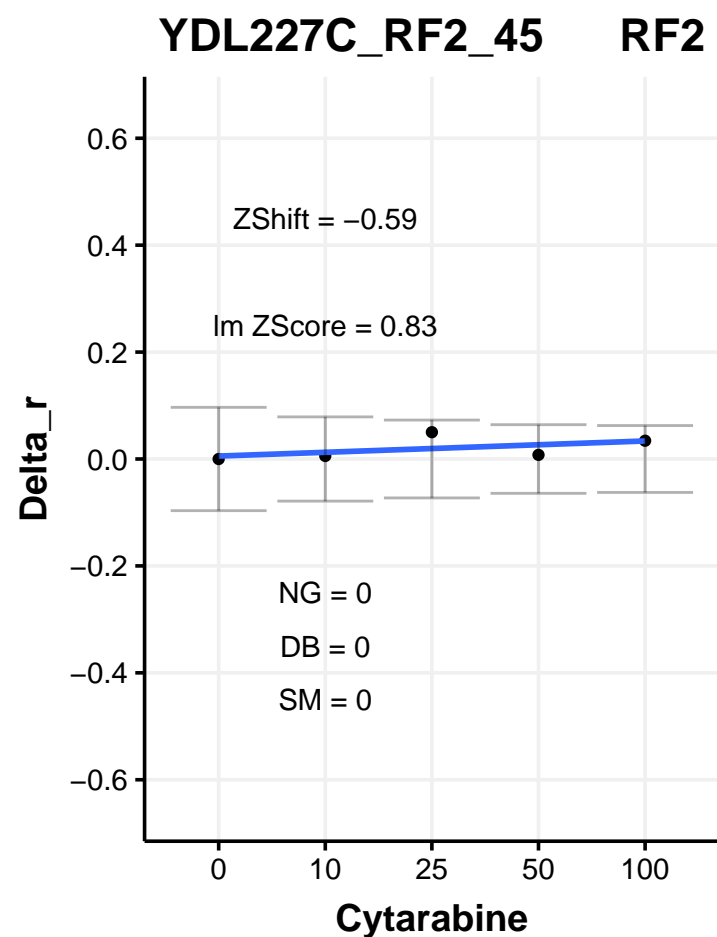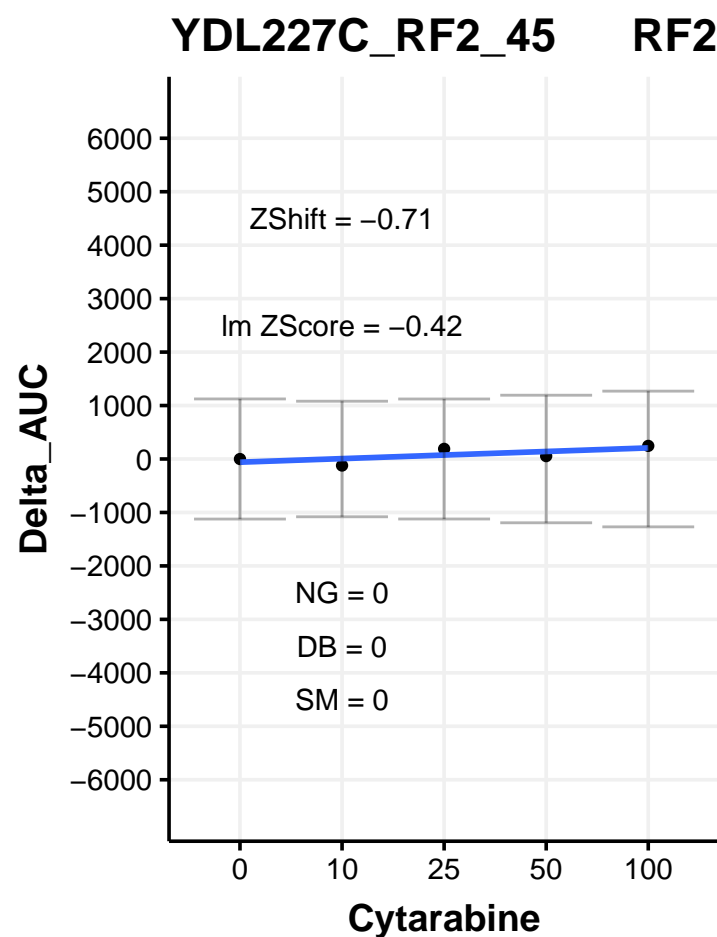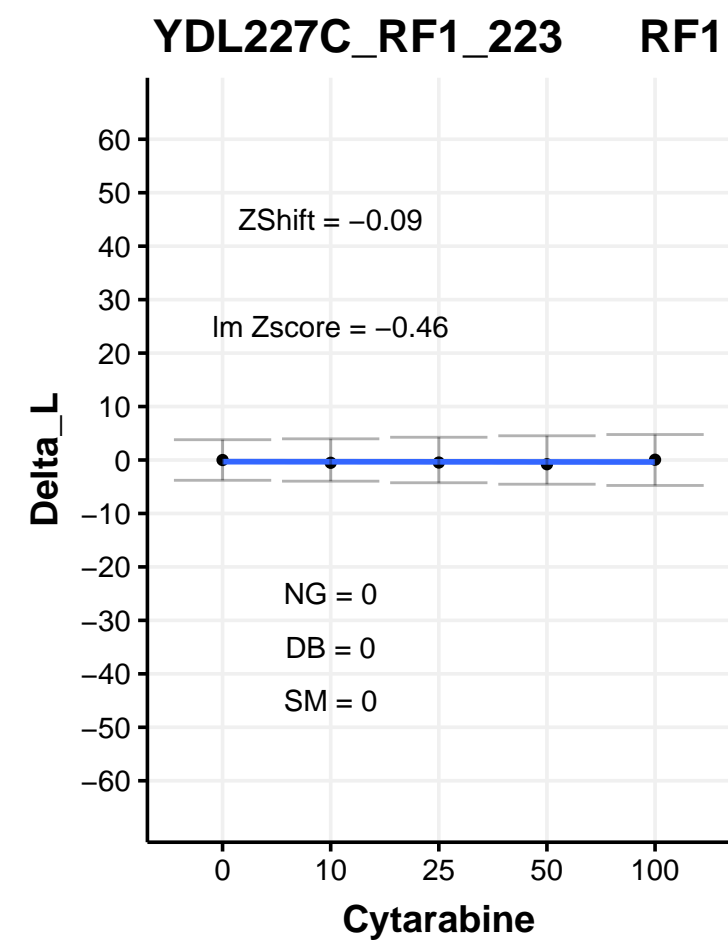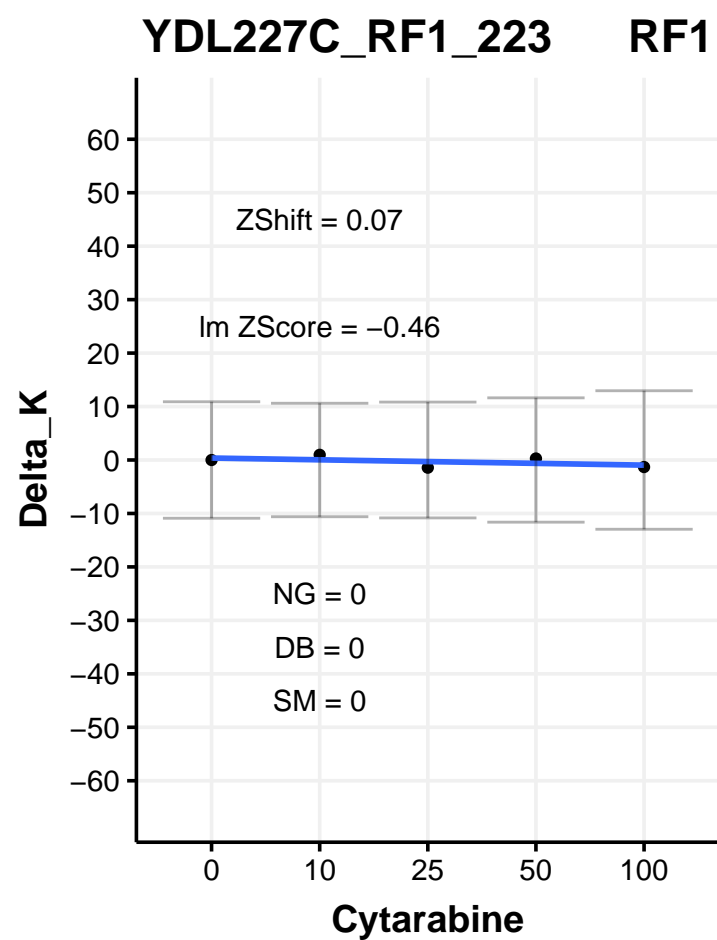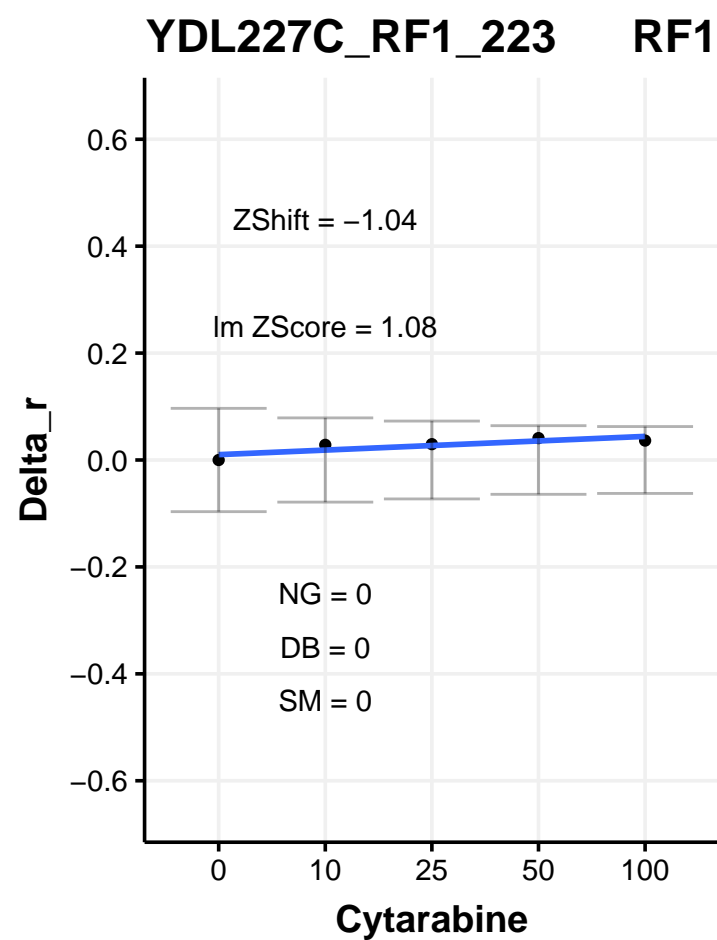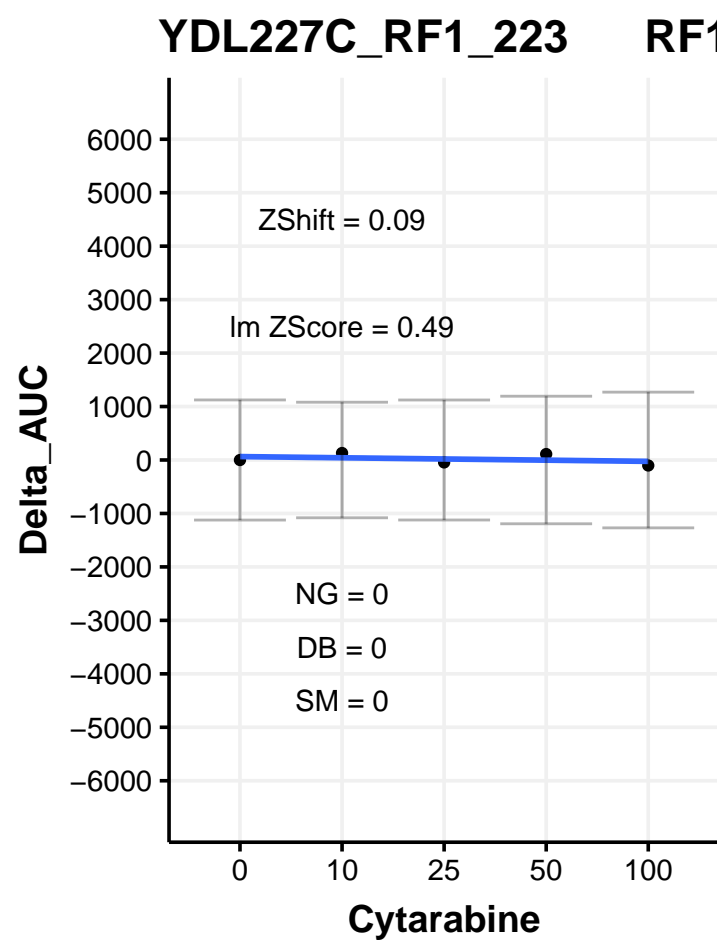

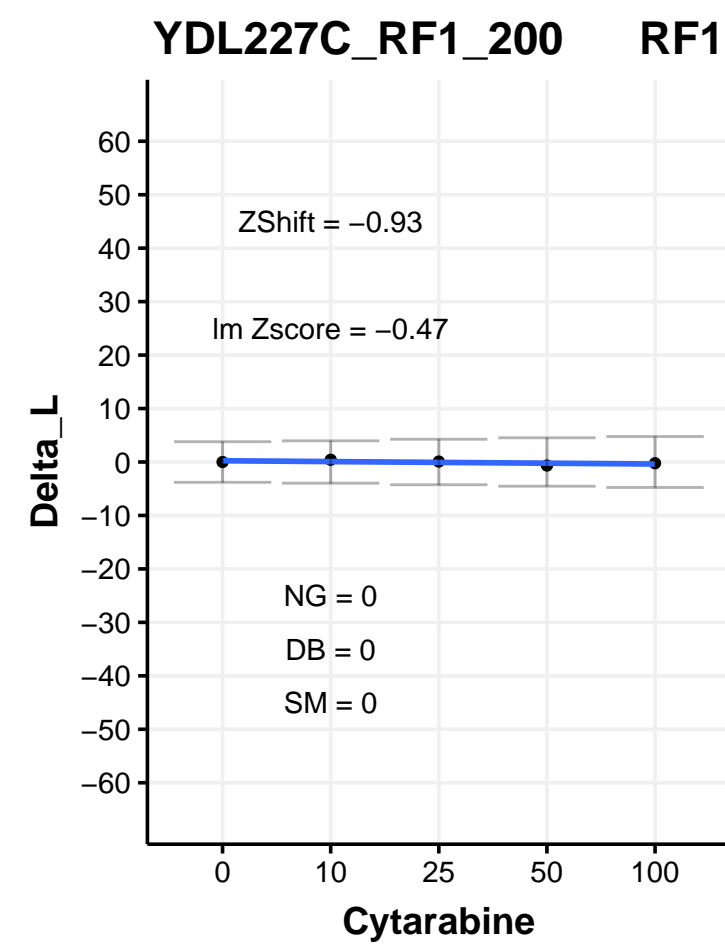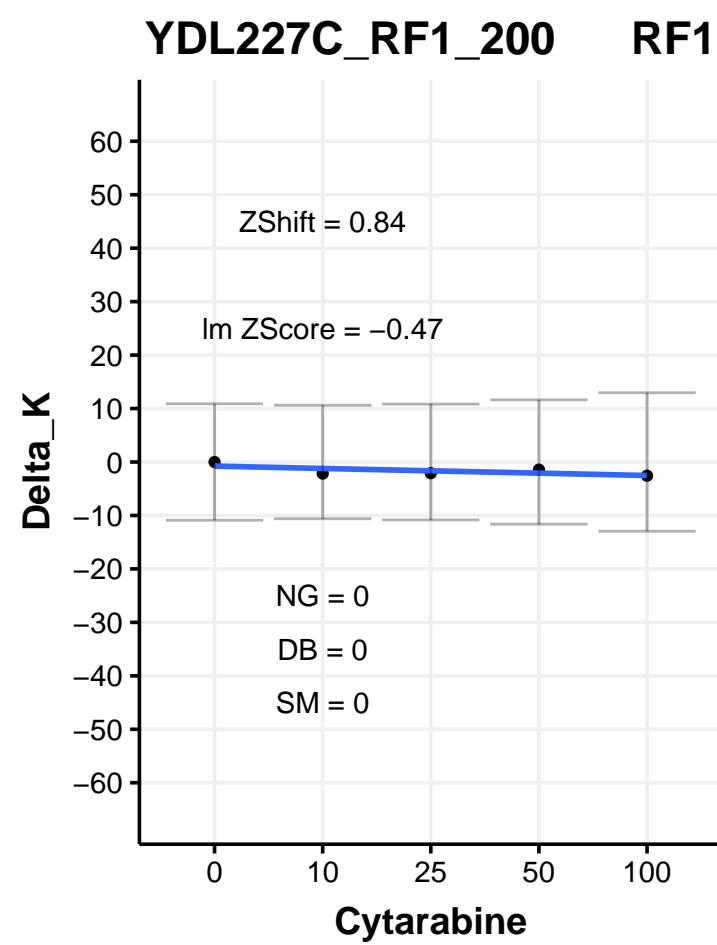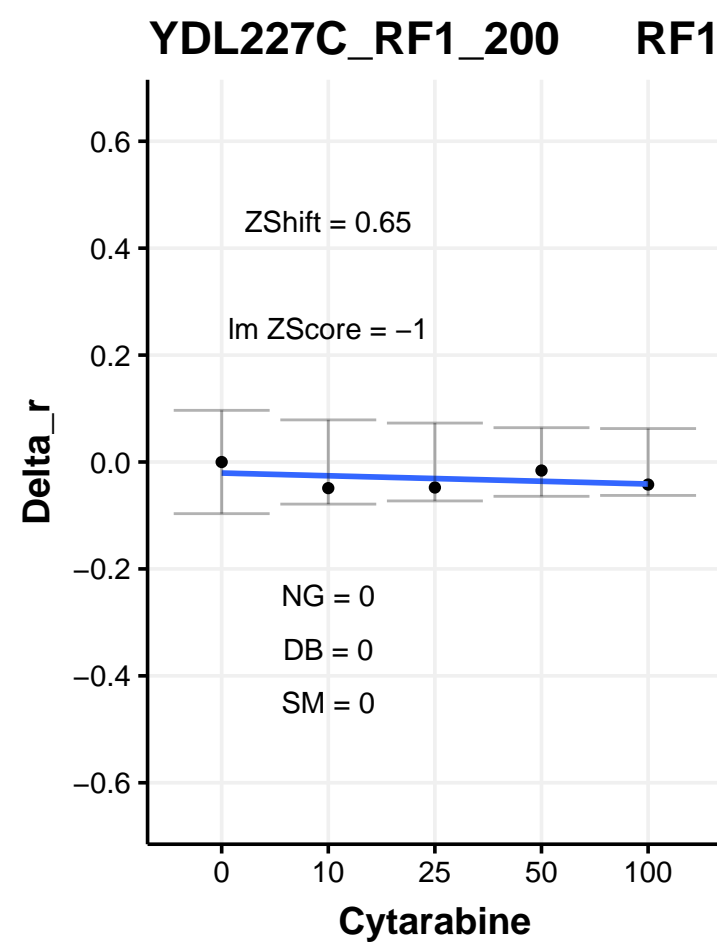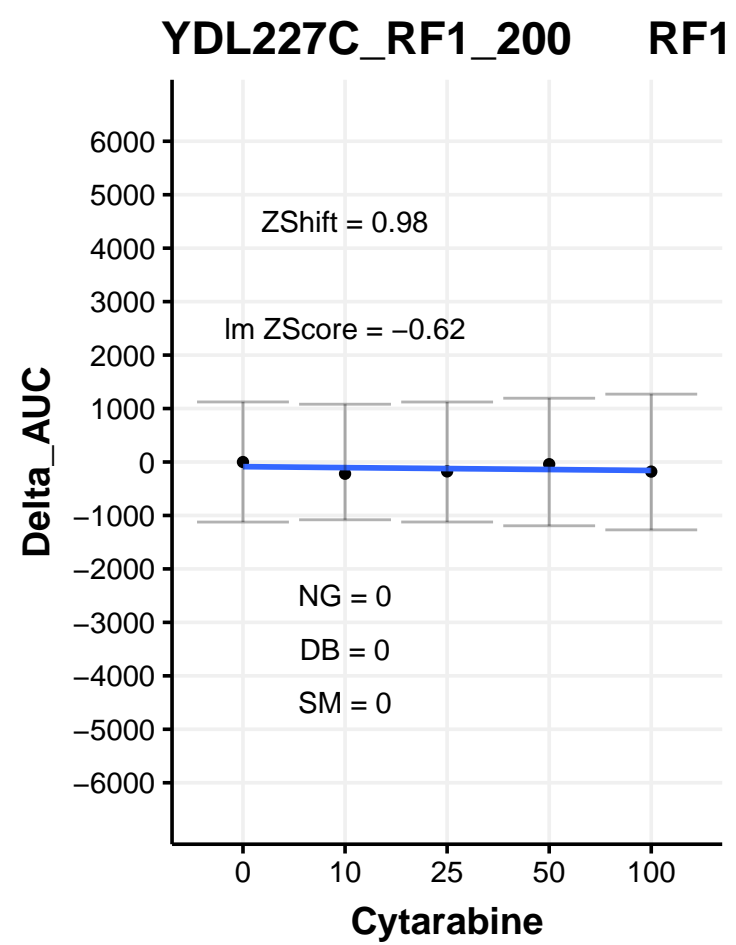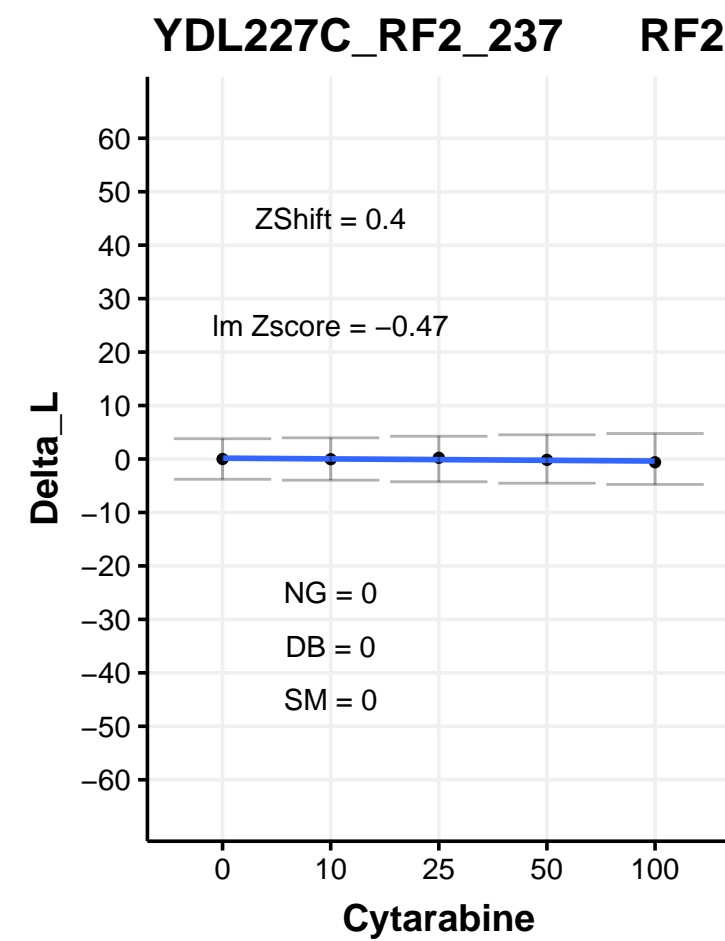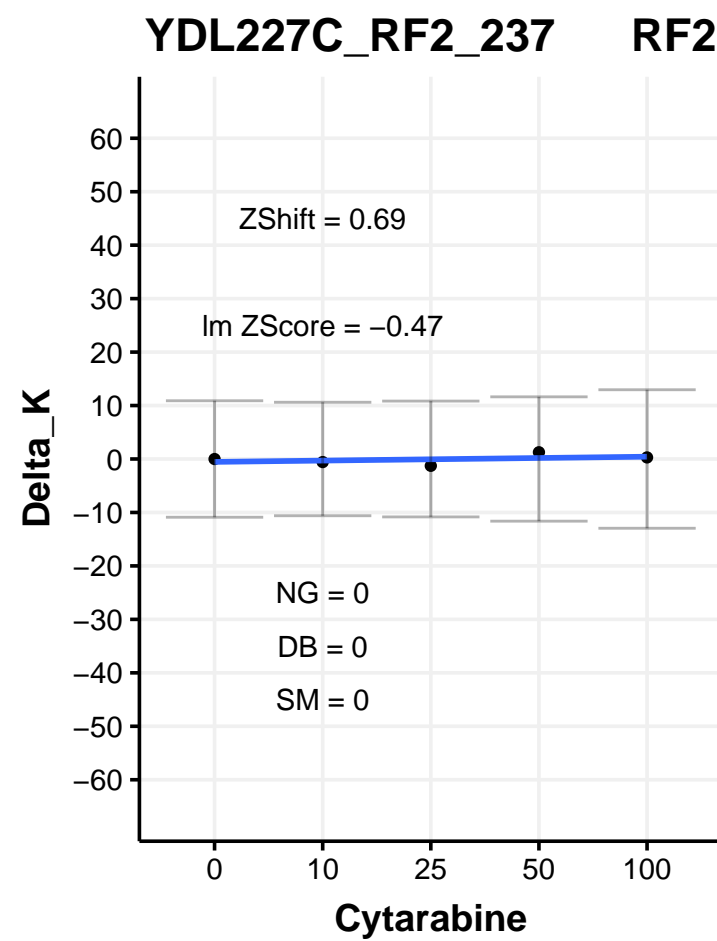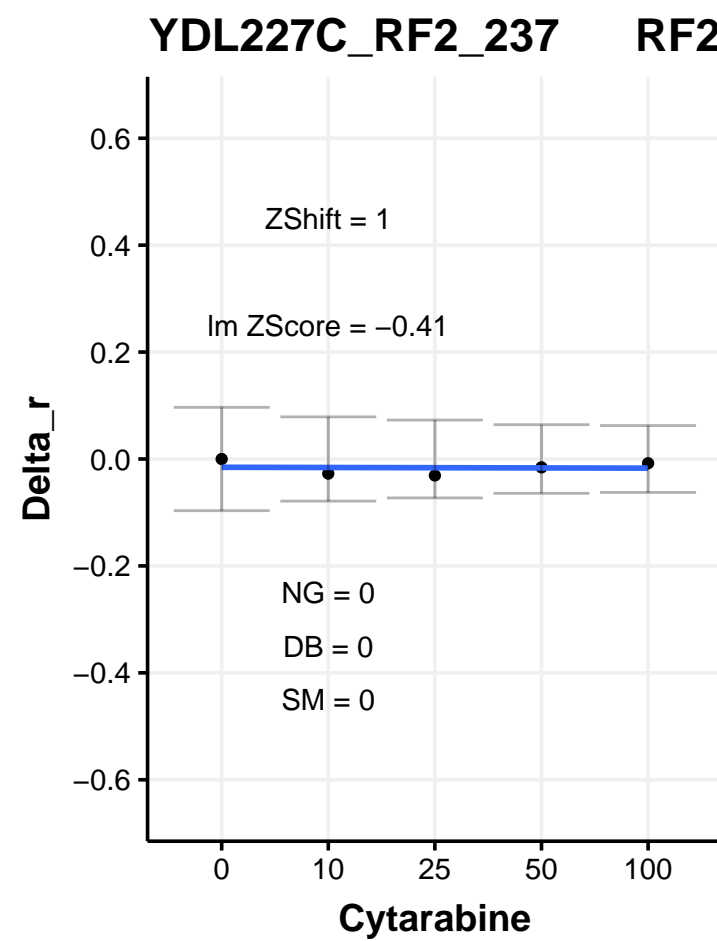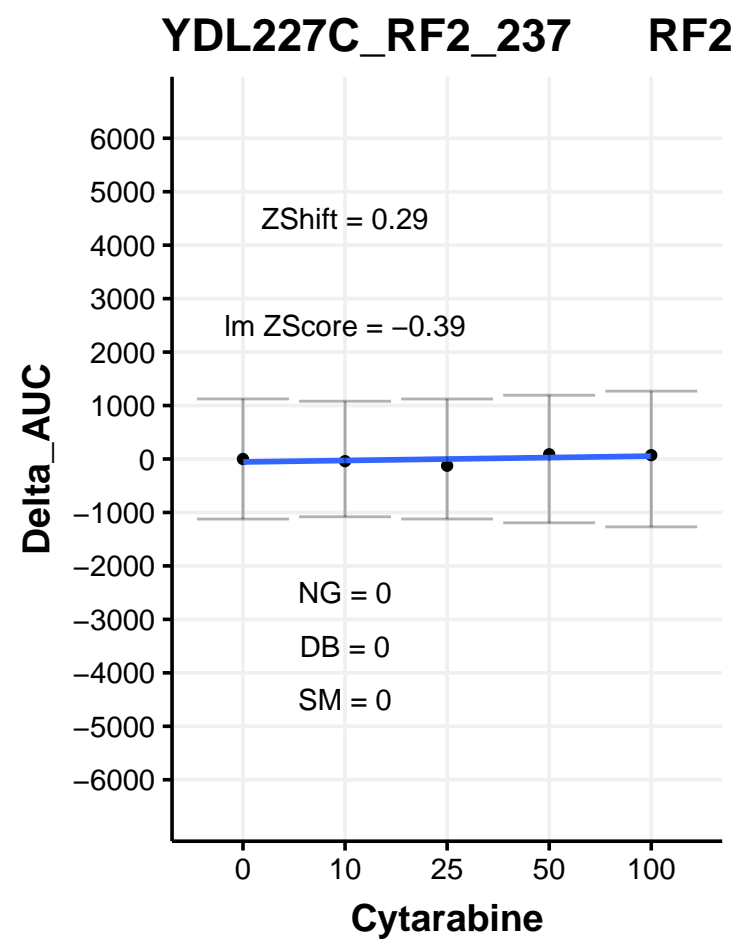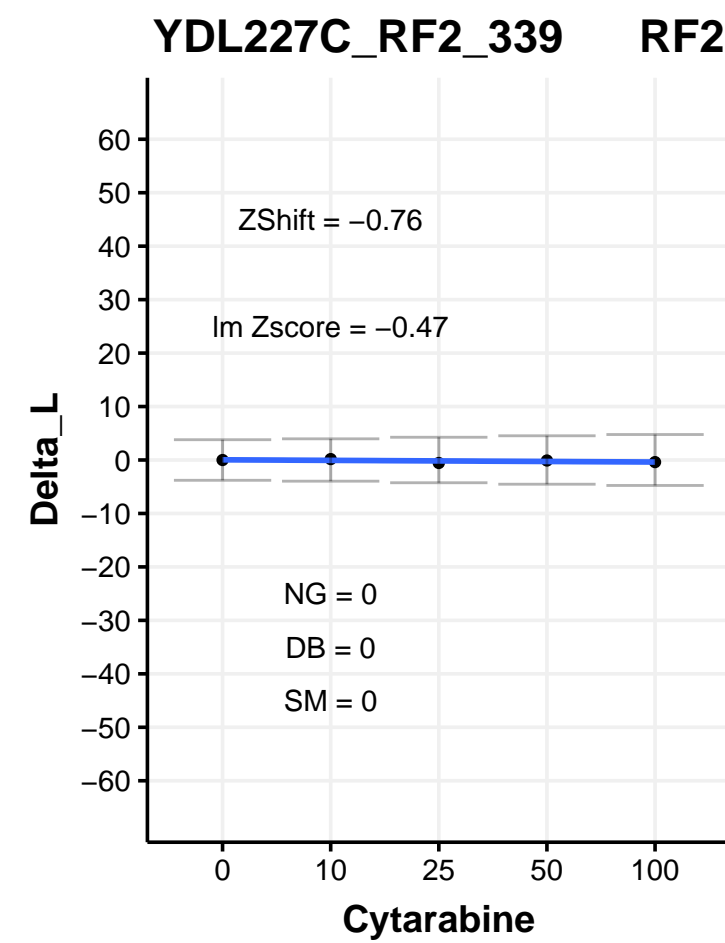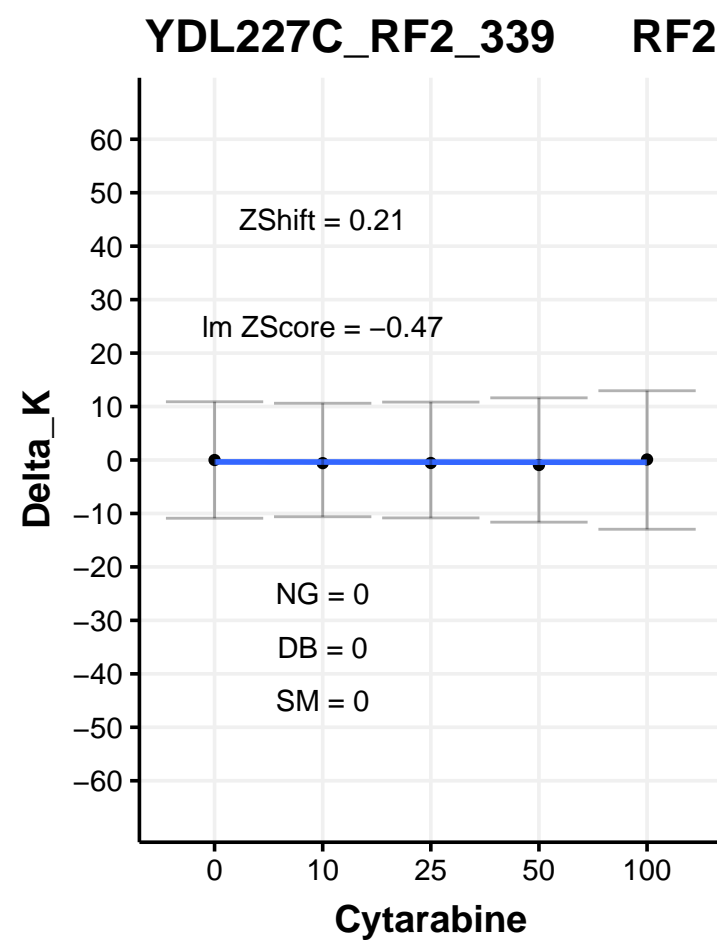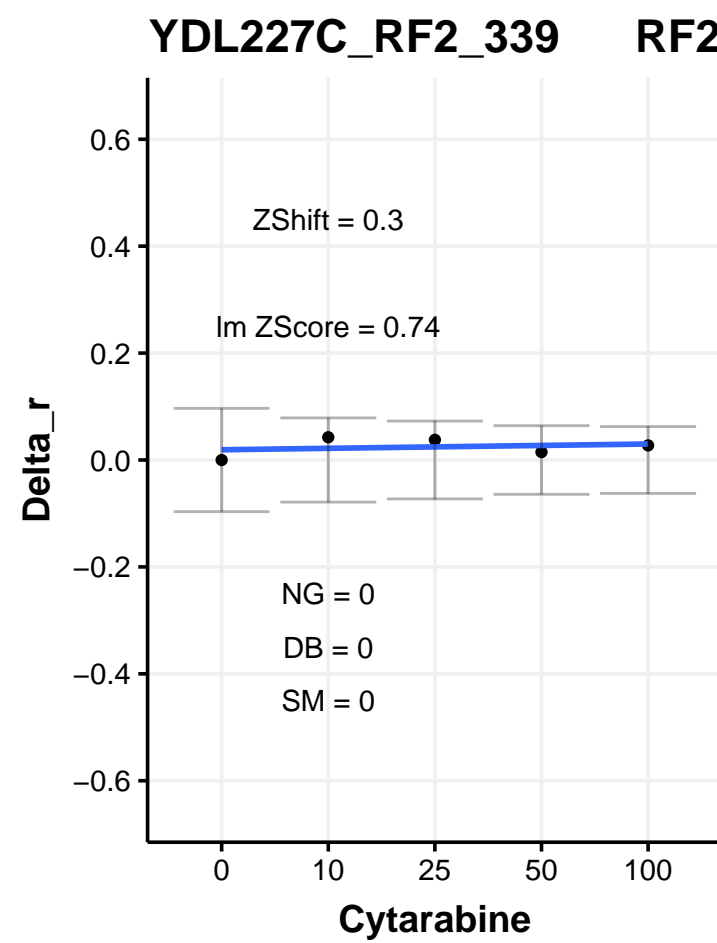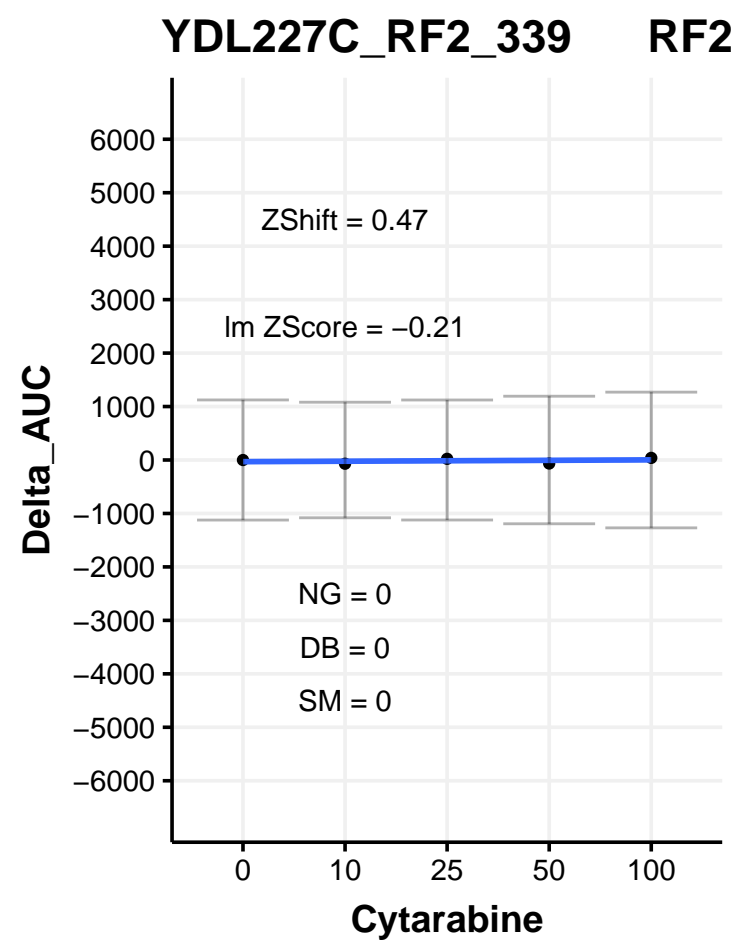

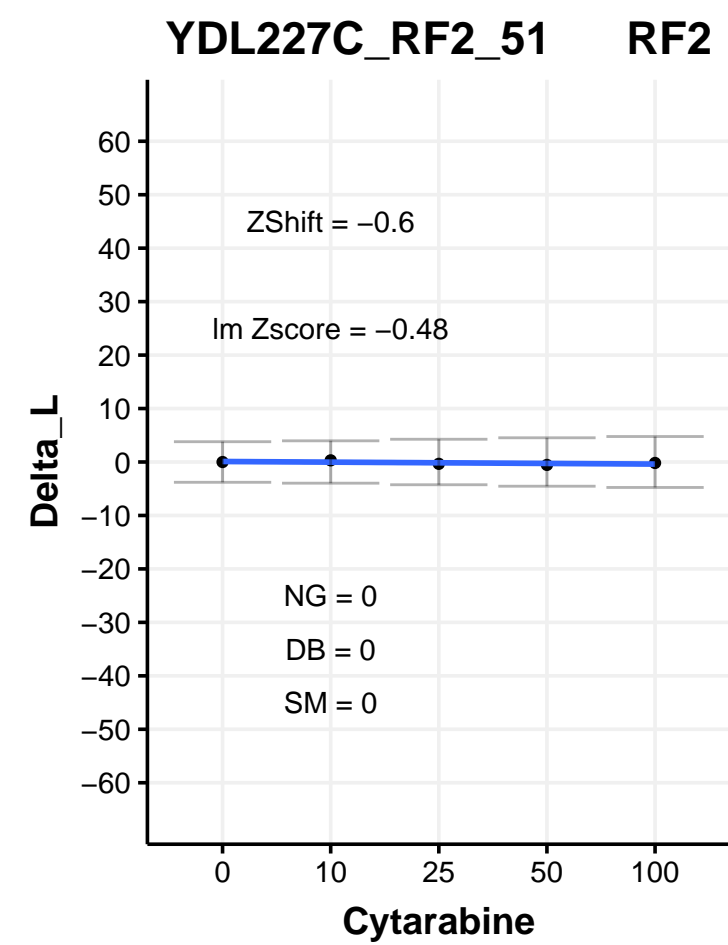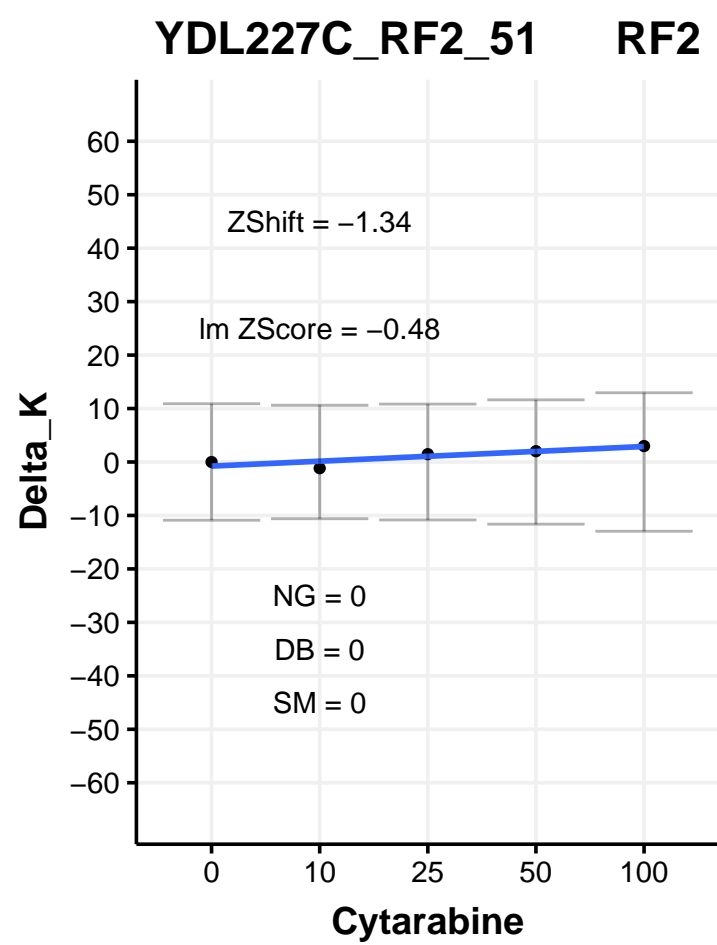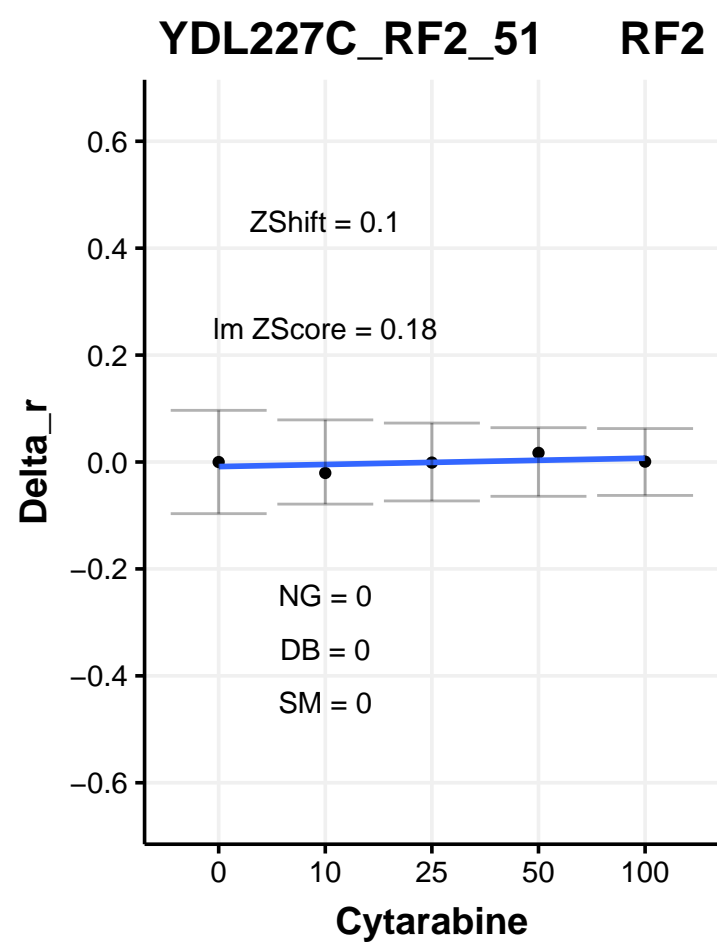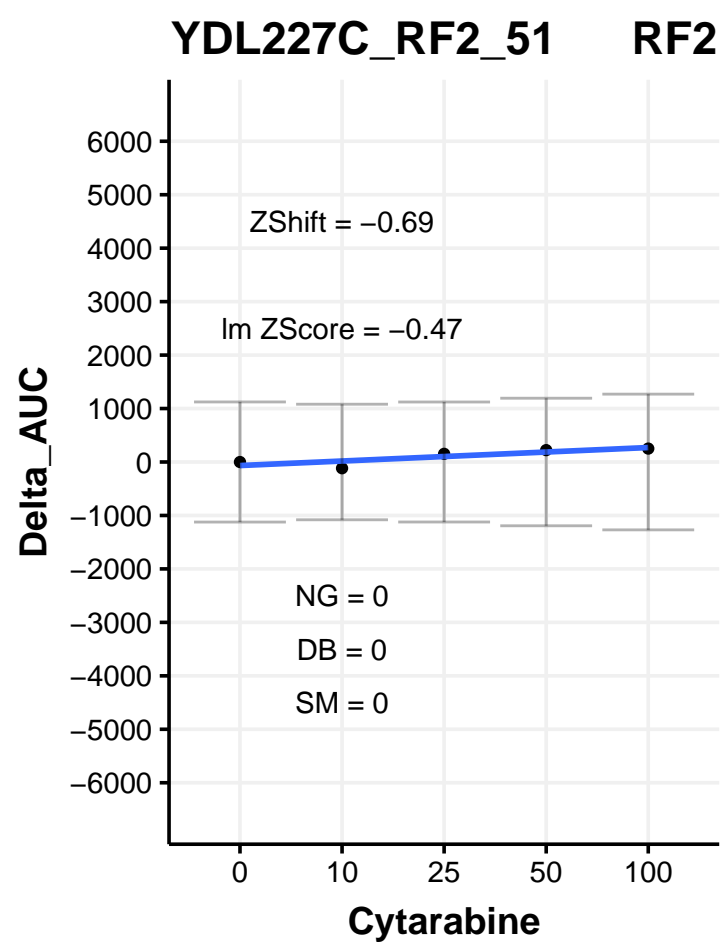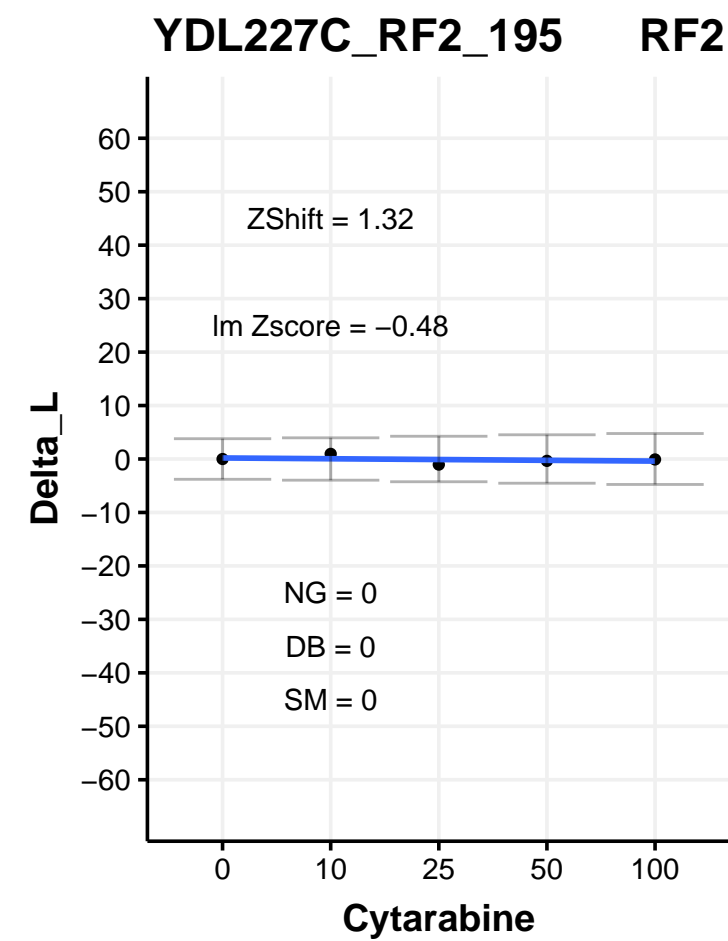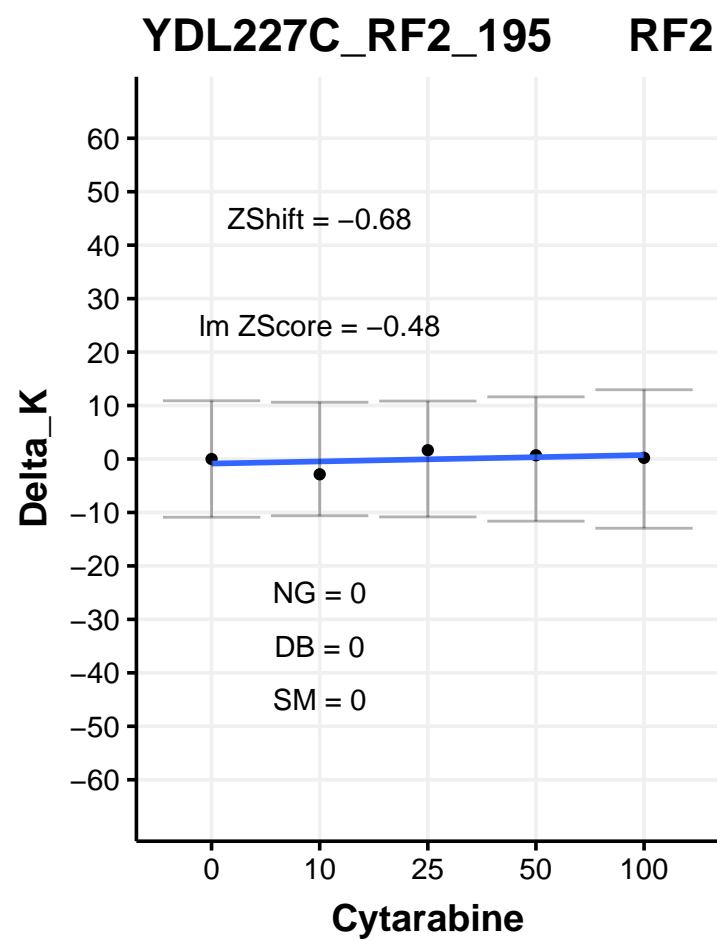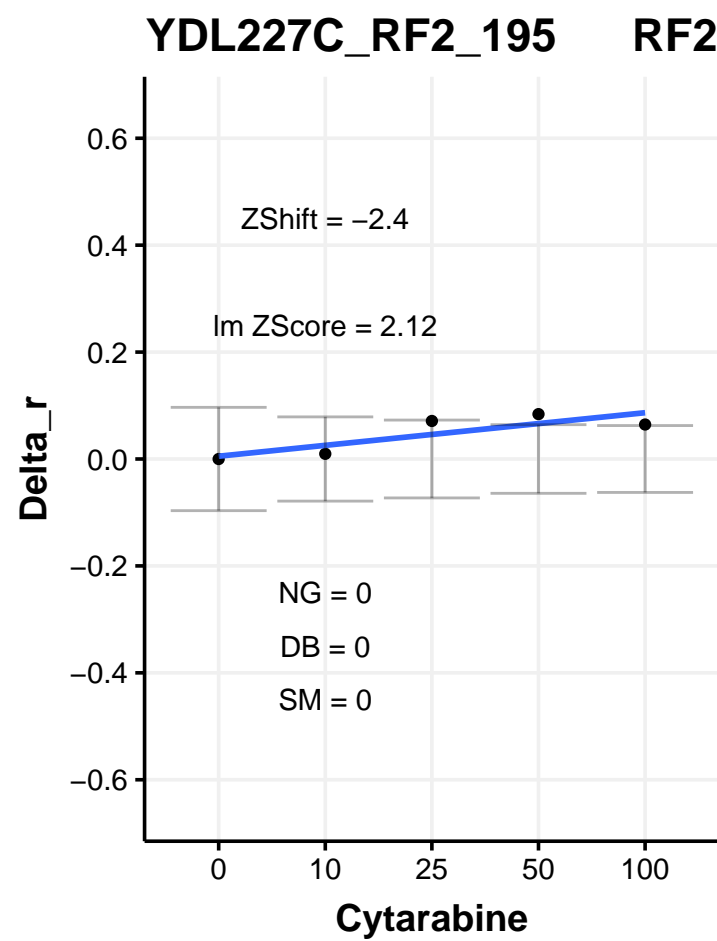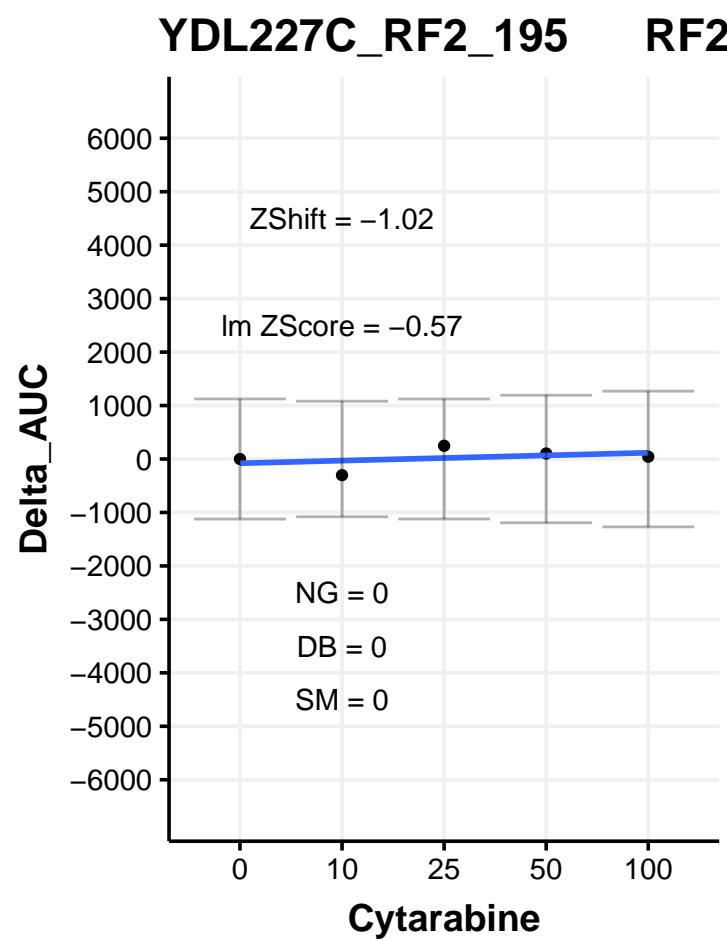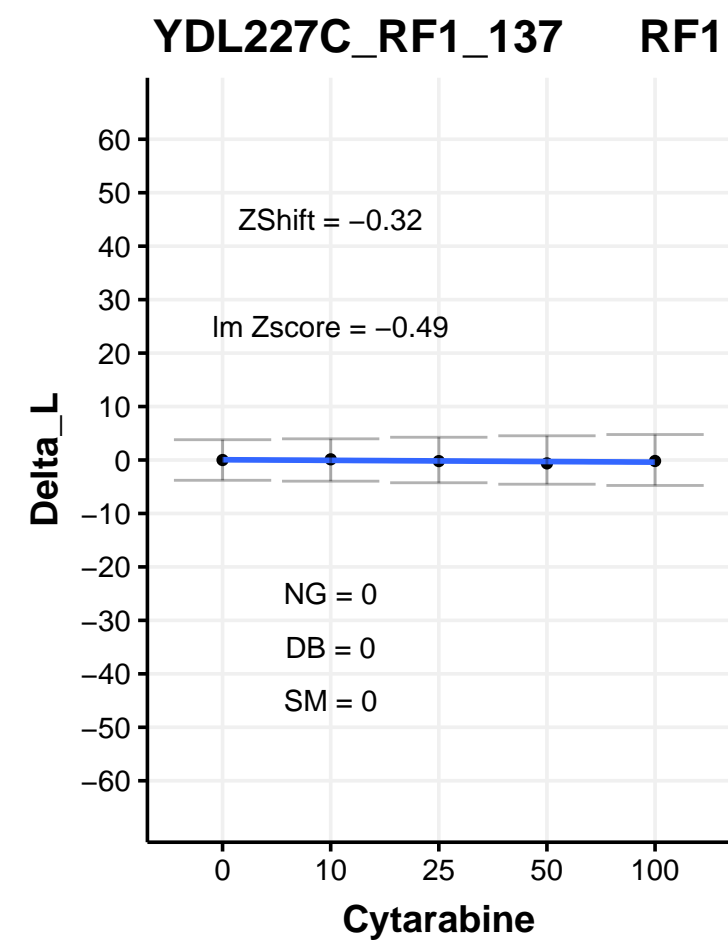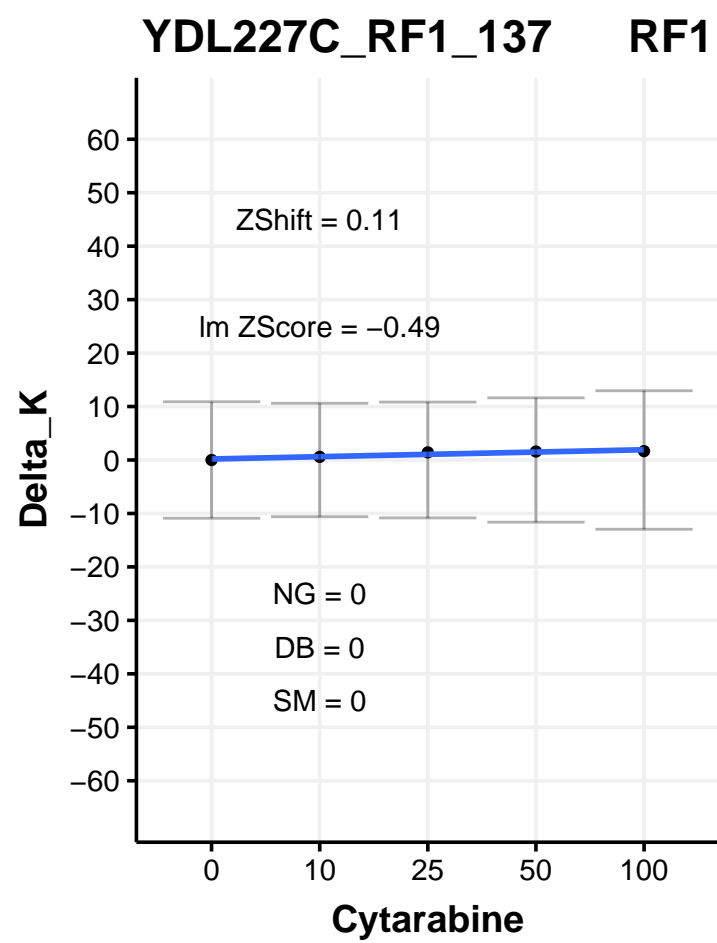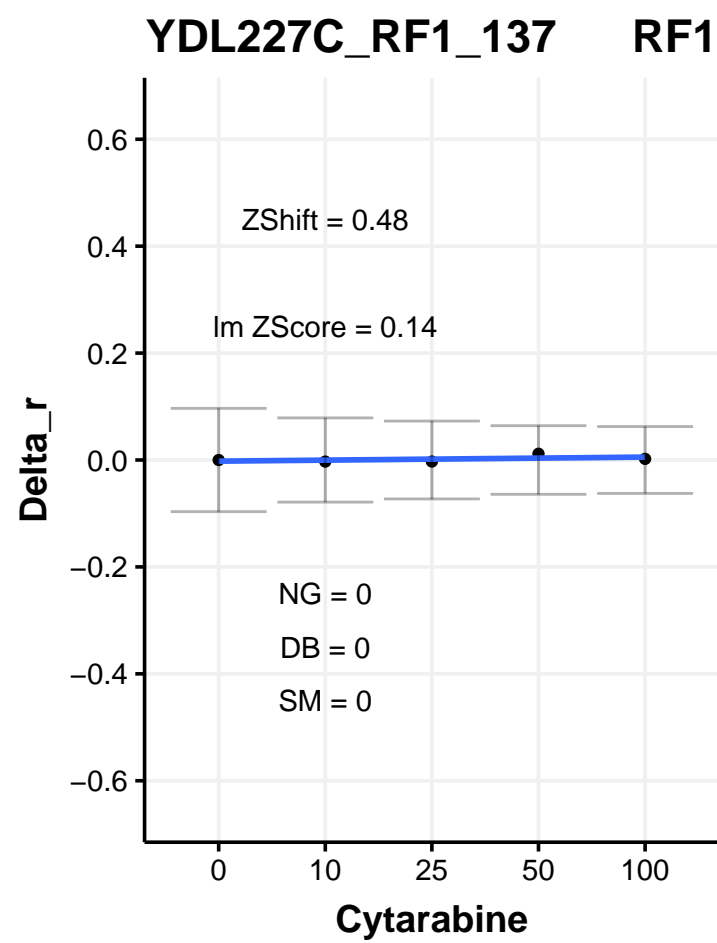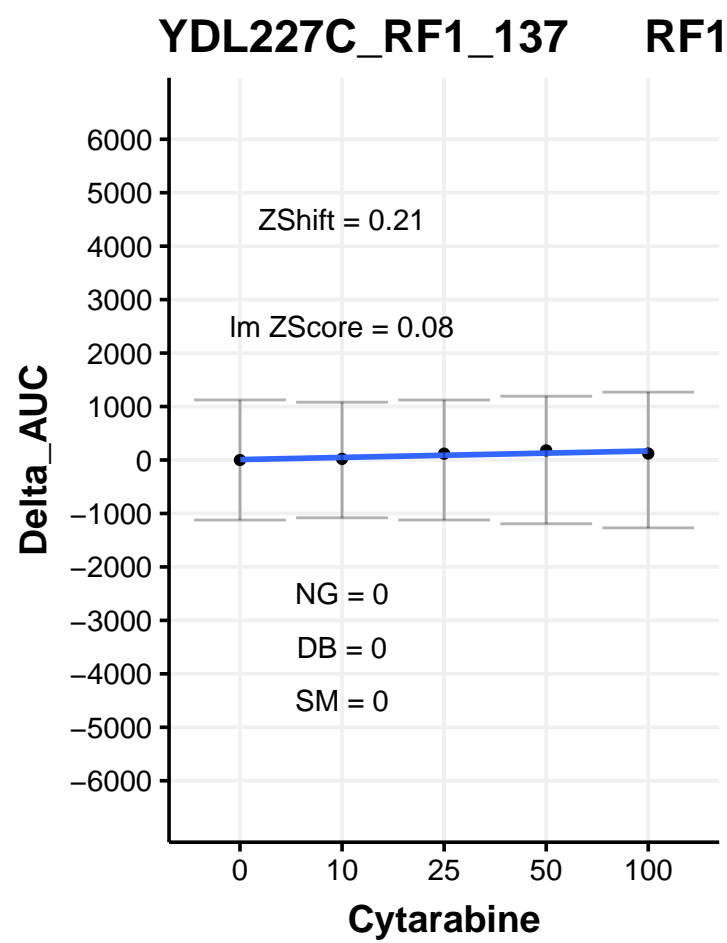

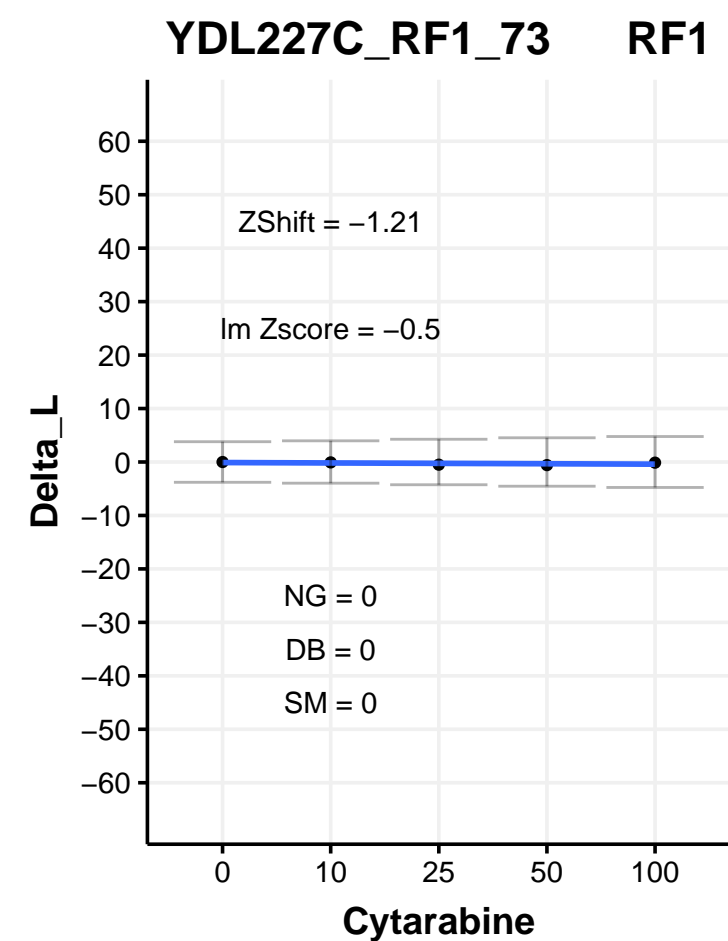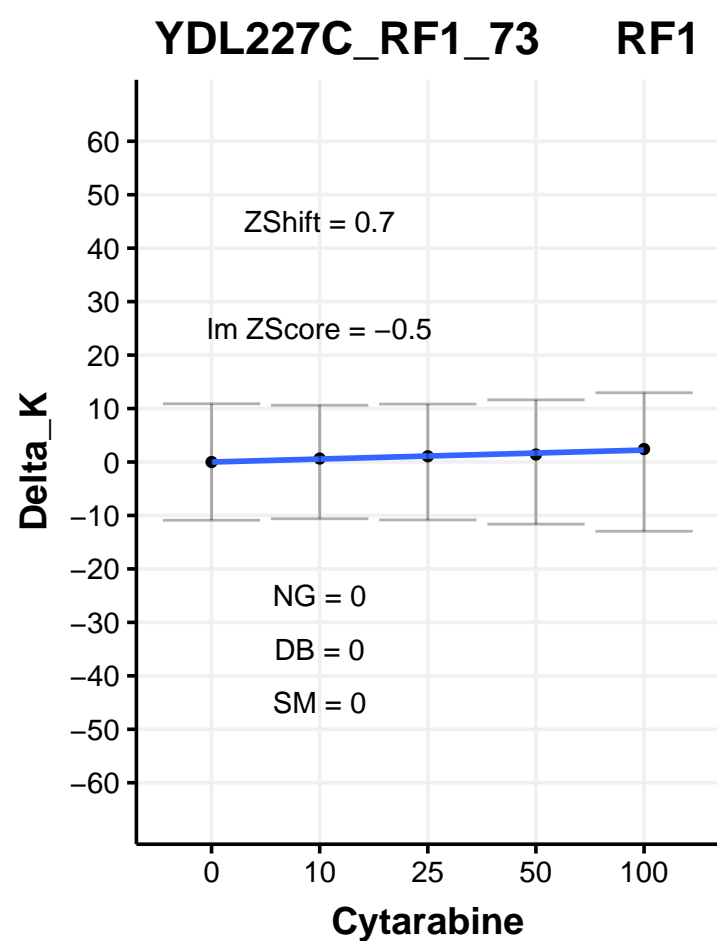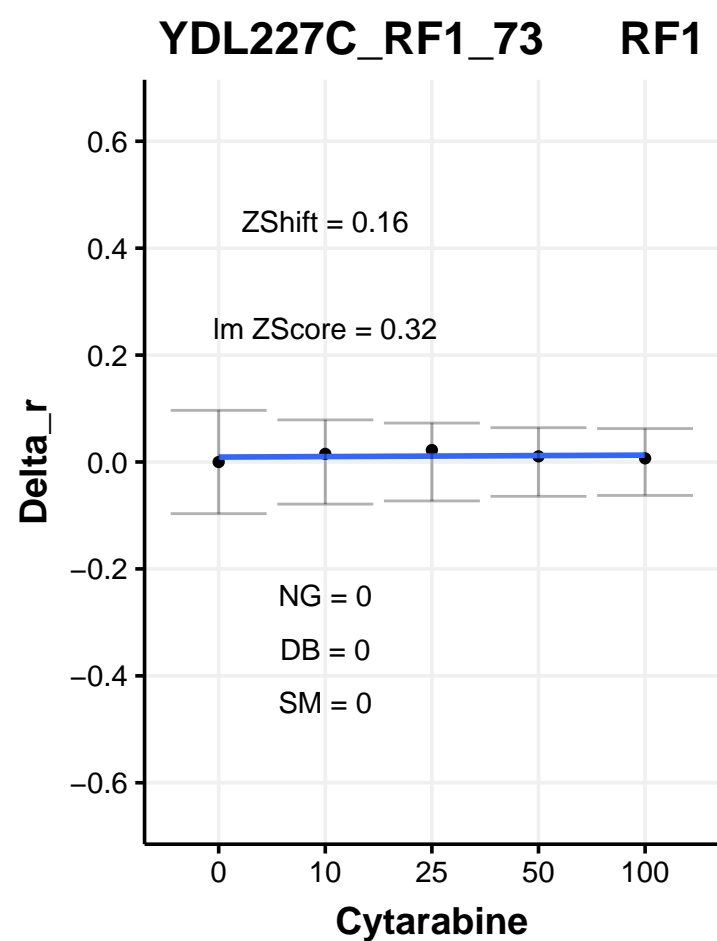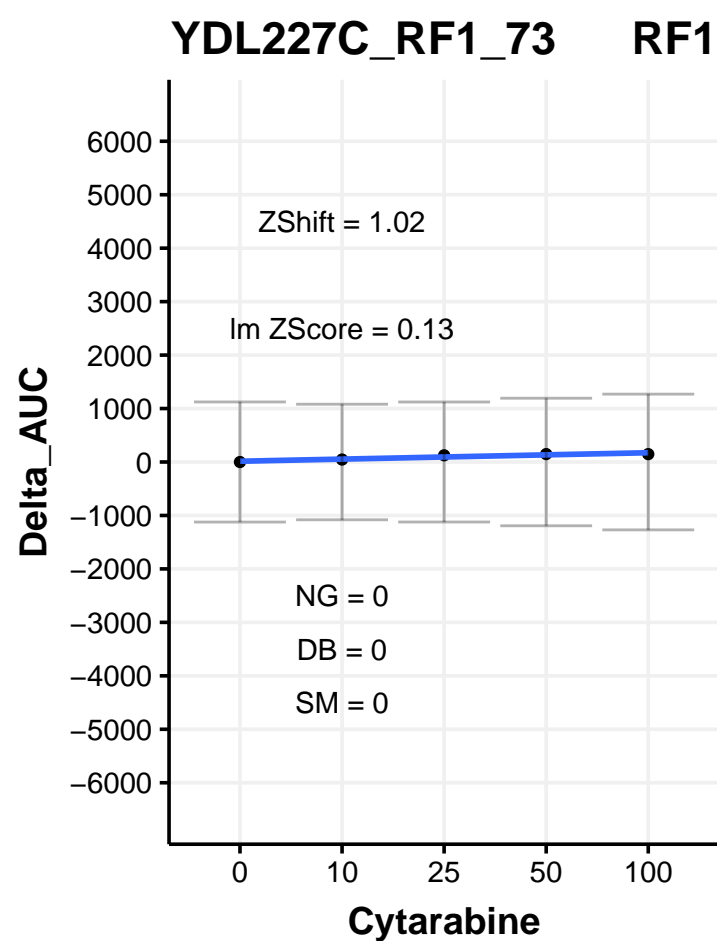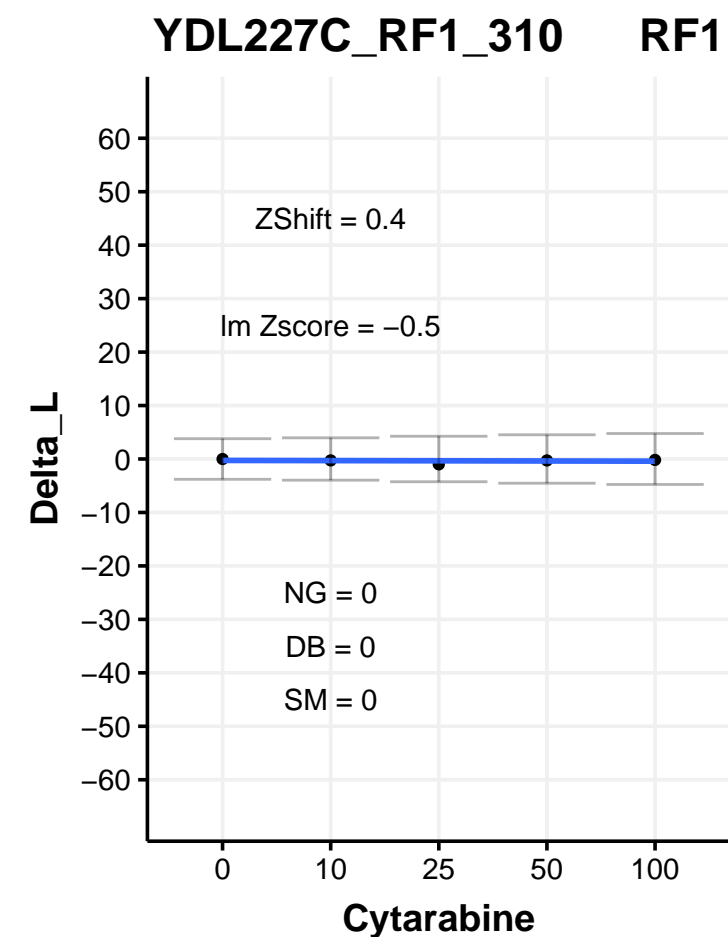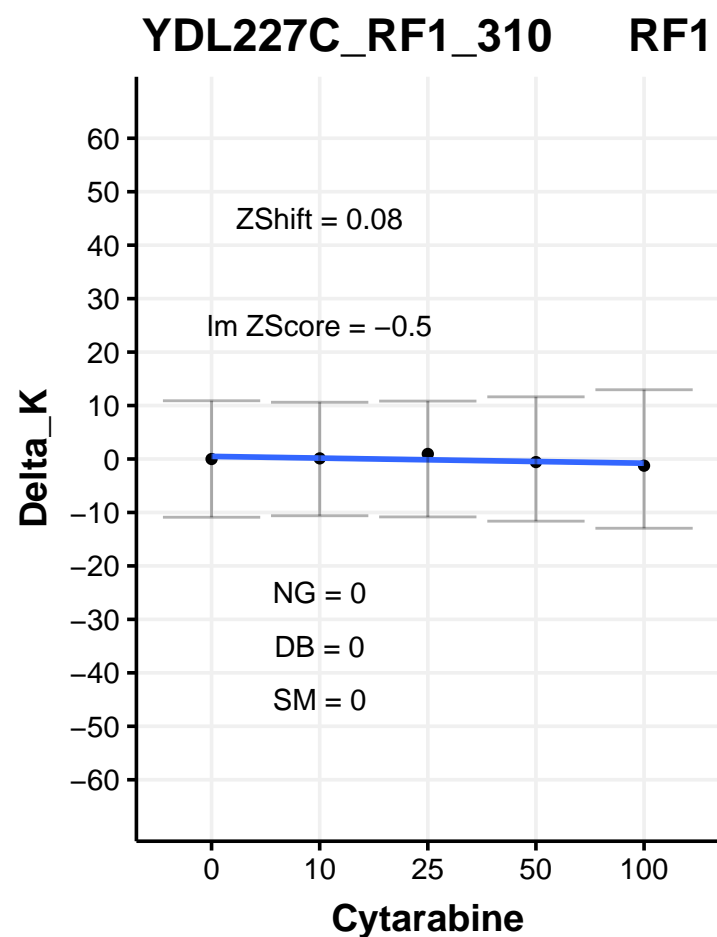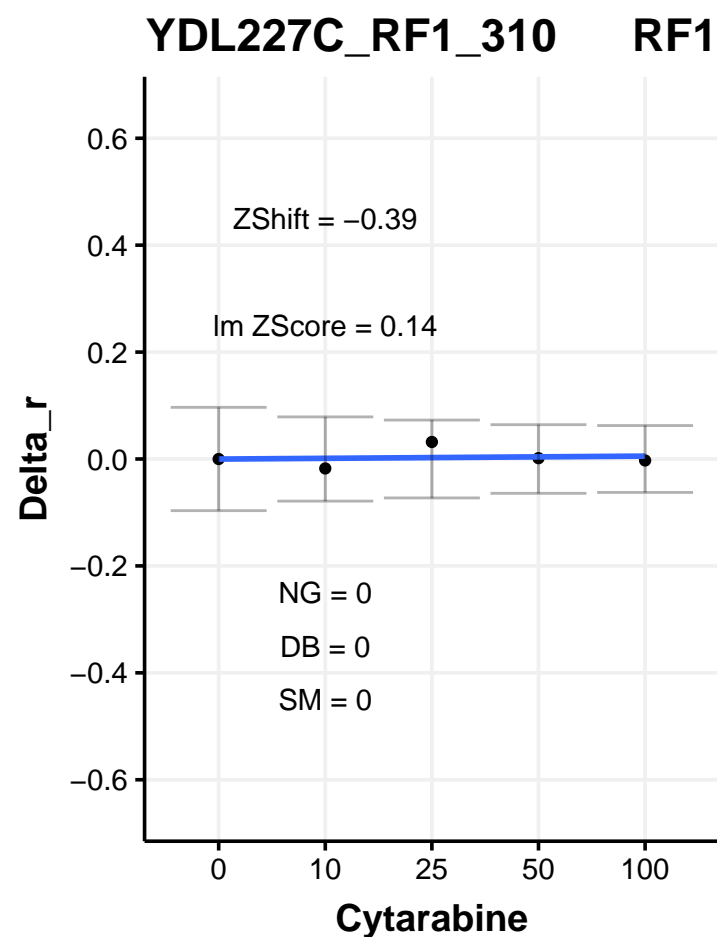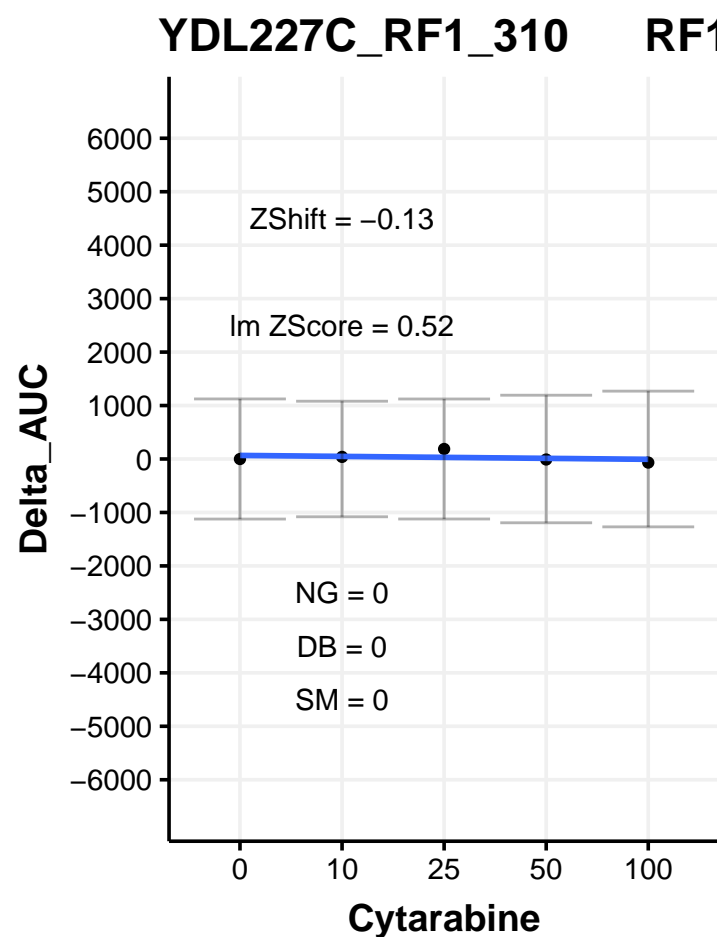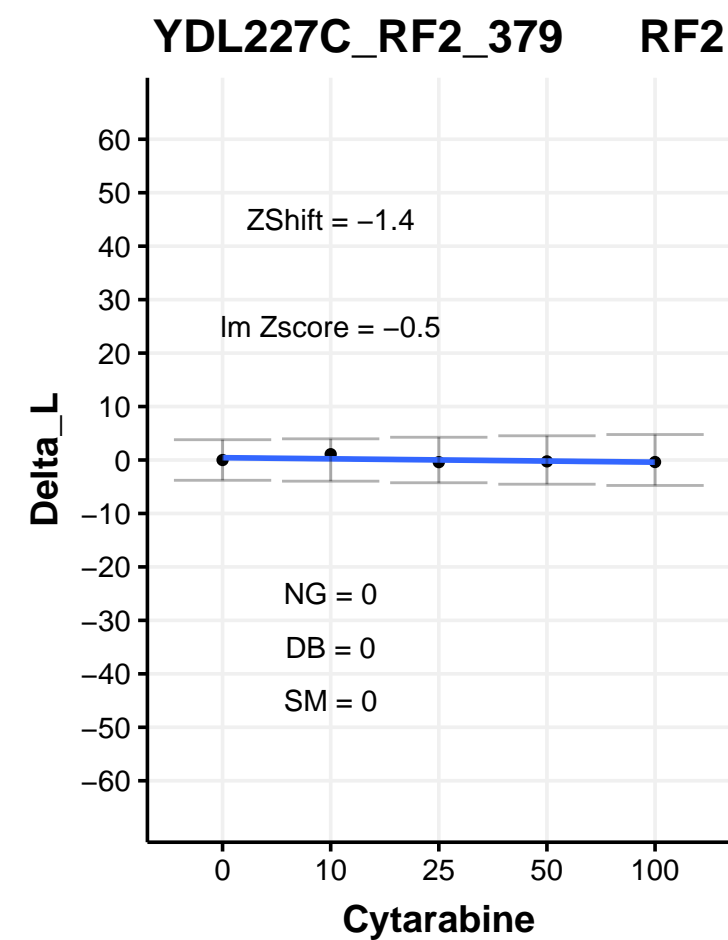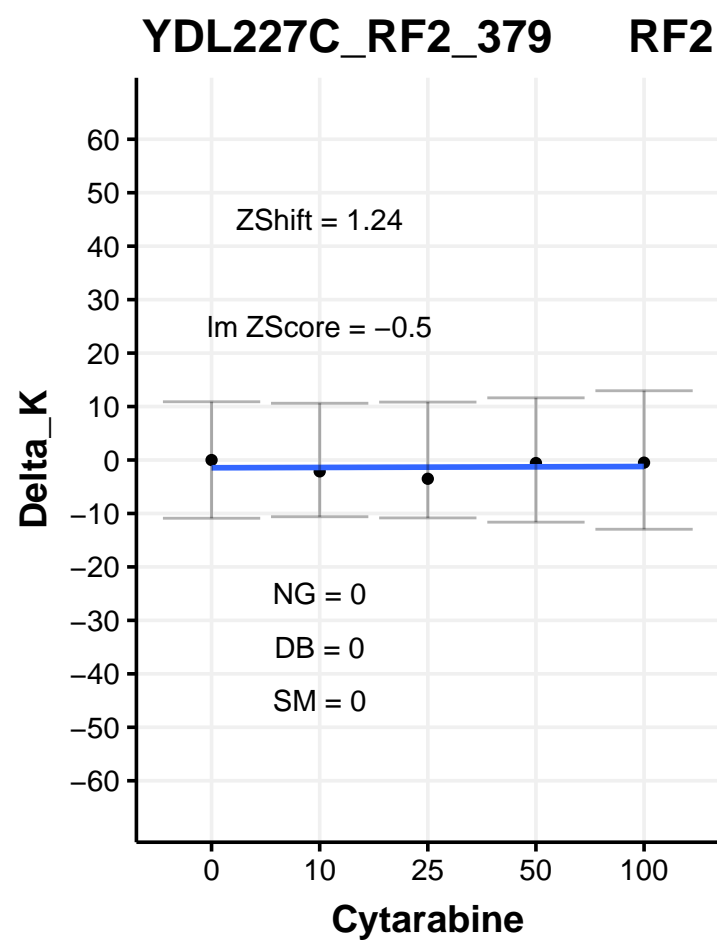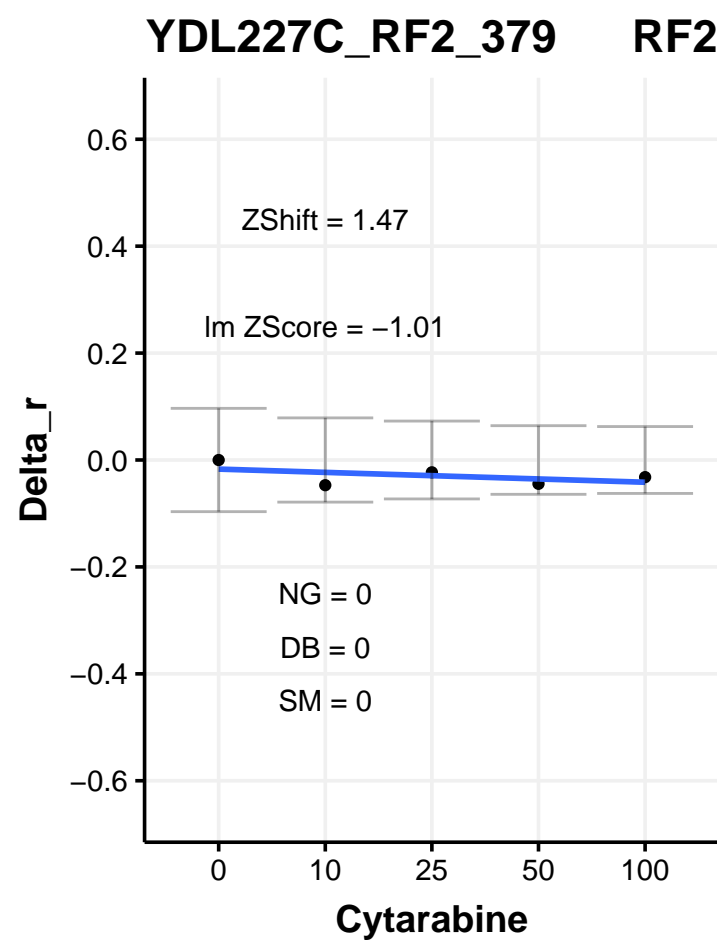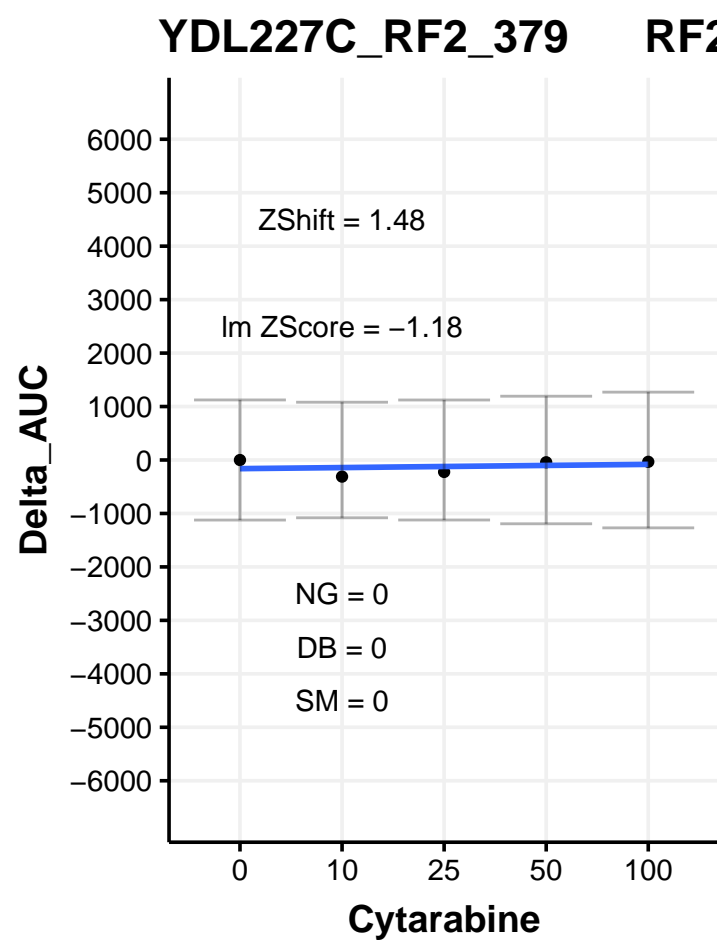

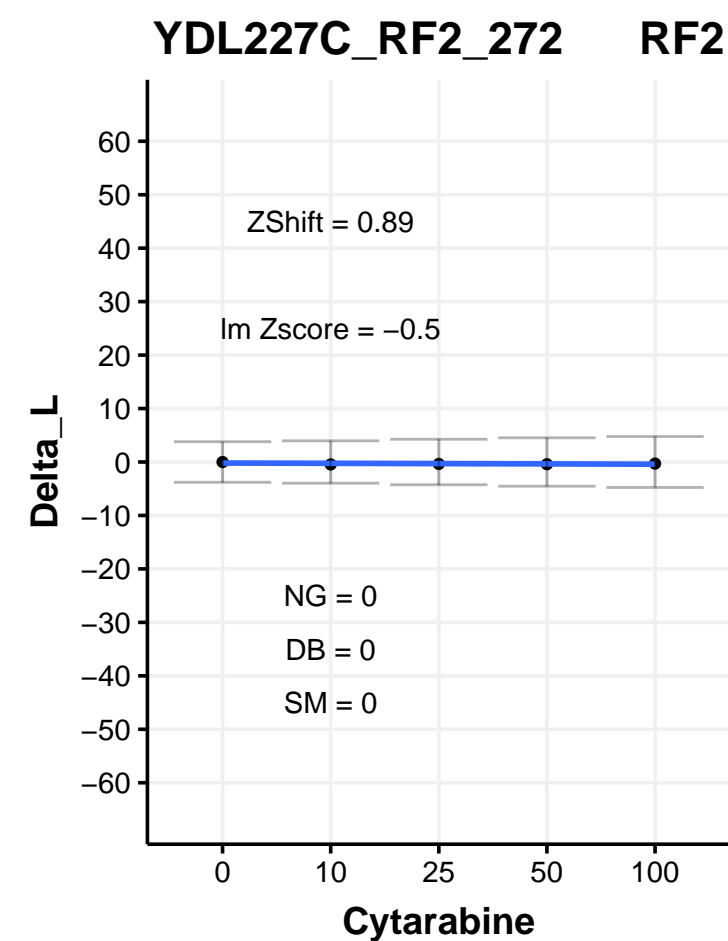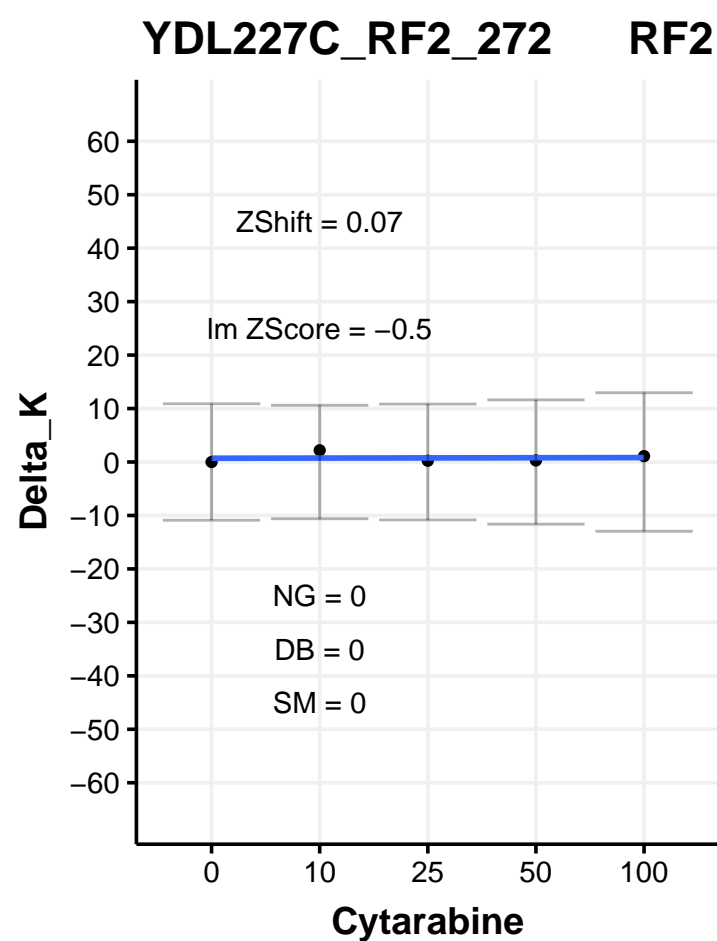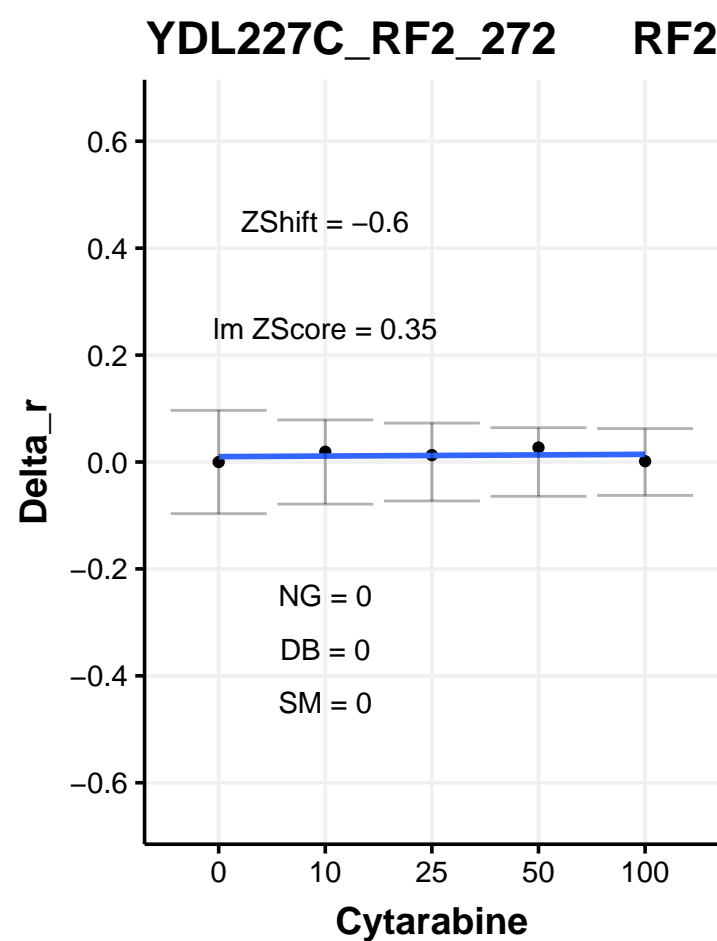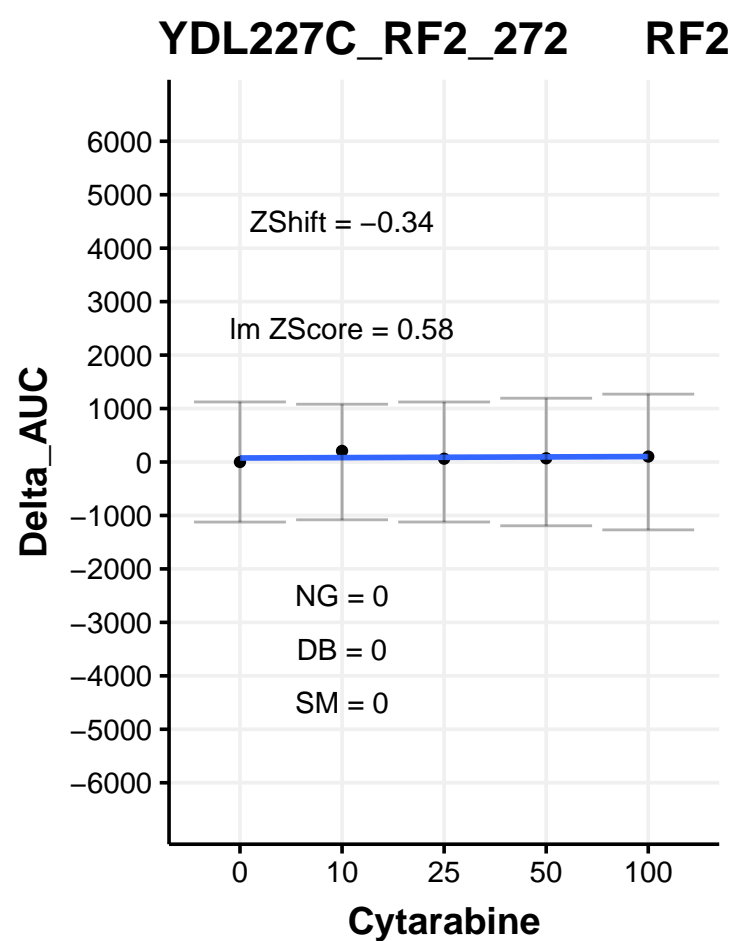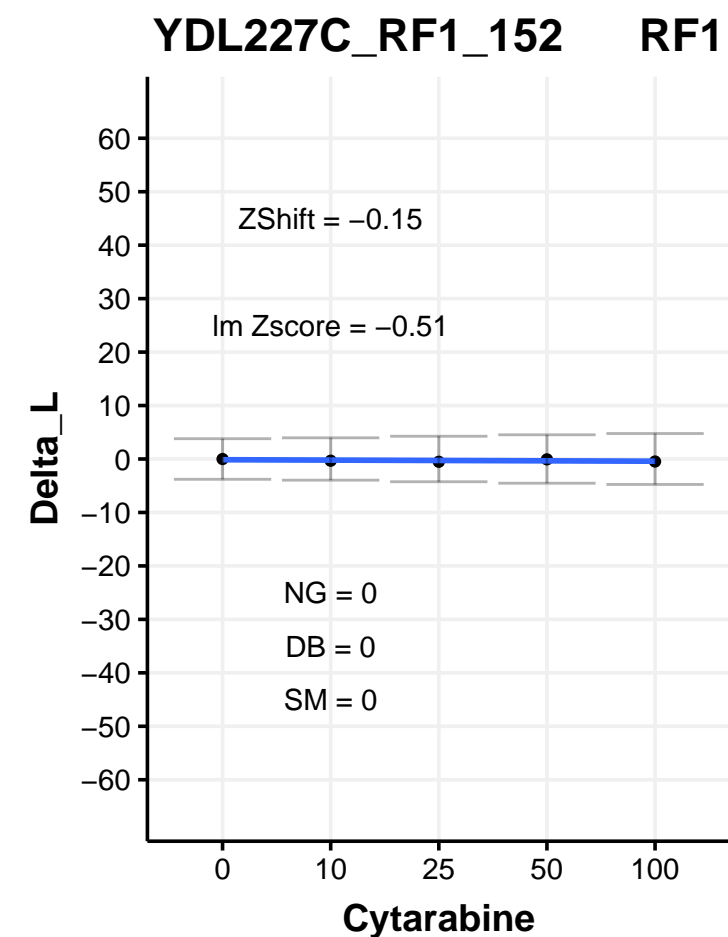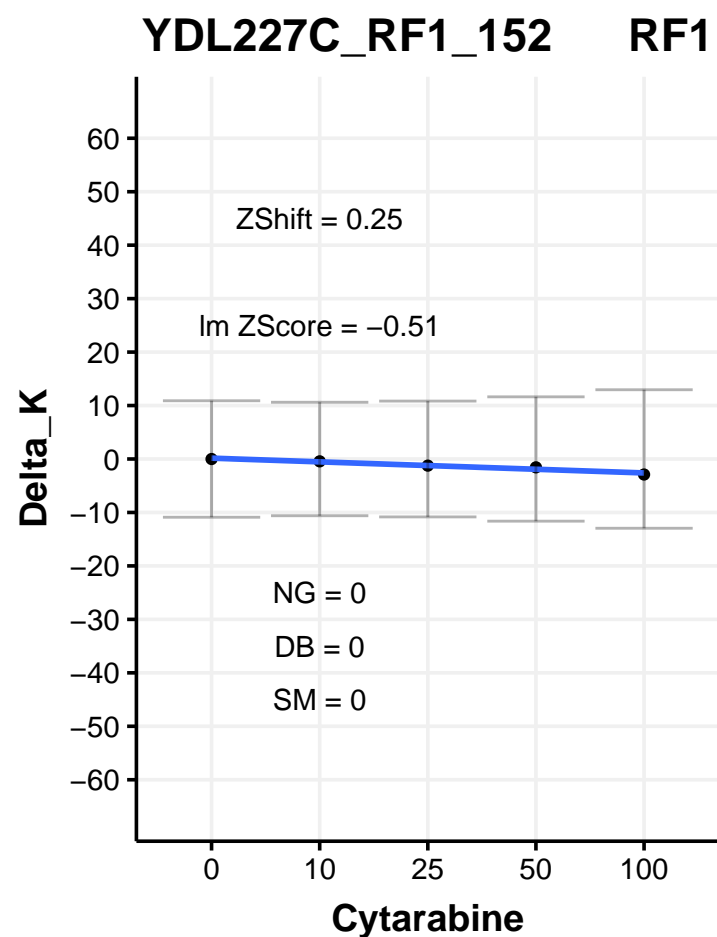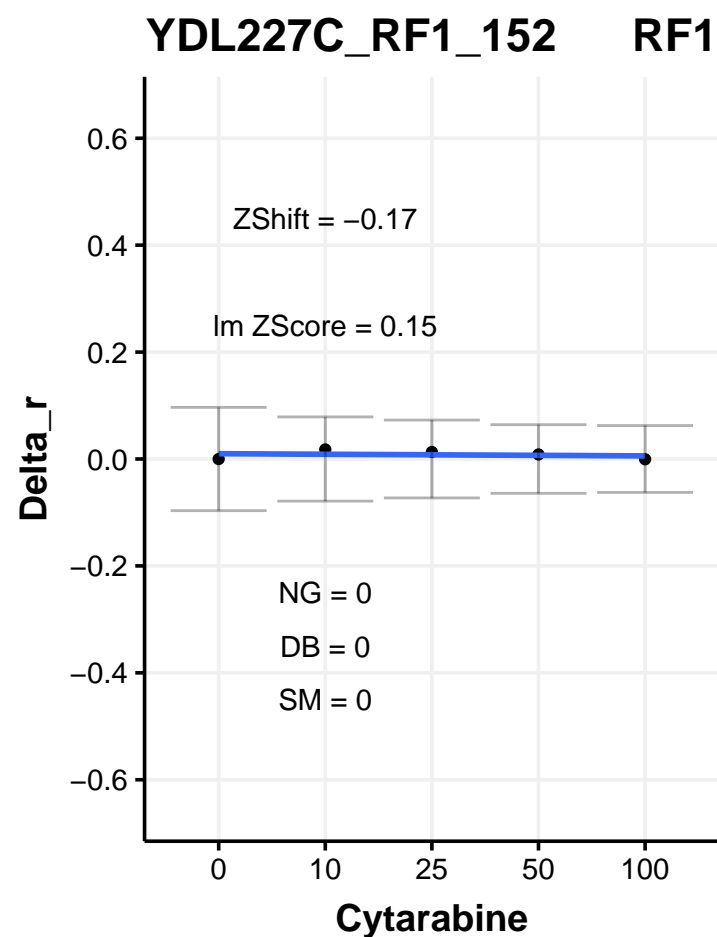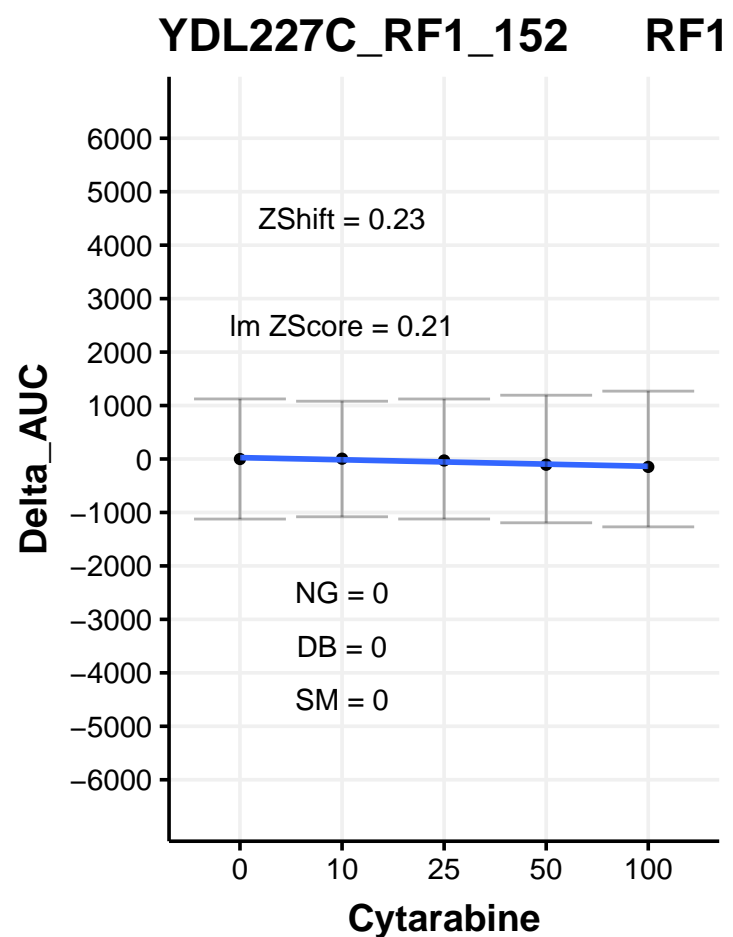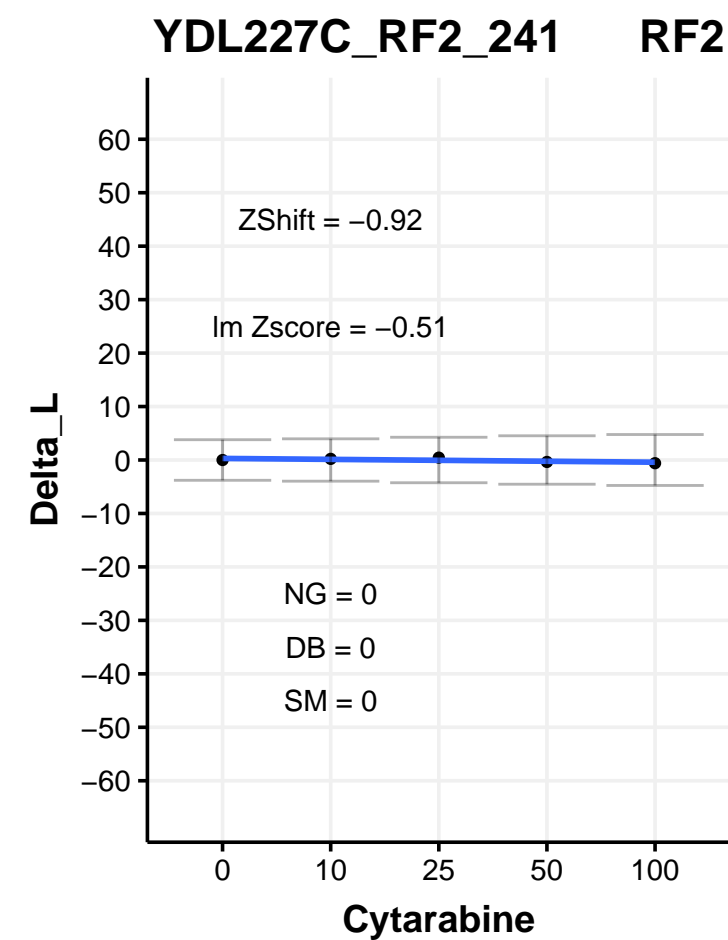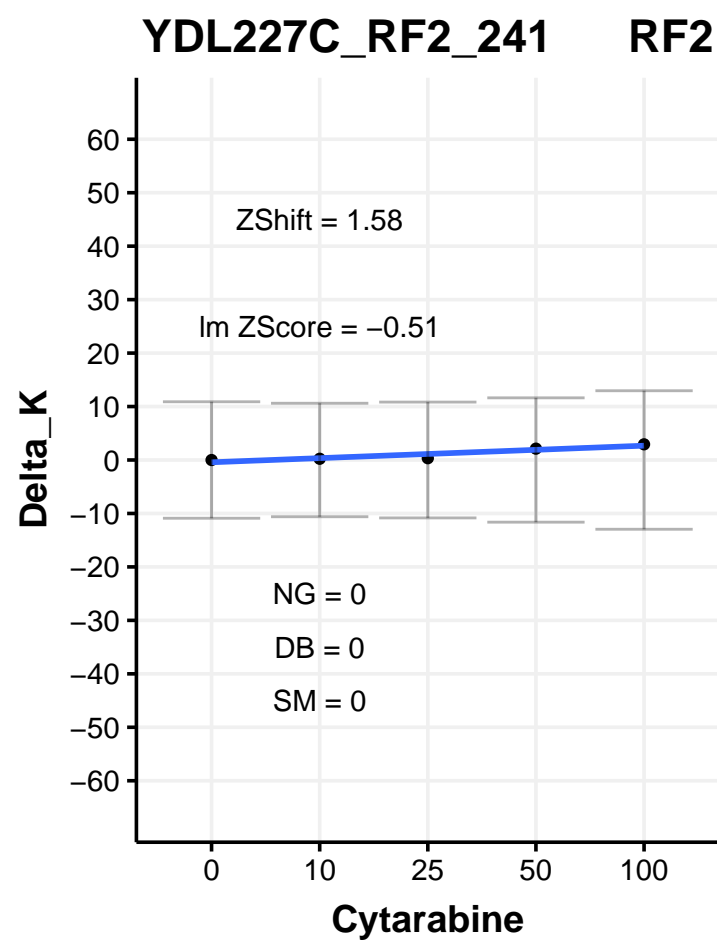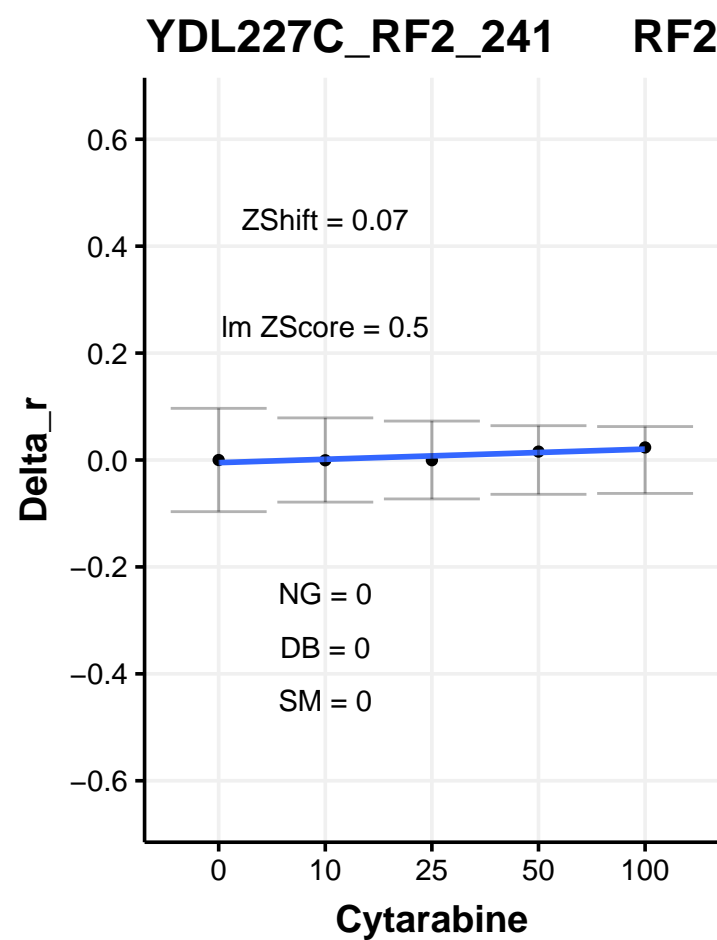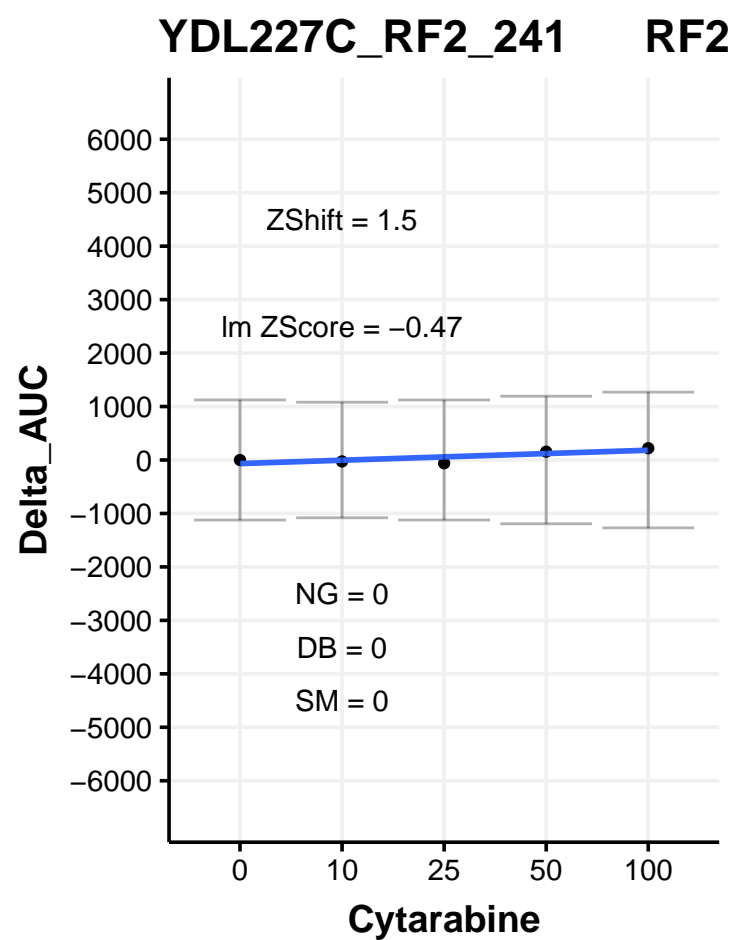



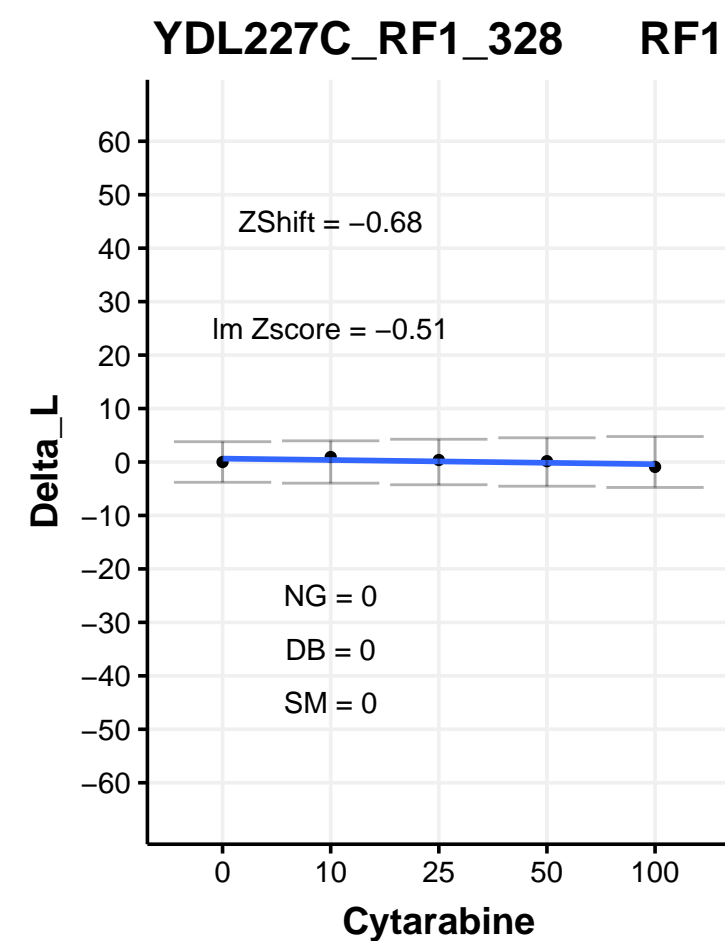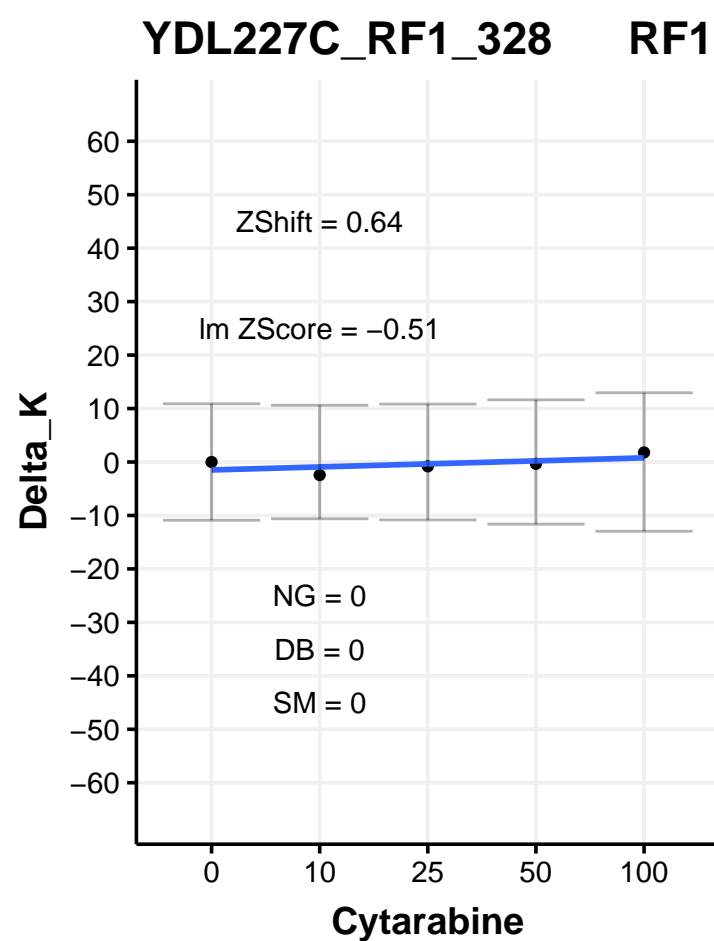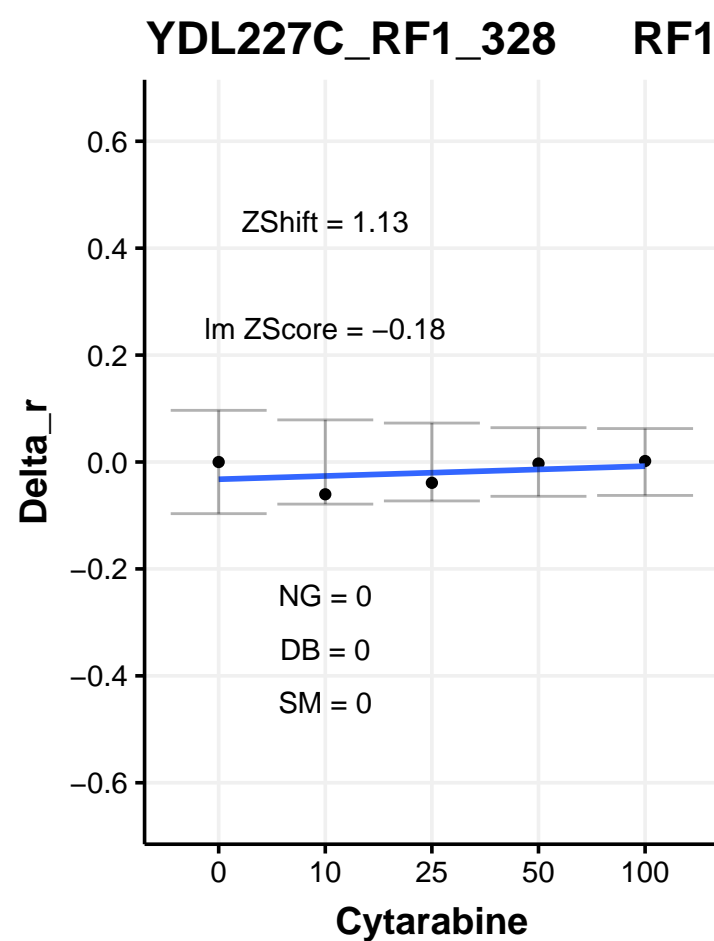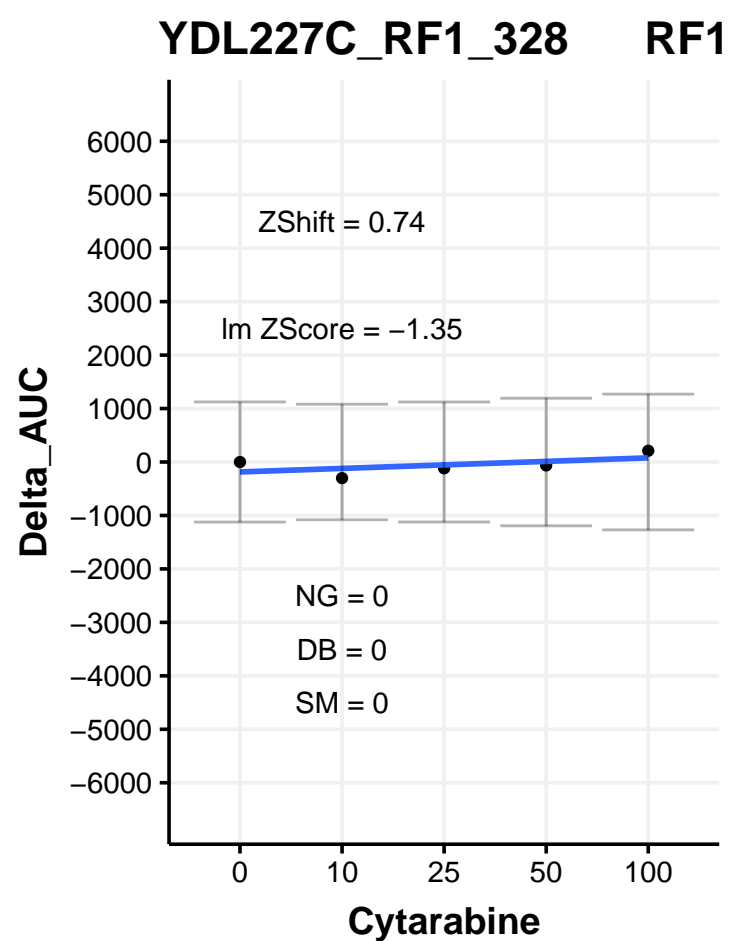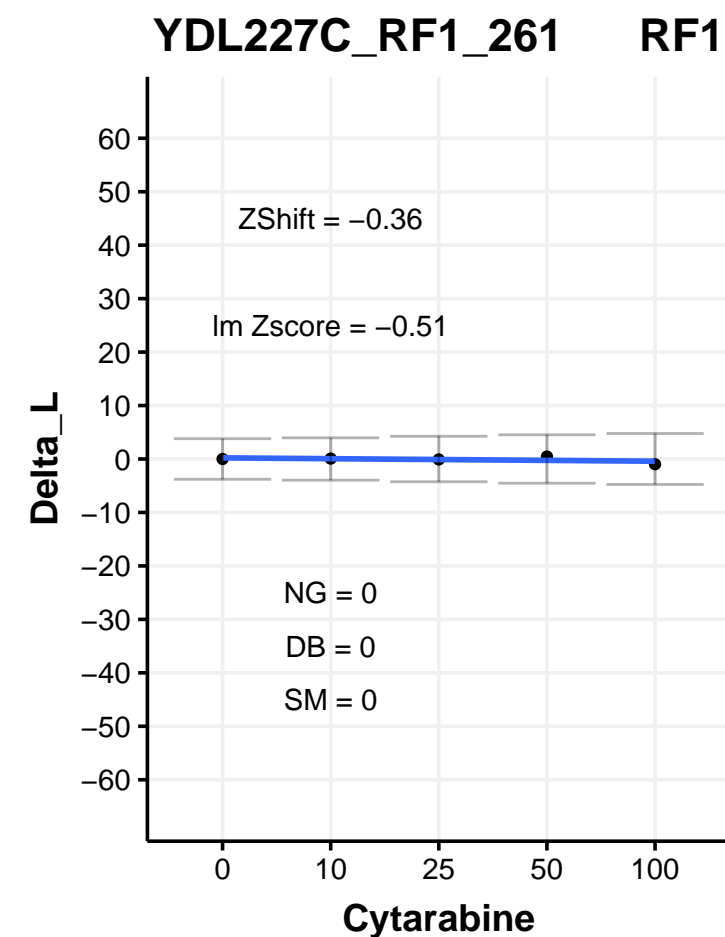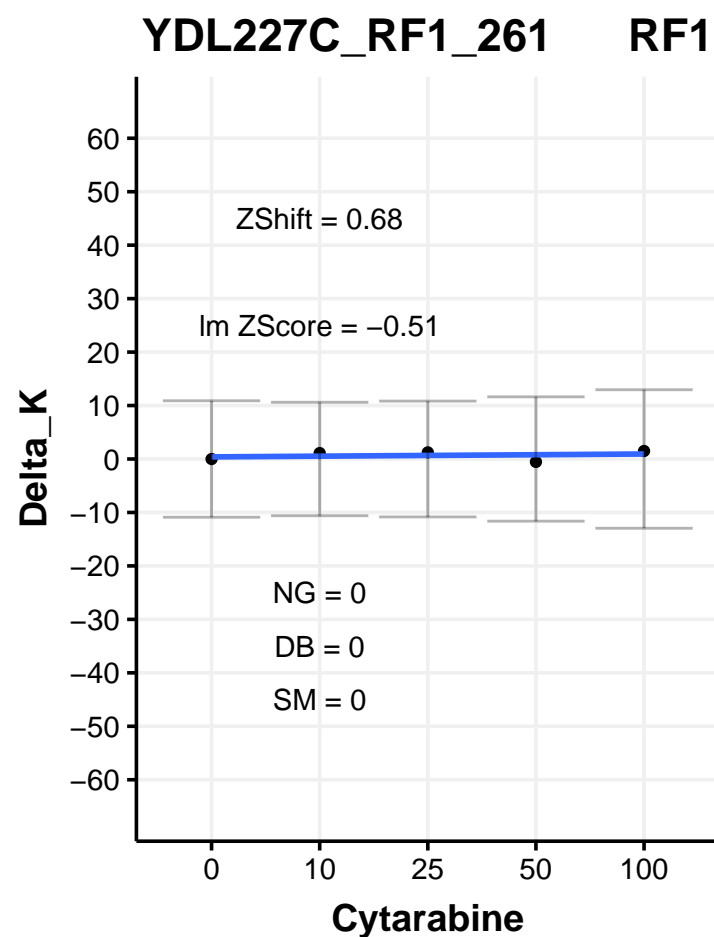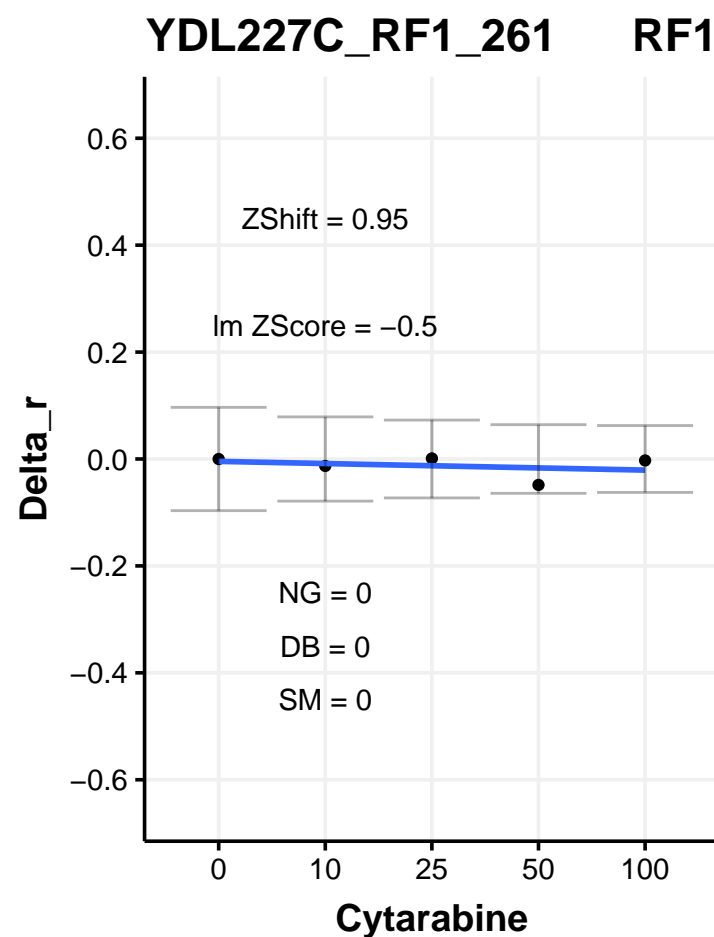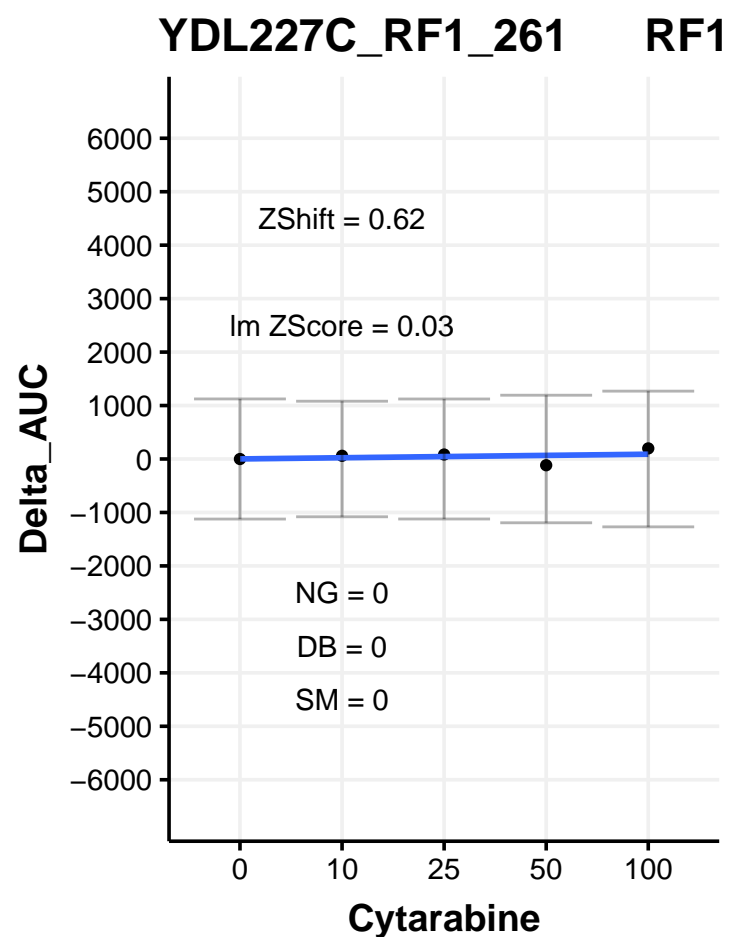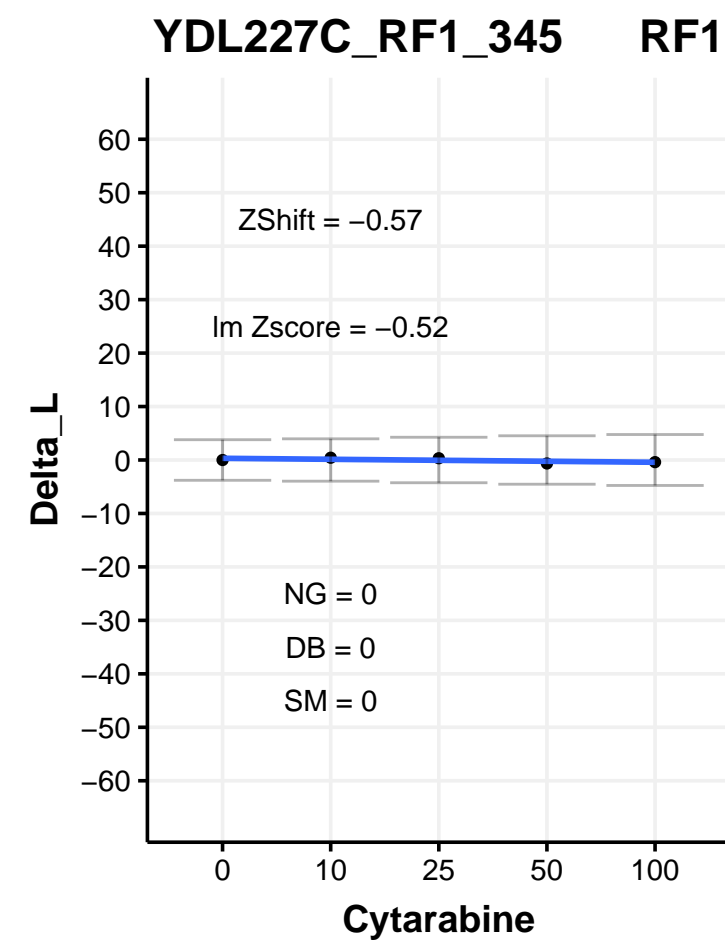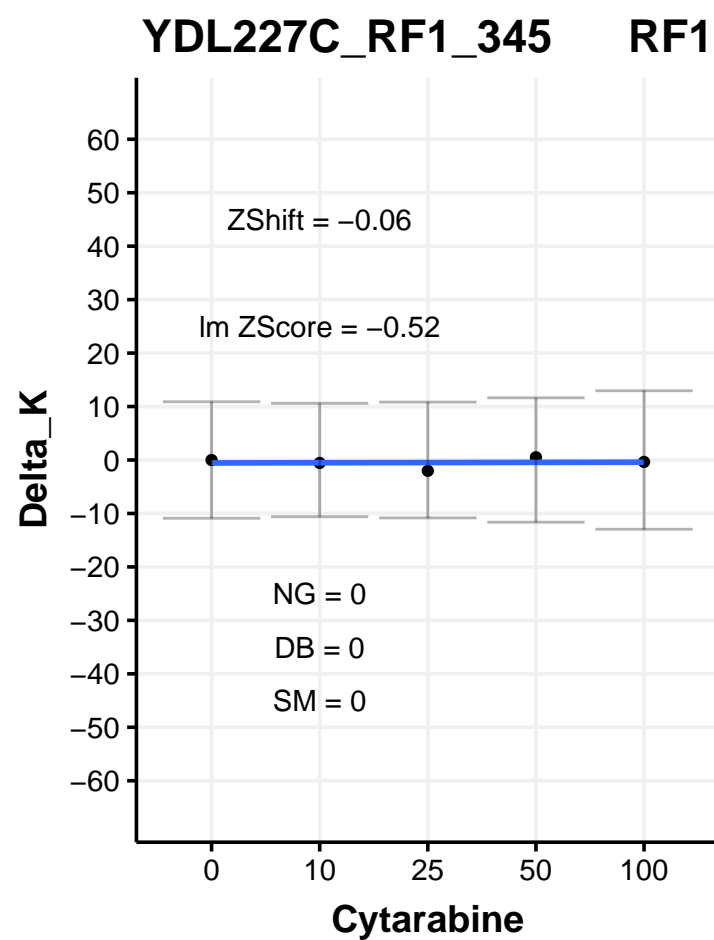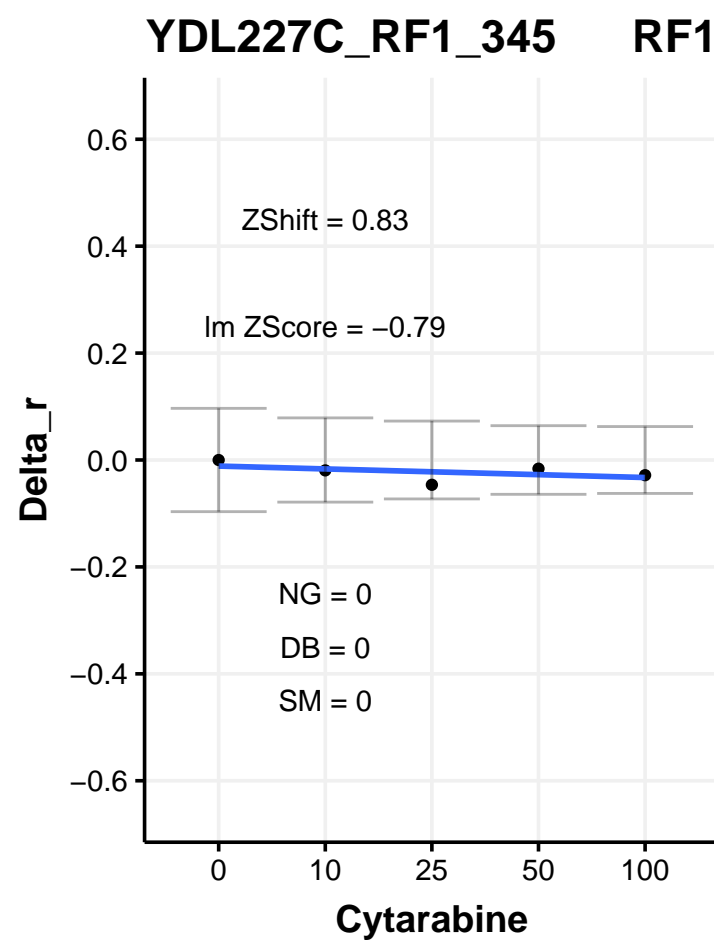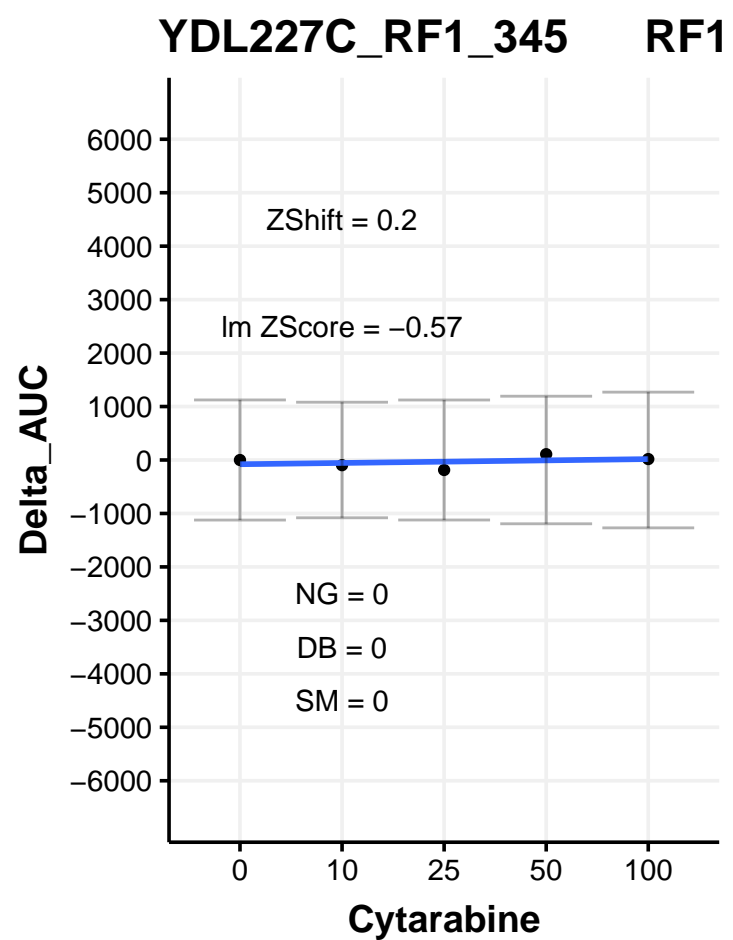

YDL227C\_RF2\_48 RF2

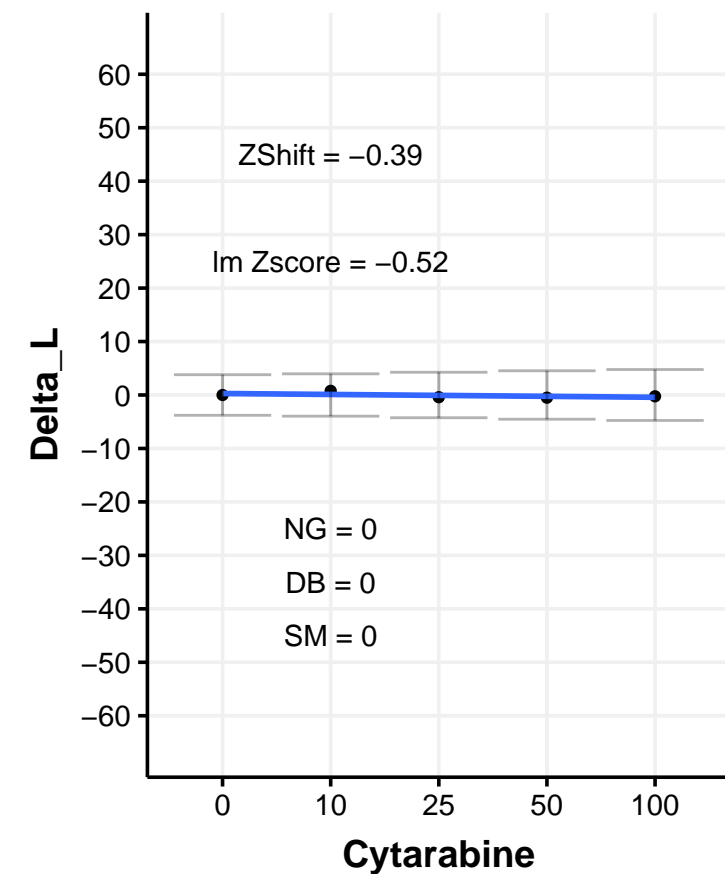

YDL227C\_RF2\_48 RF2

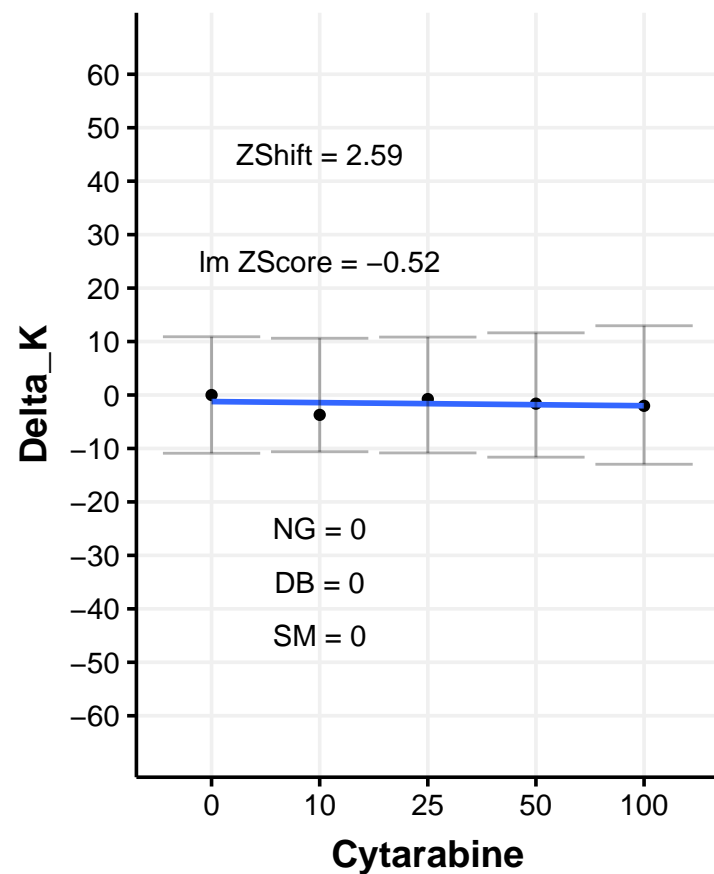

YDL227C\_RF2\_48 RF2

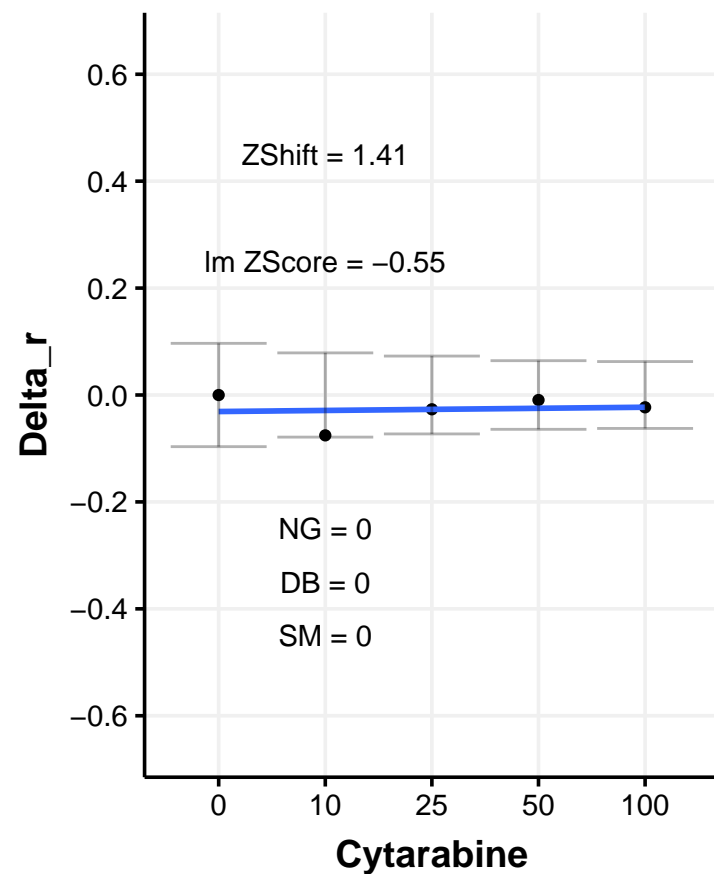

YDL227C\_RF2\_48 RF2

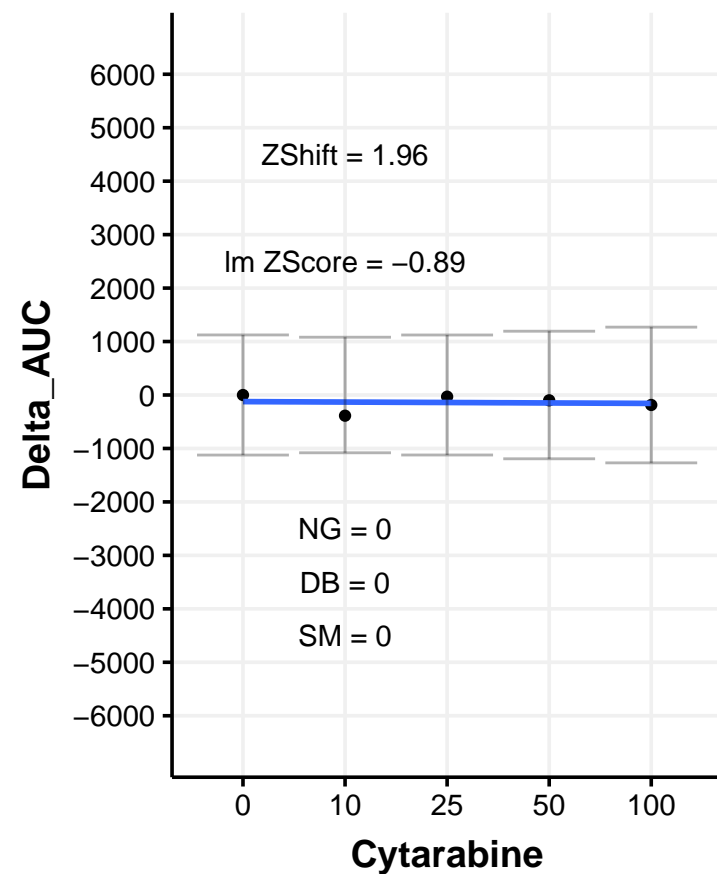

YDL227C\_RF1\_377 RF1

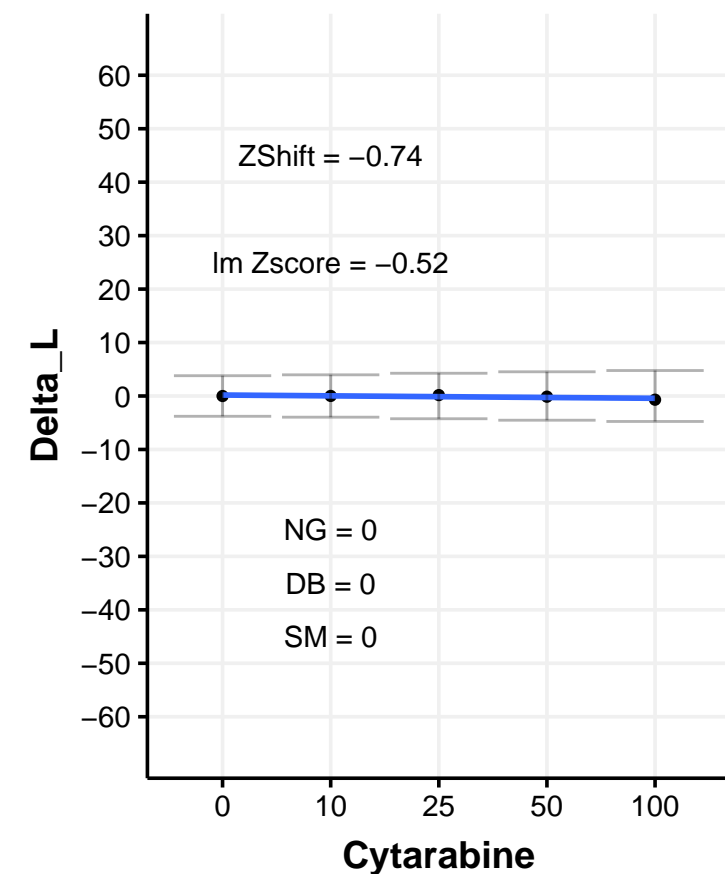

YDL227C\_RF1\_377 RF1

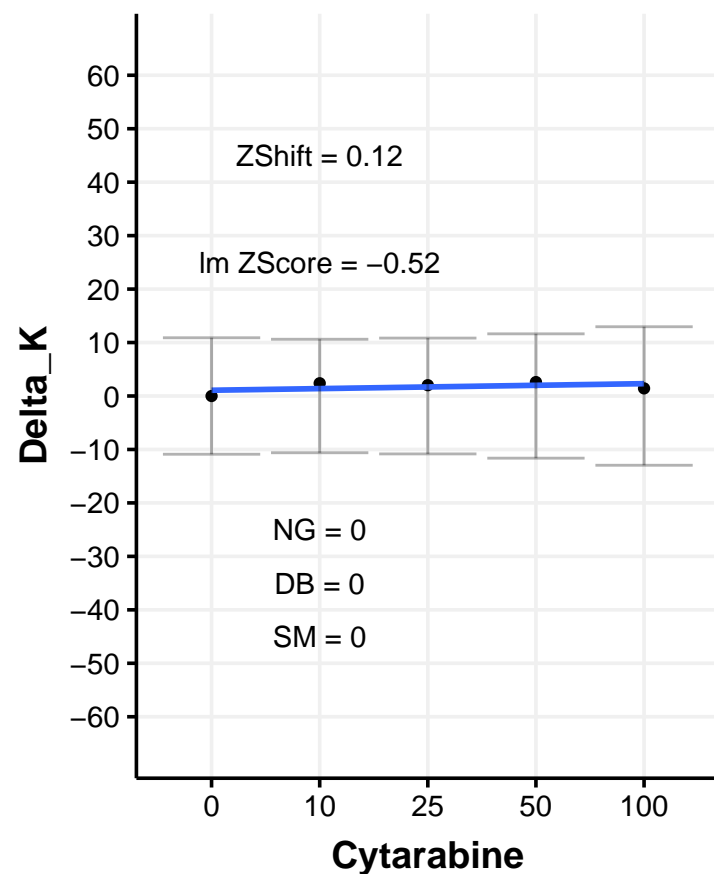

YDL227C\_RF1\_377 RF1

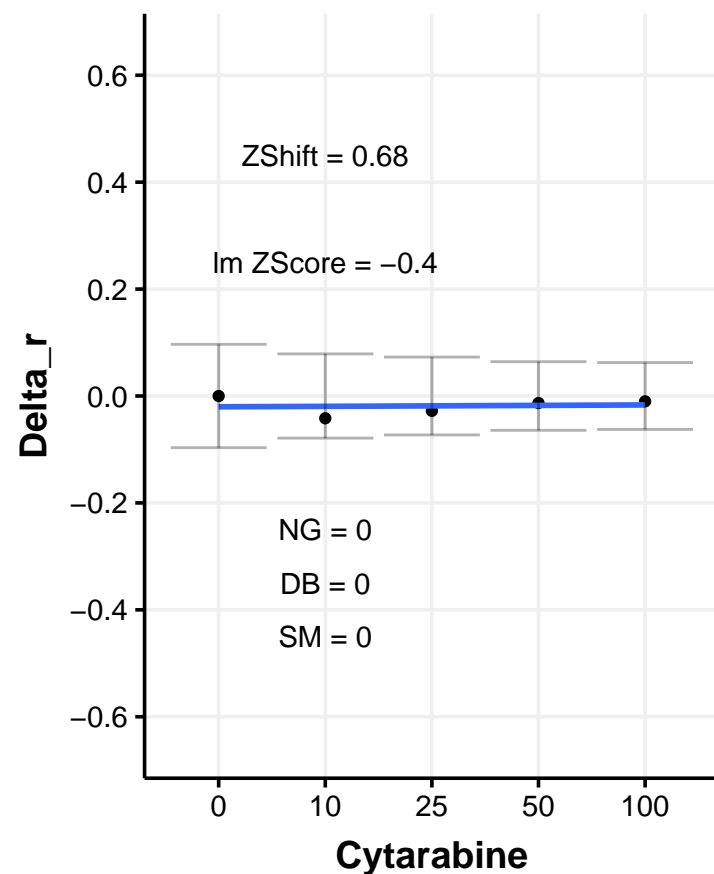

YDL227C\_RF1\_377 RF1

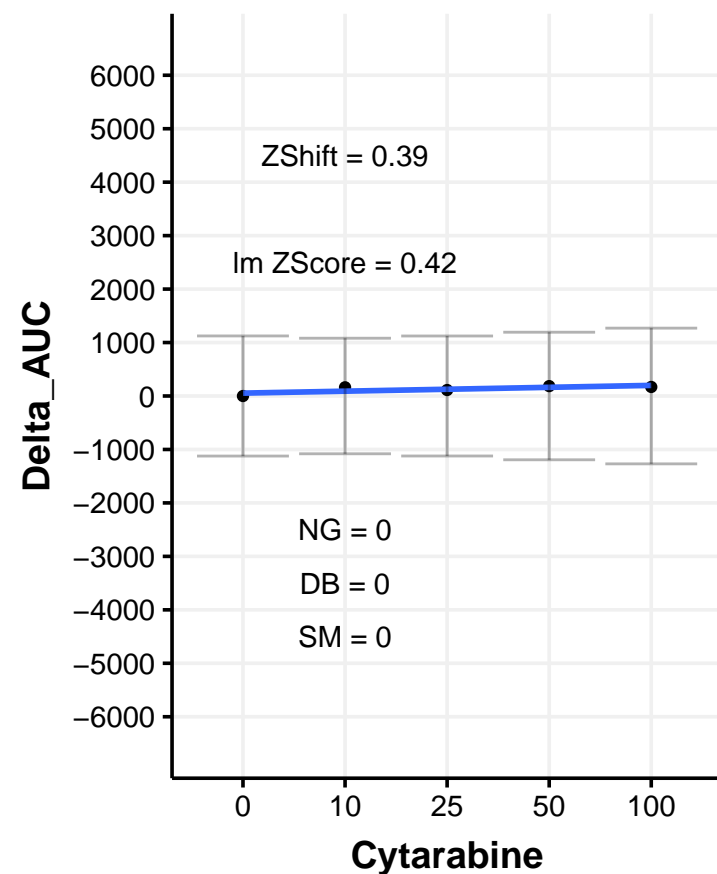

YDL227C\_RF2\_57 RF2

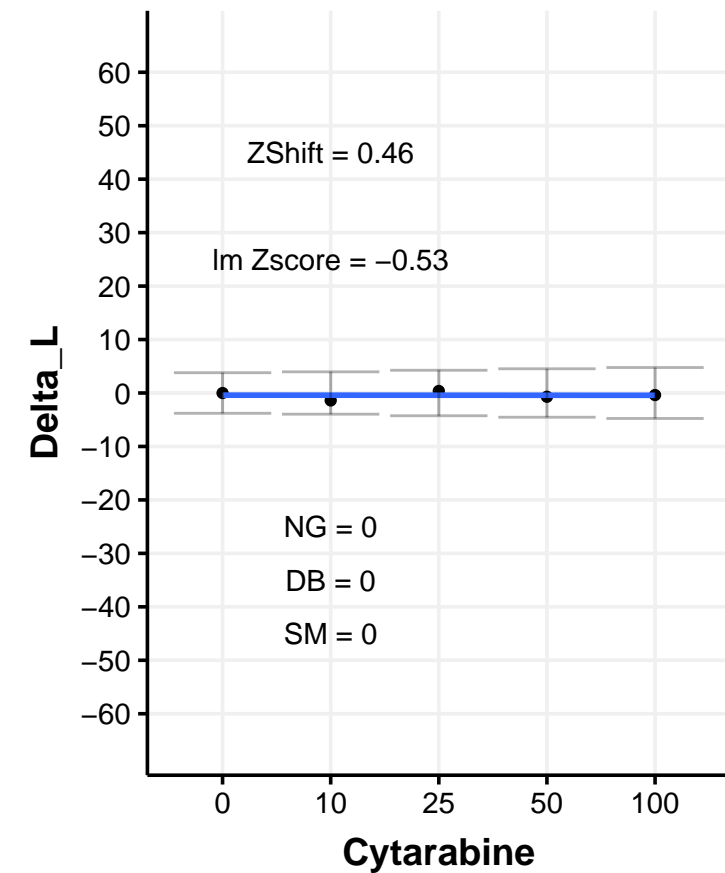

YDL227C\_RF2\_57 RF2

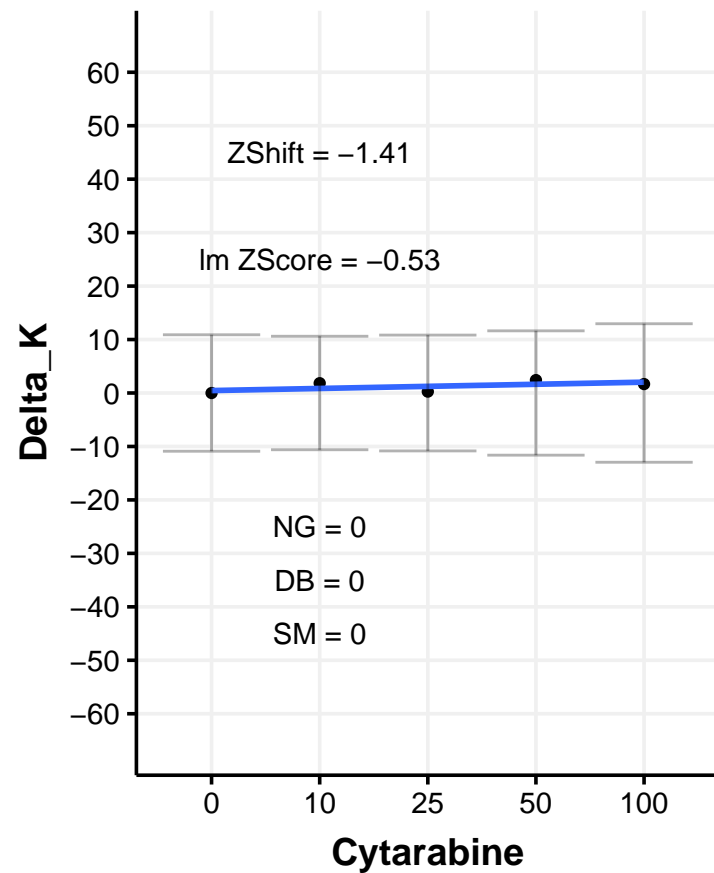

YDL227C\_RF2\_57 RF2

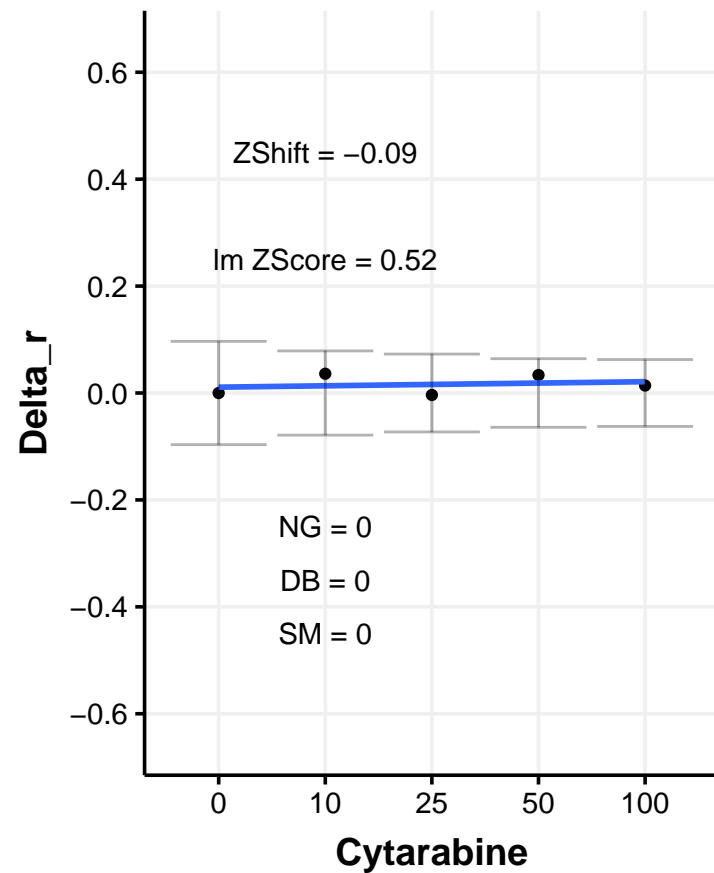

YDL227C\_RF2\_57 RF2

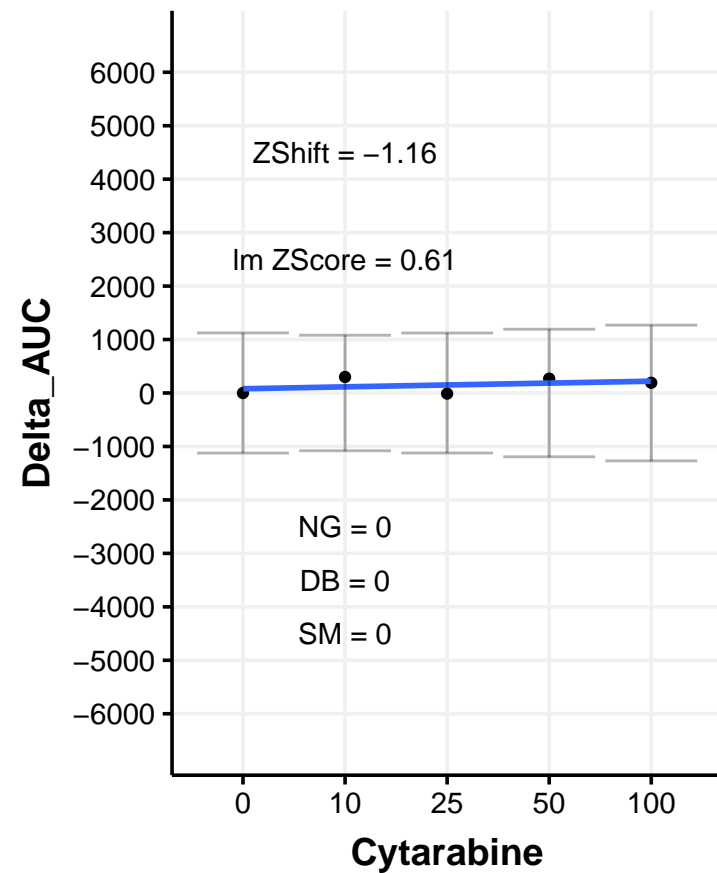

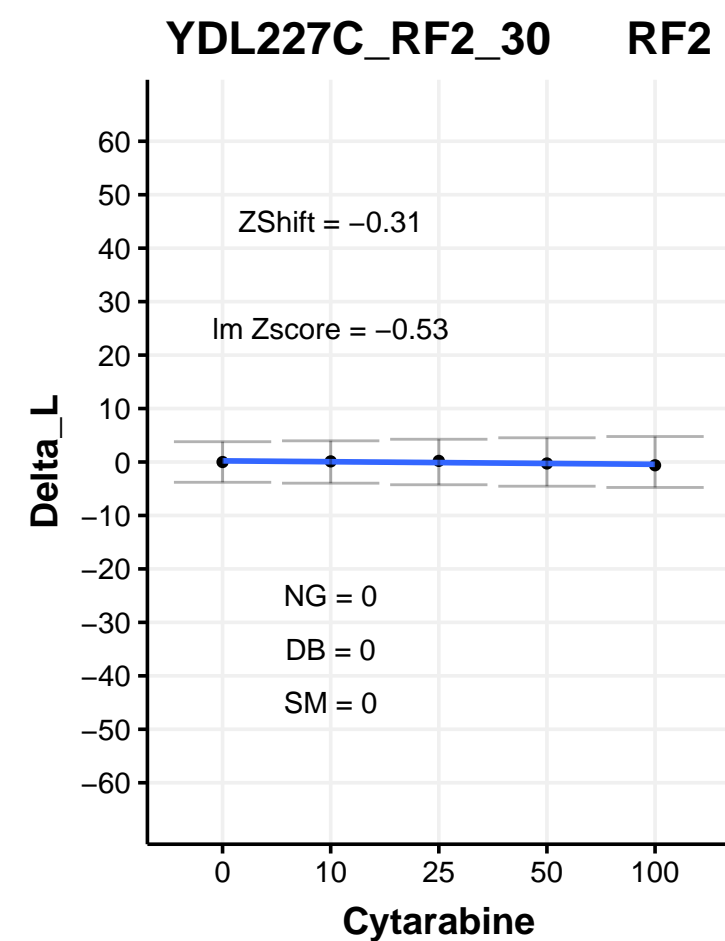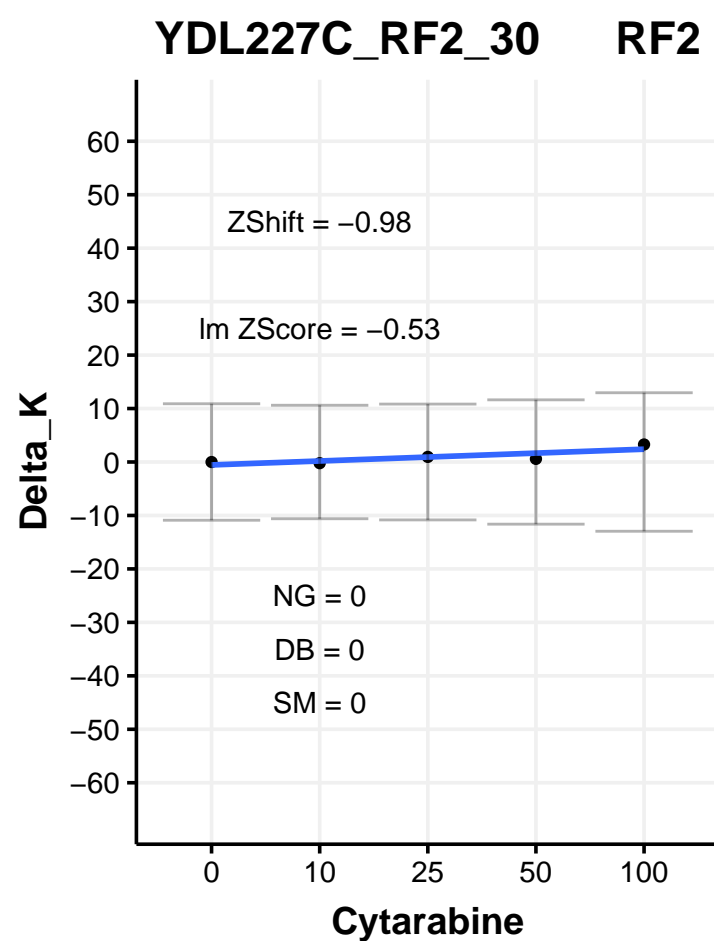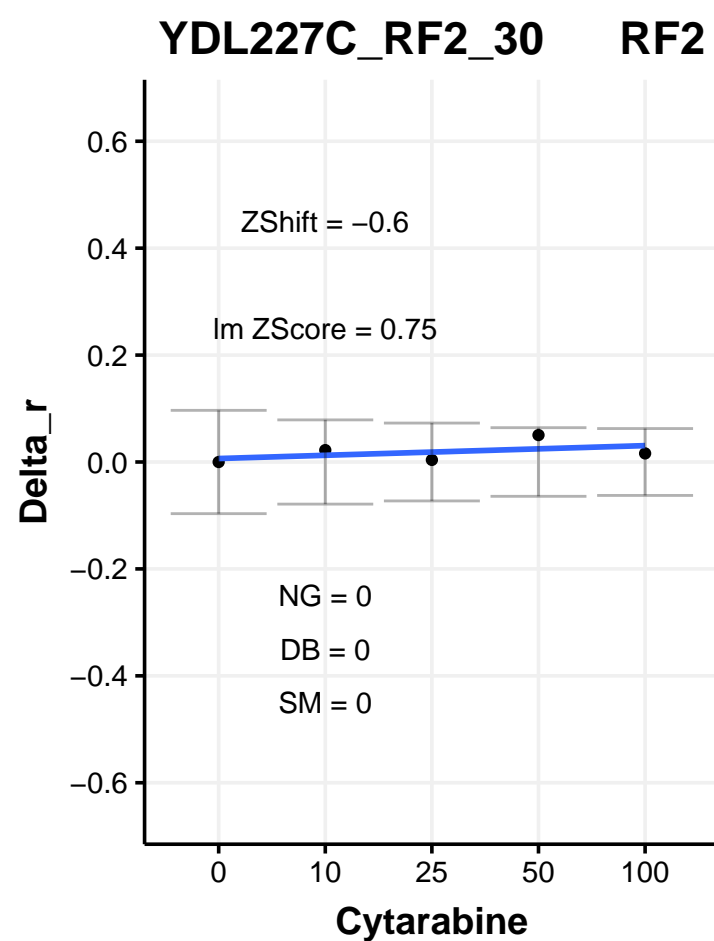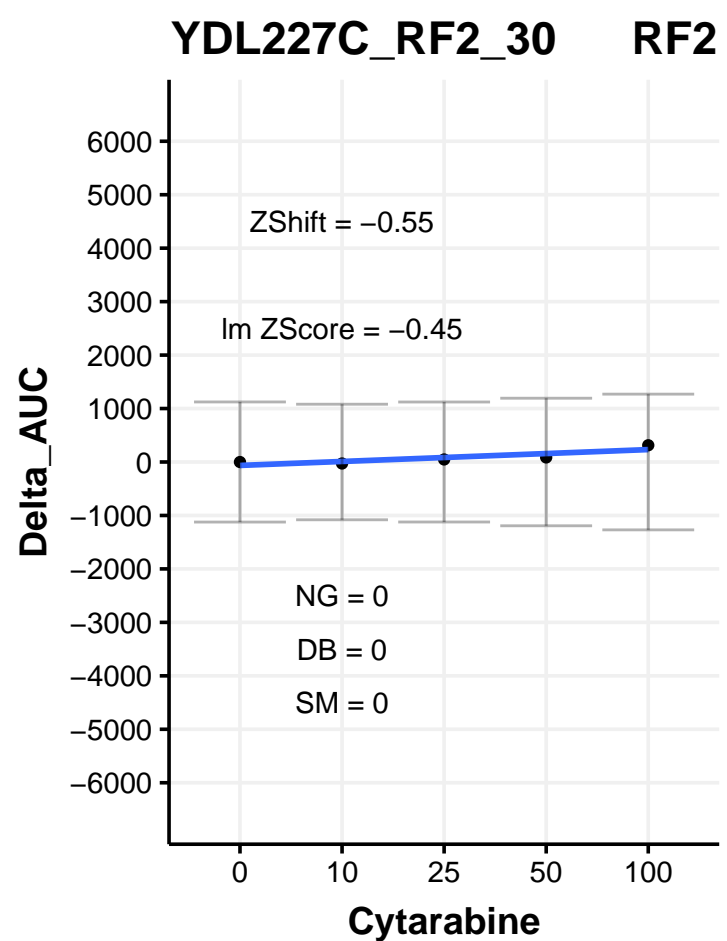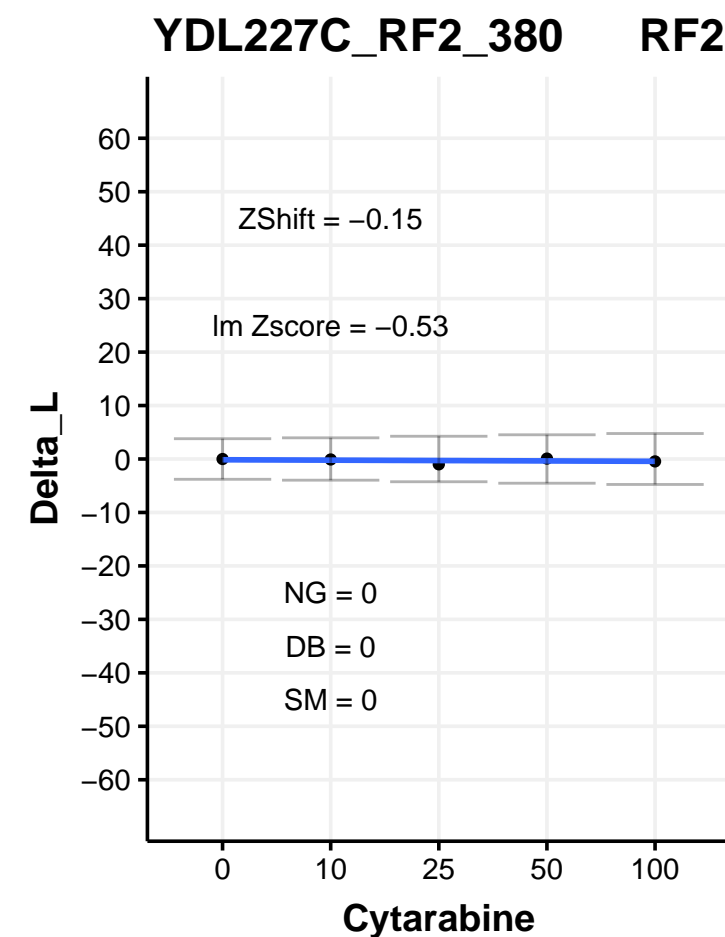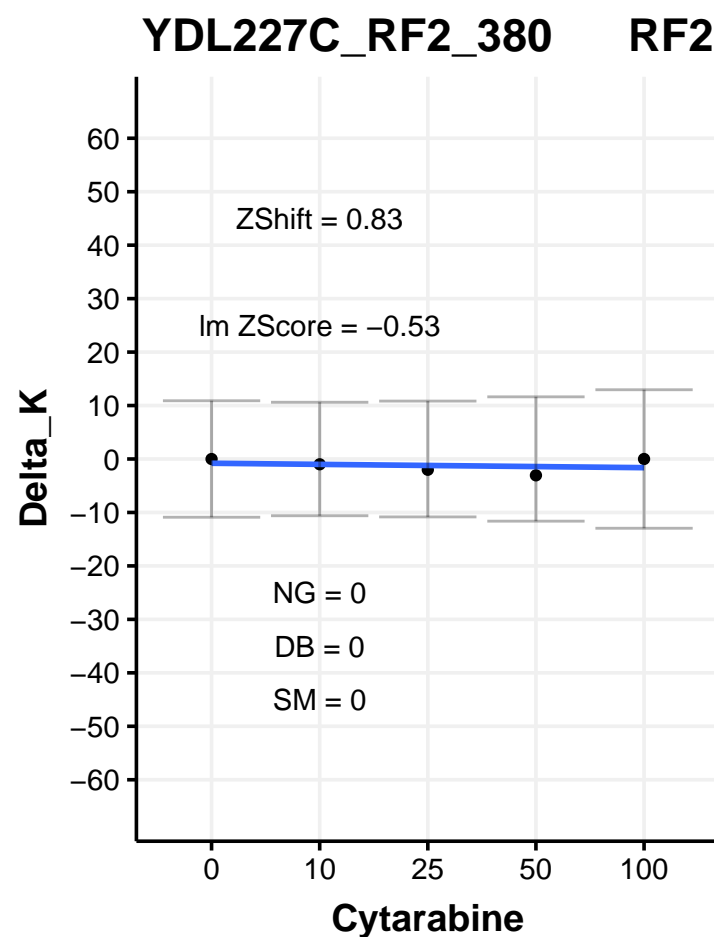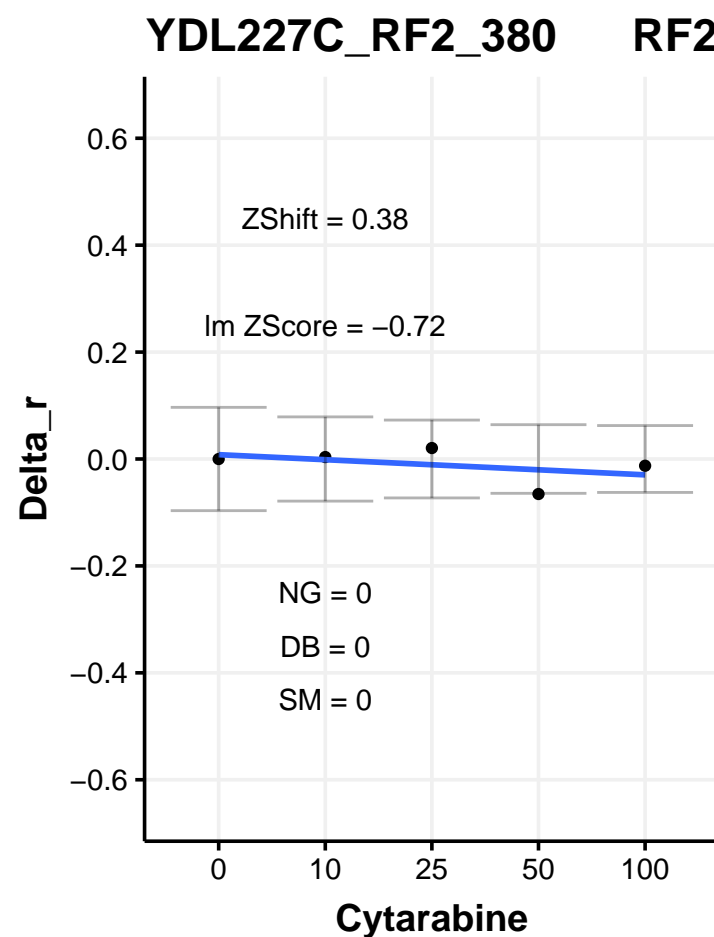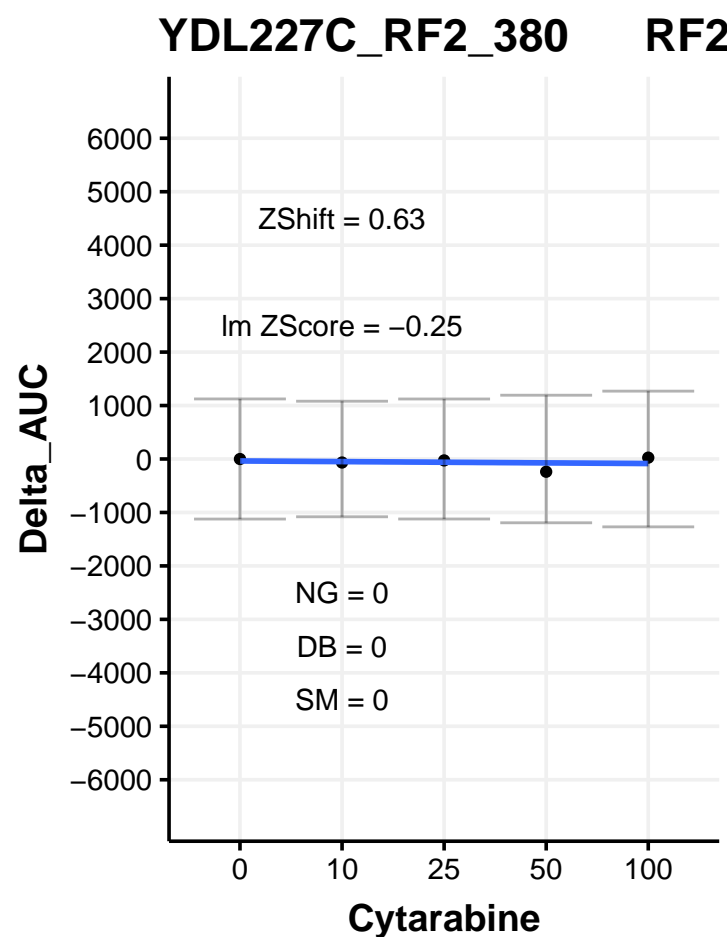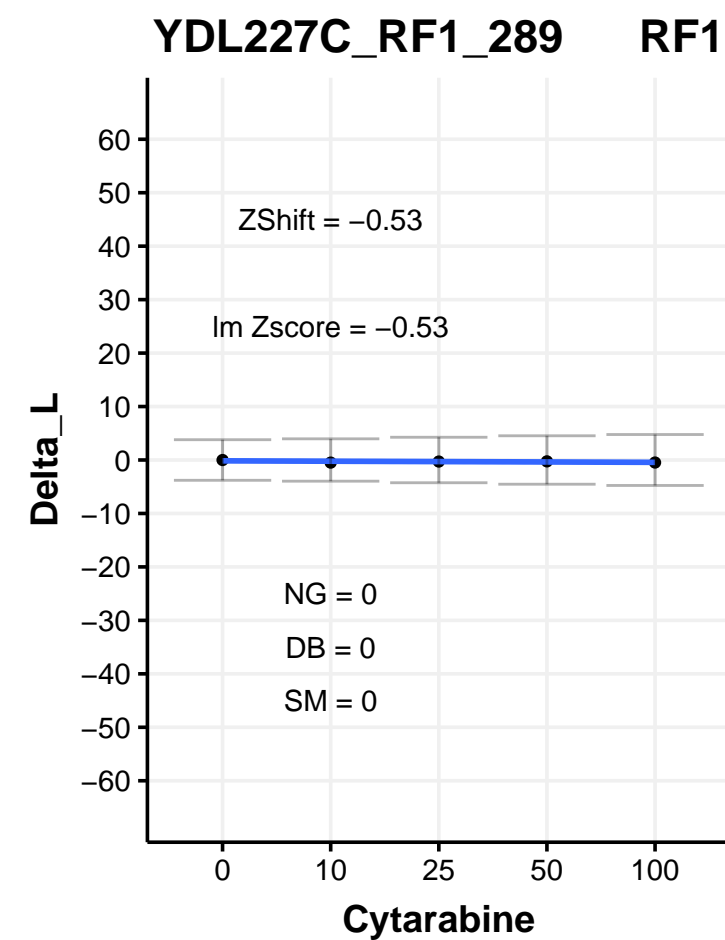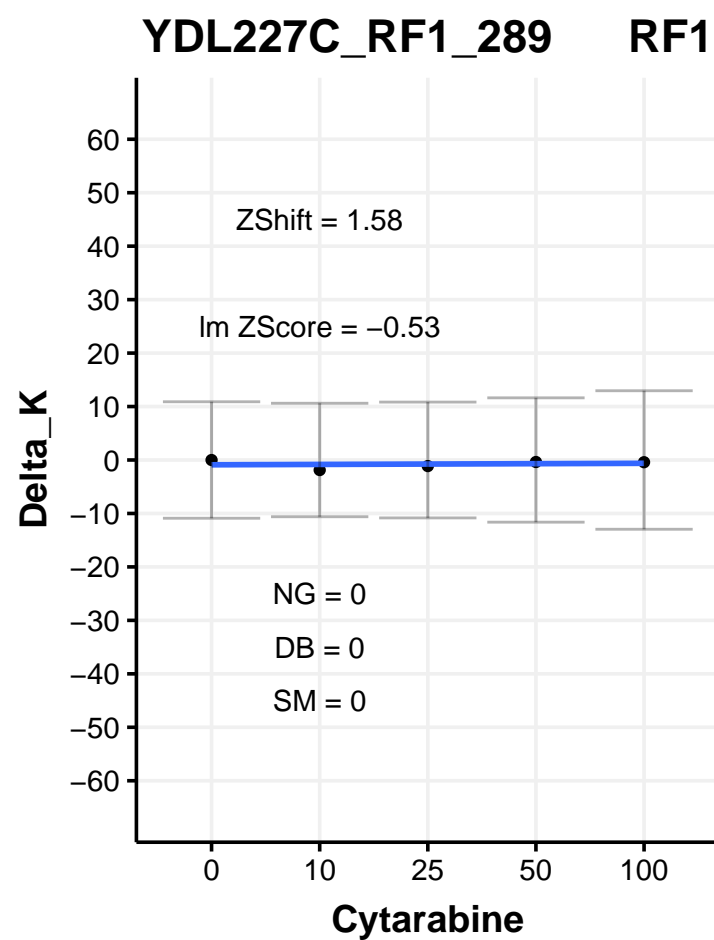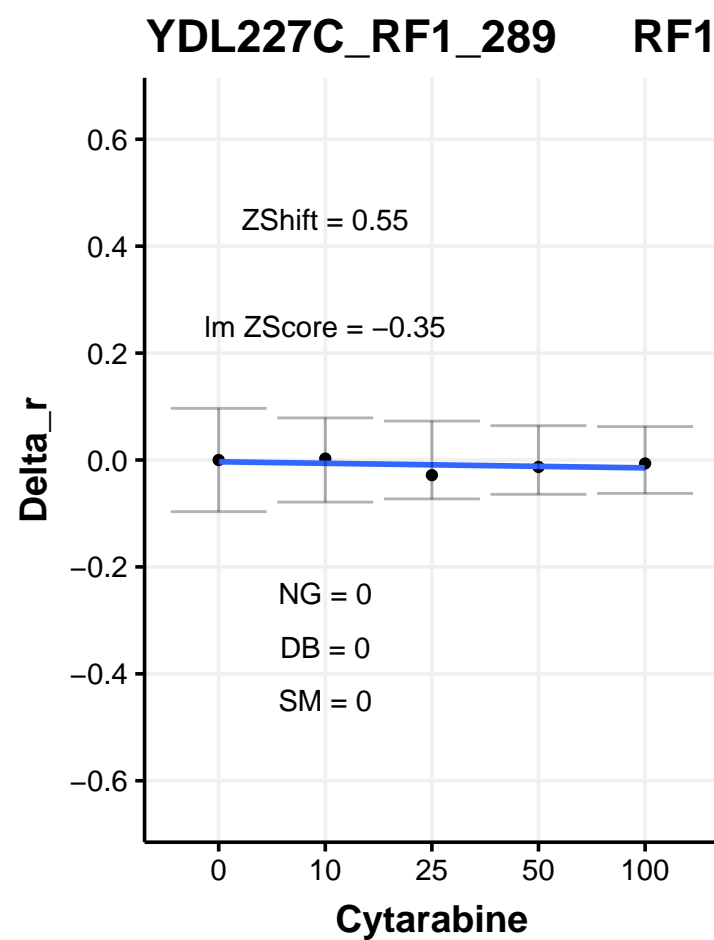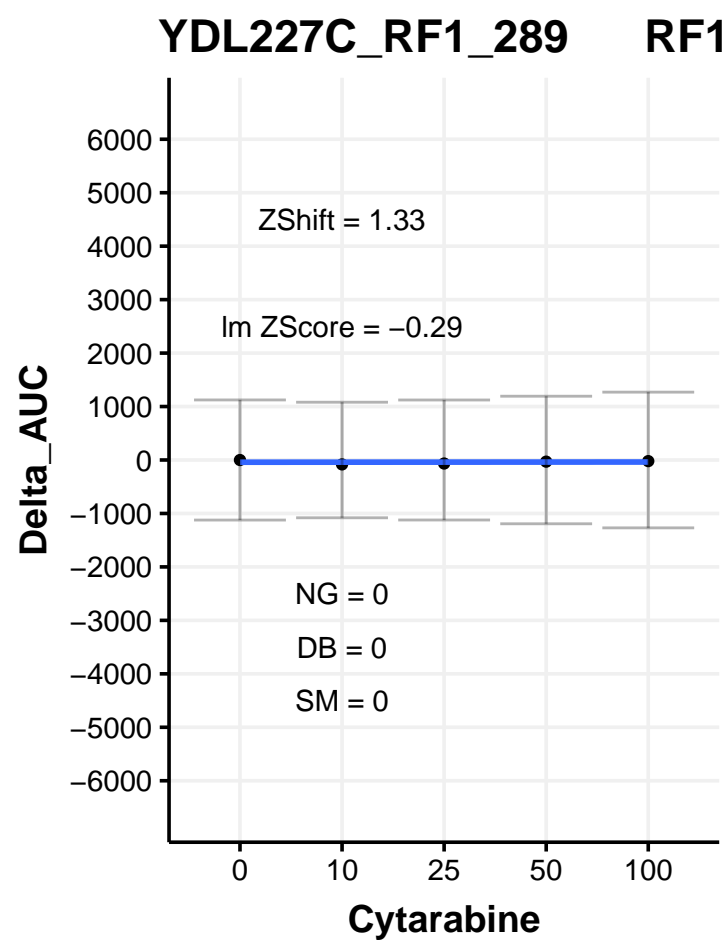

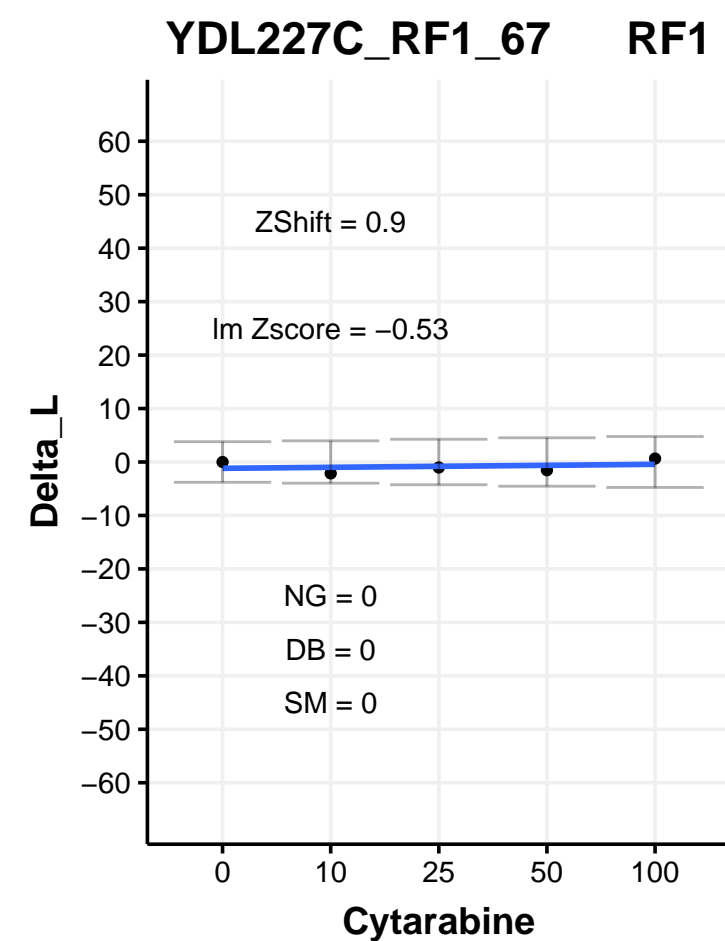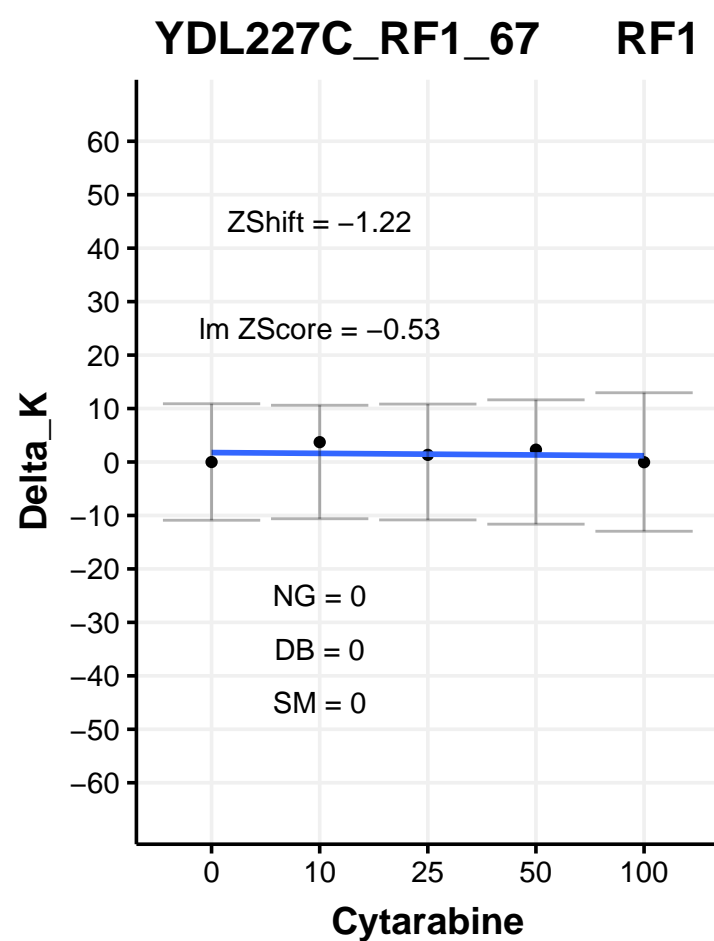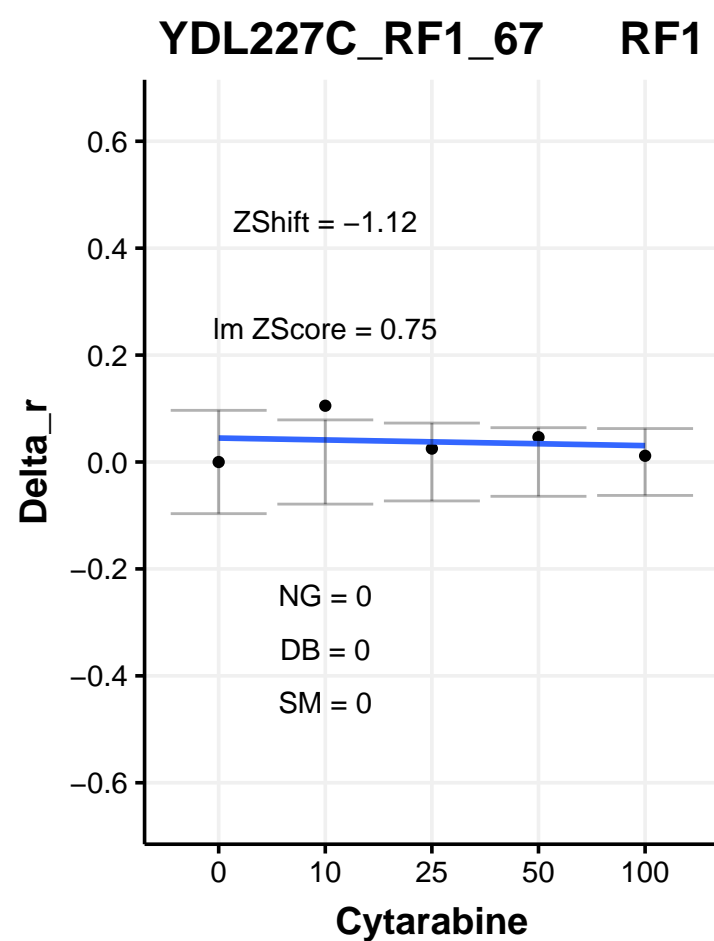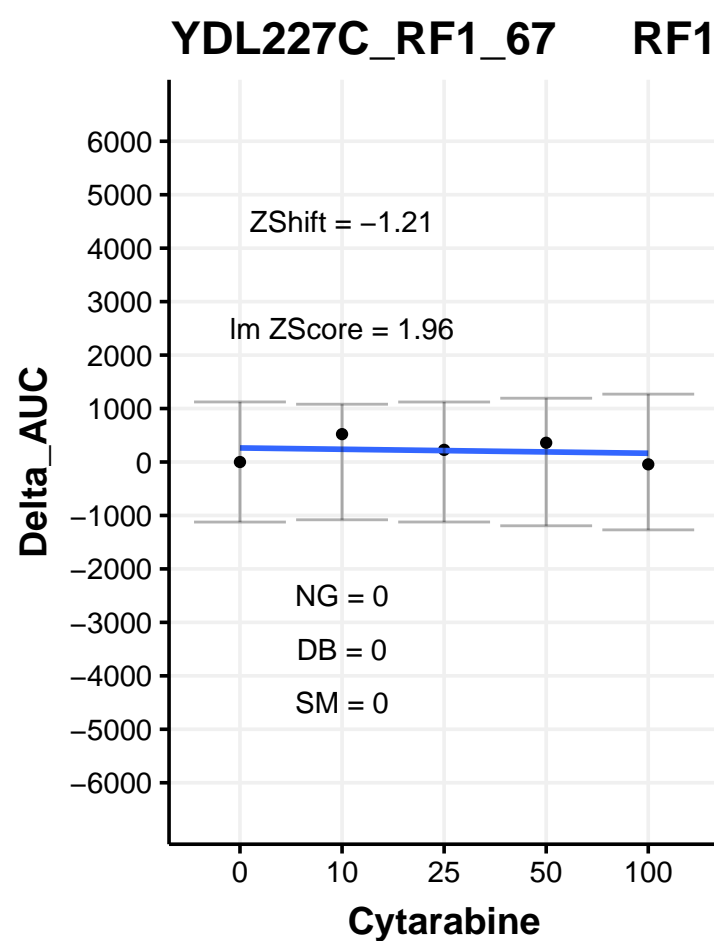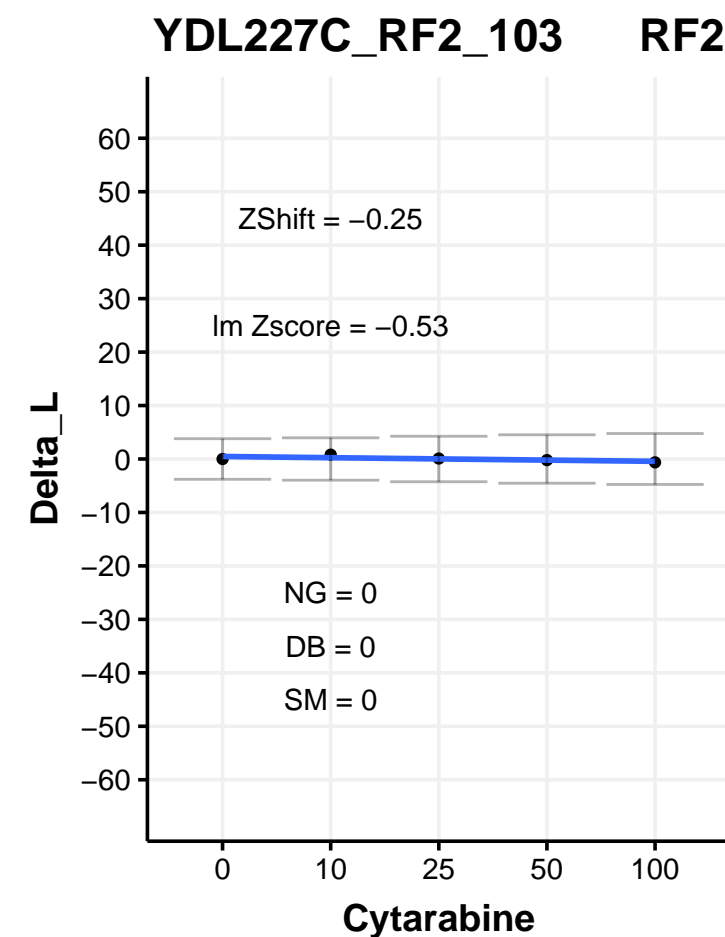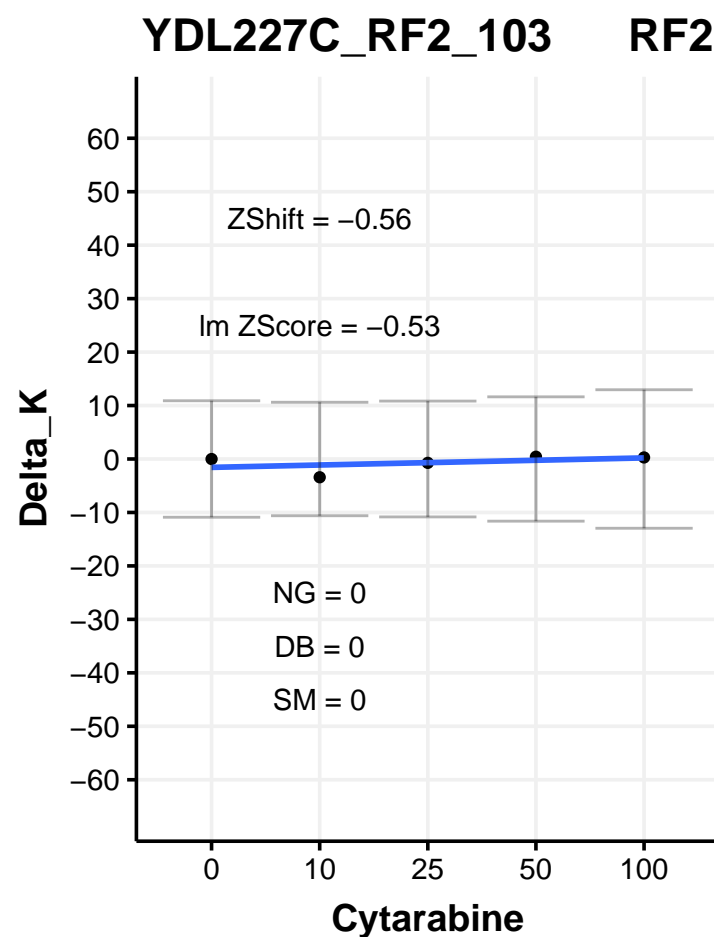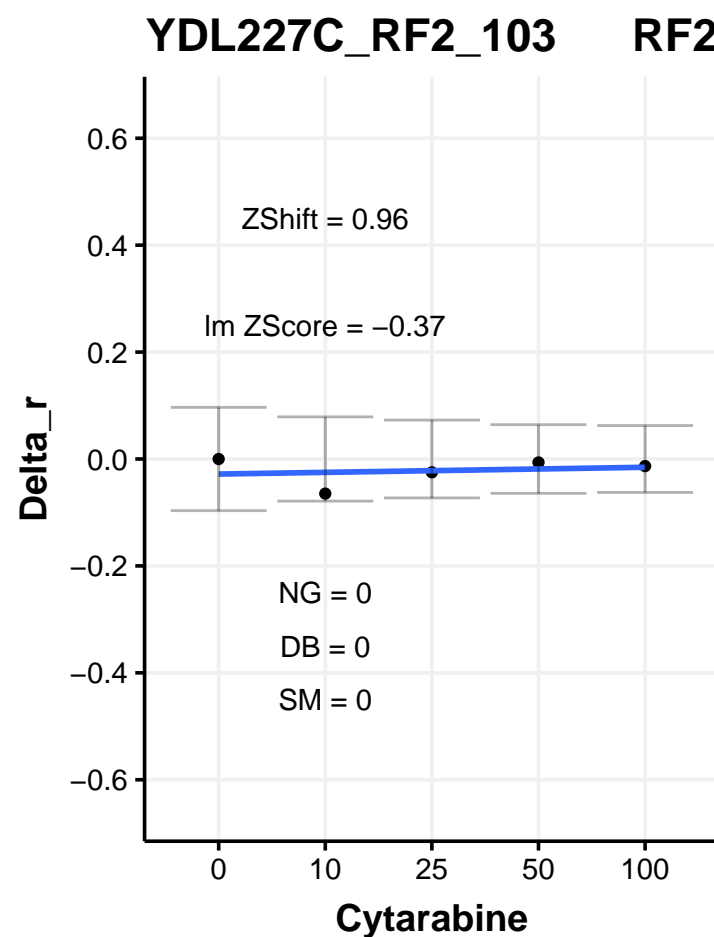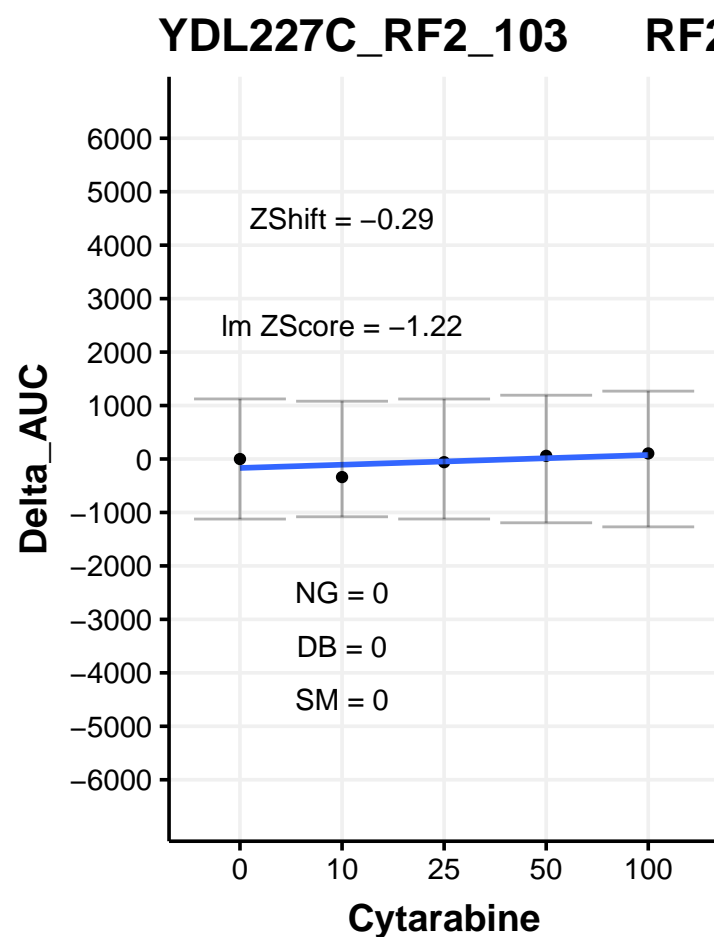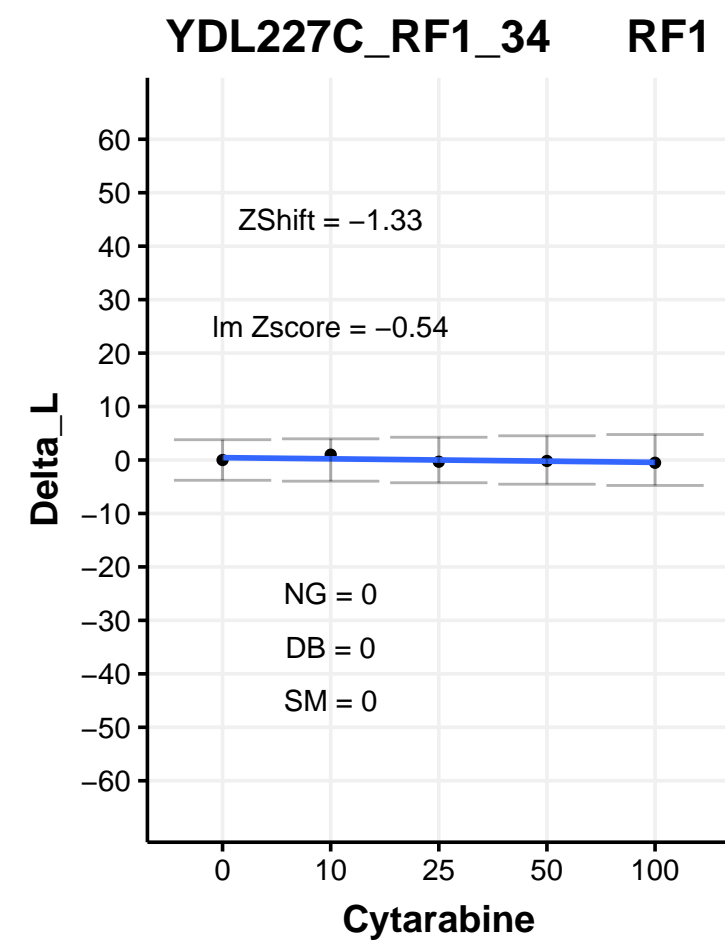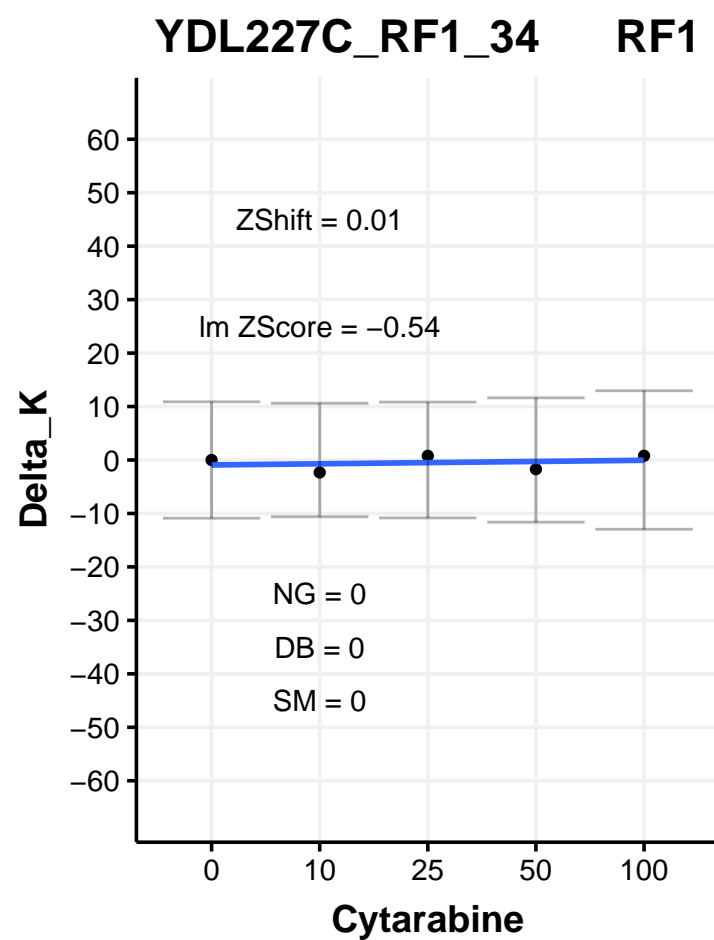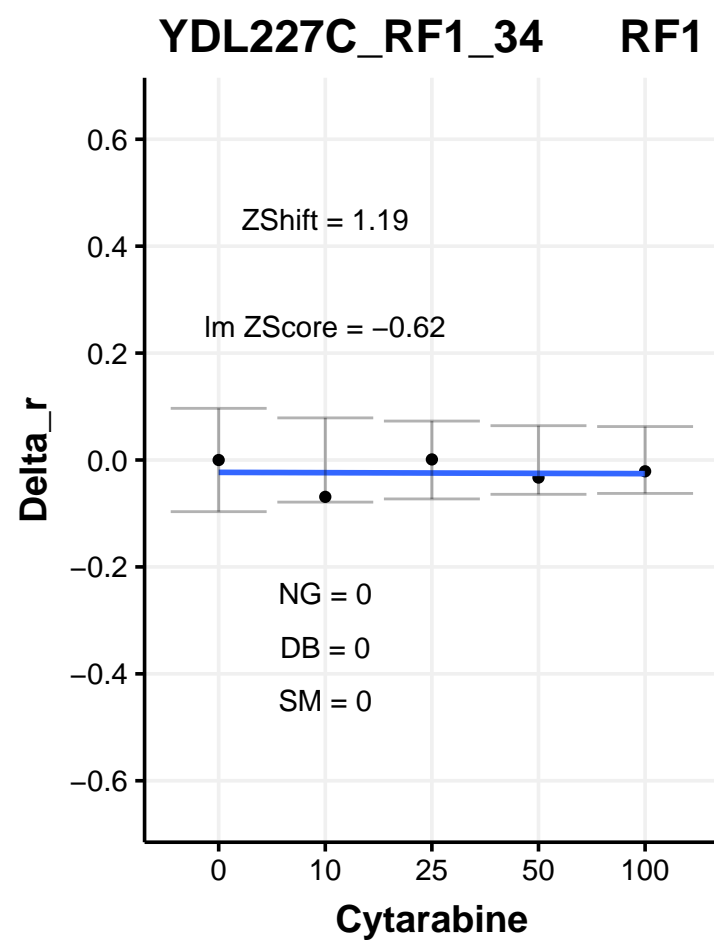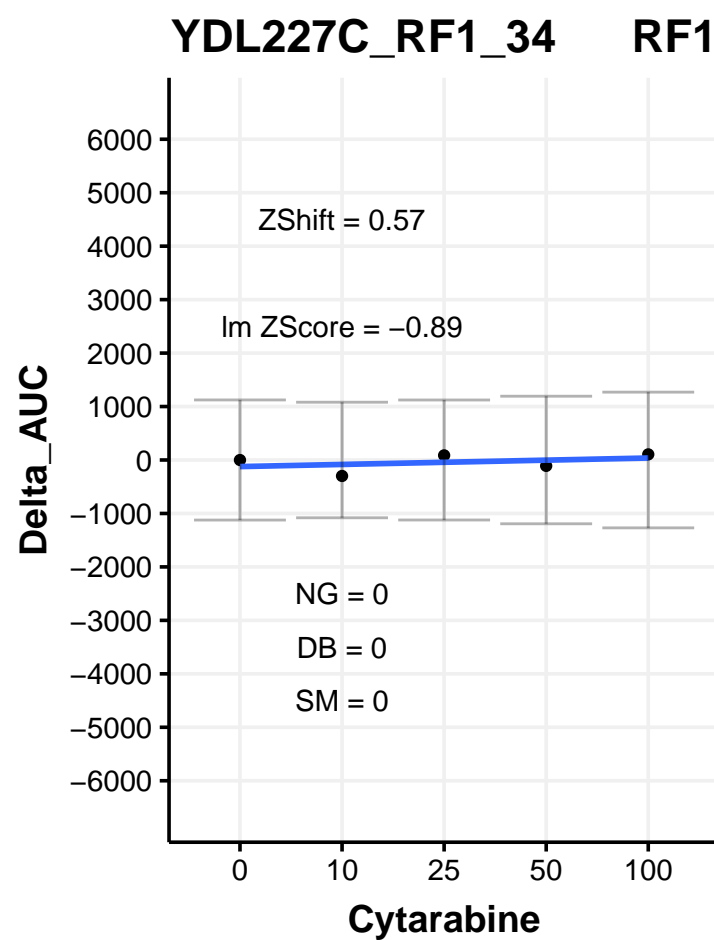

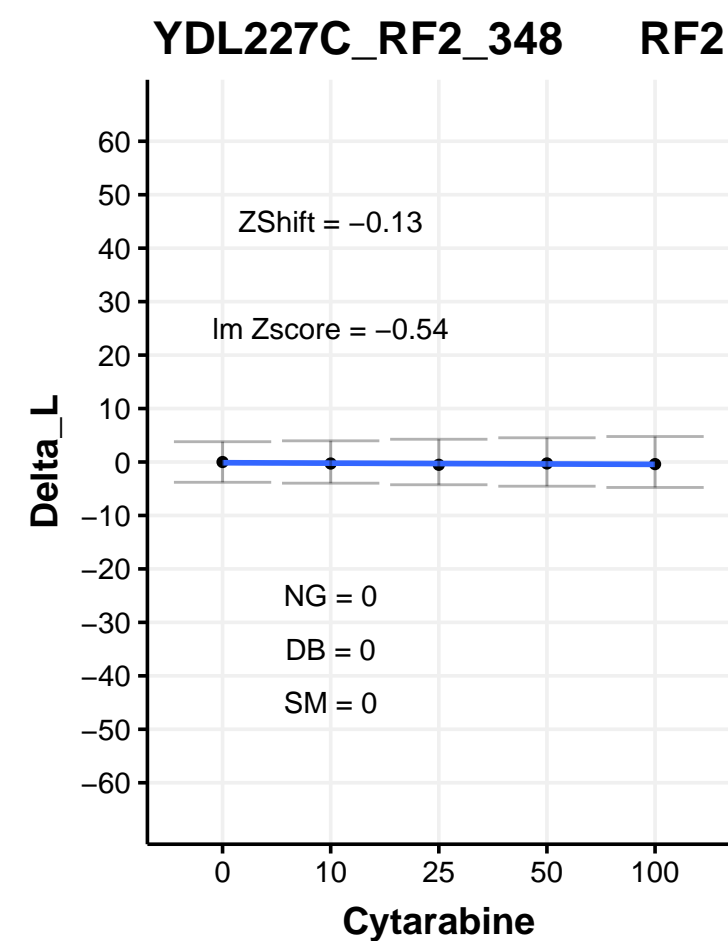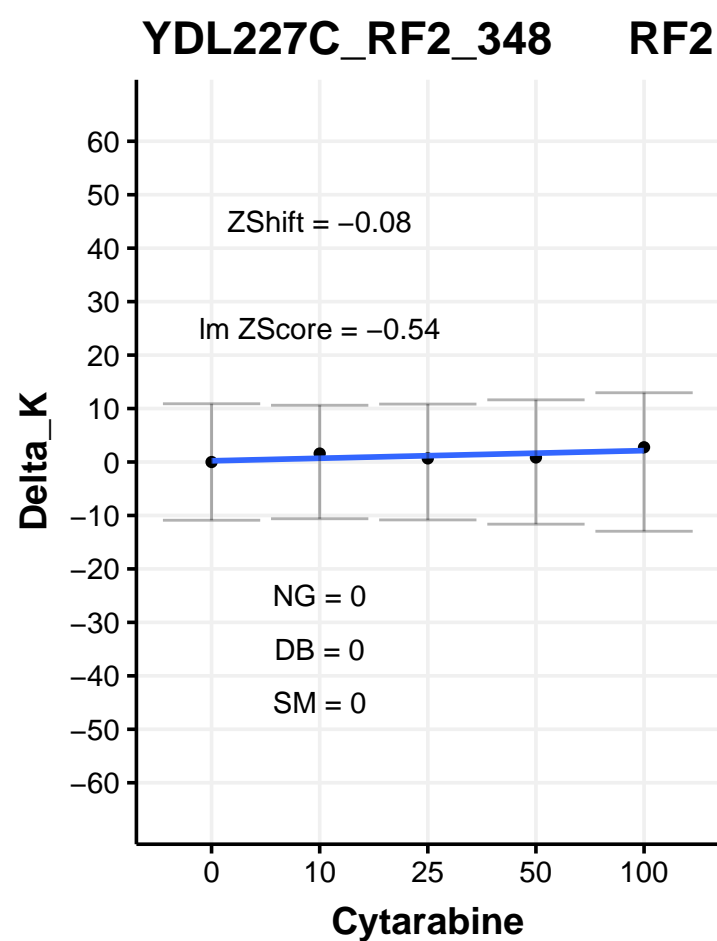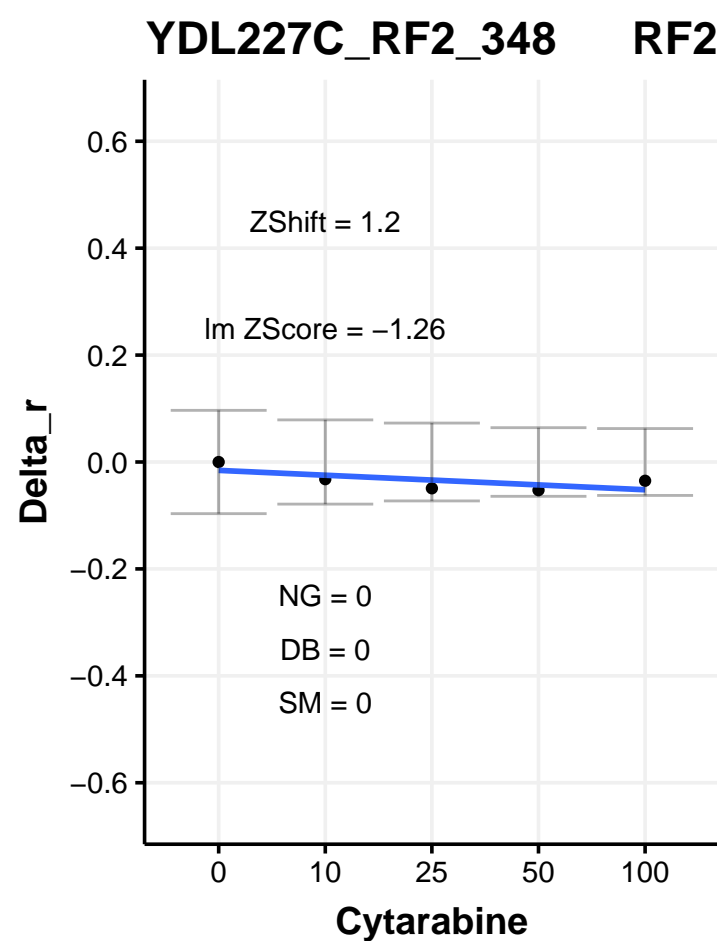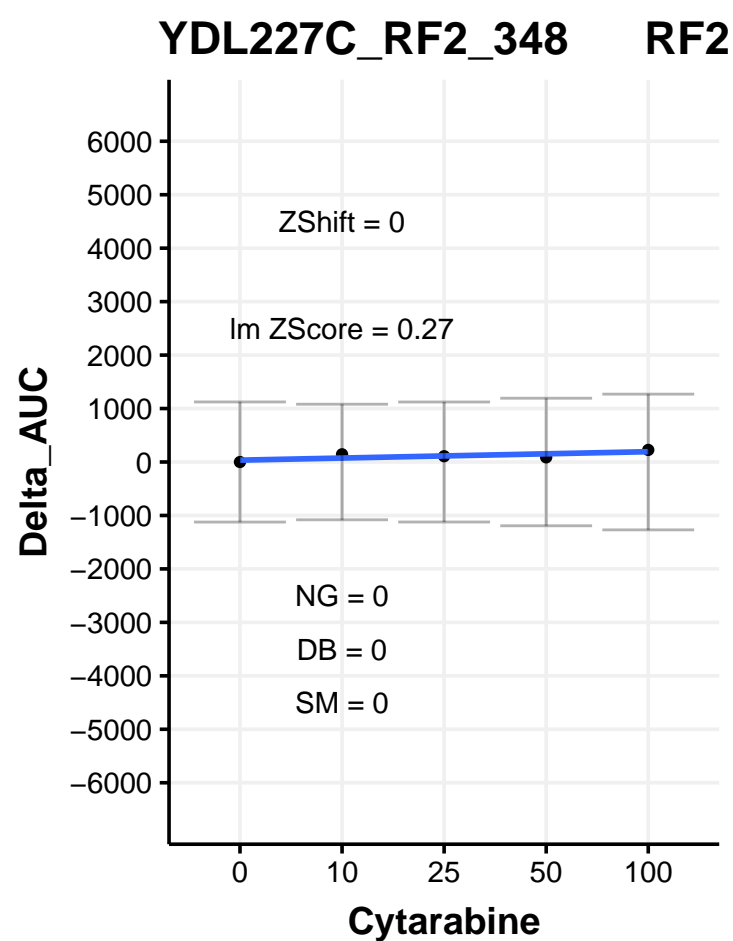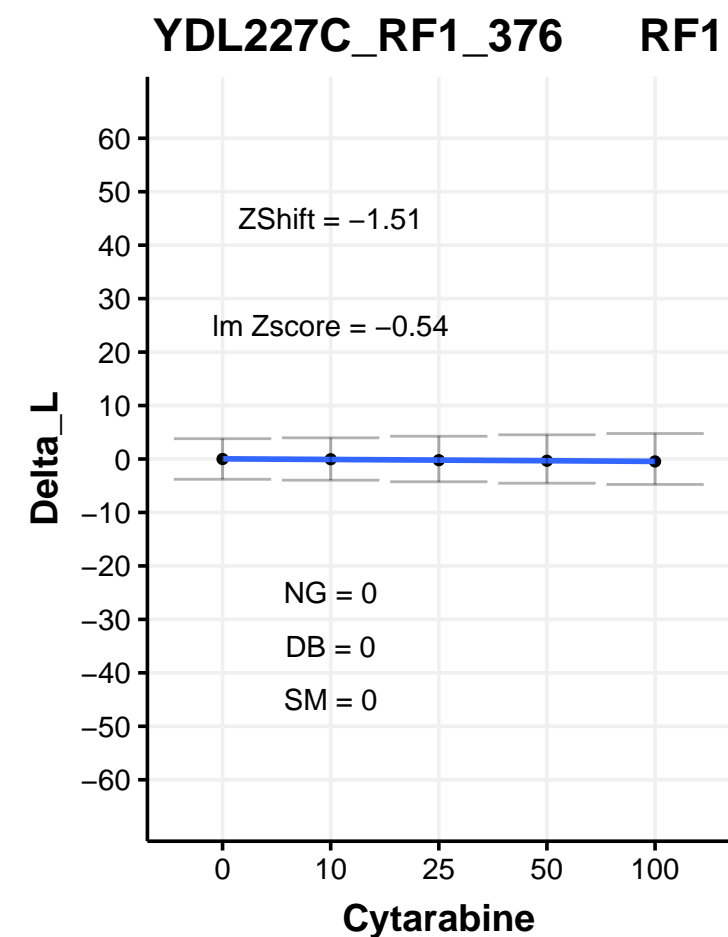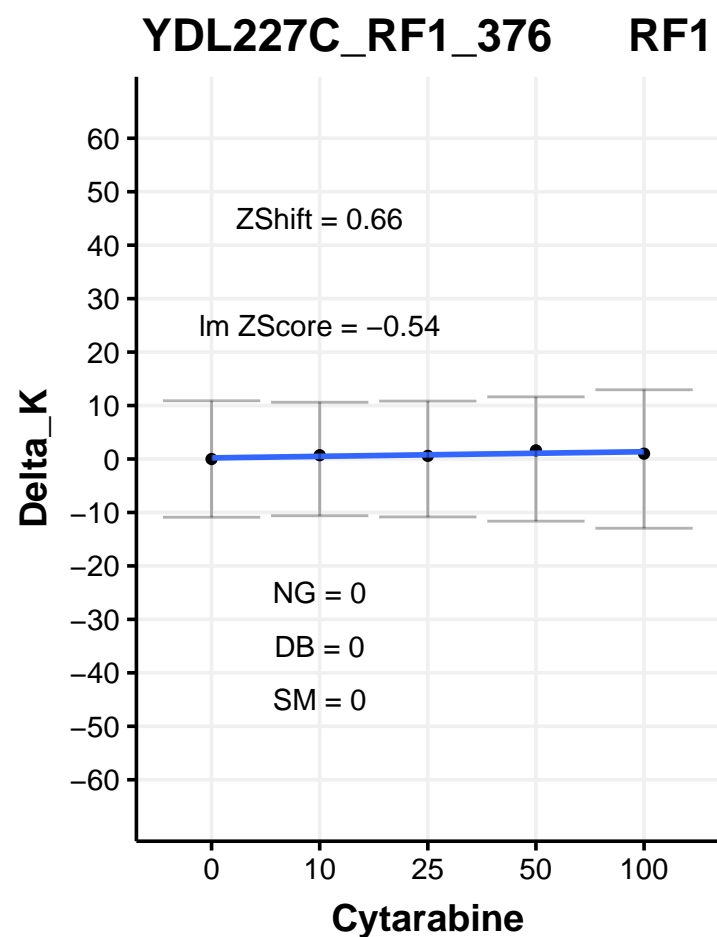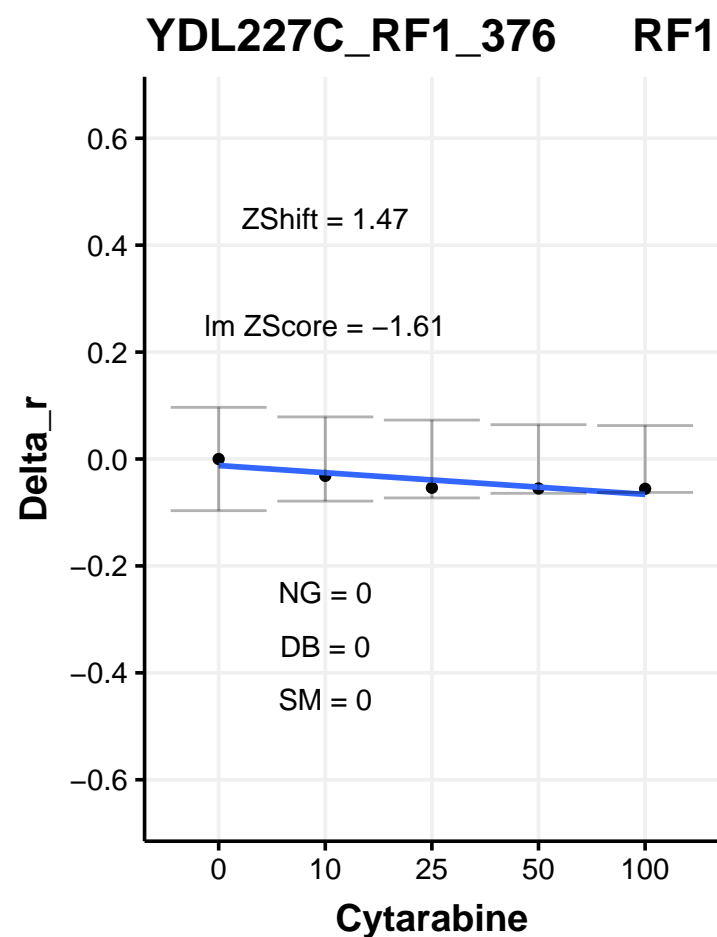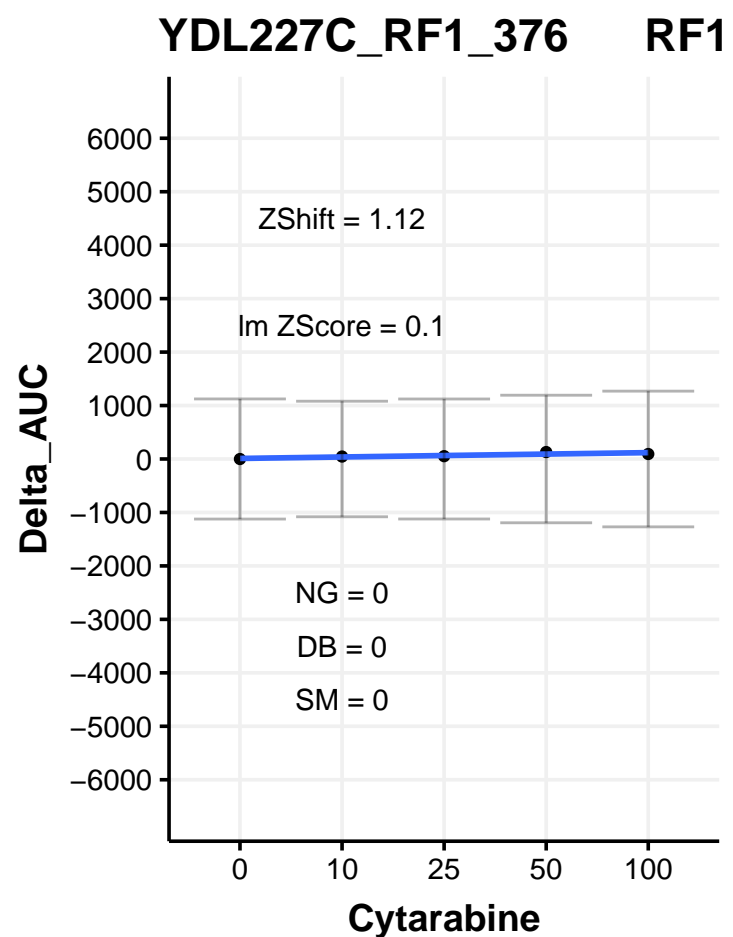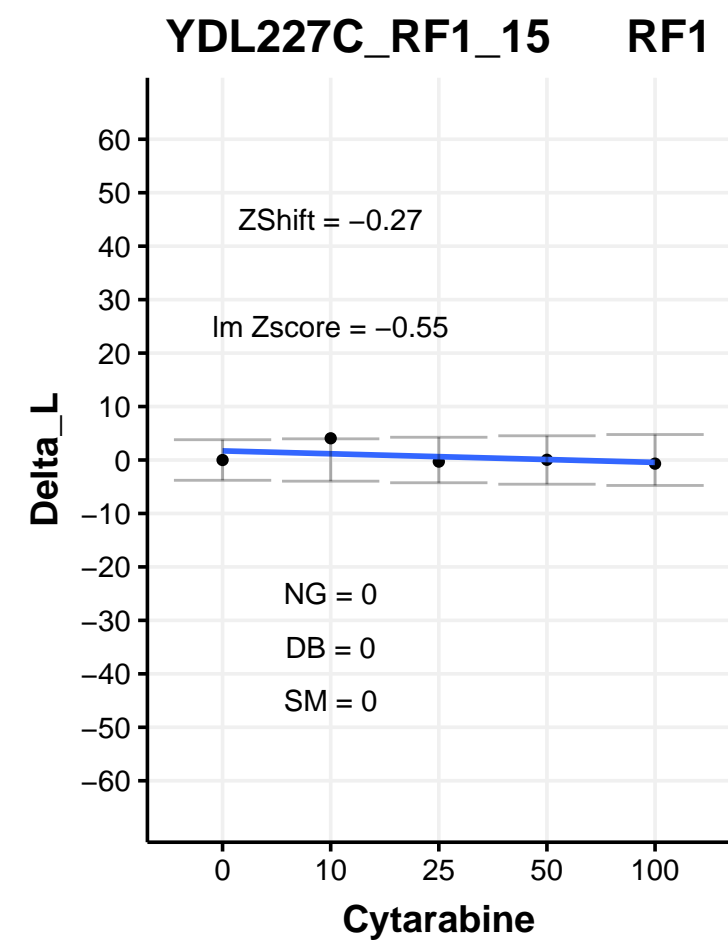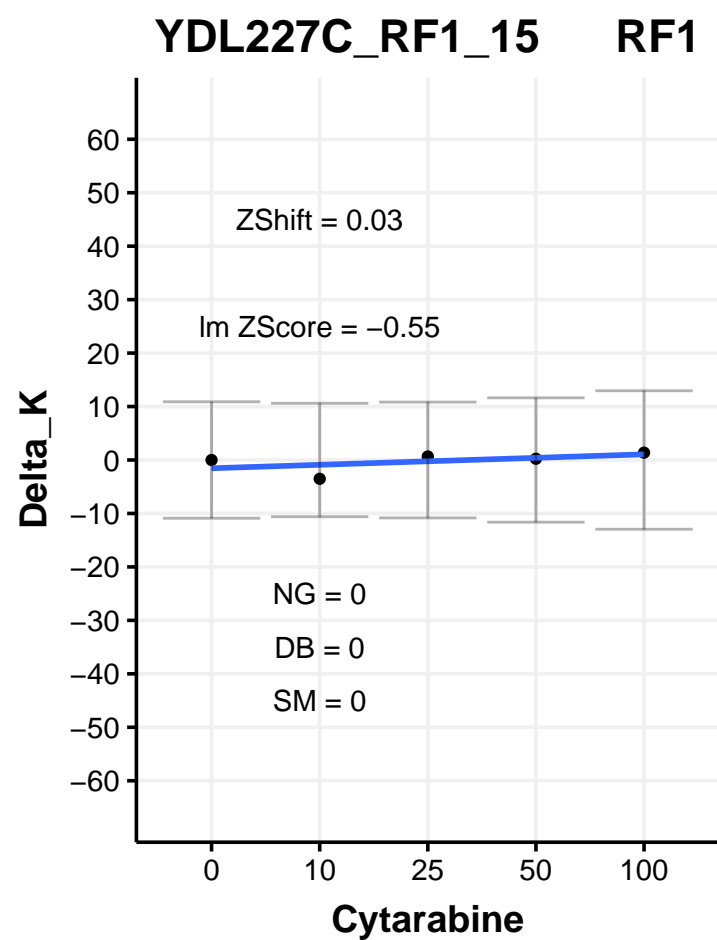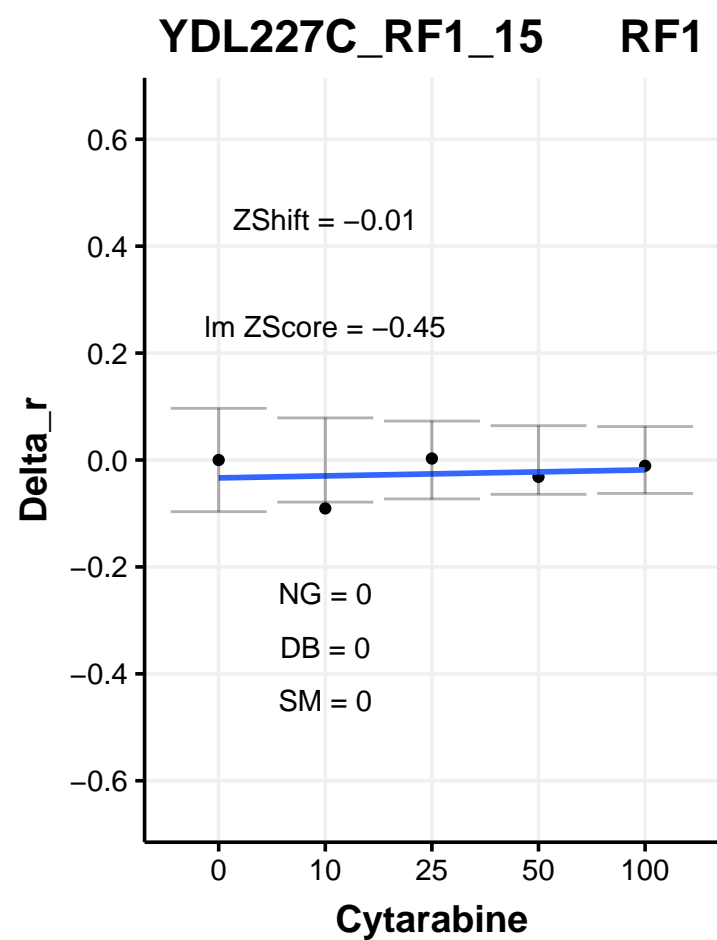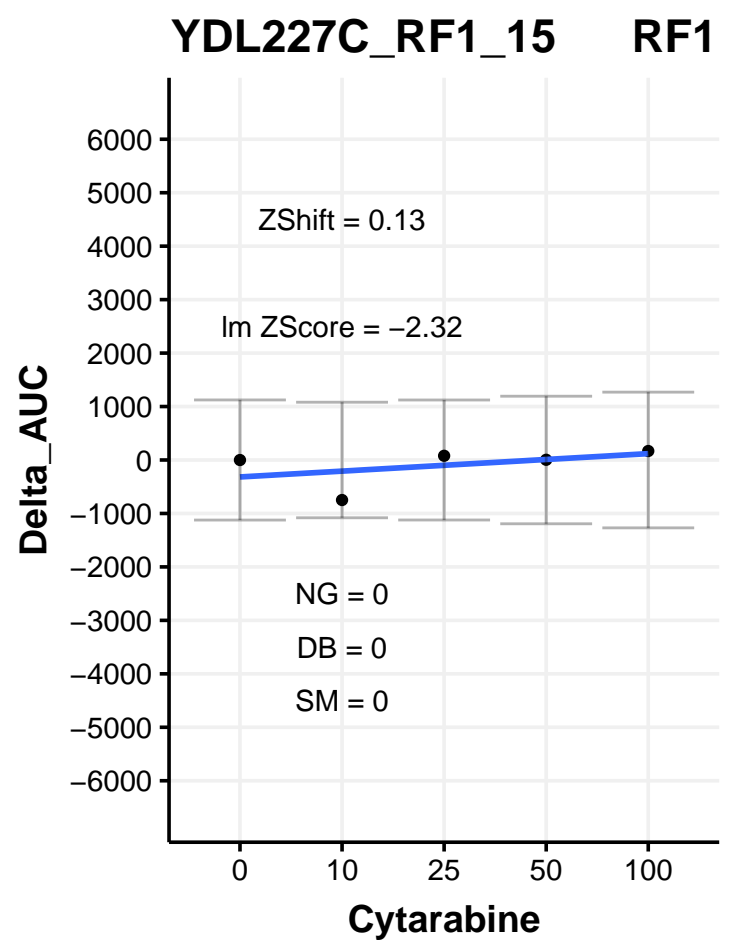

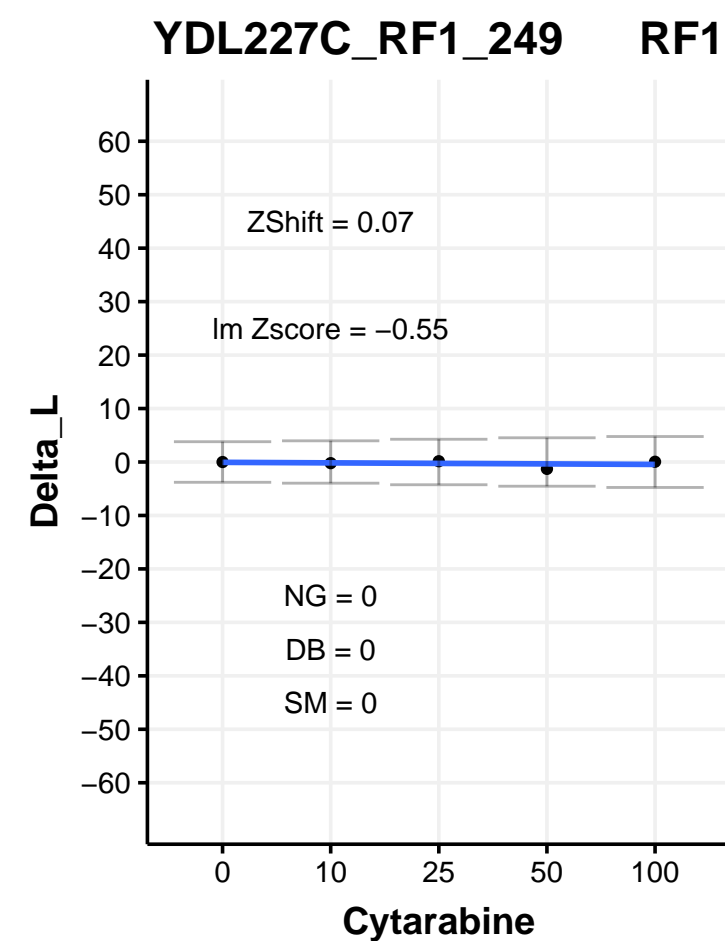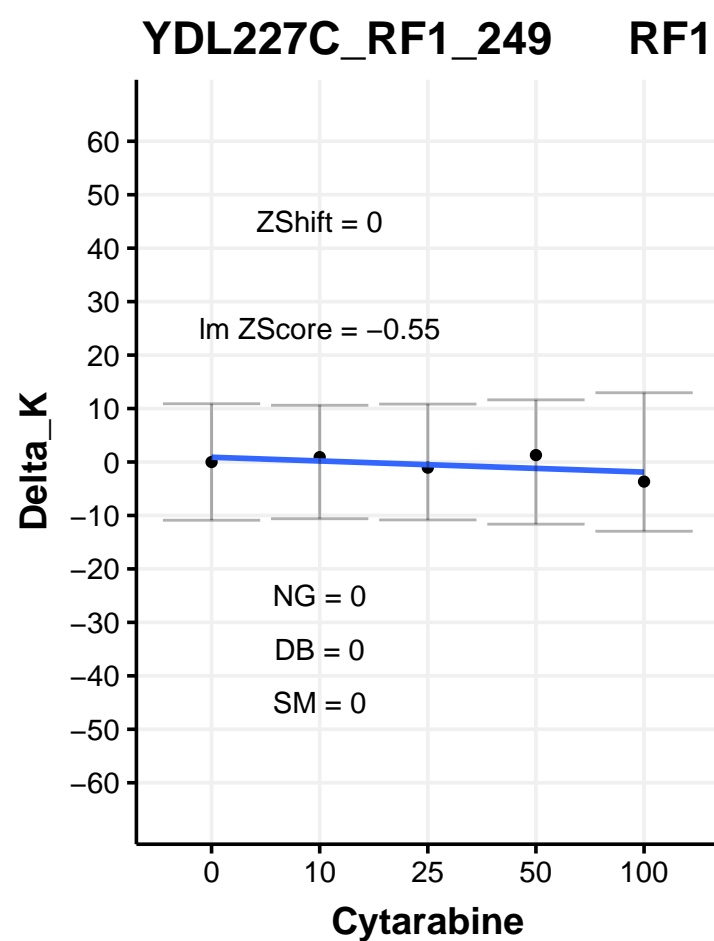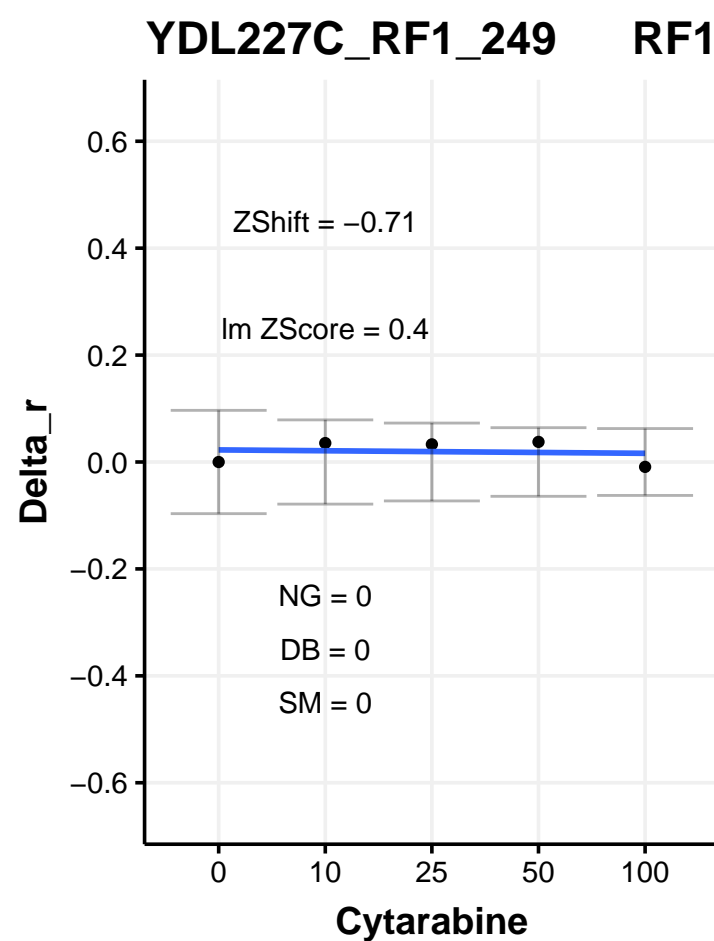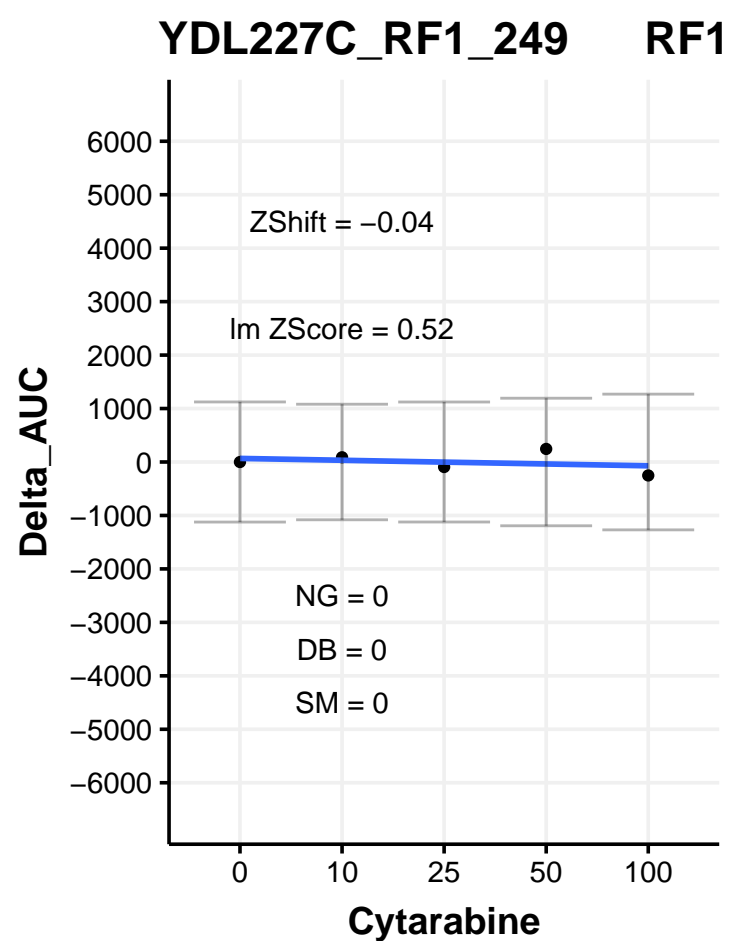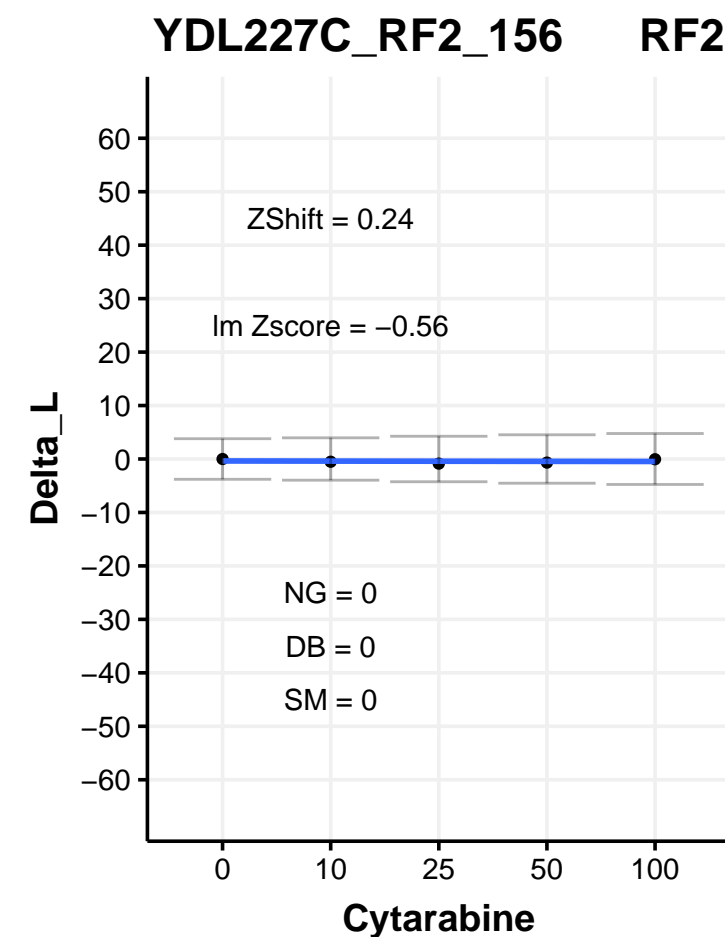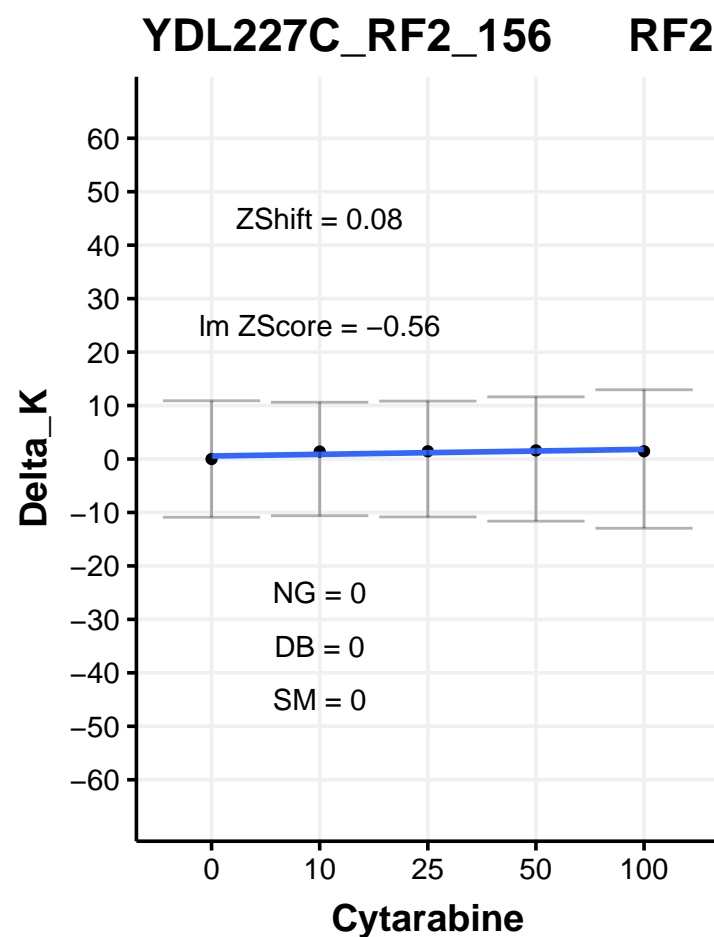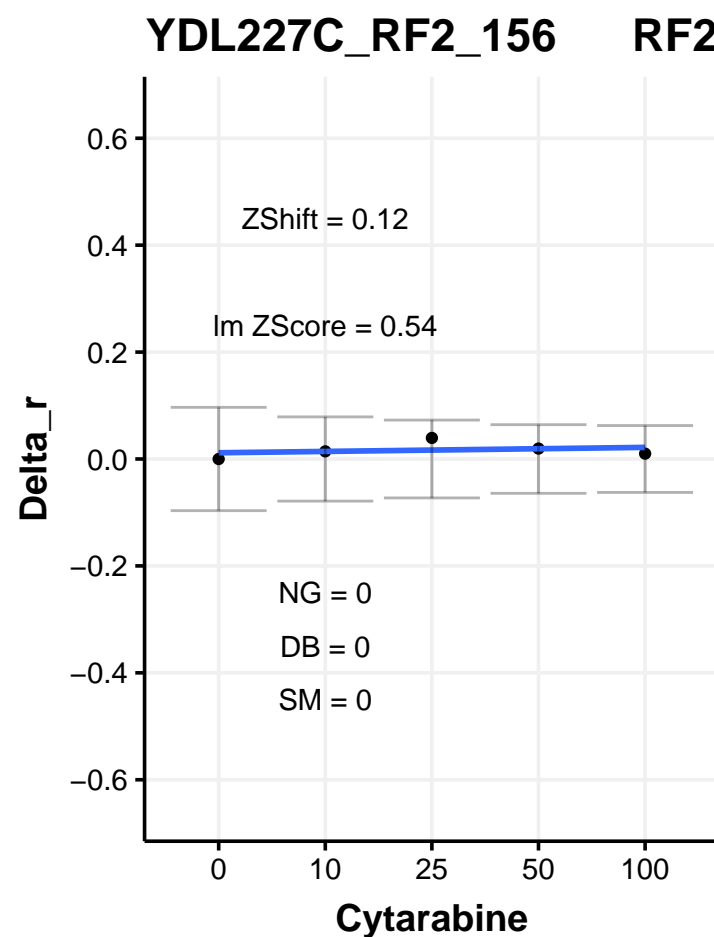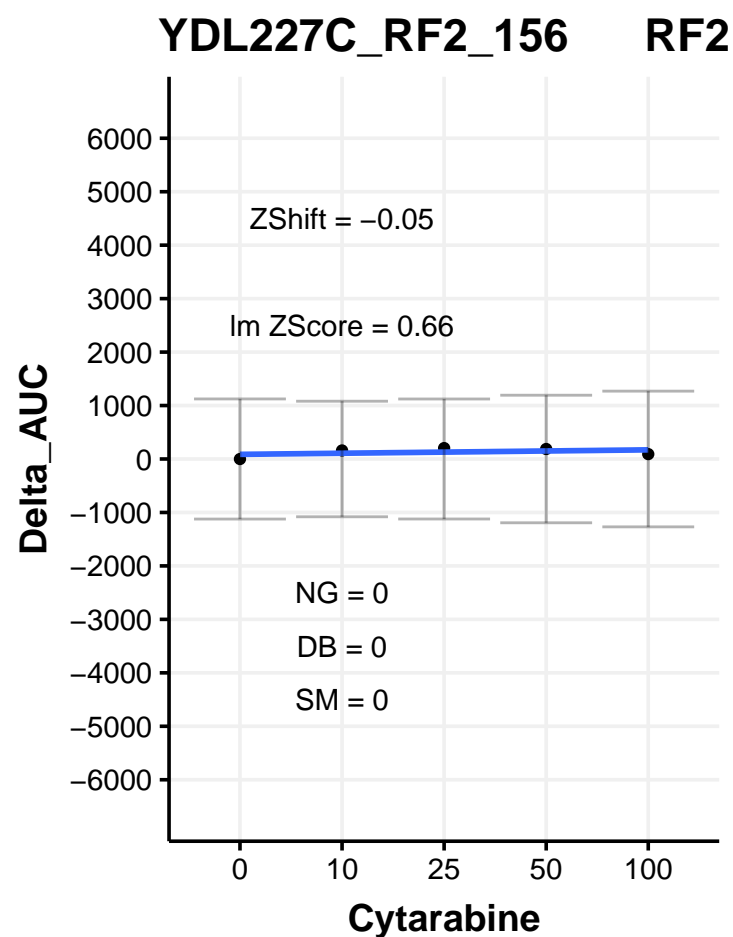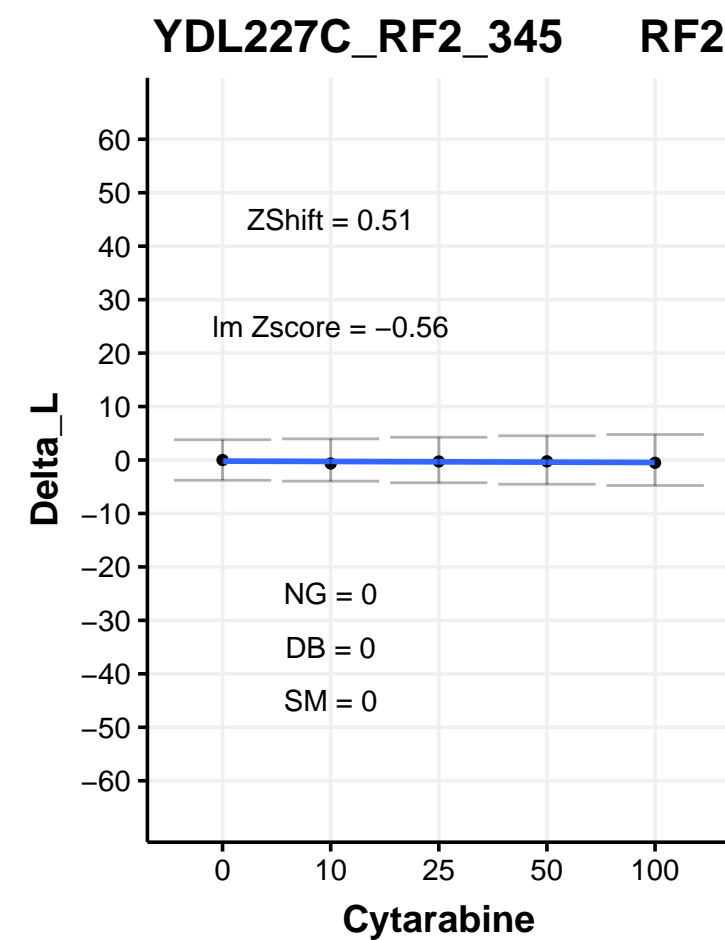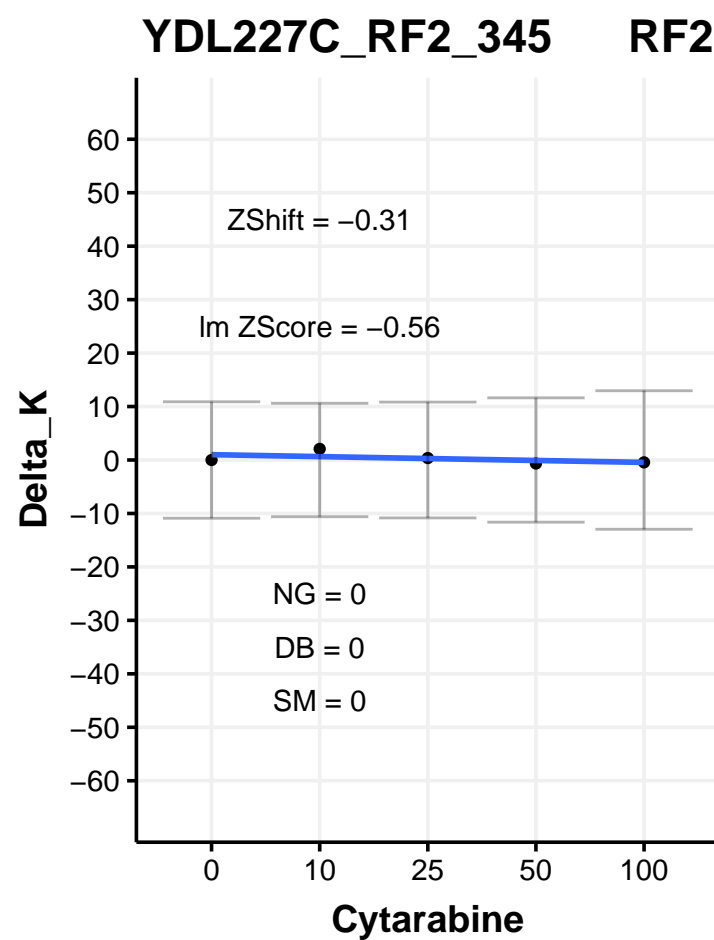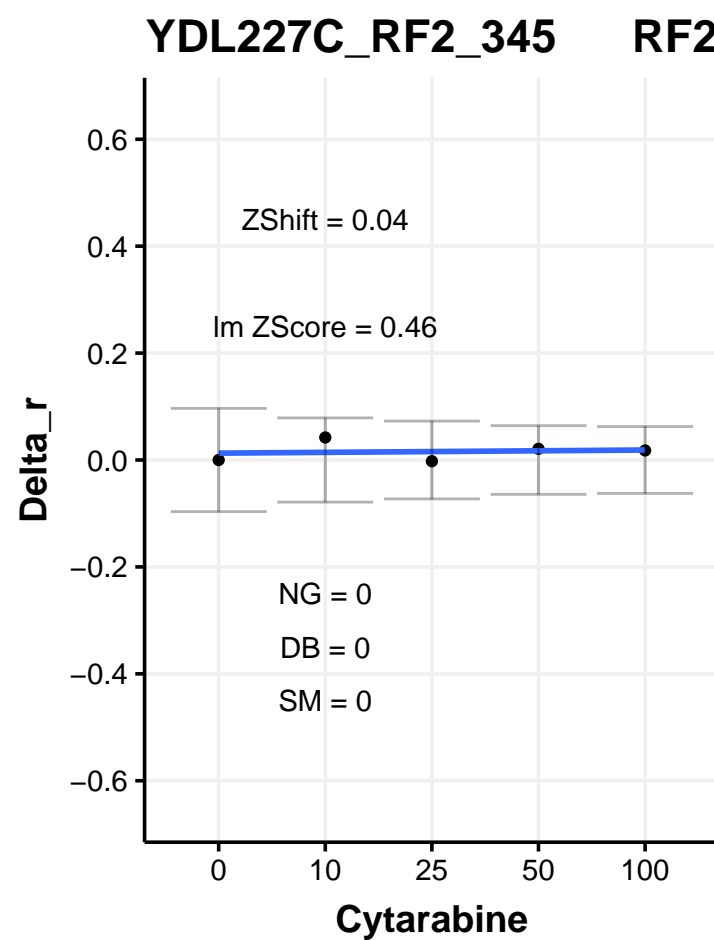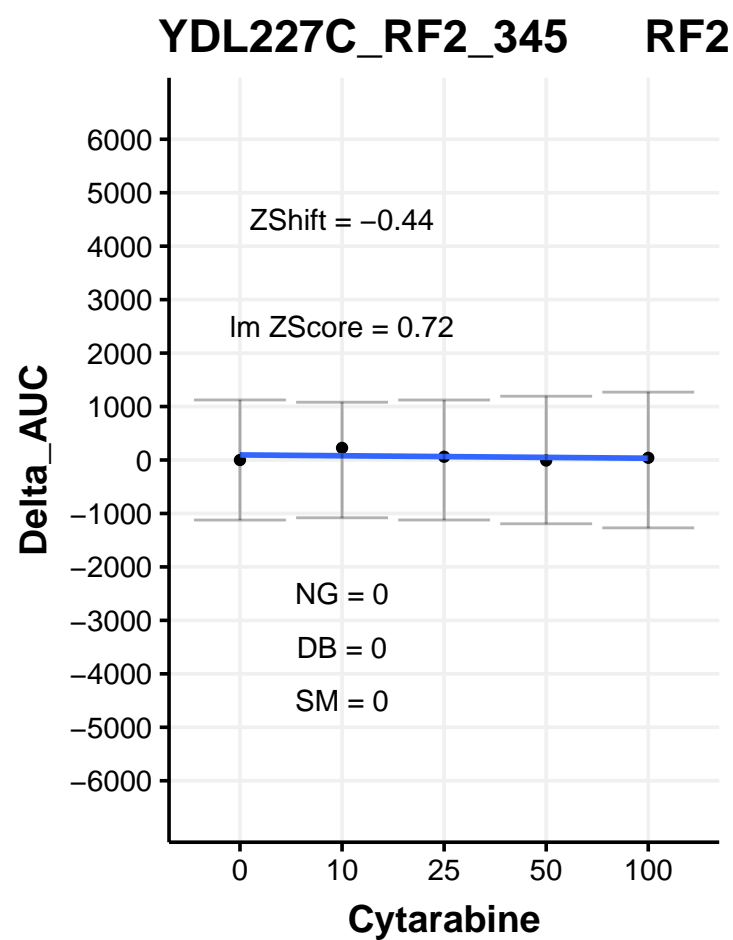

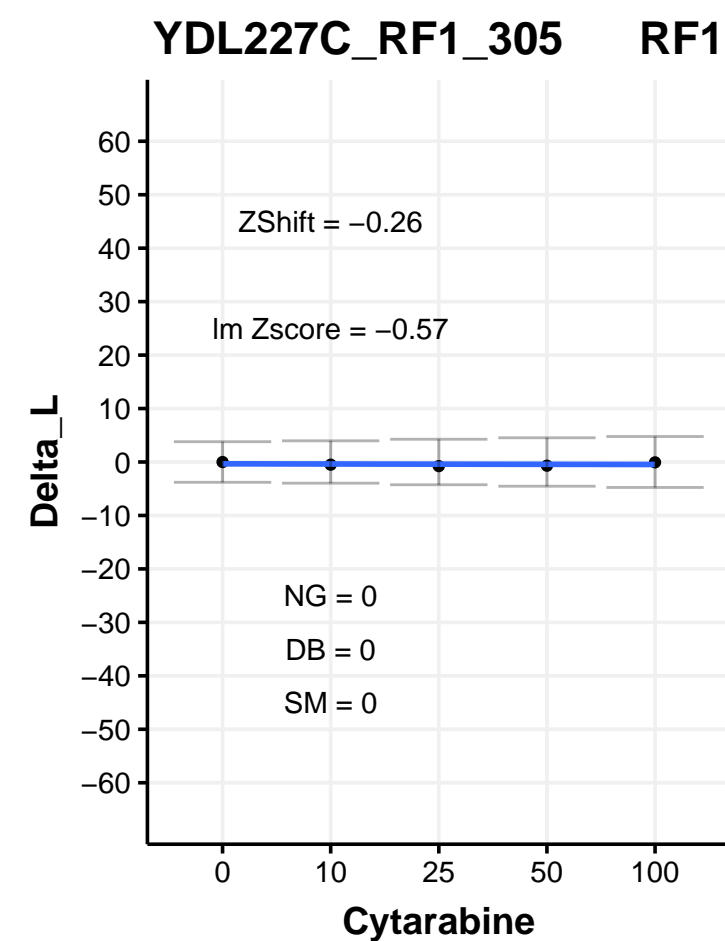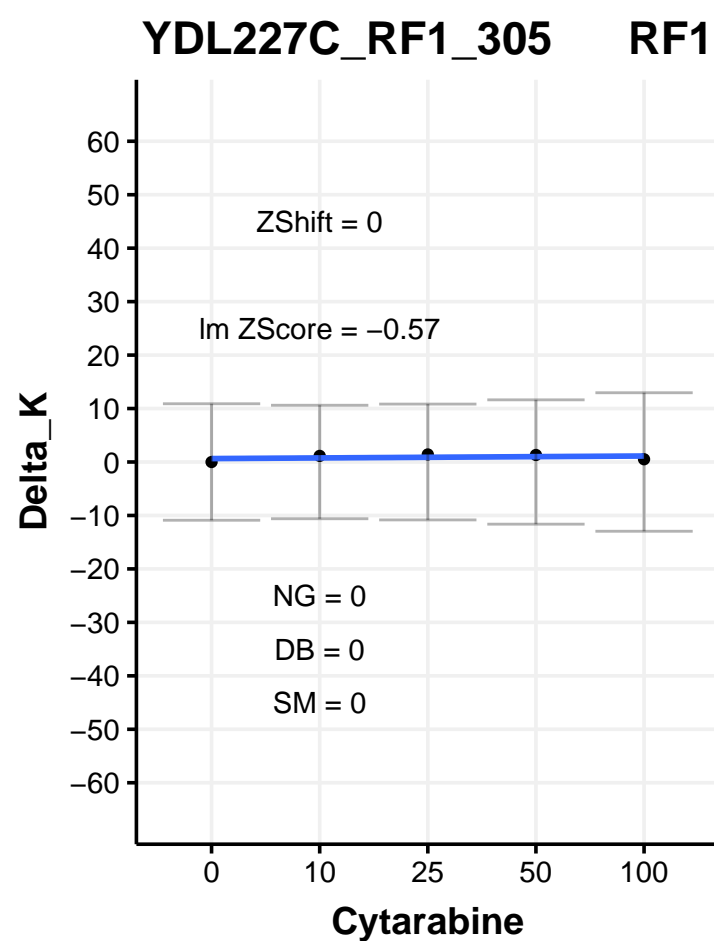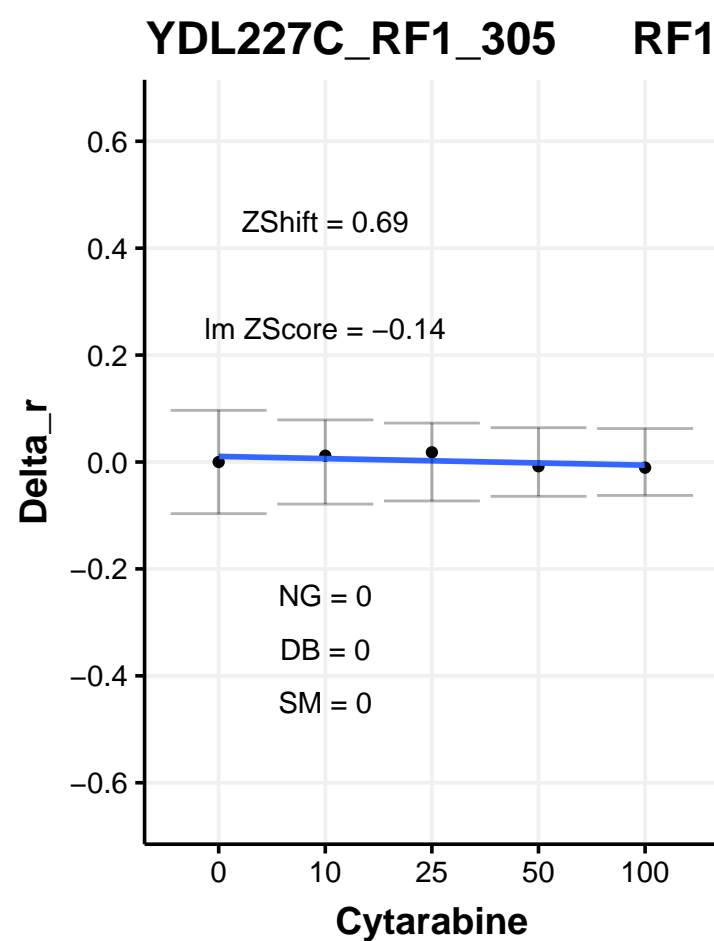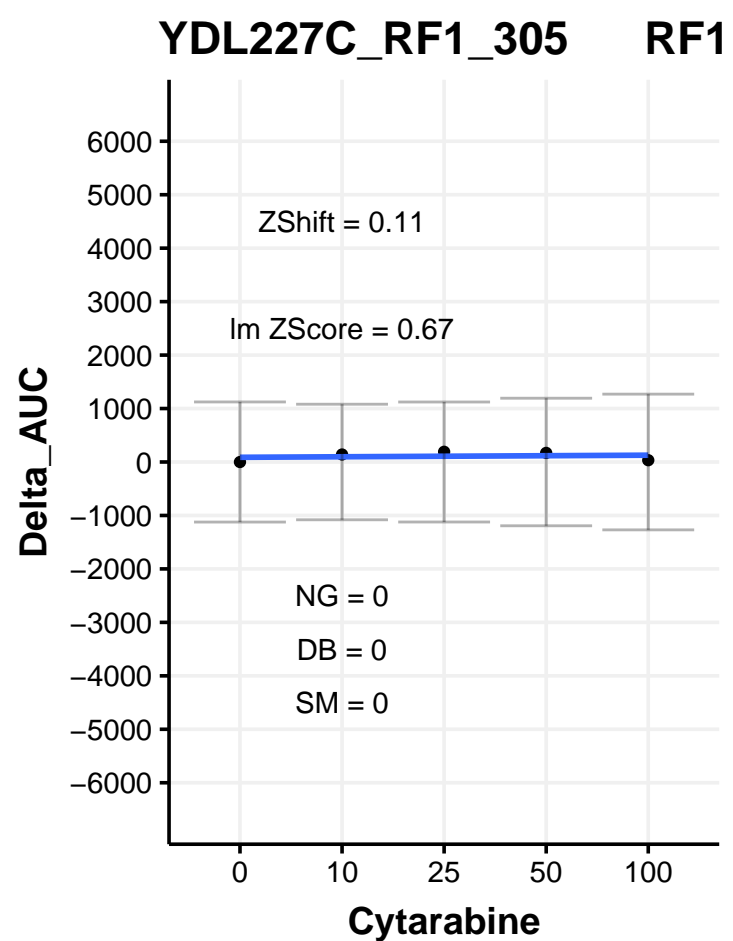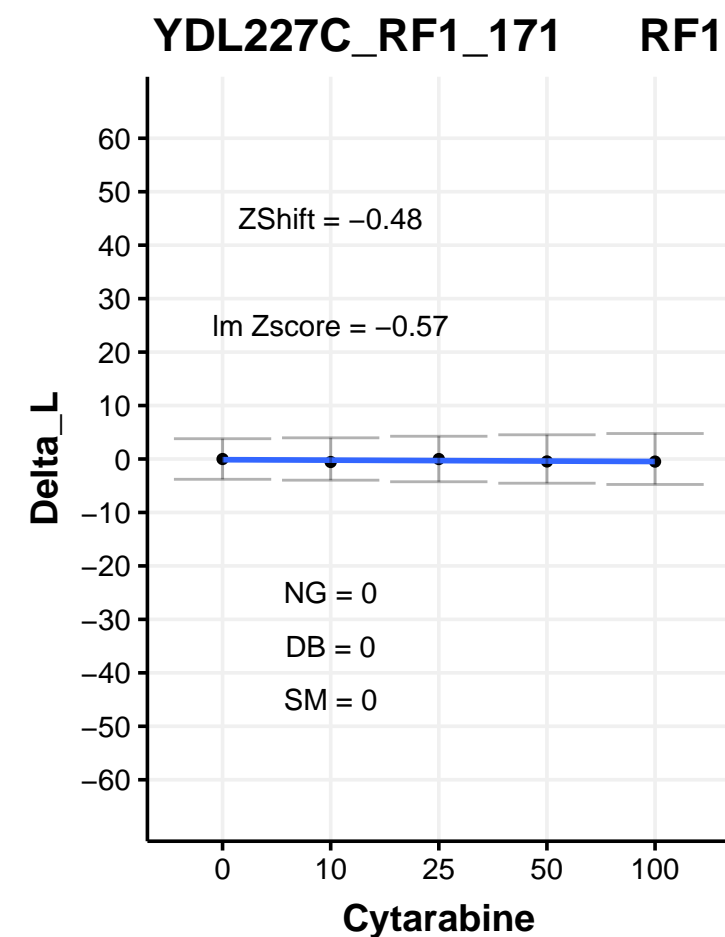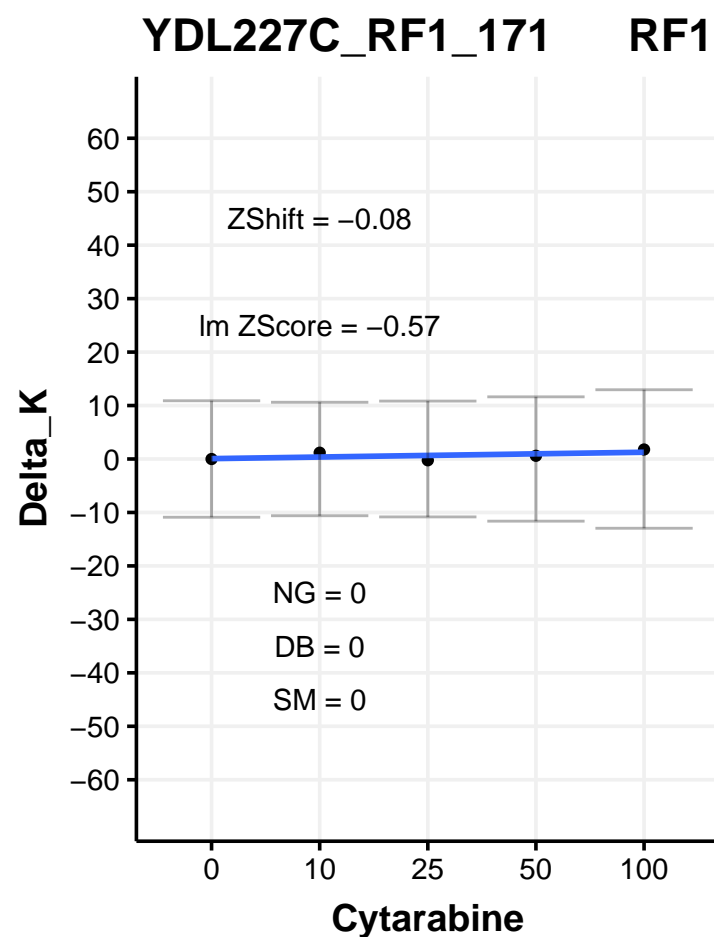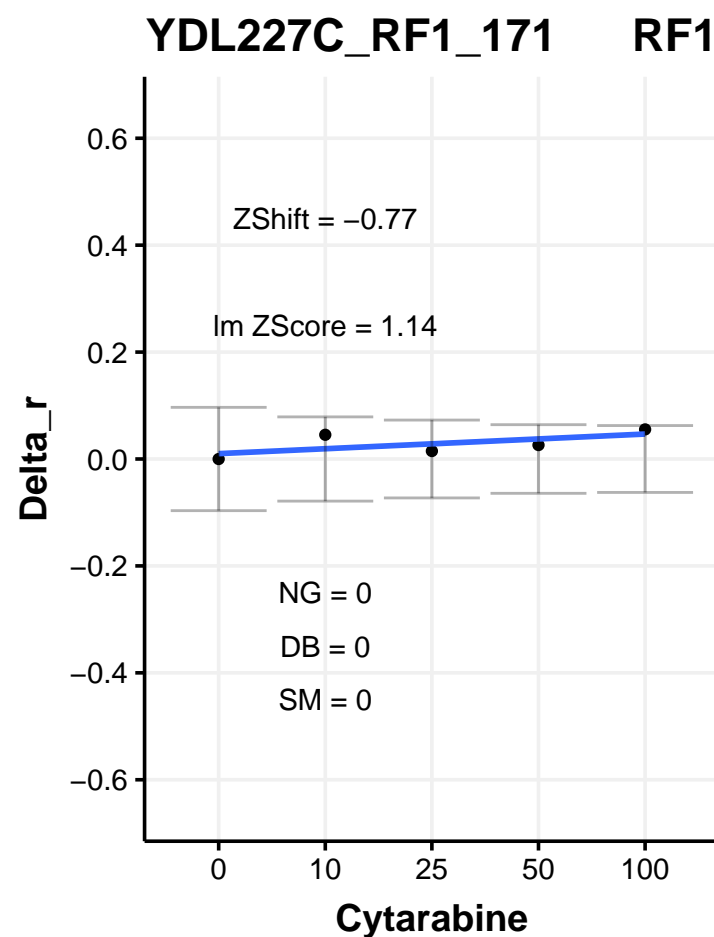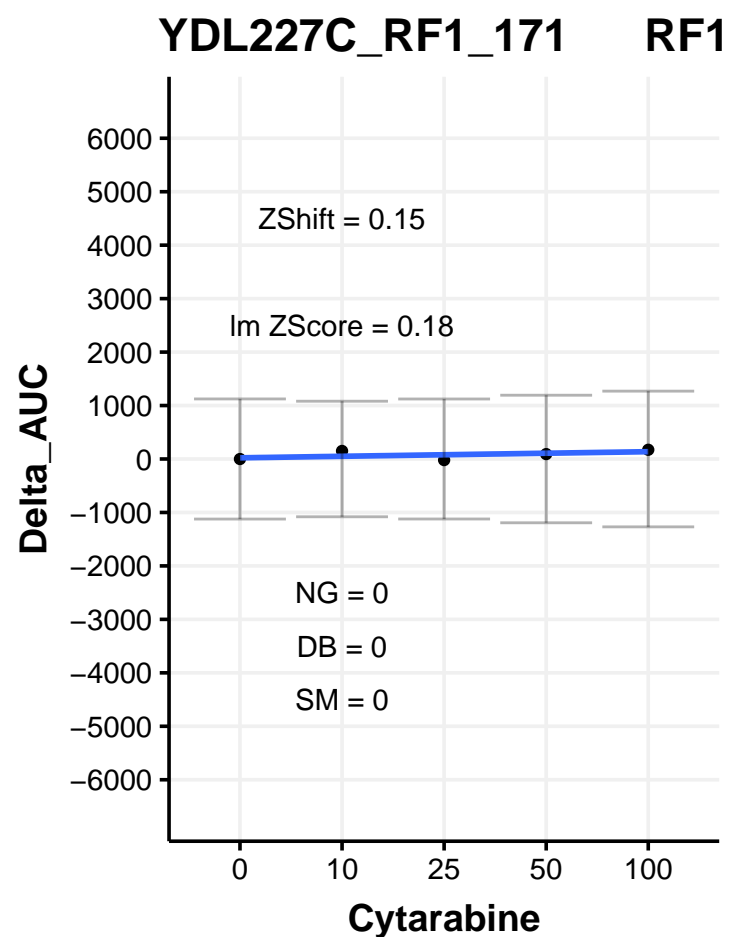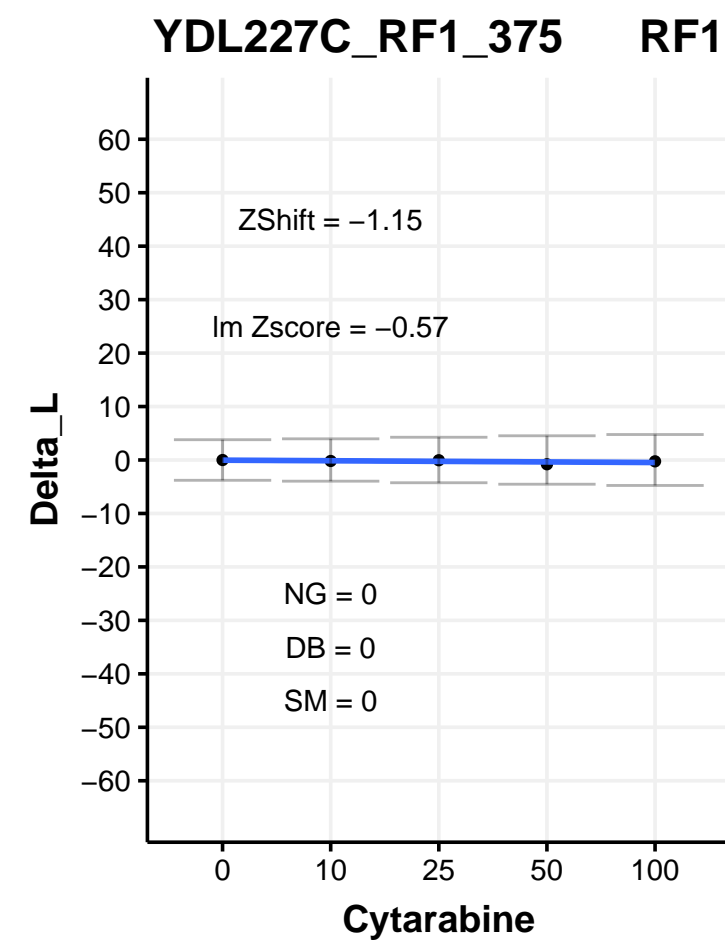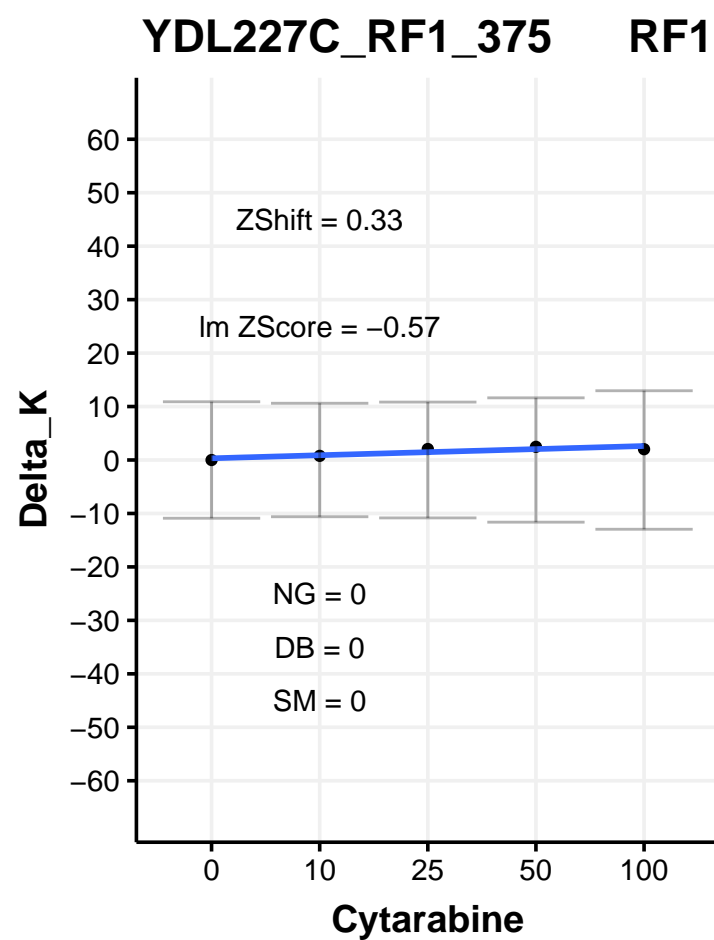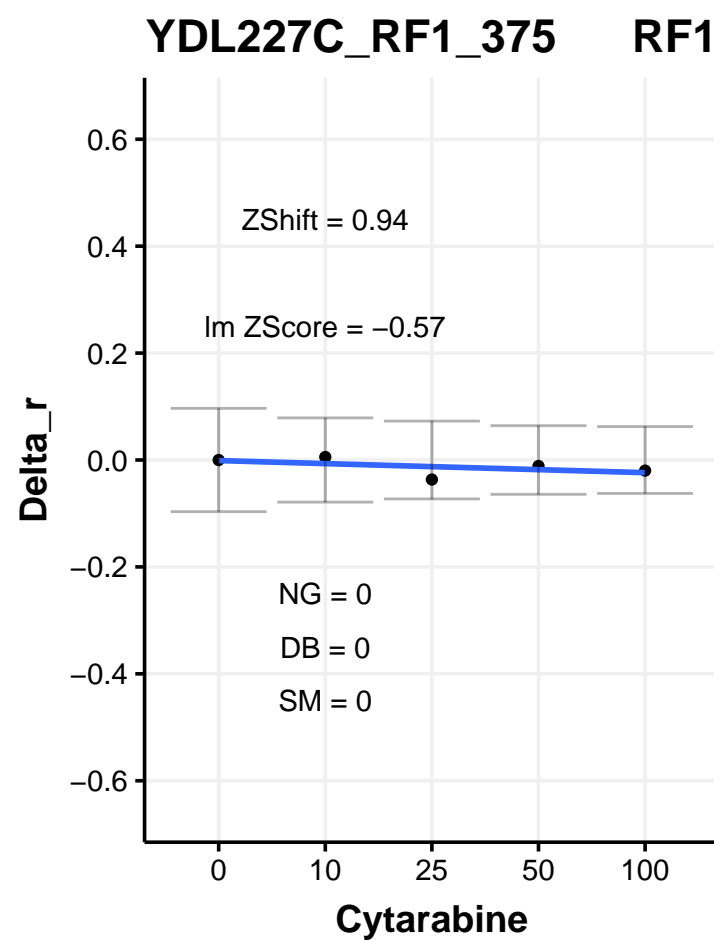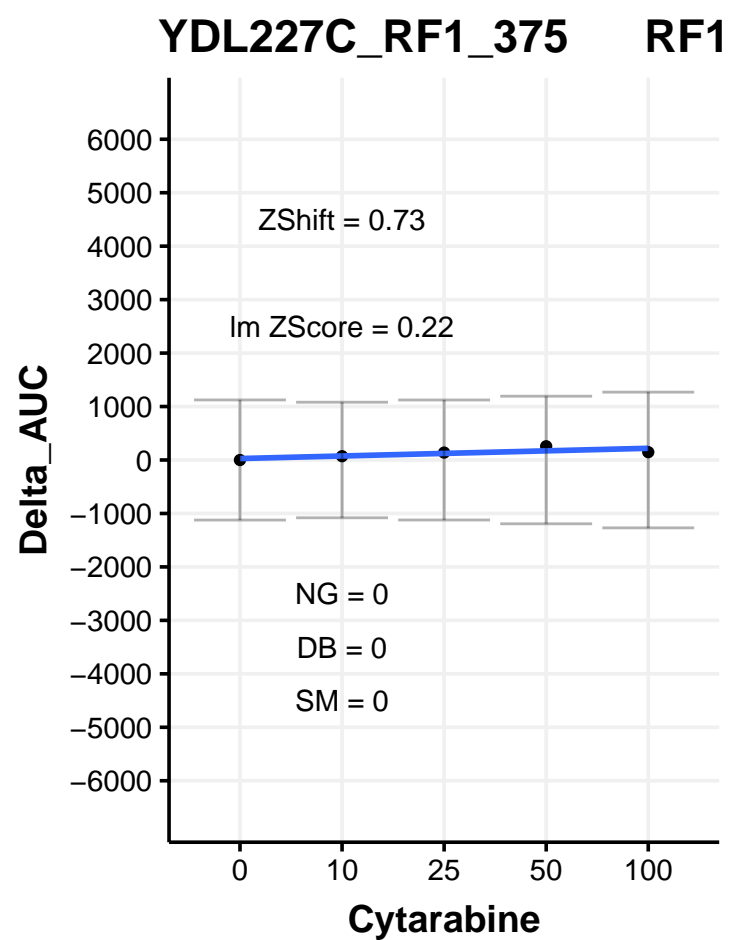



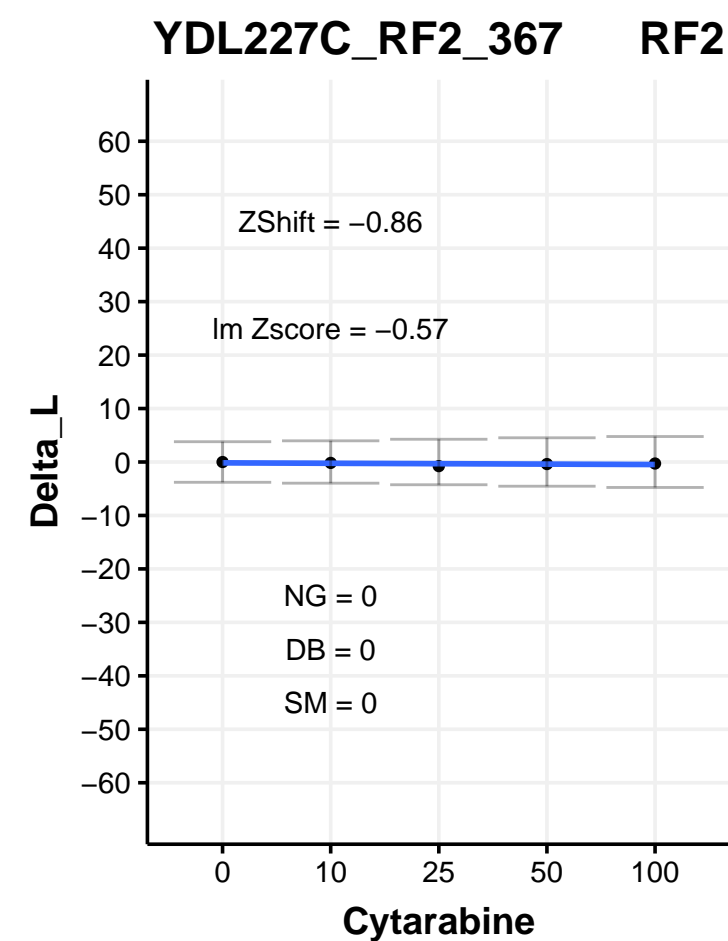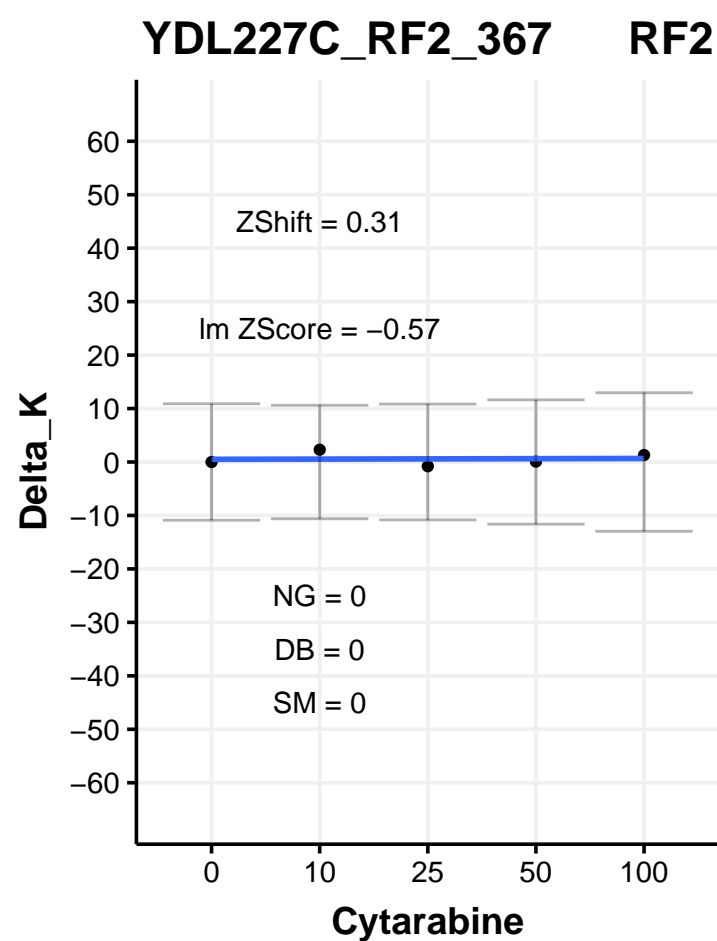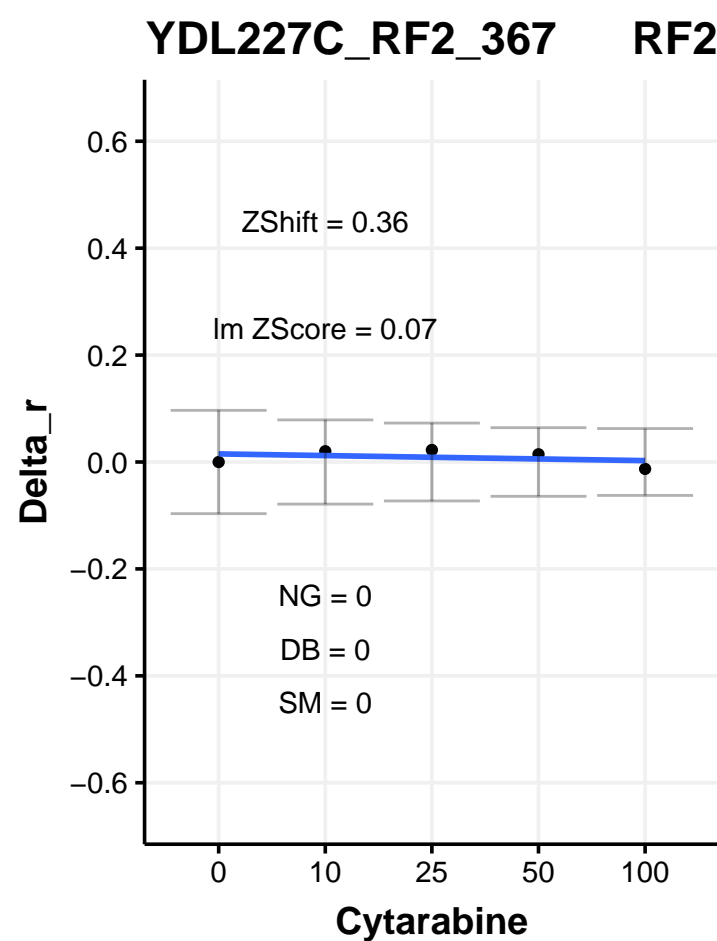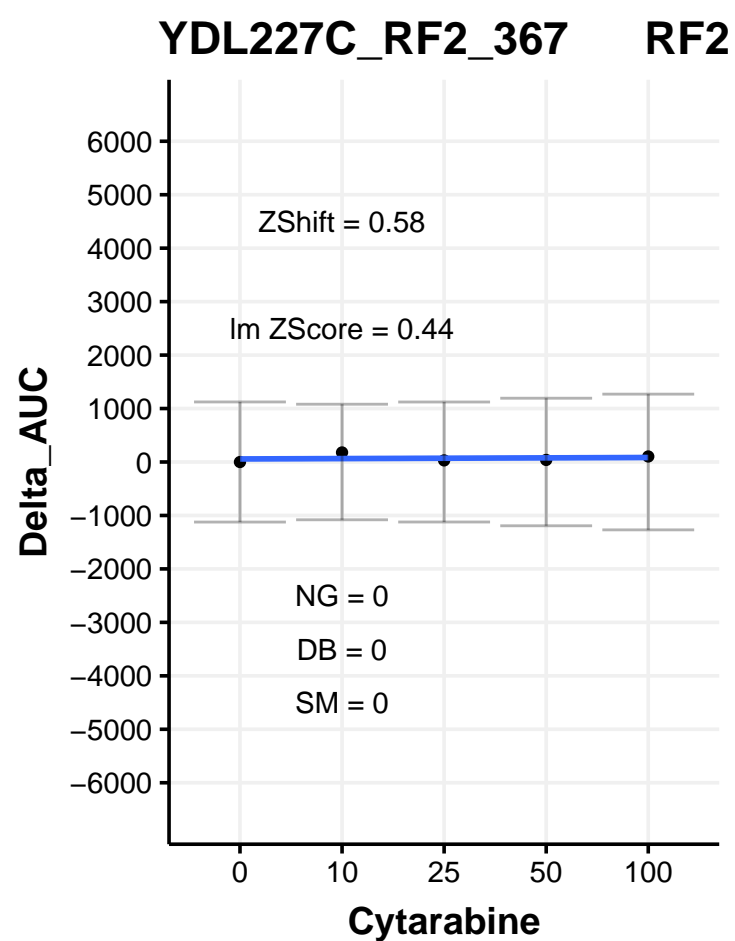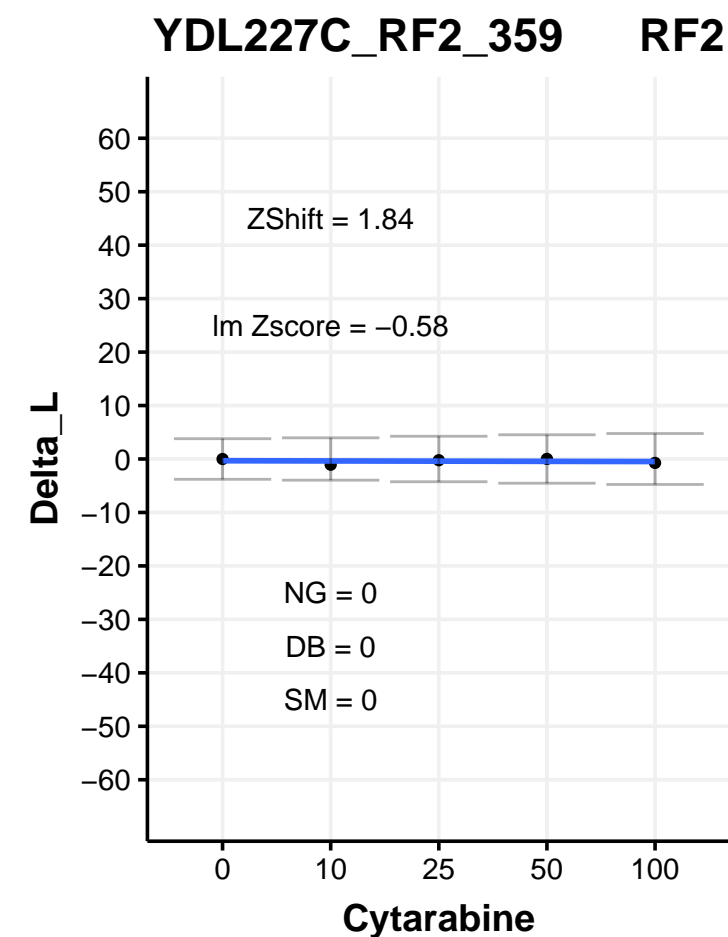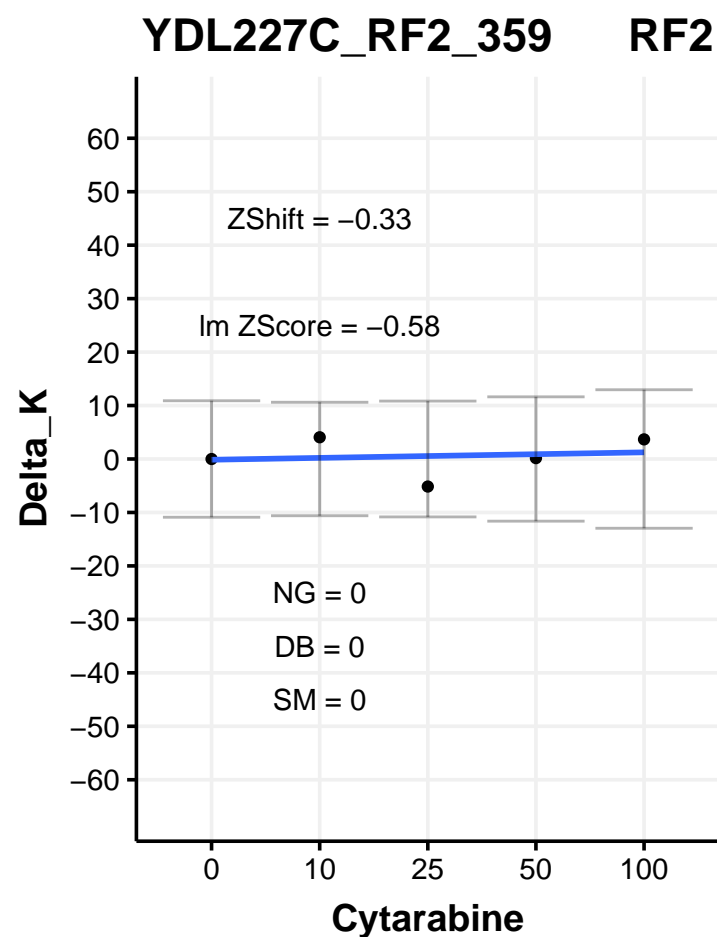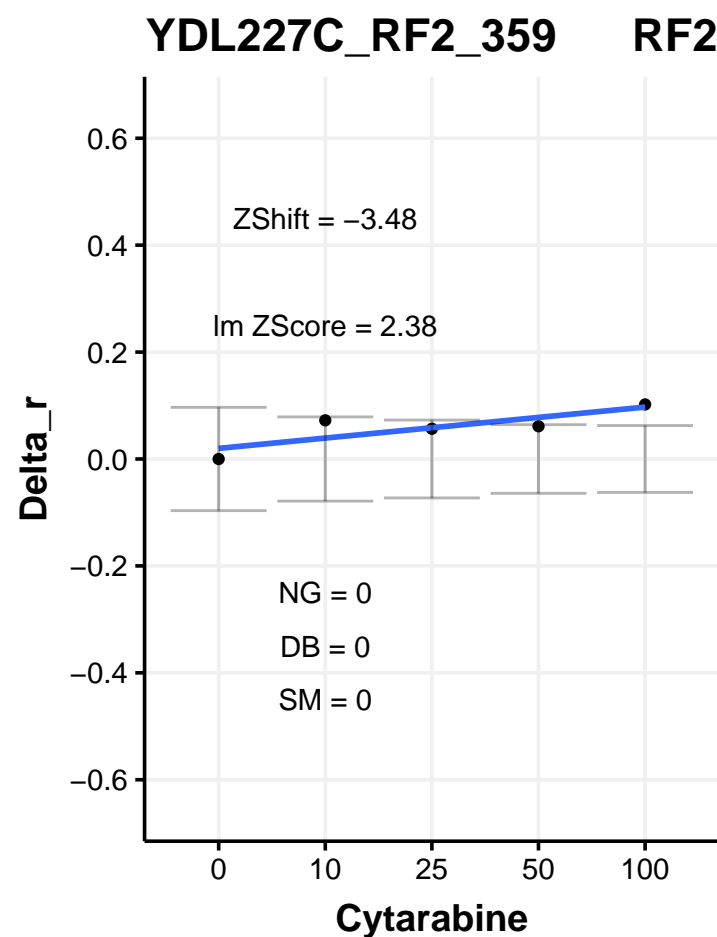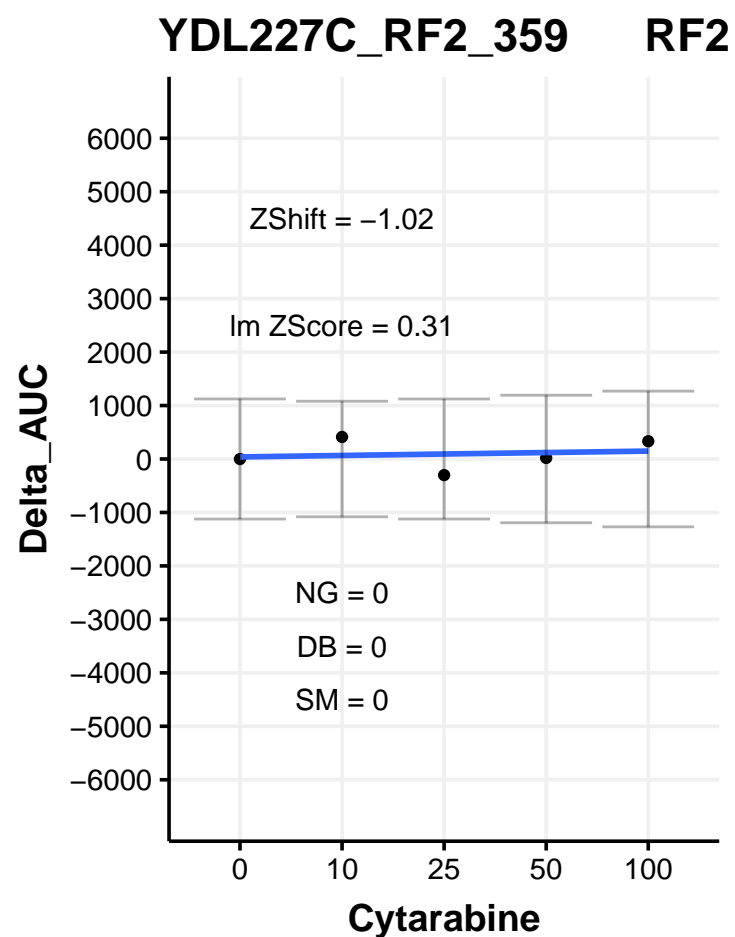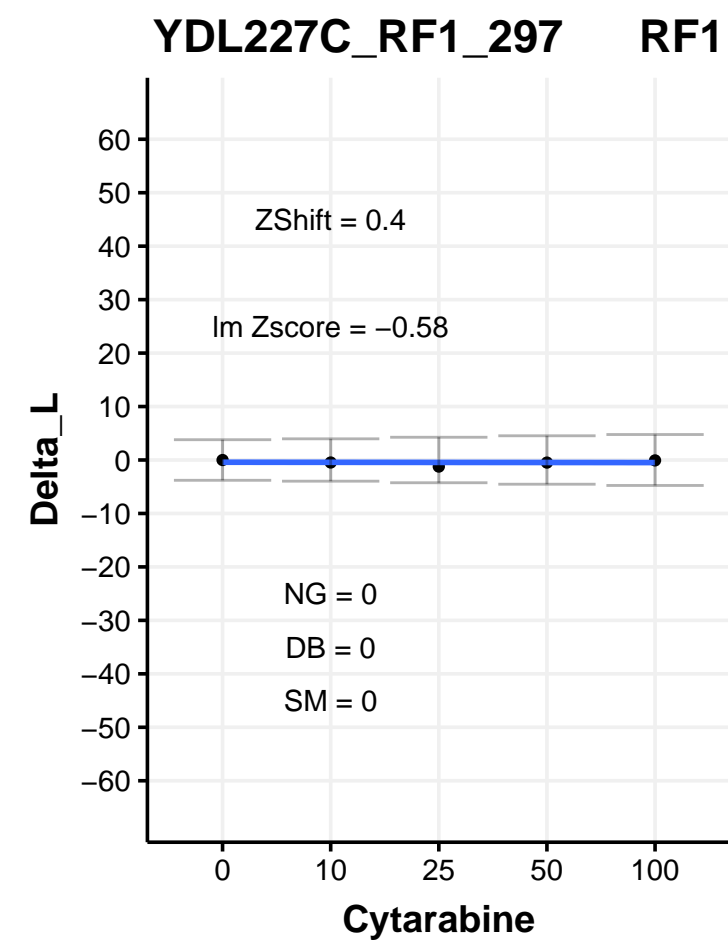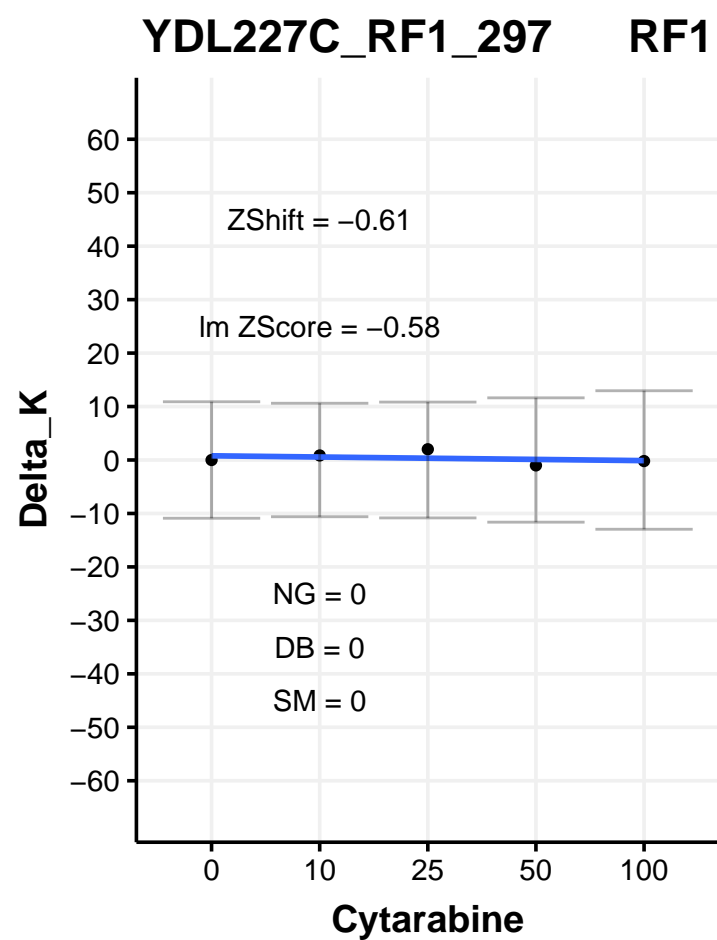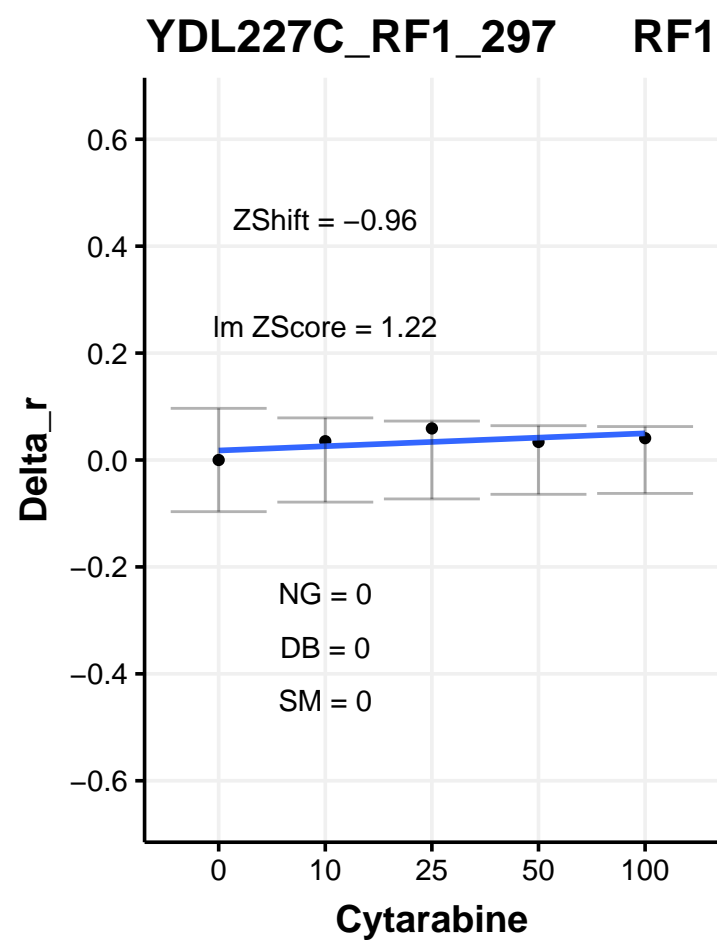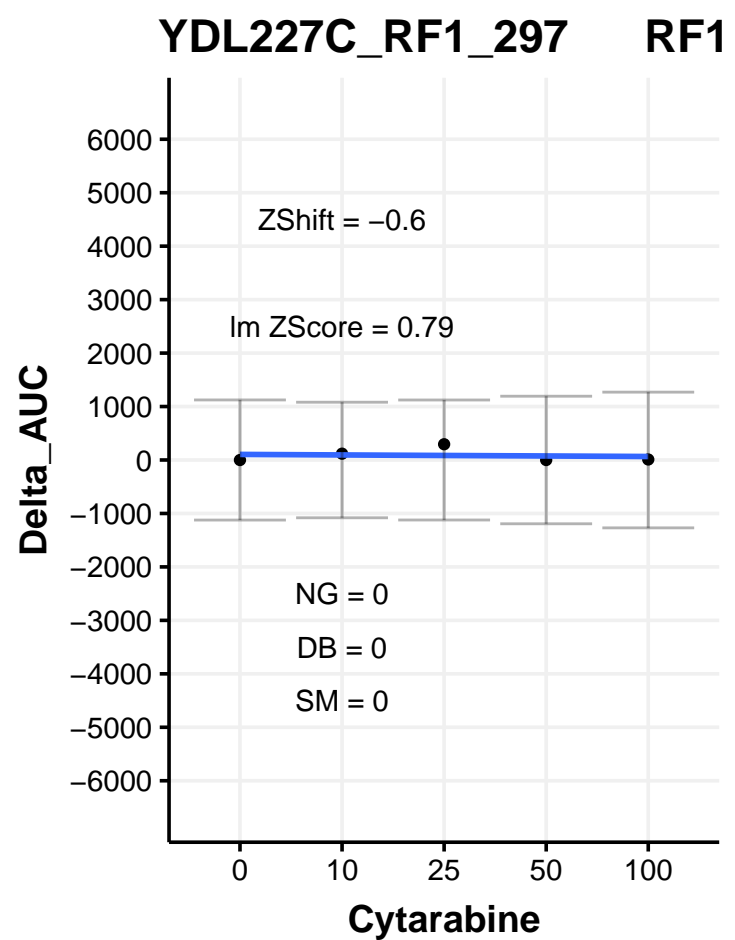



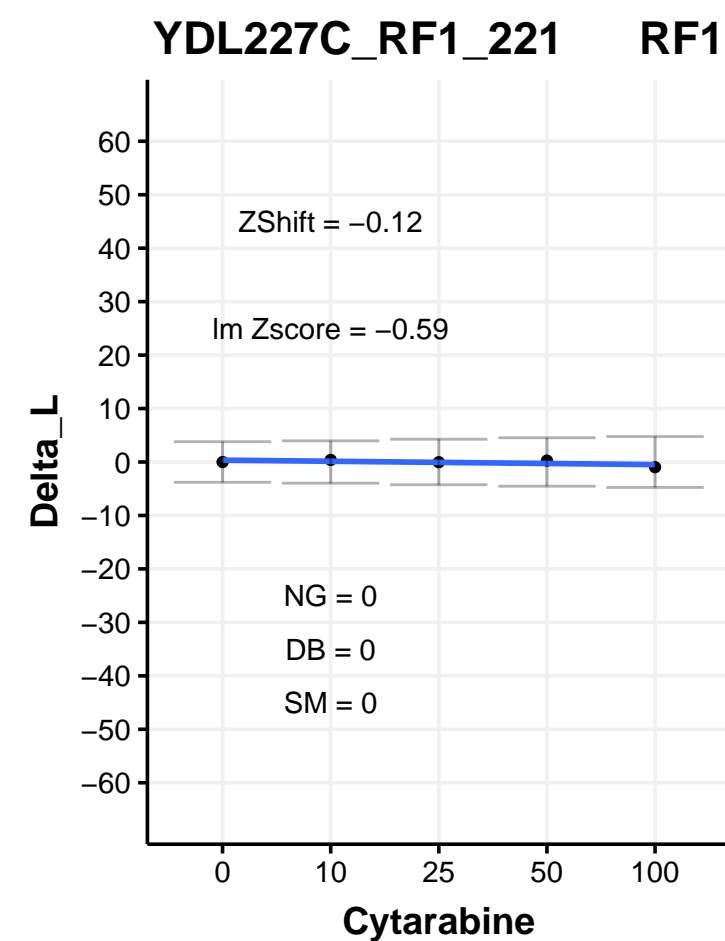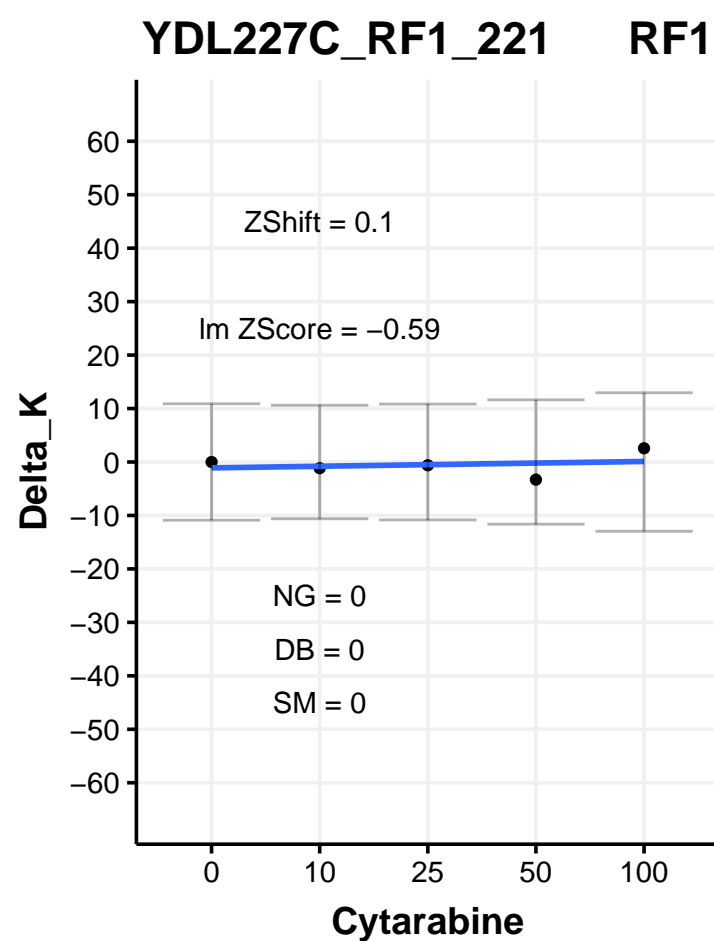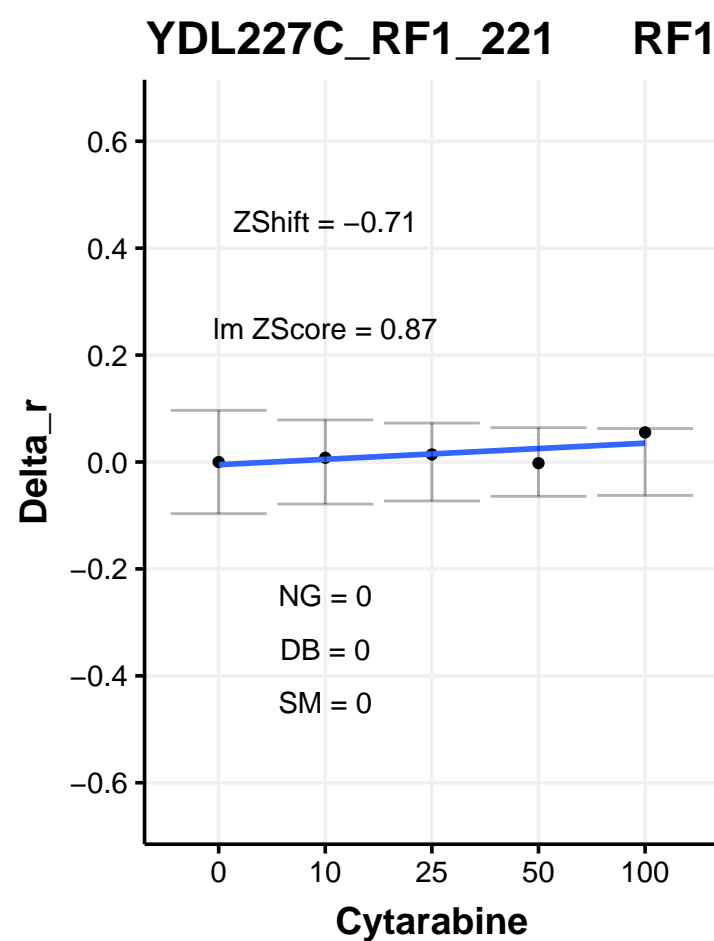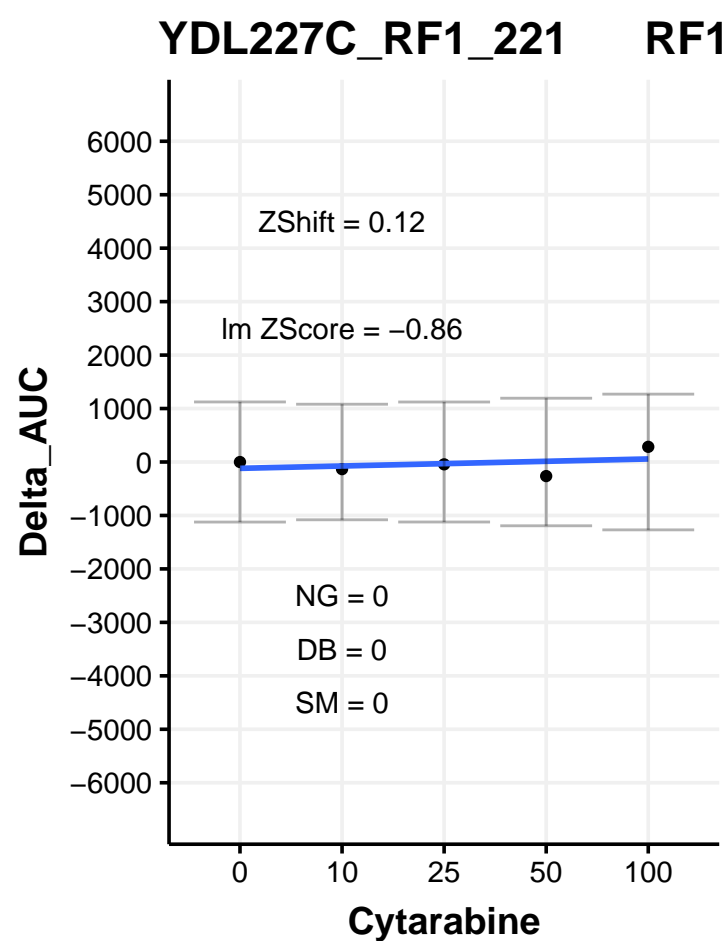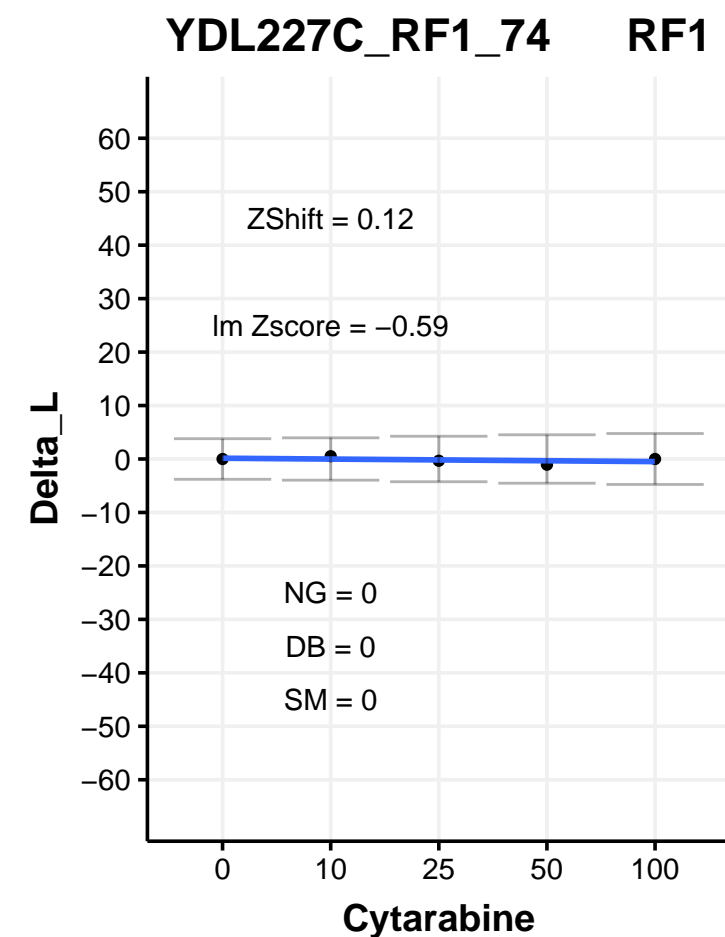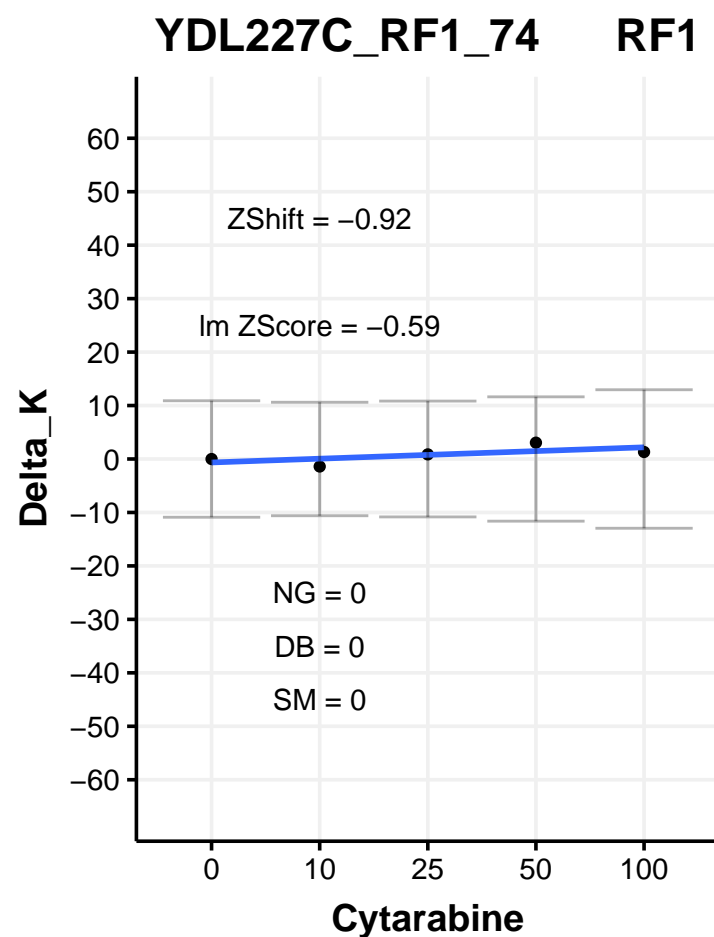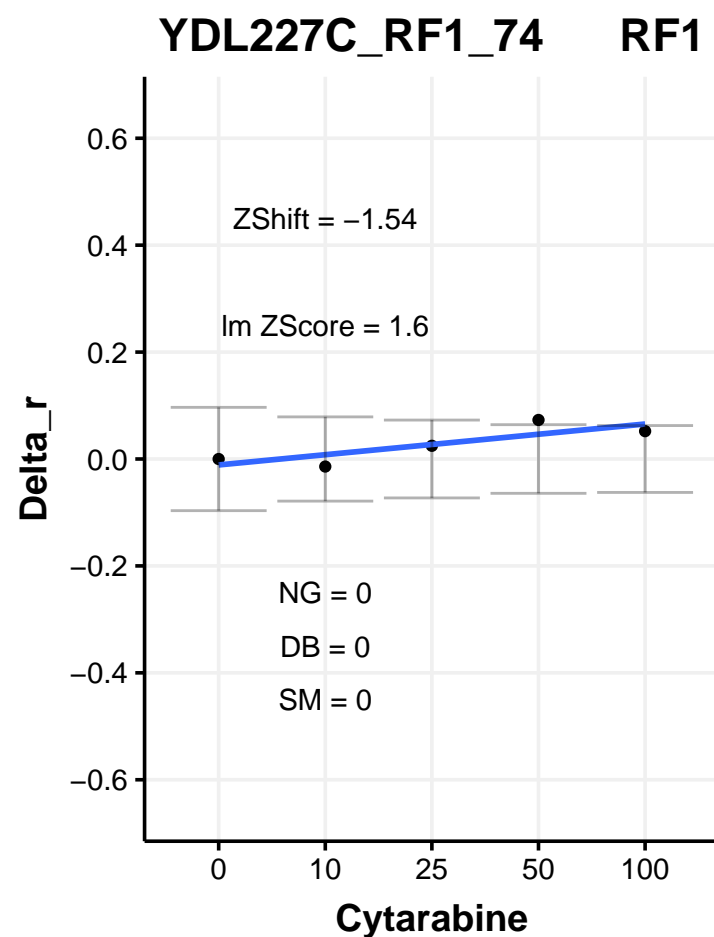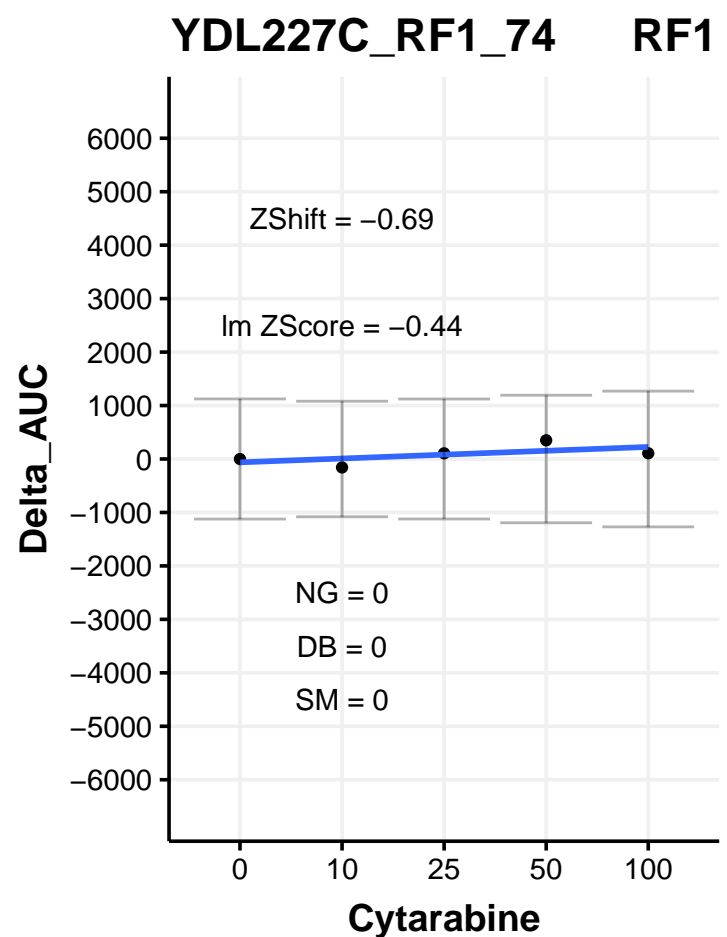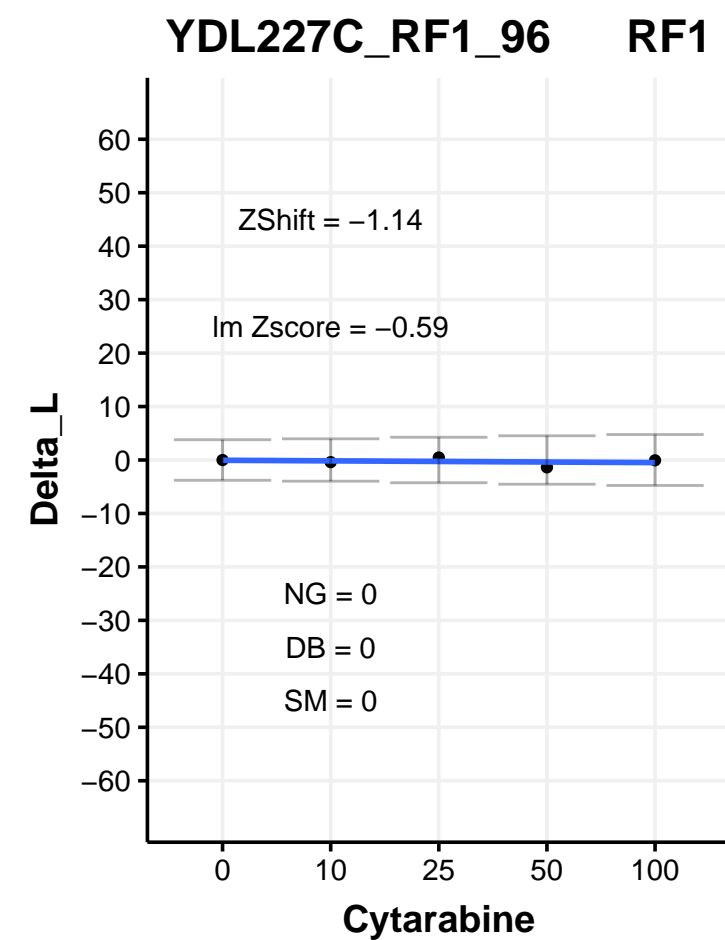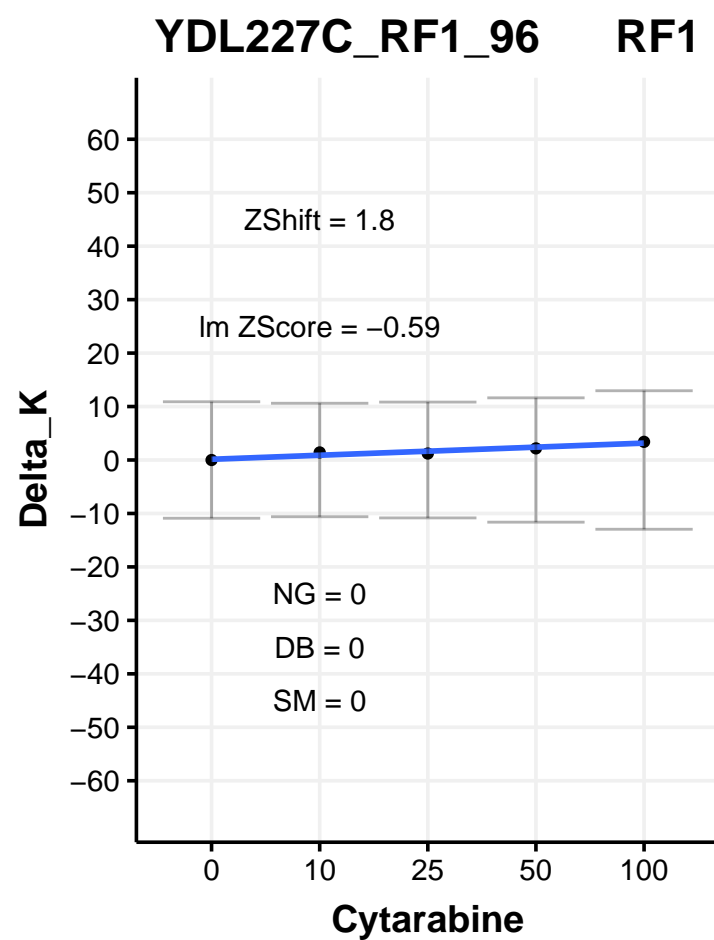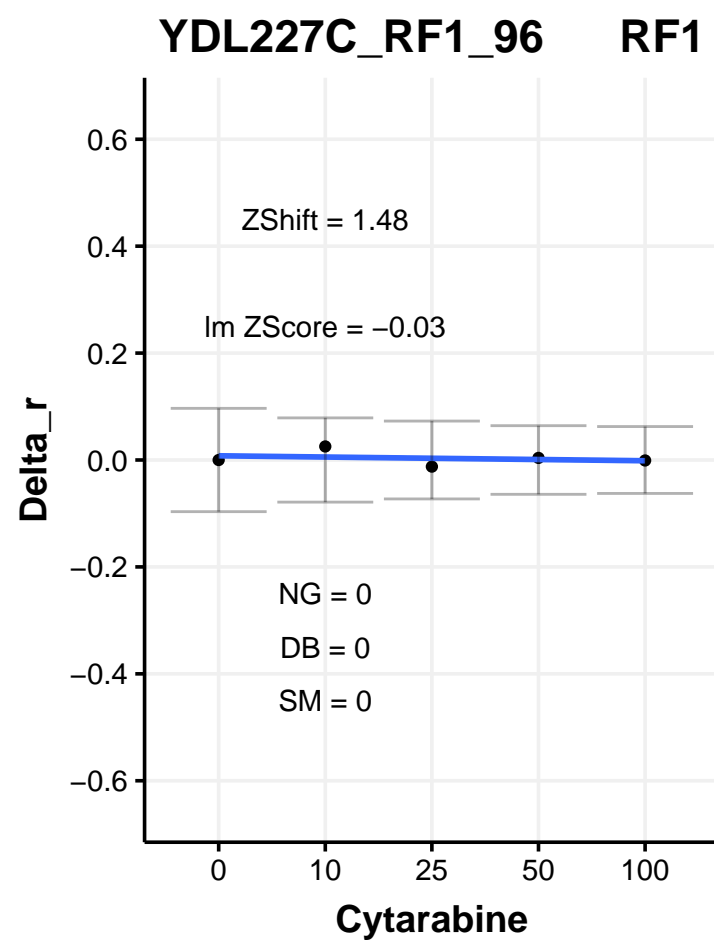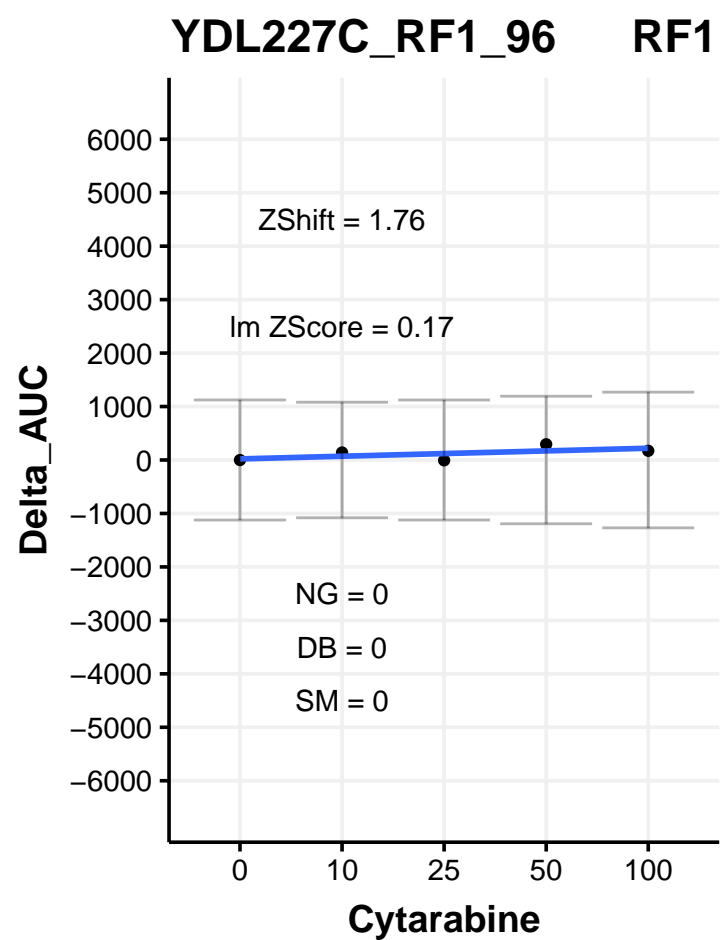

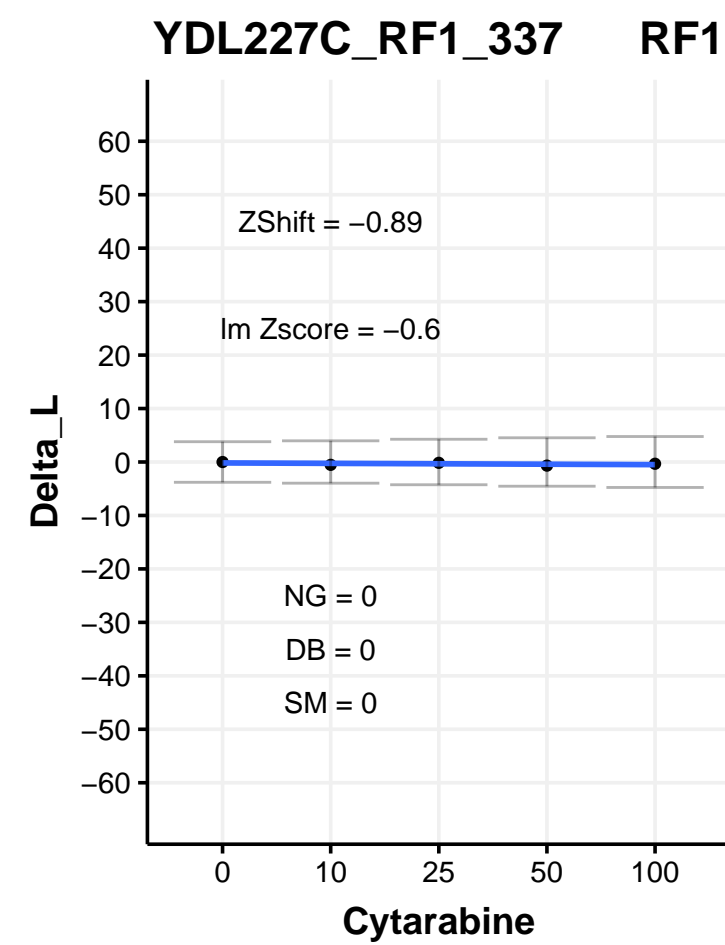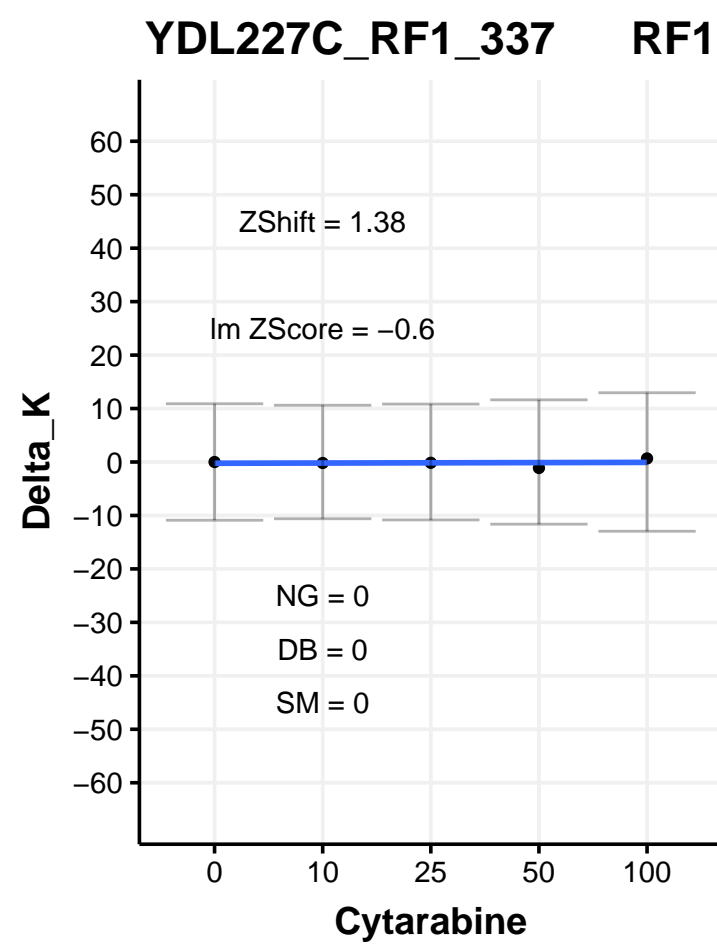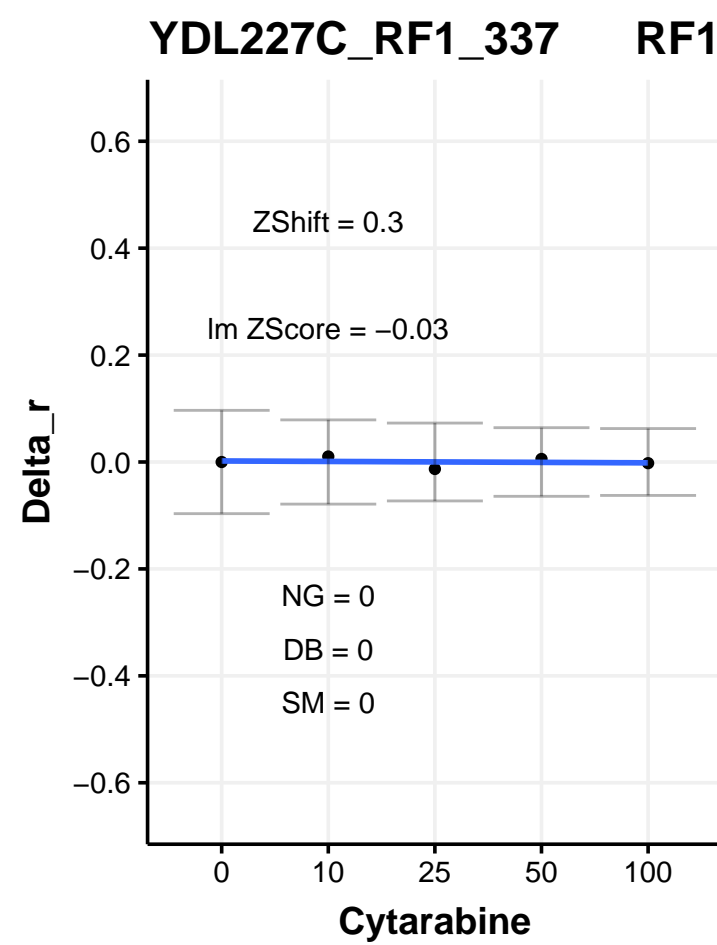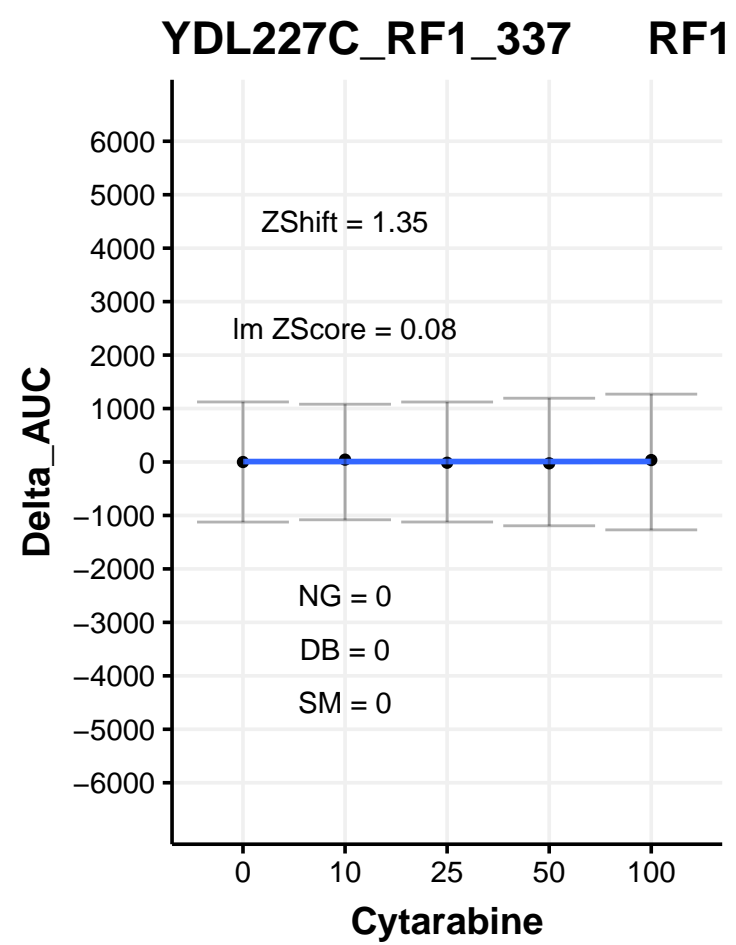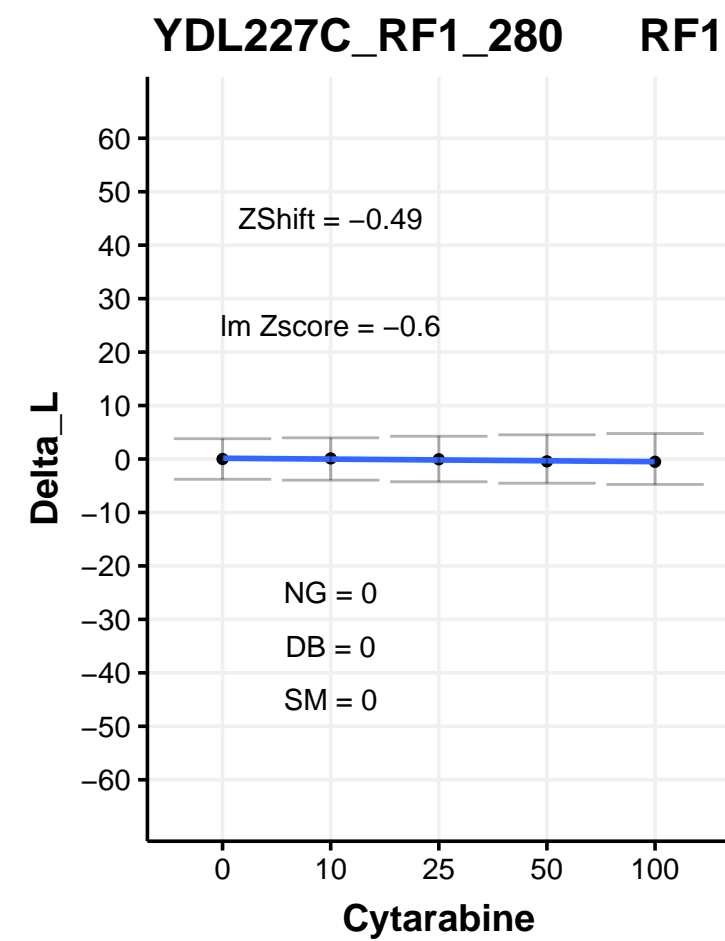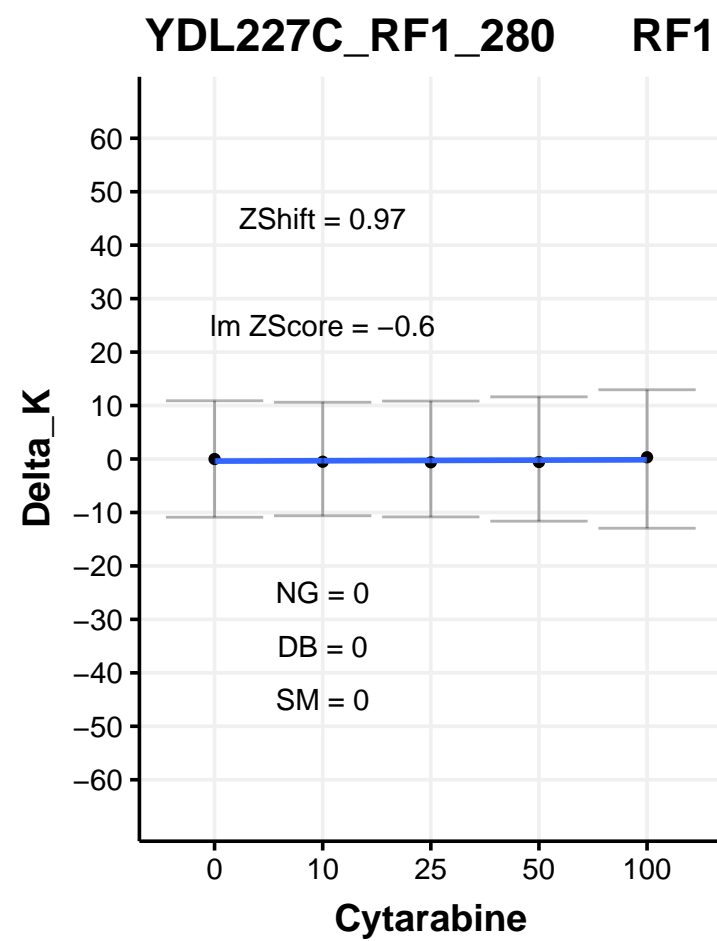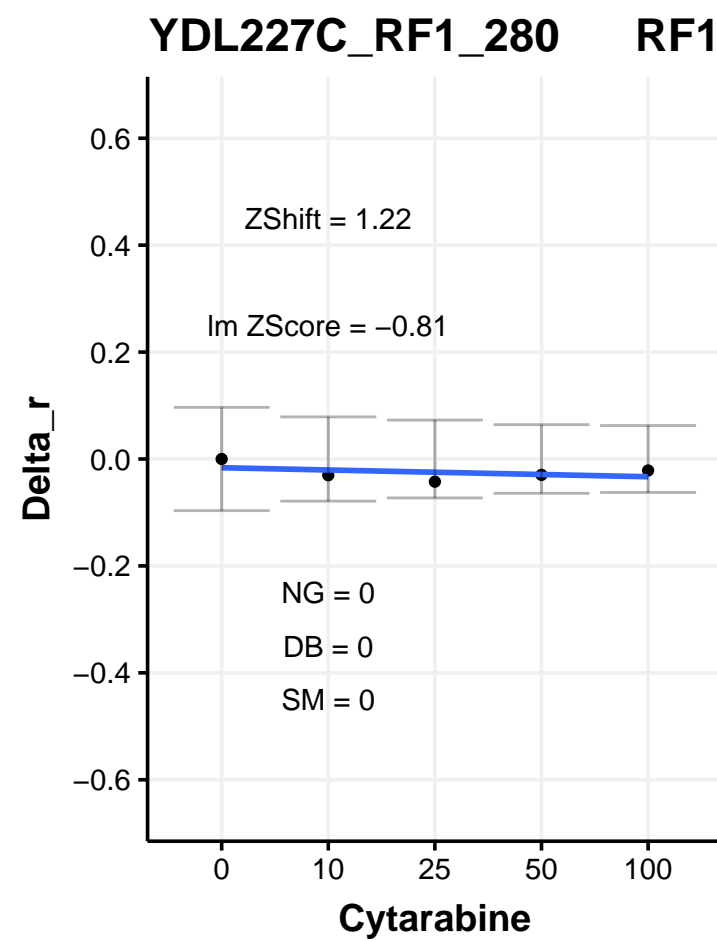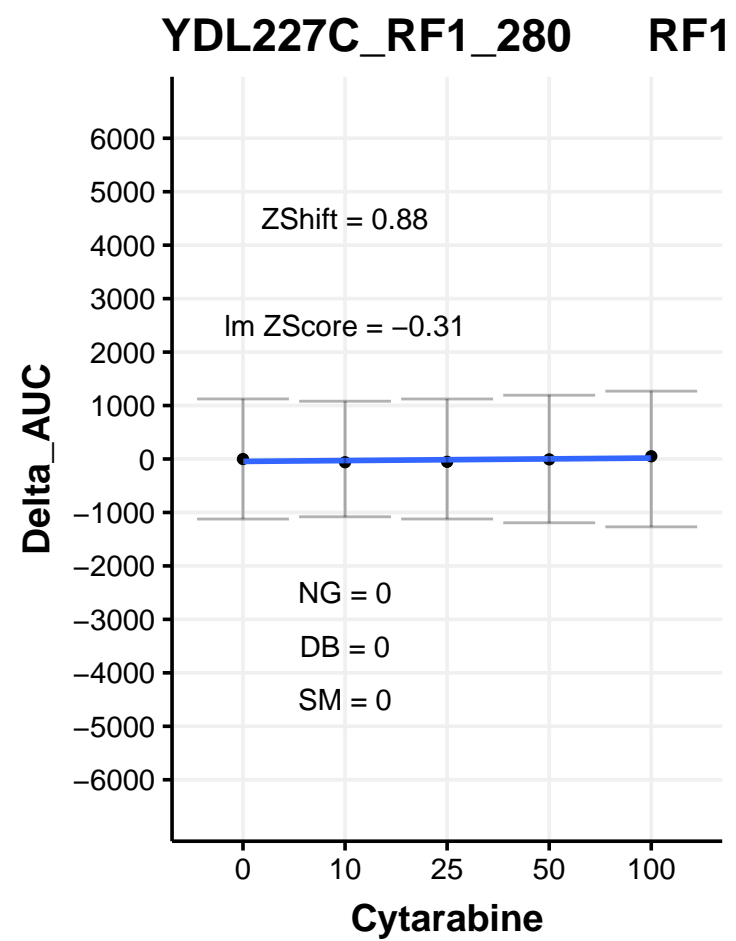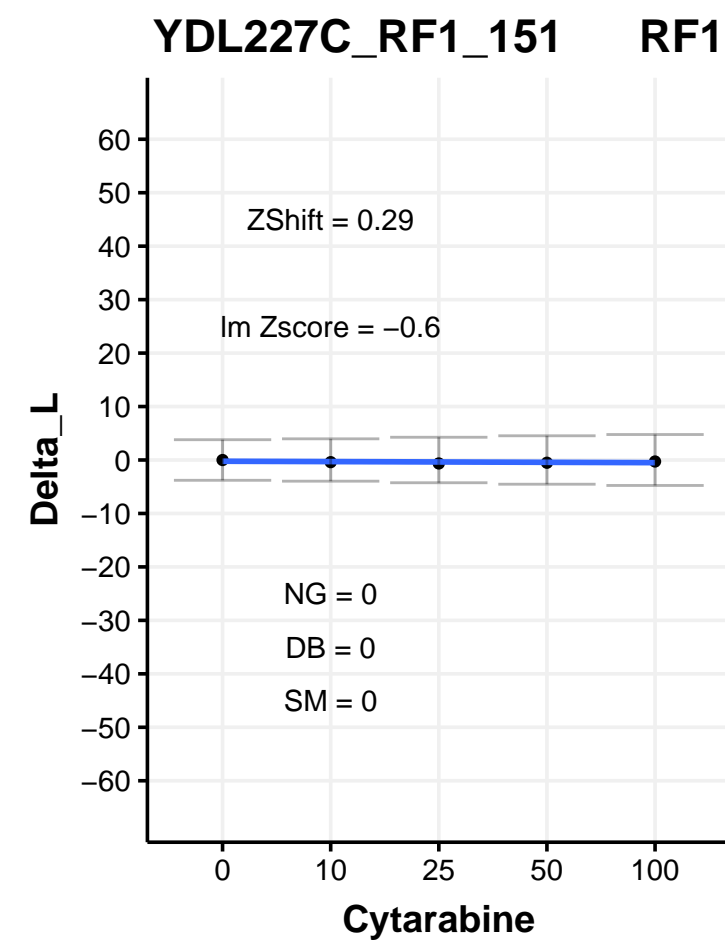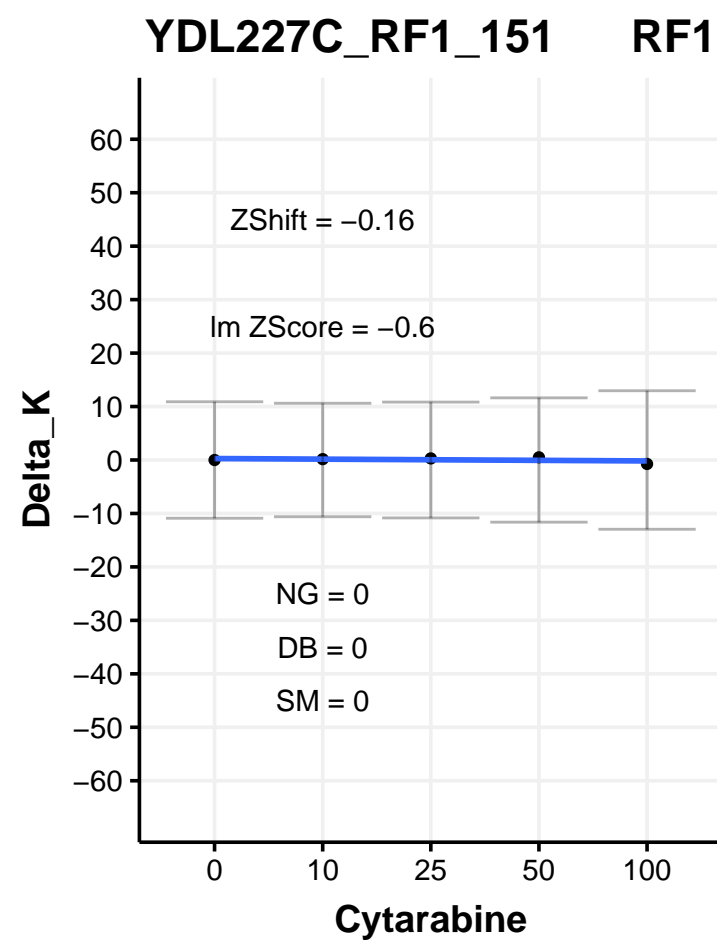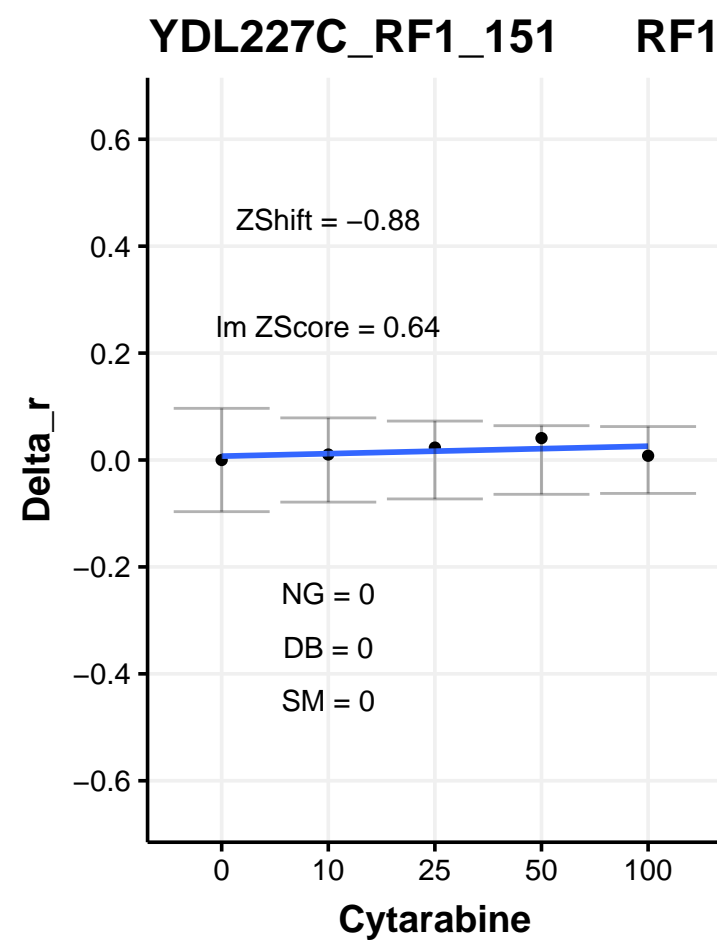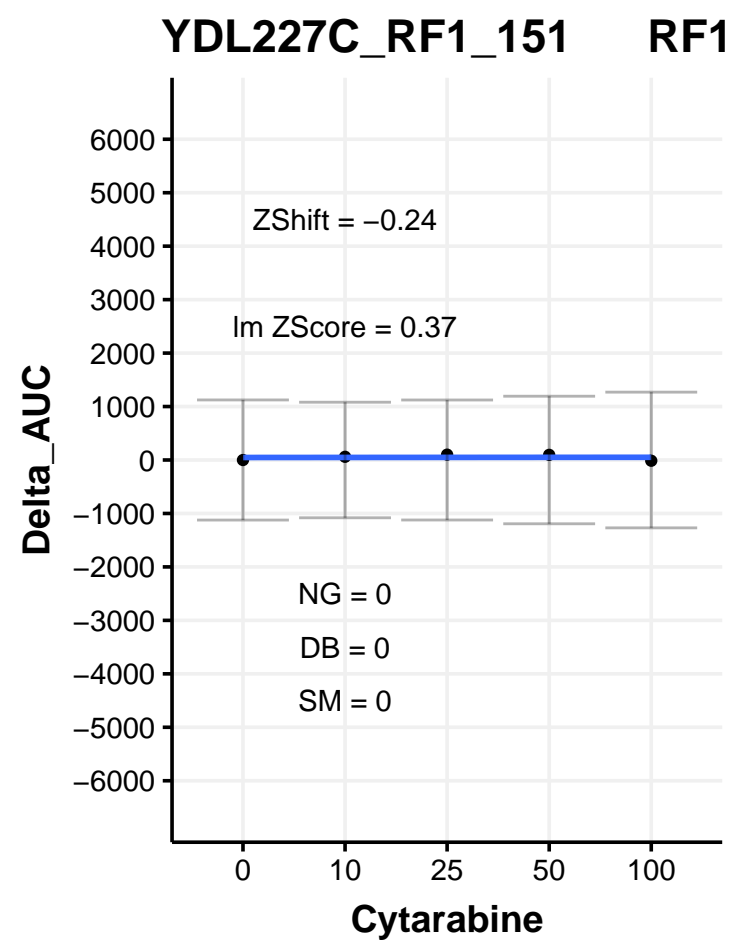

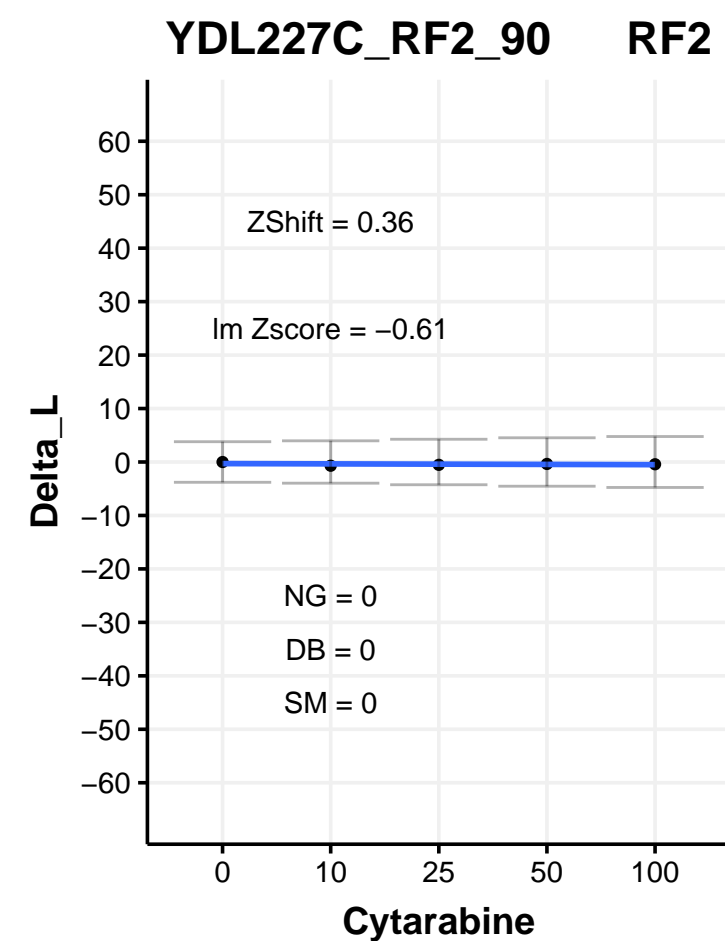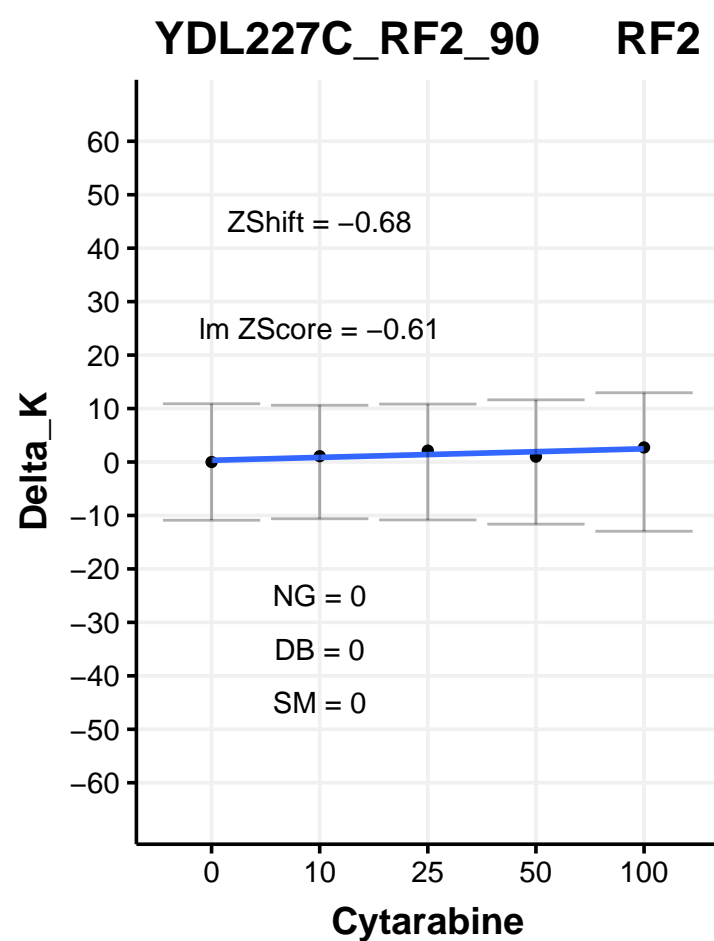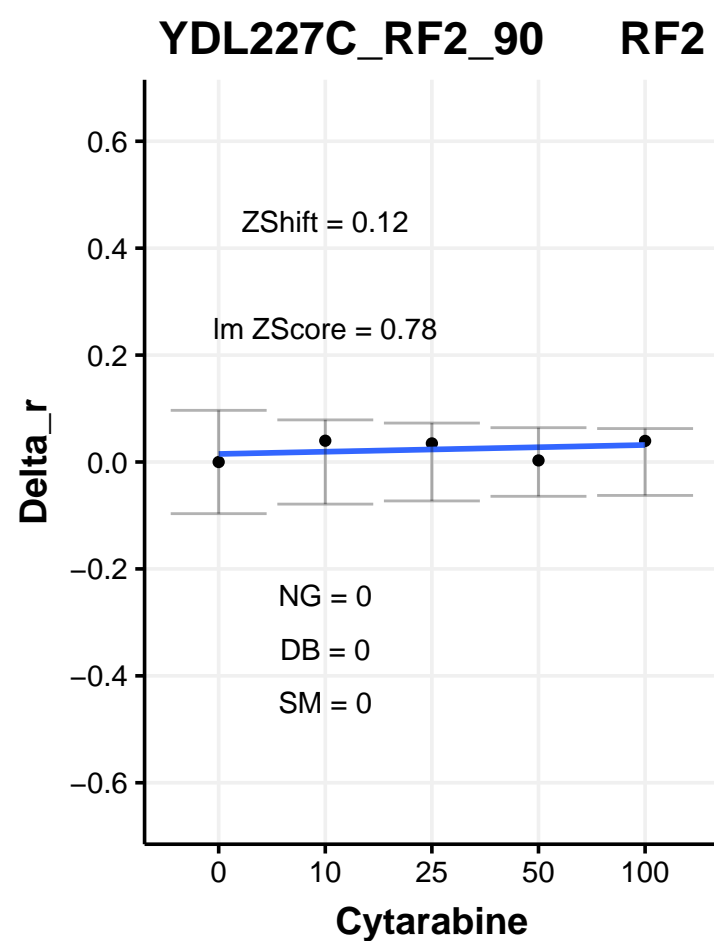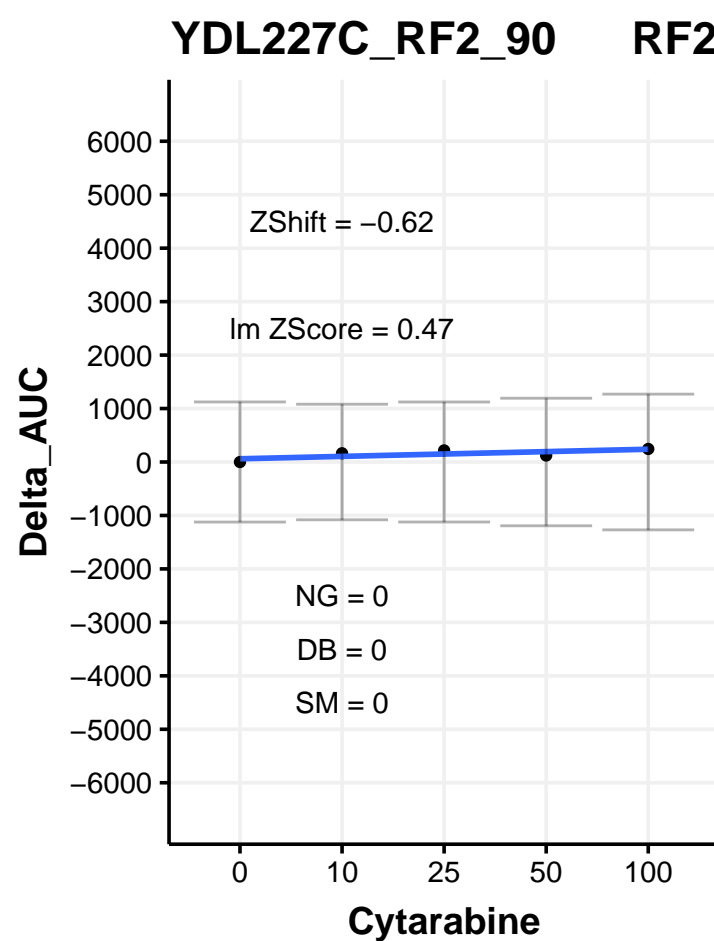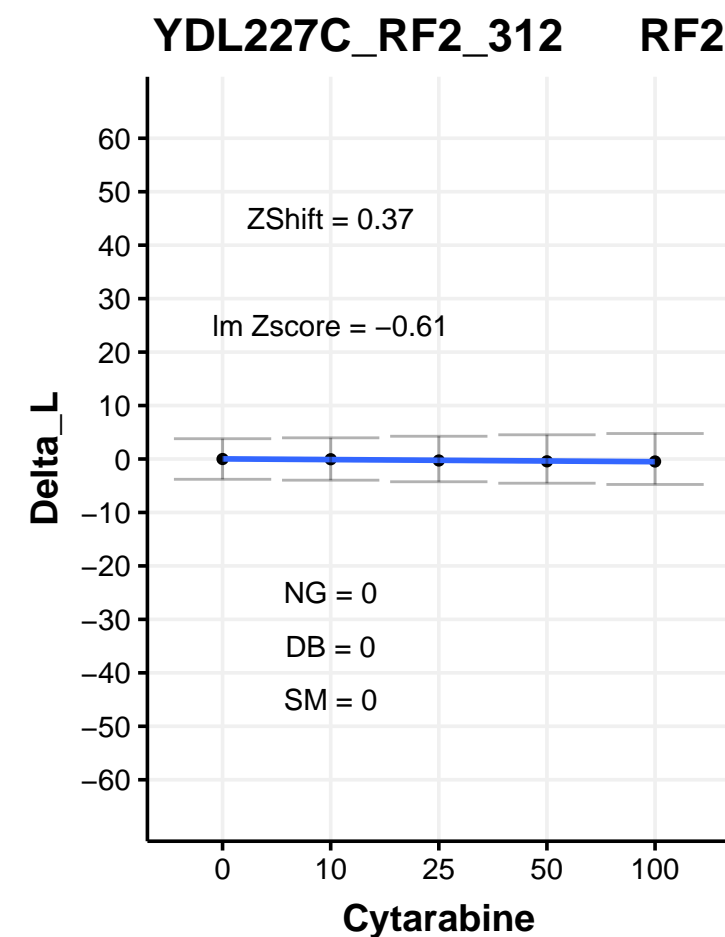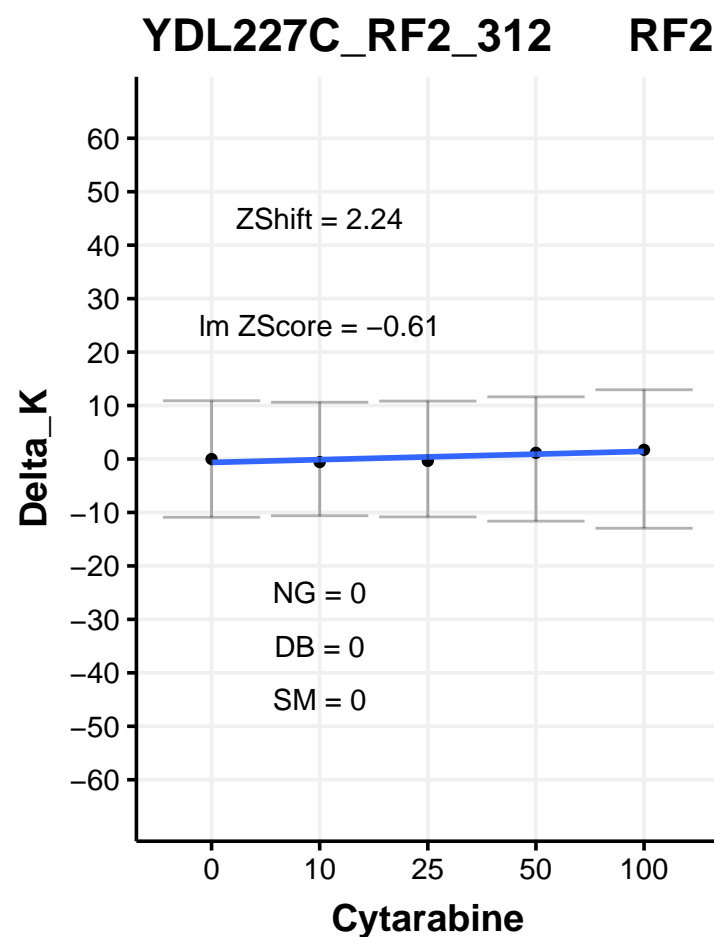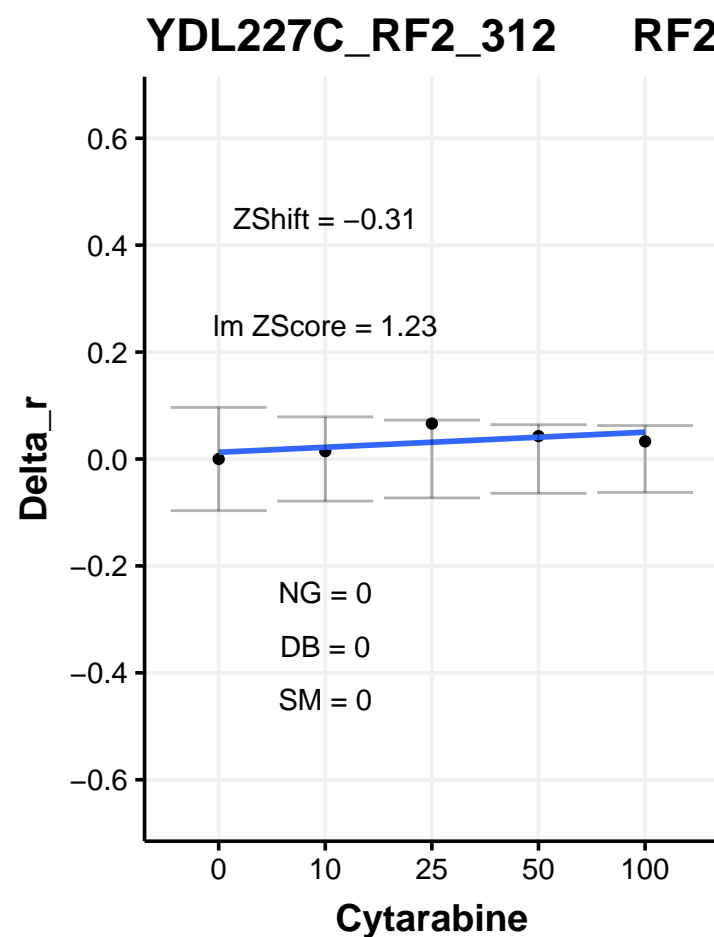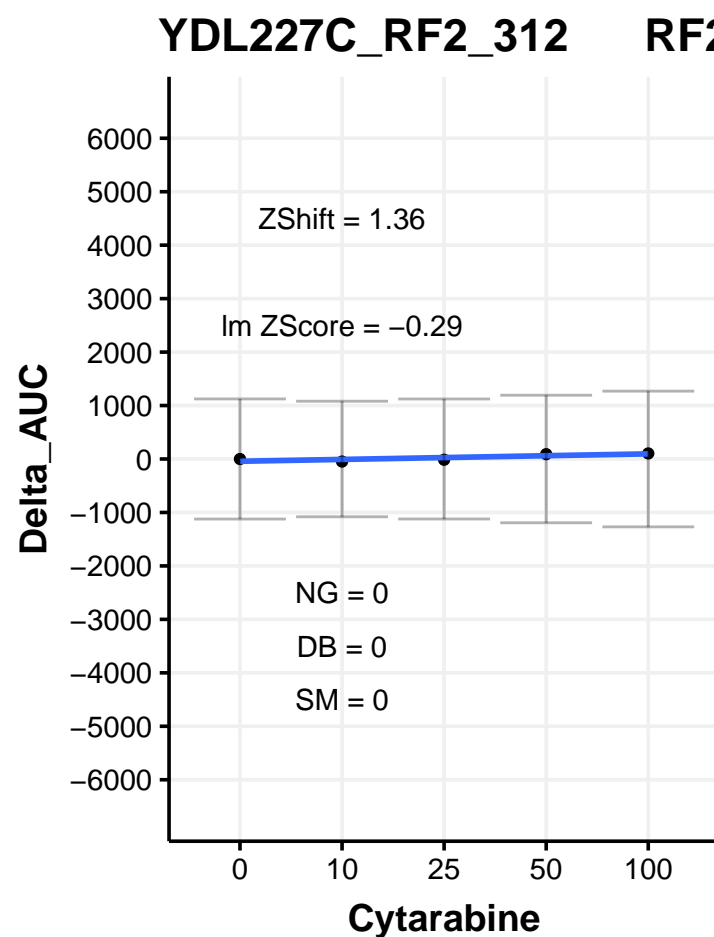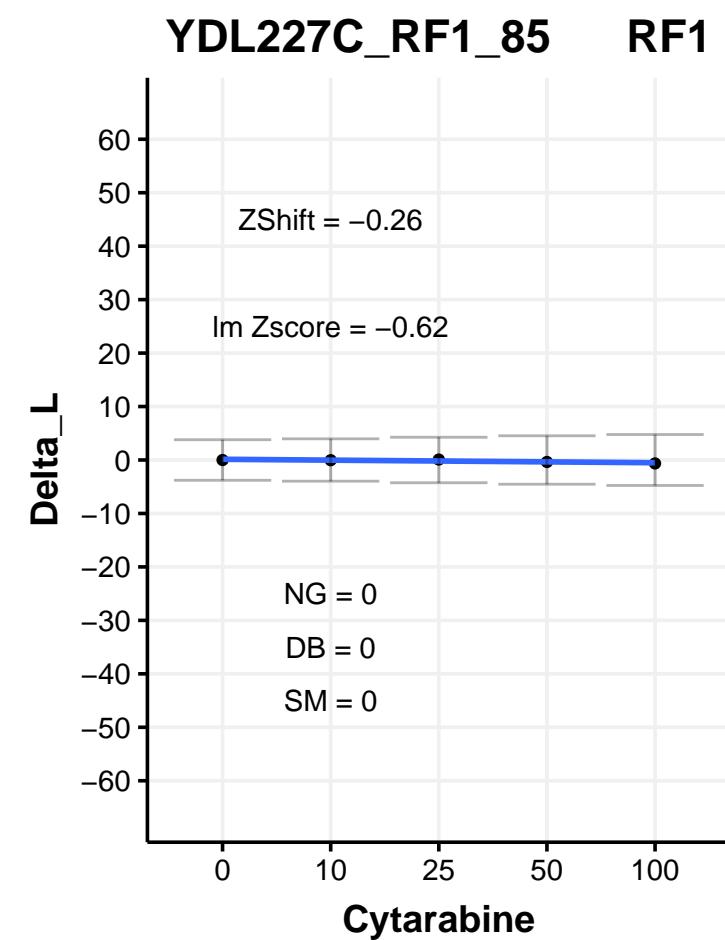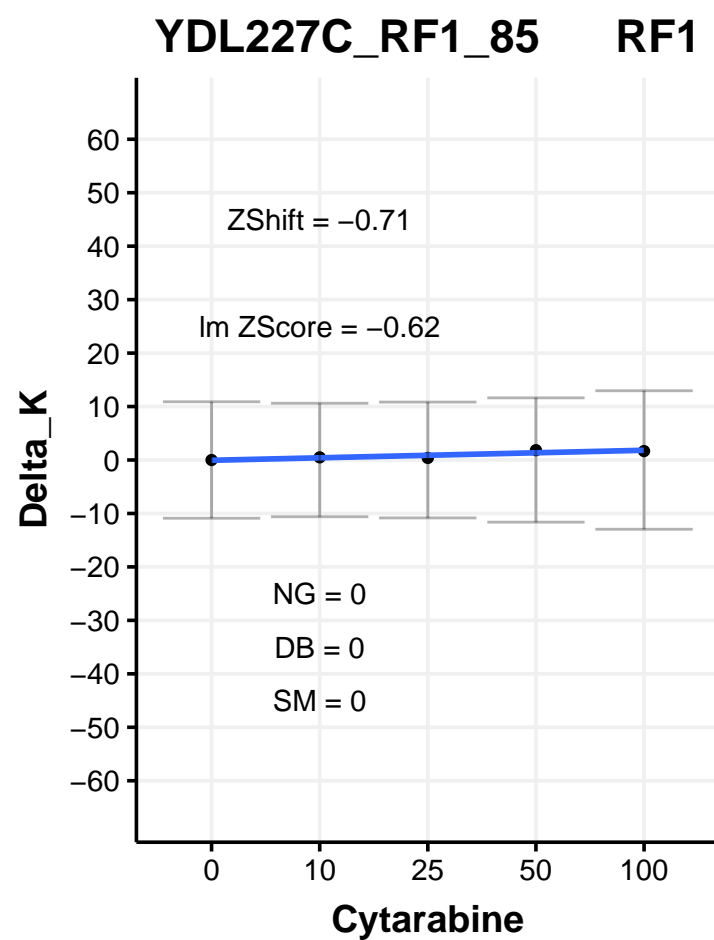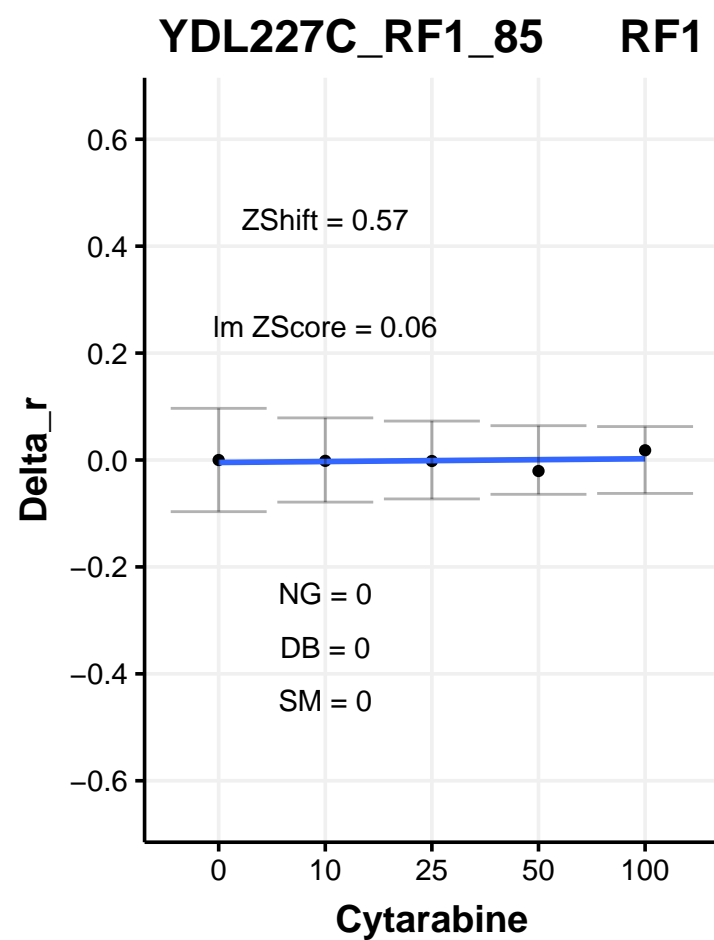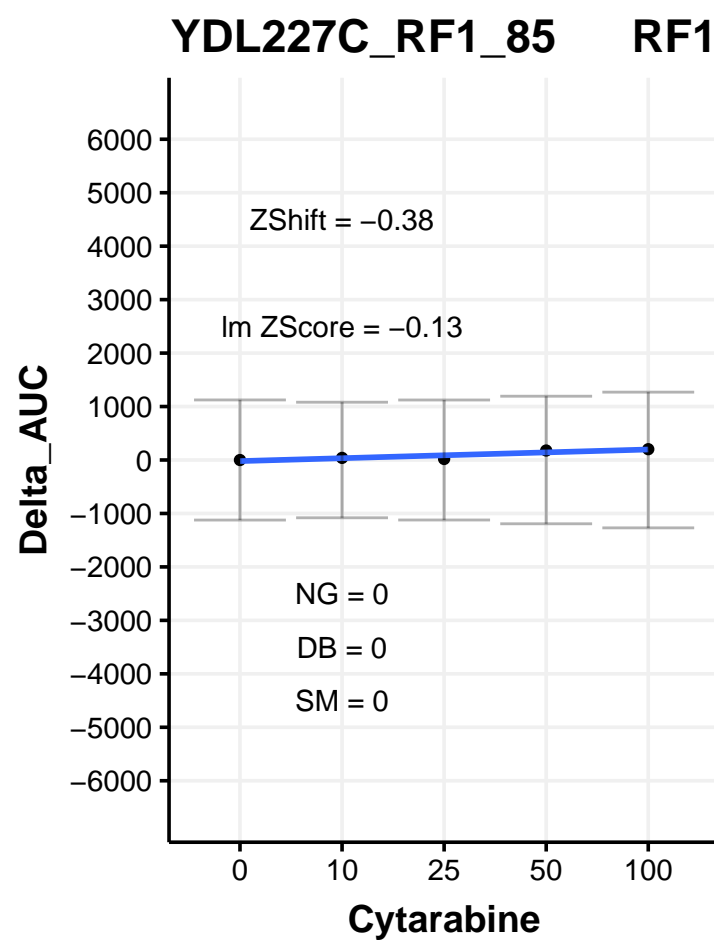

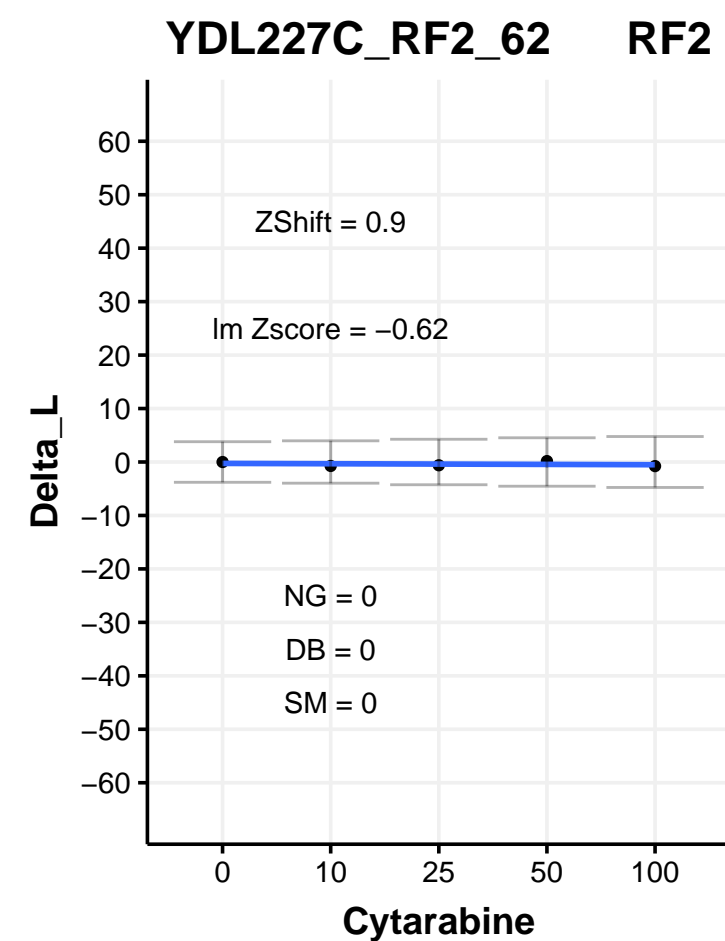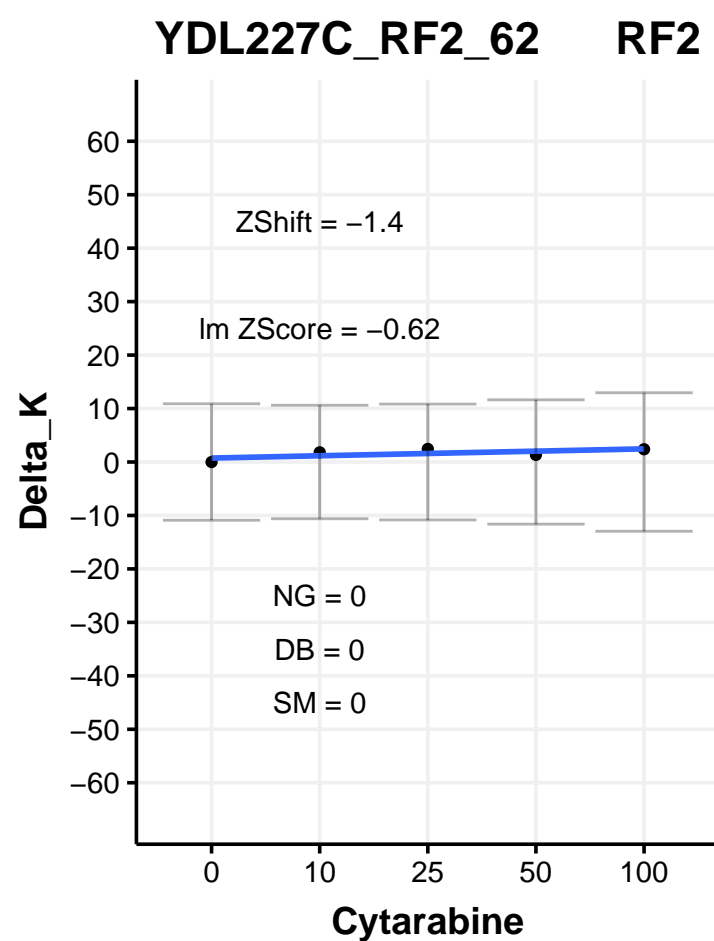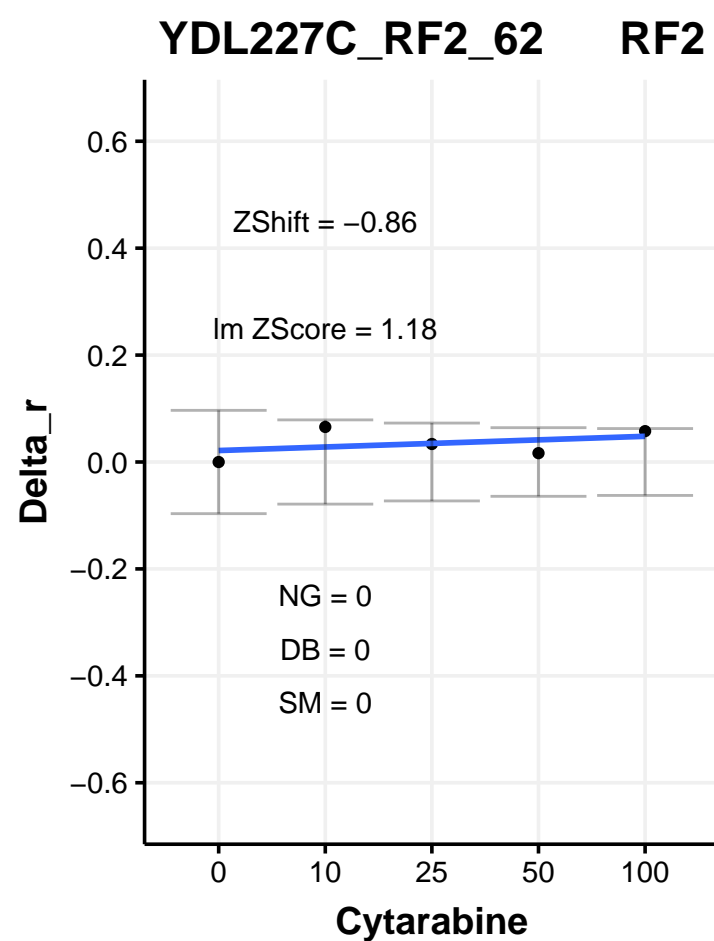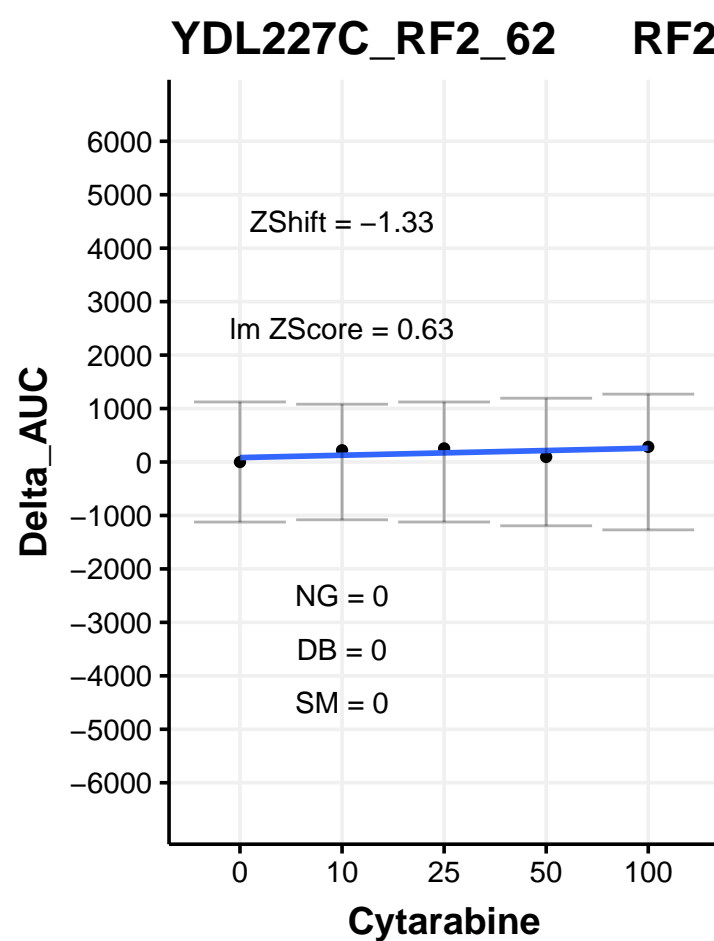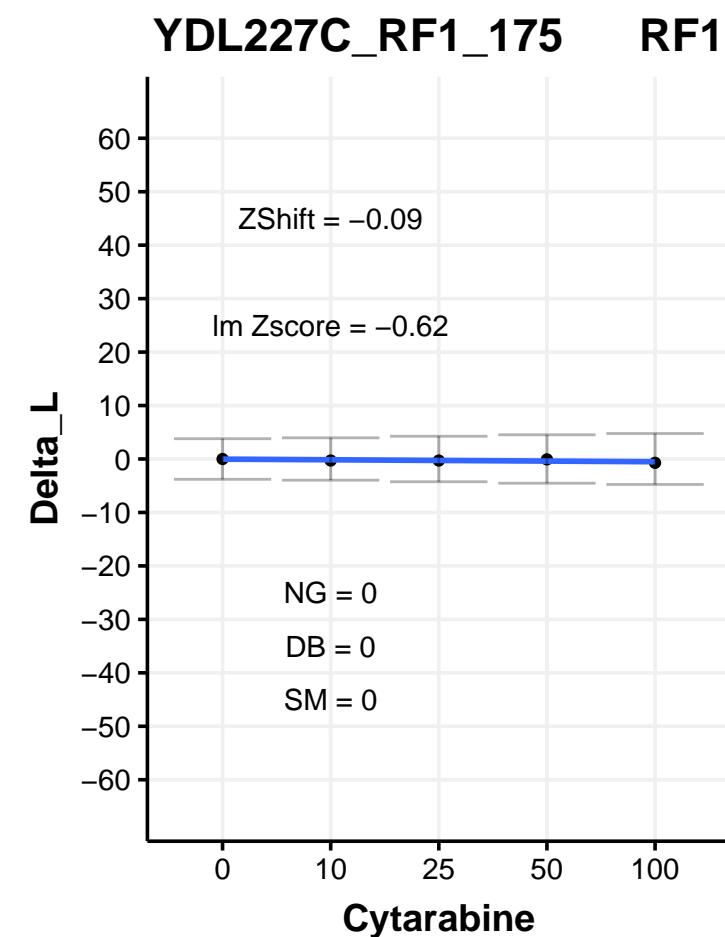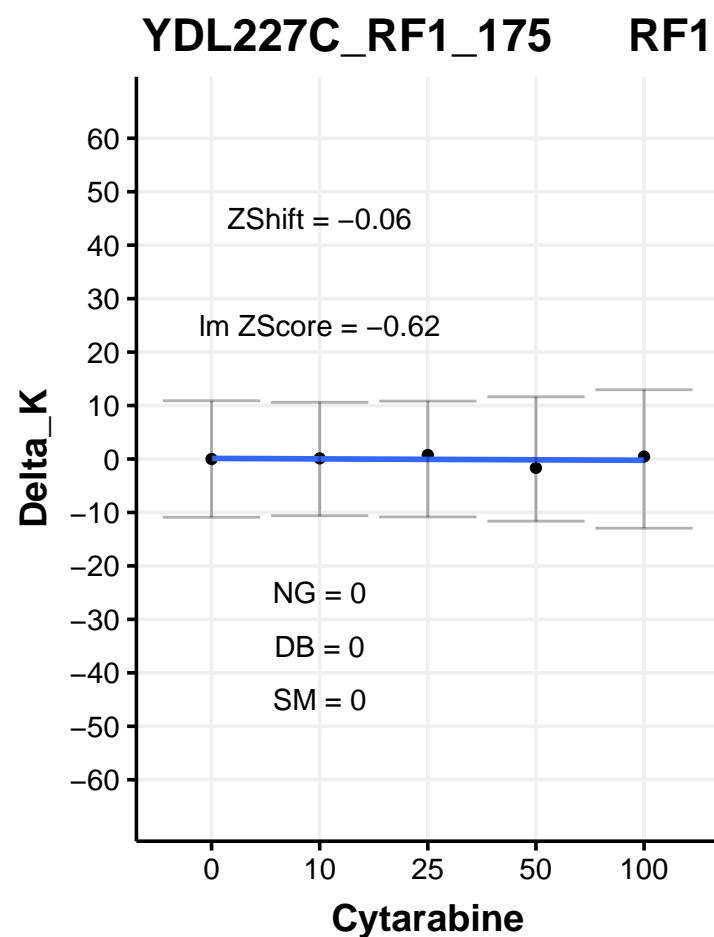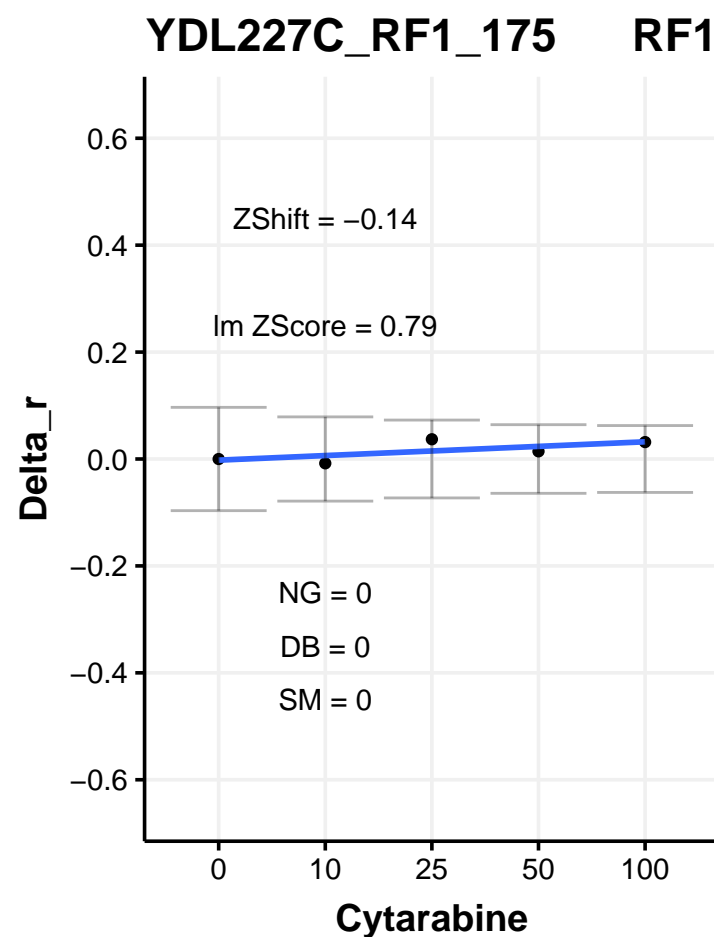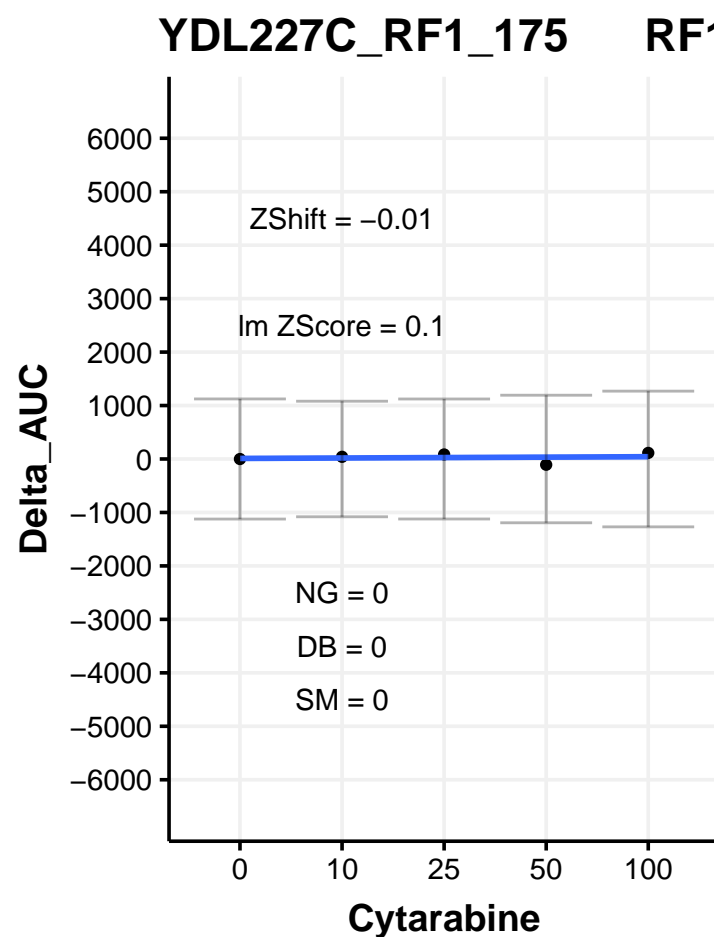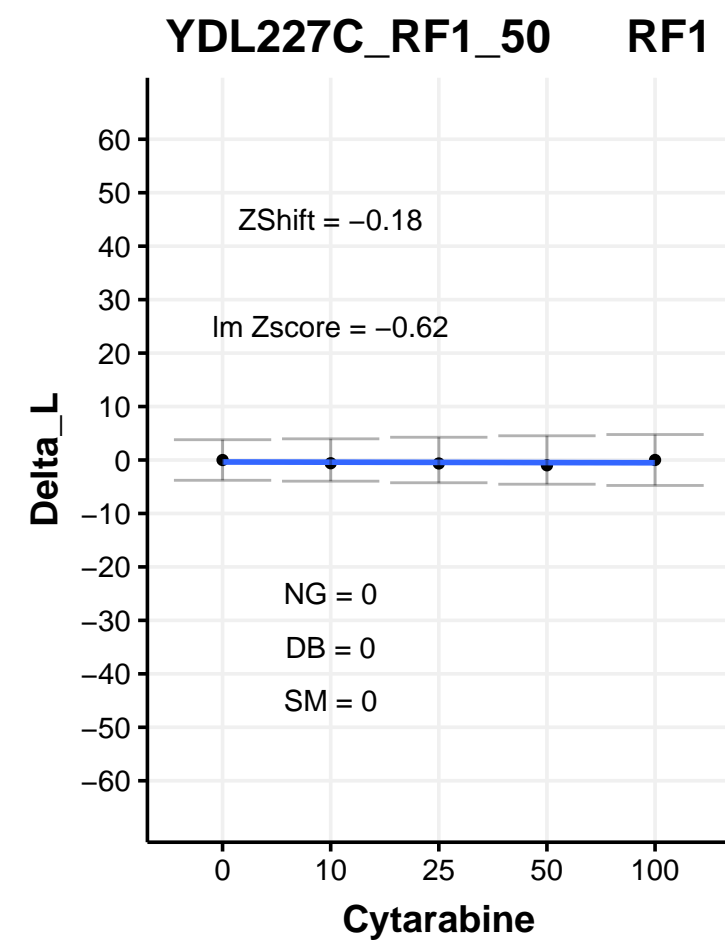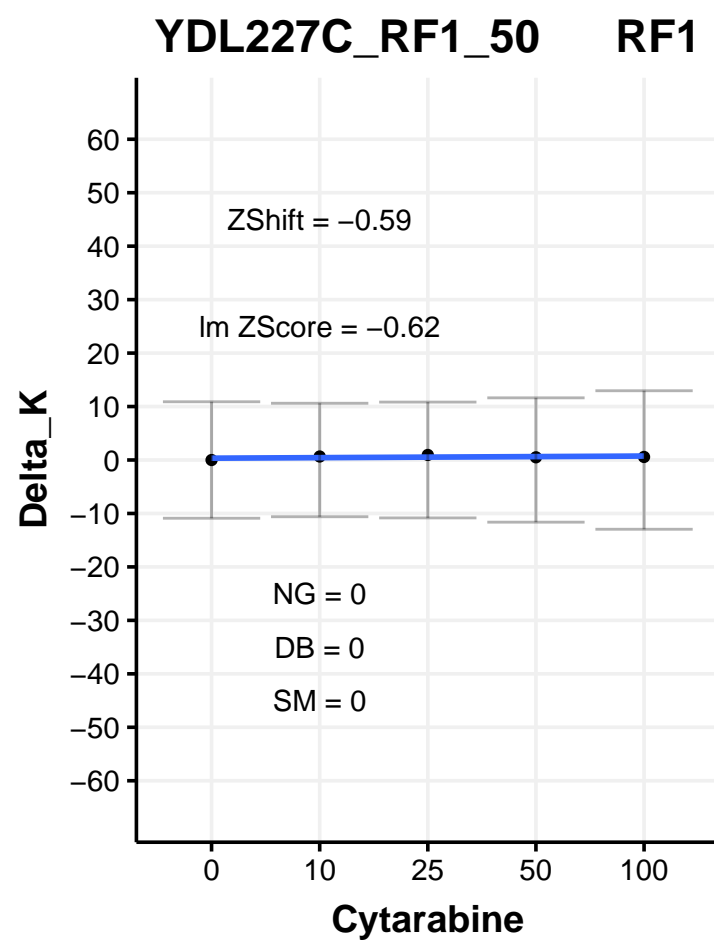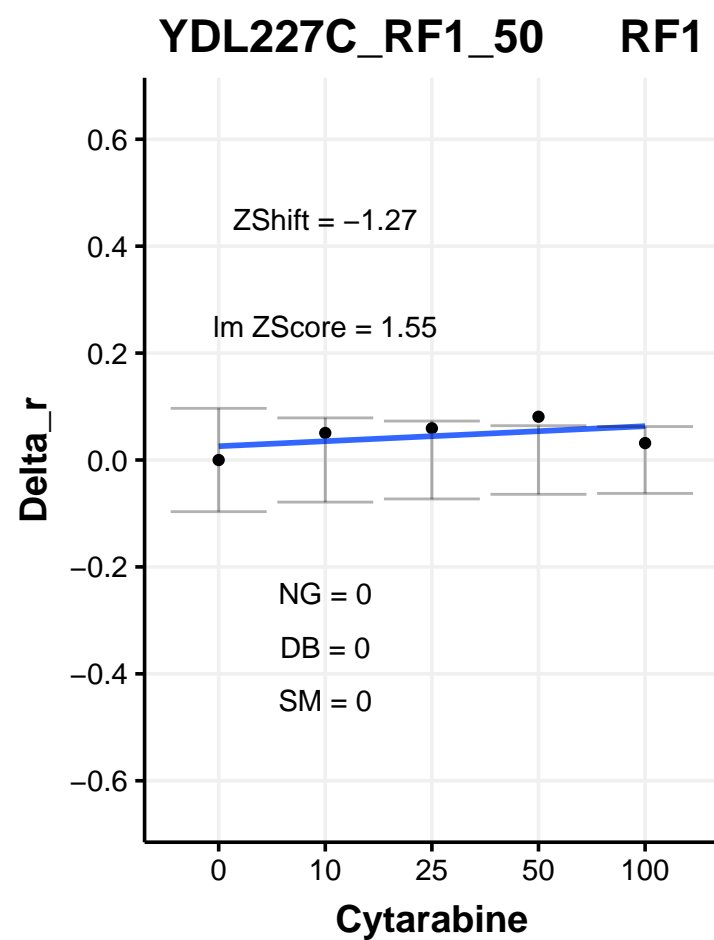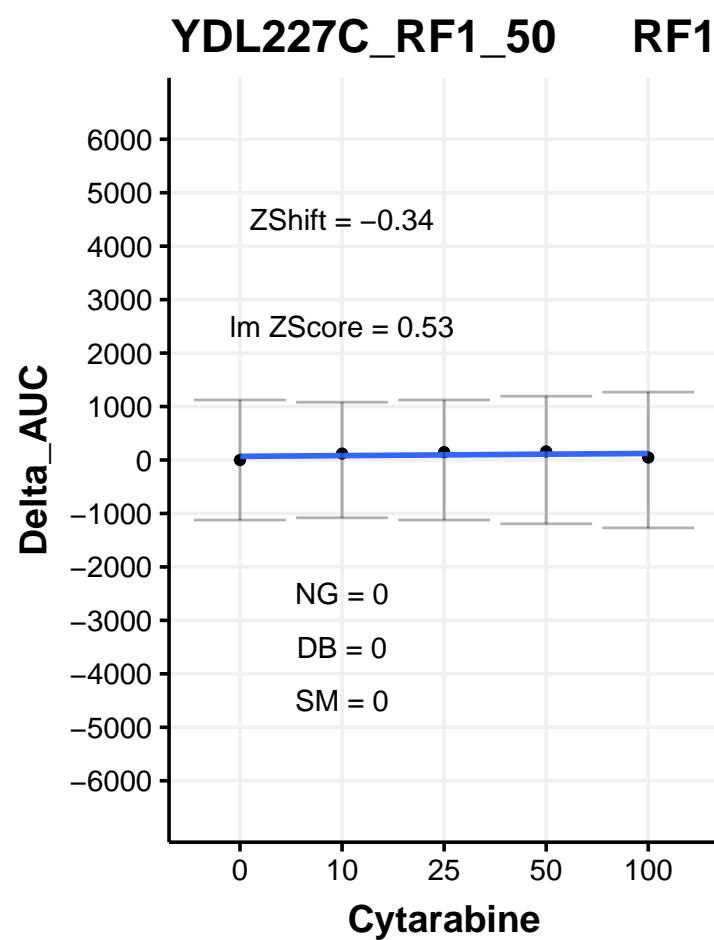

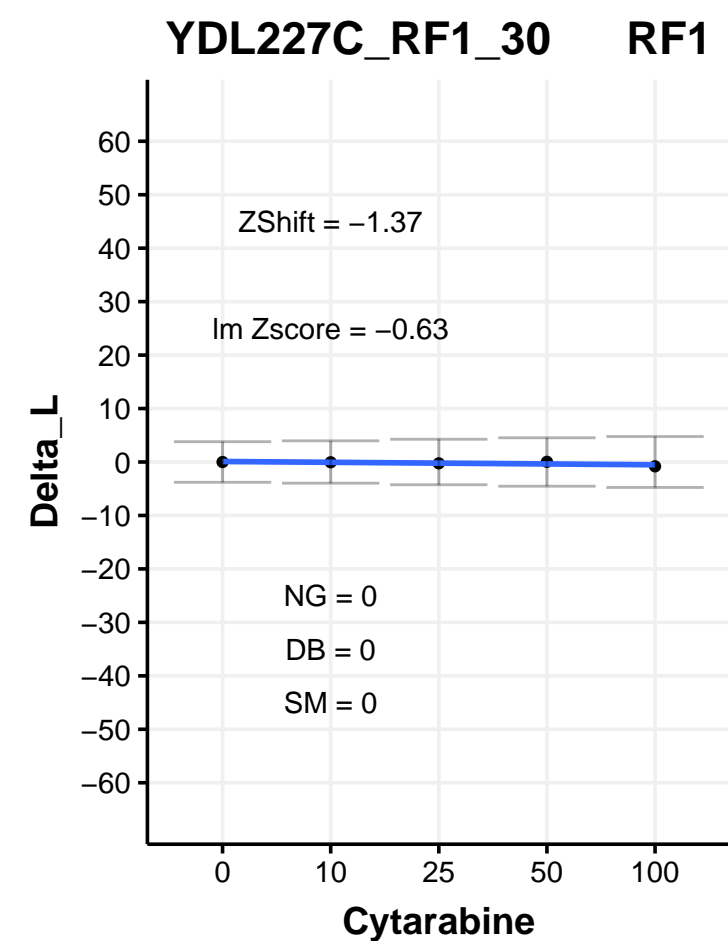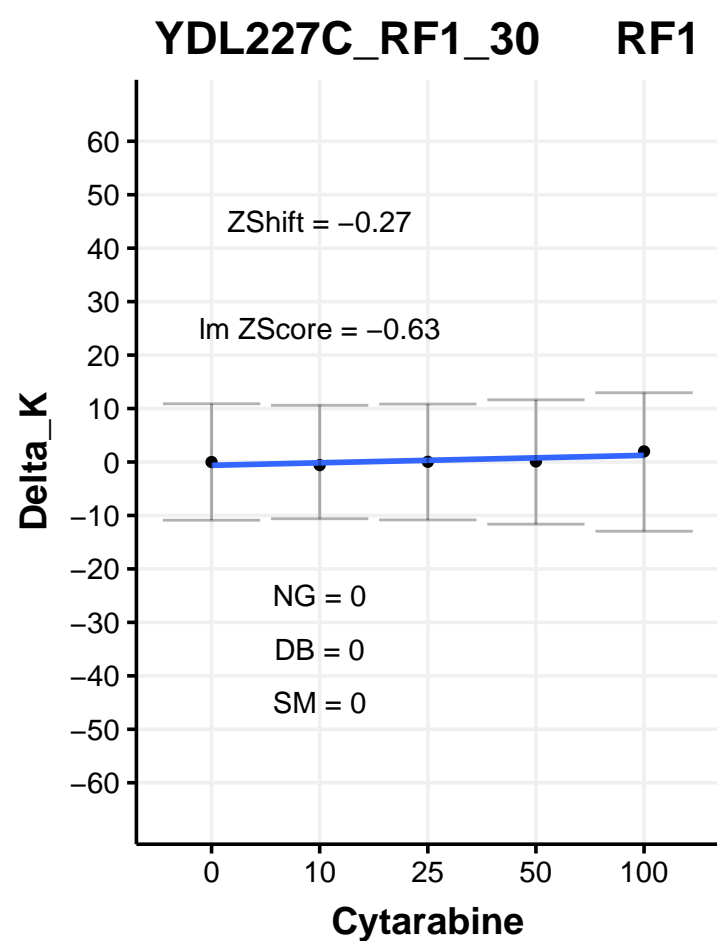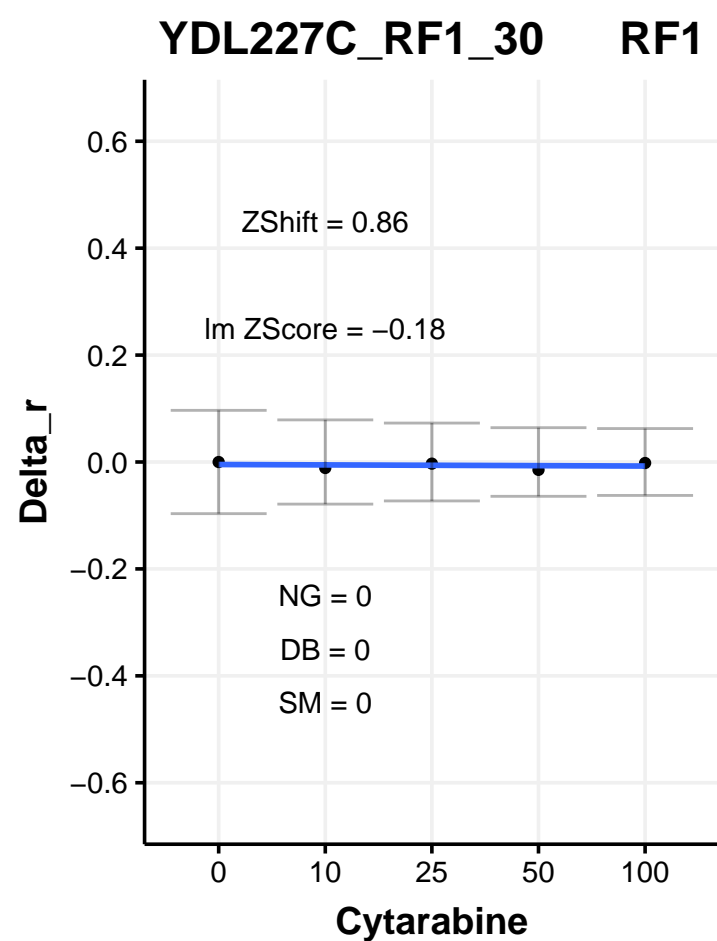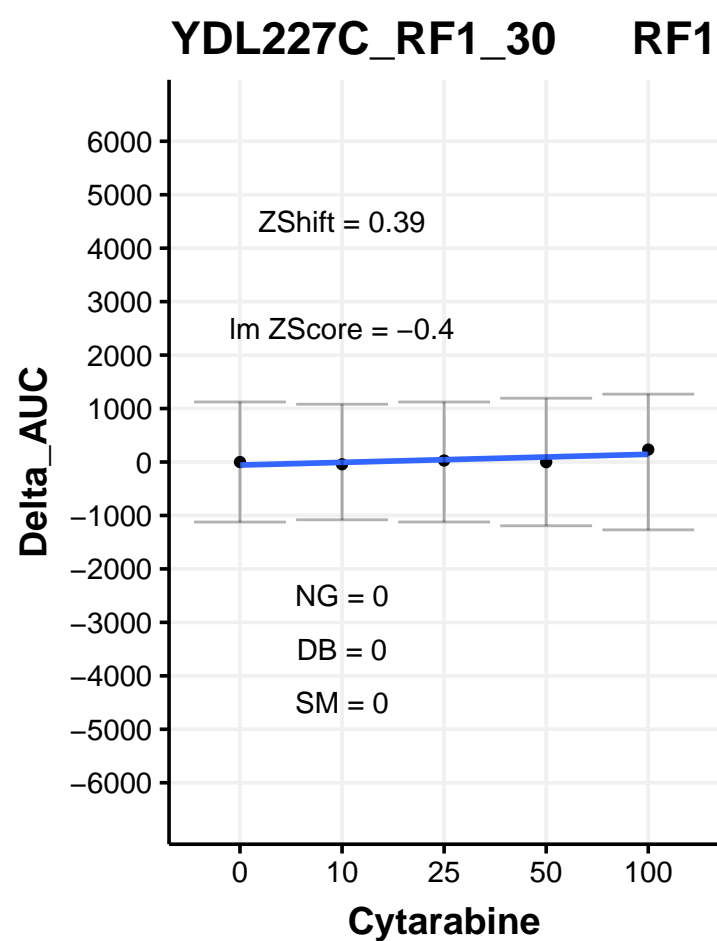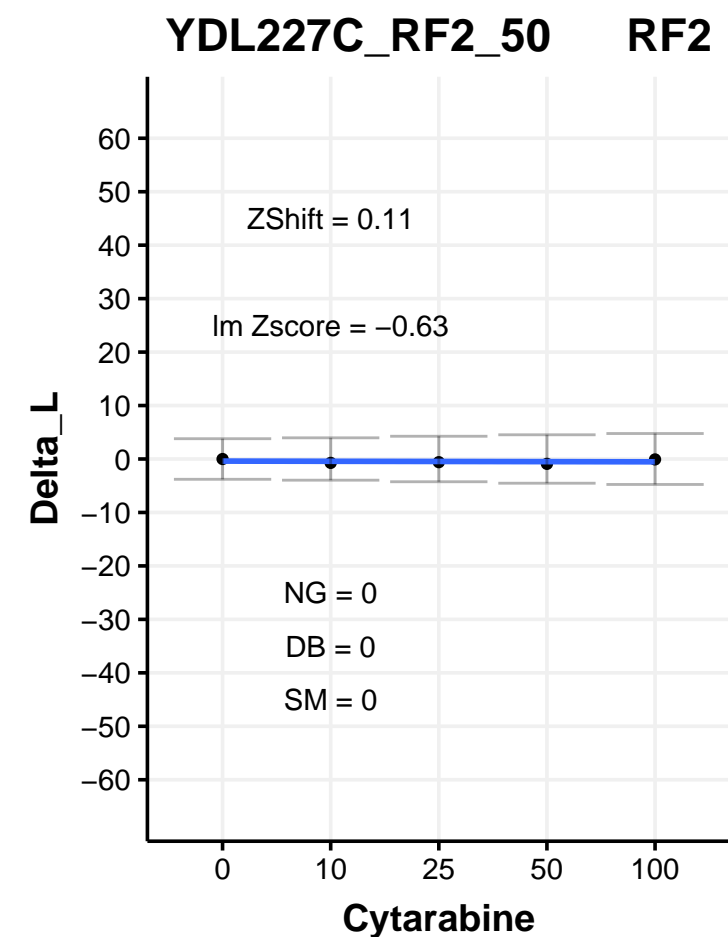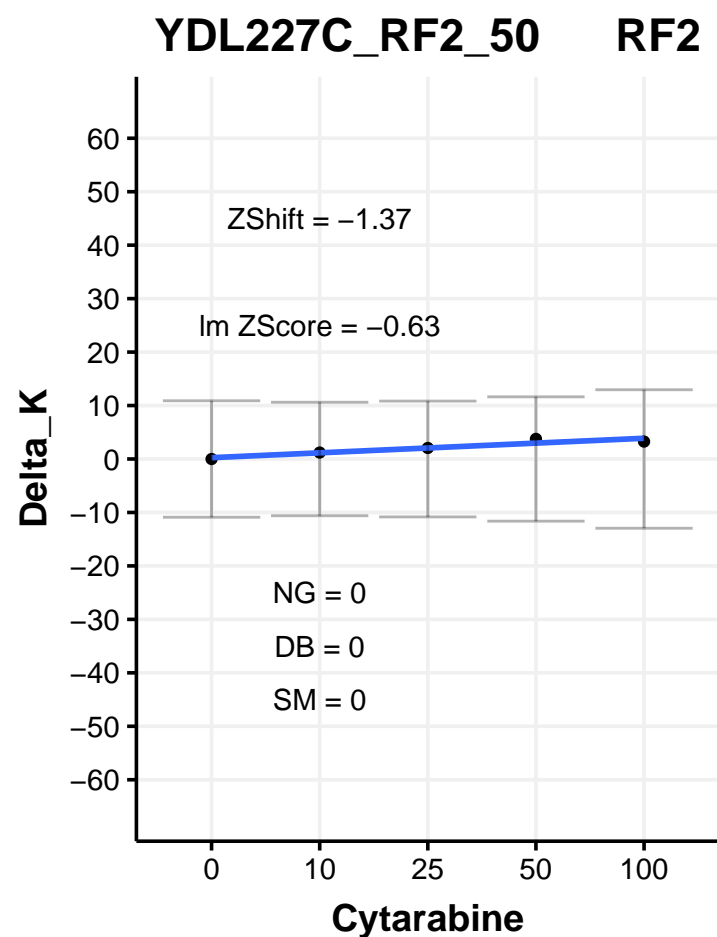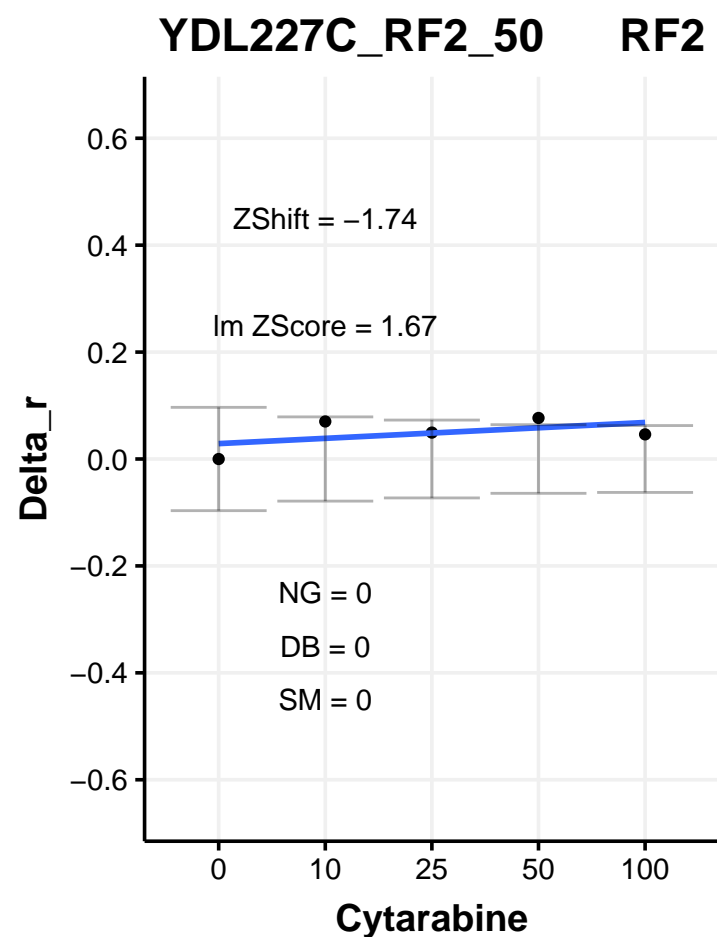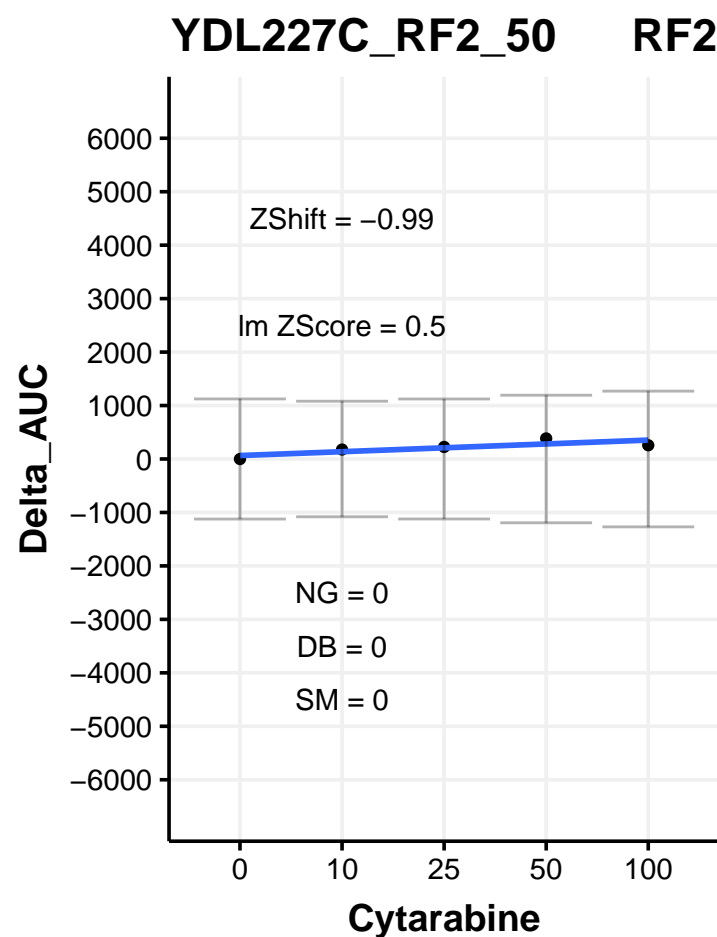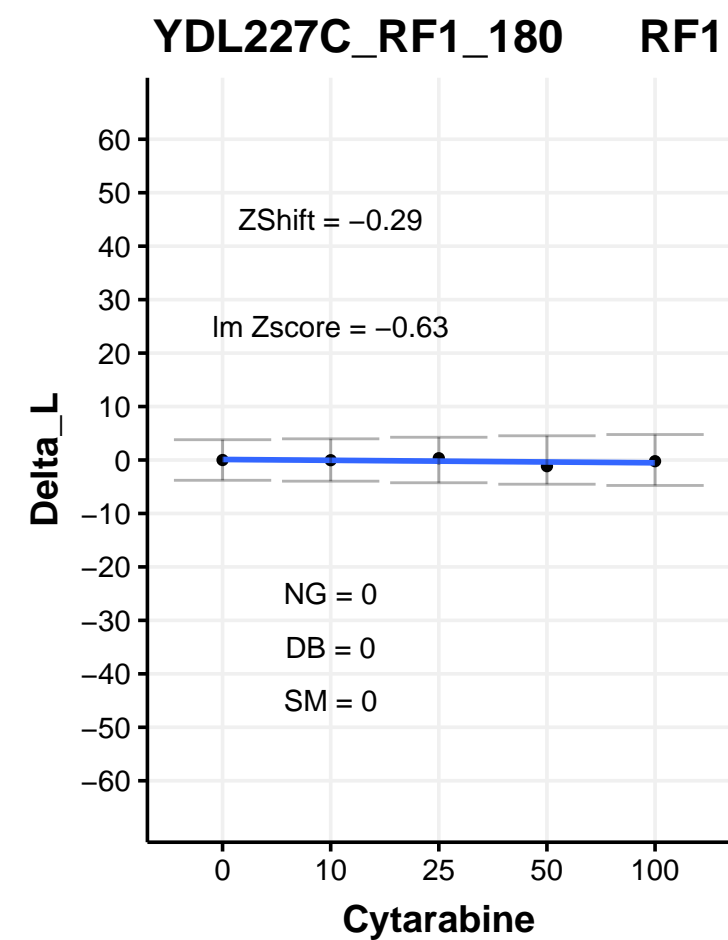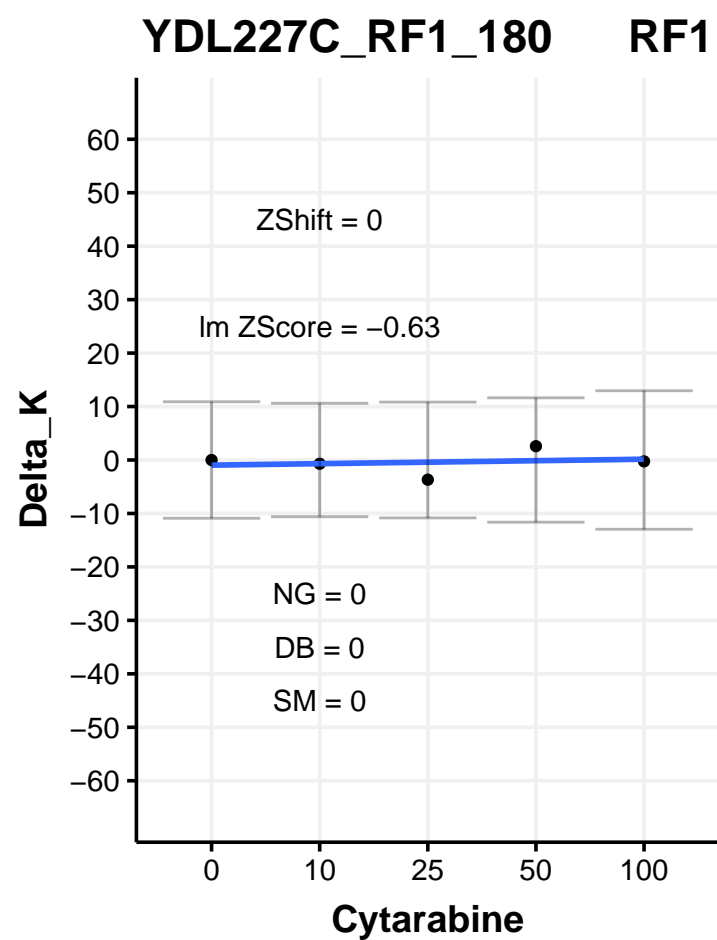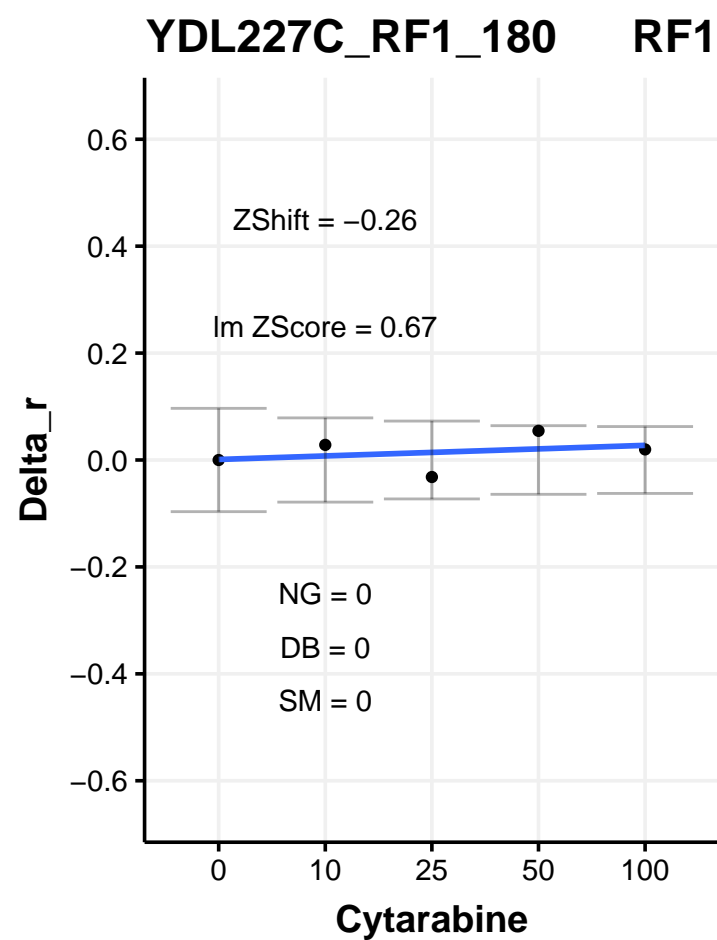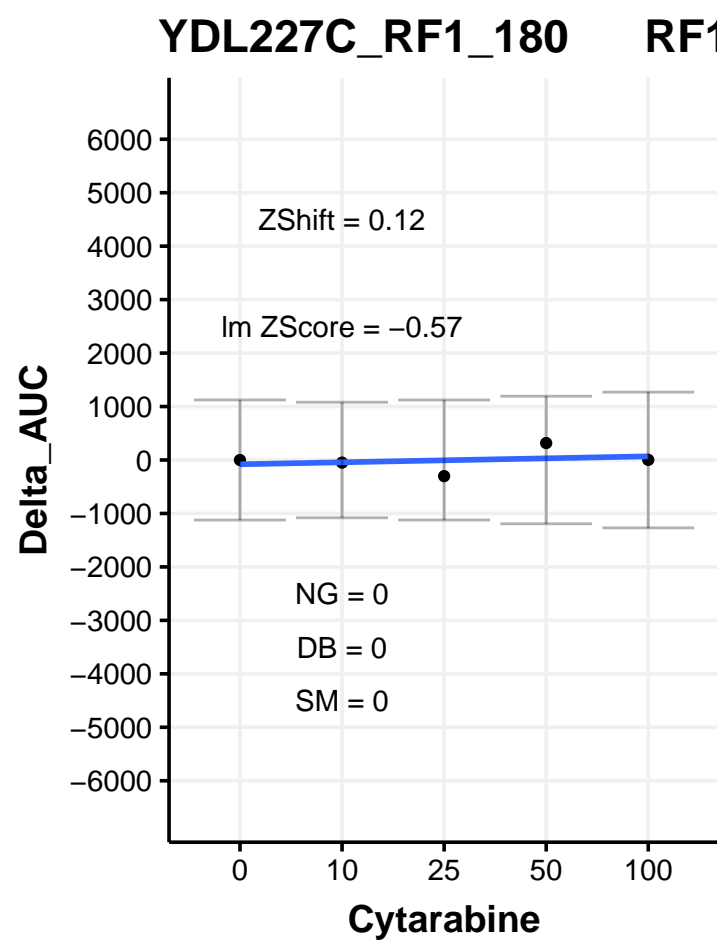

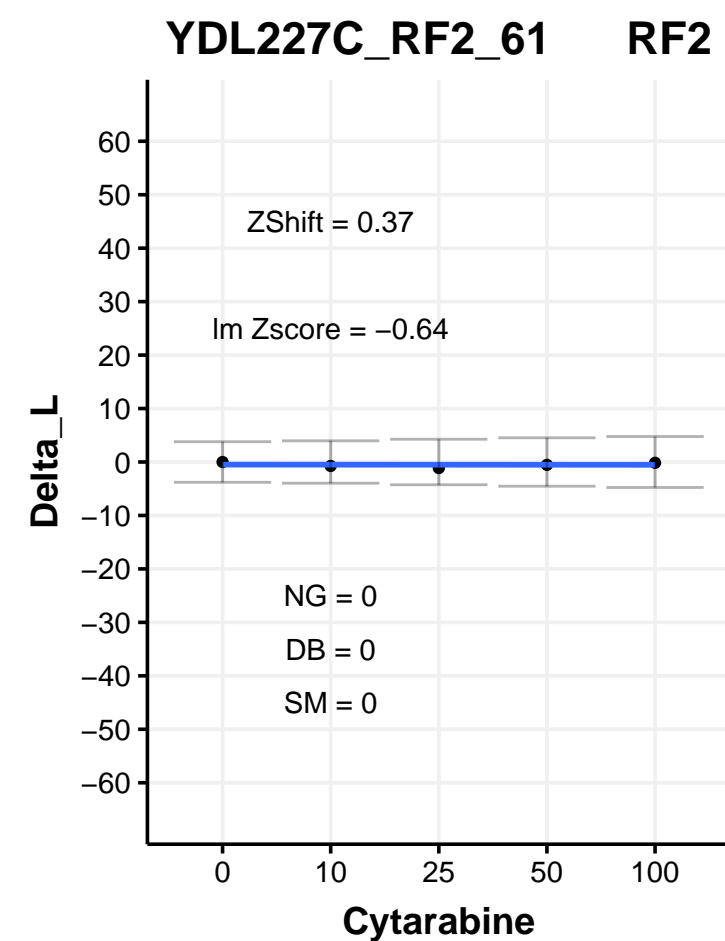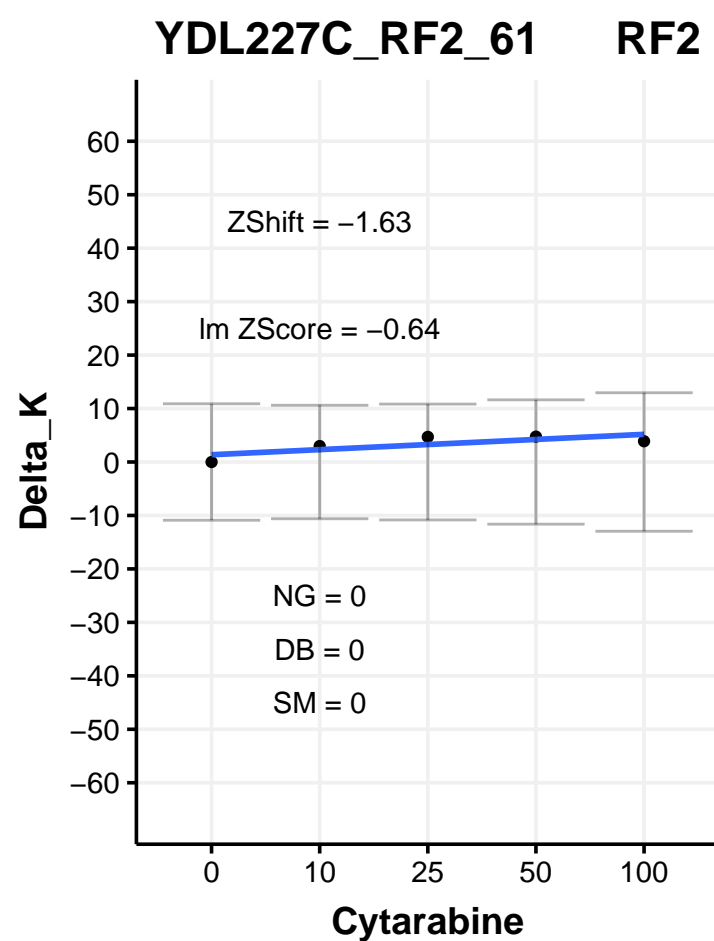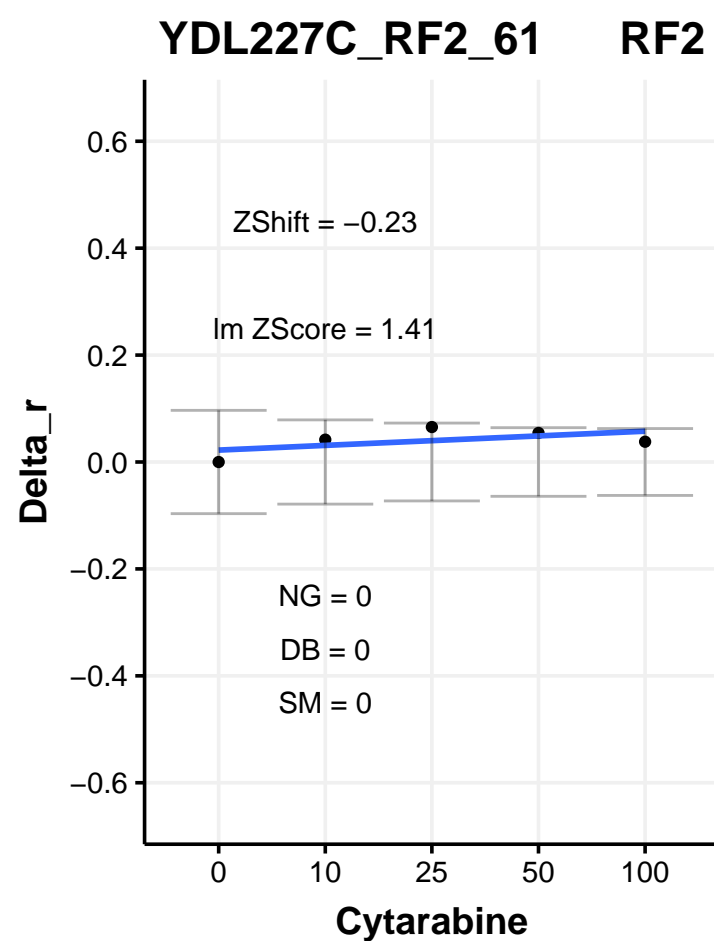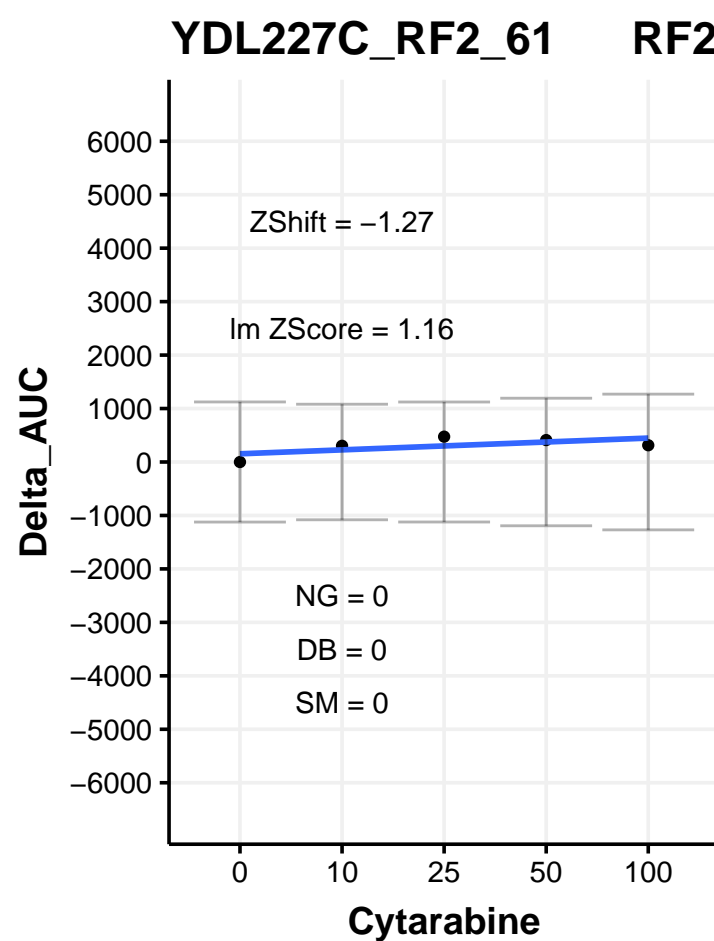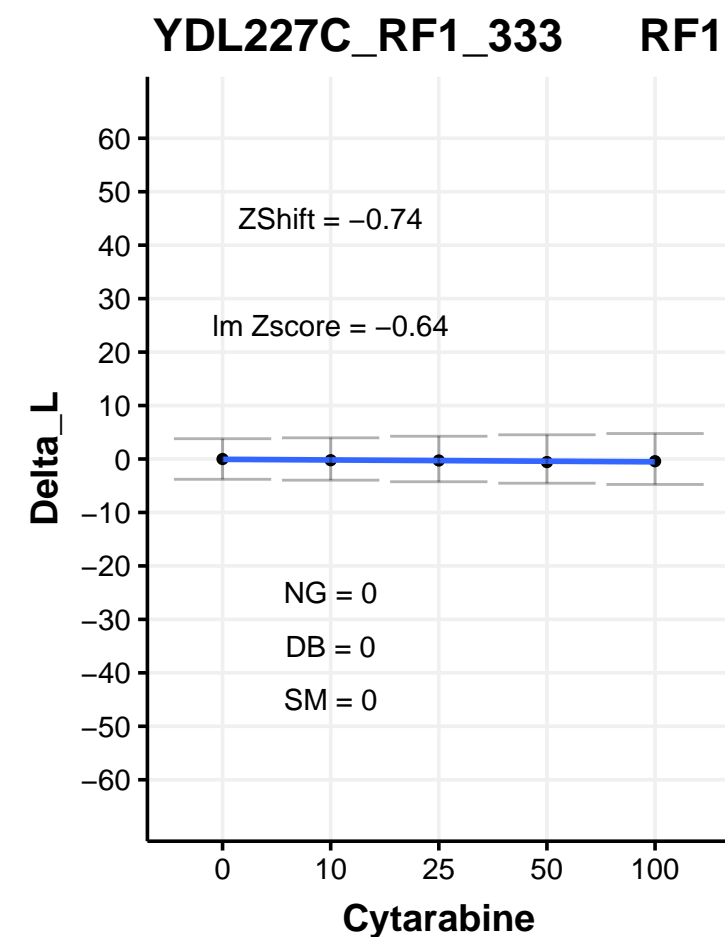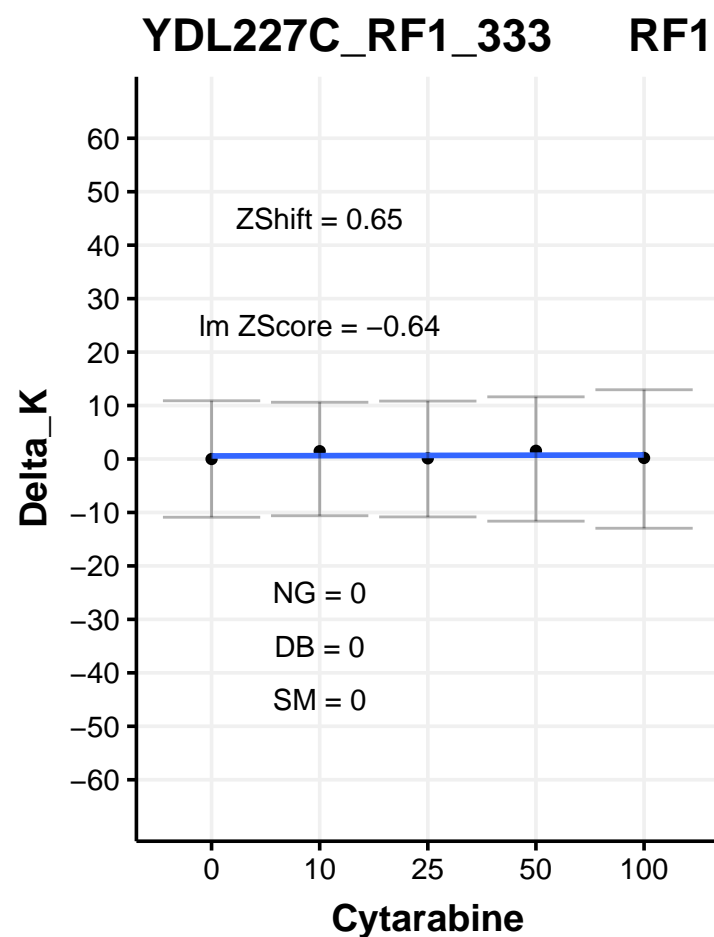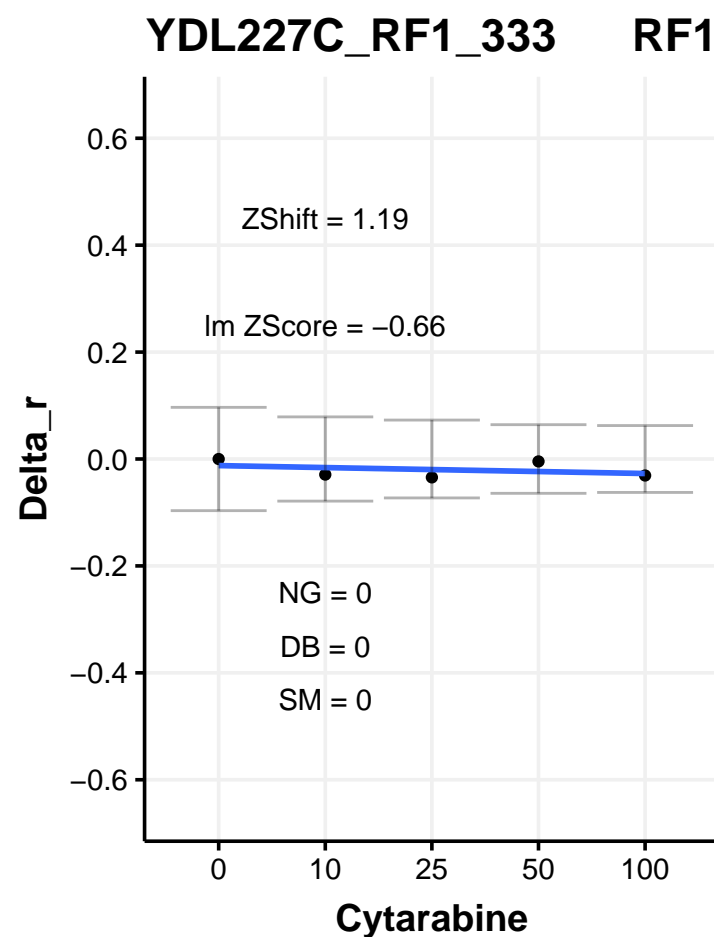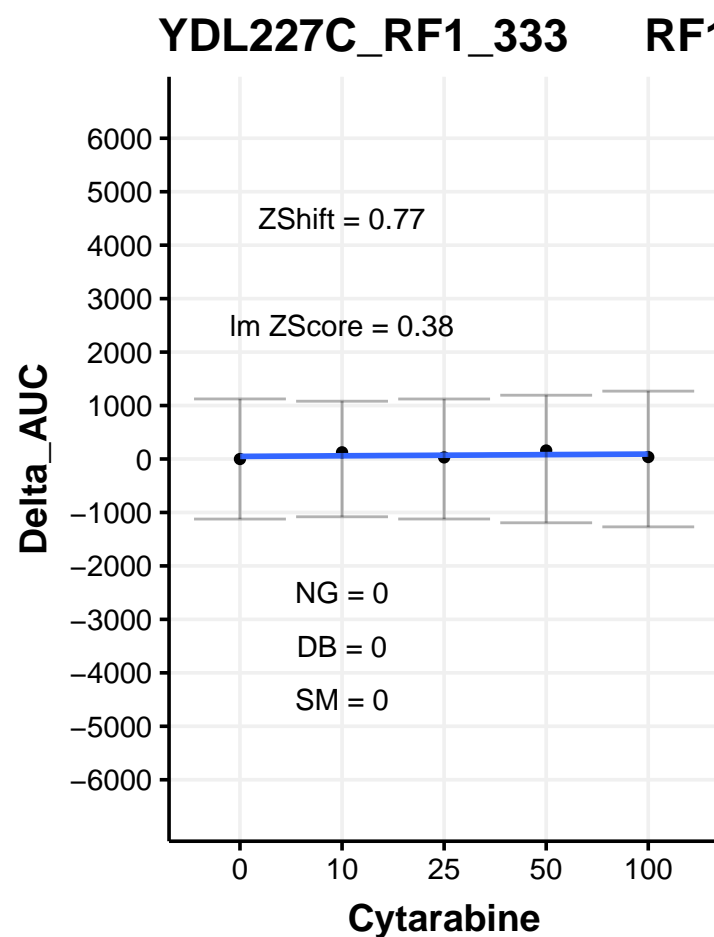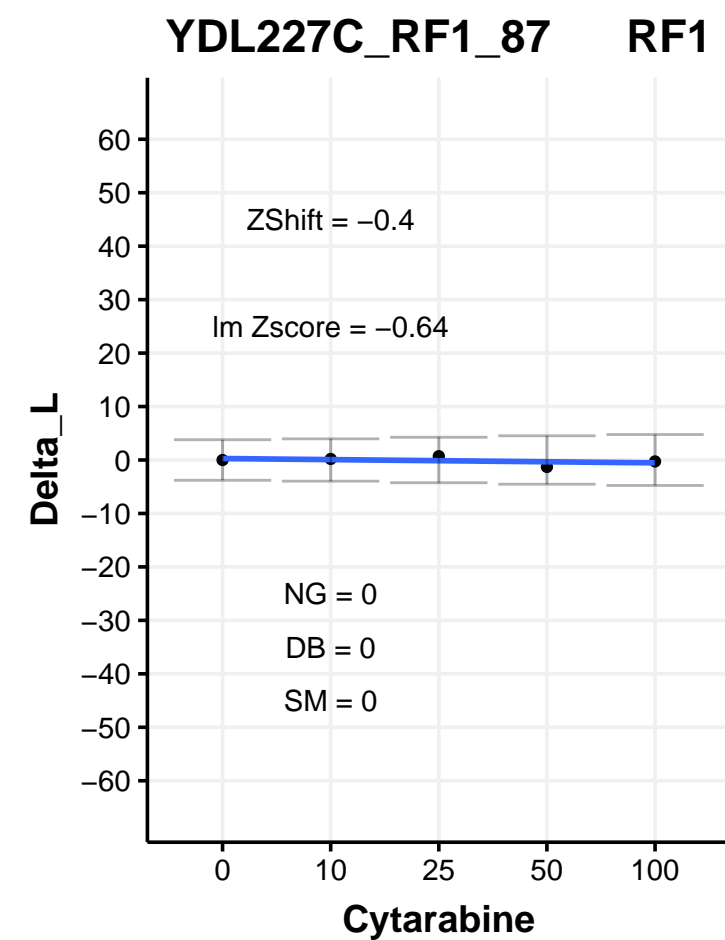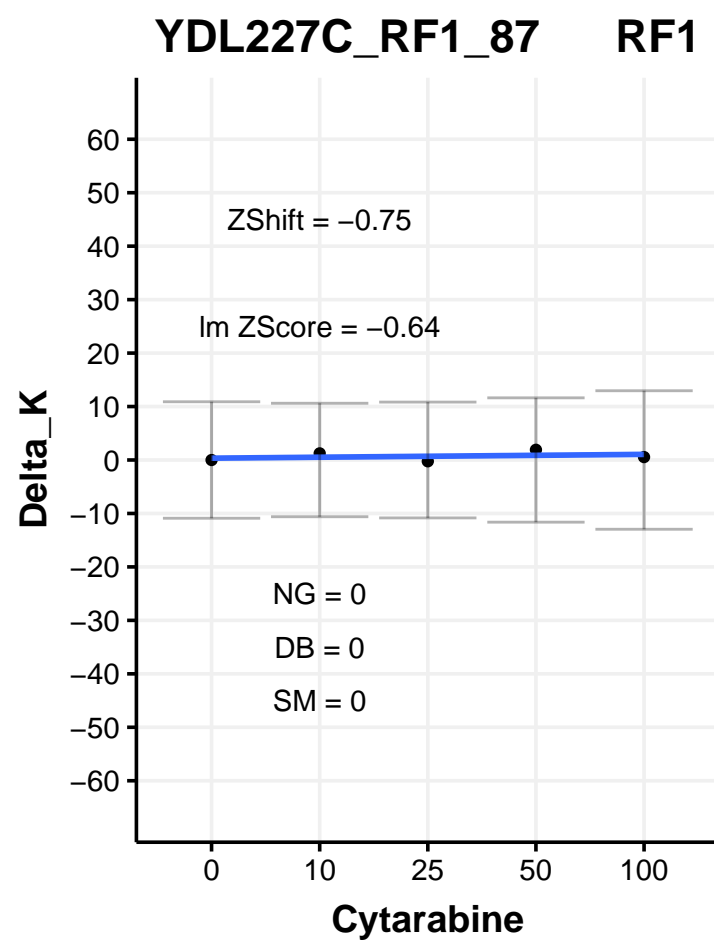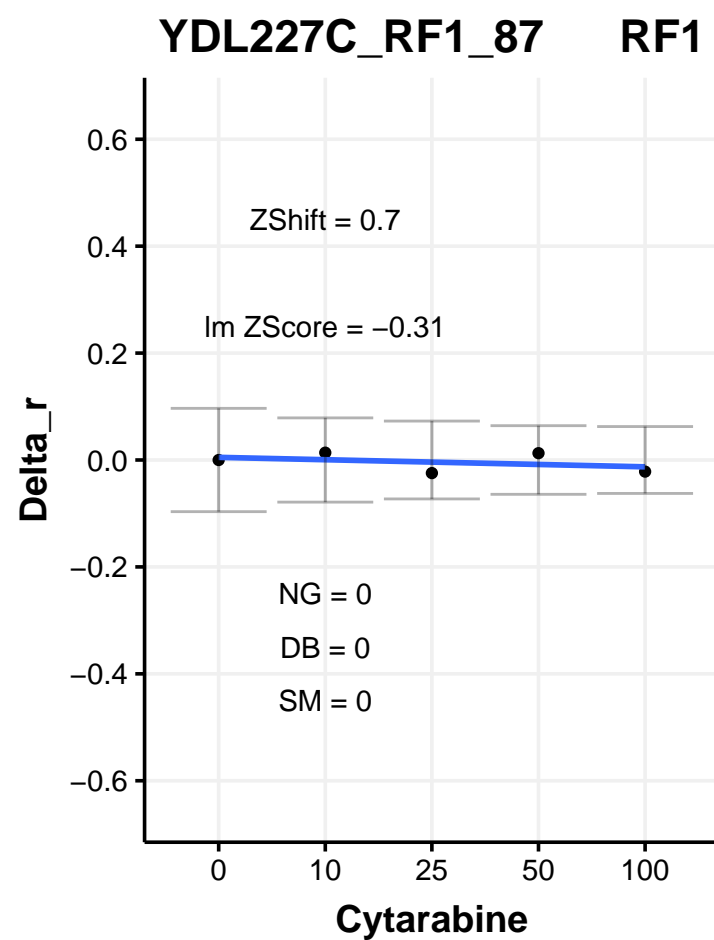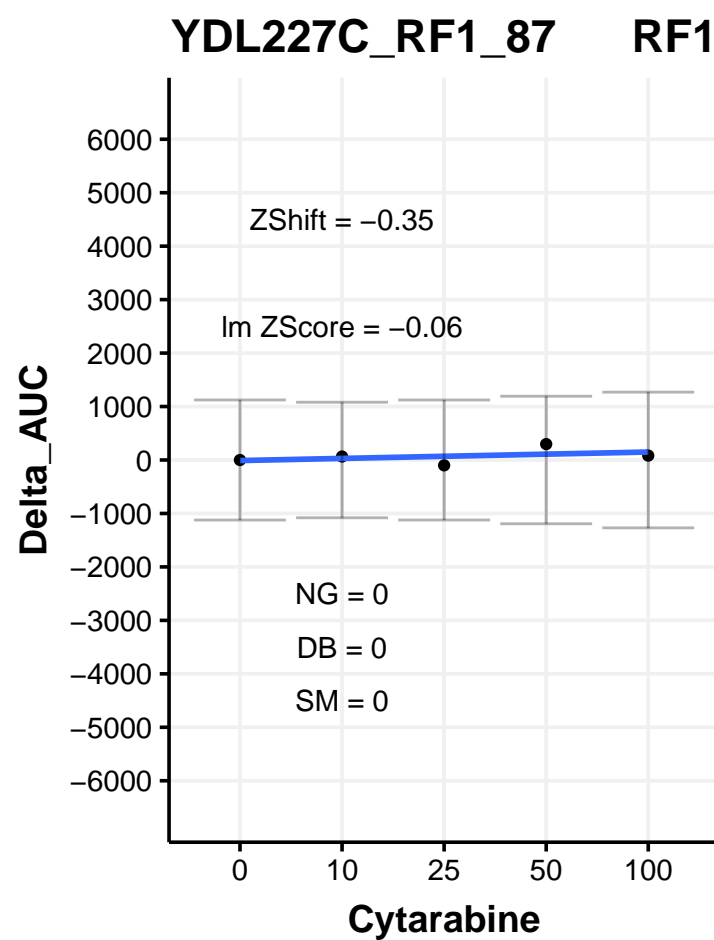

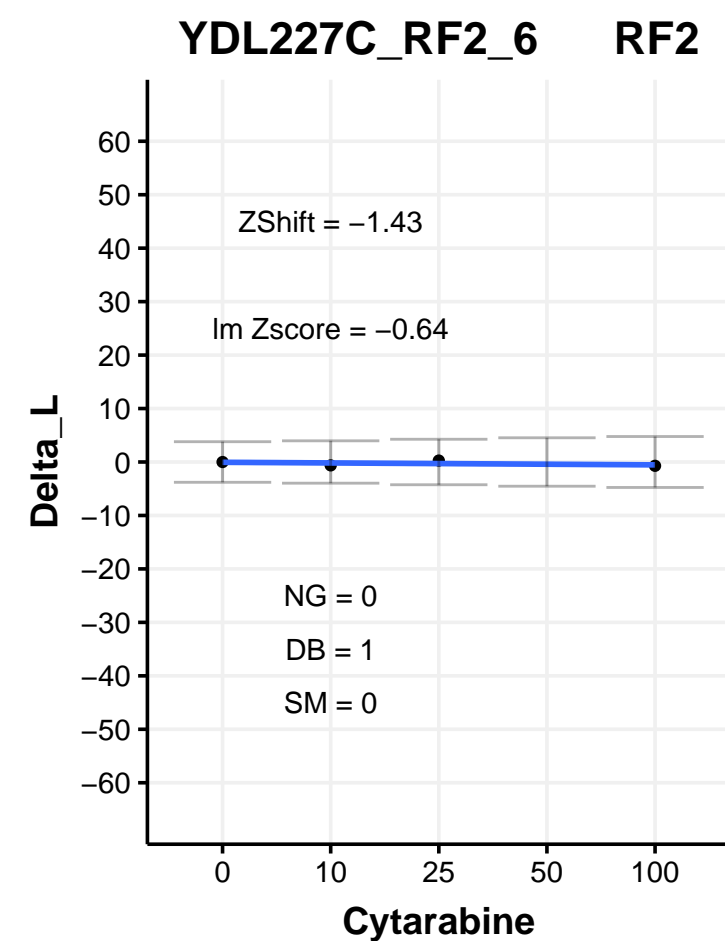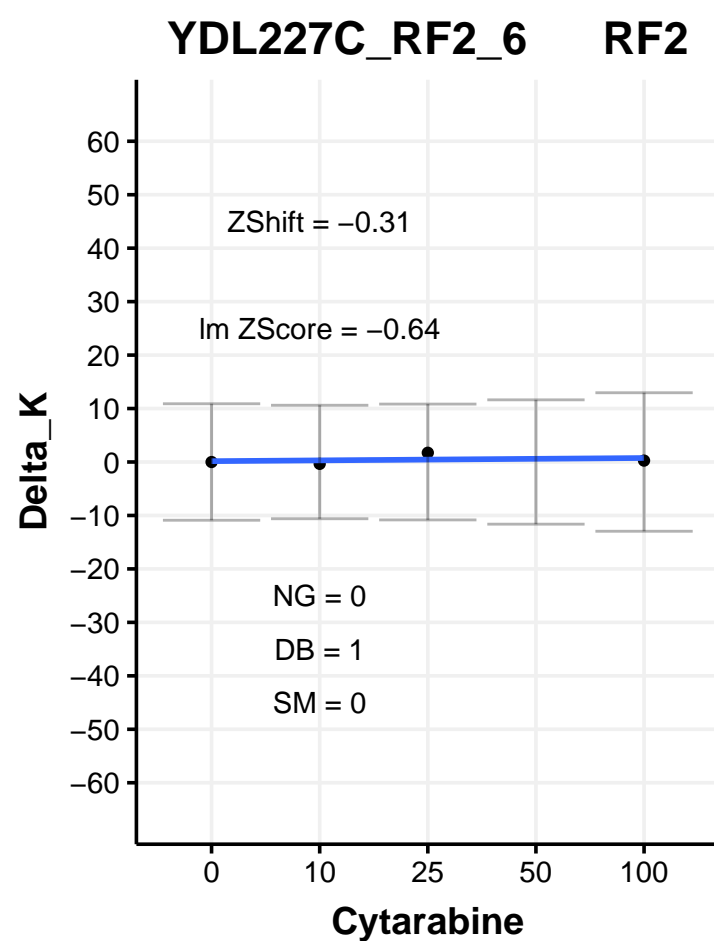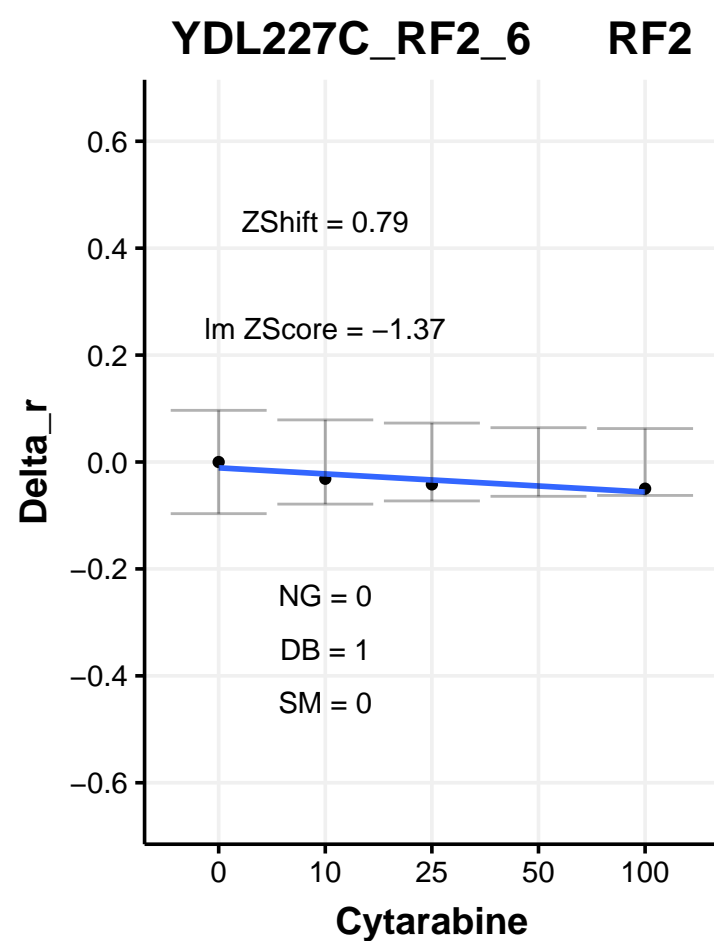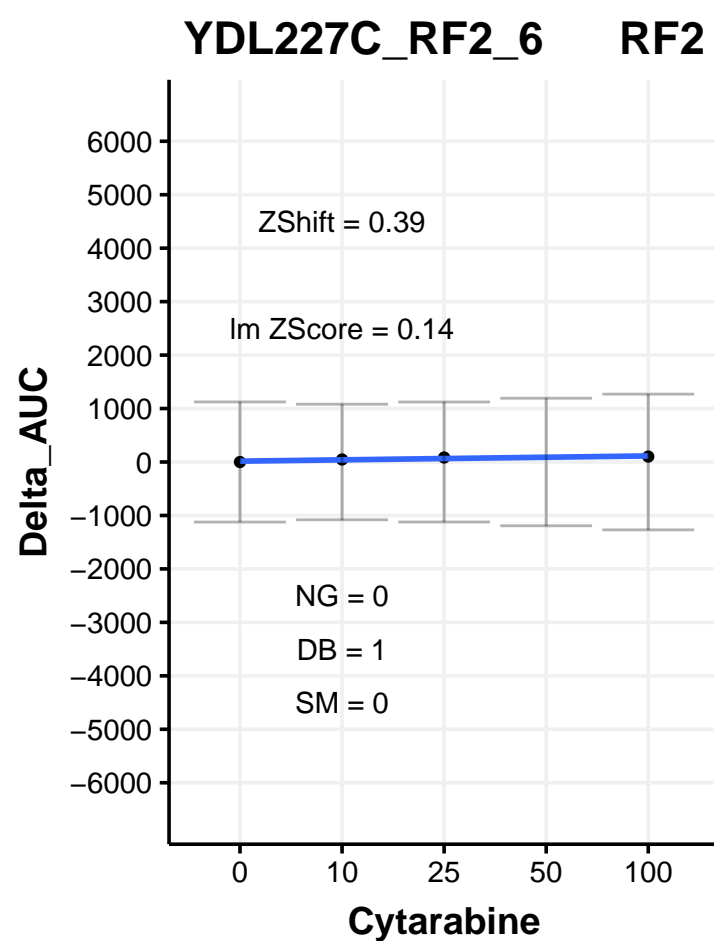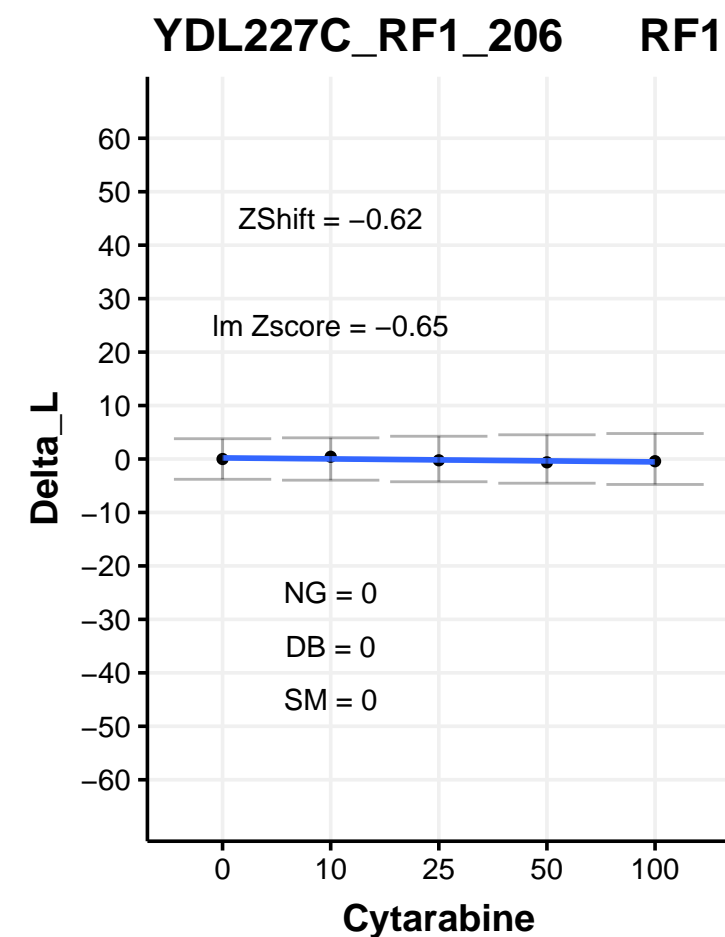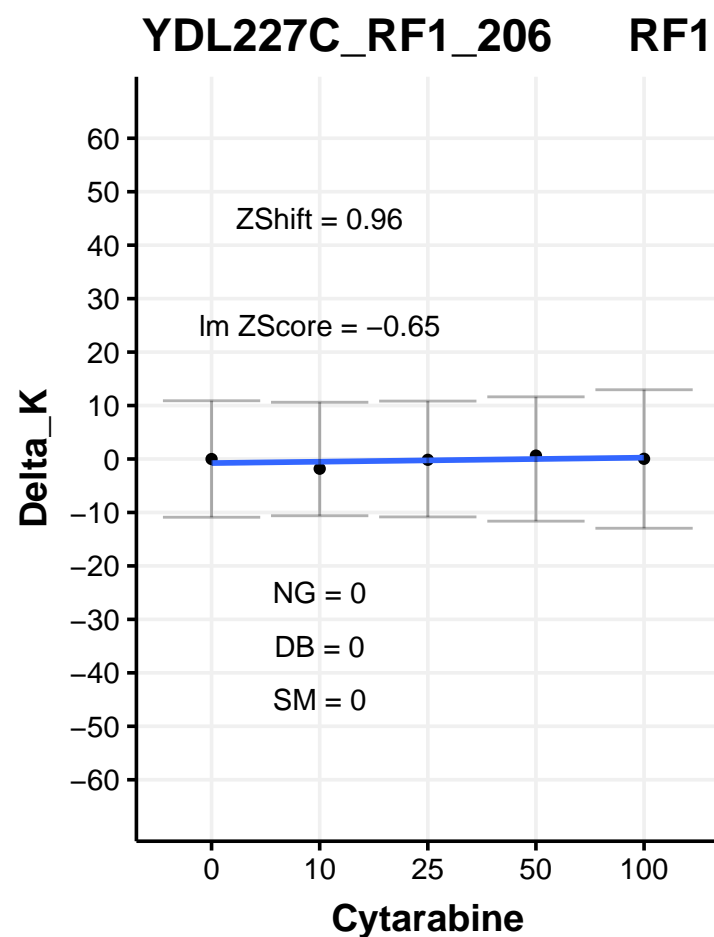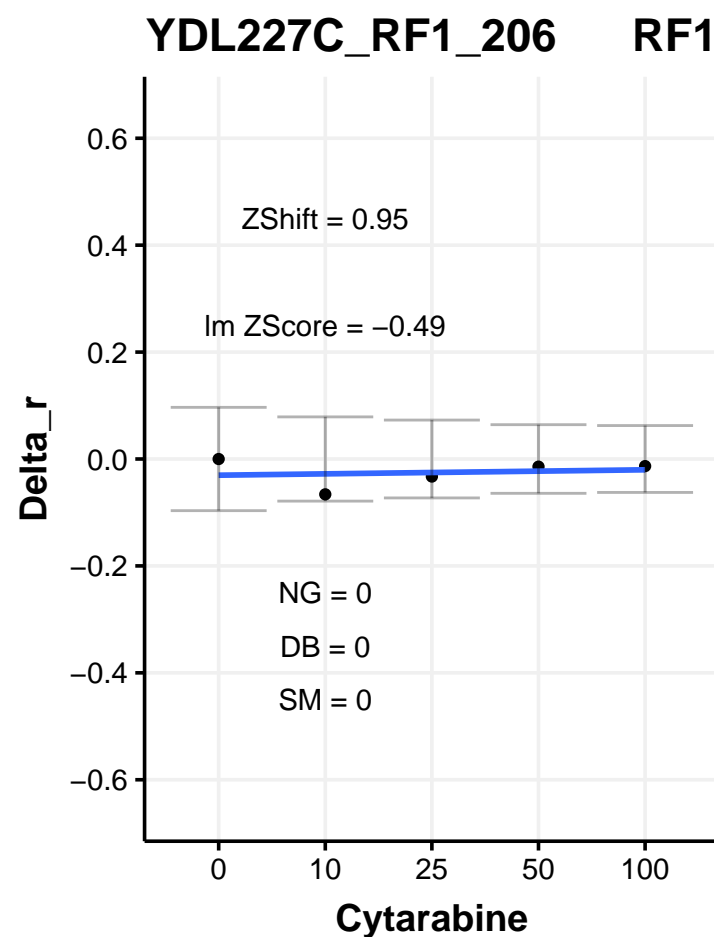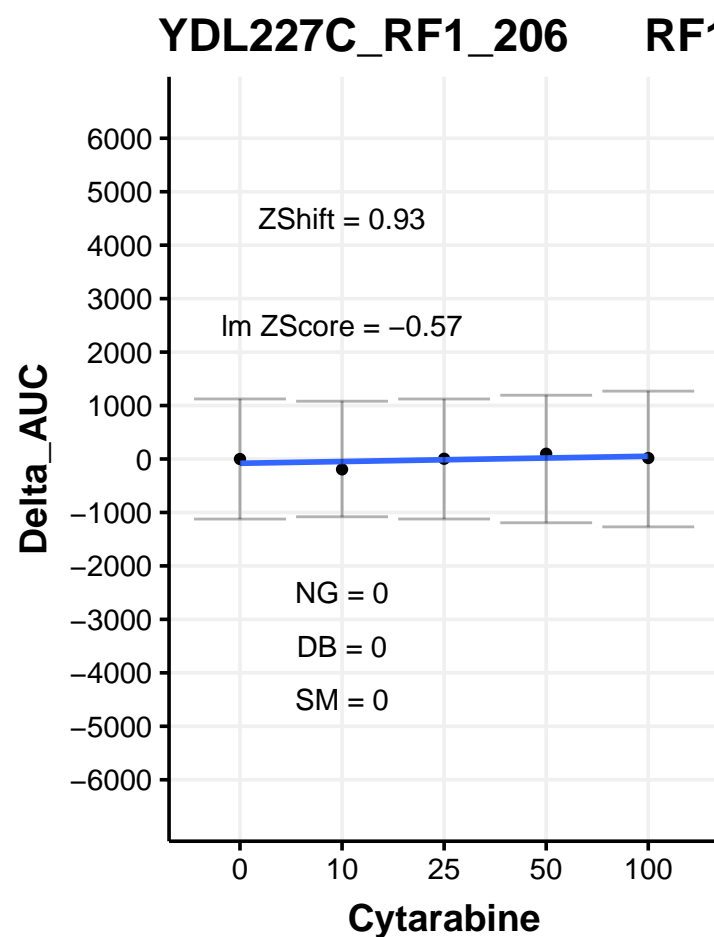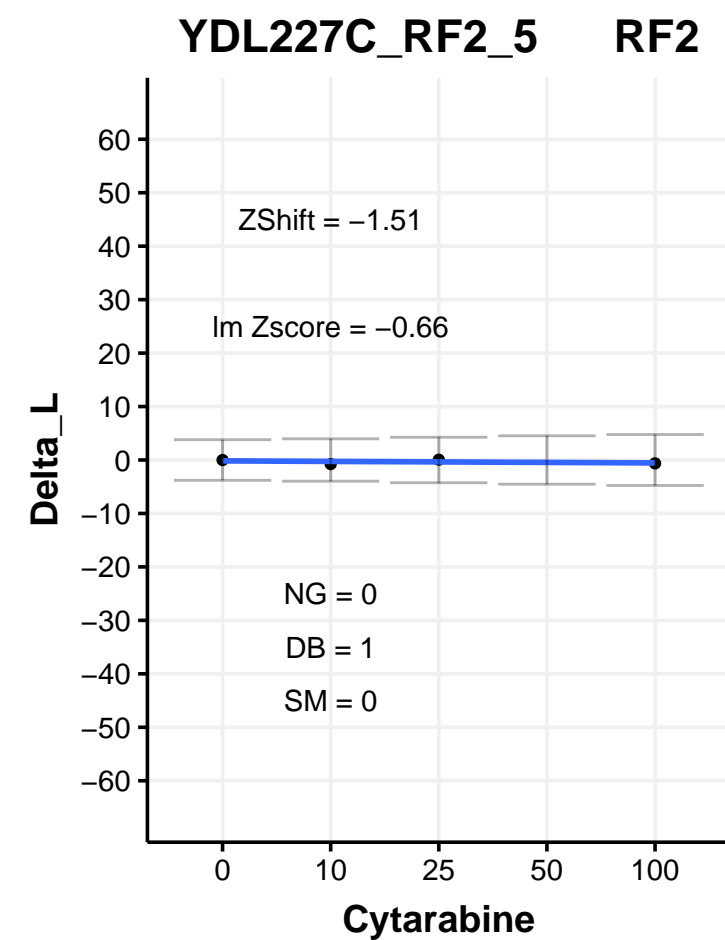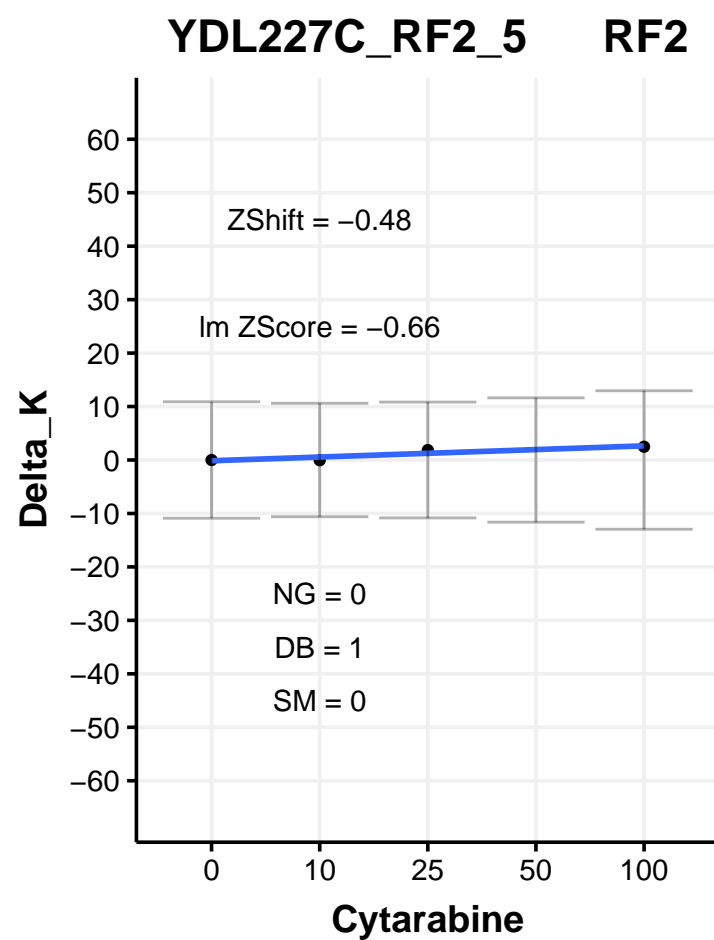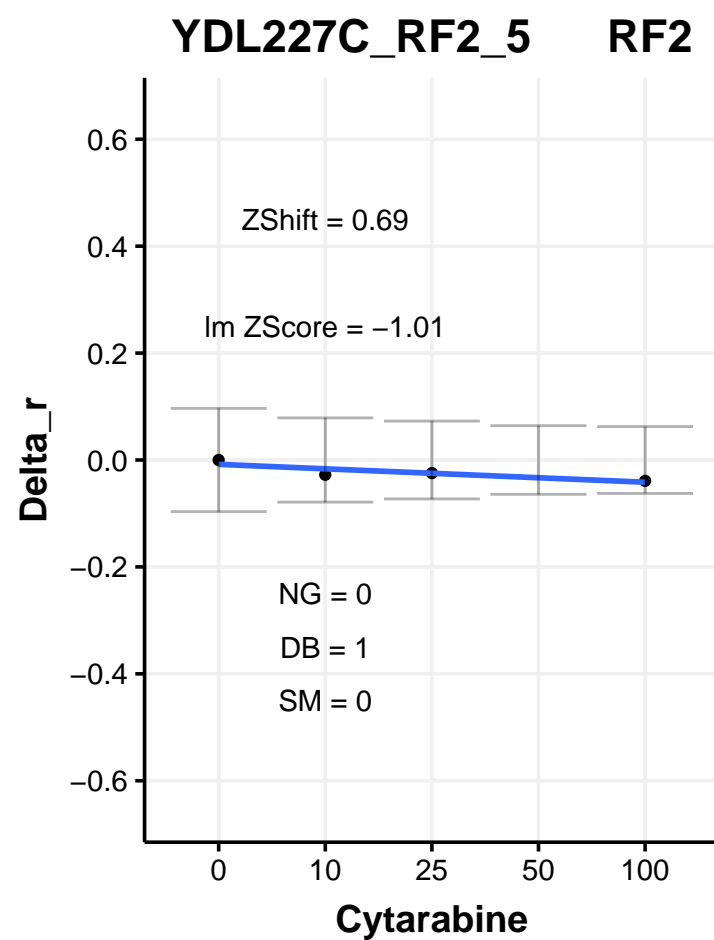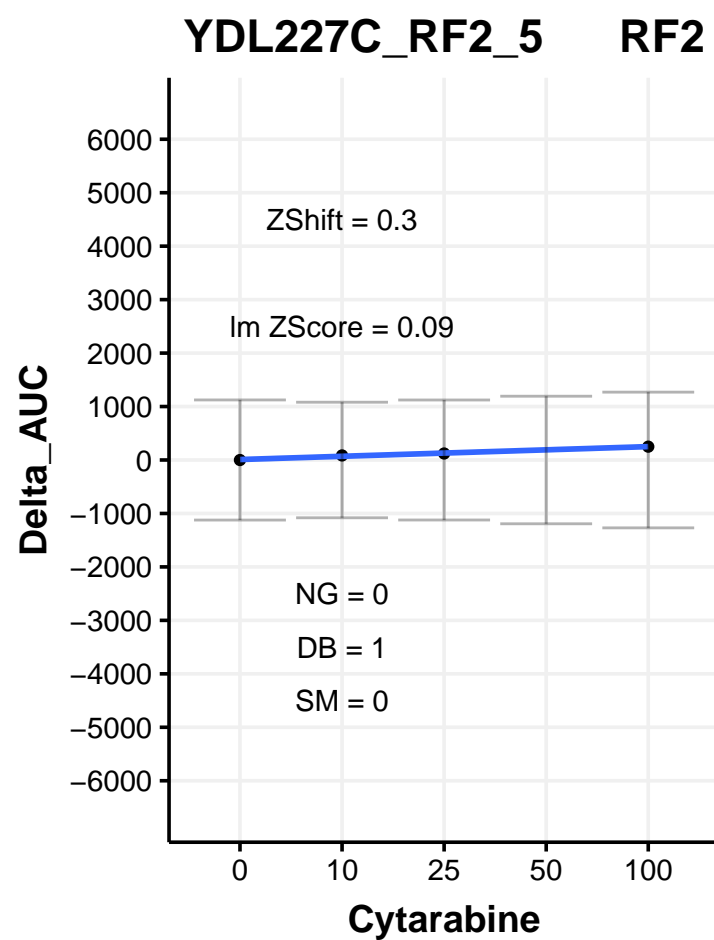

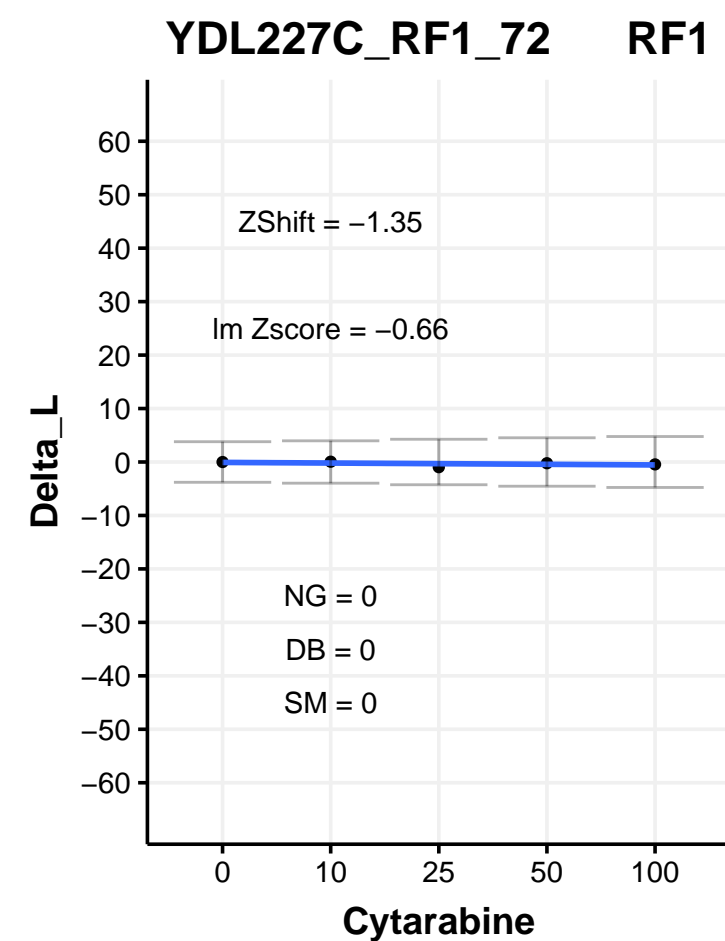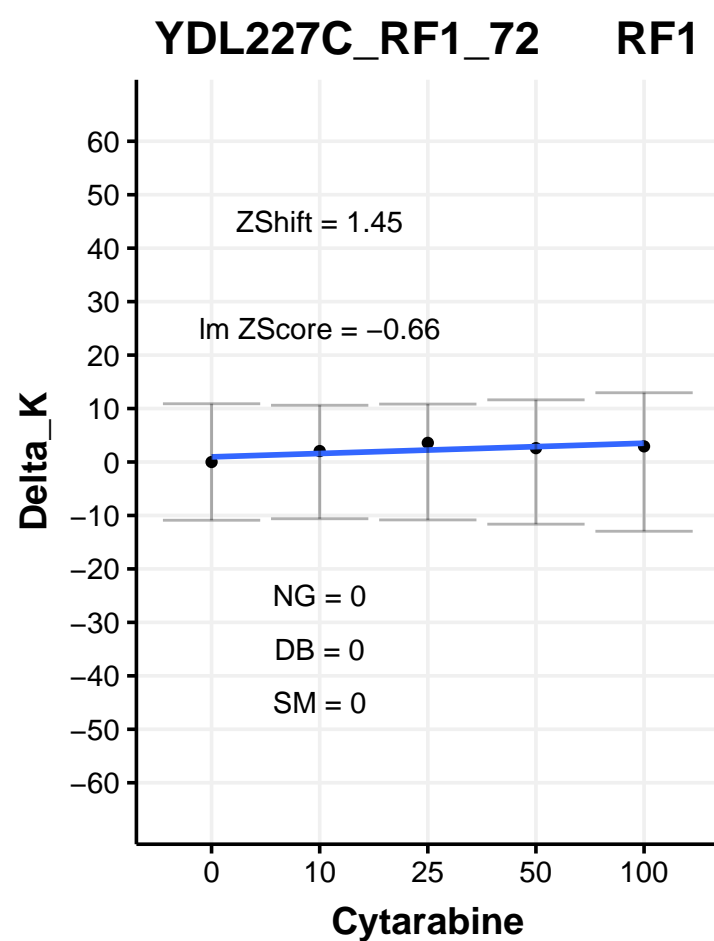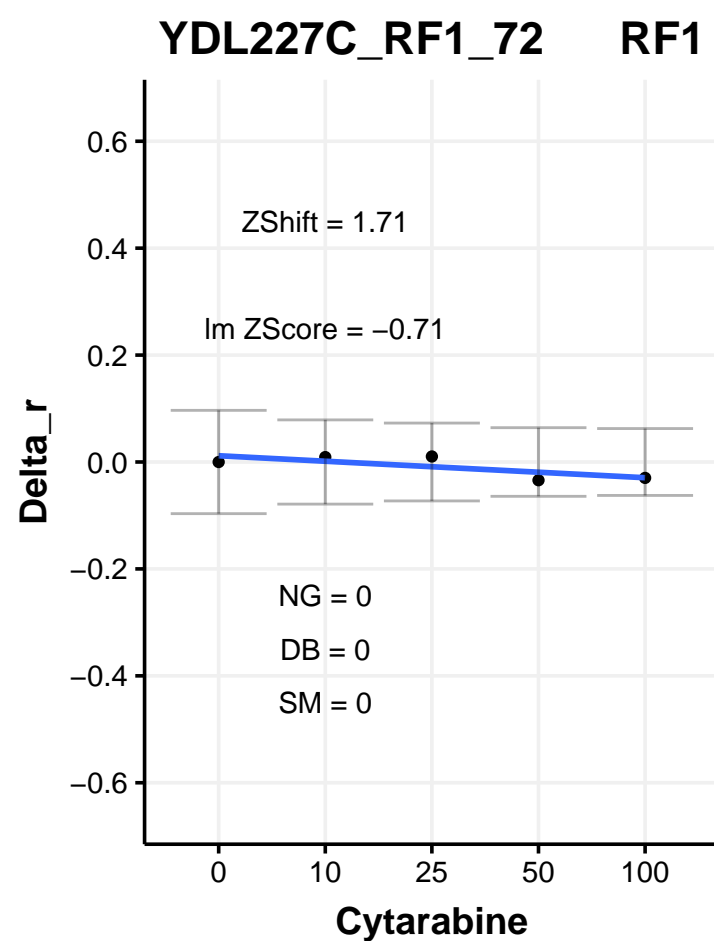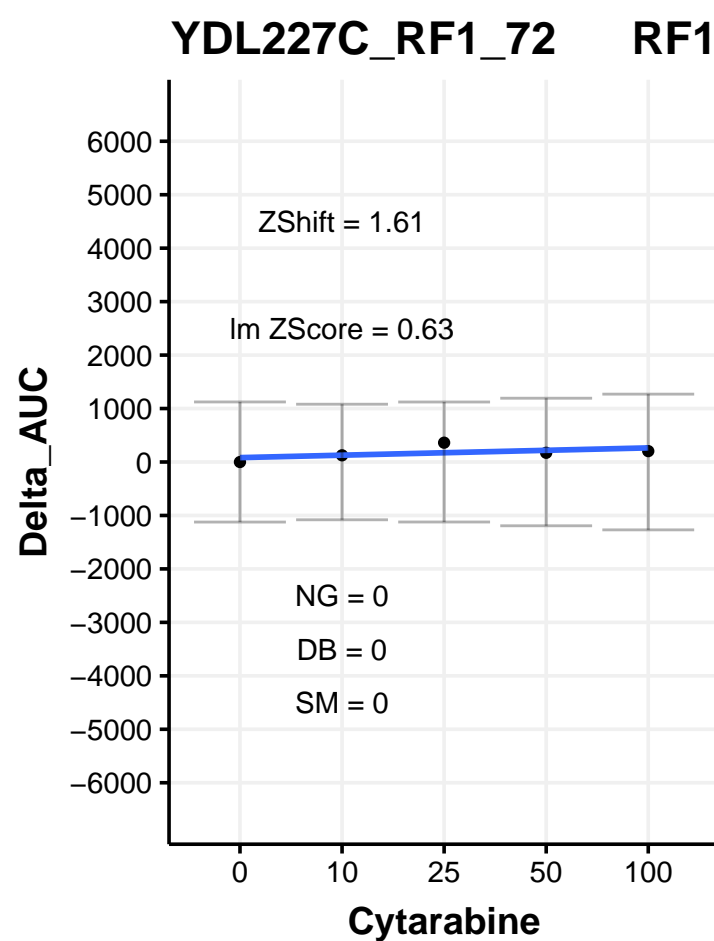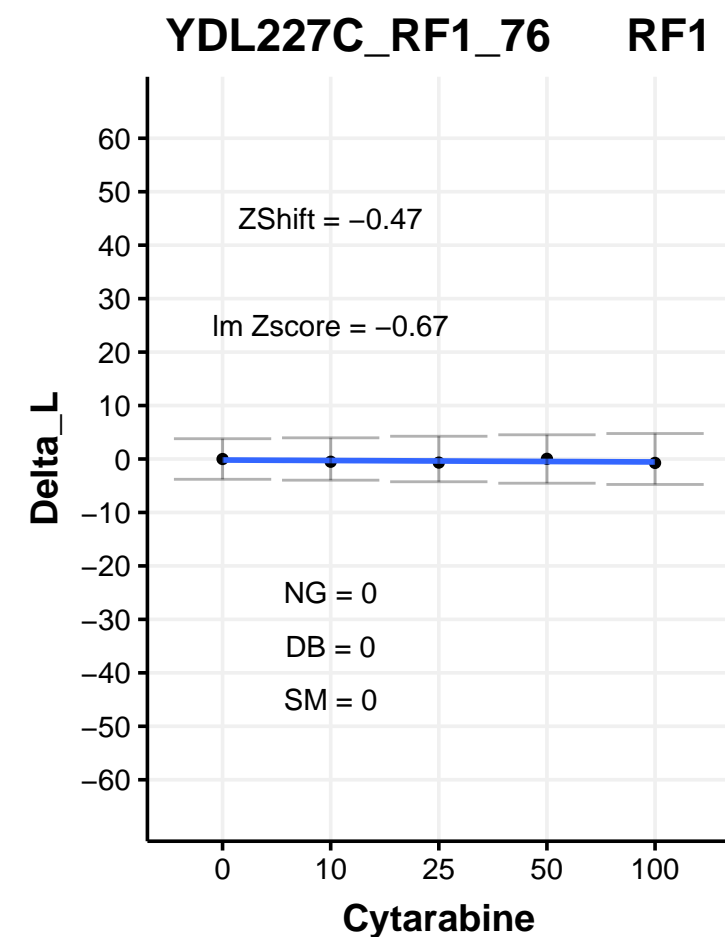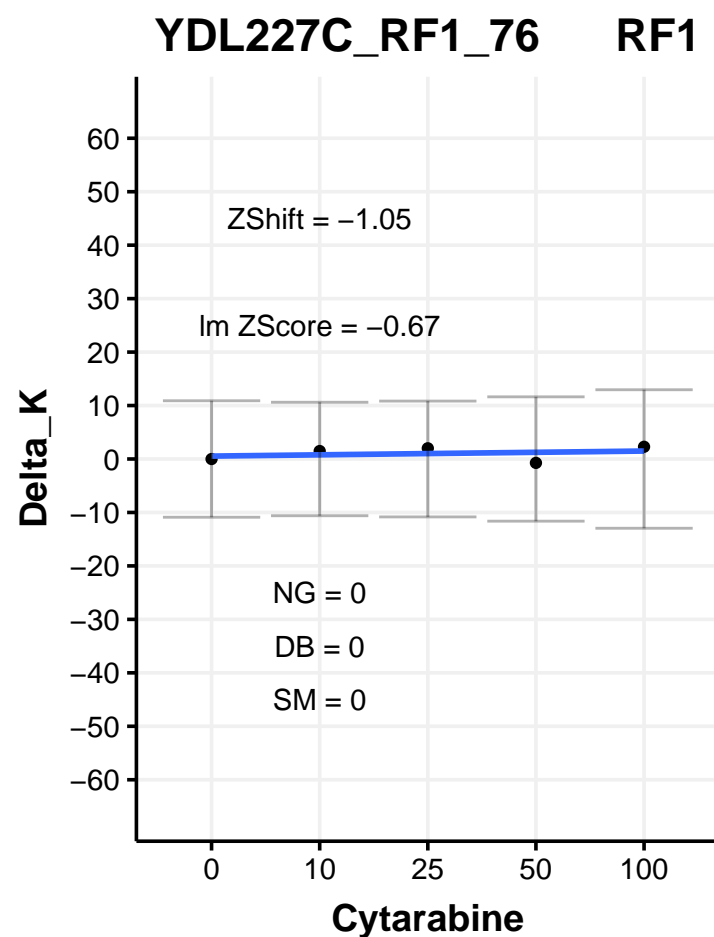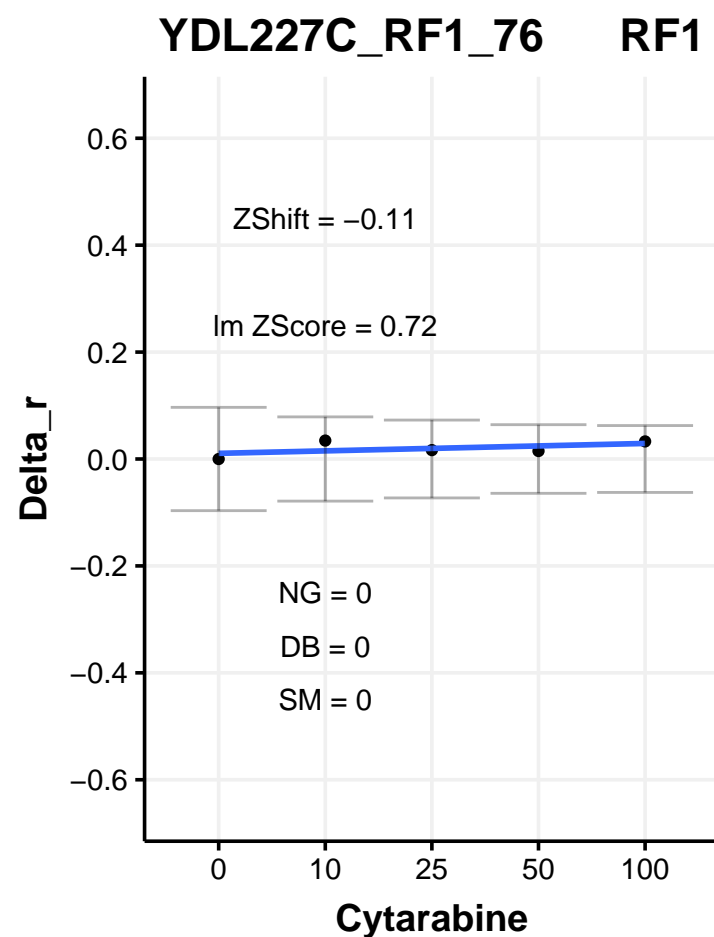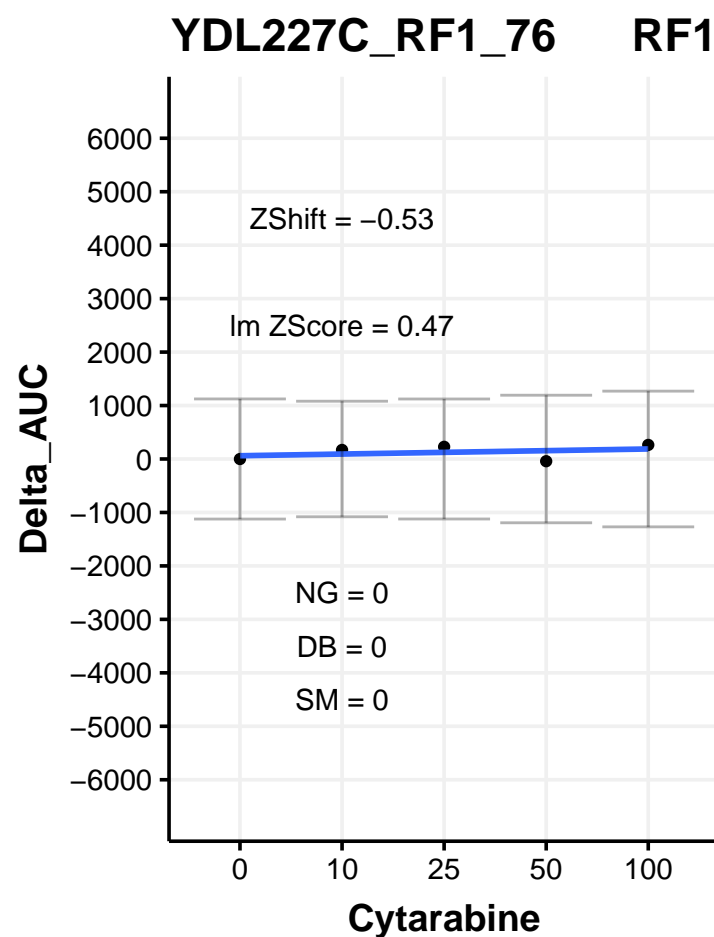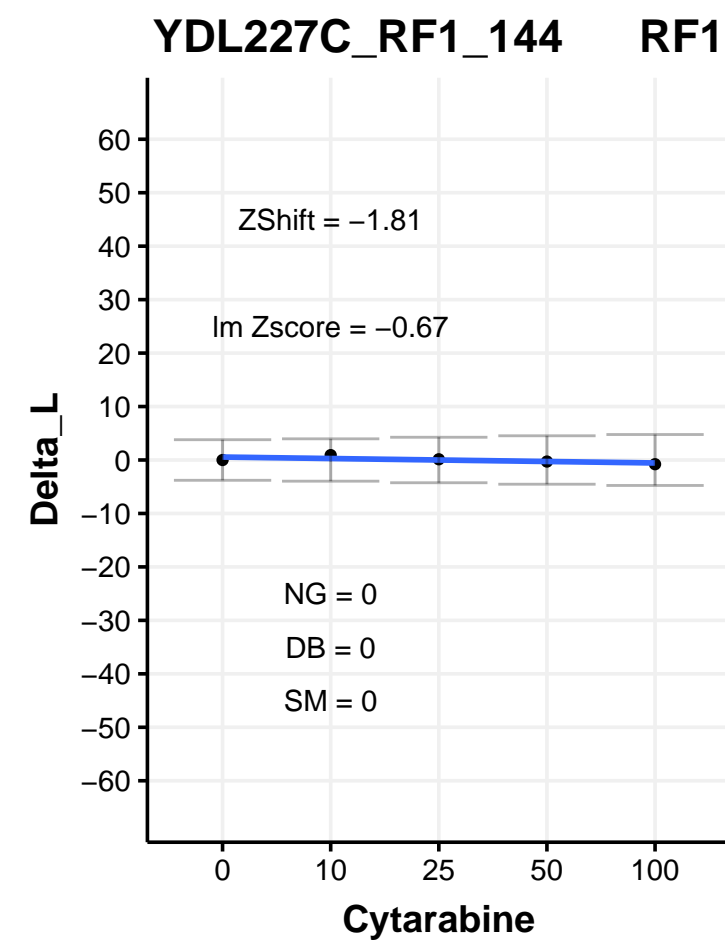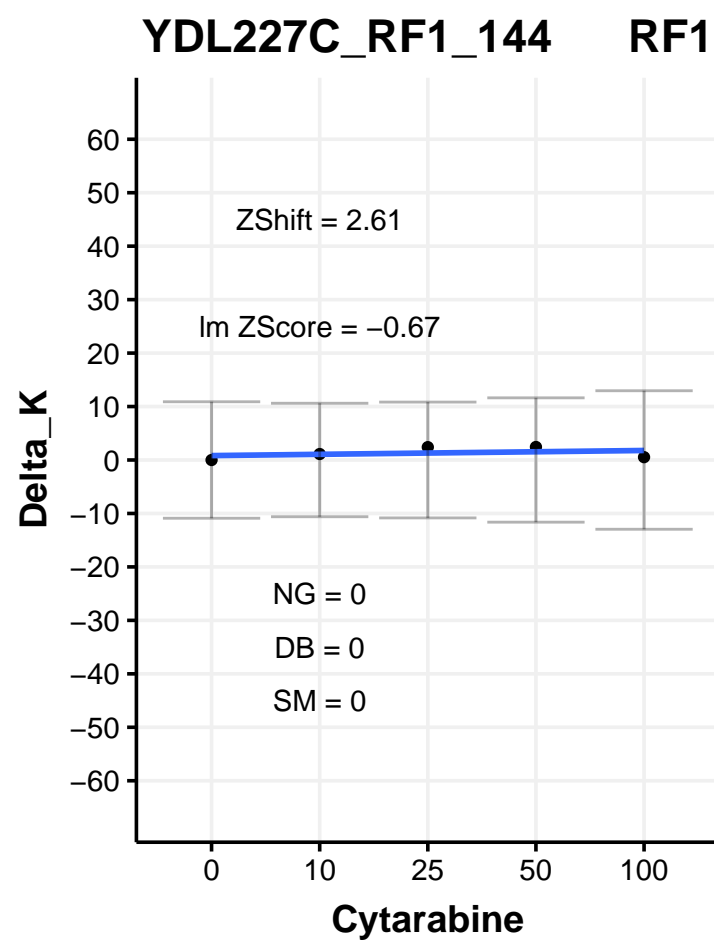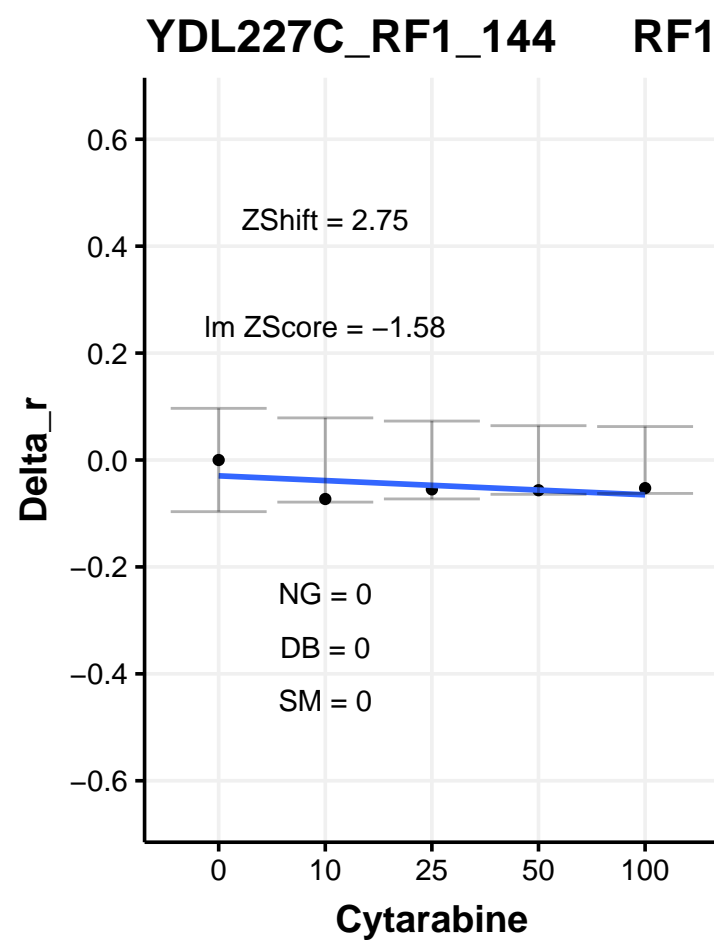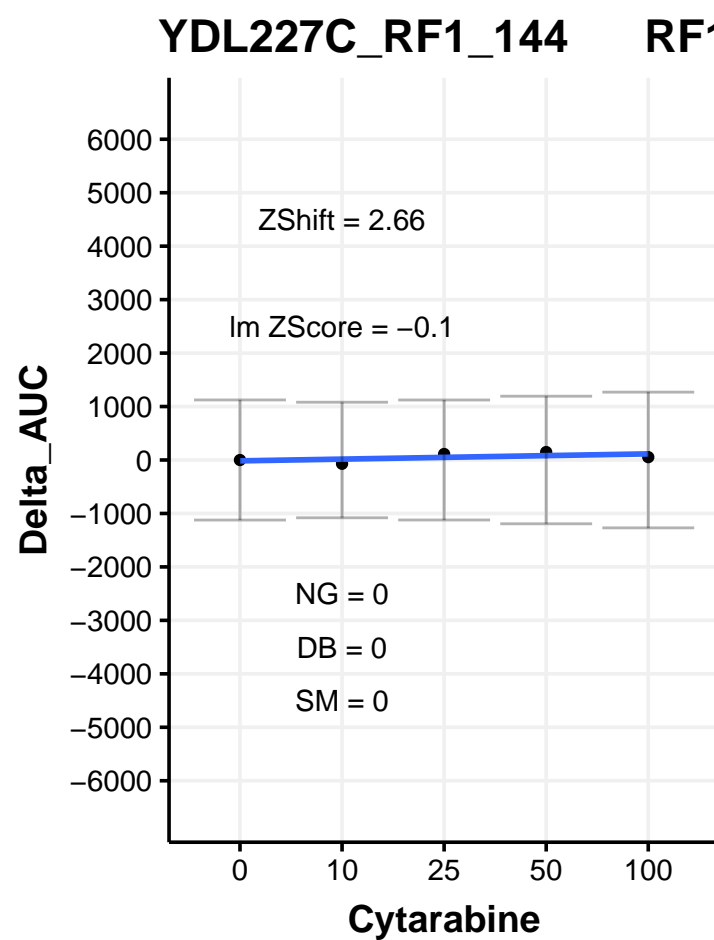



YDL227C\_RF2\_86 RF2

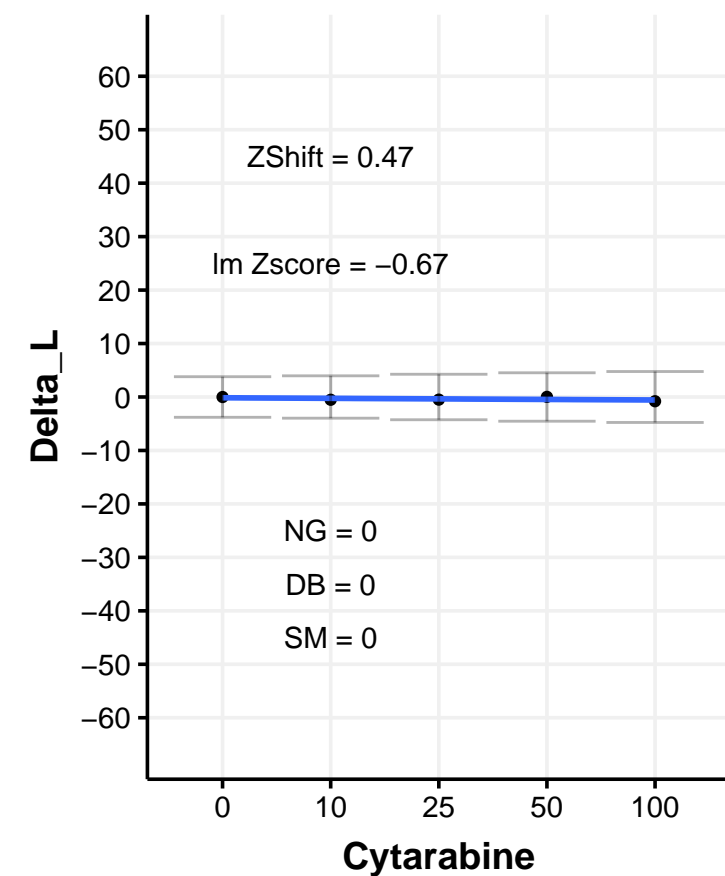

YDL227C\_RF2\_86 RF2

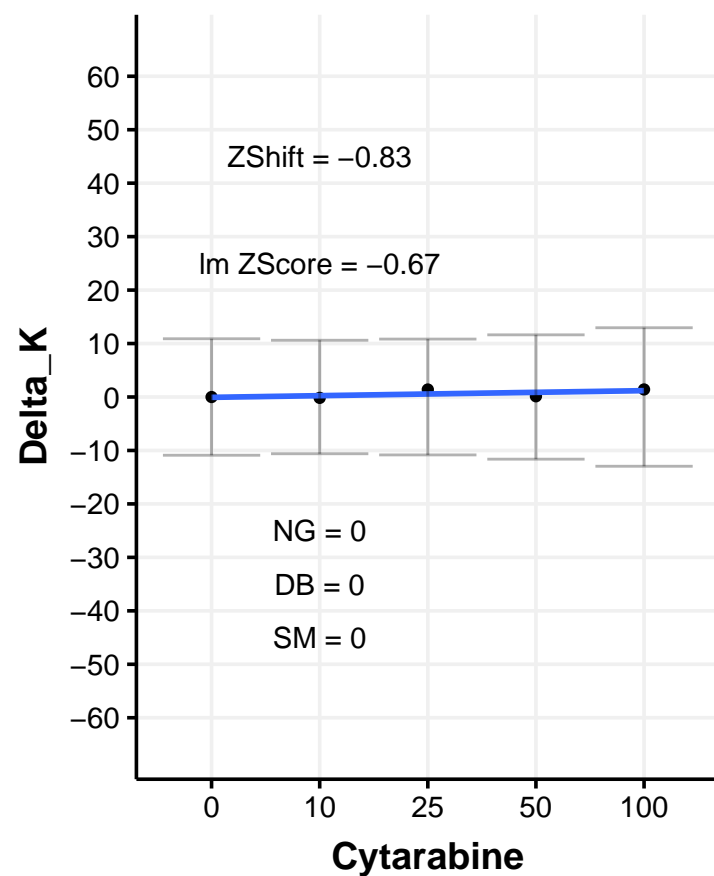

YDL227C\_RF2\_86 RF2

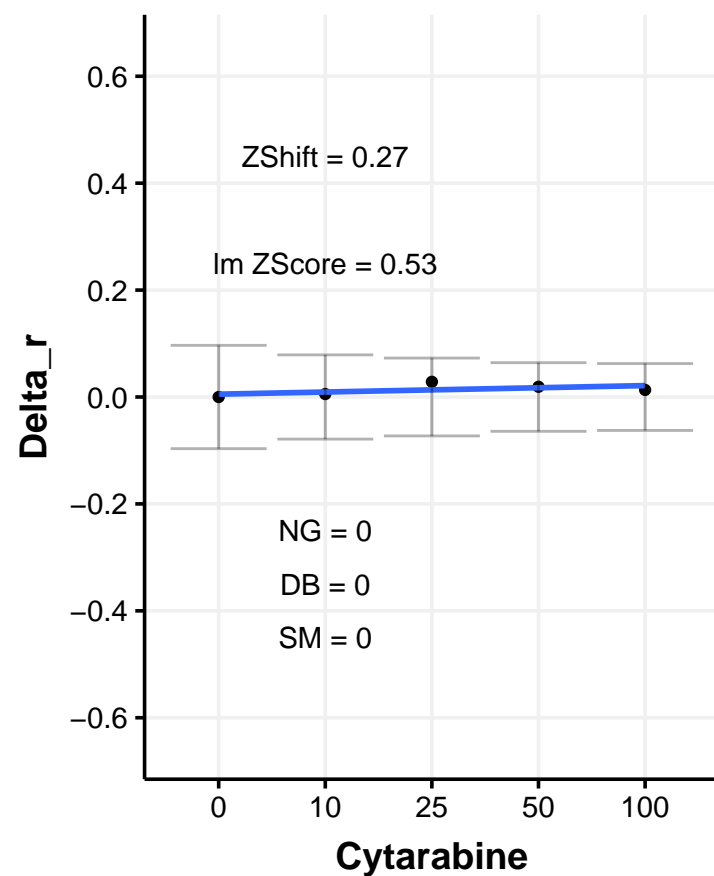

YDL227C\_RF2\_86 RF2

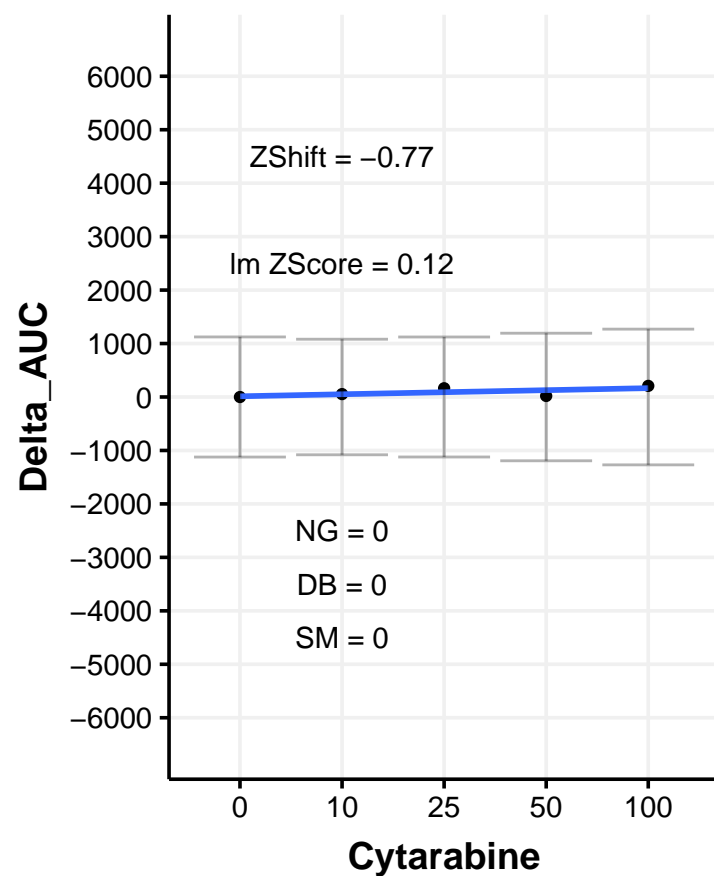

YDL227C\_RF2\_197 RF2

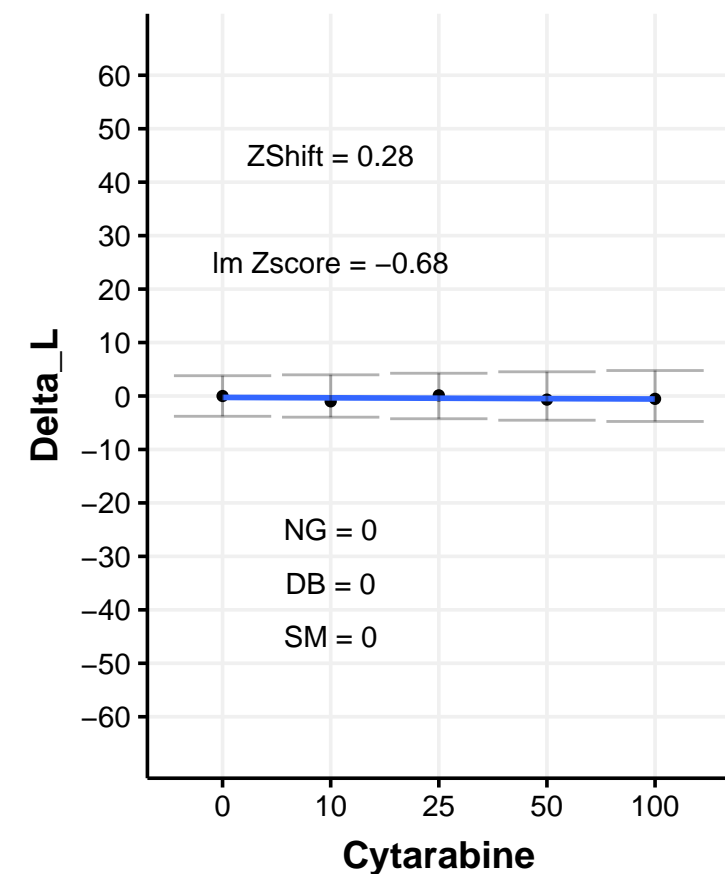

YDL227C\_RF2\_197 RF2

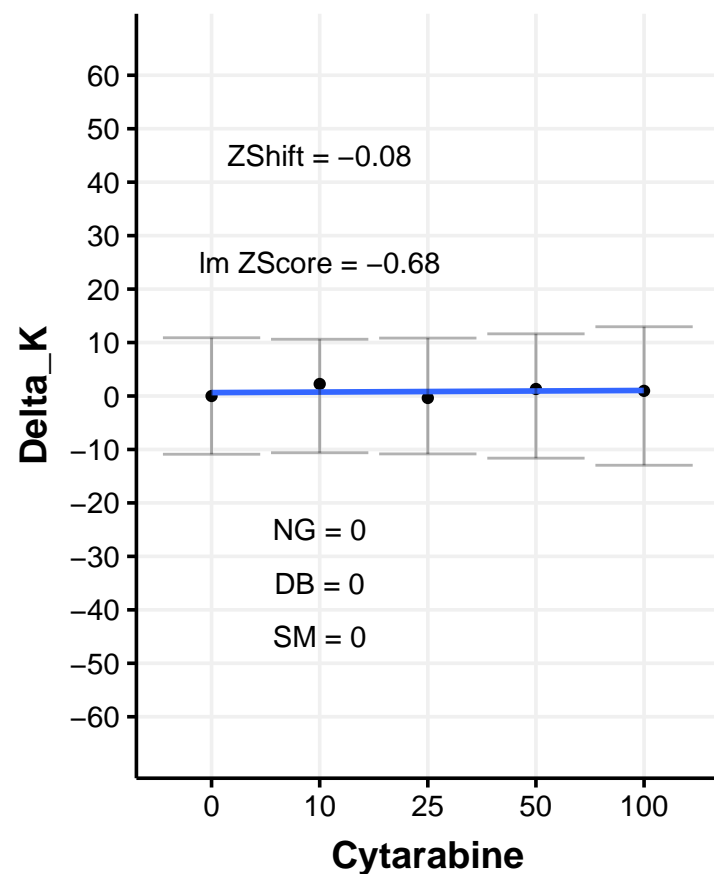

YDL227C\_RF2\_197 RF2

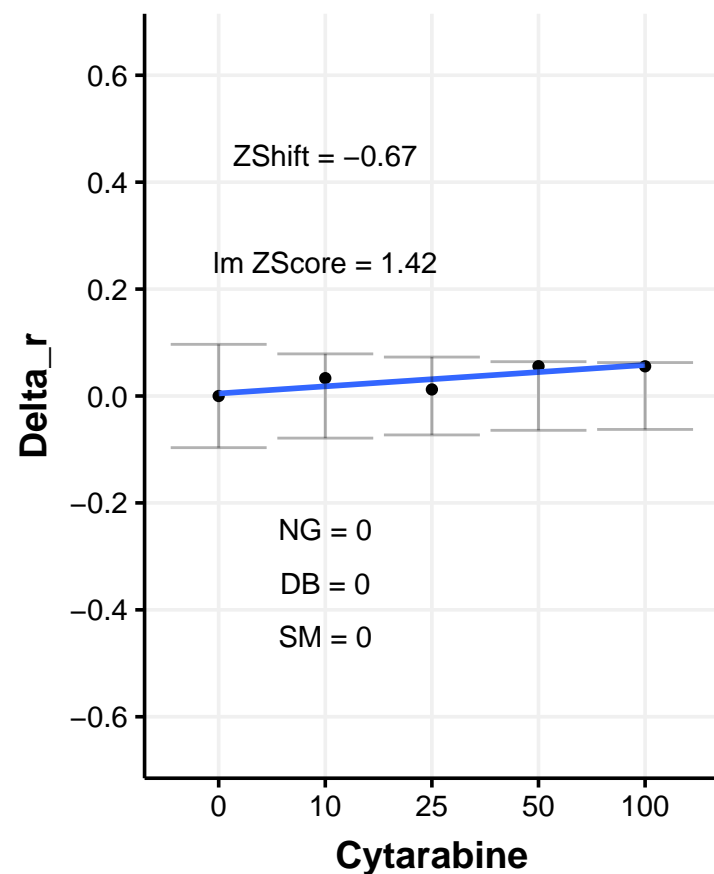

YDL227C\_RF2\_197 RF2

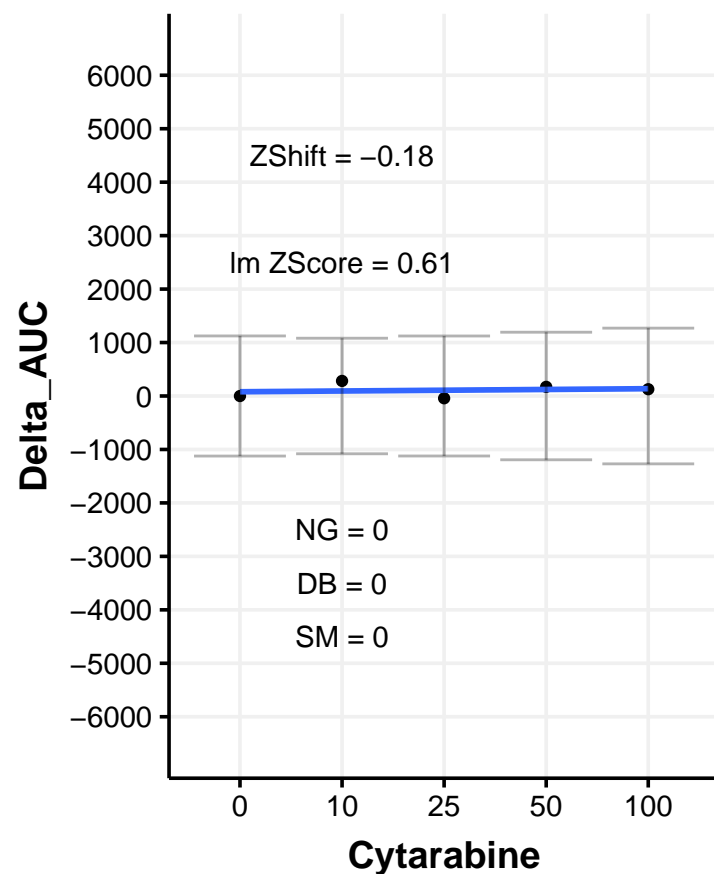

YDL227C\_RF2\_369 RF2

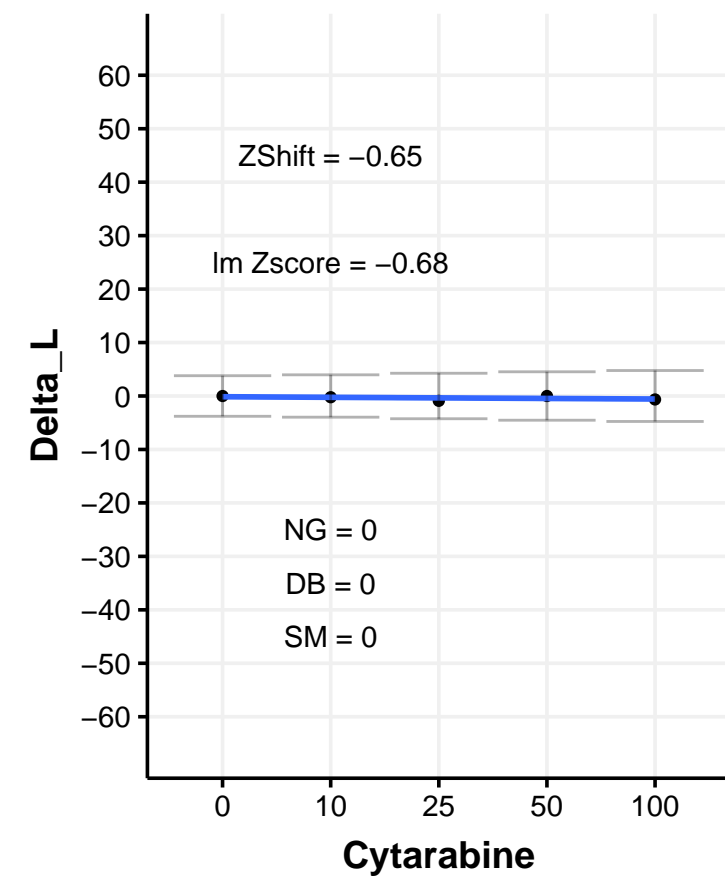

YDL227C\_RF2\_369 RF2

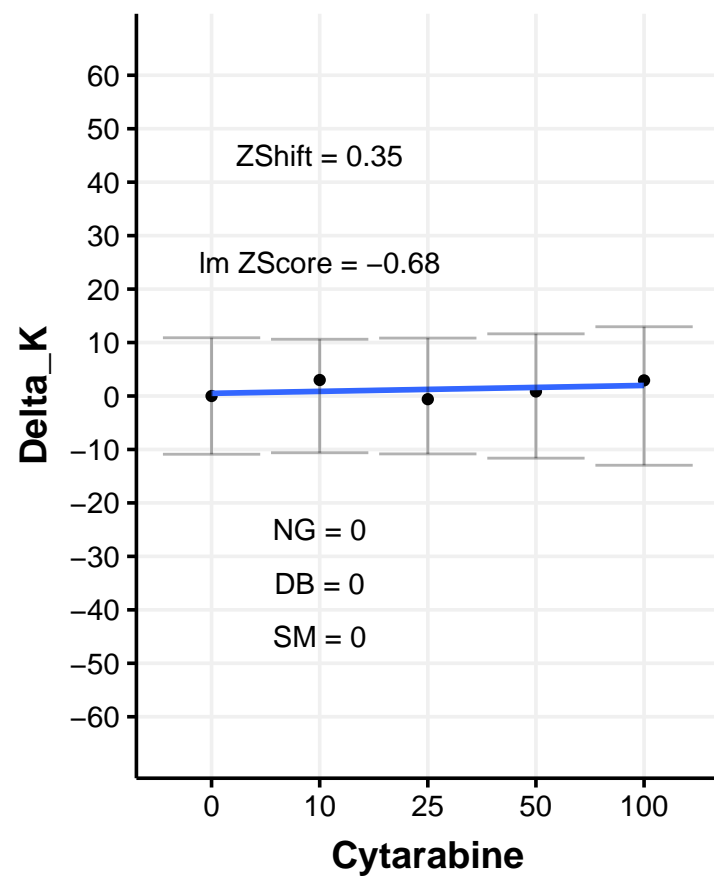

YDL227C\_RF2\_369 RF2

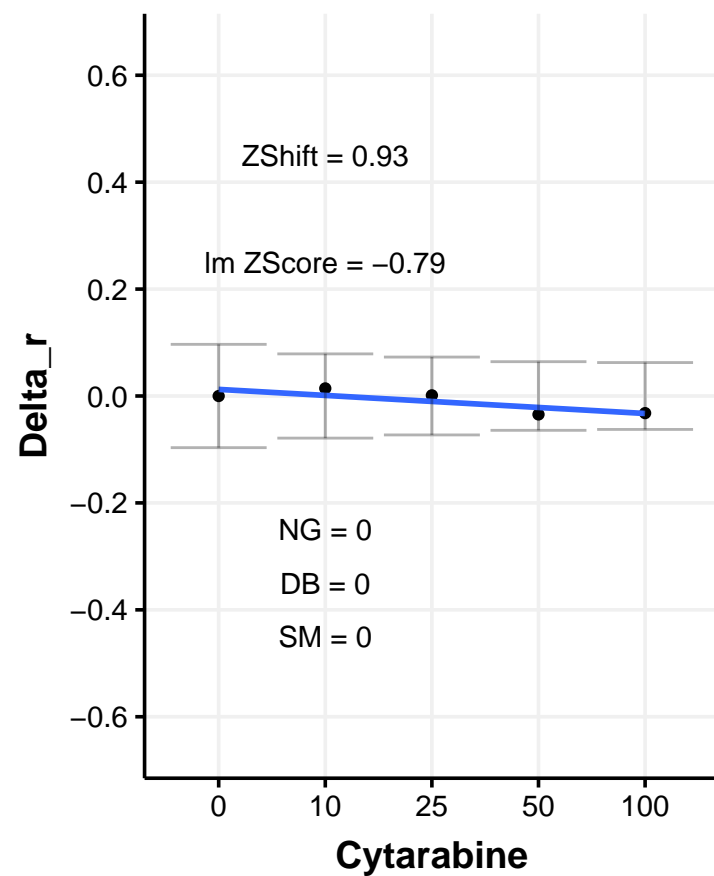

YDL227C\_RF2\_369 RF2

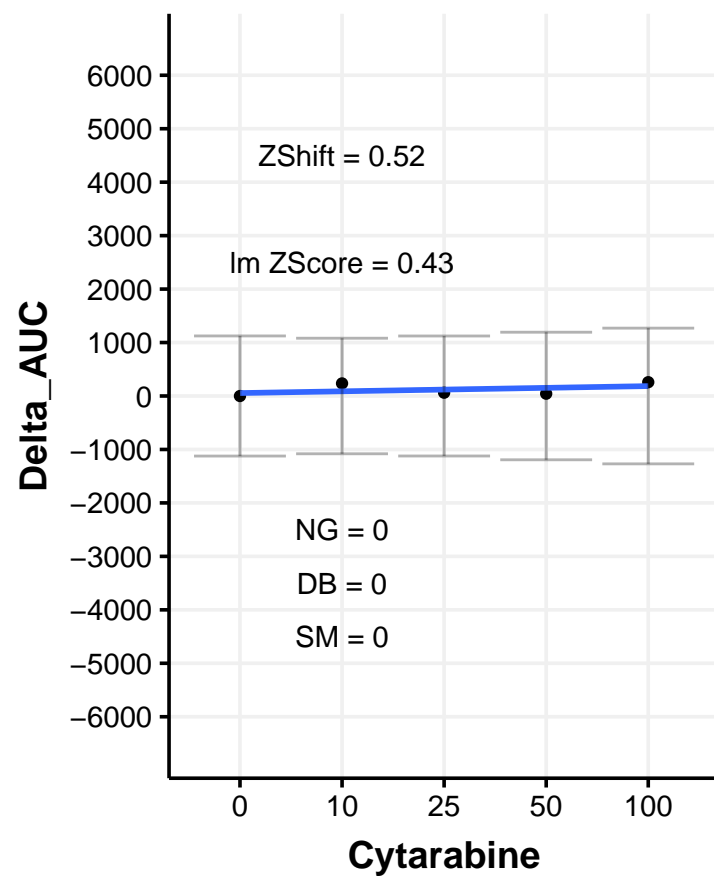

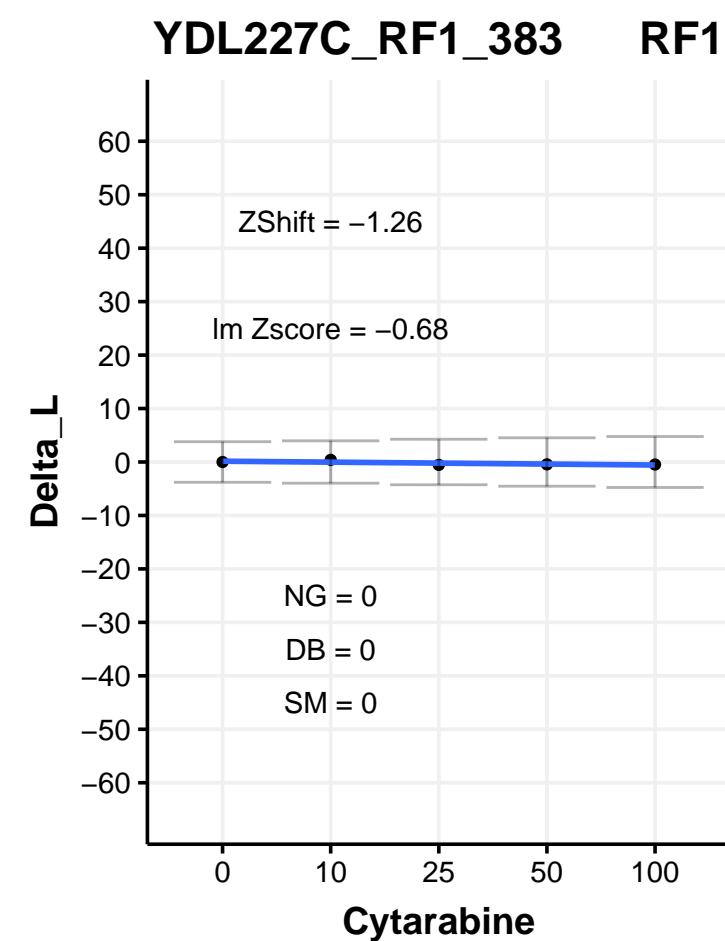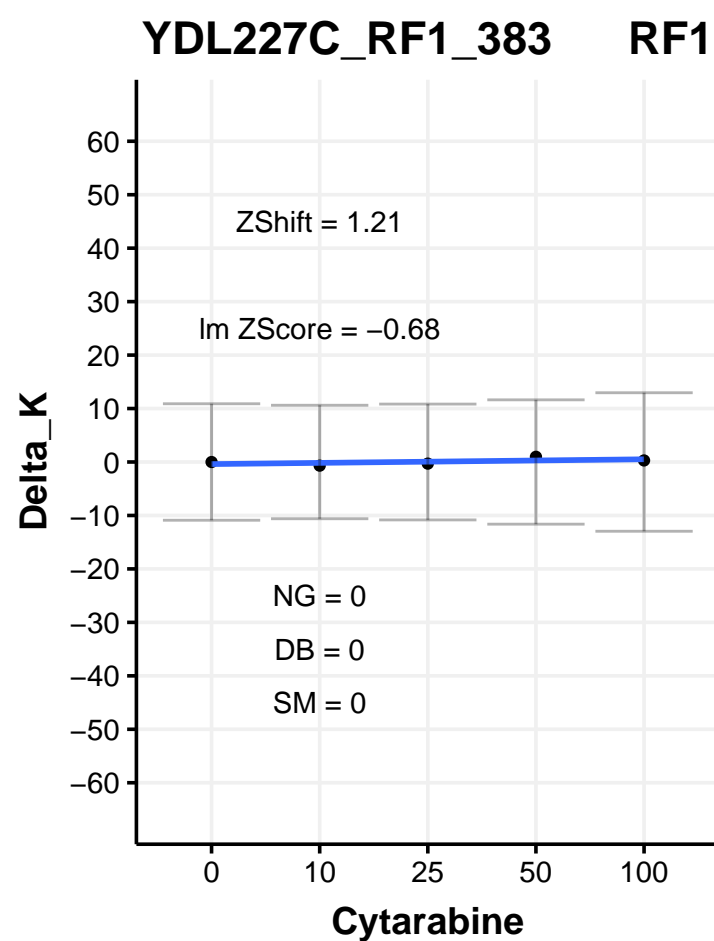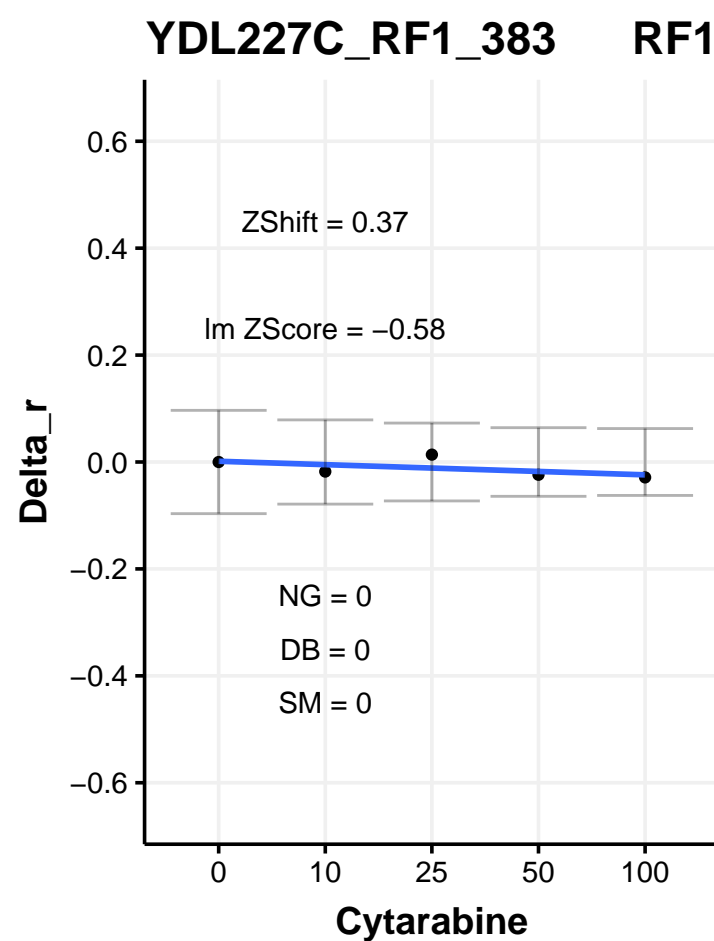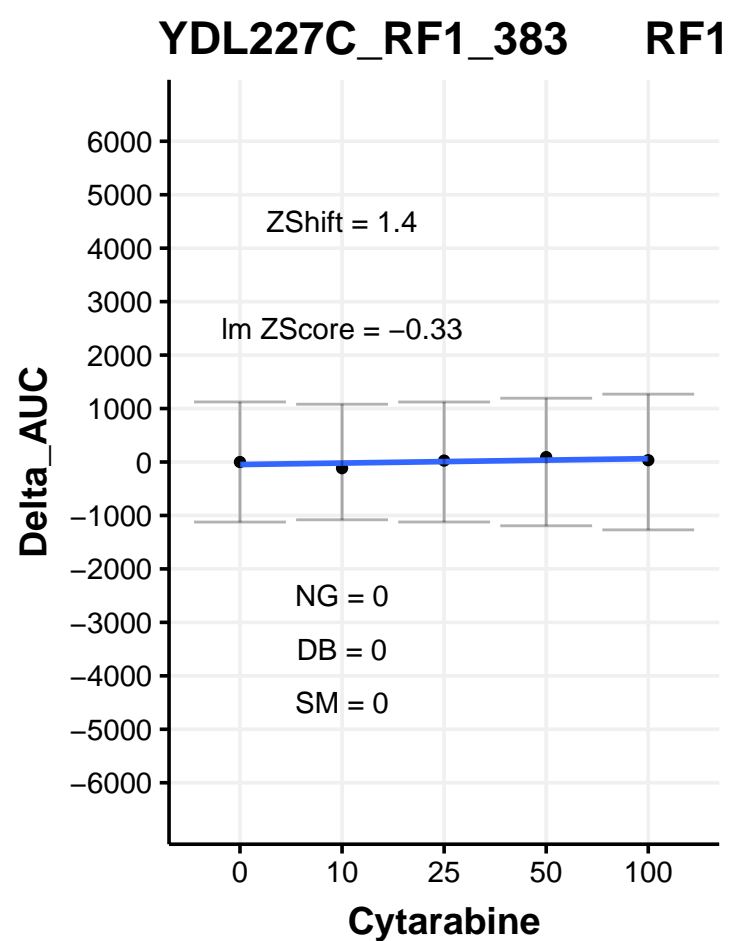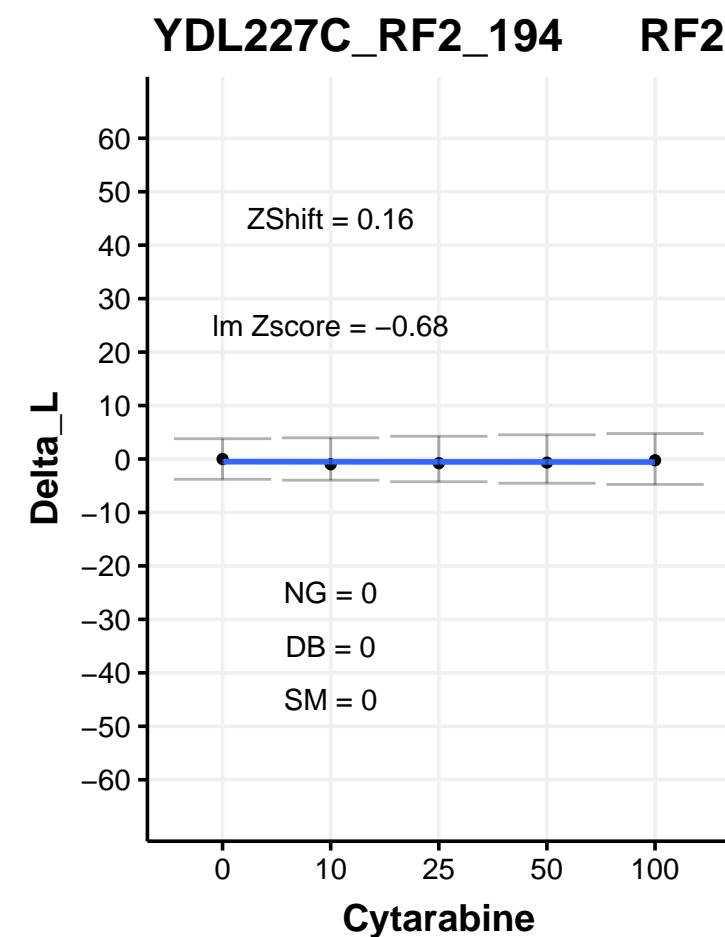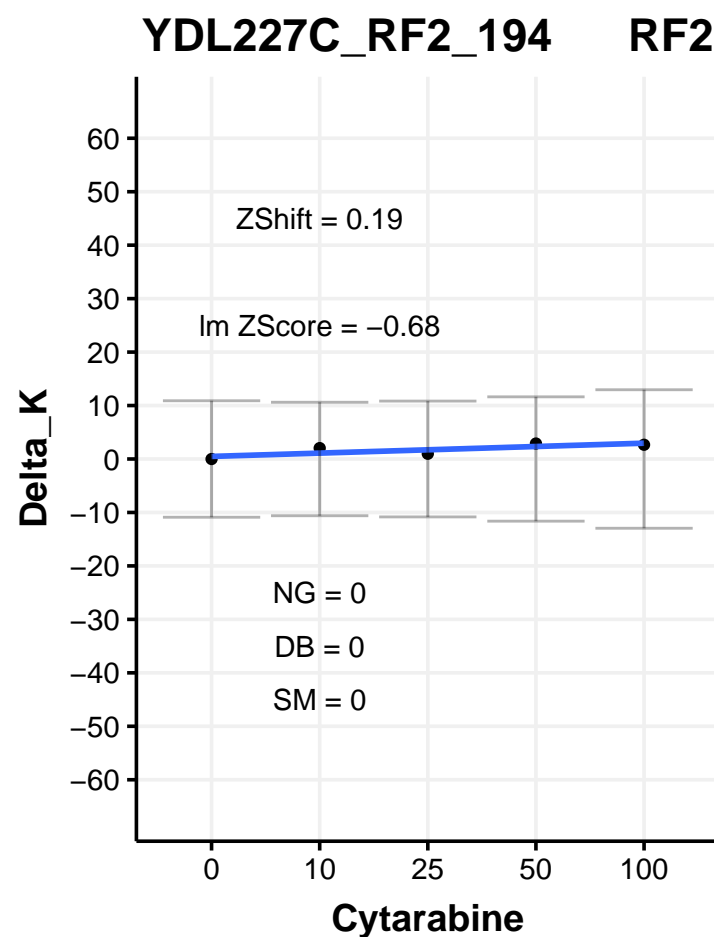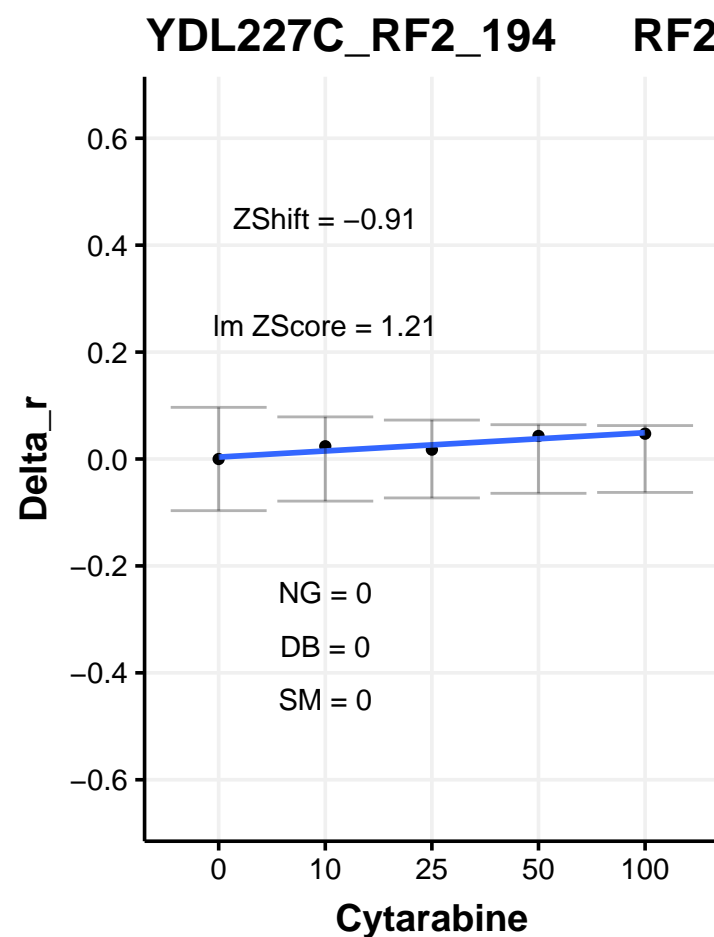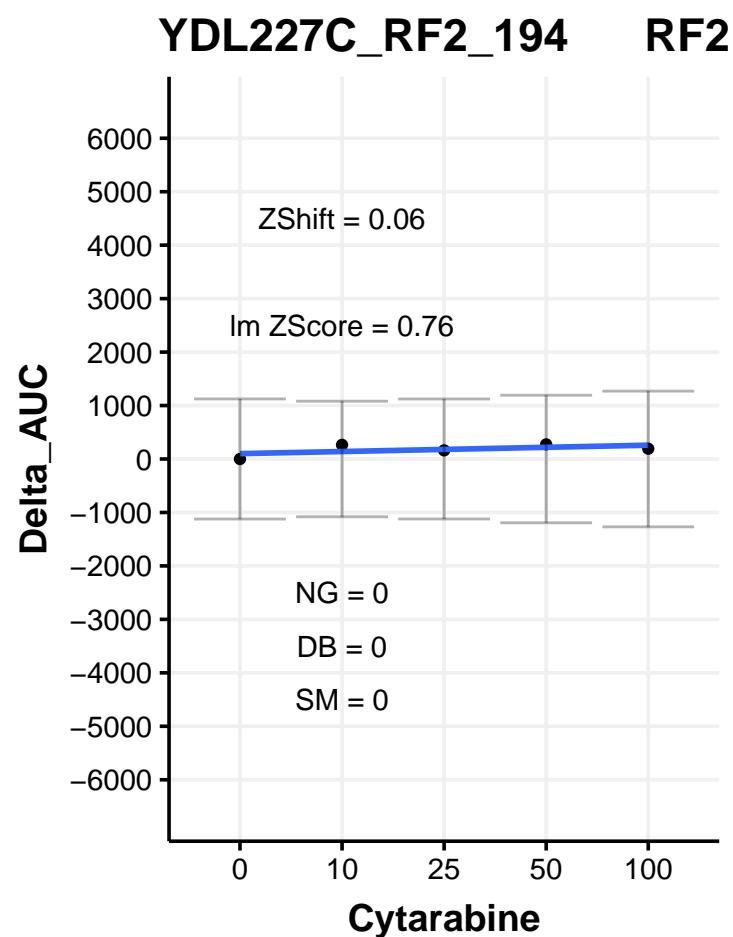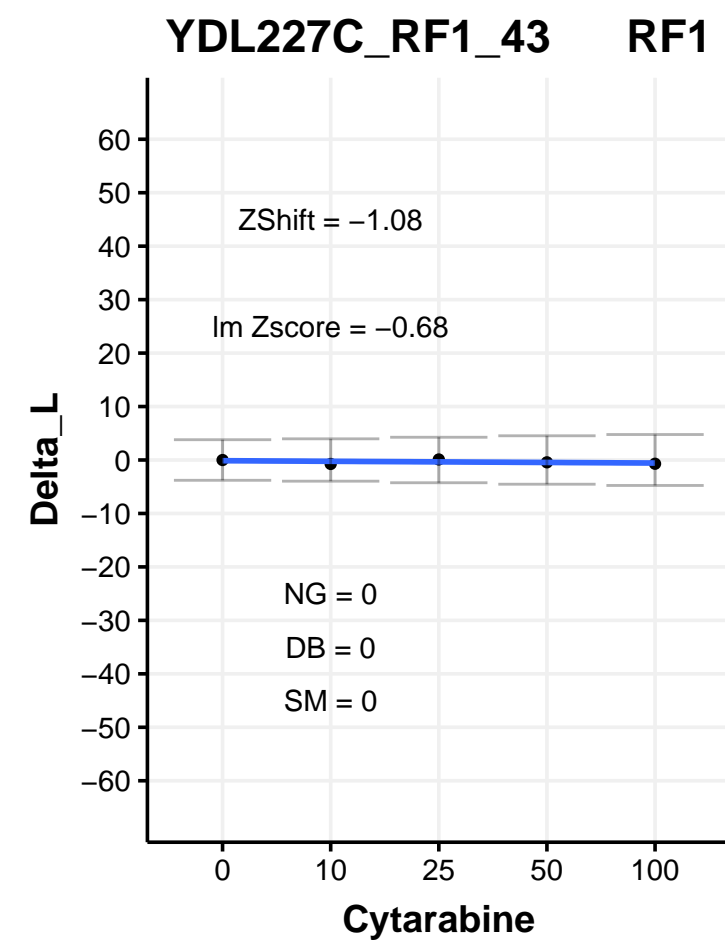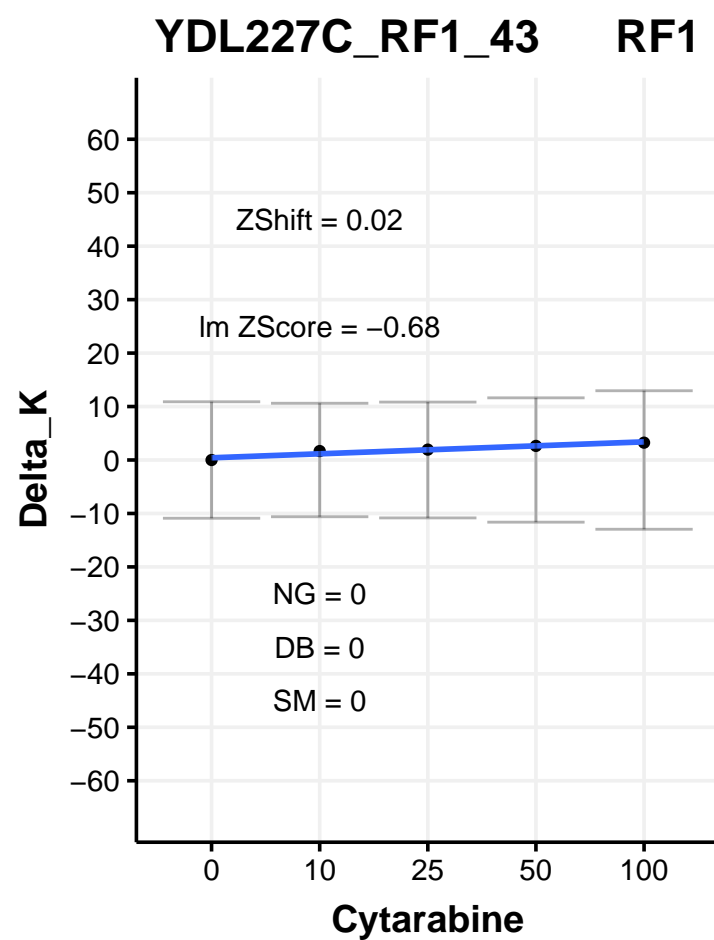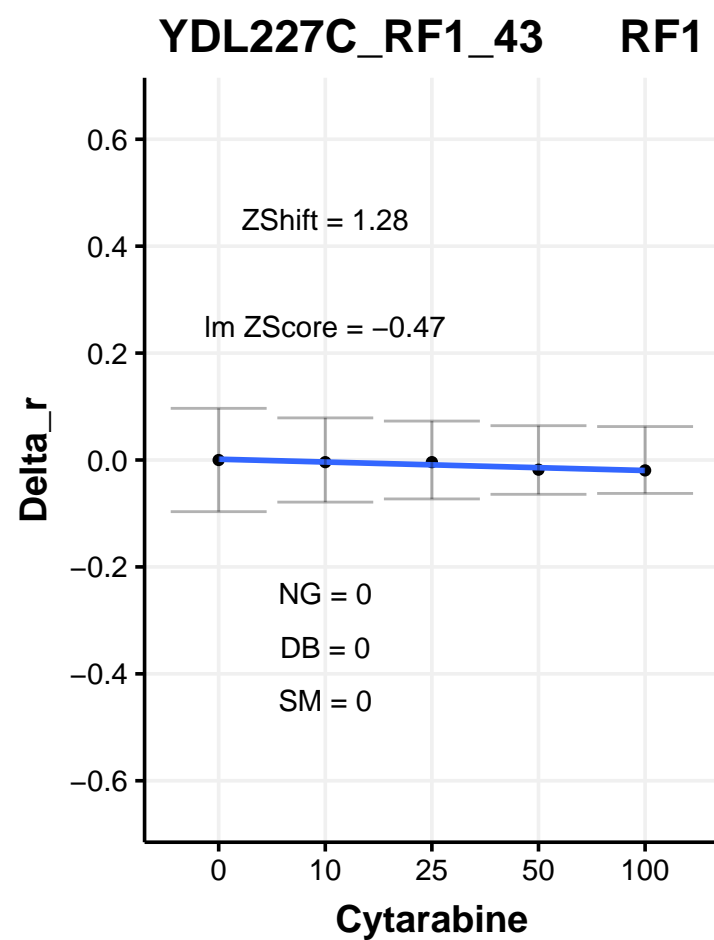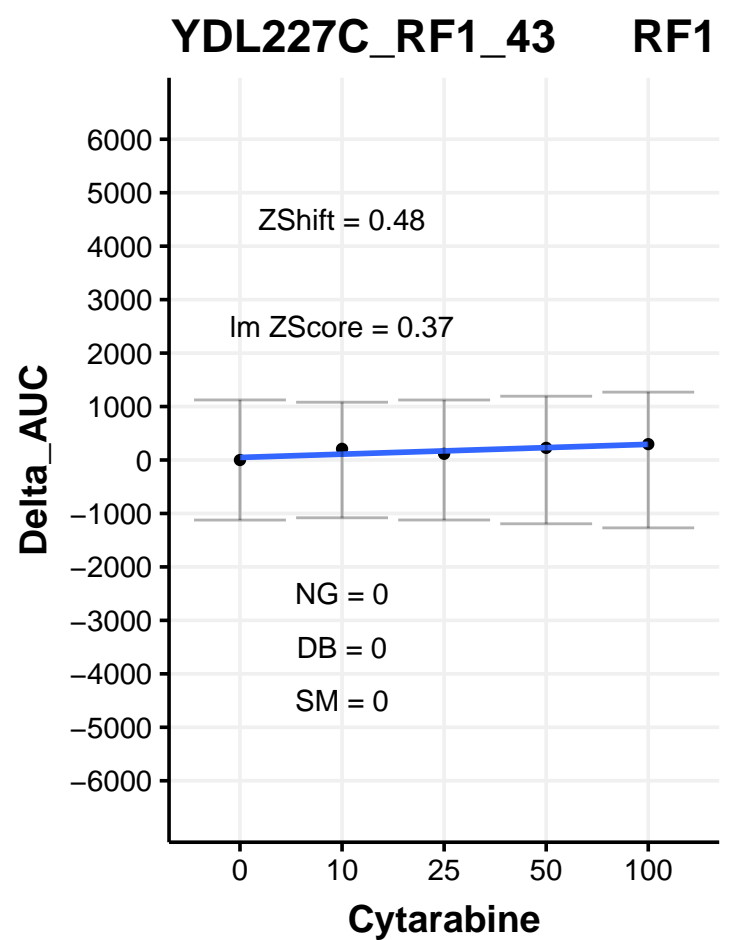

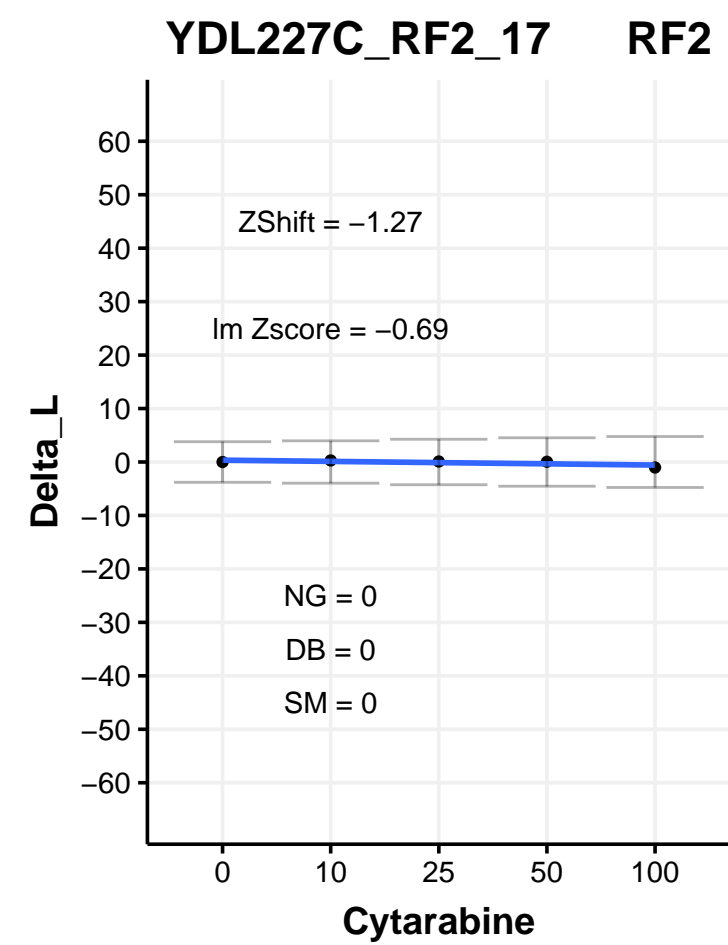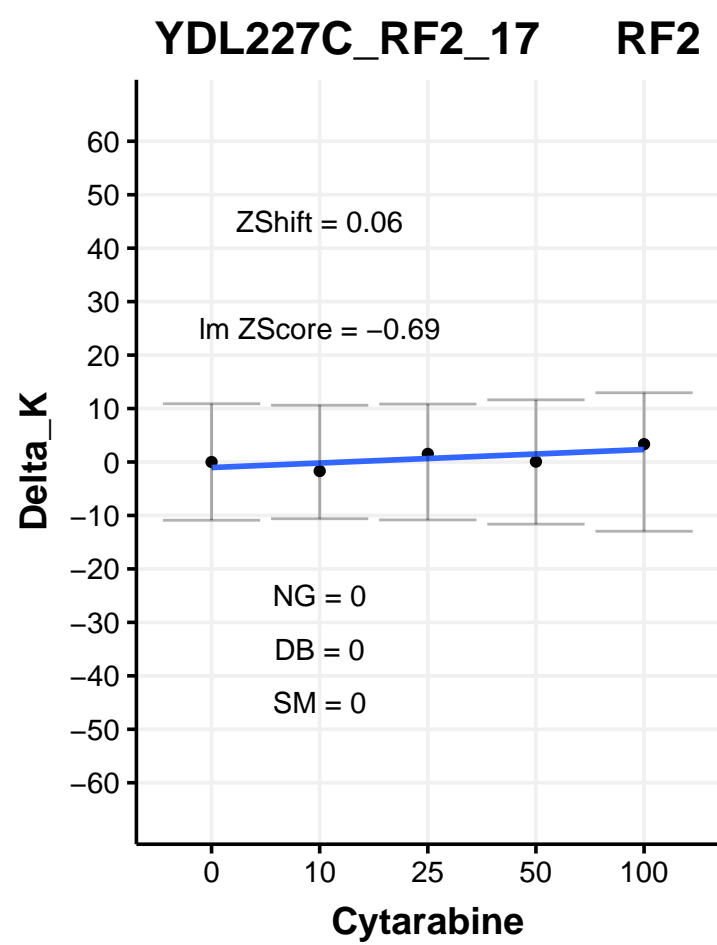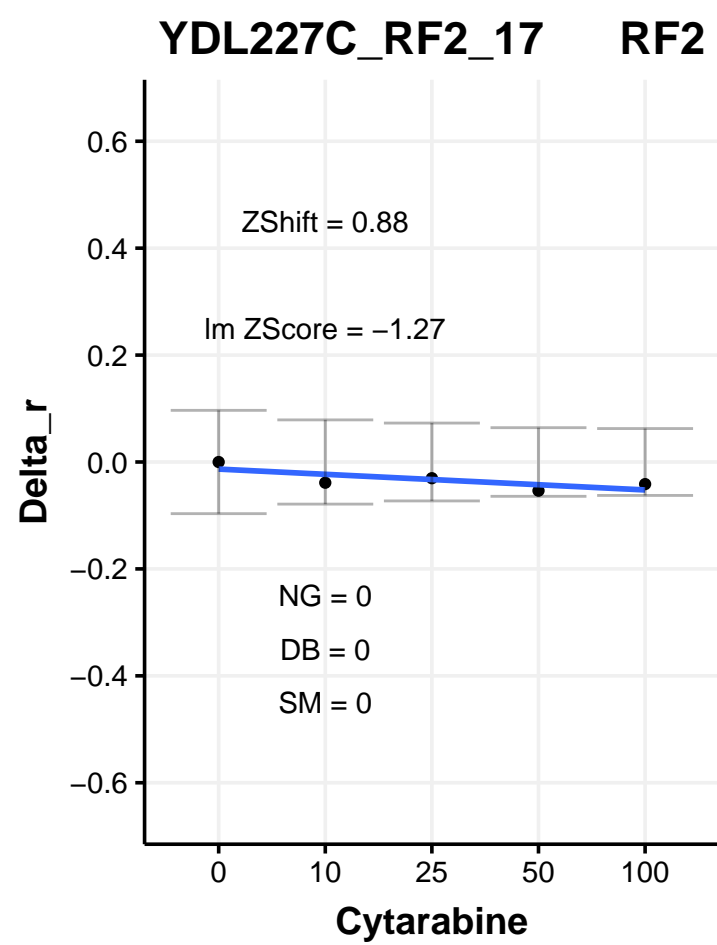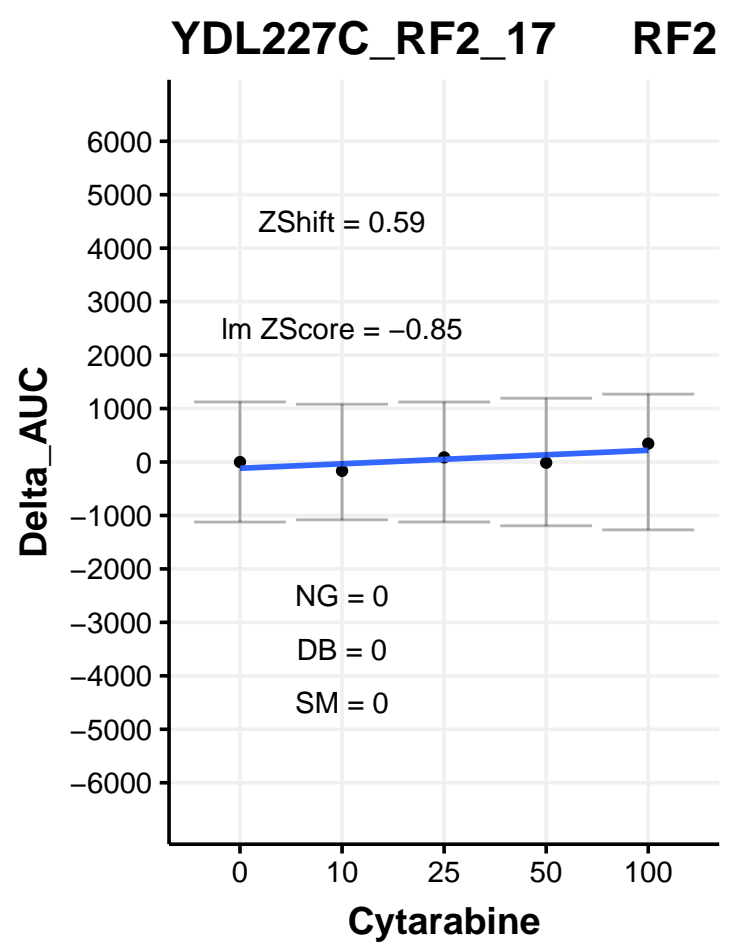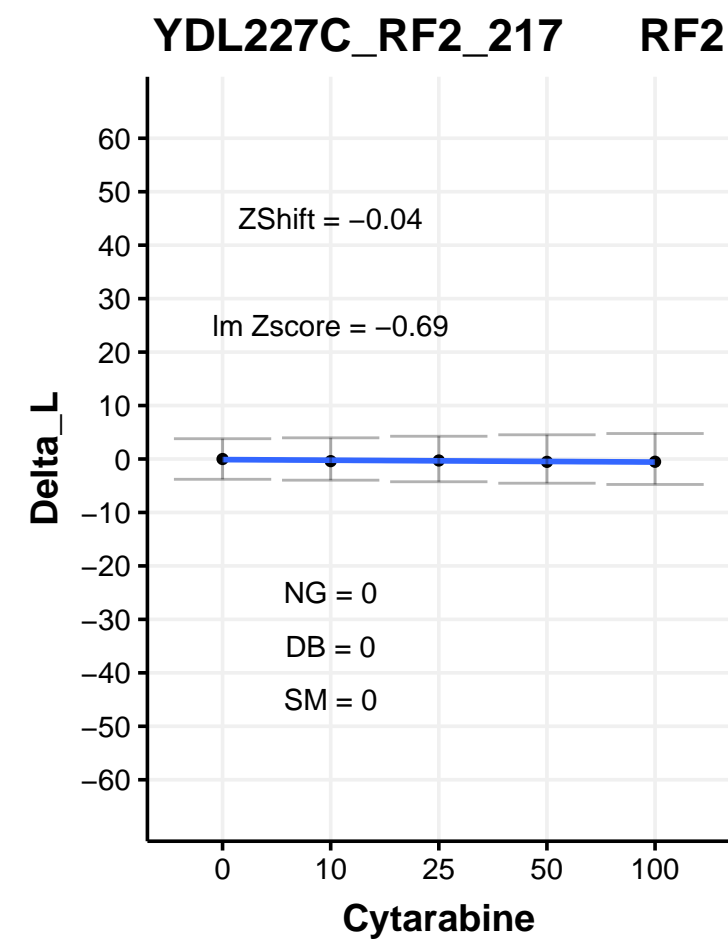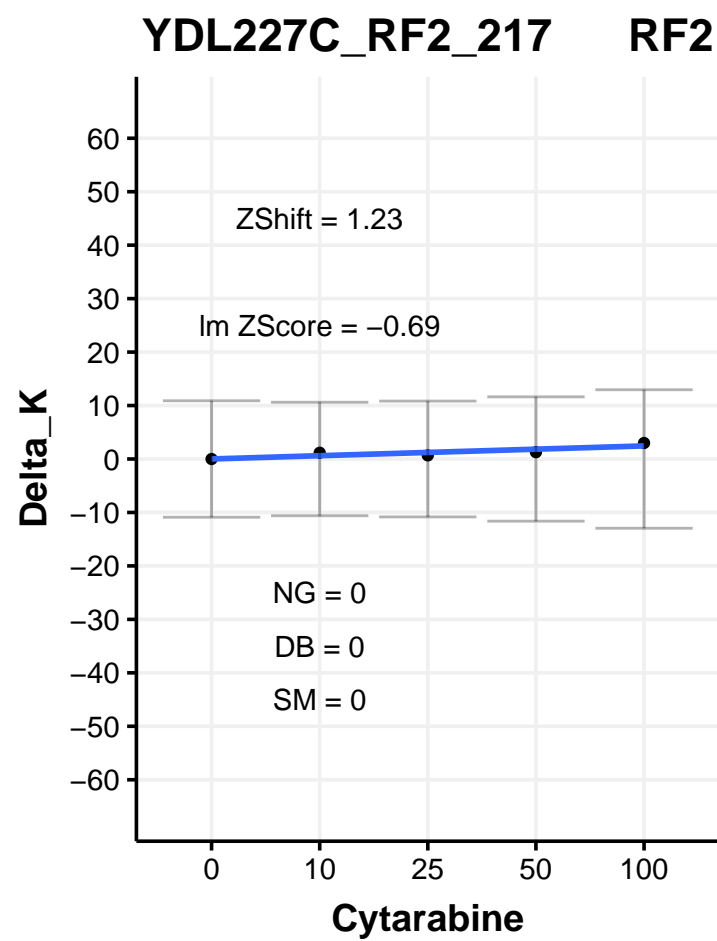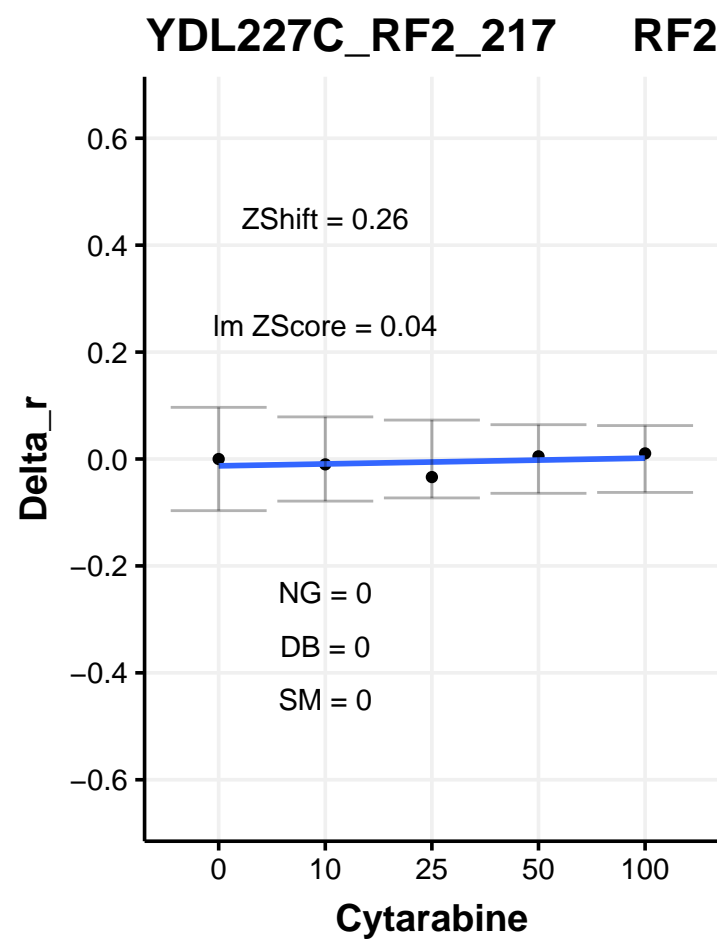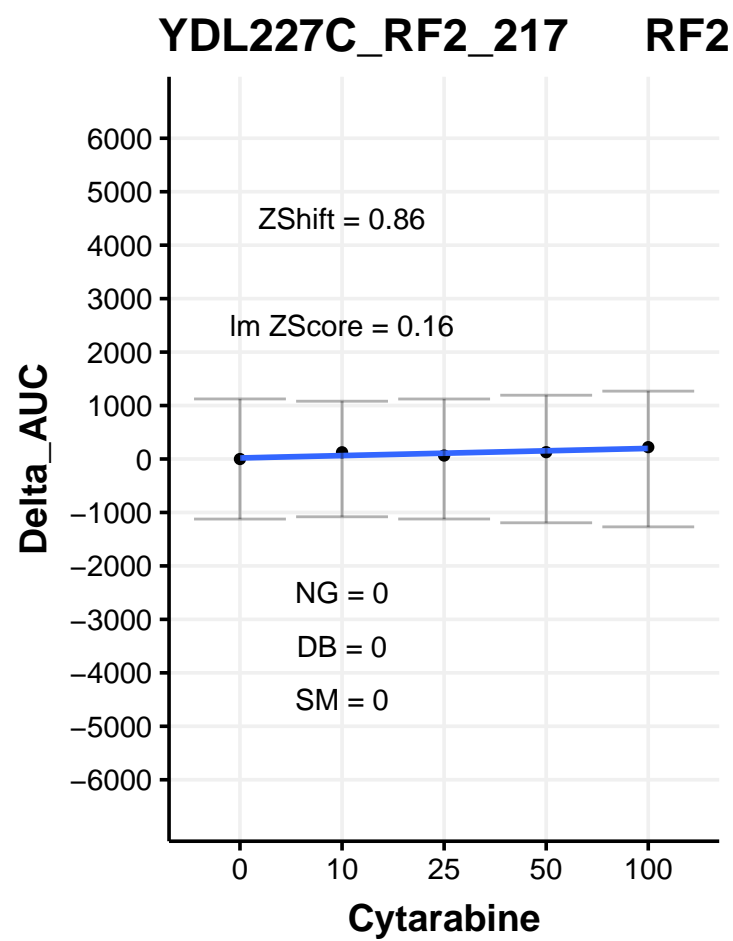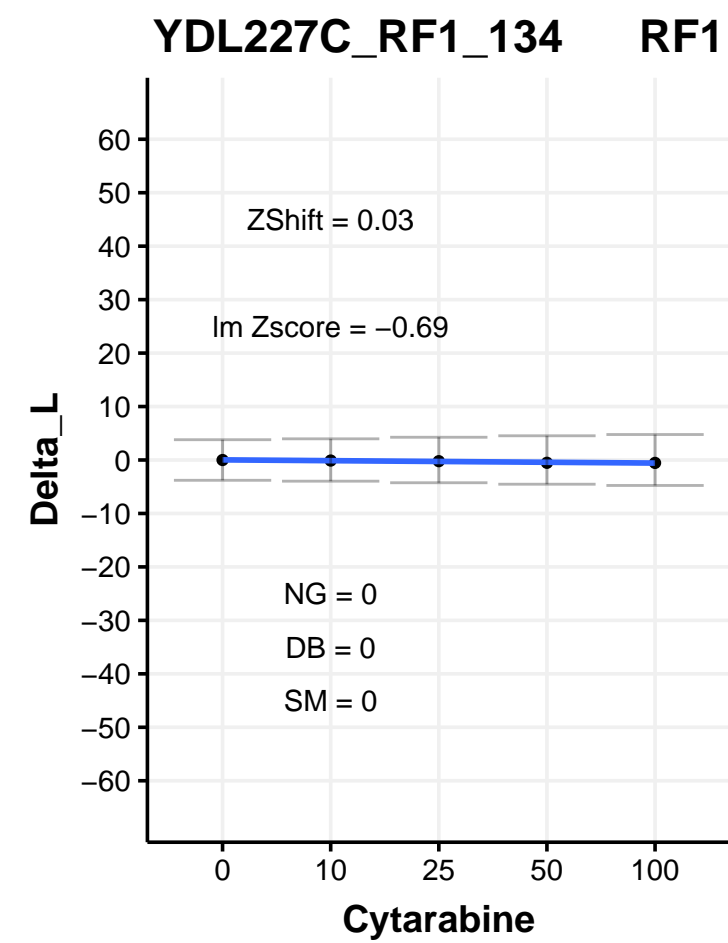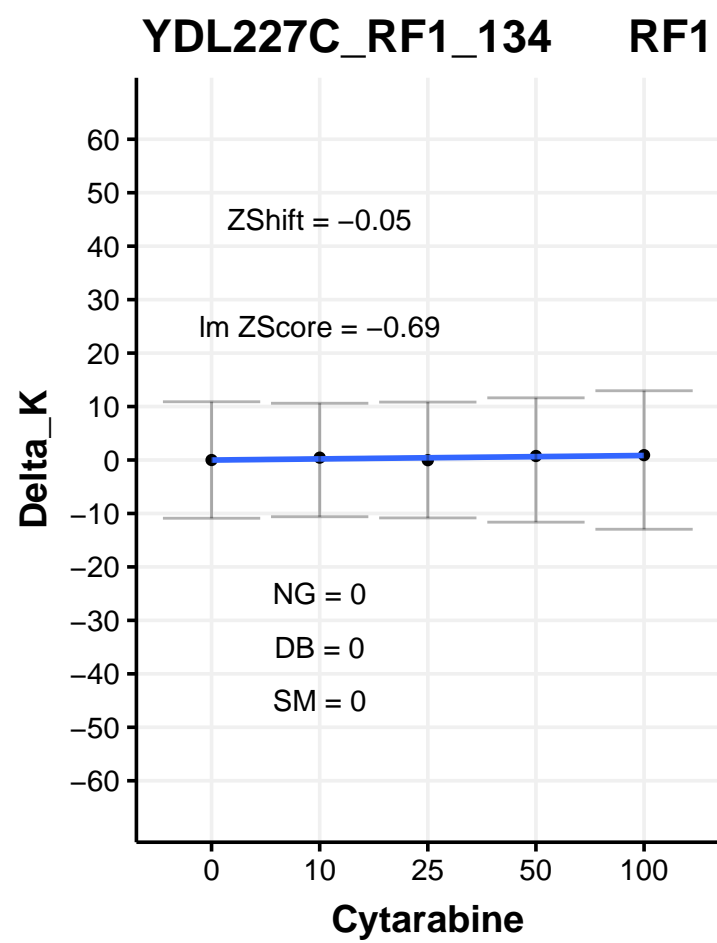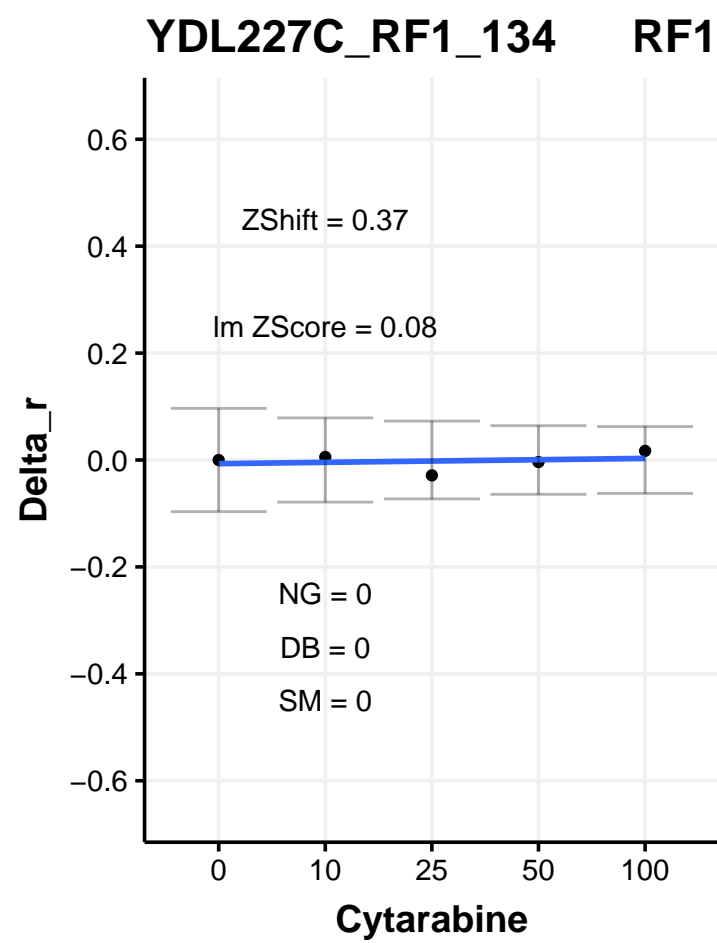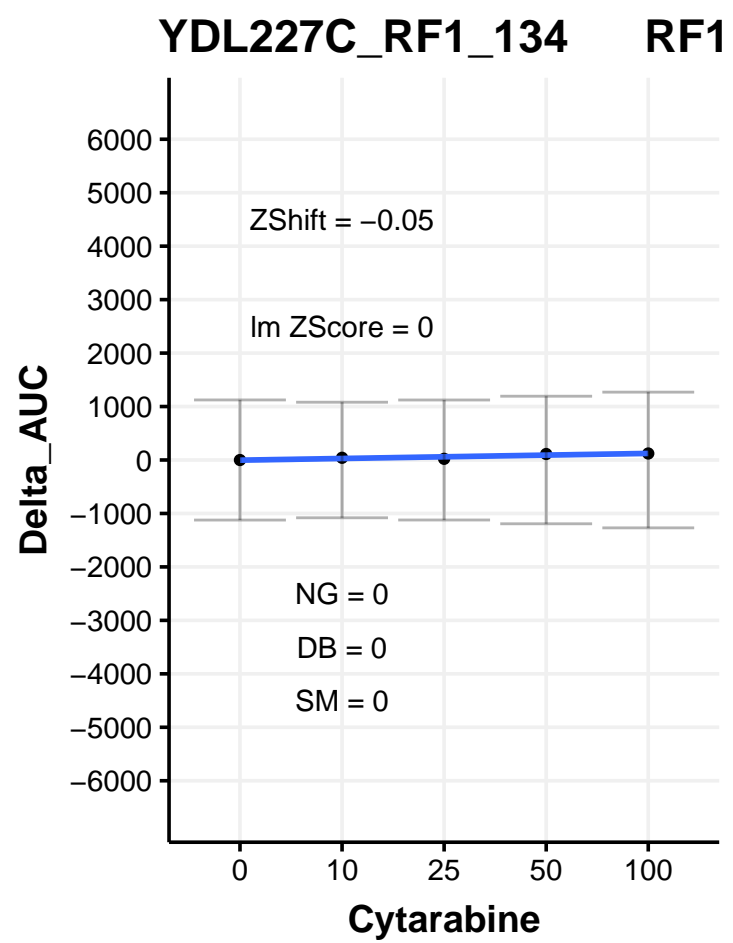

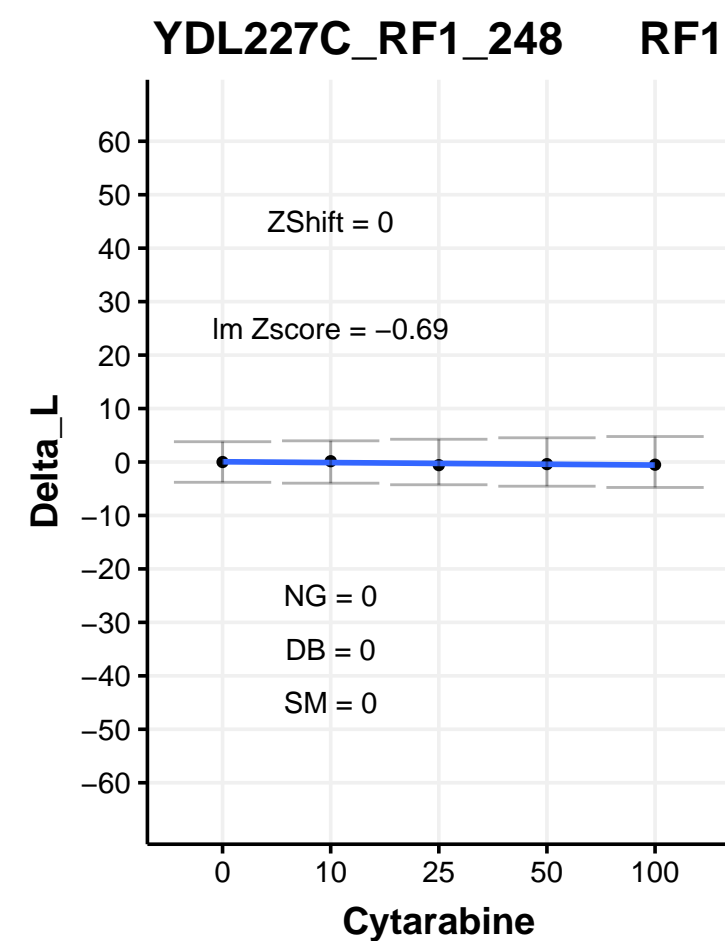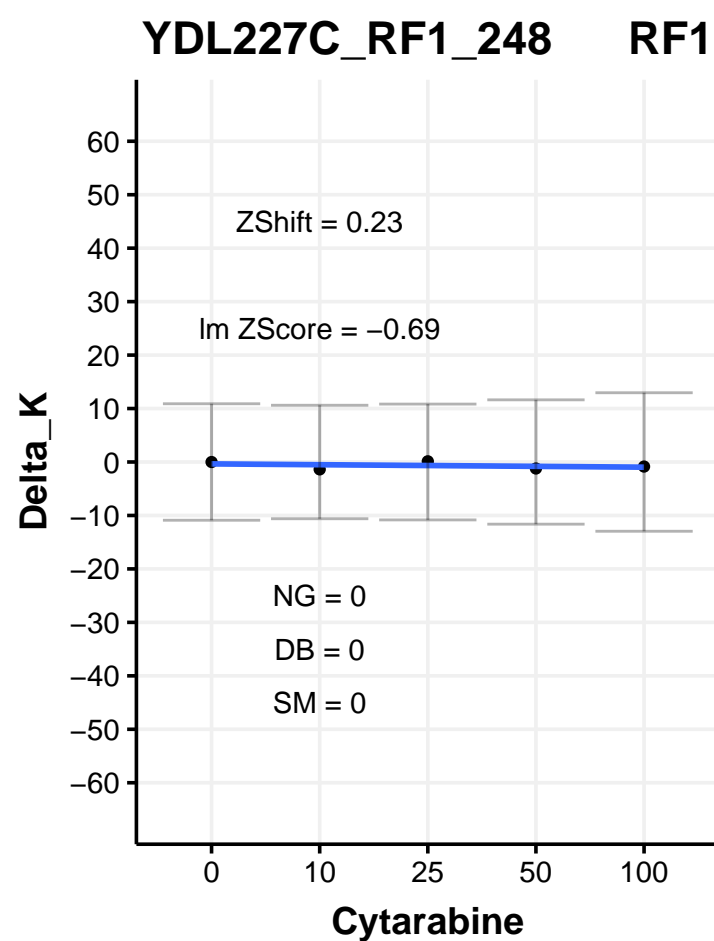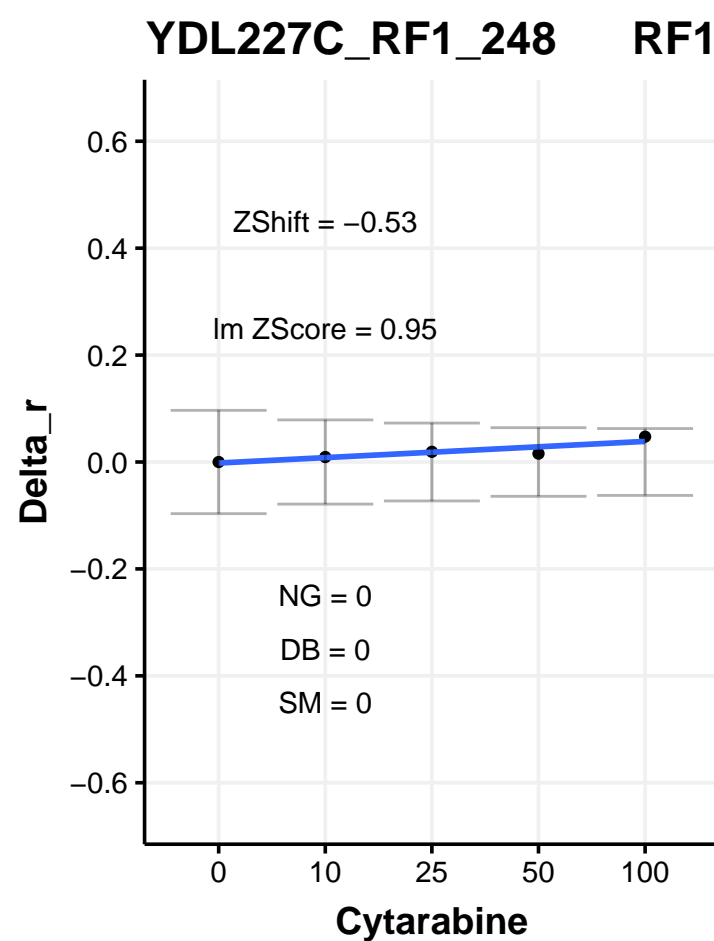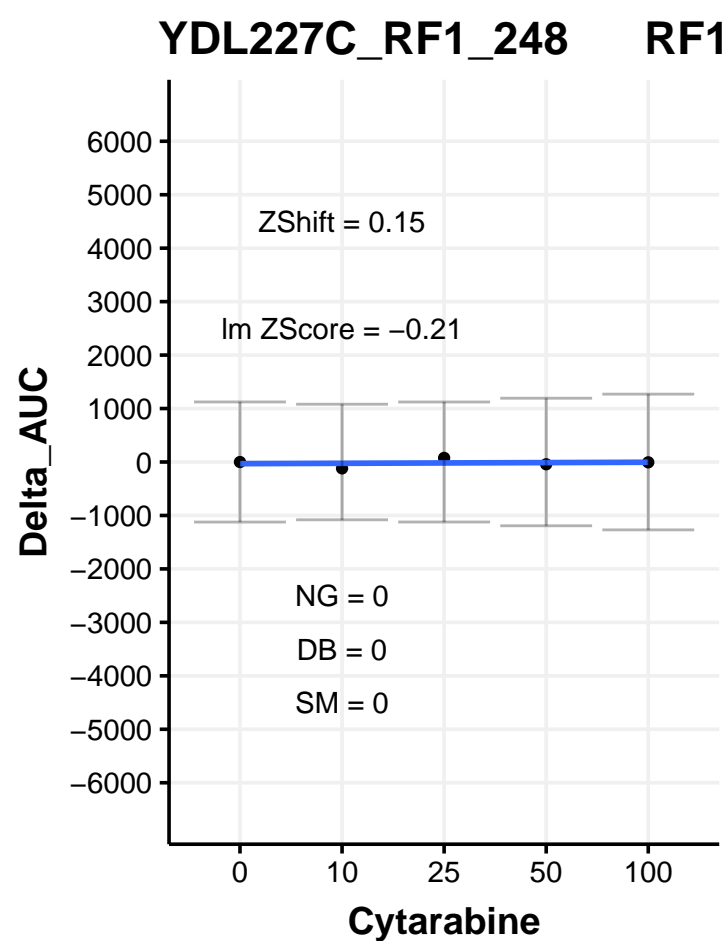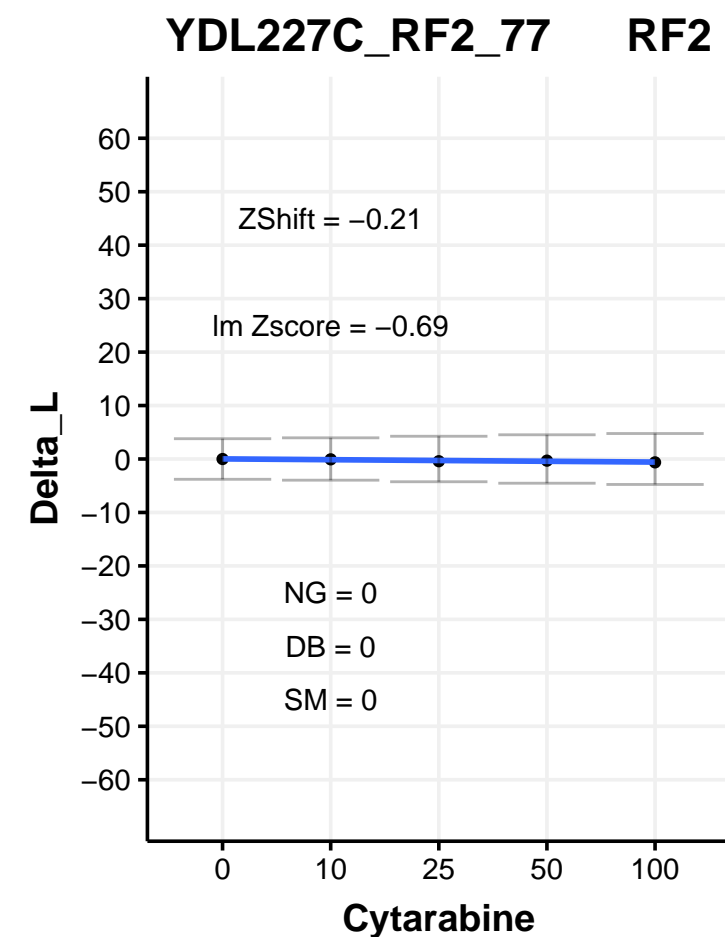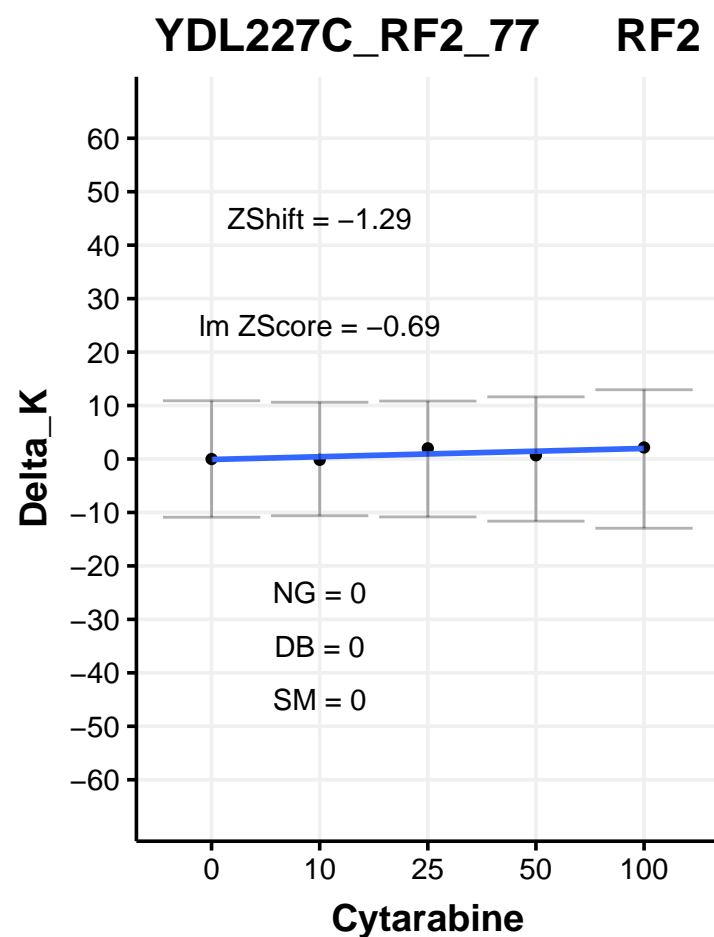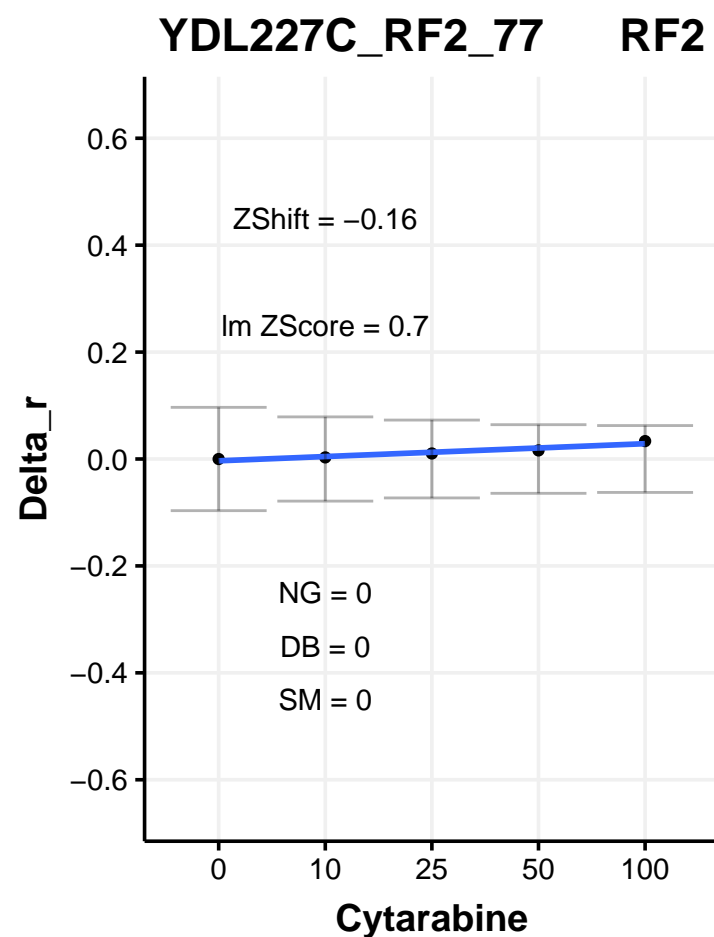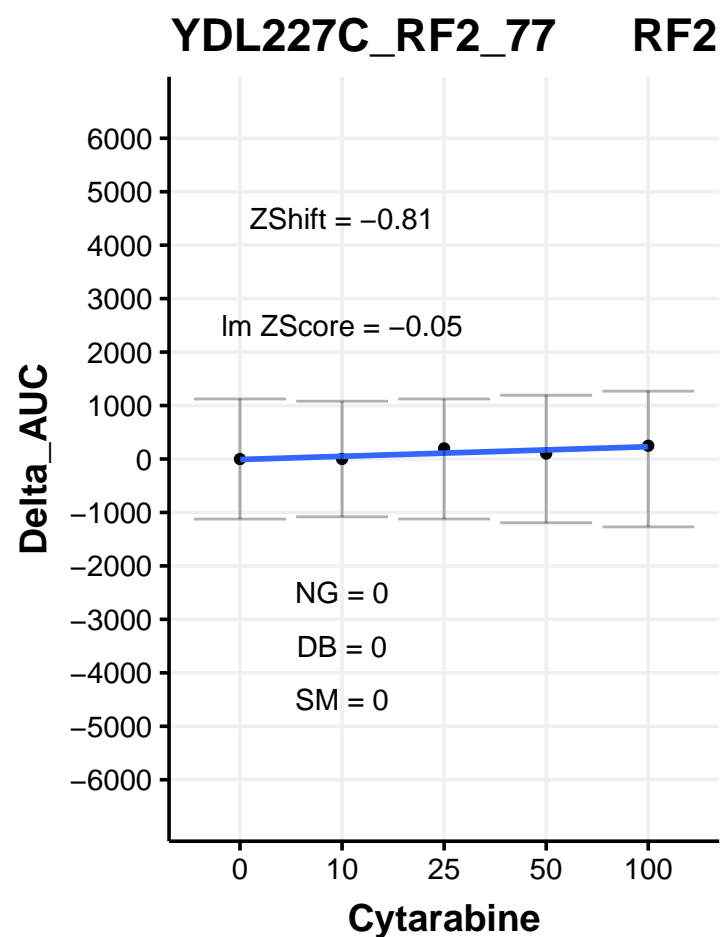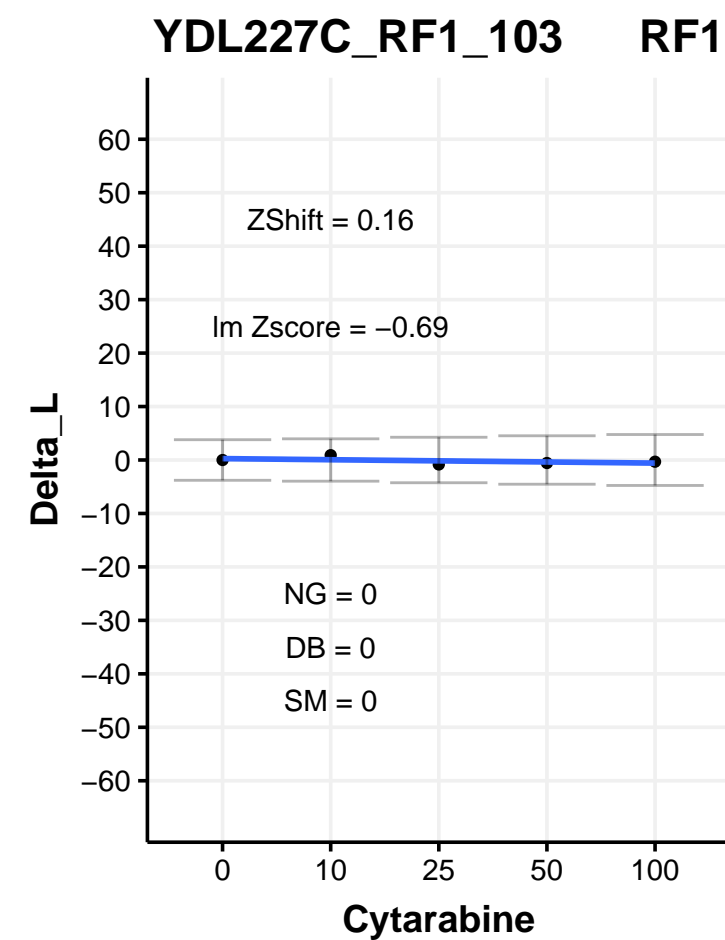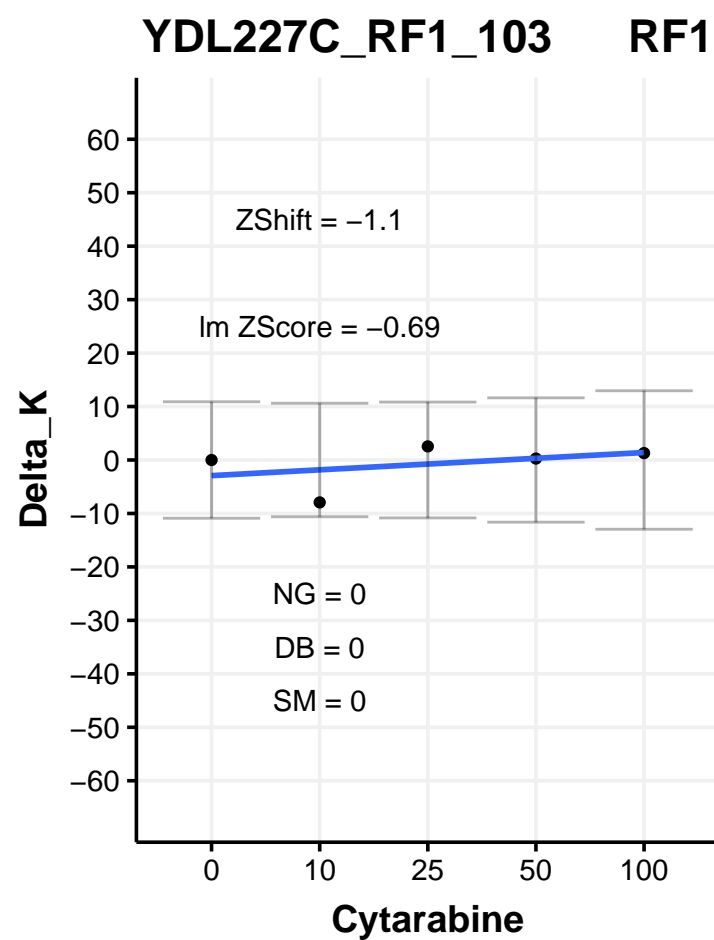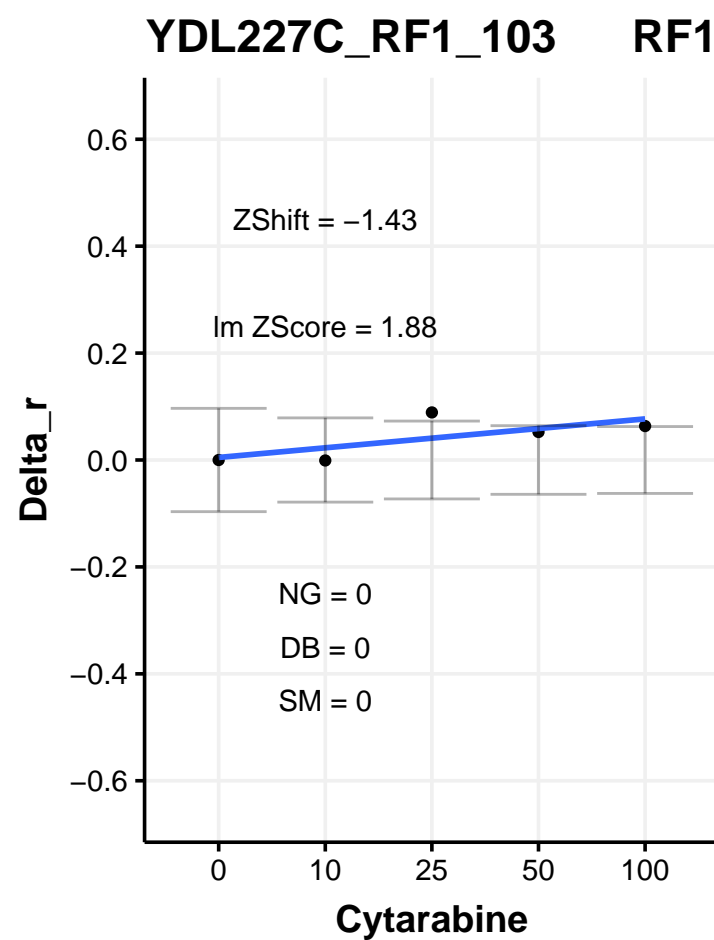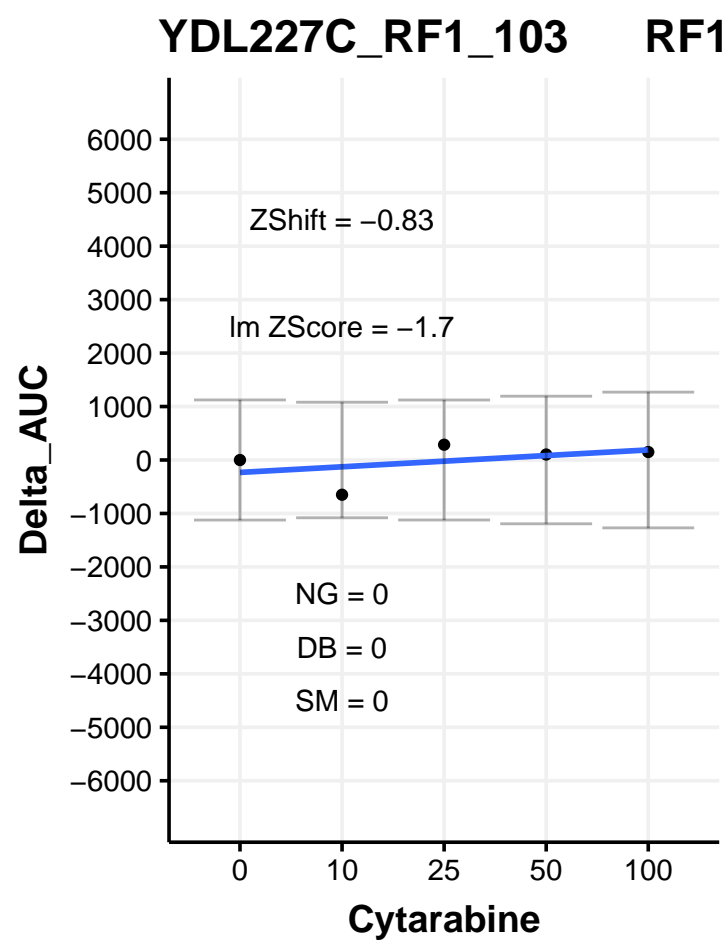

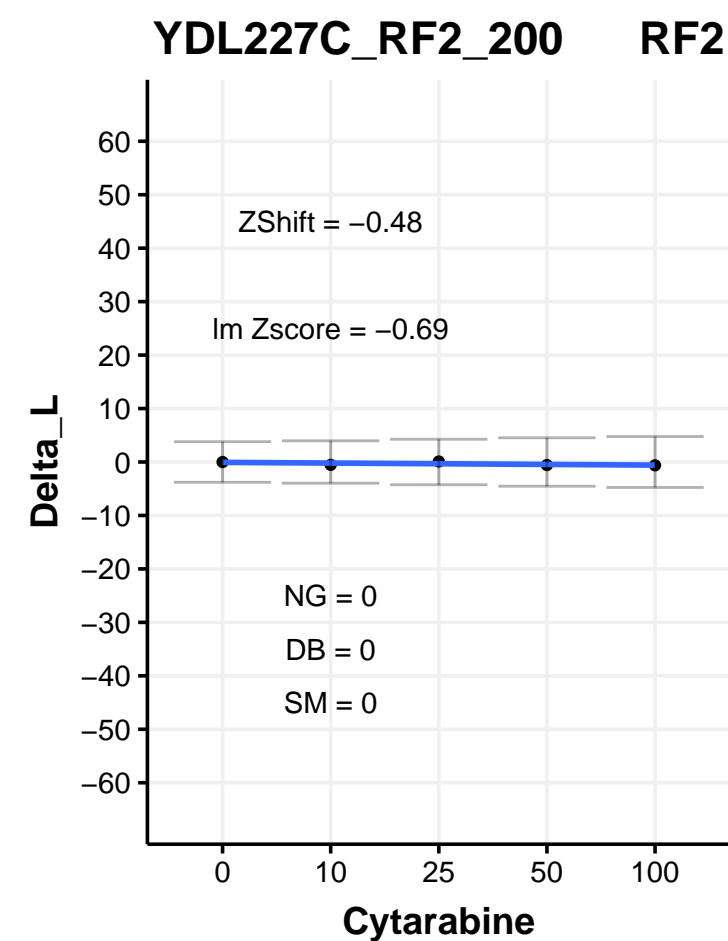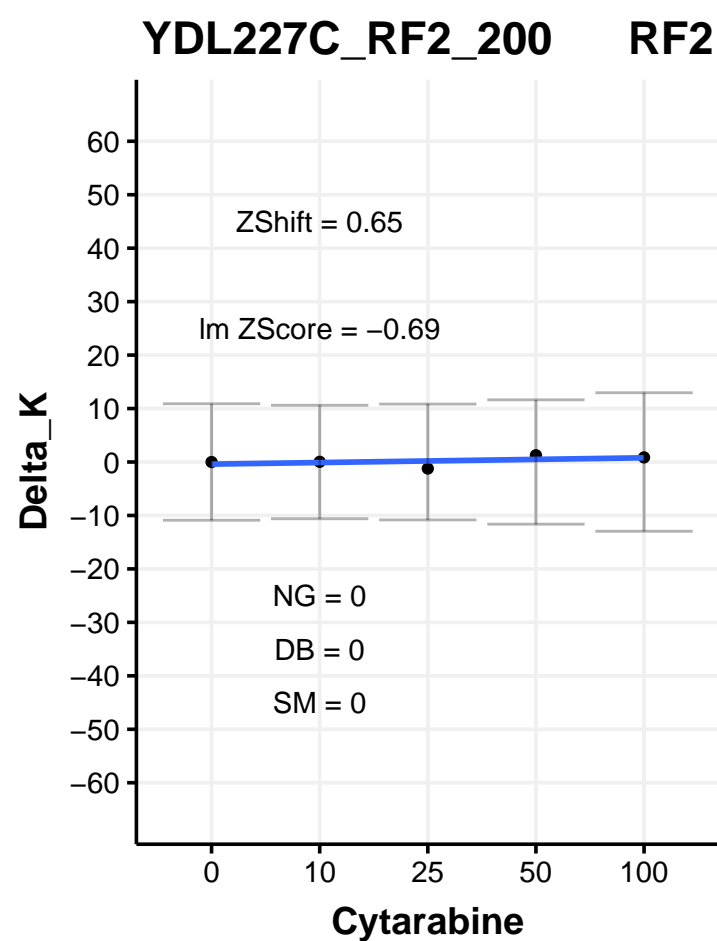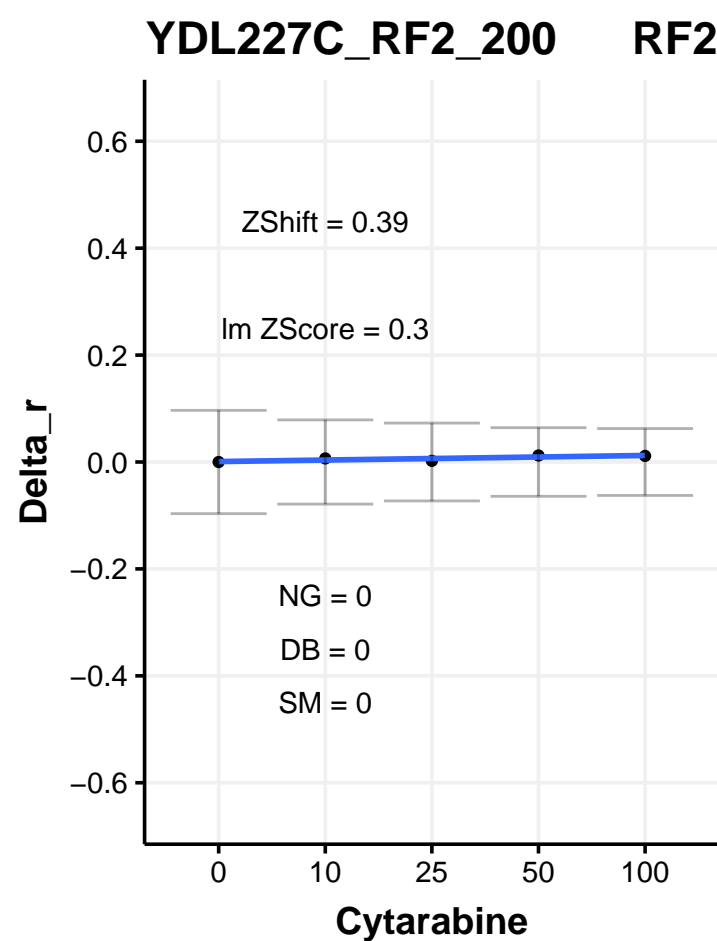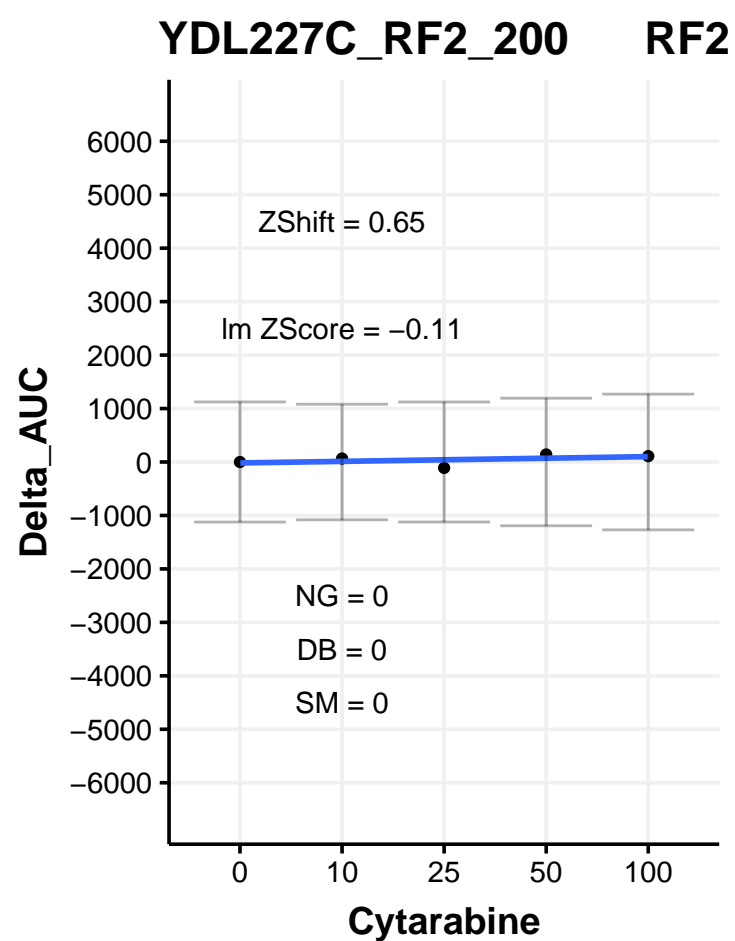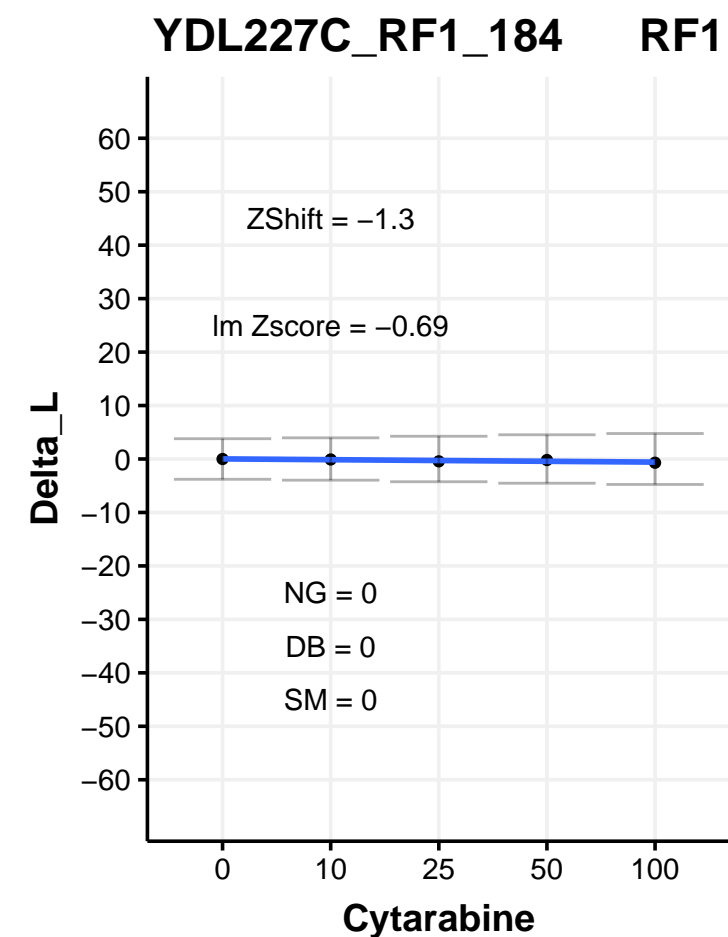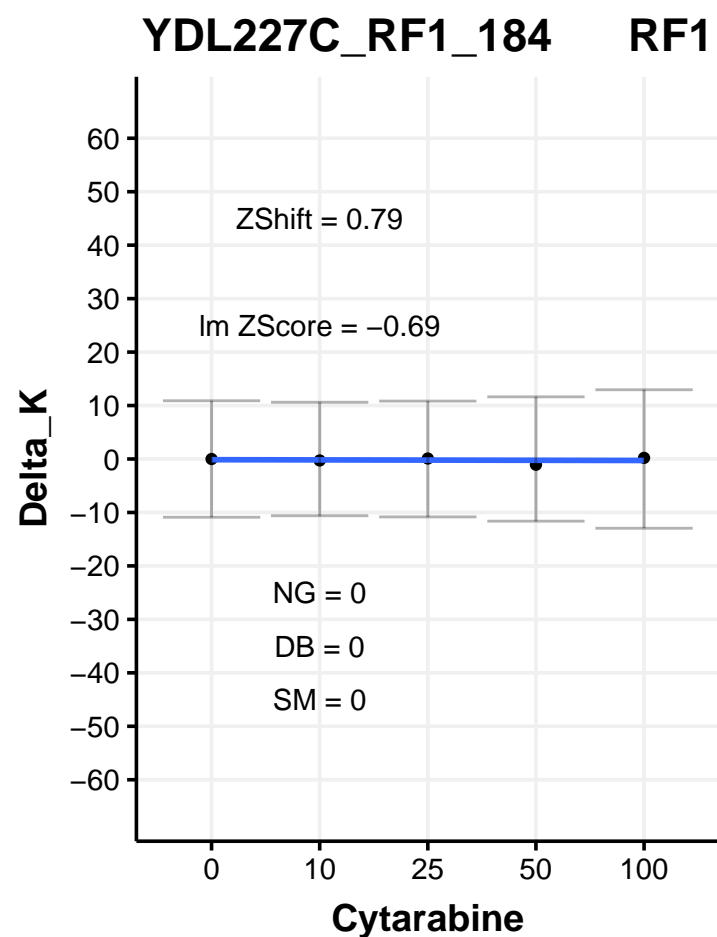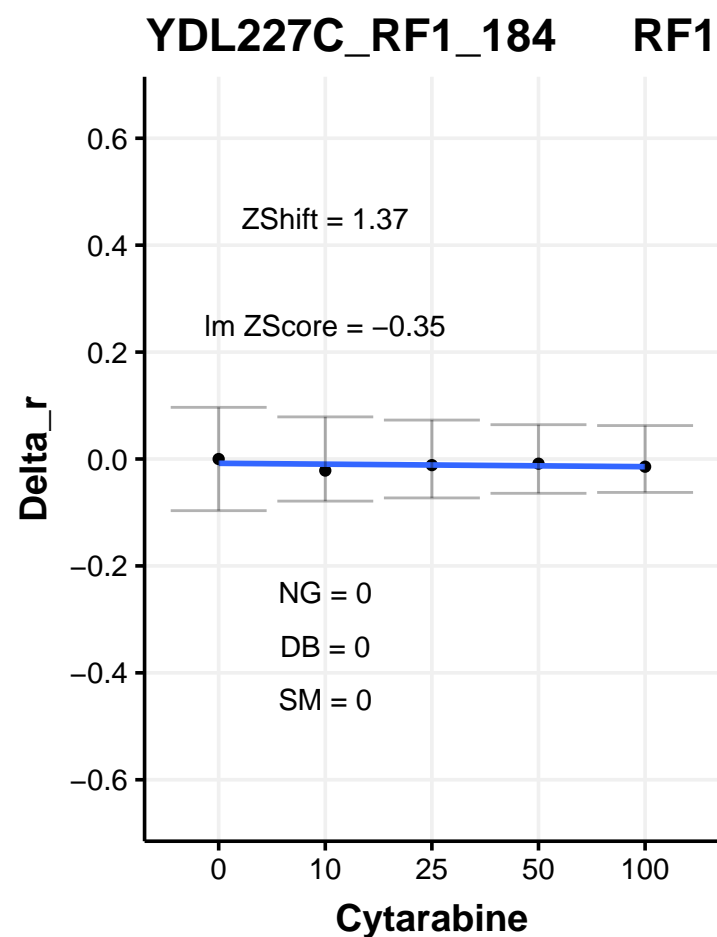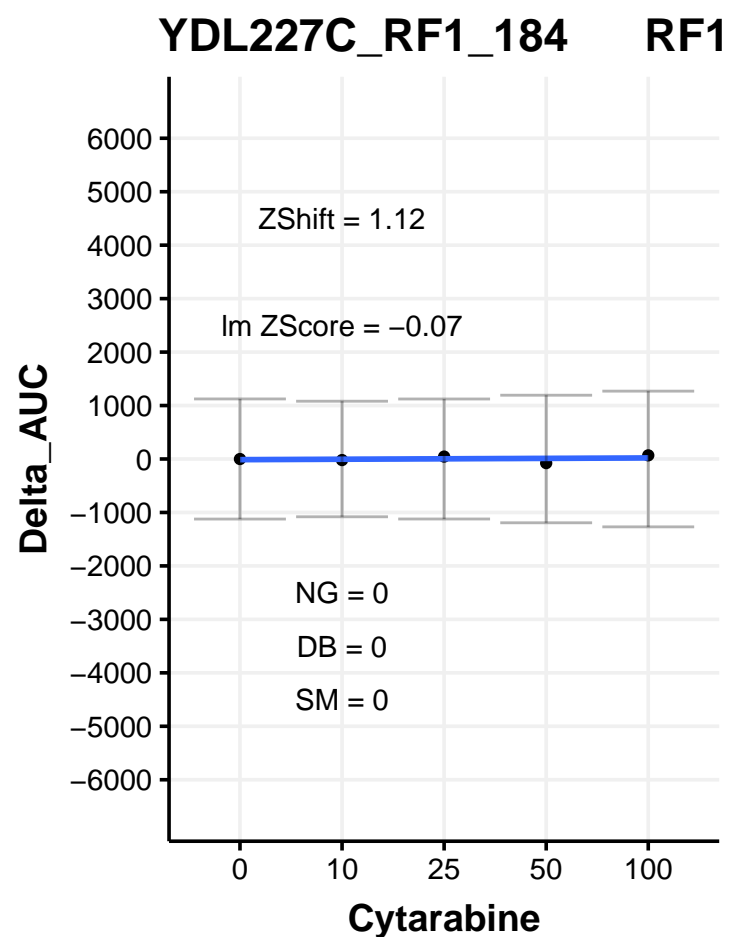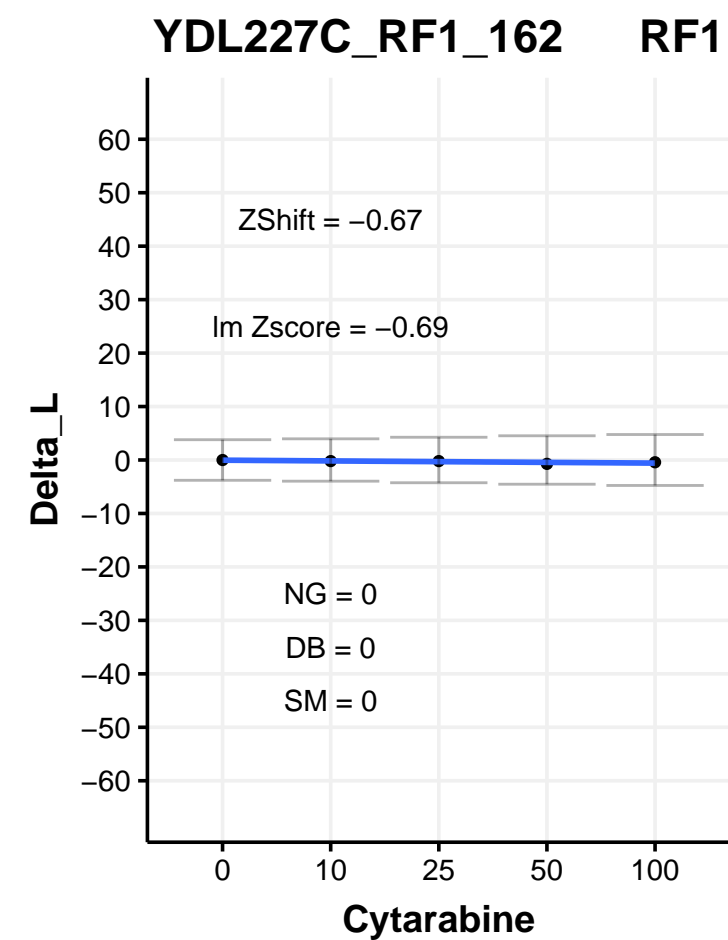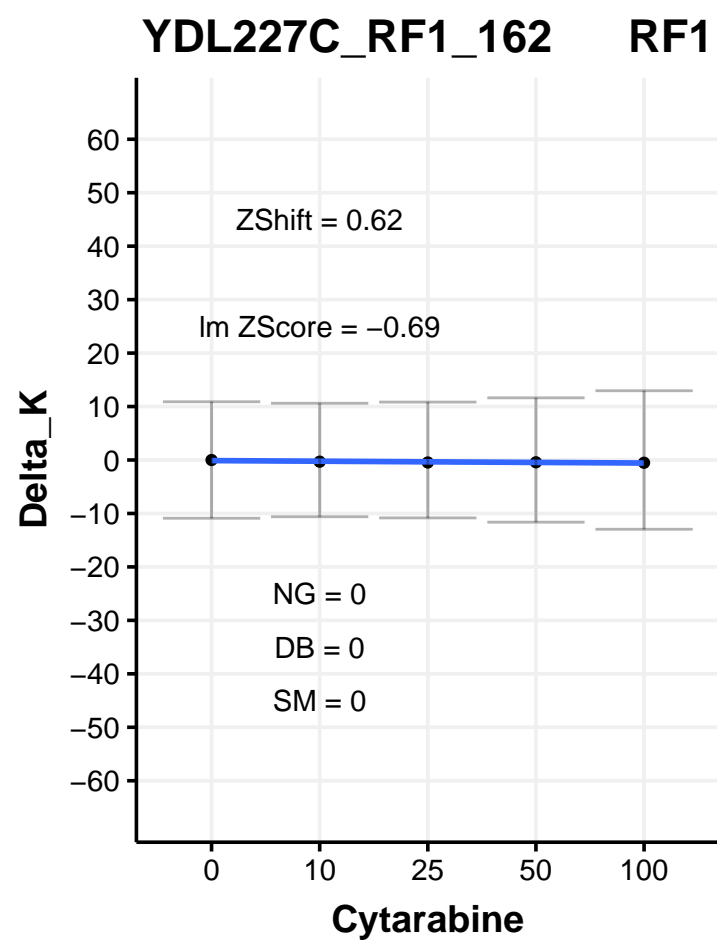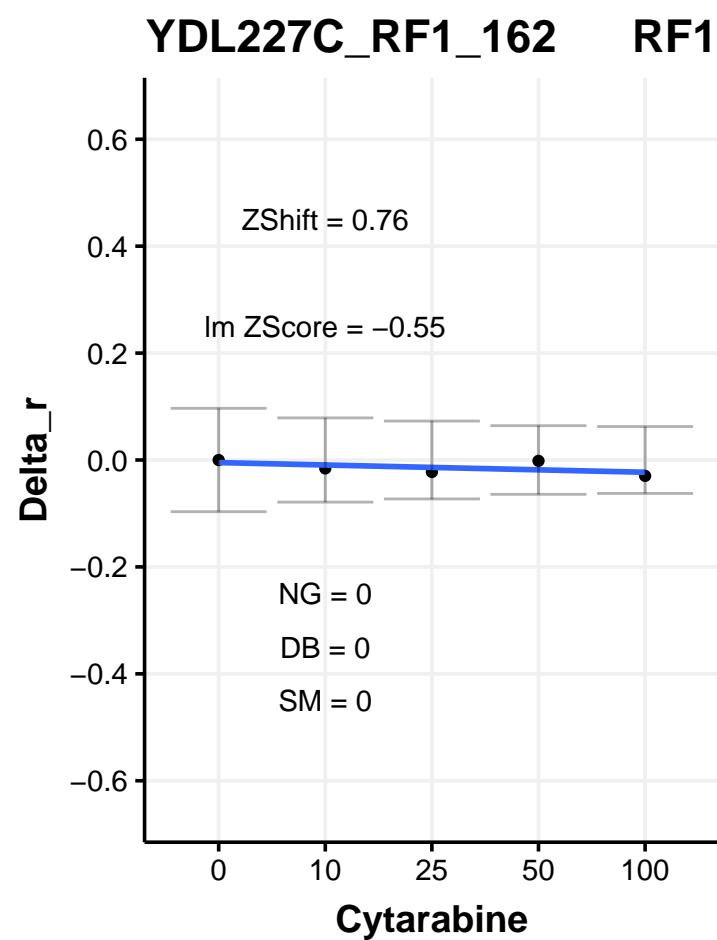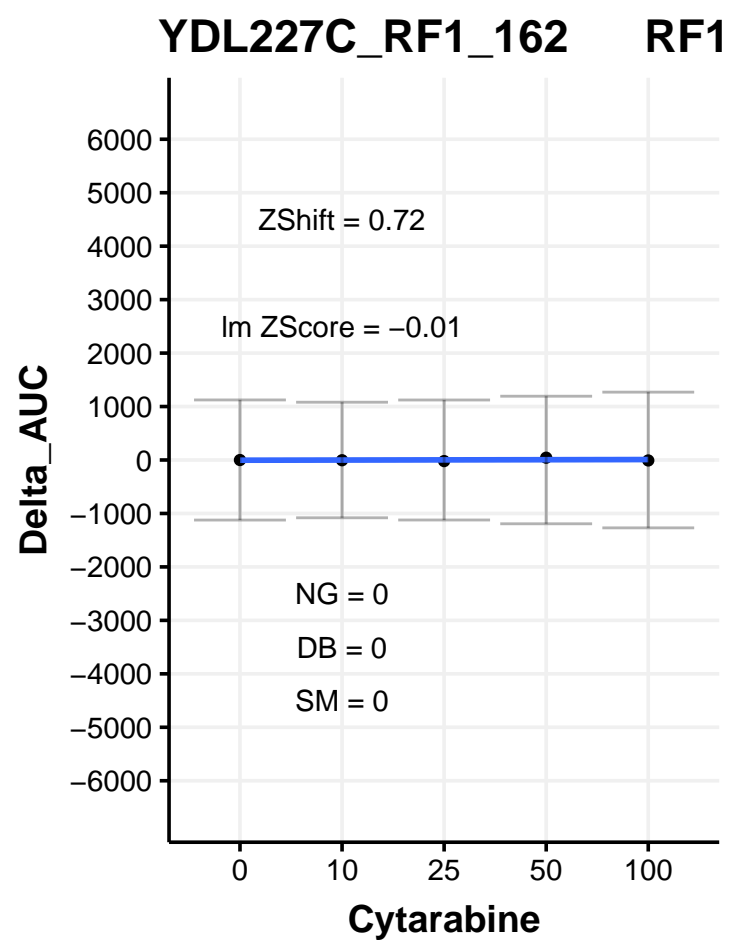

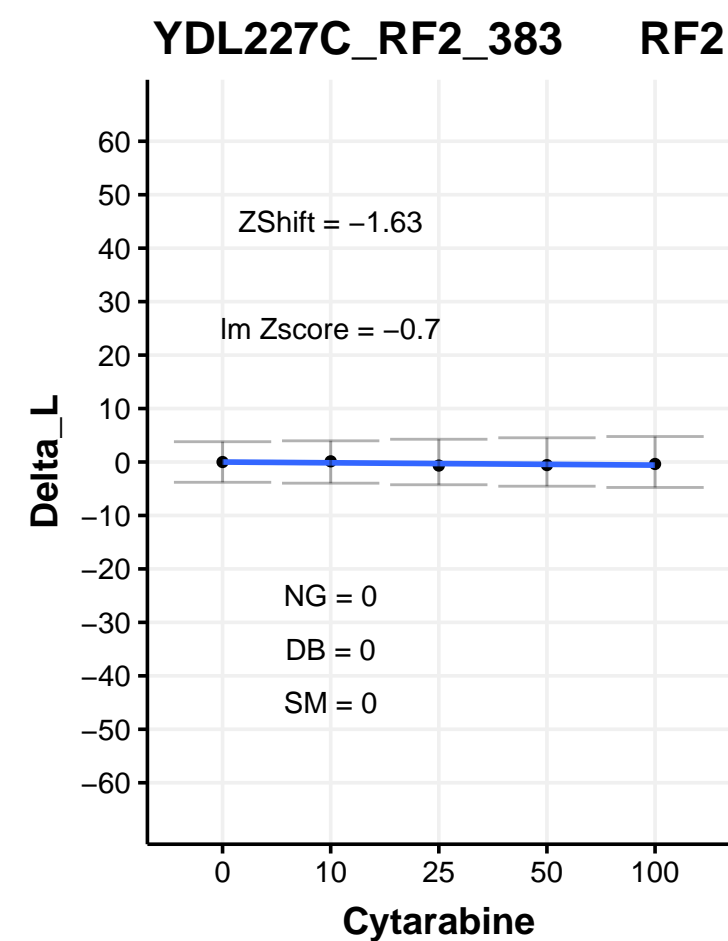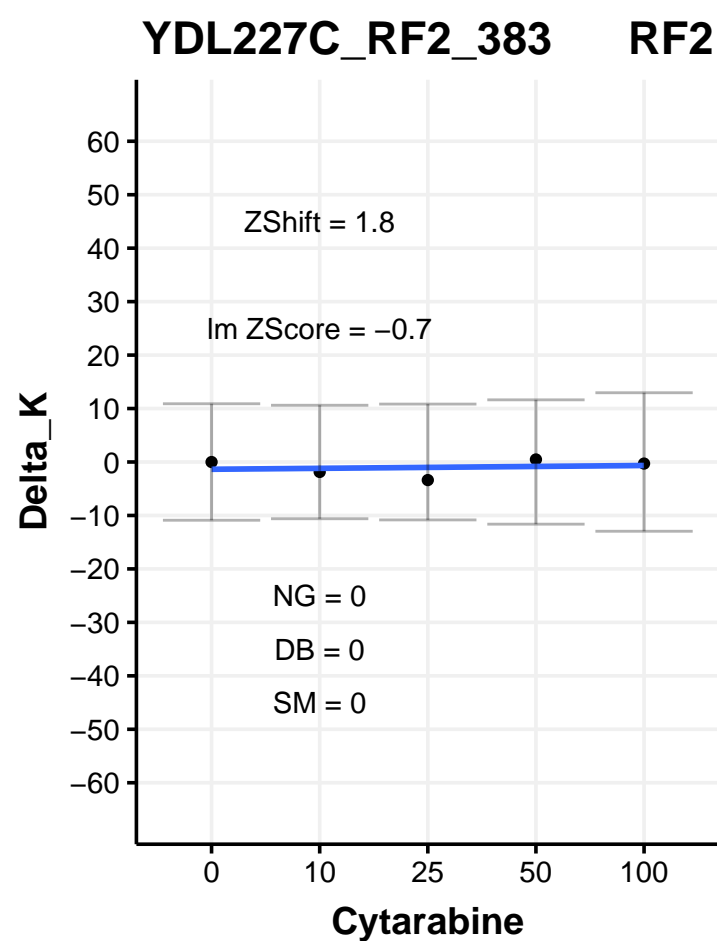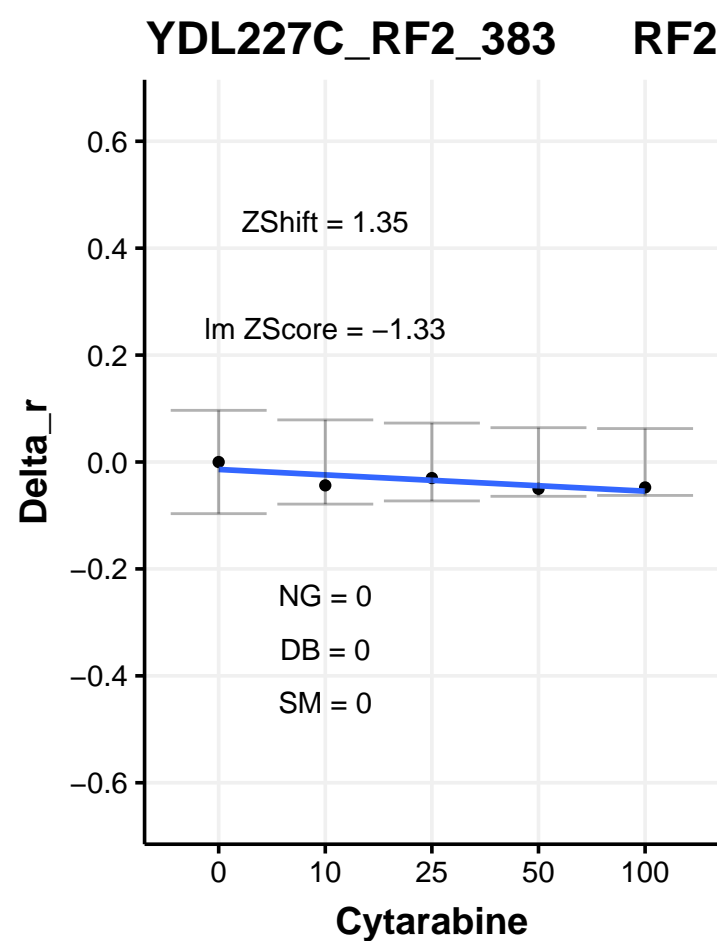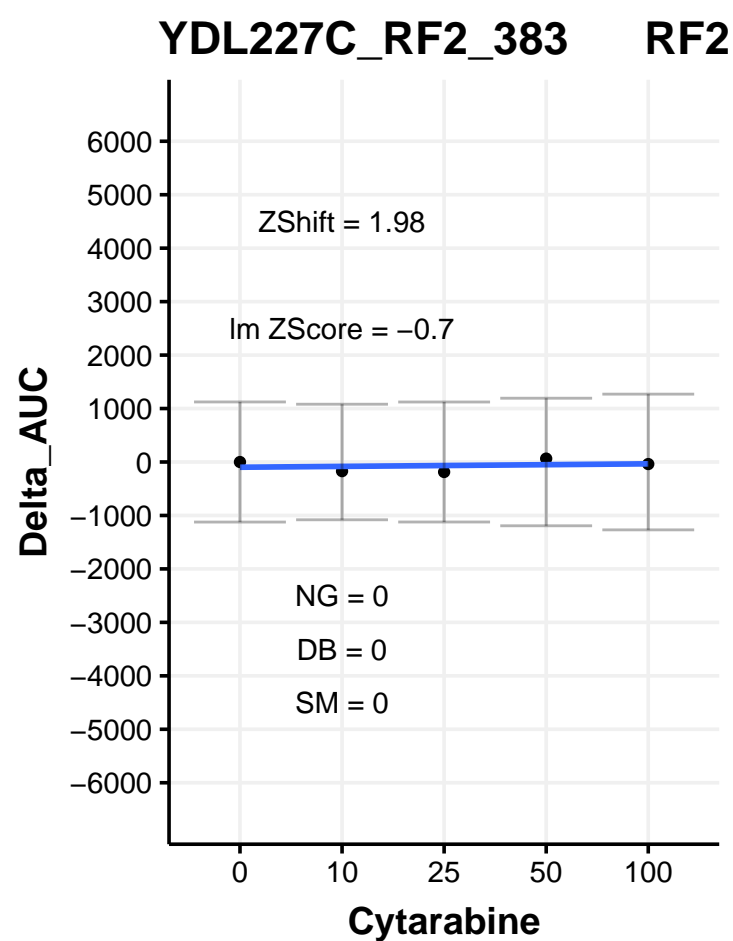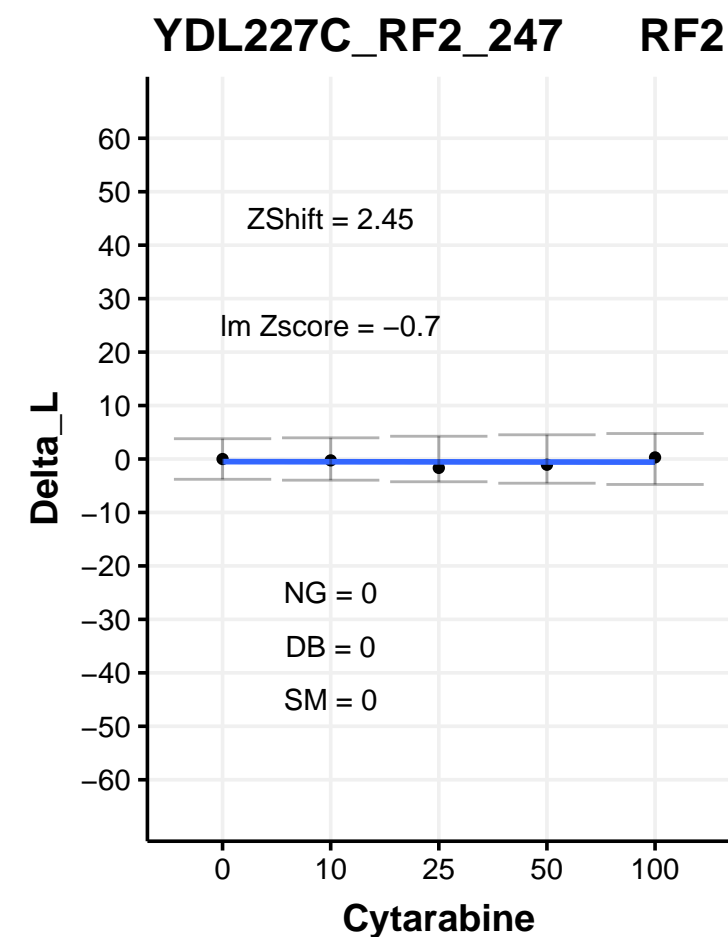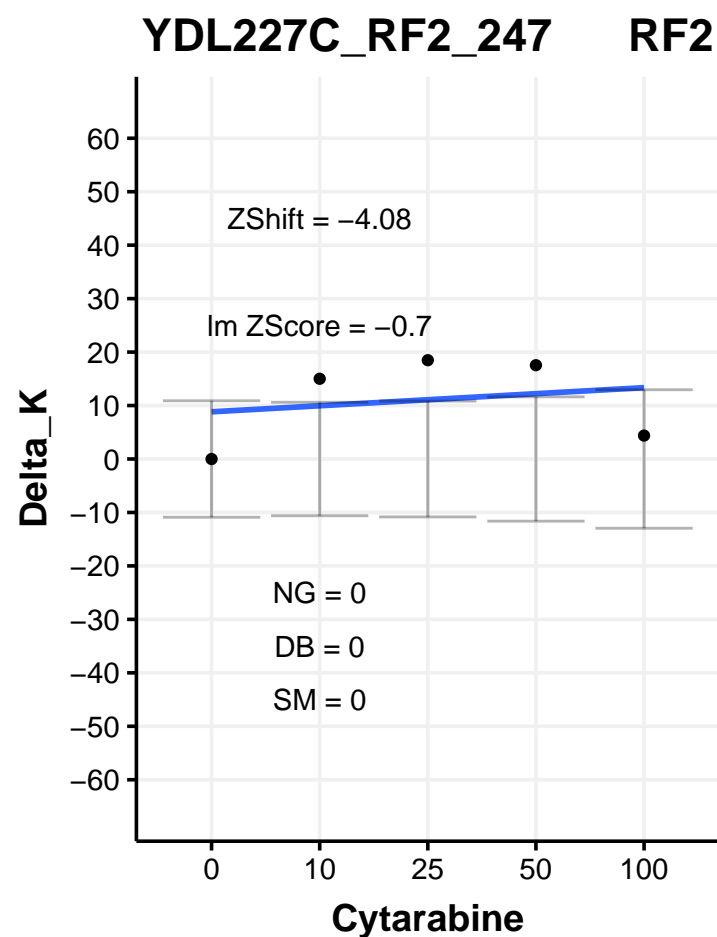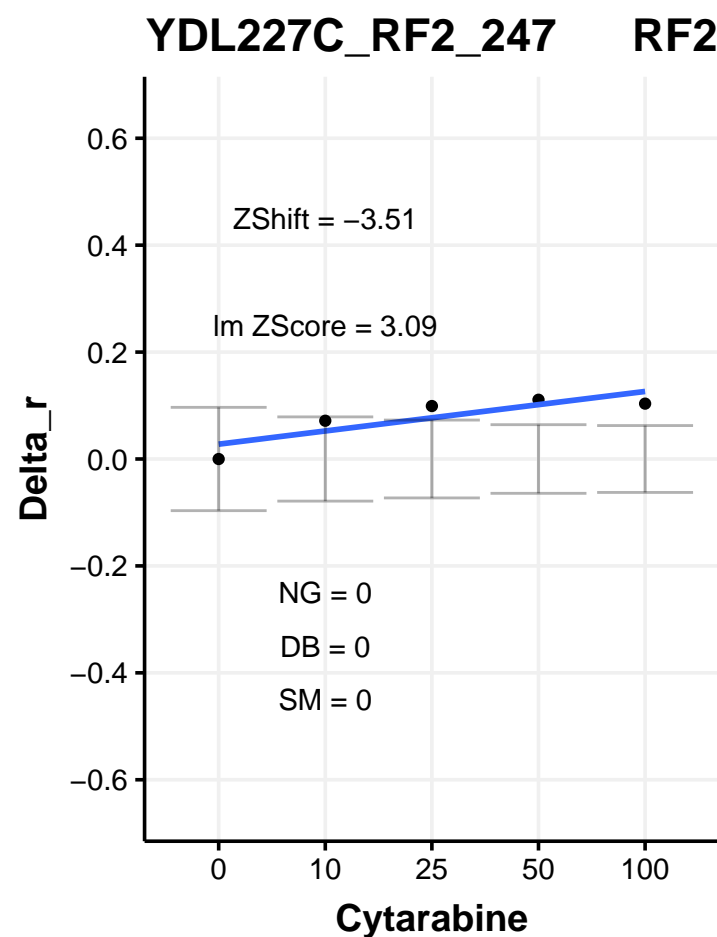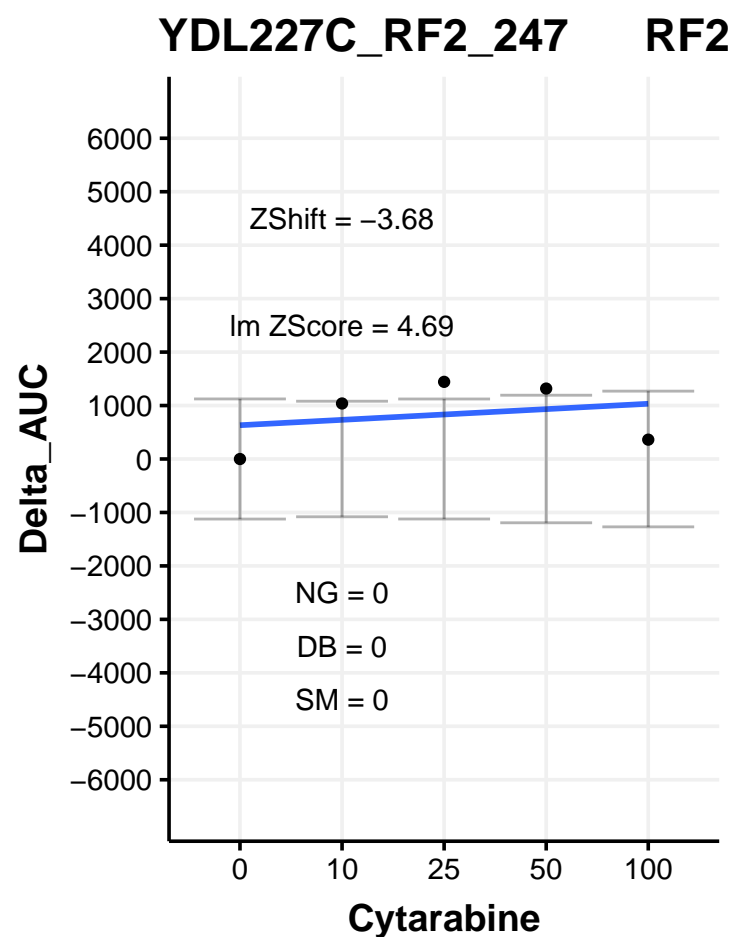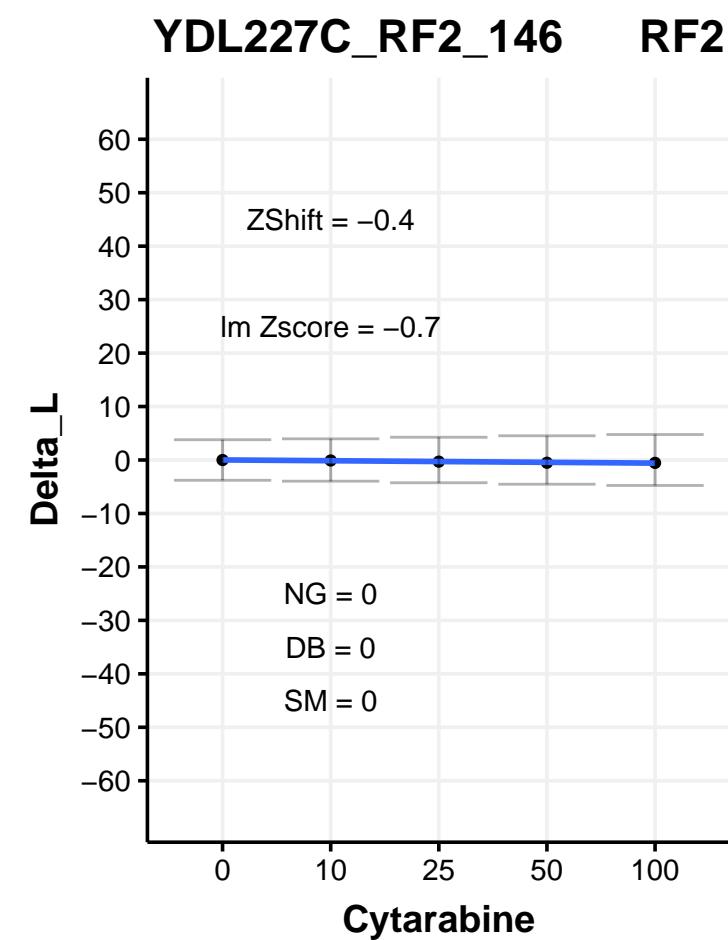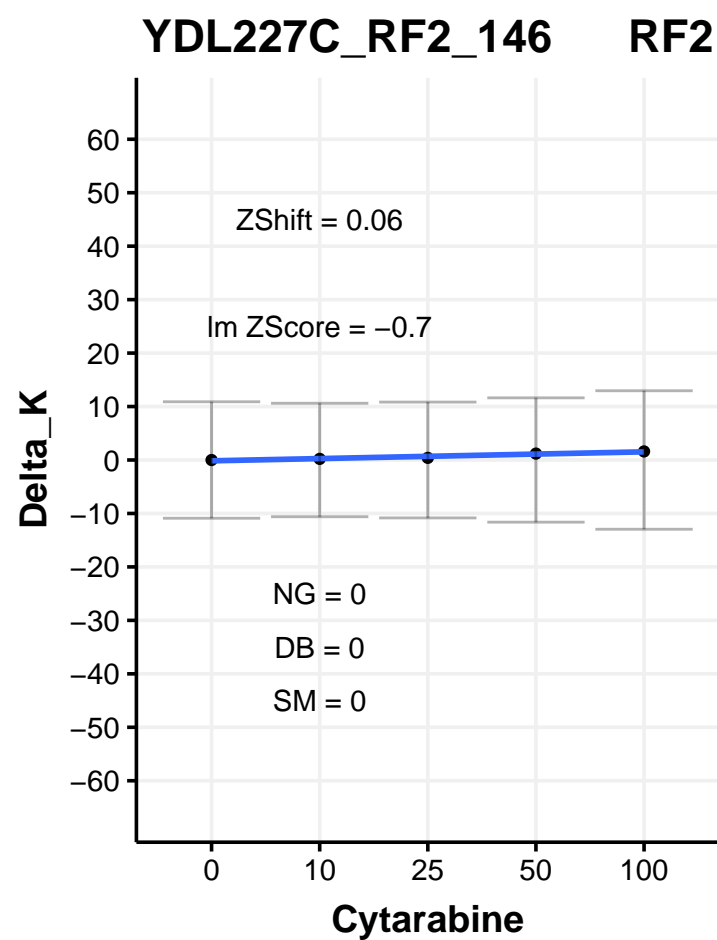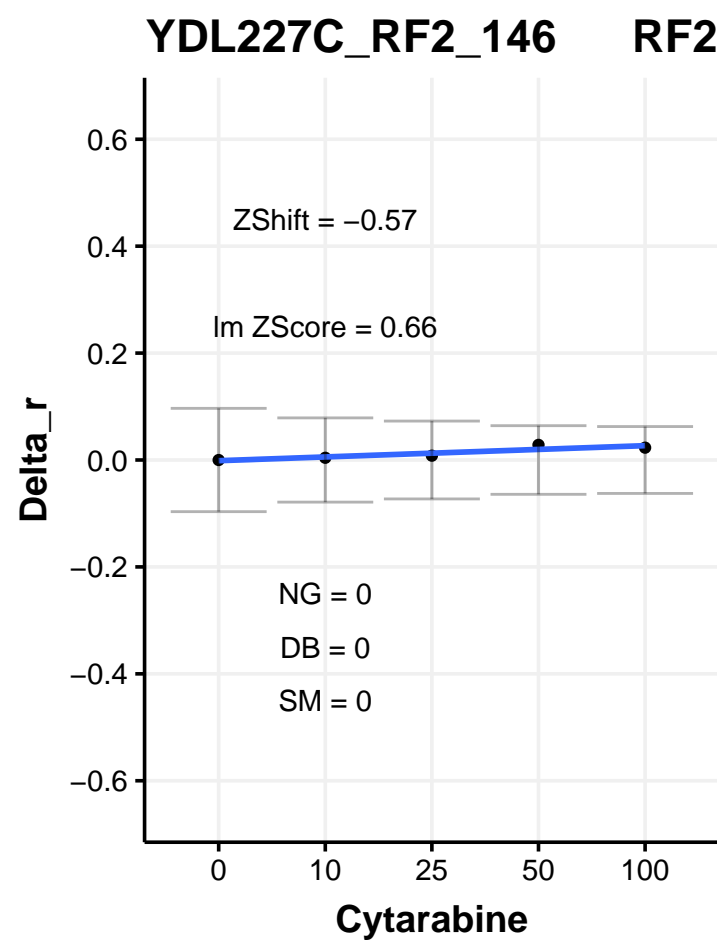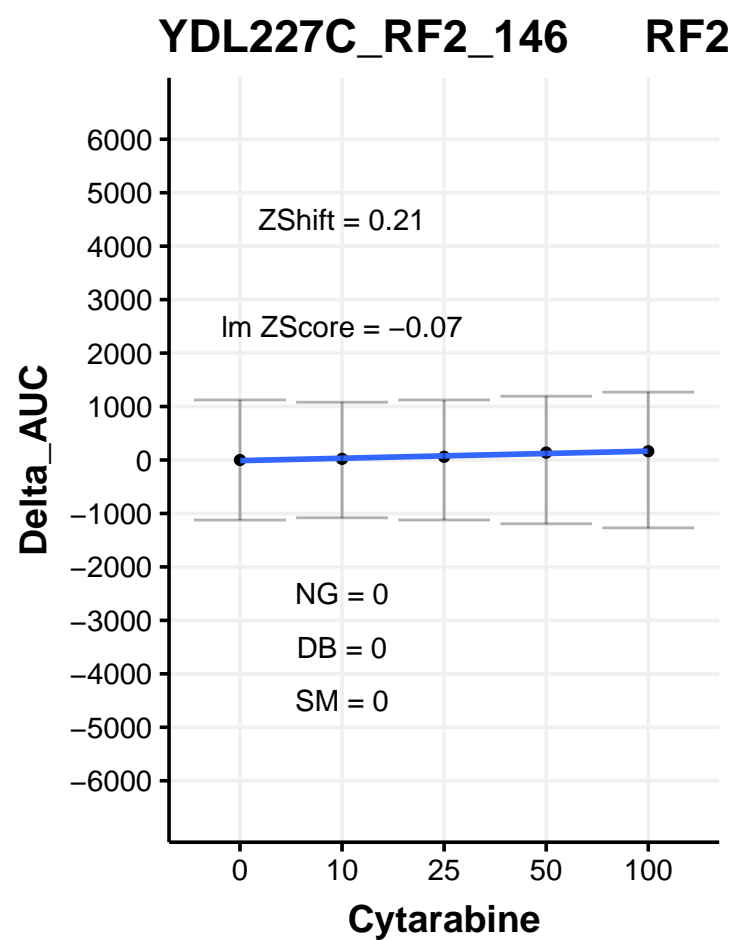

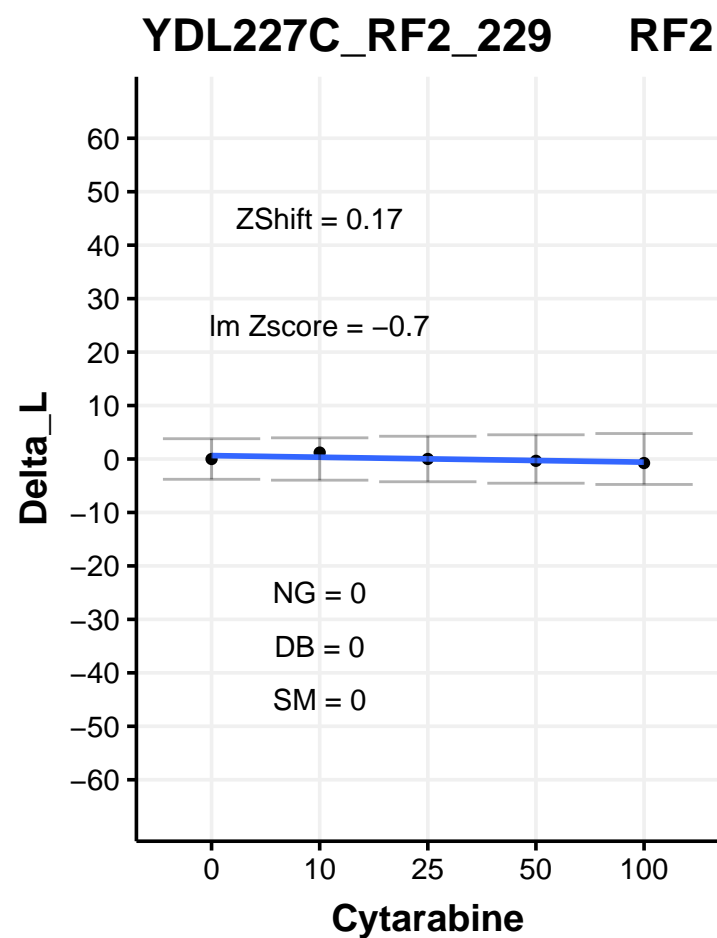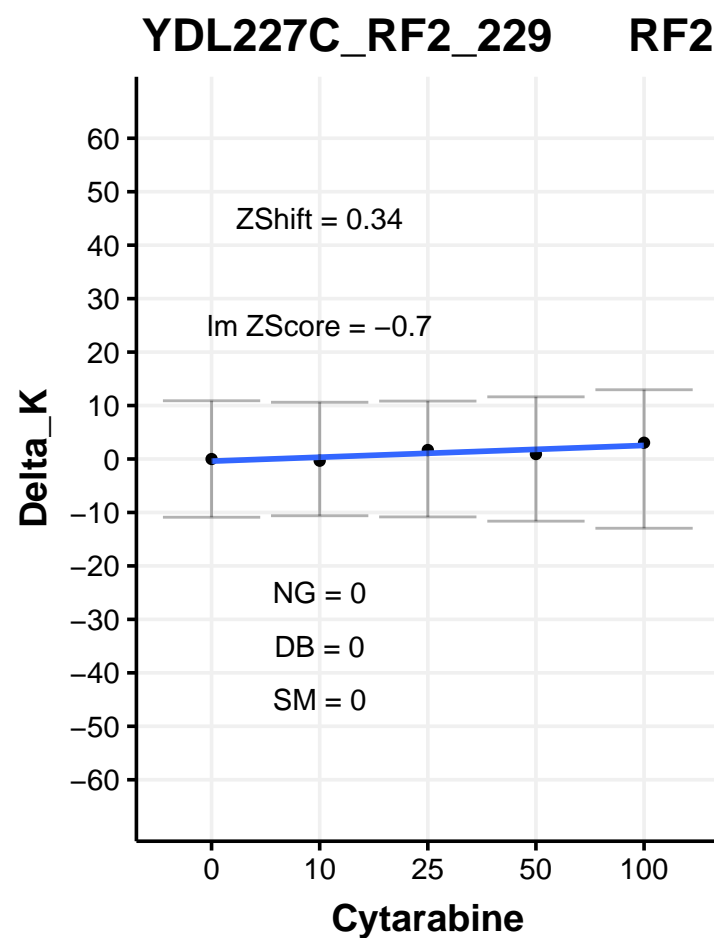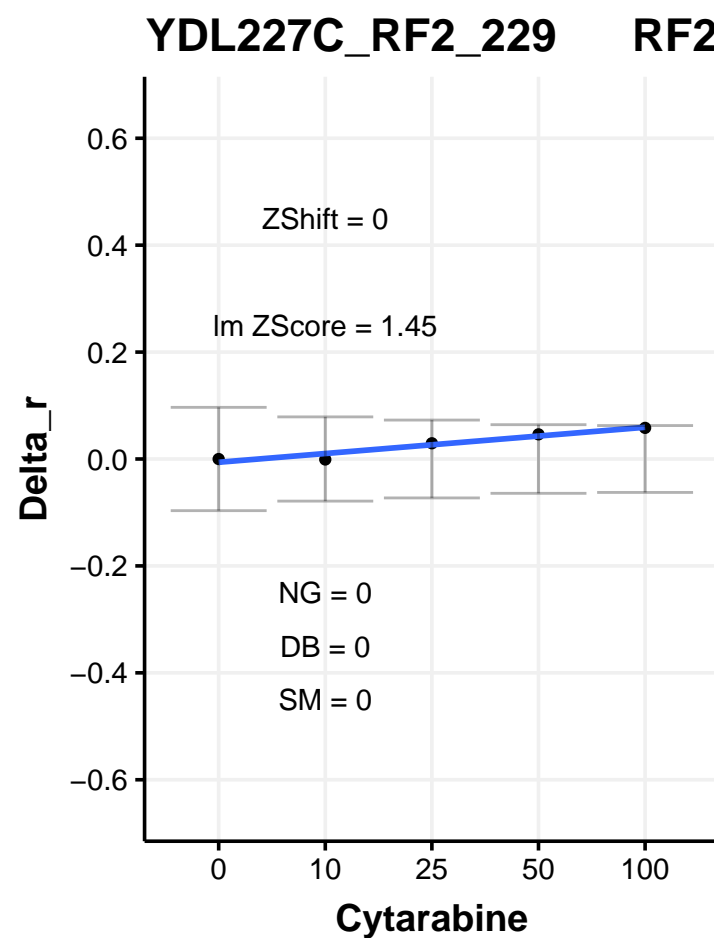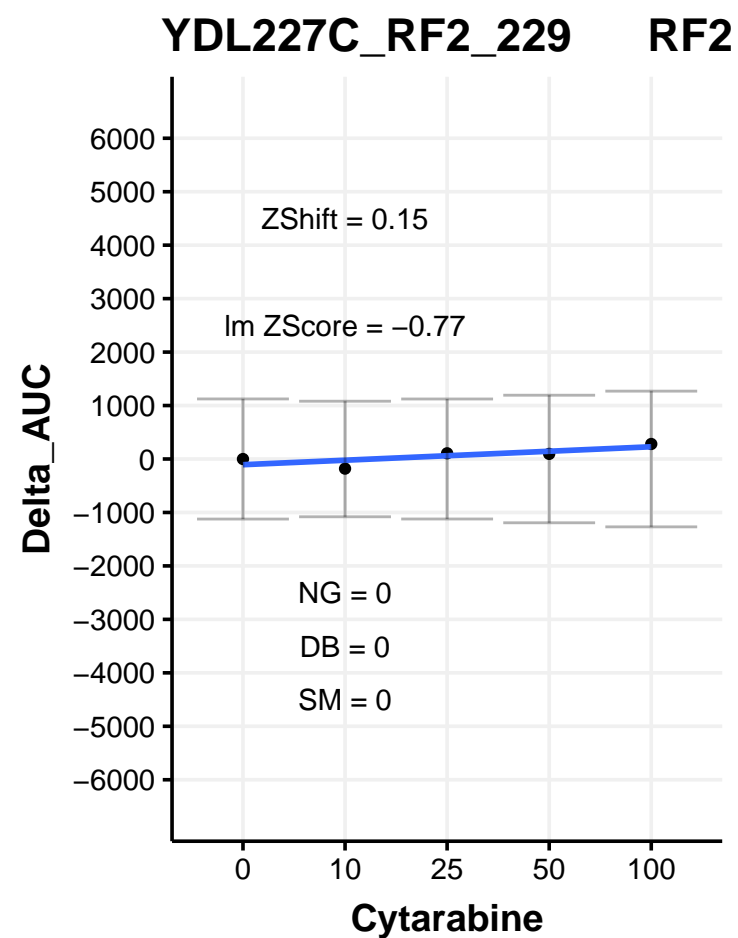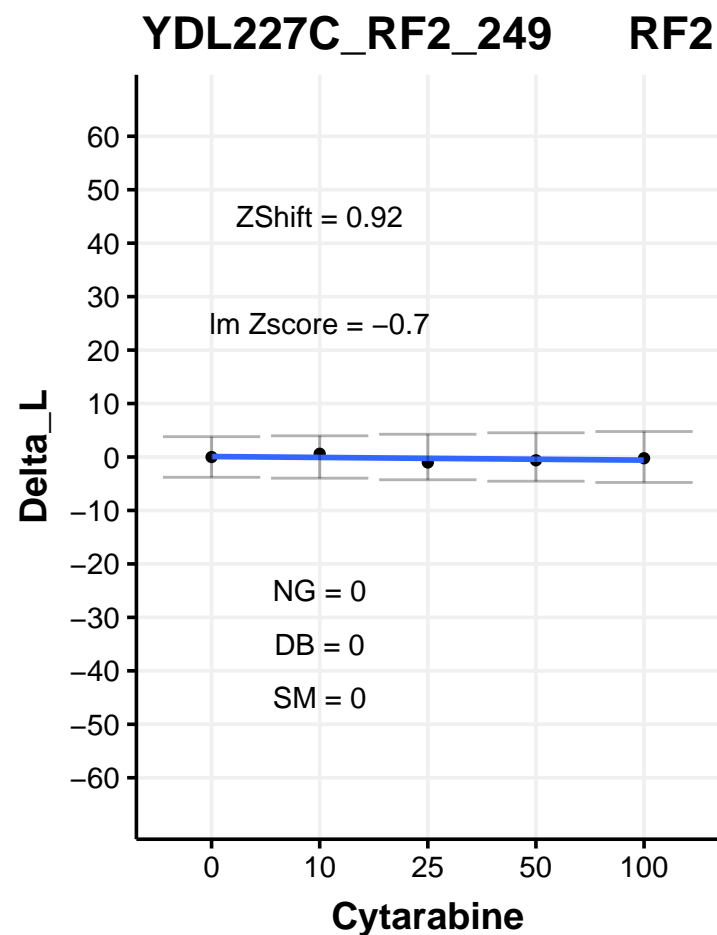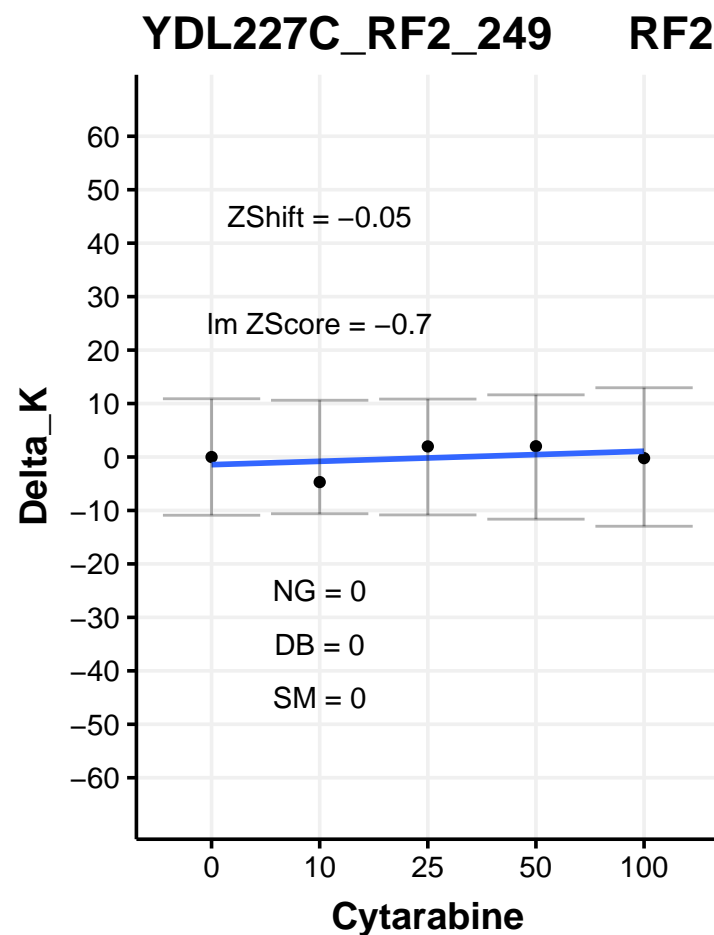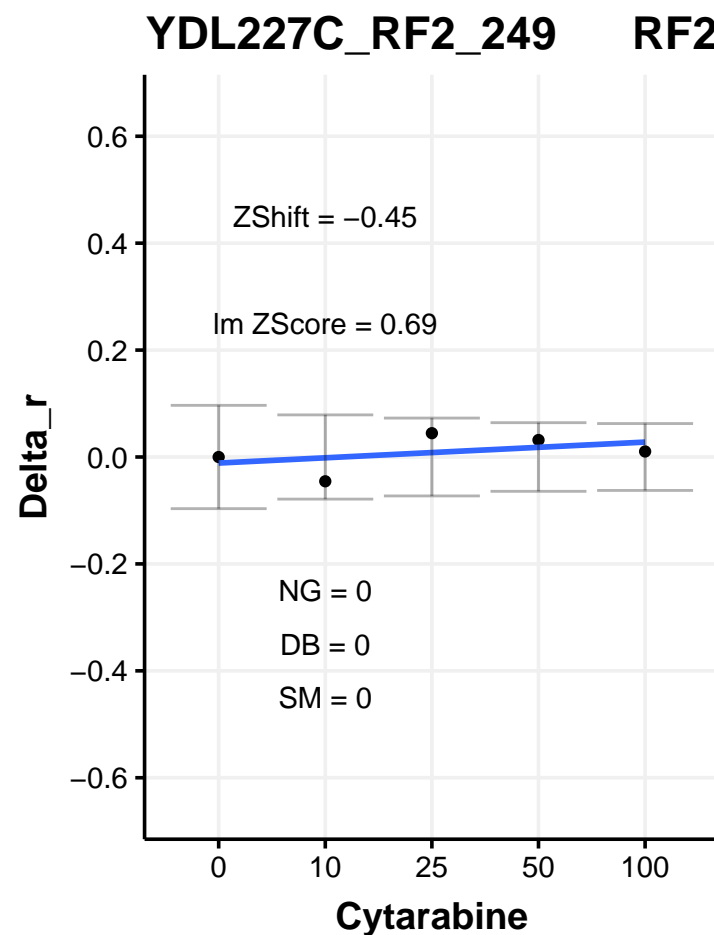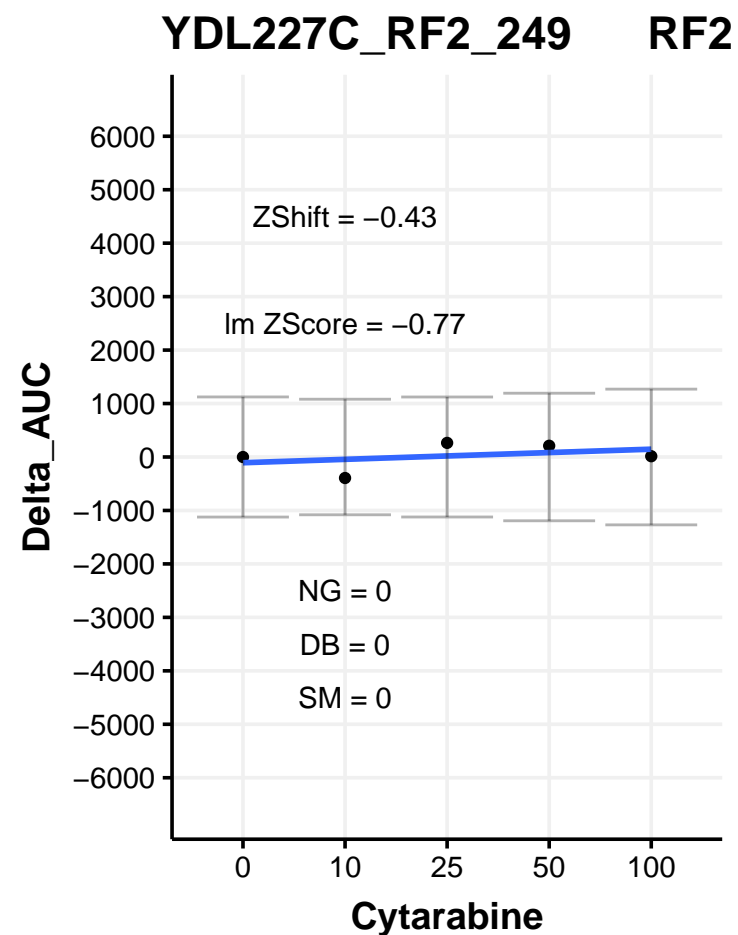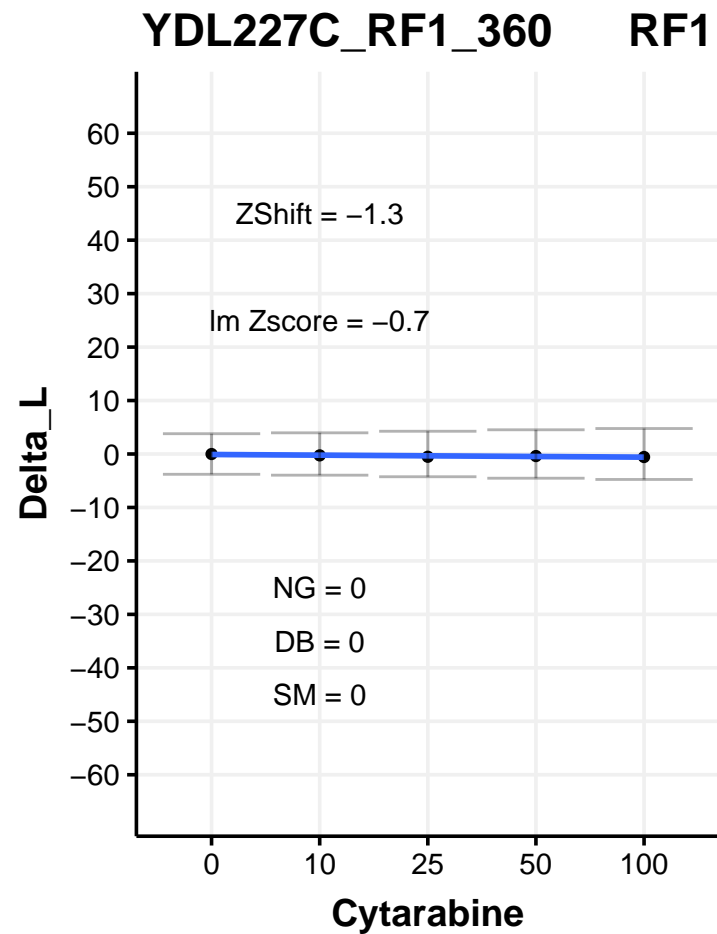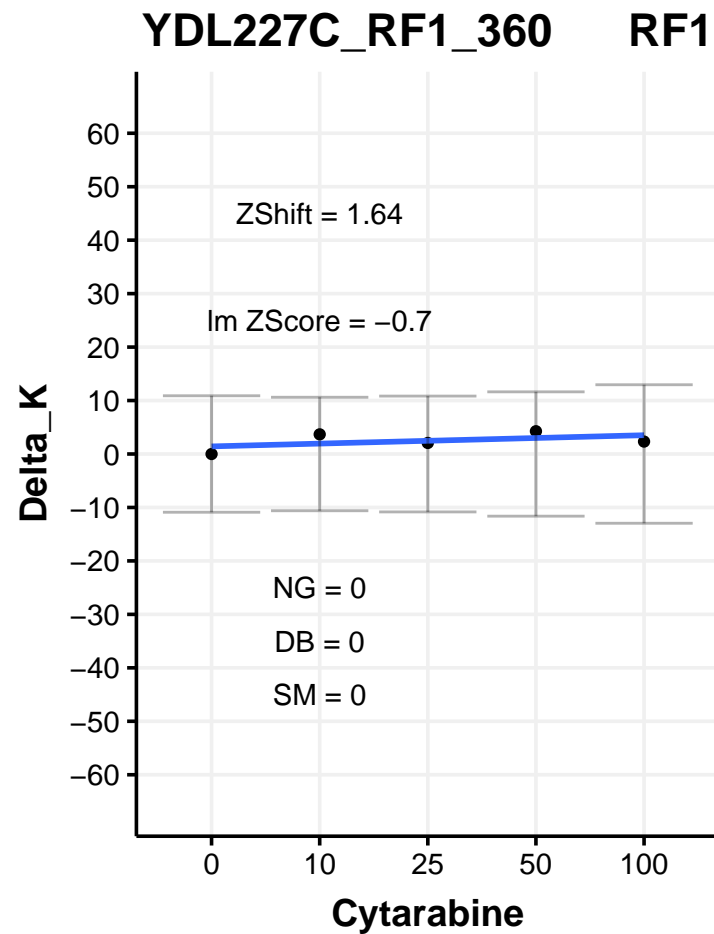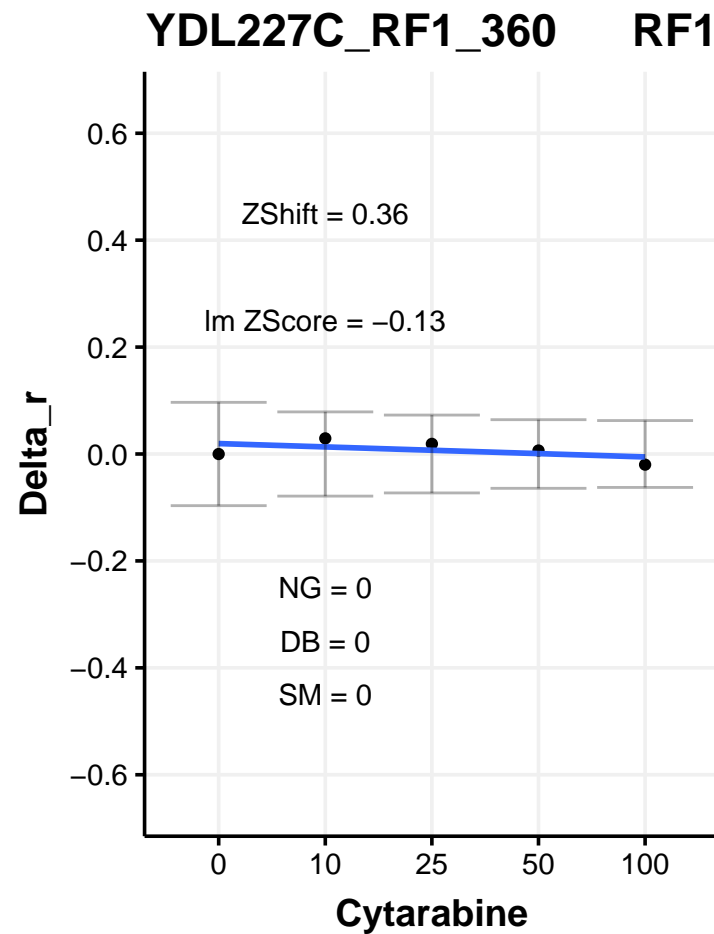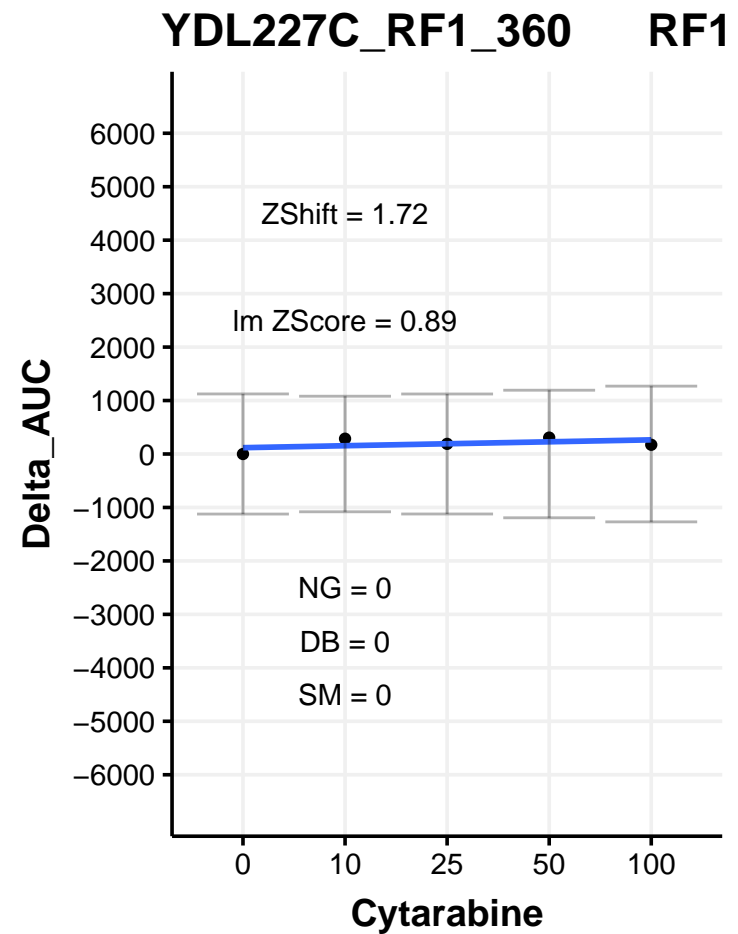



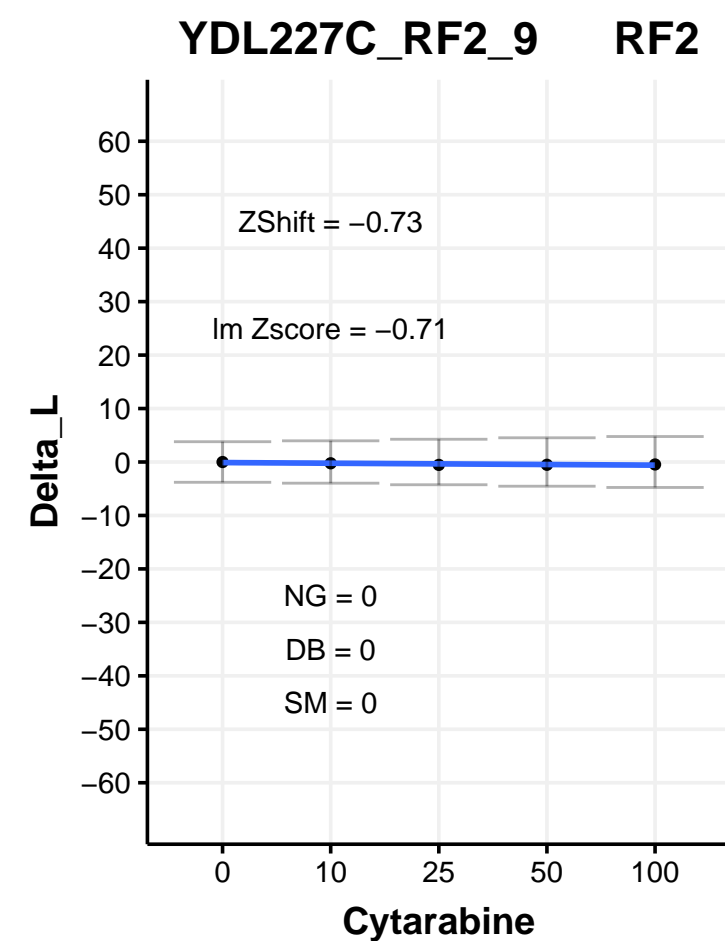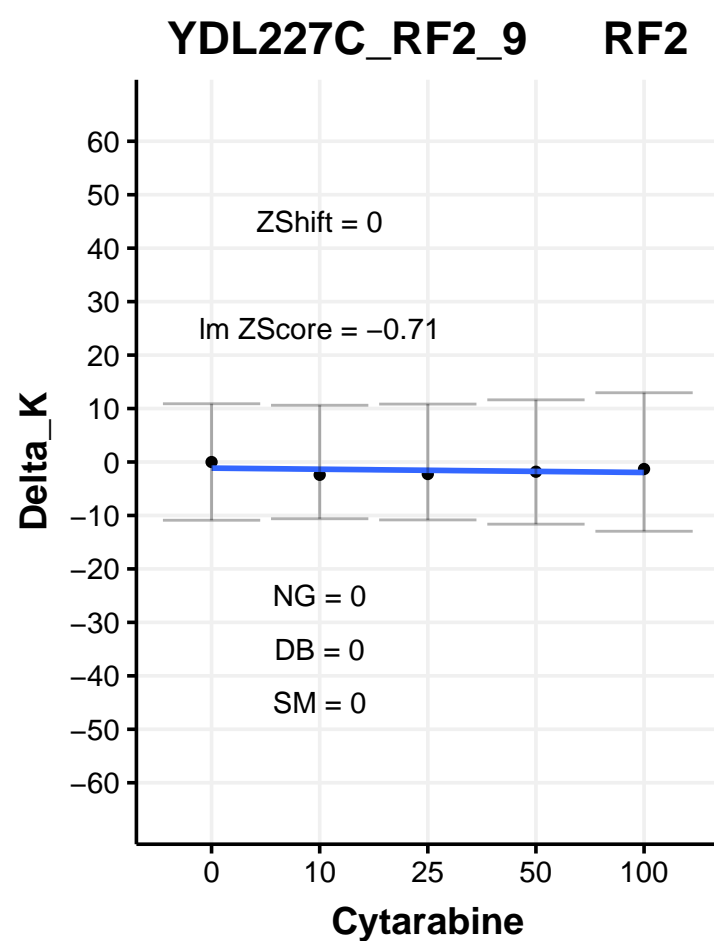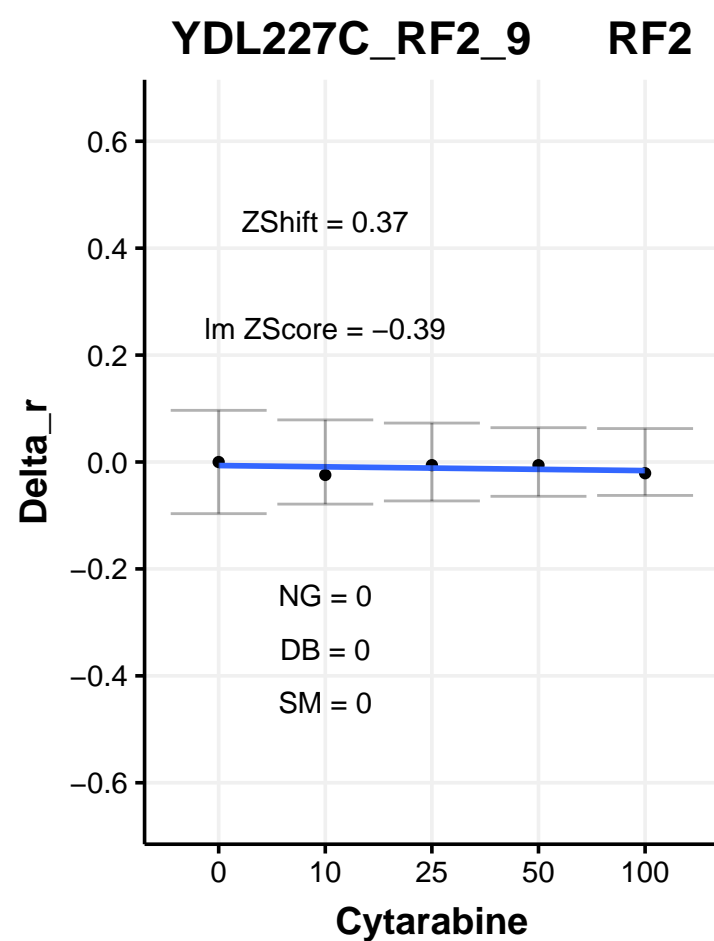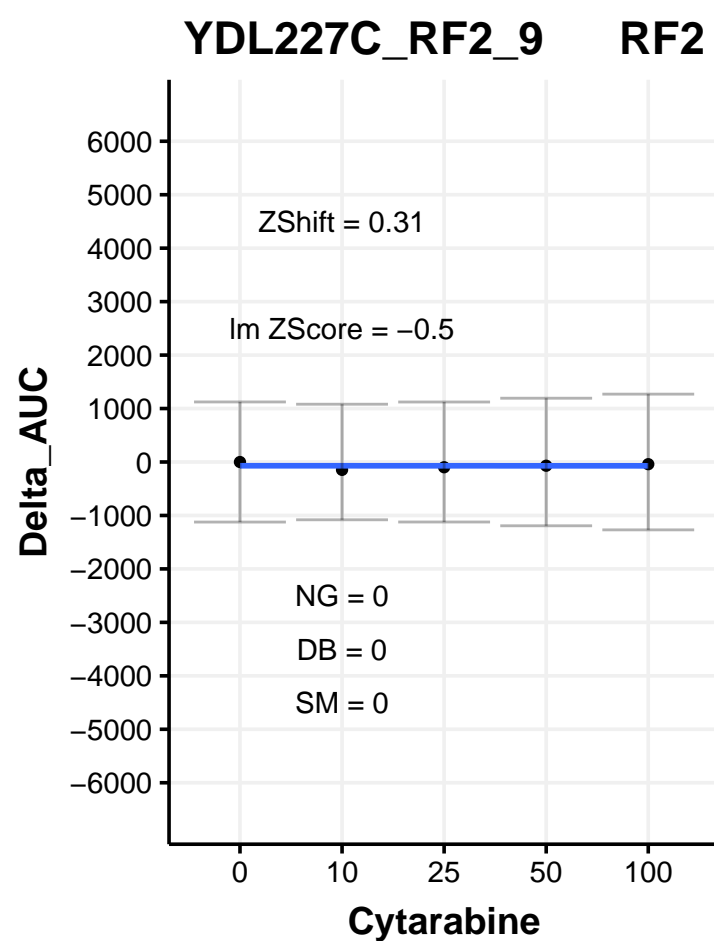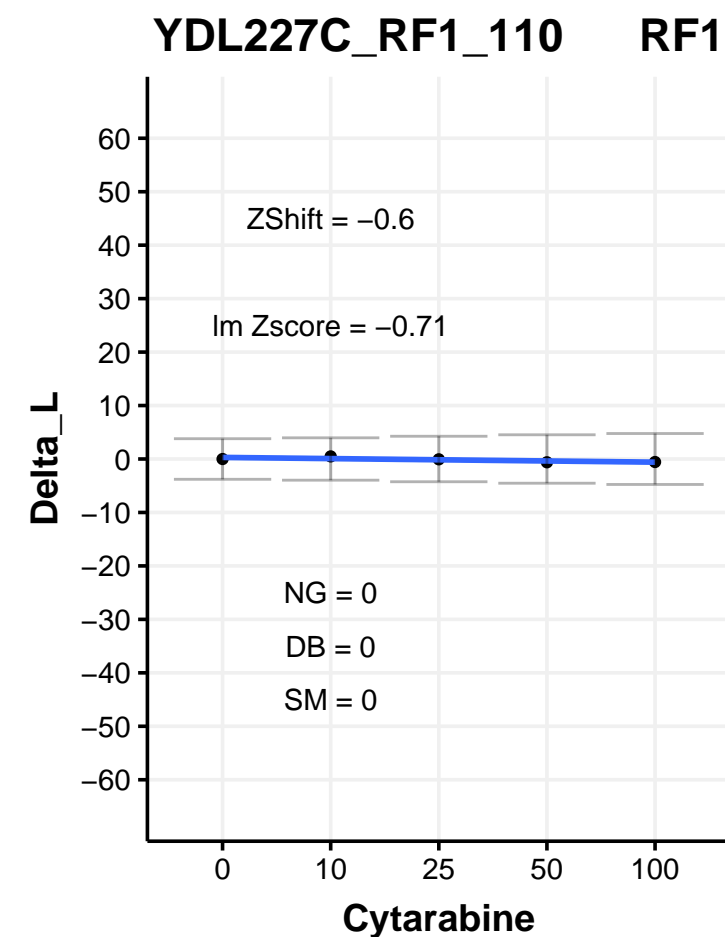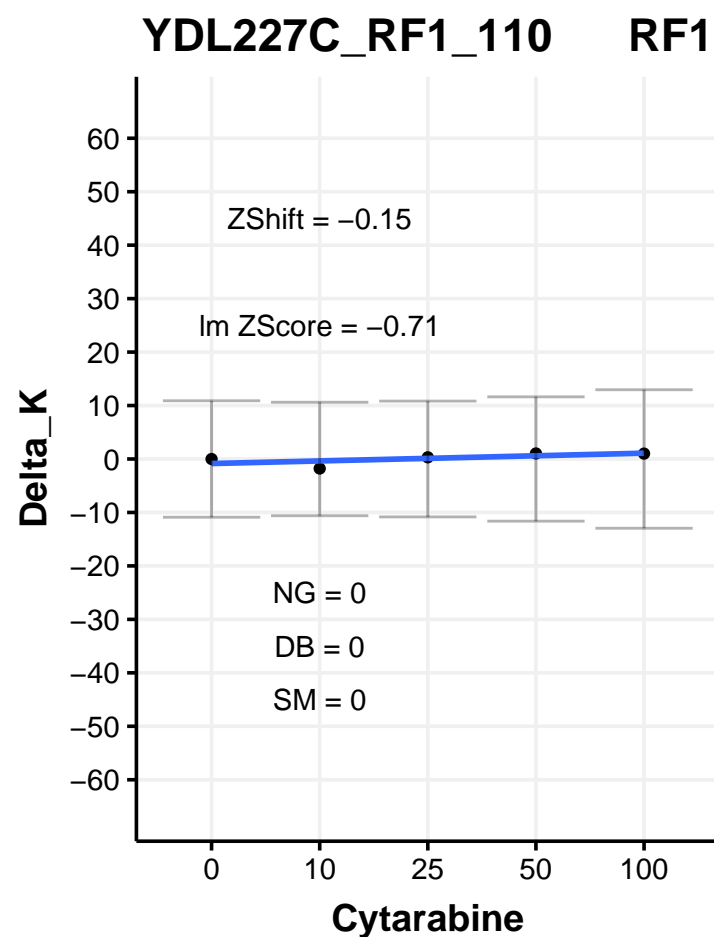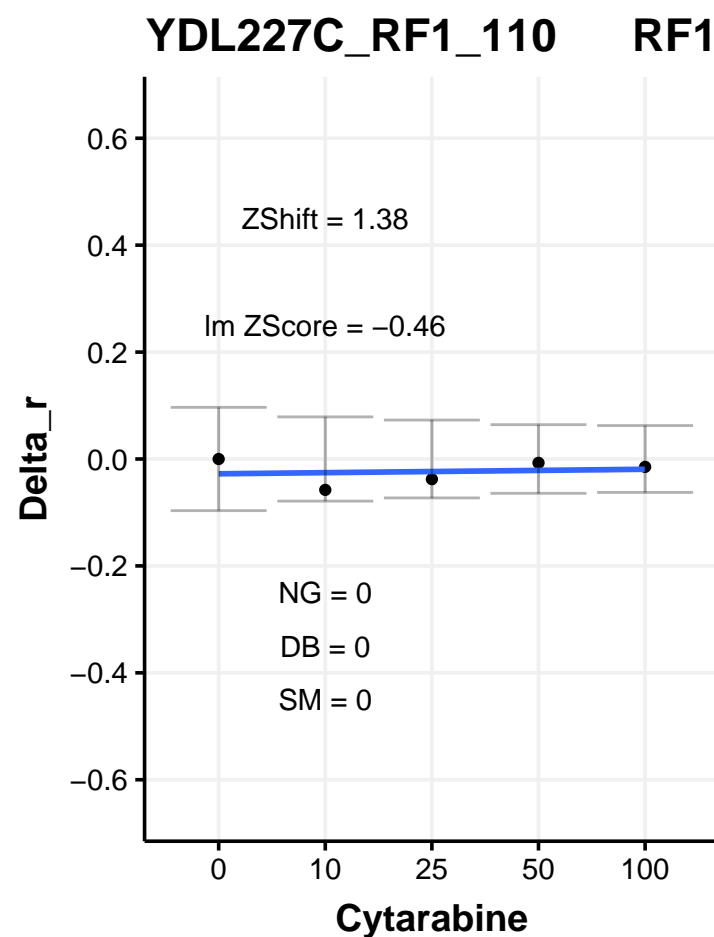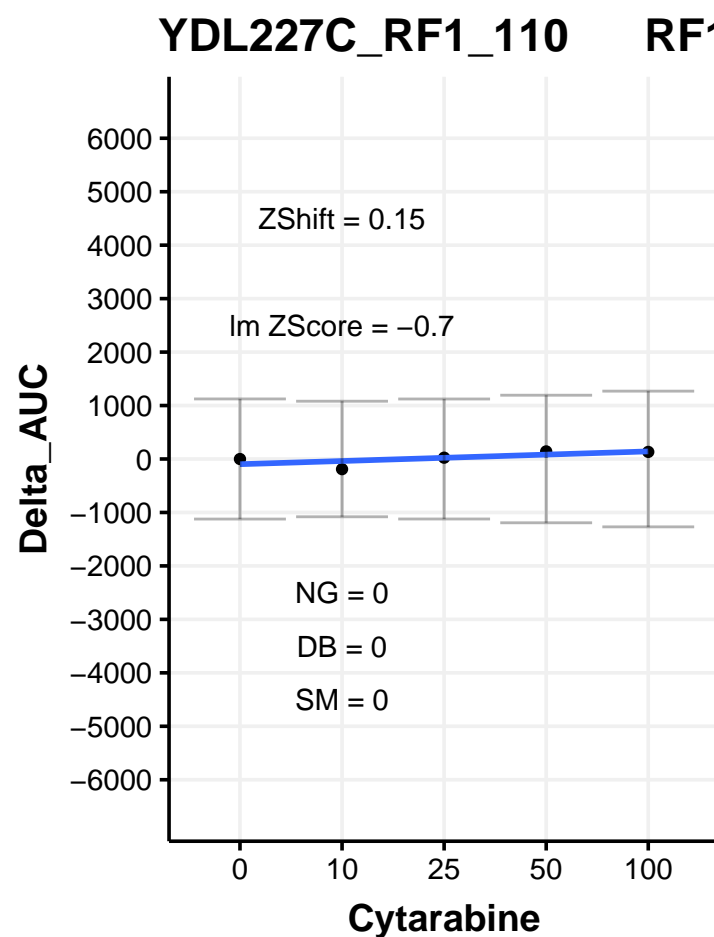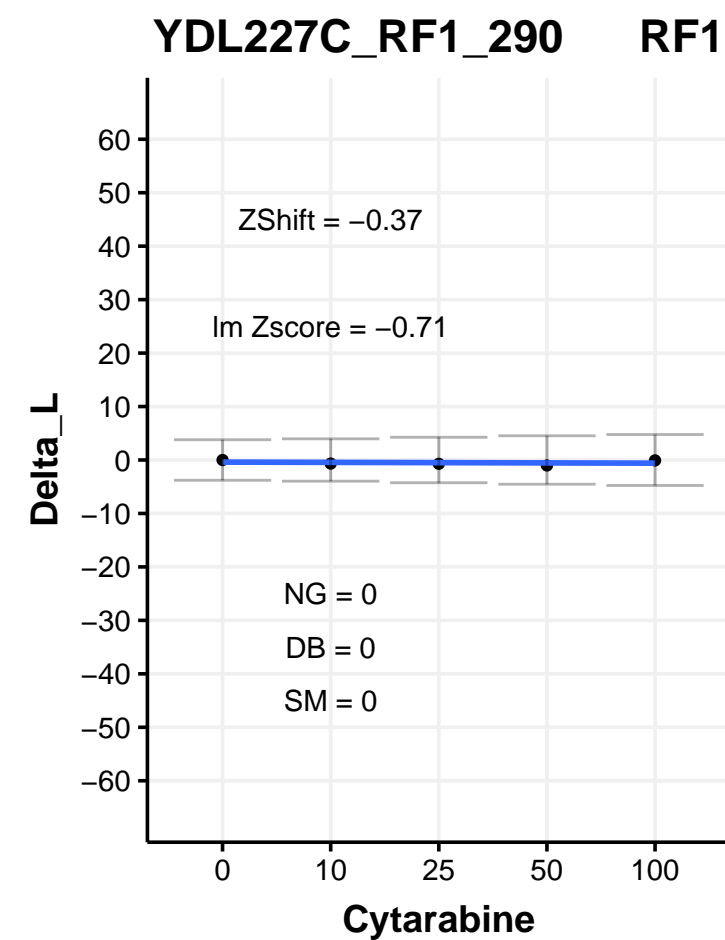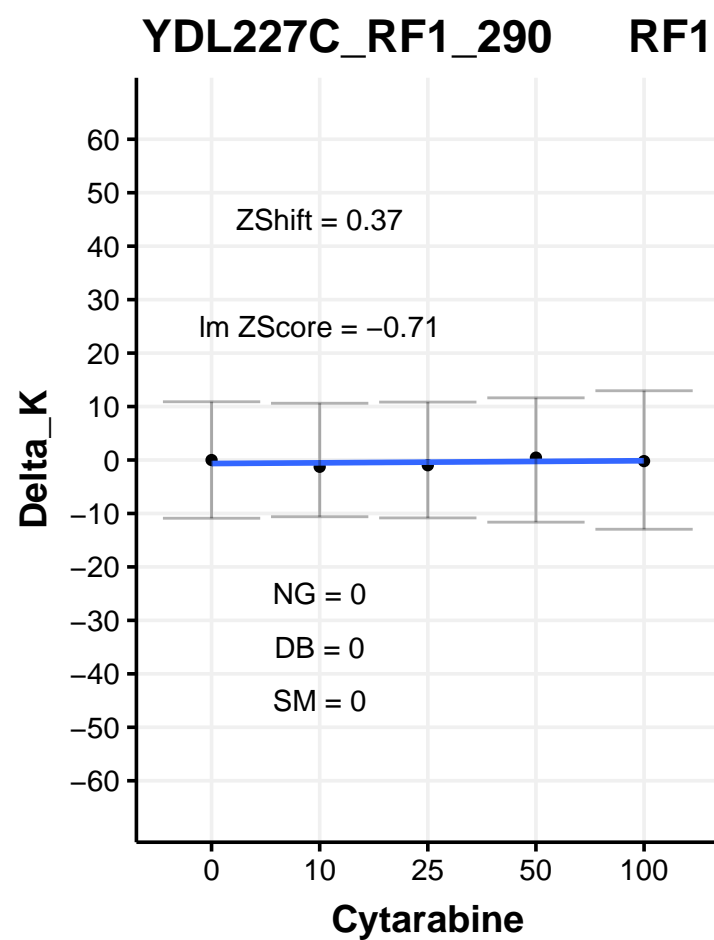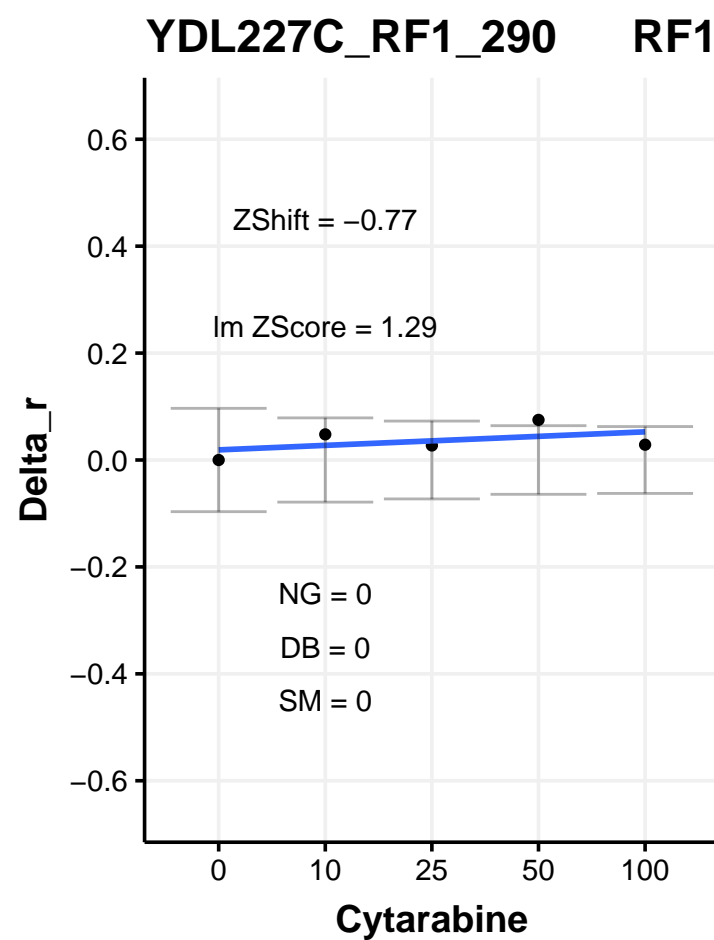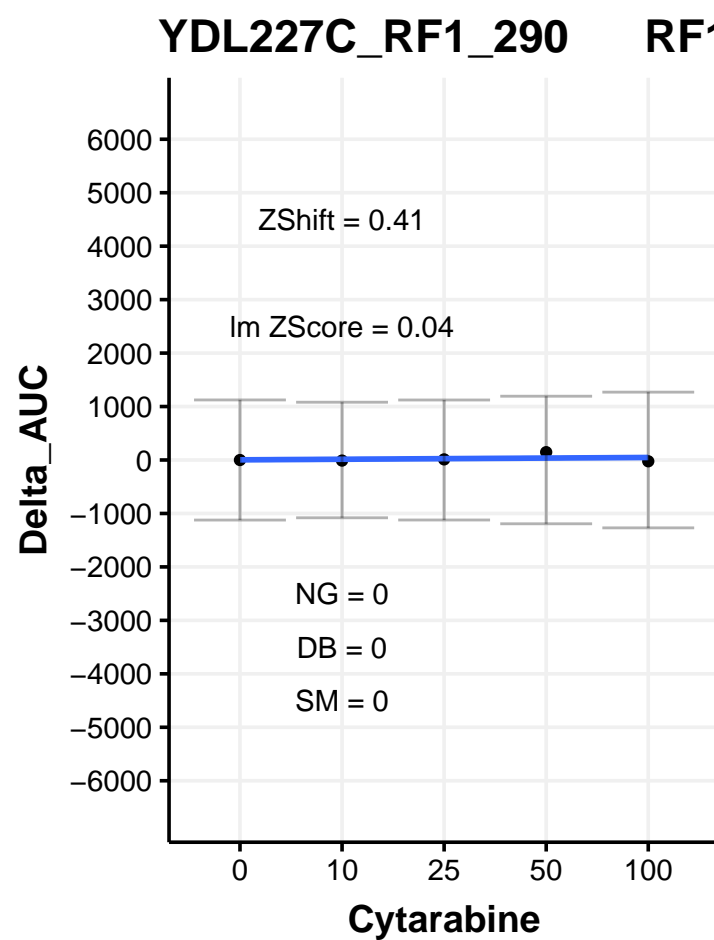



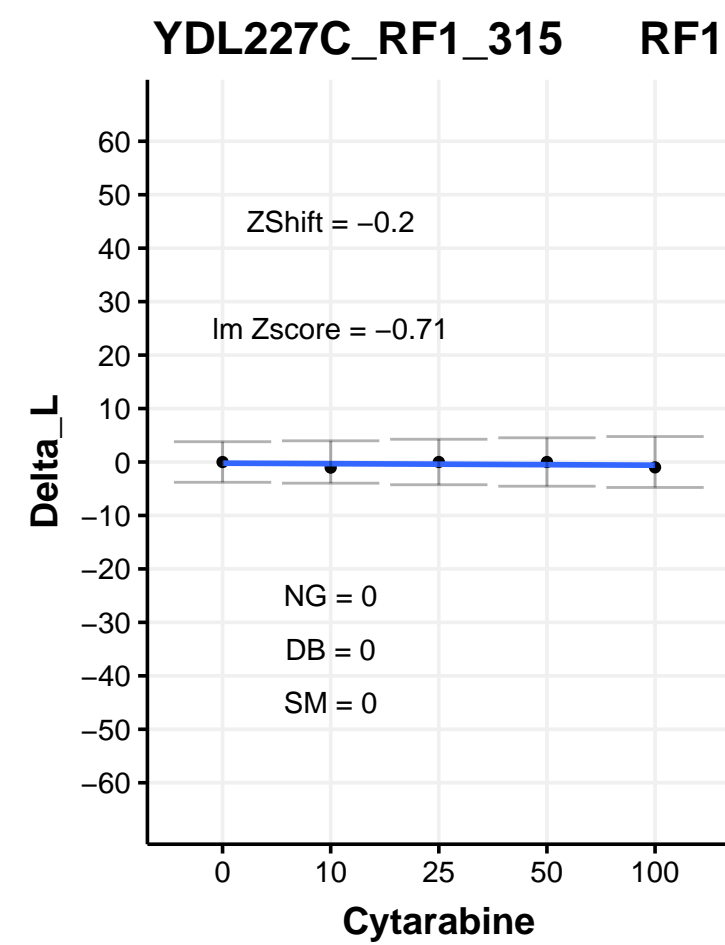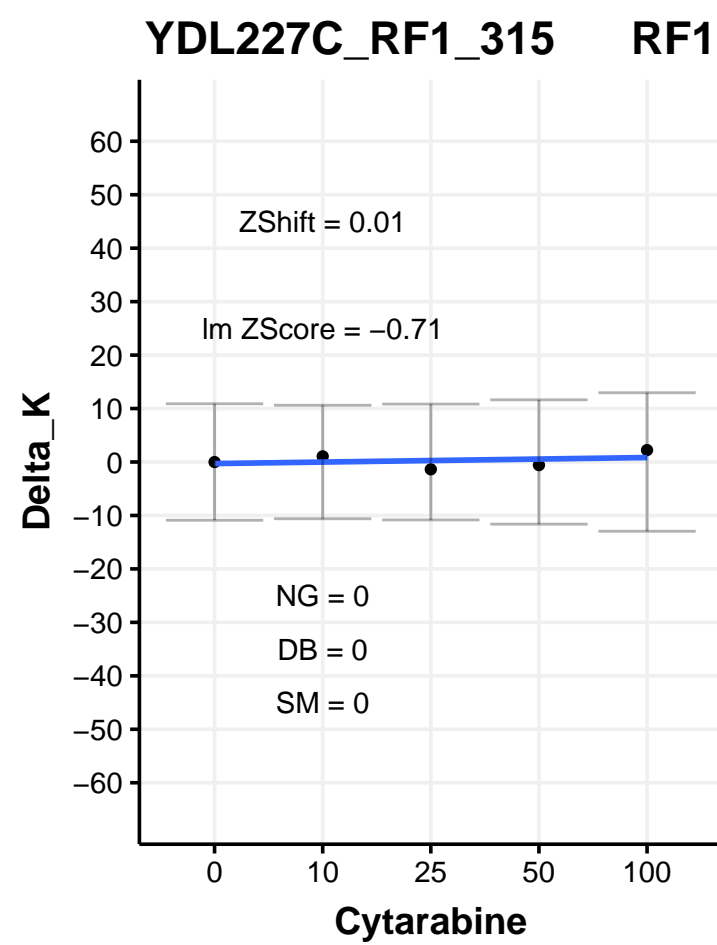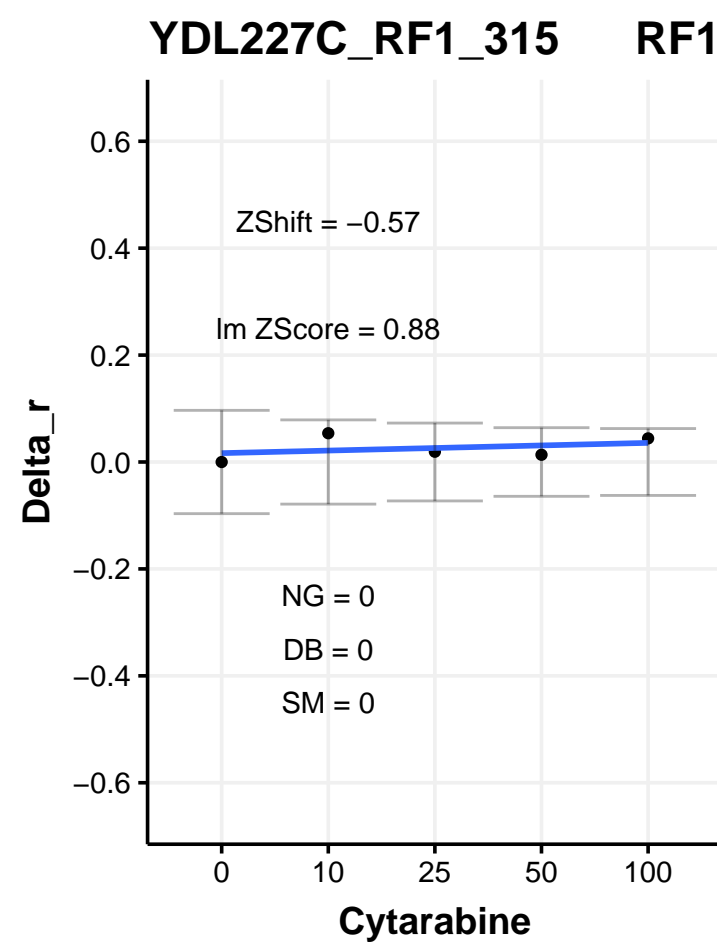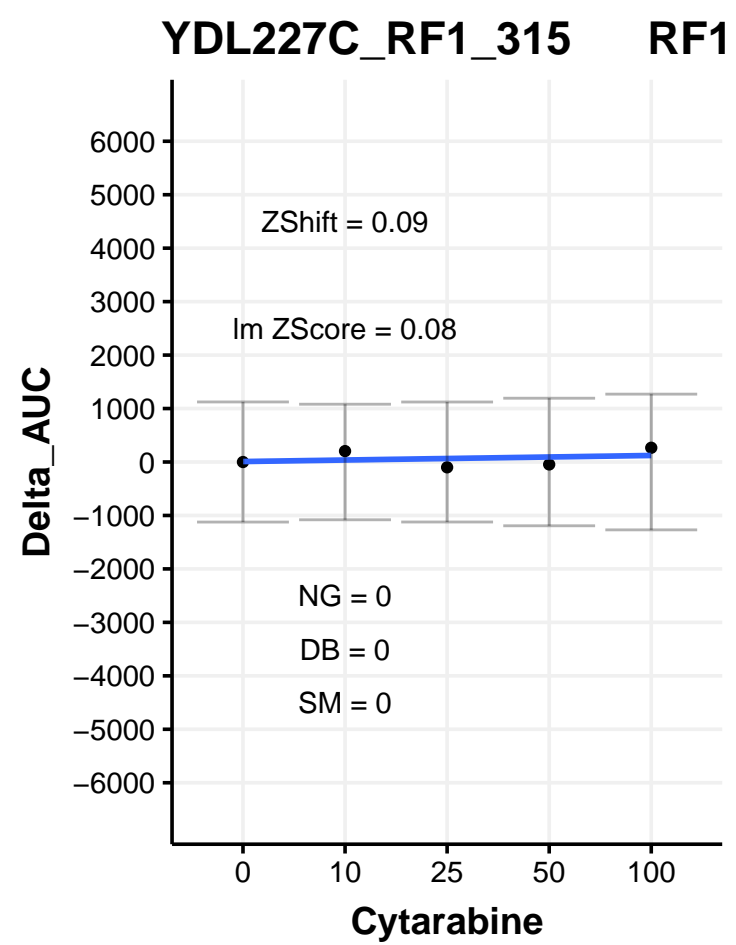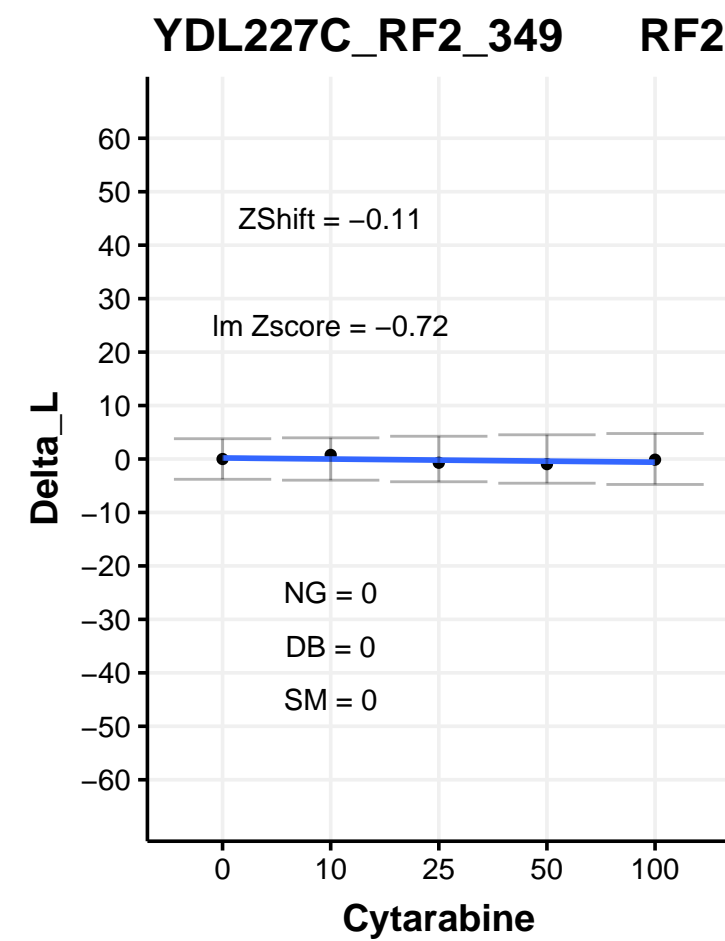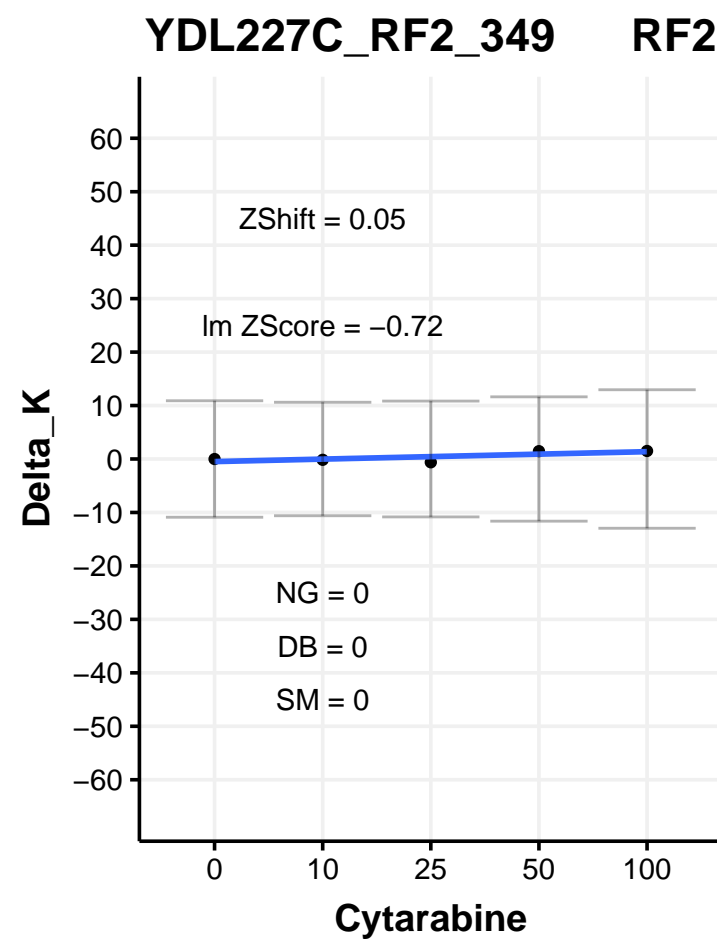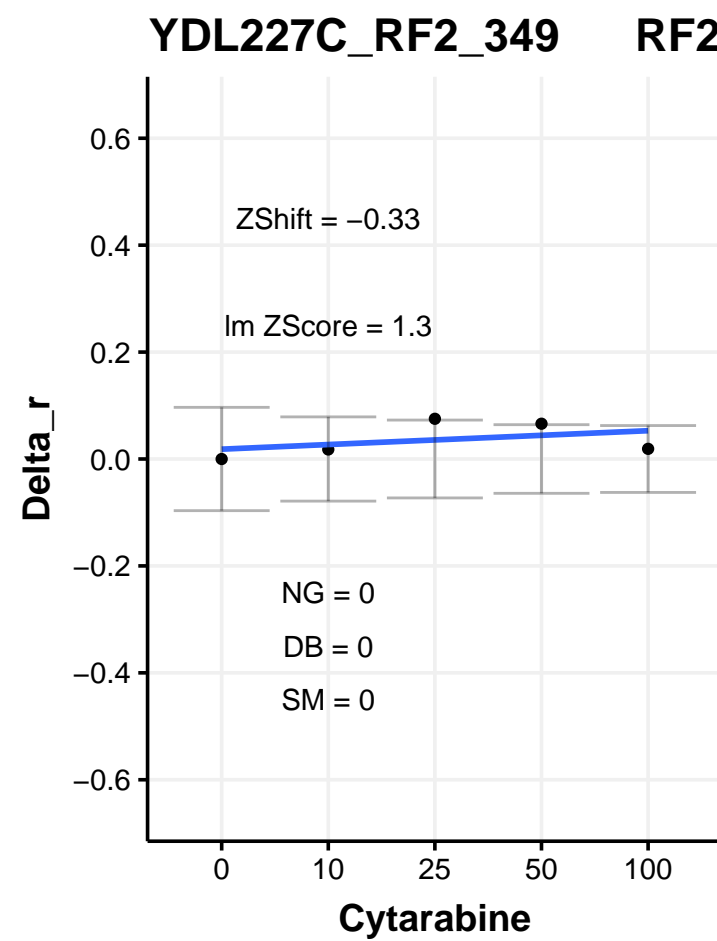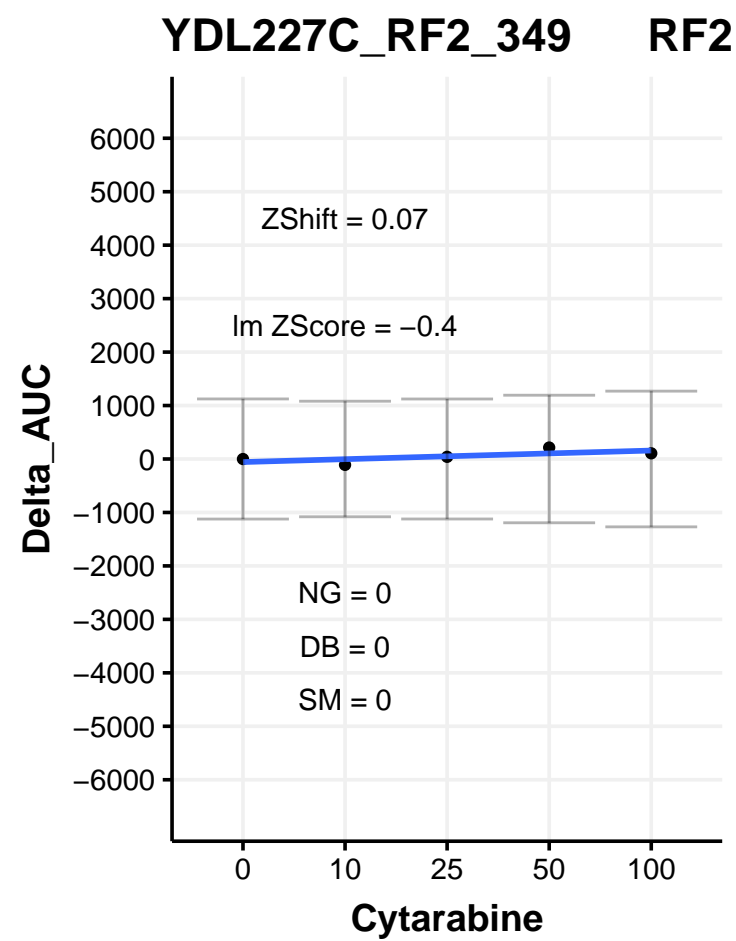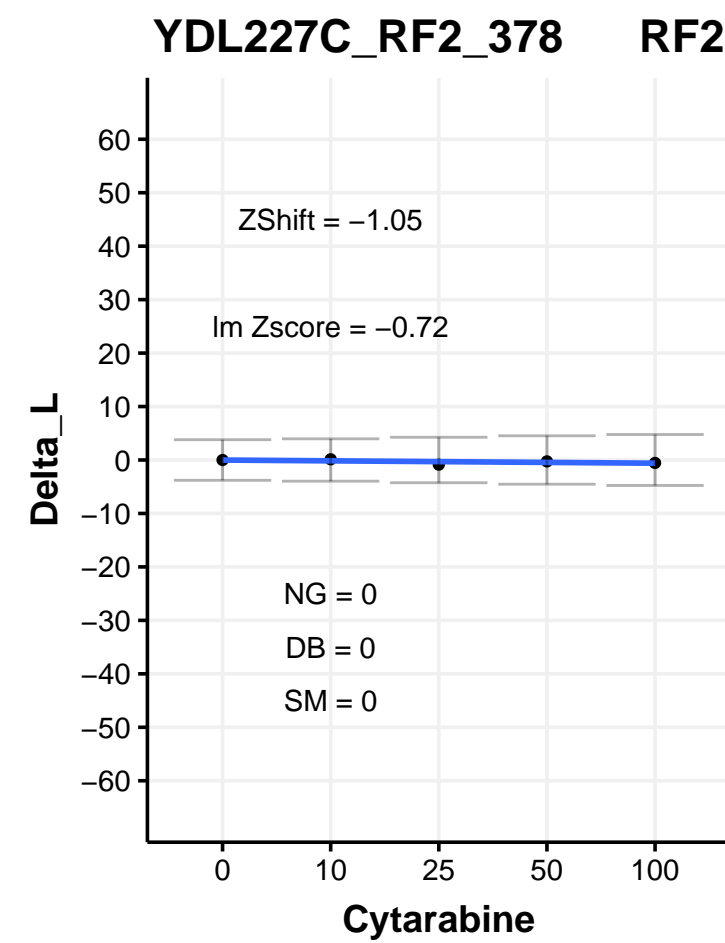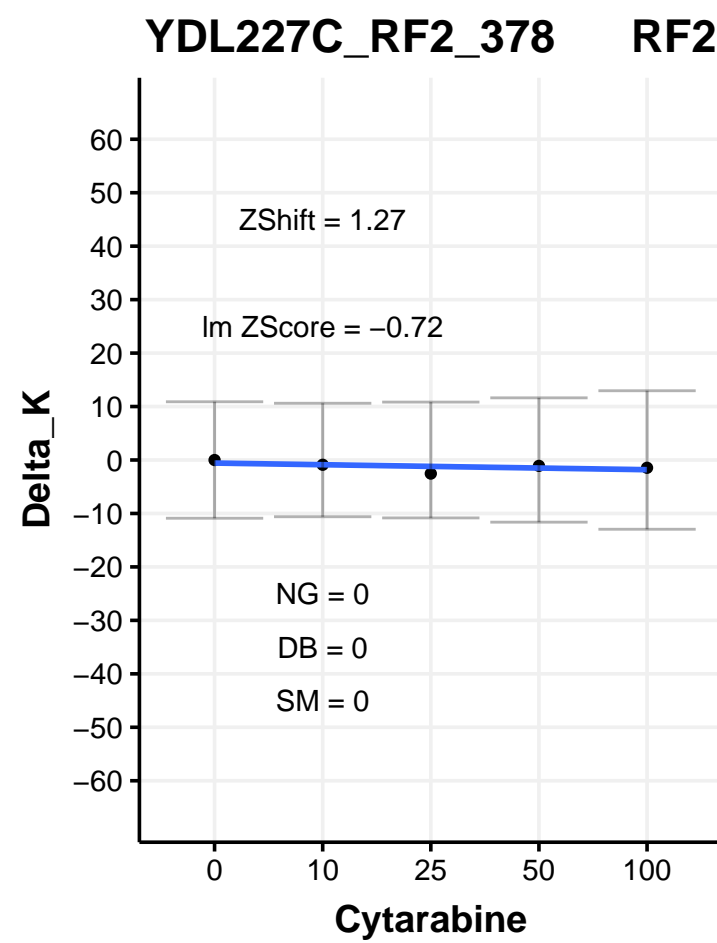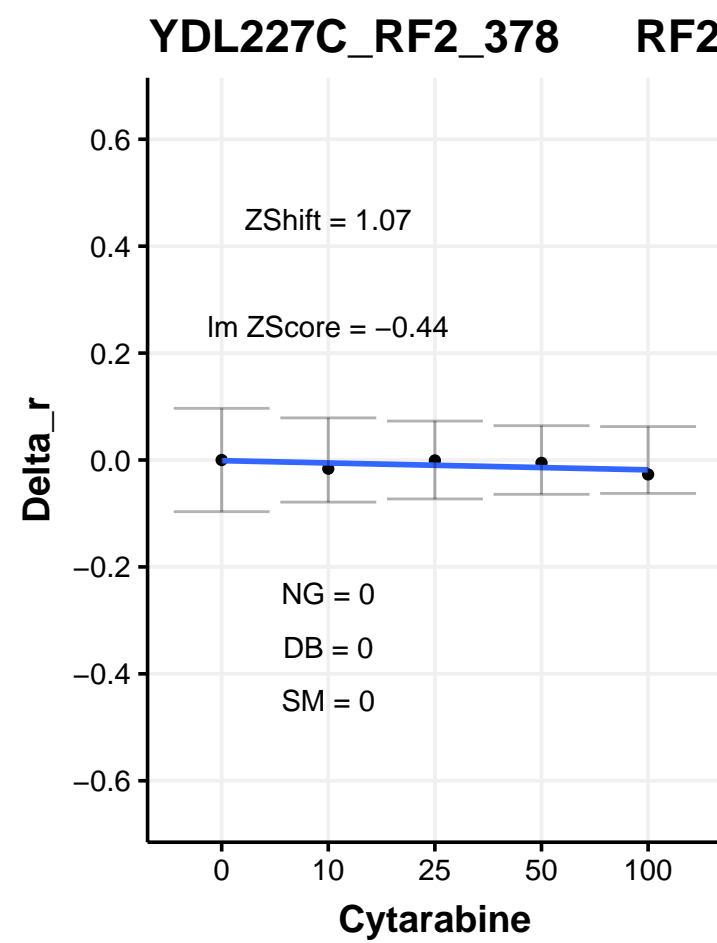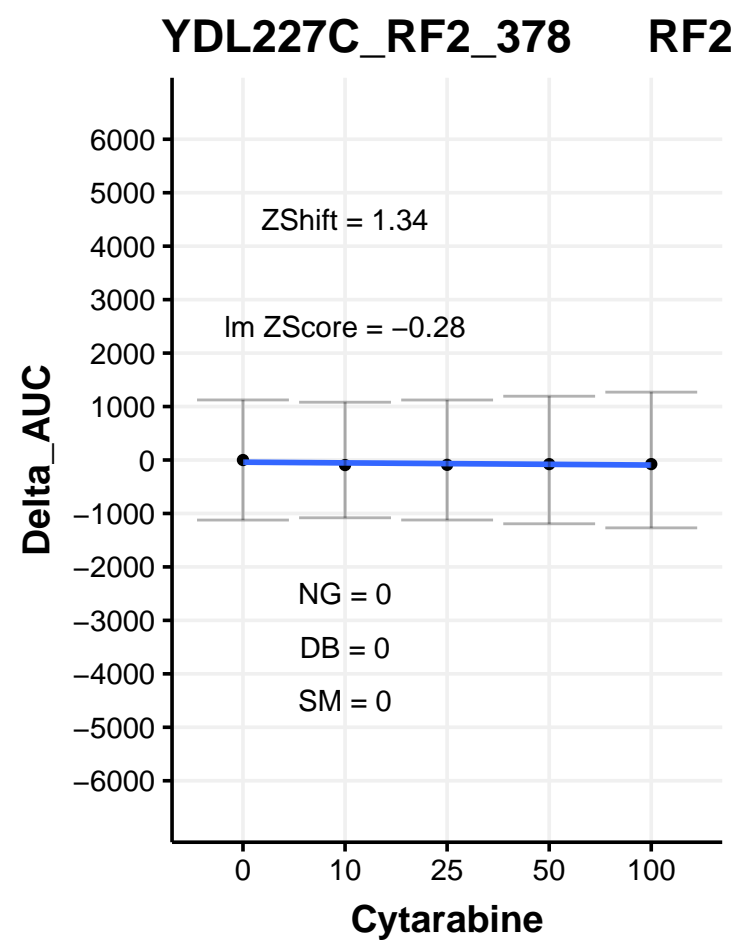

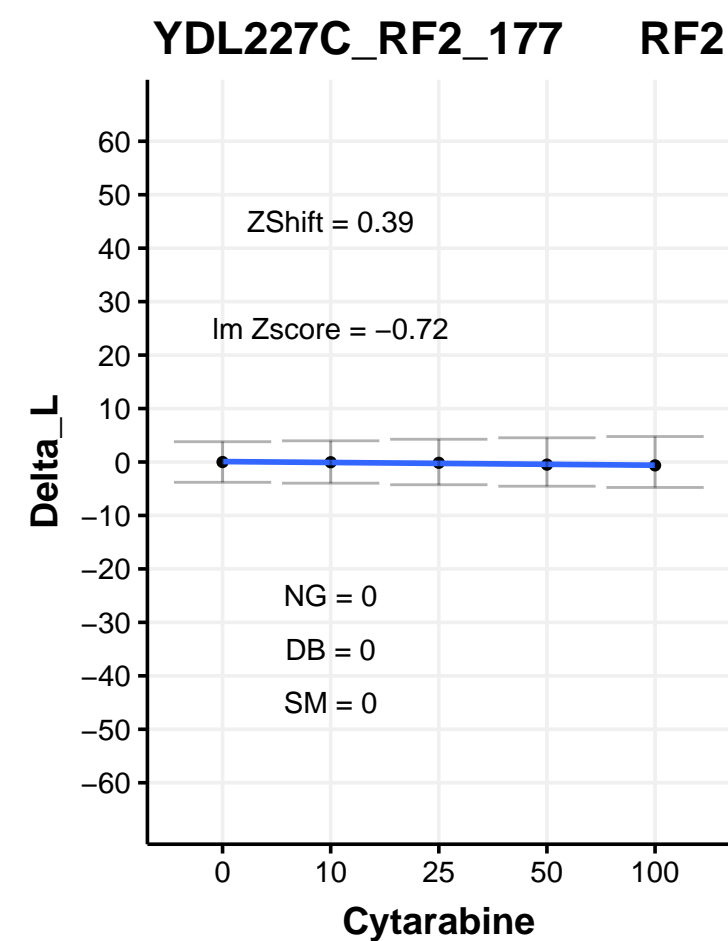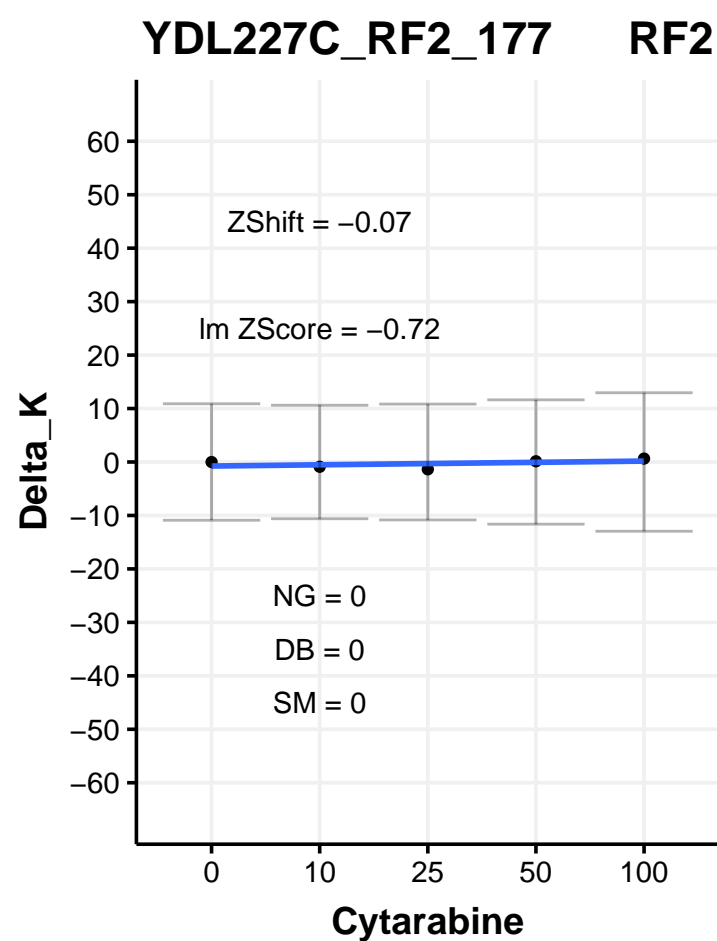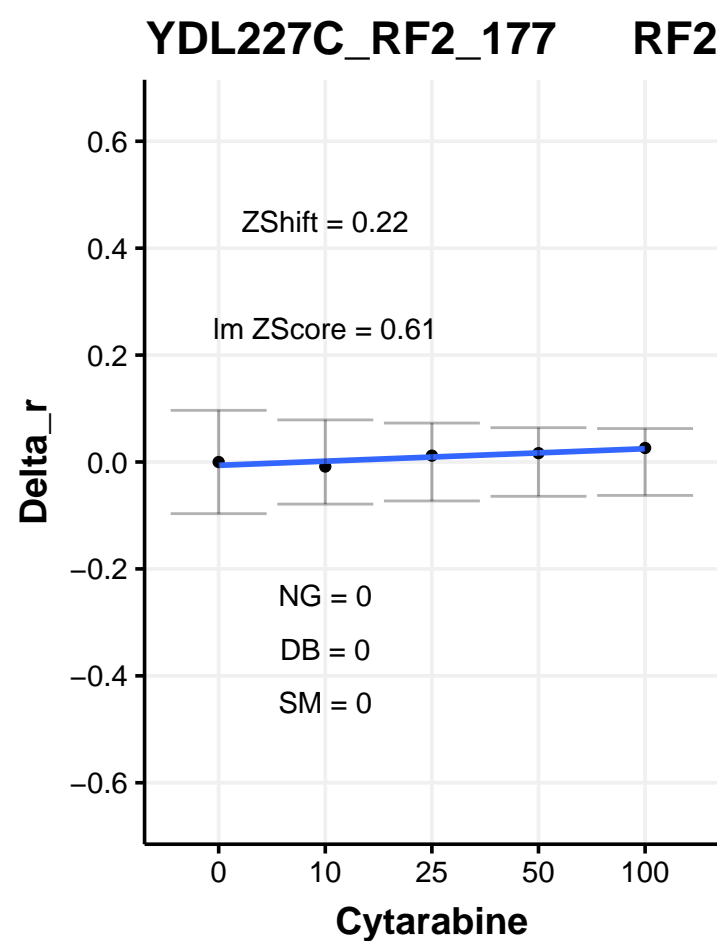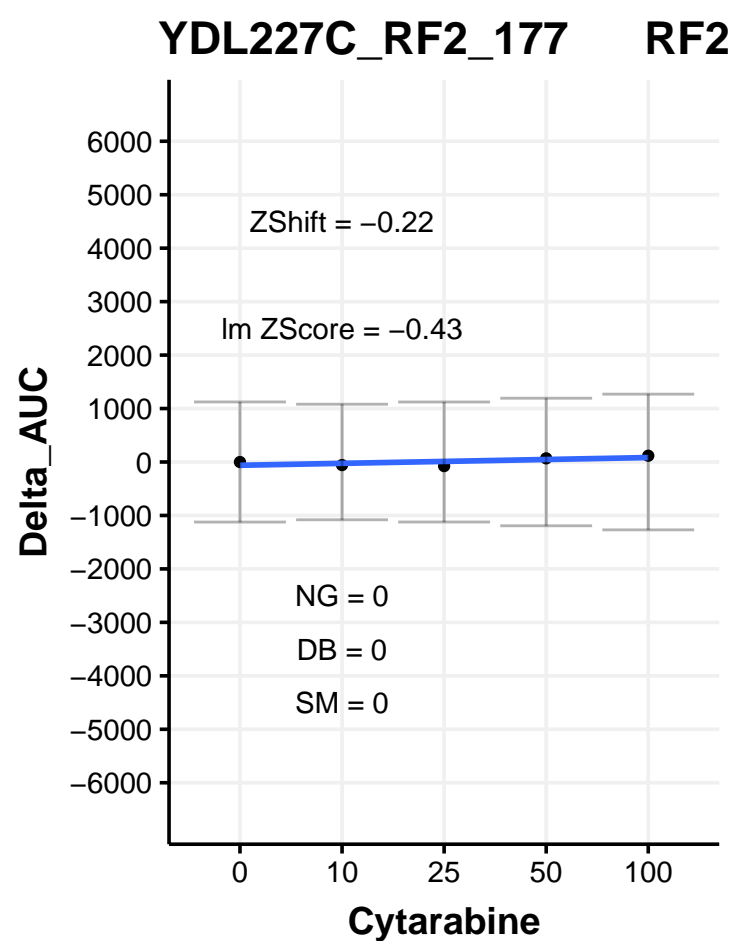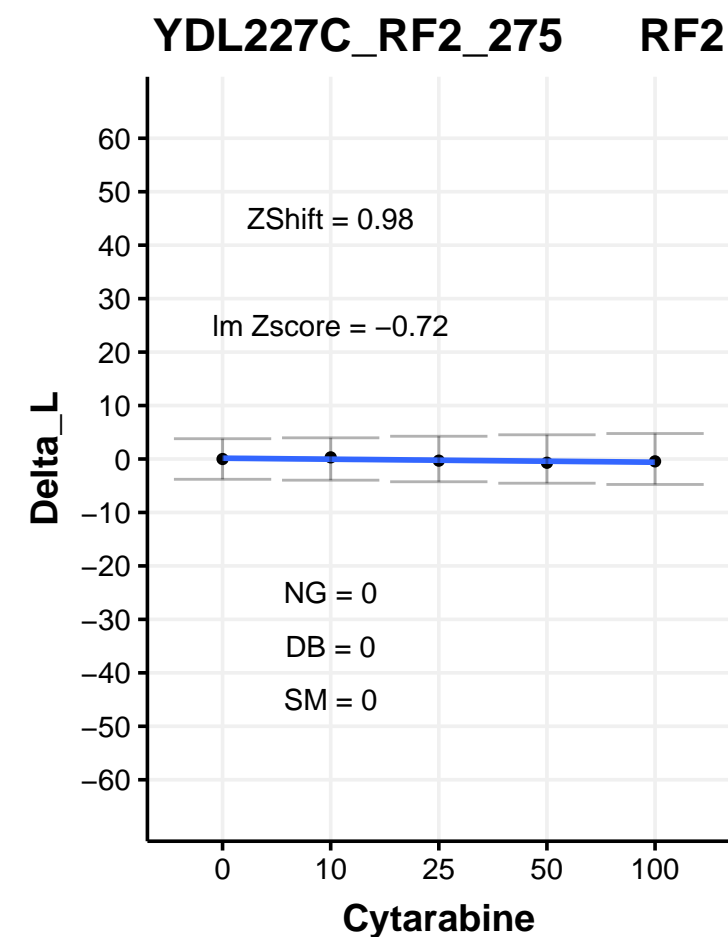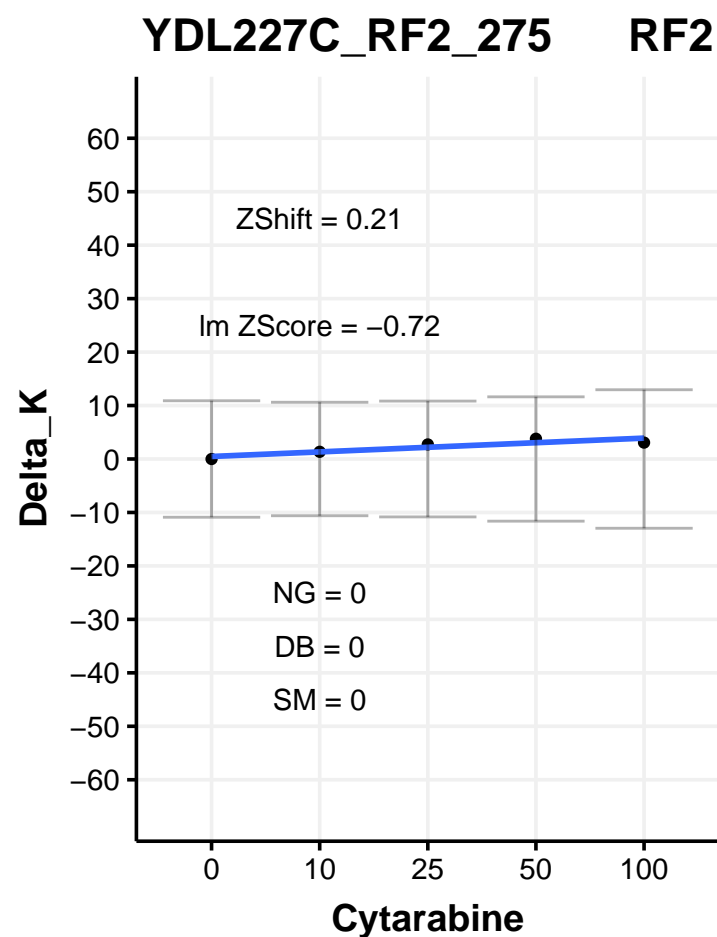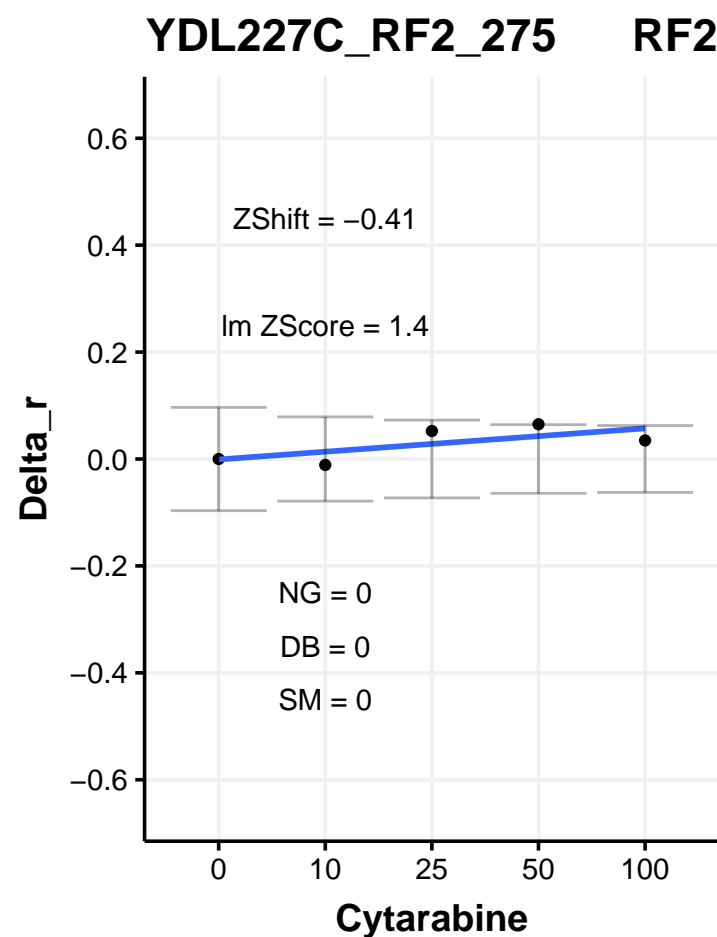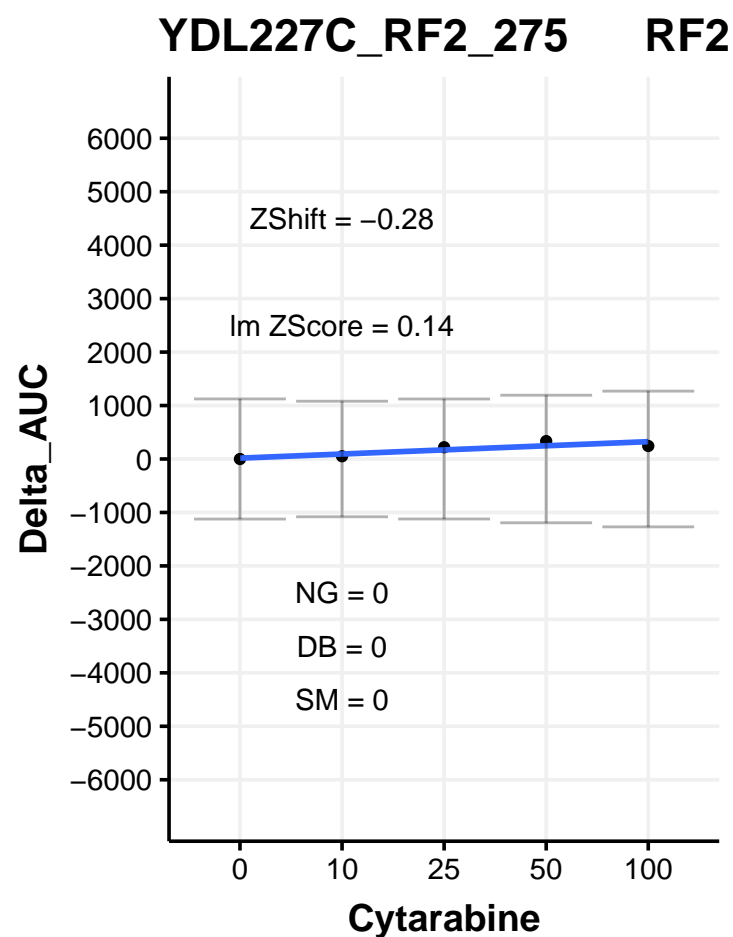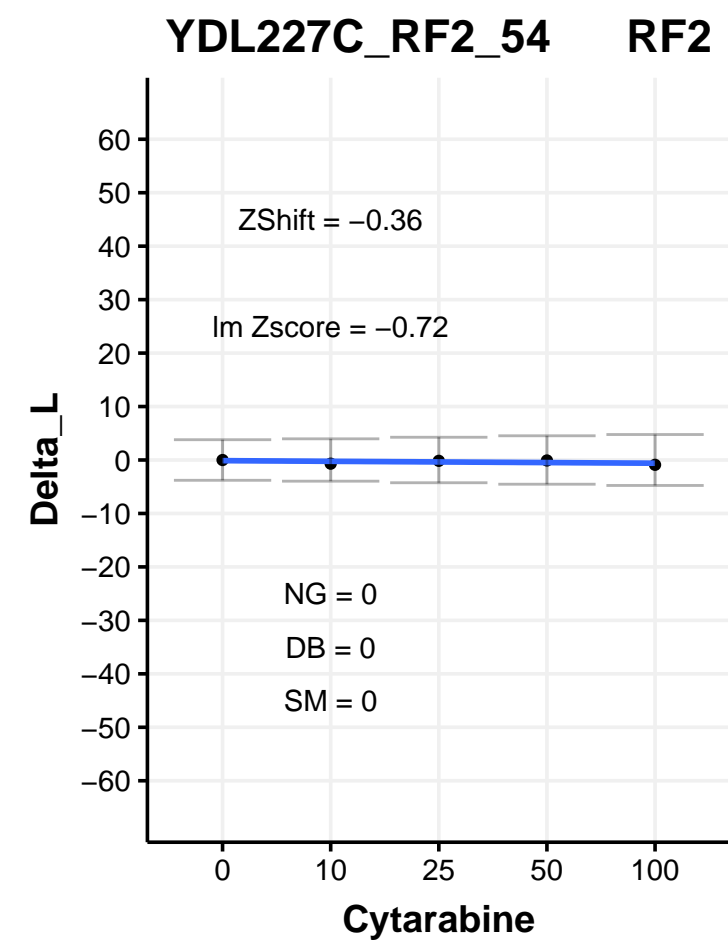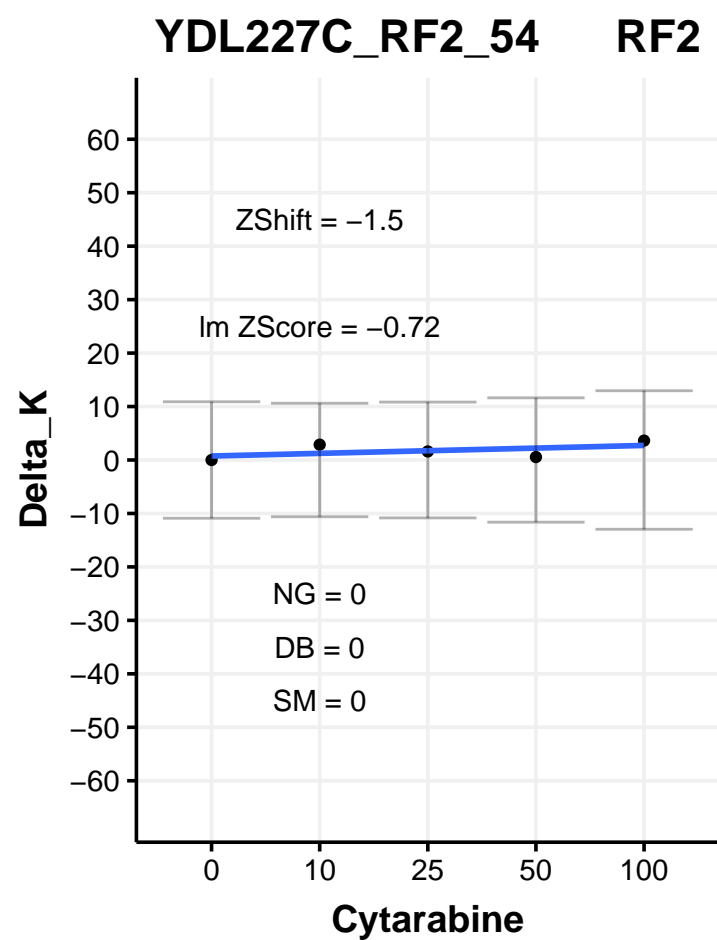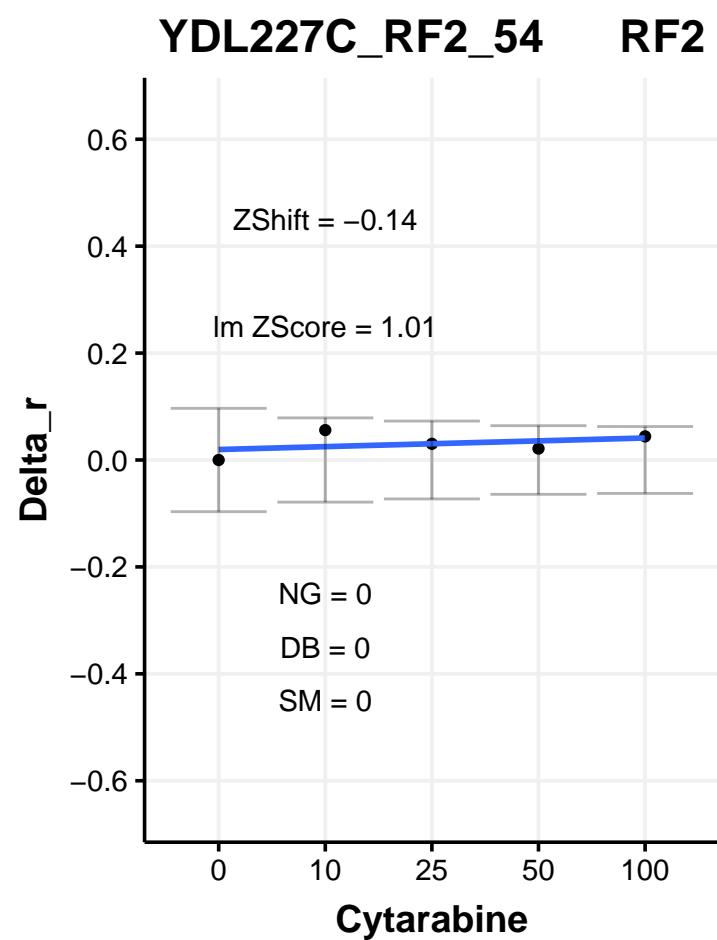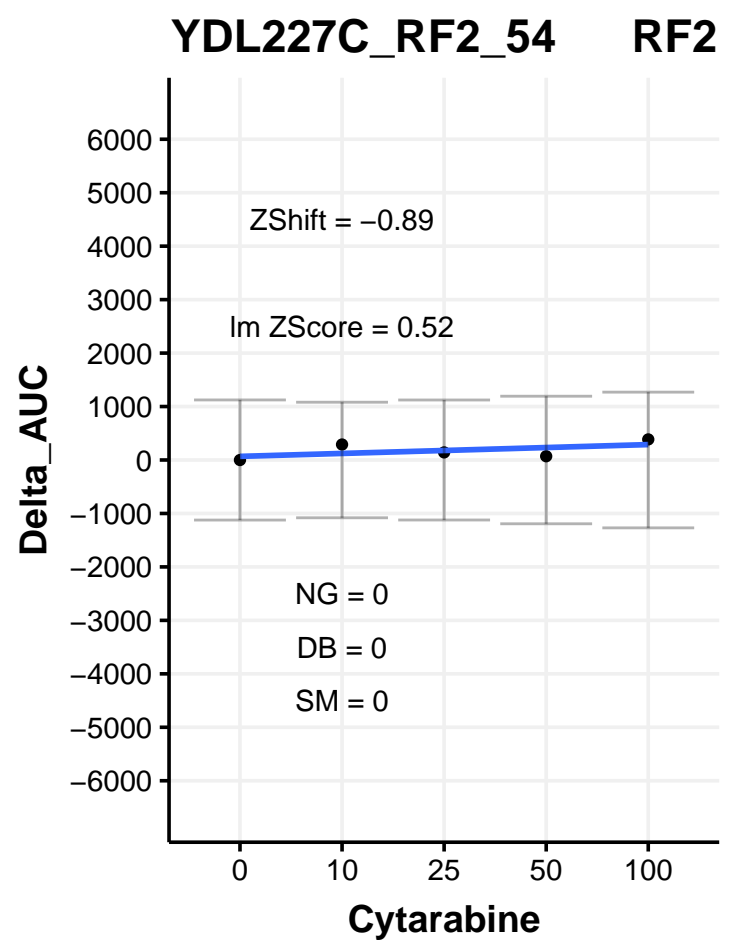

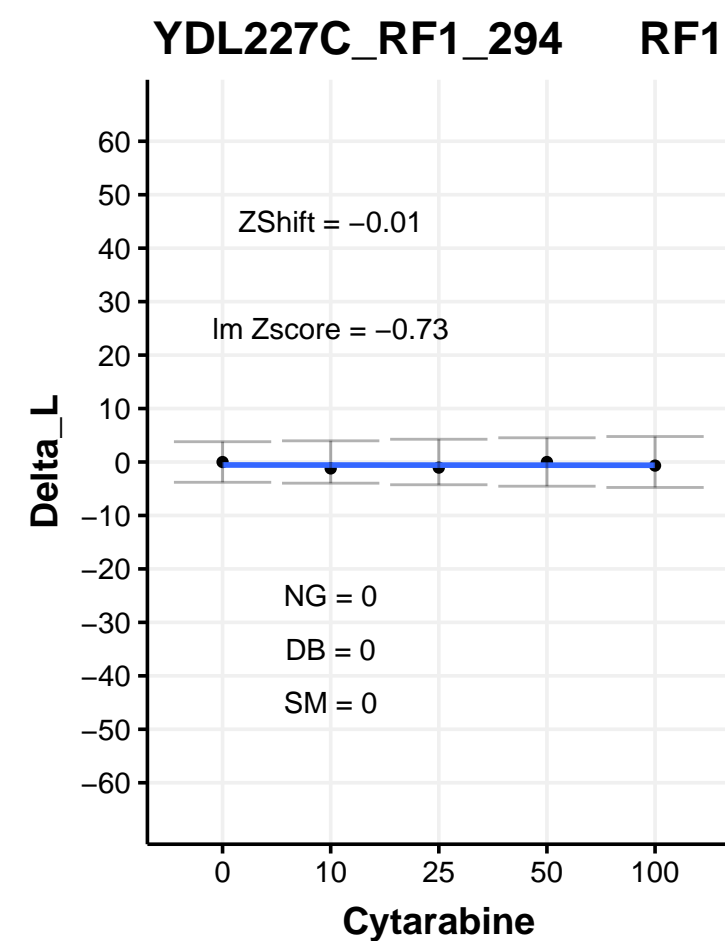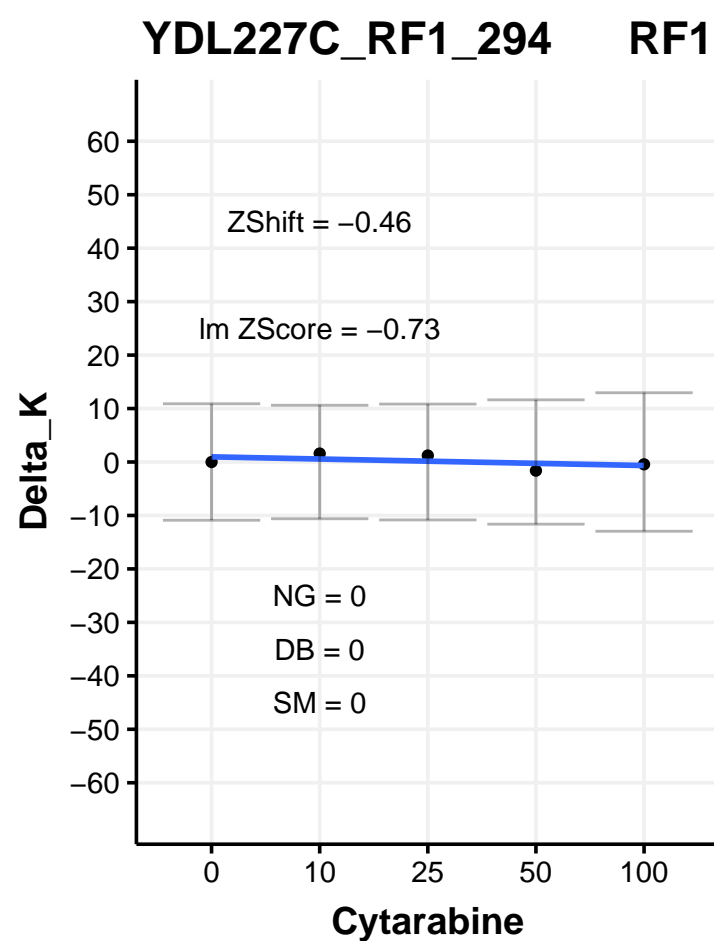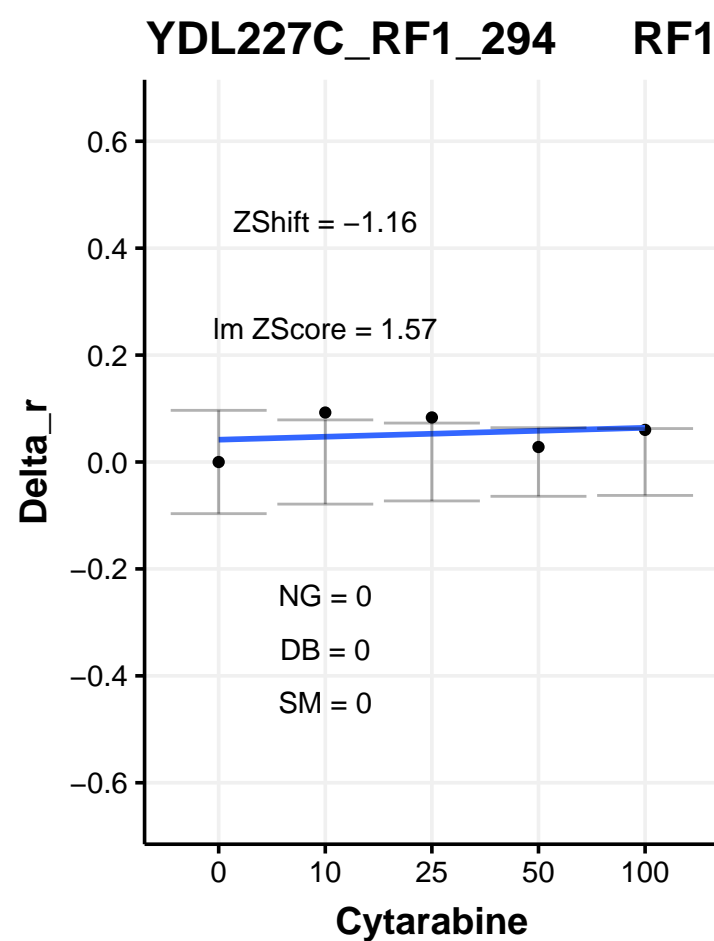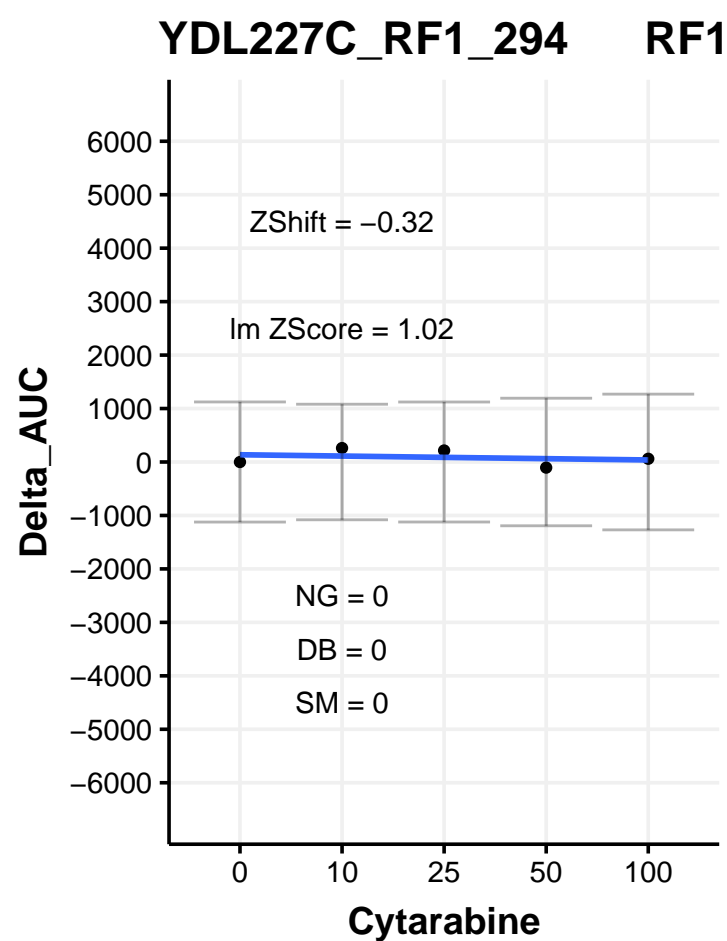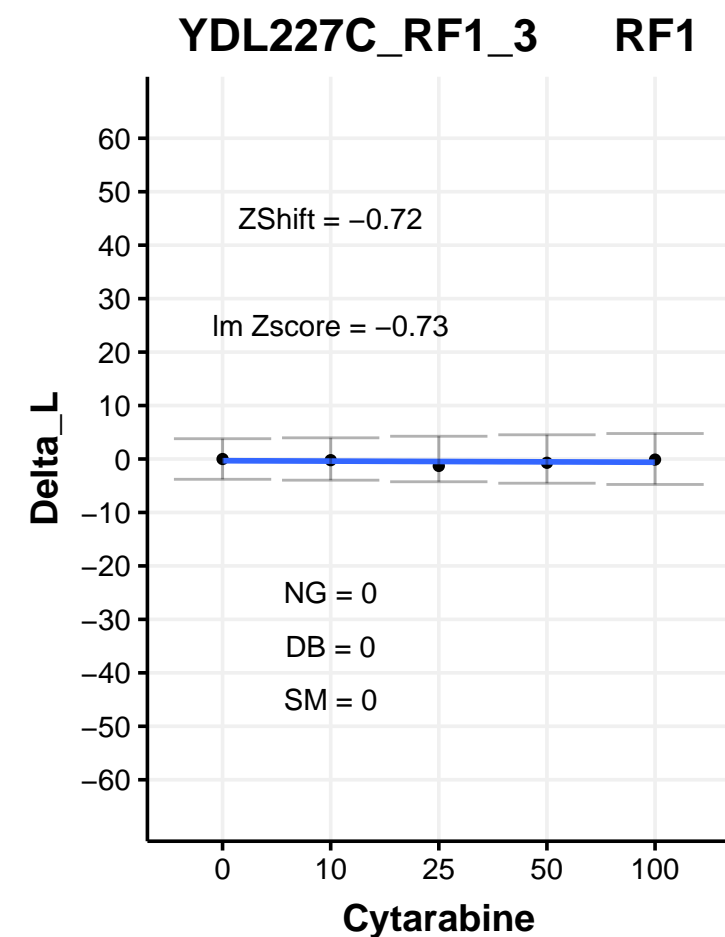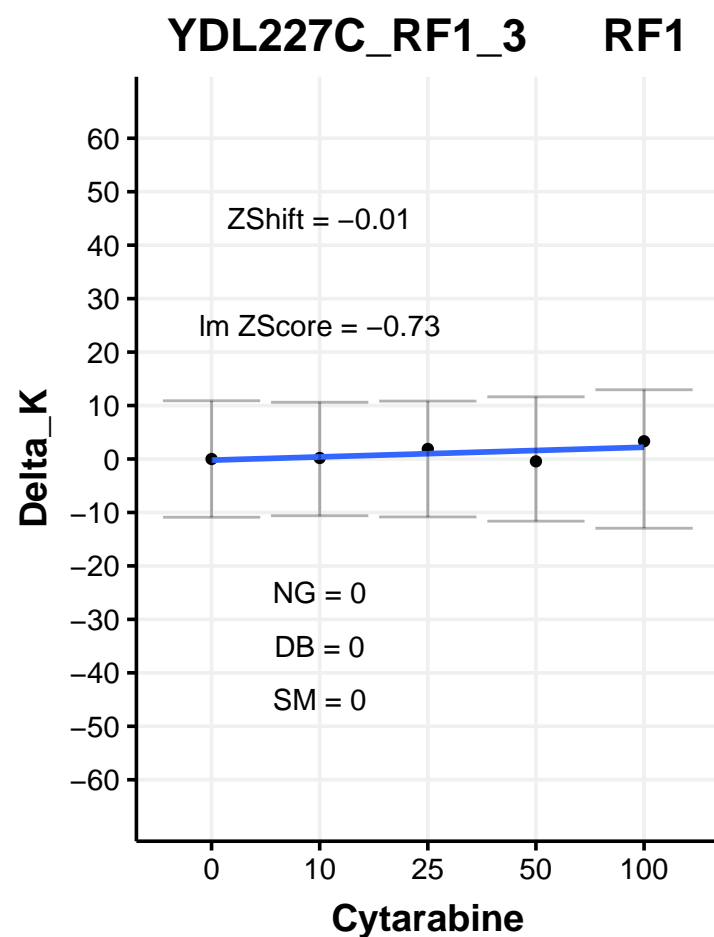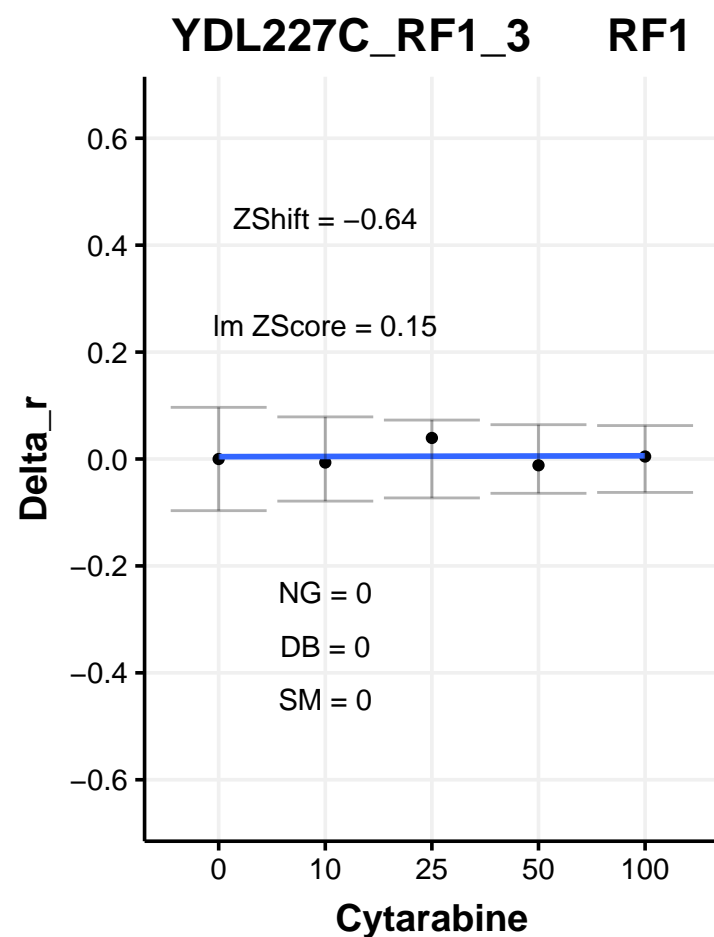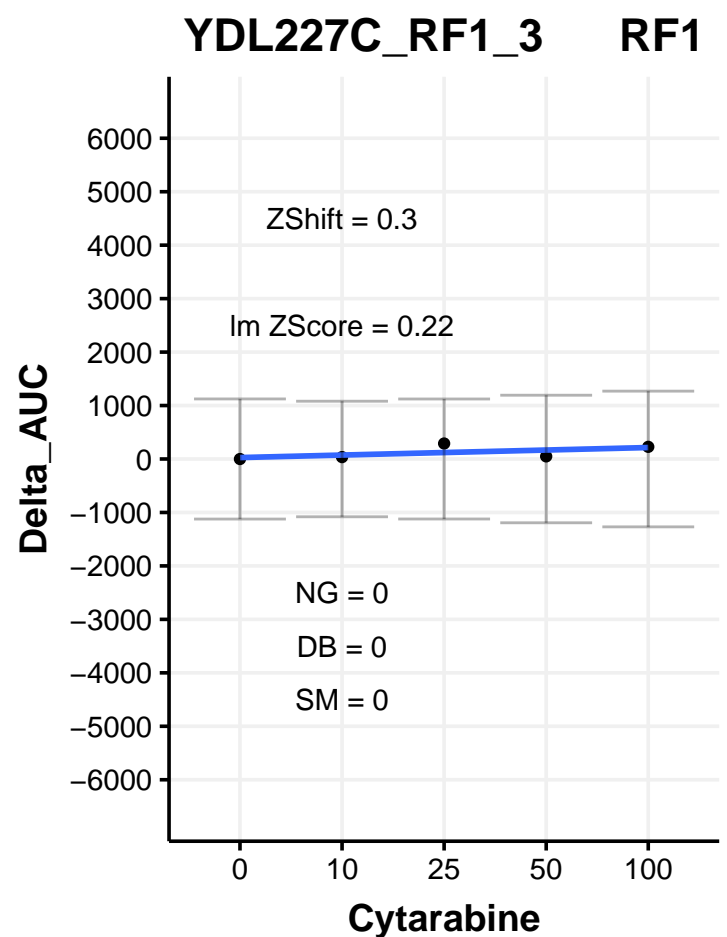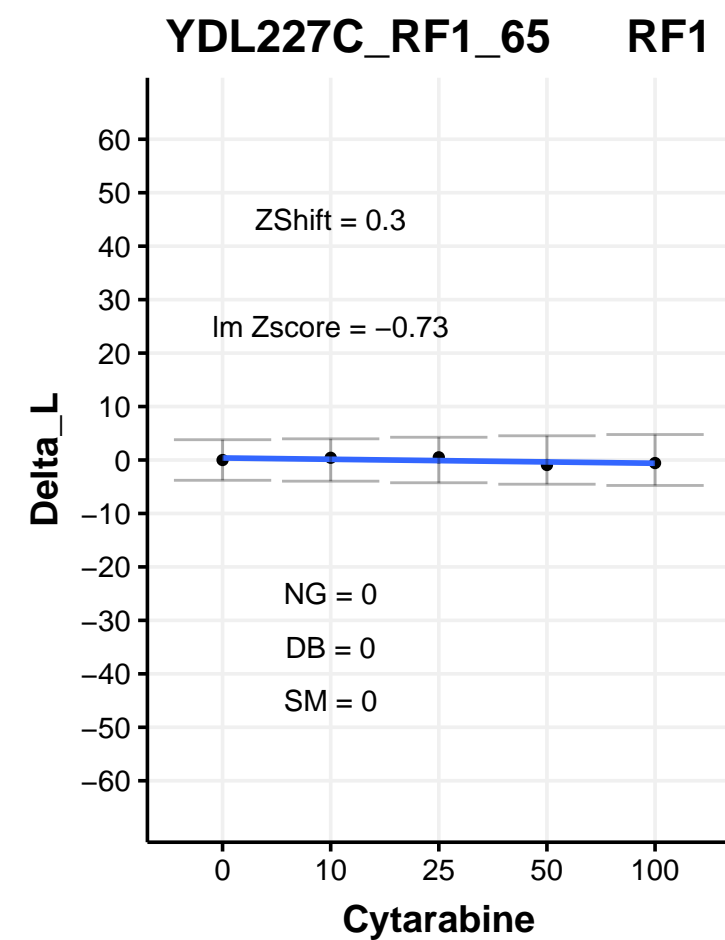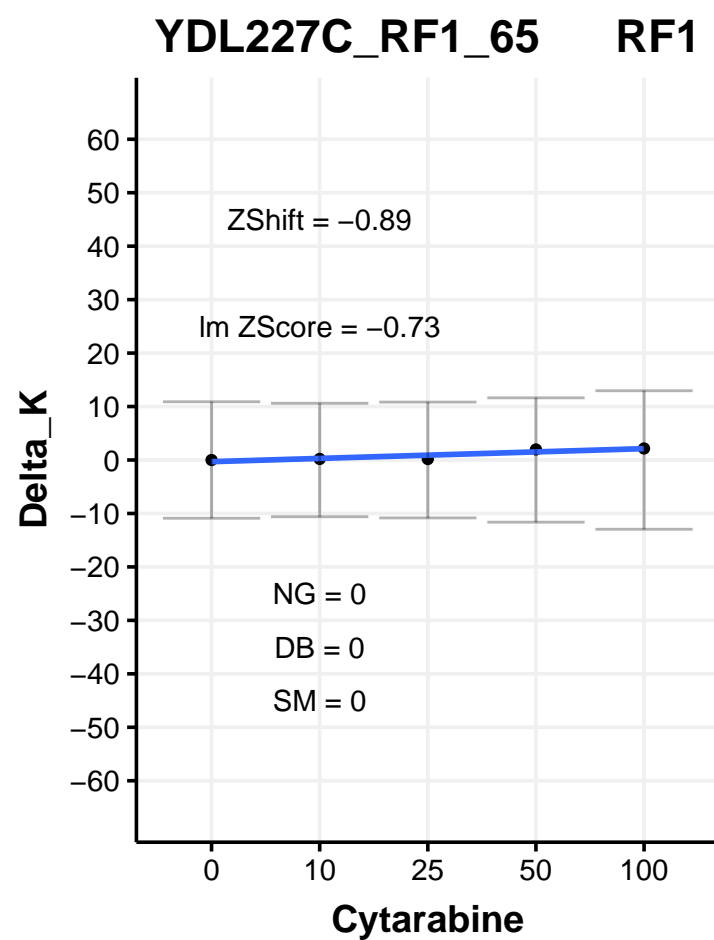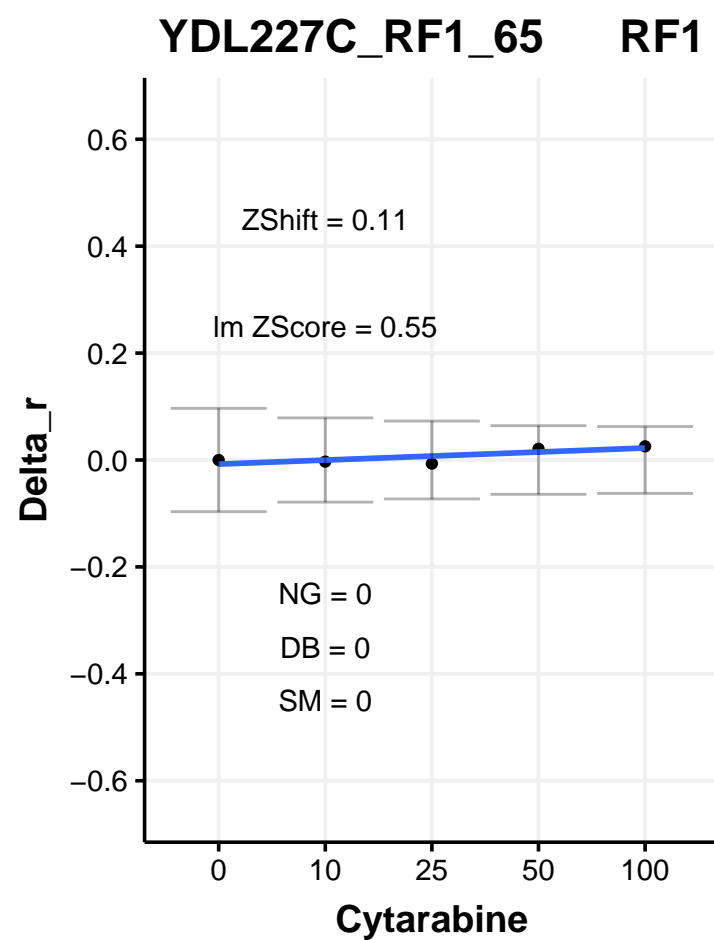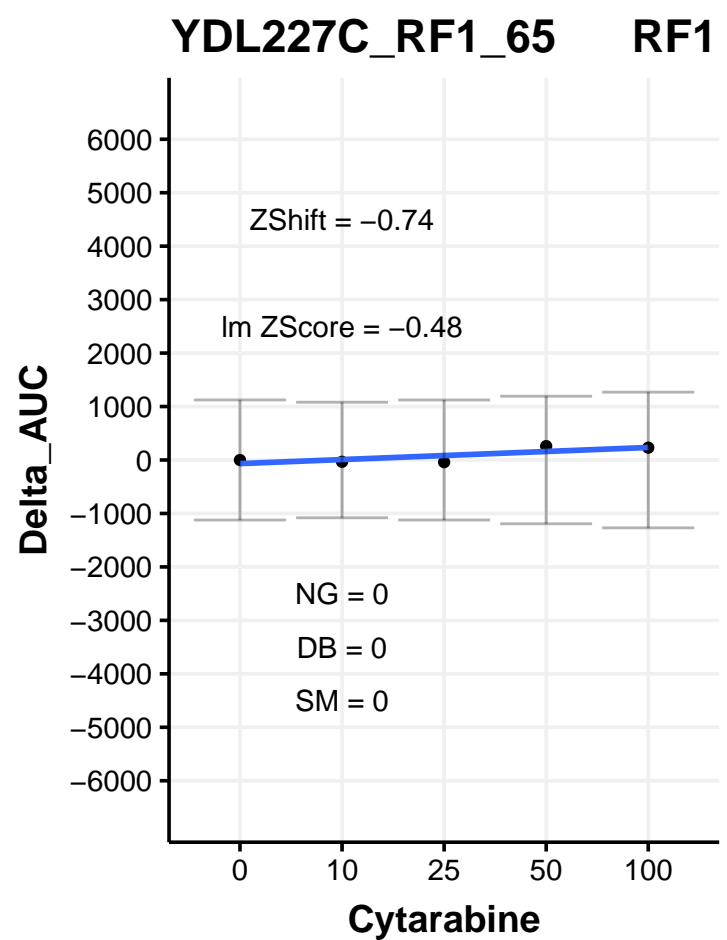

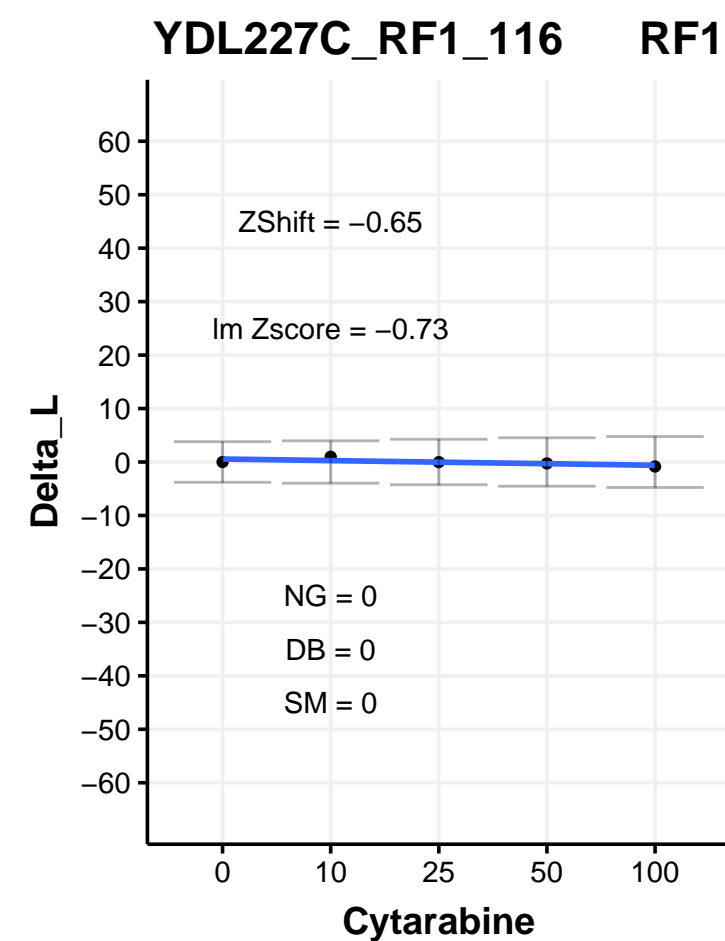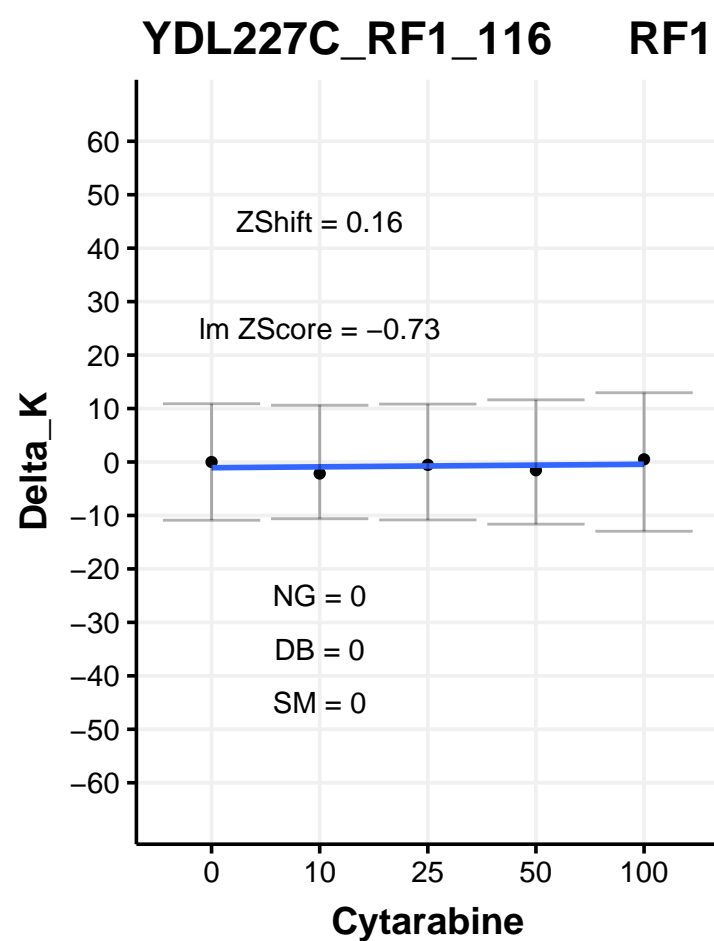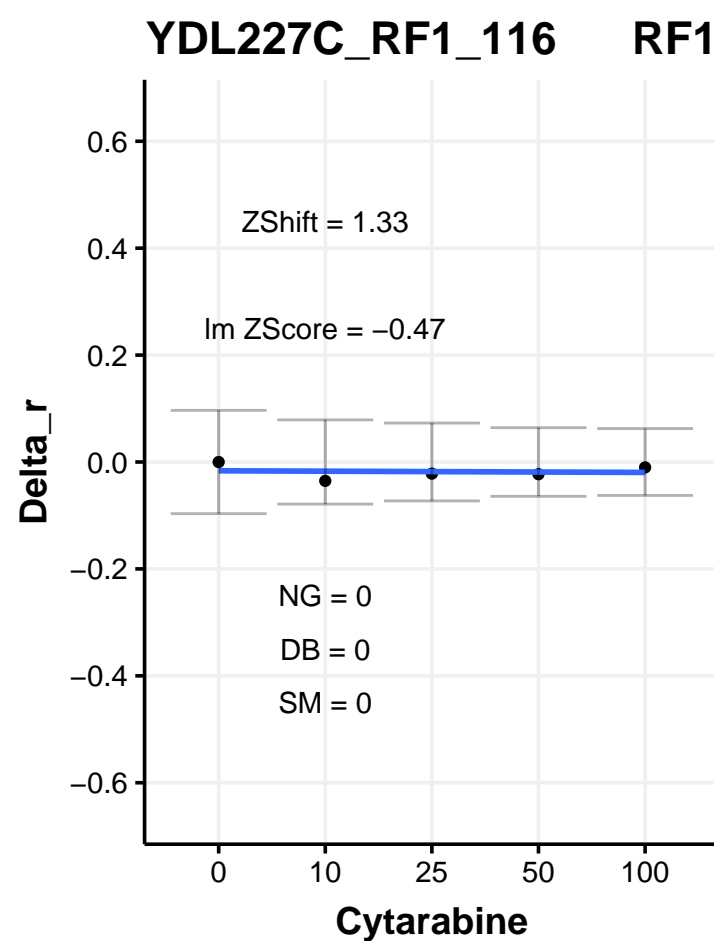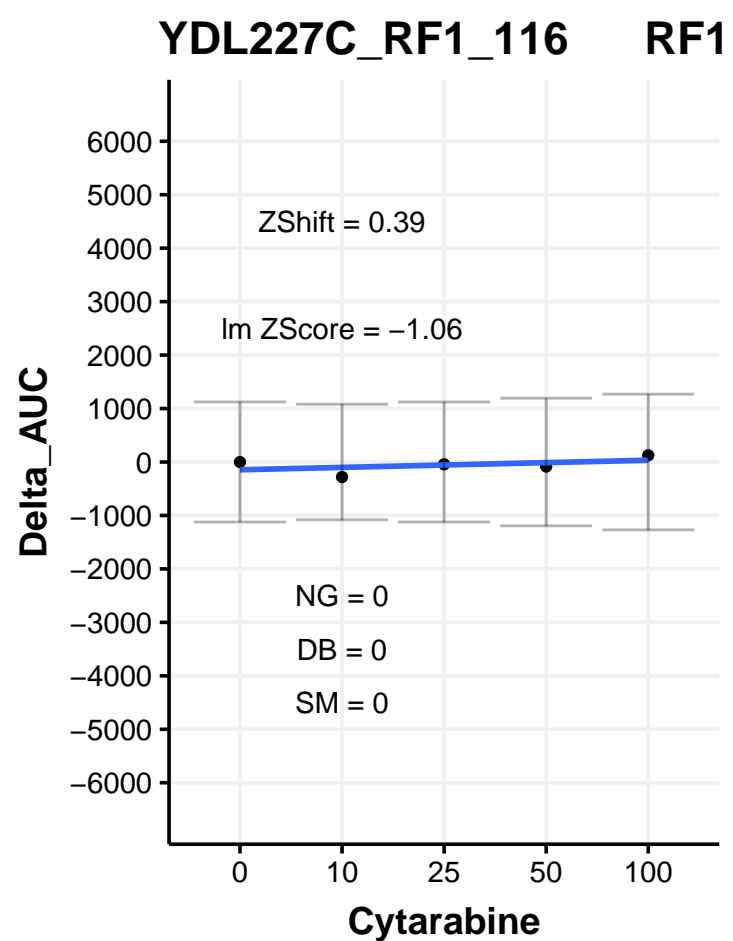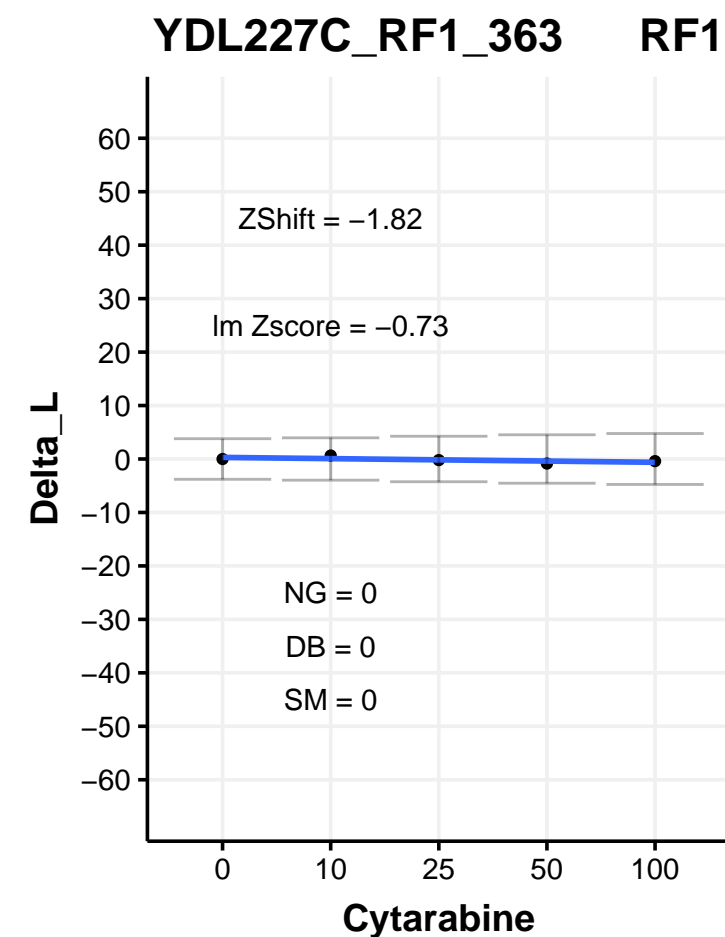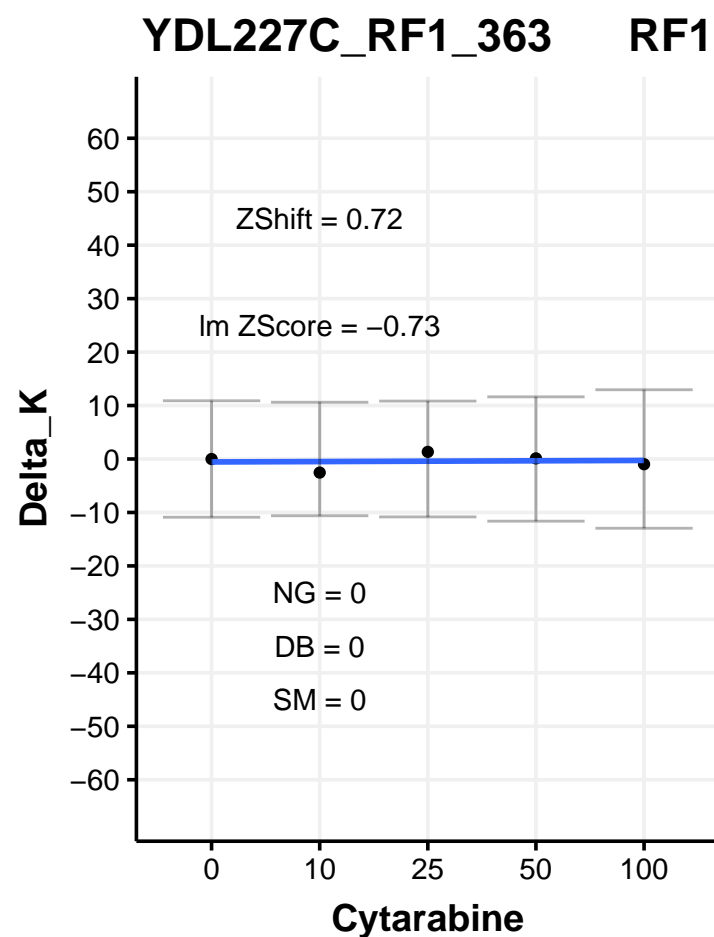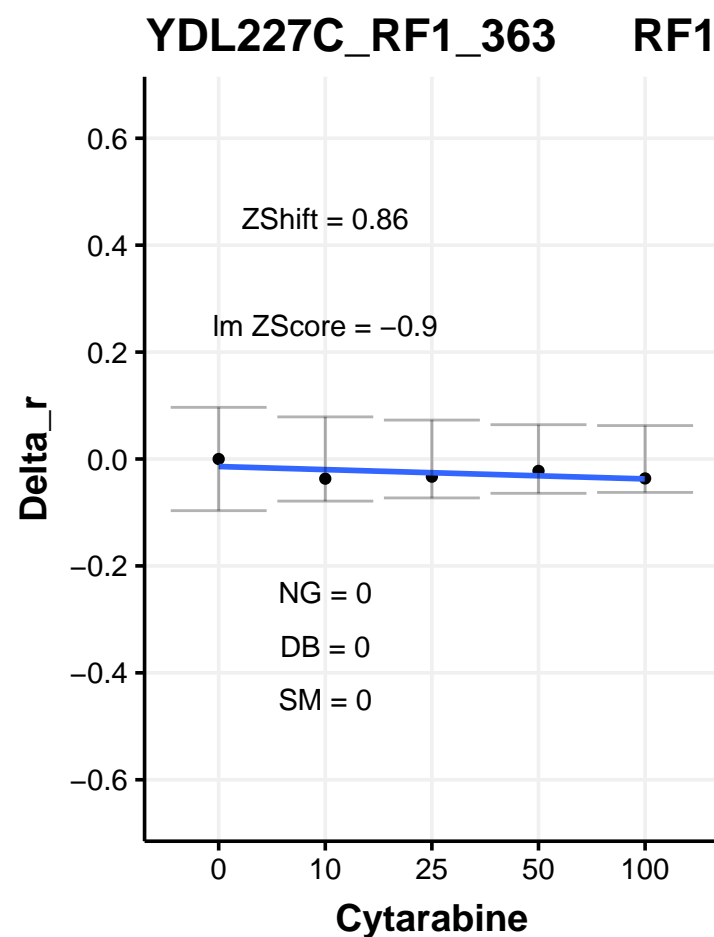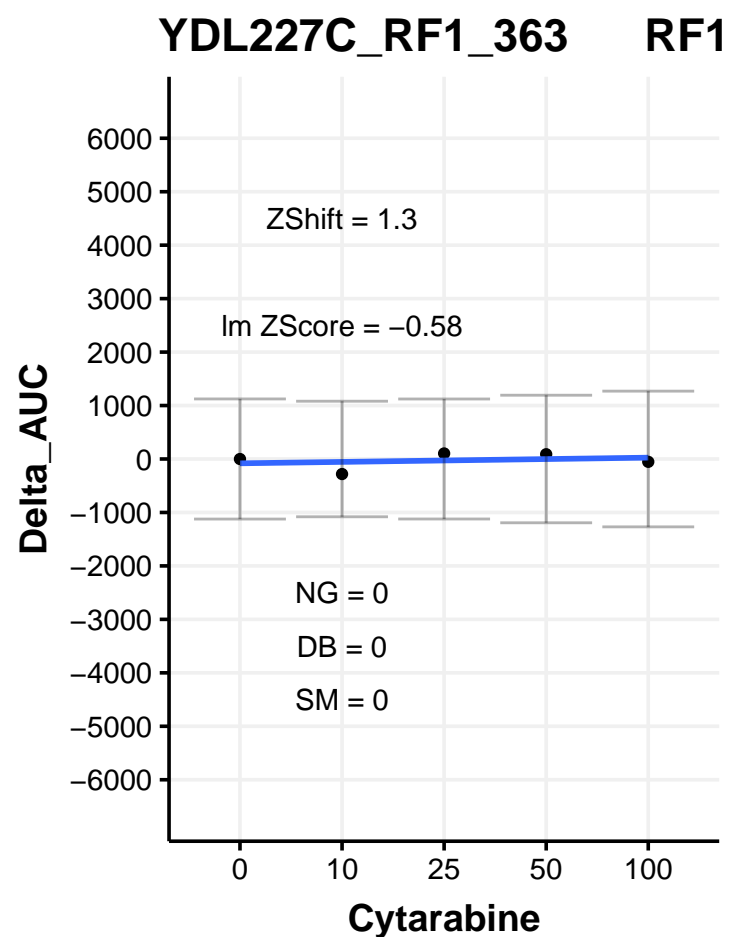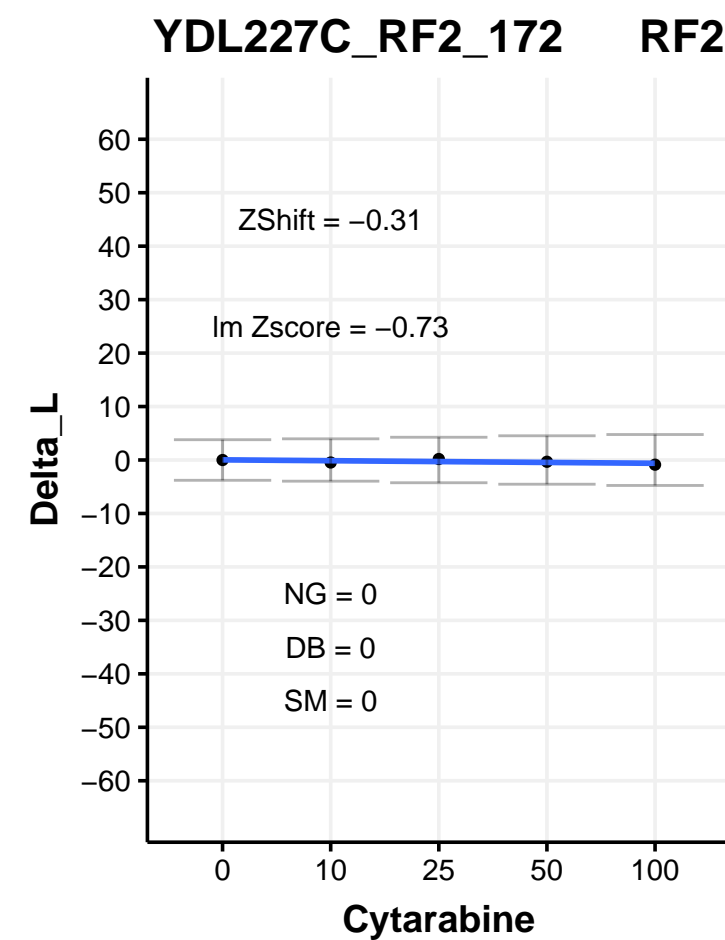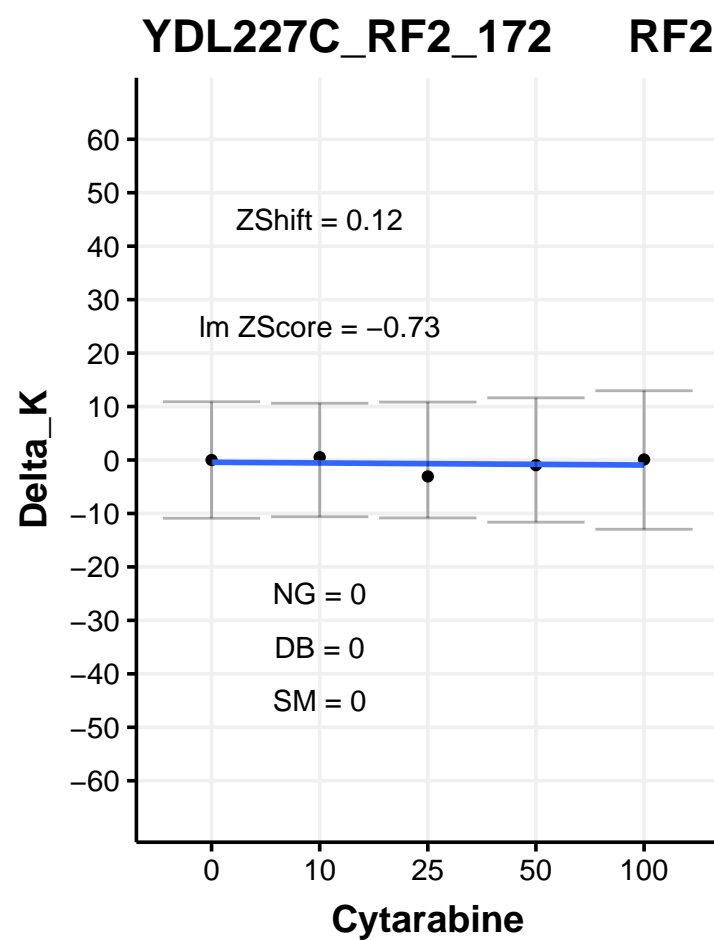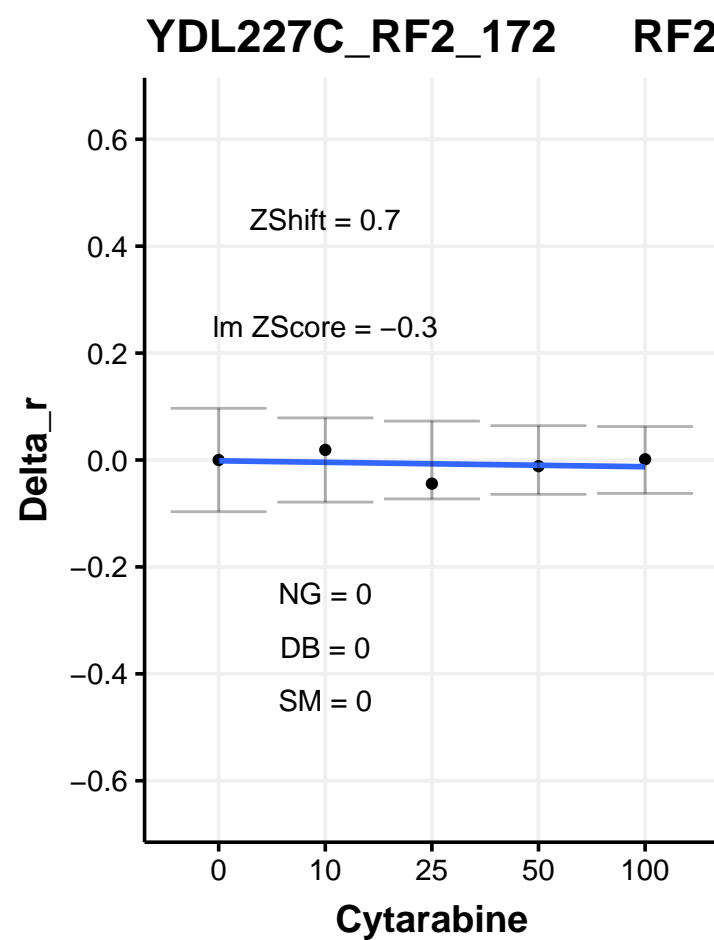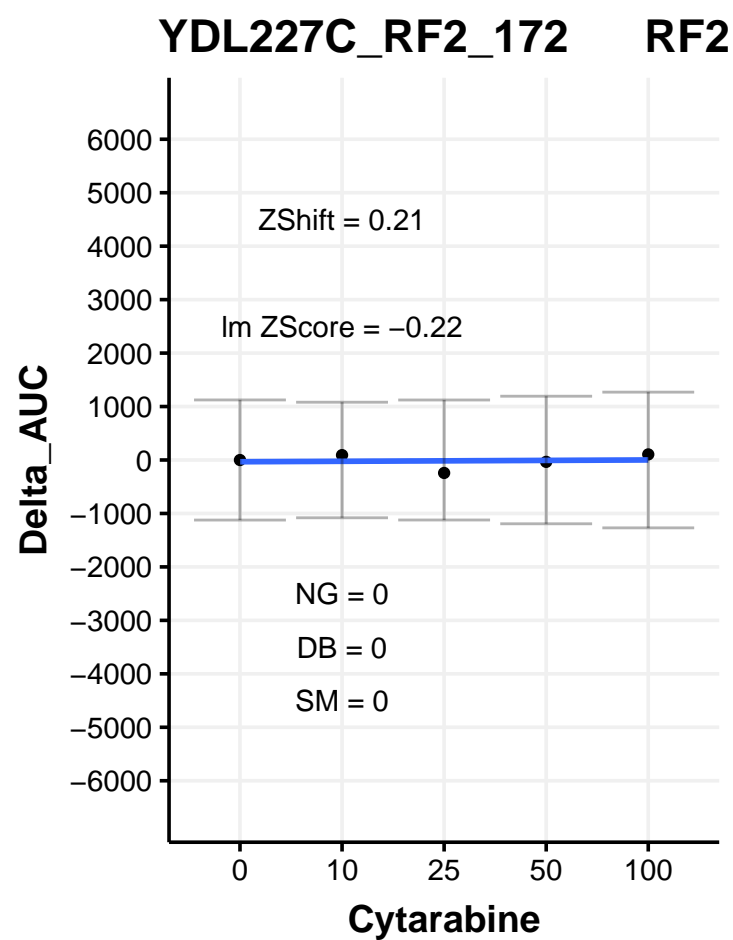

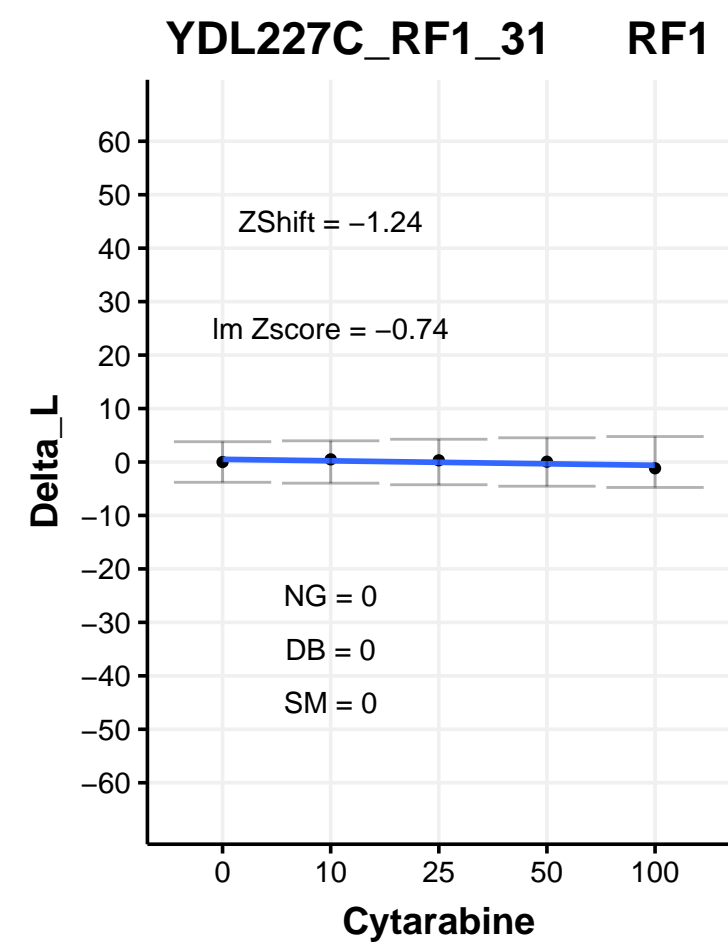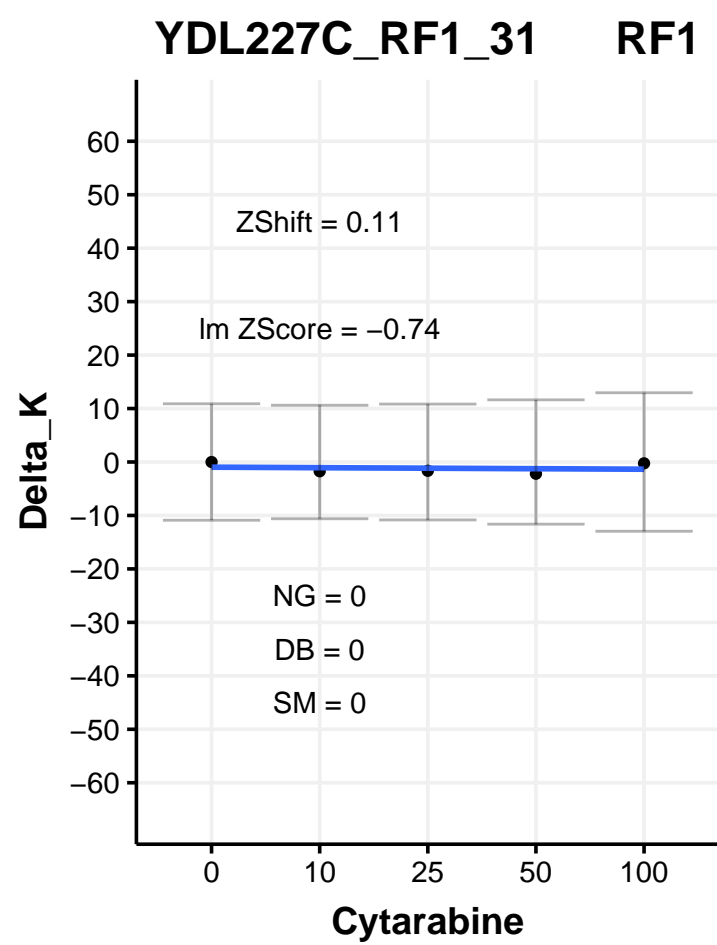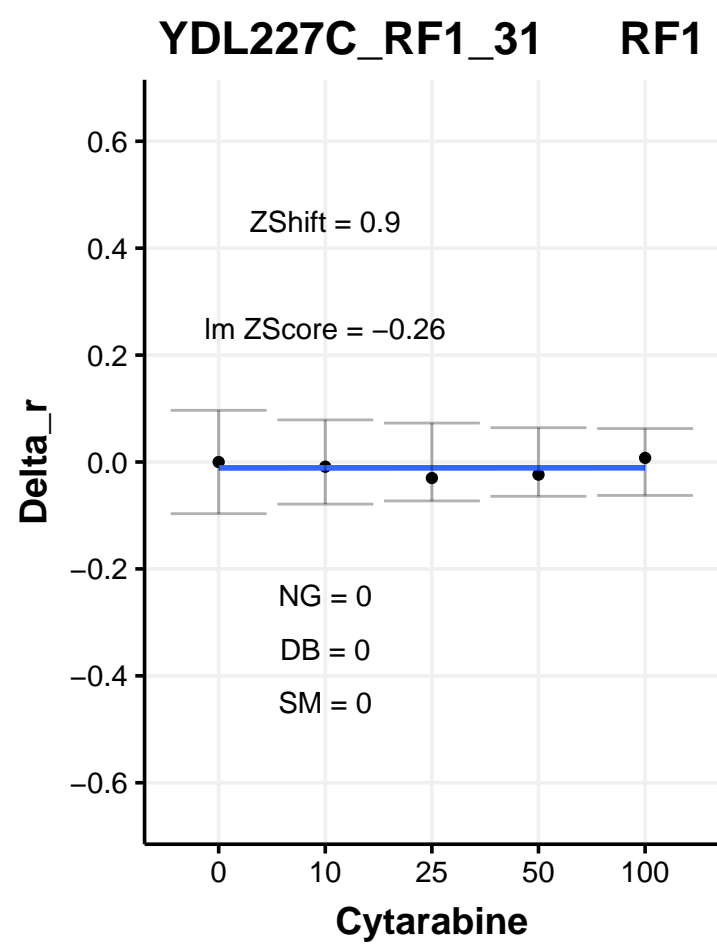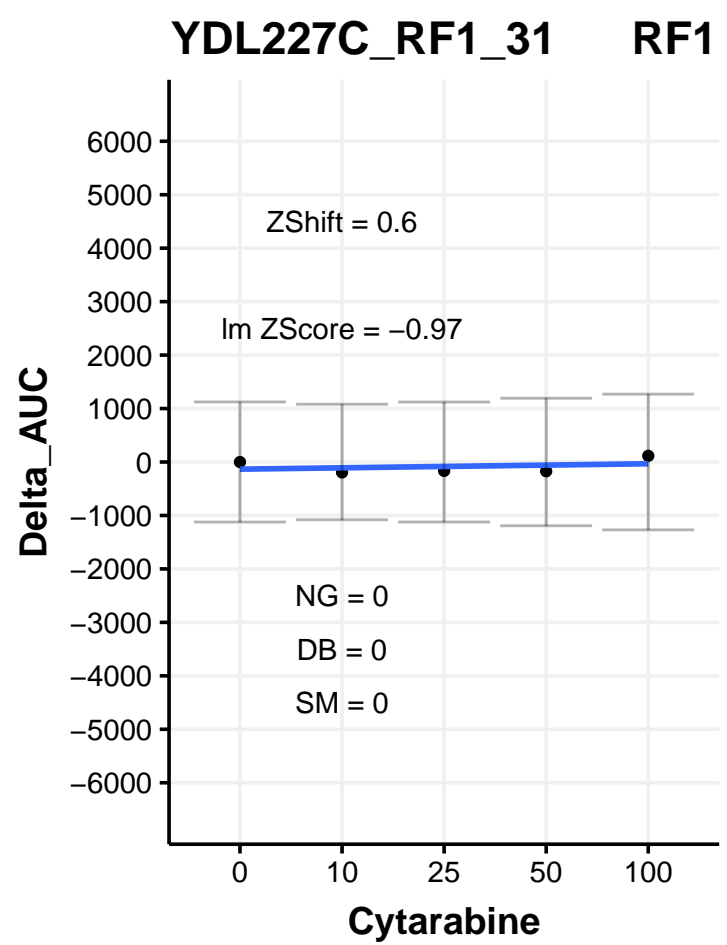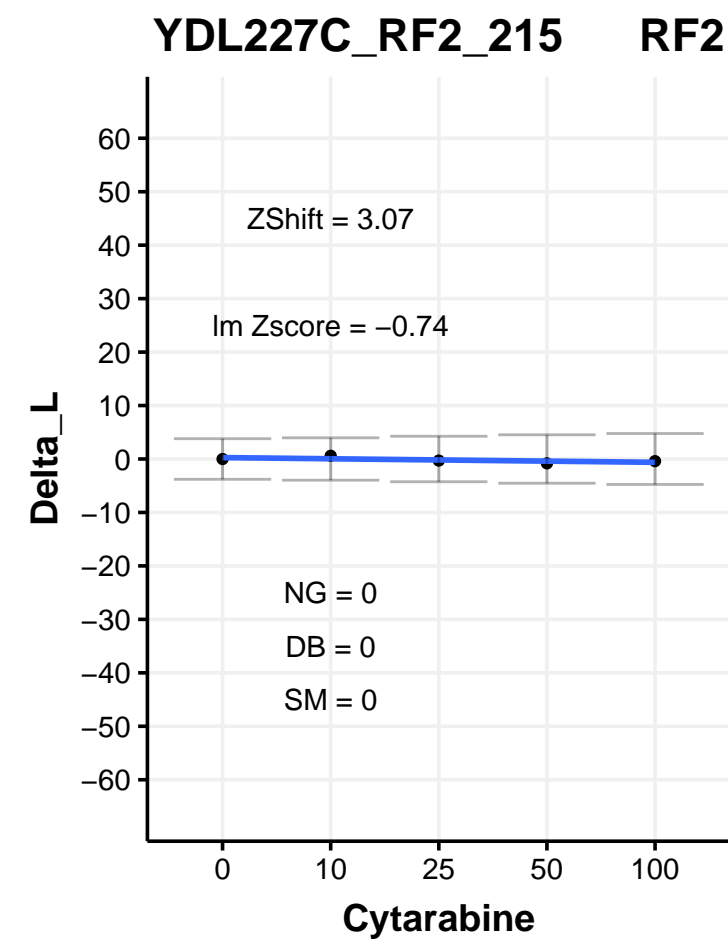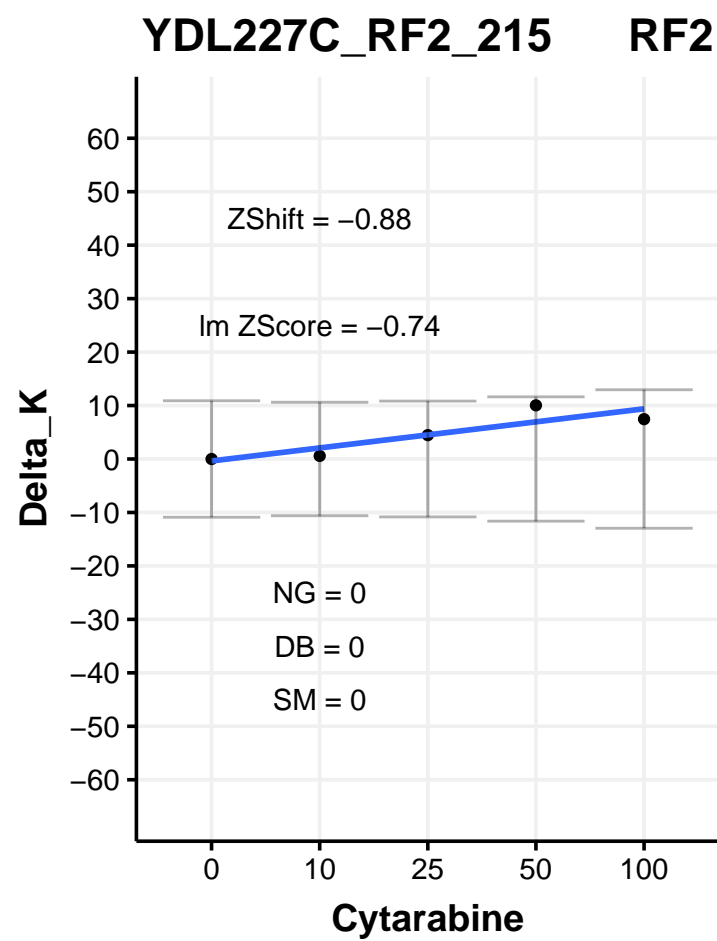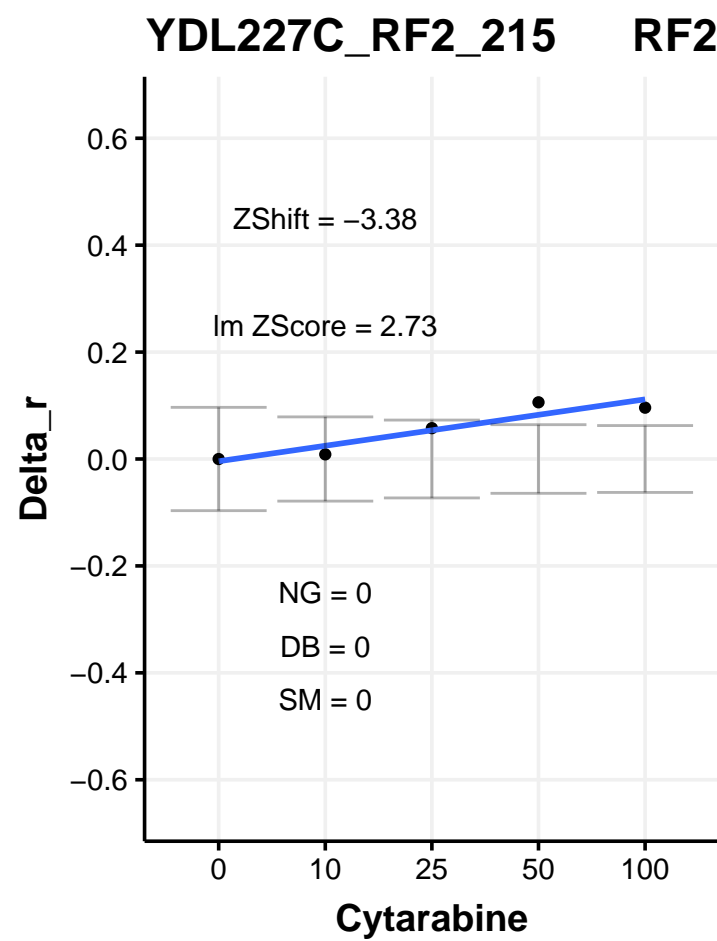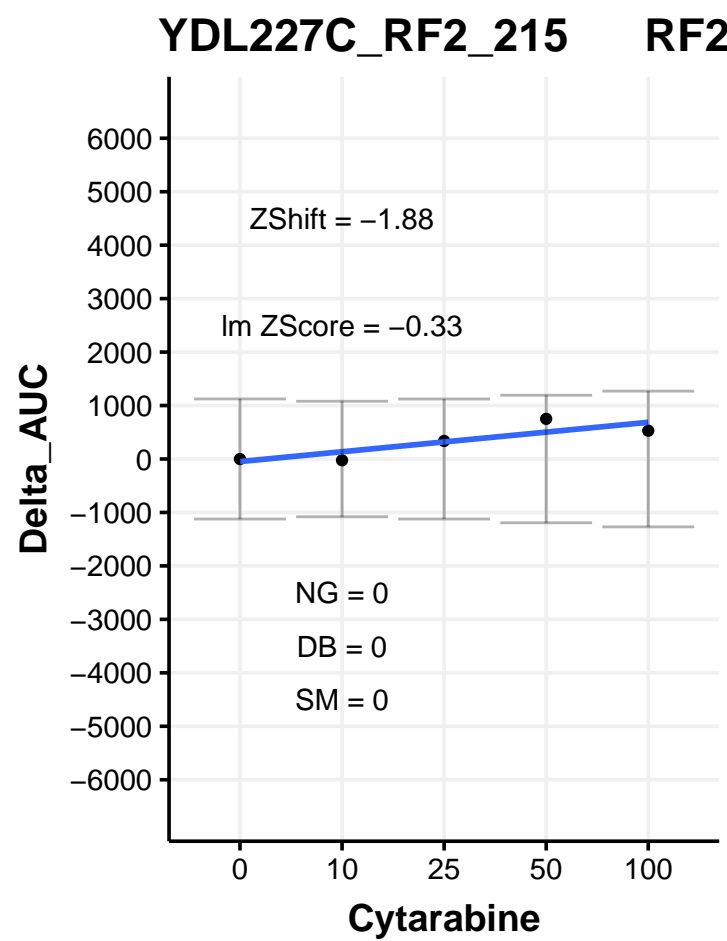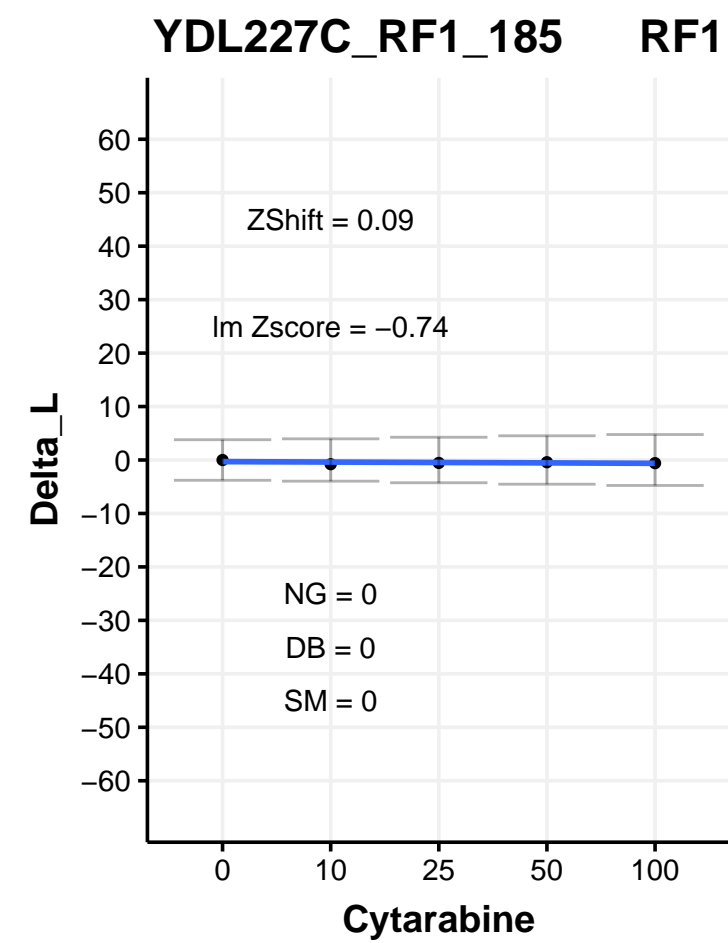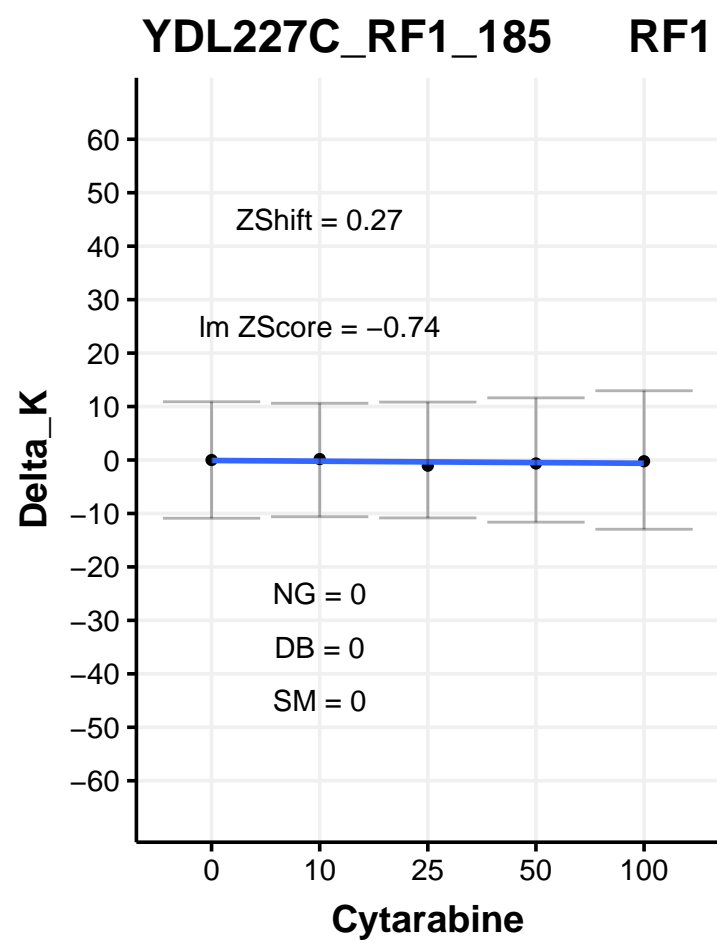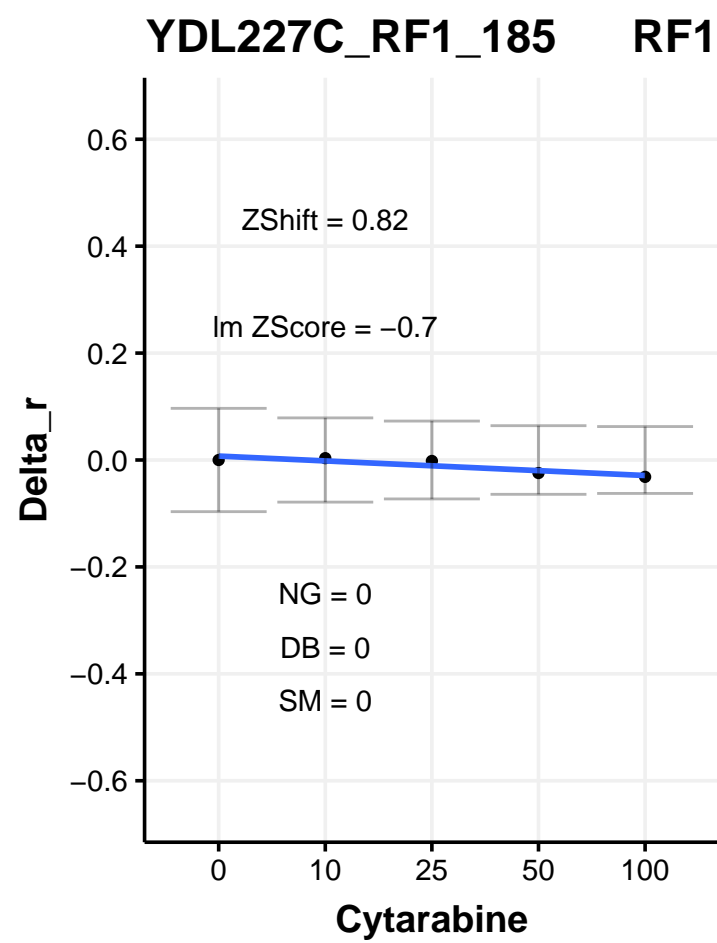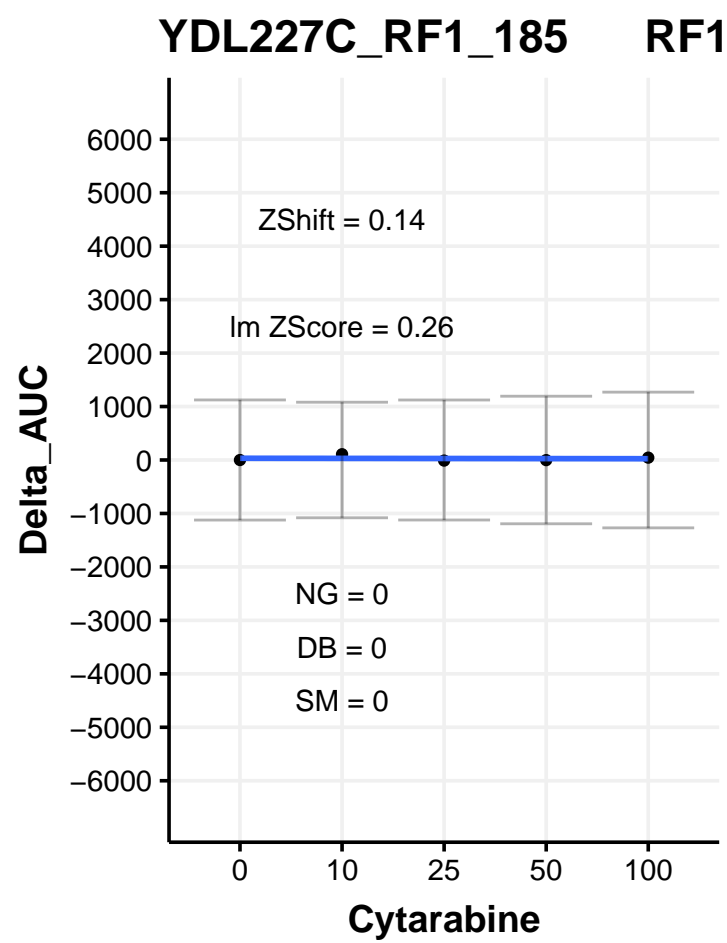

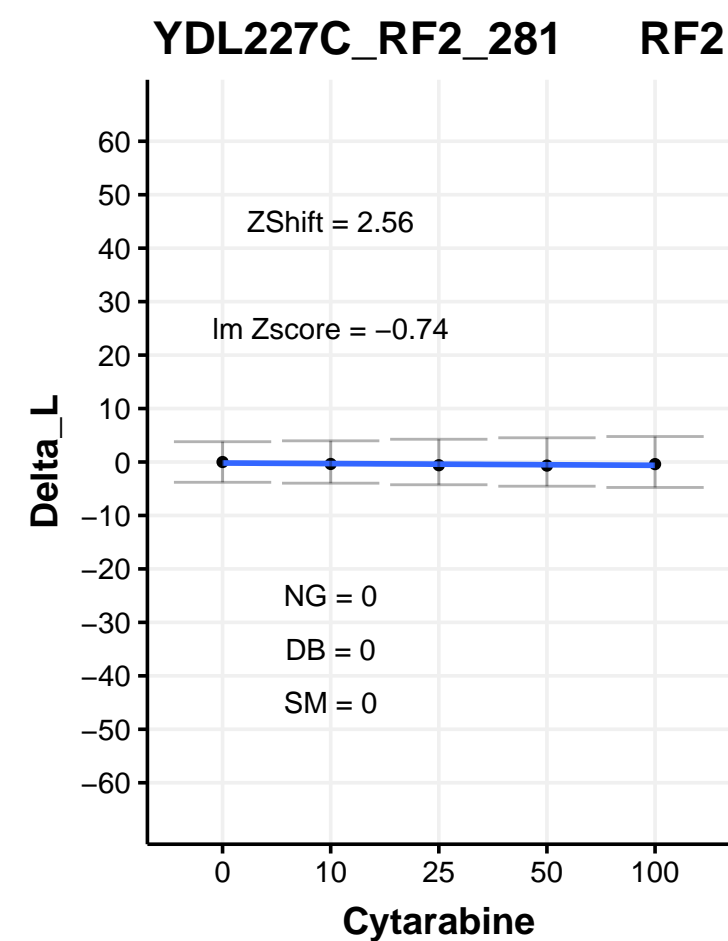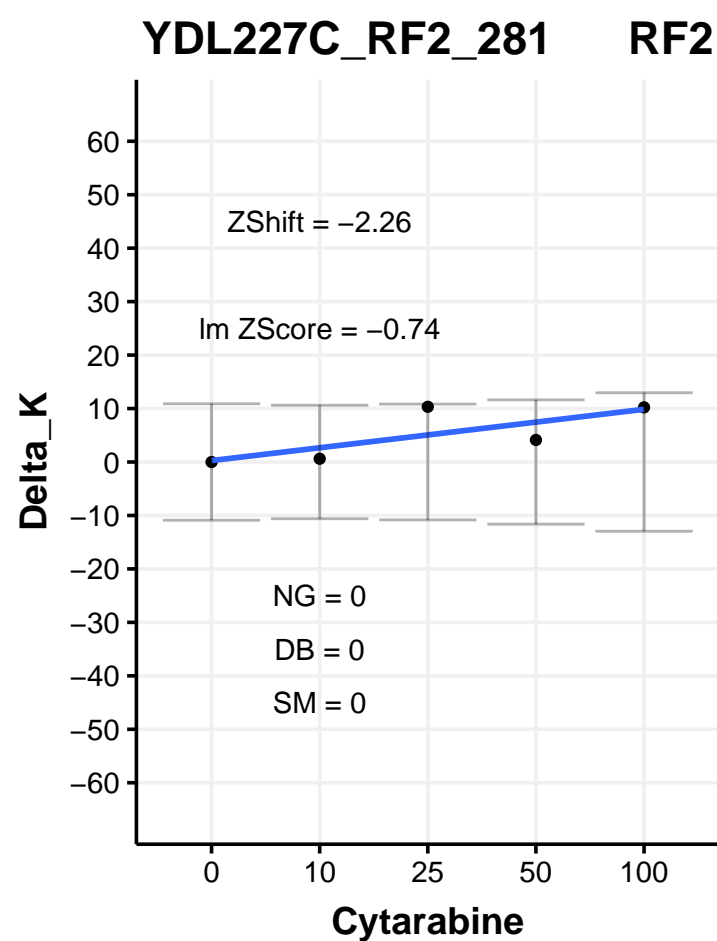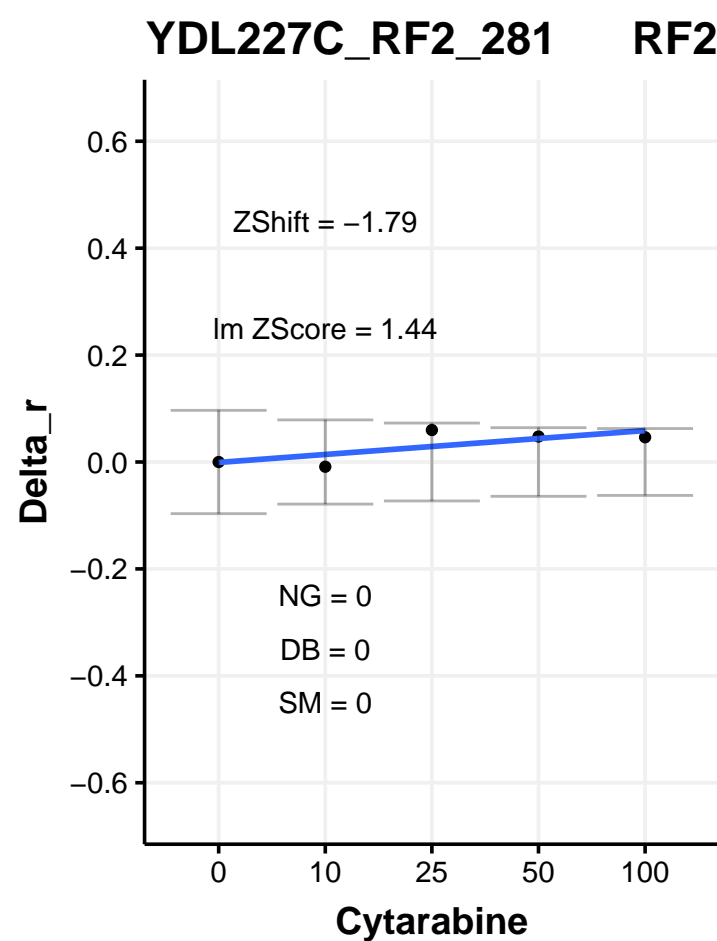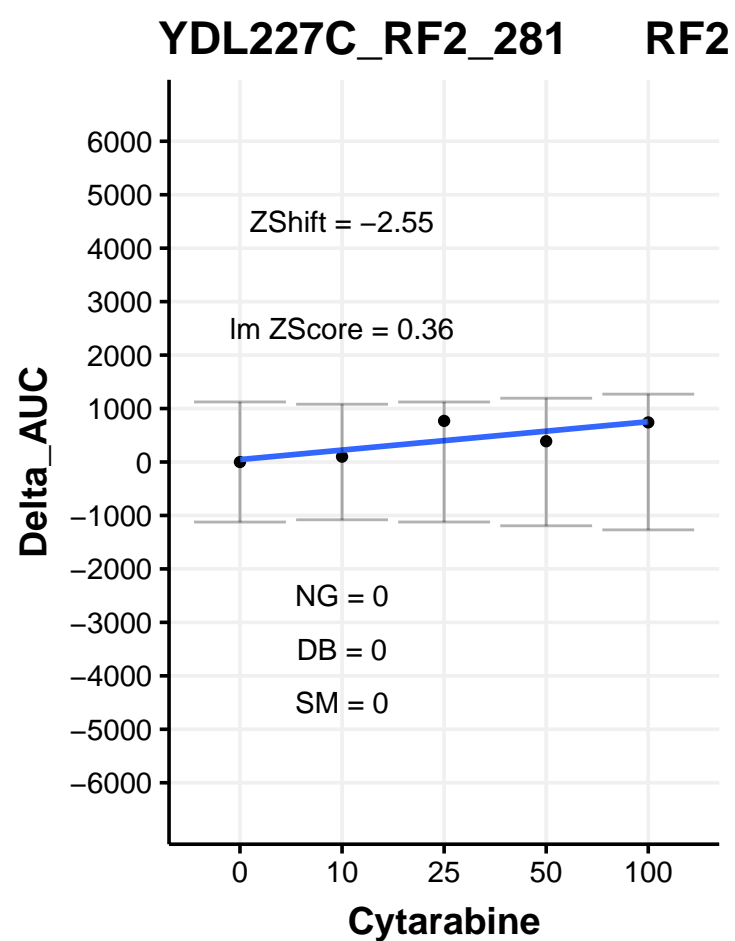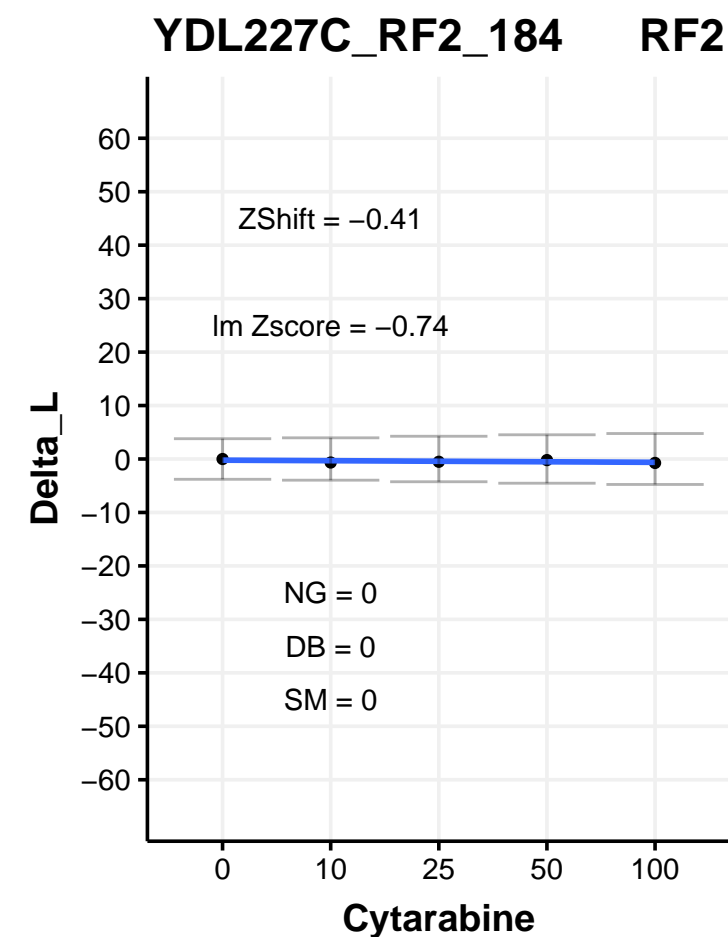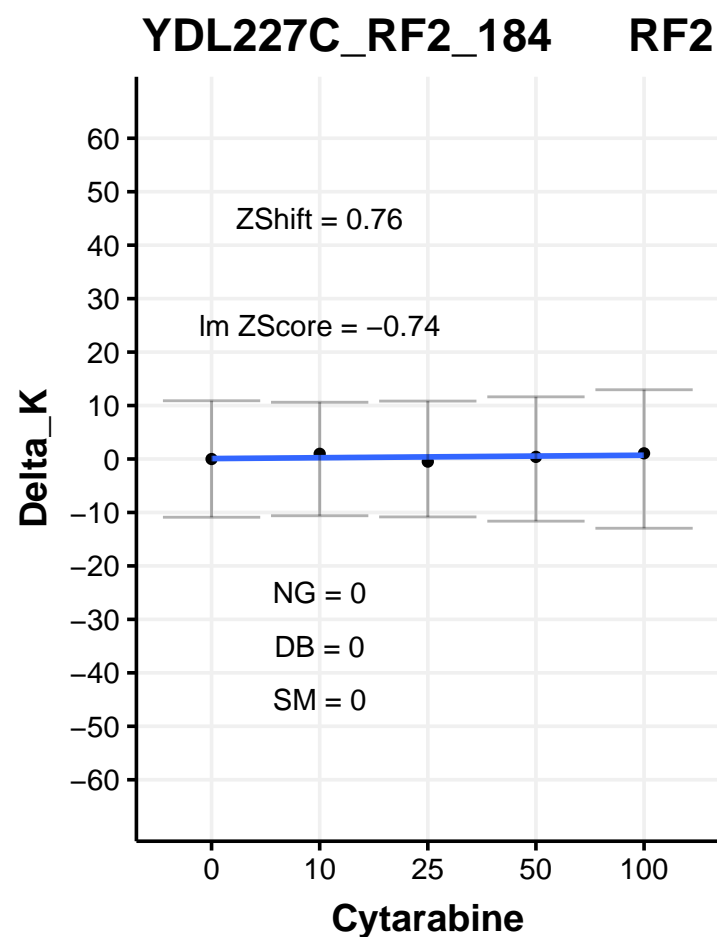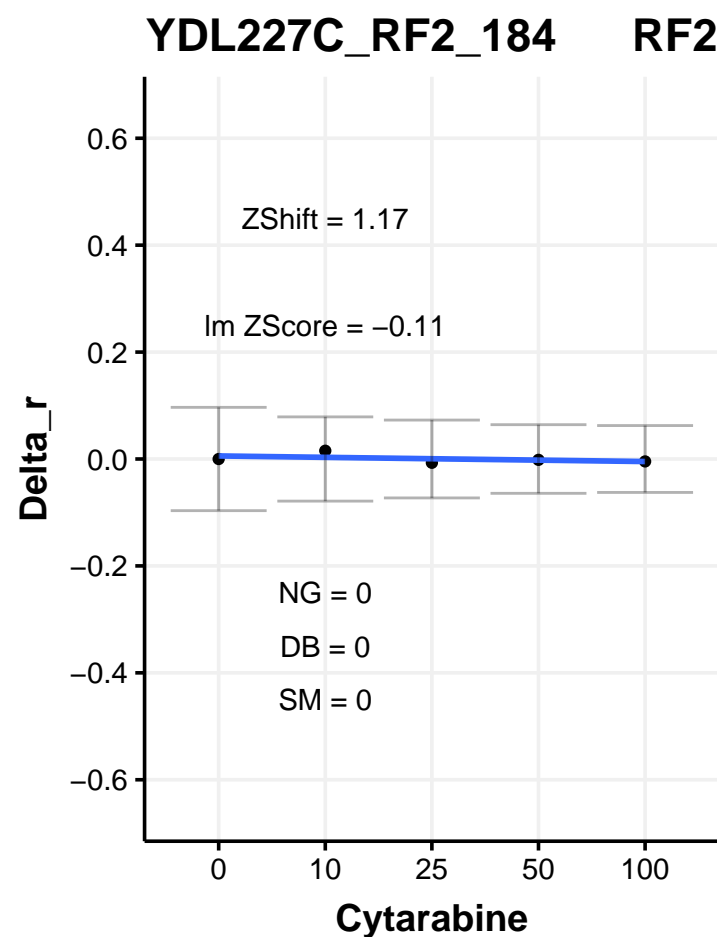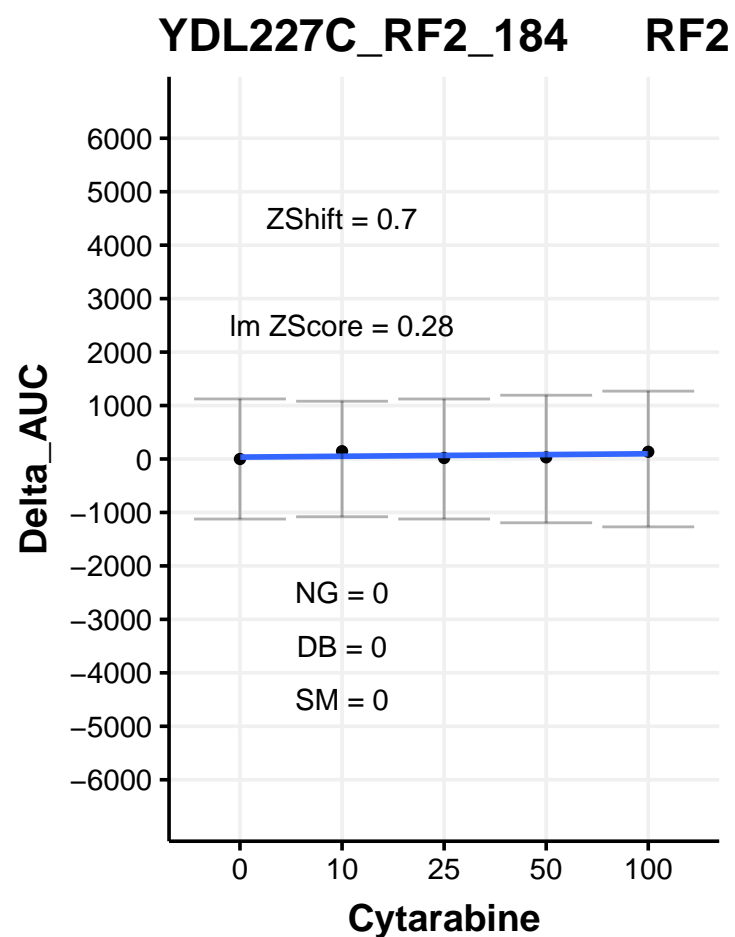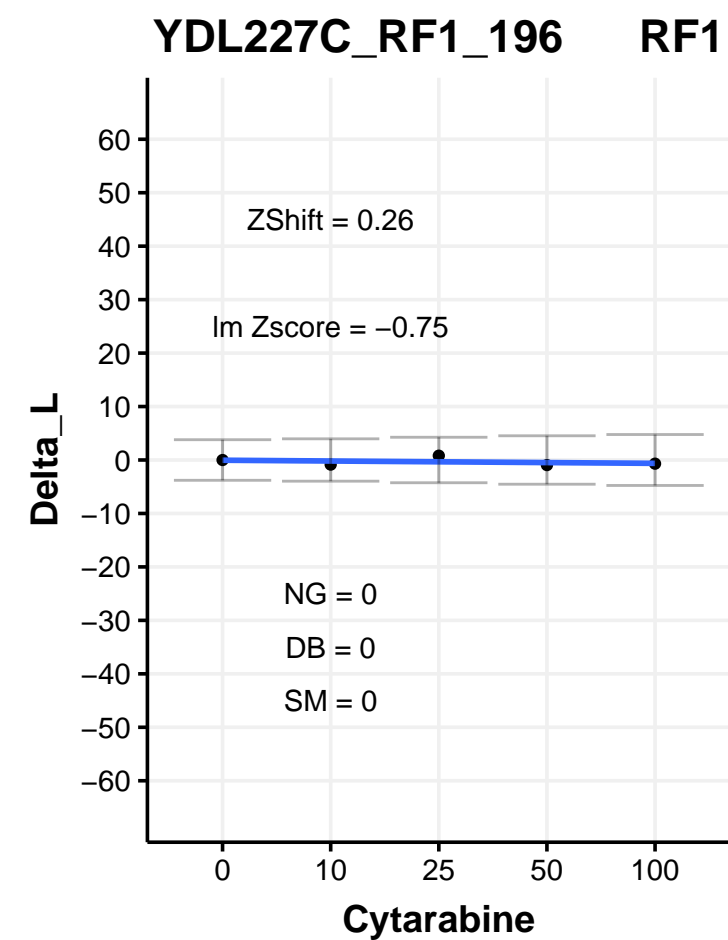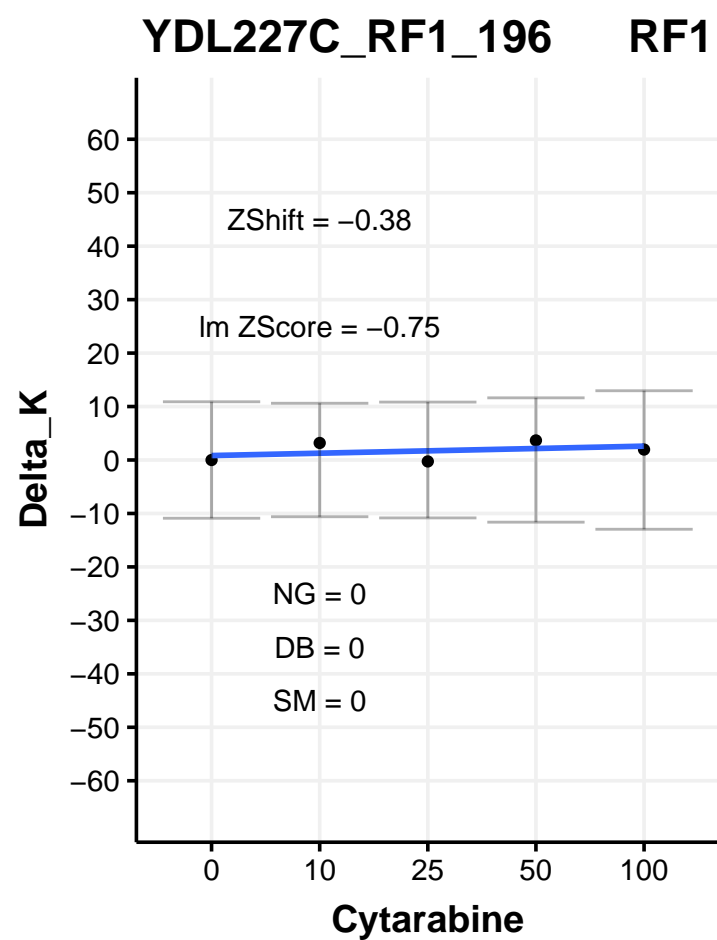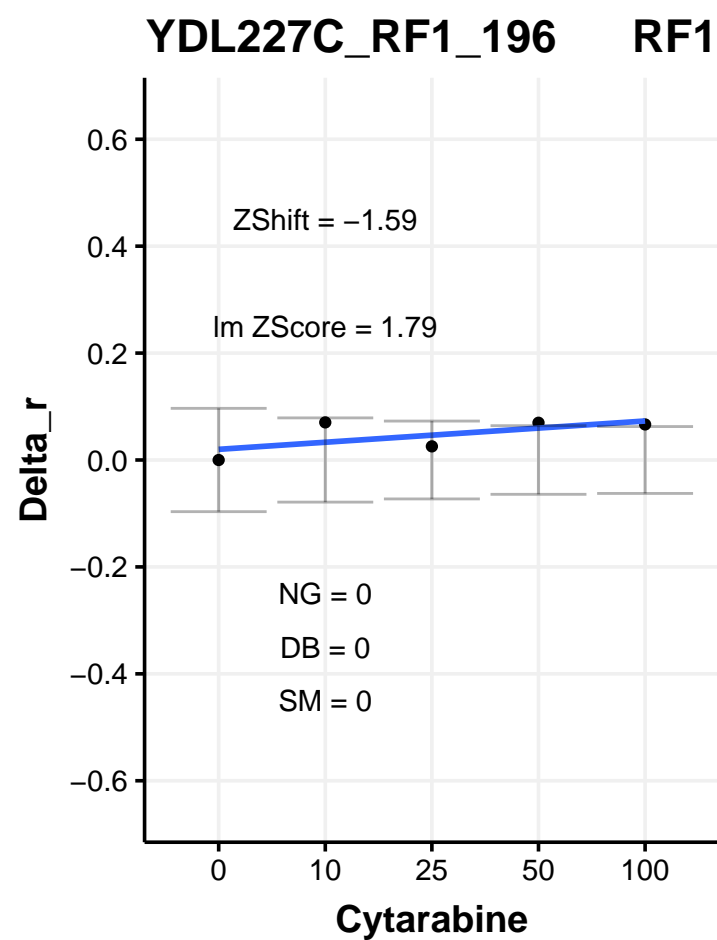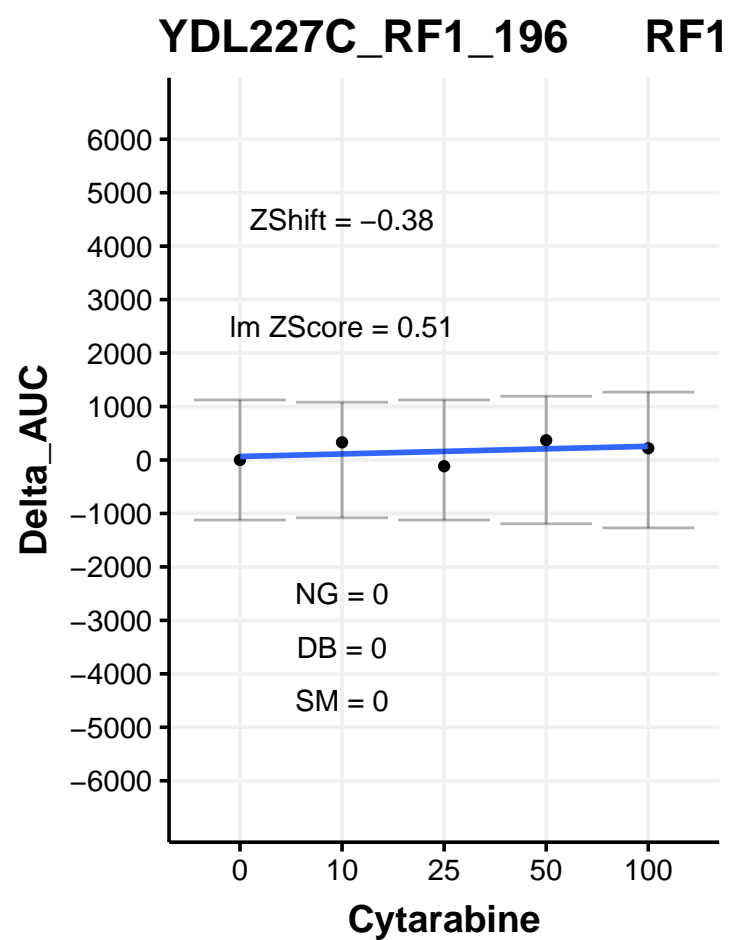

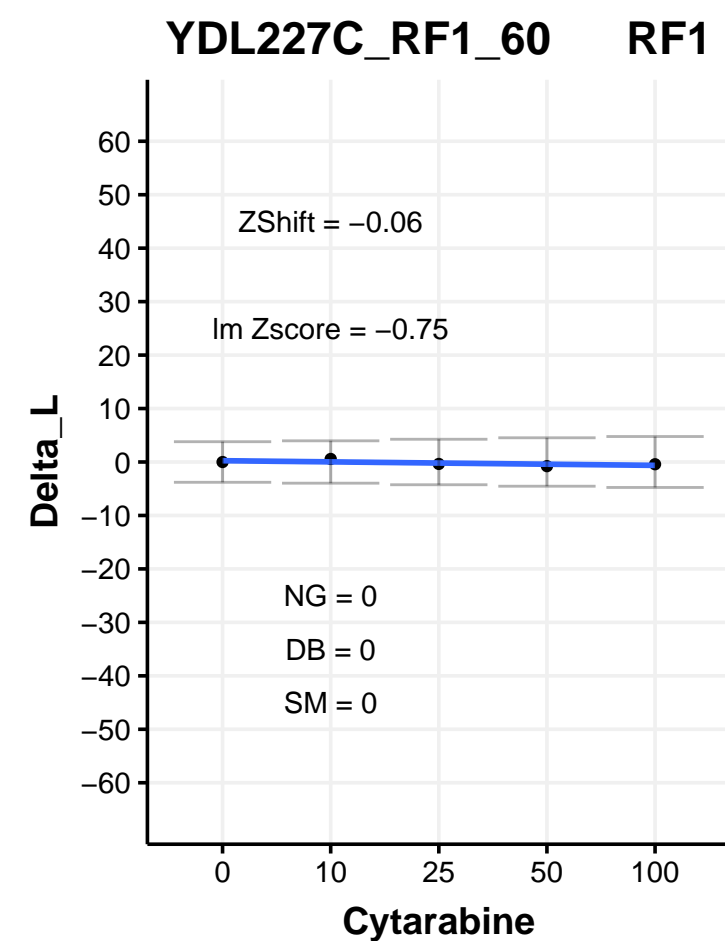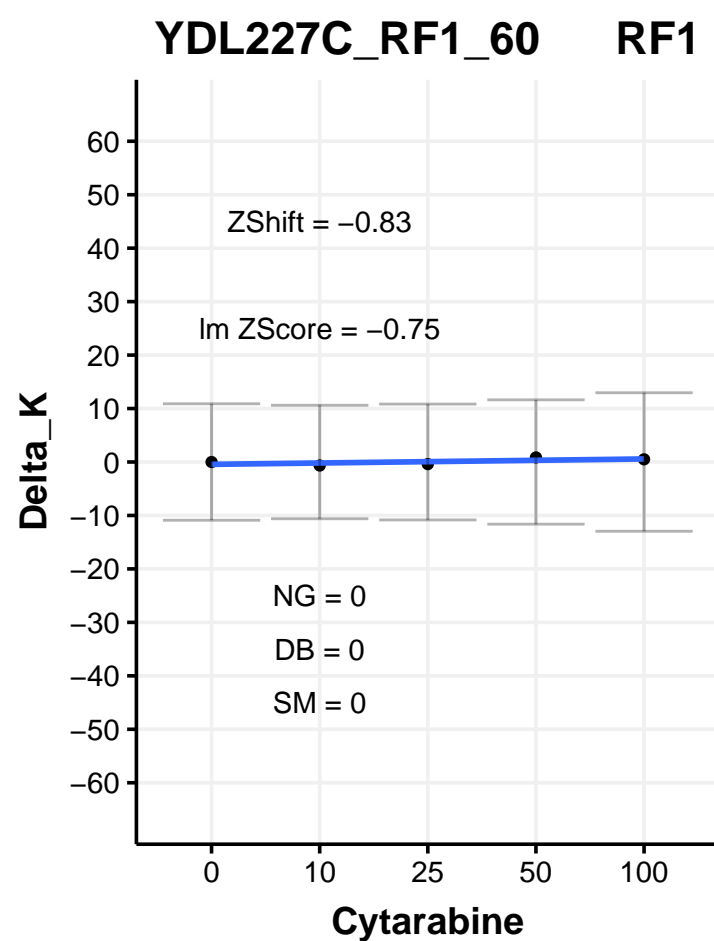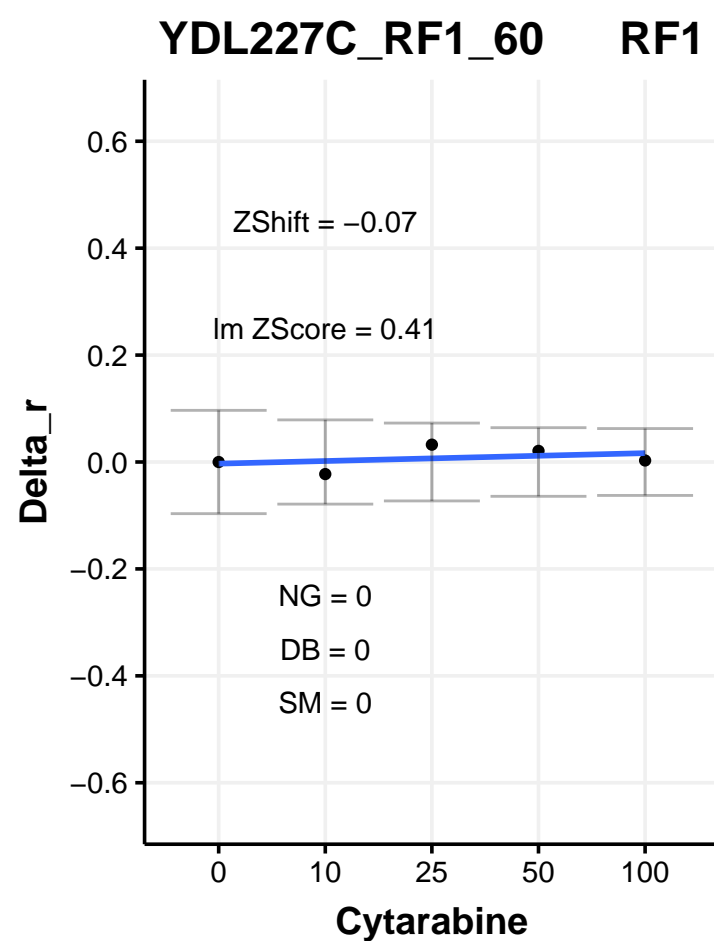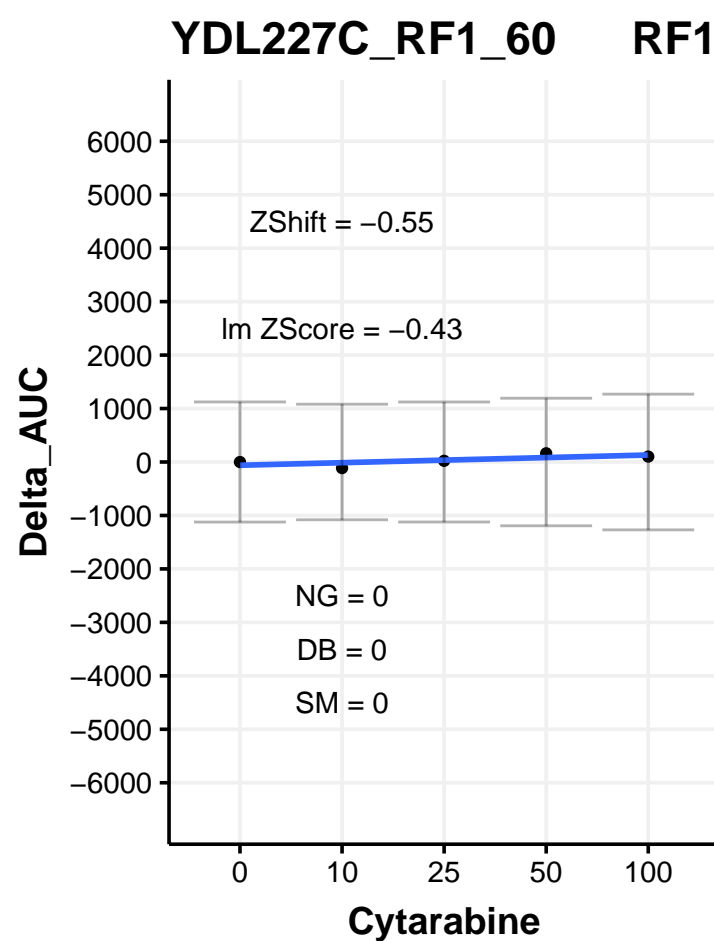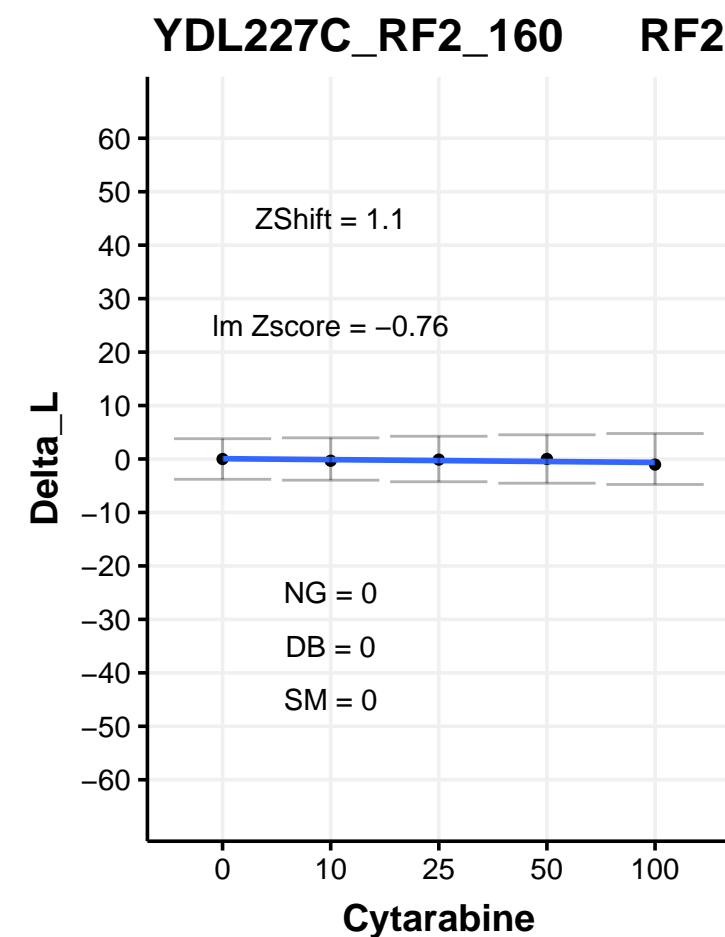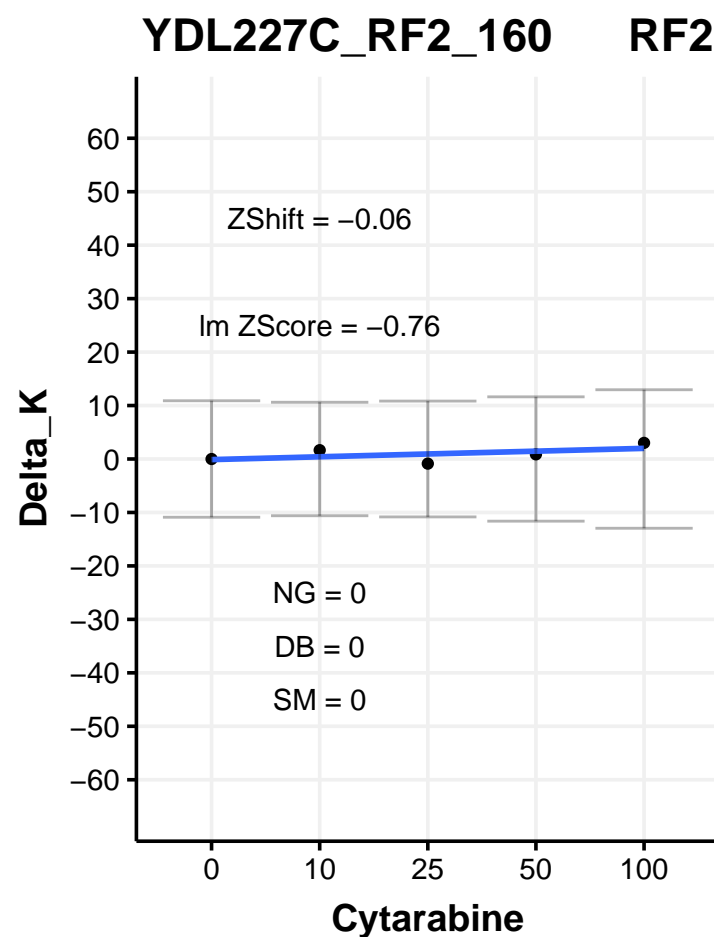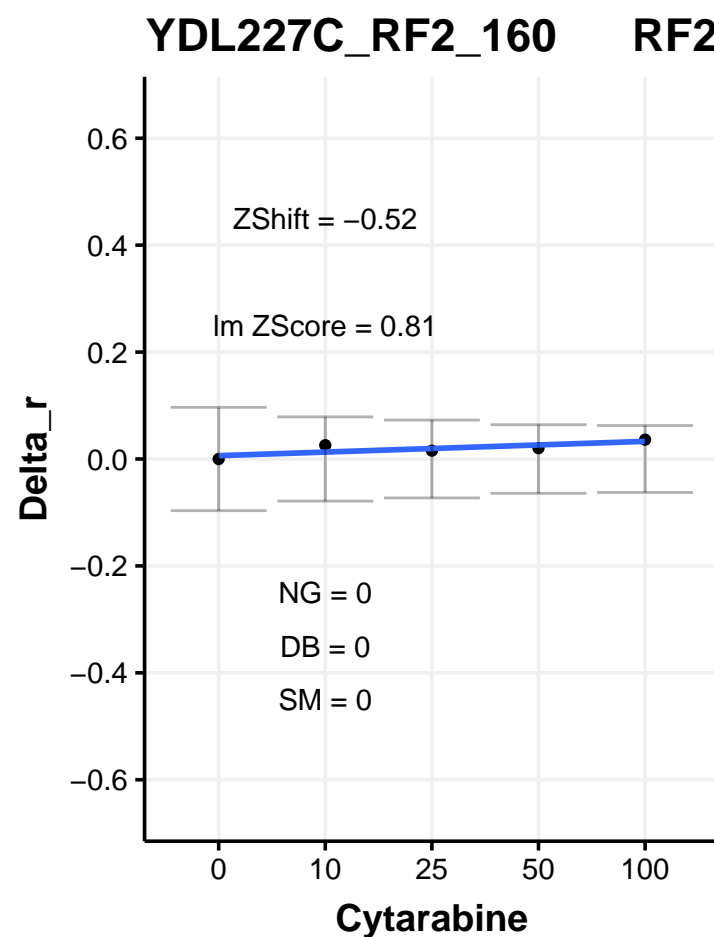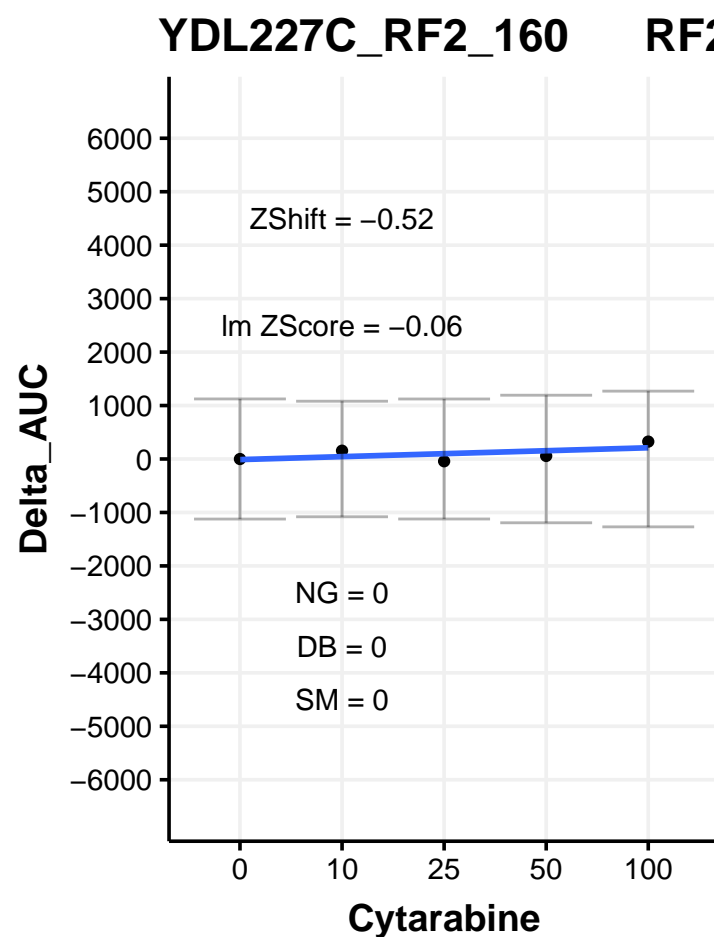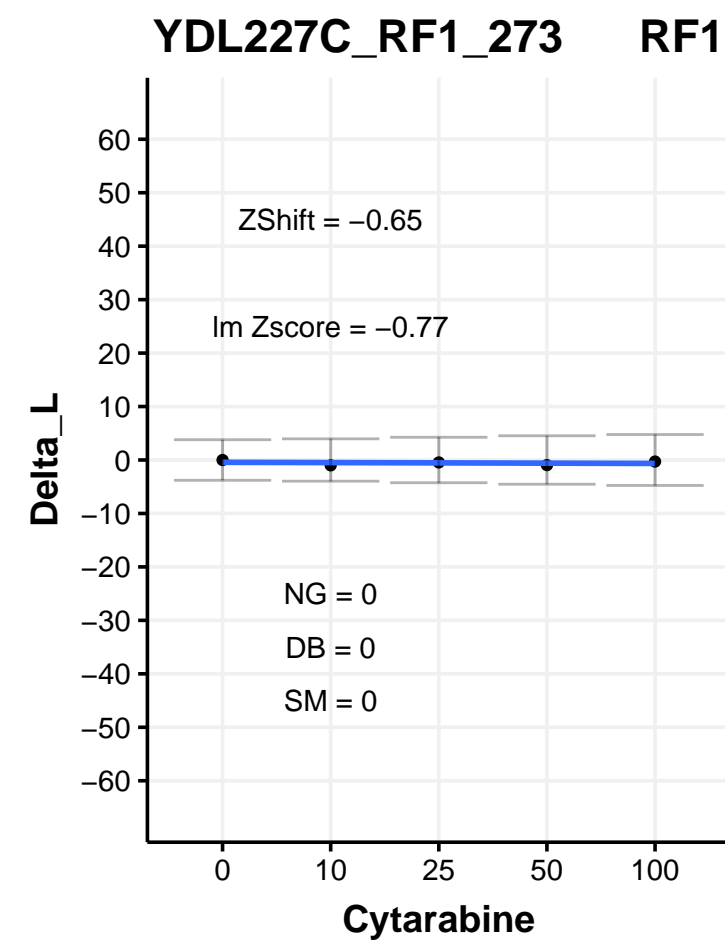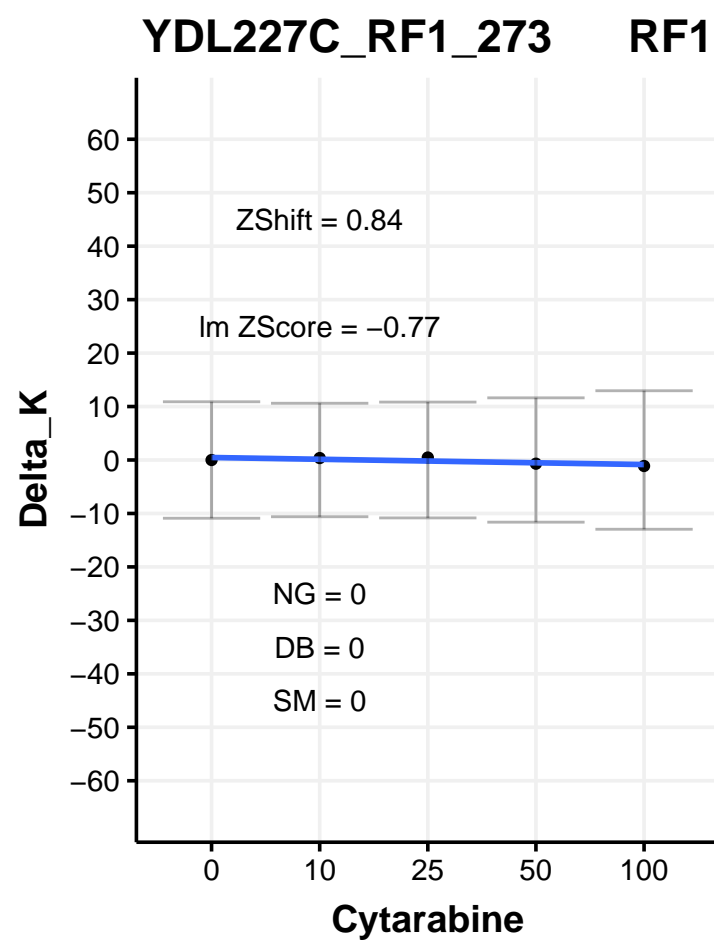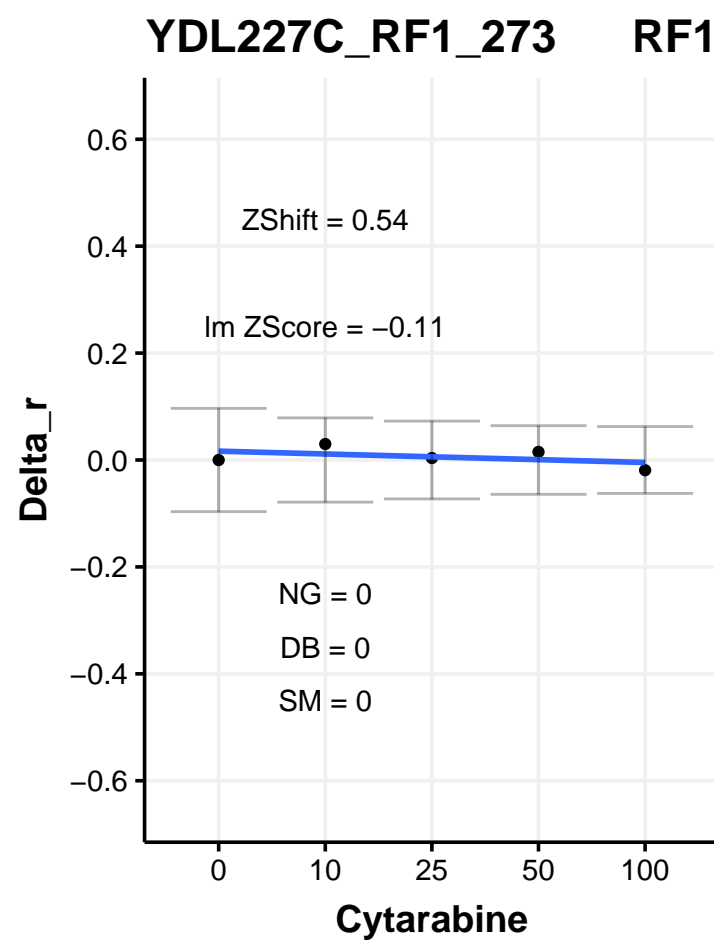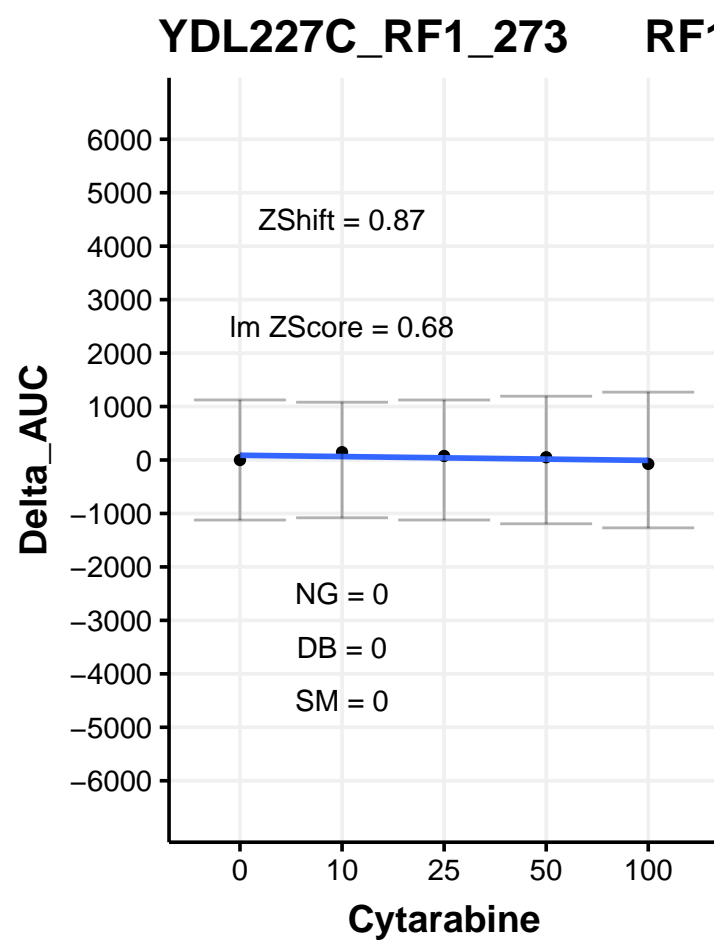



YDL227C\_RF2\_76 RF2

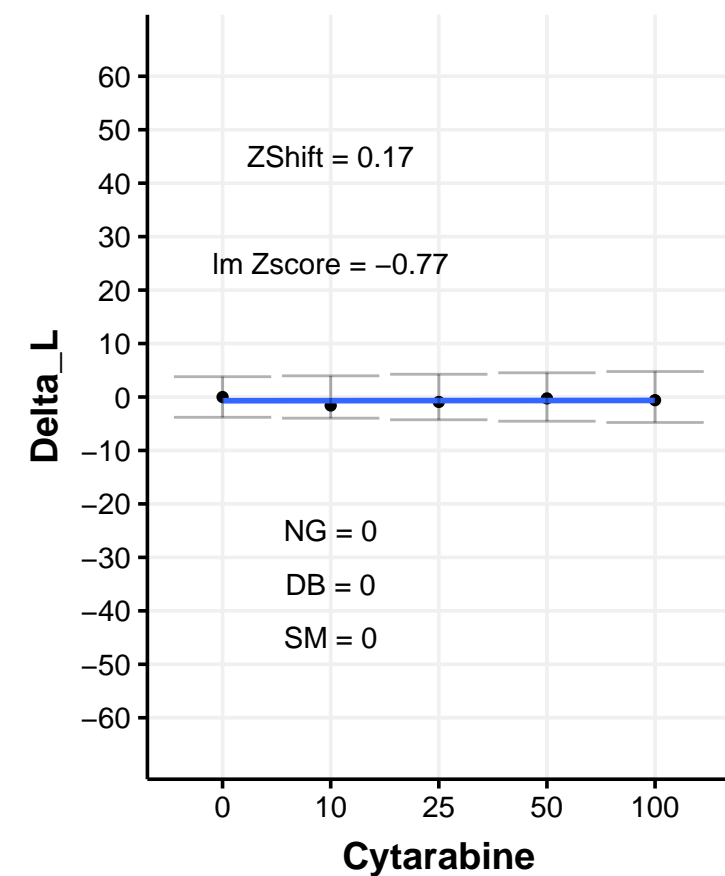

YDL227C\_RF2\_76 RF2

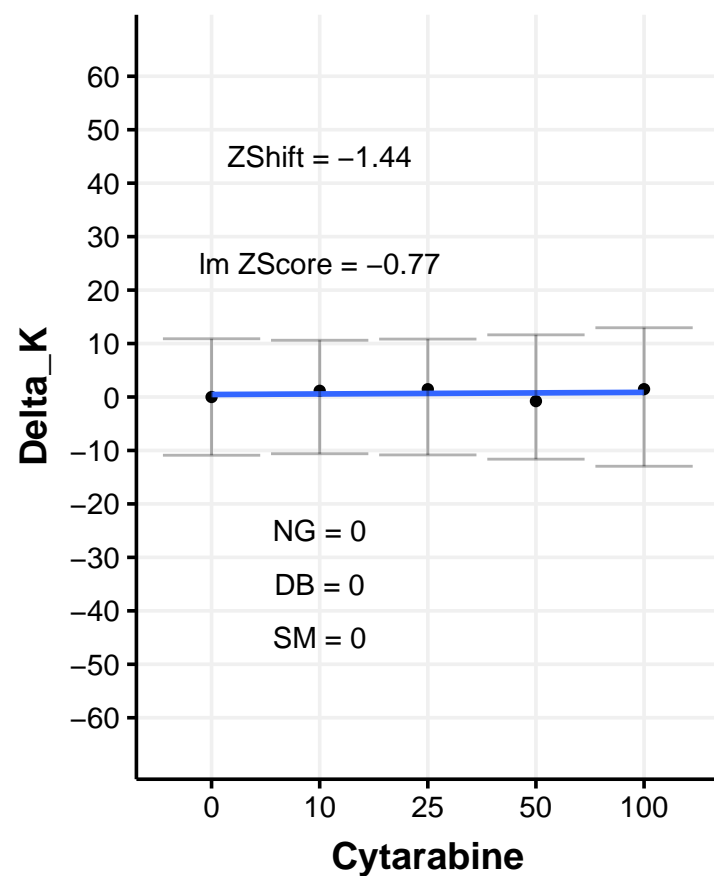

YDL227C\_RF2\_76 RF2

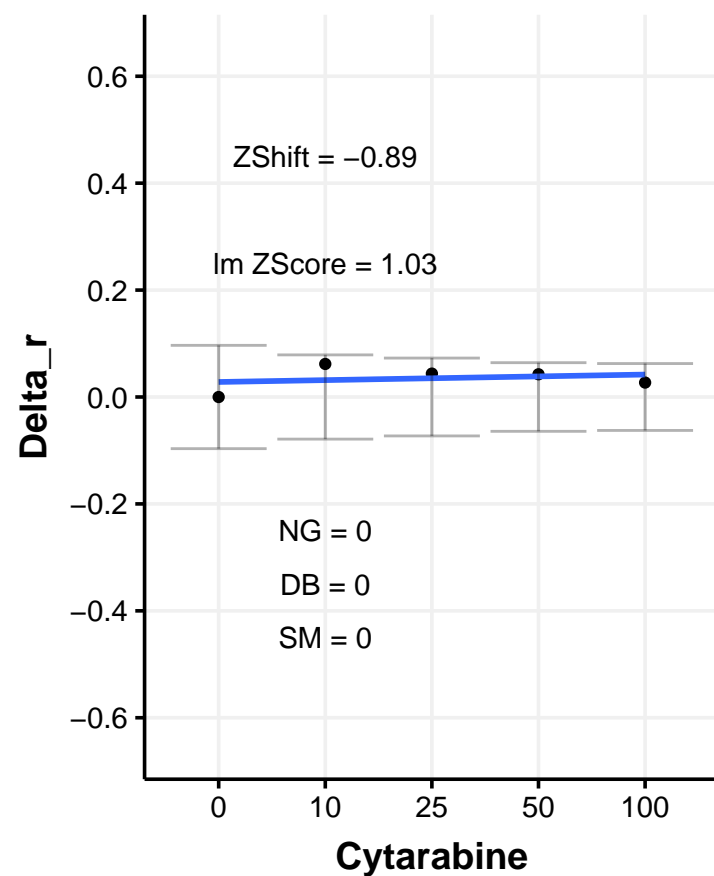

YDL227C\_RF2\_76 RF2

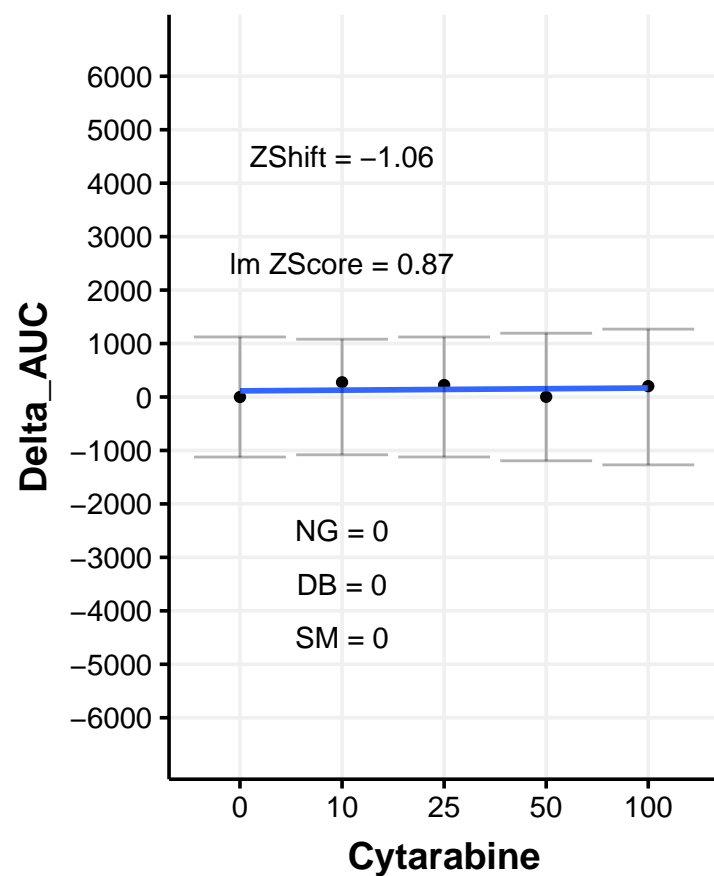

YDL227C\_RF2\_276 RF2

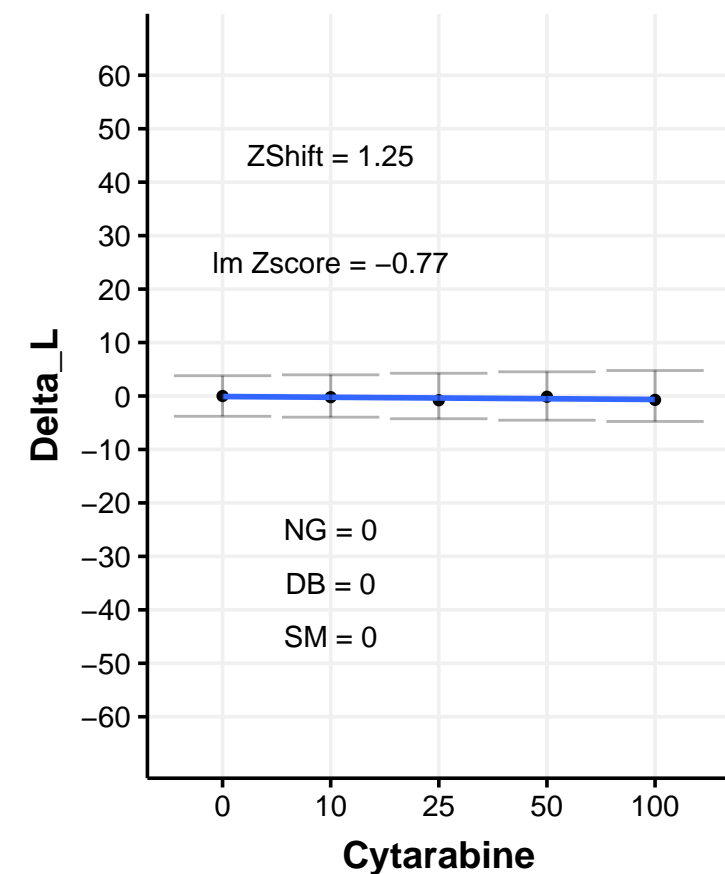

YDL227C\_RF2\_276 RF2

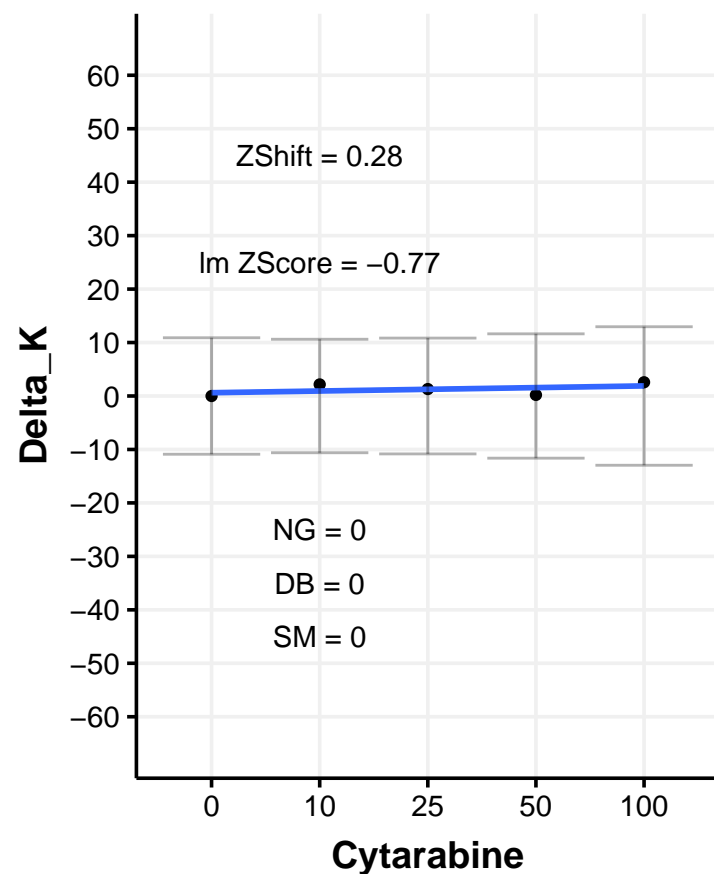

YDL227C\_RF2\_276 RF2

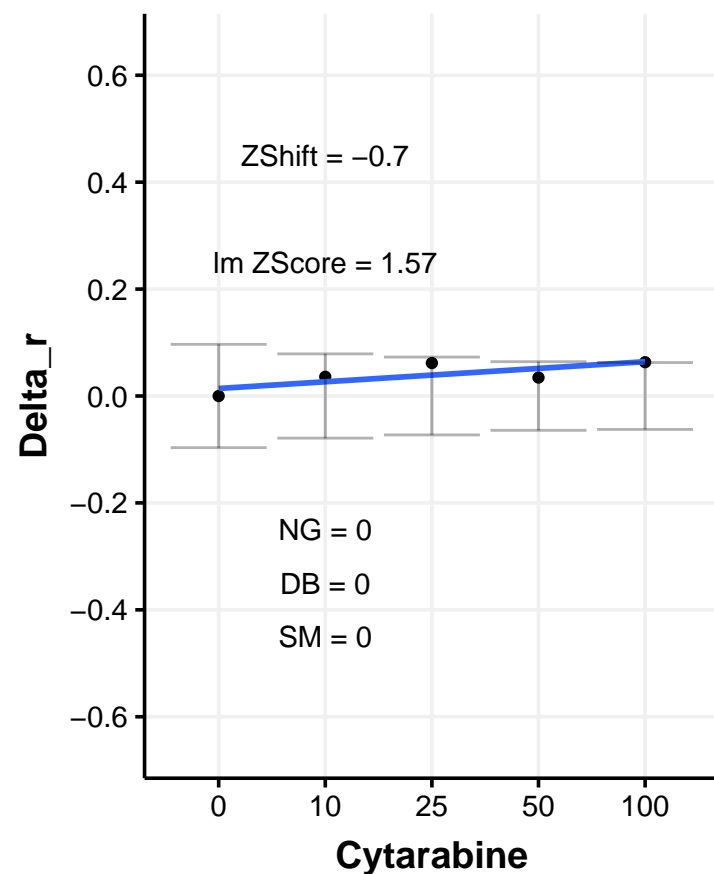

YDL227C\_RF2\_276 RF2

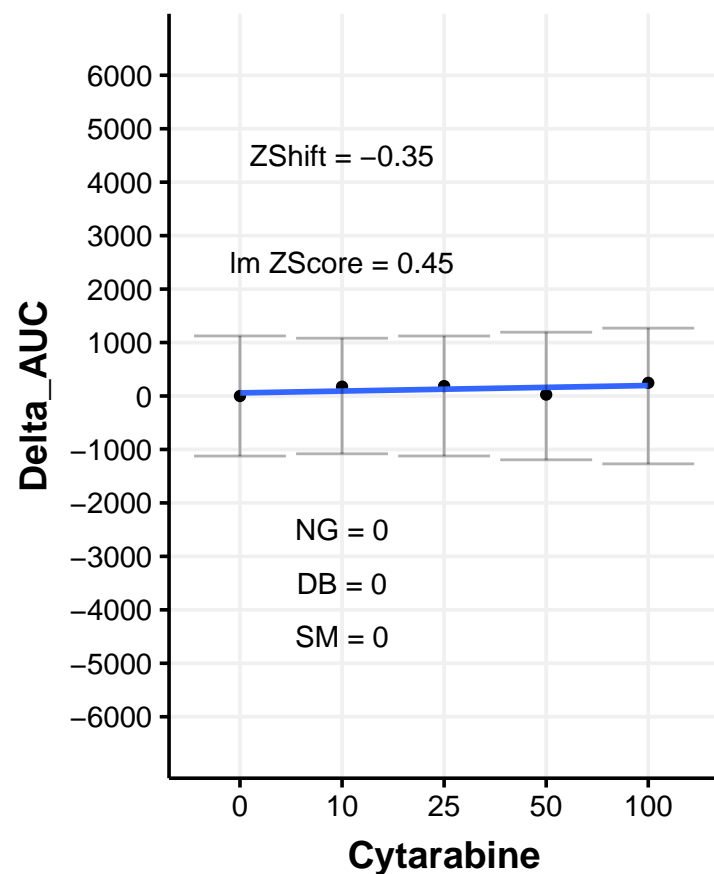

YDL227C\_RF1\_218 RF1

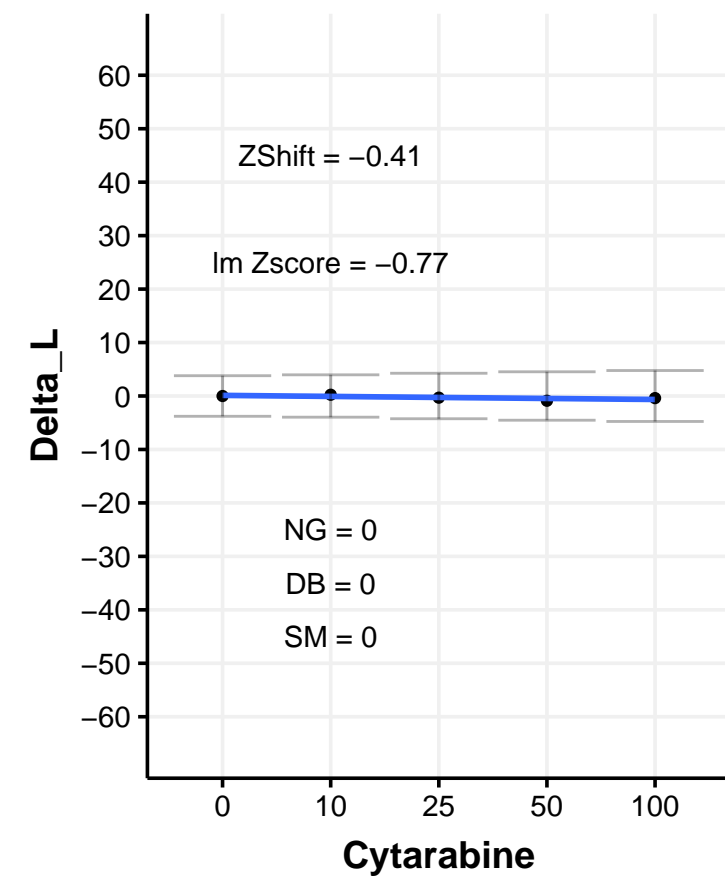

YDL227C\_RF1\_218 RF1

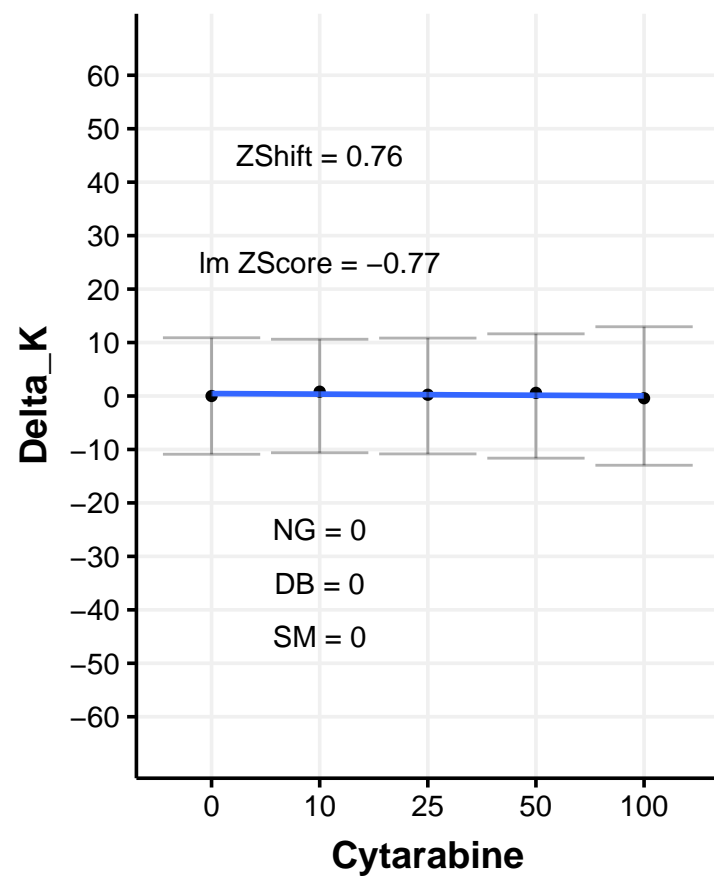

YDL227C\_RF1\_218 RF1

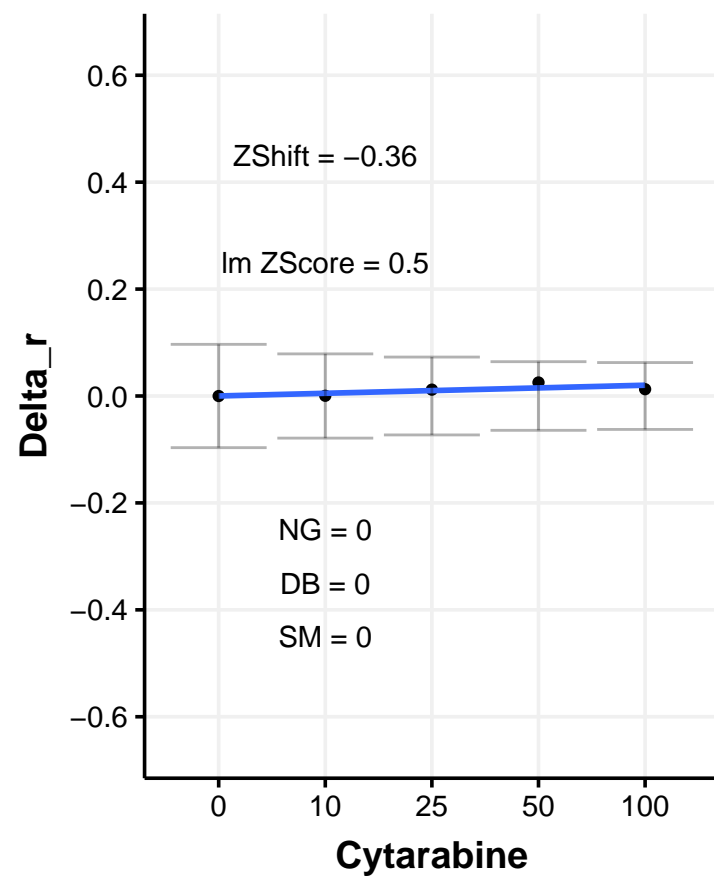

YDL227C\_RF1\_218 RF1

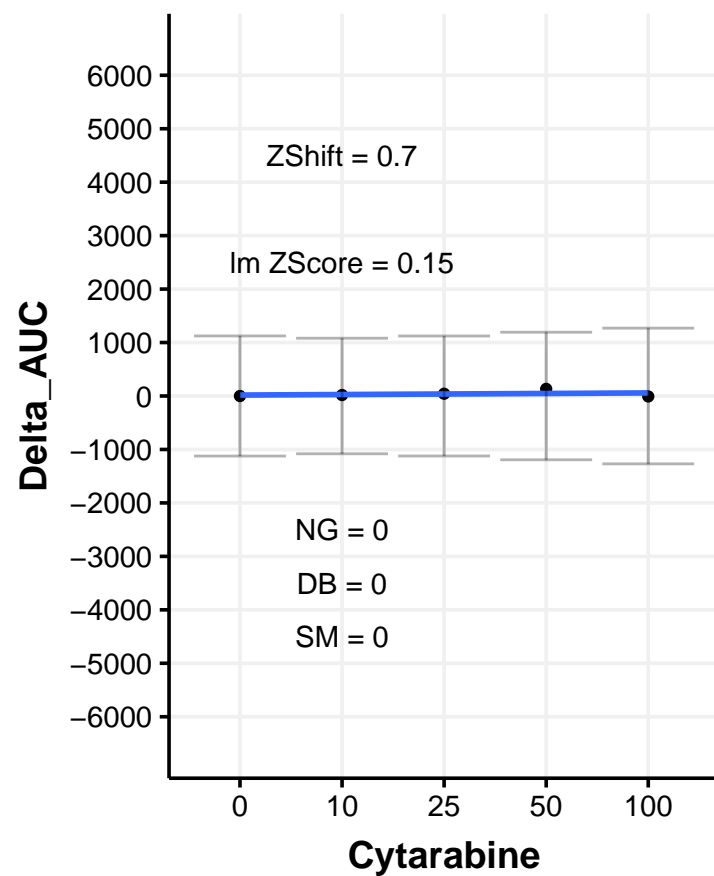



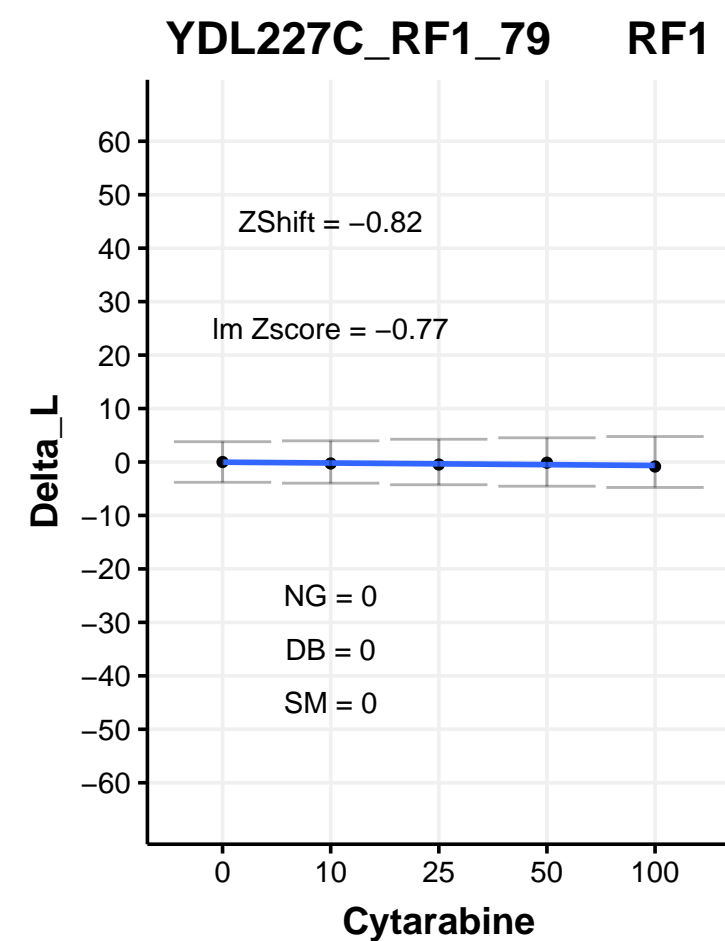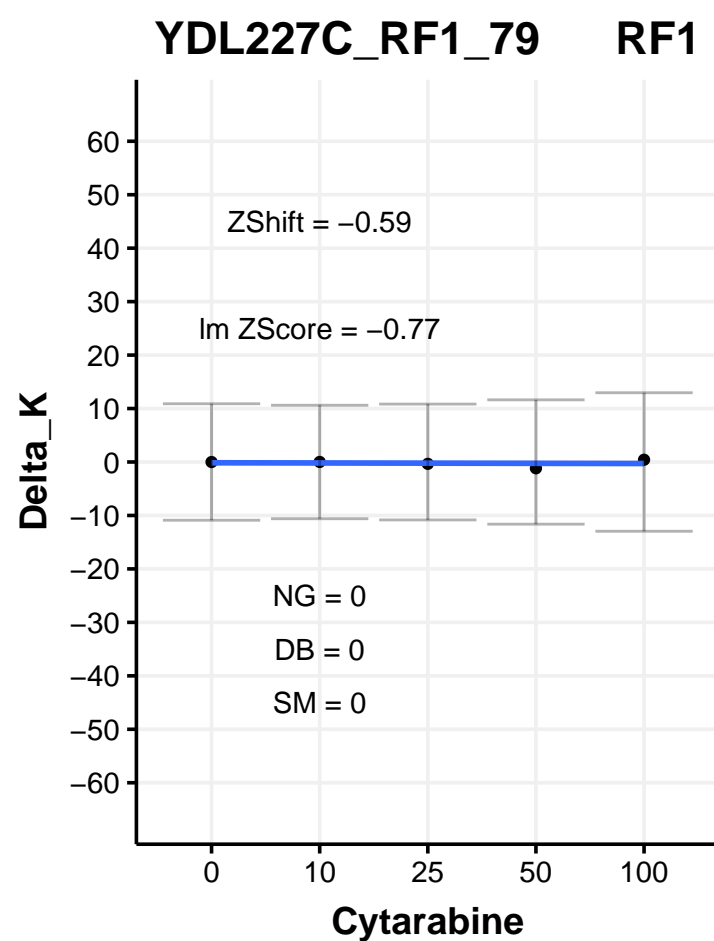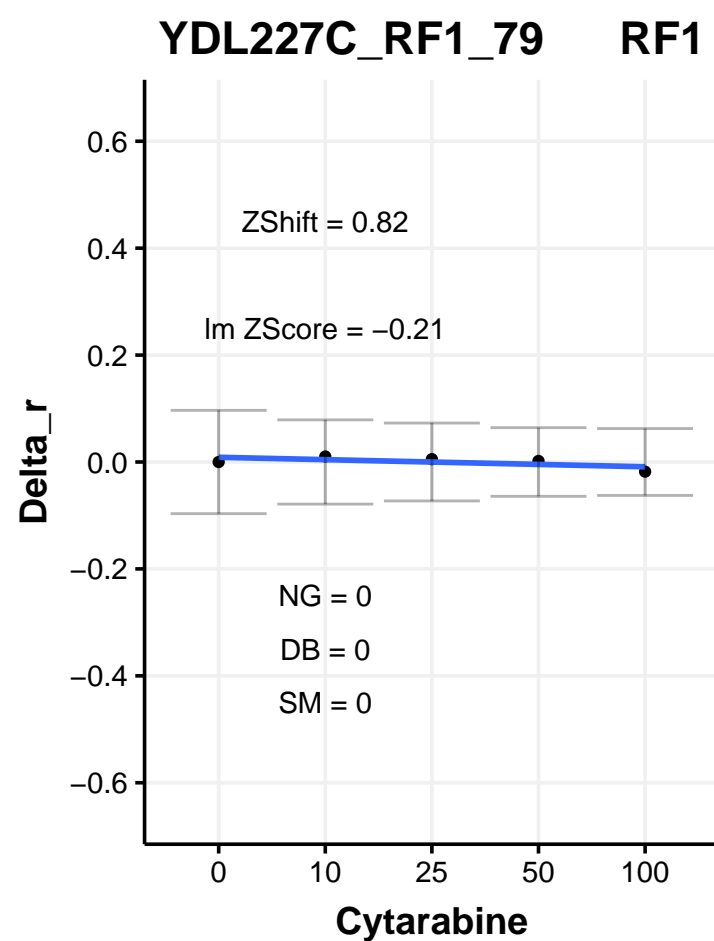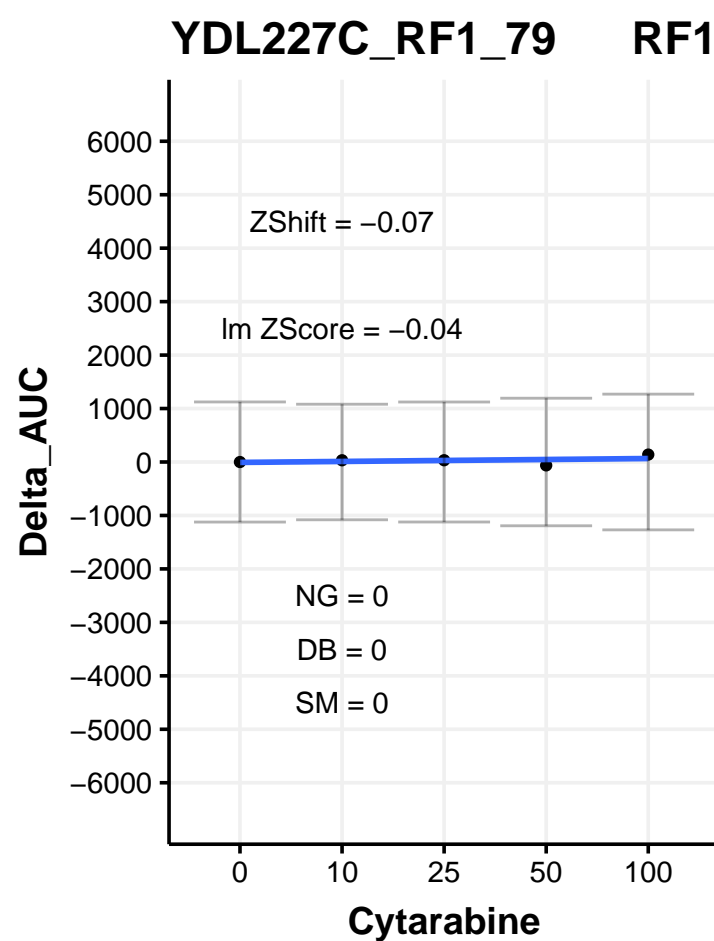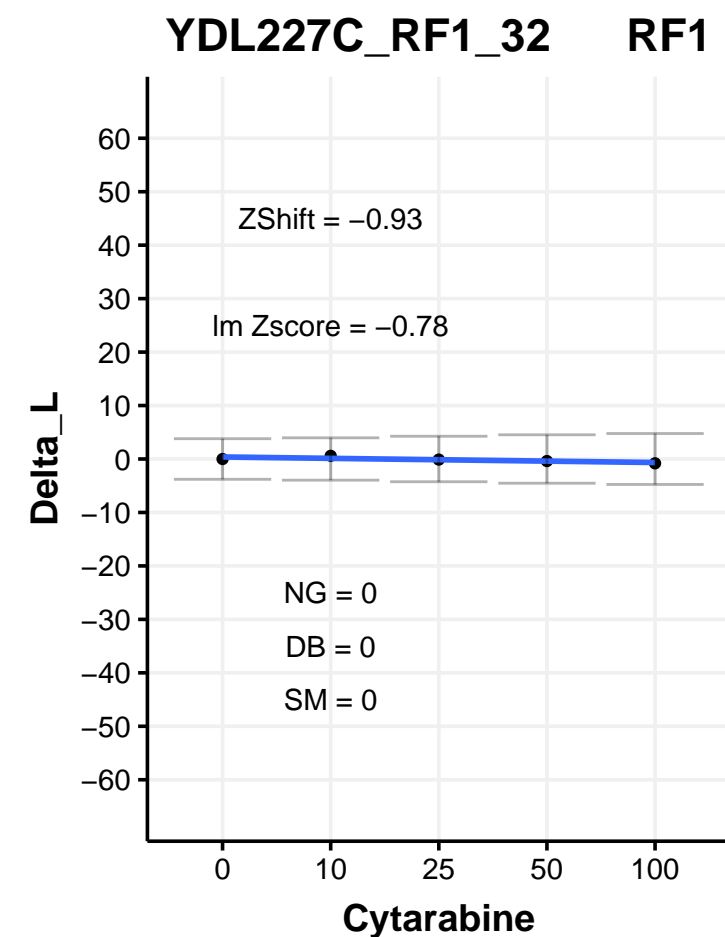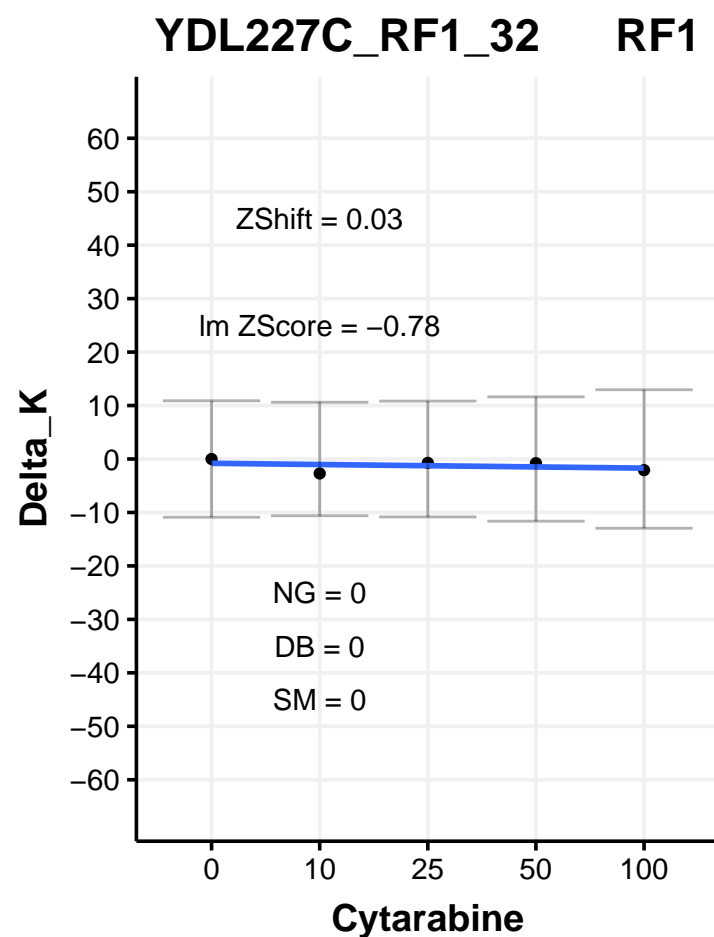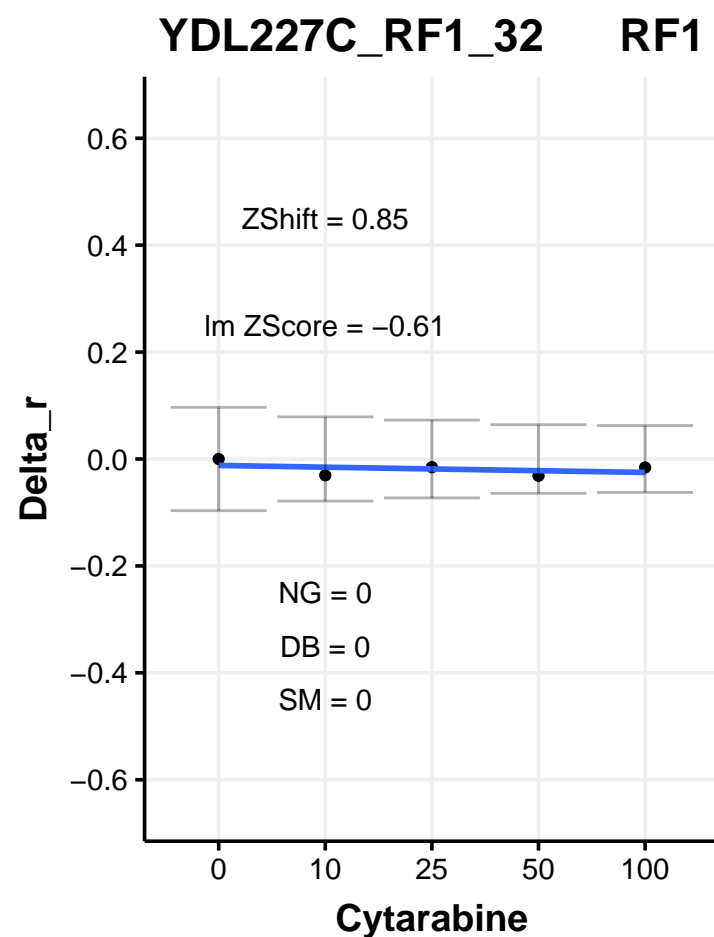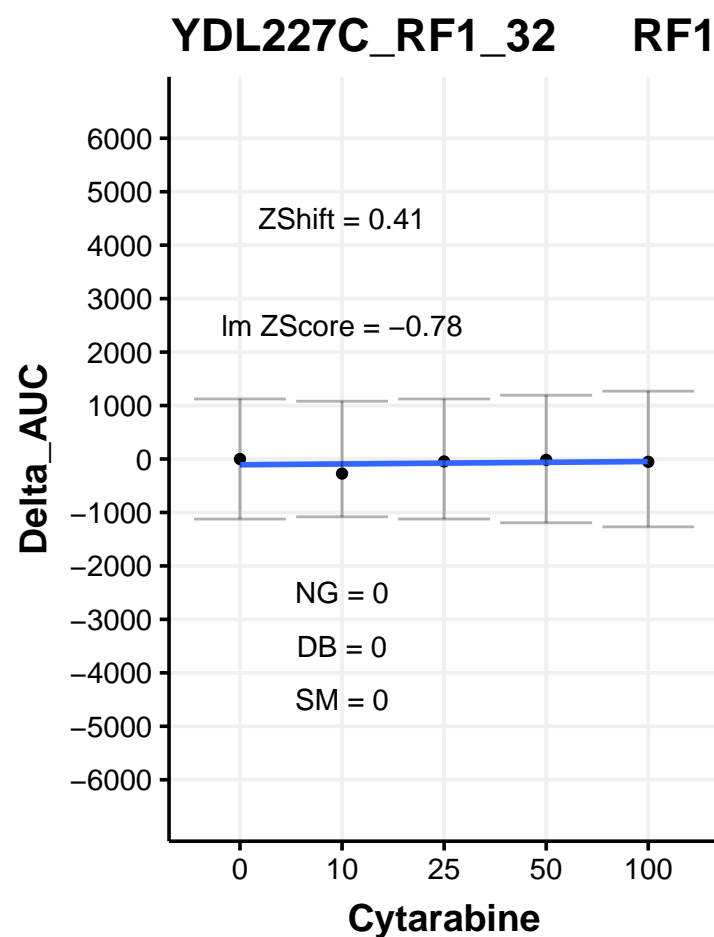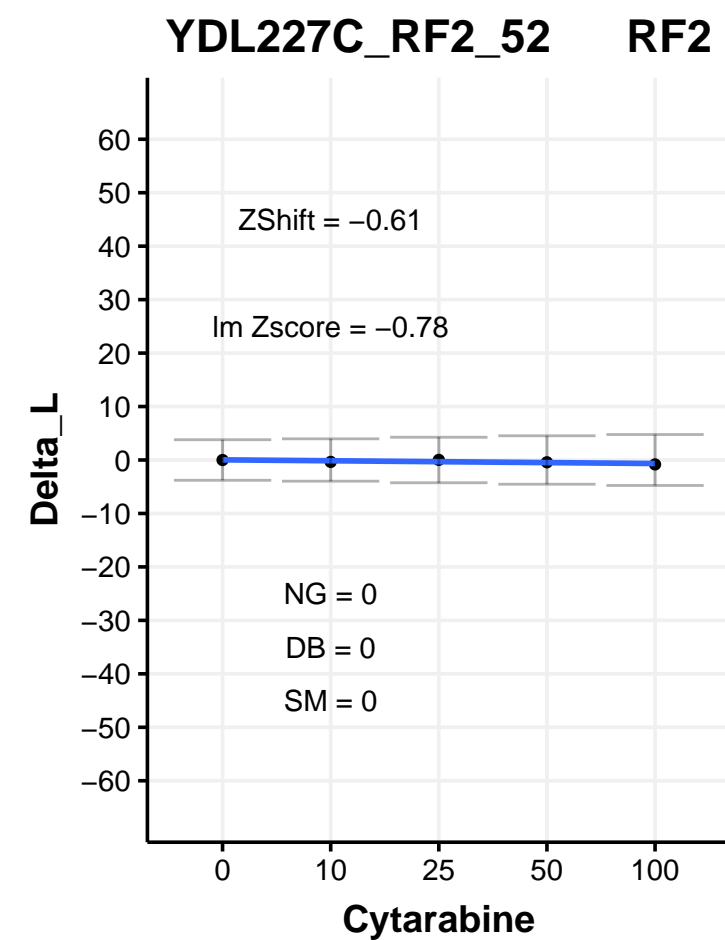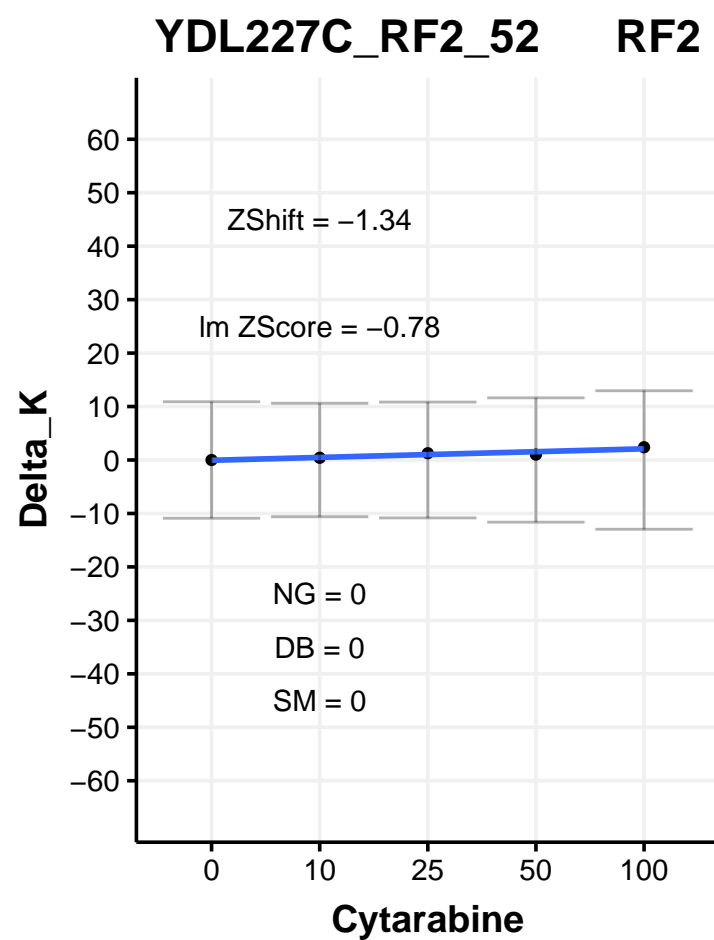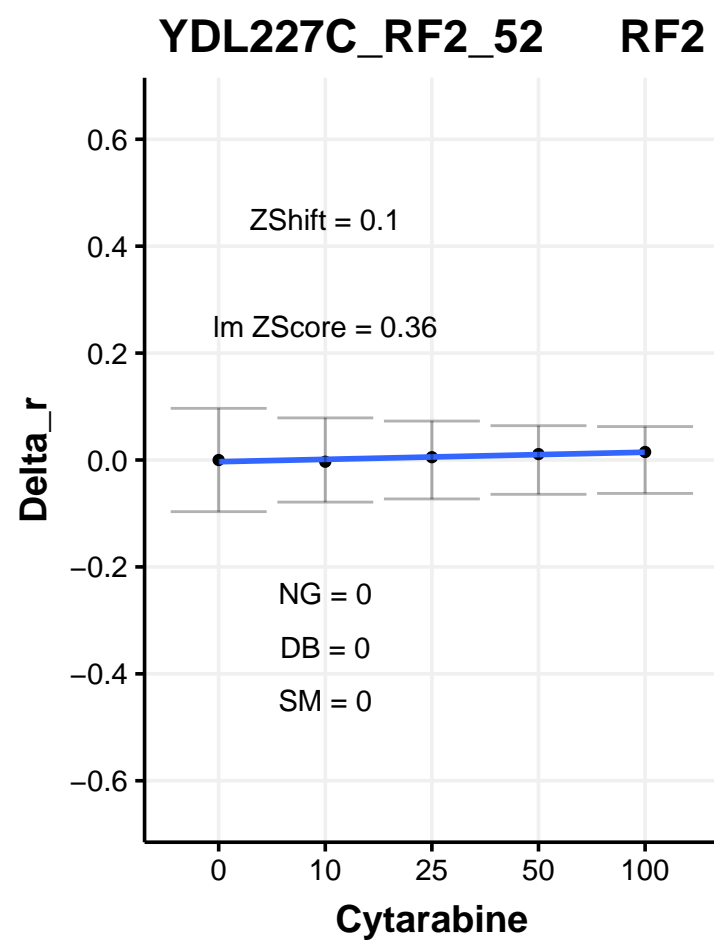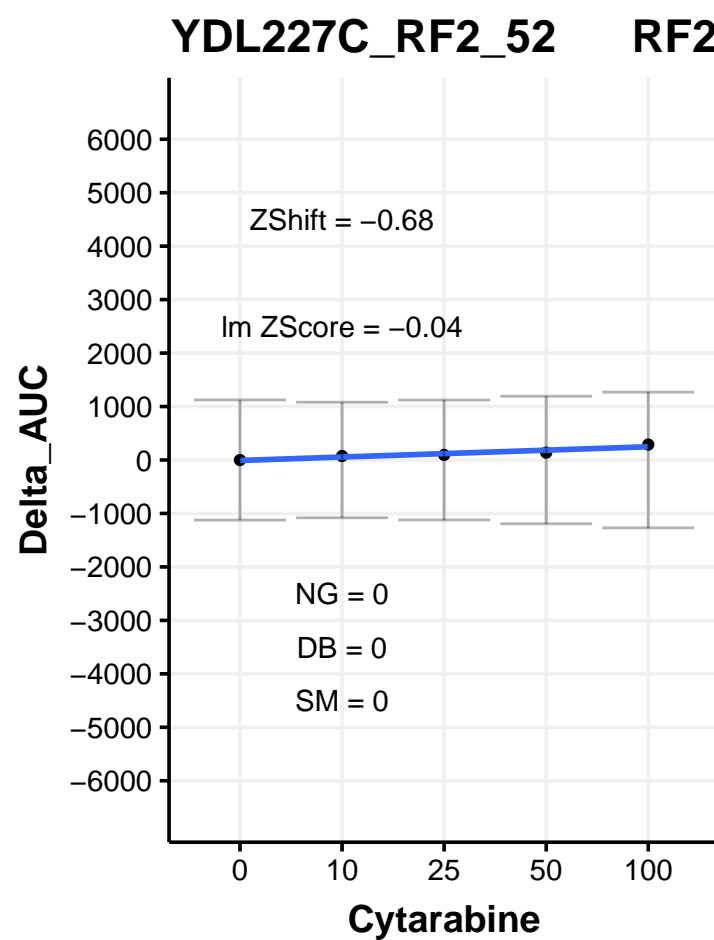

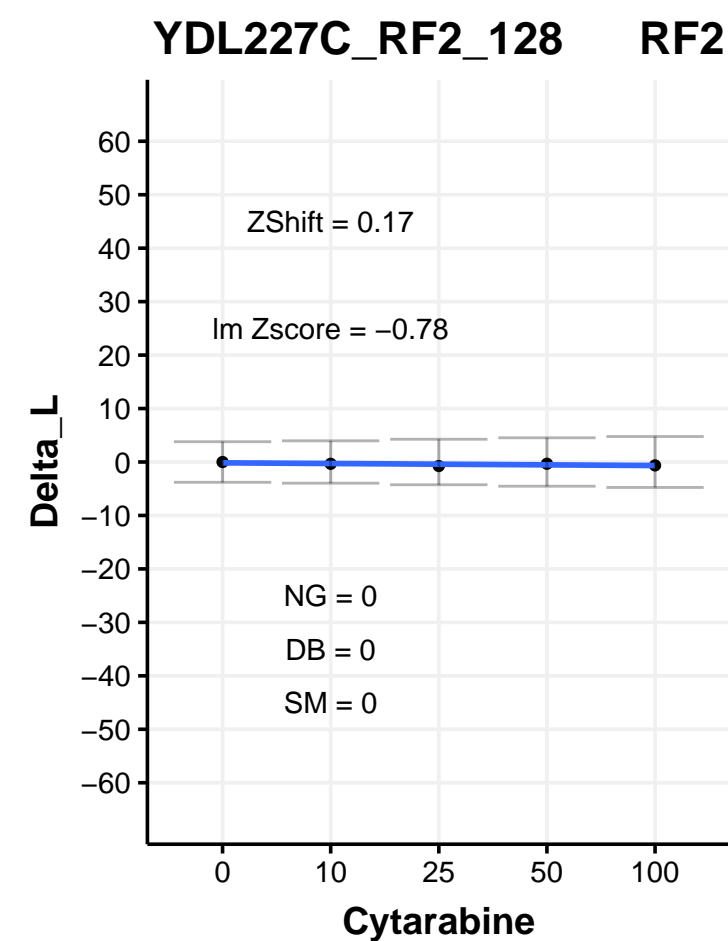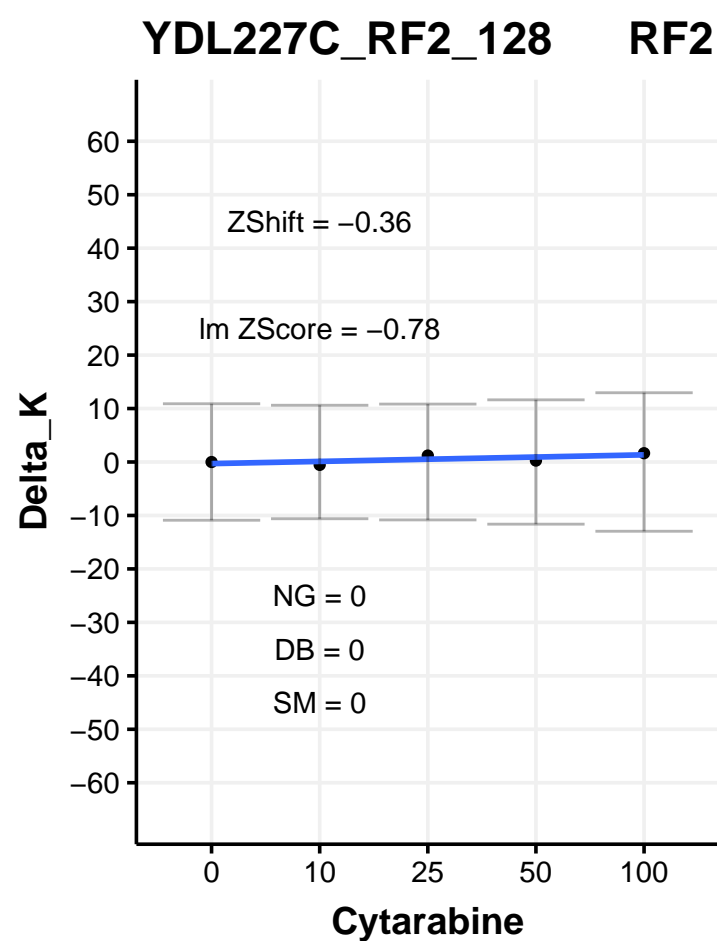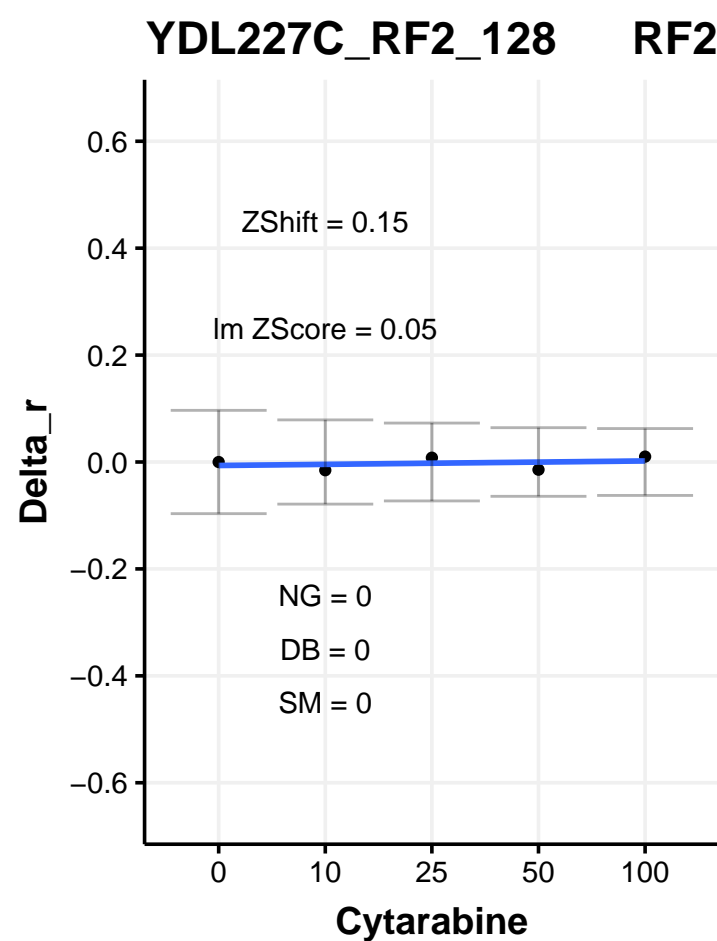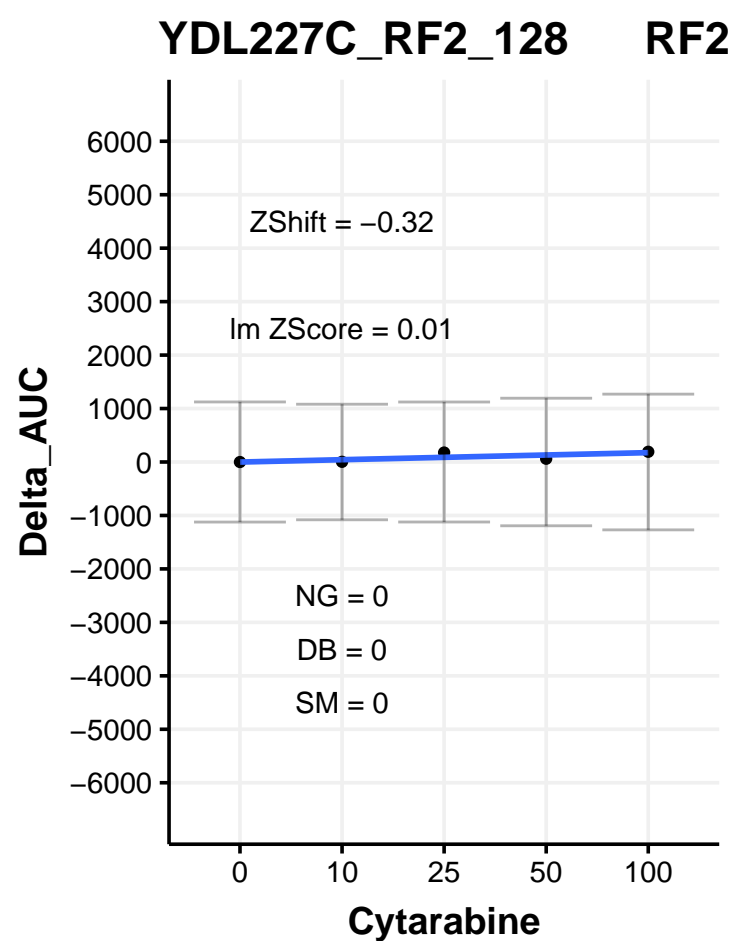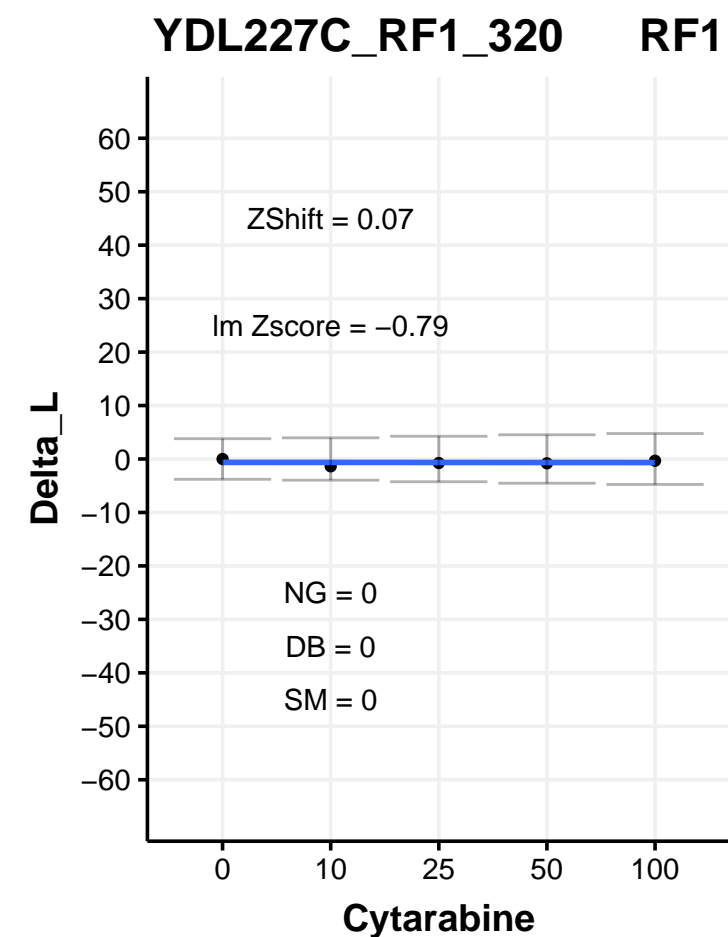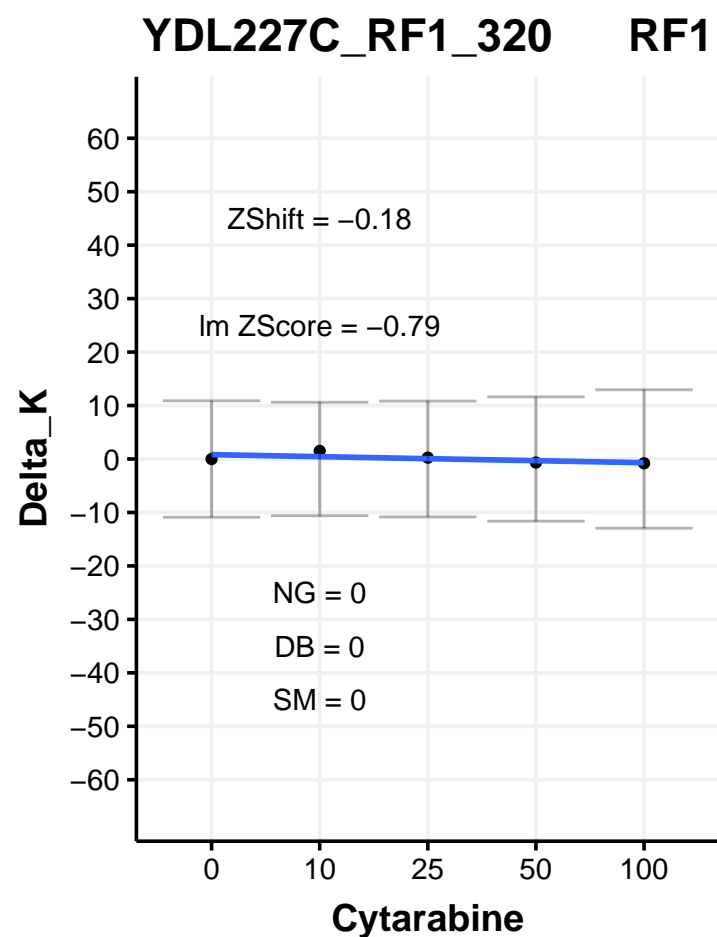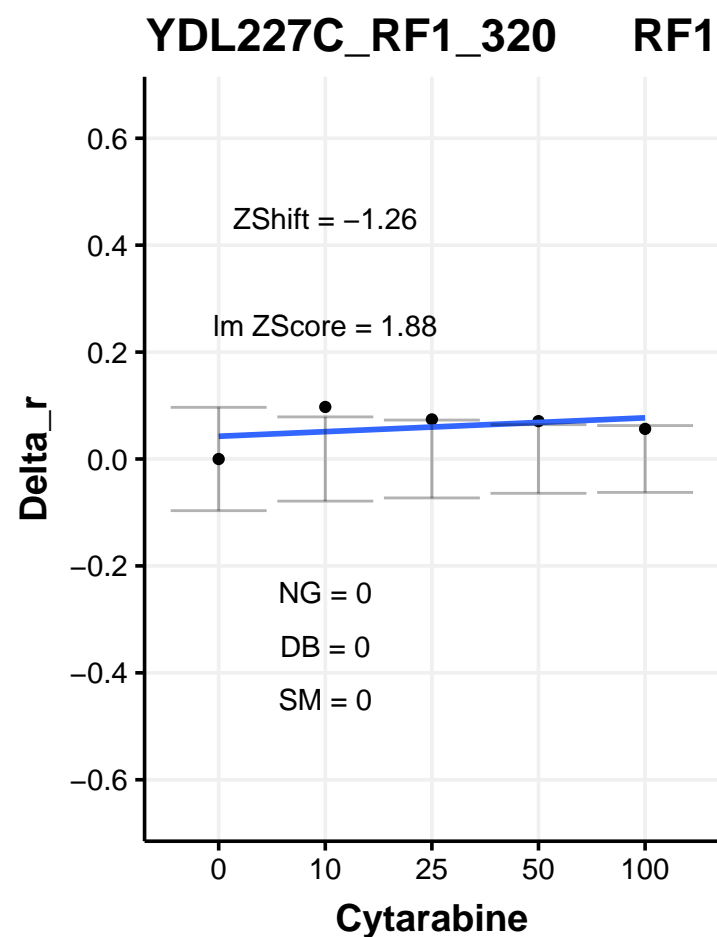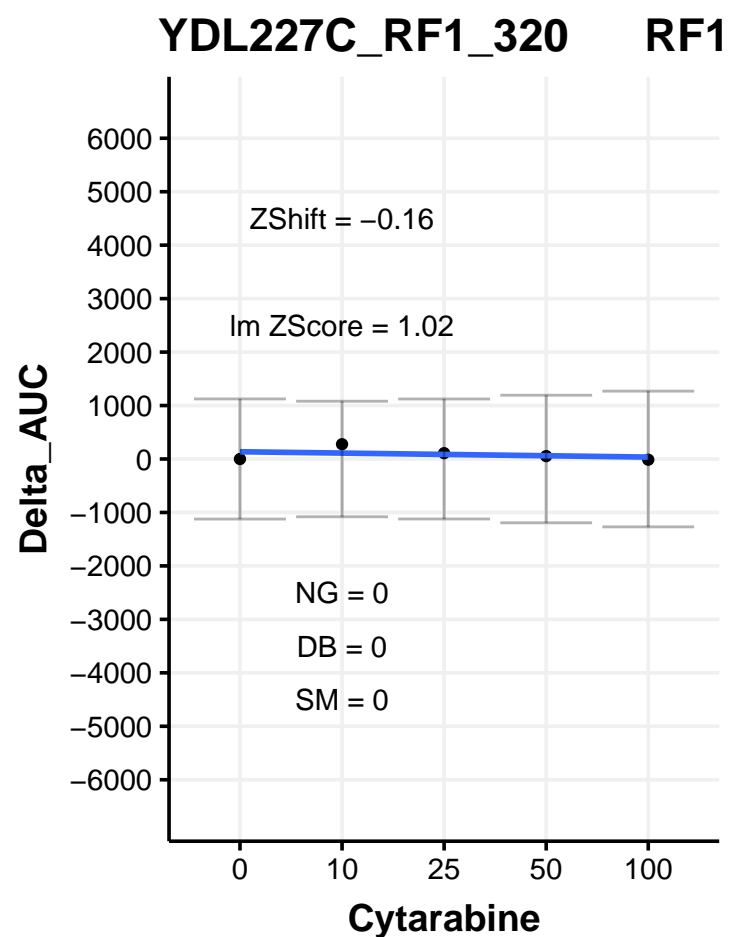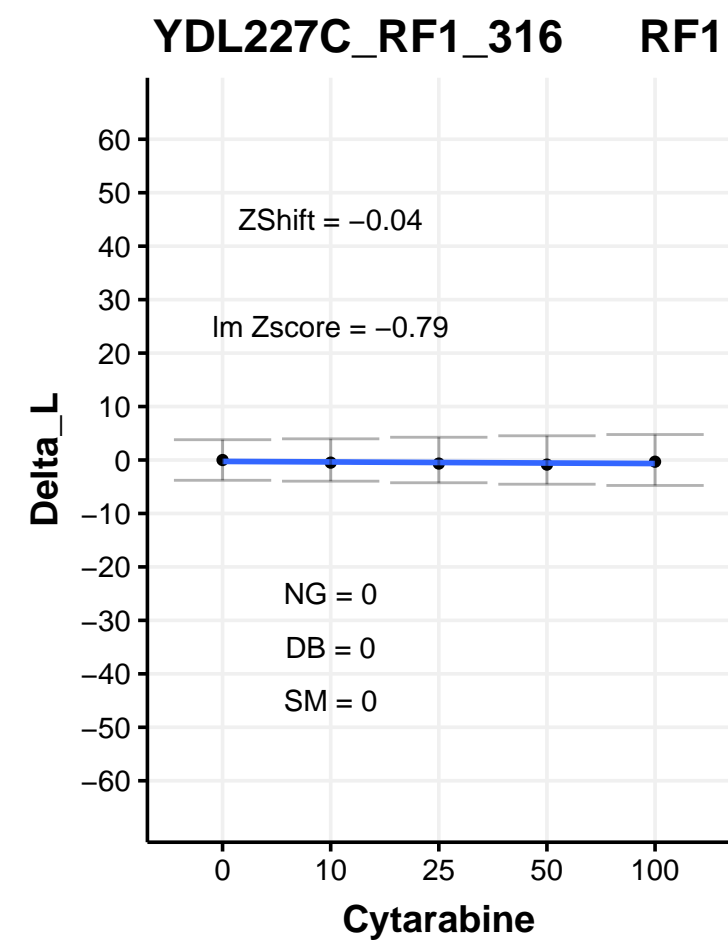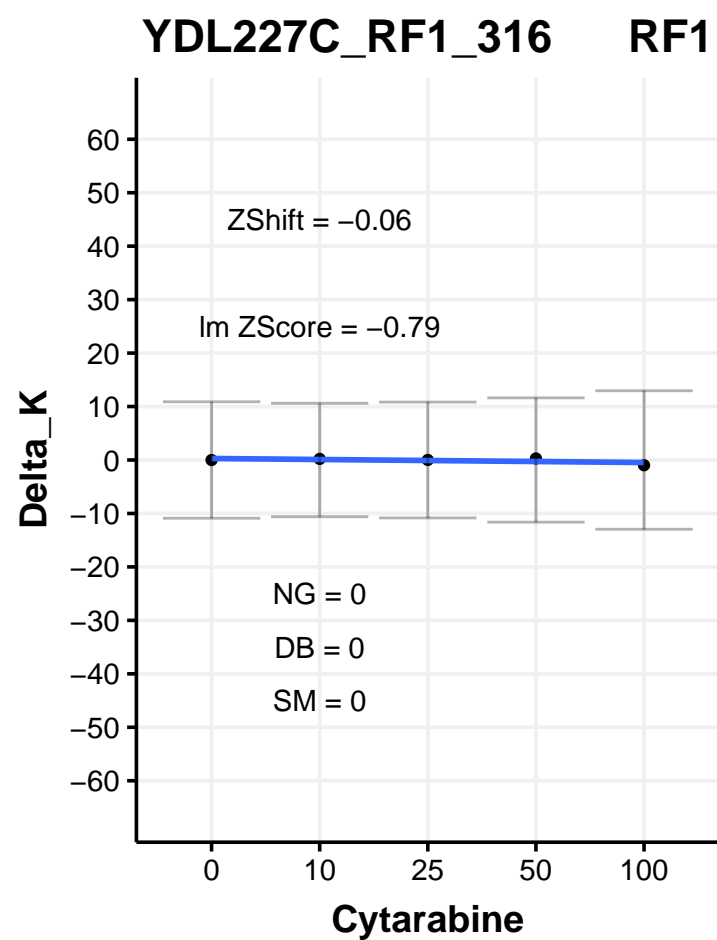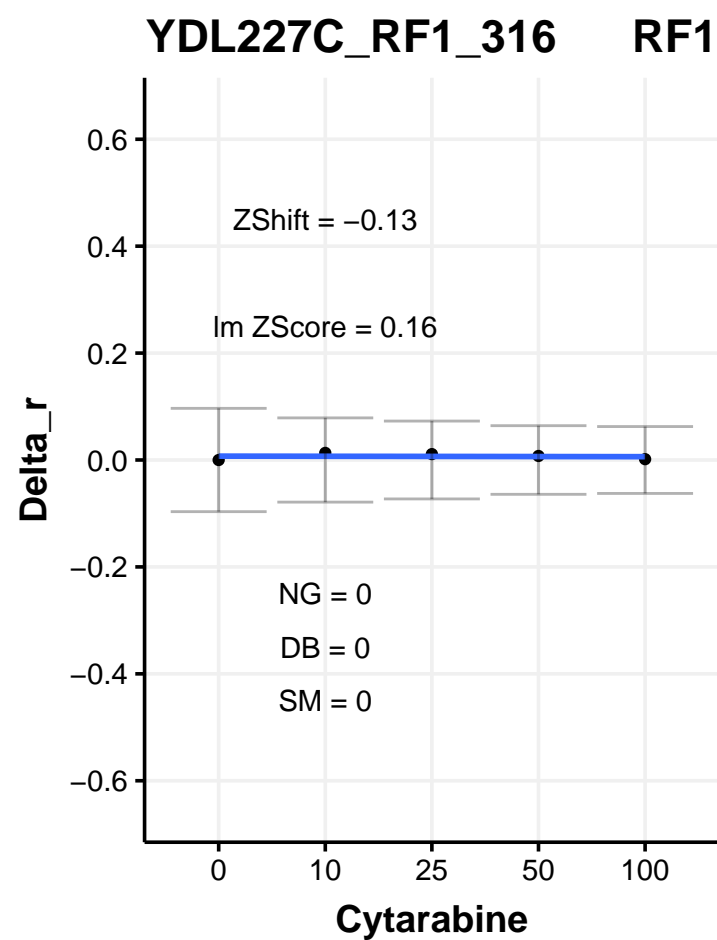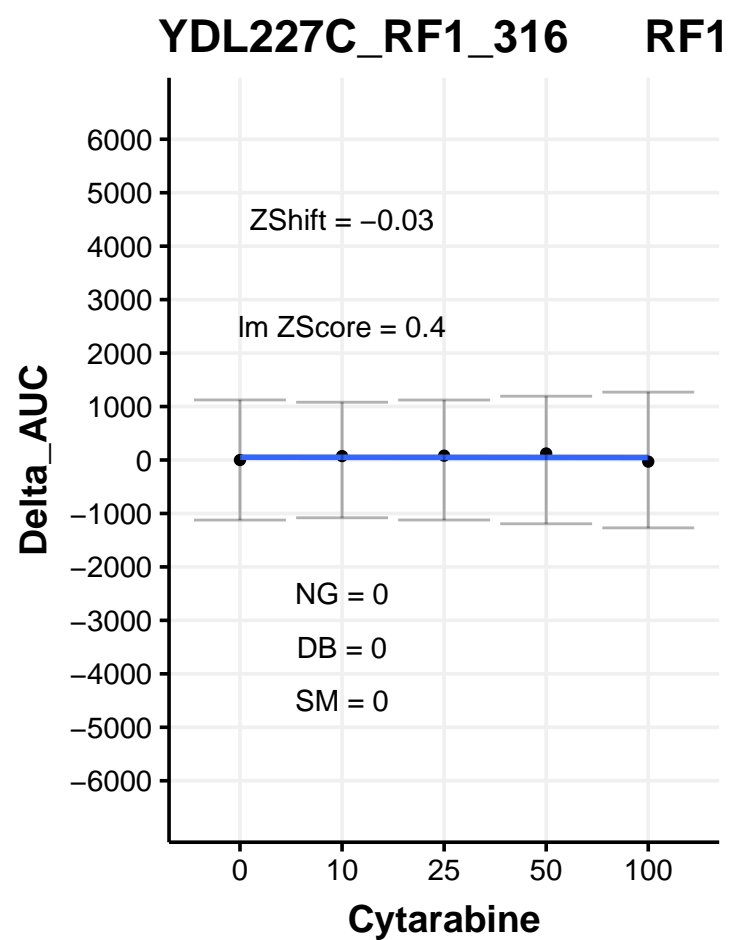

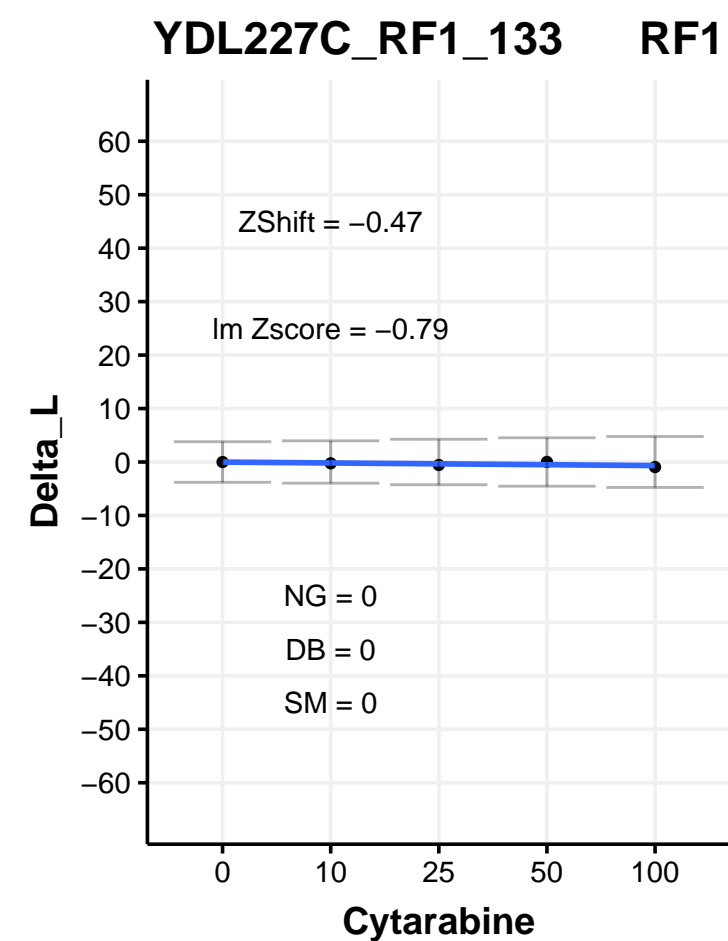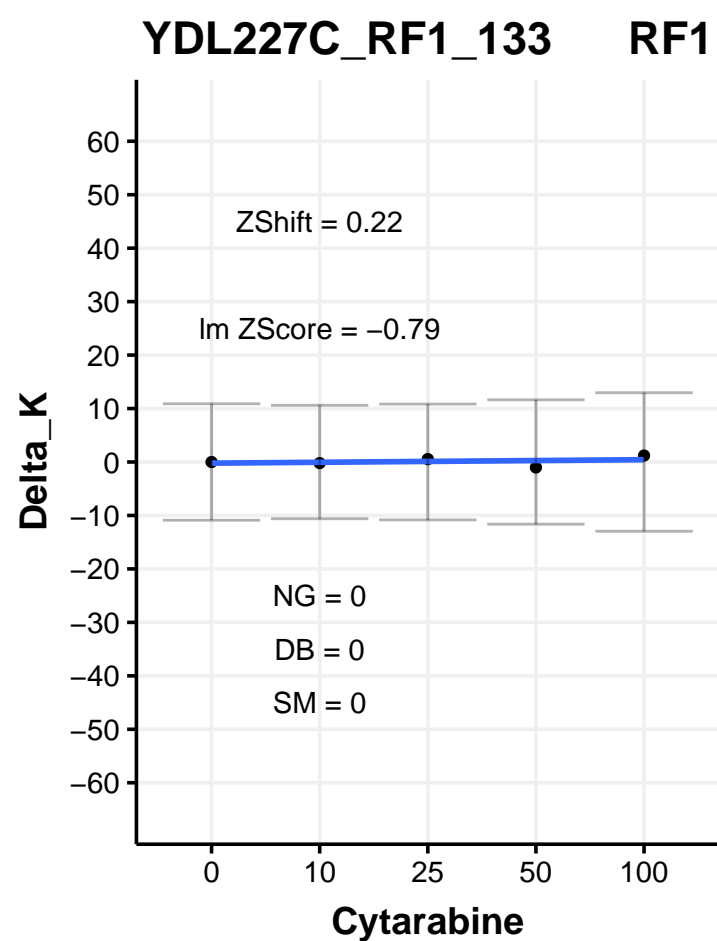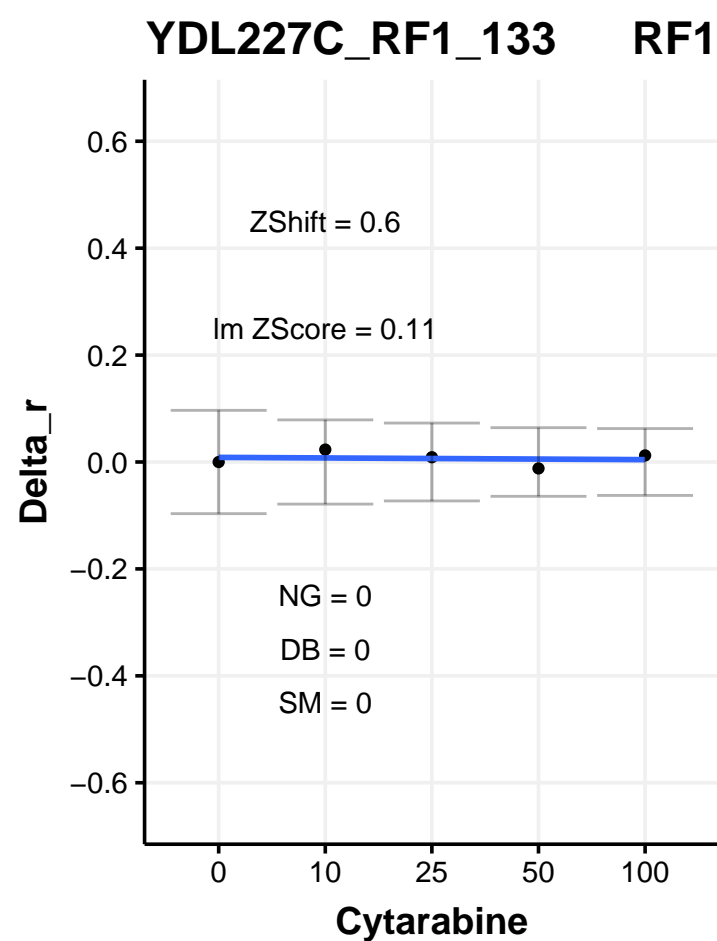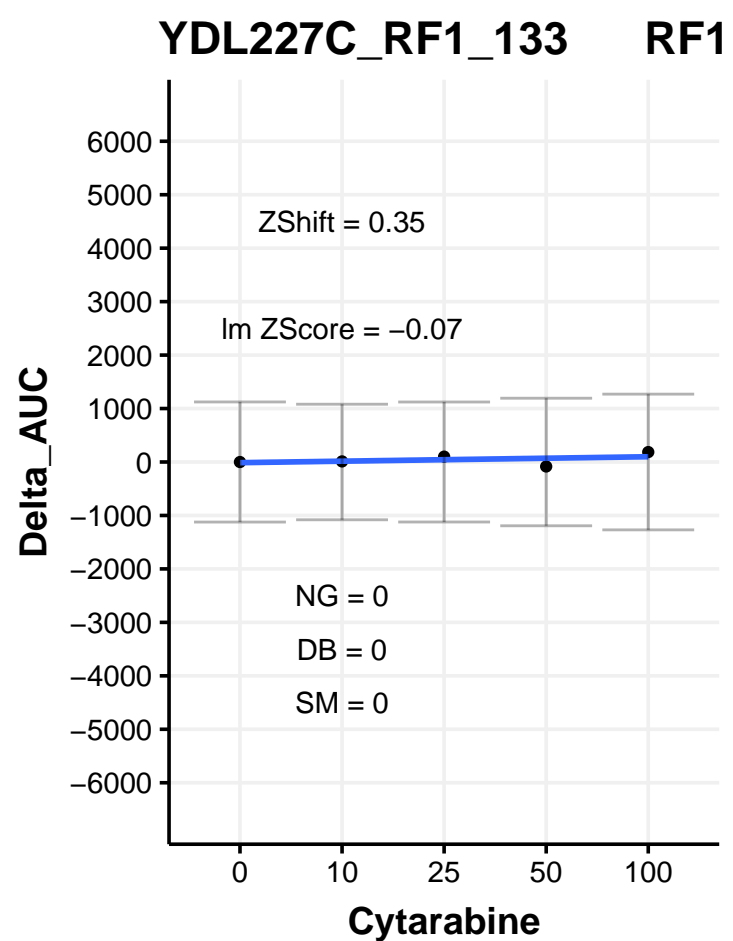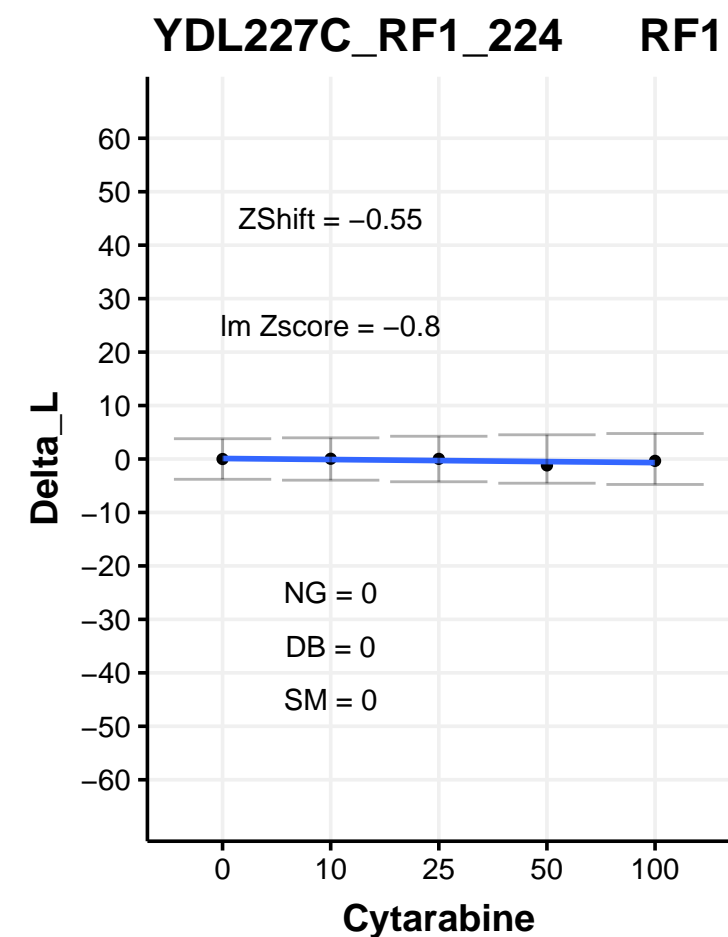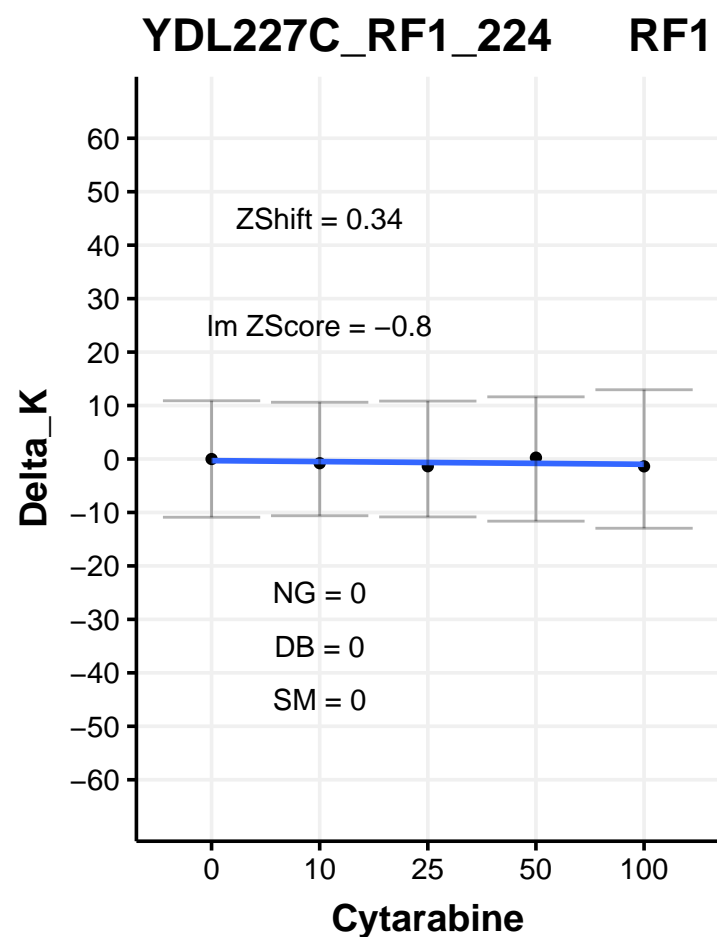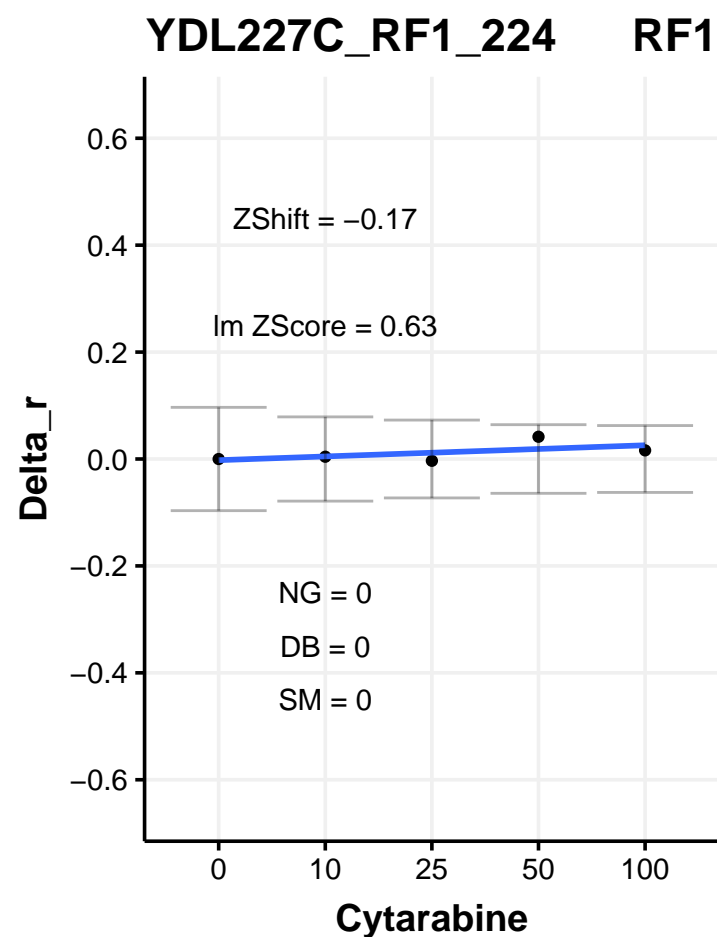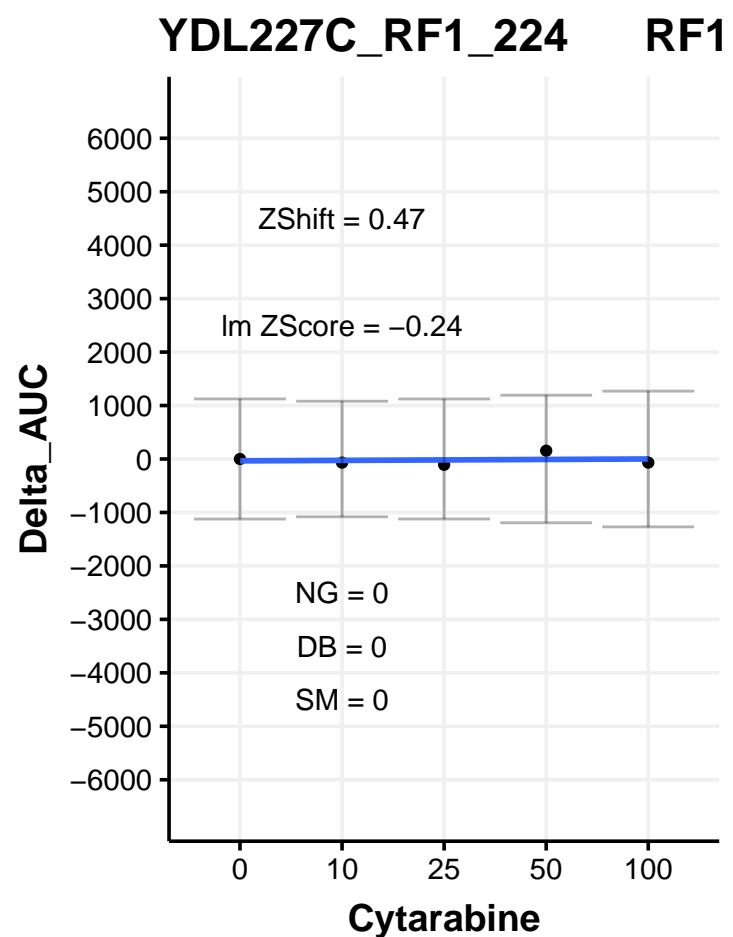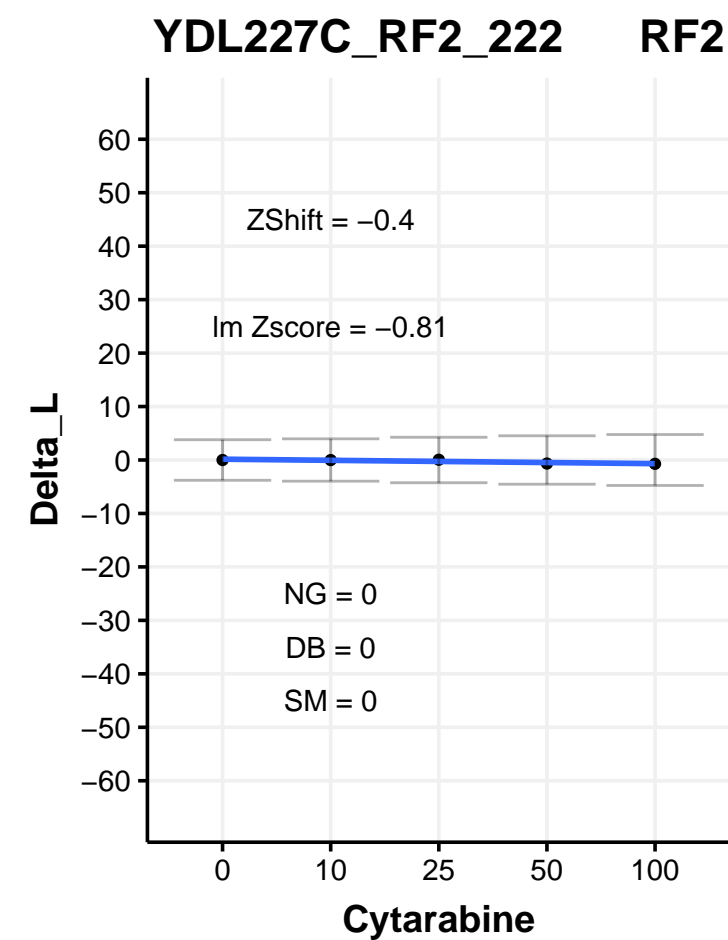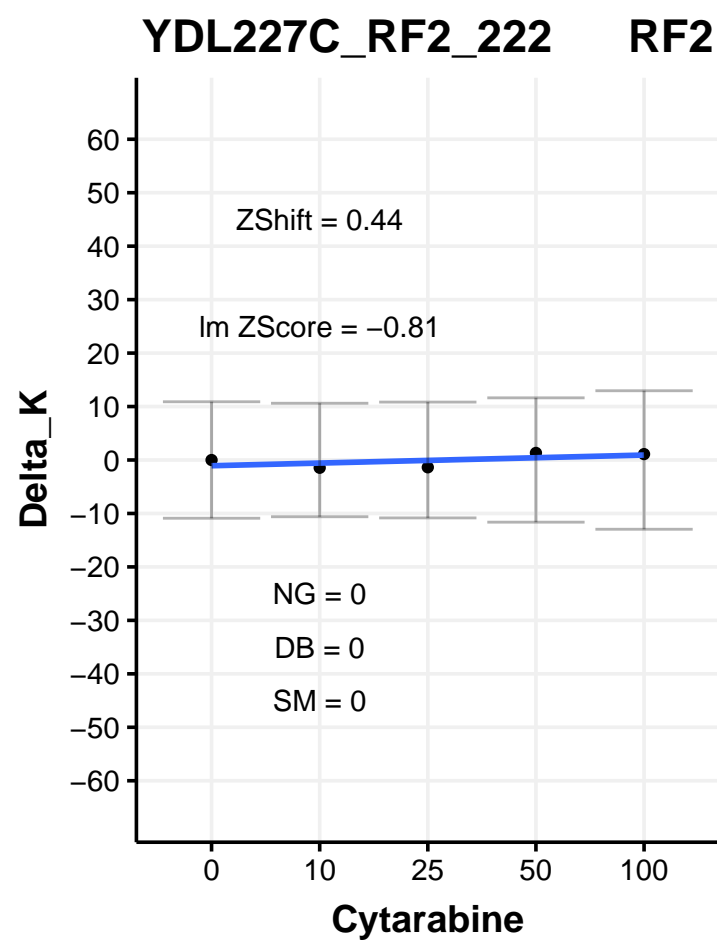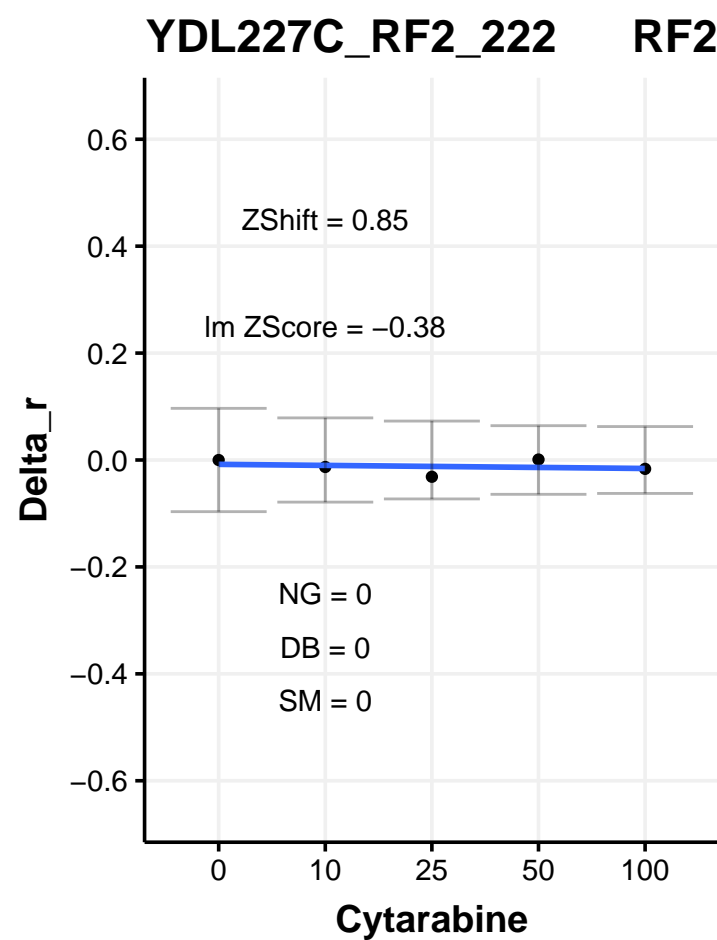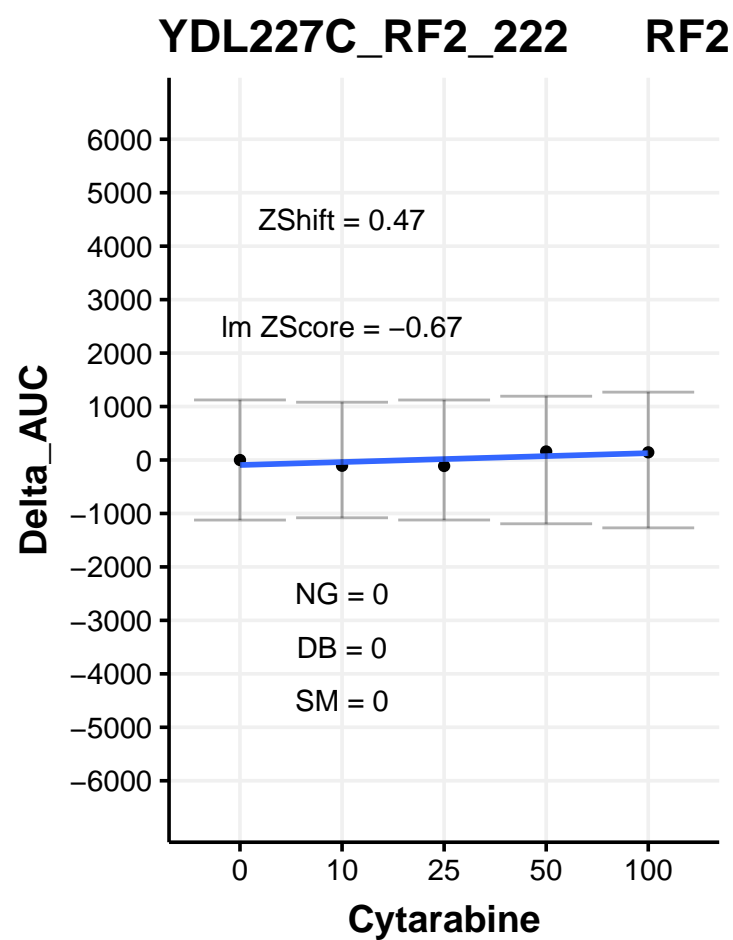

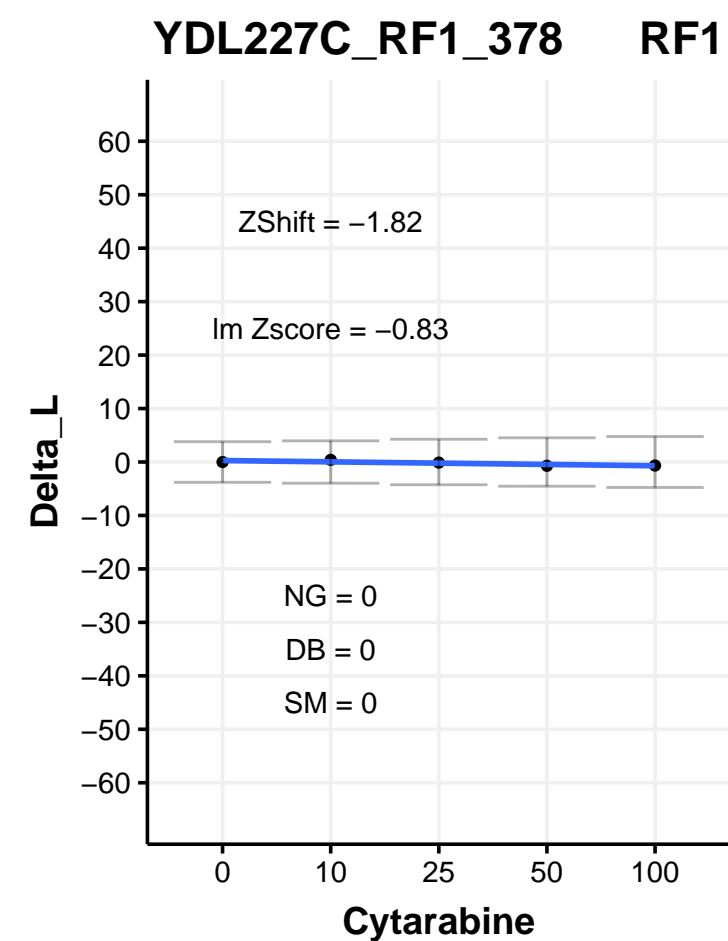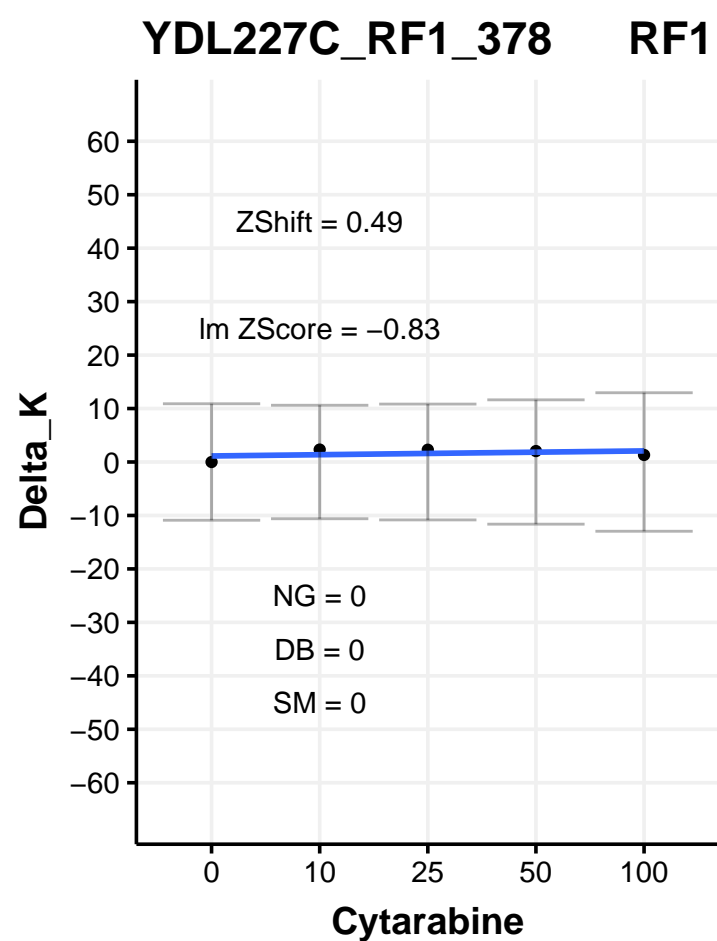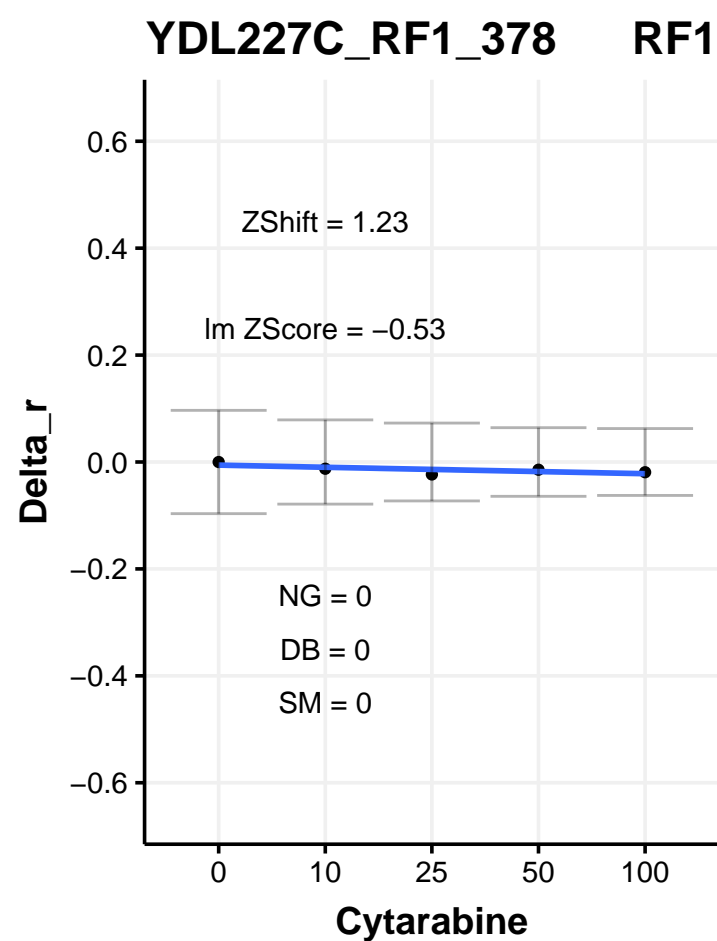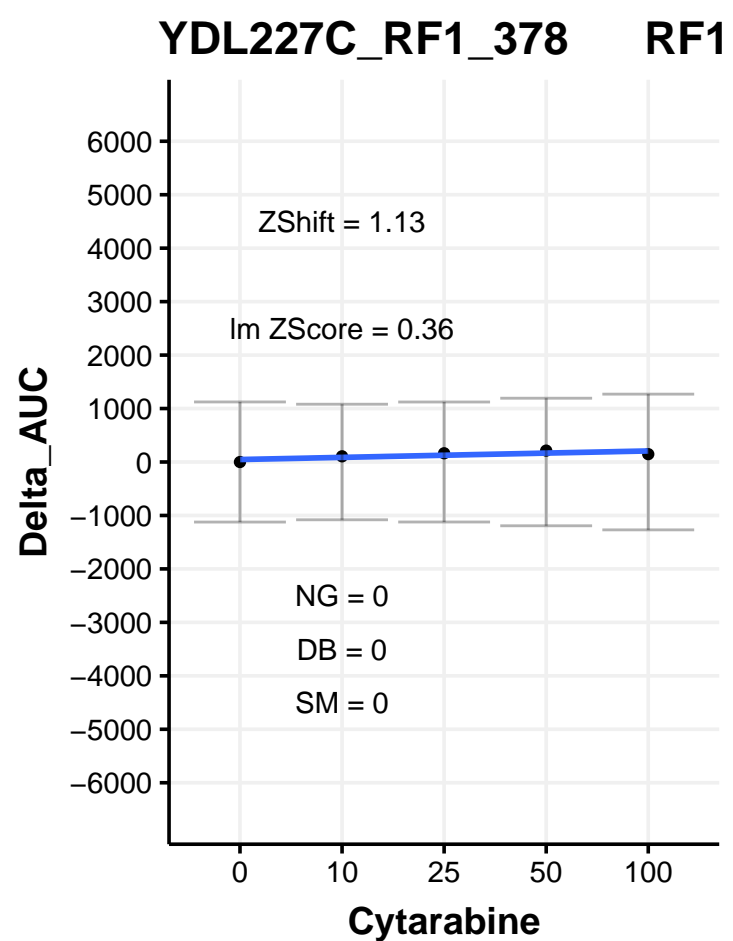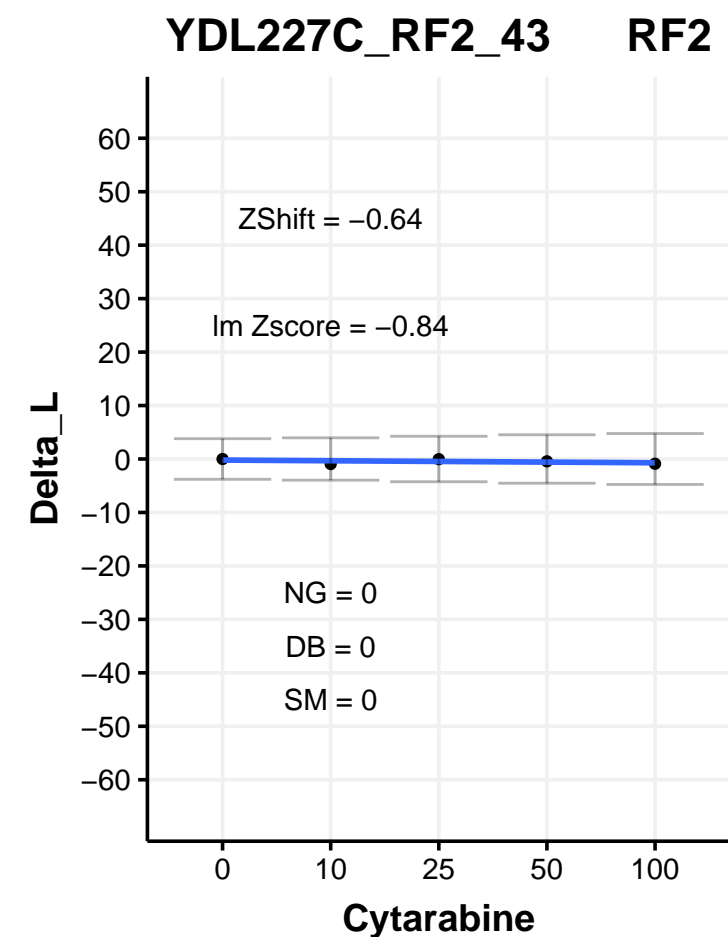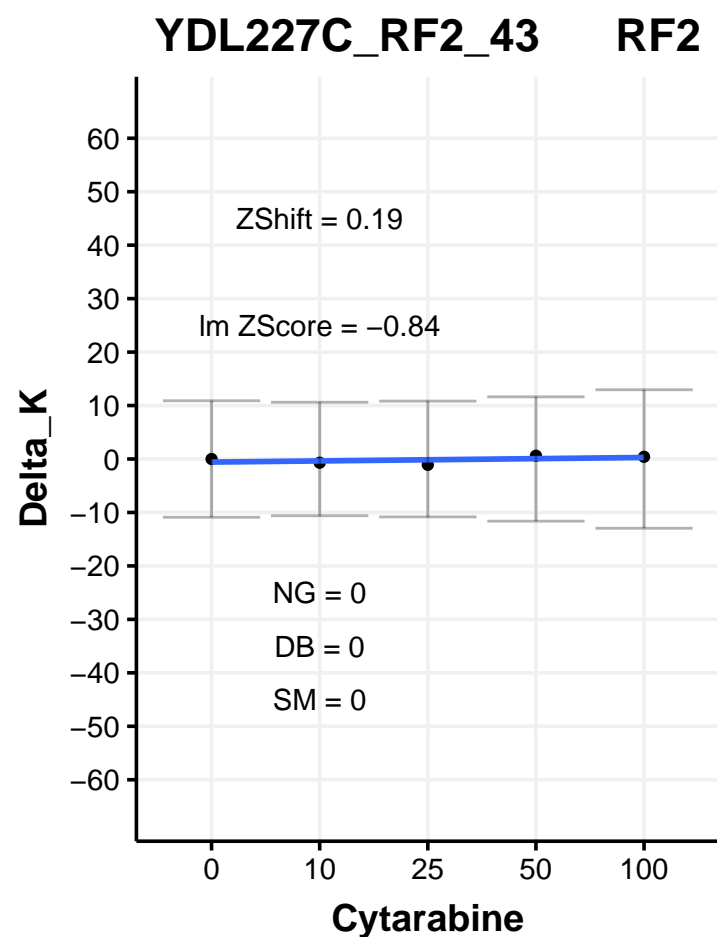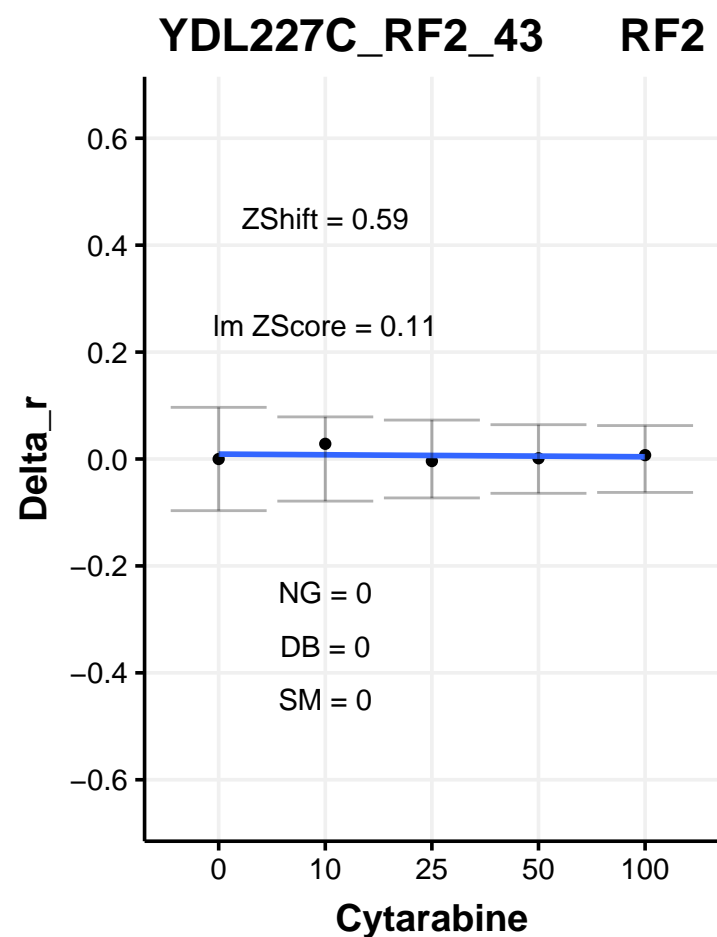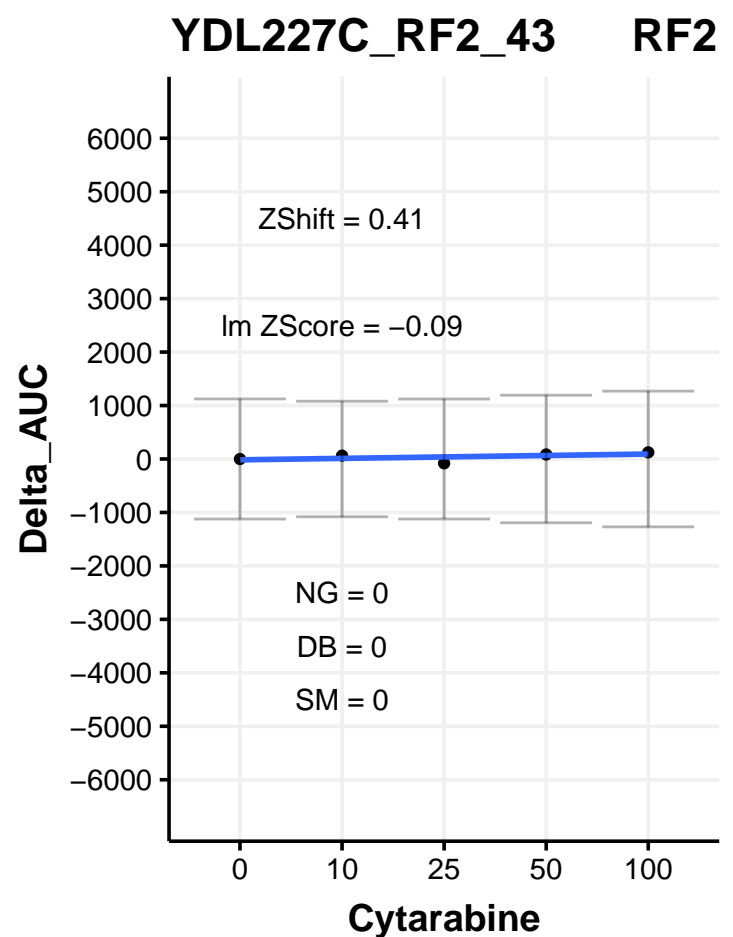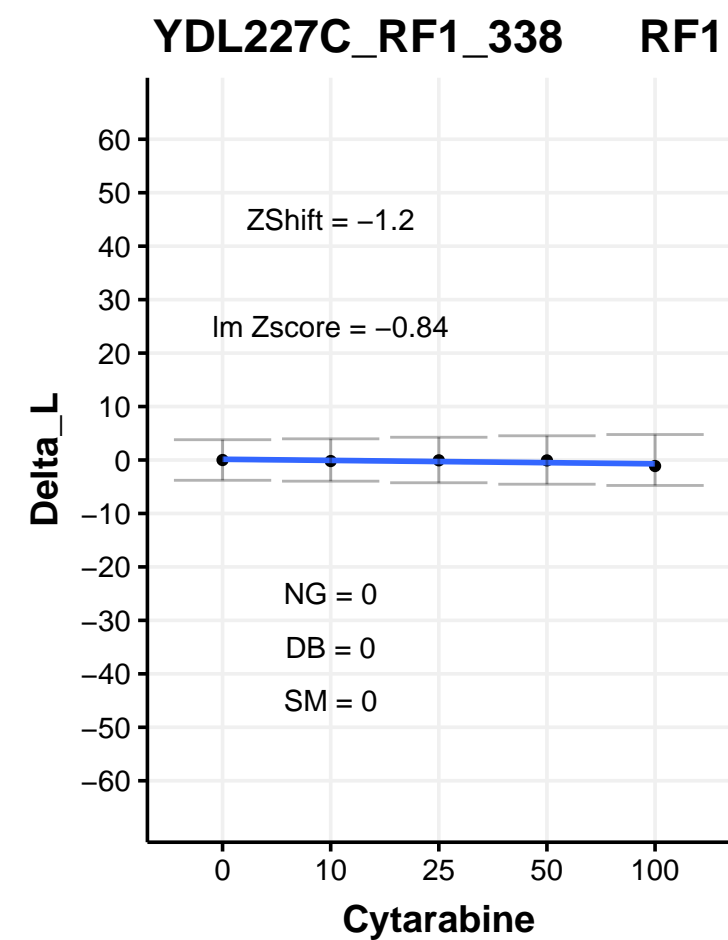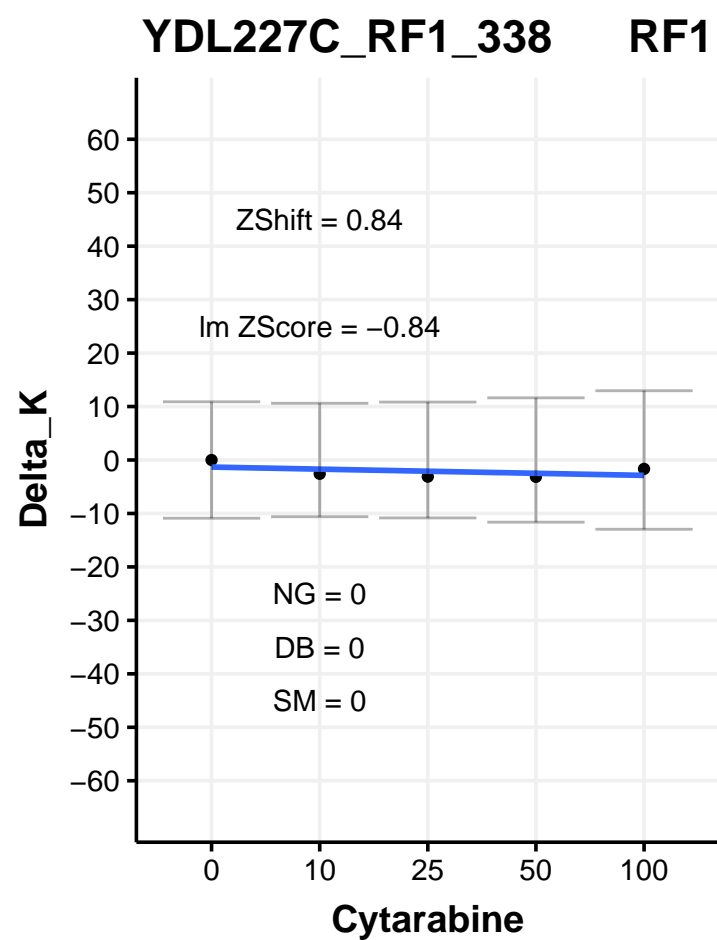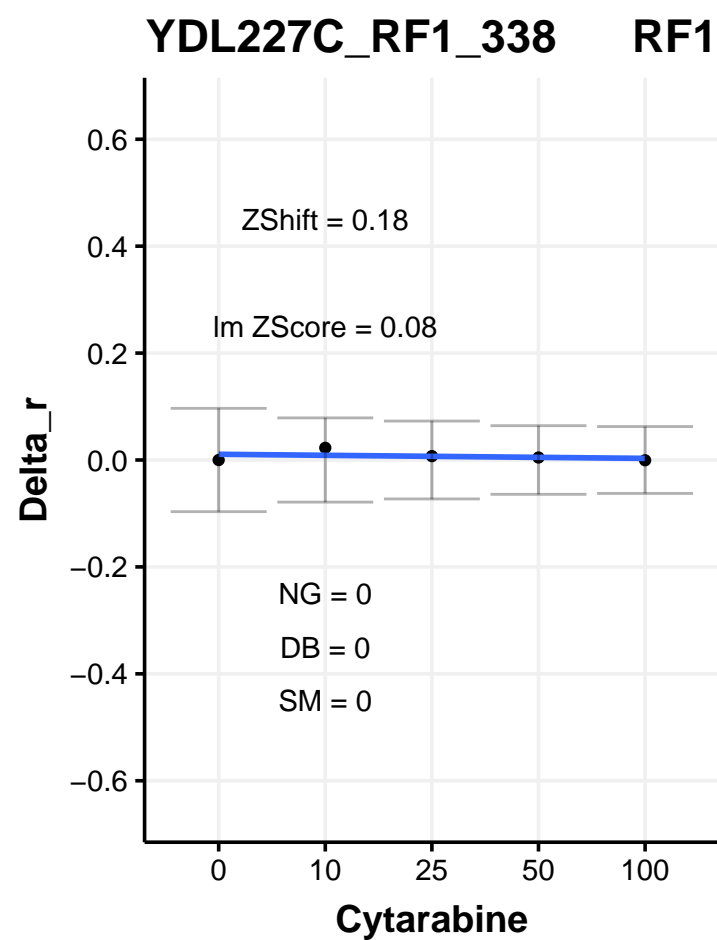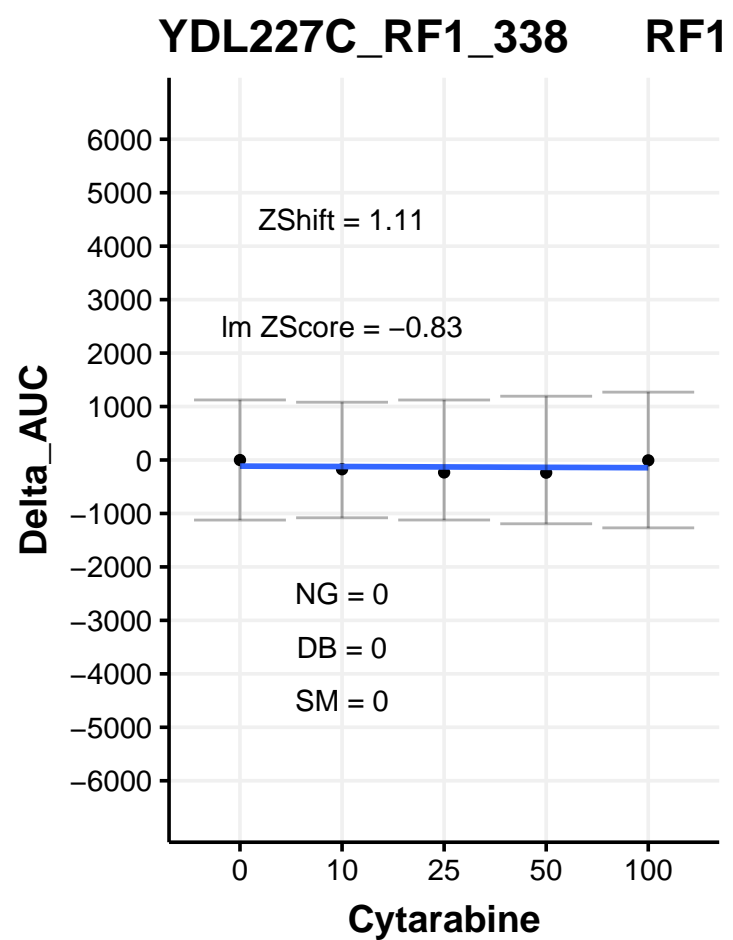

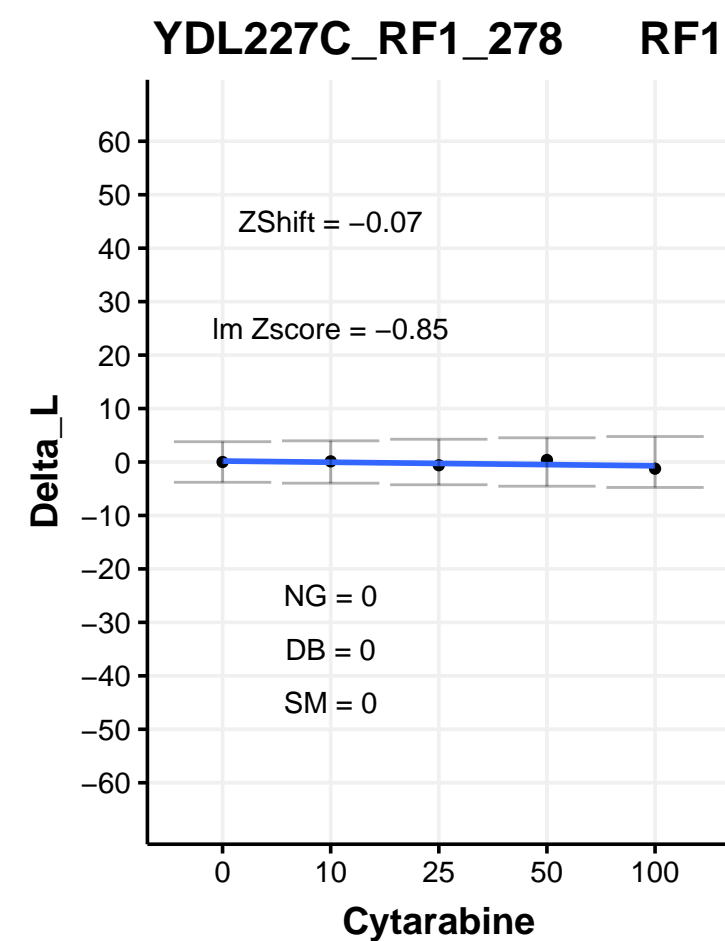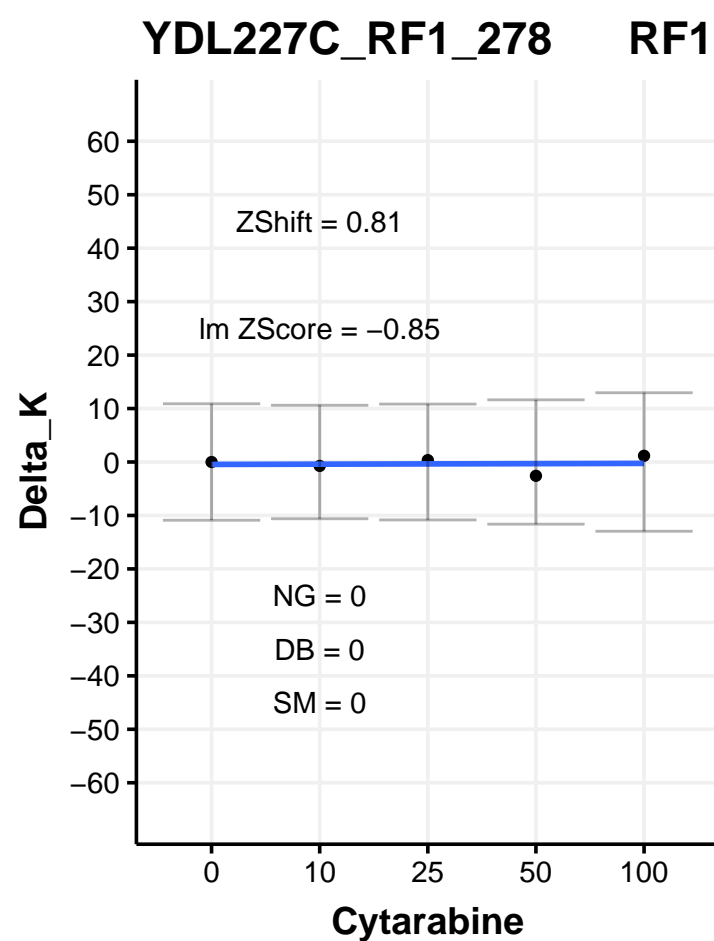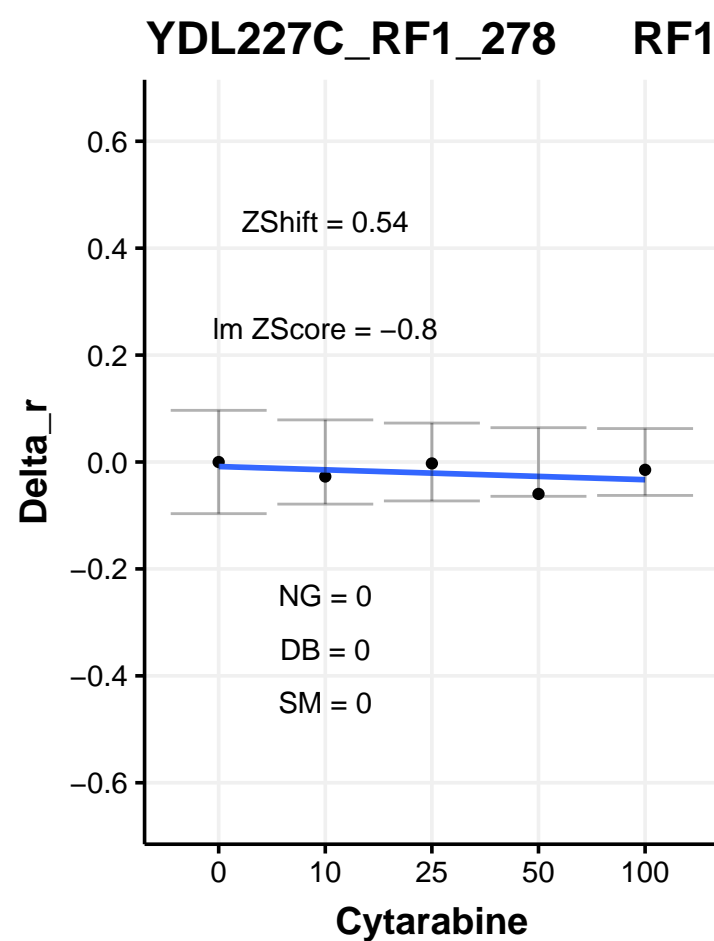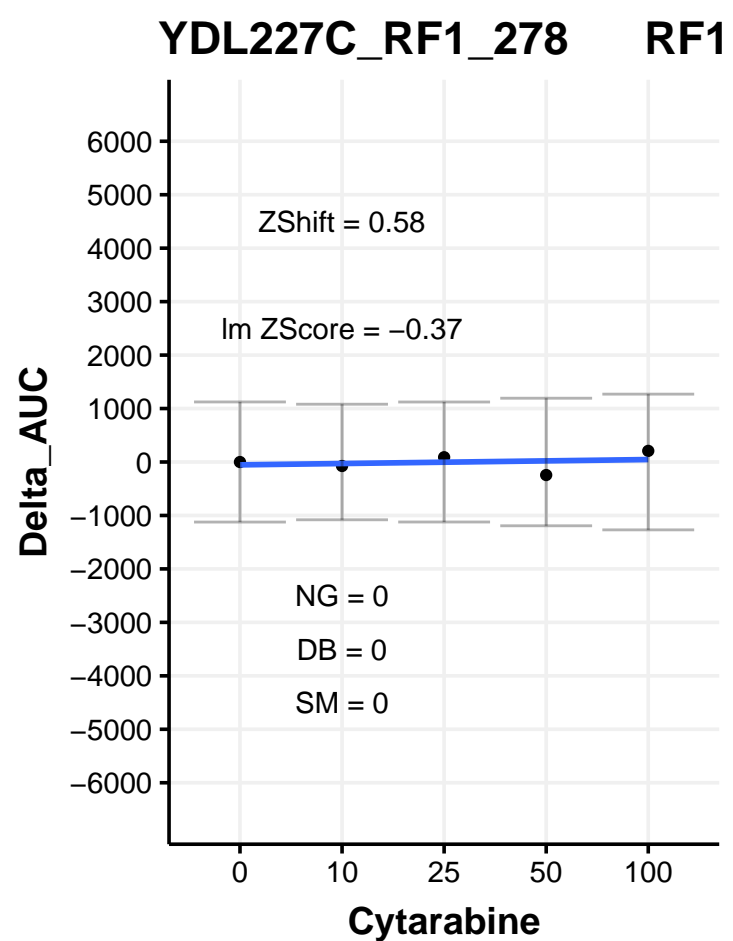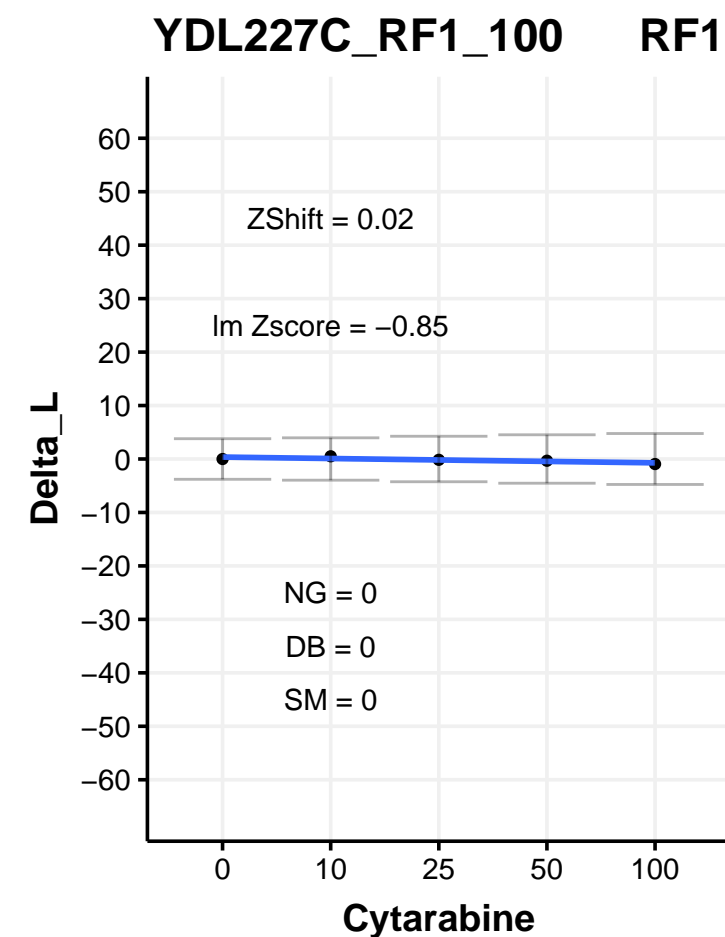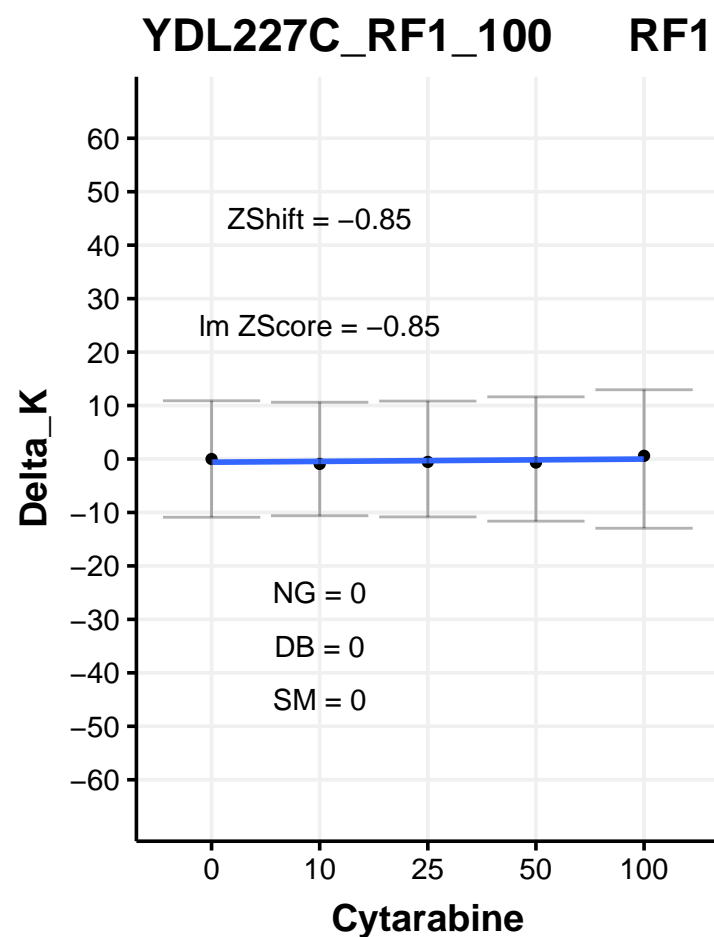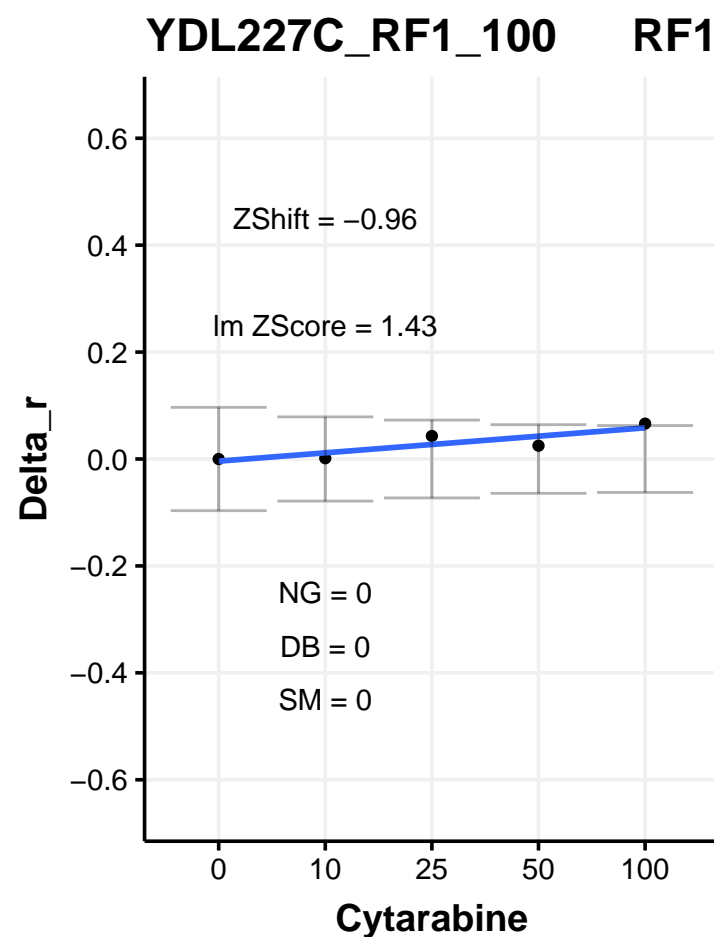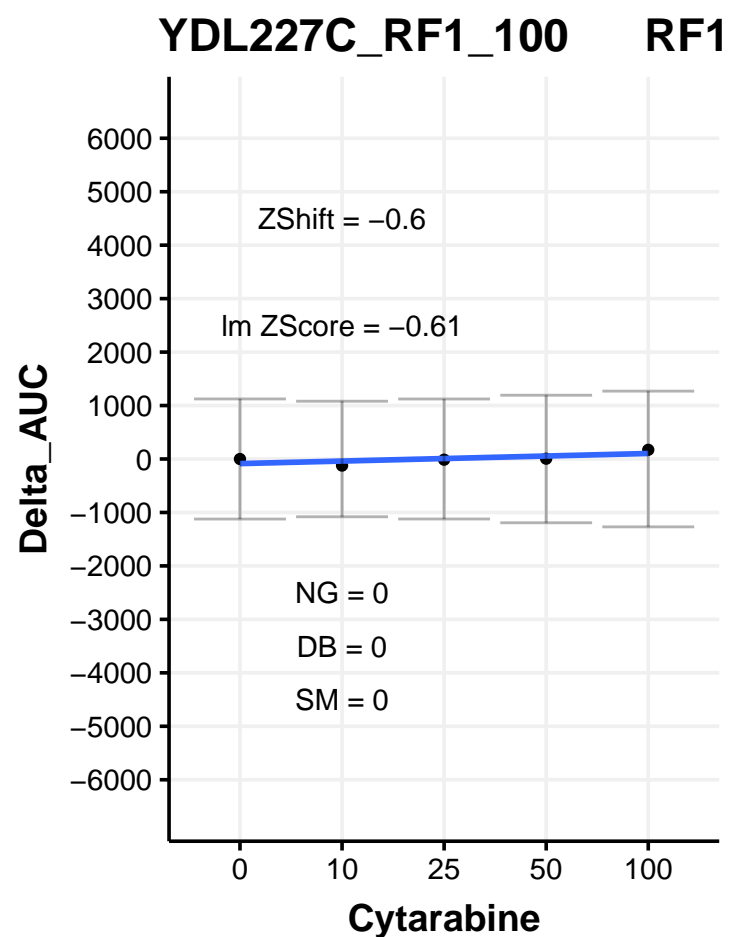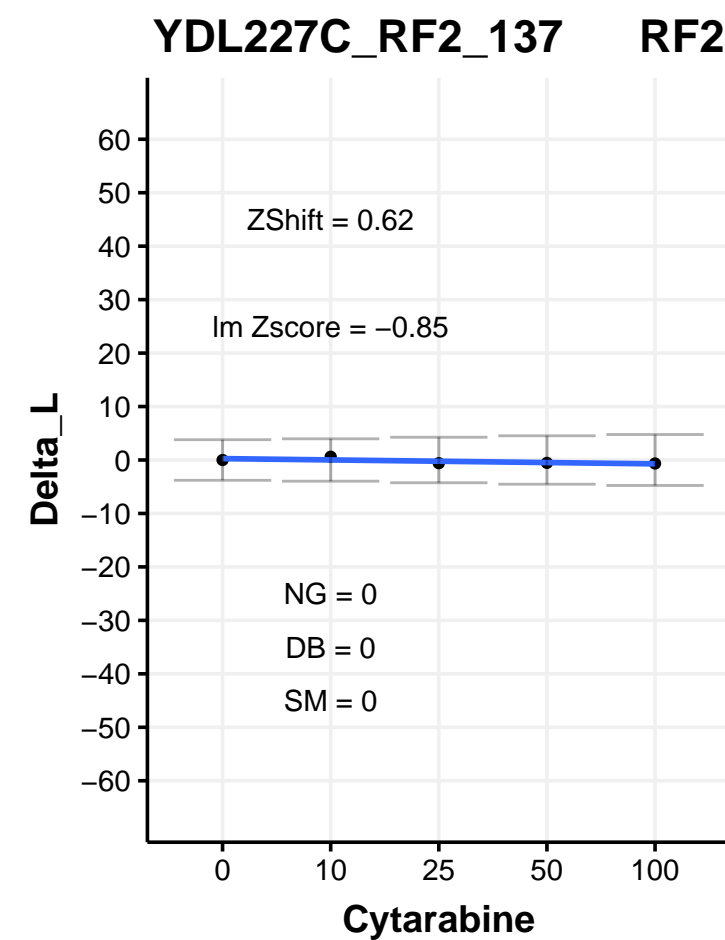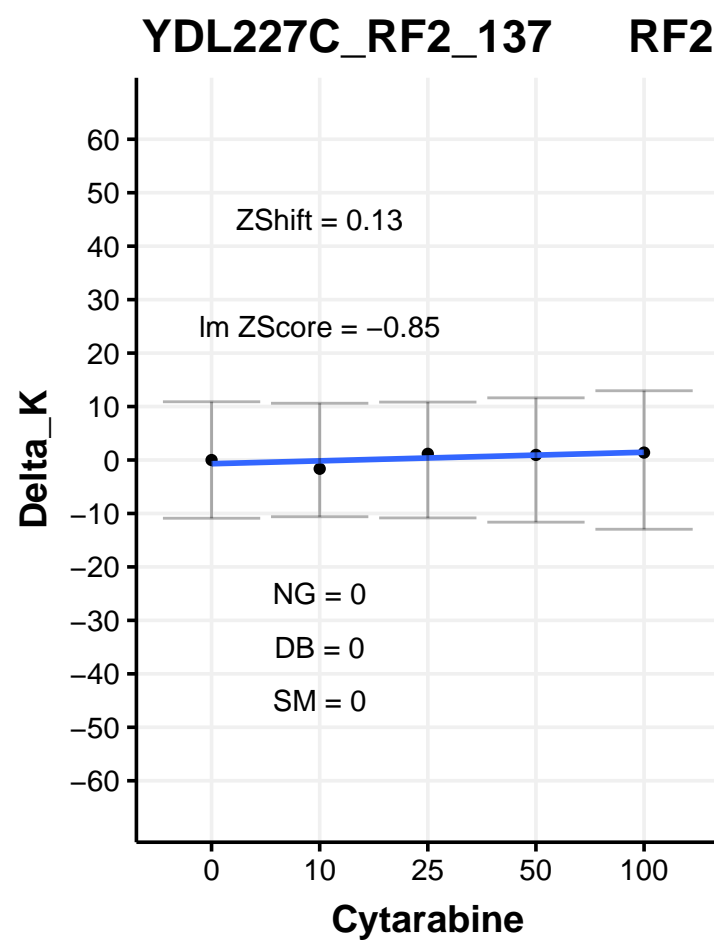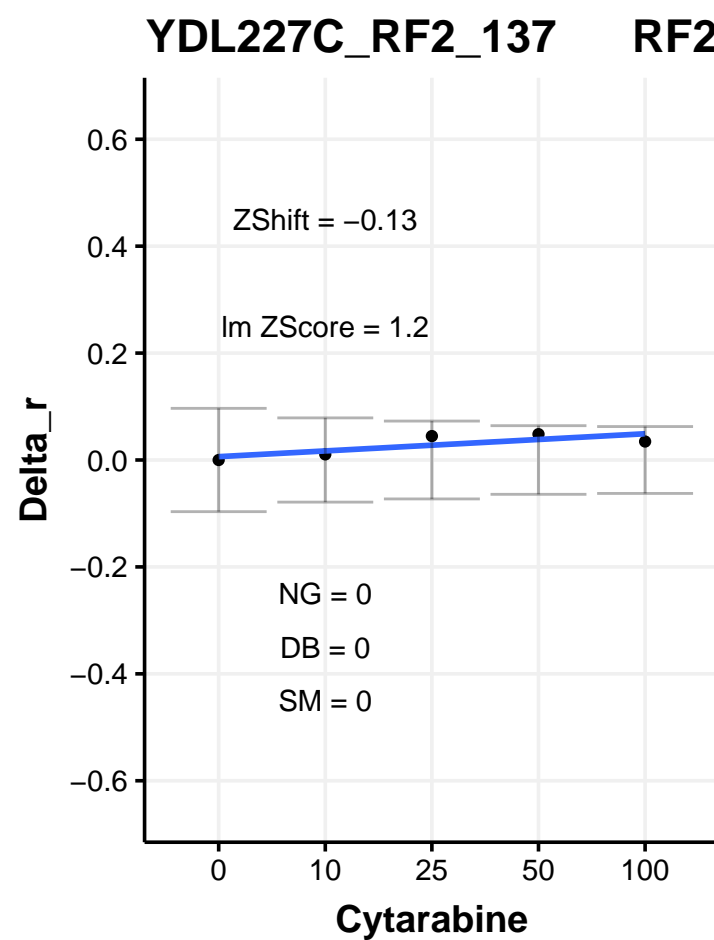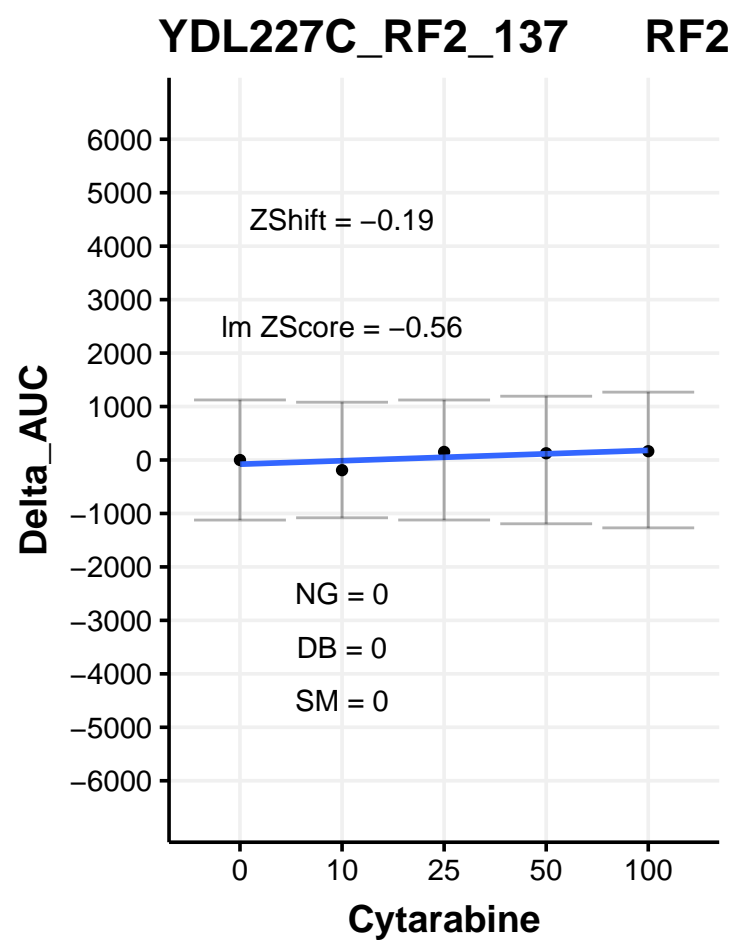

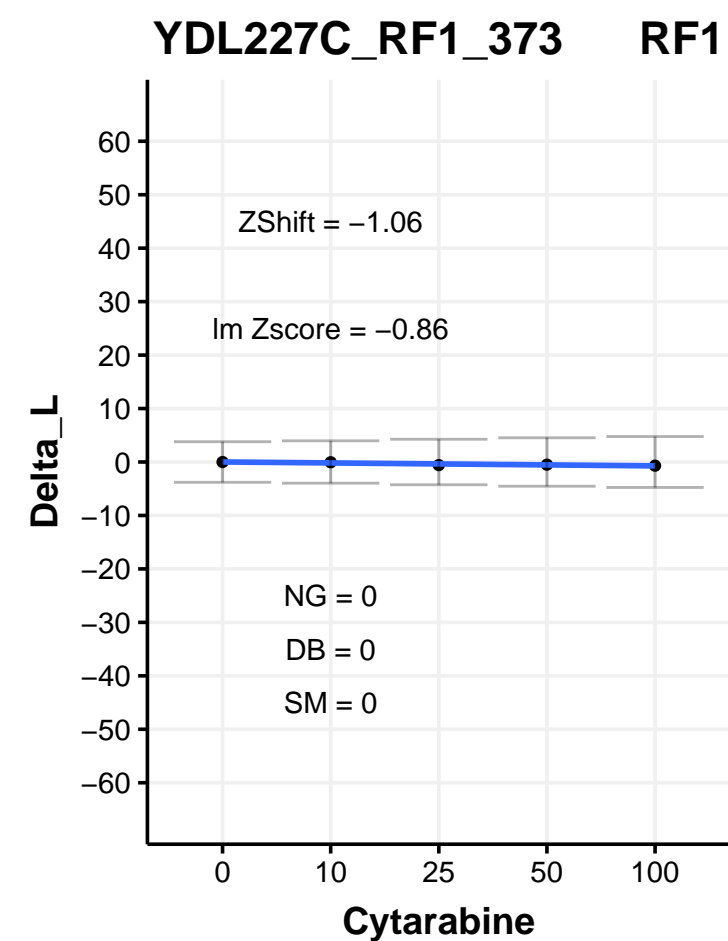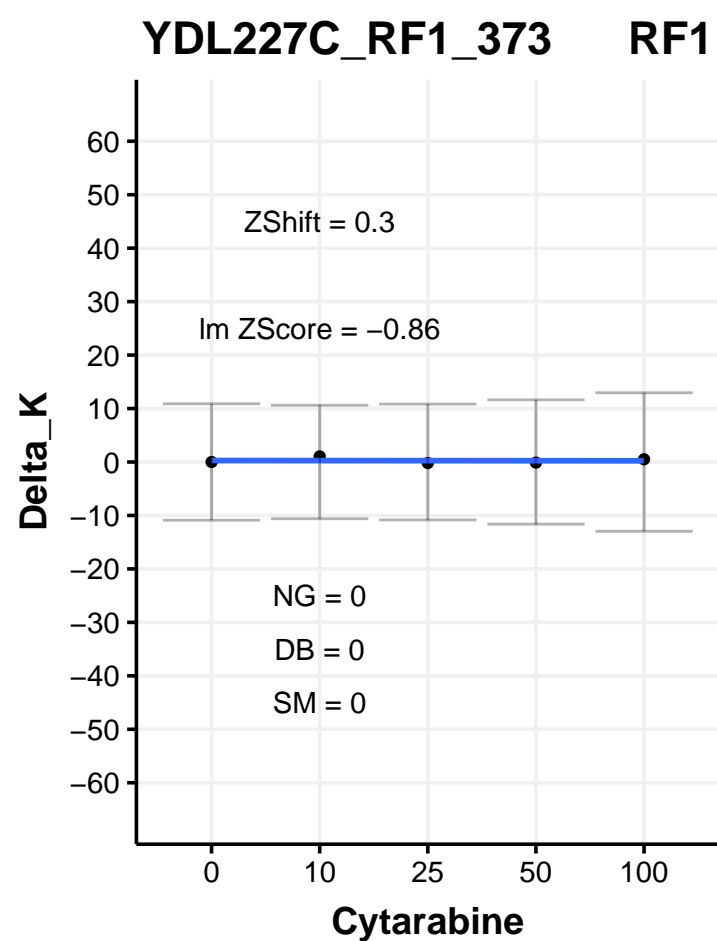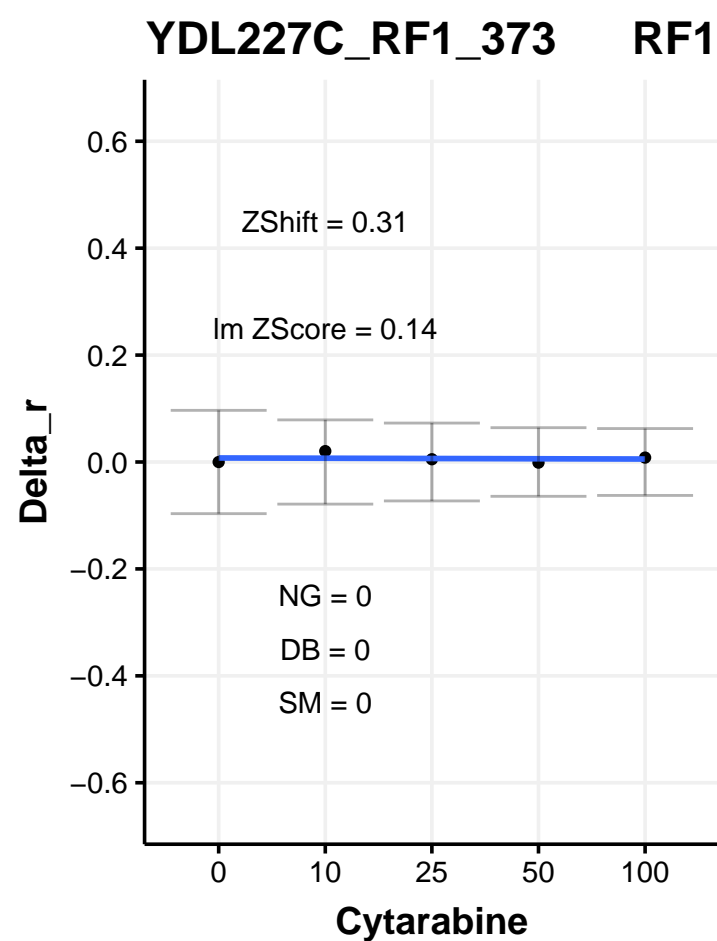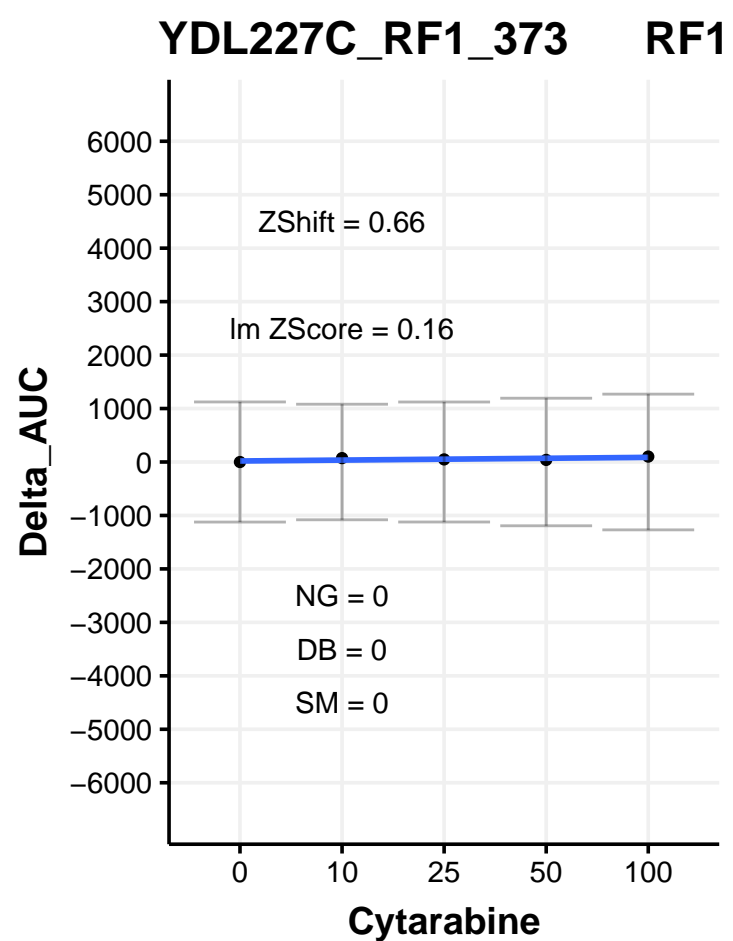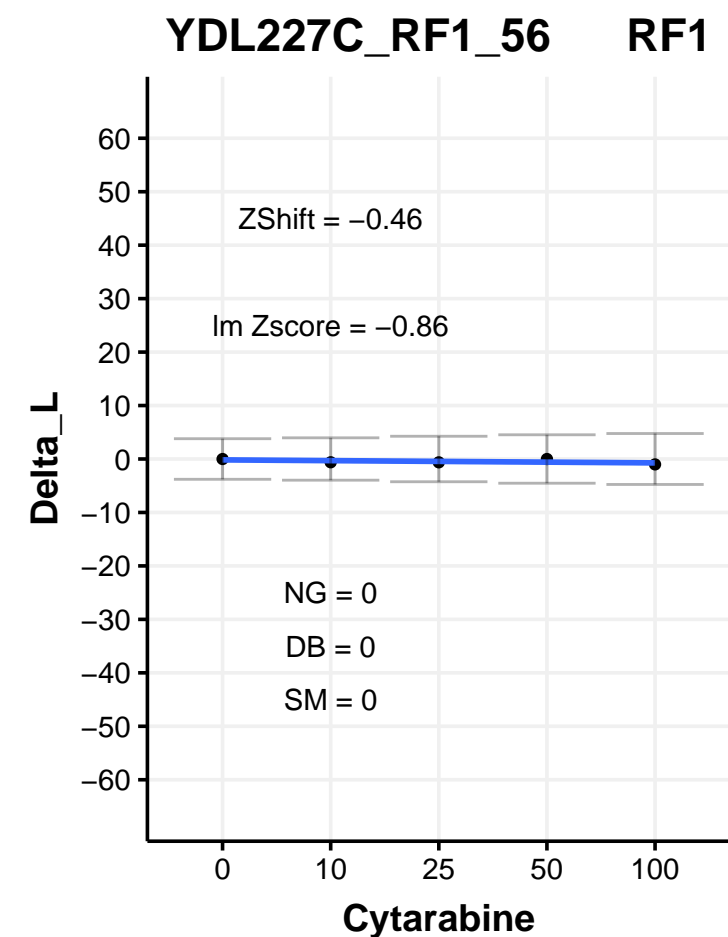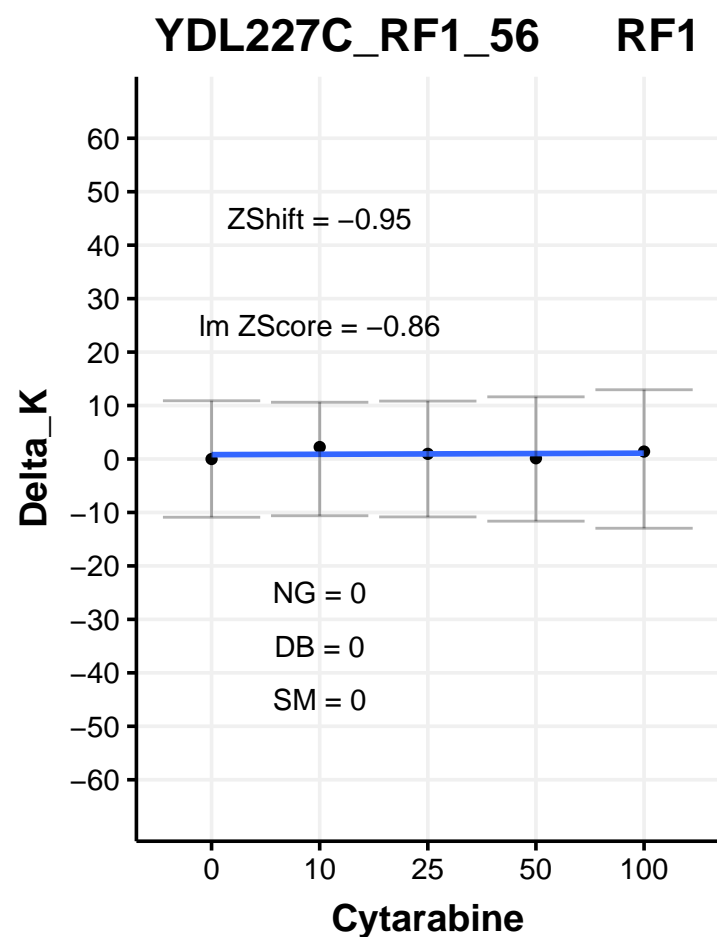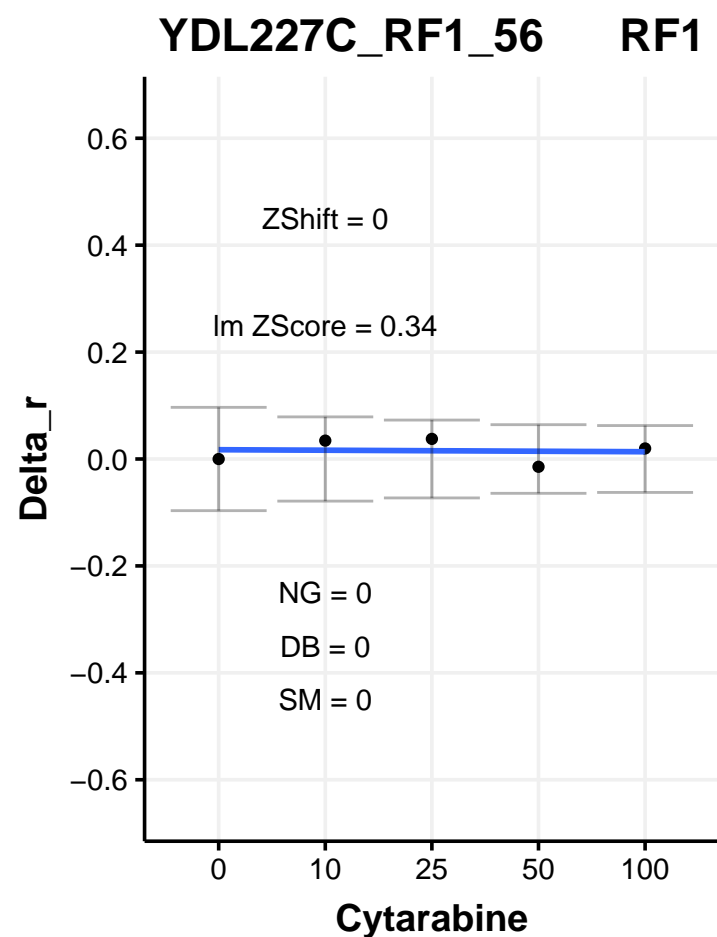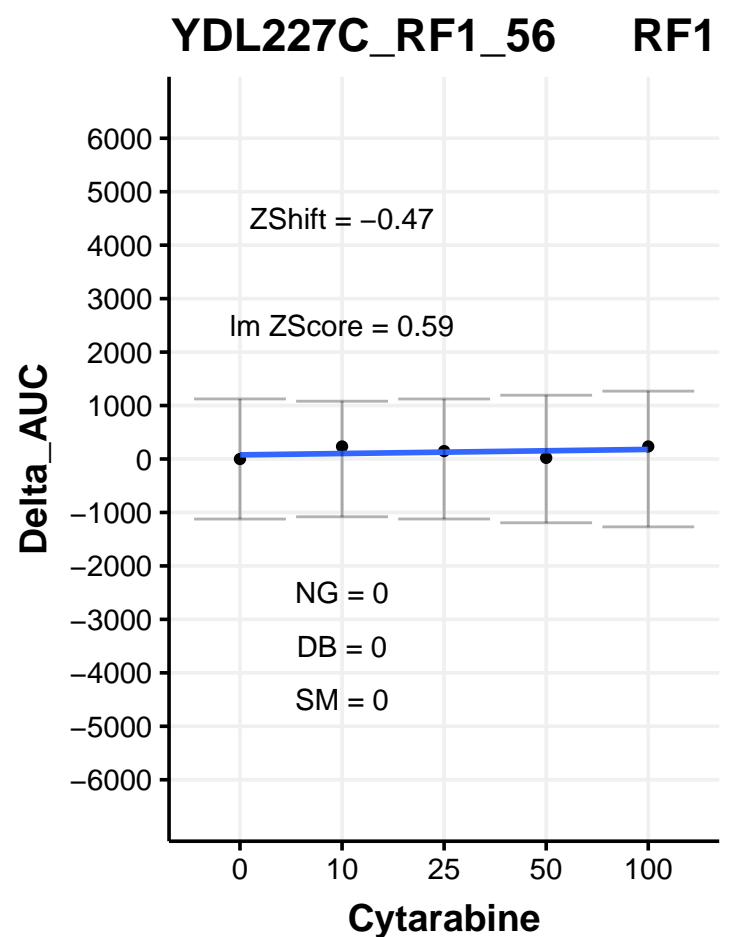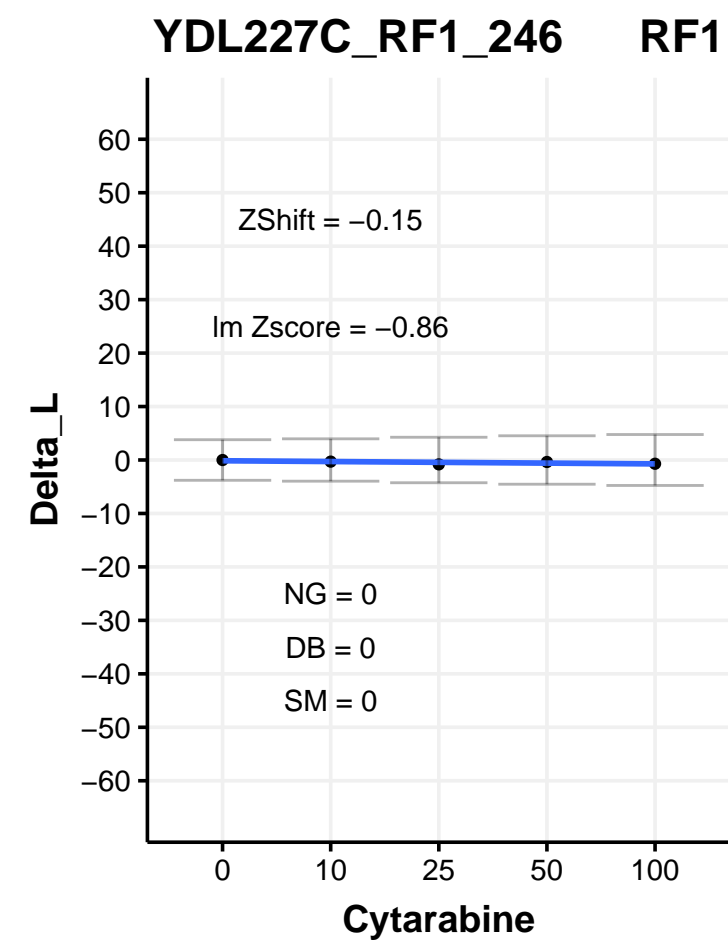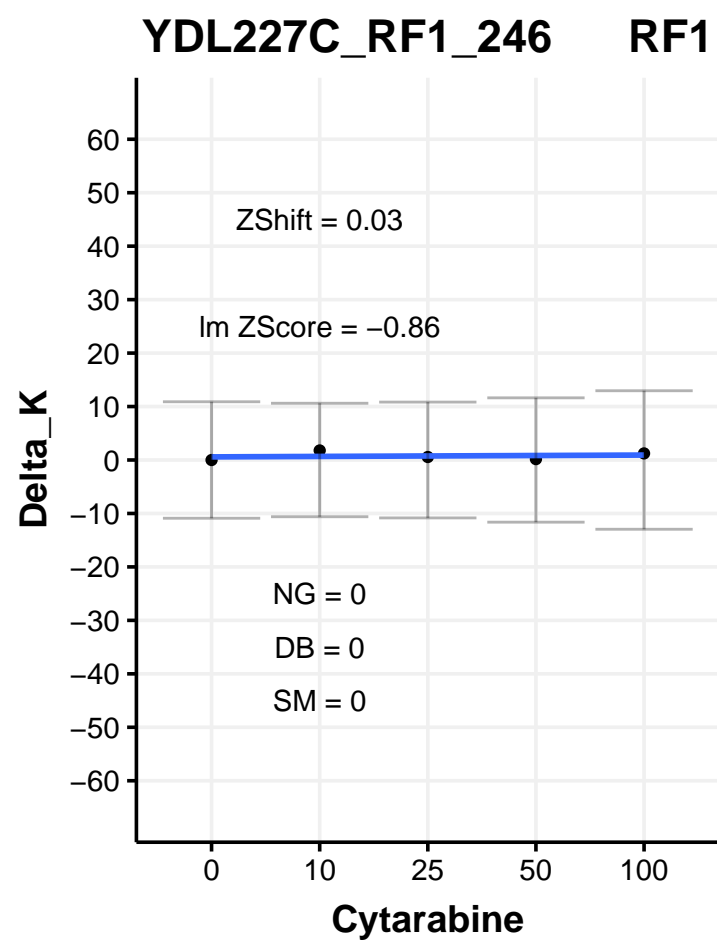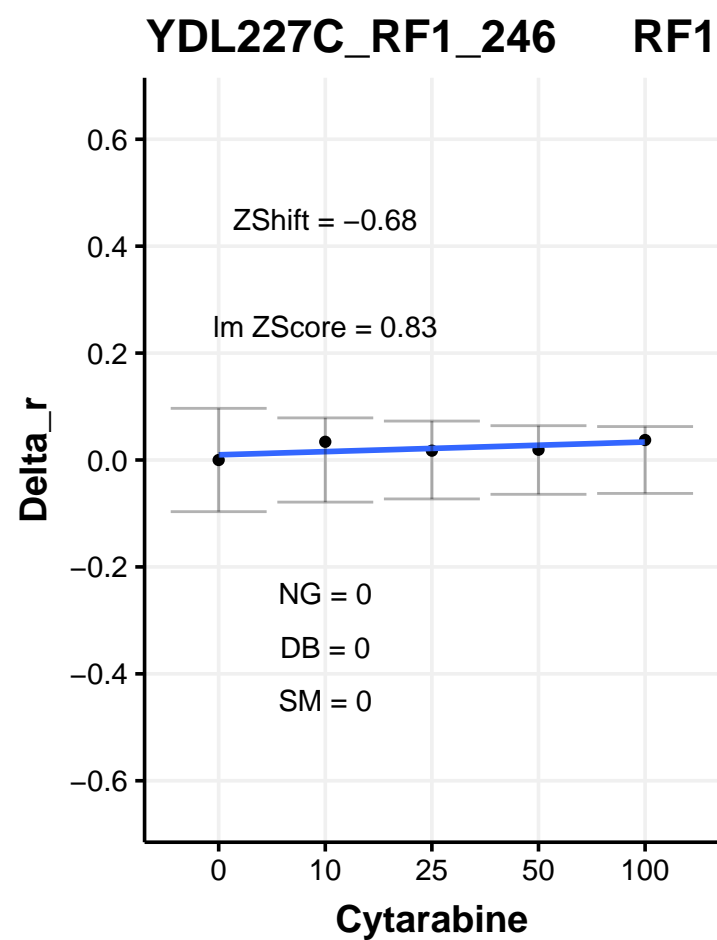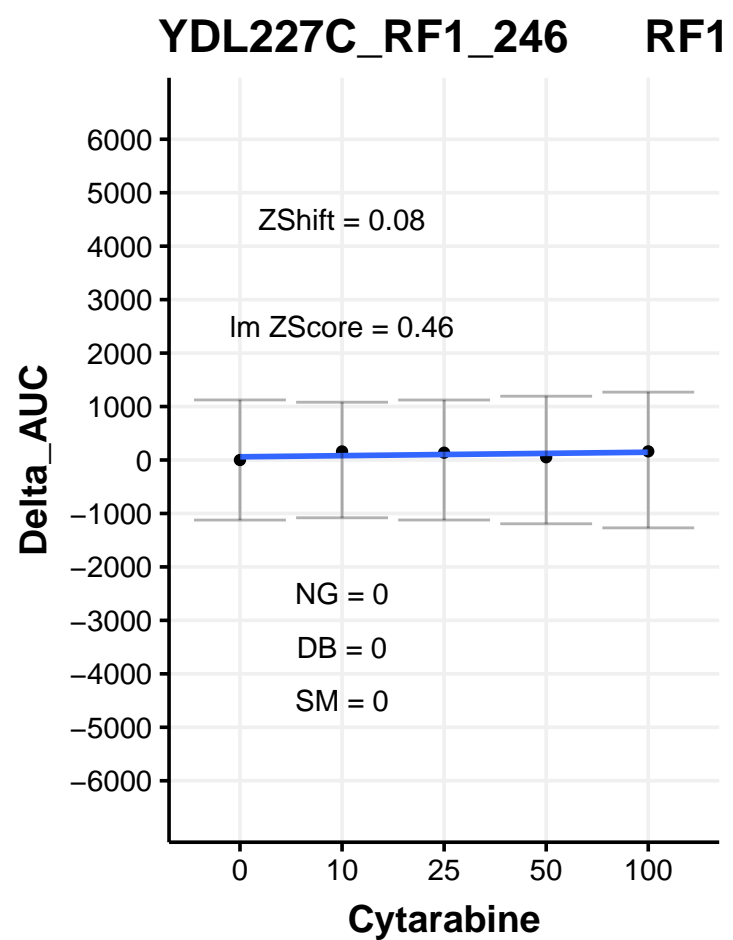

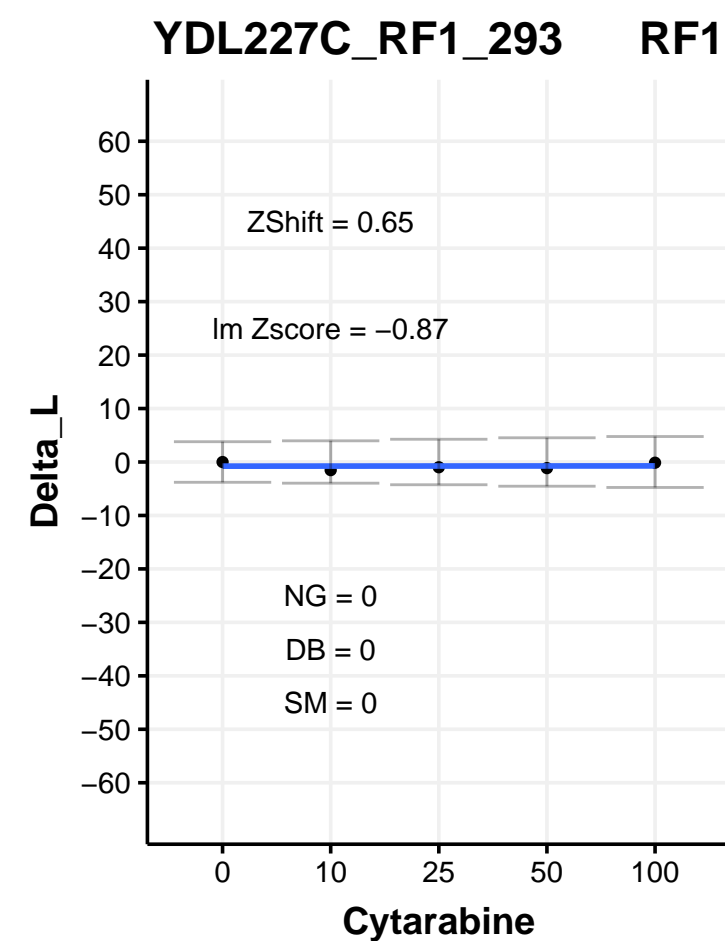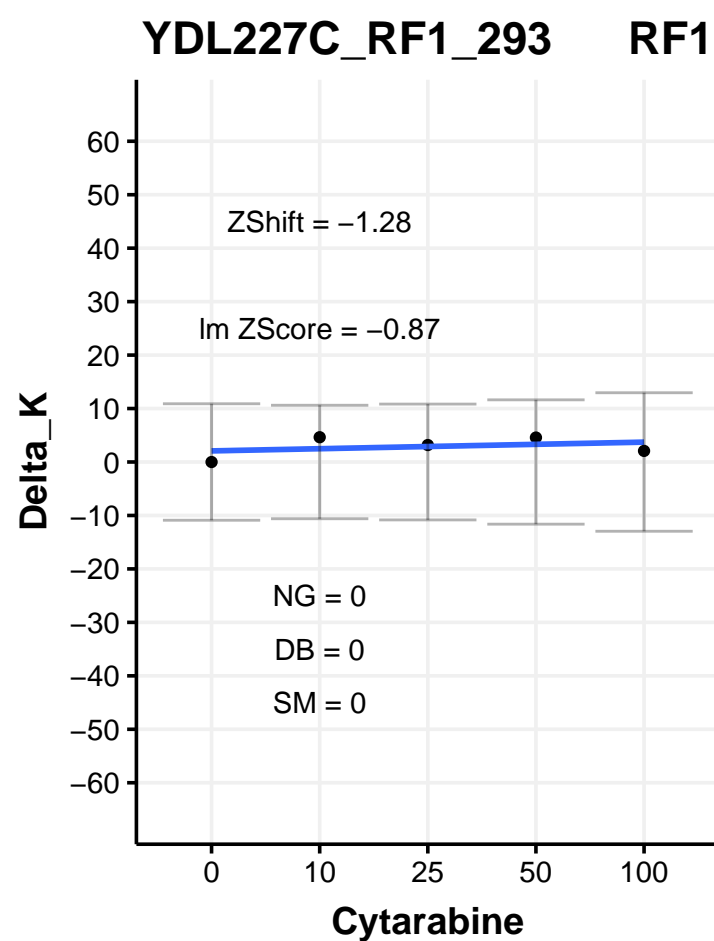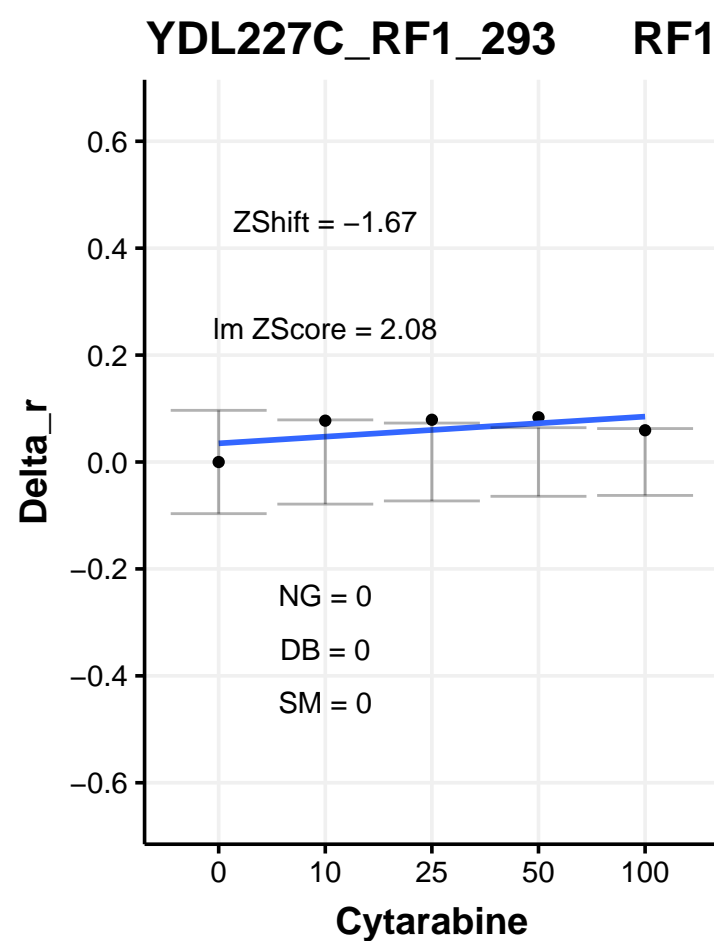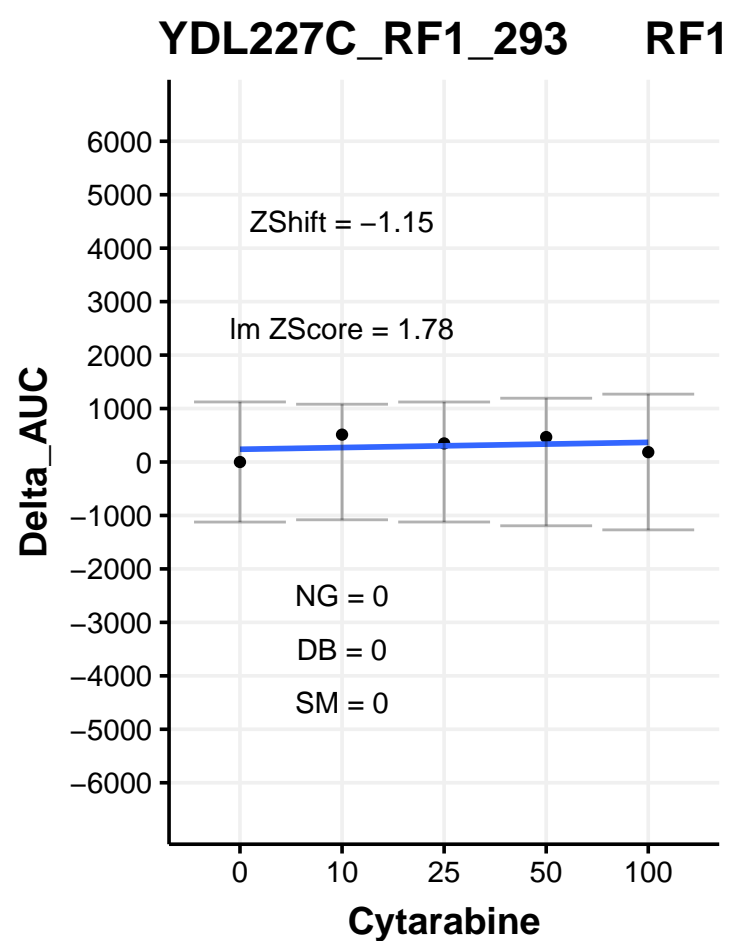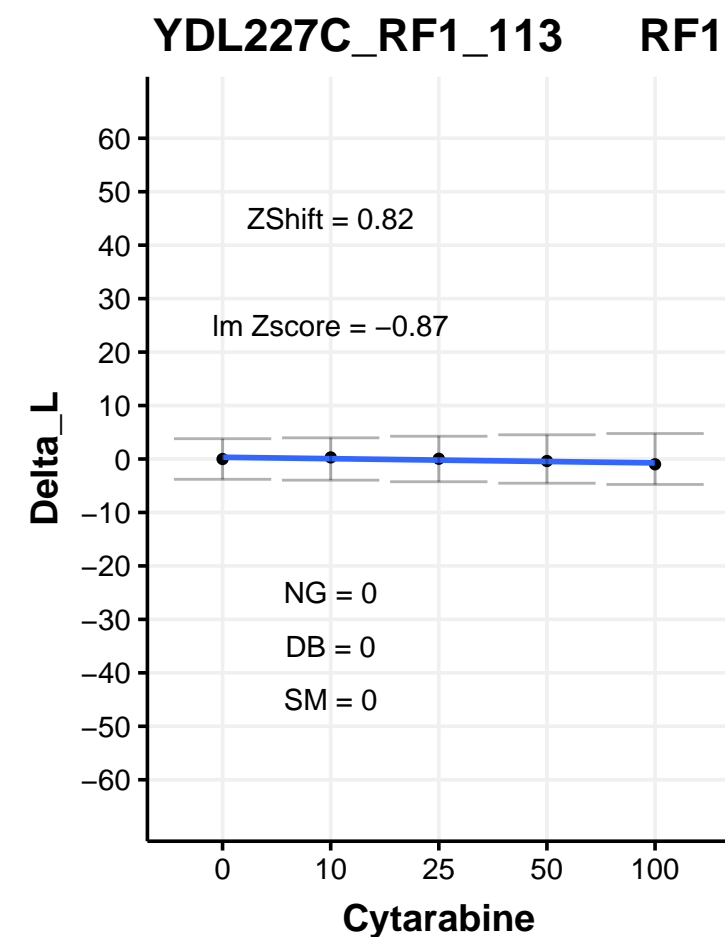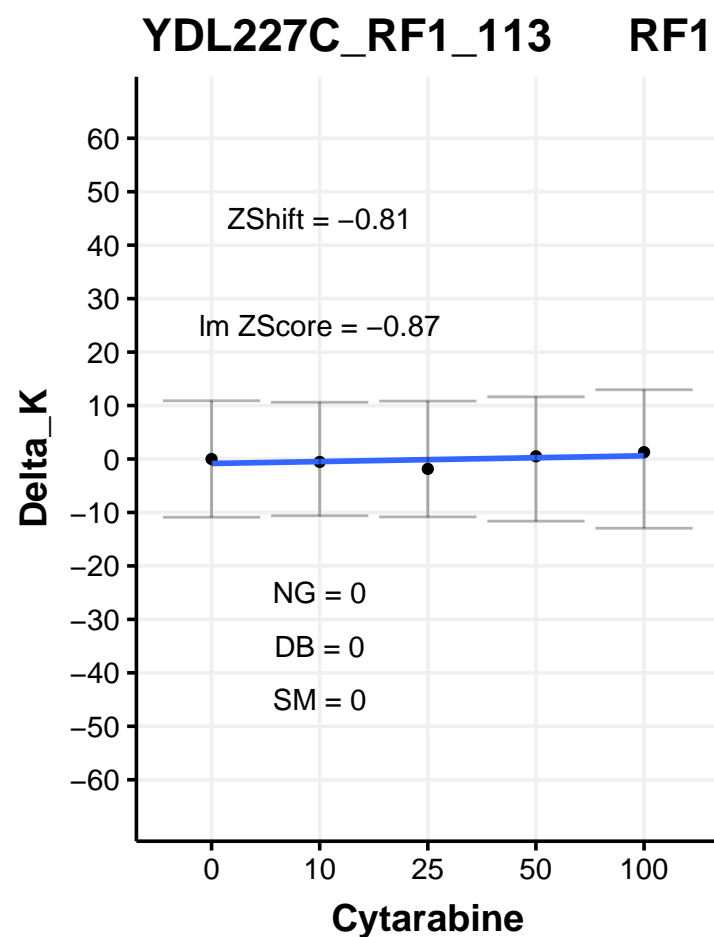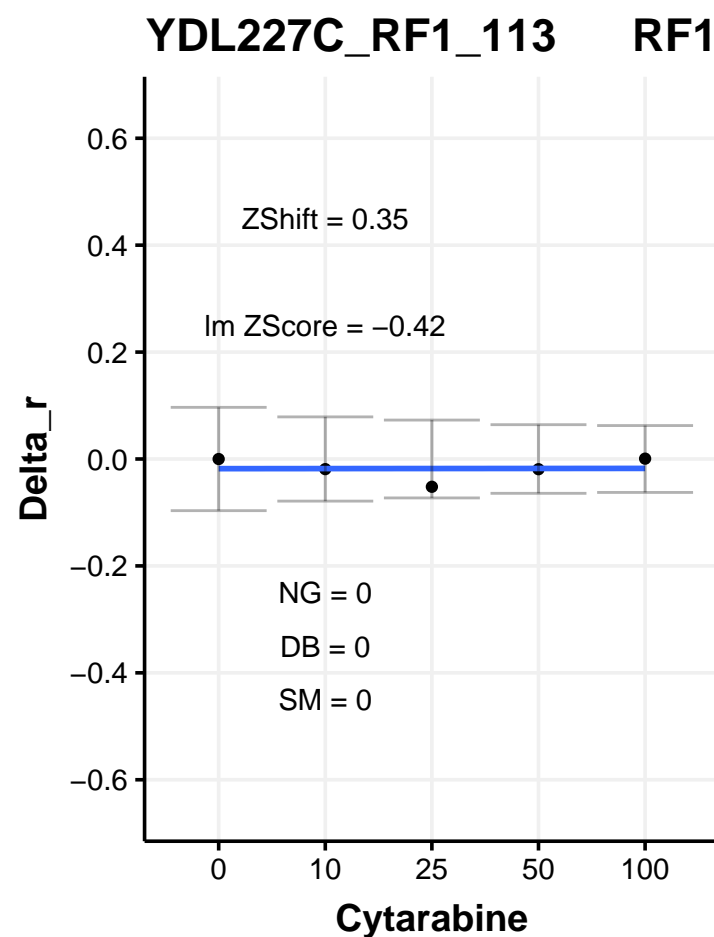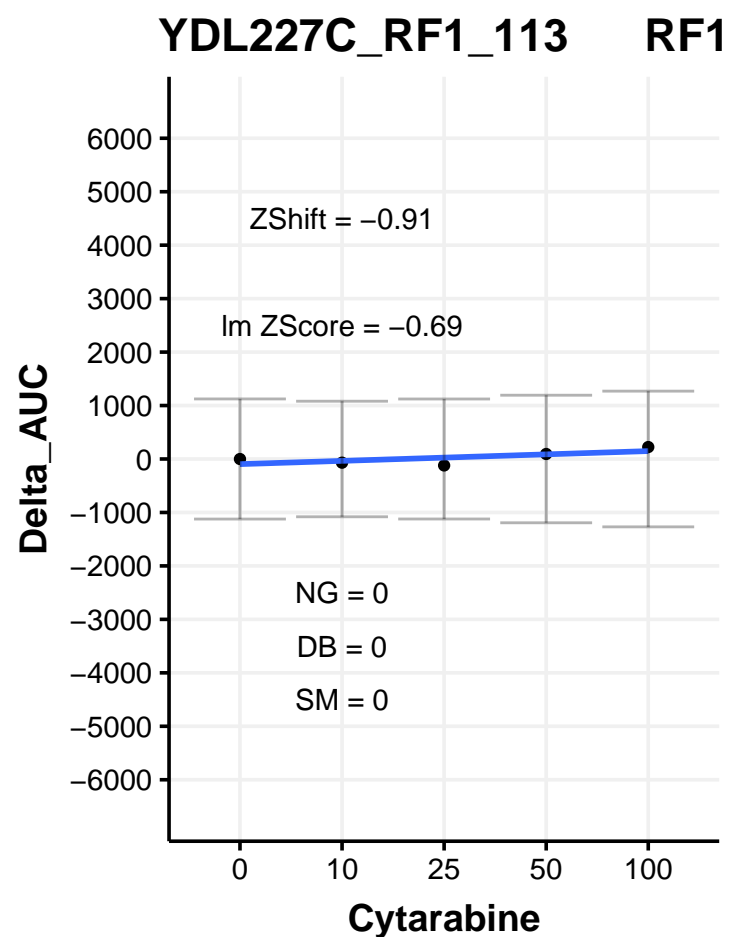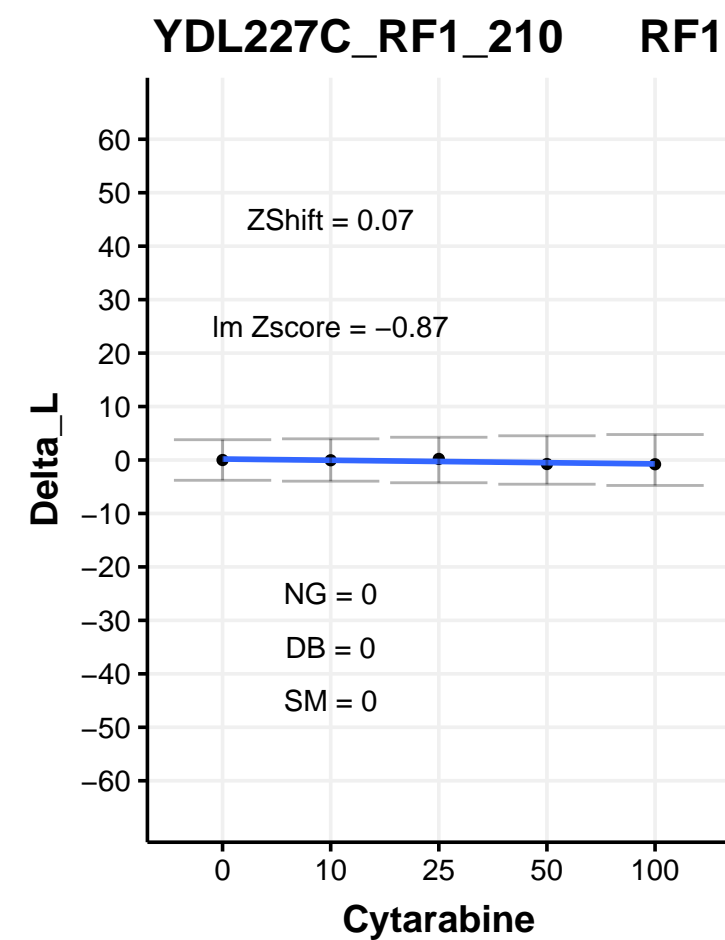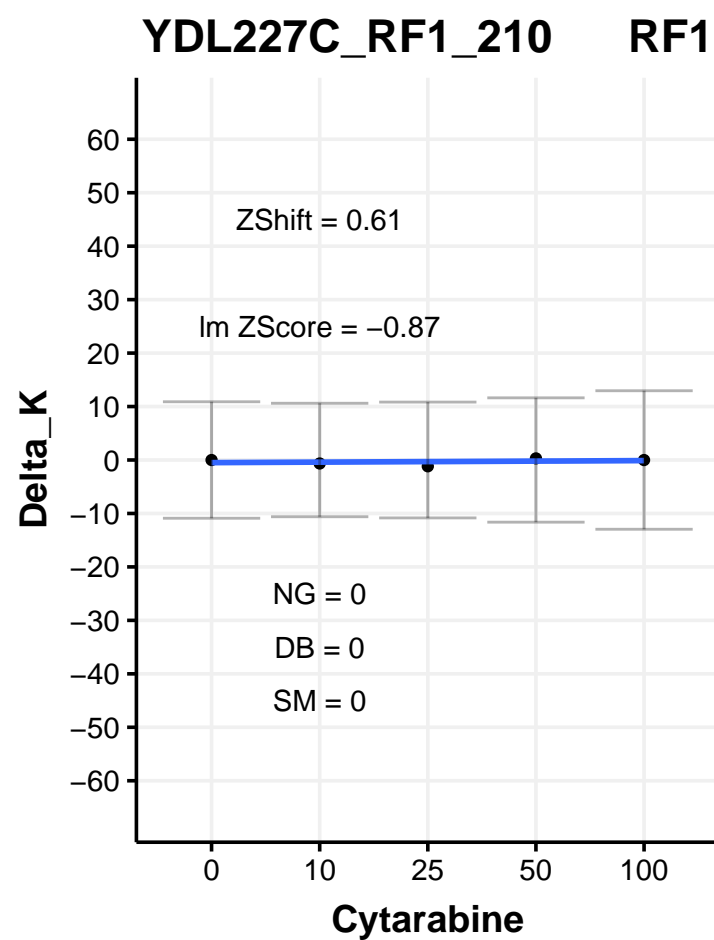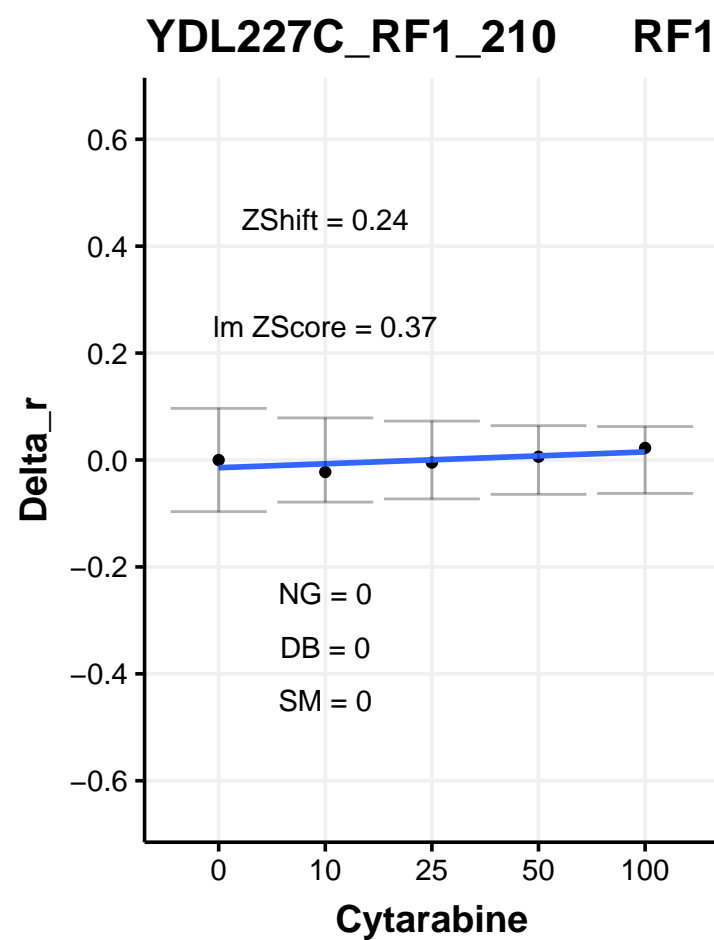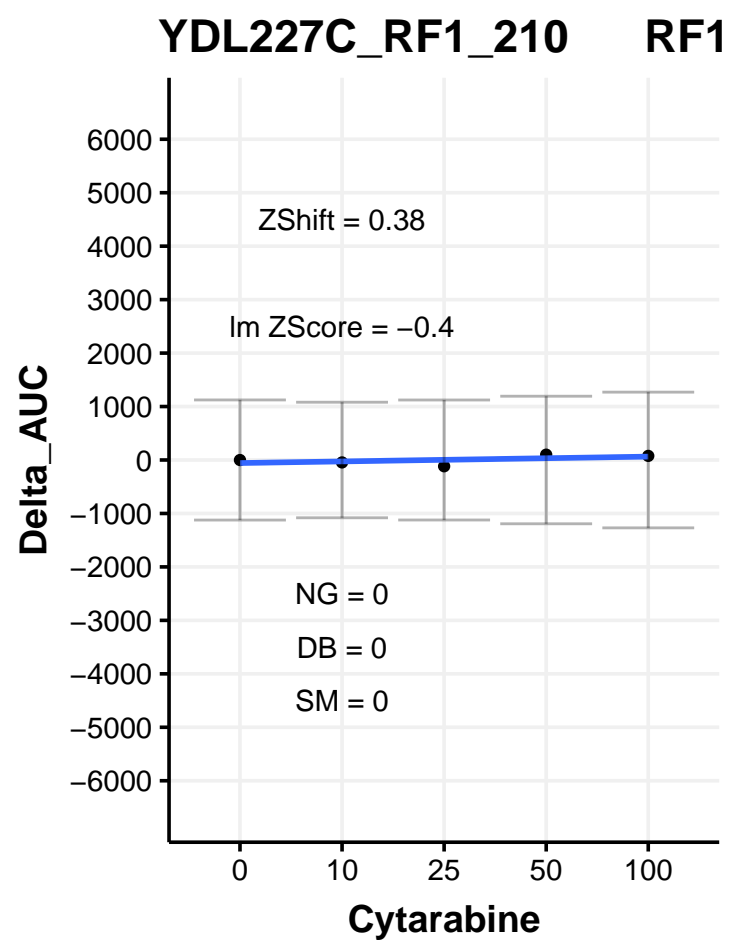



YDL227C\_RF1\_82 RF1

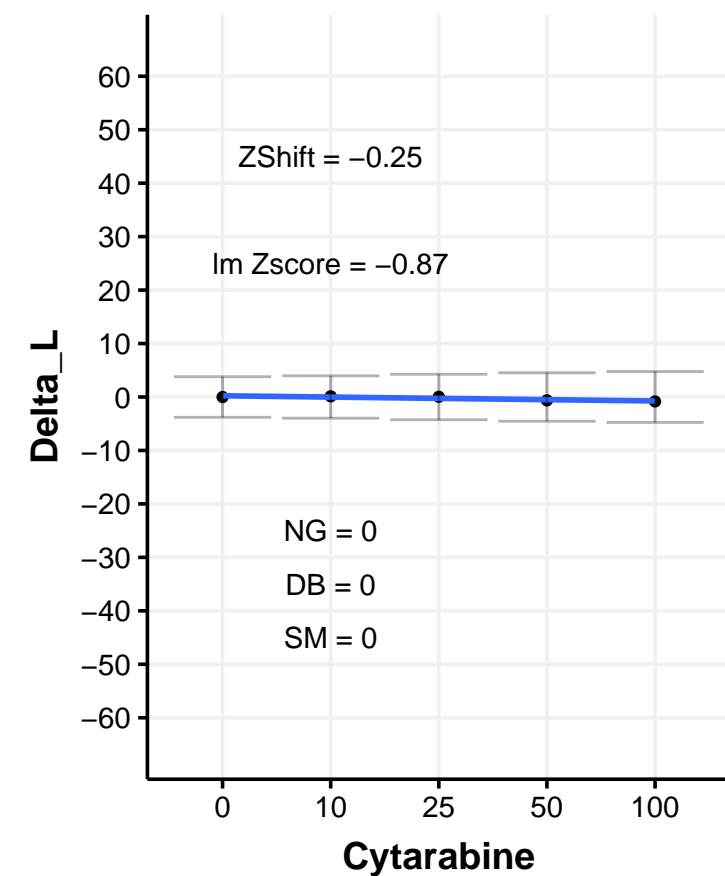

YDL227C\_RF1\_82 RF1

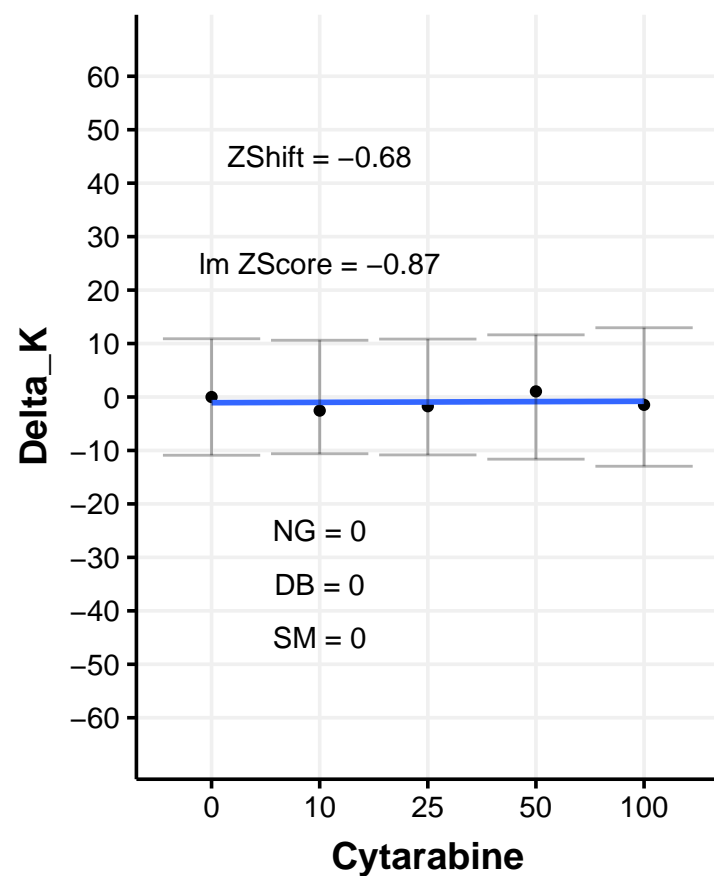

YDL227C\_RF1\_82 RF1

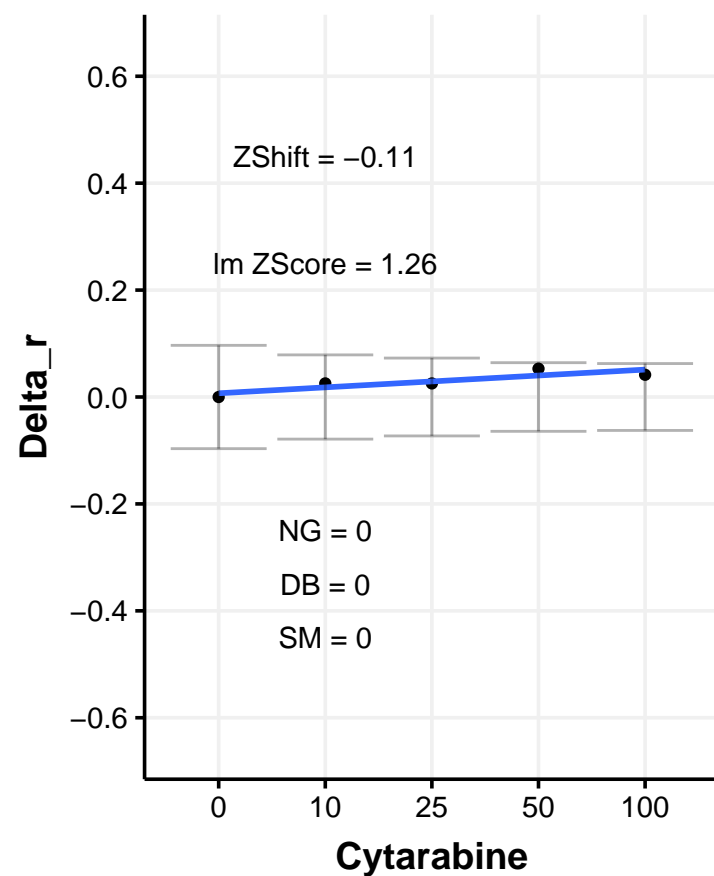

YDL227C\_RF1\_82 RF1

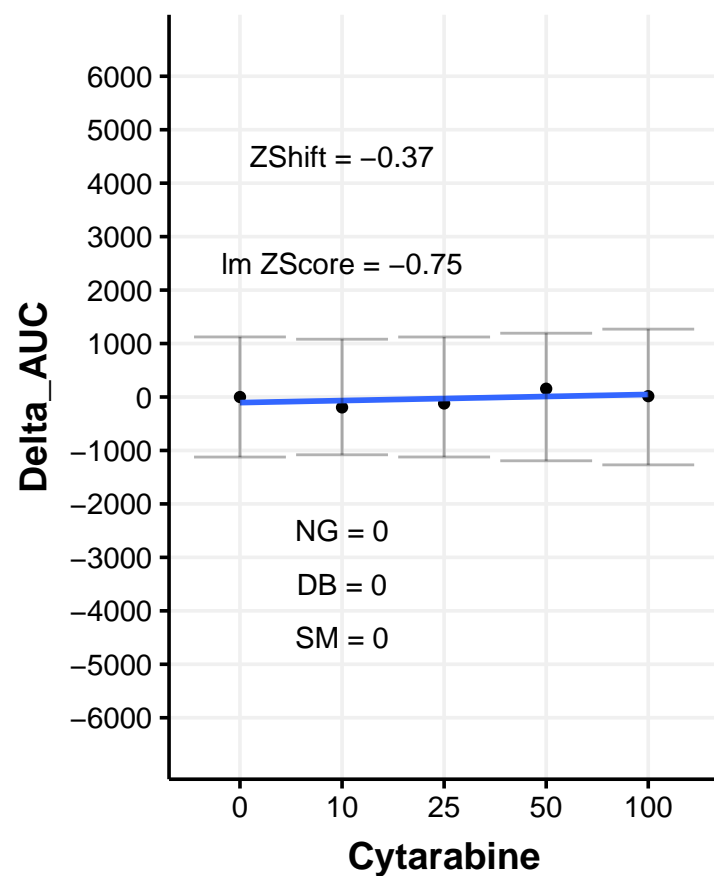

YDL227C\_RF2\_371 RF2

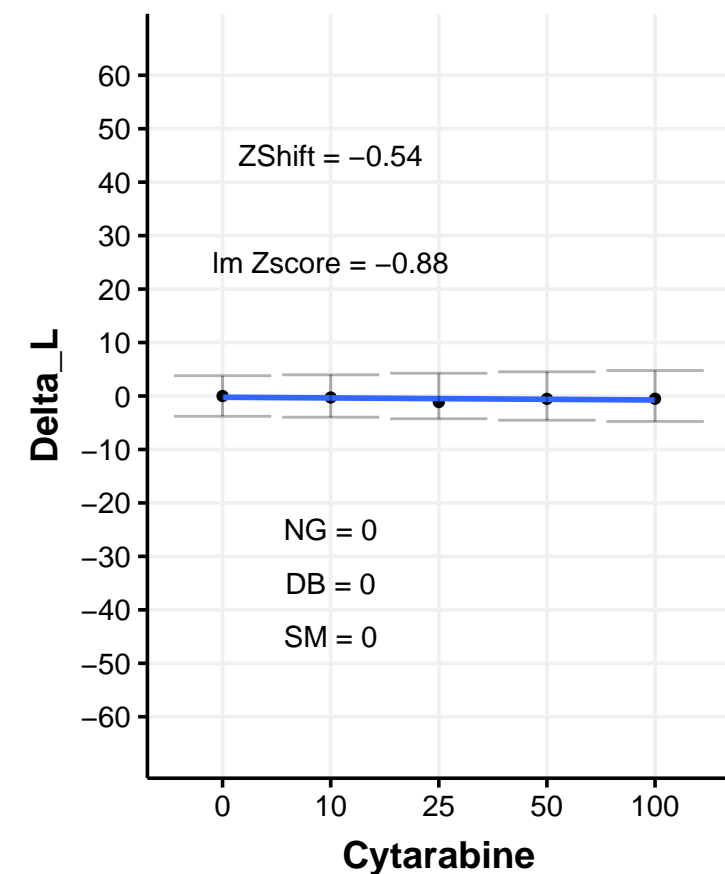

YDL227C\_RF2\_371 RF2

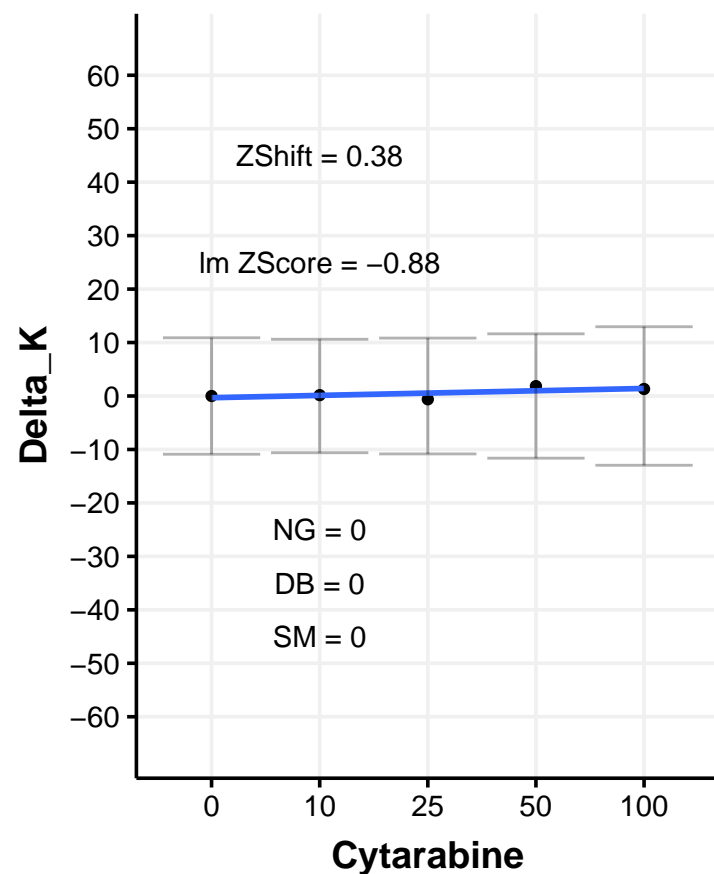

YDL227C\_RF2\_371 RF2

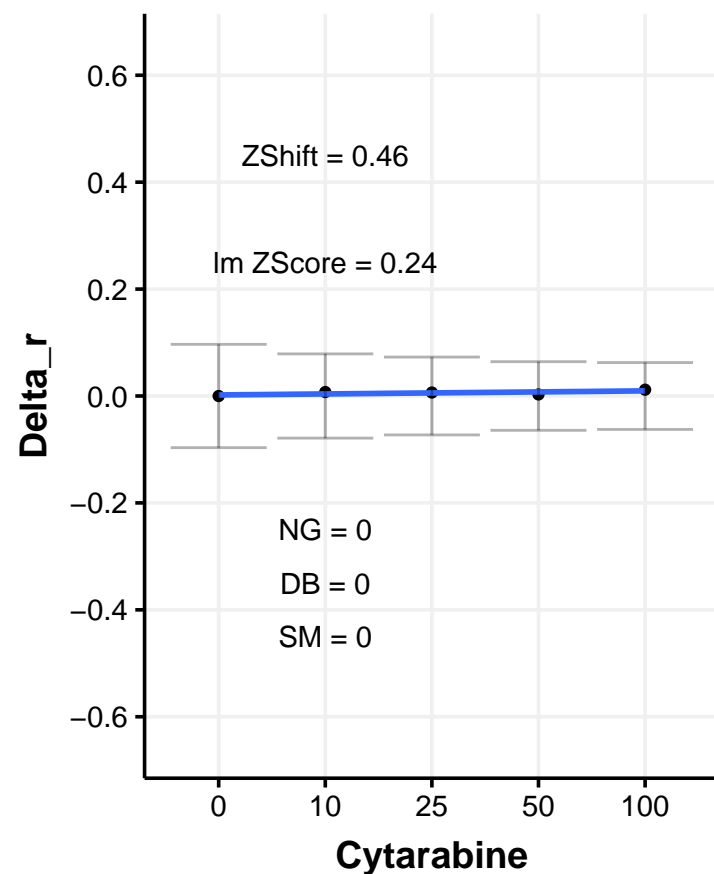

YDL227C\_RF2\_371 RF2

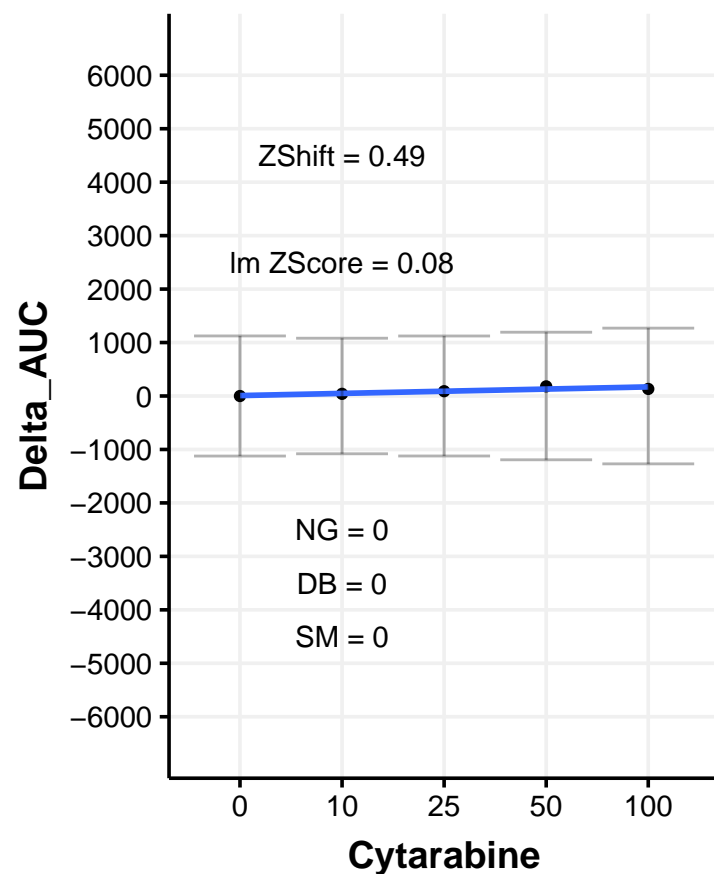

YDL227C\_RF1\_228 RF1

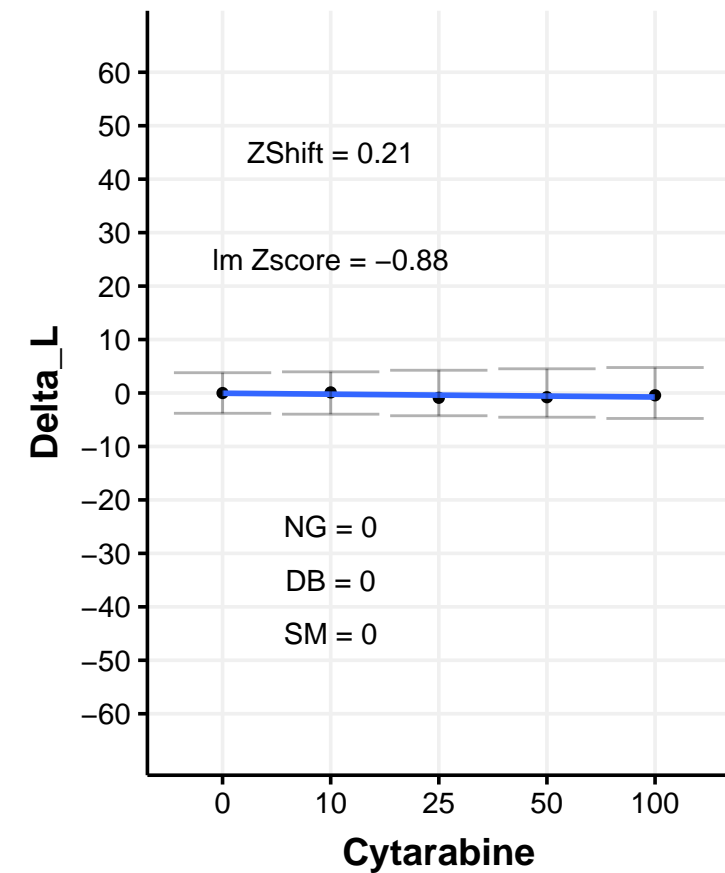

YDL227C\_RF1\_228 RF1

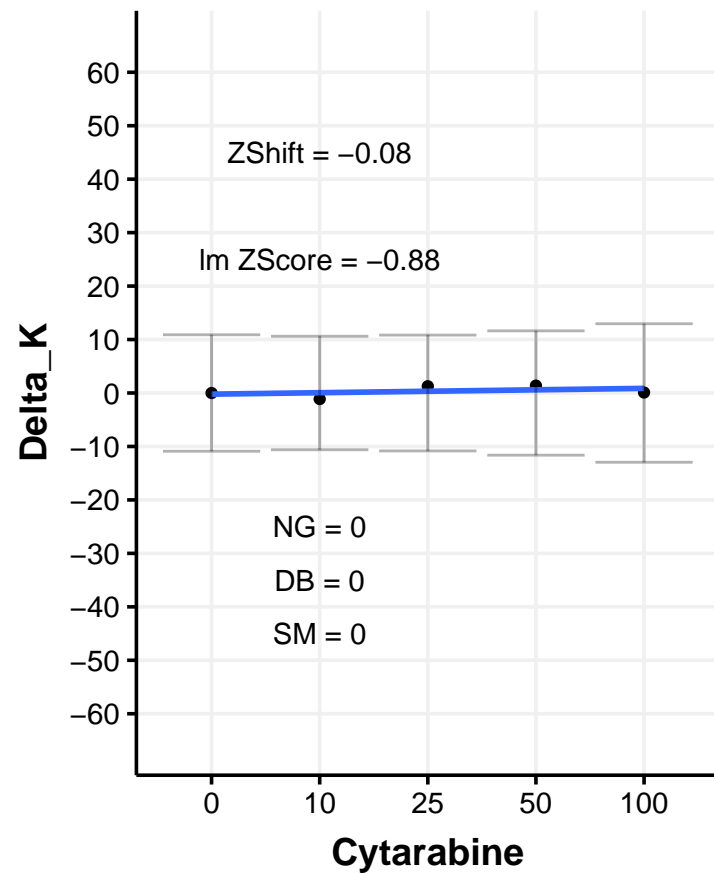

YDL227C\_RF1\_228 RF1

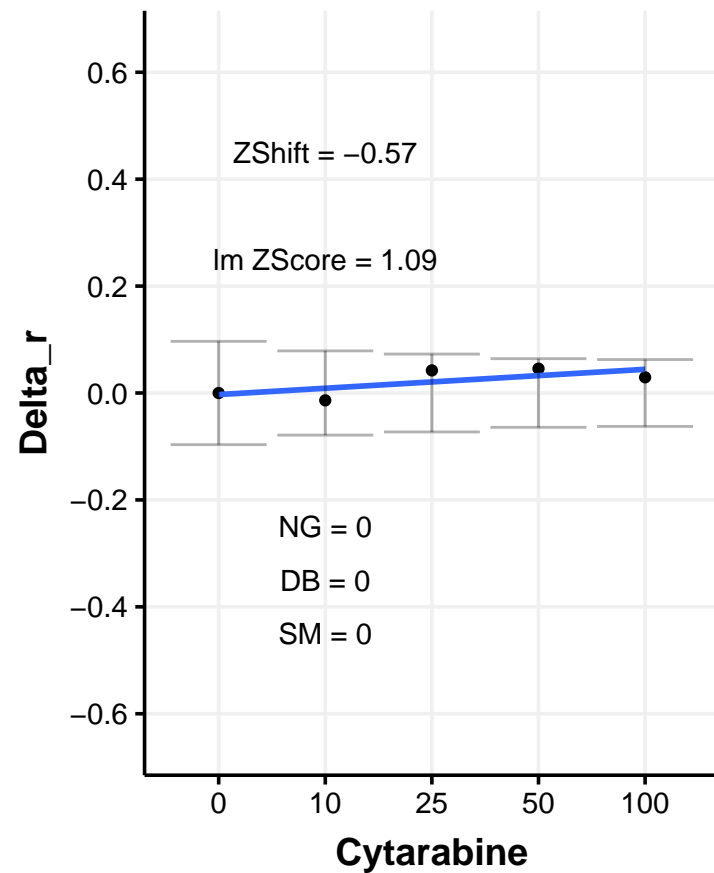

YDL227C\_RF1\_228 RF1

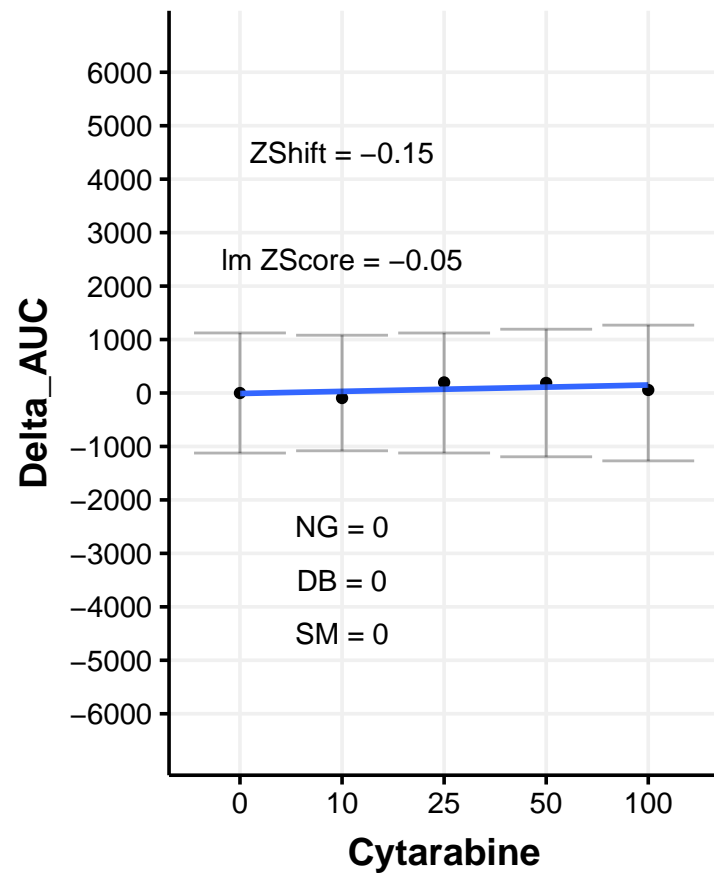



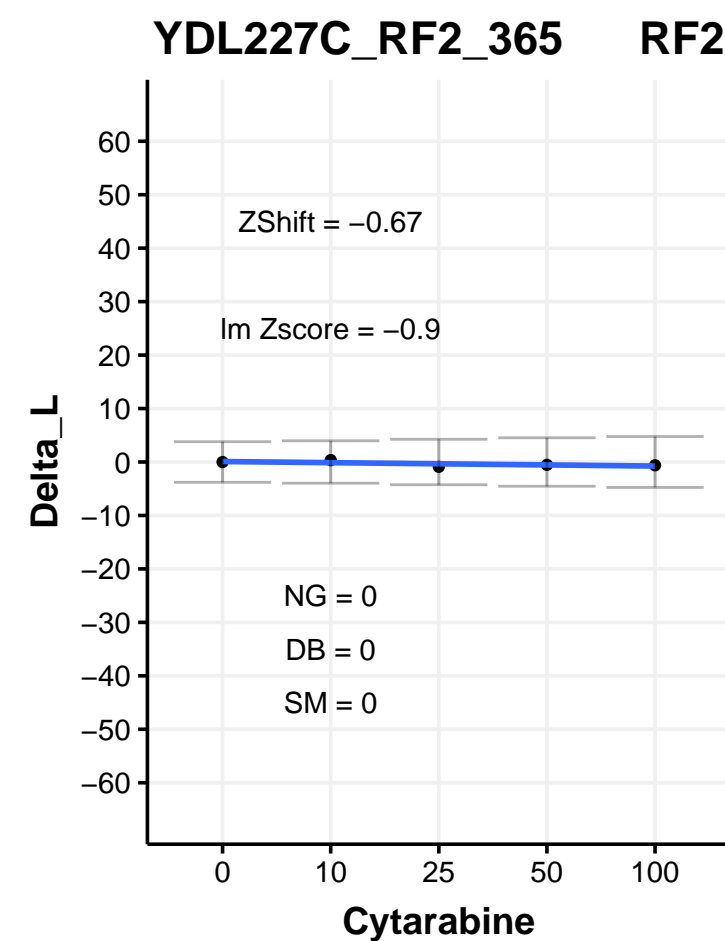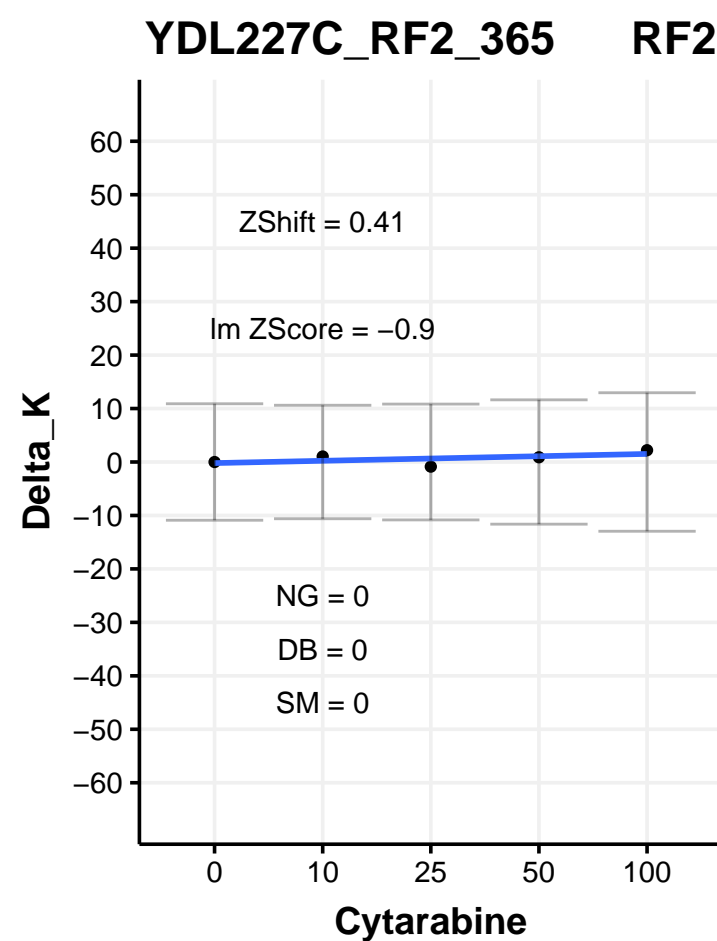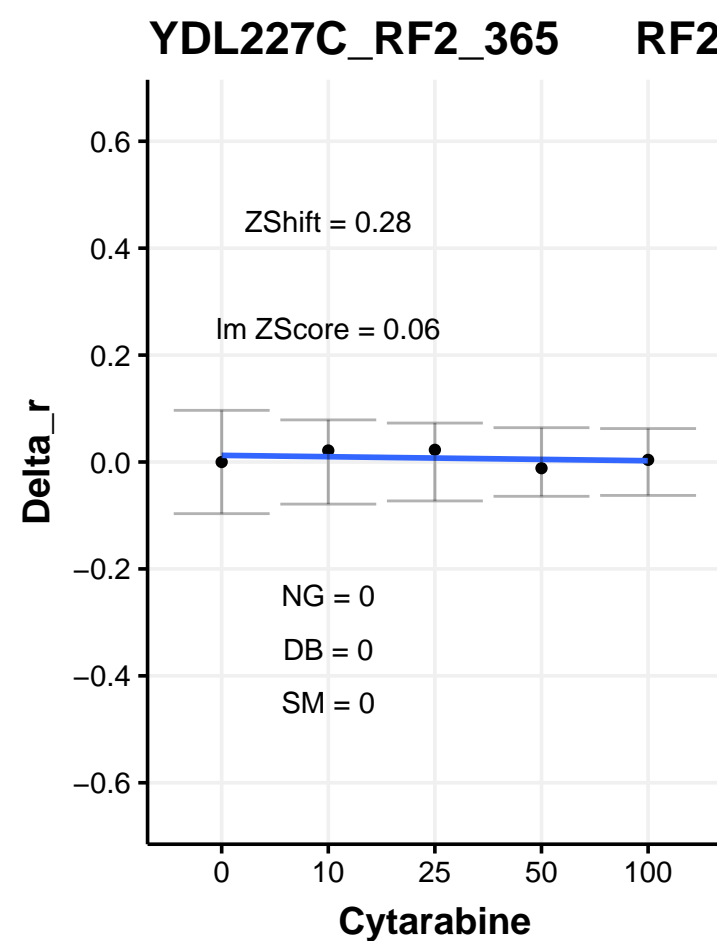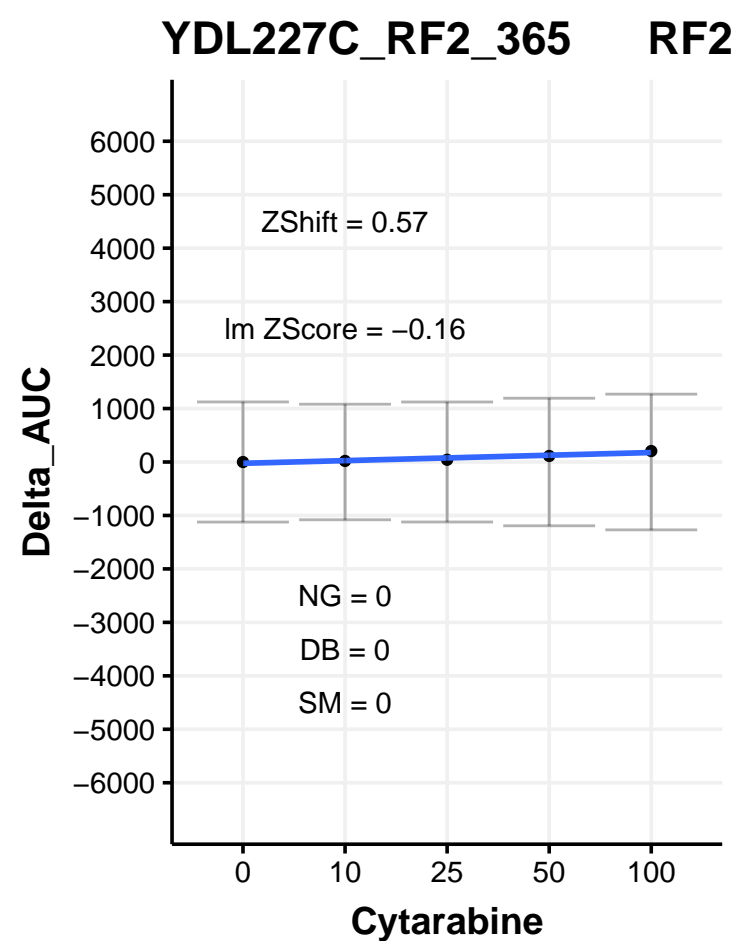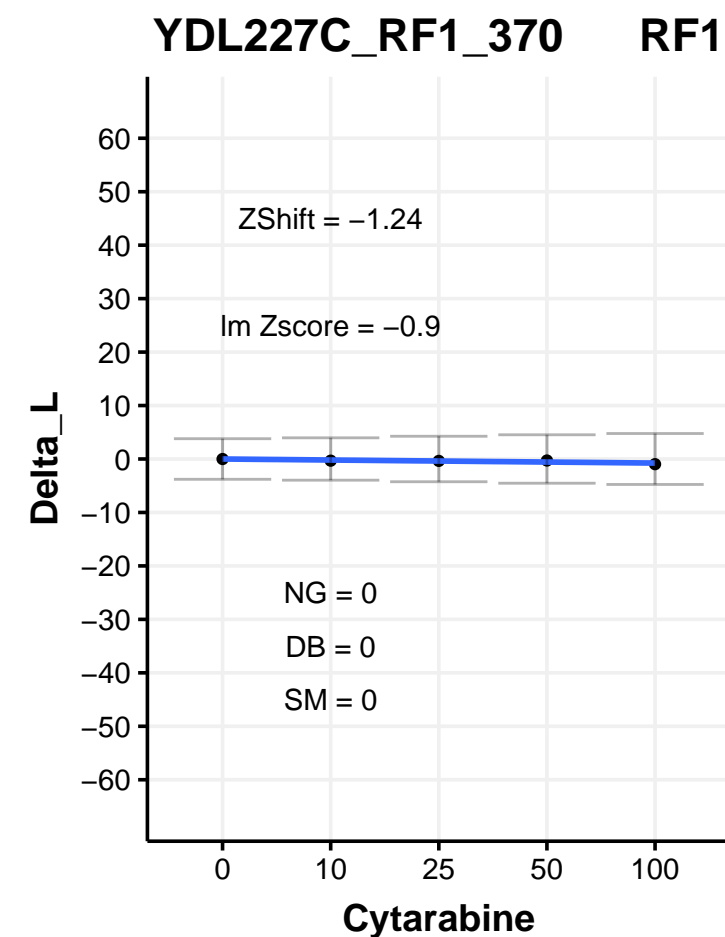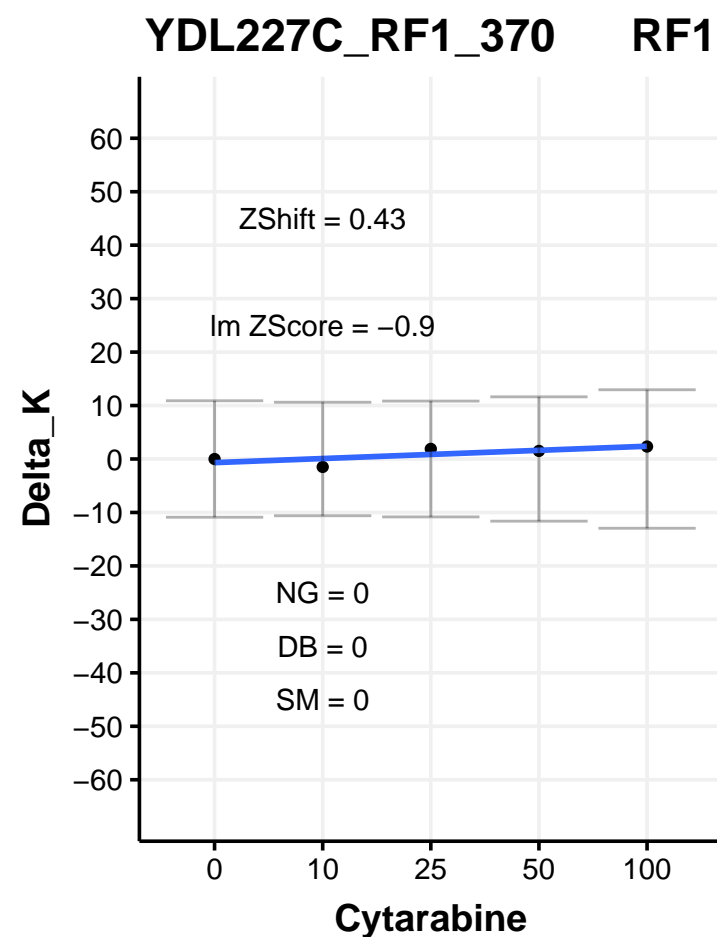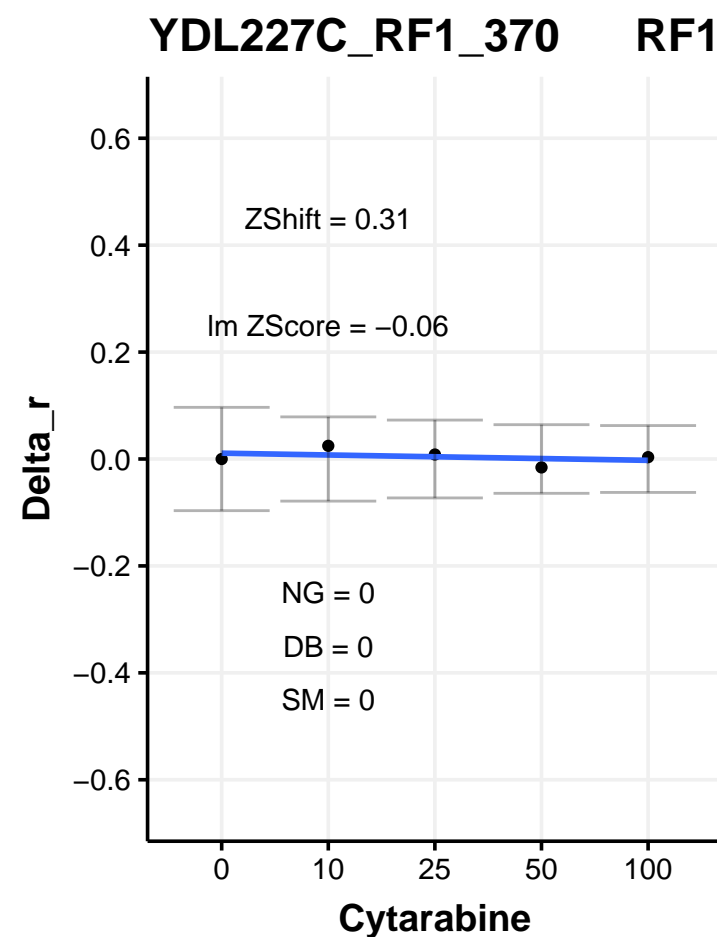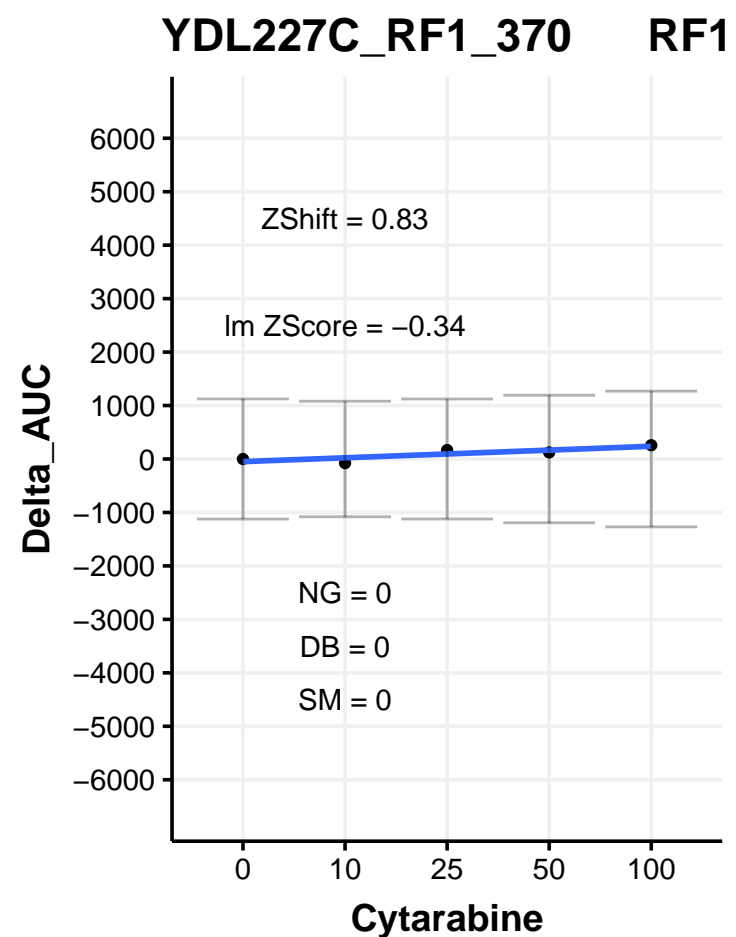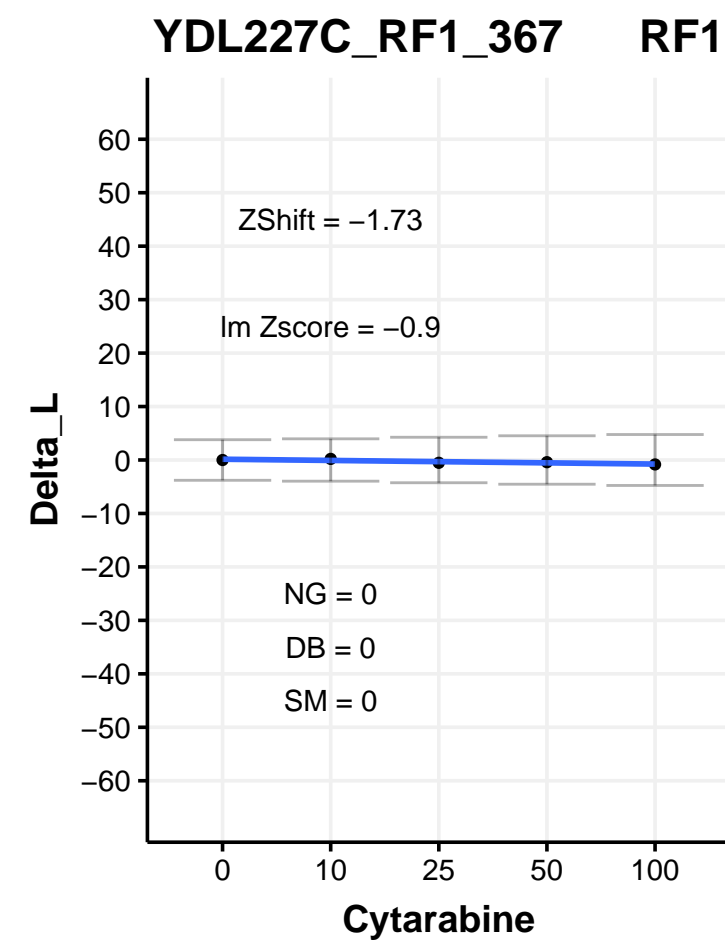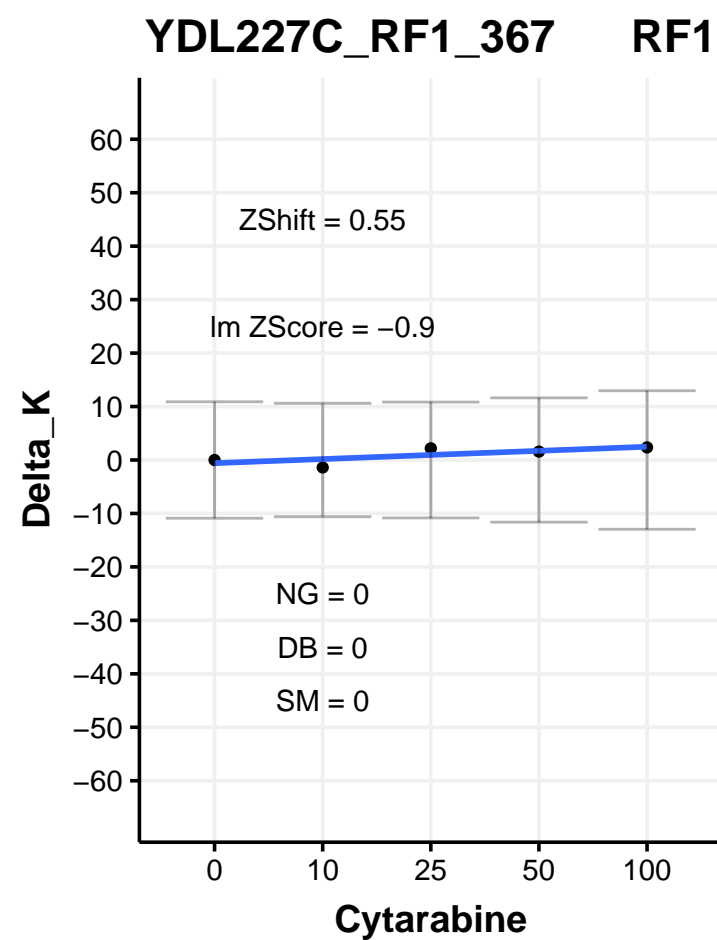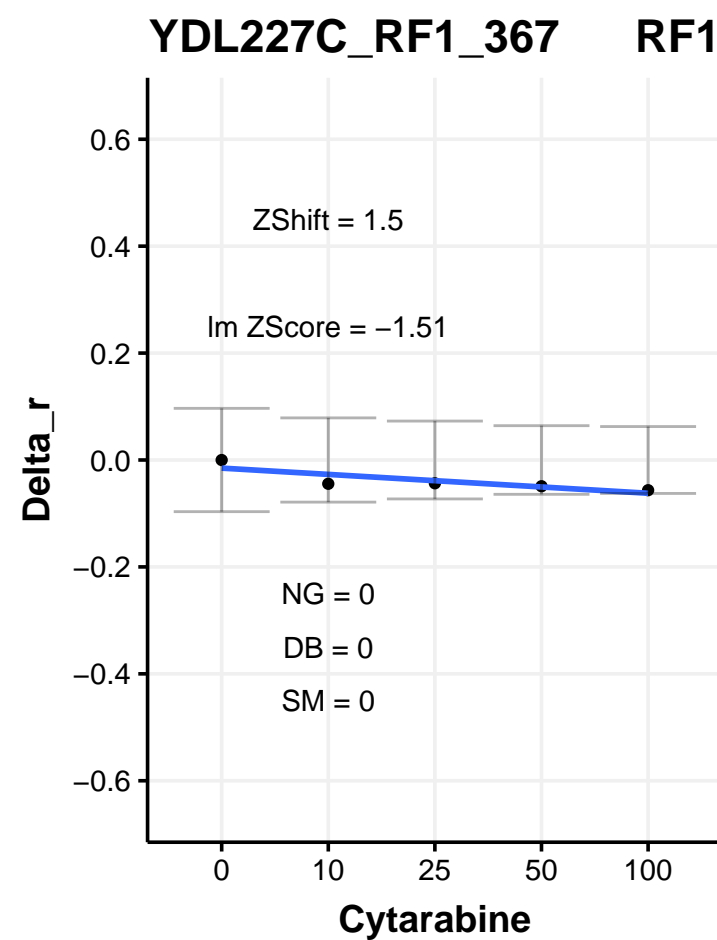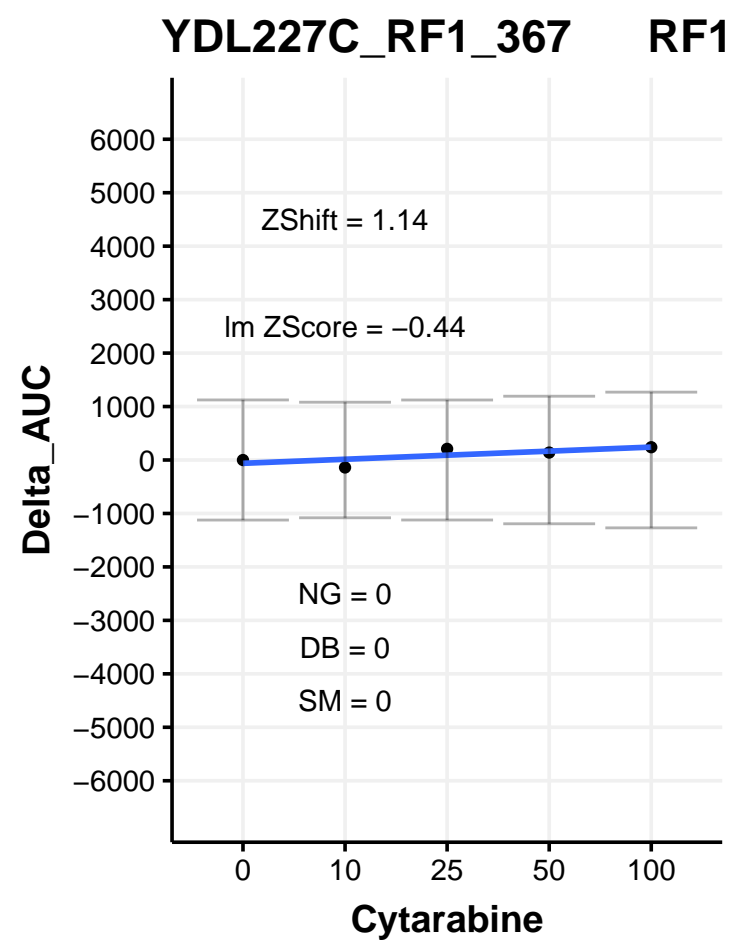

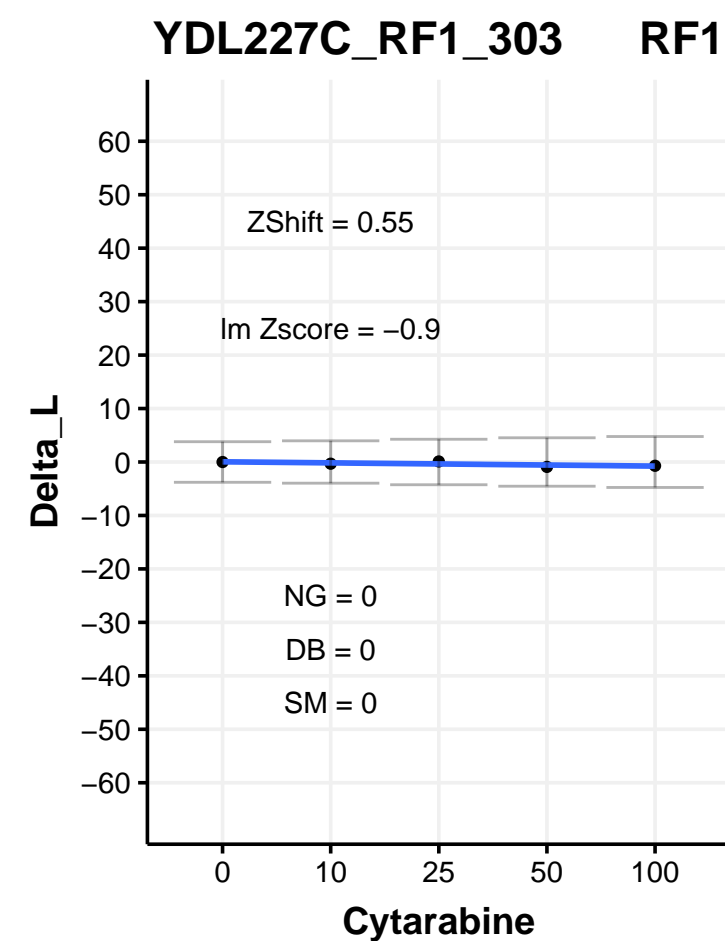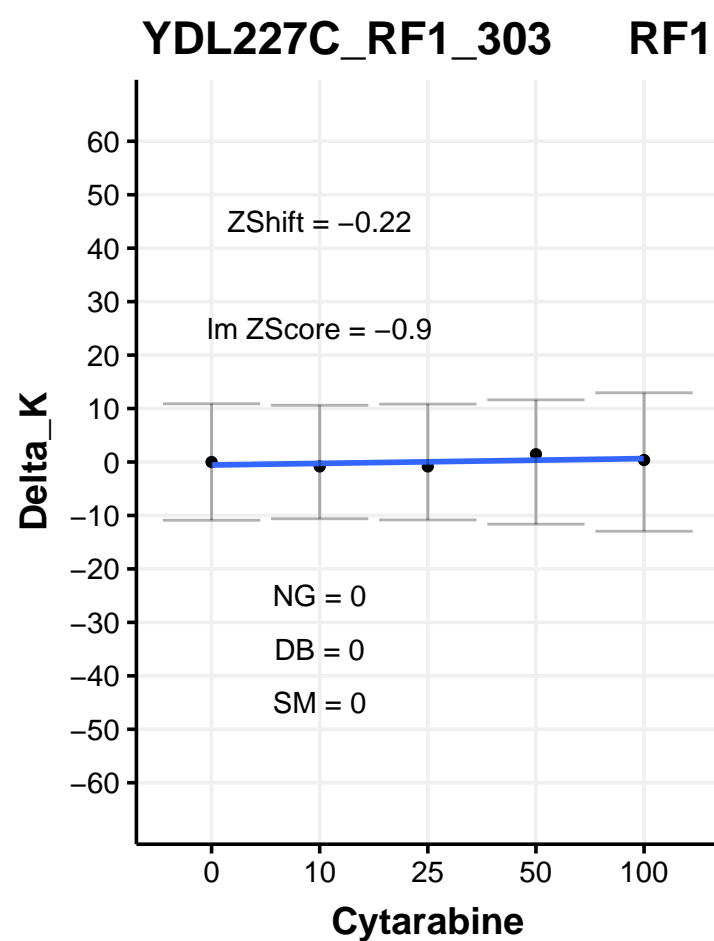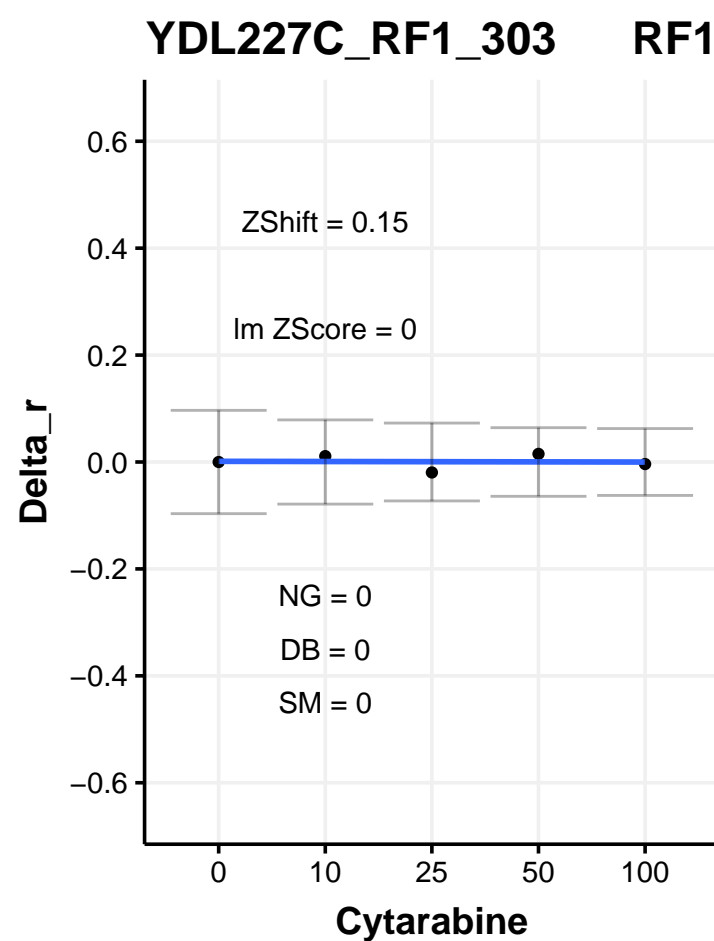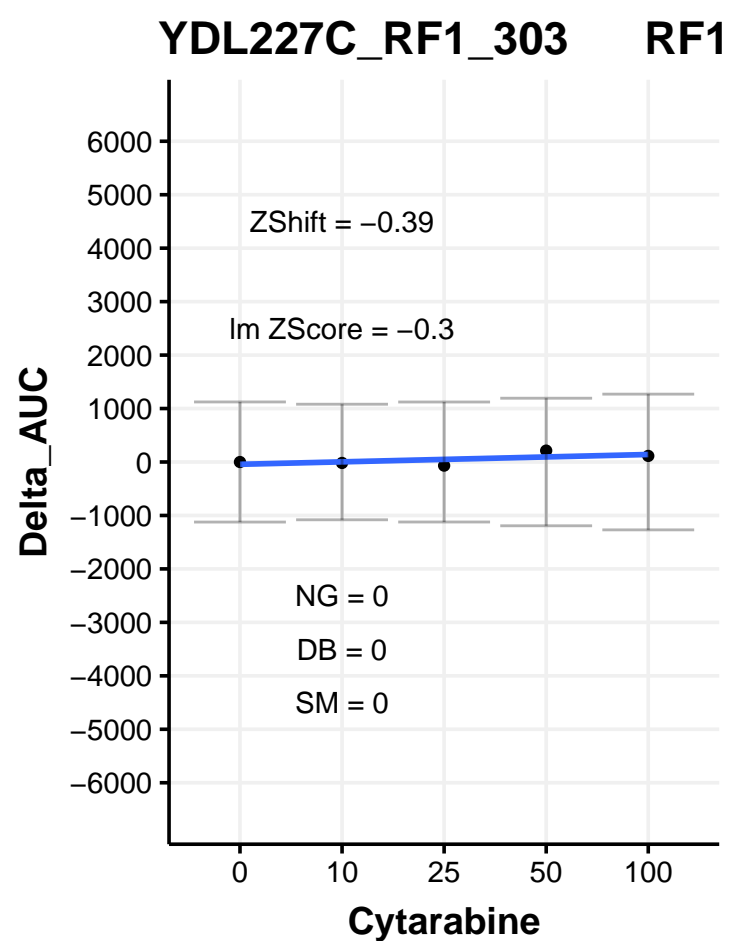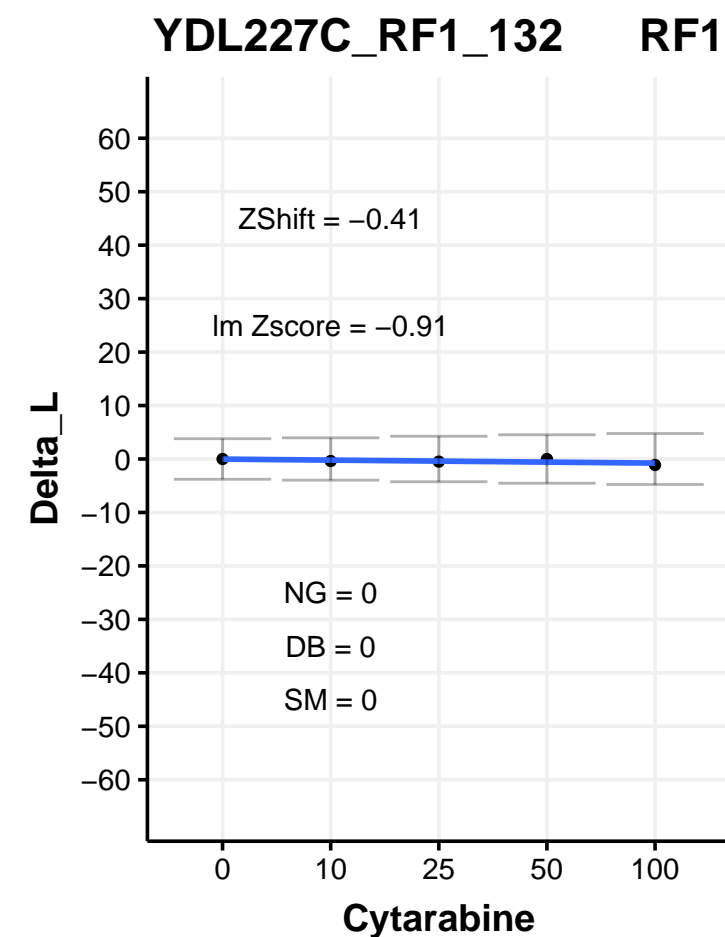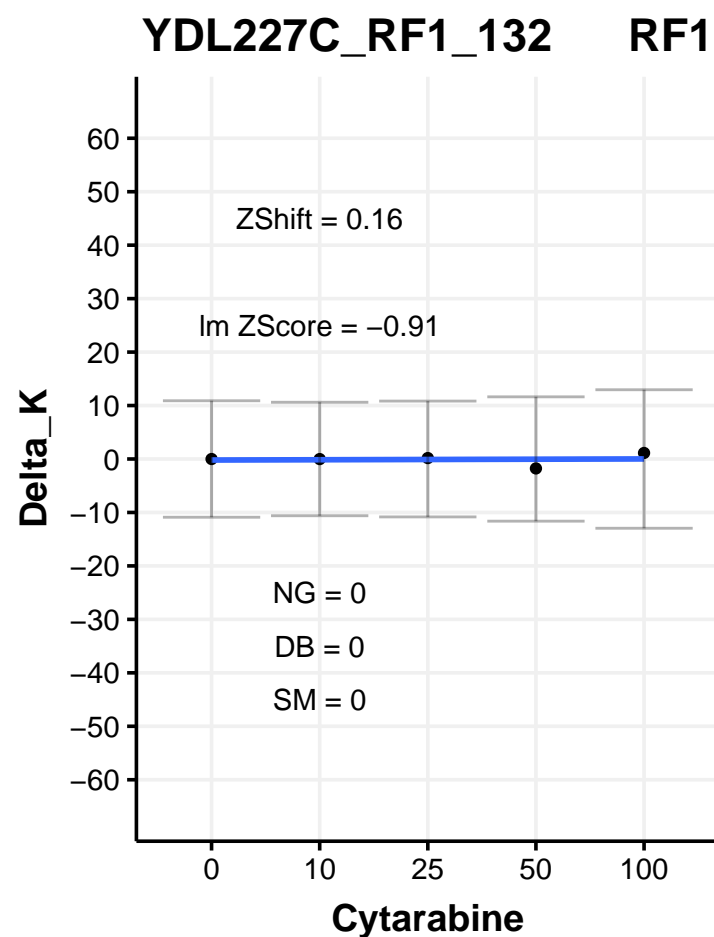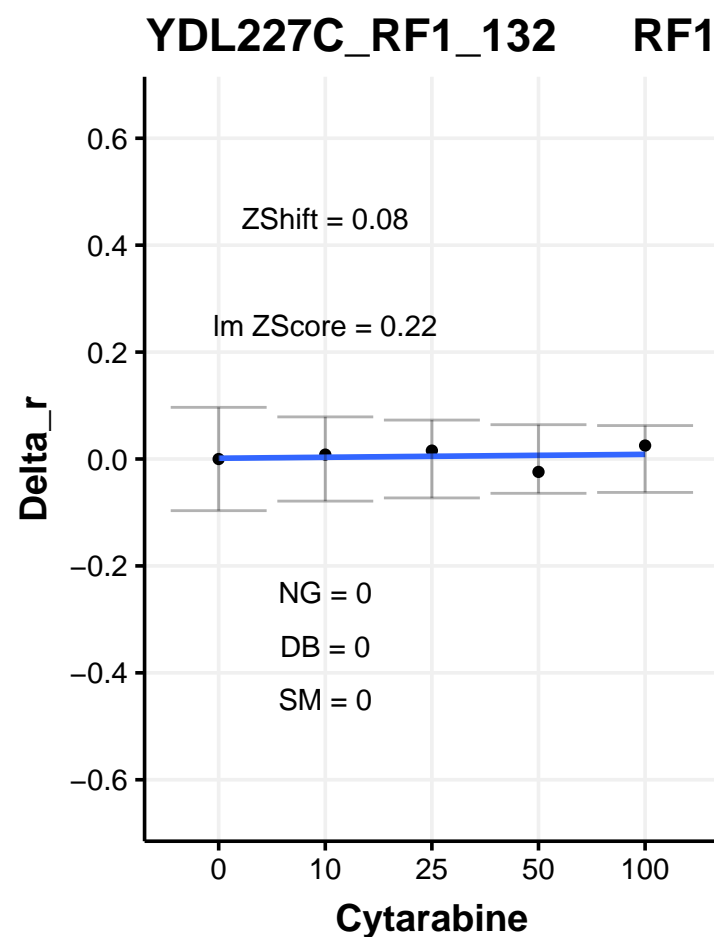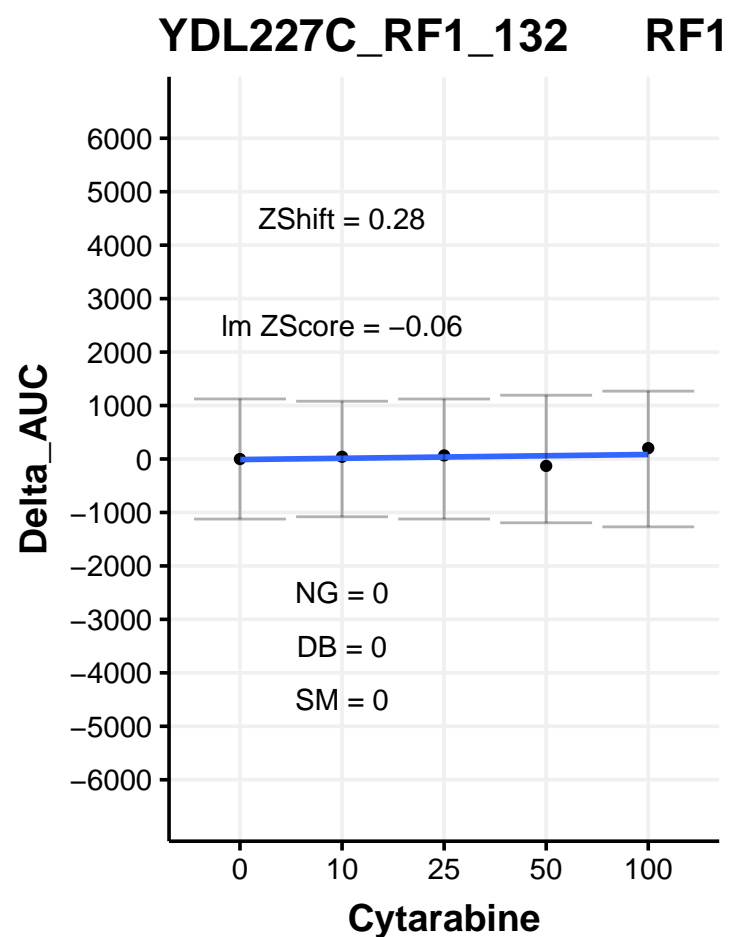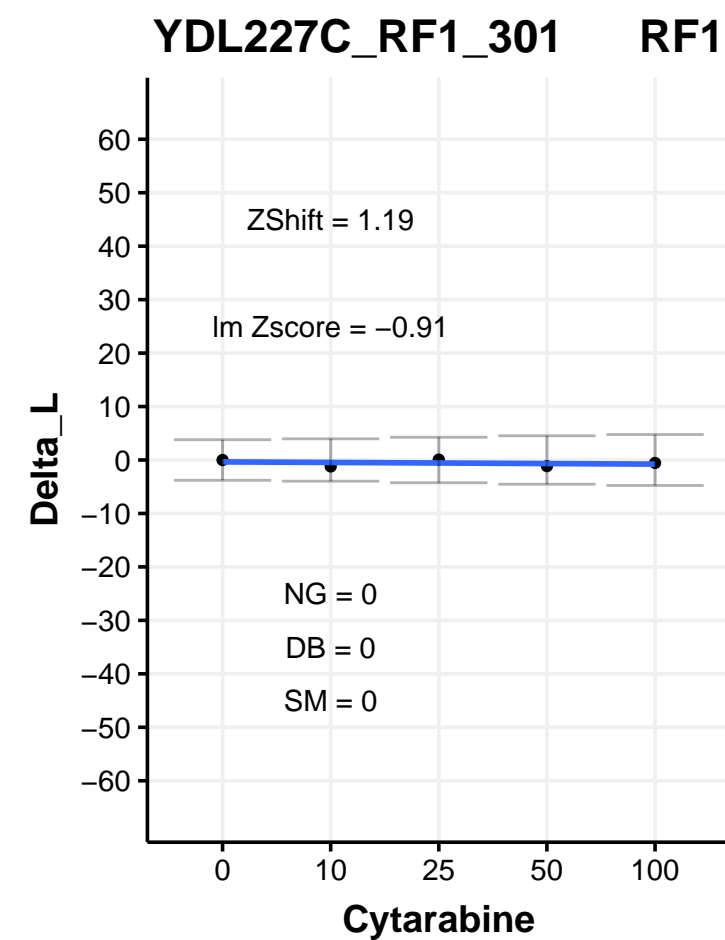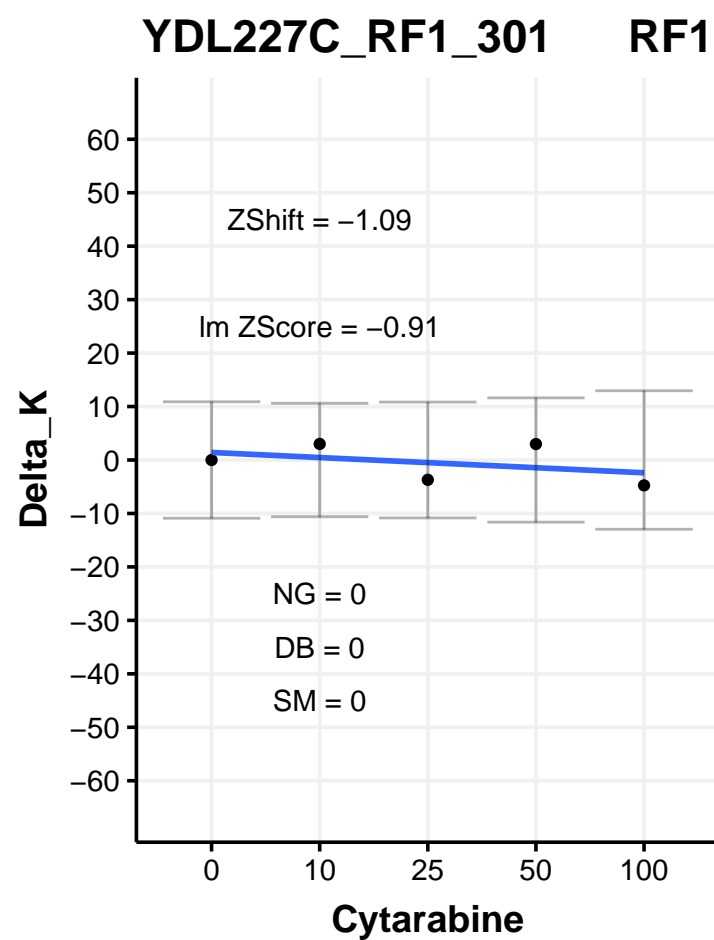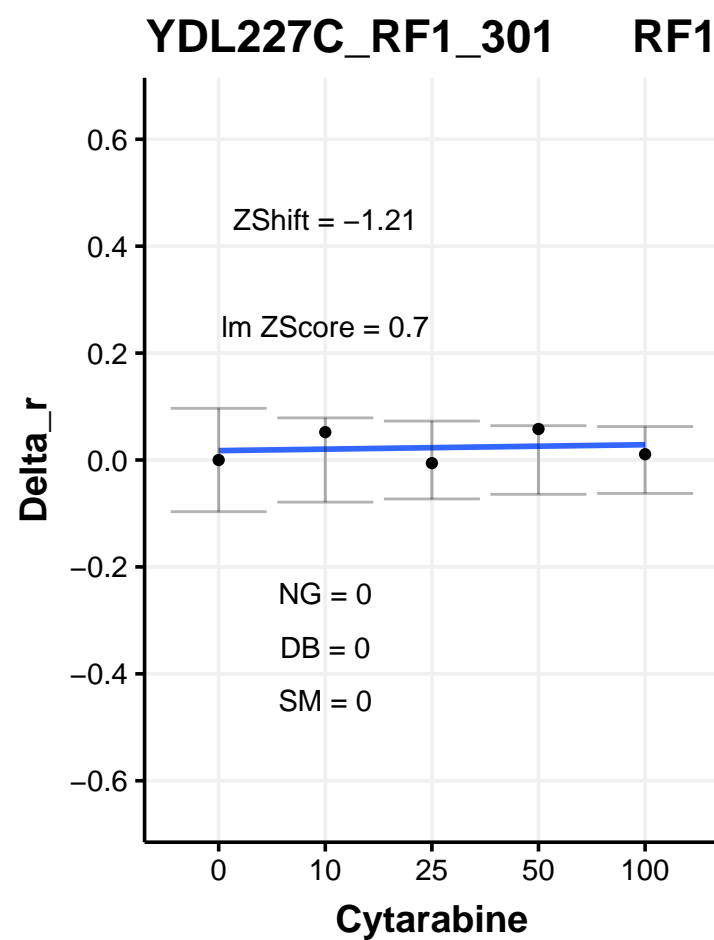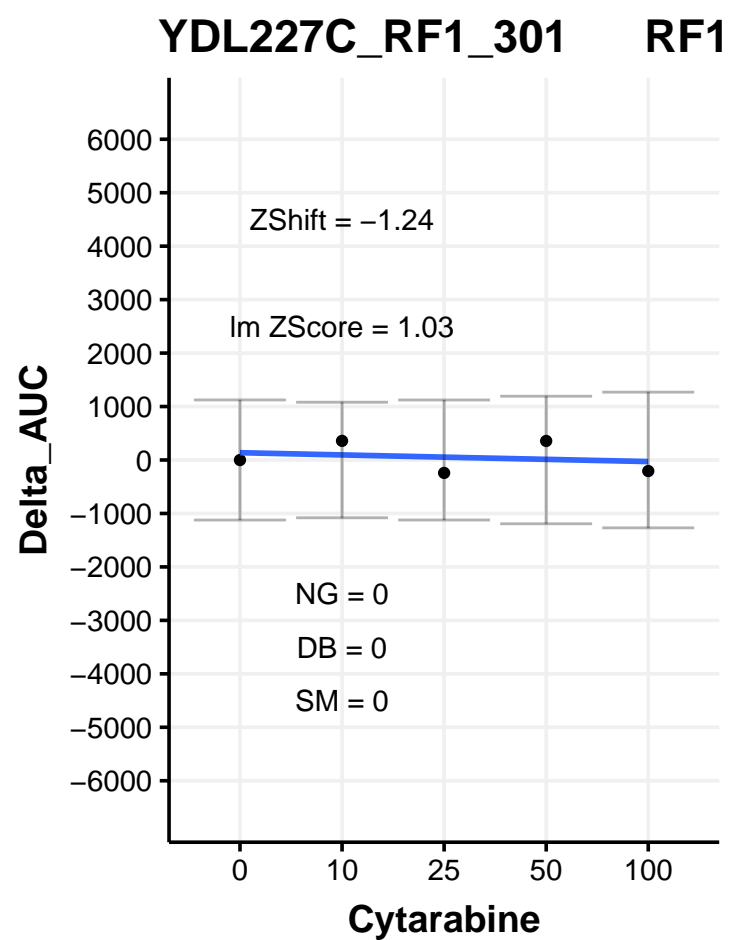

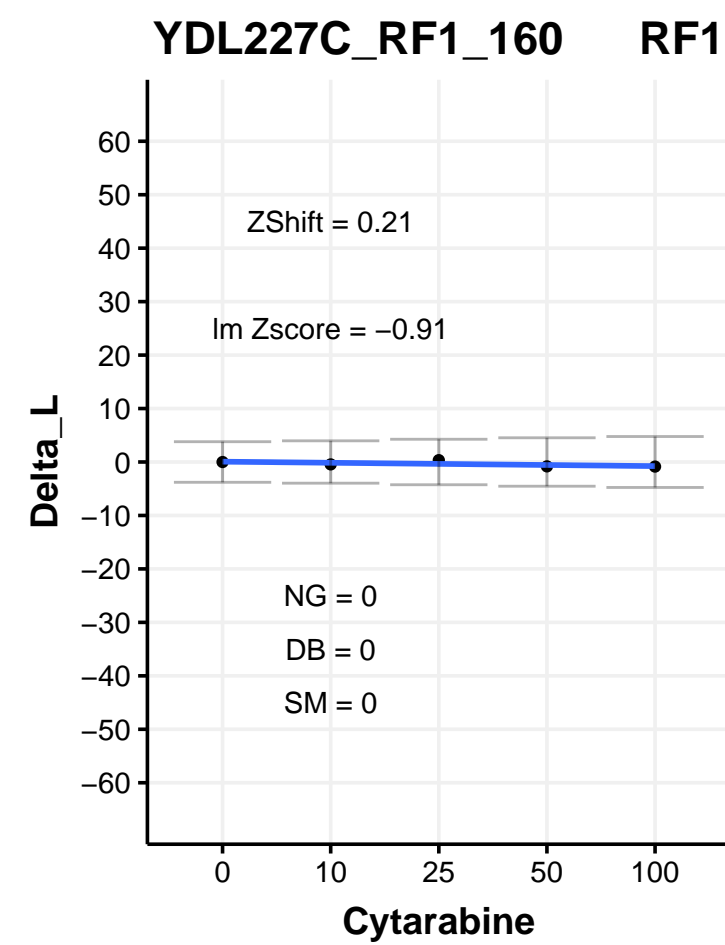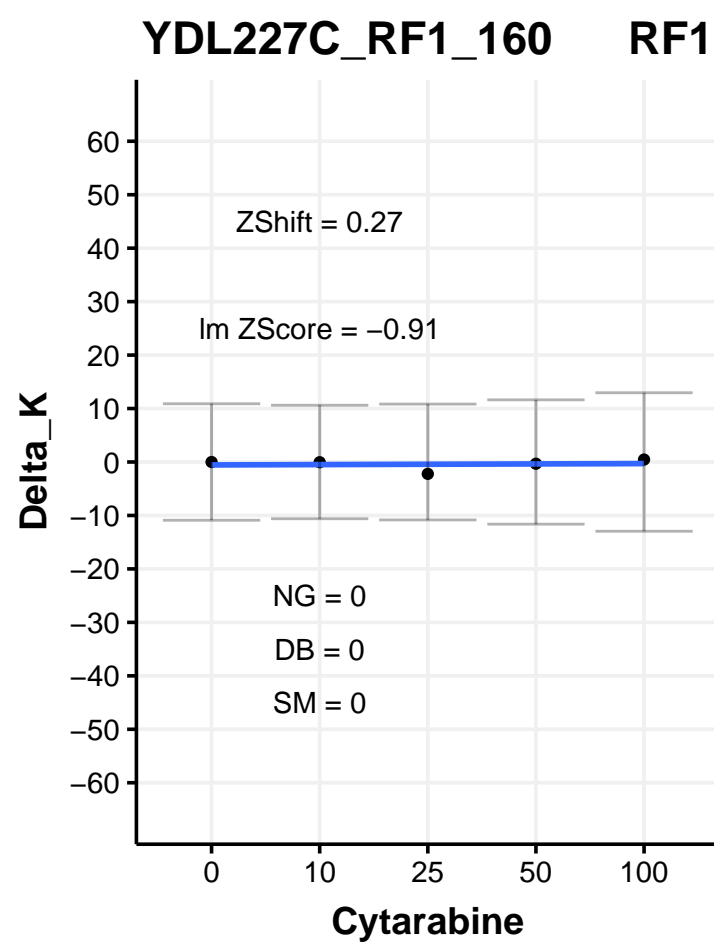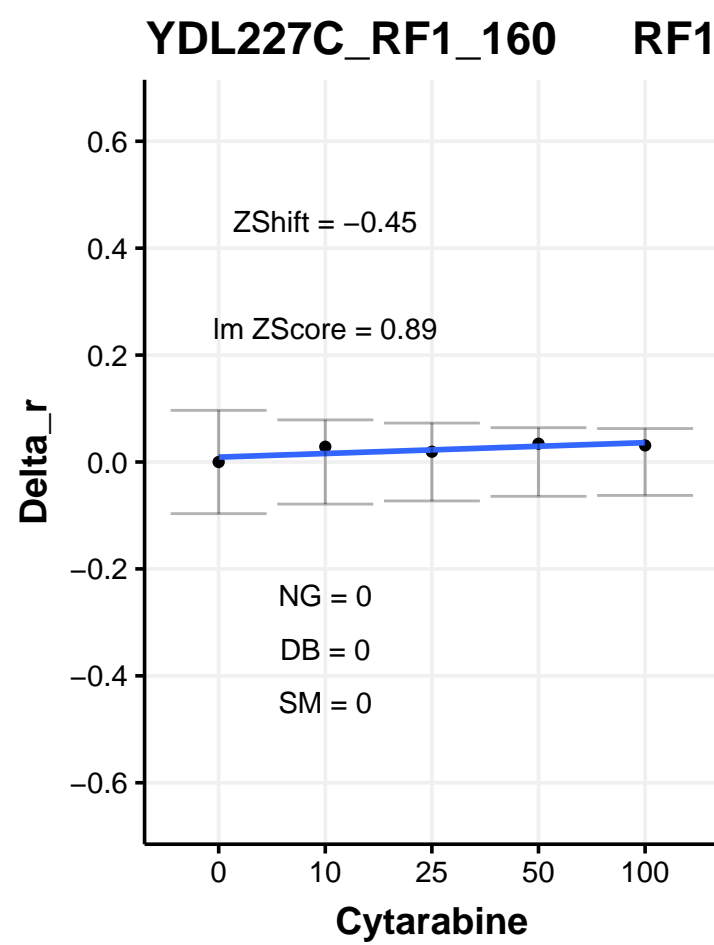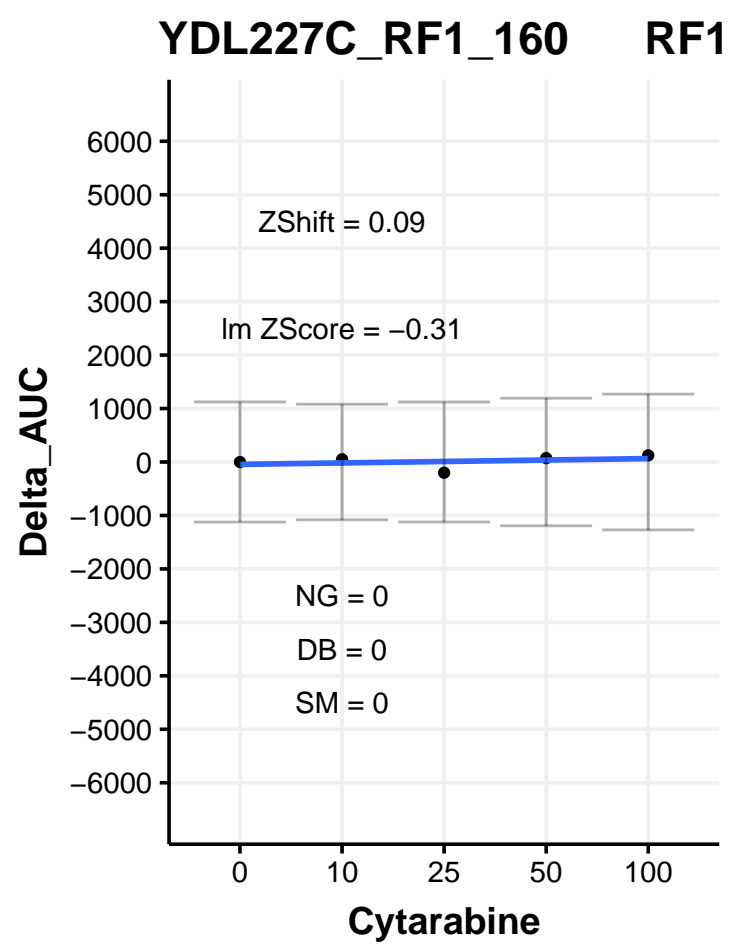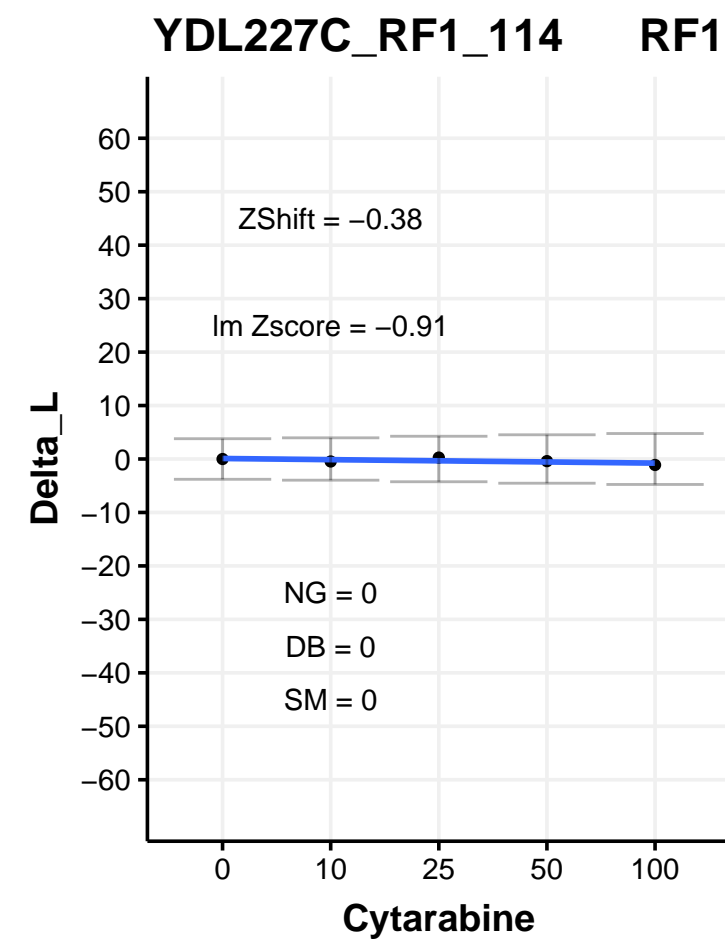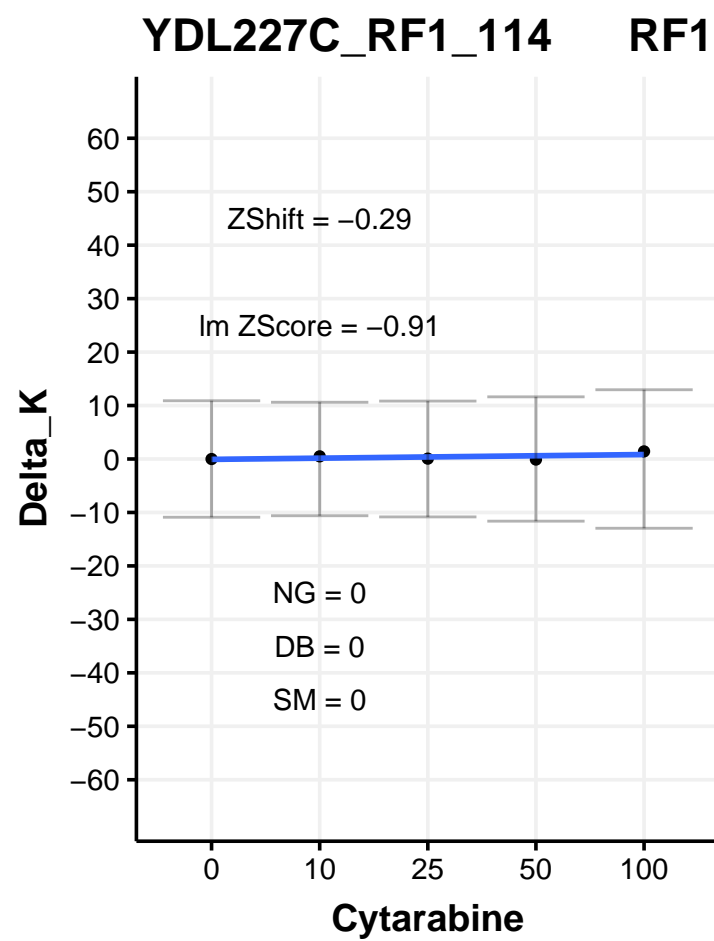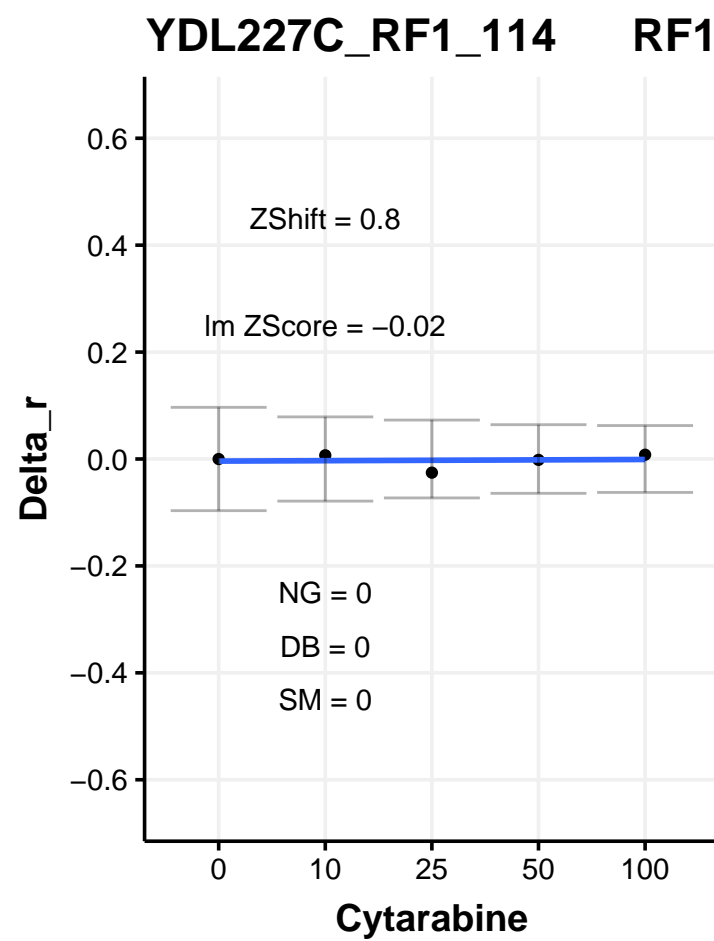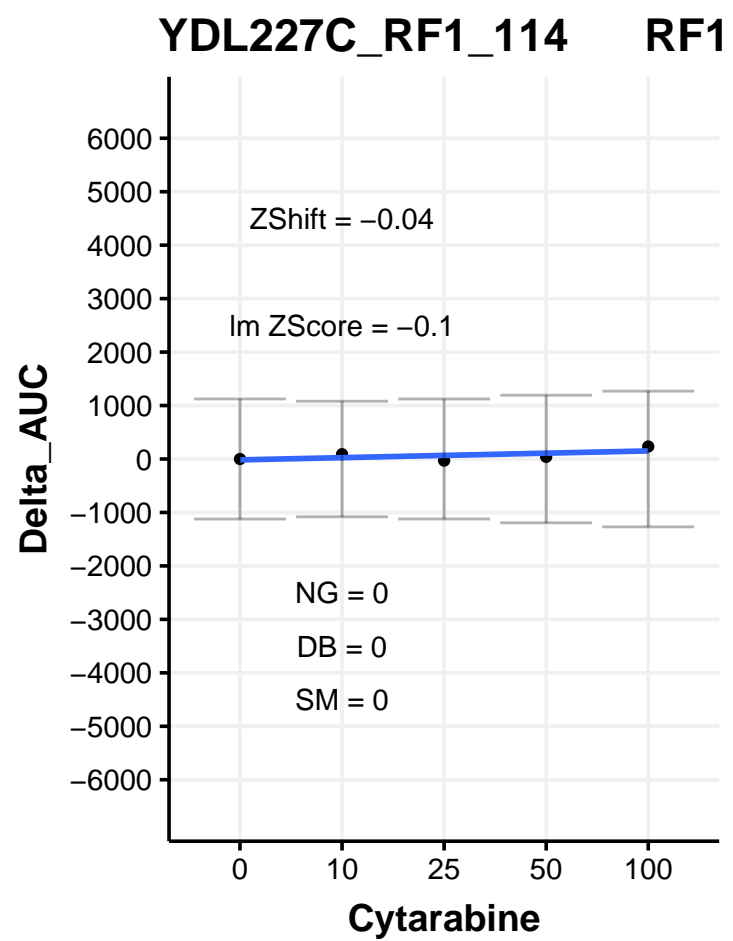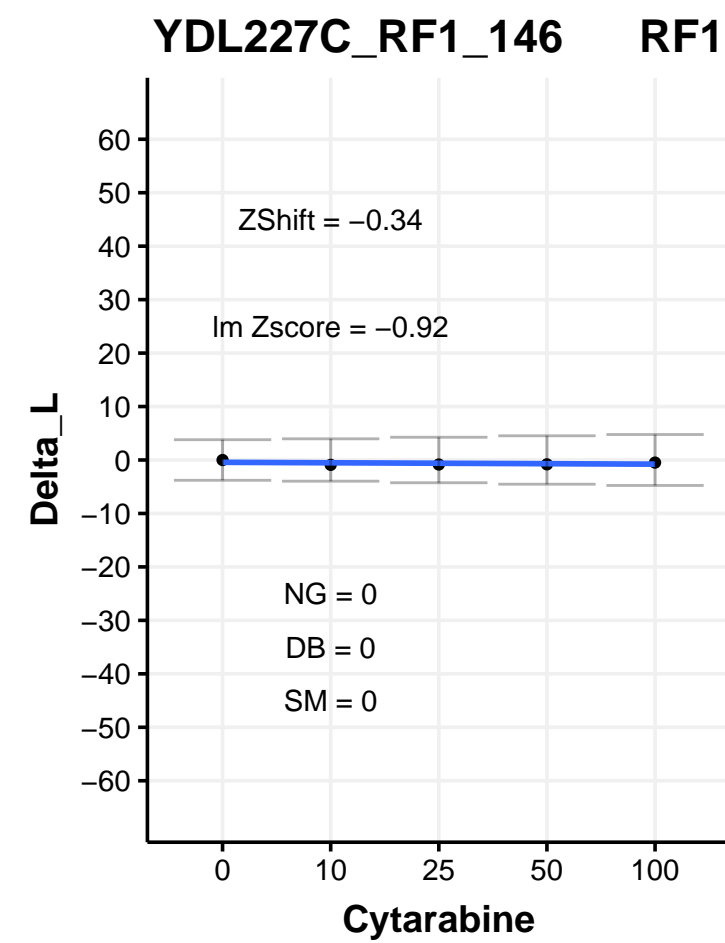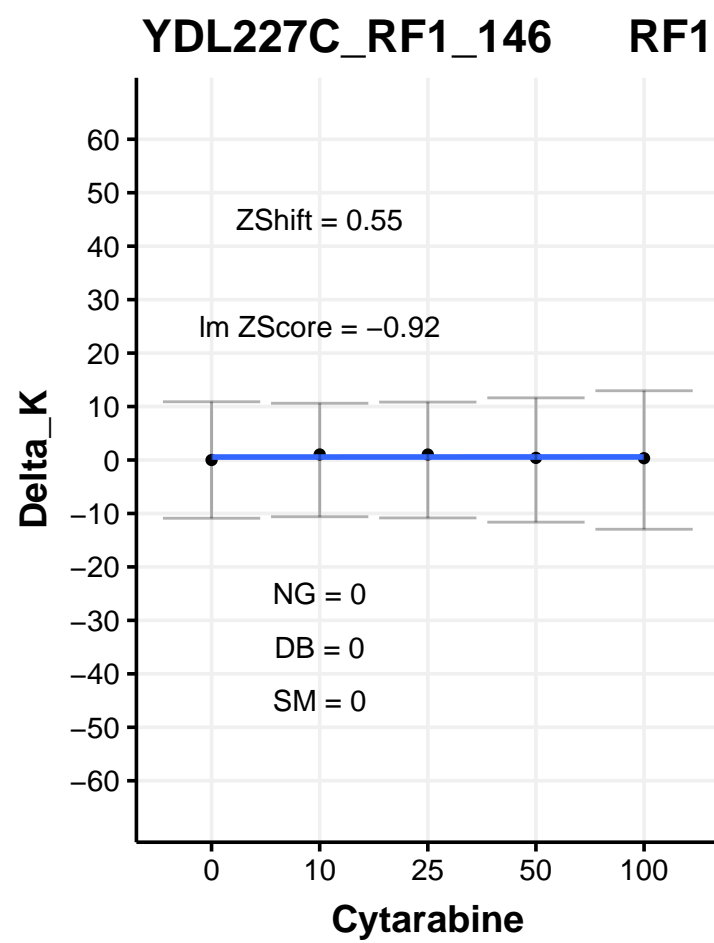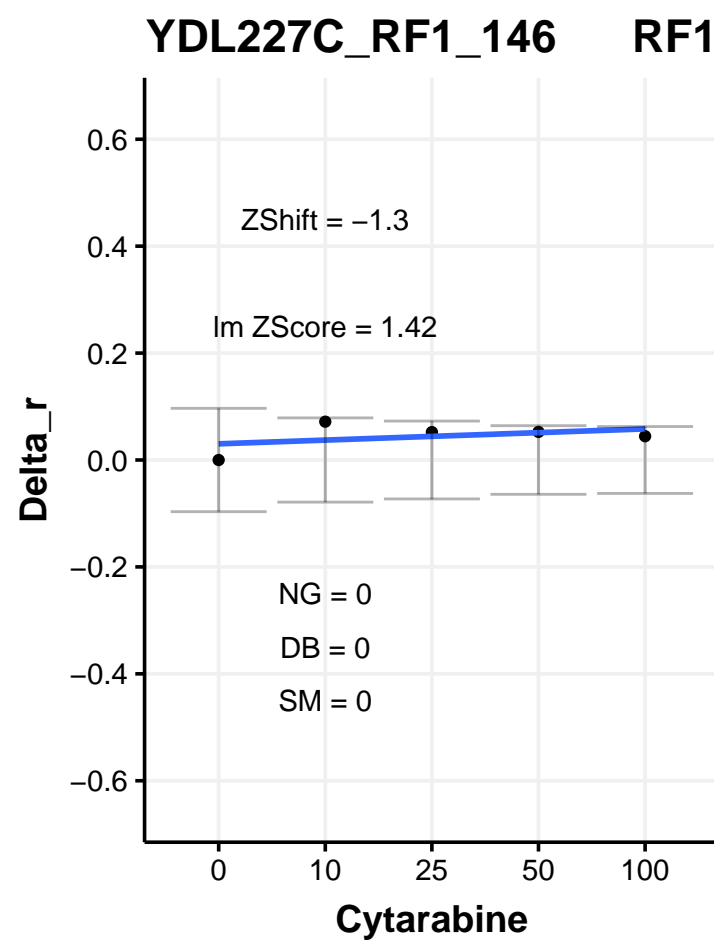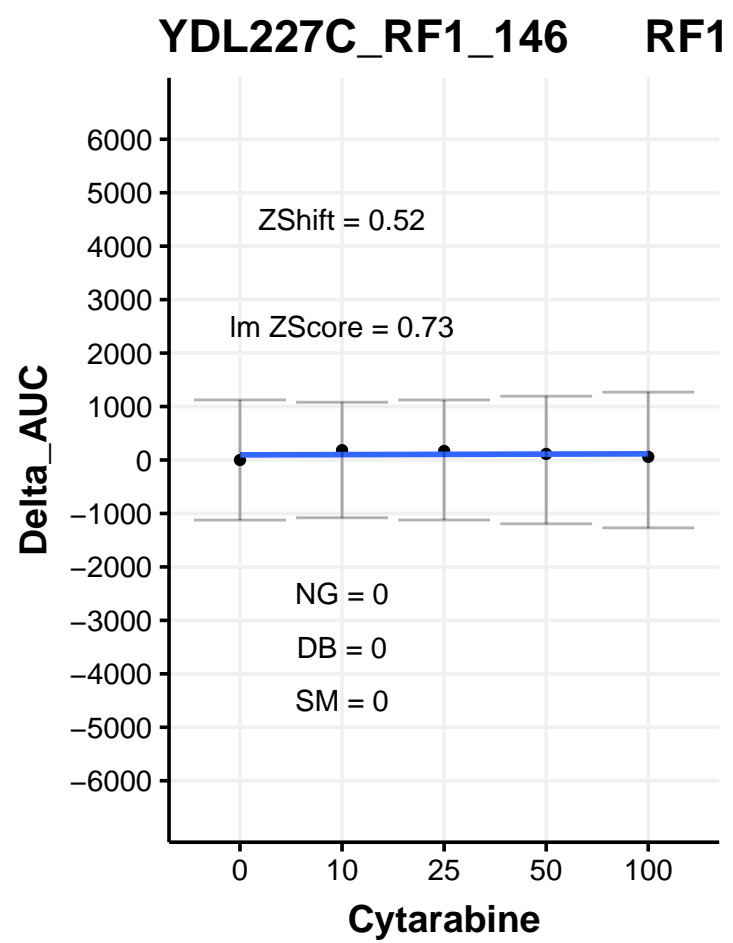

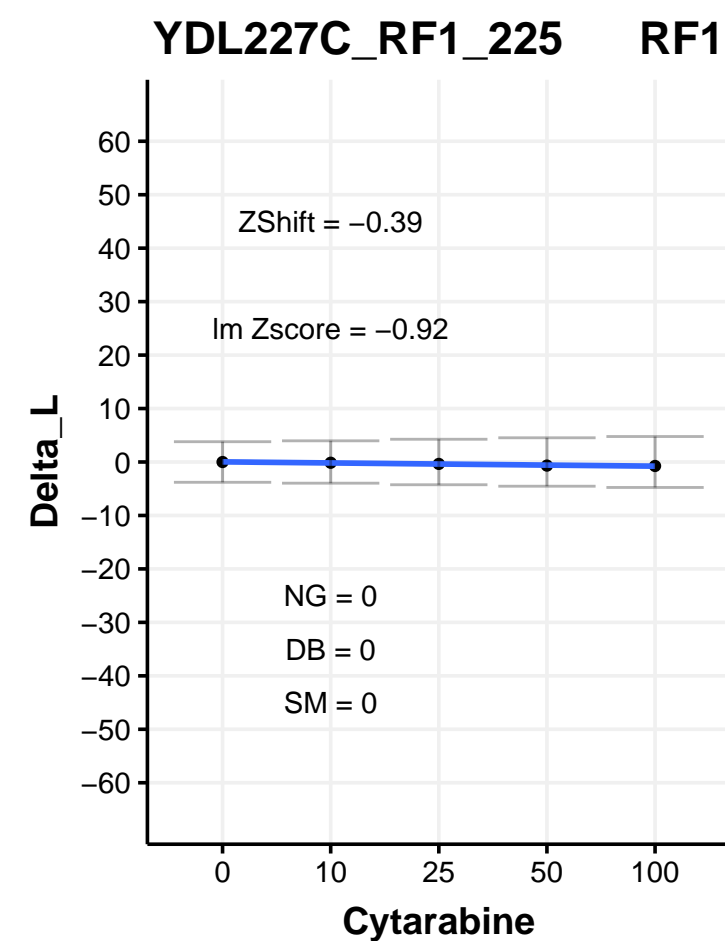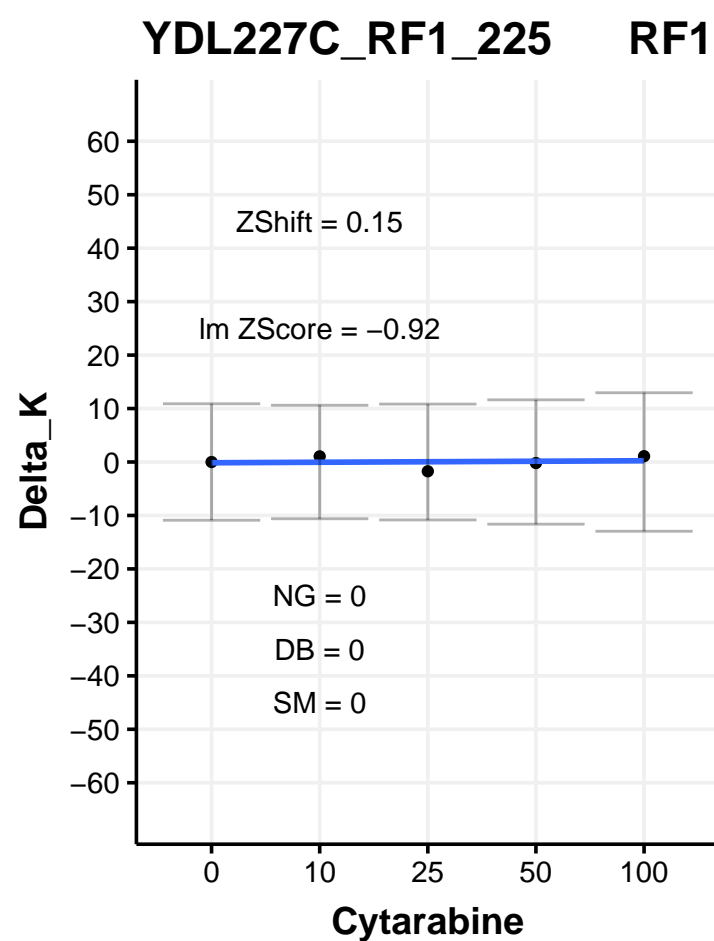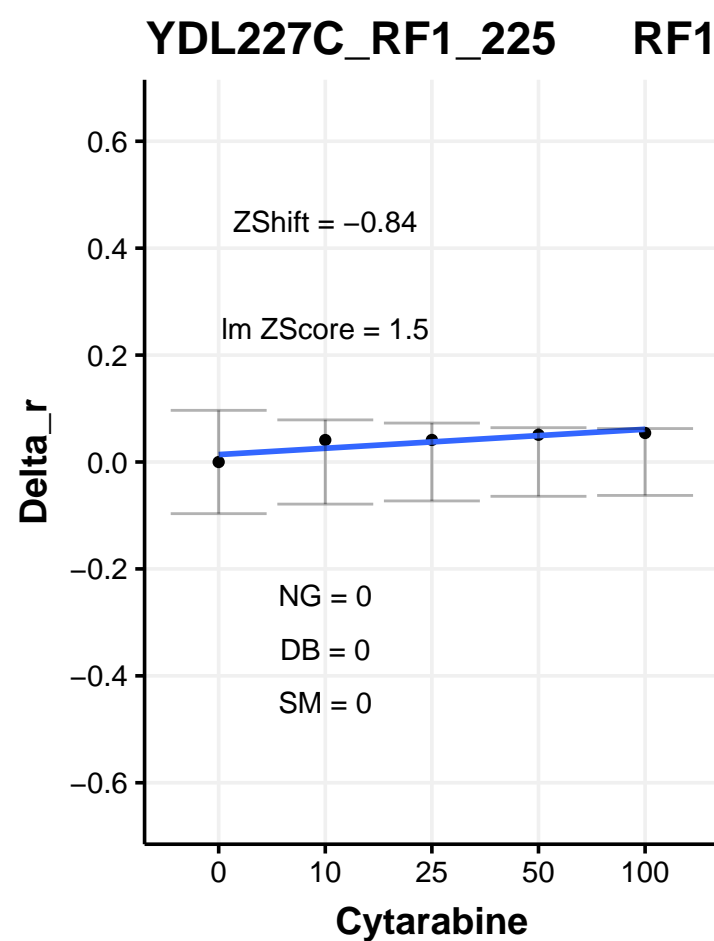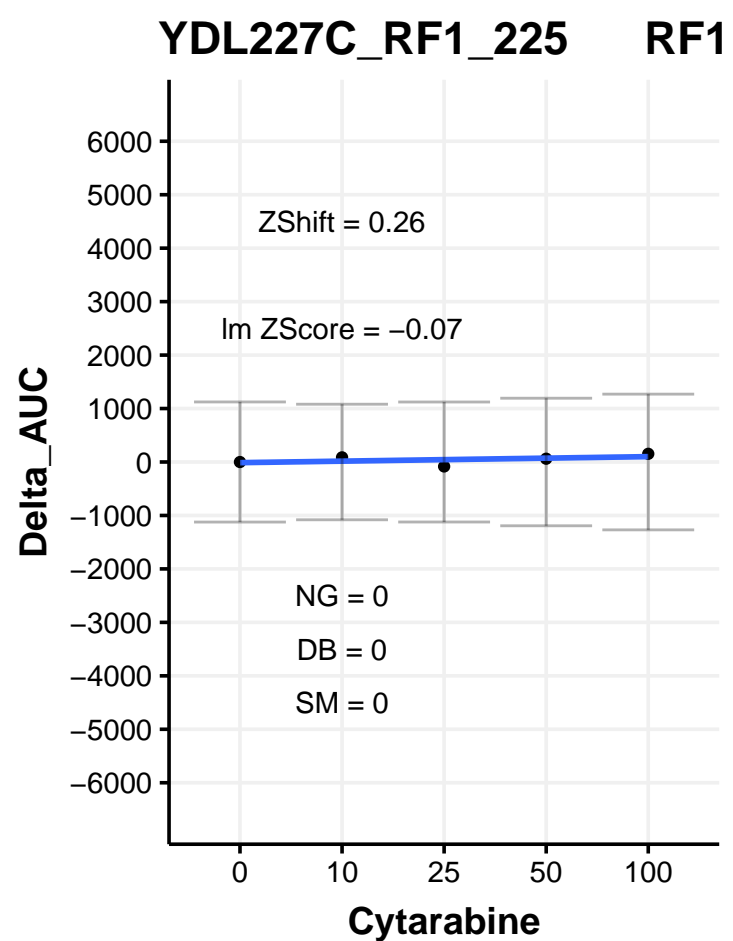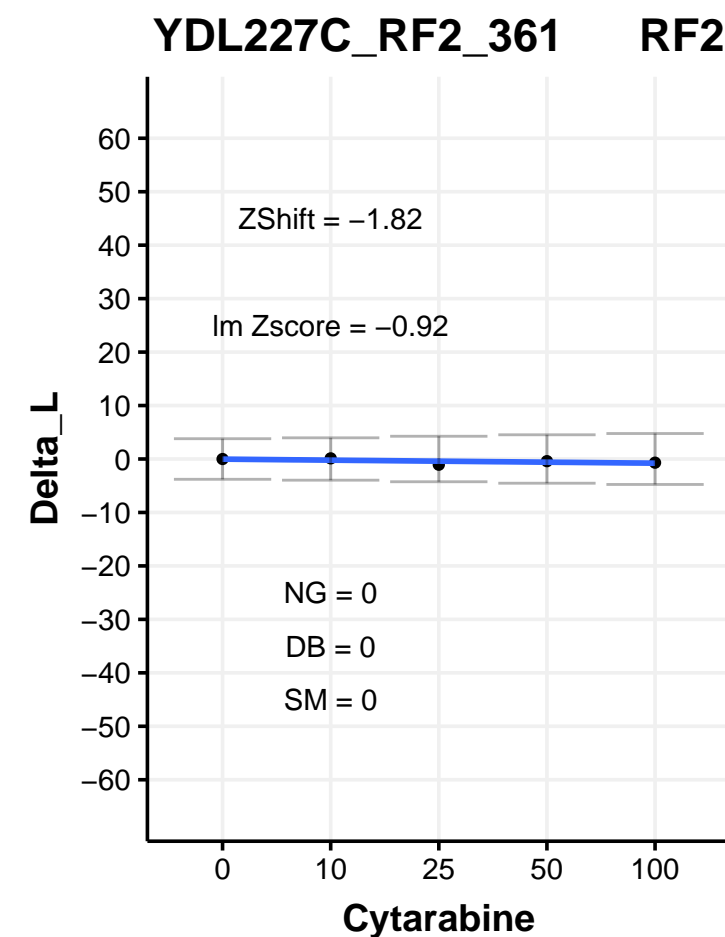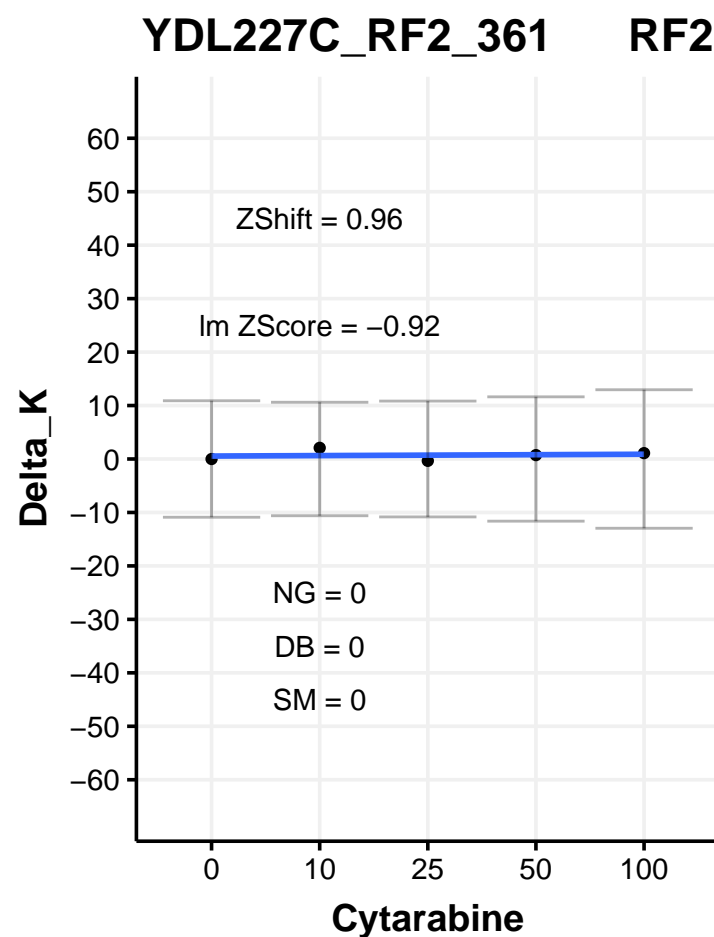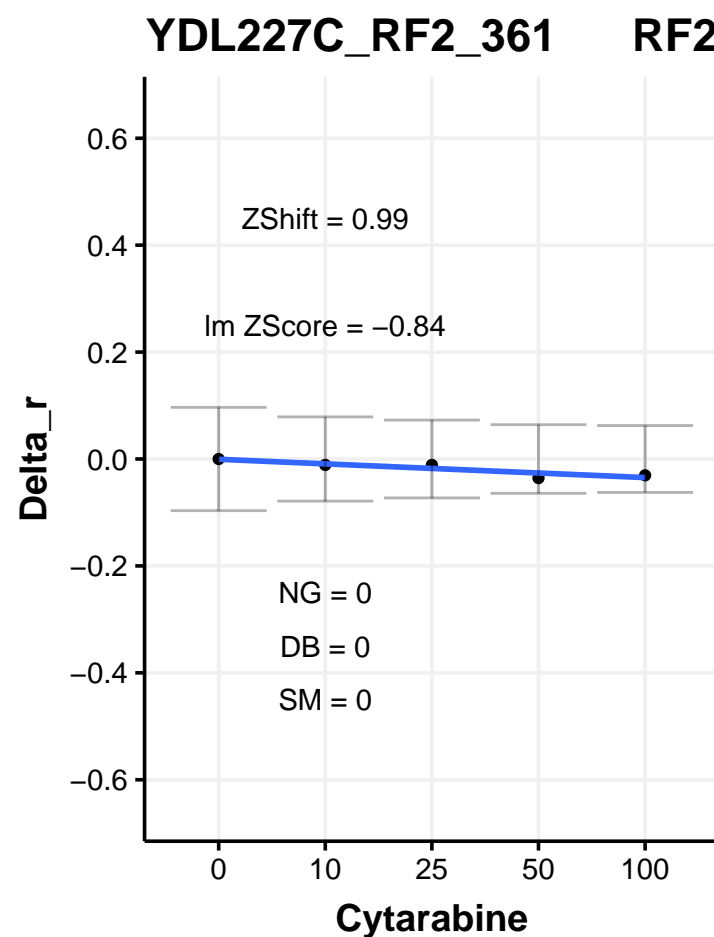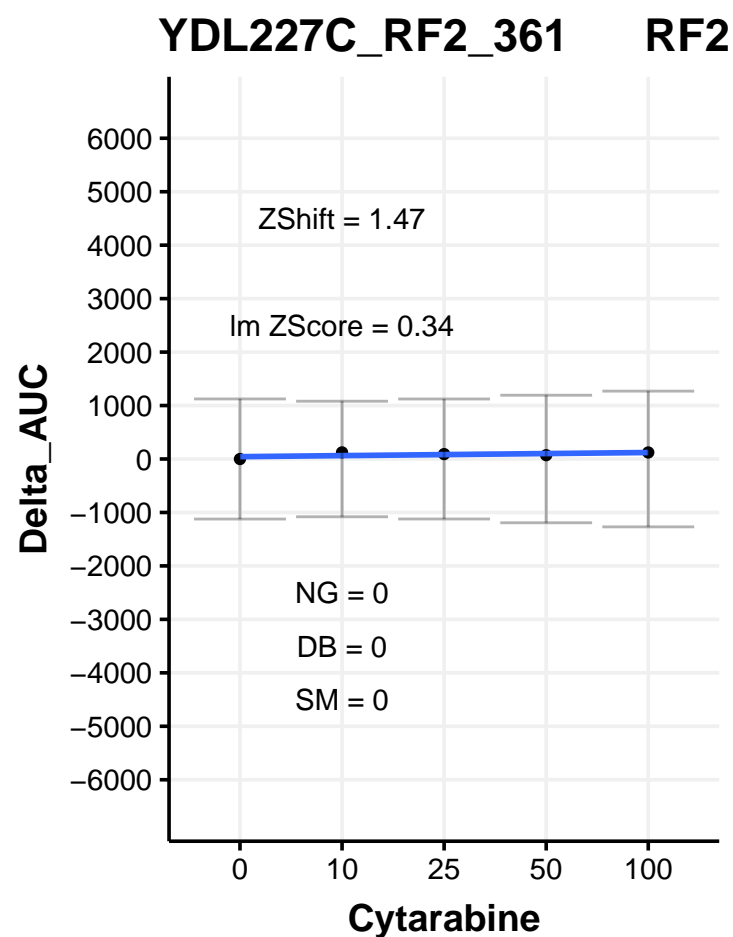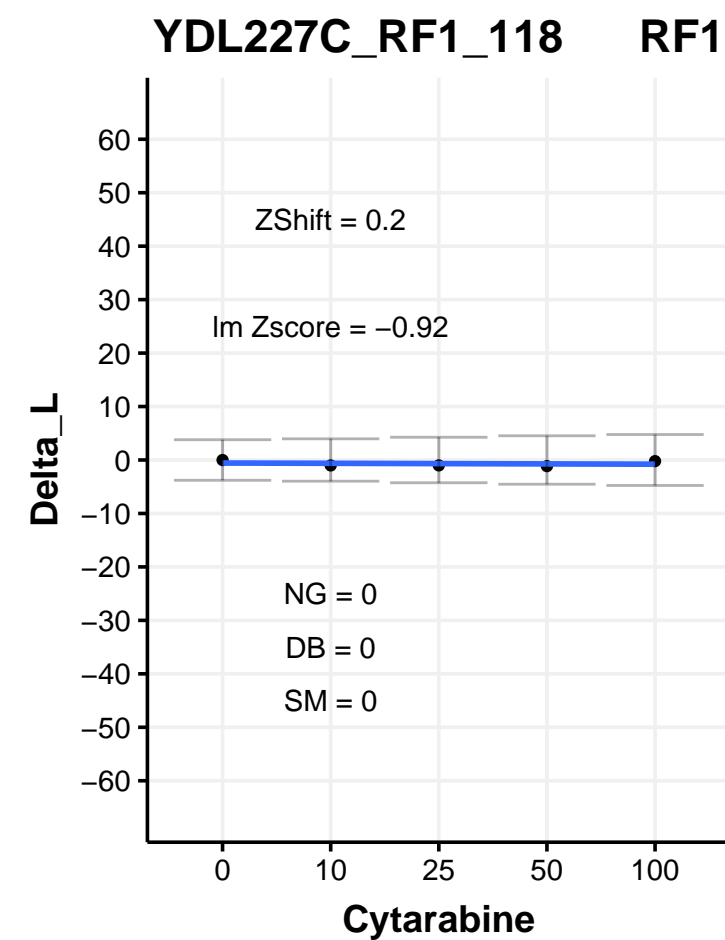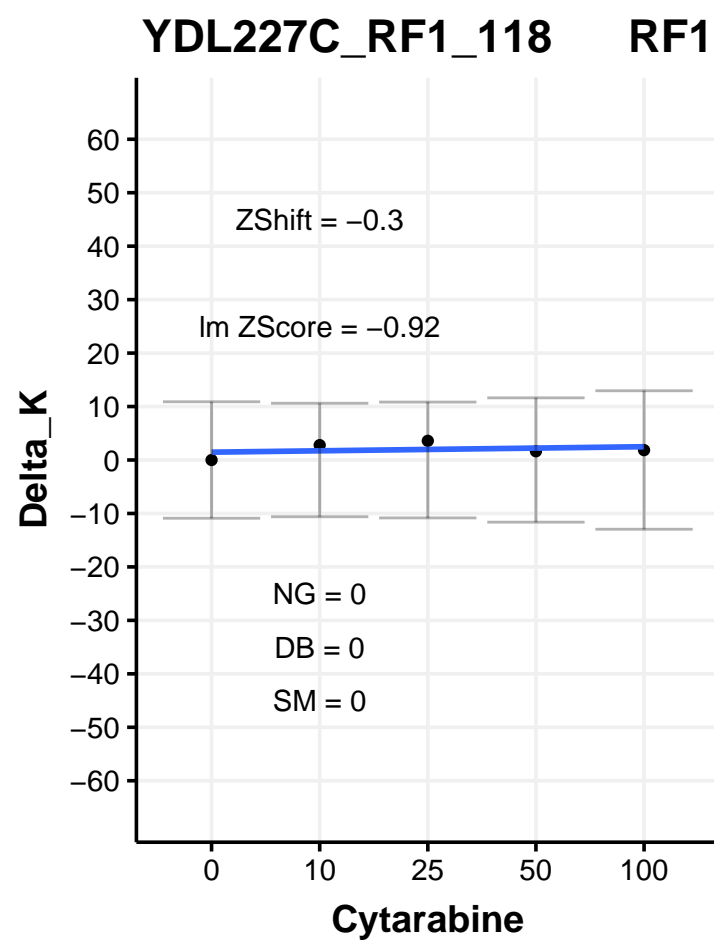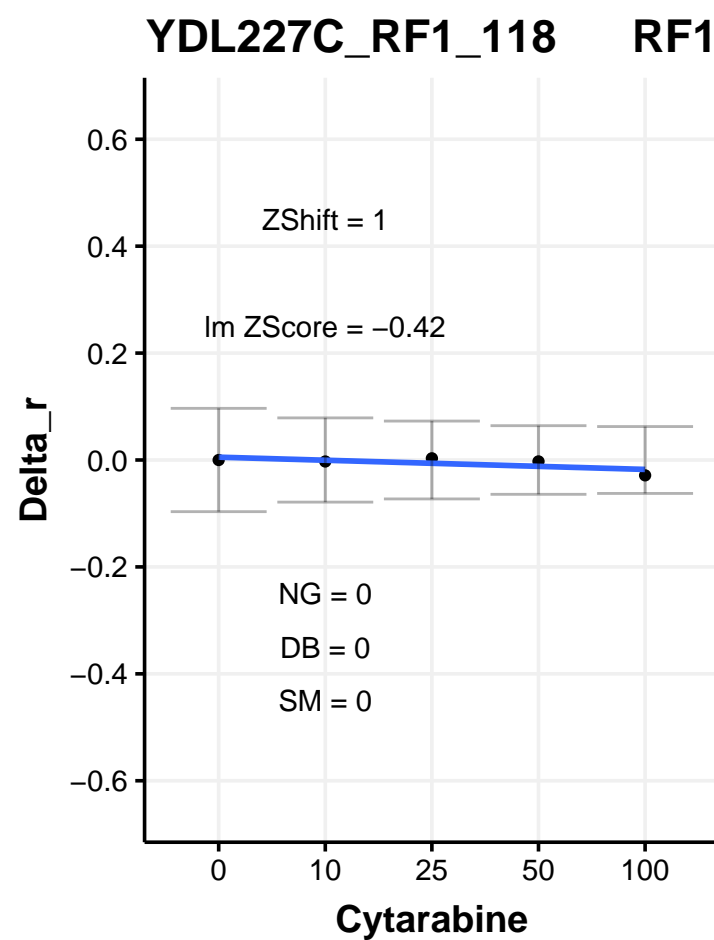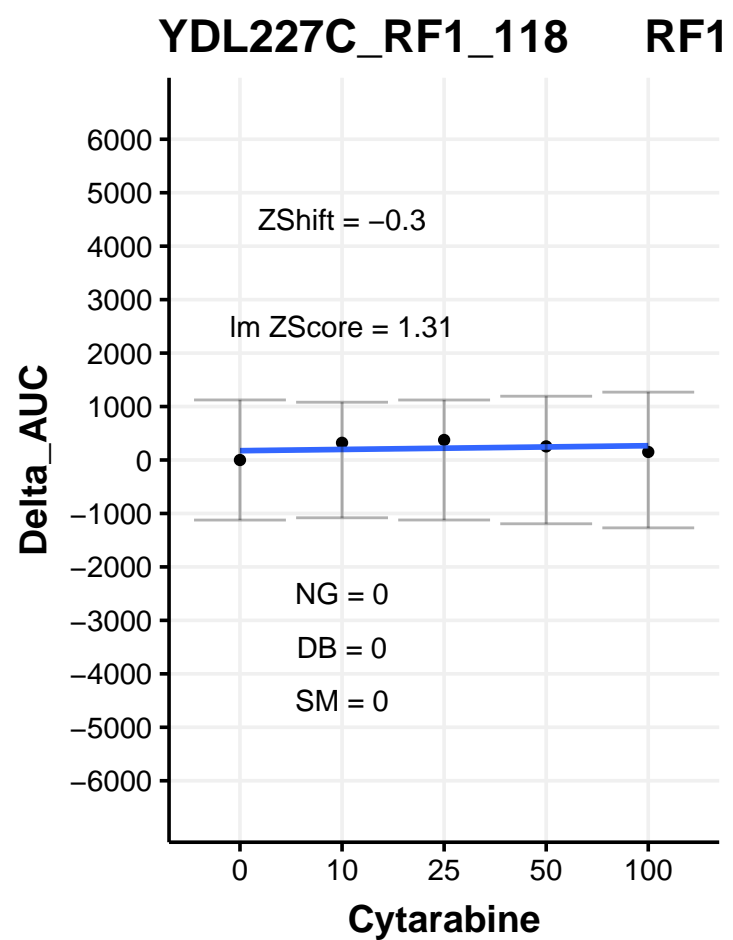

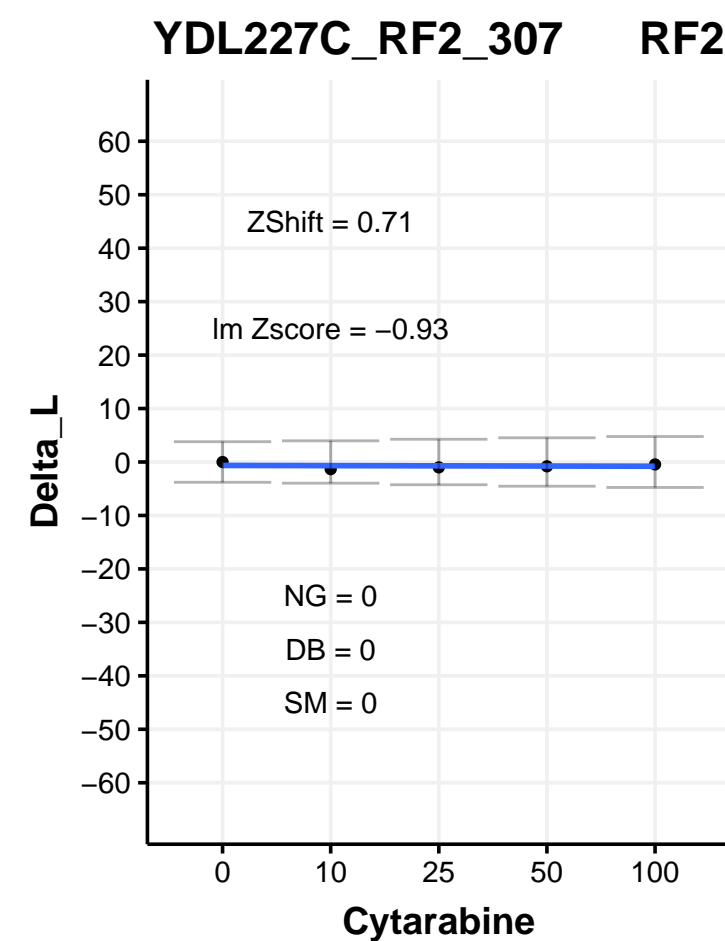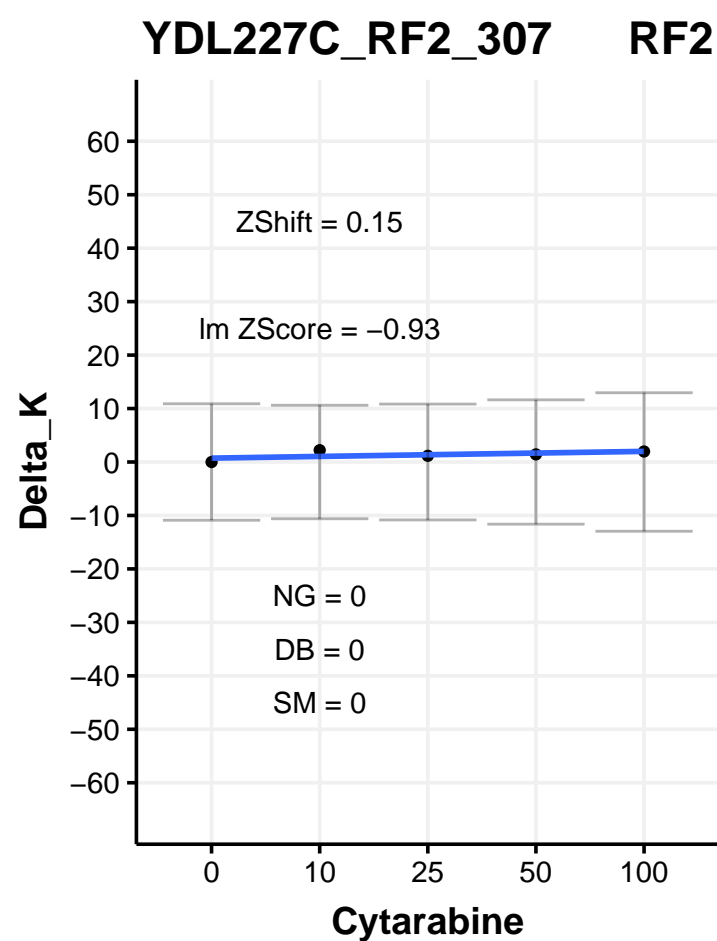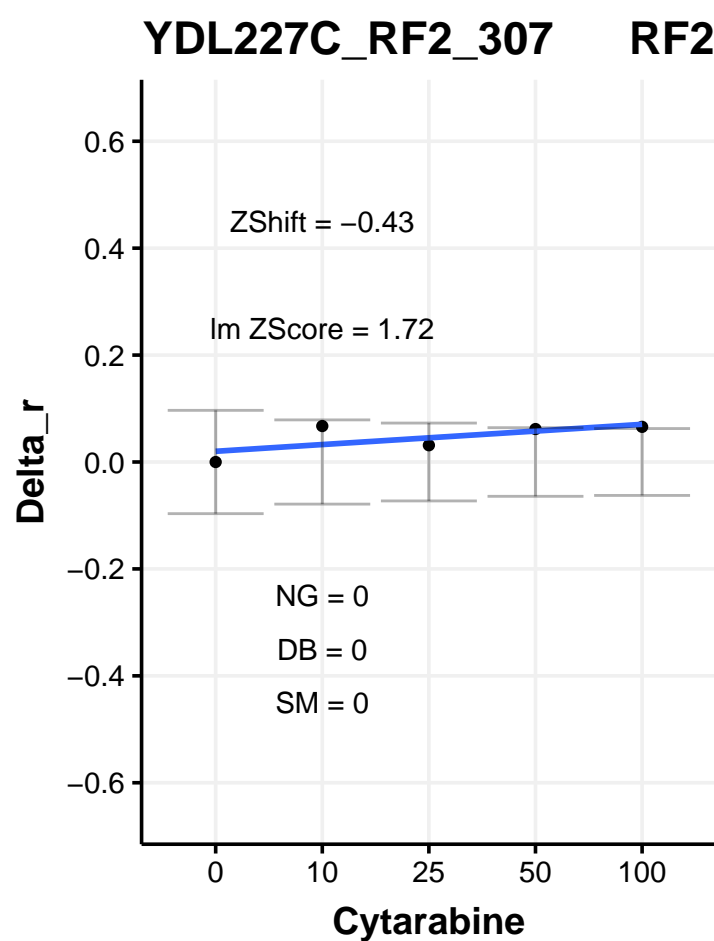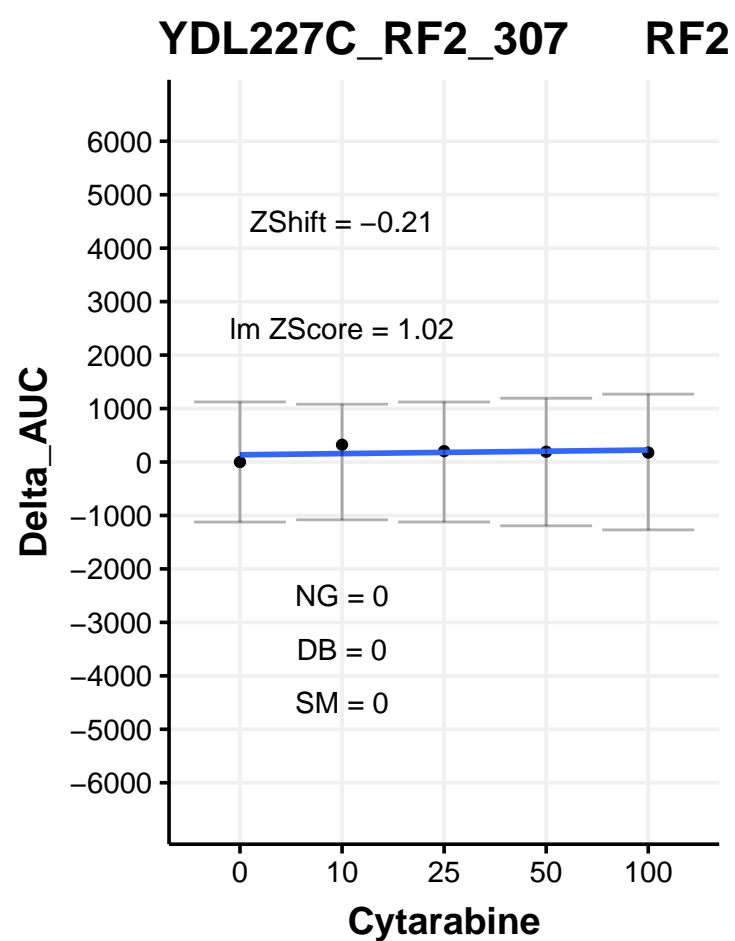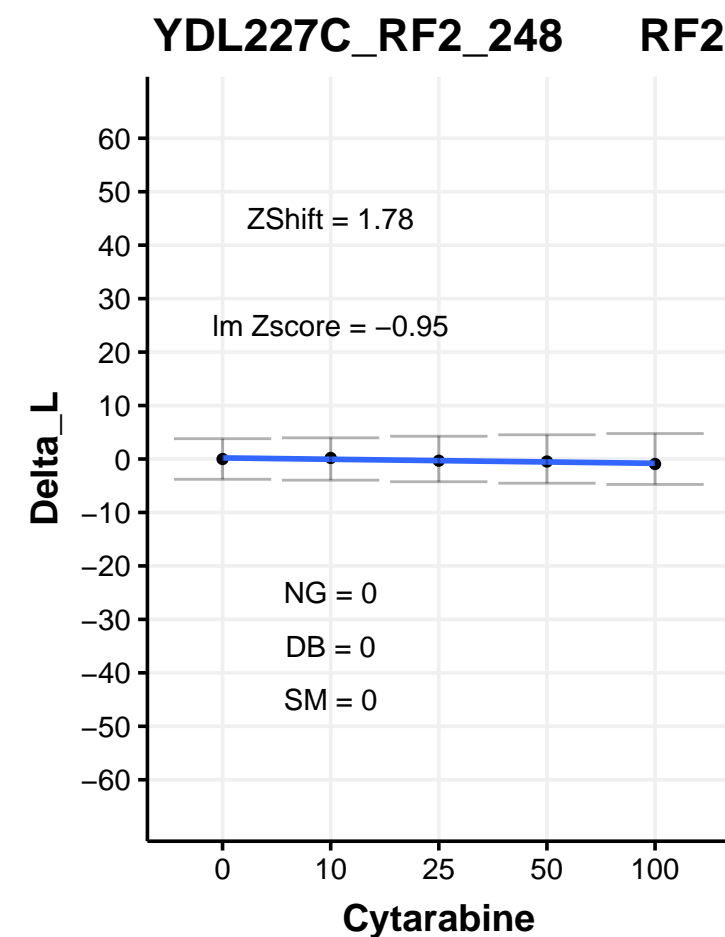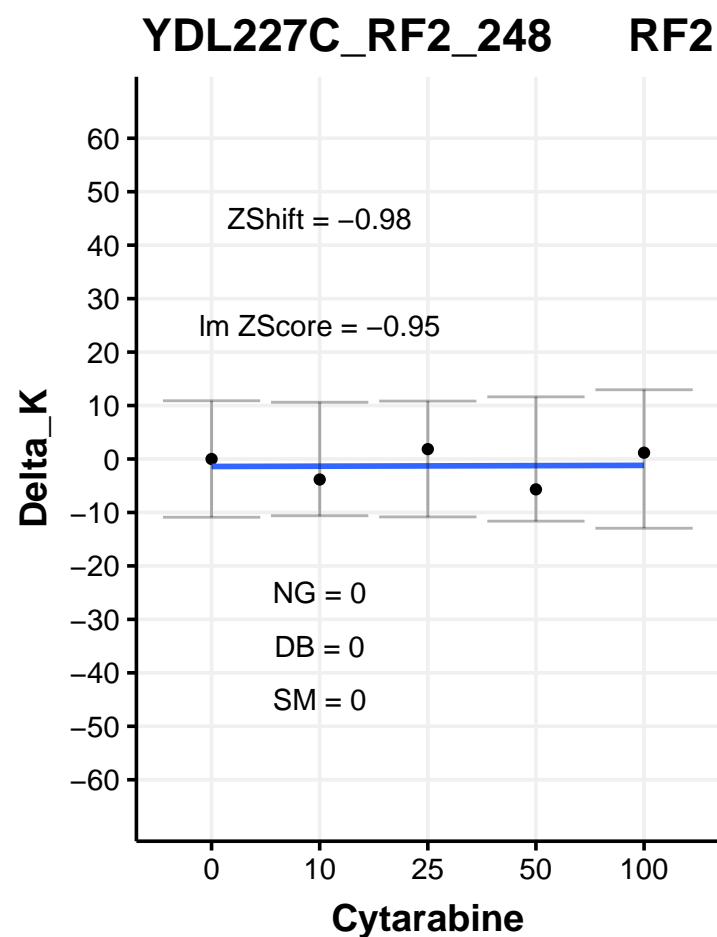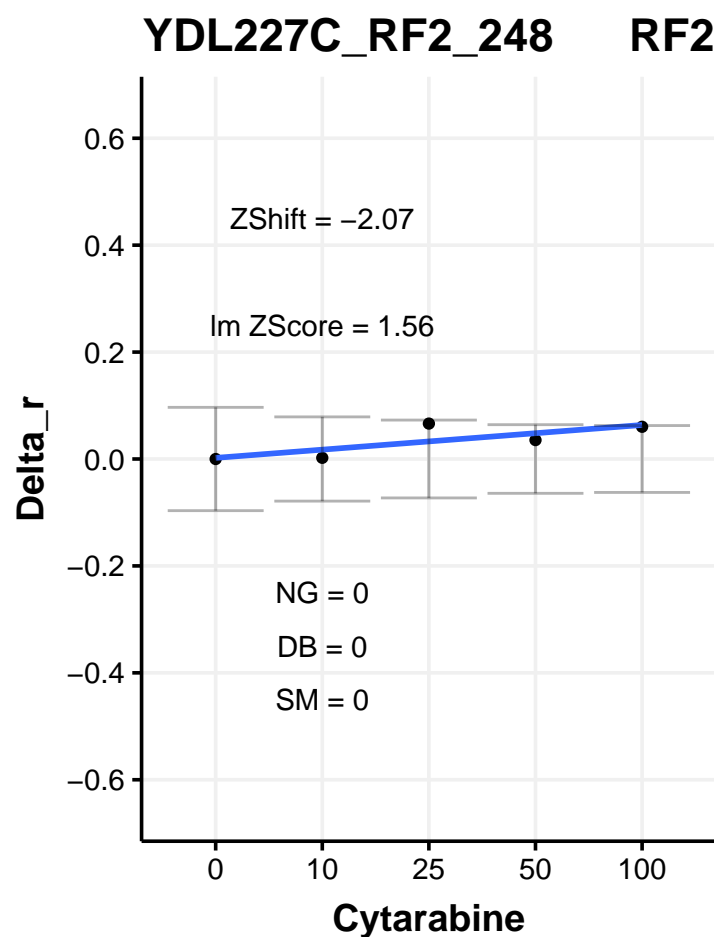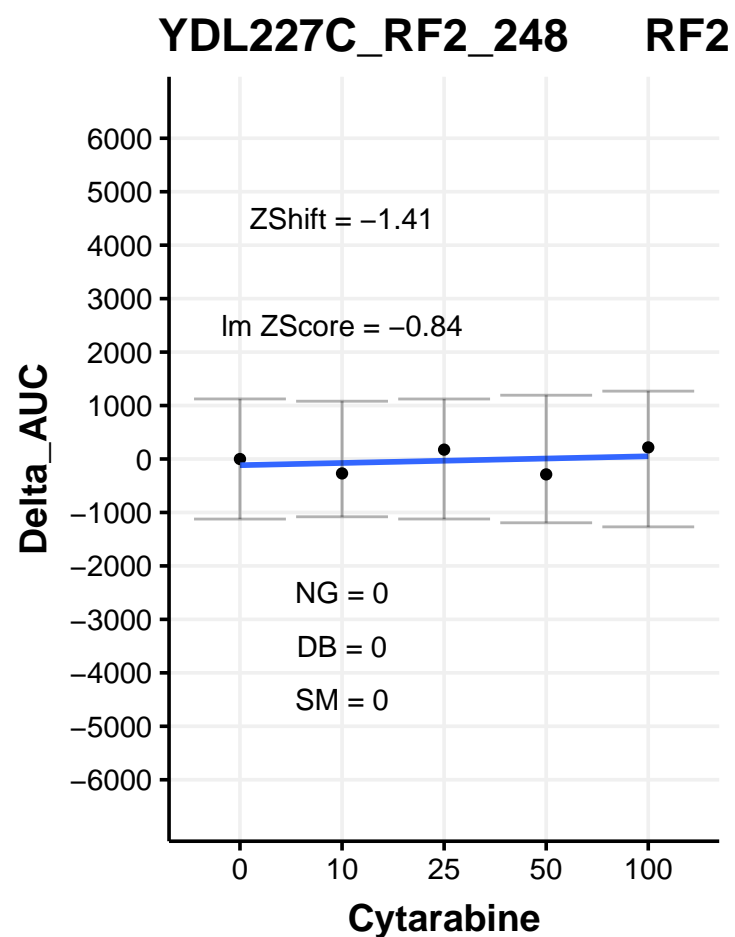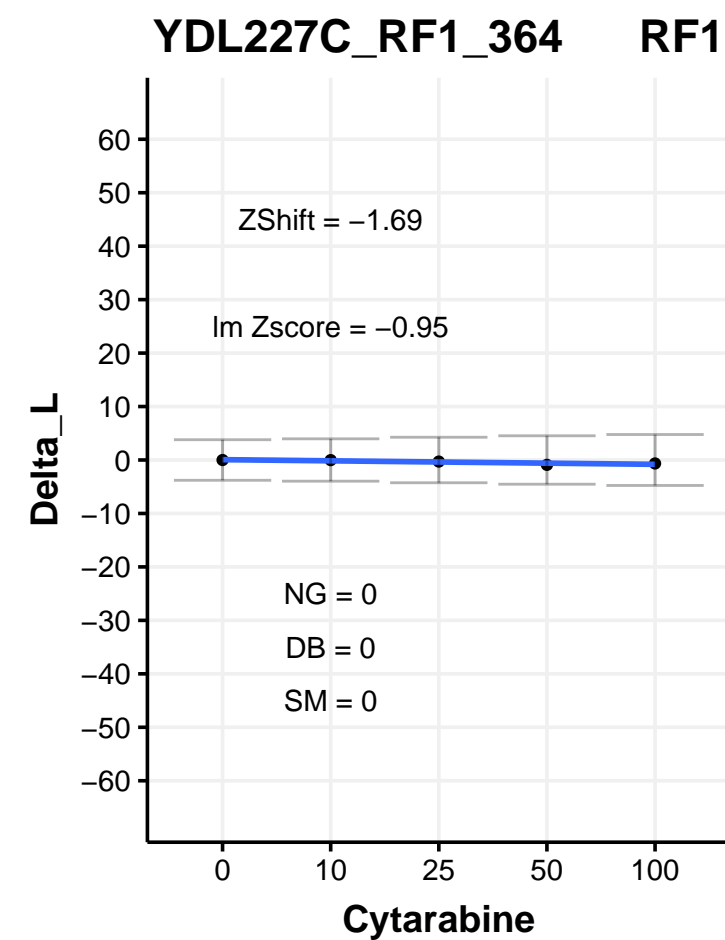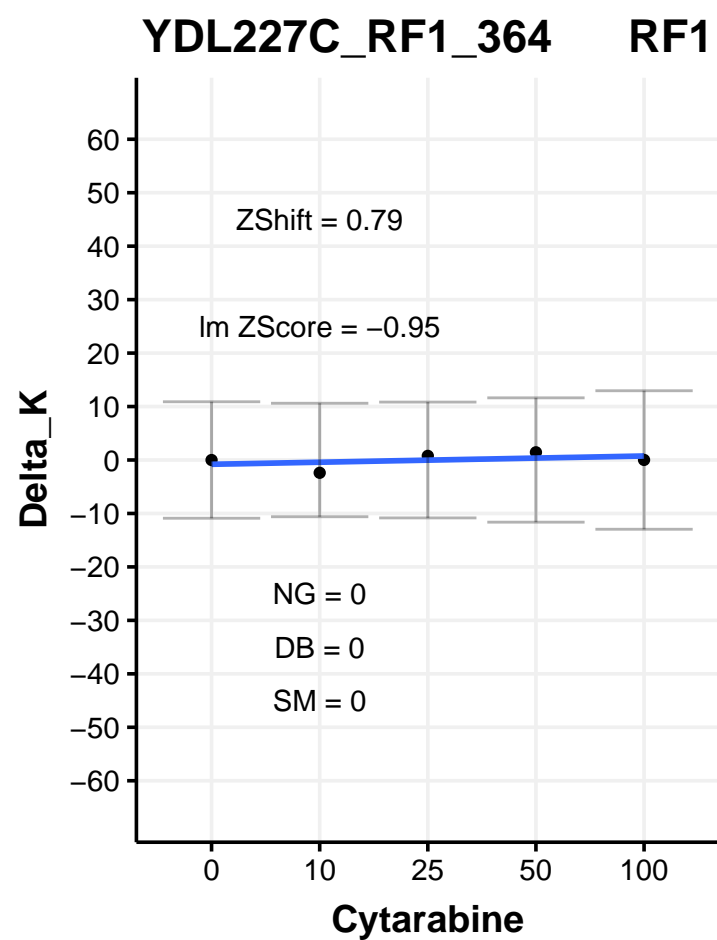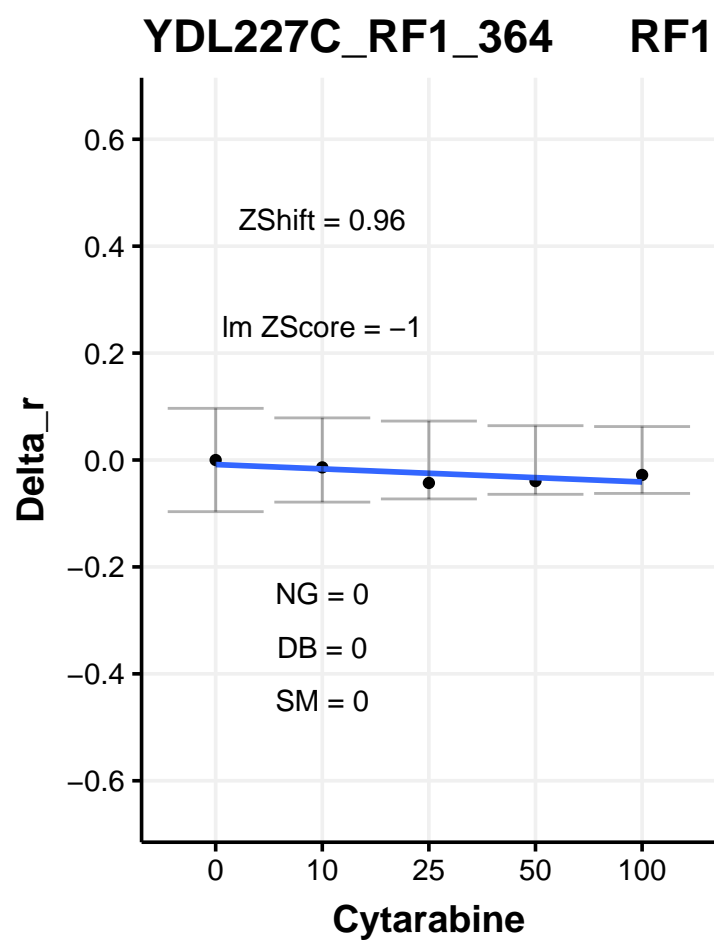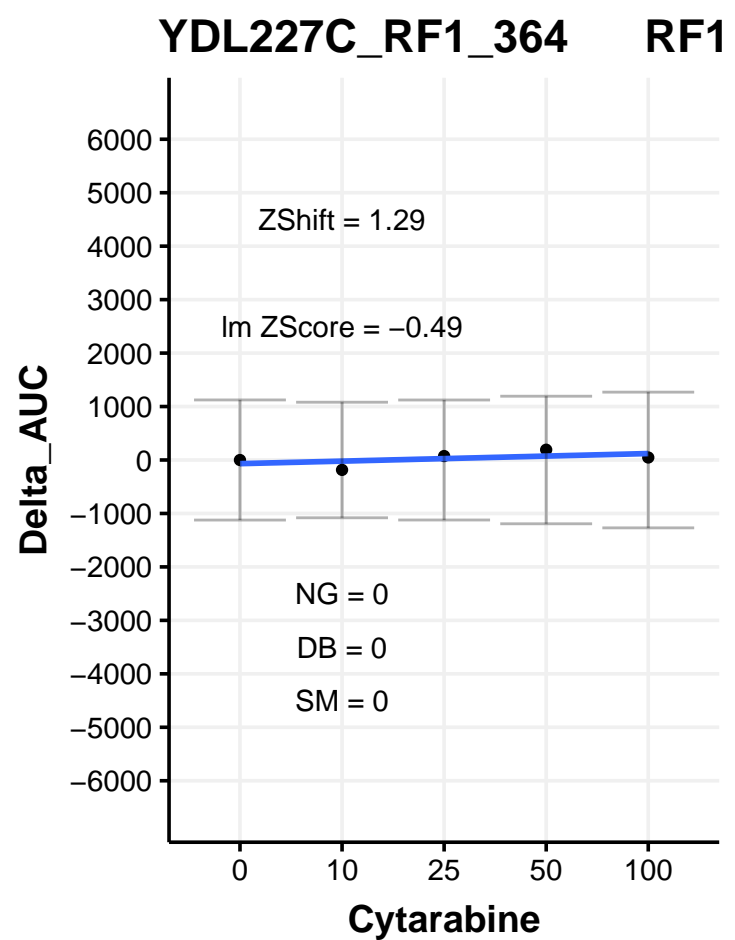

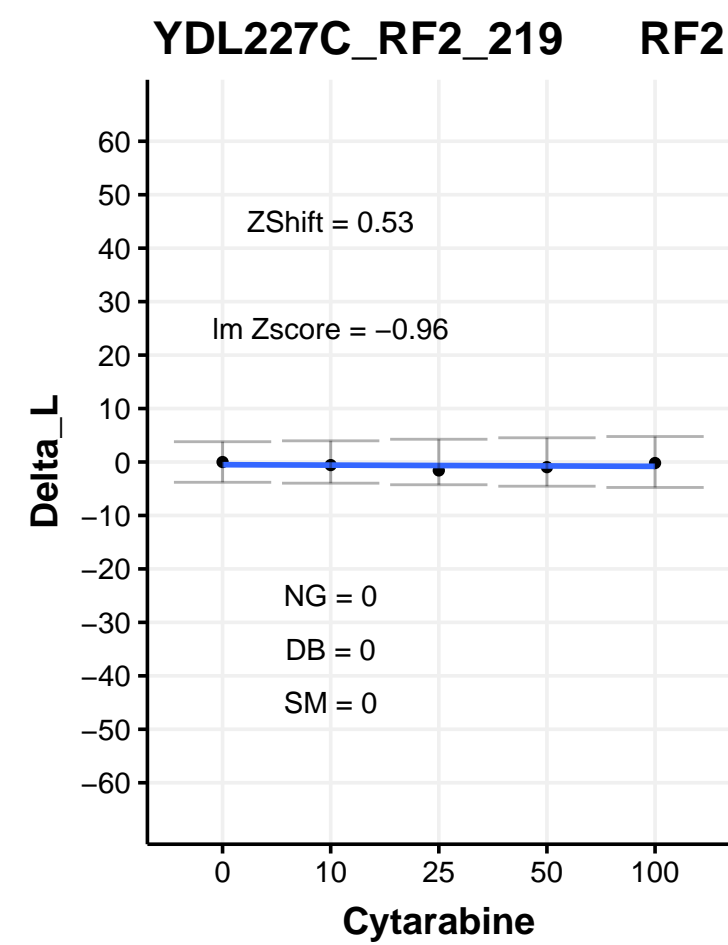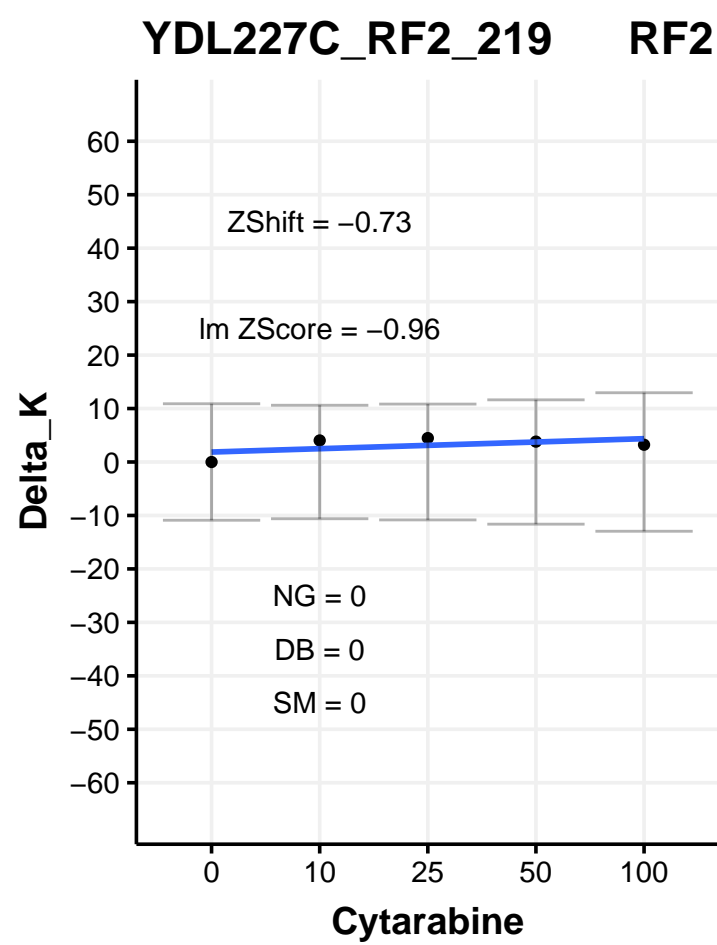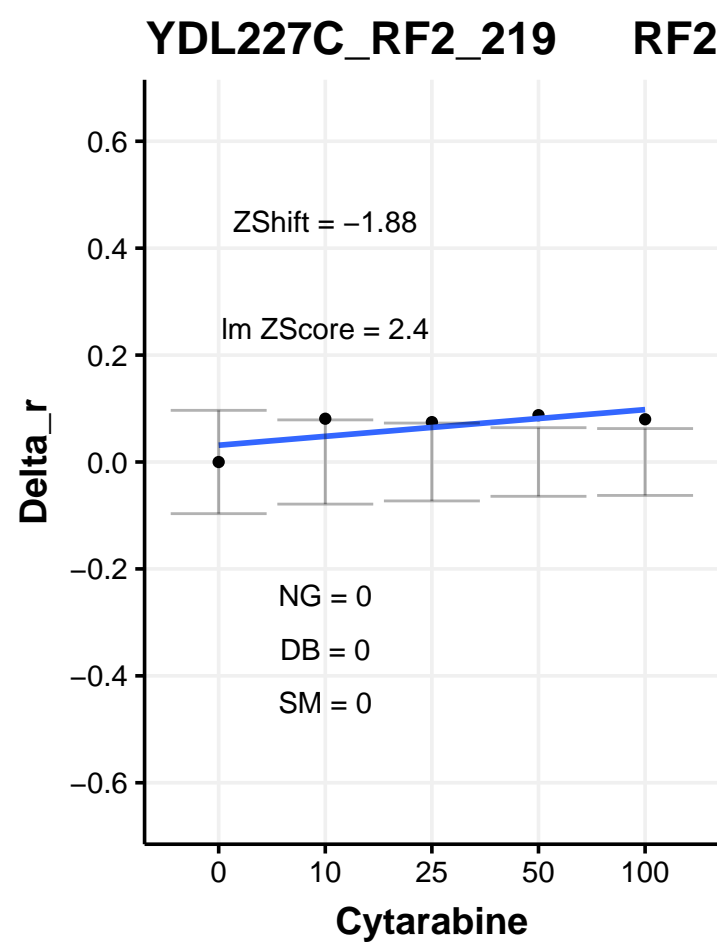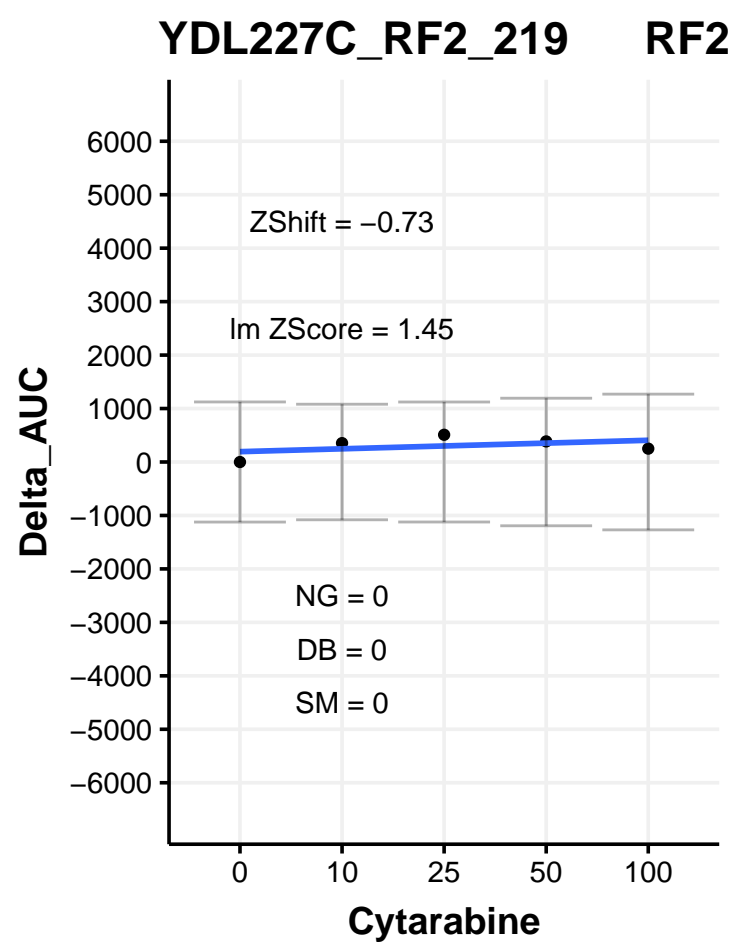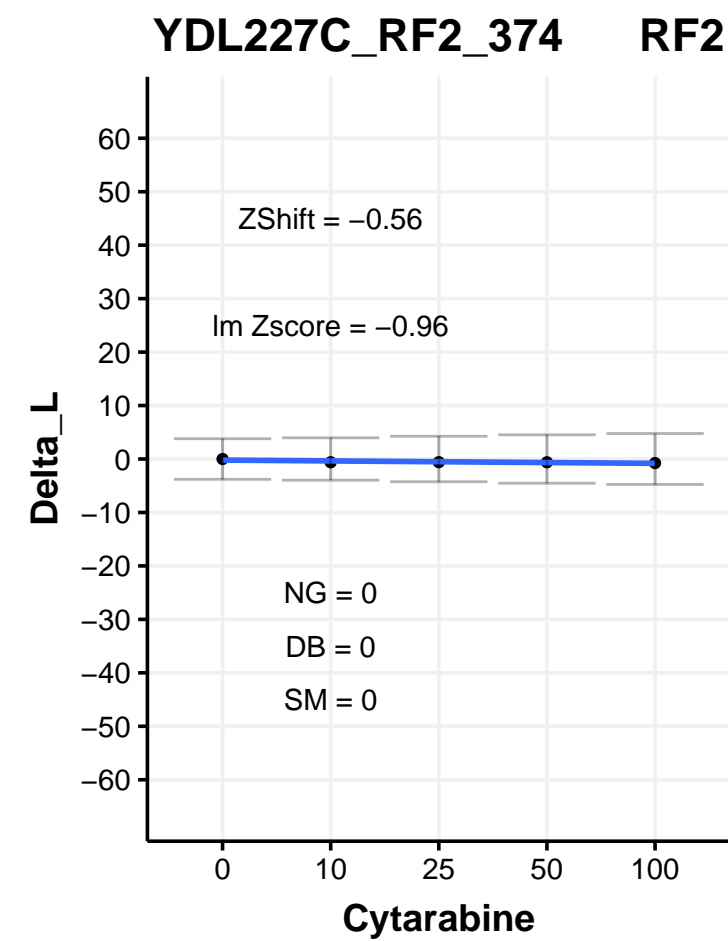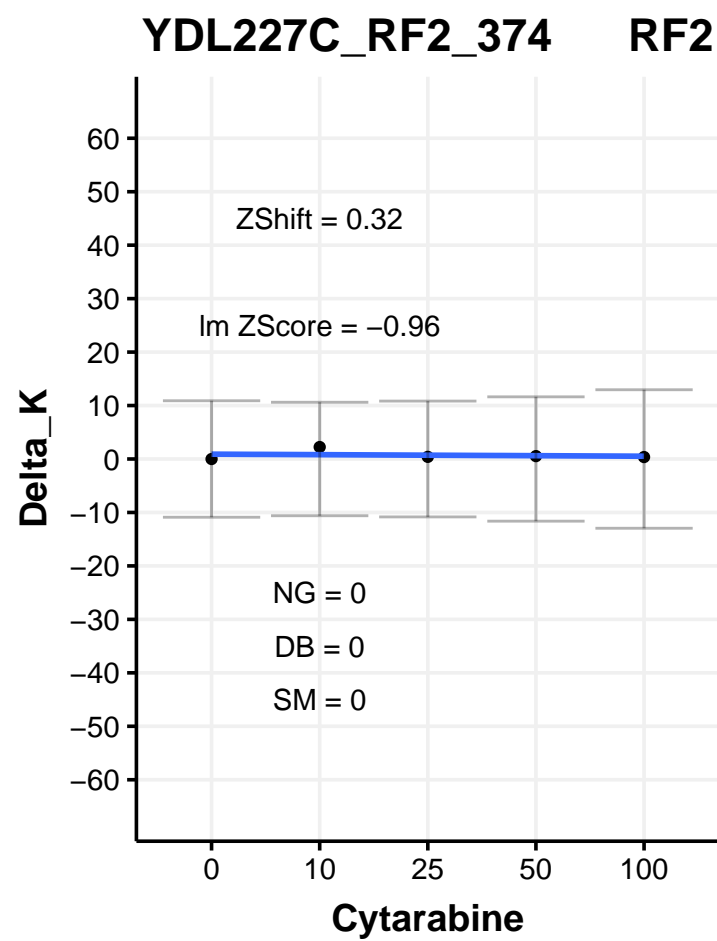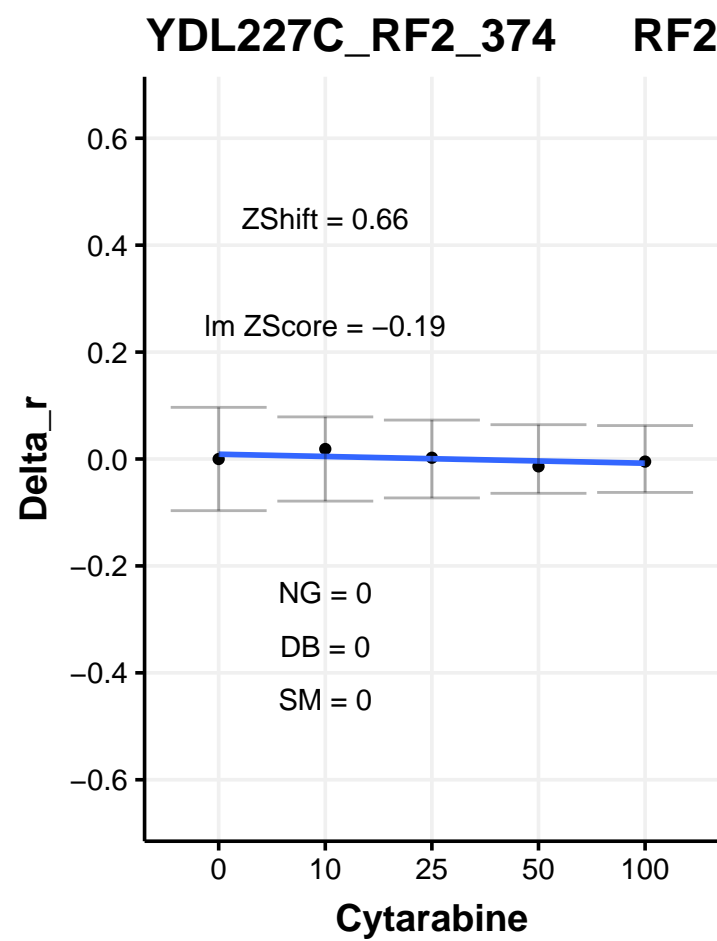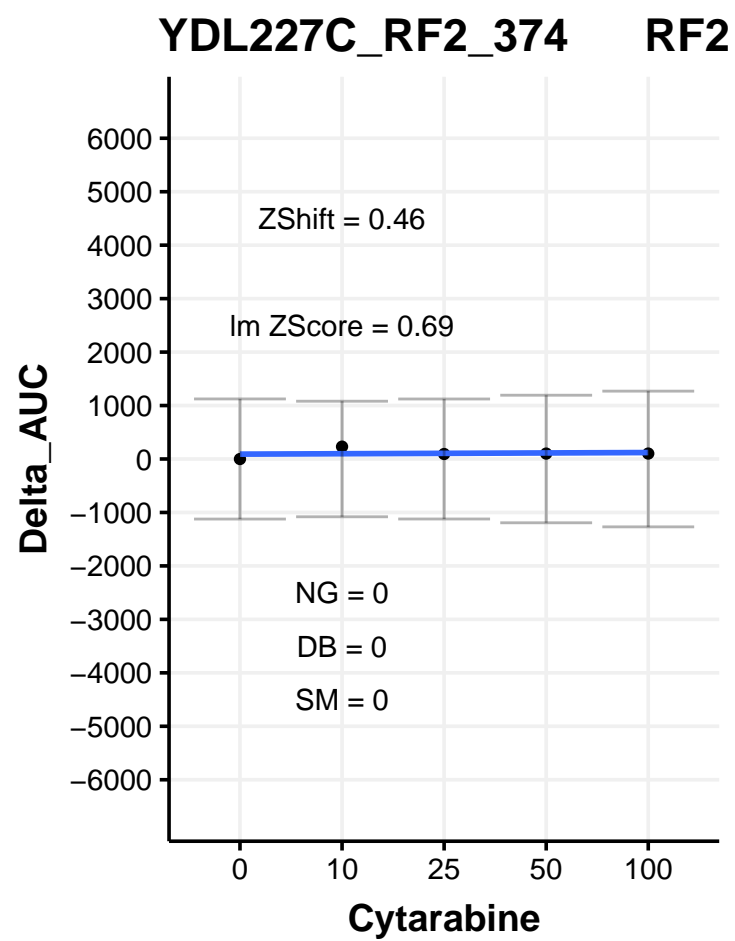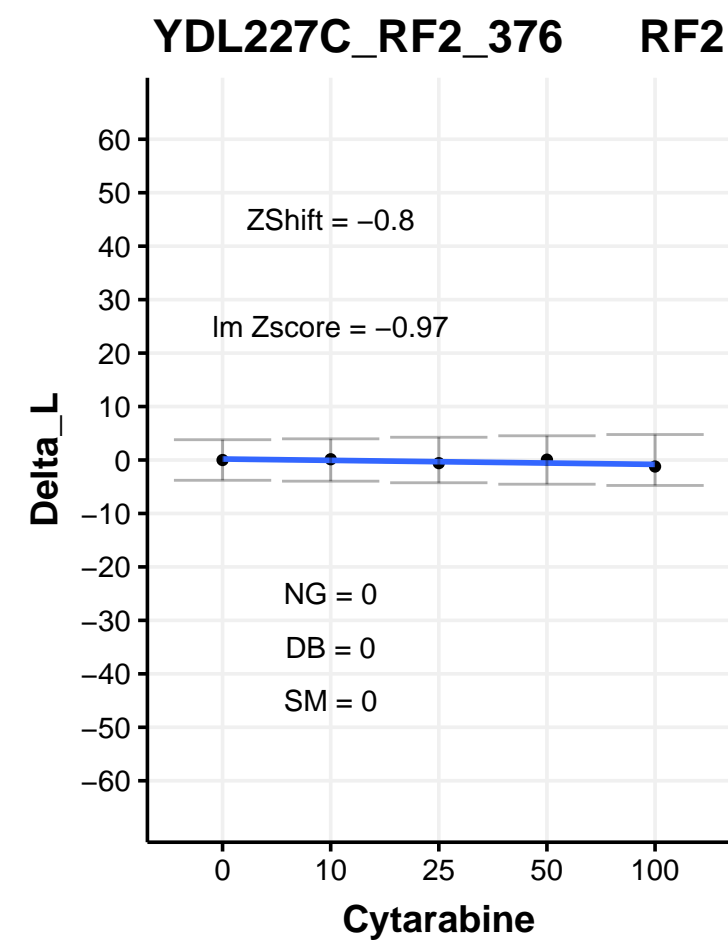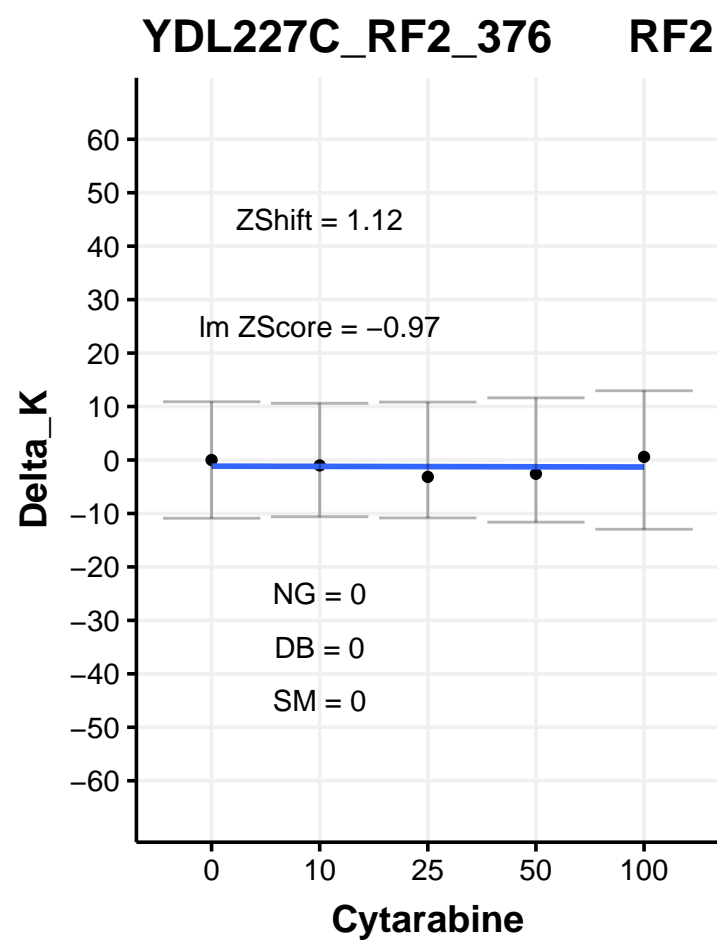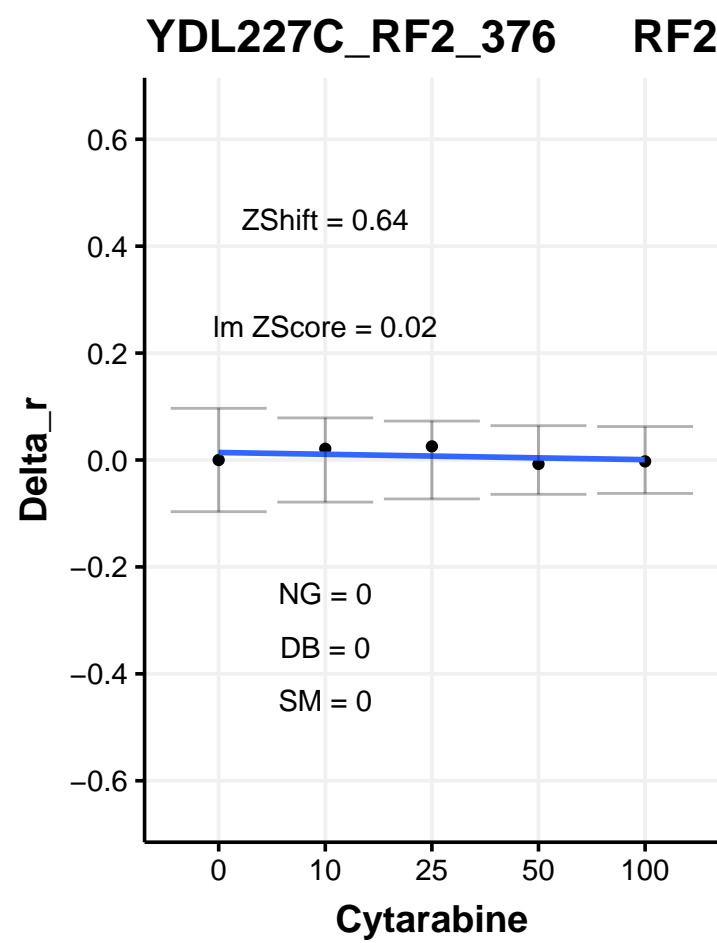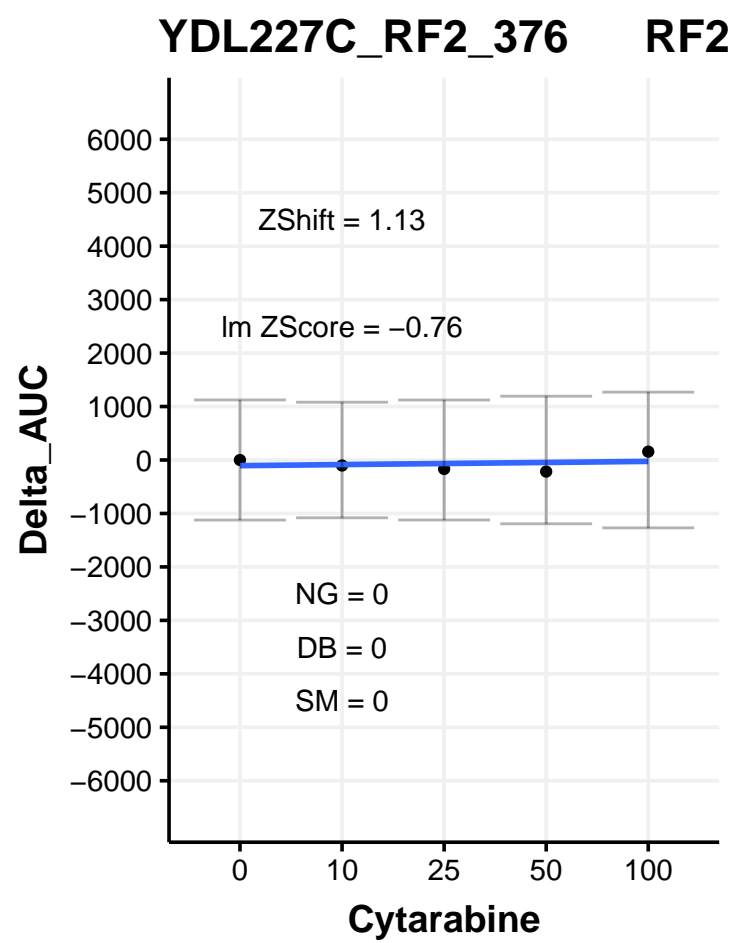

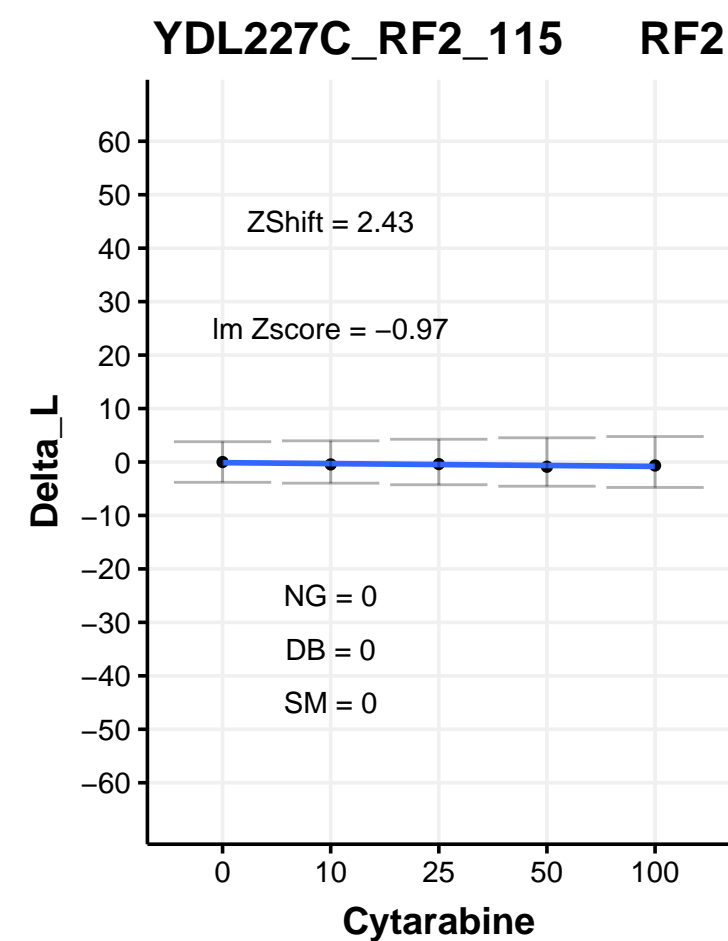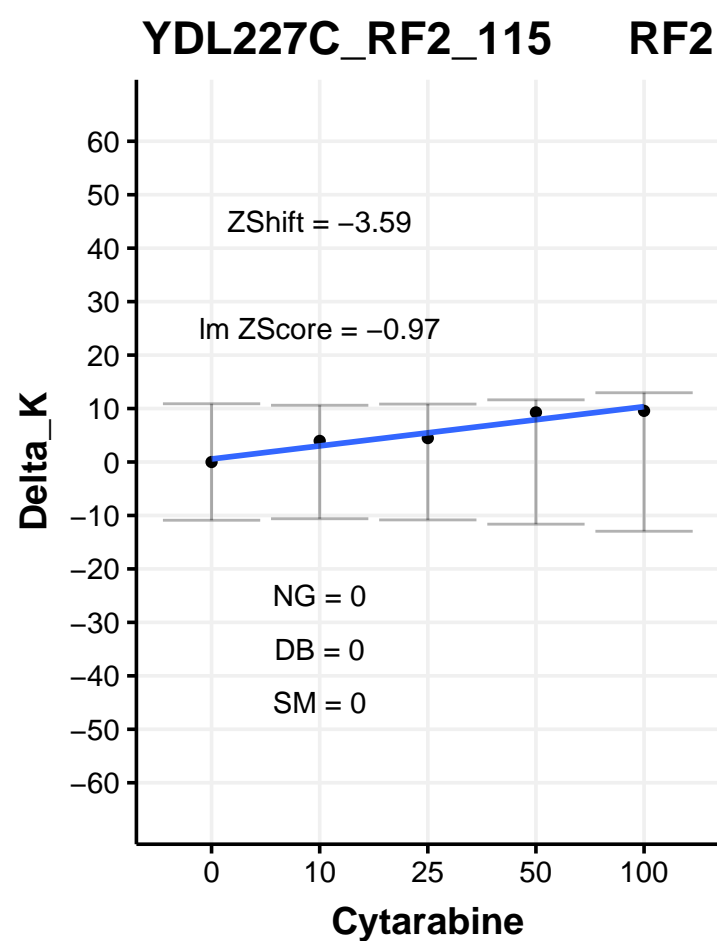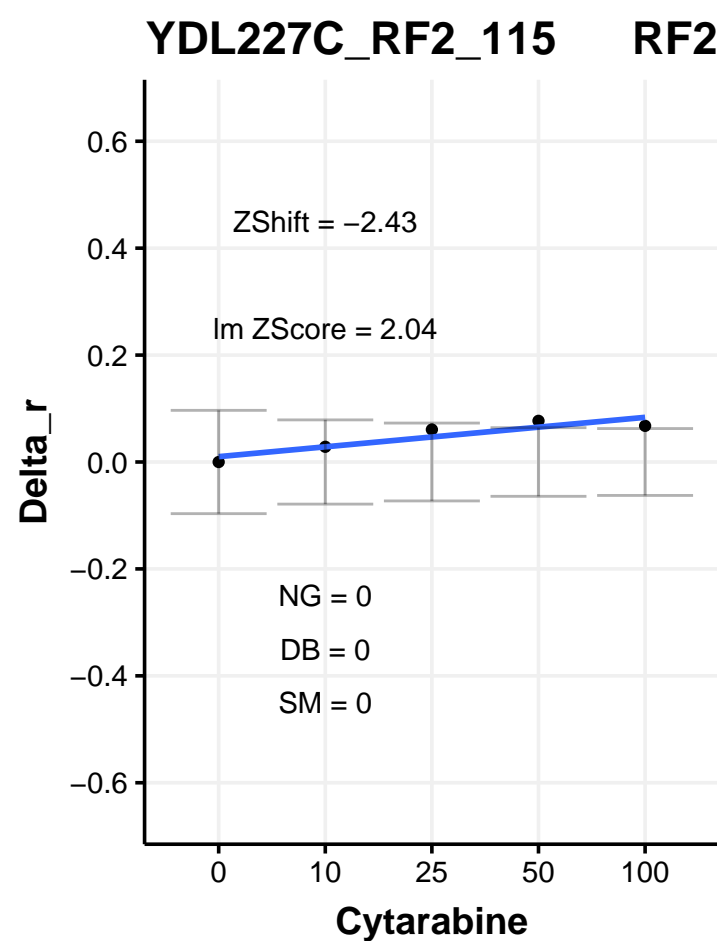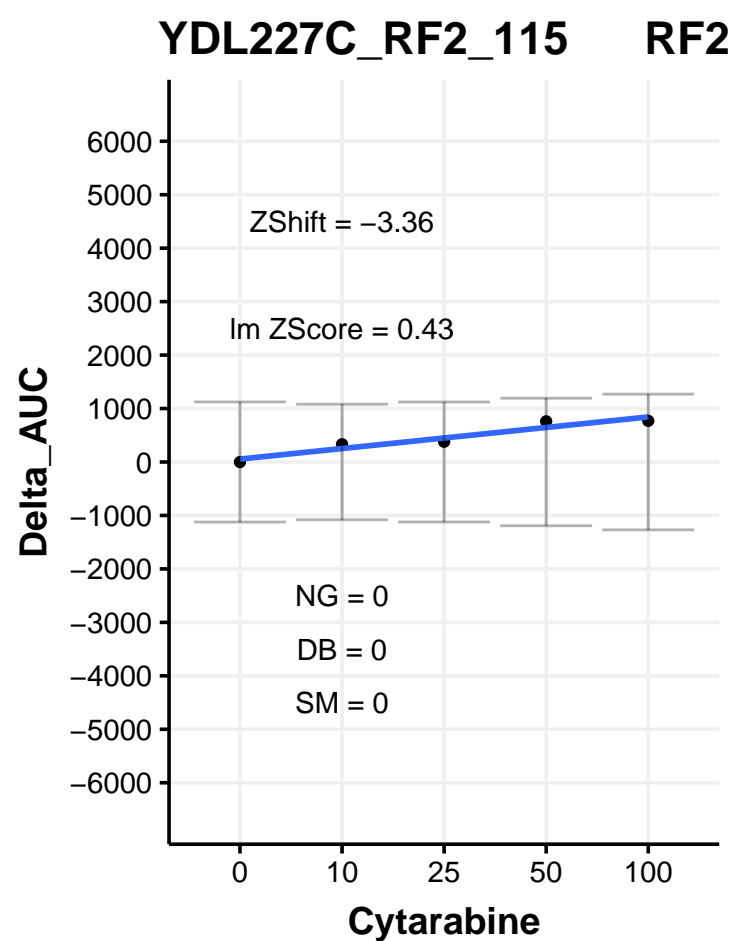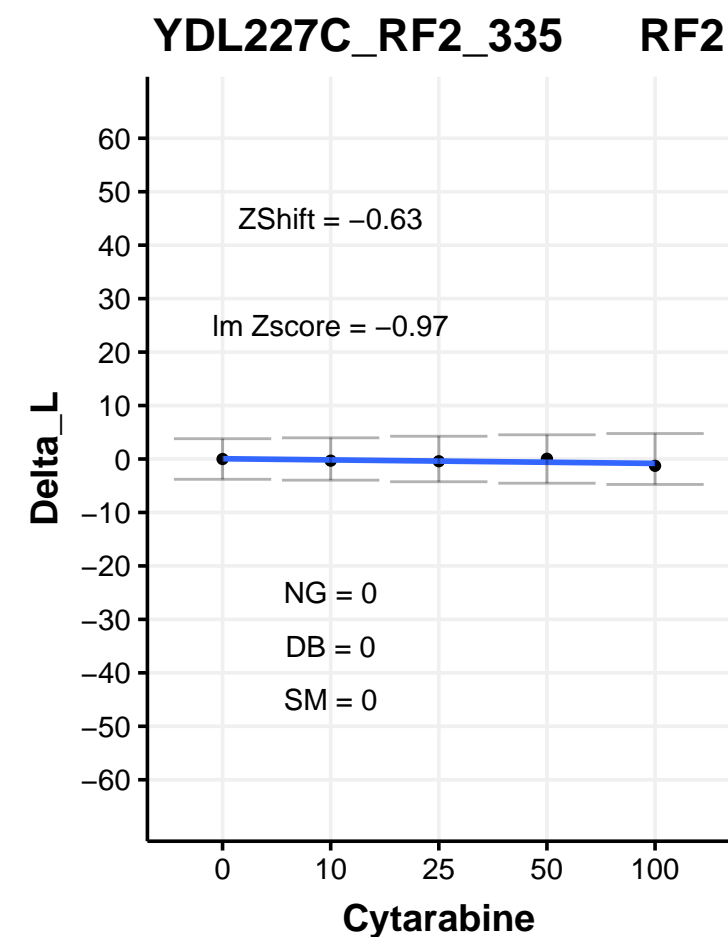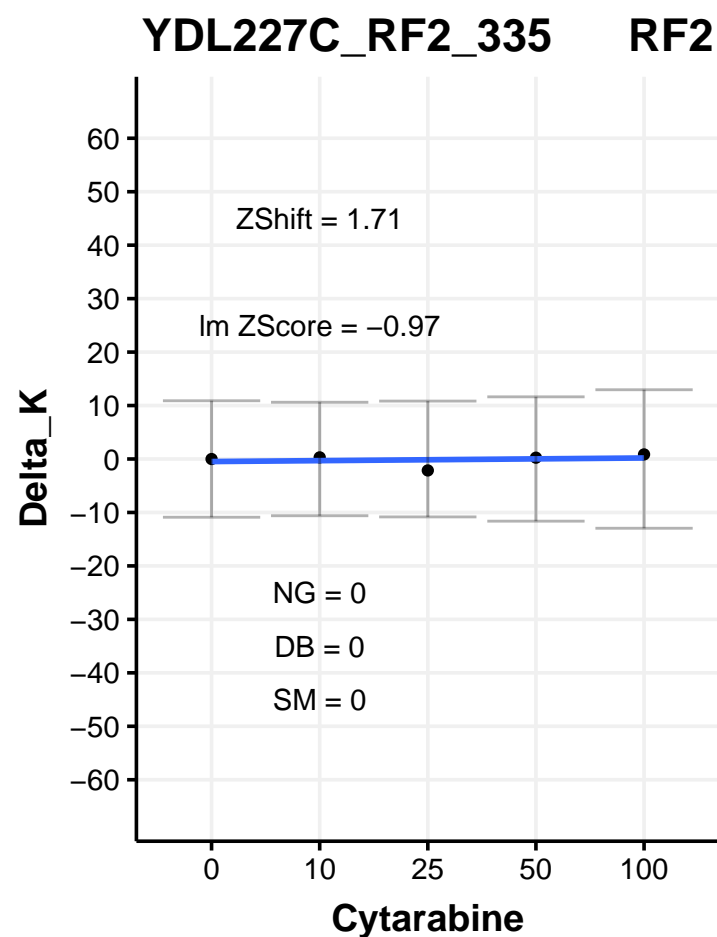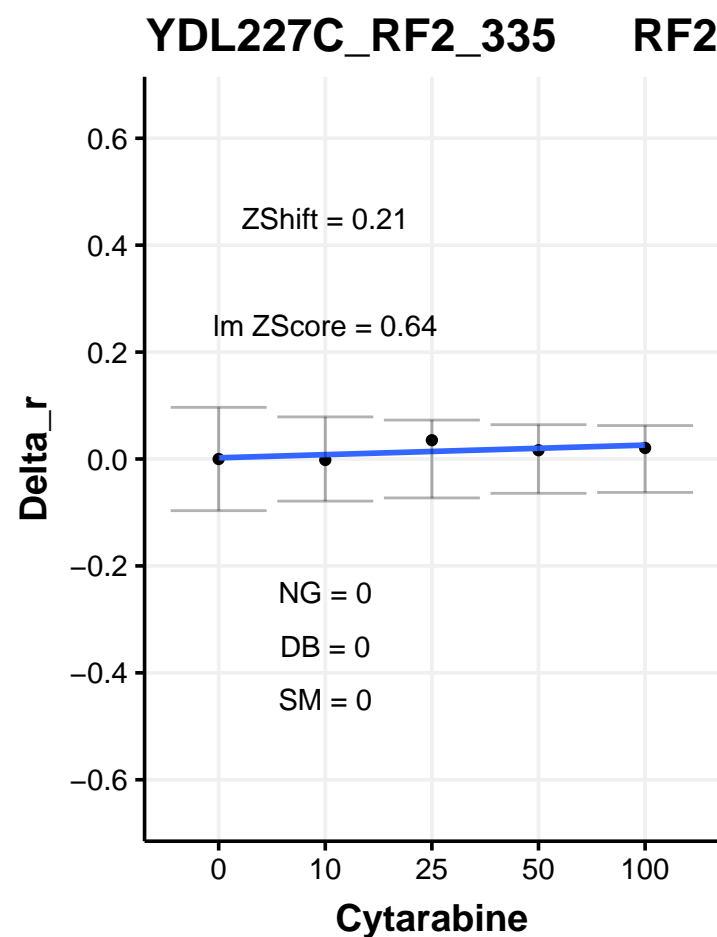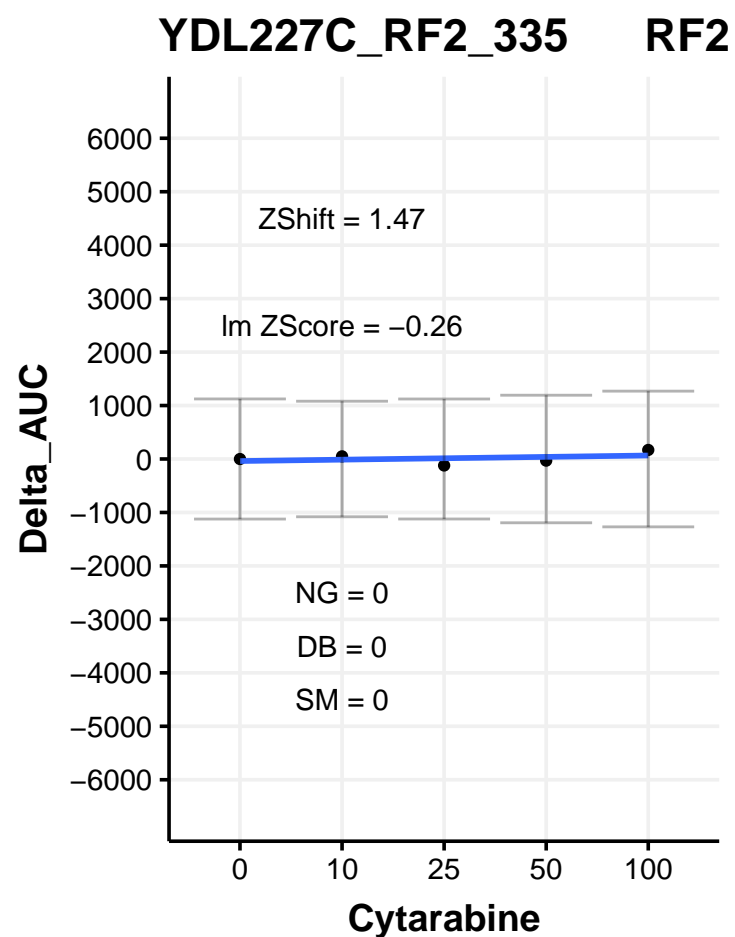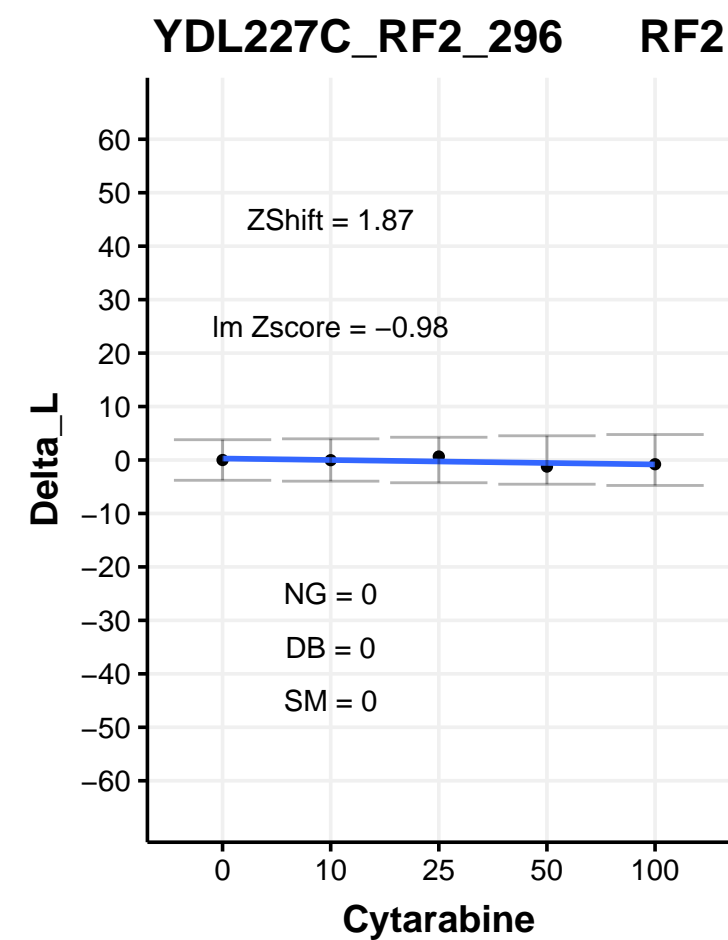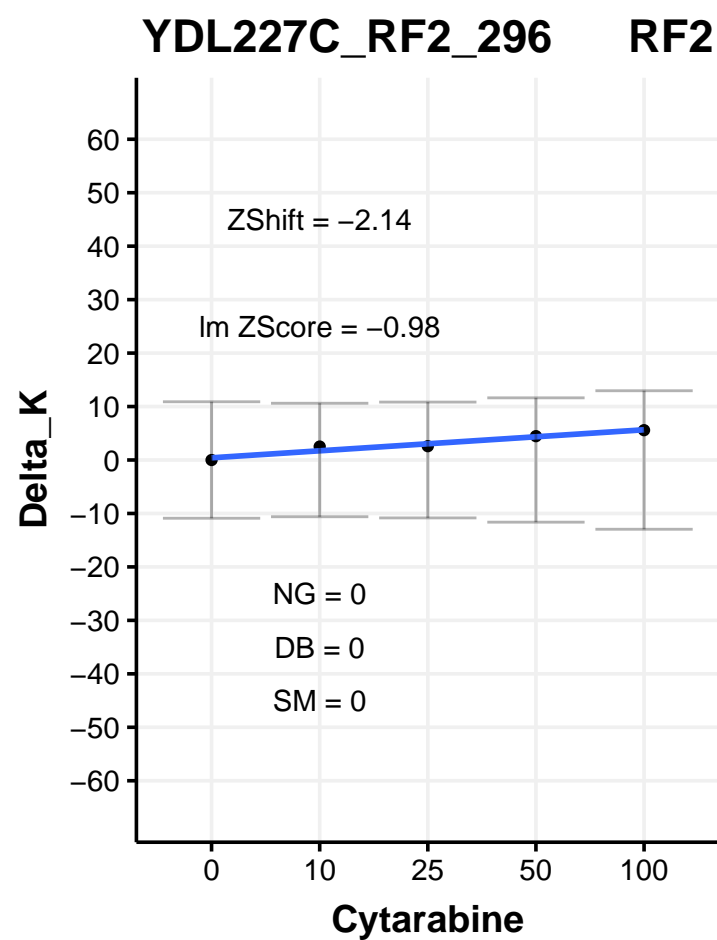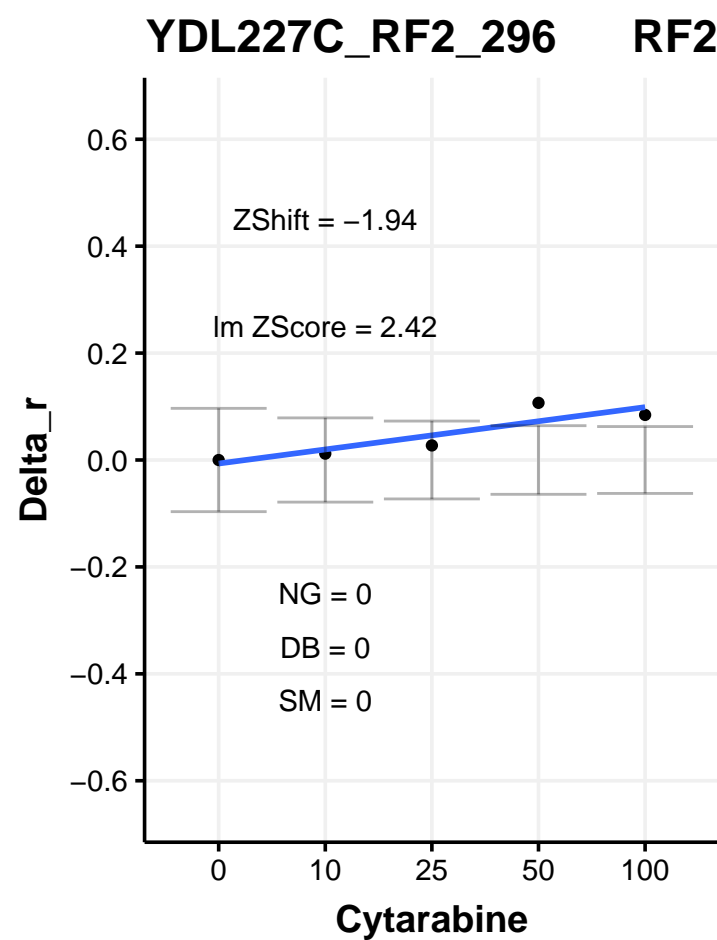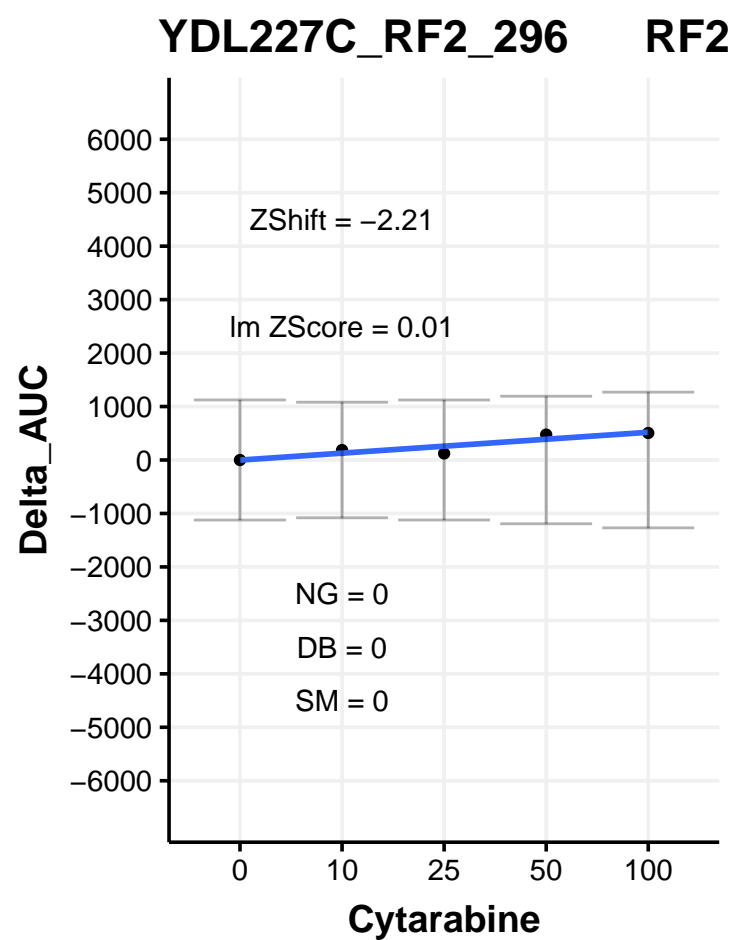



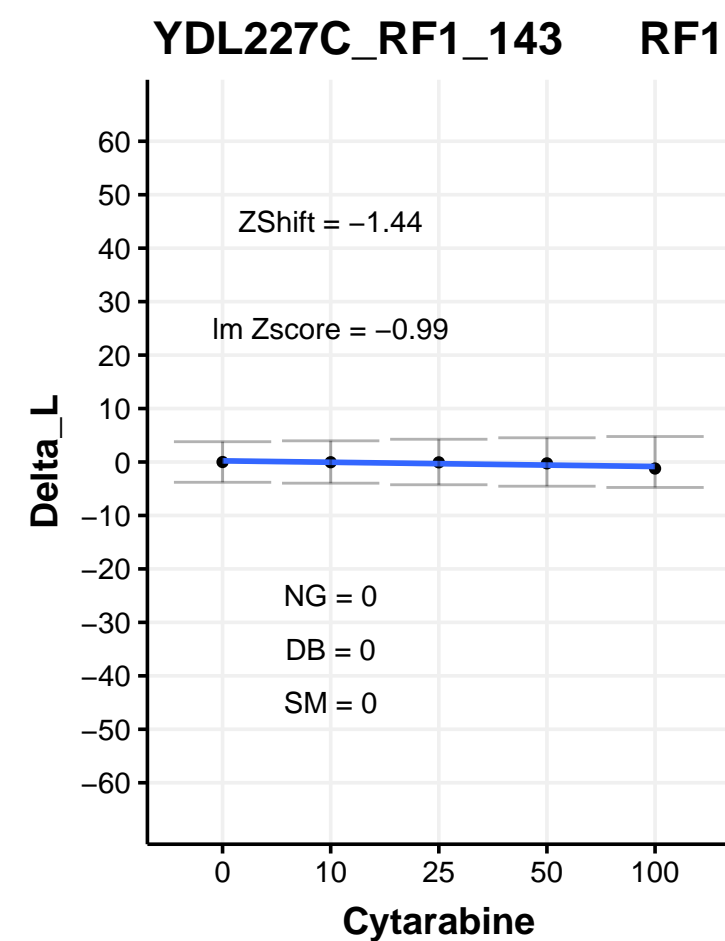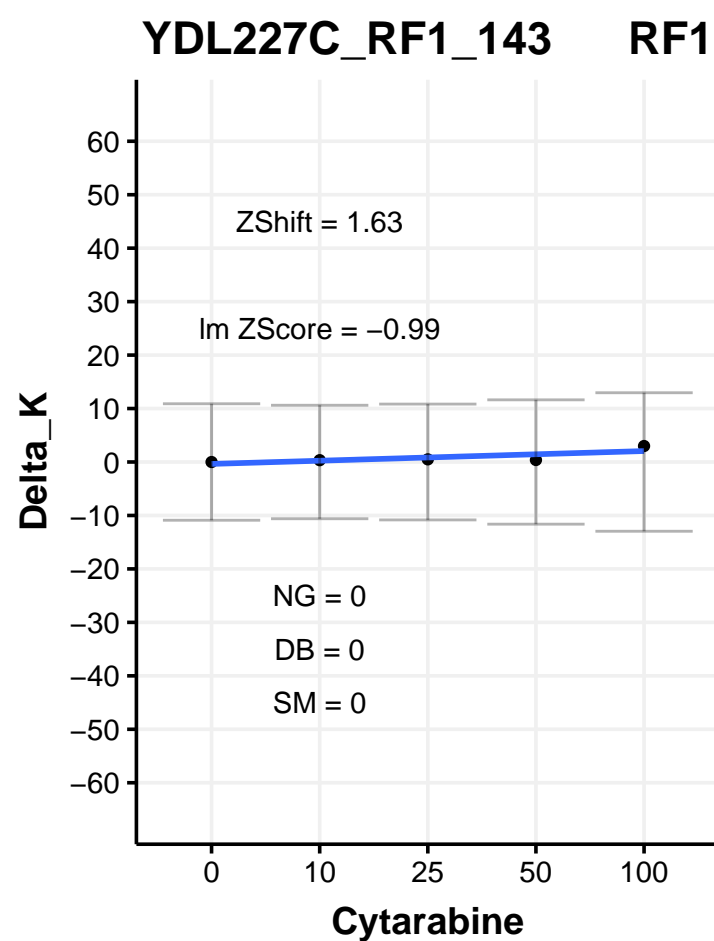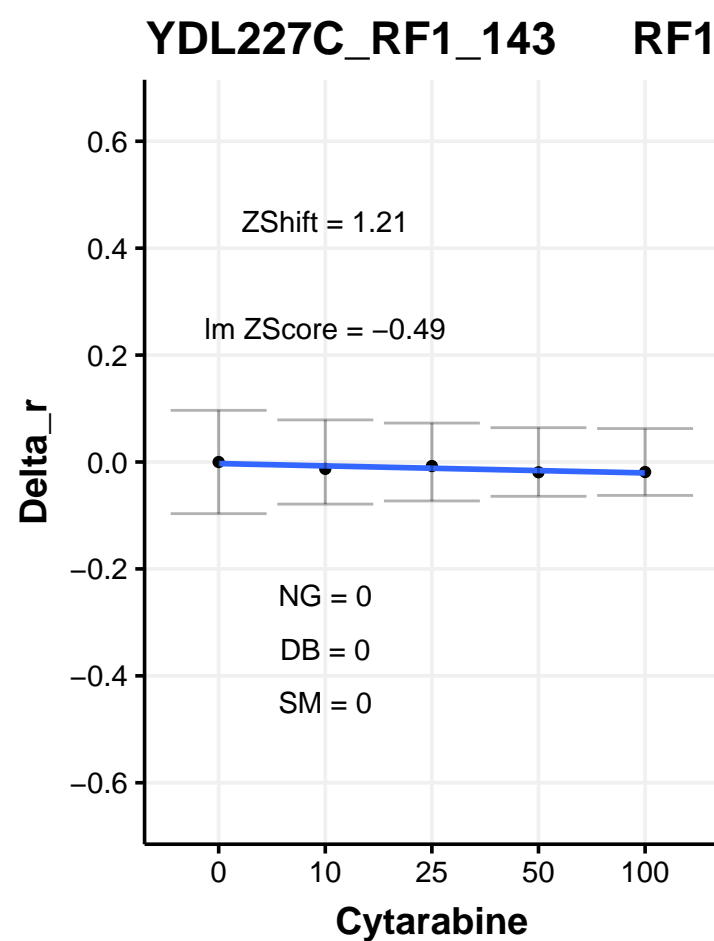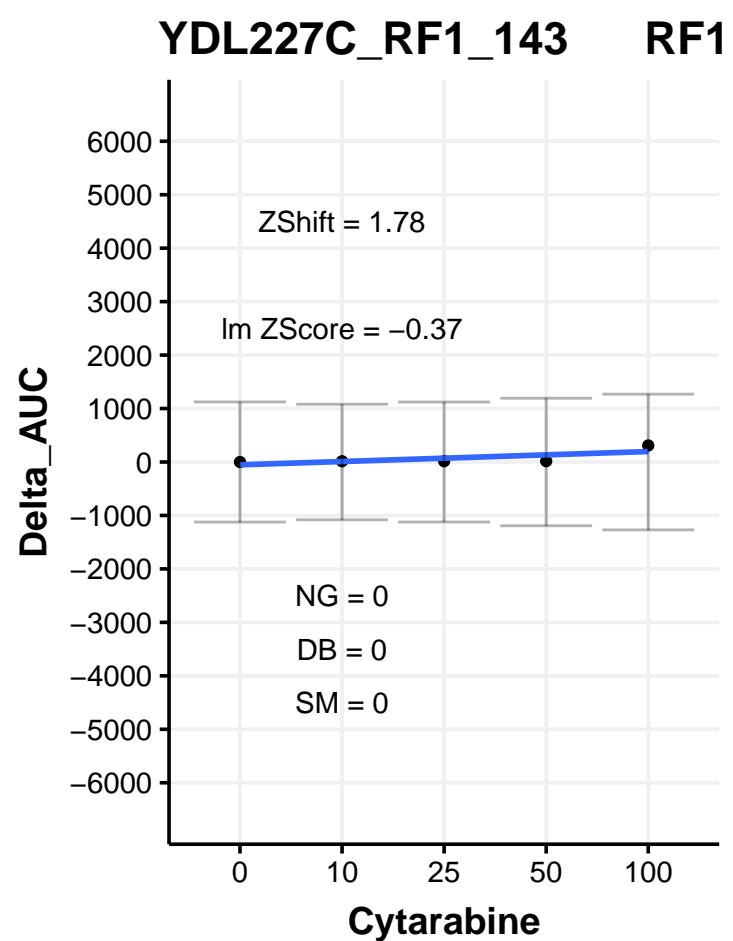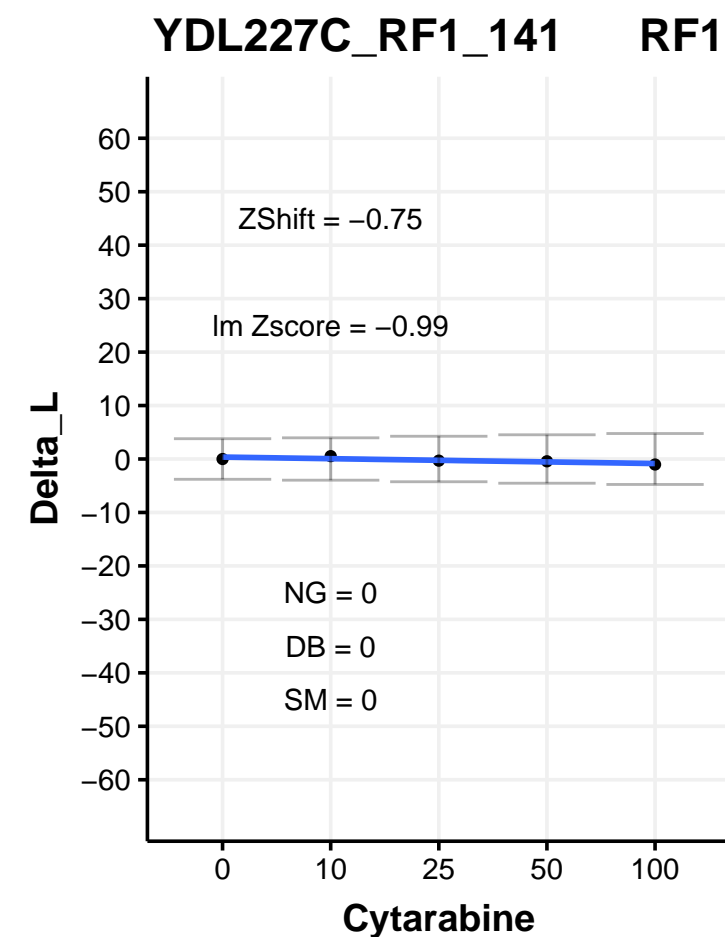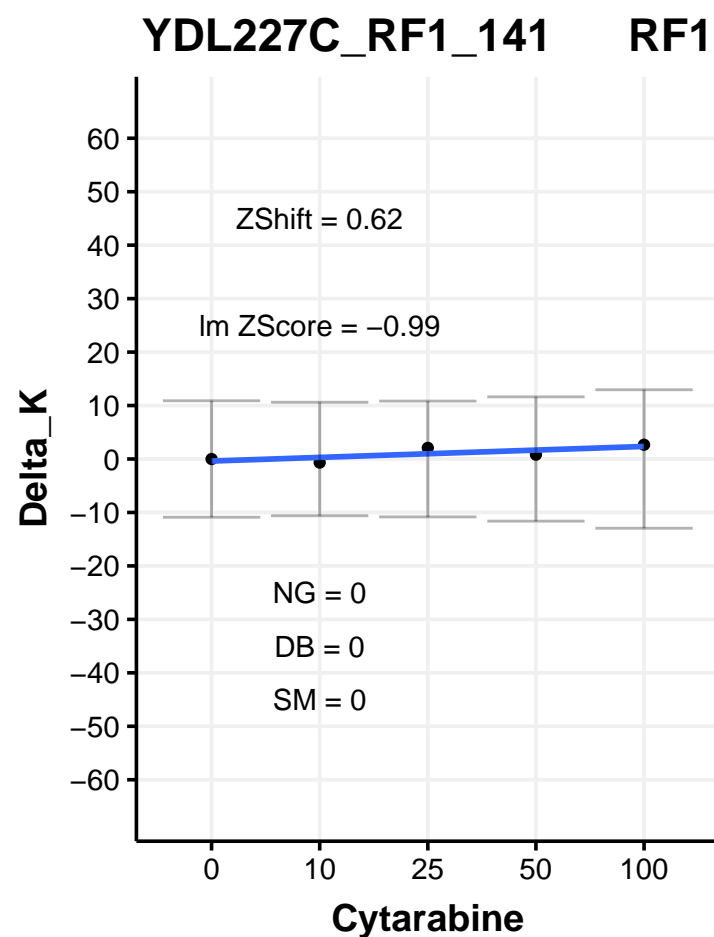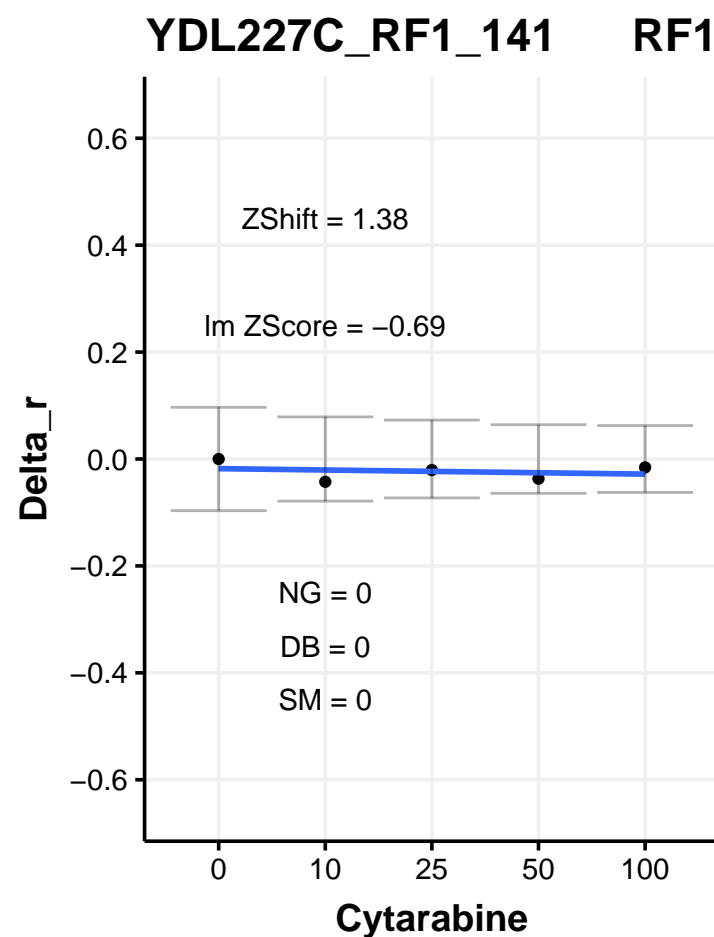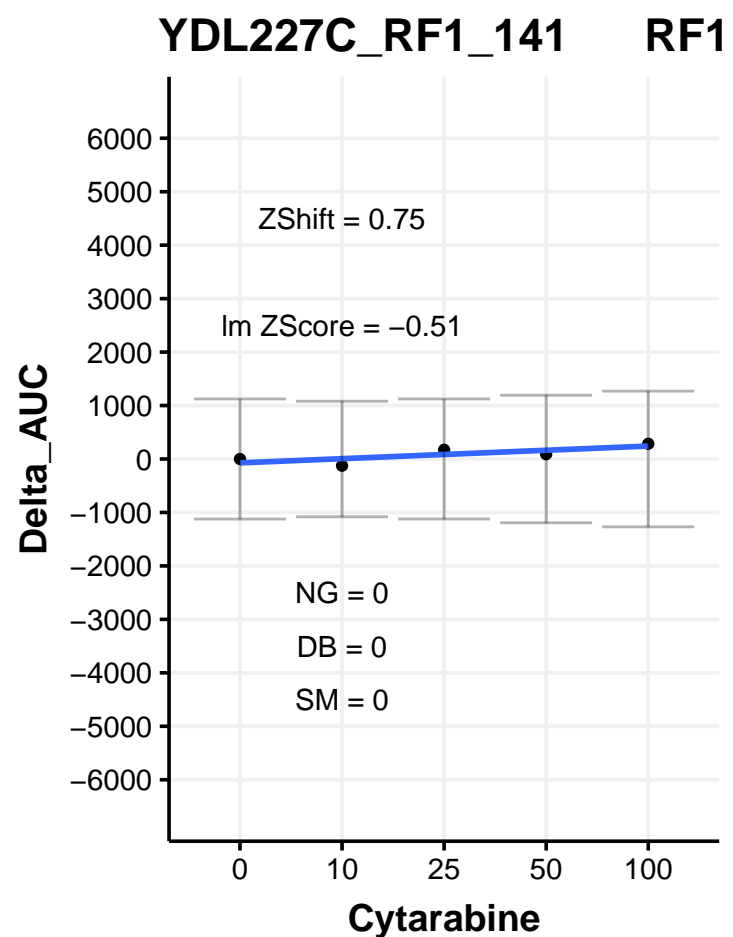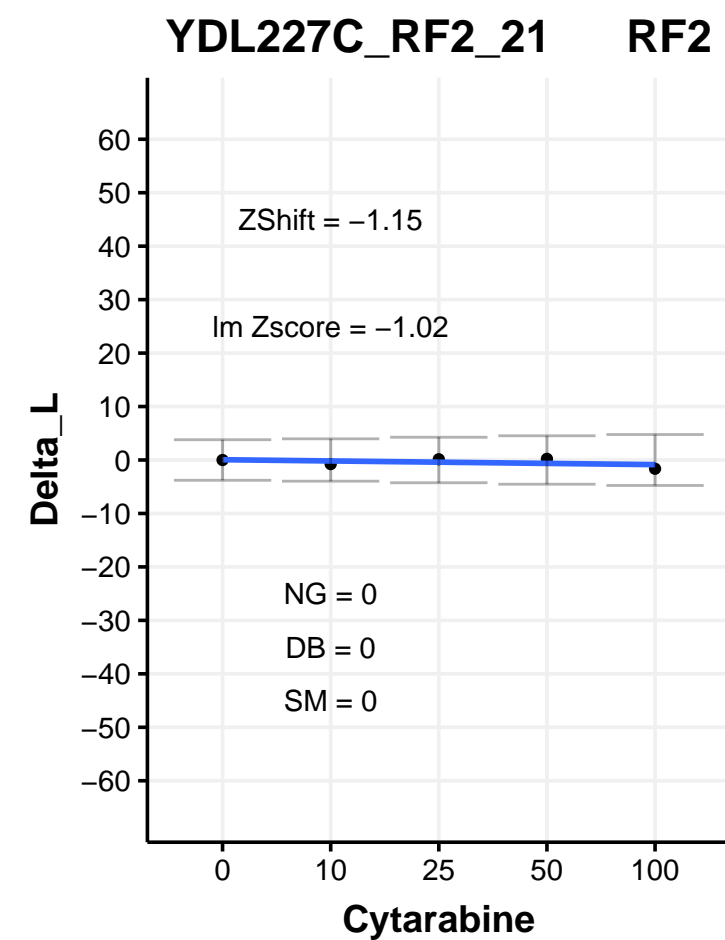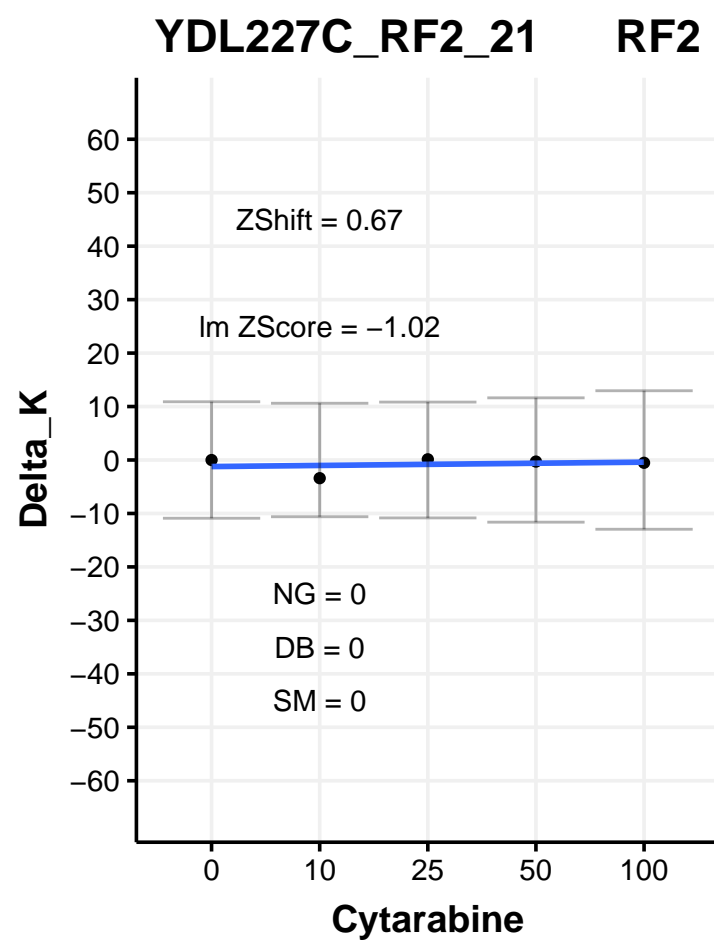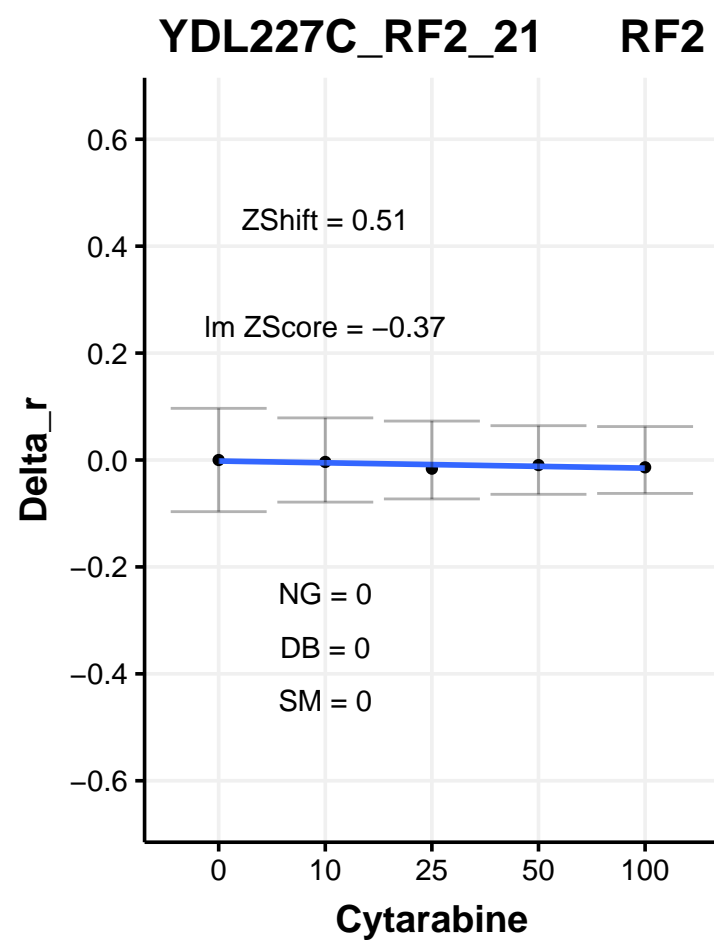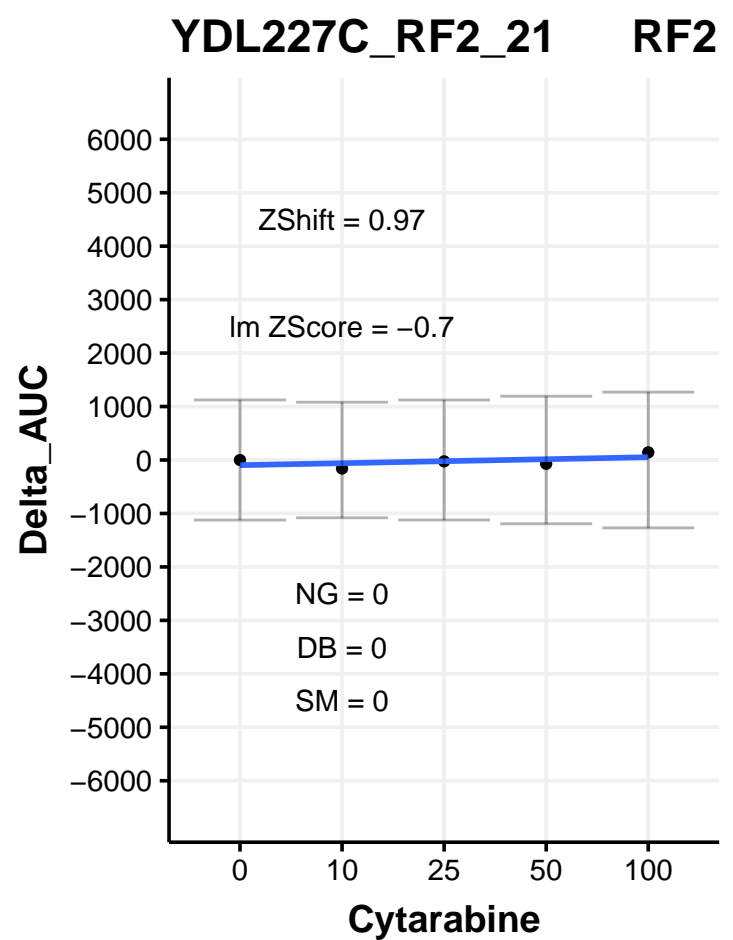



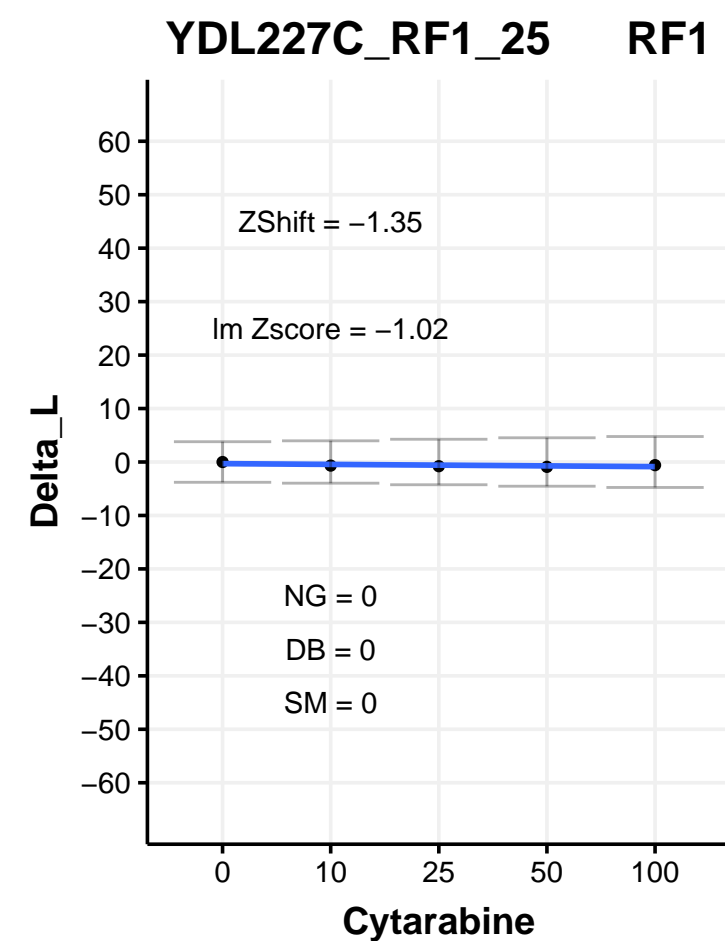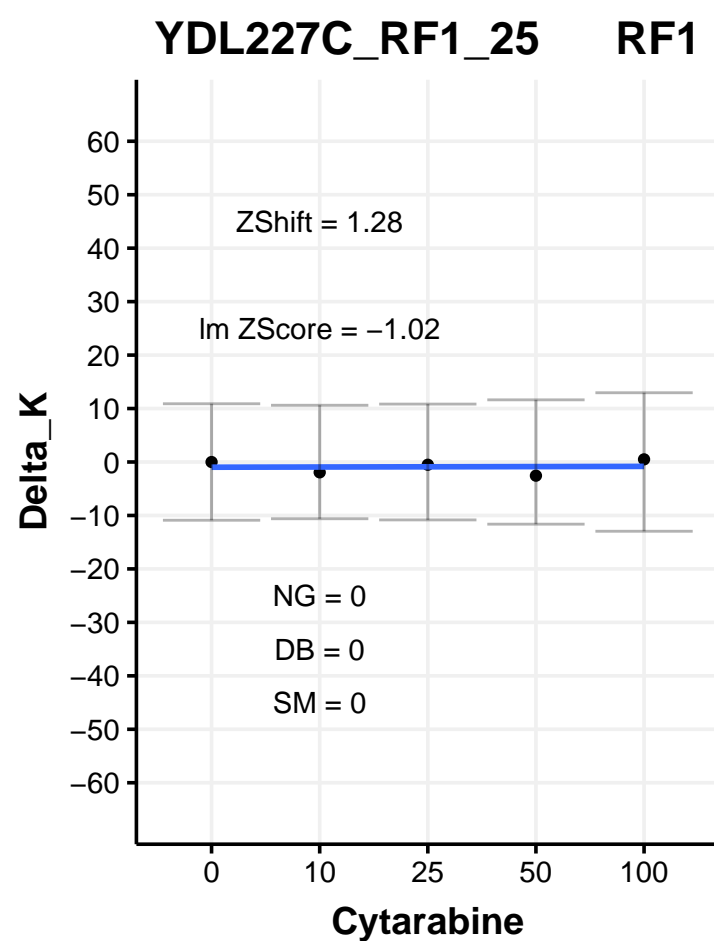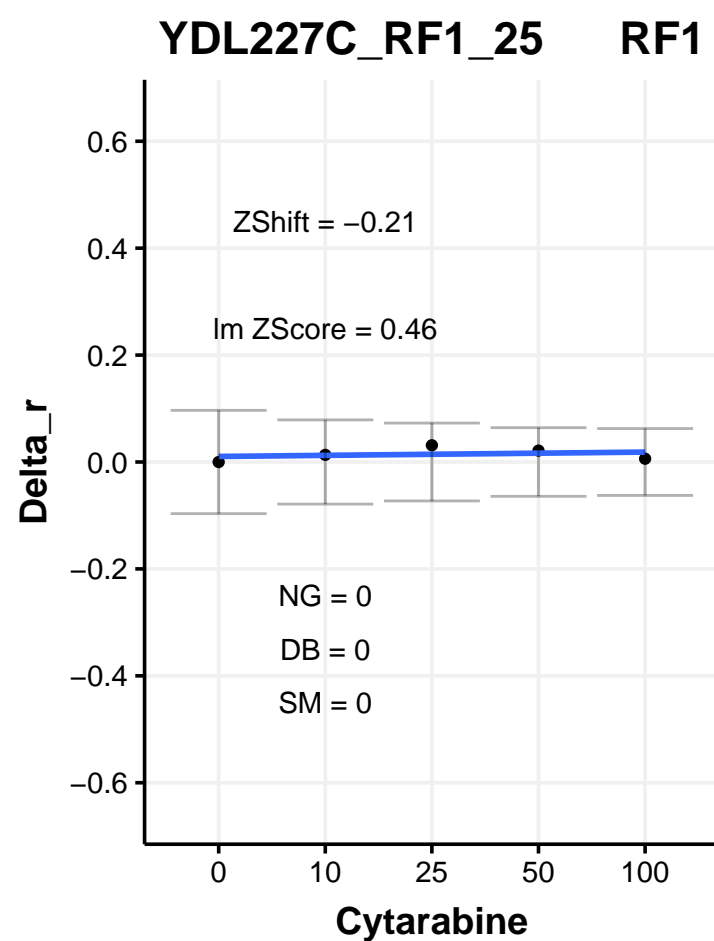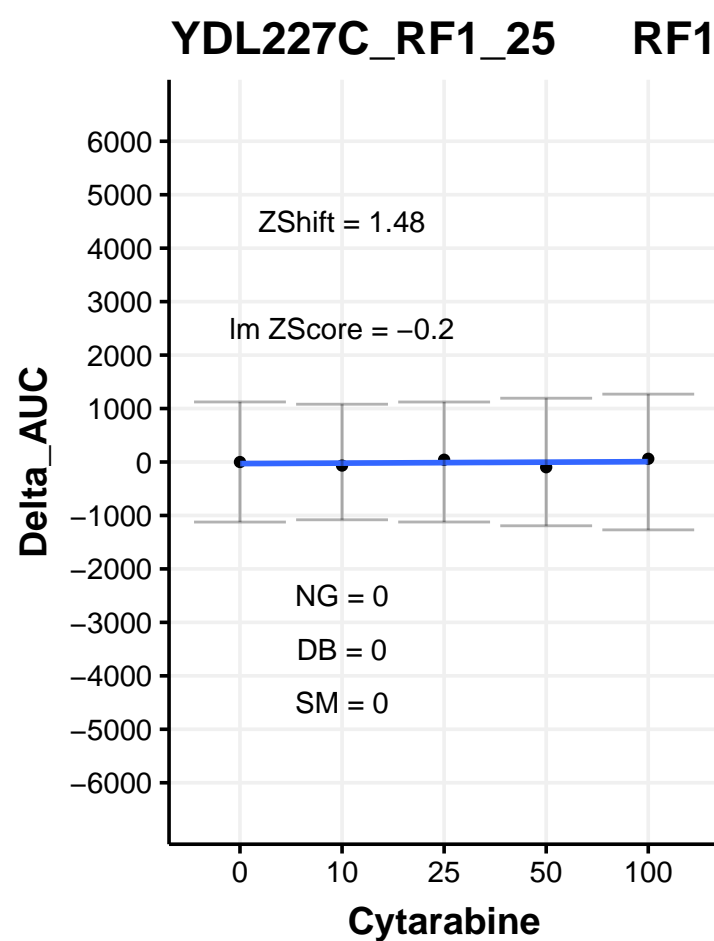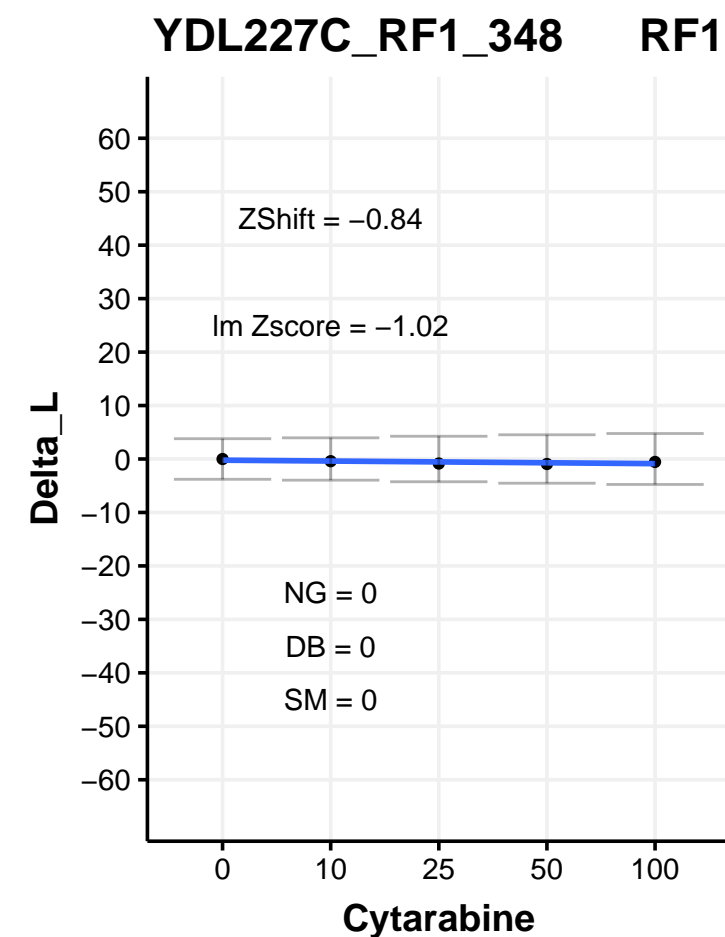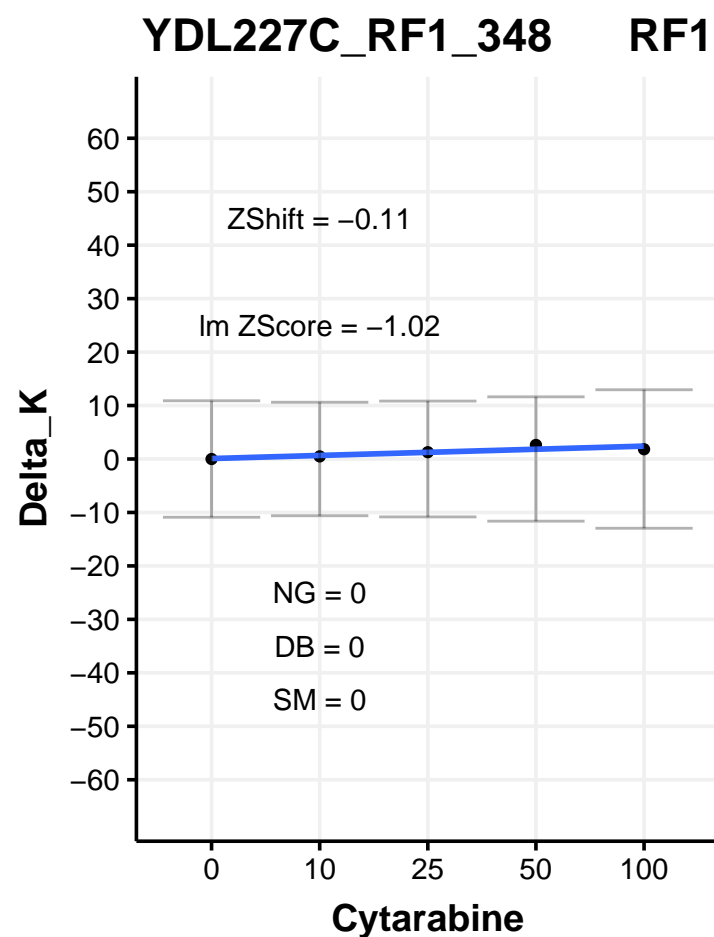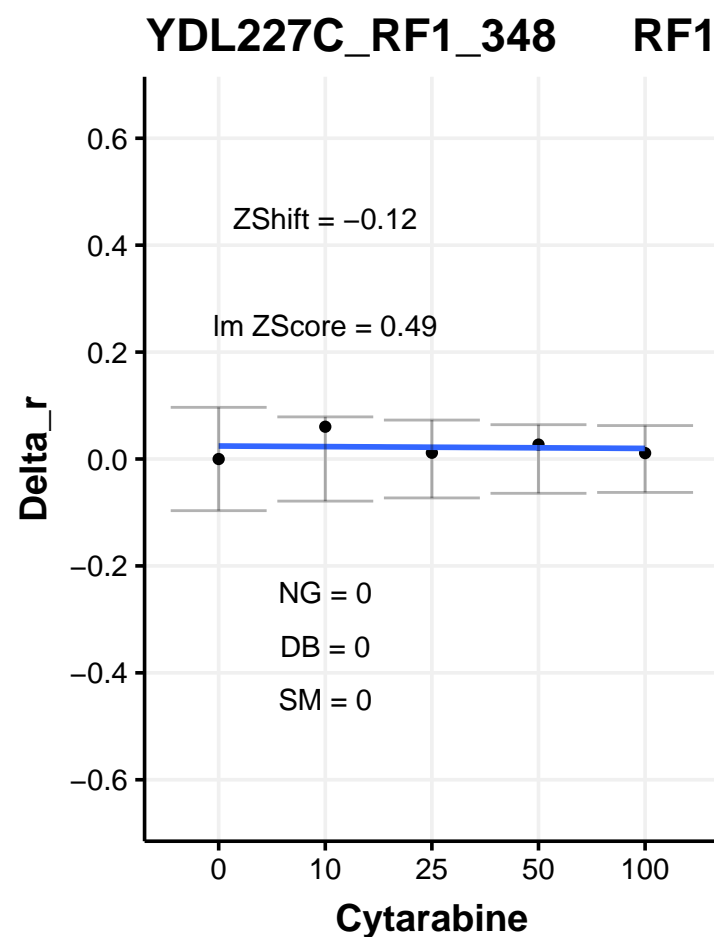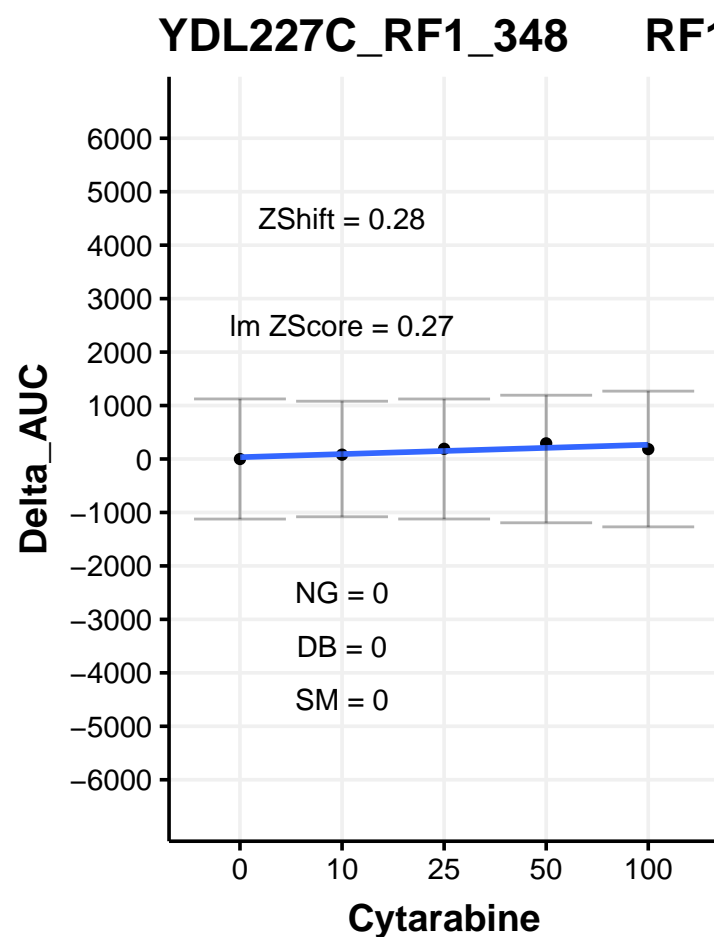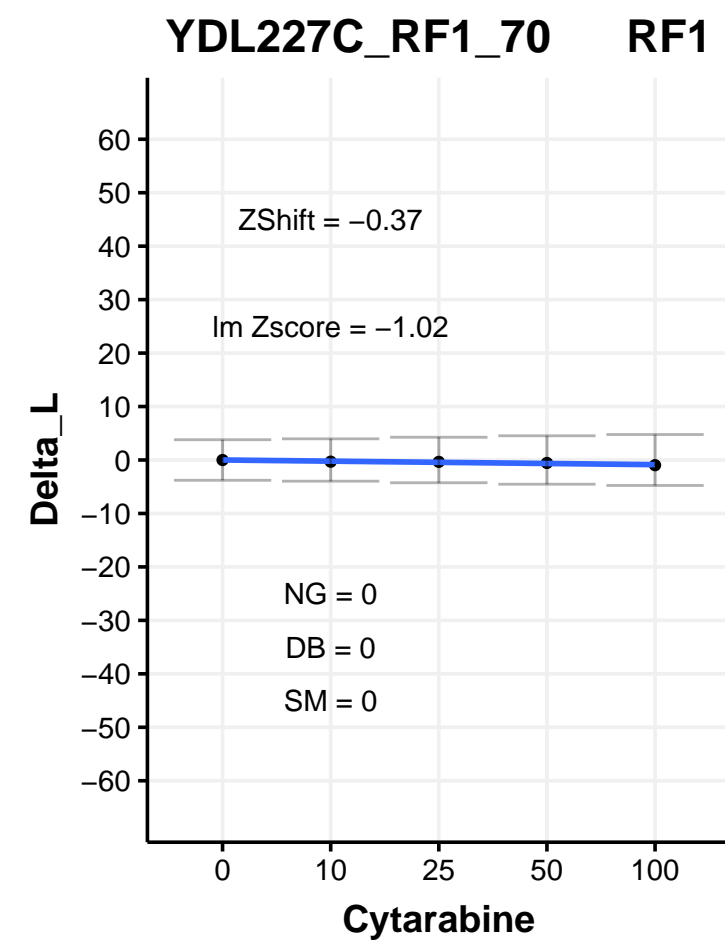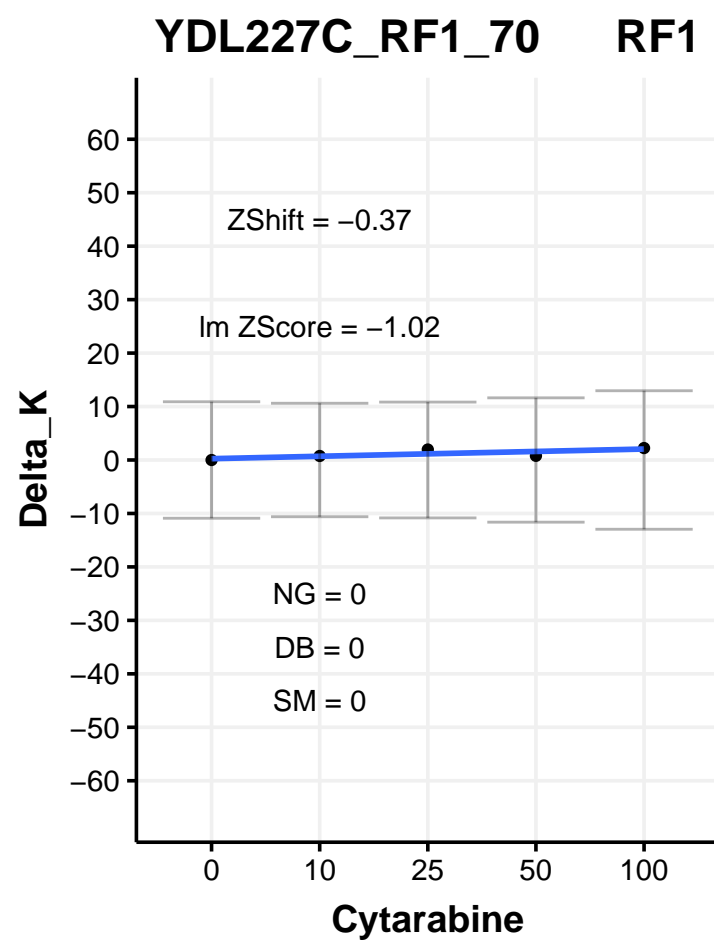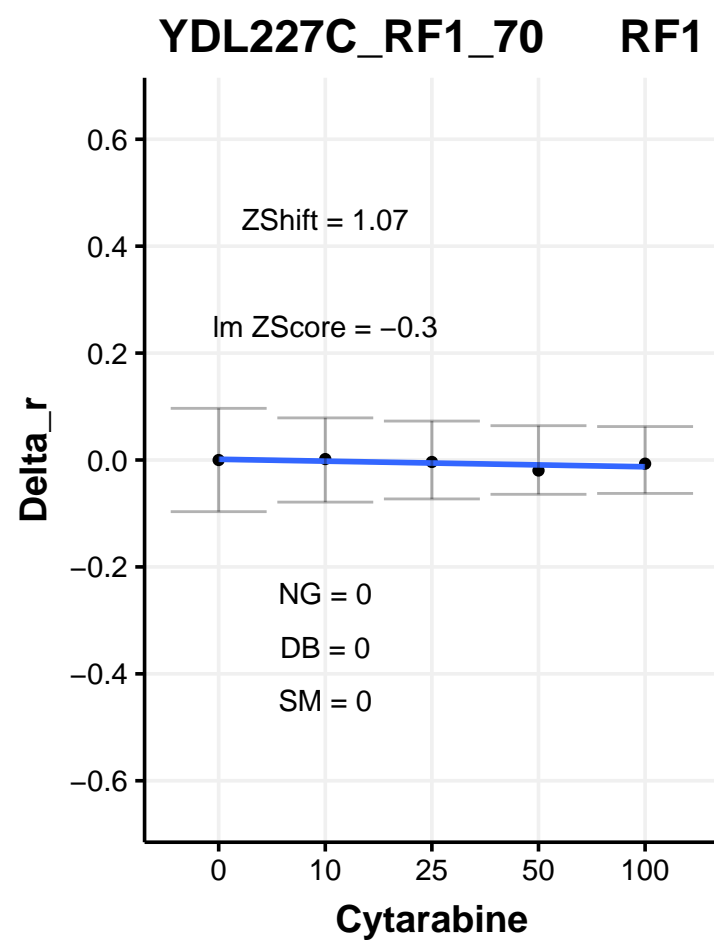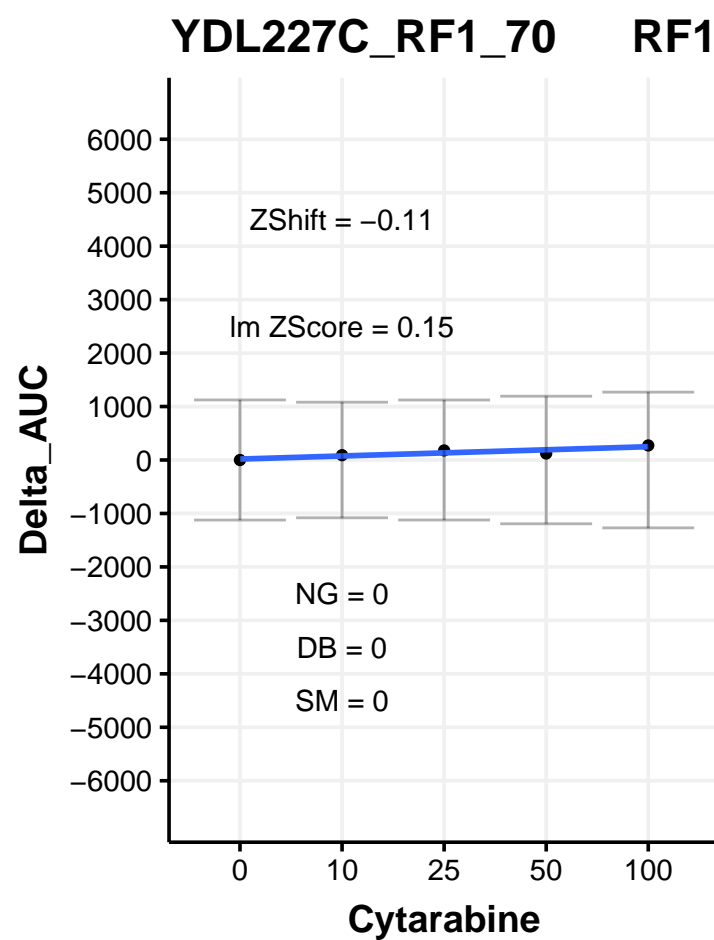

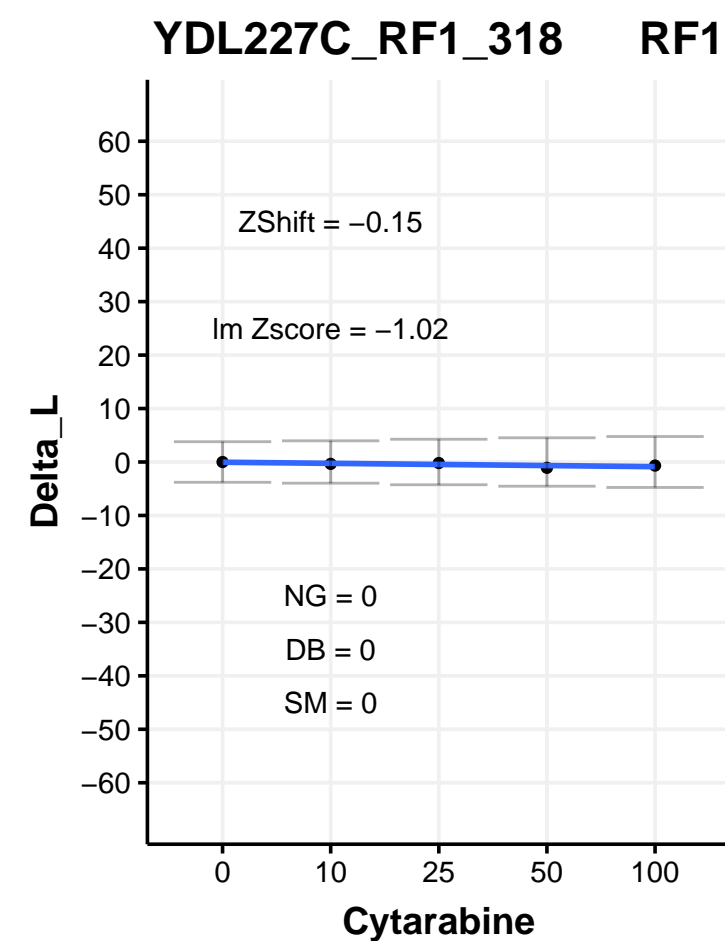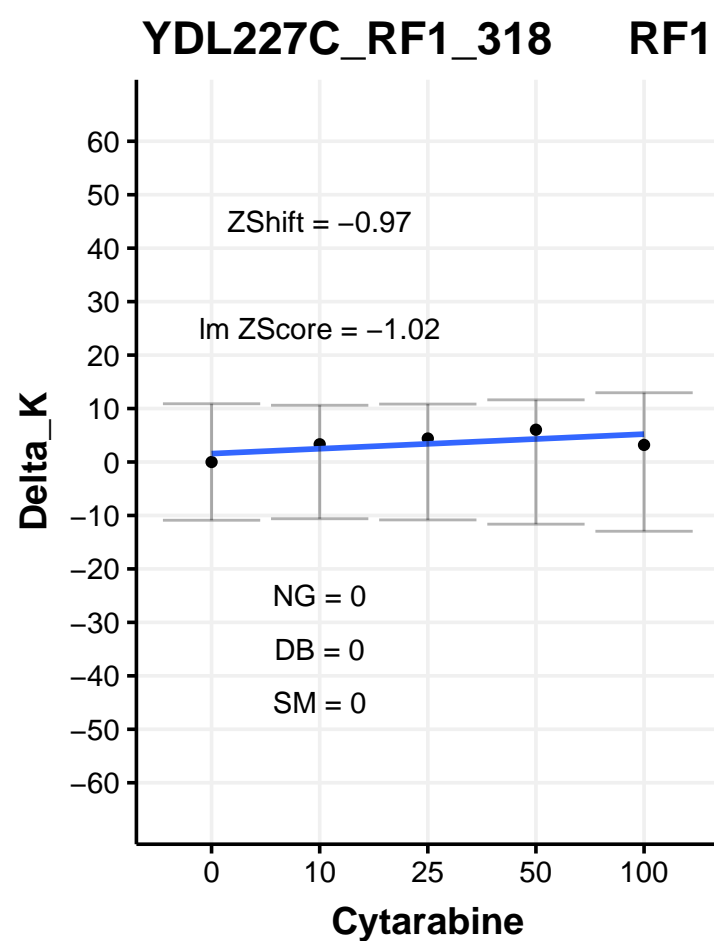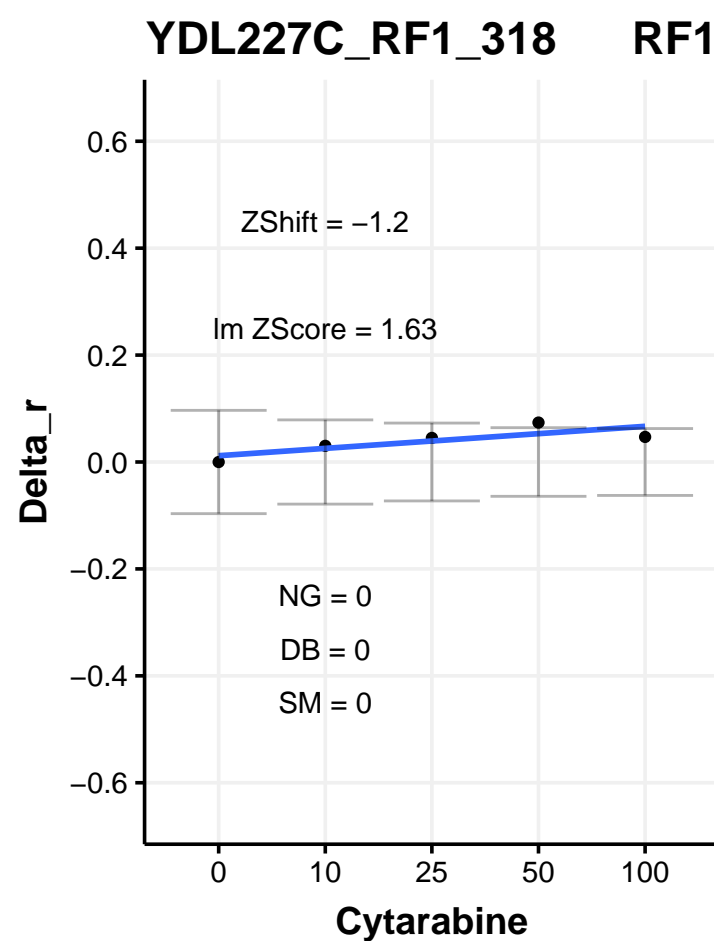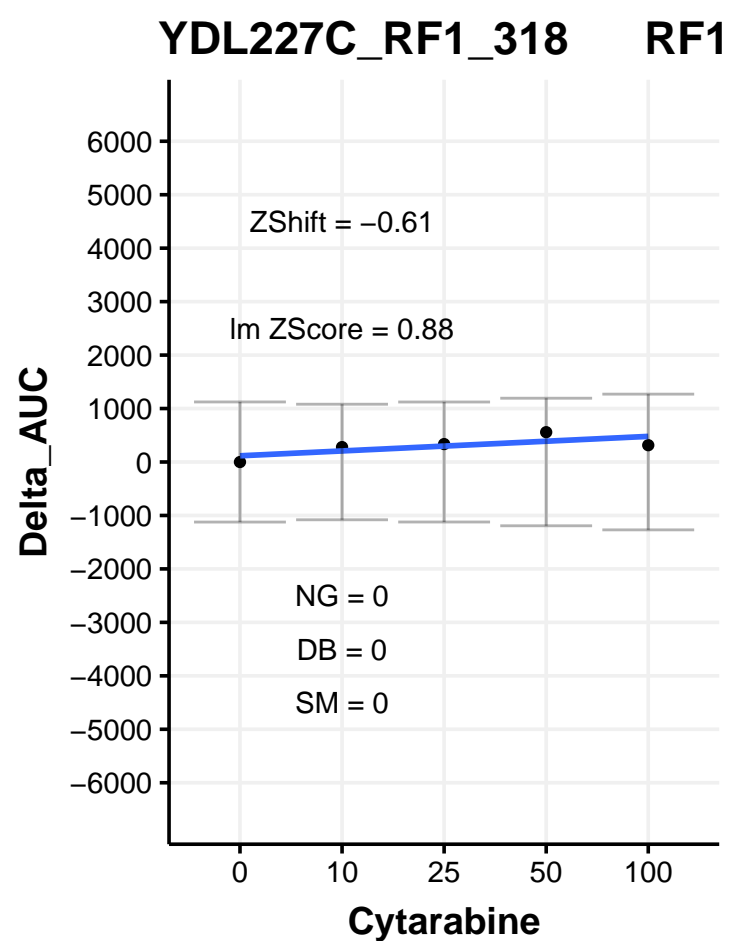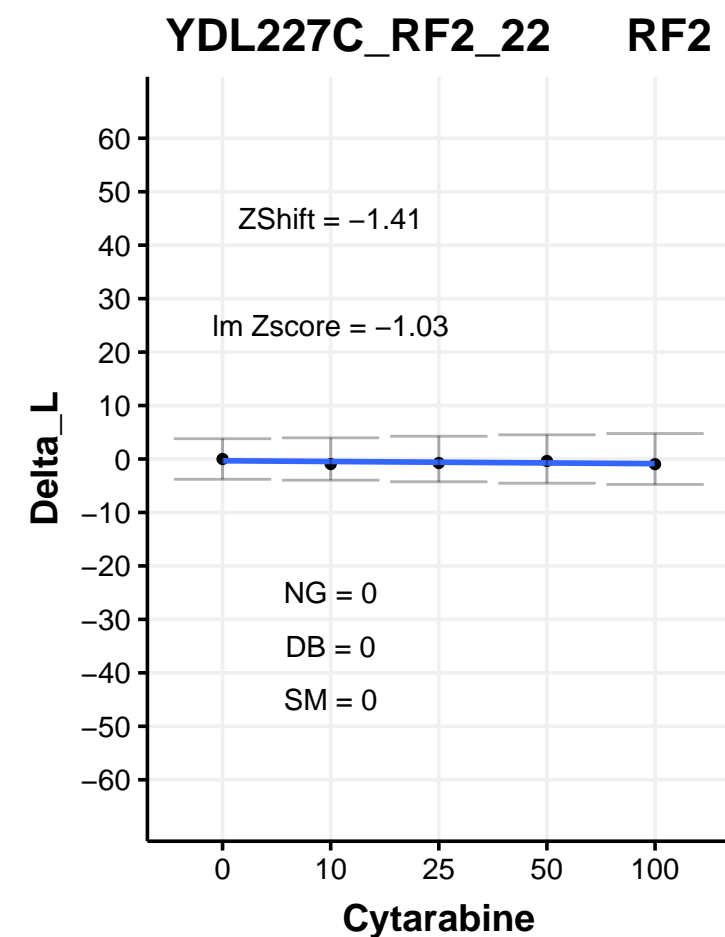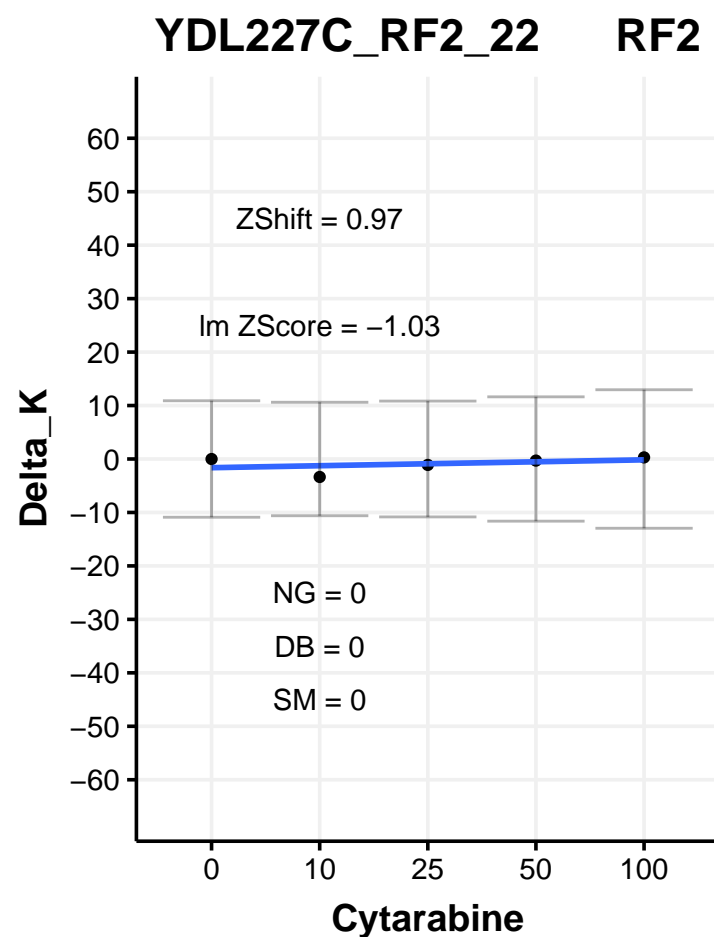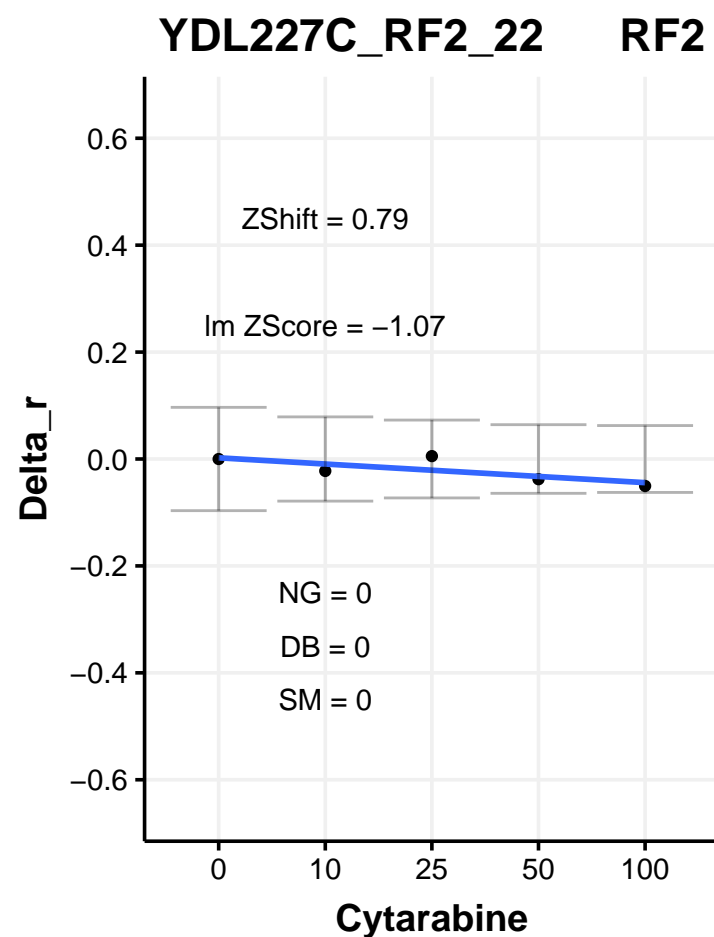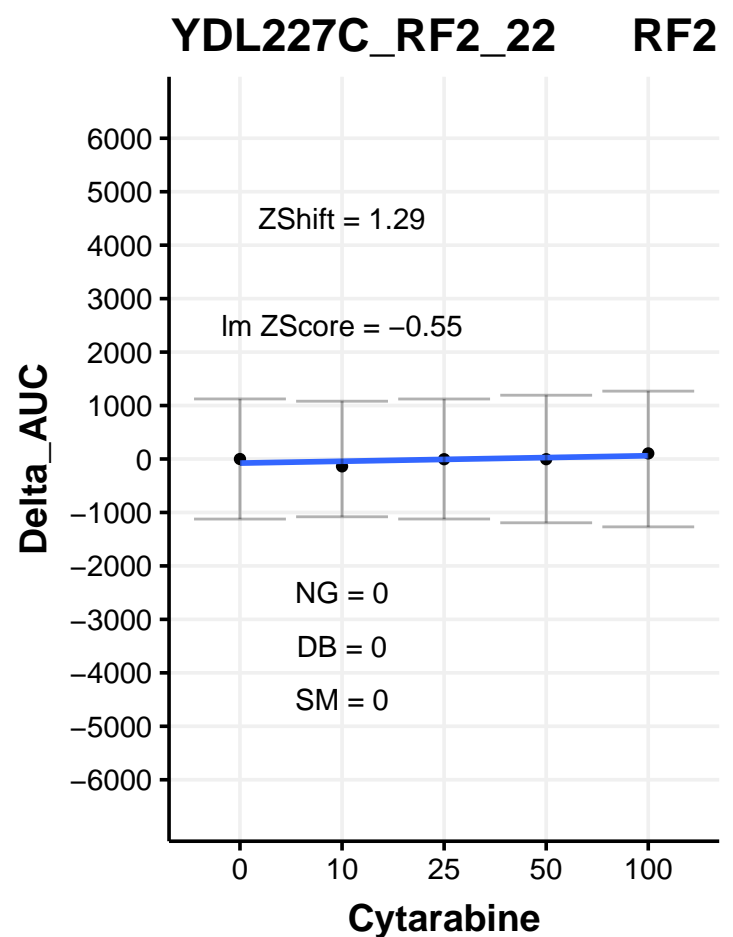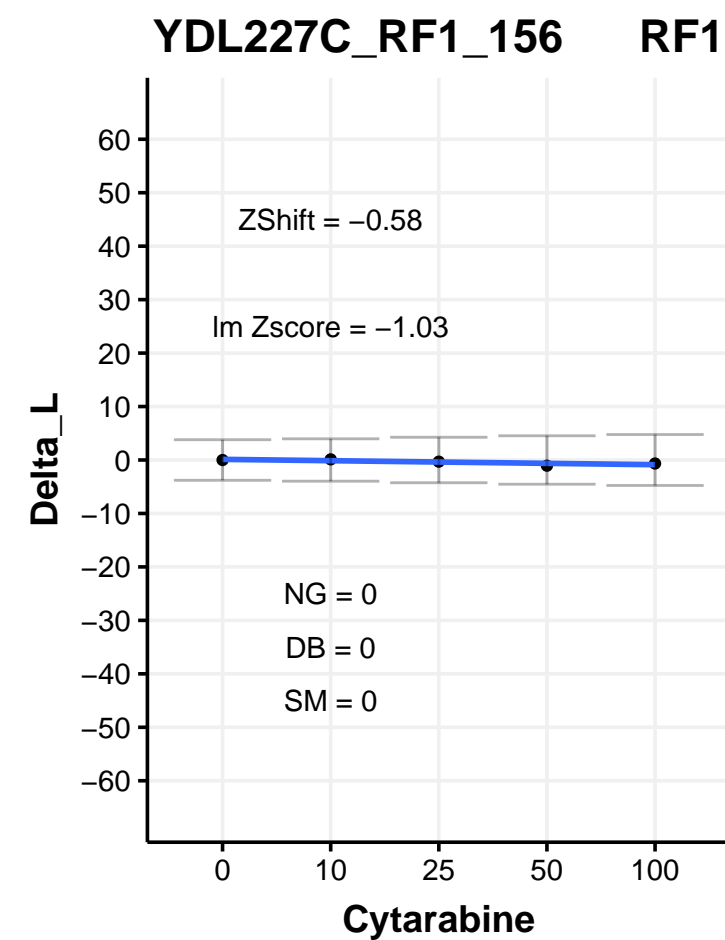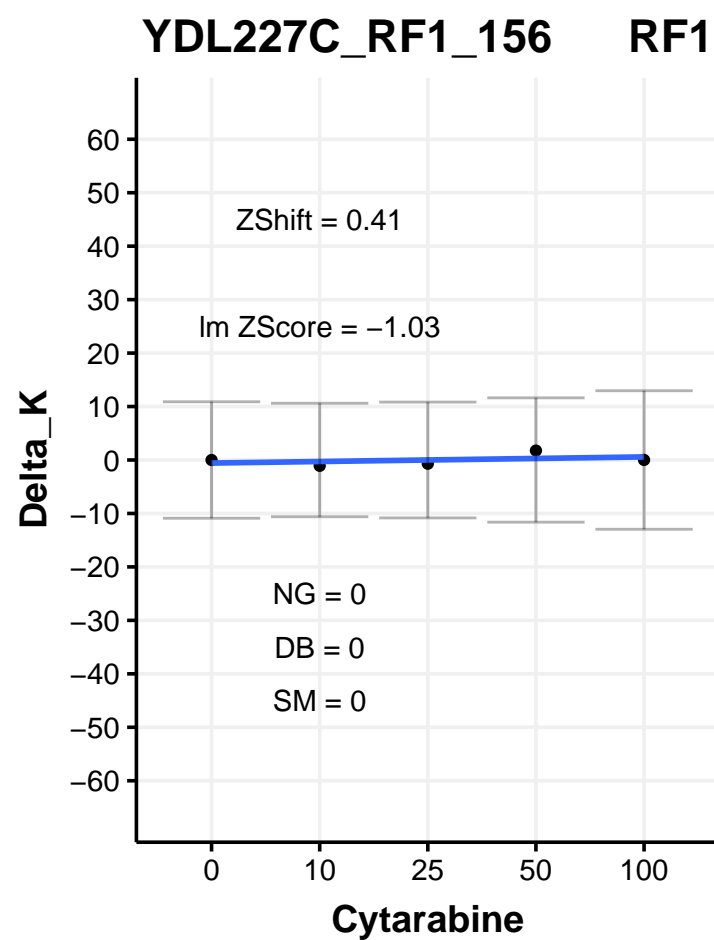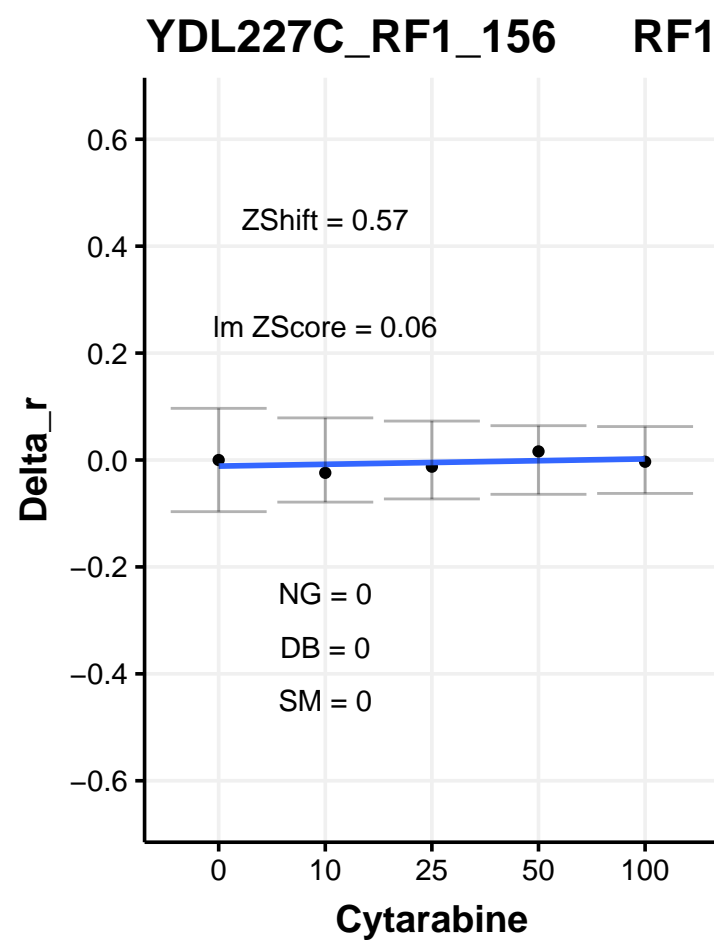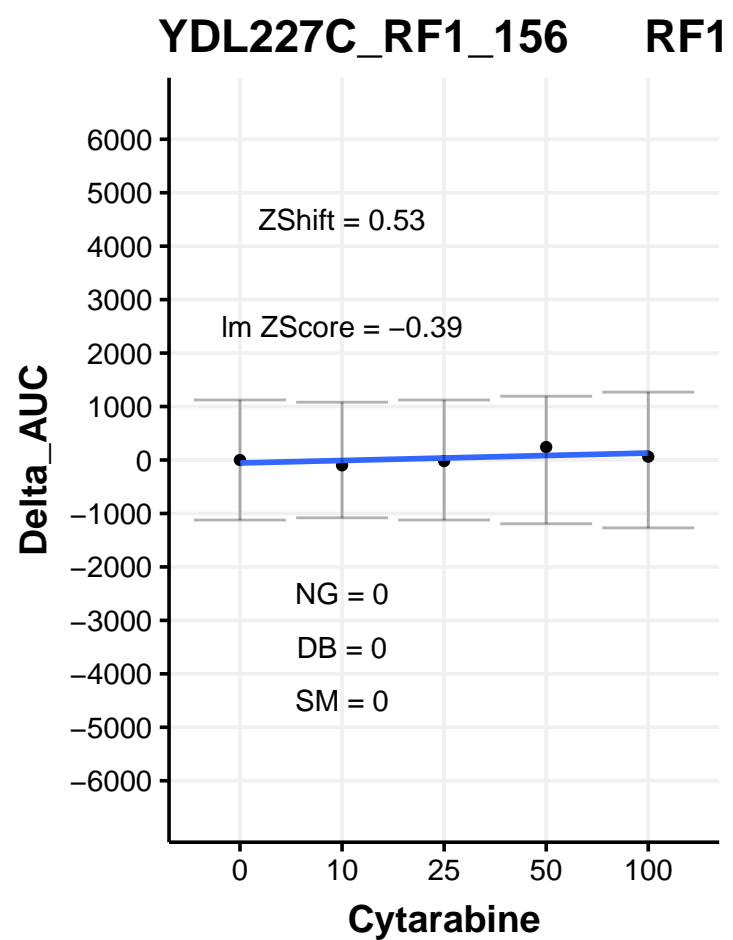

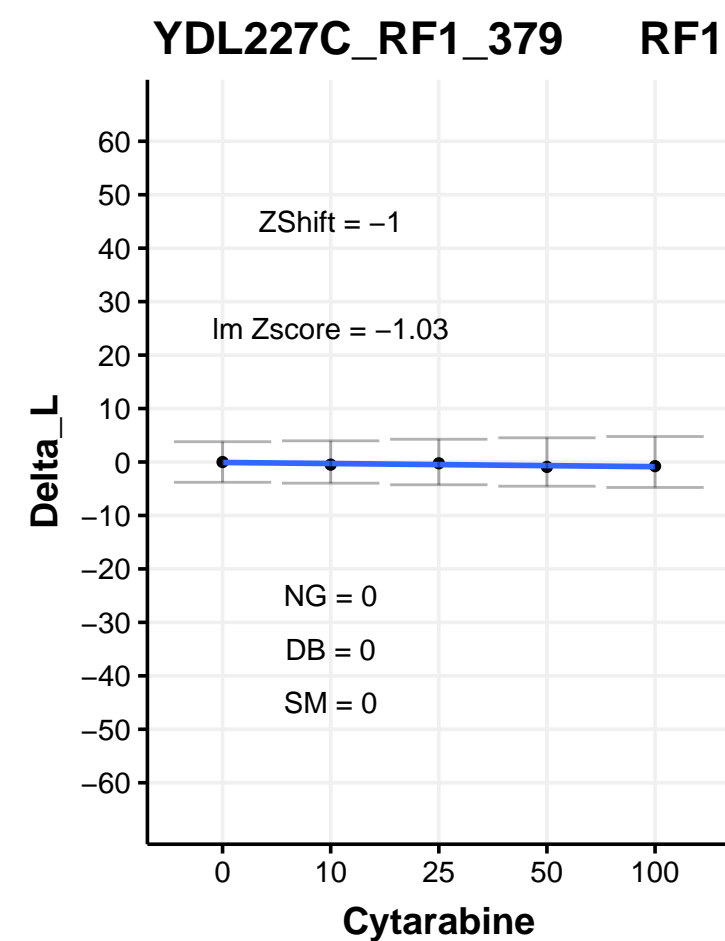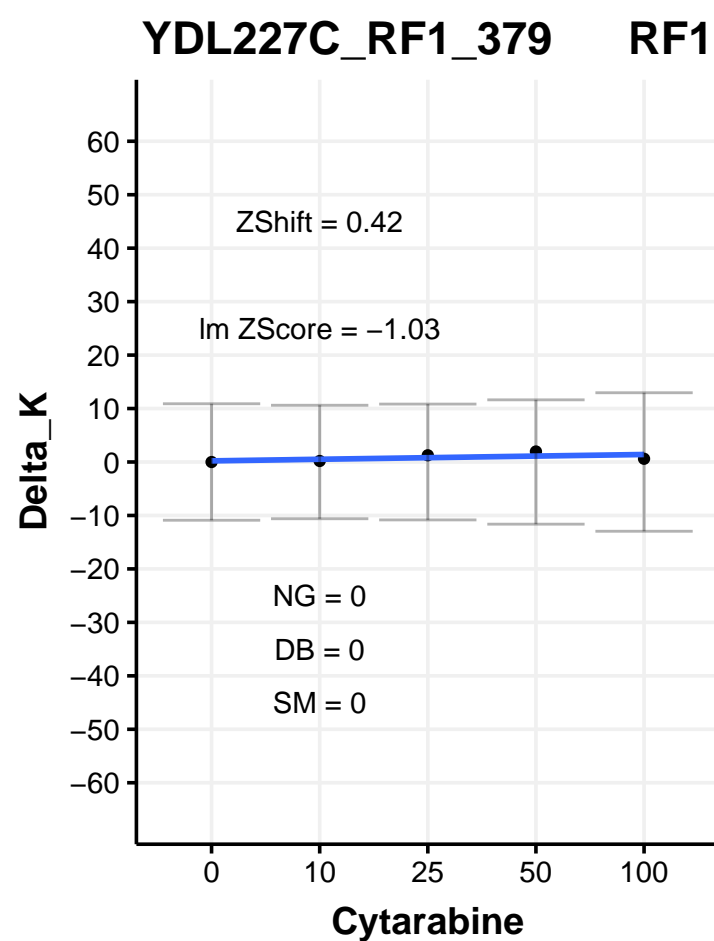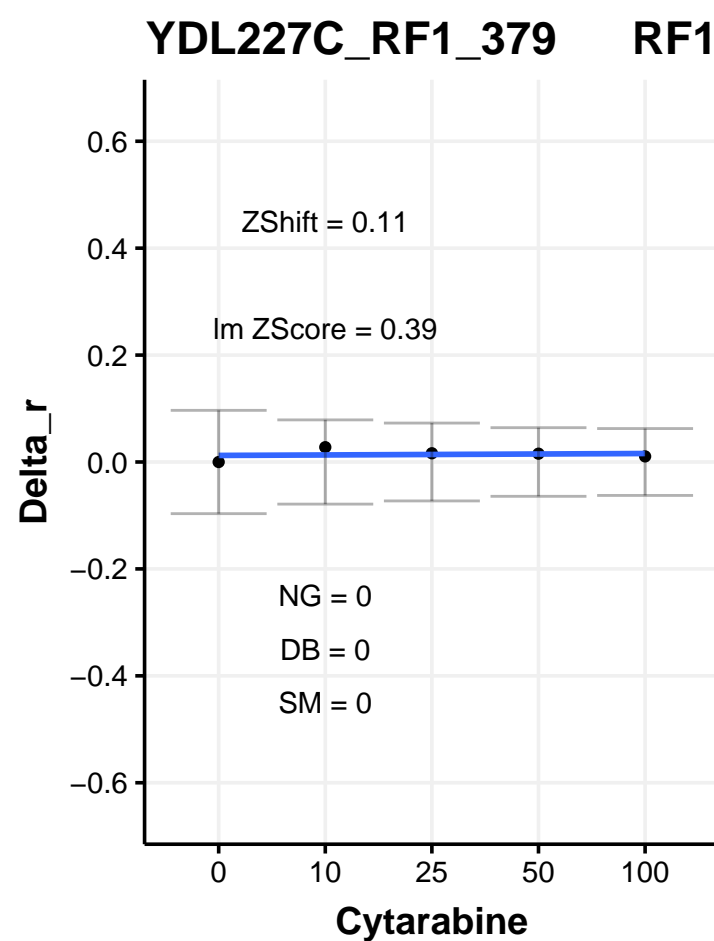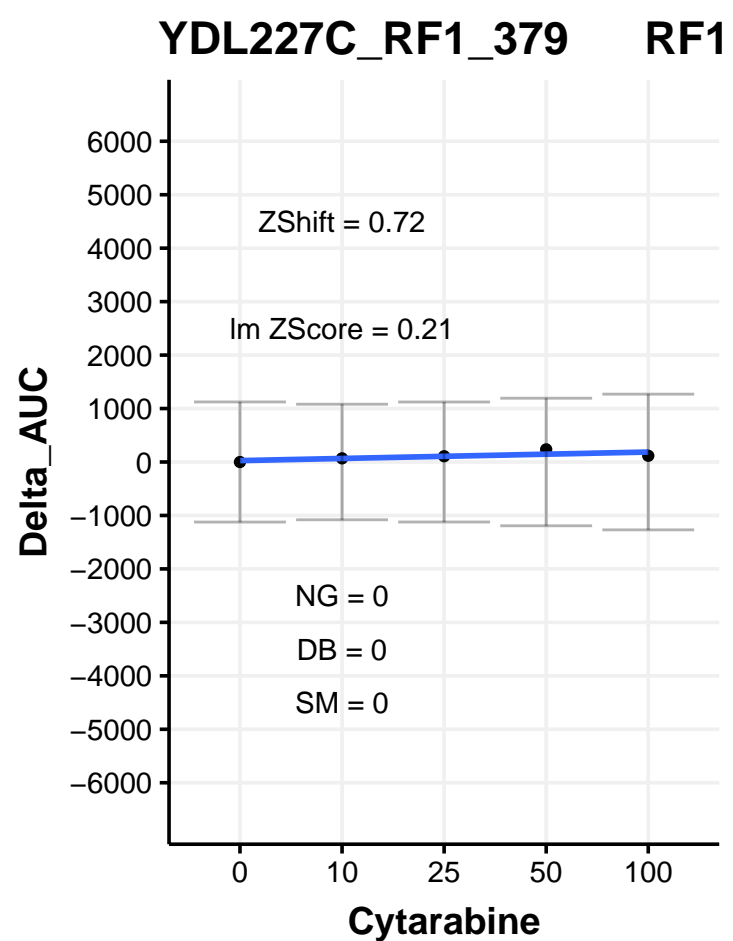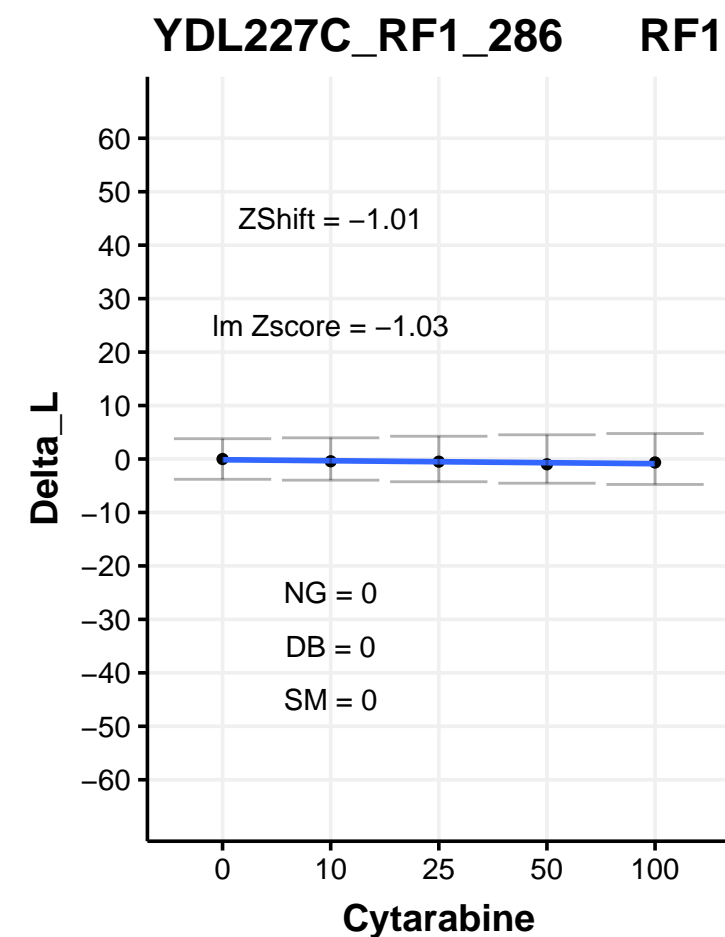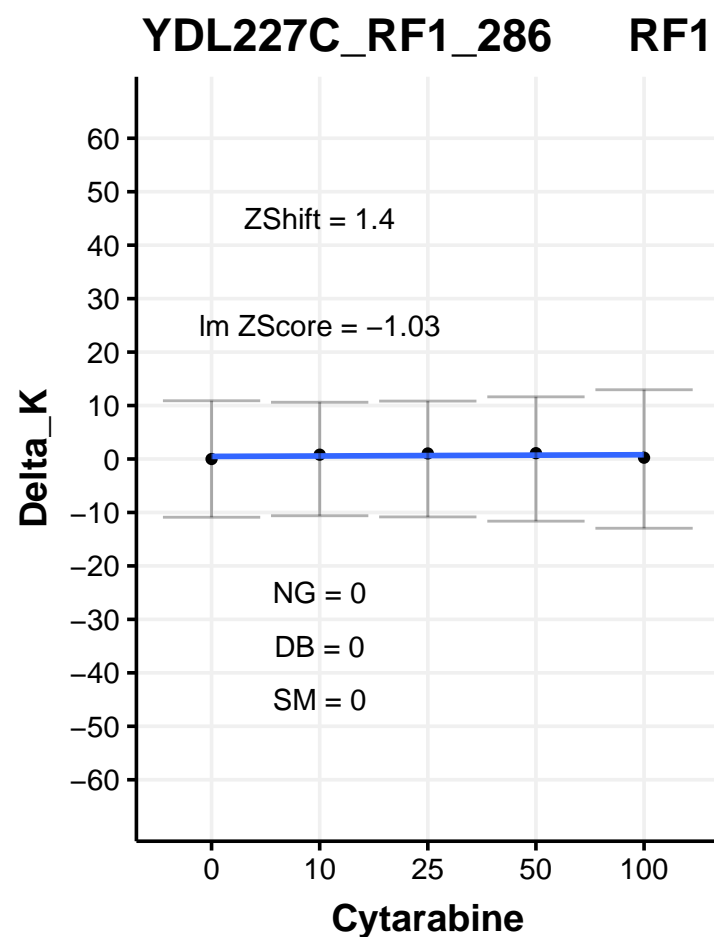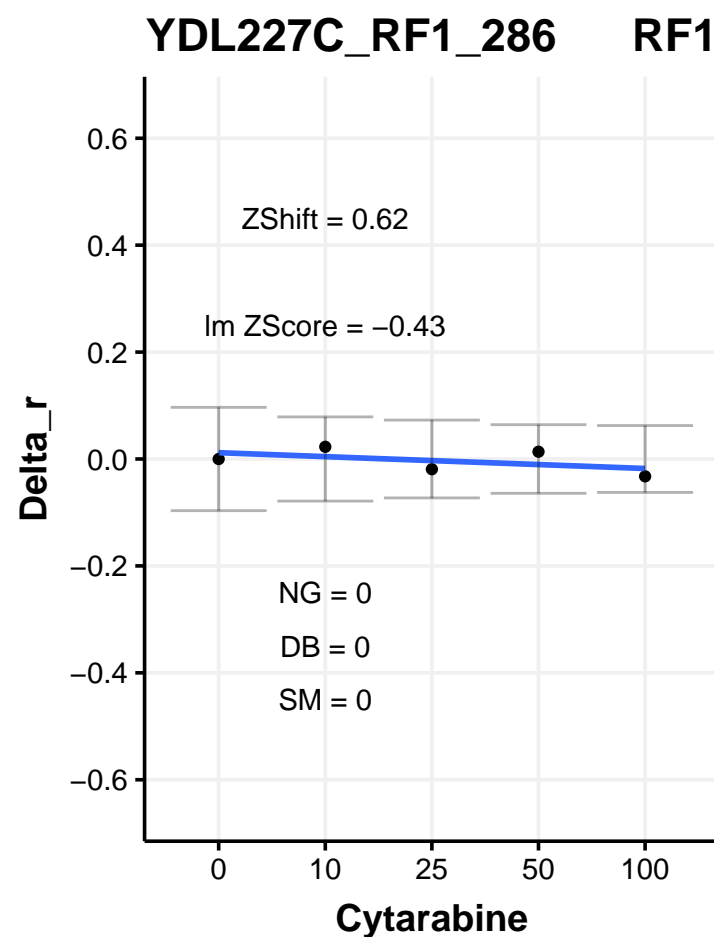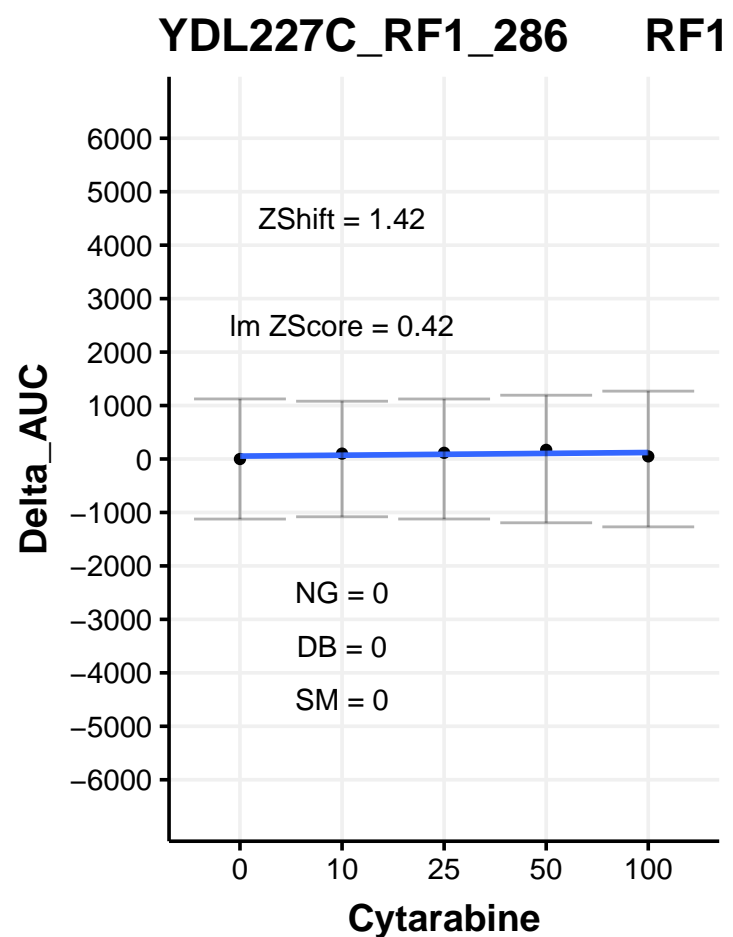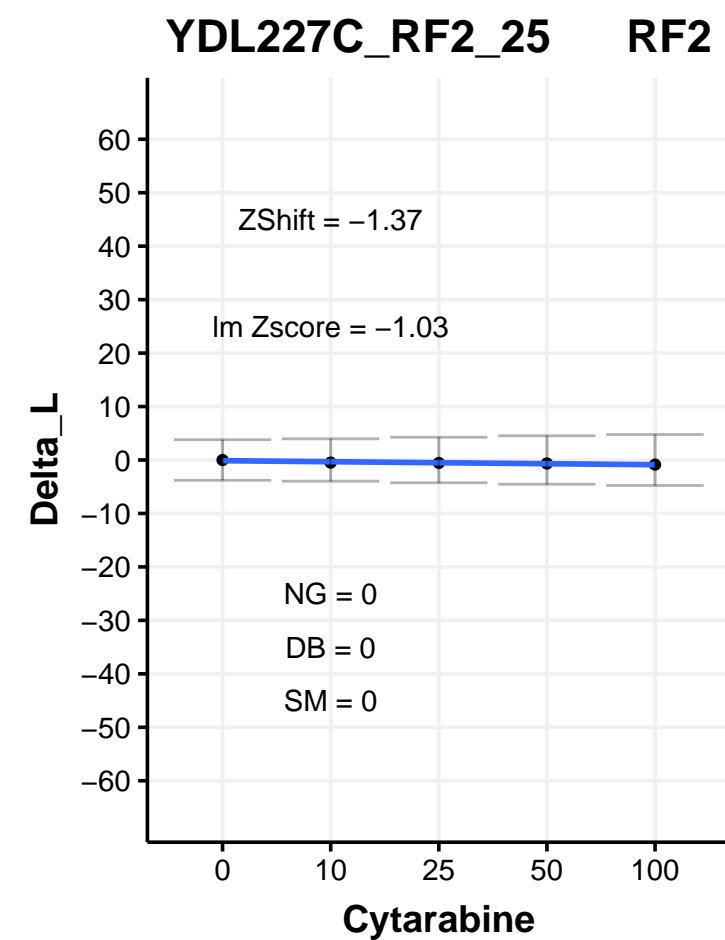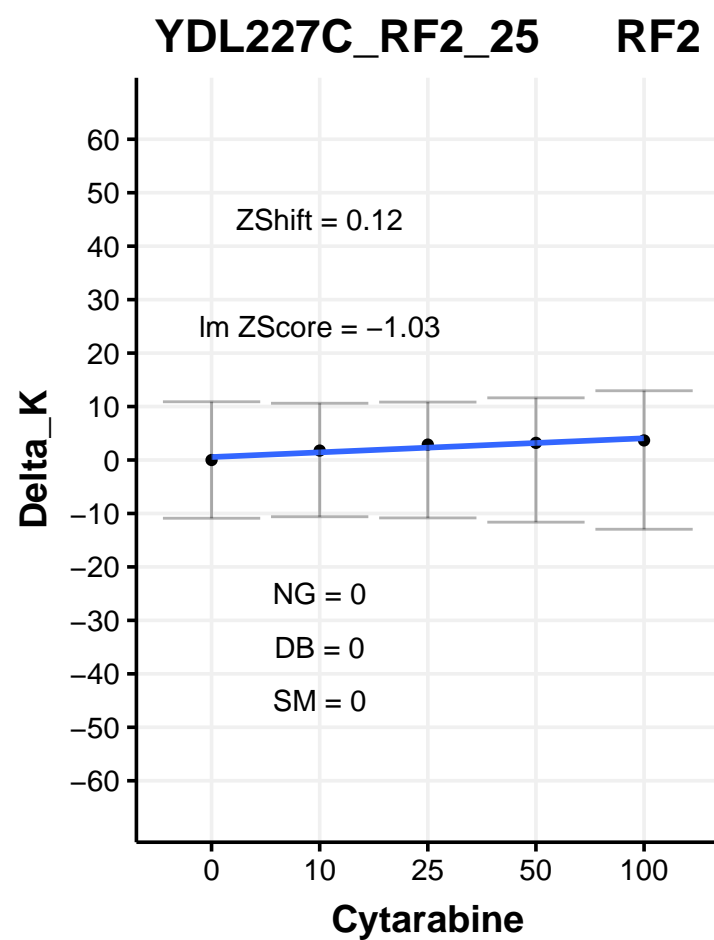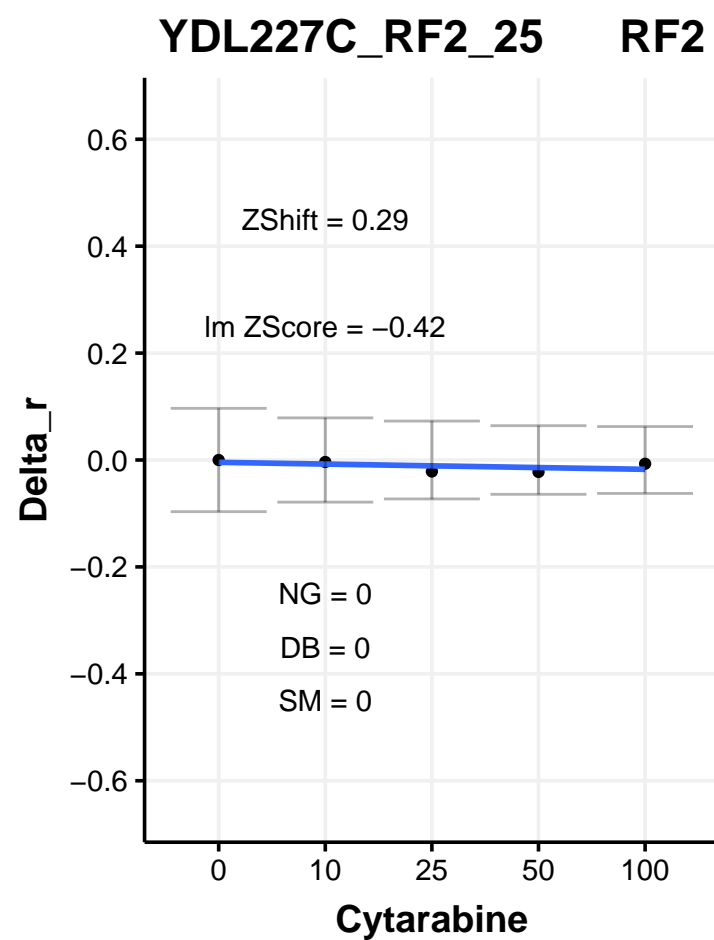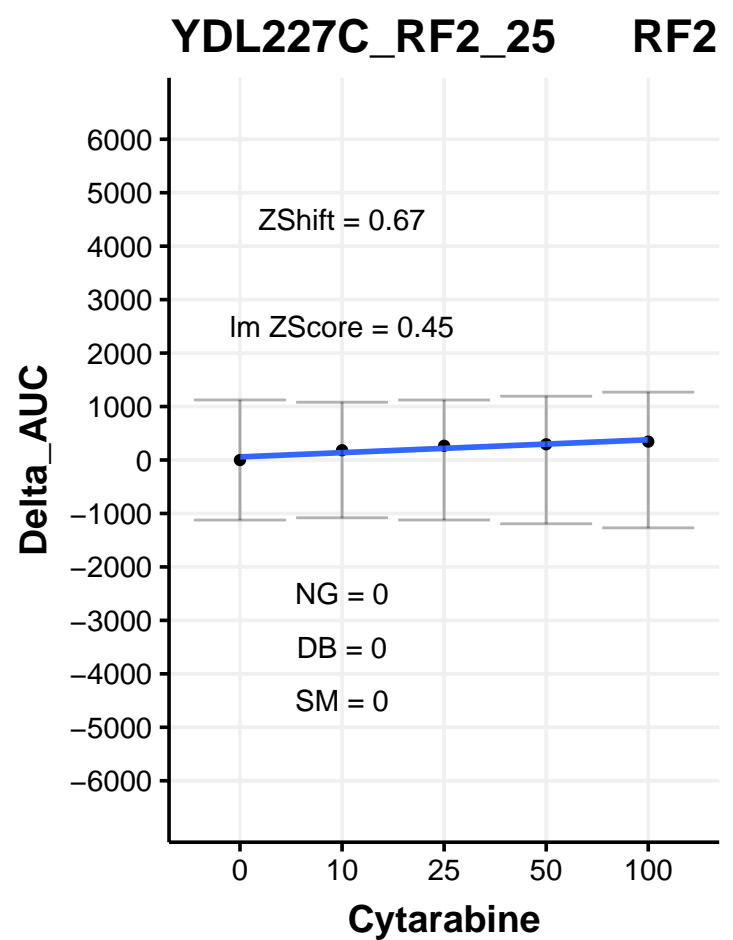

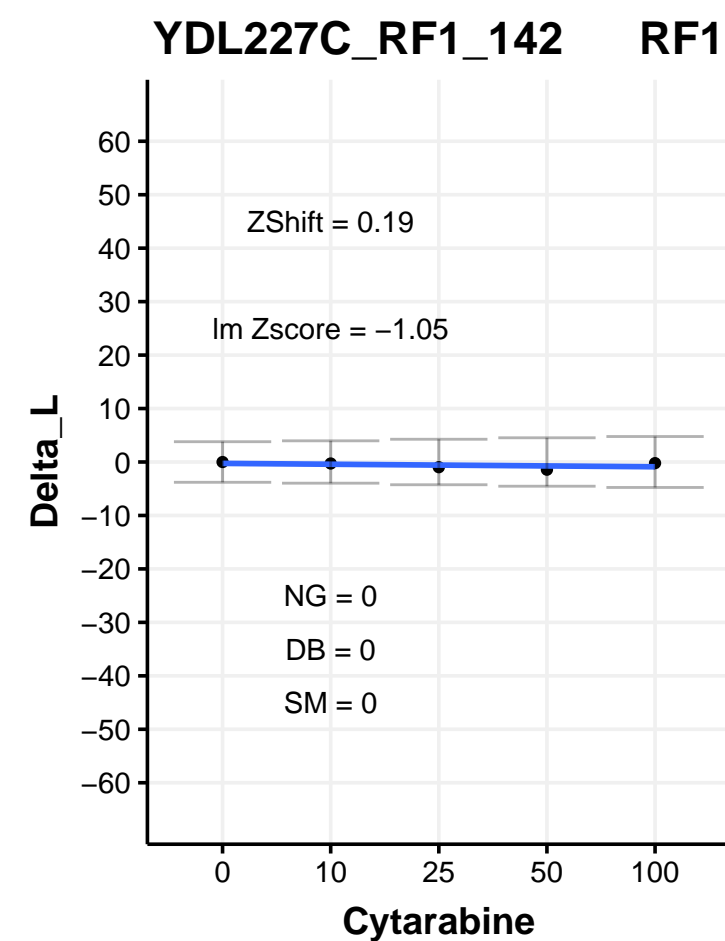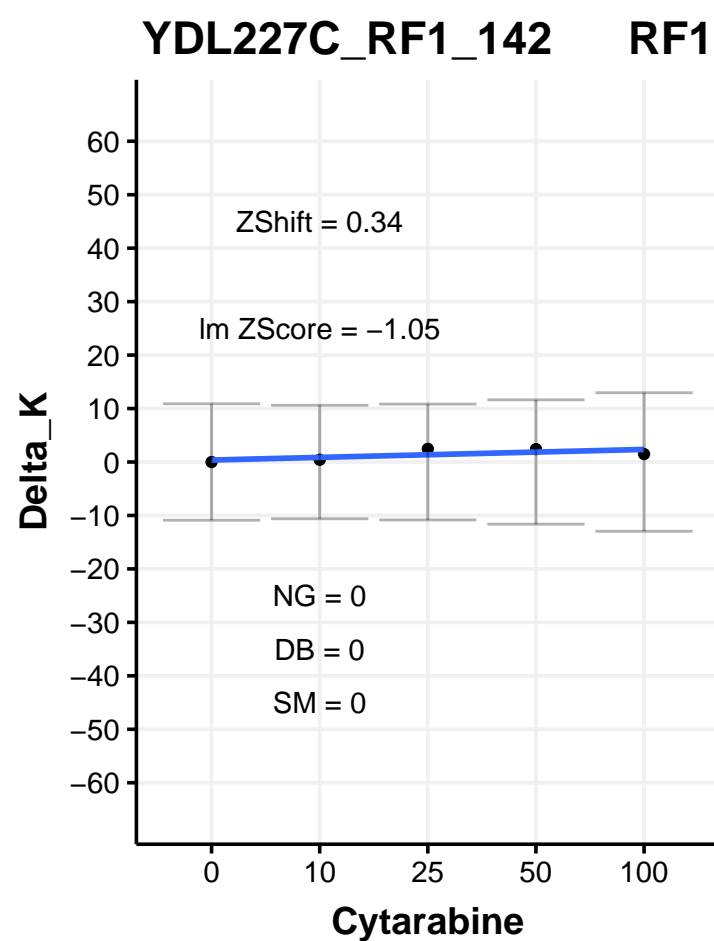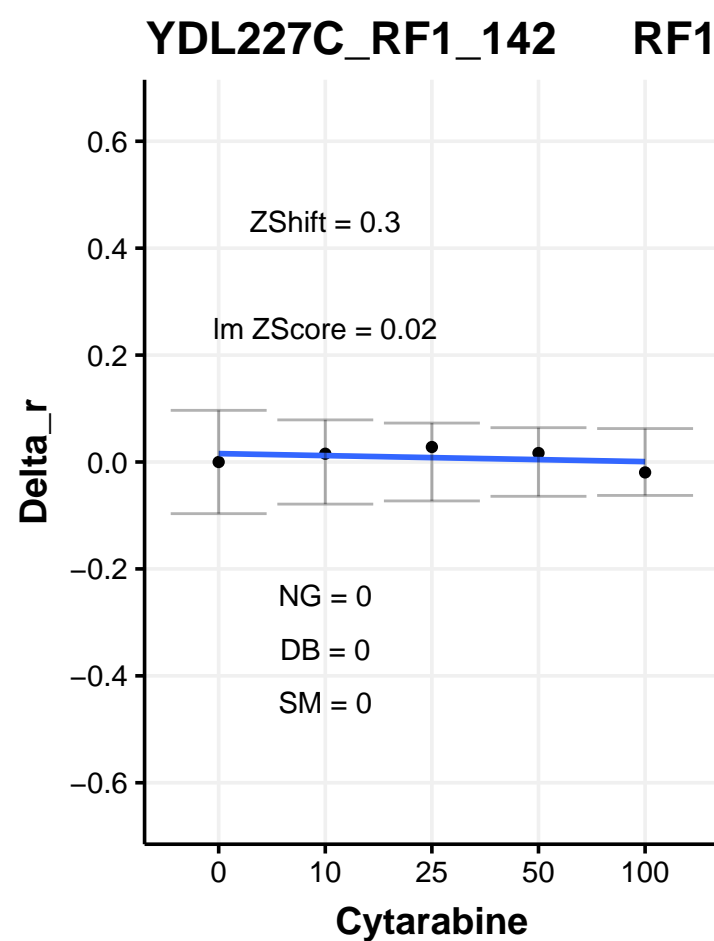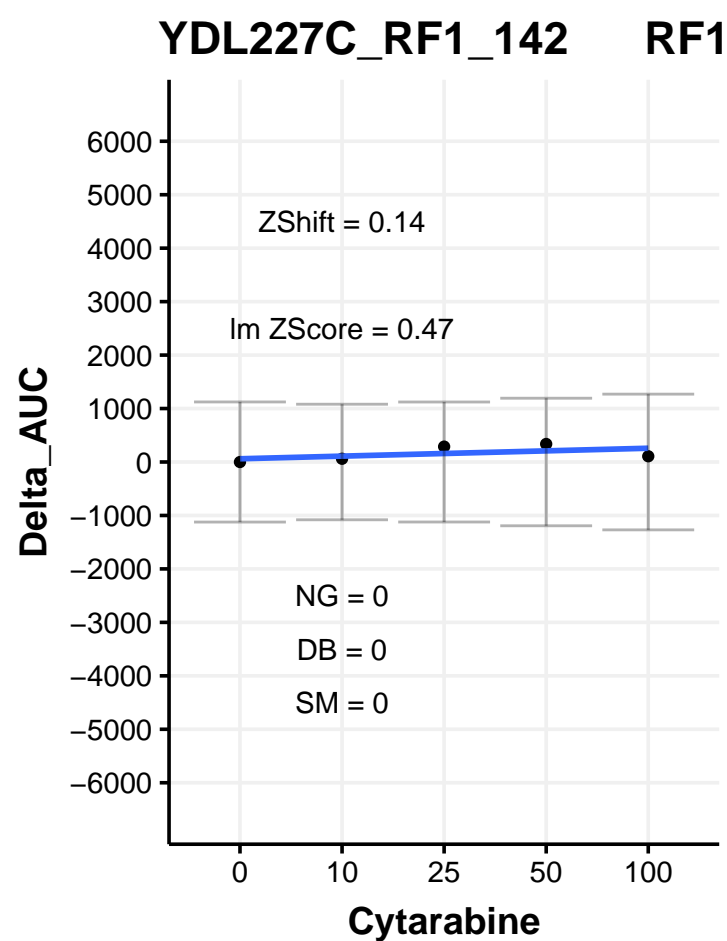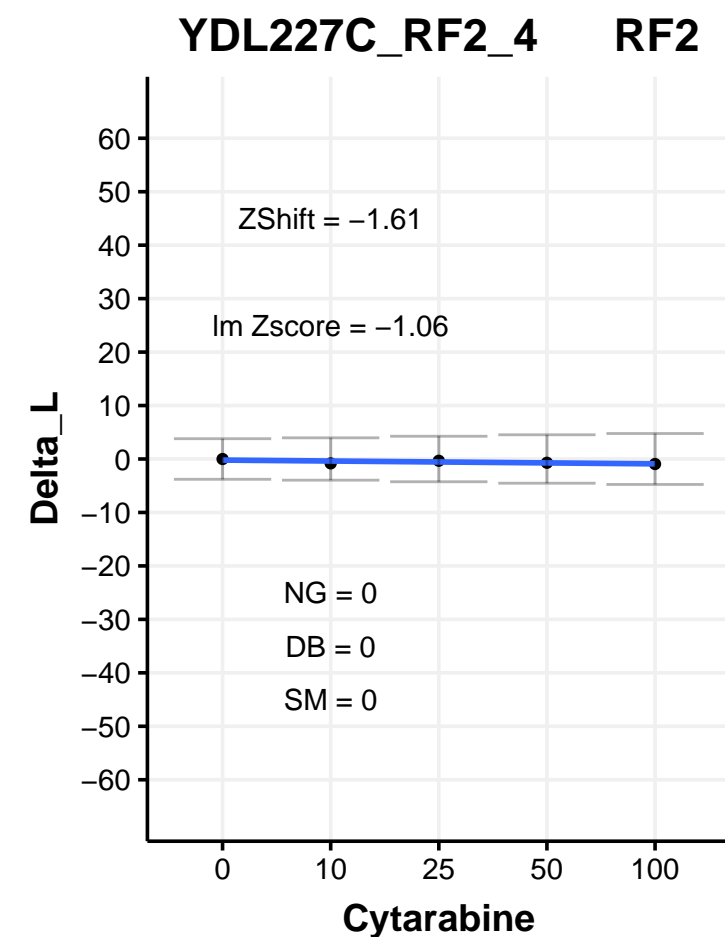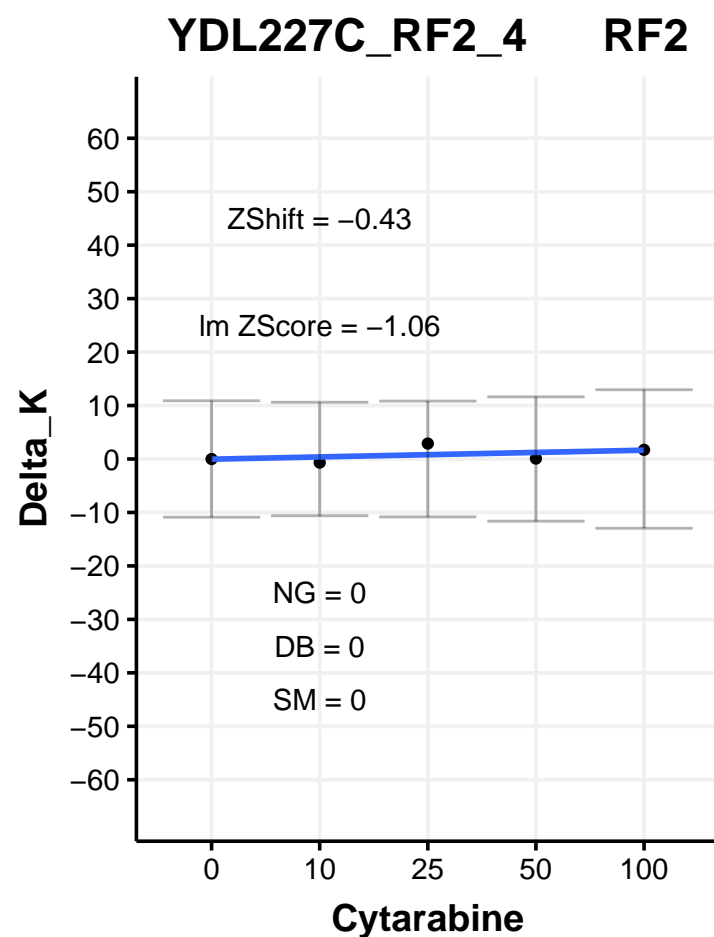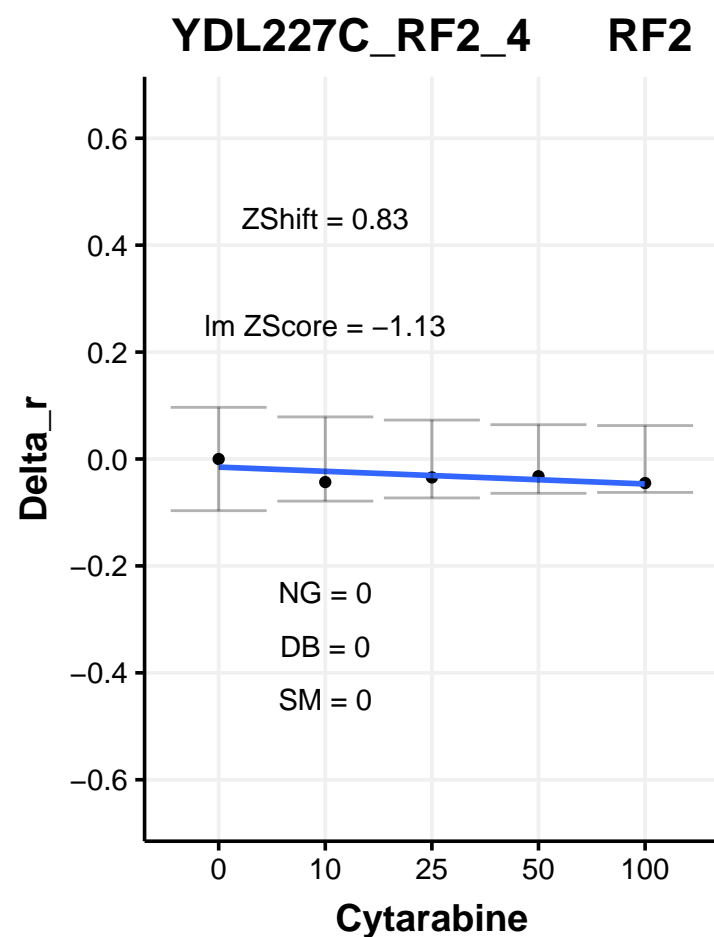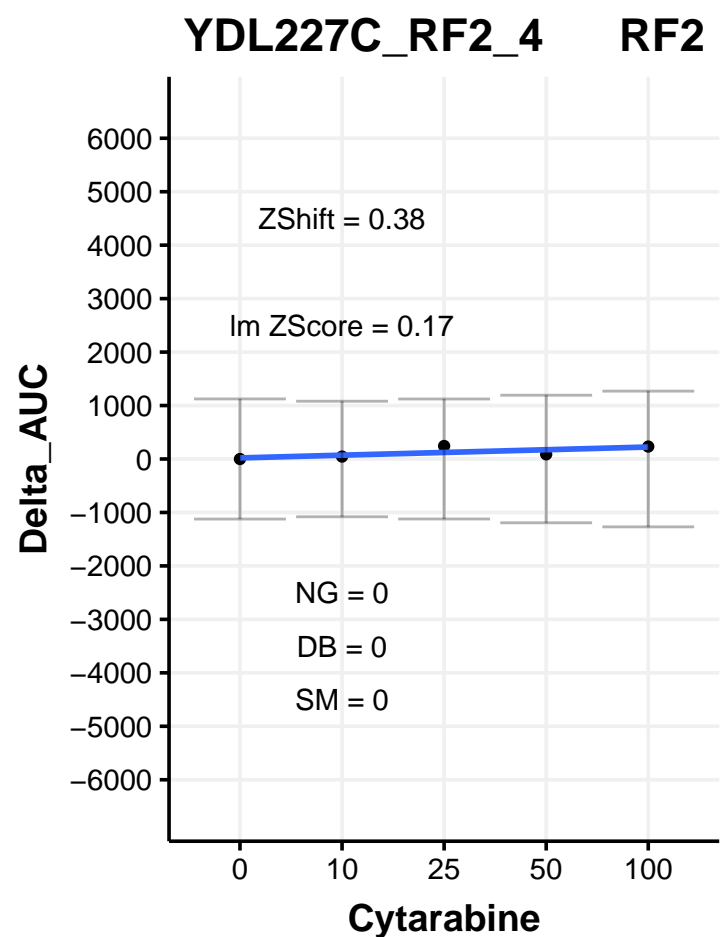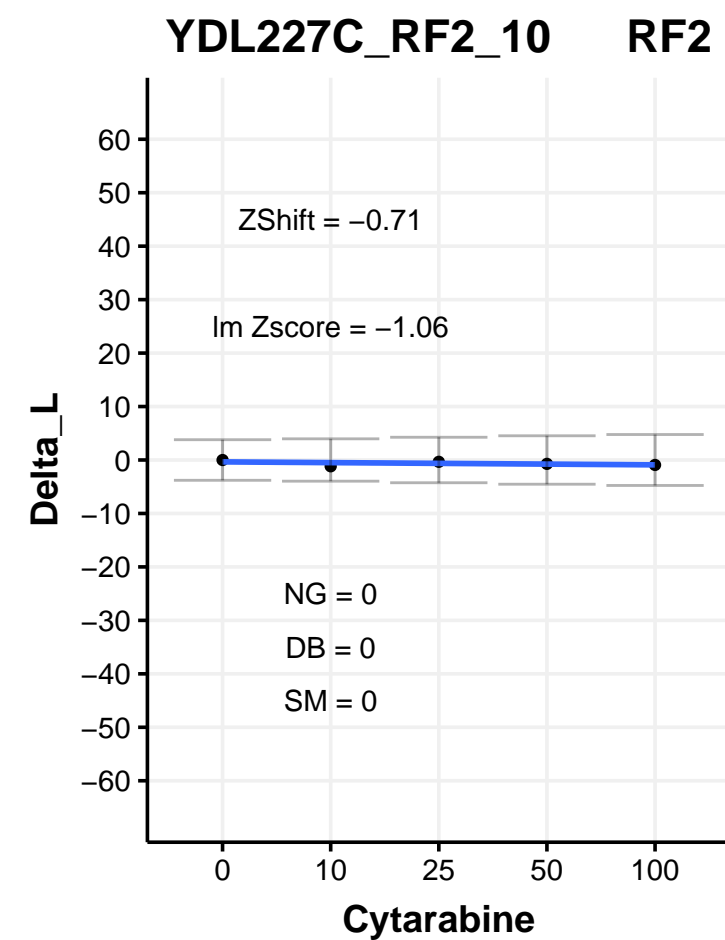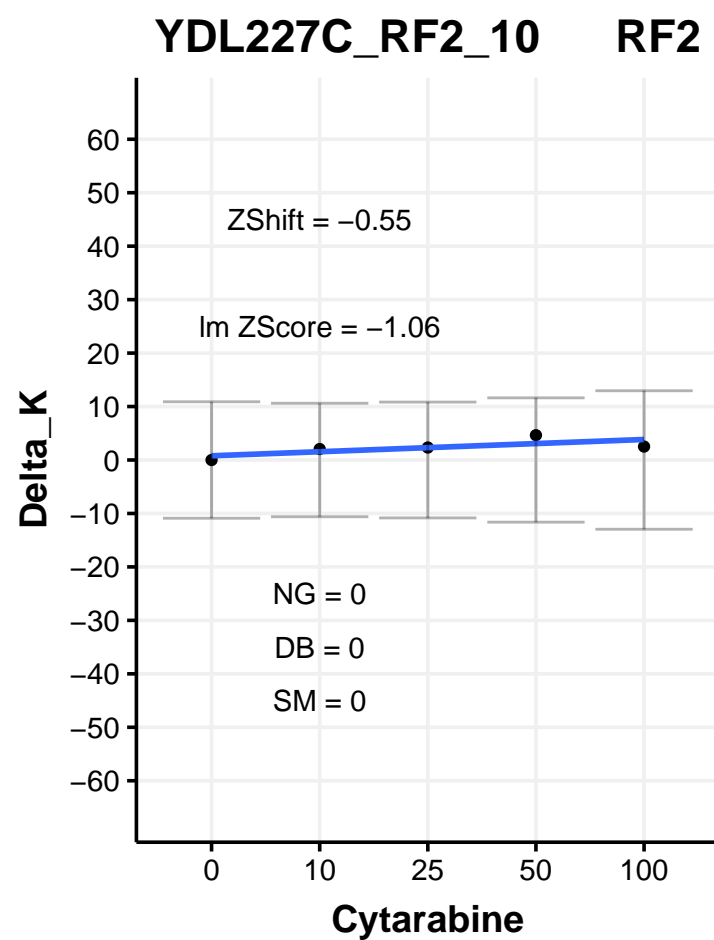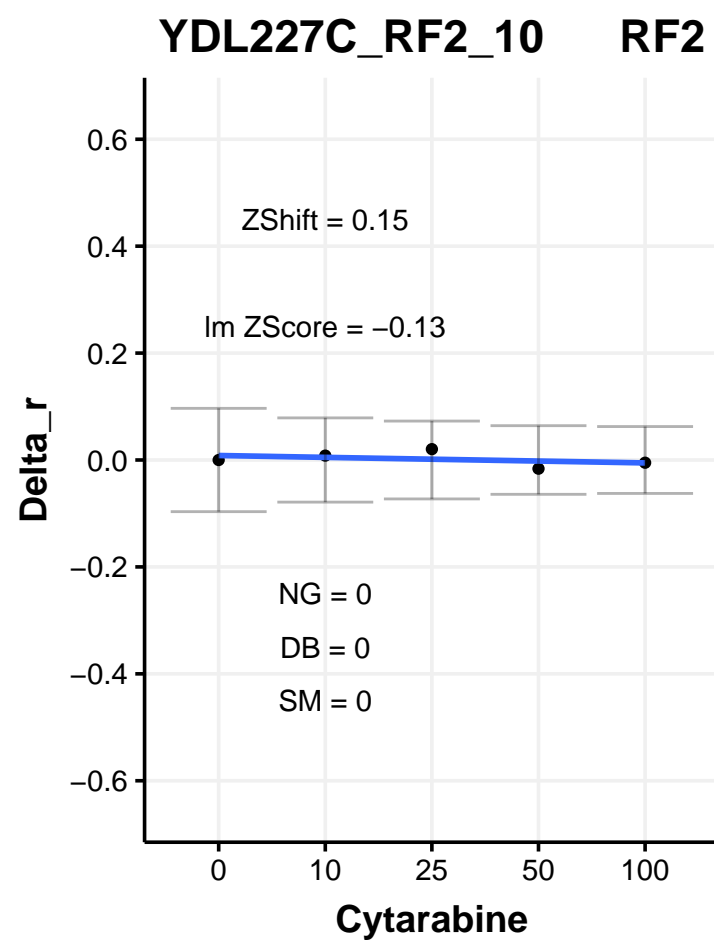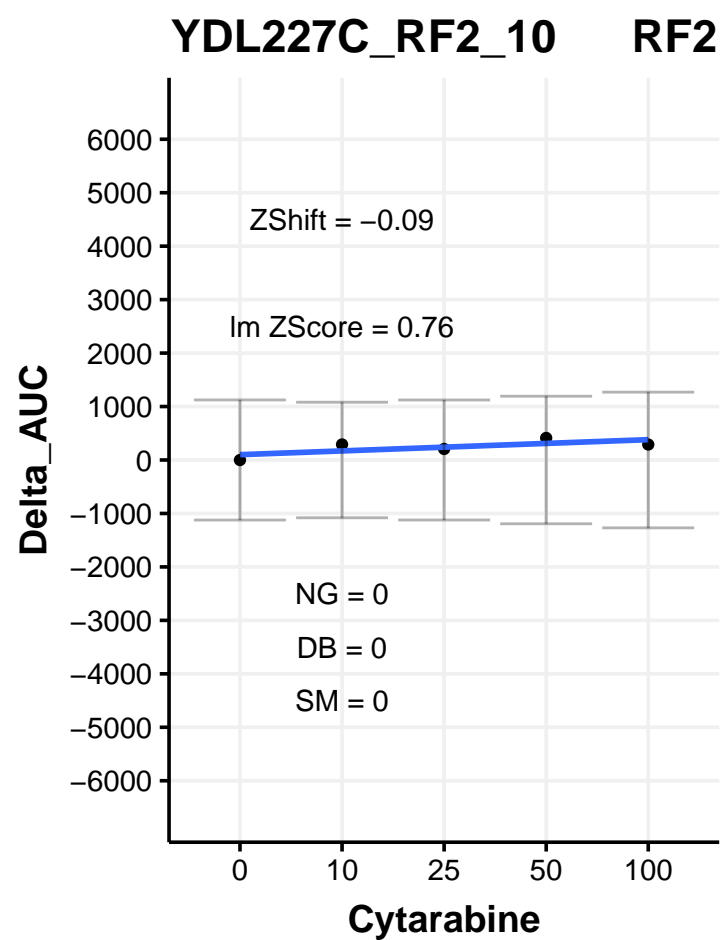

YDL227C\_RF2\_18 RF2

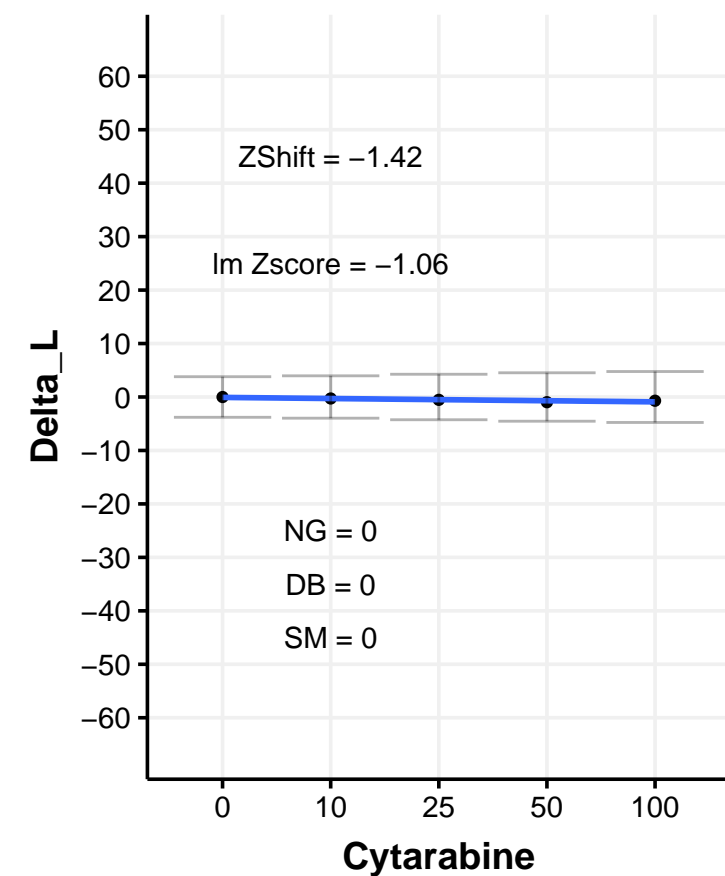

YDL227C\_RF2\_18 RF2

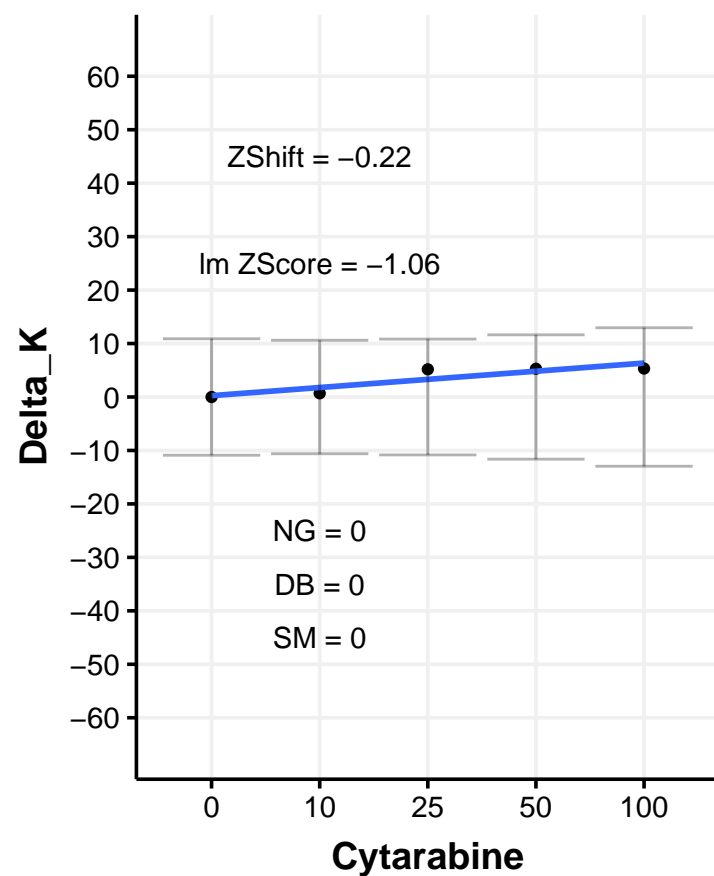

YDL227C\_RF2\_18 RF2

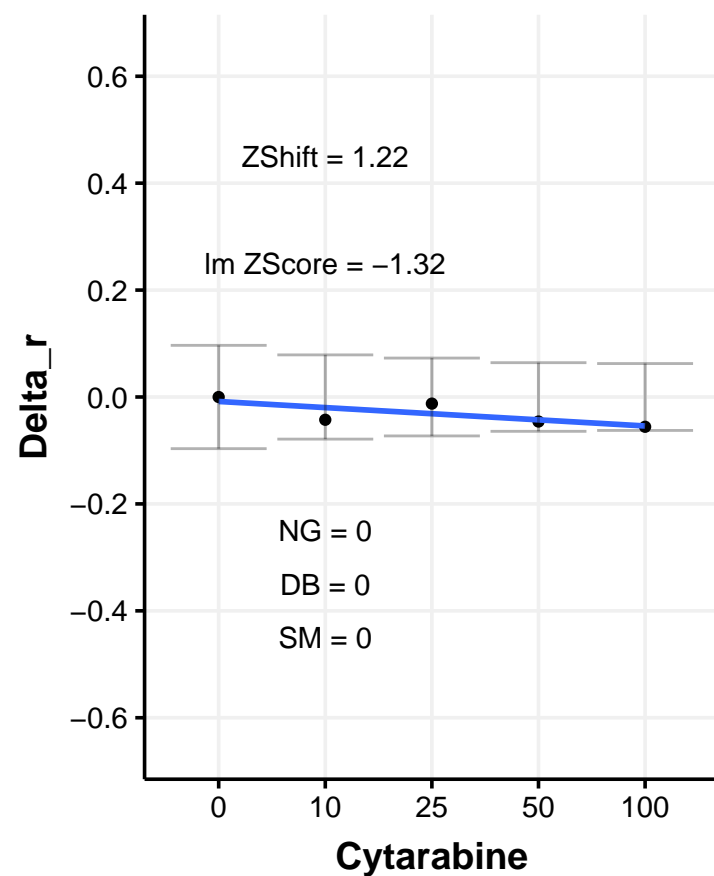

YDL227C\_RF2\_18 RF2

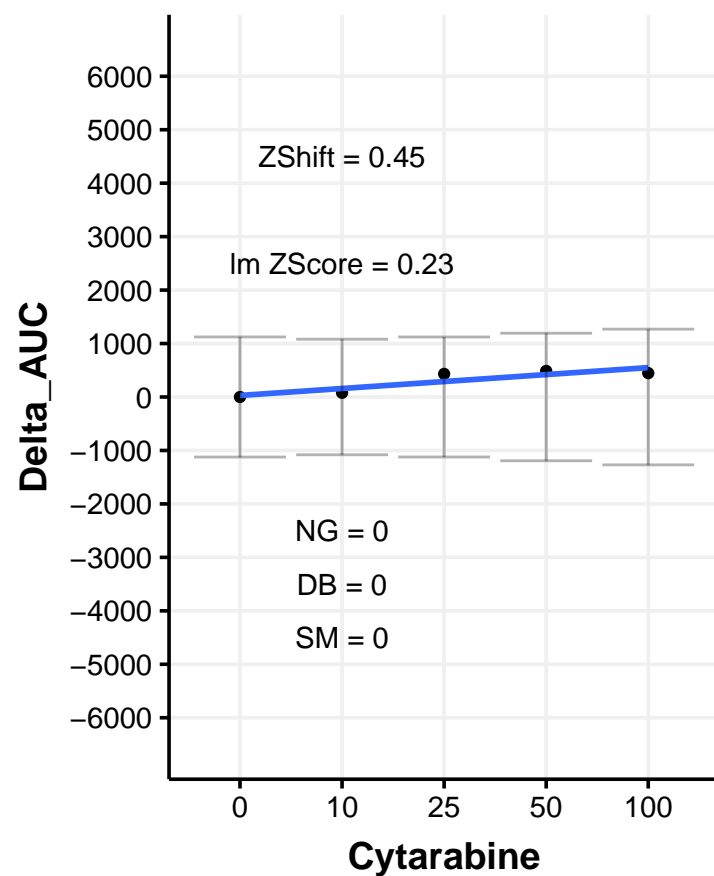

YDL227C\_RF1\_212 RF1

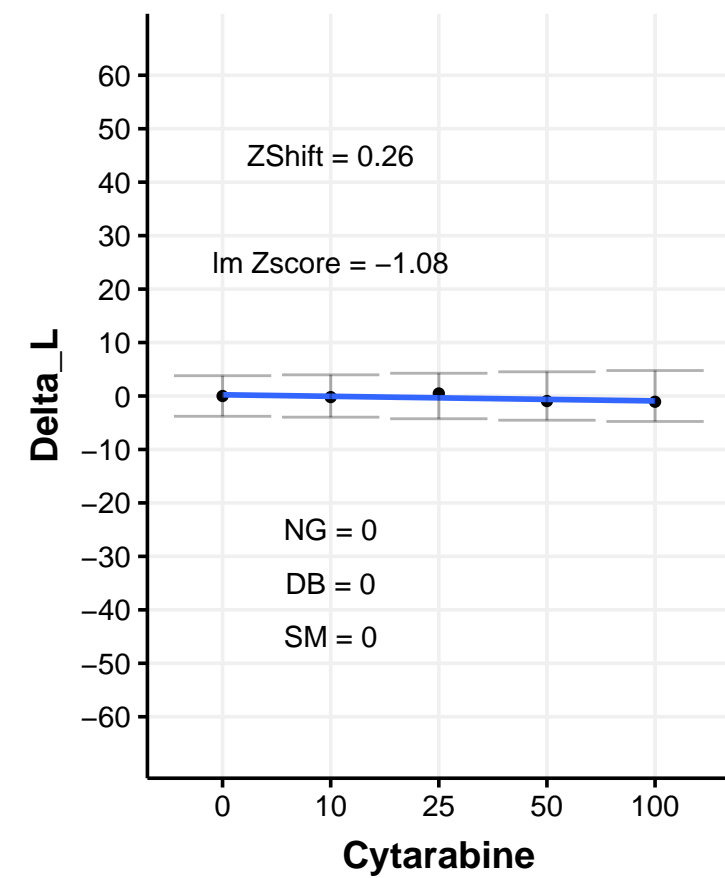

YDL227C\_RF1\_212 RF1

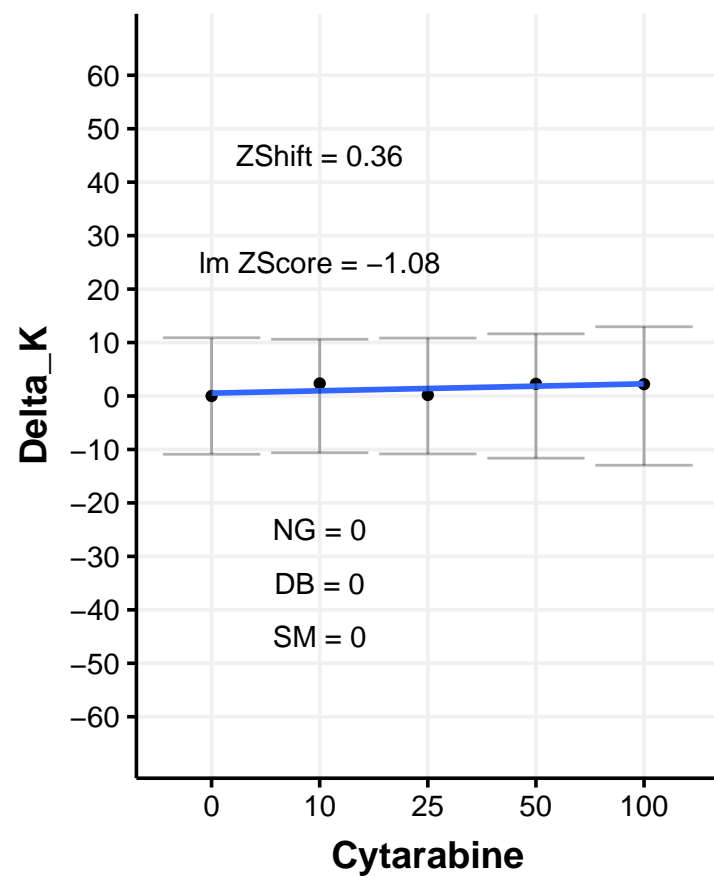

YDL227C\_RF1\_212 RF1

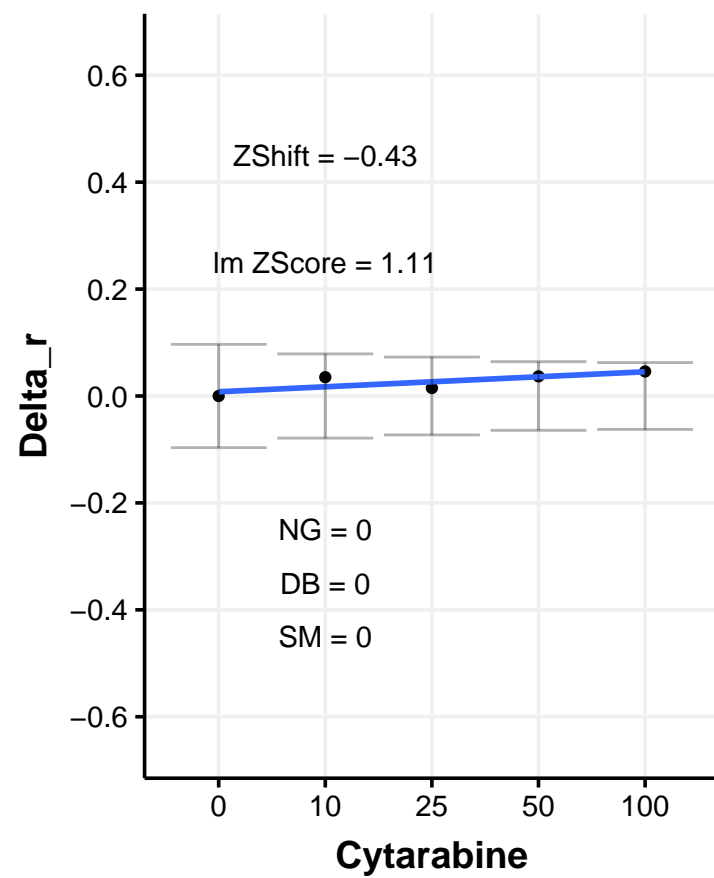

YDL227C\_RF1\_212 RF1

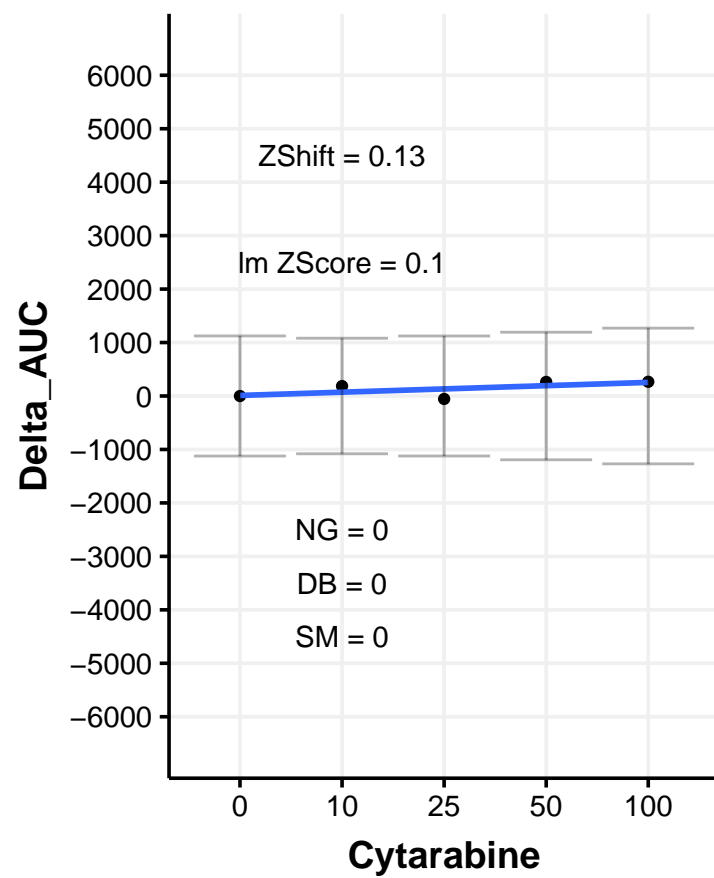

YDL227C\_RF1\_219 RF1

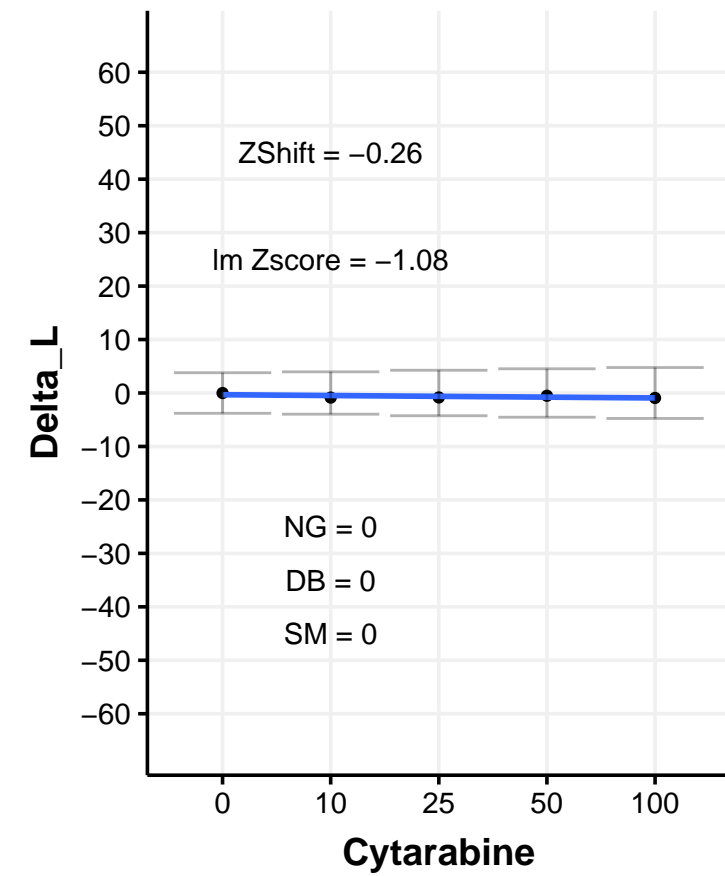

YDL227C\_RF1\_219 RF1

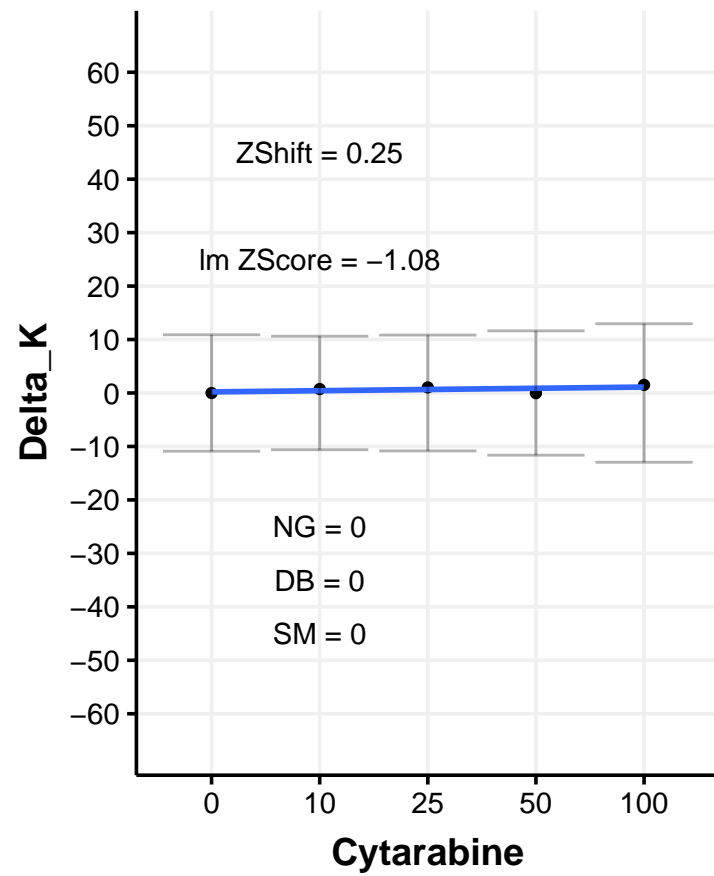

YDL227C\_RF1\_219 RF1

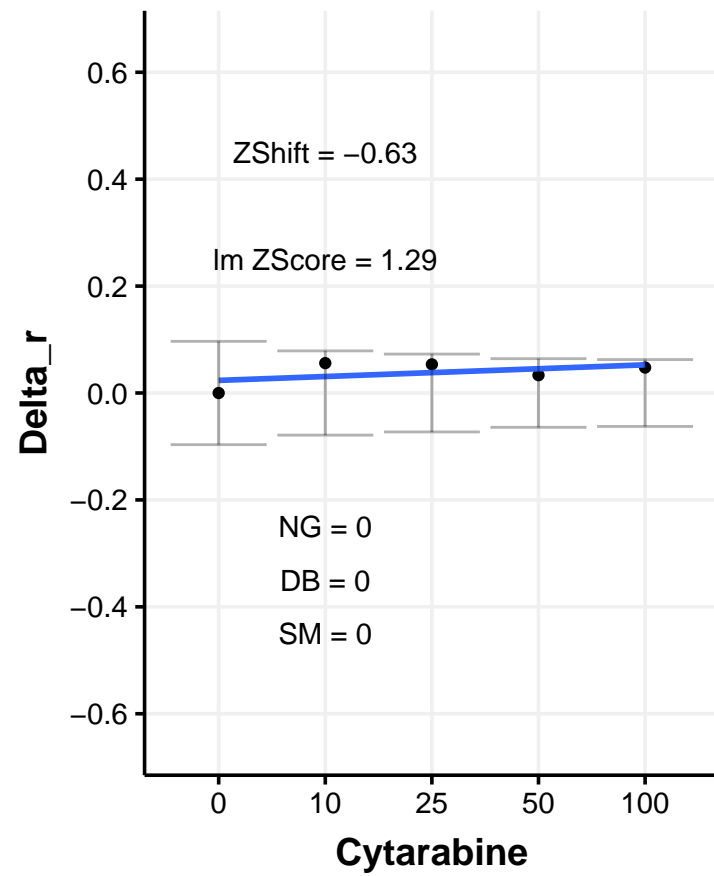

YDL227C\_RF1\_219 RF1

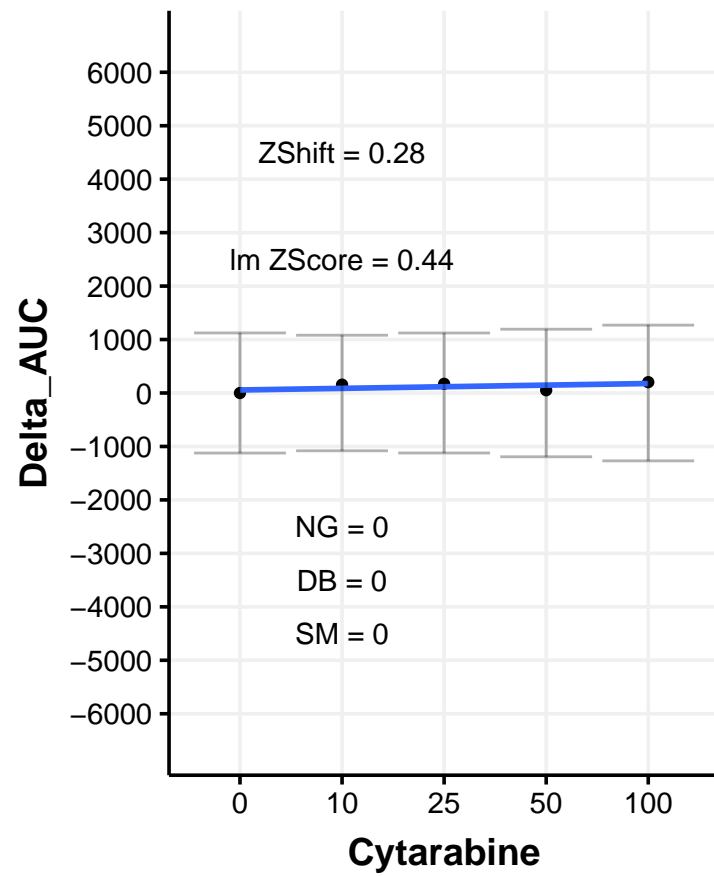

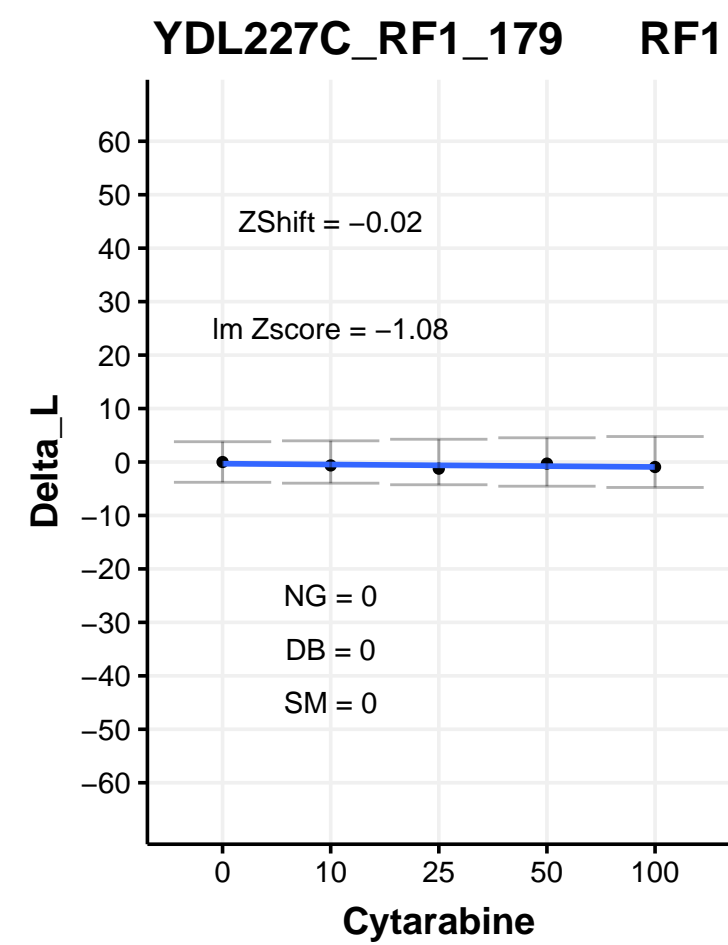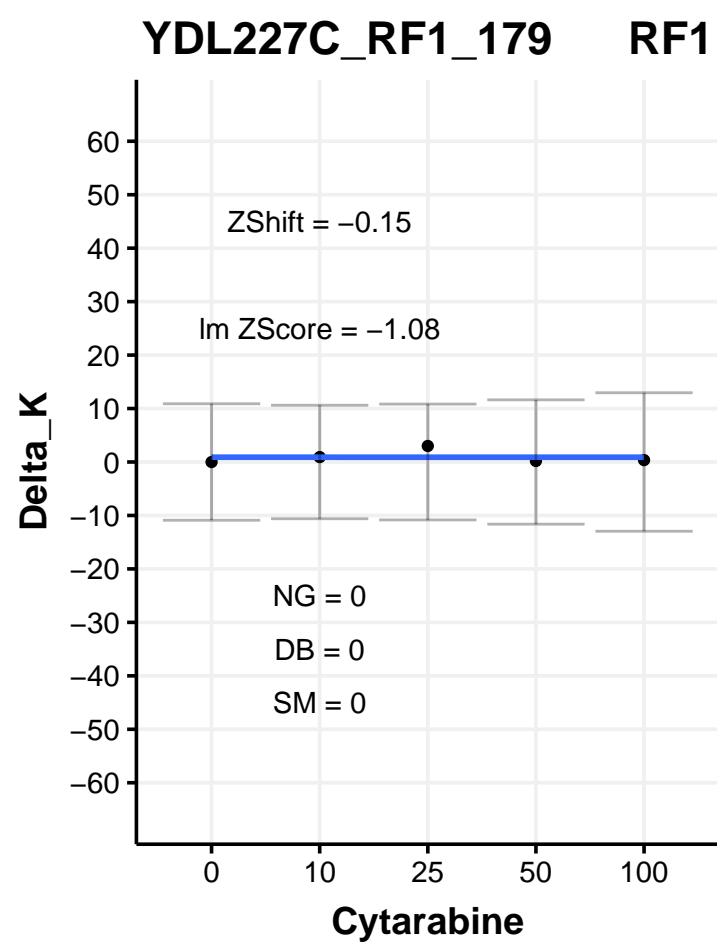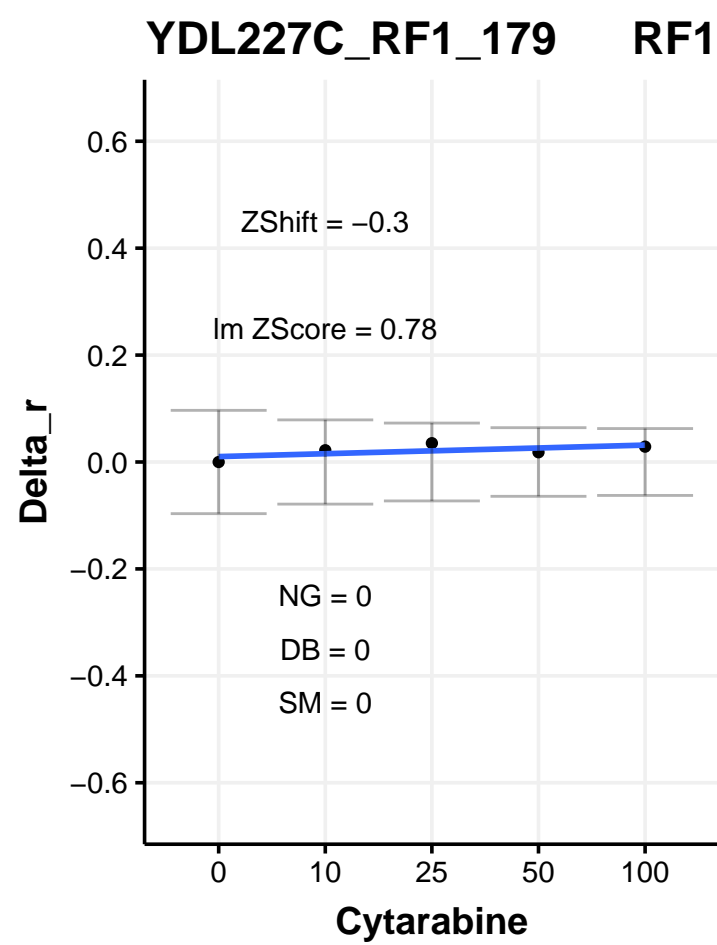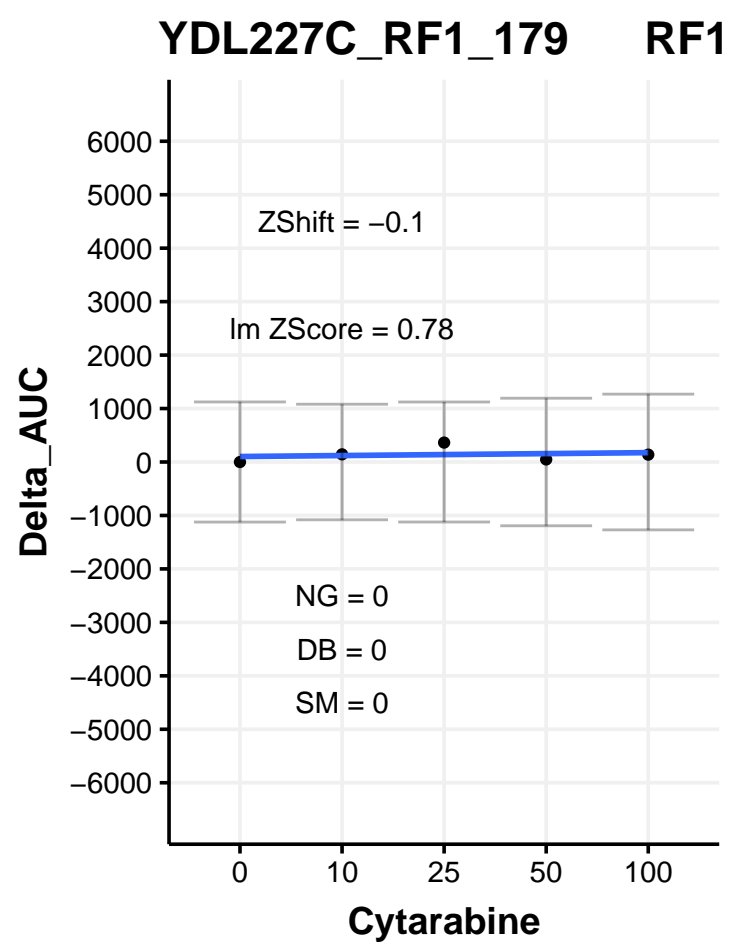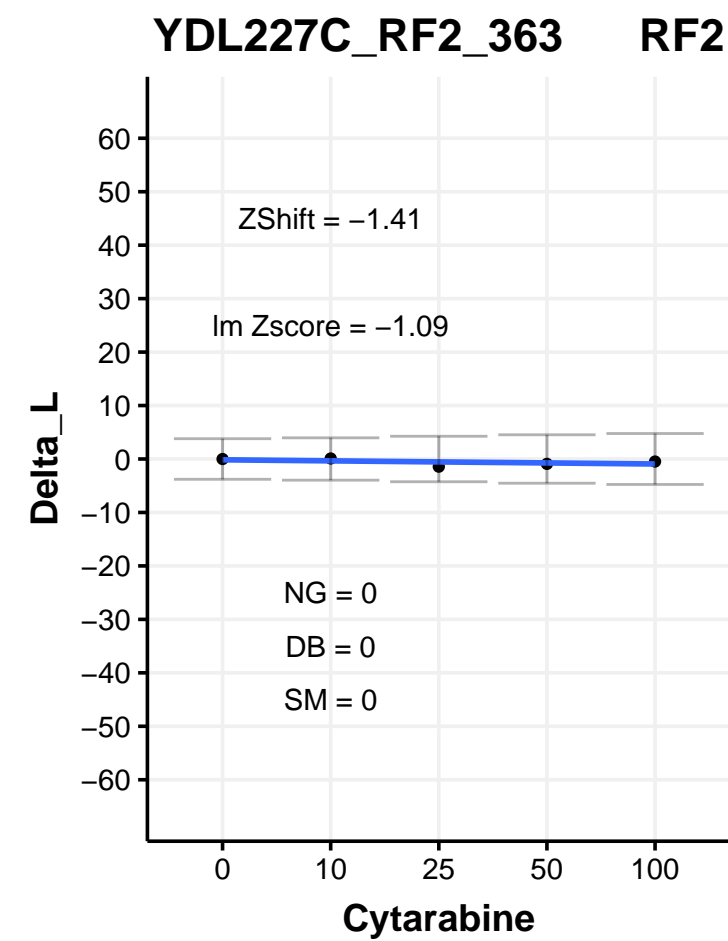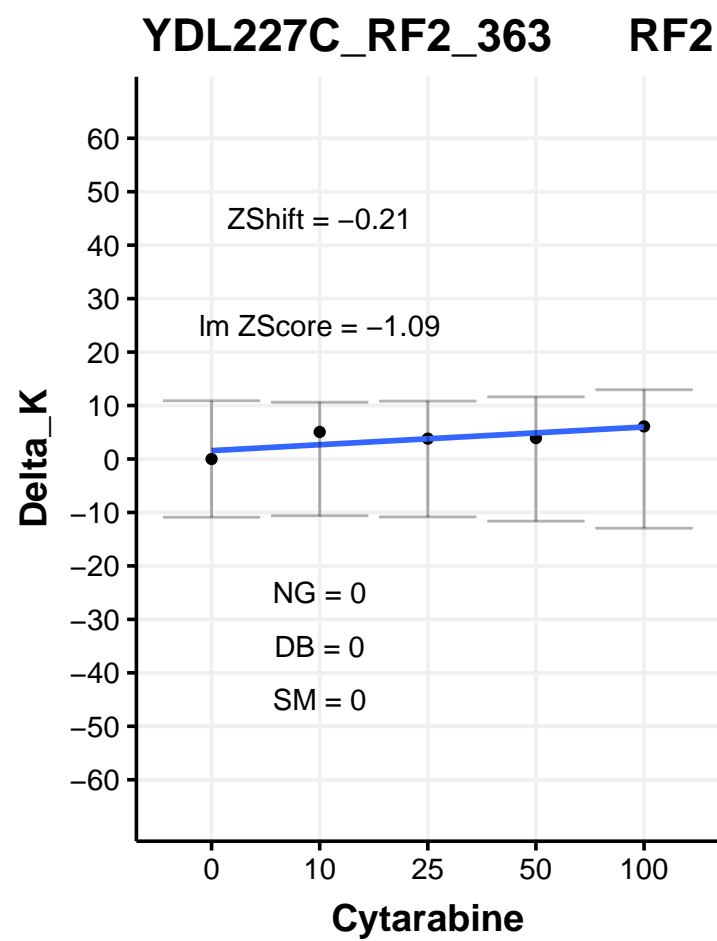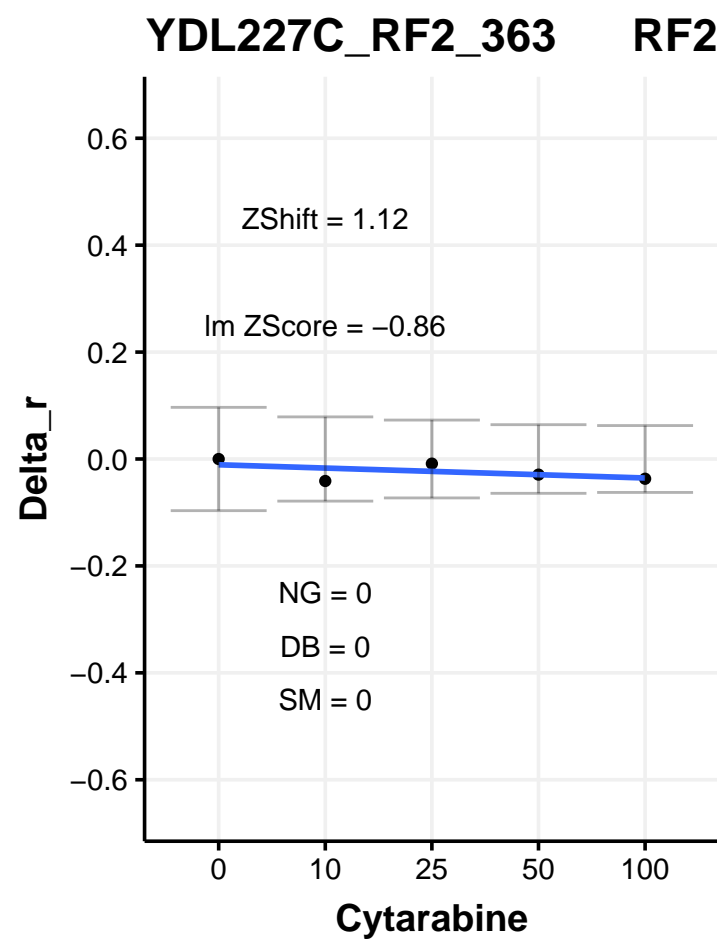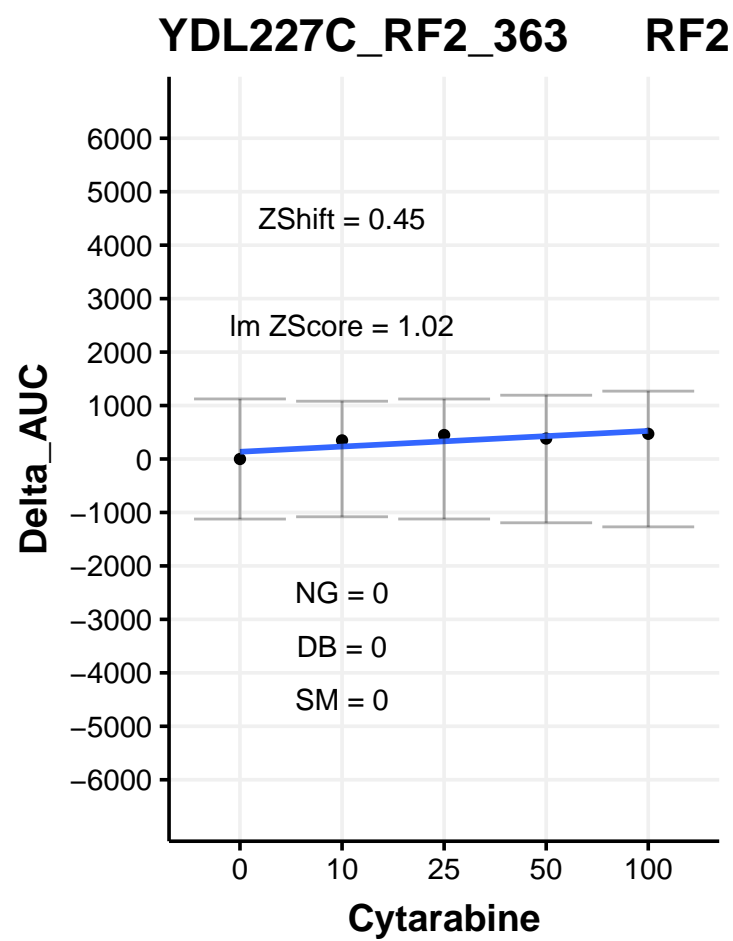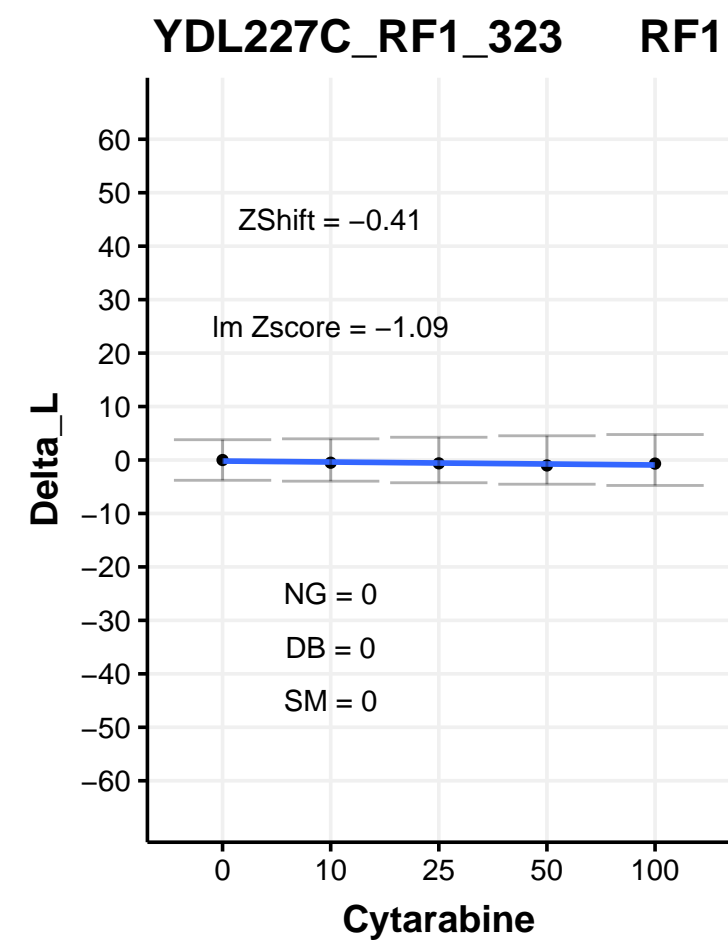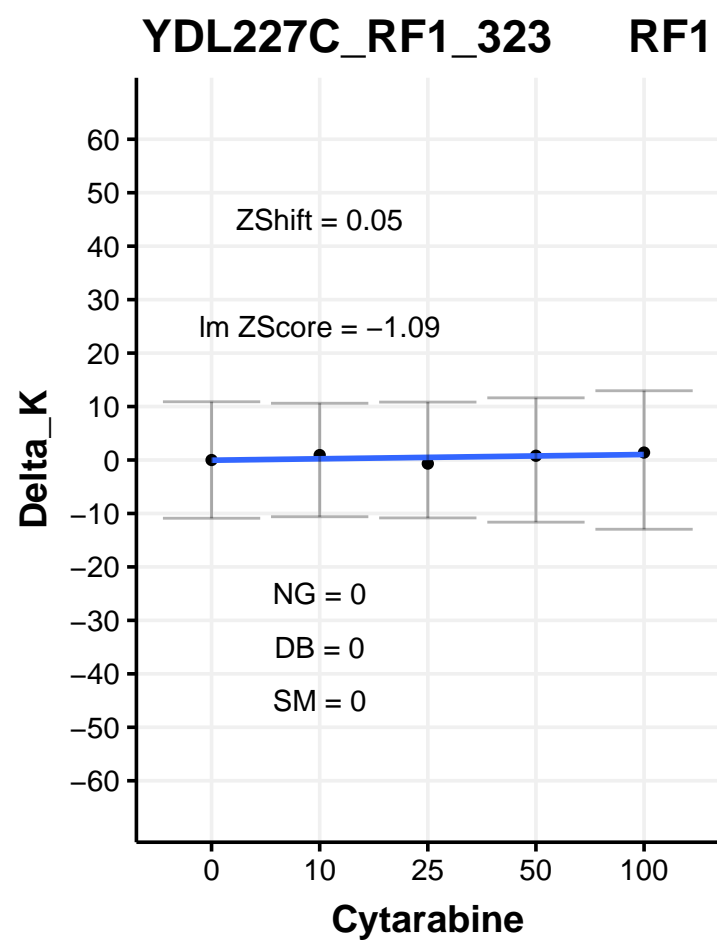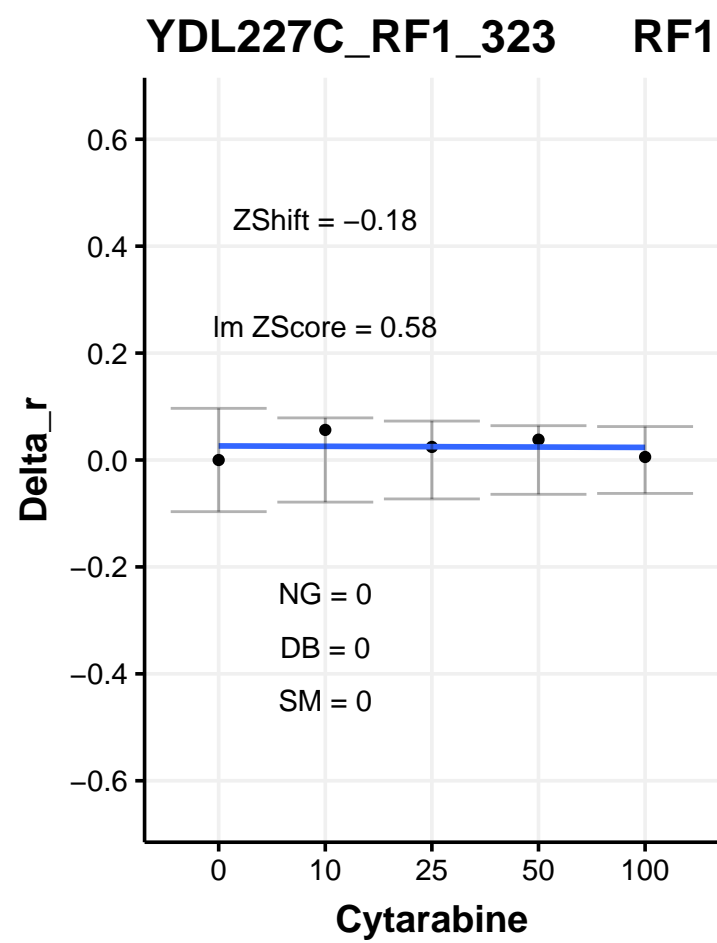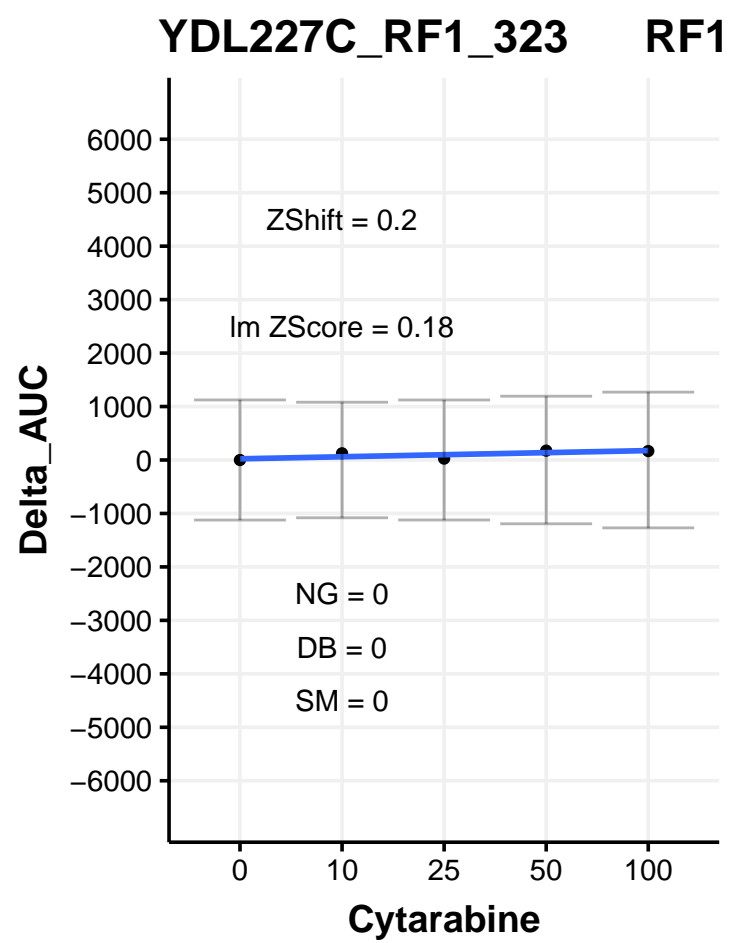

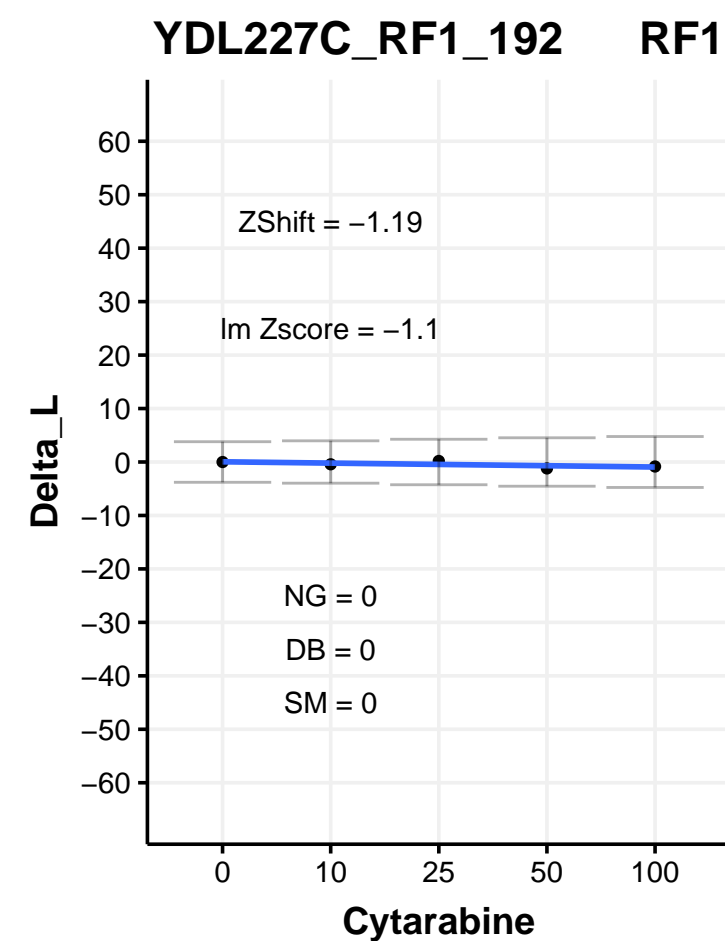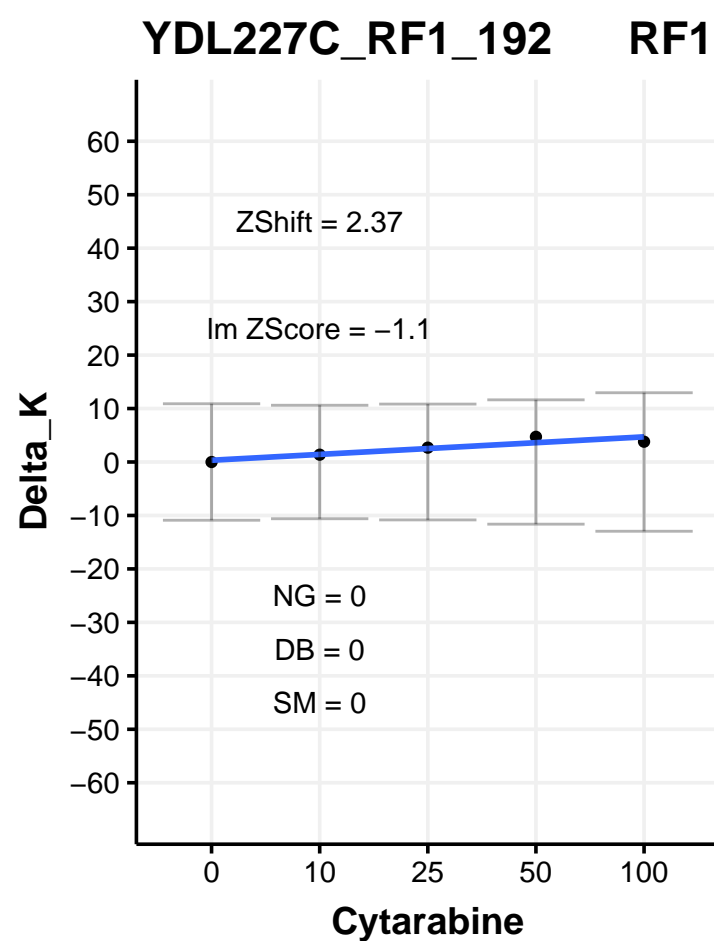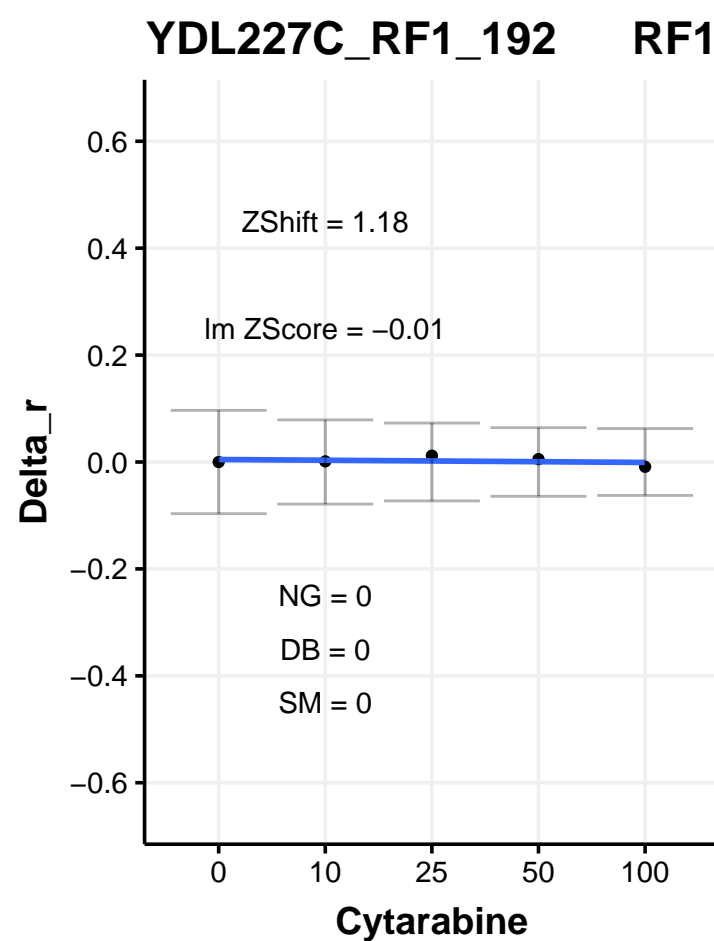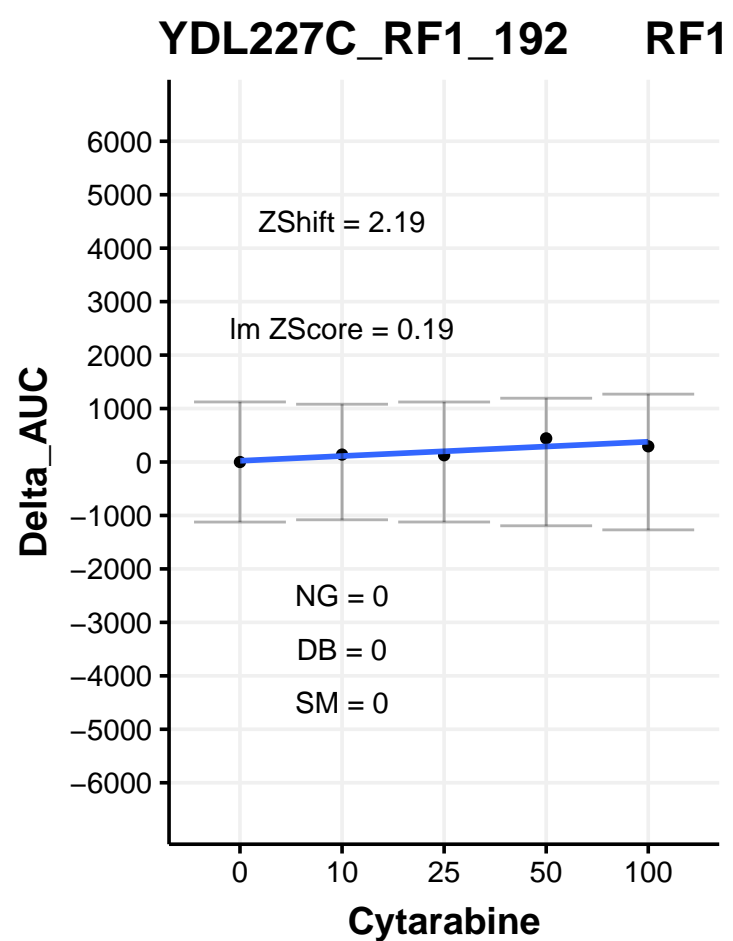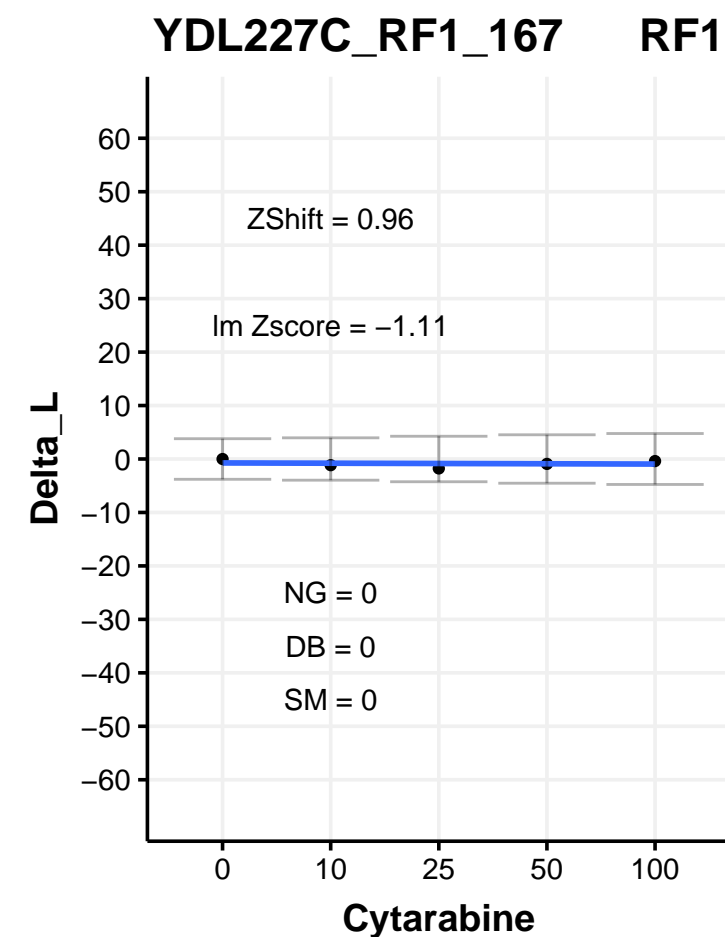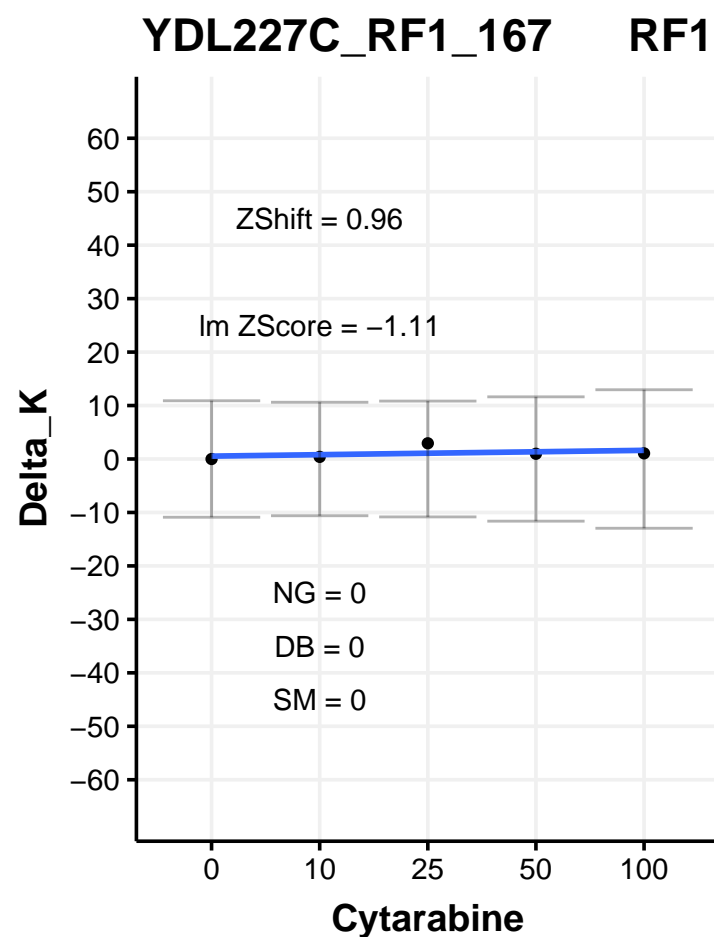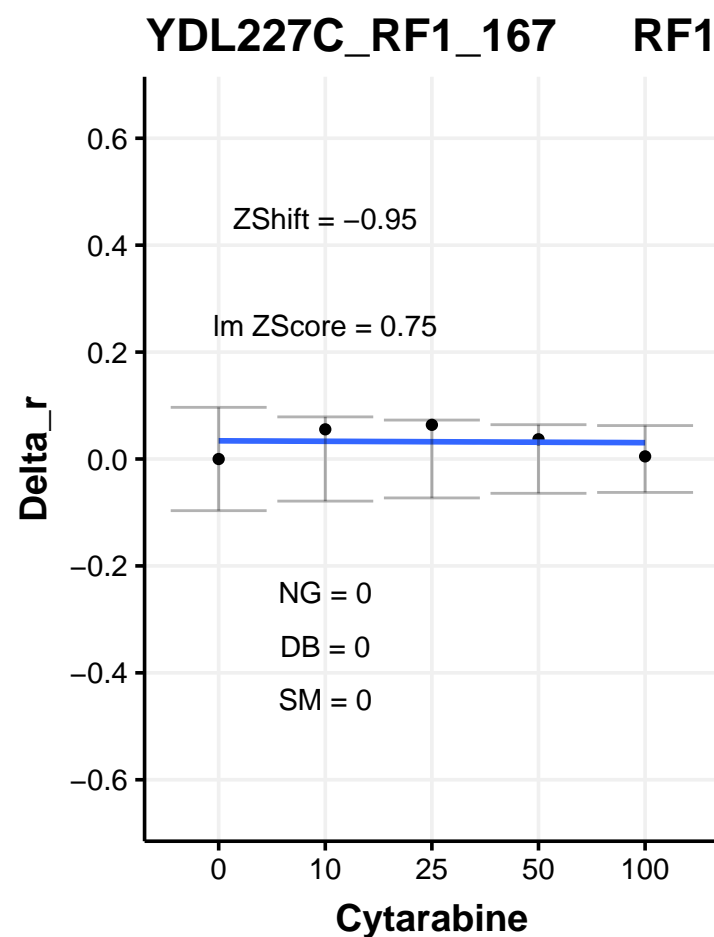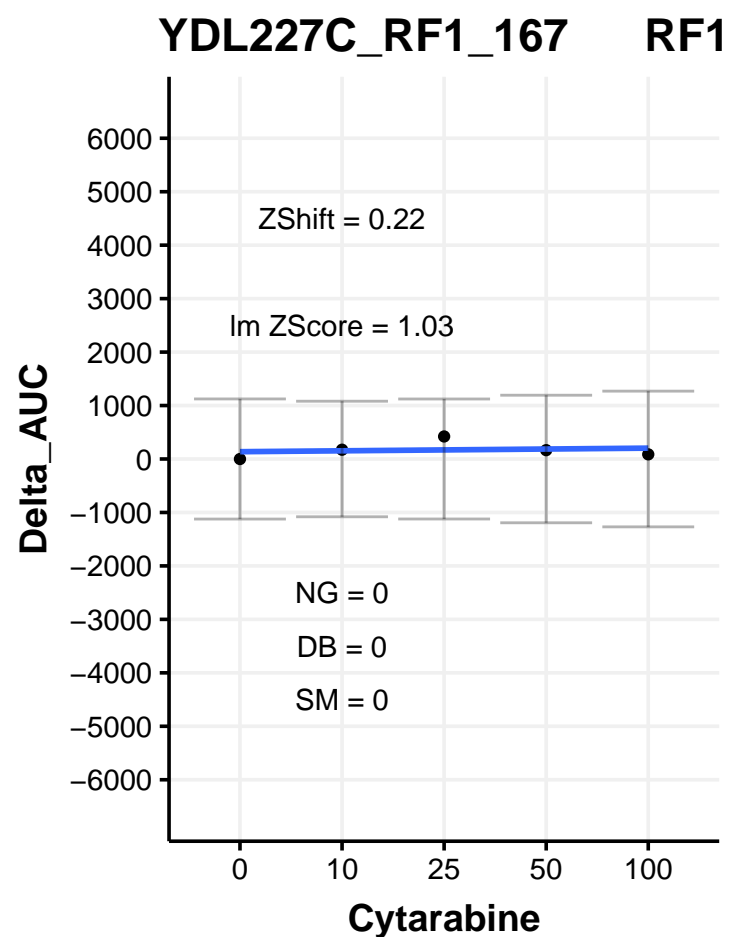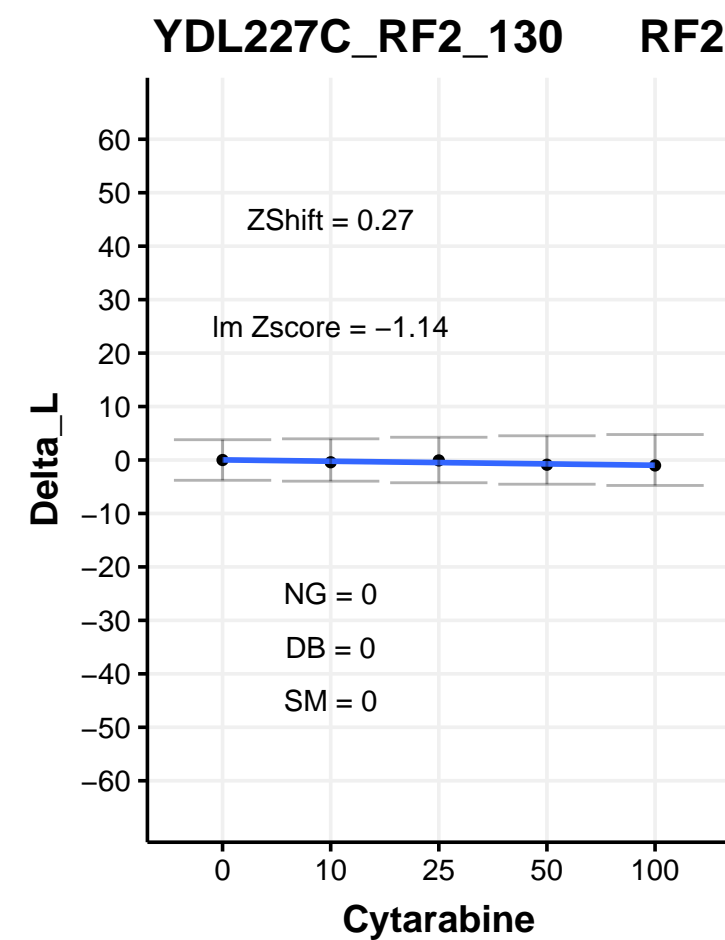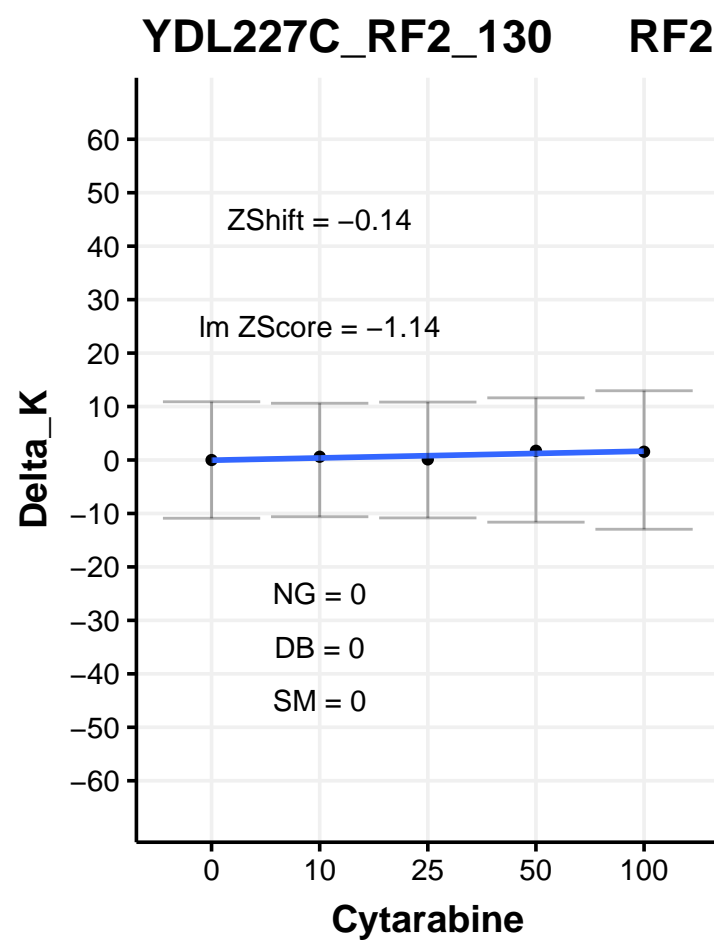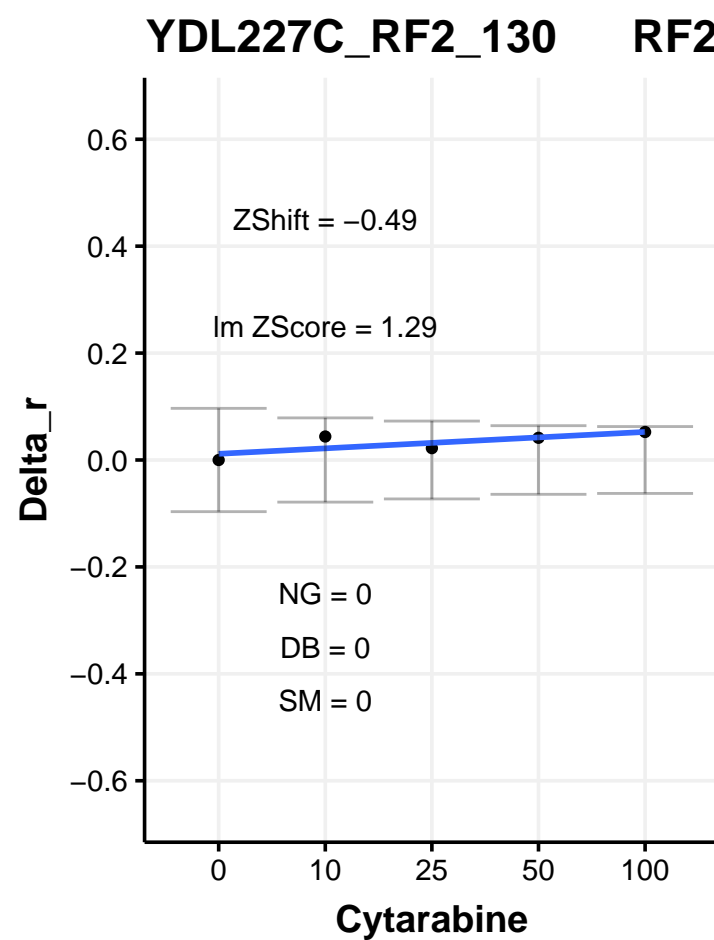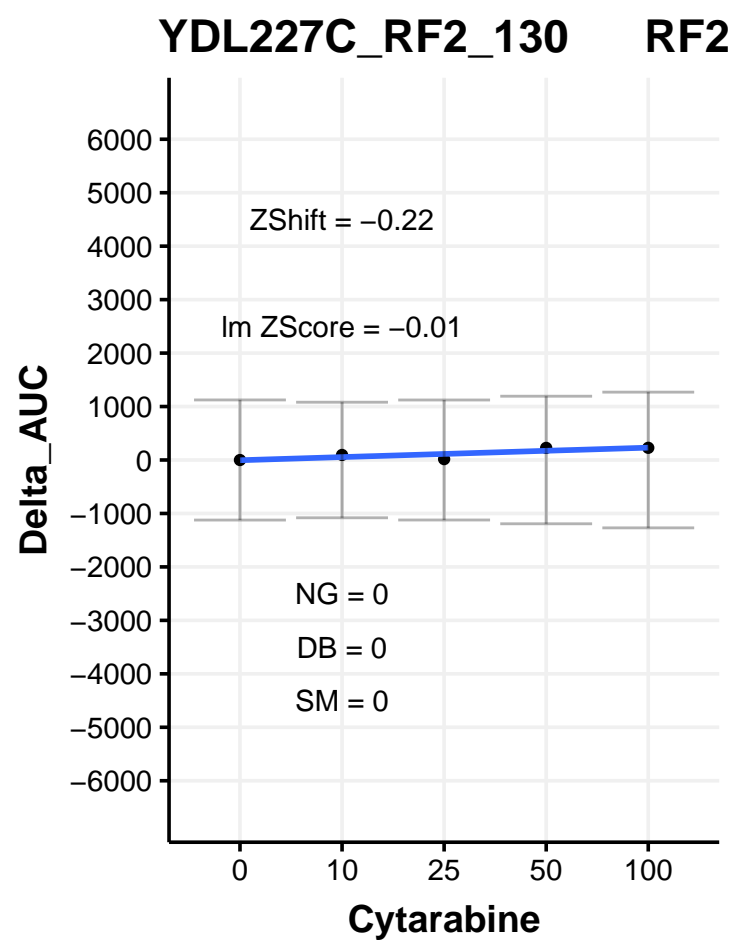

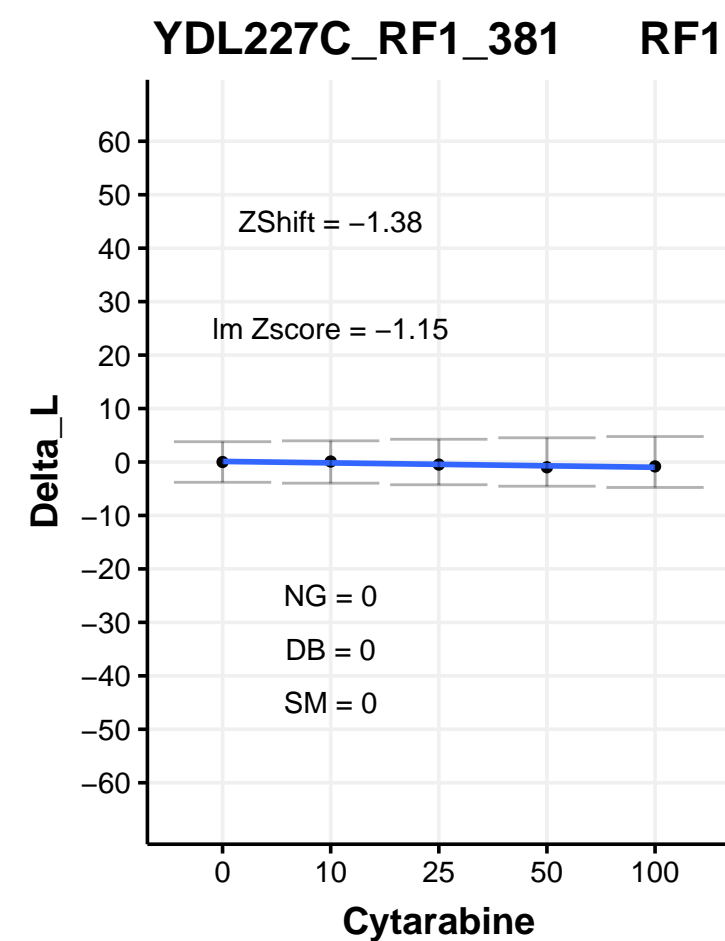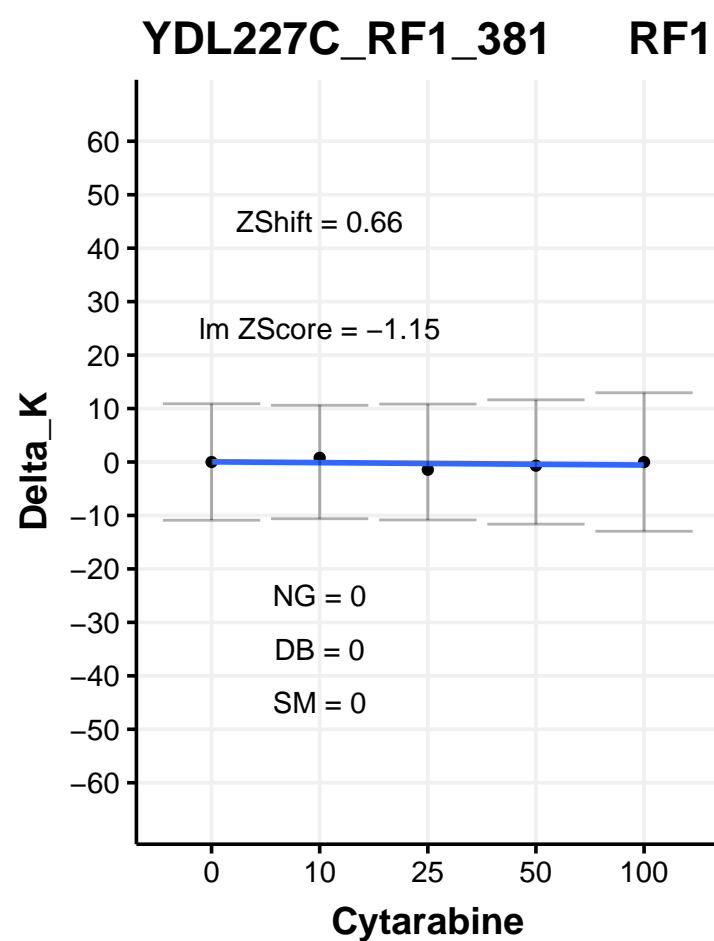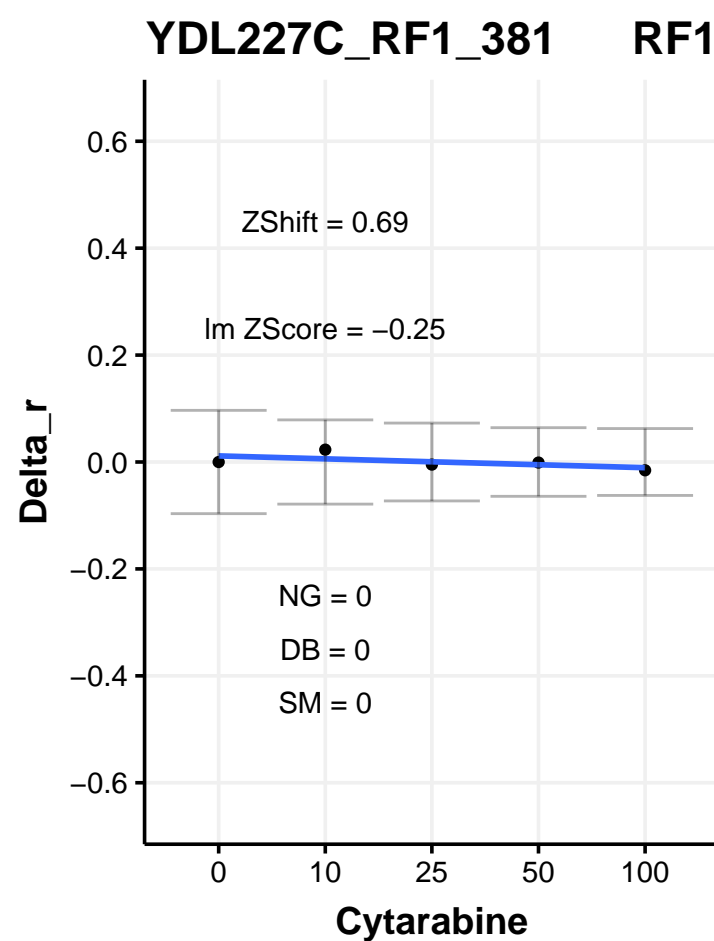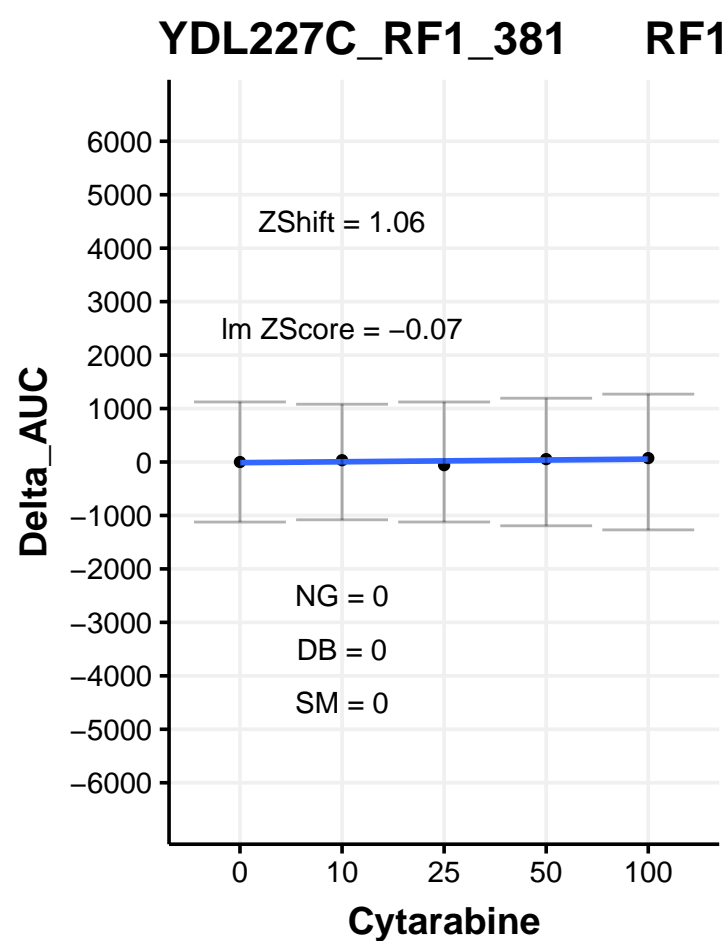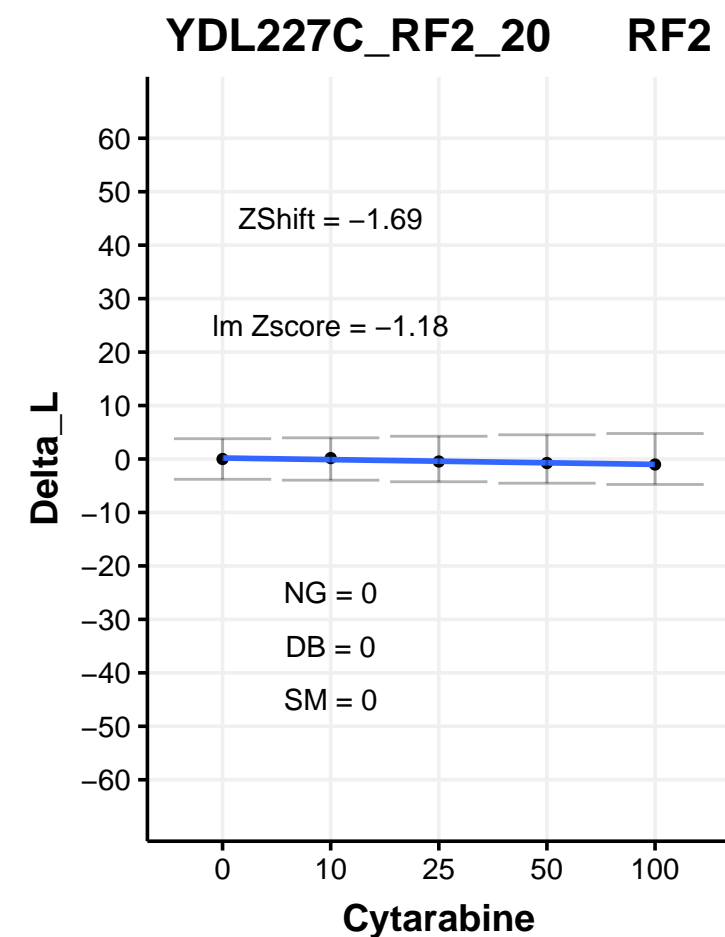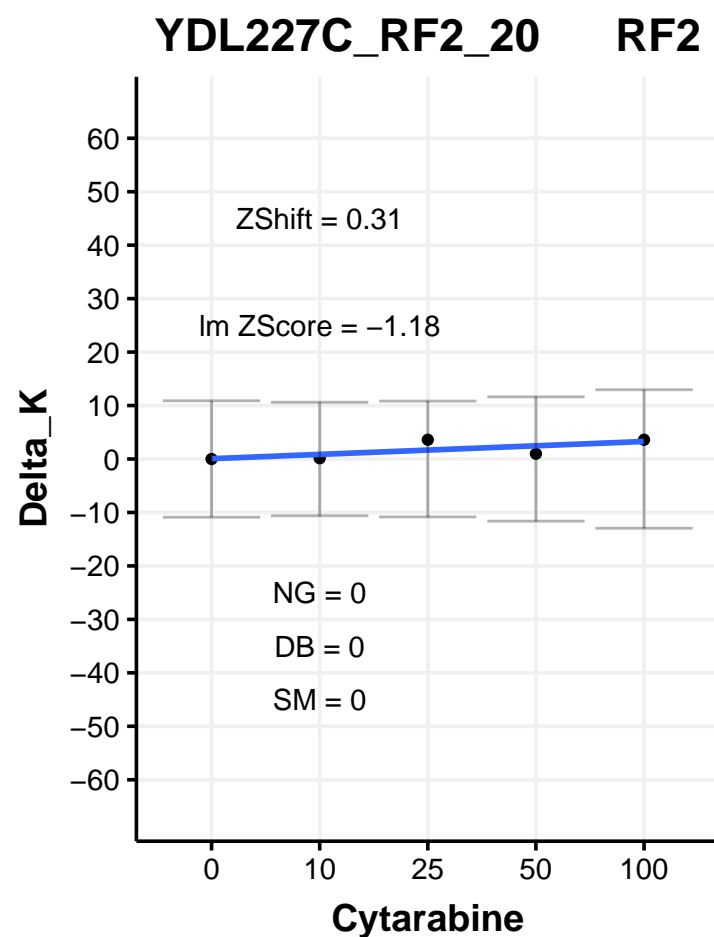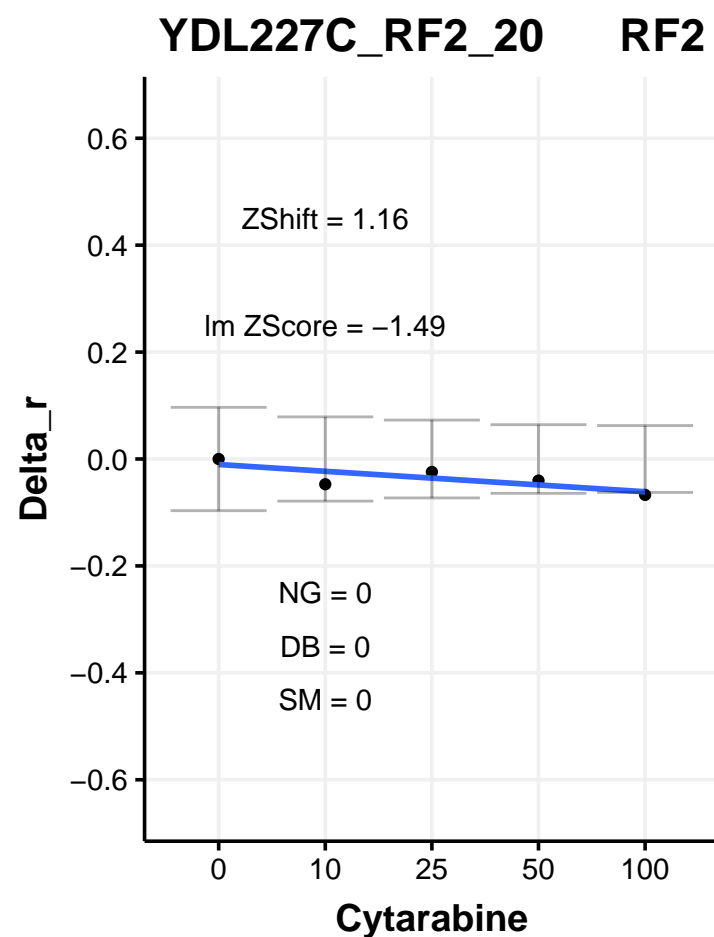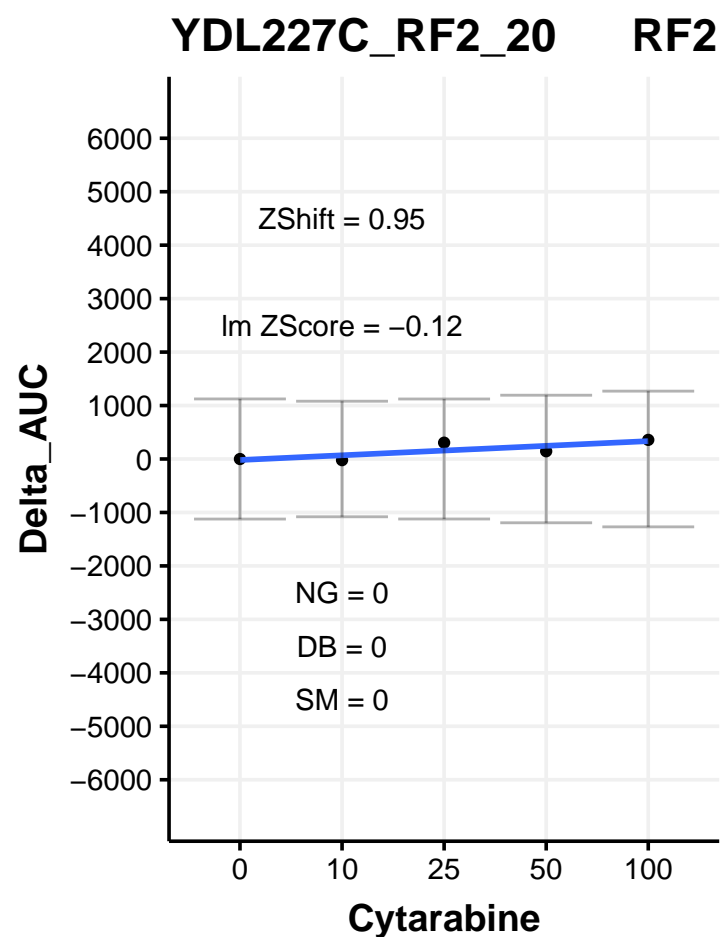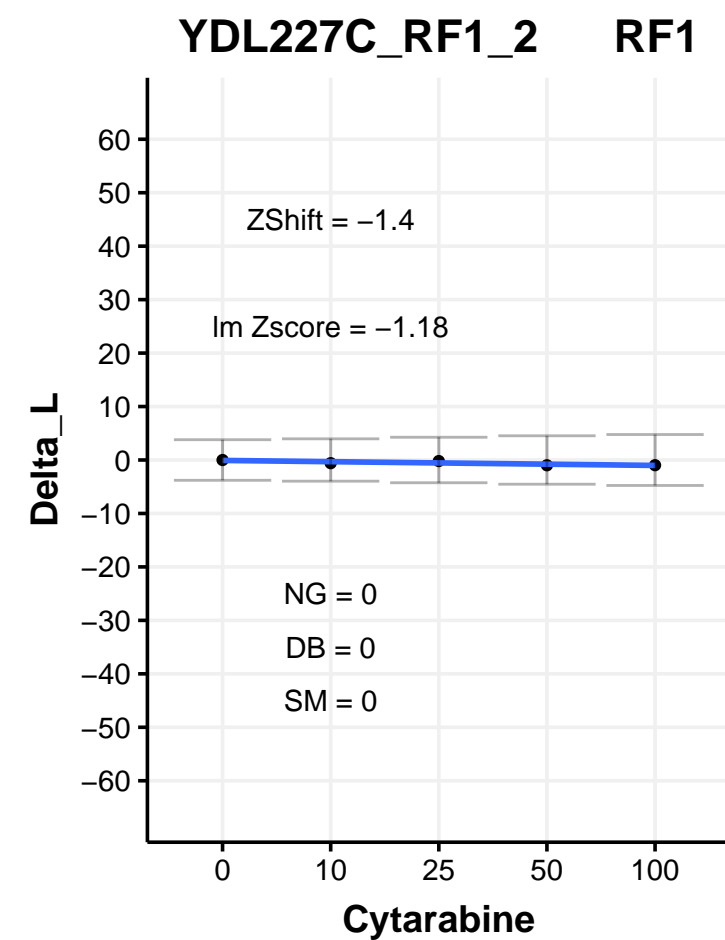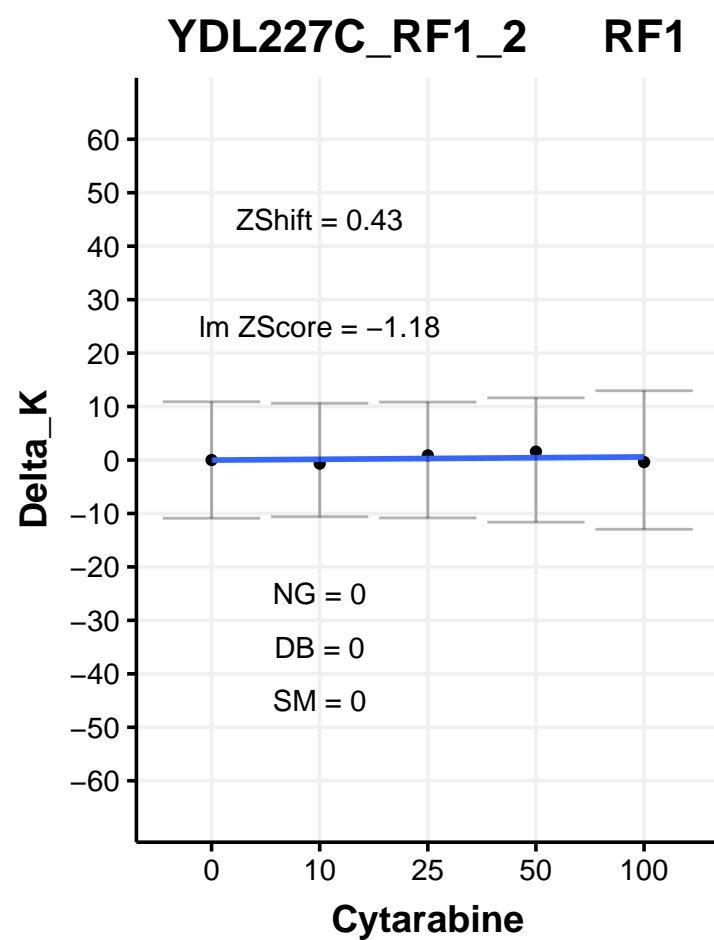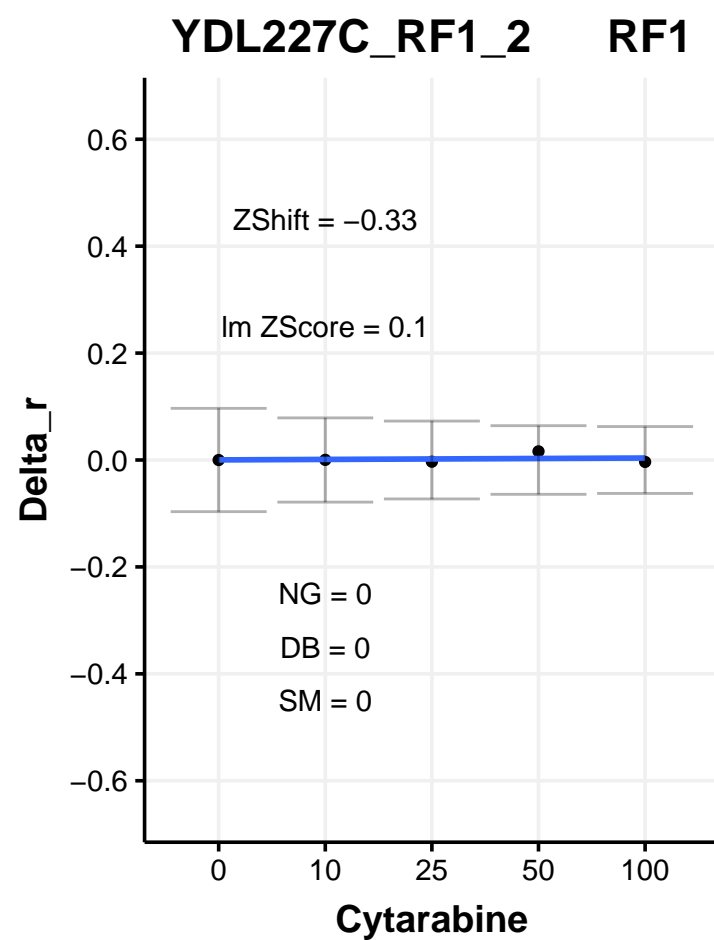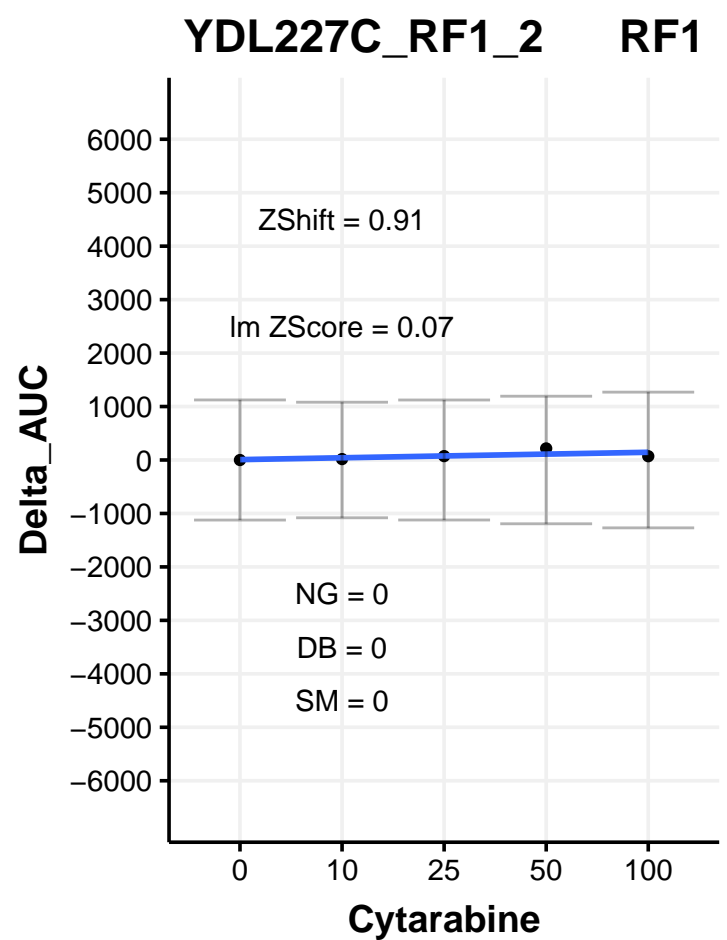



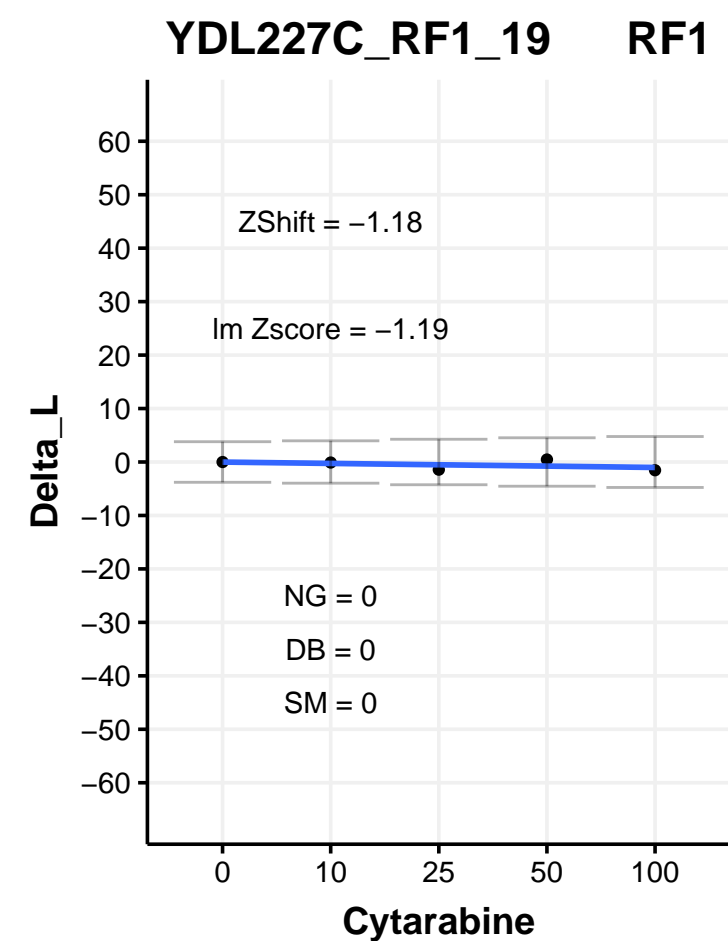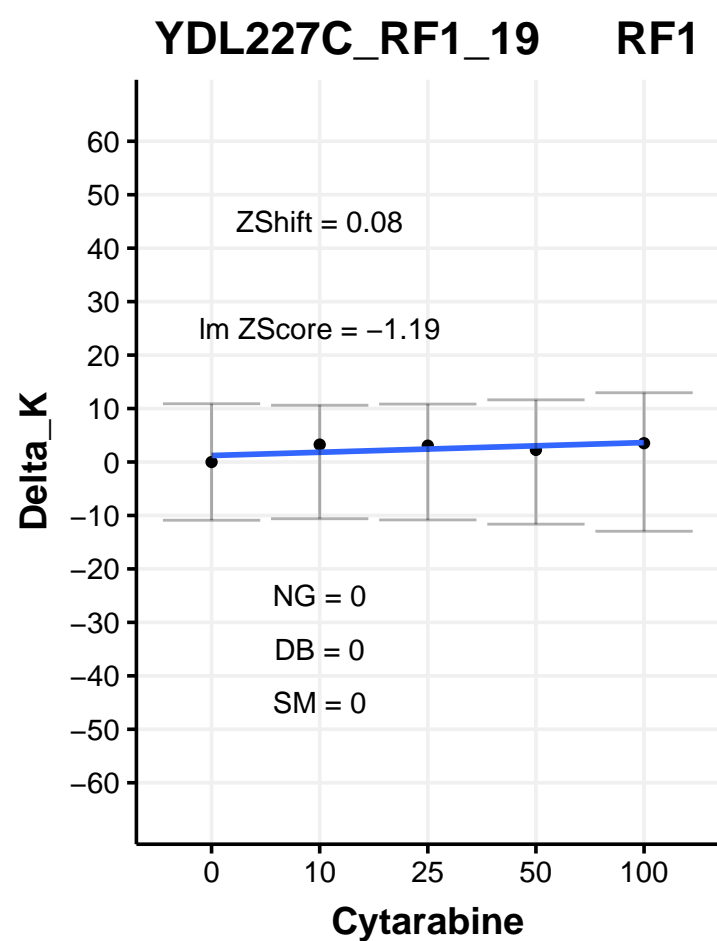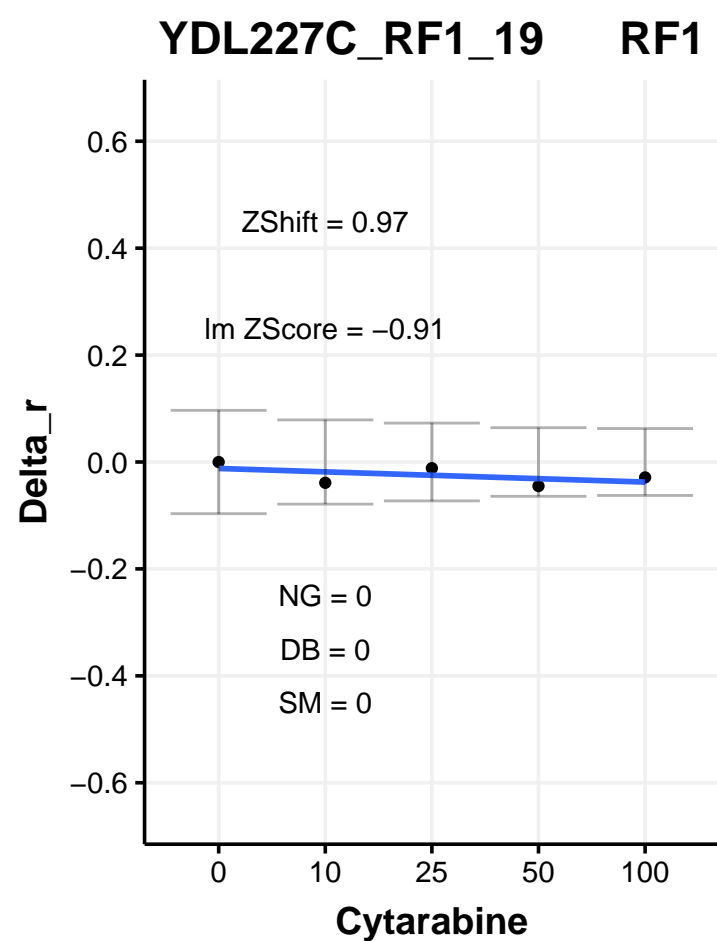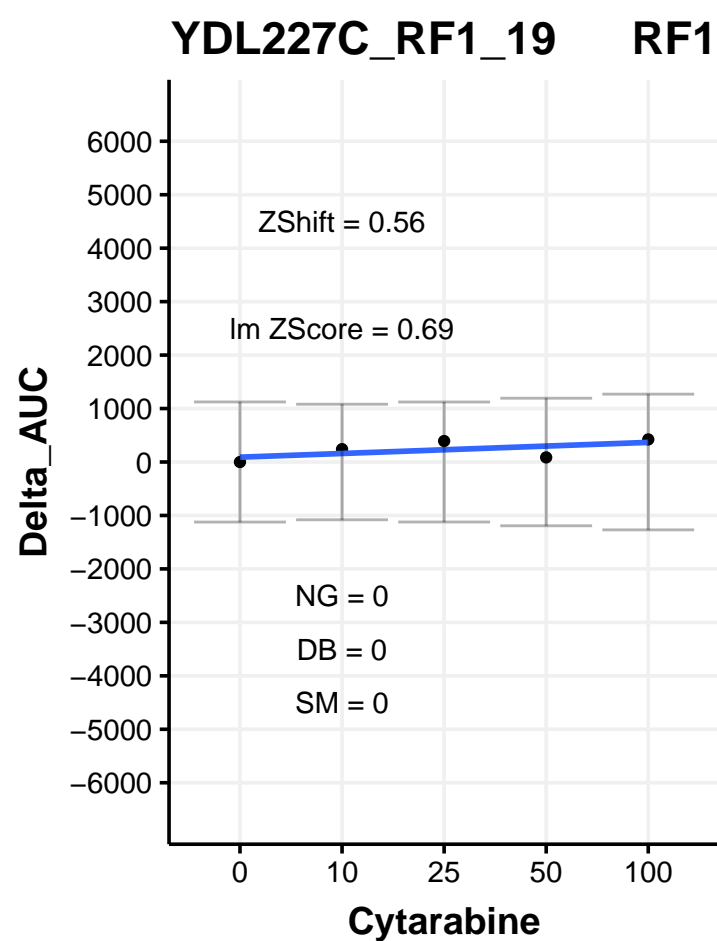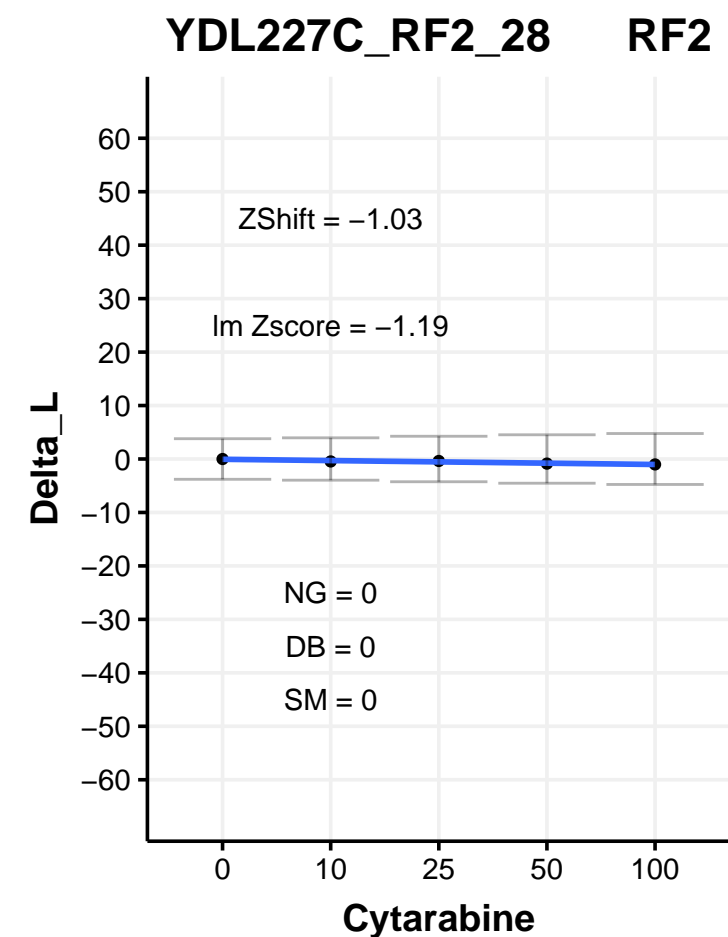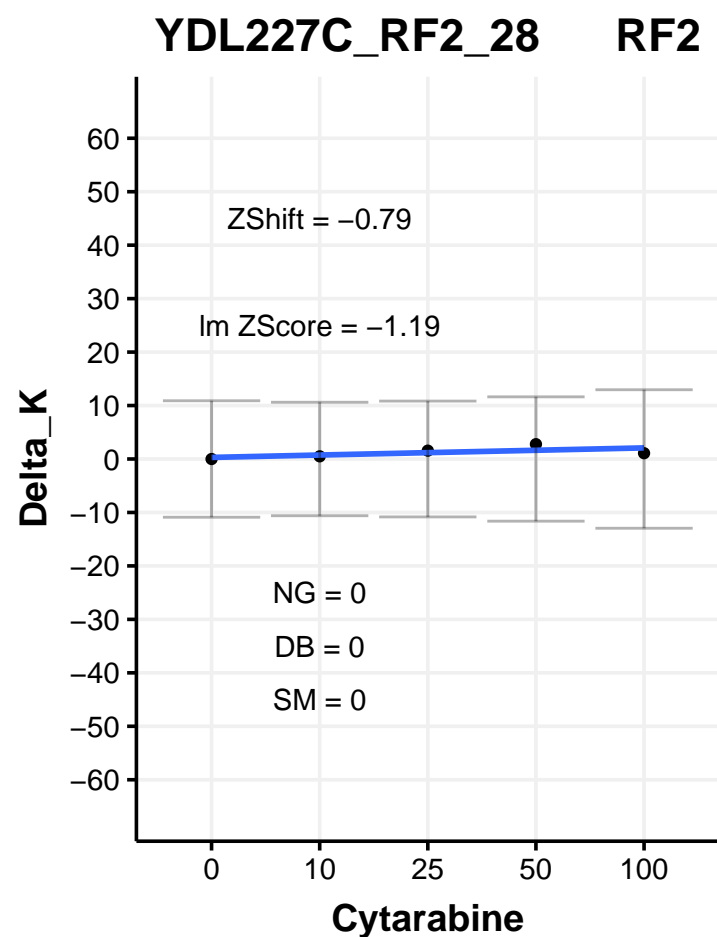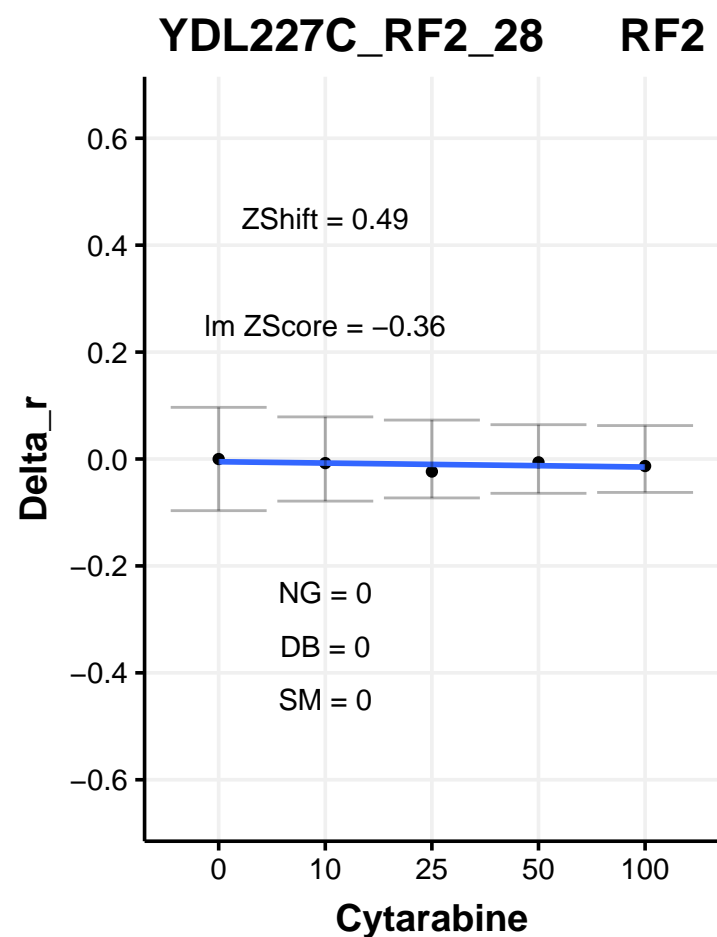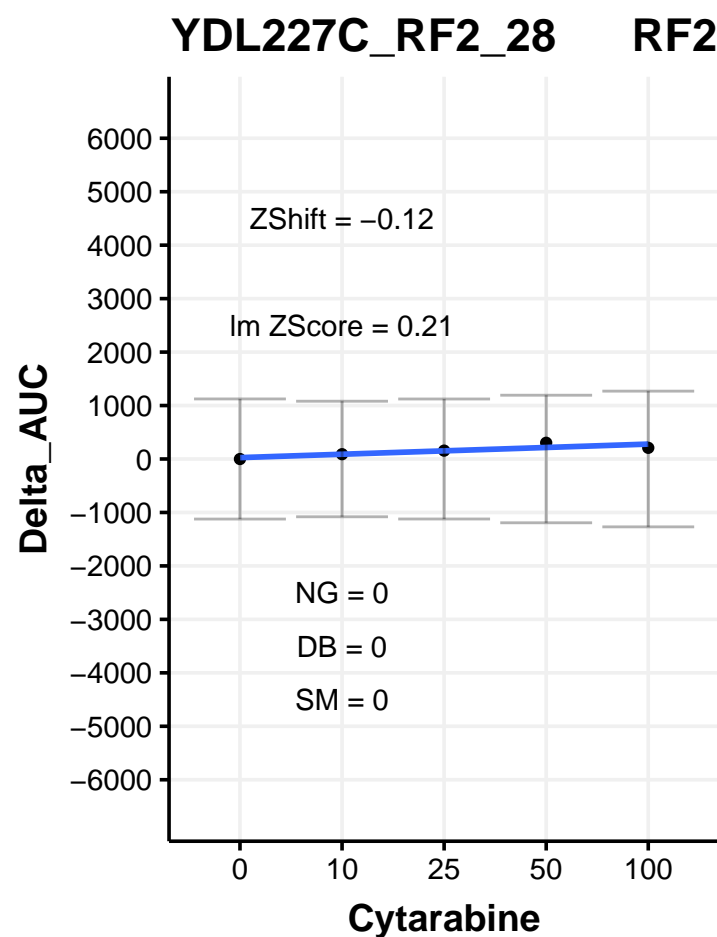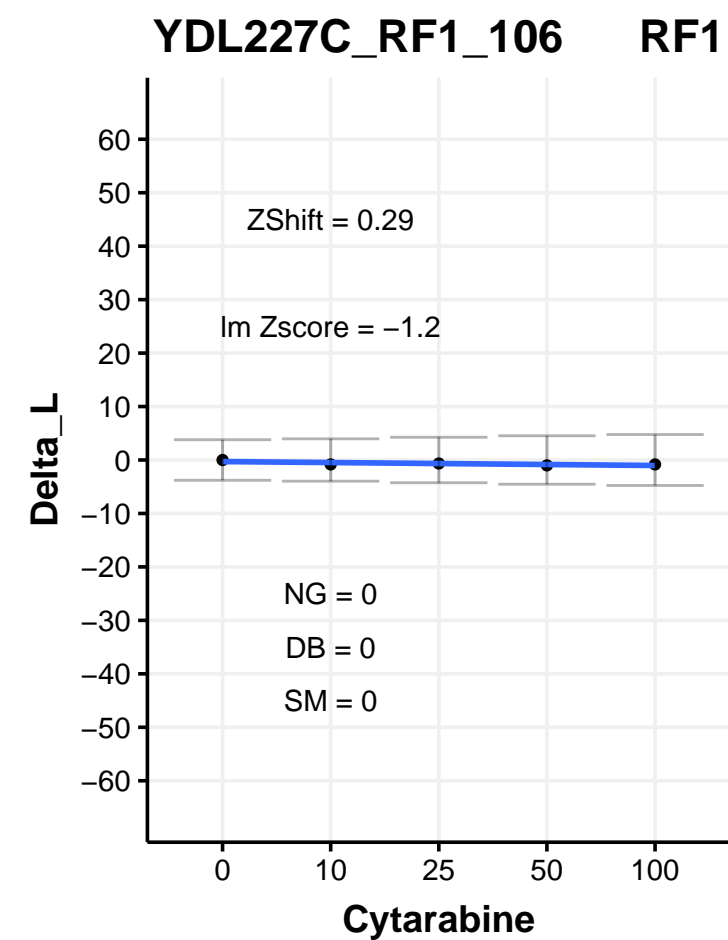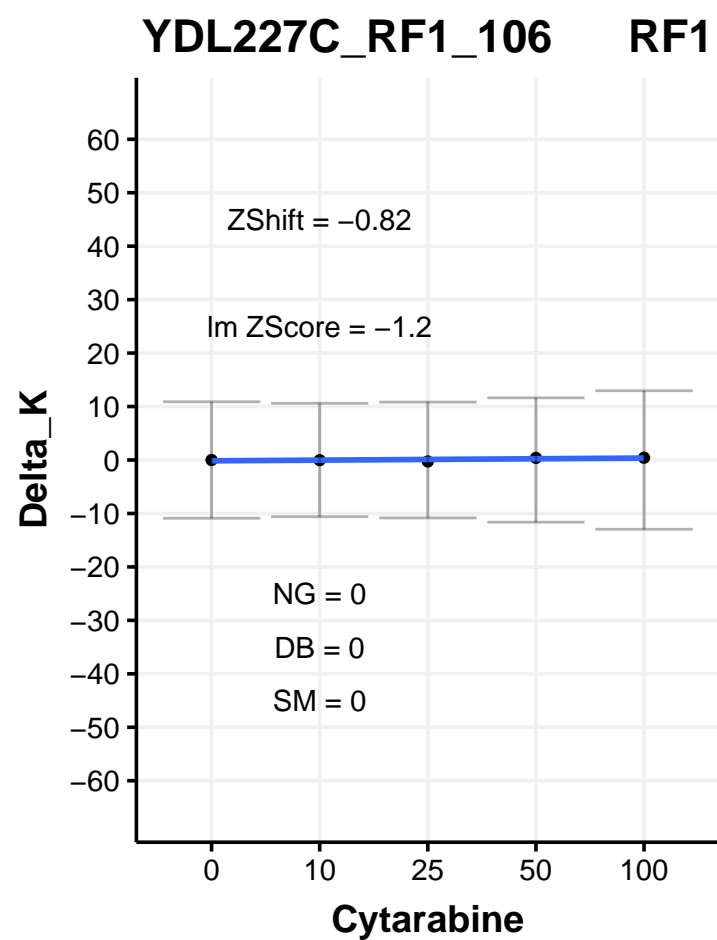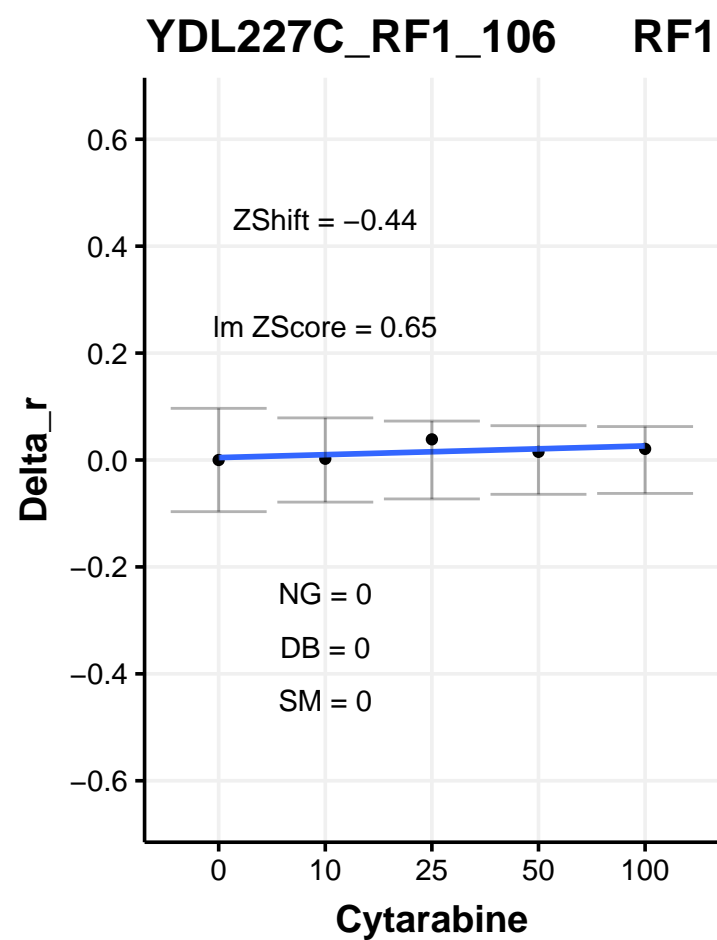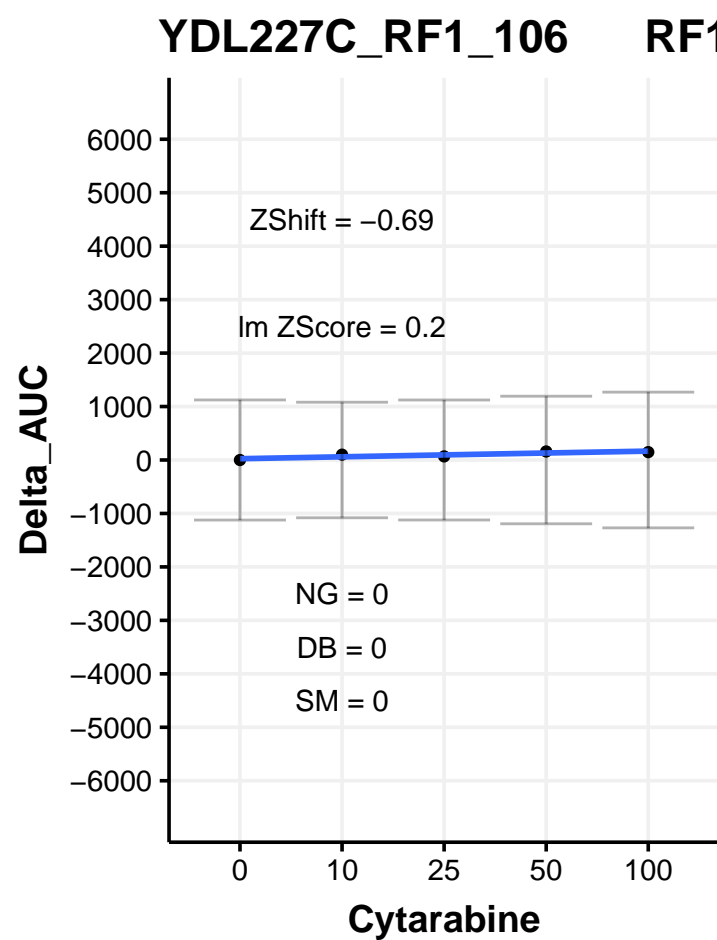

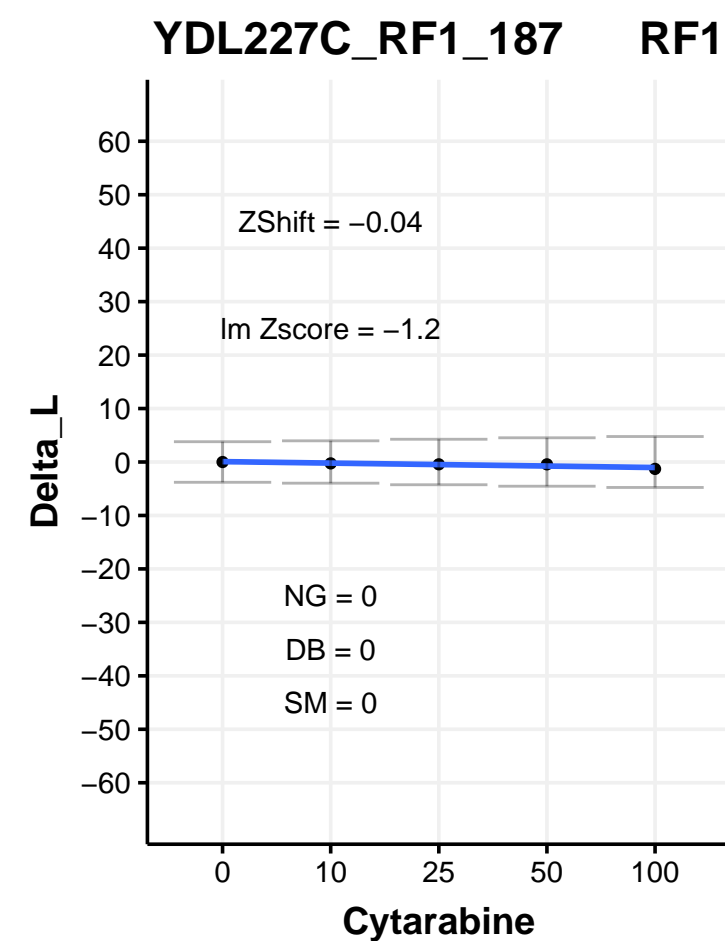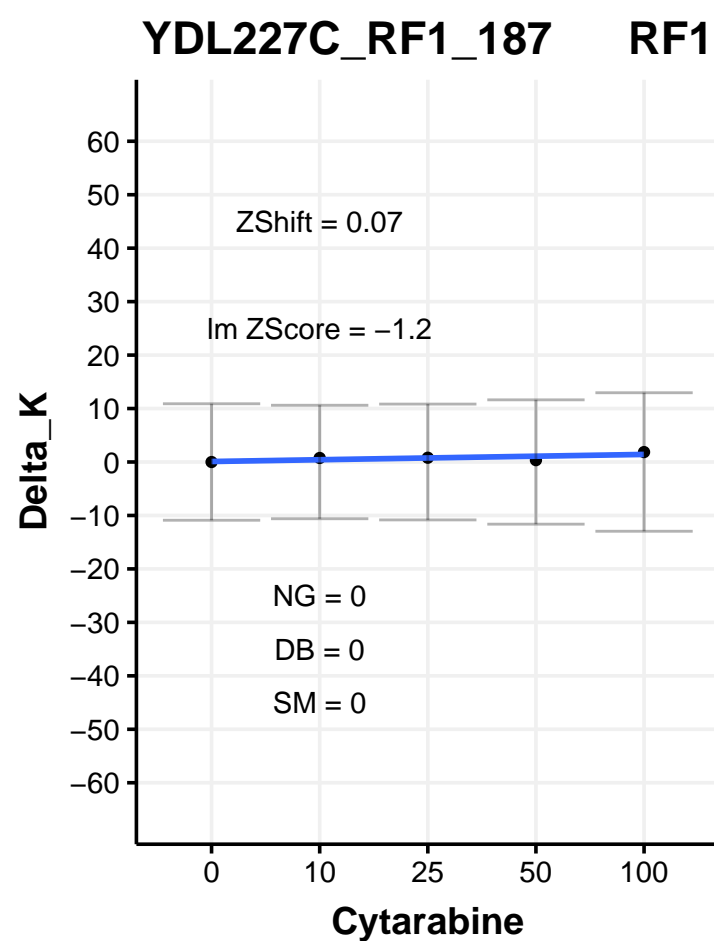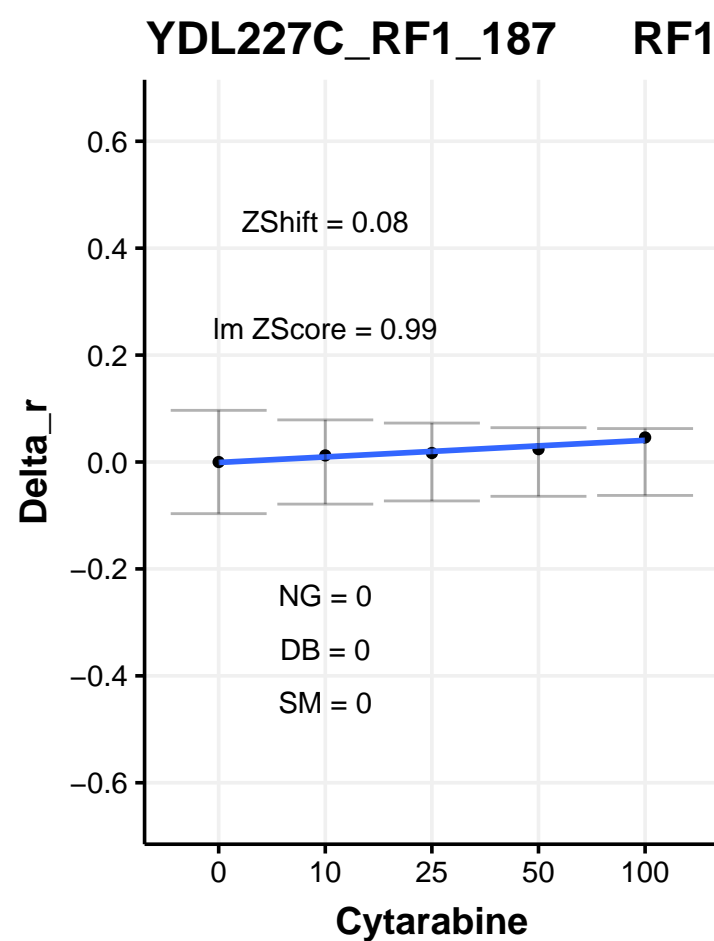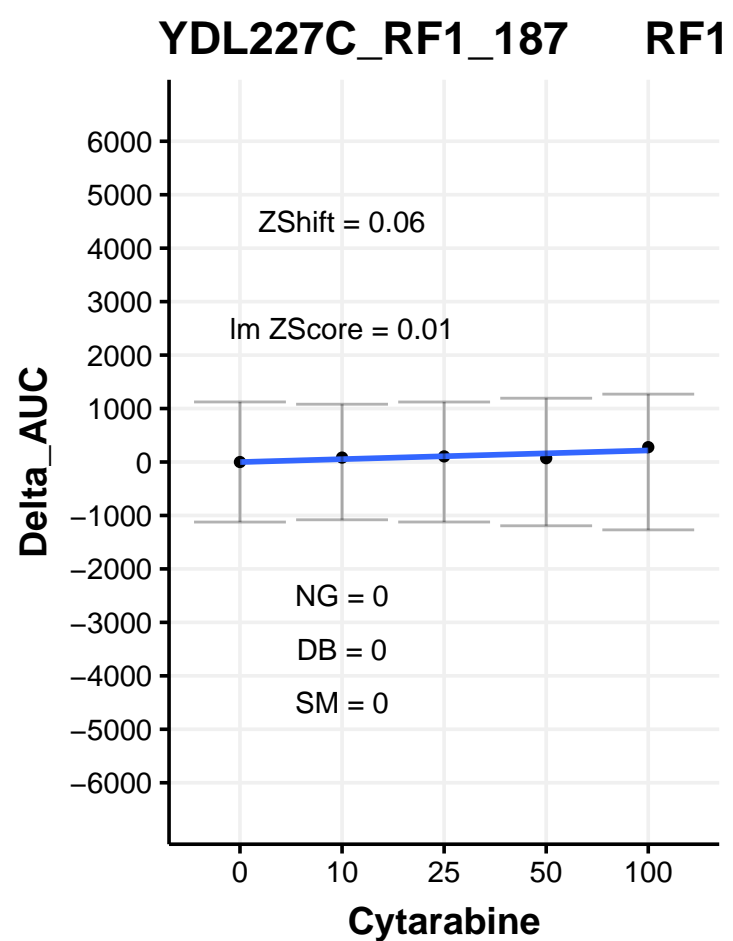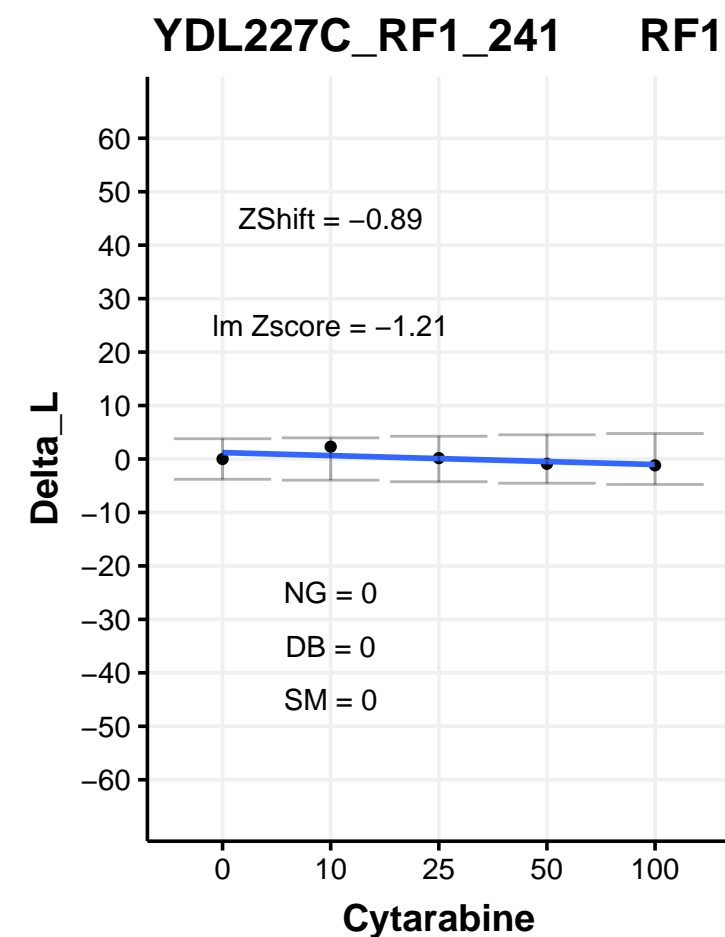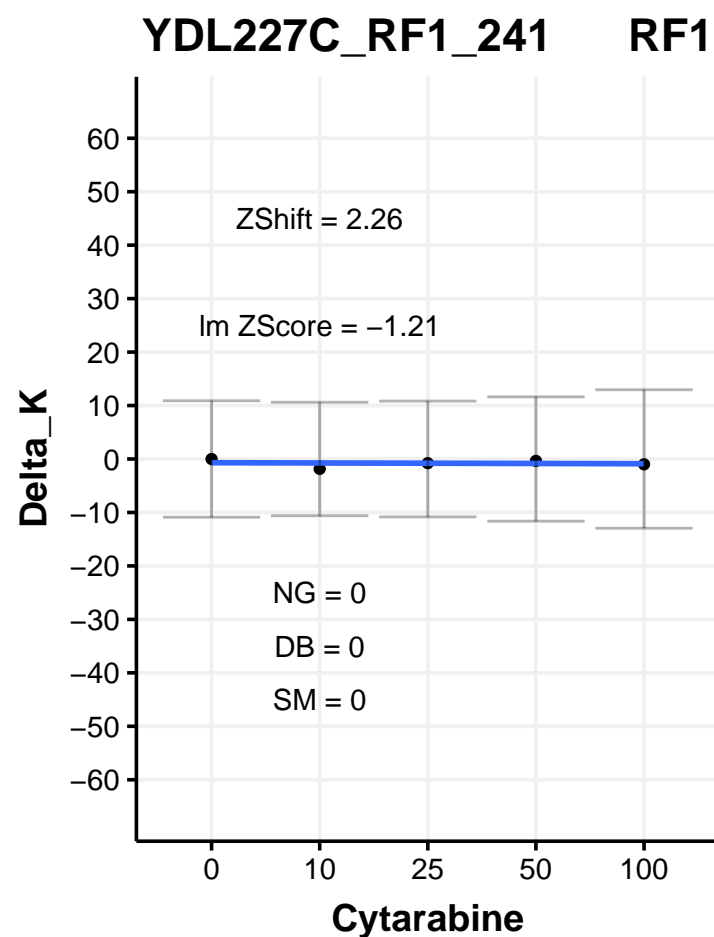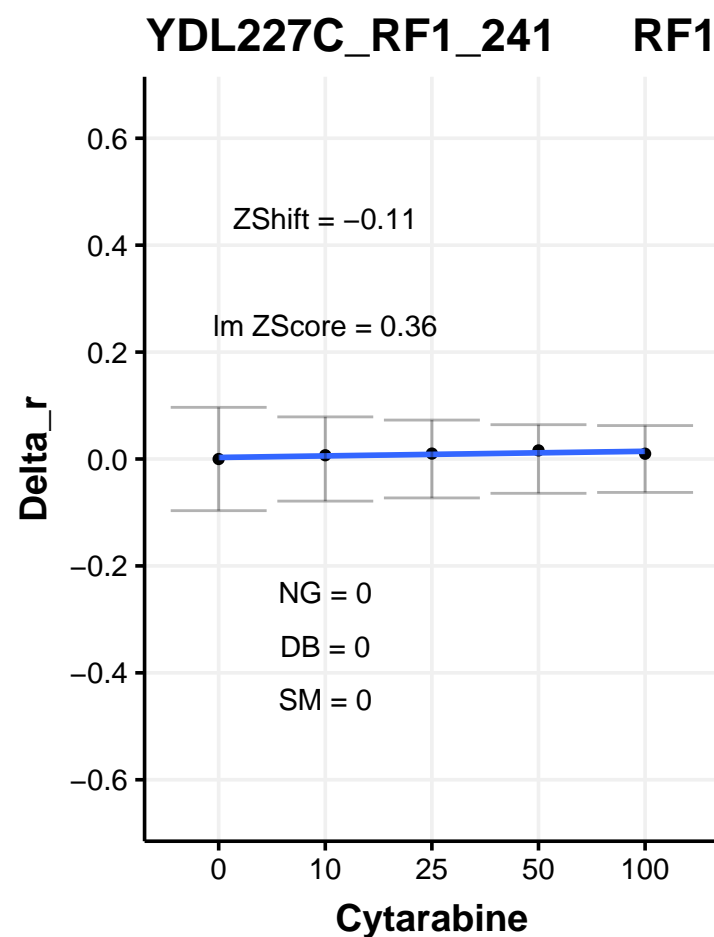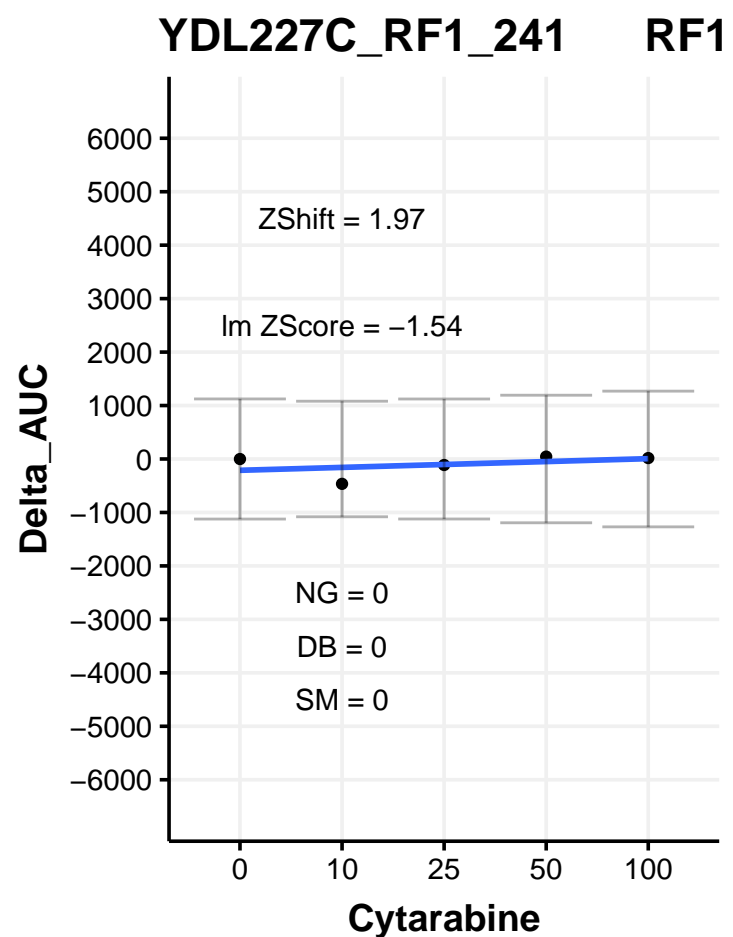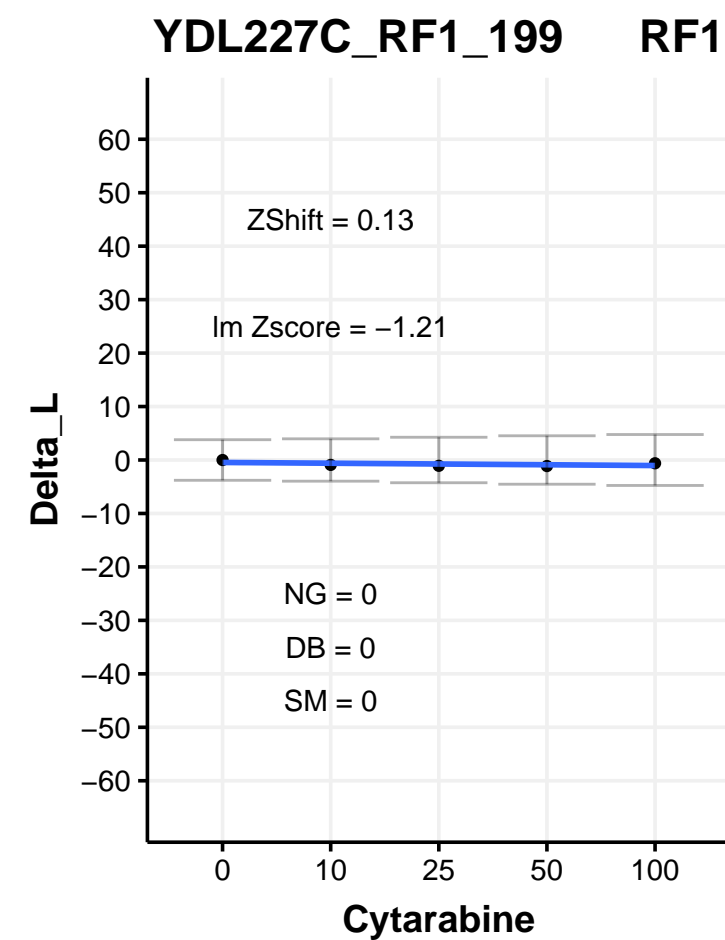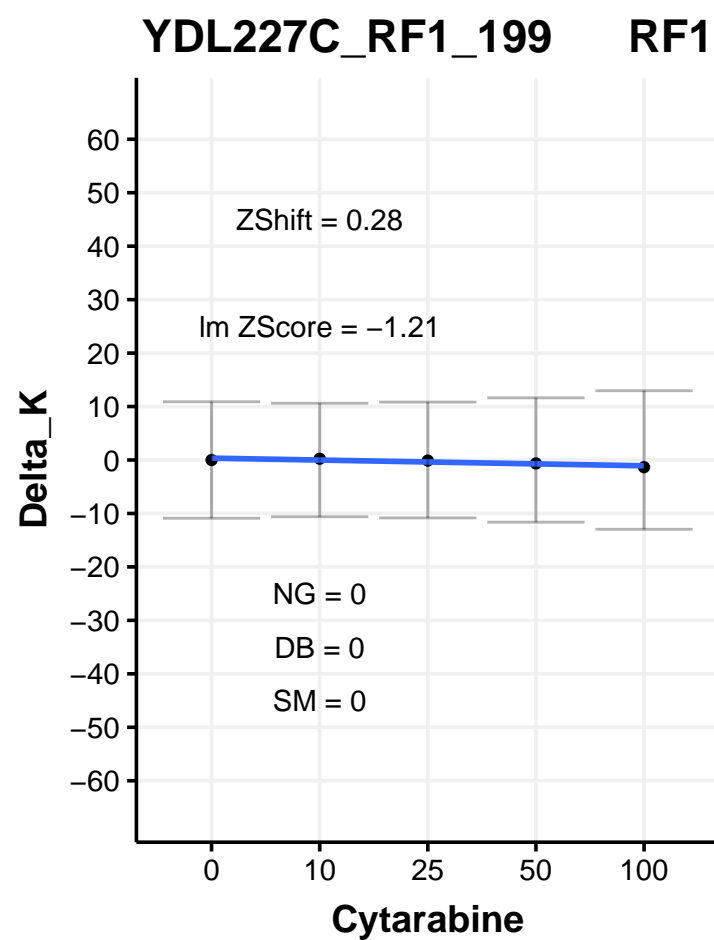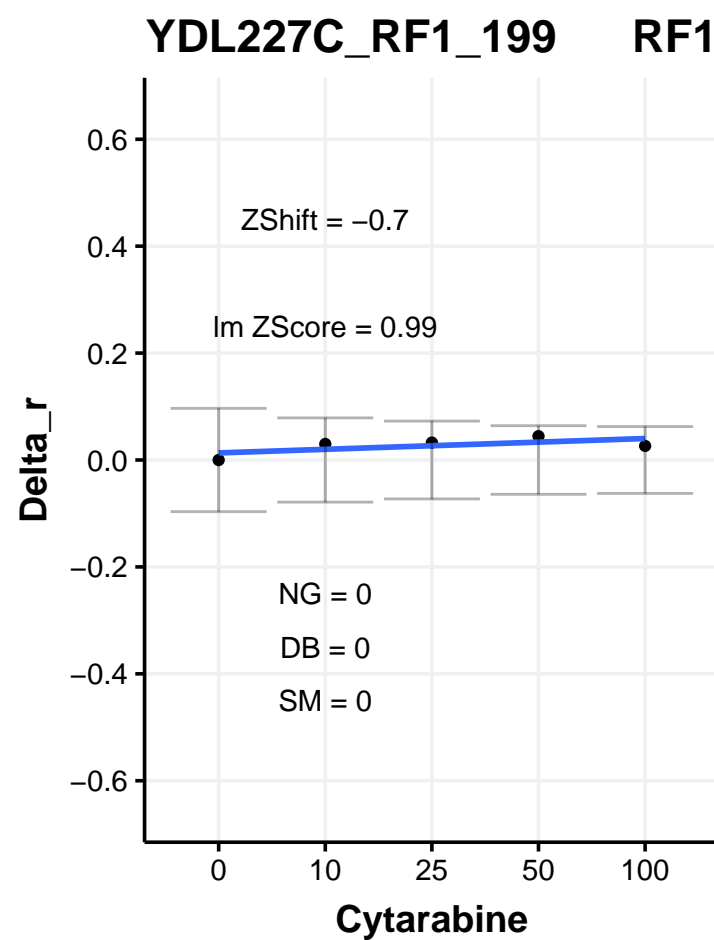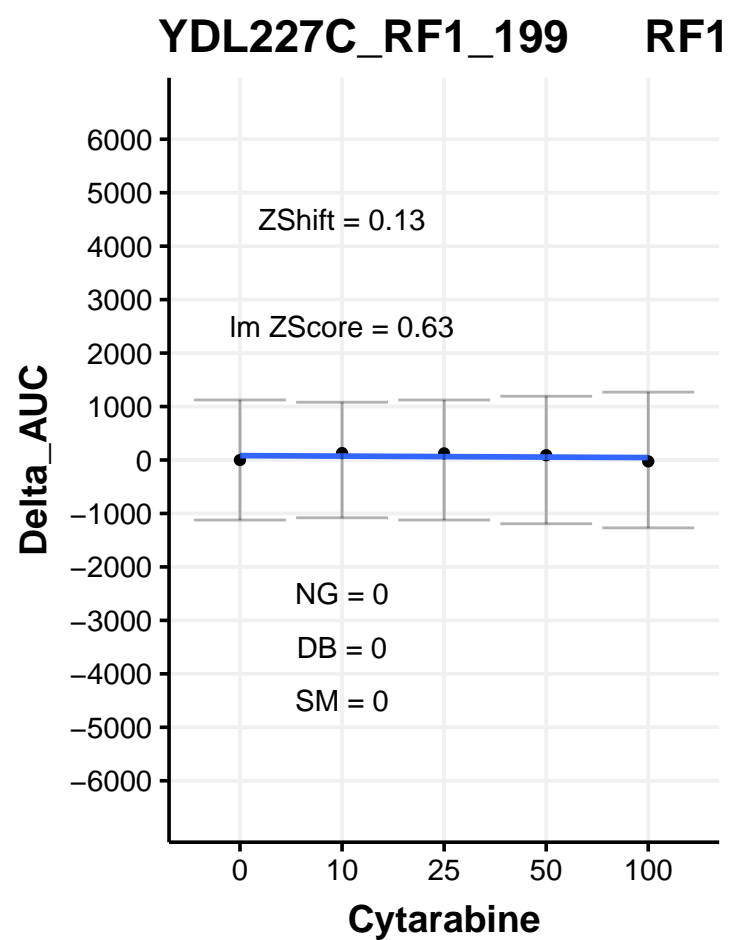

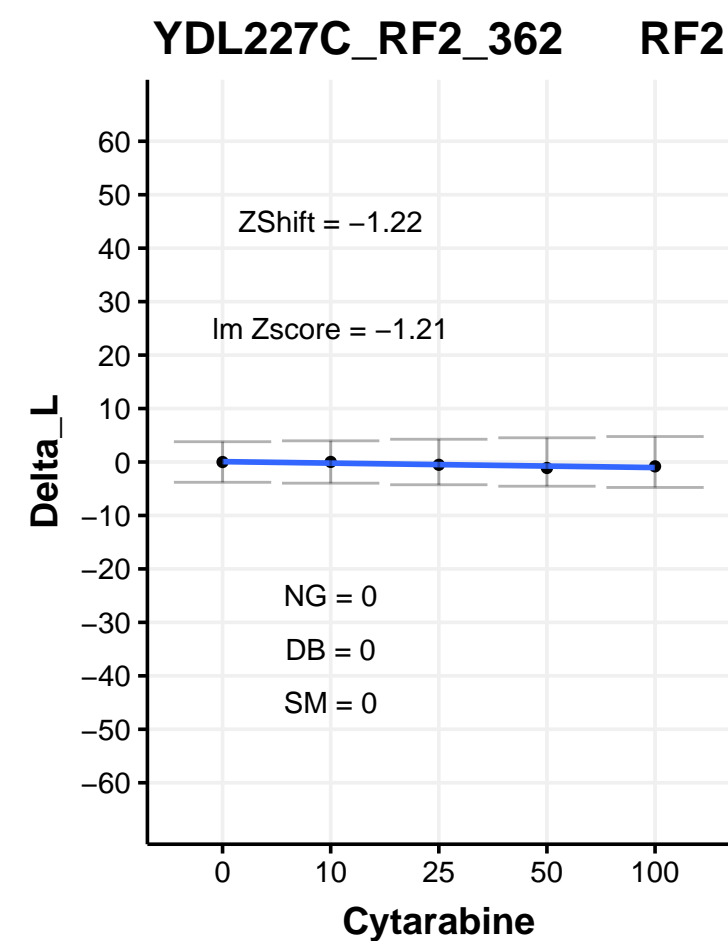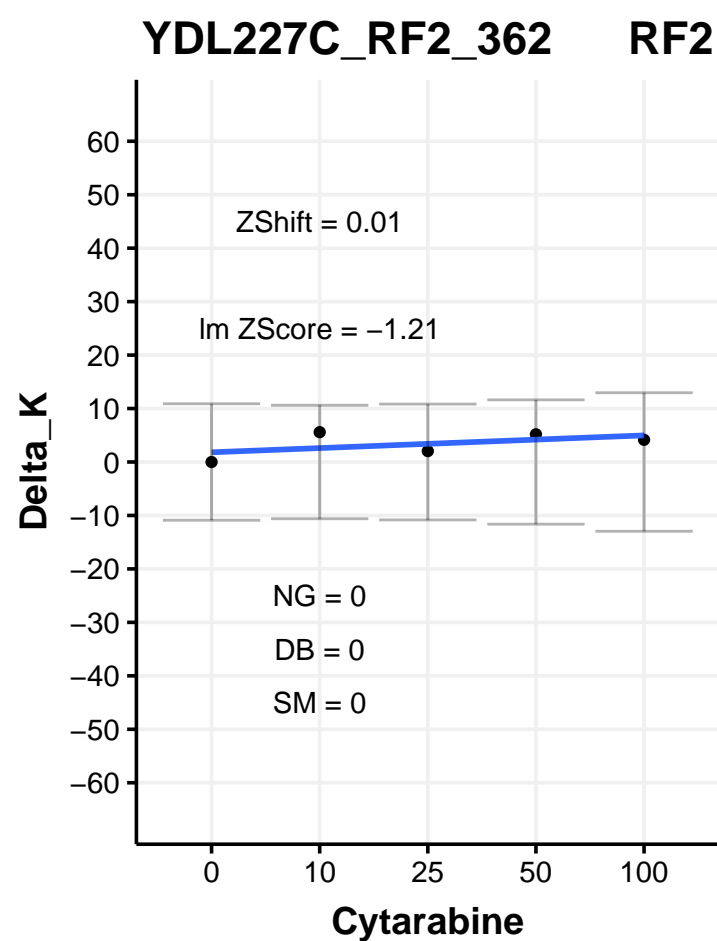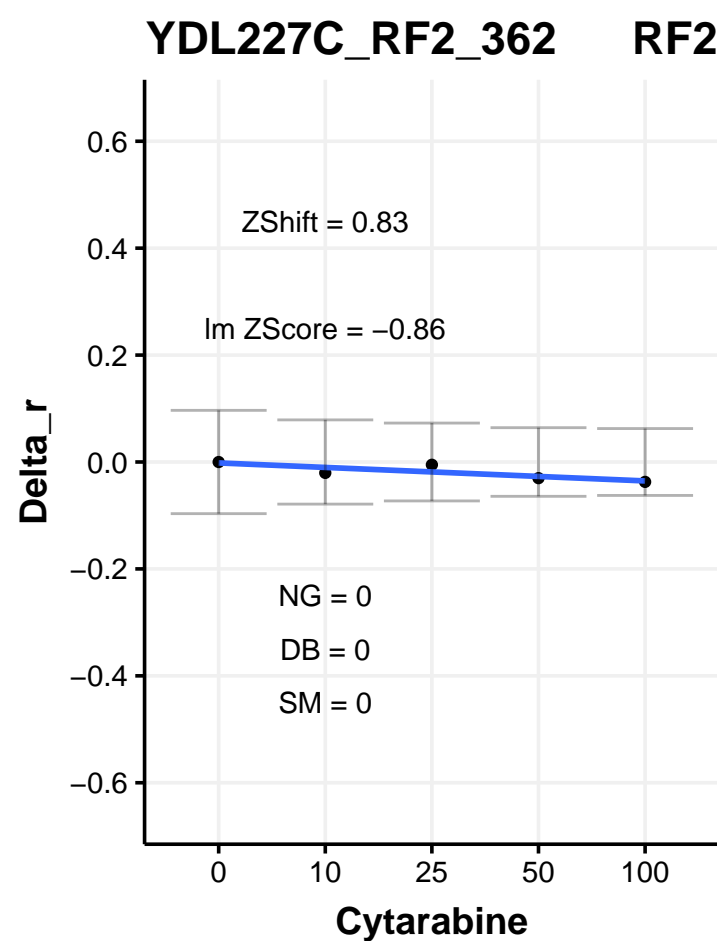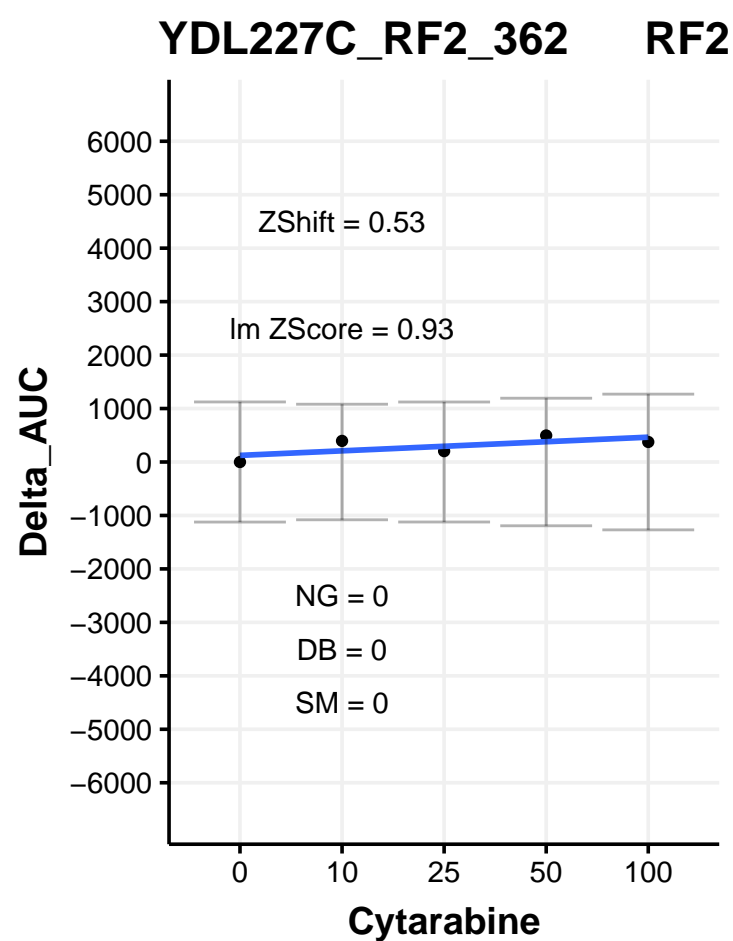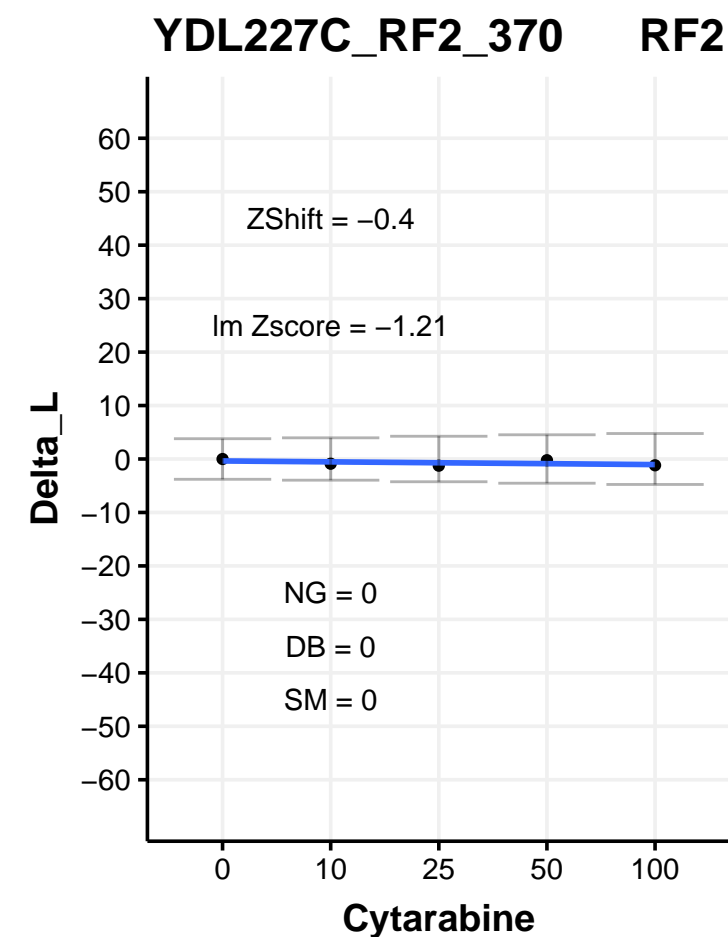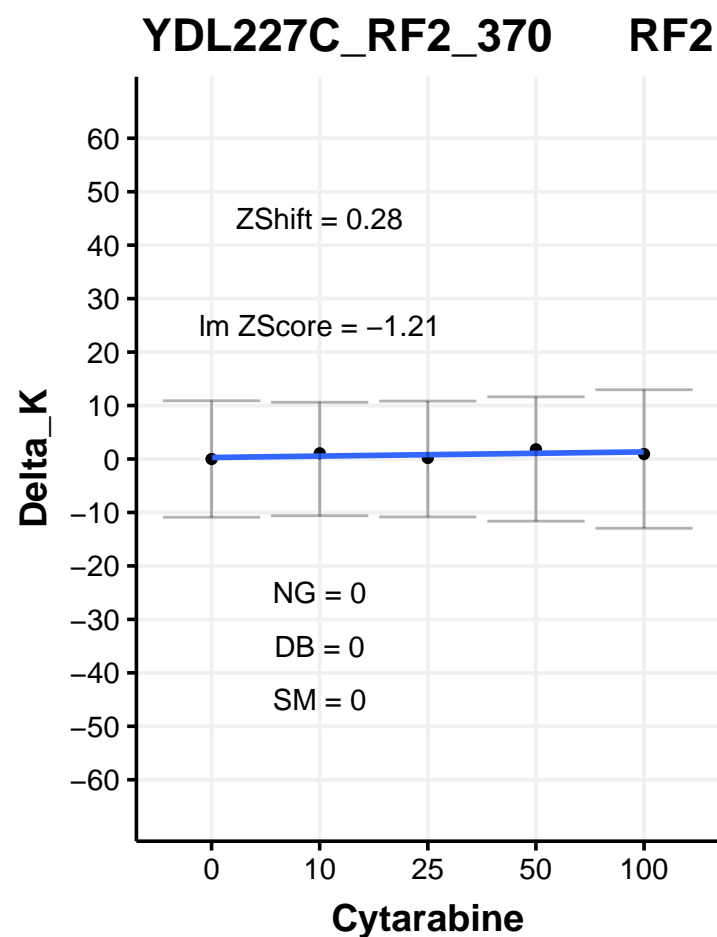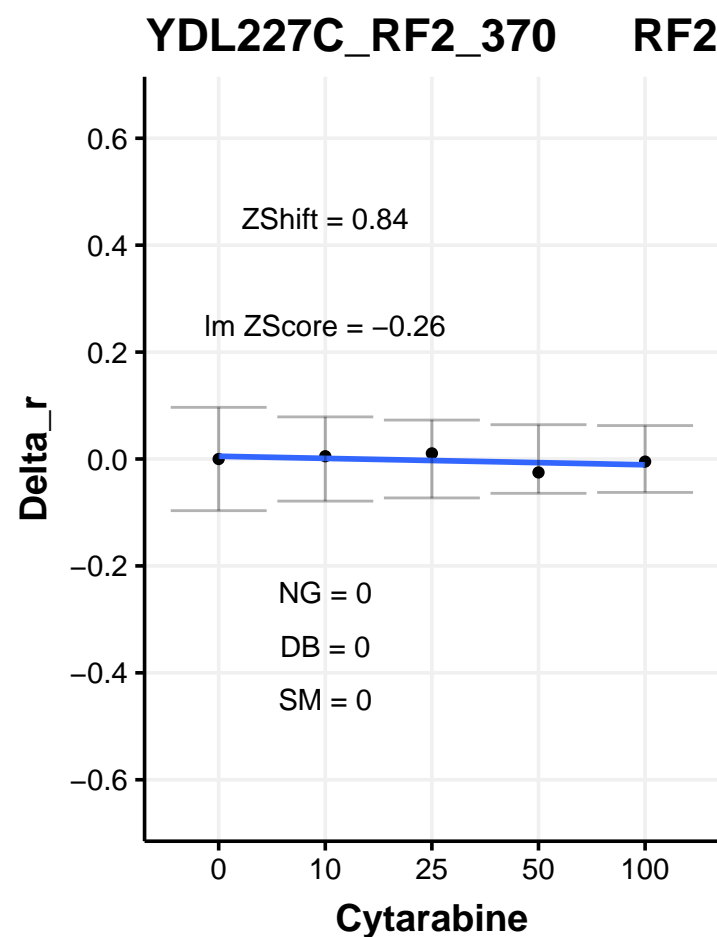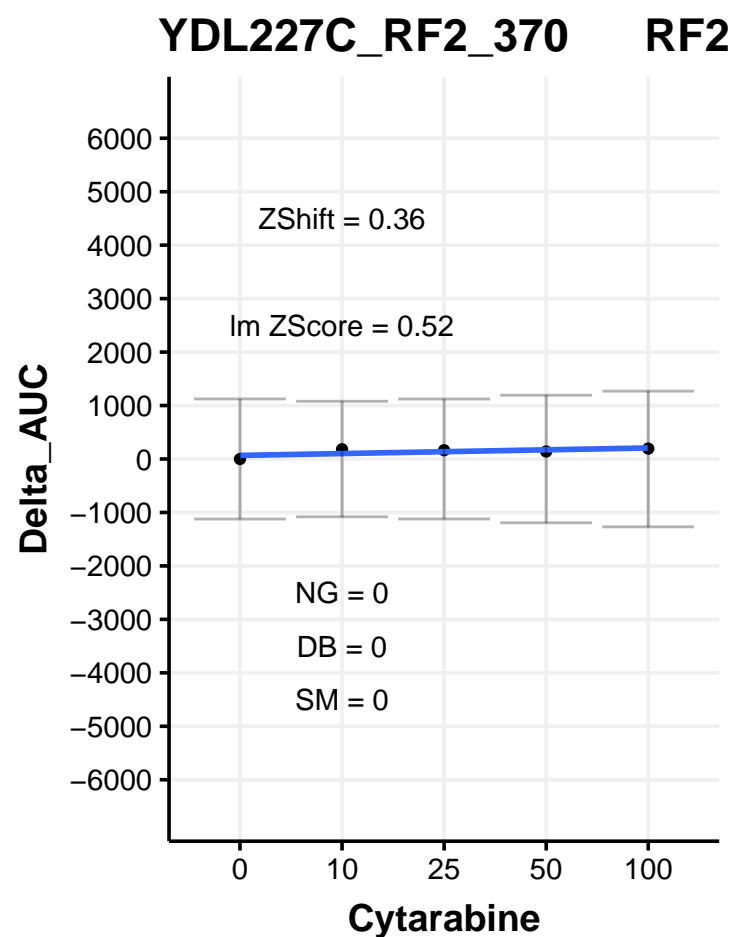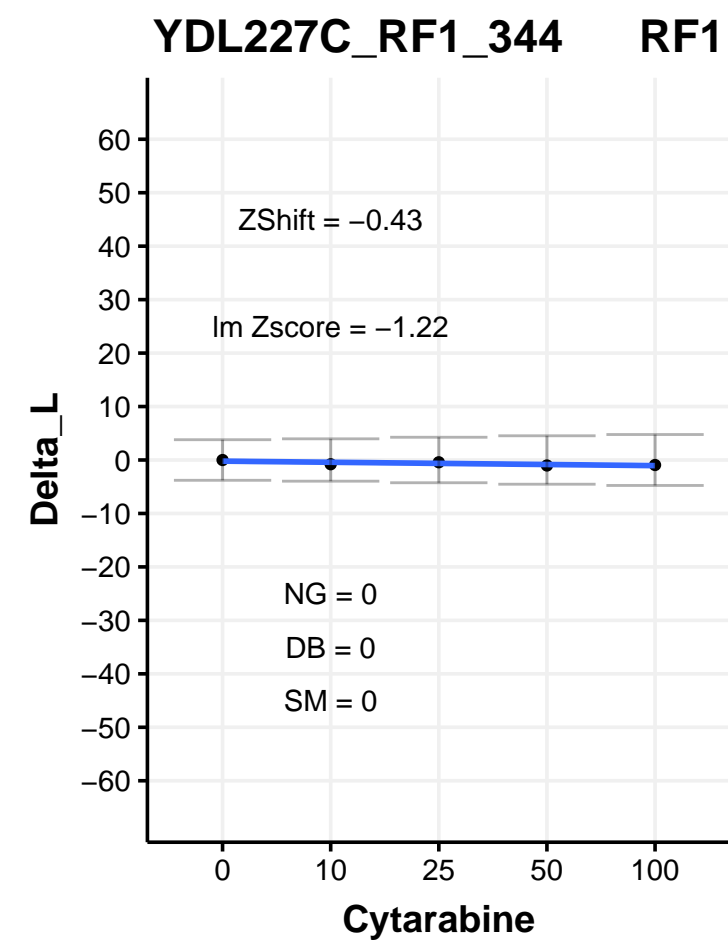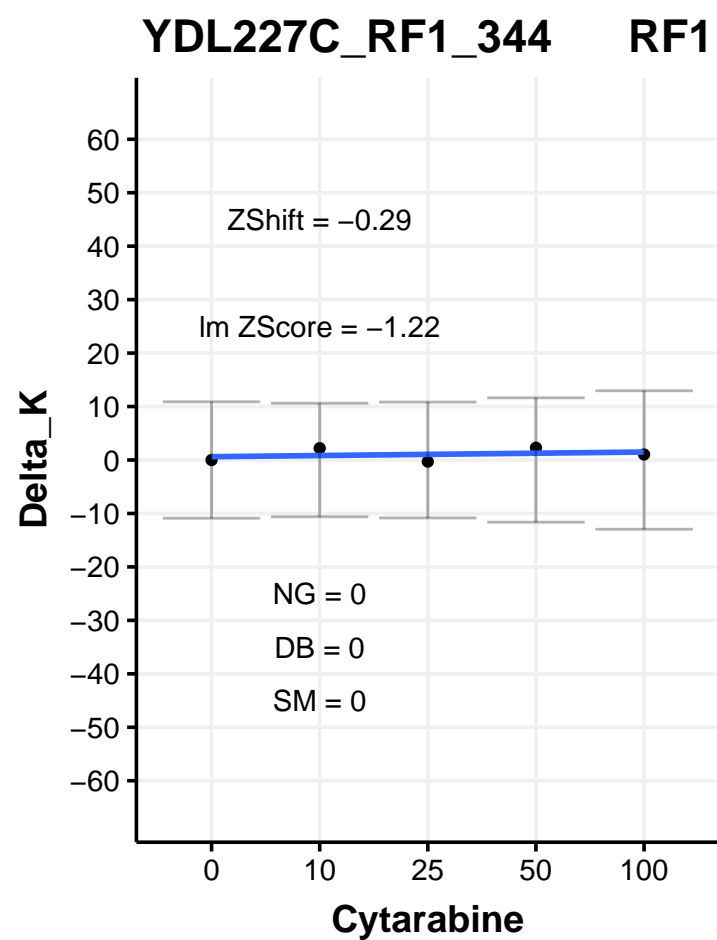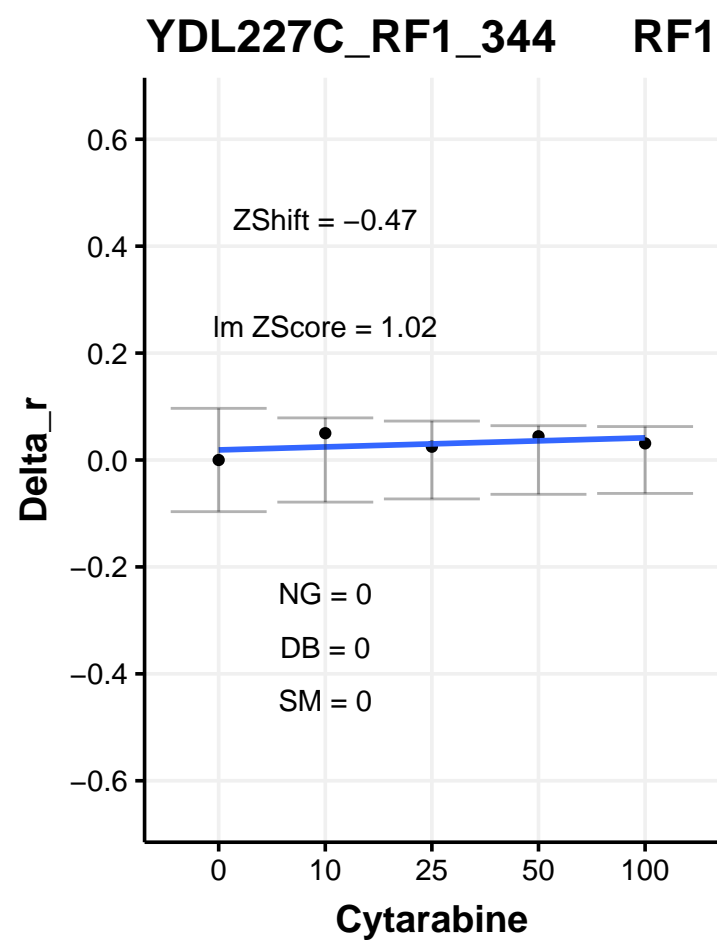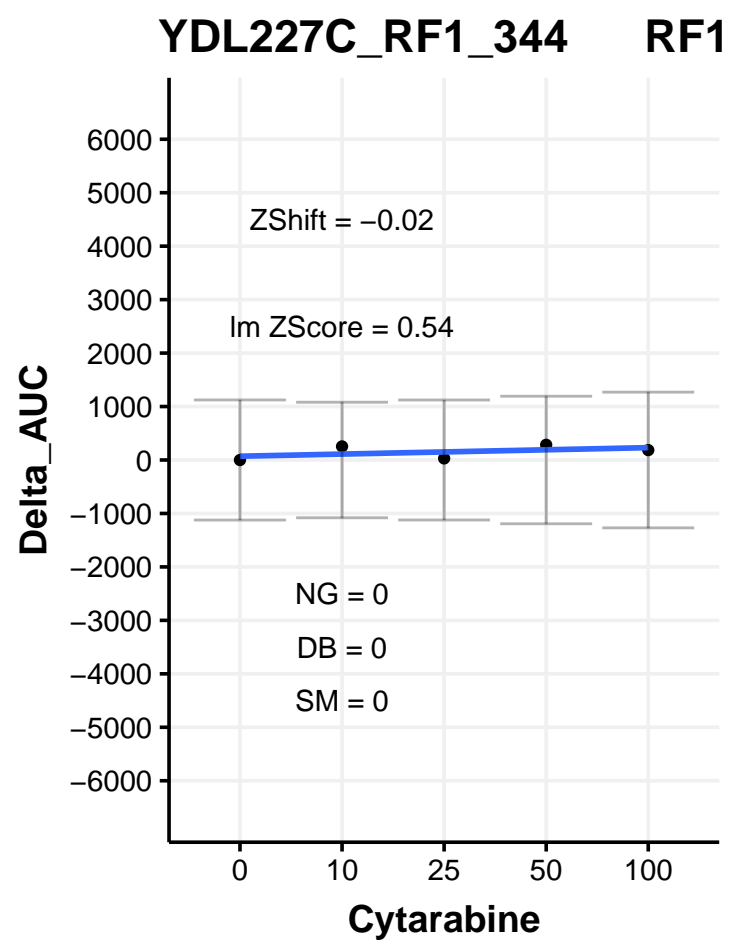

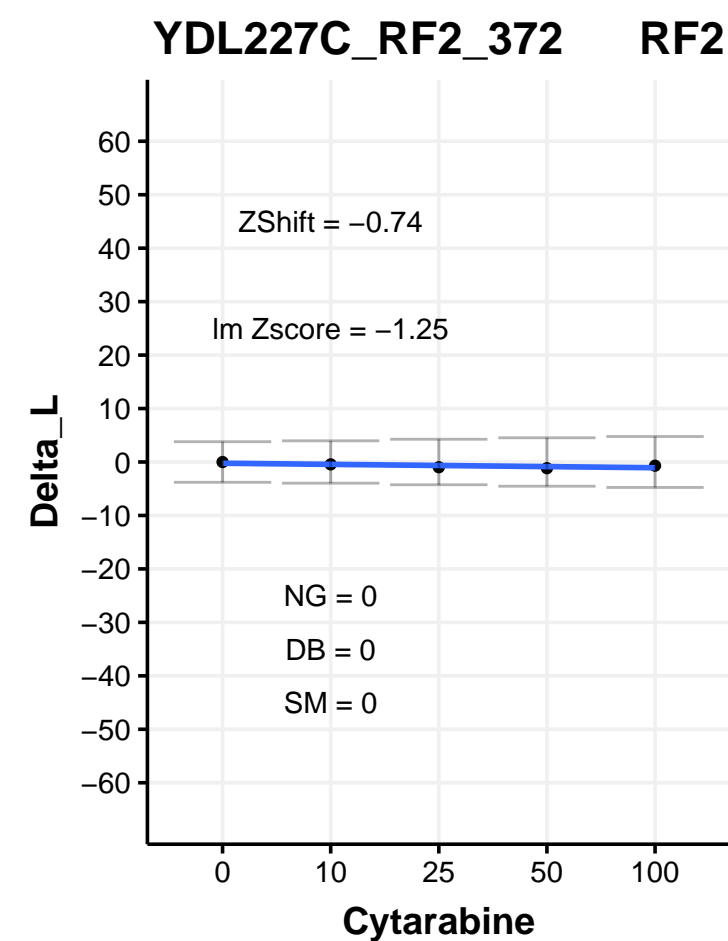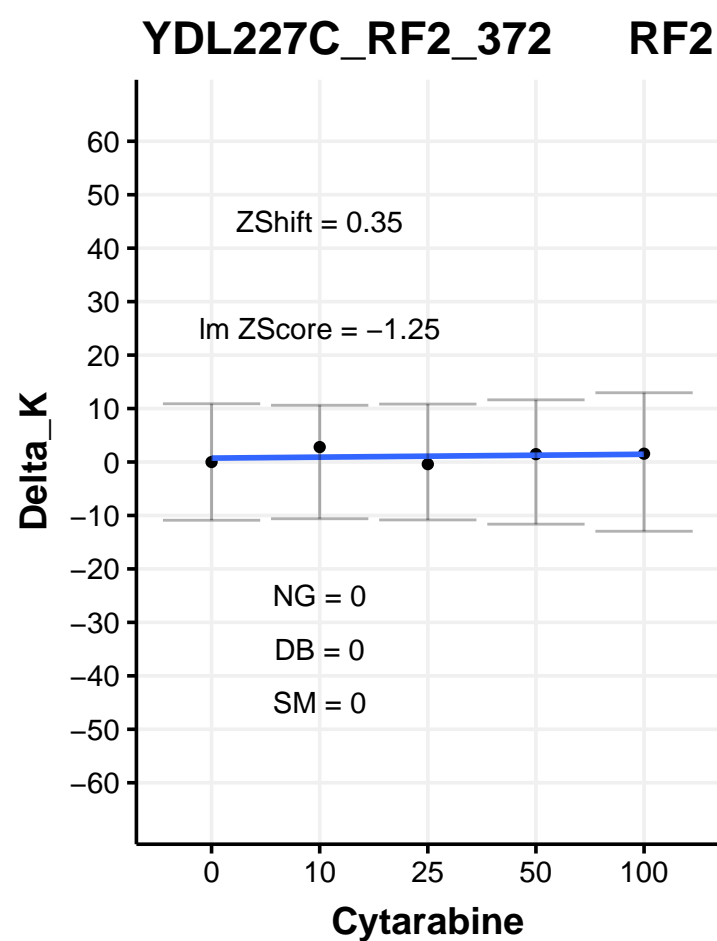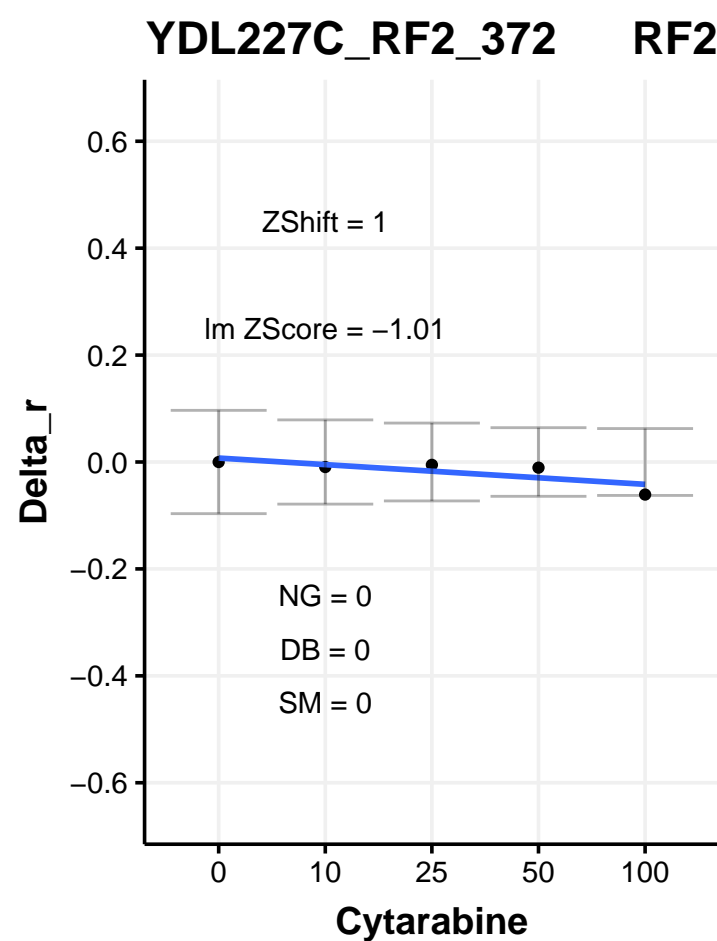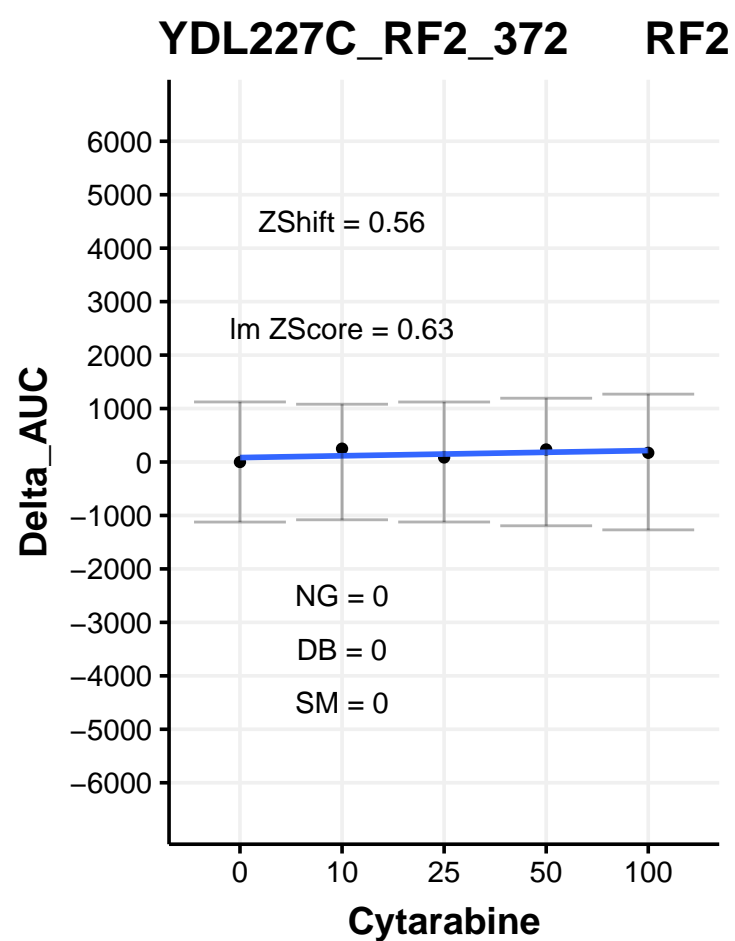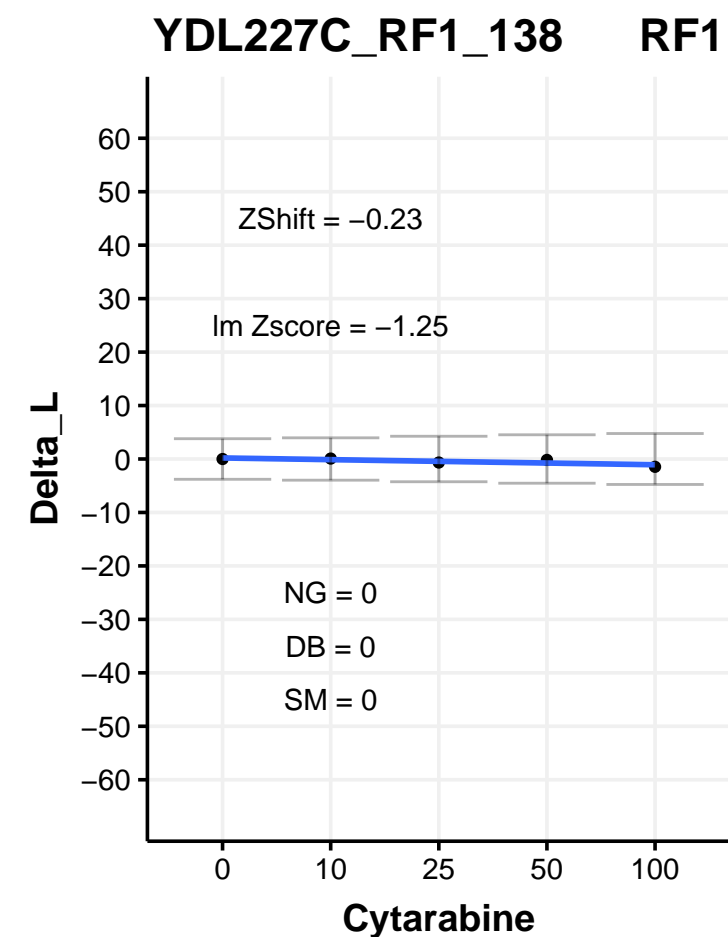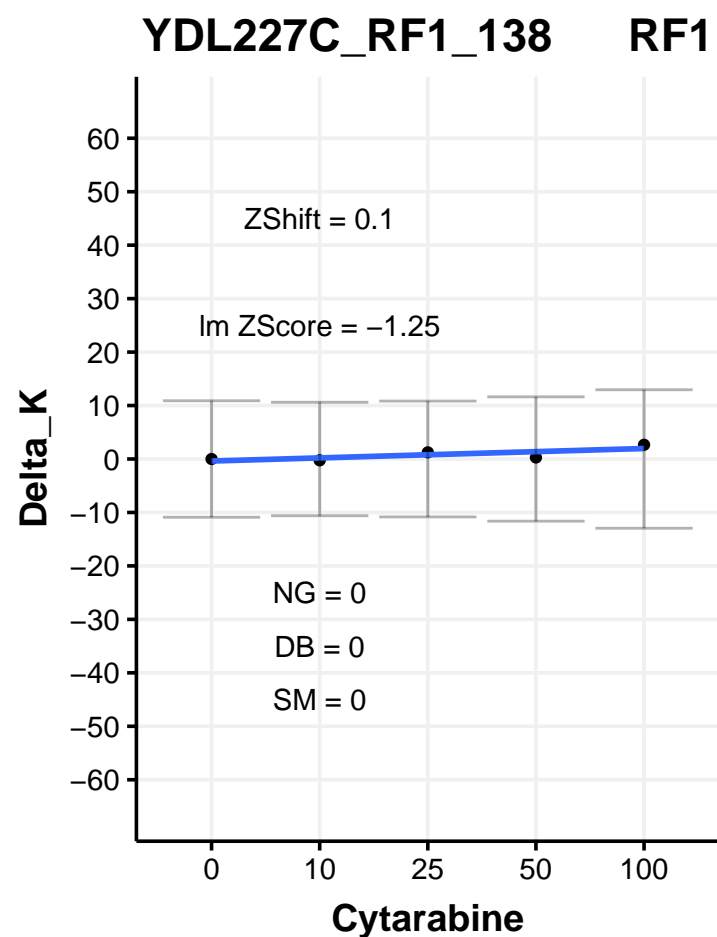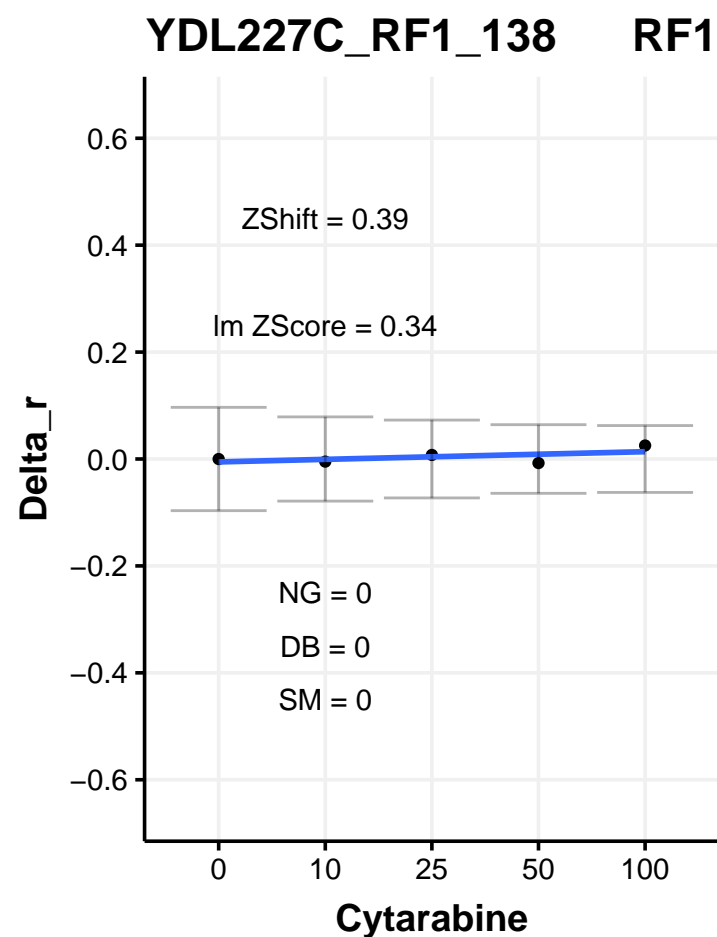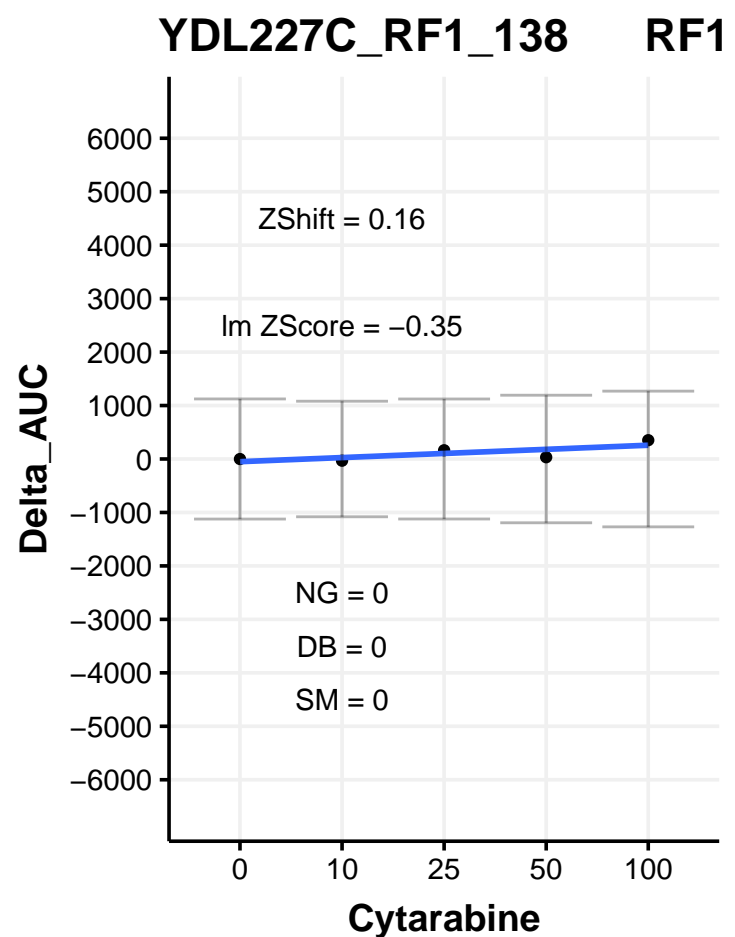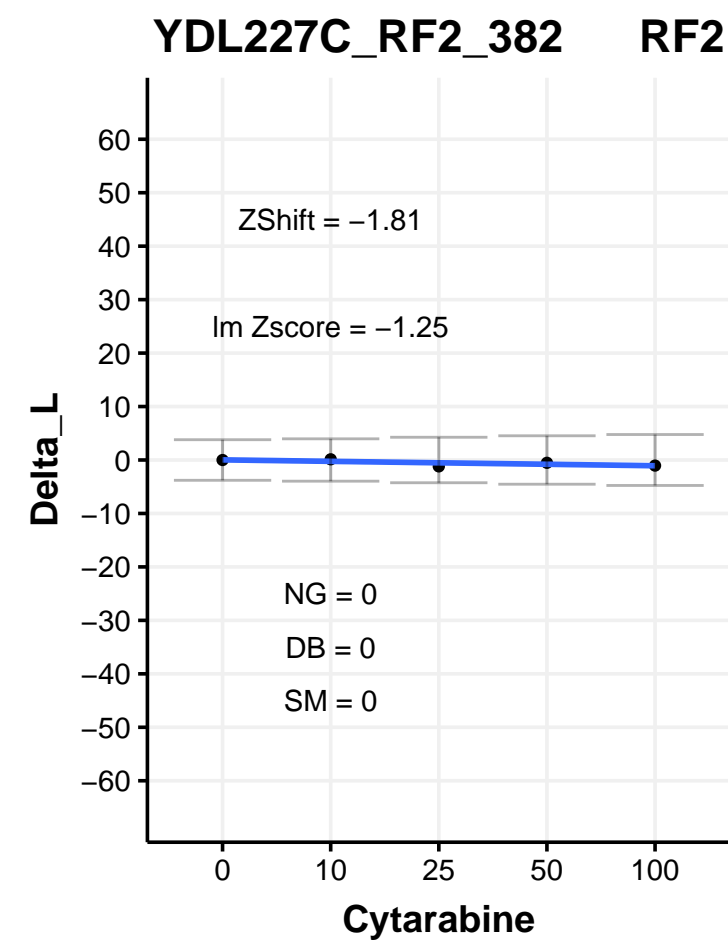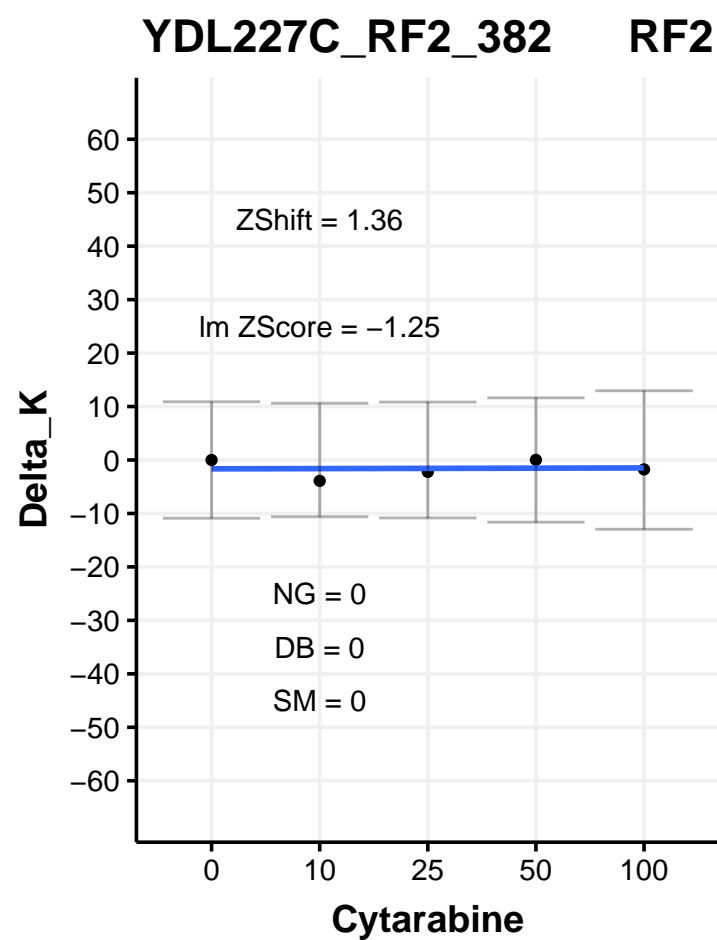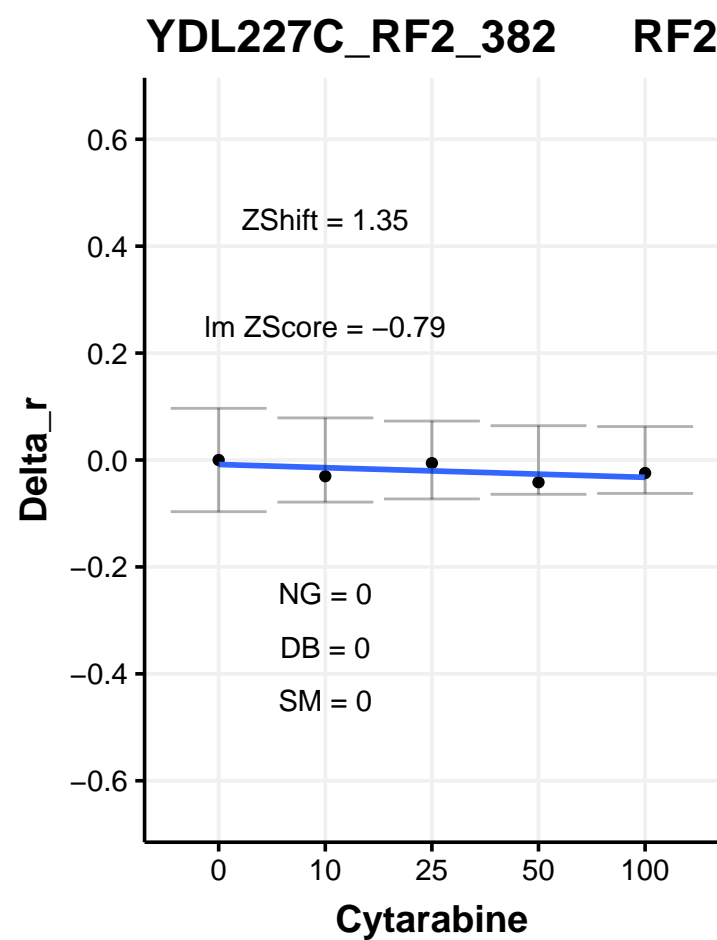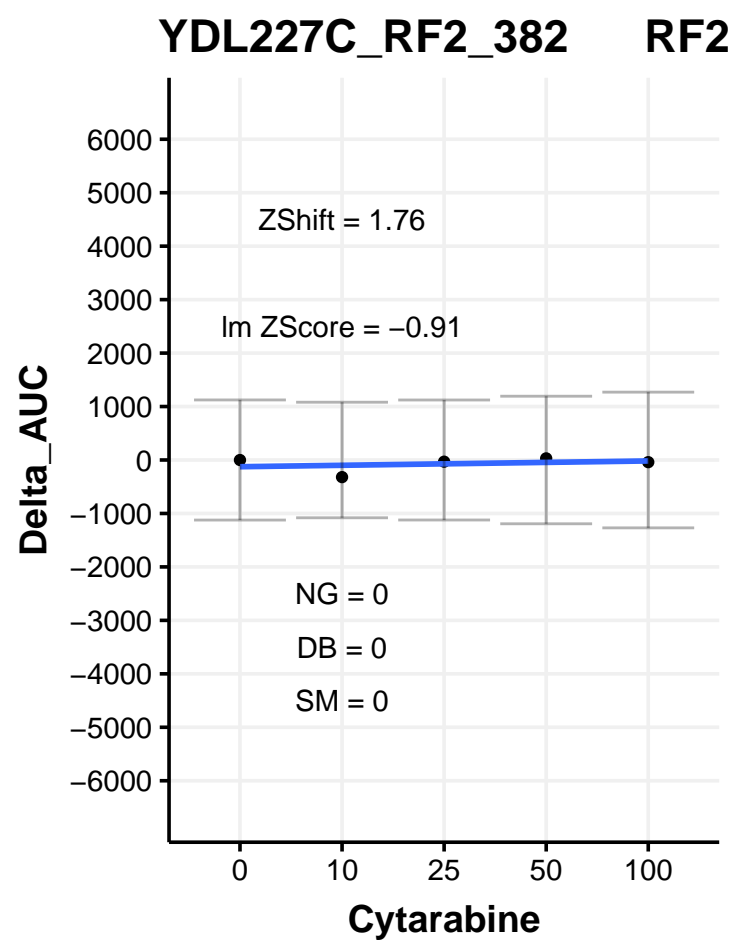

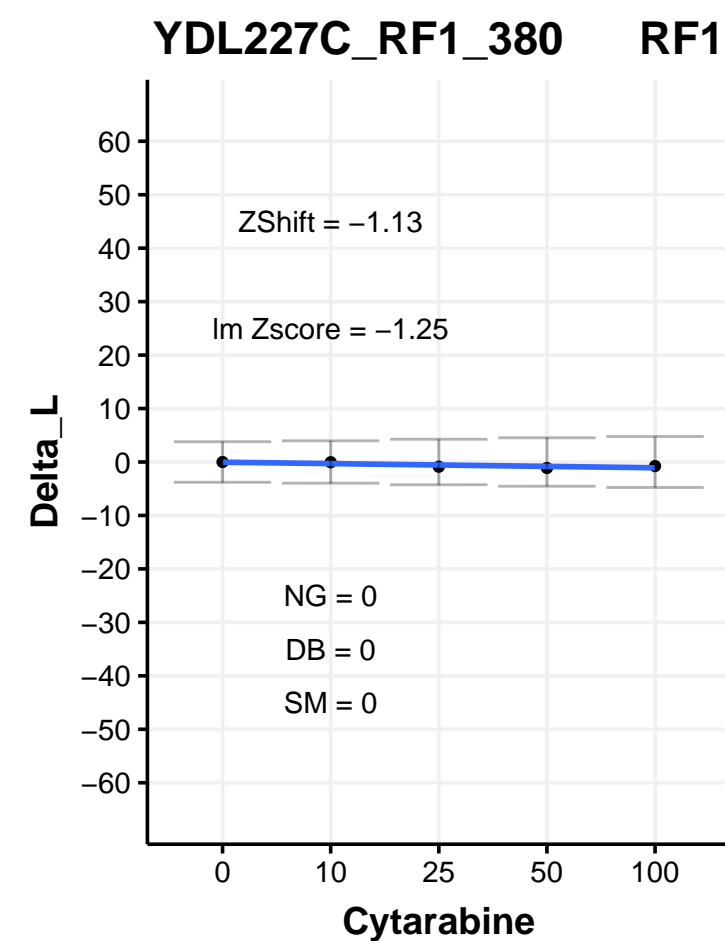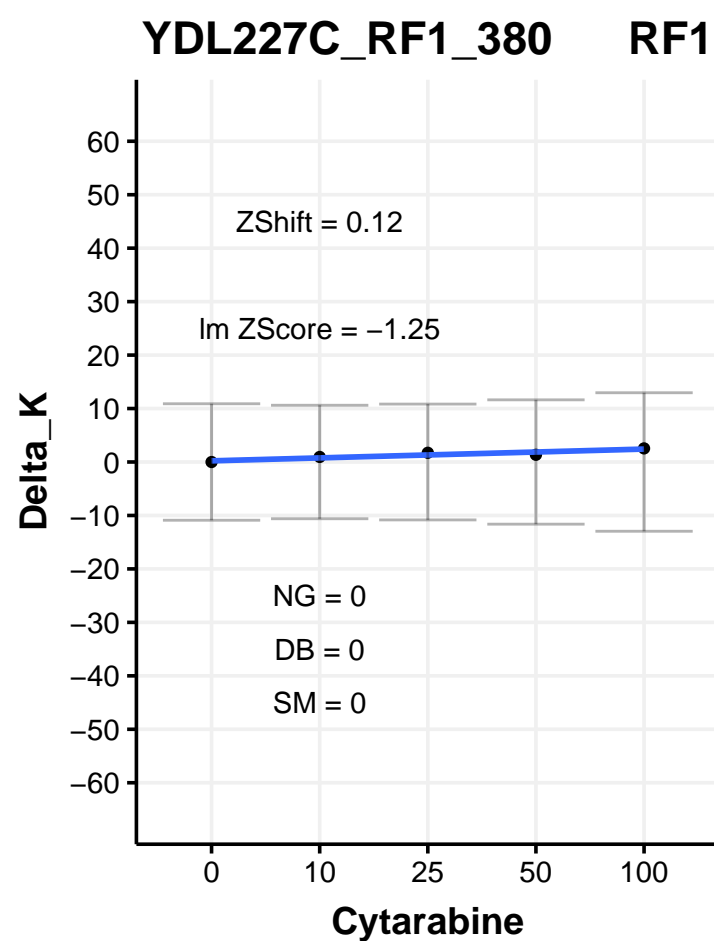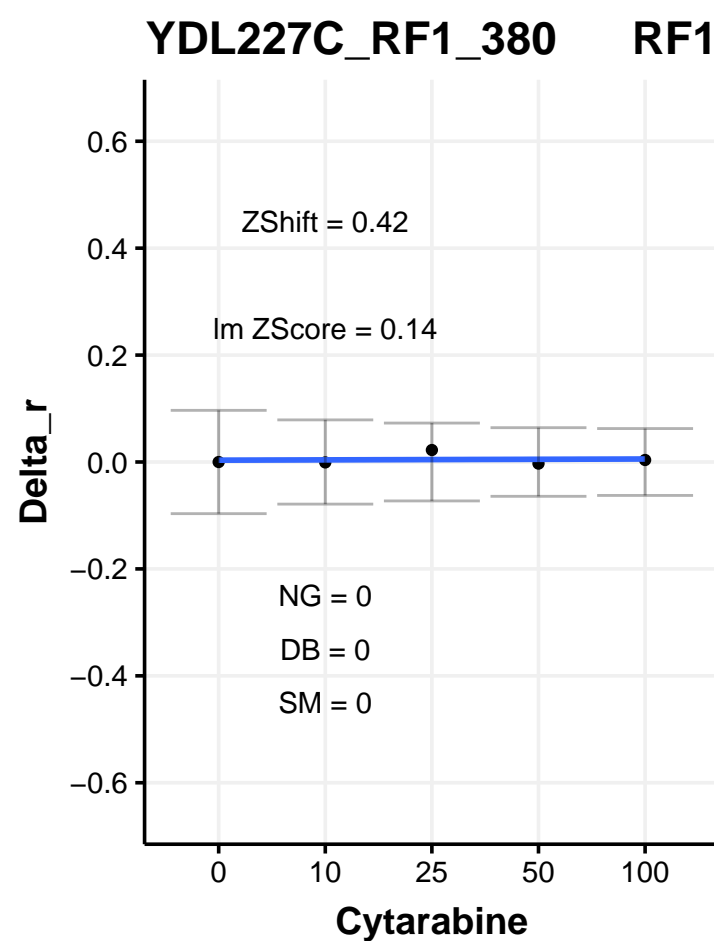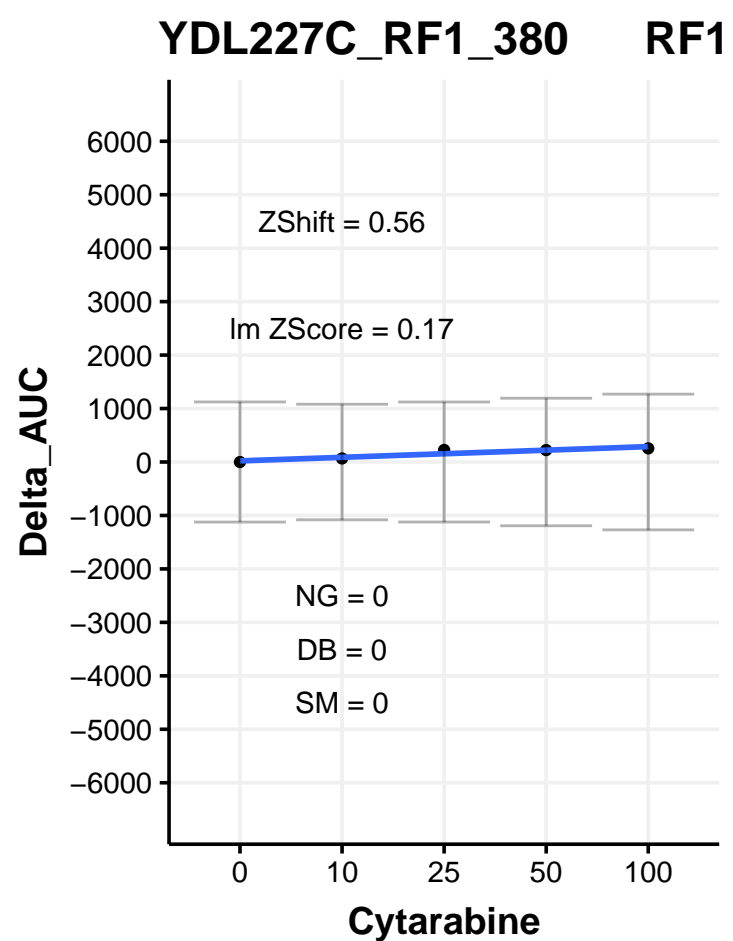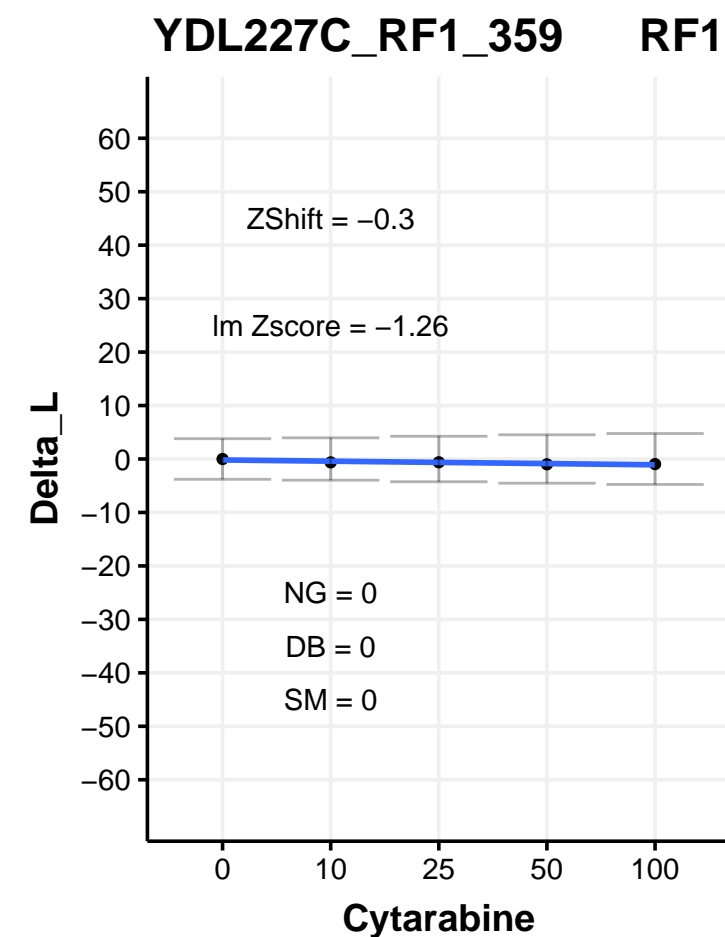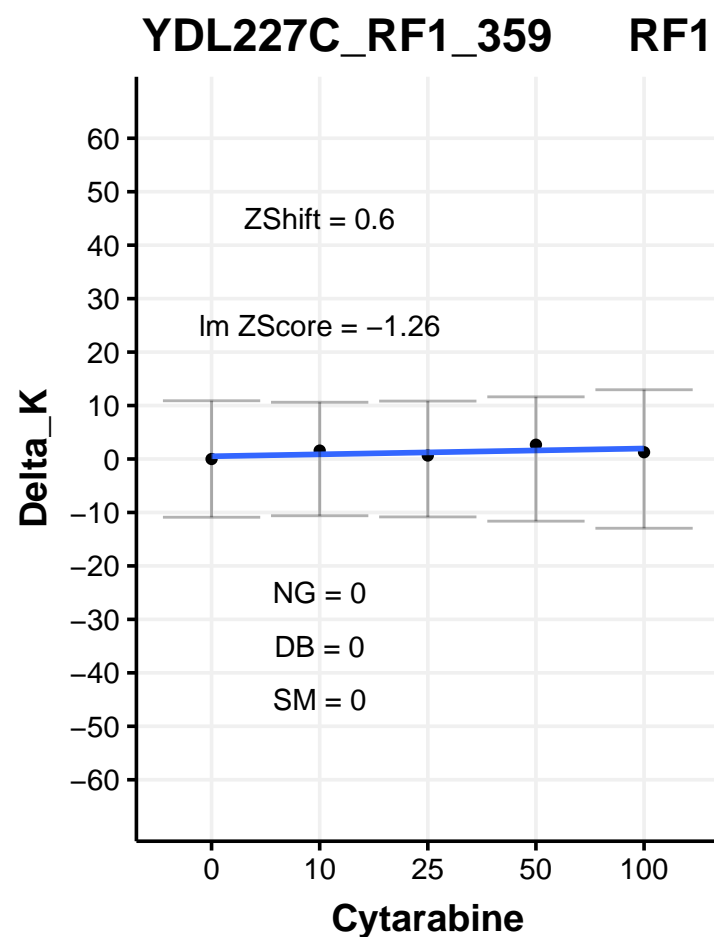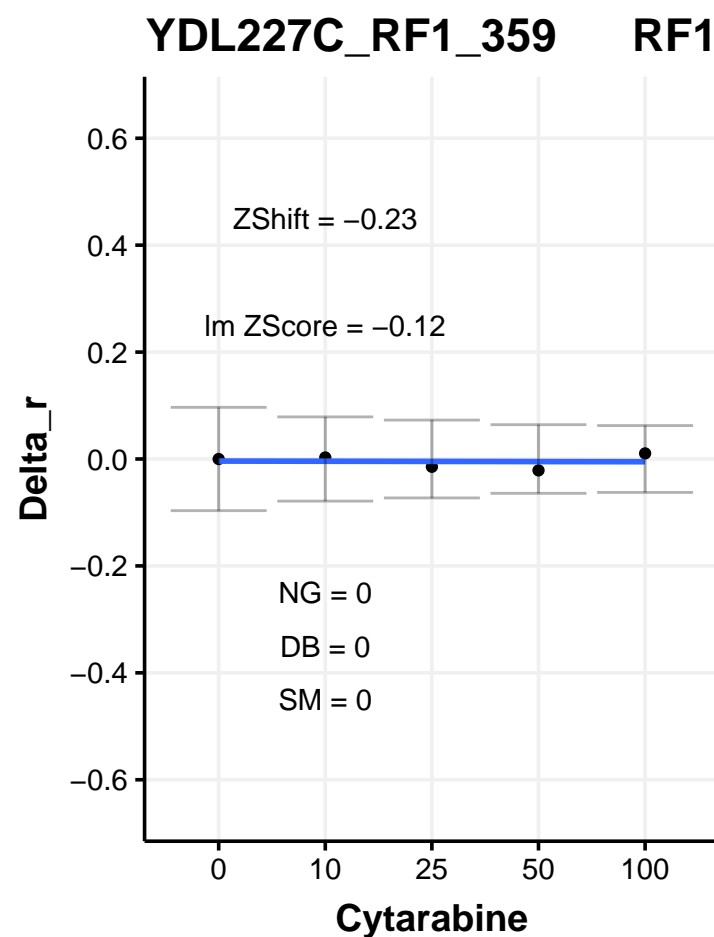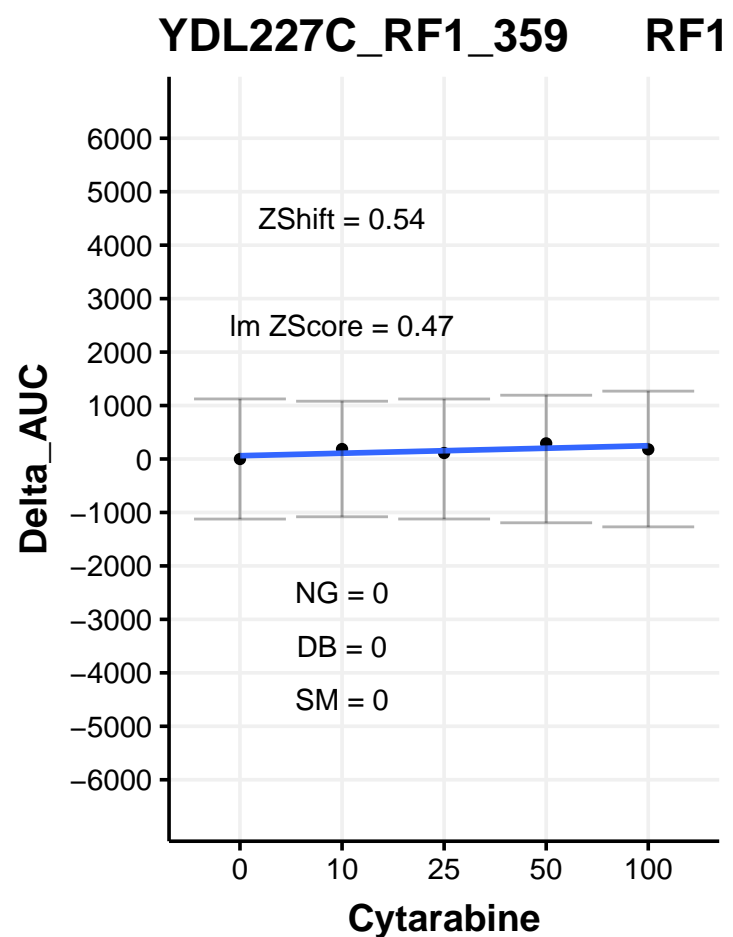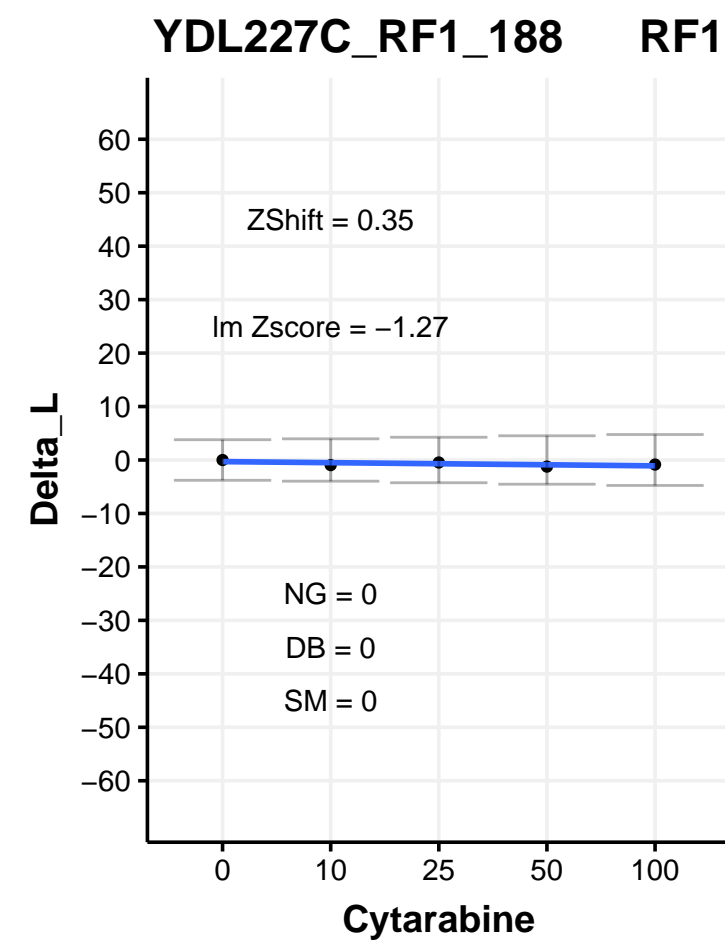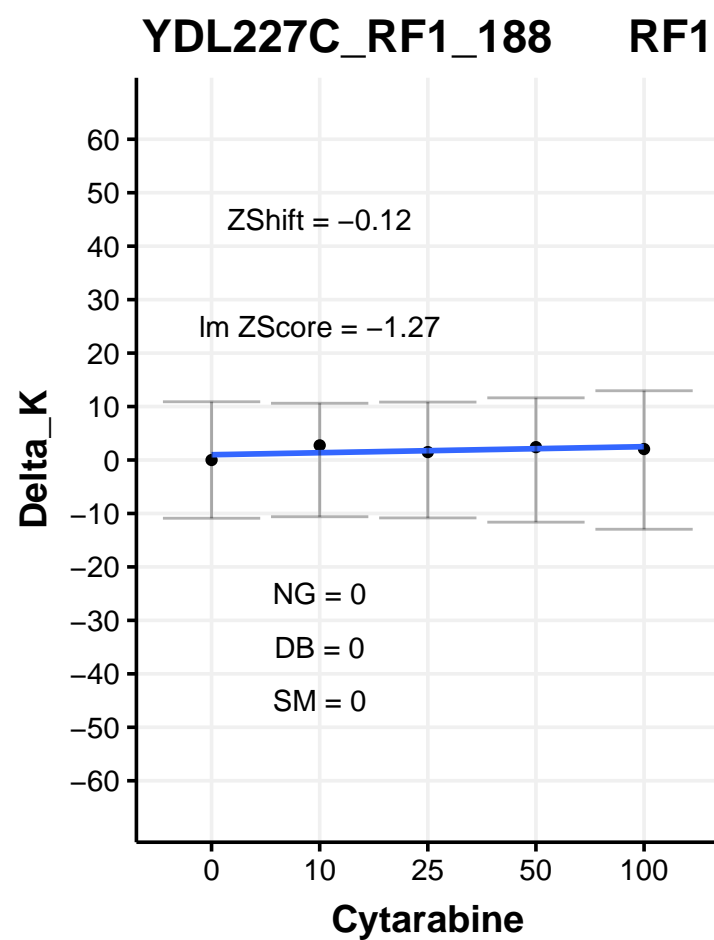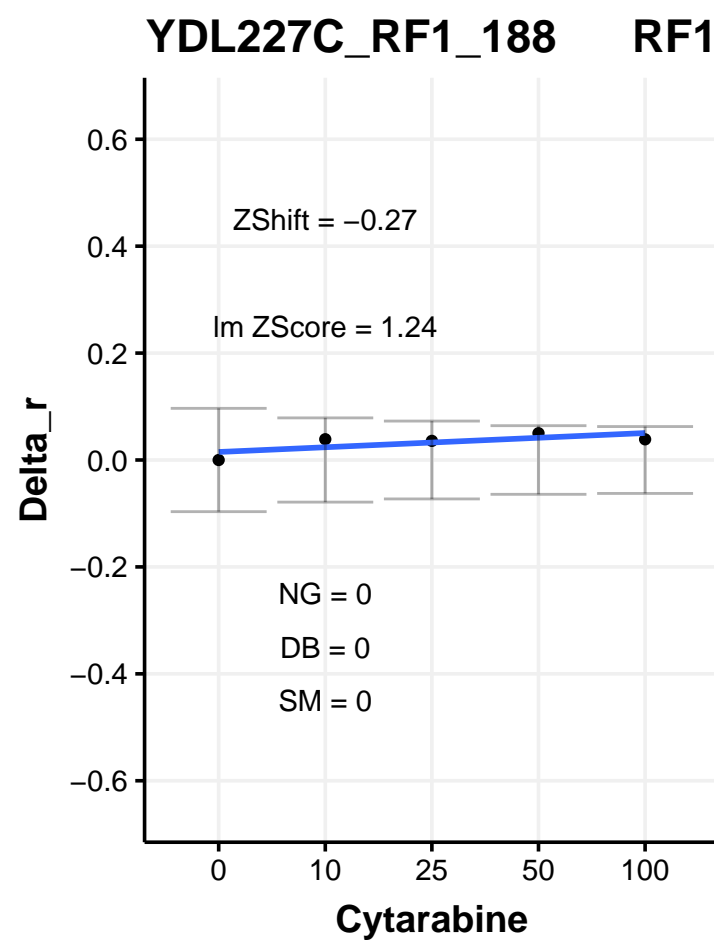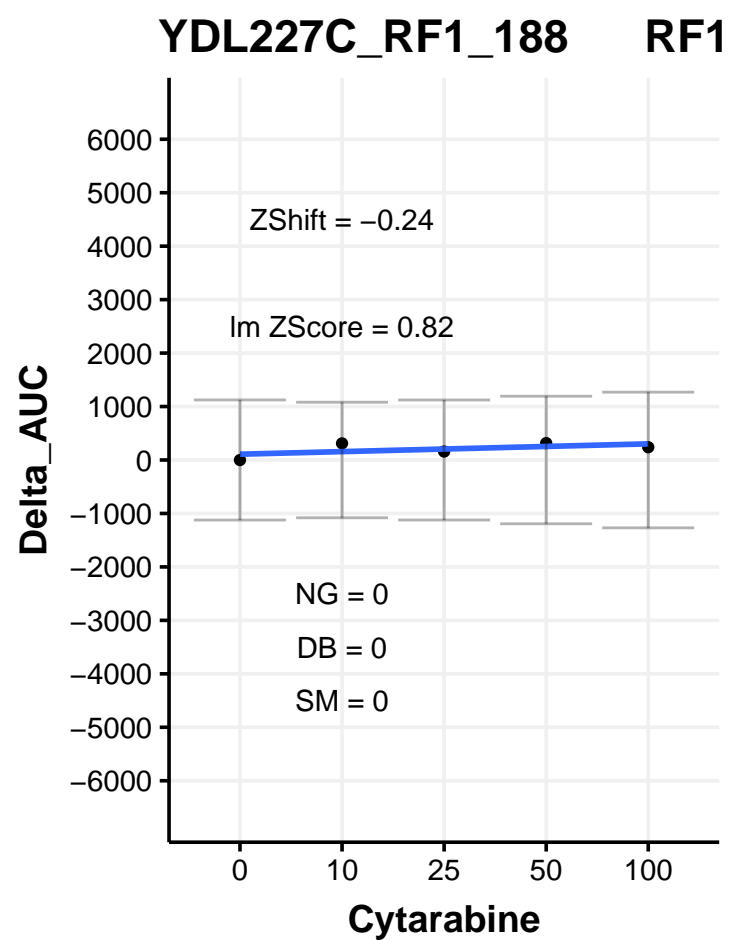

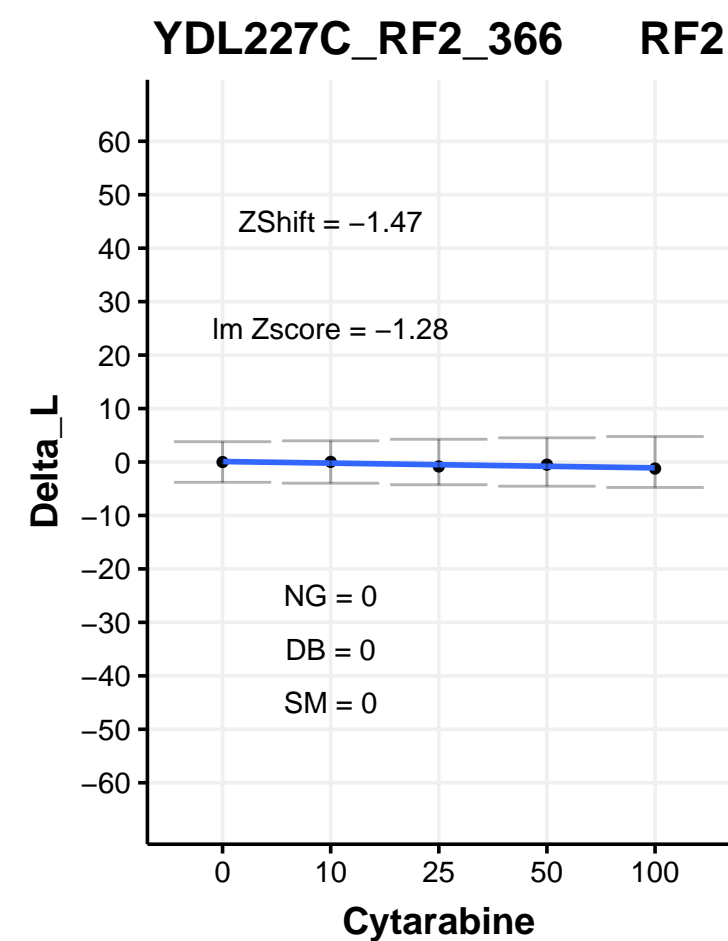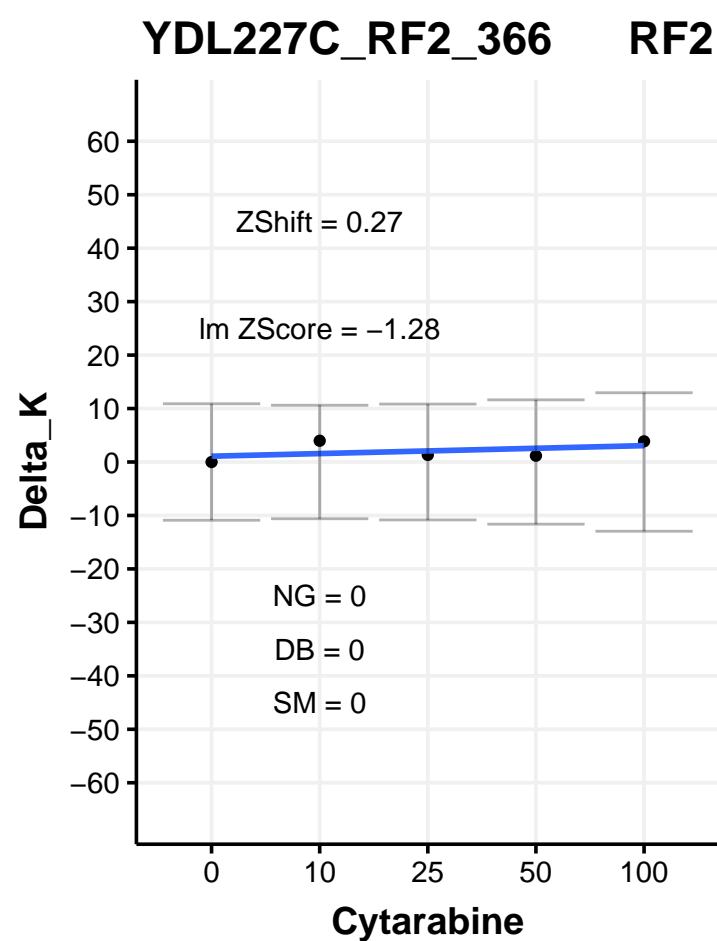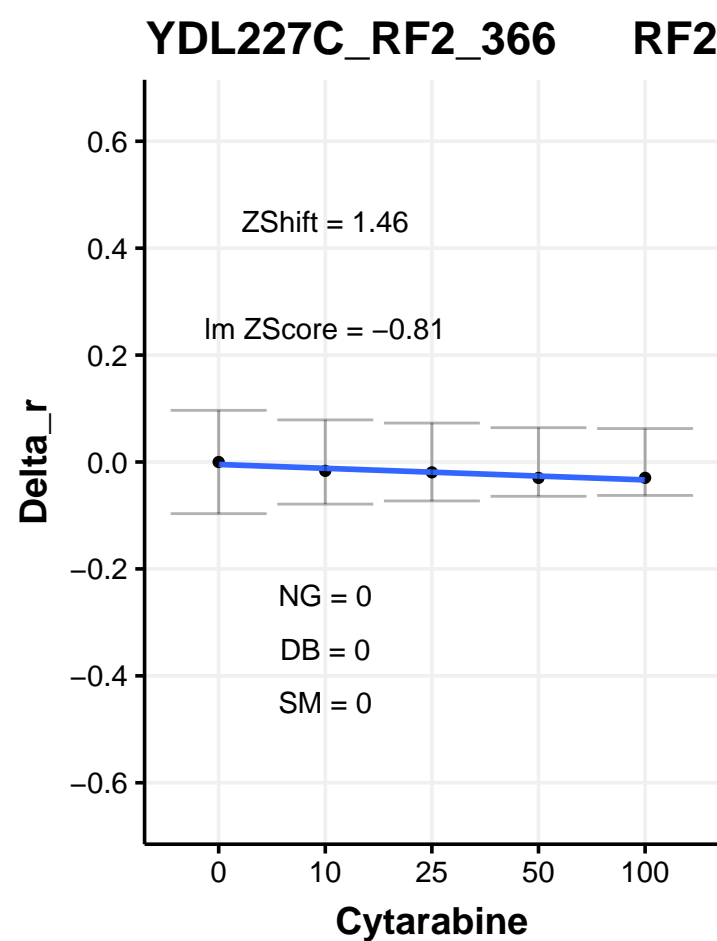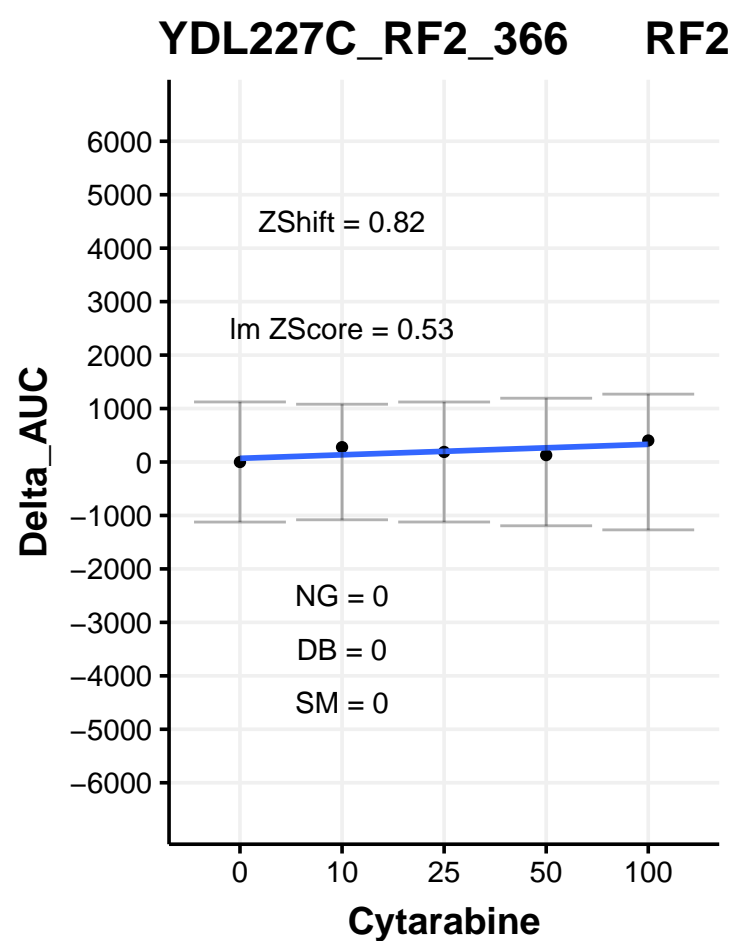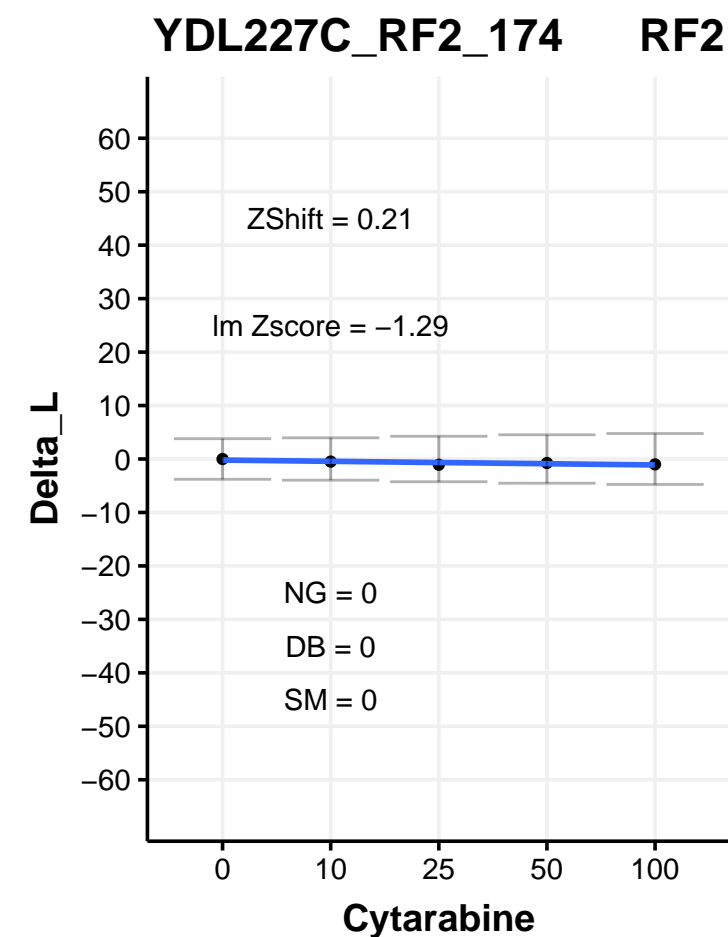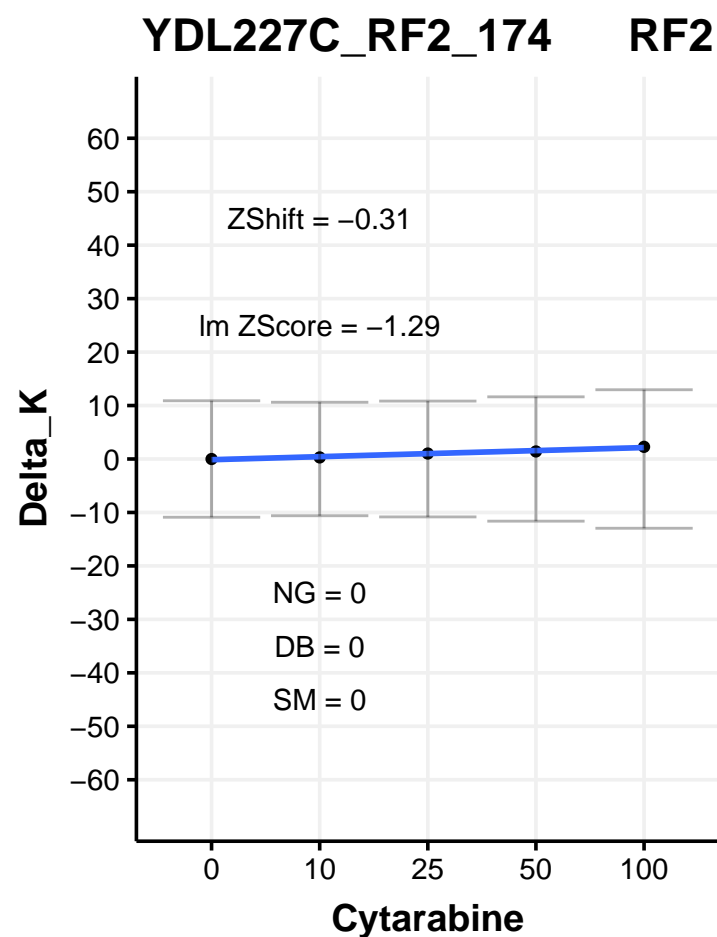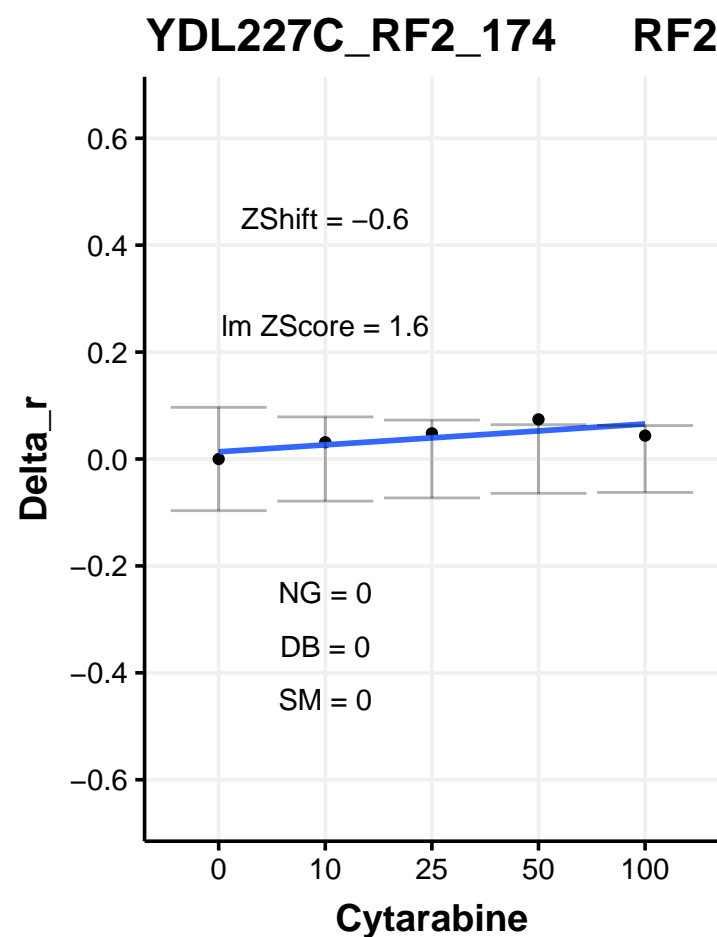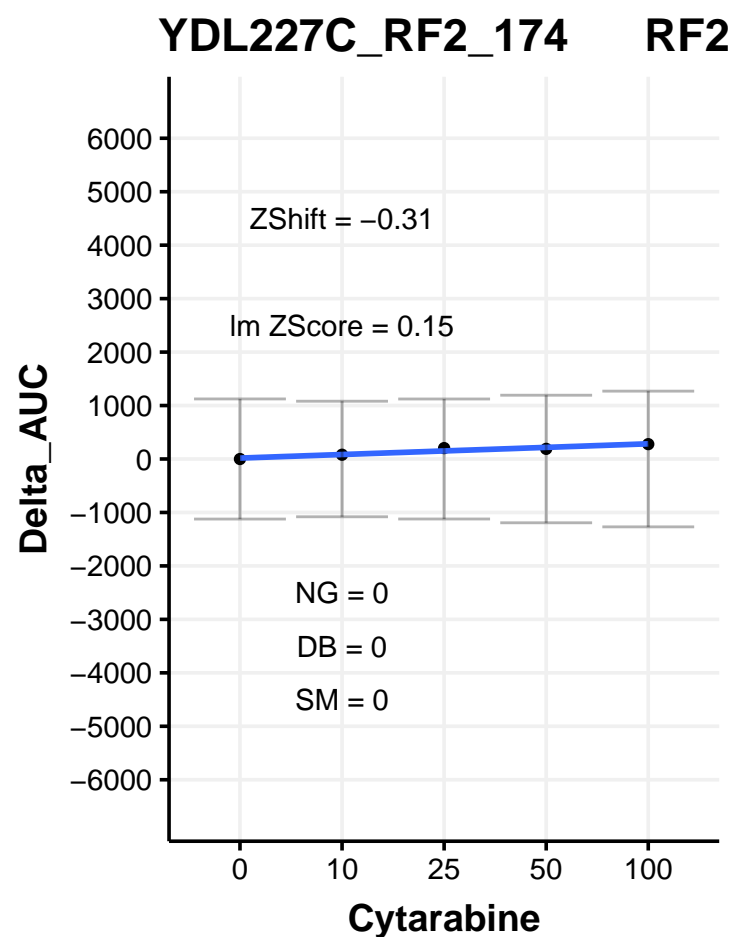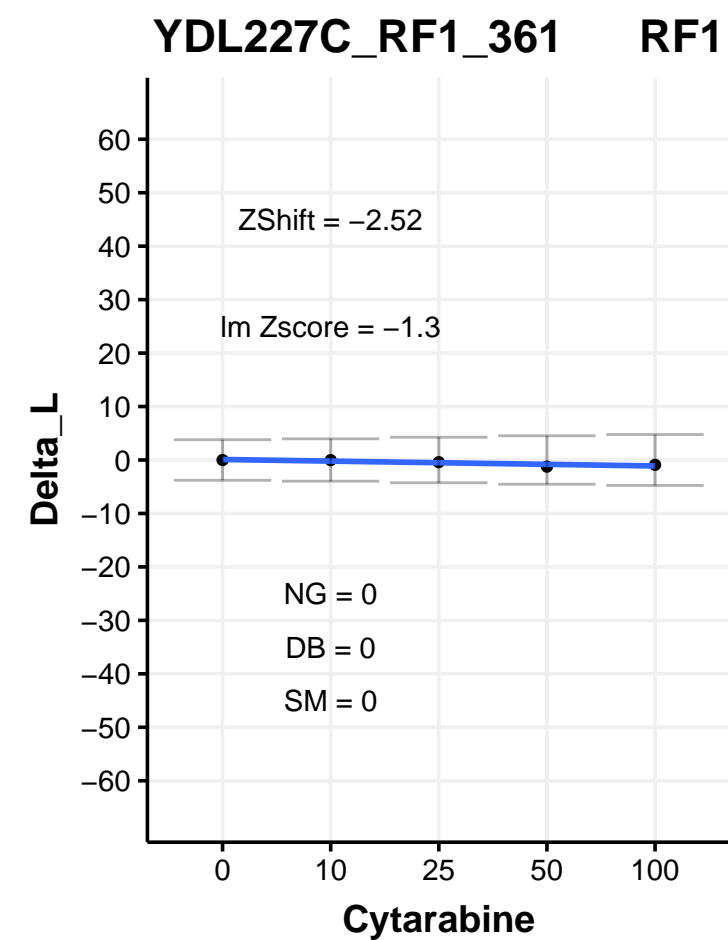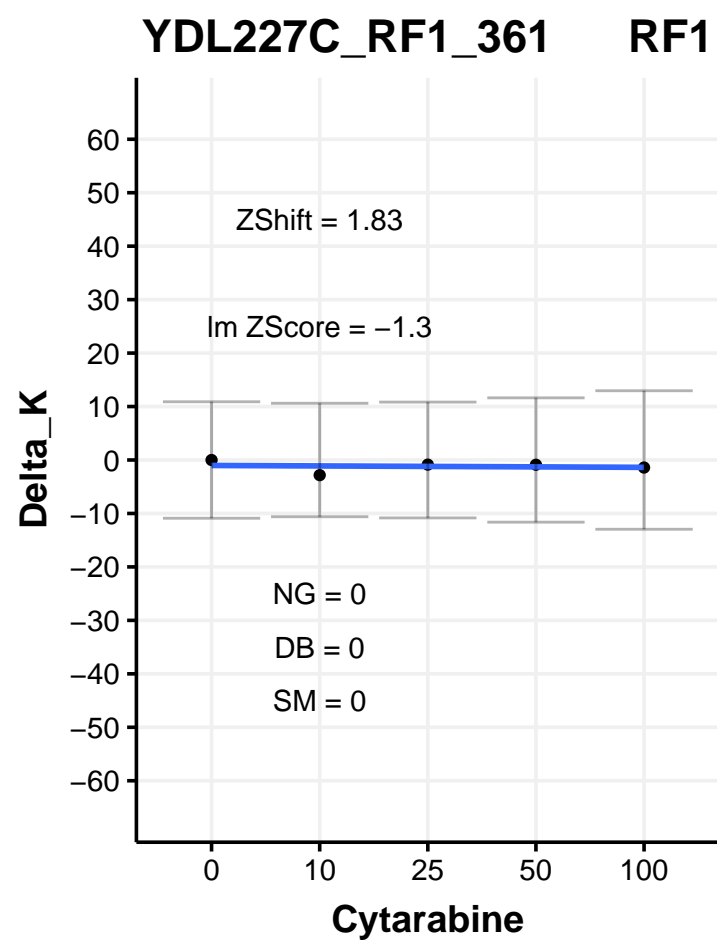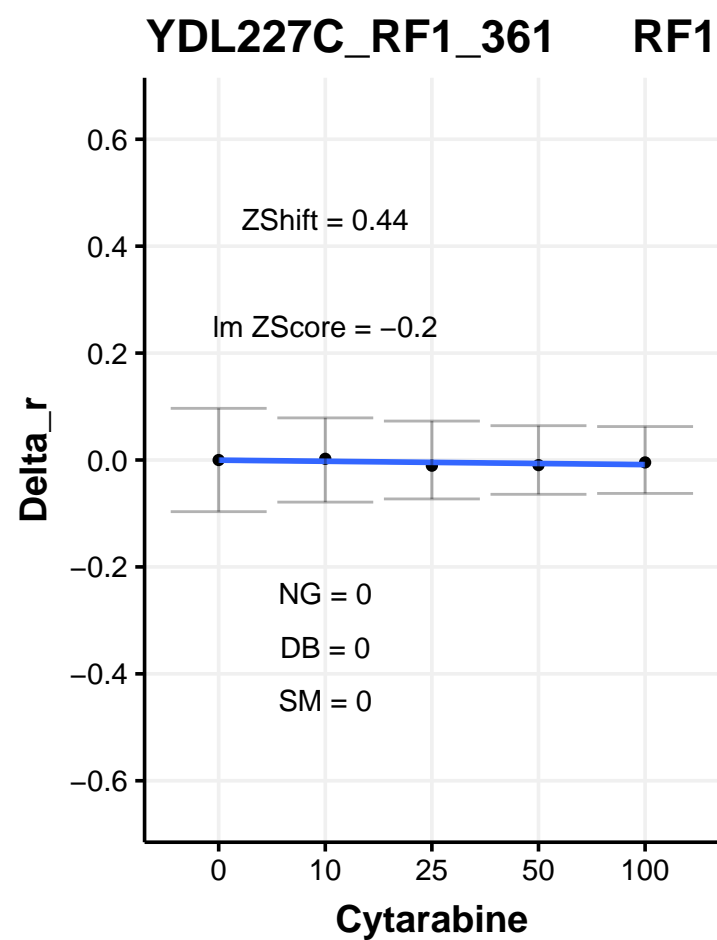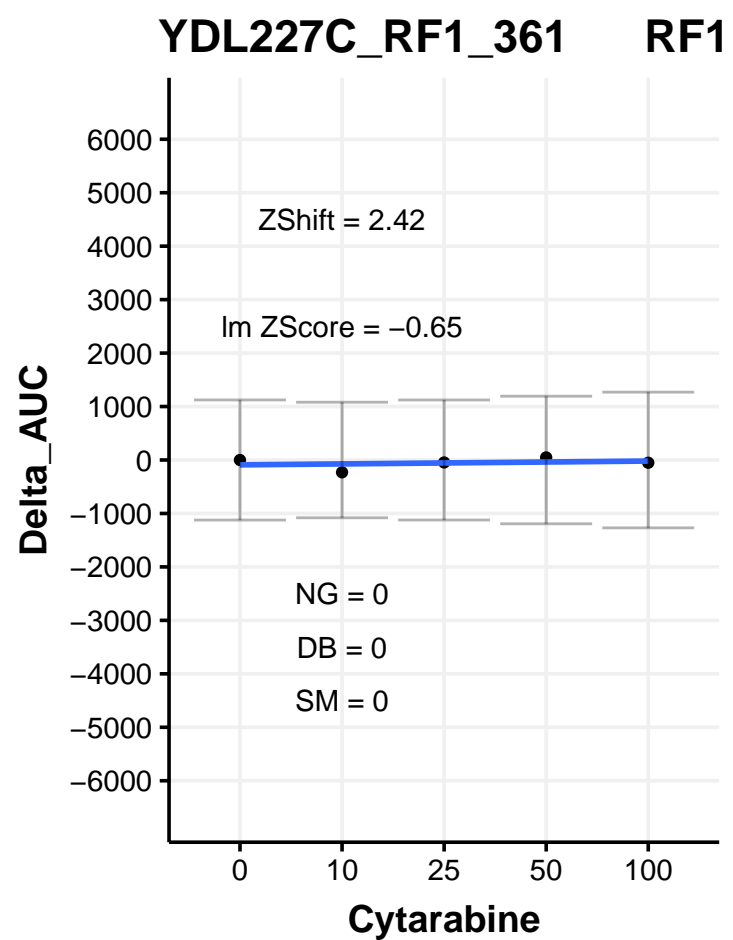

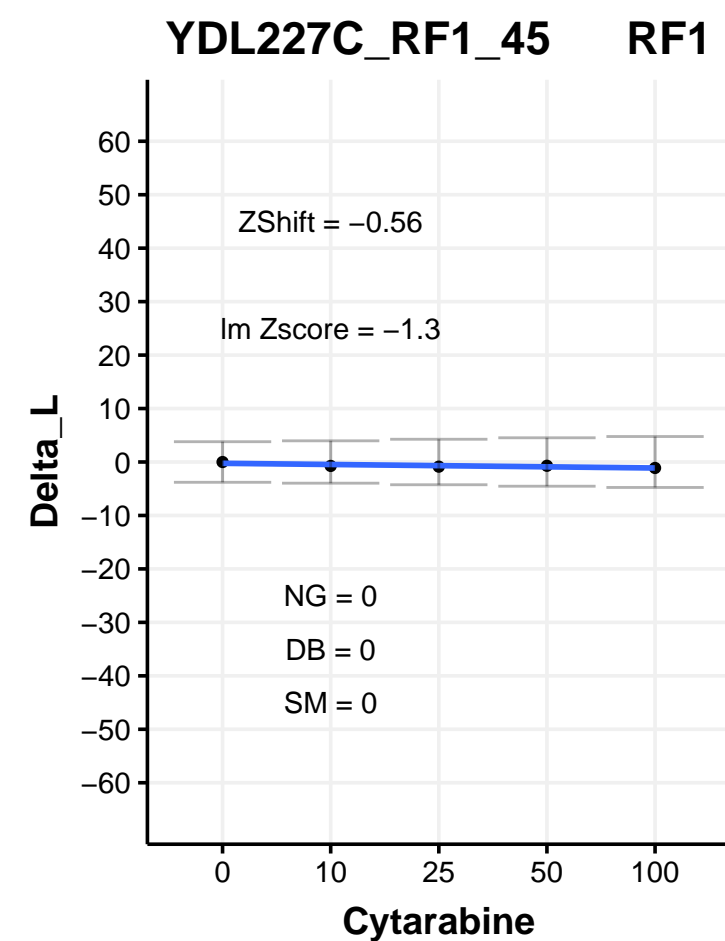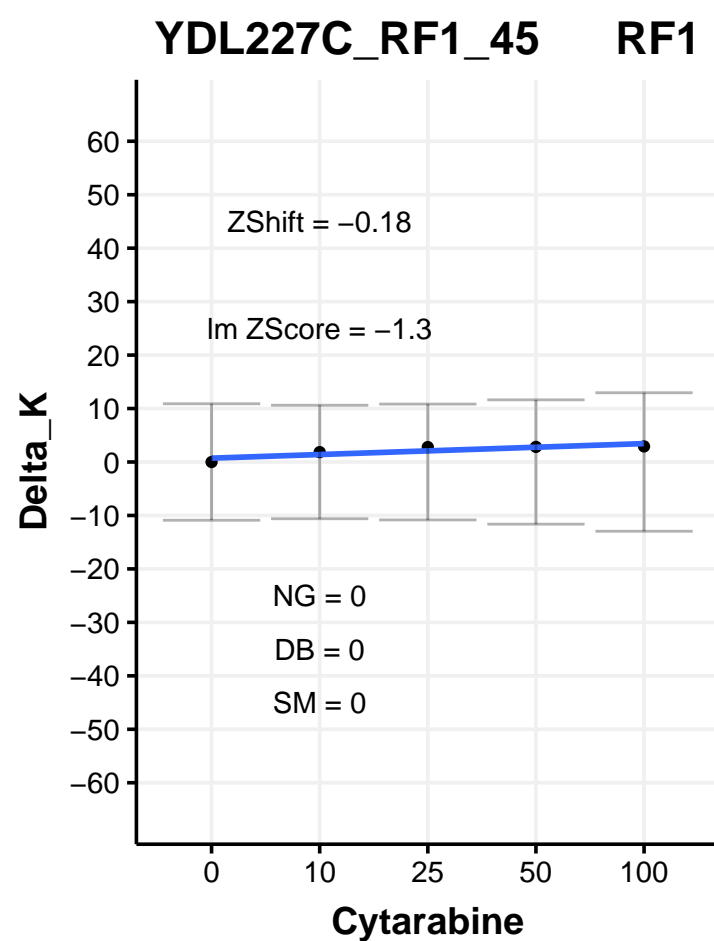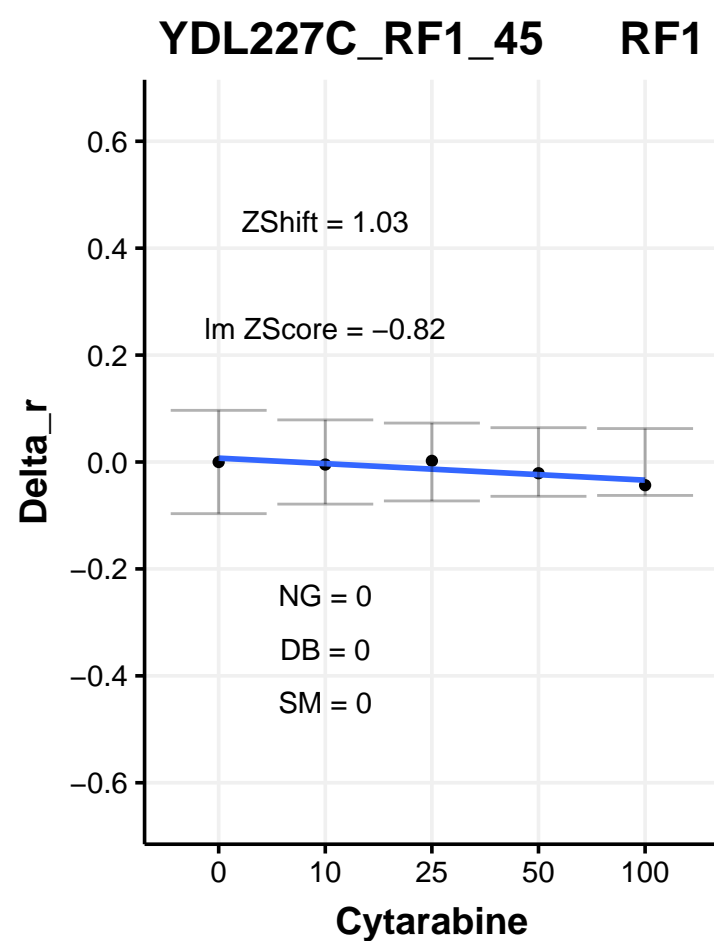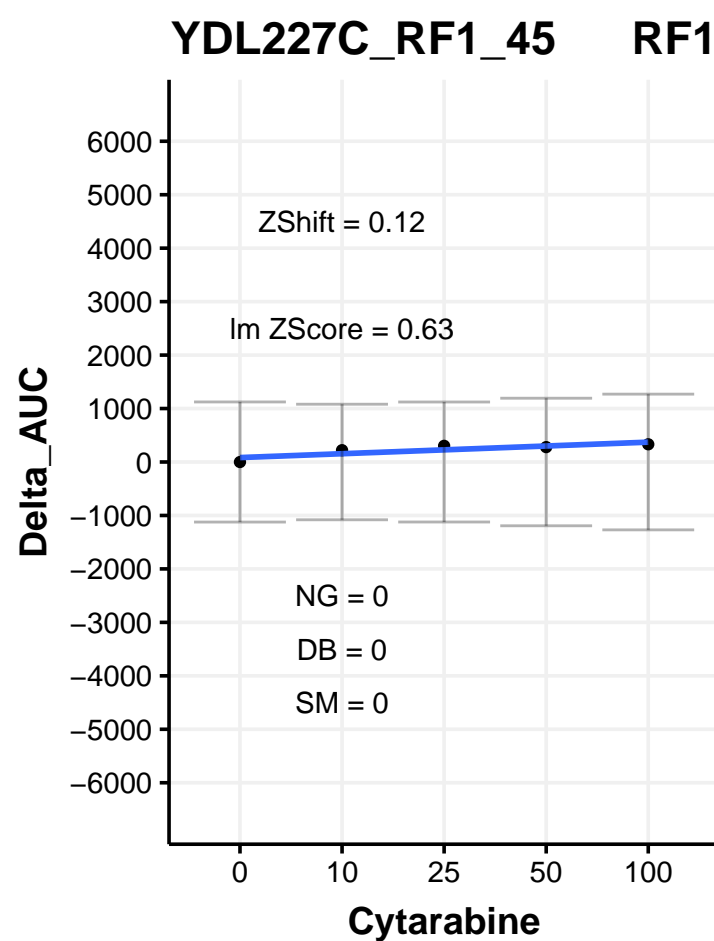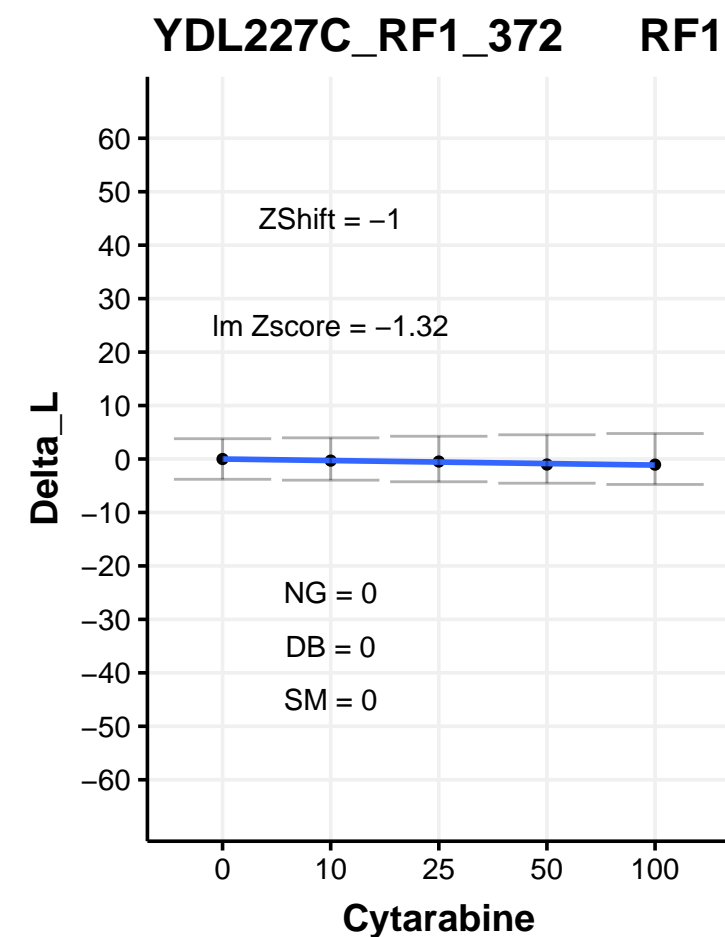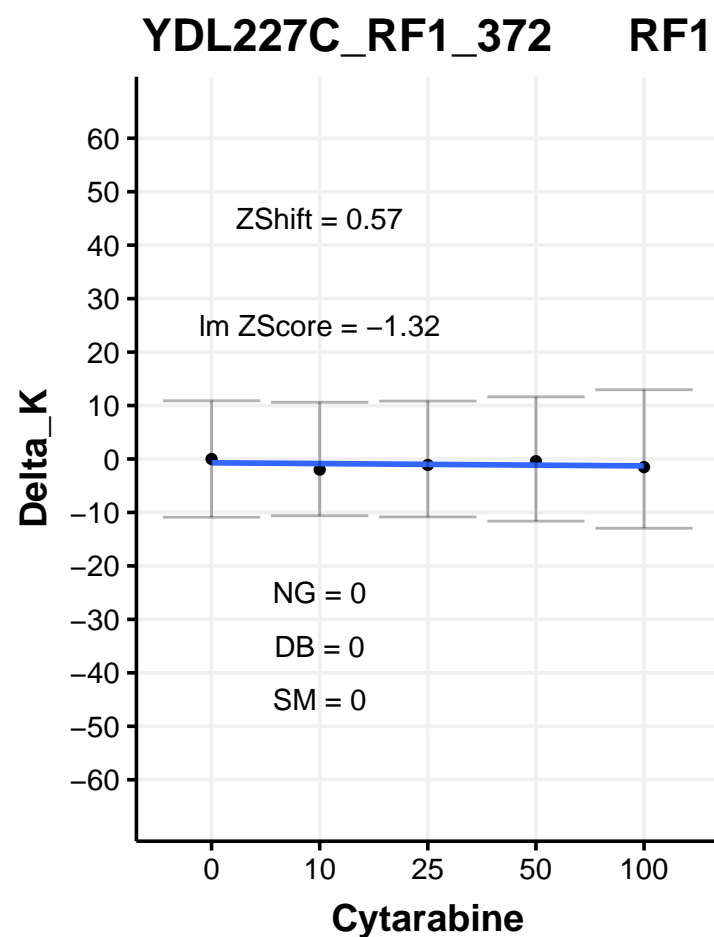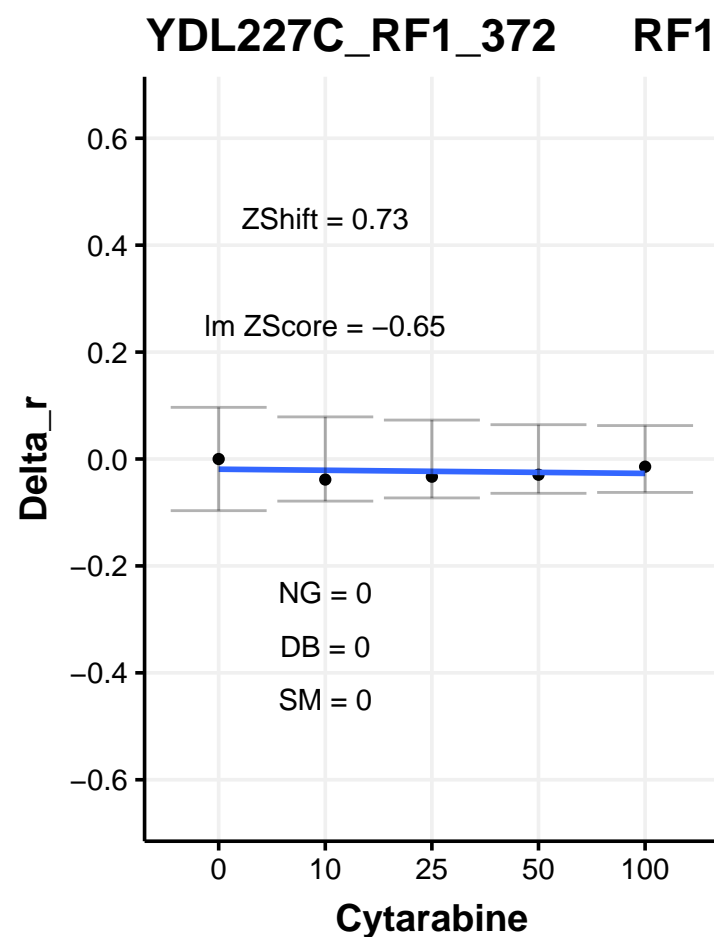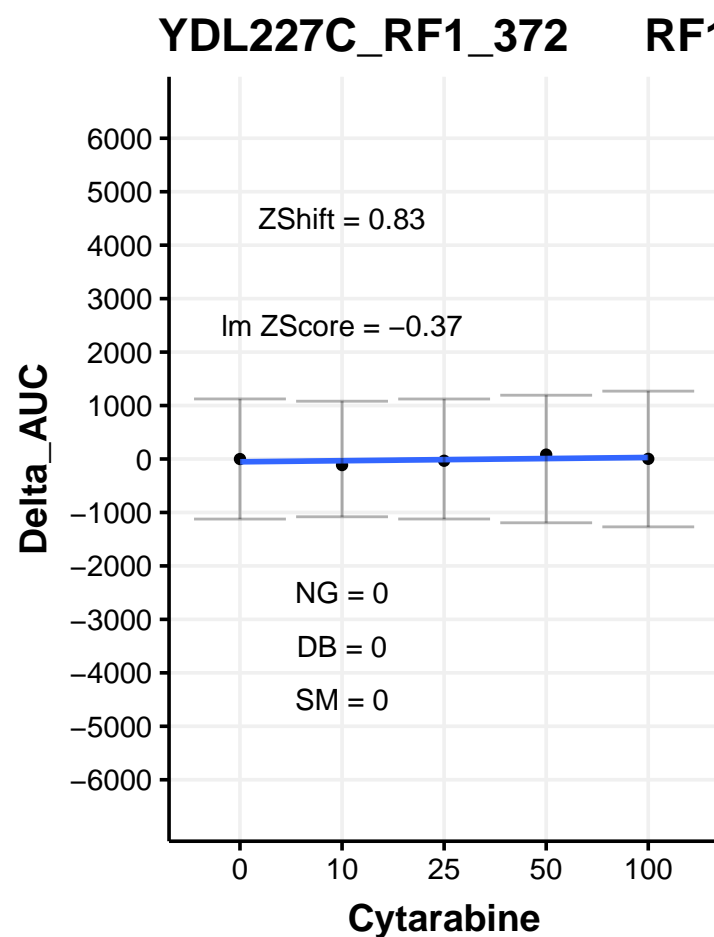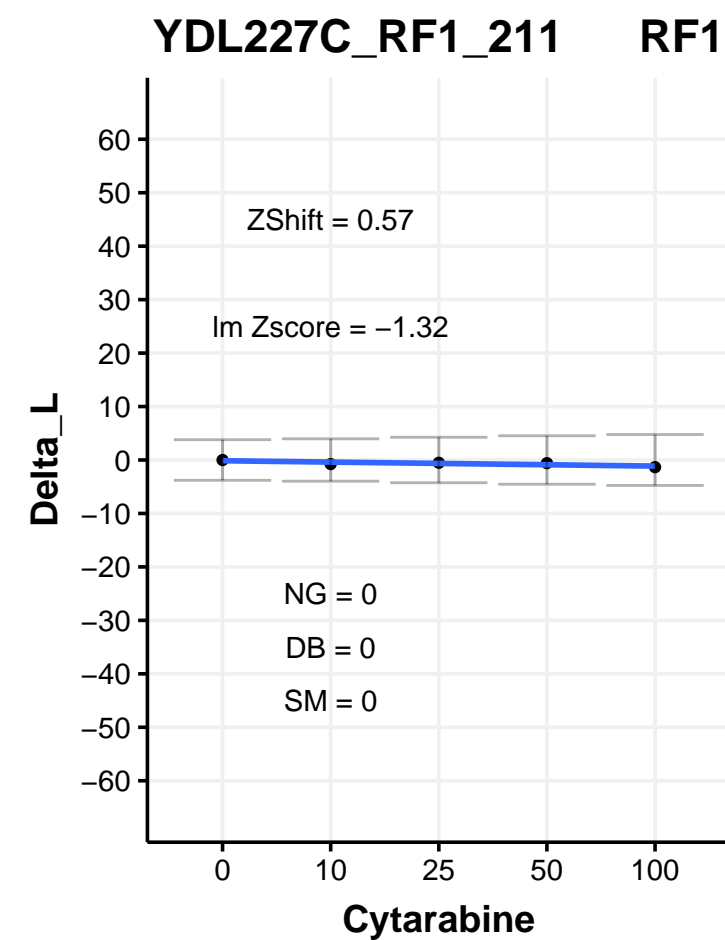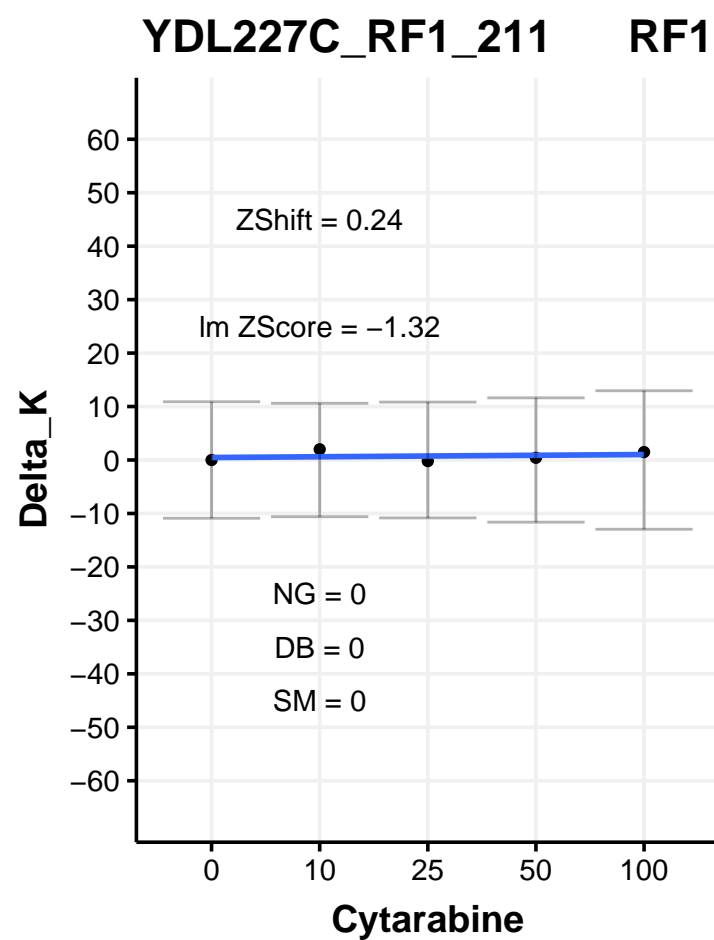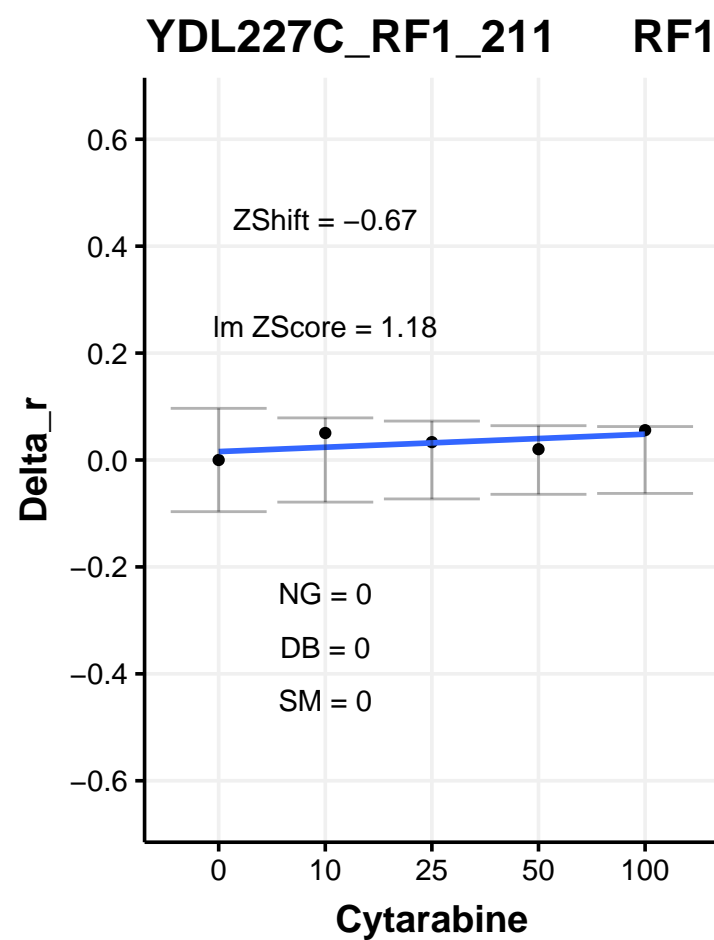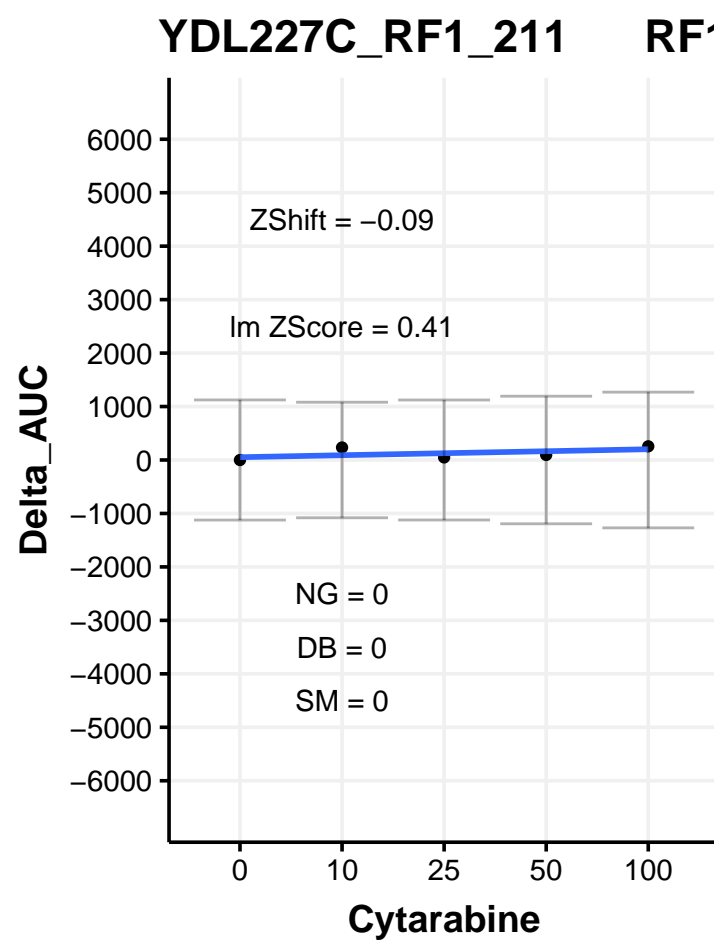



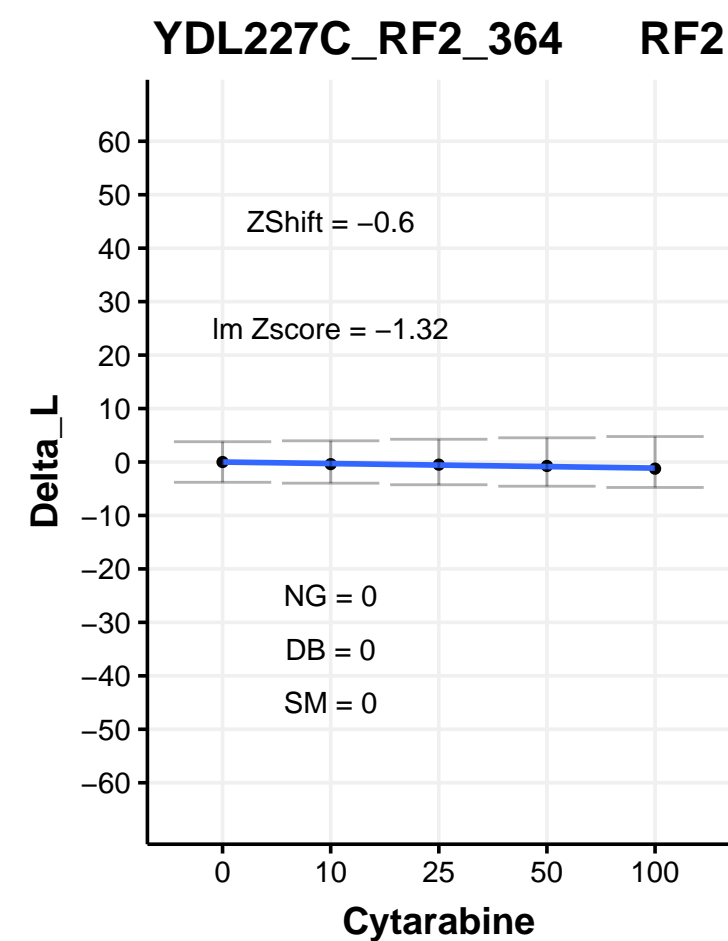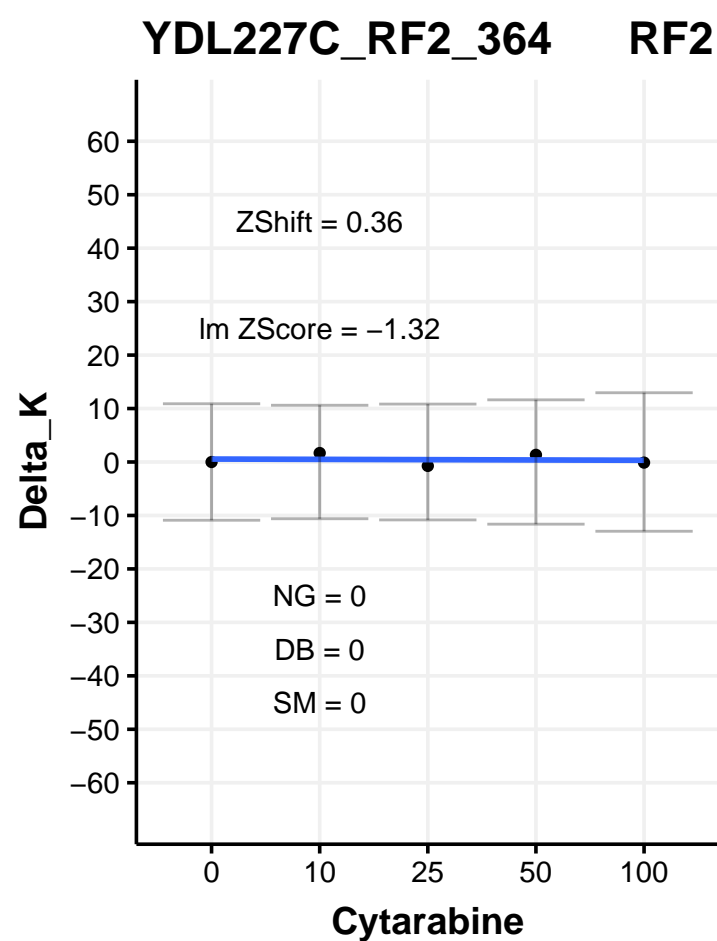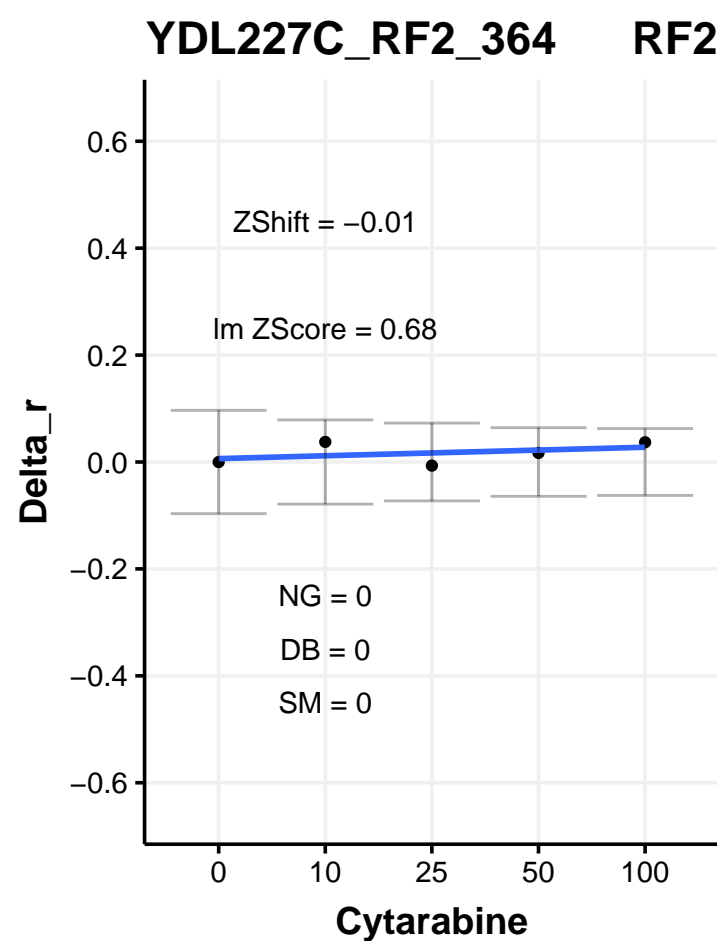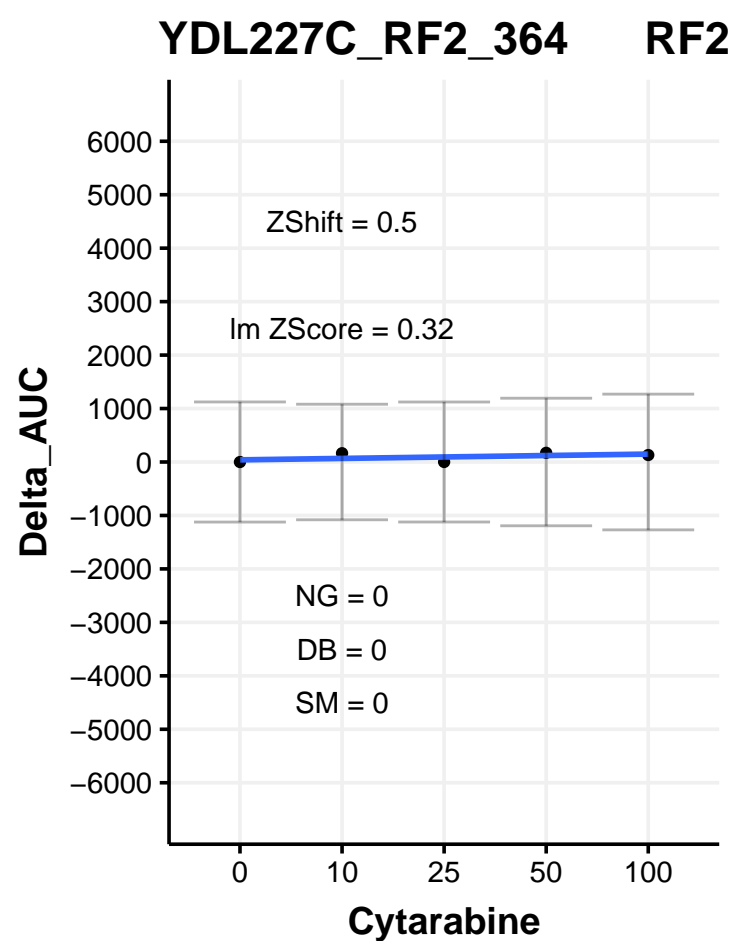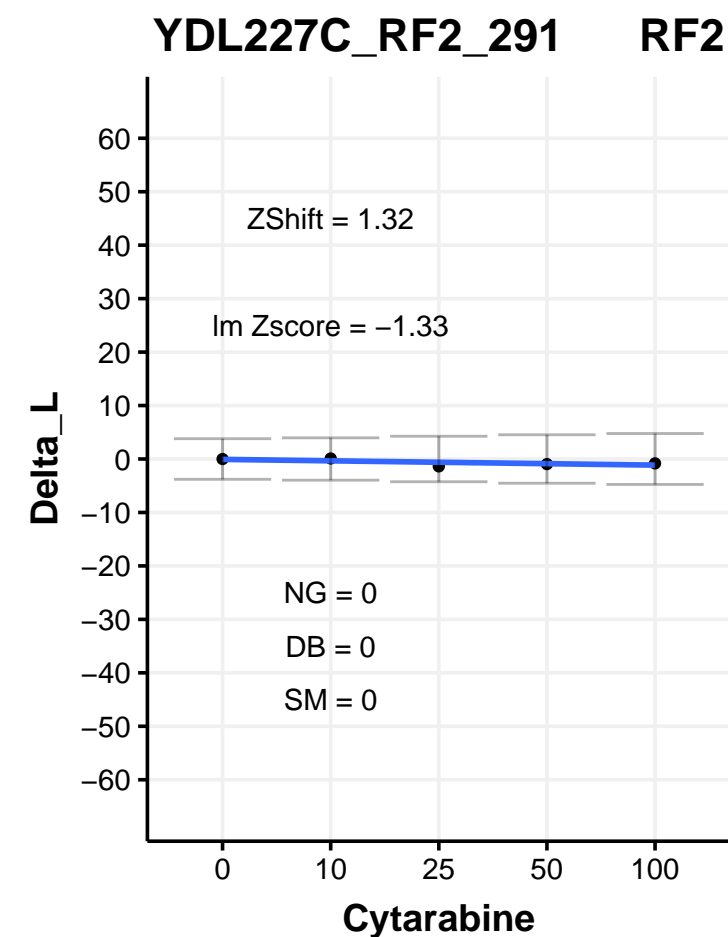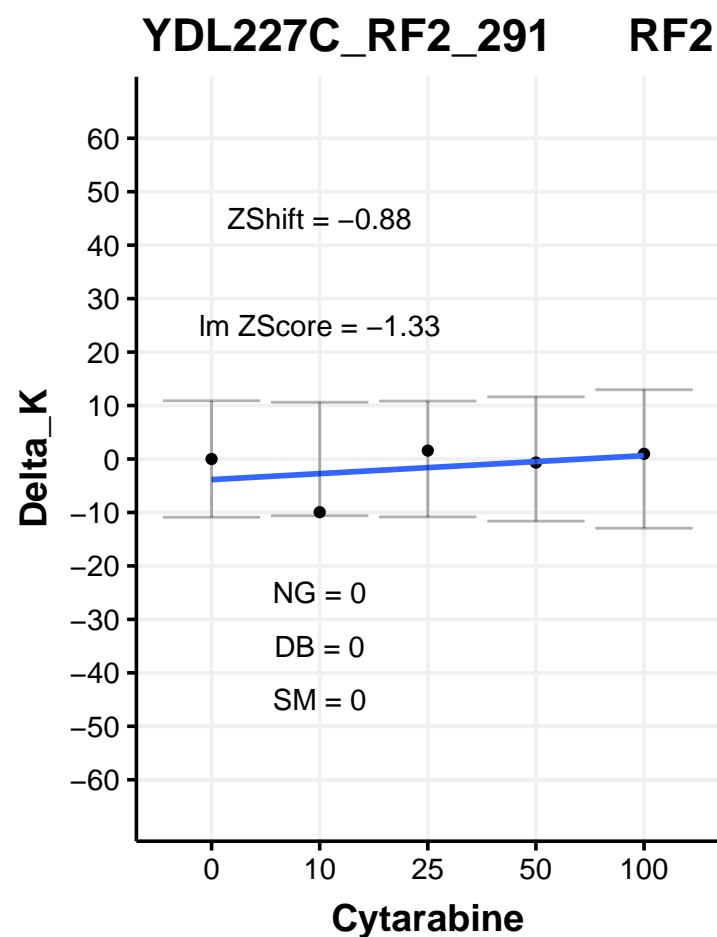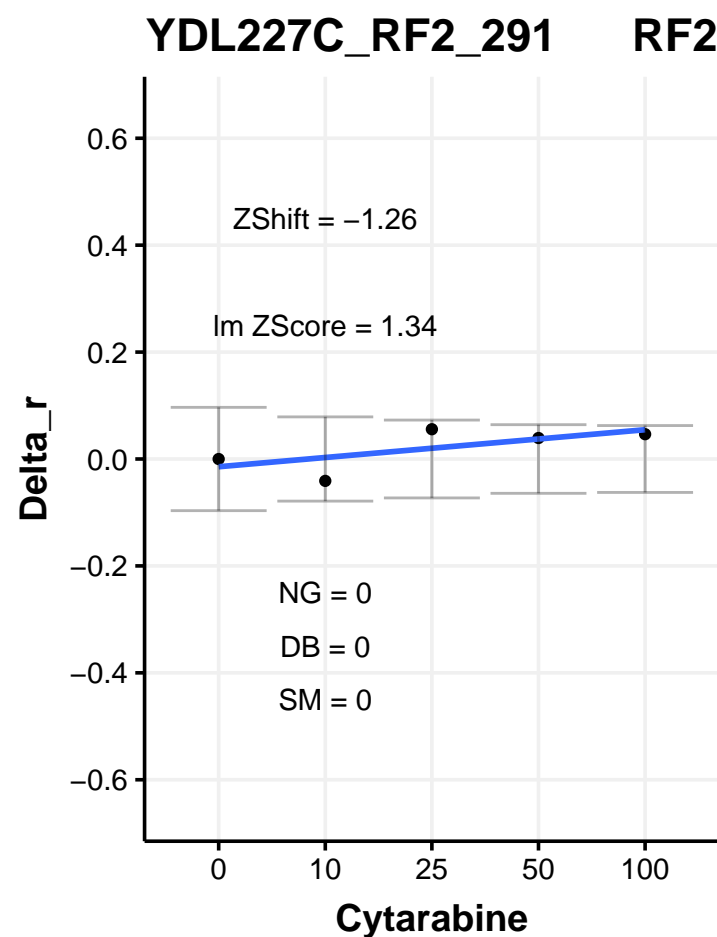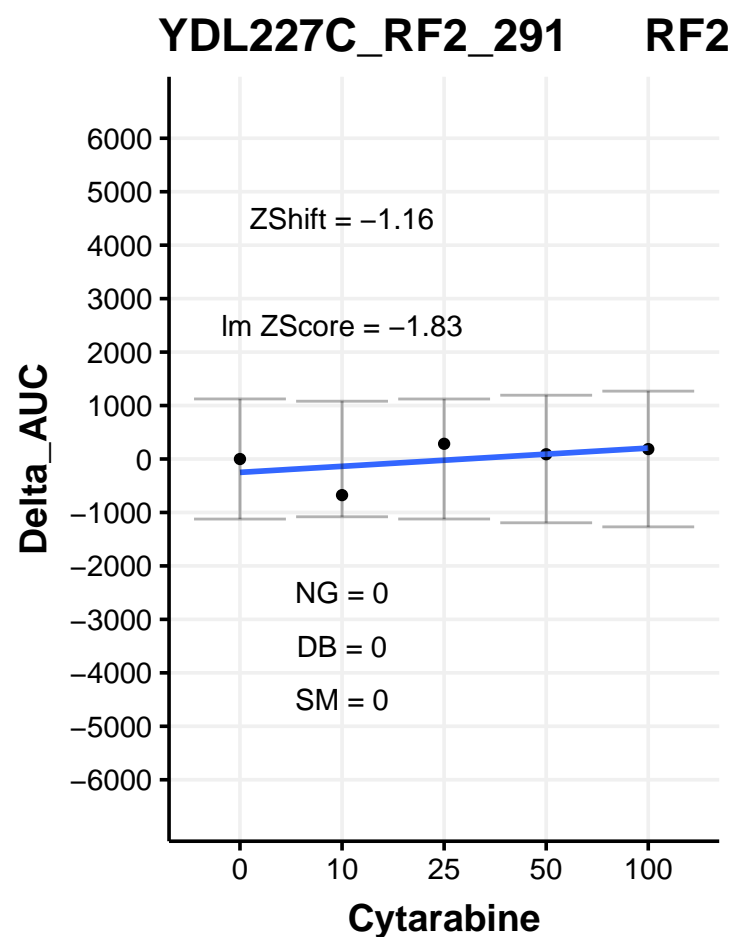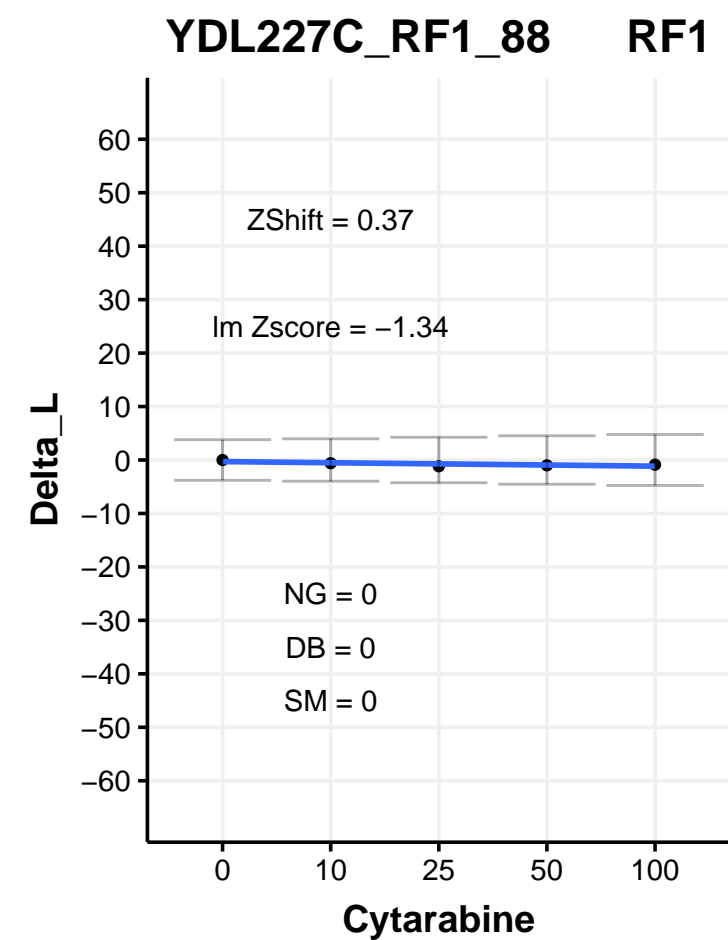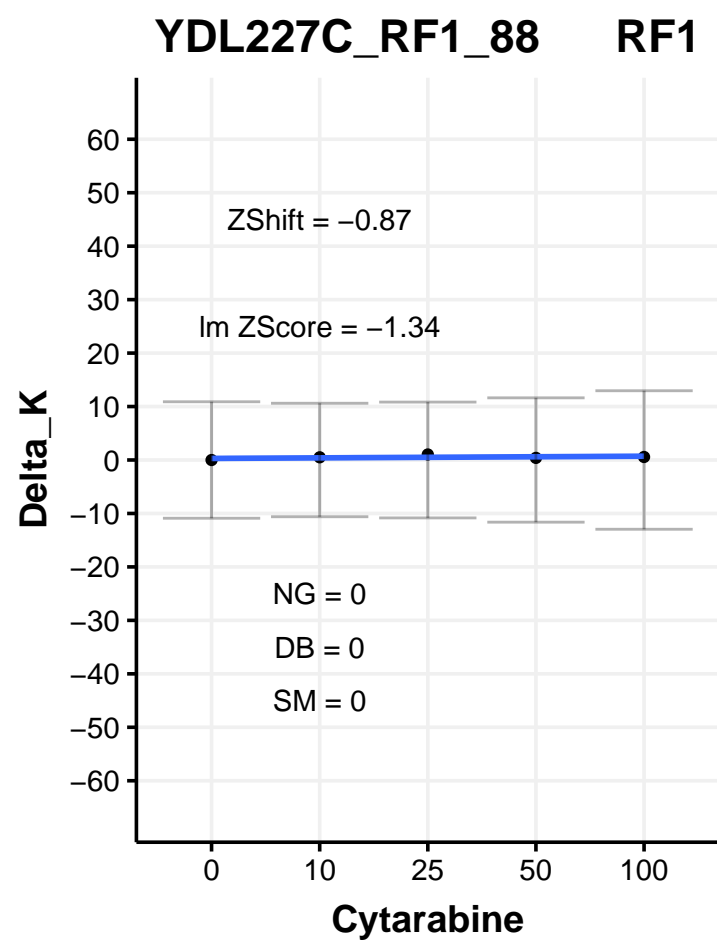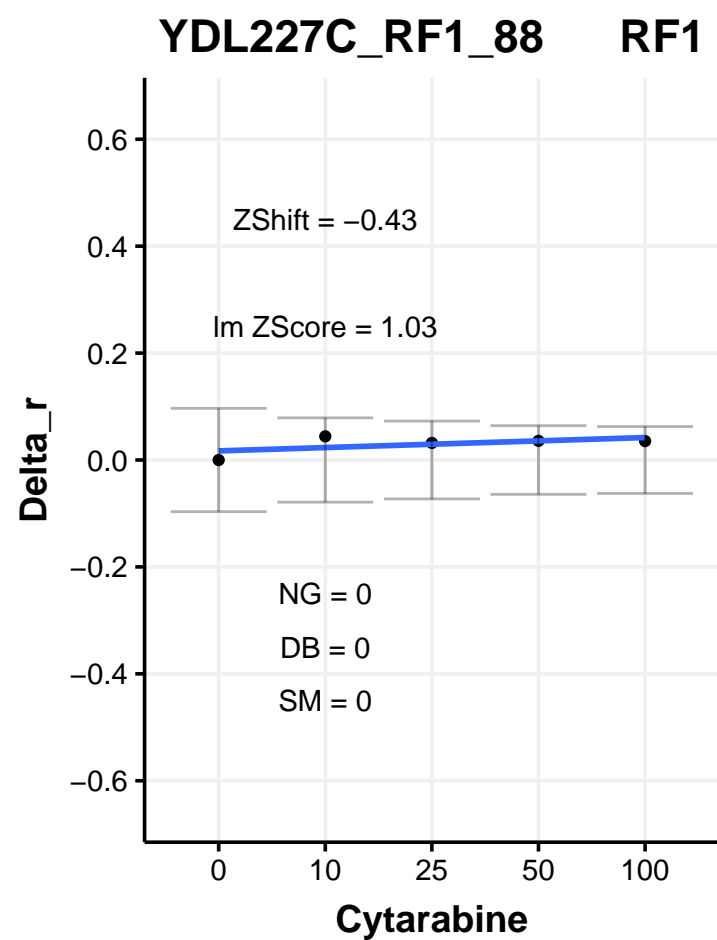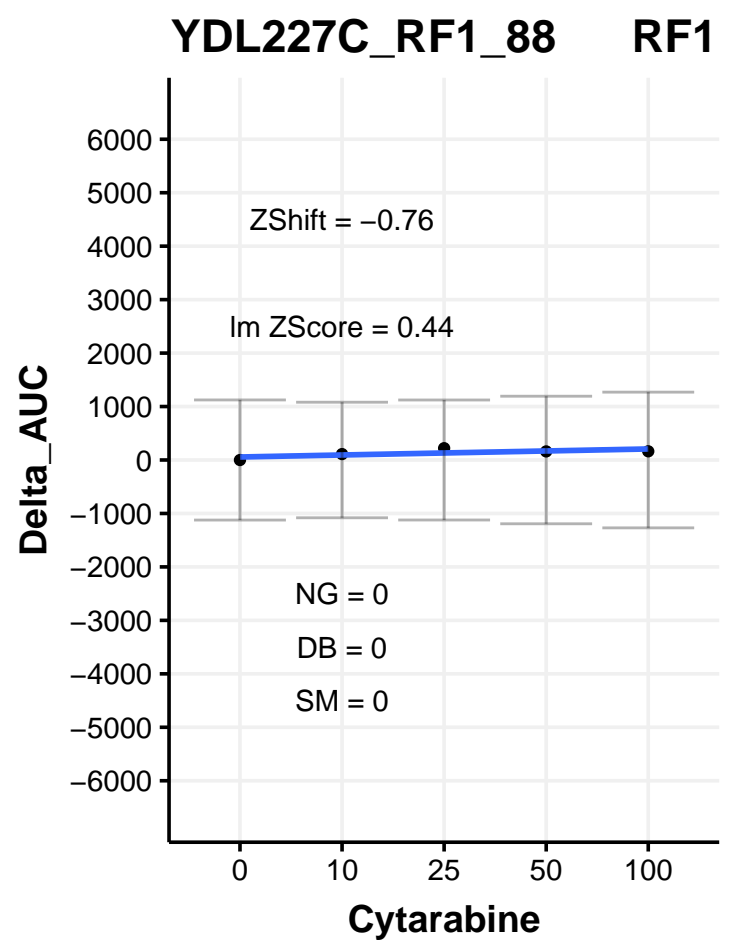



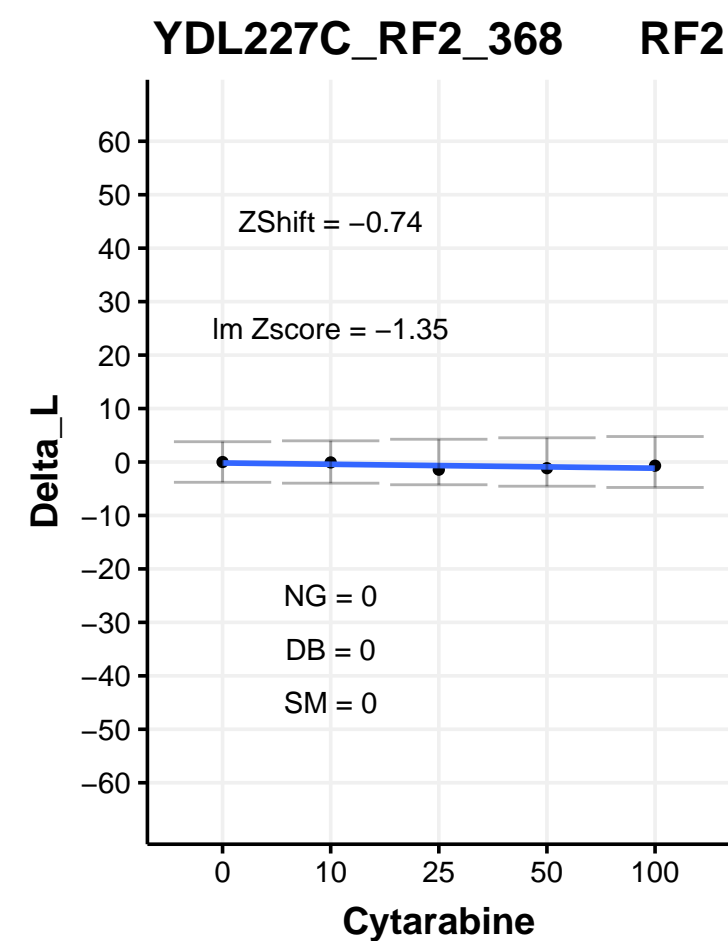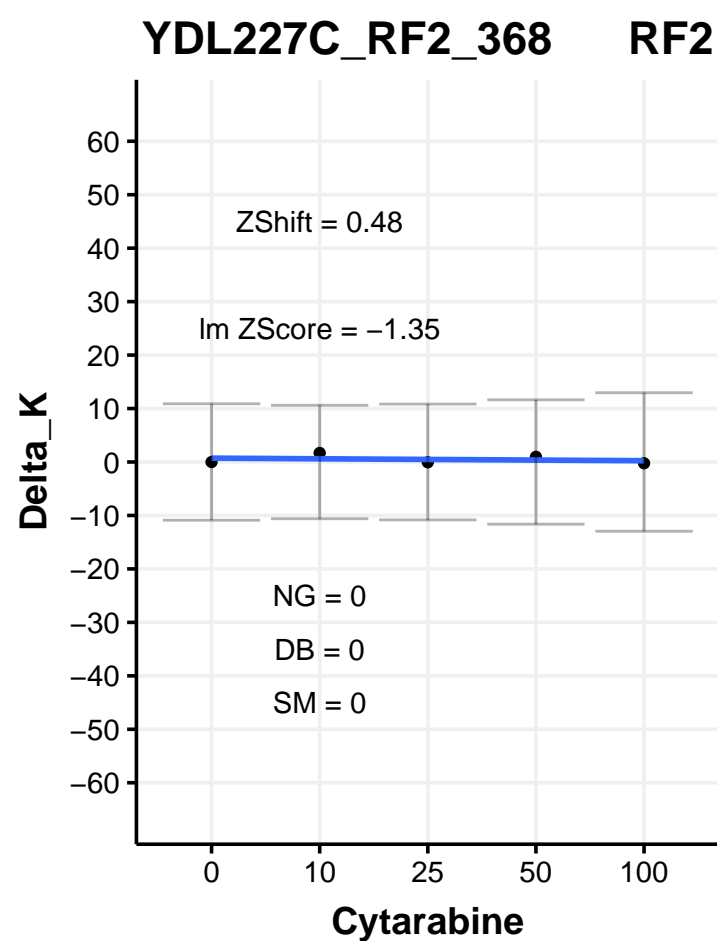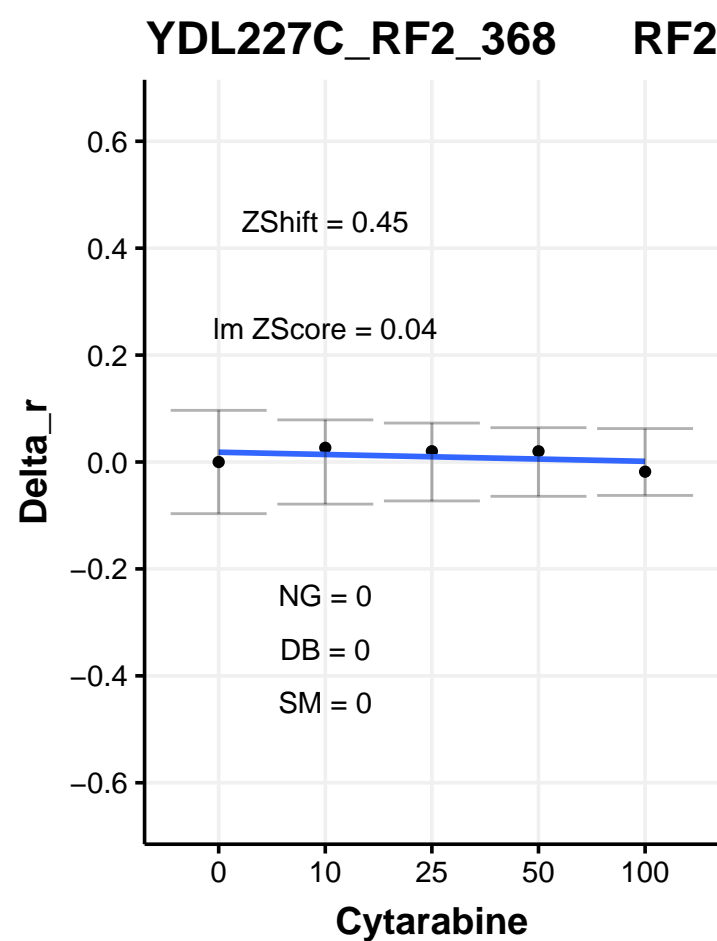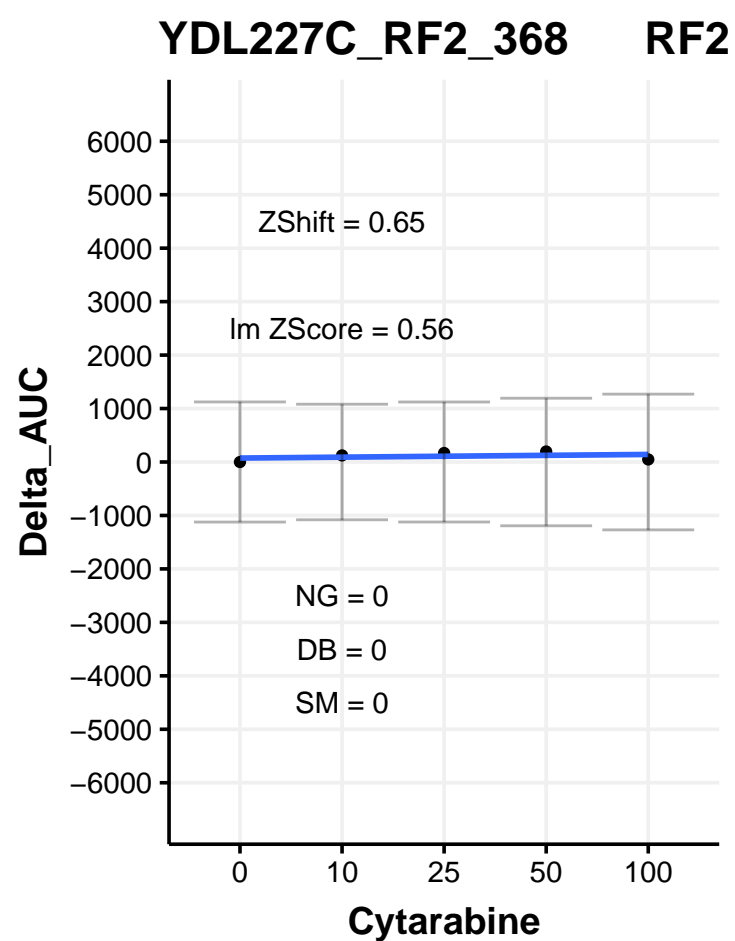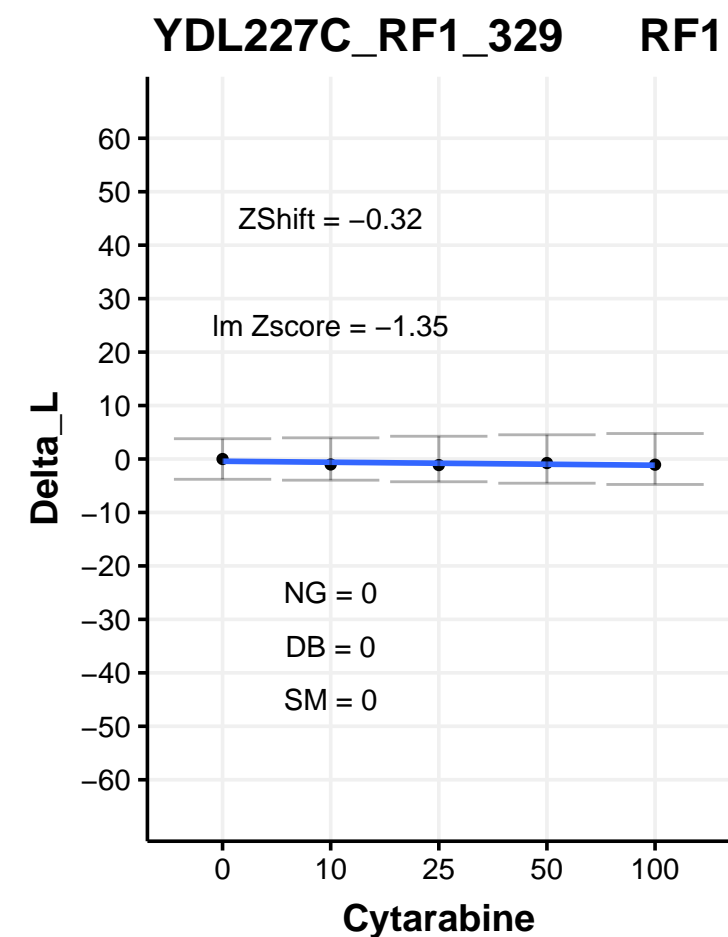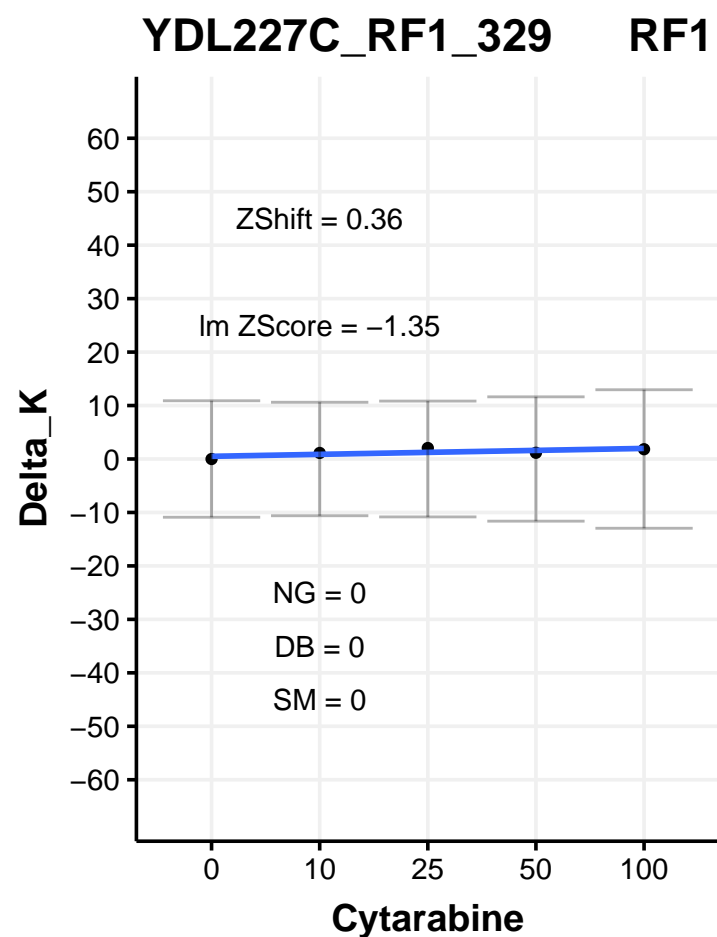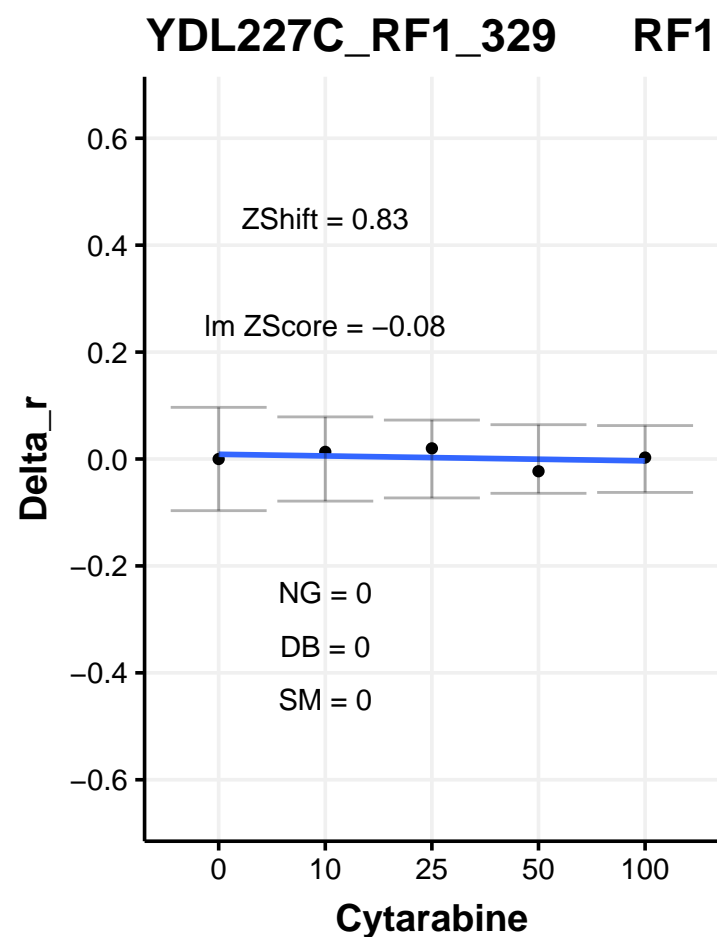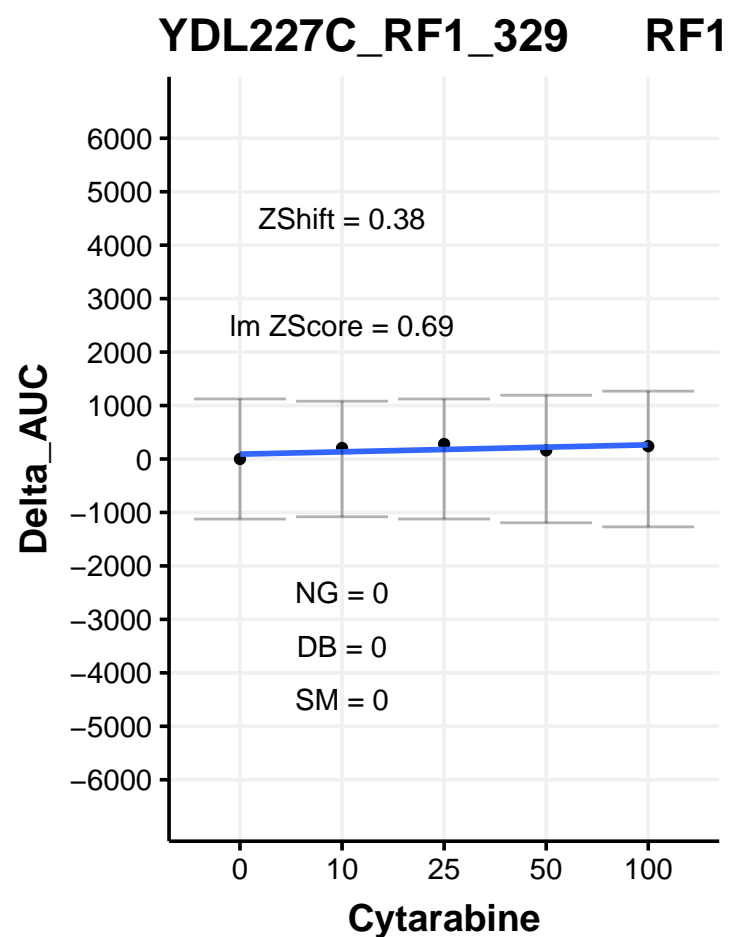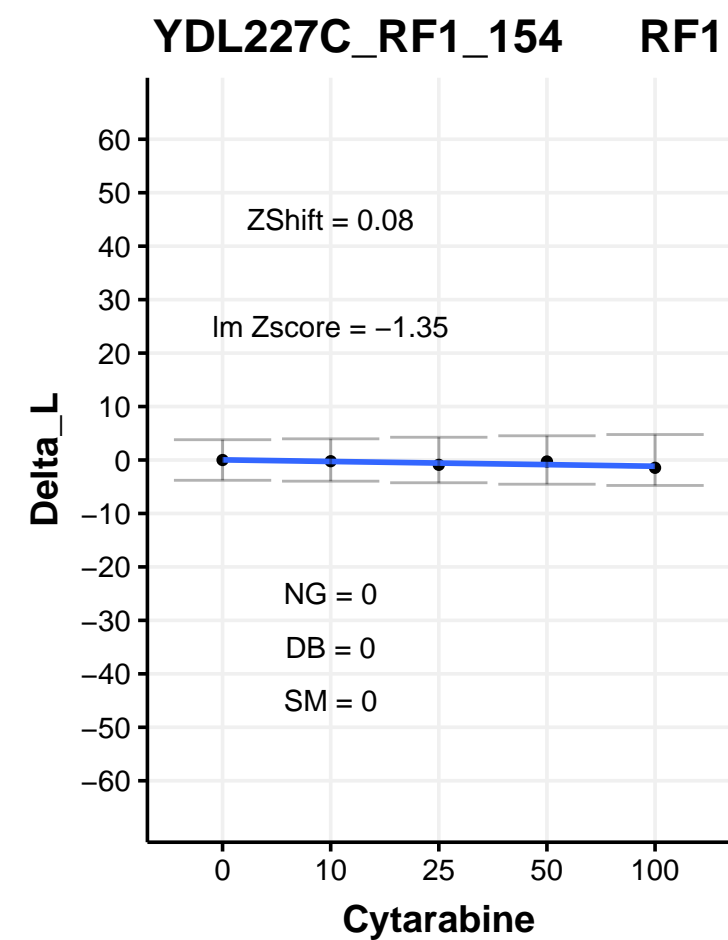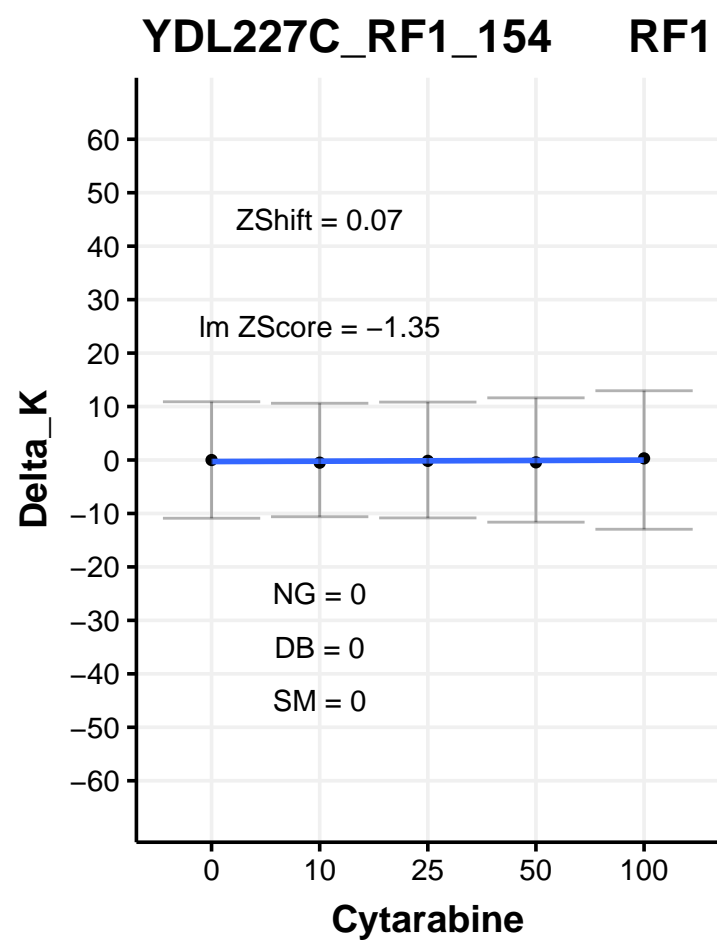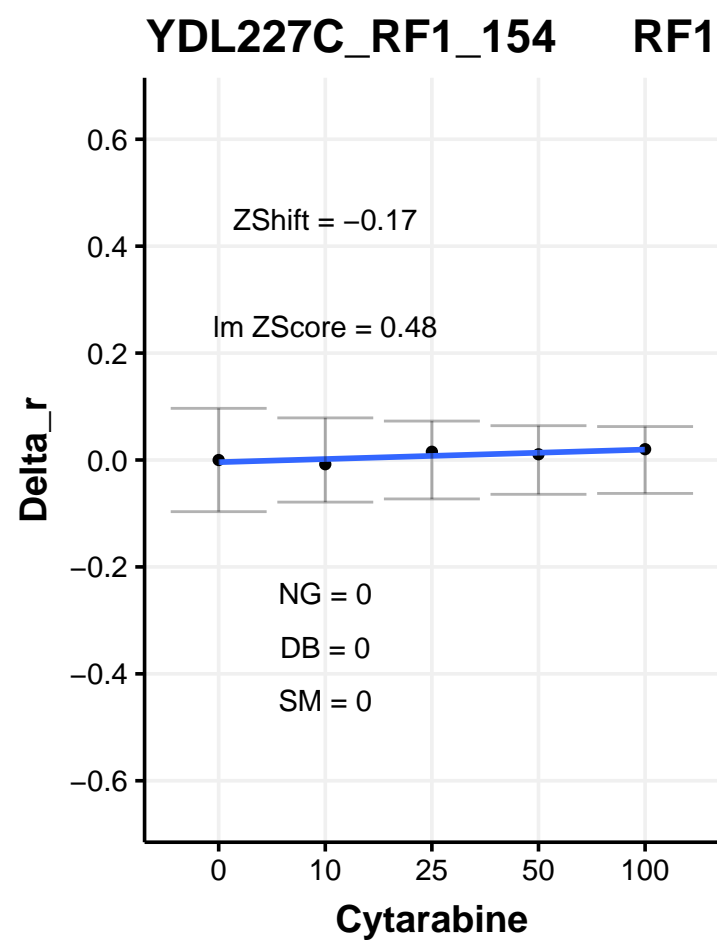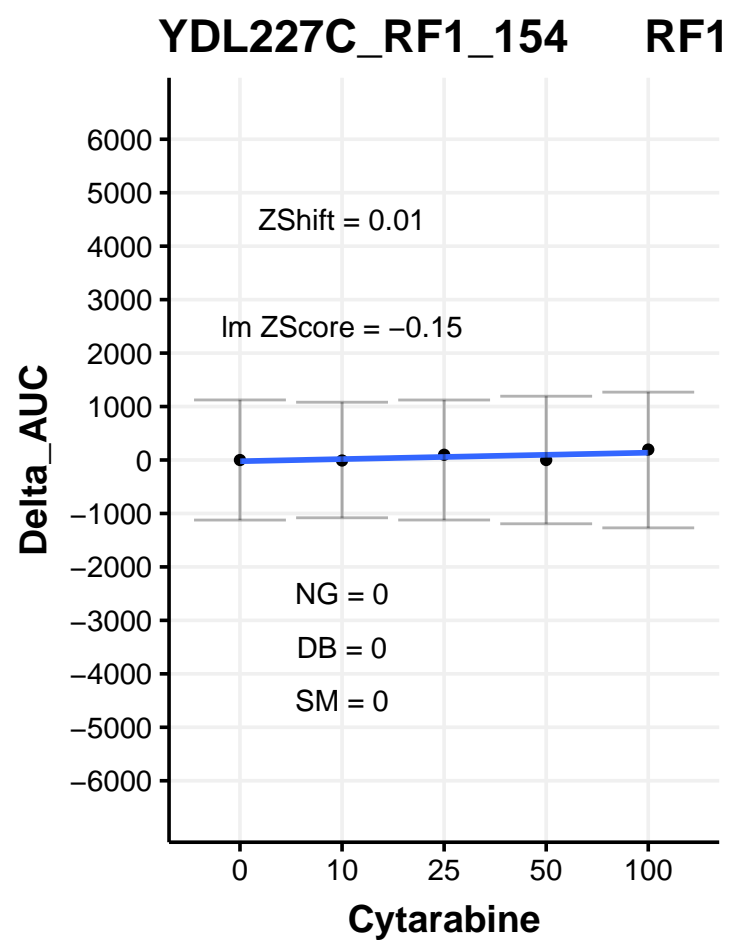

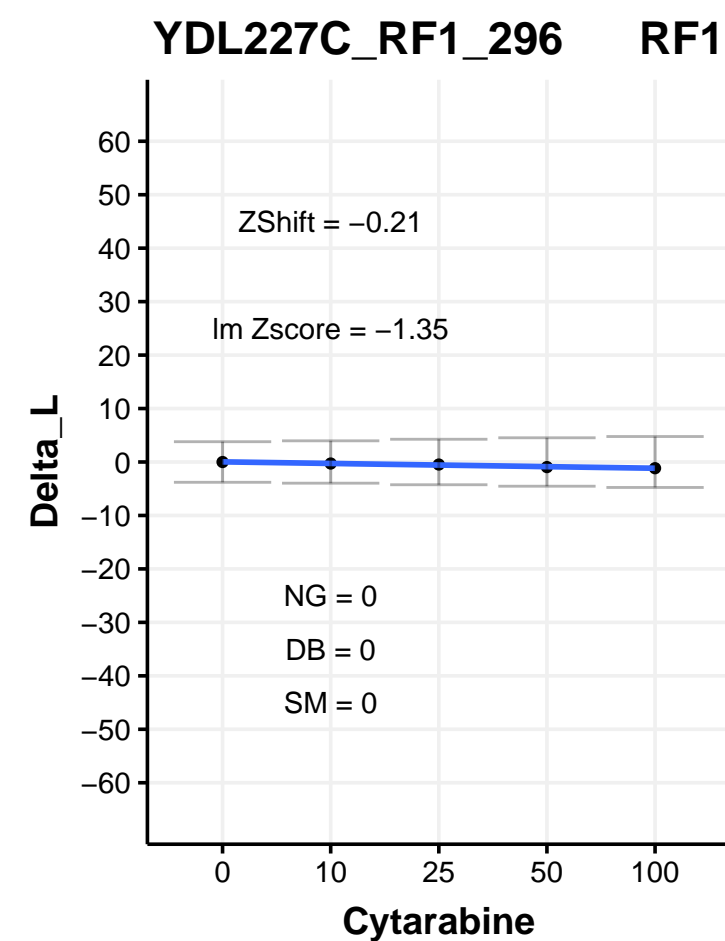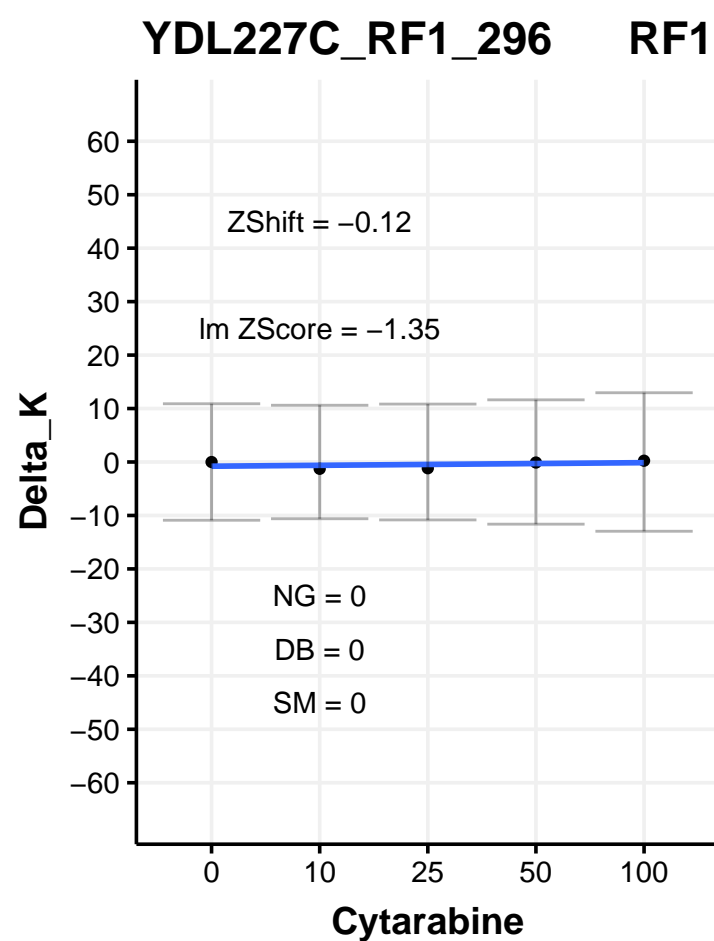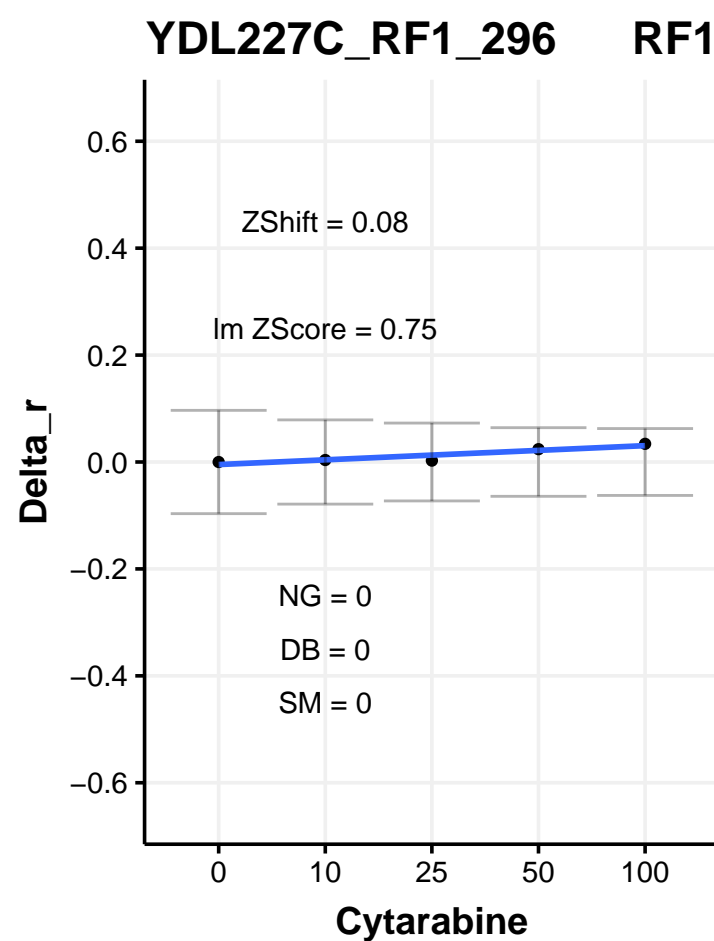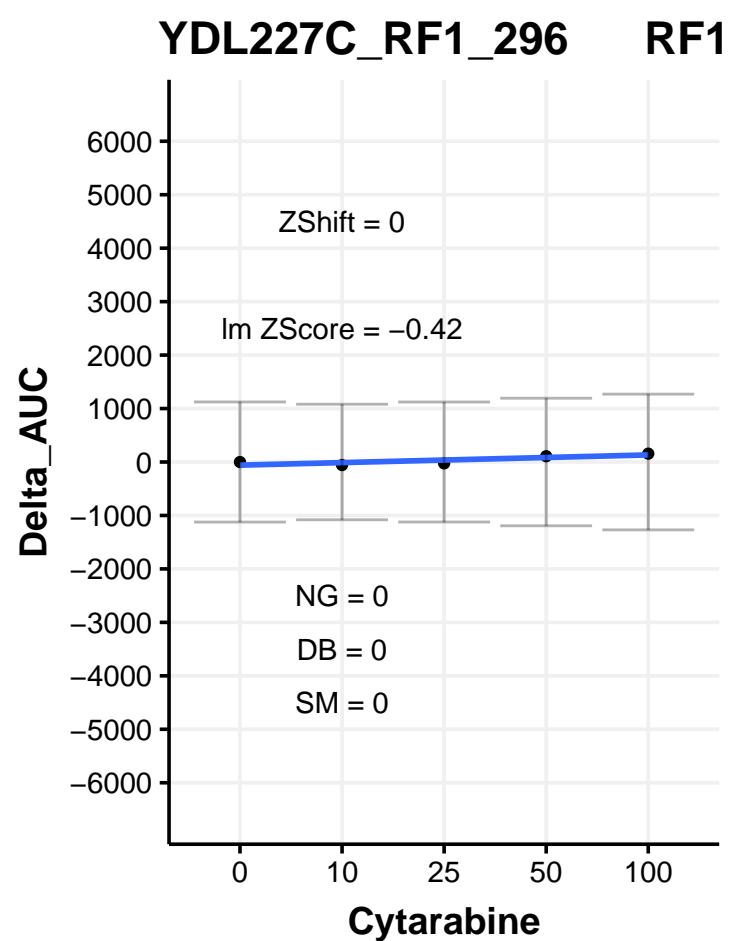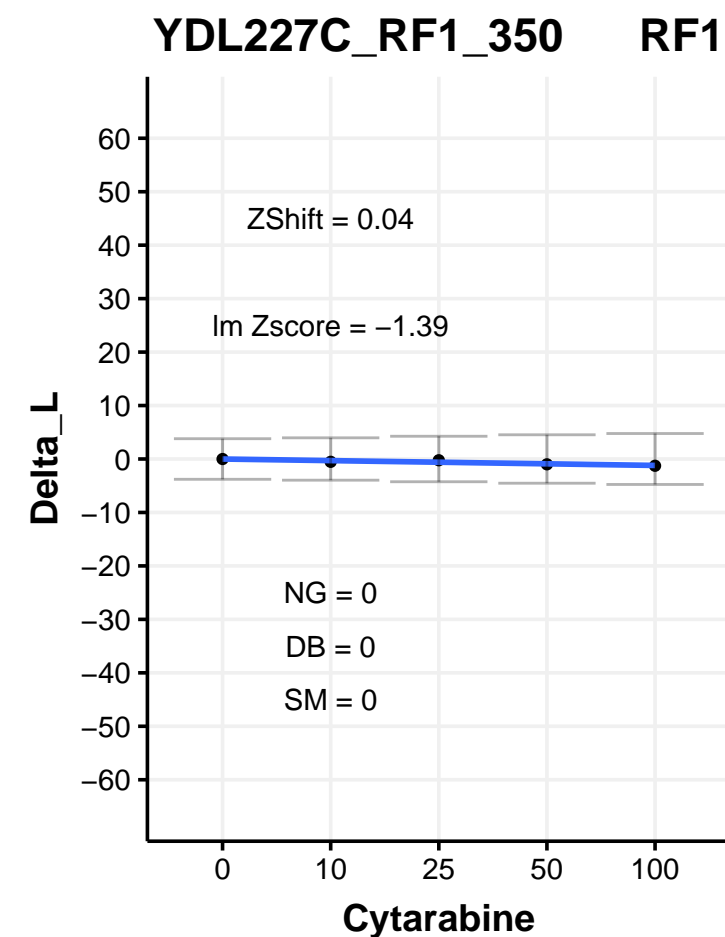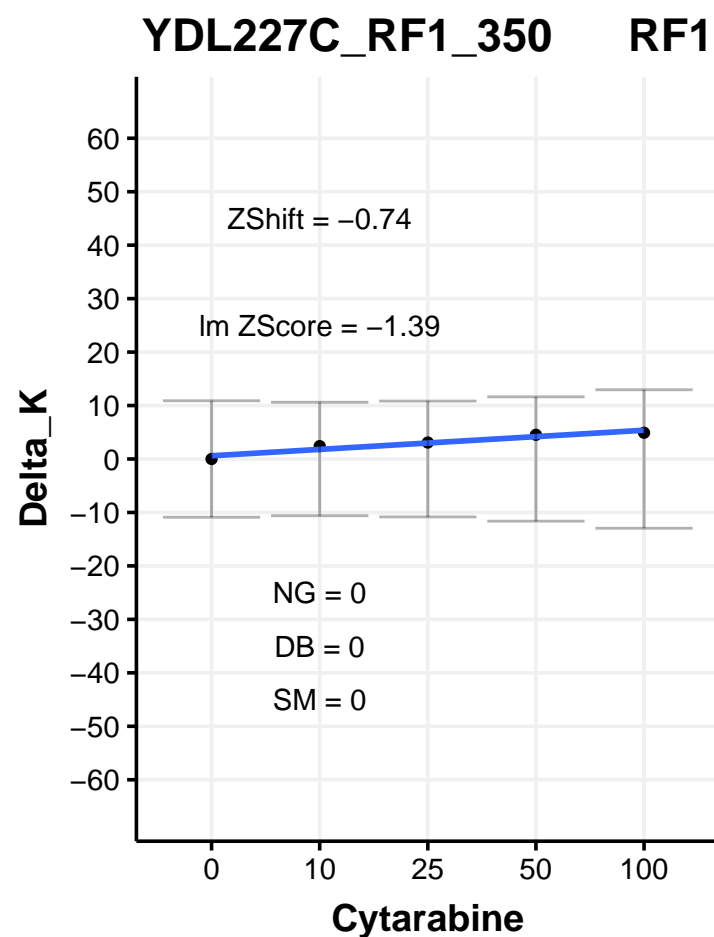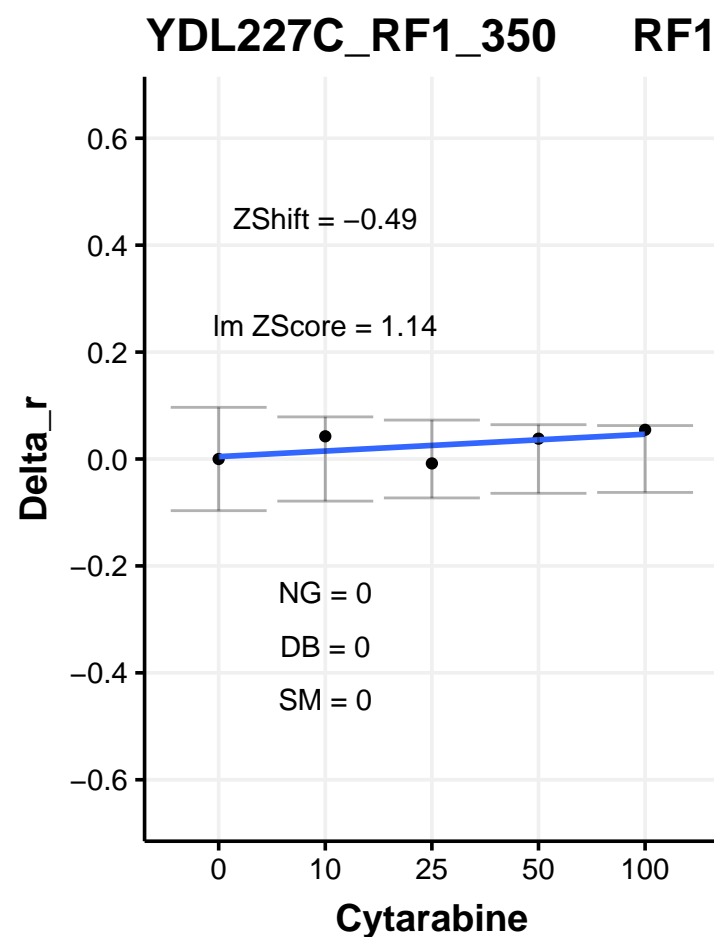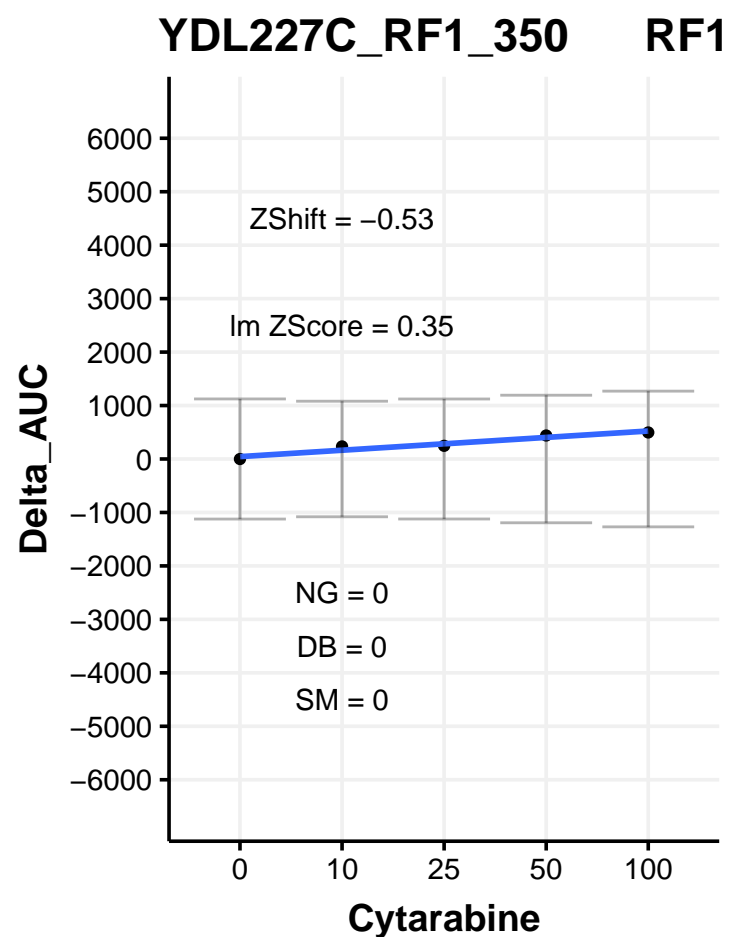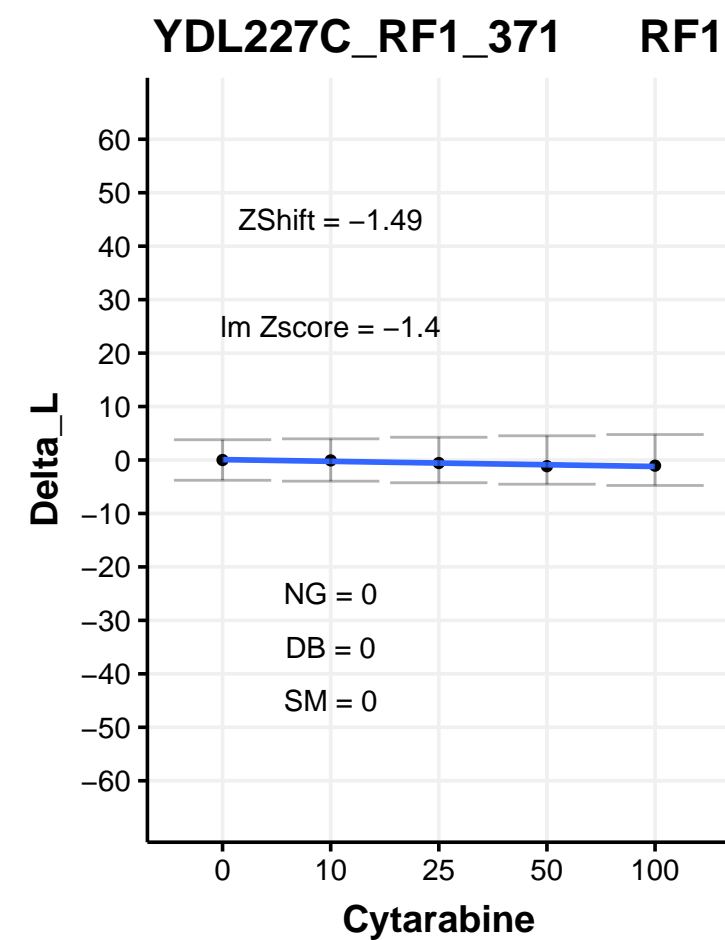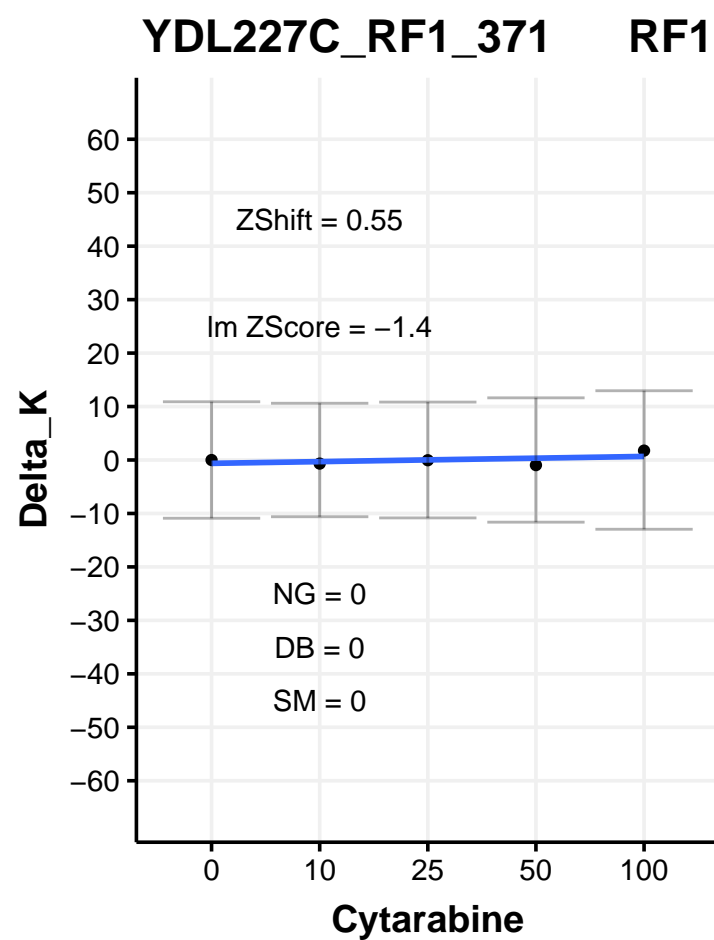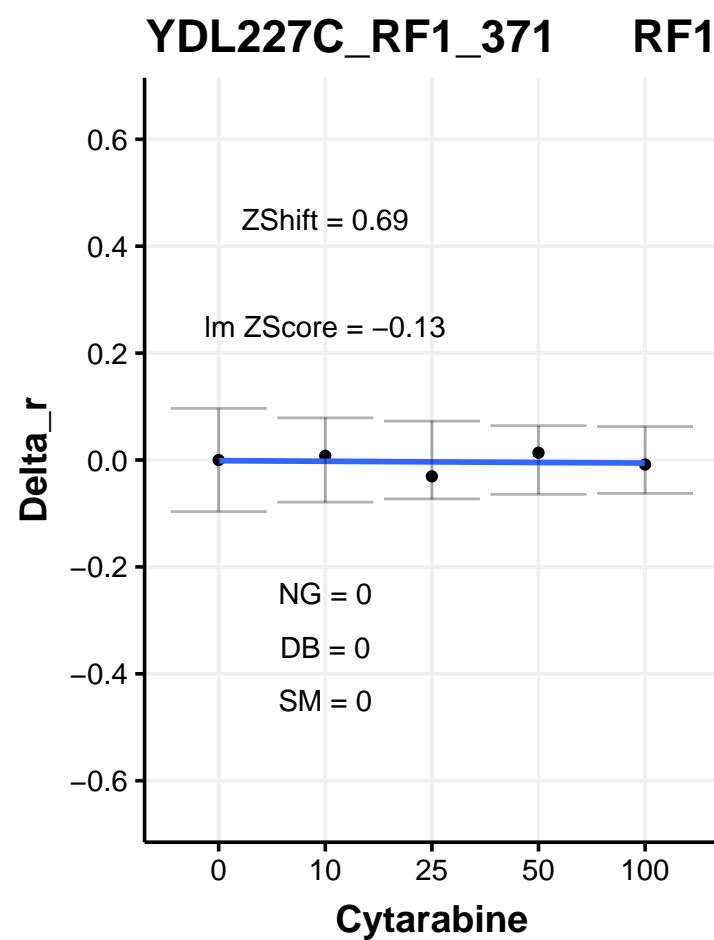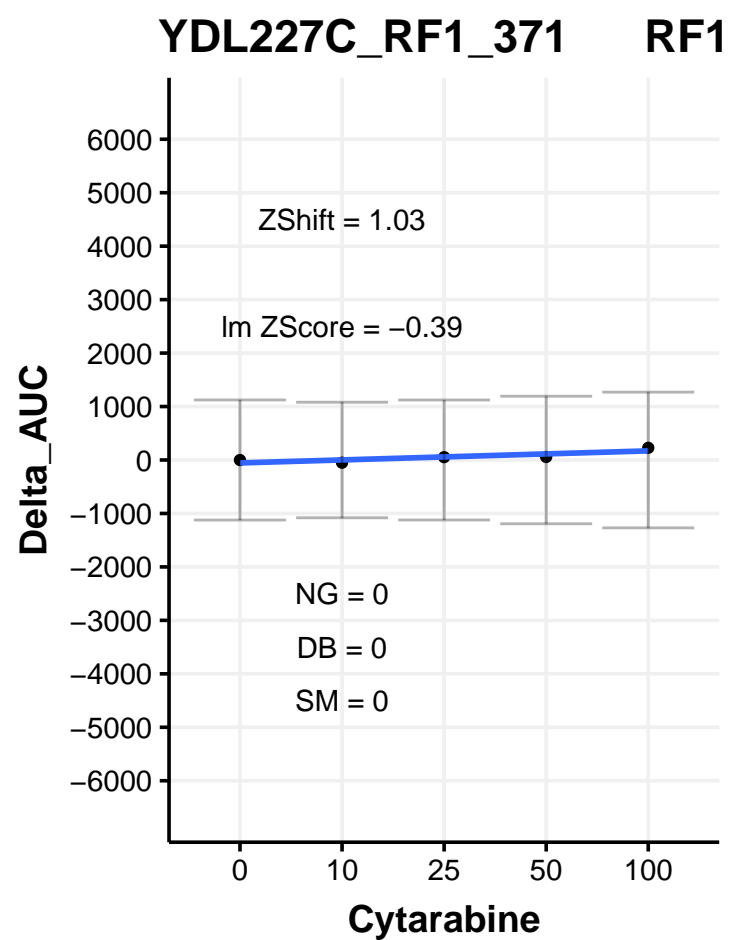

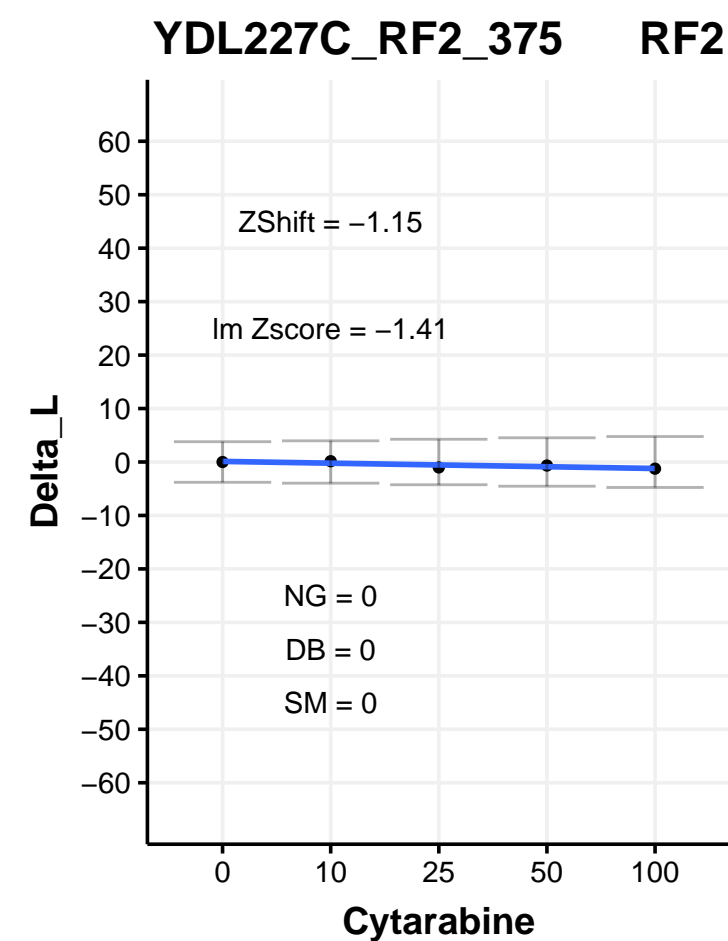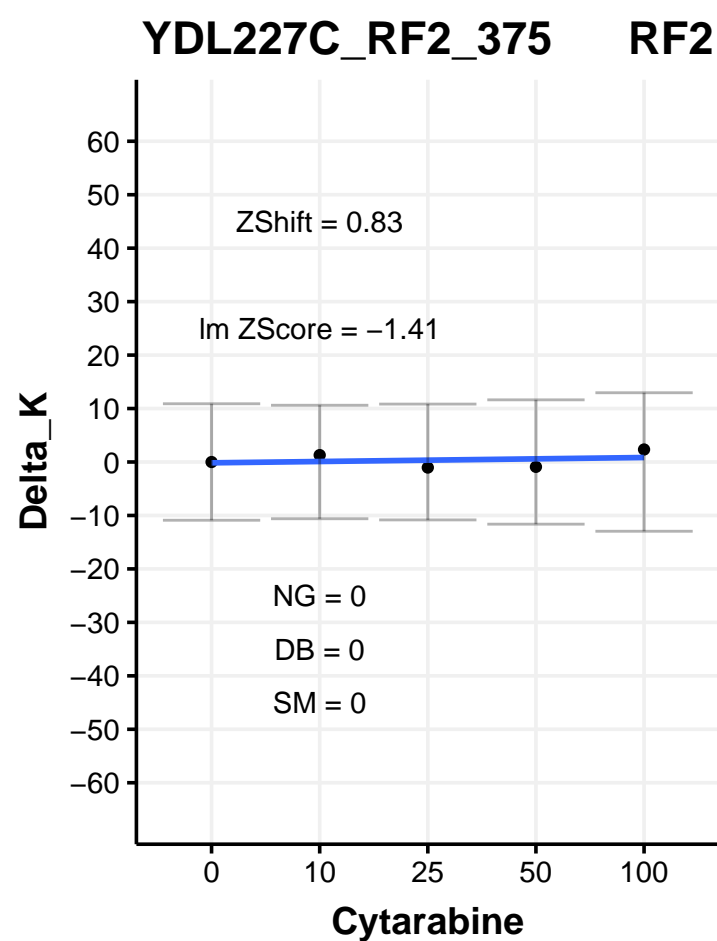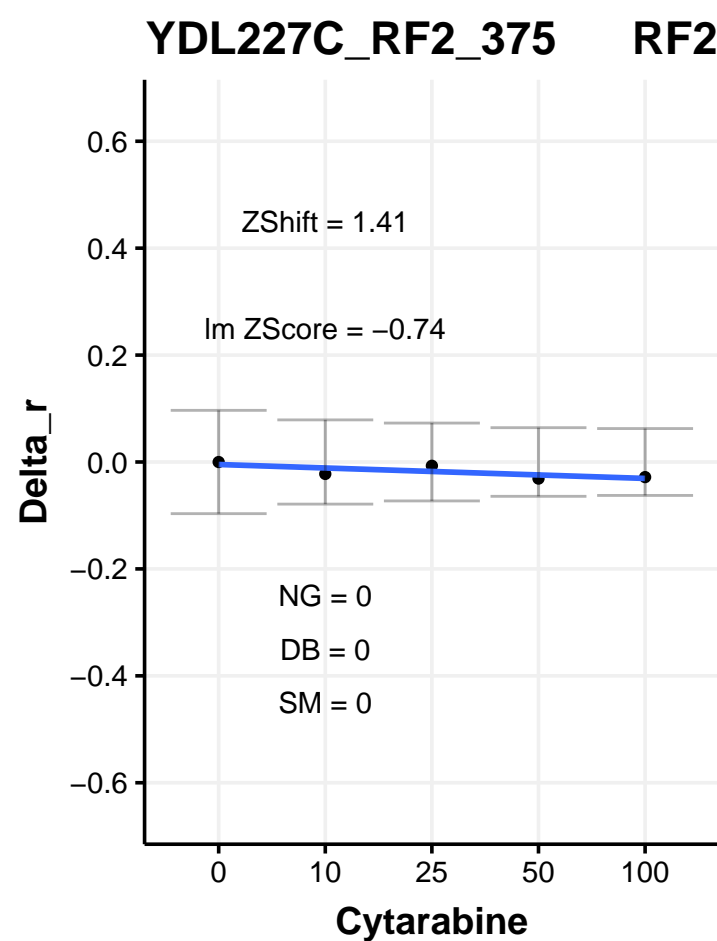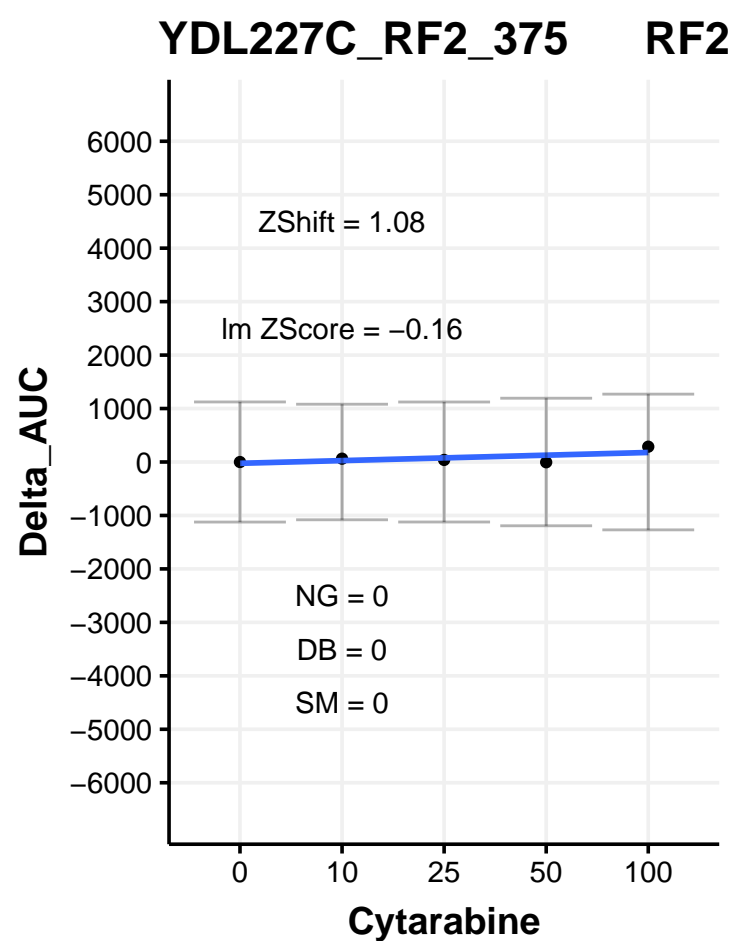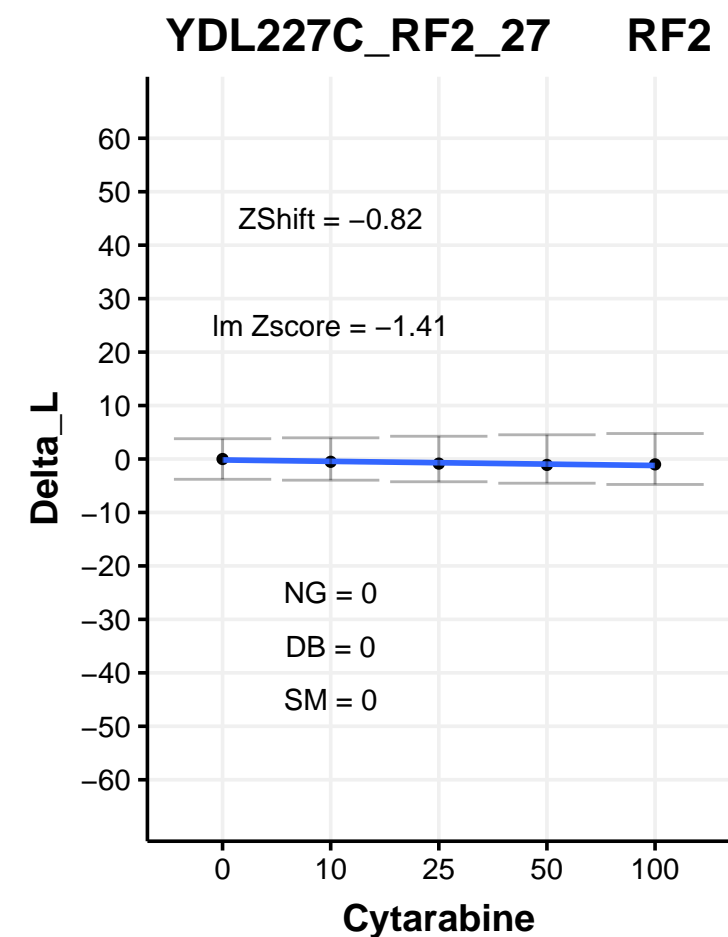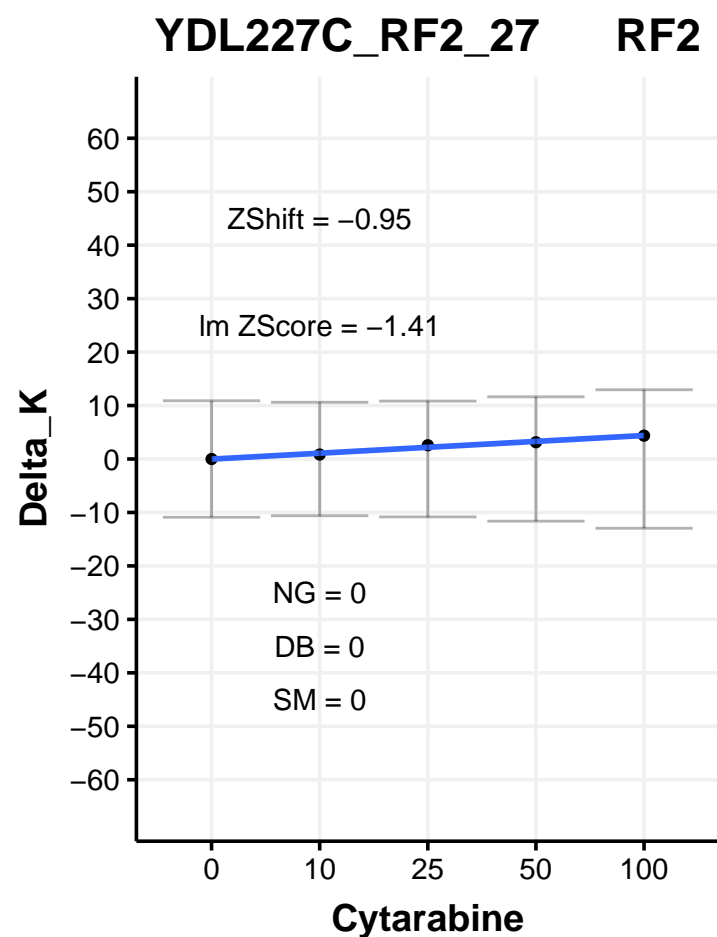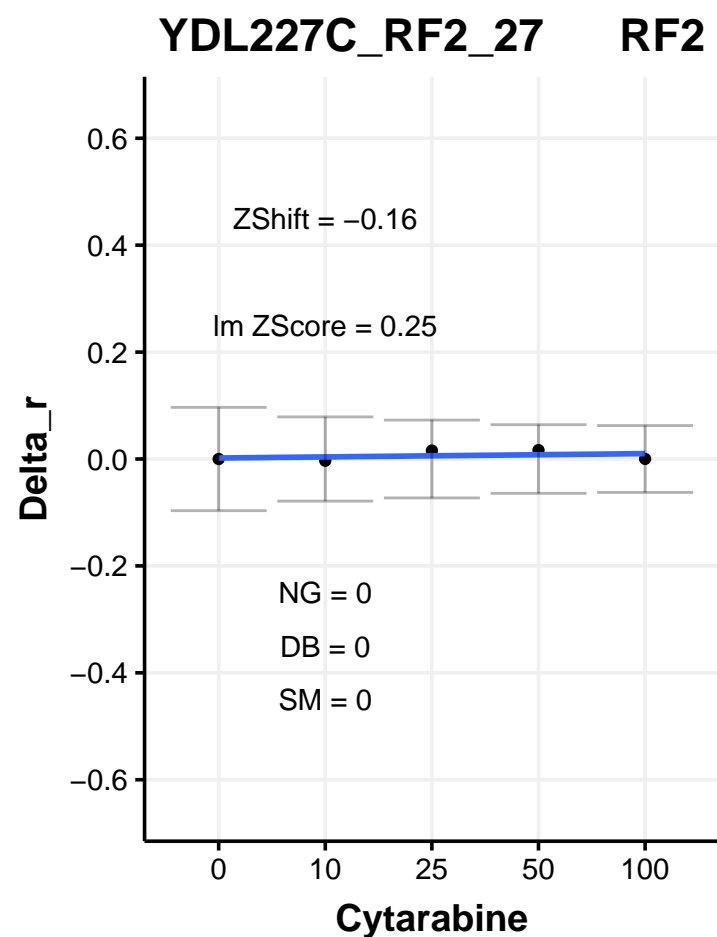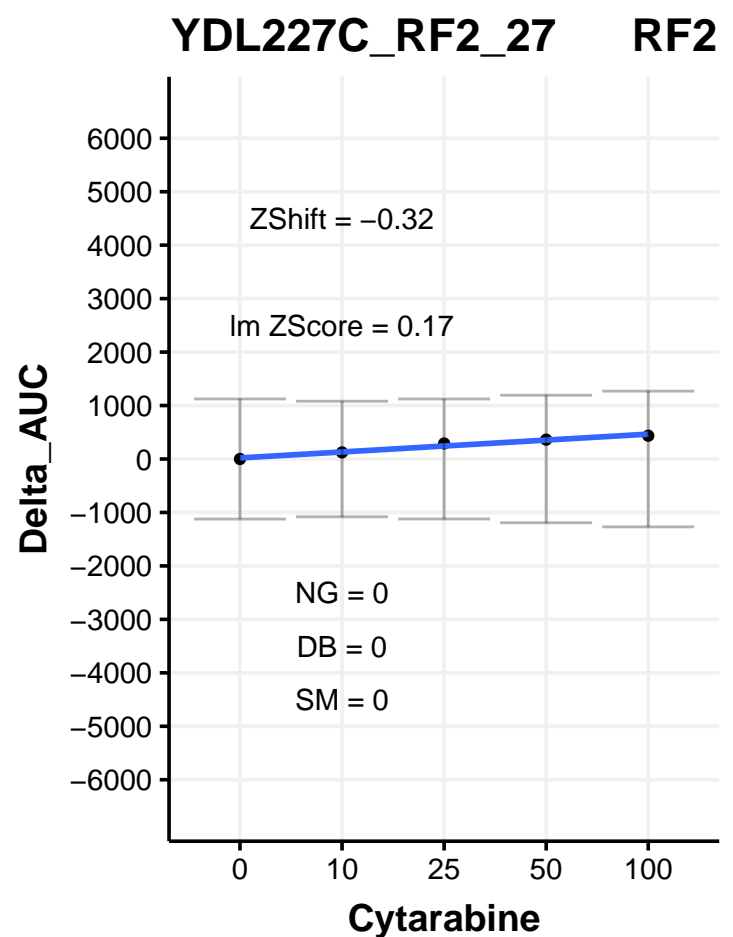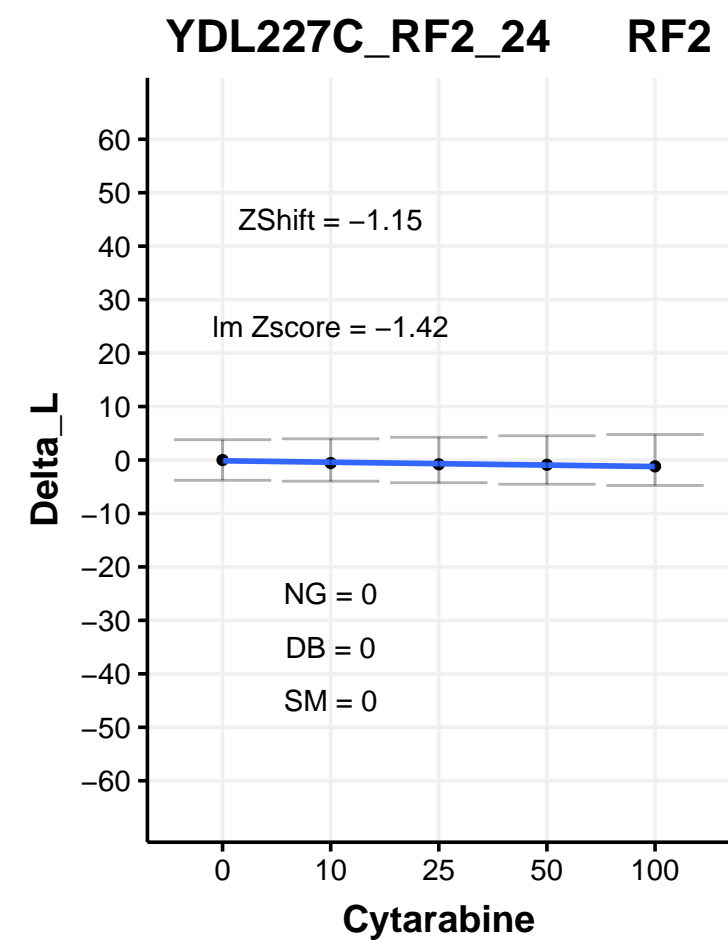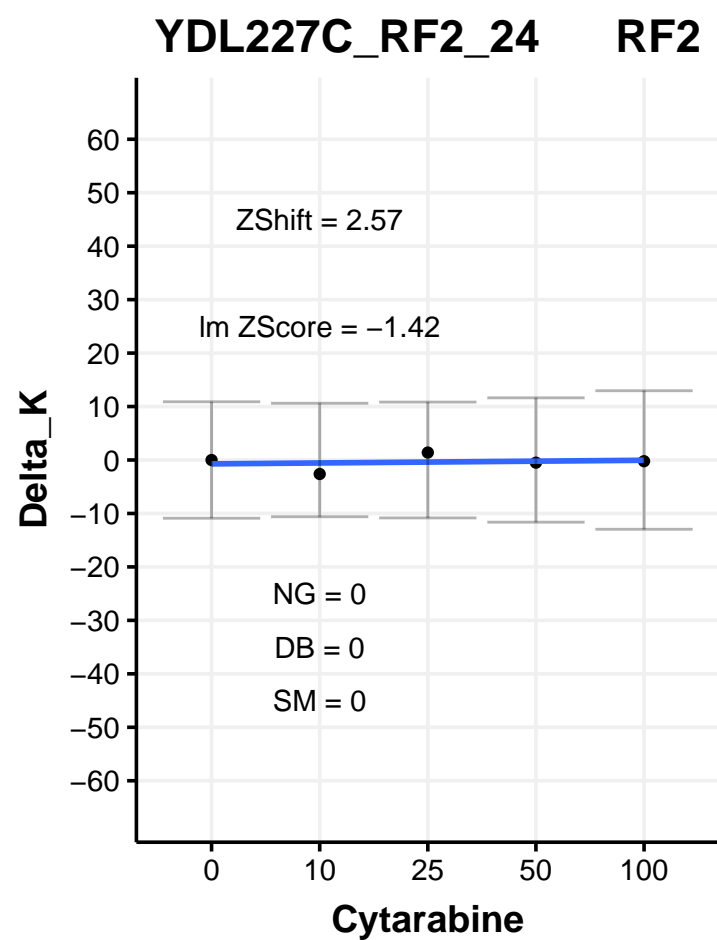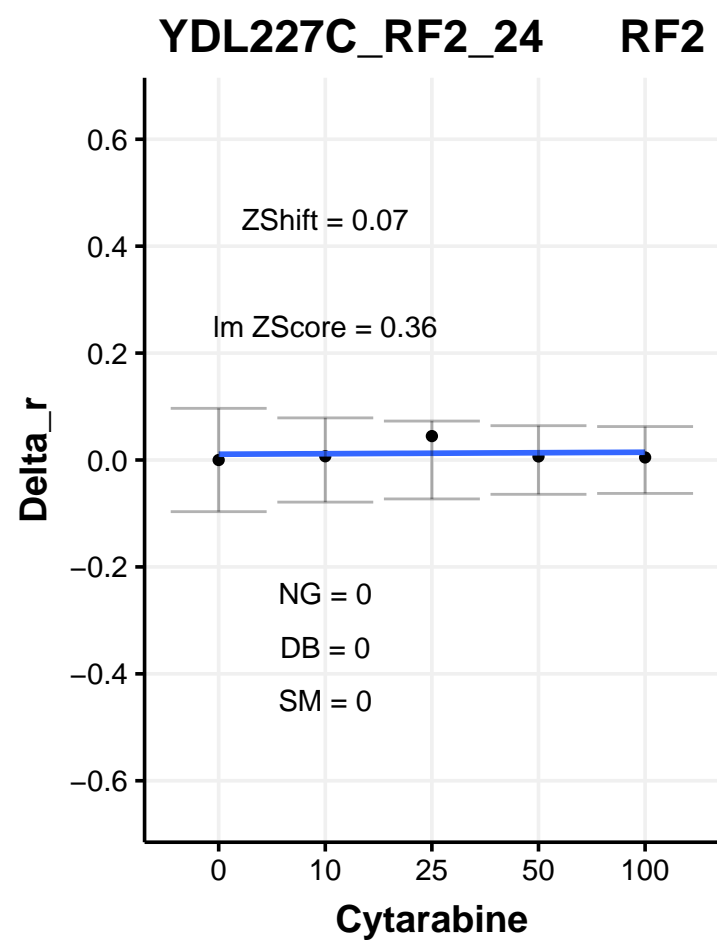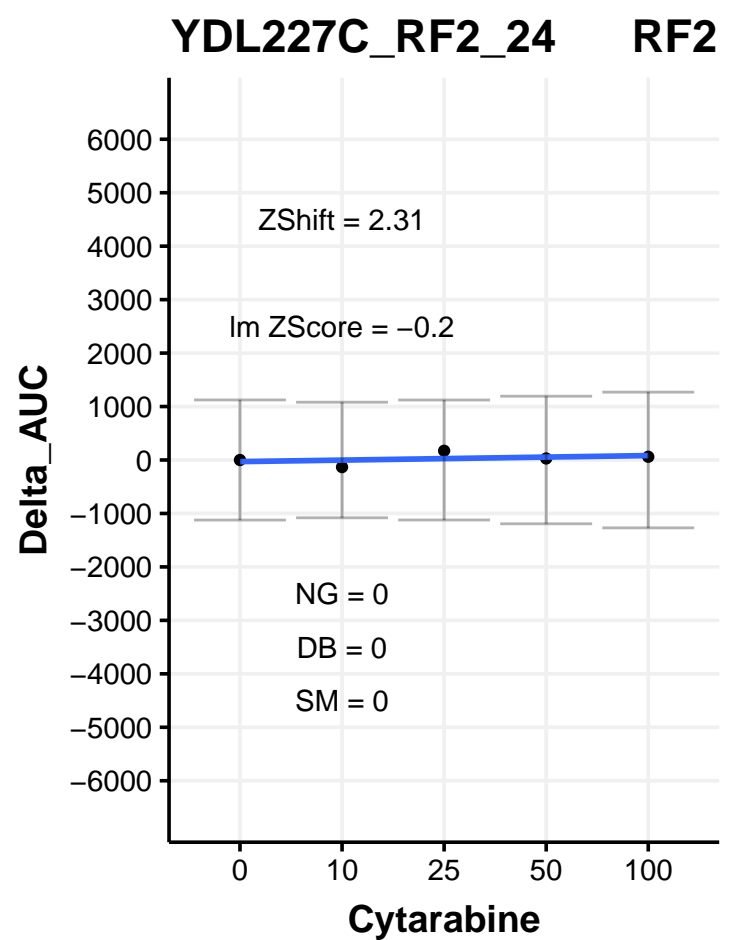

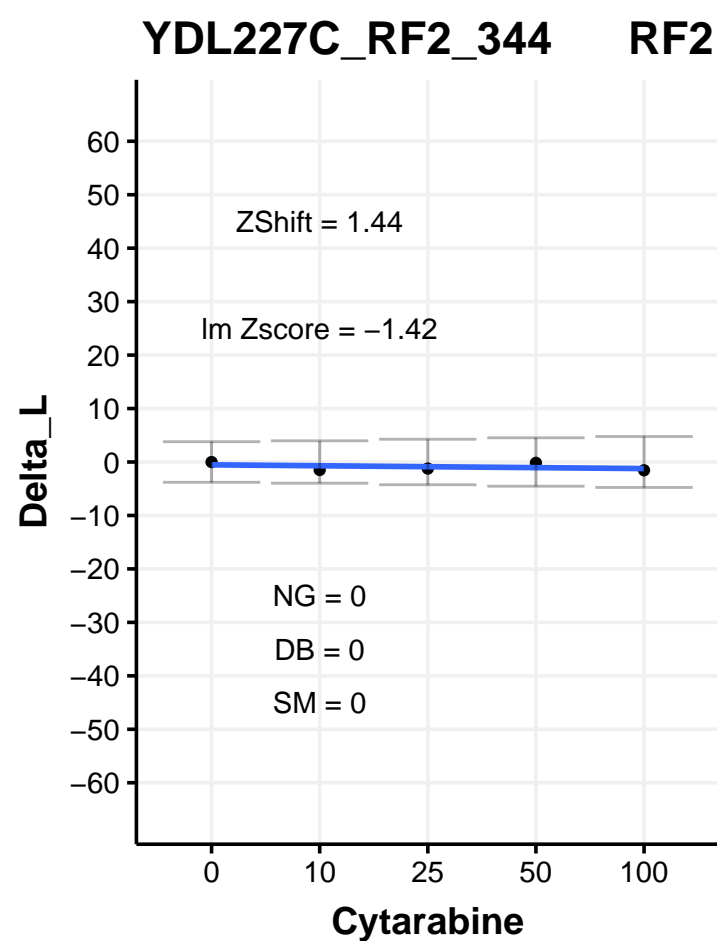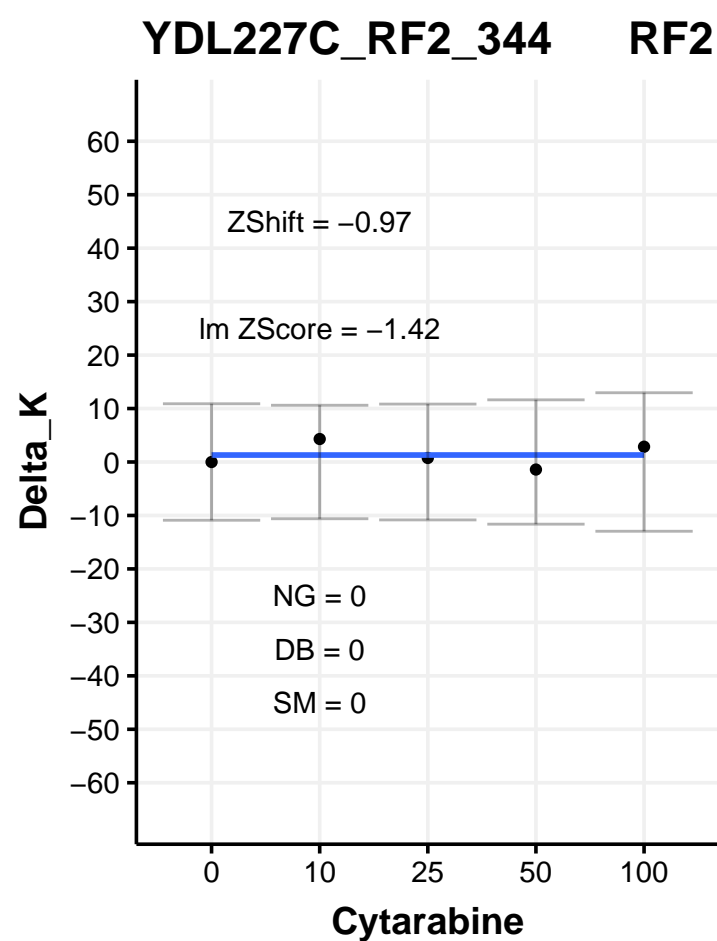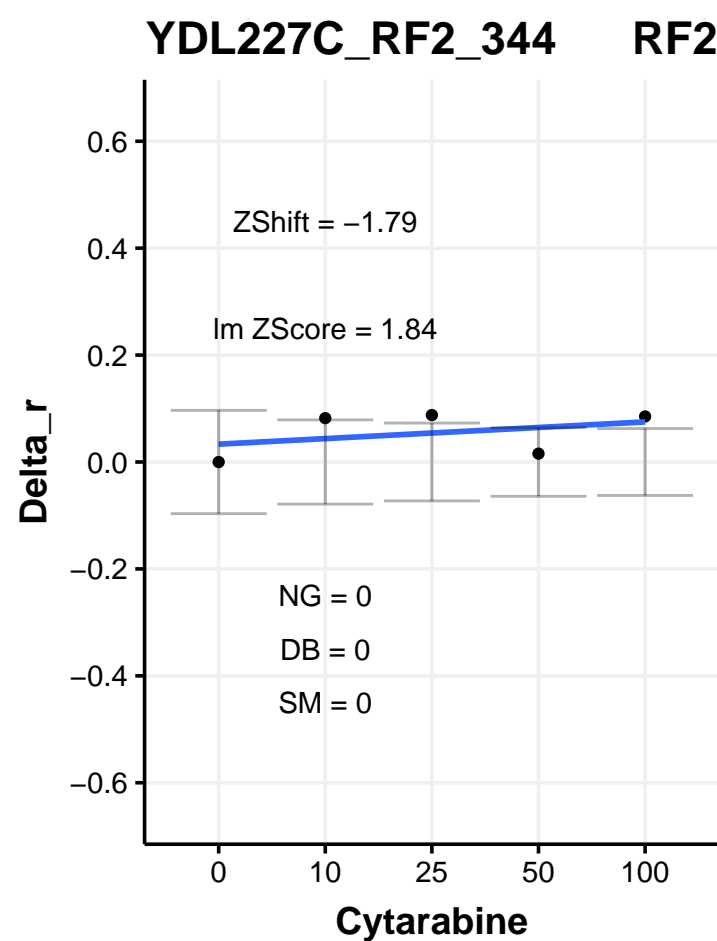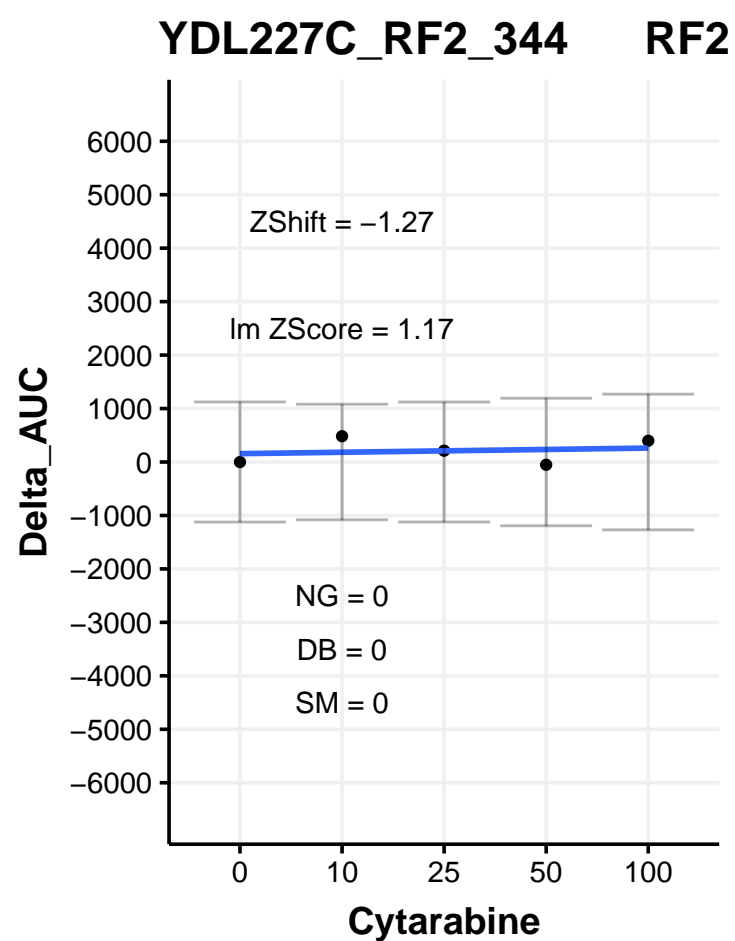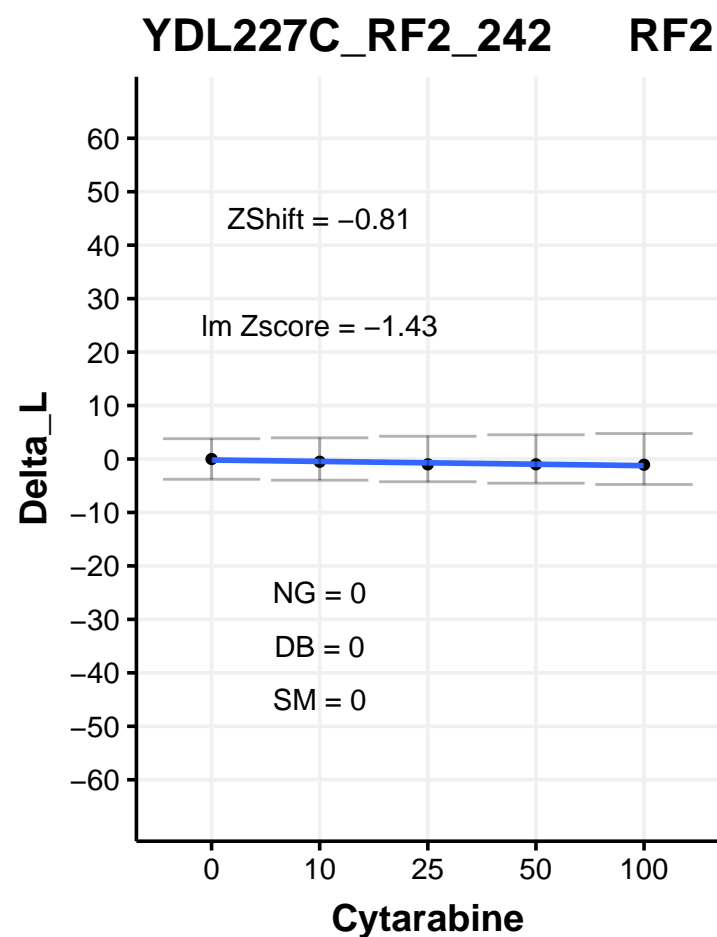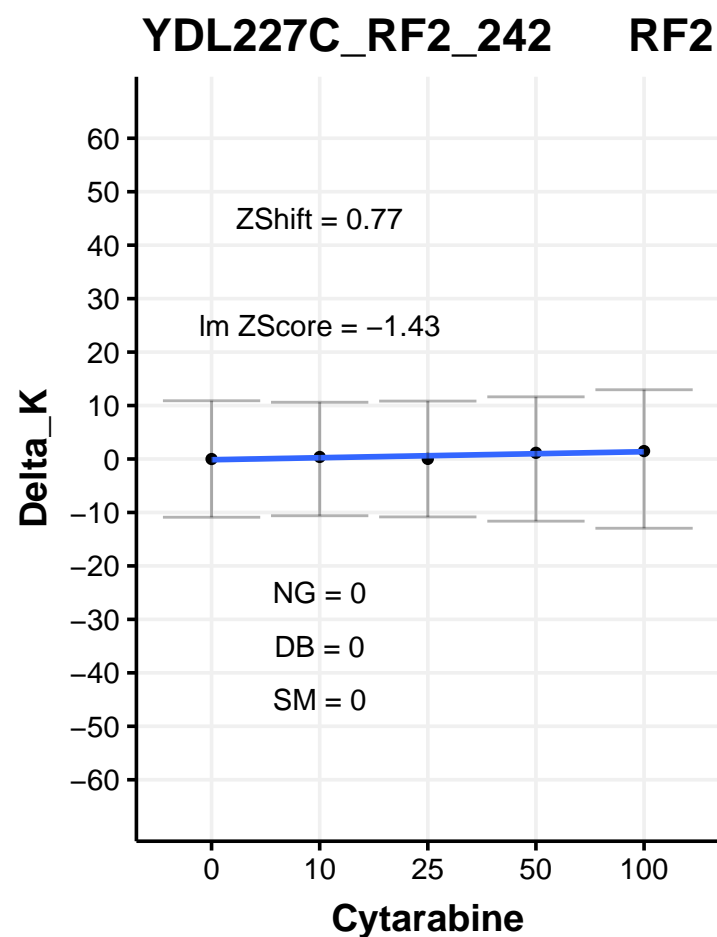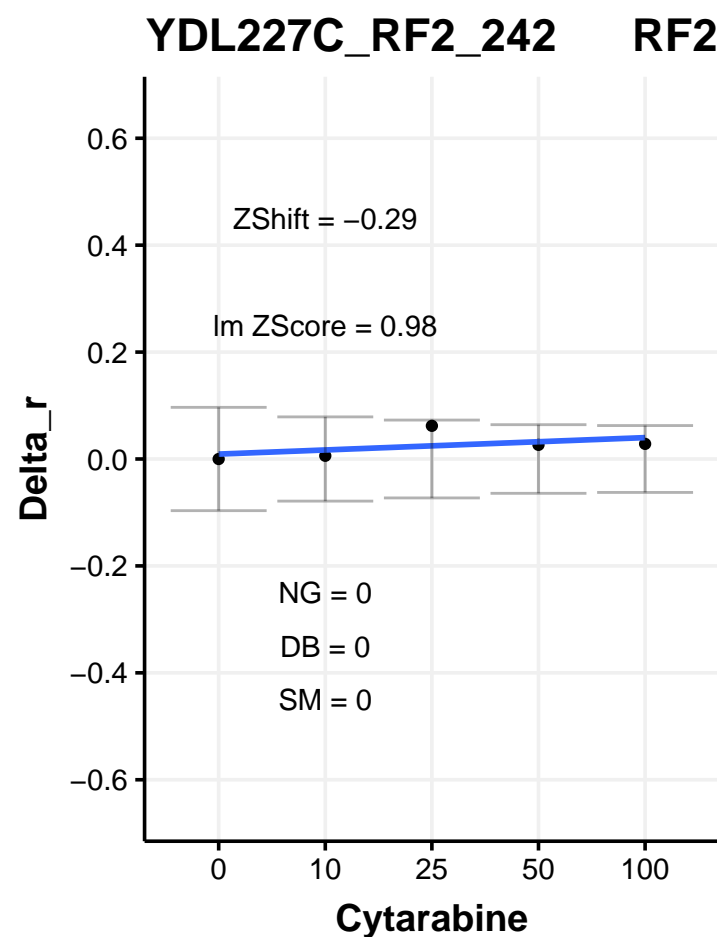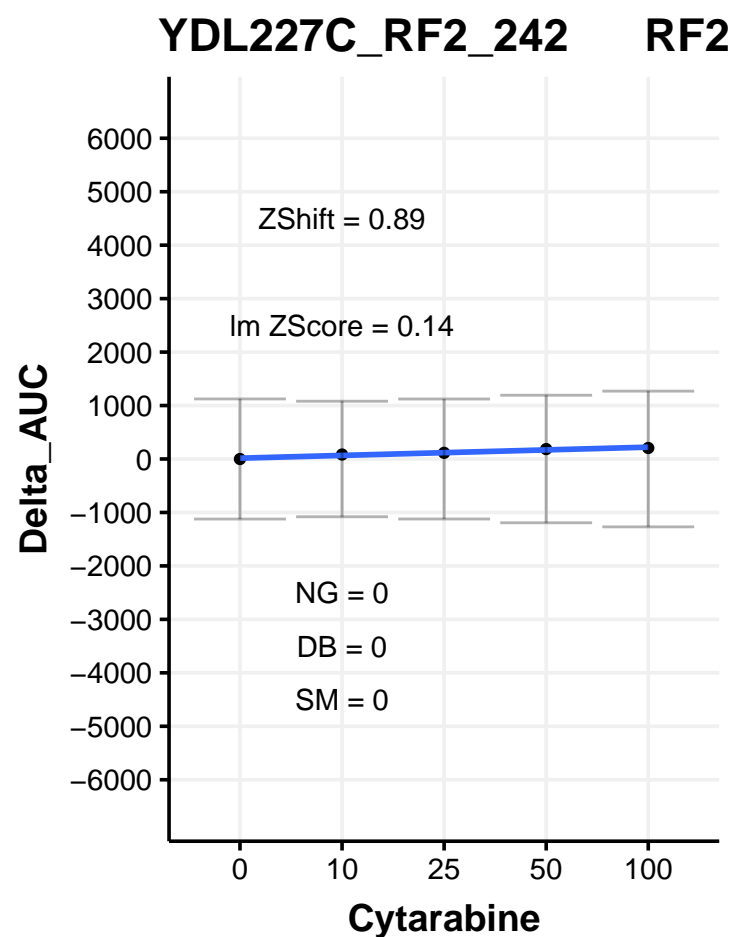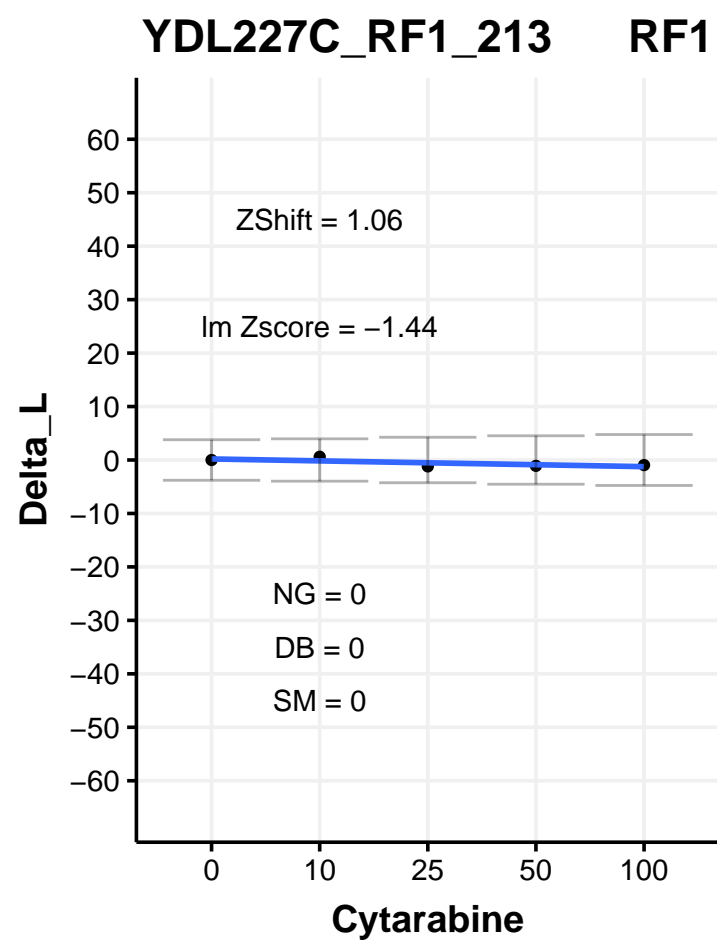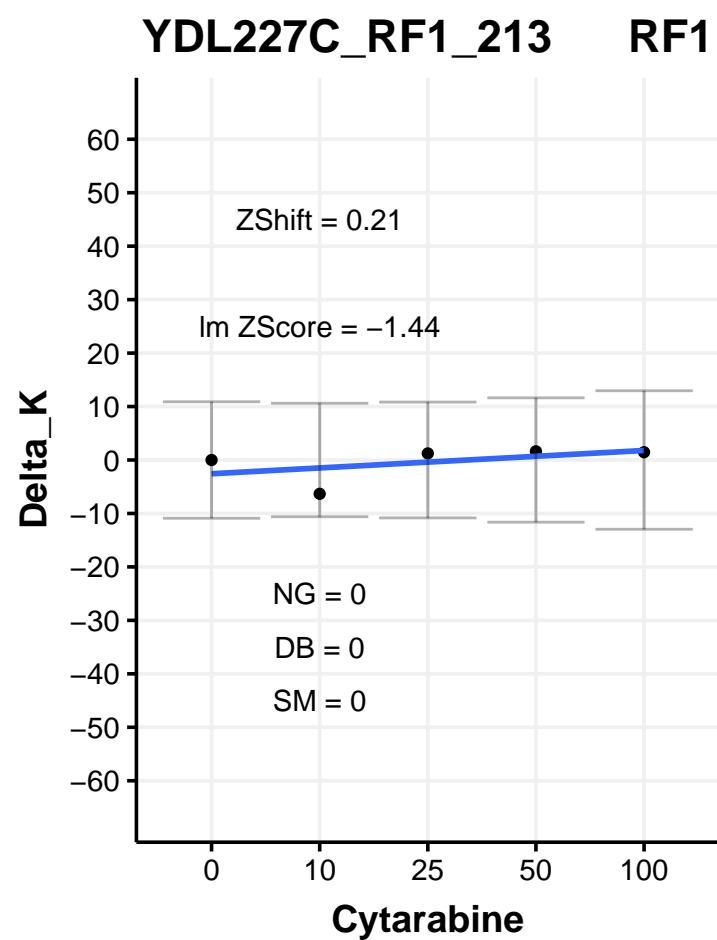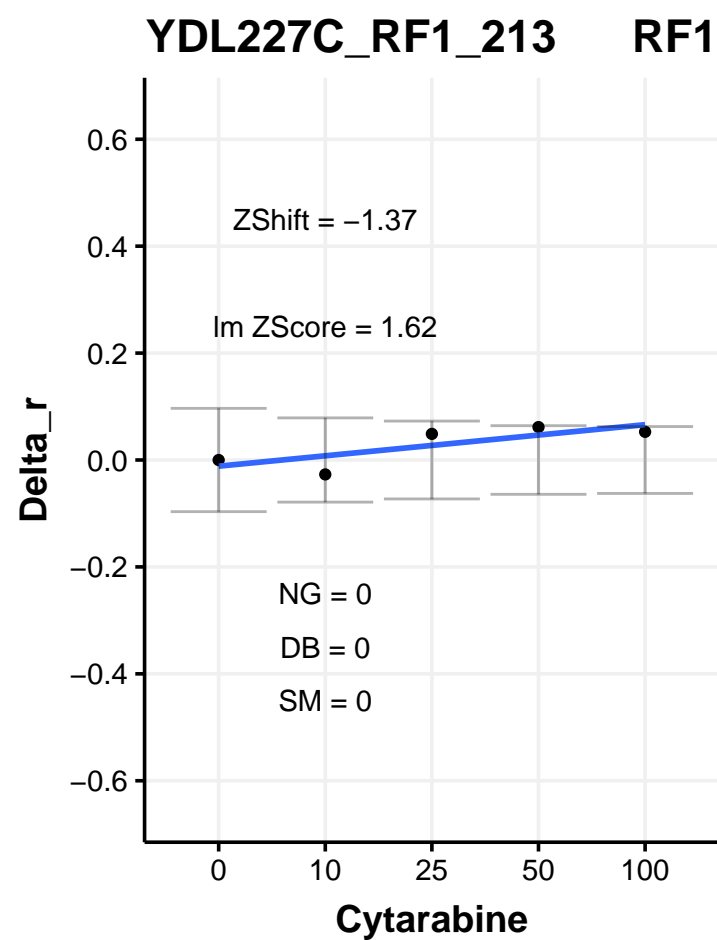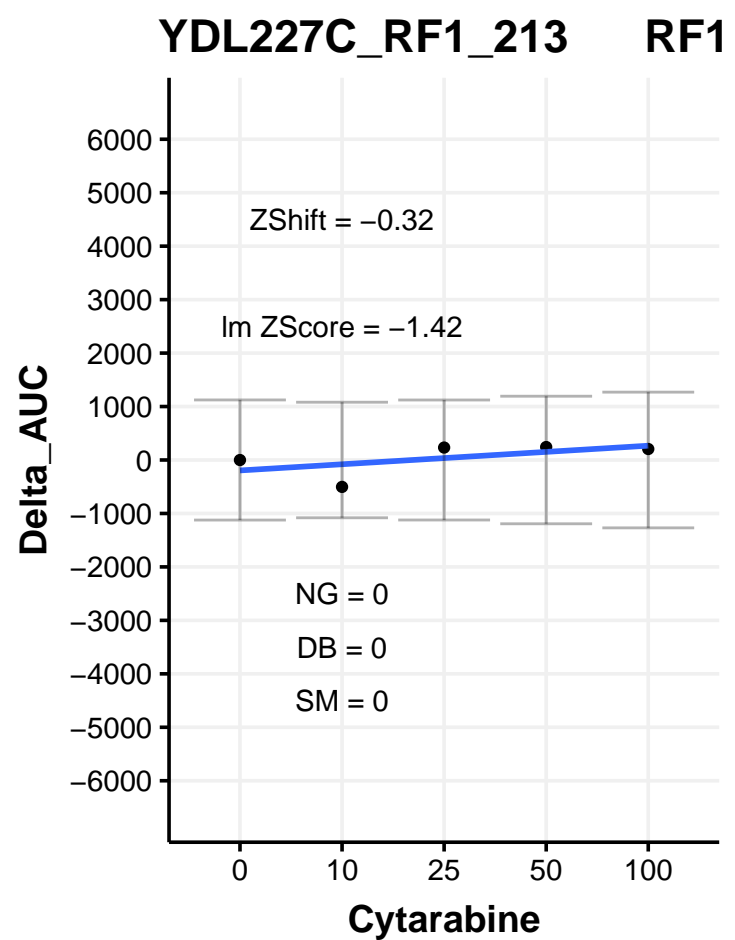

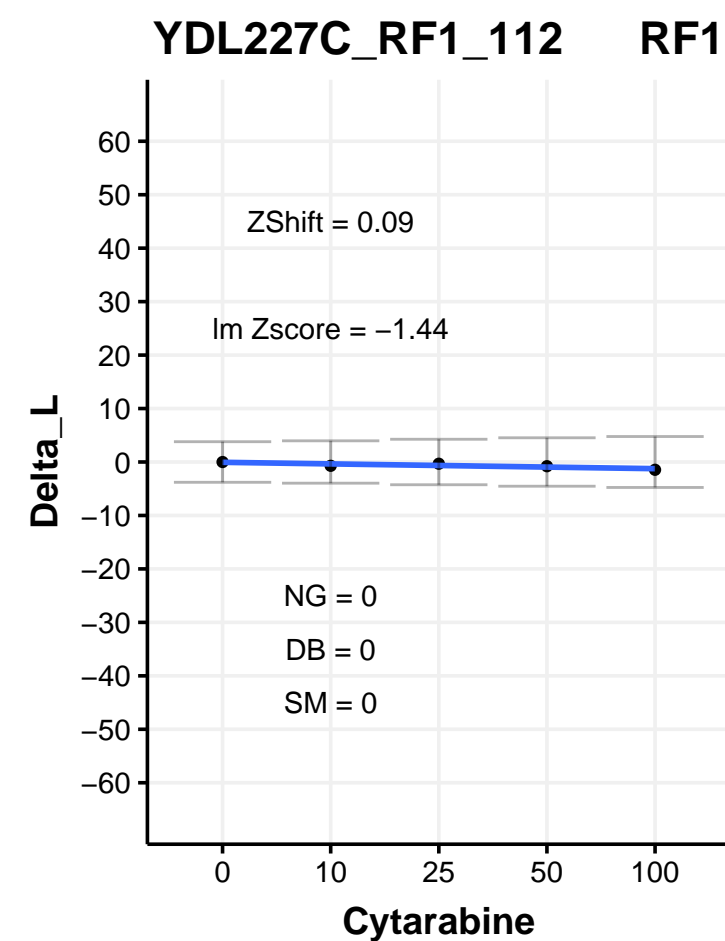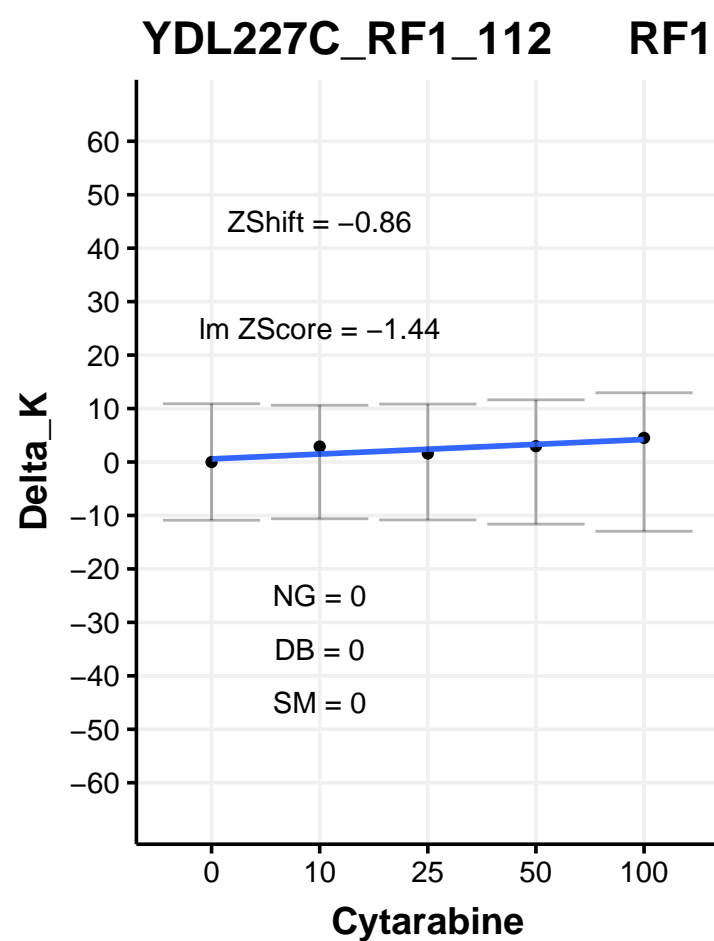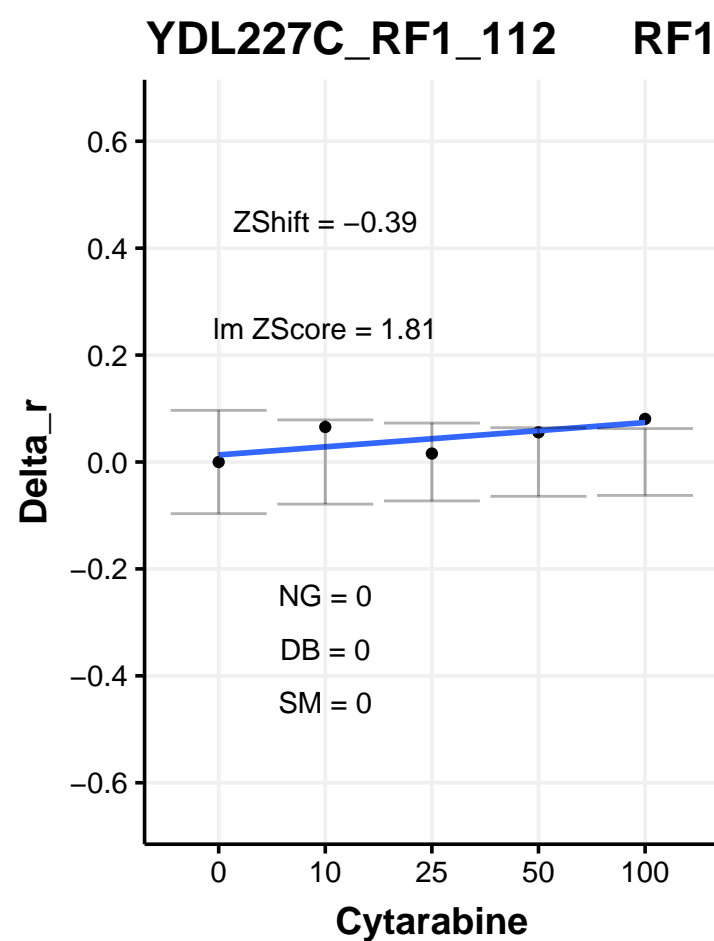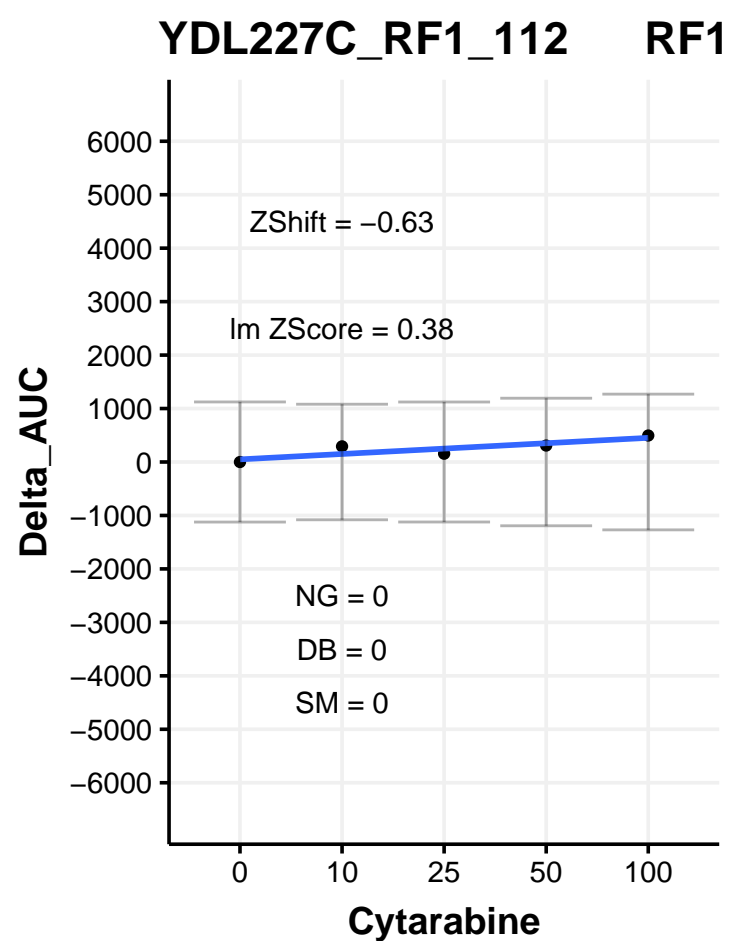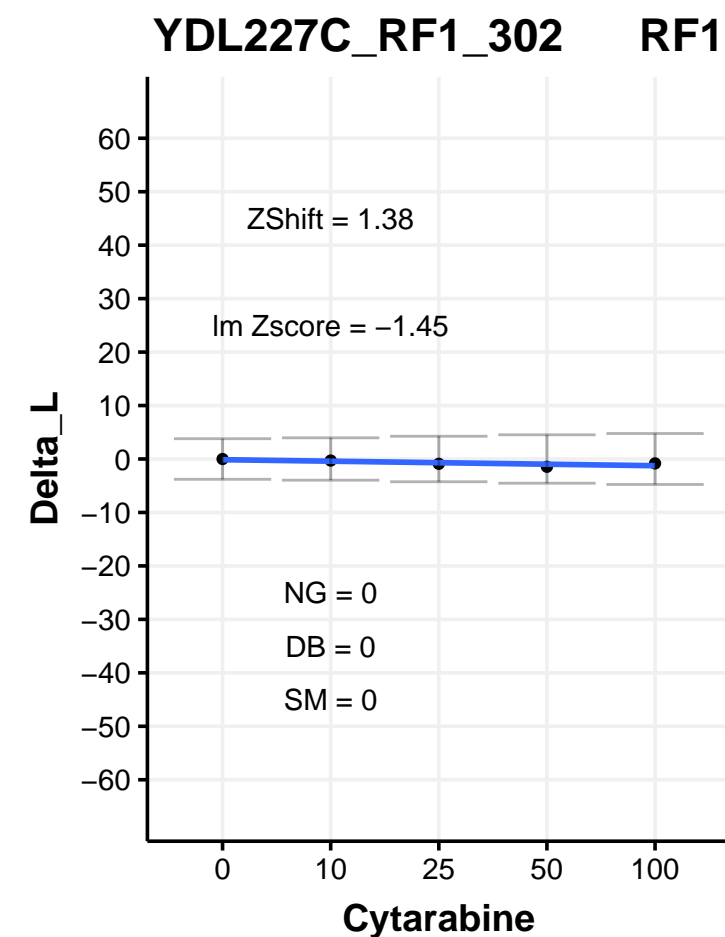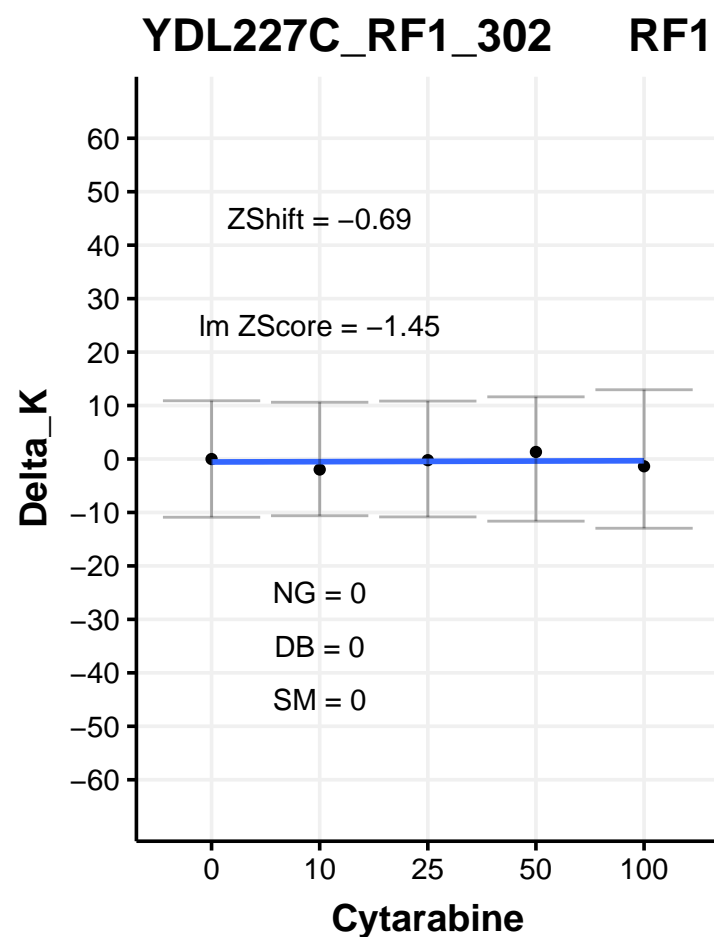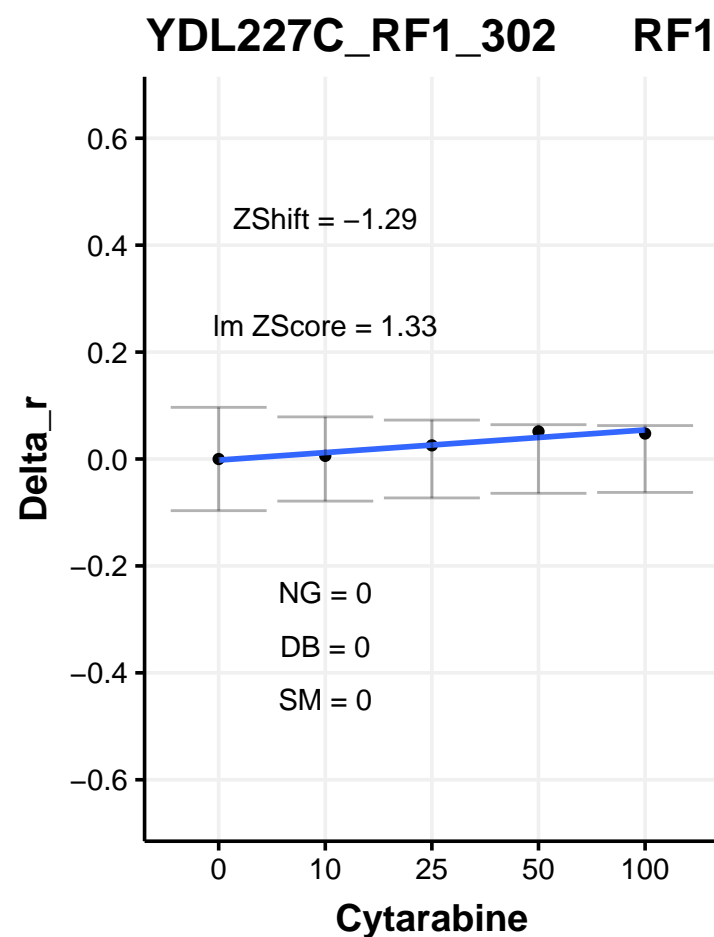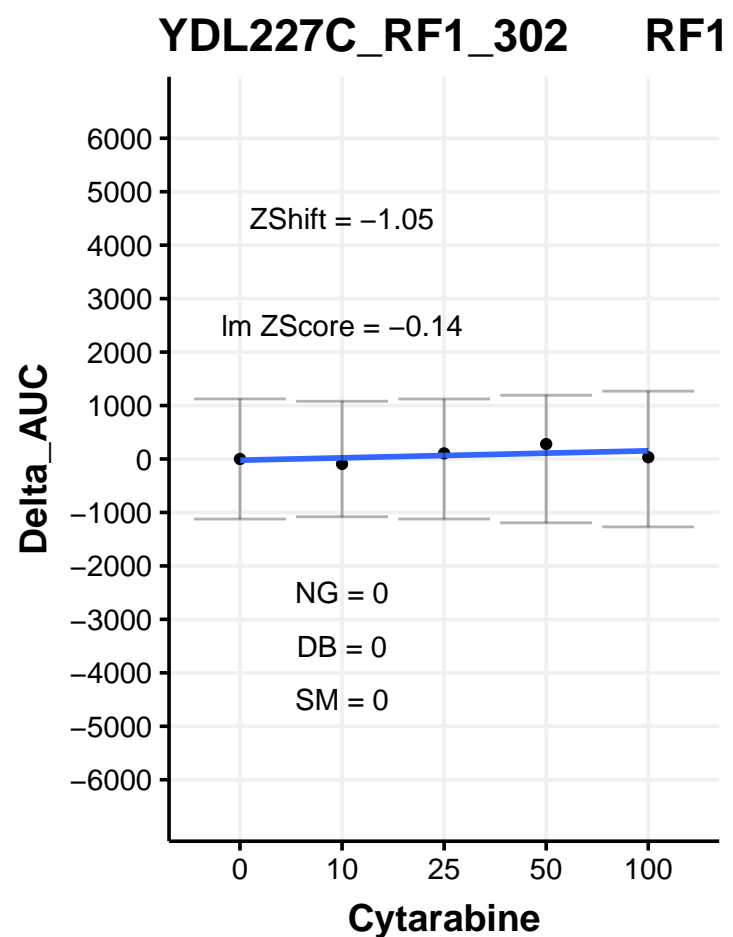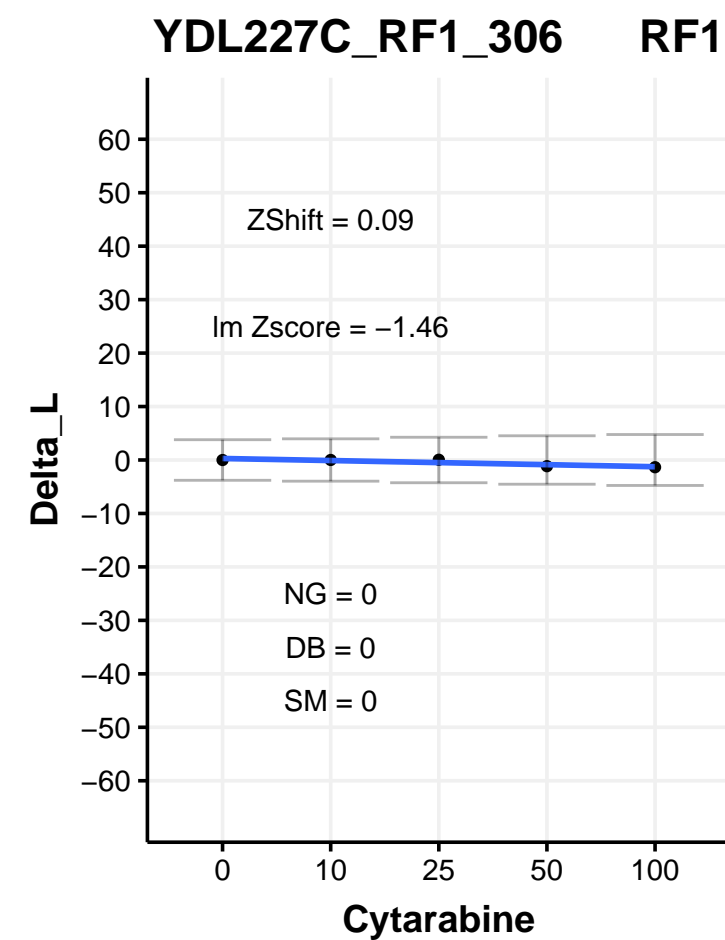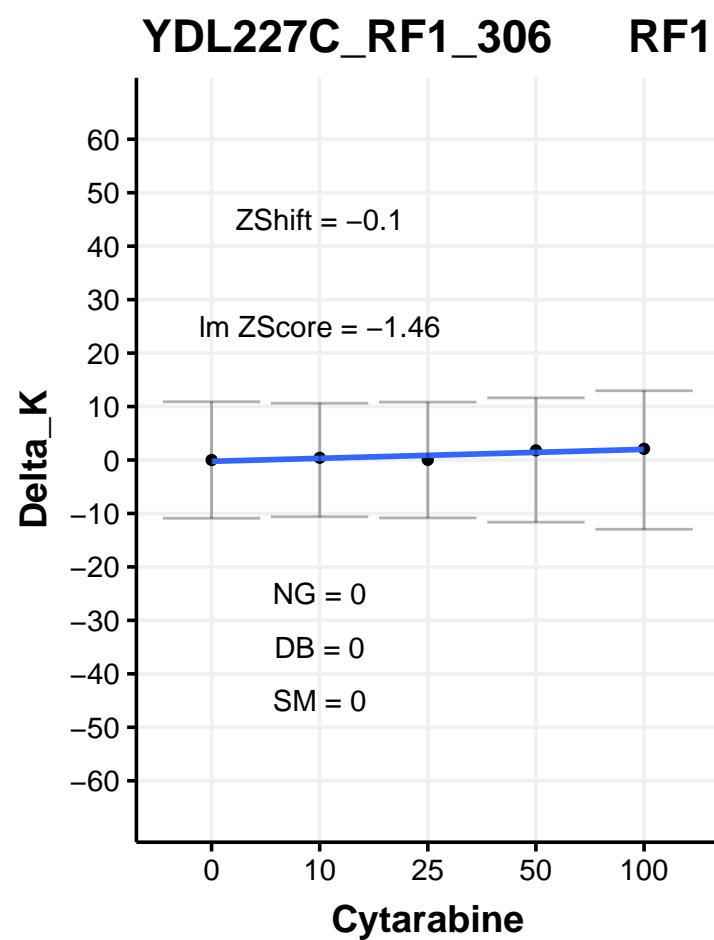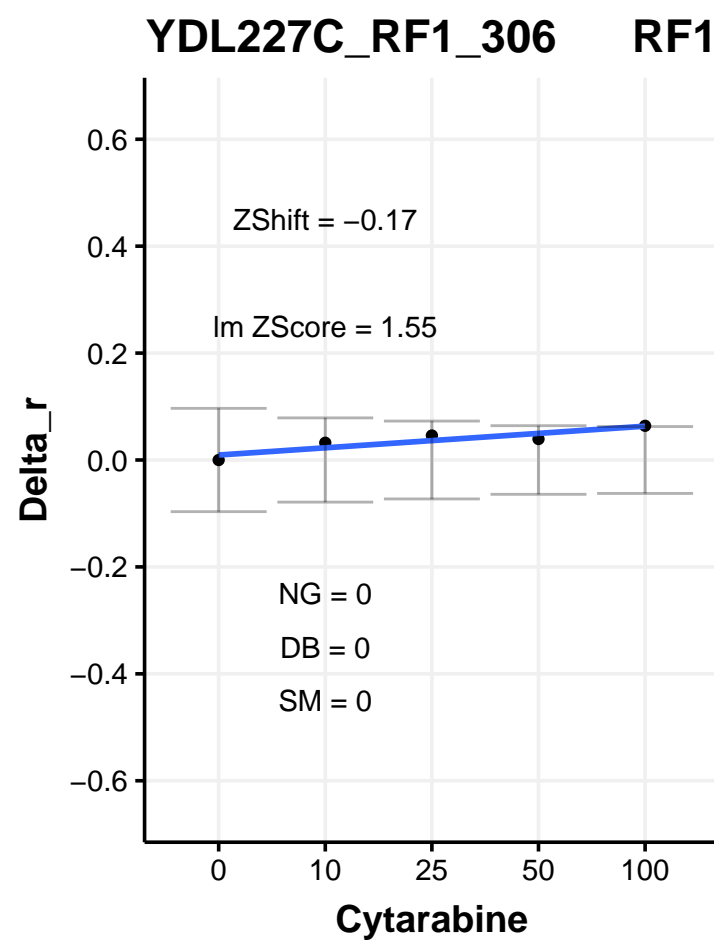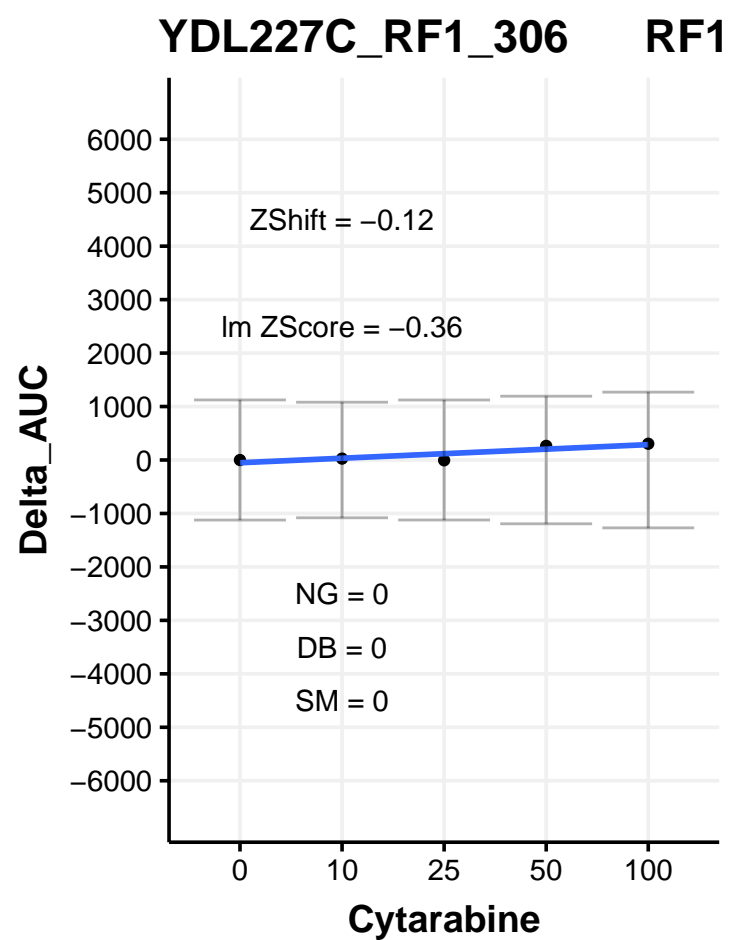

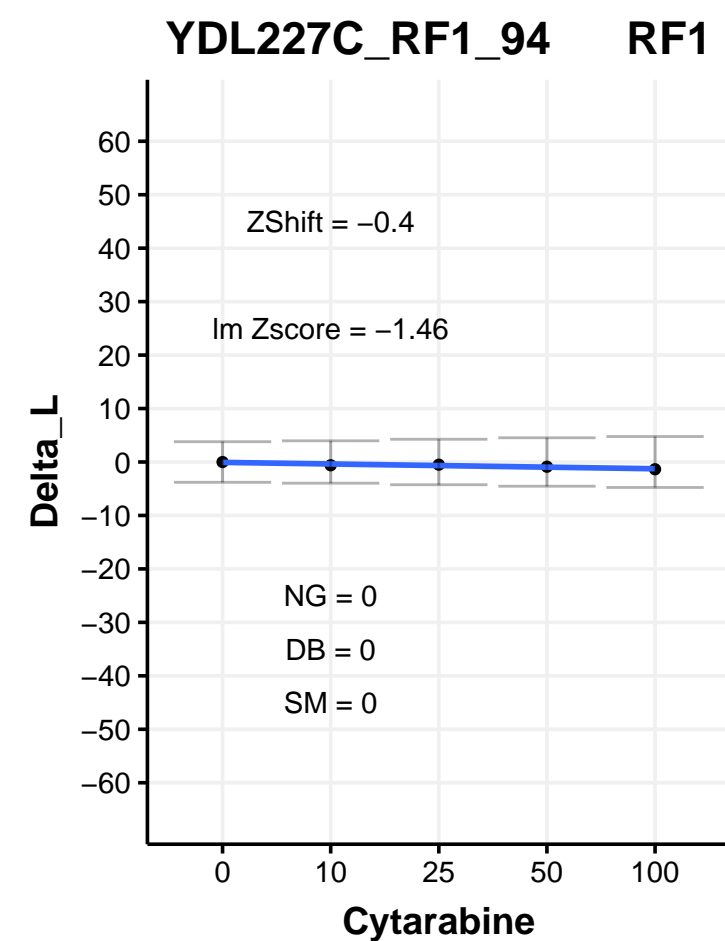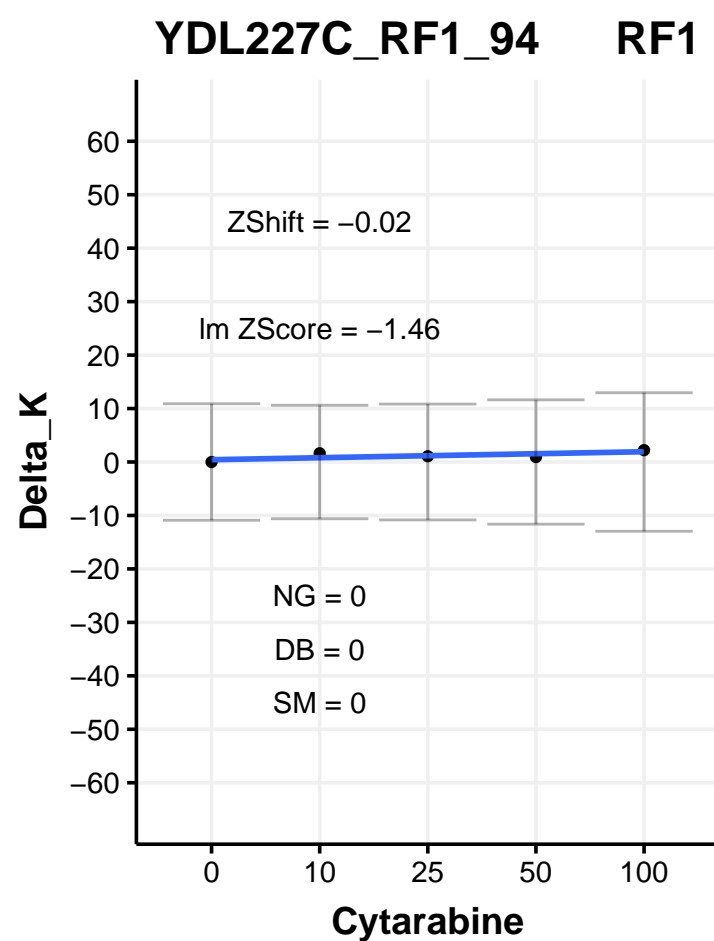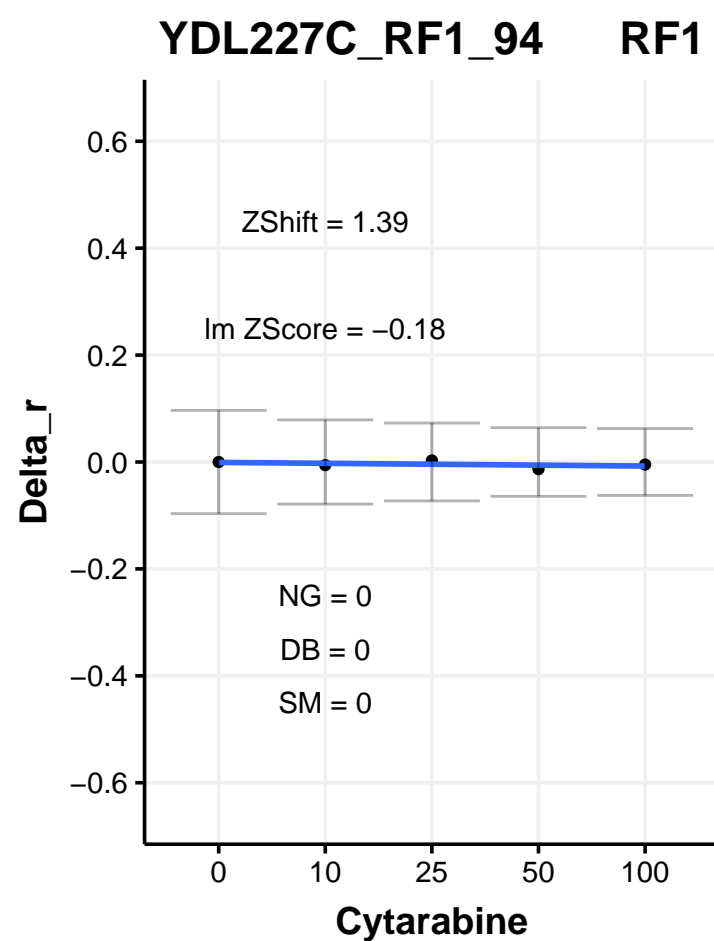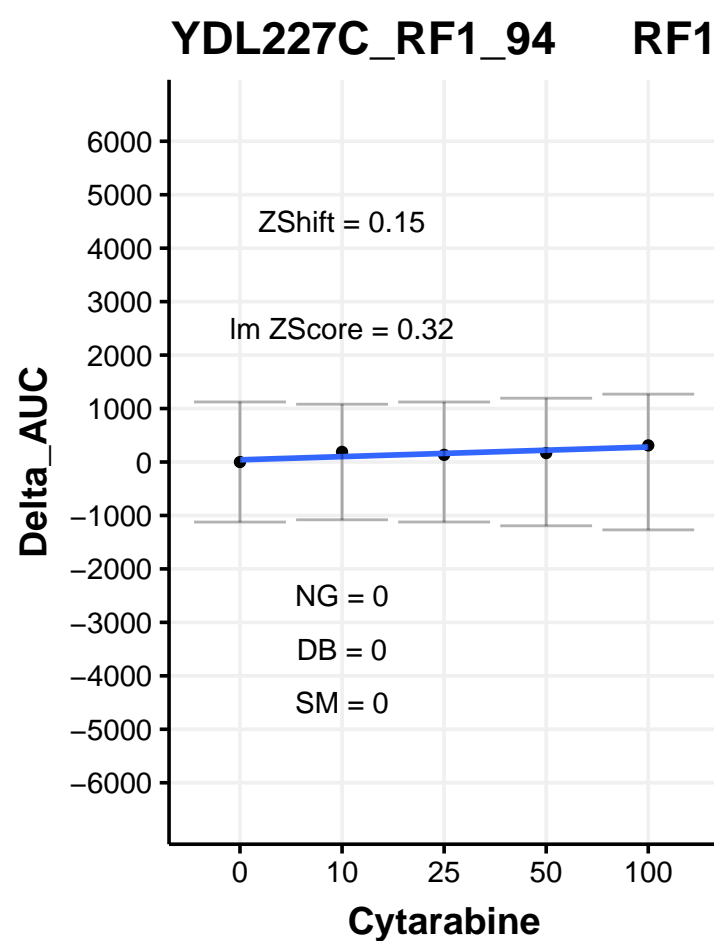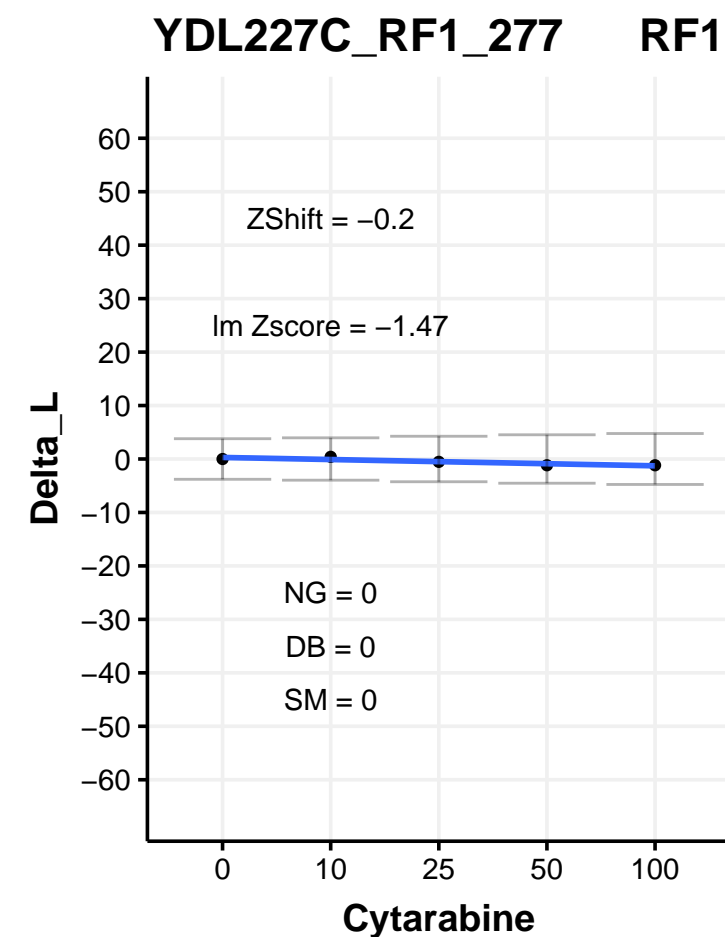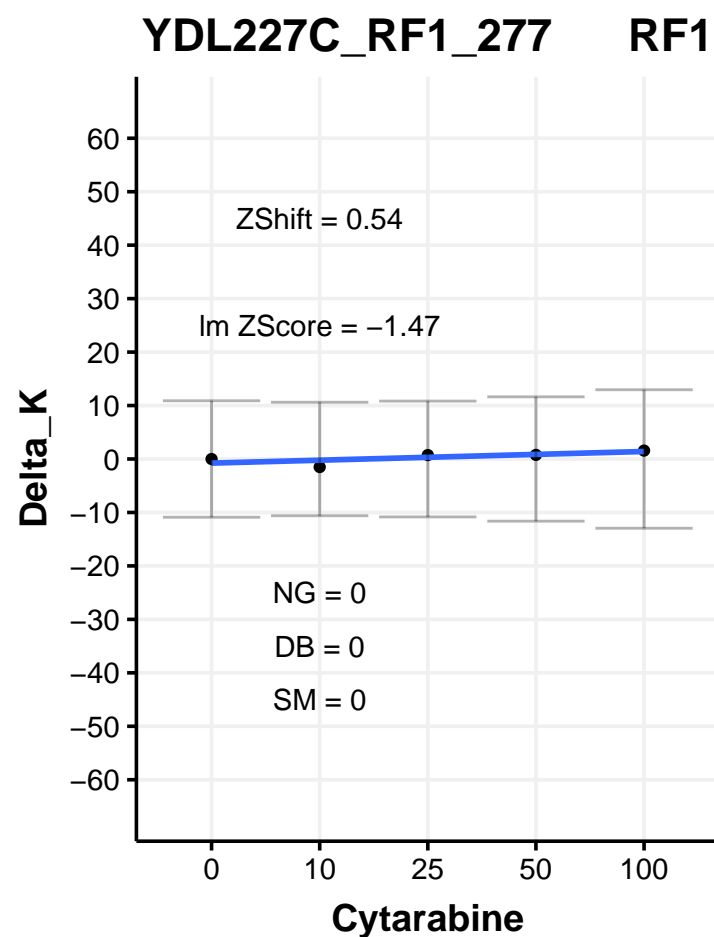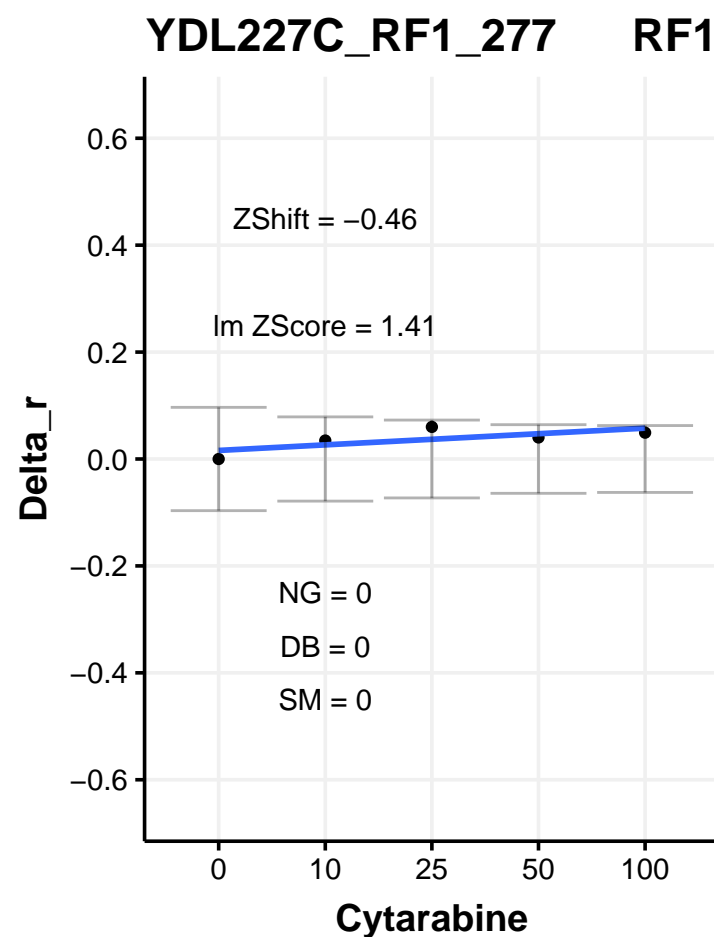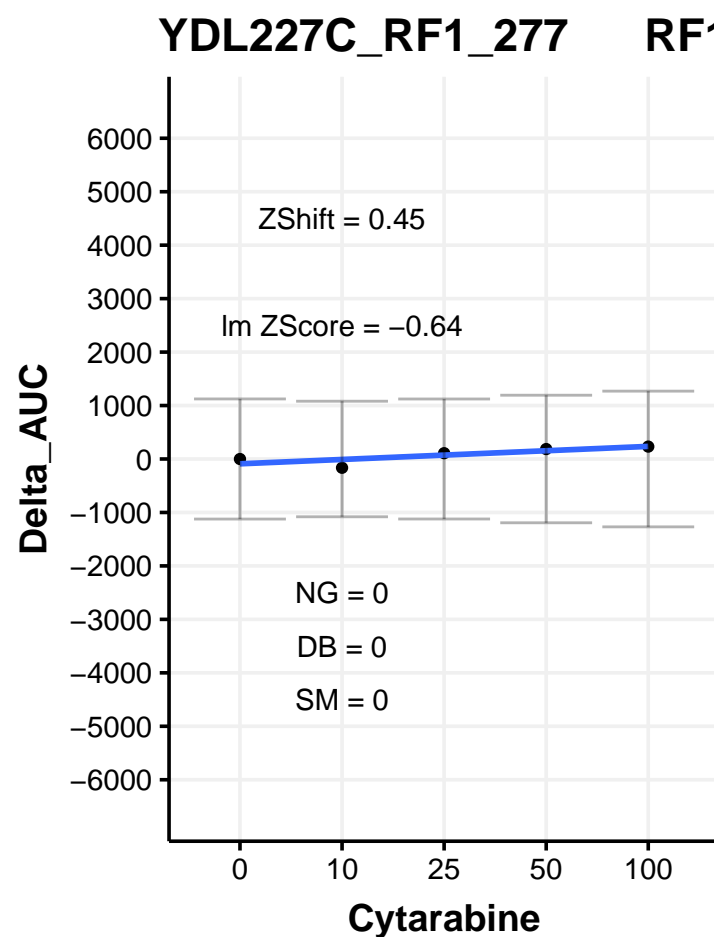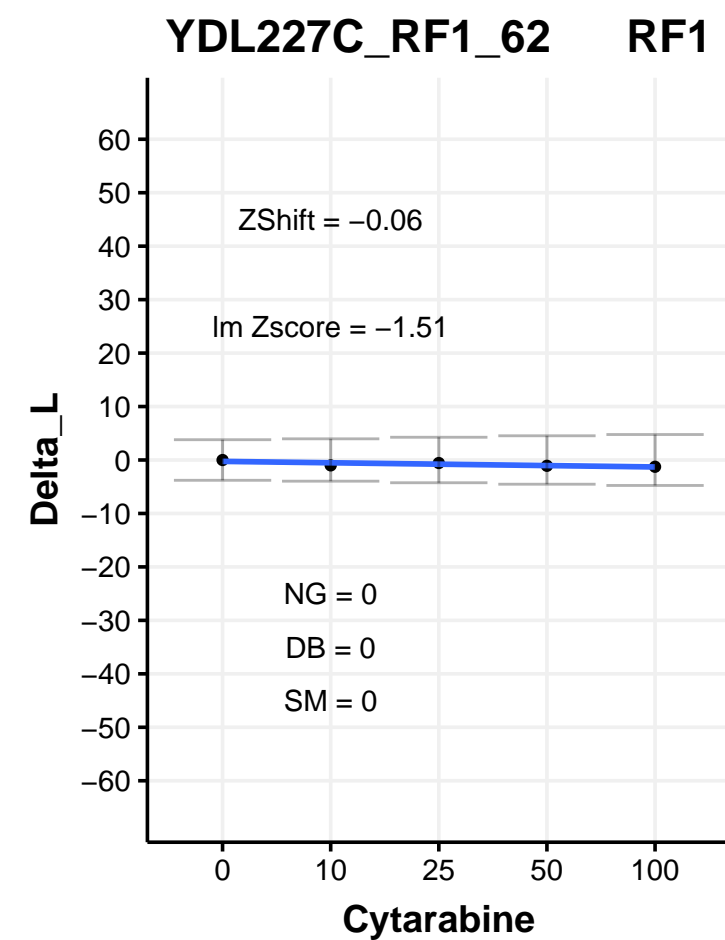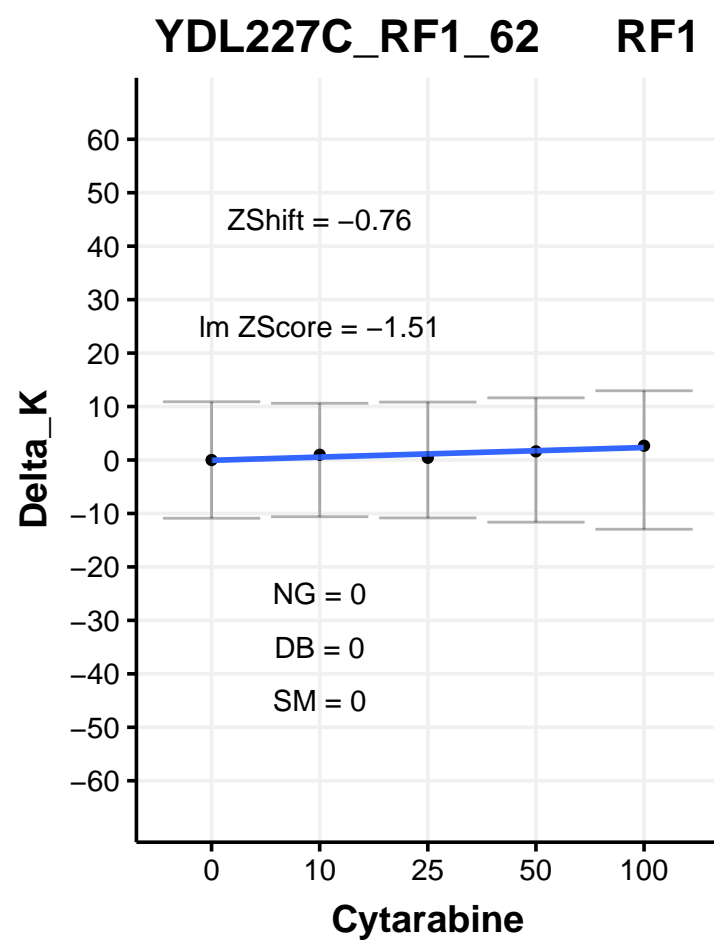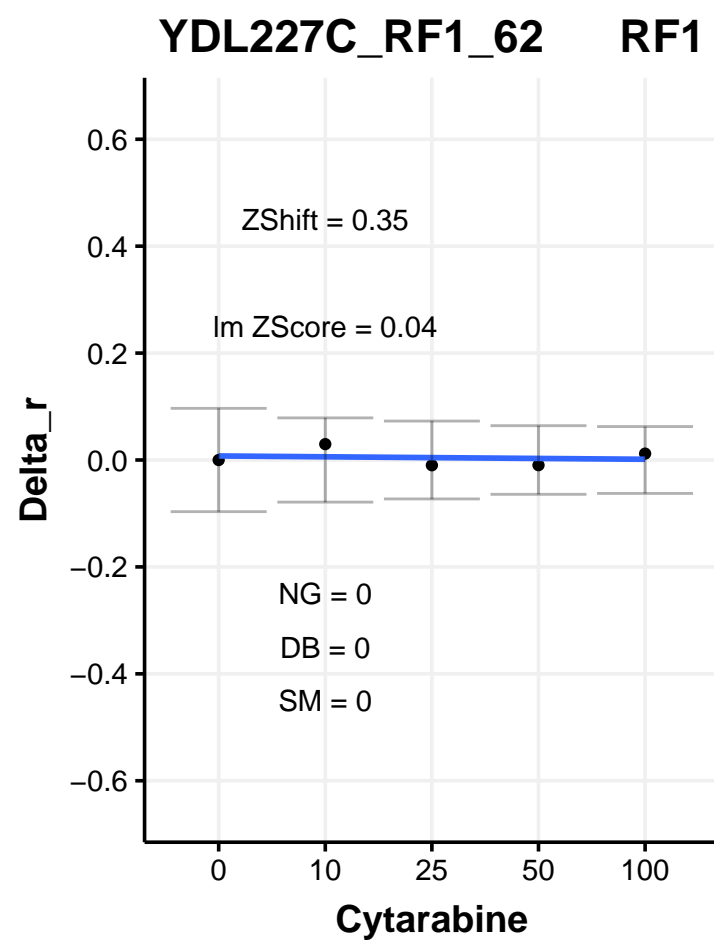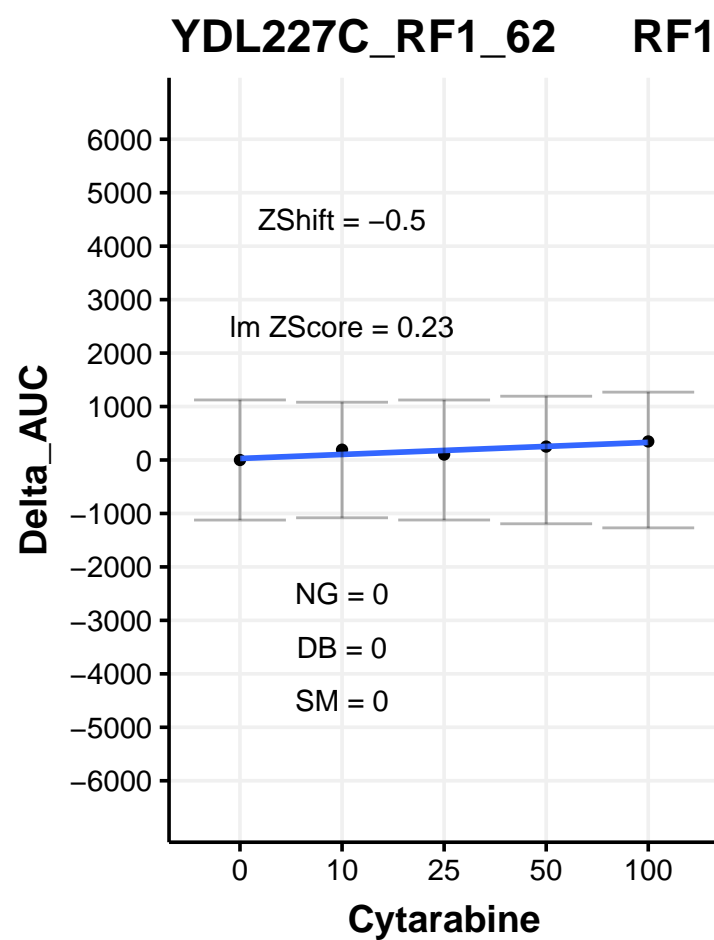

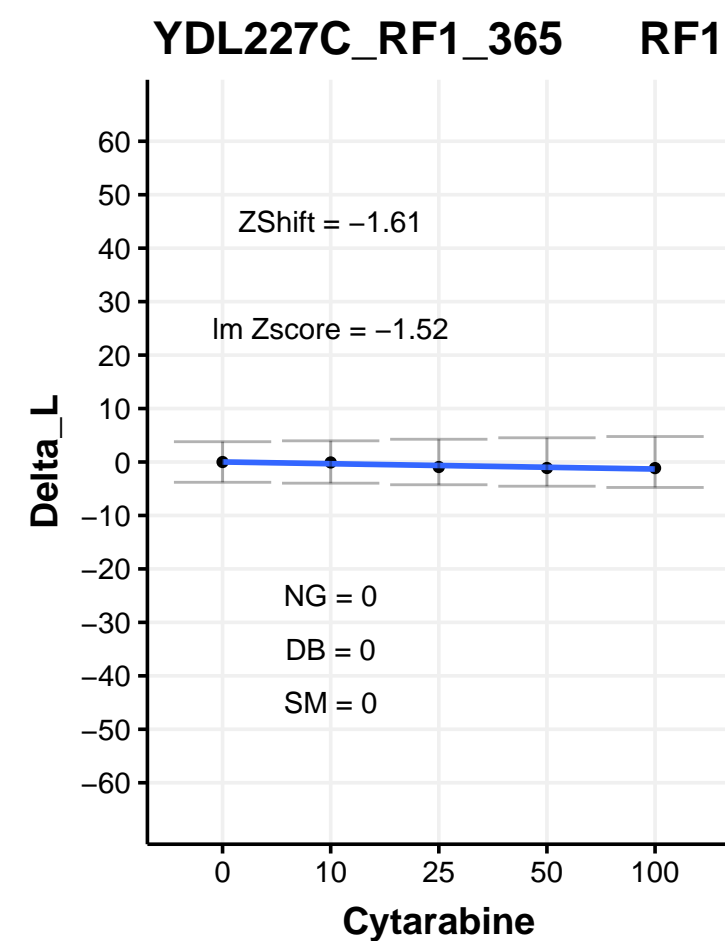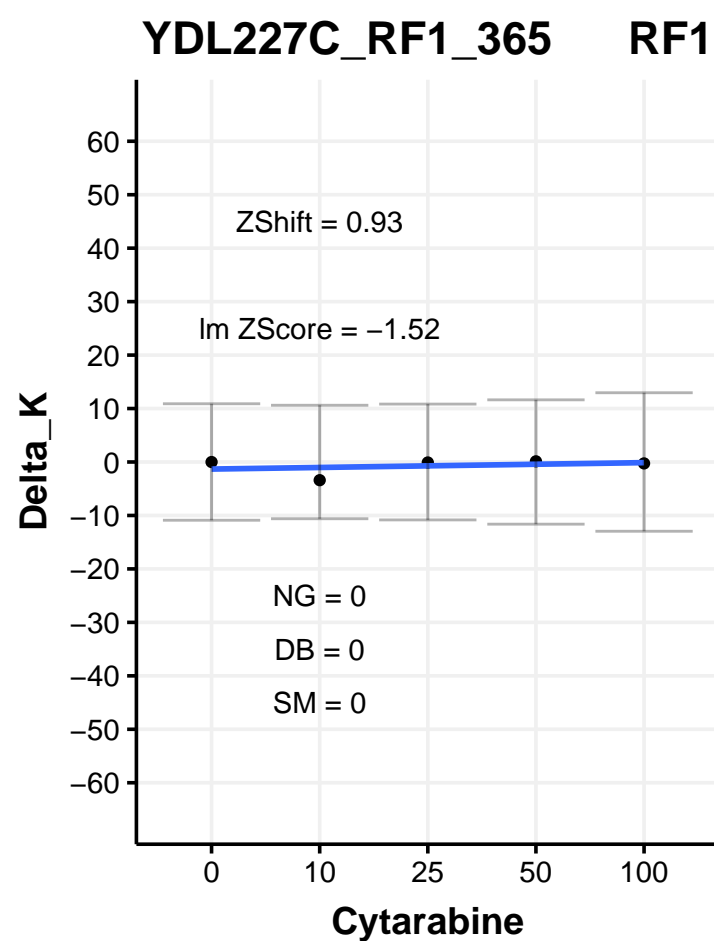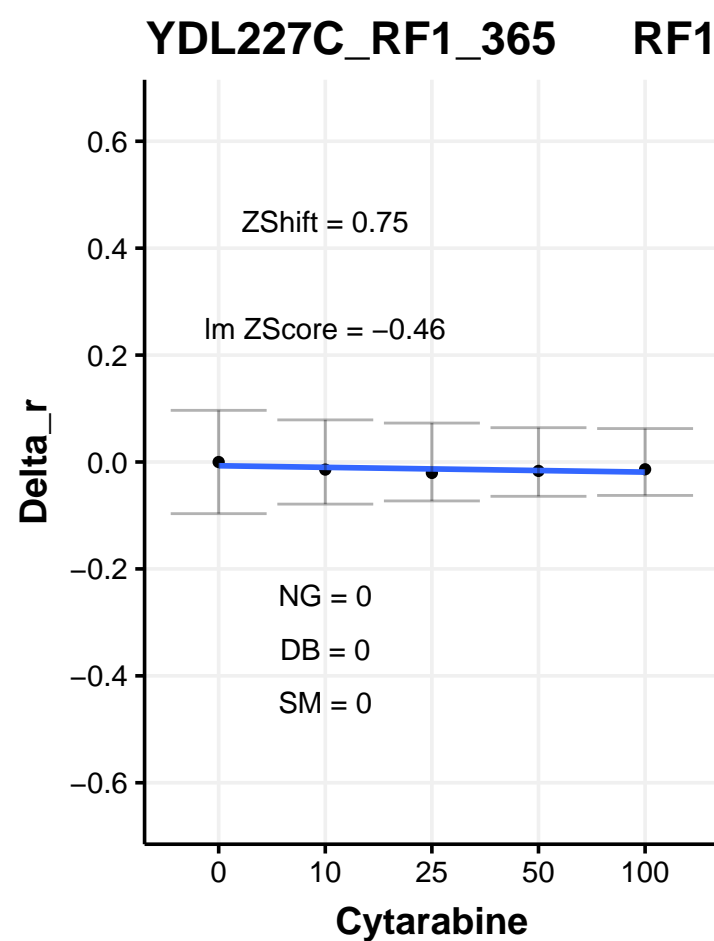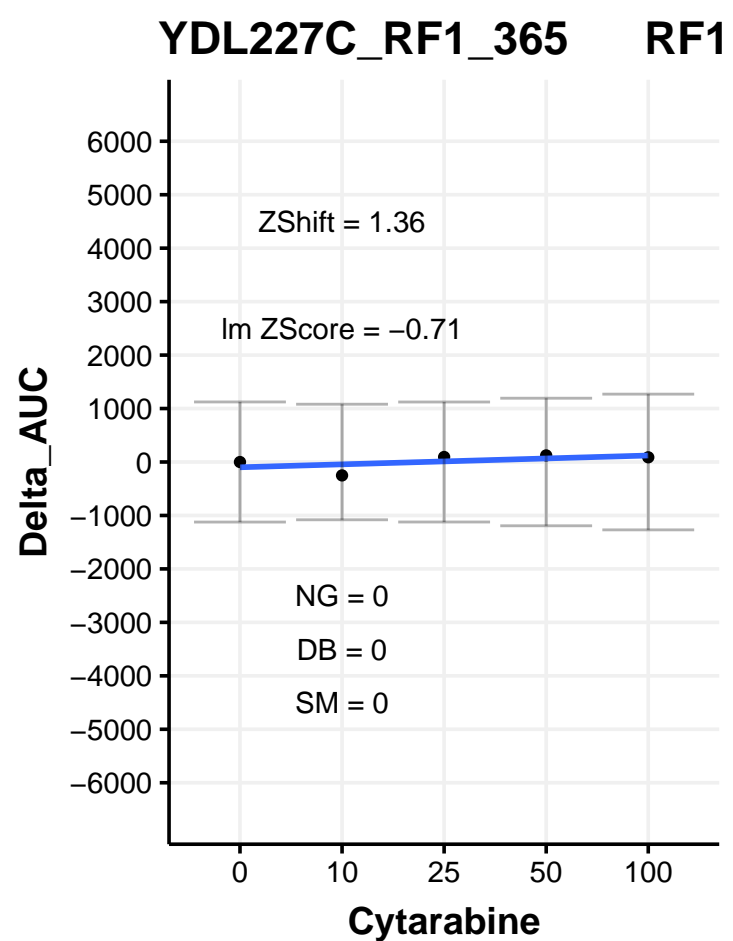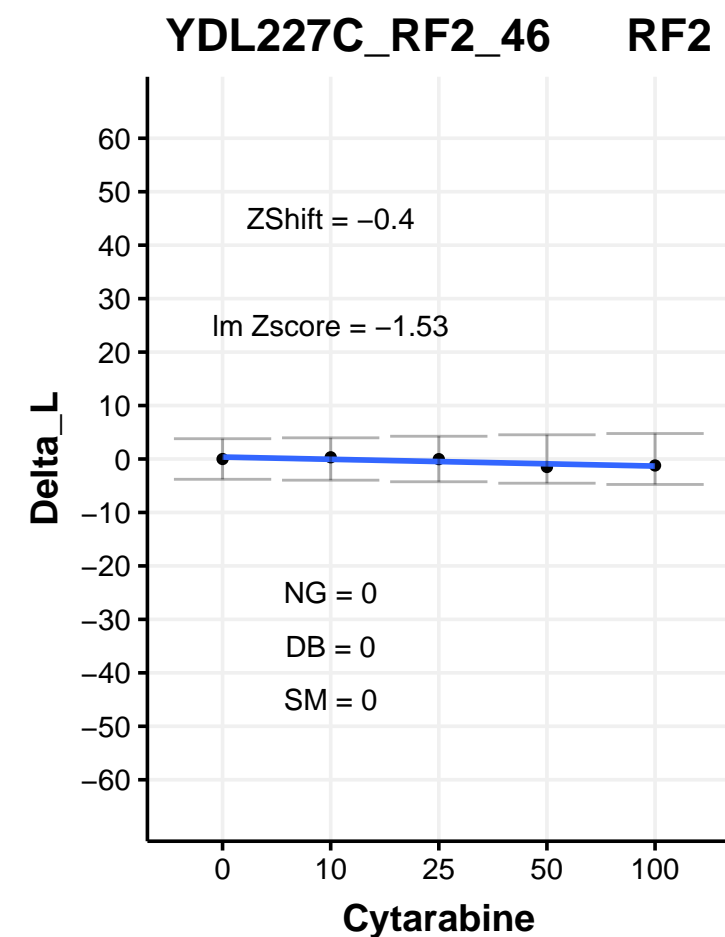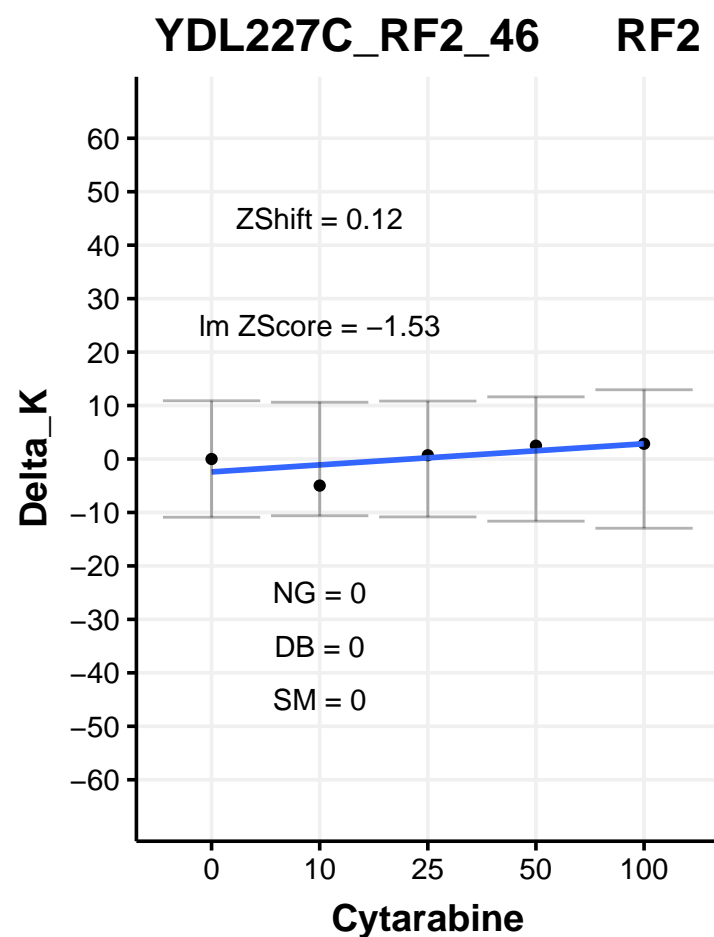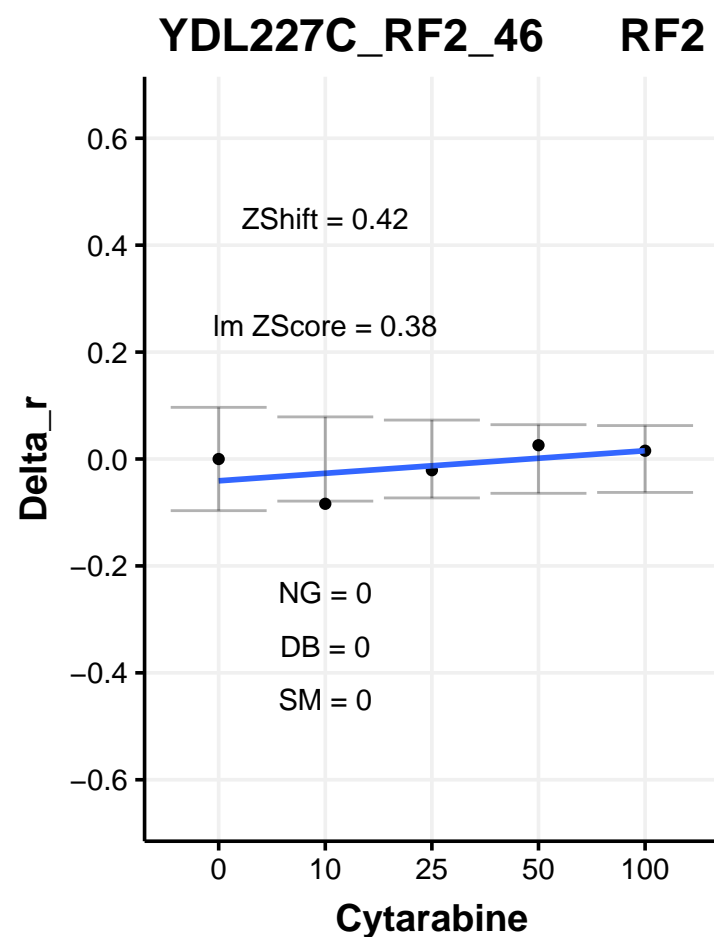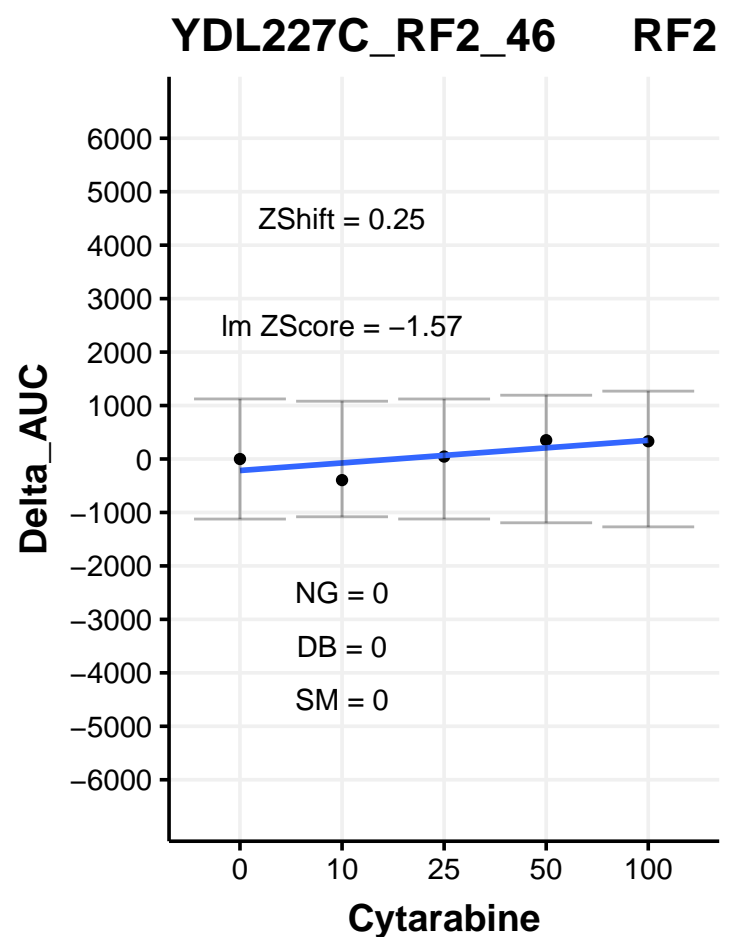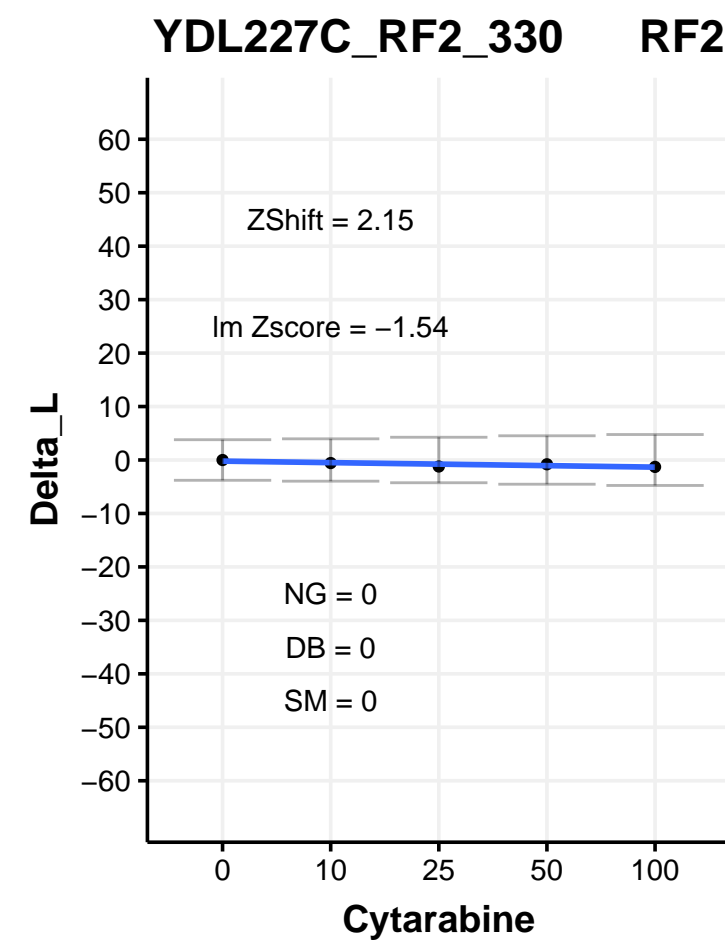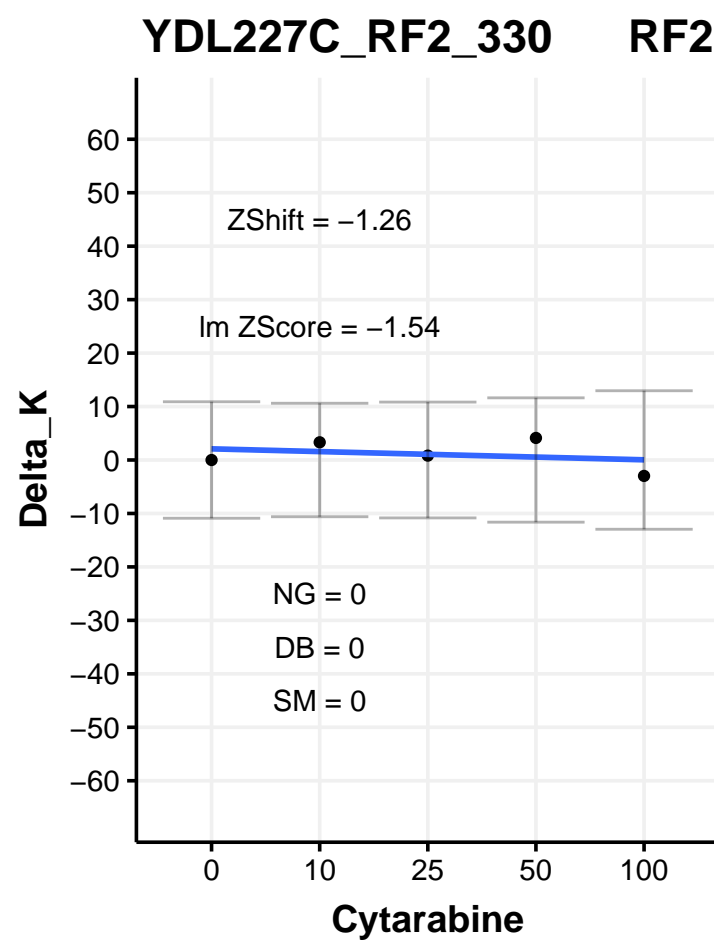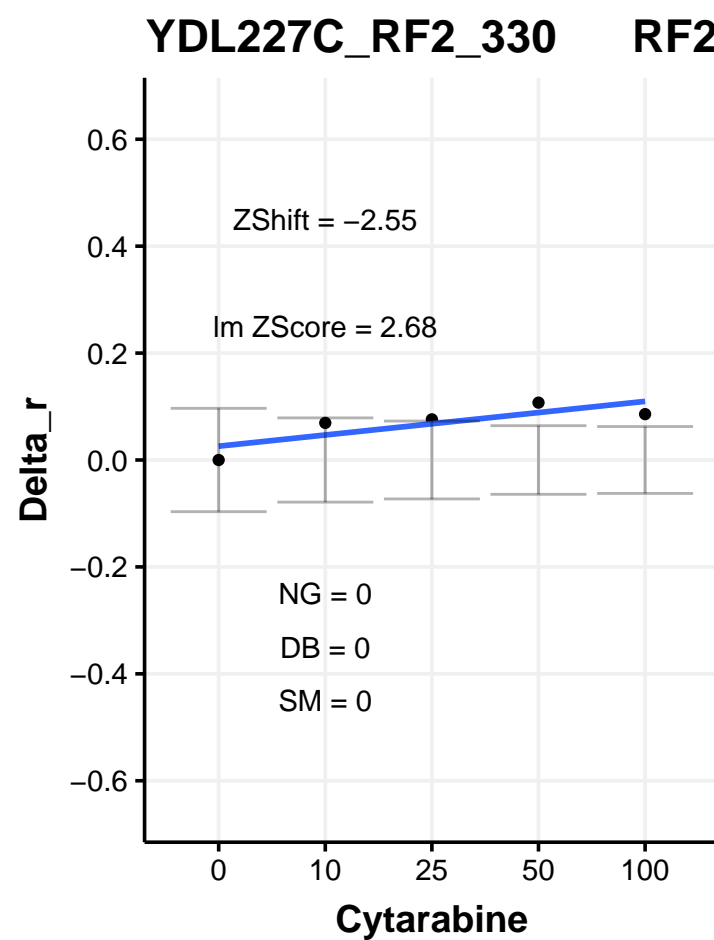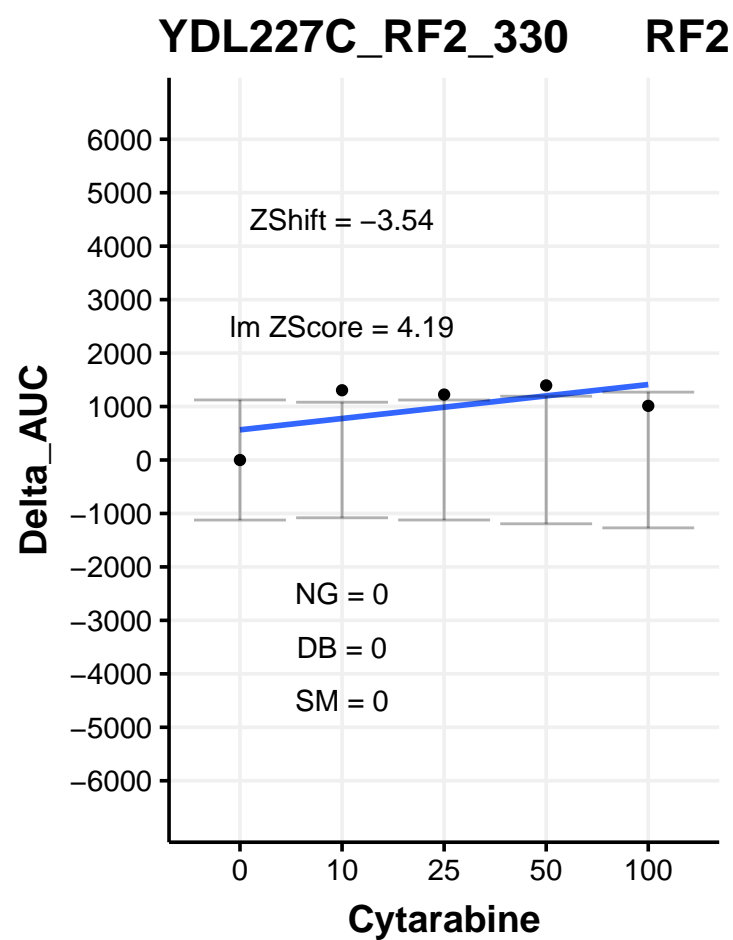



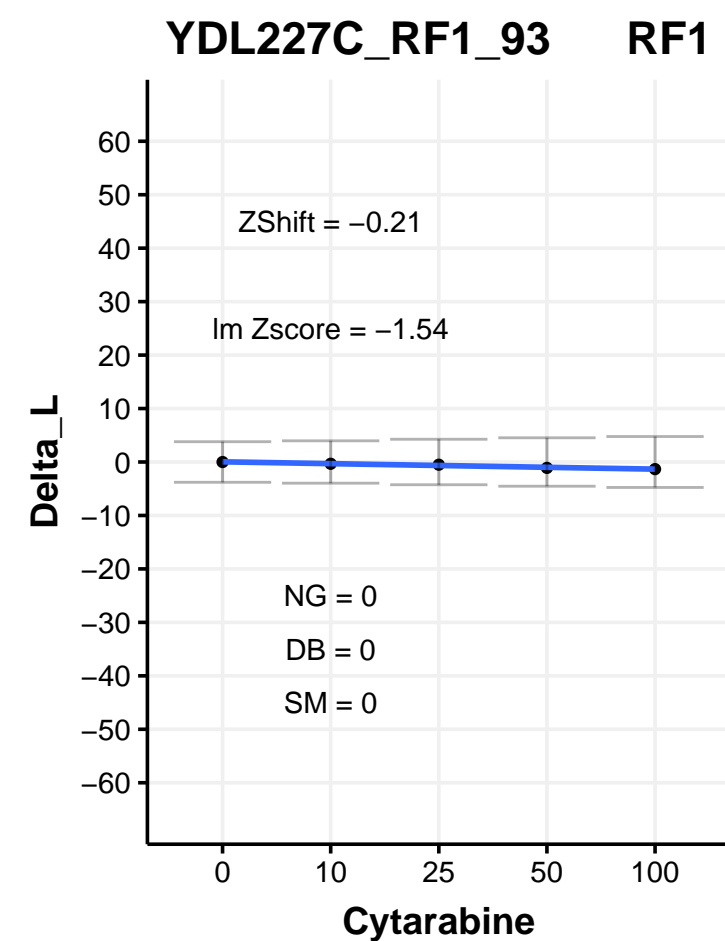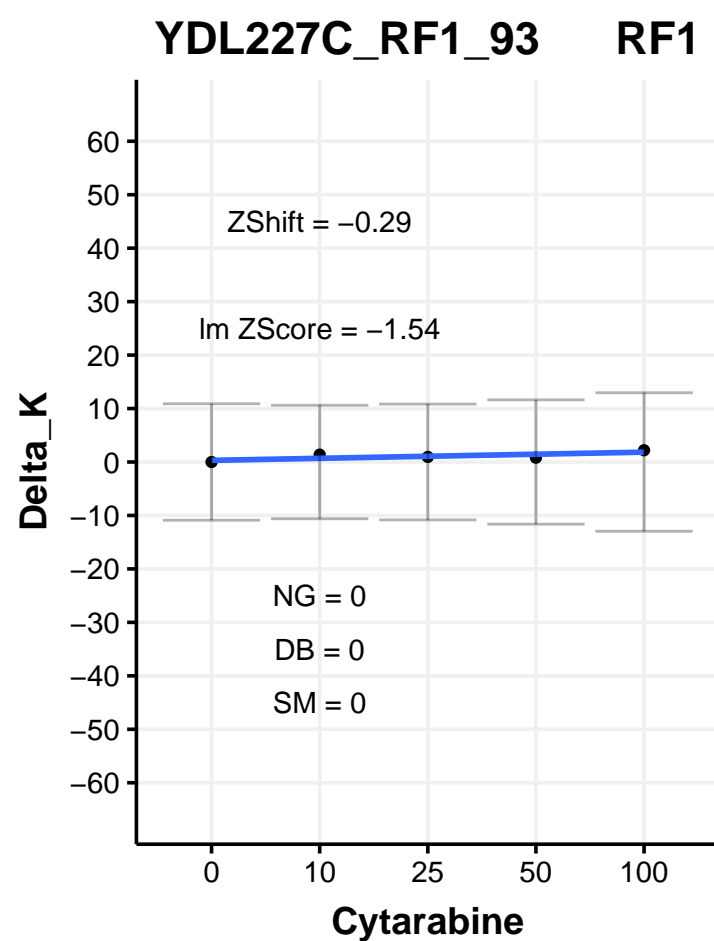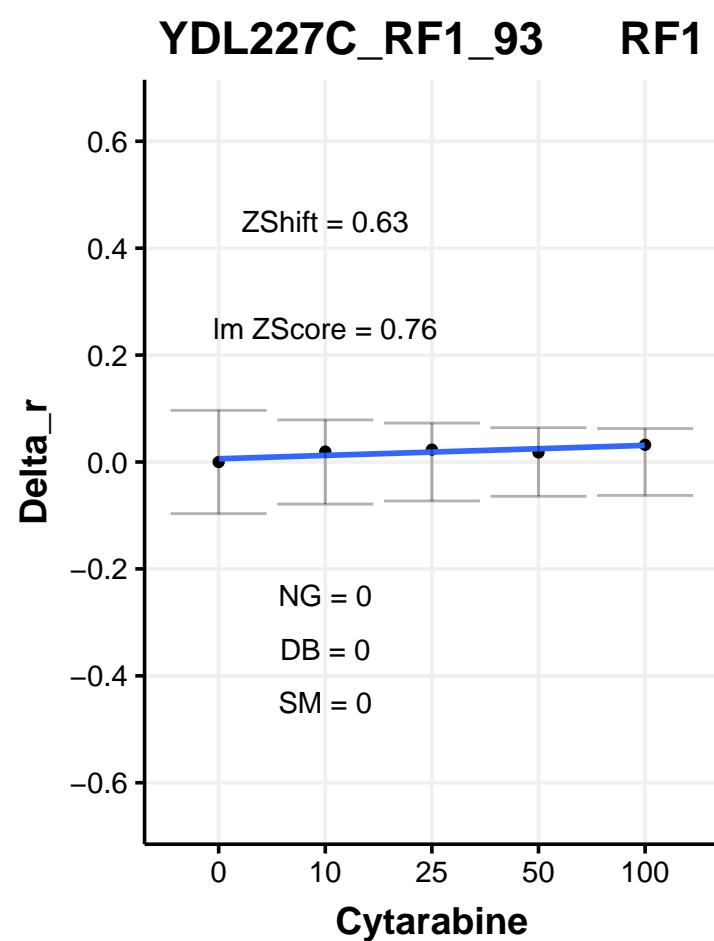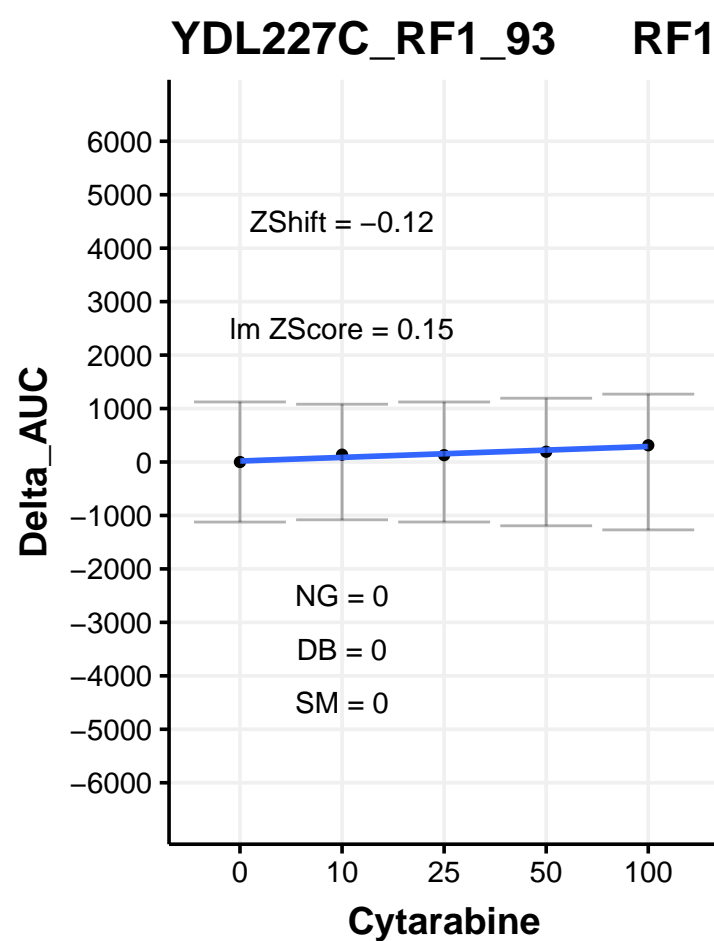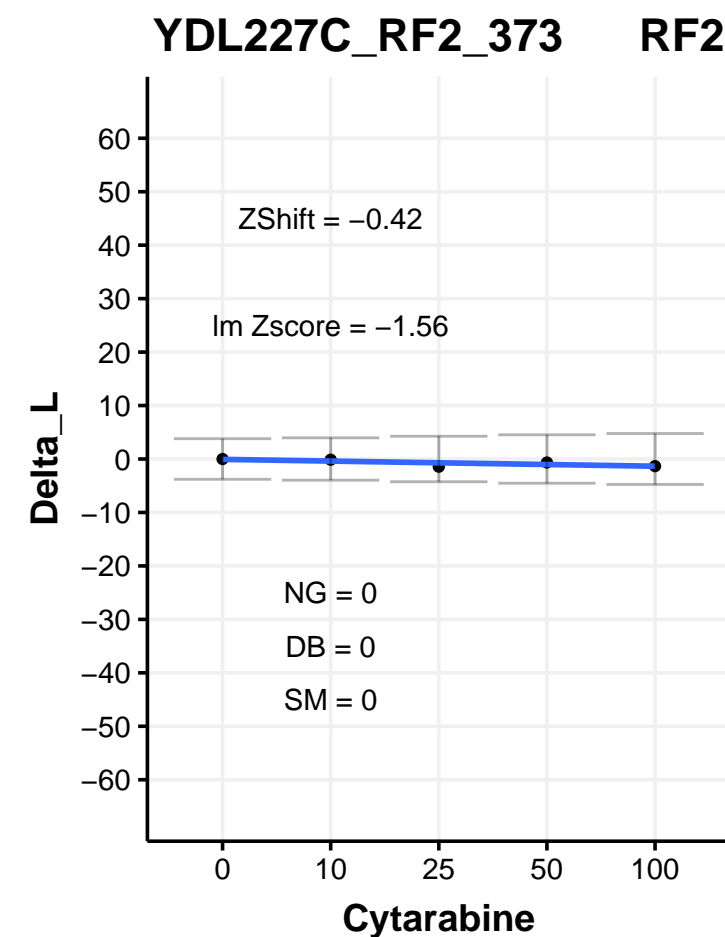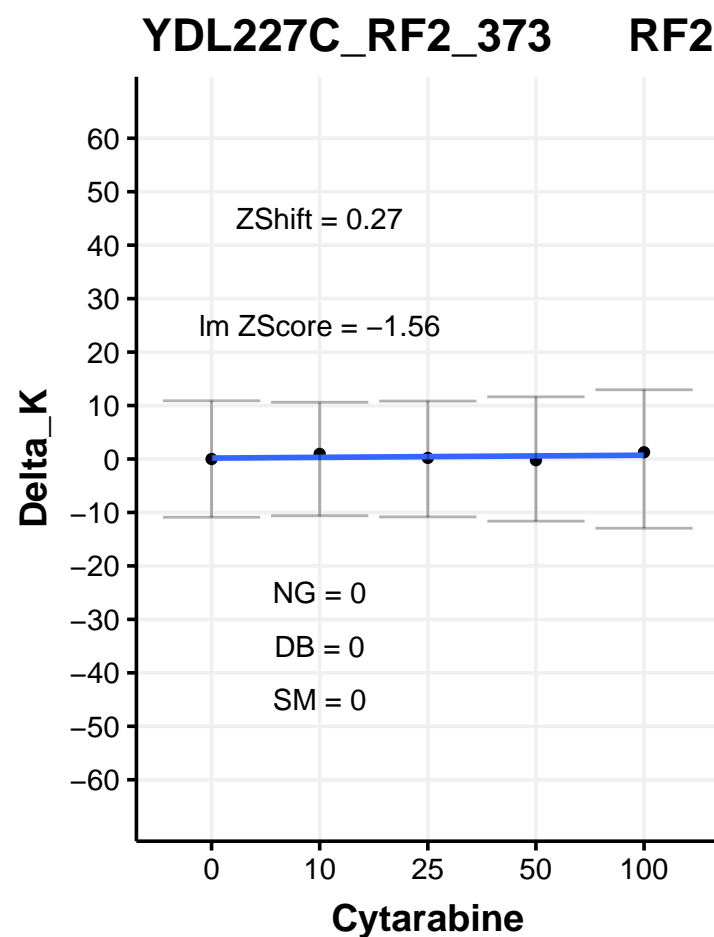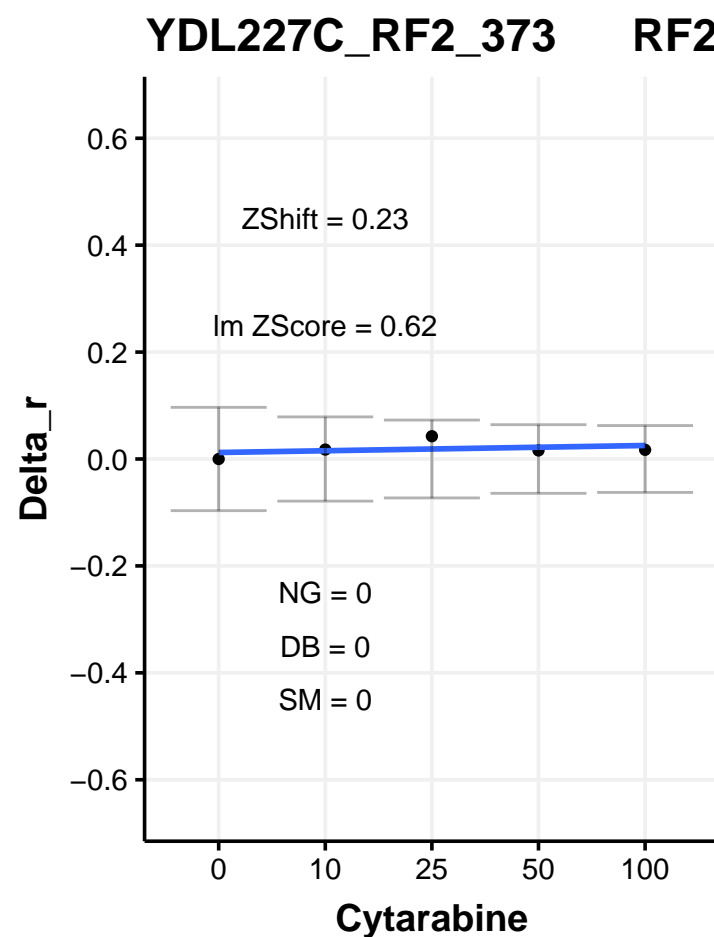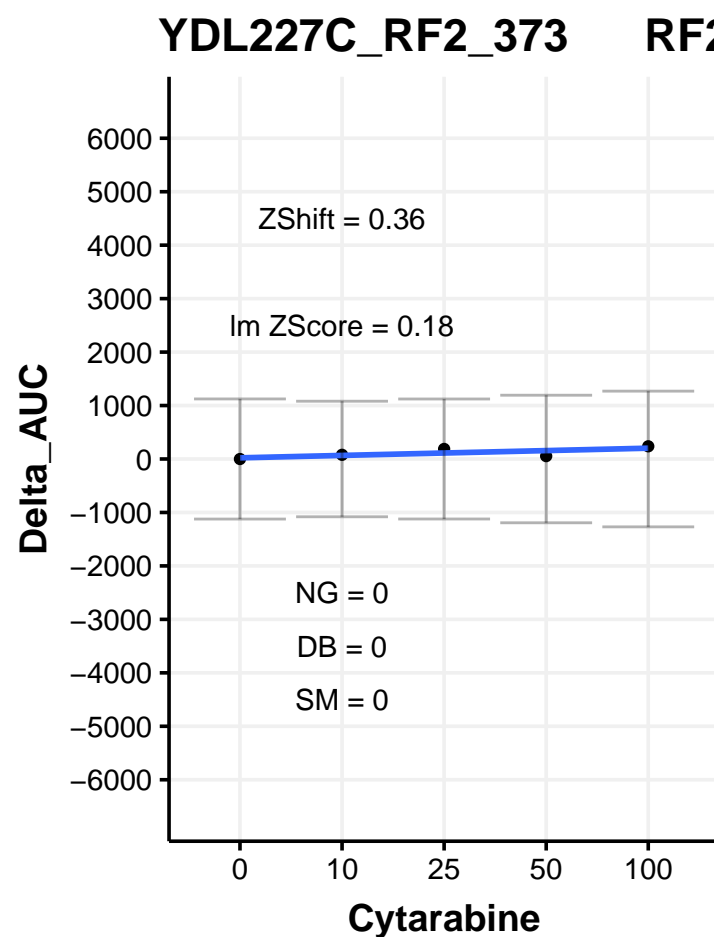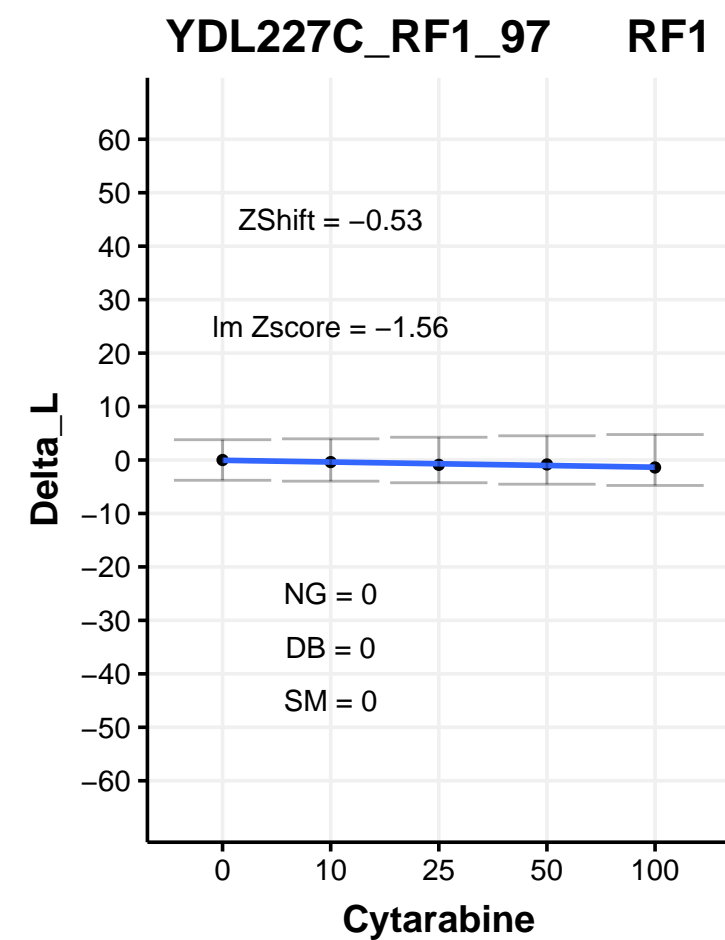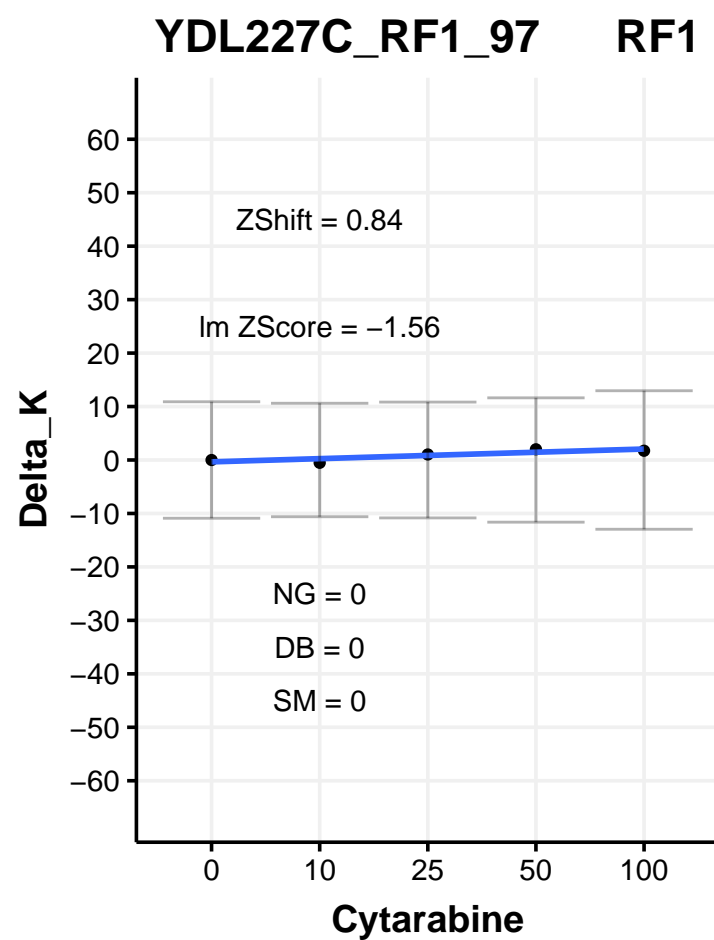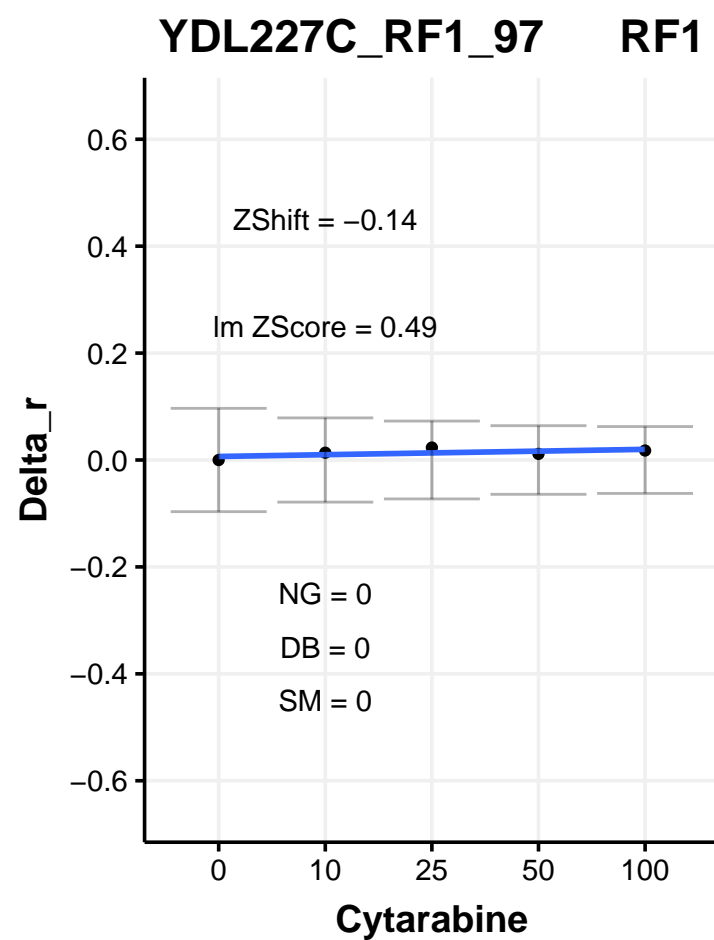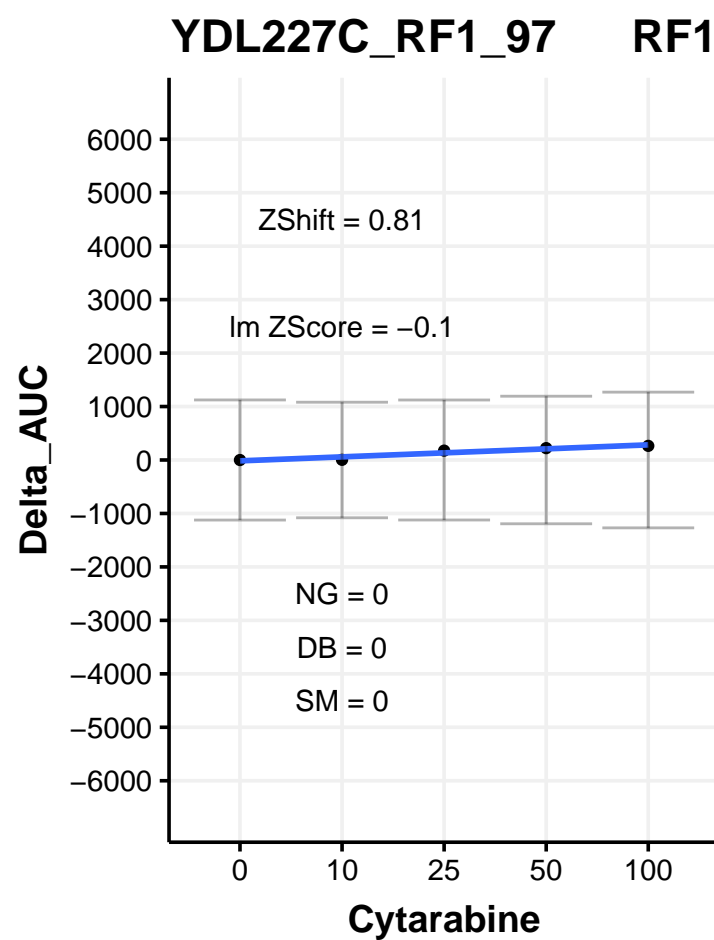



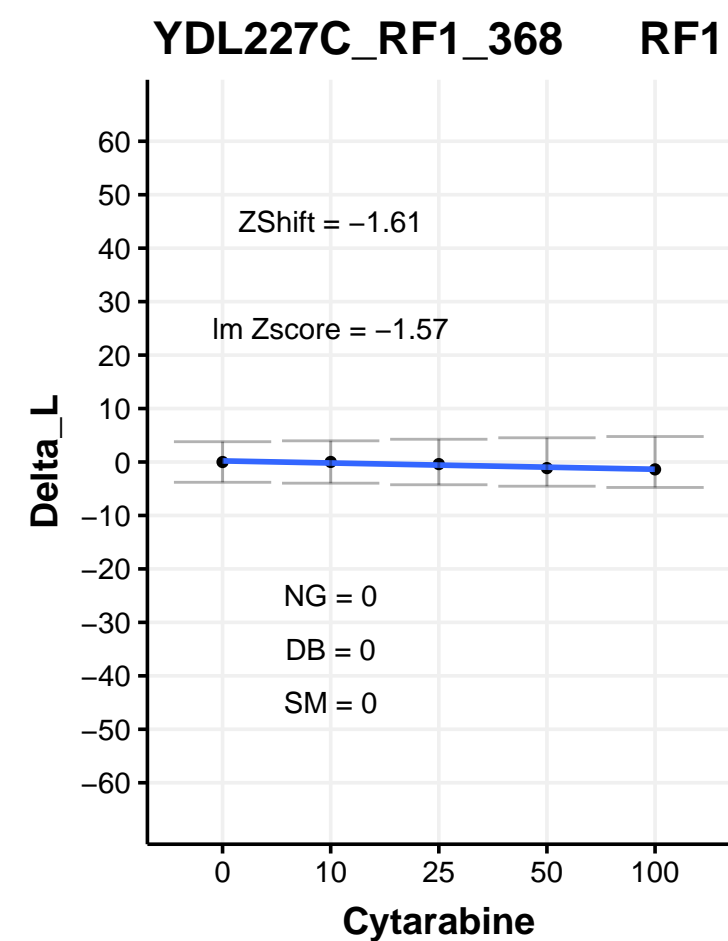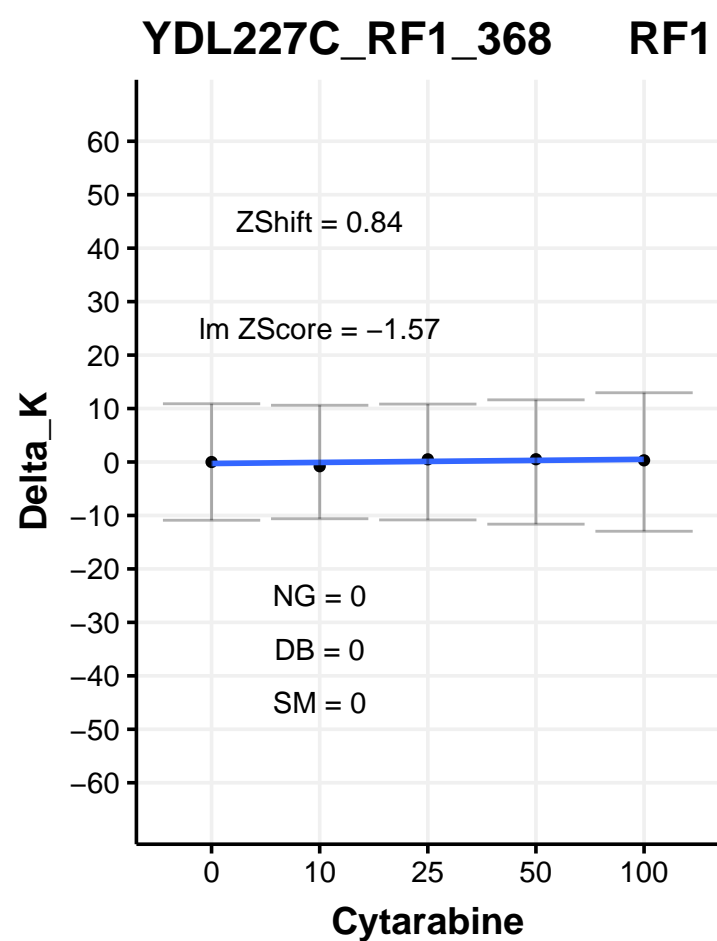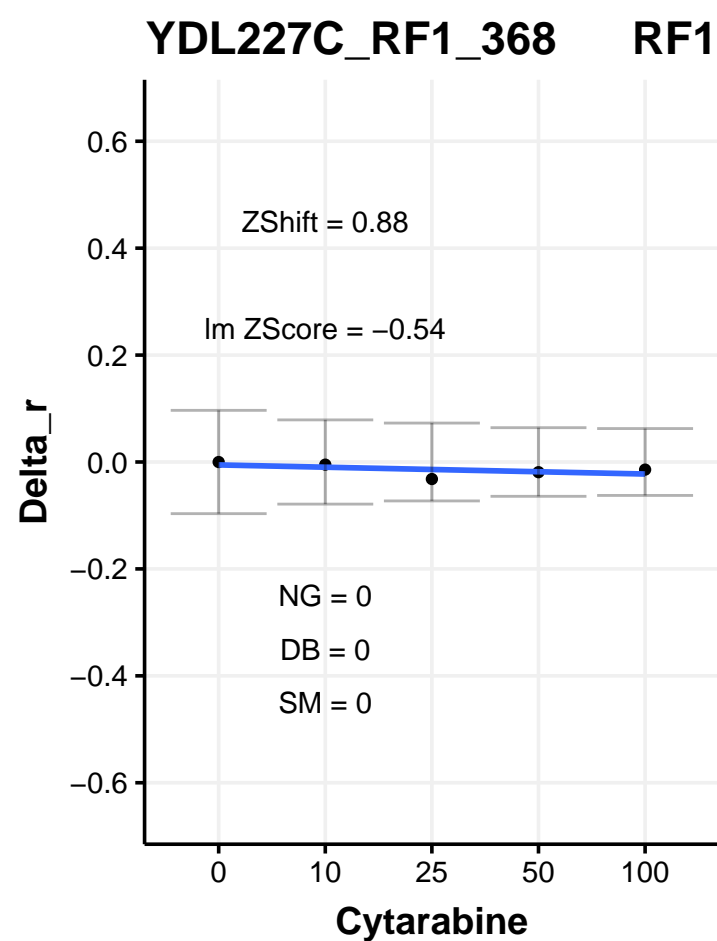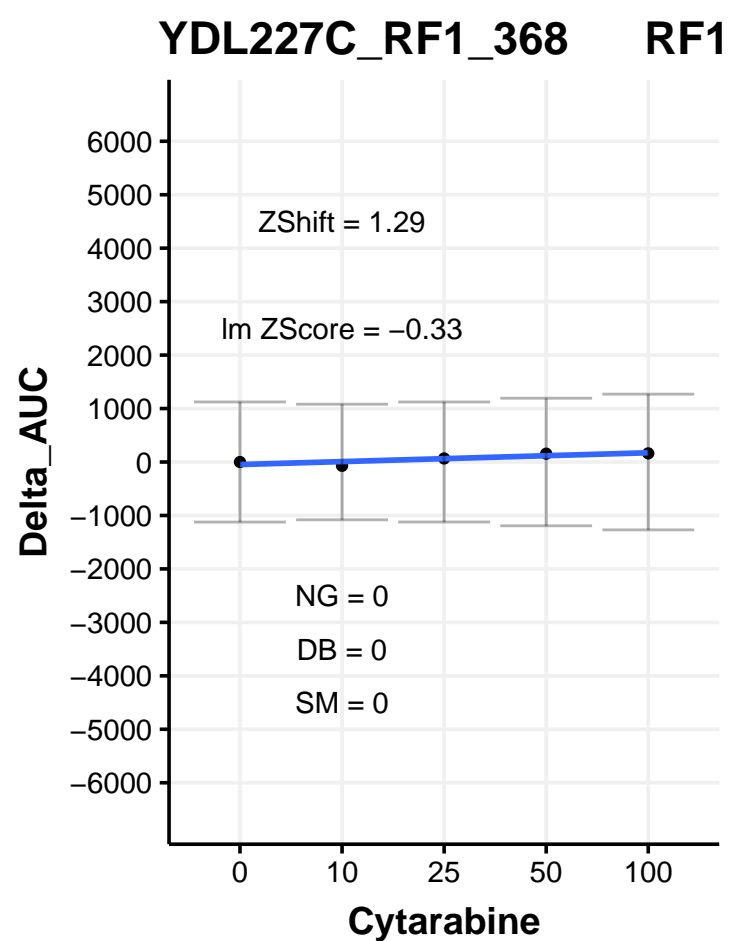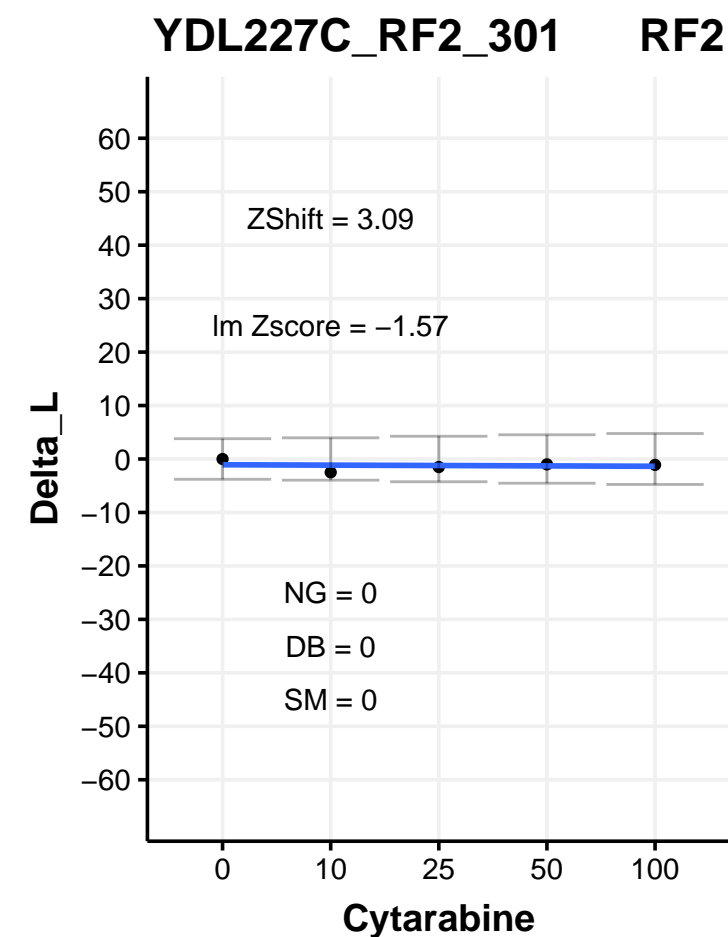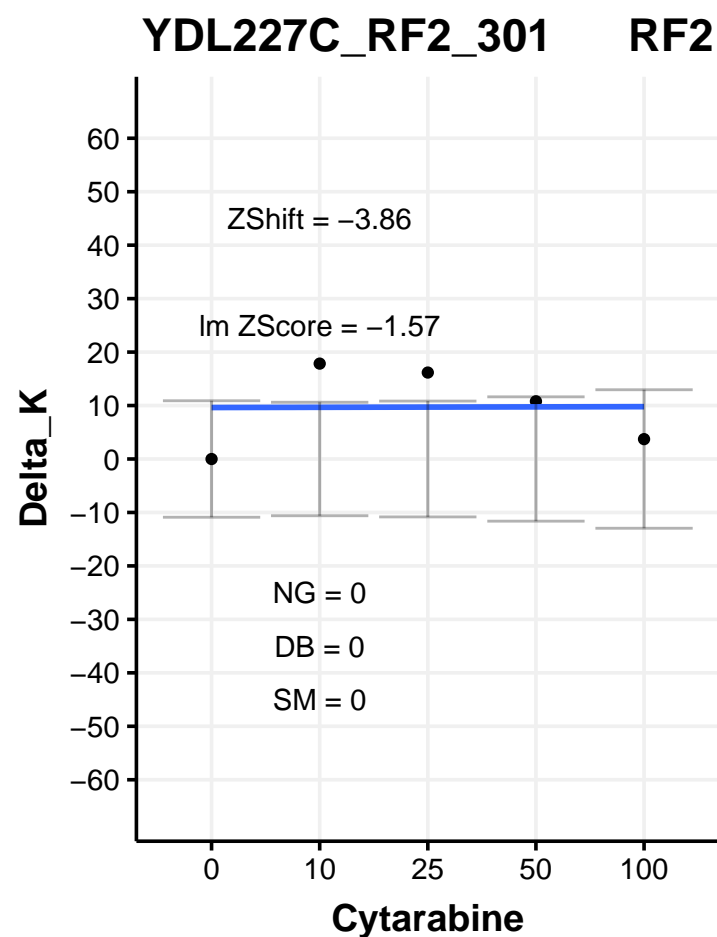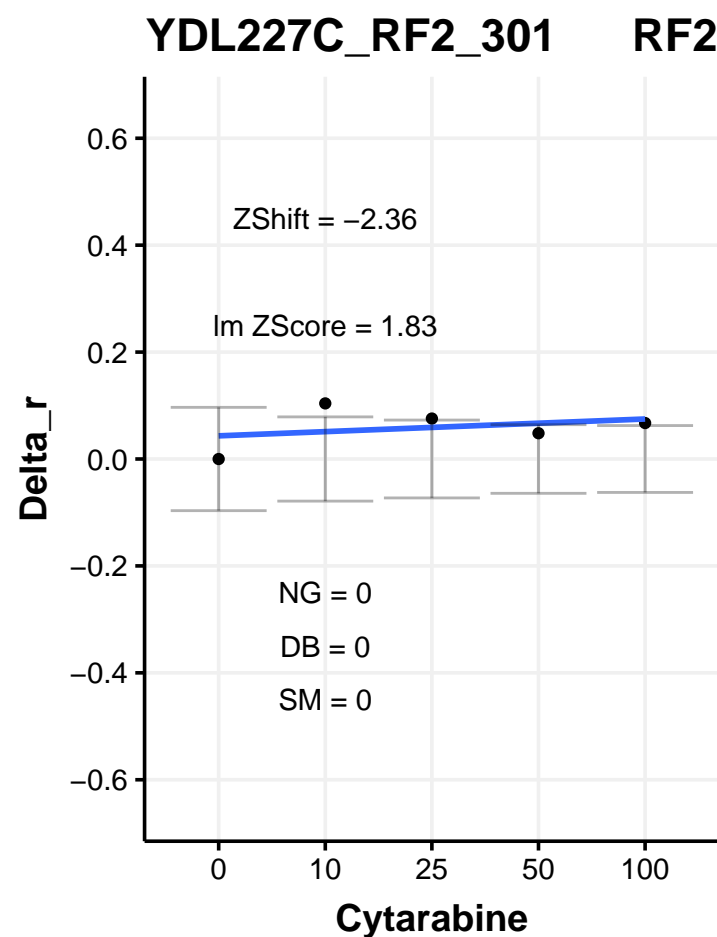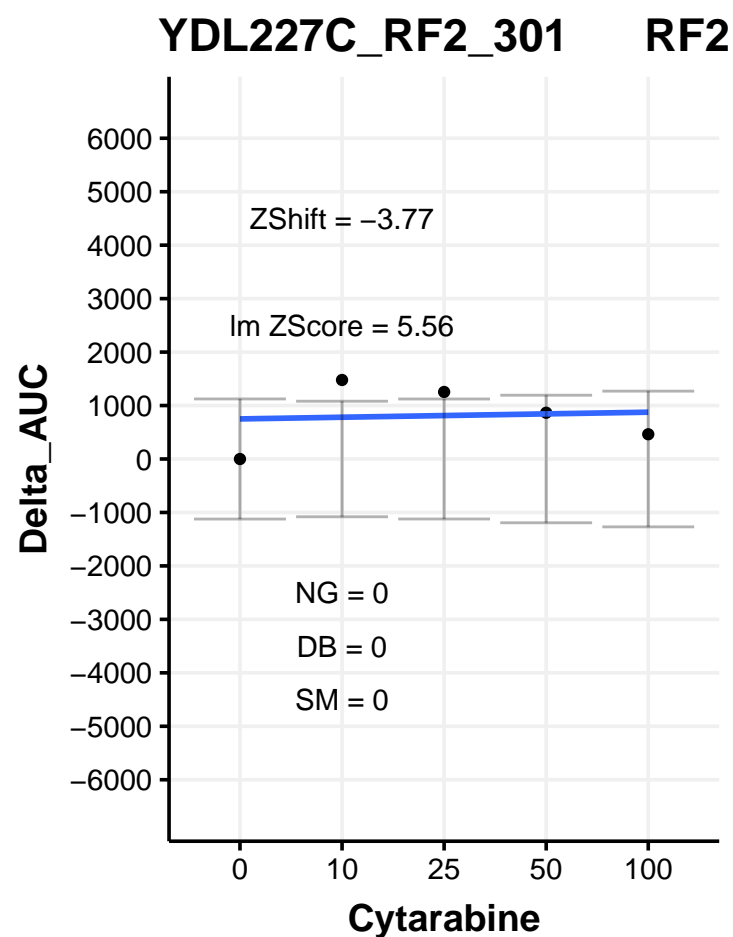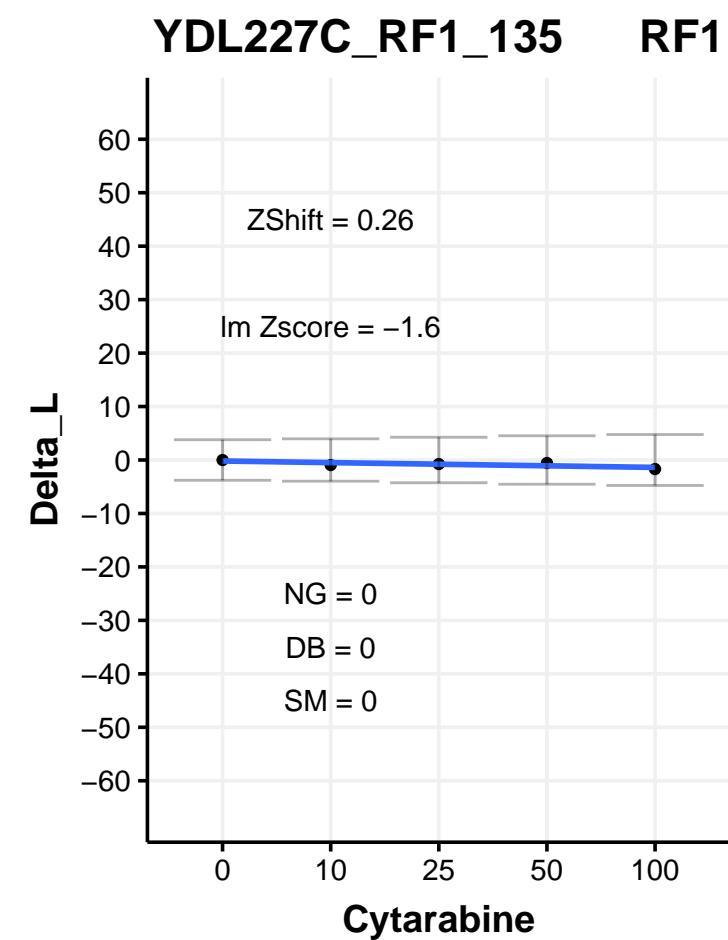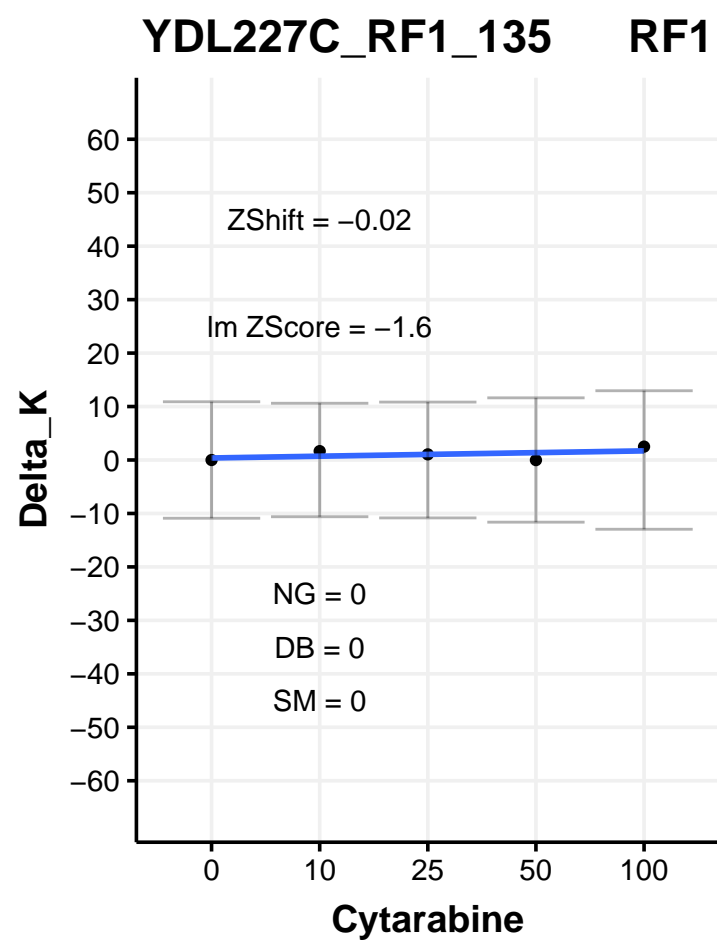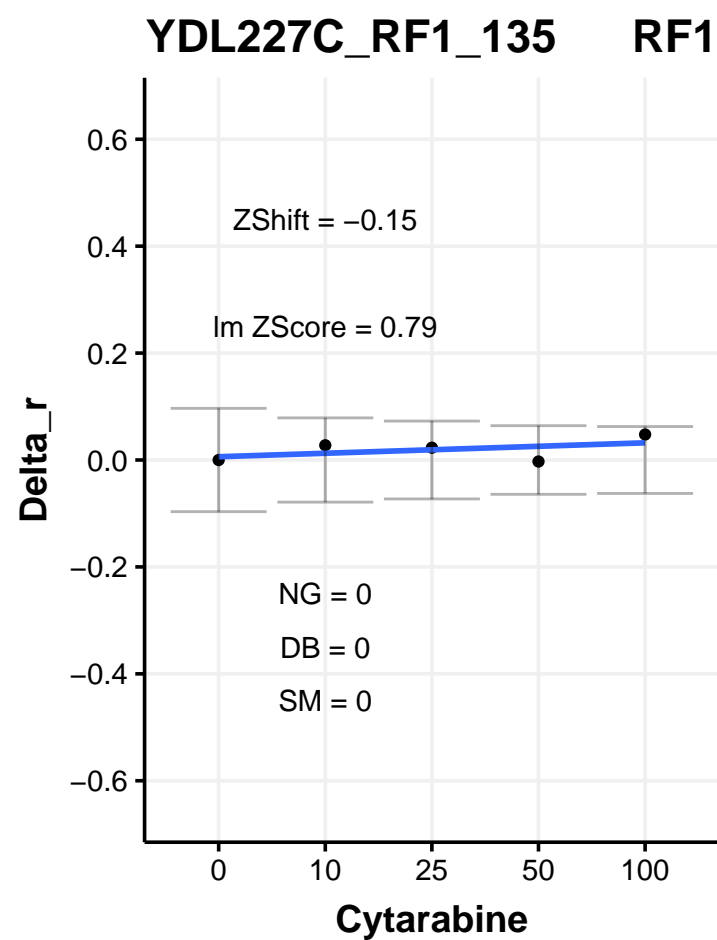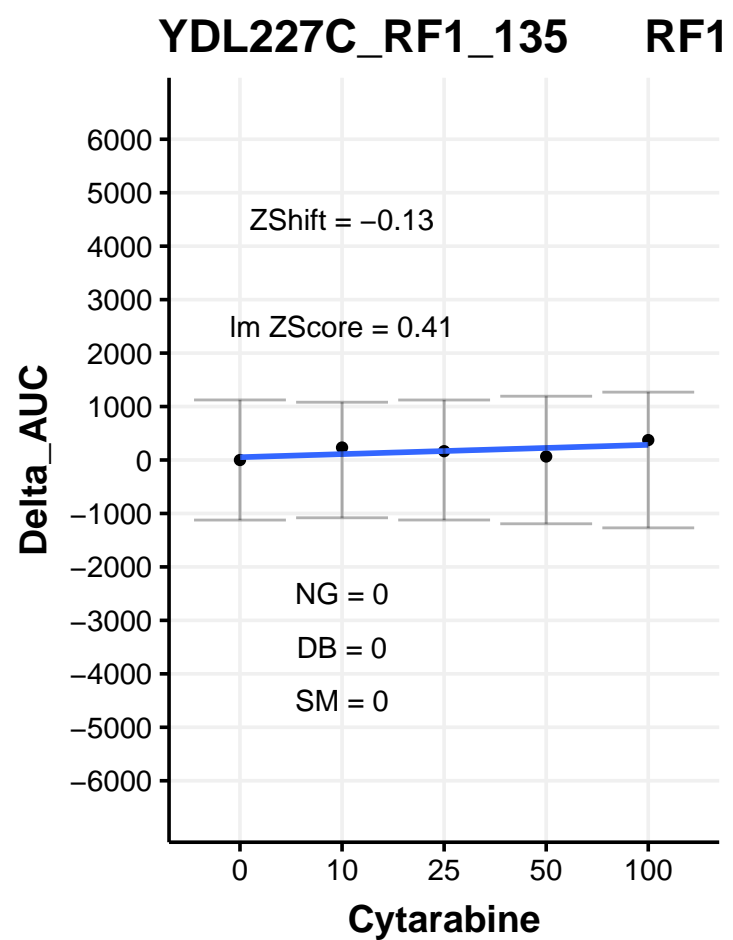

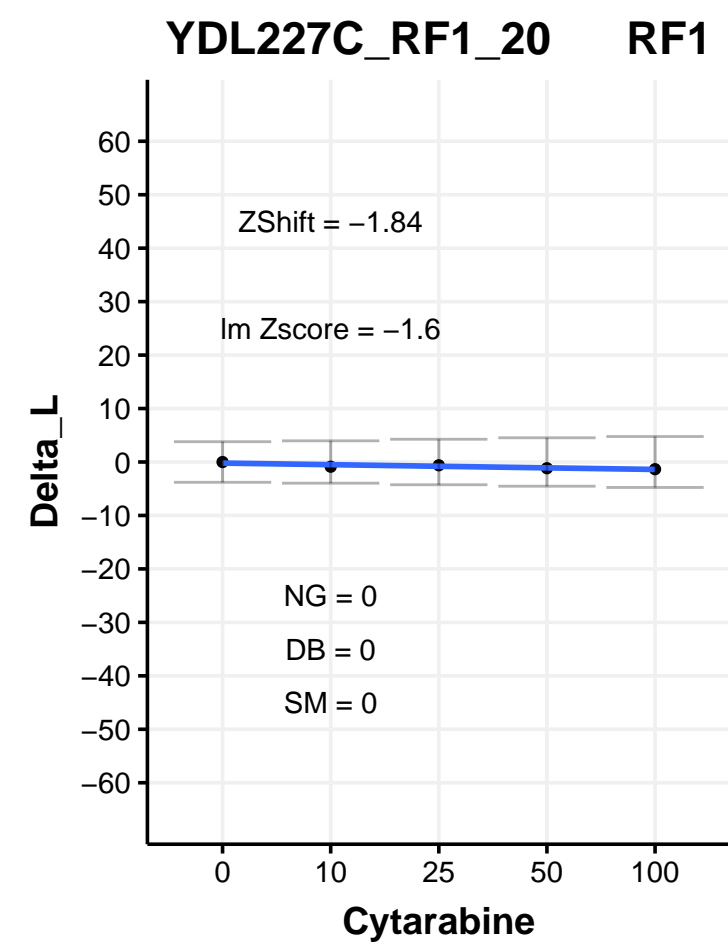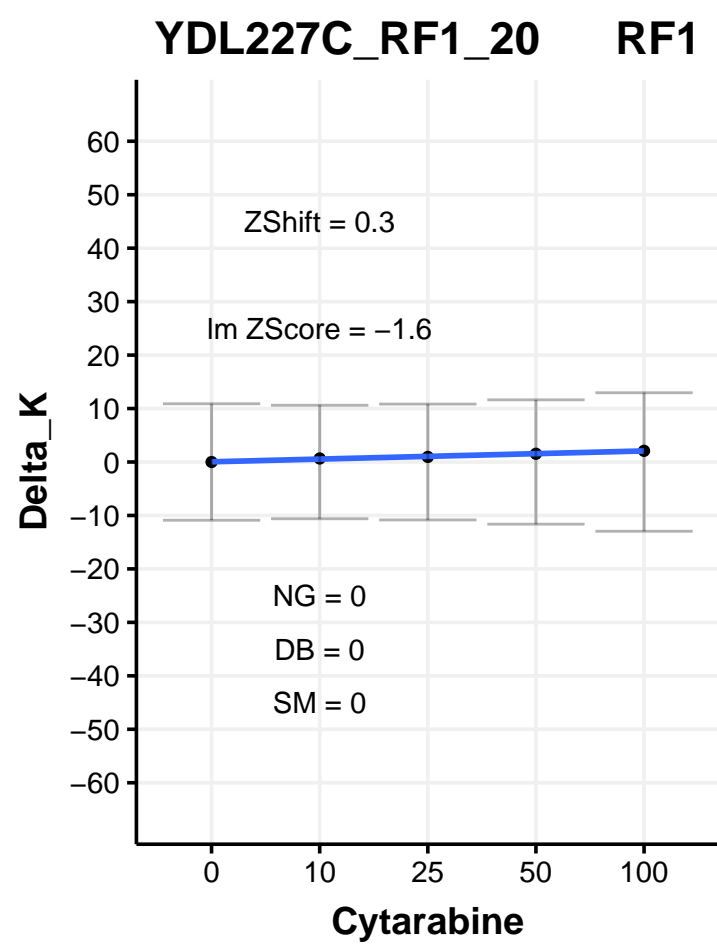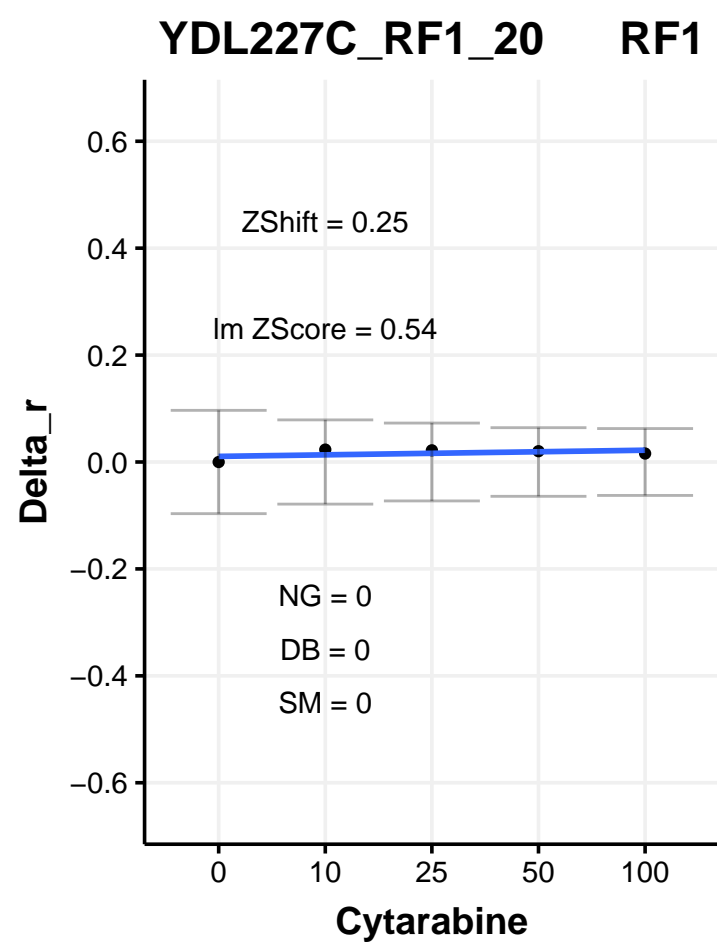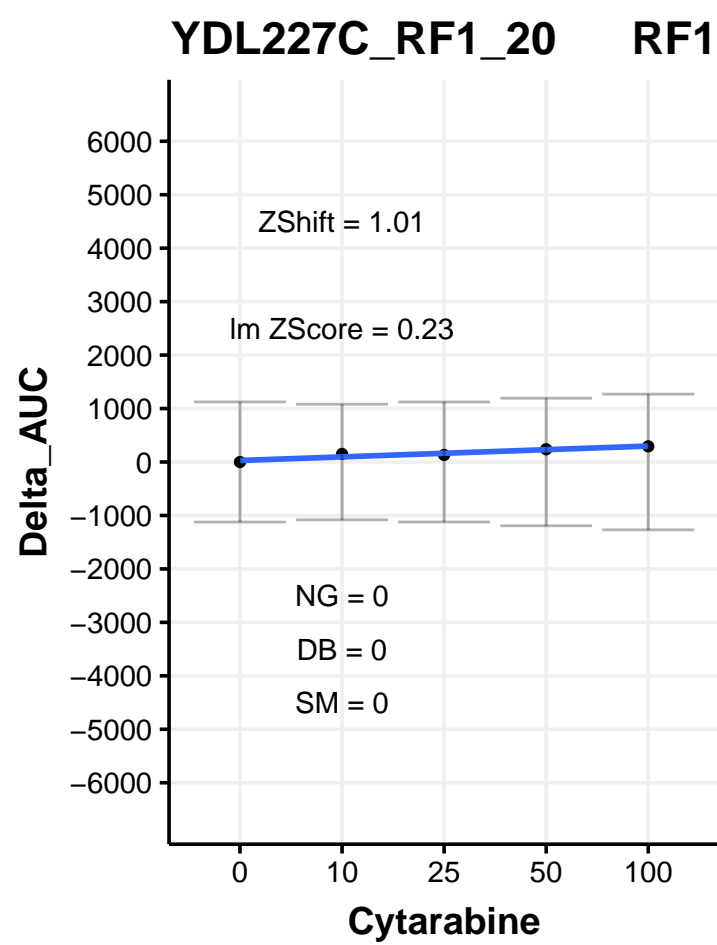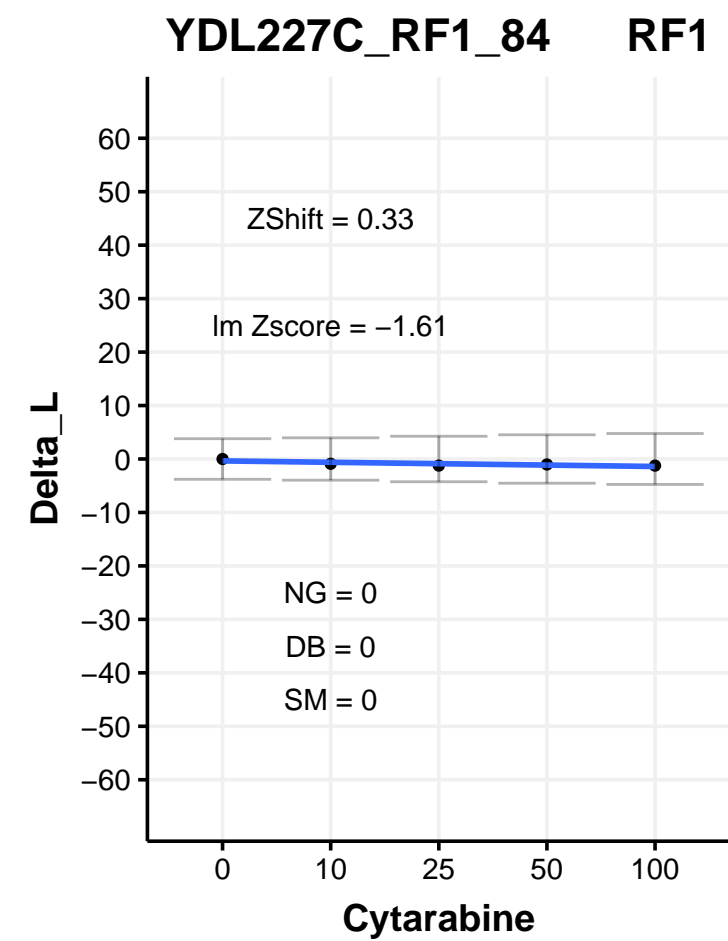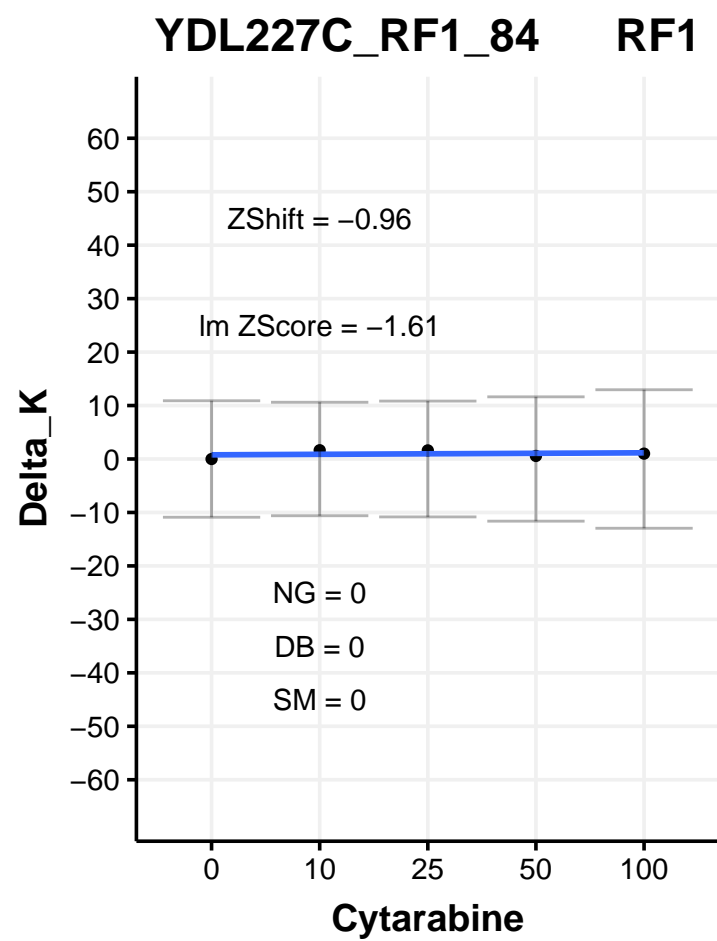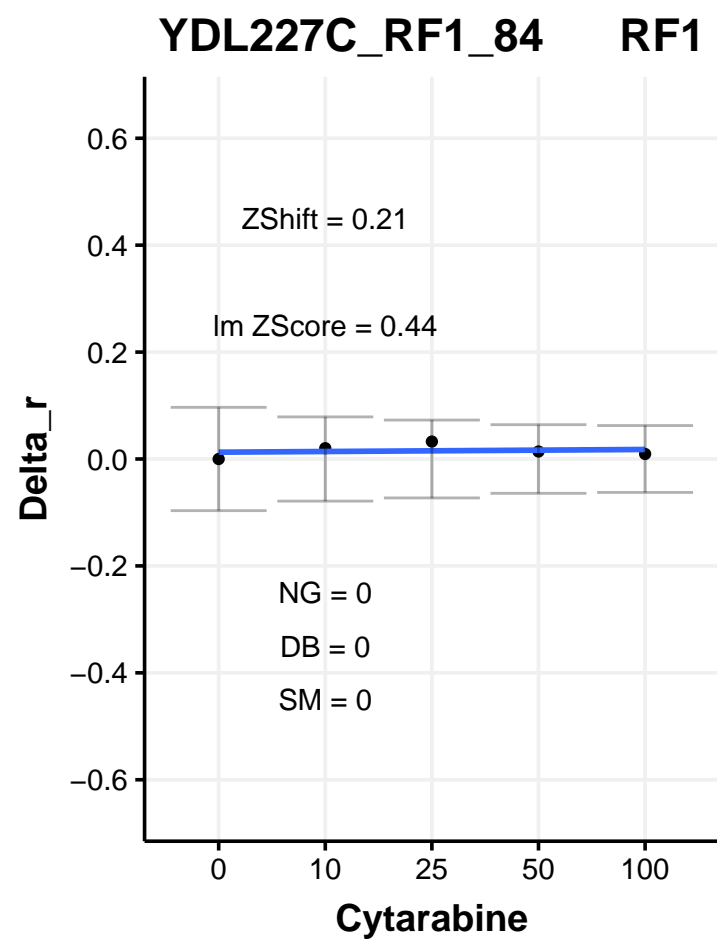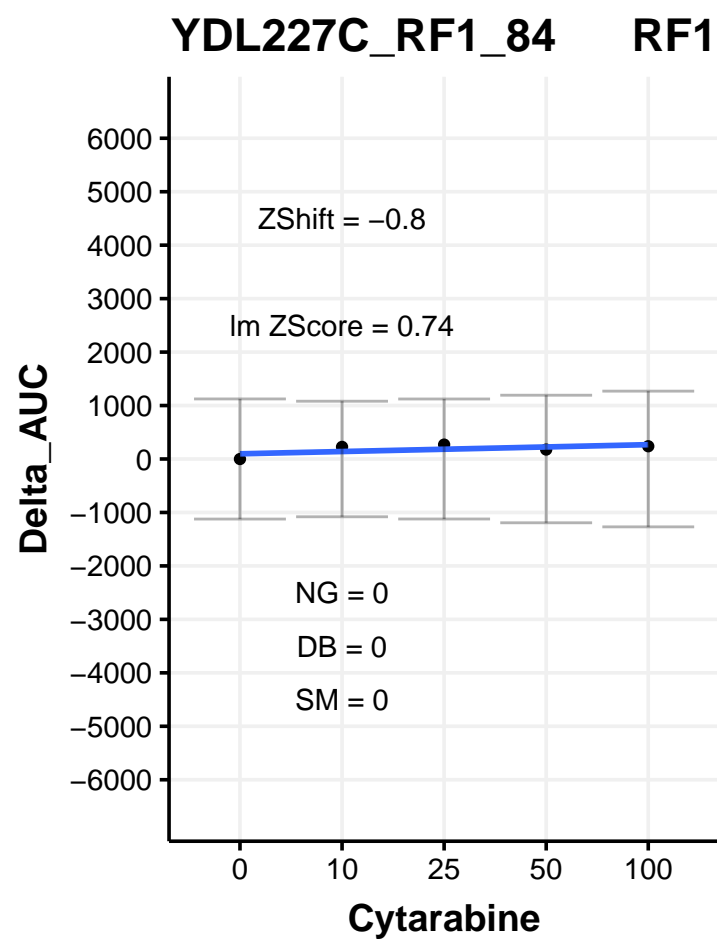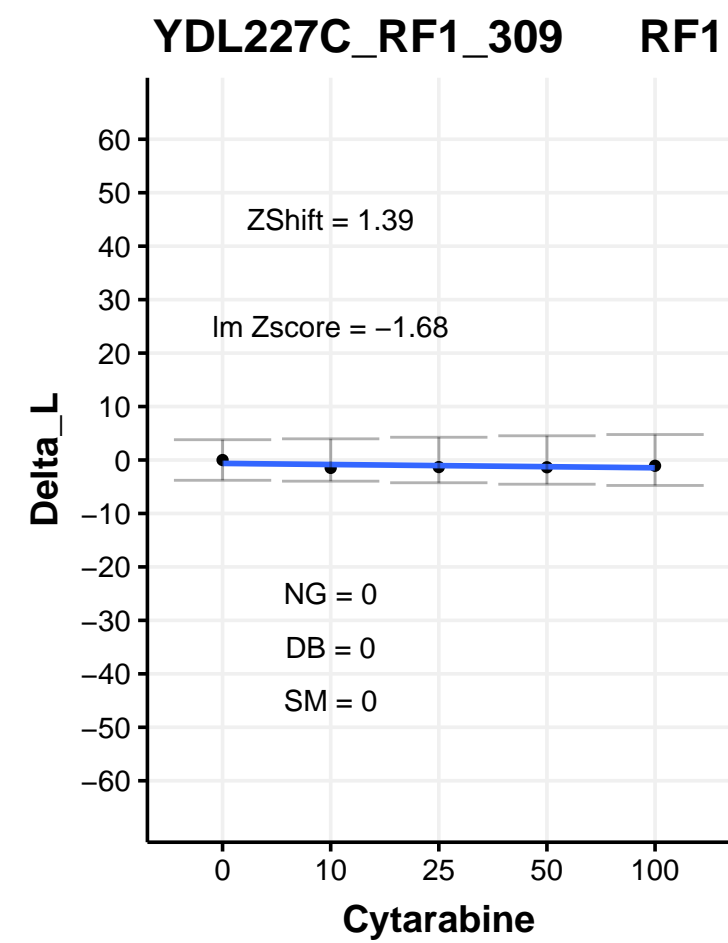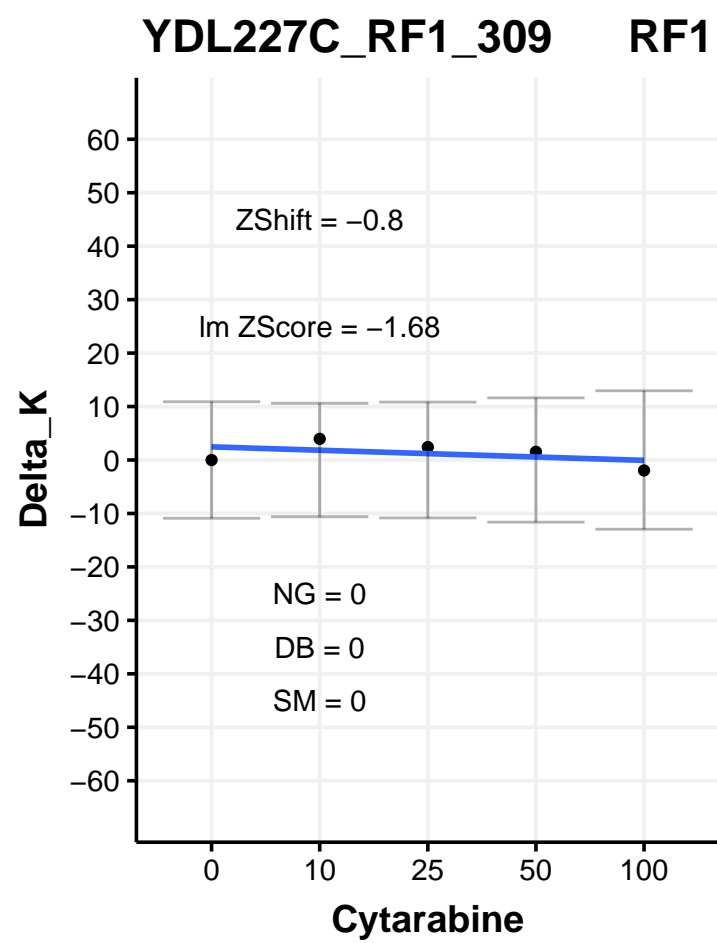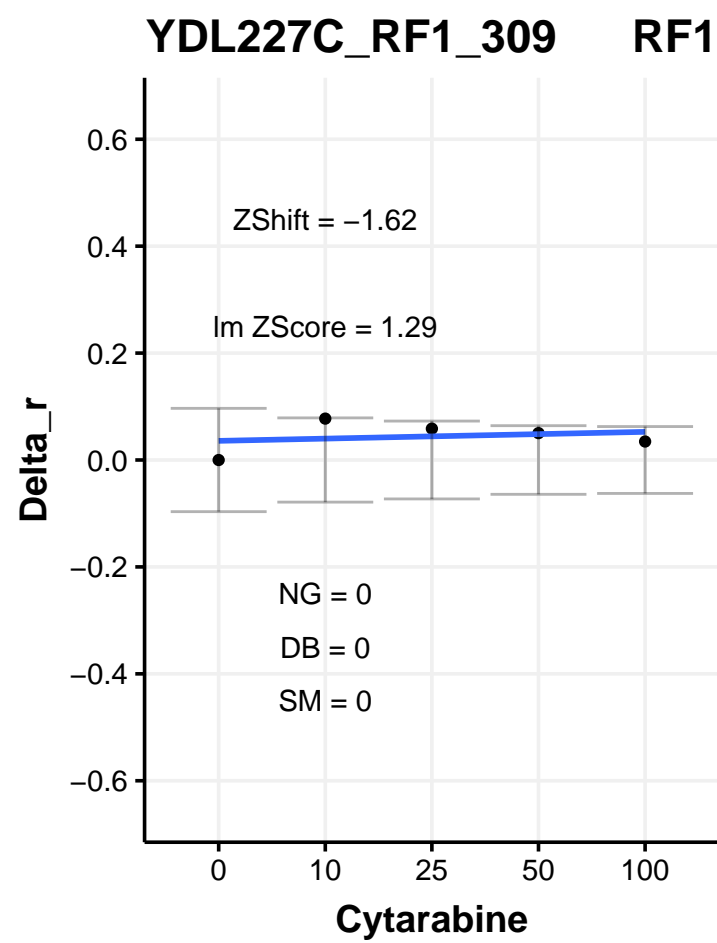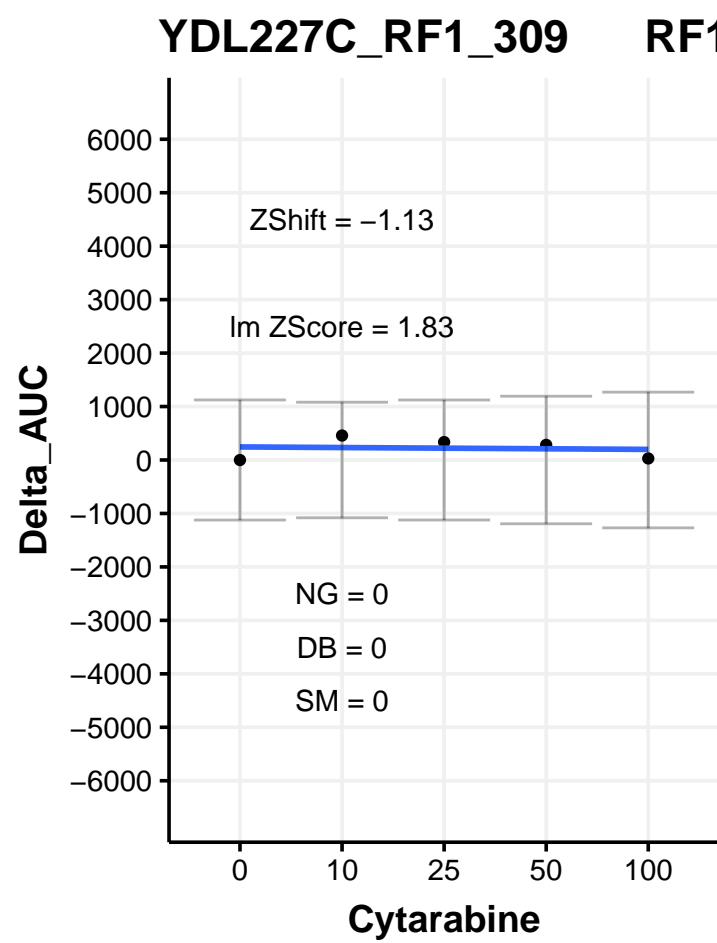

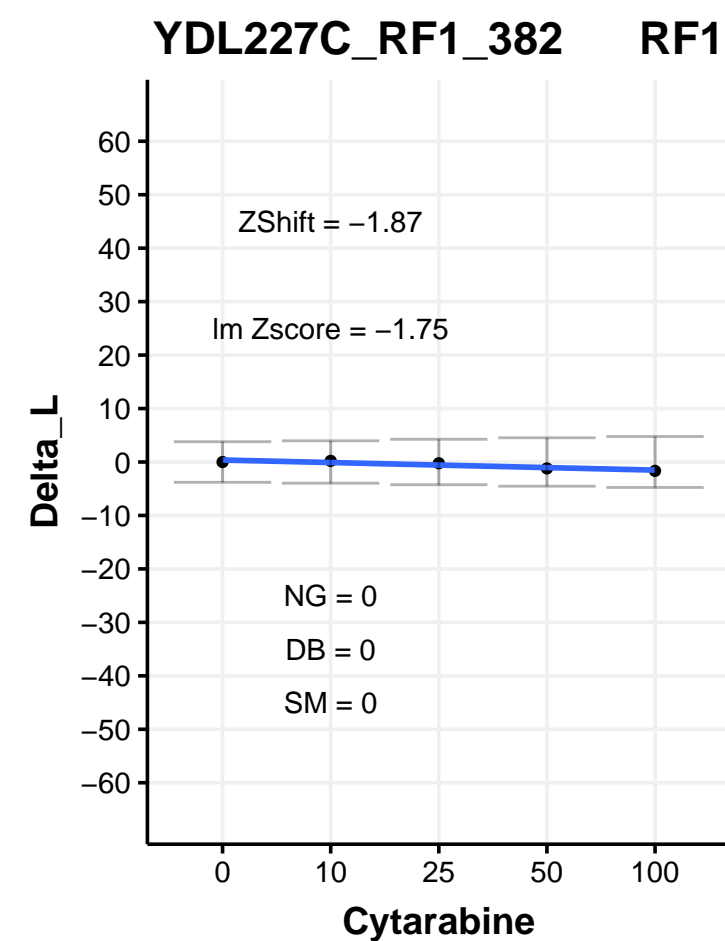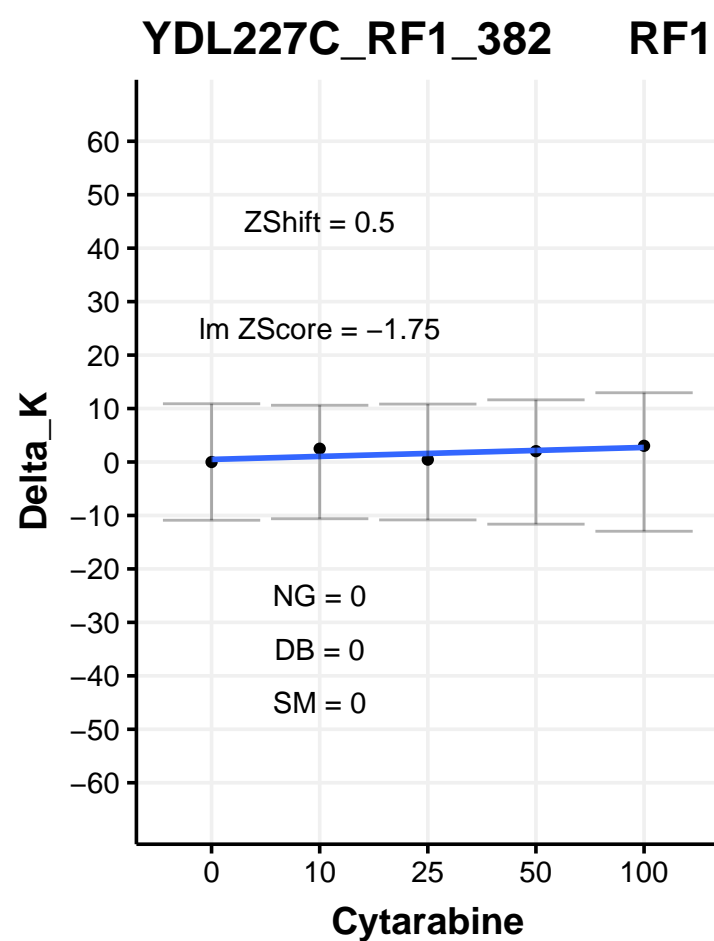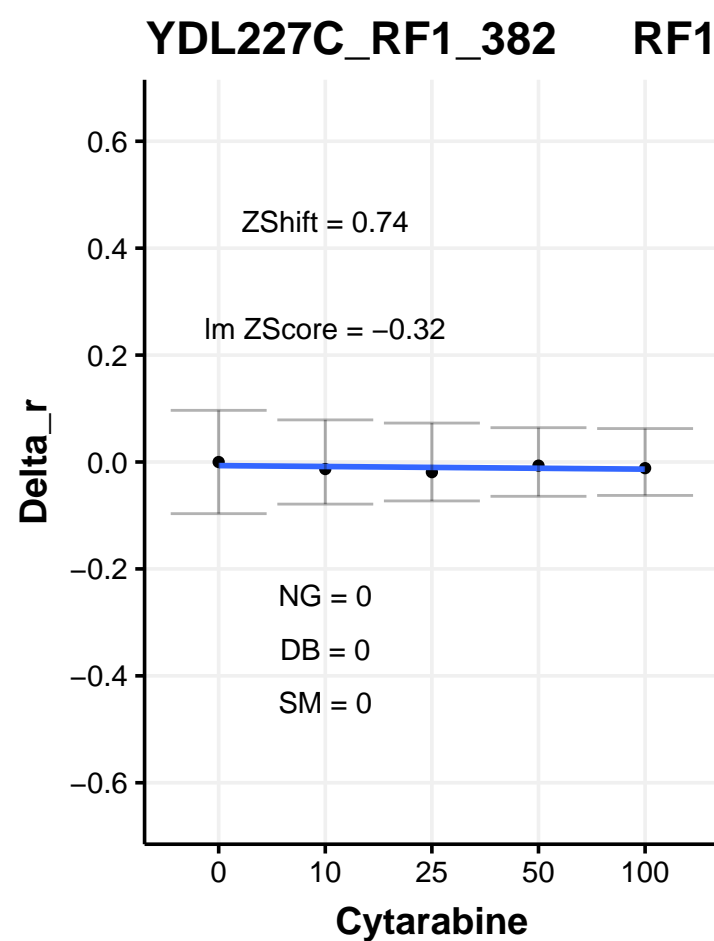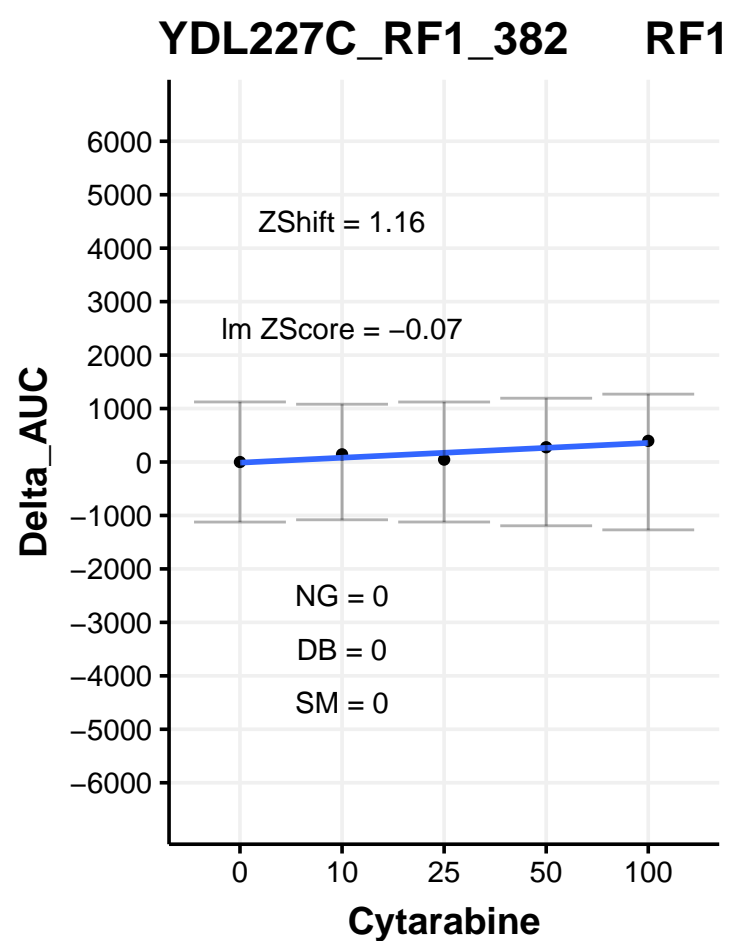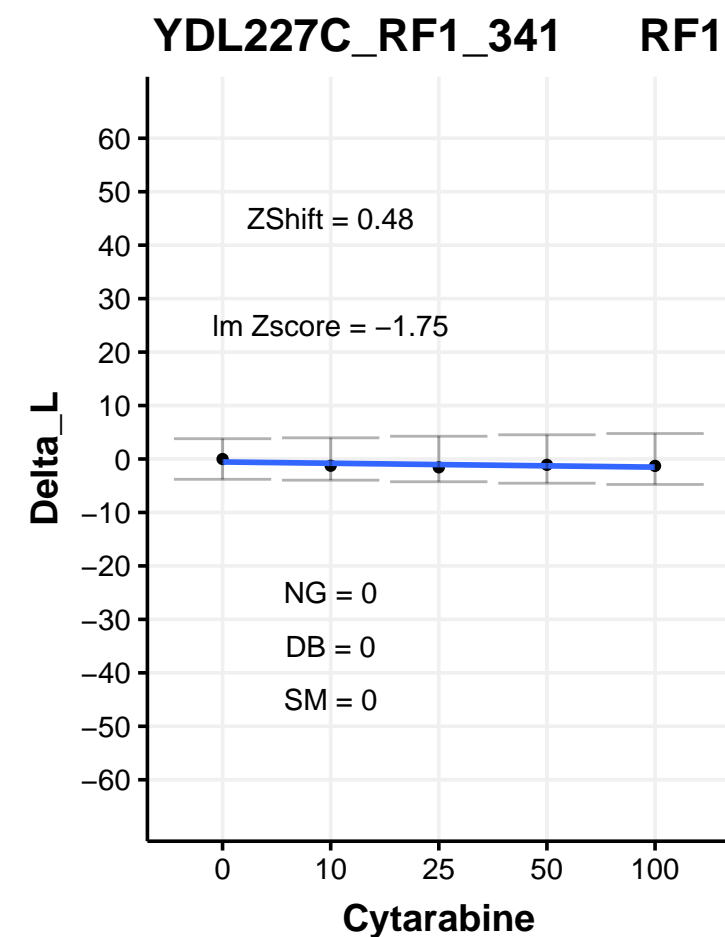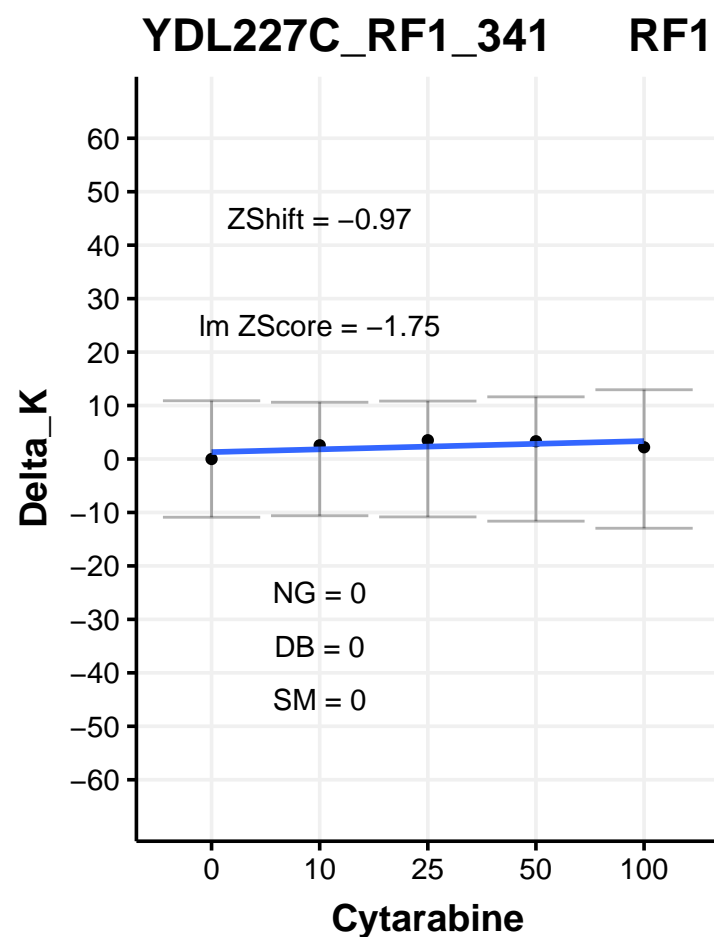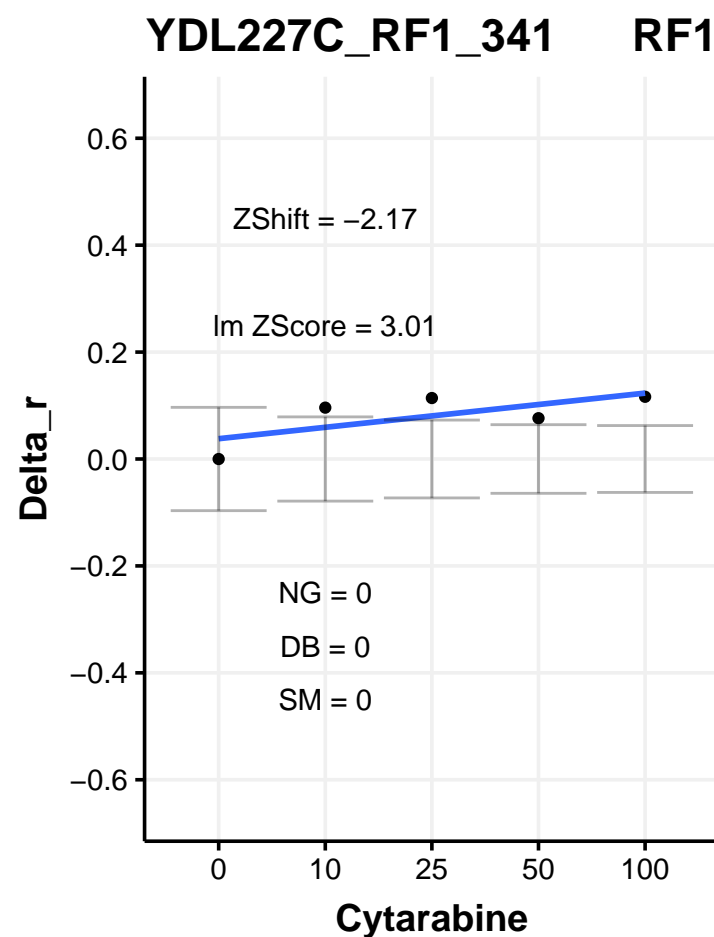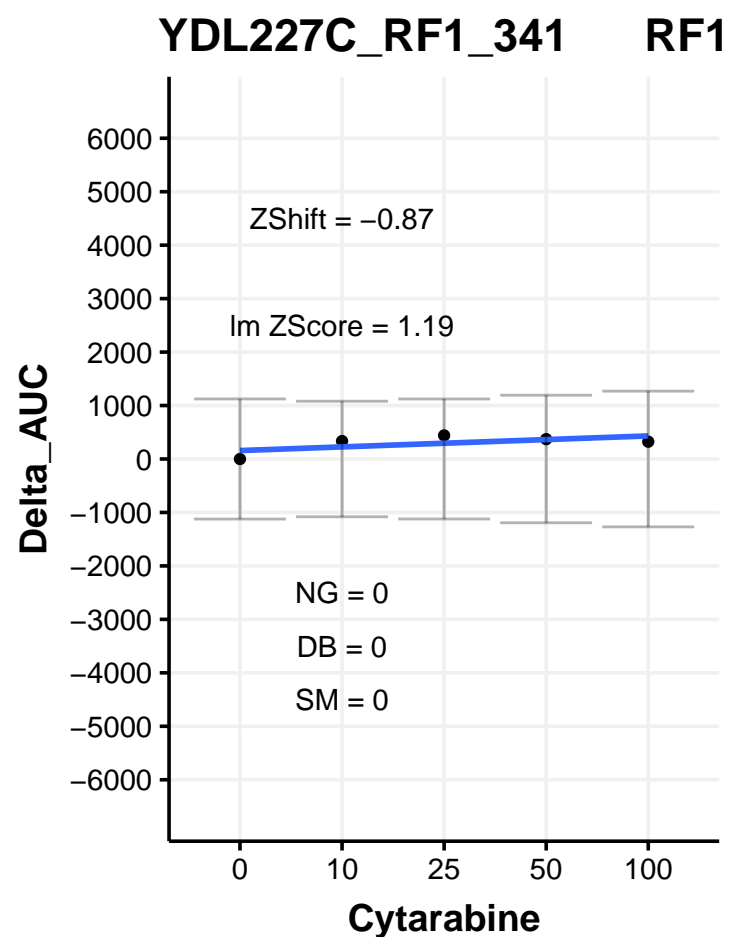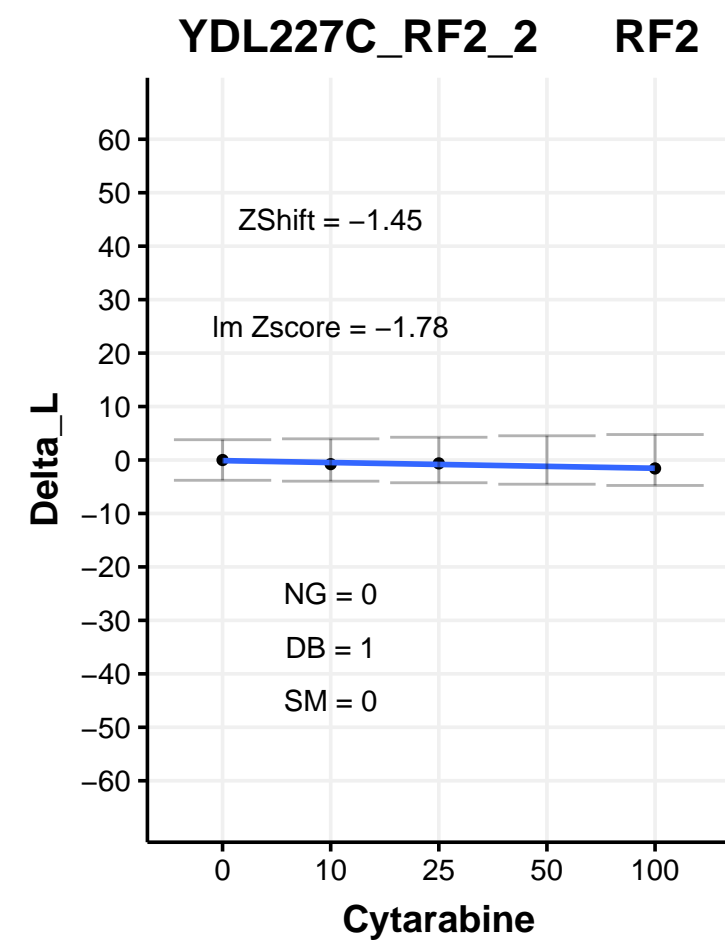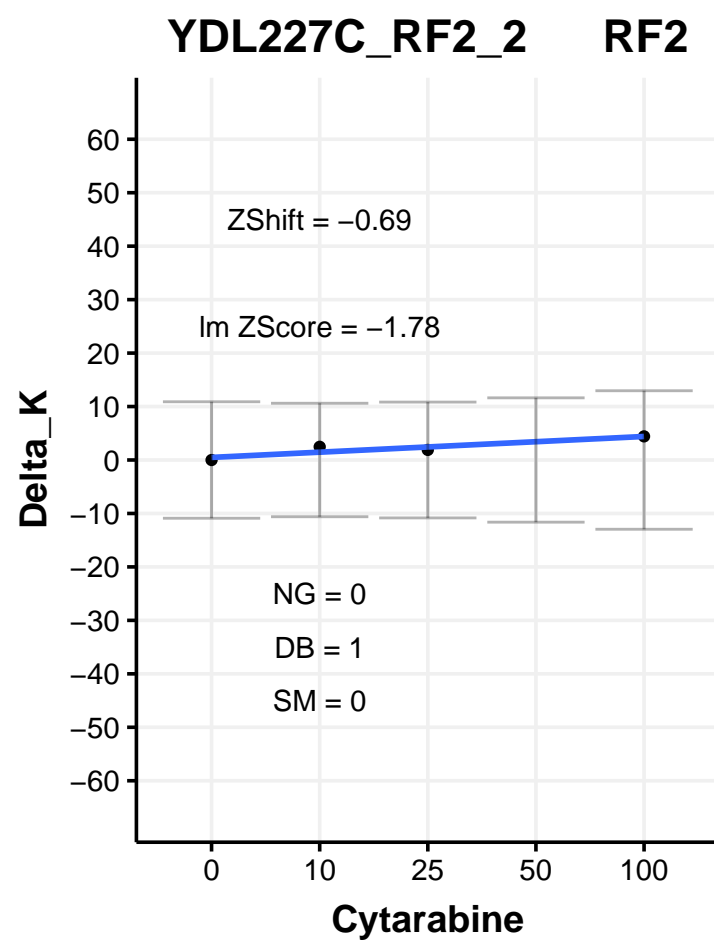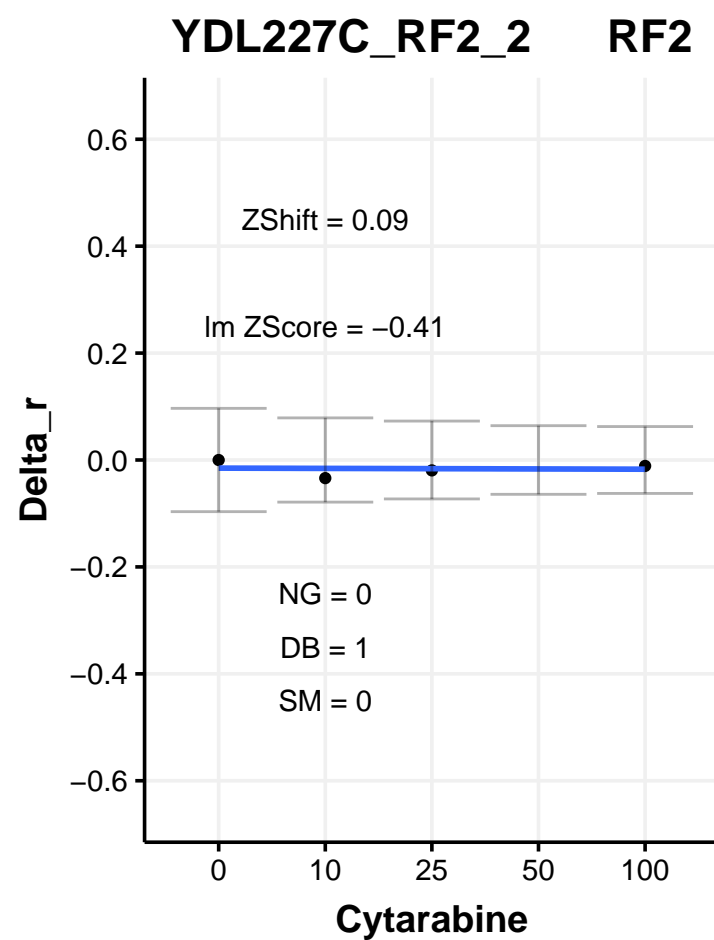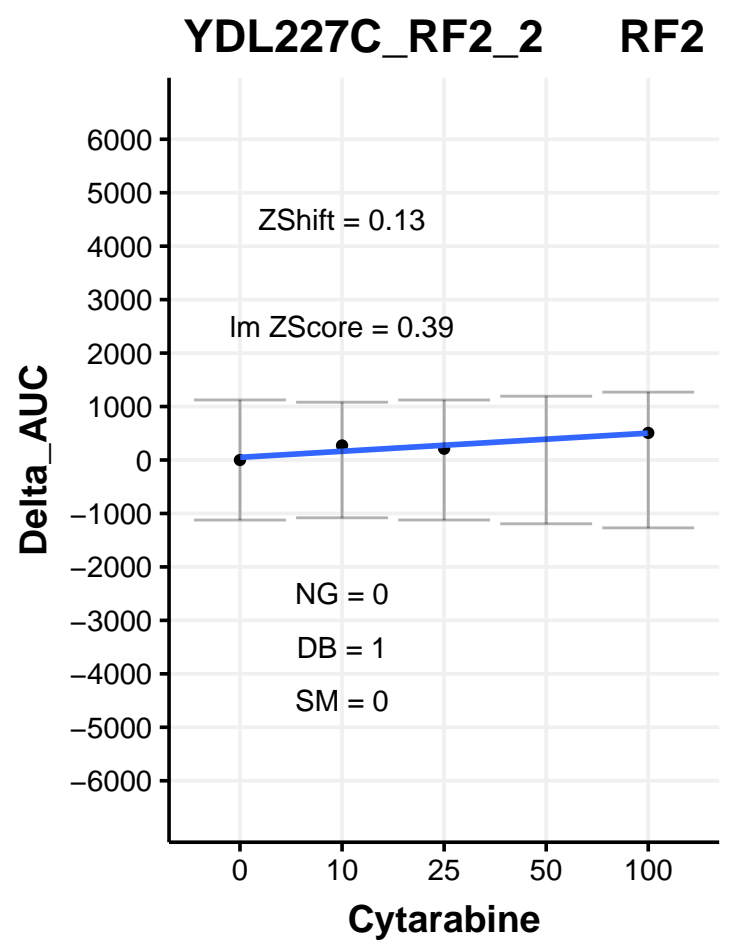

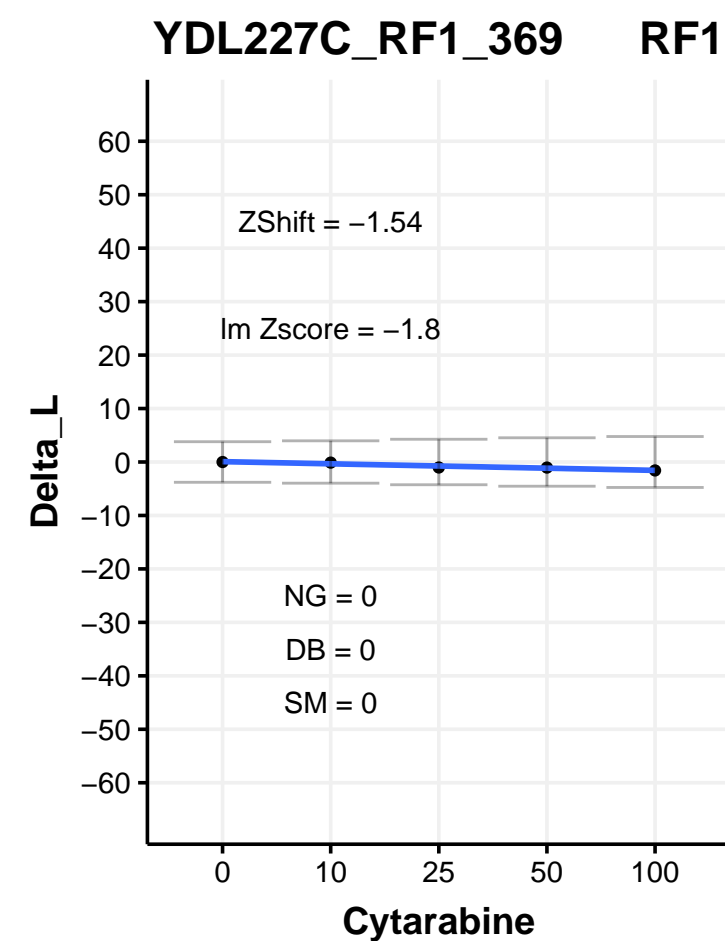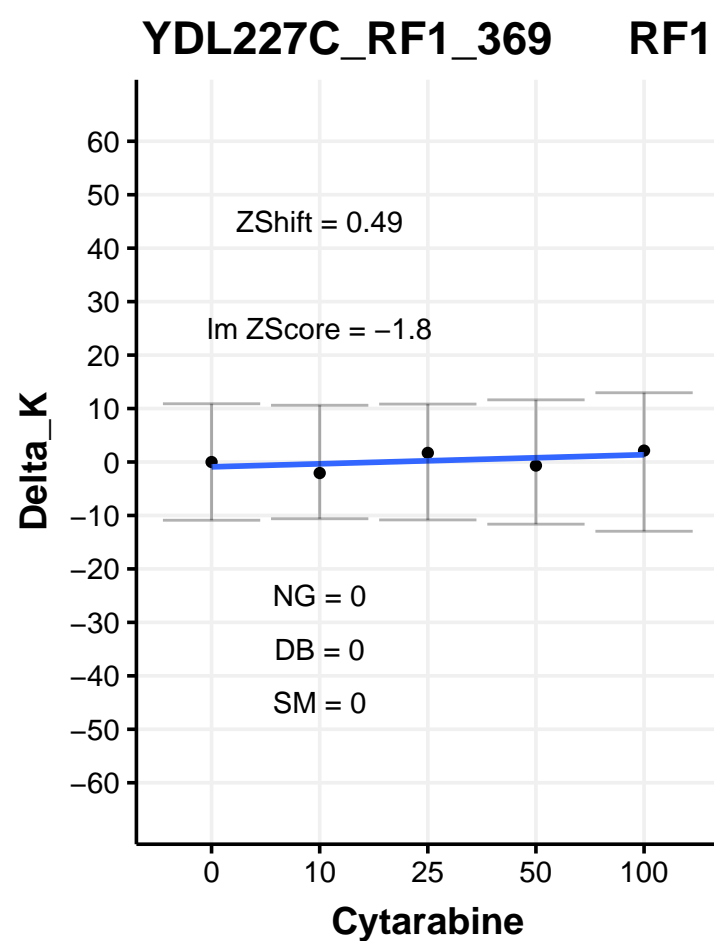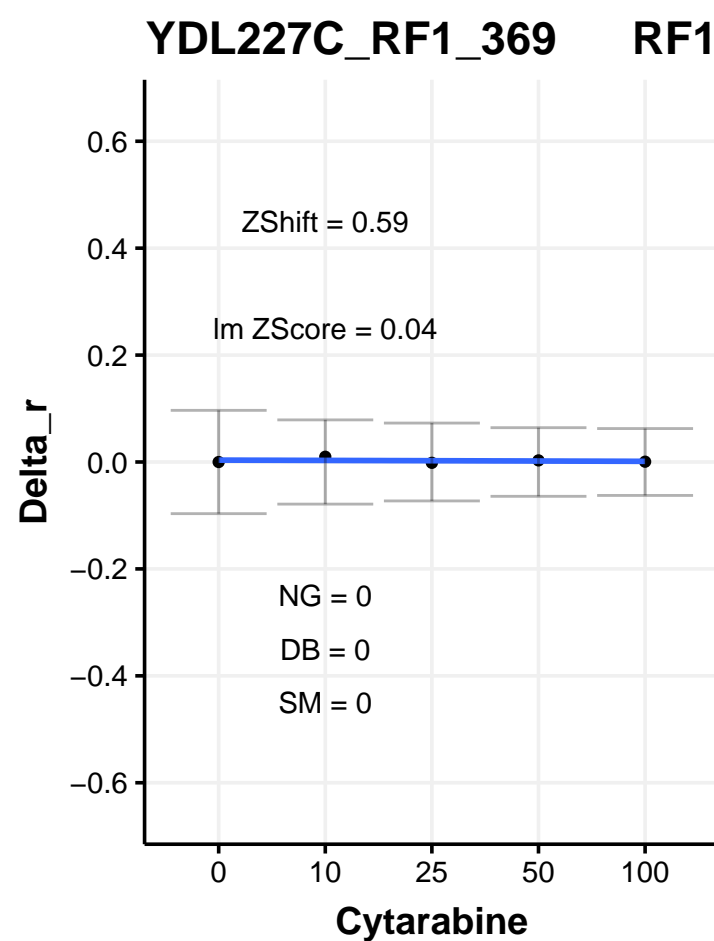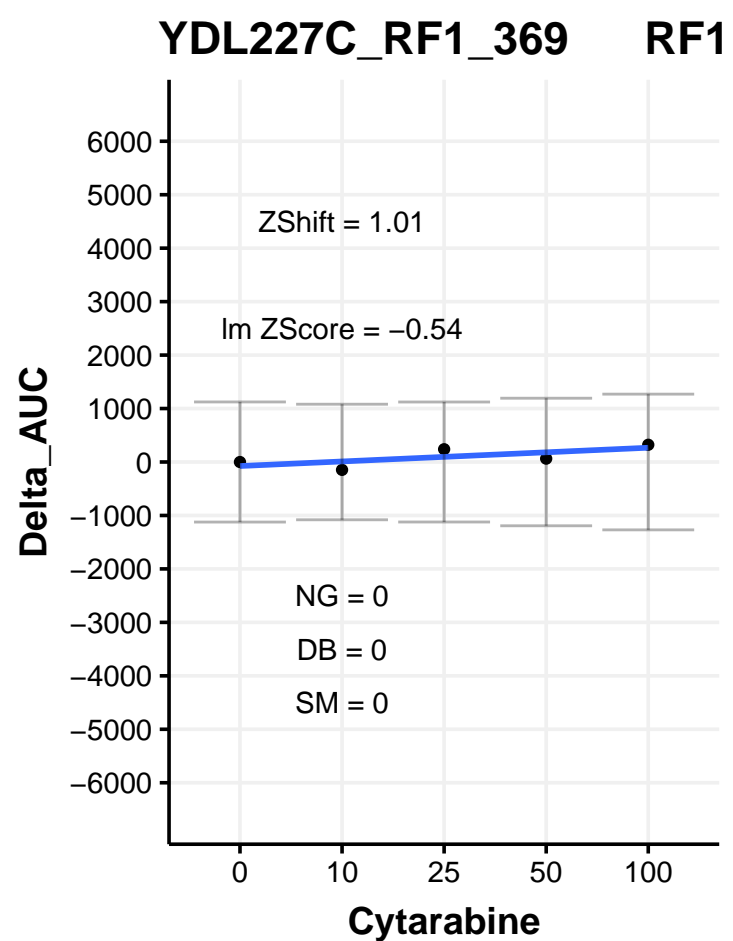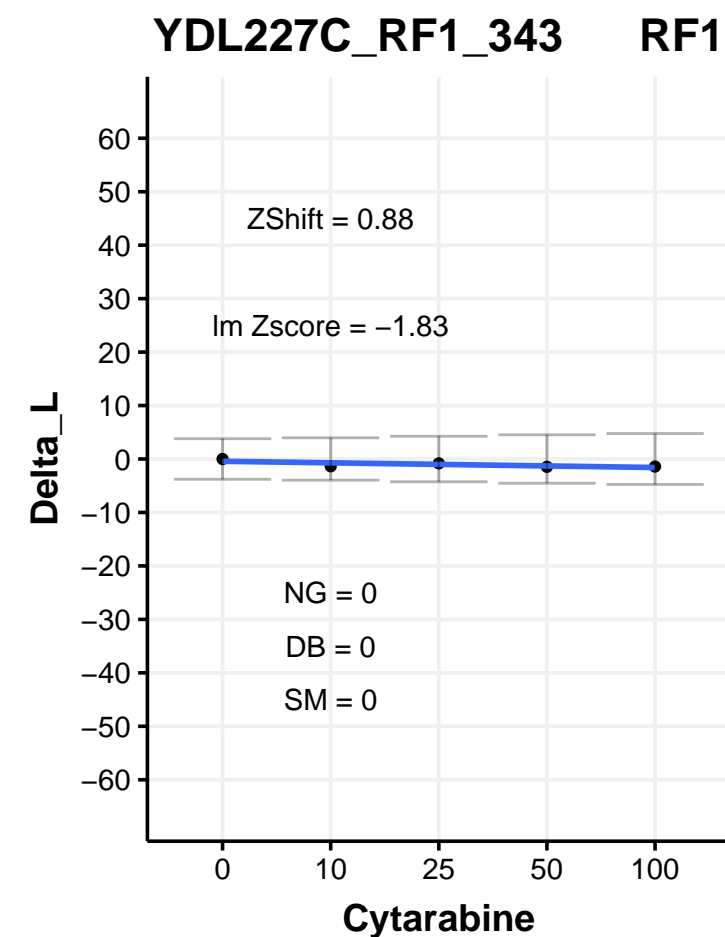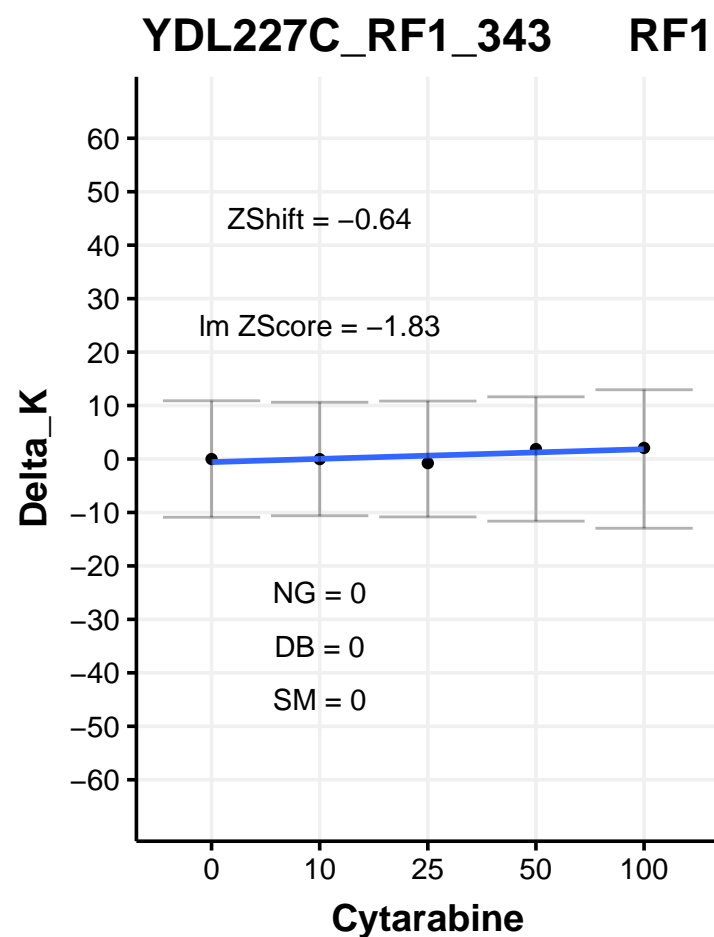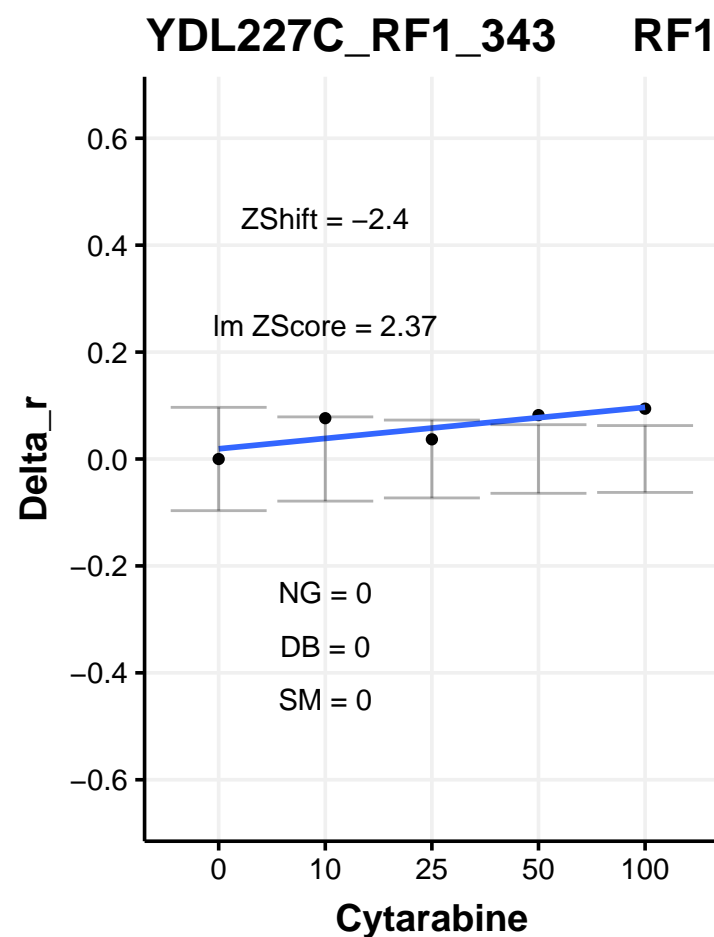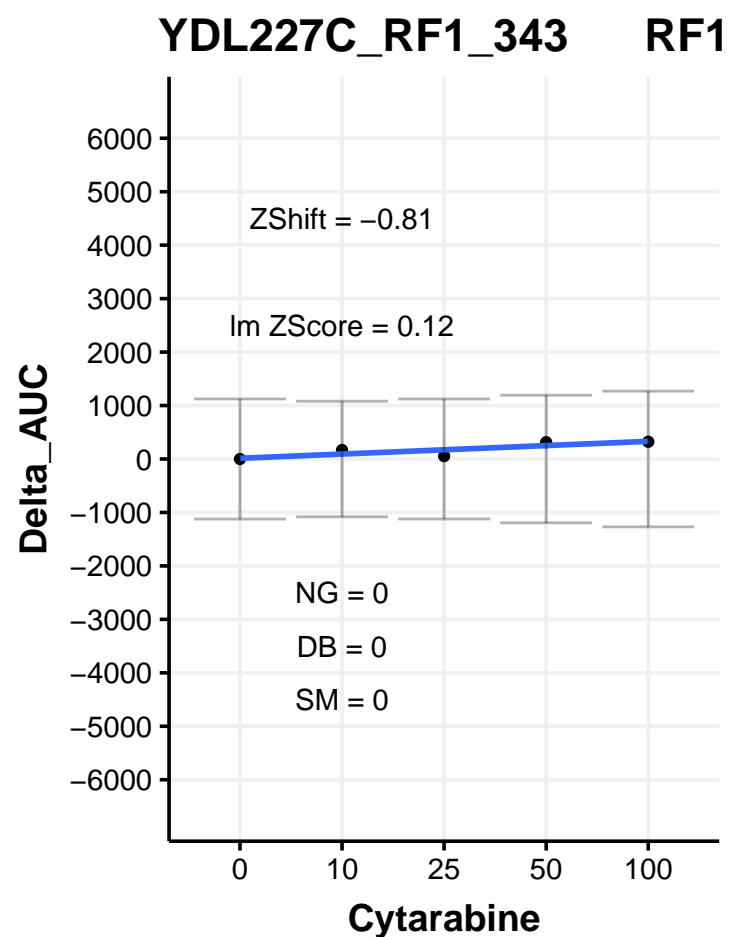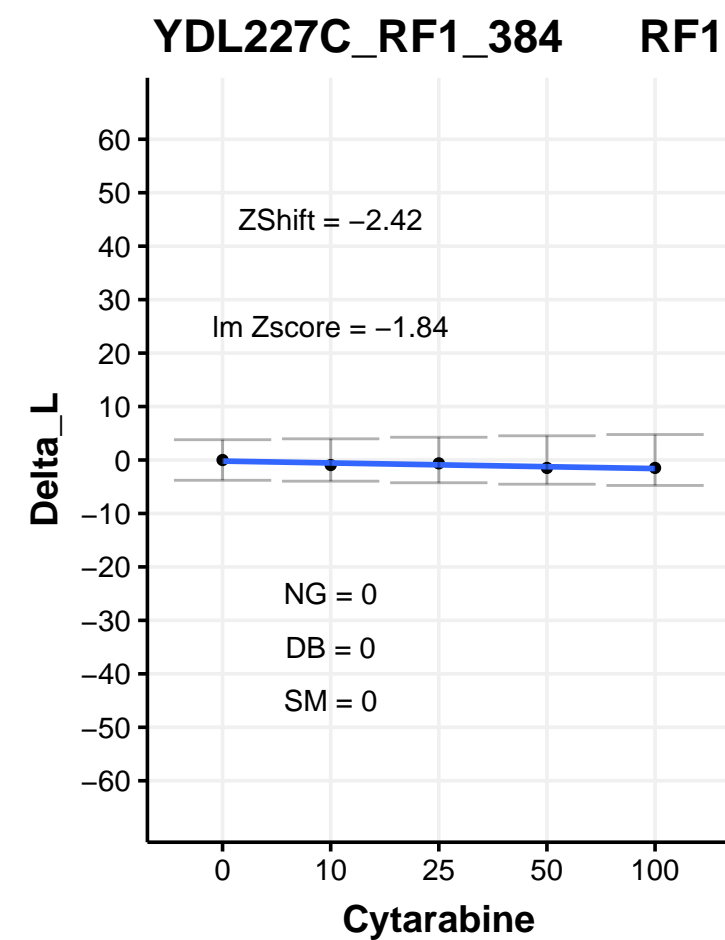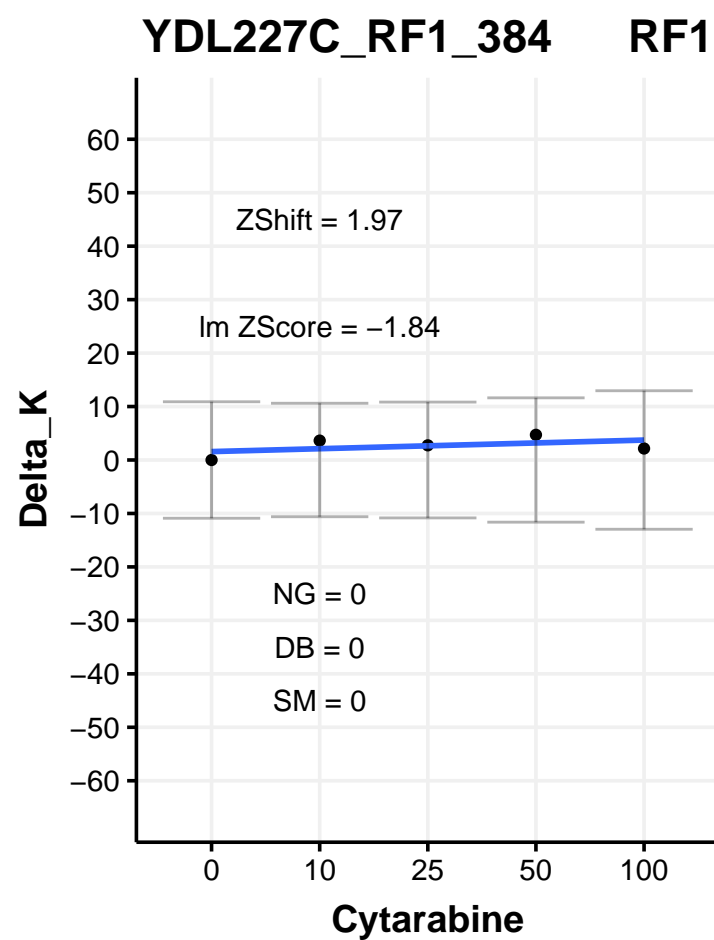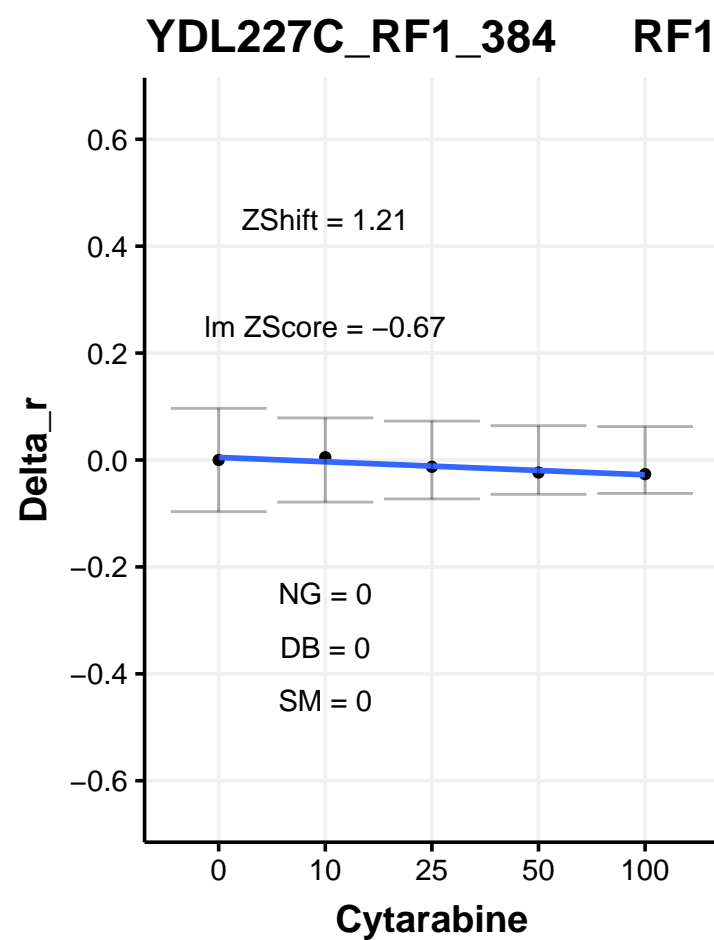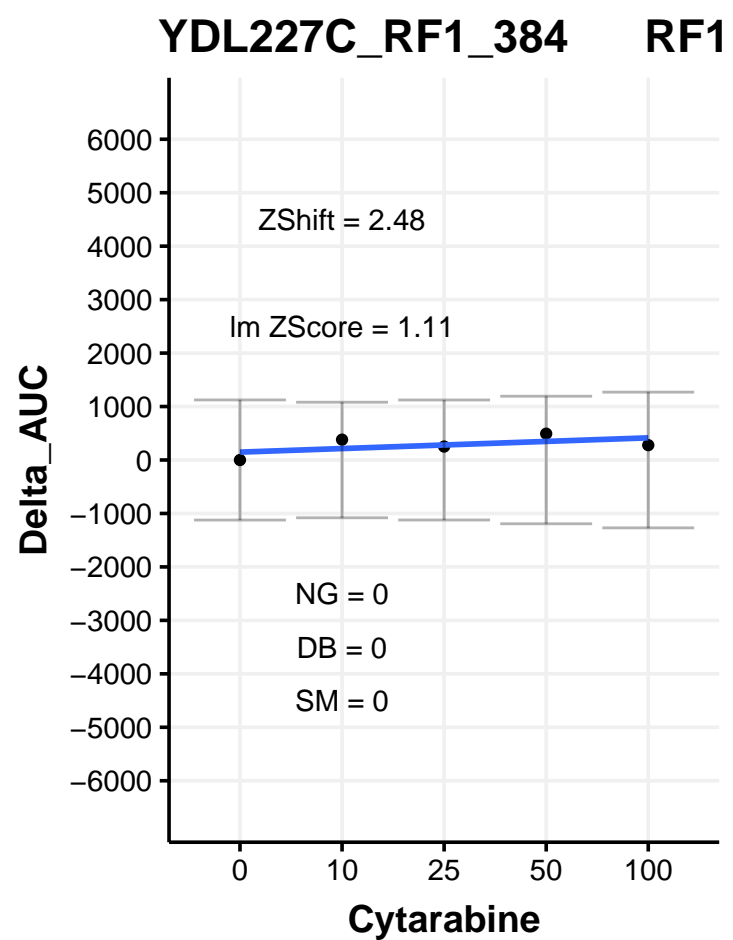

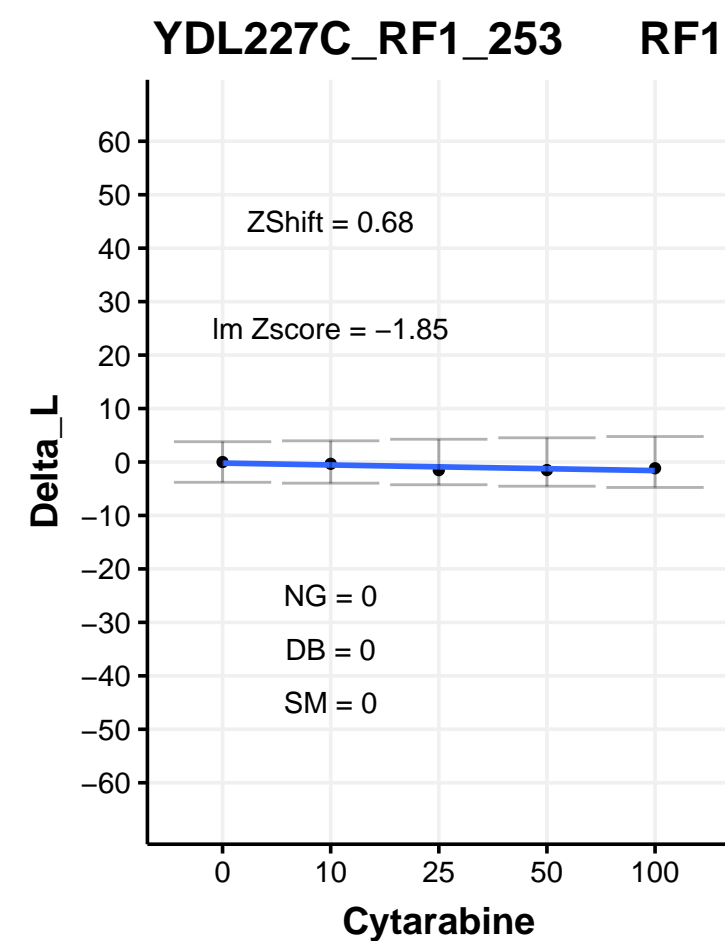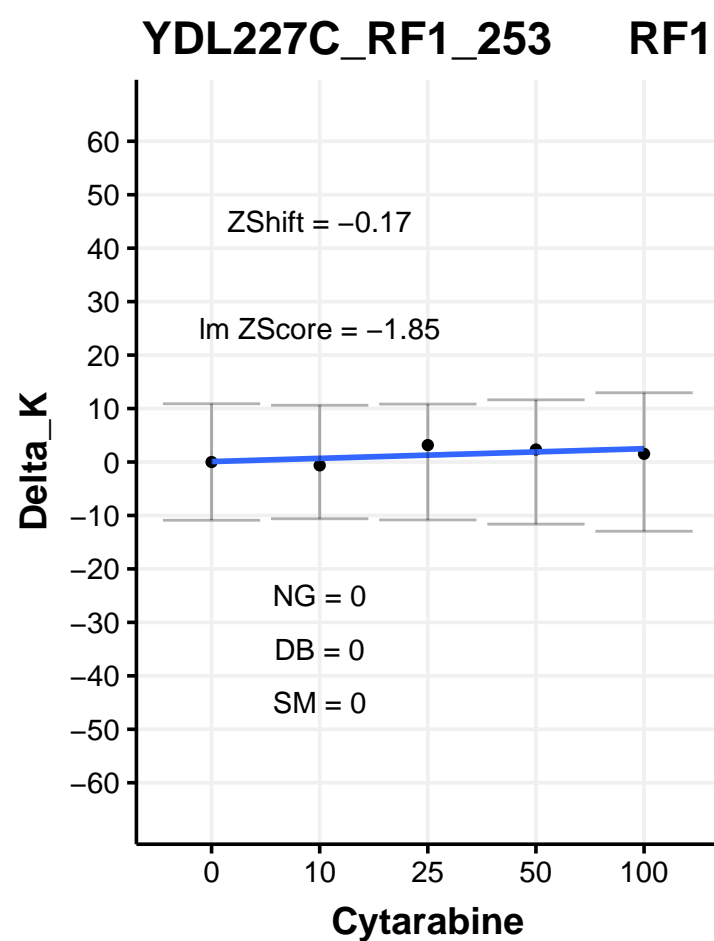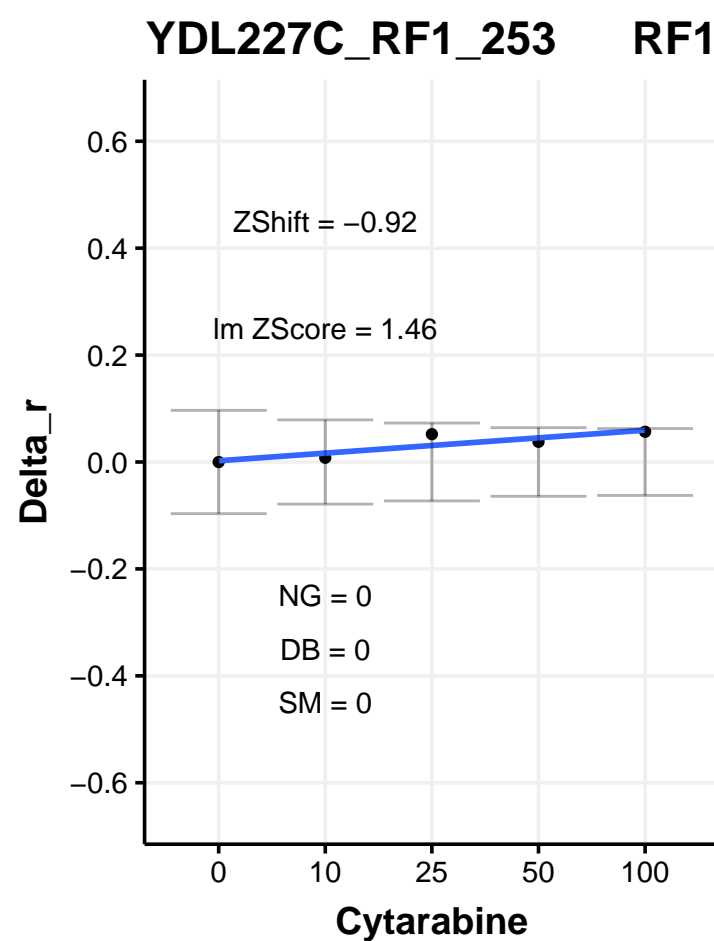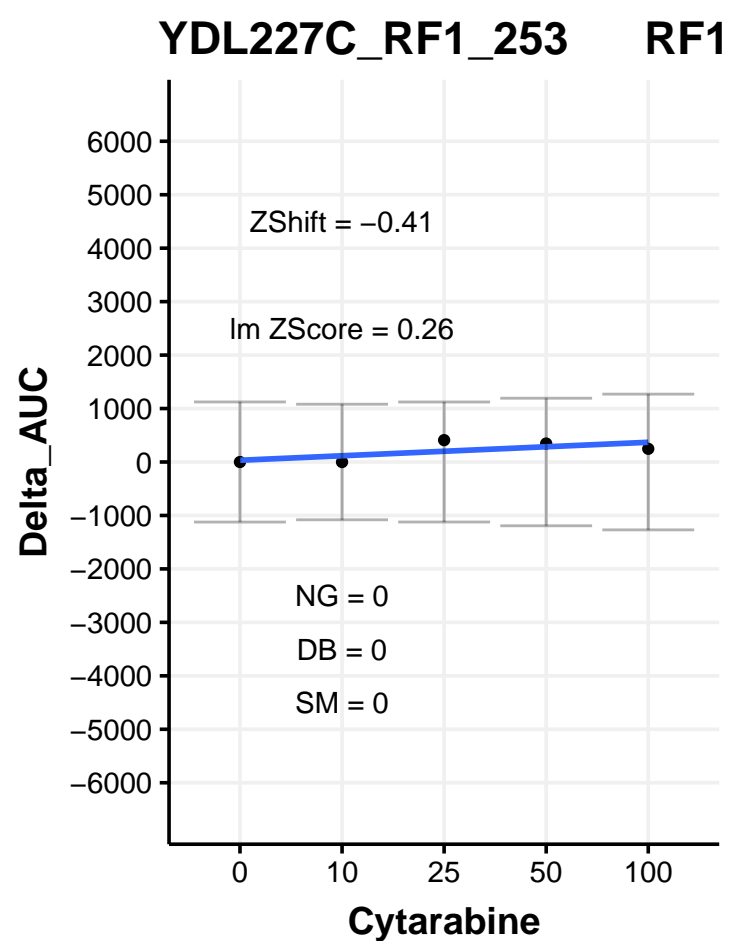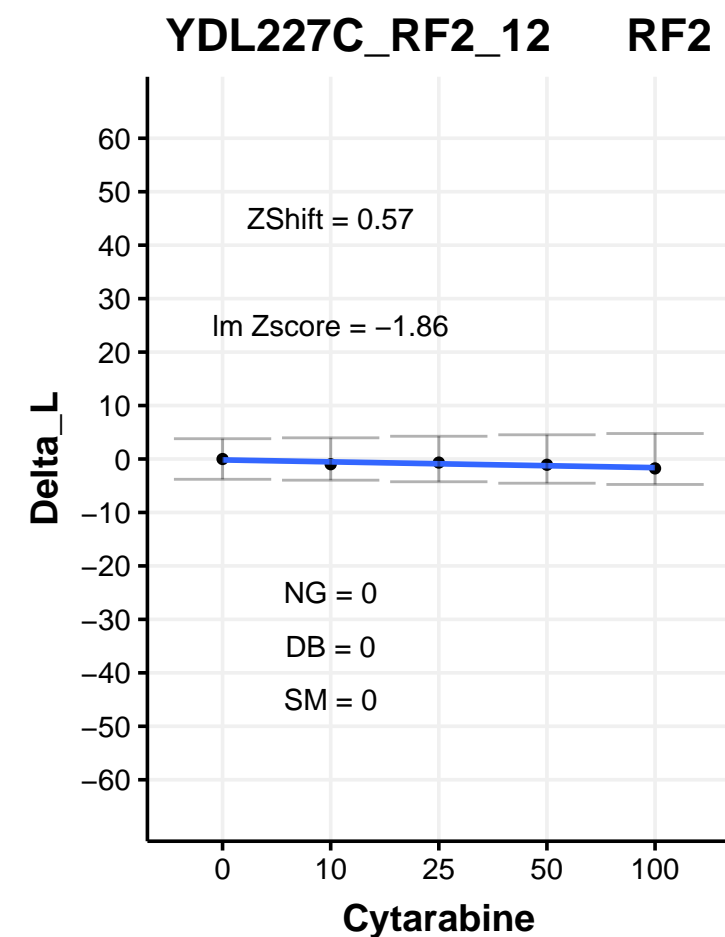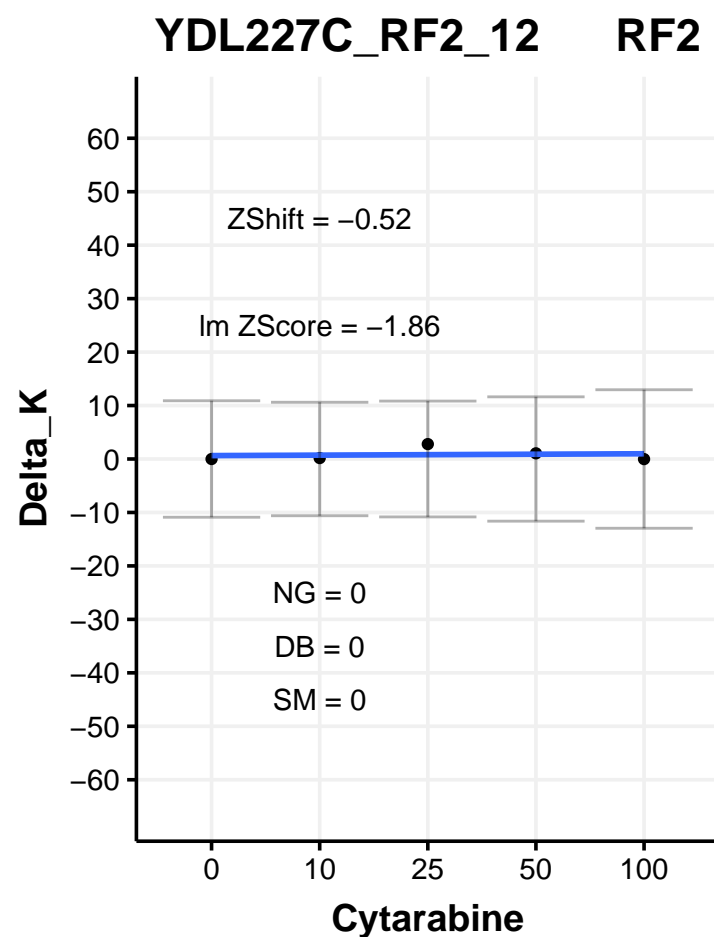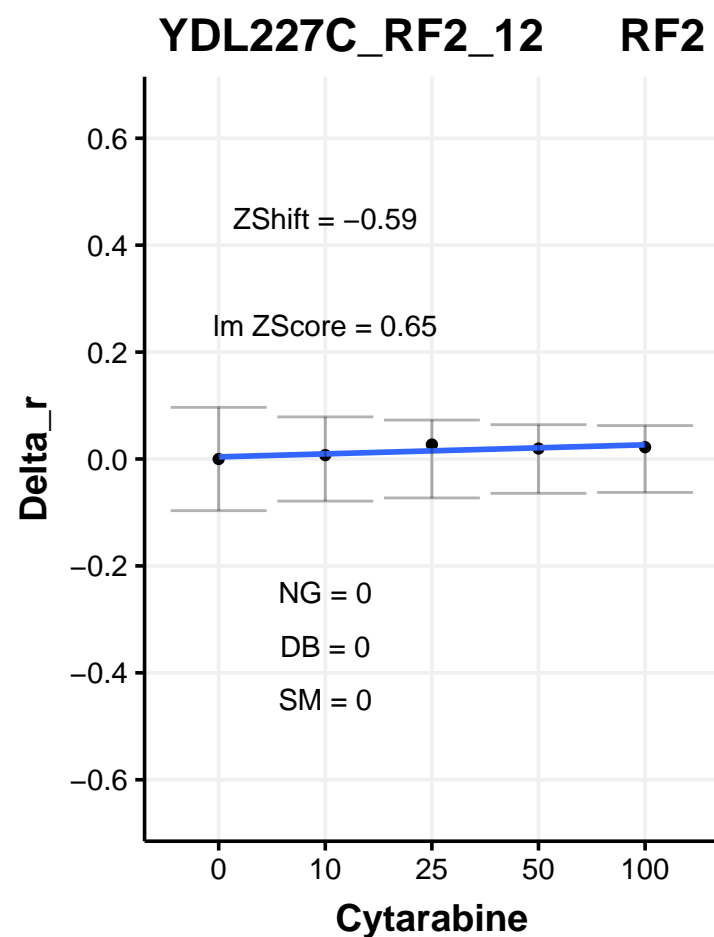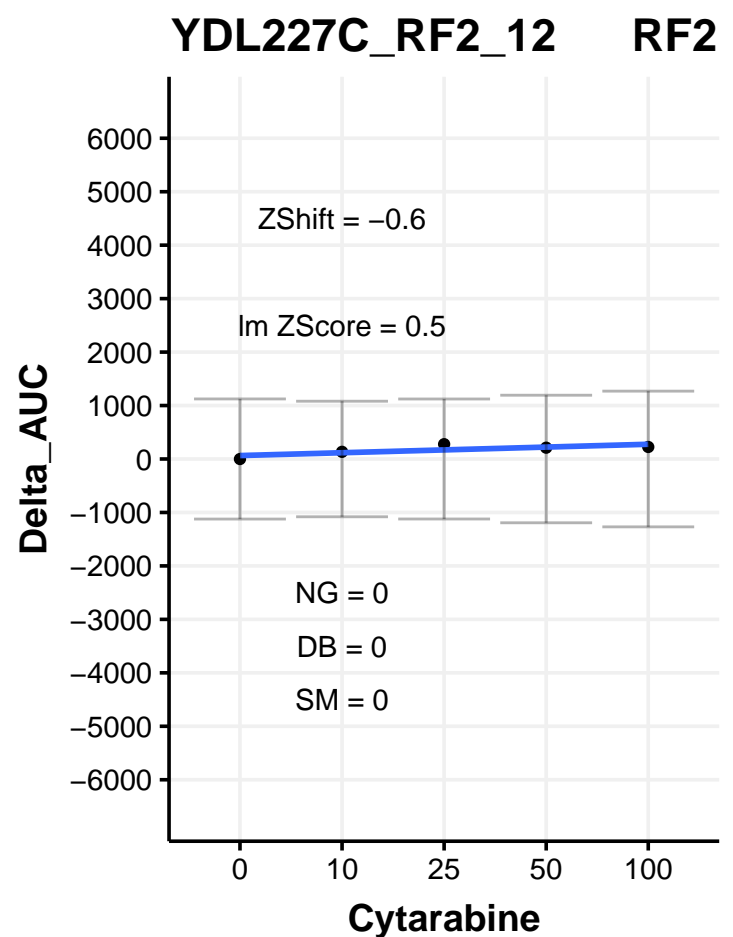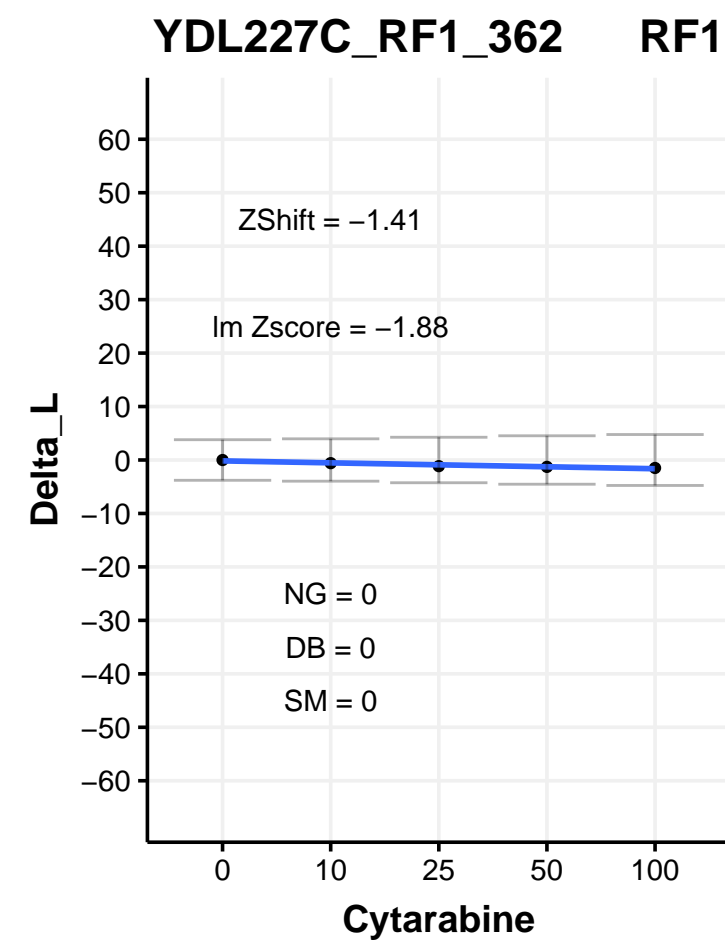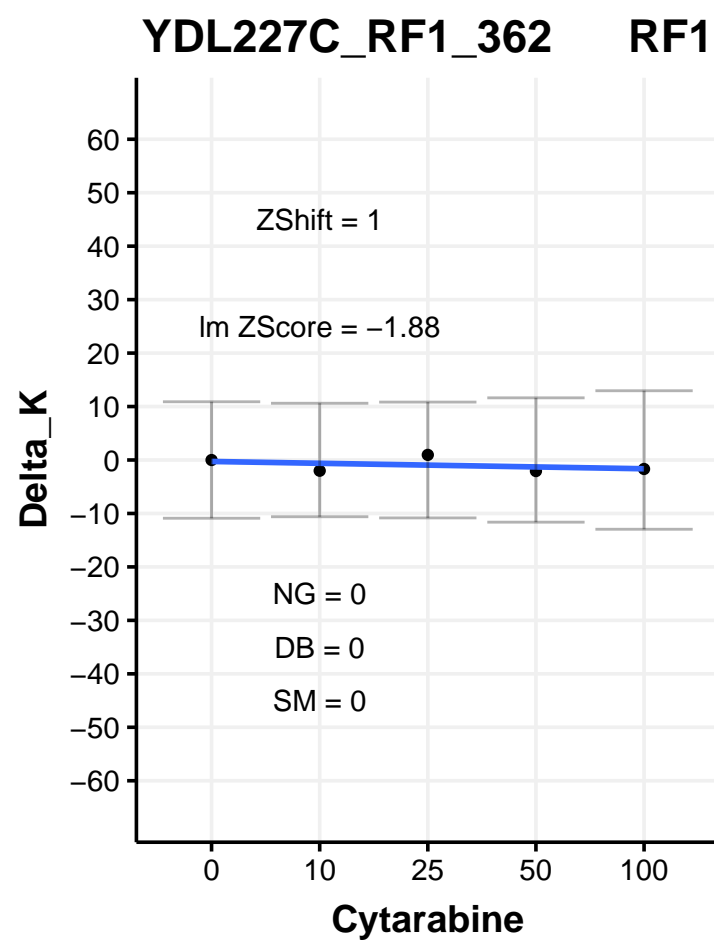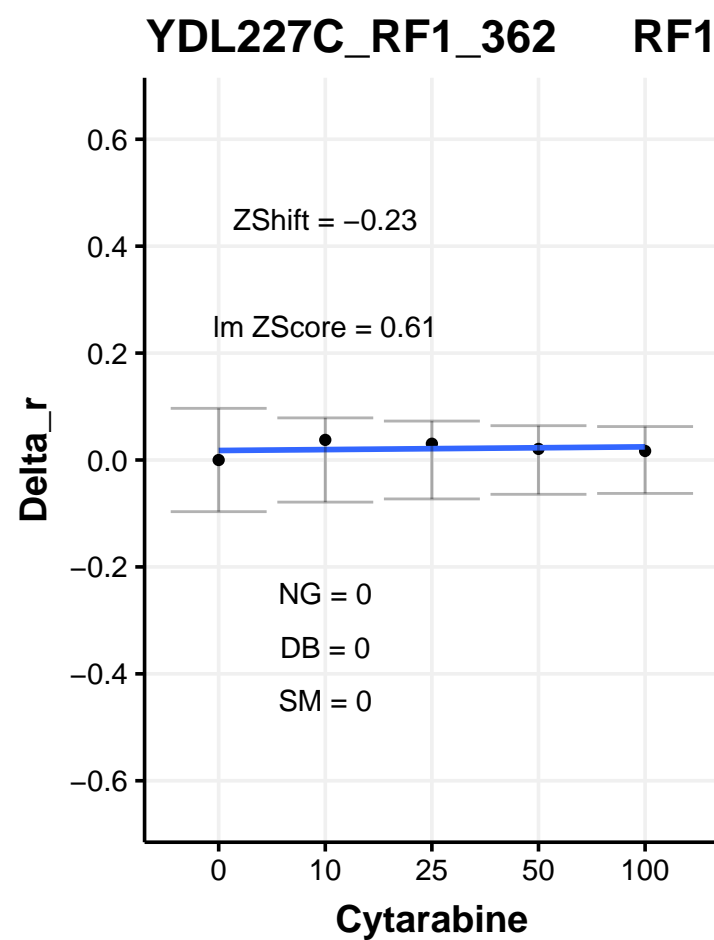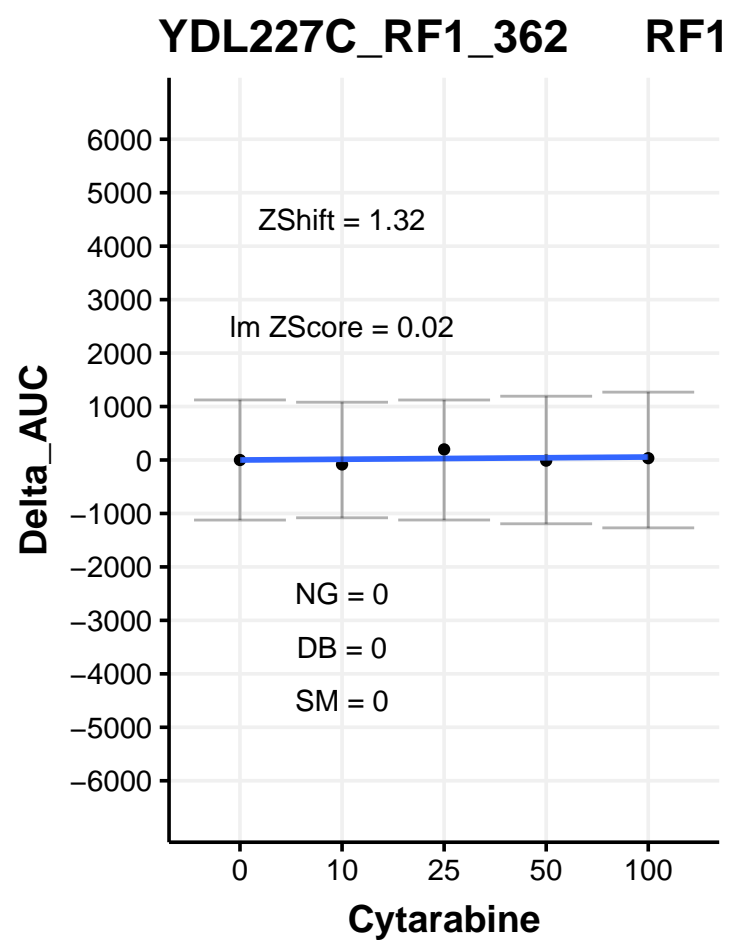

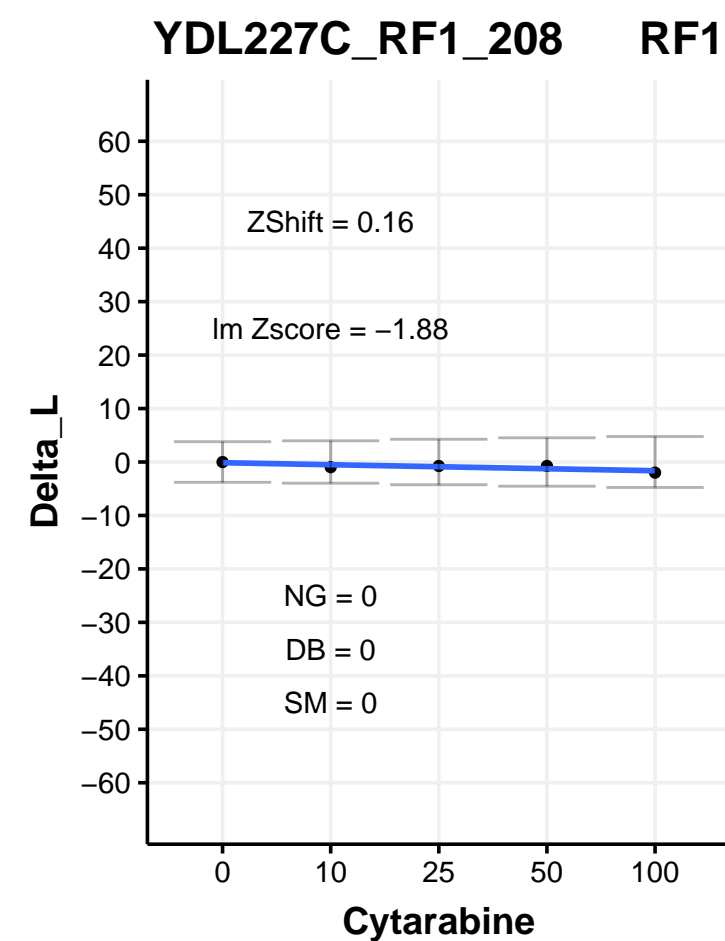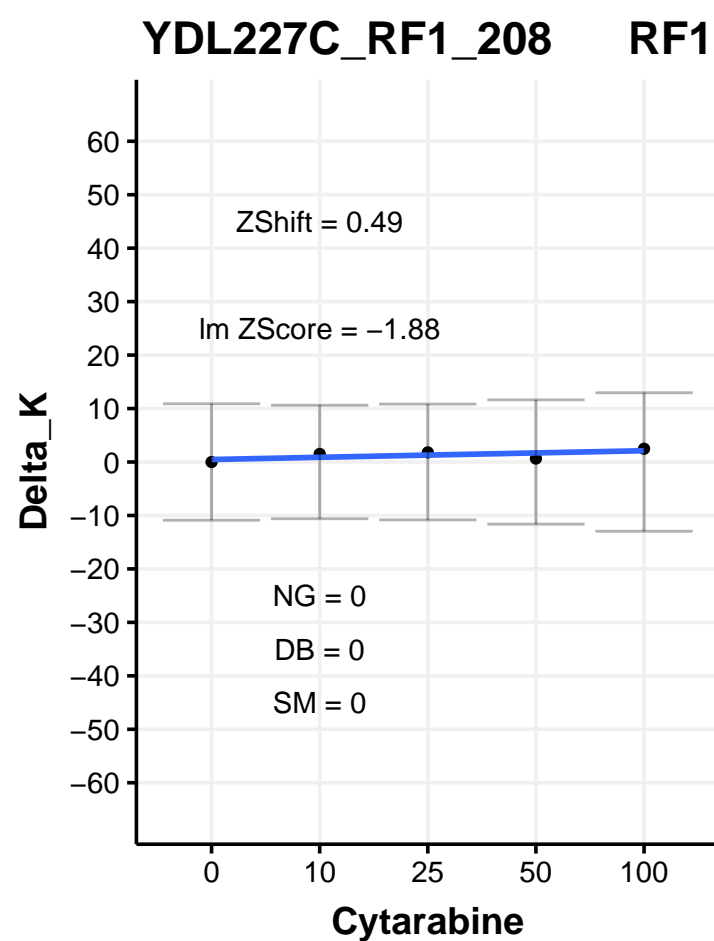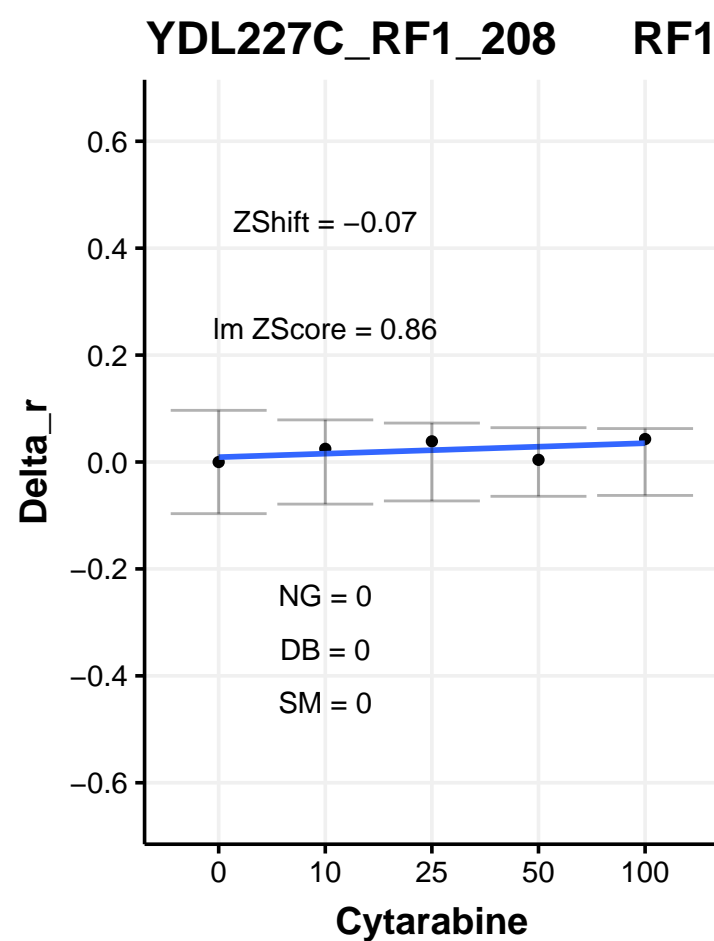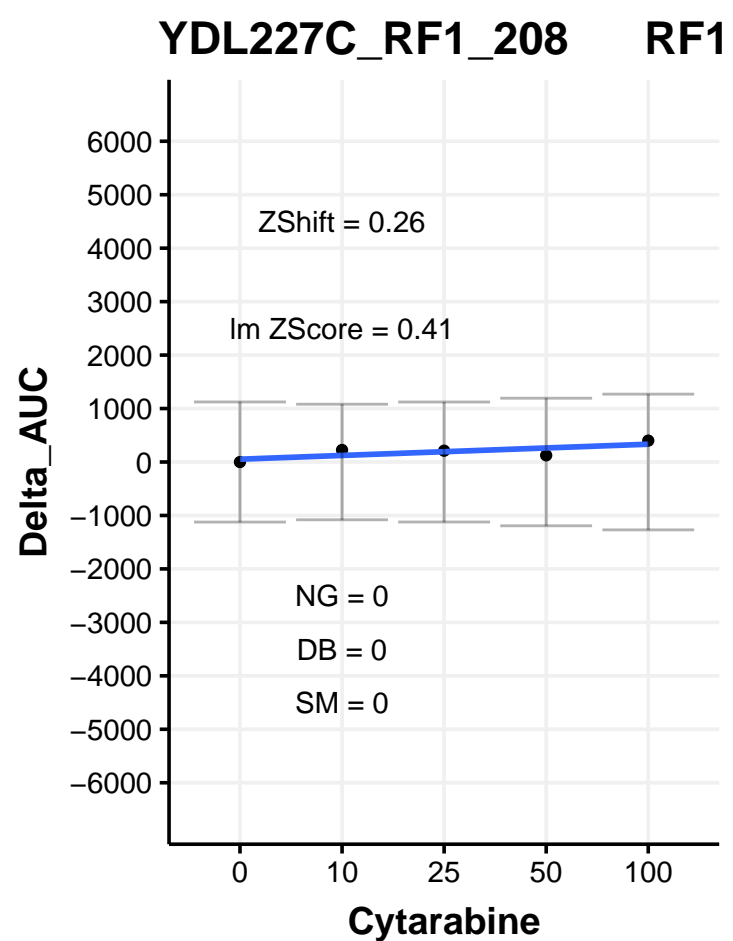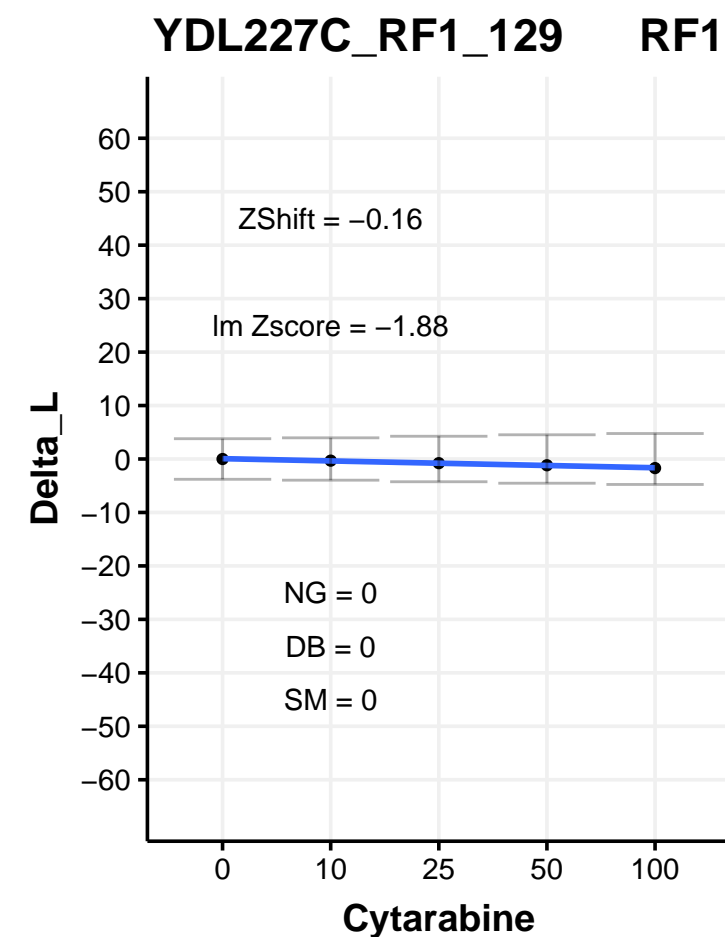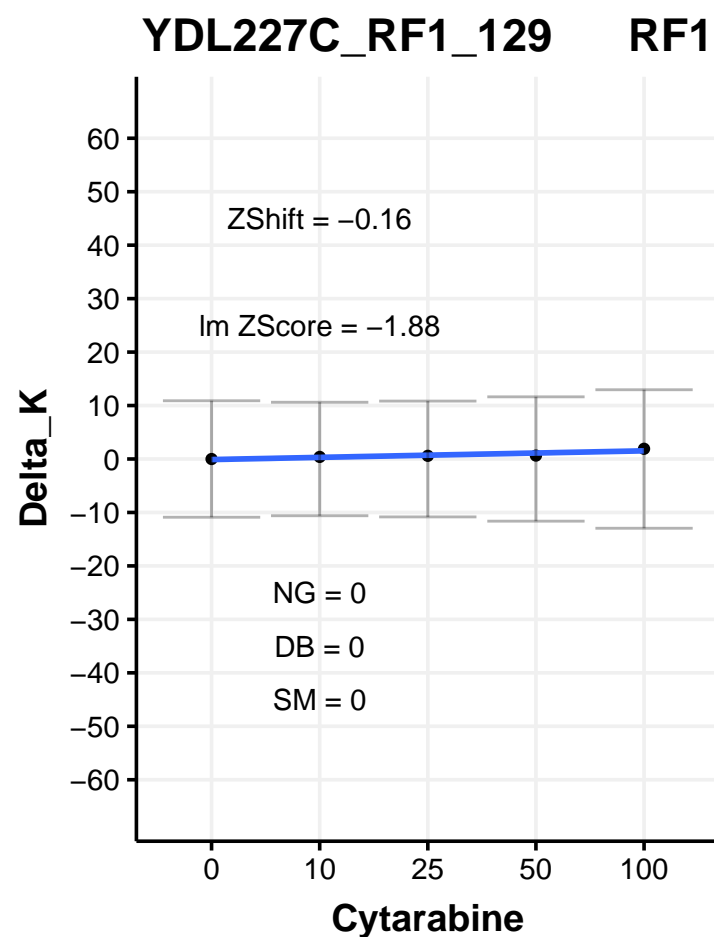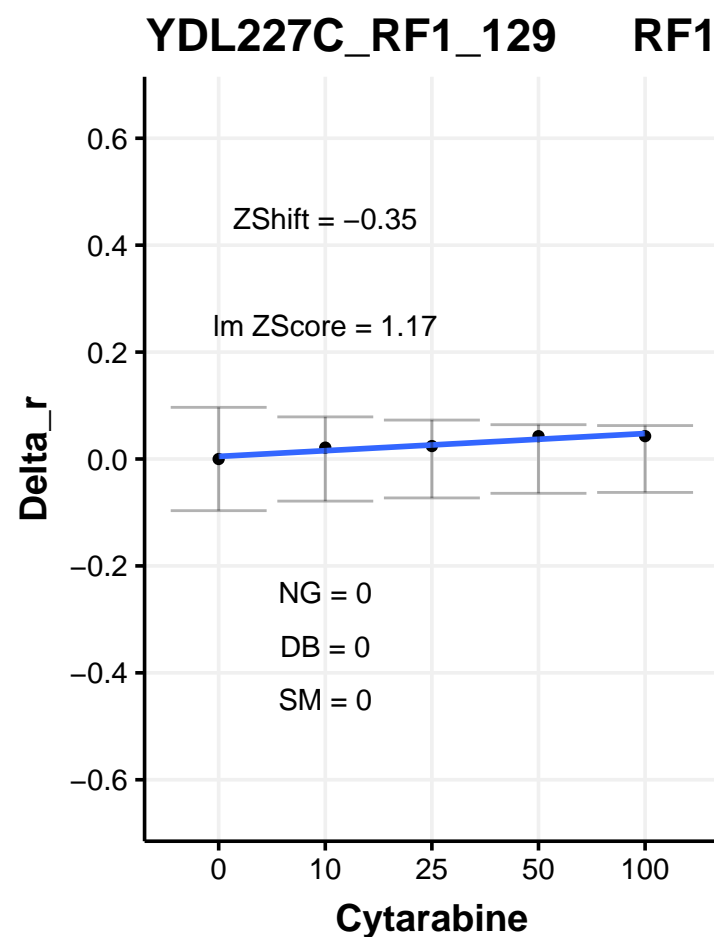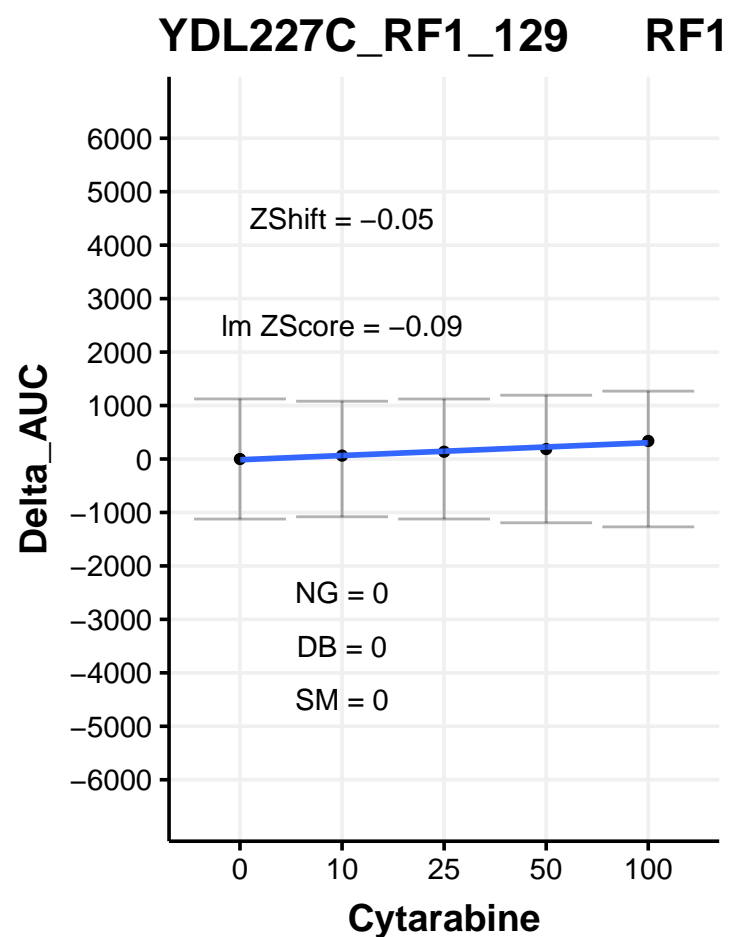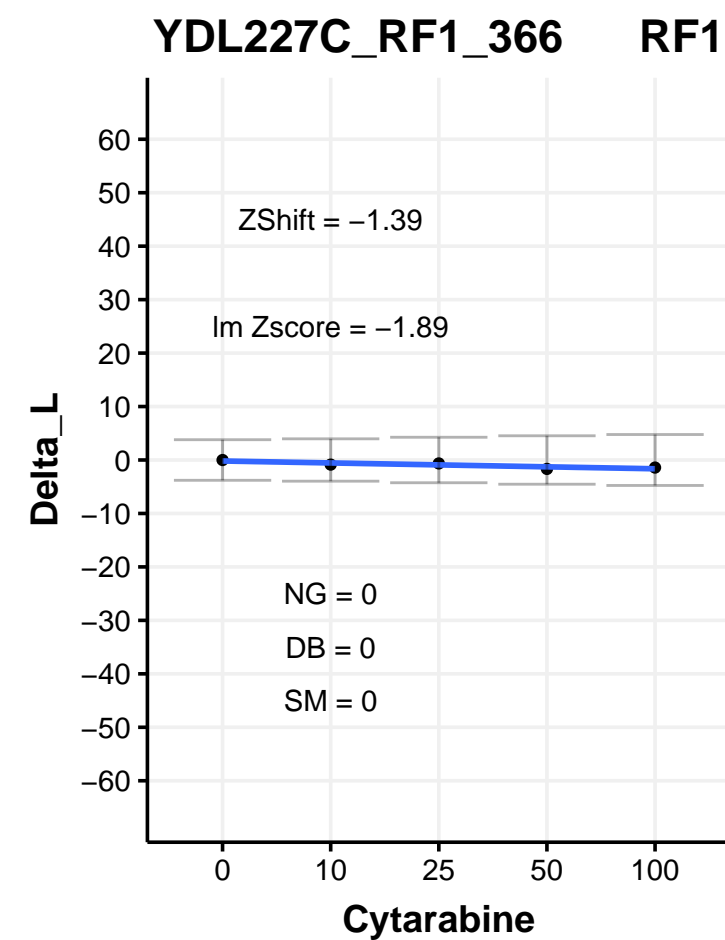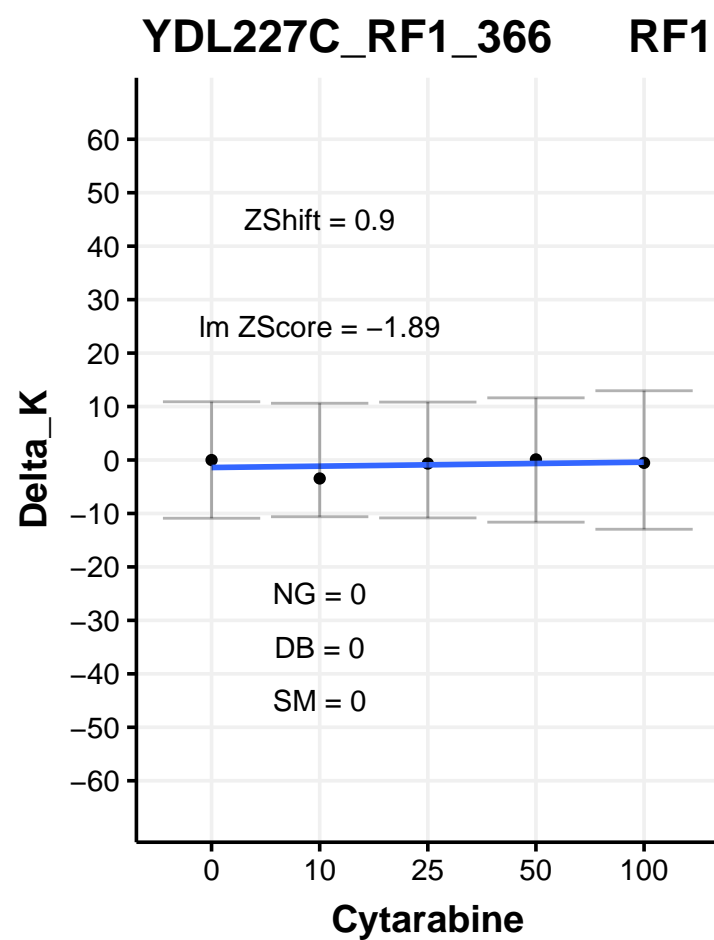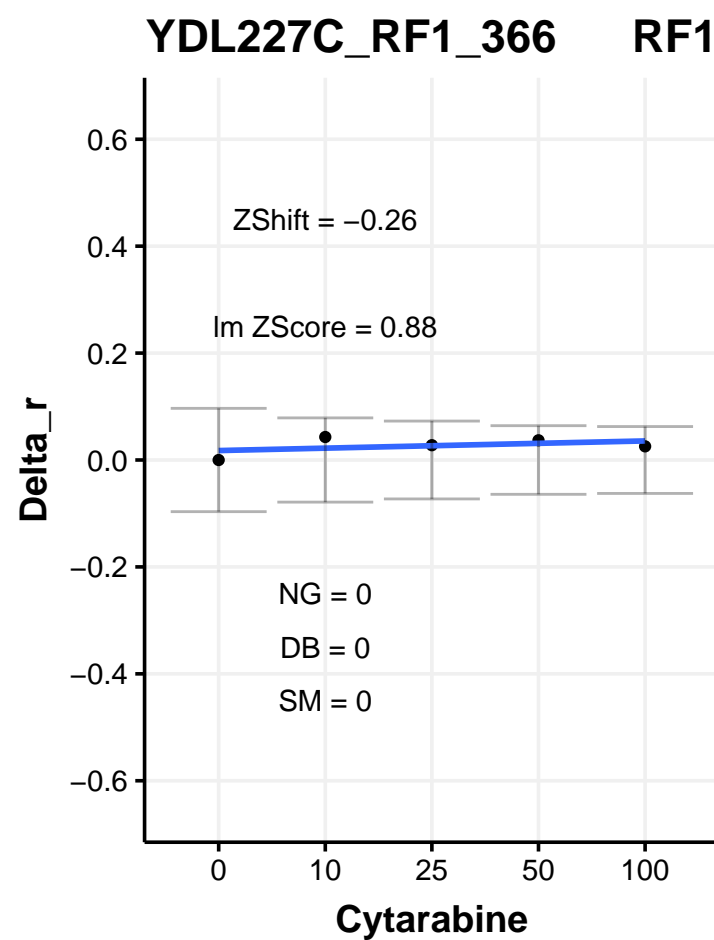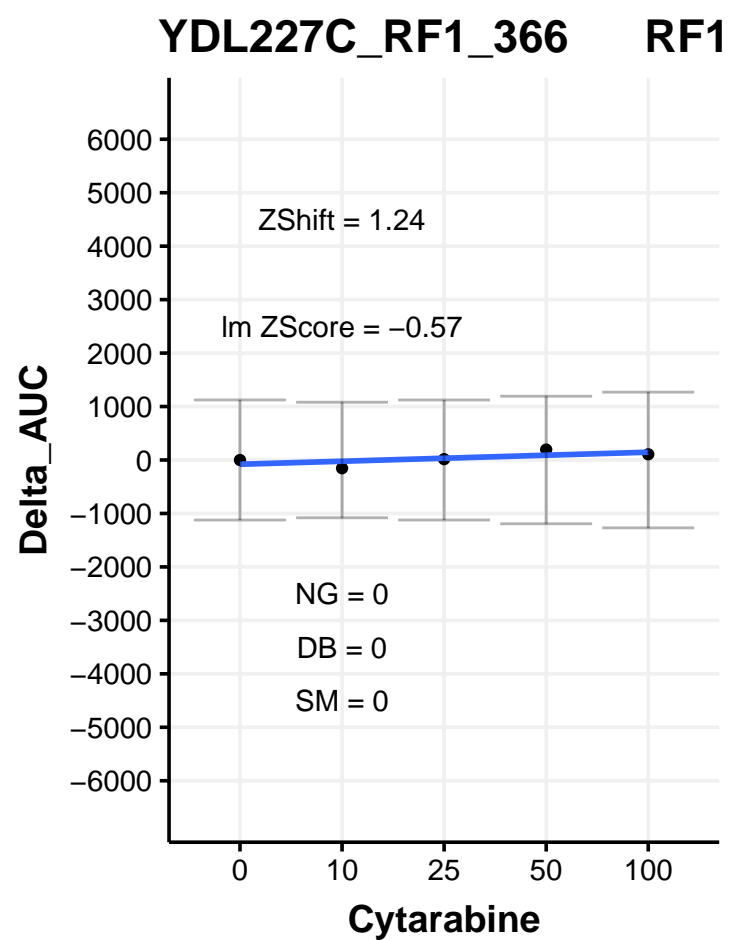

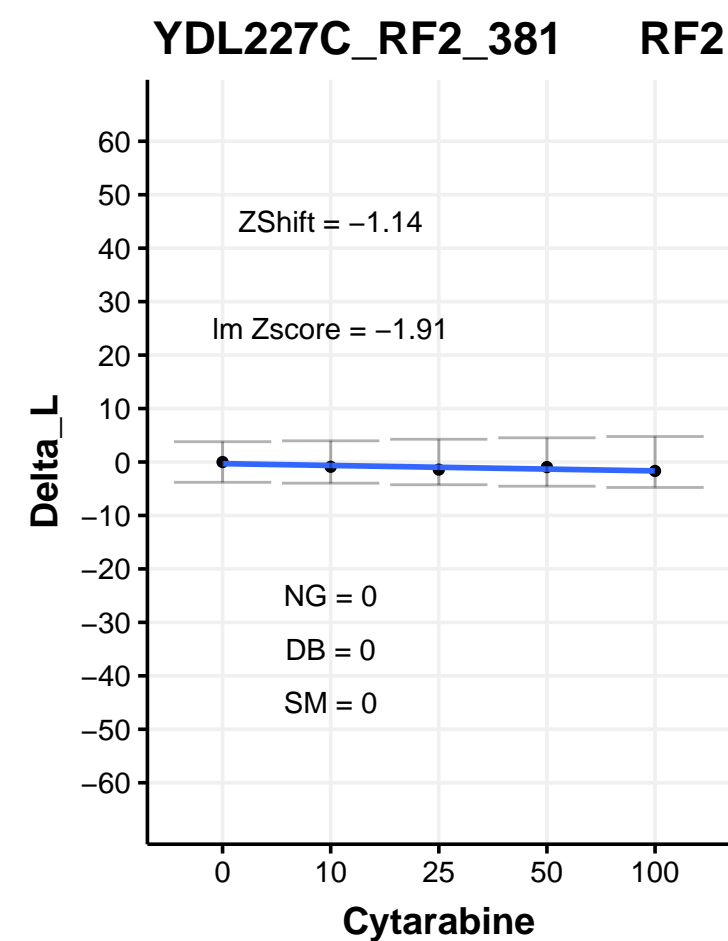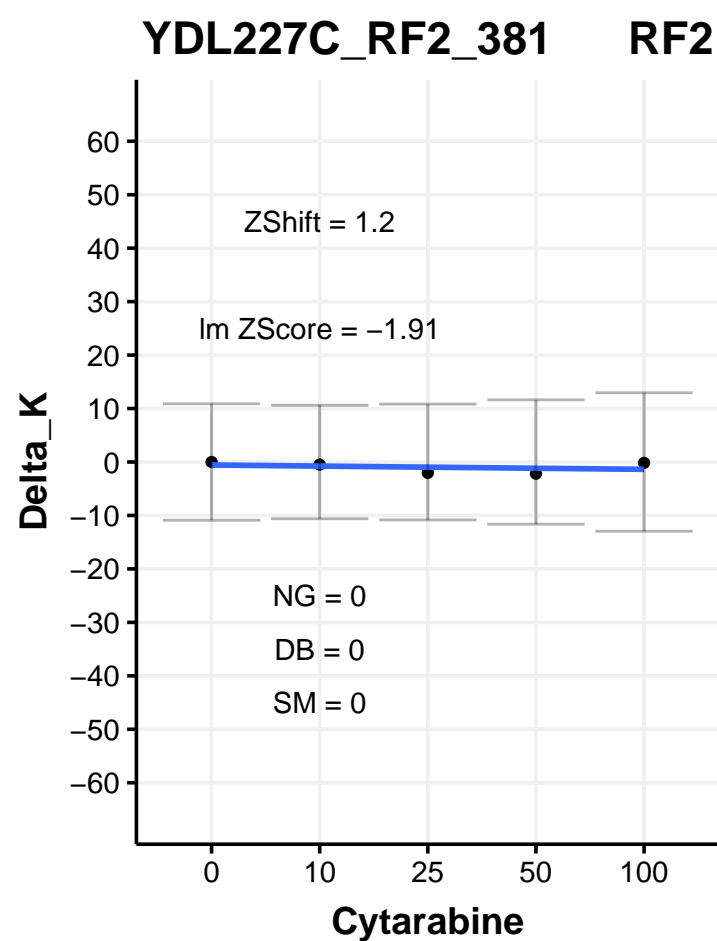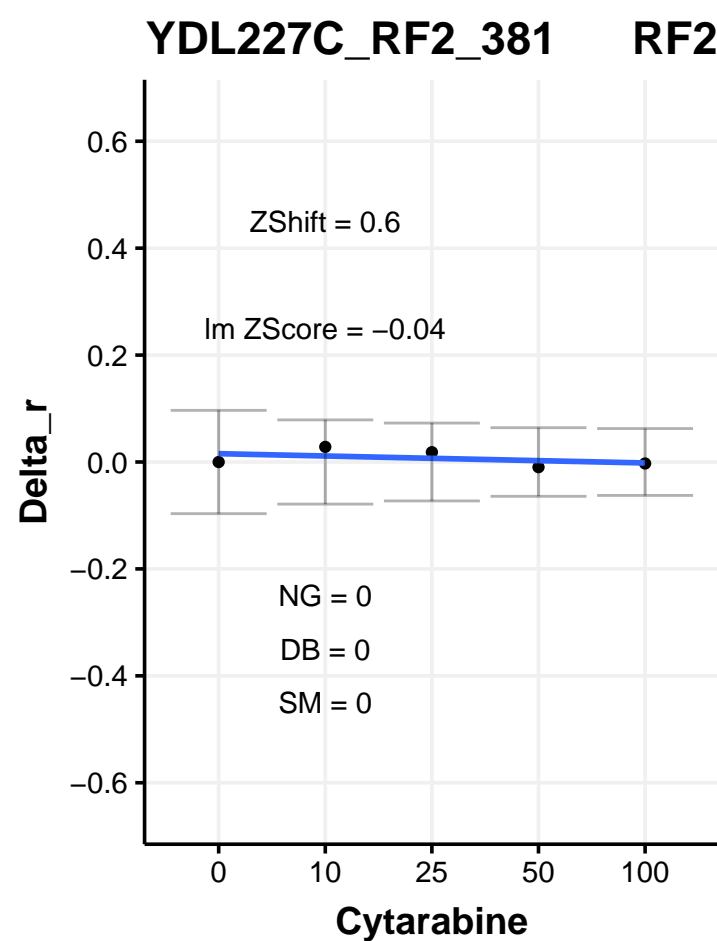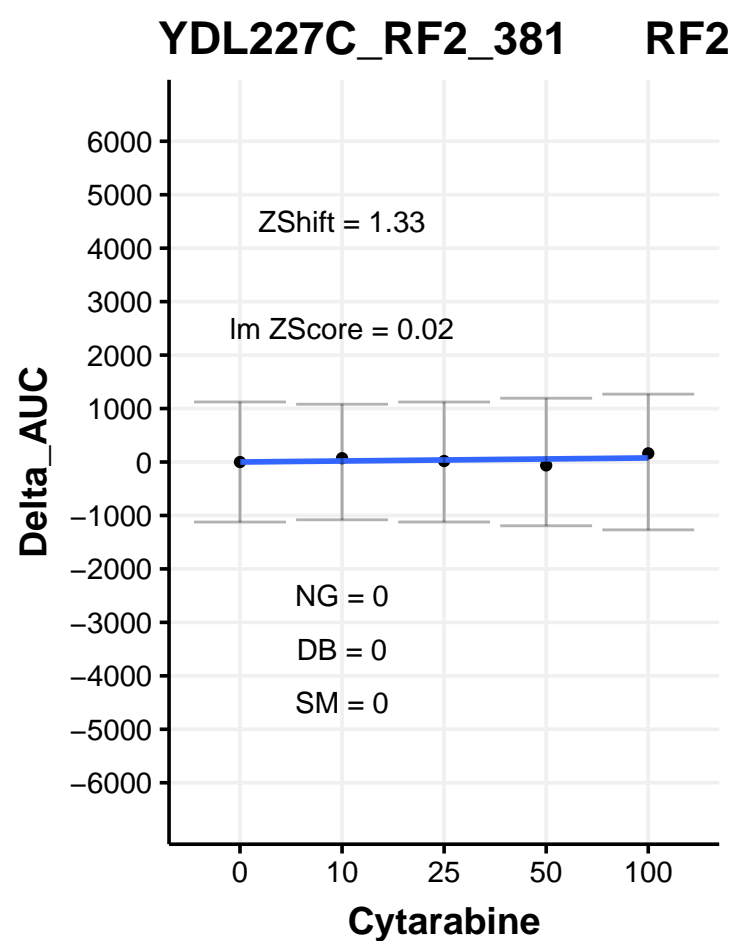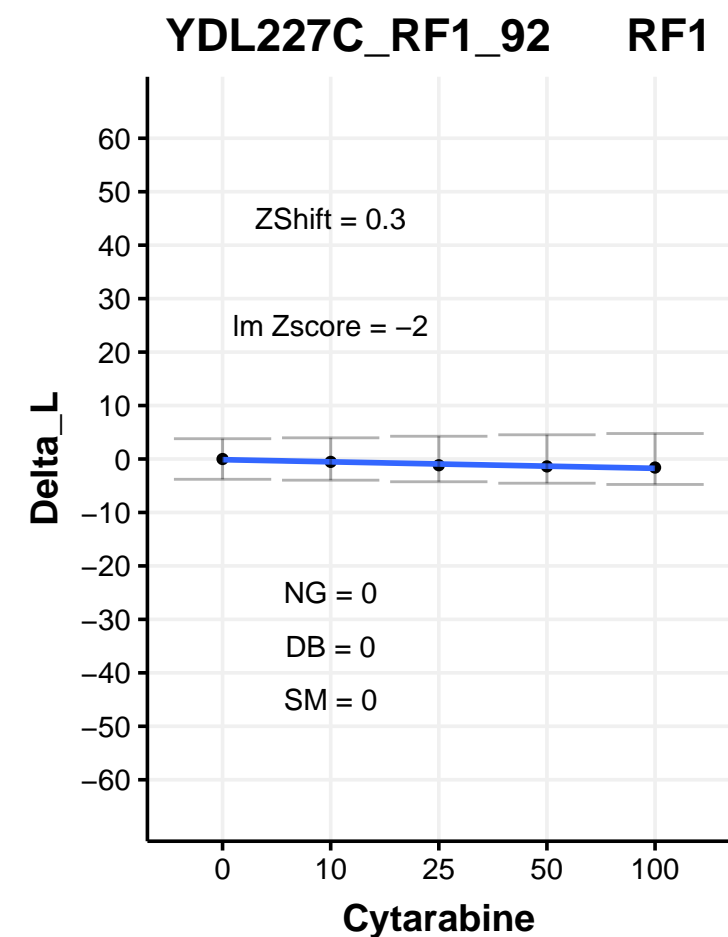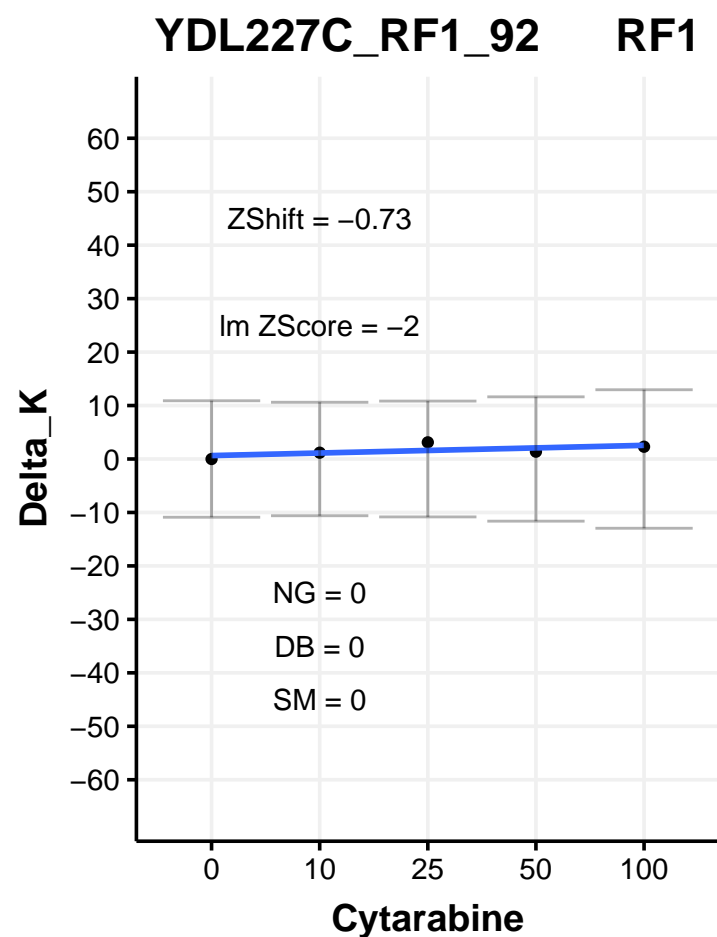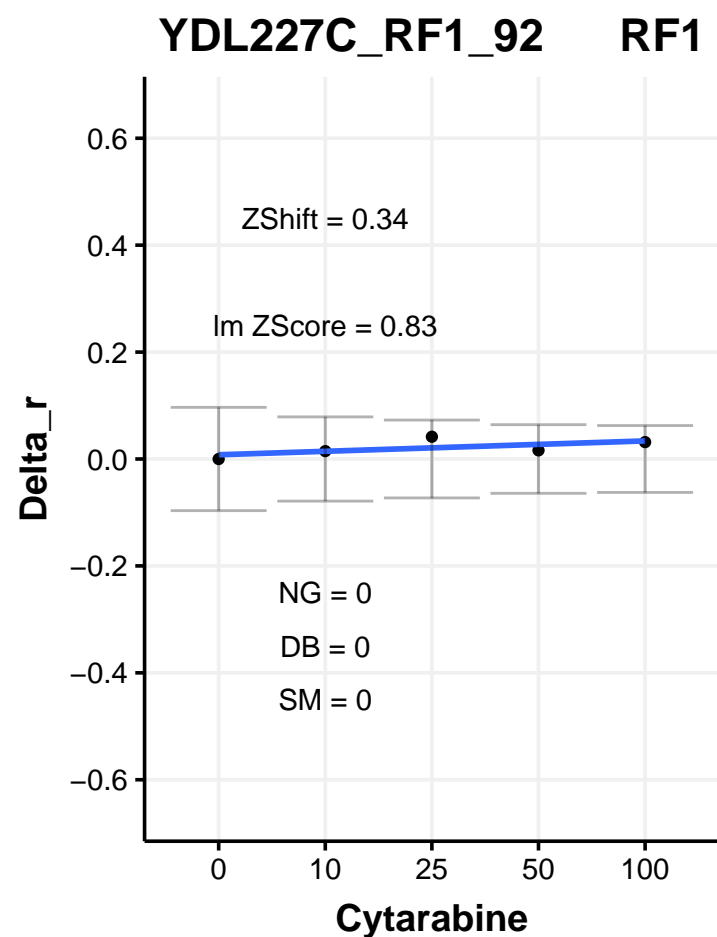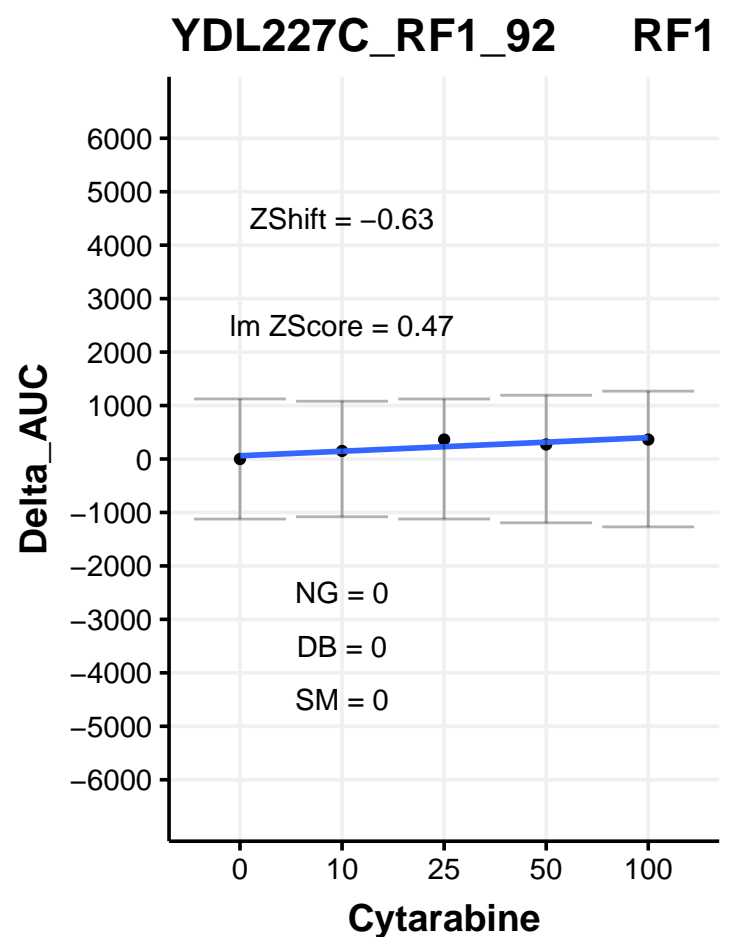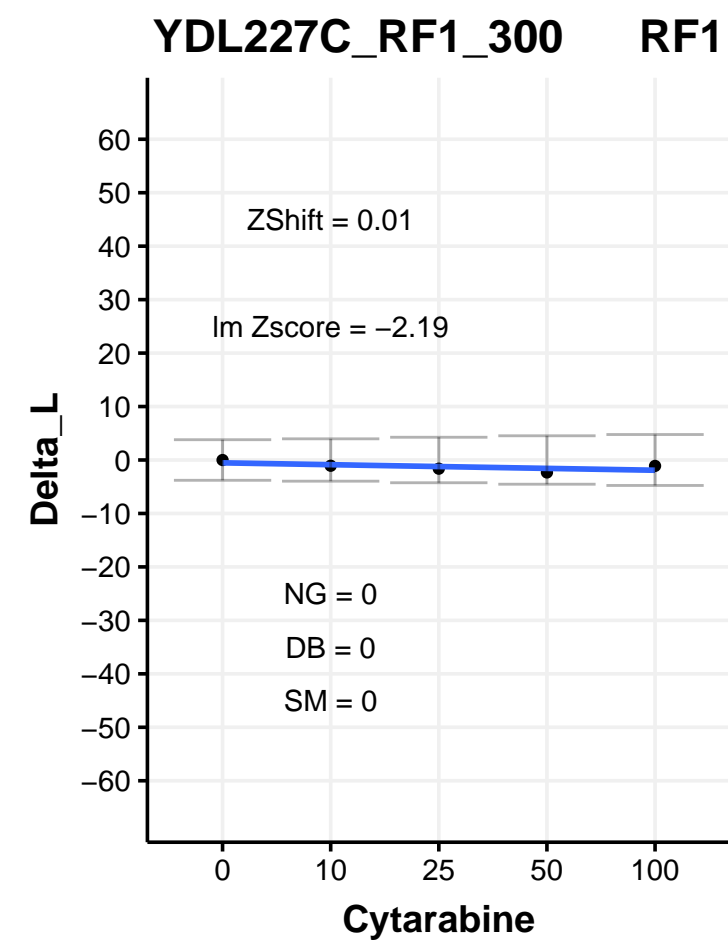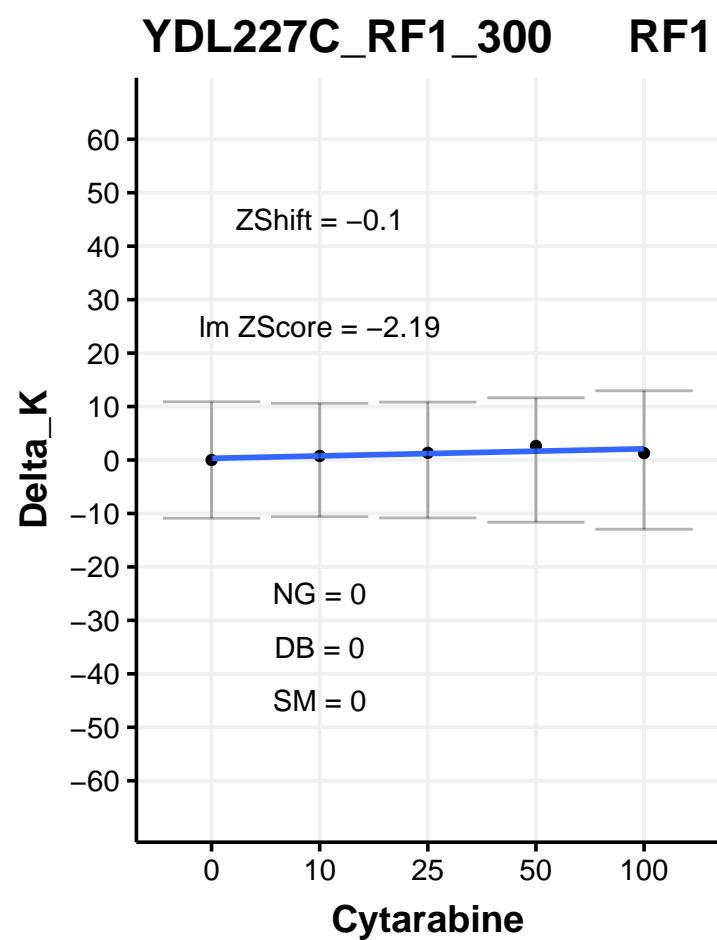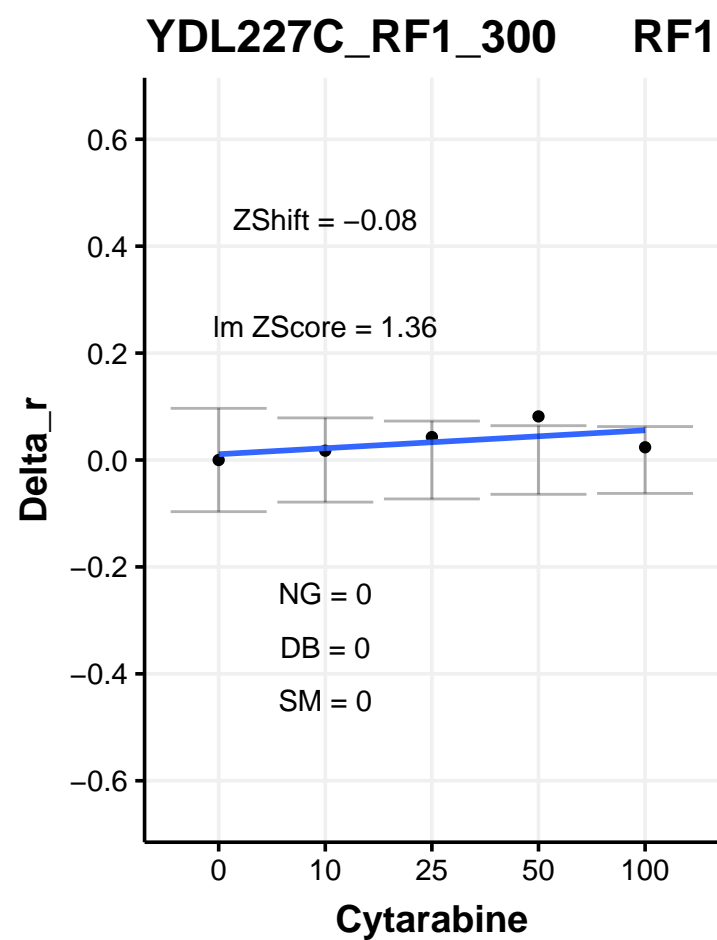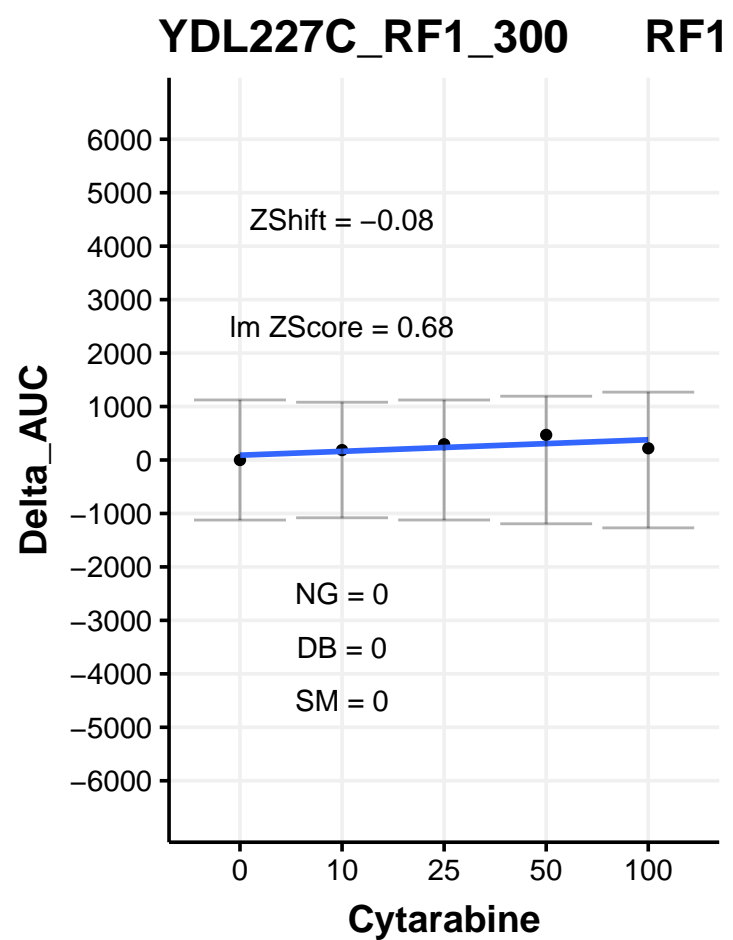



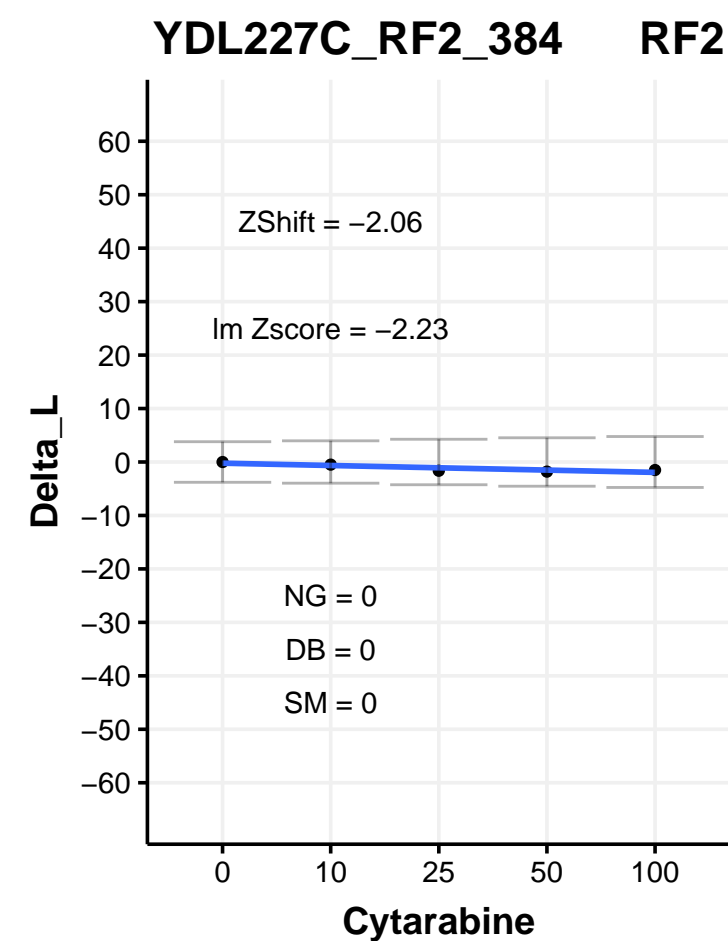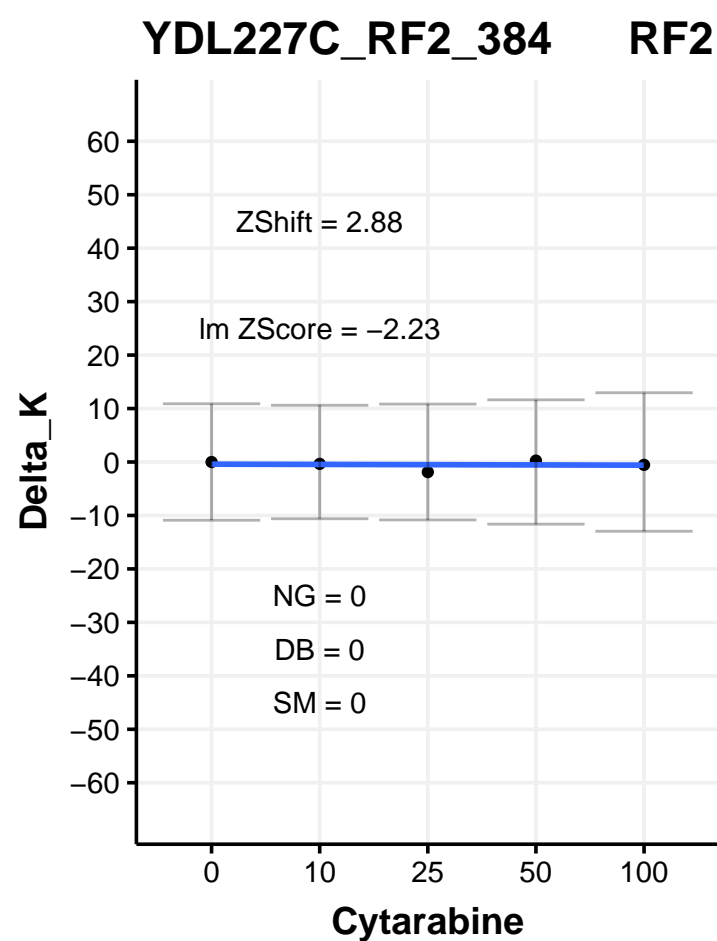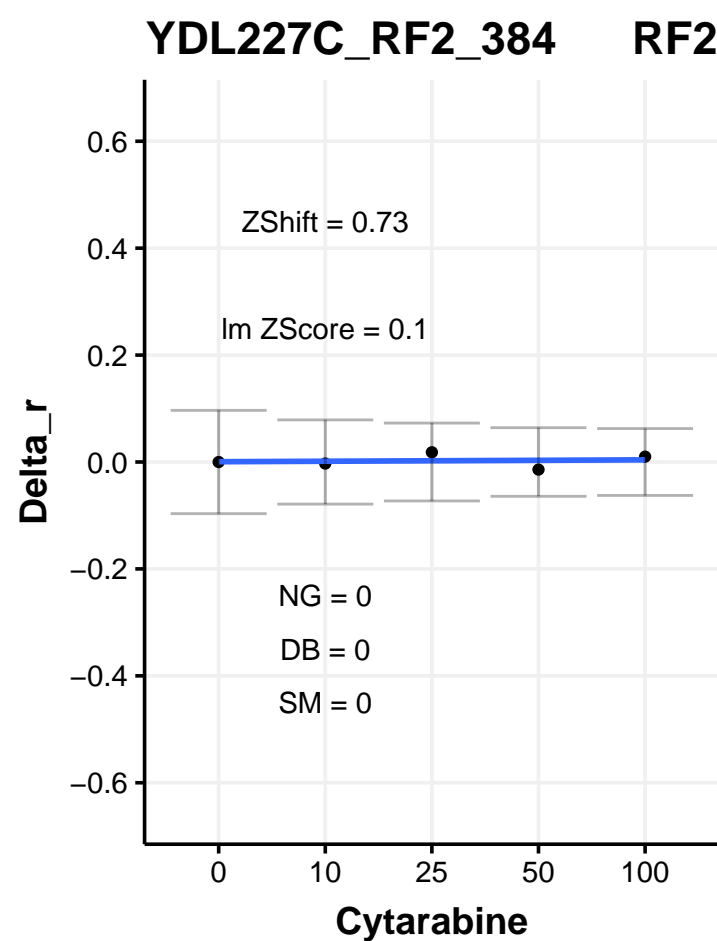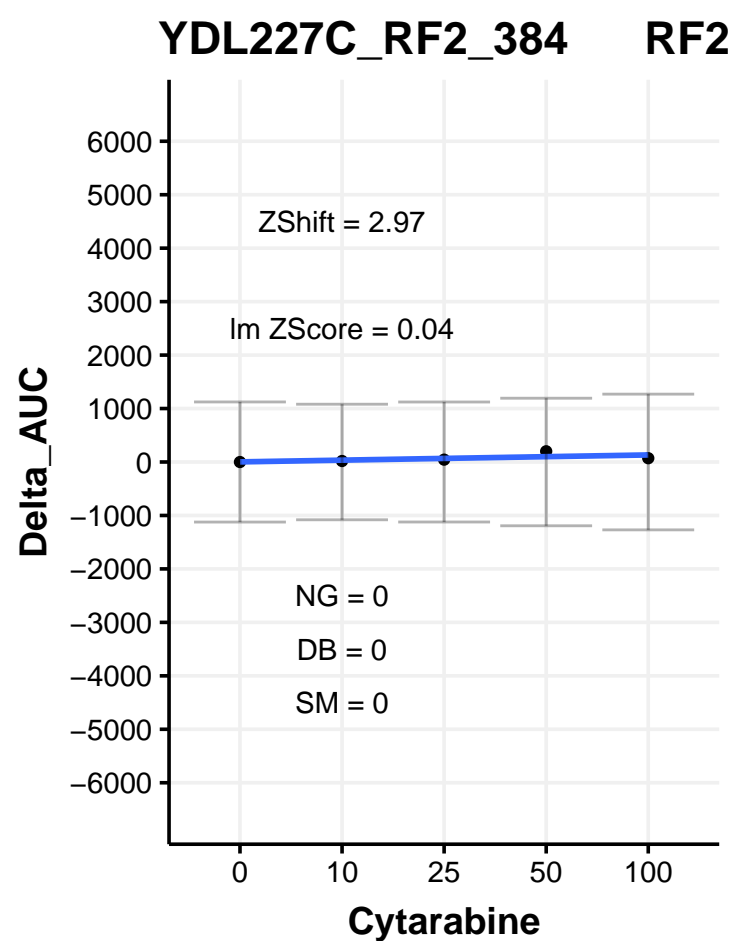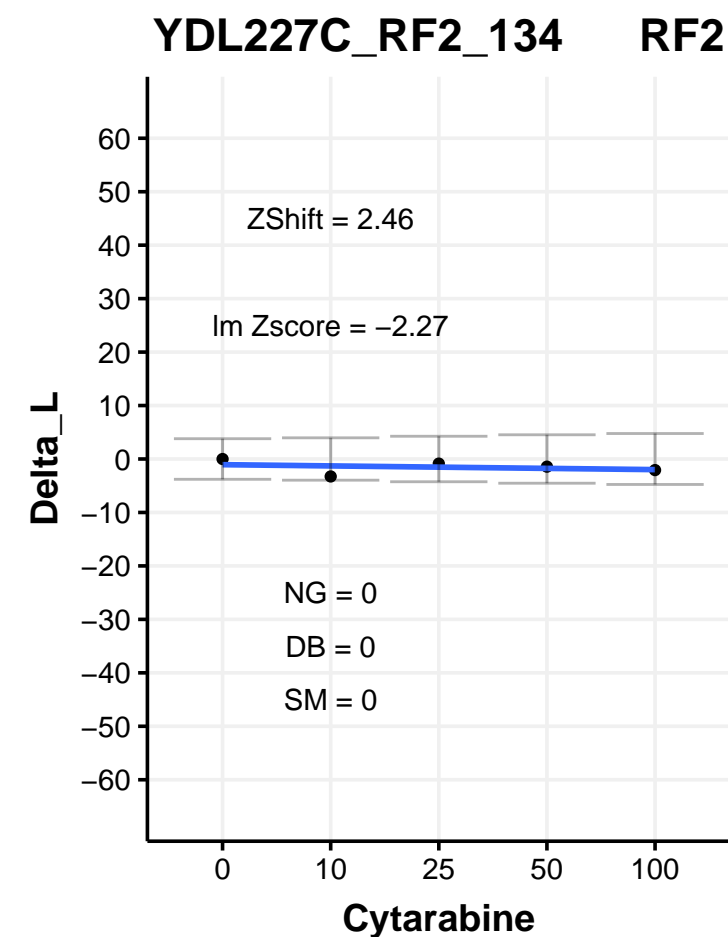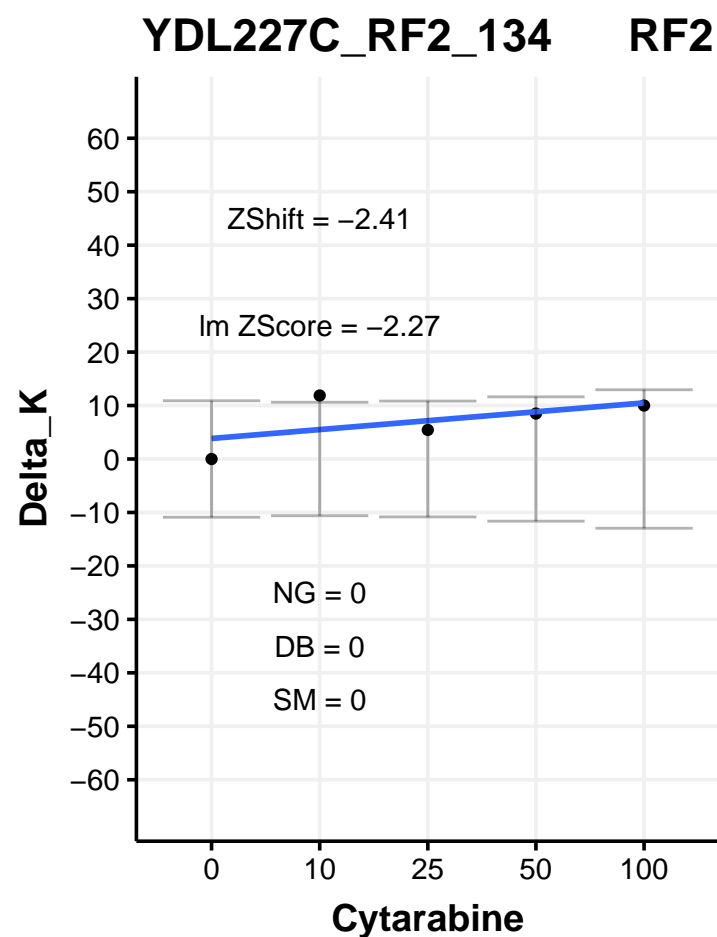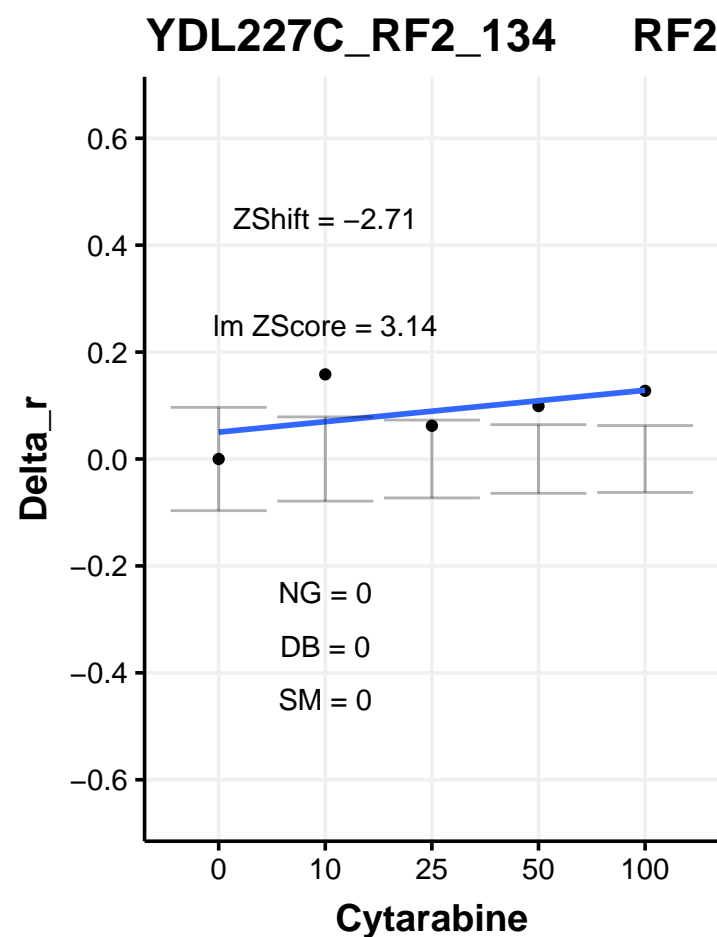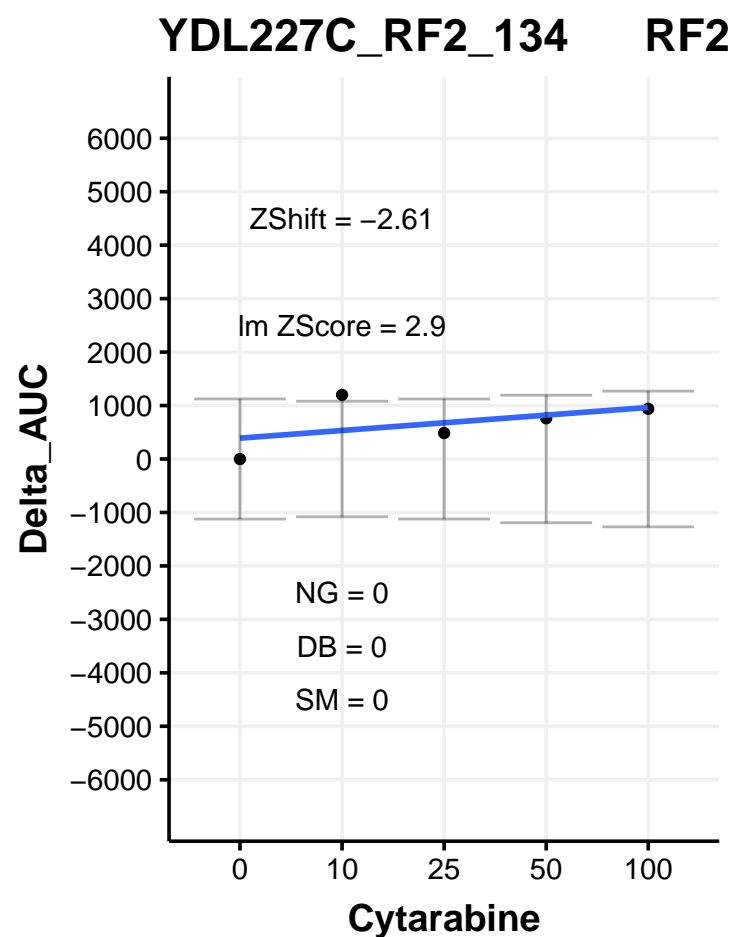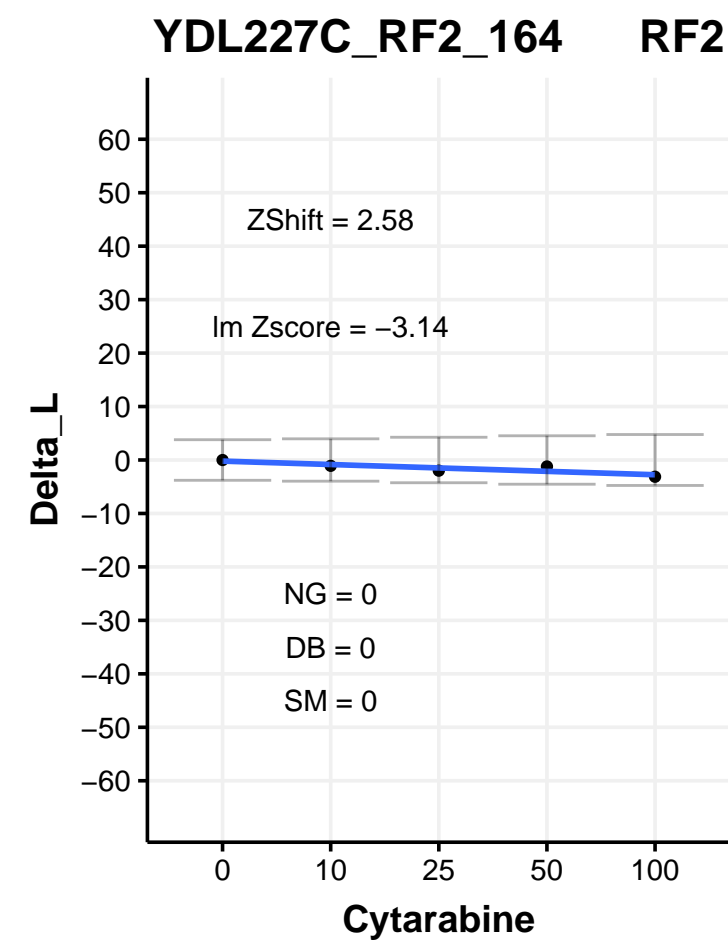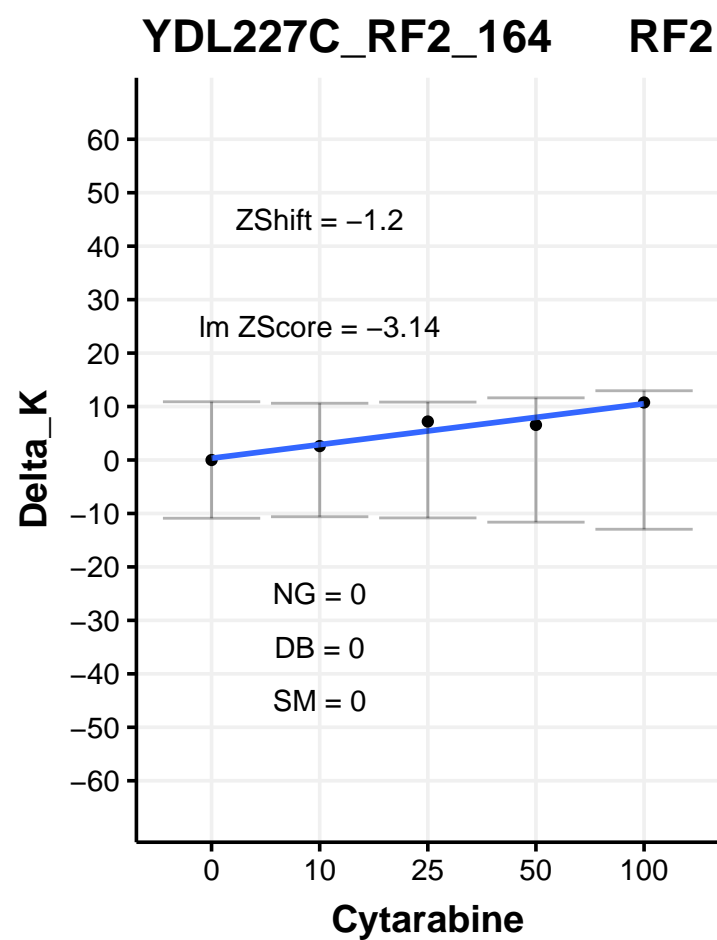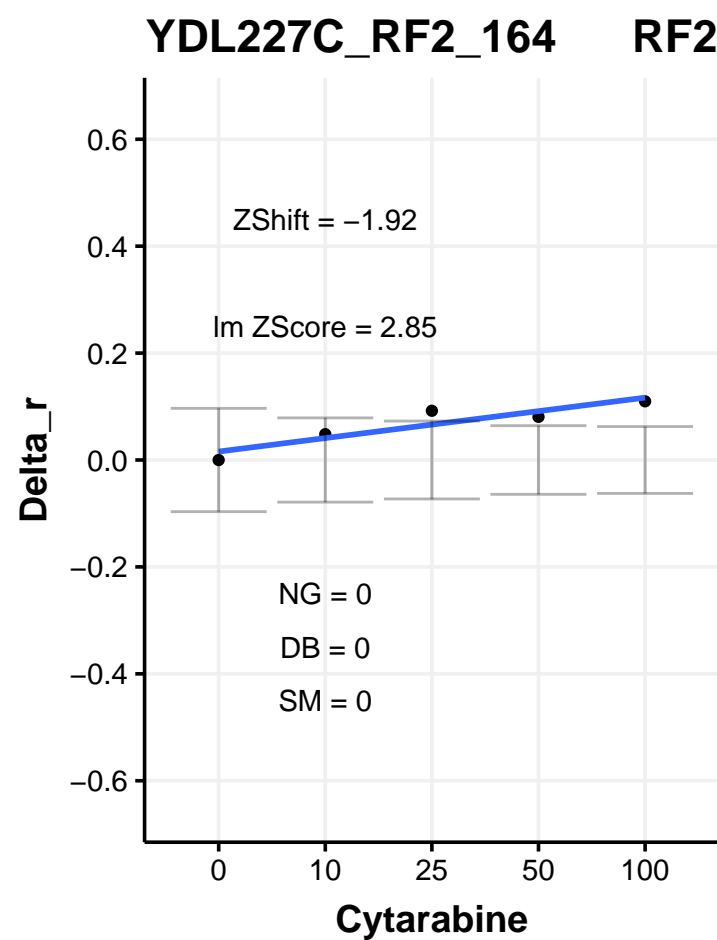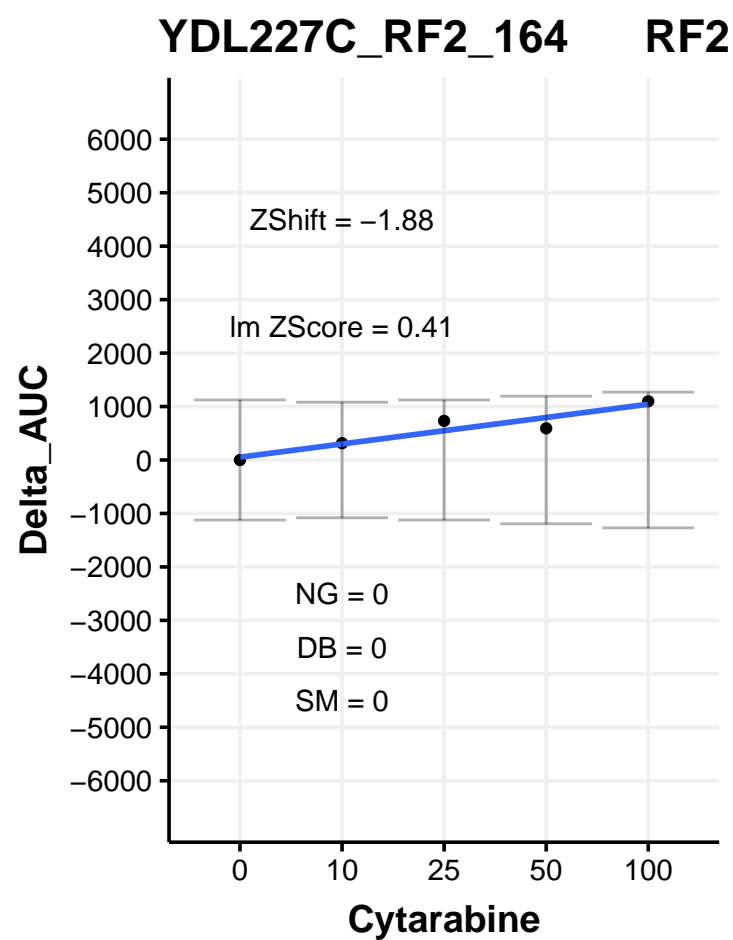



YDL227C\_RF1\_17 RF1

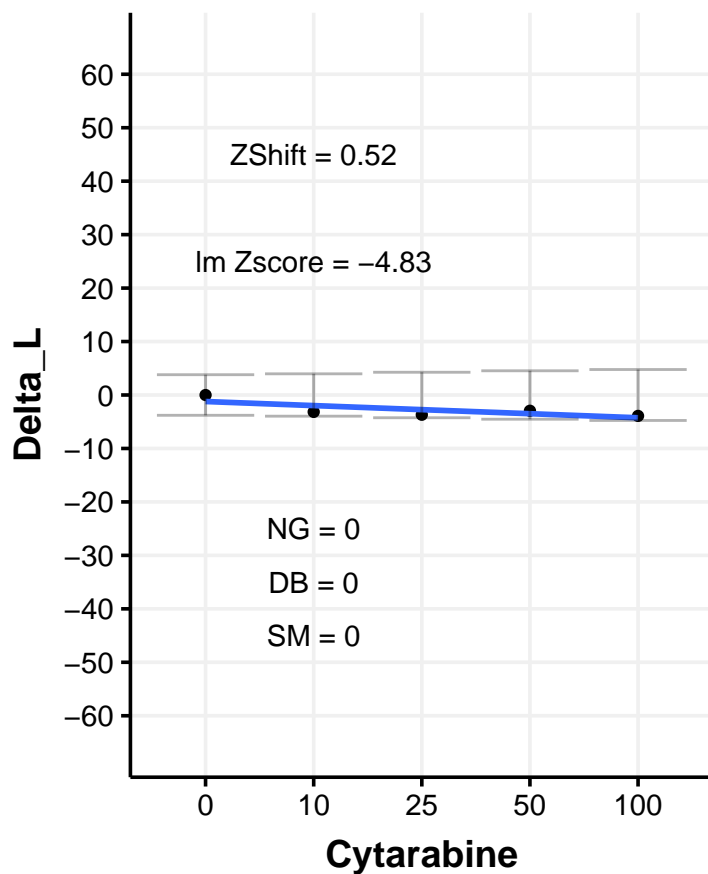

YDL227C\_RF1\_17 RF1

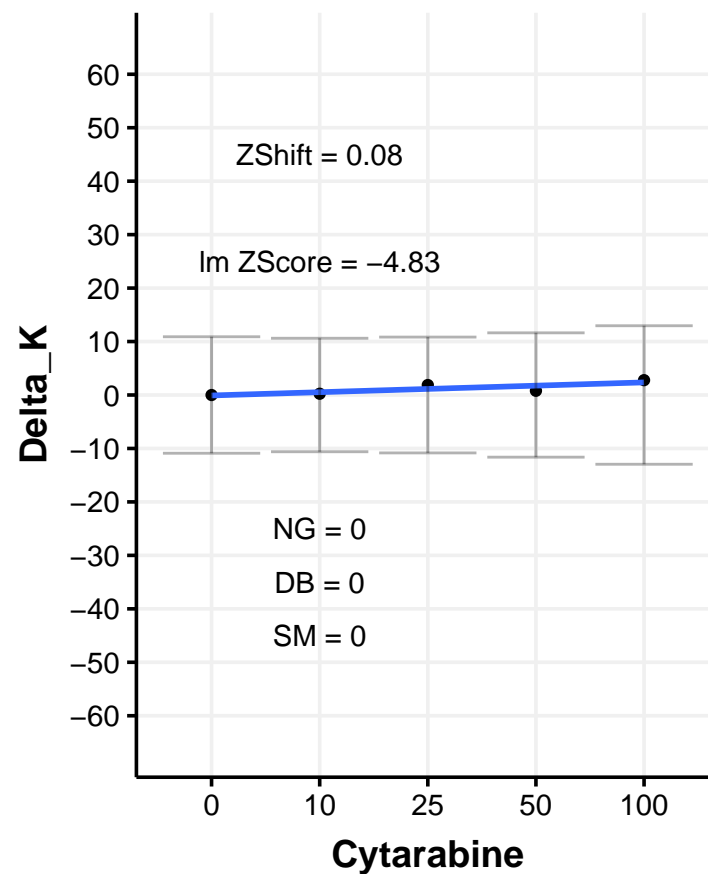

YDL227C\_RF1\_17 RF1

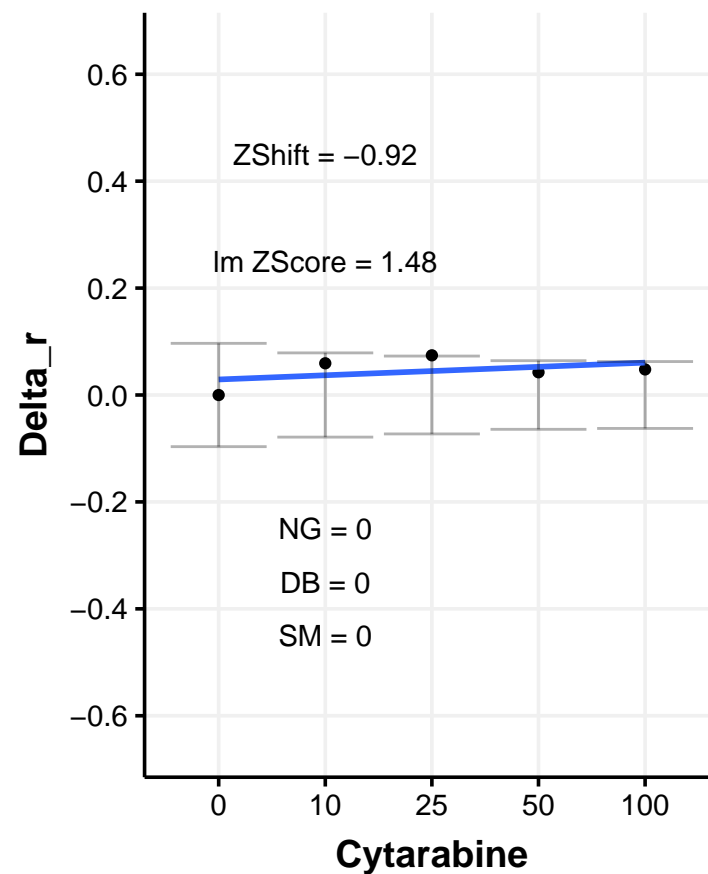

YDL227C\_RF1\_17 RF1

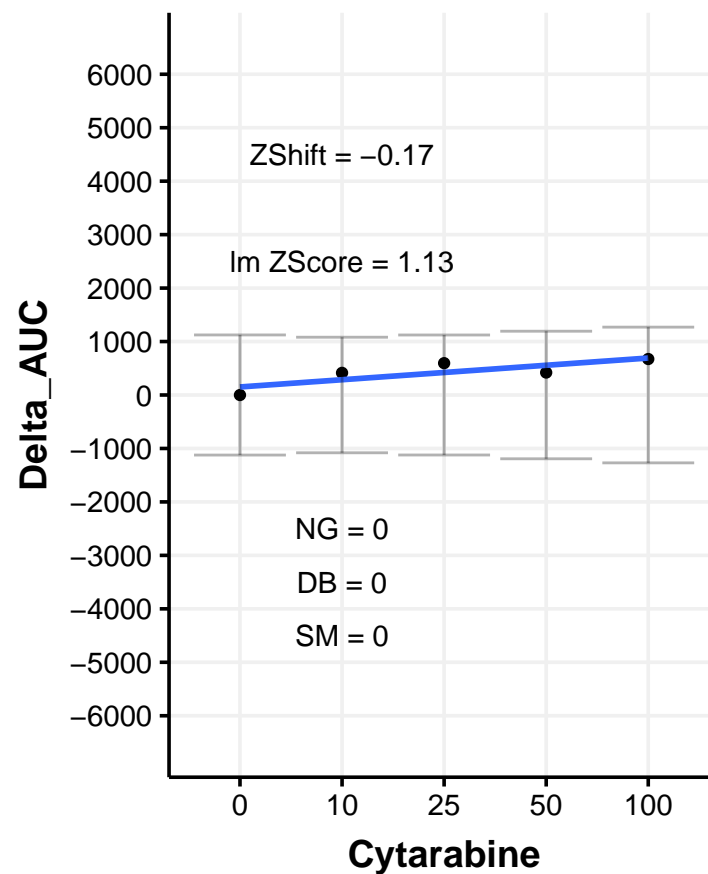

YDL227C\_RF1\_21 RF1

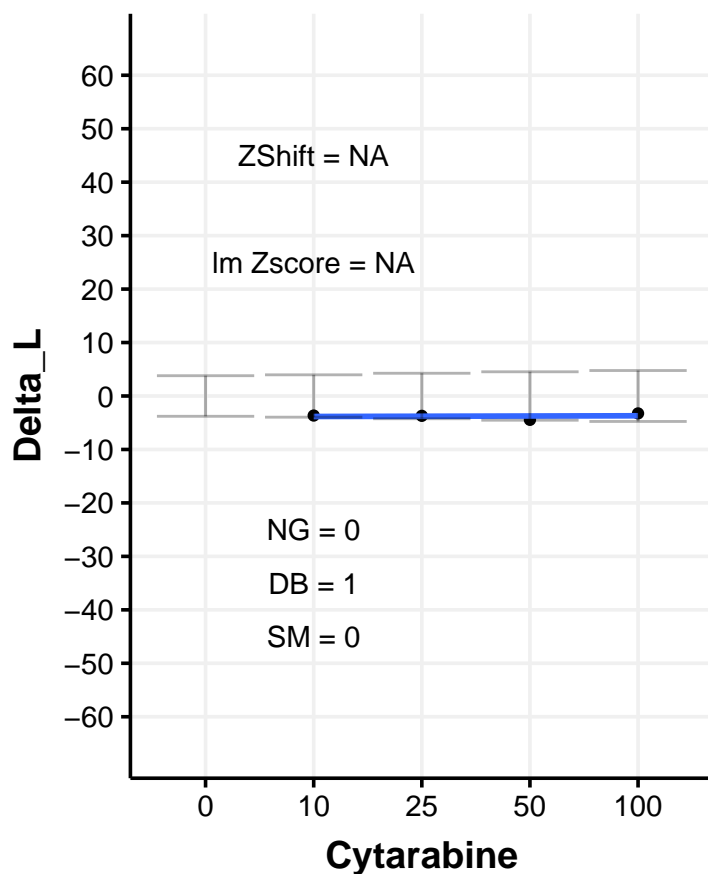

YDL227C\_RF1\_21 RF1

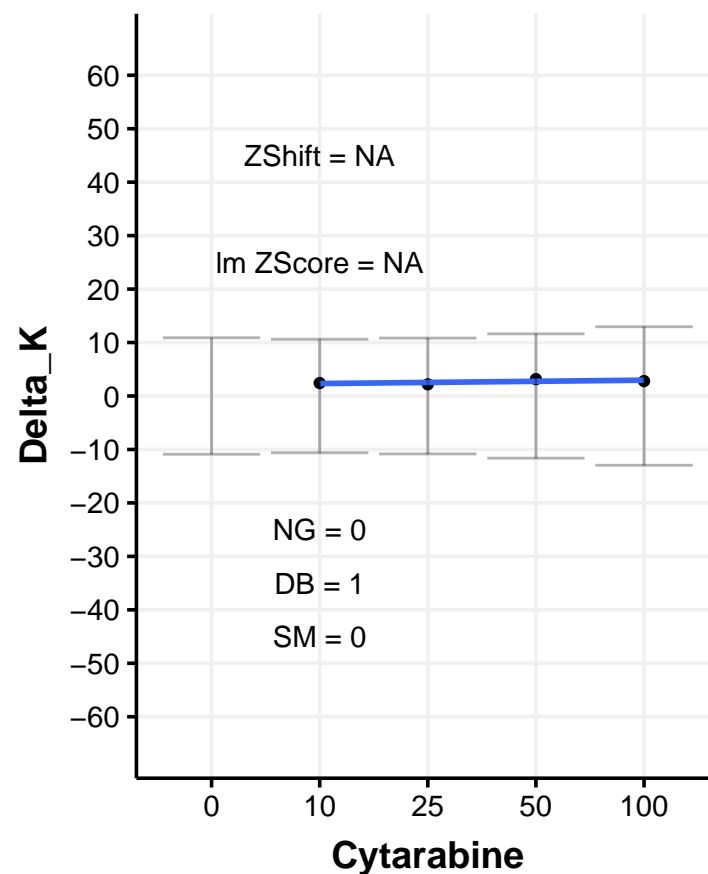

YDL227C\_RF1\_21 RF1

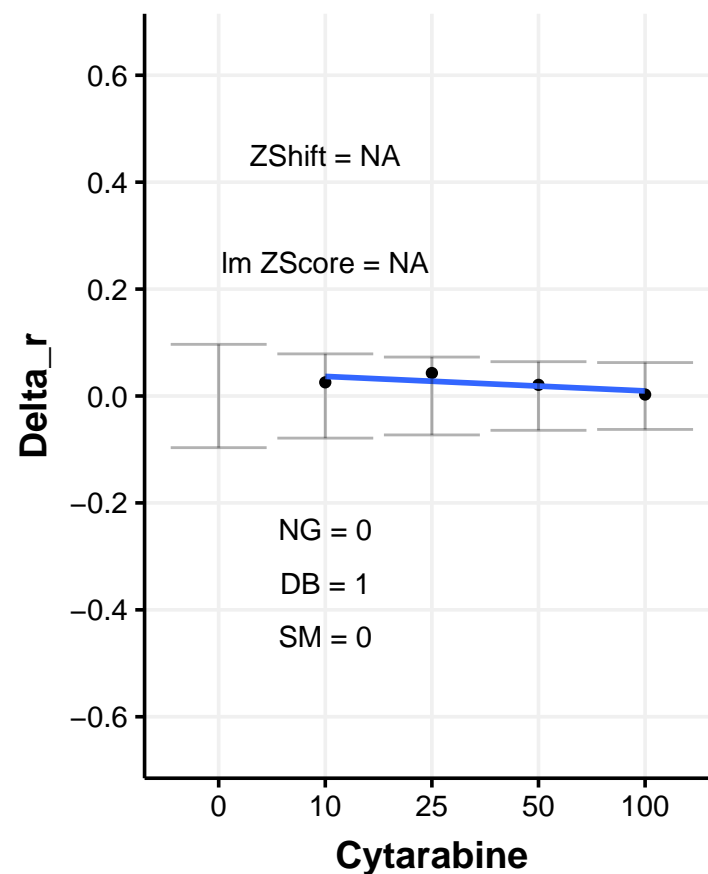

YDL227C\_RF1\_21 RF1

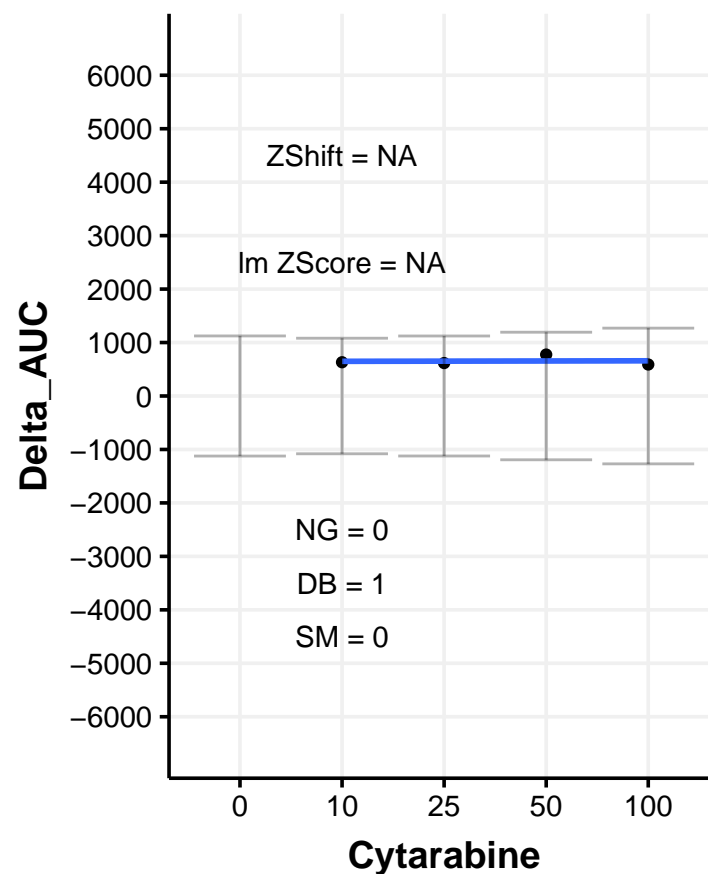

YDL227C\_RF1\_22 RF1

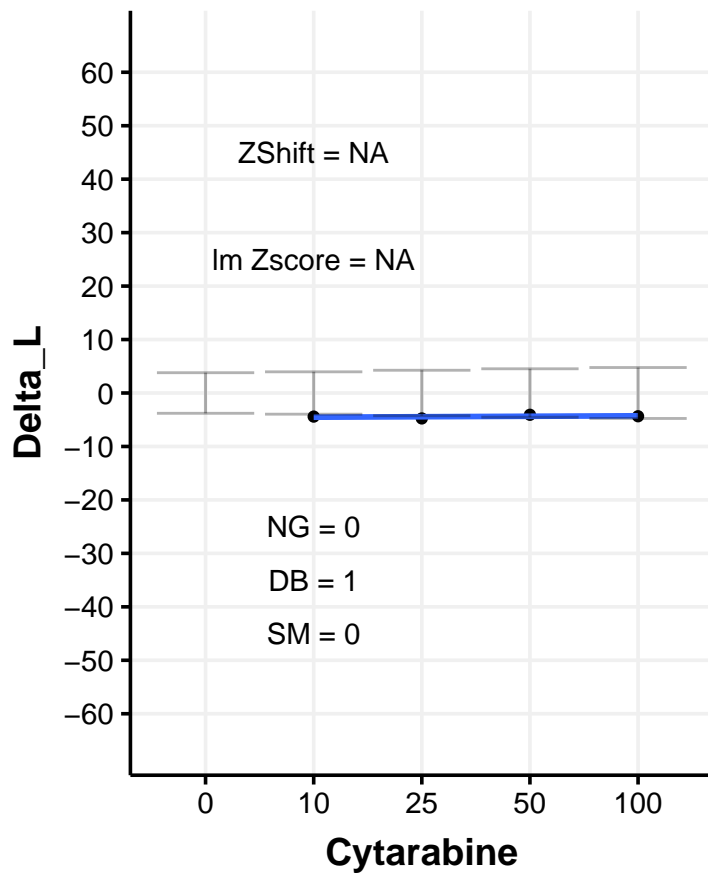

YDL227C\_RF1\_22 RF1

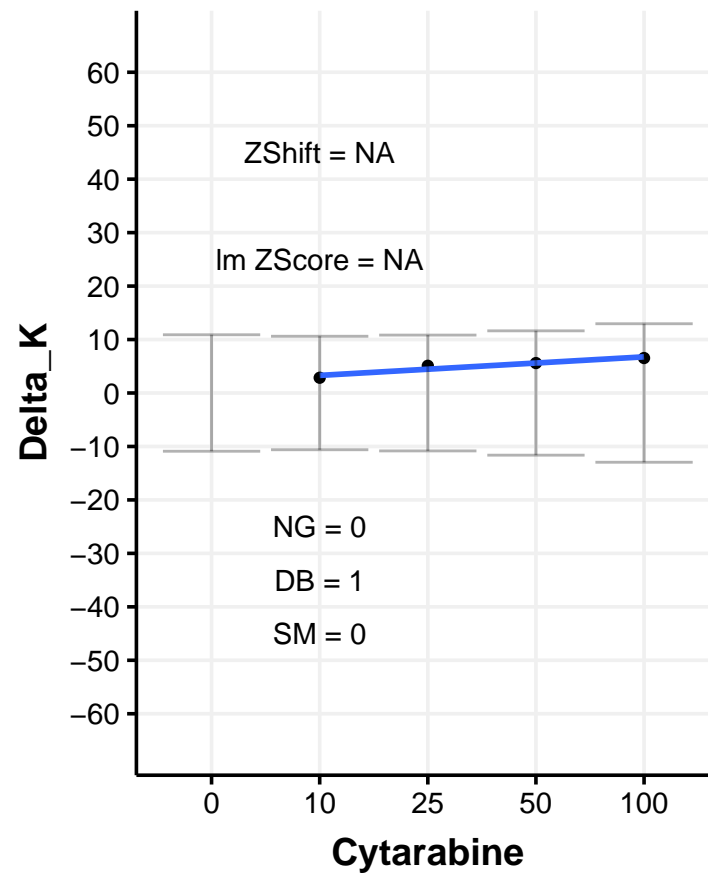

YDL227C\_RF1\_22 RF1

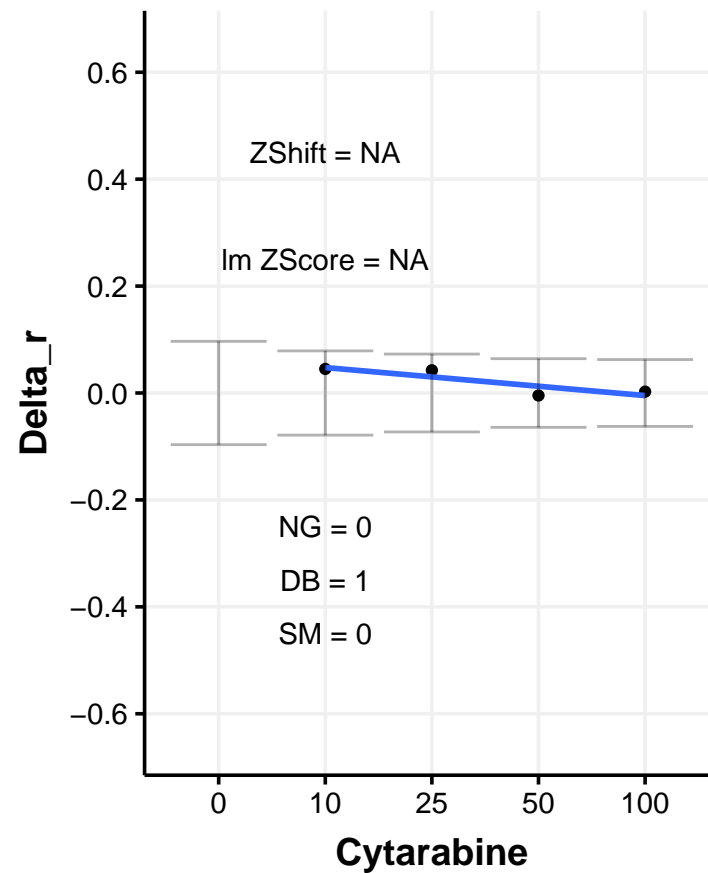

YDL227C\_RF1\_22 RF1

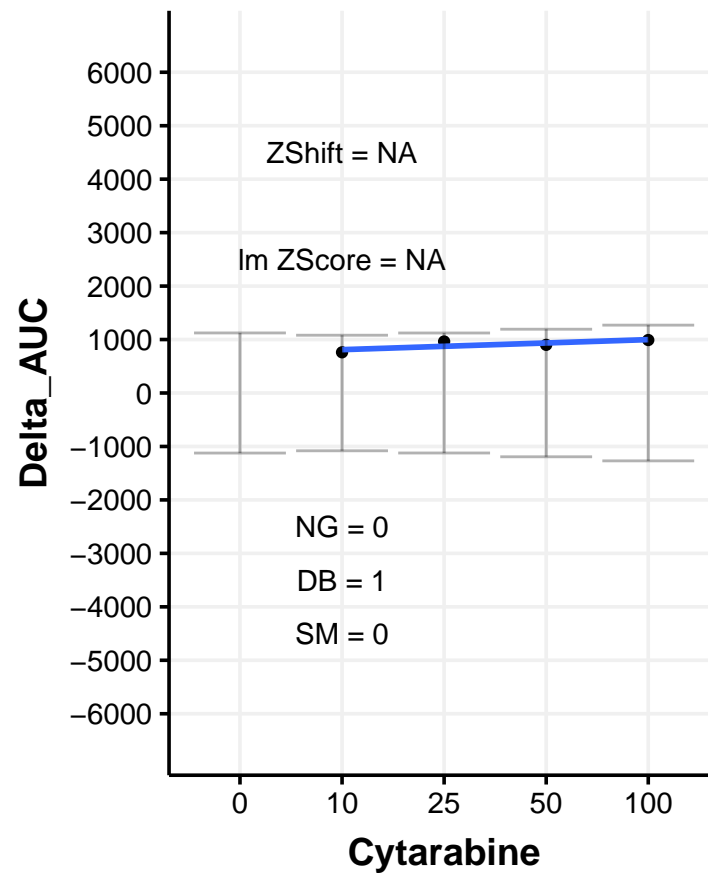

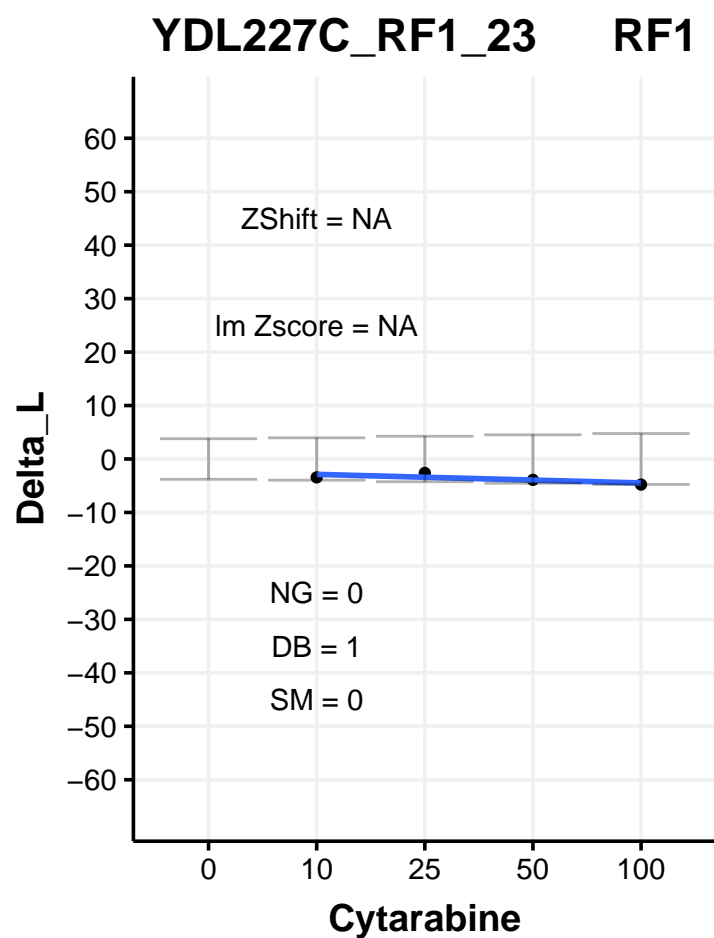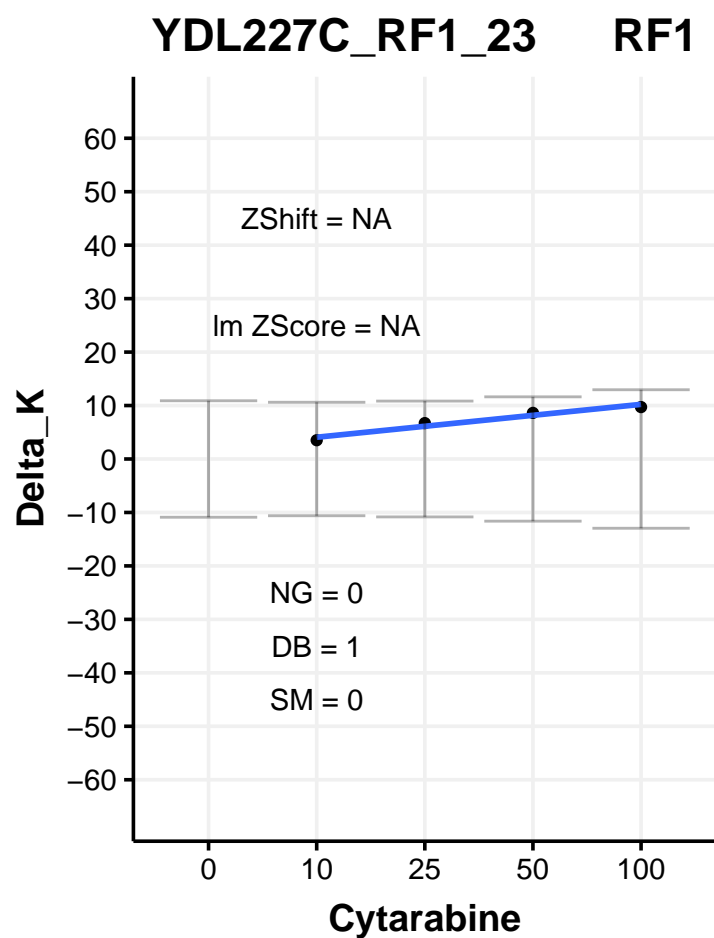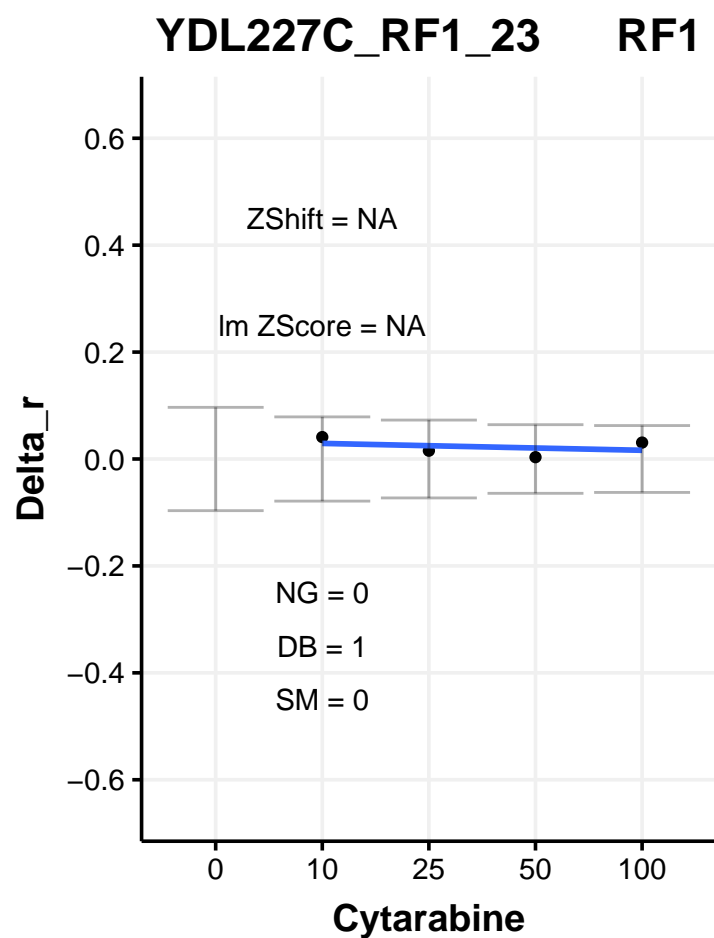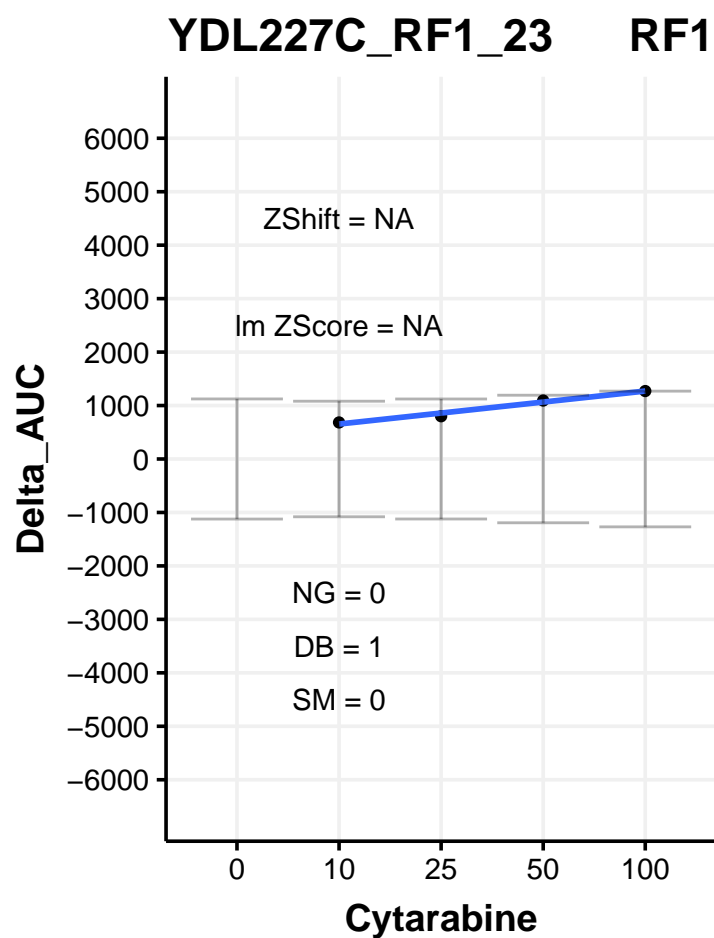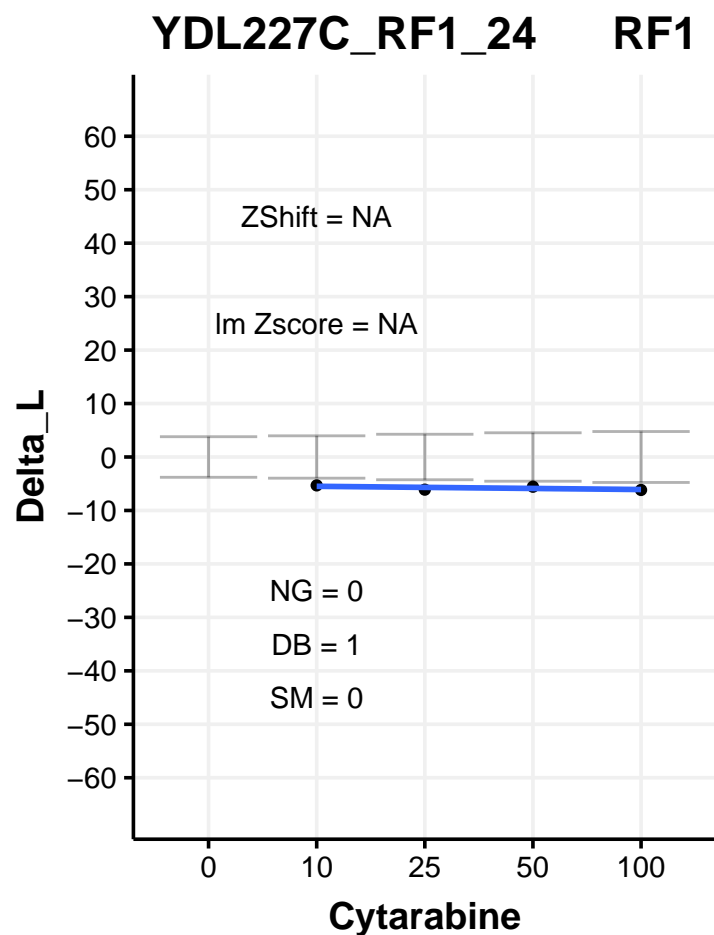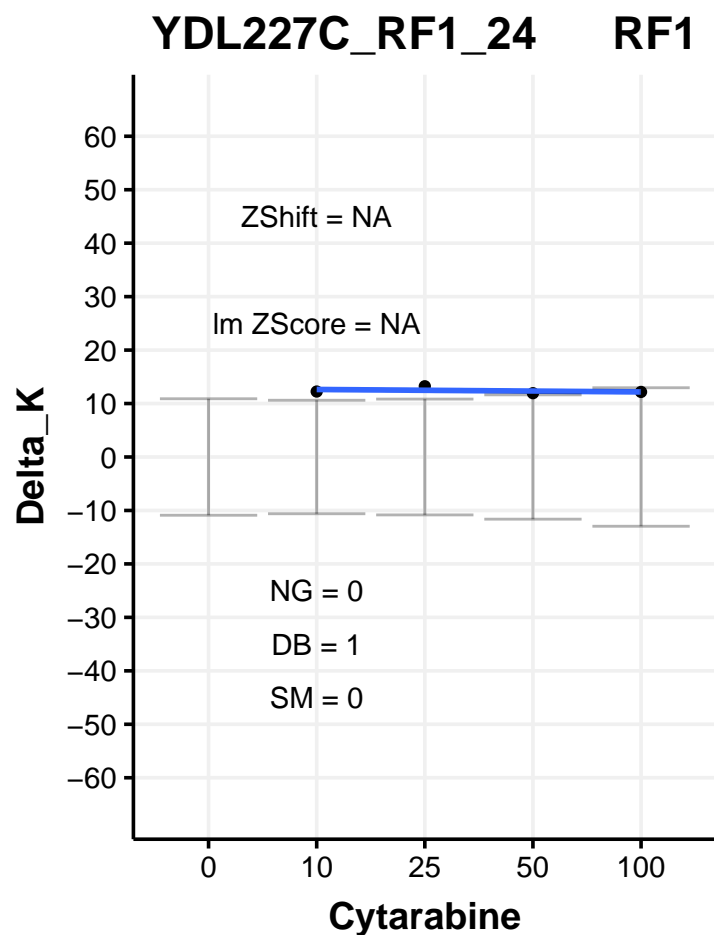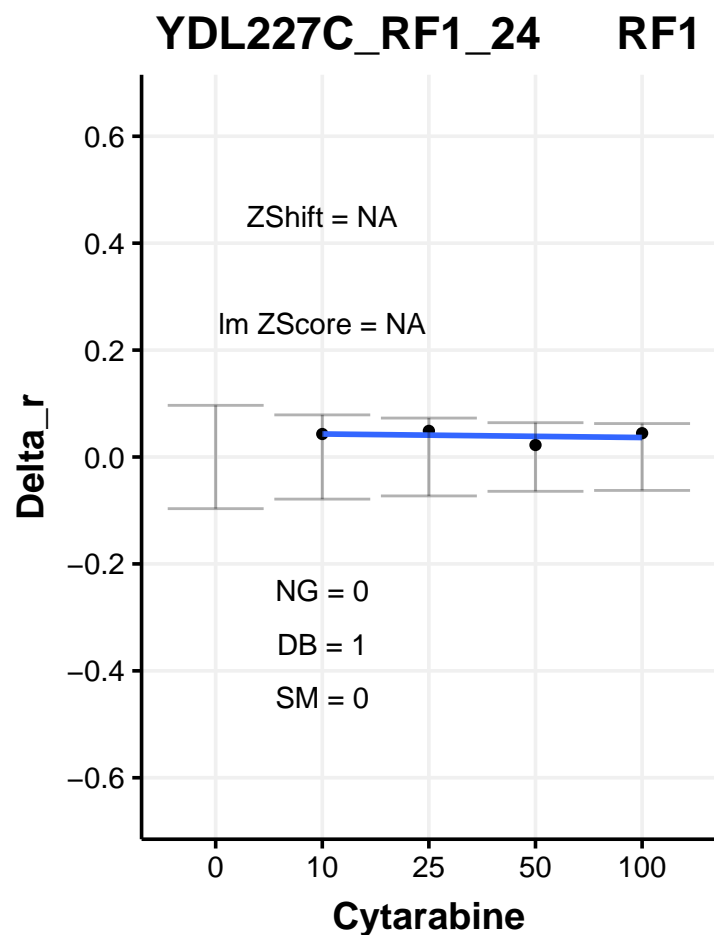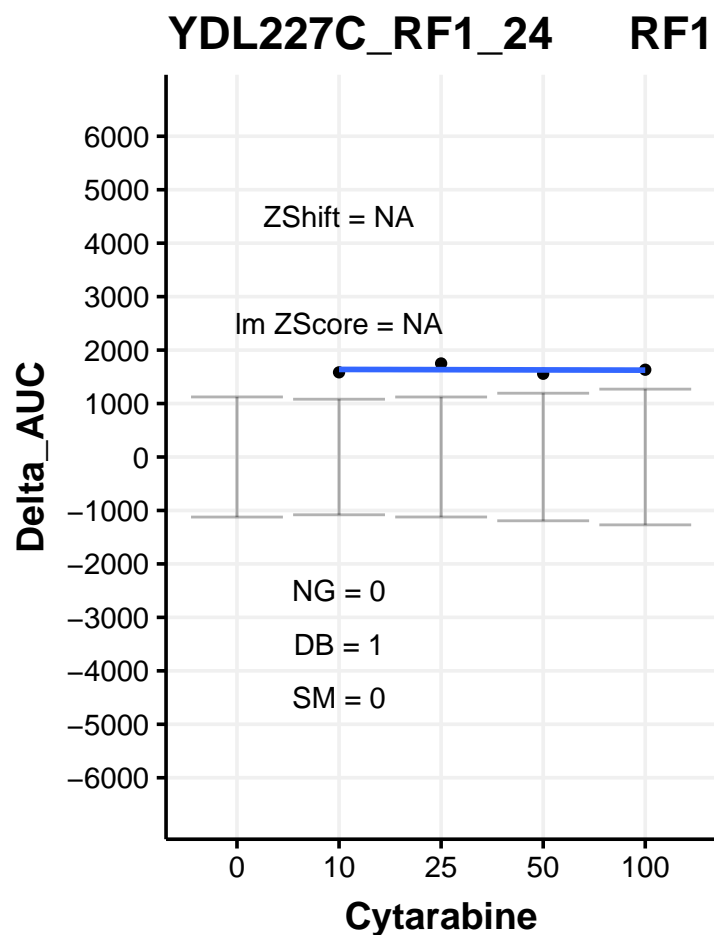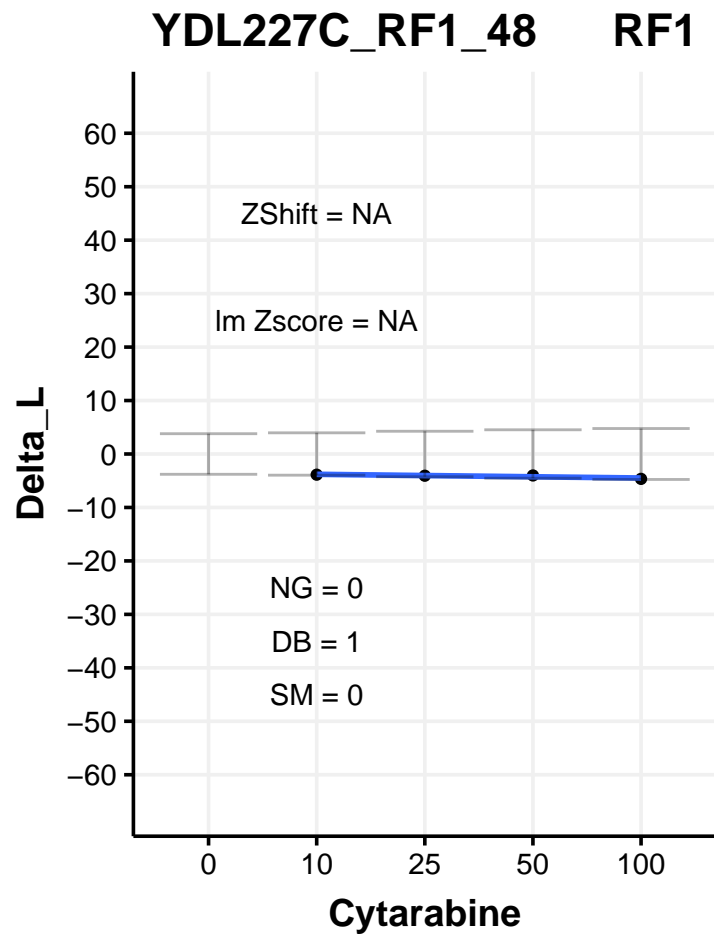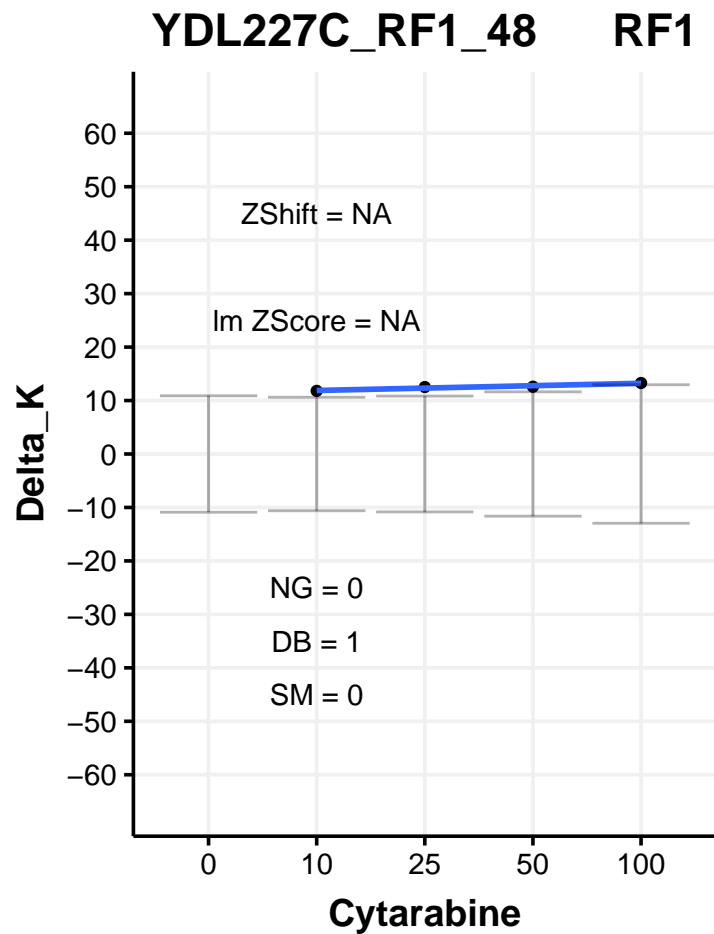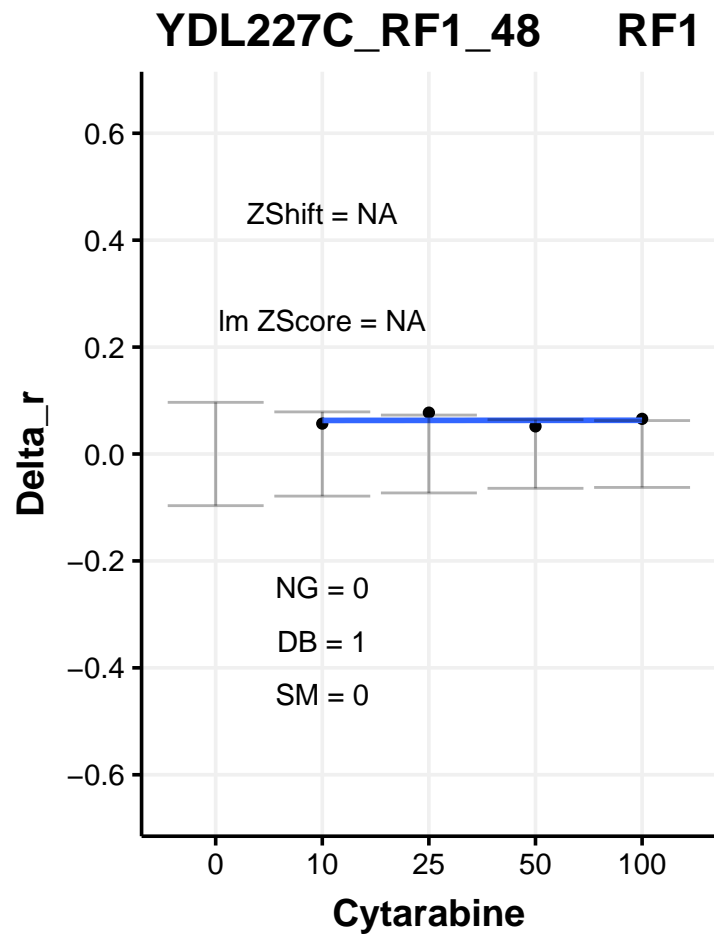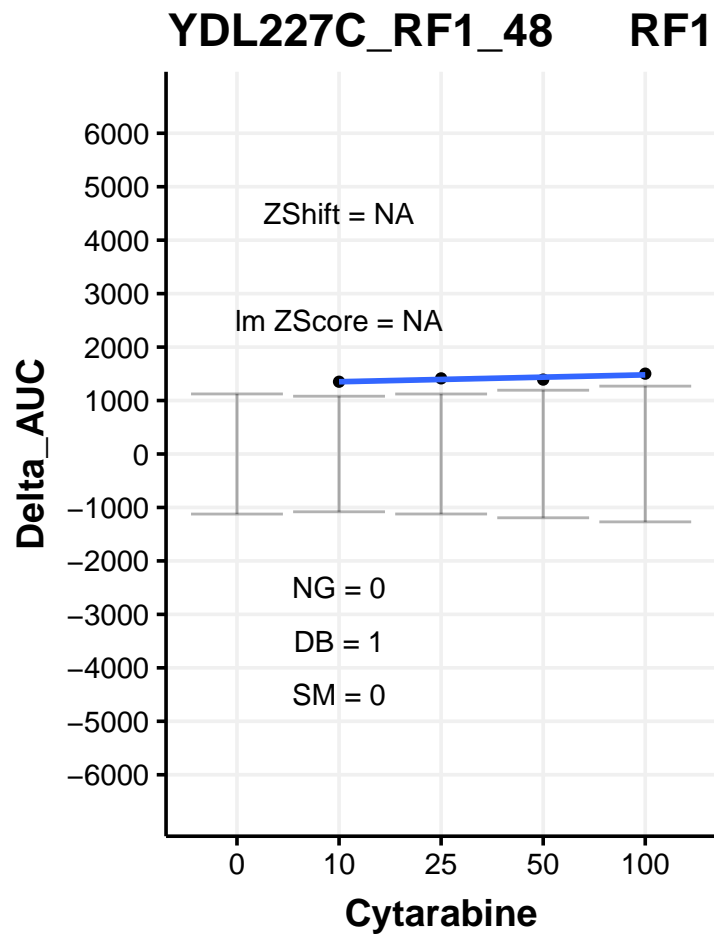

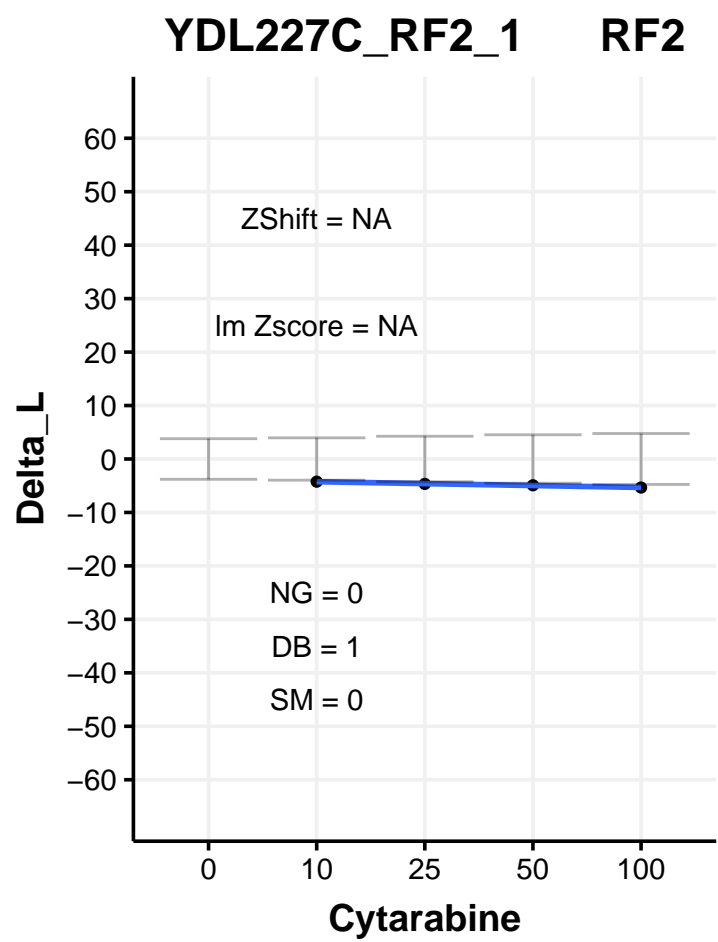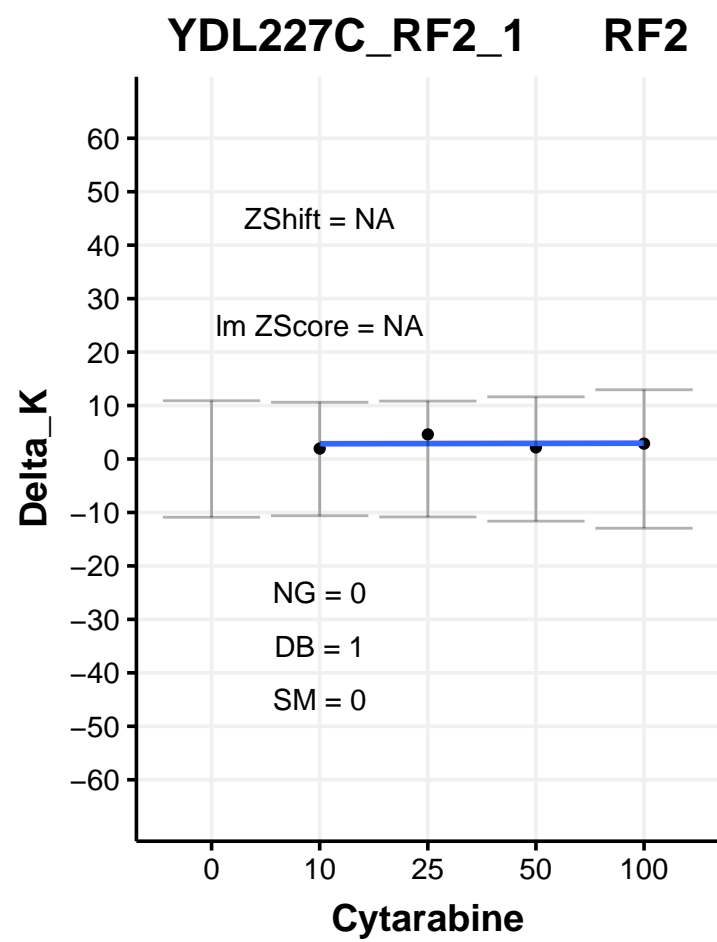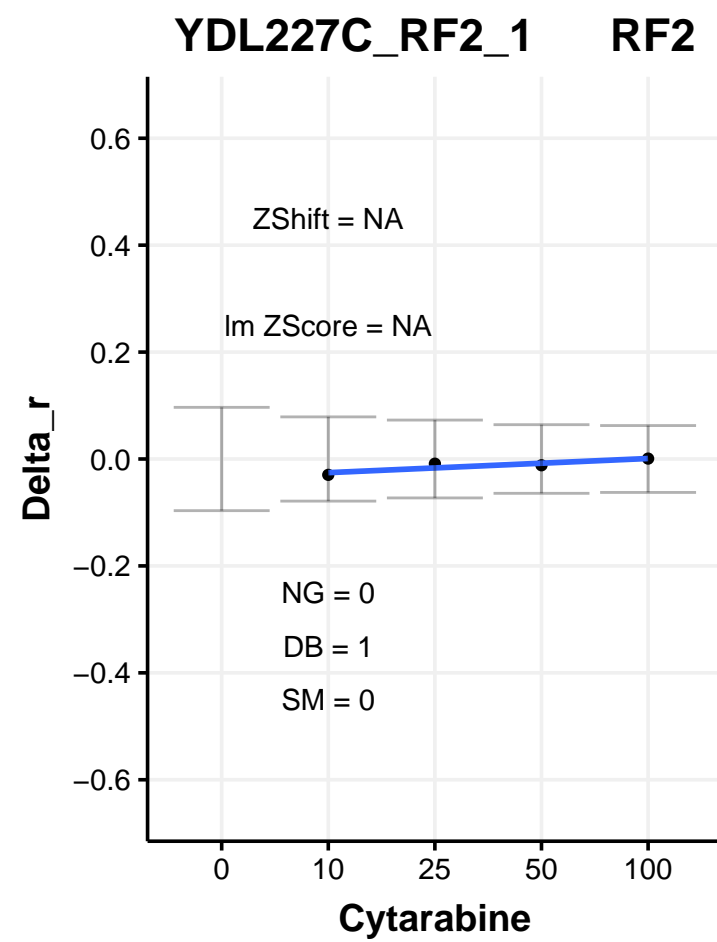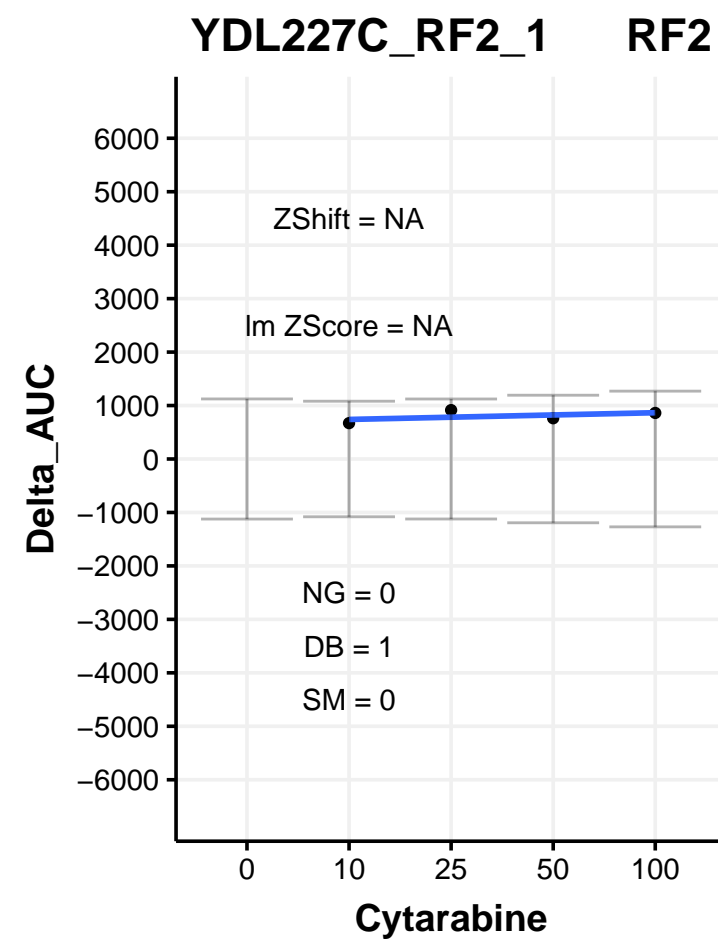

Supplement: s1 [file s1]
