# Supplementary material for: A Humanized Yeast Phenomic Model of Deoxycytidine Kinase to Predict Genetic Buffering of Nucleoside Analog Cytotoxicity
Source: MDPI journal article supplement (doi:10.3390/genes10100770), 2019-09-30

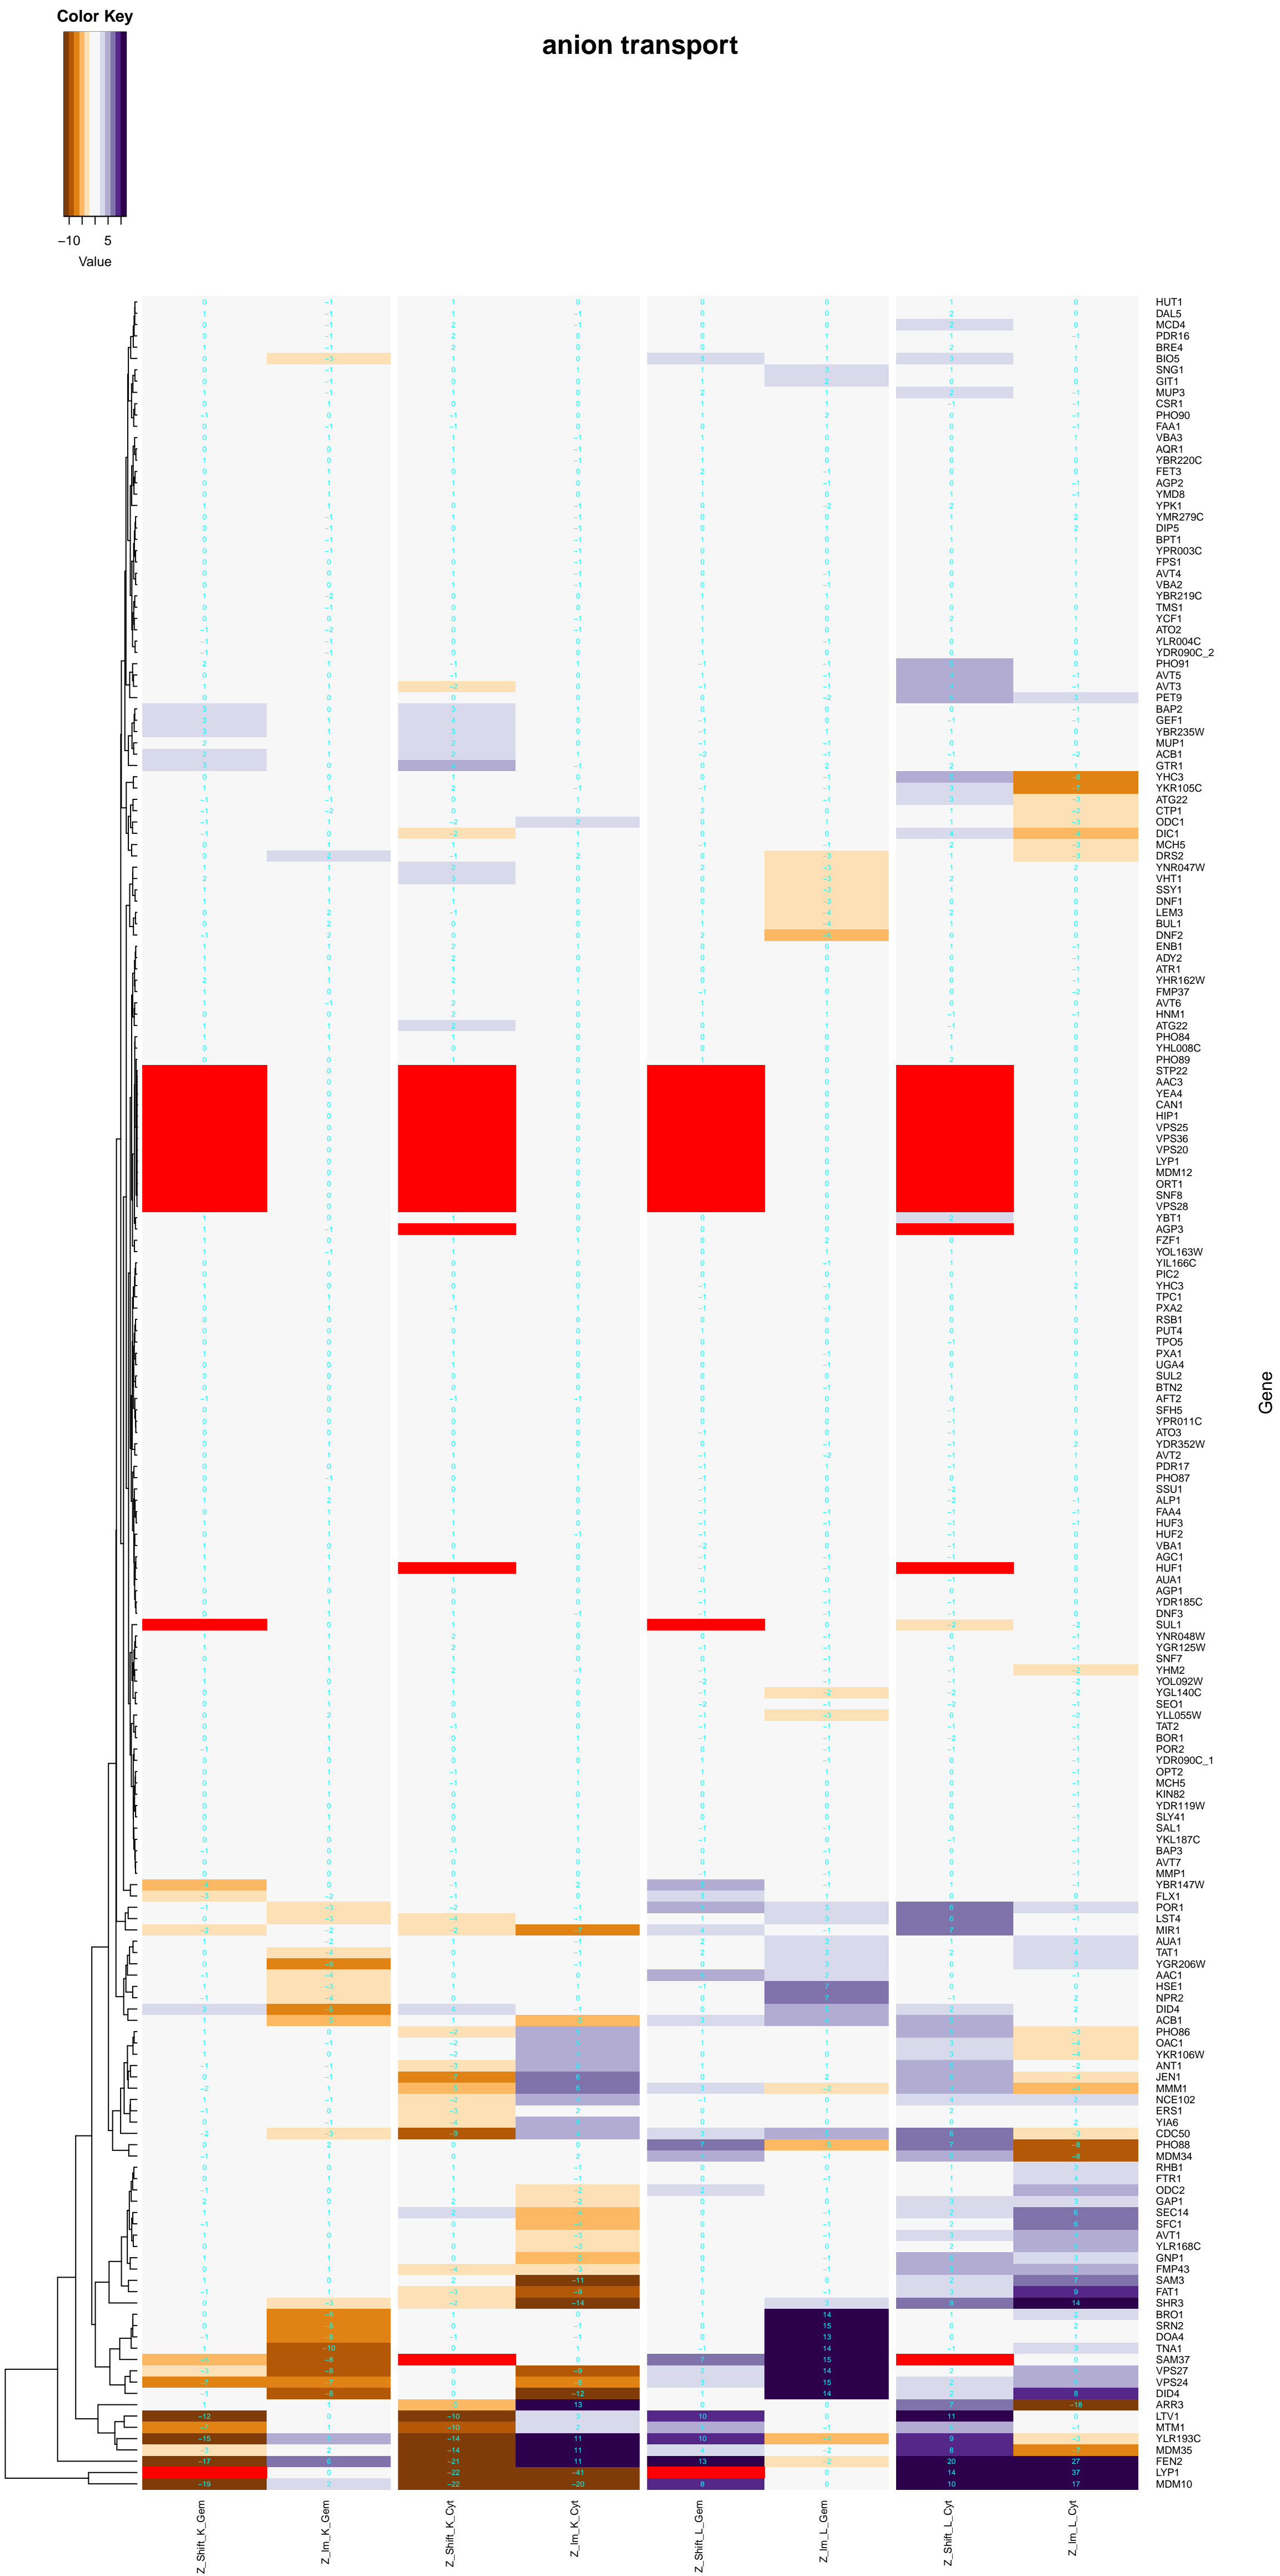

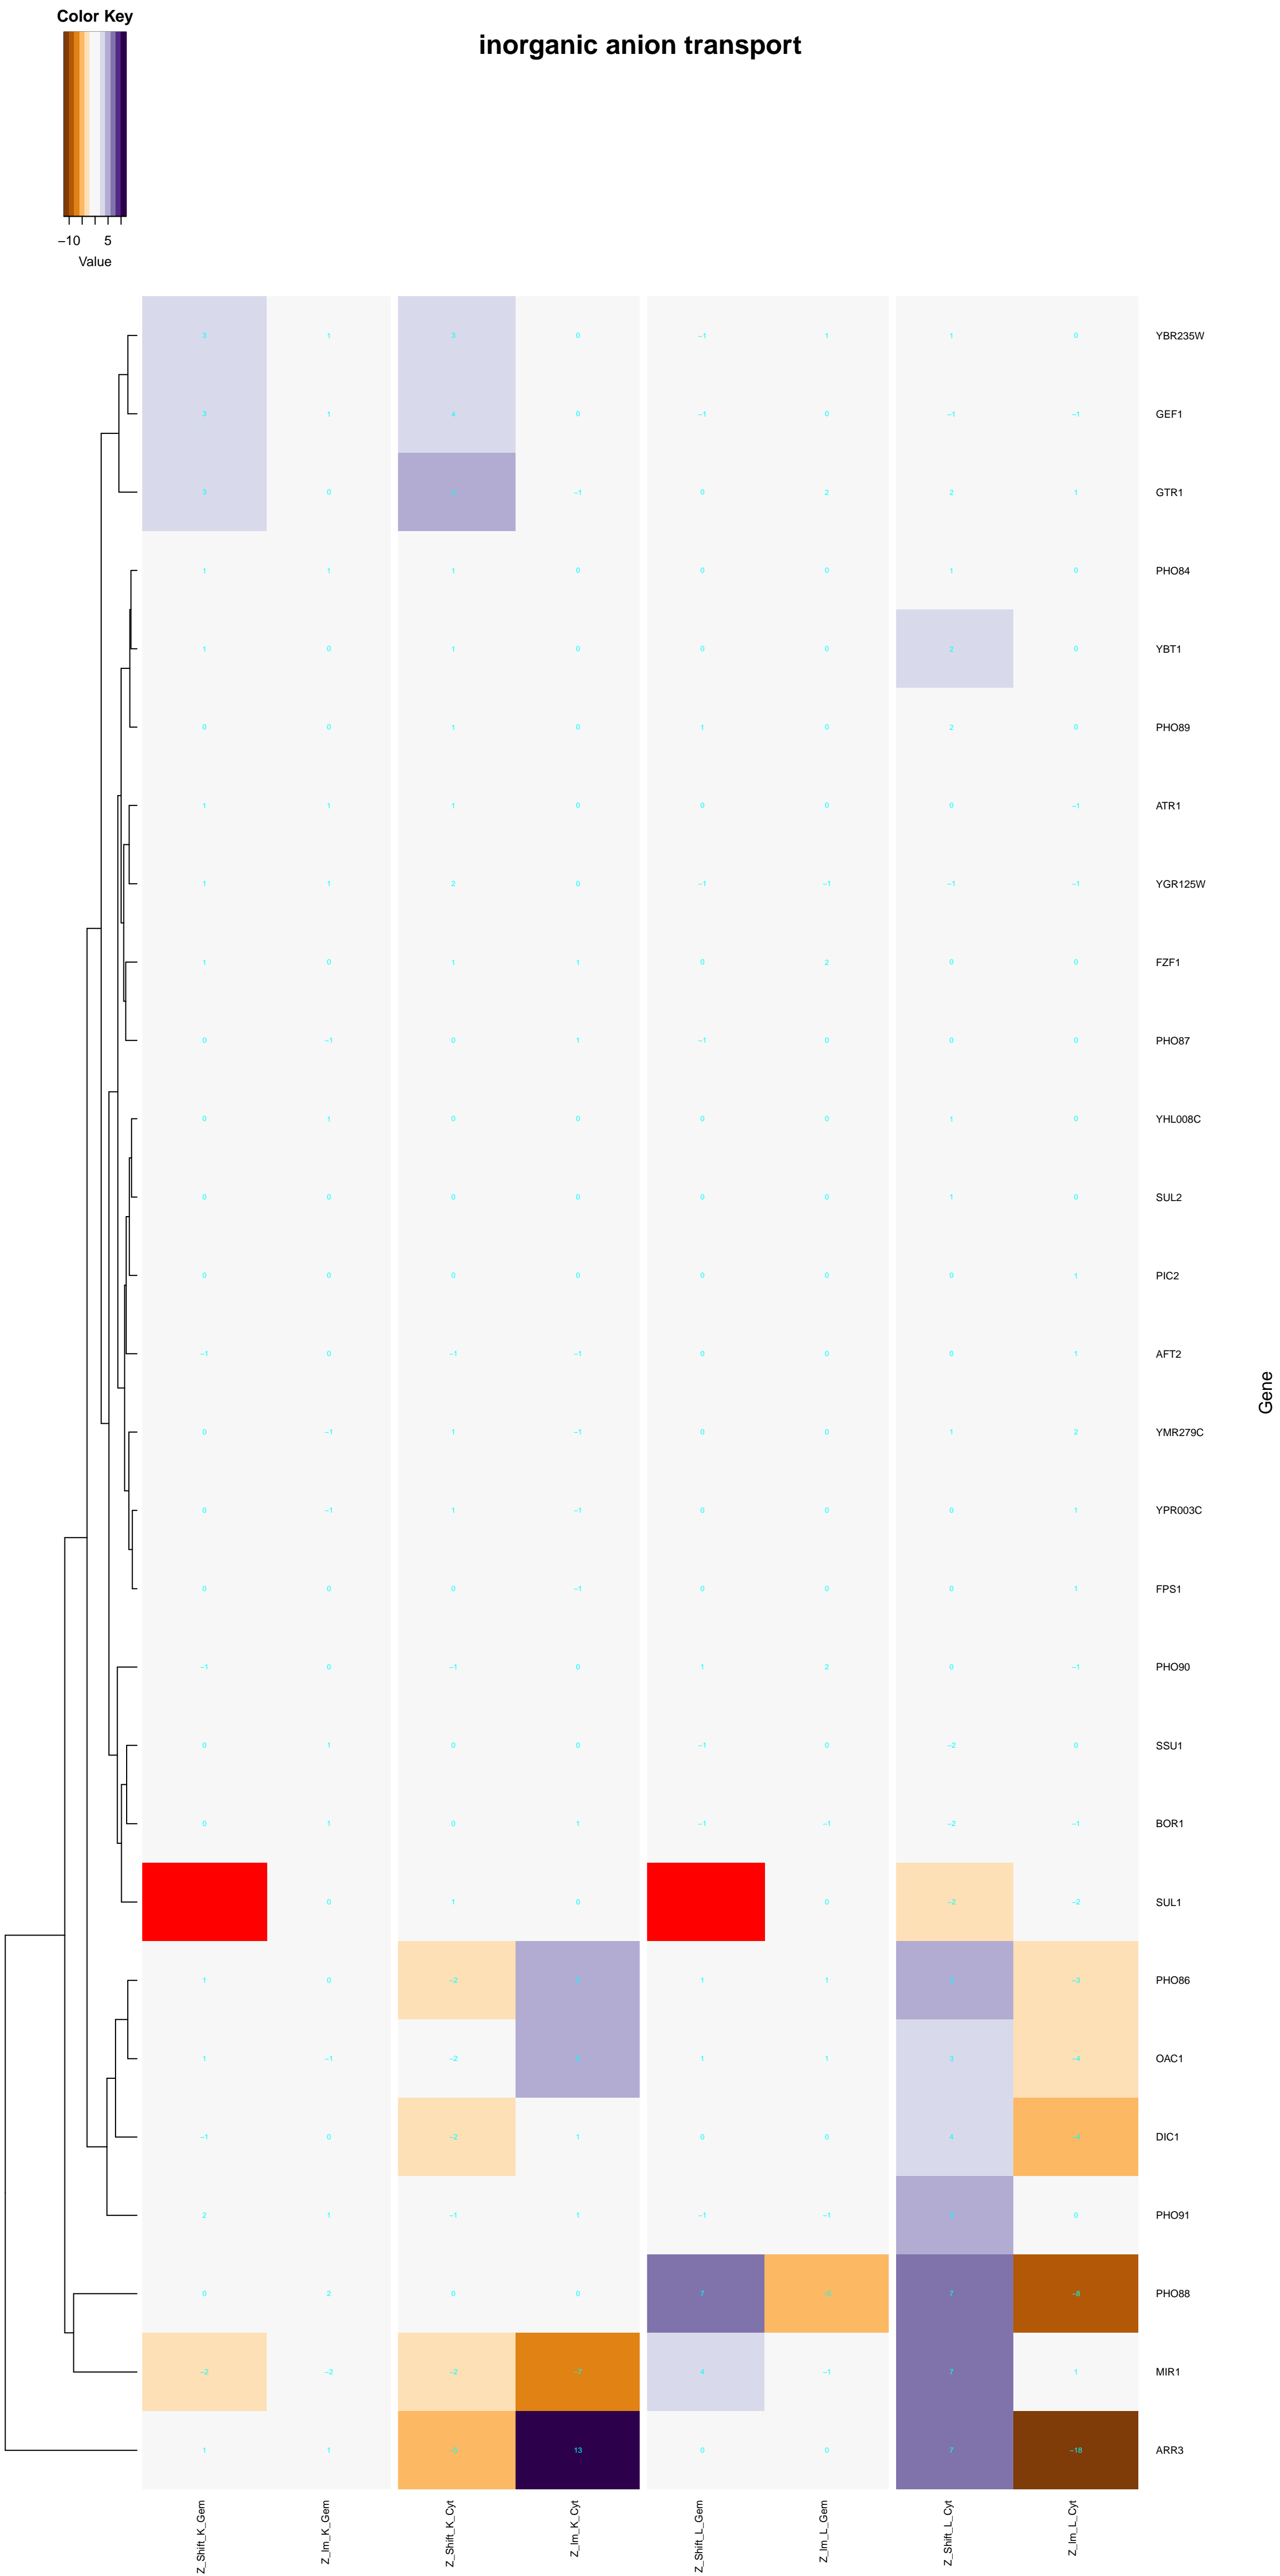

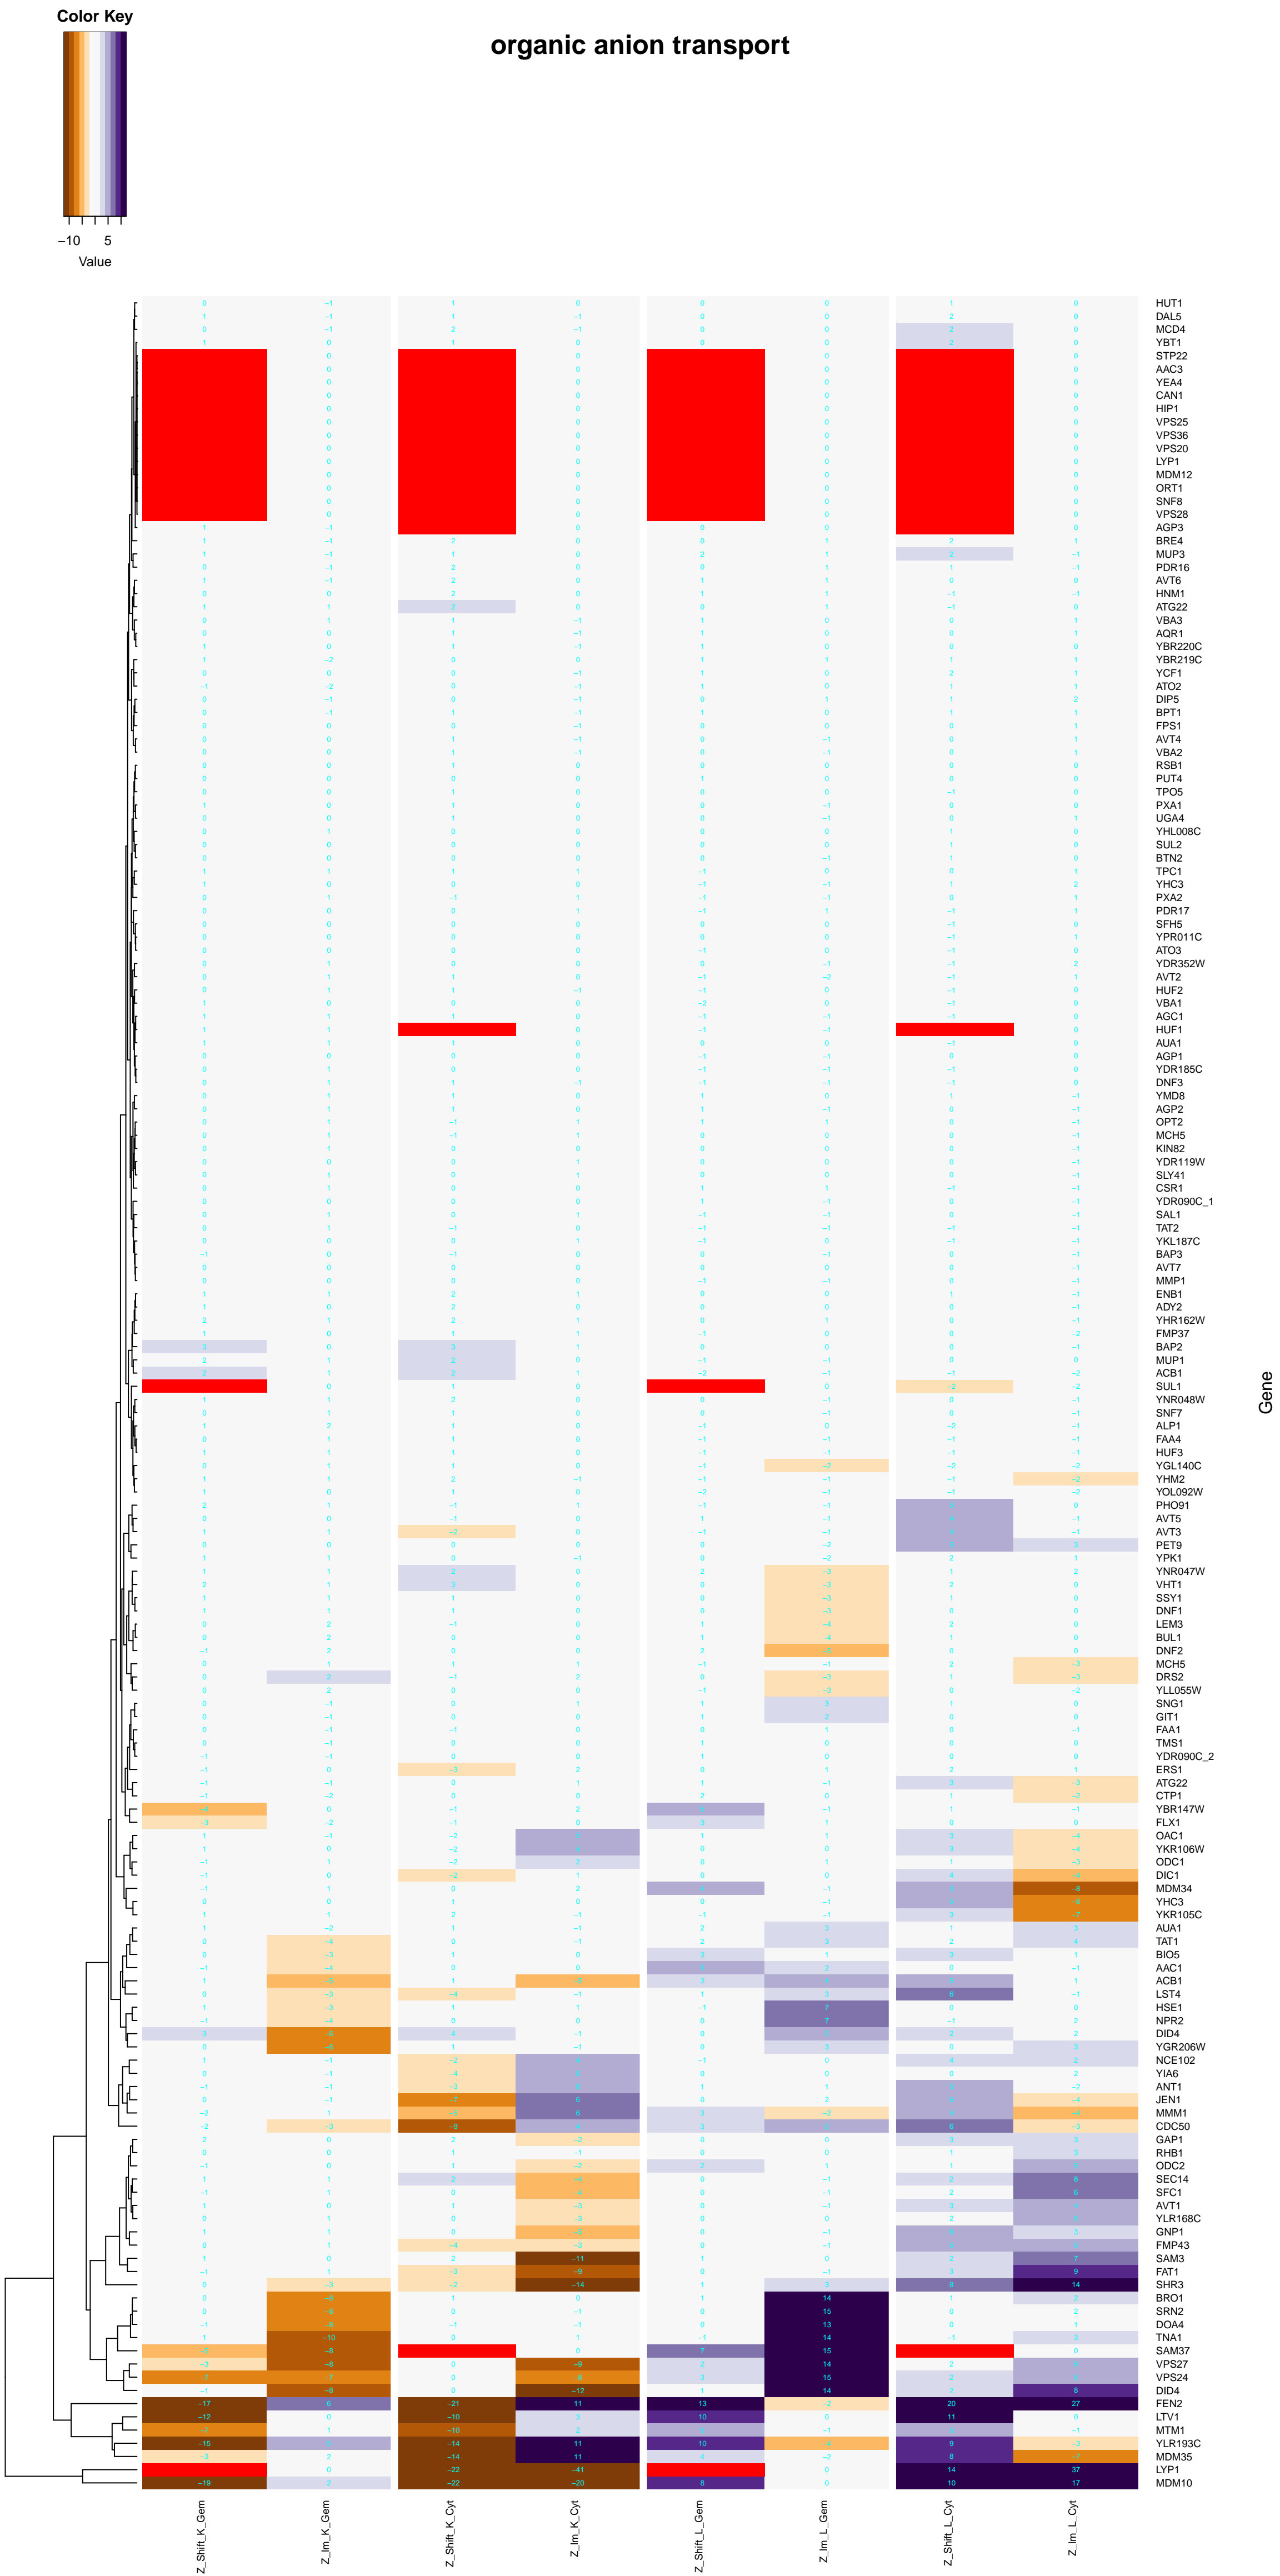

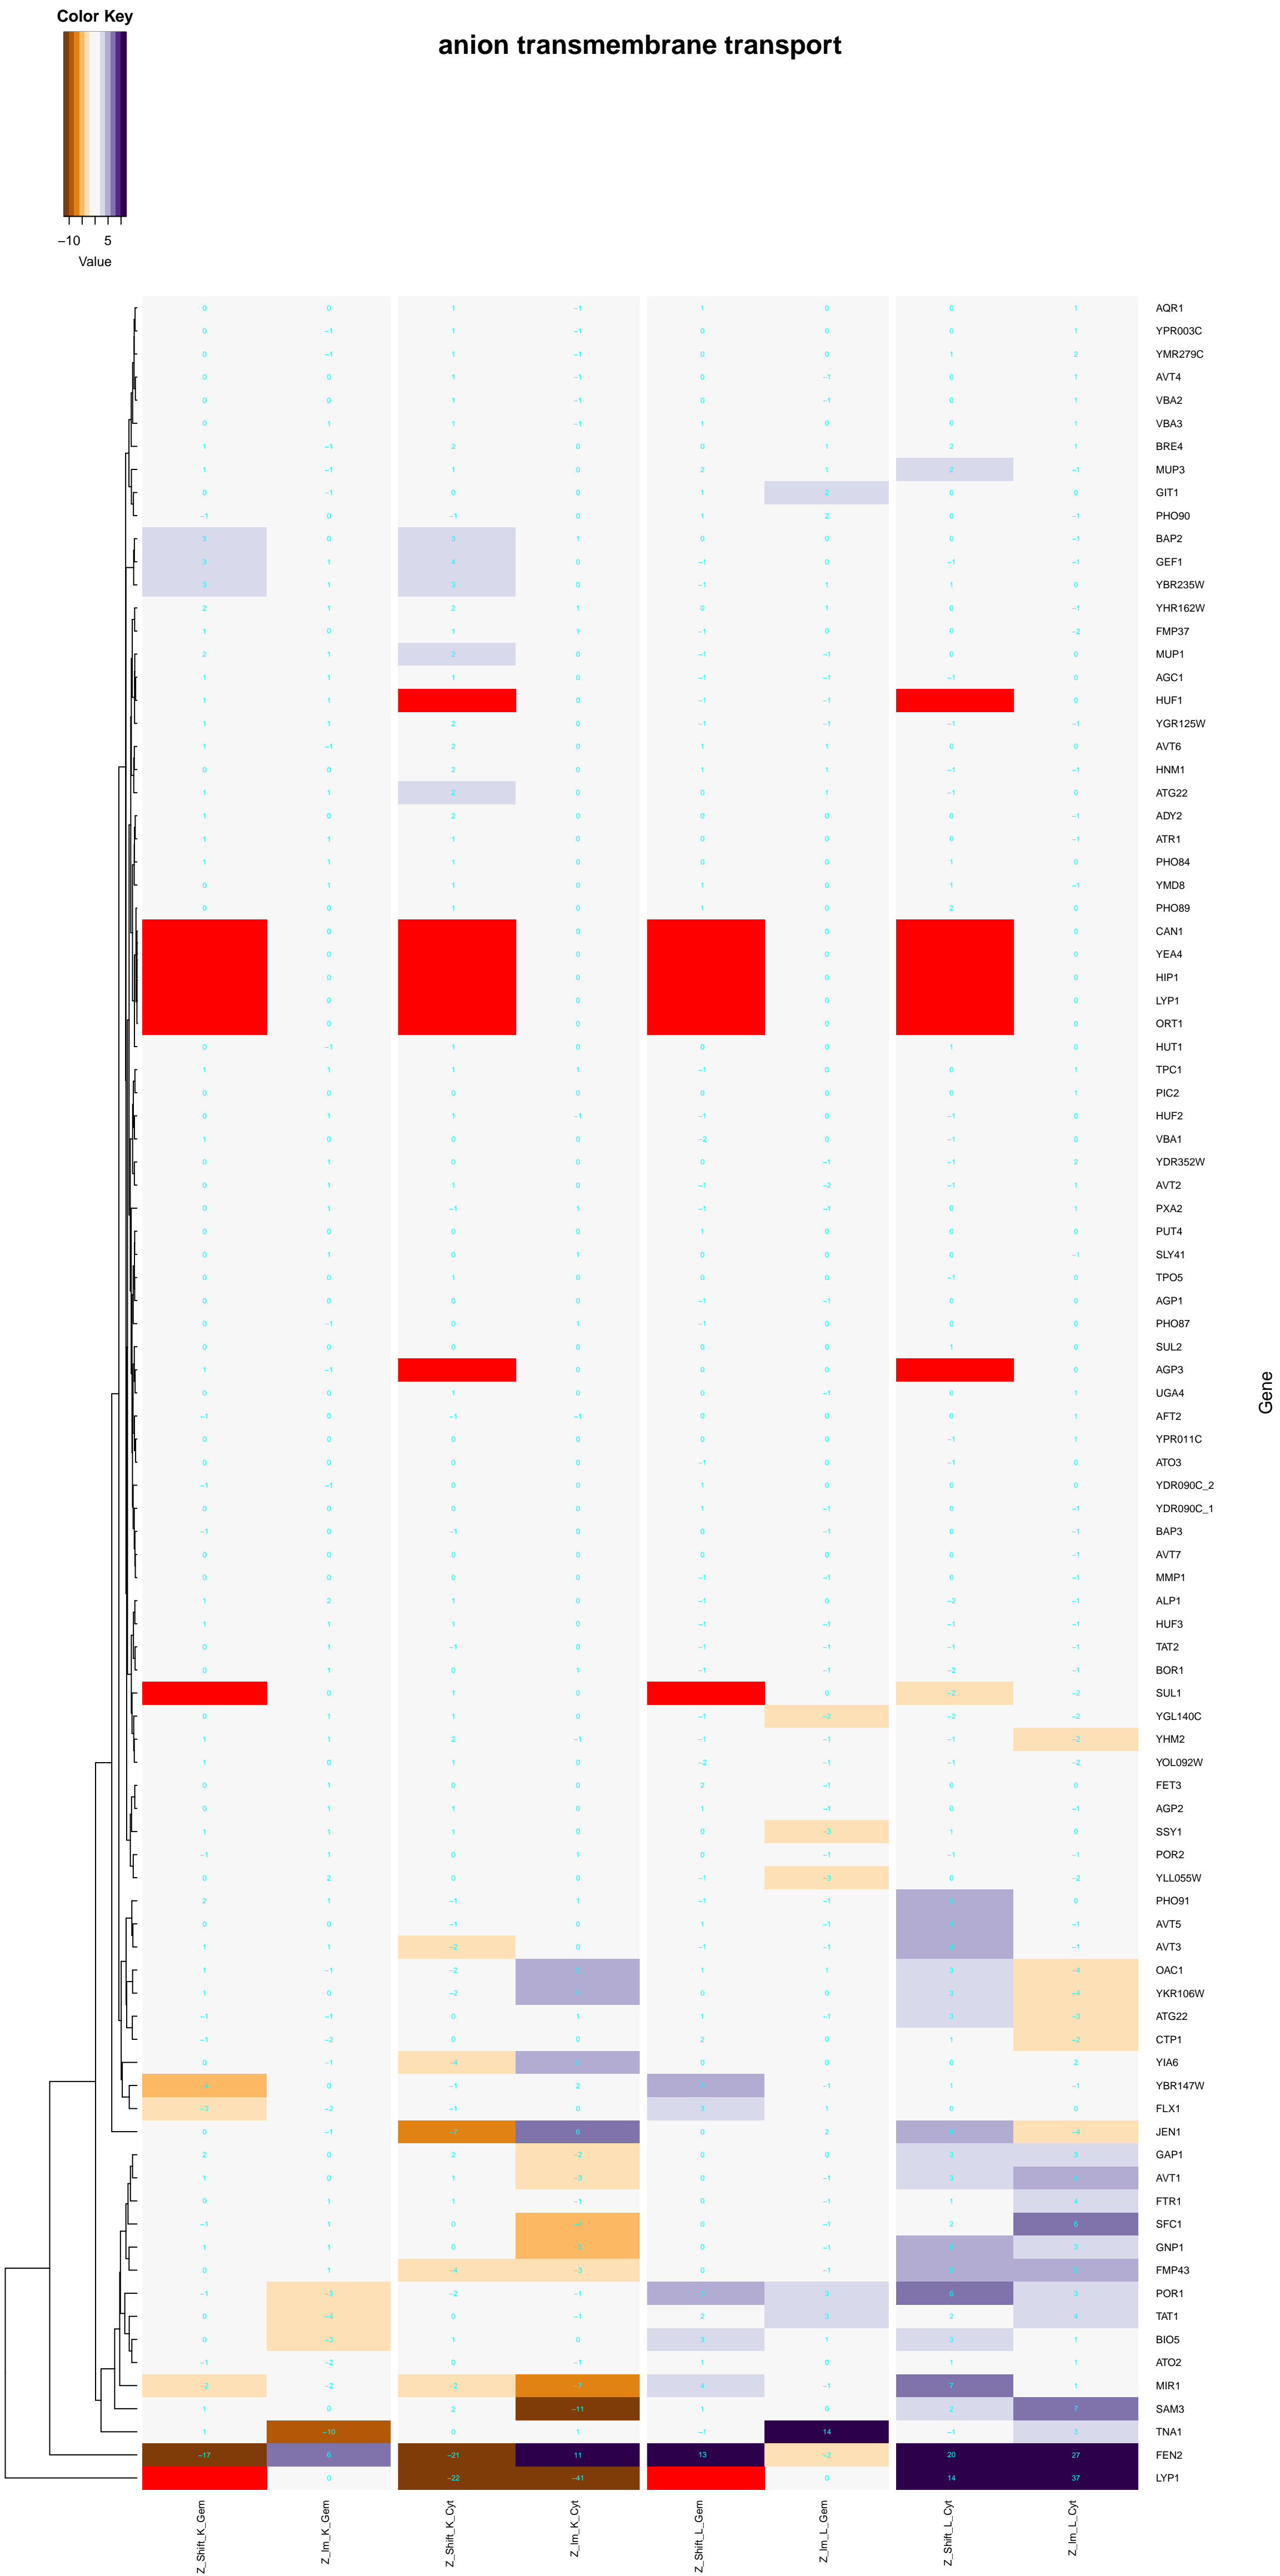

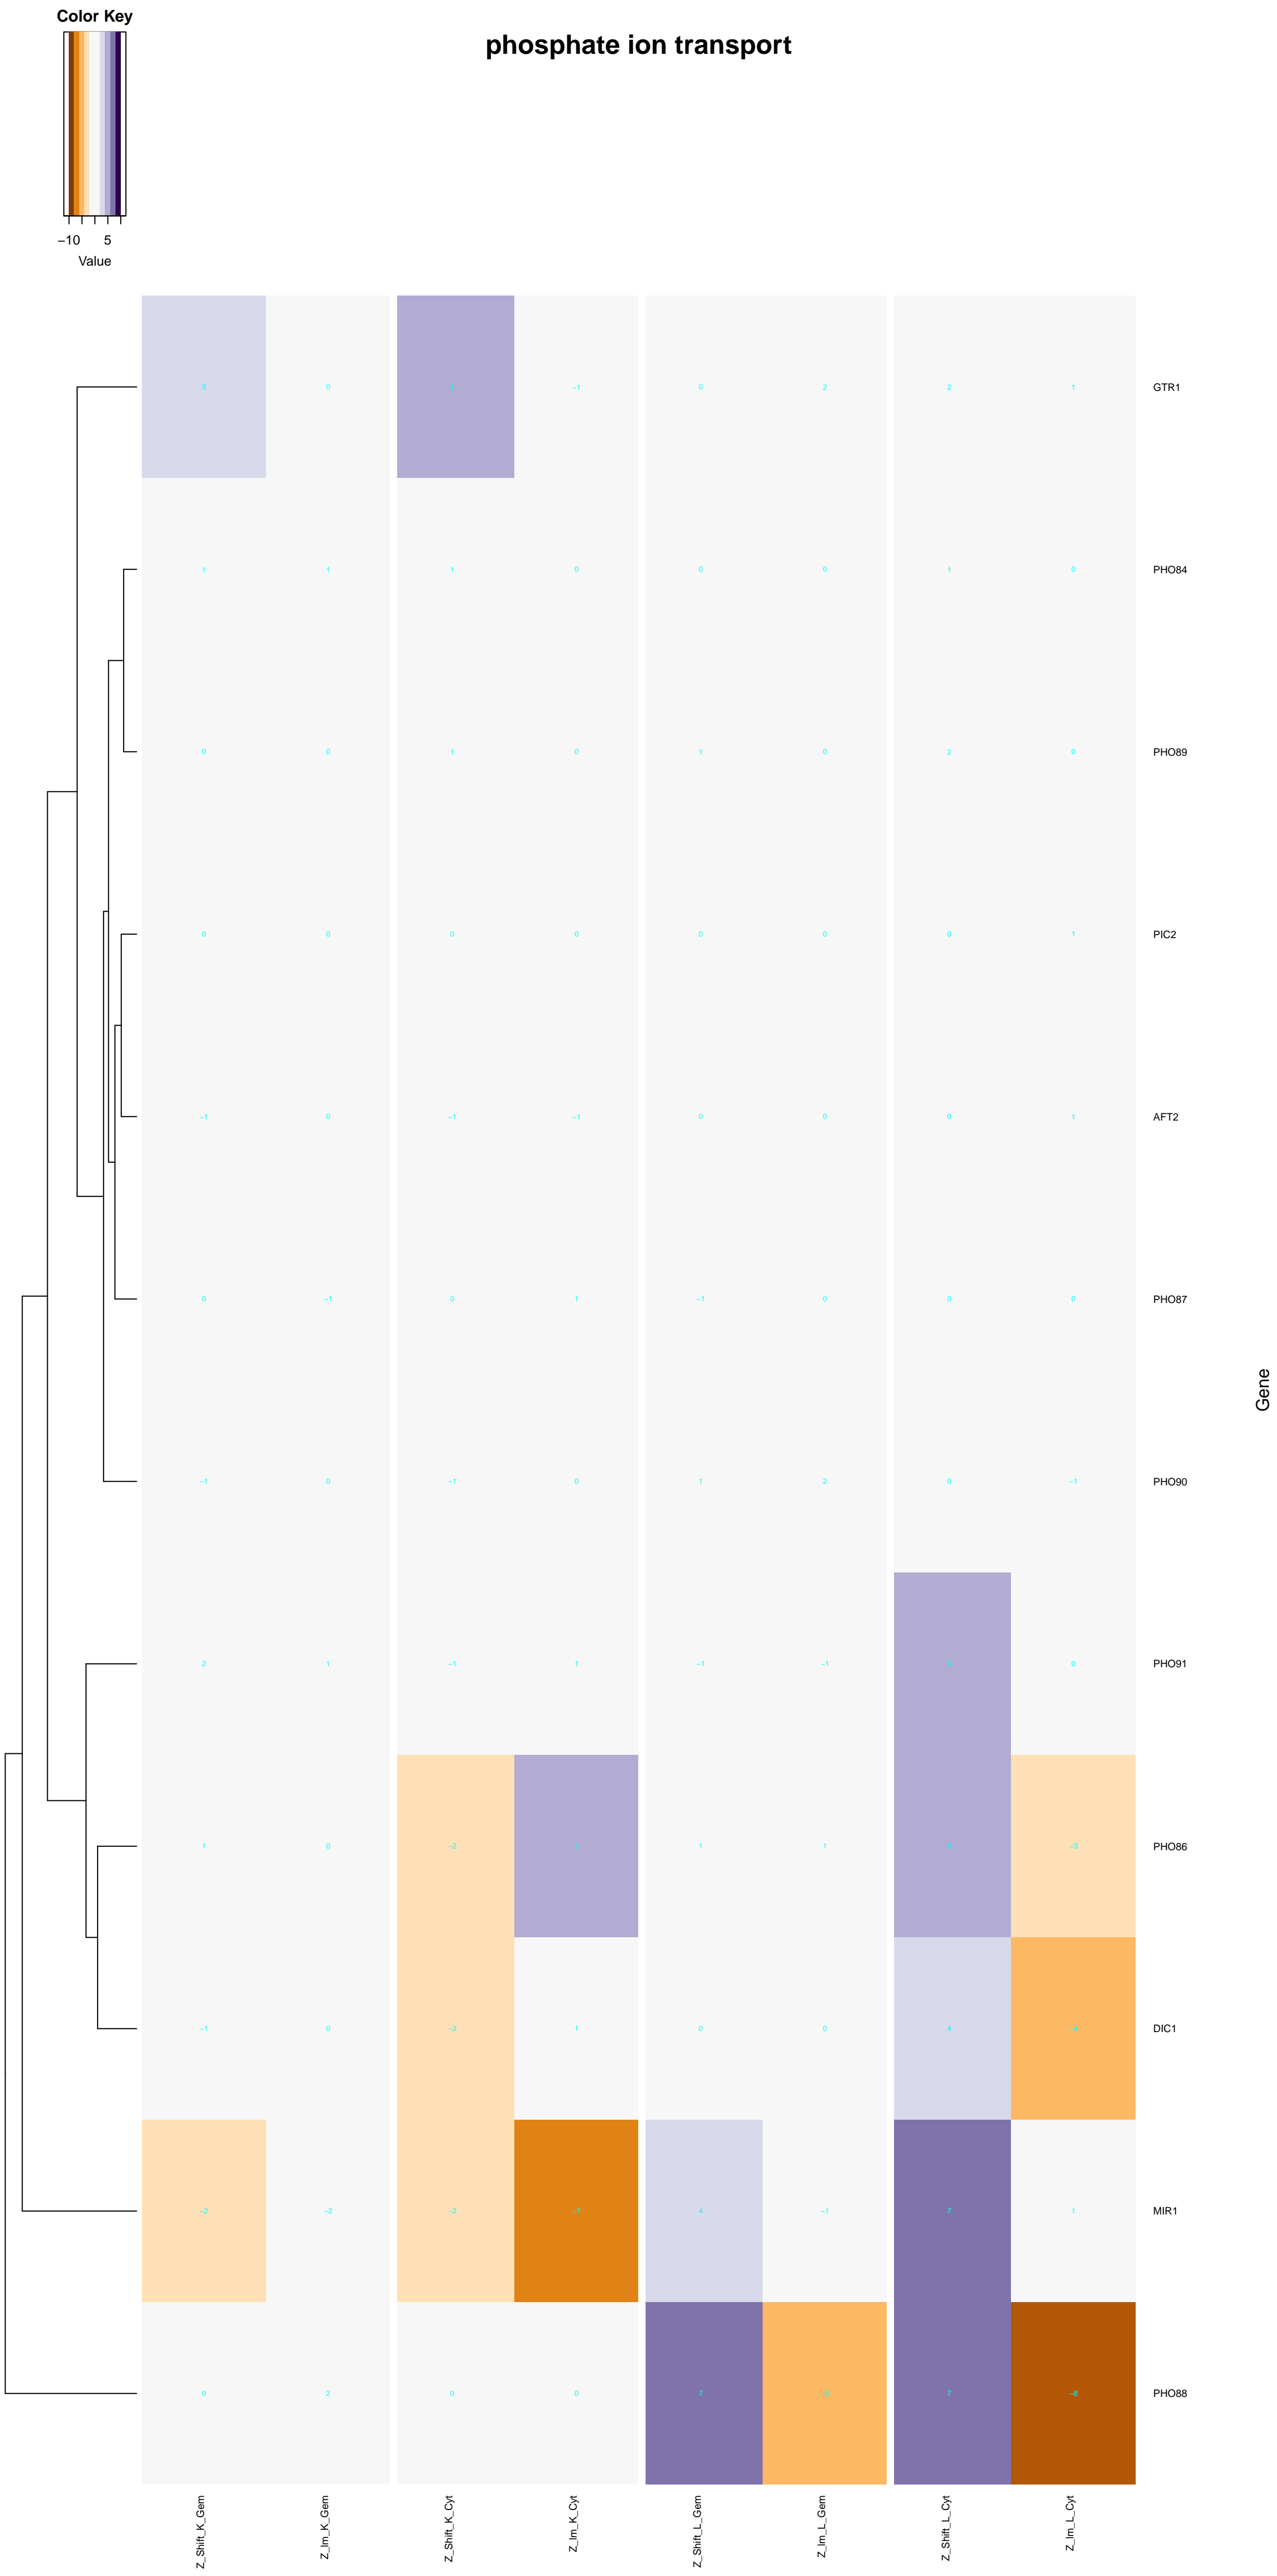

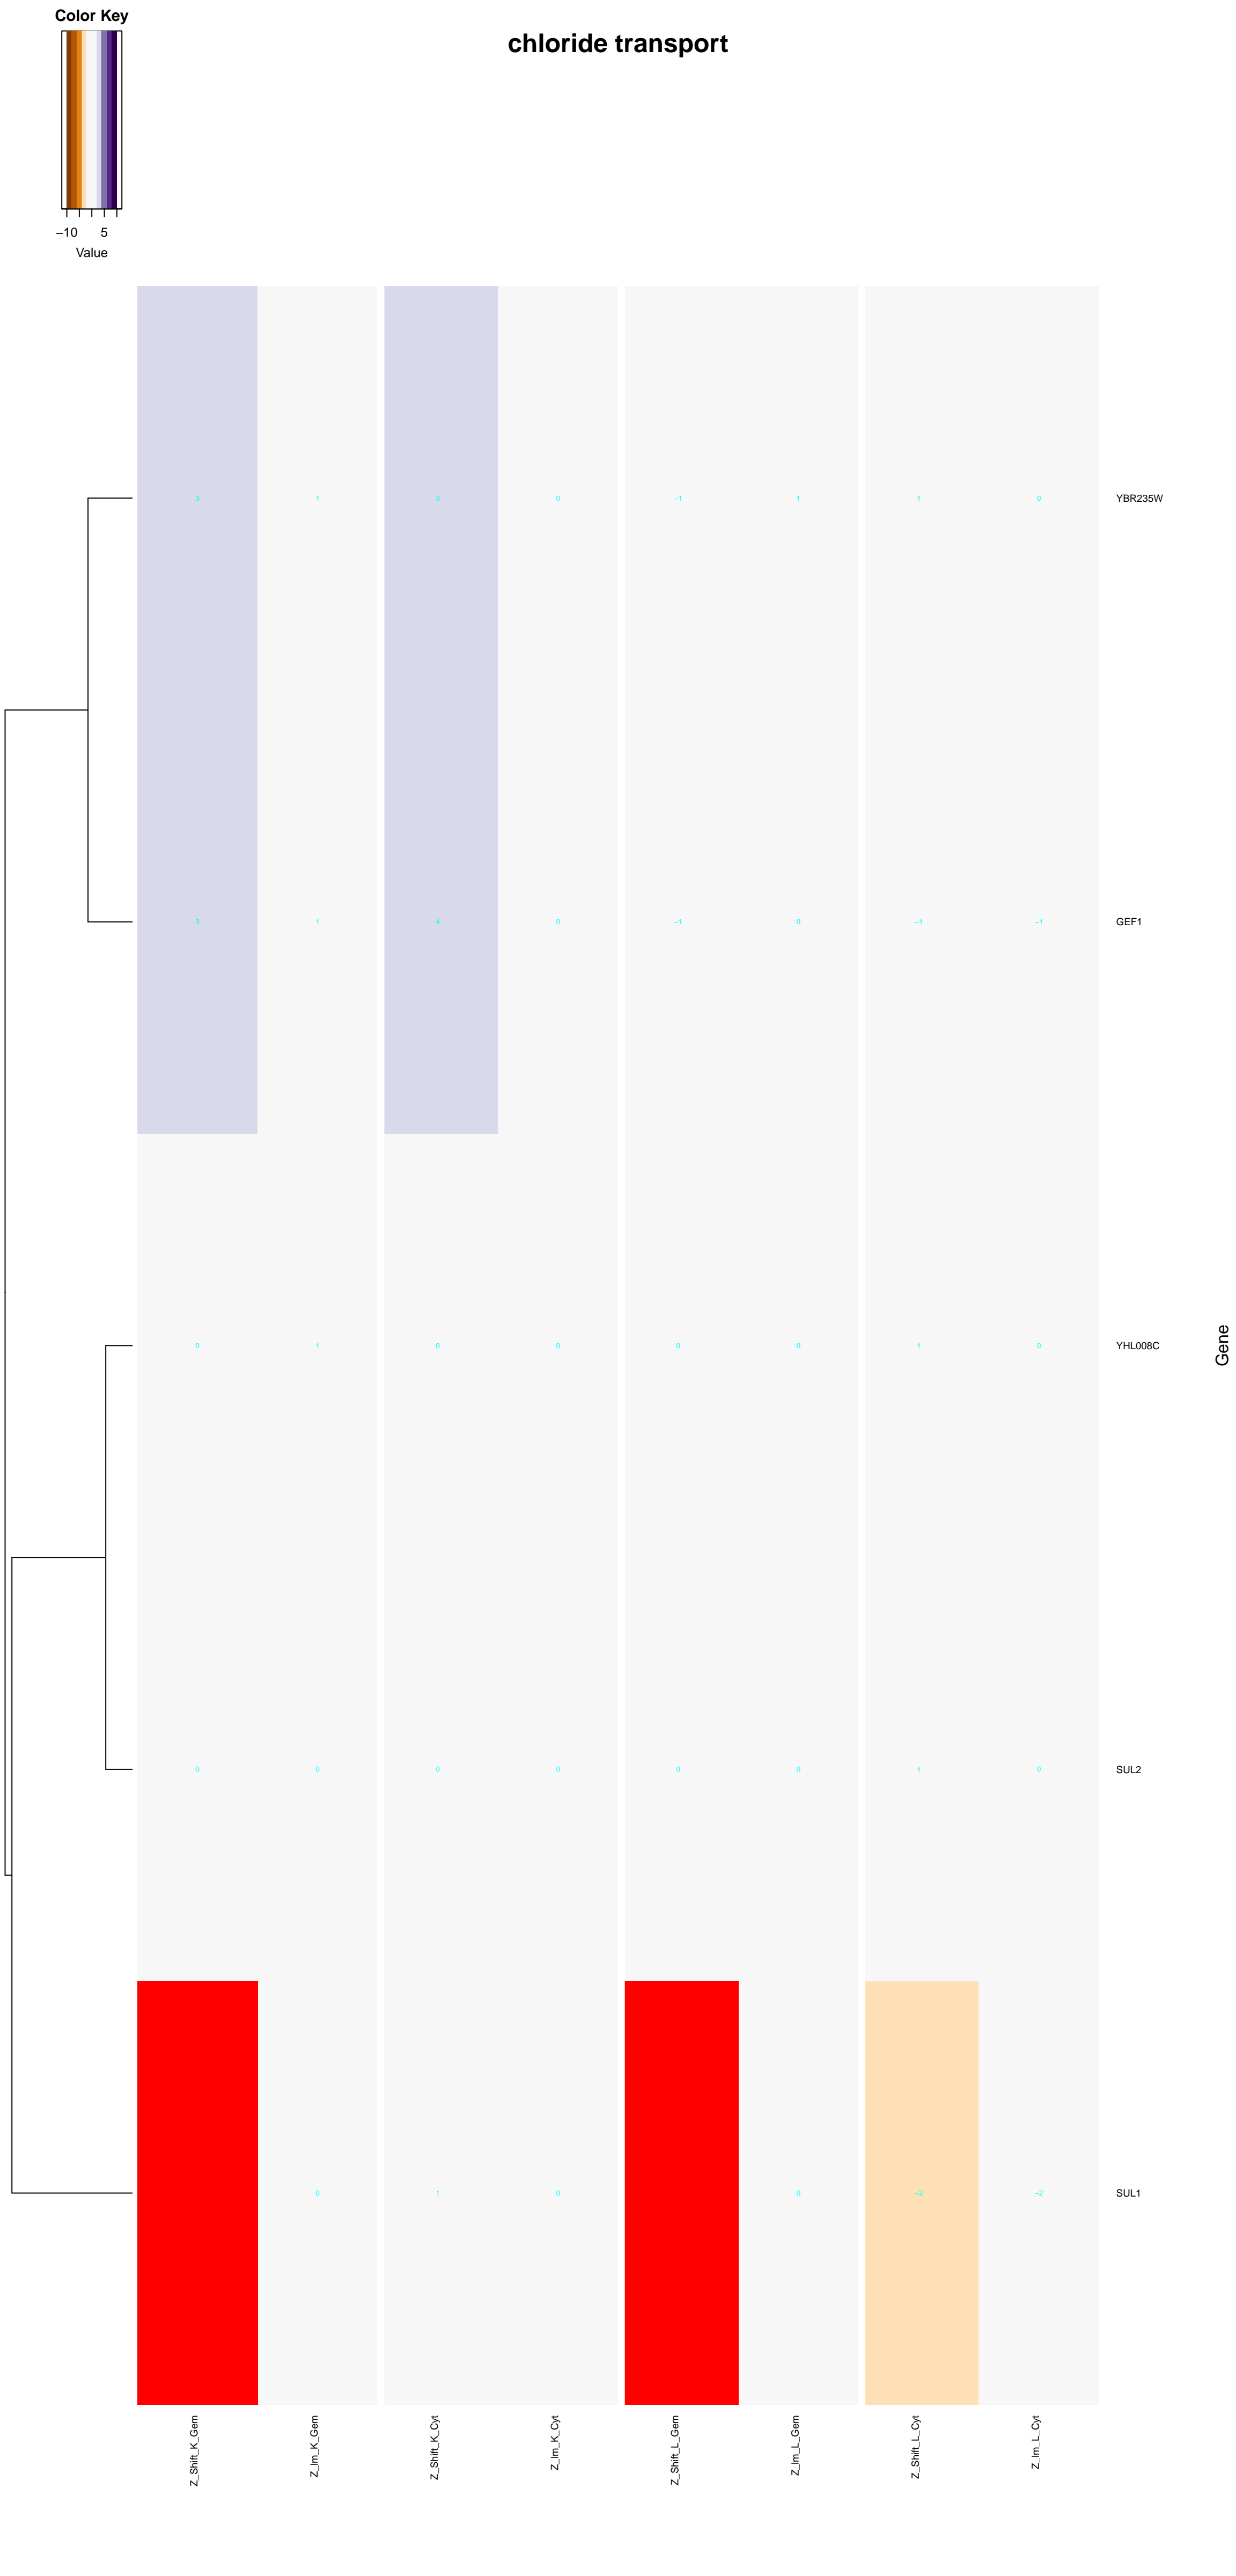

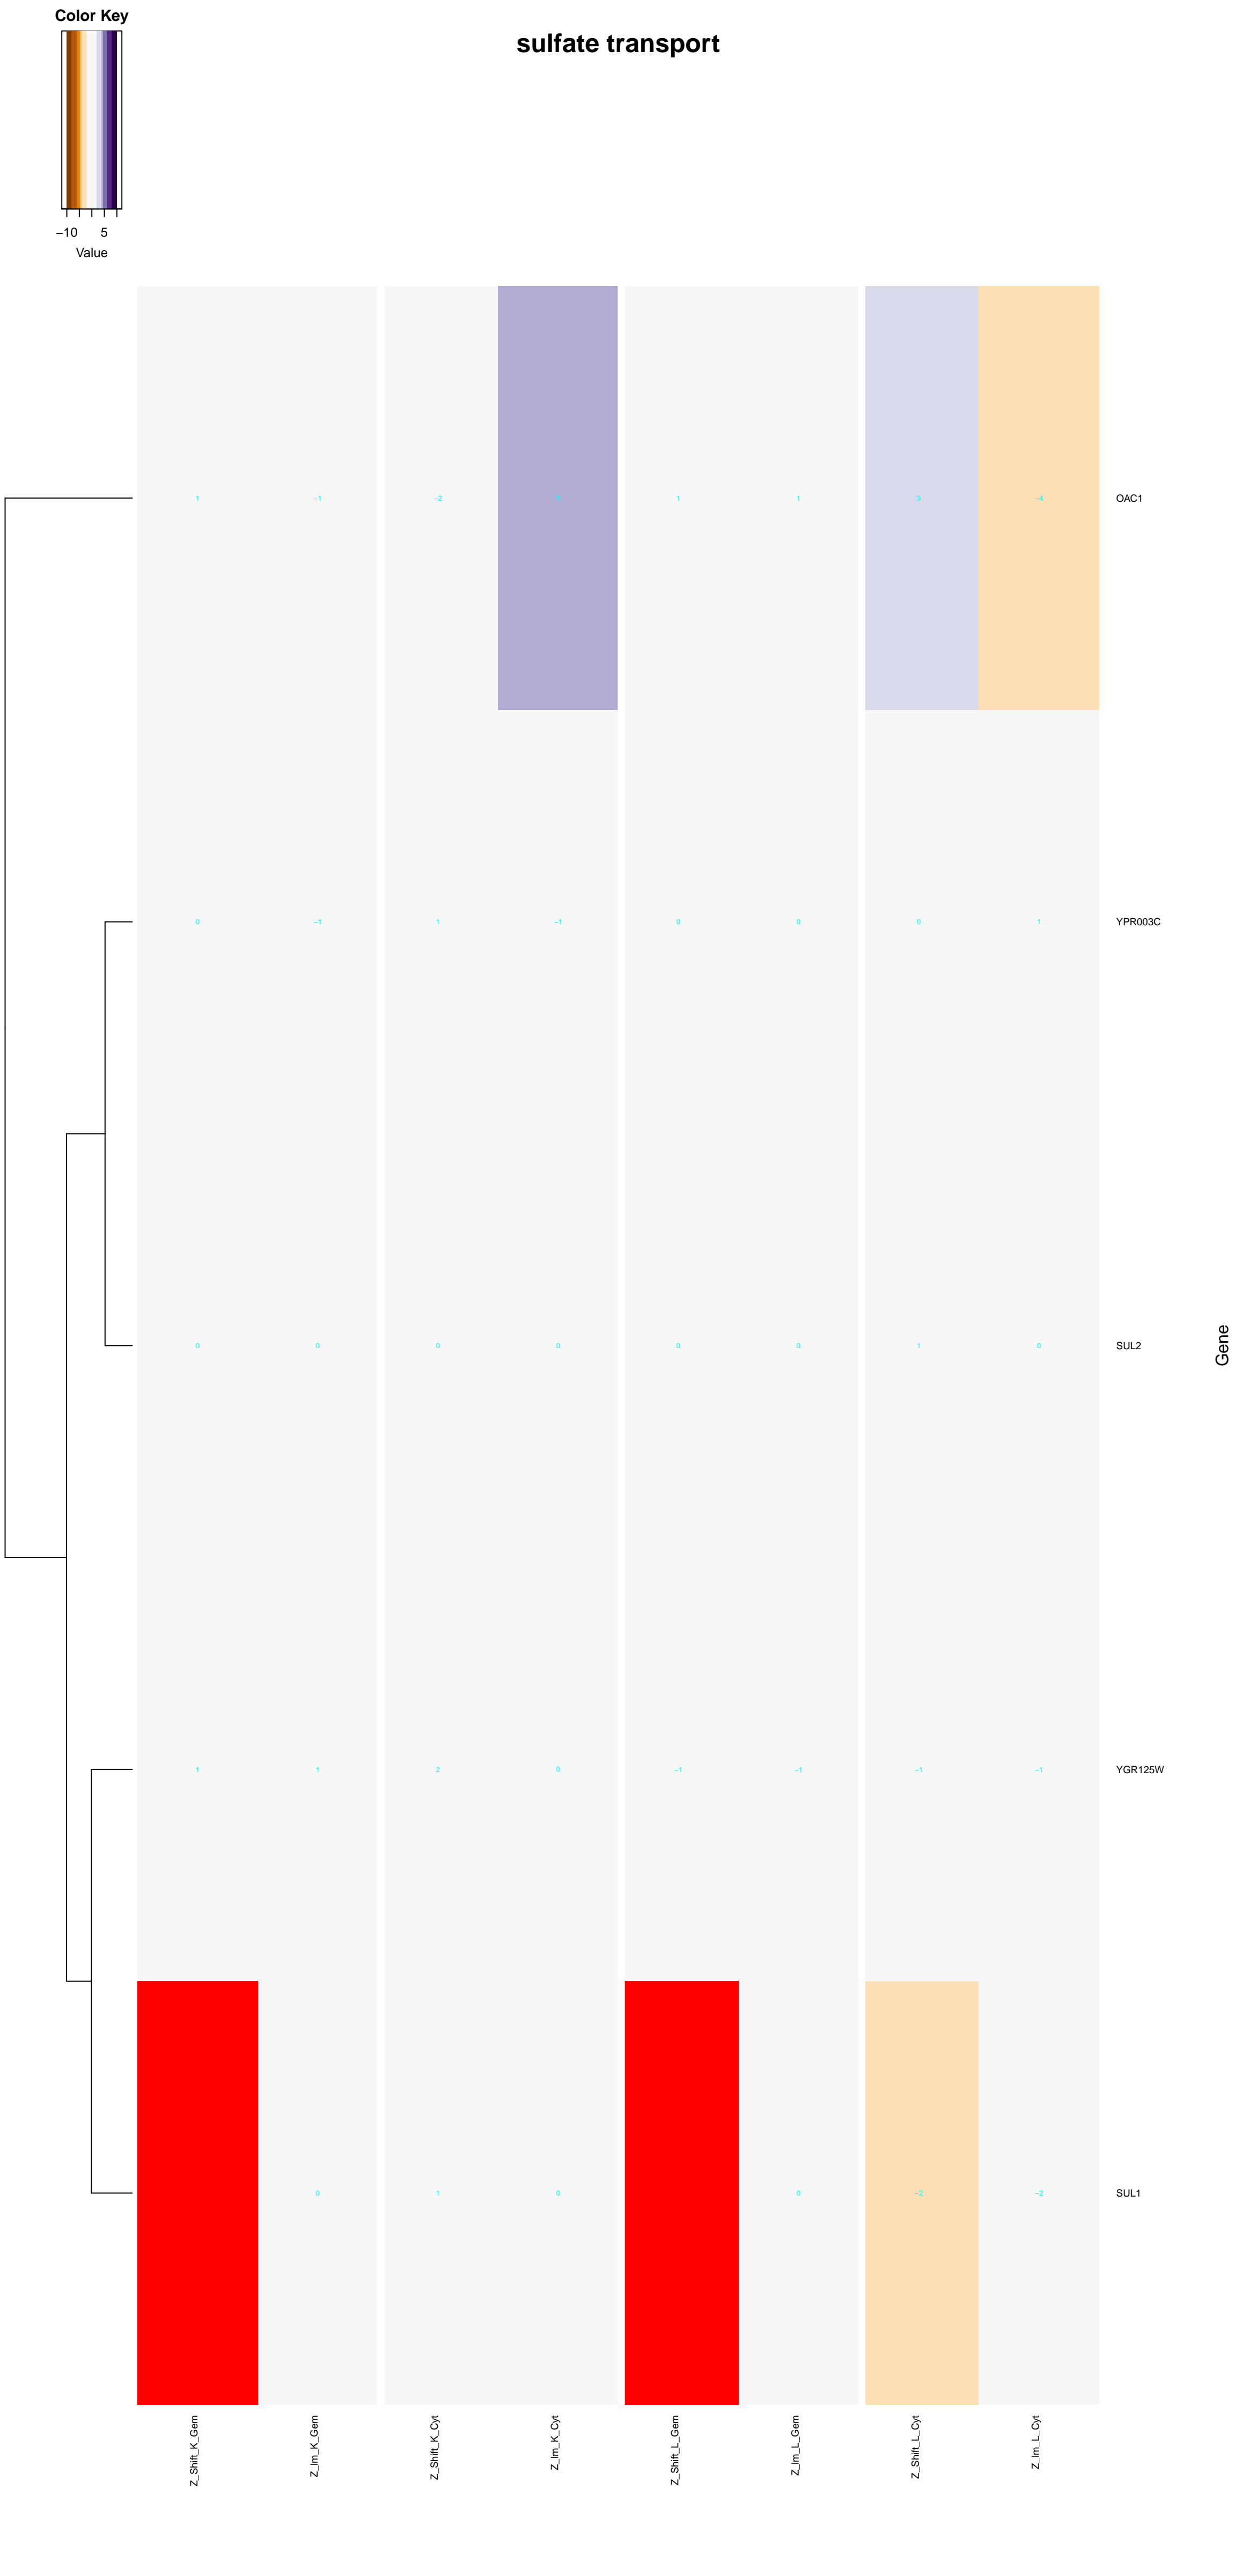

borate transport

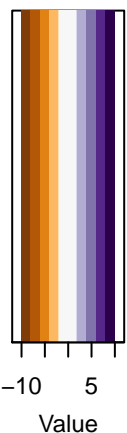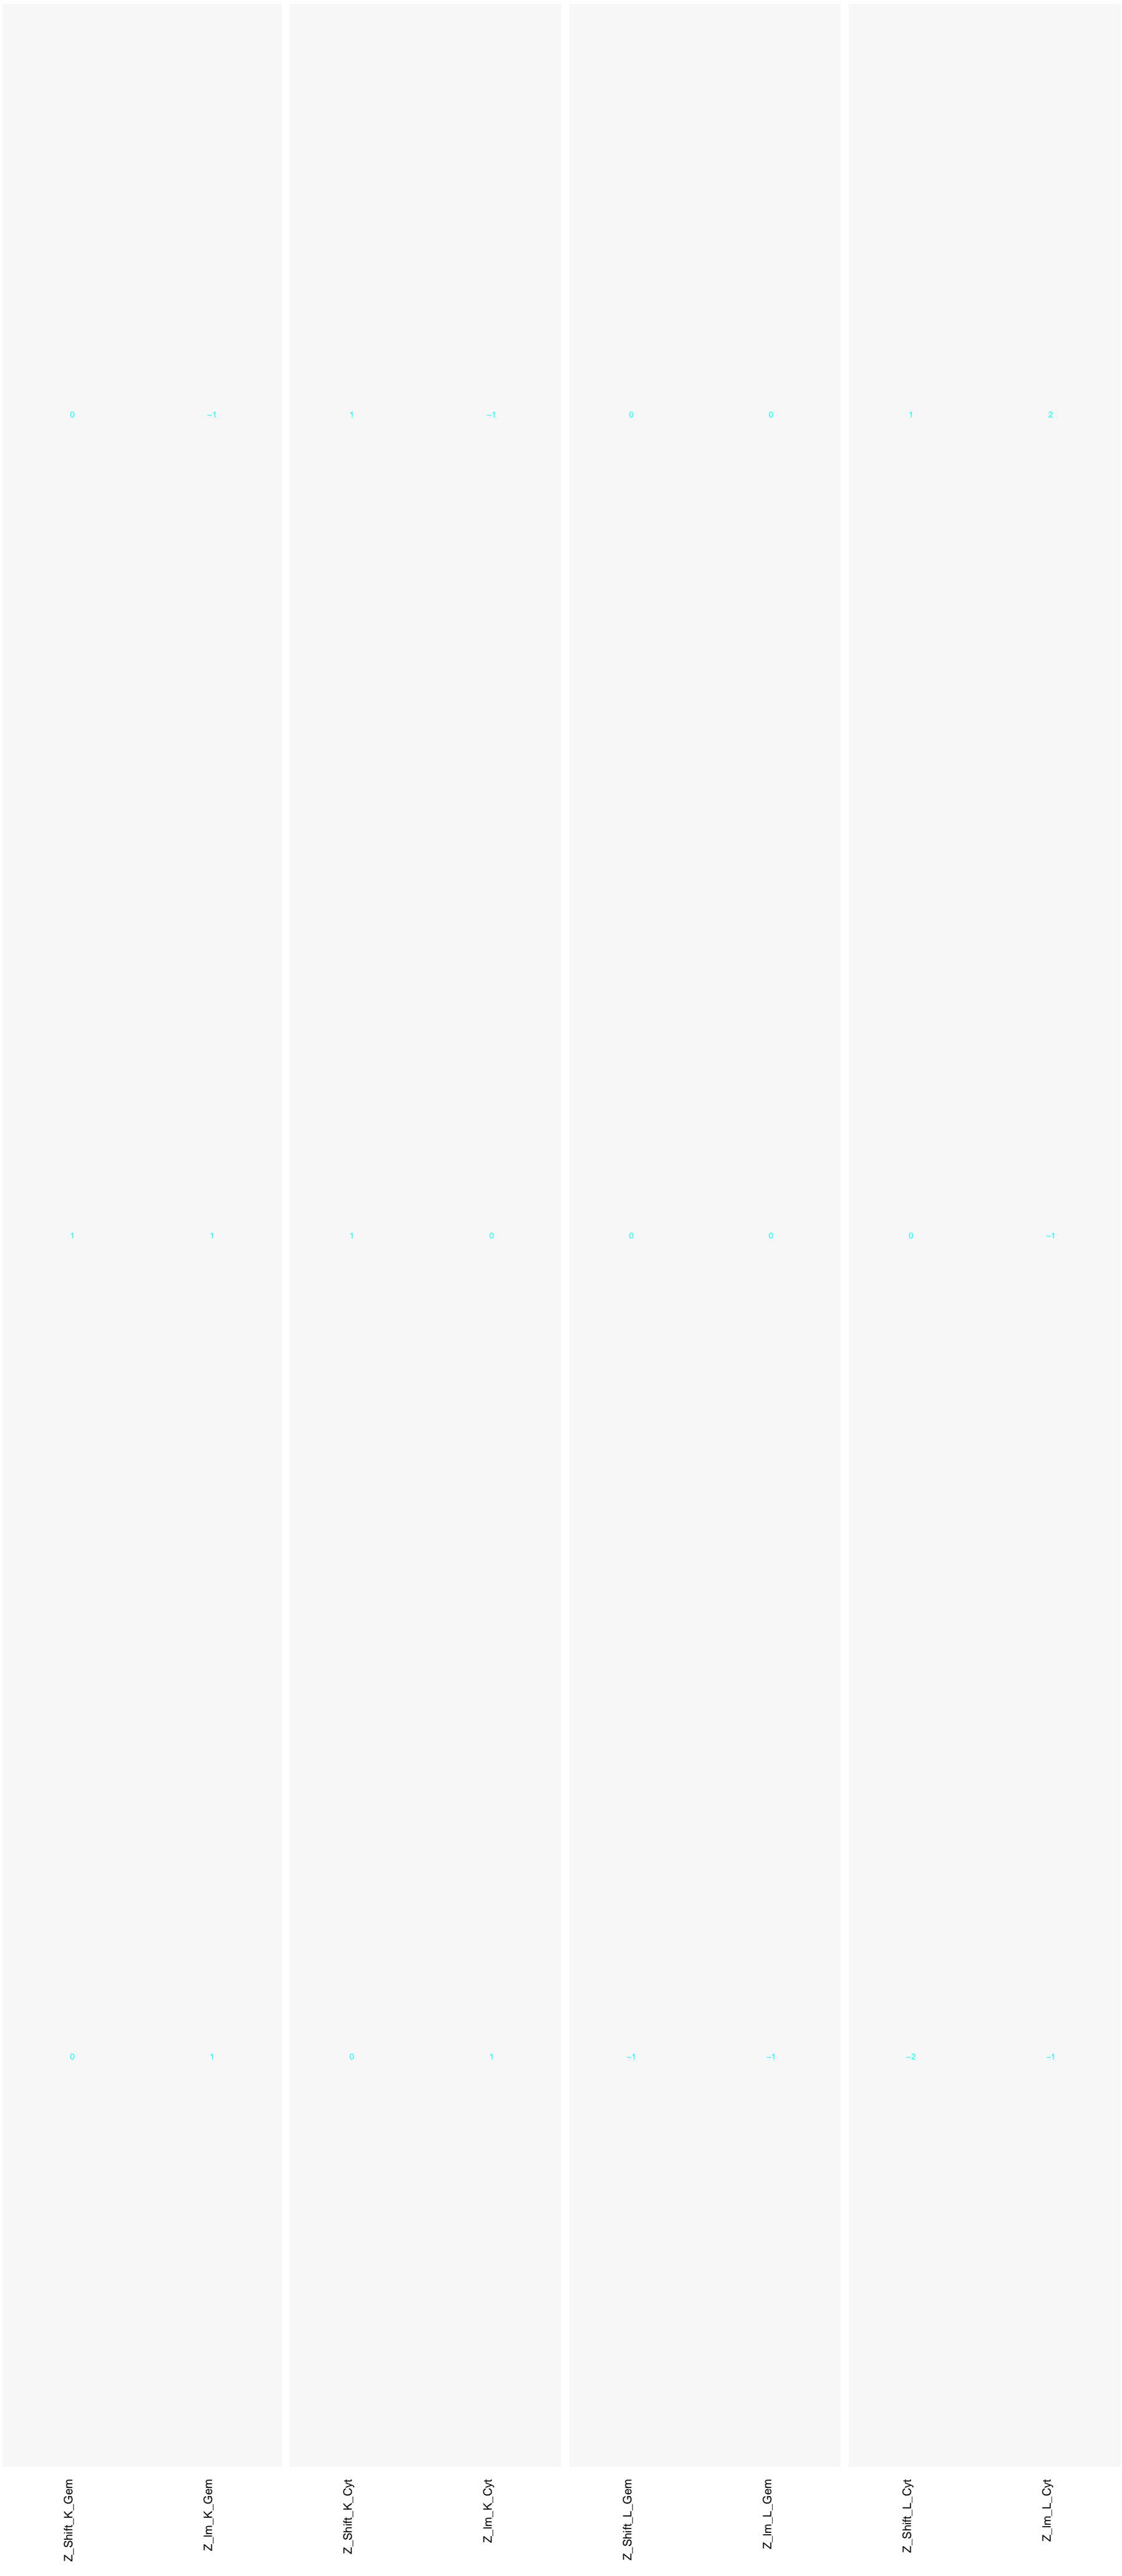

Gene

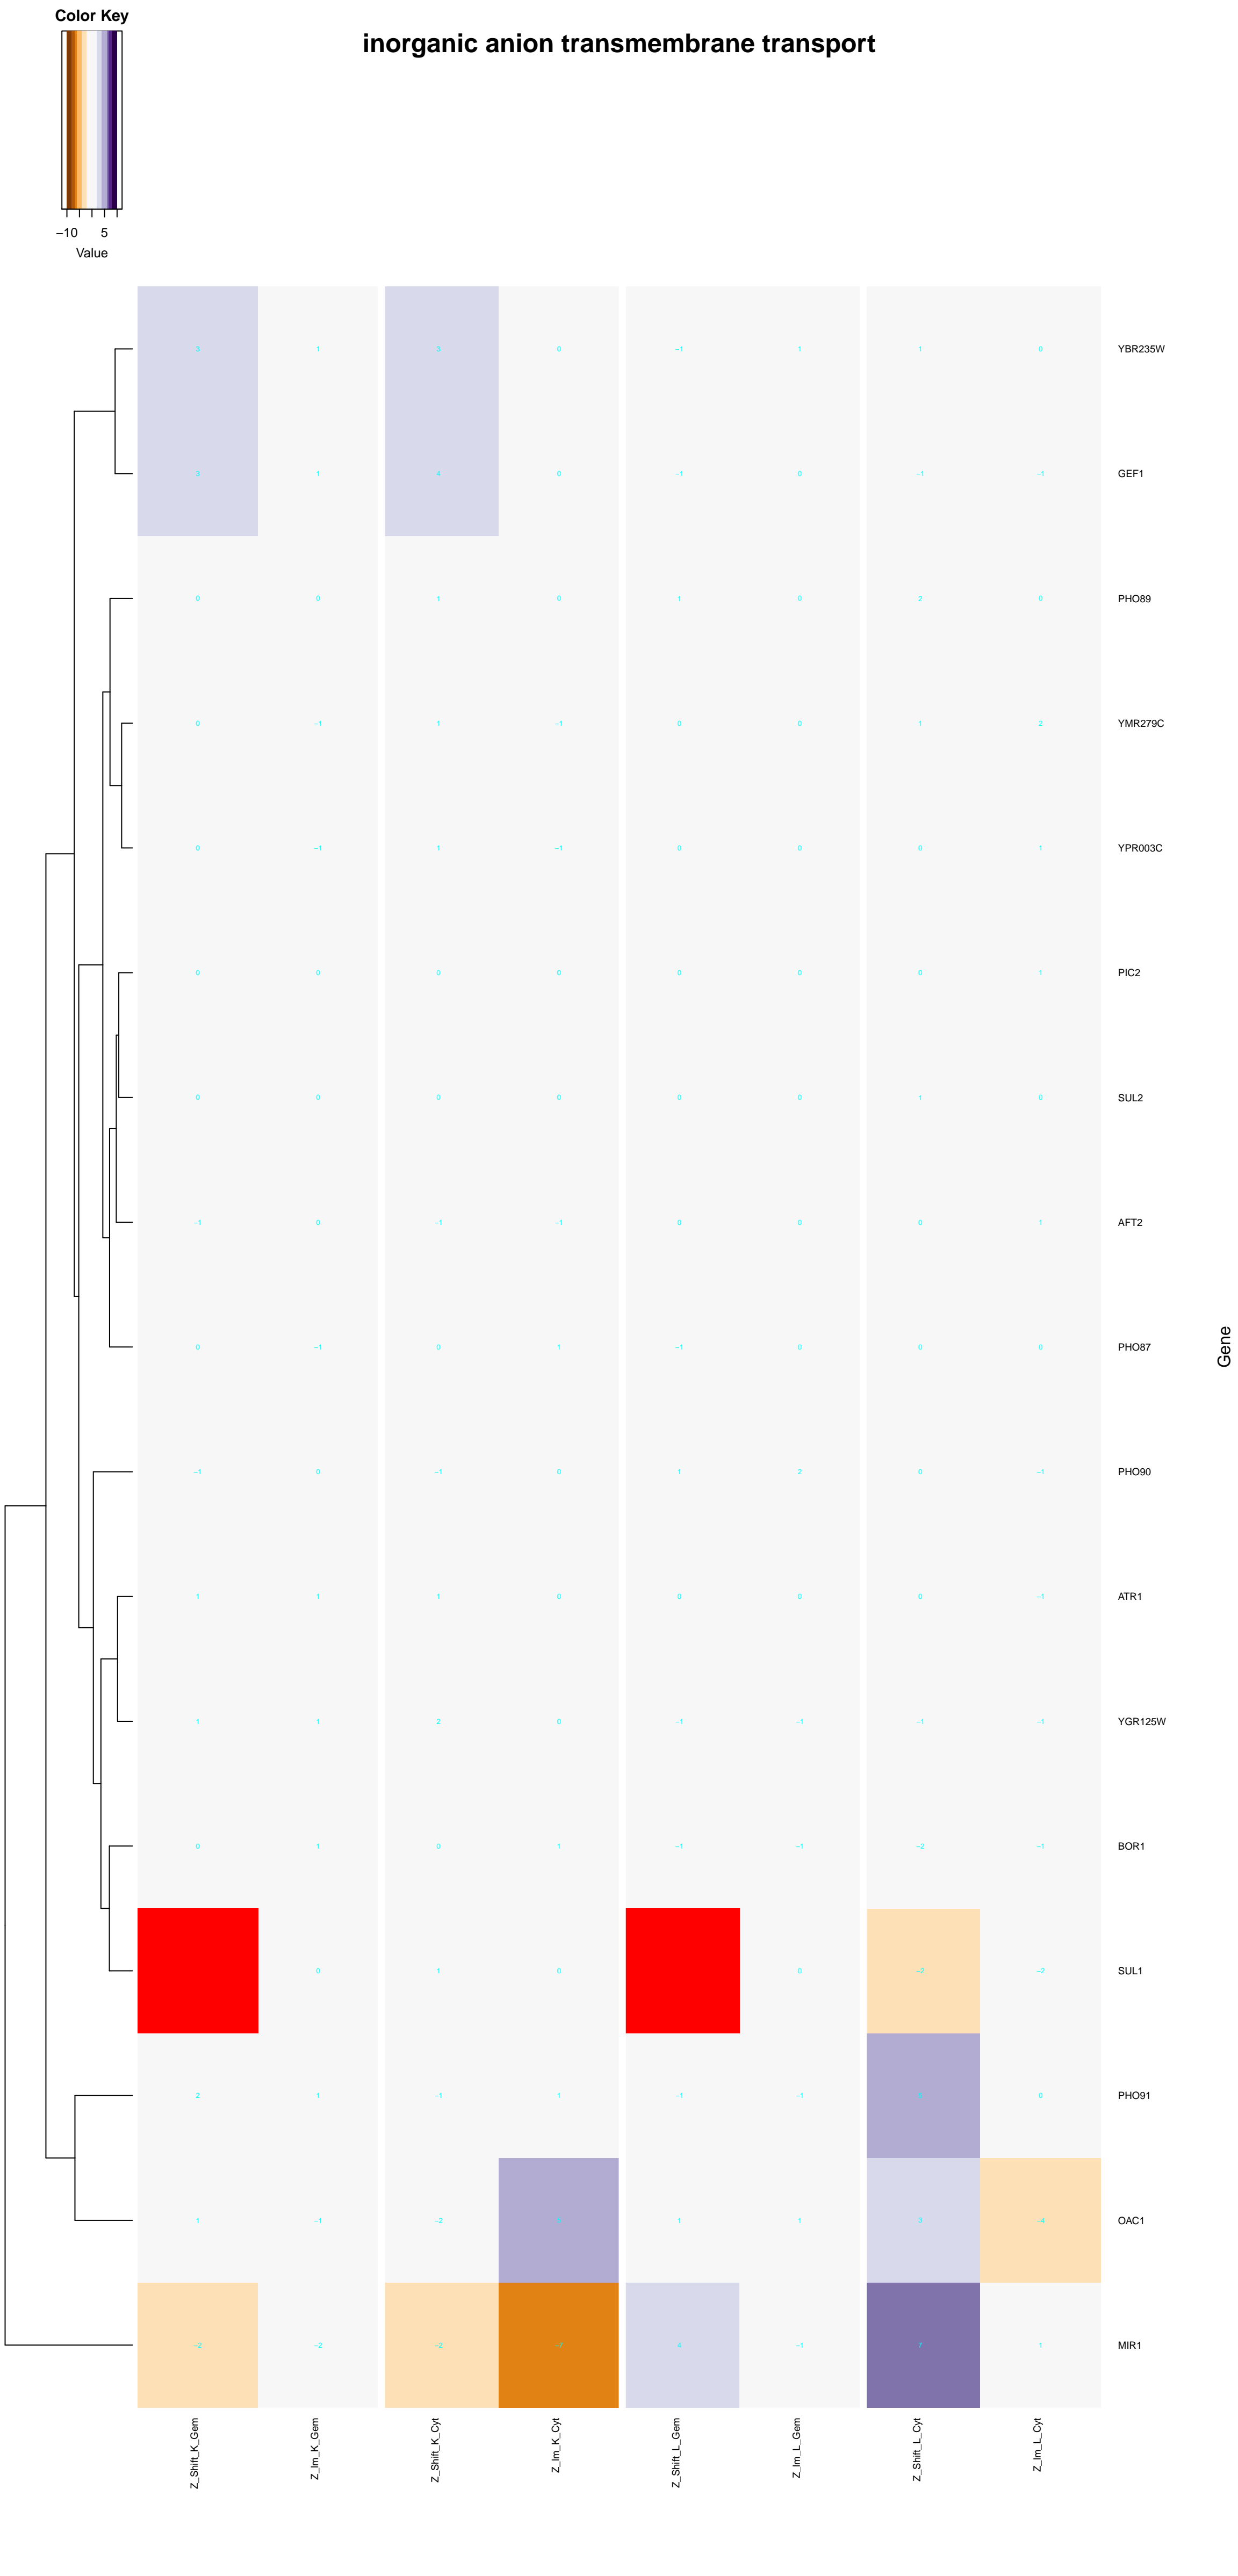

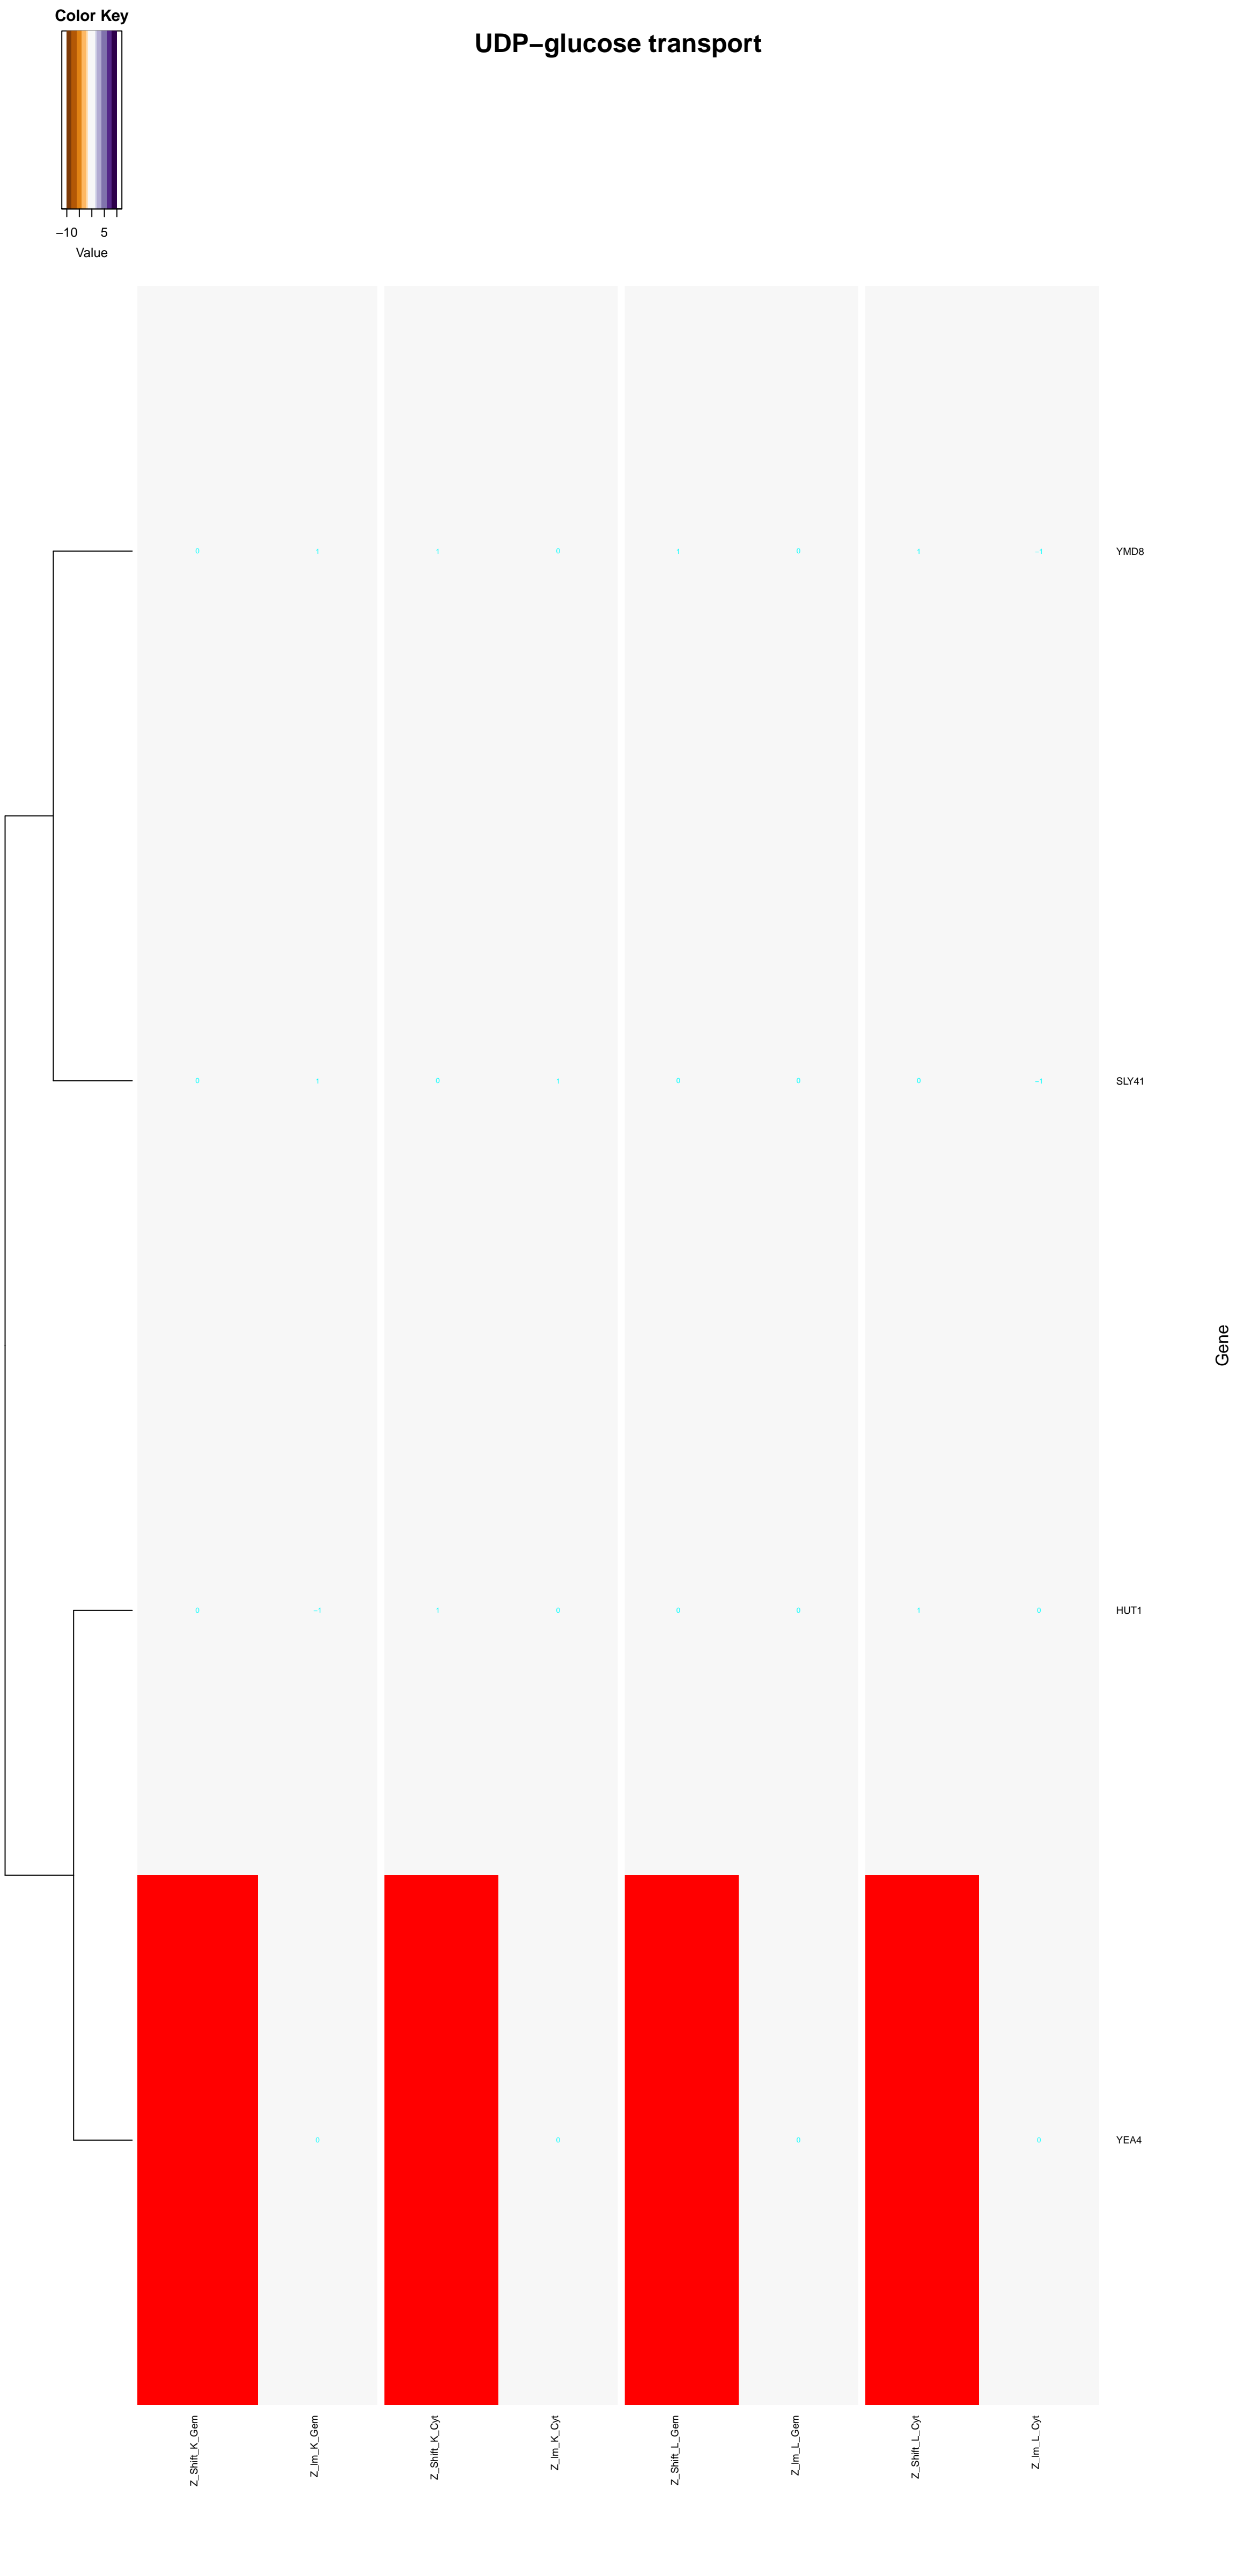

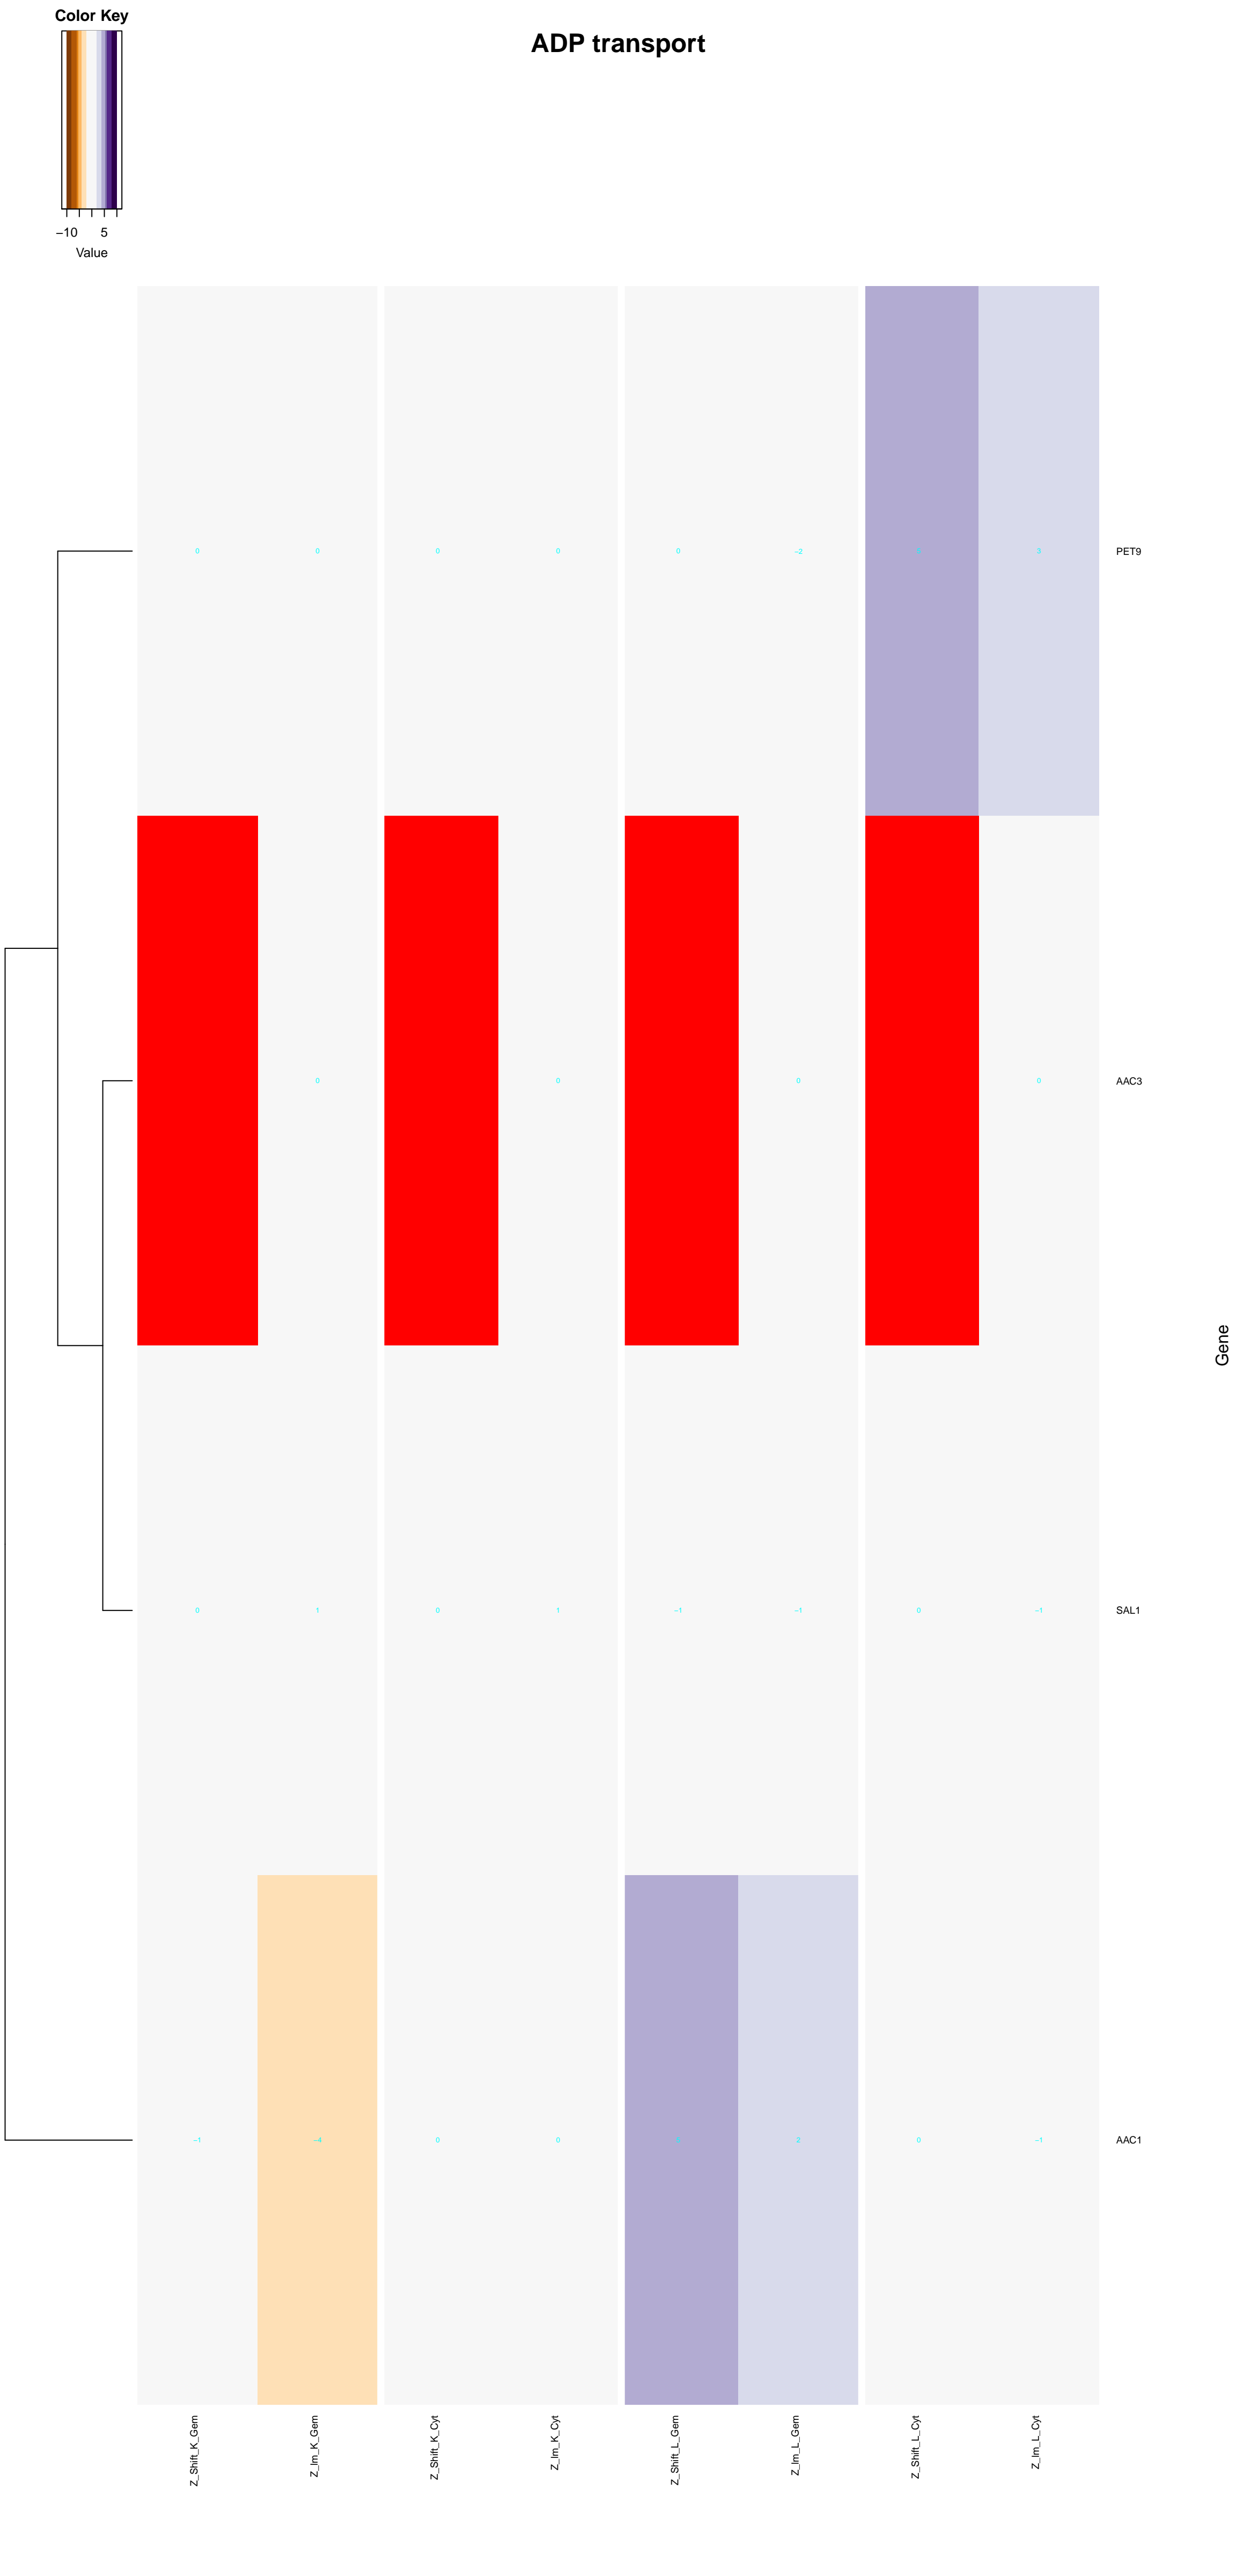

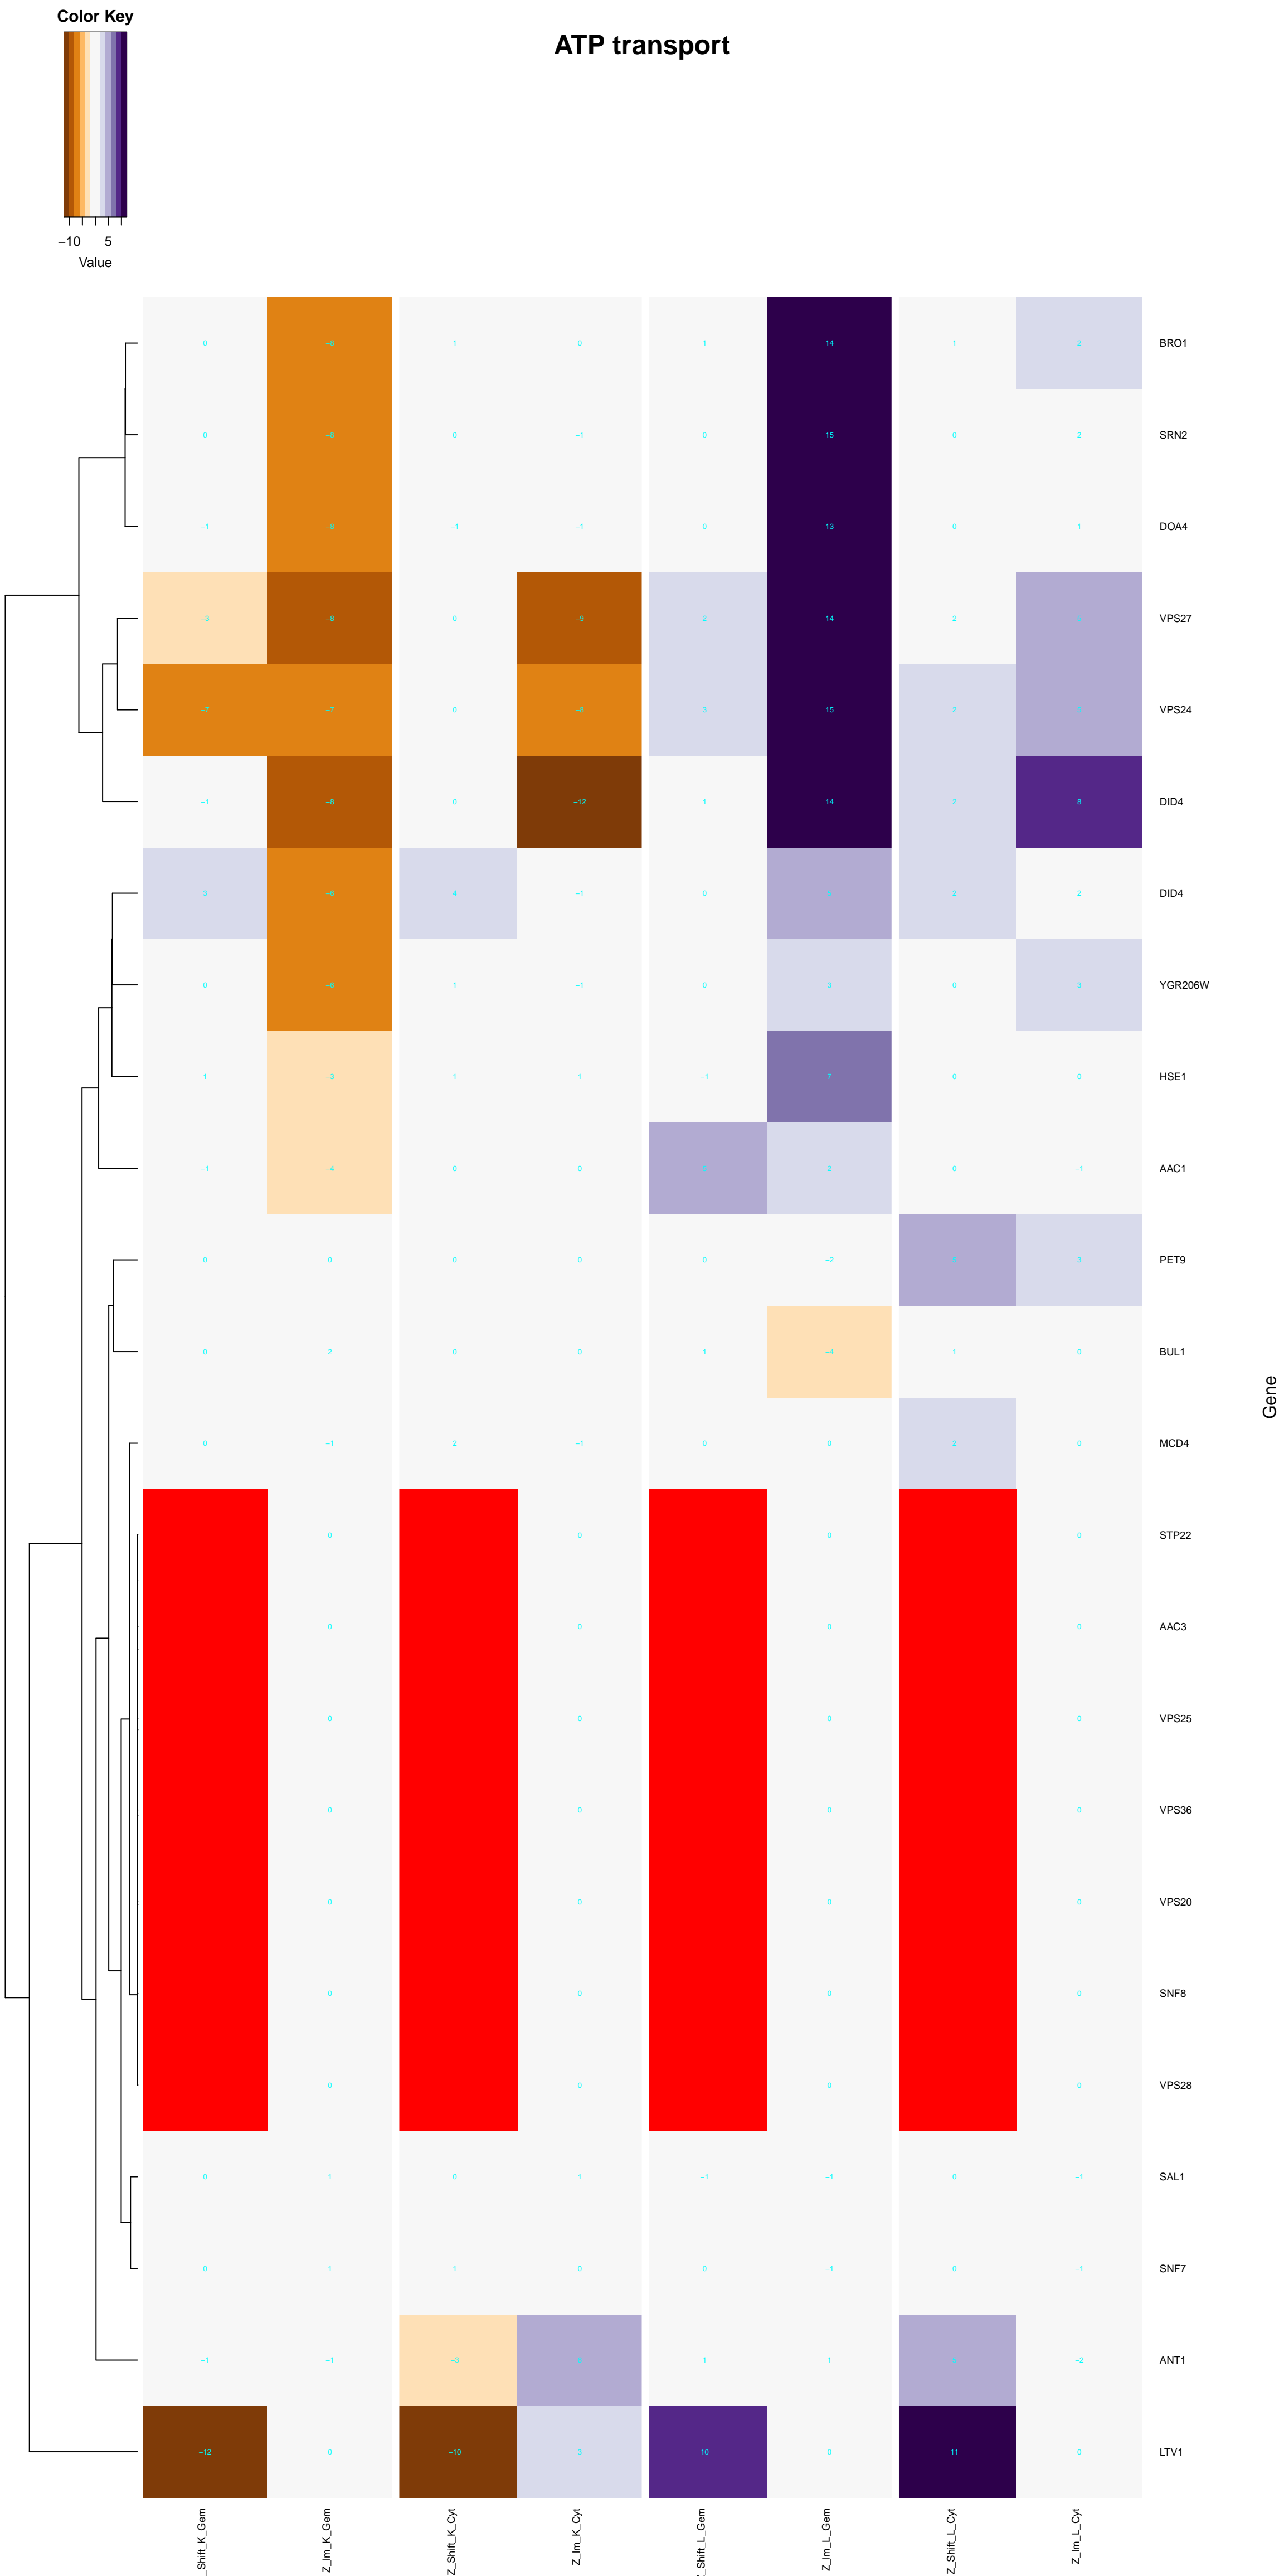

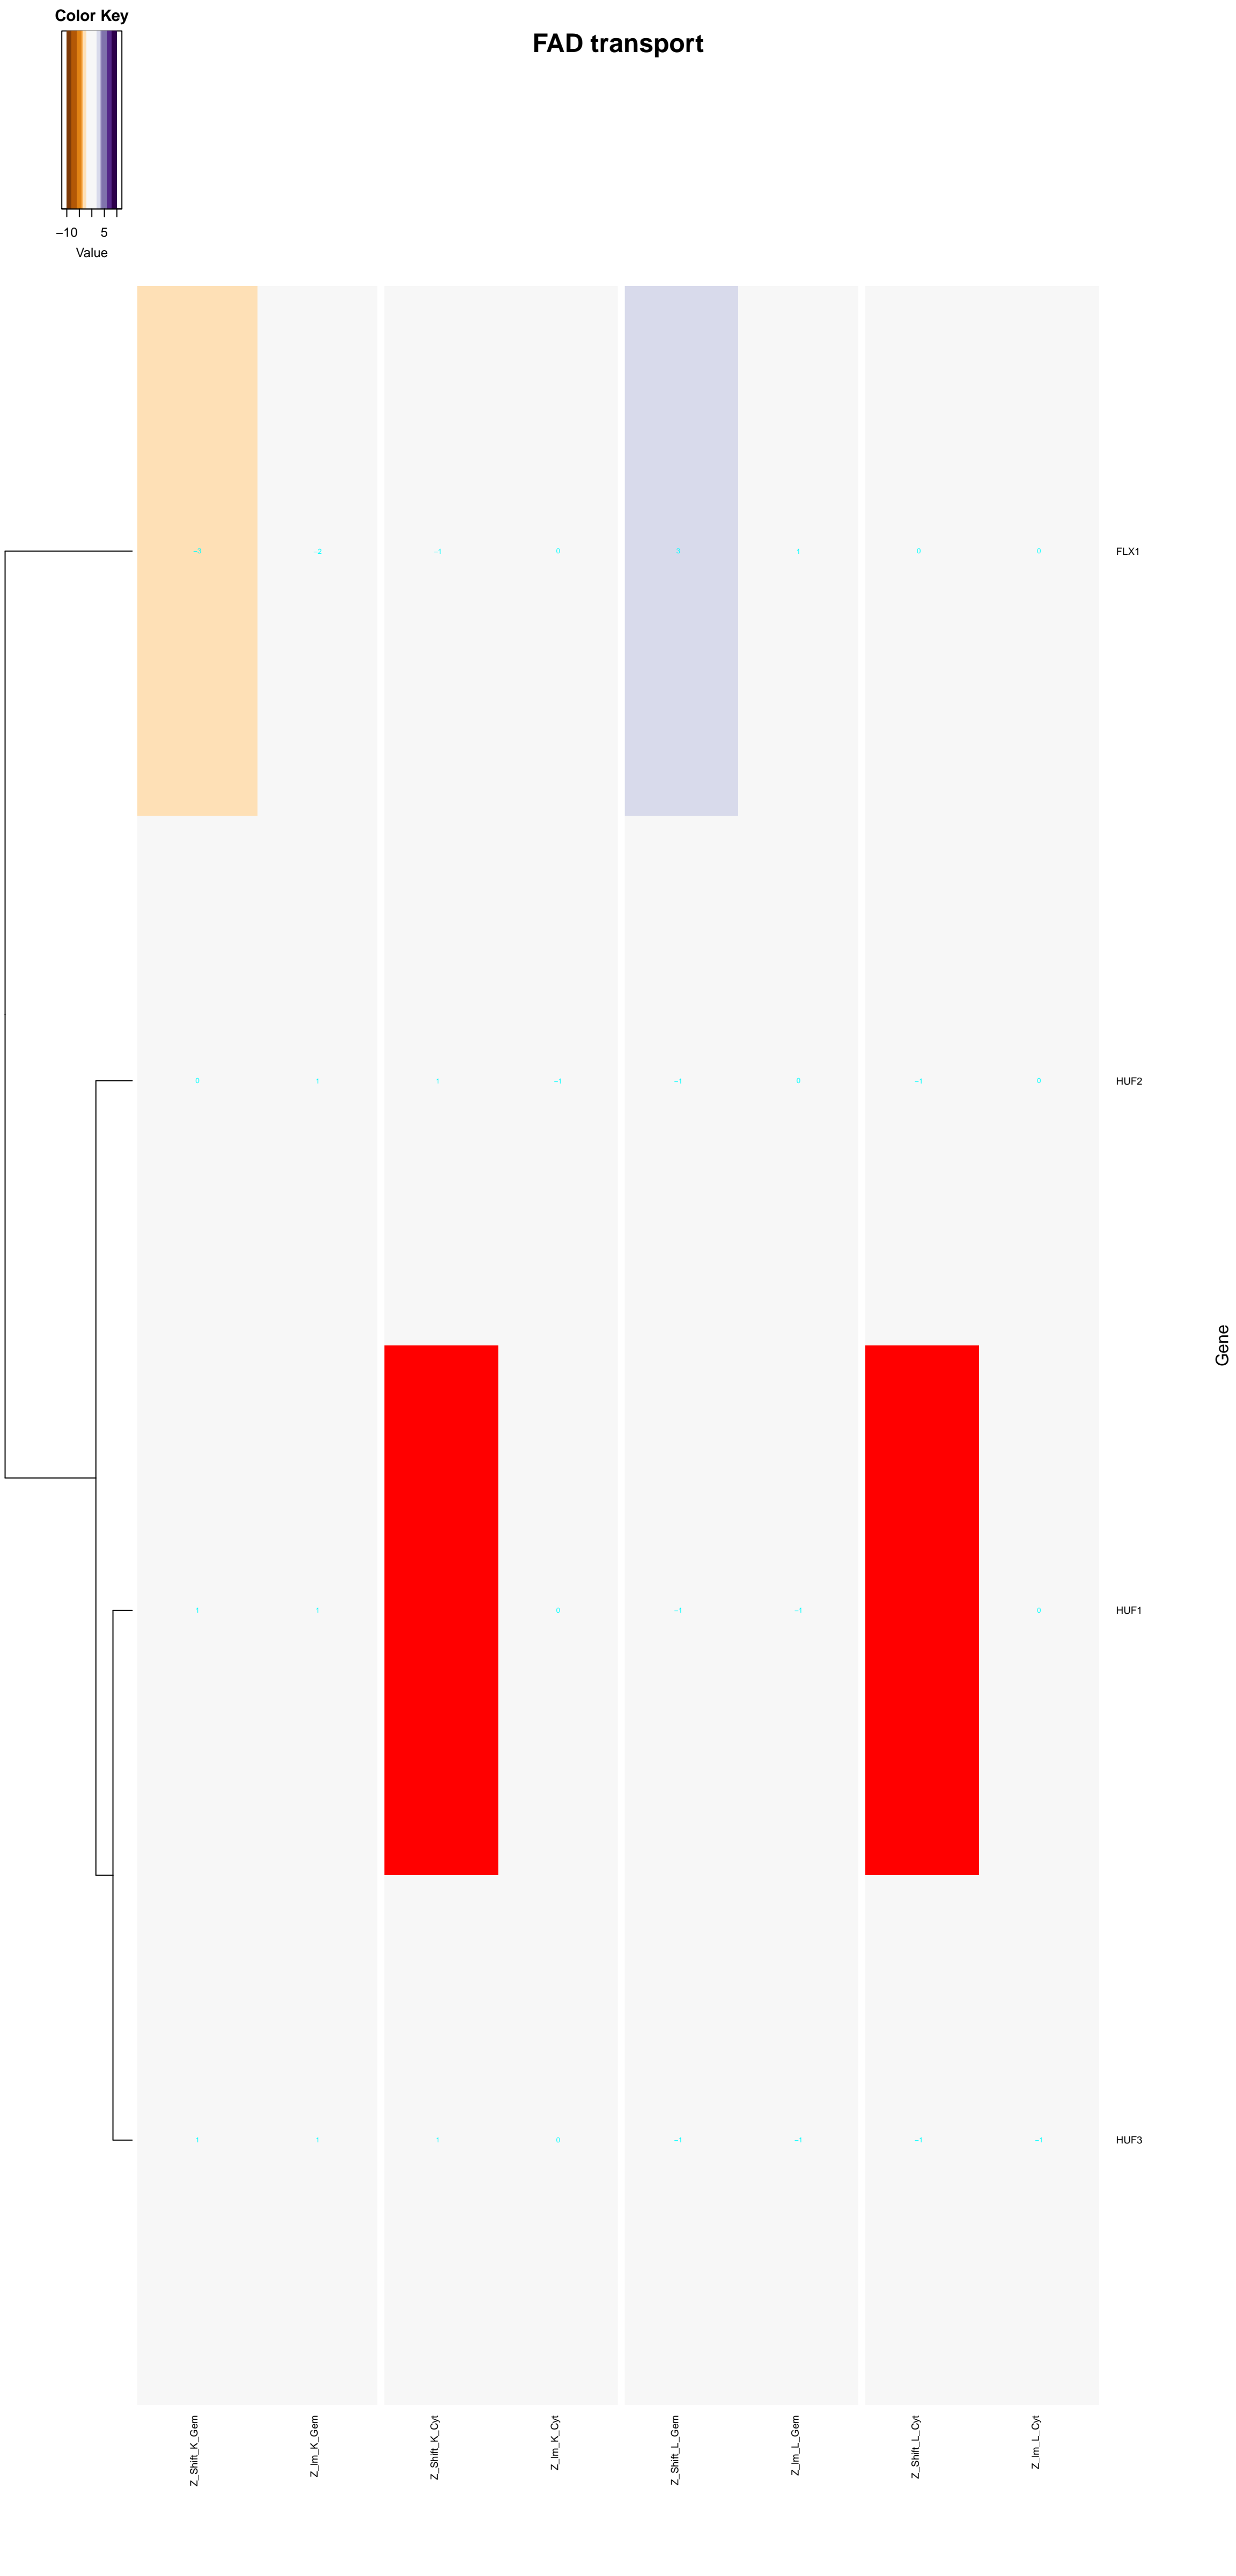

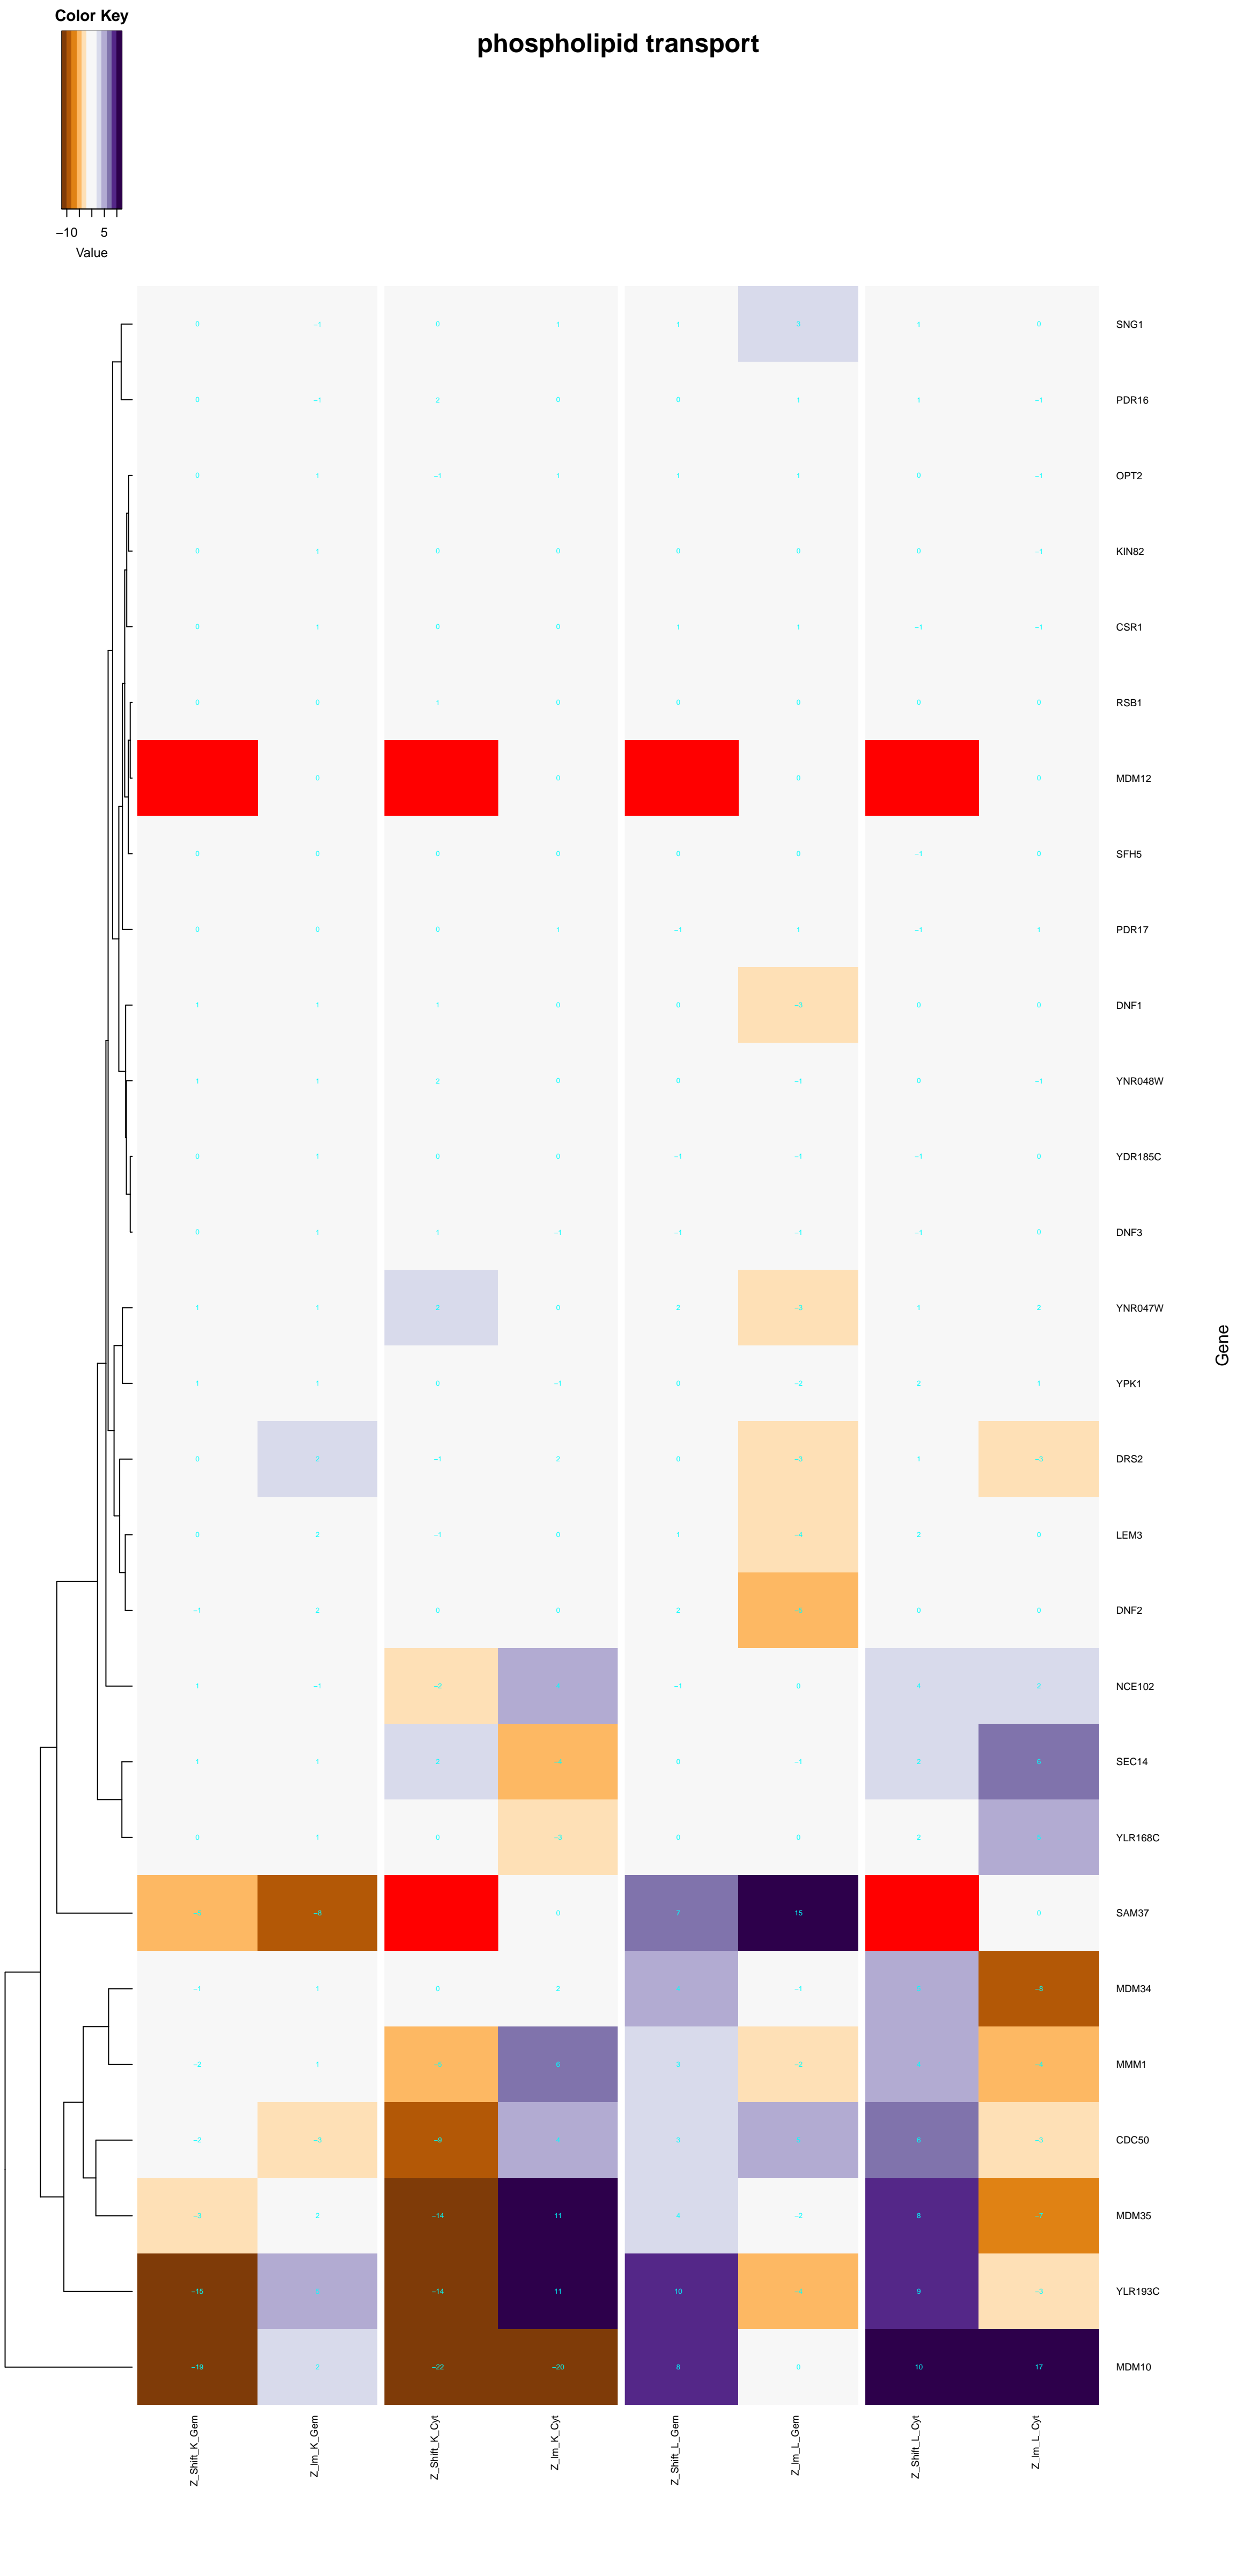

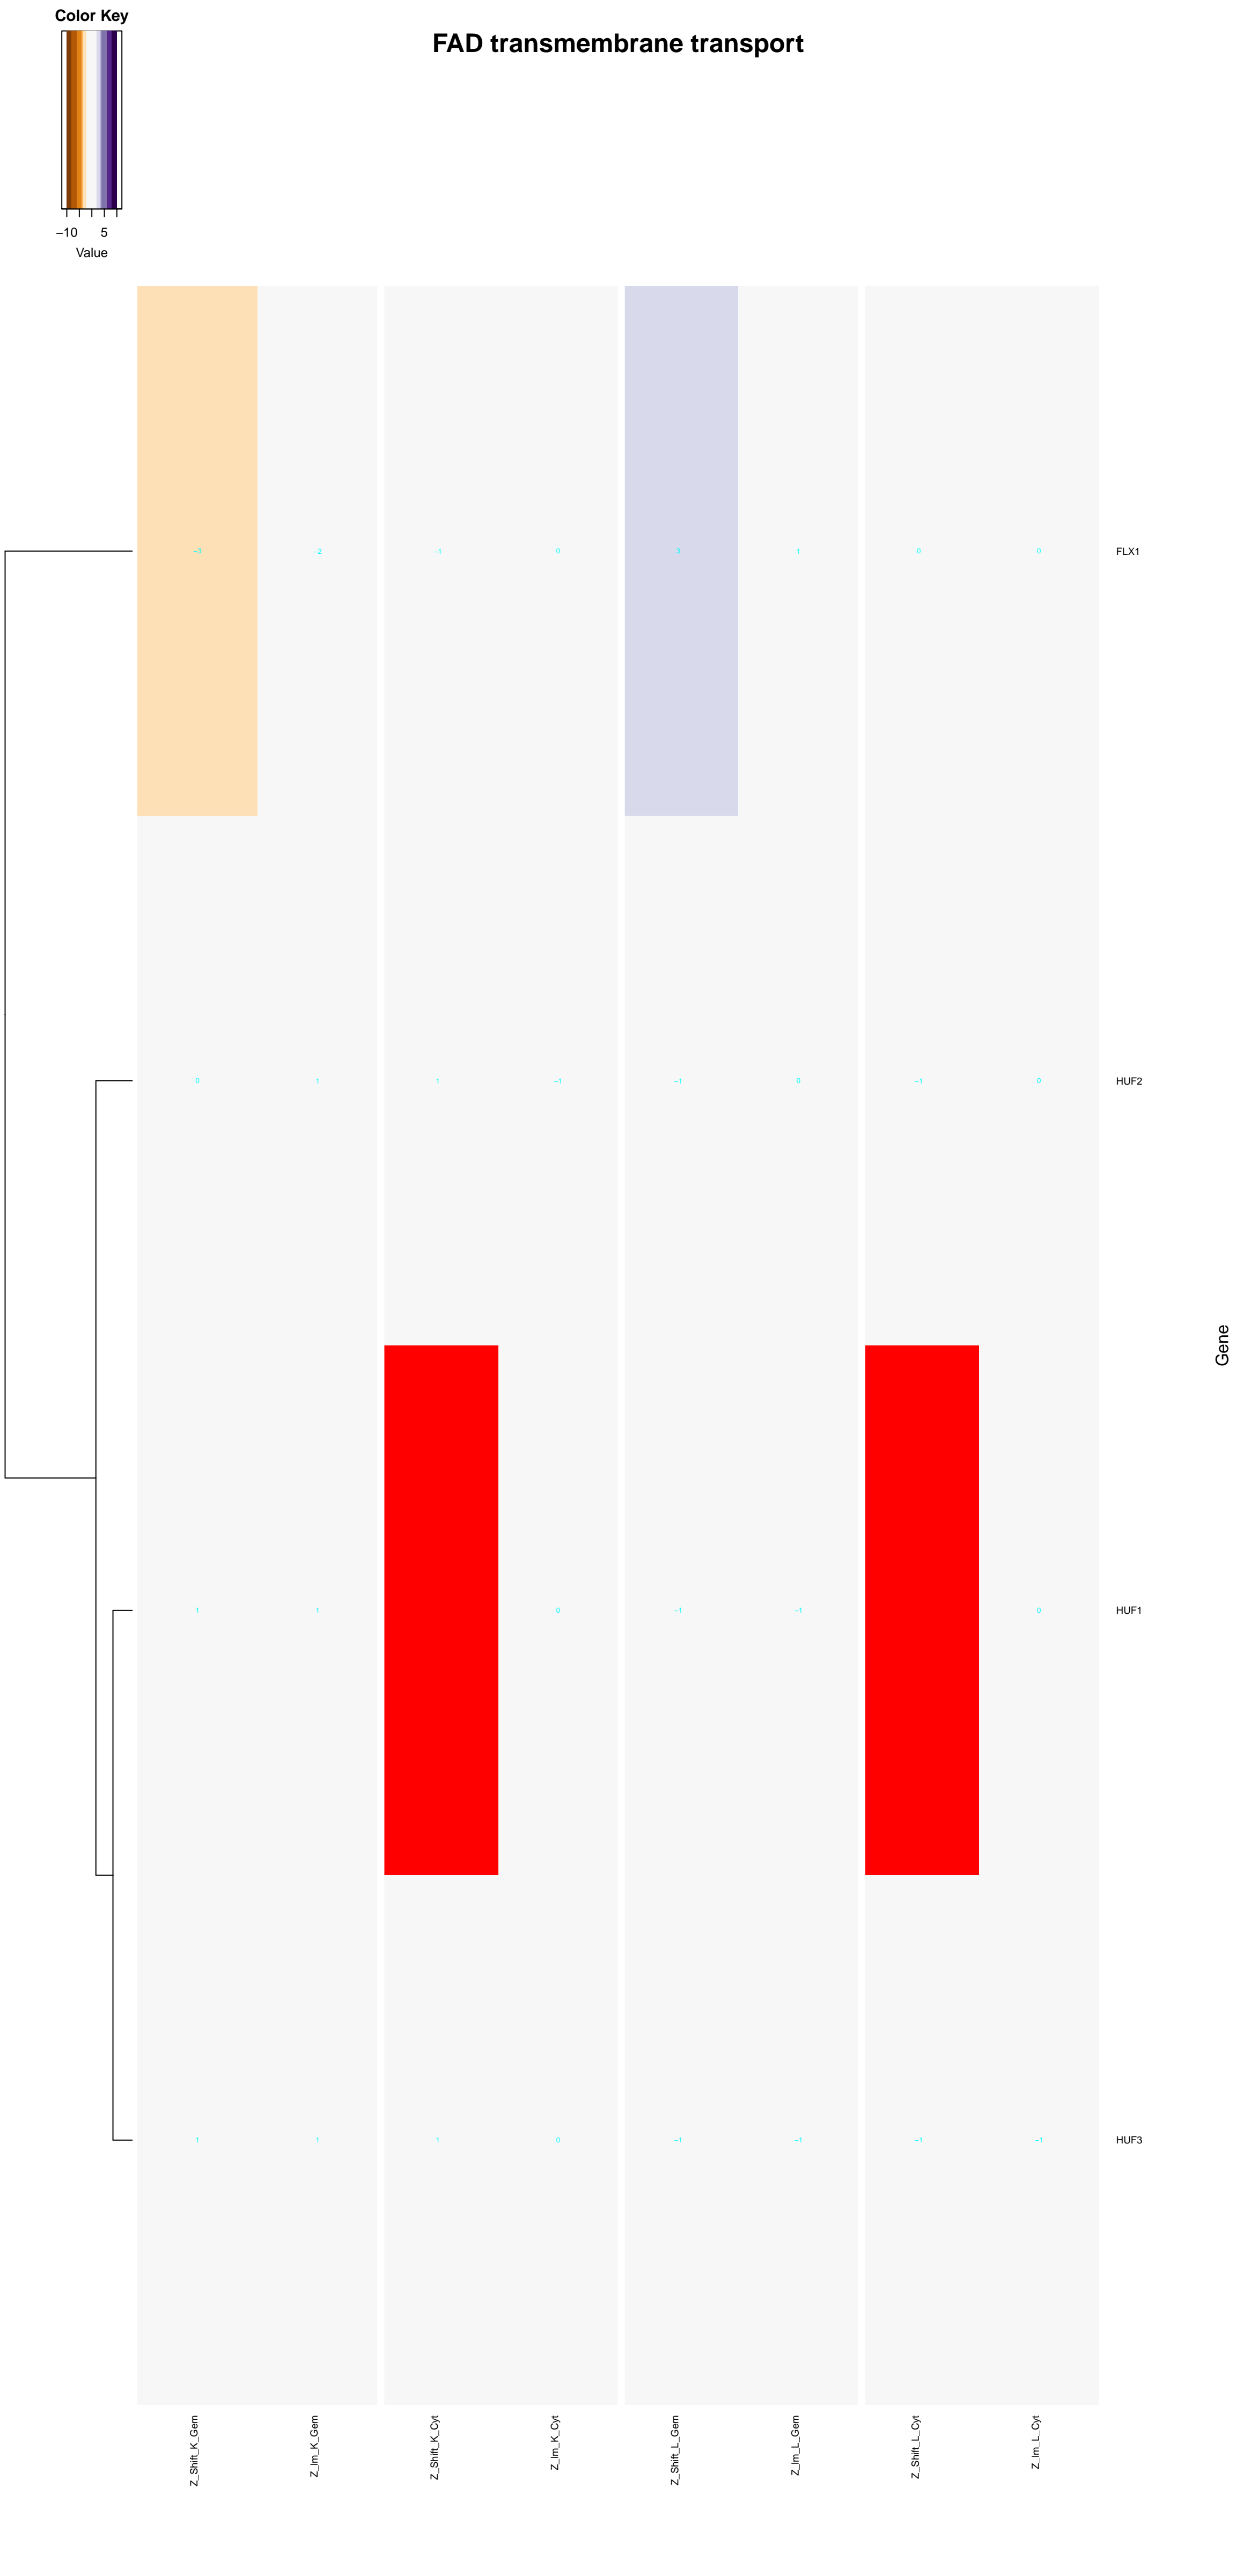

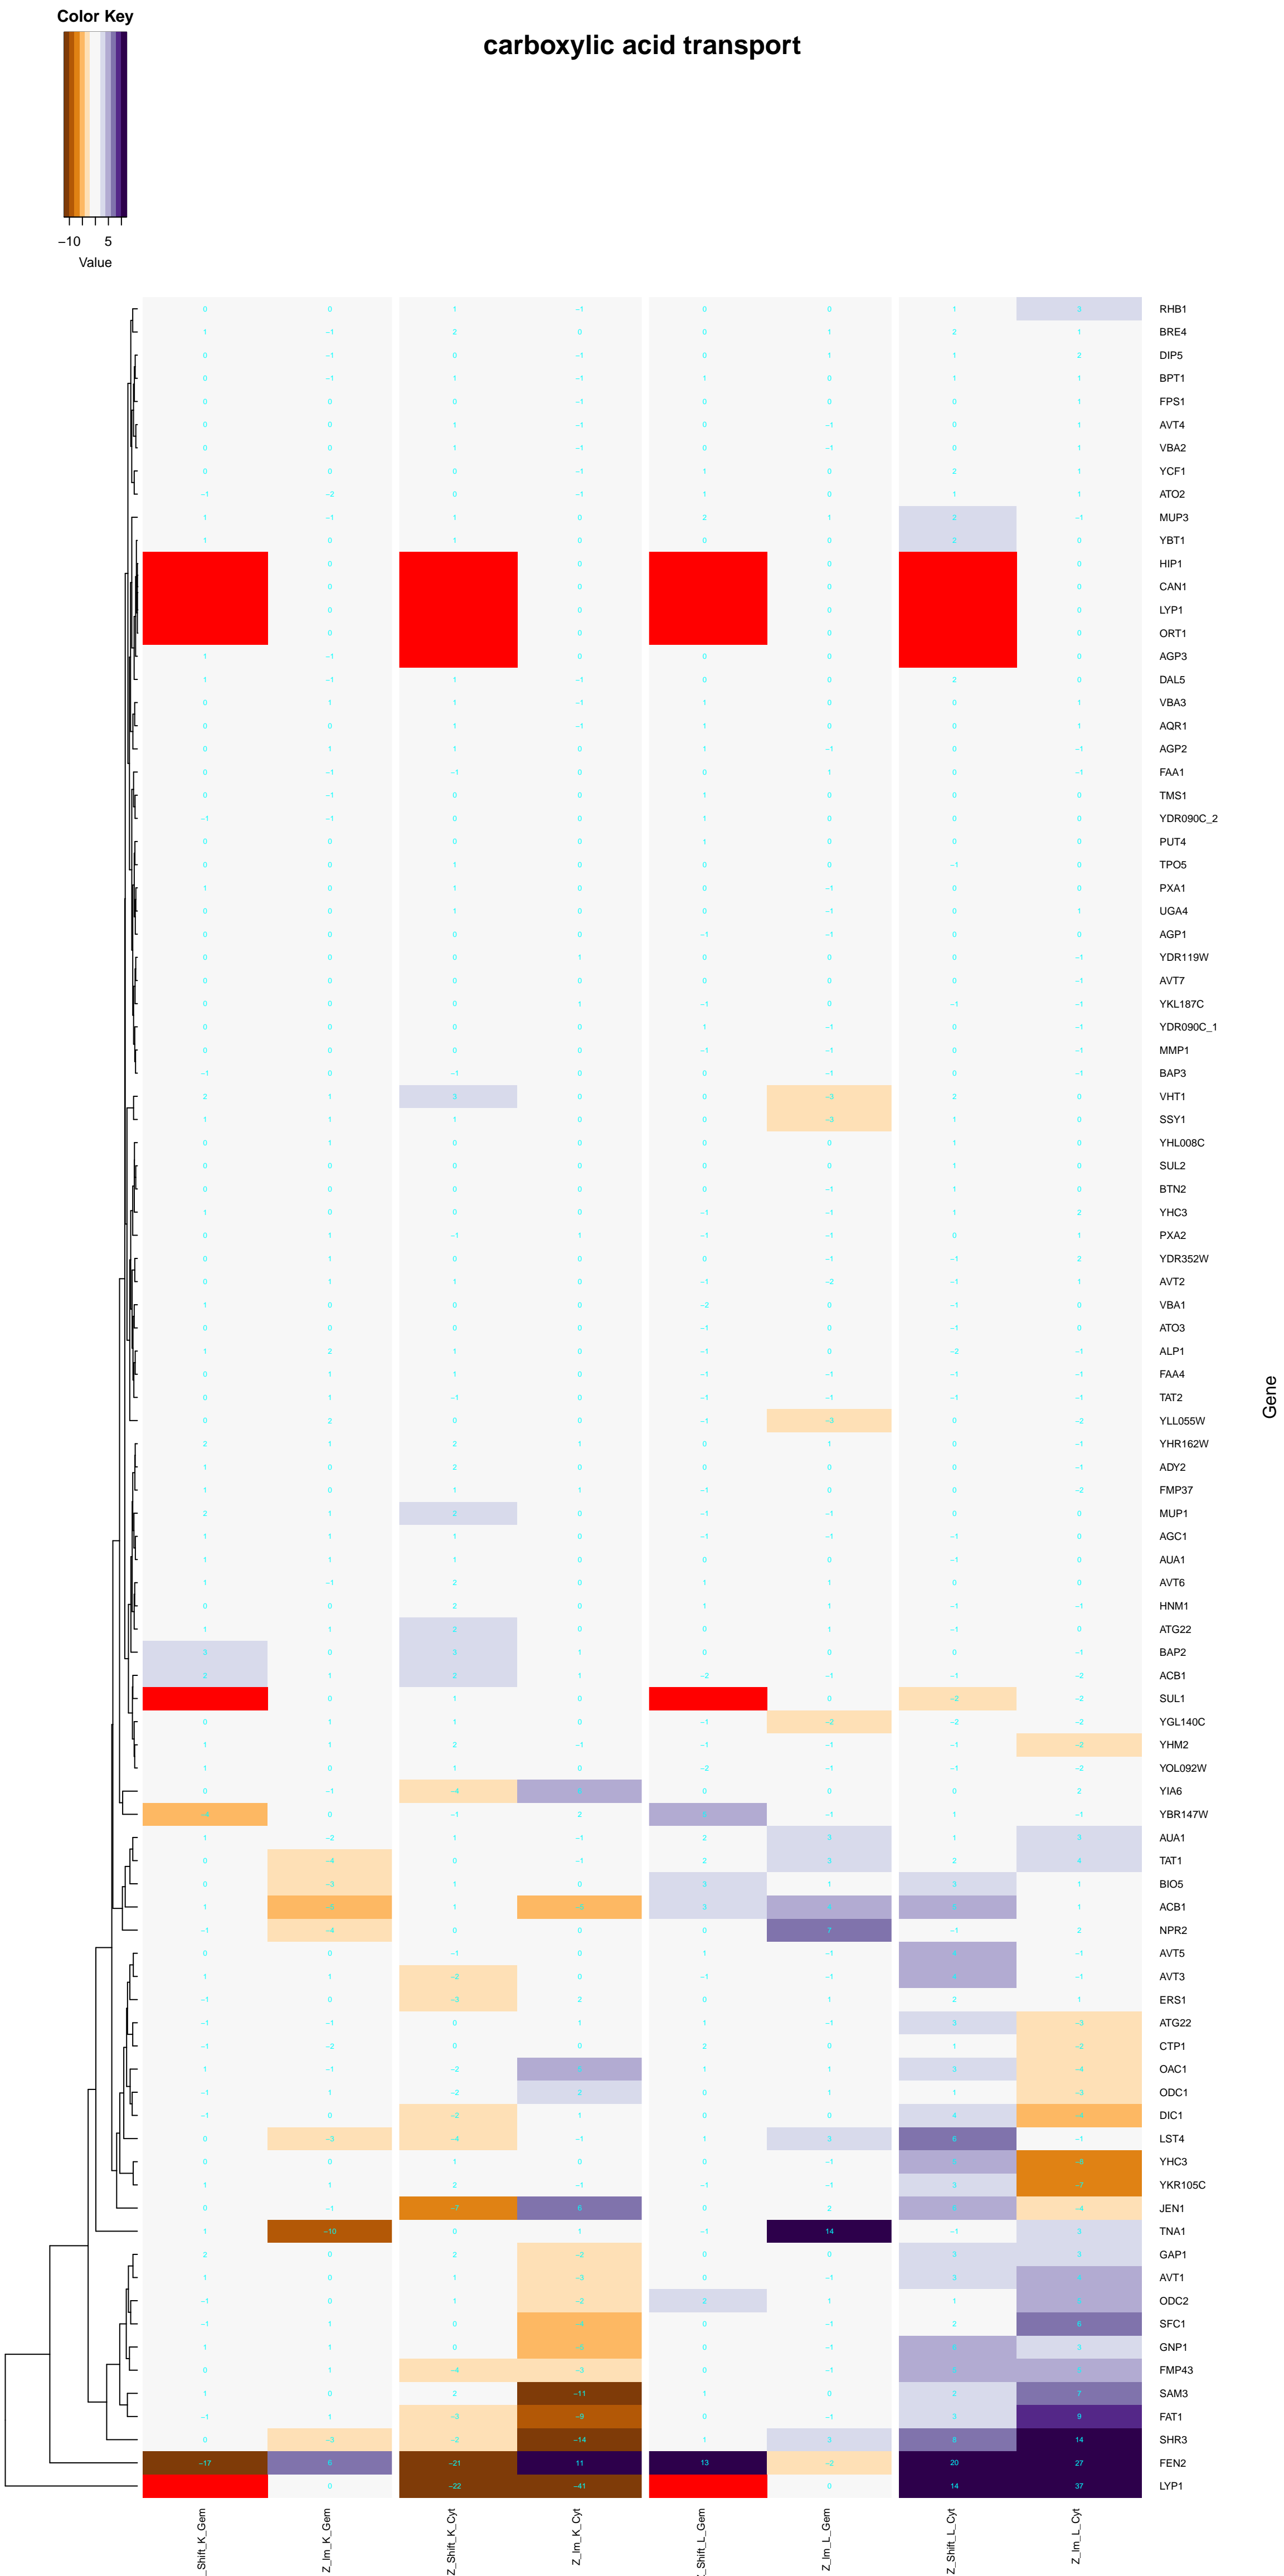

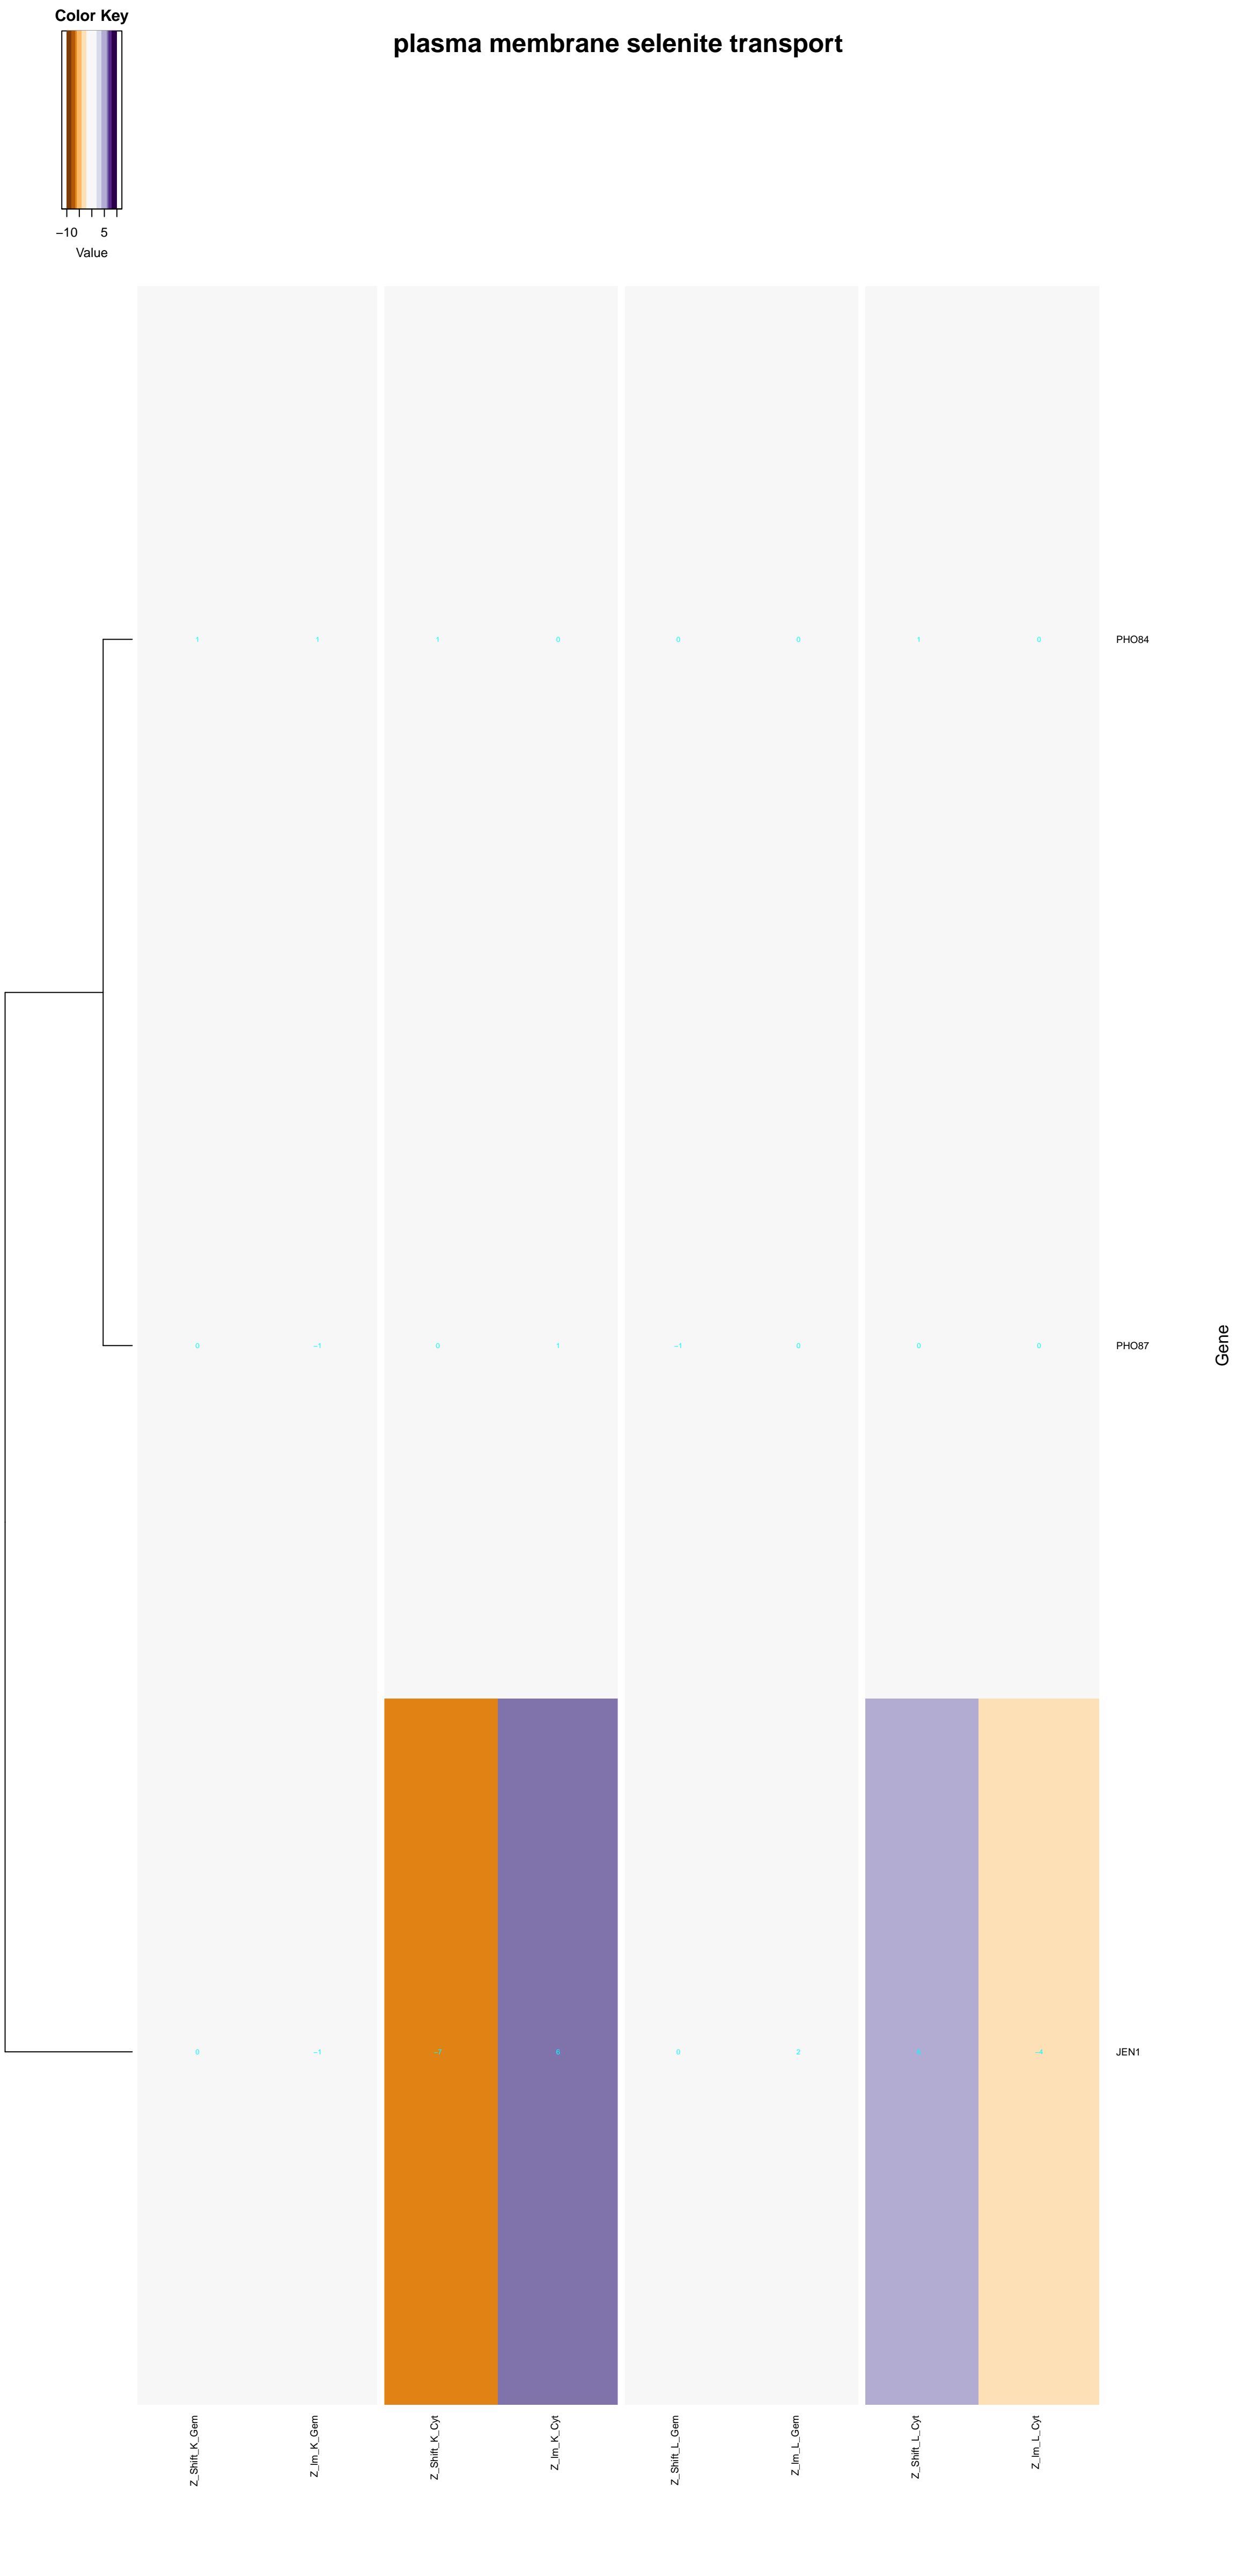

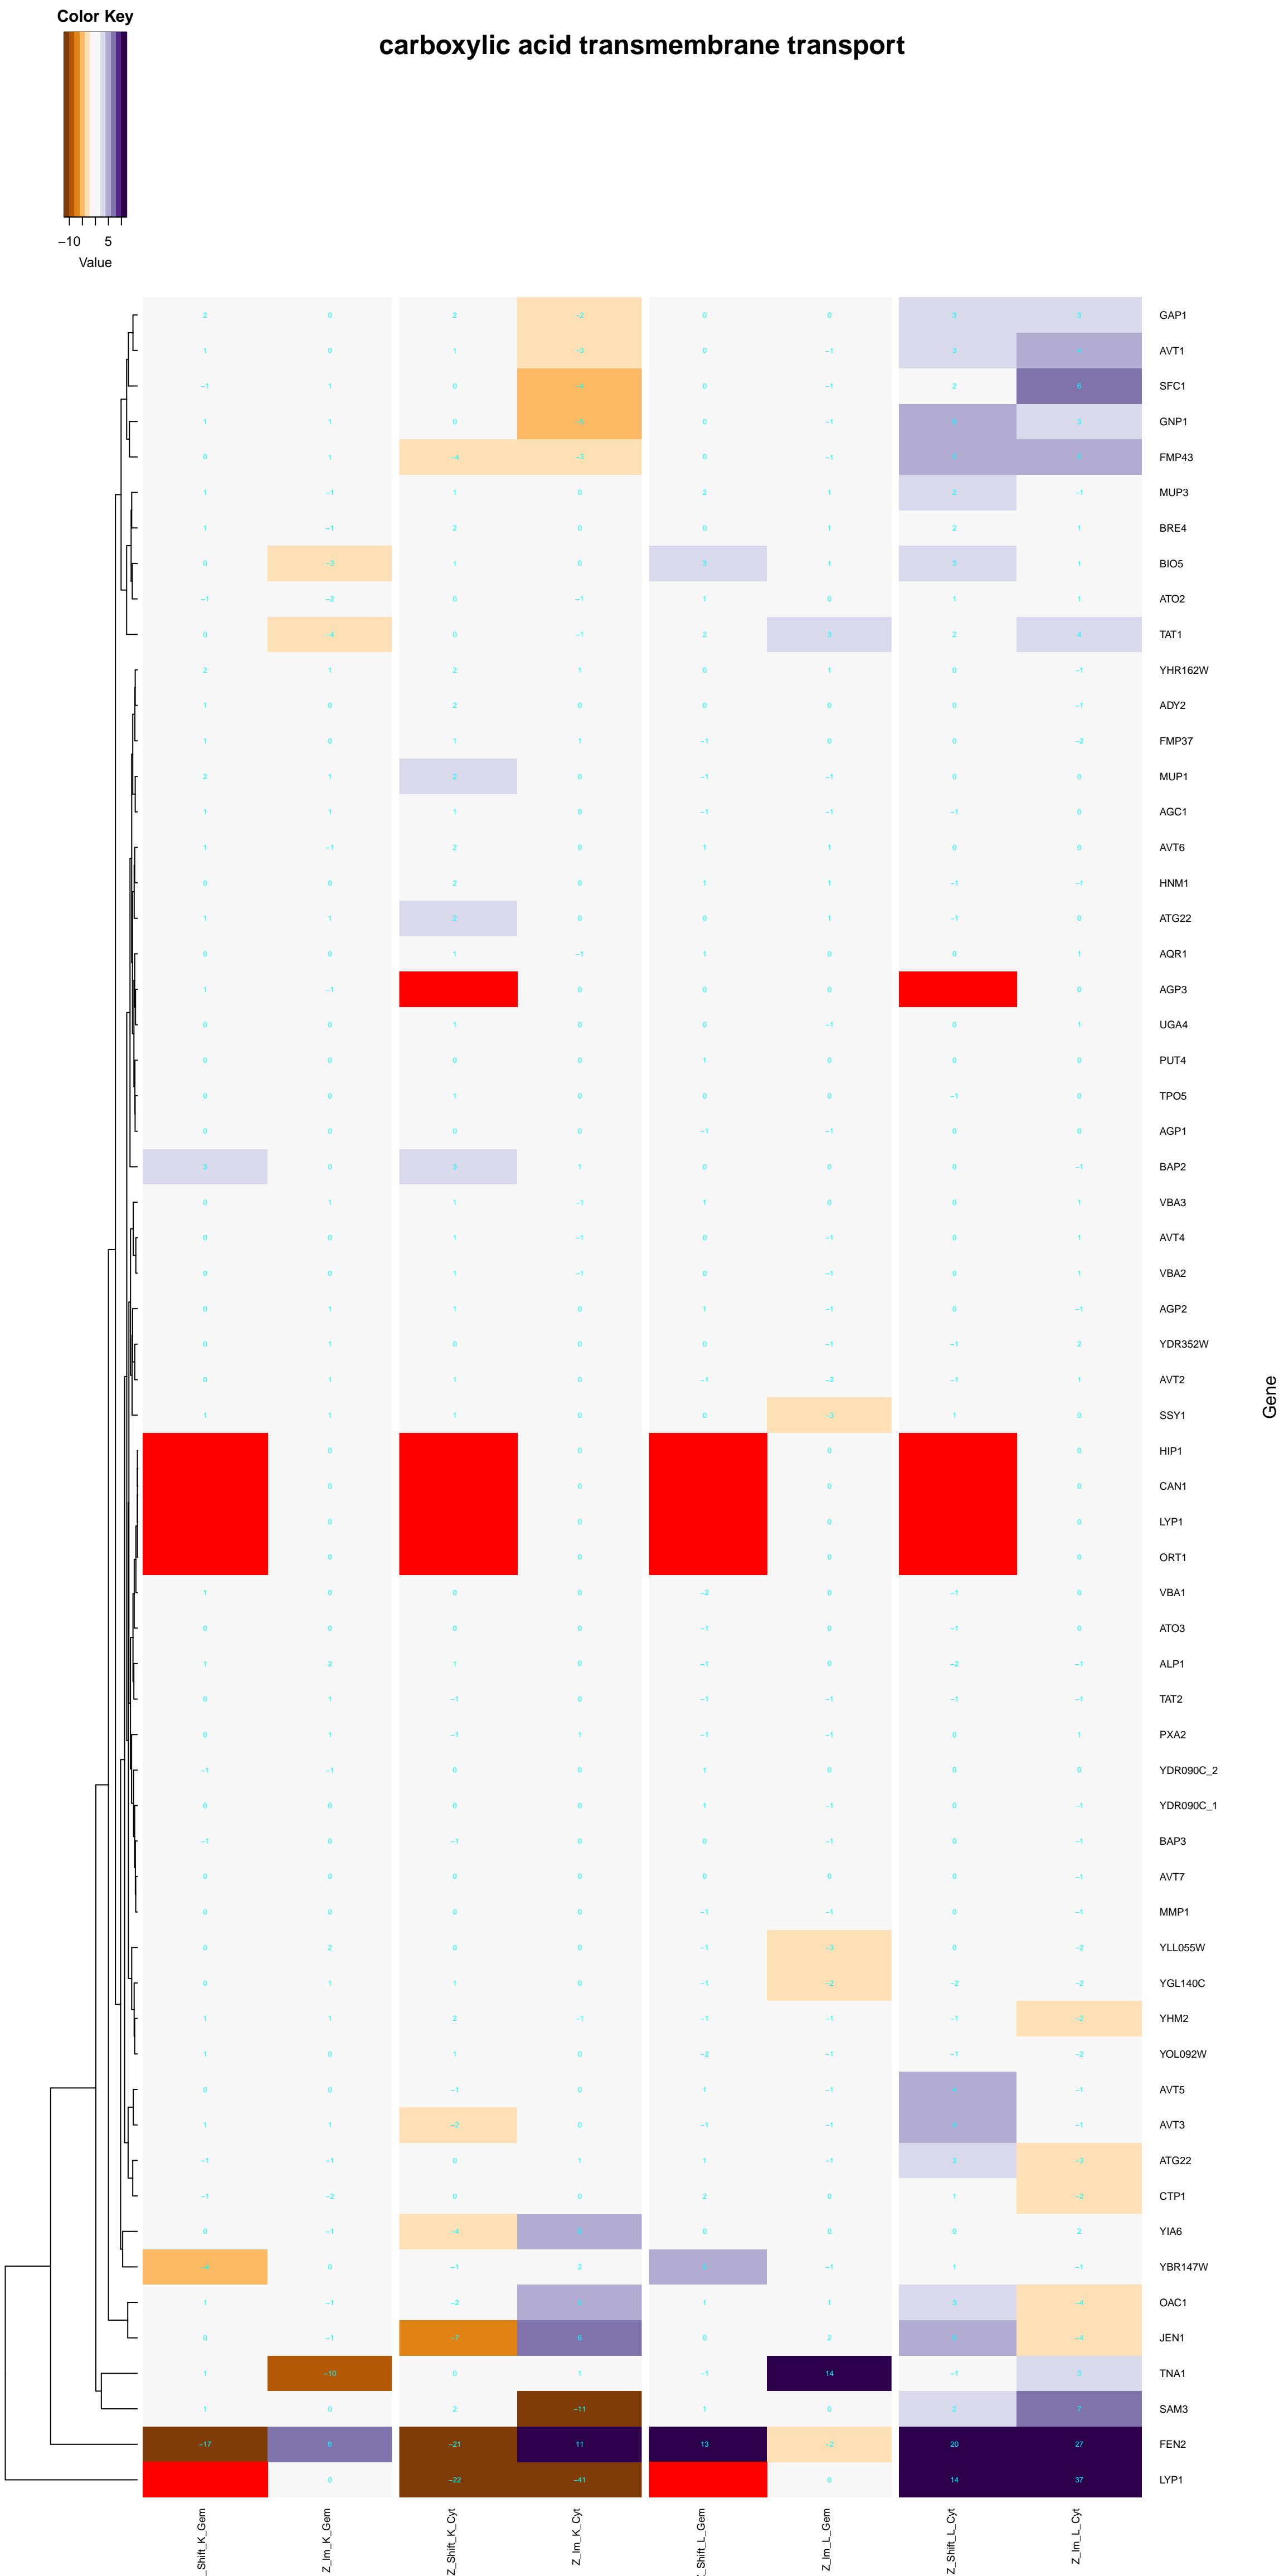

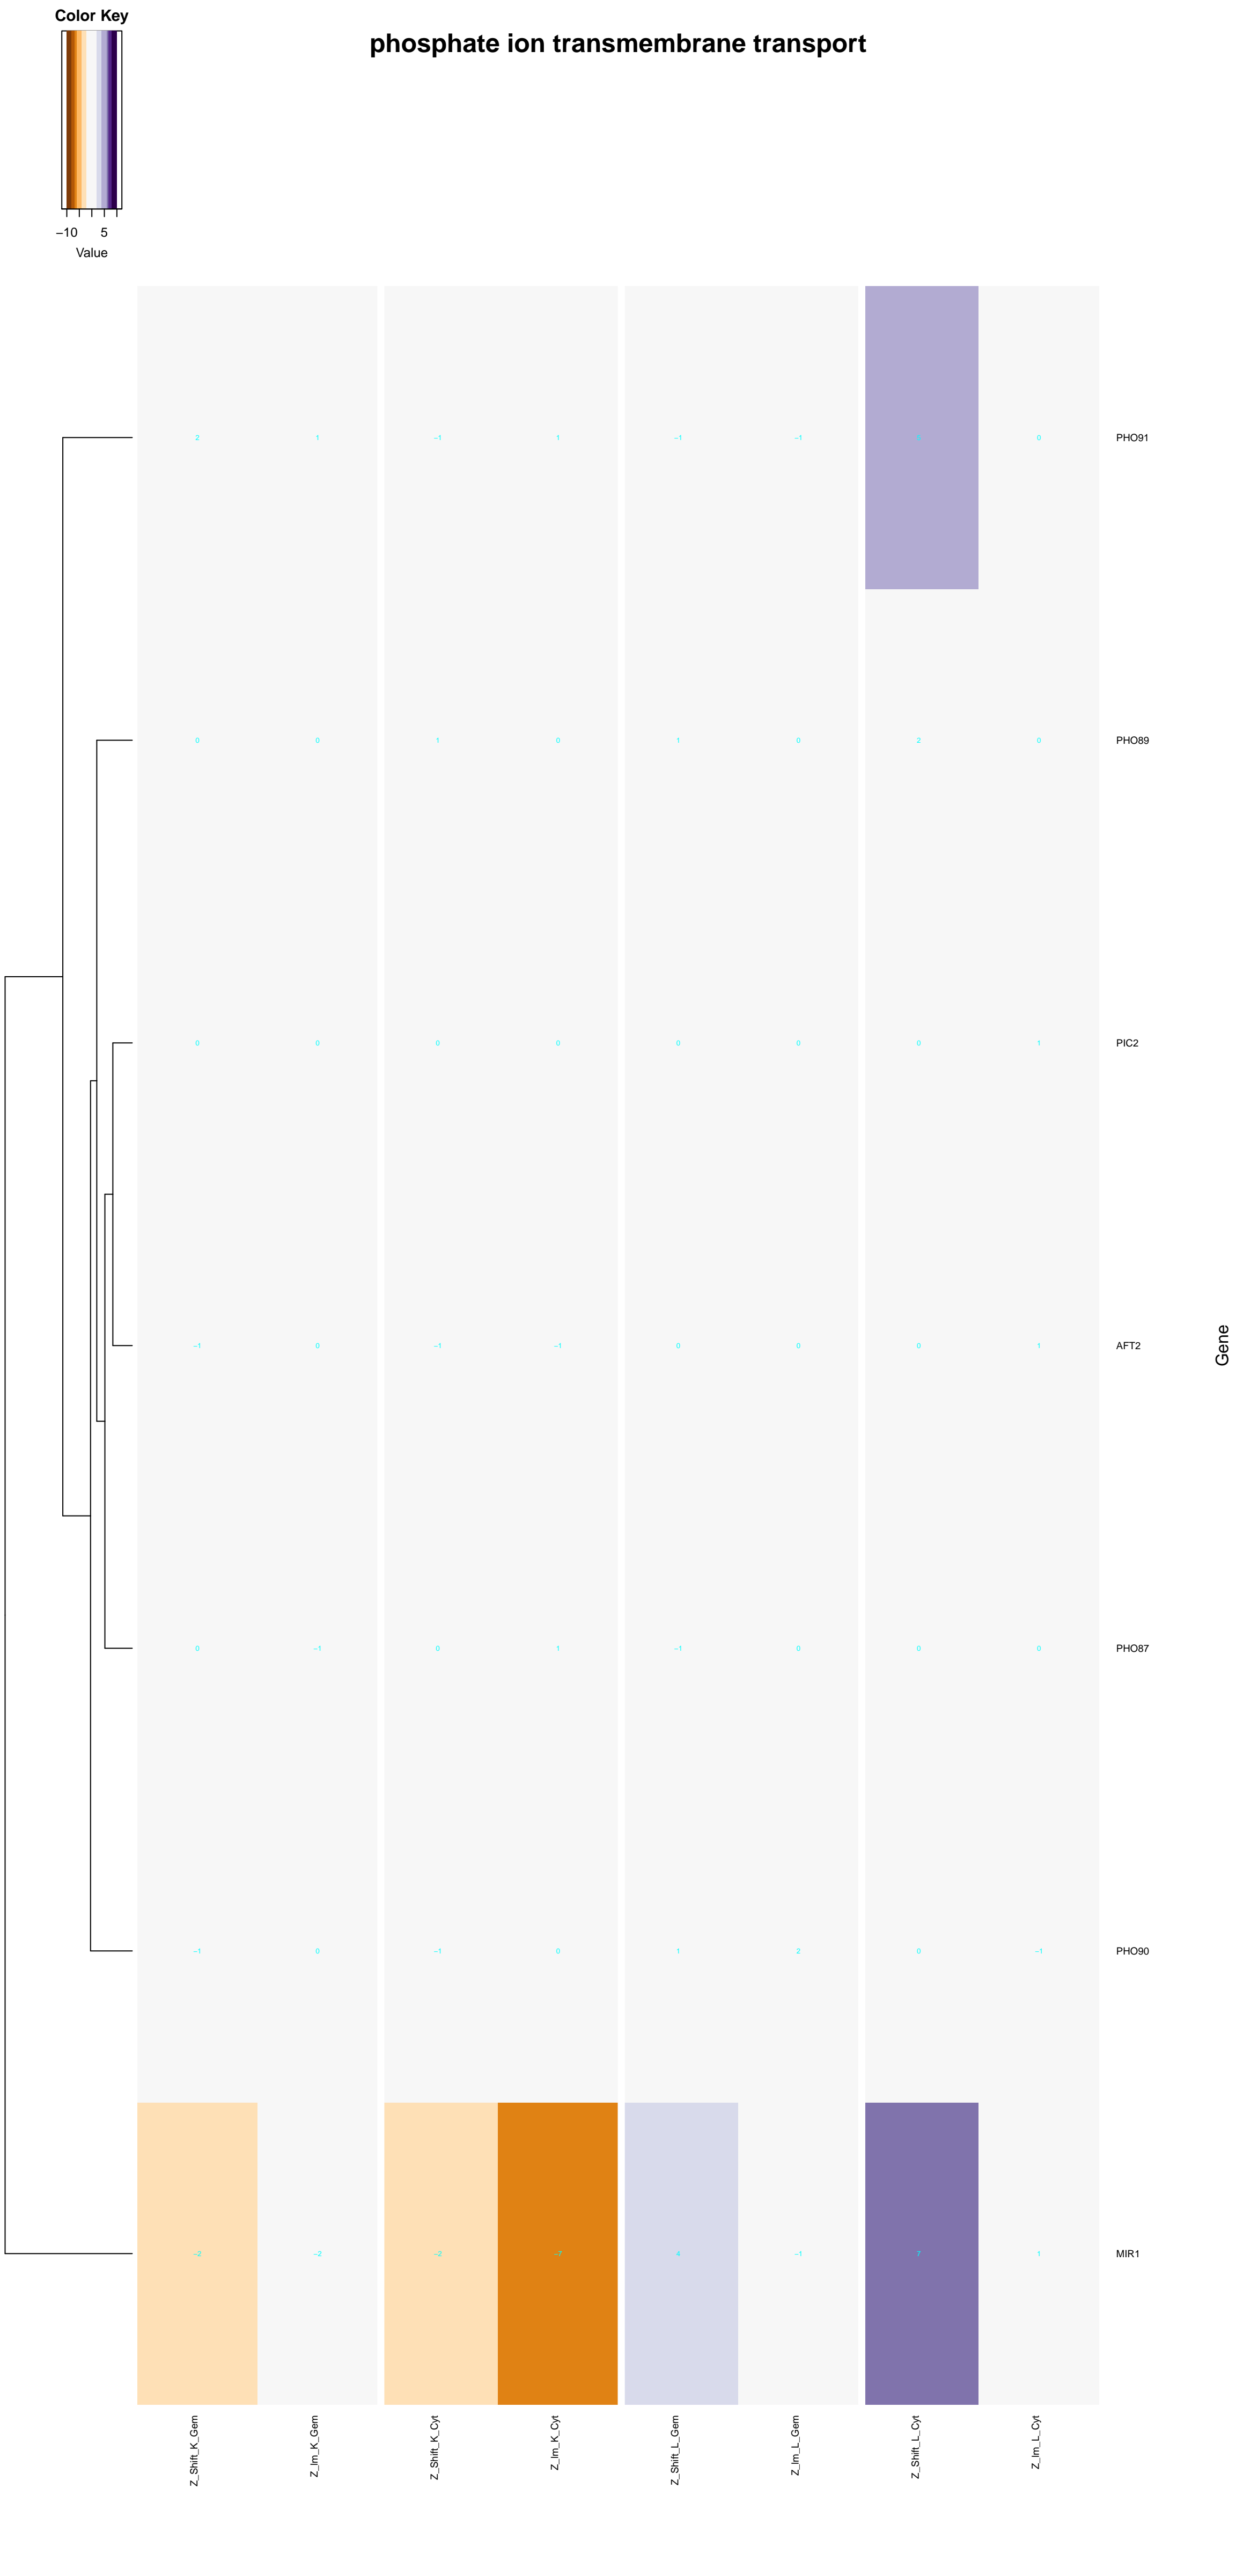

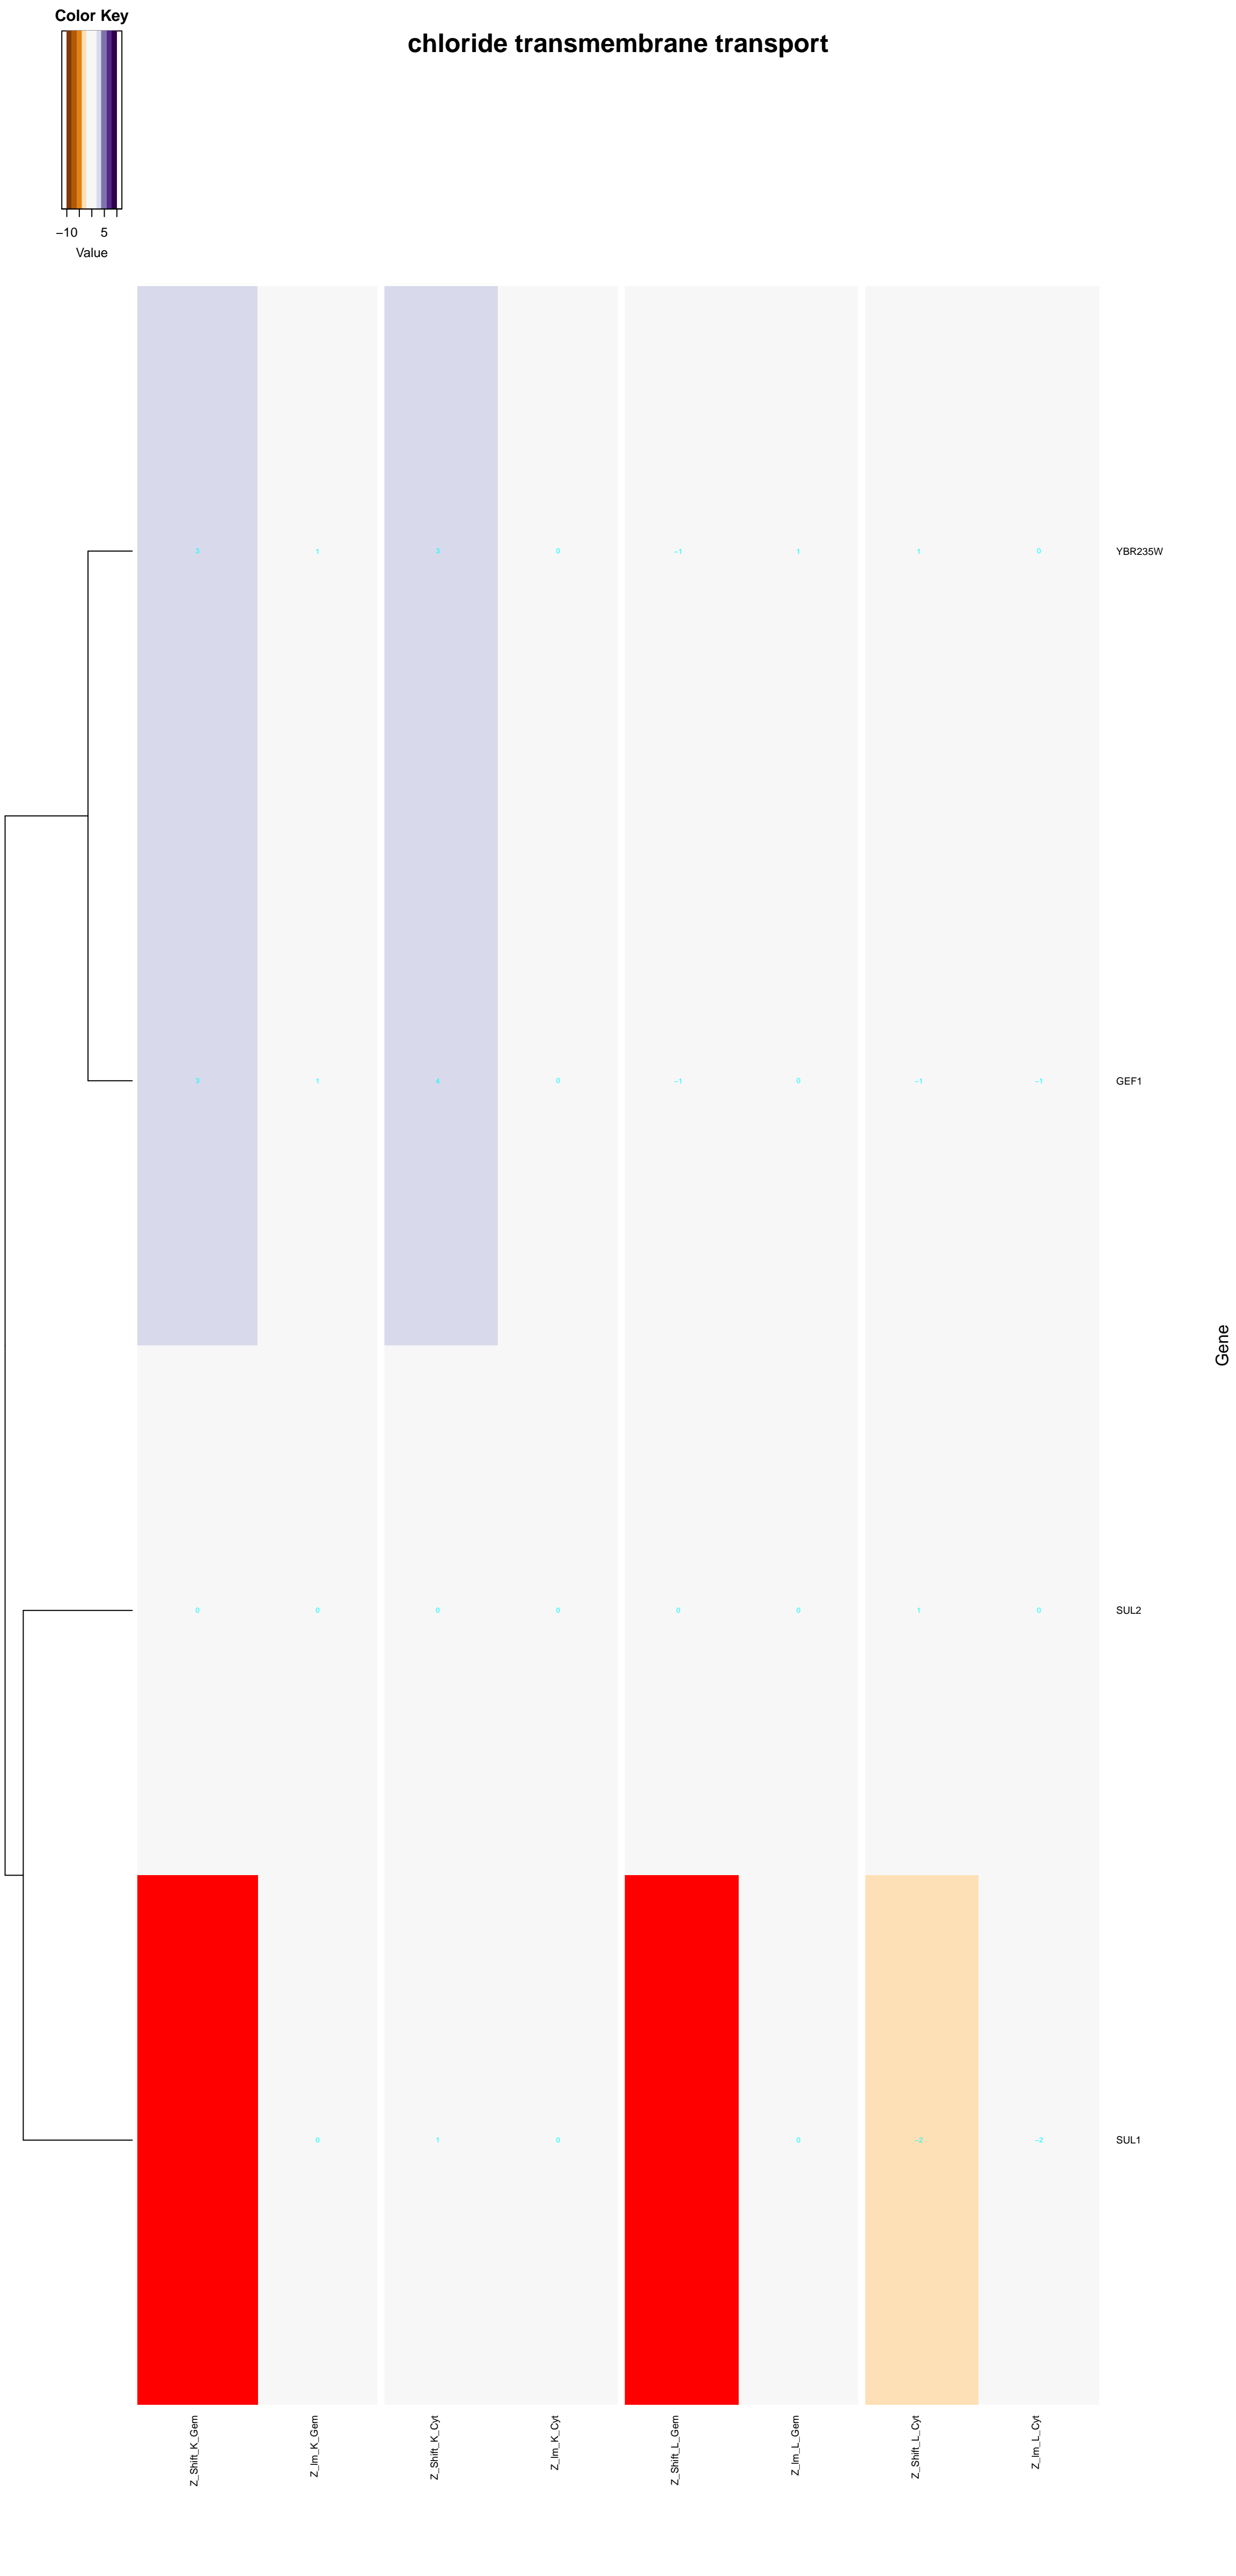

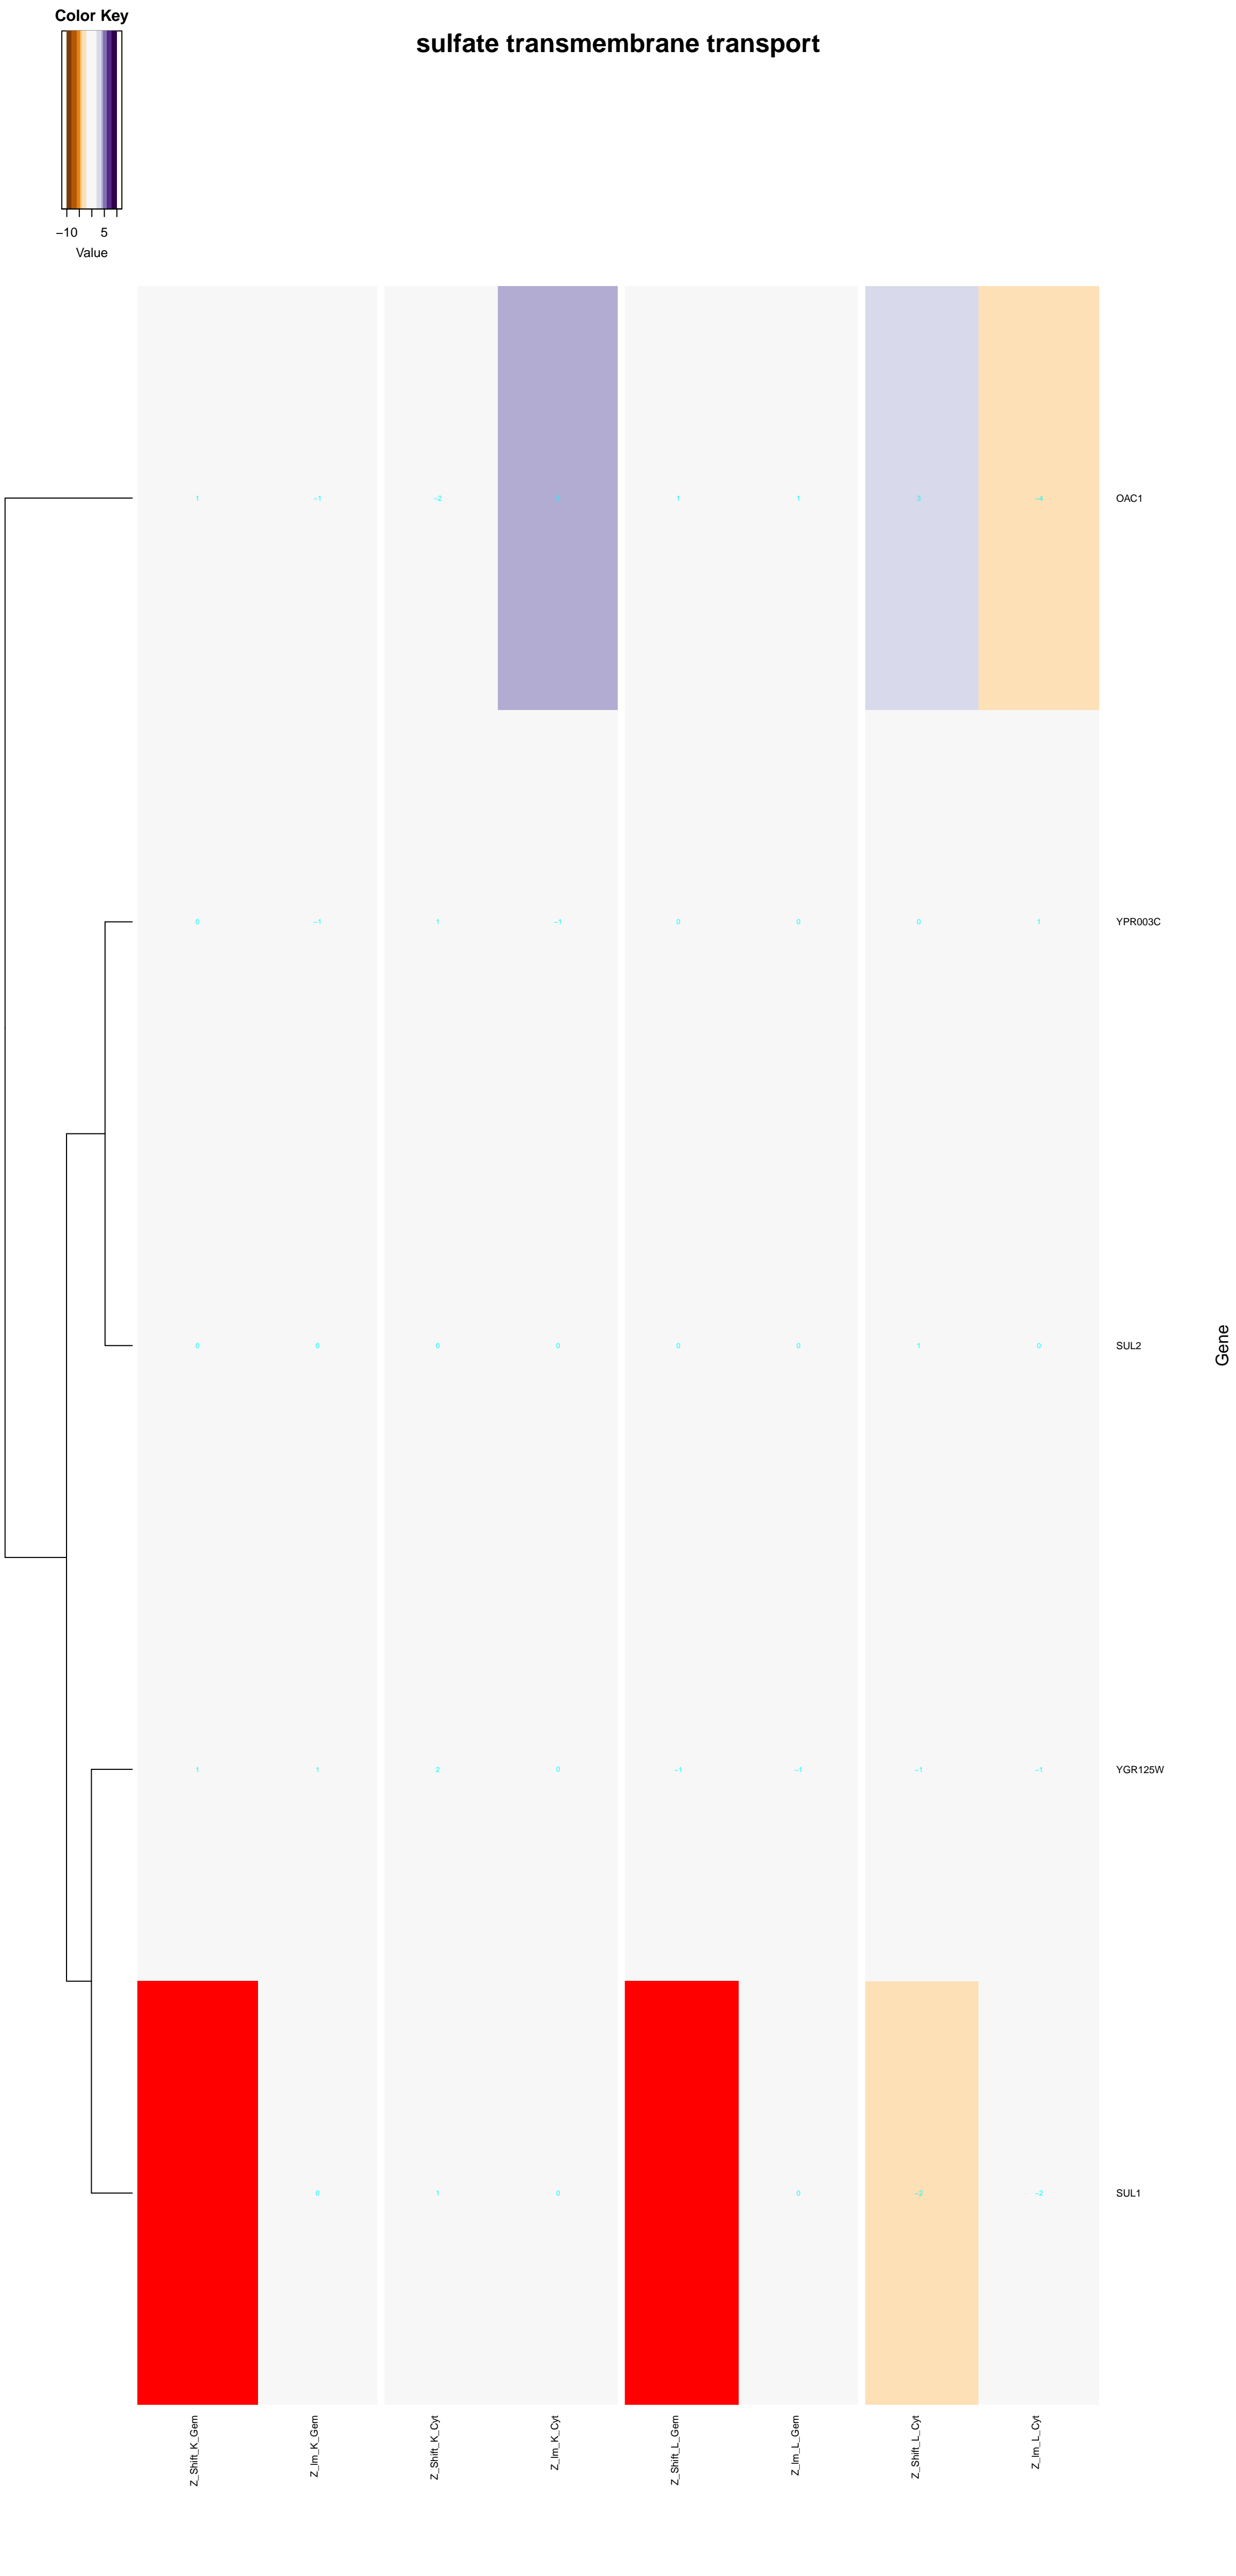

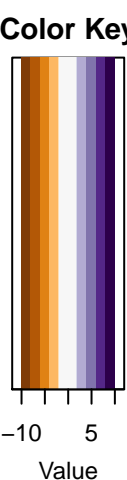

borate transmembrane transport

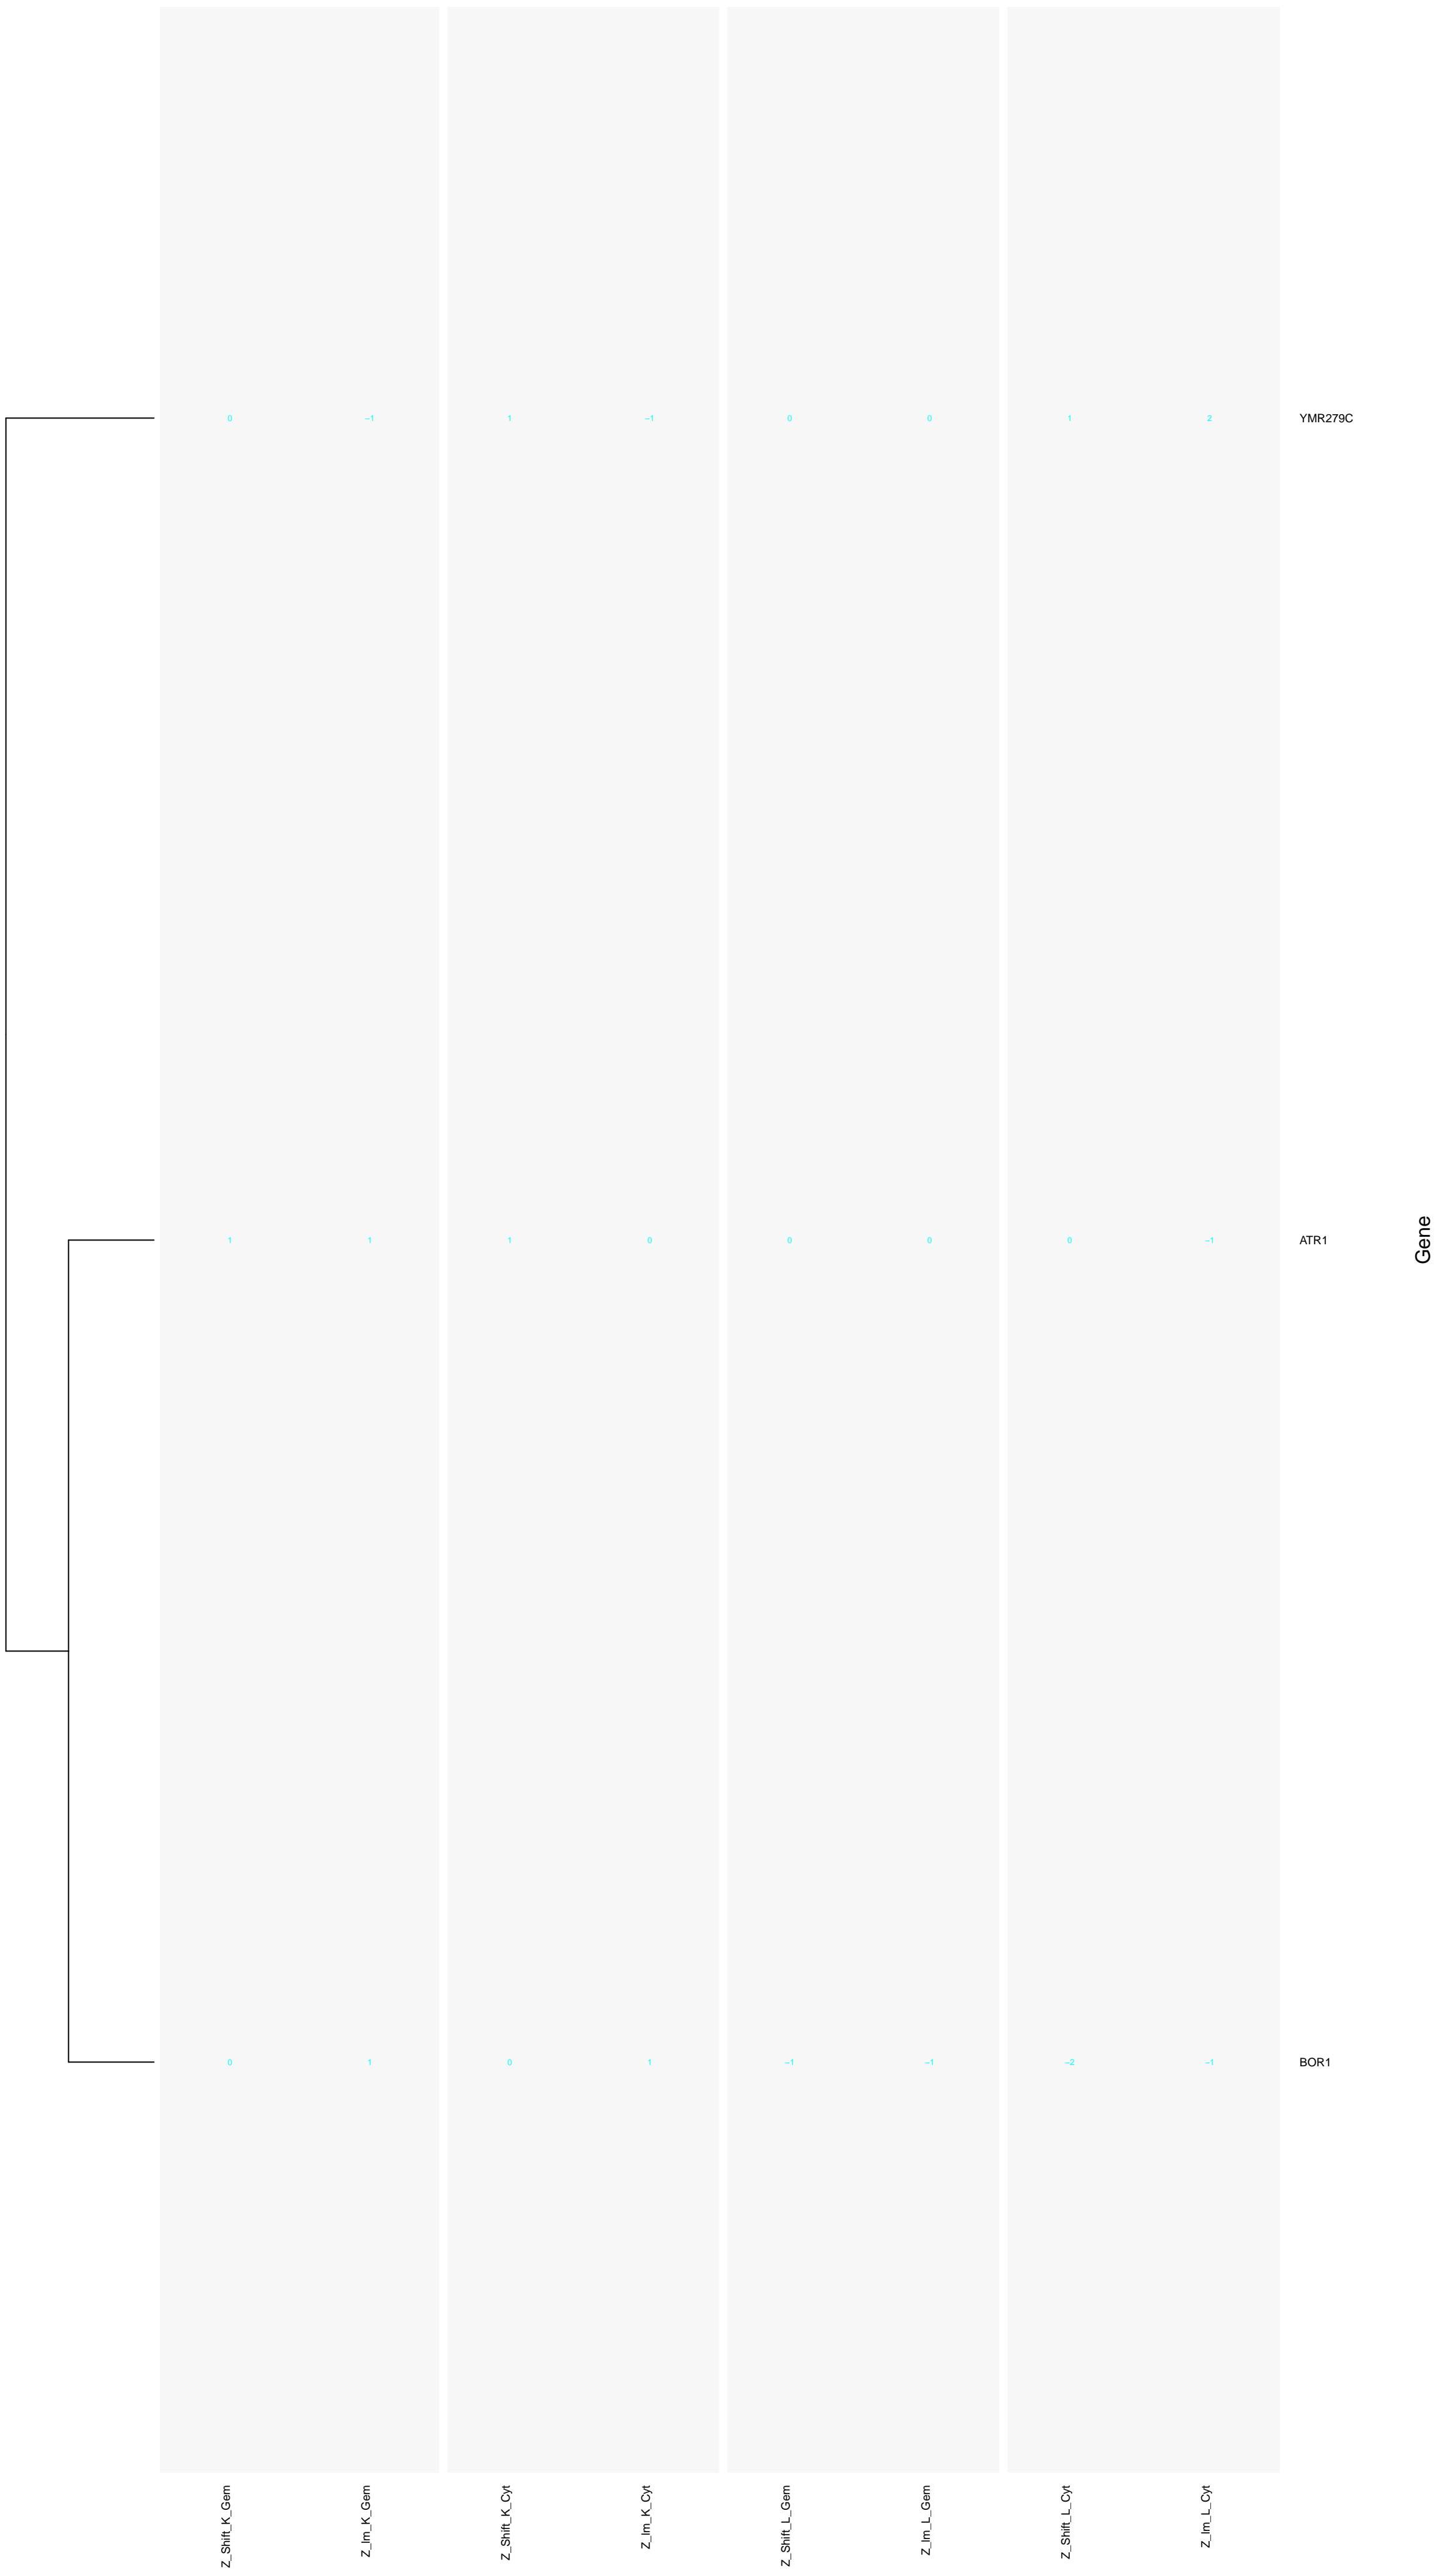

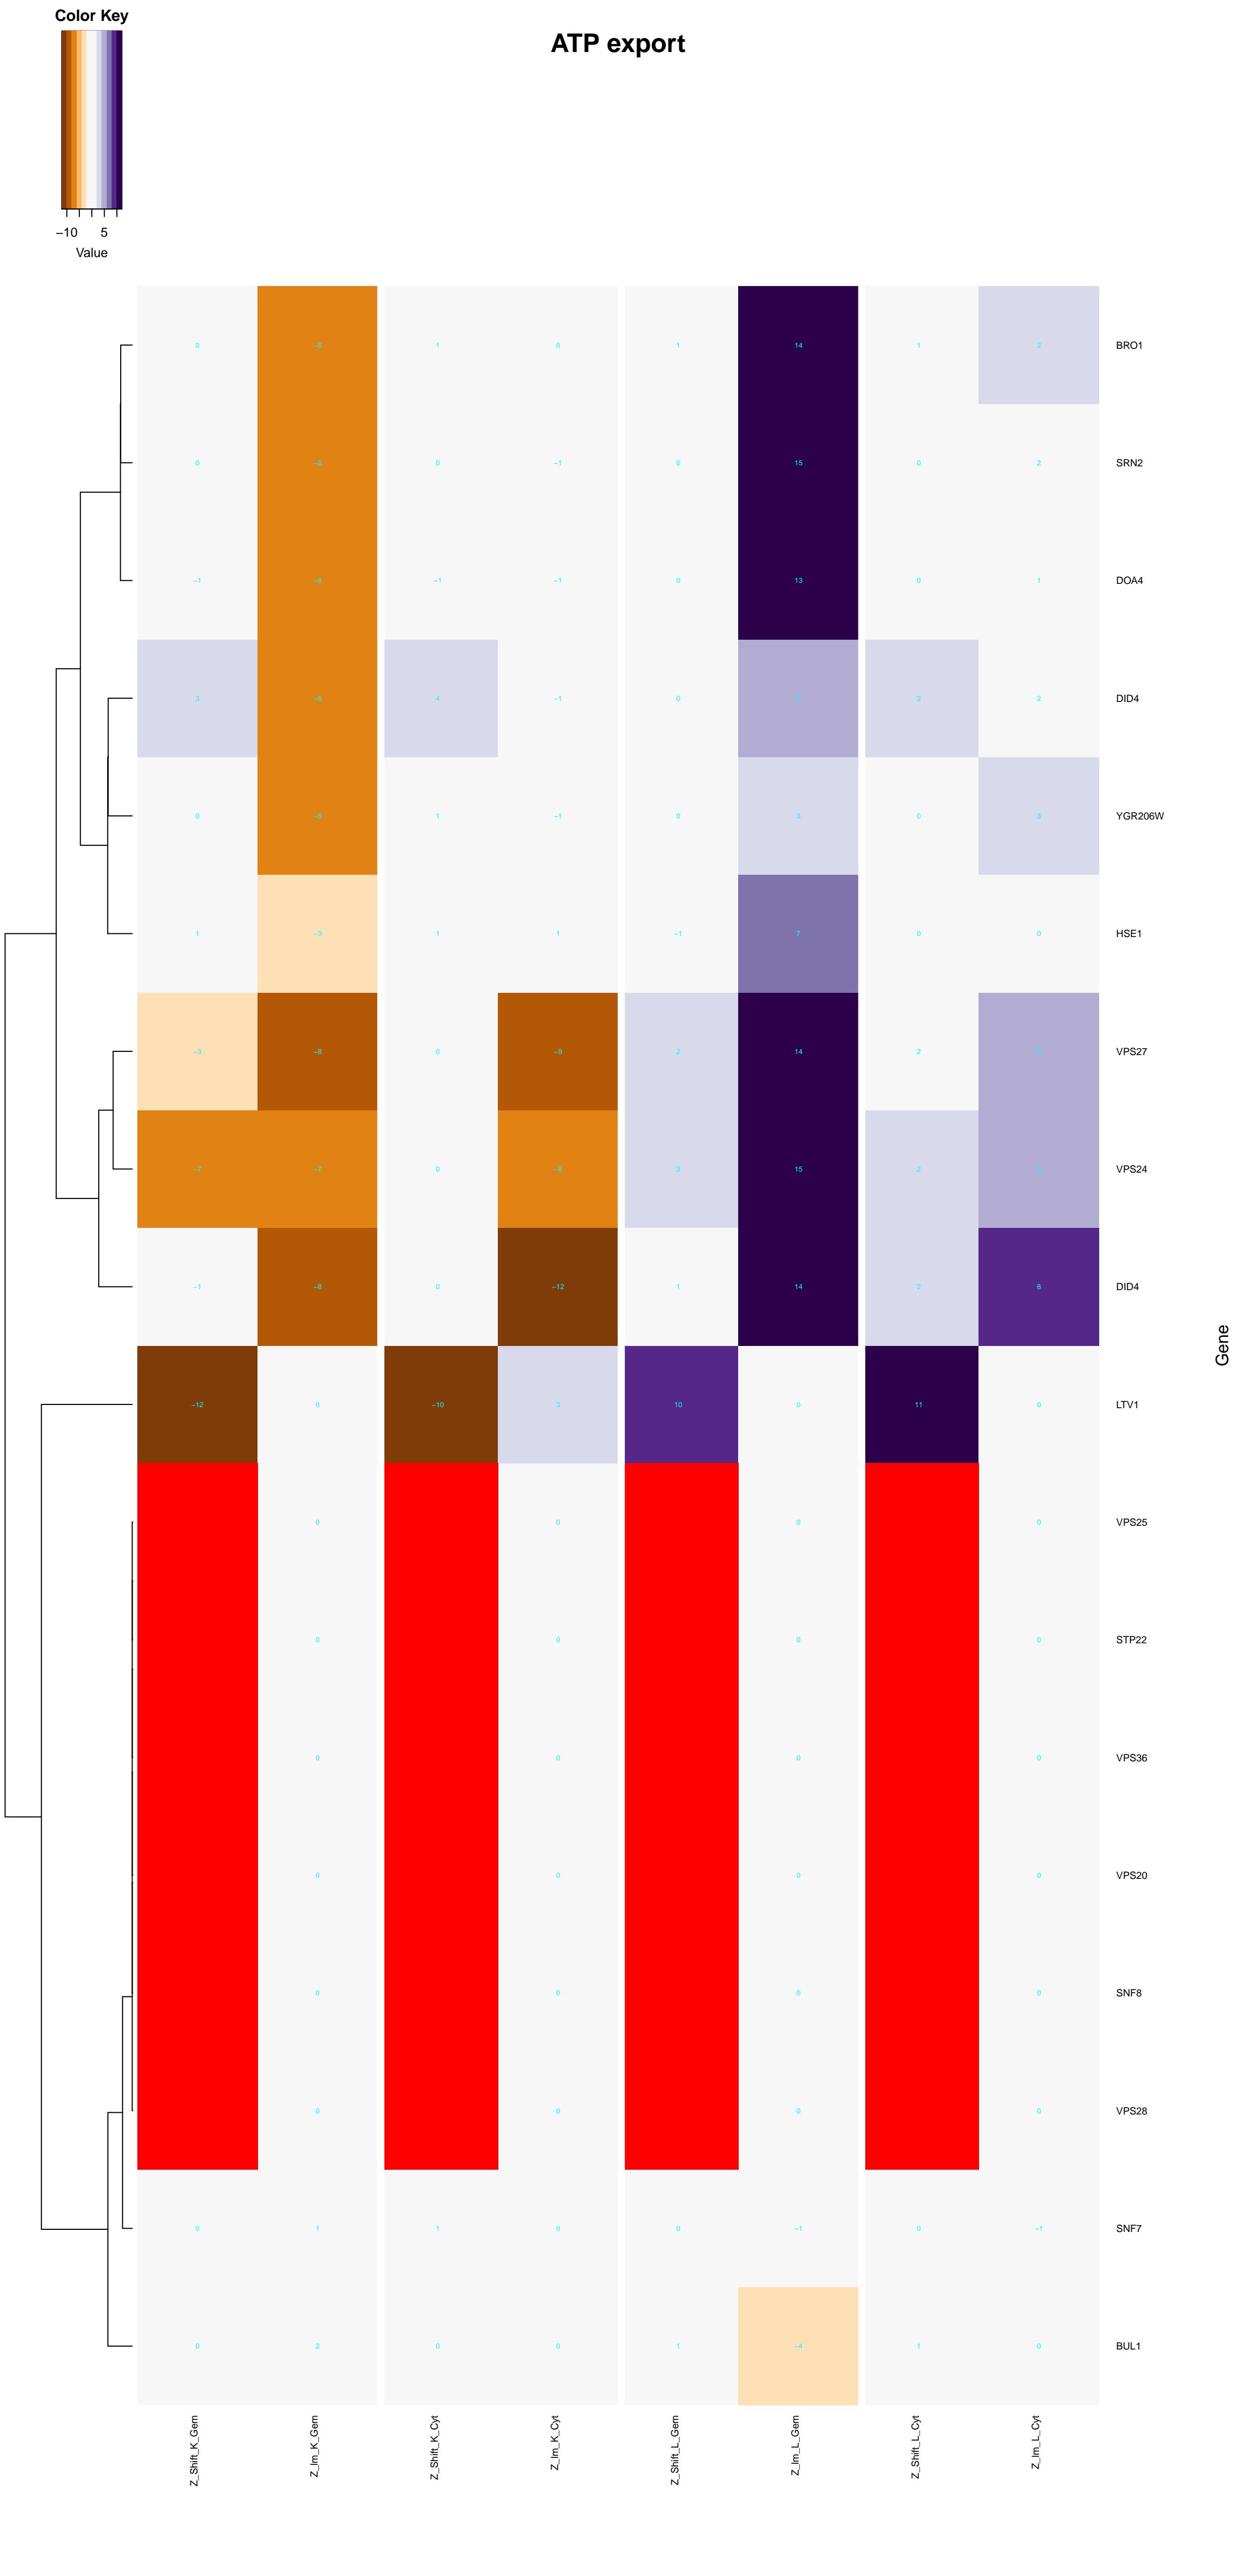

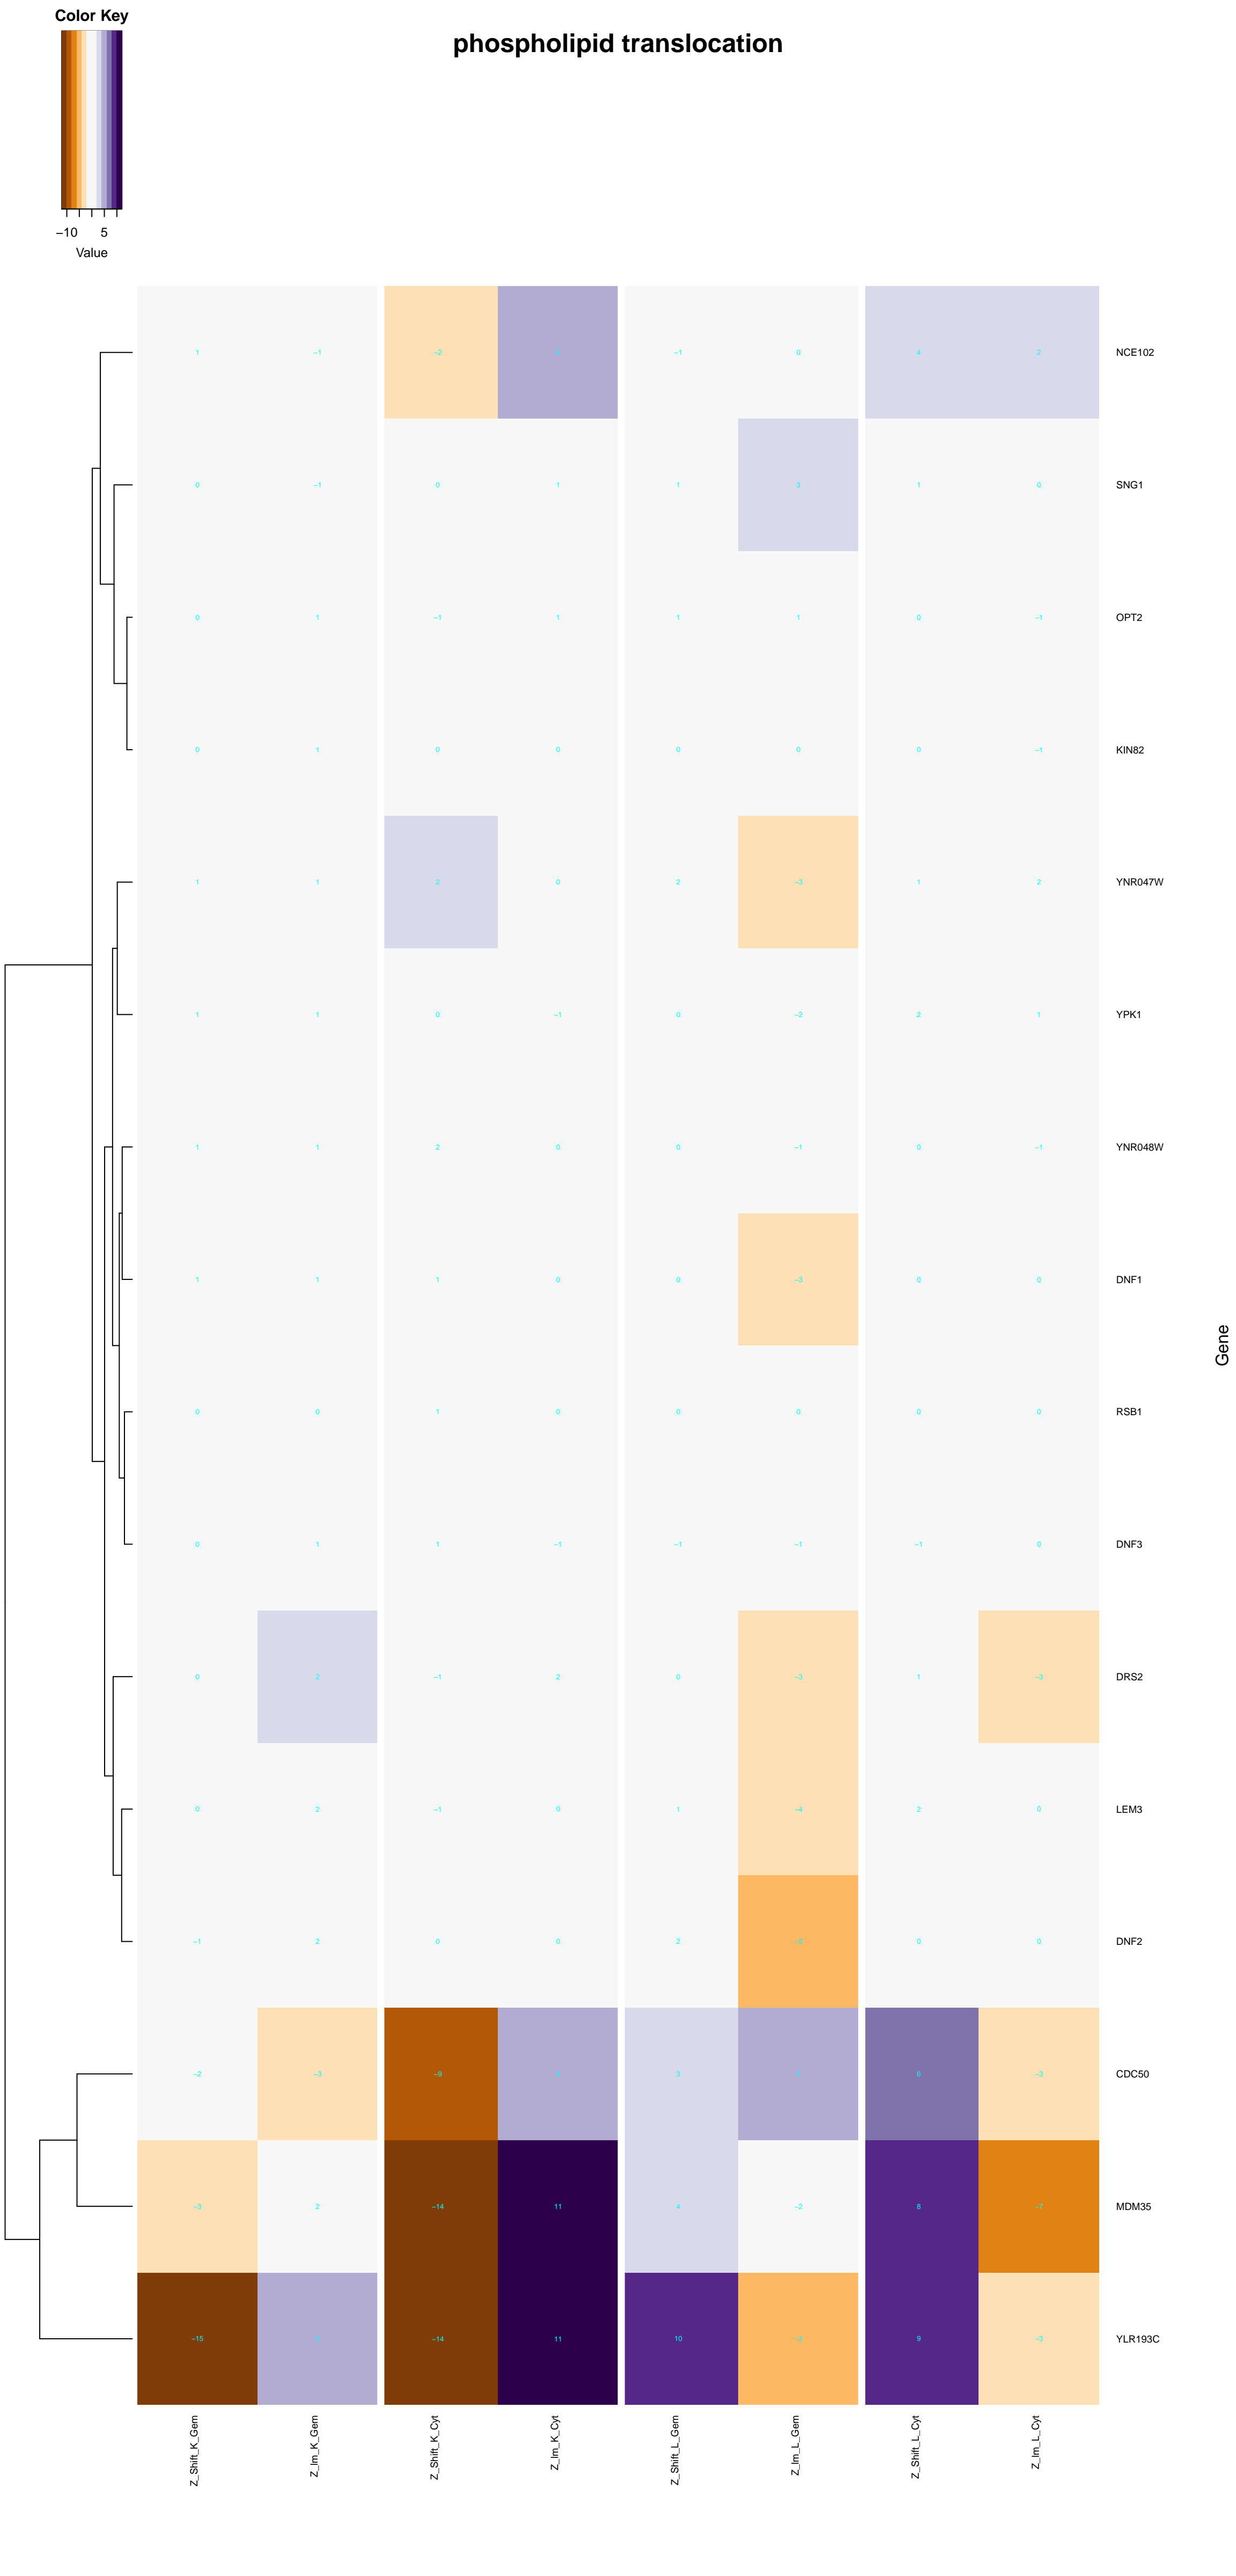

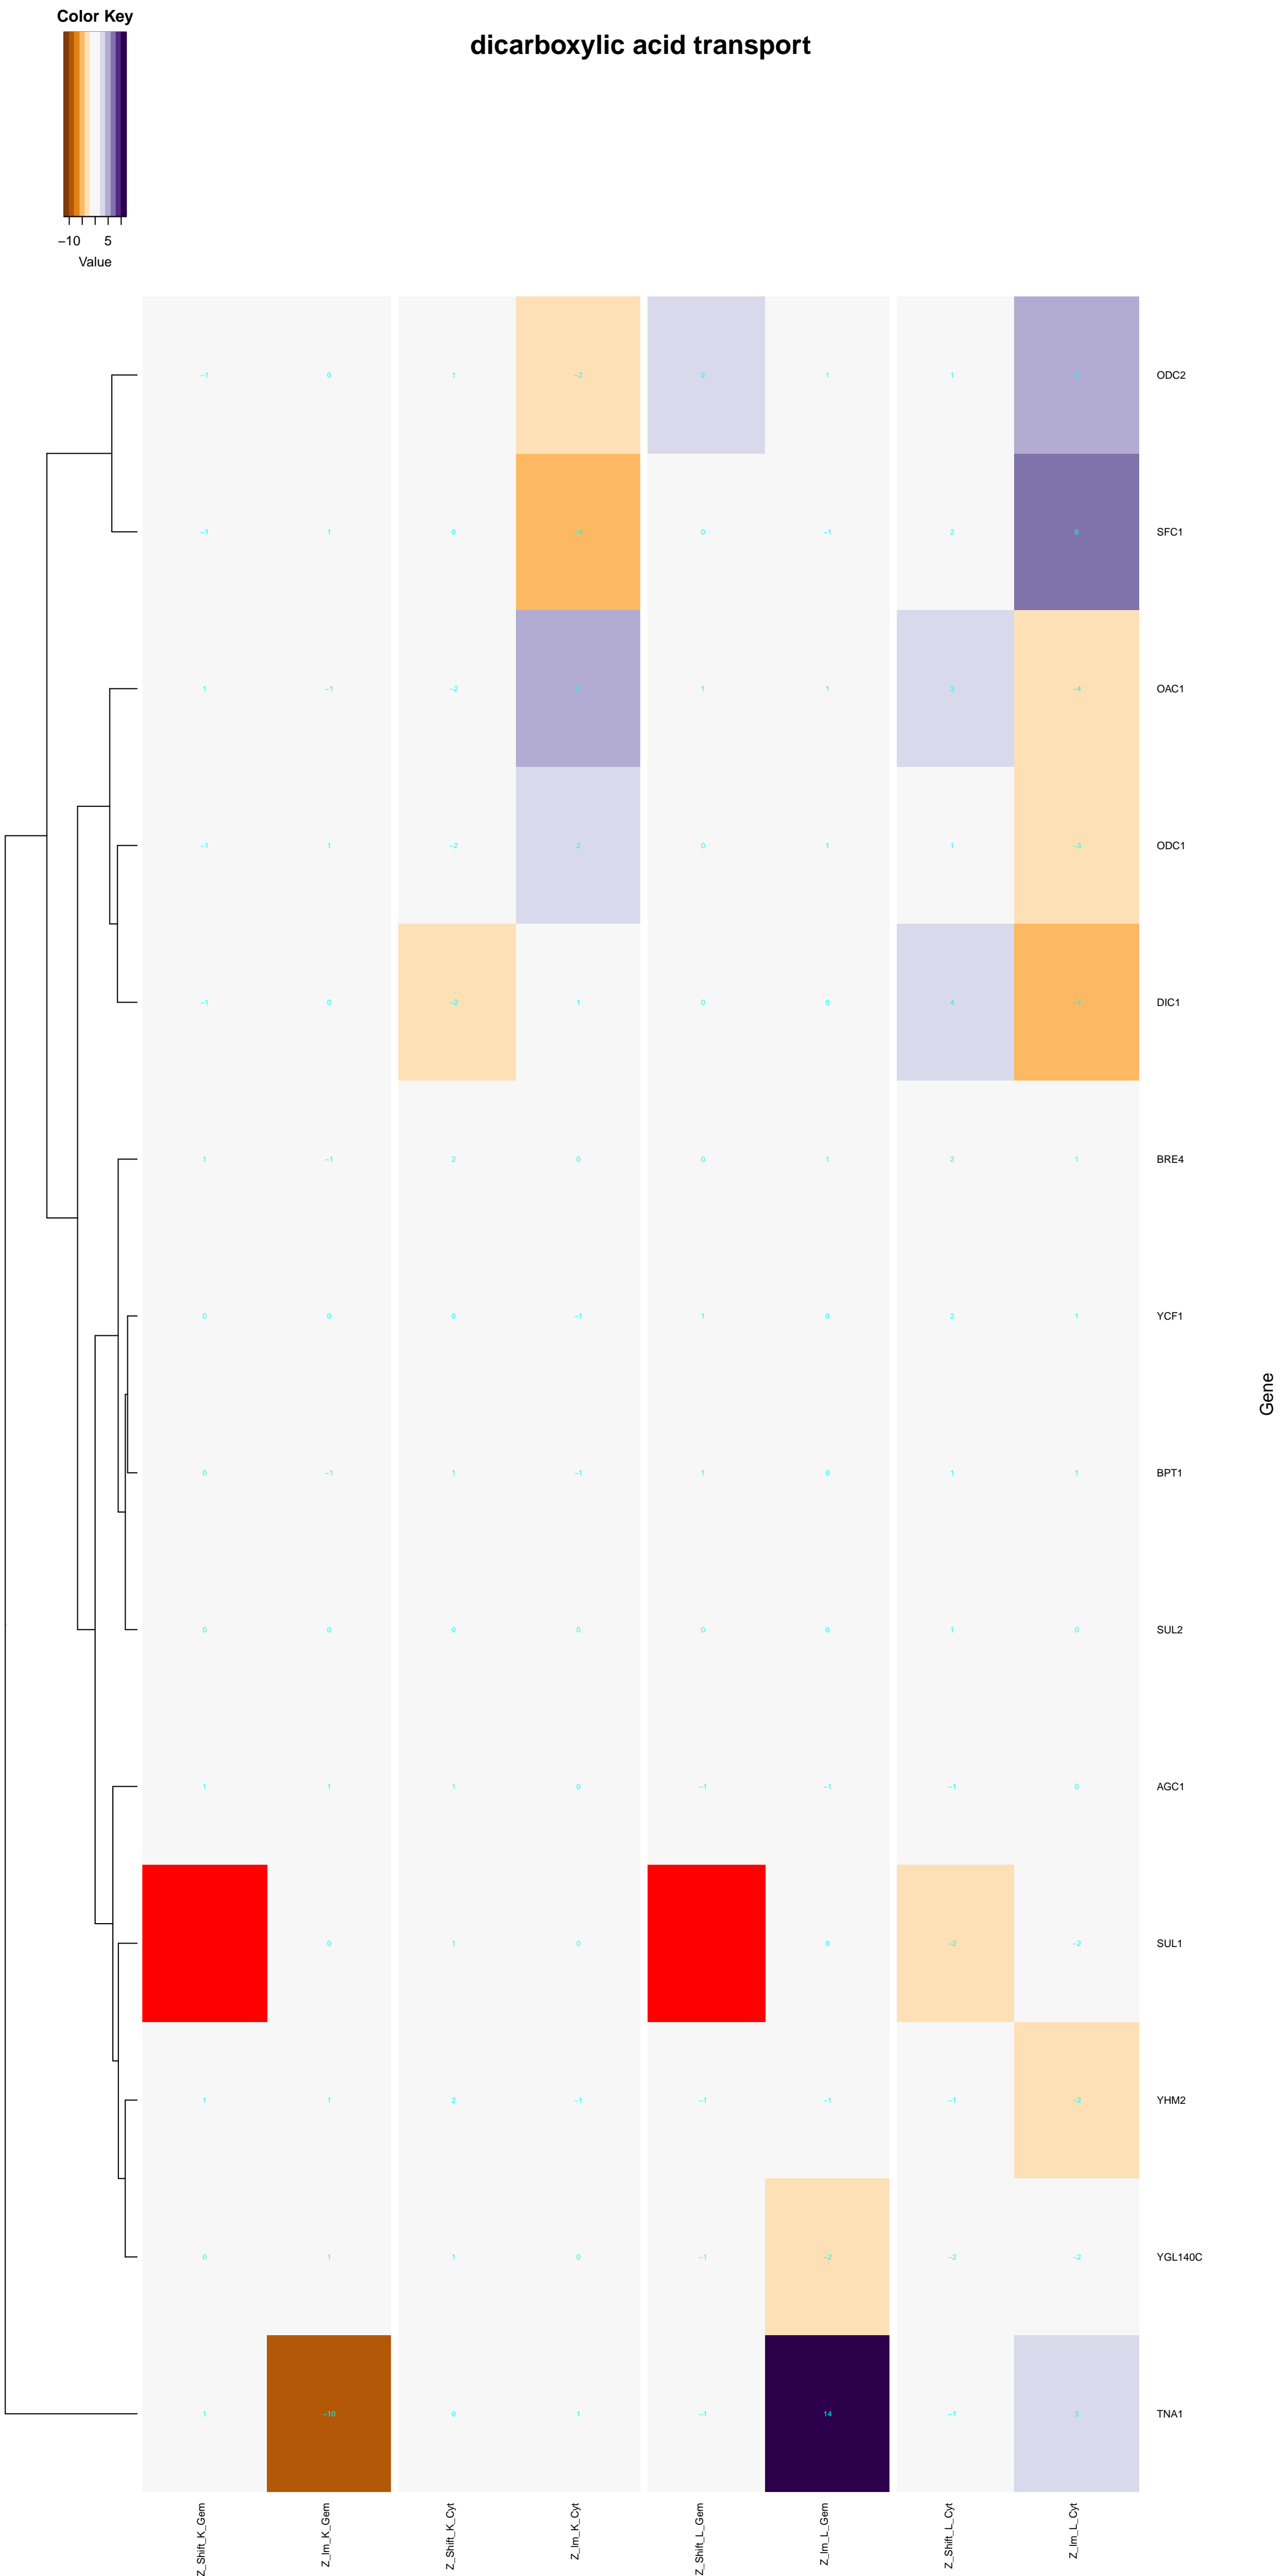

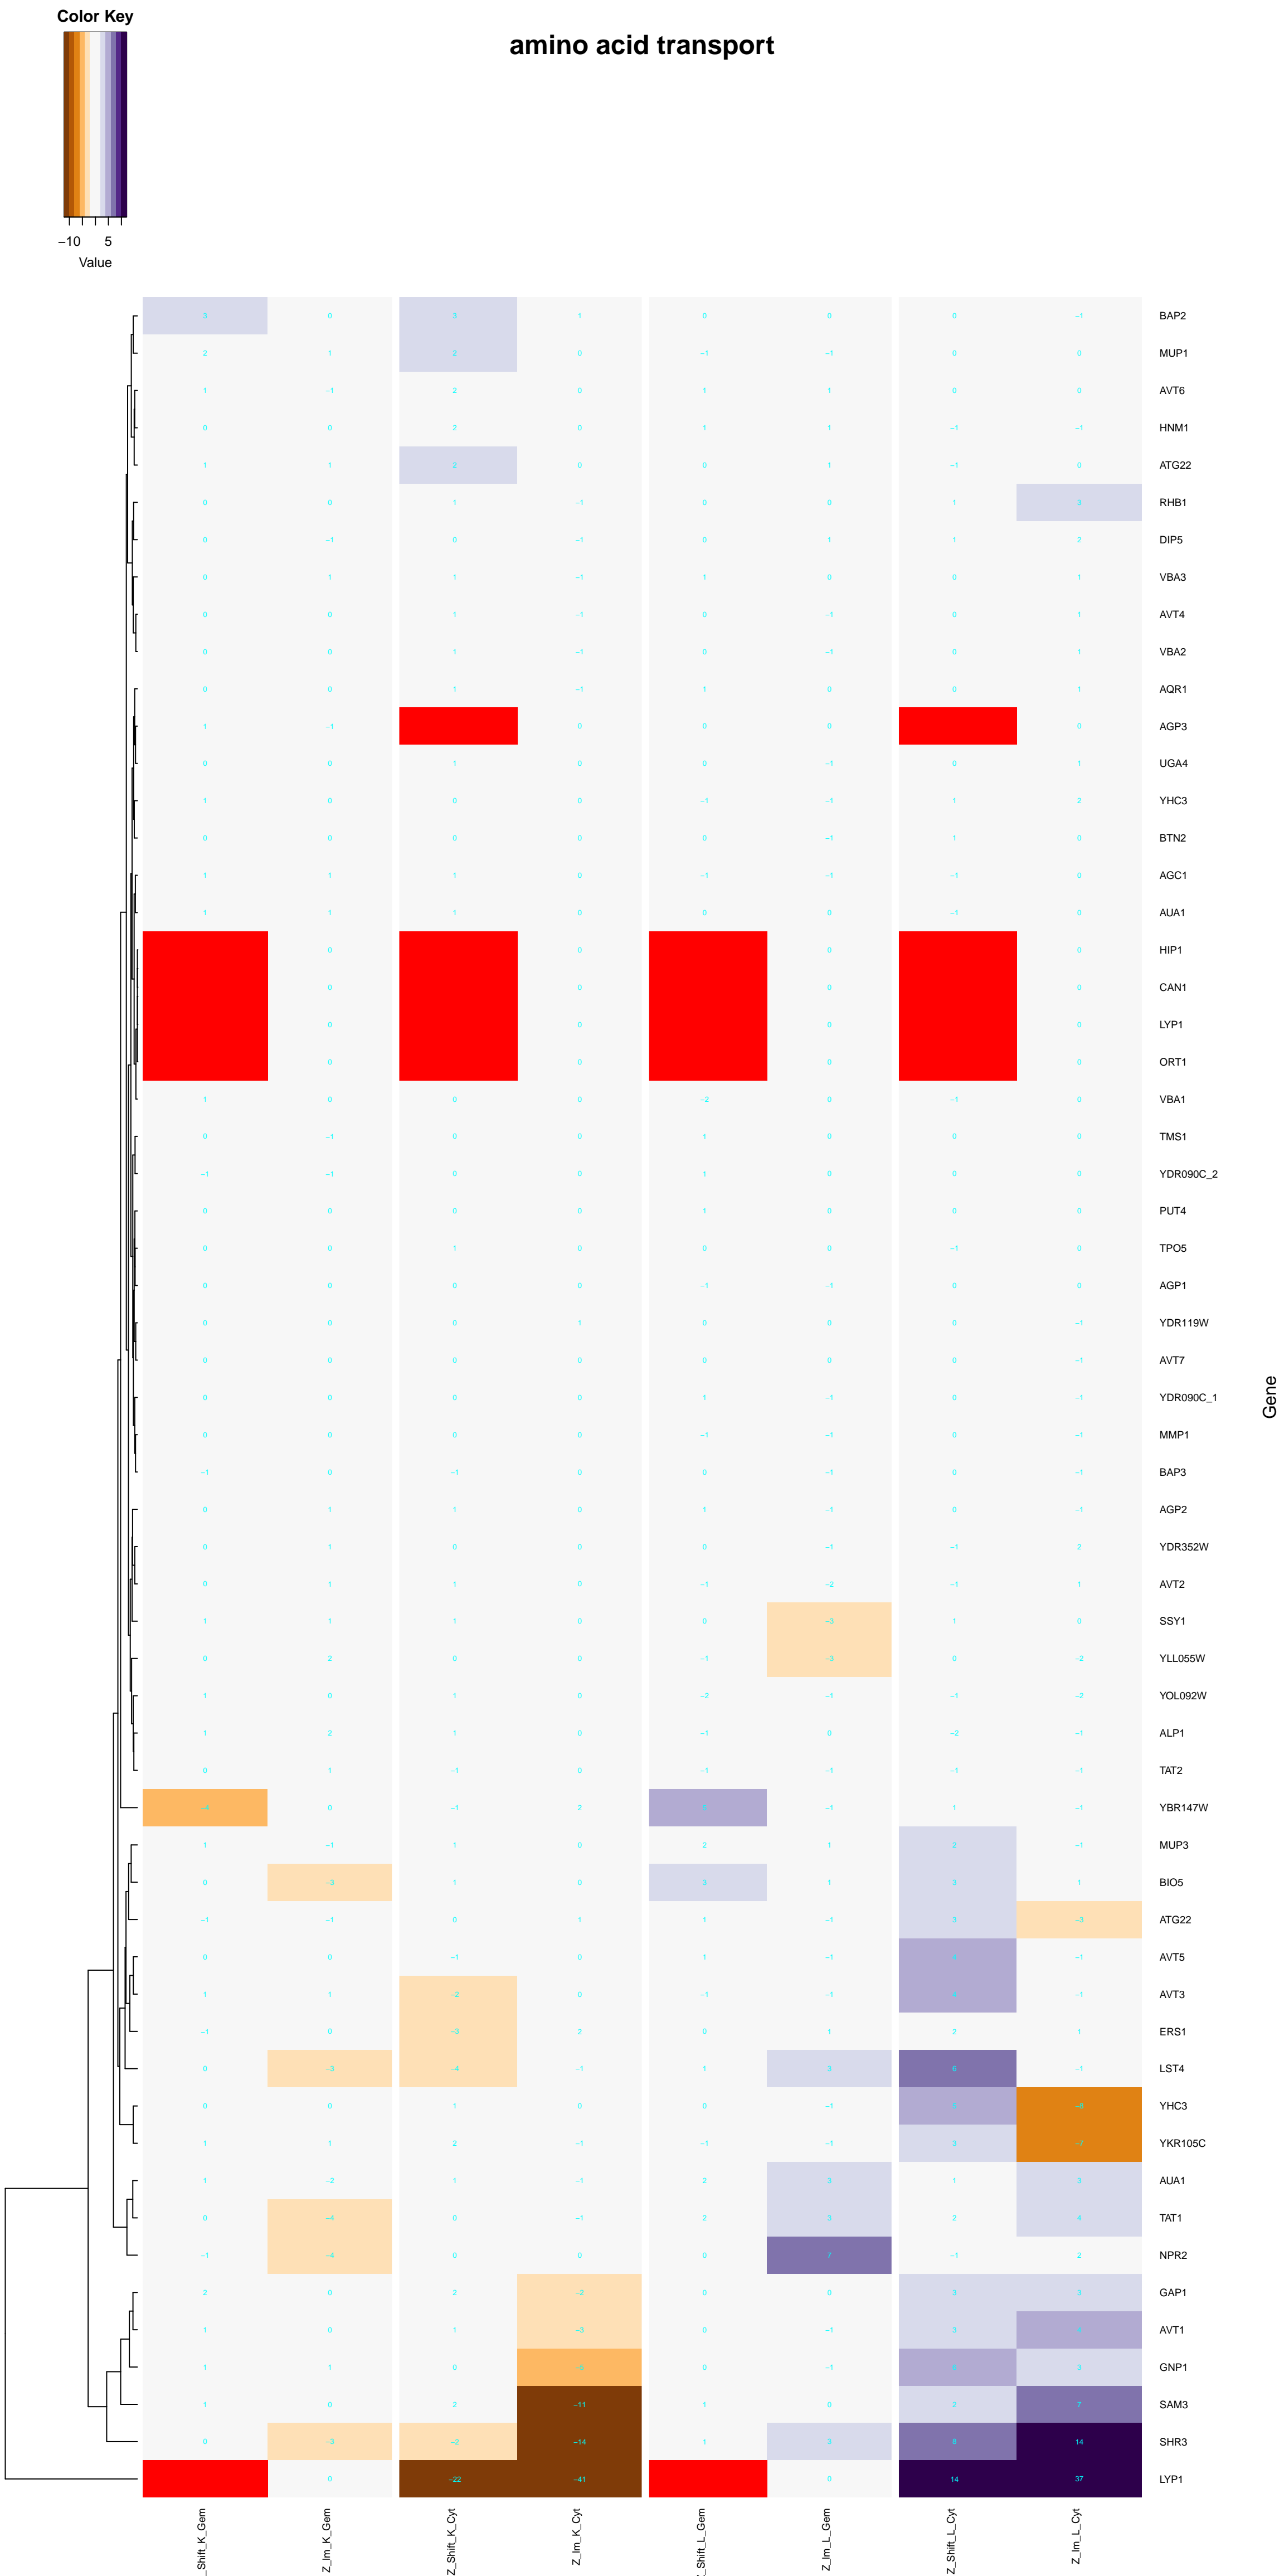

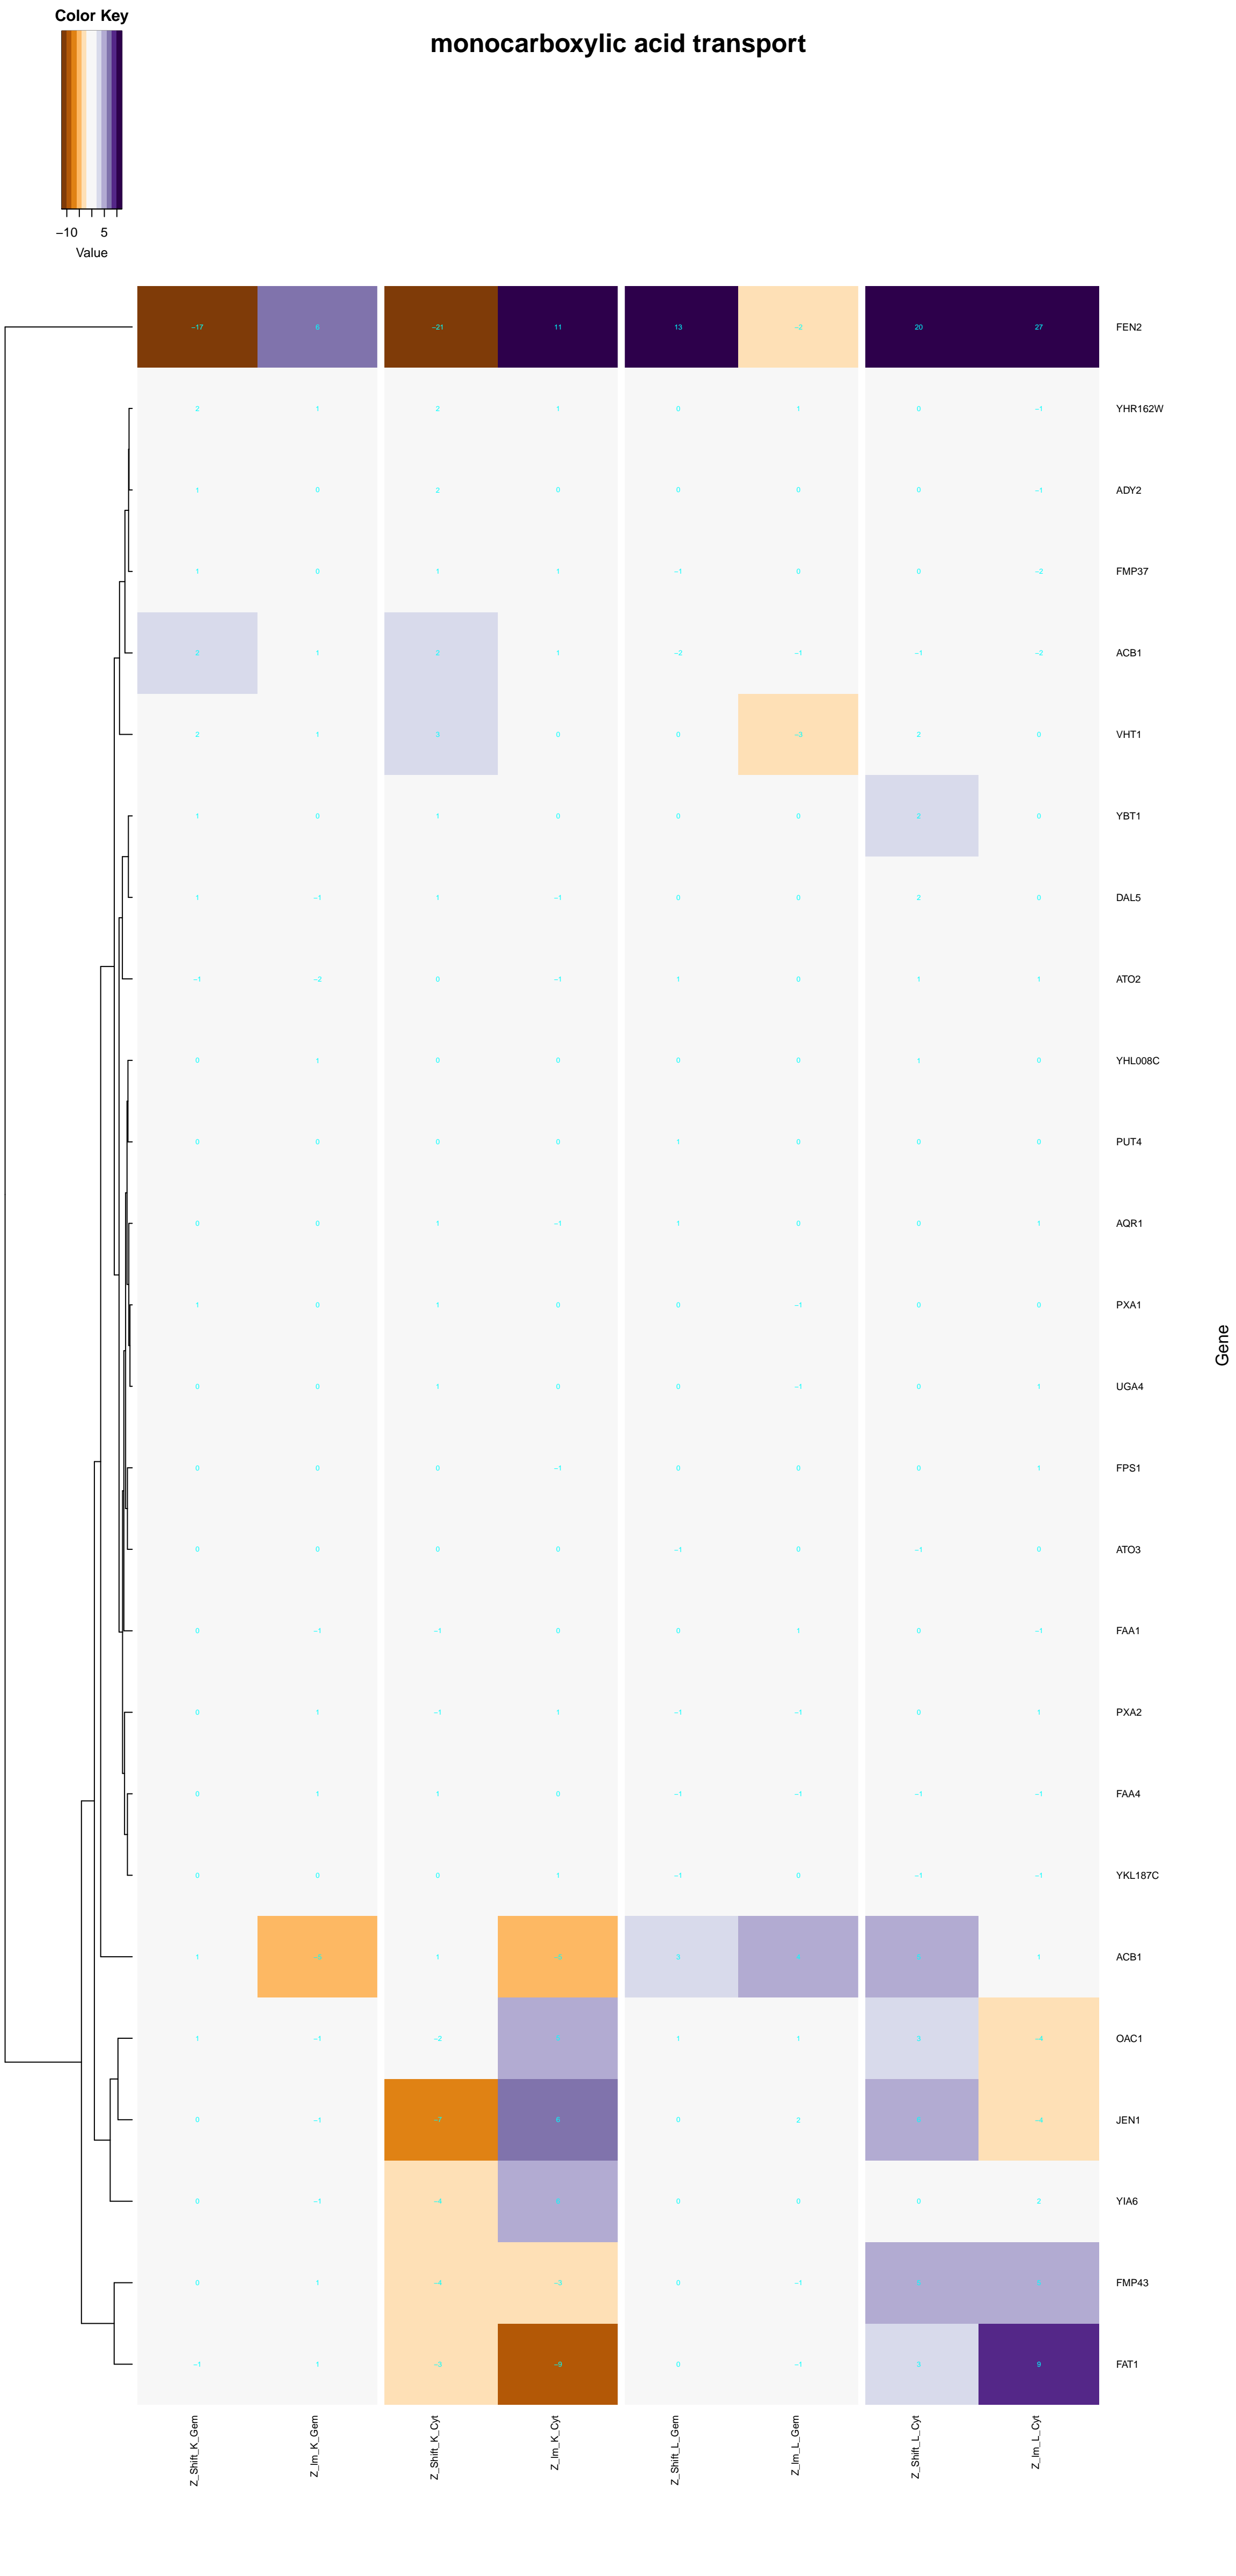

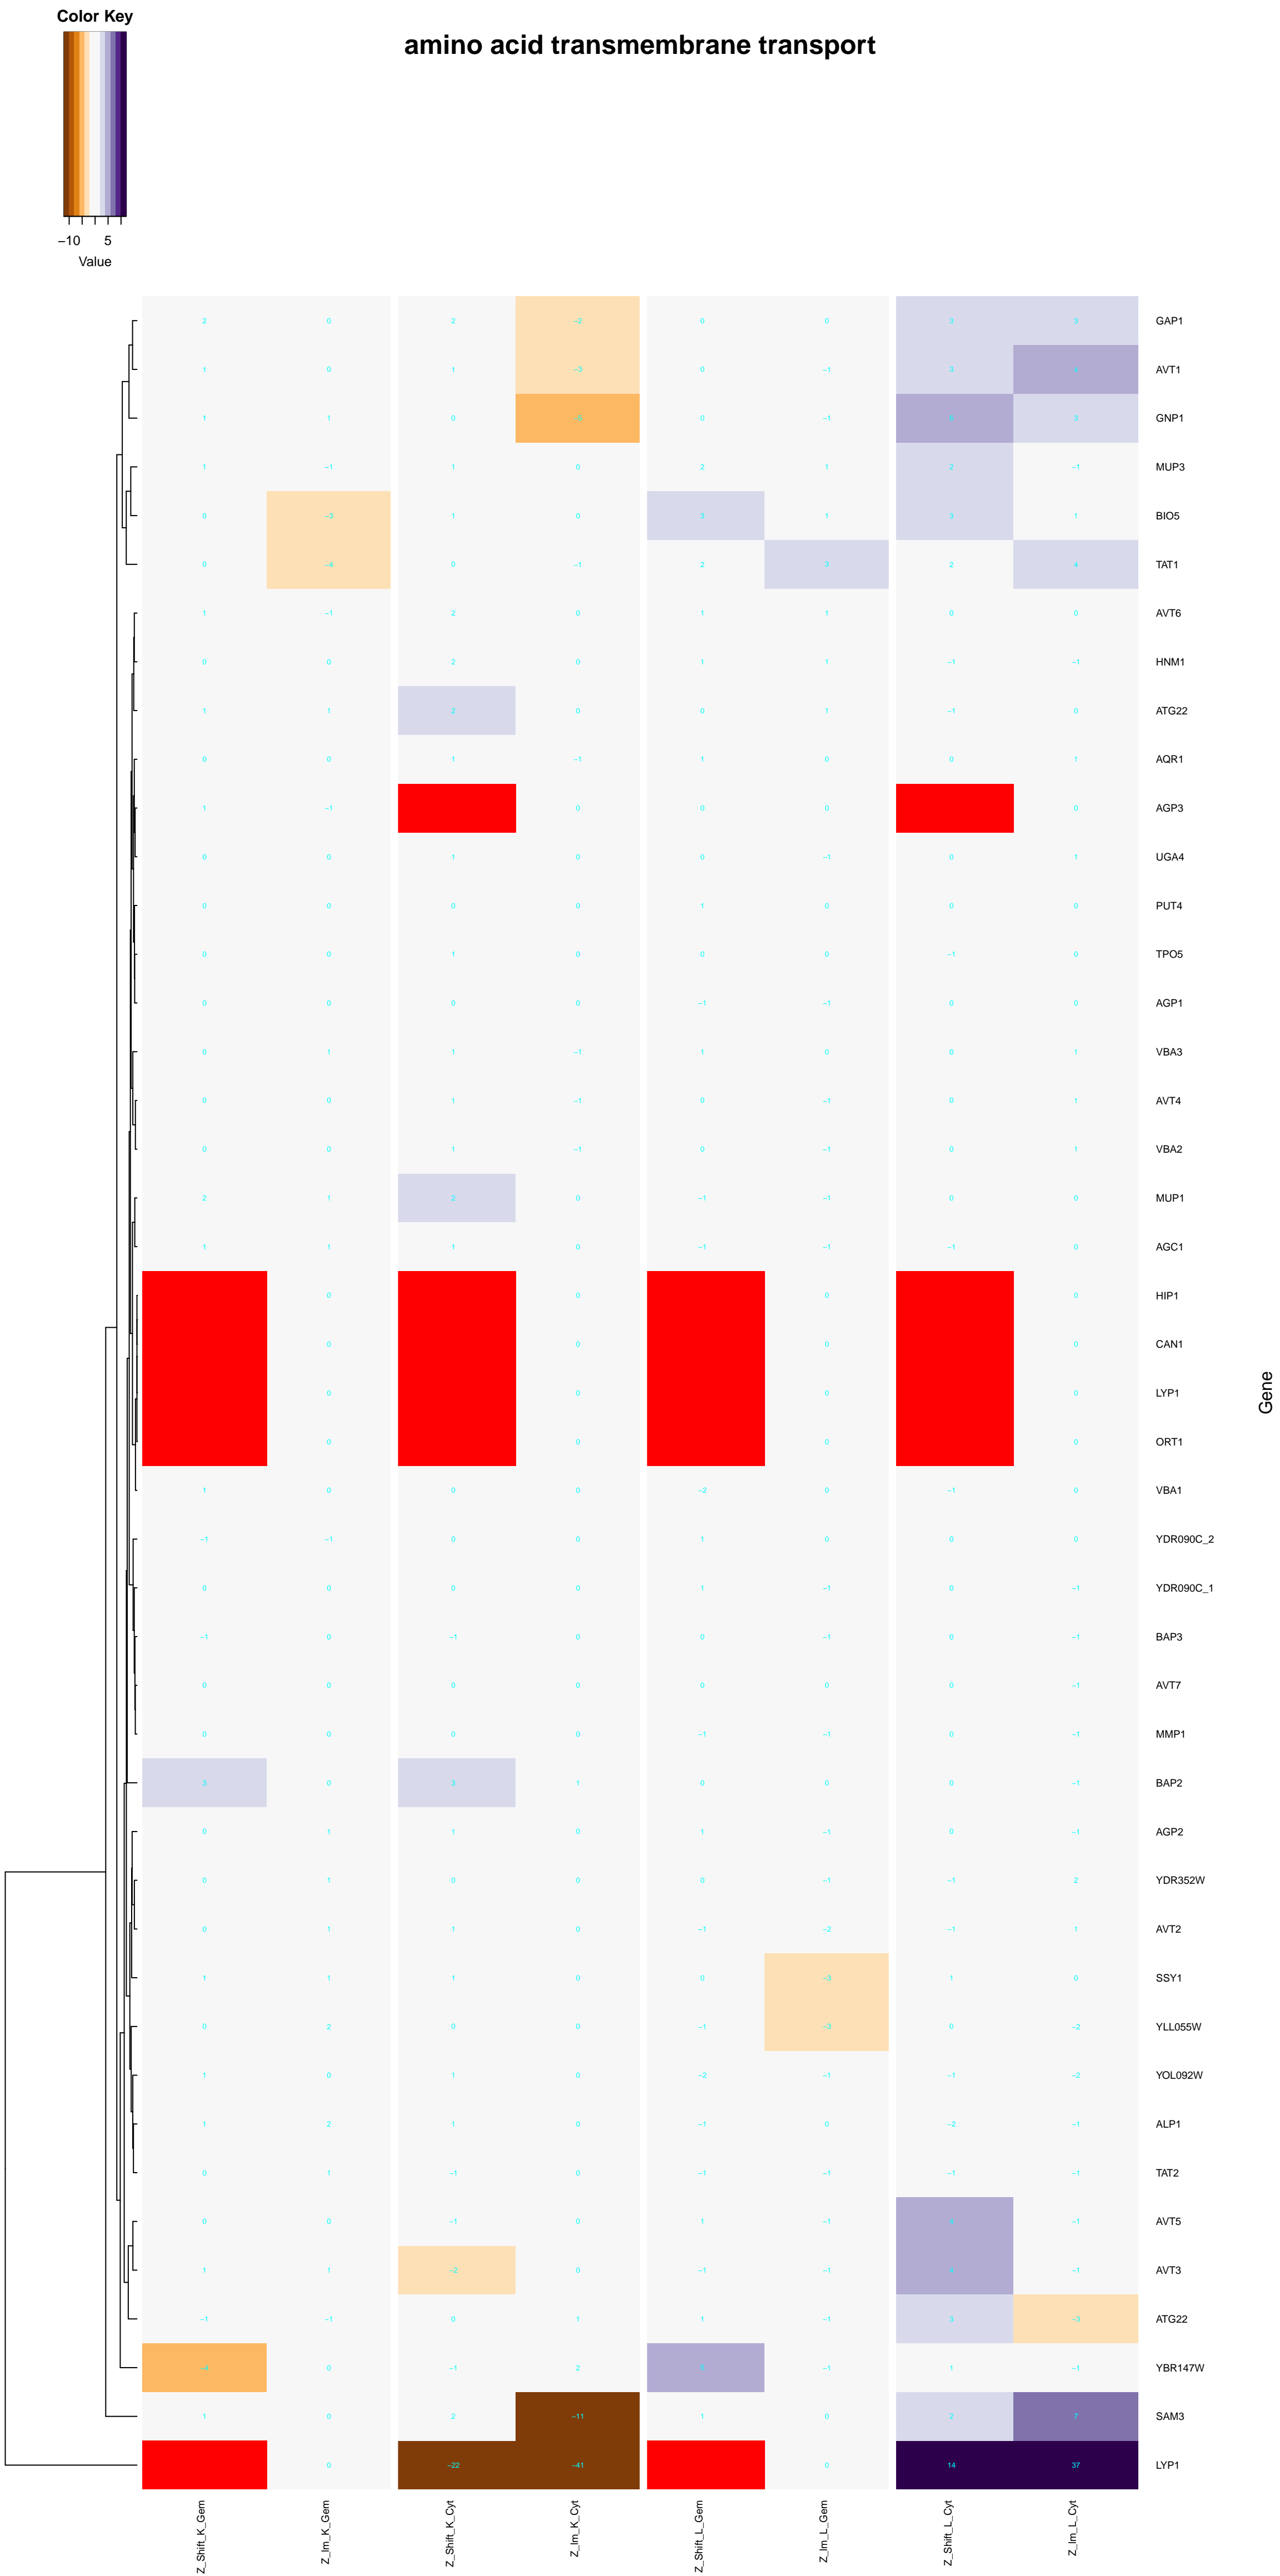

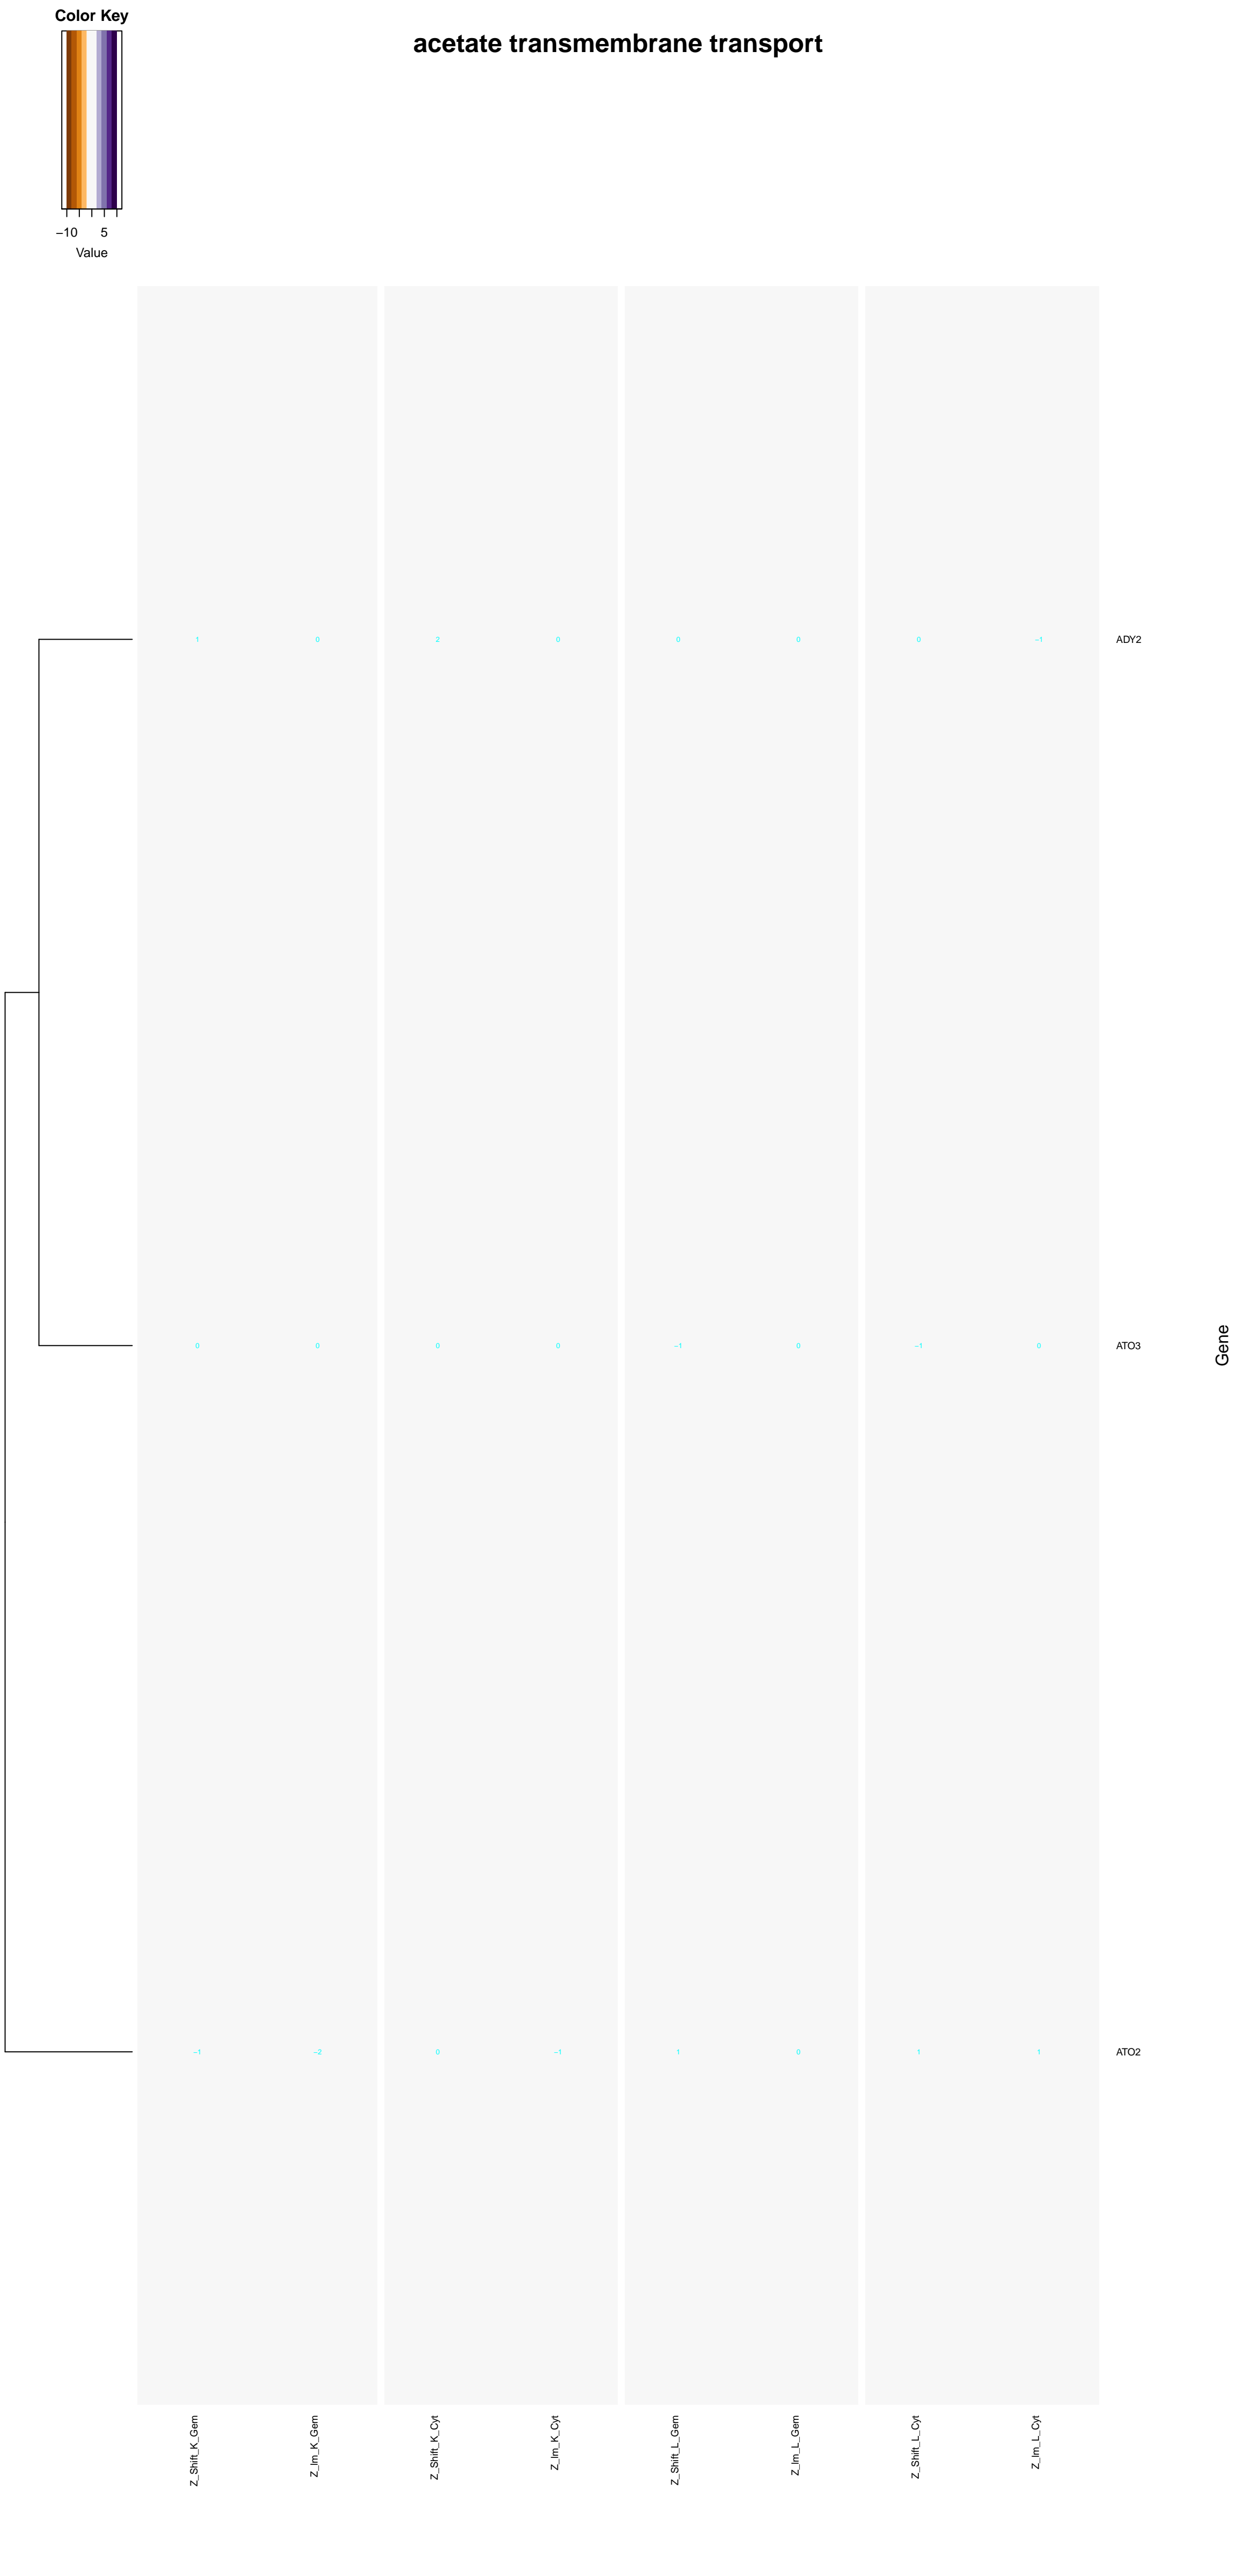

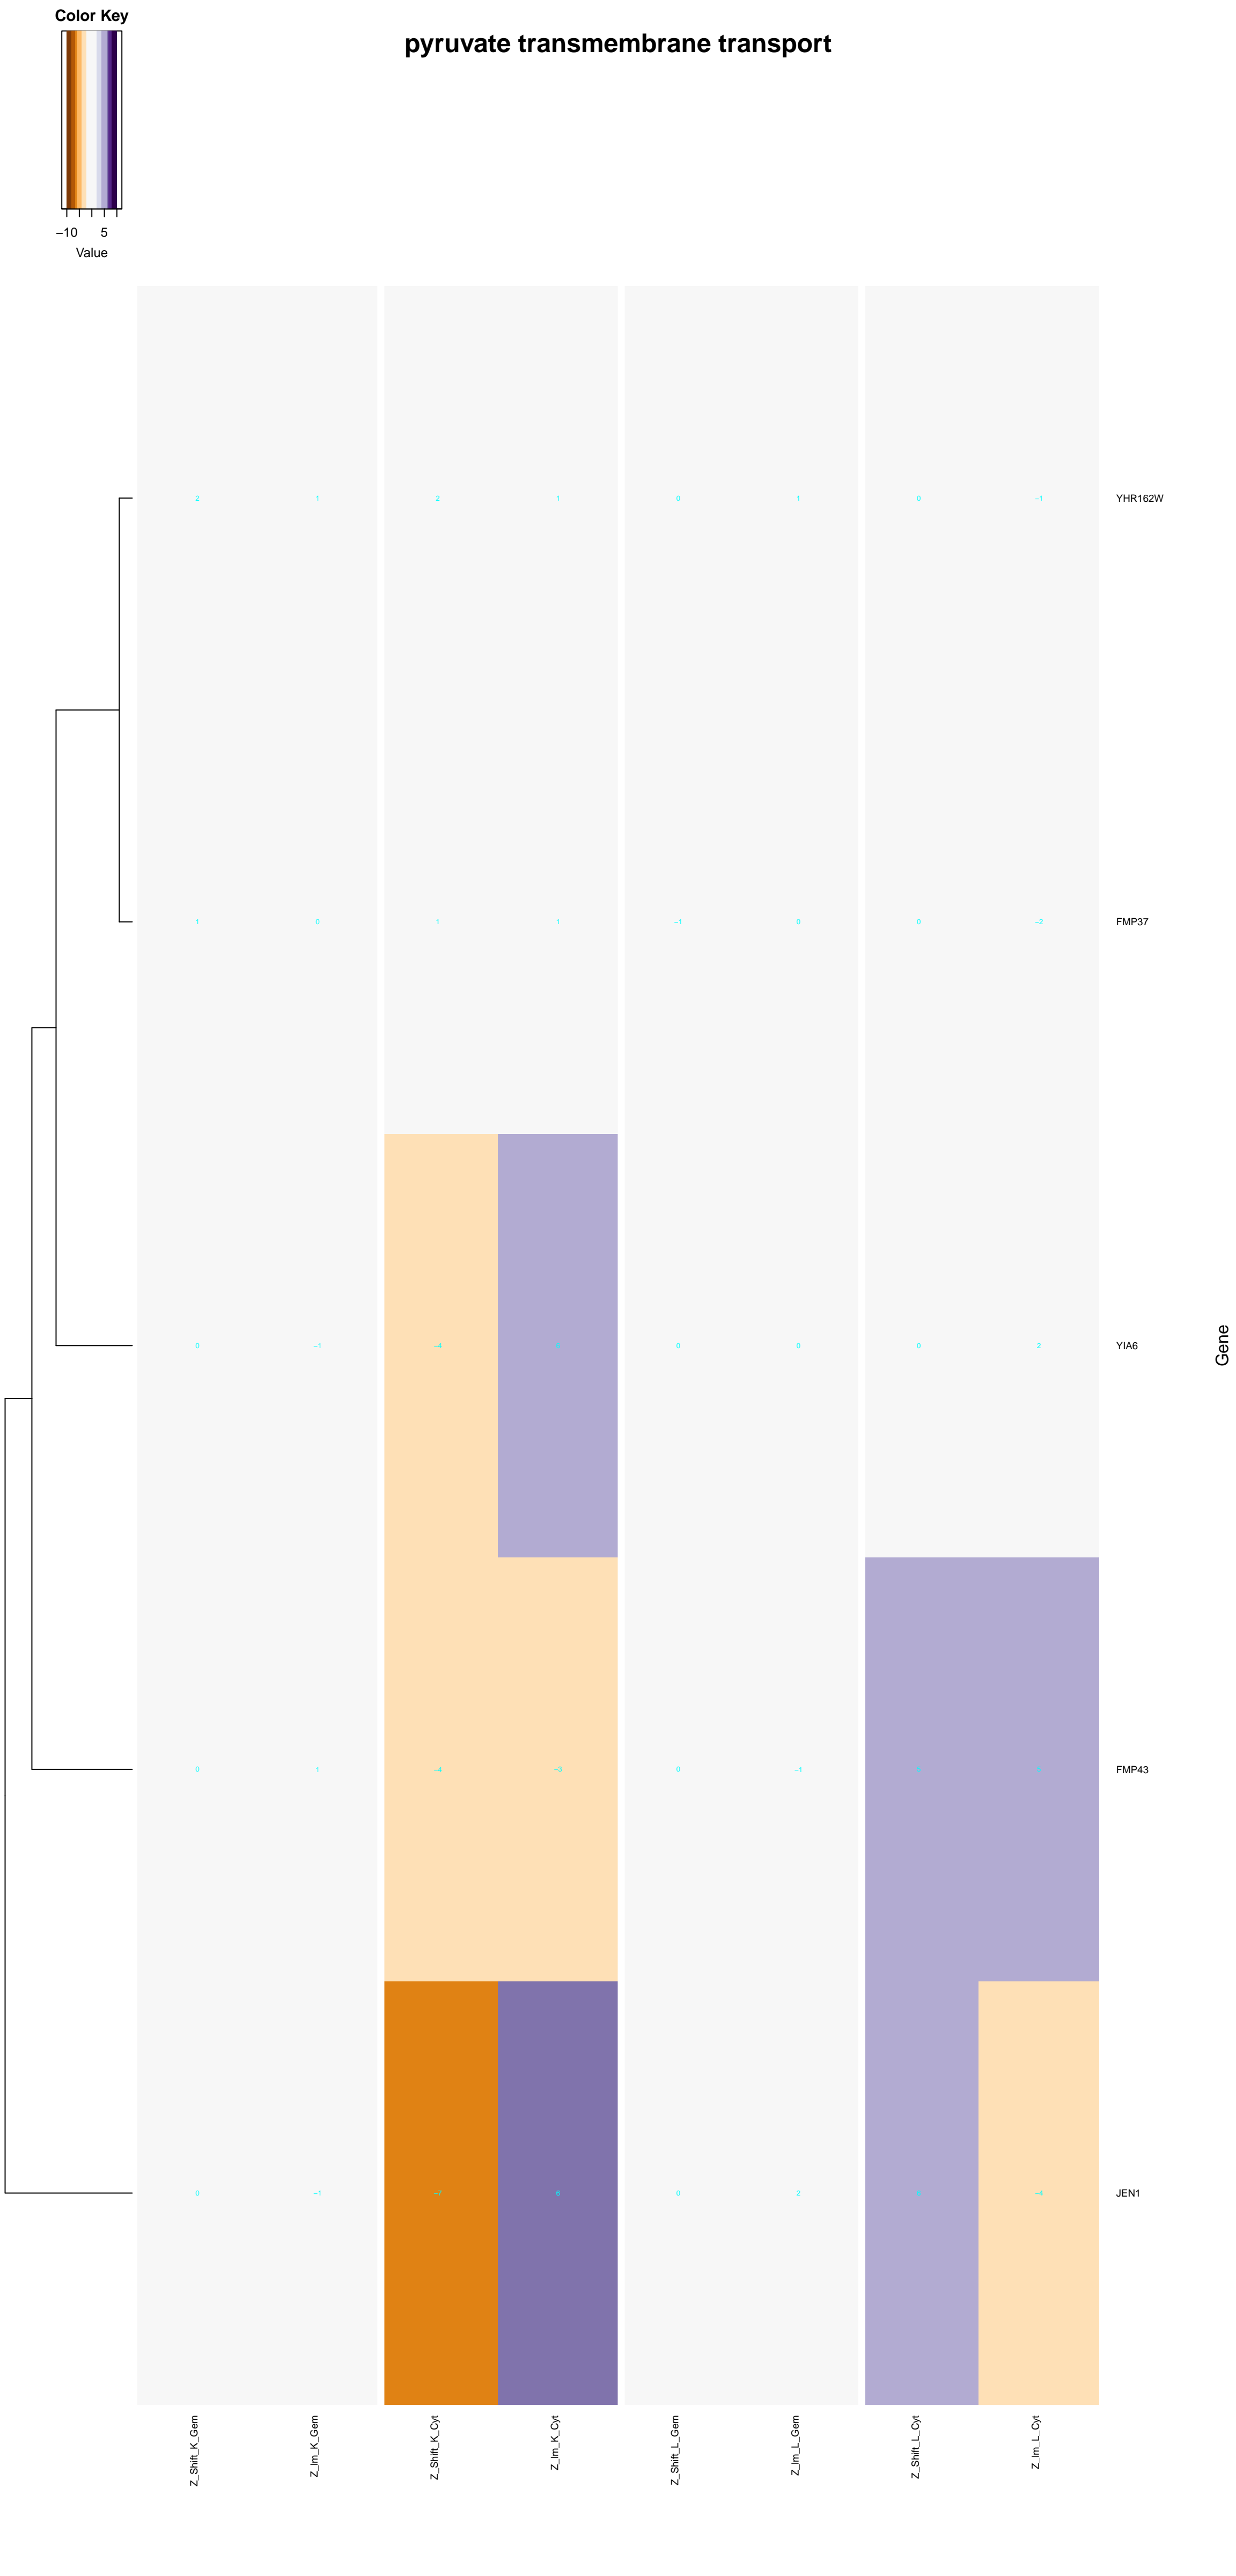

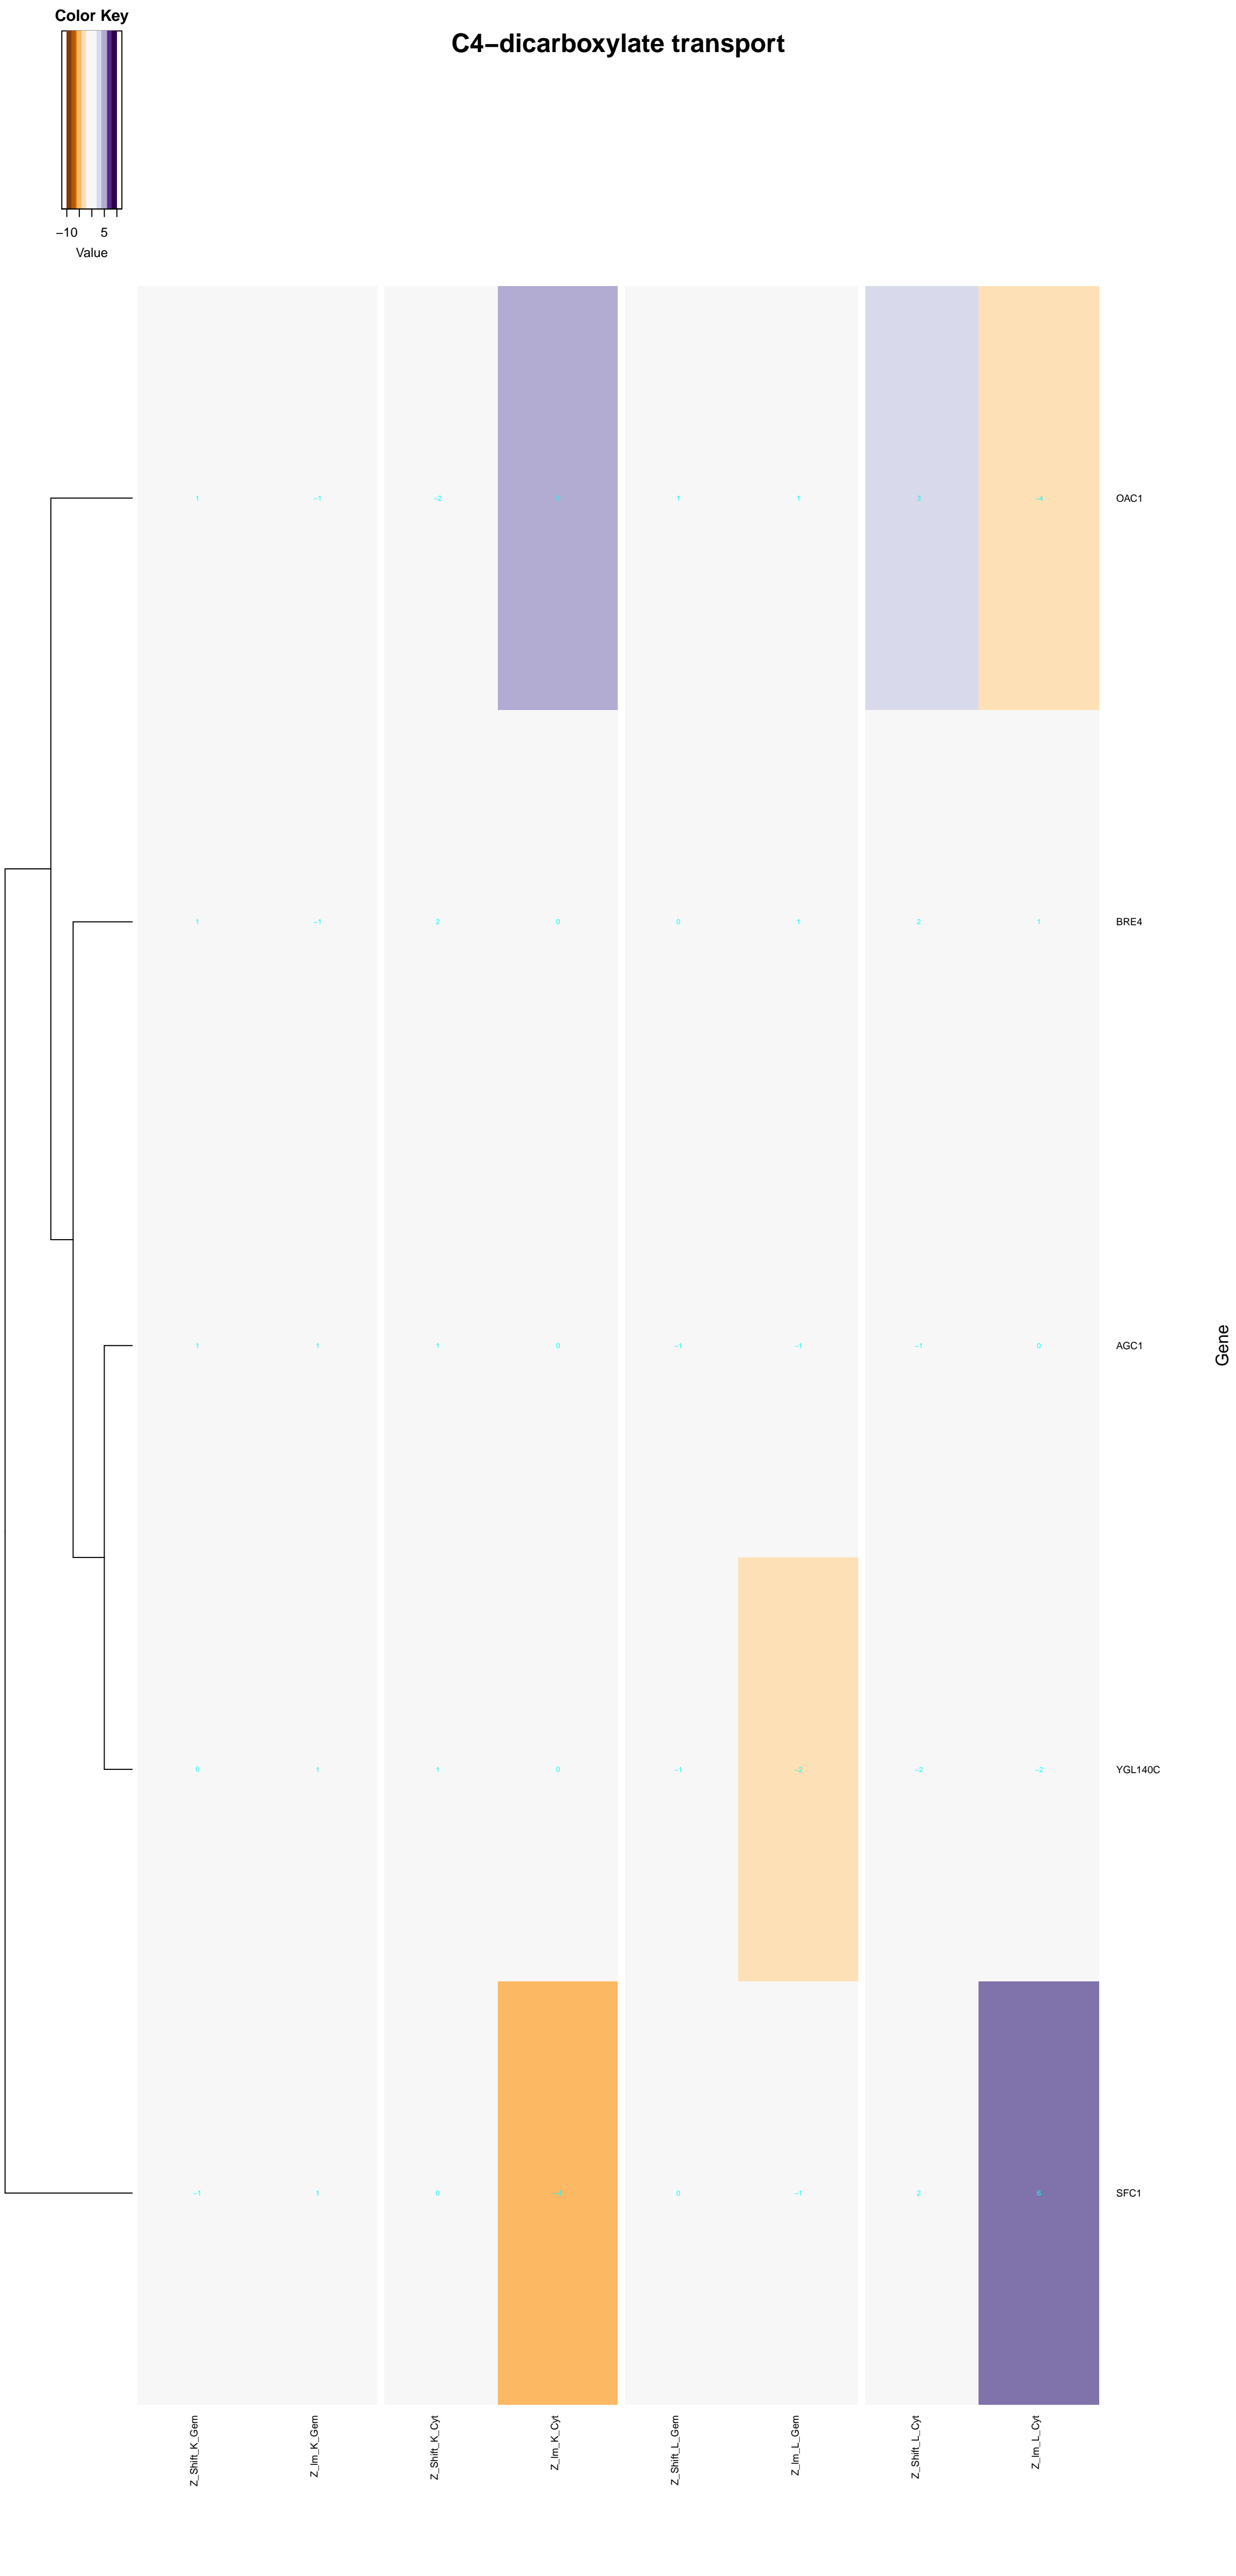

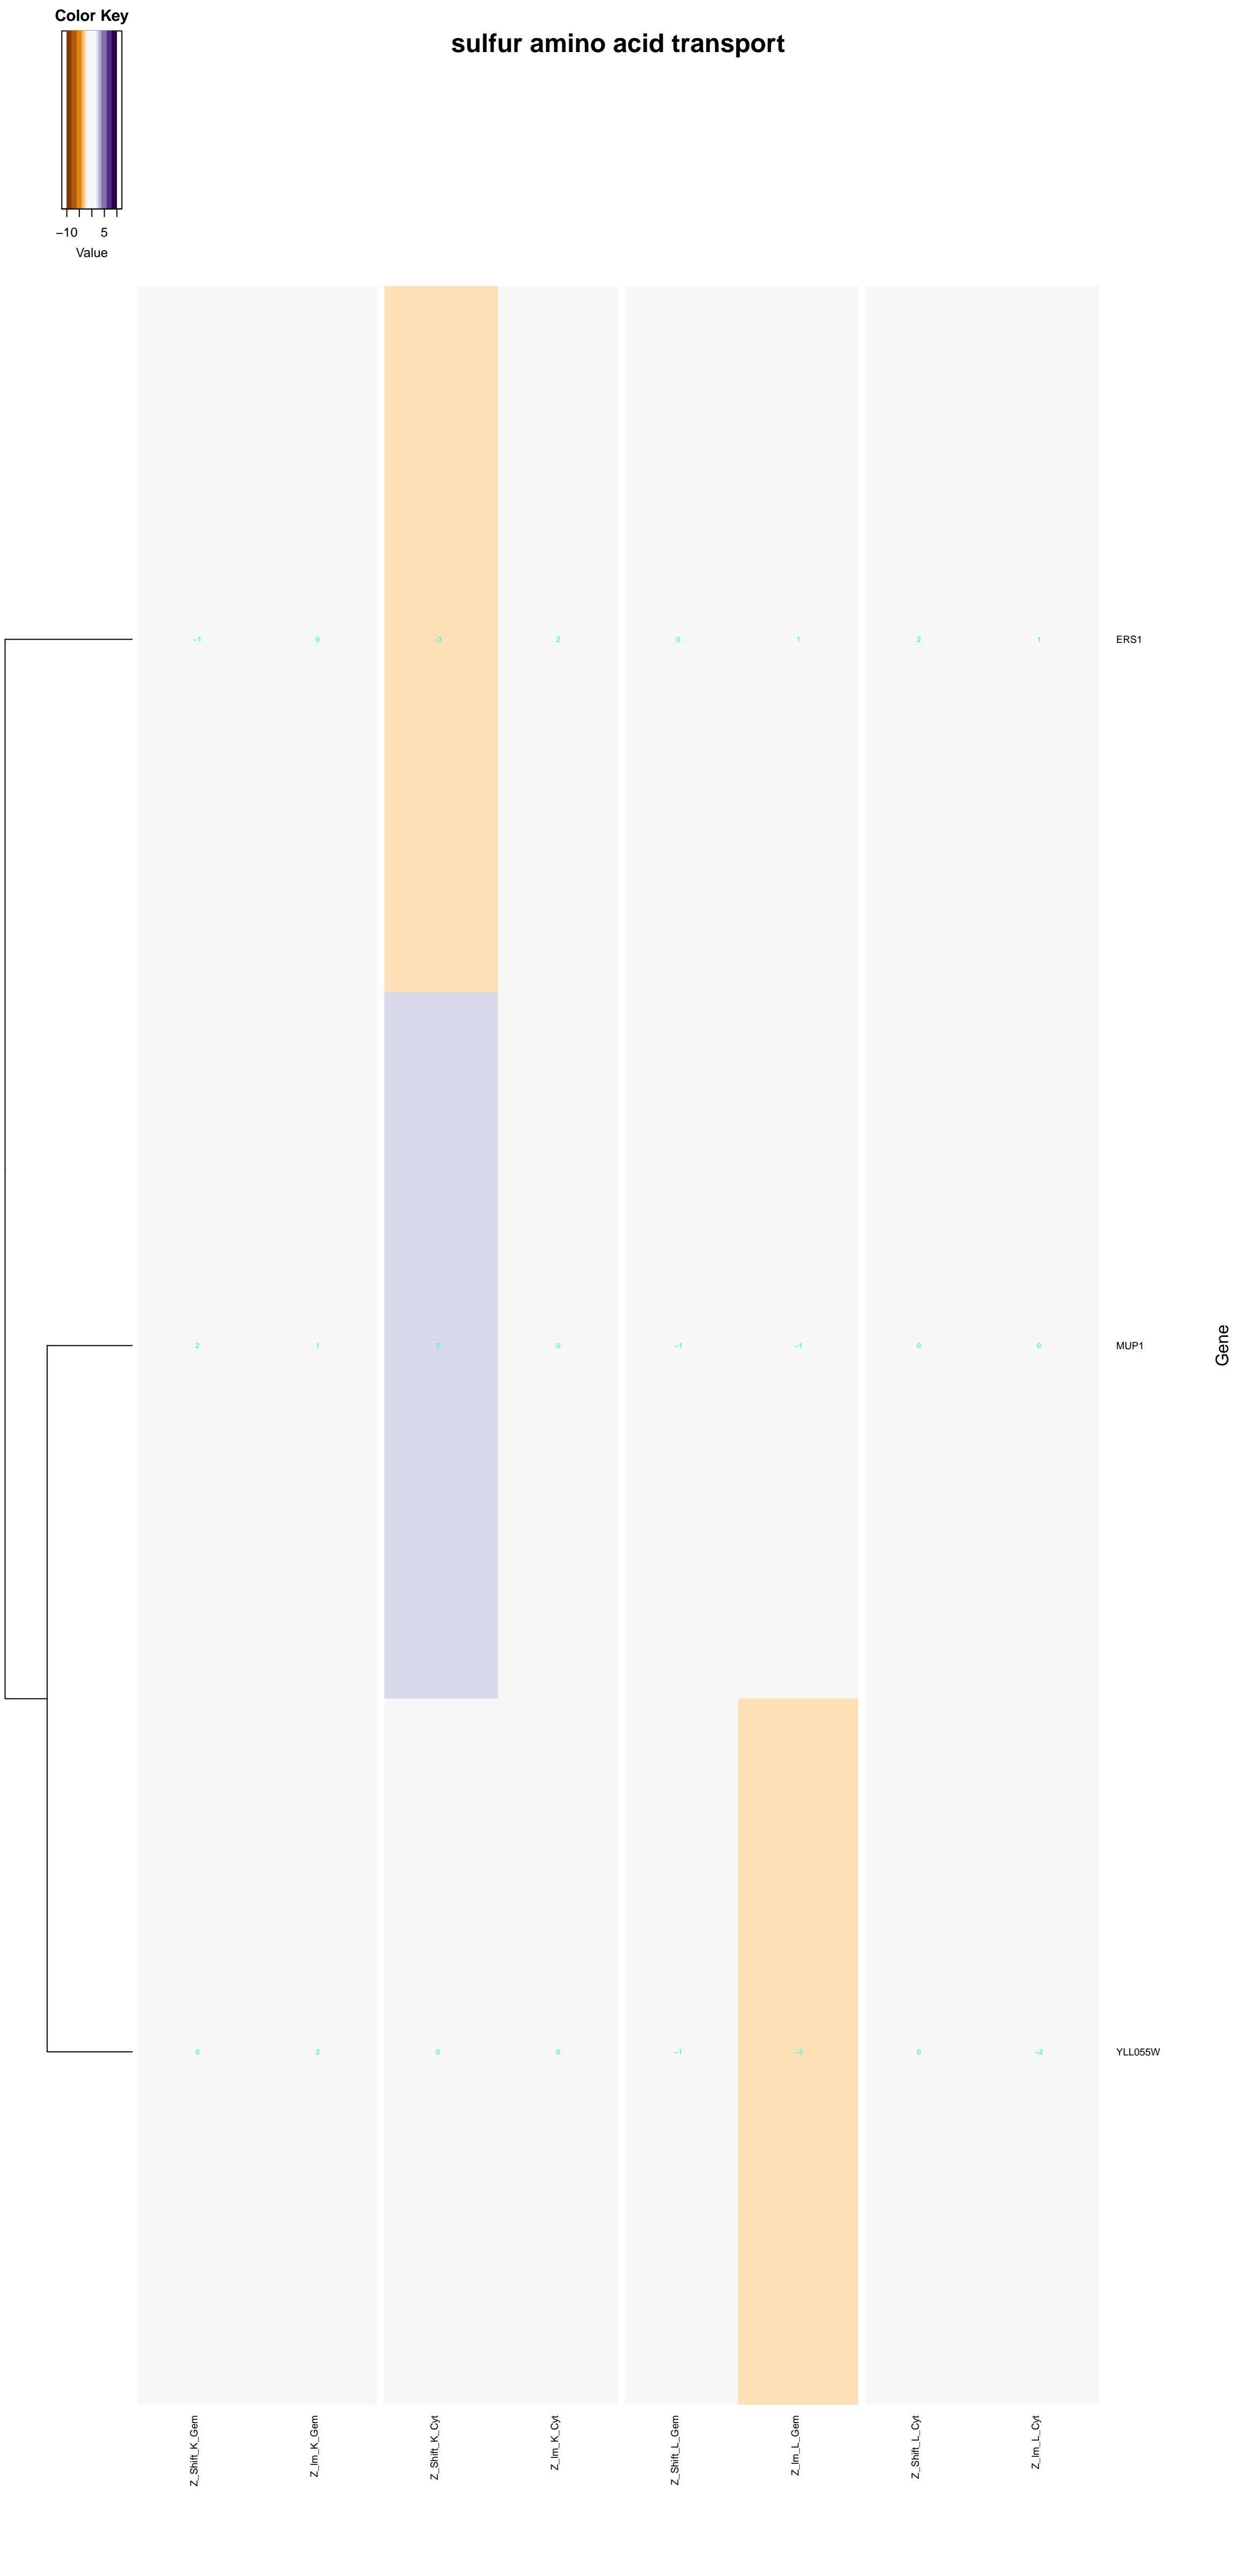

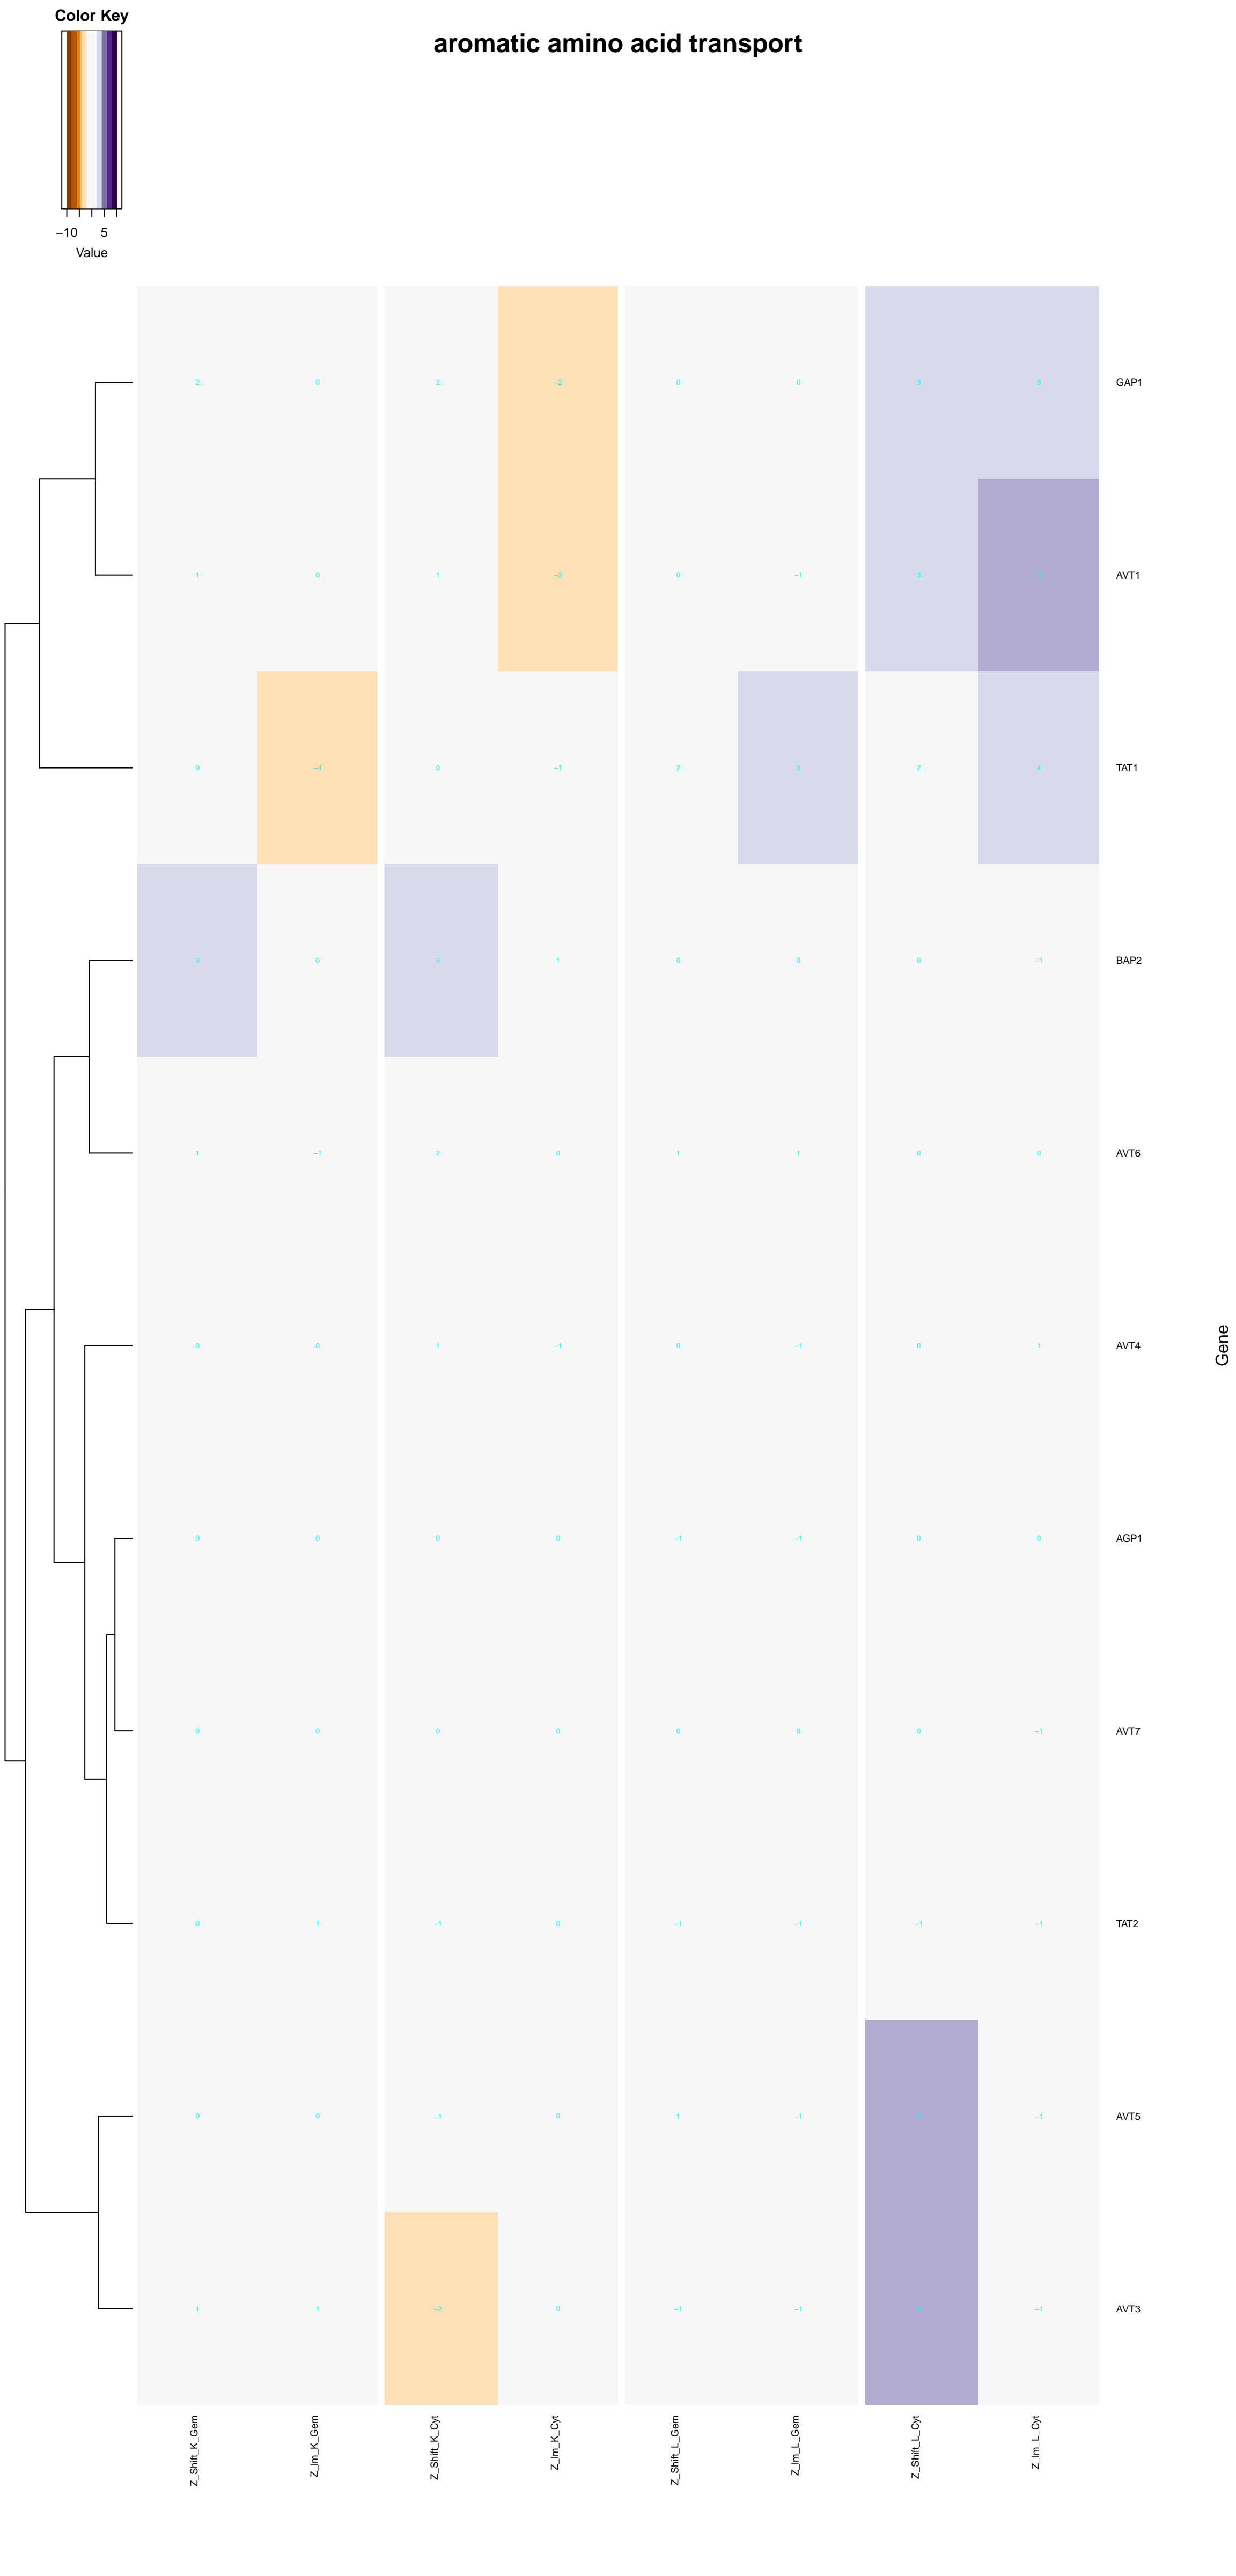

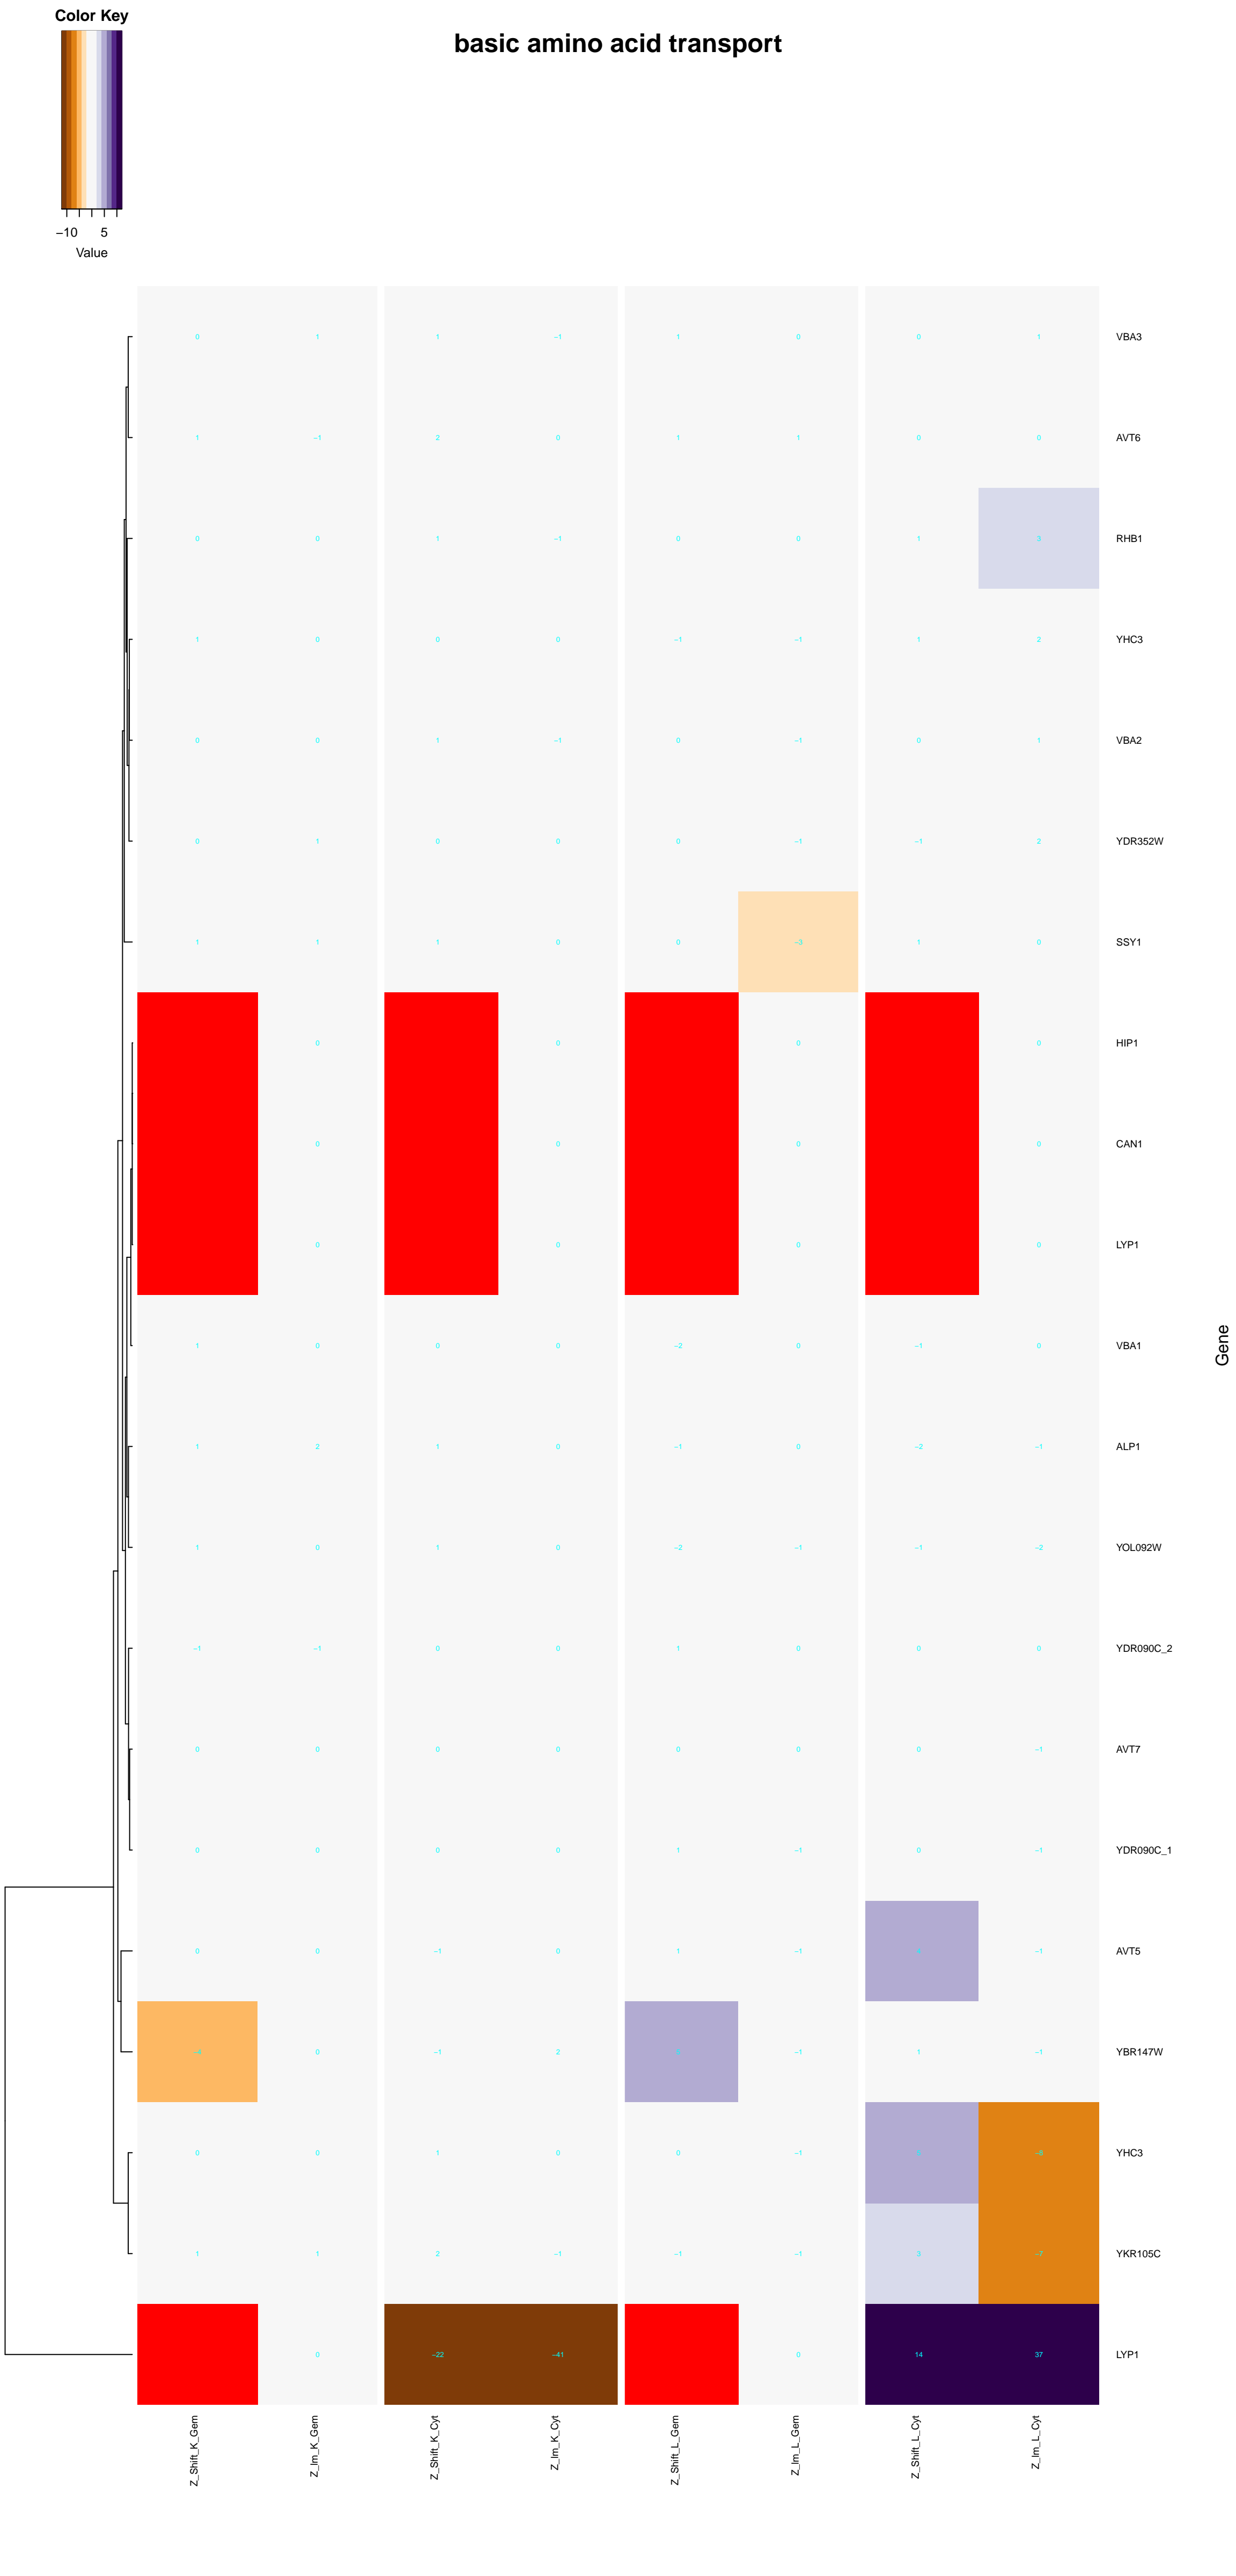

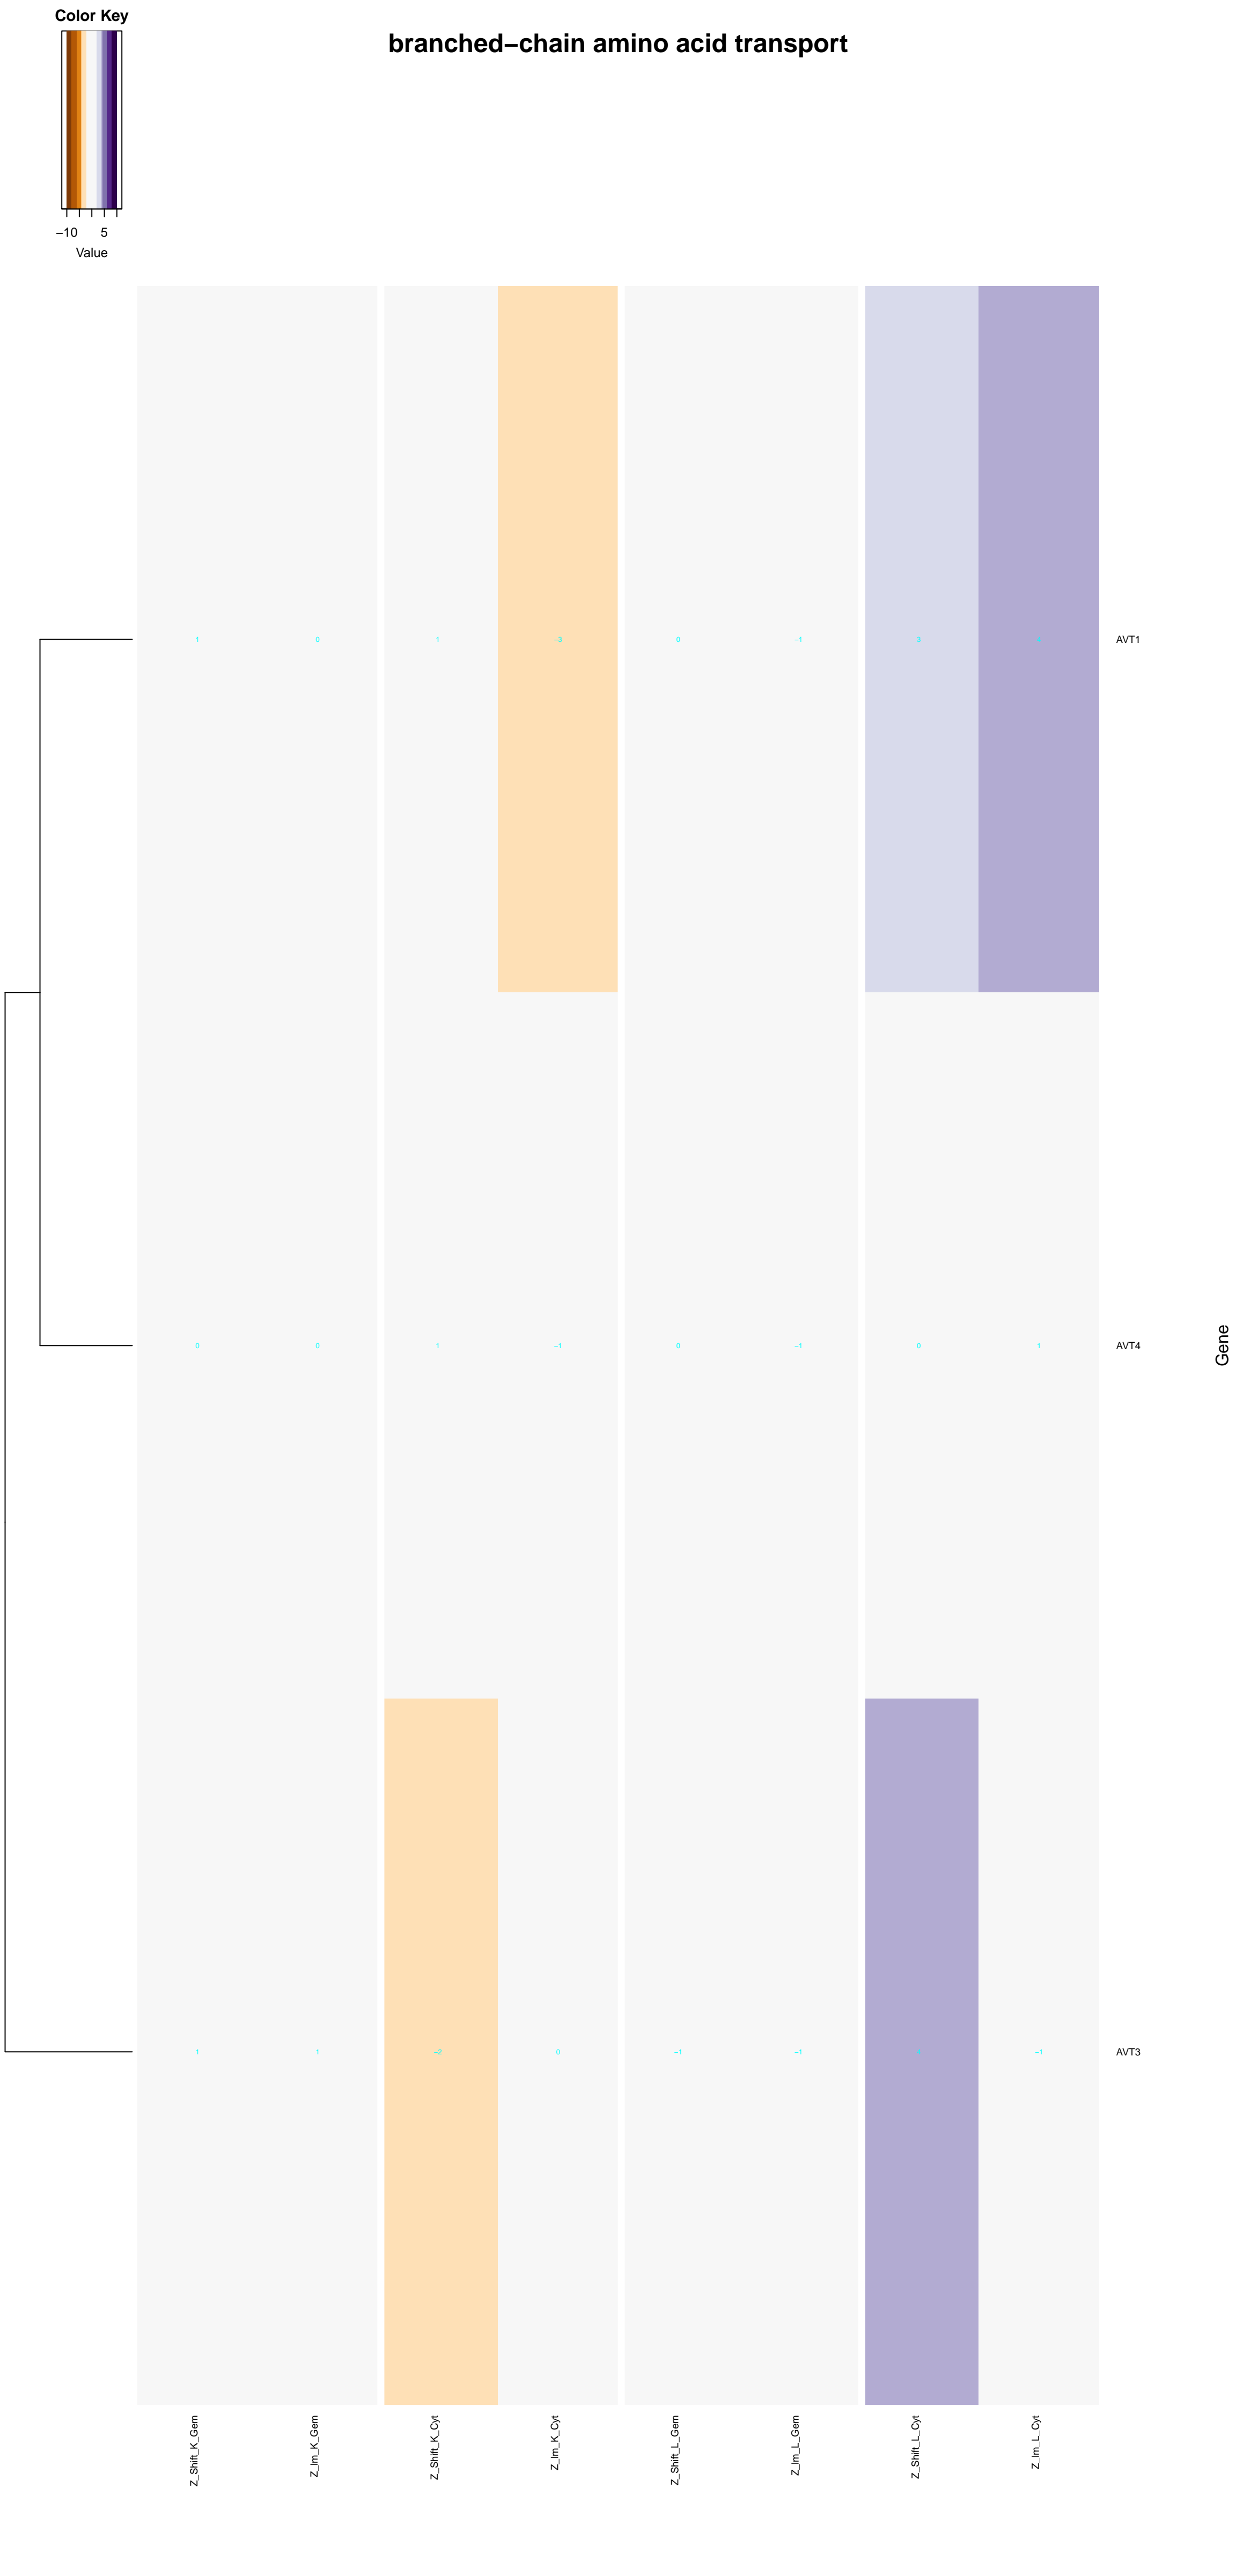

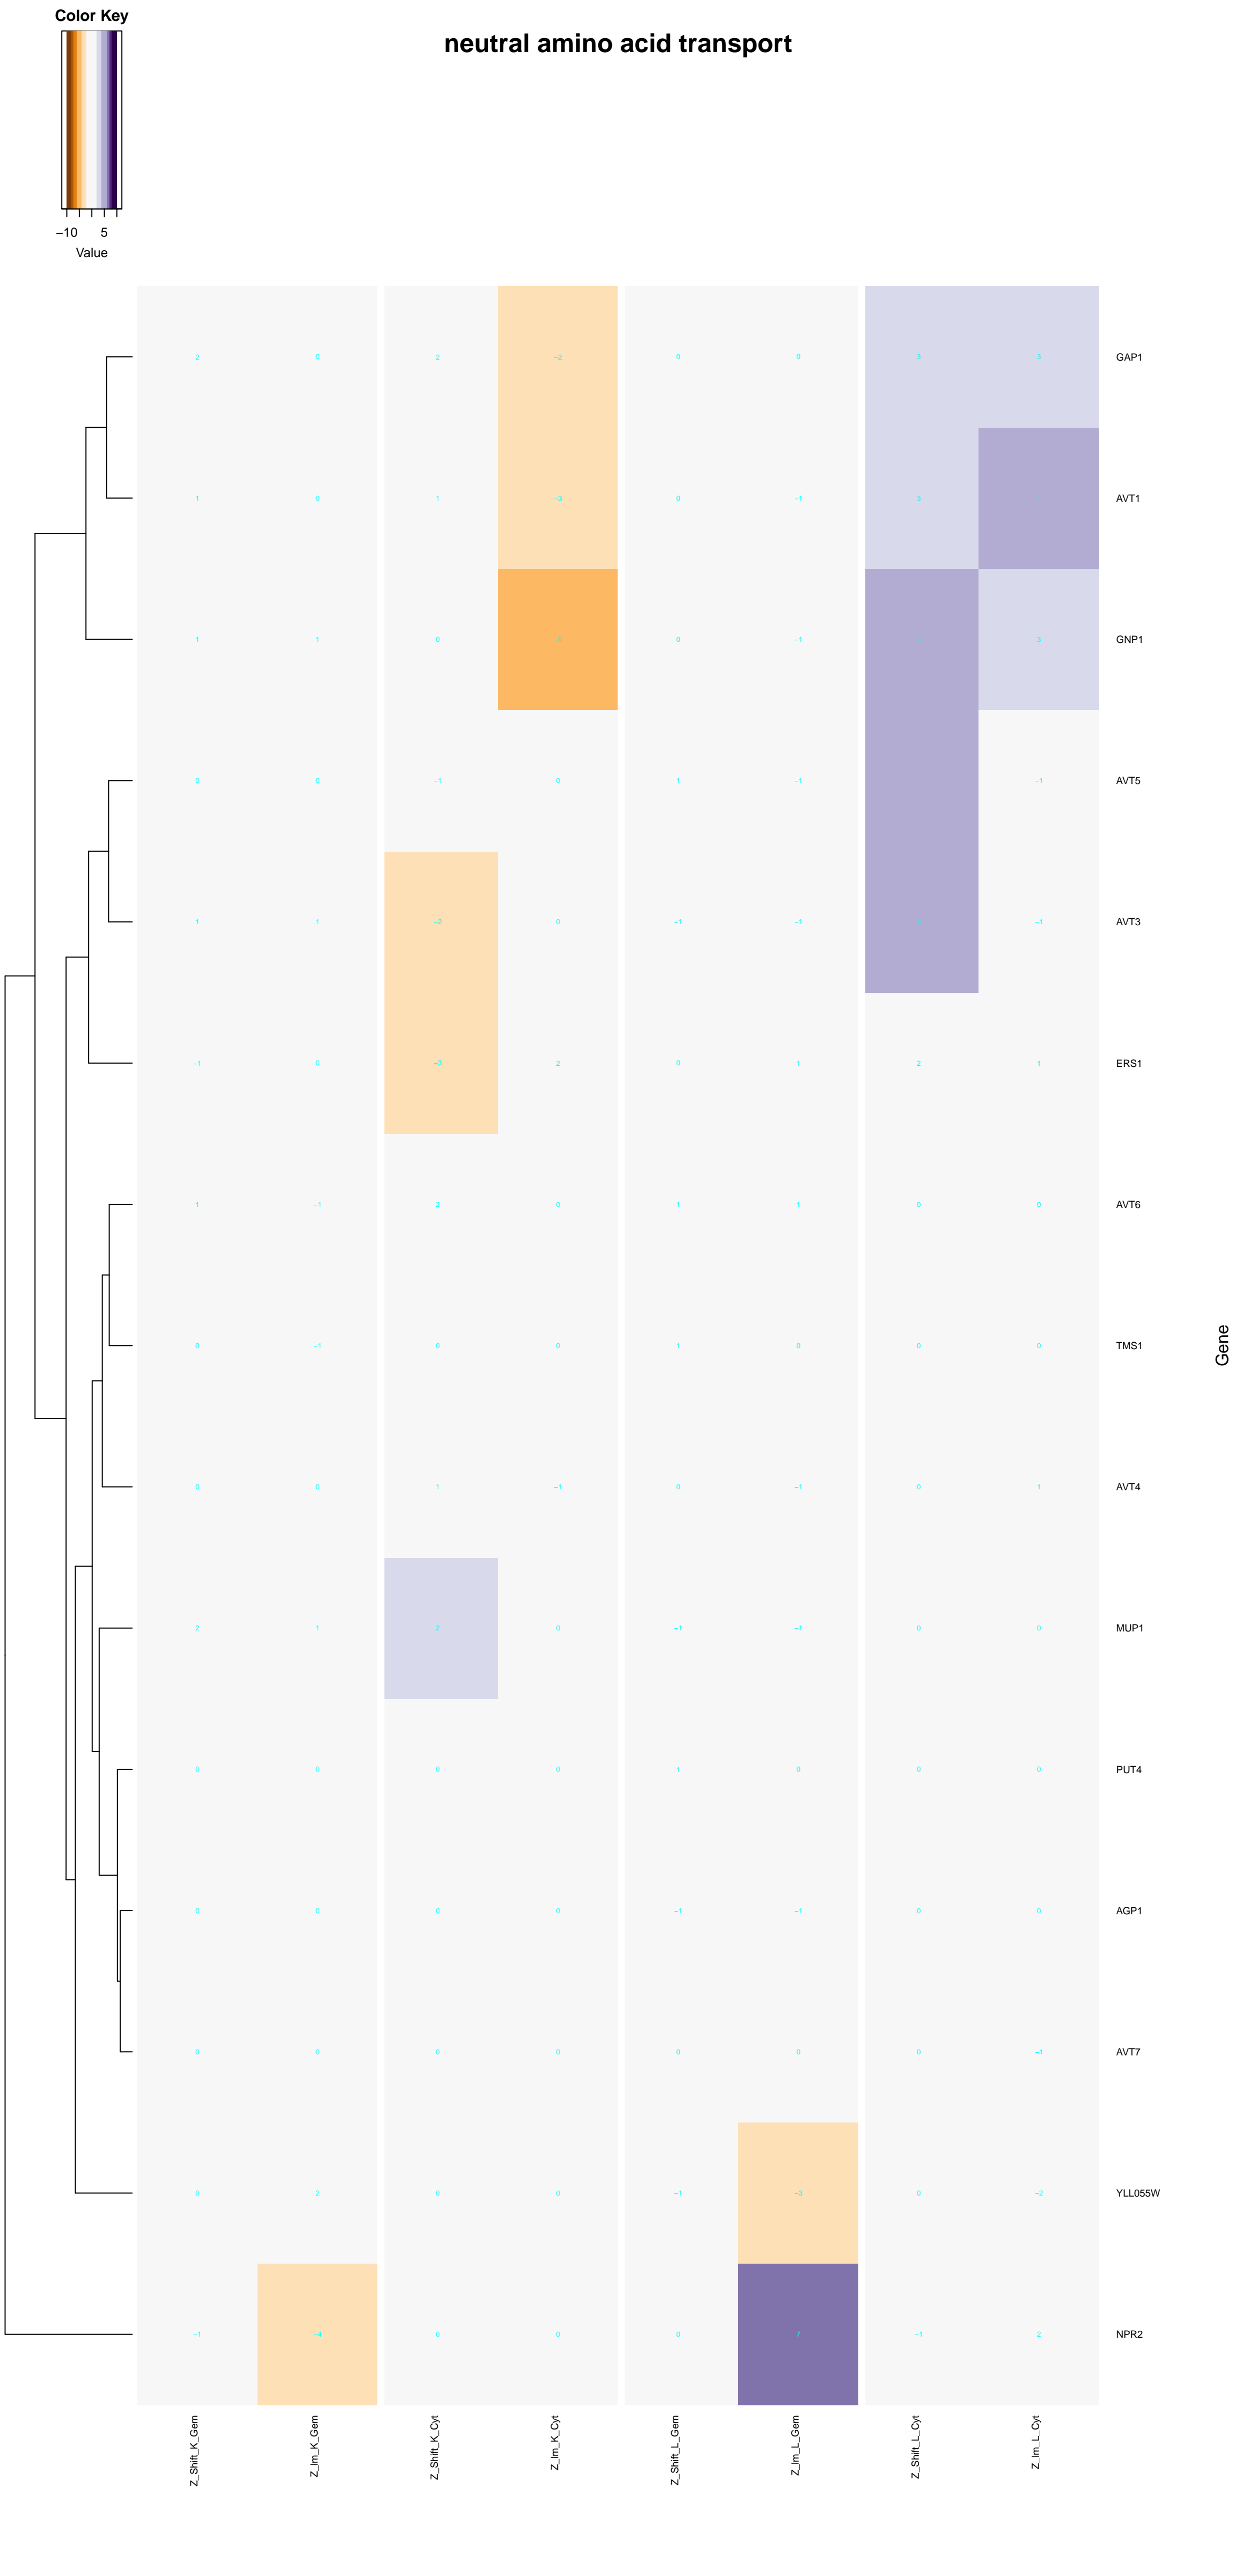

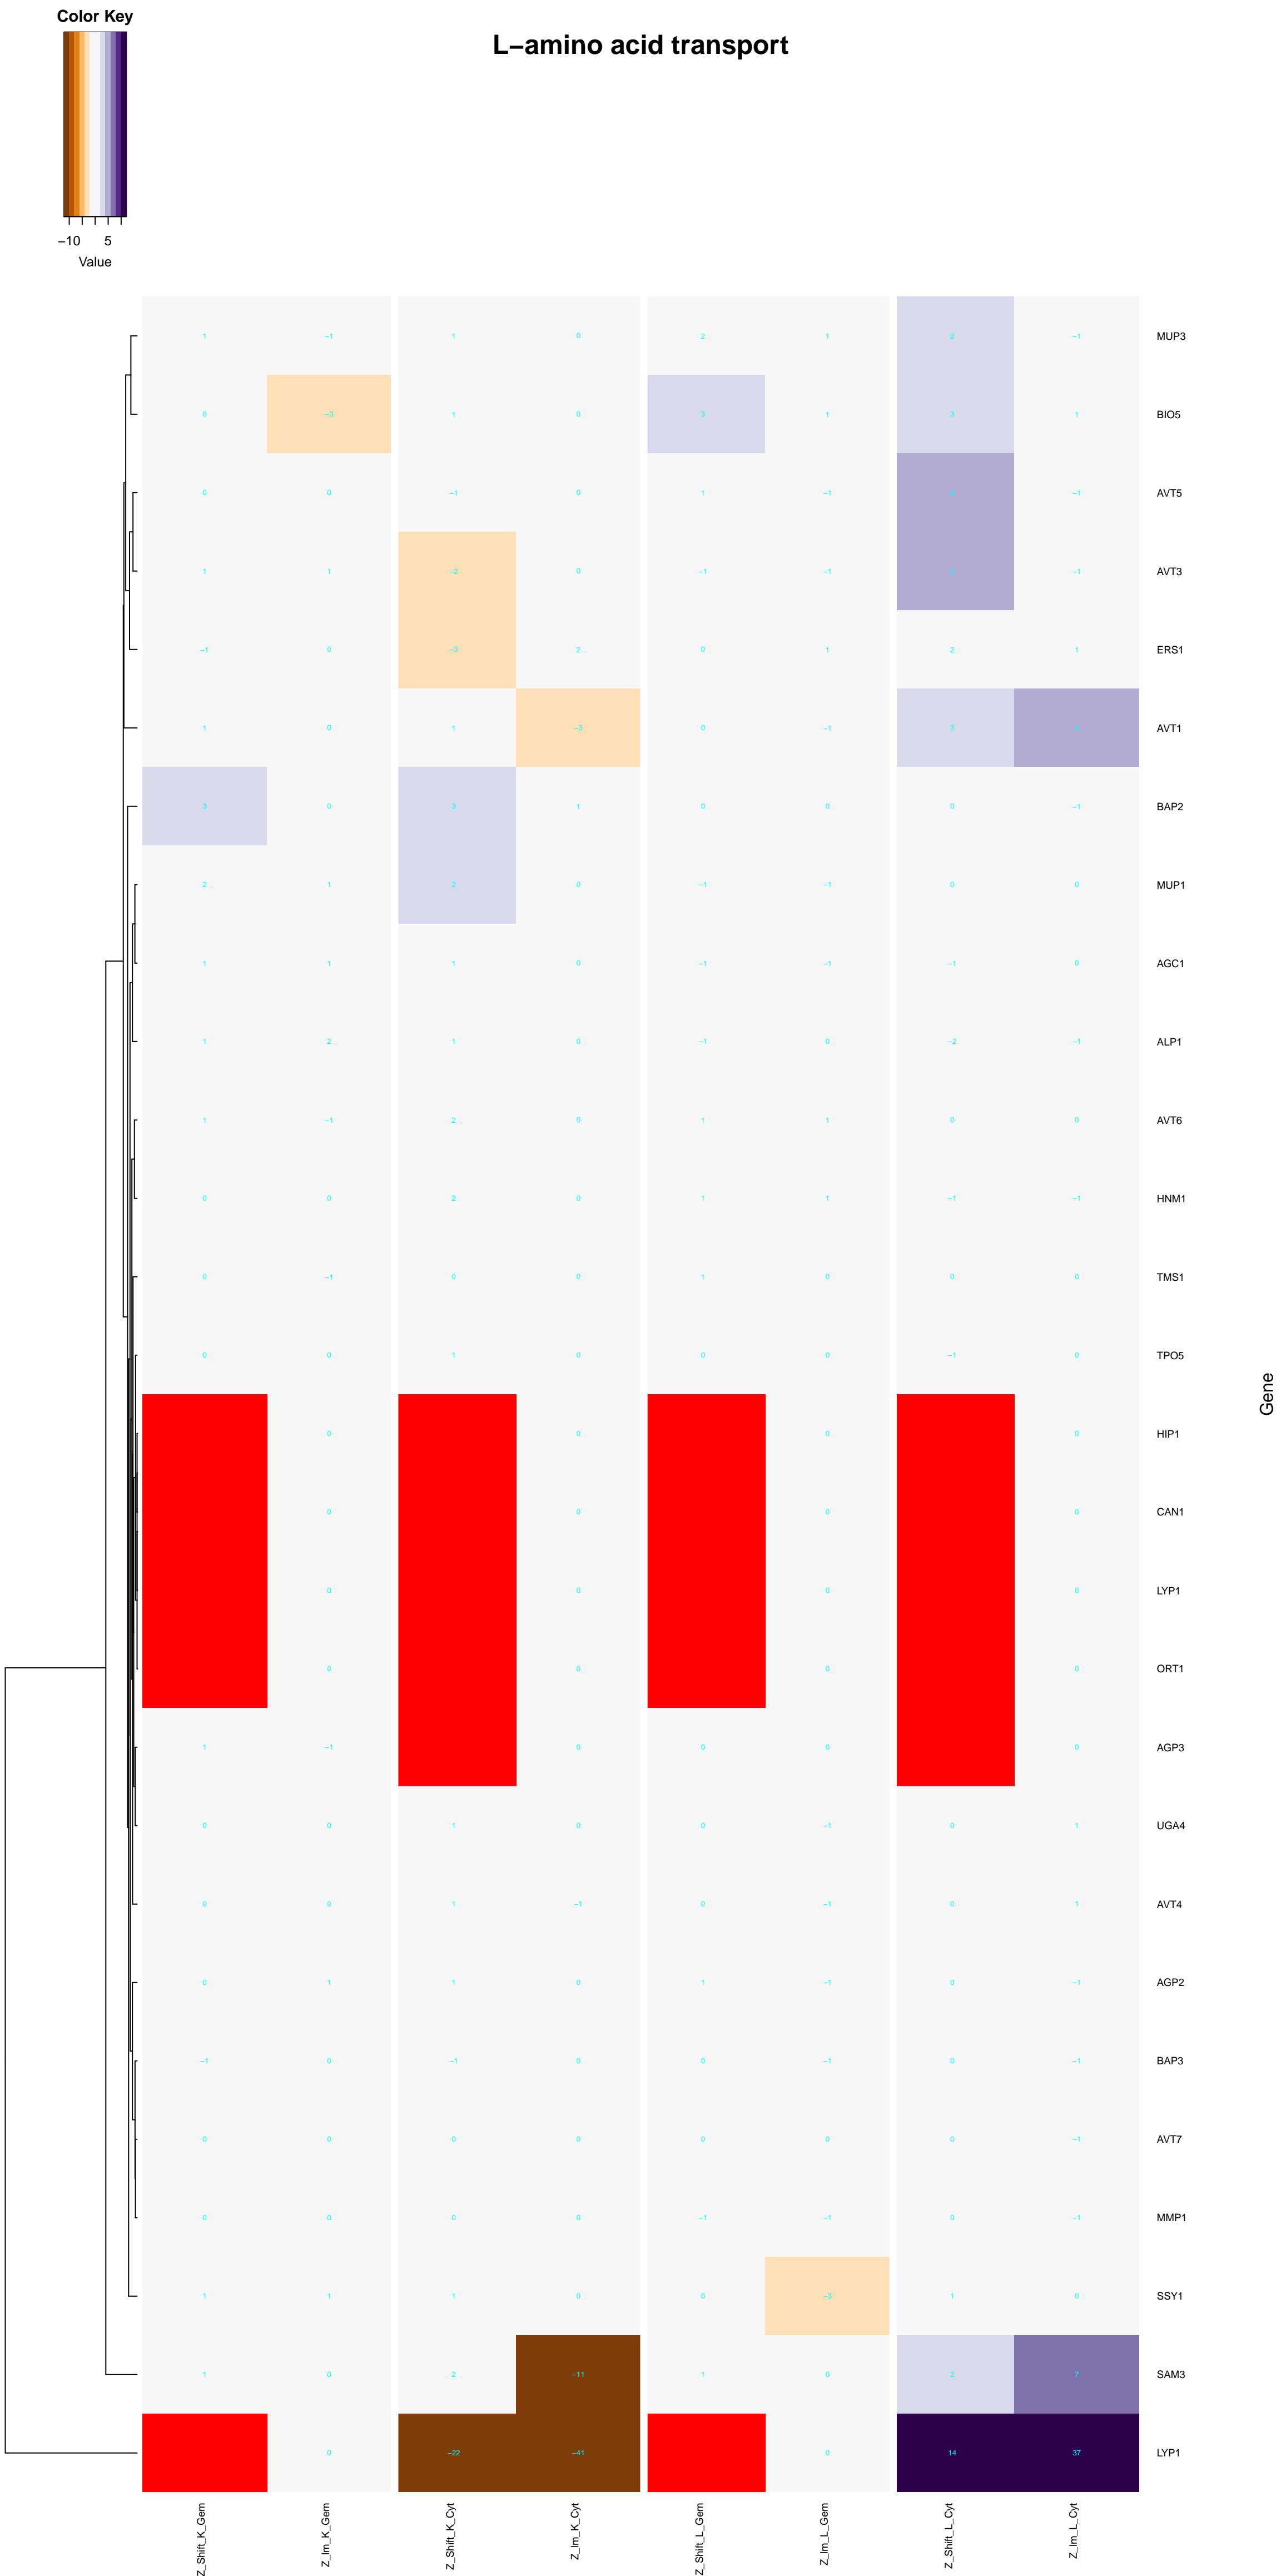

acetate transport

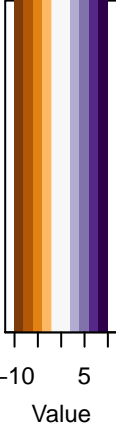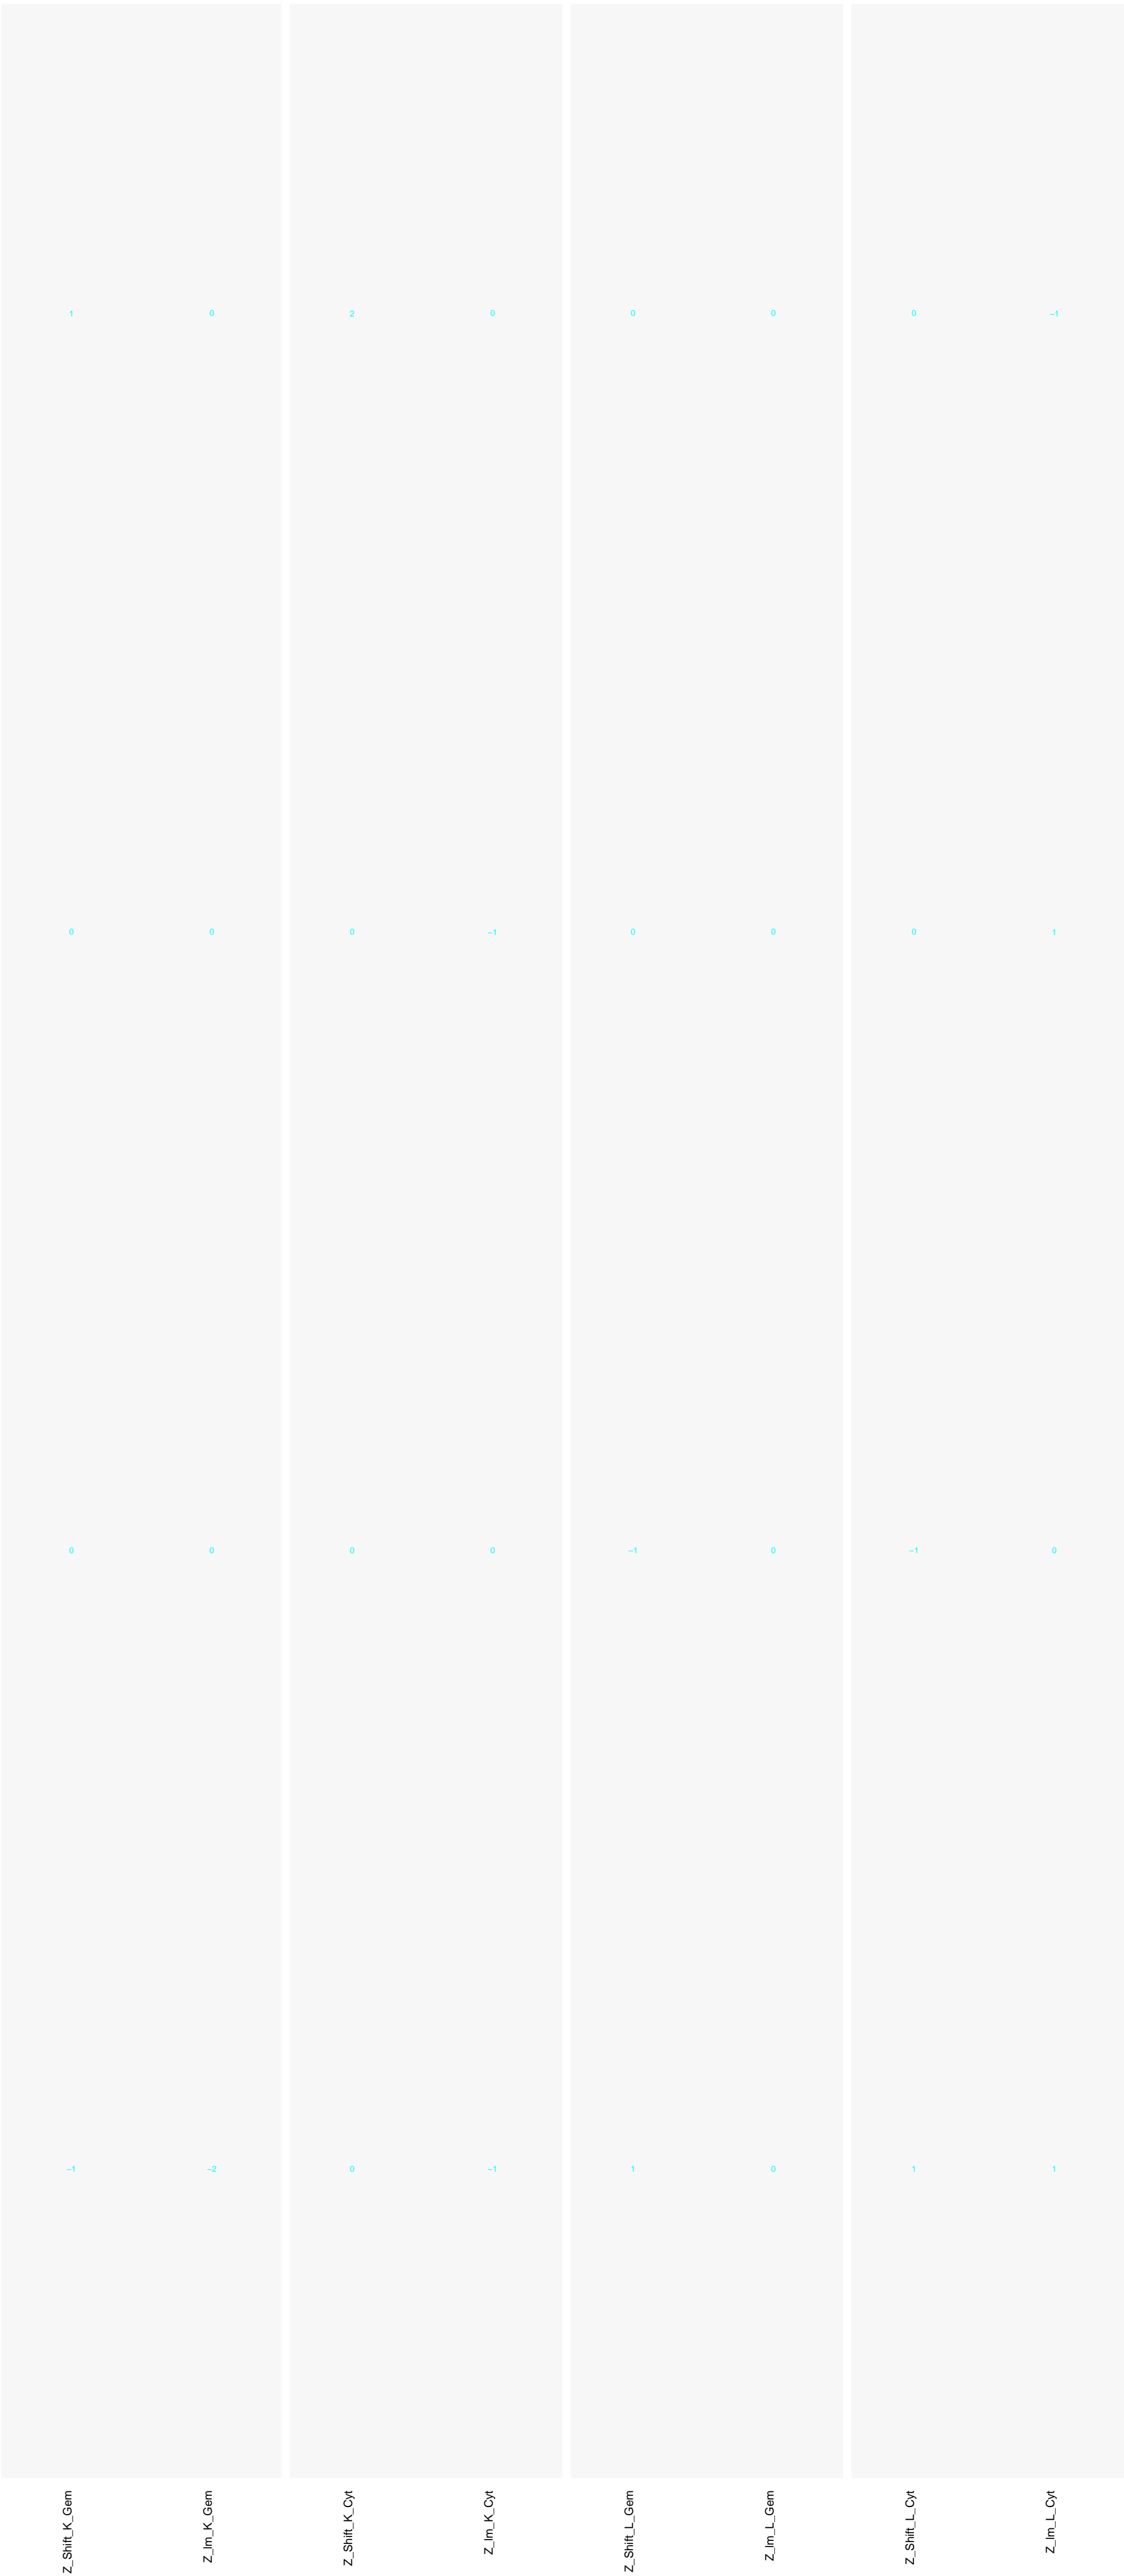

Gene

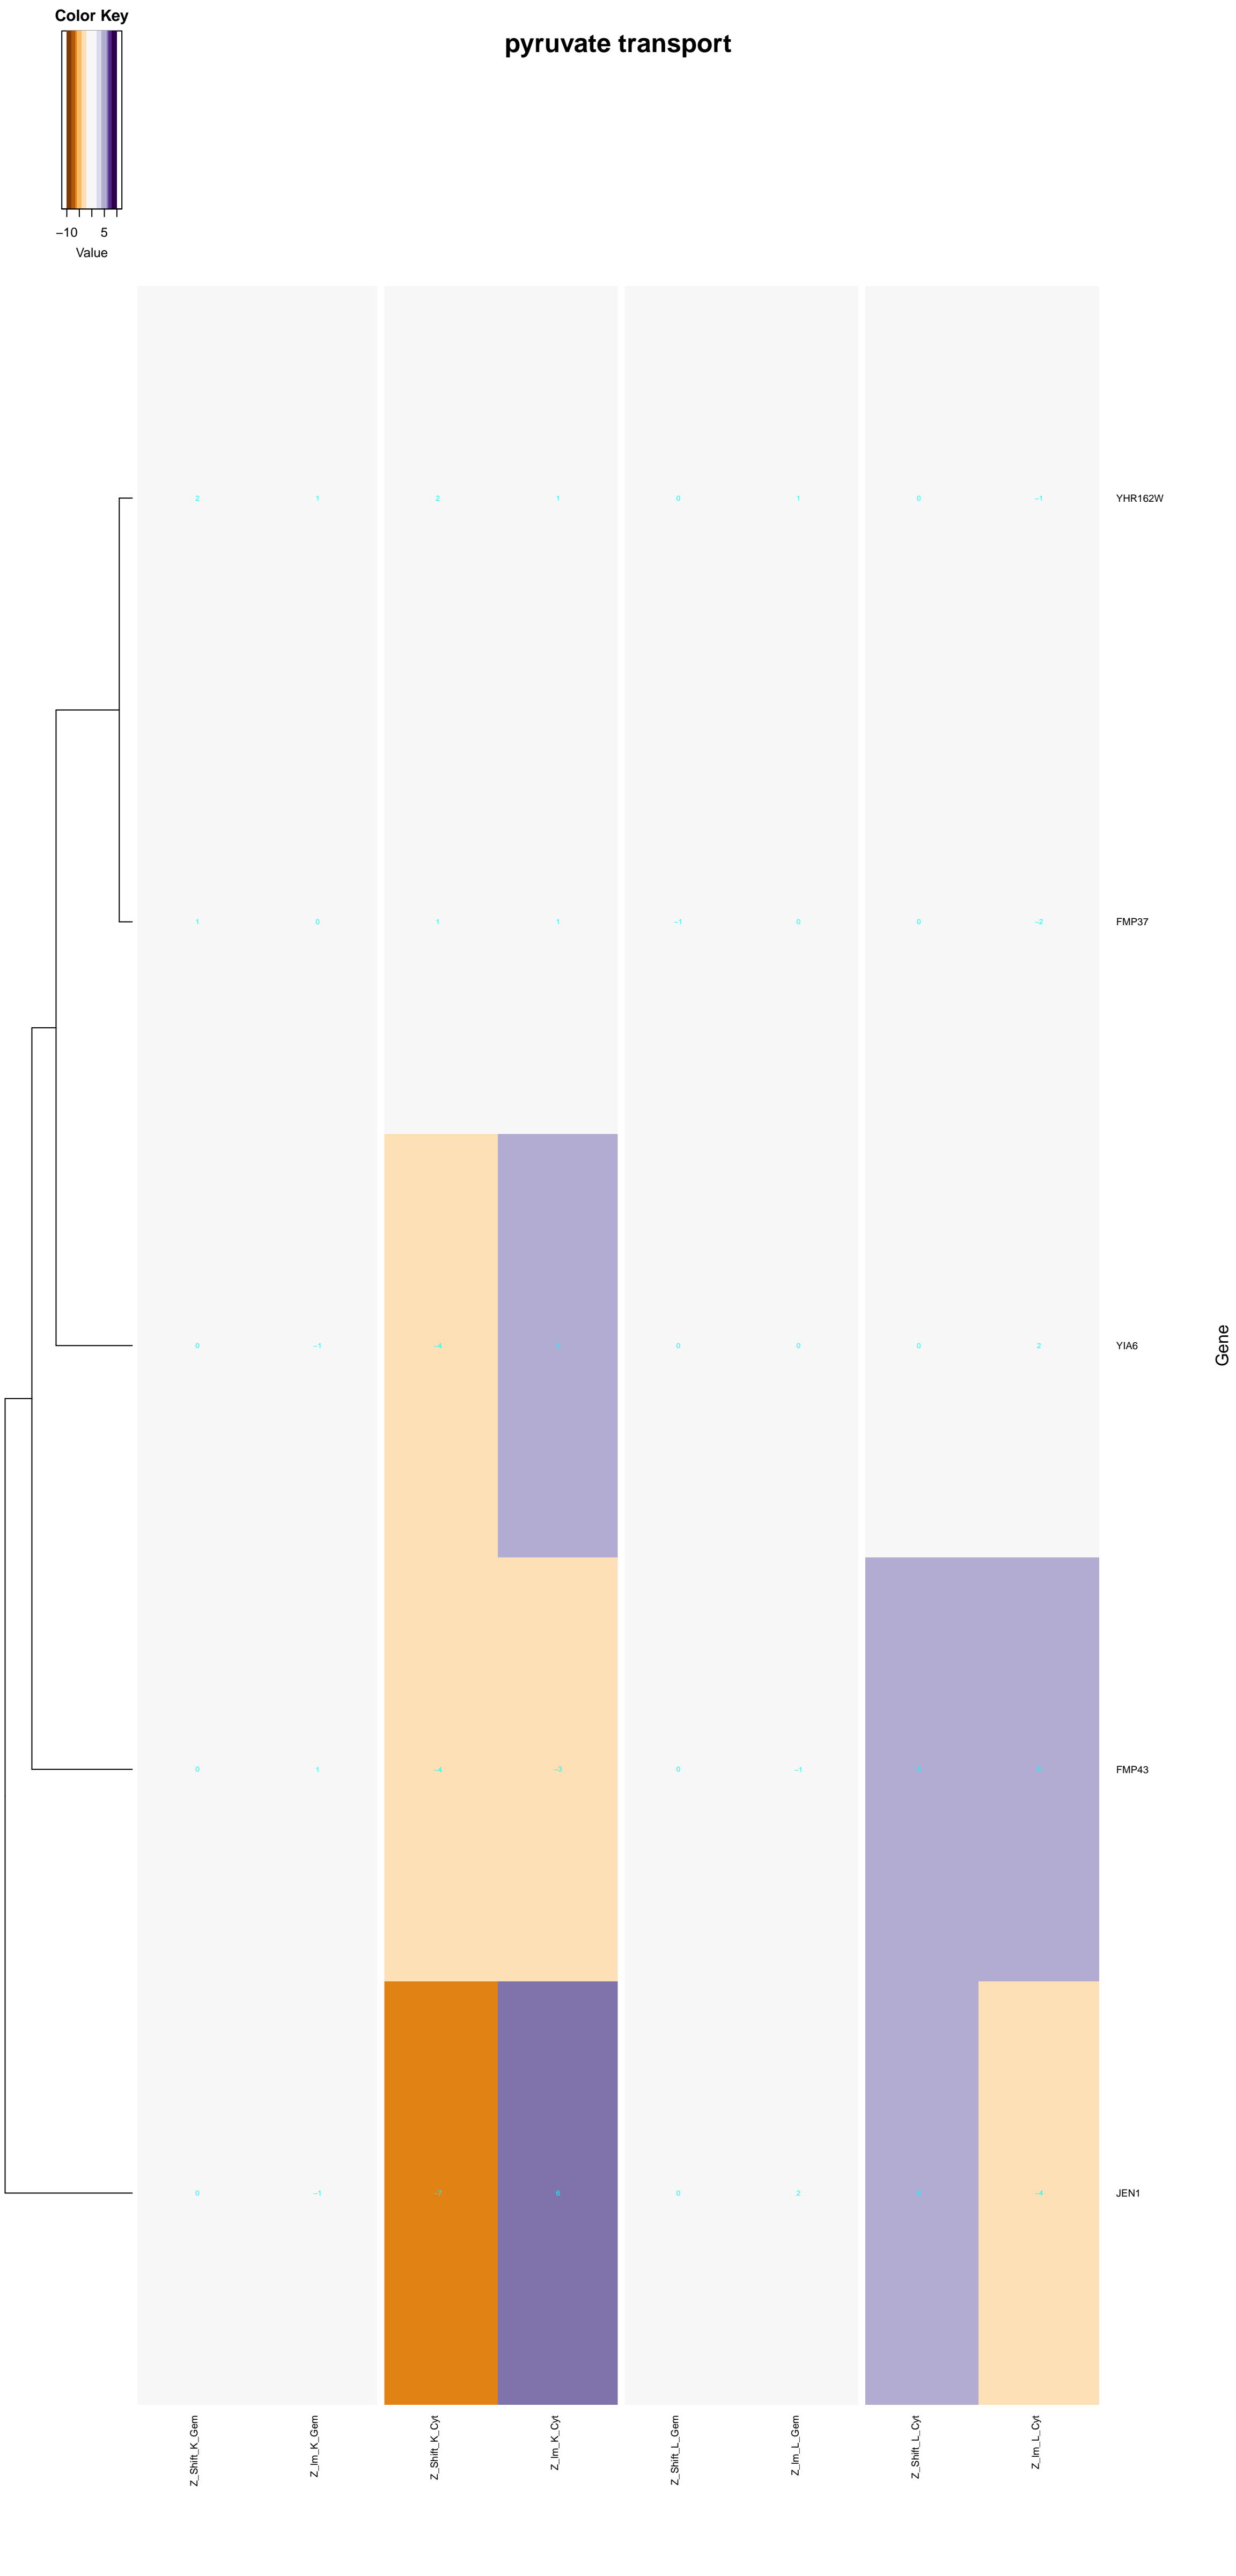

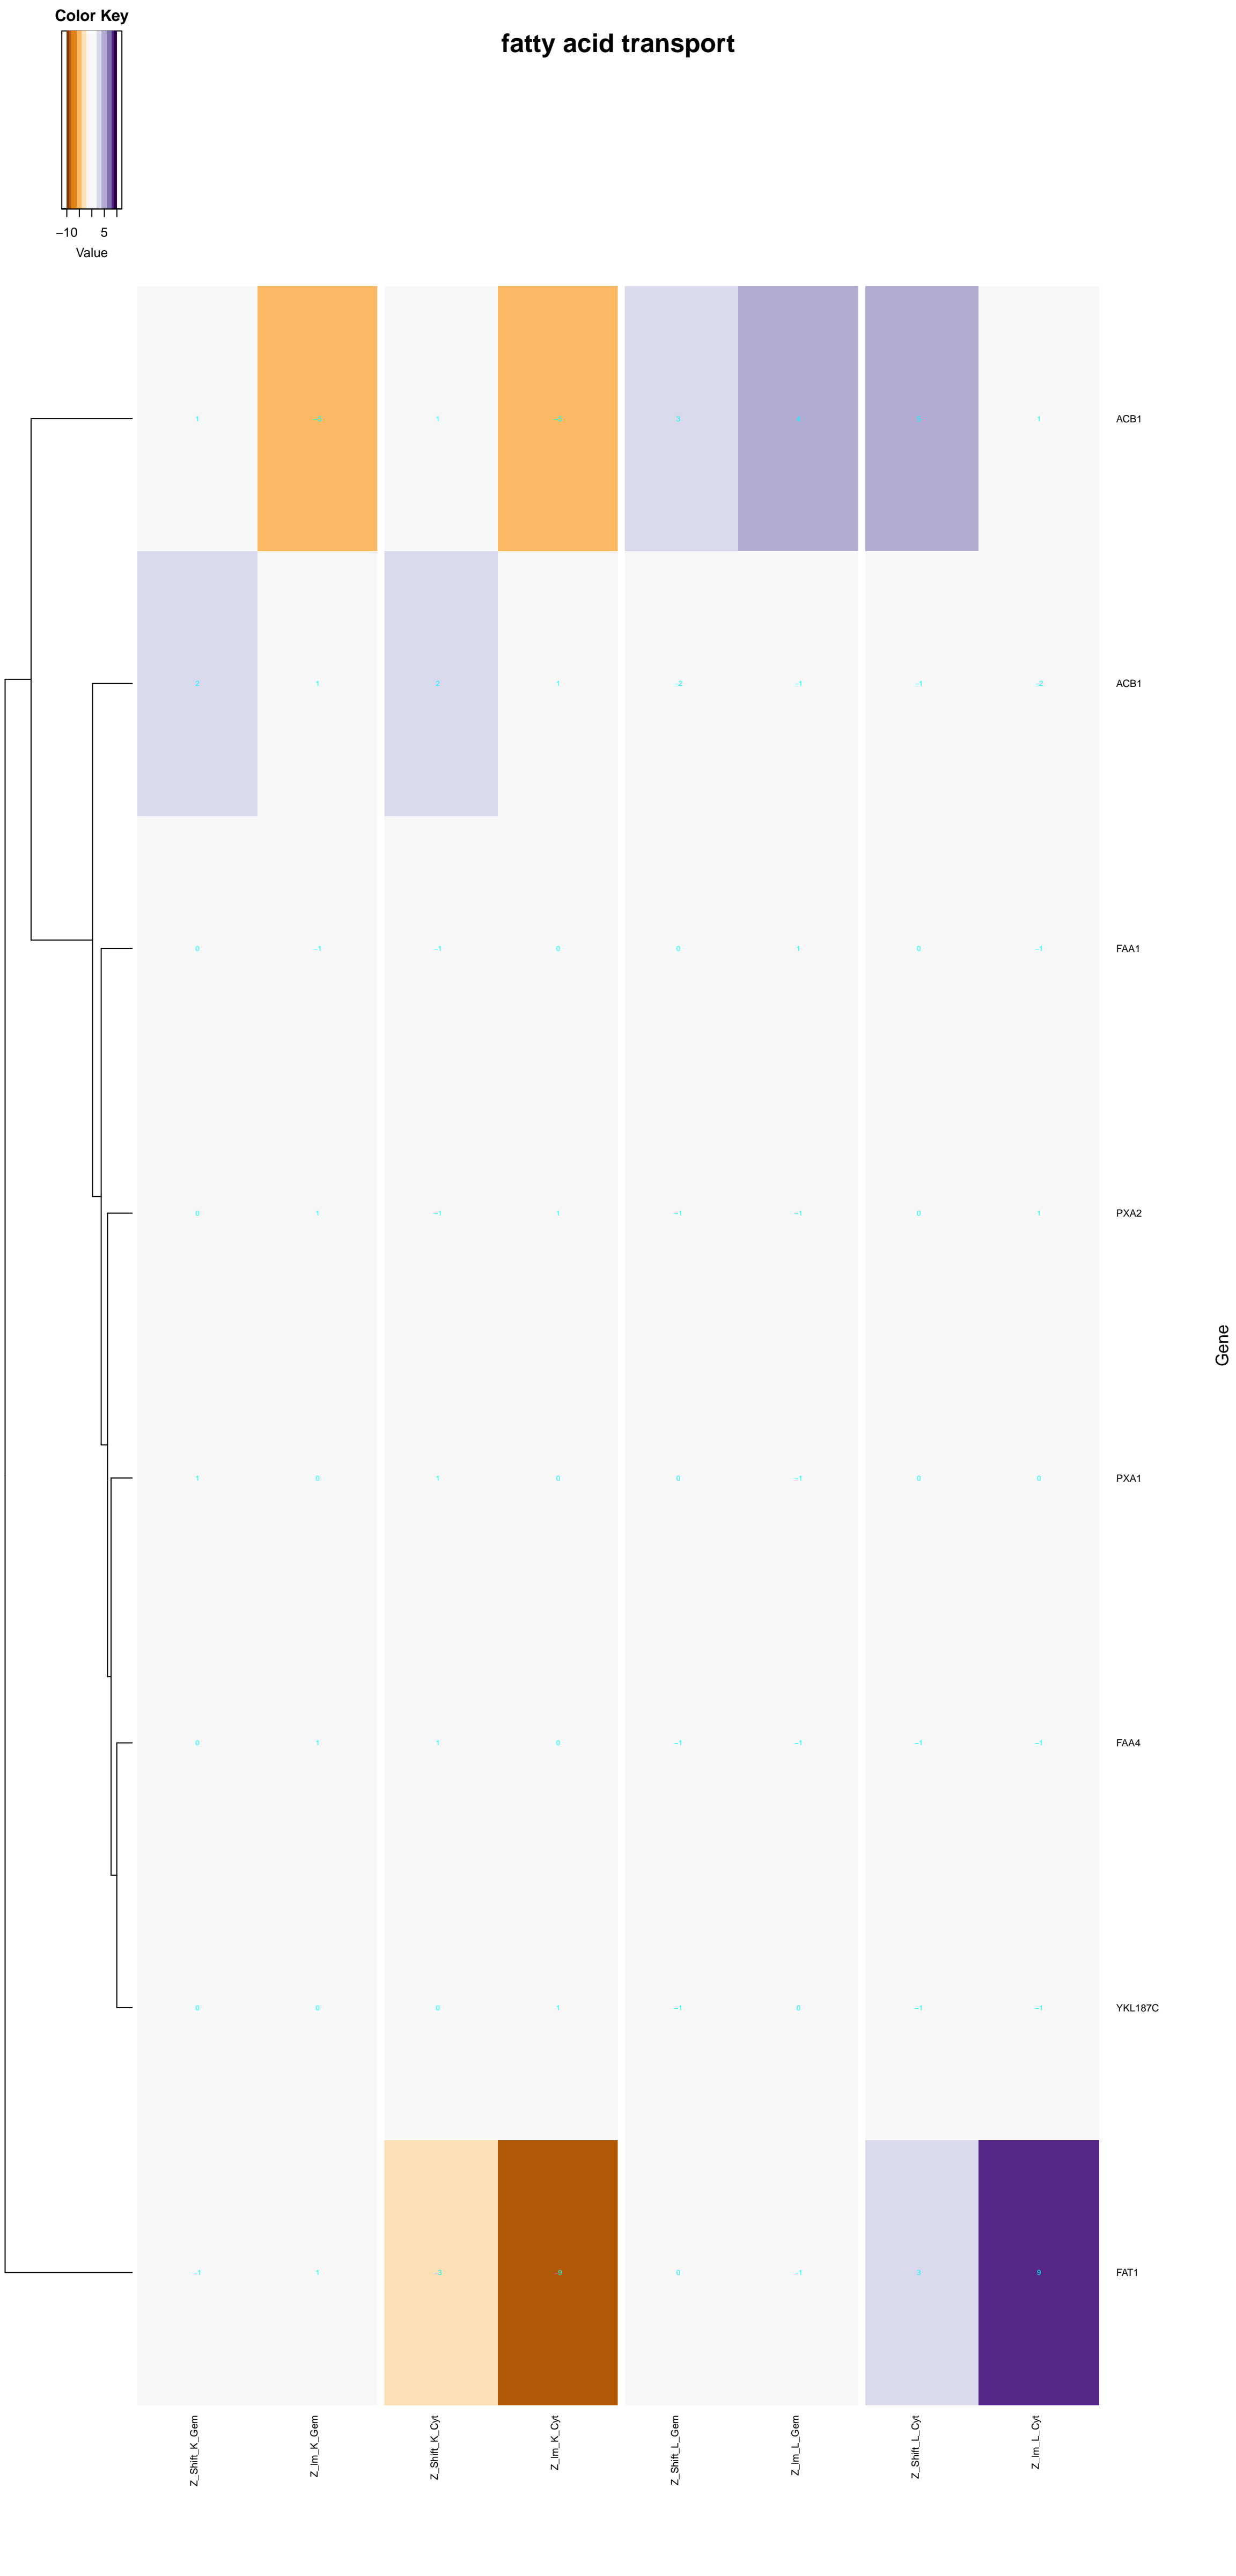

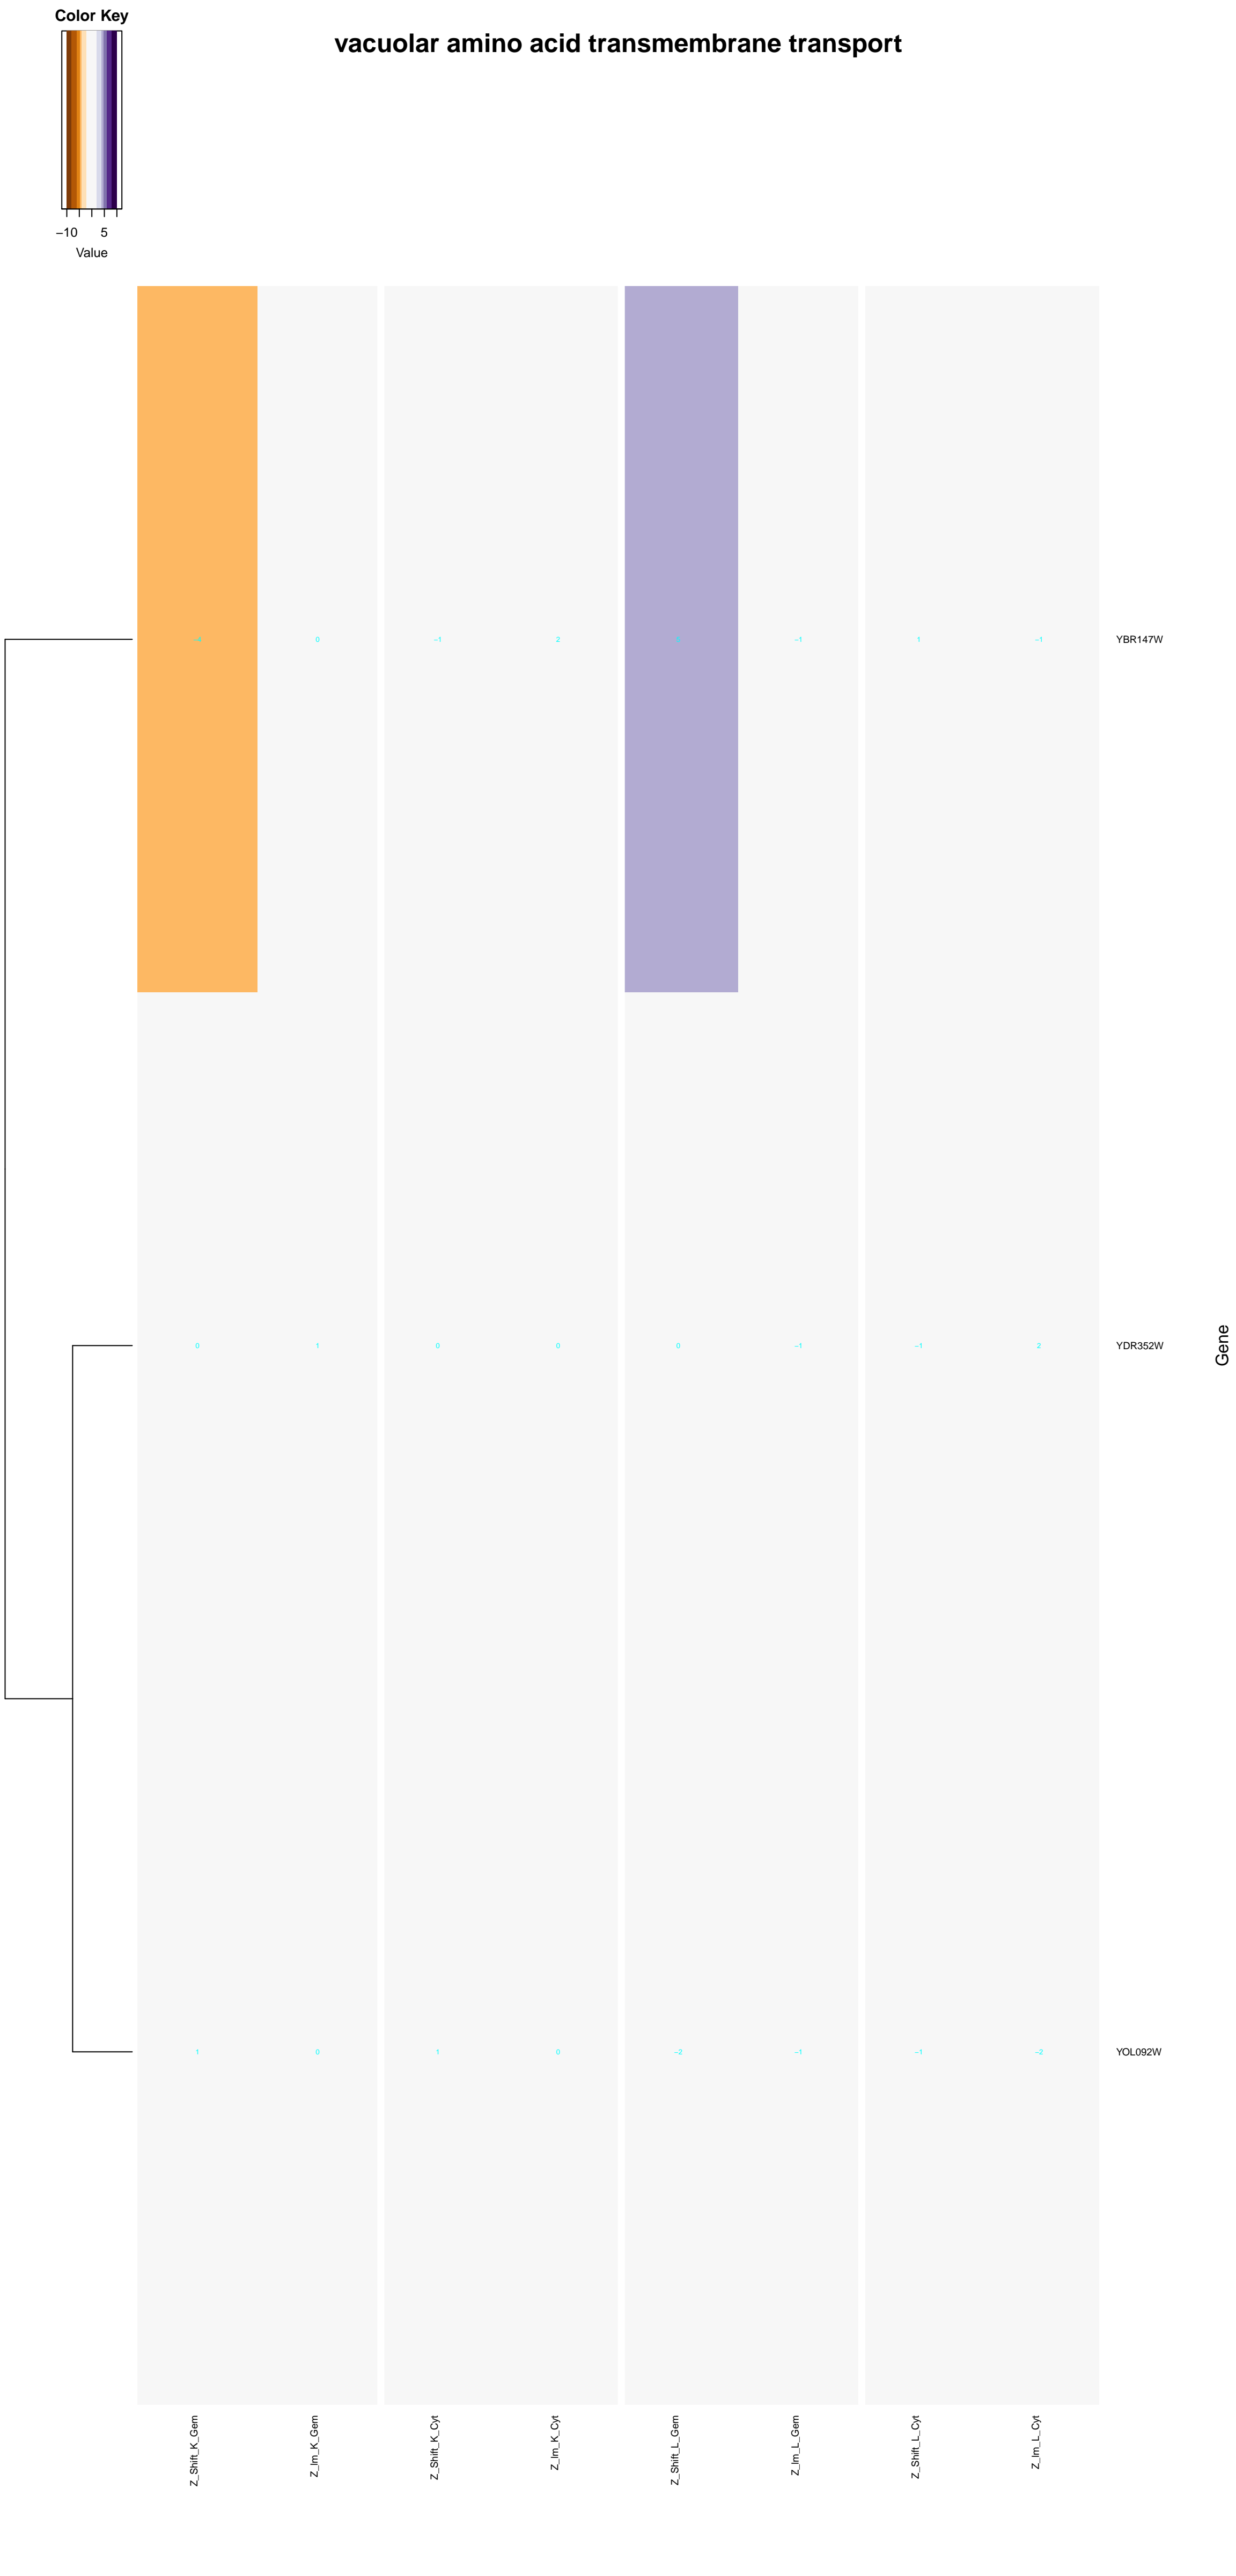

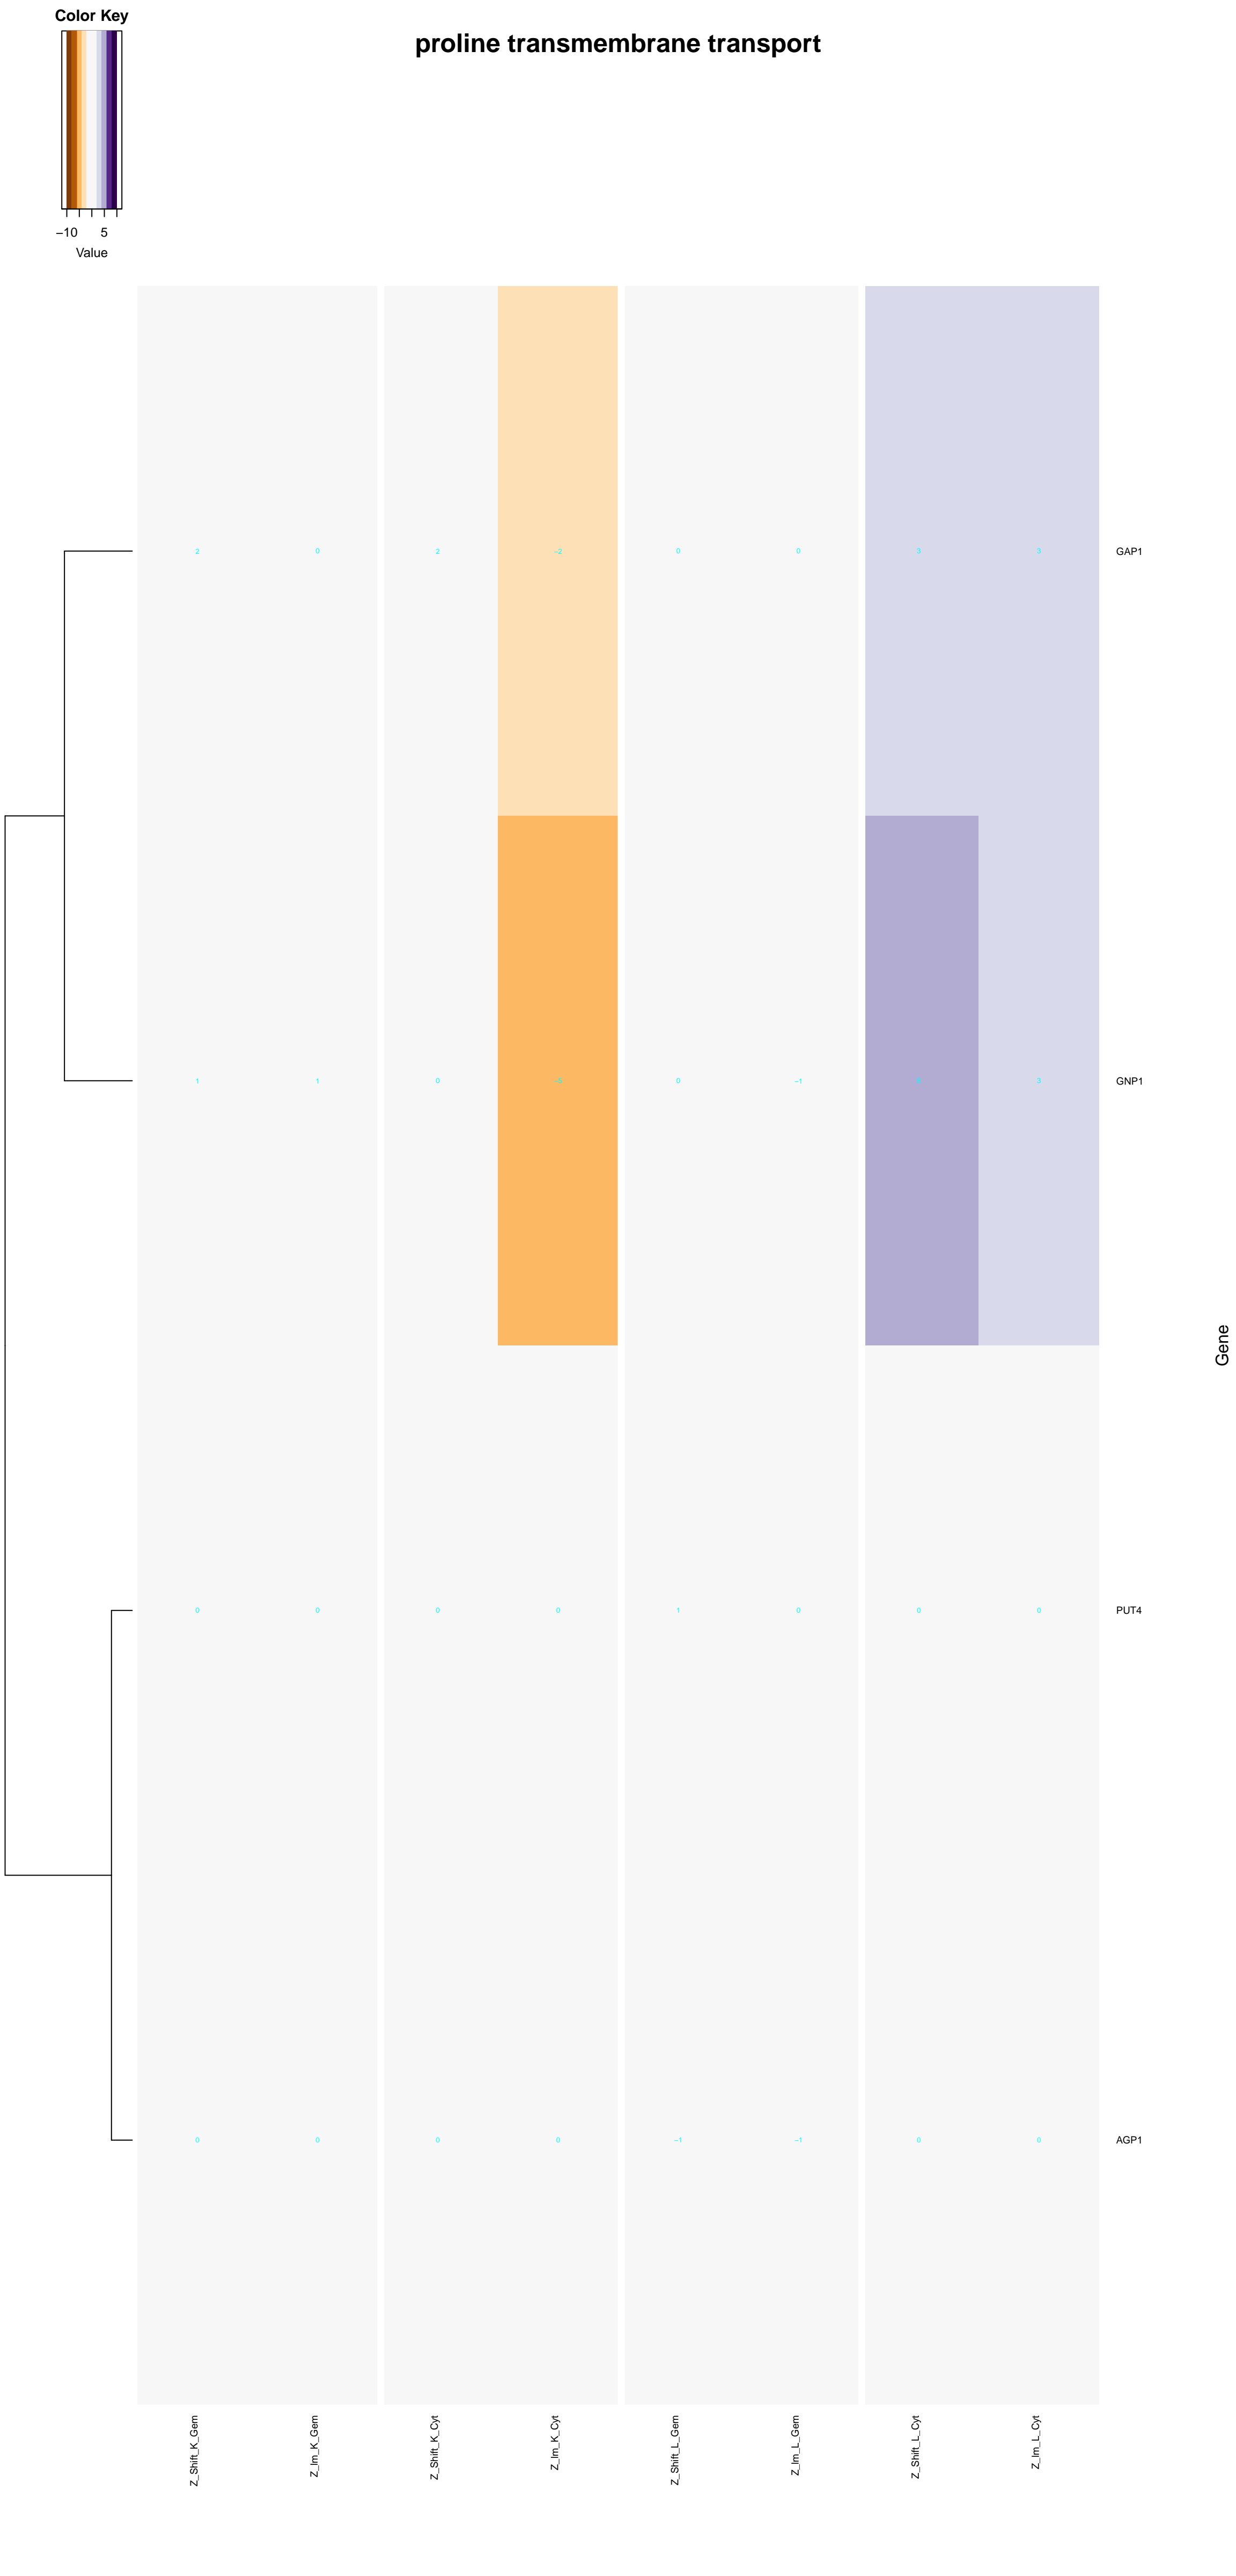

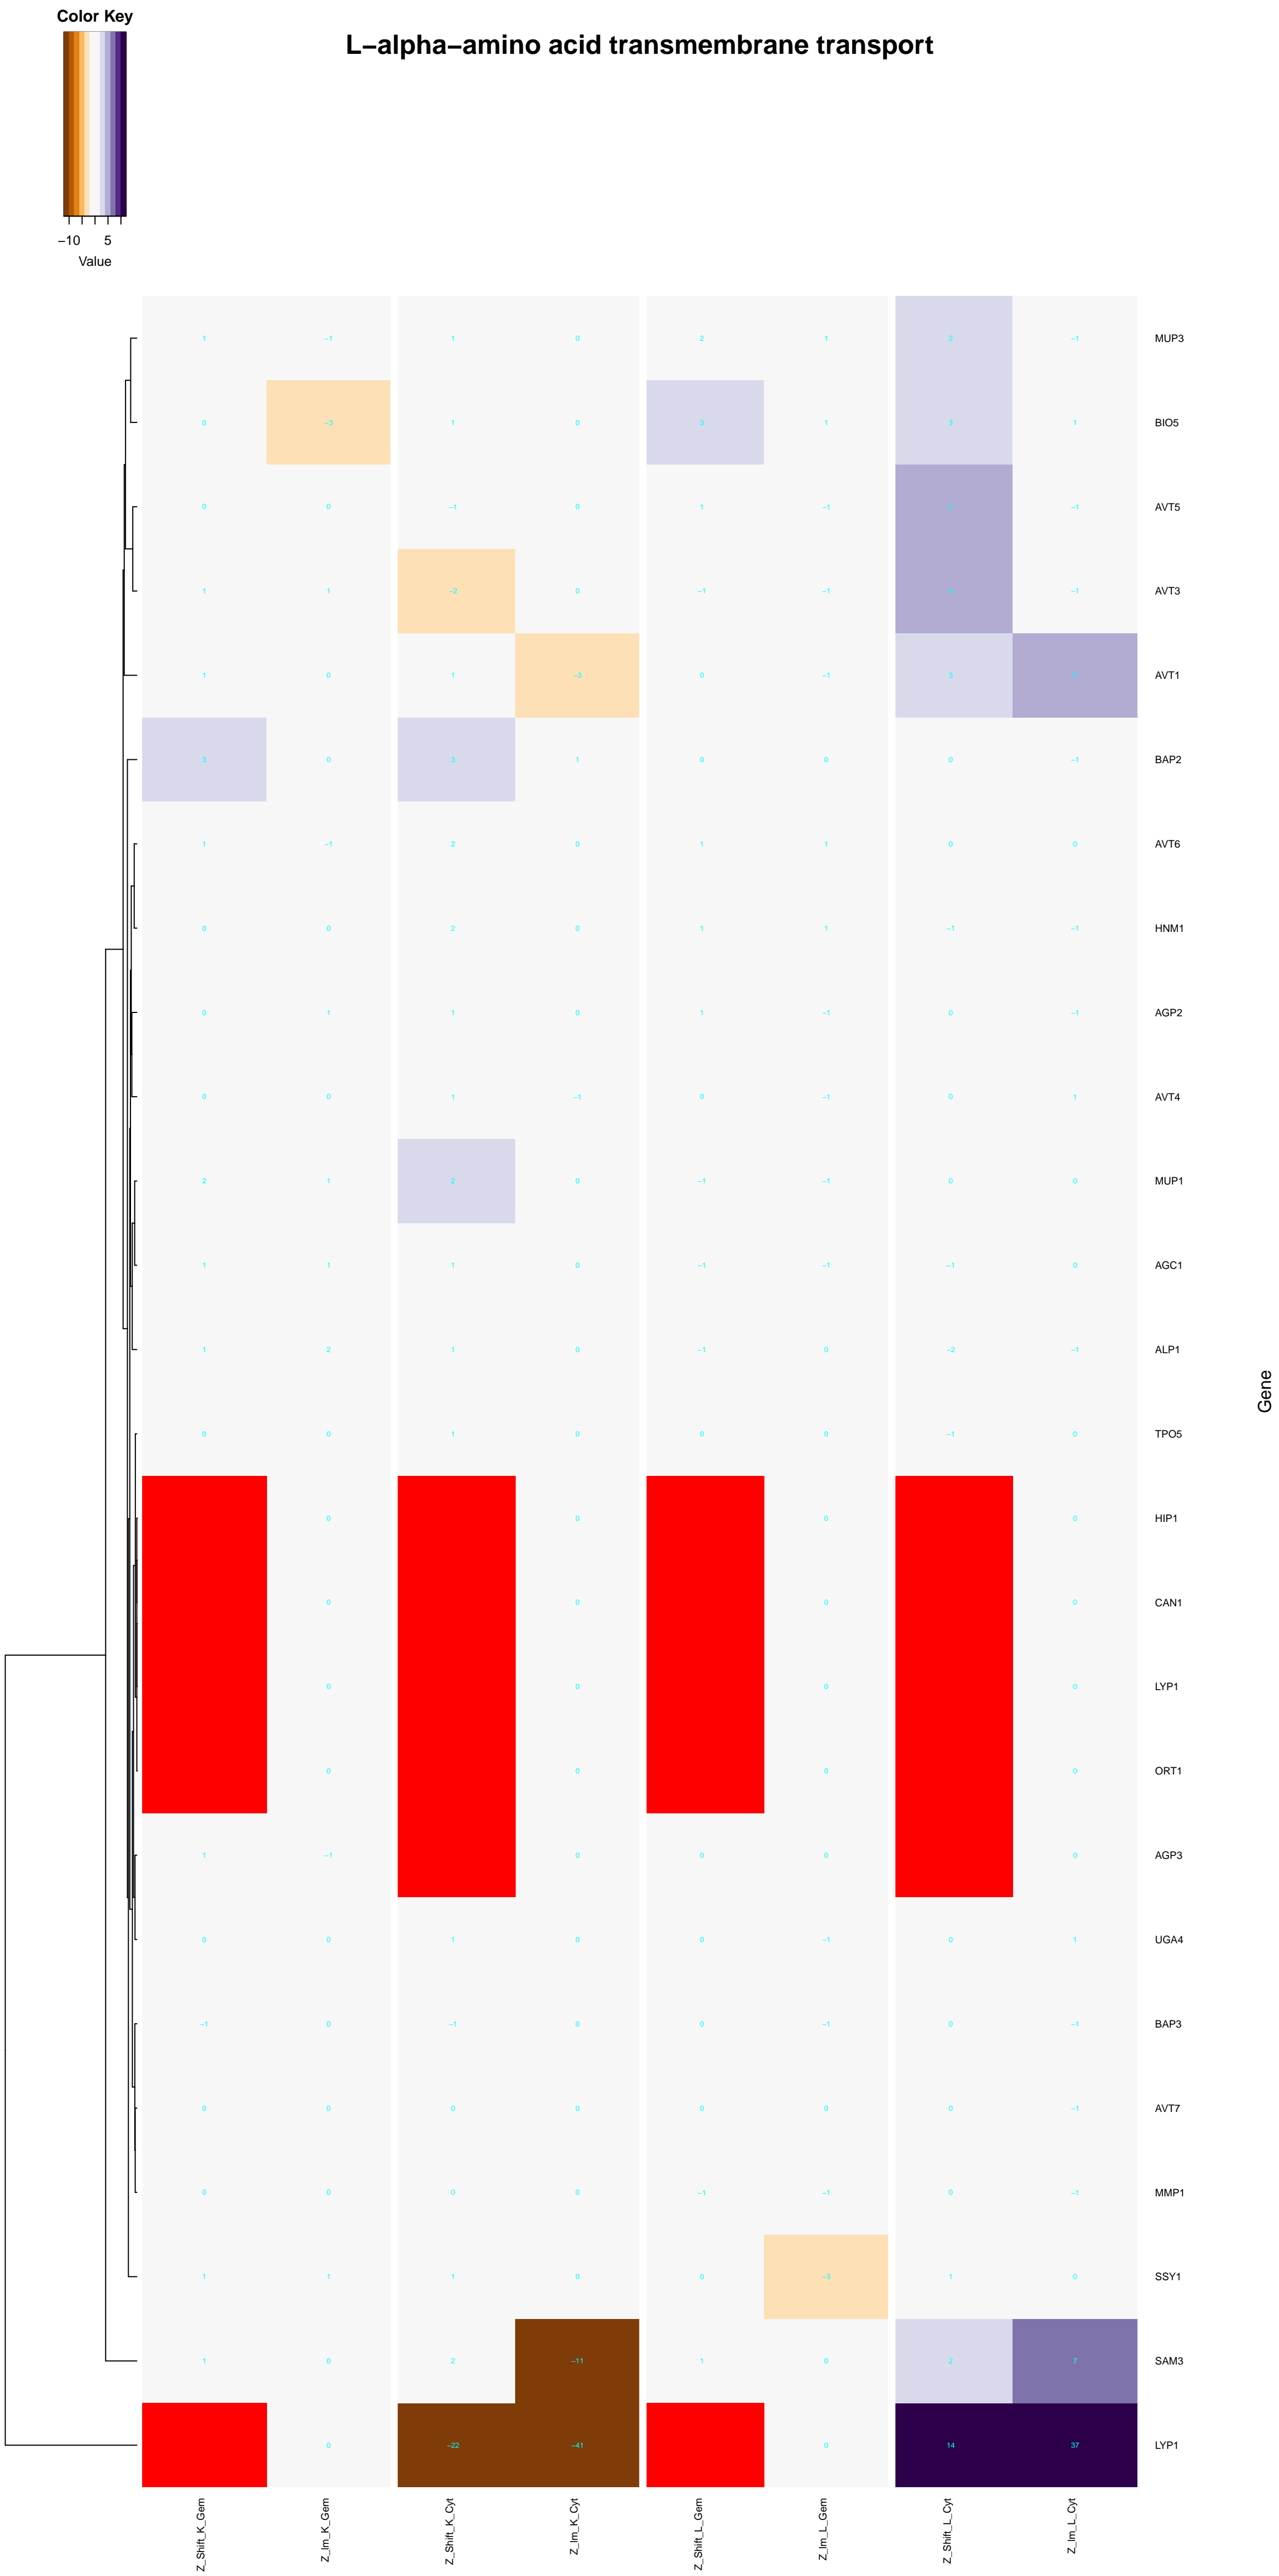

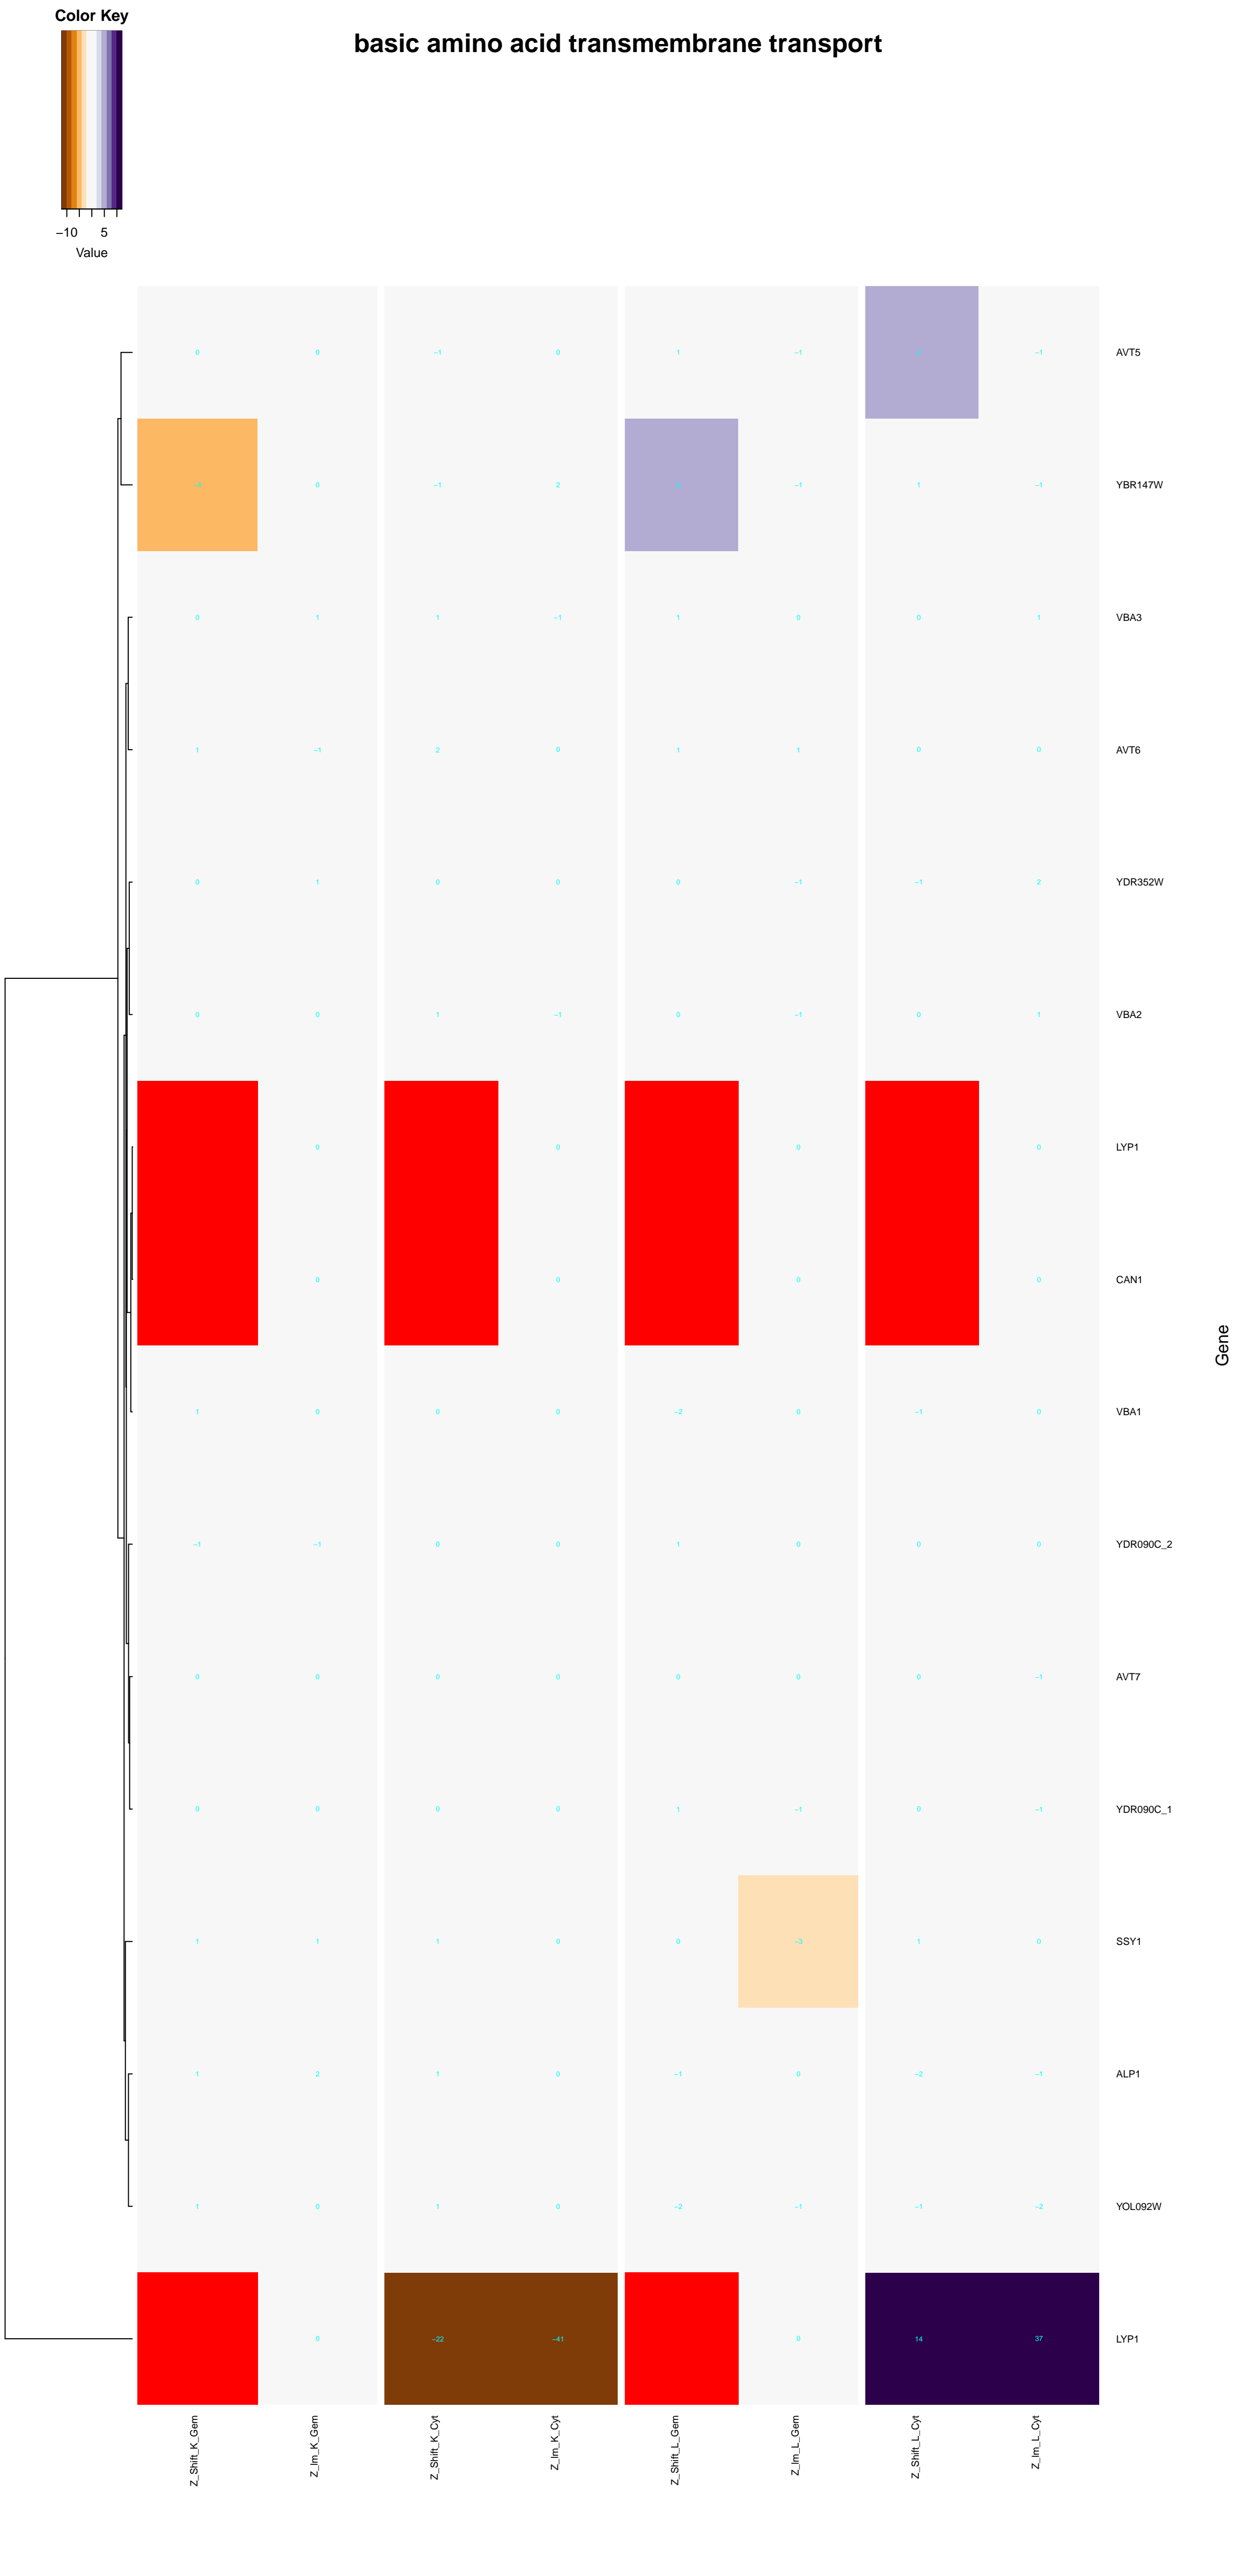

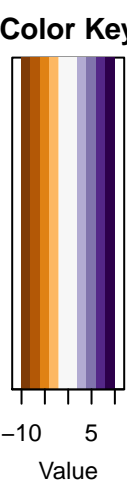

plasma membrane acetate transport

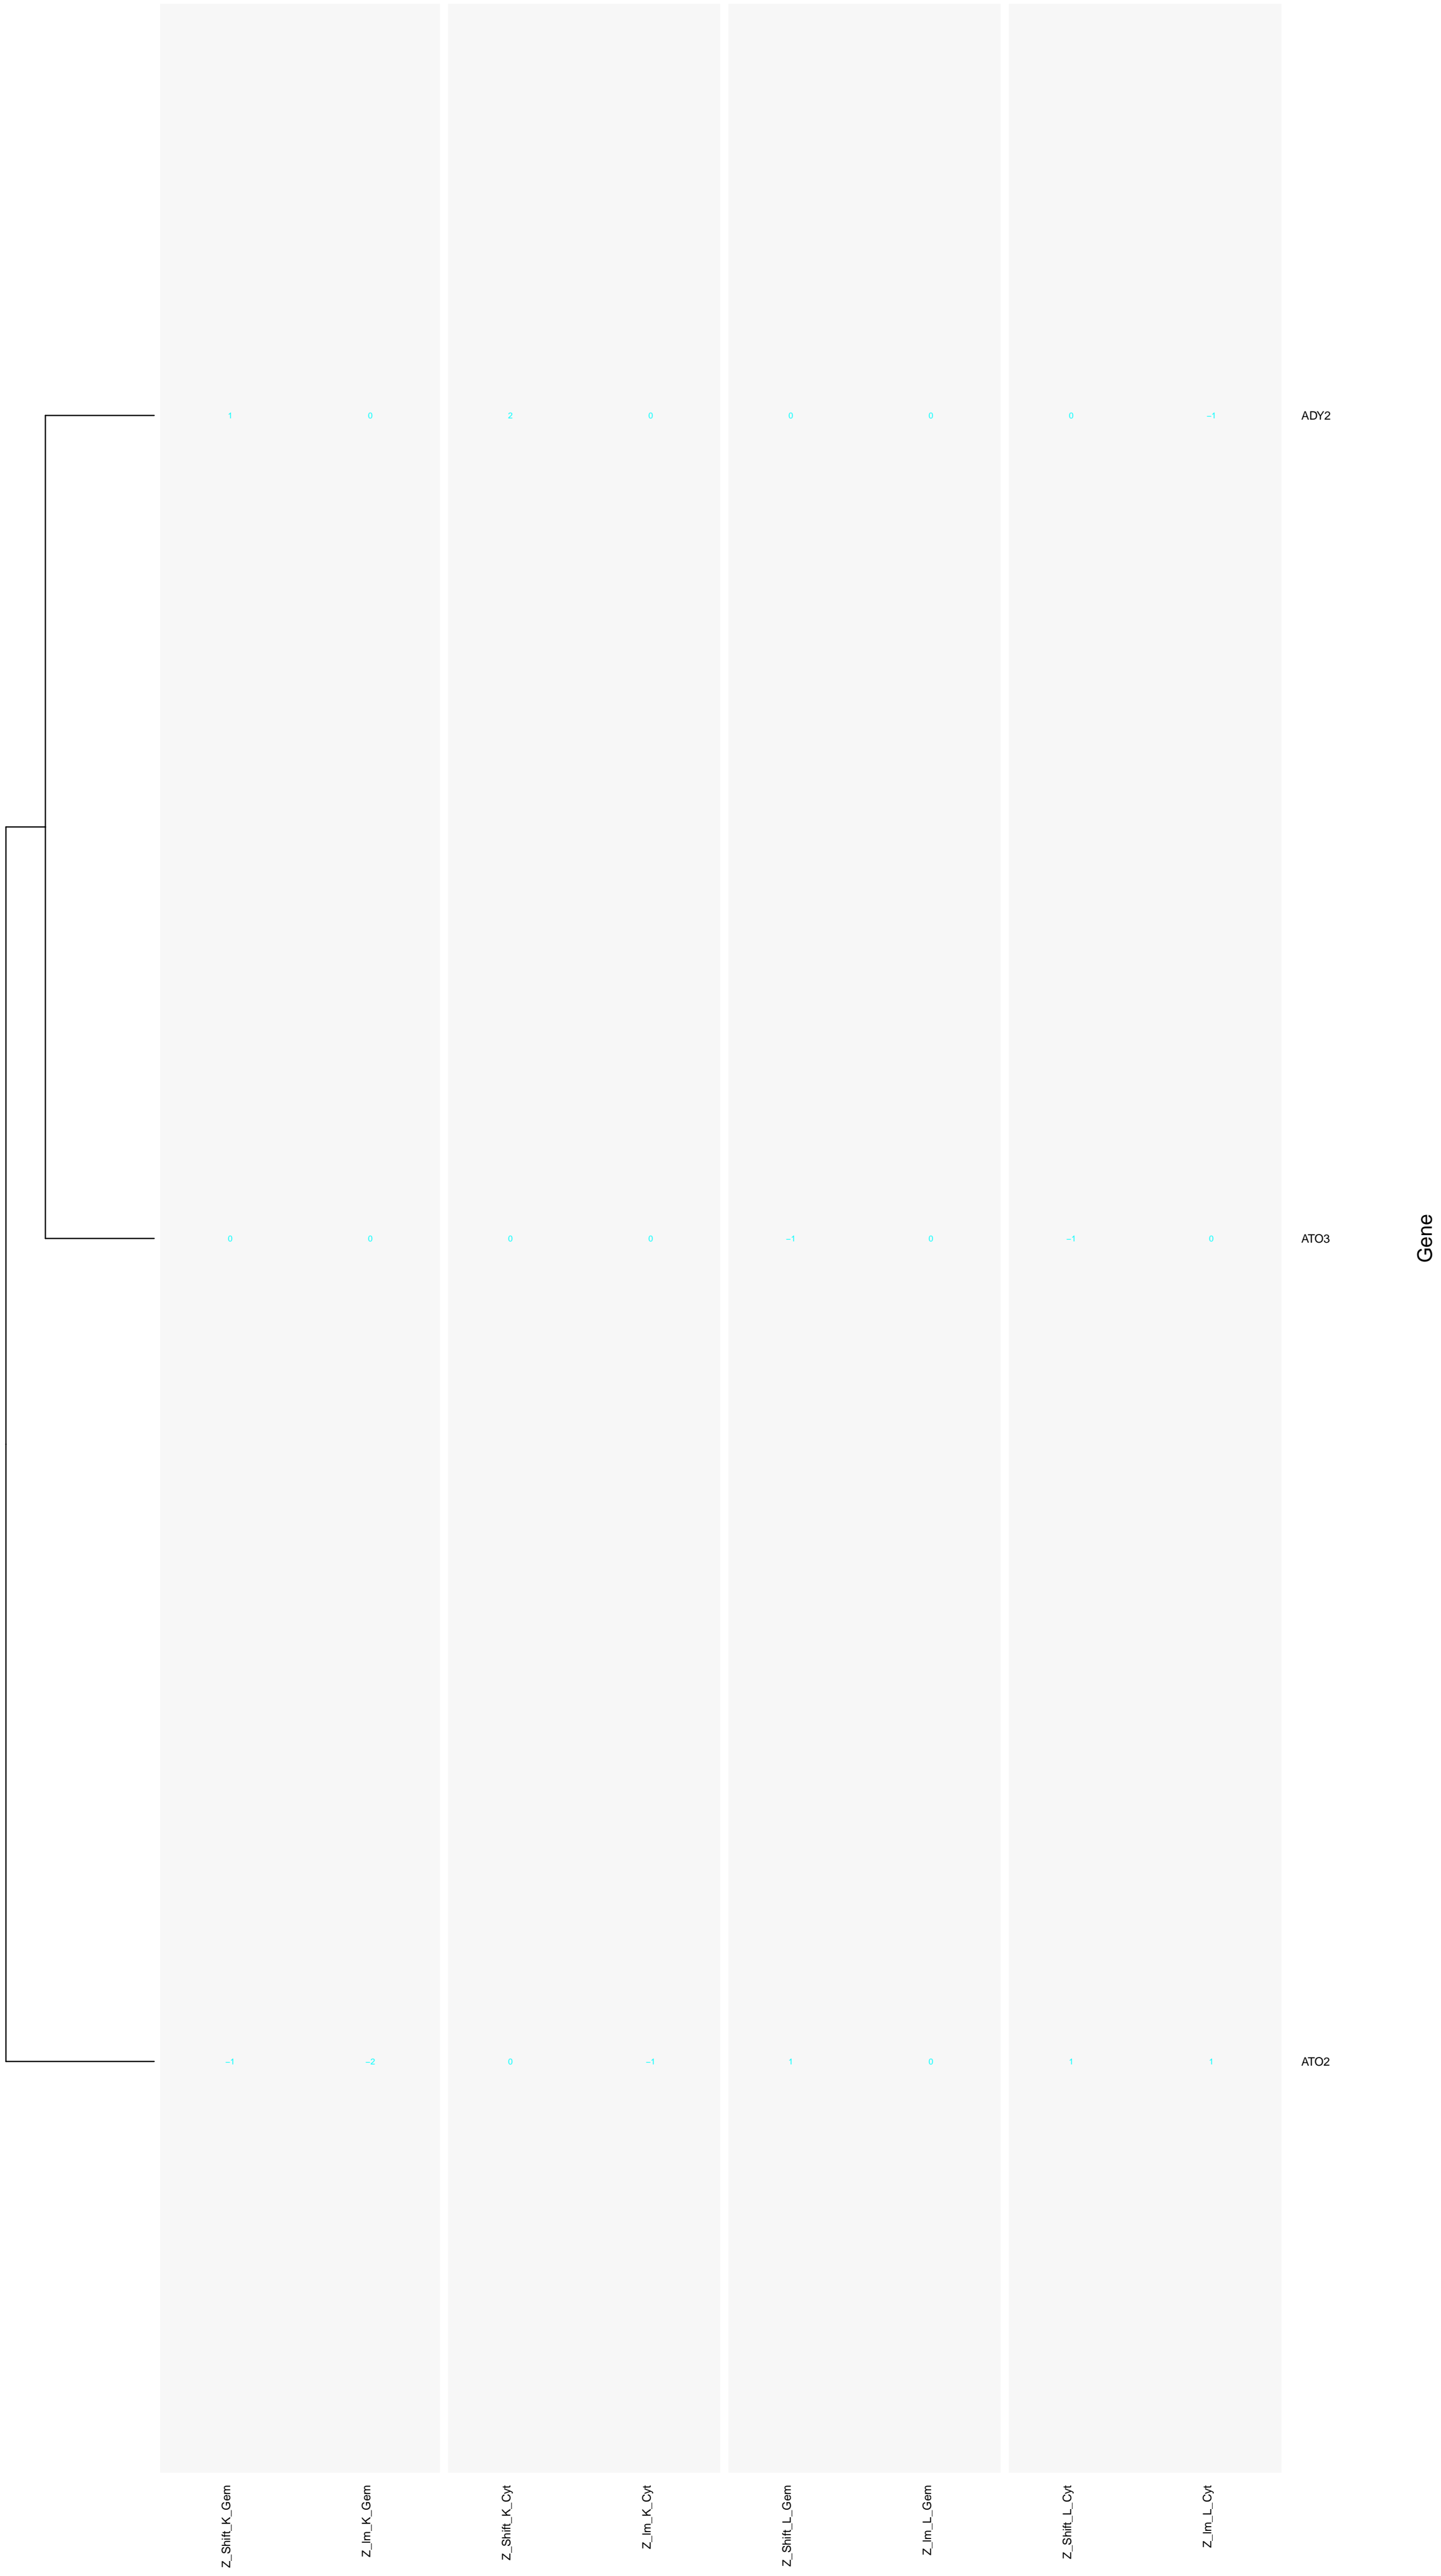

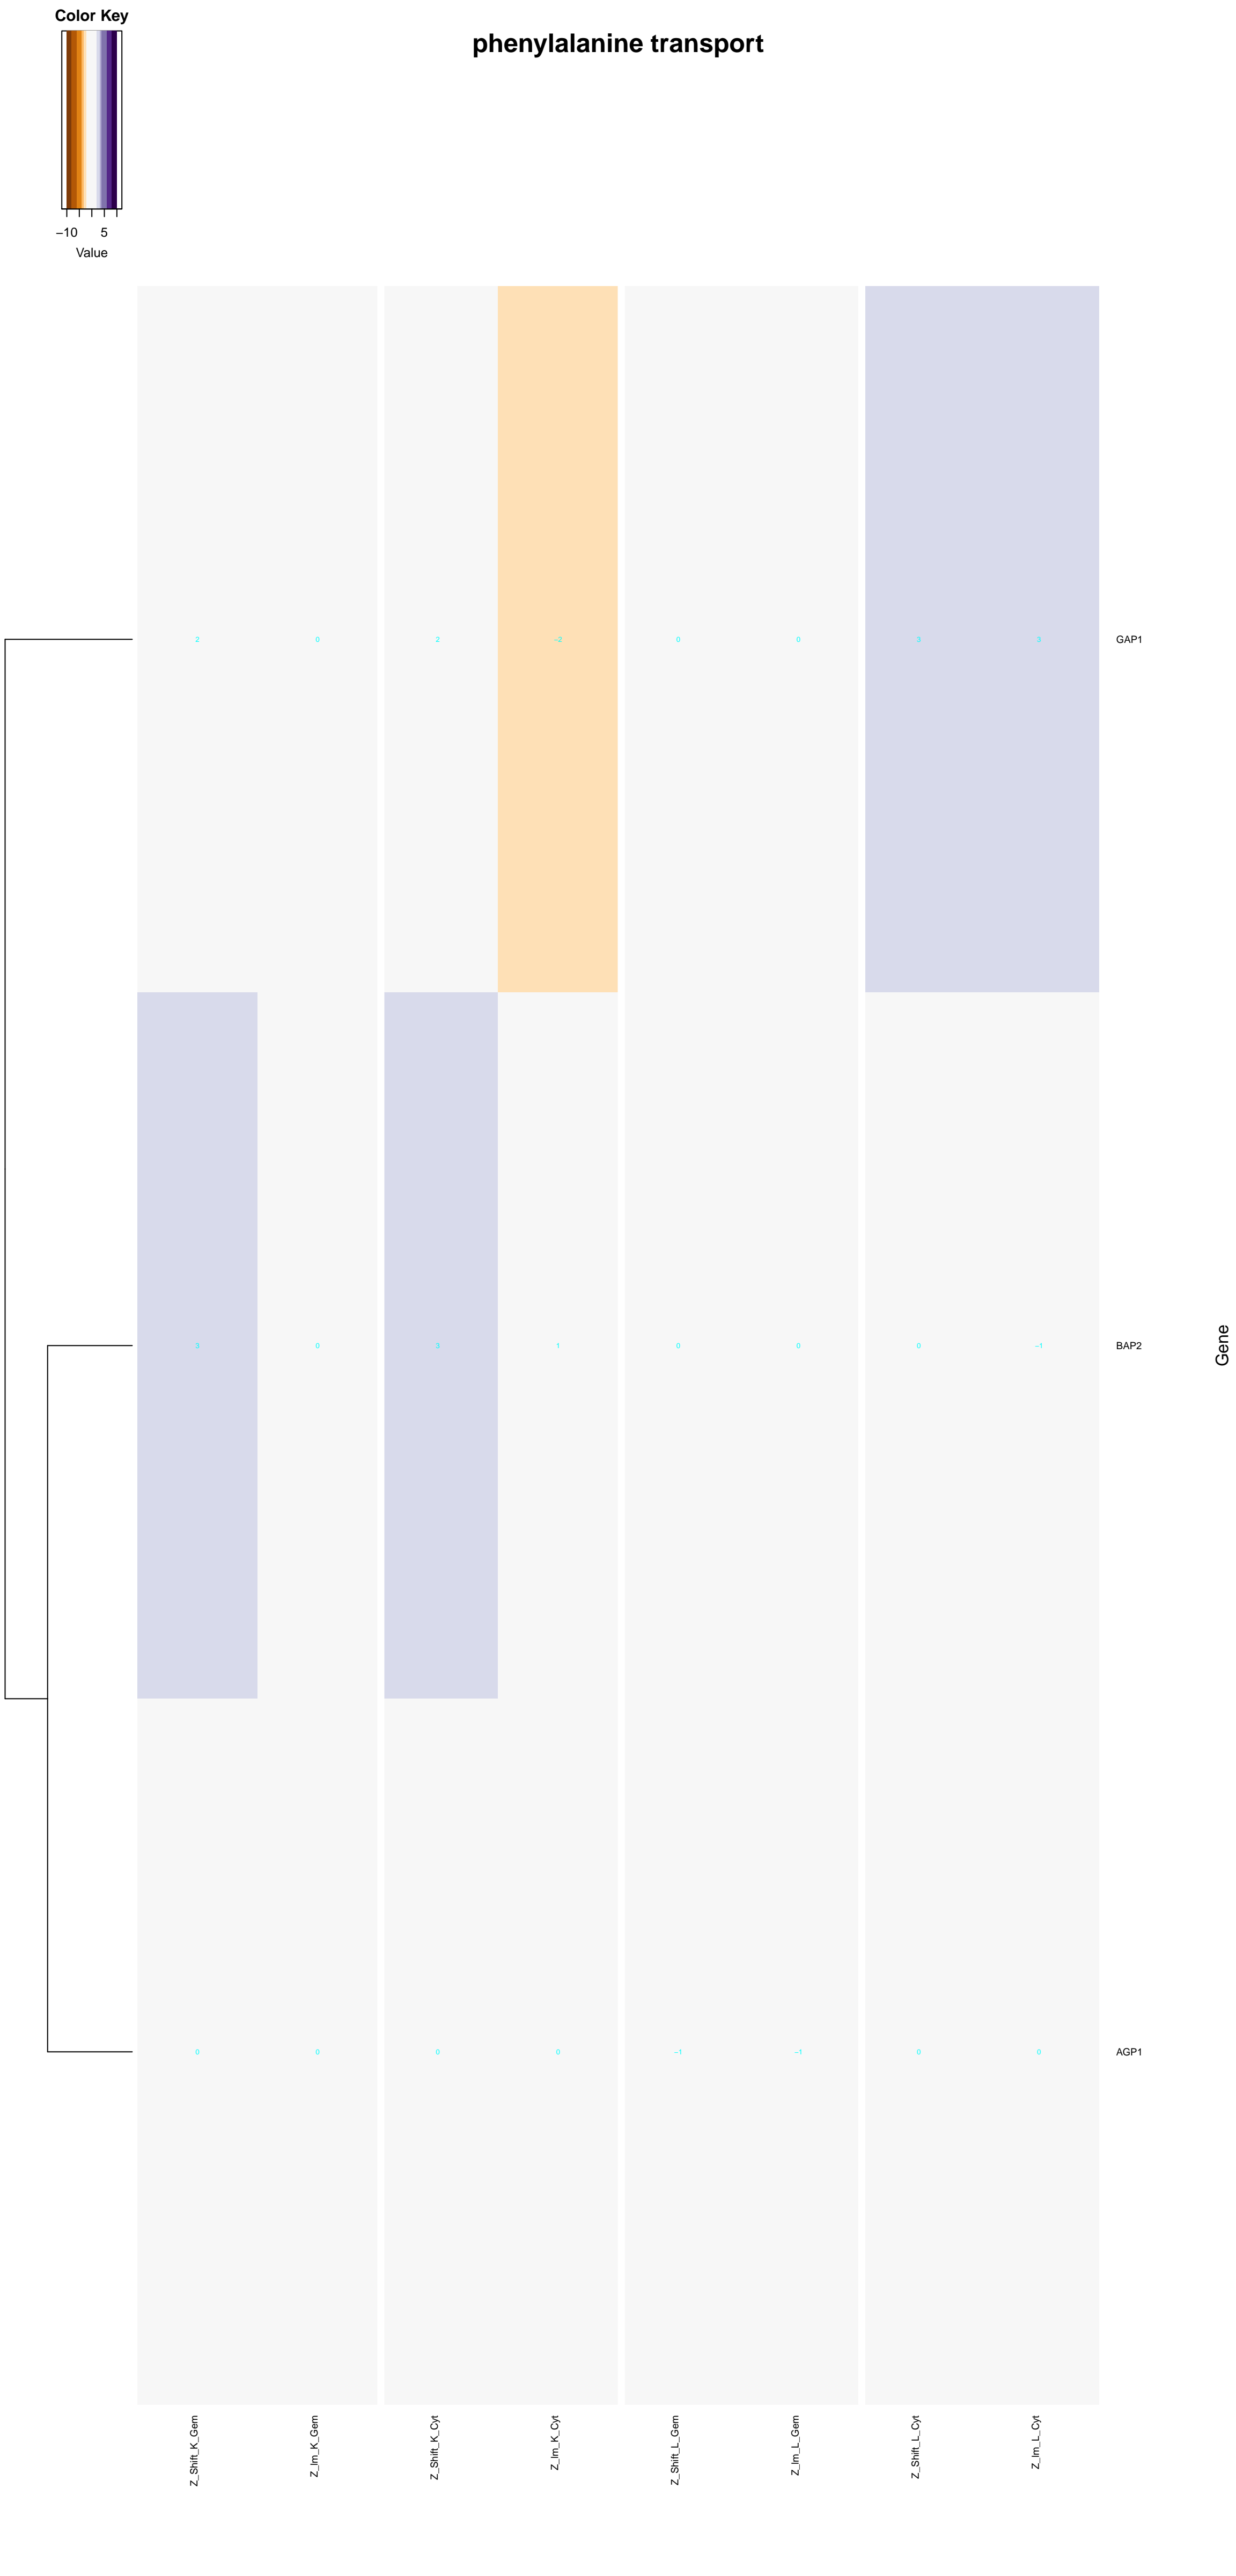

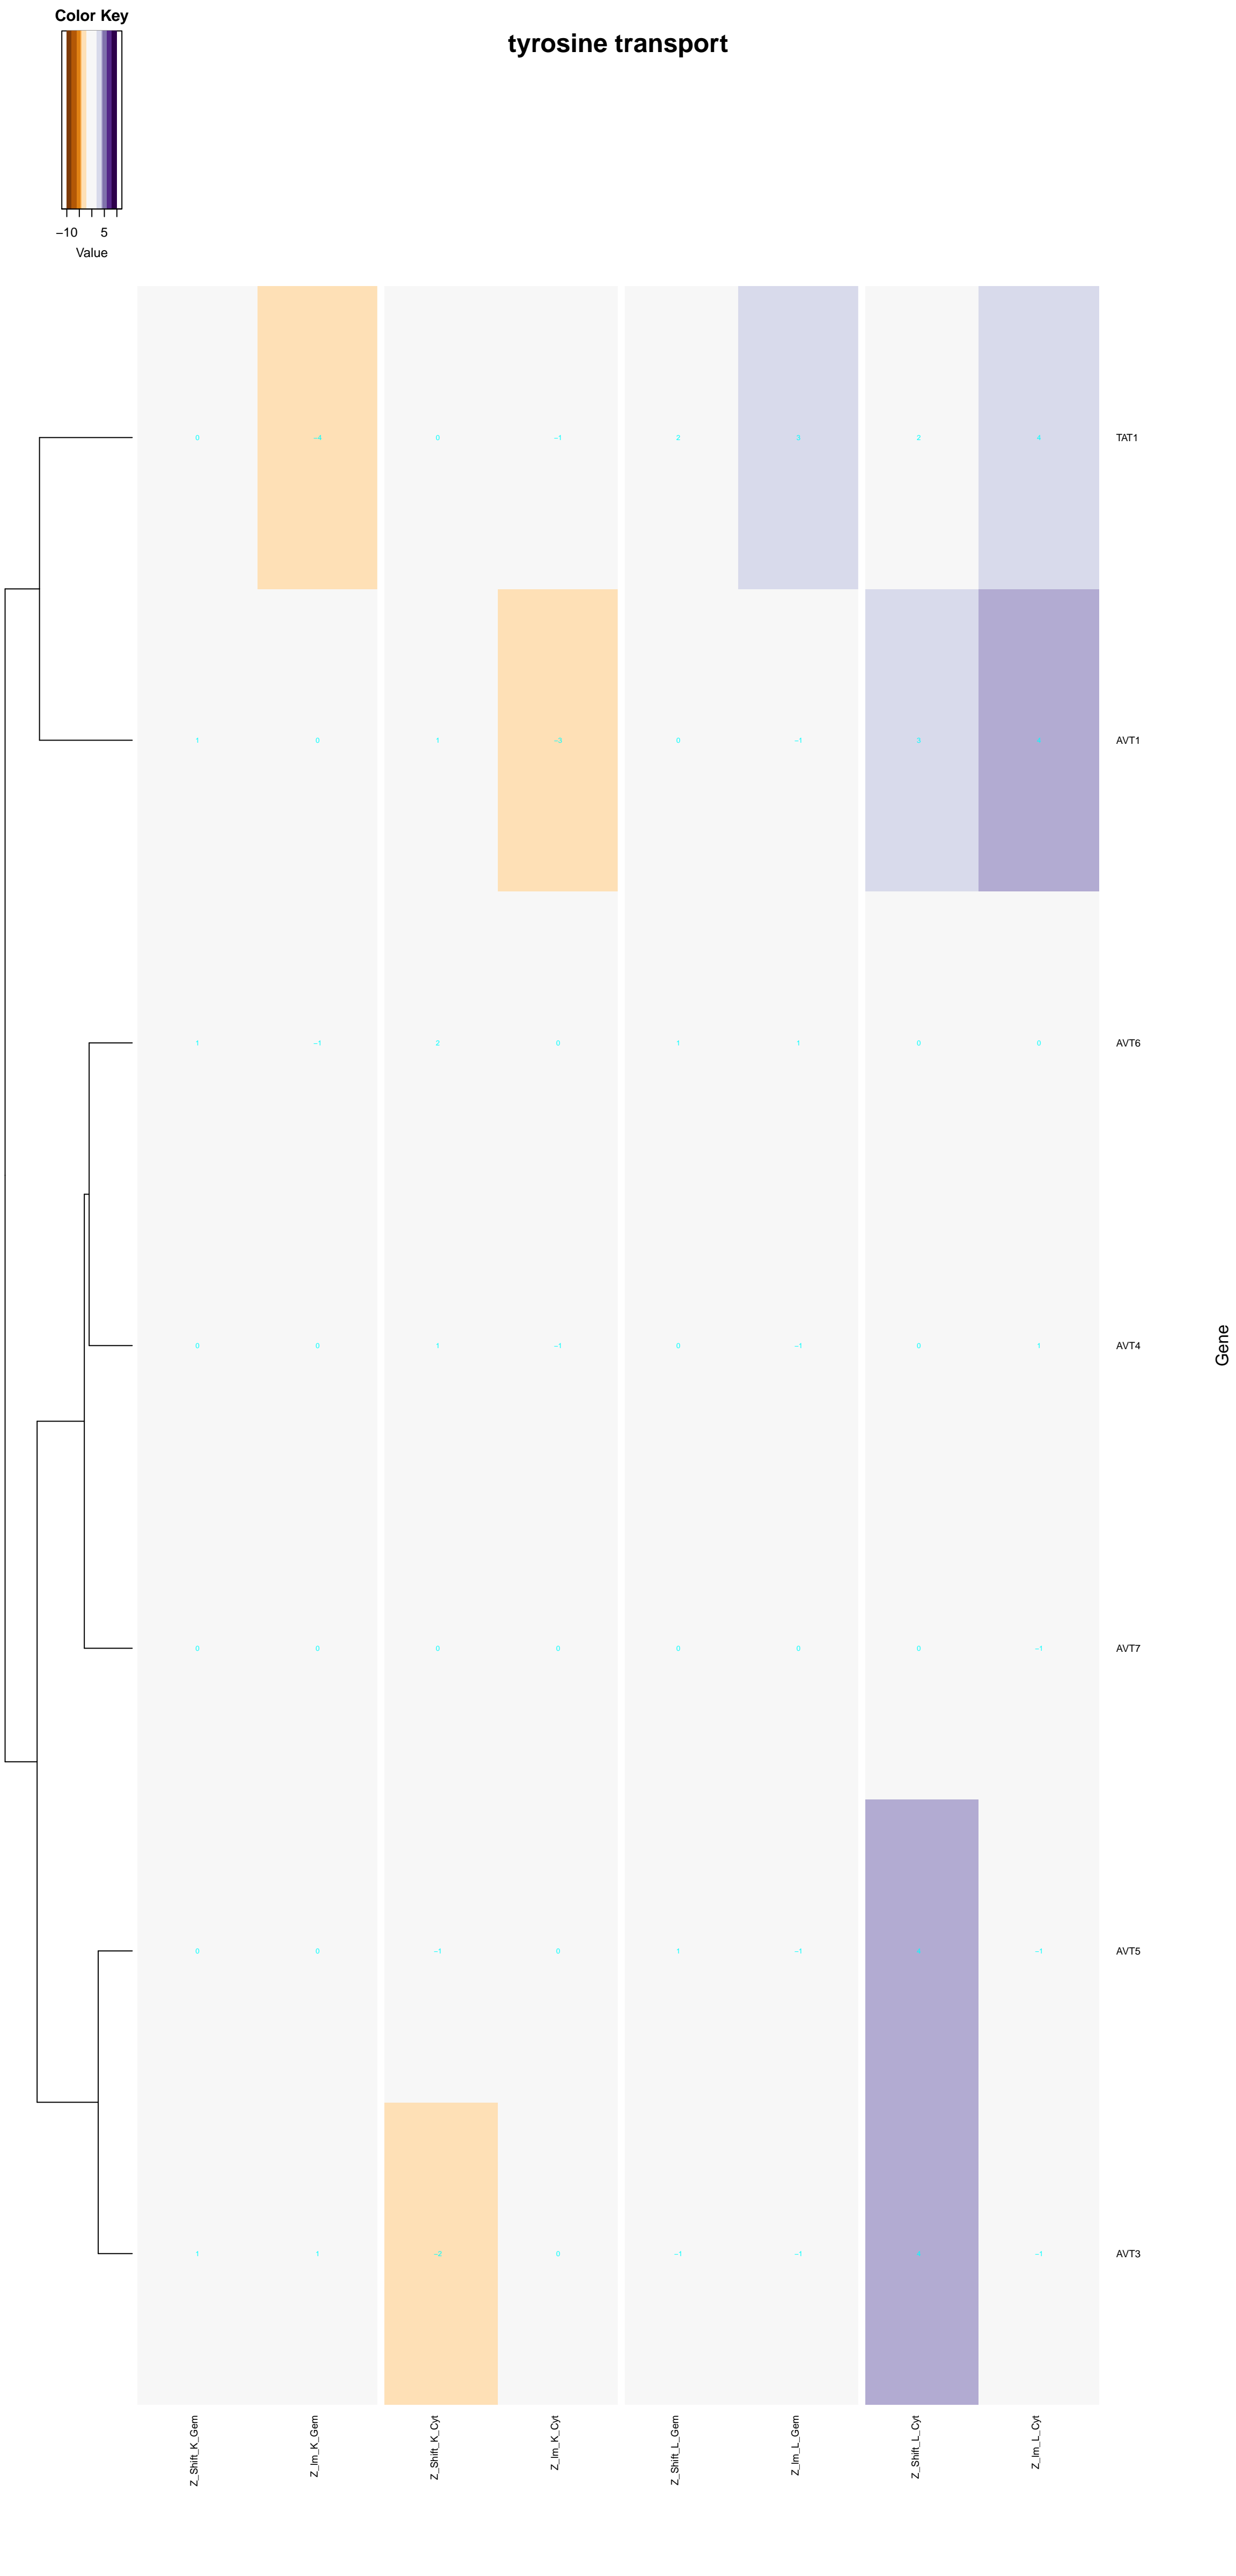

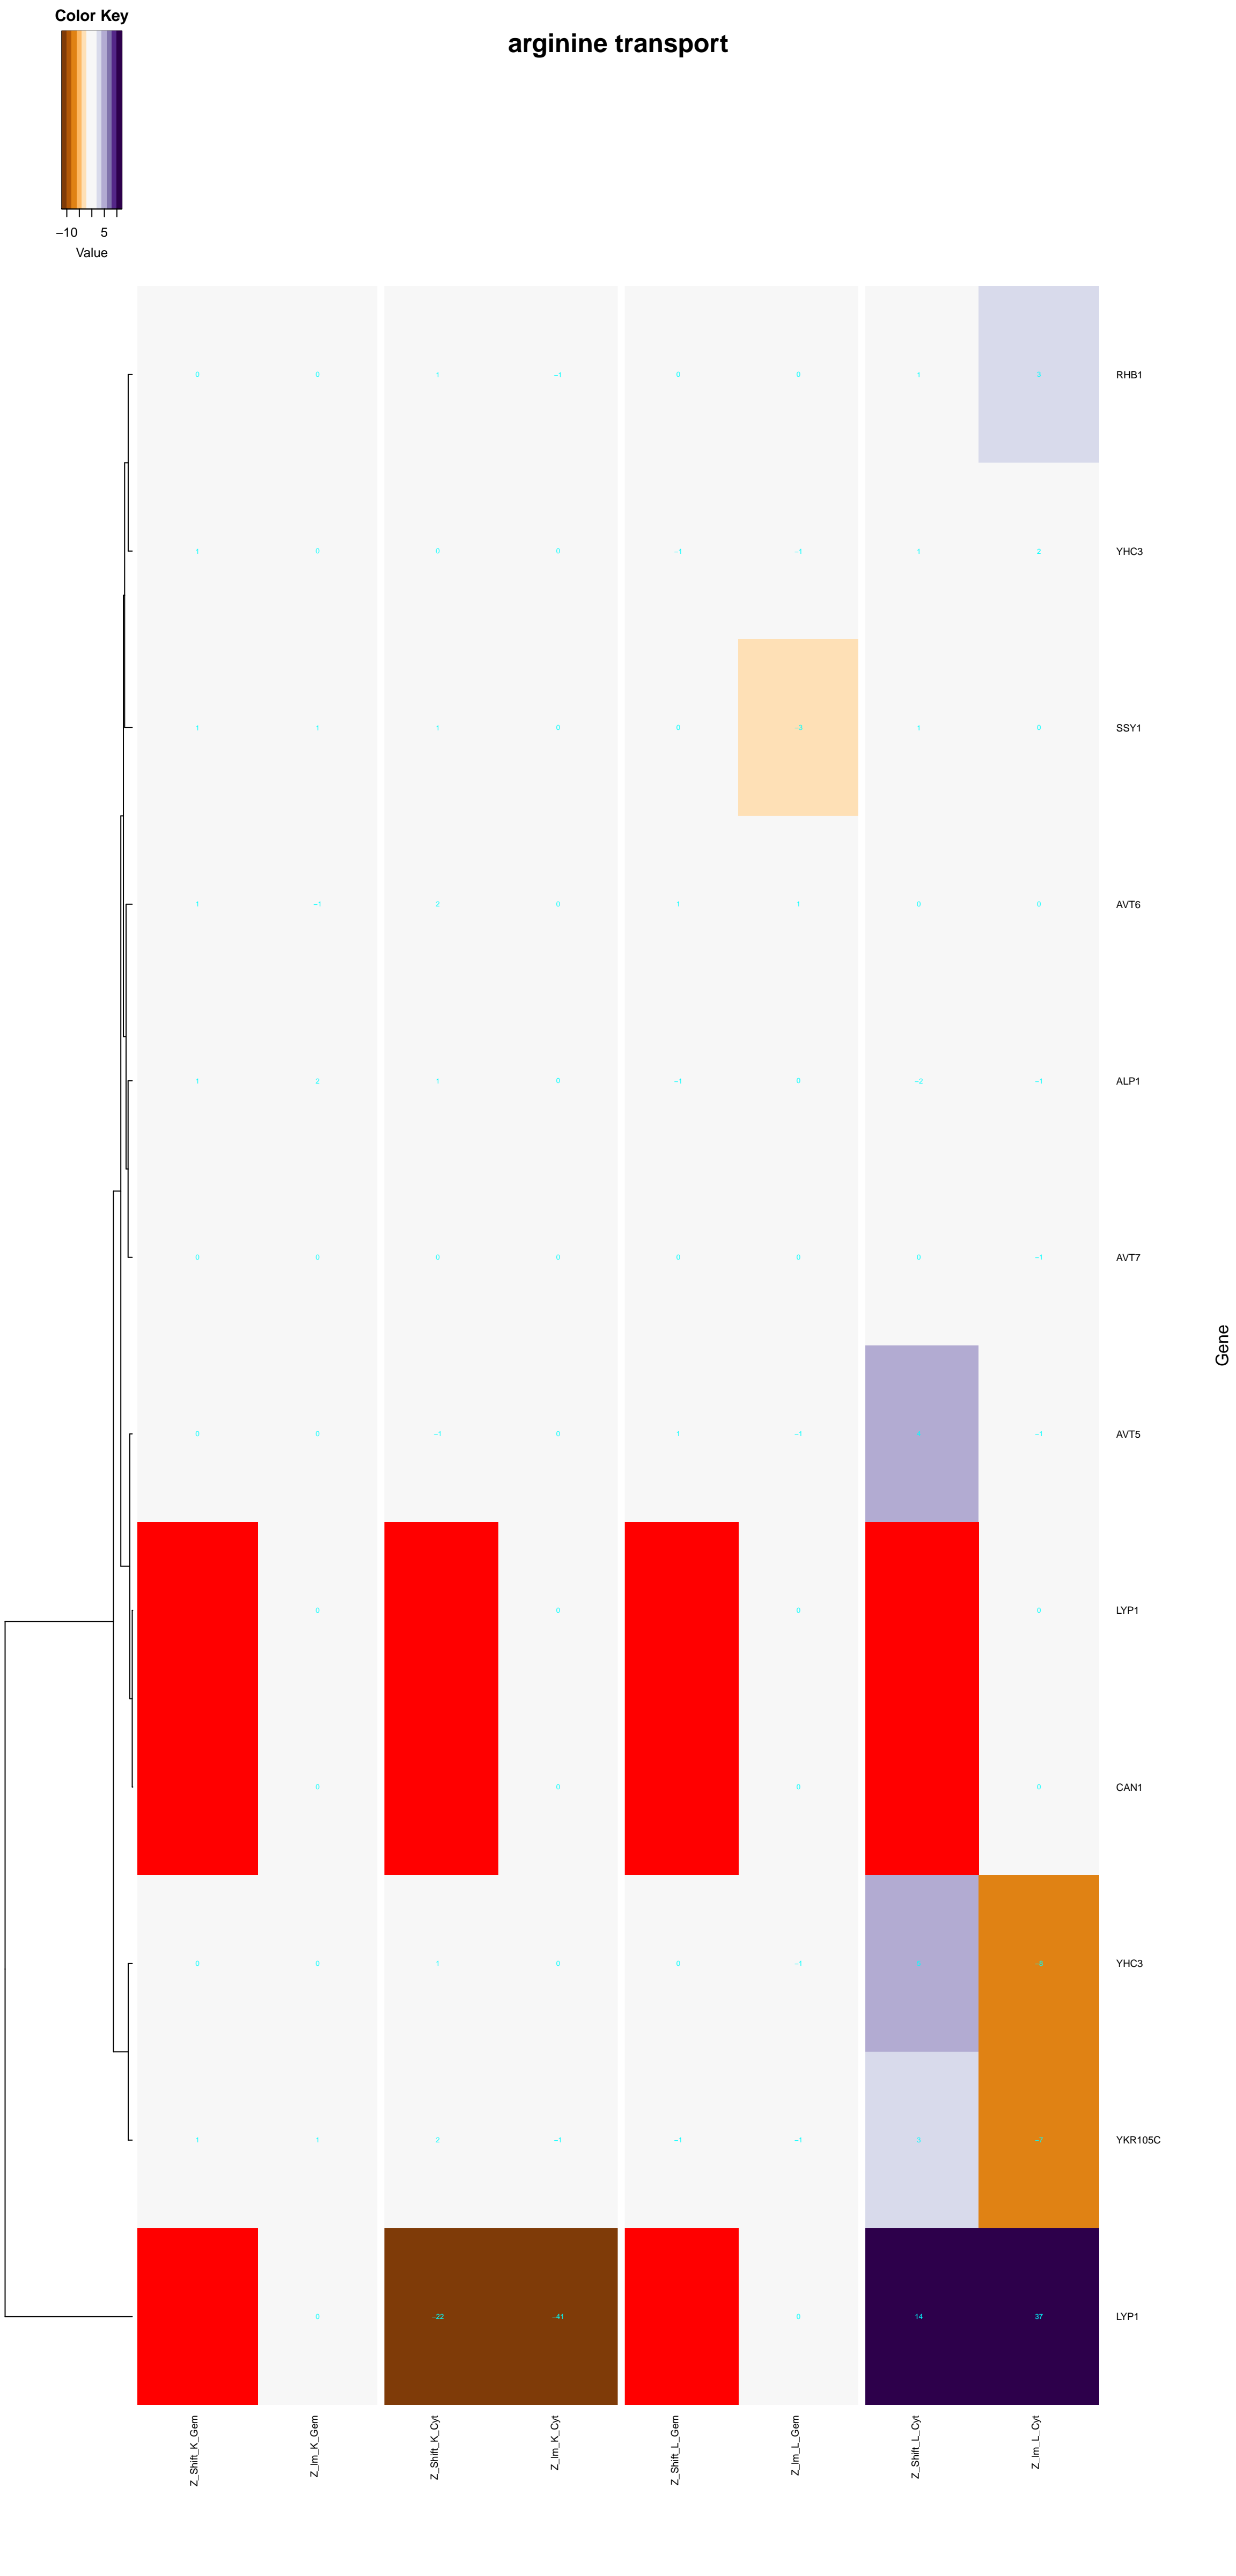

lysine transport

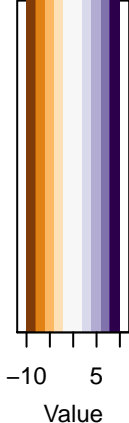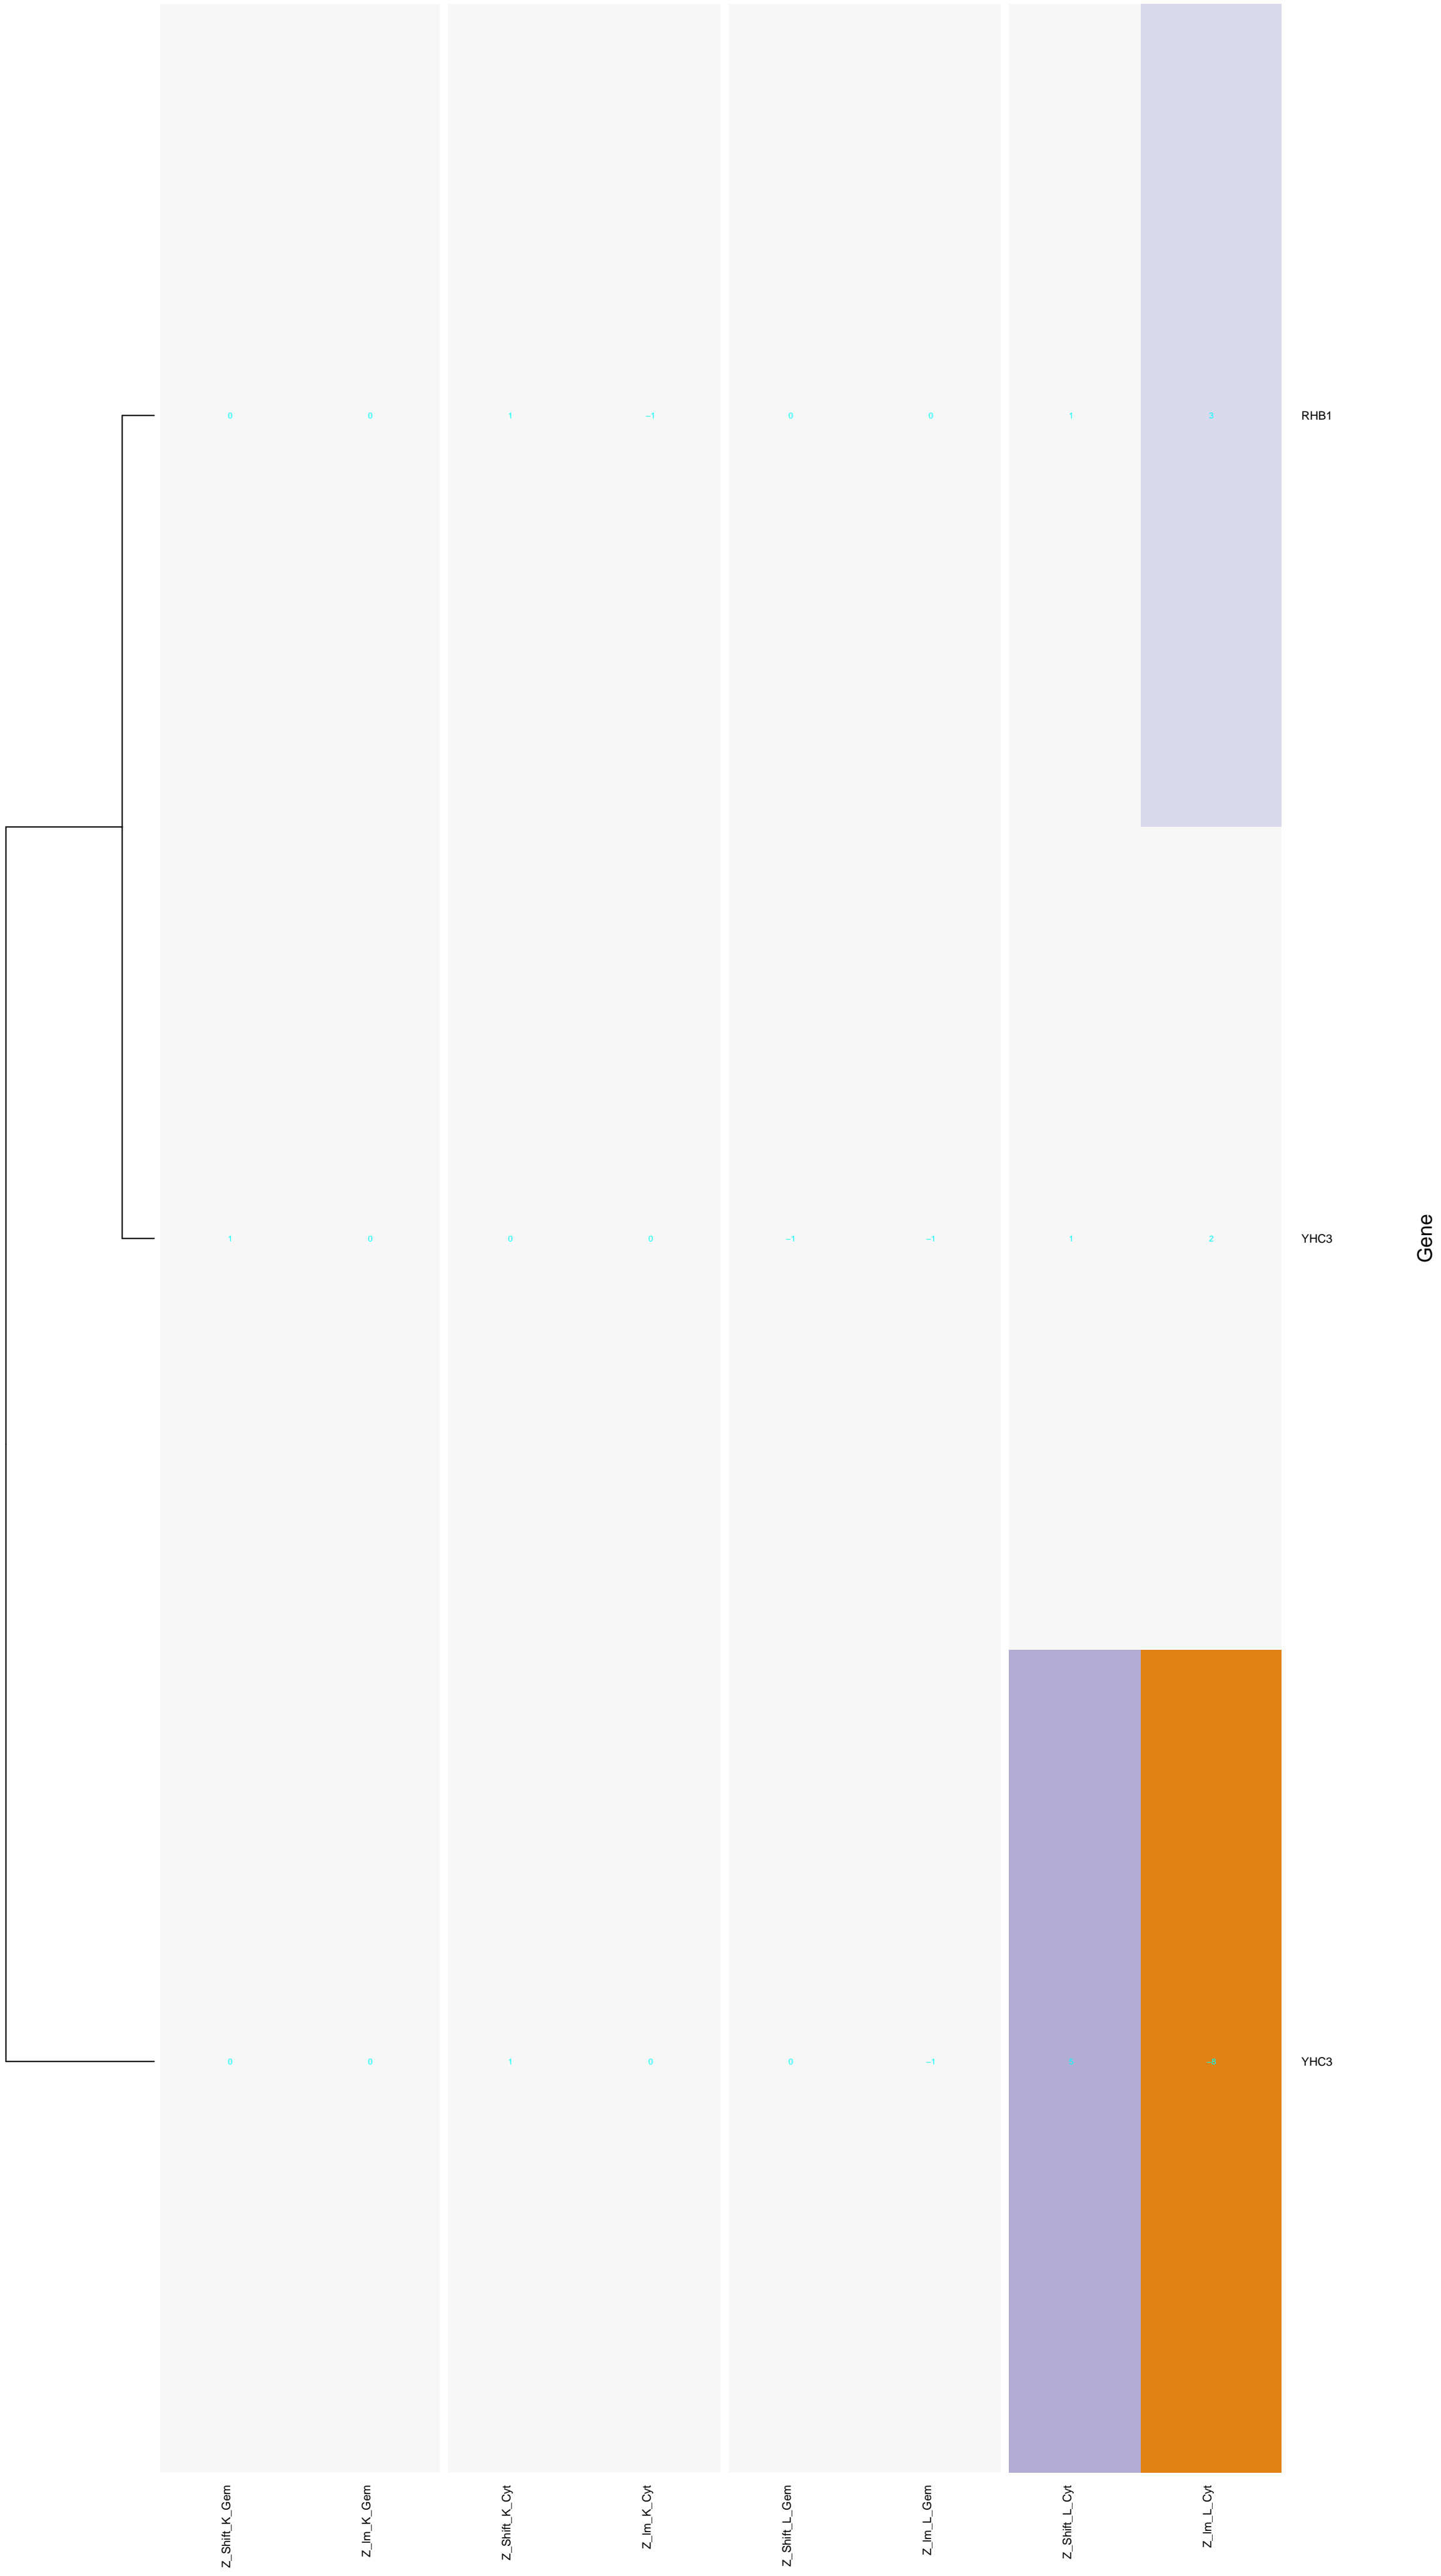

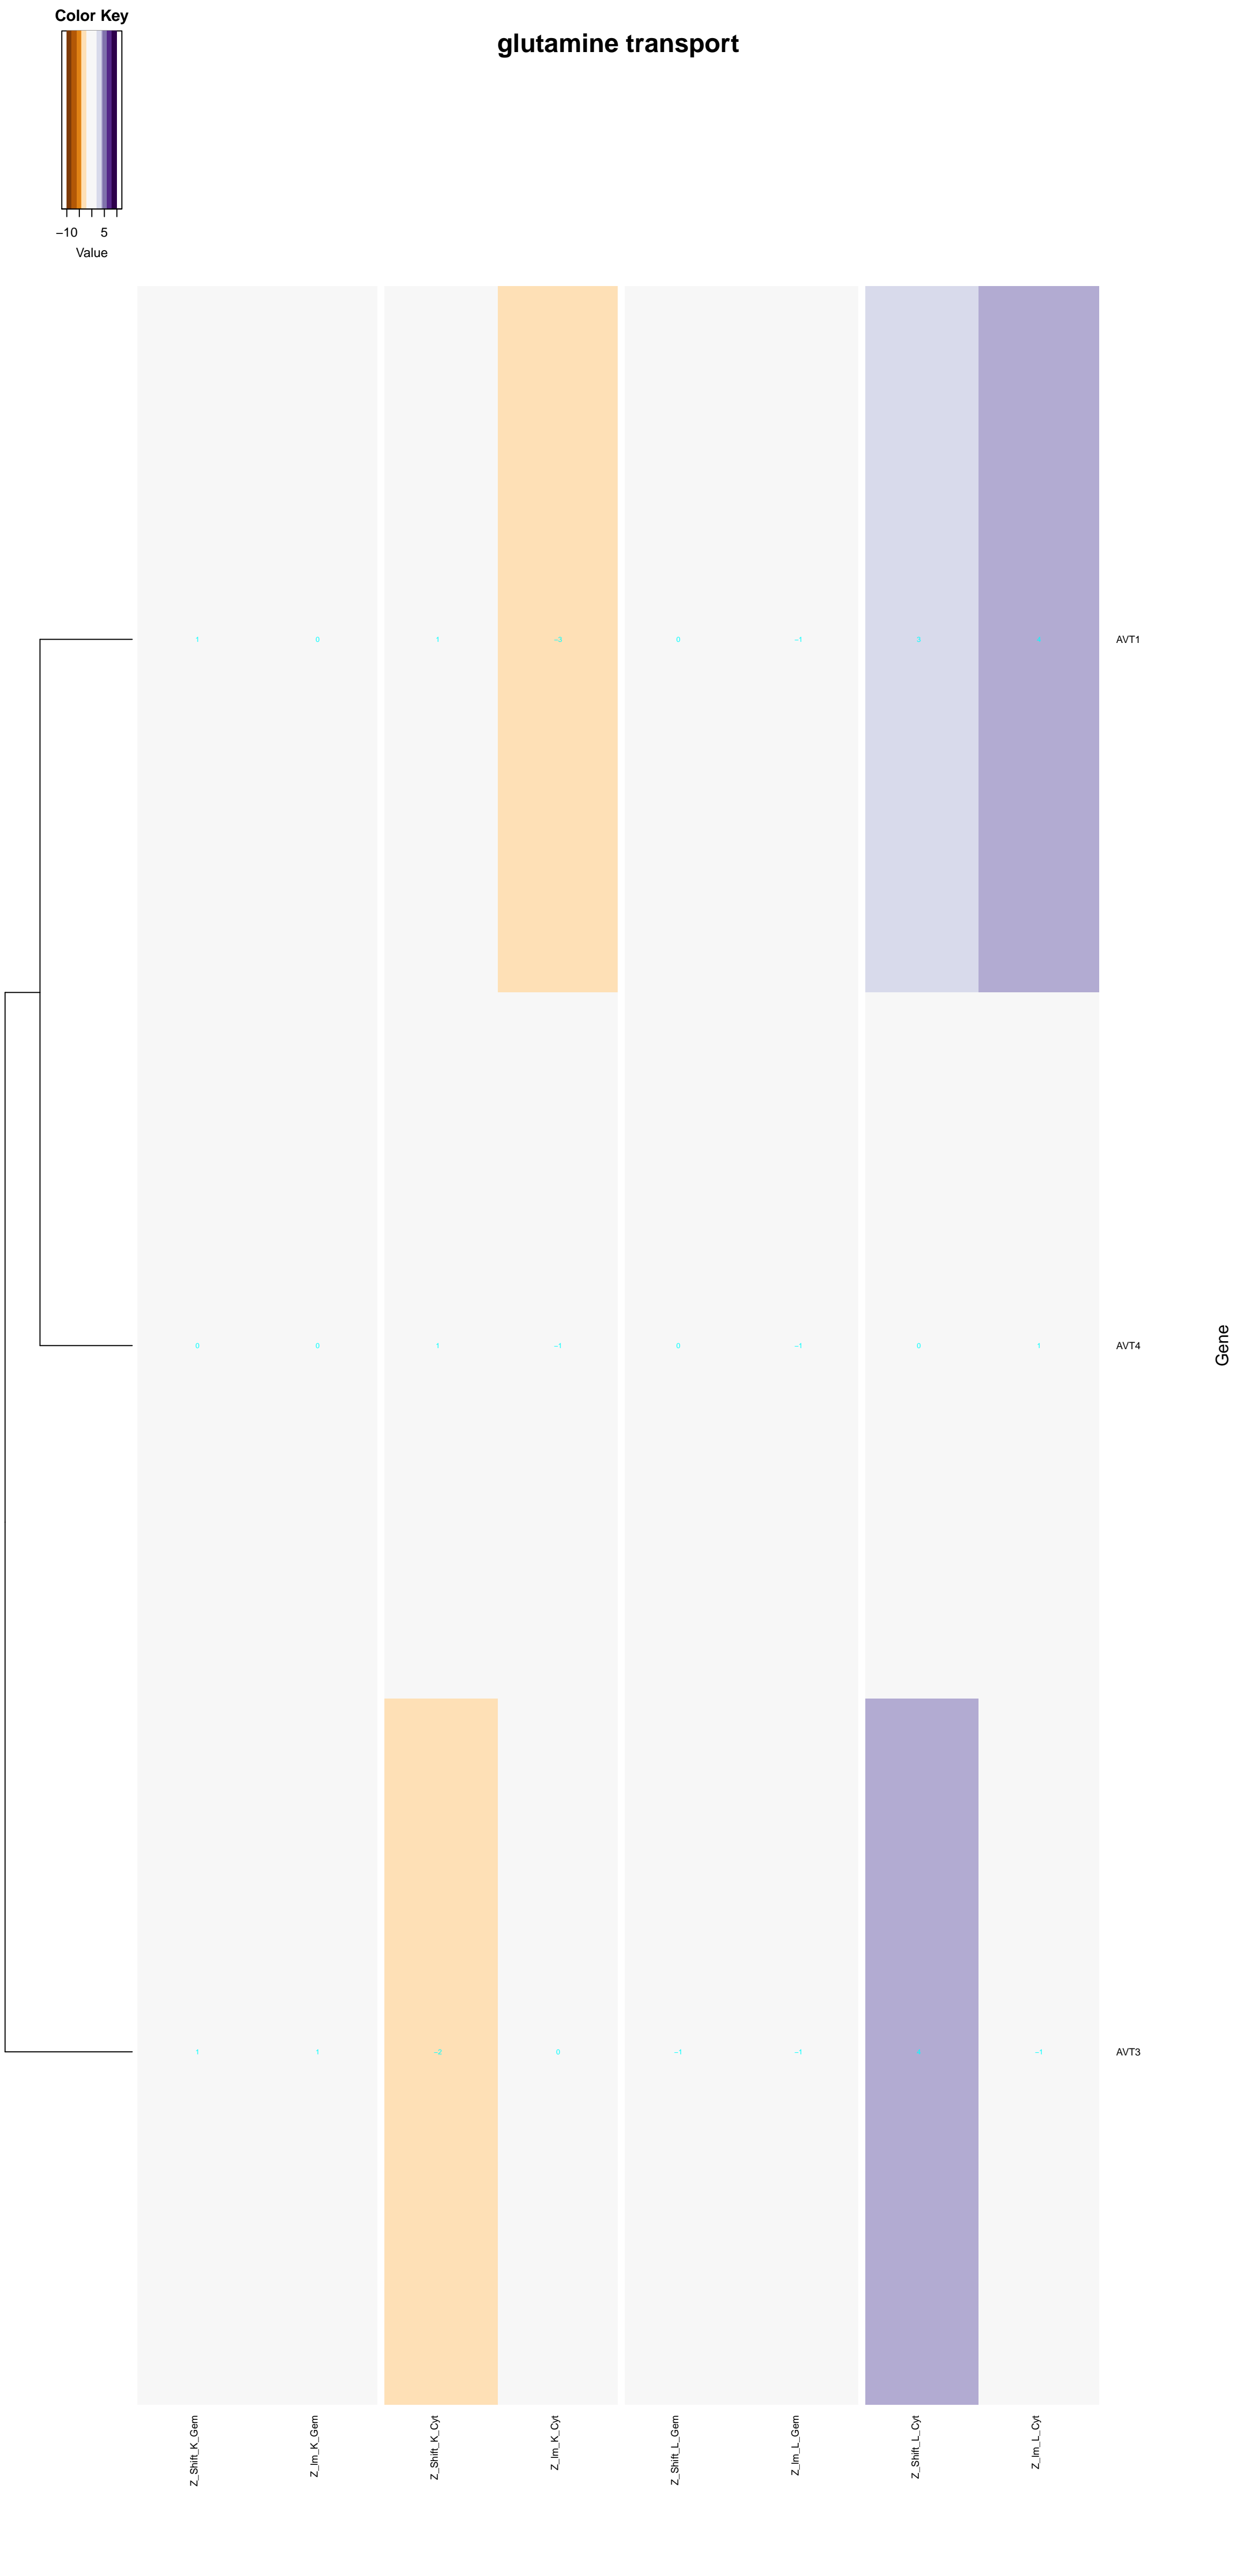

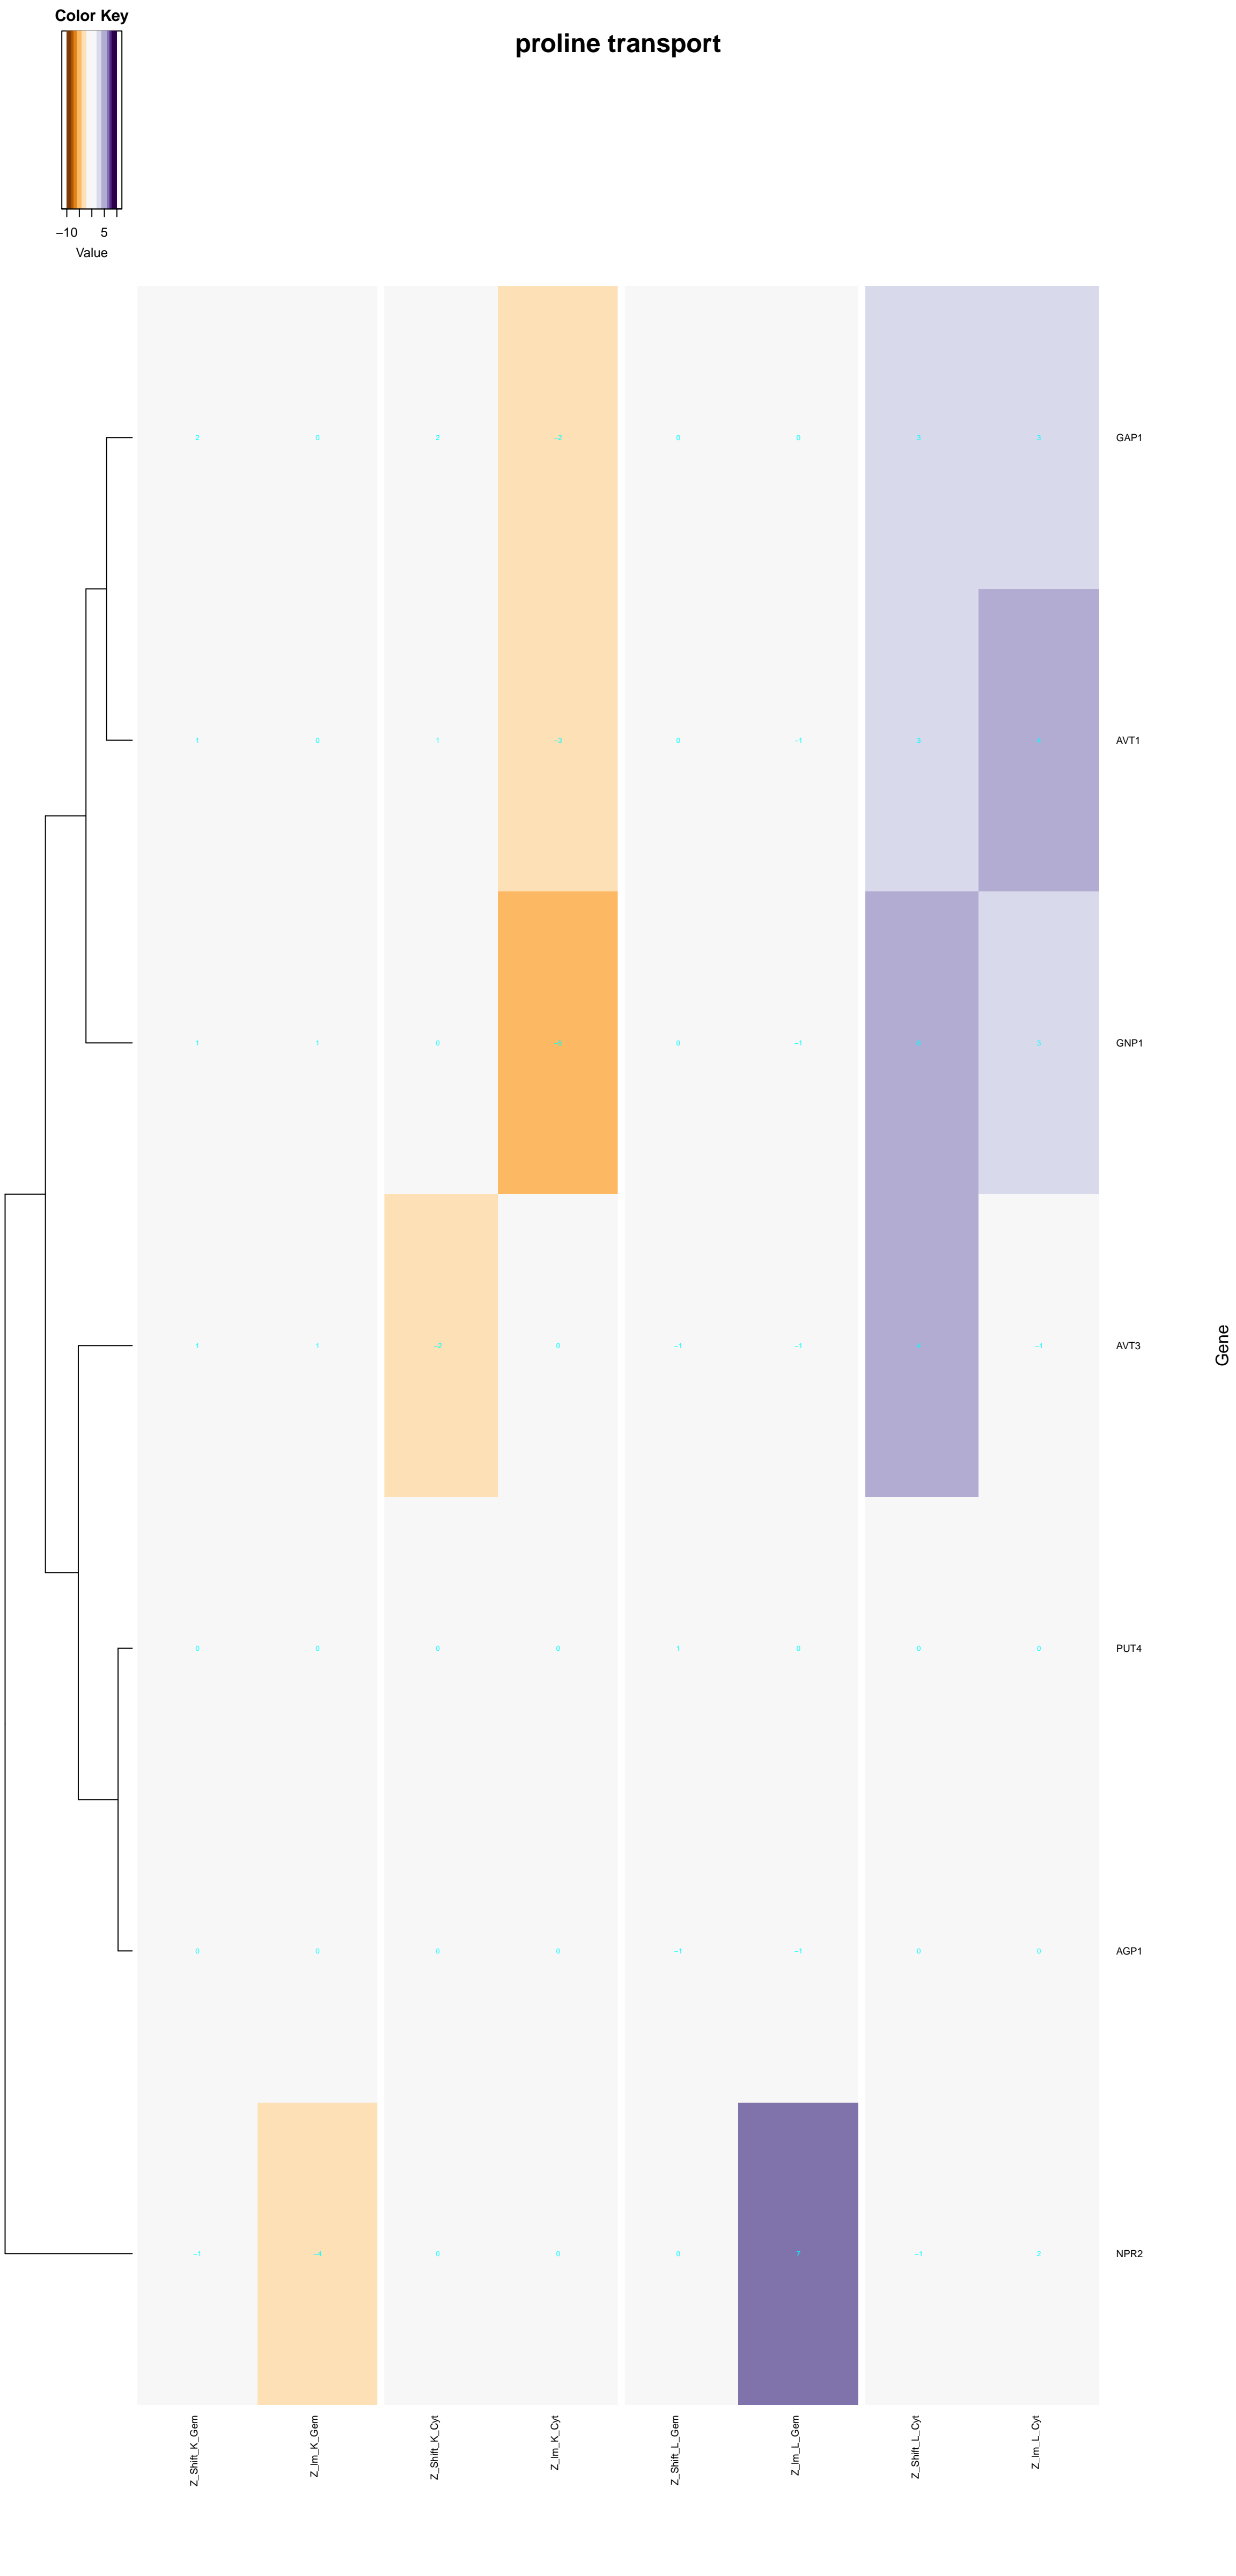

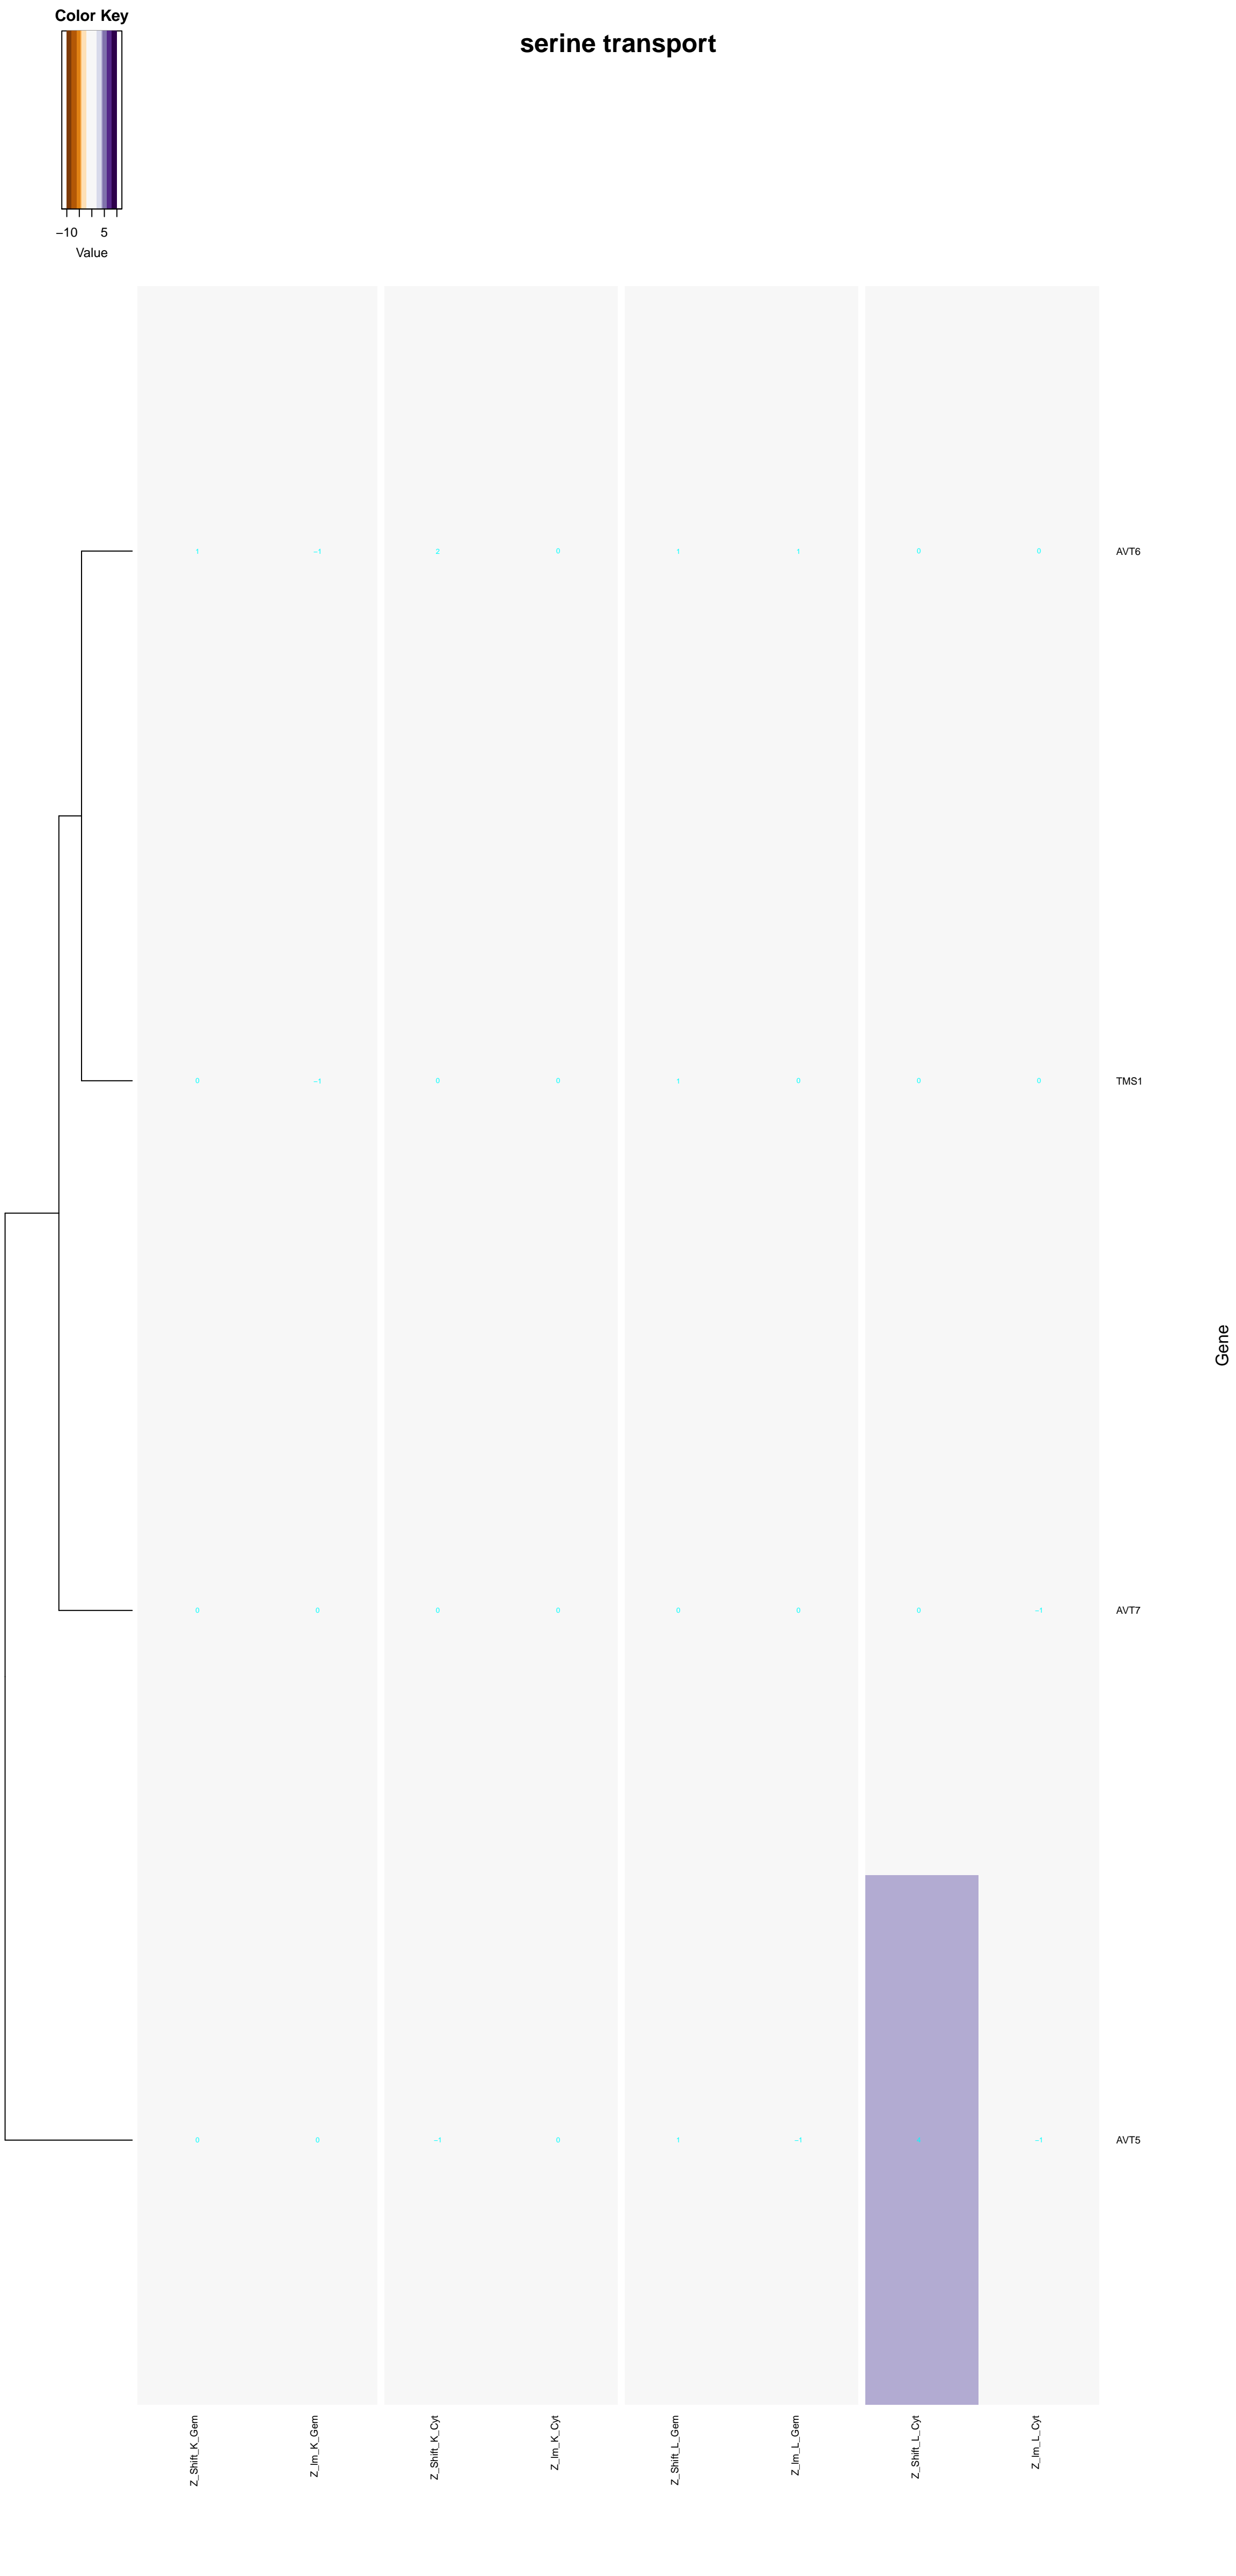

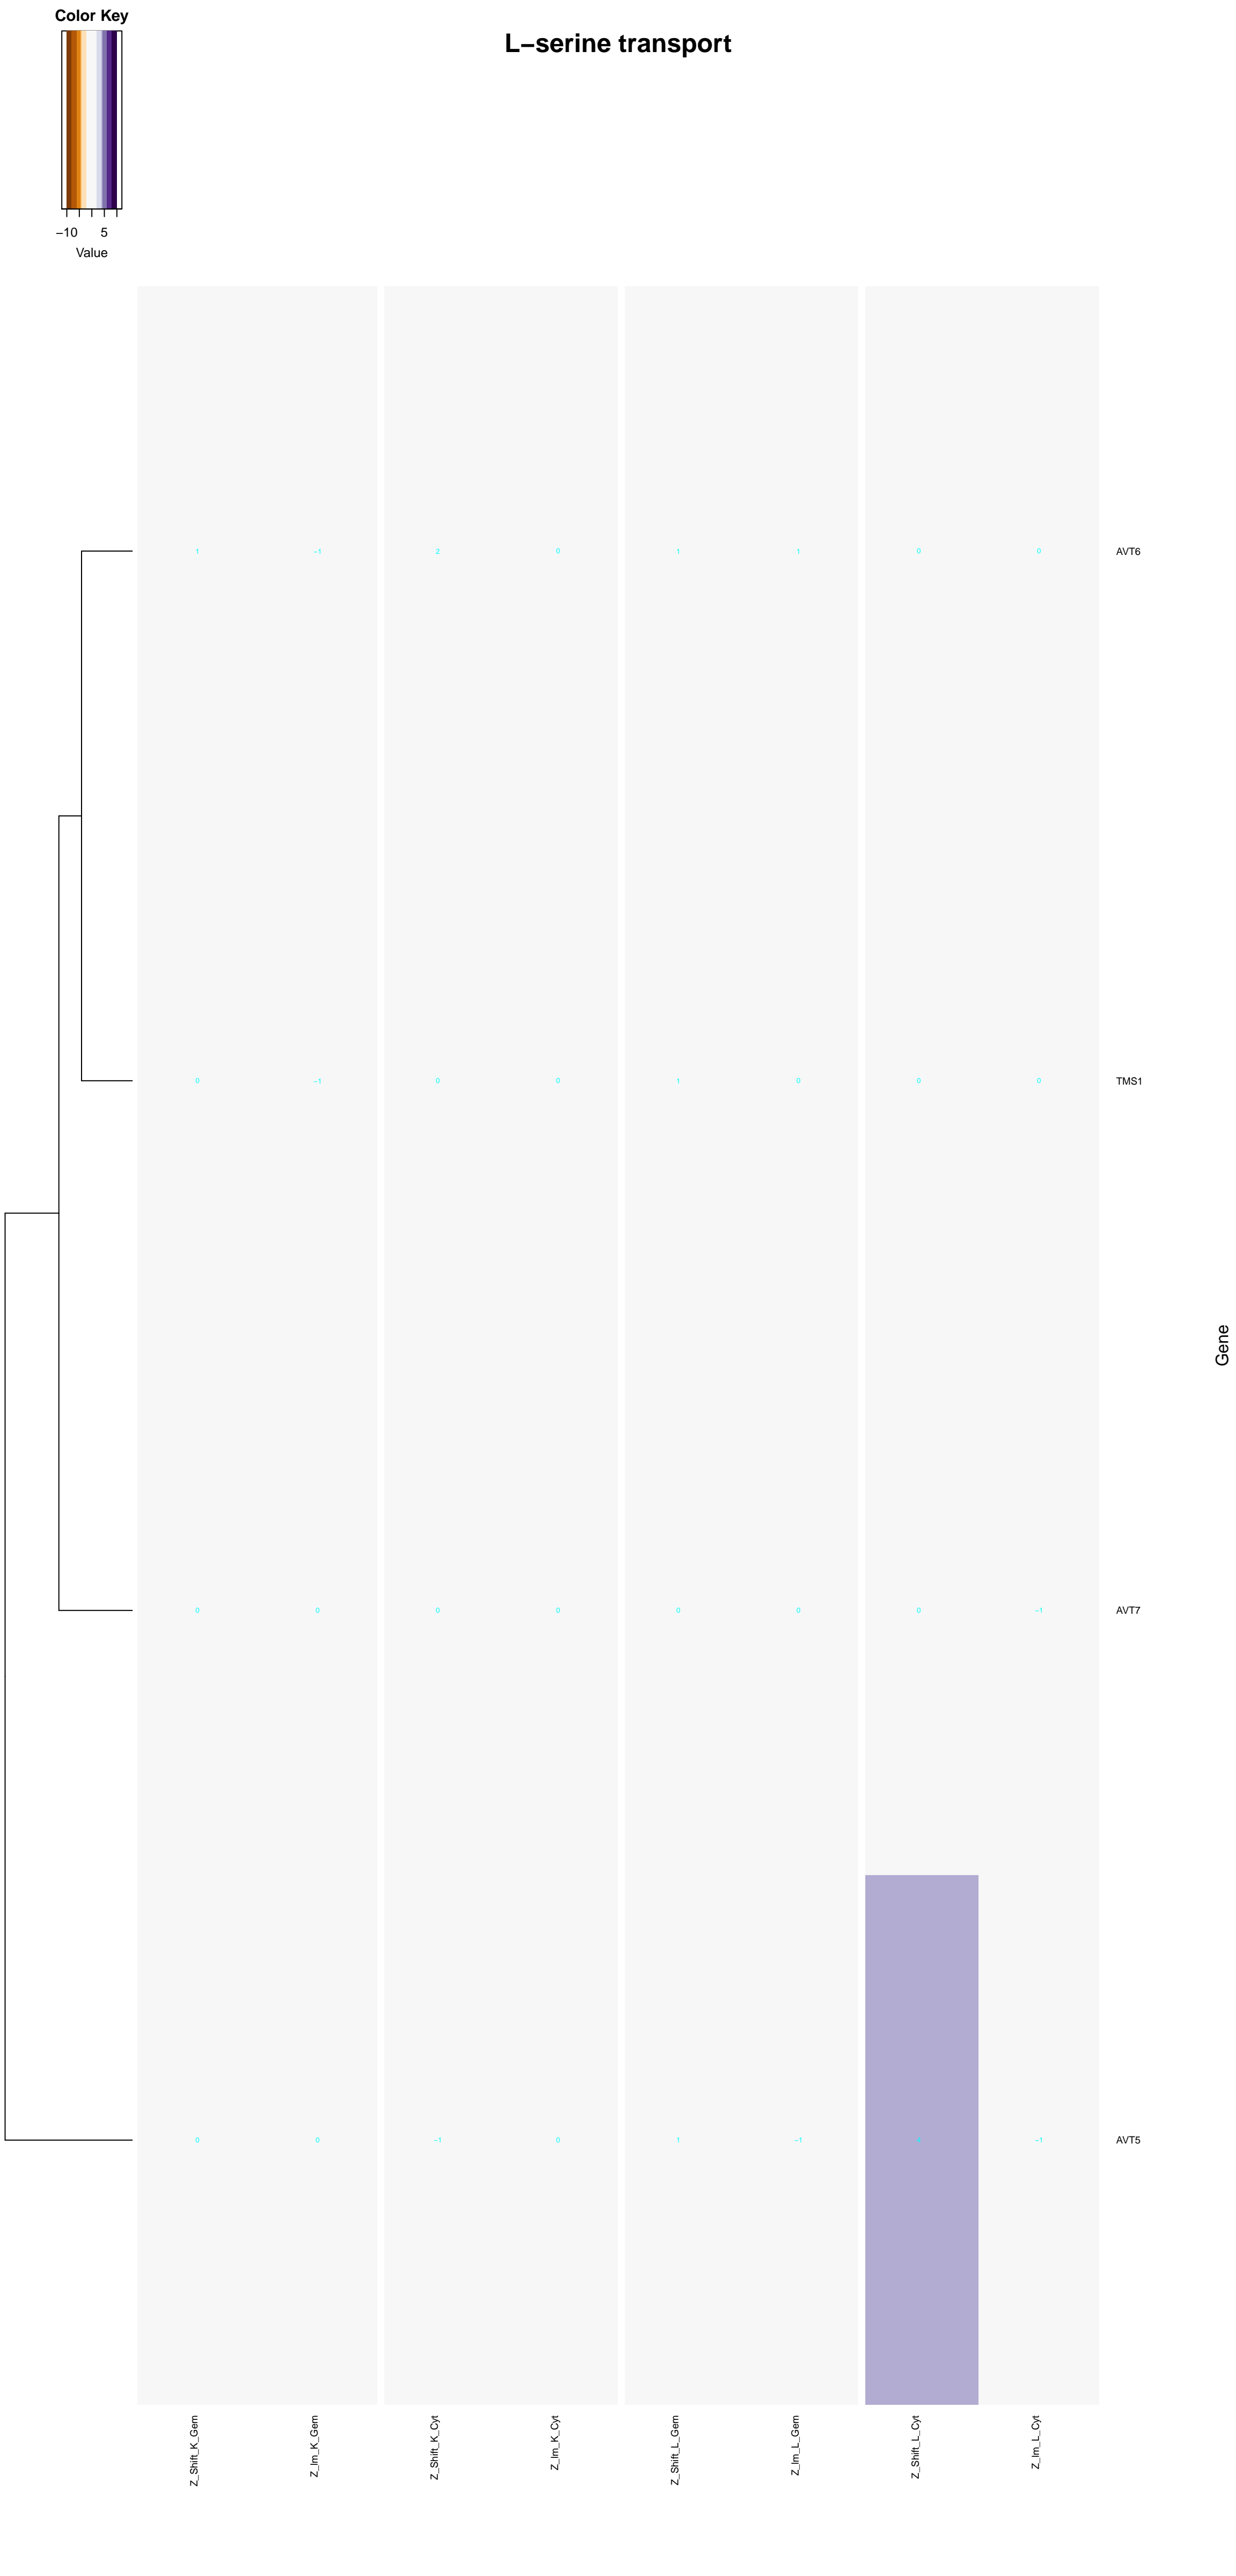

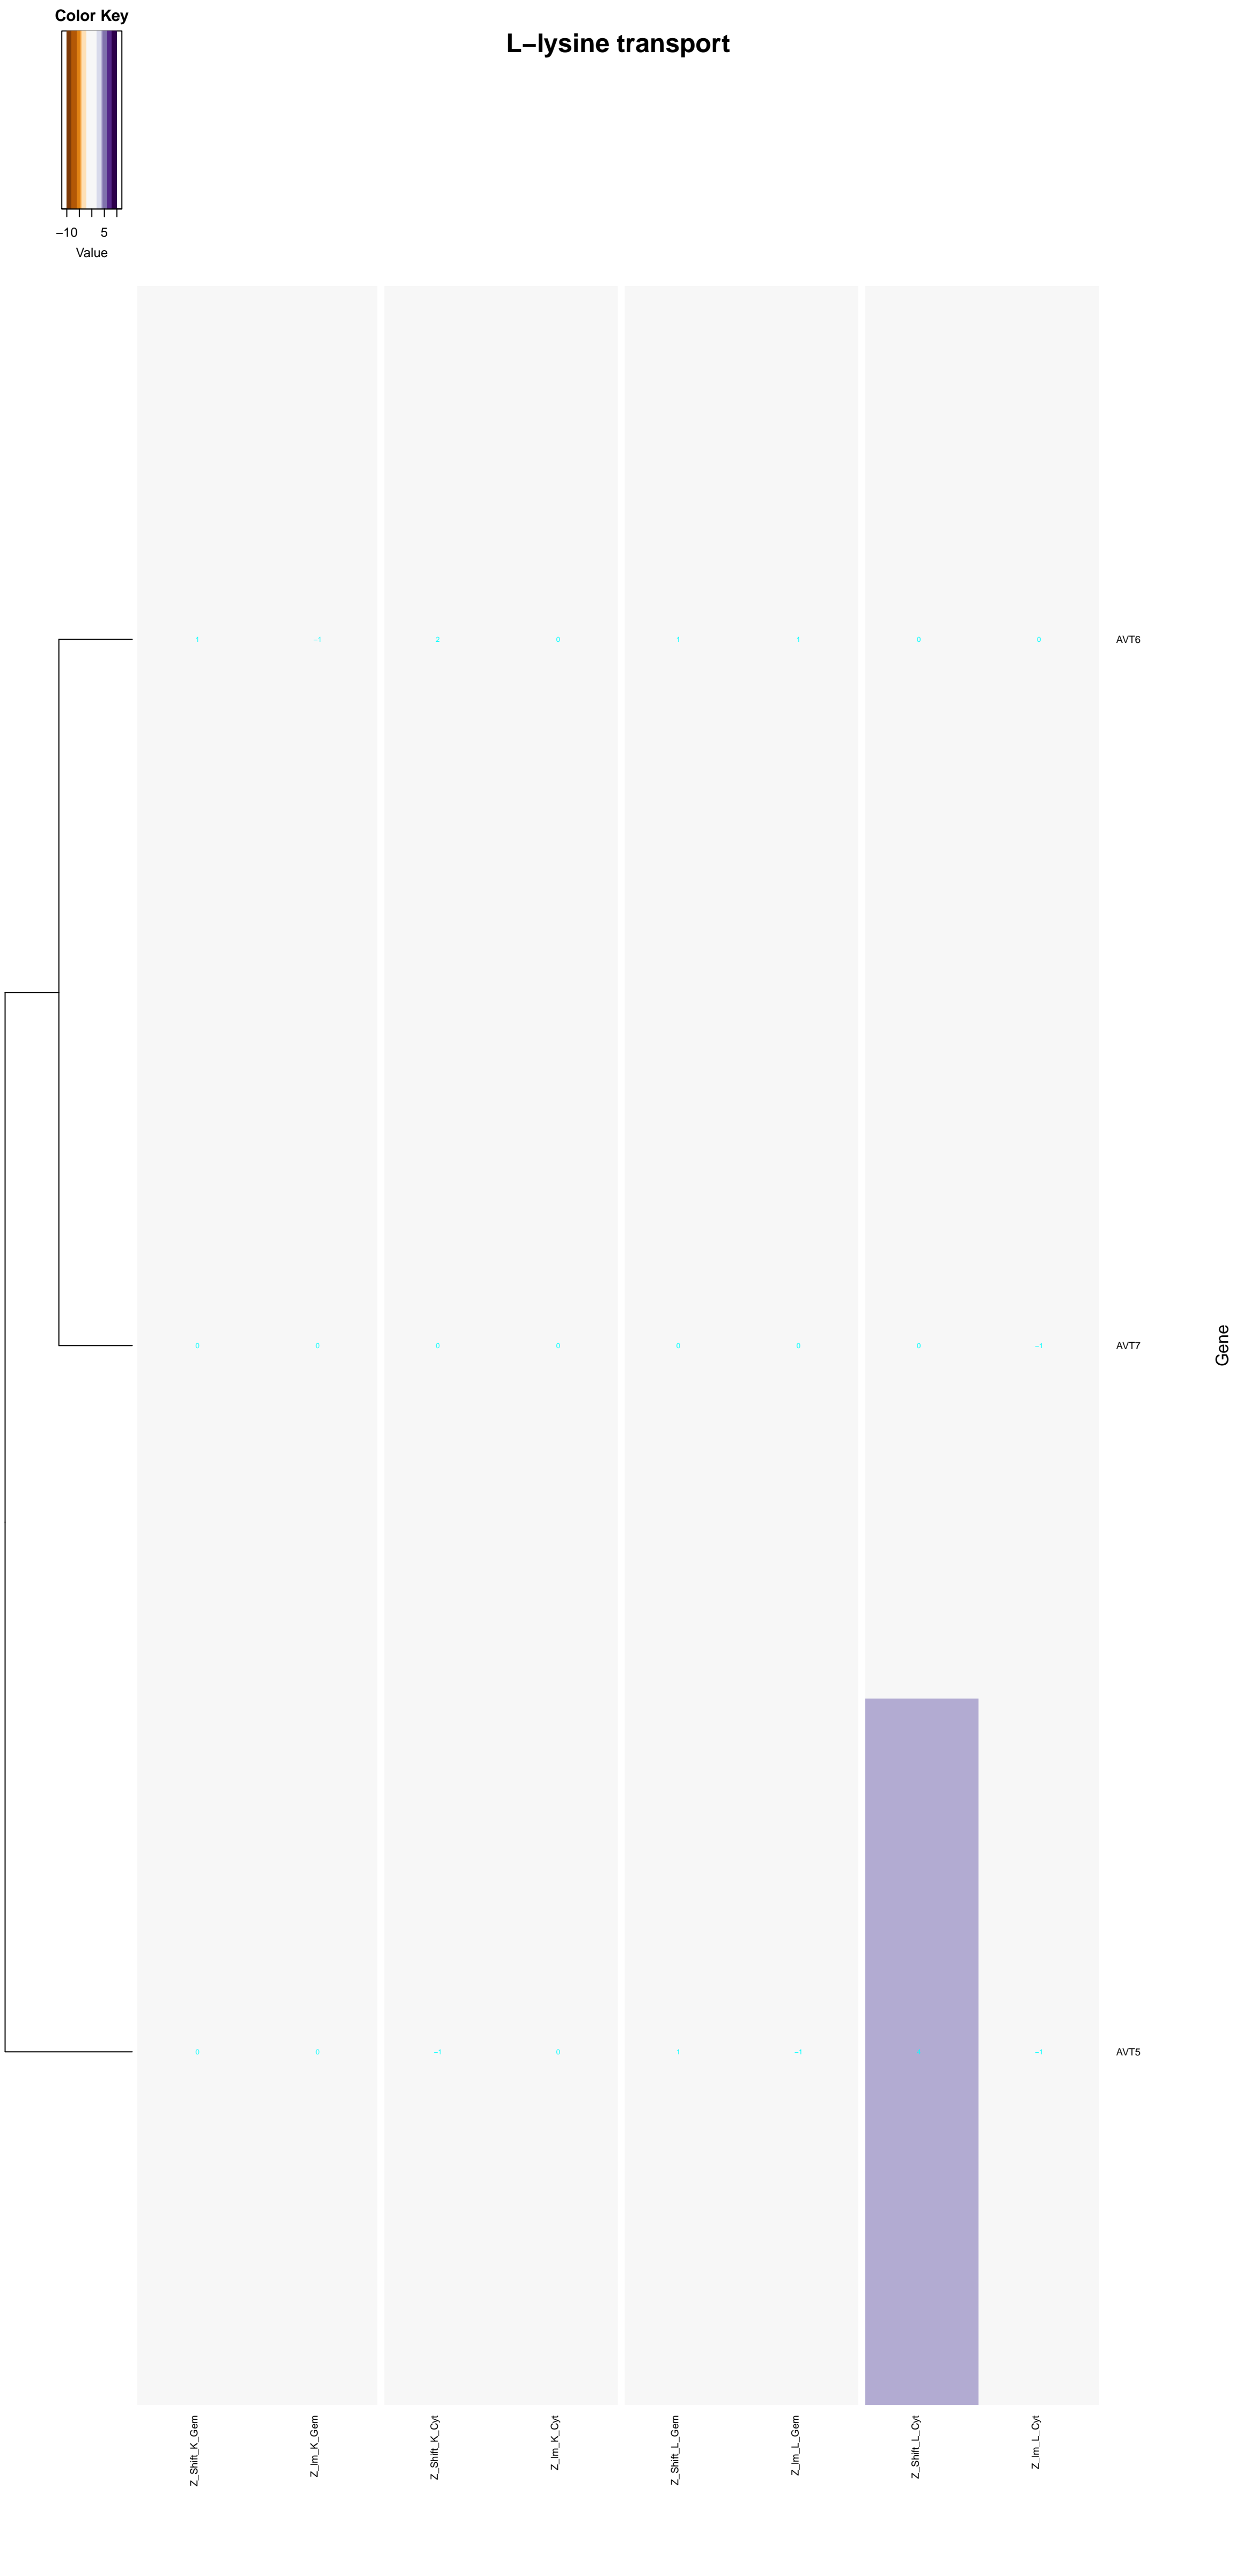

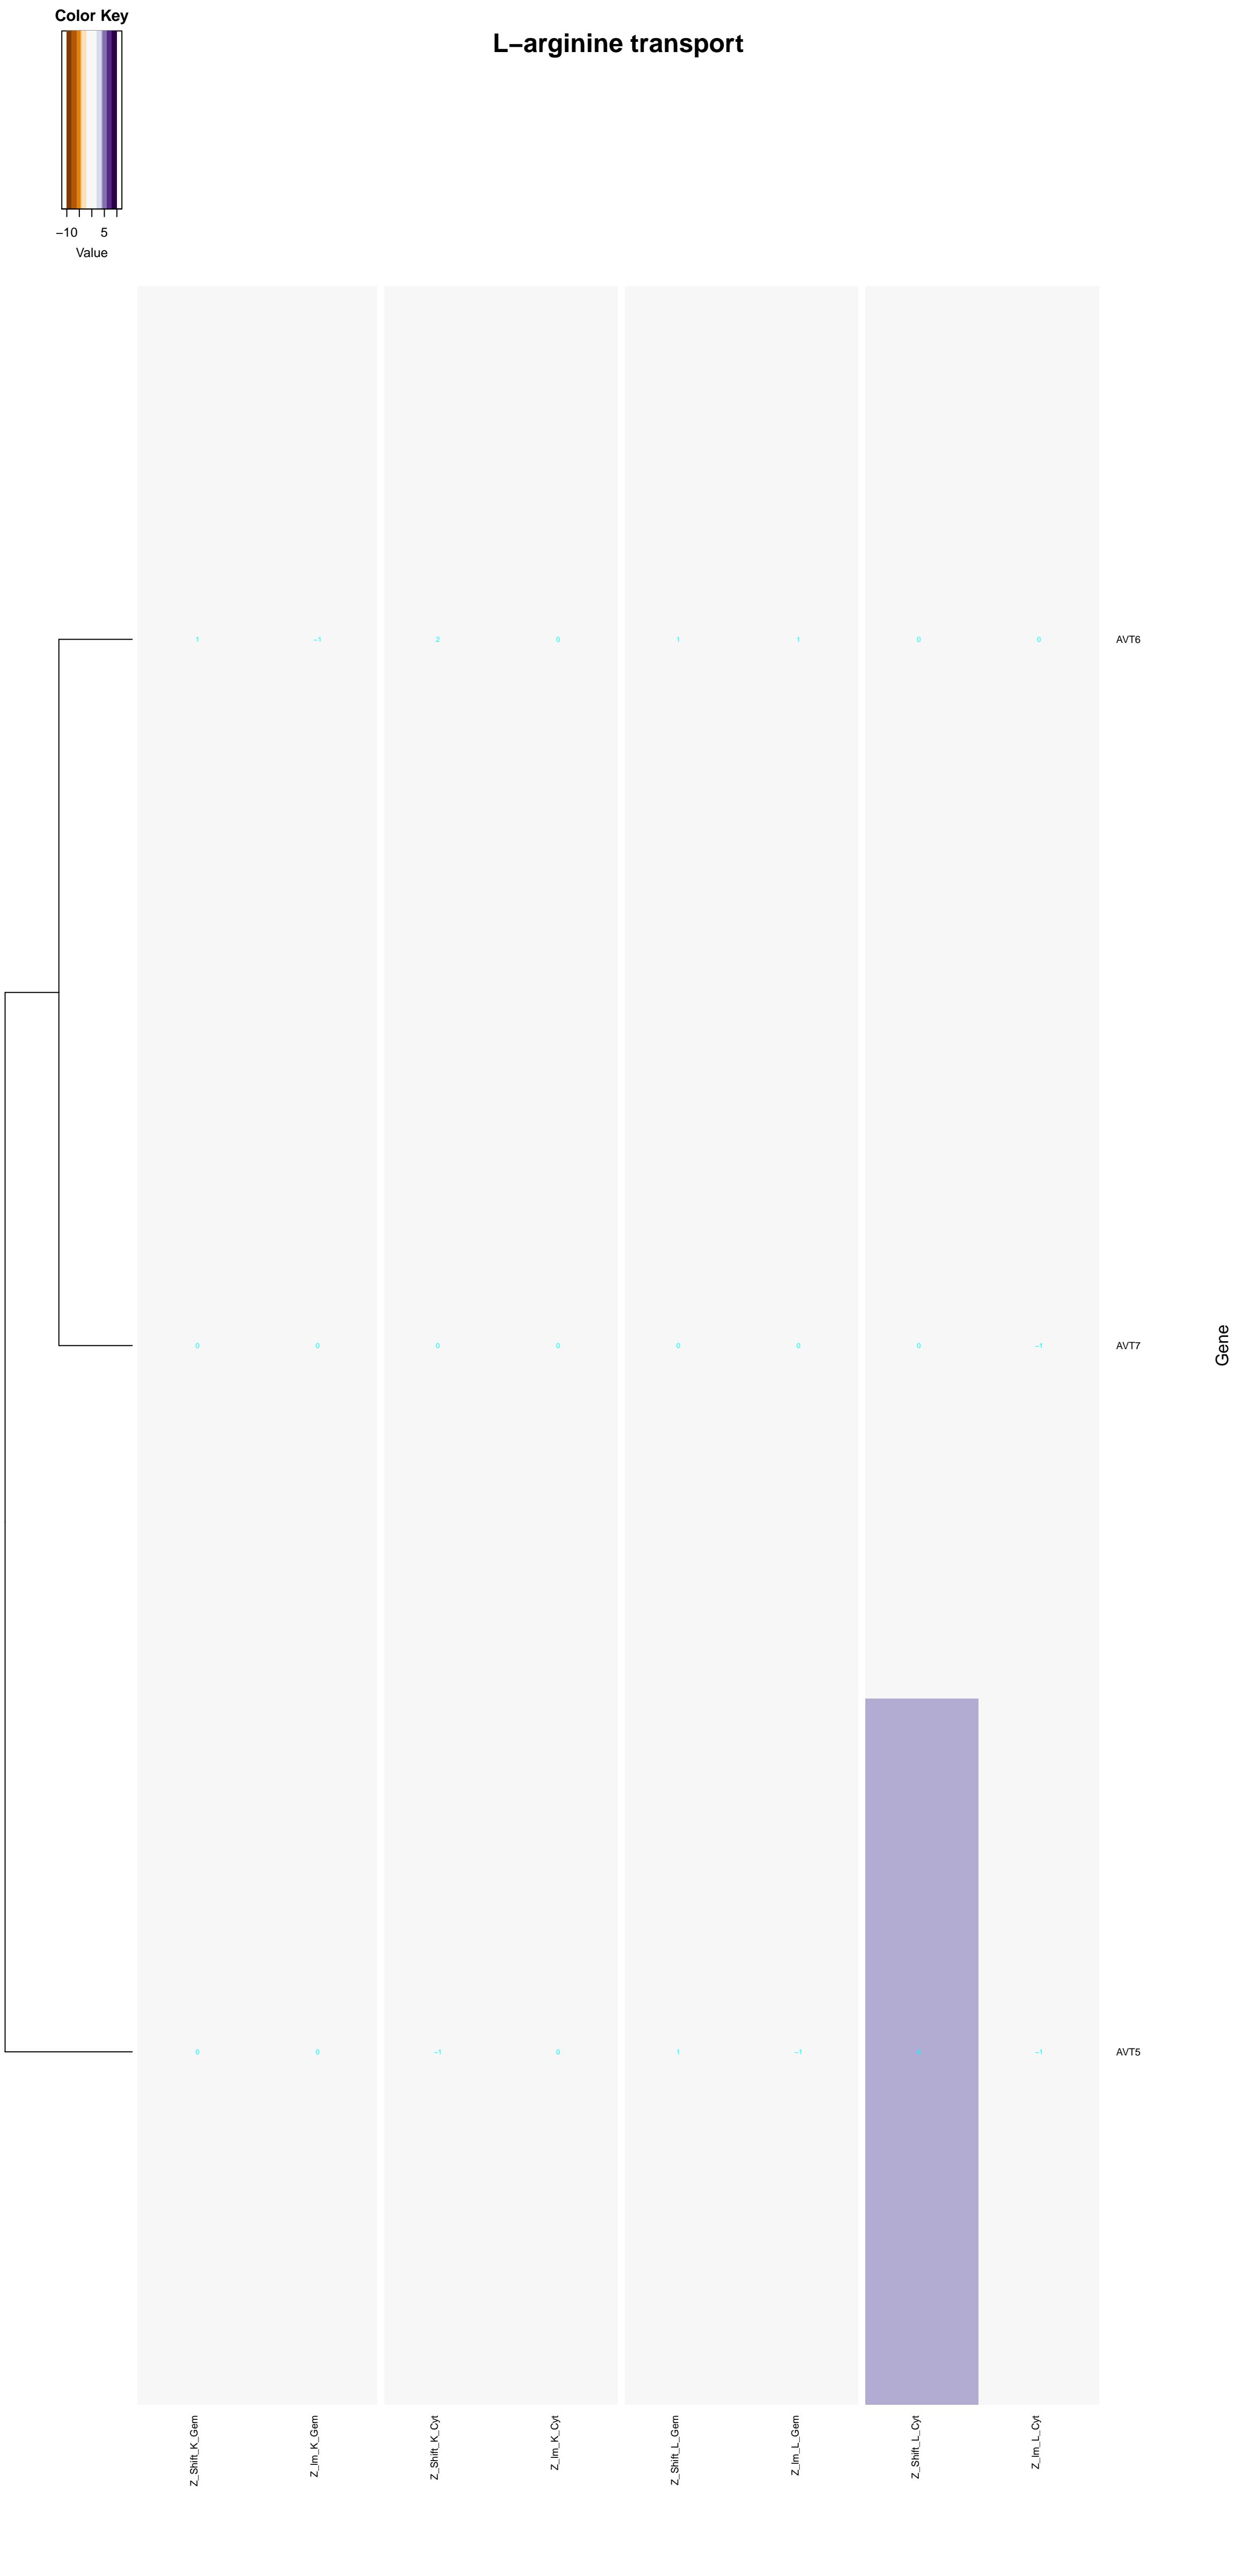



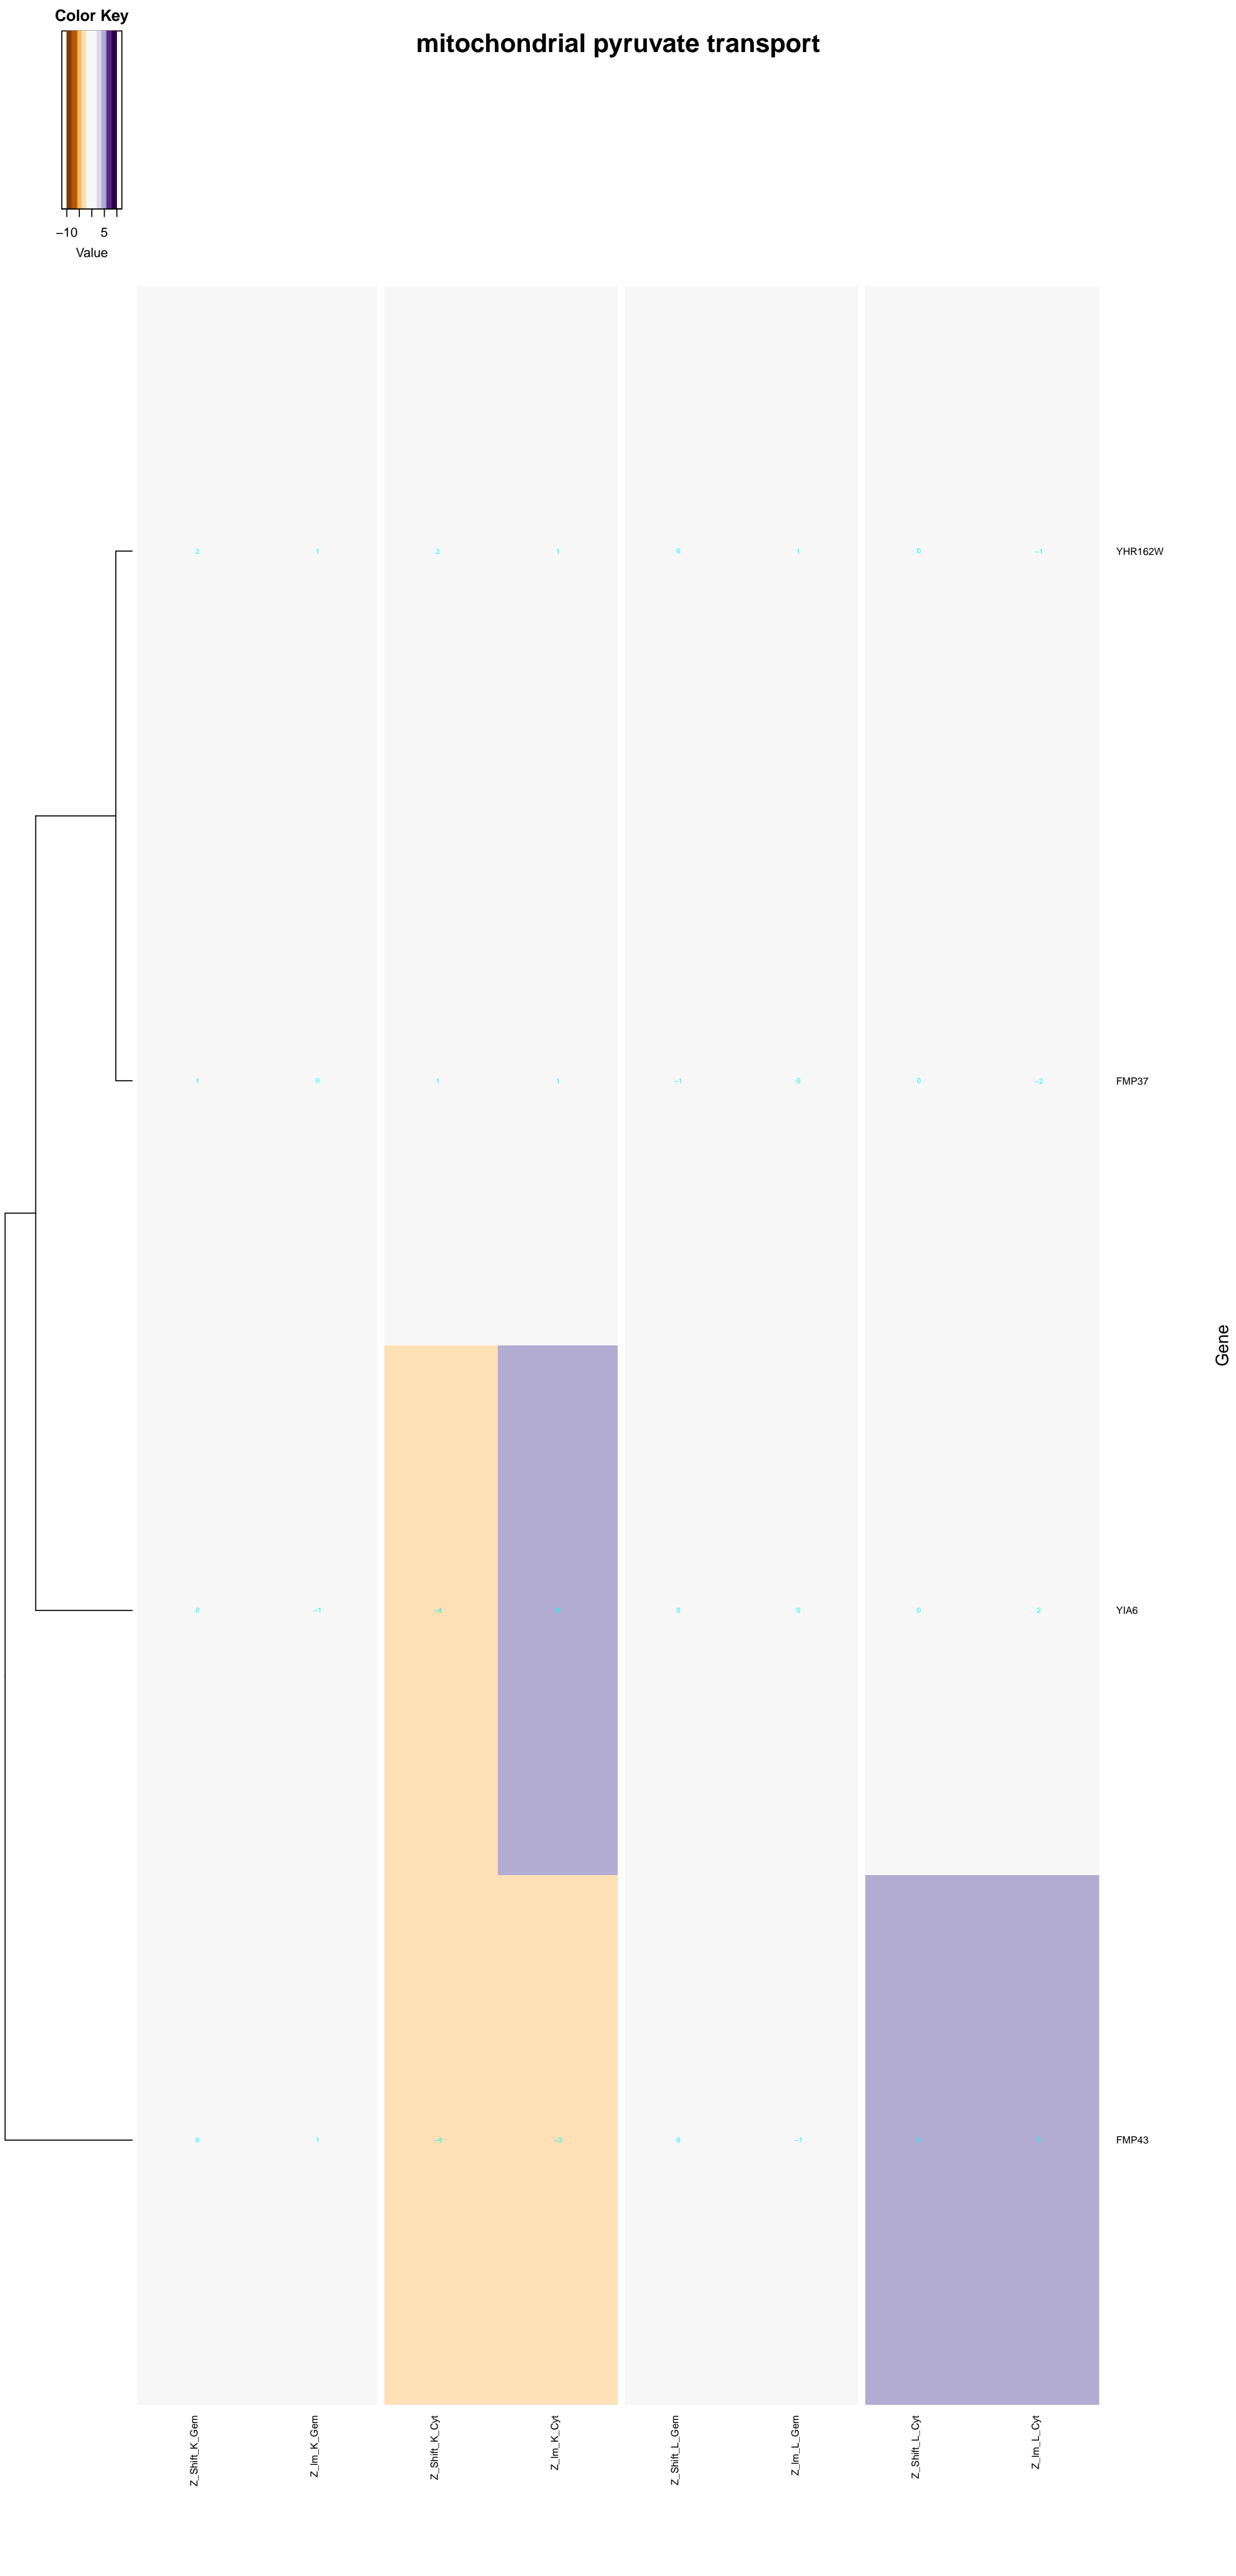



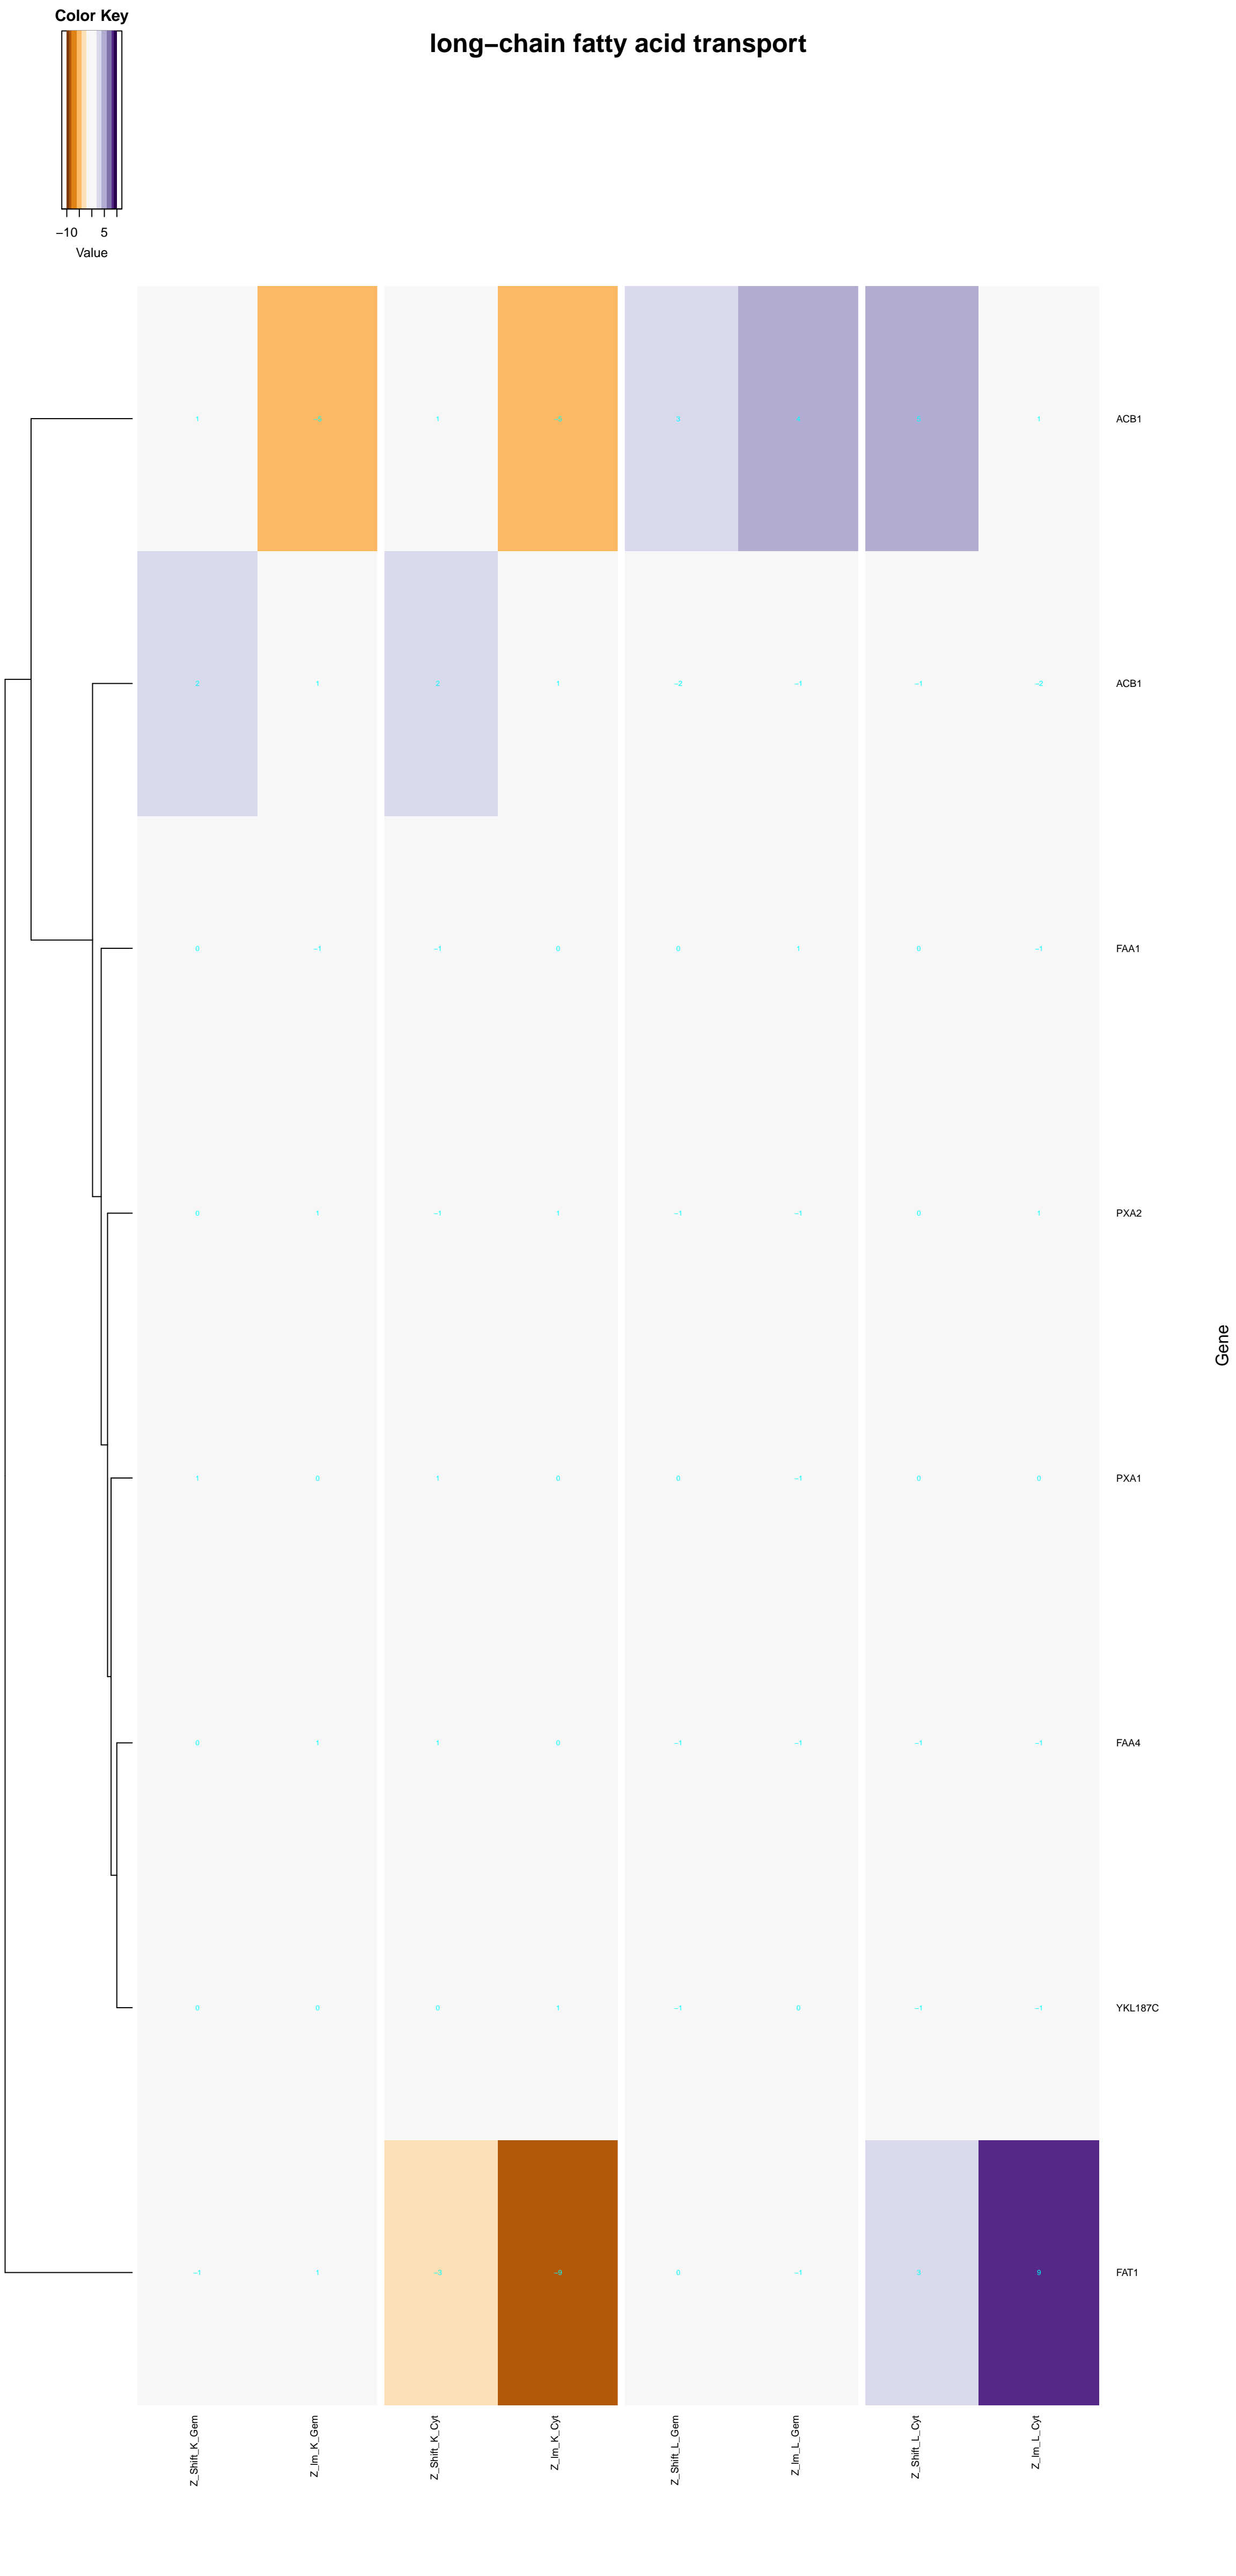

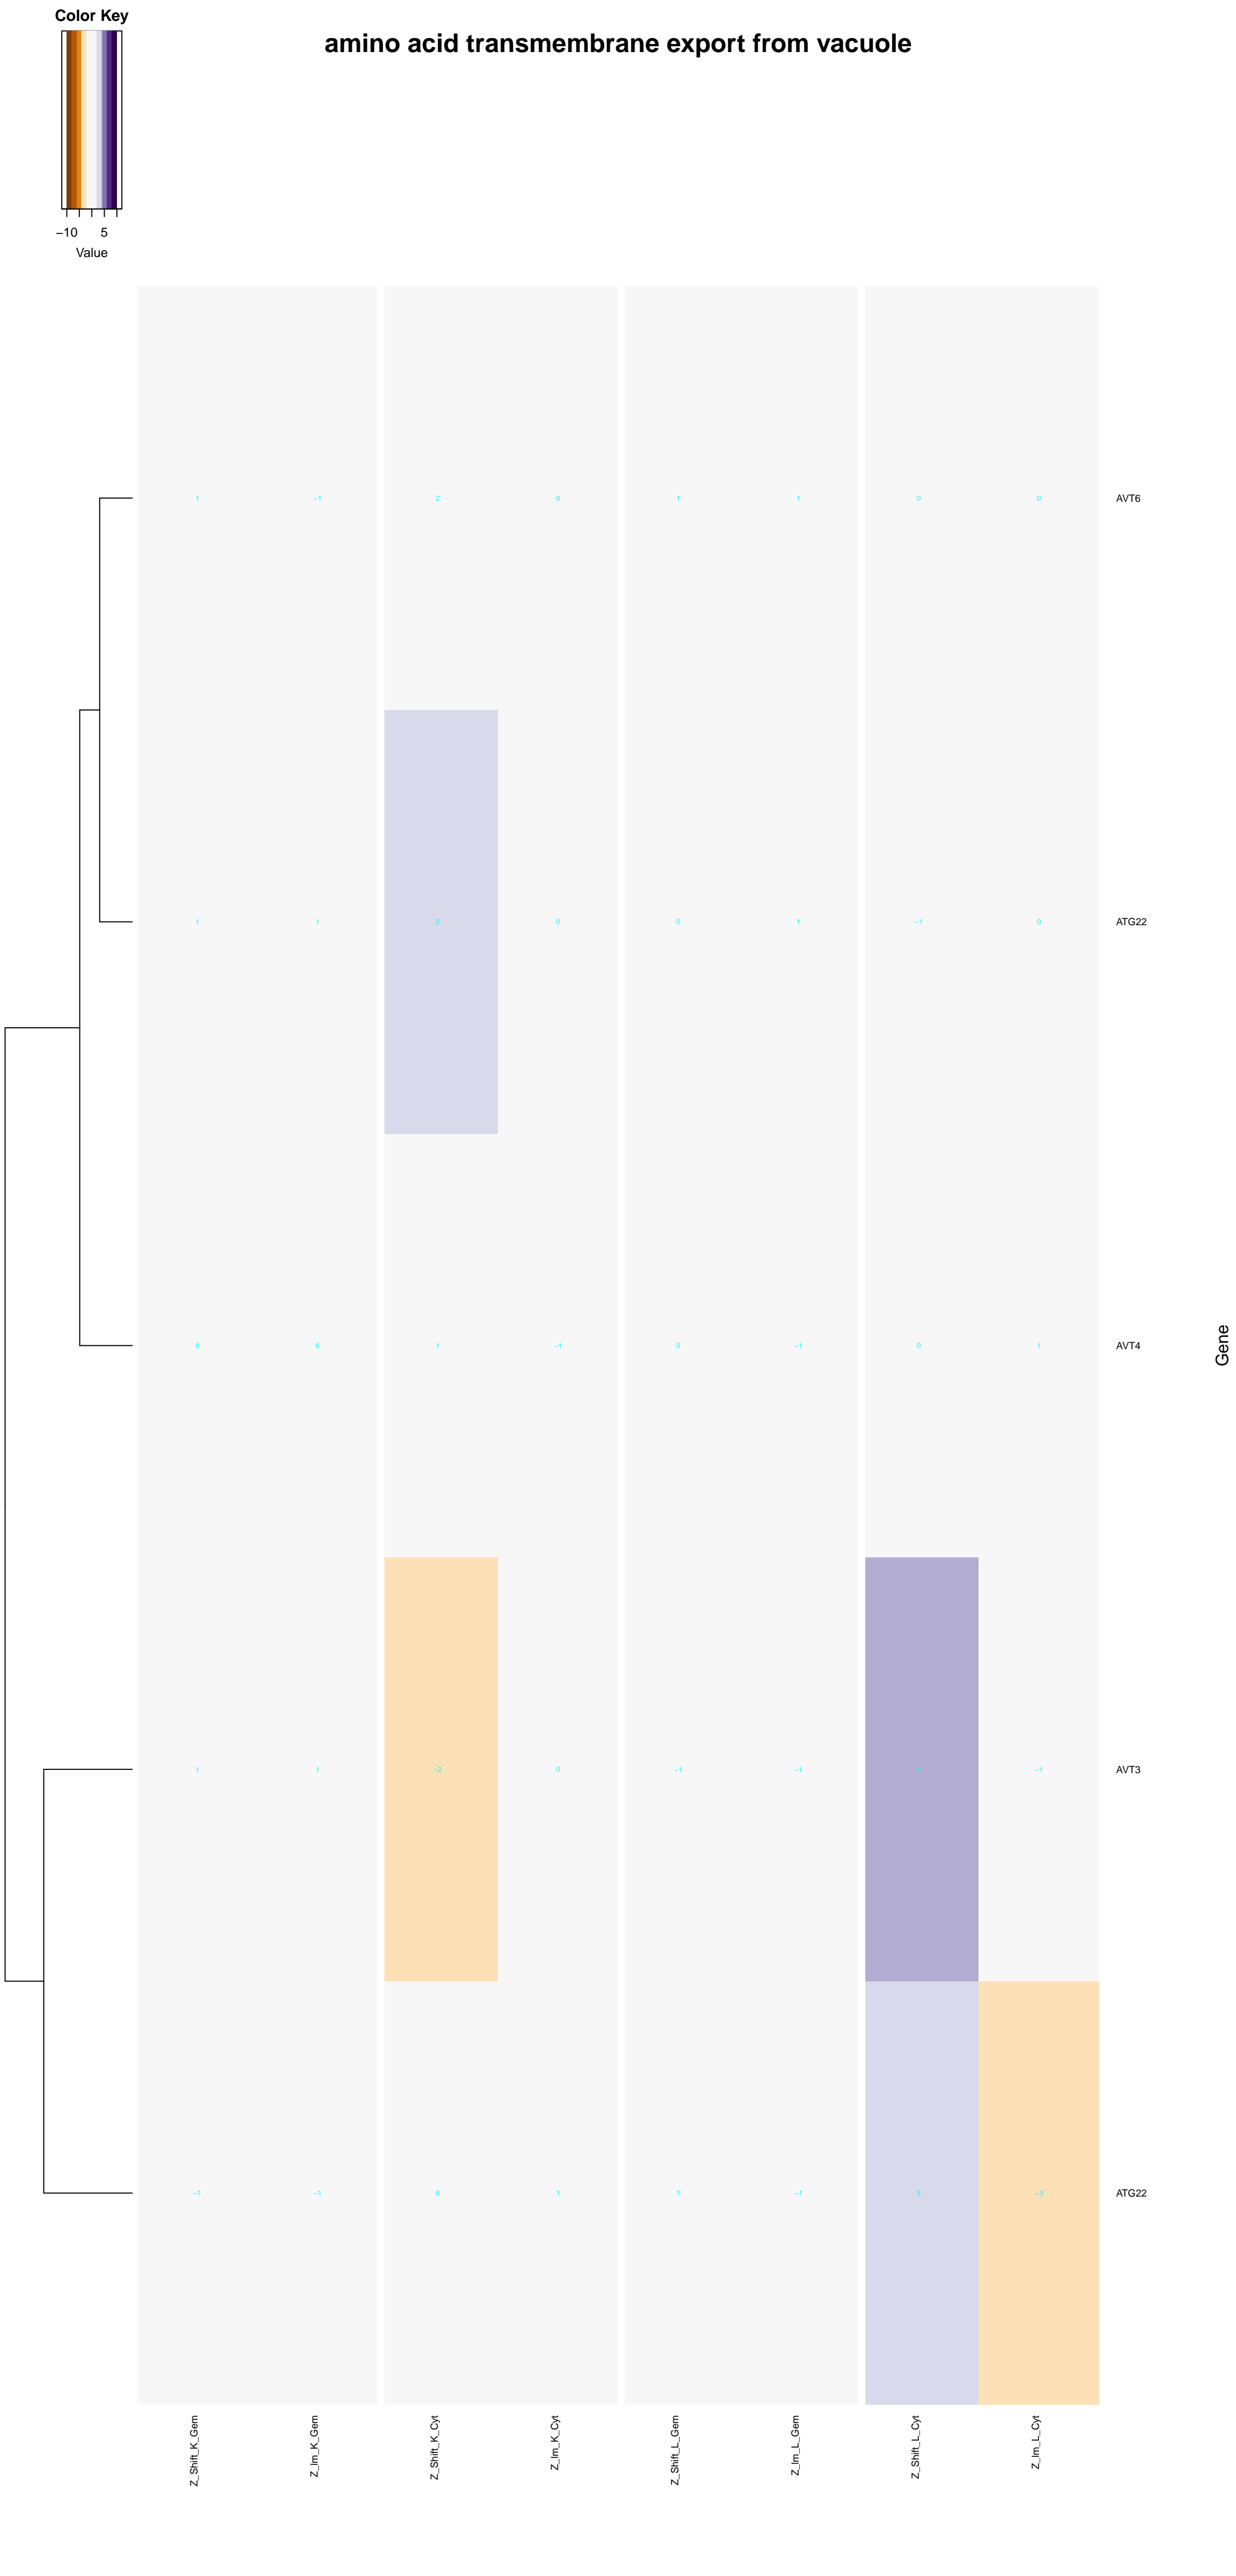

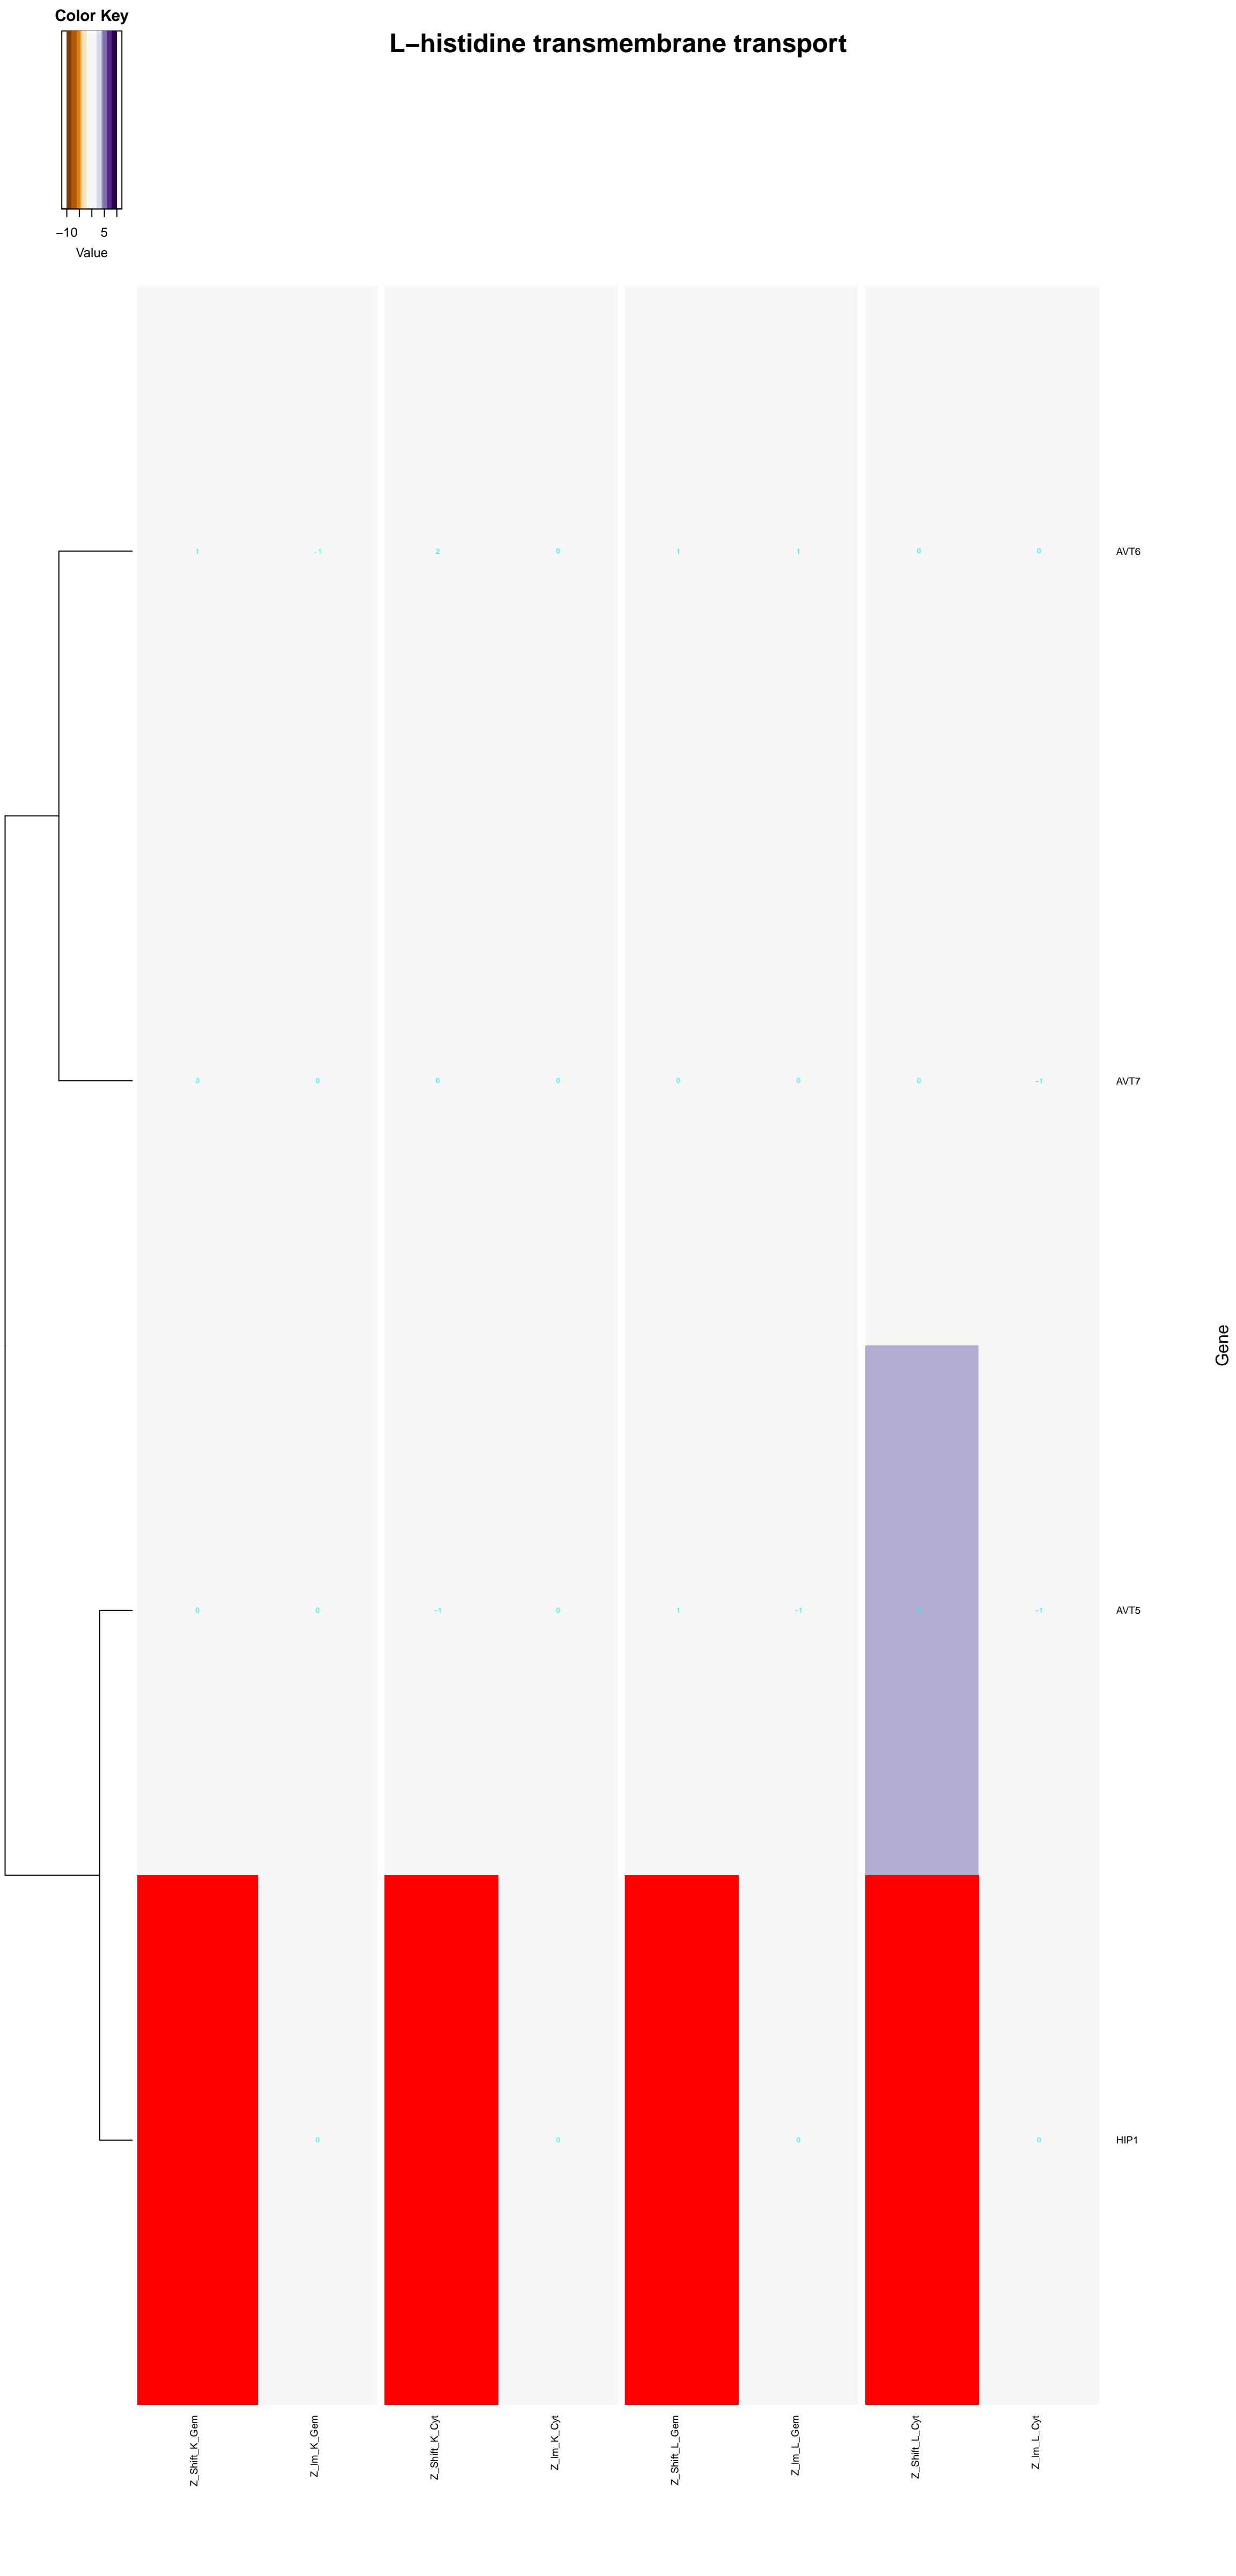

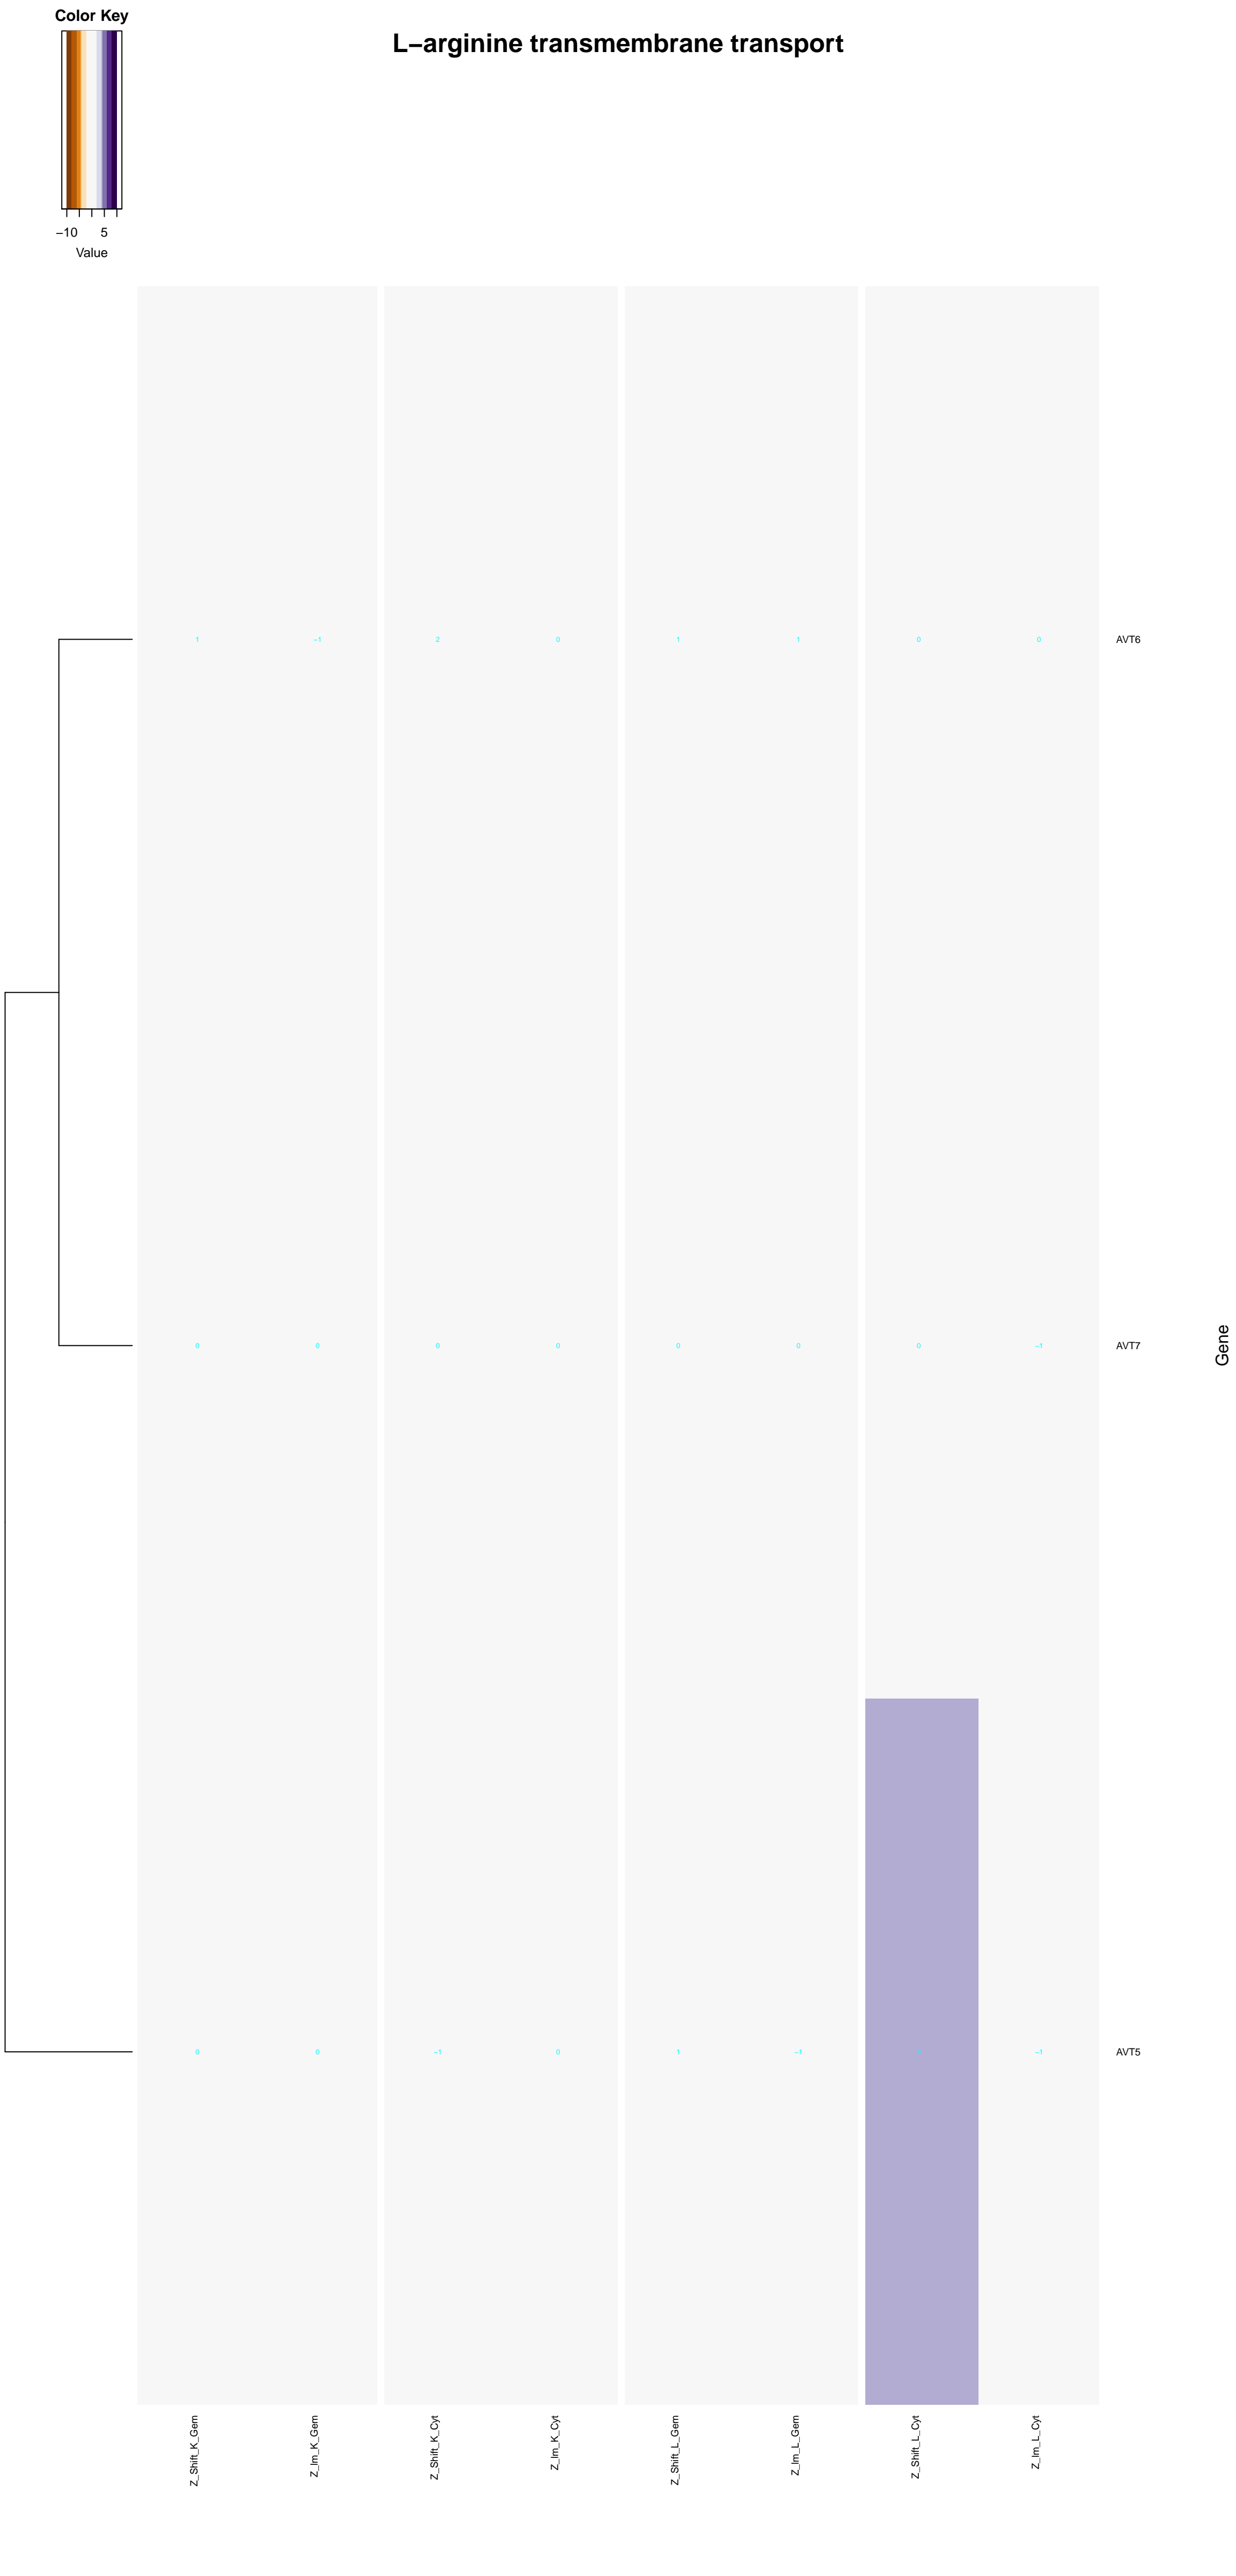

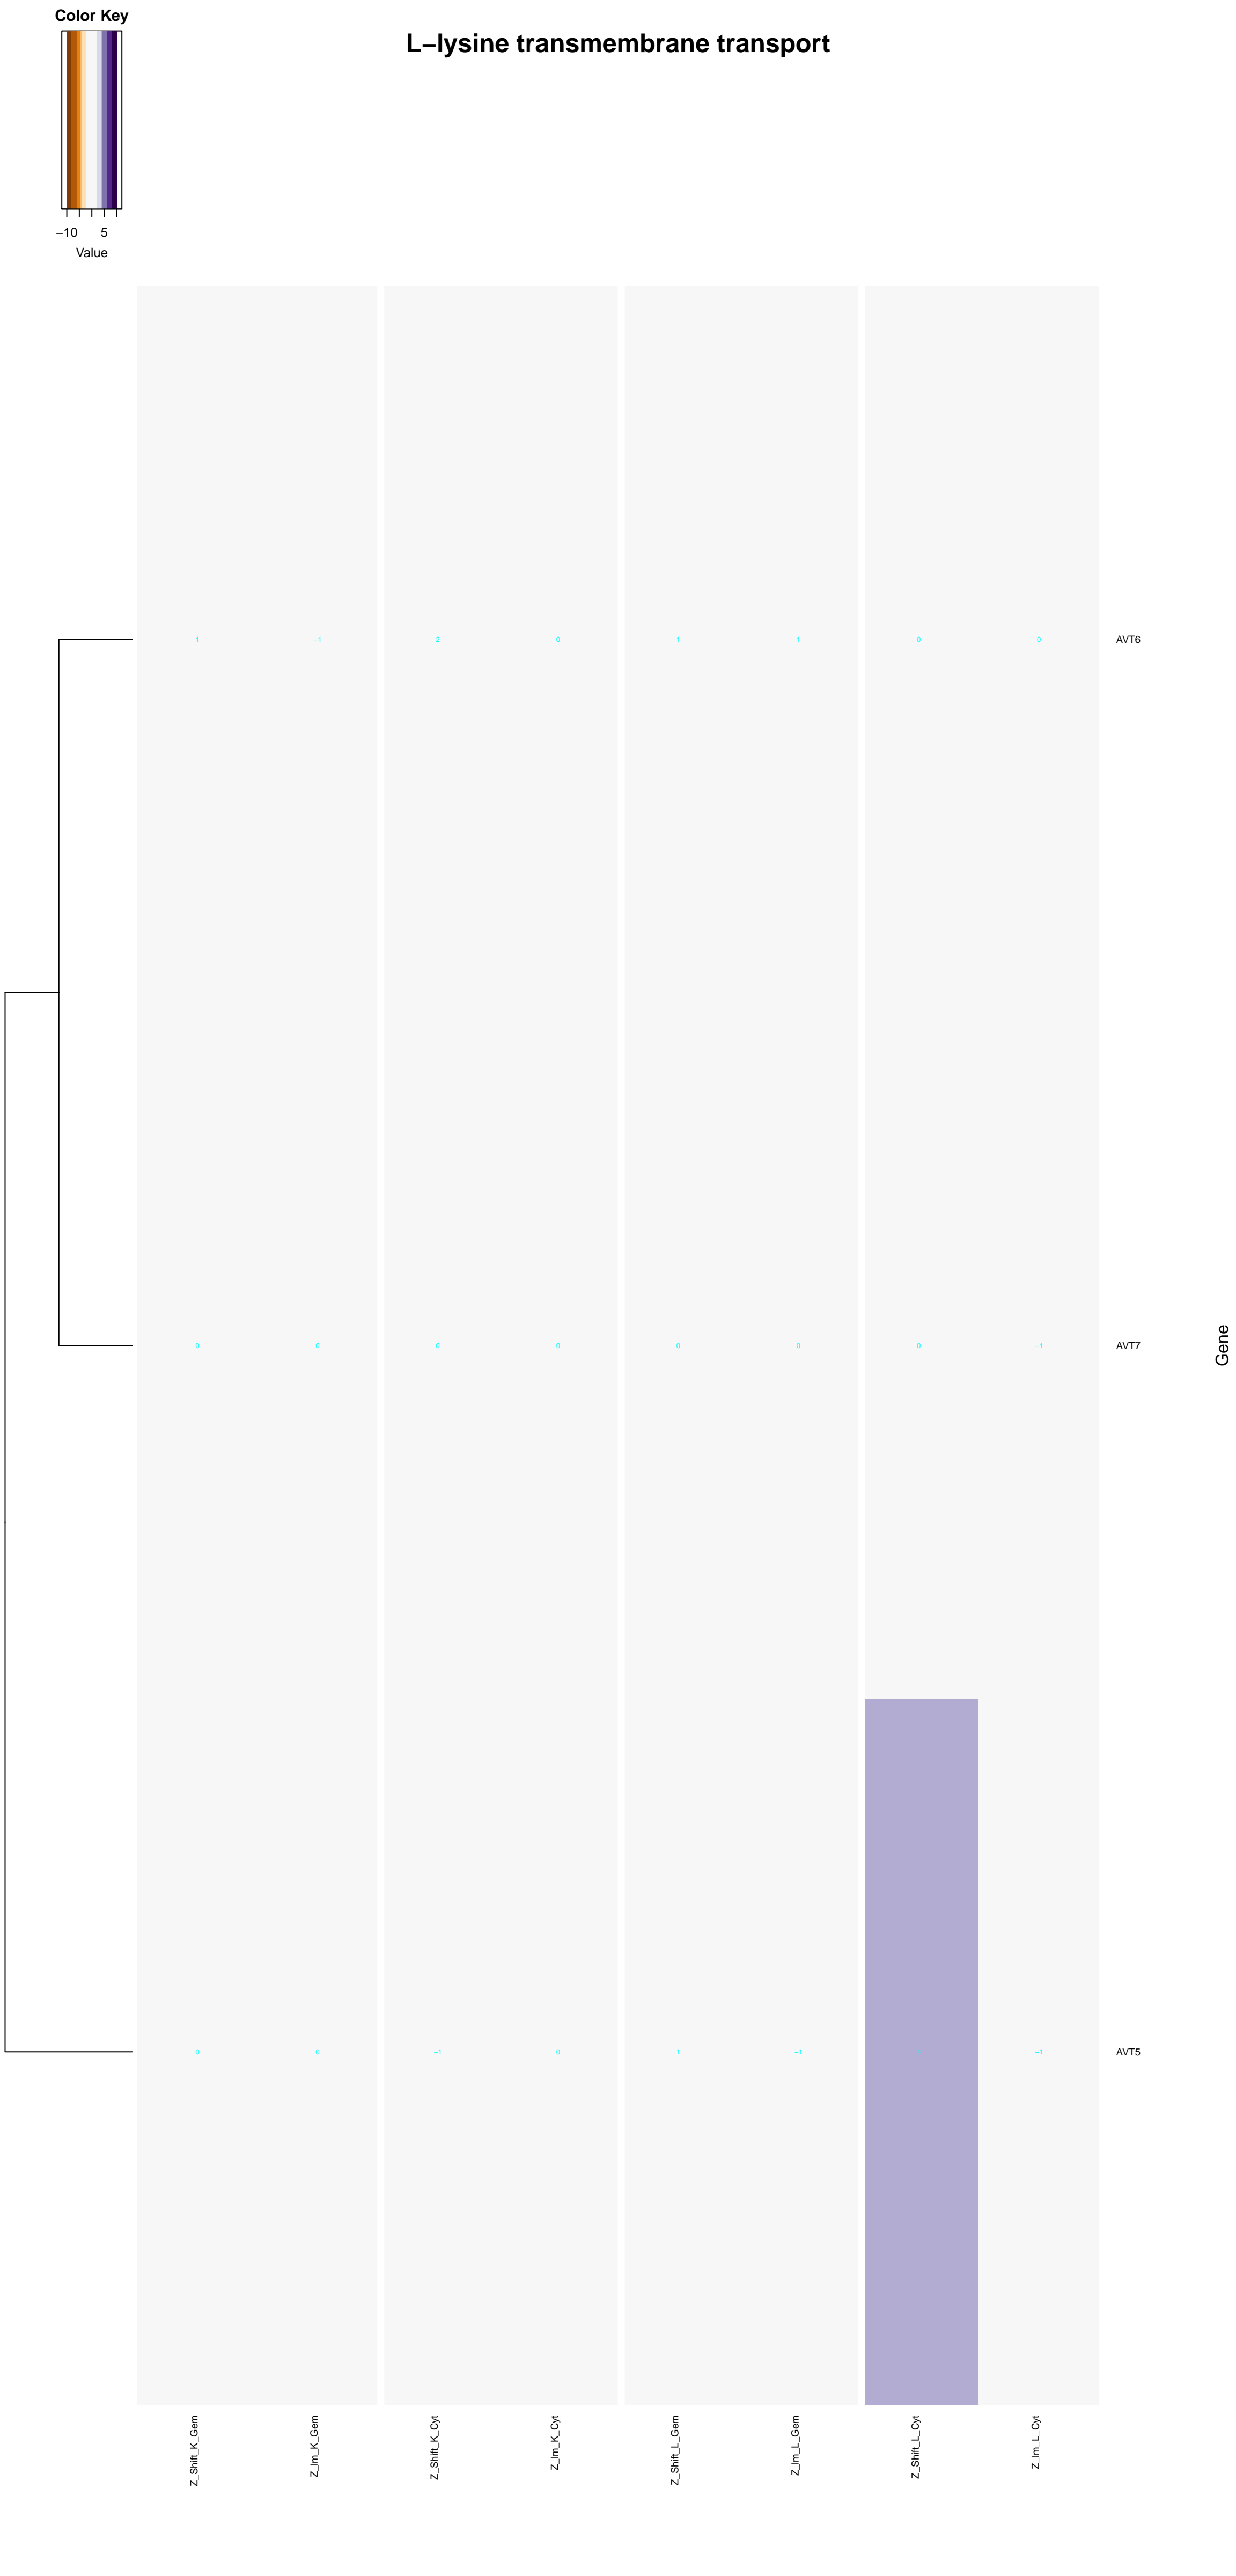

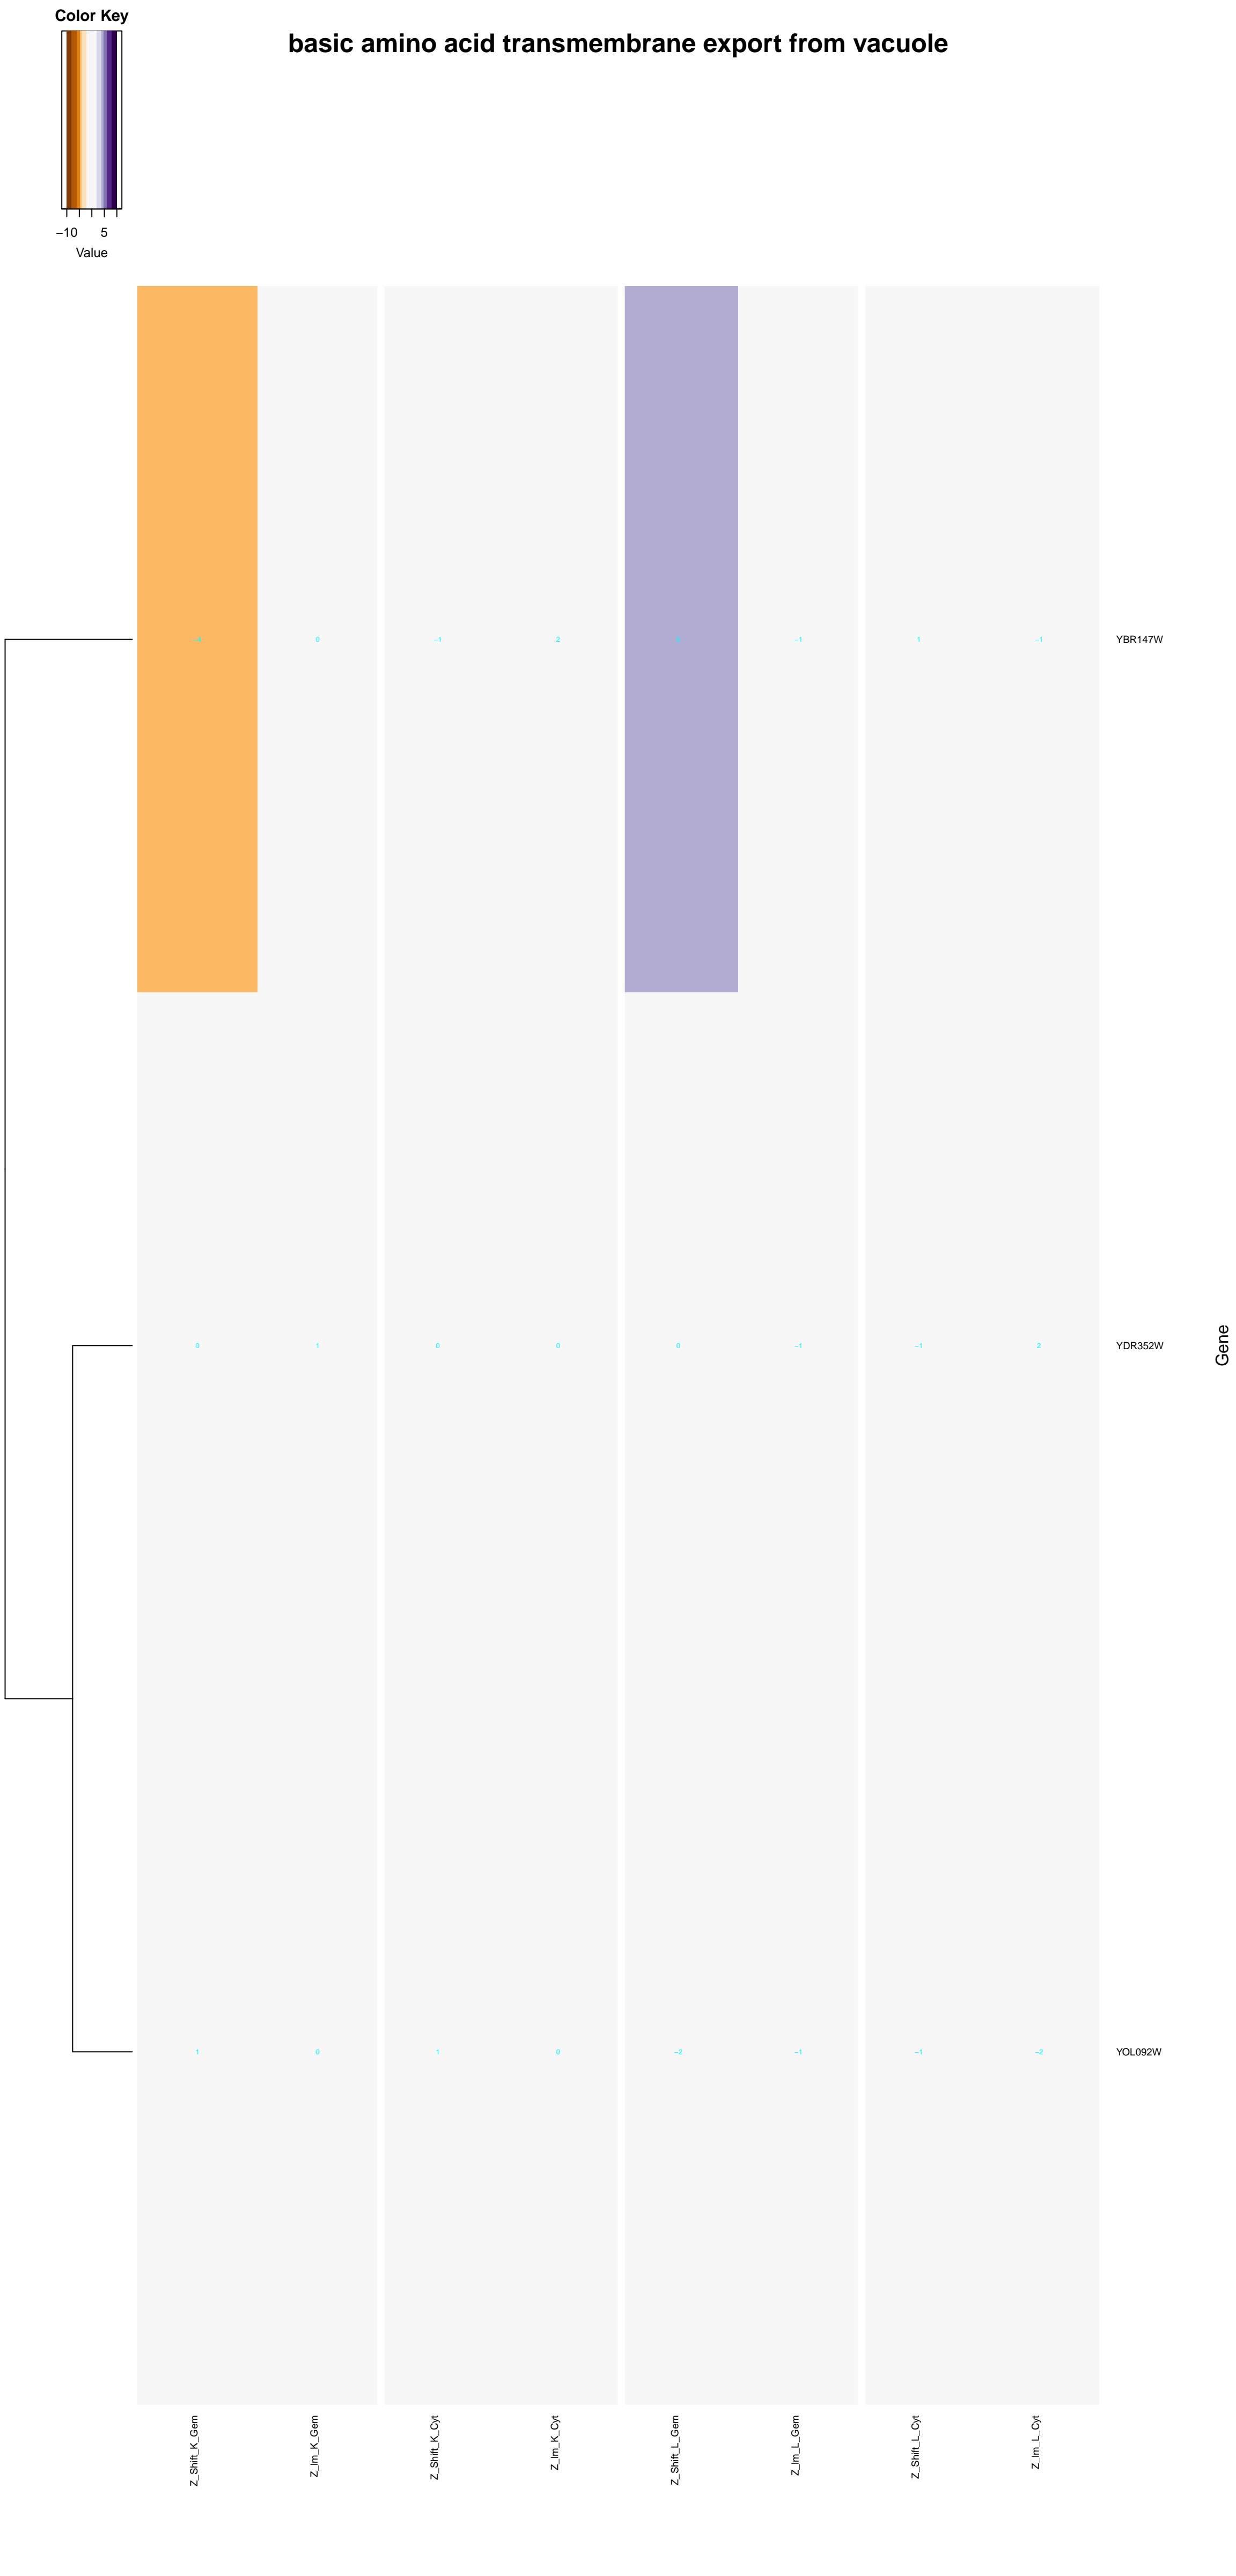

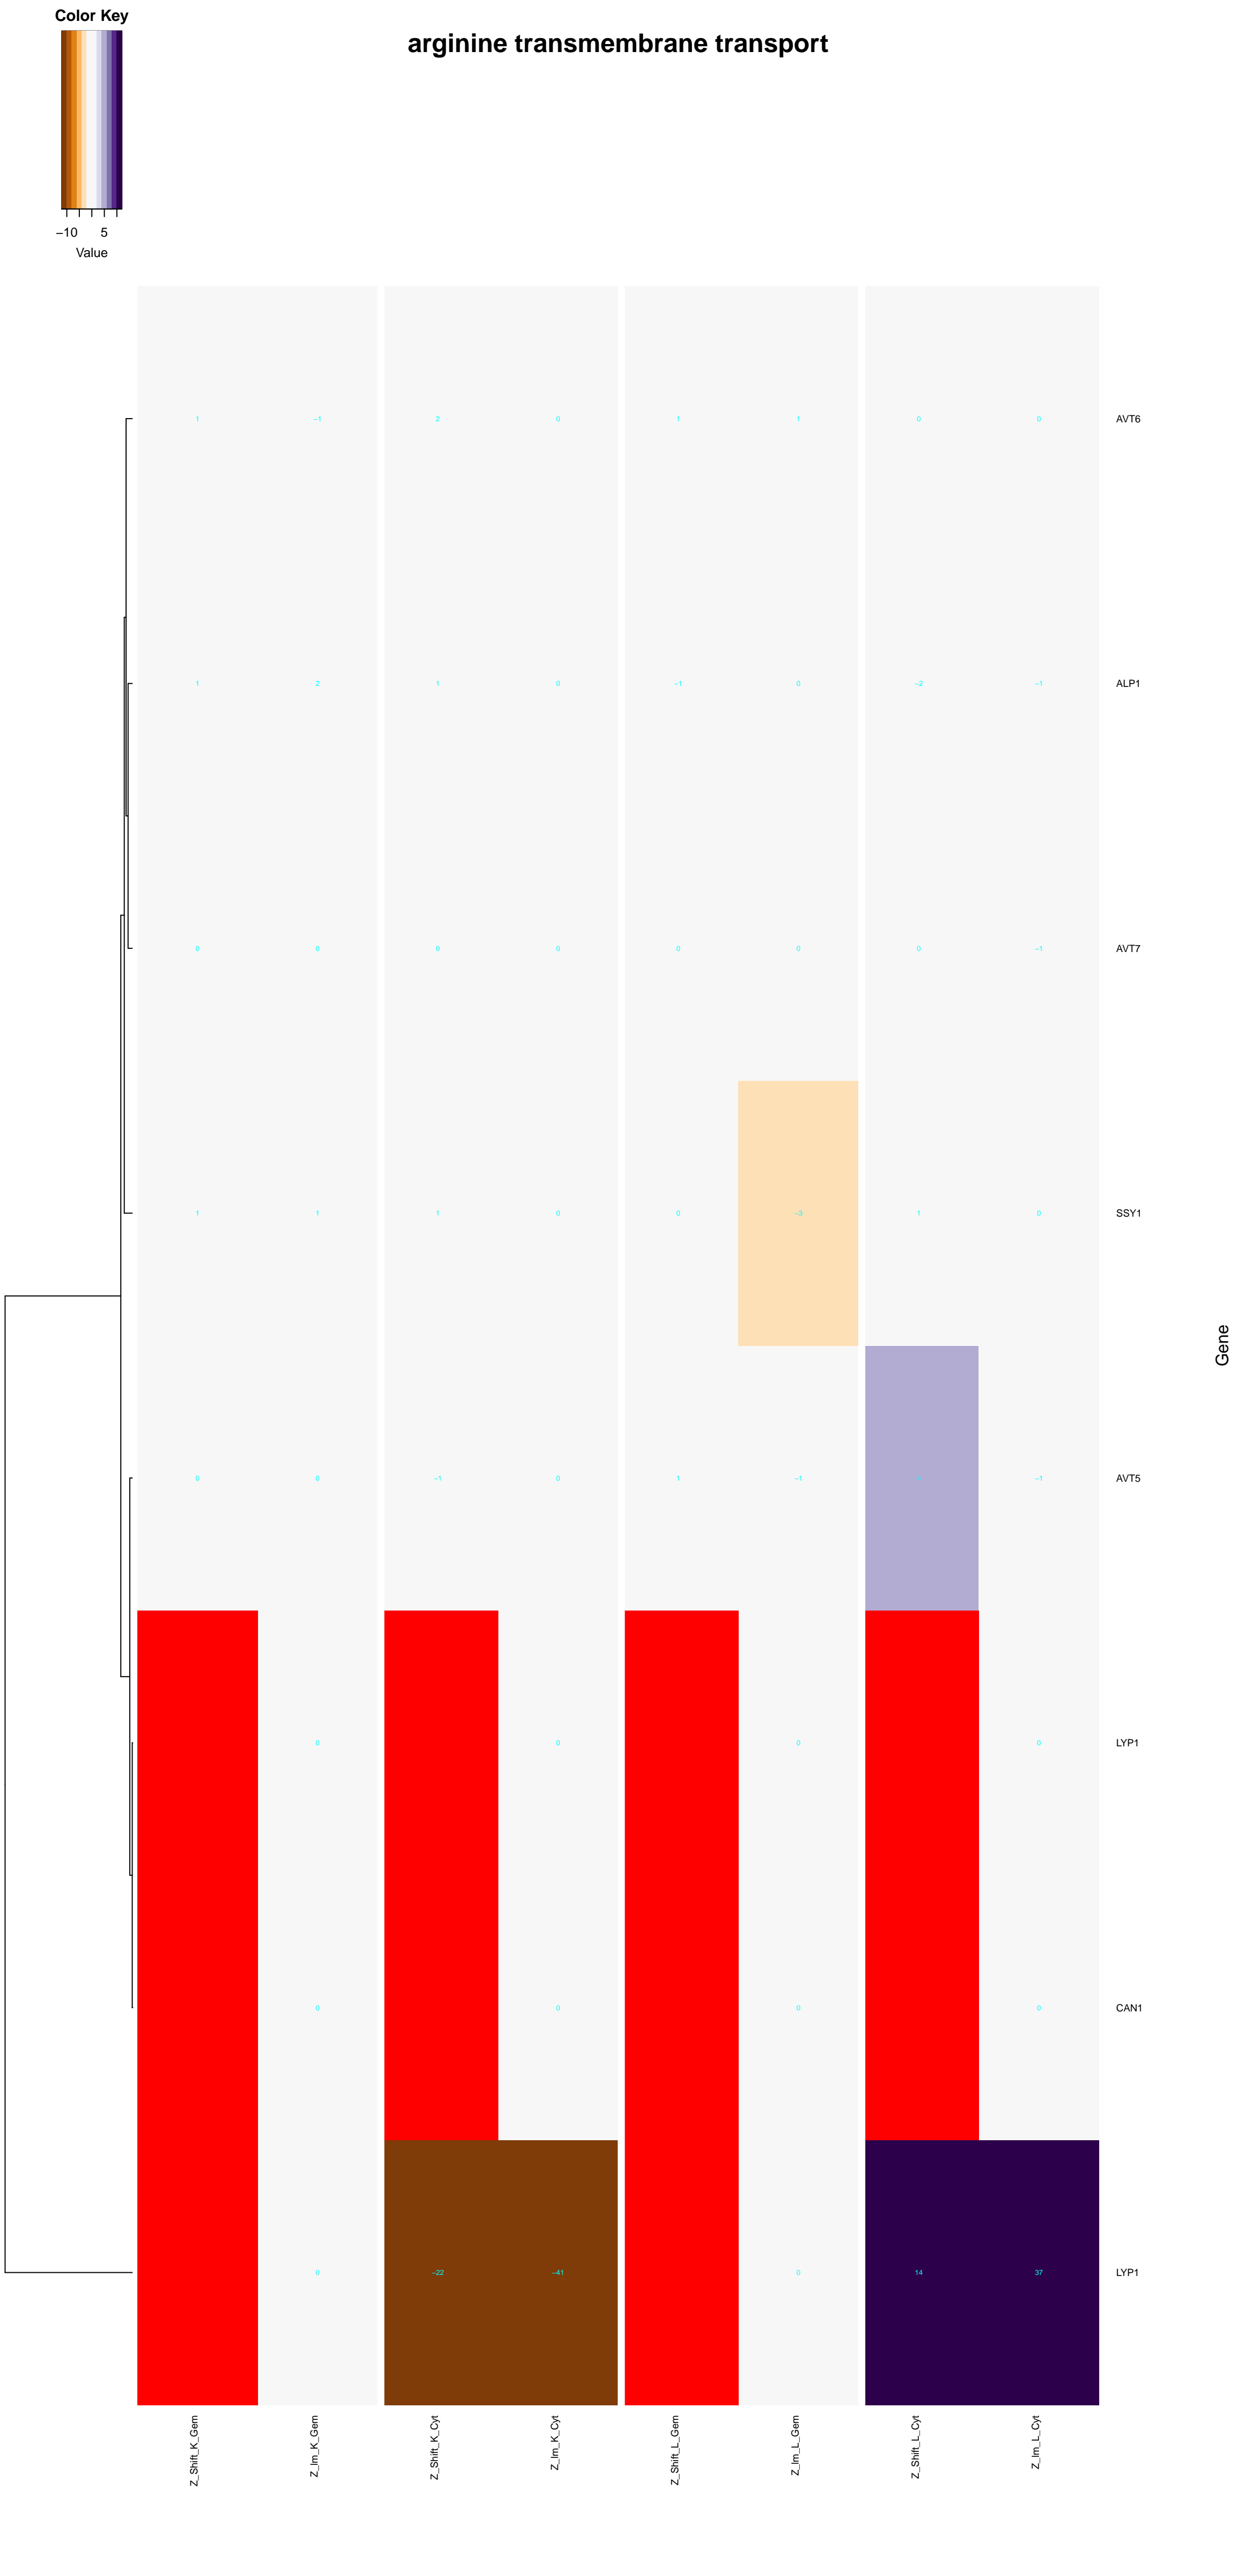





plasma membrane acetate transport



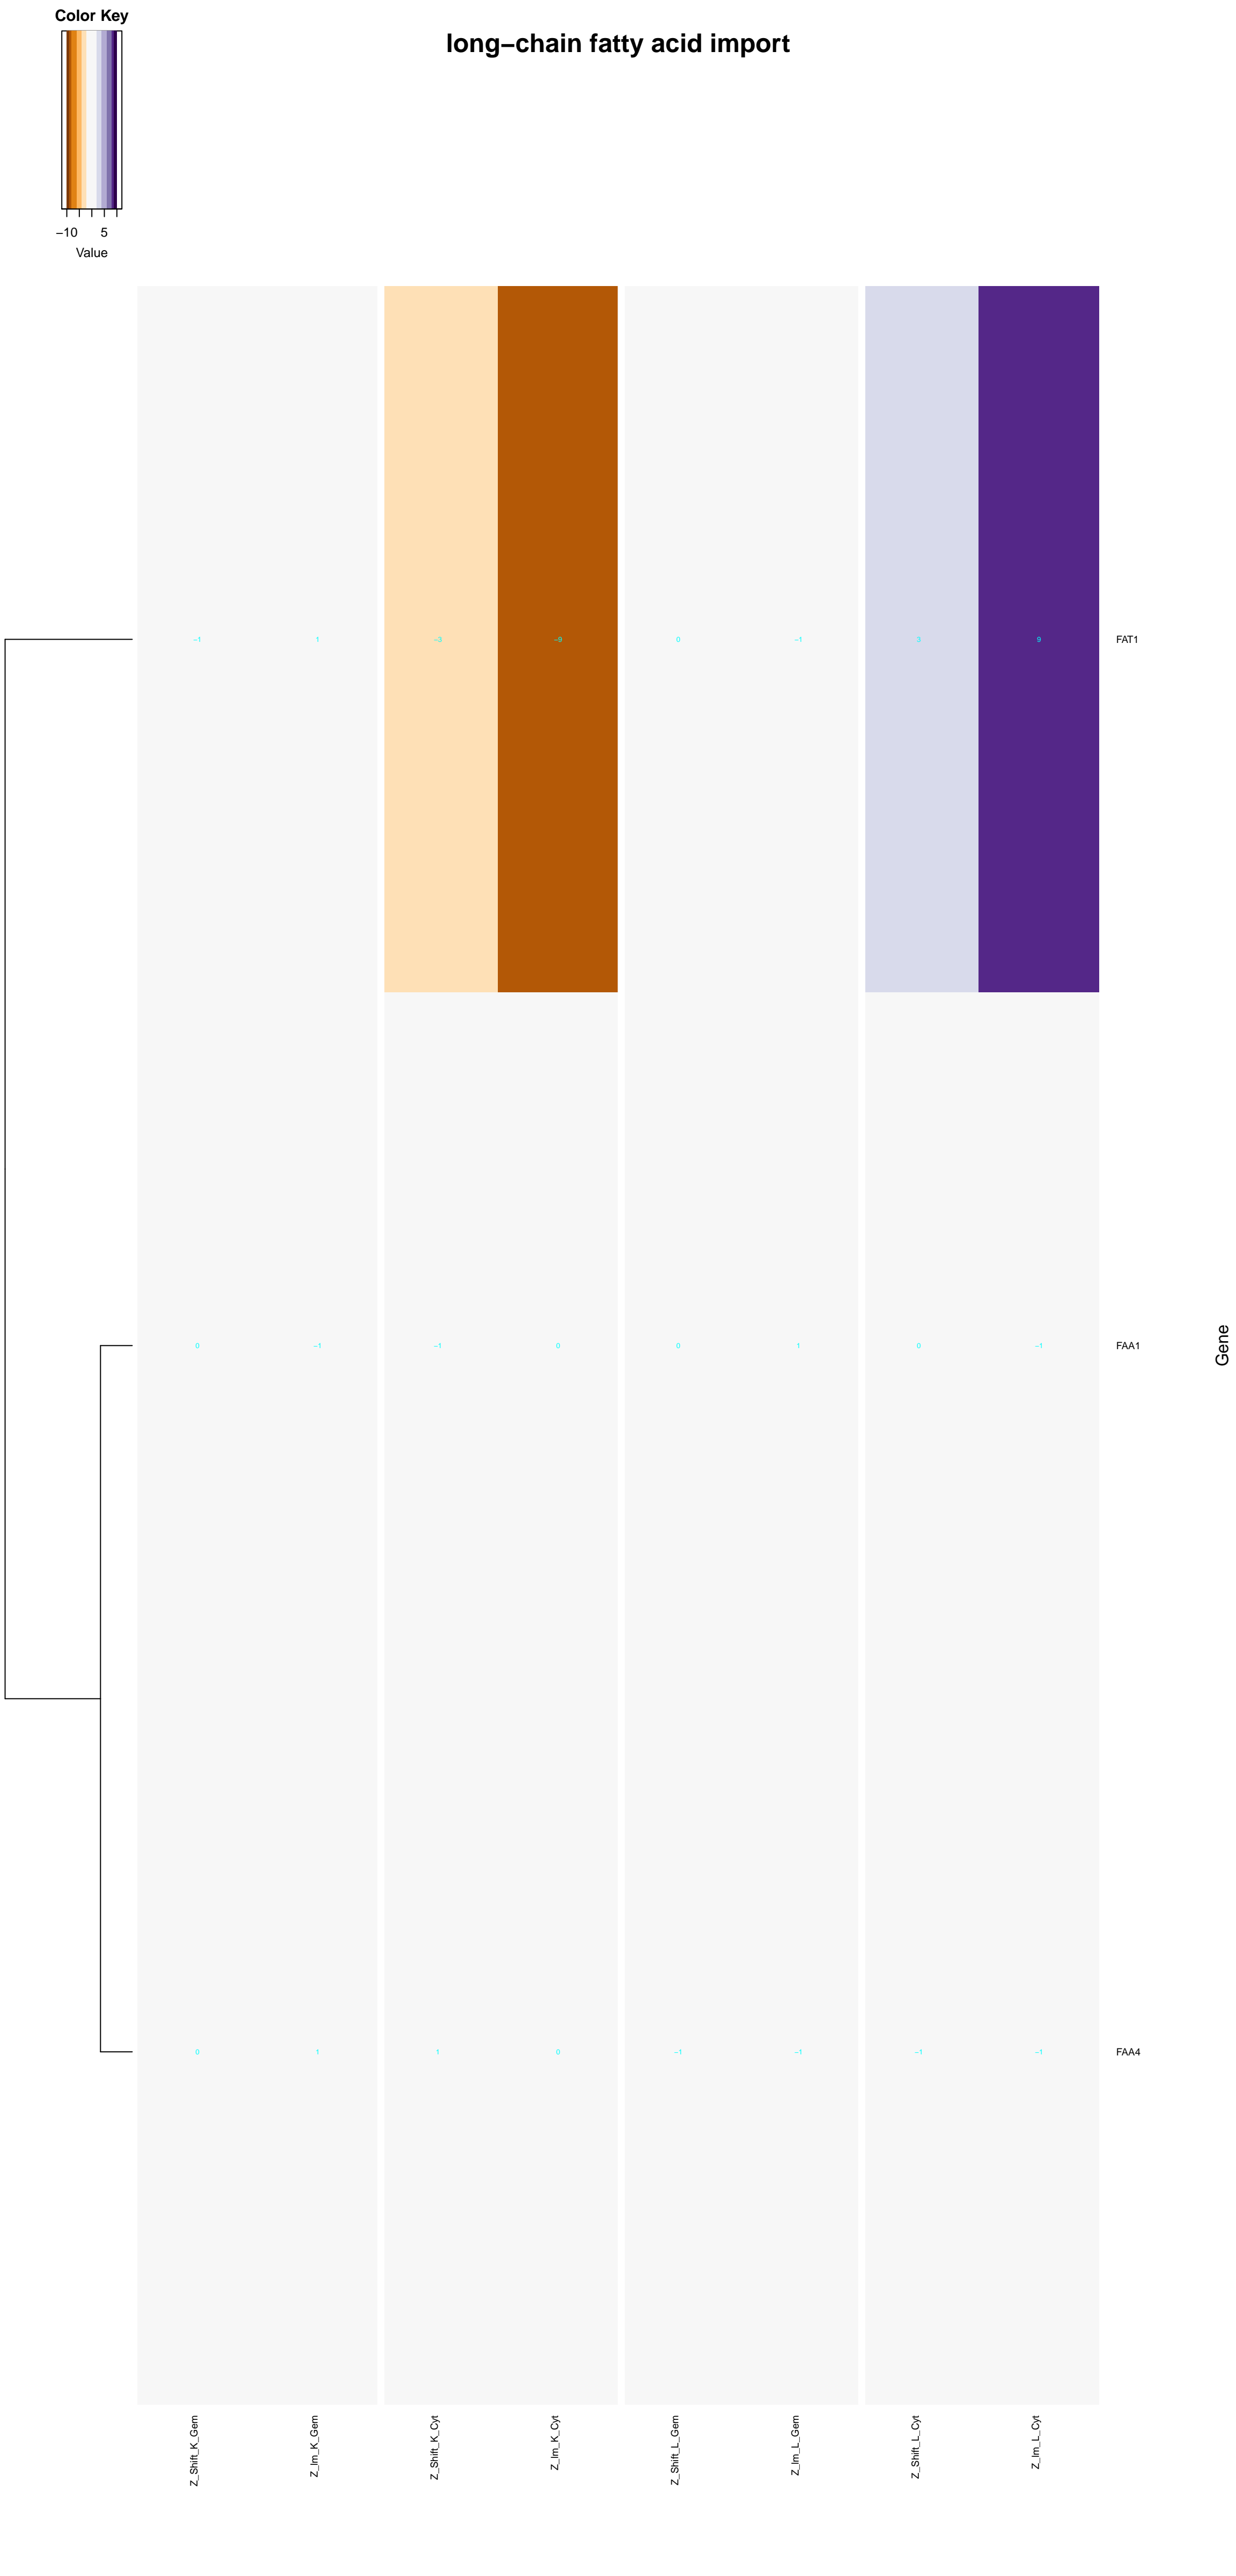

Supplement: s1 [file s1]
