# Supplementary material for: A Humanized Yeast Phenomic Model of Deoxycytidine Kinase to Predict Genetic Buffering of Nucleoside Analog Cytotoxicity
Source: MDPI journal article supplement (doi:10.3390/genes10100770), 2019-09-30

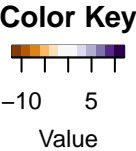

histone deacetylase complex

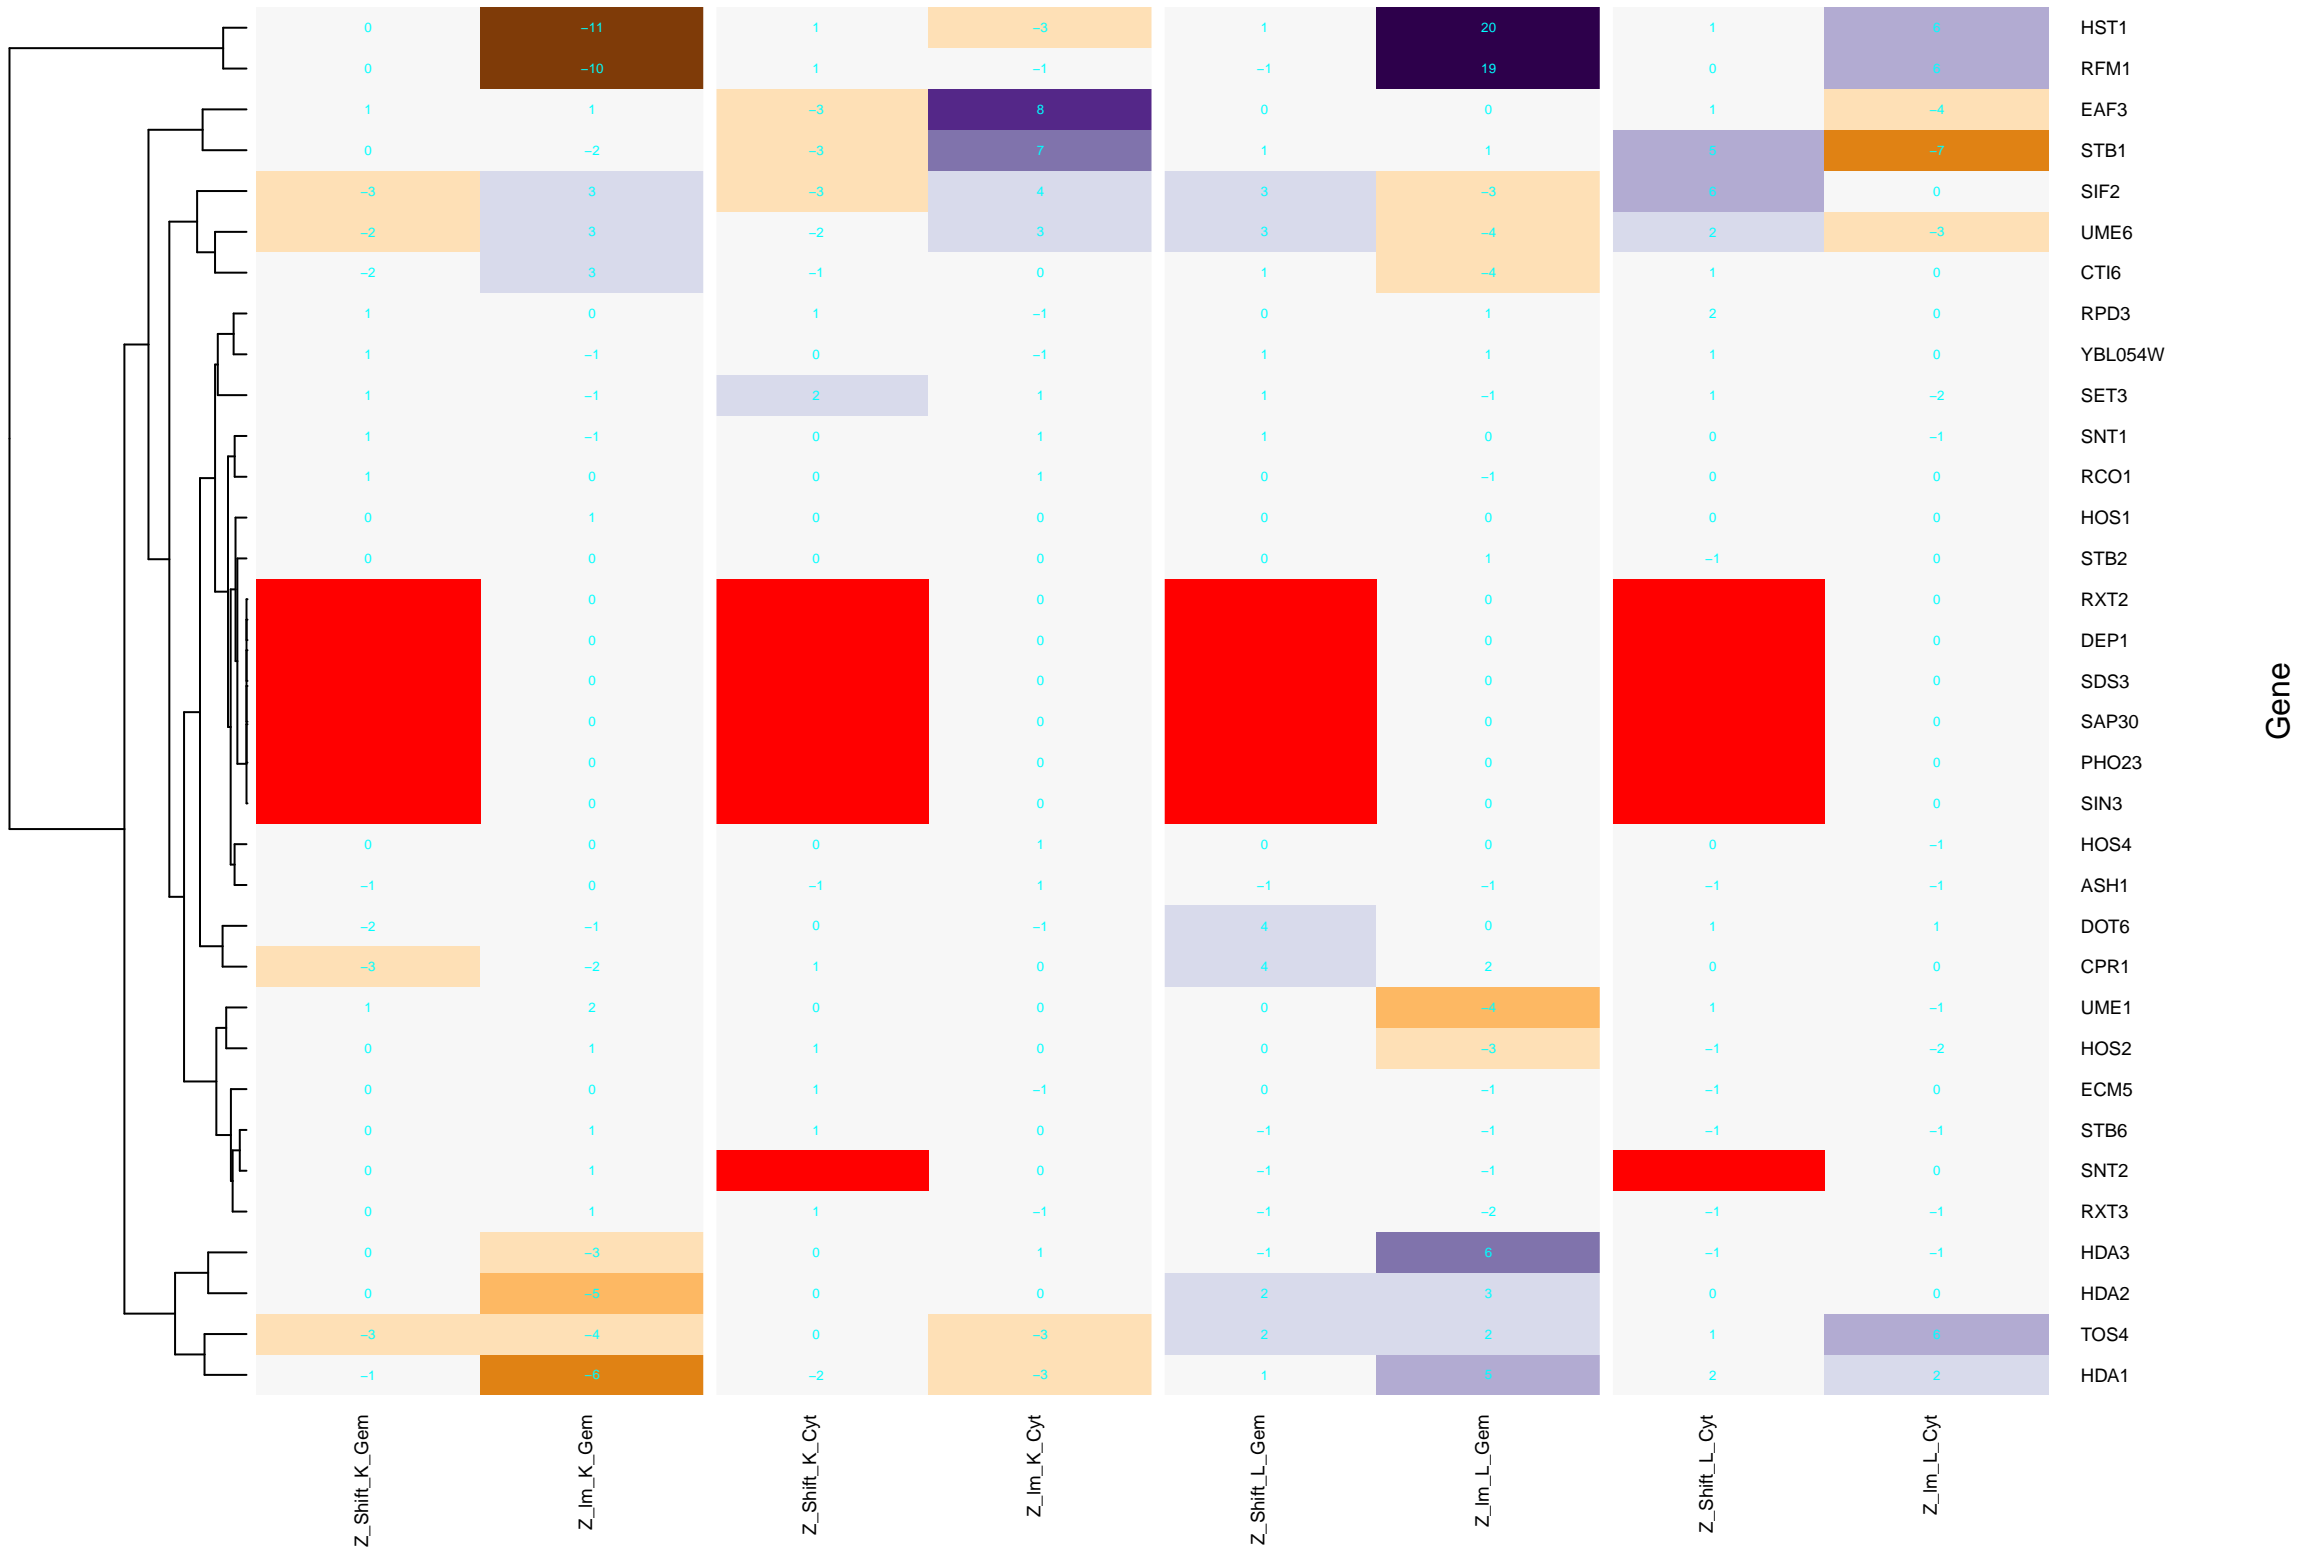

Color Key

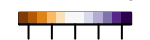

-10 5

Value

# Set3 complex

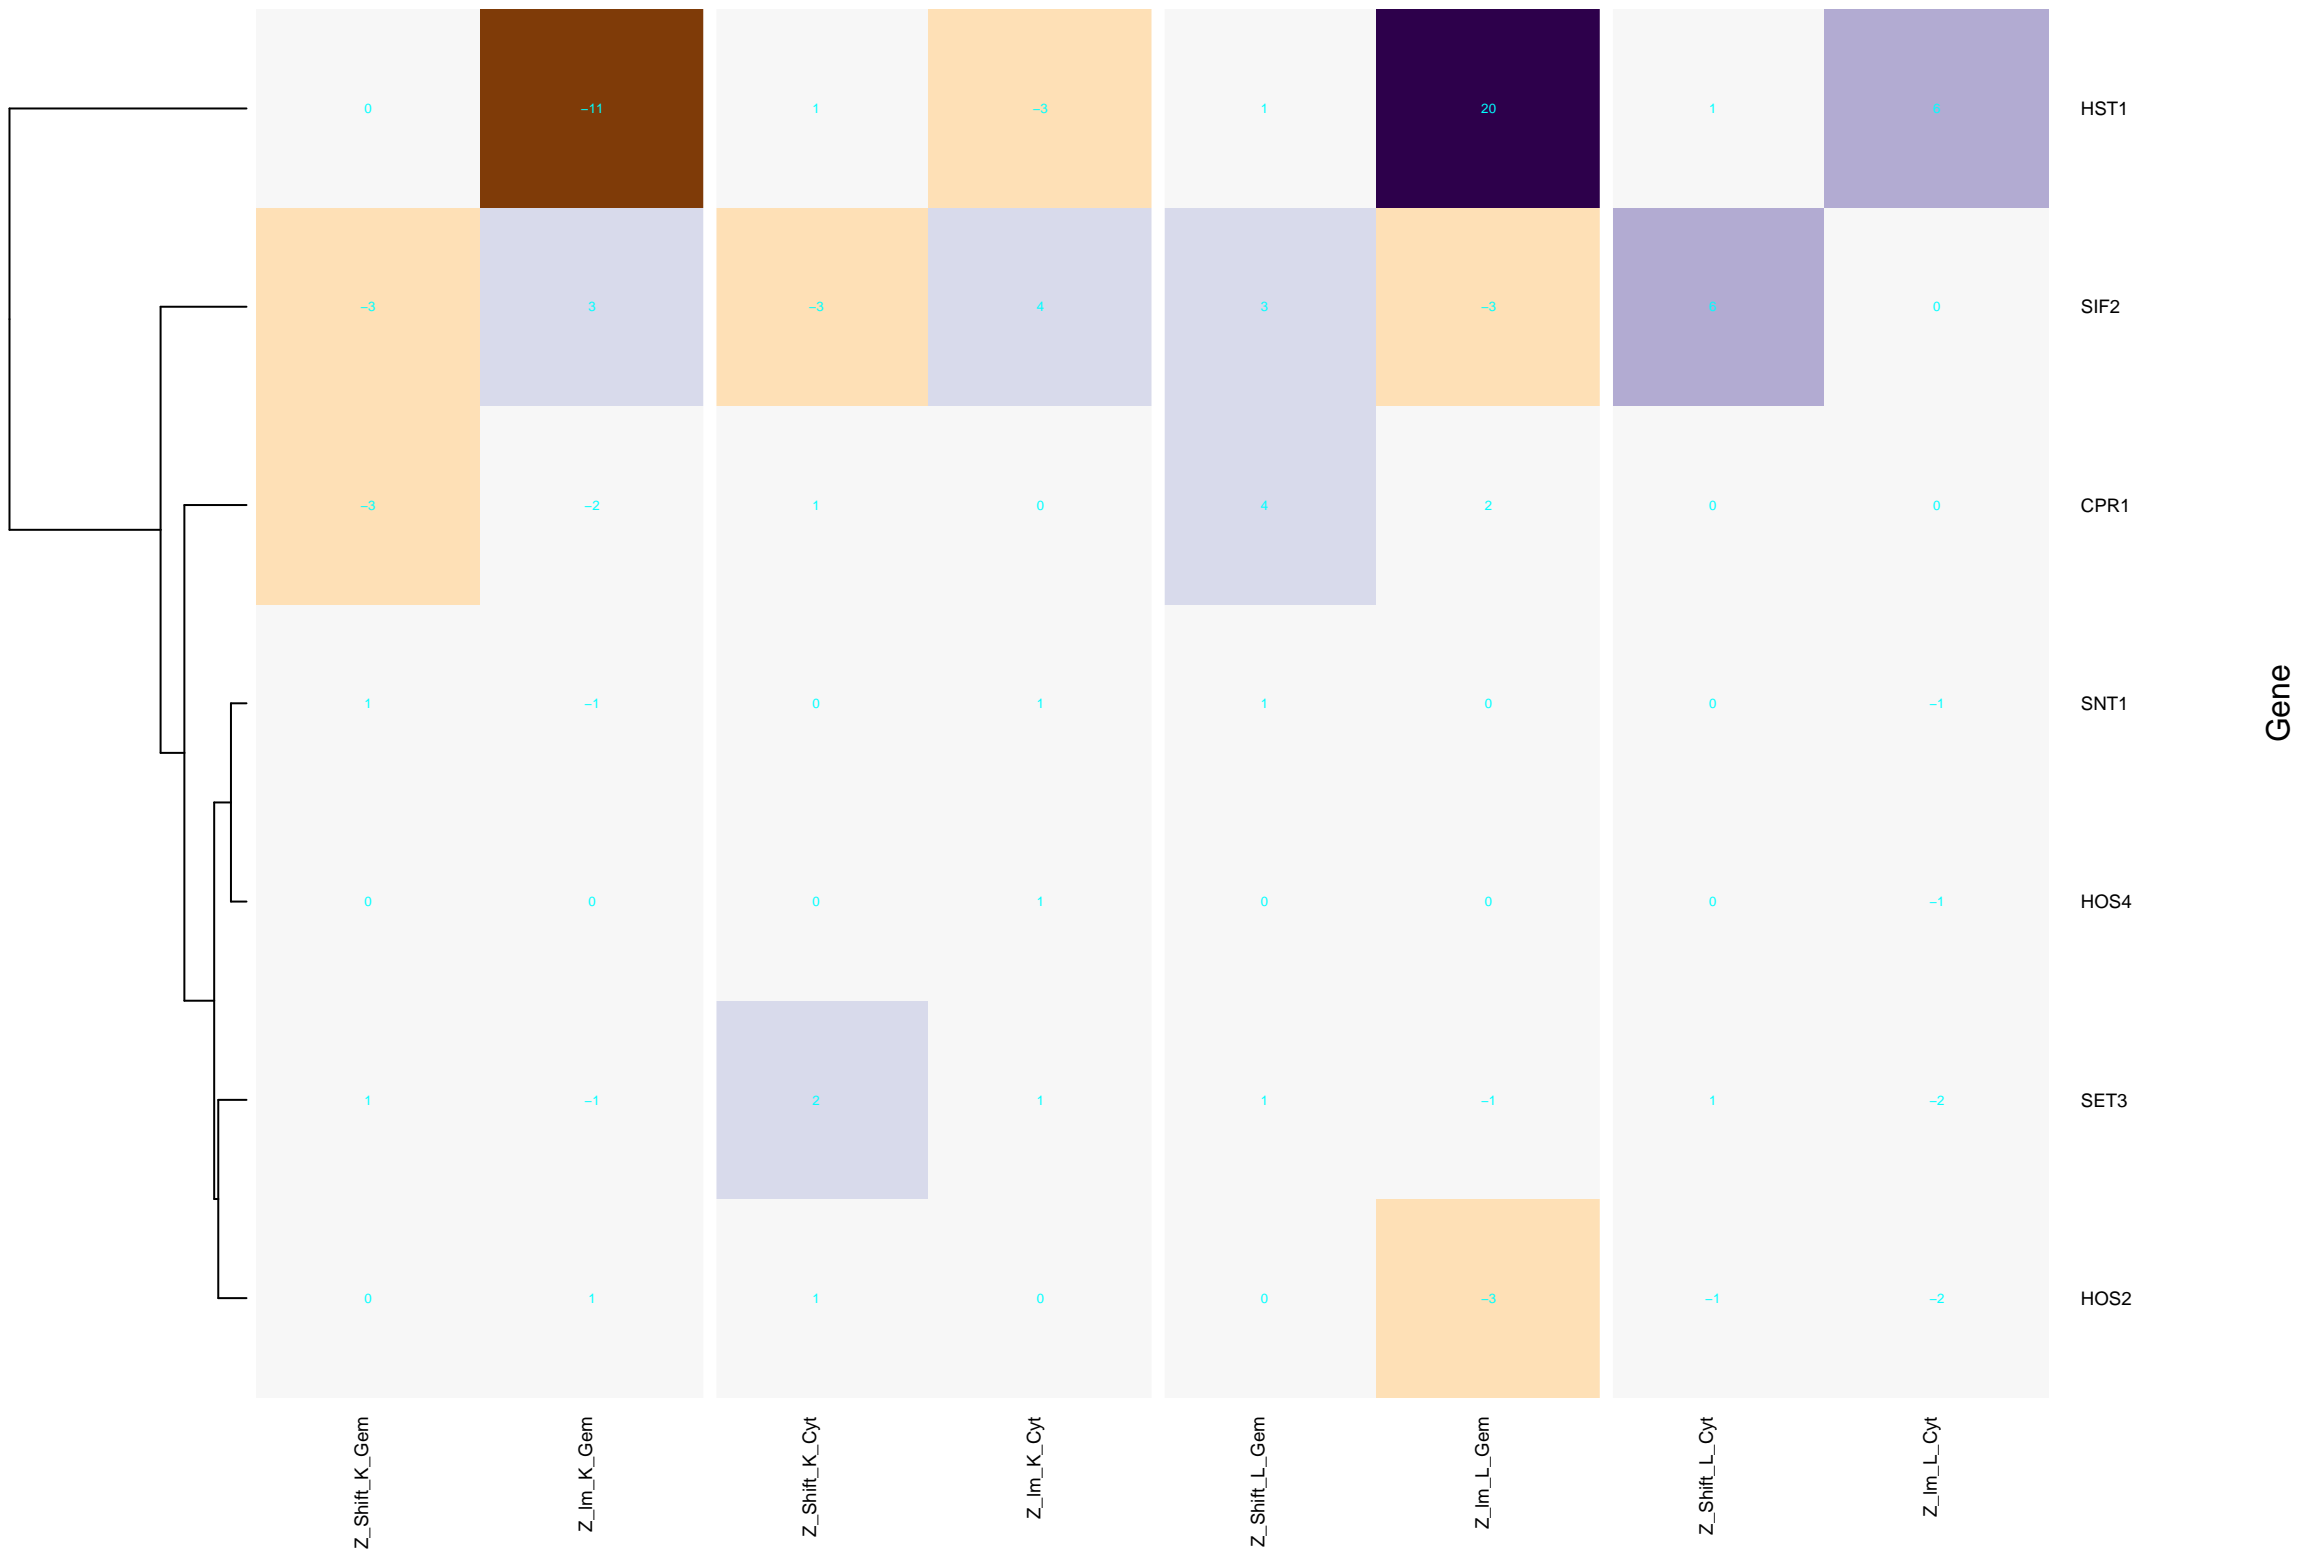

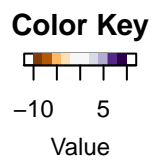

# Rpd3L-Expanded complex

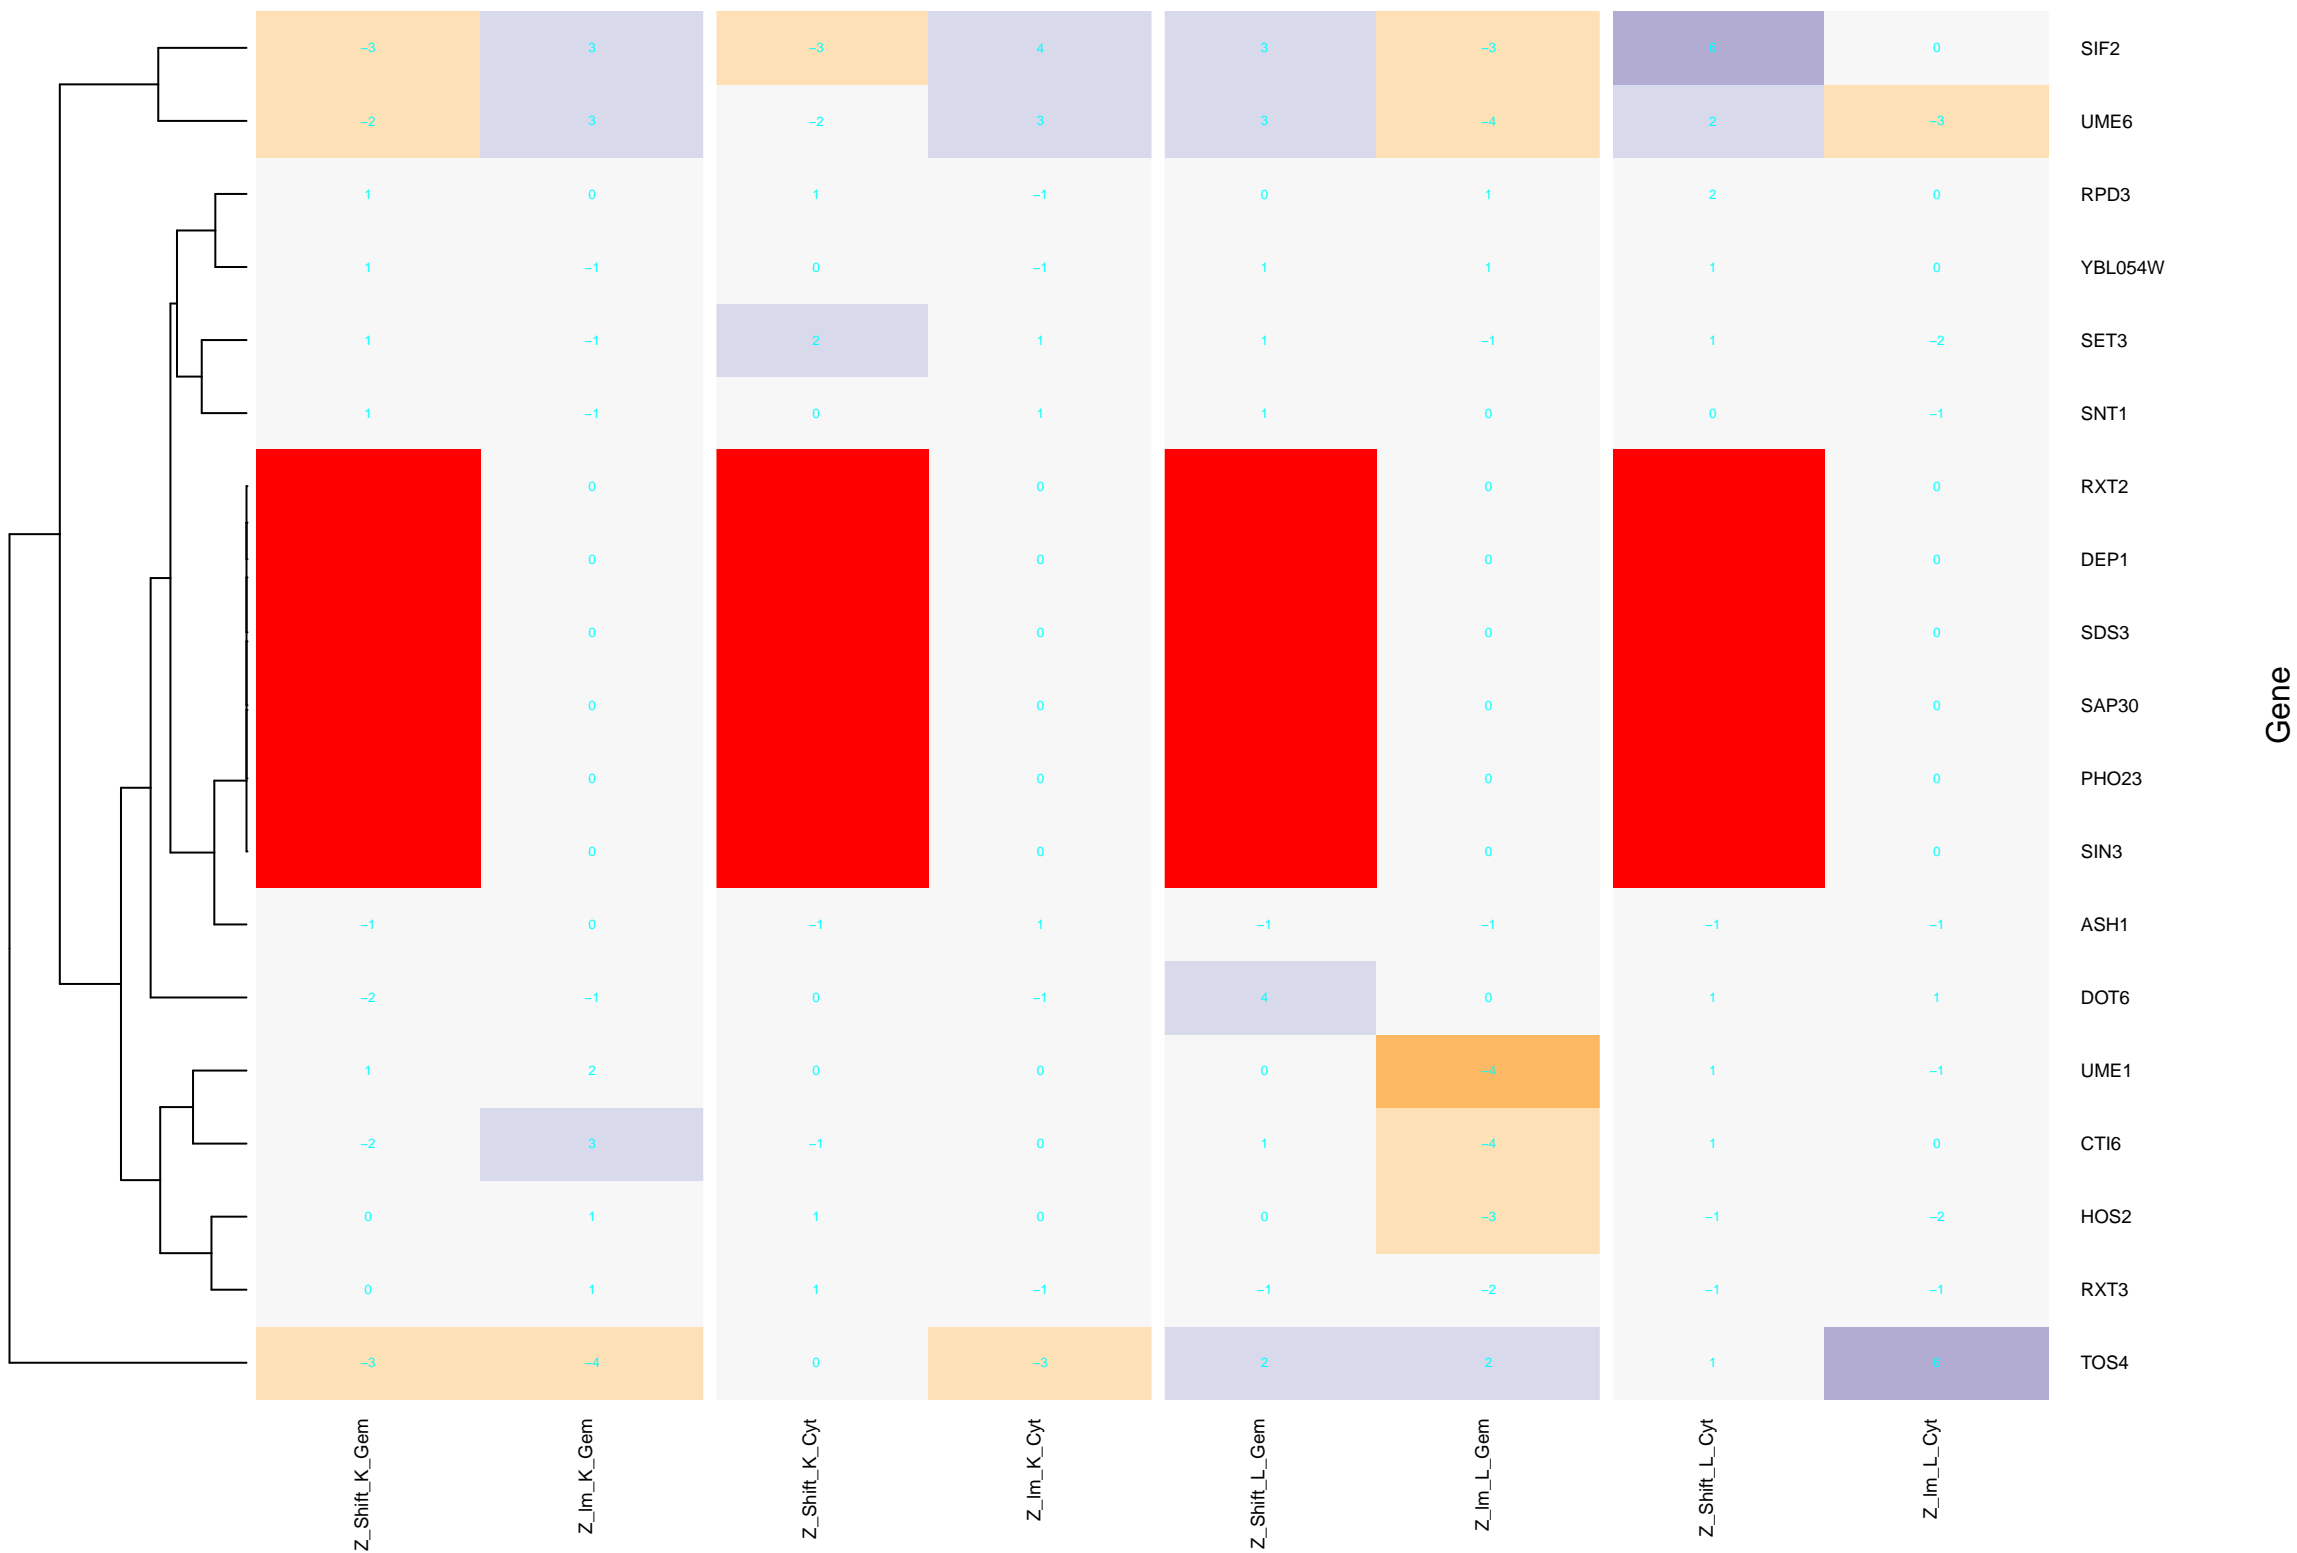

Snt2C complex

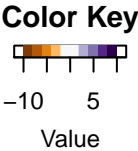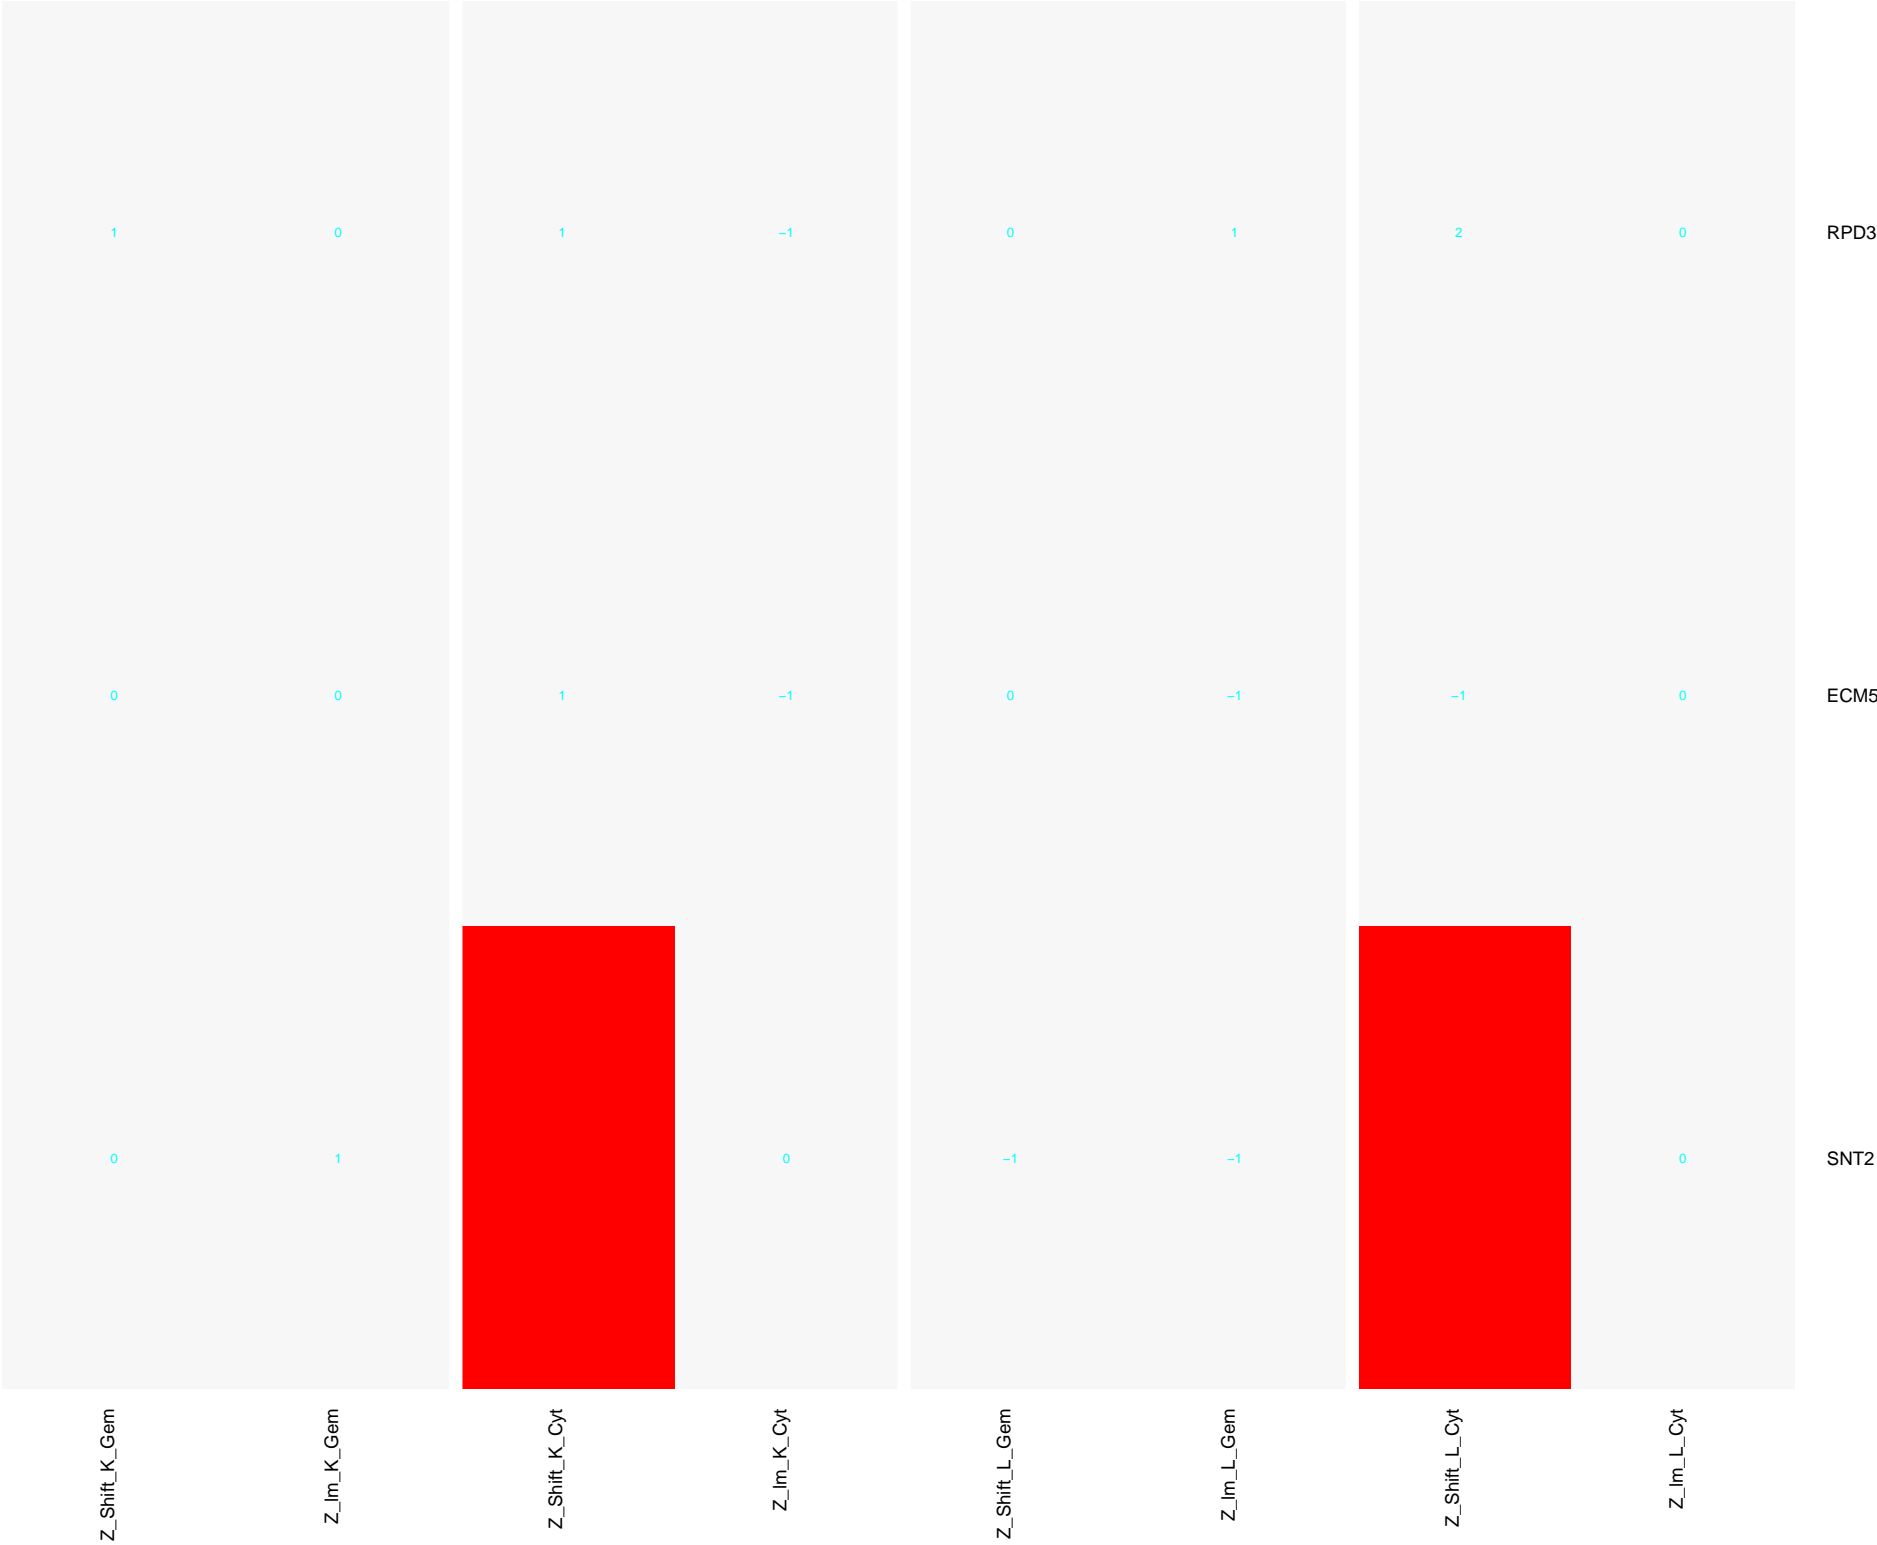

# Sin3-type complex

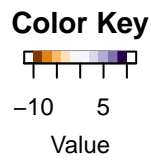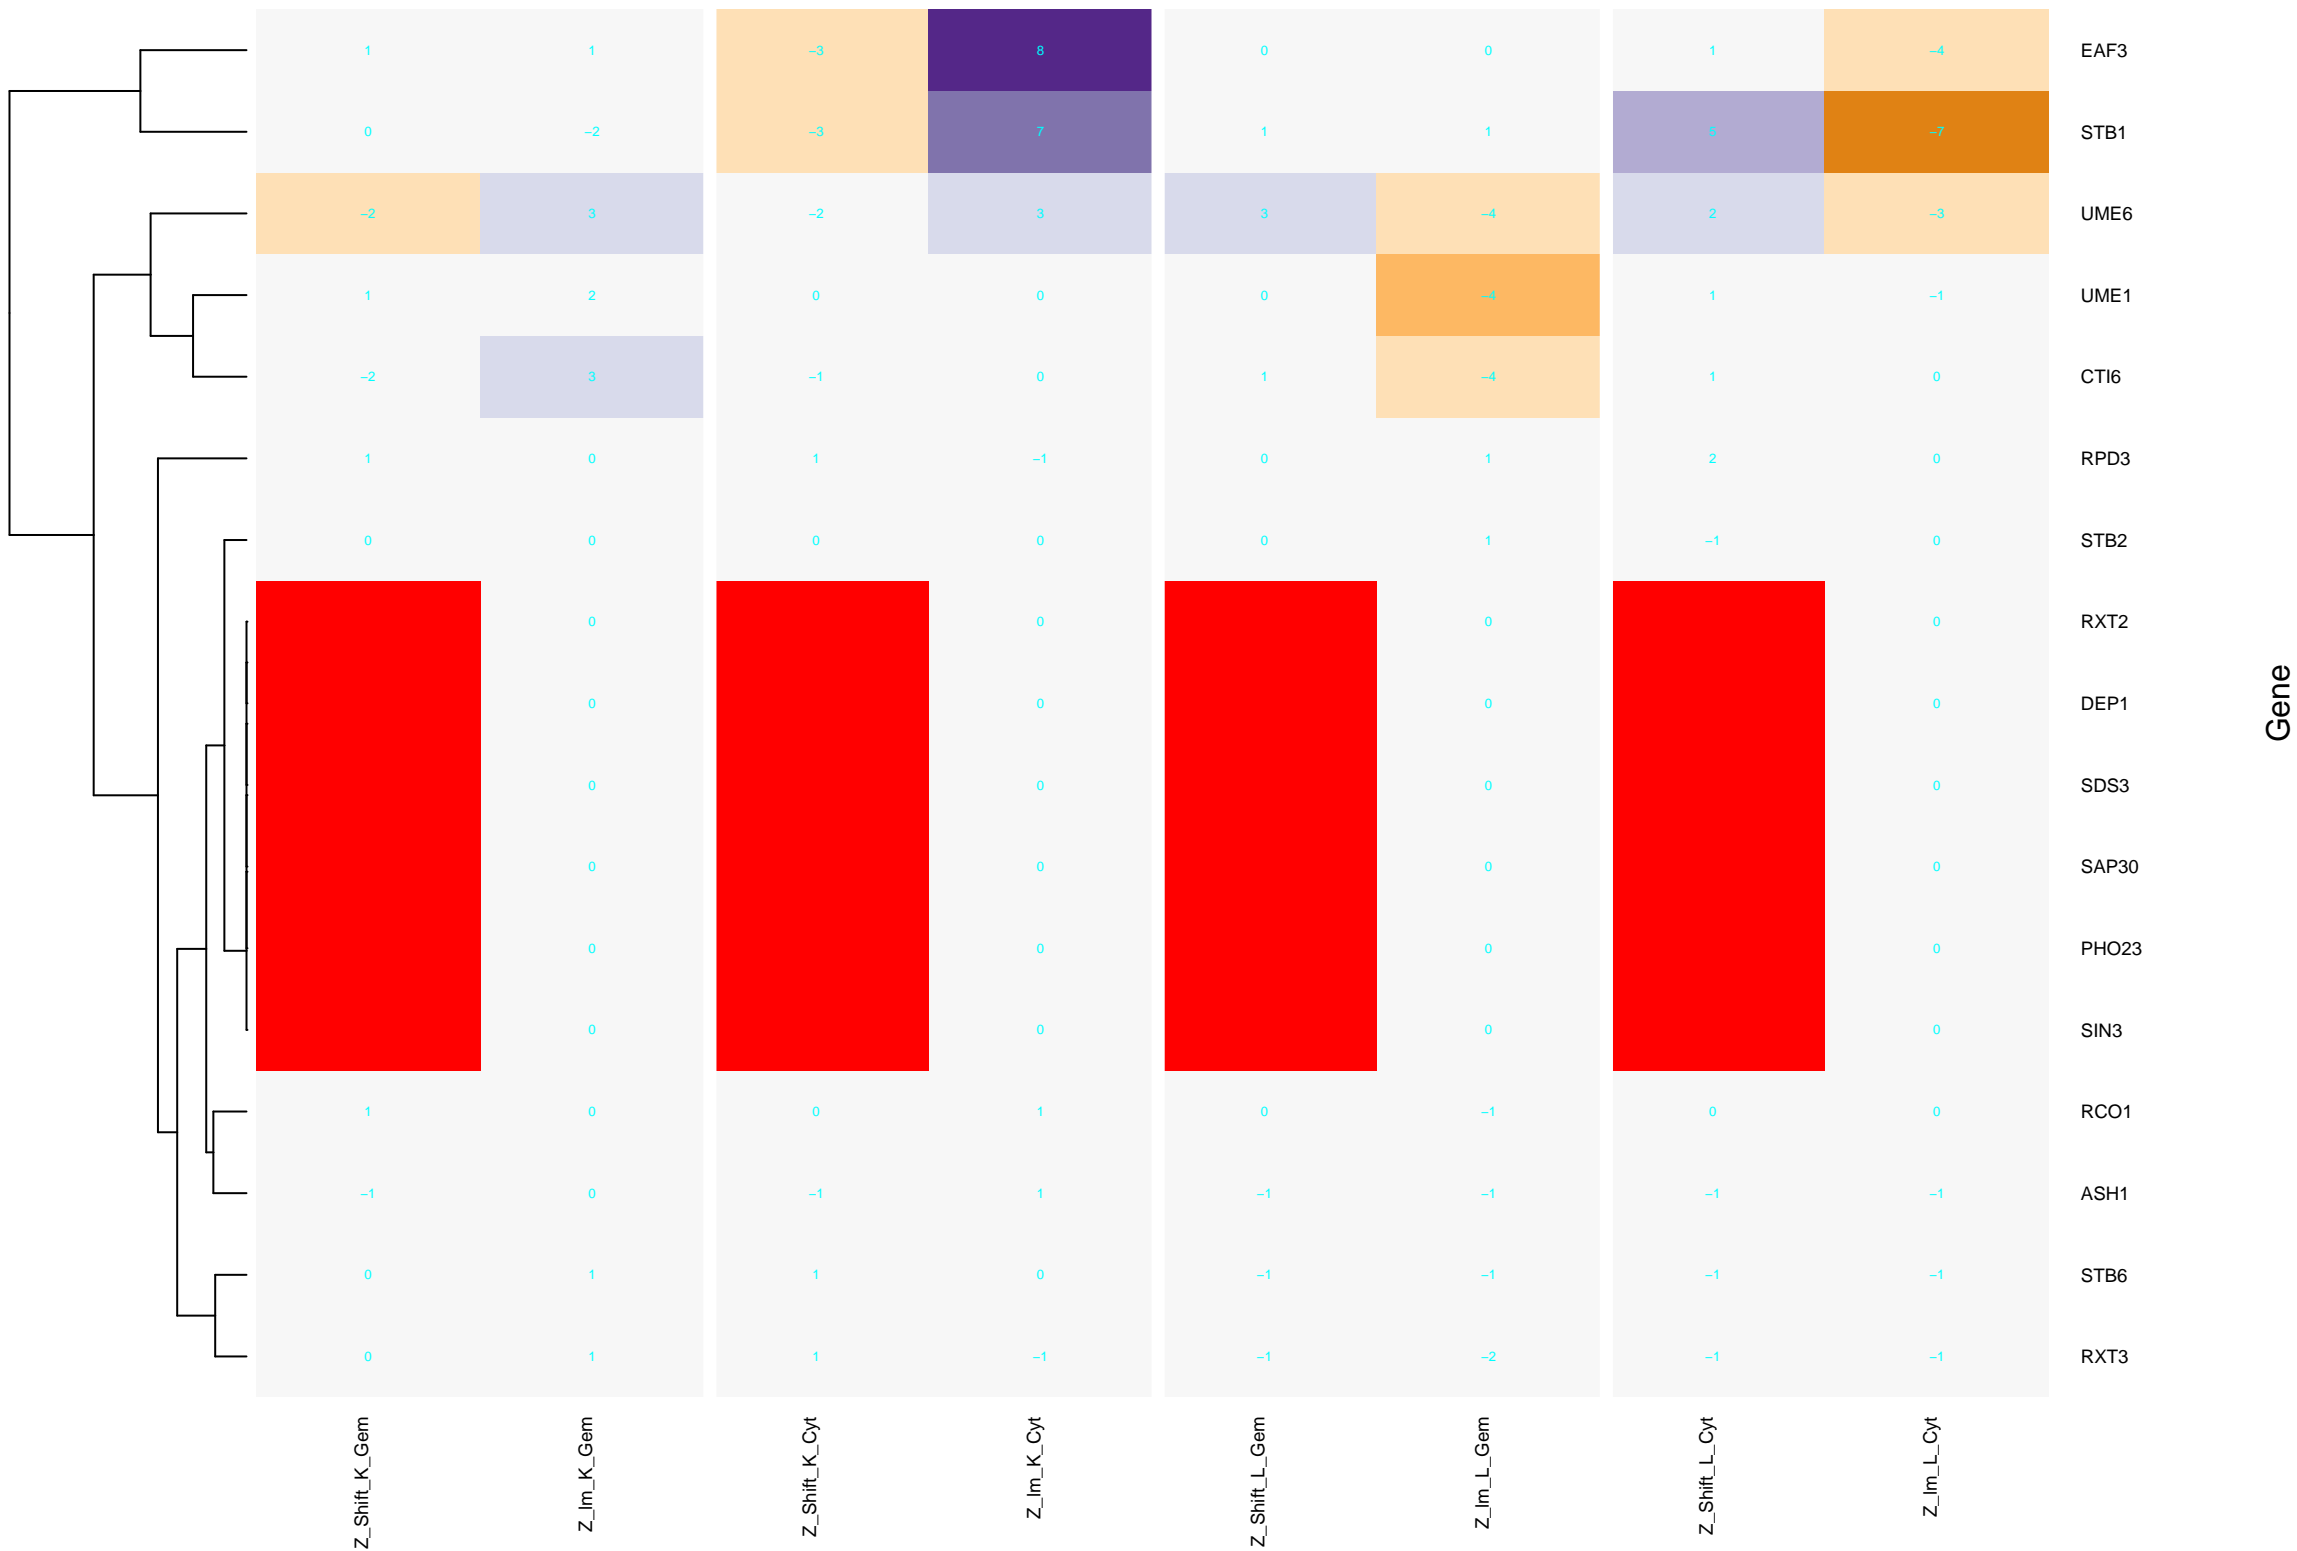

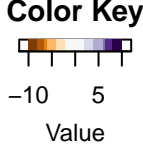

**HDA1 complex**

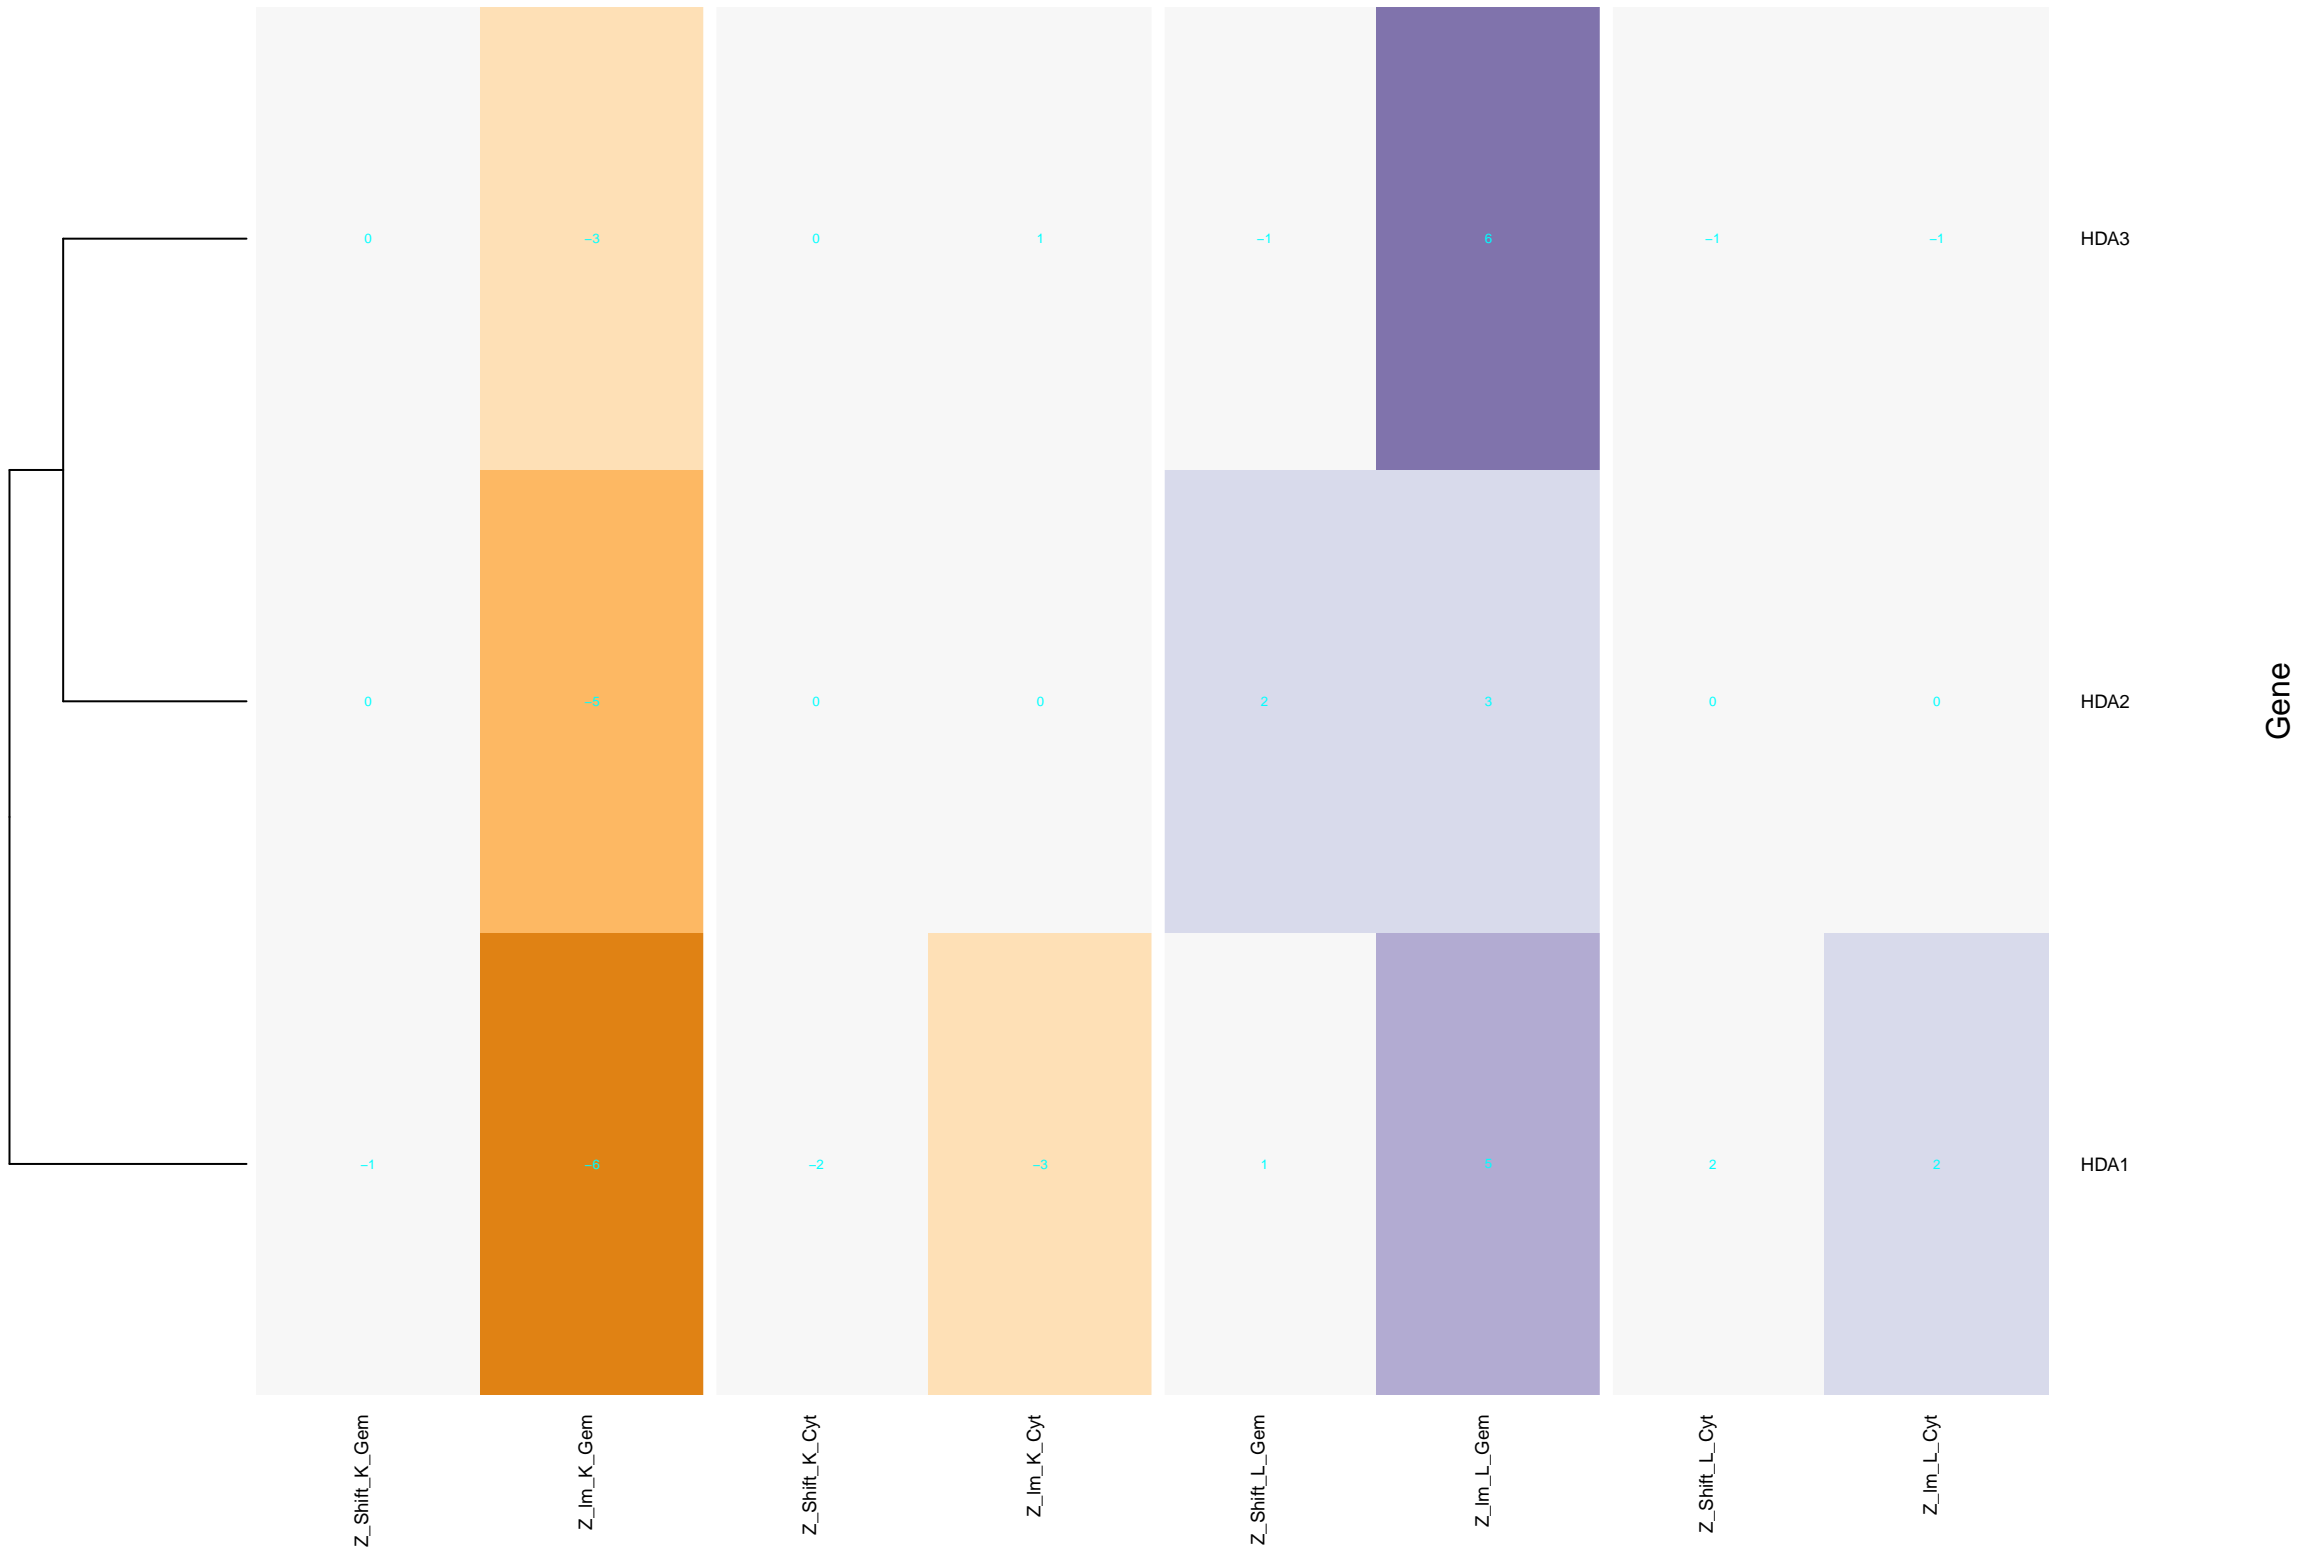

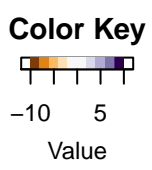

# Rpd3S complex

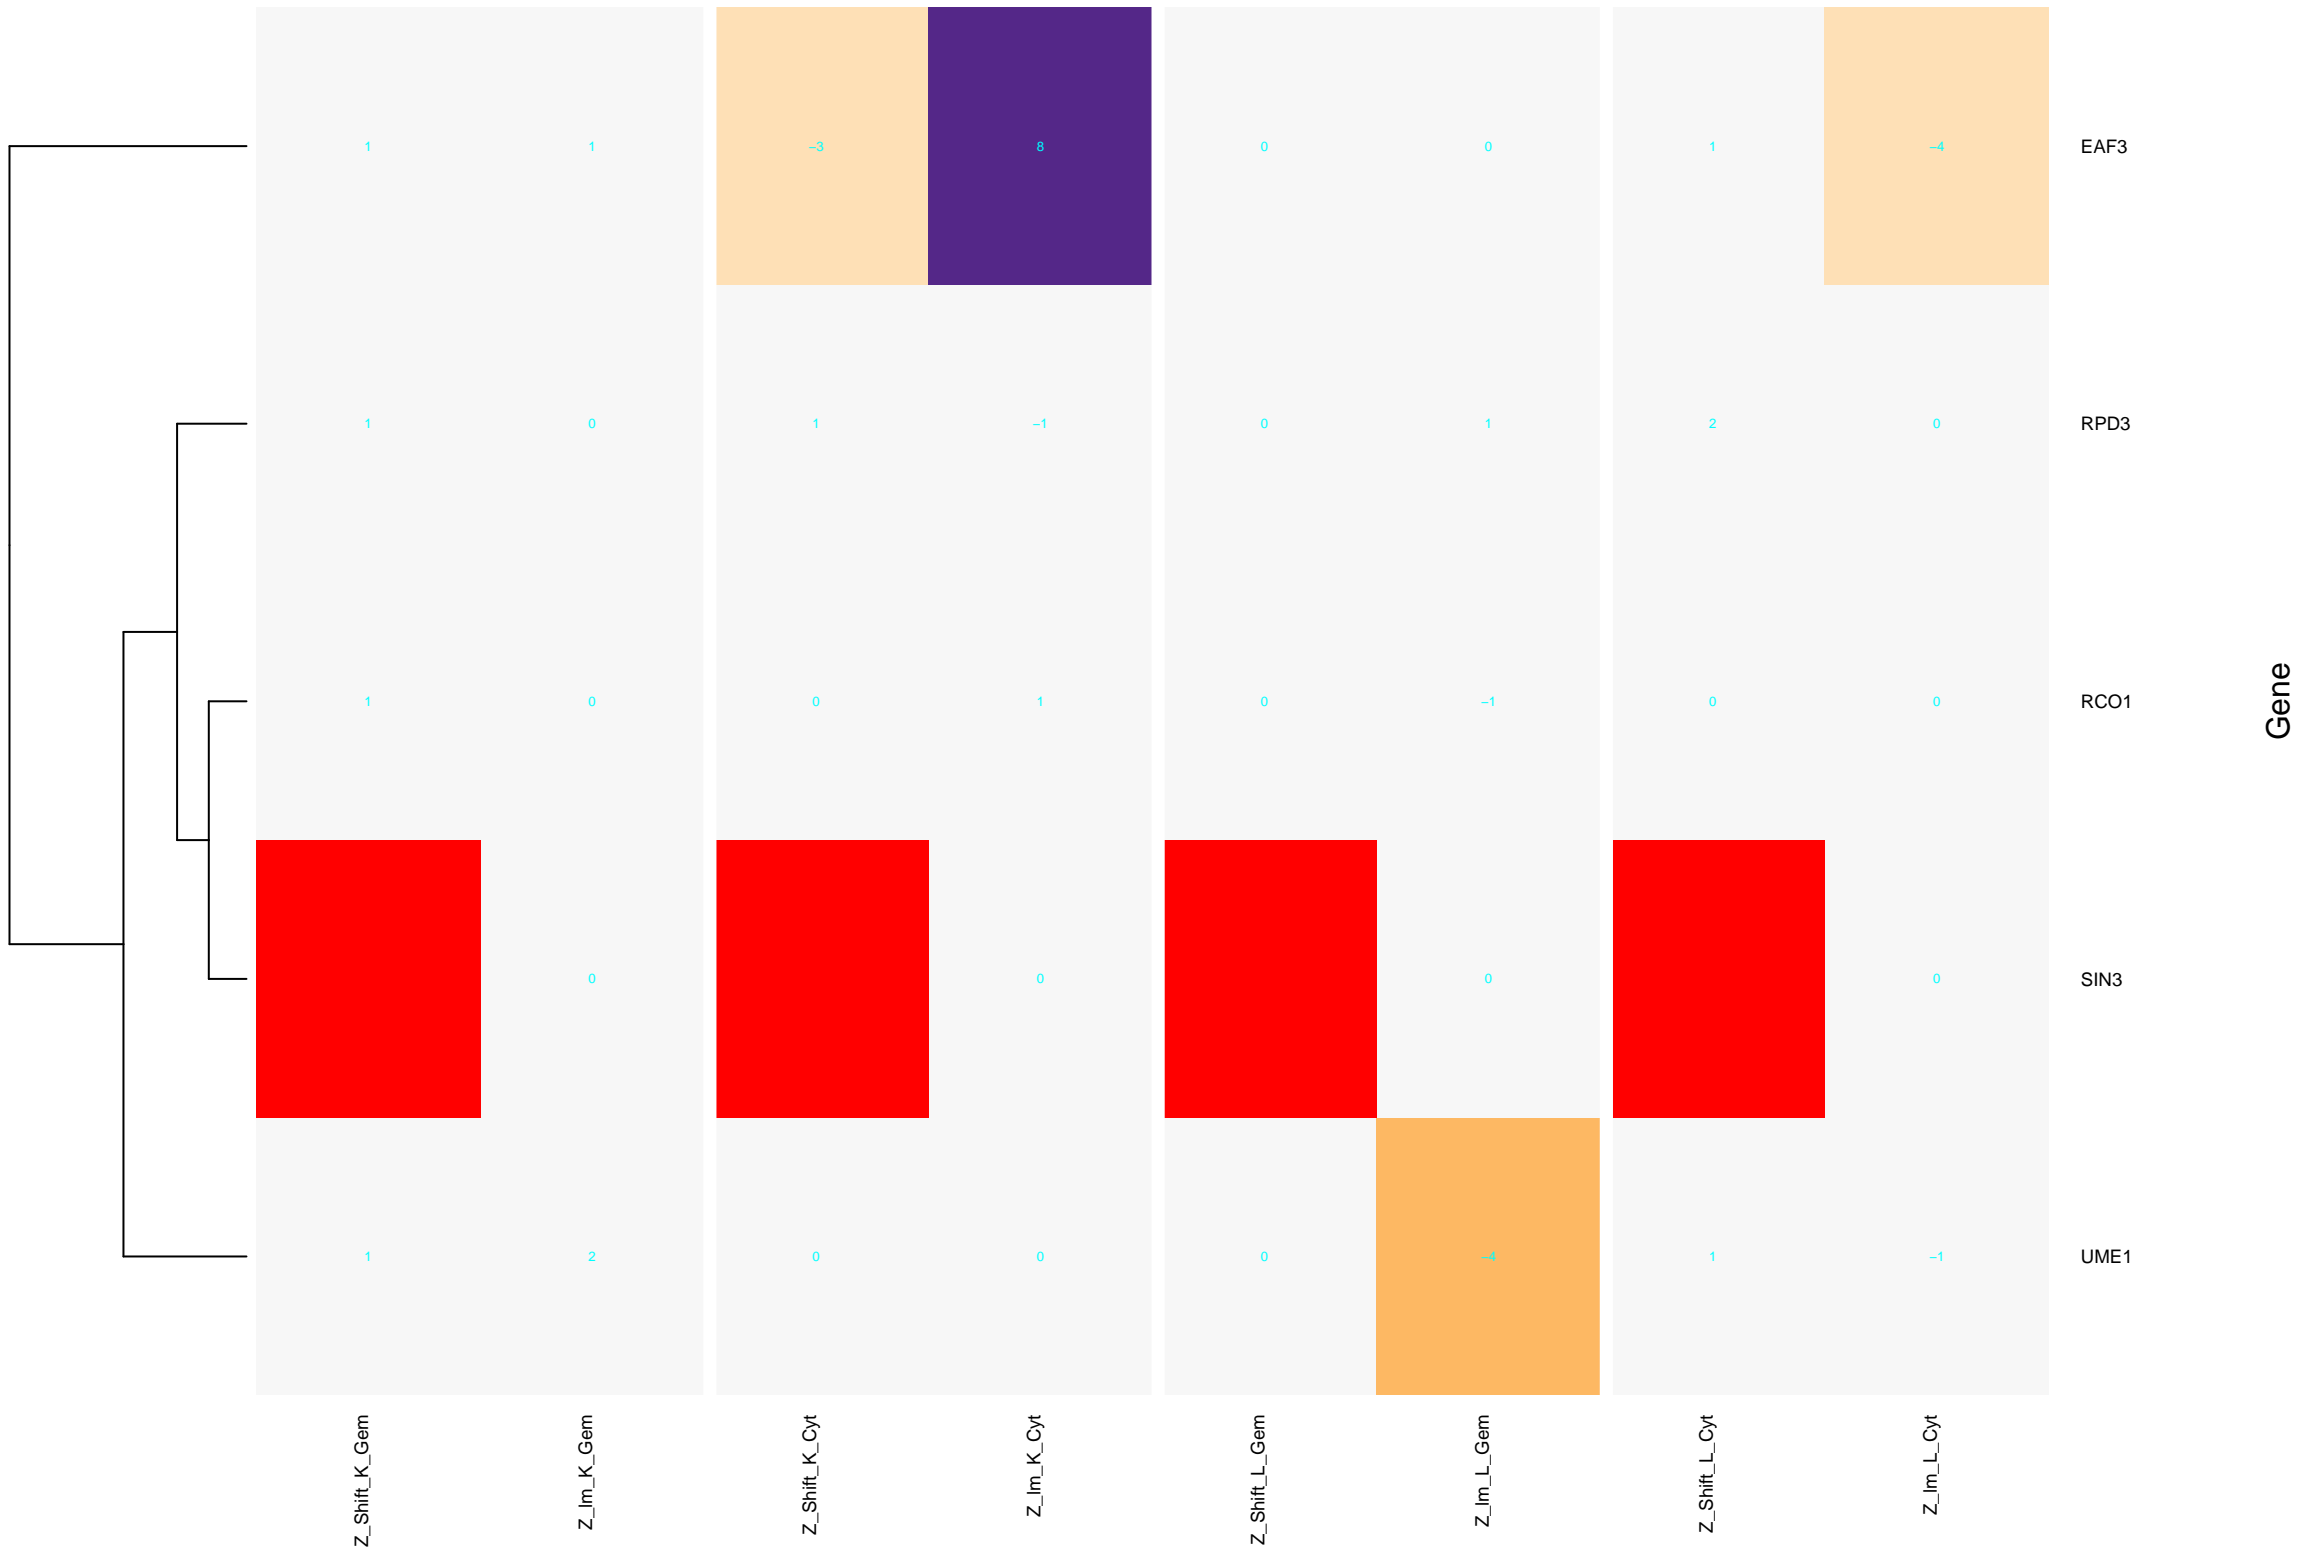

# Rpd3L complex

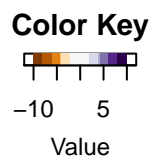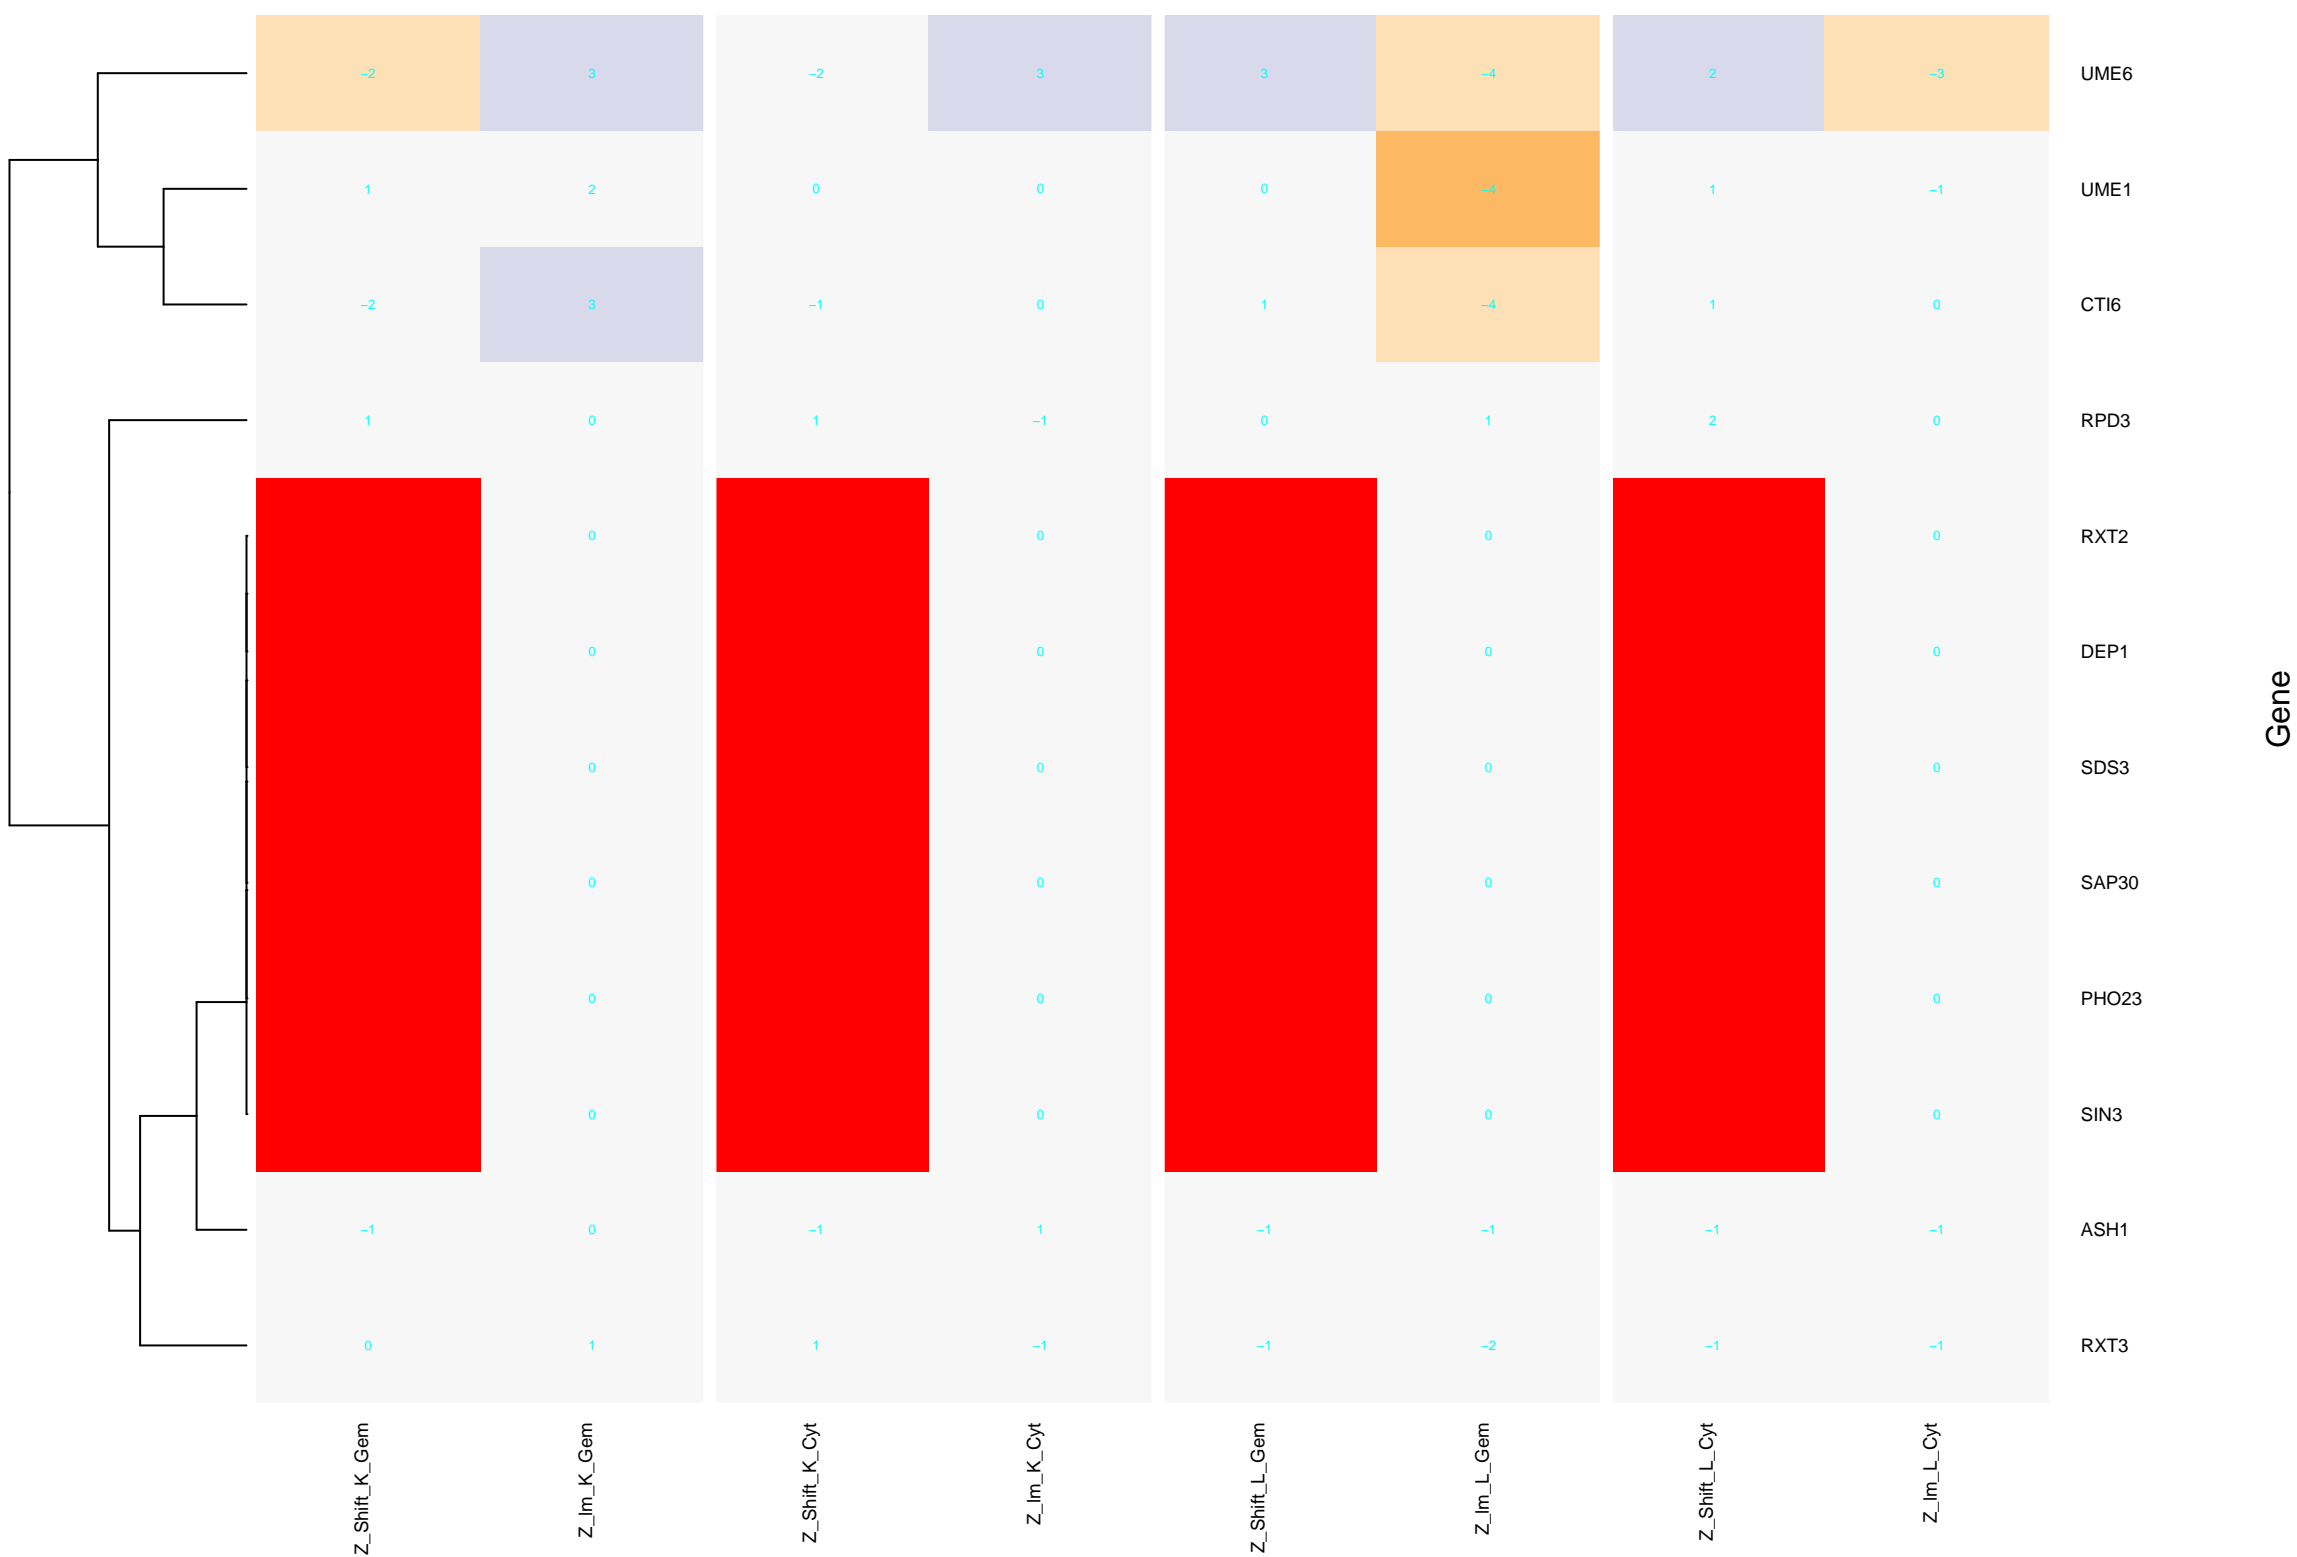

Supplement: s1 [file s1]
