# Supplementary material for: A Humanized Yeast Phenomic Model of Deoxycytidine Kinase to Predict Genetic Buffering of Nucleoside Analog Cytotoxicity
Source: MDPI journal article supplement (doi:10.3390/genes10100770), 2019-09-30

YDL227C Scatter RF for L with SD

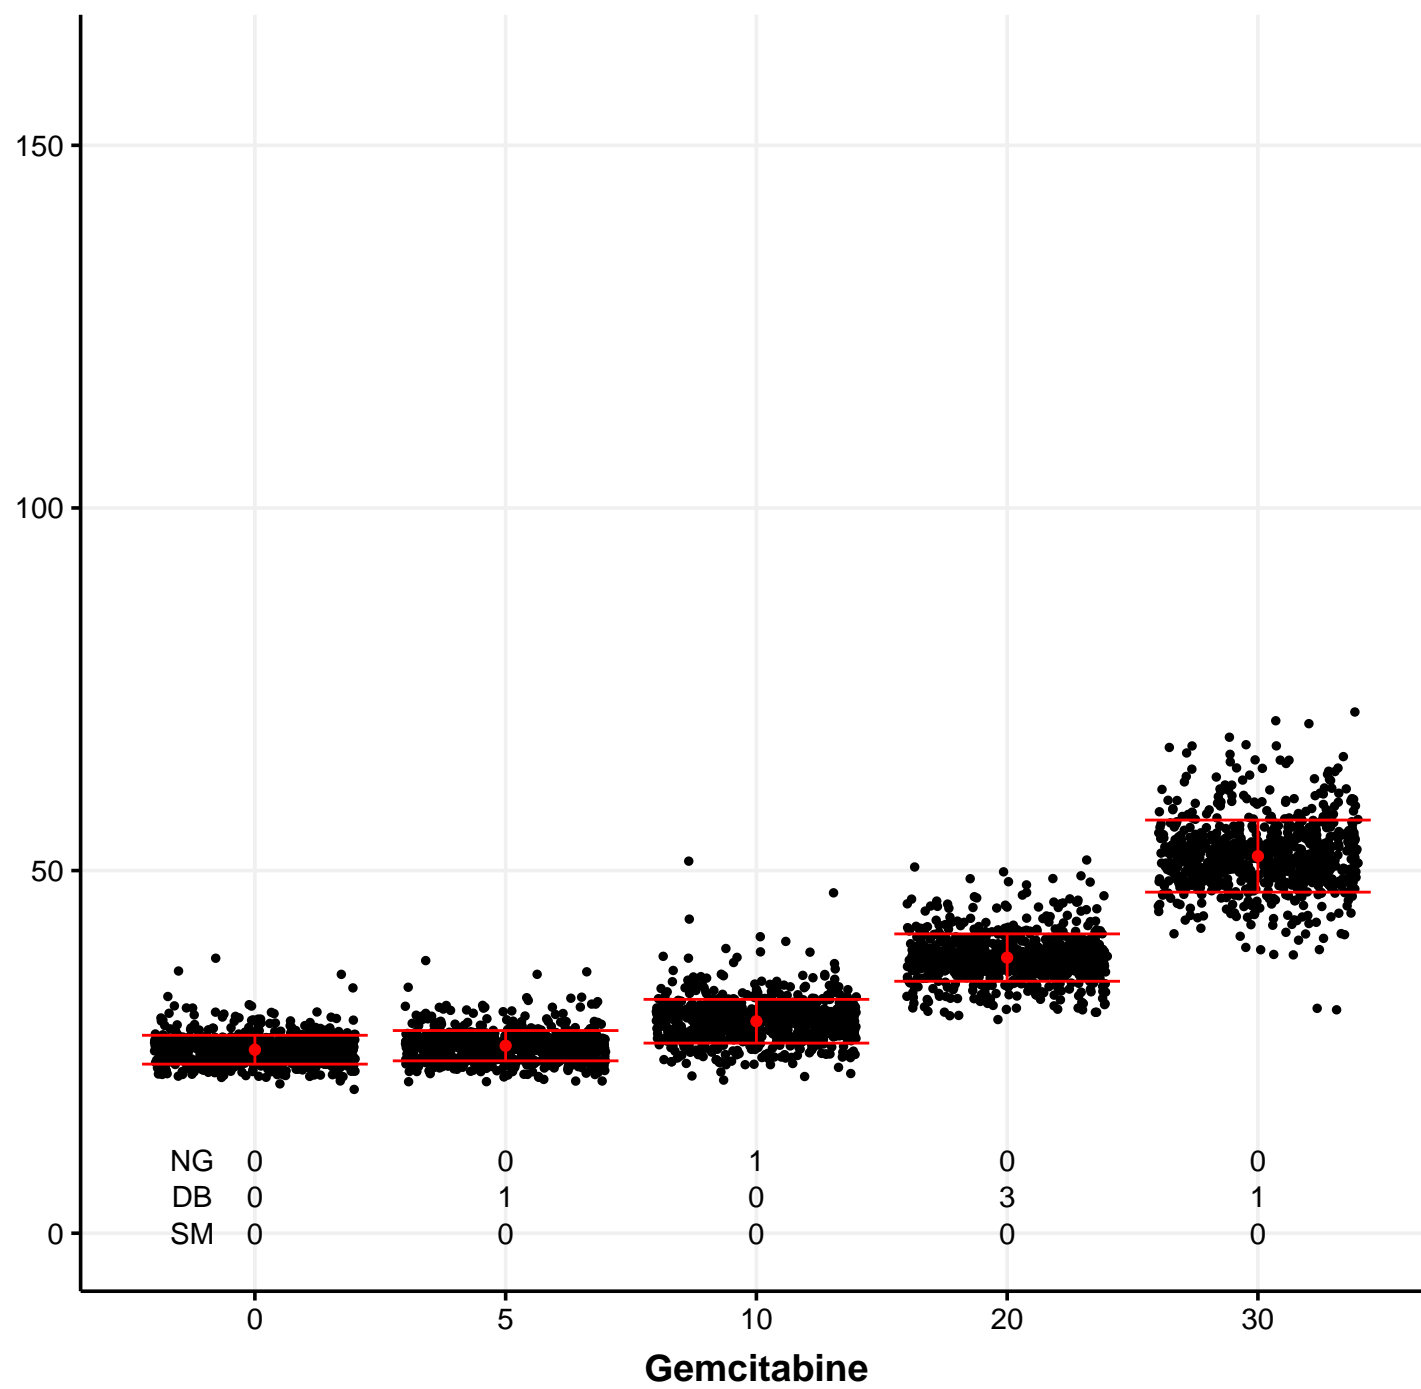

YDL227C Scatter RF for K with SD

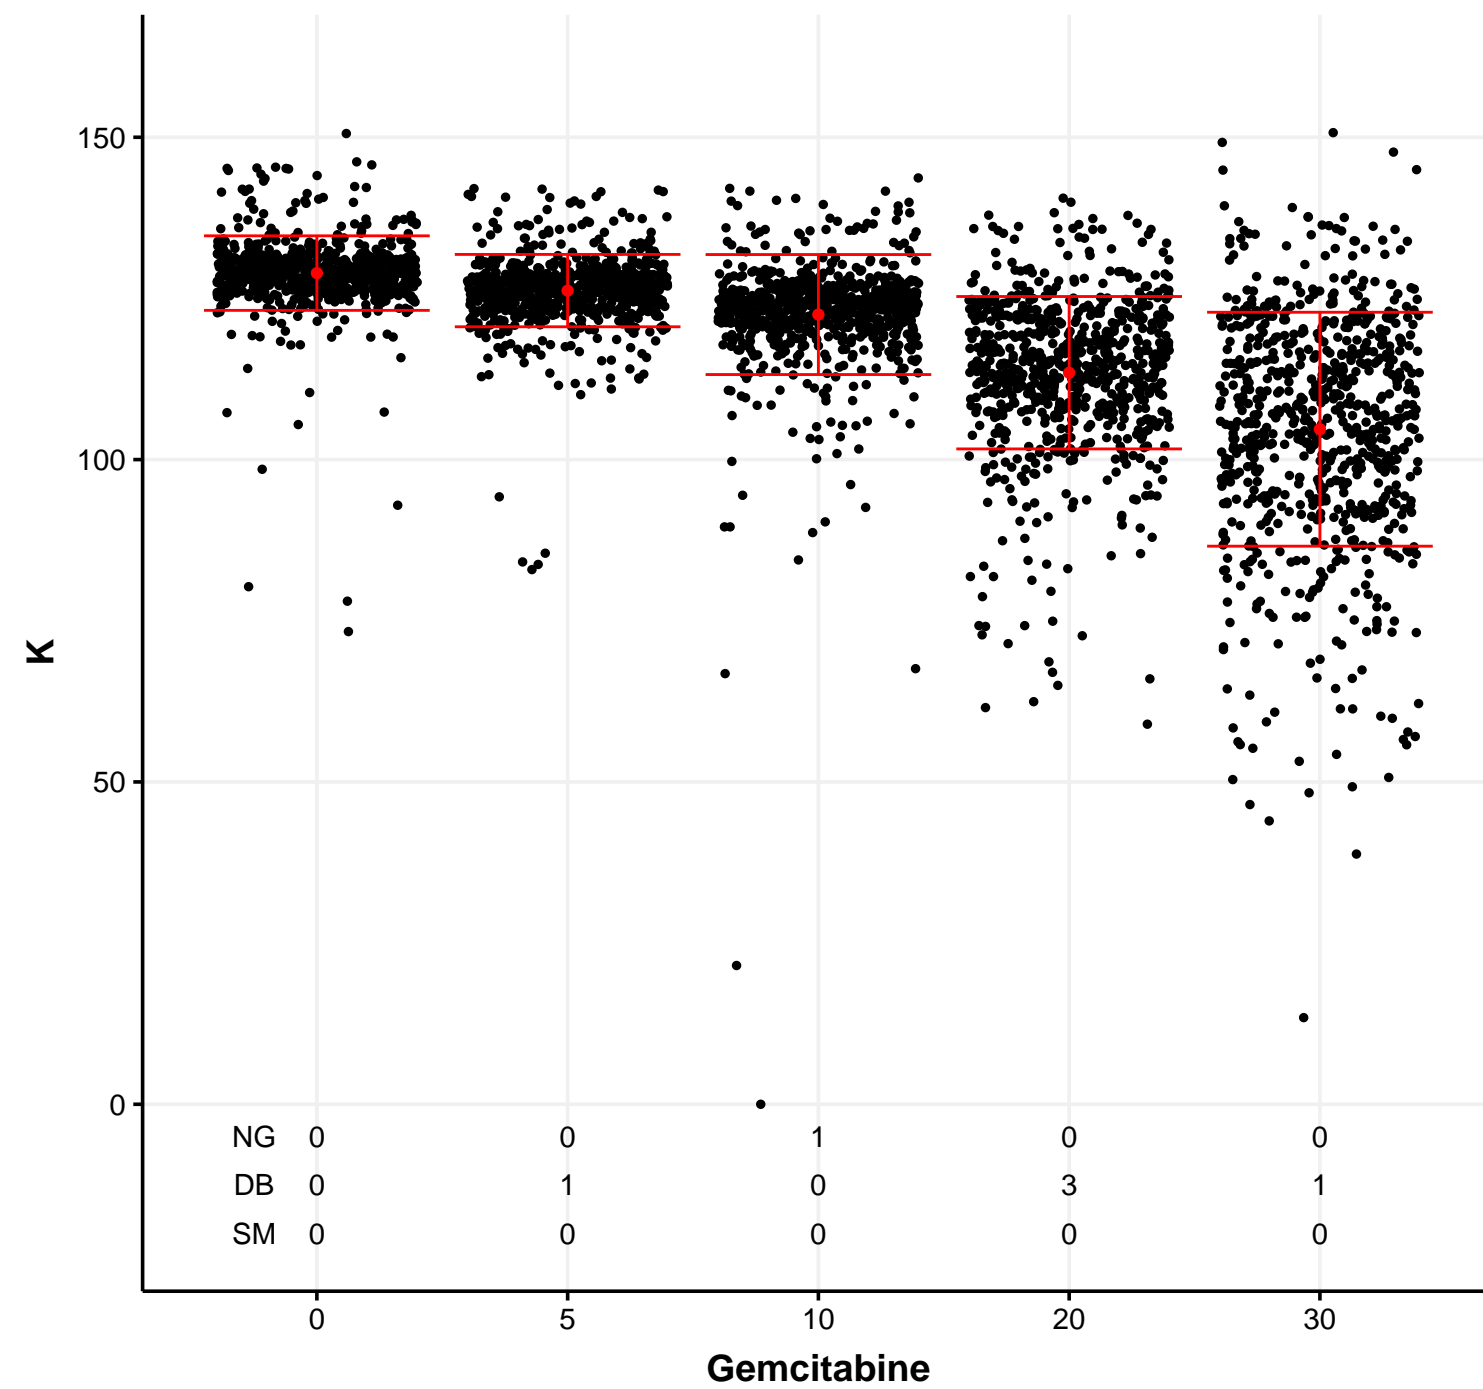

YDL227C Scatter RF for r with SD

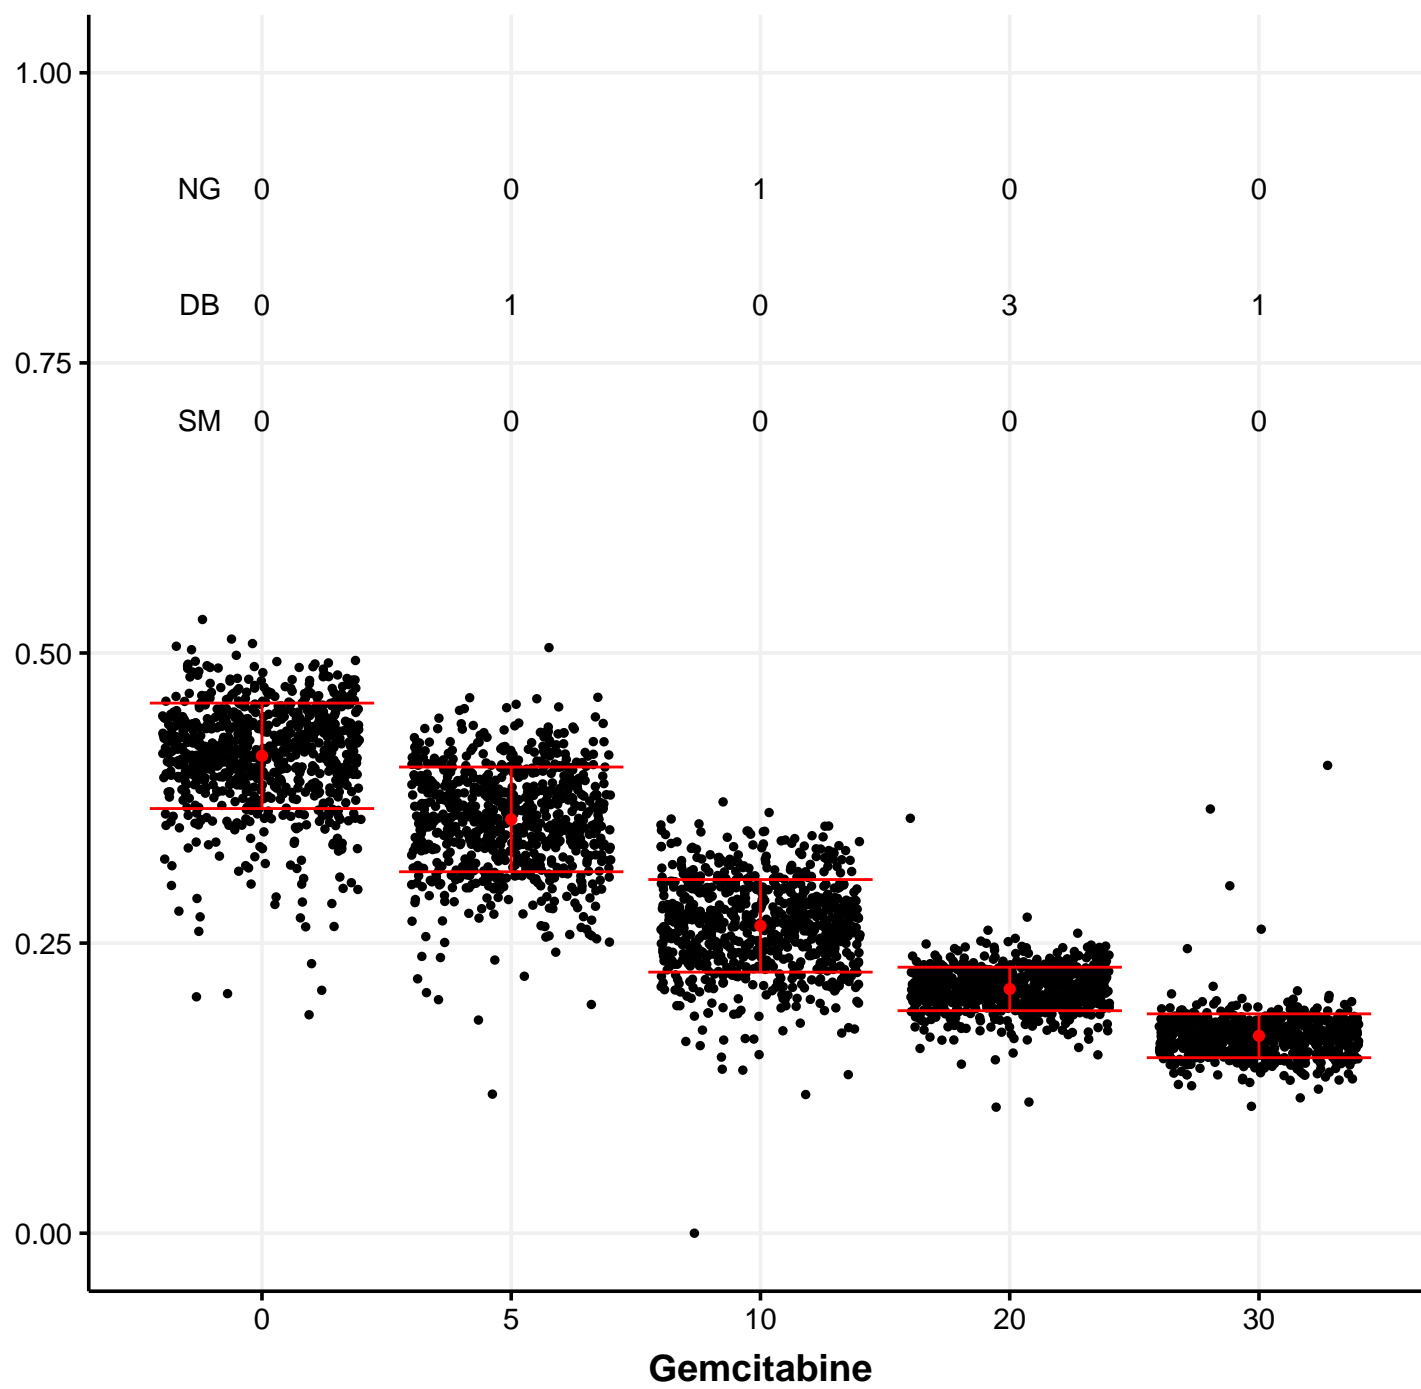

YDL227C Scatter RF for AUC with SD

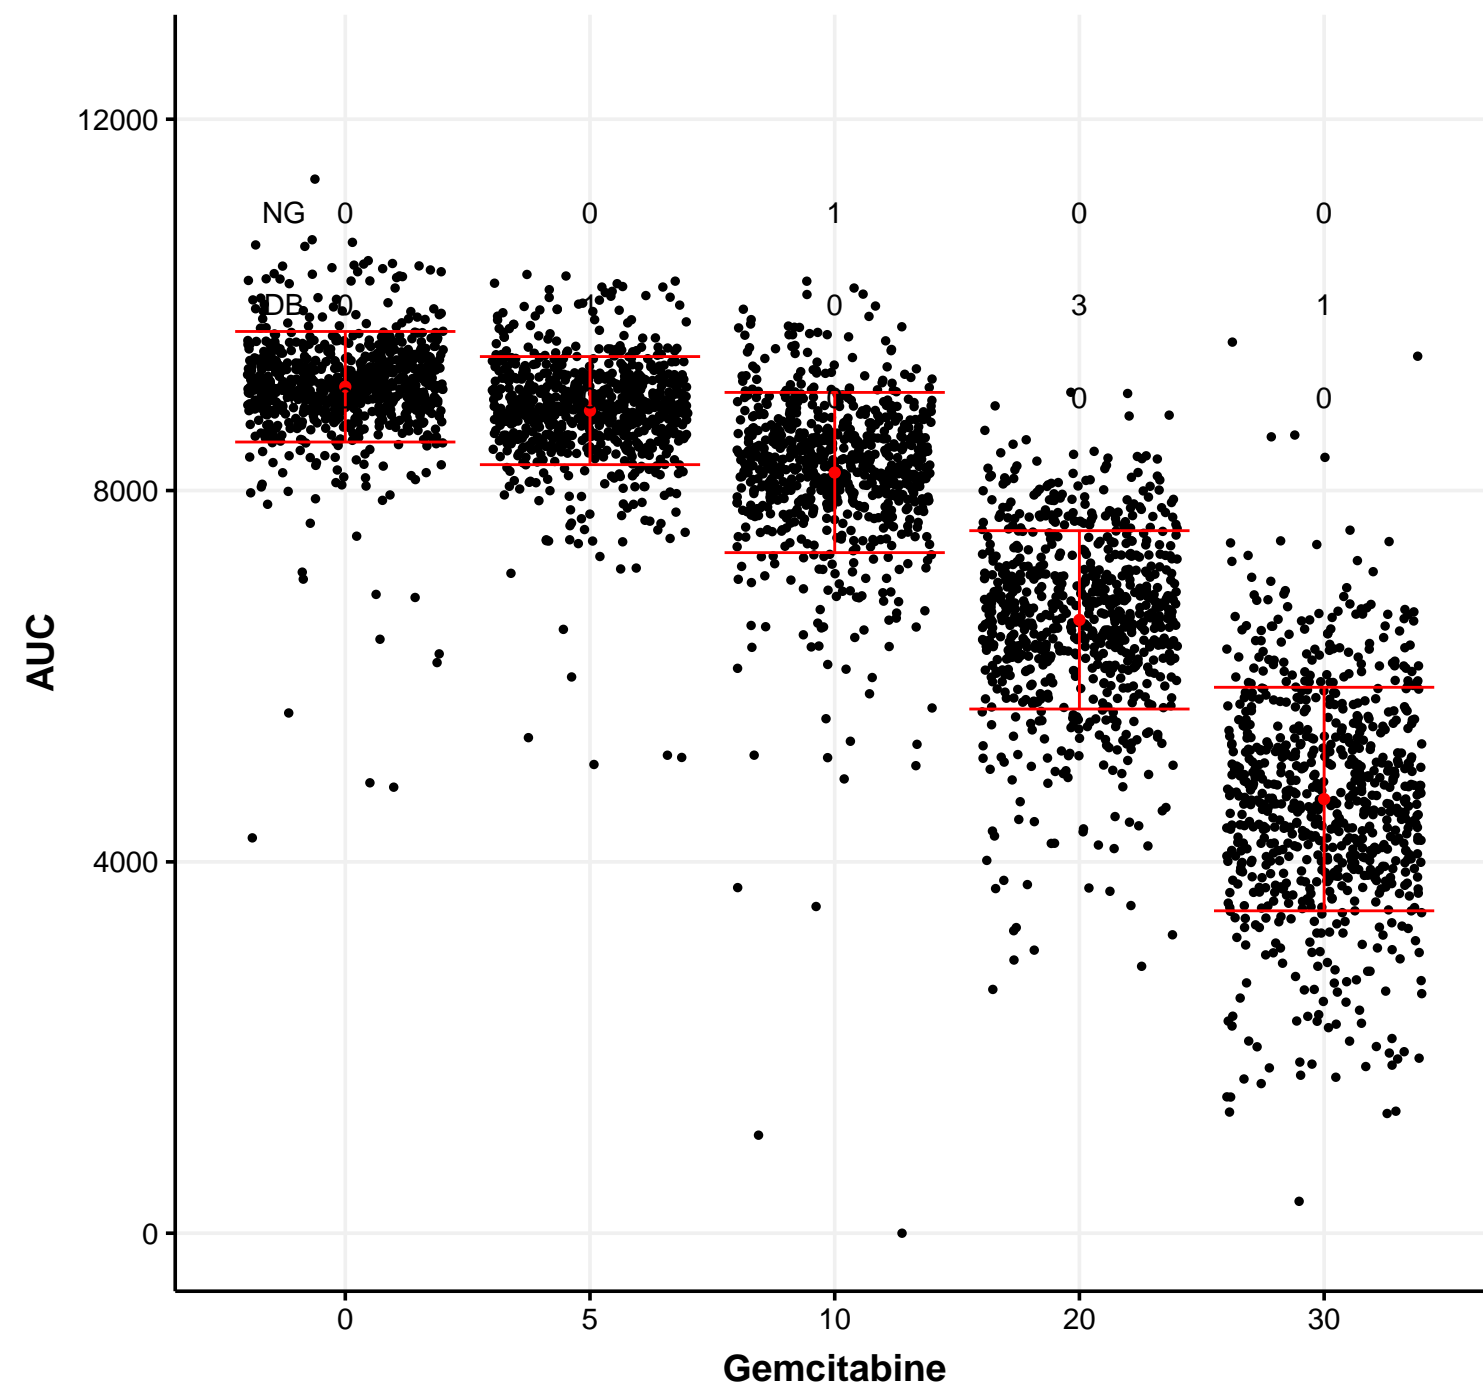

YDL227C Scatter RF for L with SD

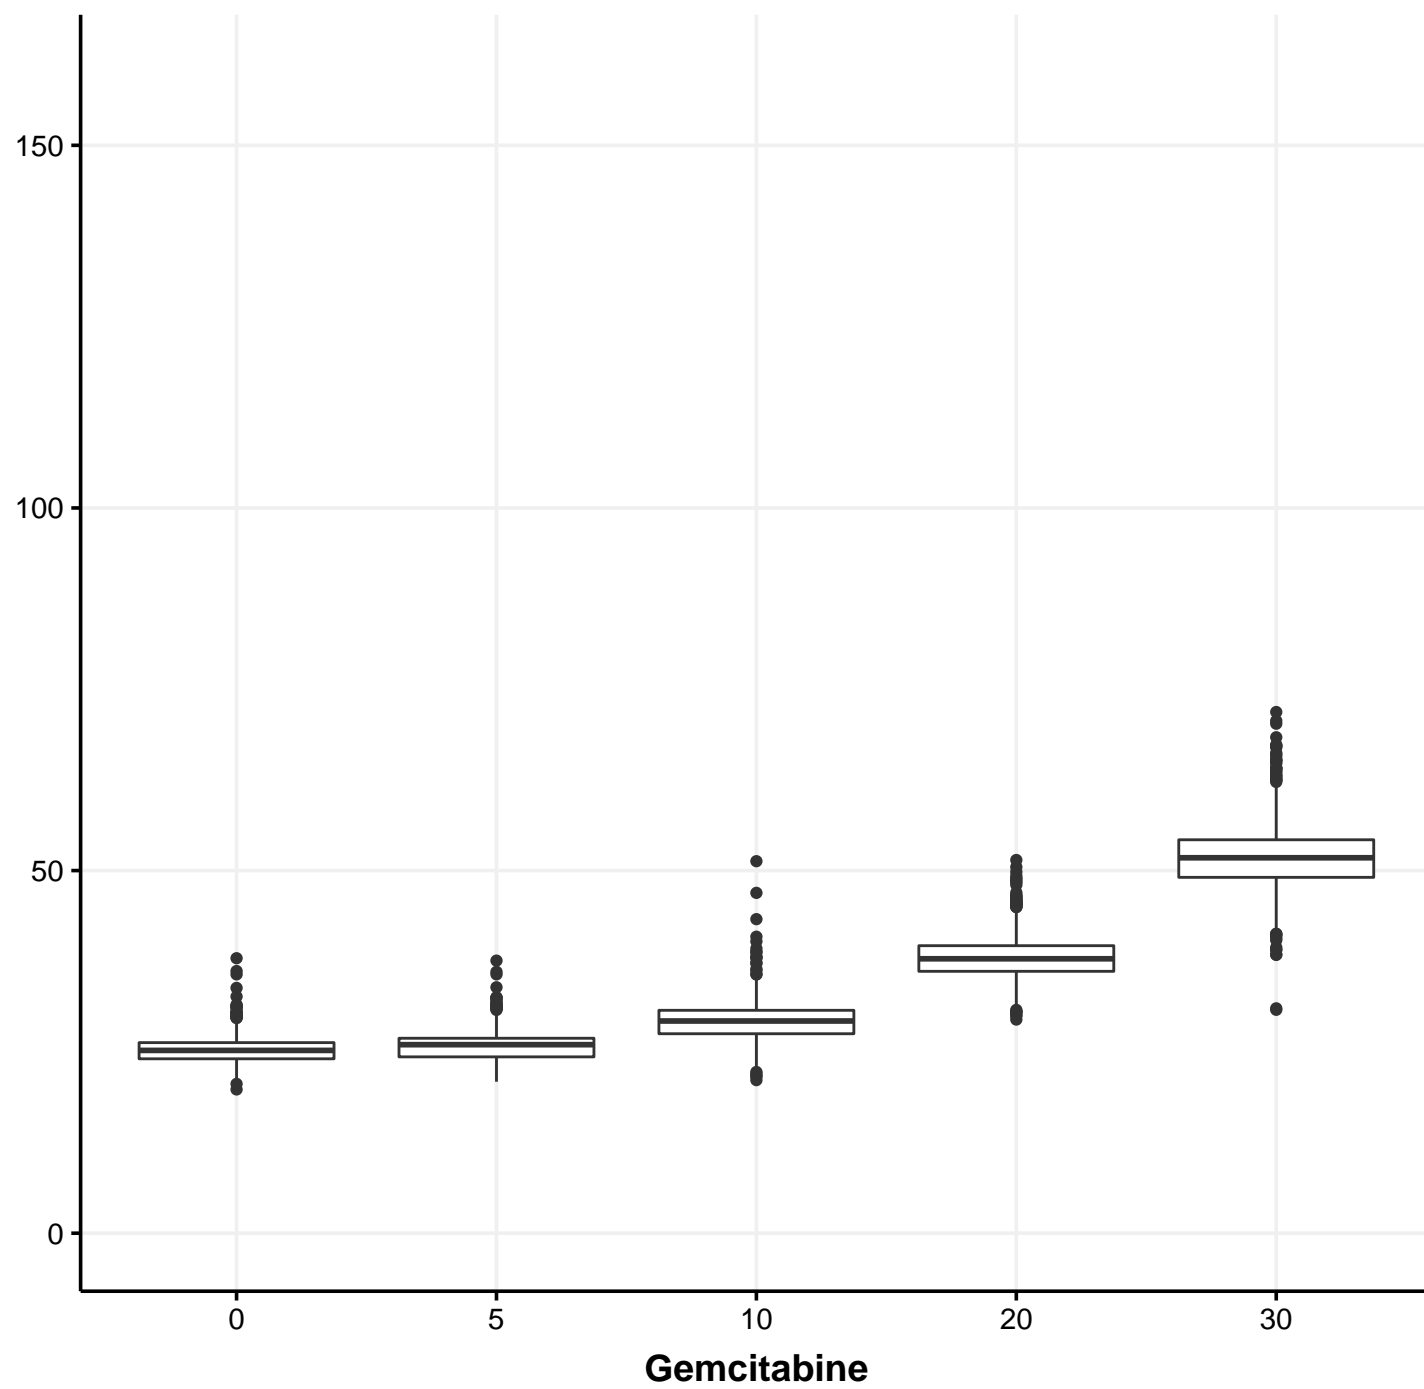

YDL227C Scatter RF for K with SD

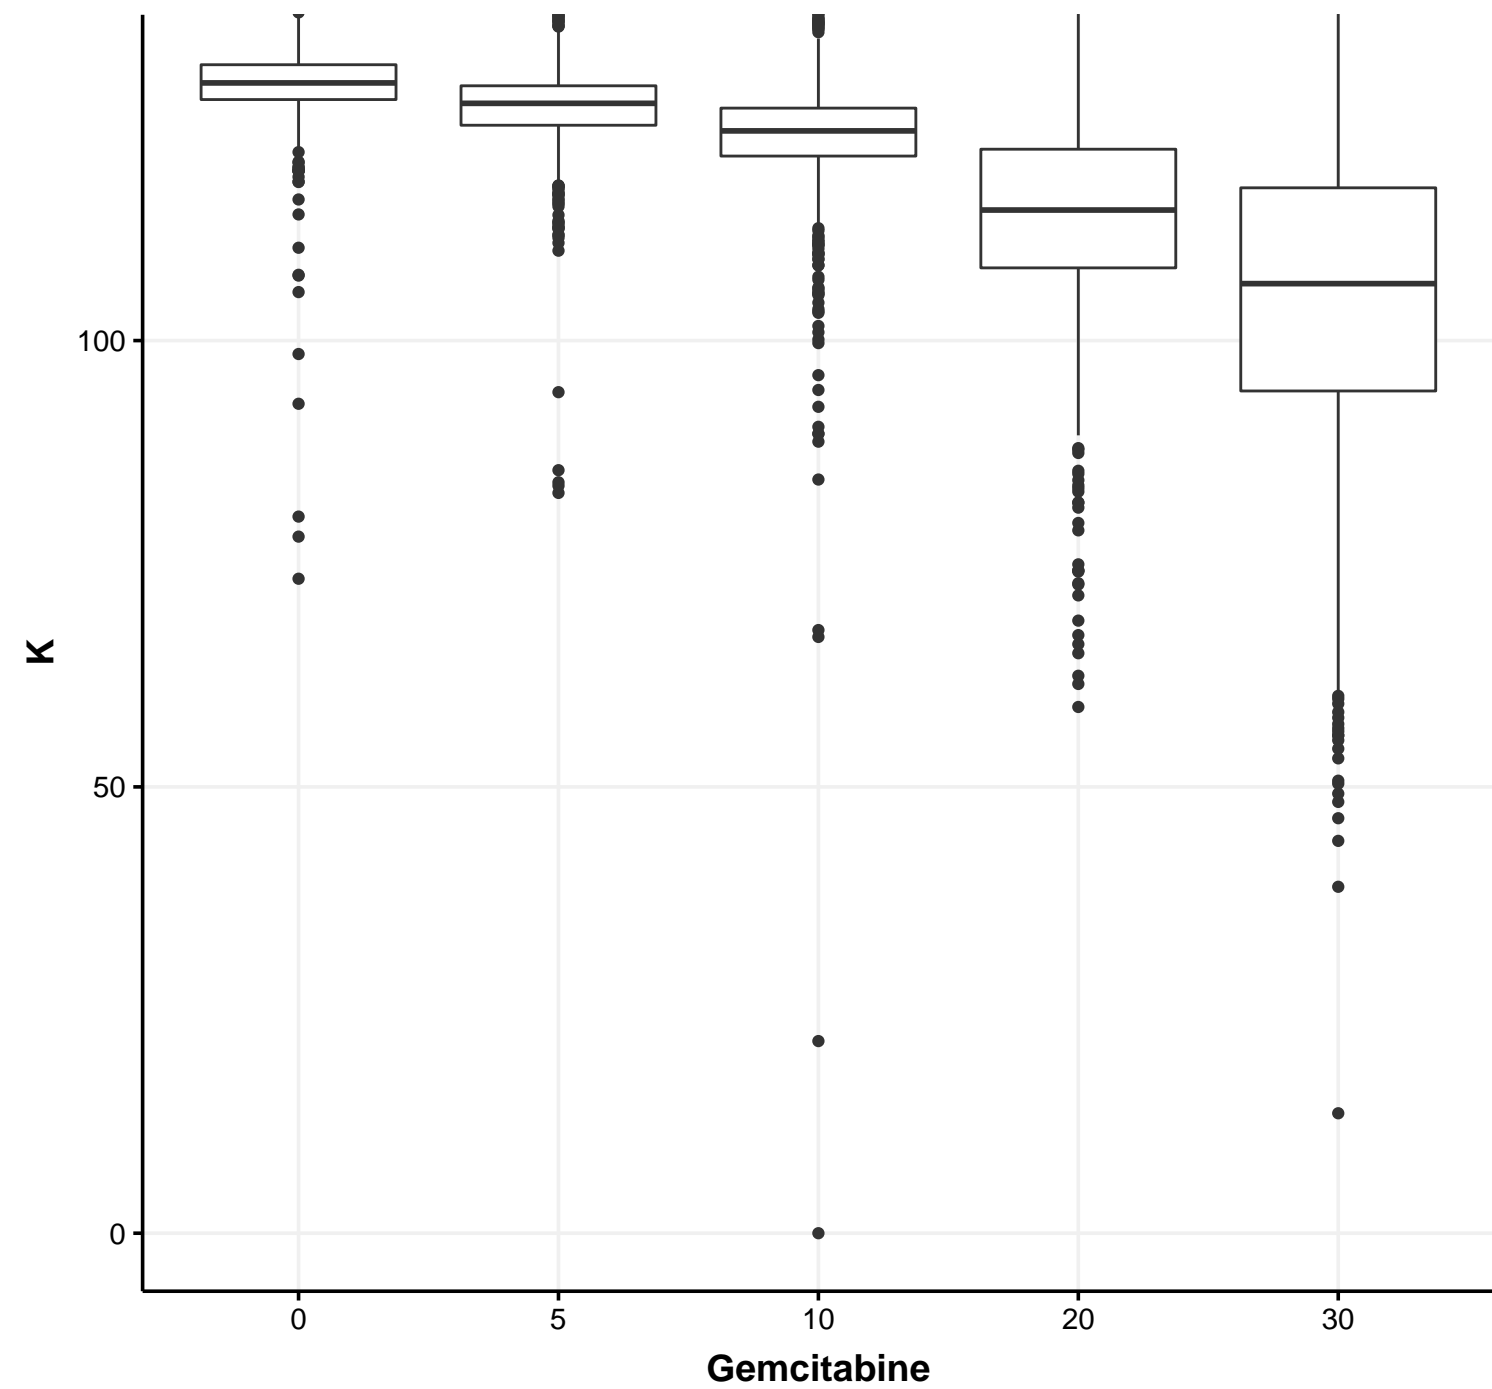

YDL227C Scatter RF for r with SD

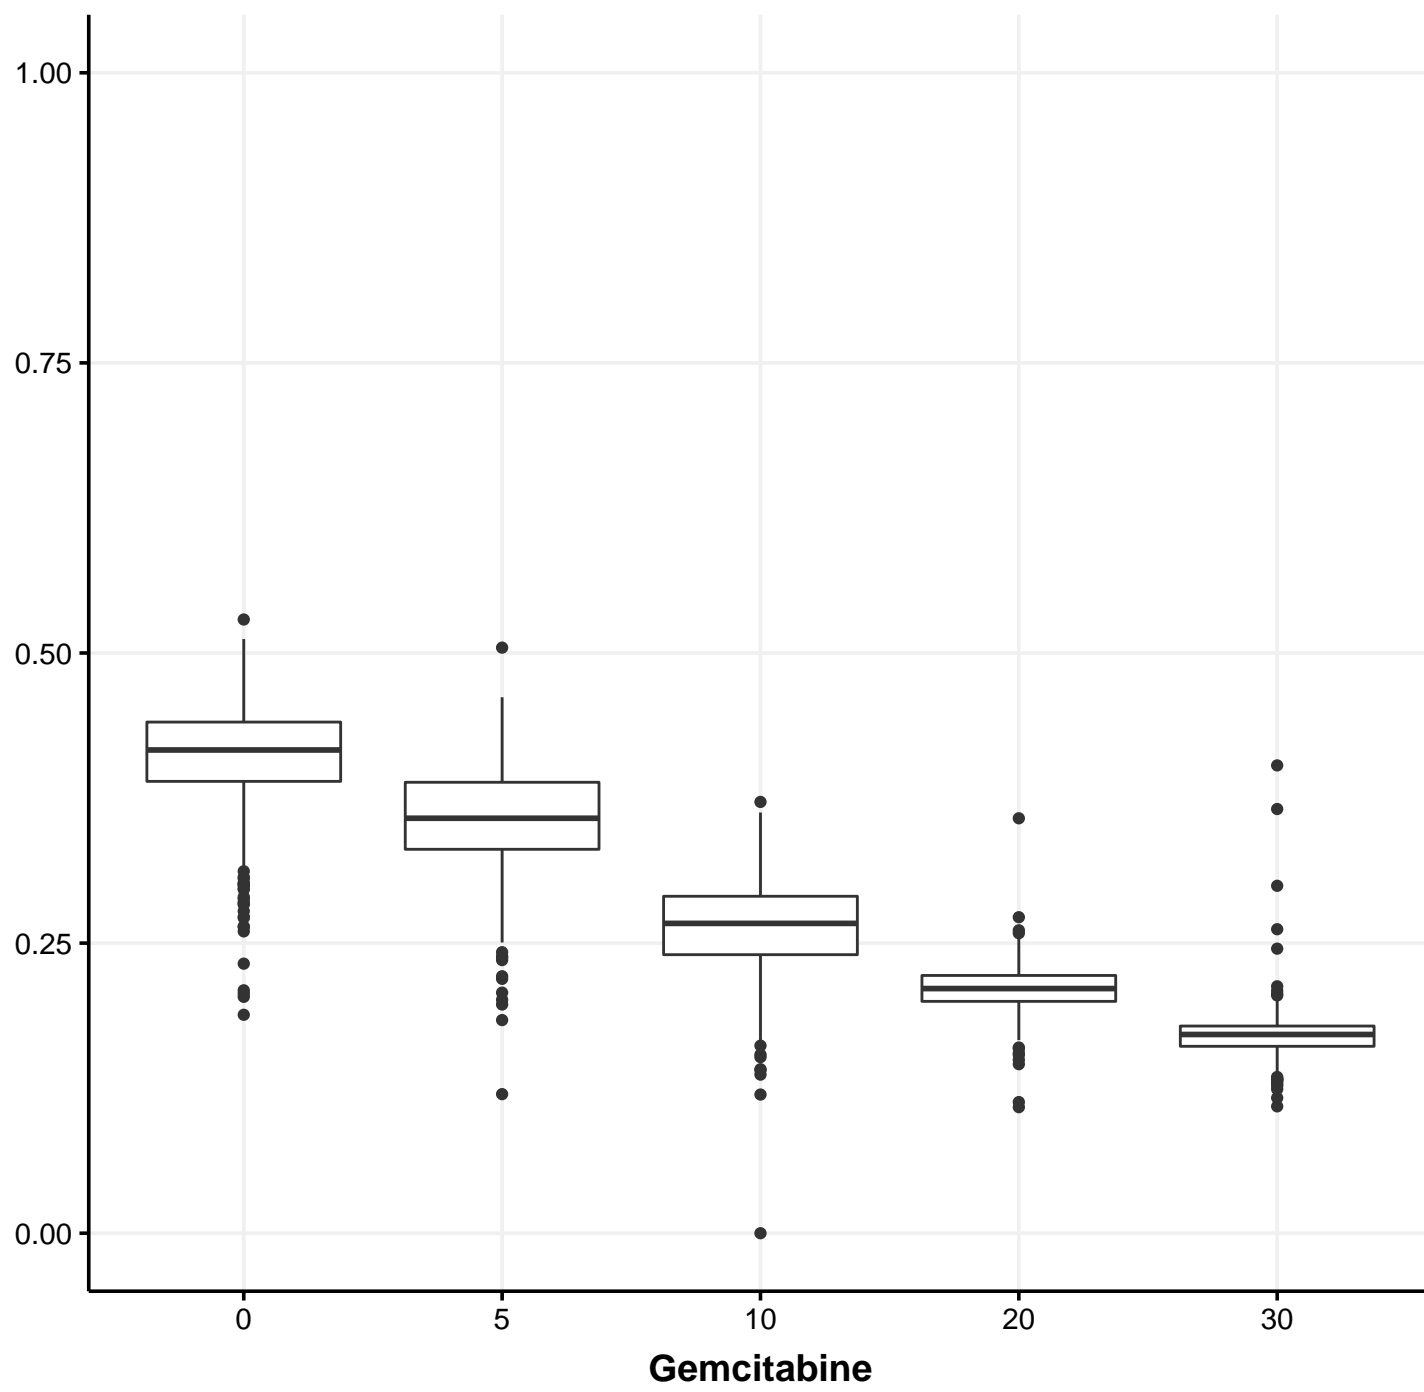

YDL227C Scatter RF for AUC with SD

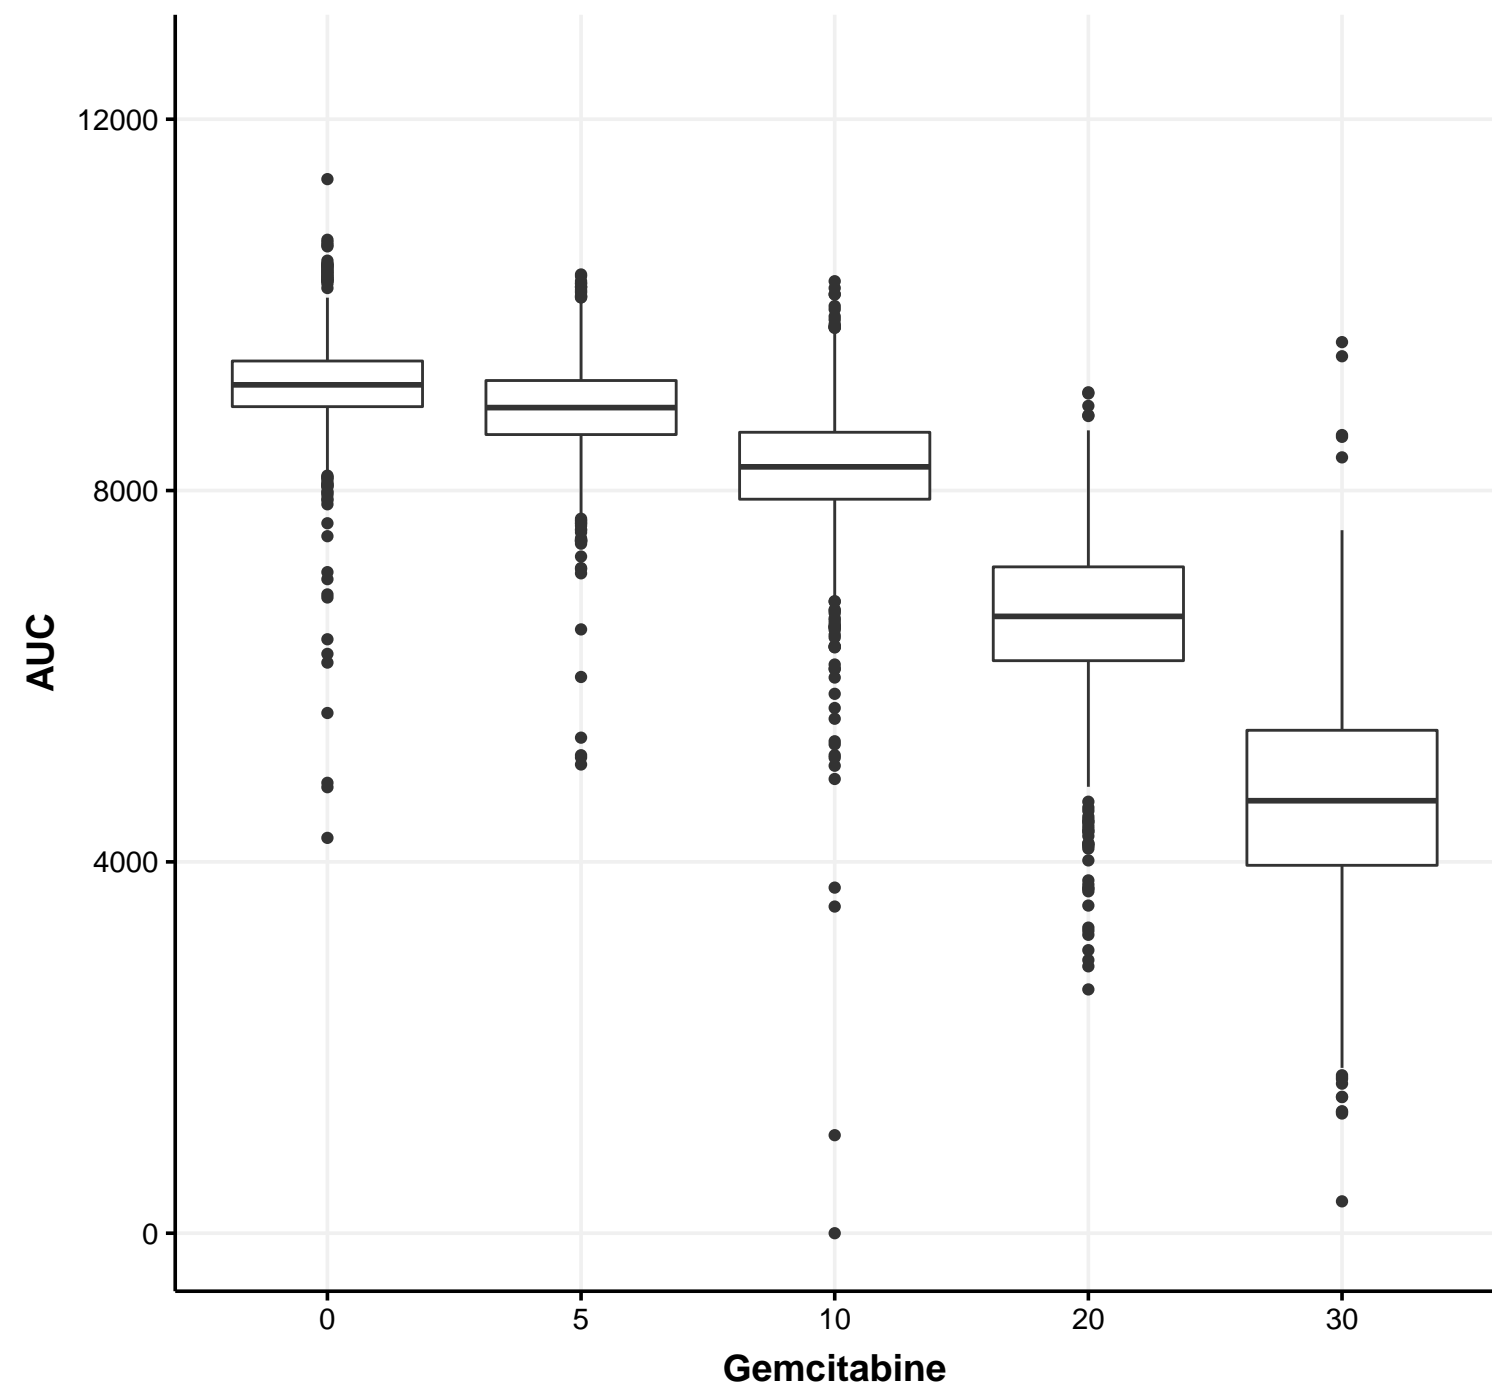

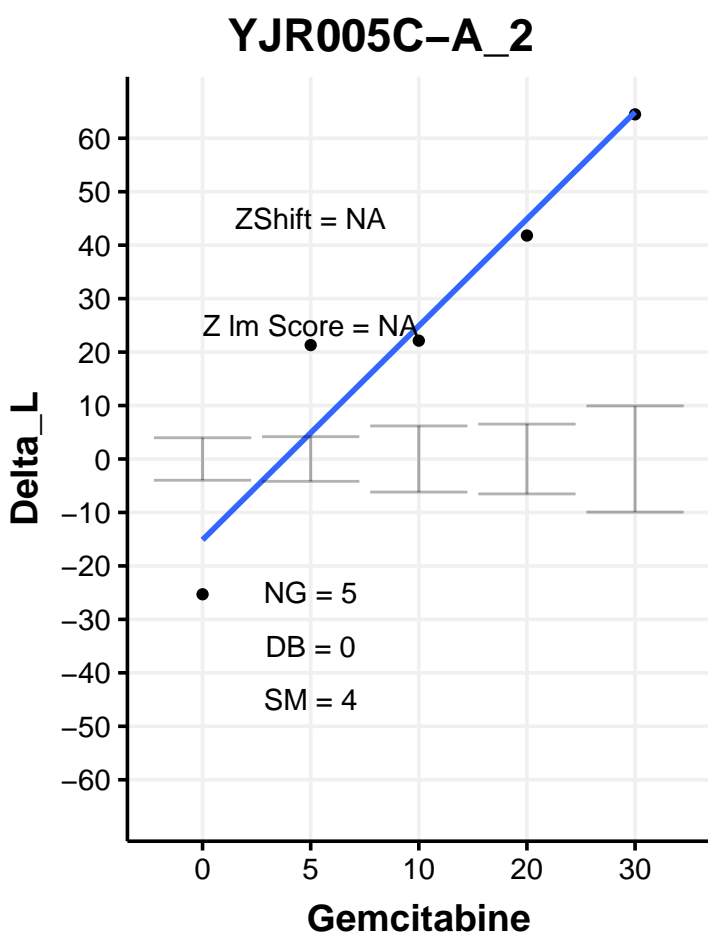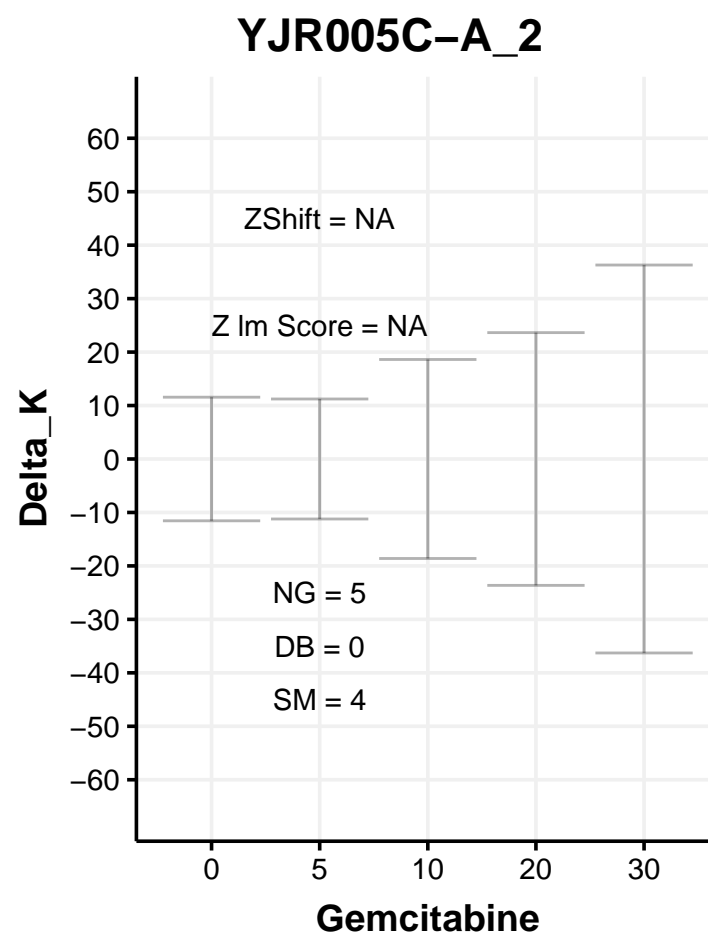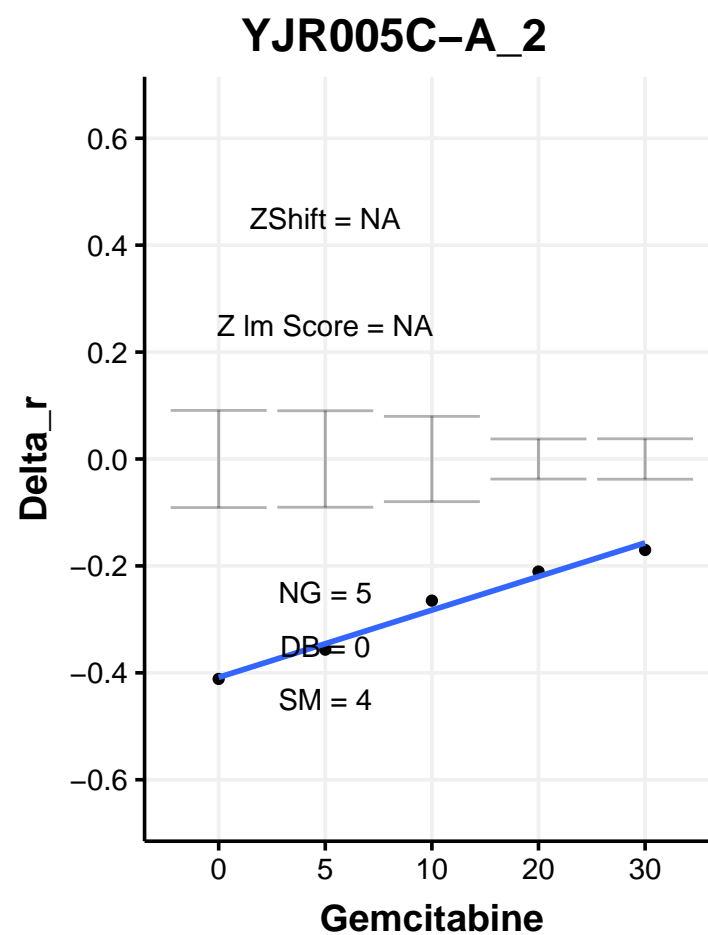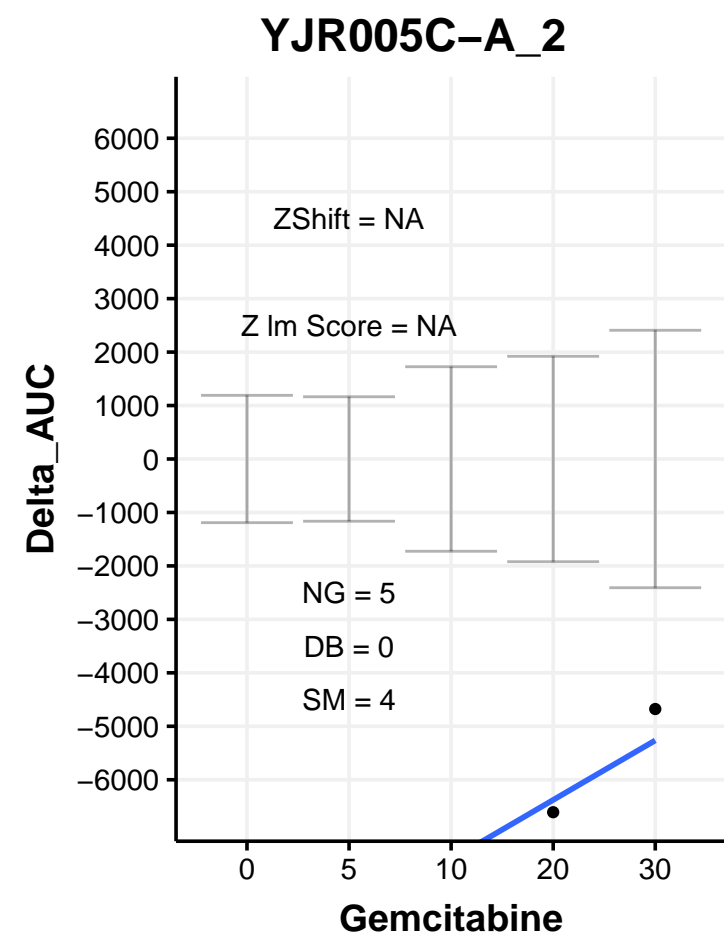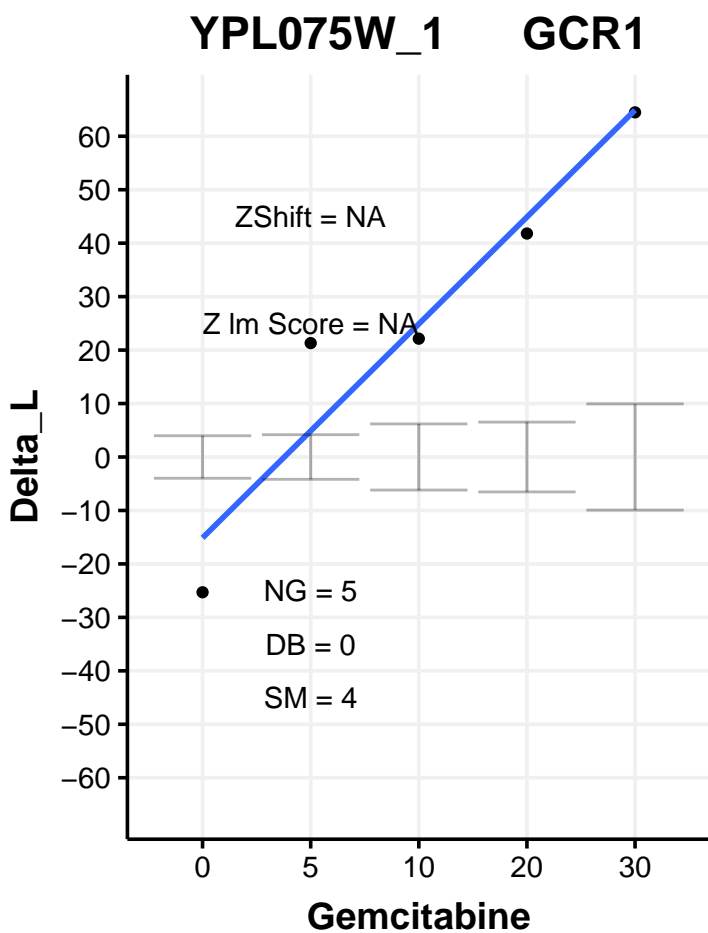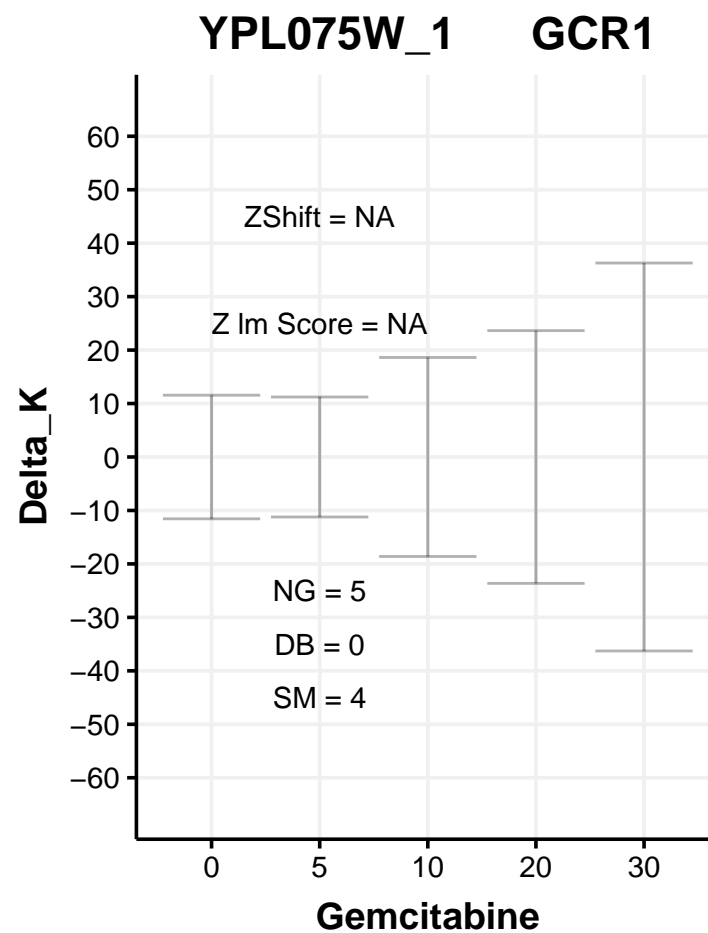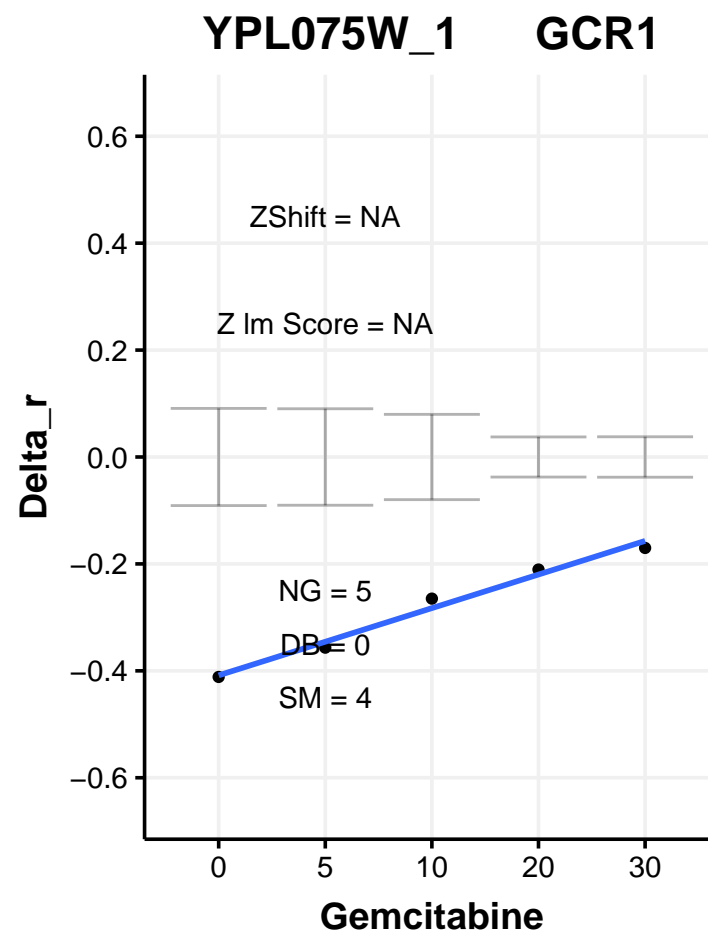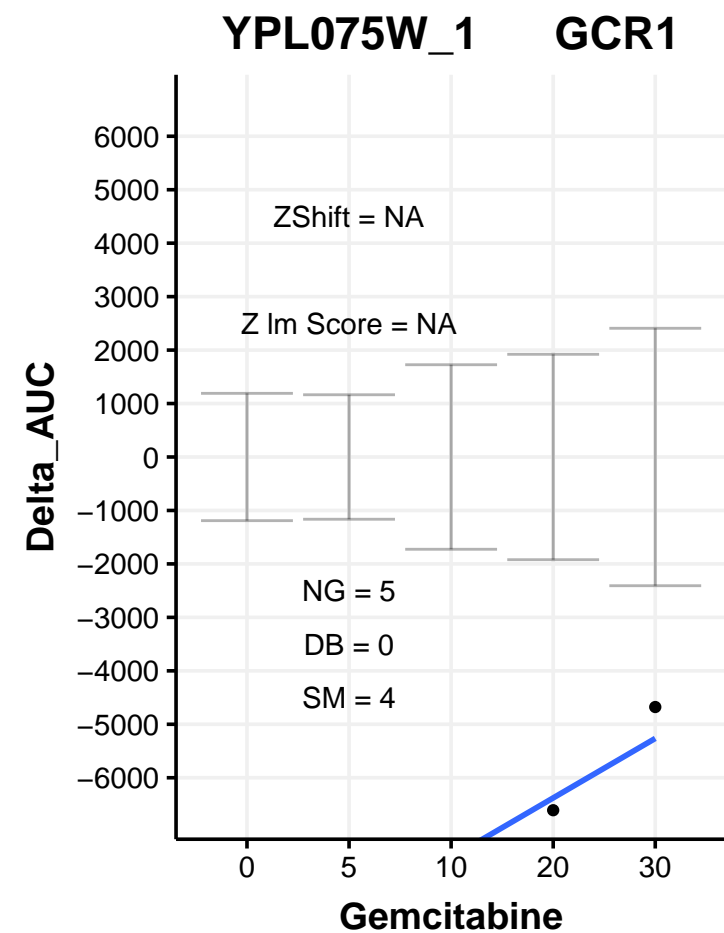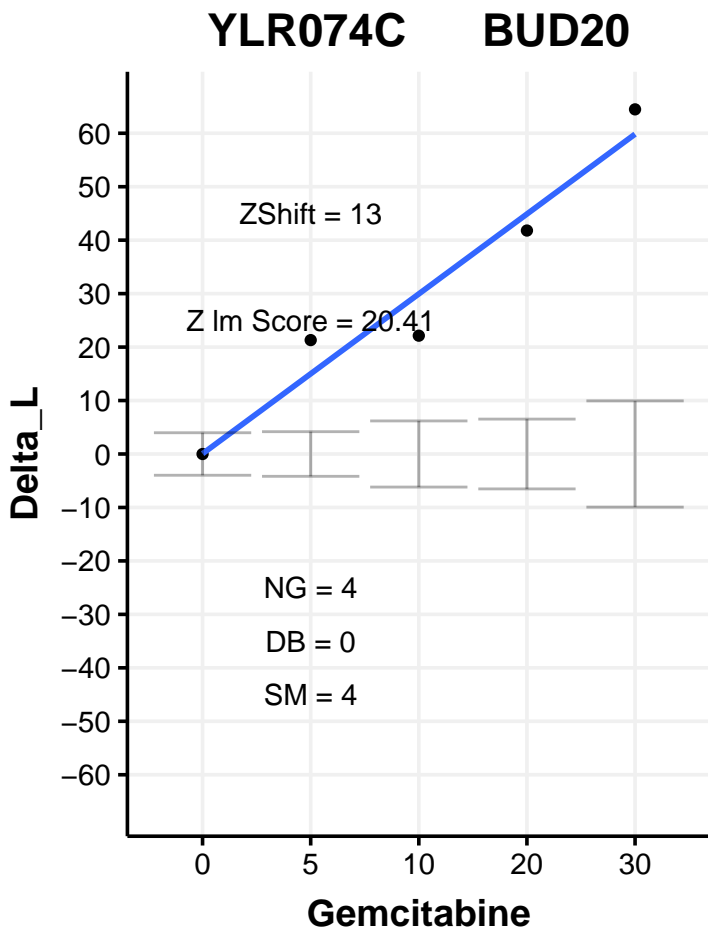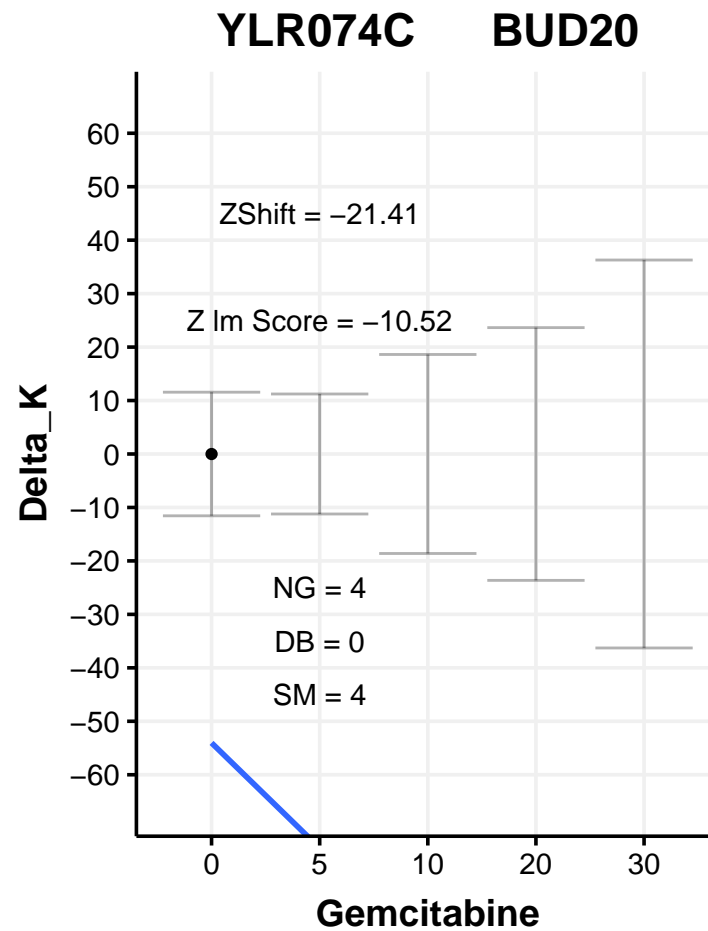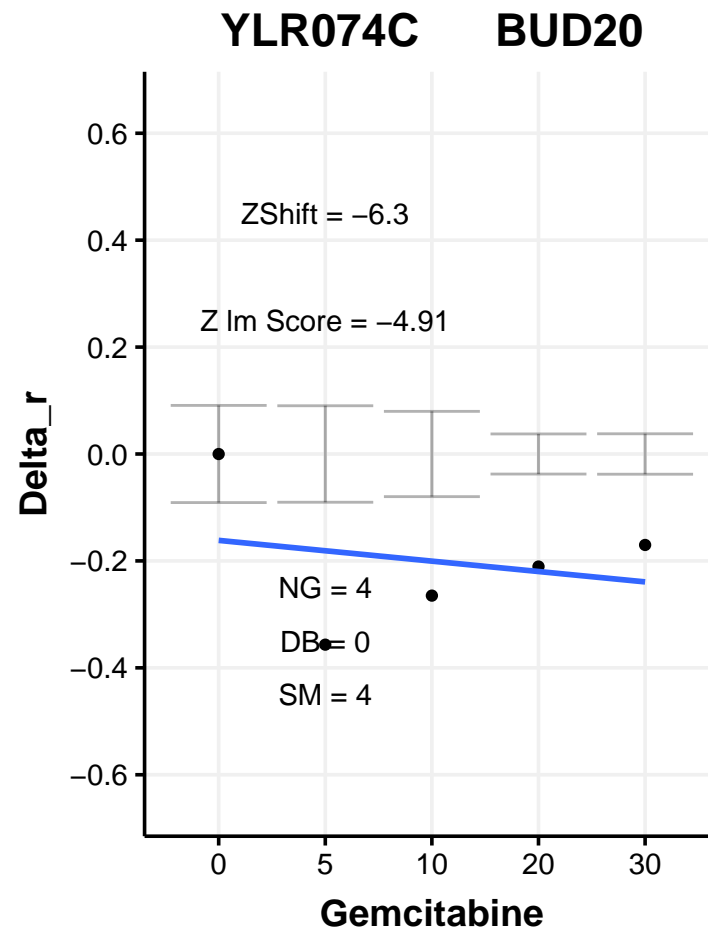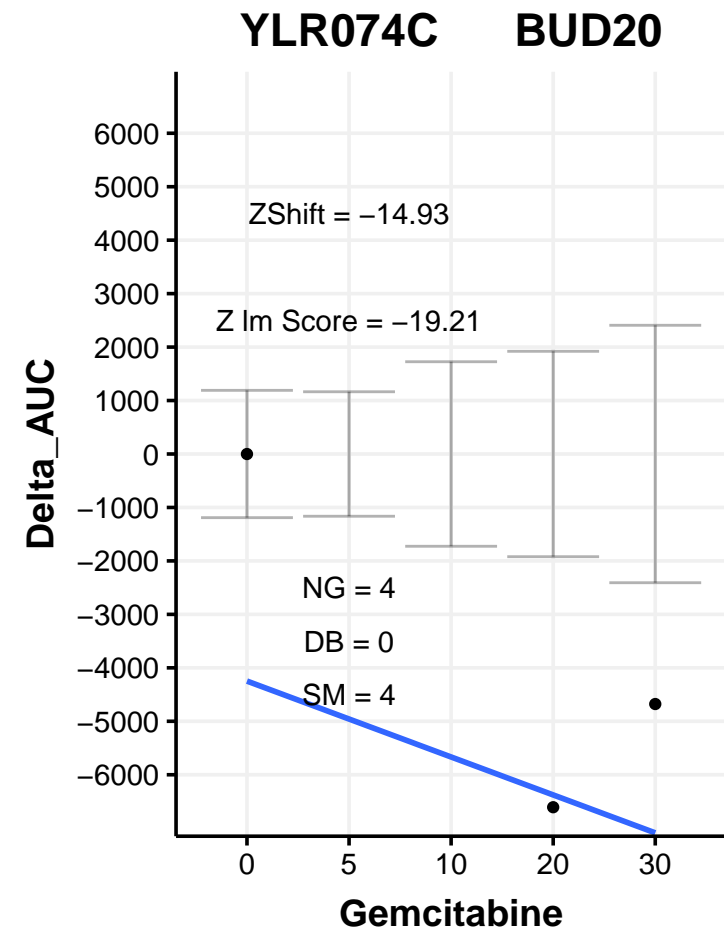

YOR072W

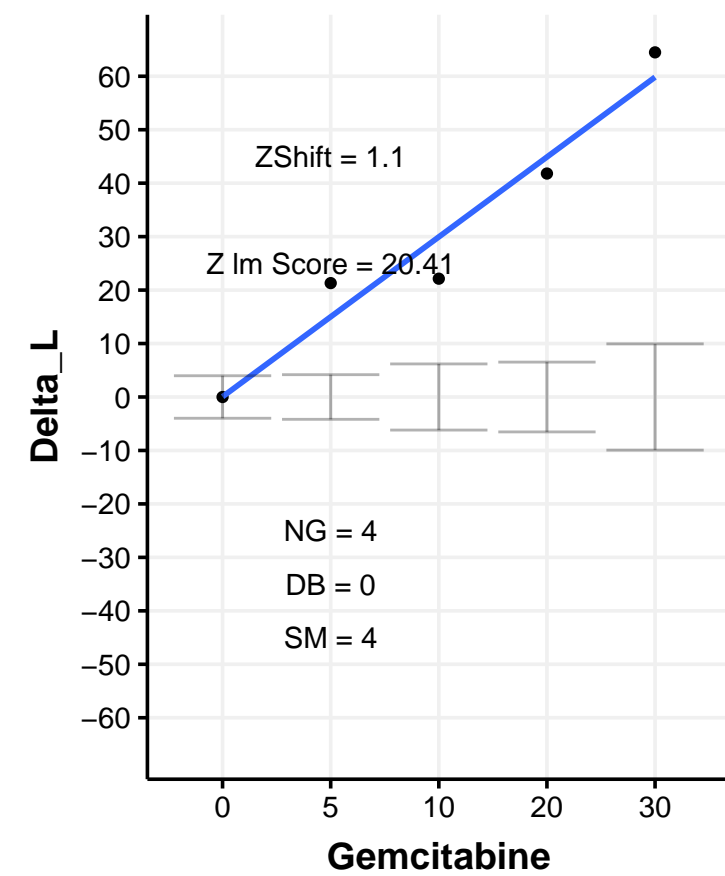

YOR072W

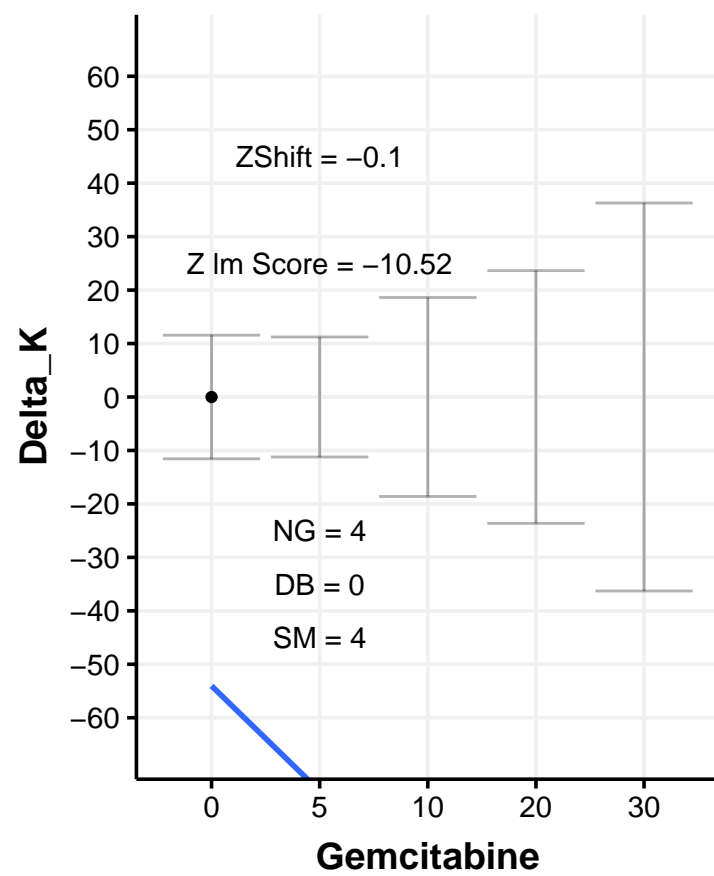

YOR072W

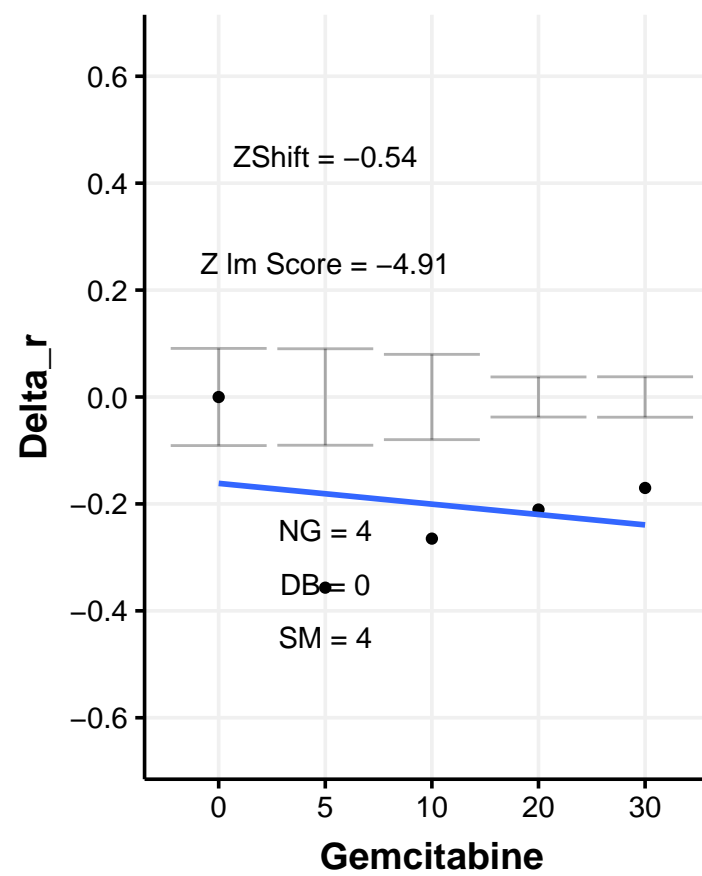

YOR072W

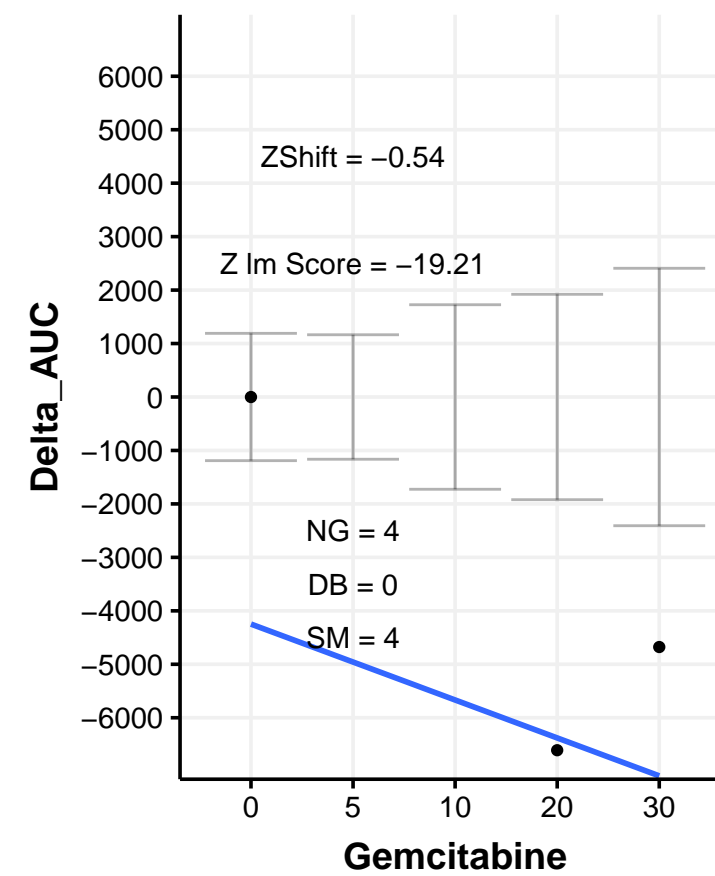

YDR028C REG1

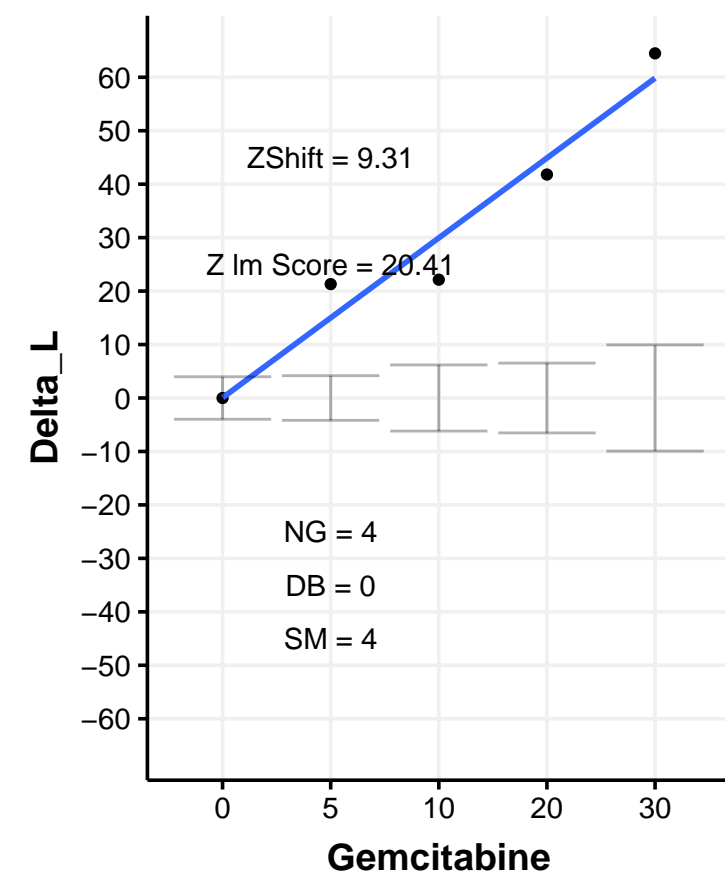

YDR028C REG1

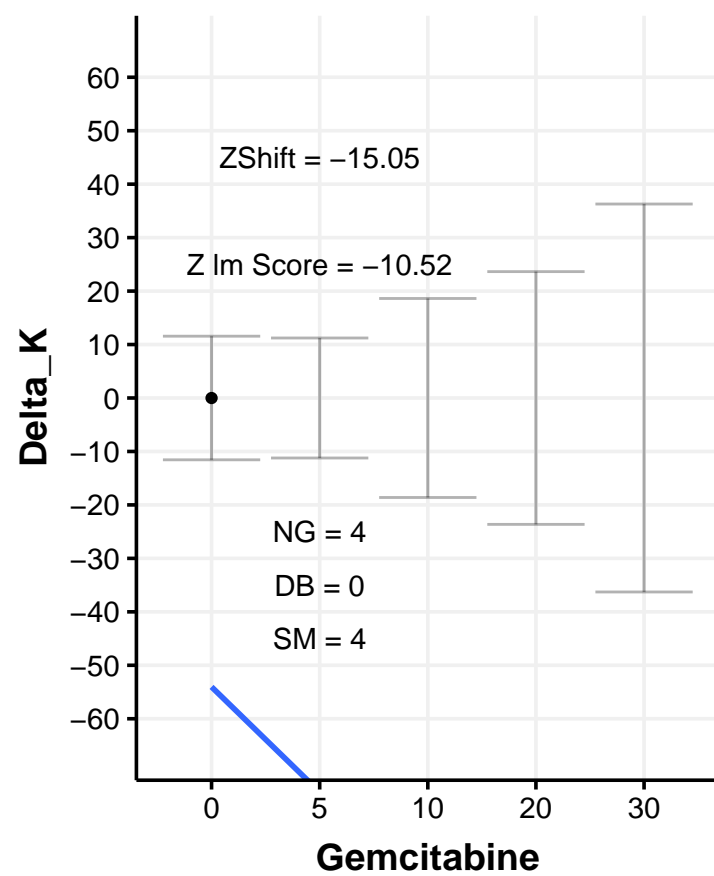

YDR028C REG1

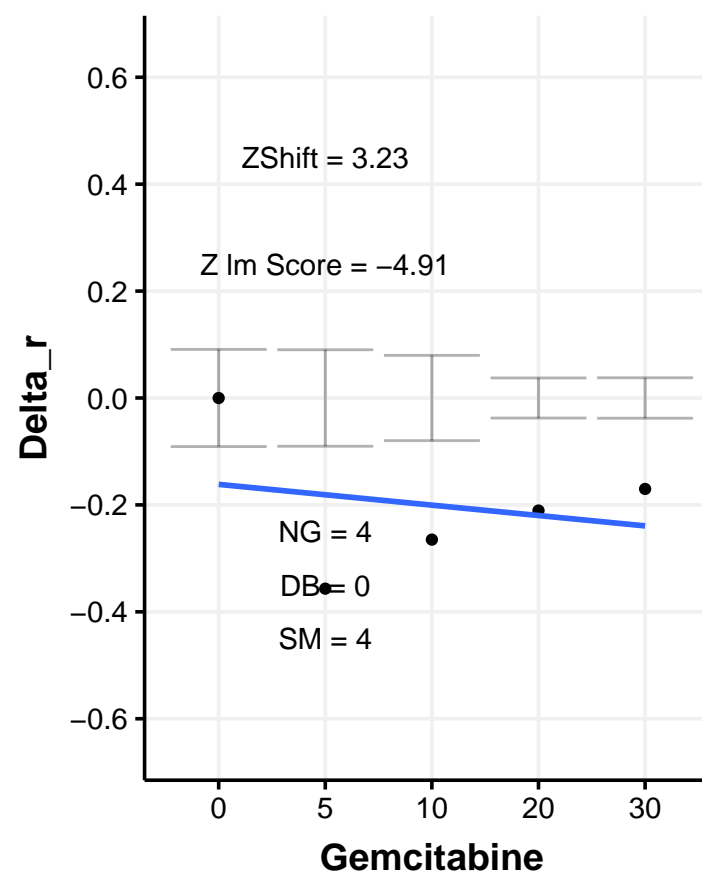

YDR028C REG1

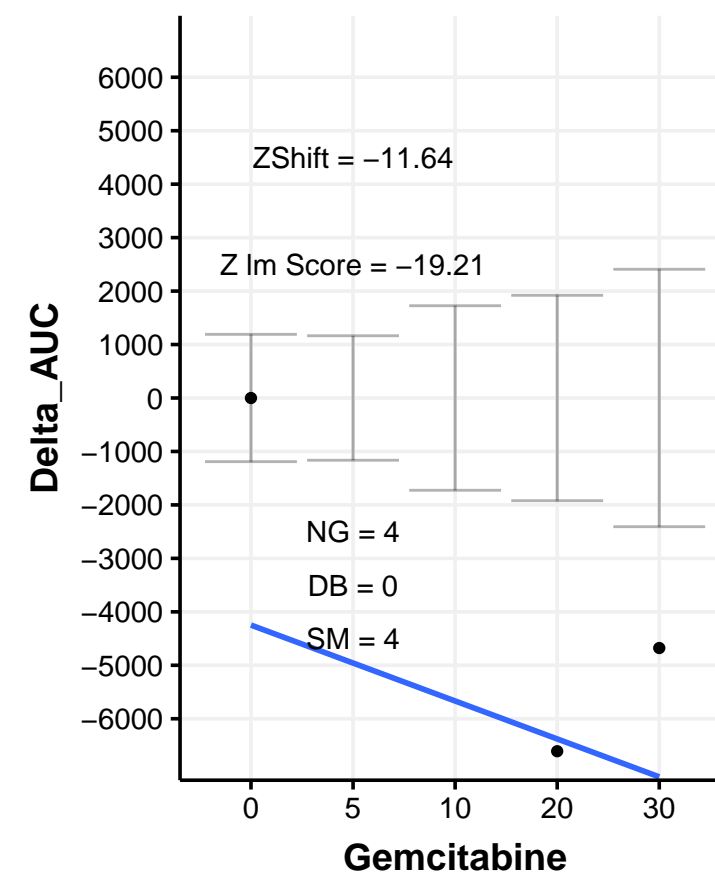

YDR034C LYS14

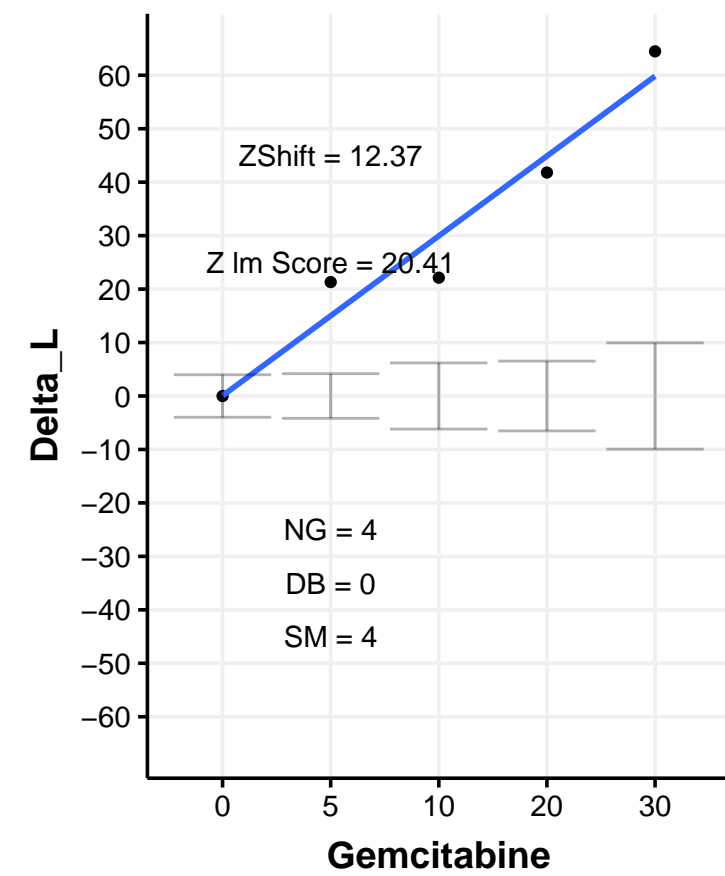

YDR034C LYS14

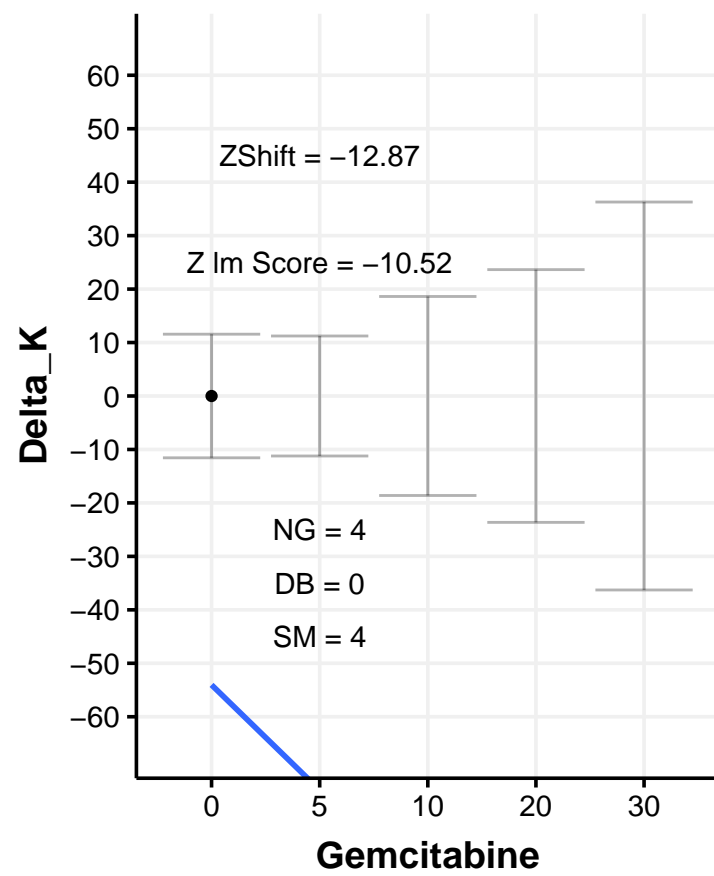

YDR034C LYS14

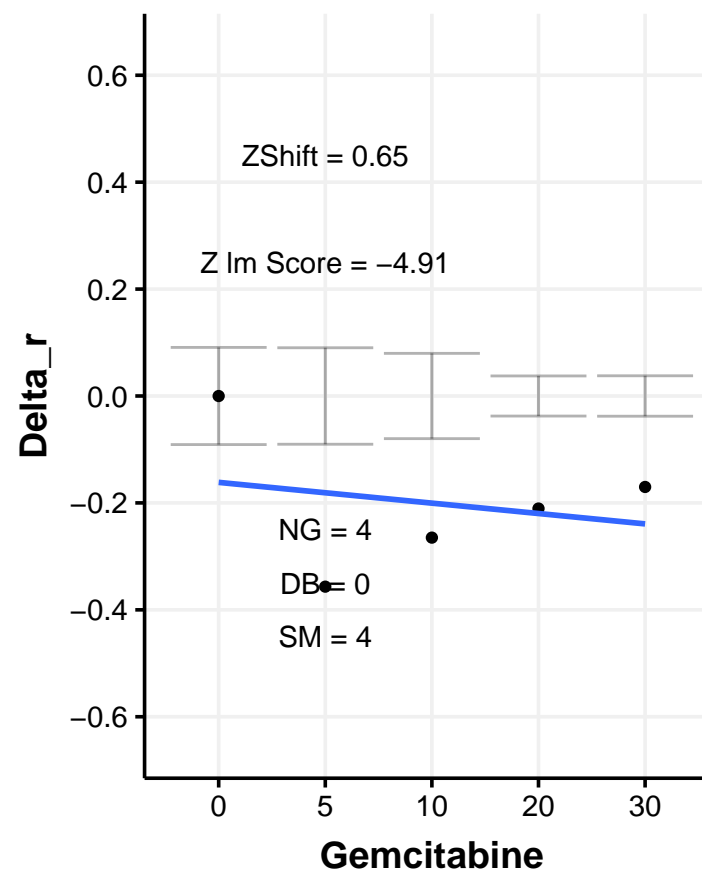

YDR034C LYS14

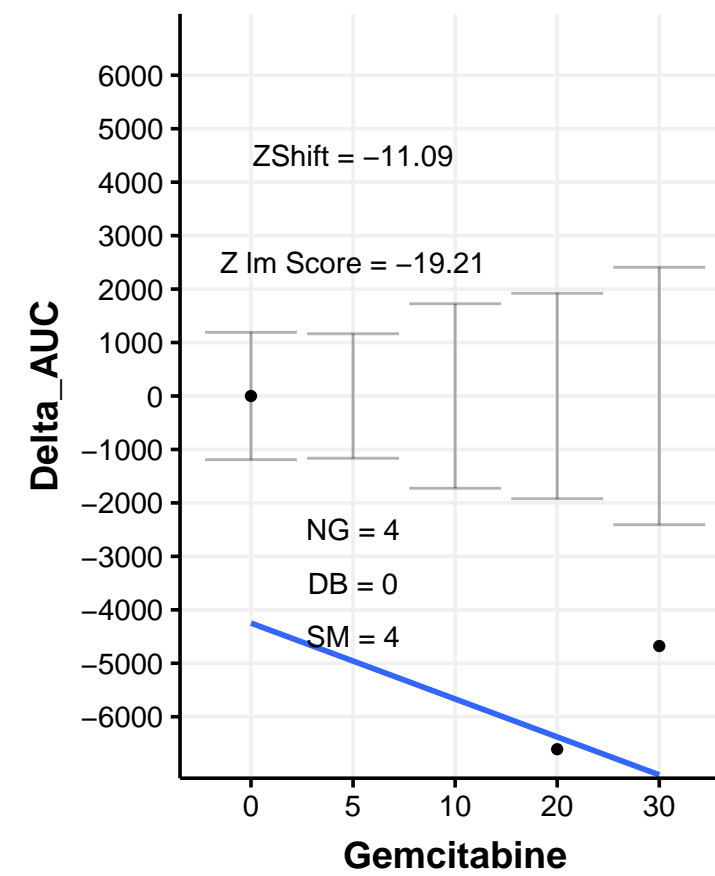

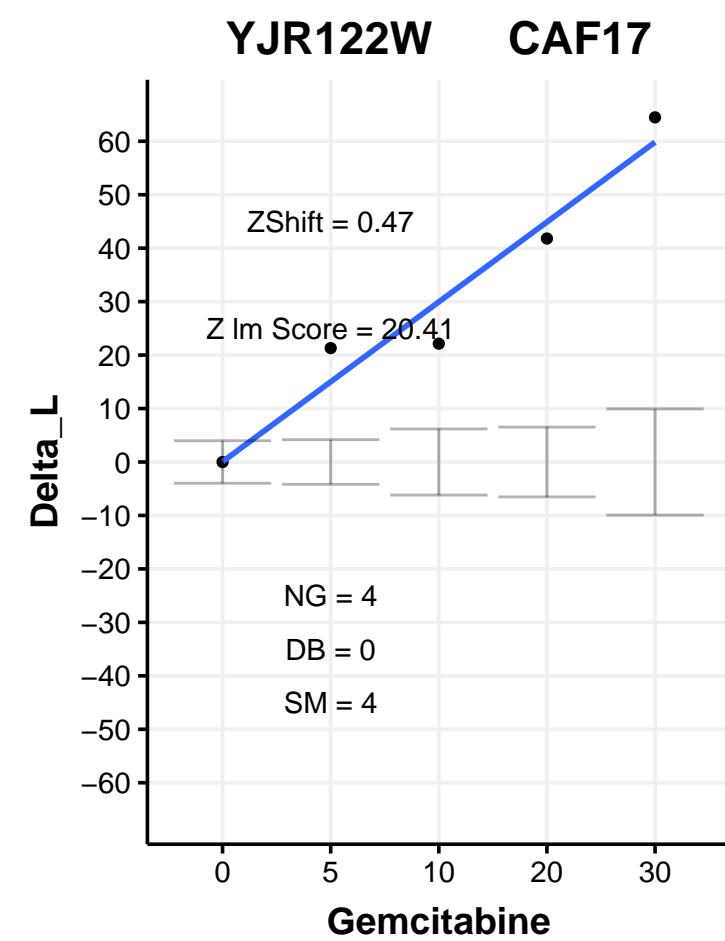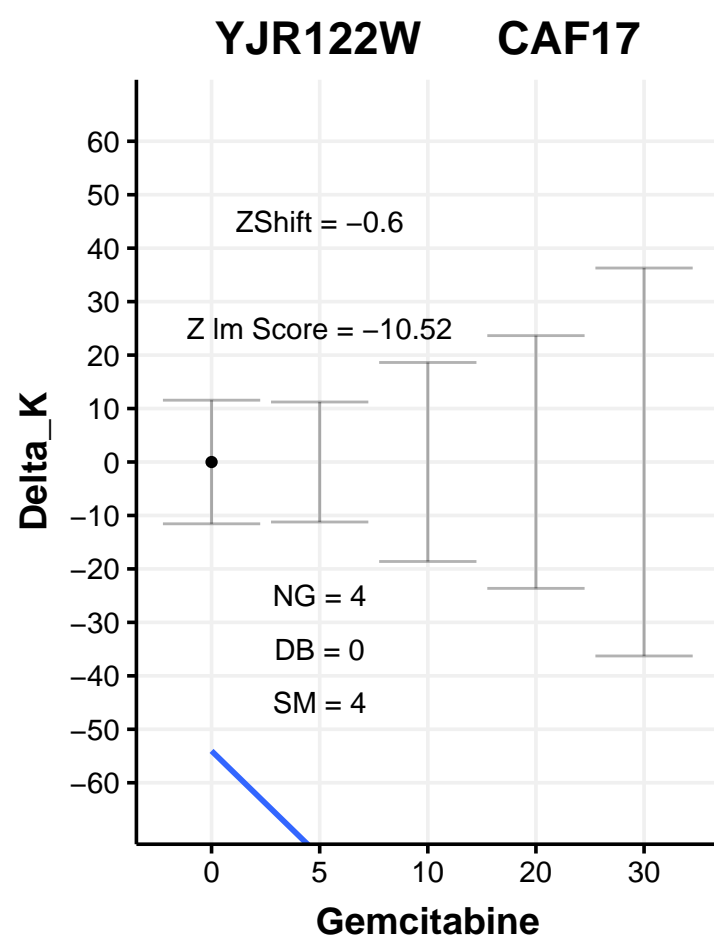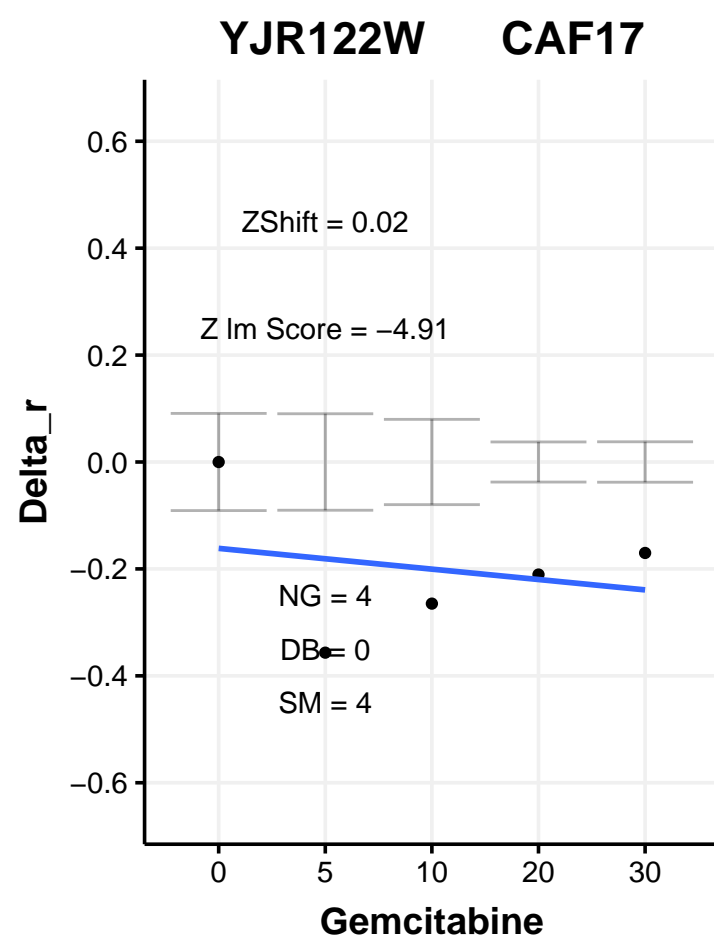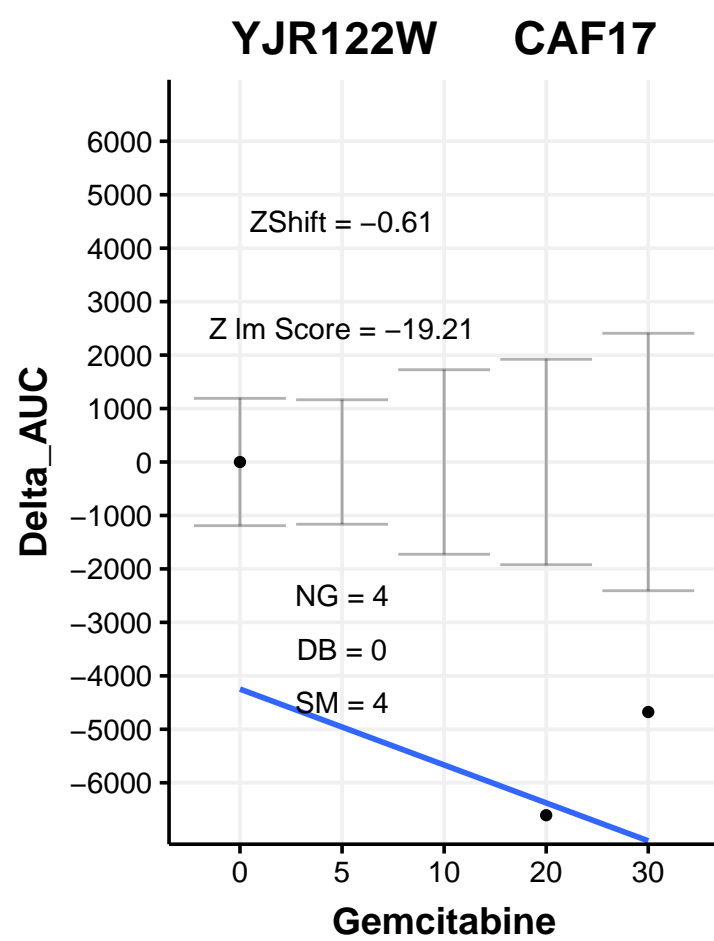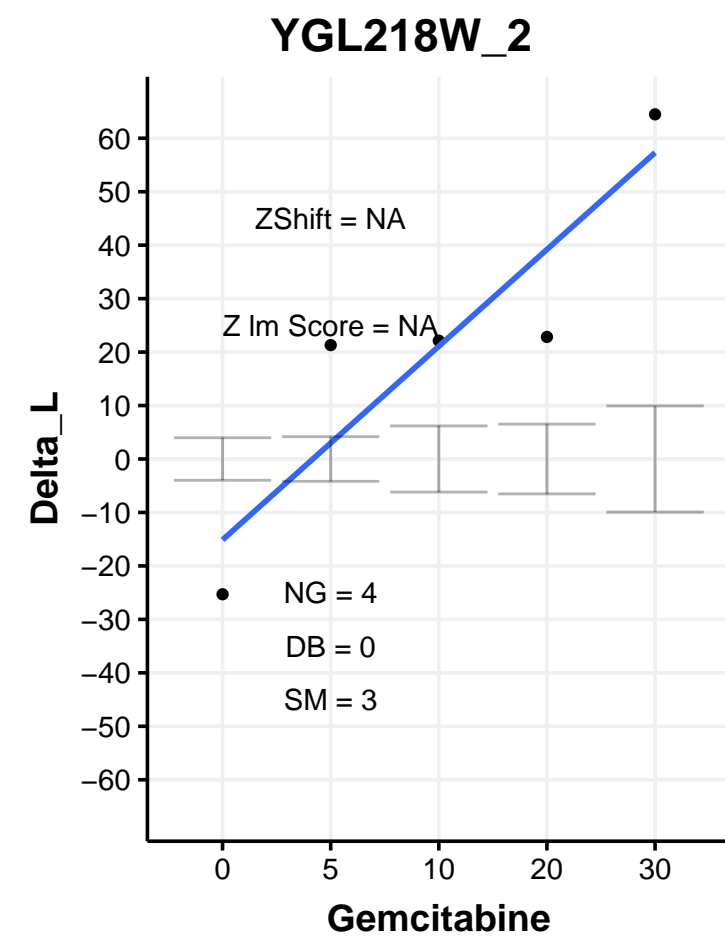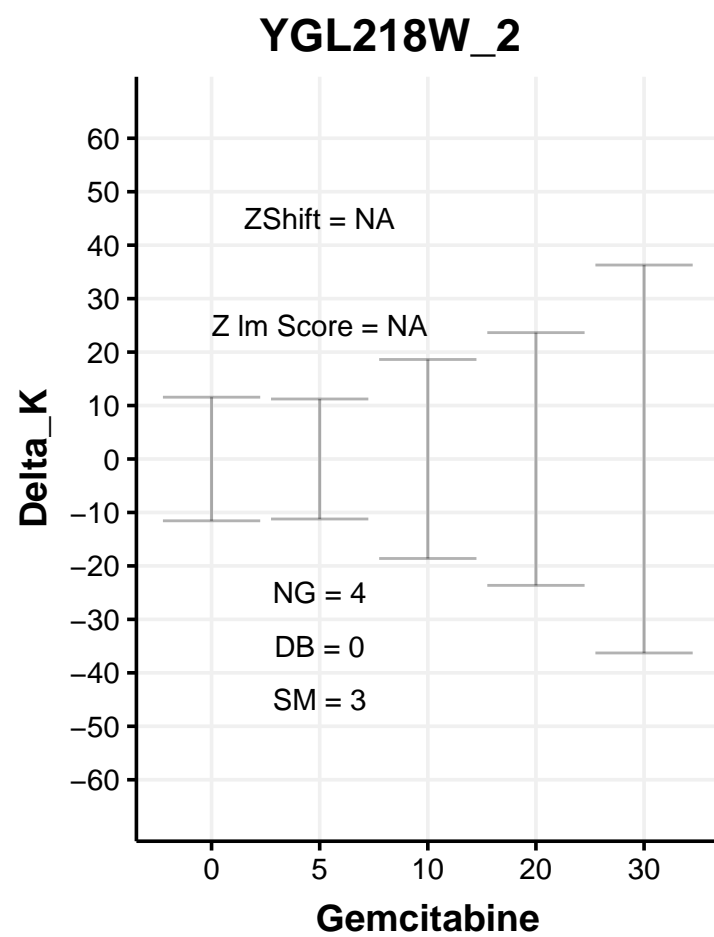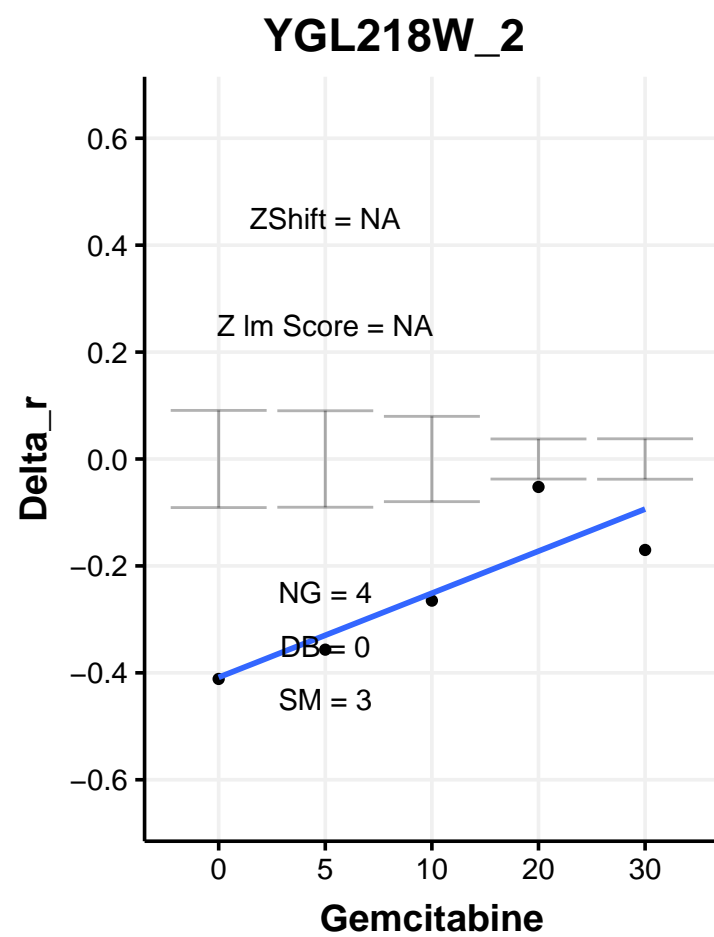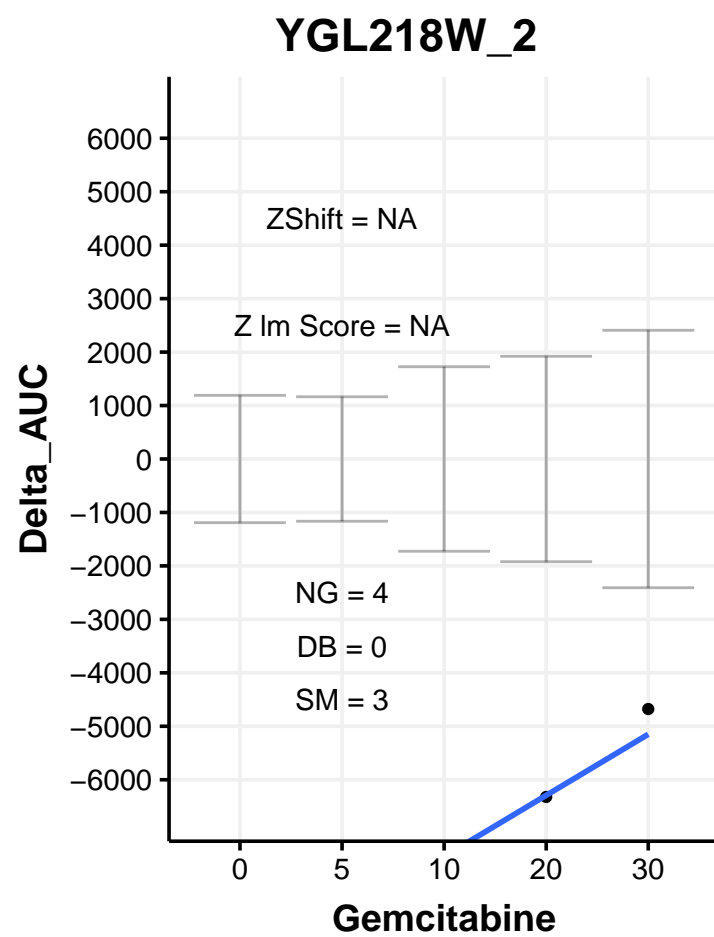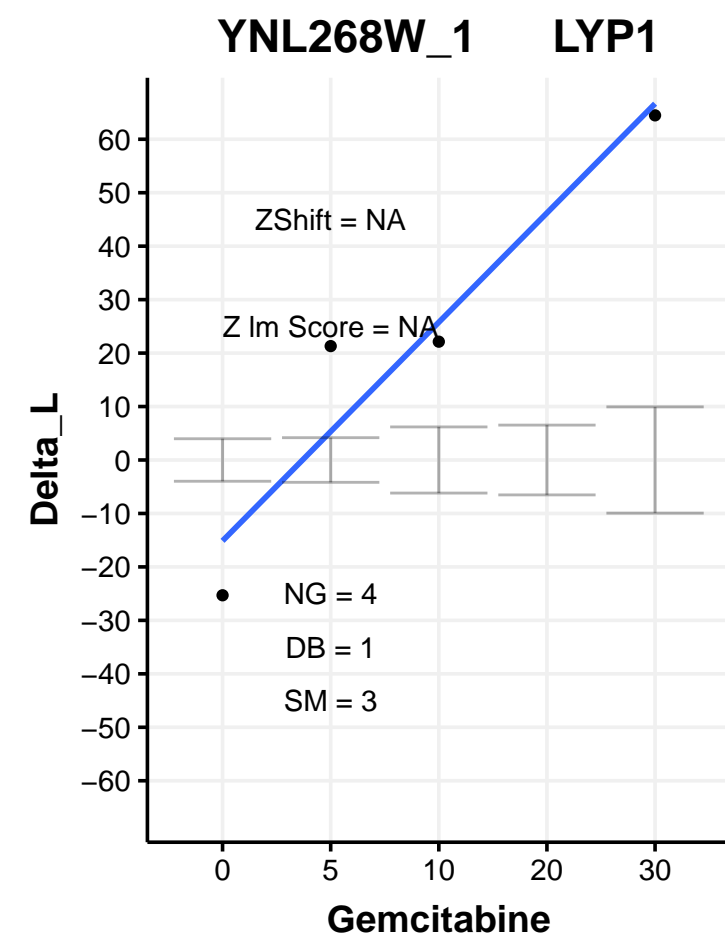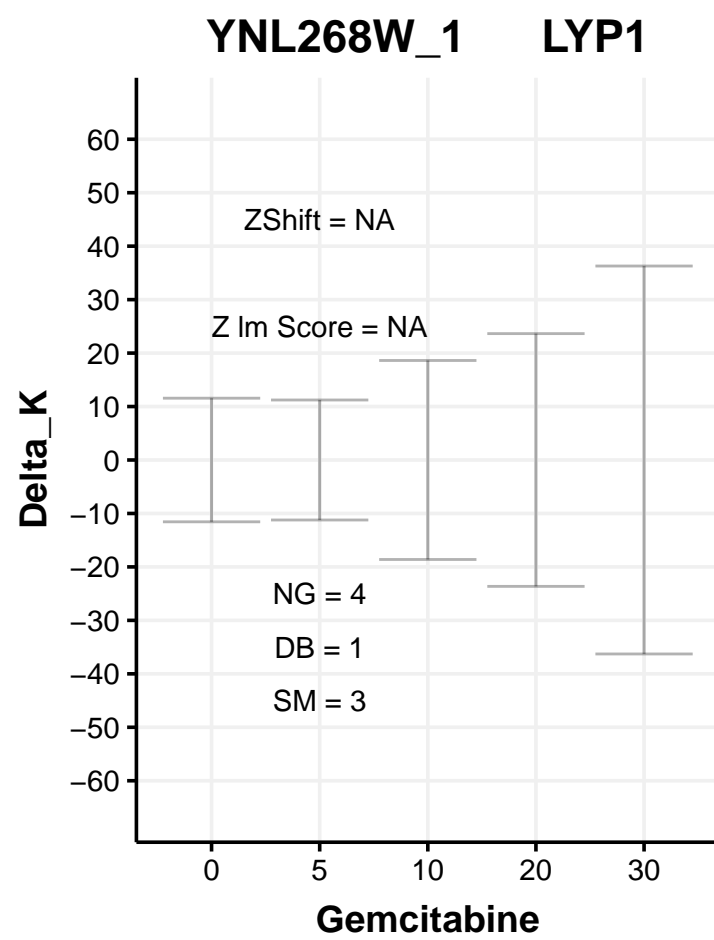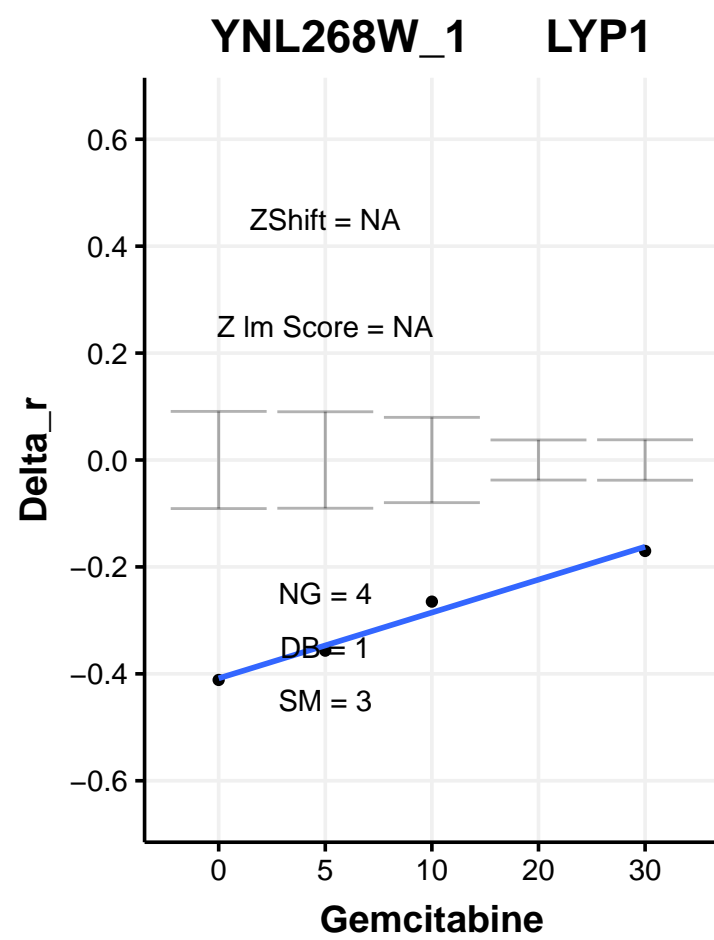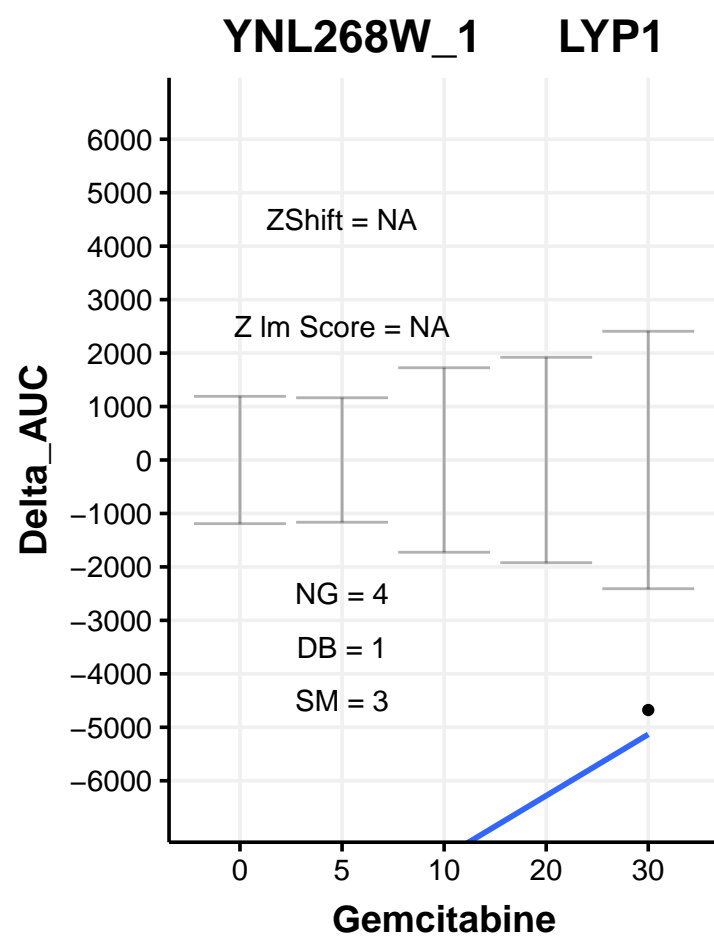

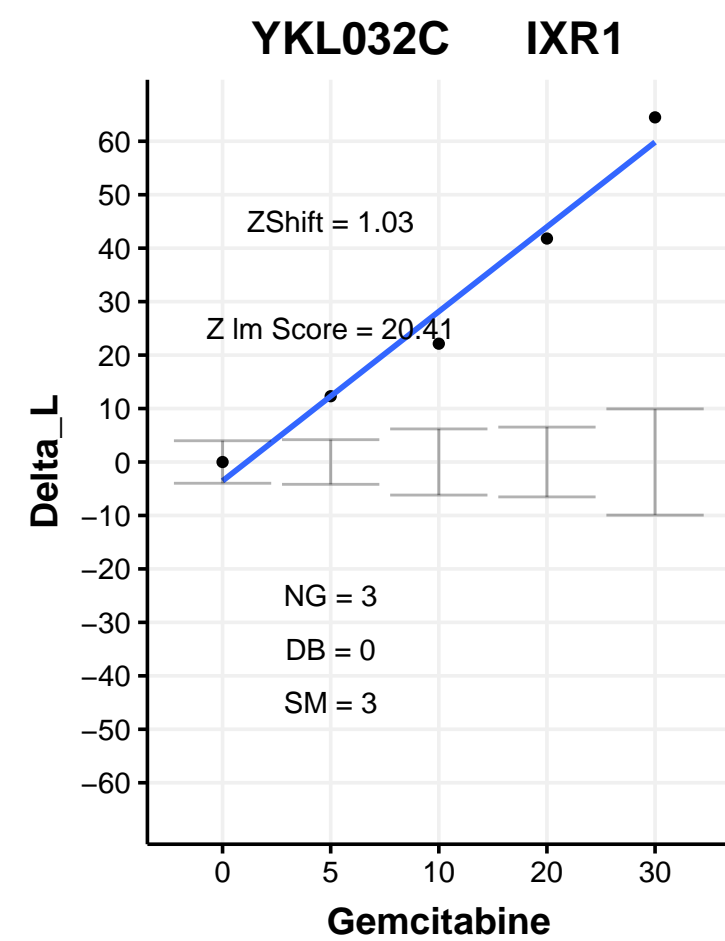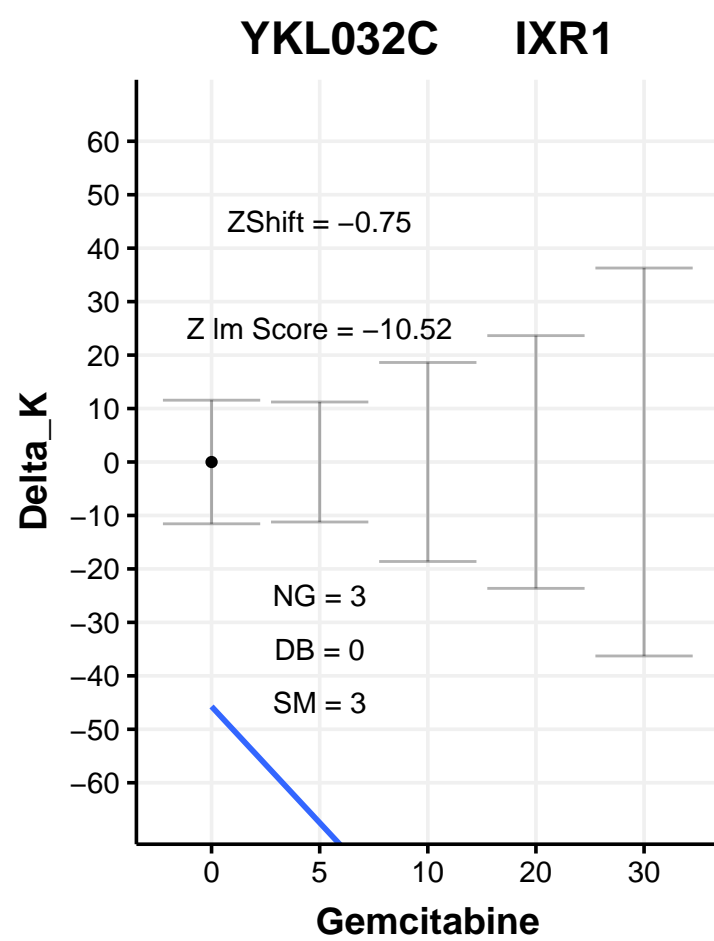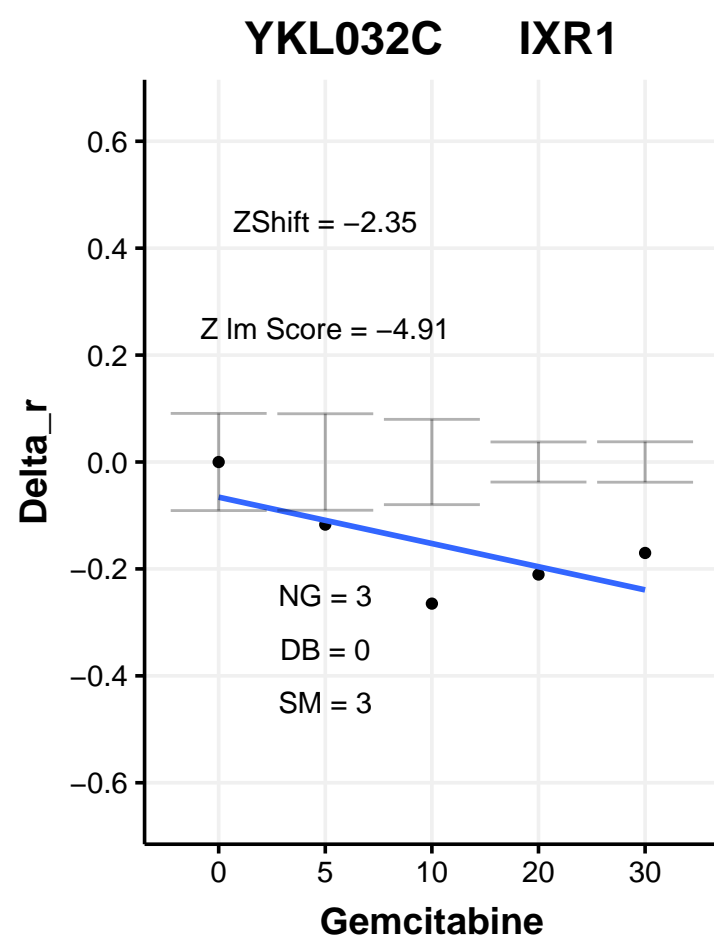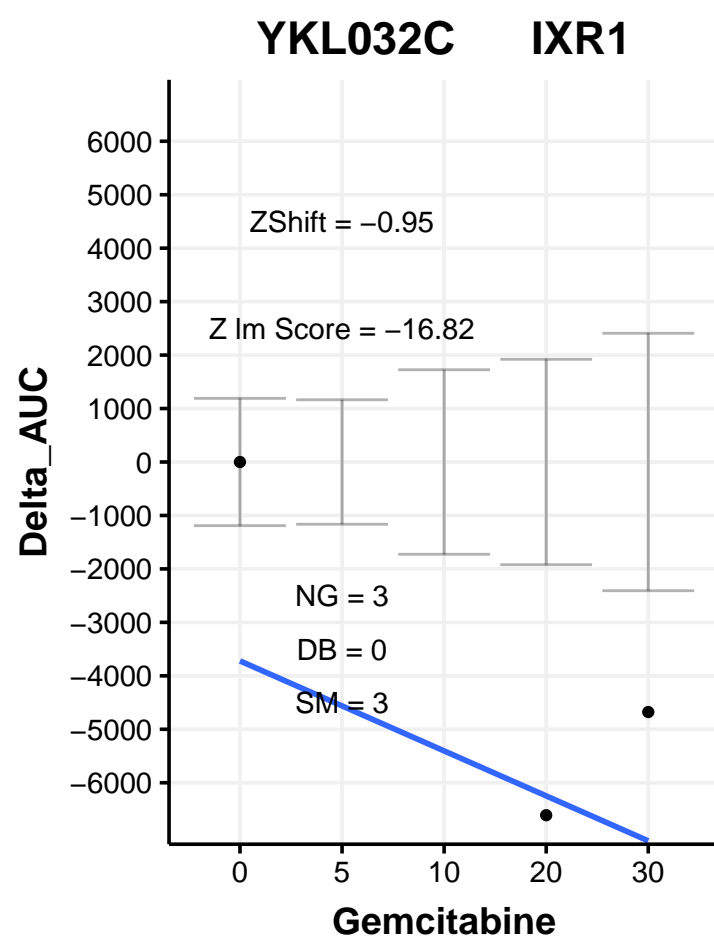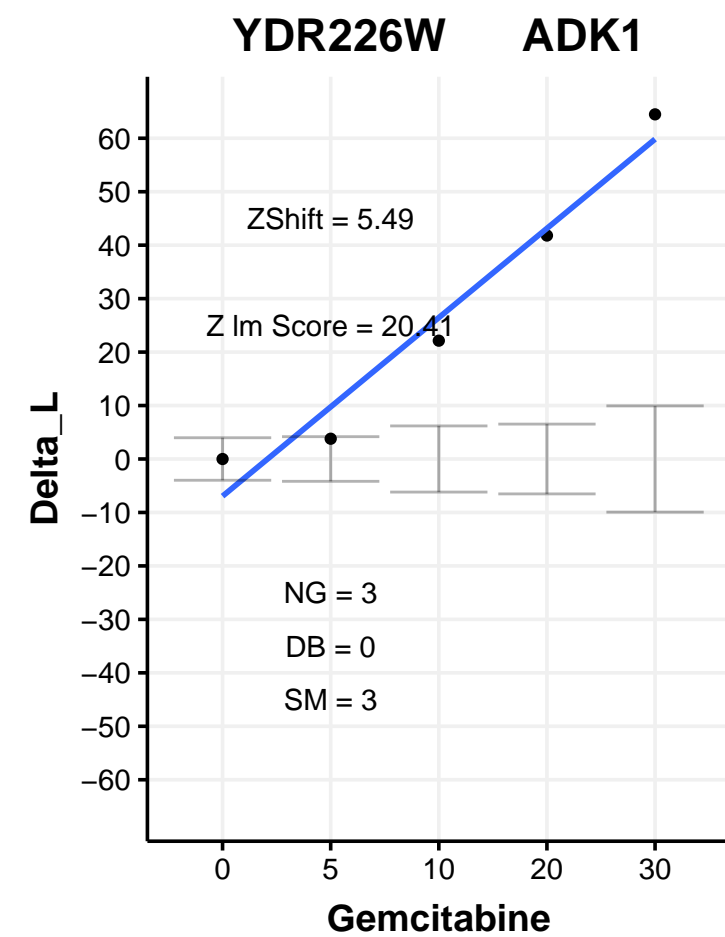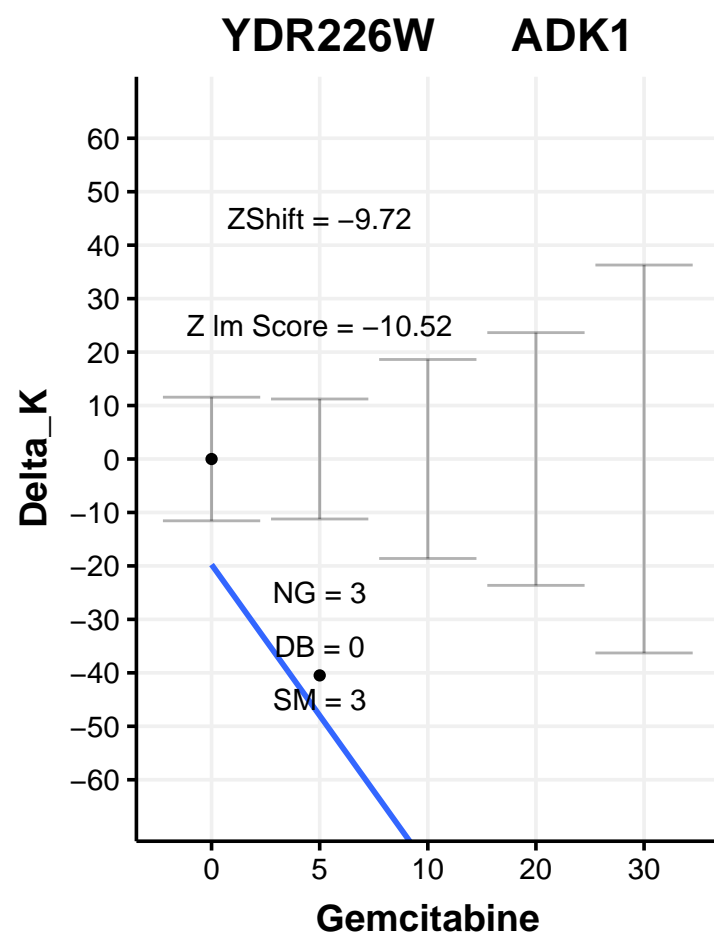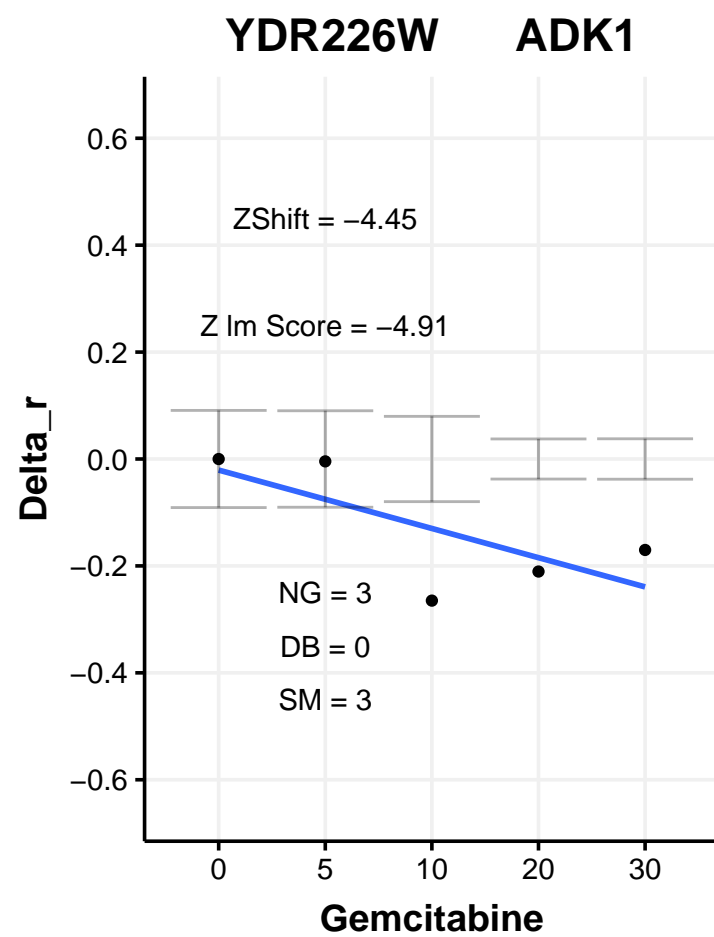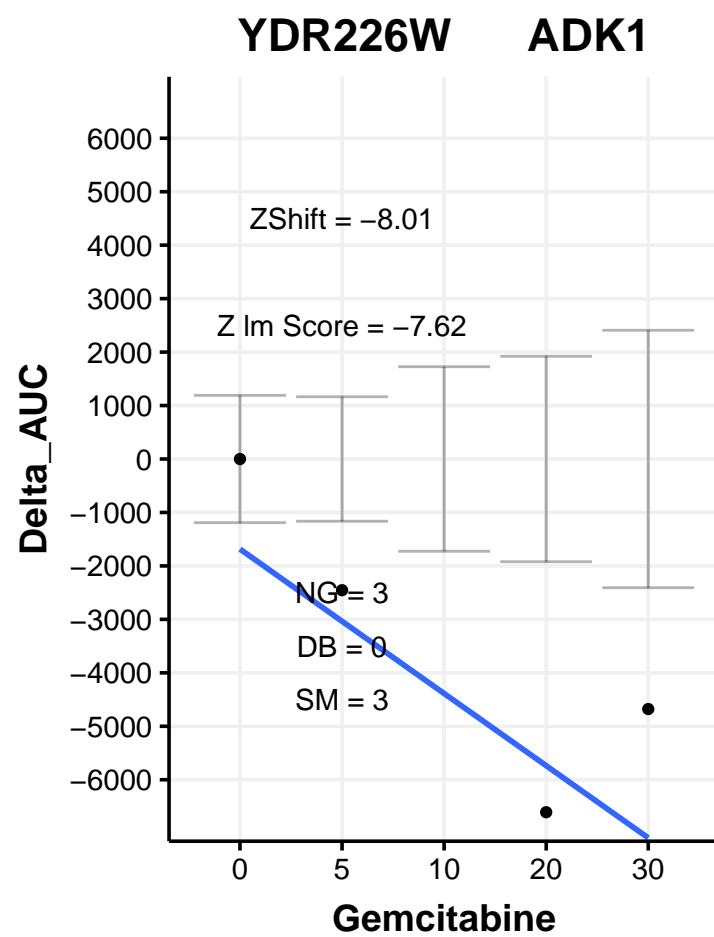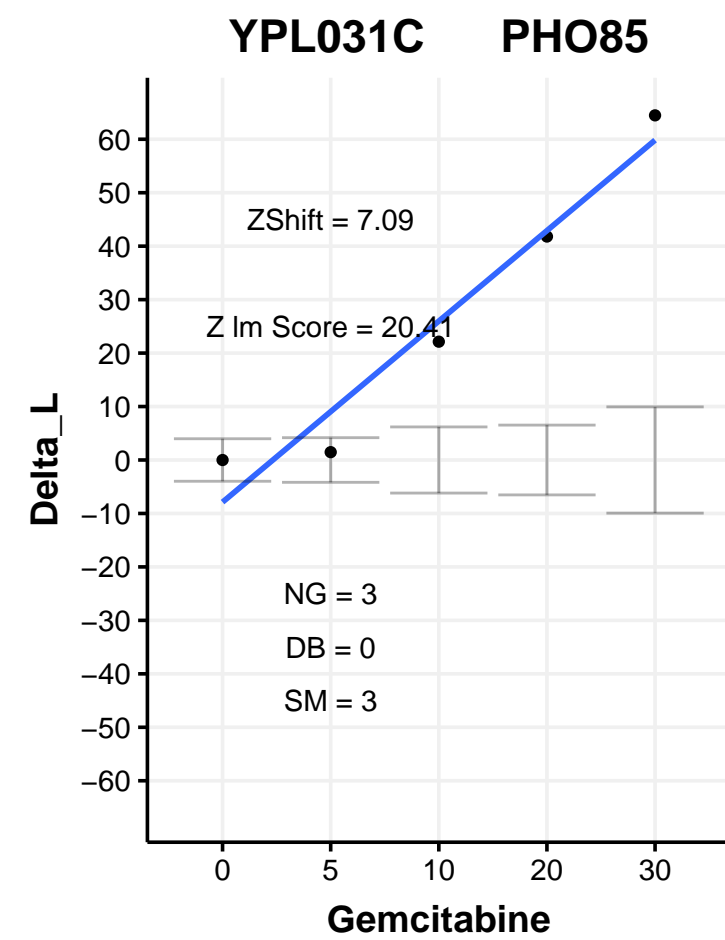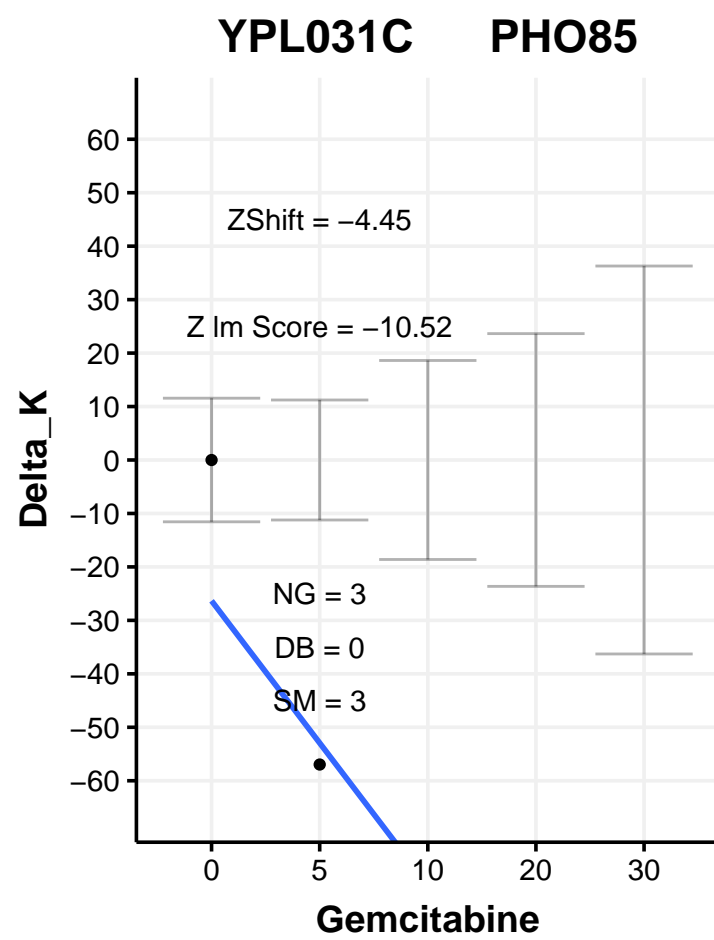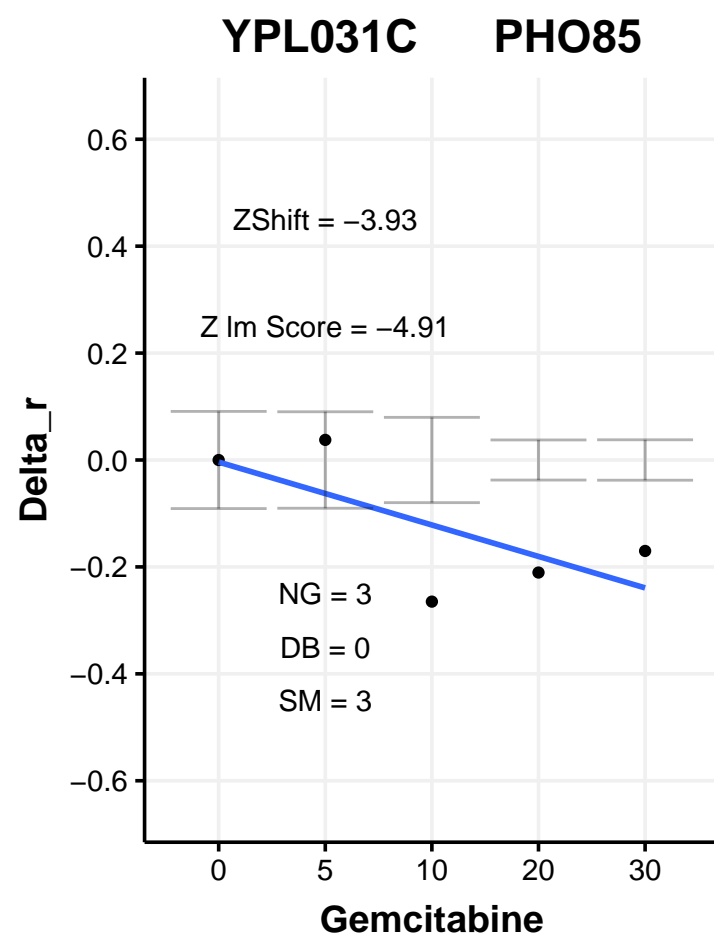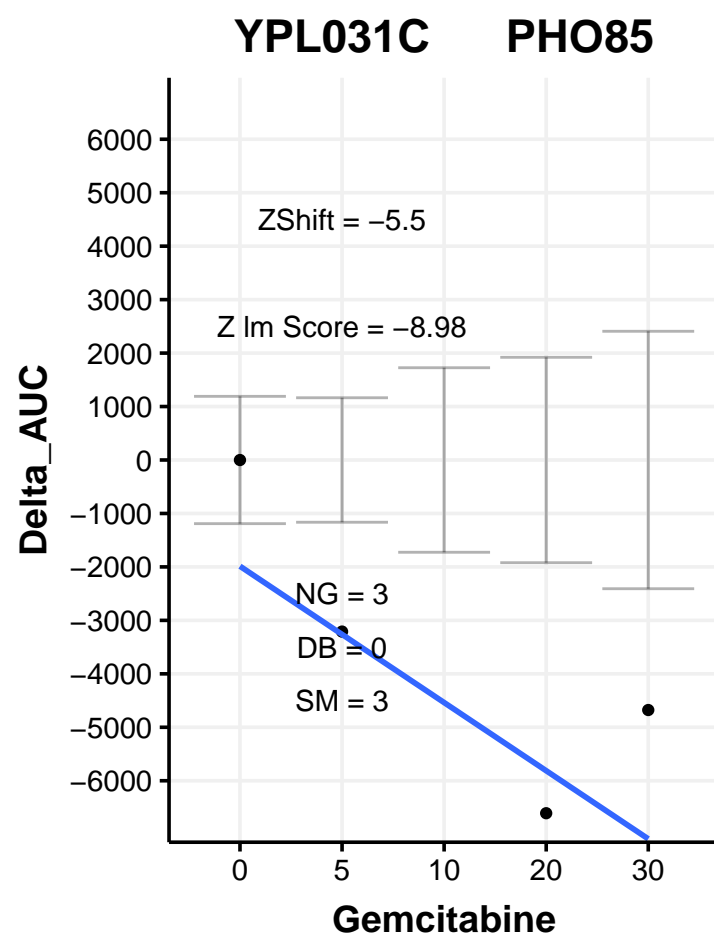

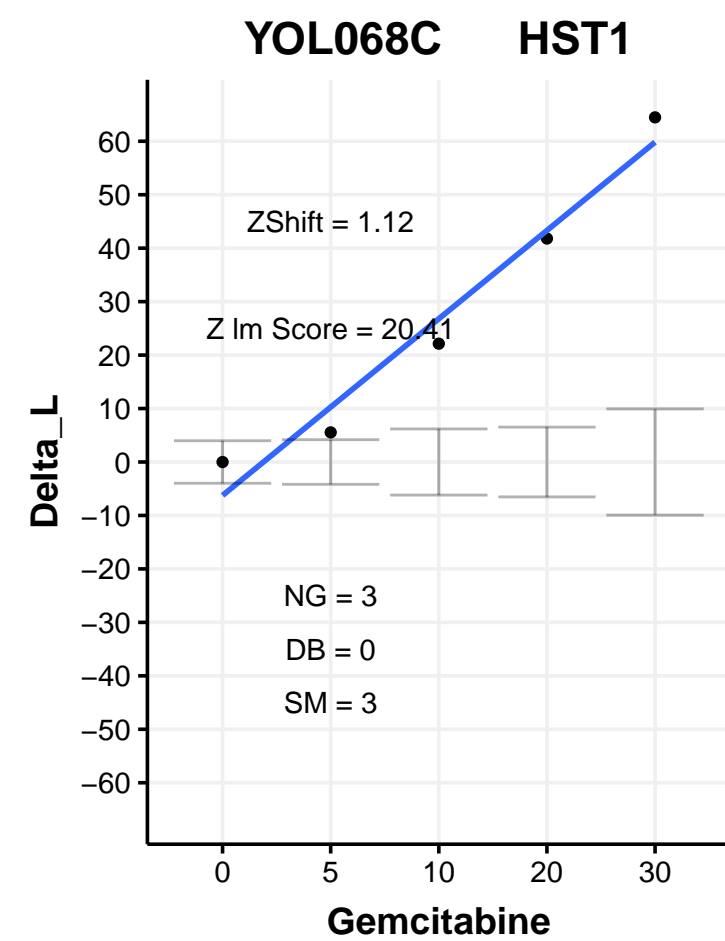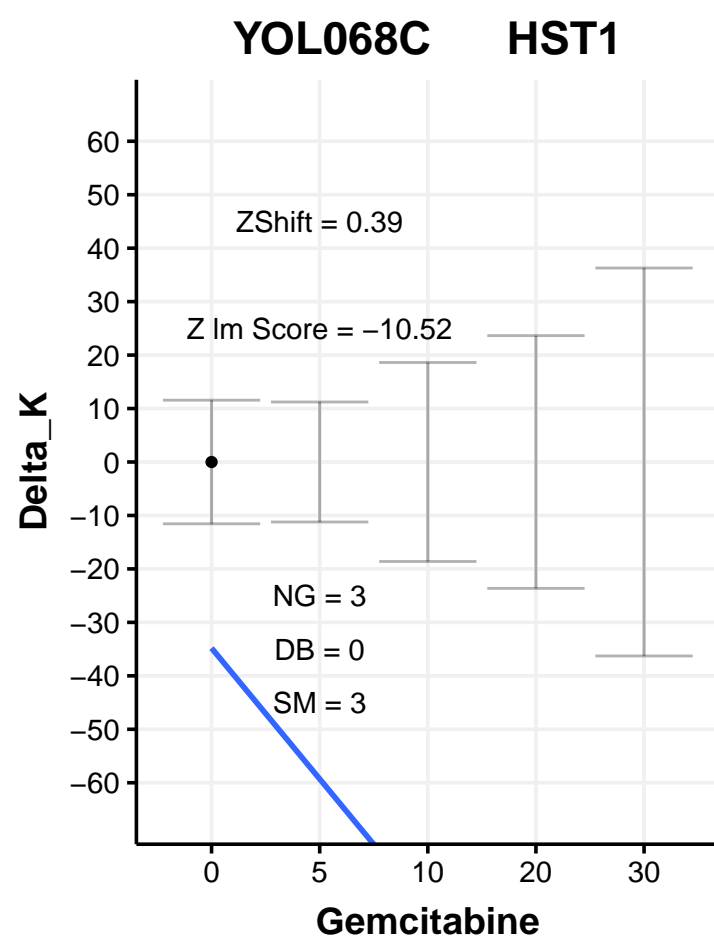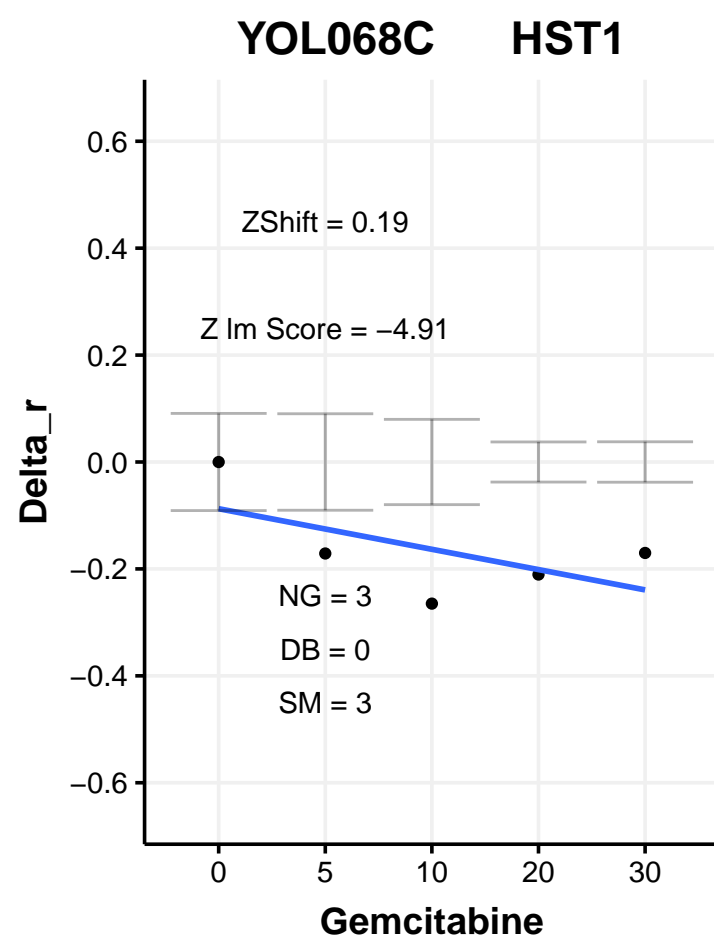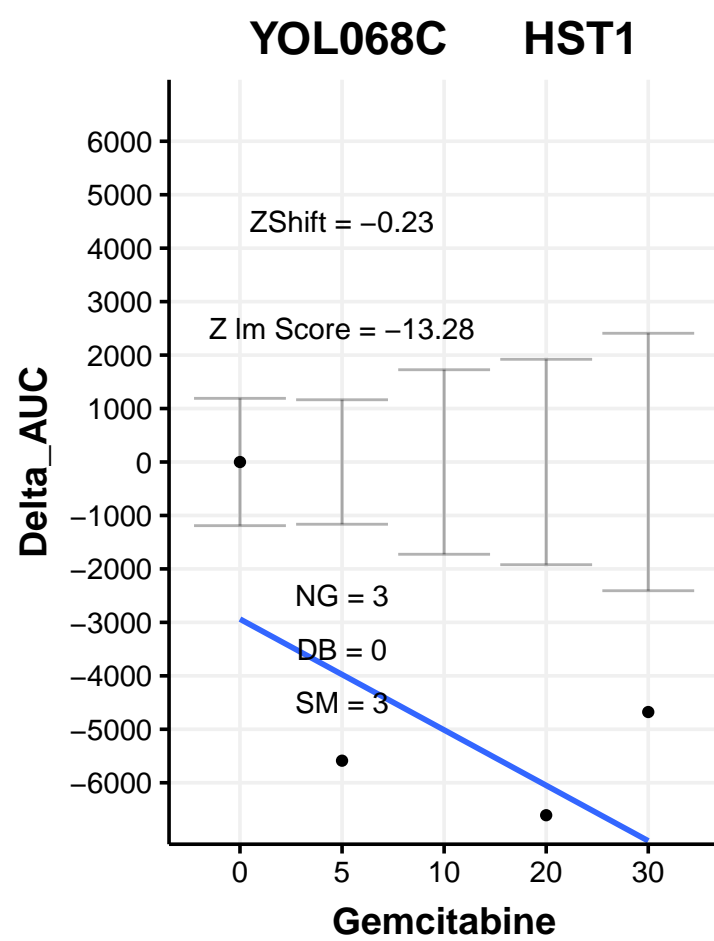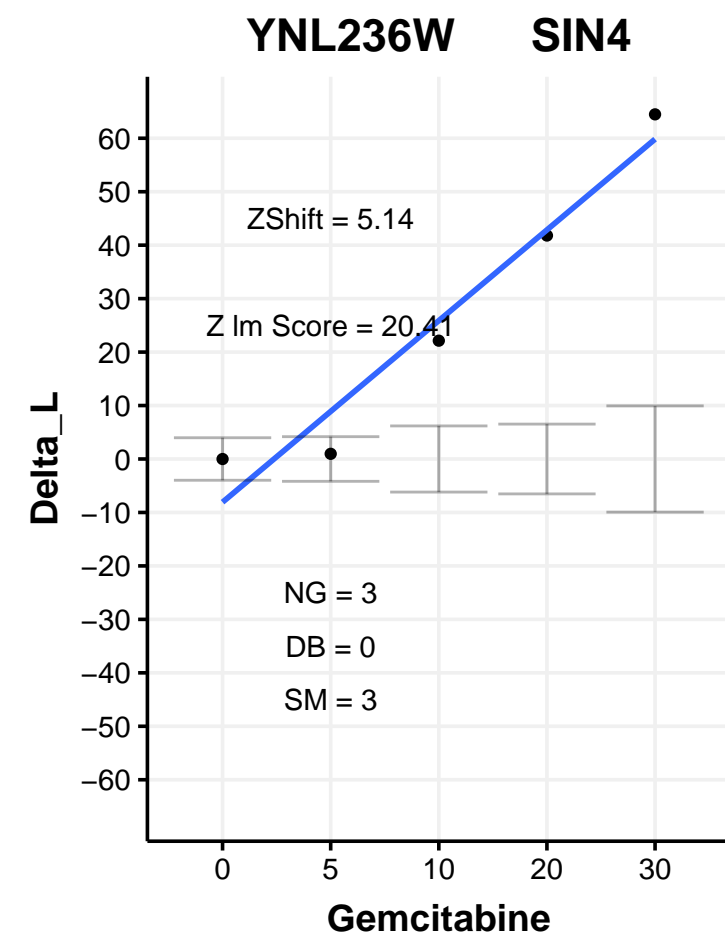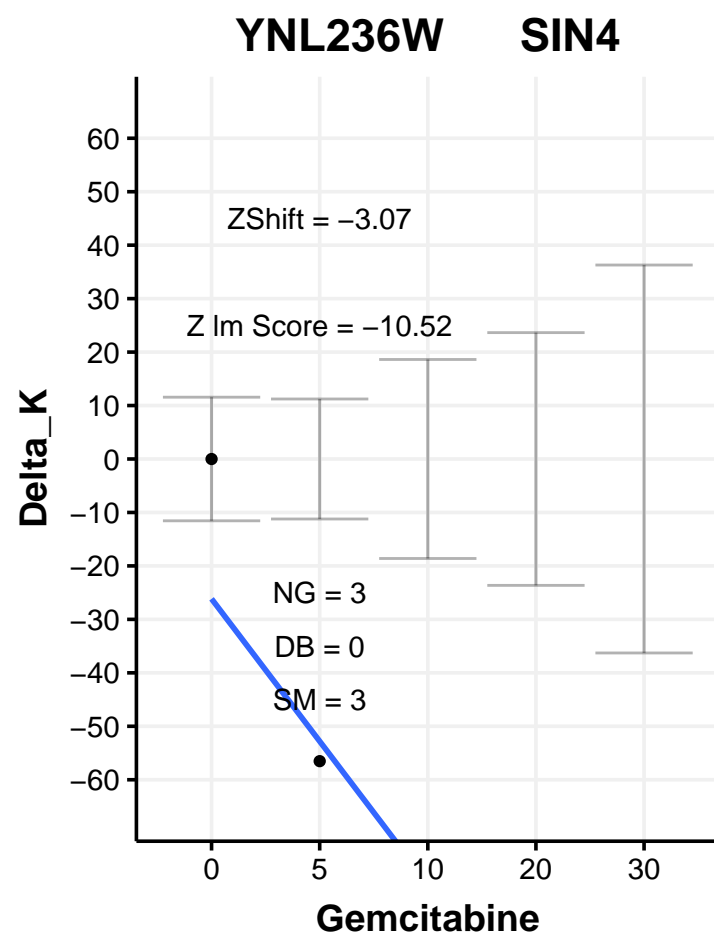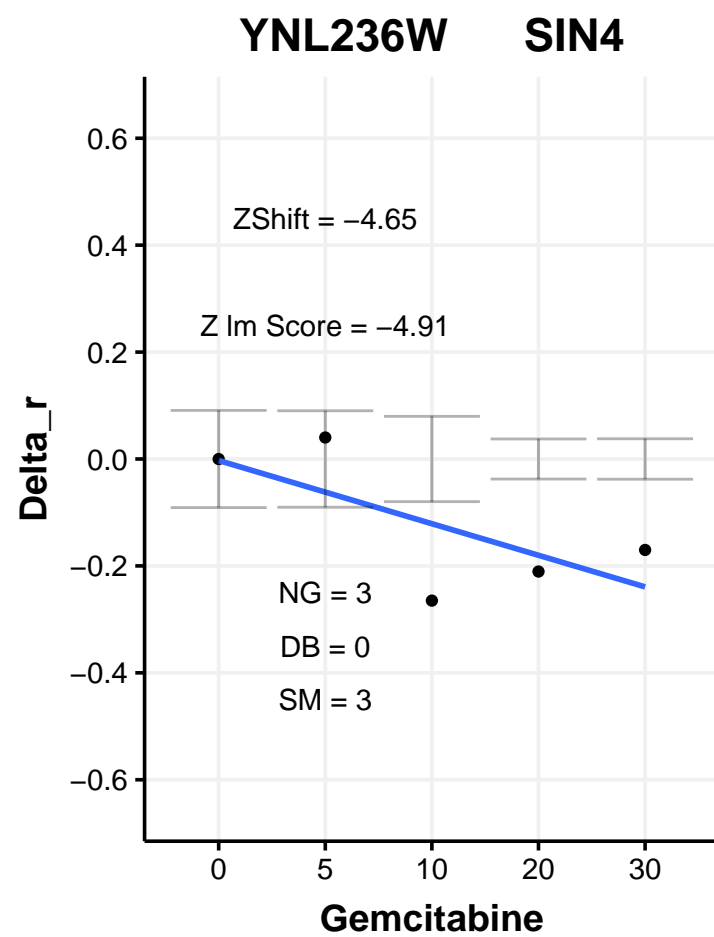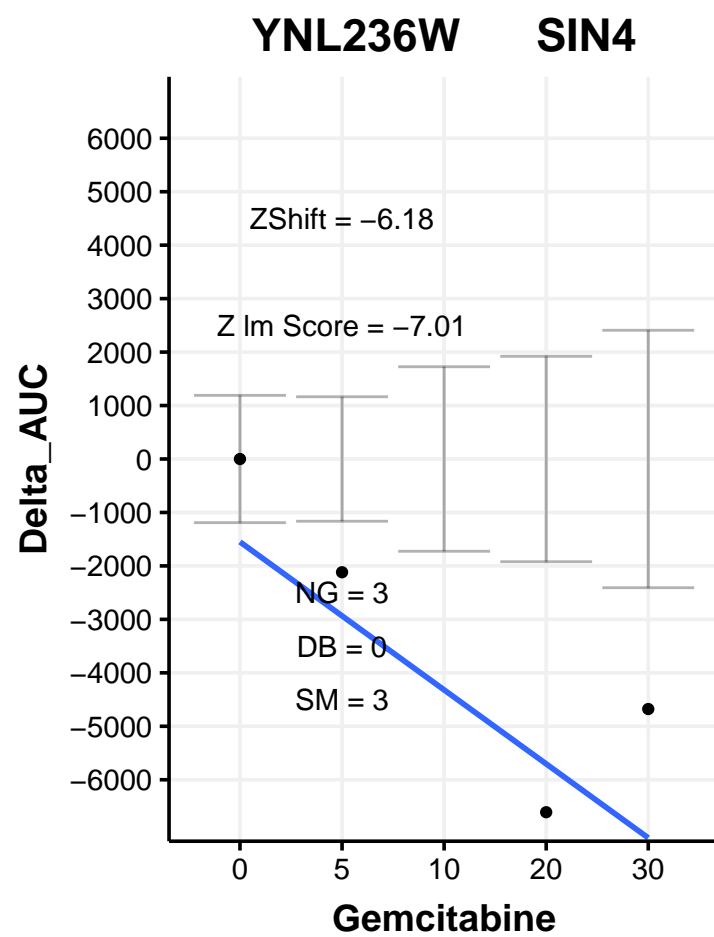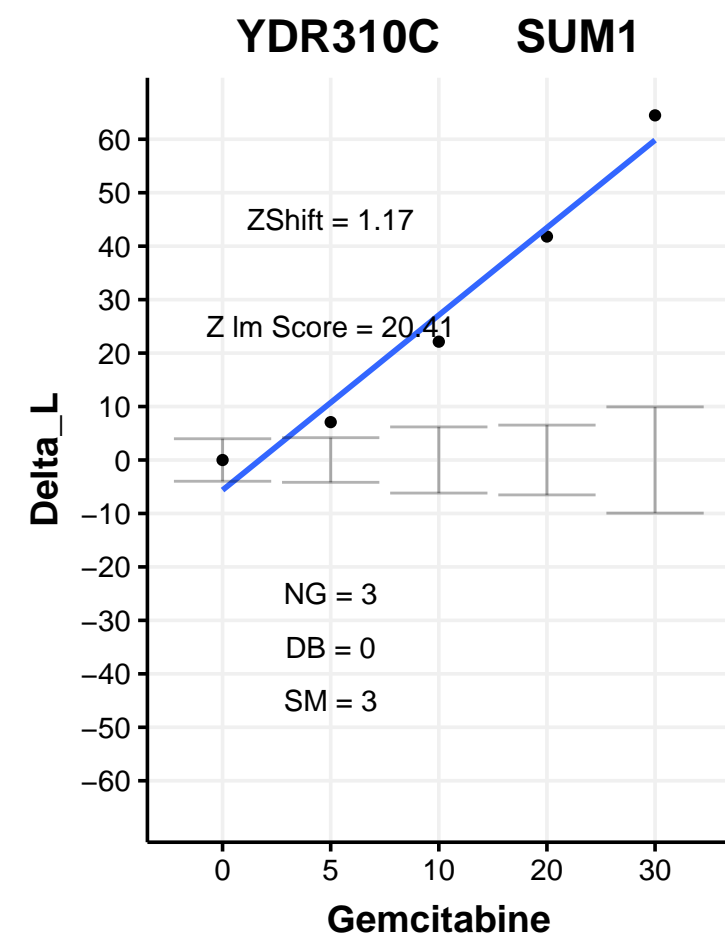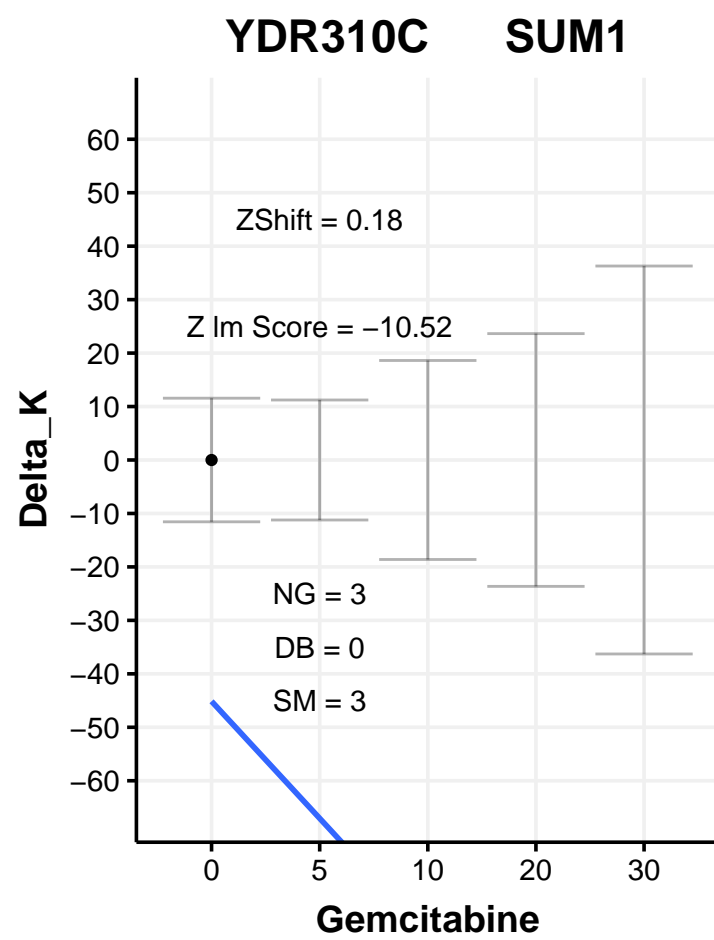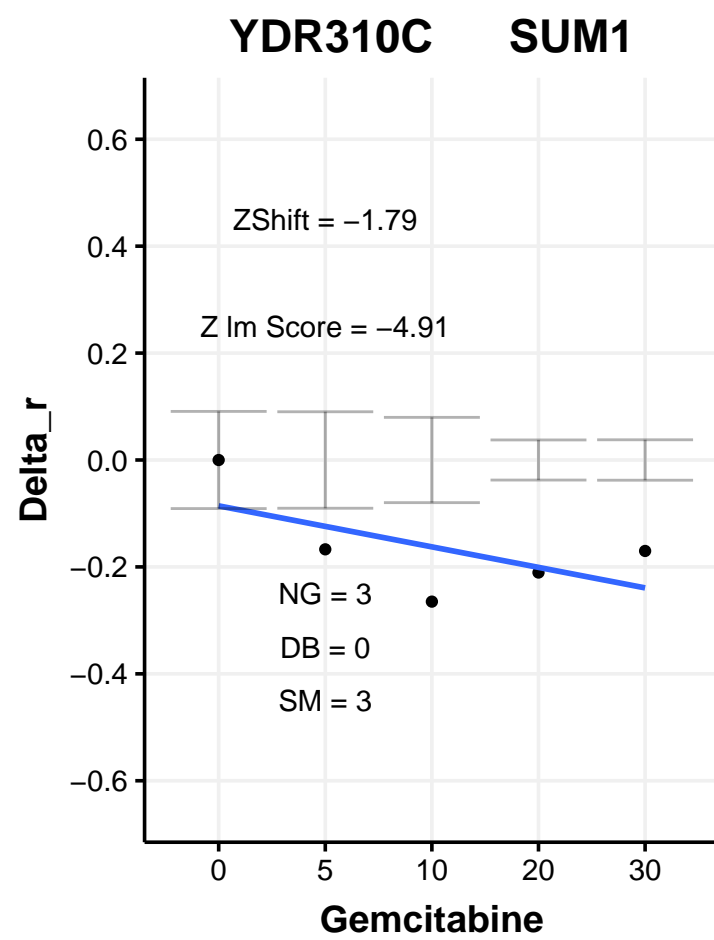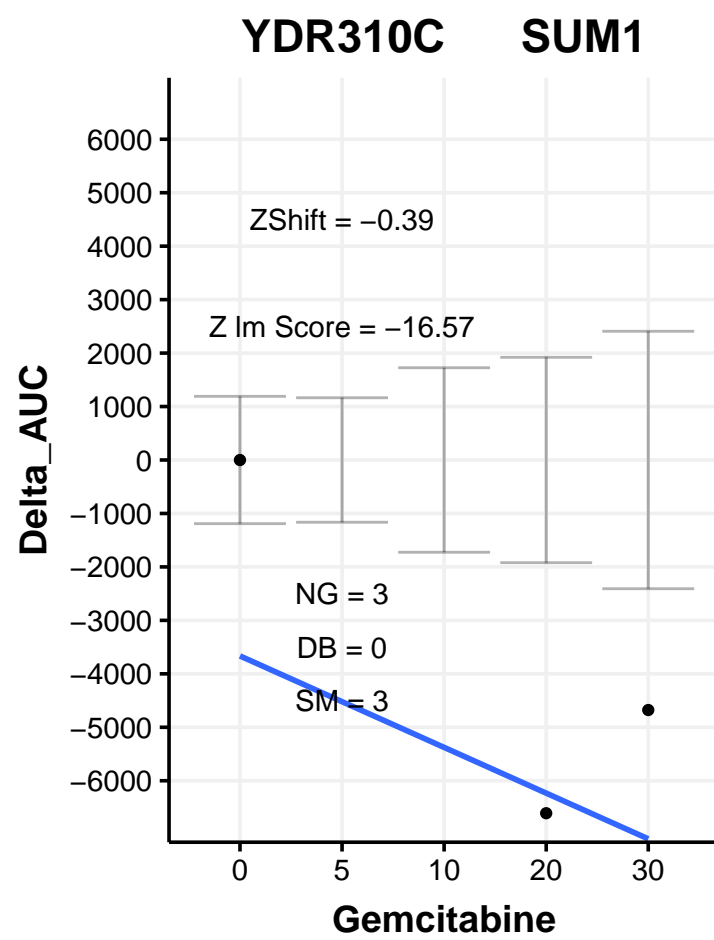



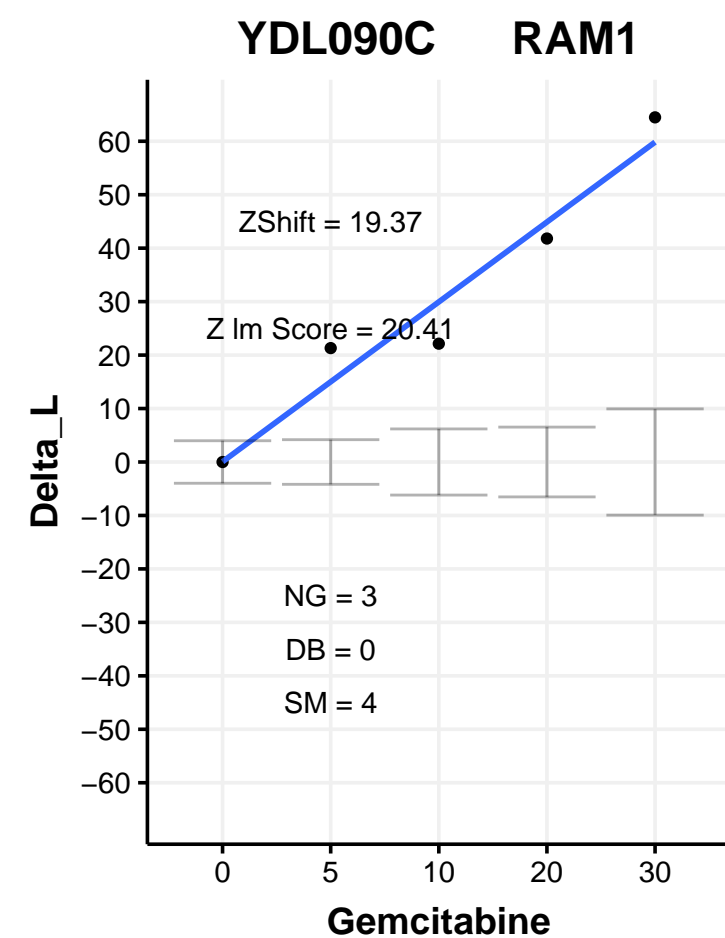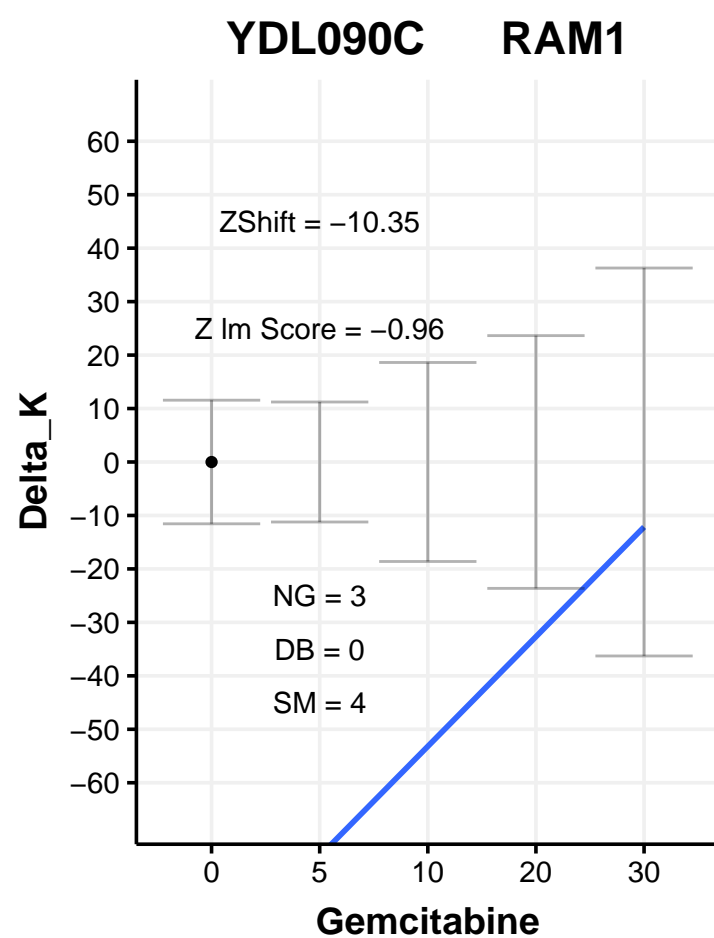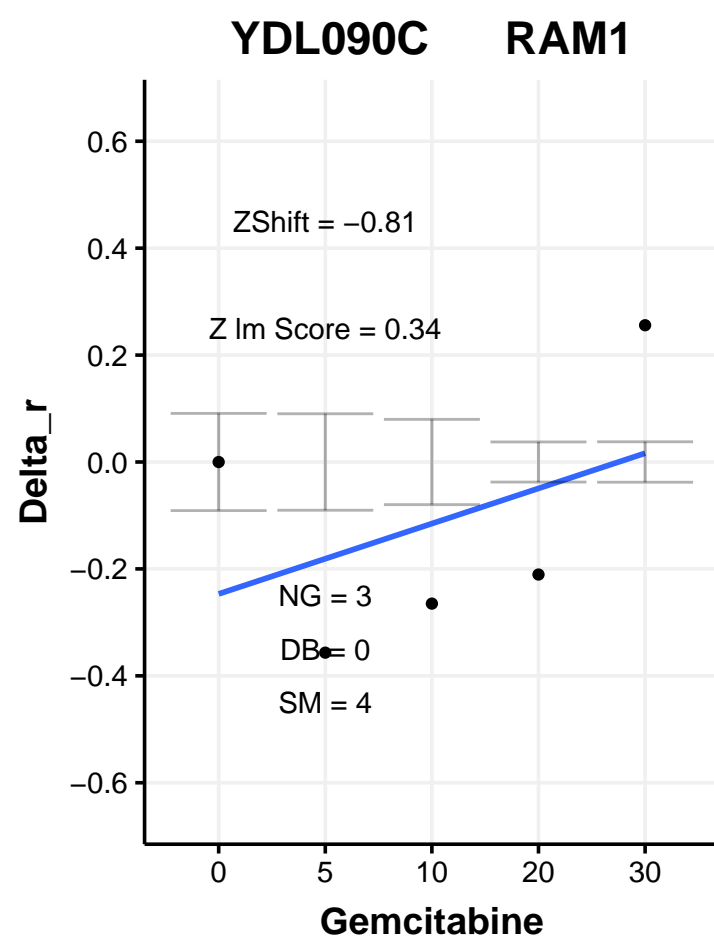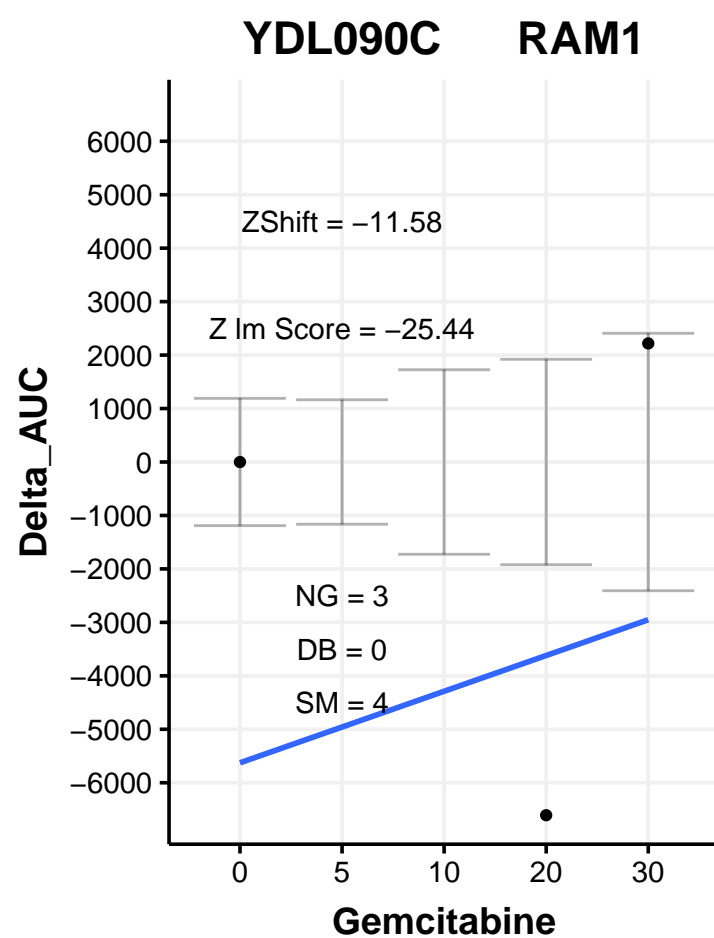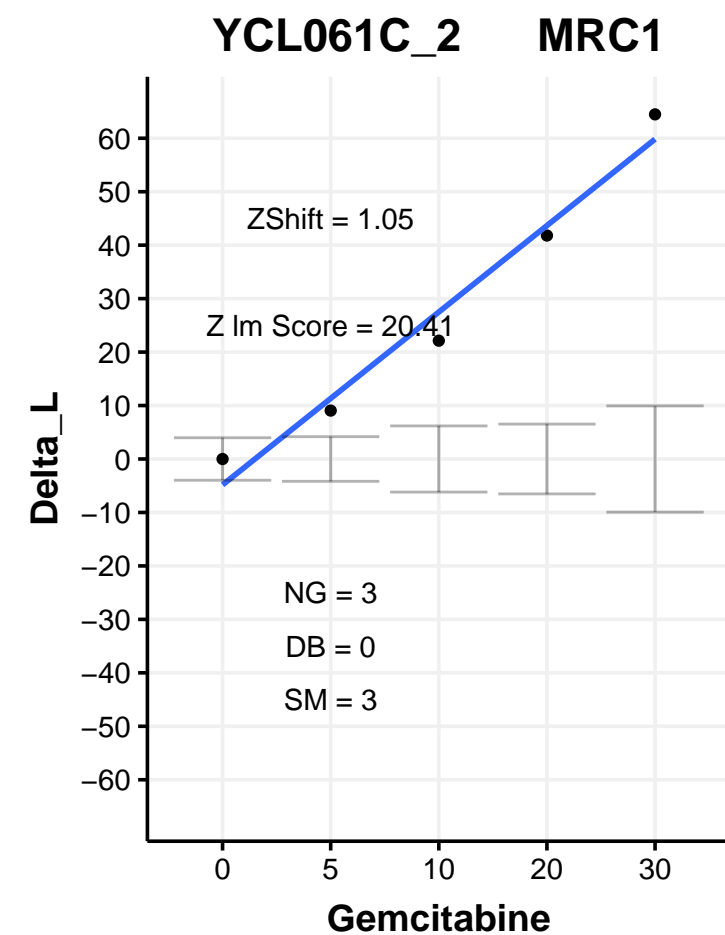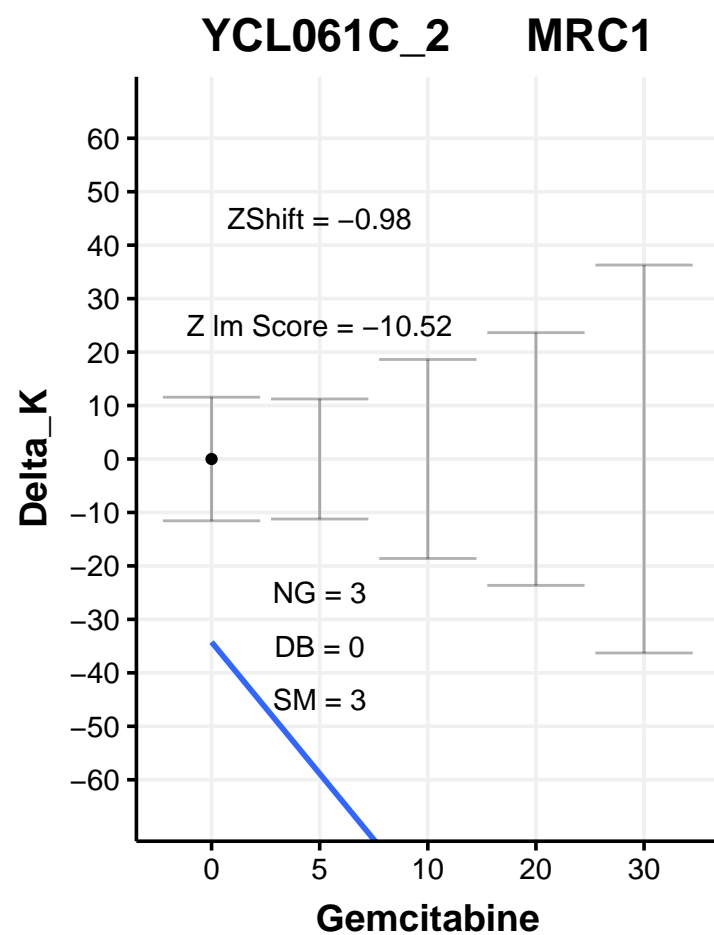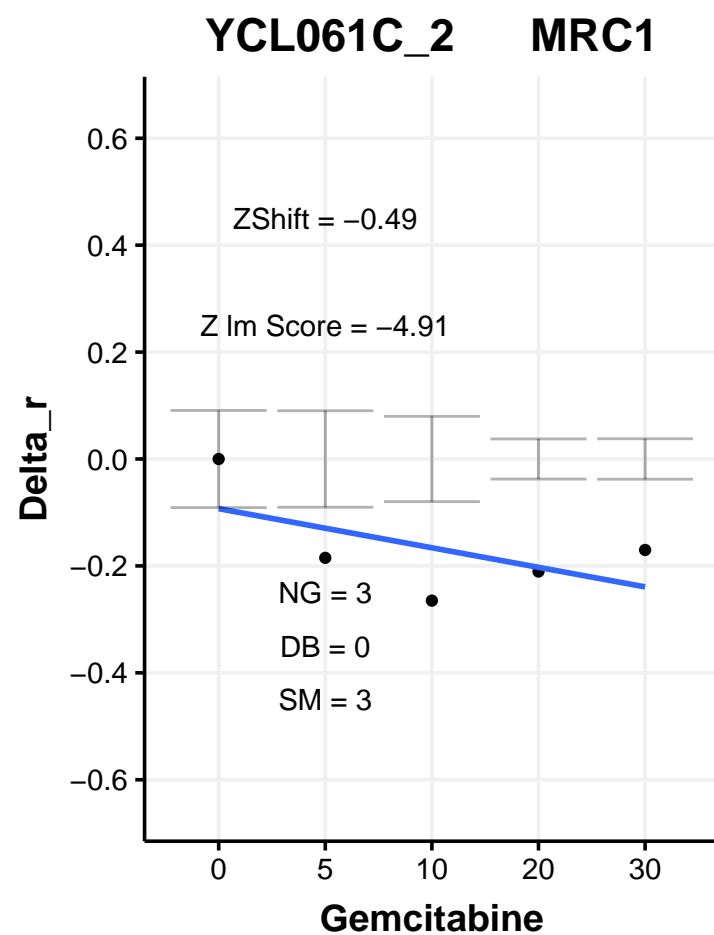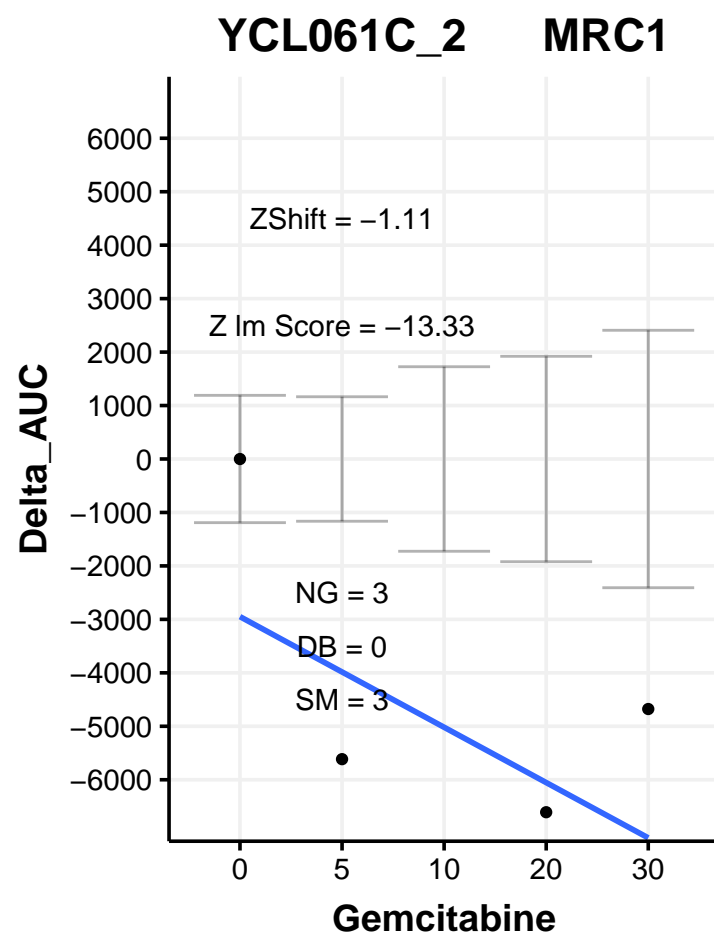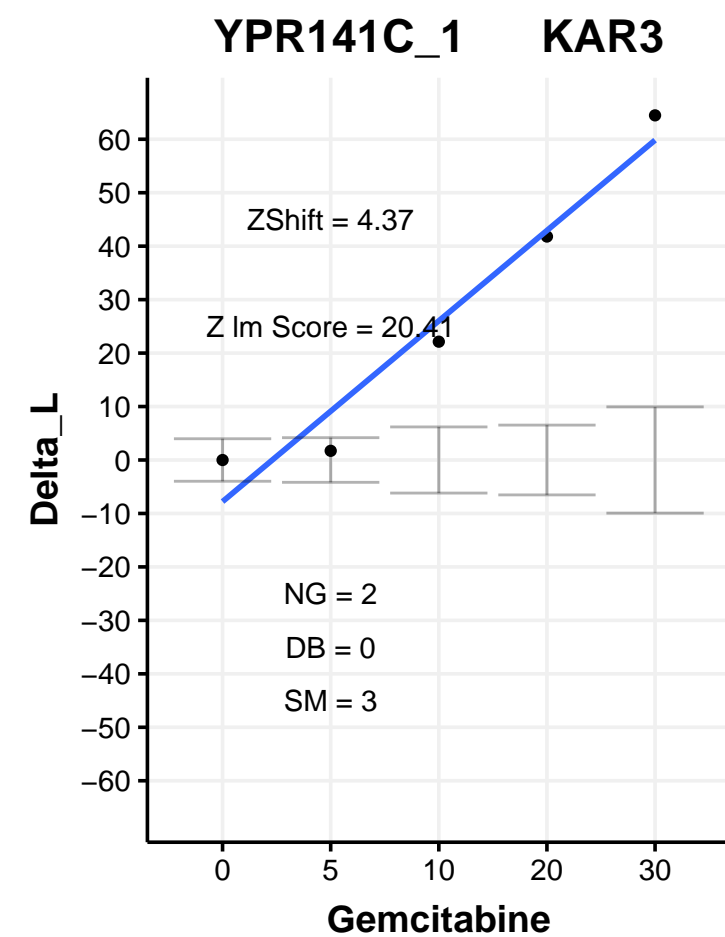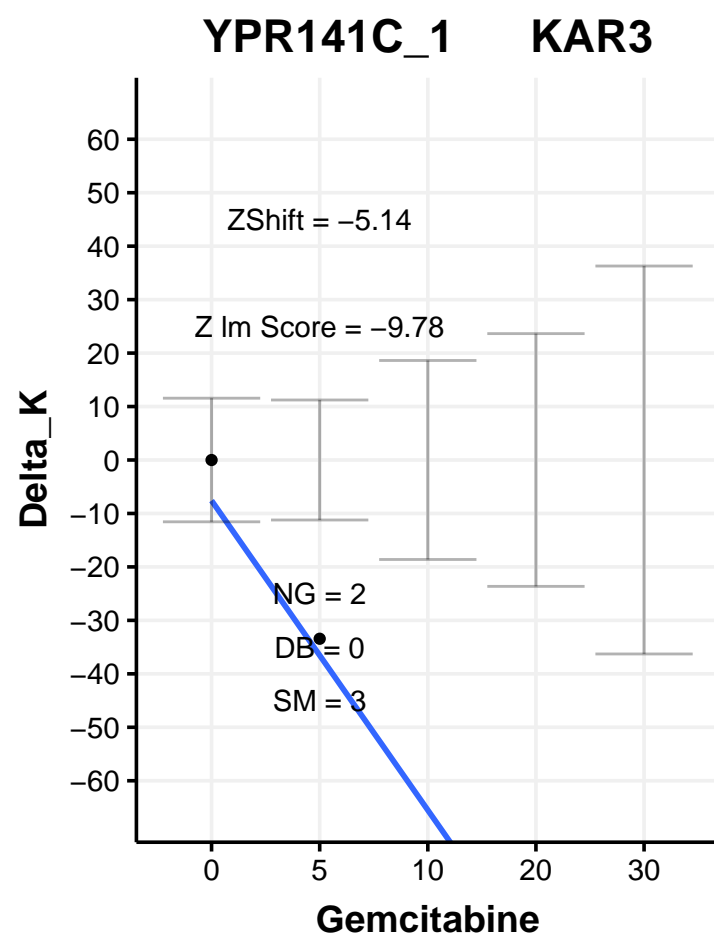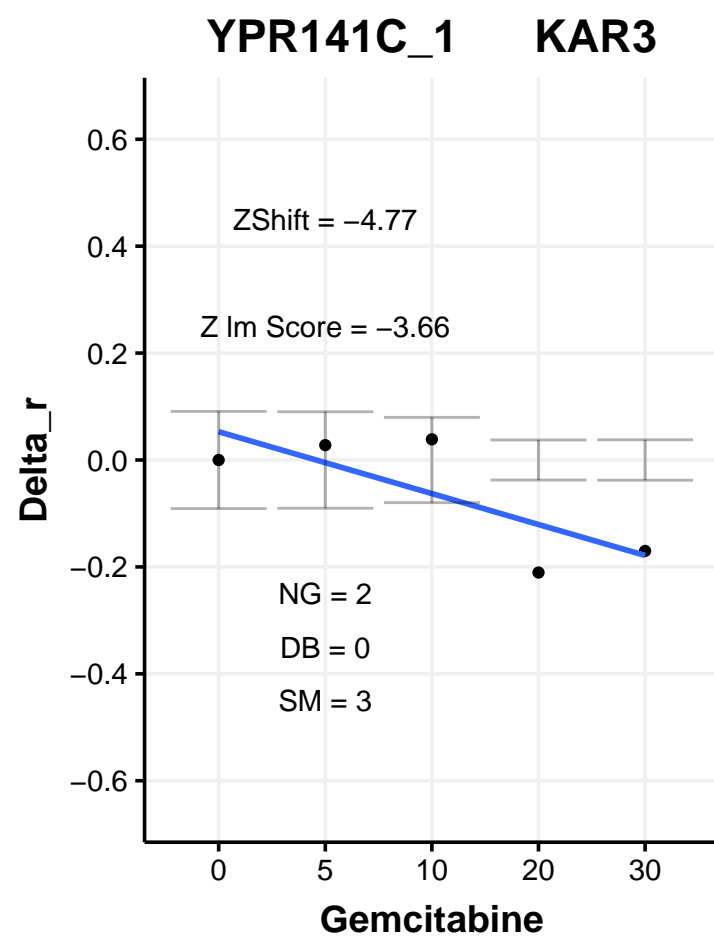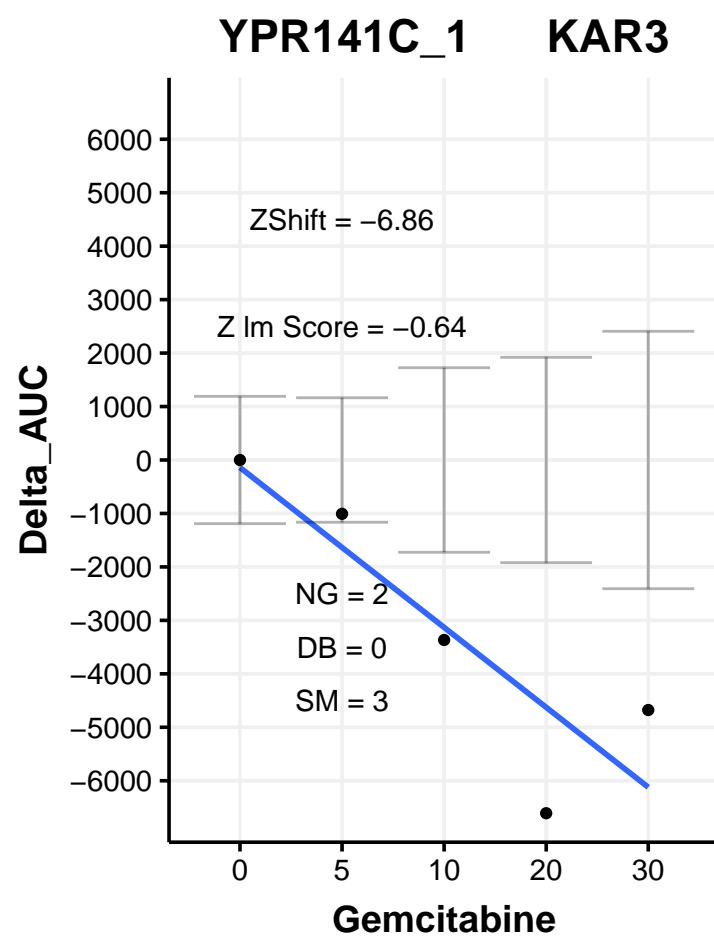



YKL096C-B\_2

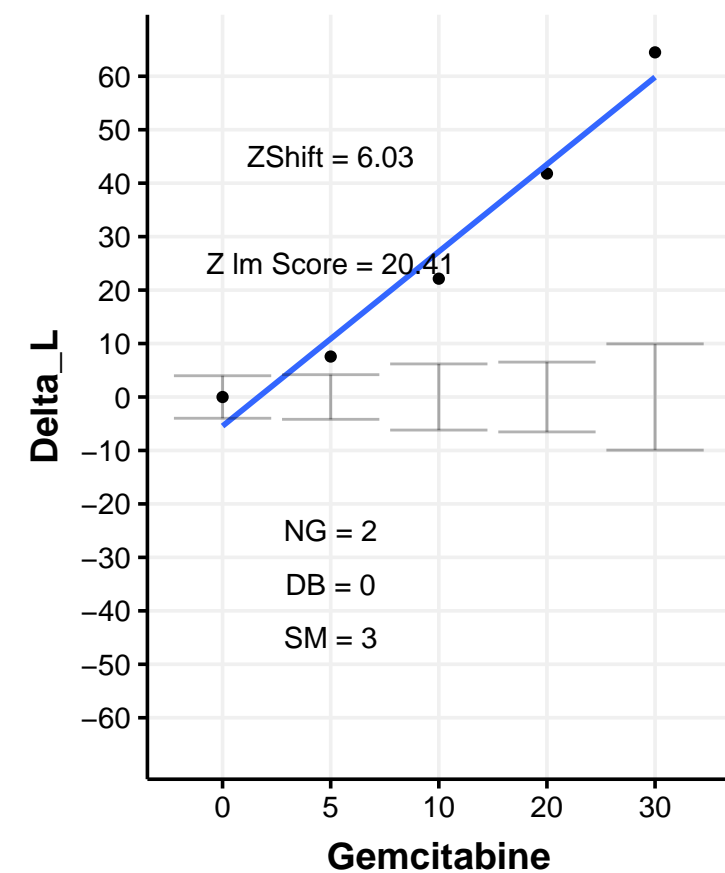

YKL096C-B\_2

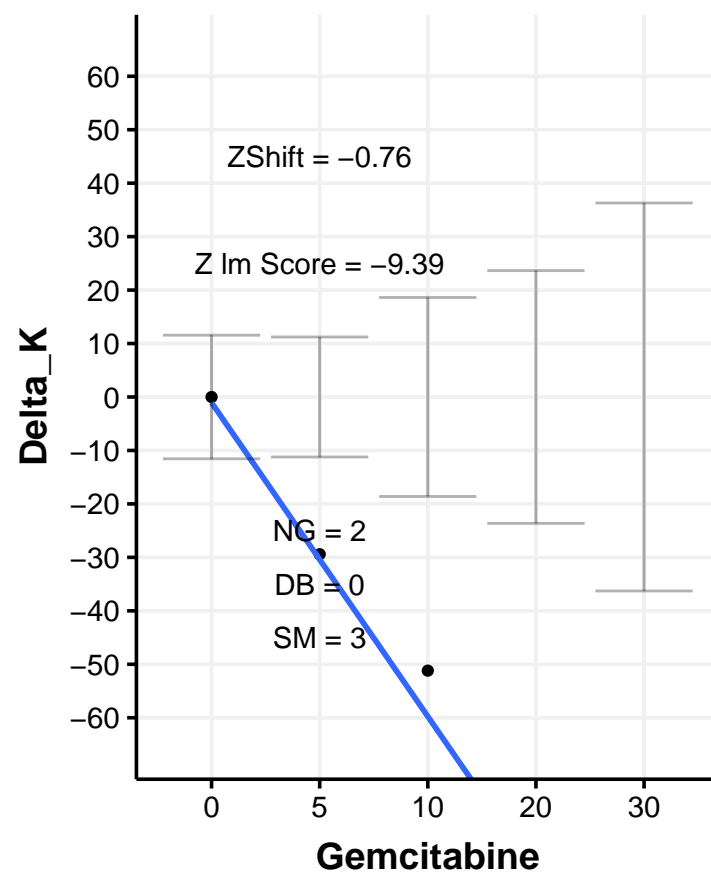

YKL096C-B\_2

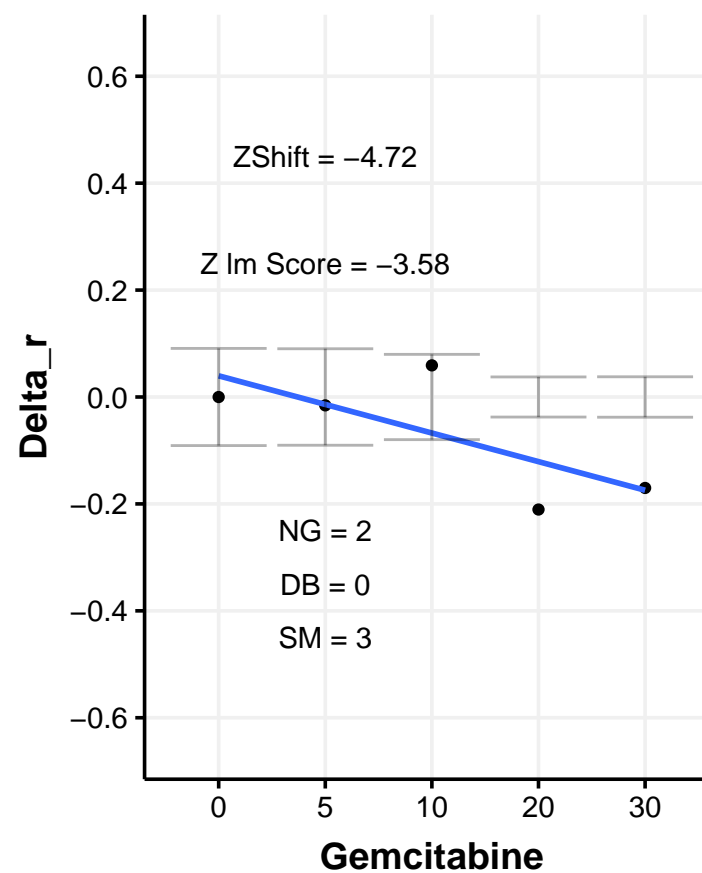

YKL096C-B\_2

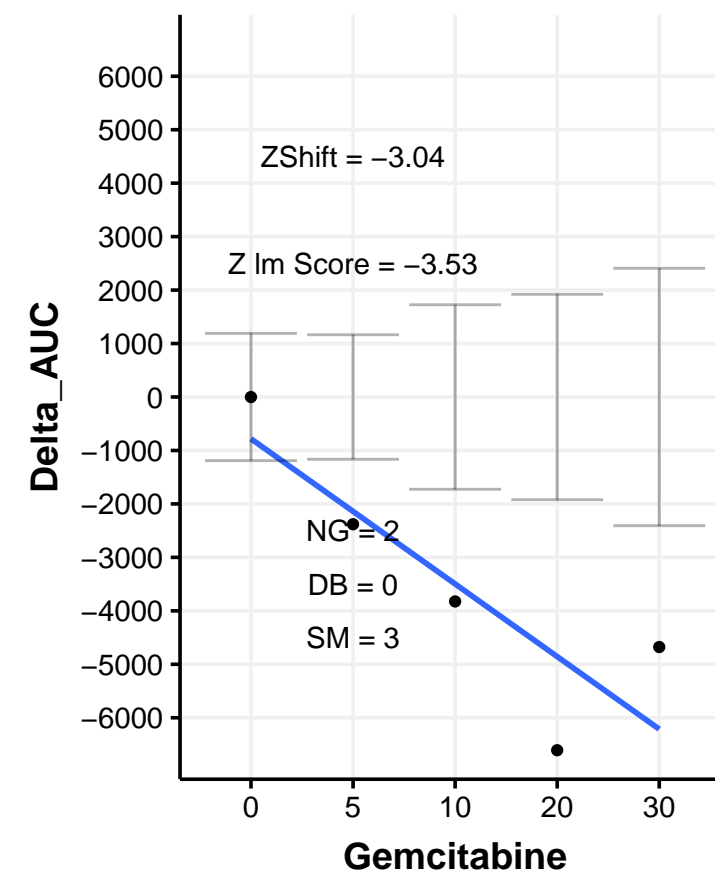

YLR399C BDF1

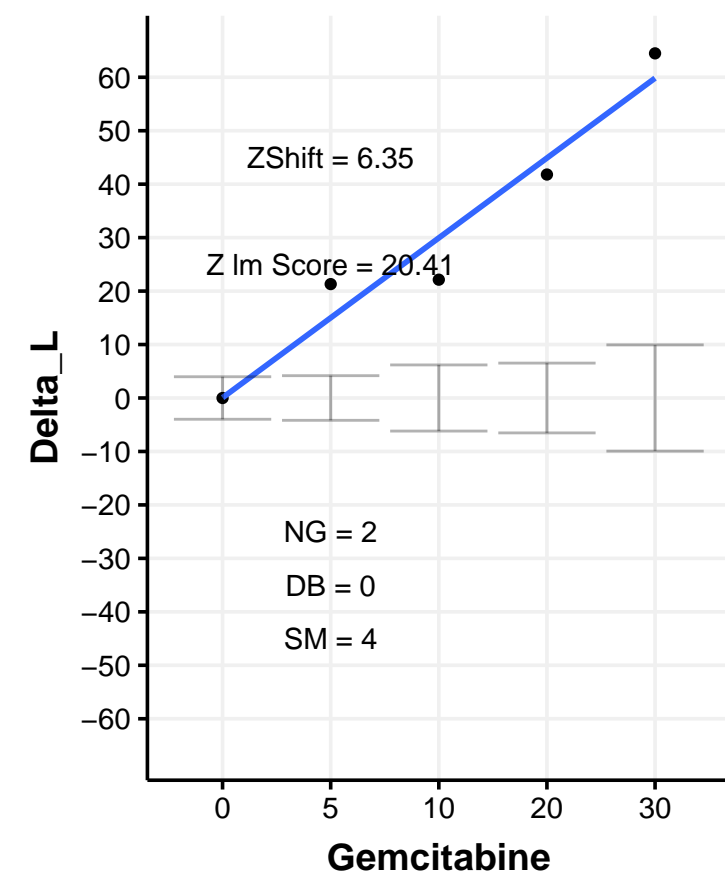

YLR399C BDF1

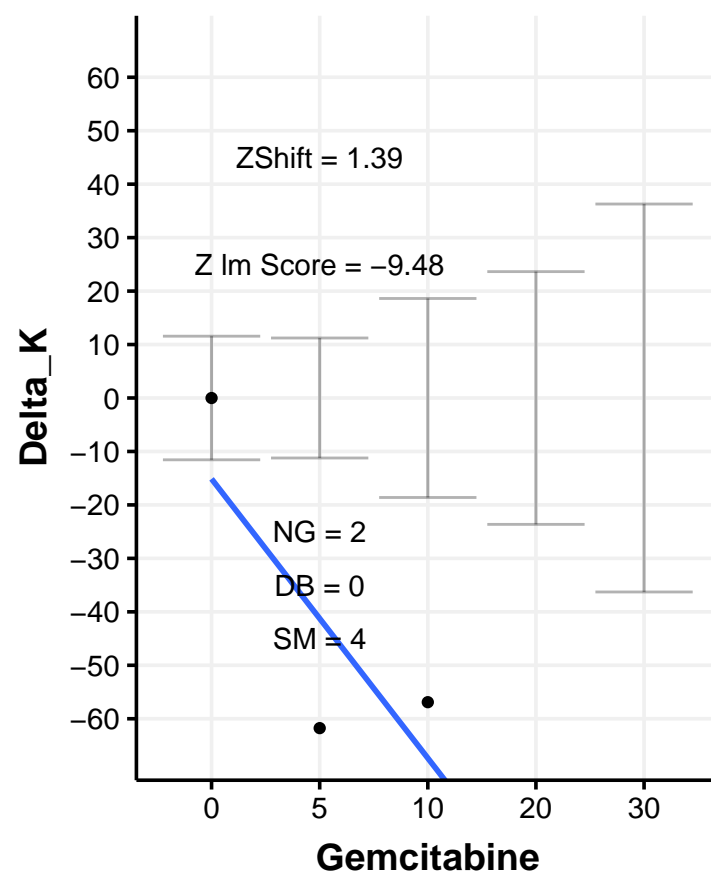

YLR399C BDF1

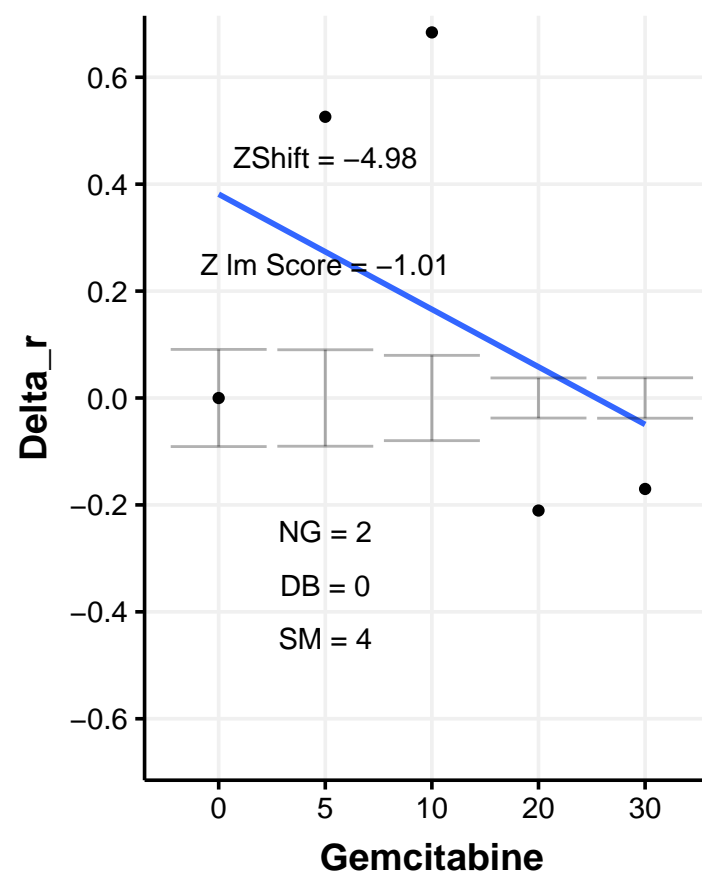

YLR399C BDF1

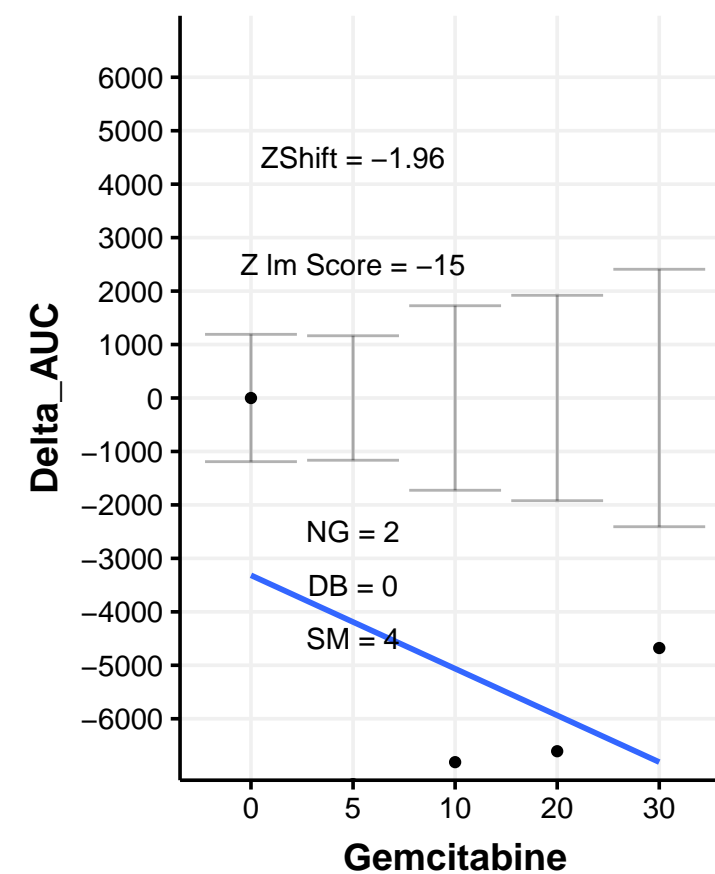

YOL076W MDM20

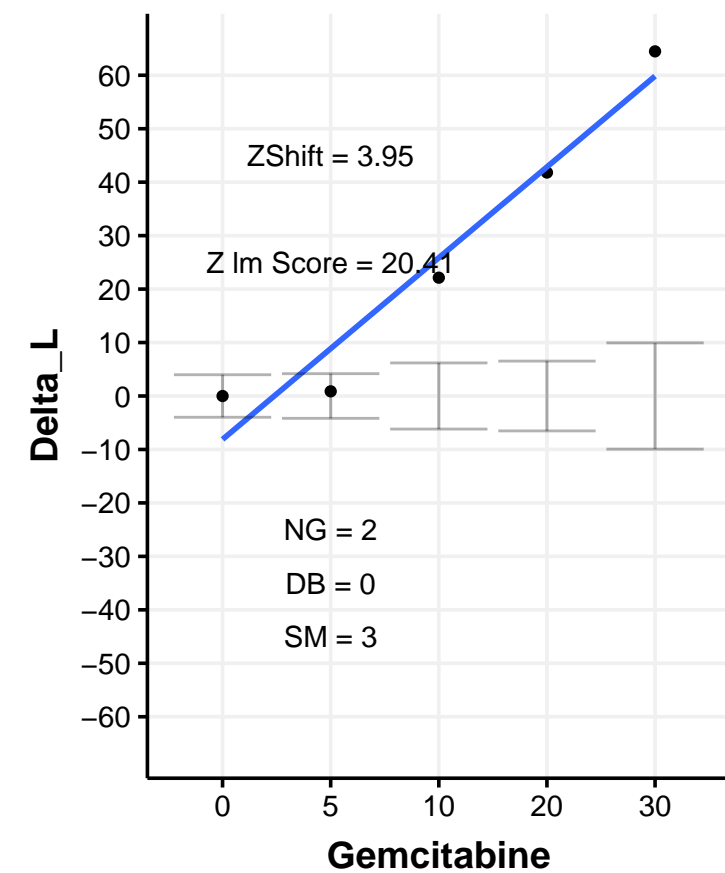

YOL076W MDM20

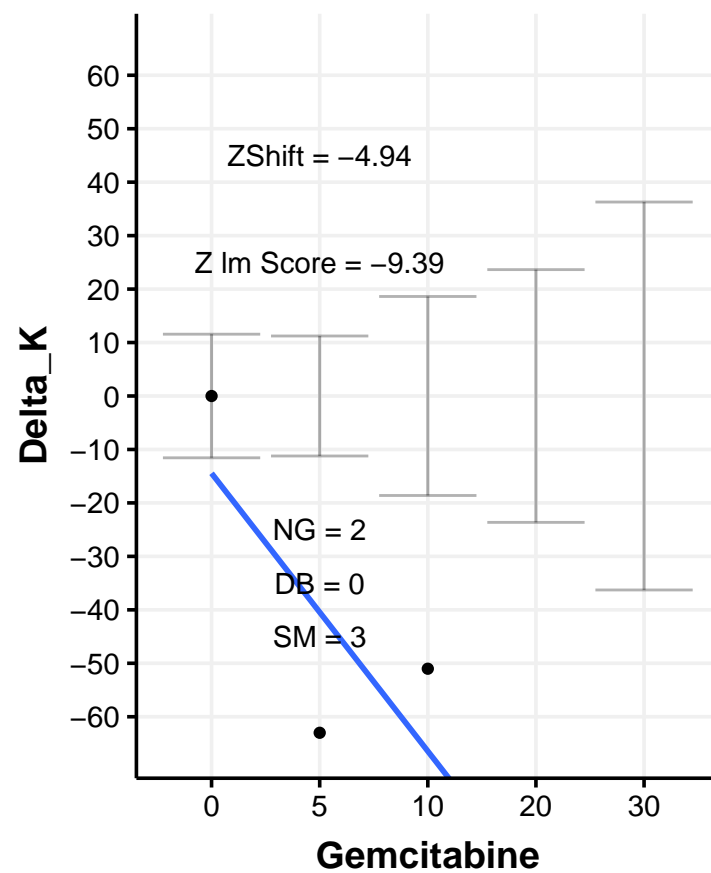

YOL076W MDM20

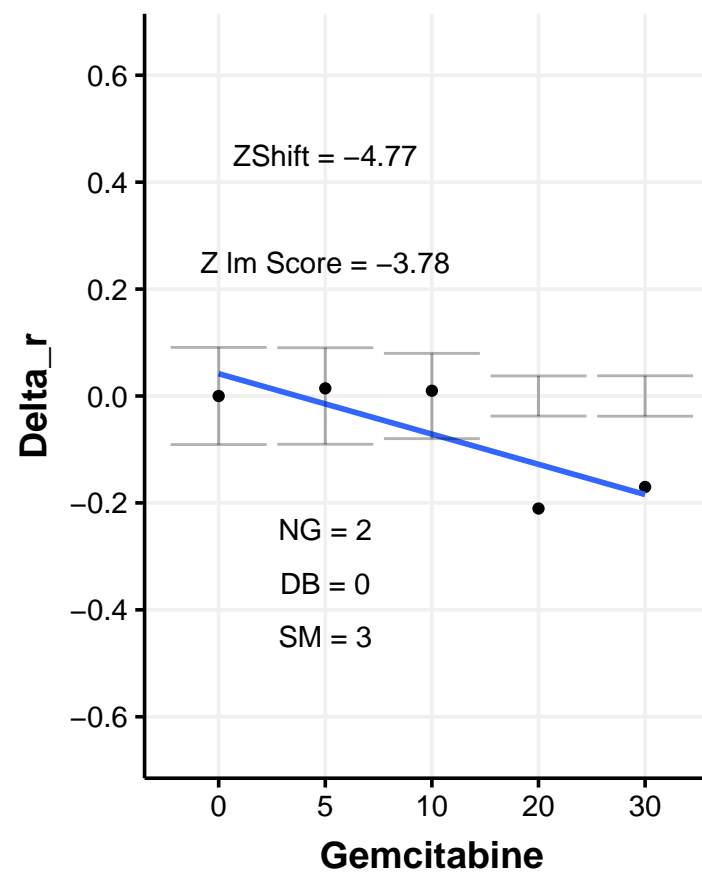

YOL076W MDM20

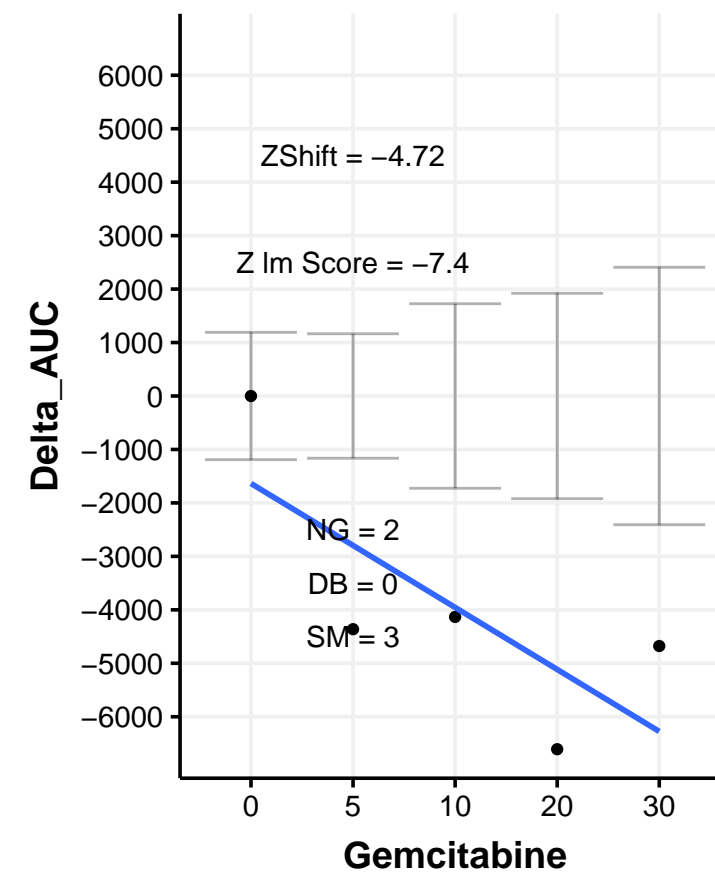

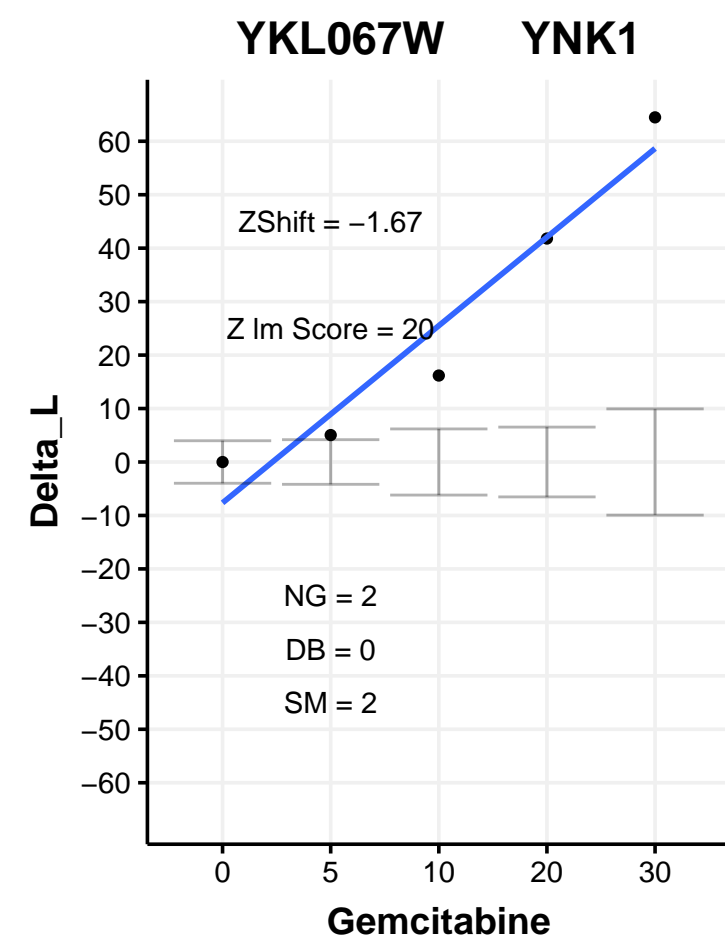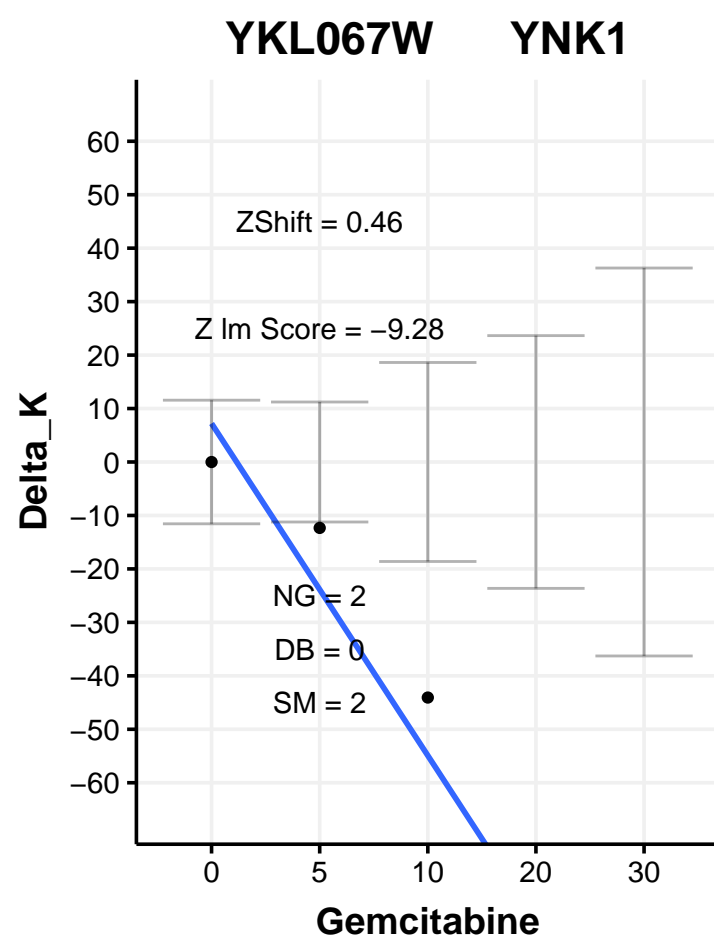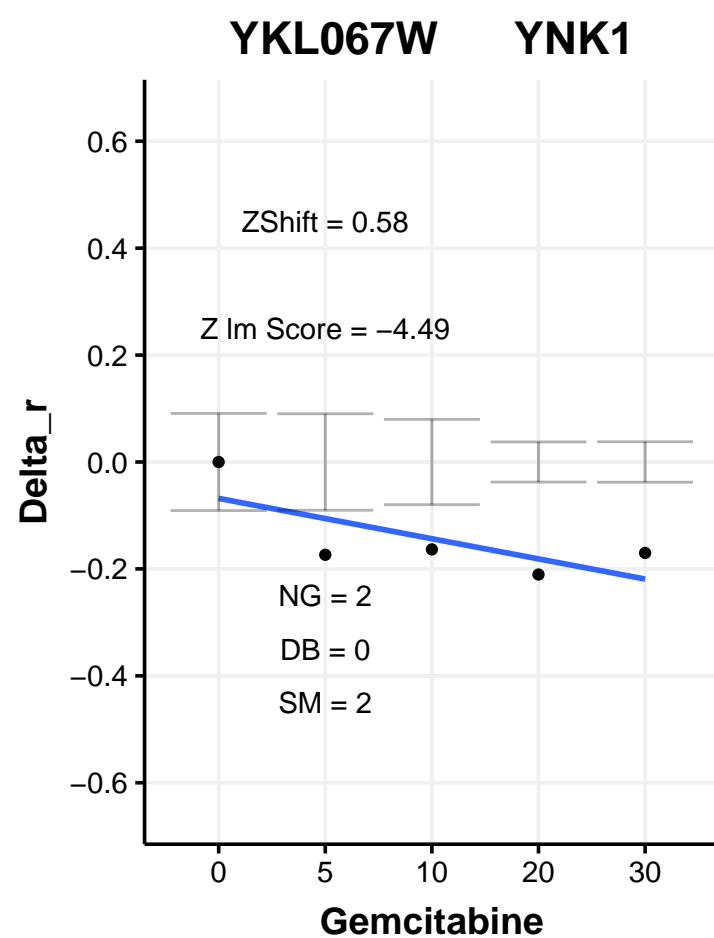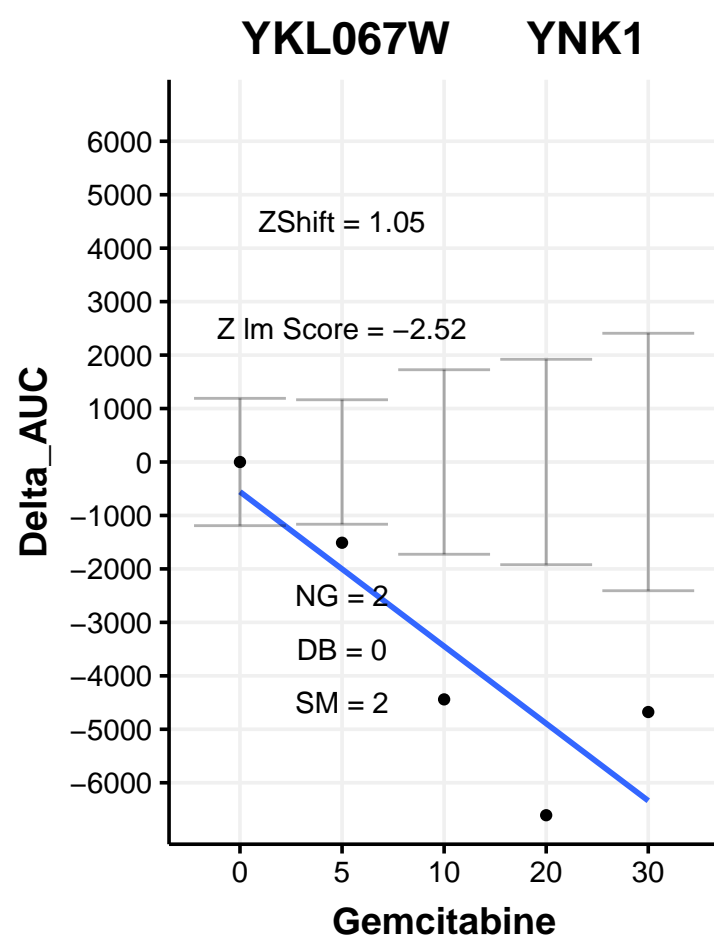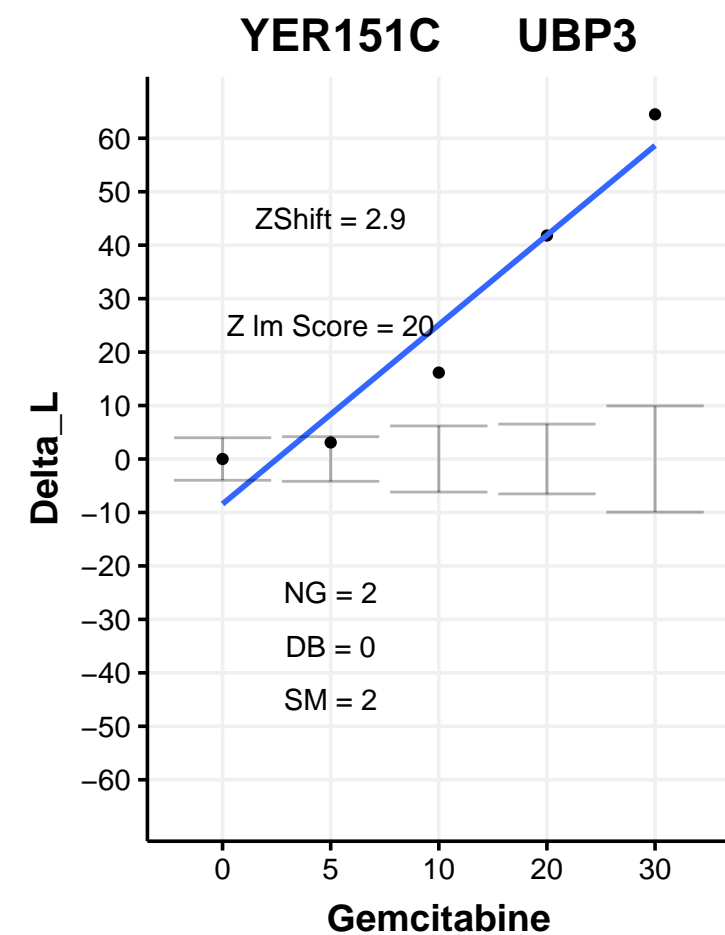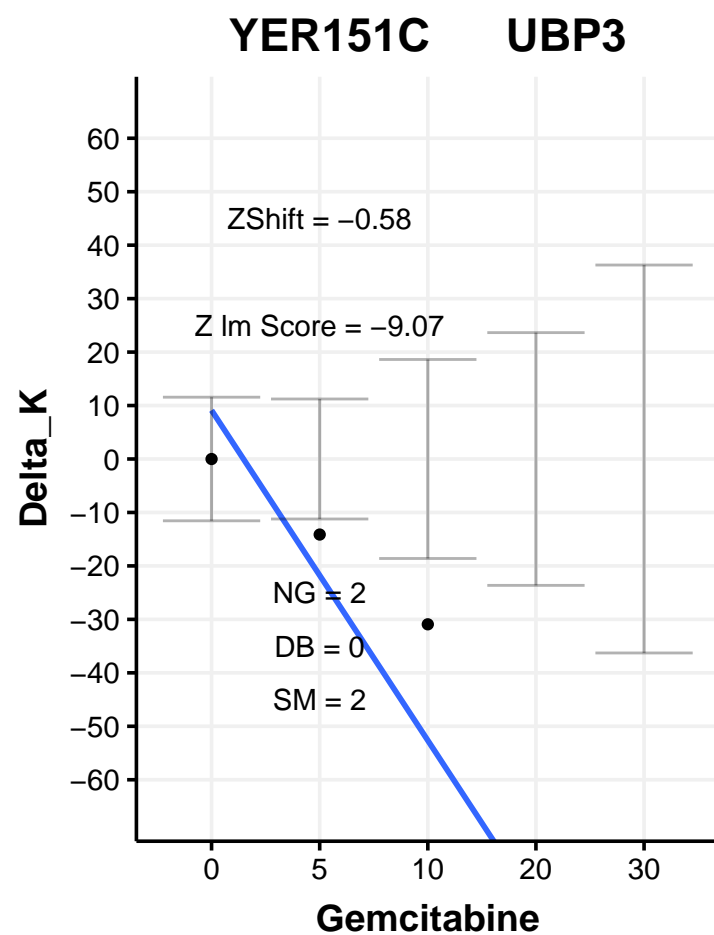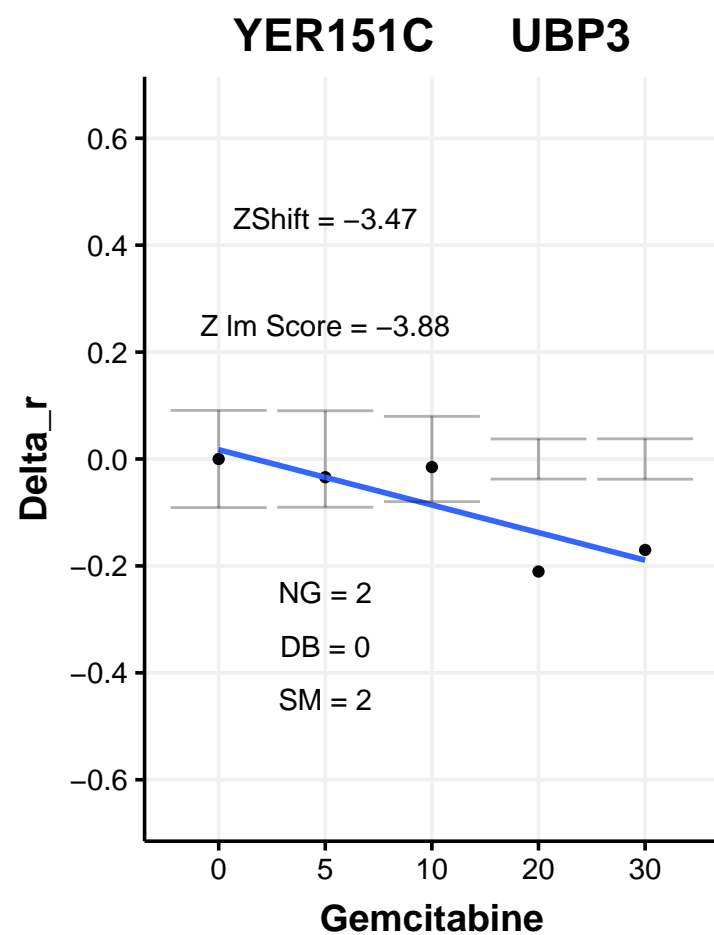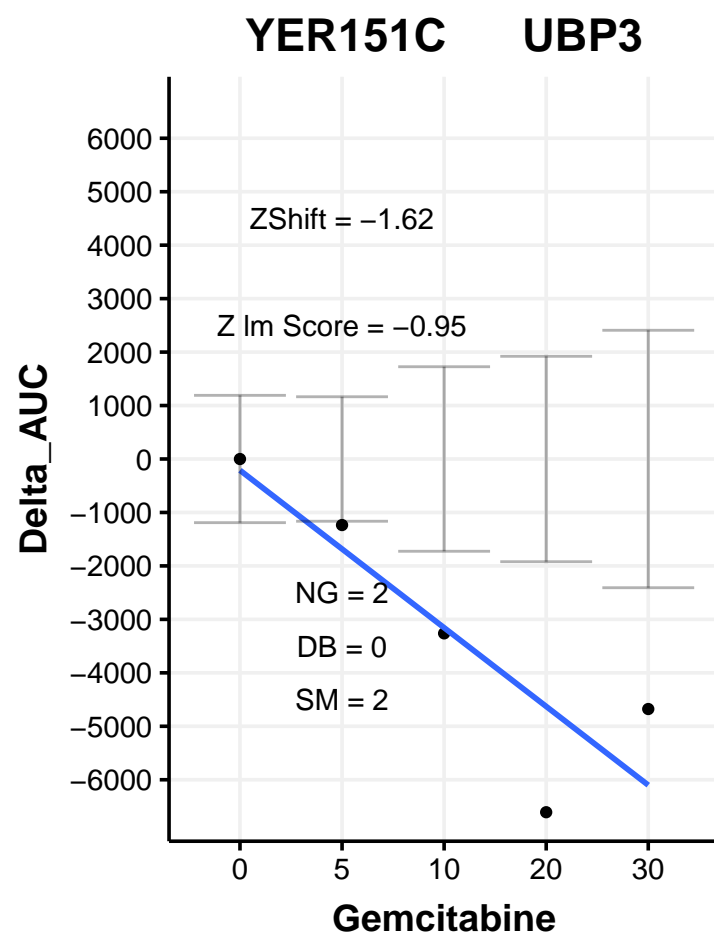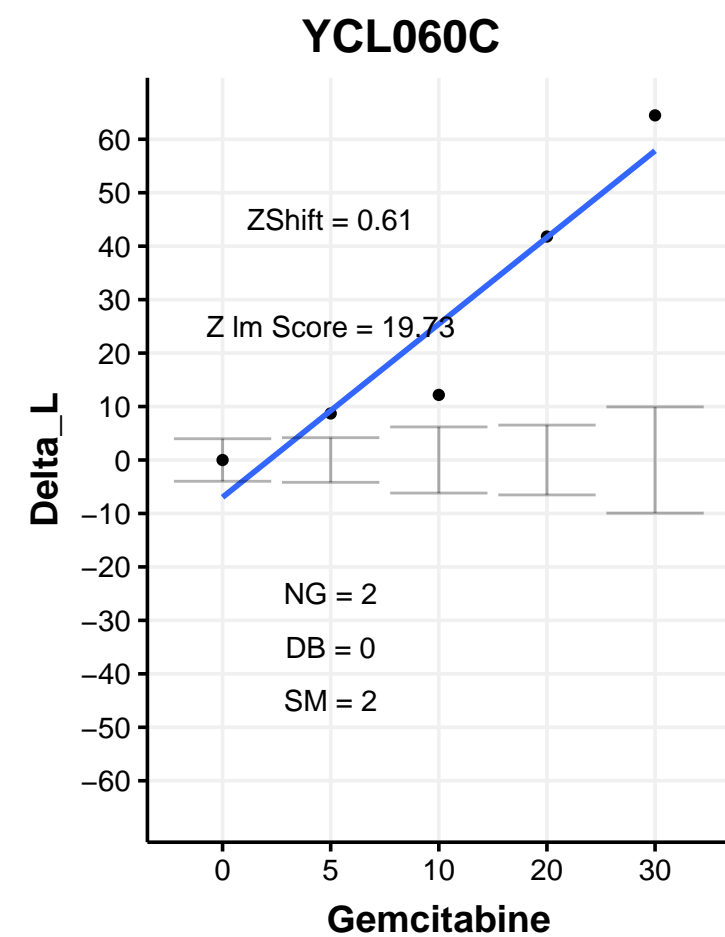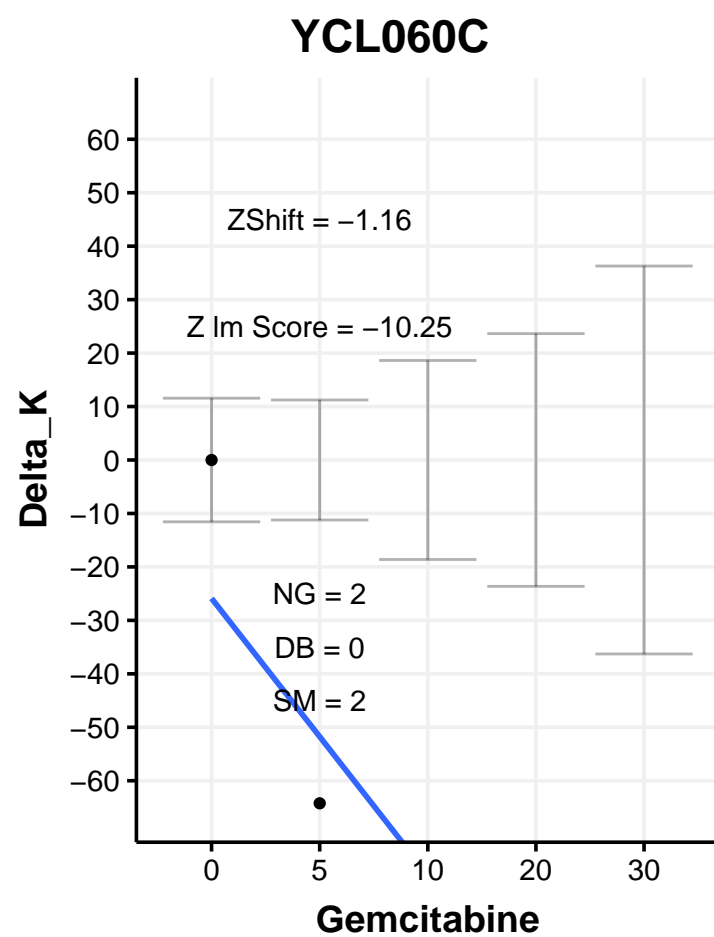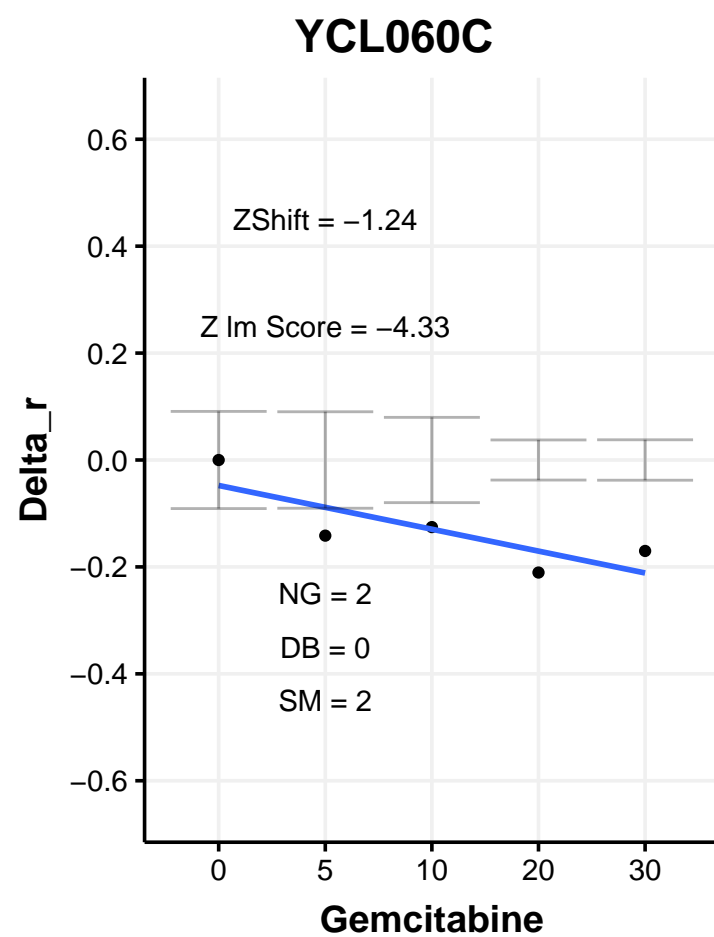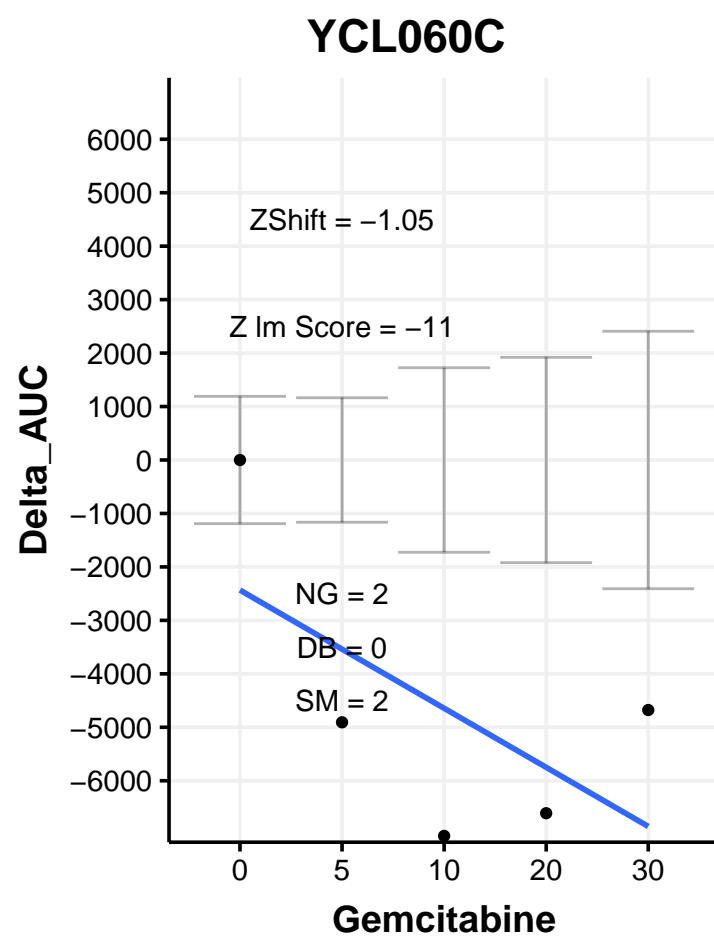

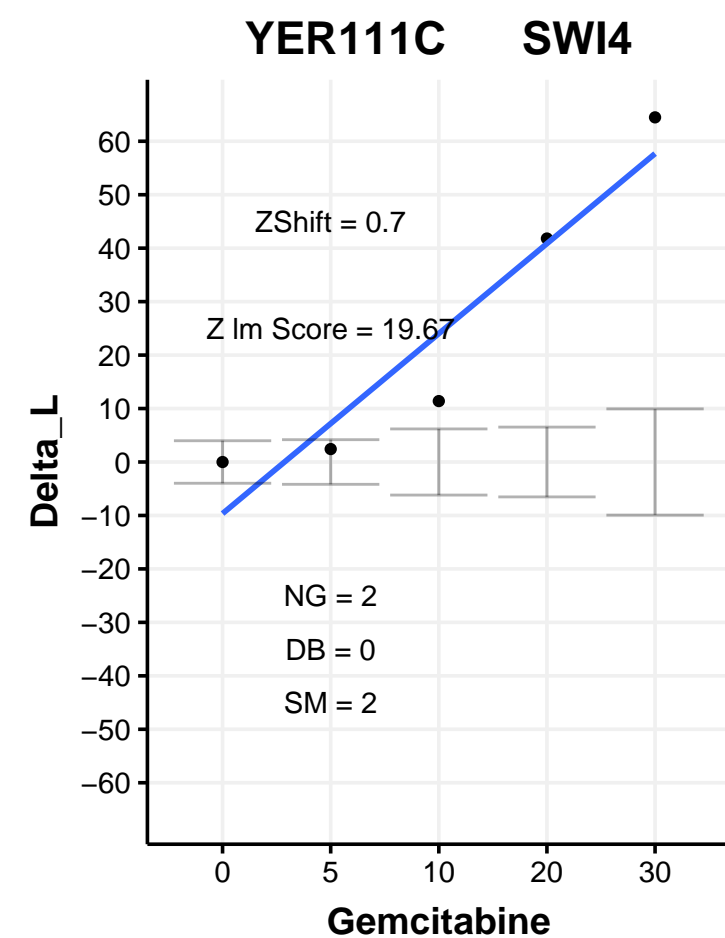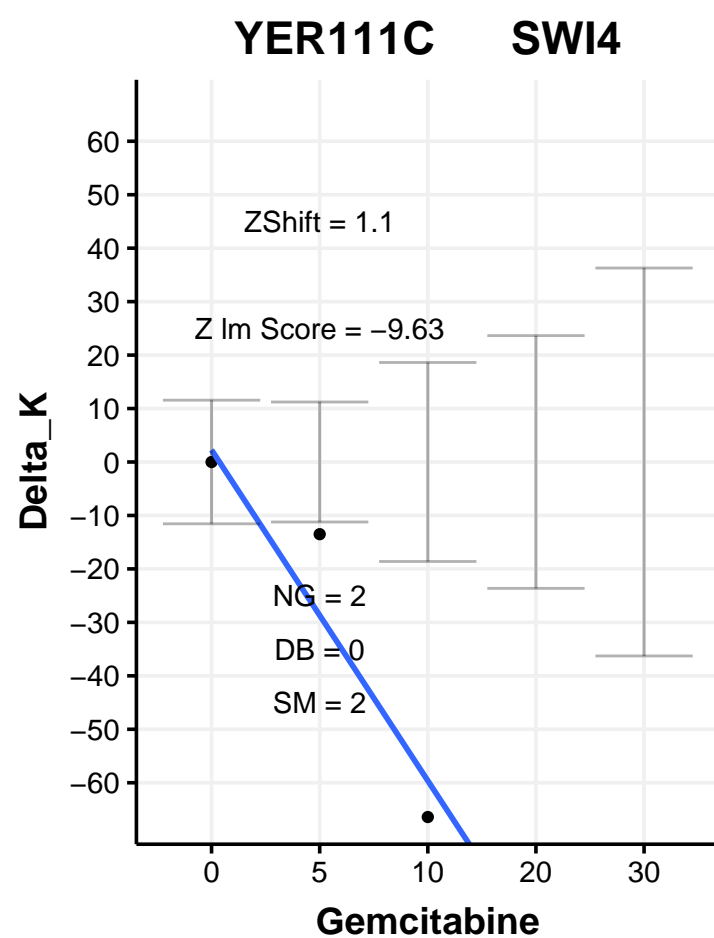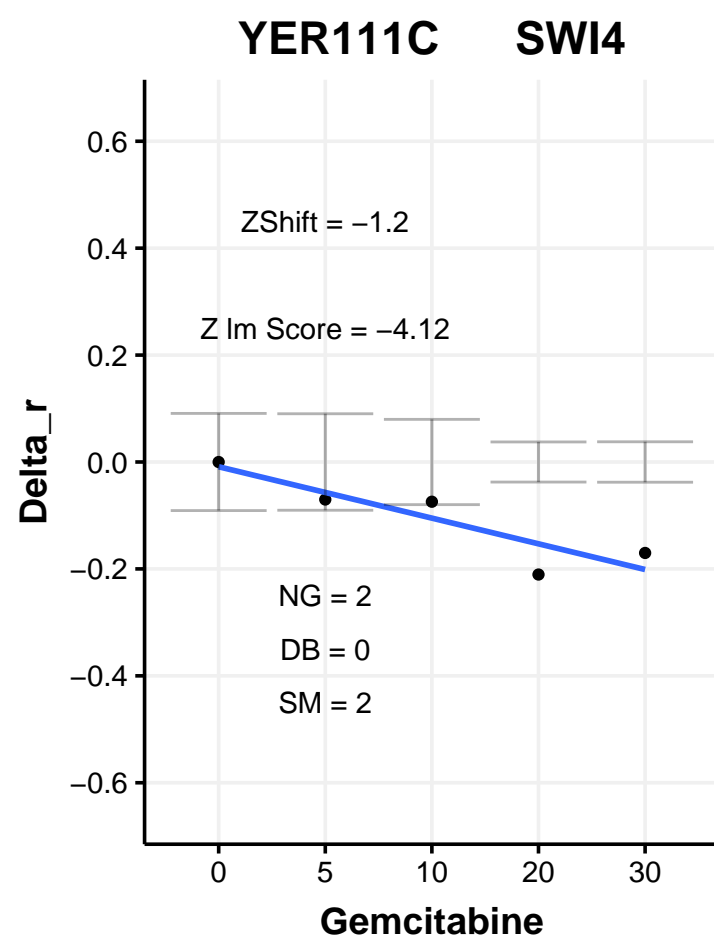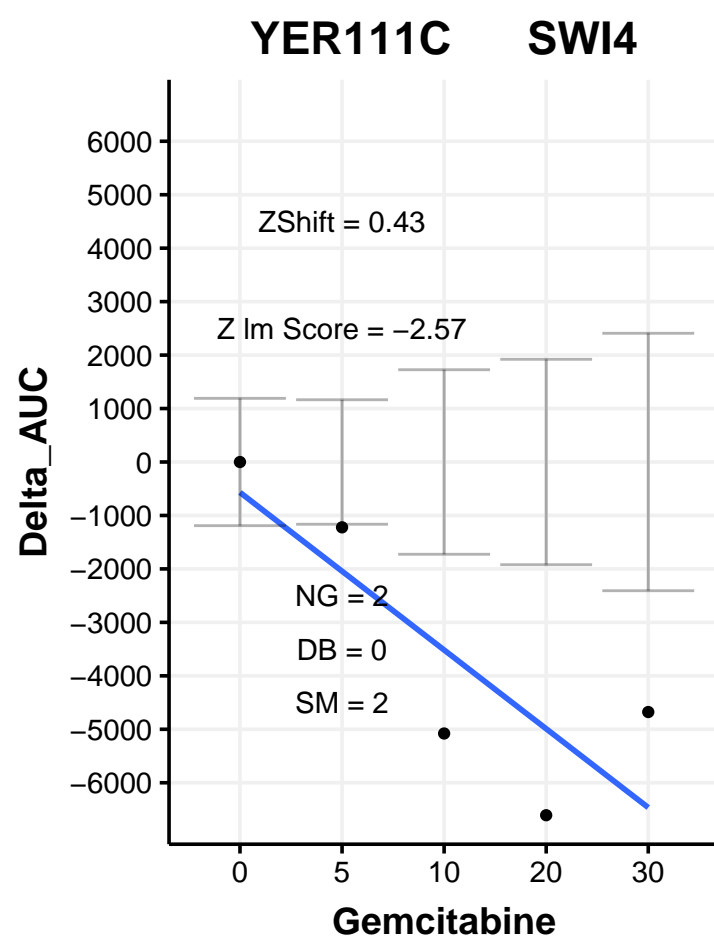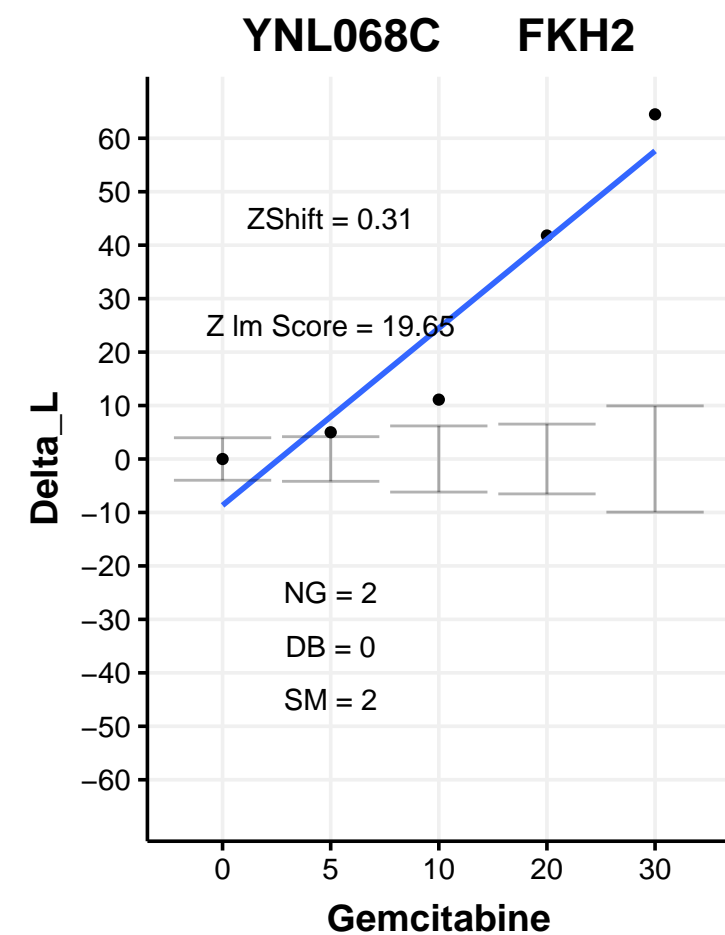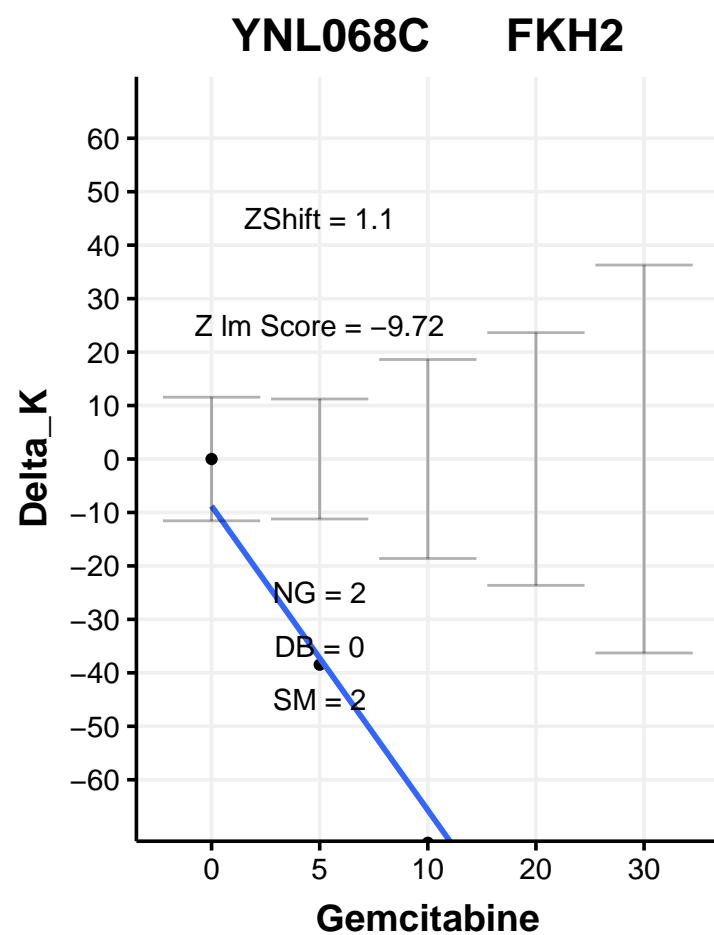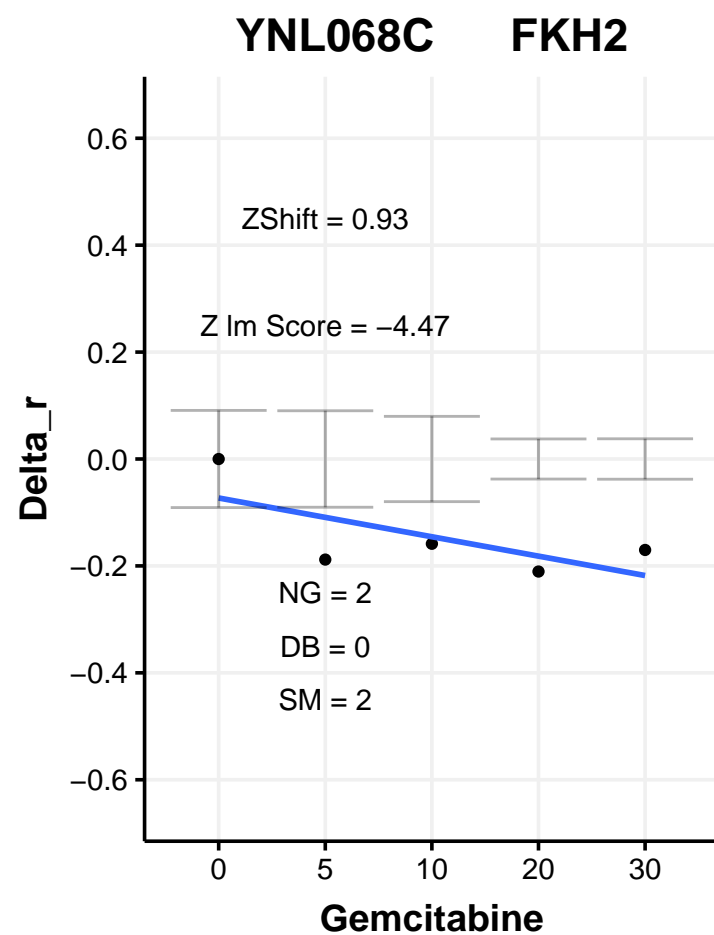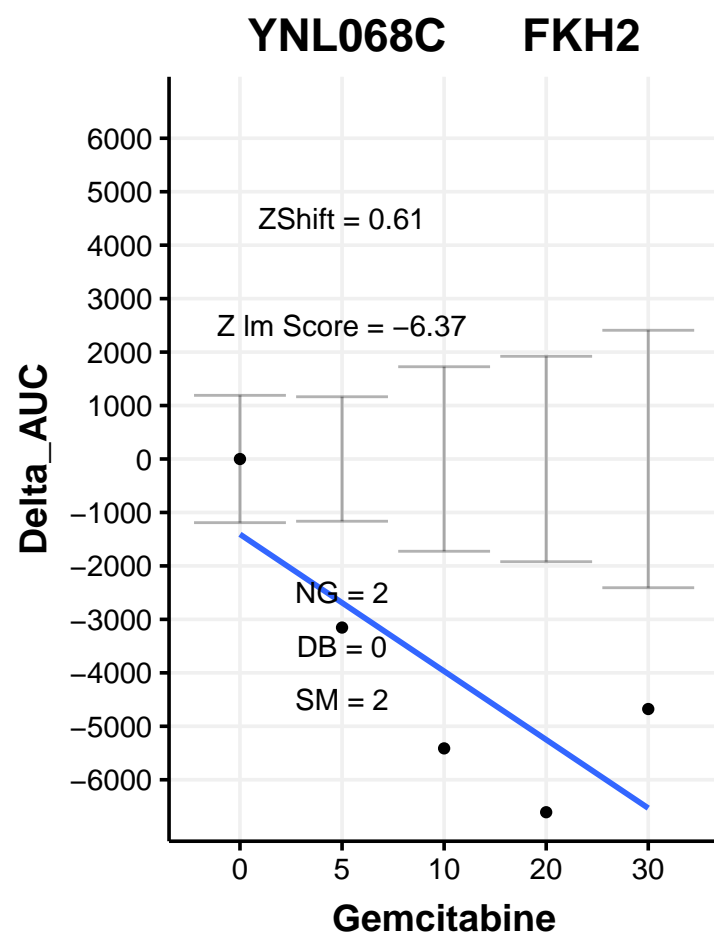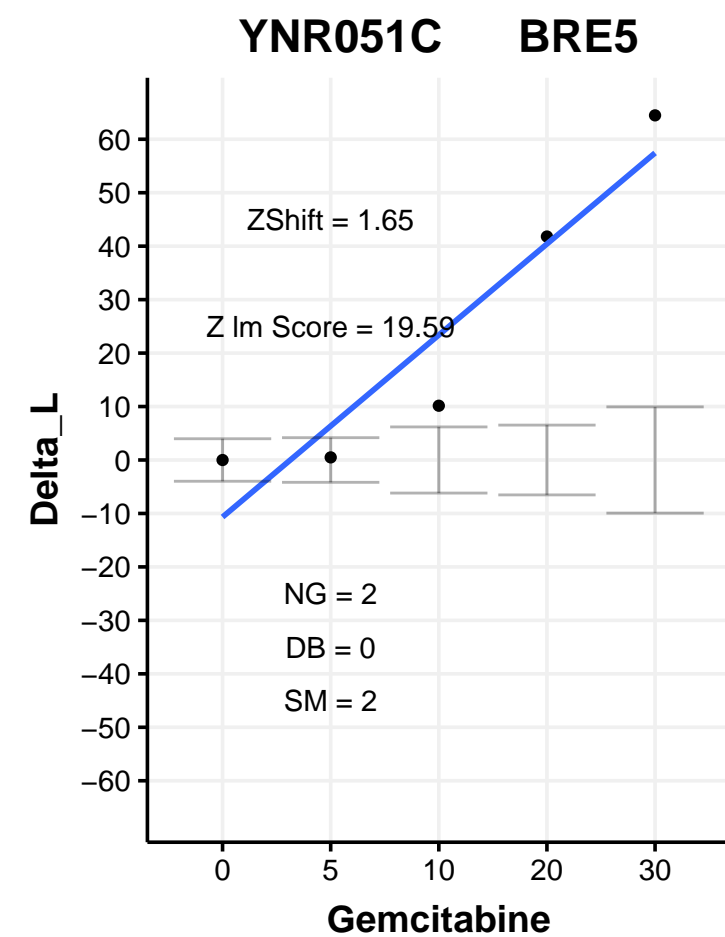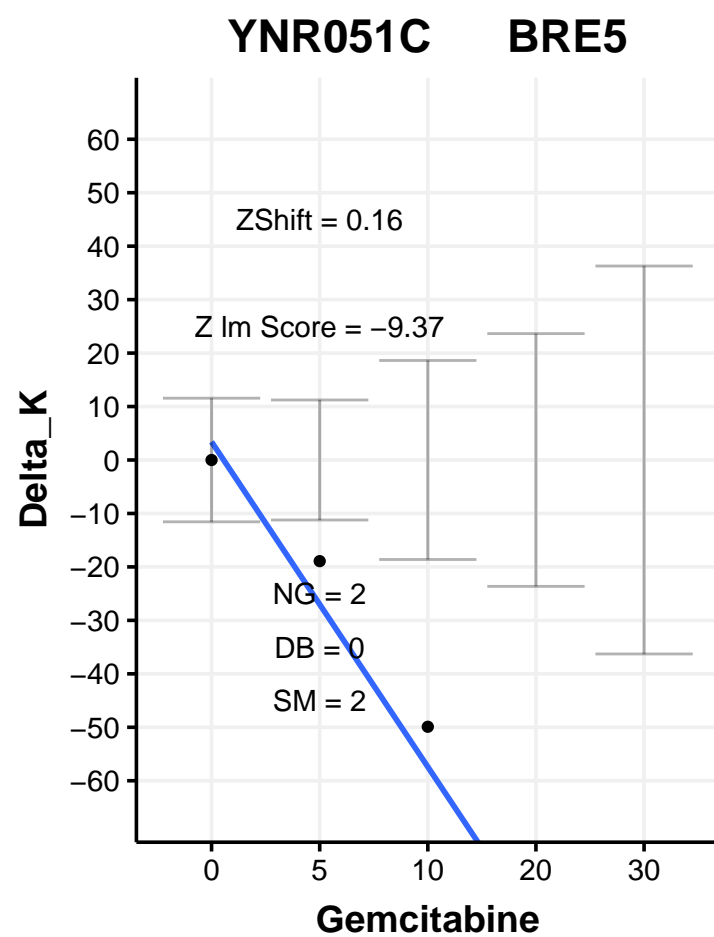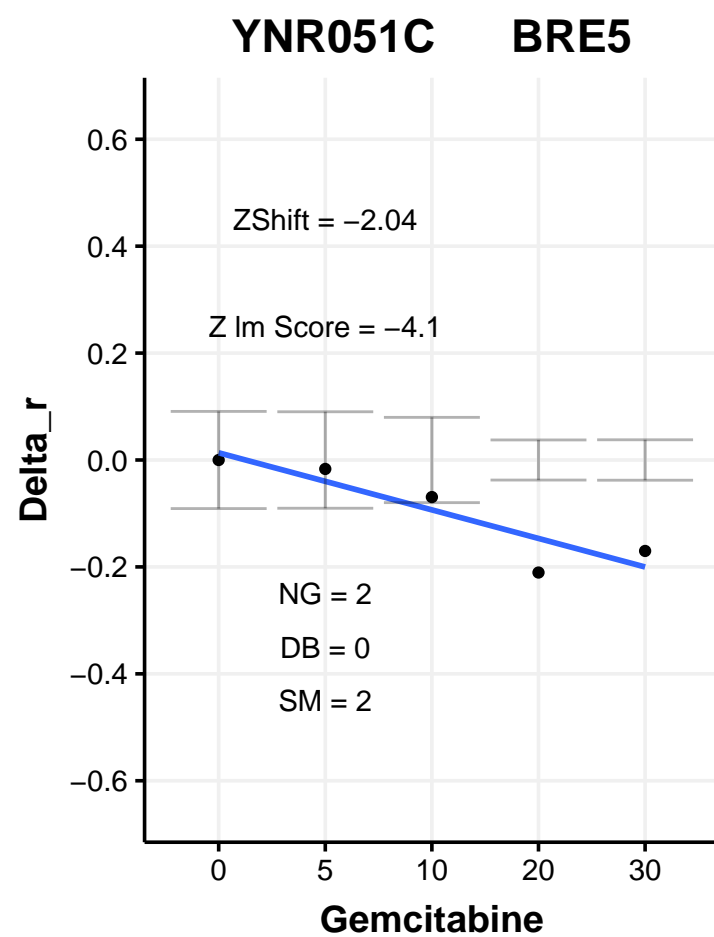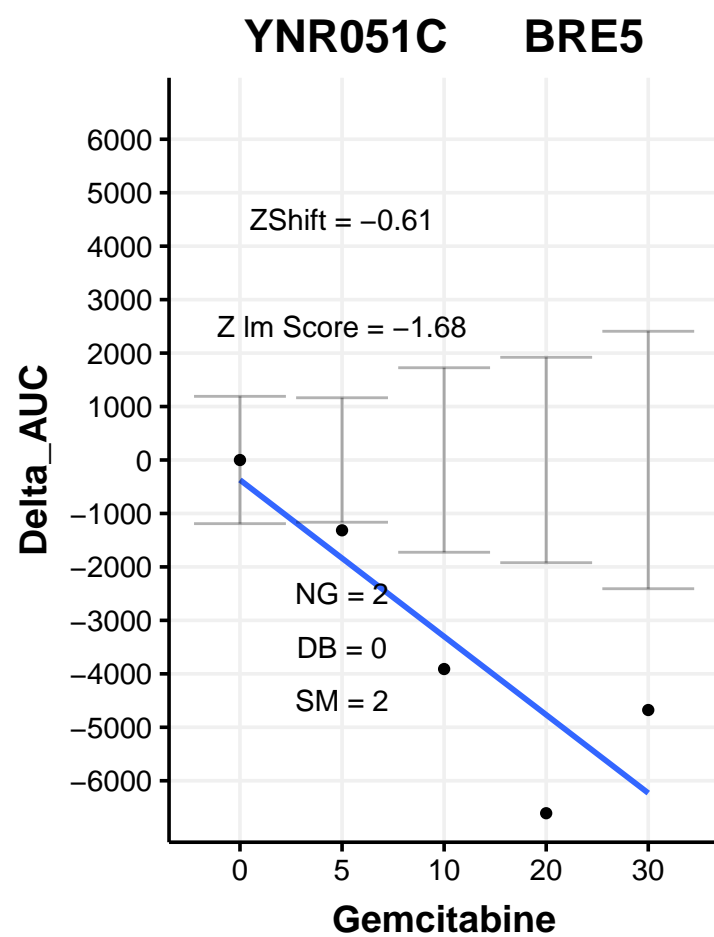

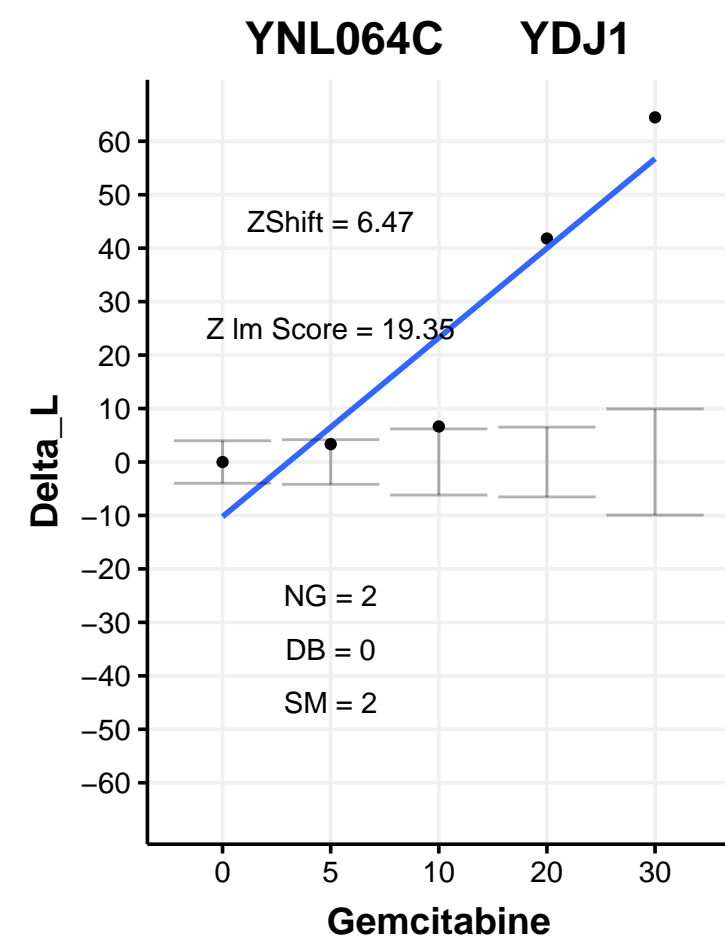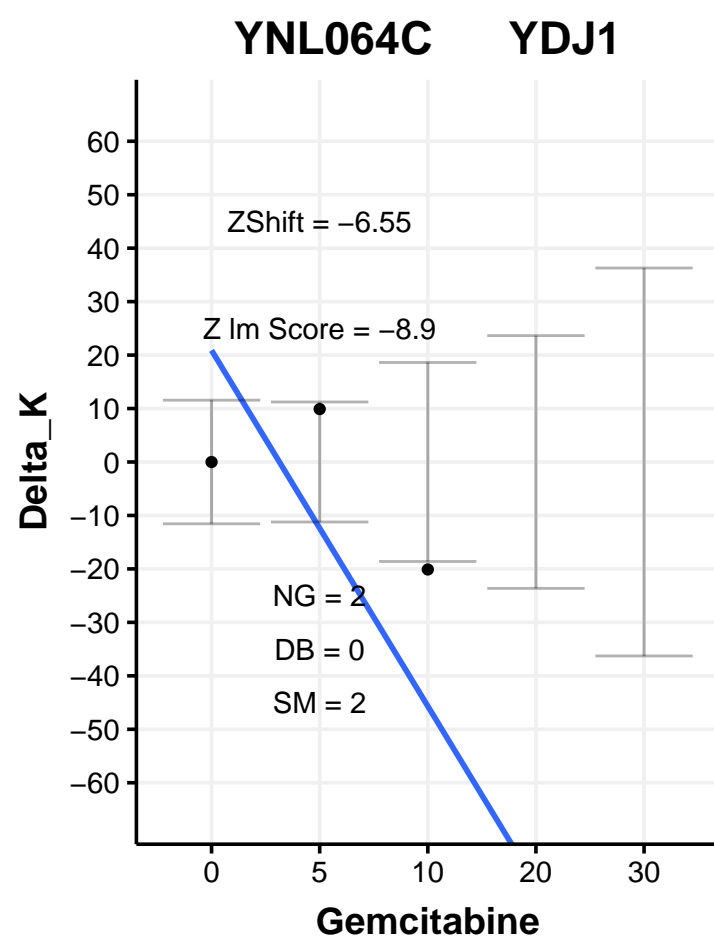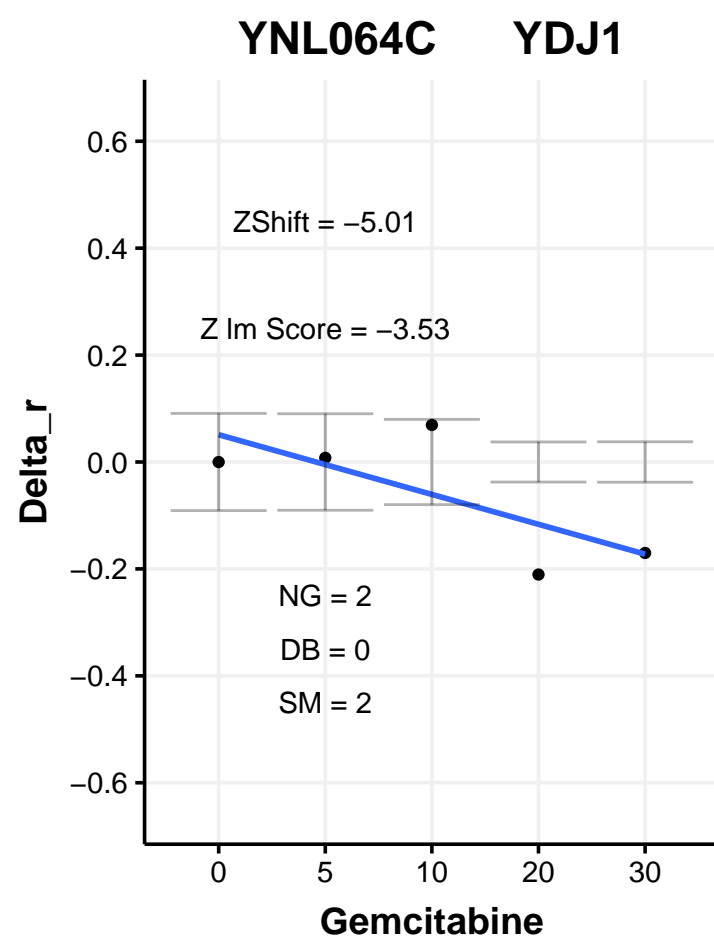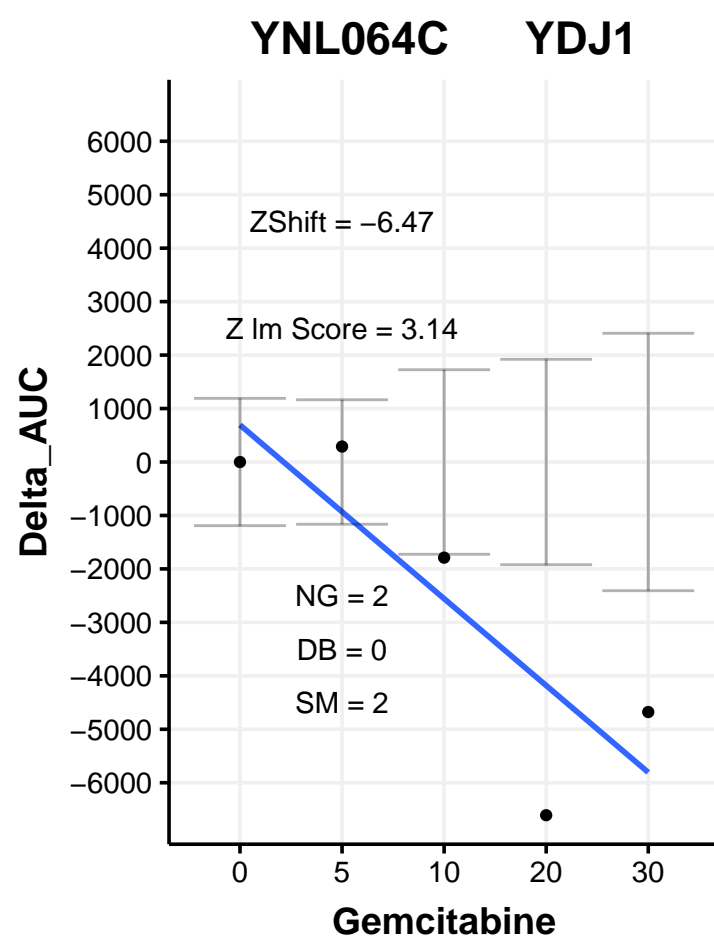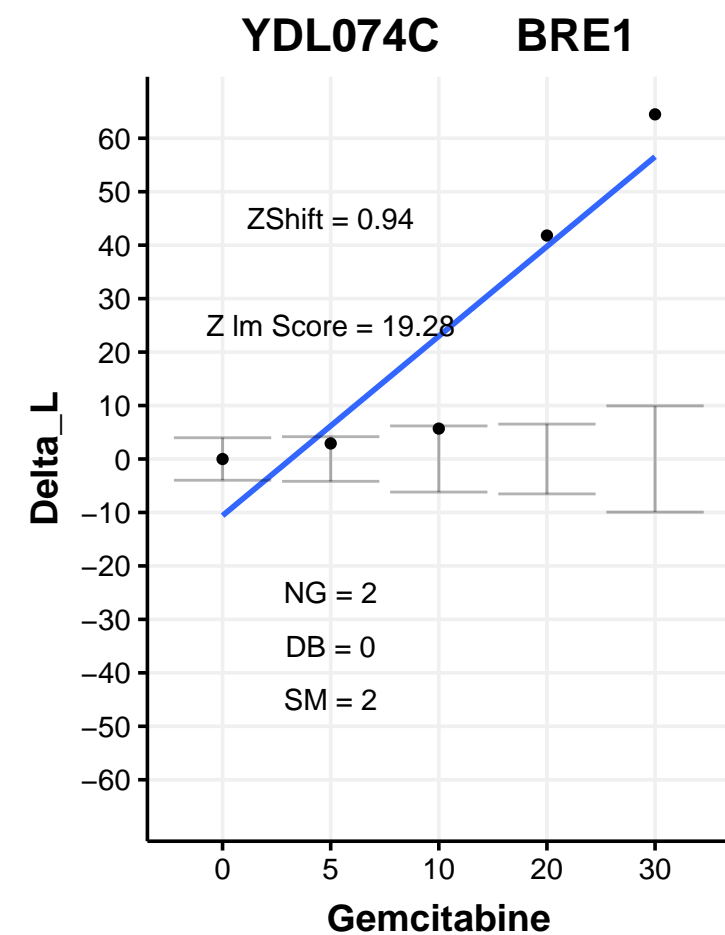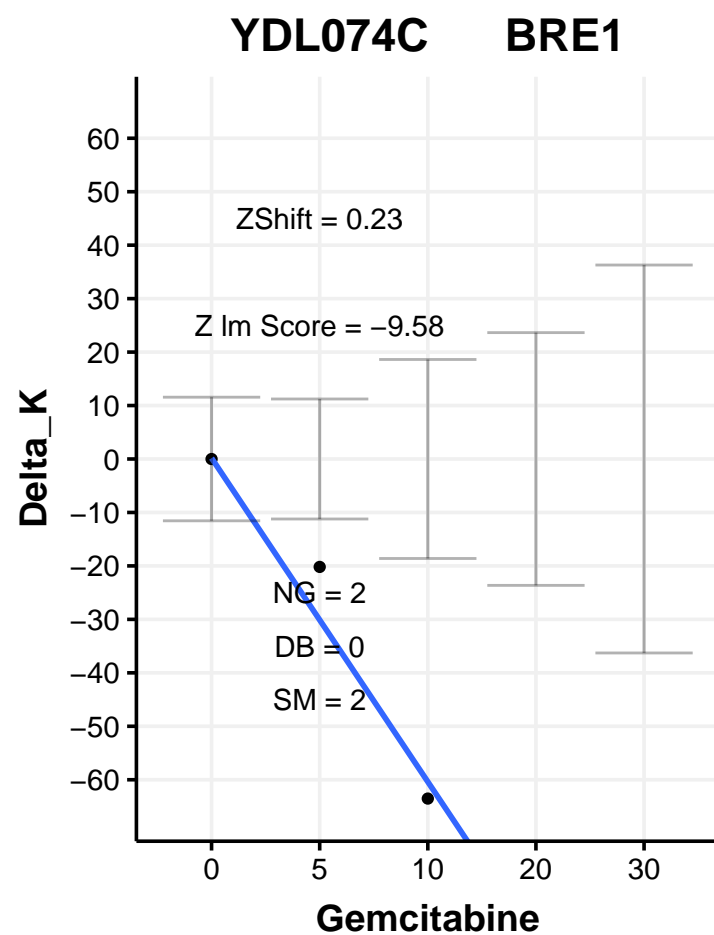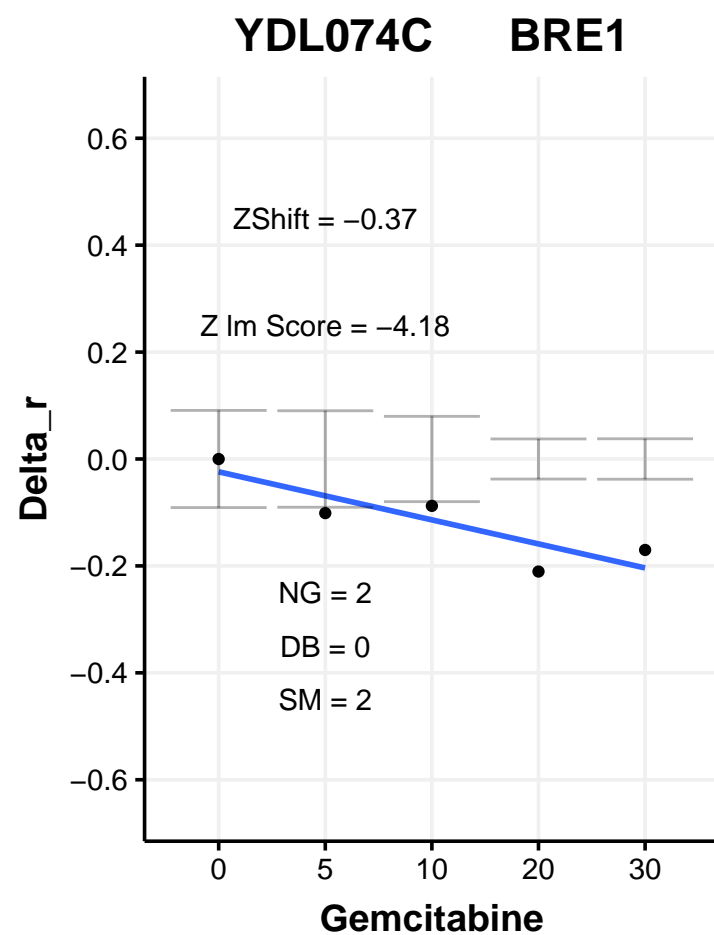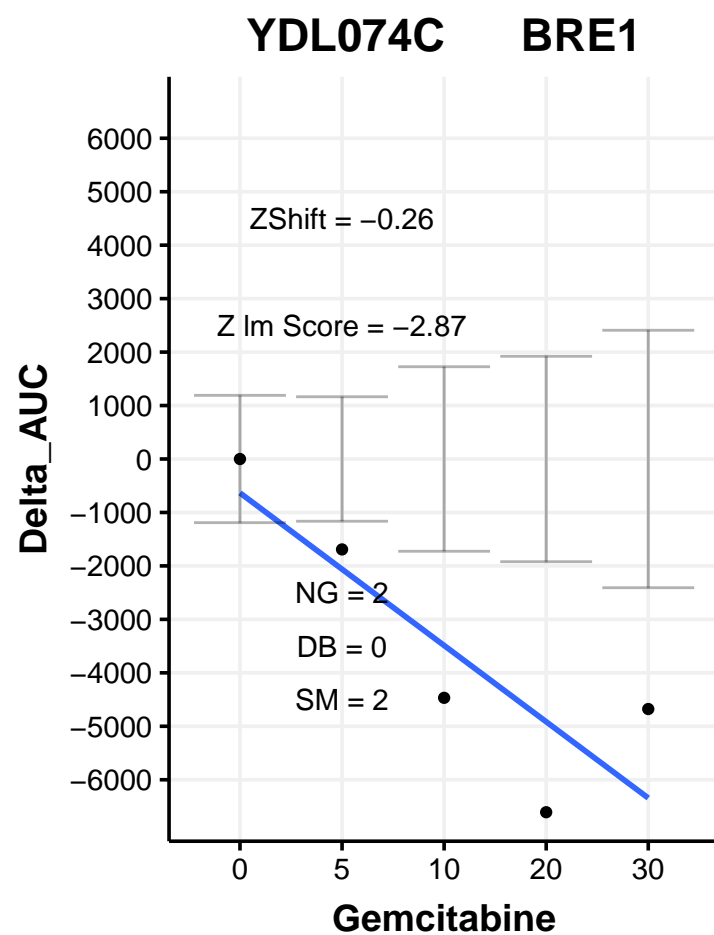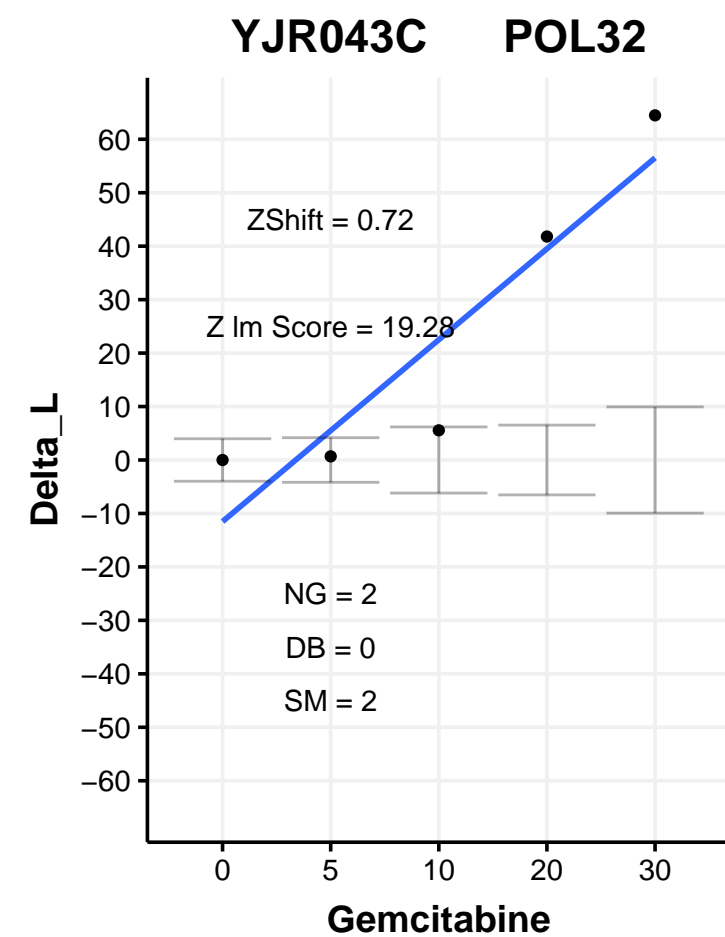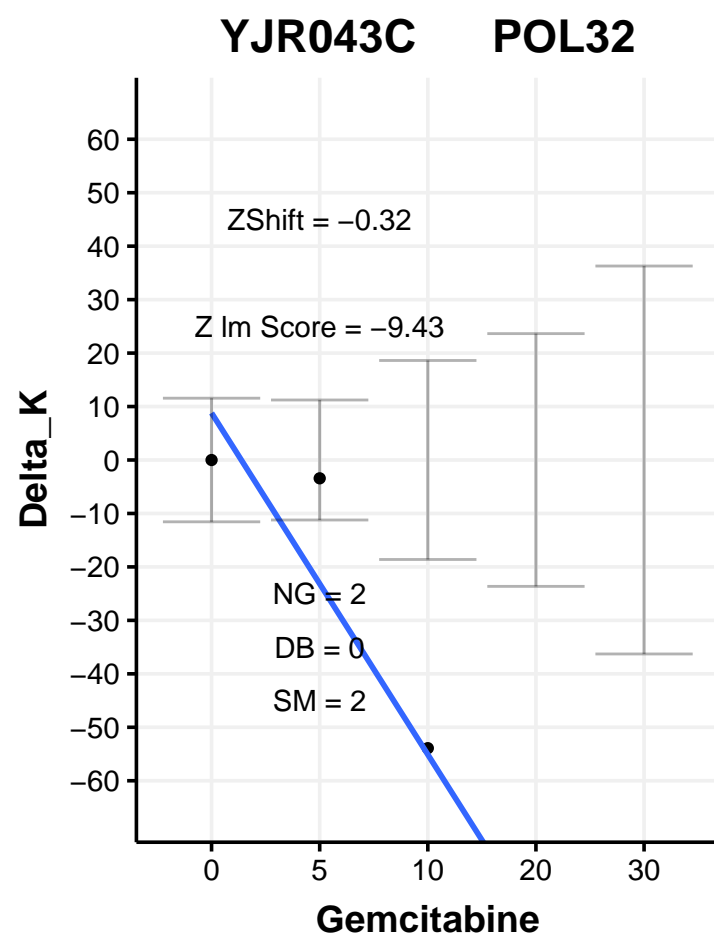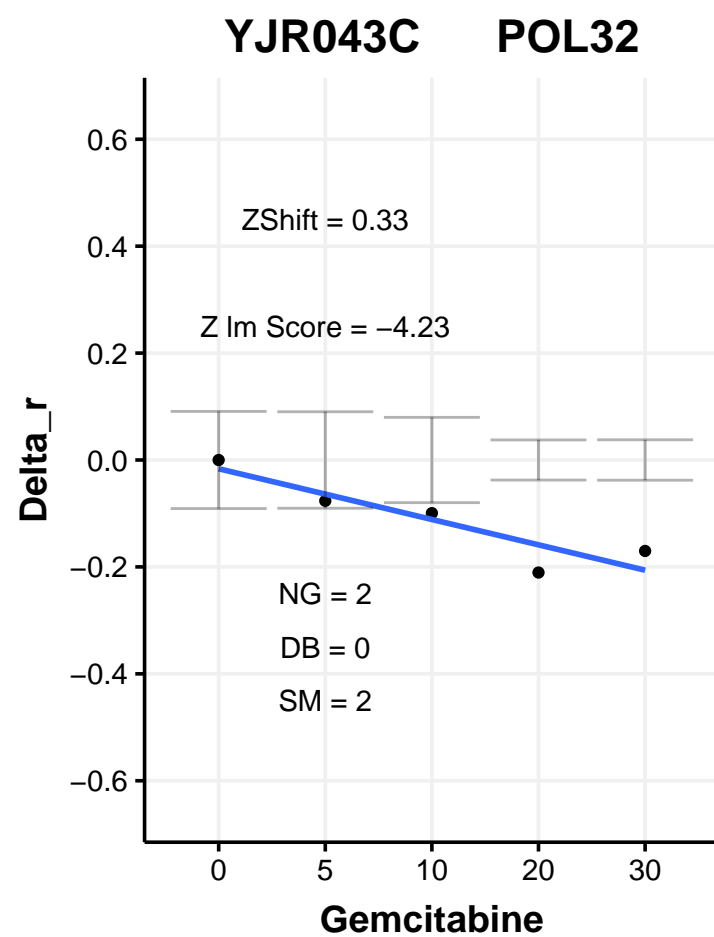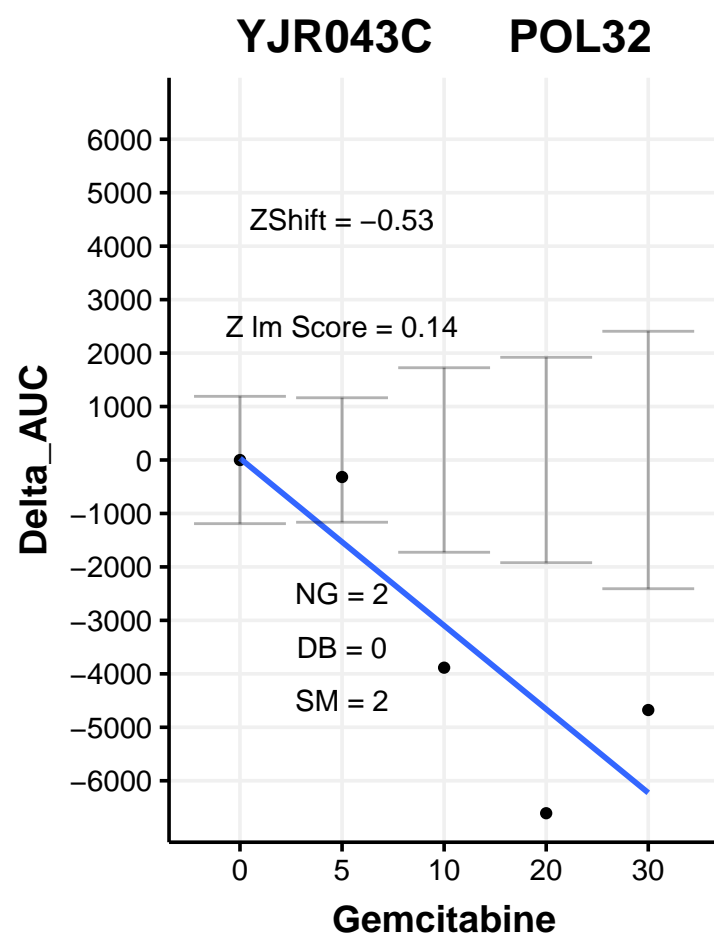

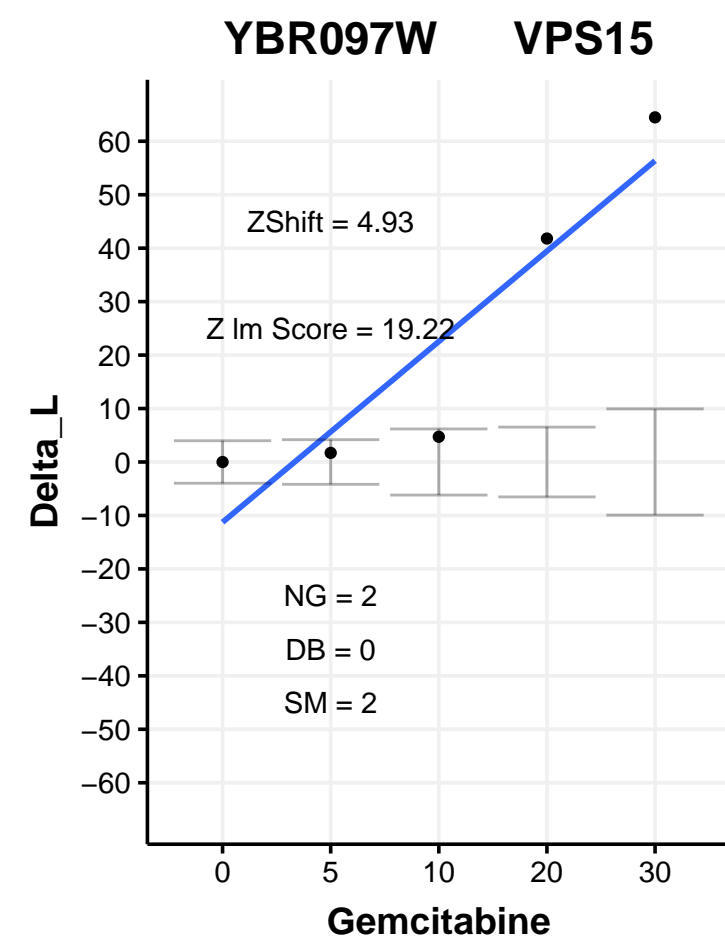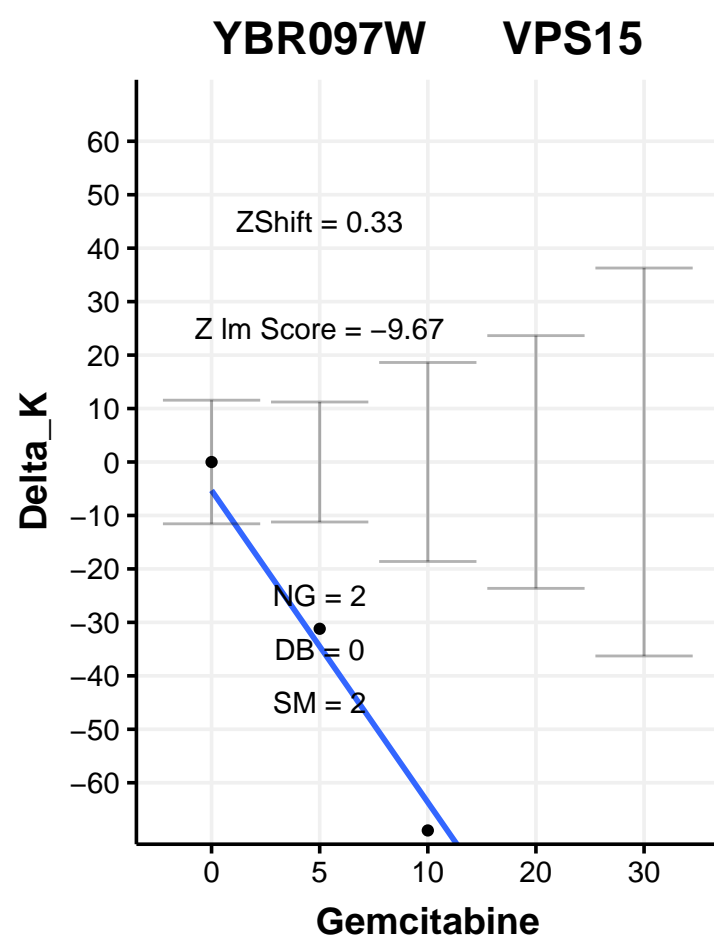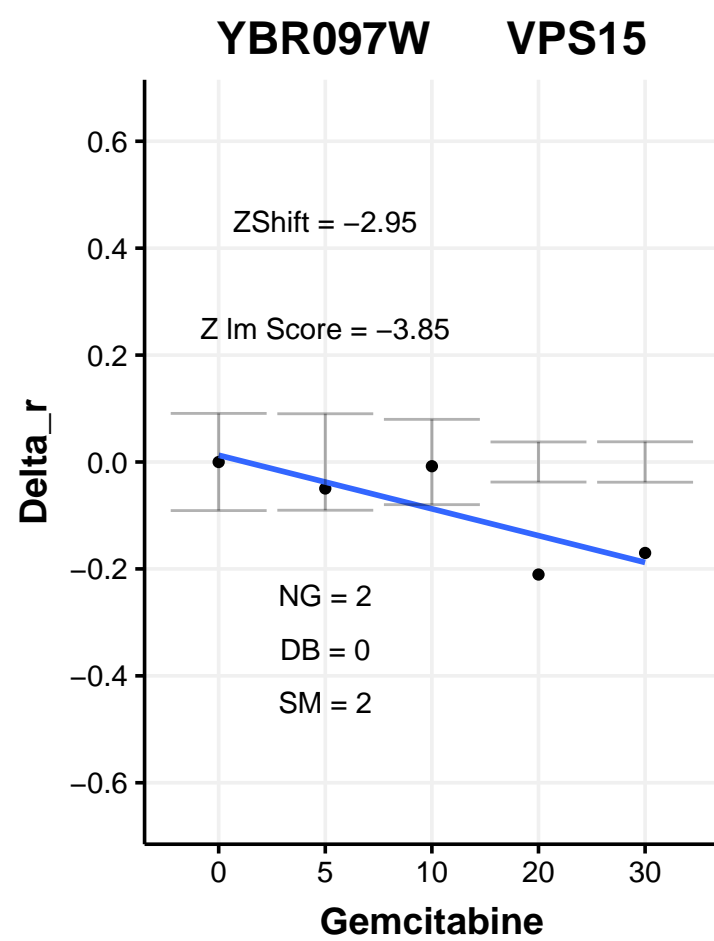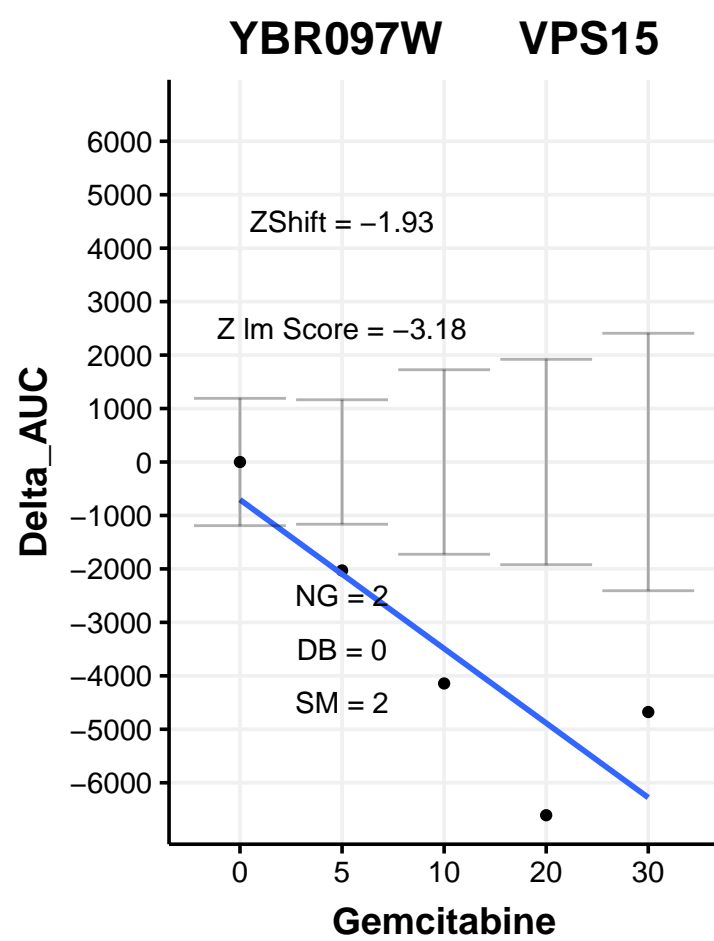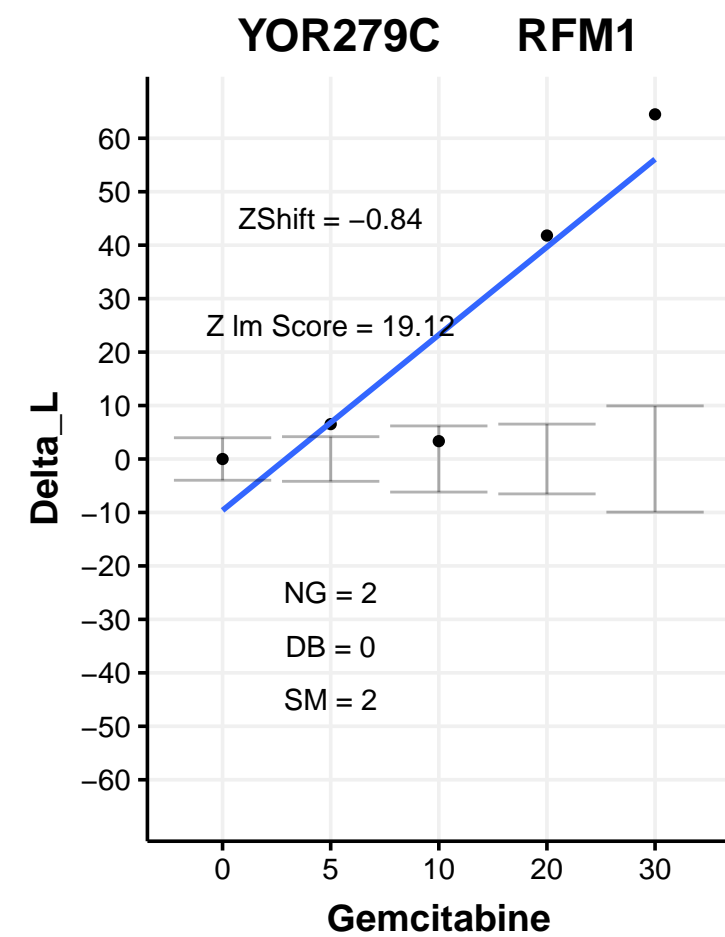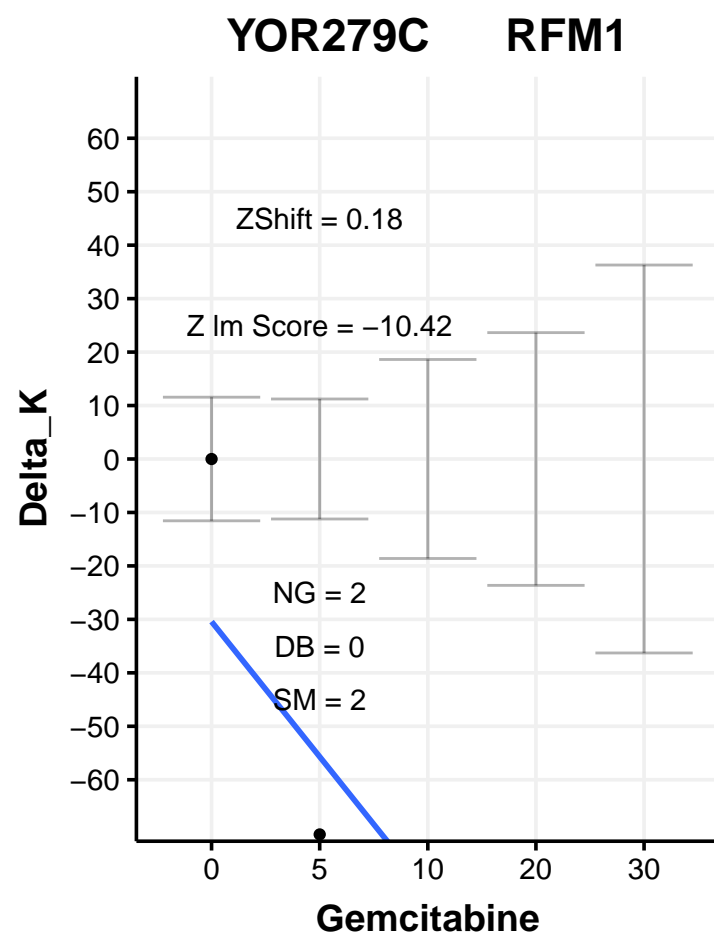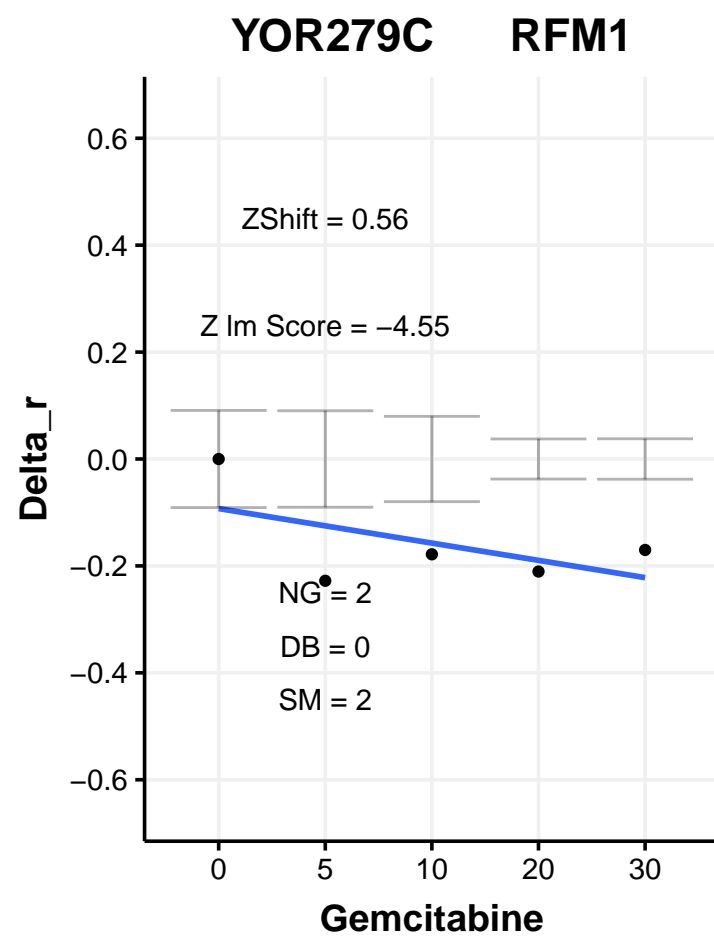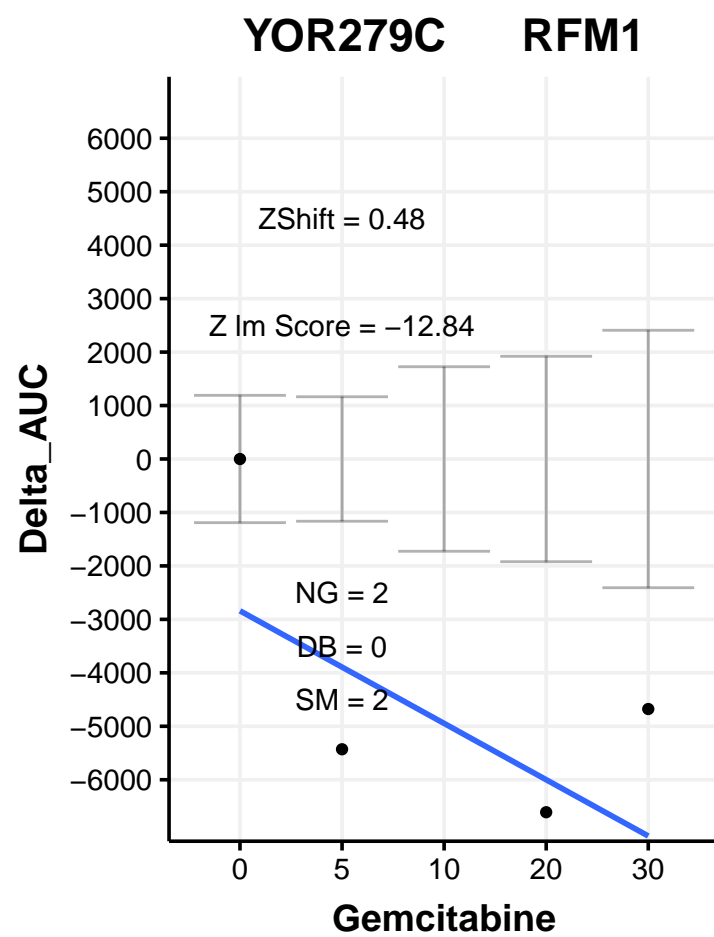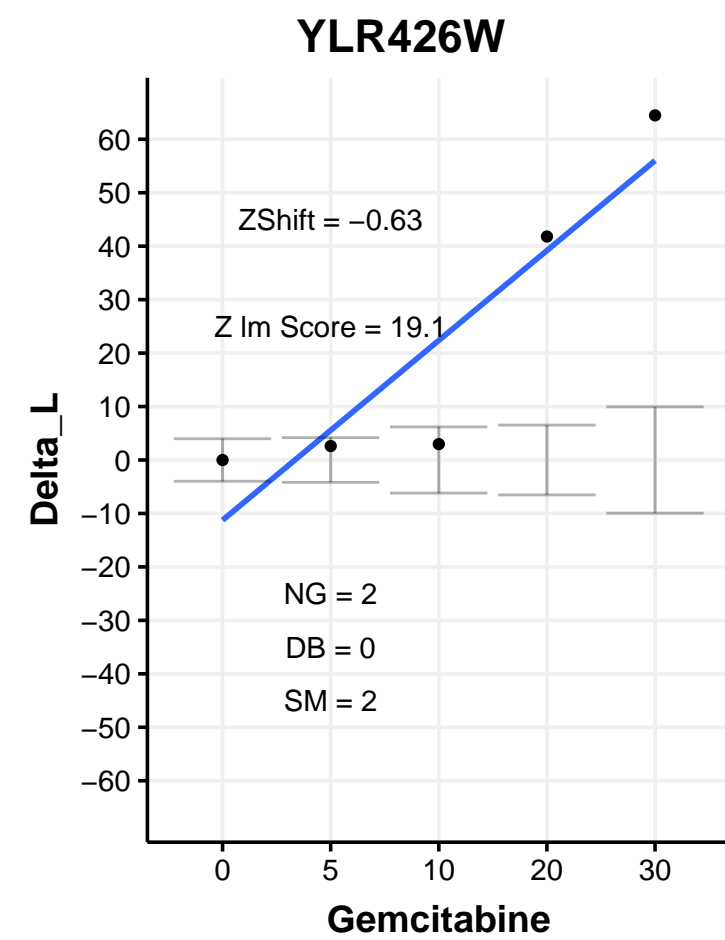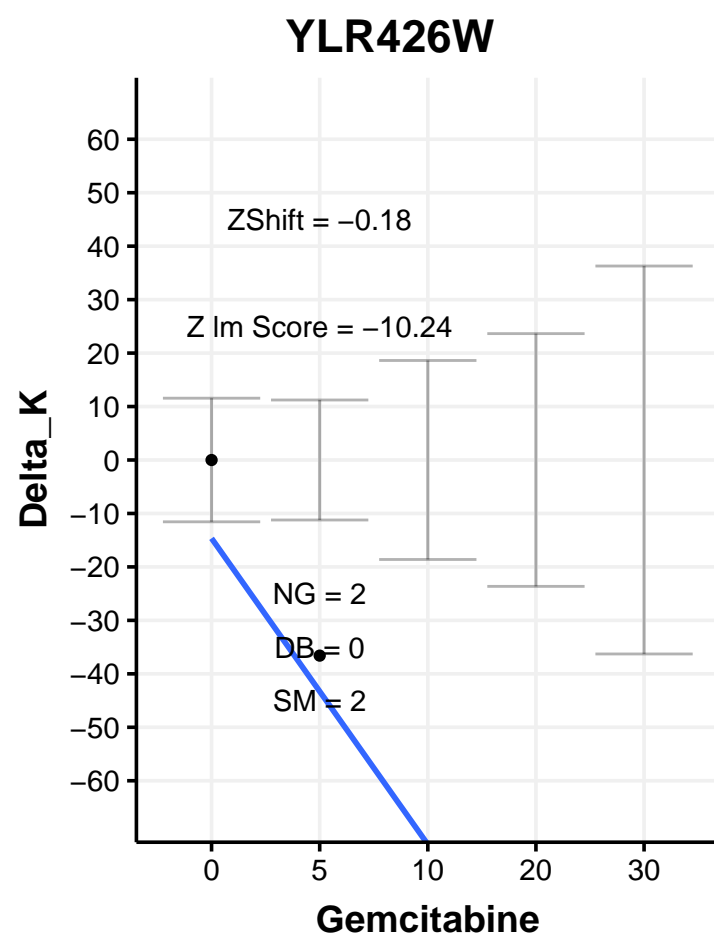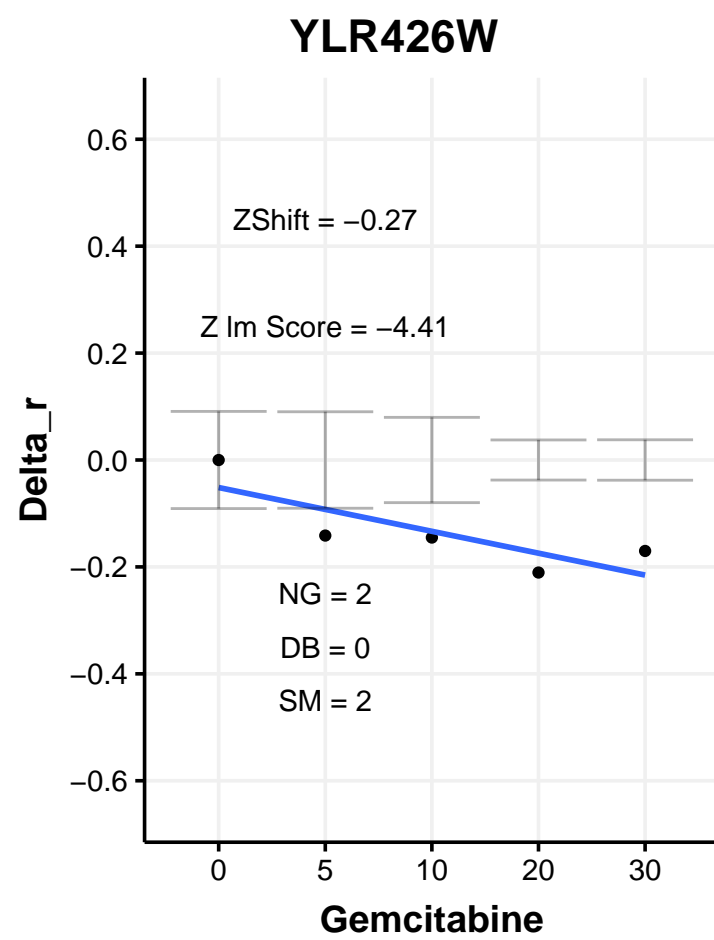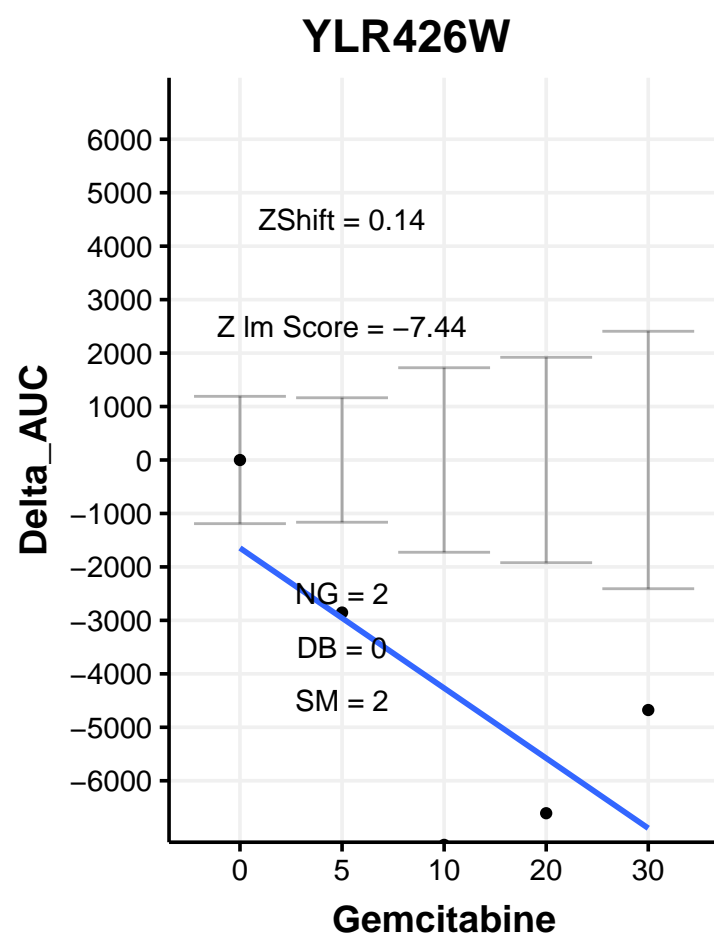

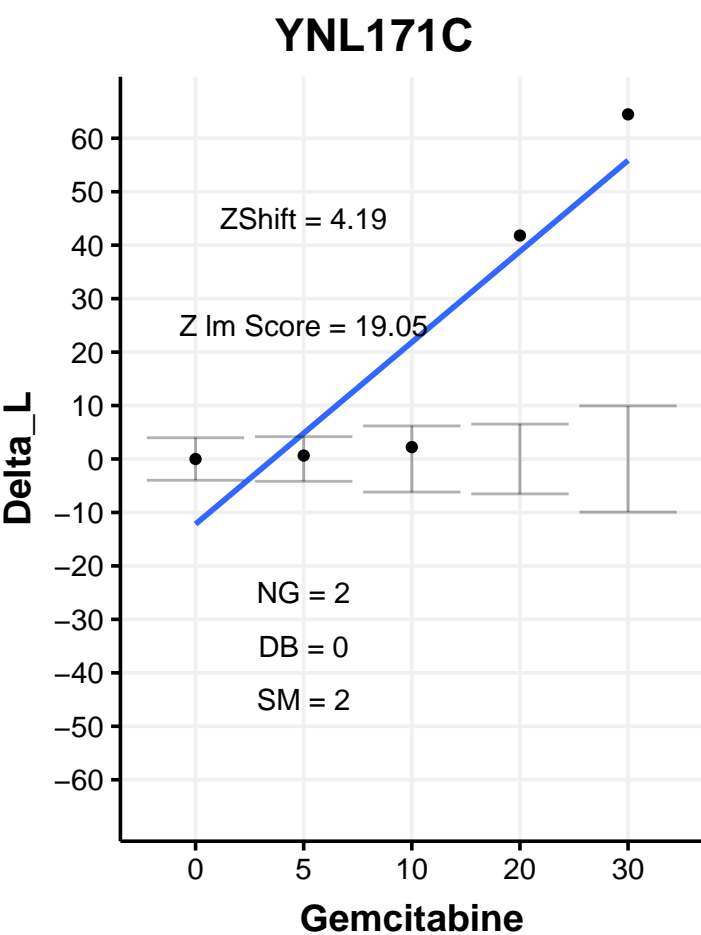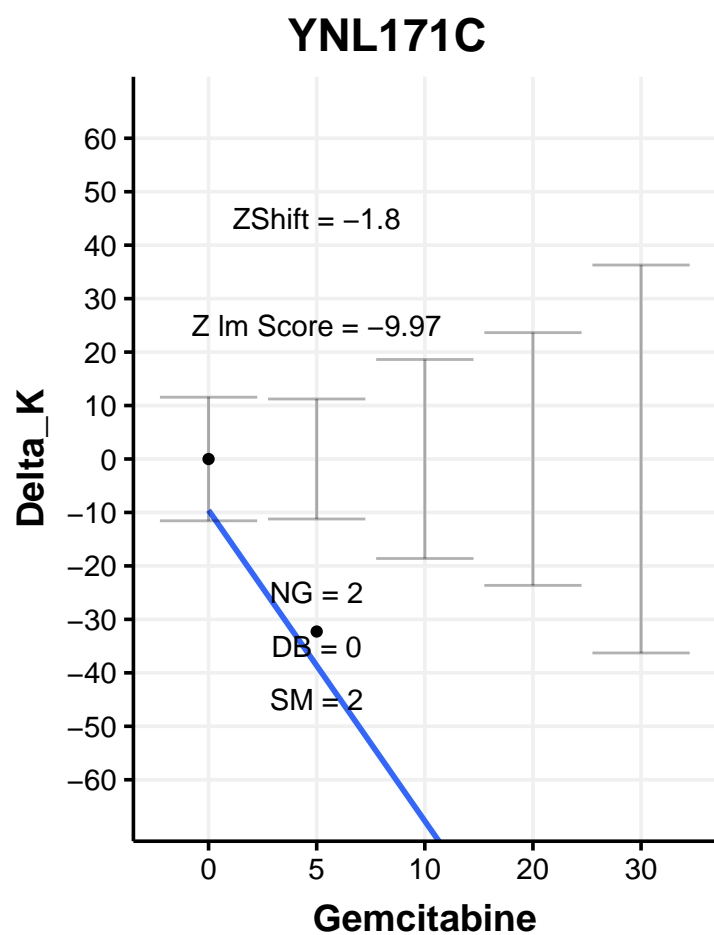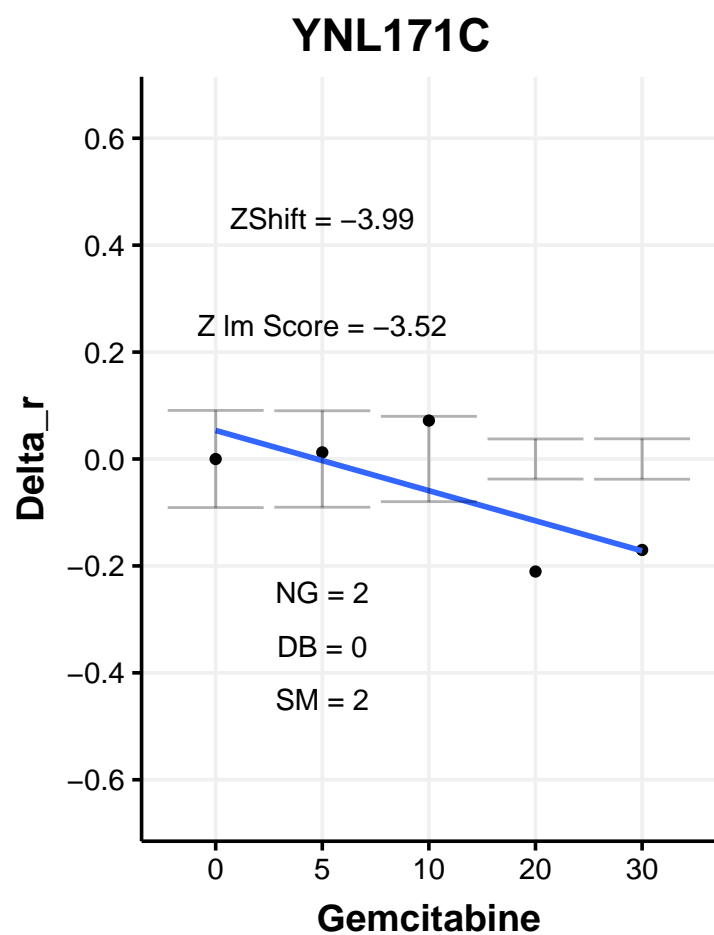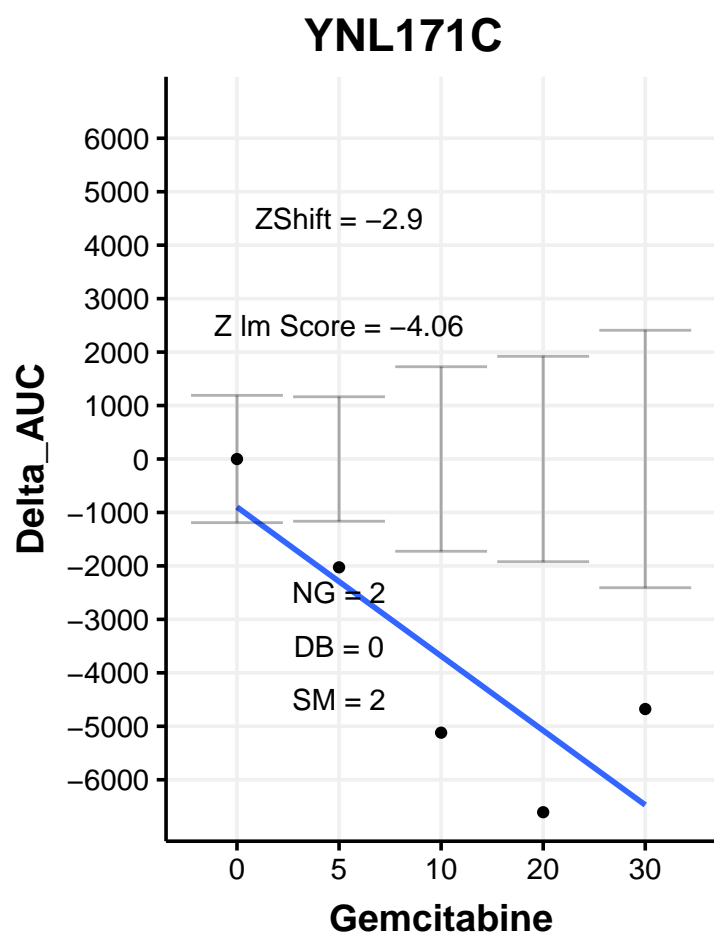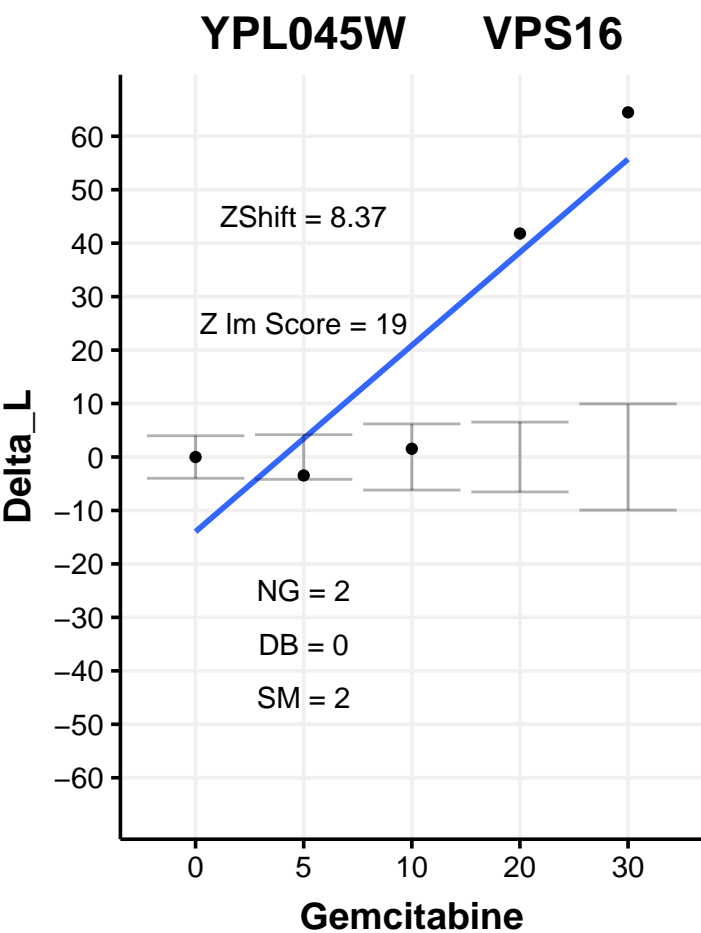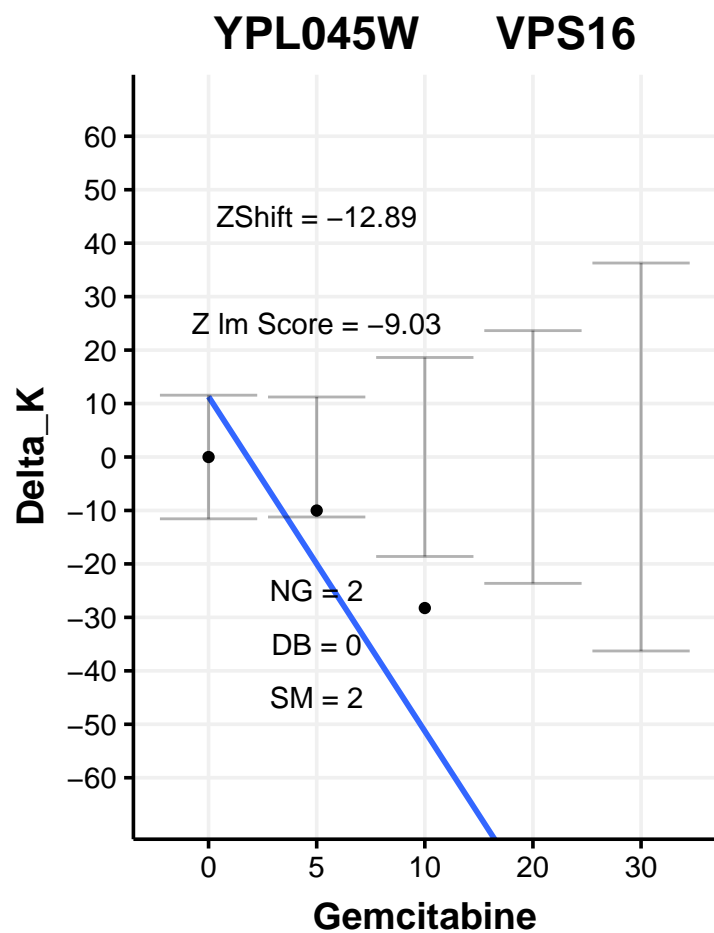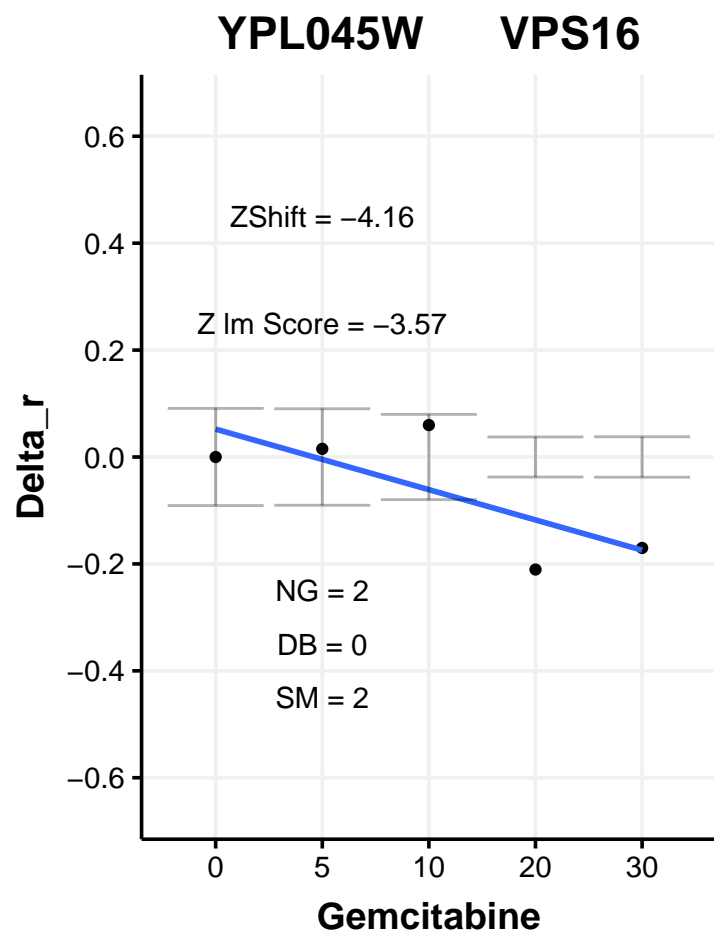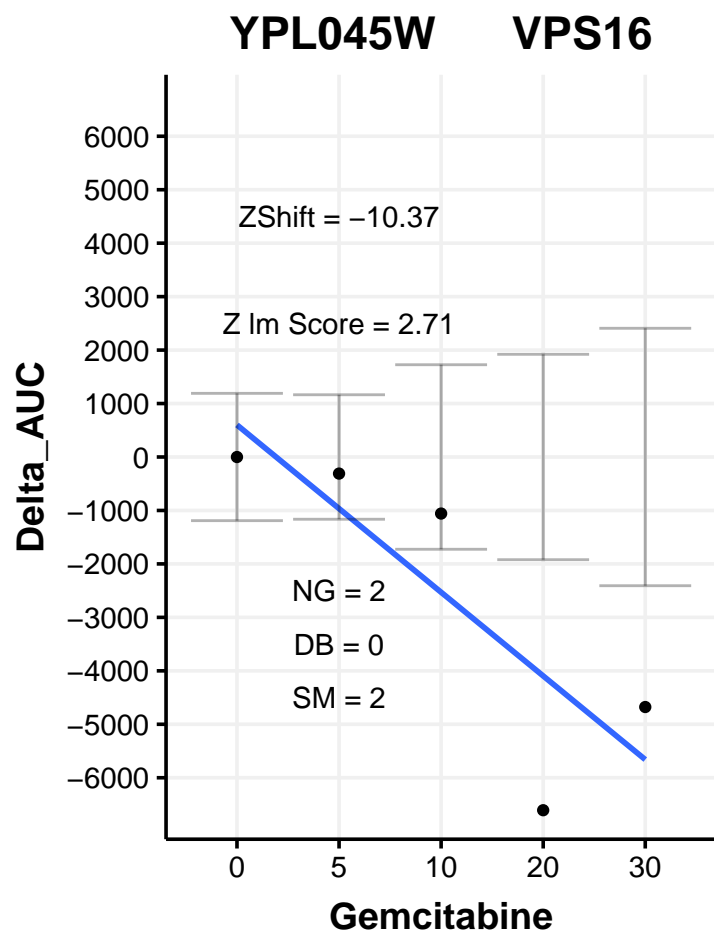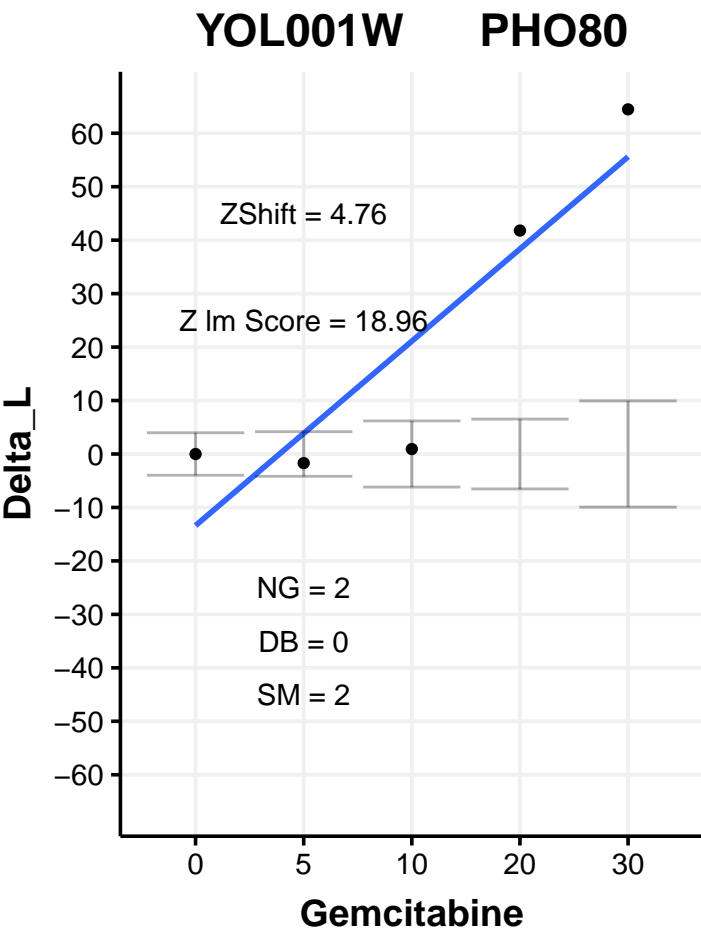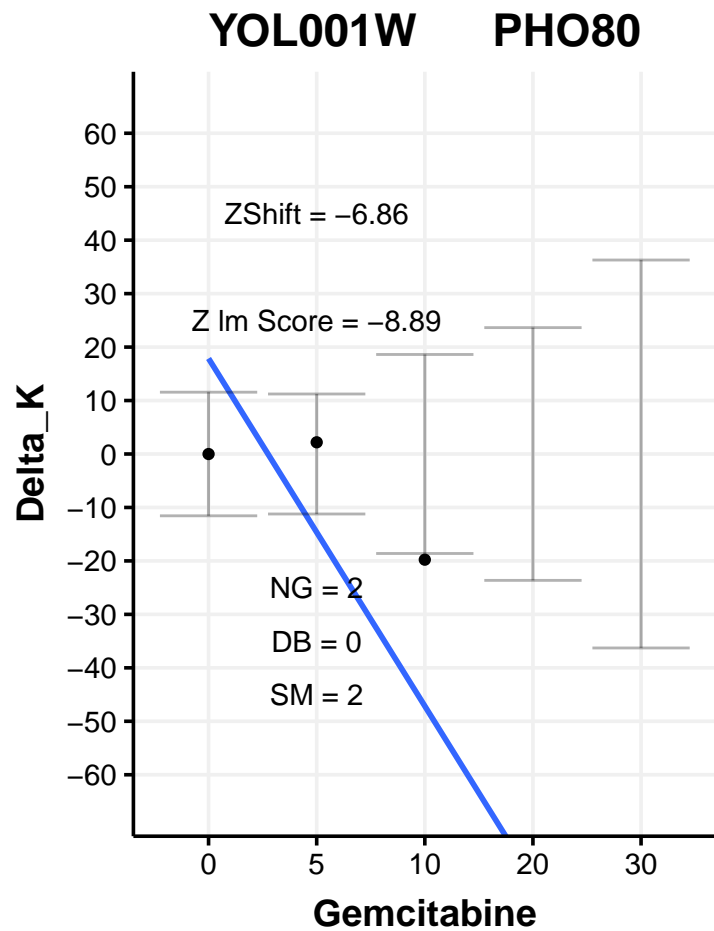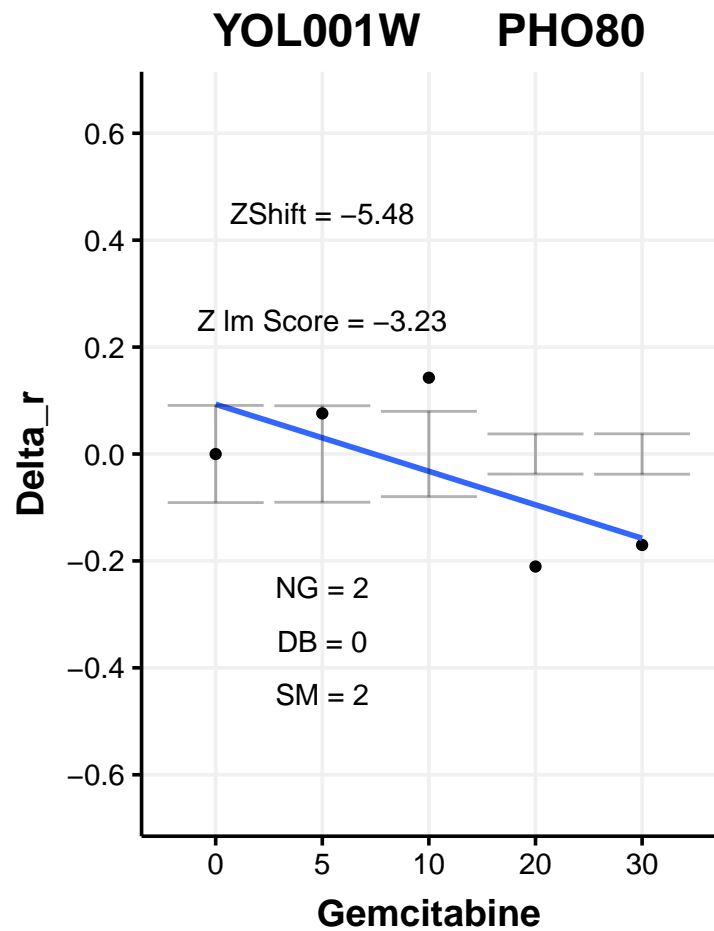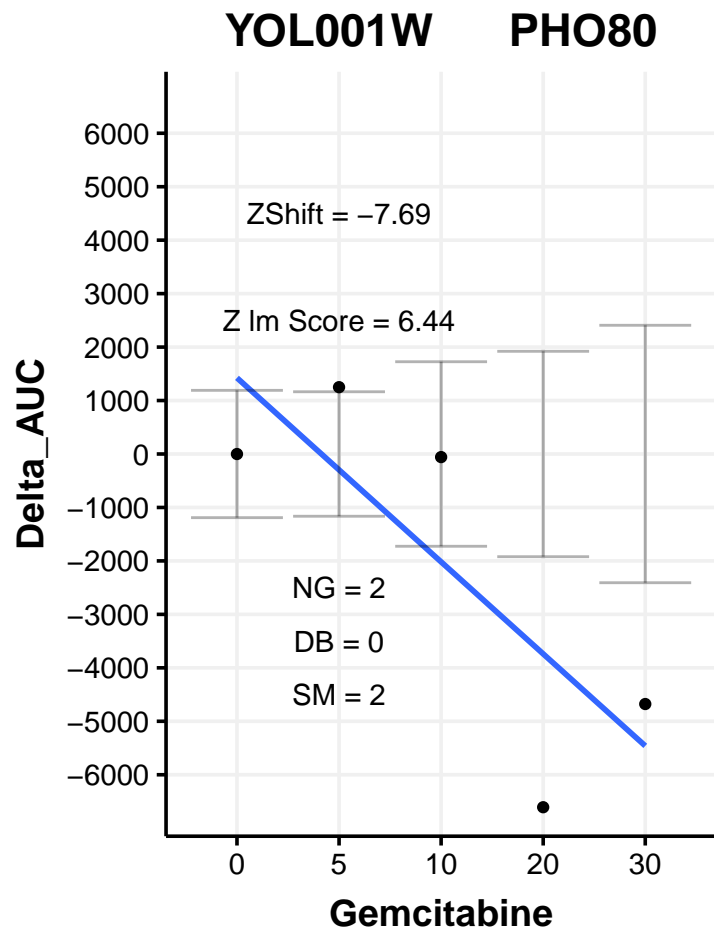

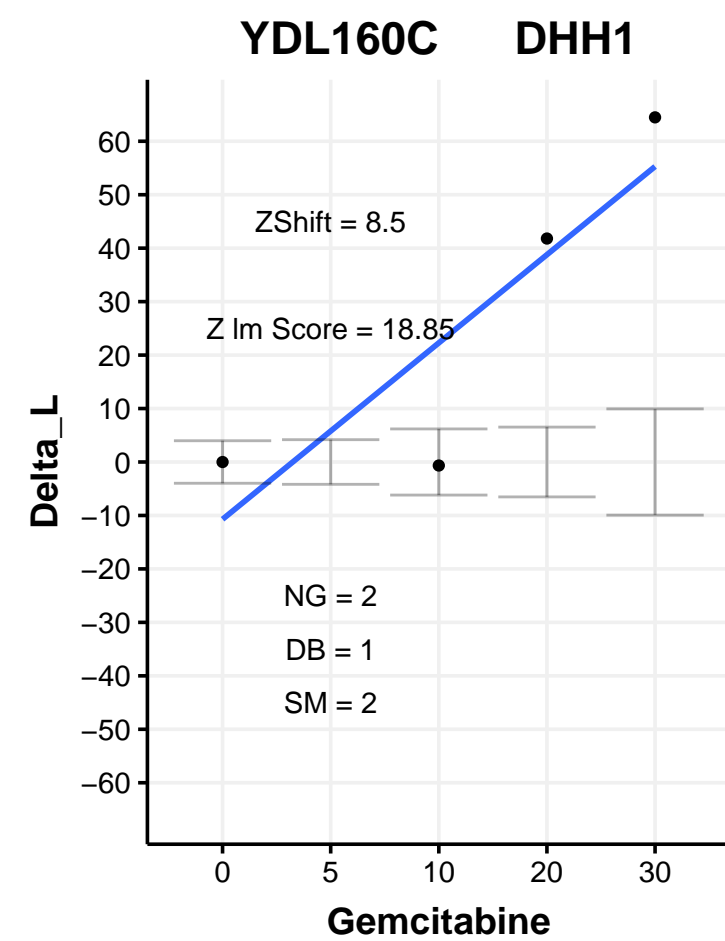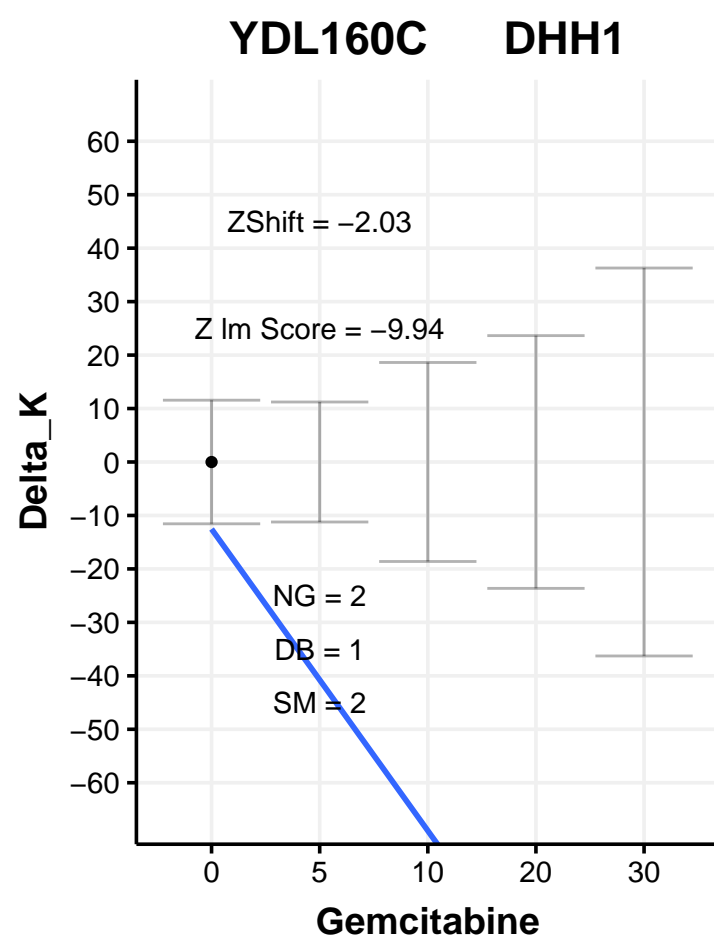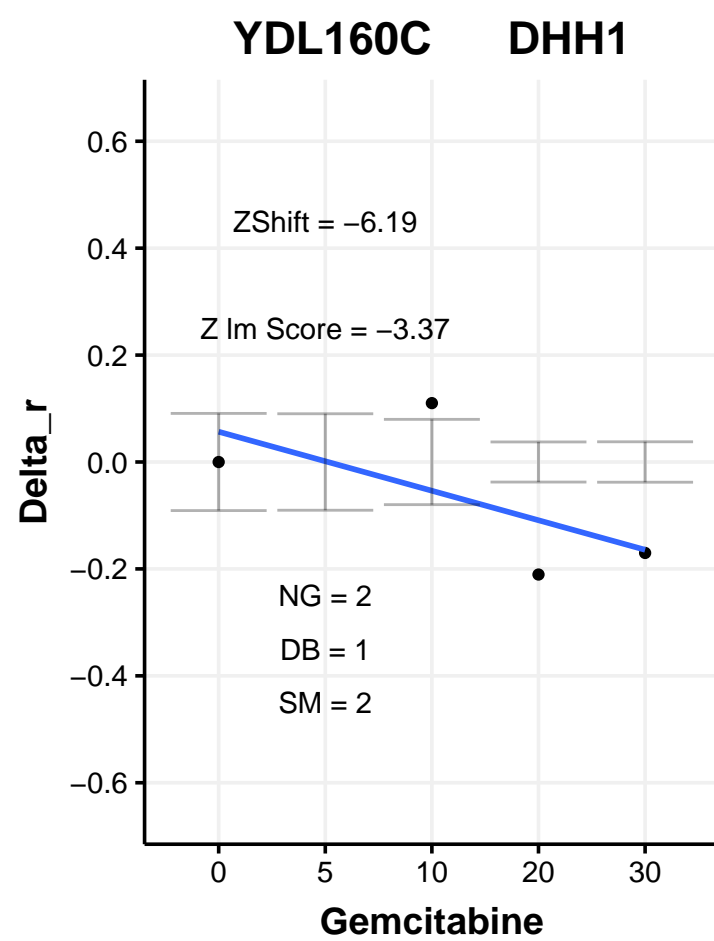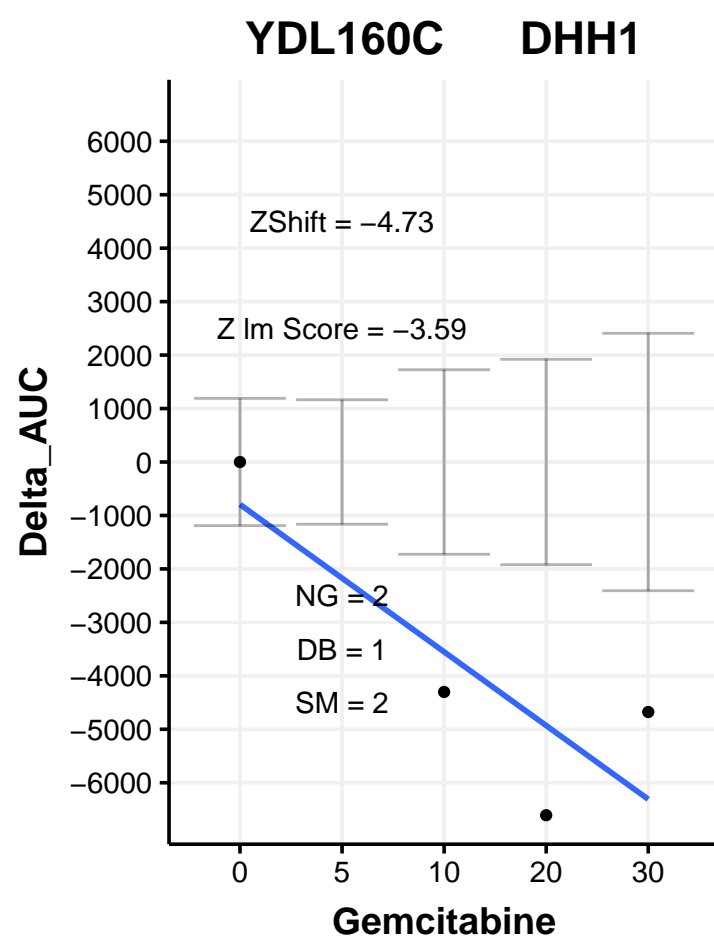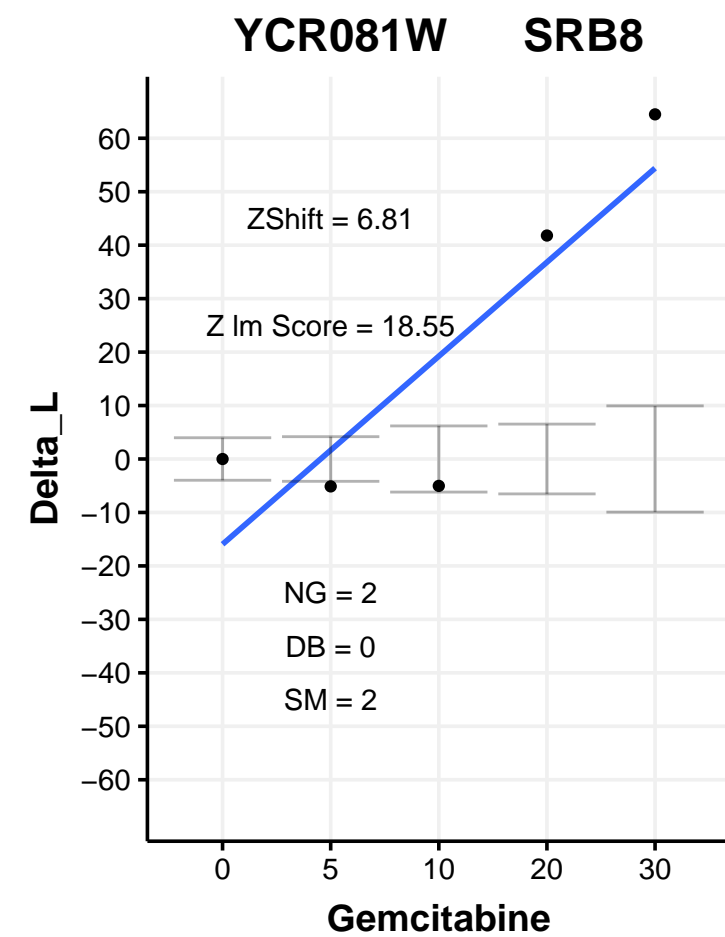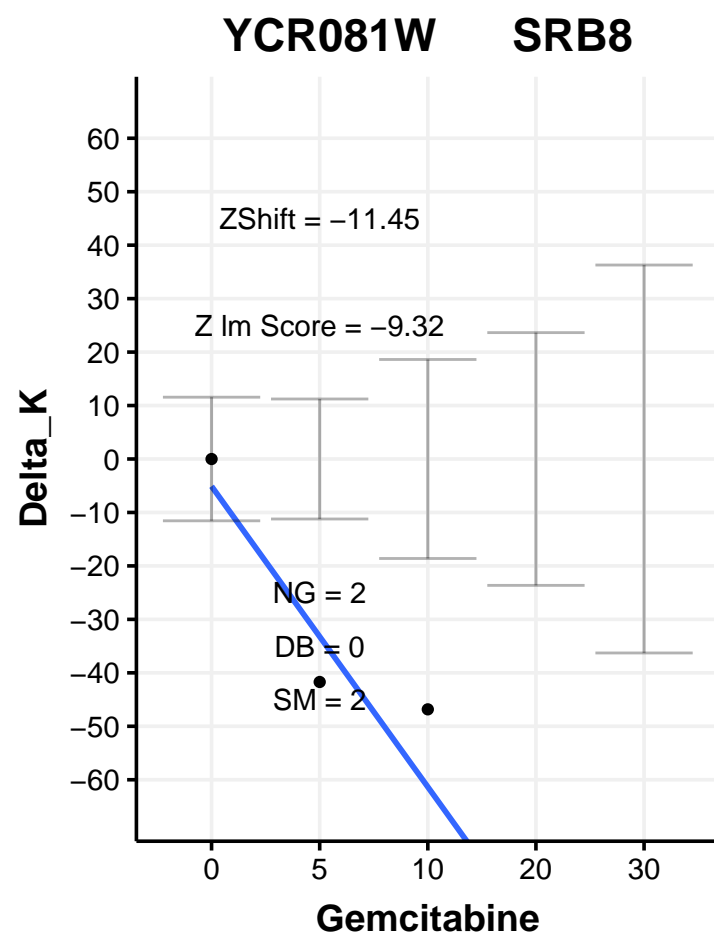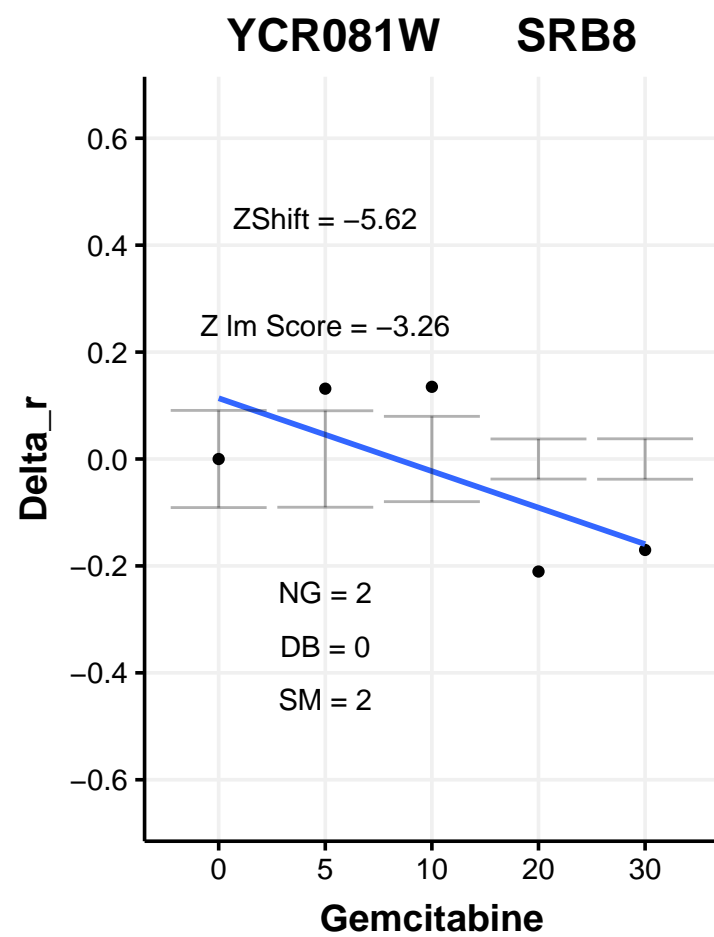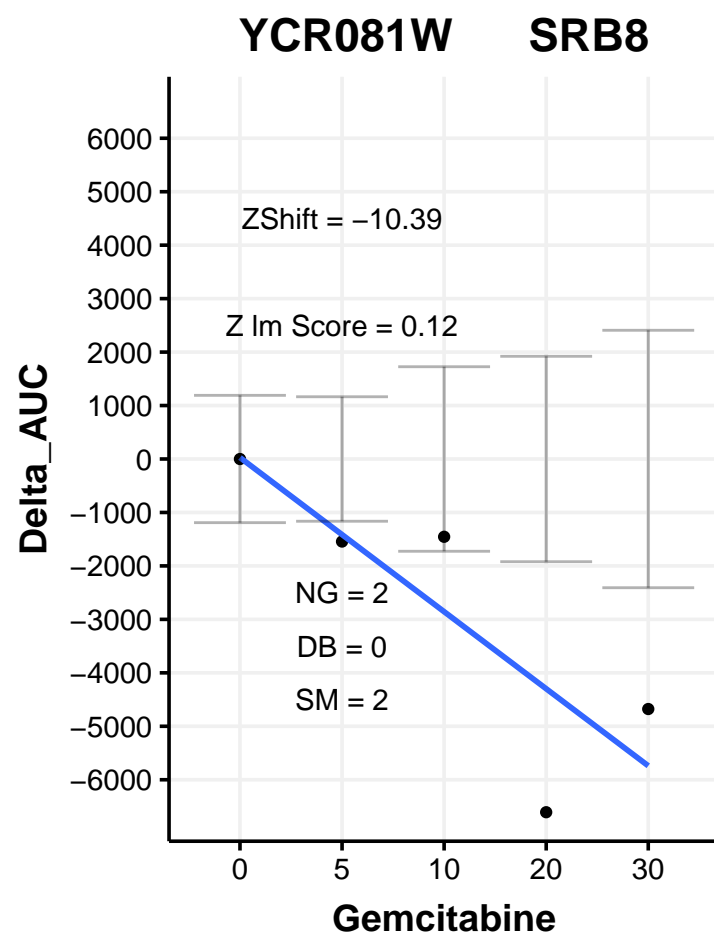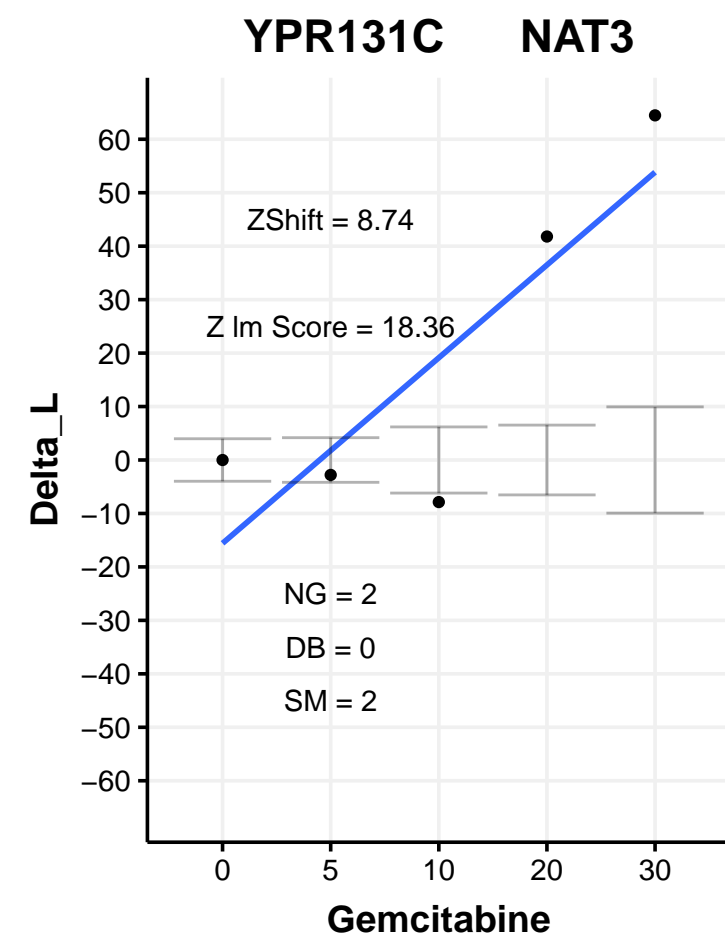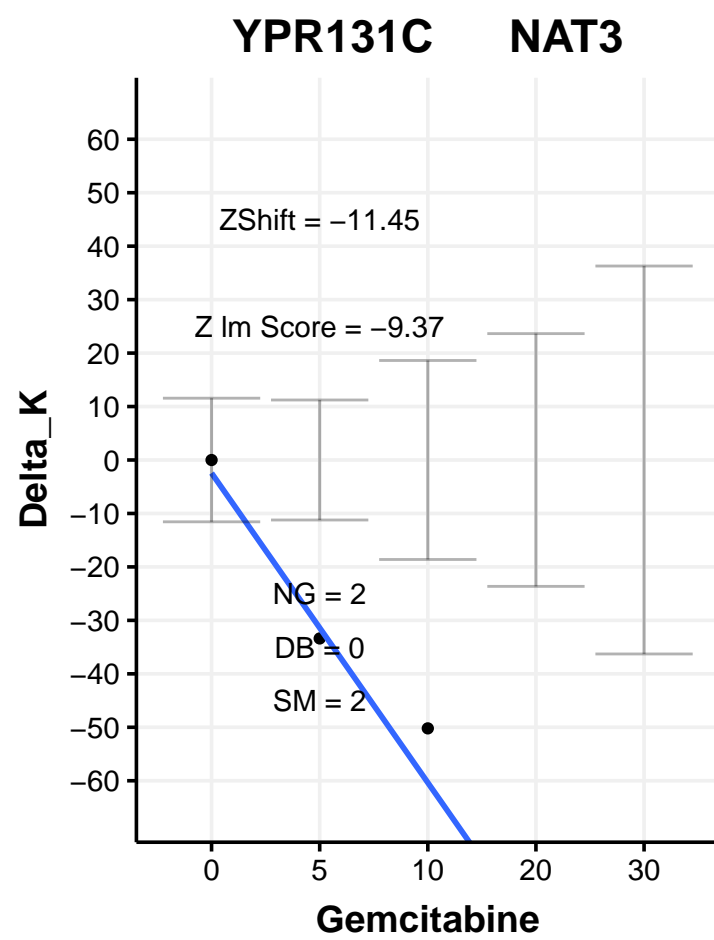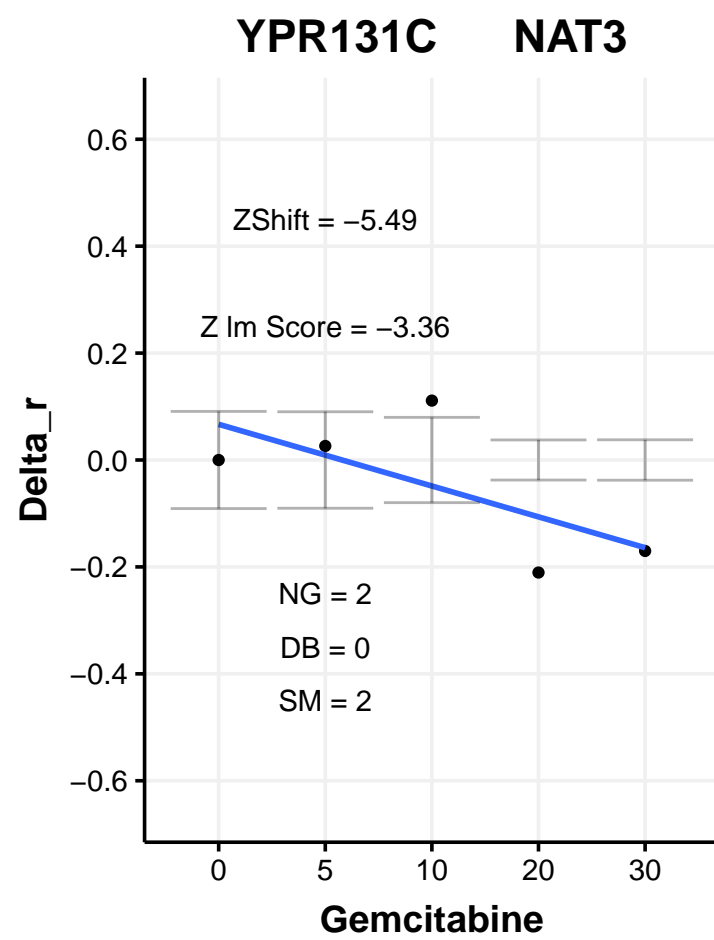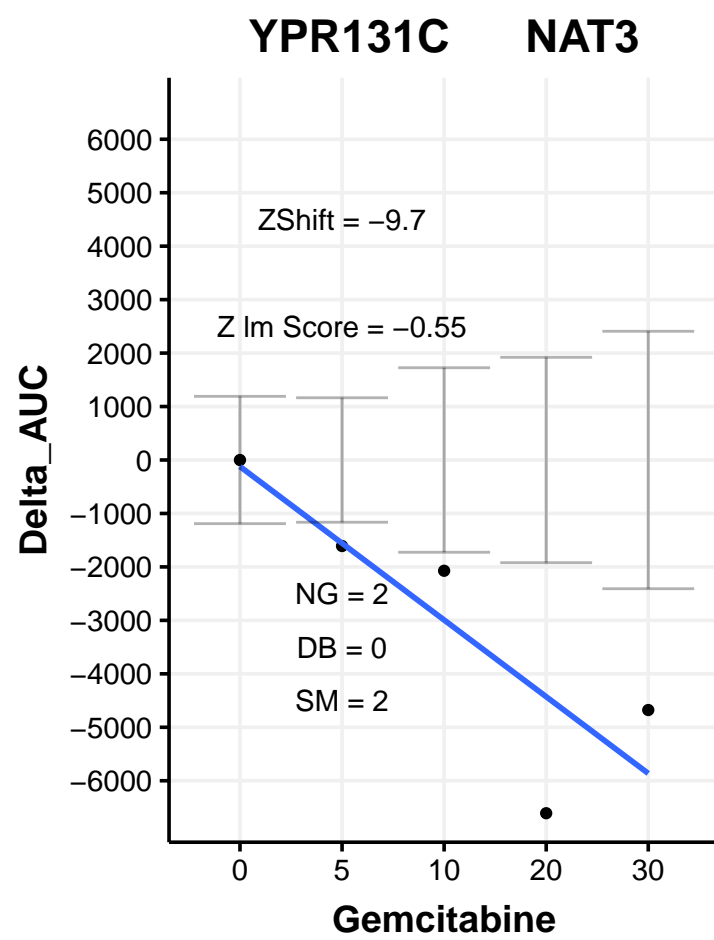



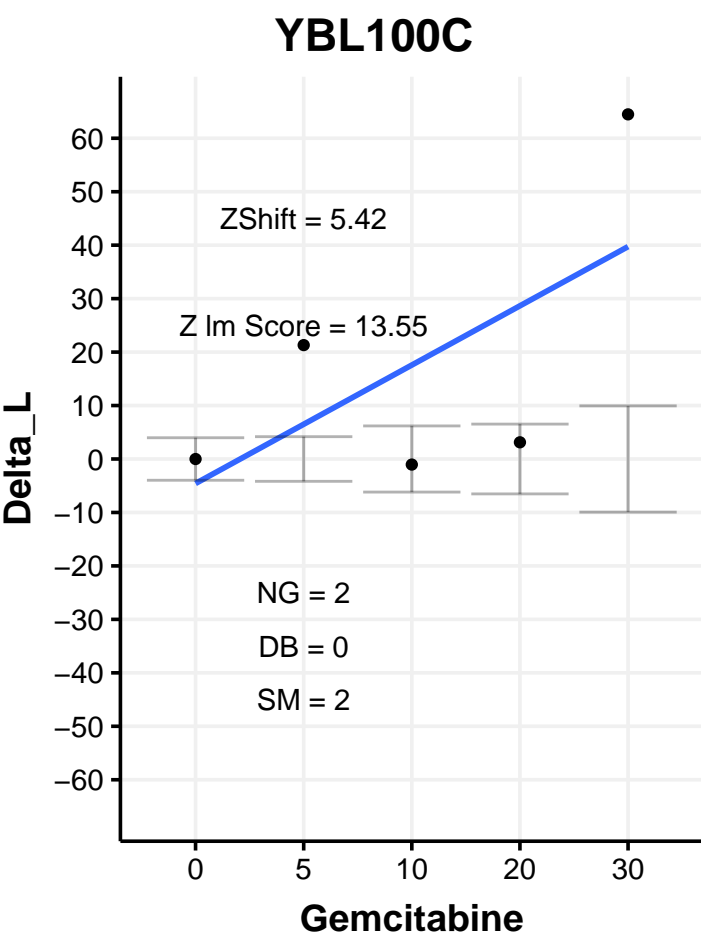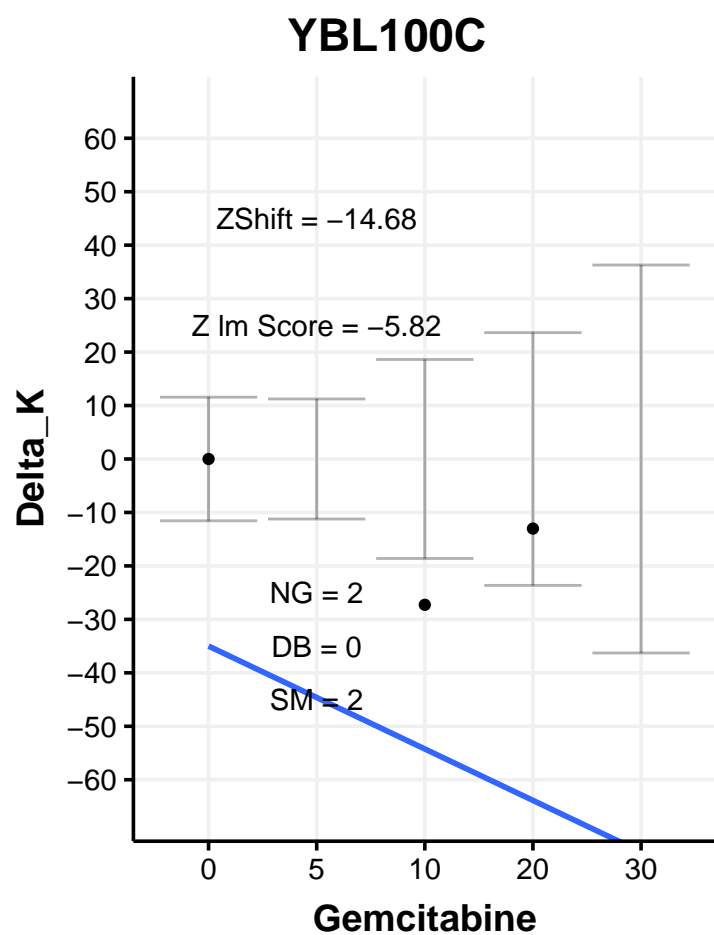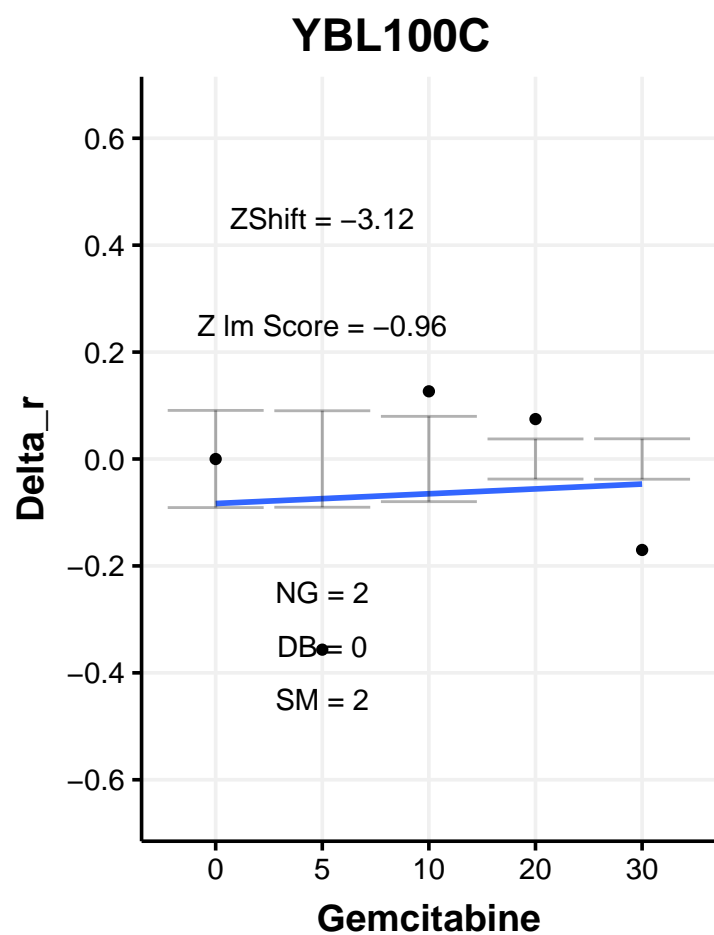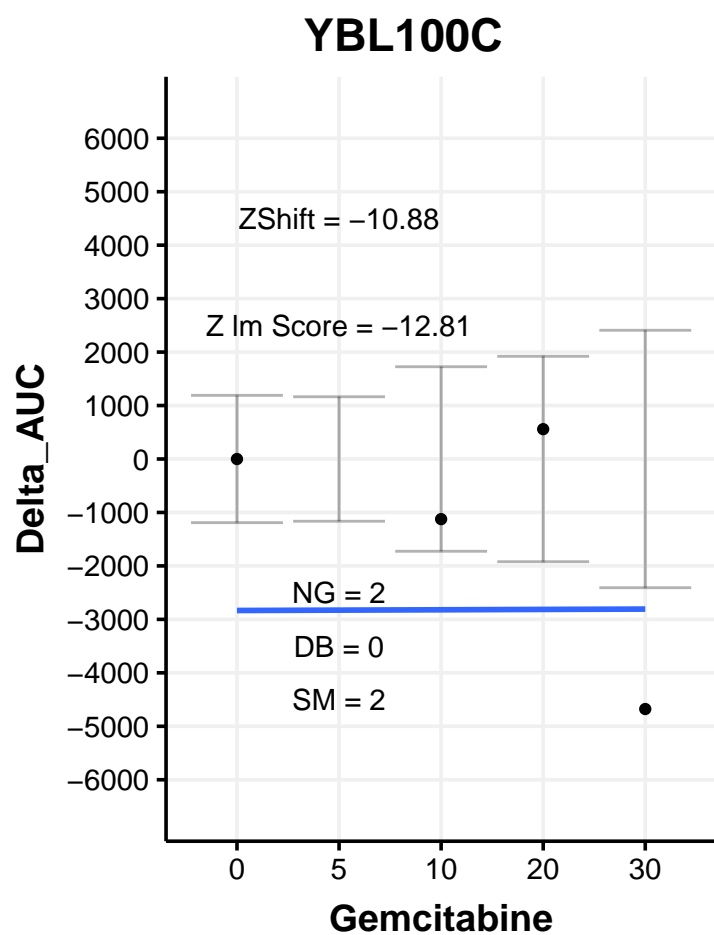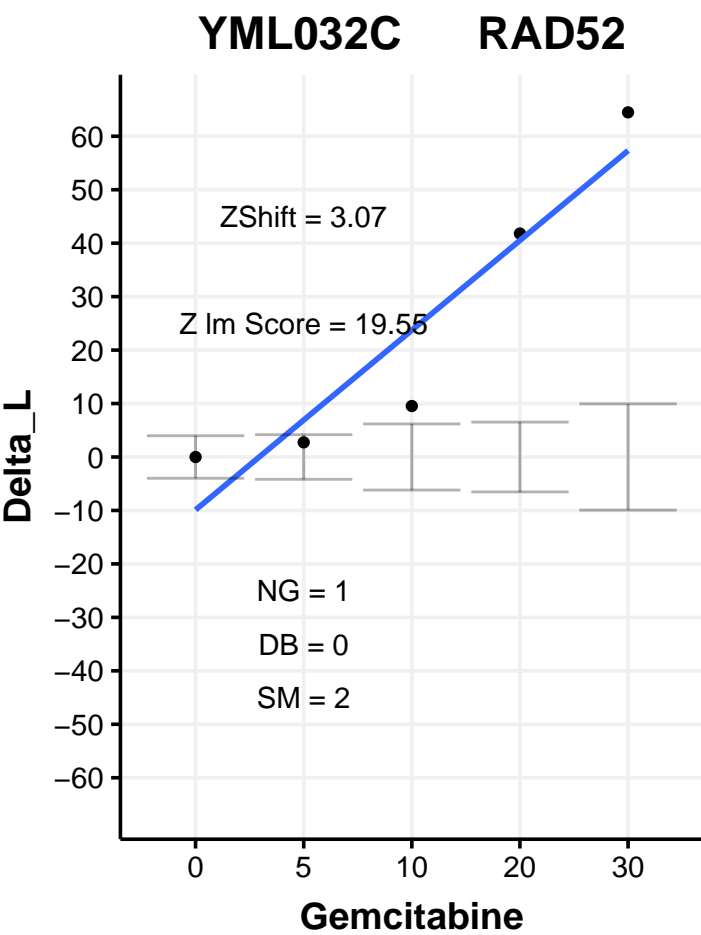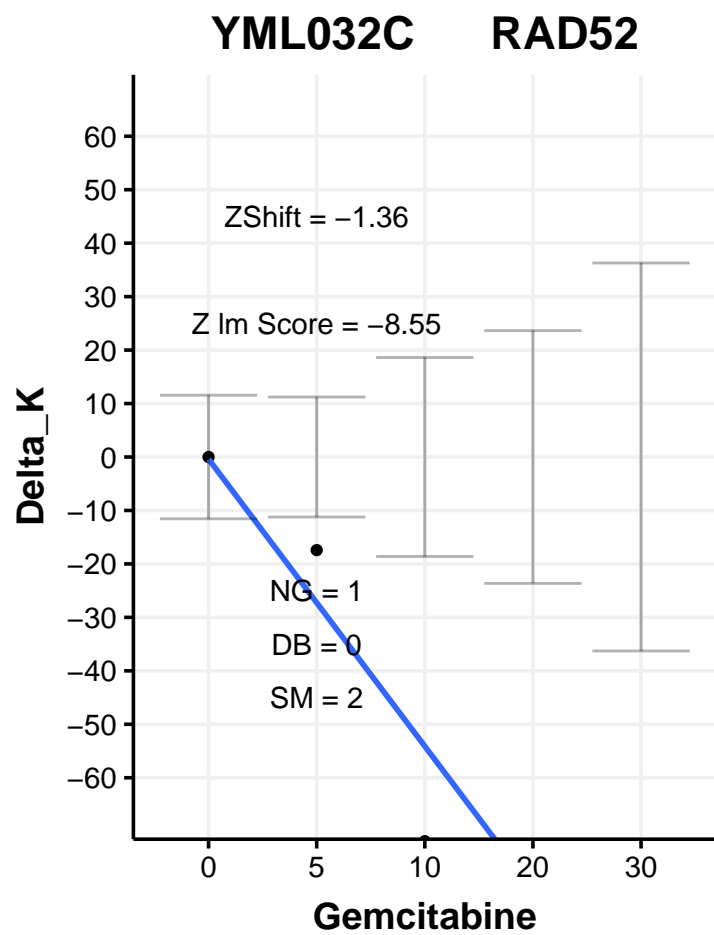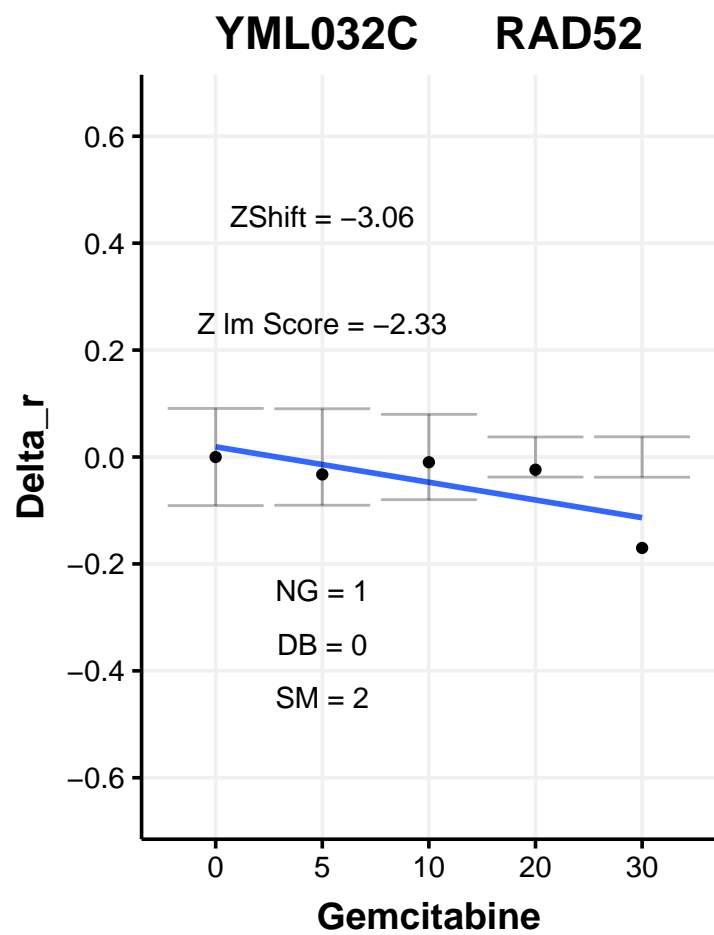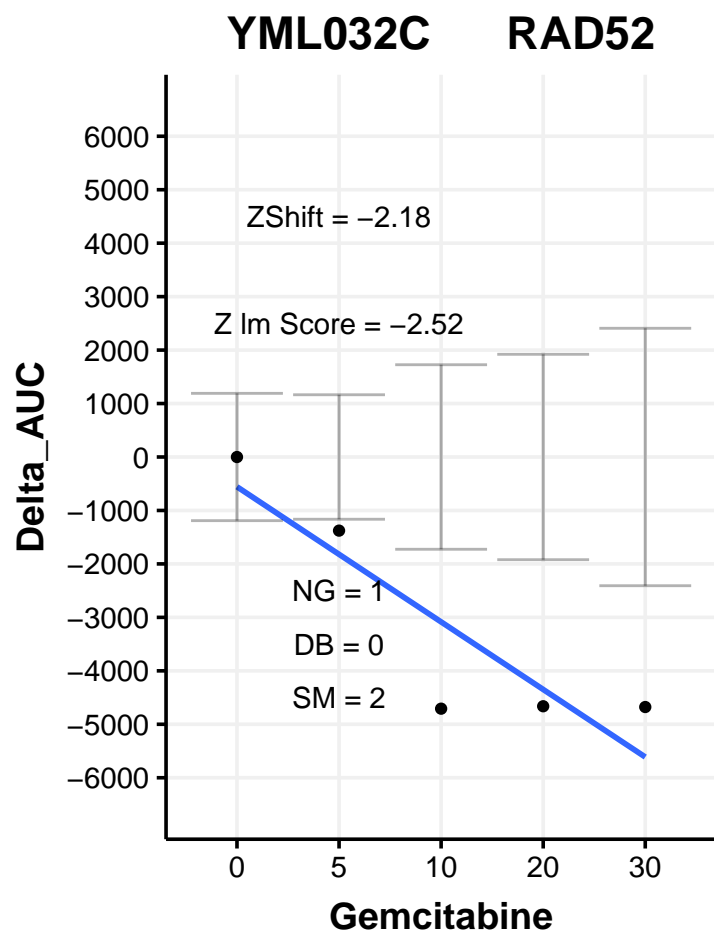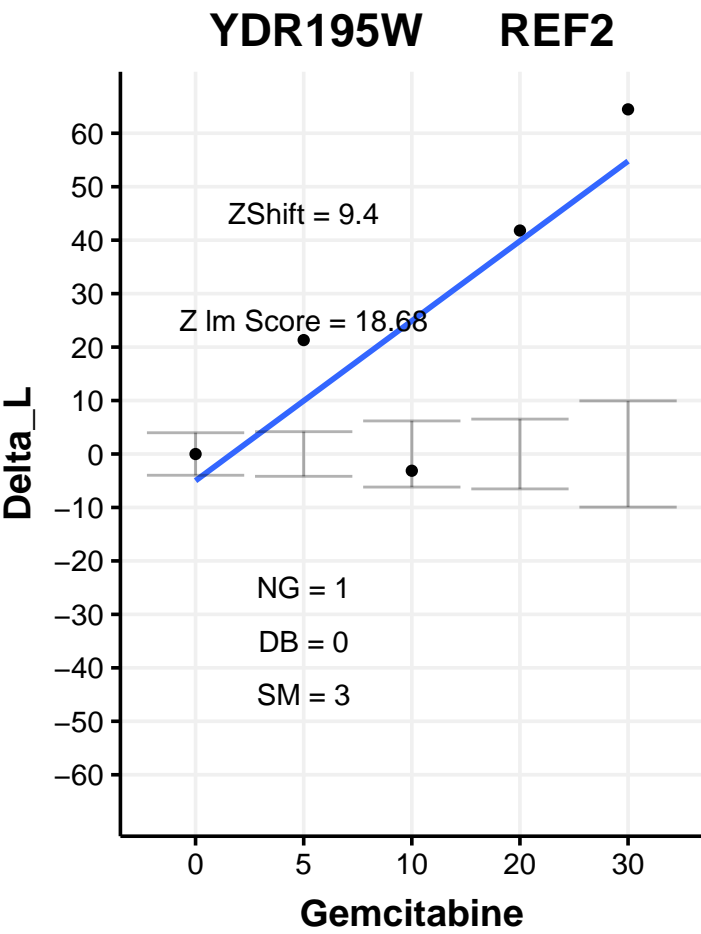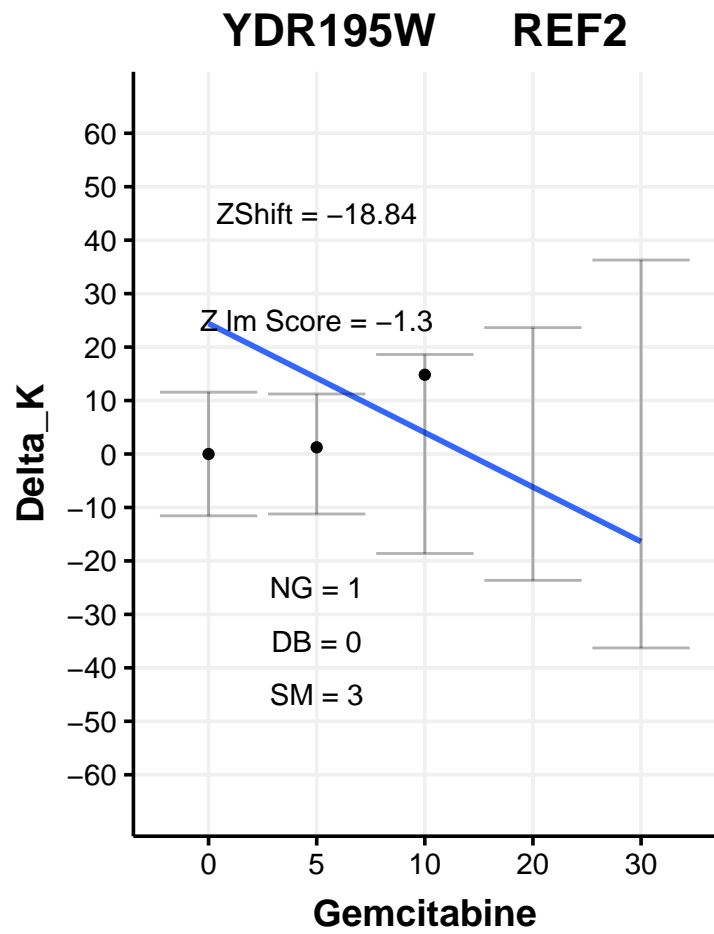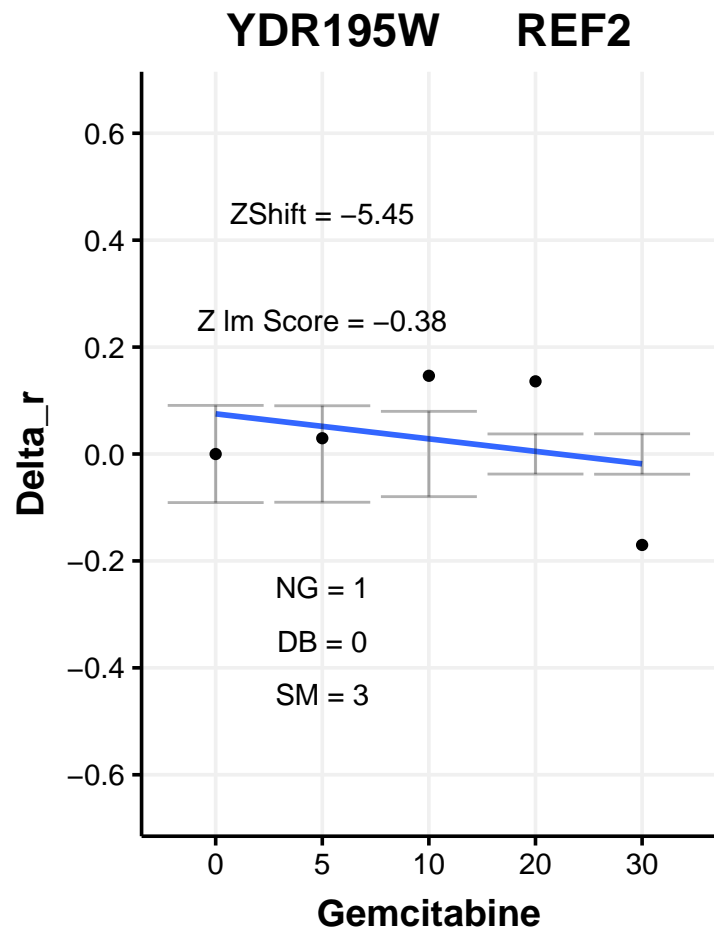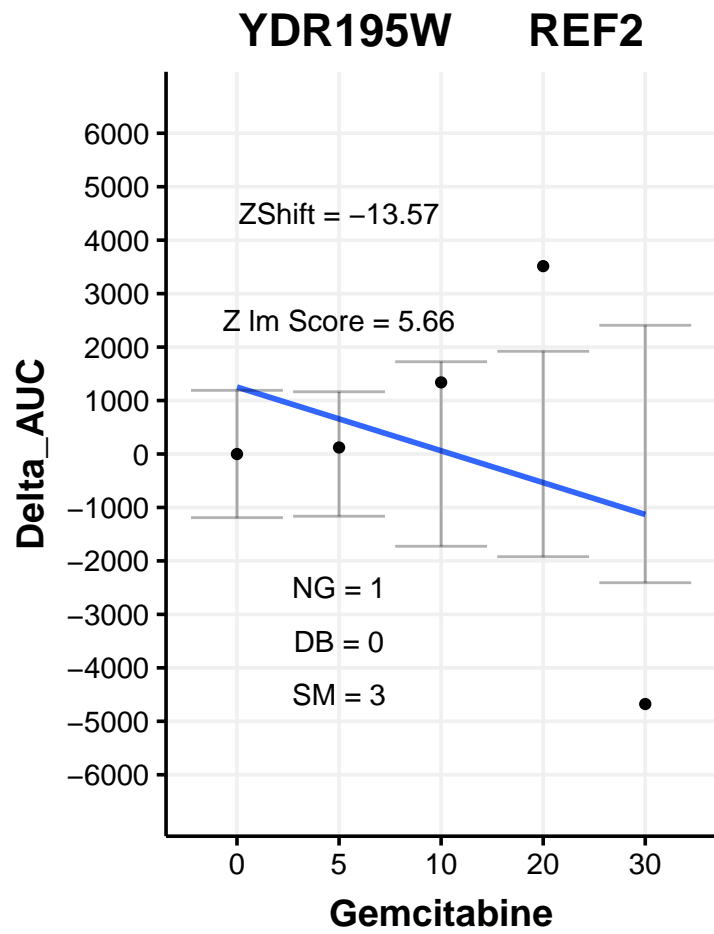

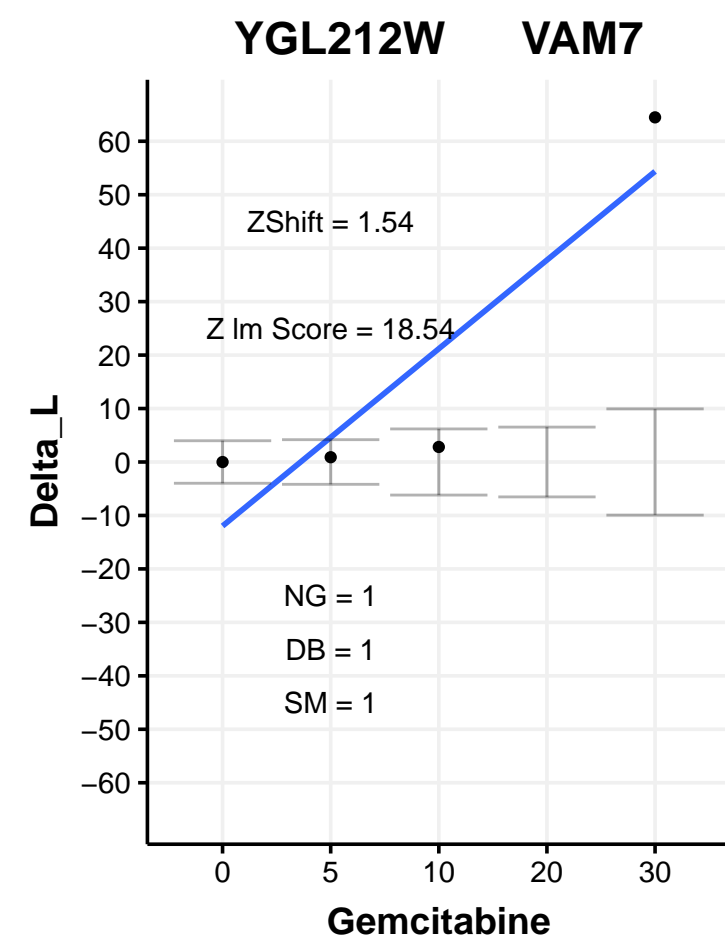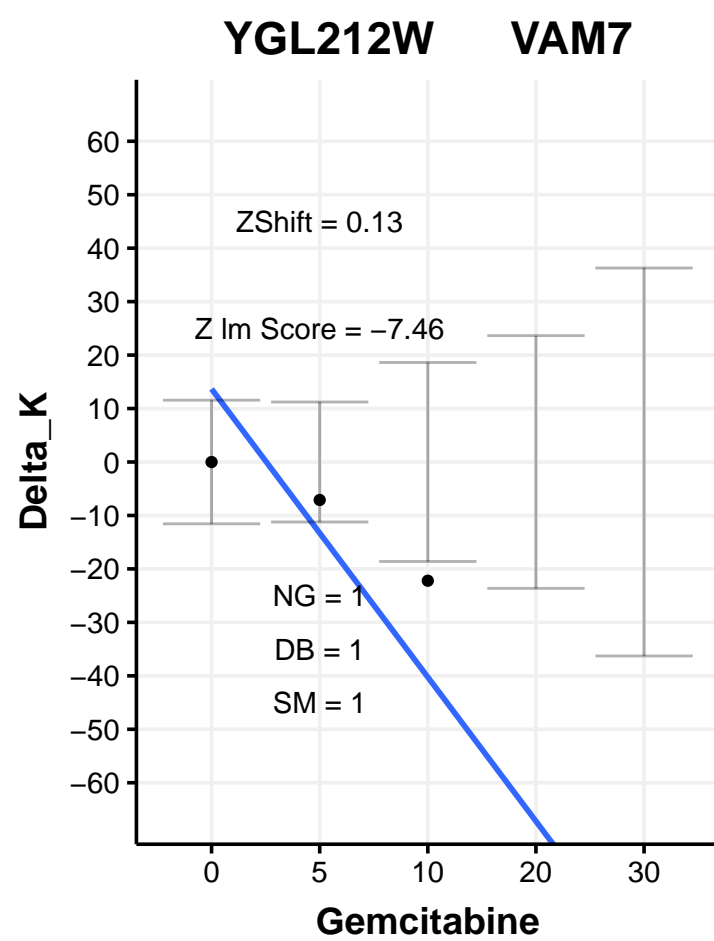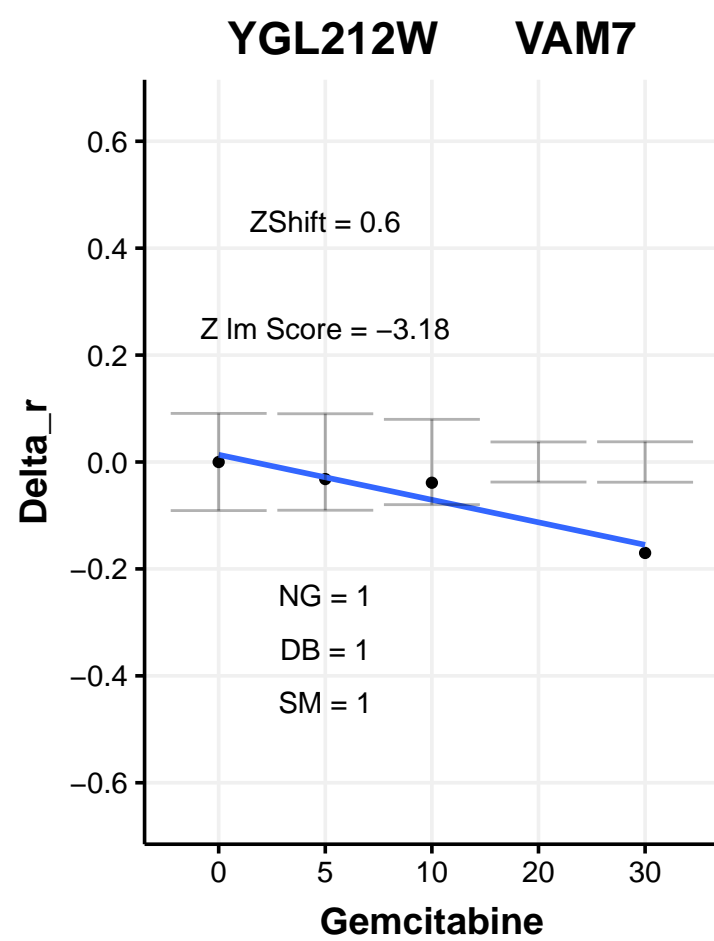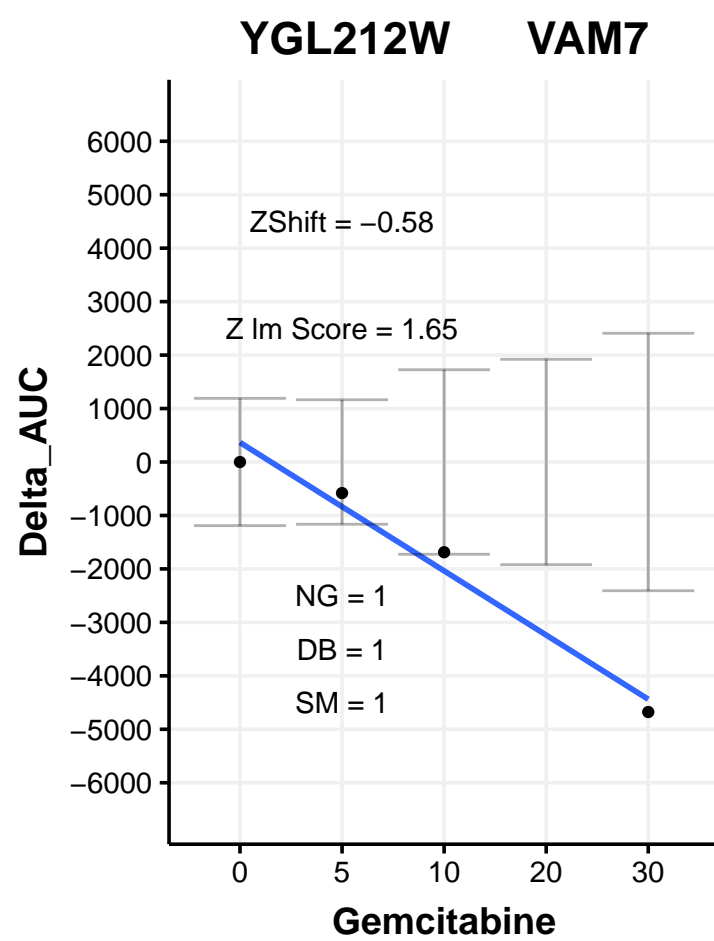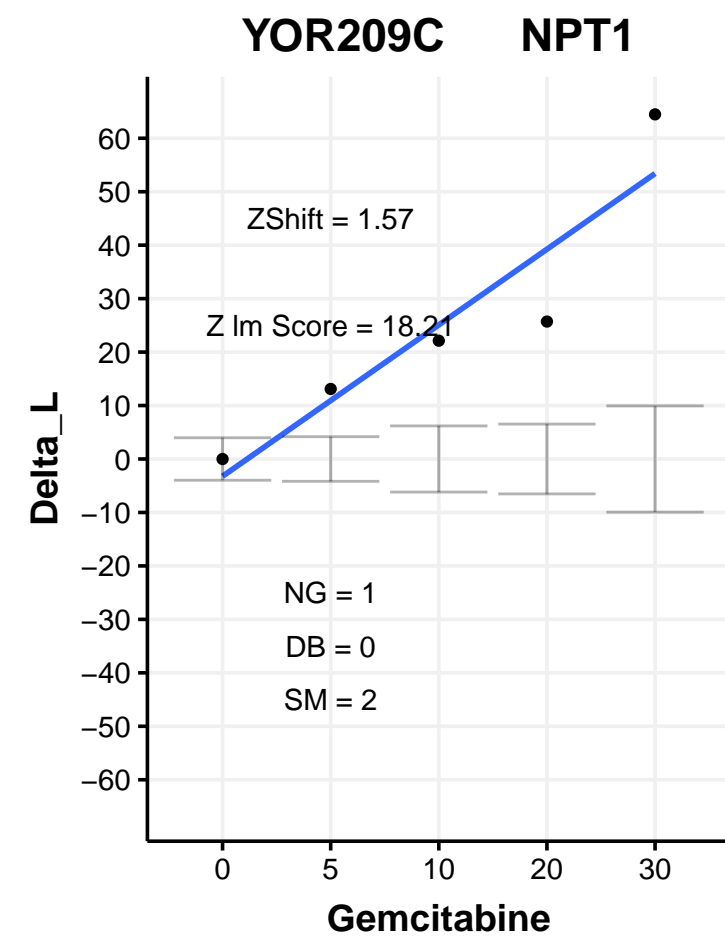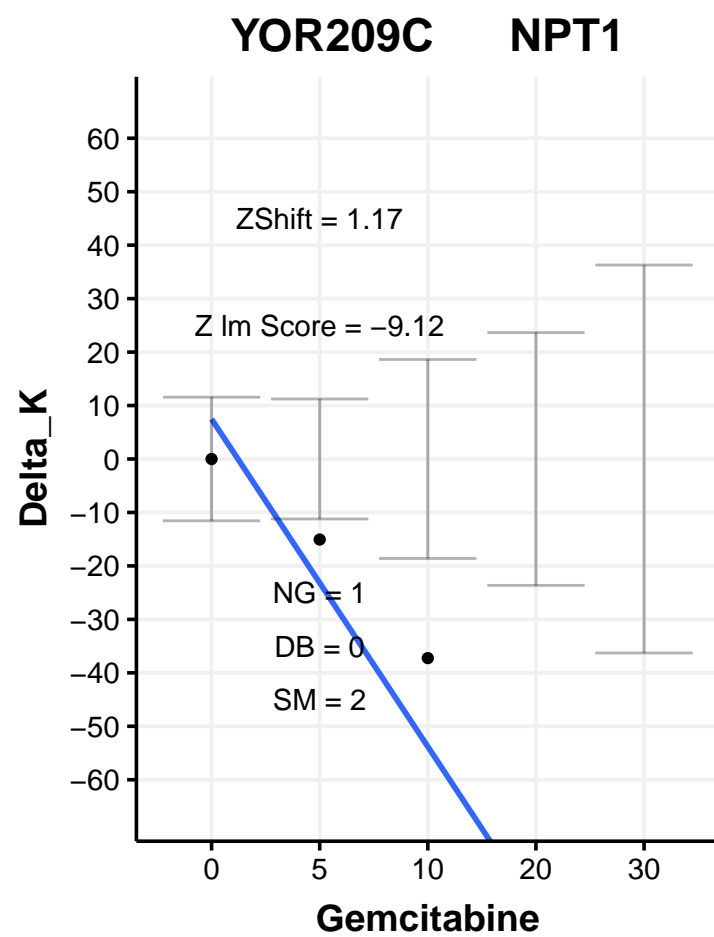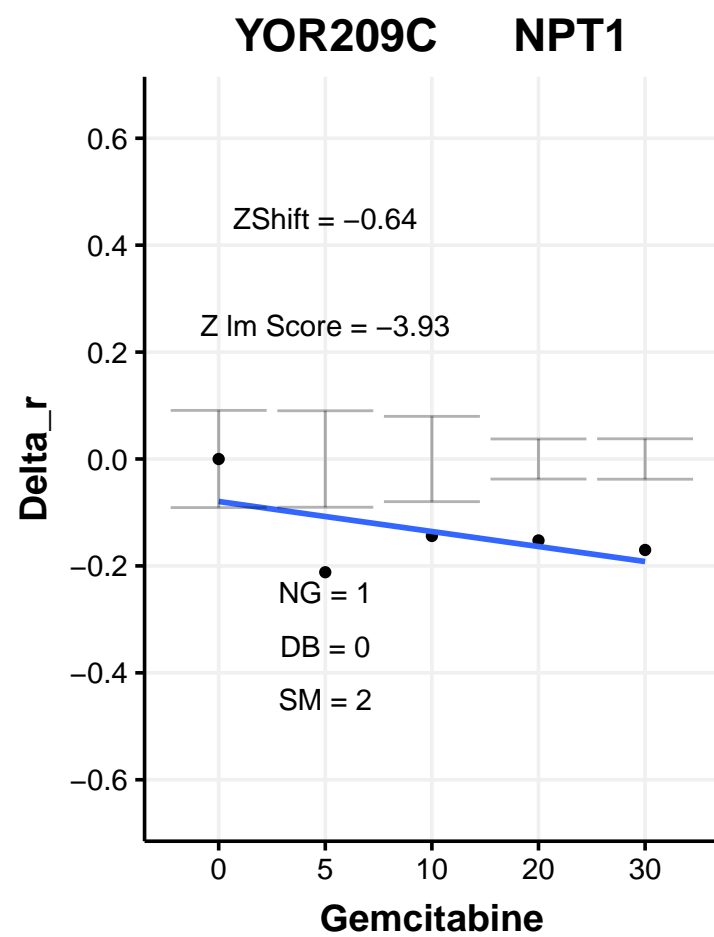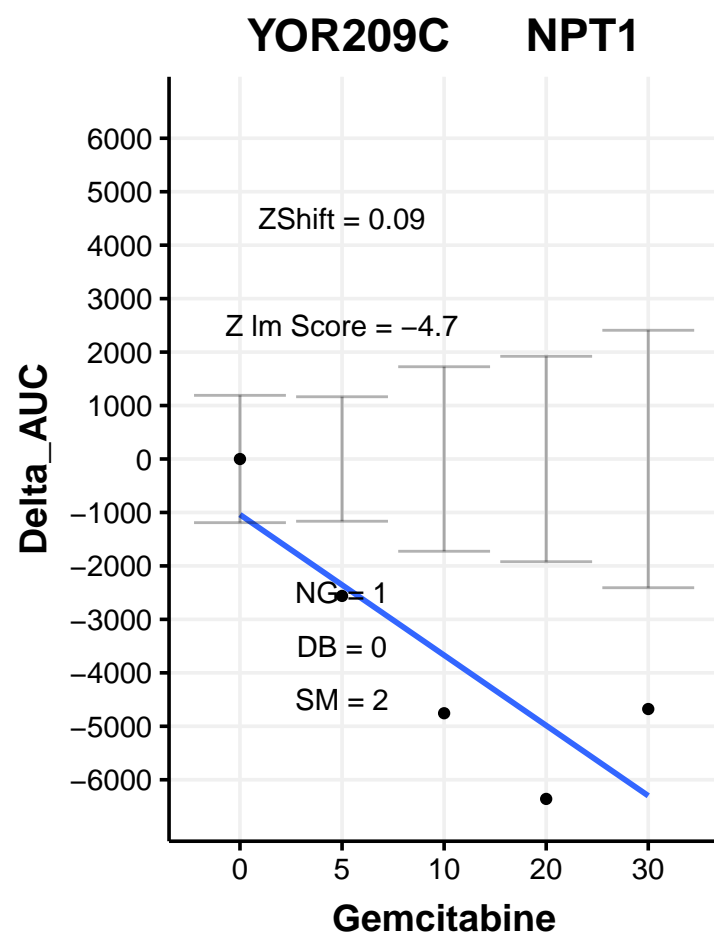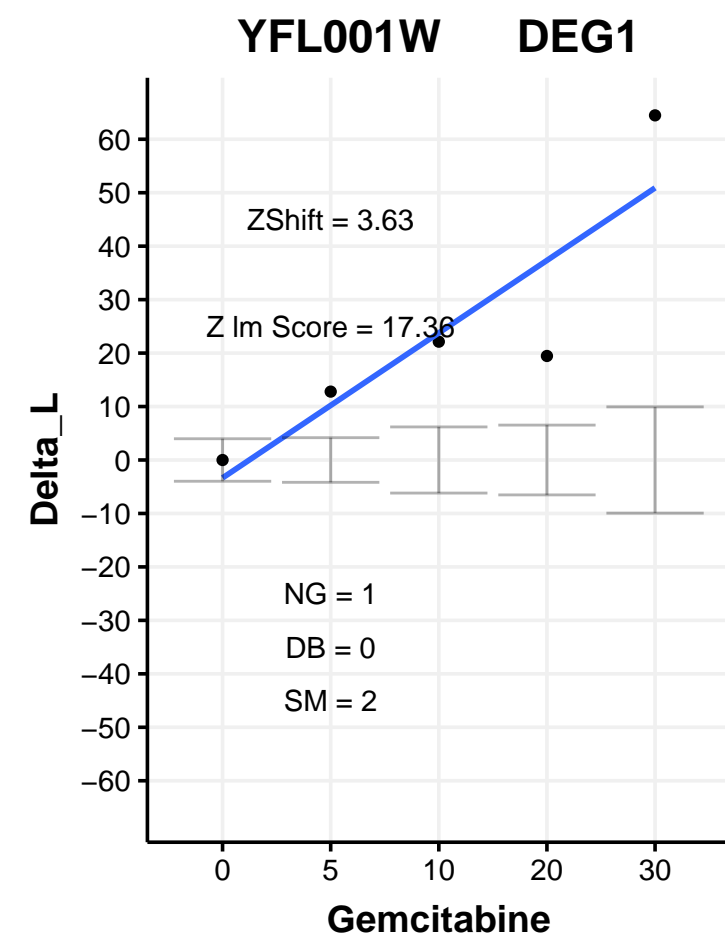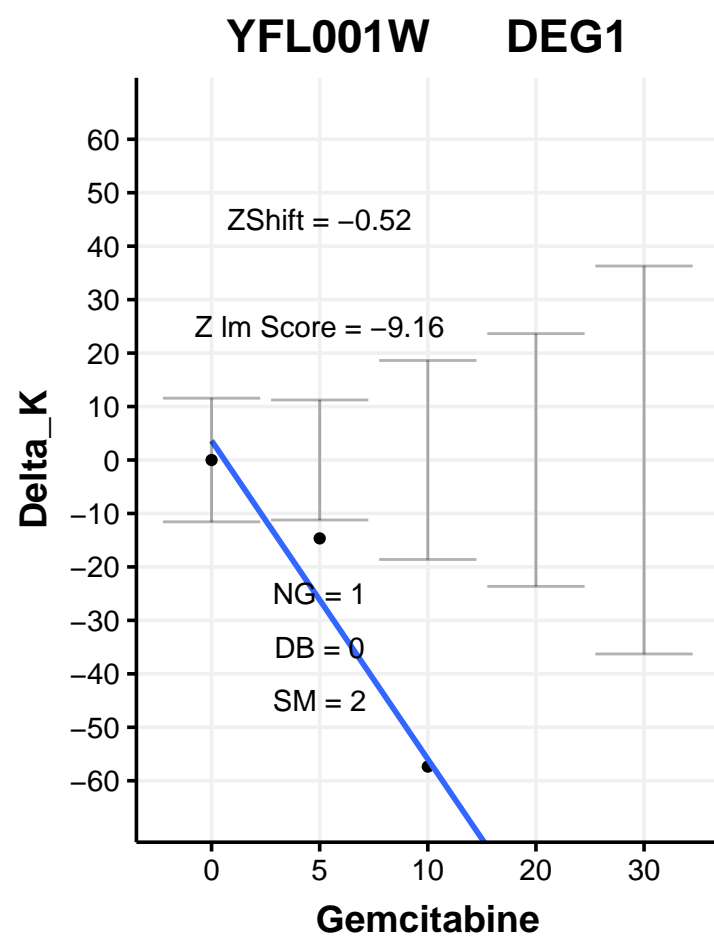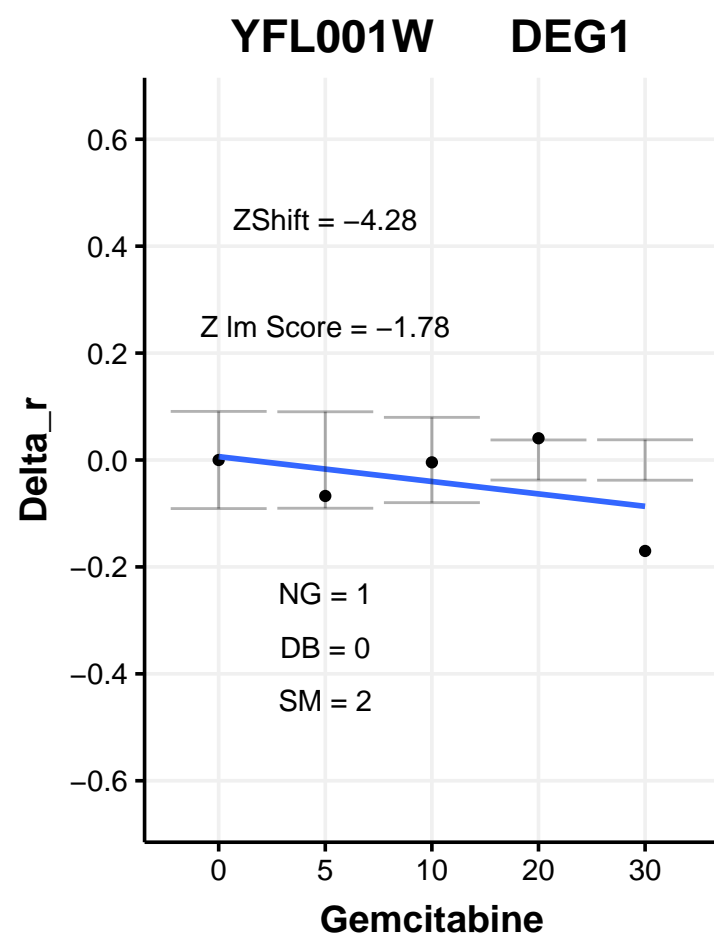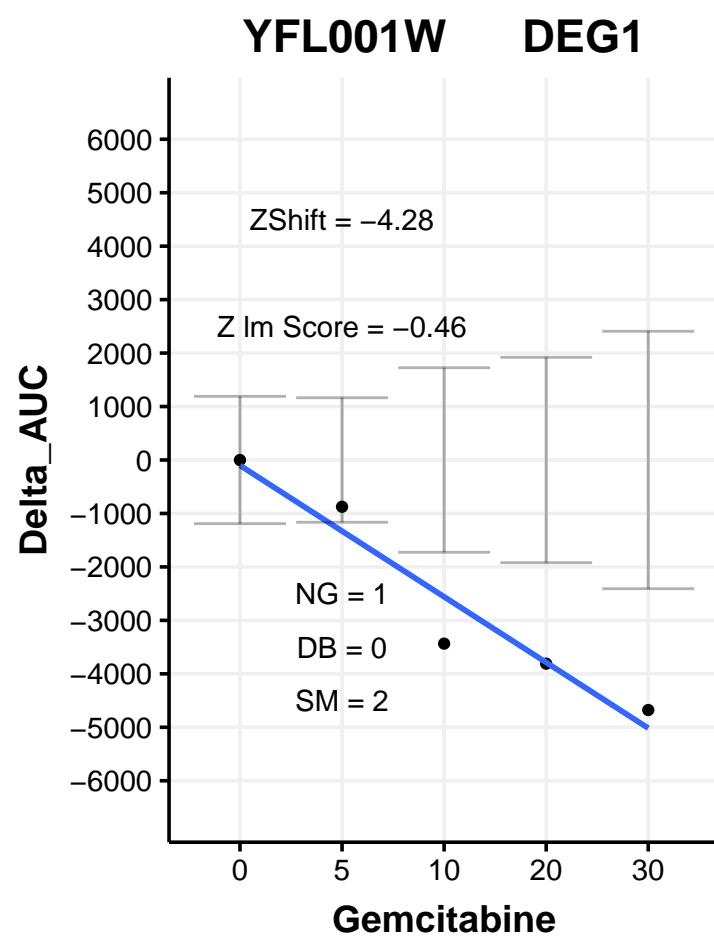

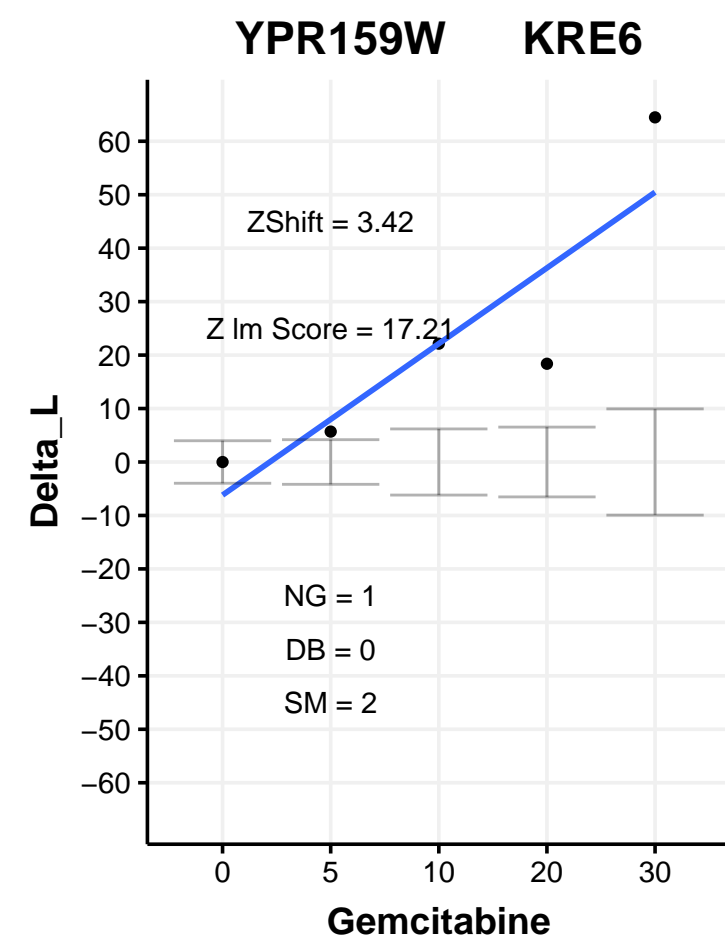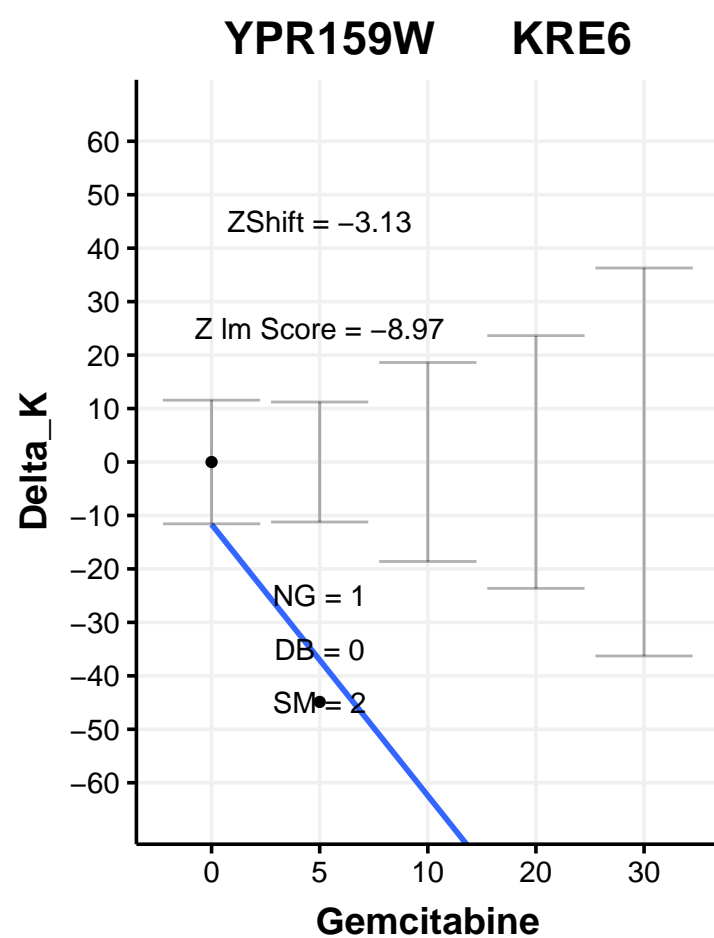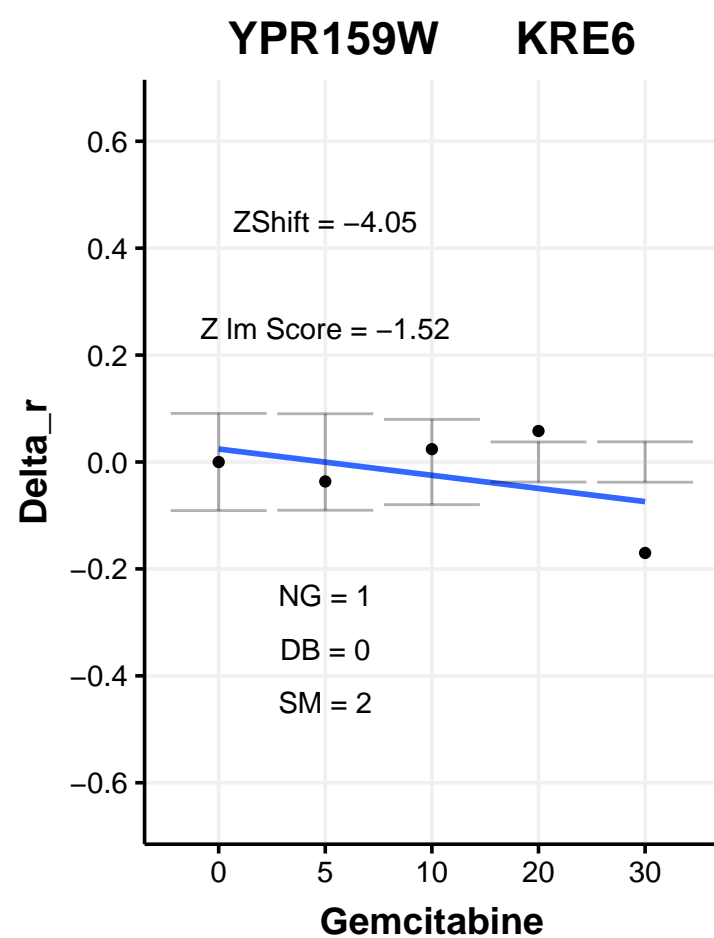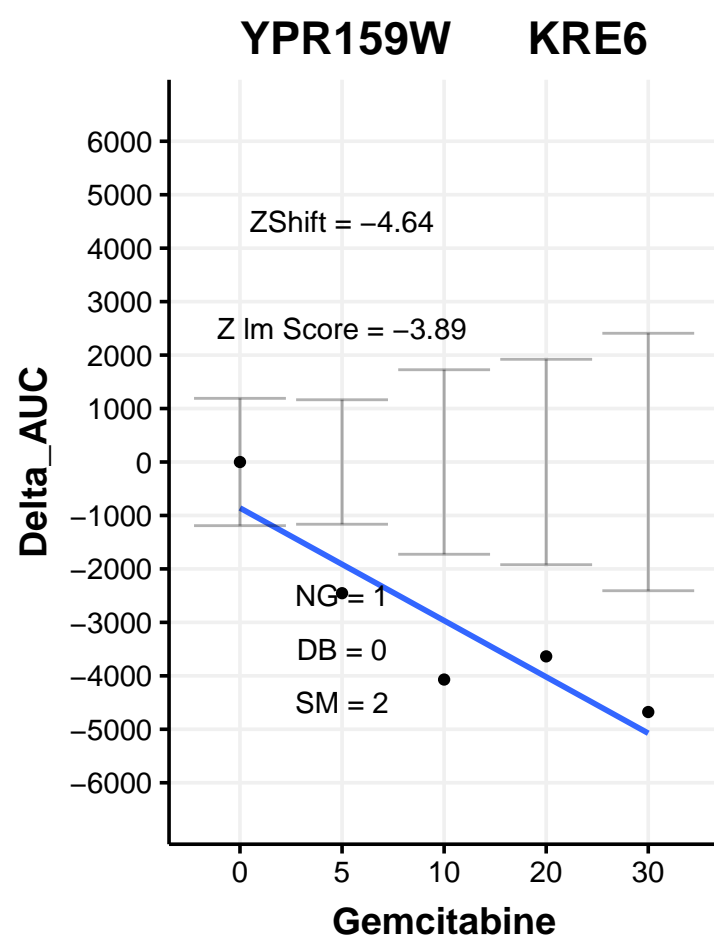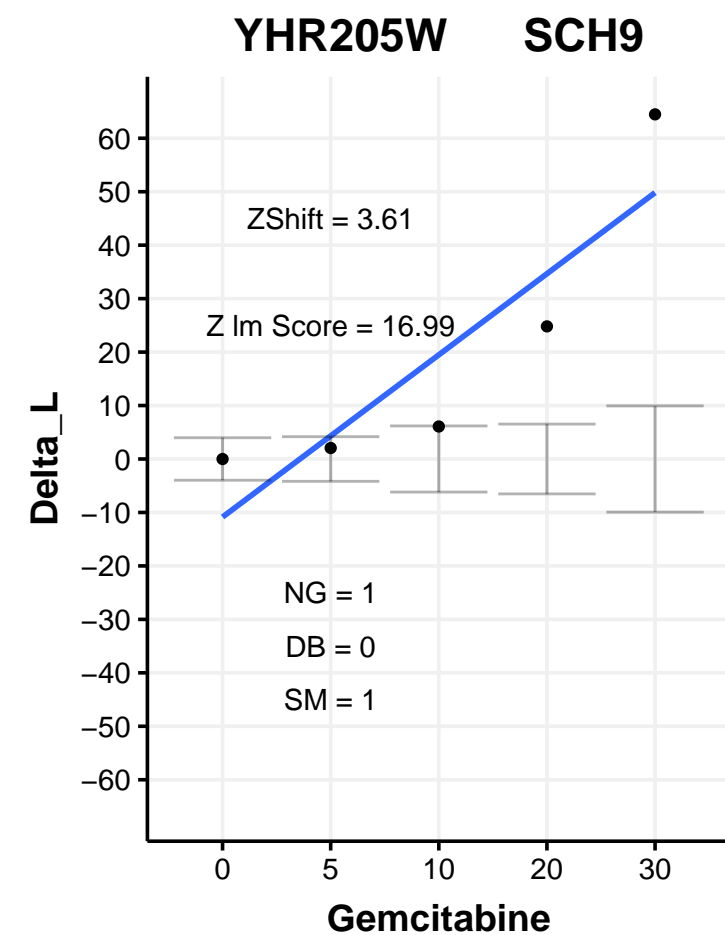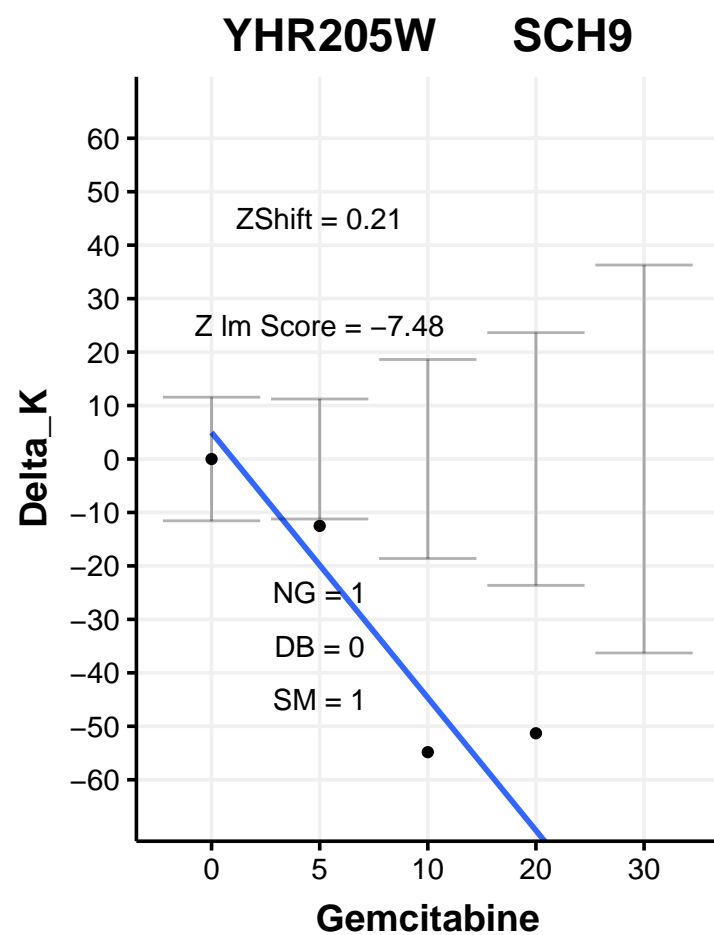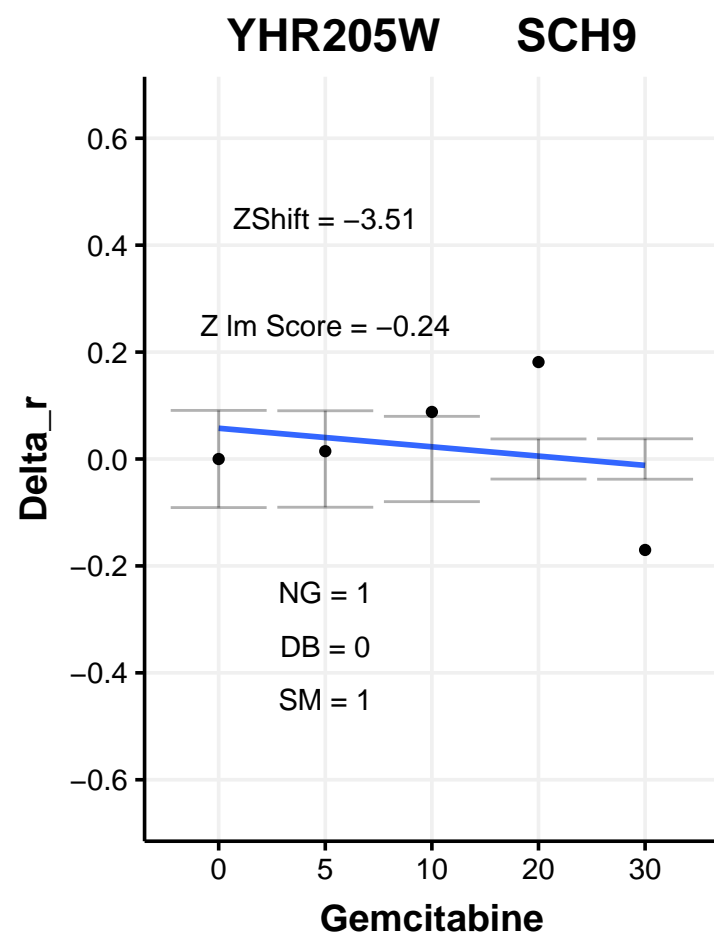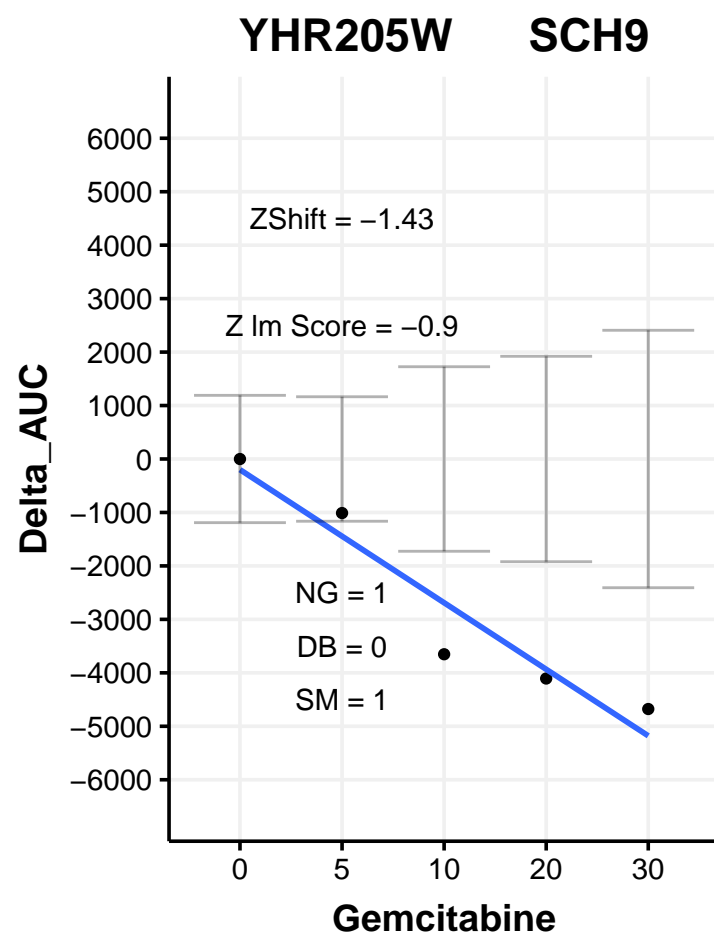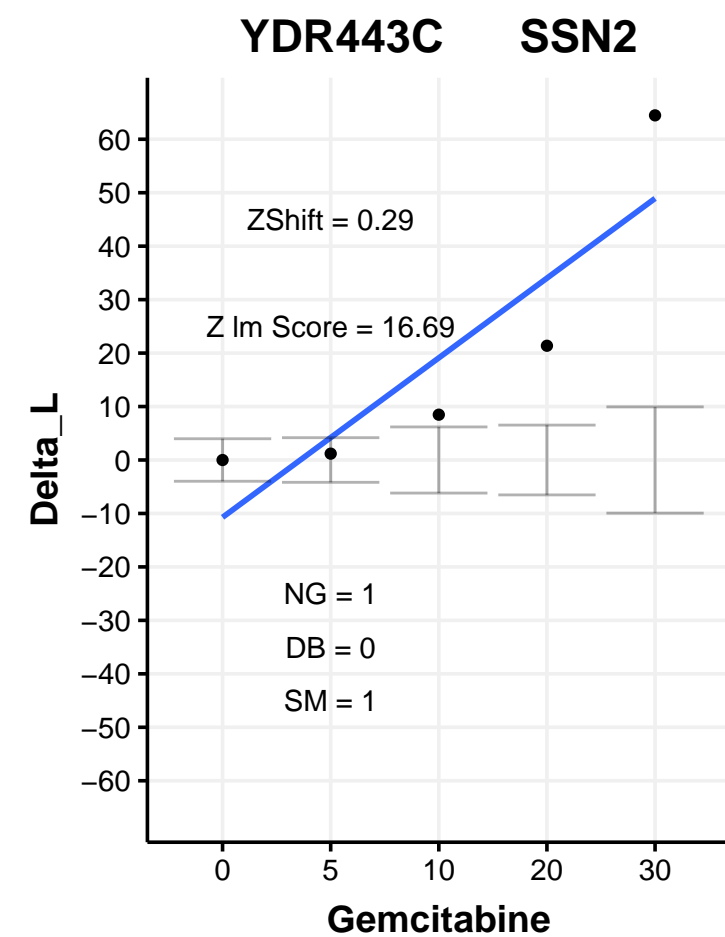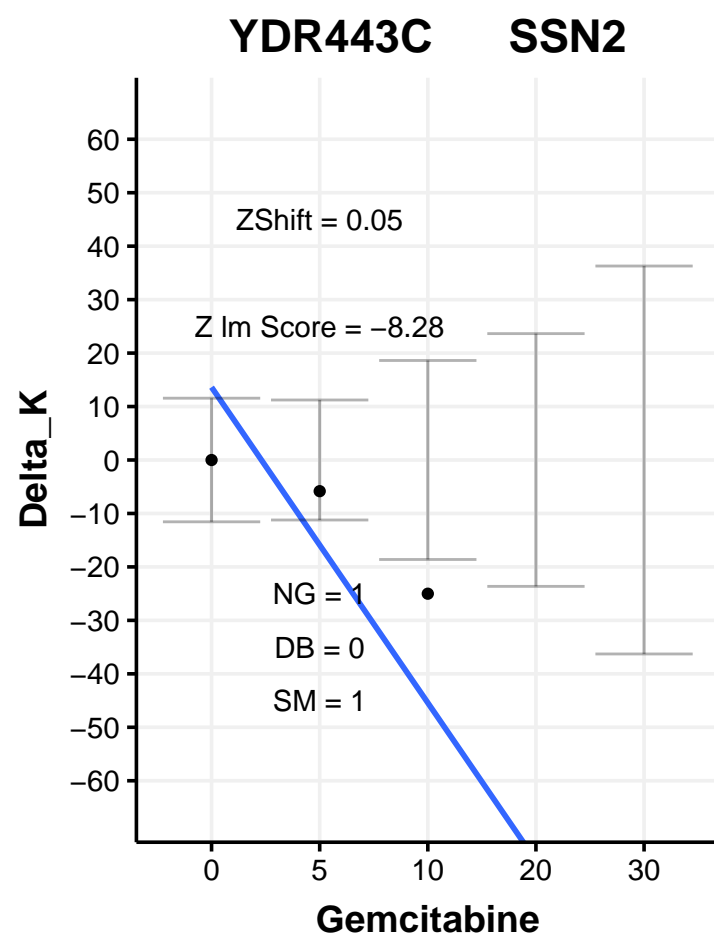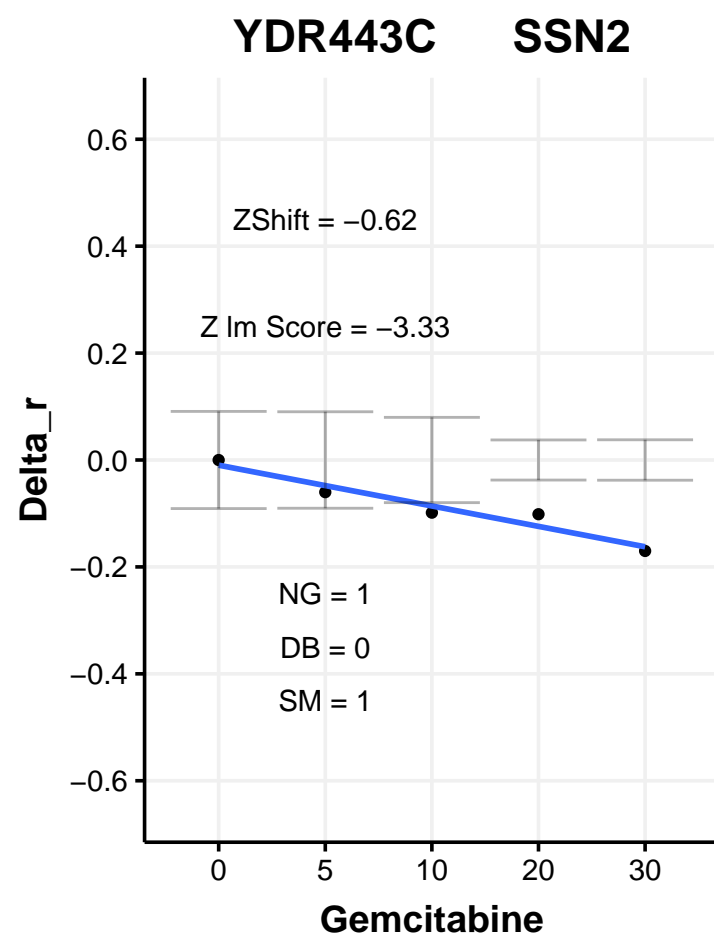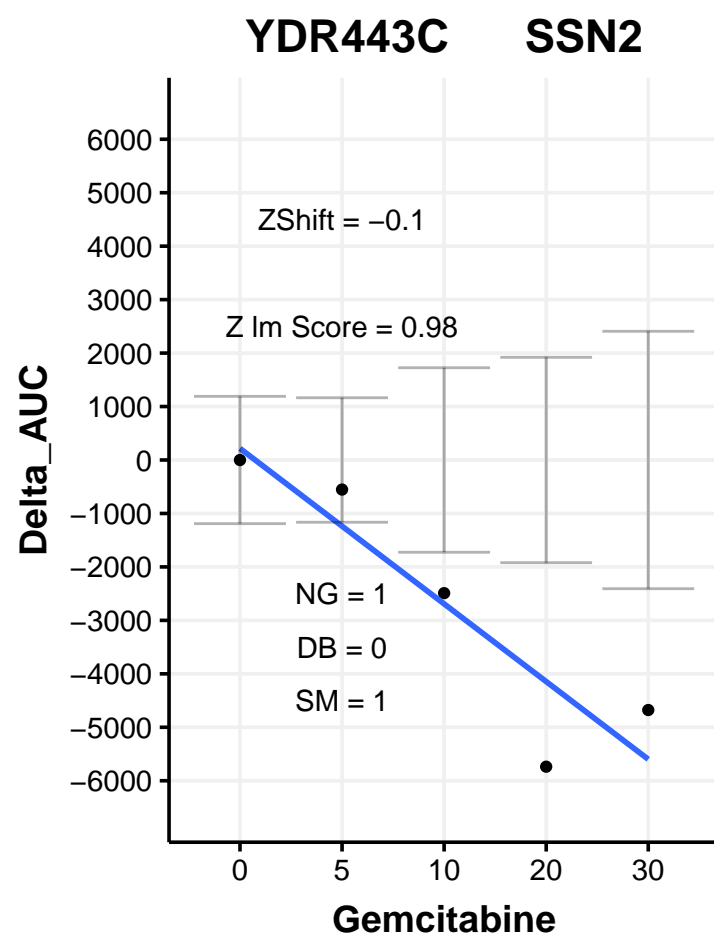

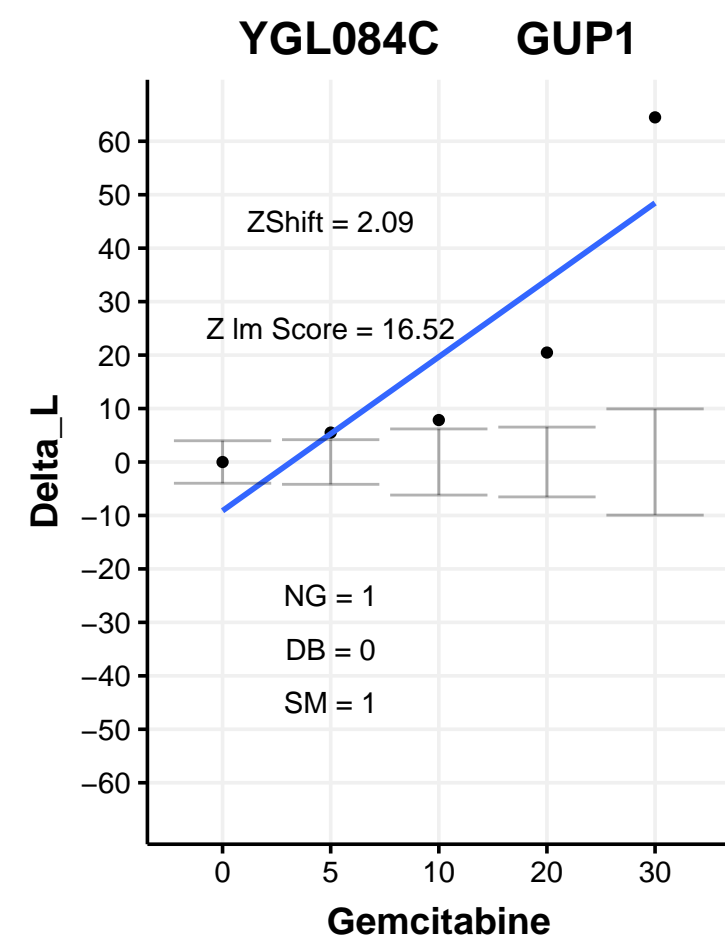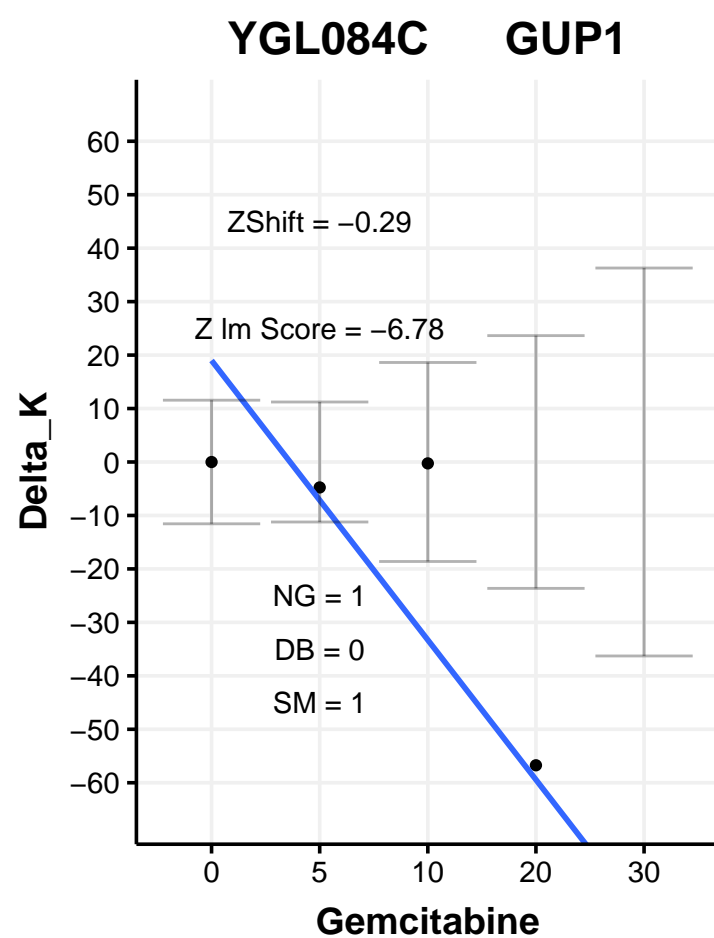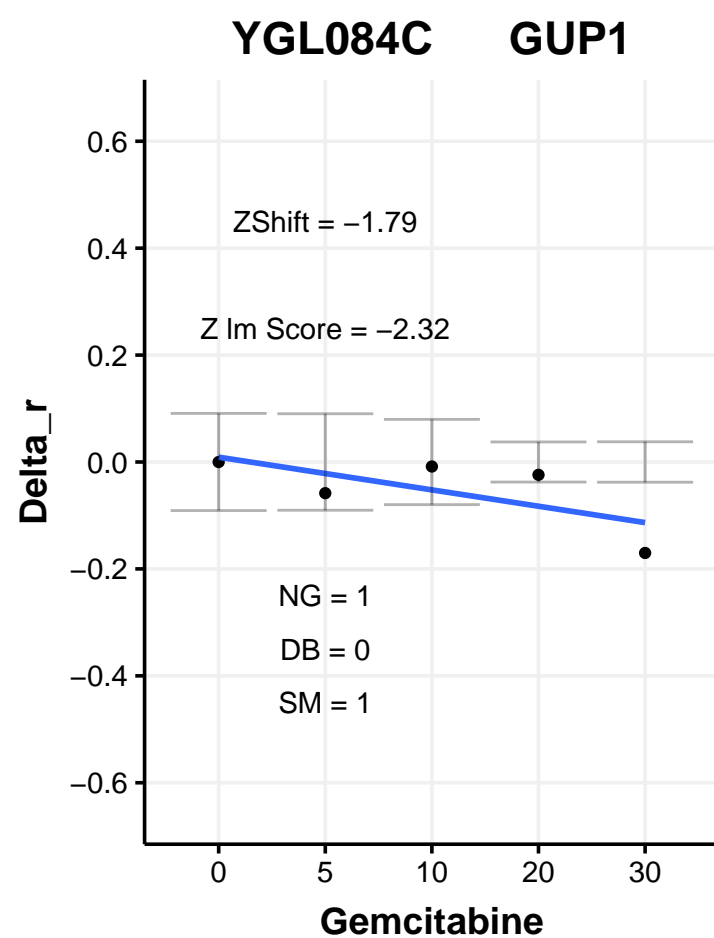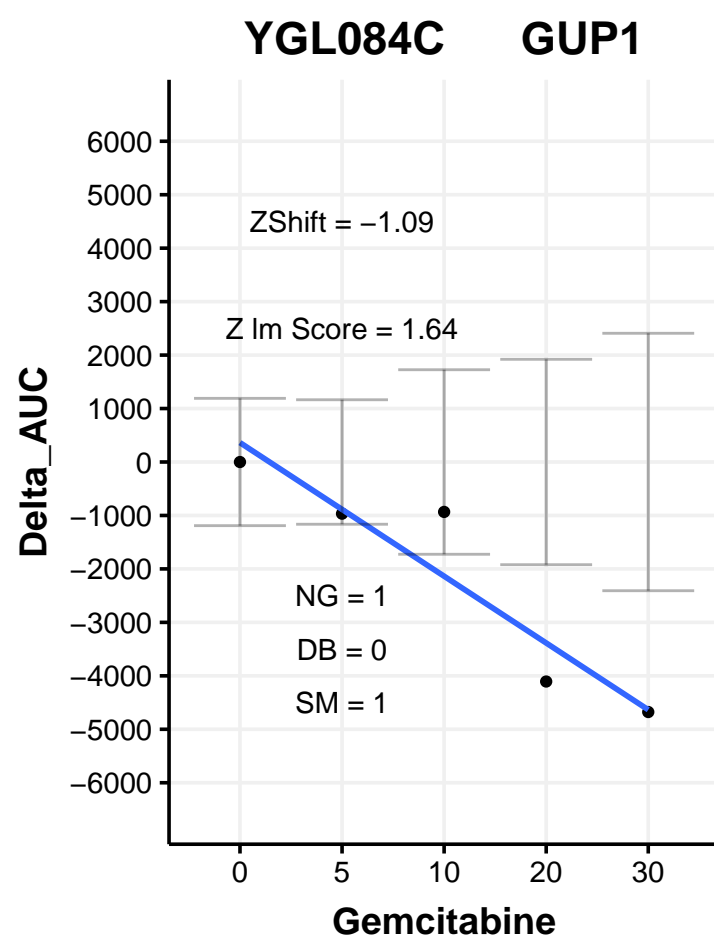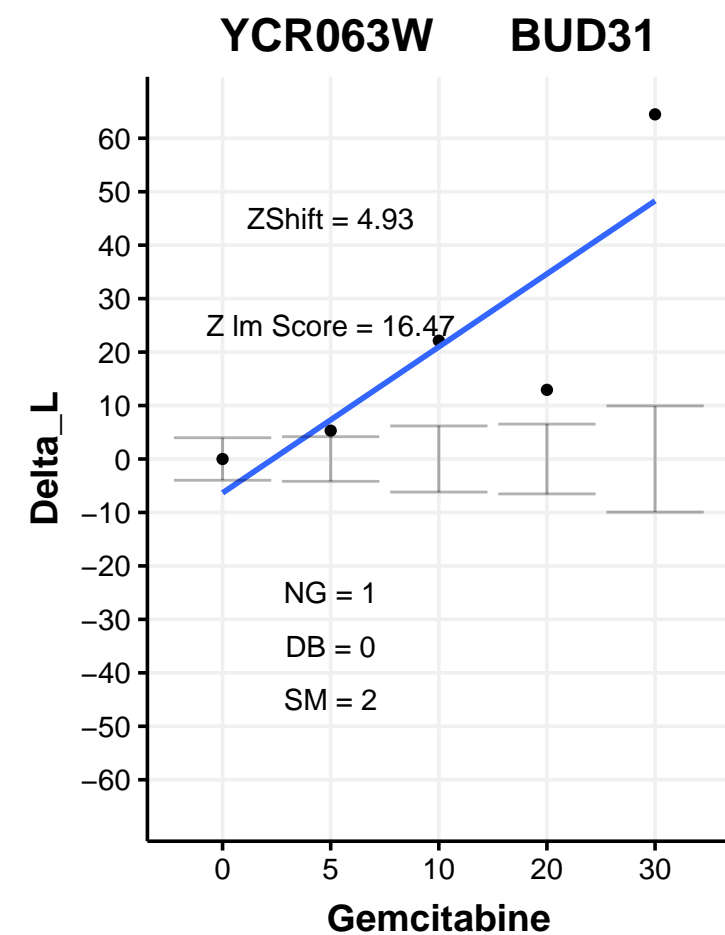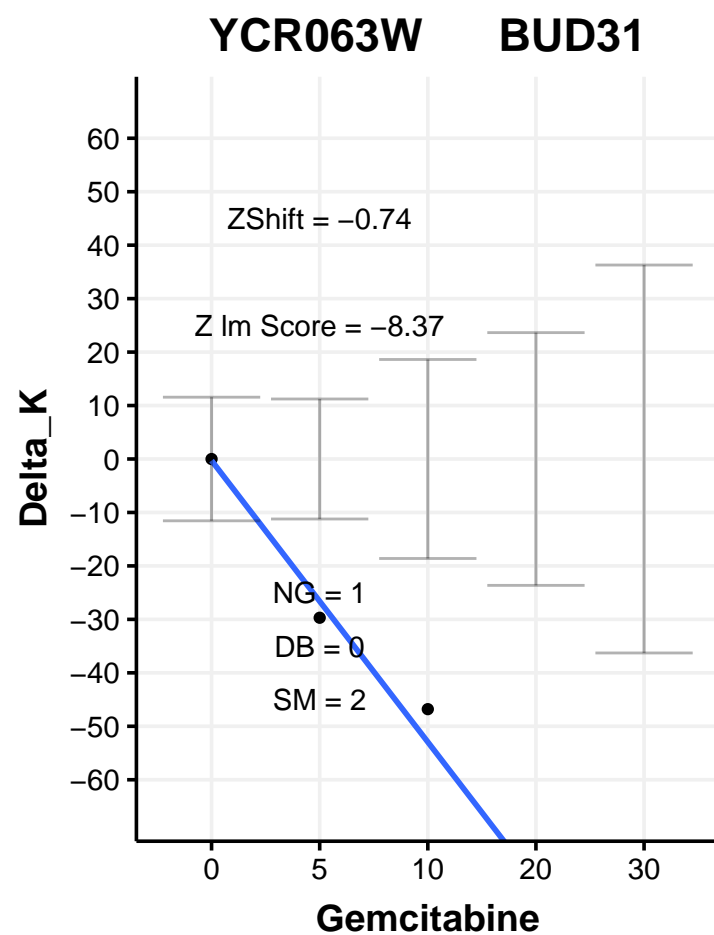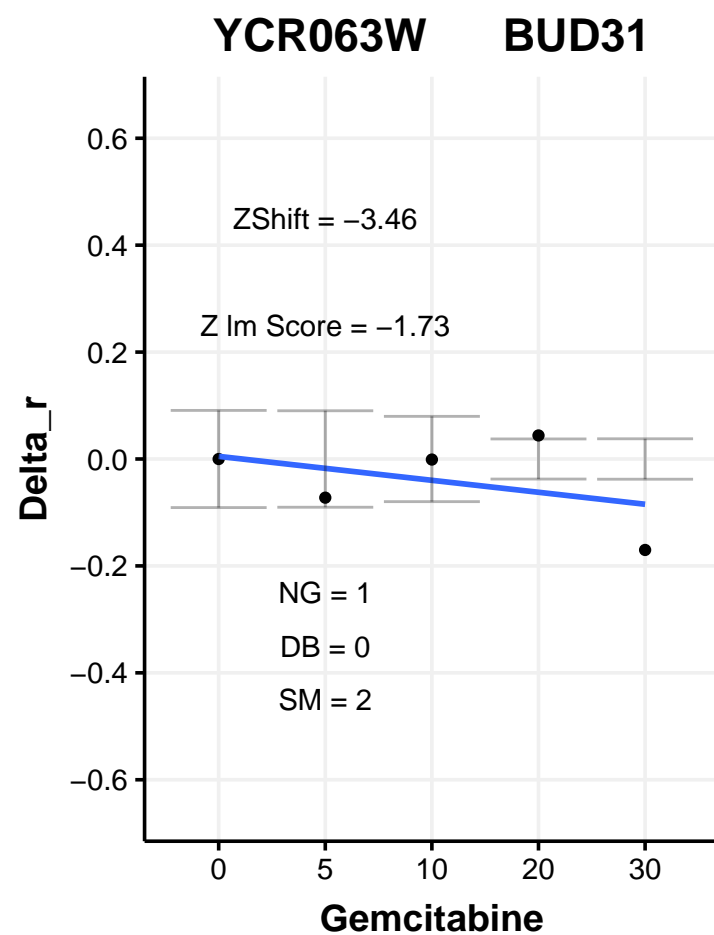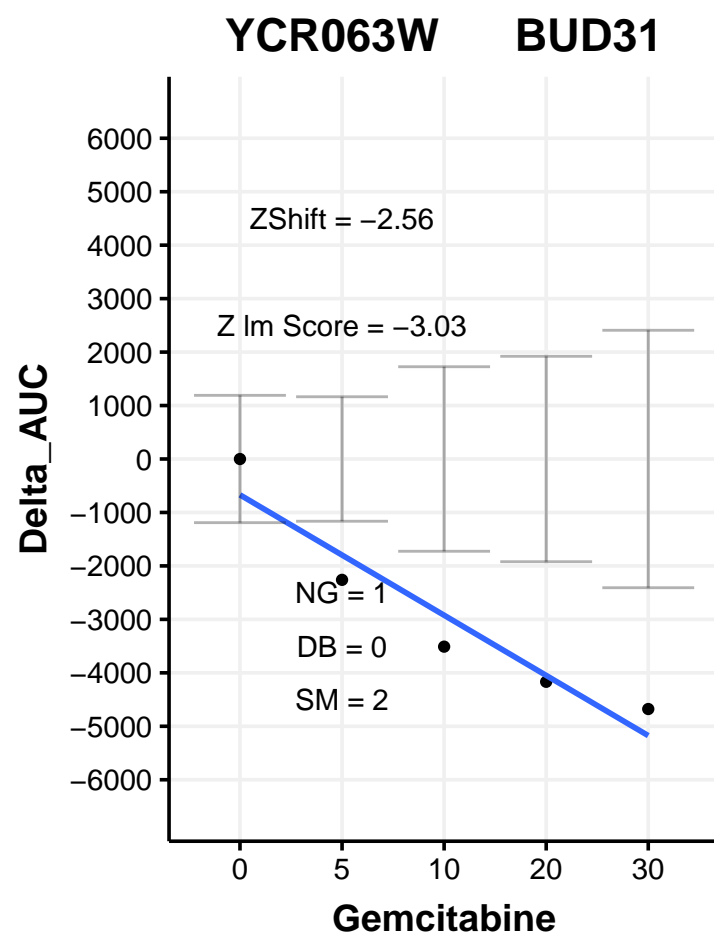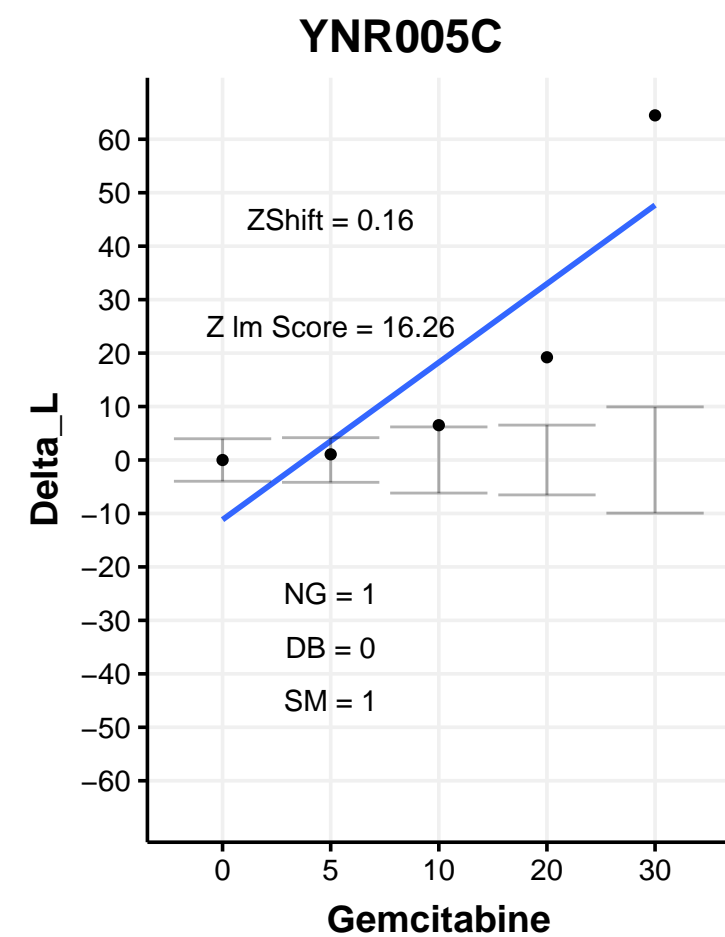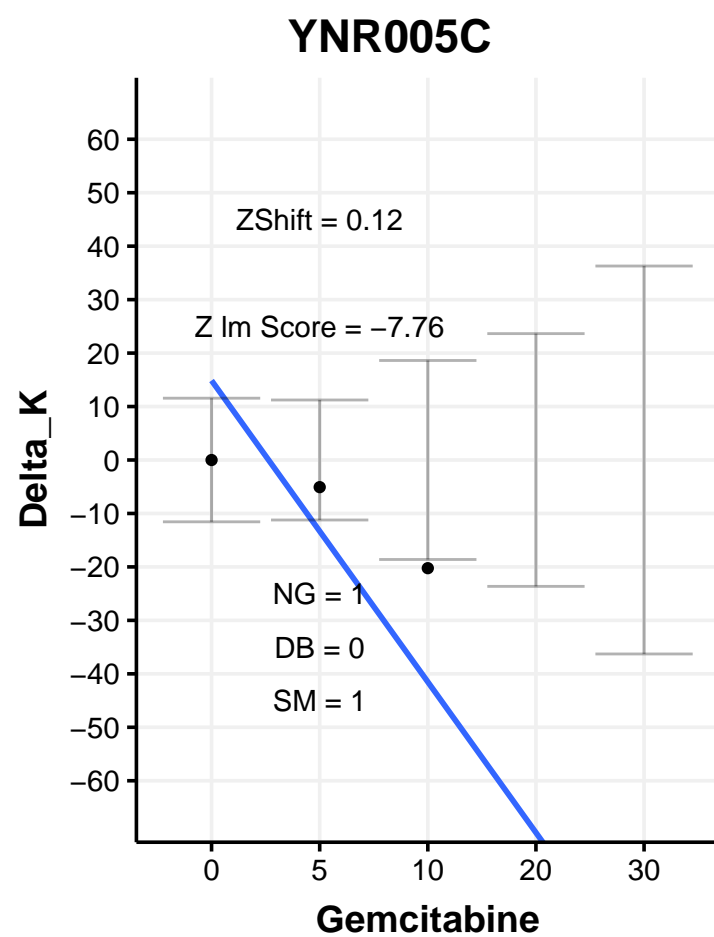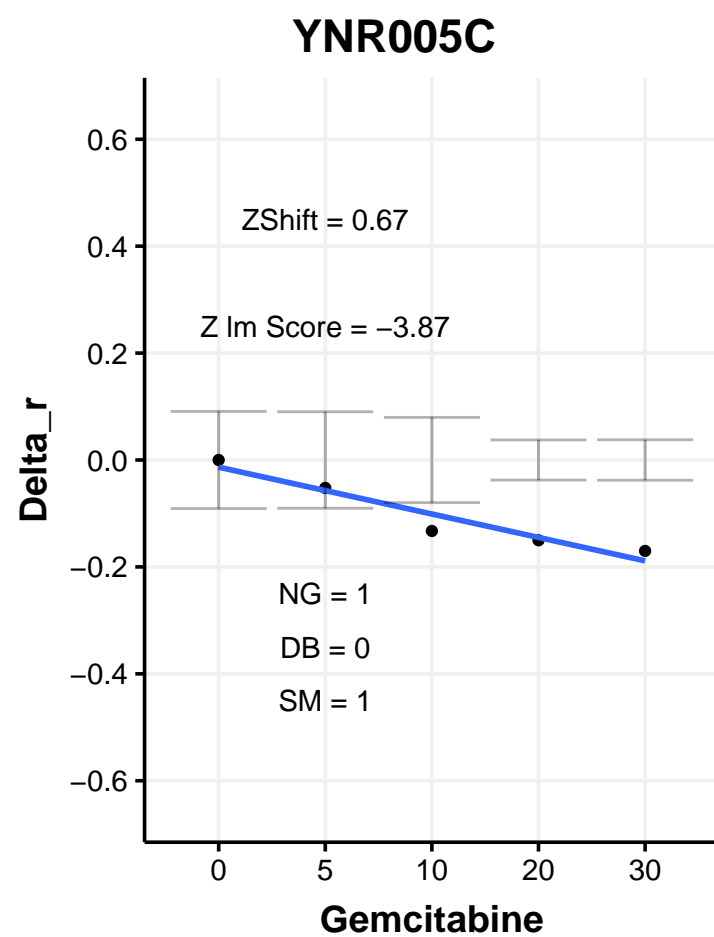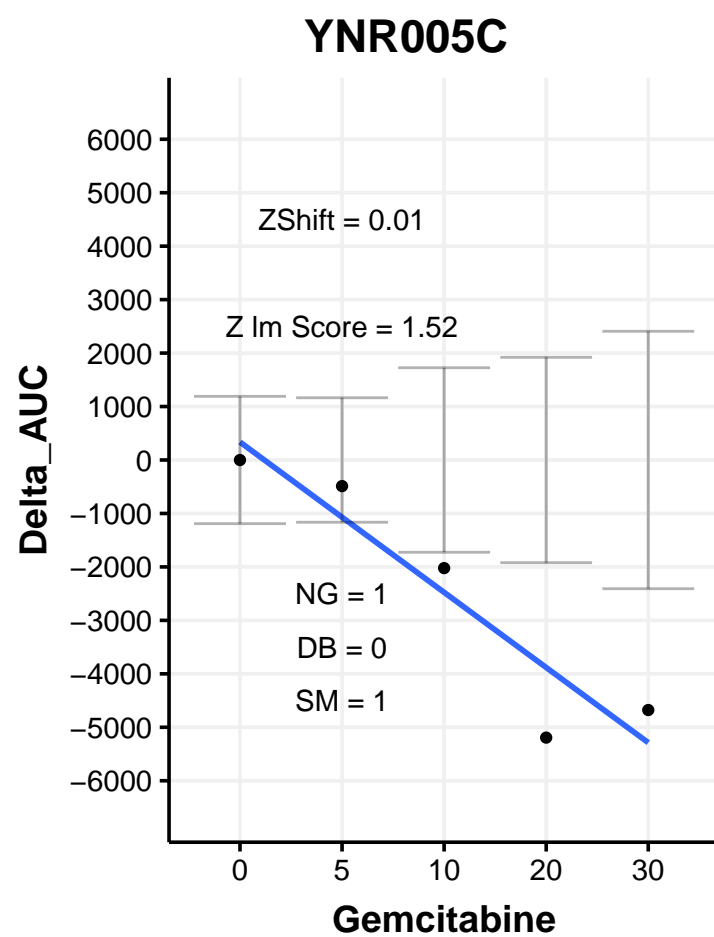

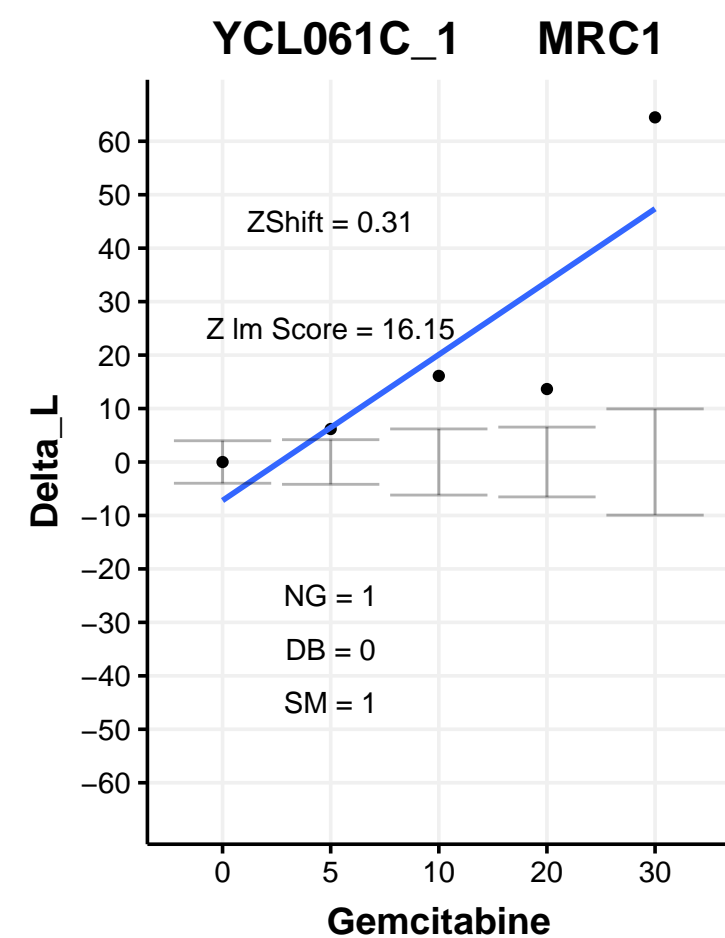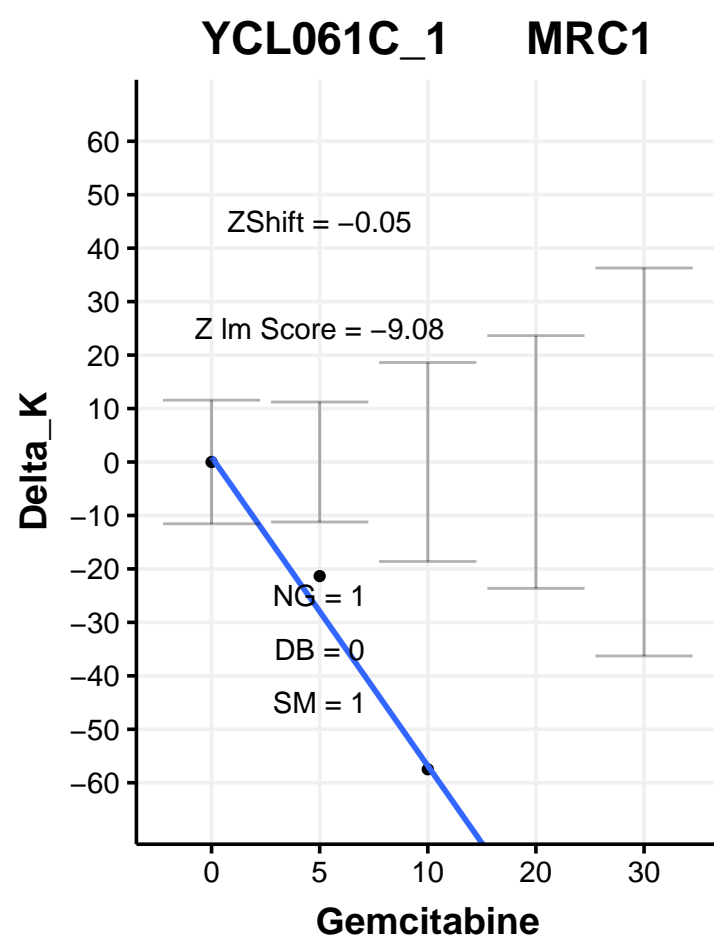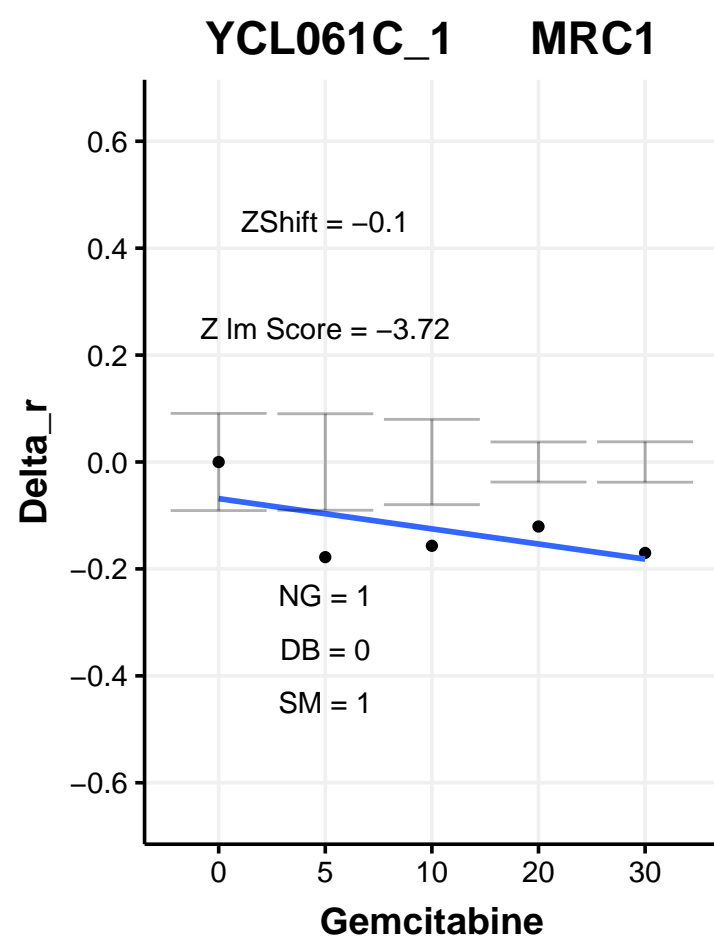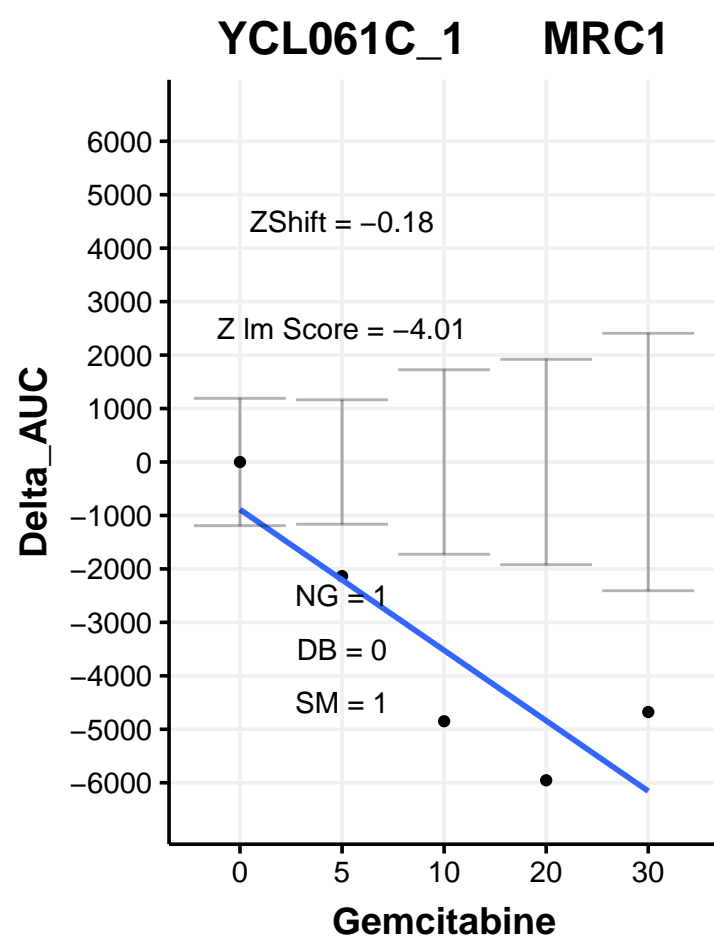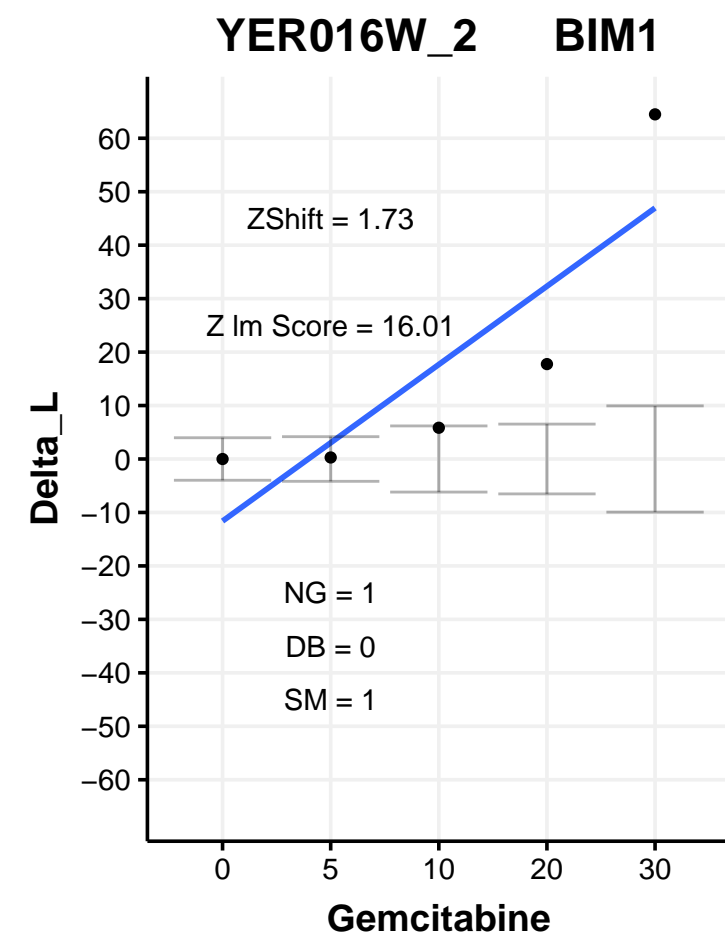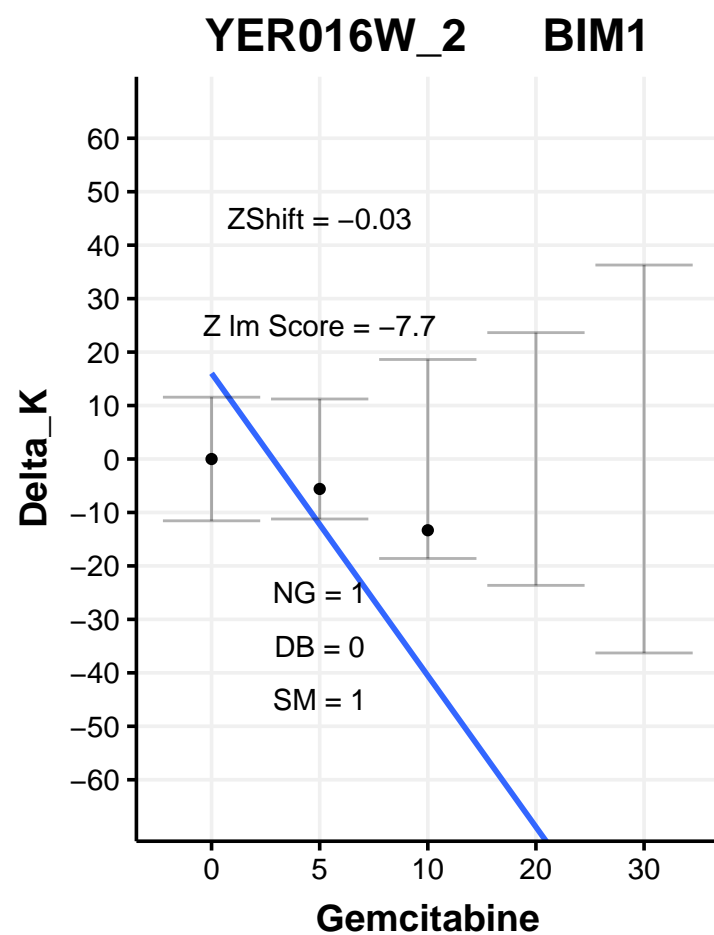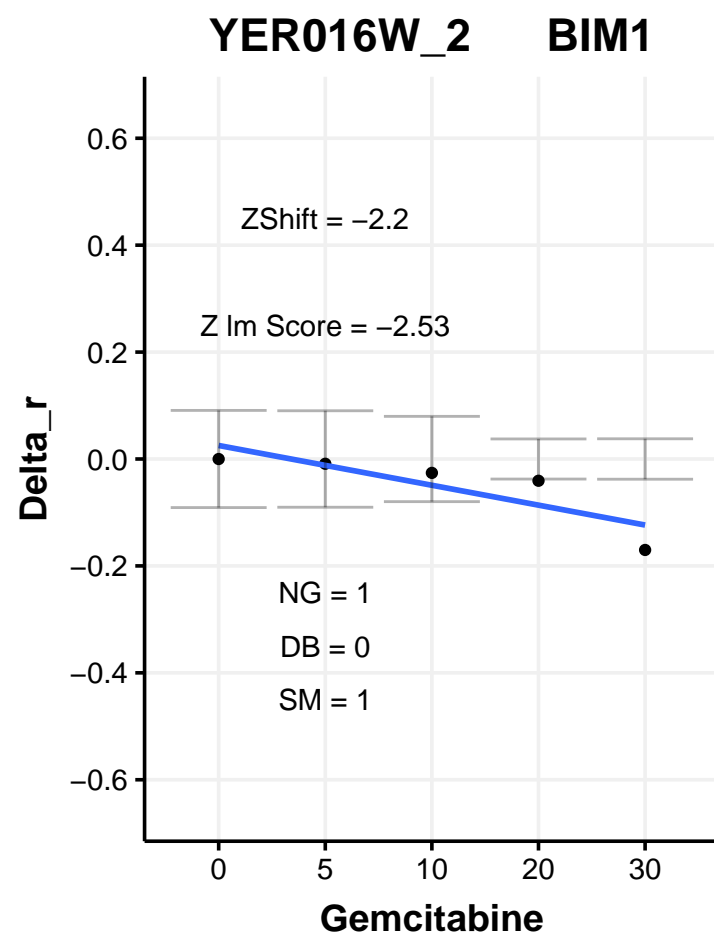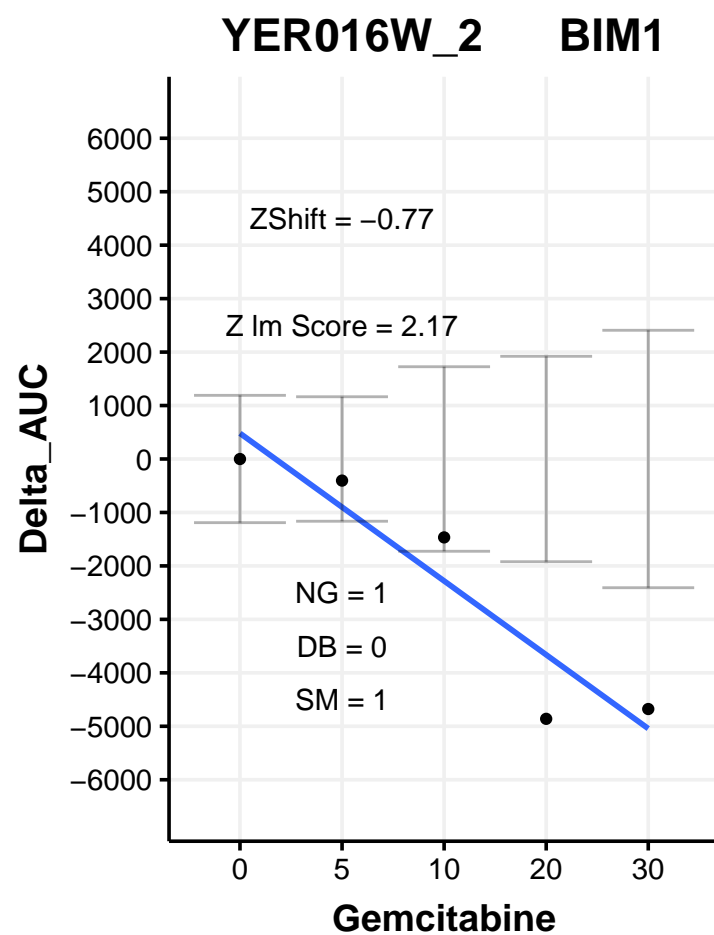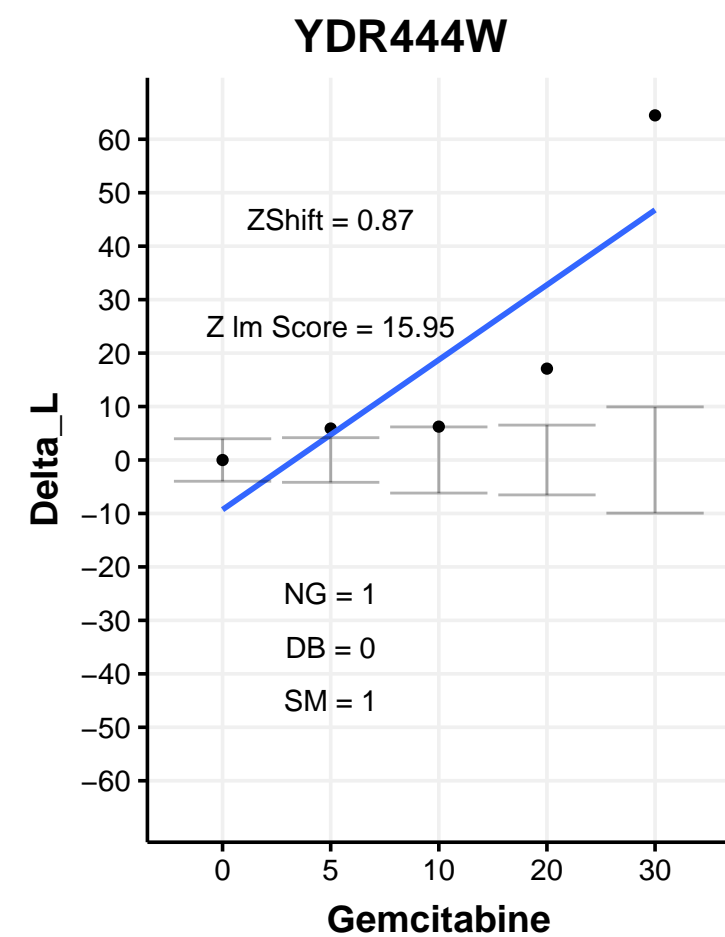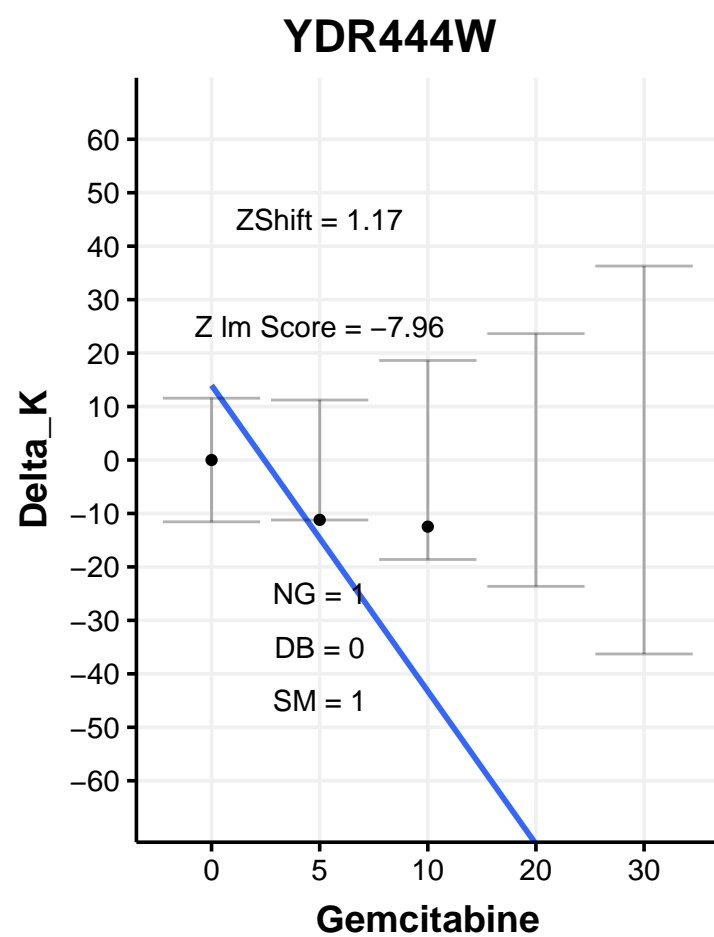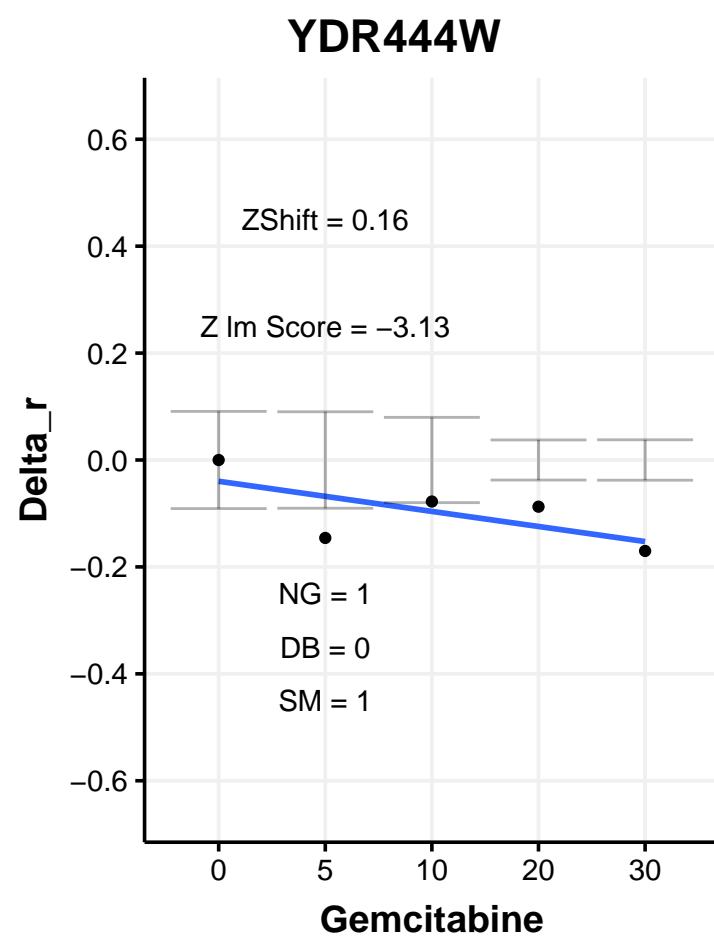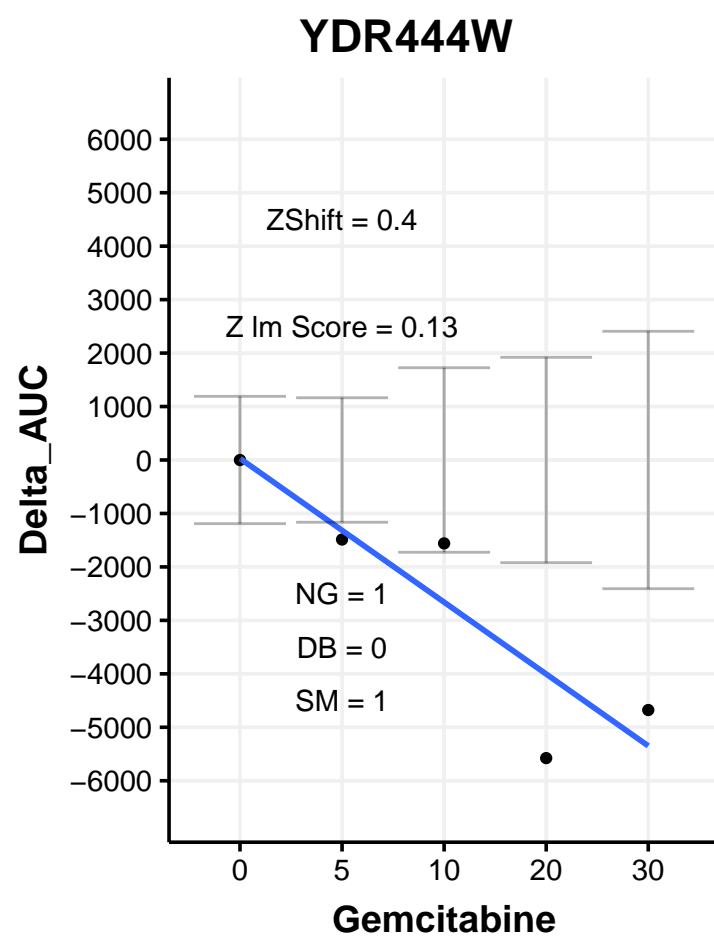

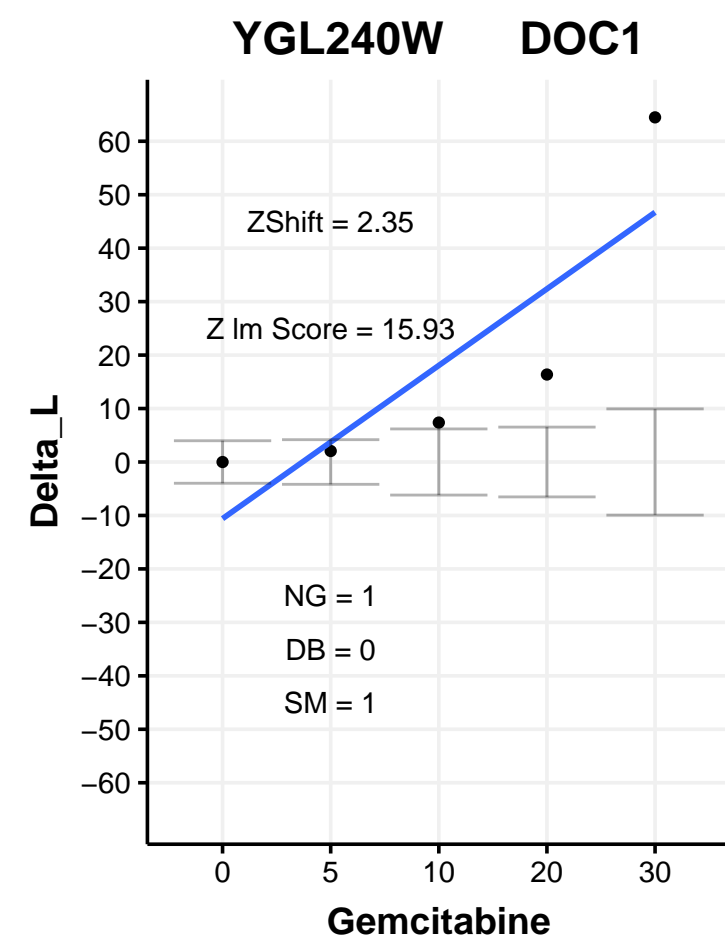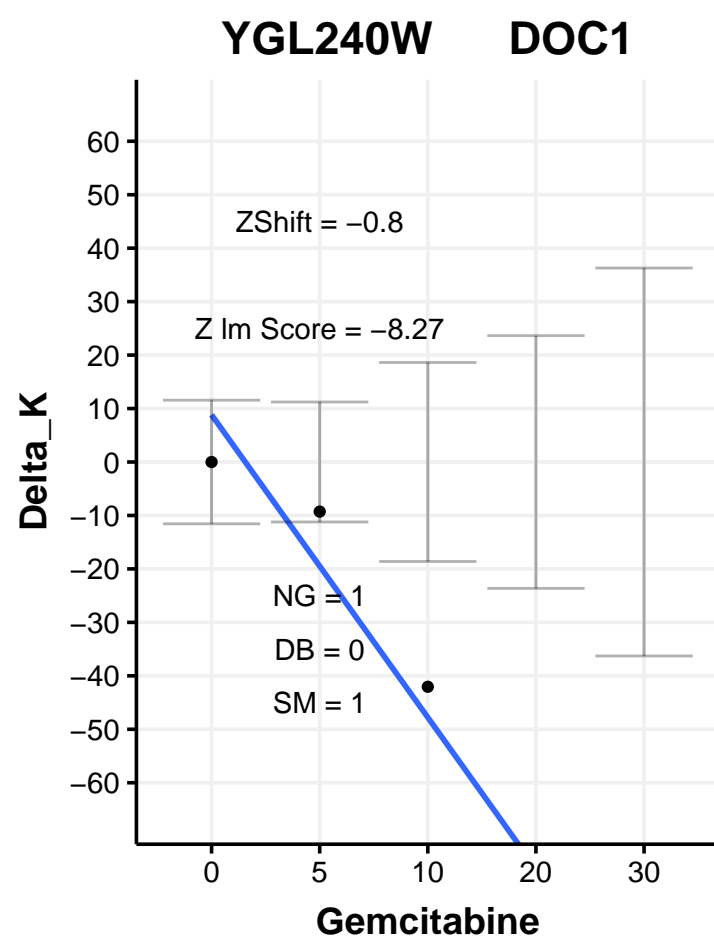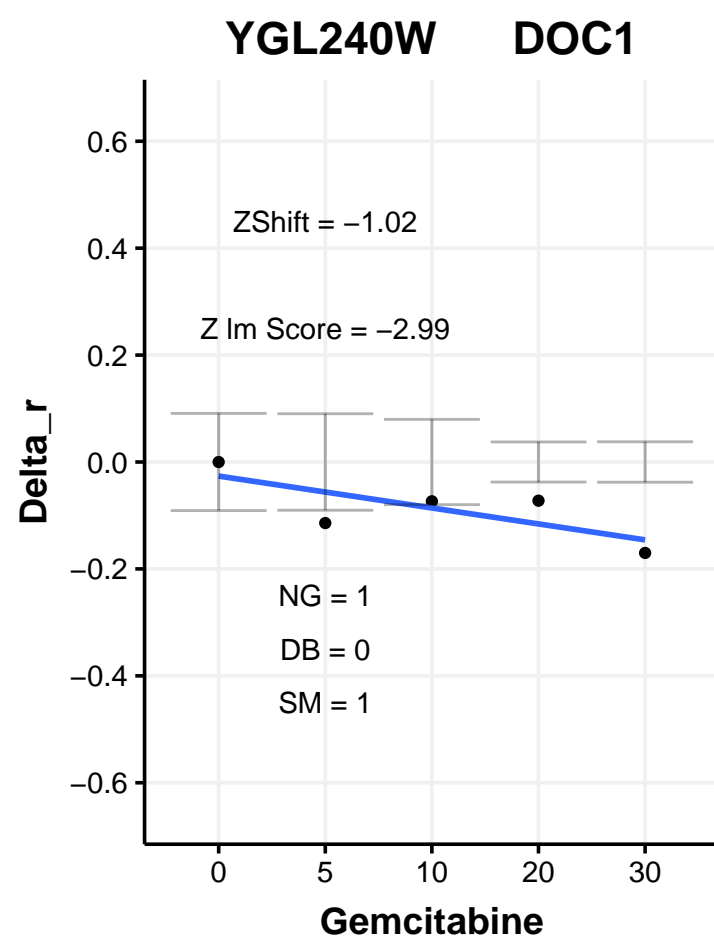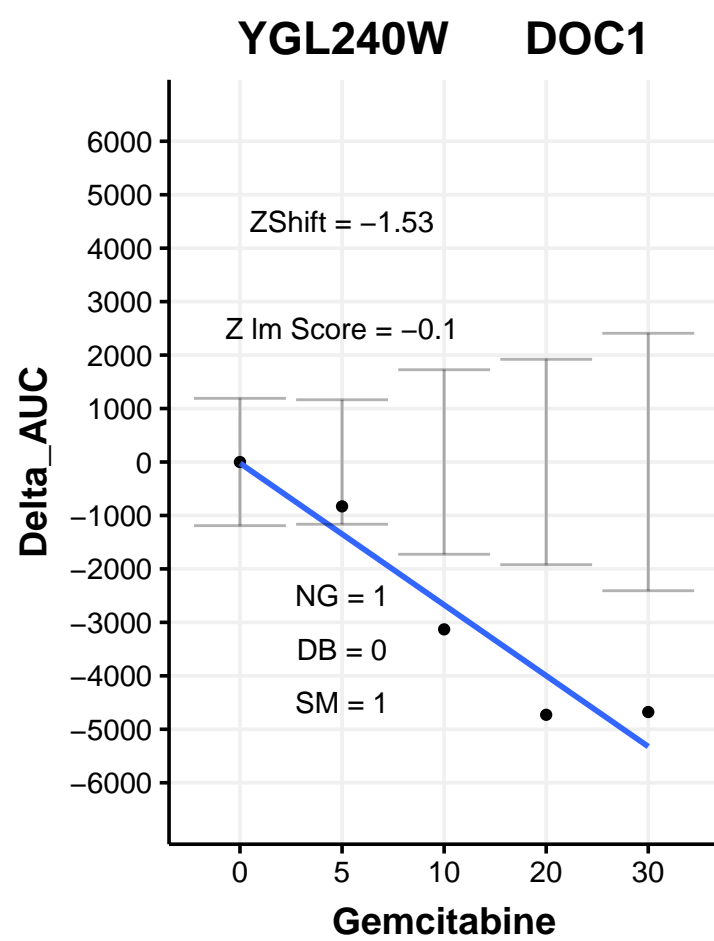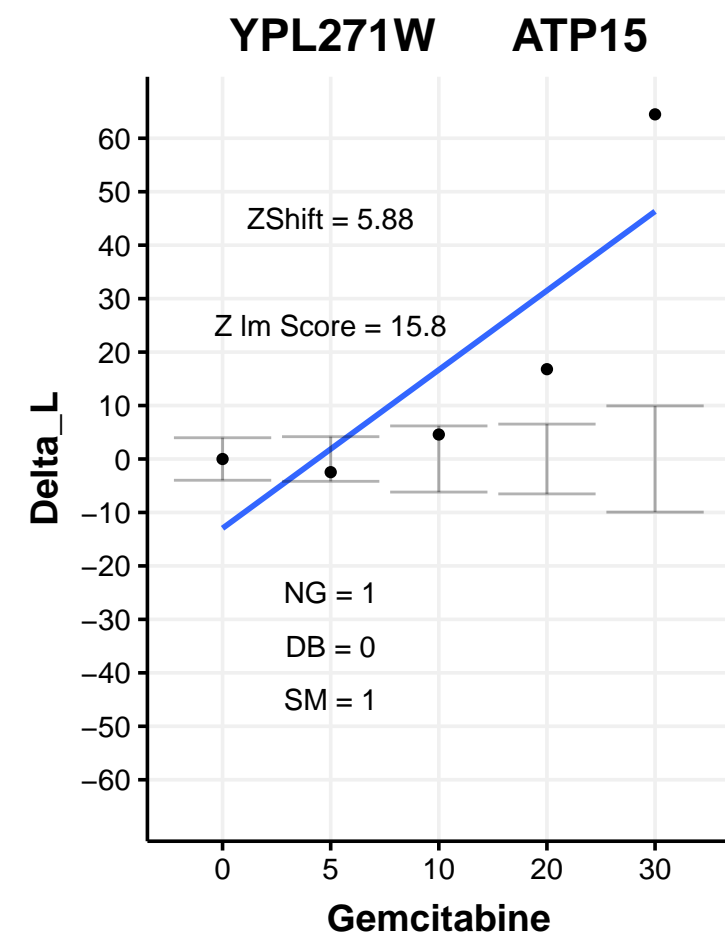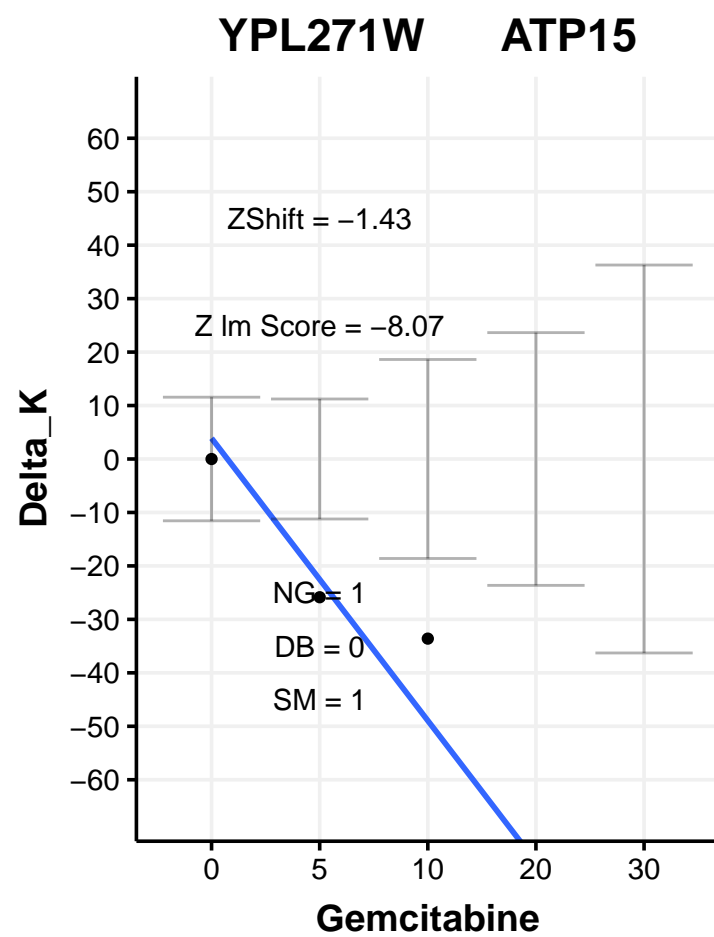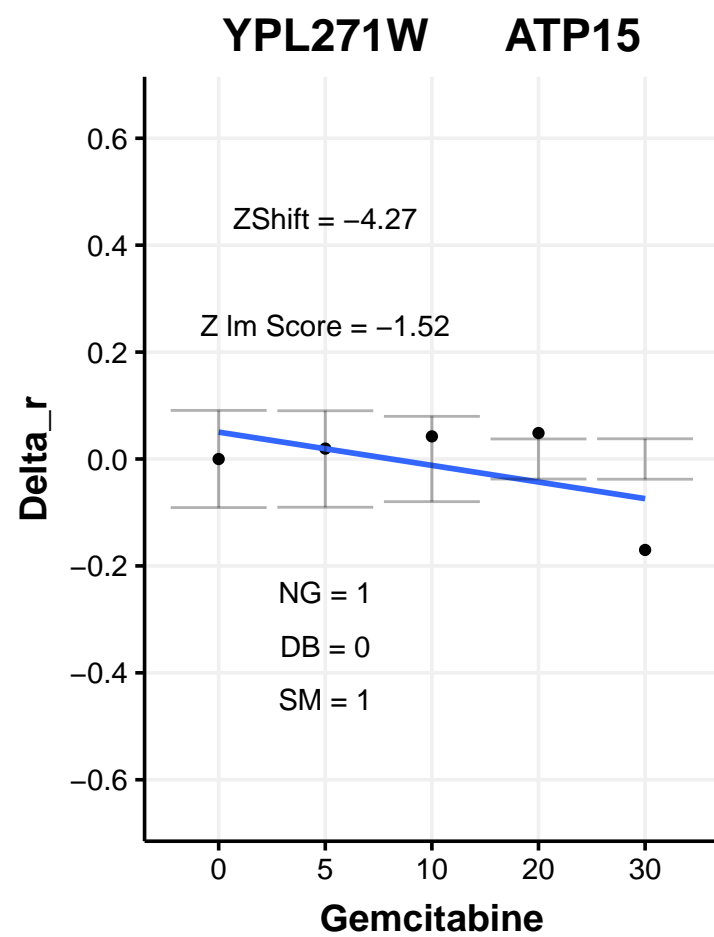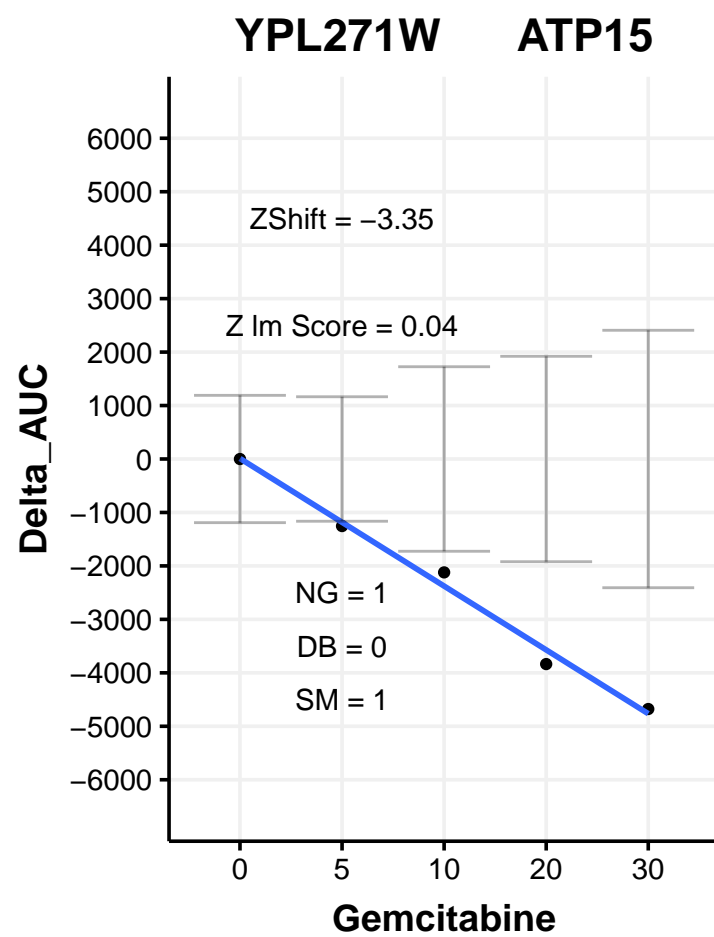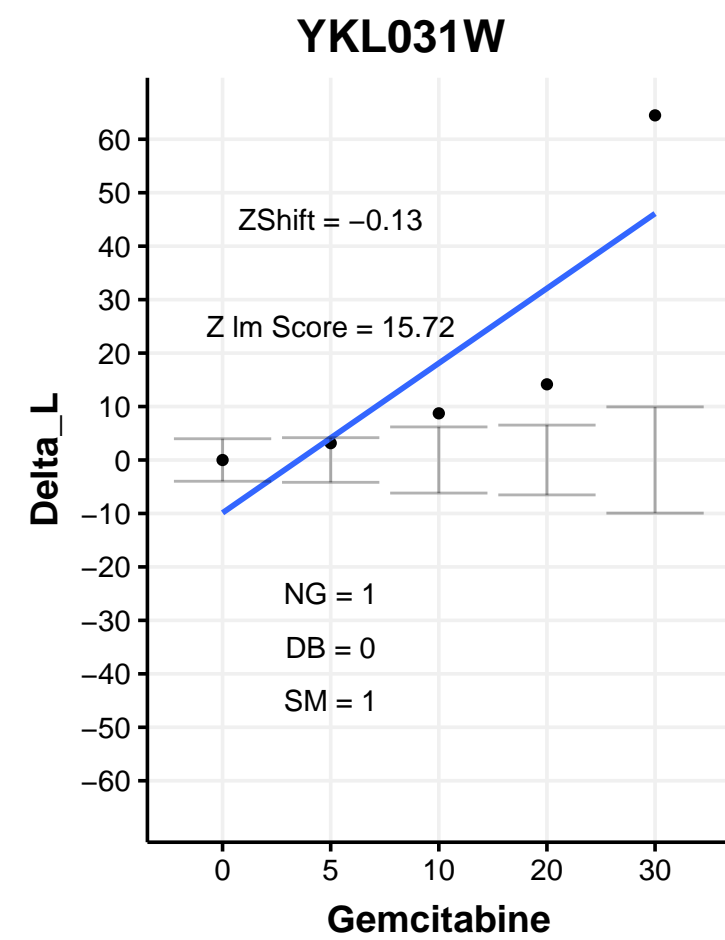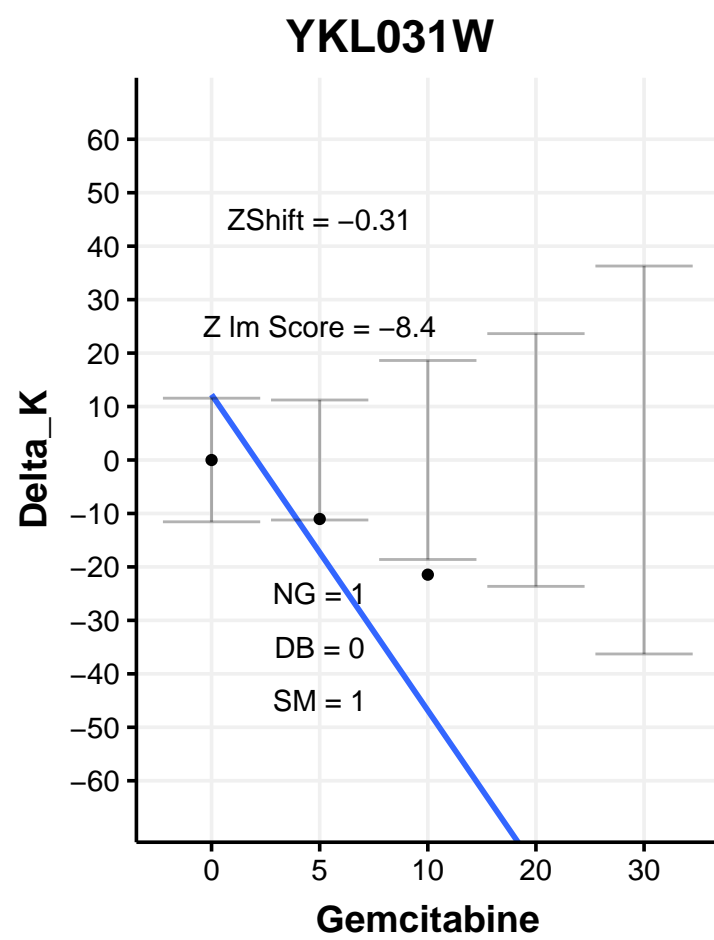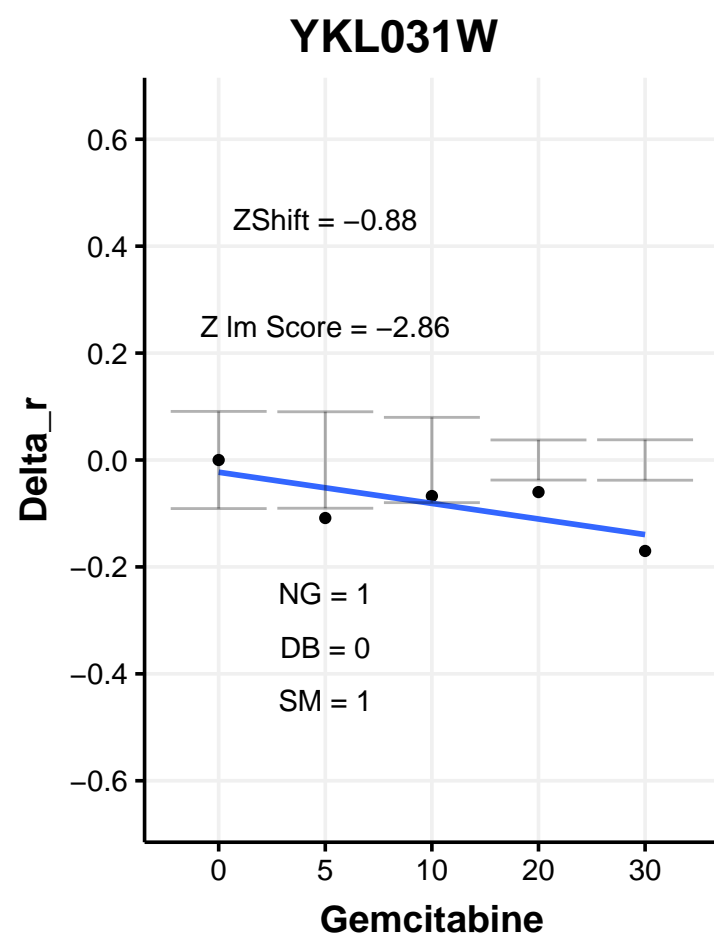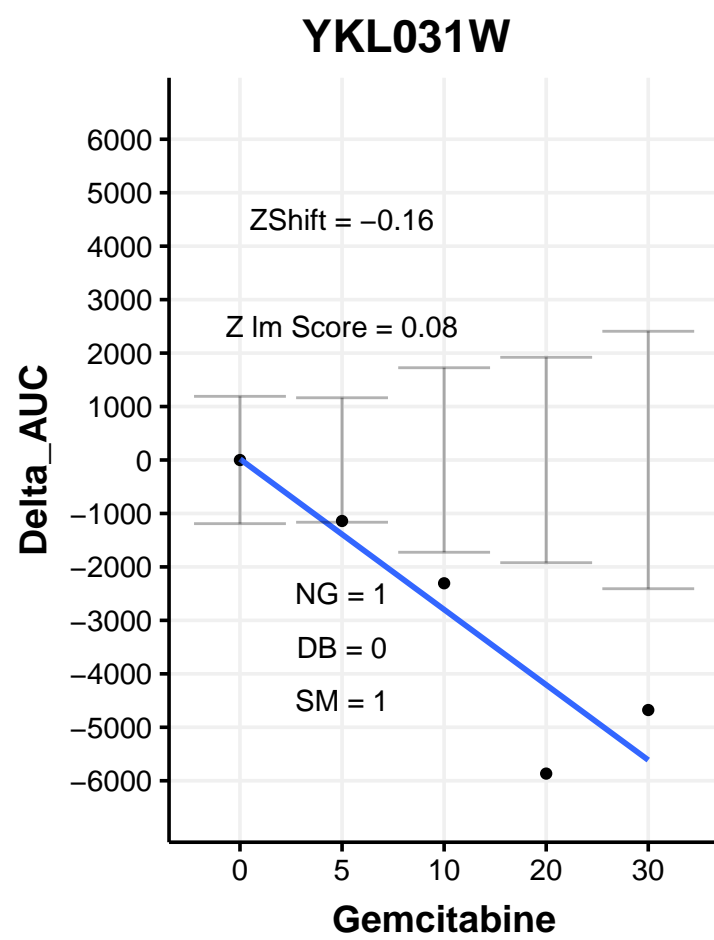

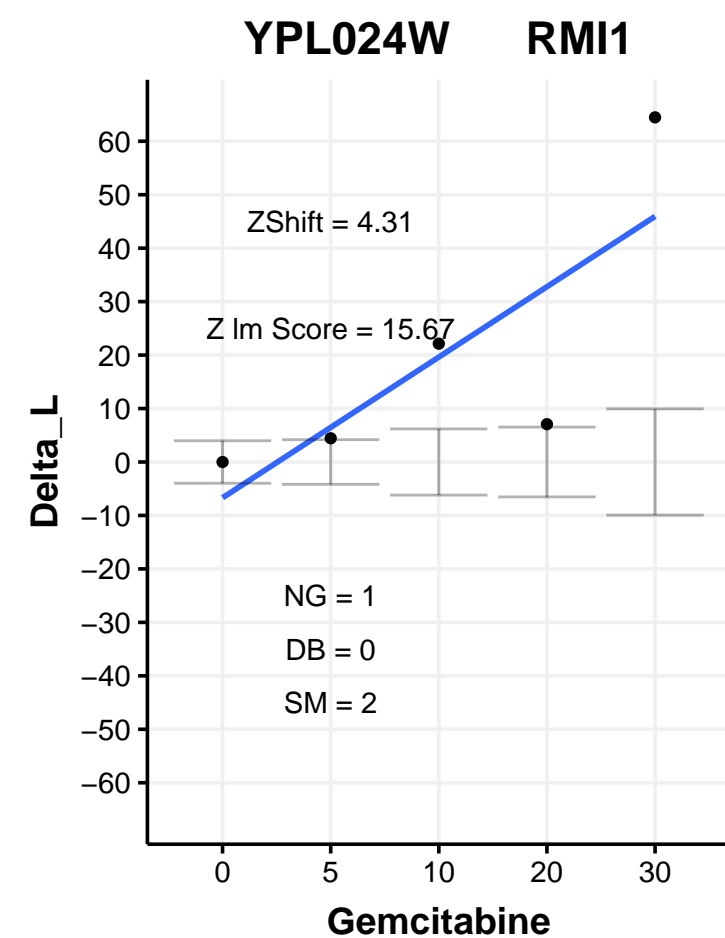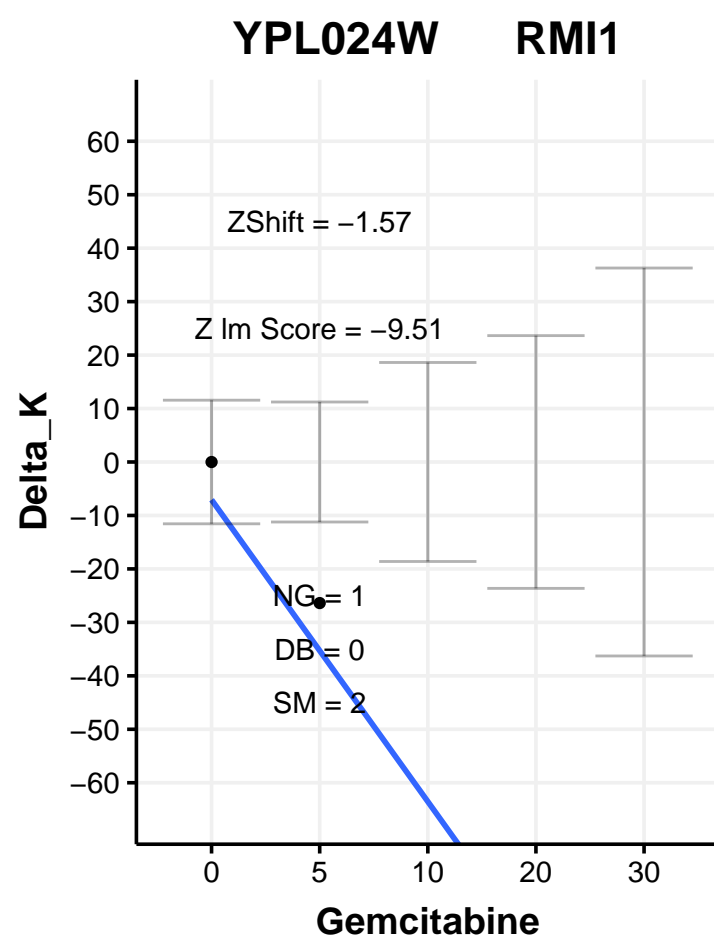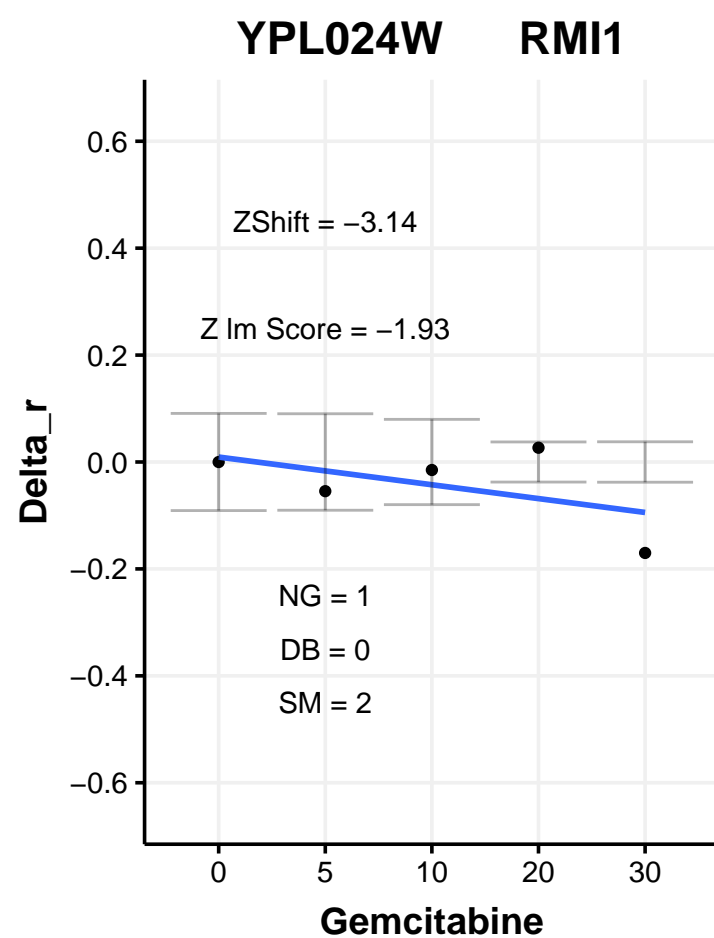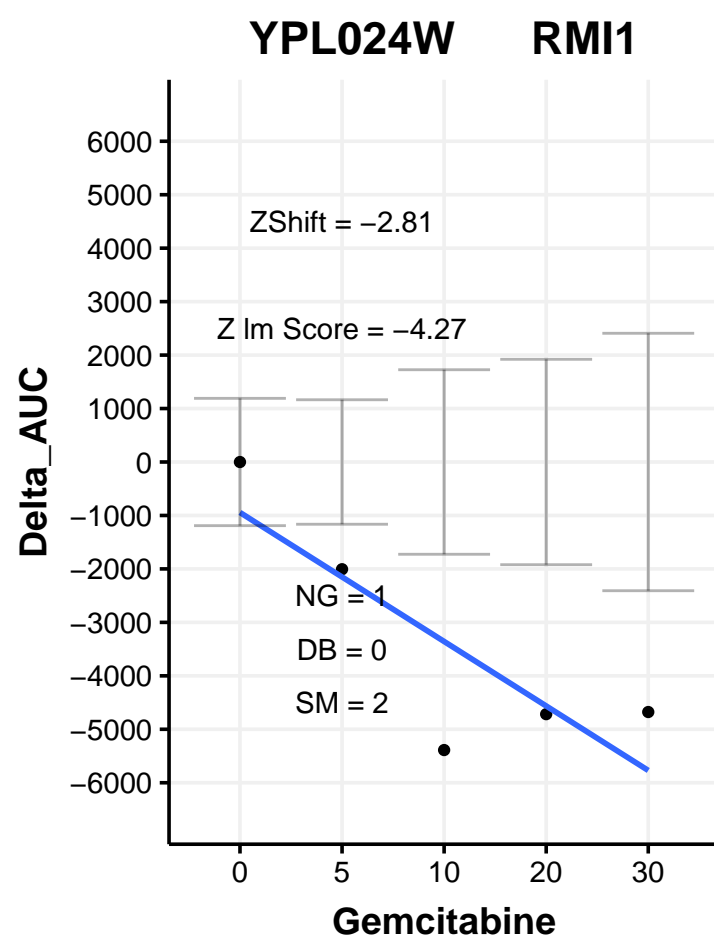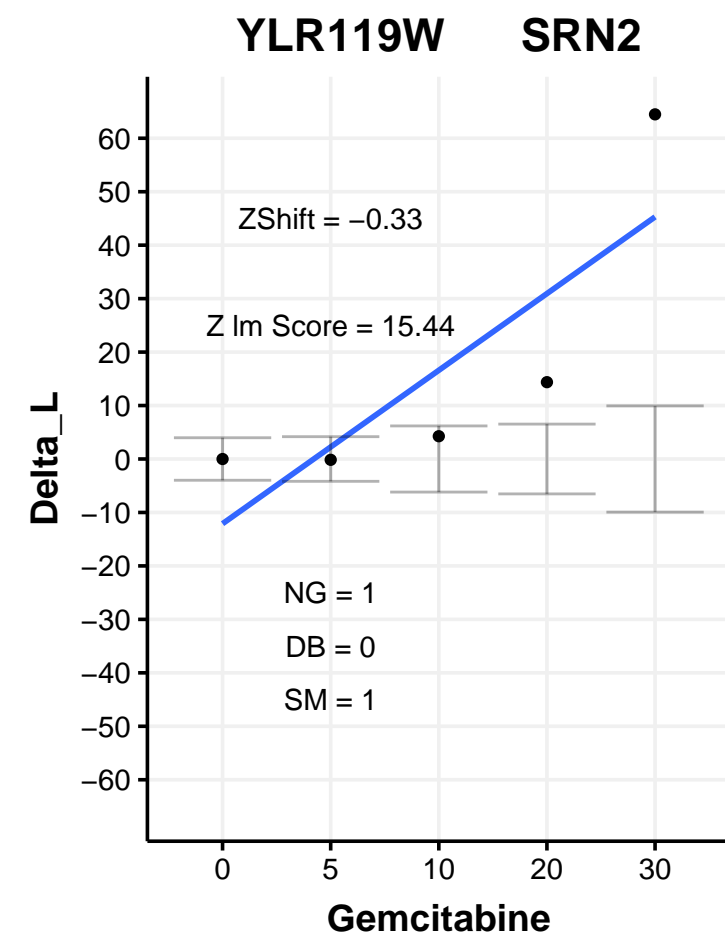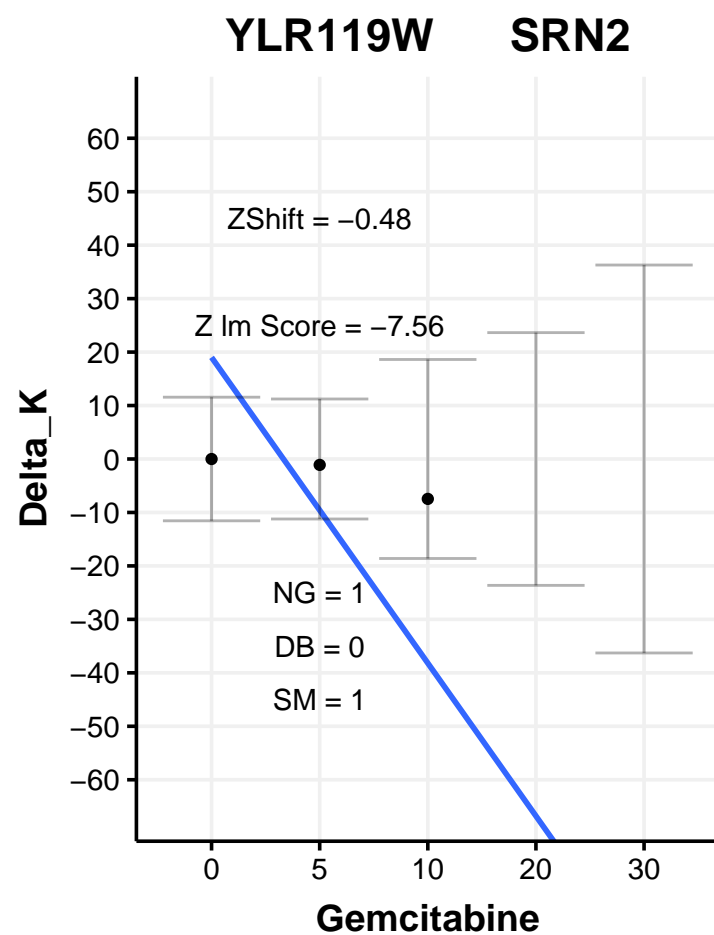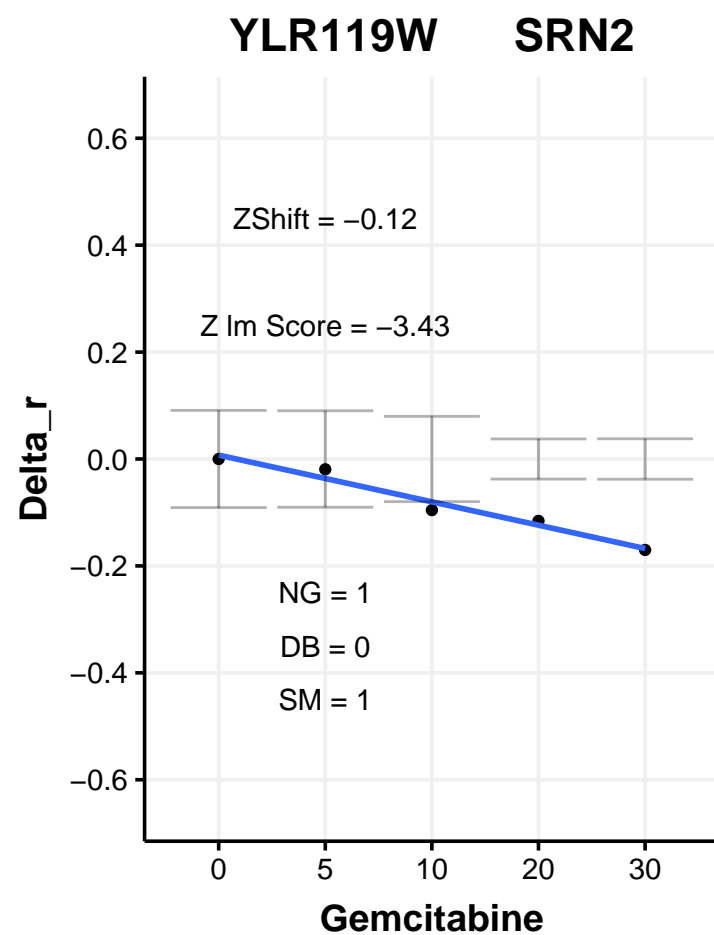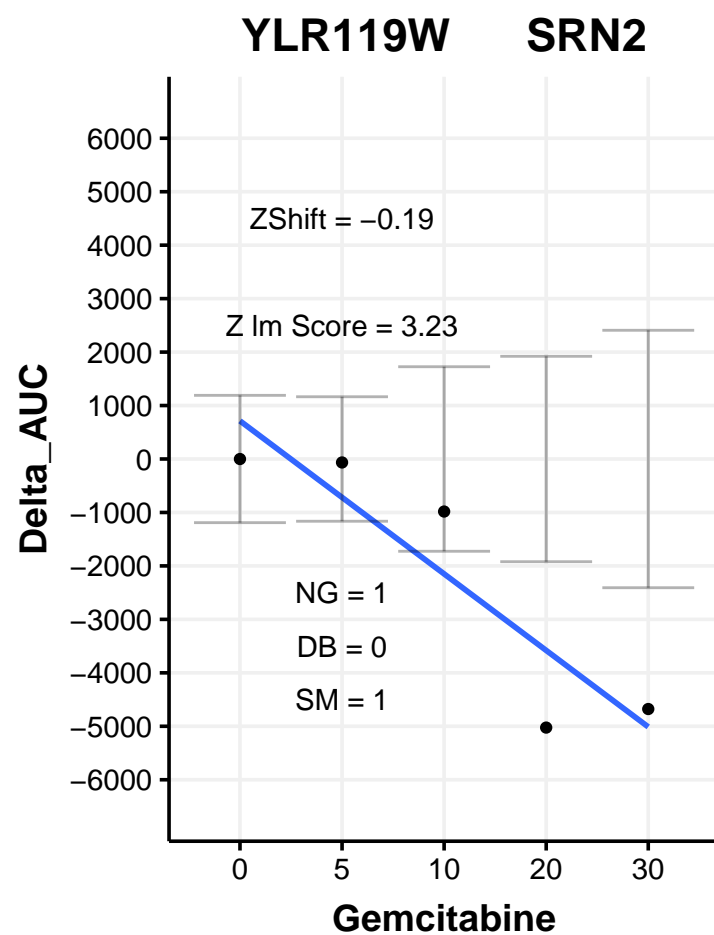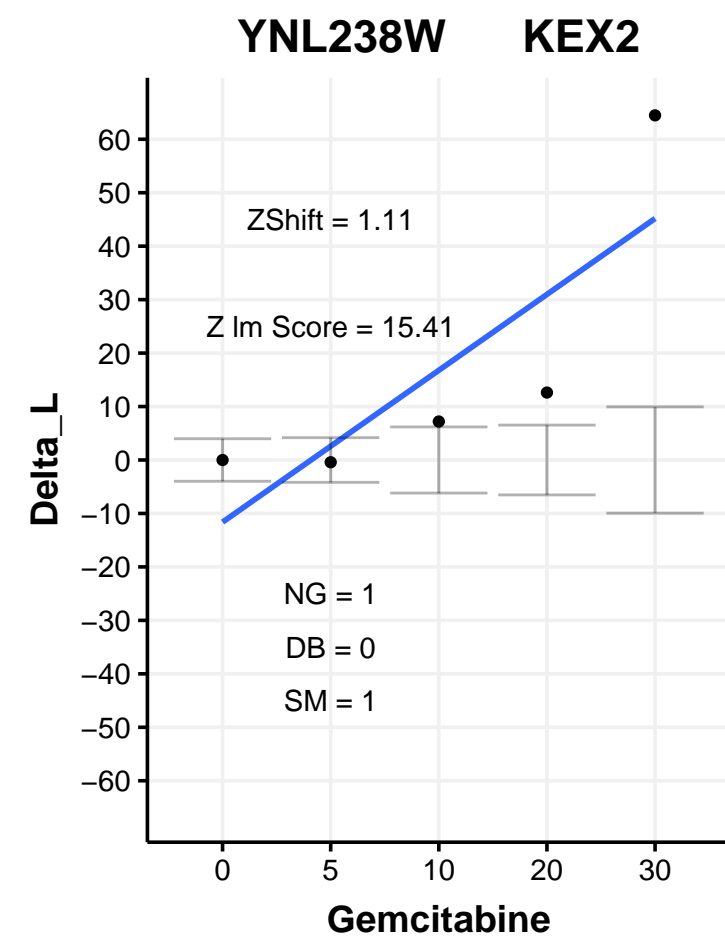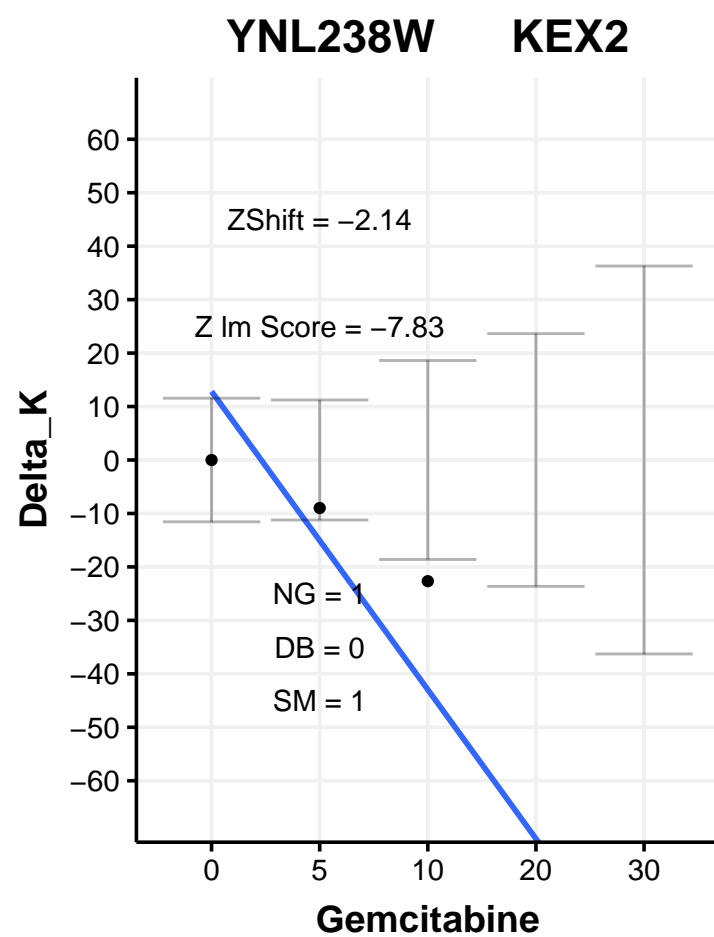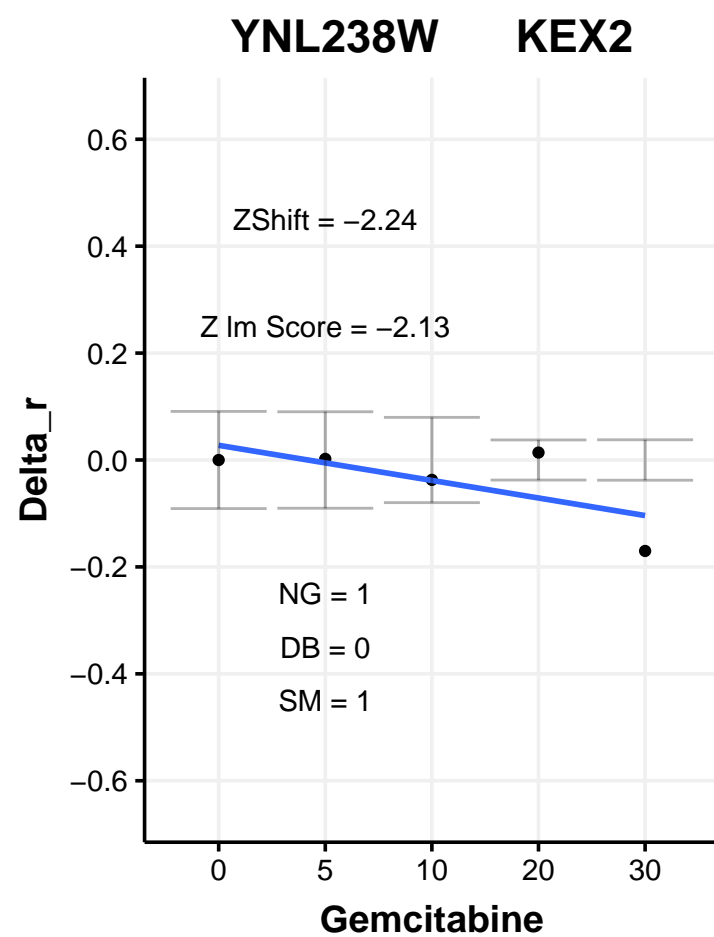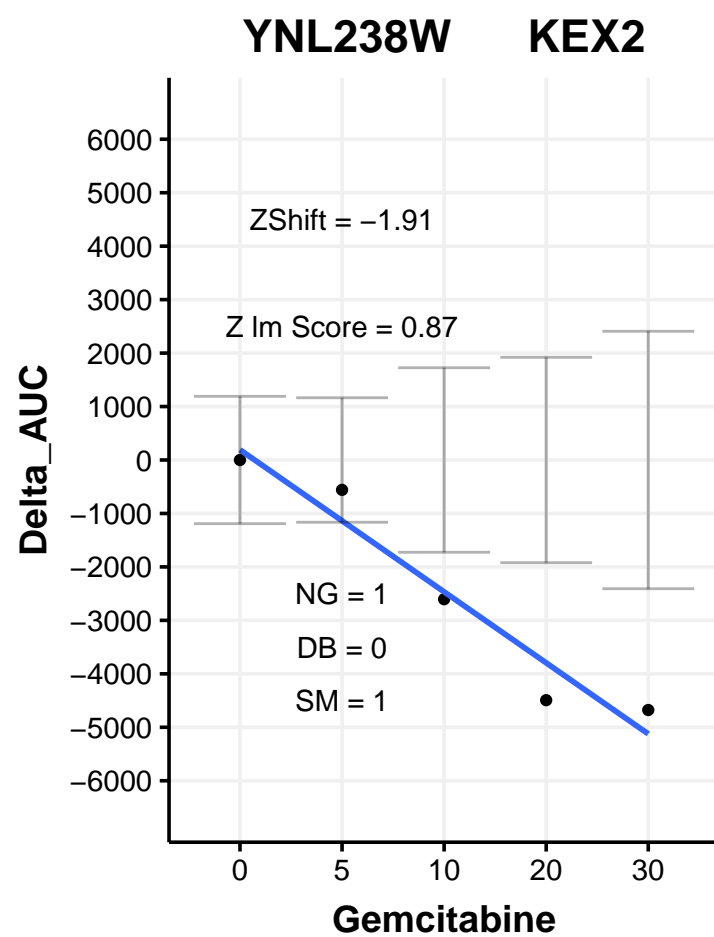



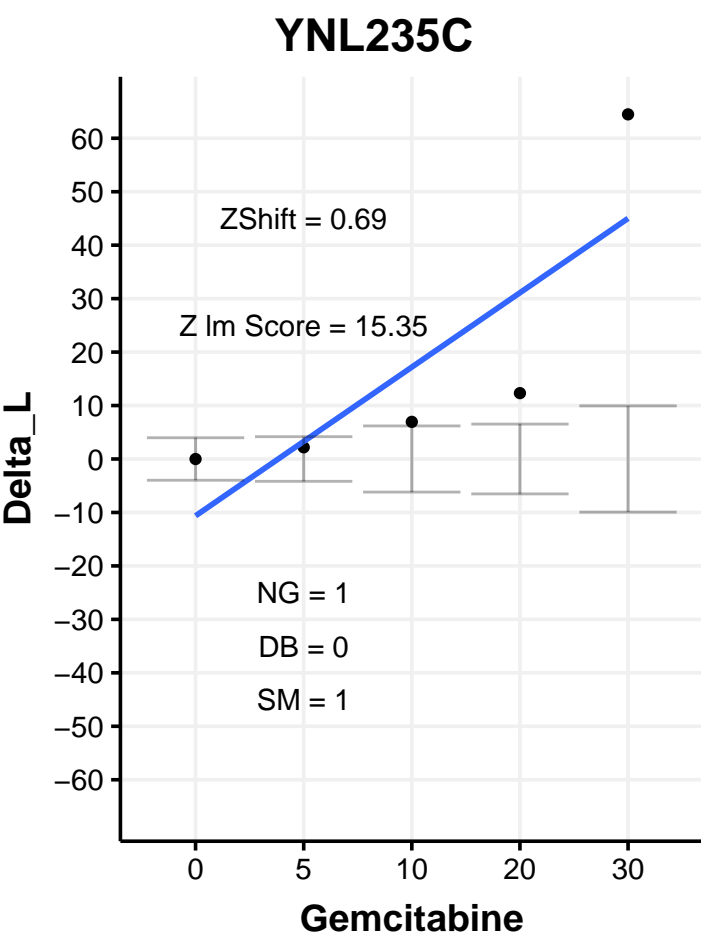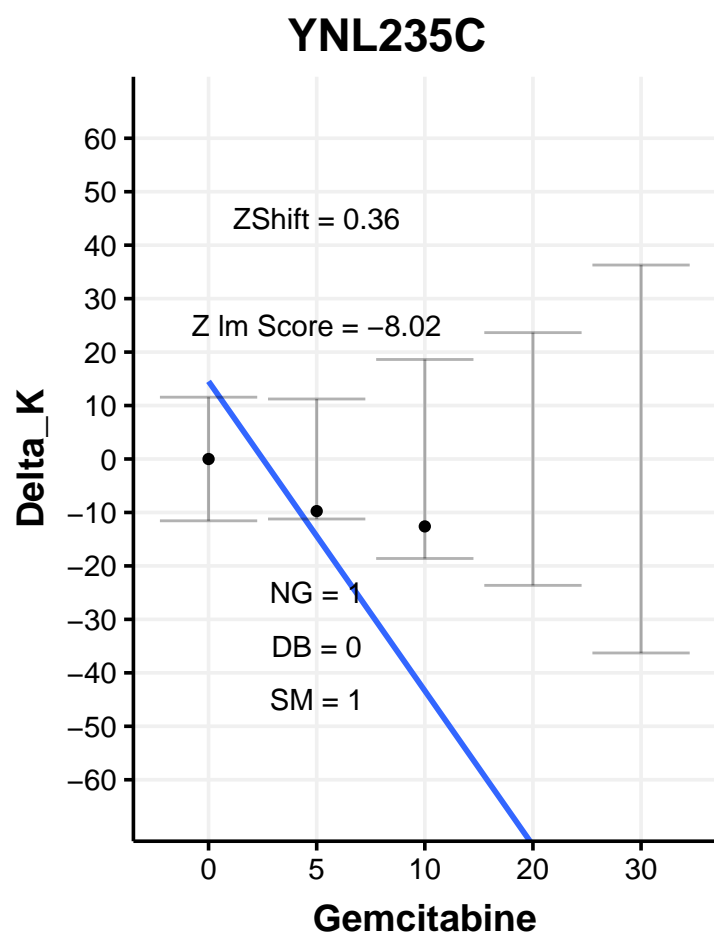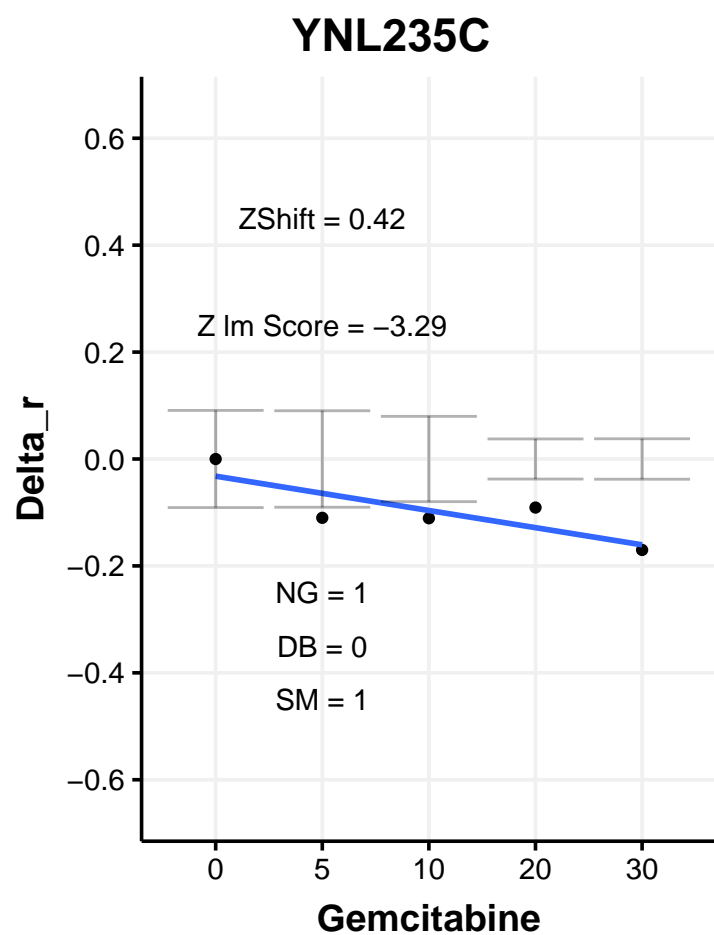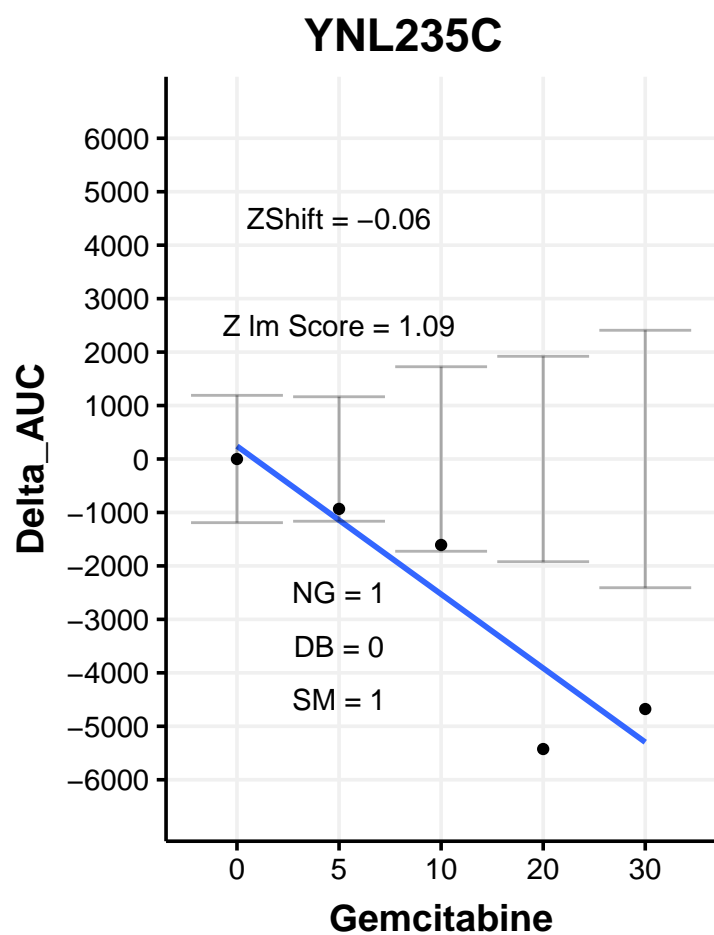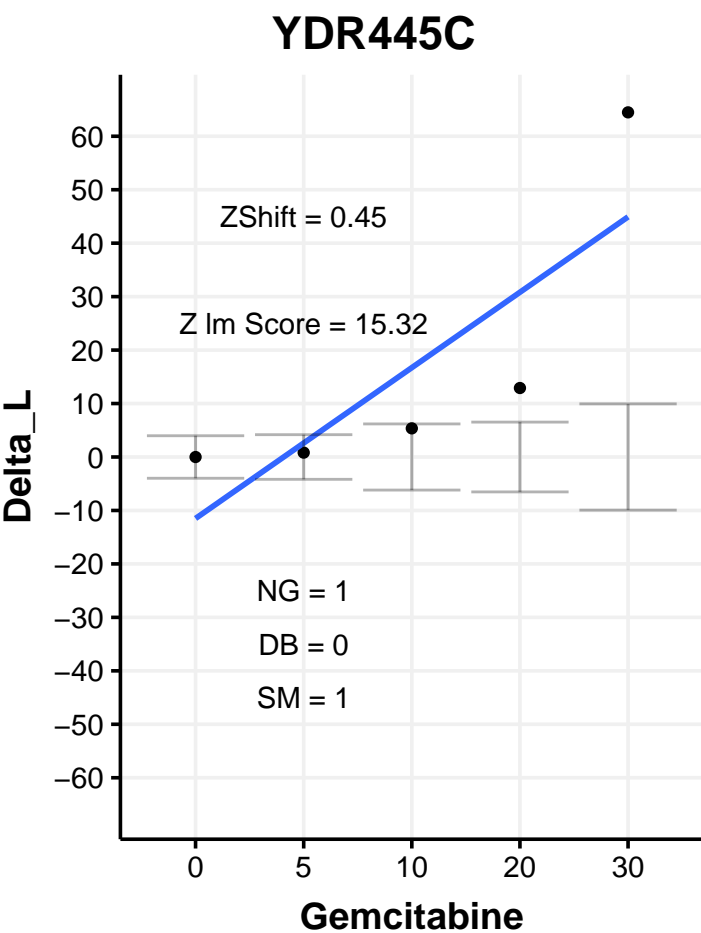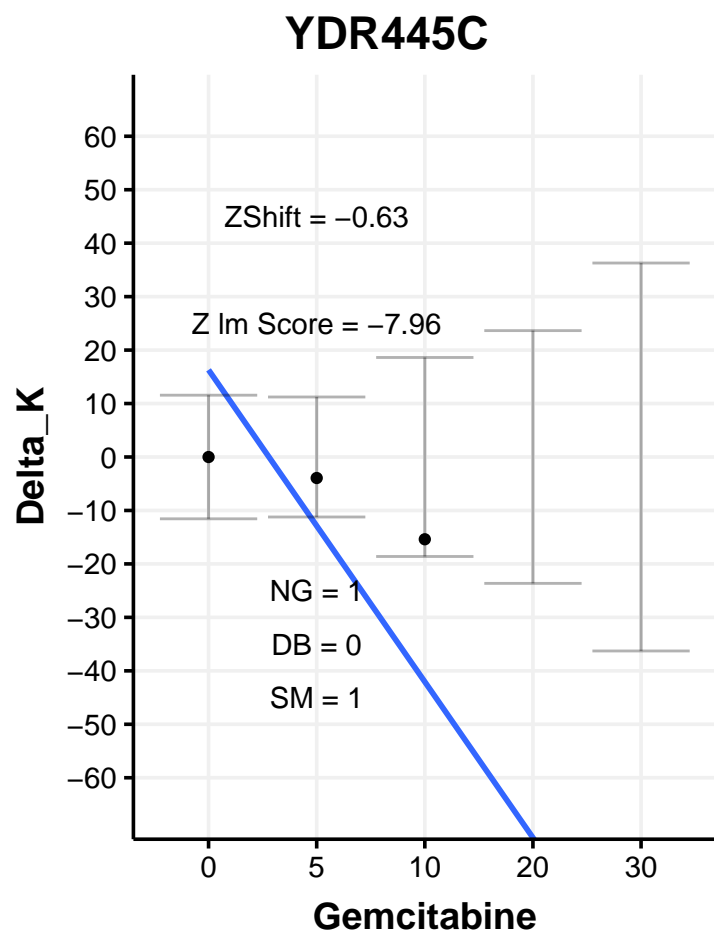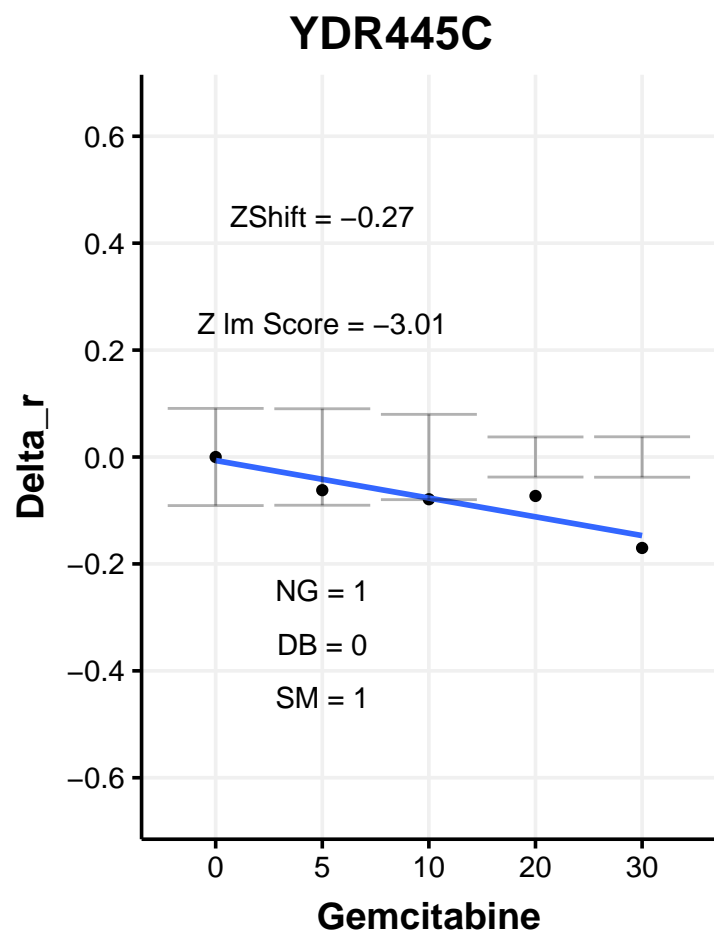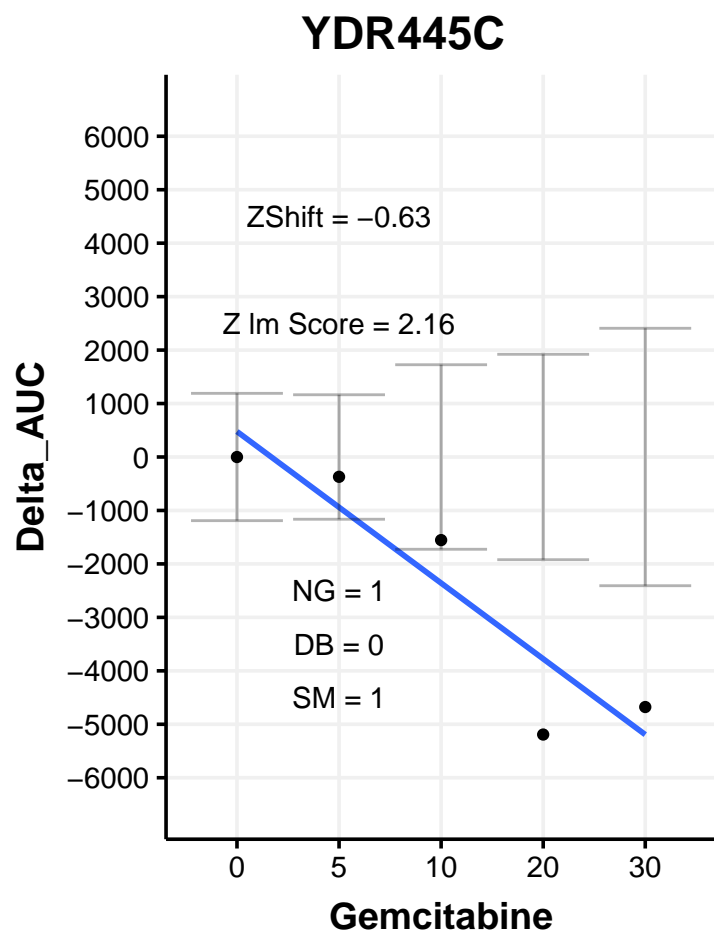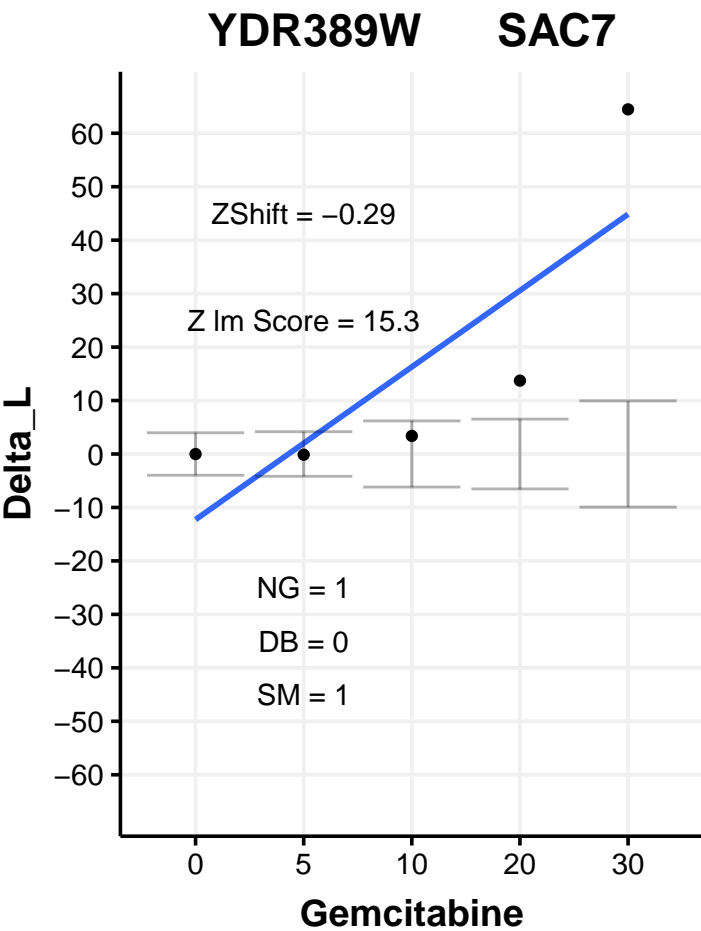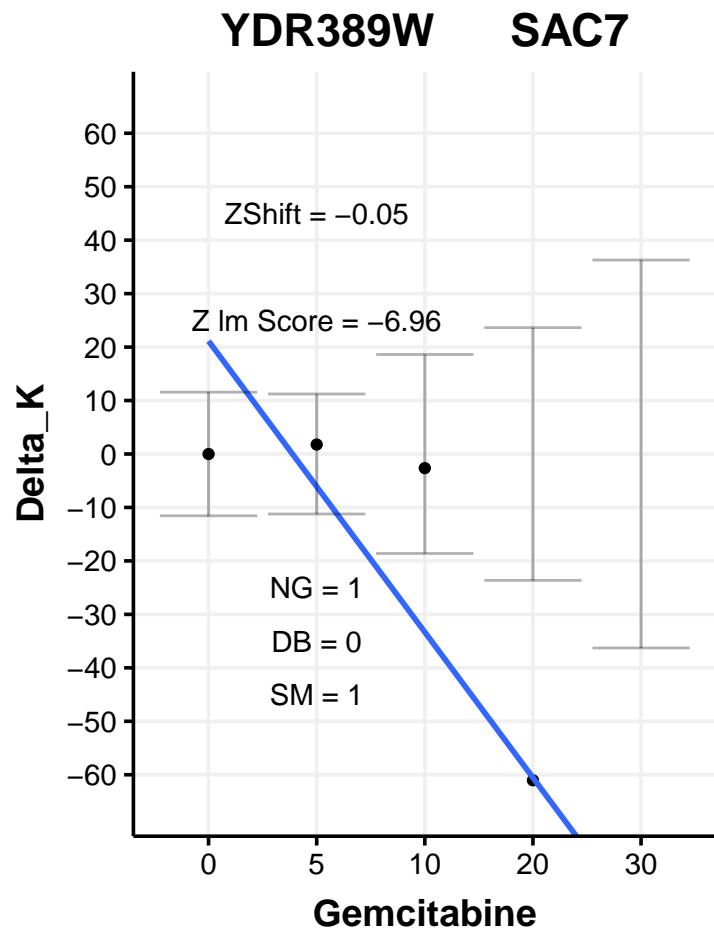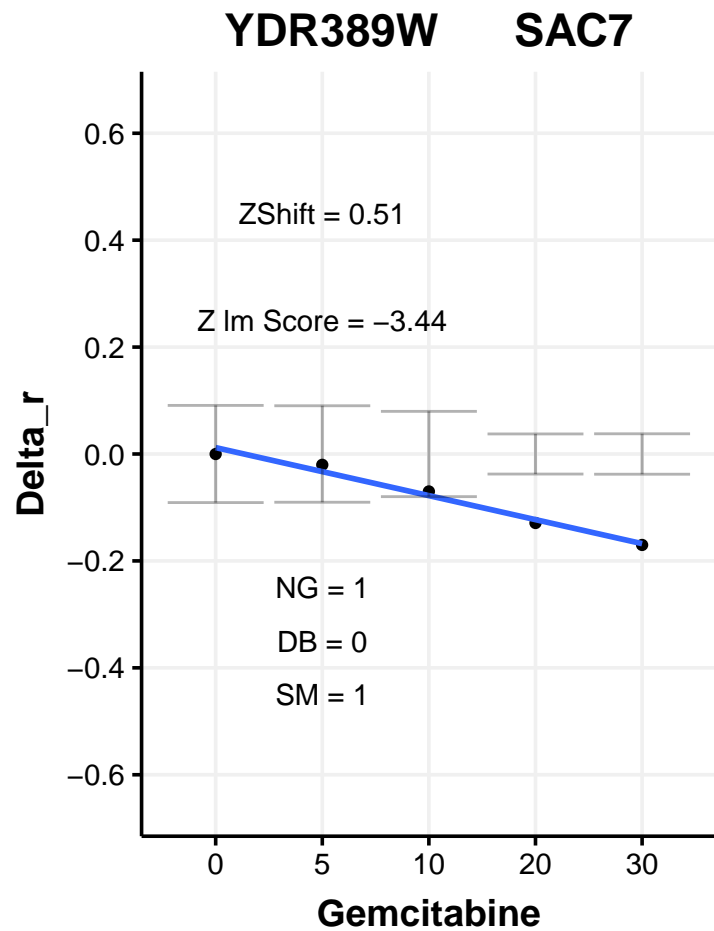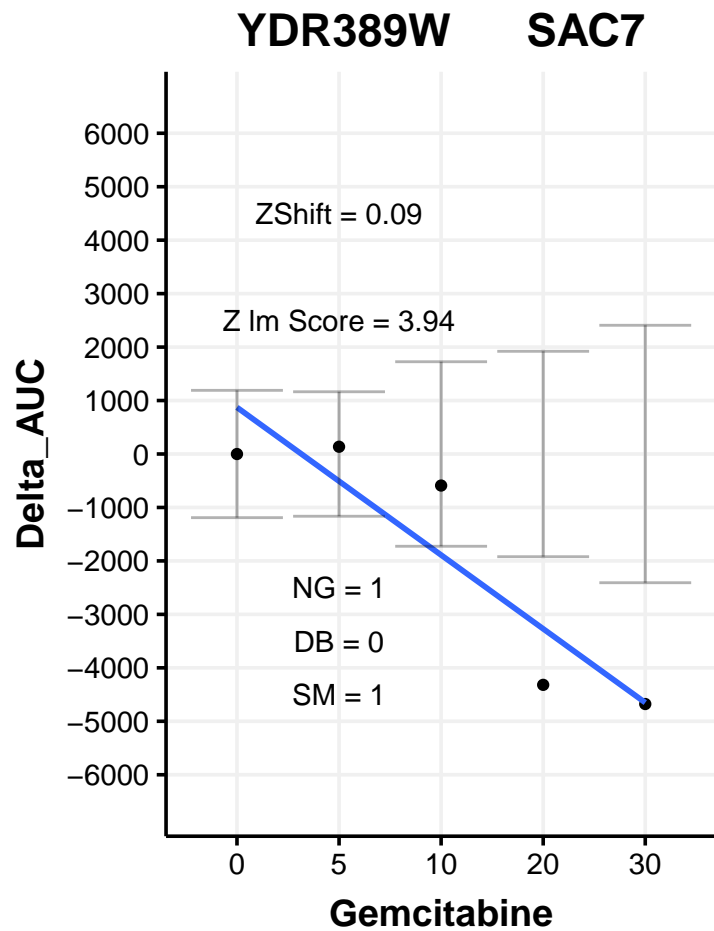

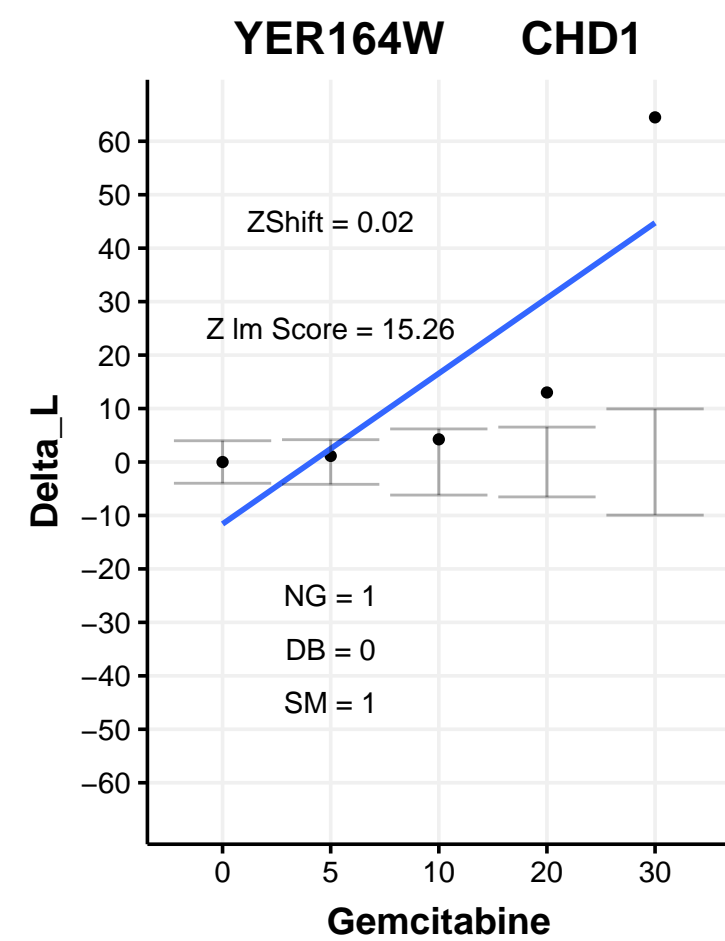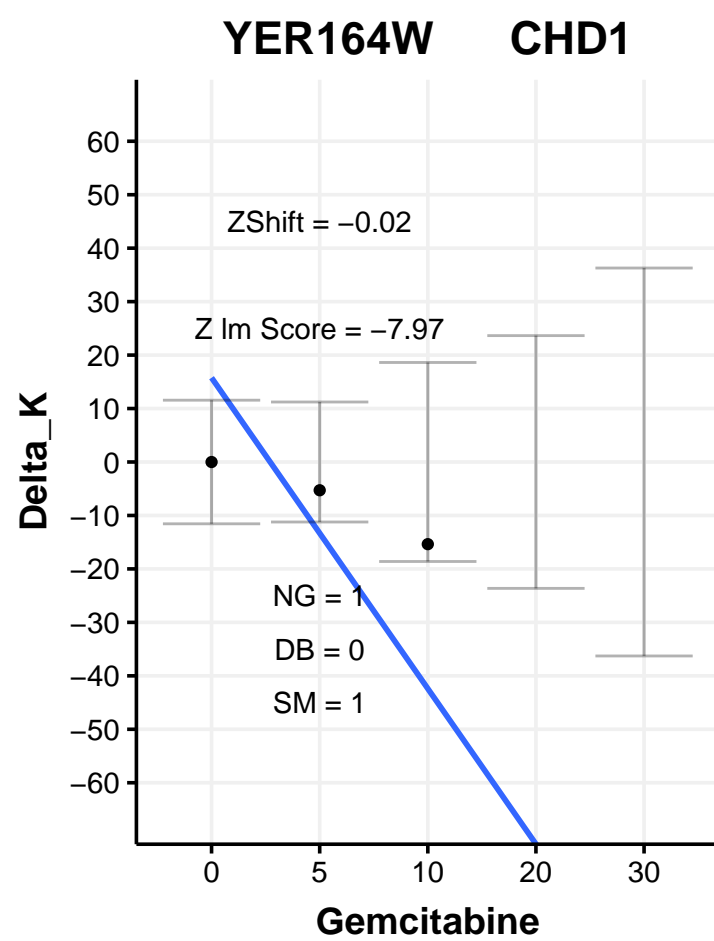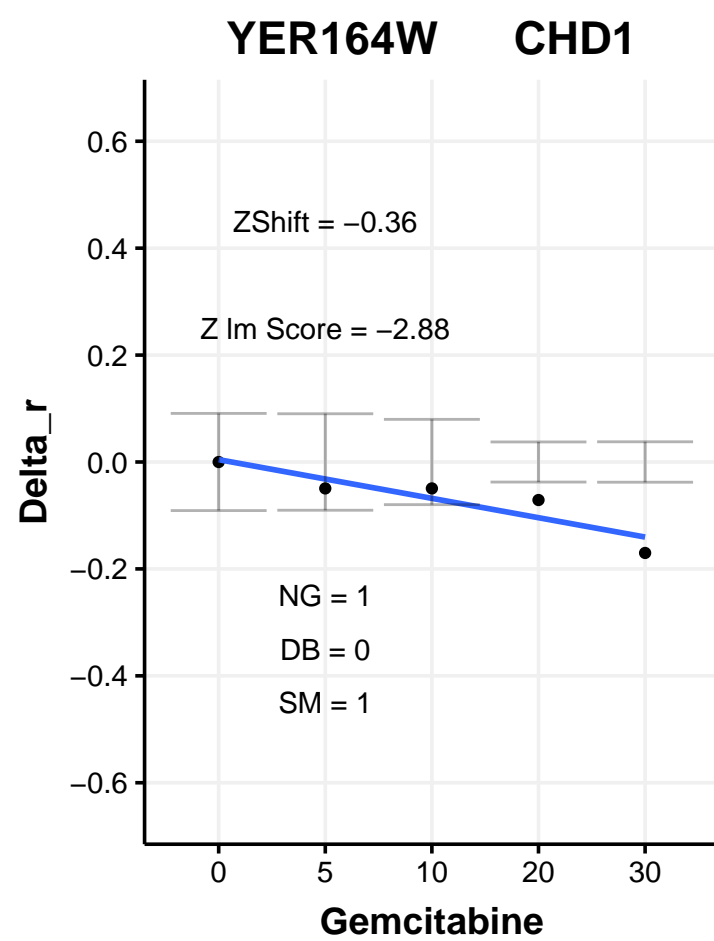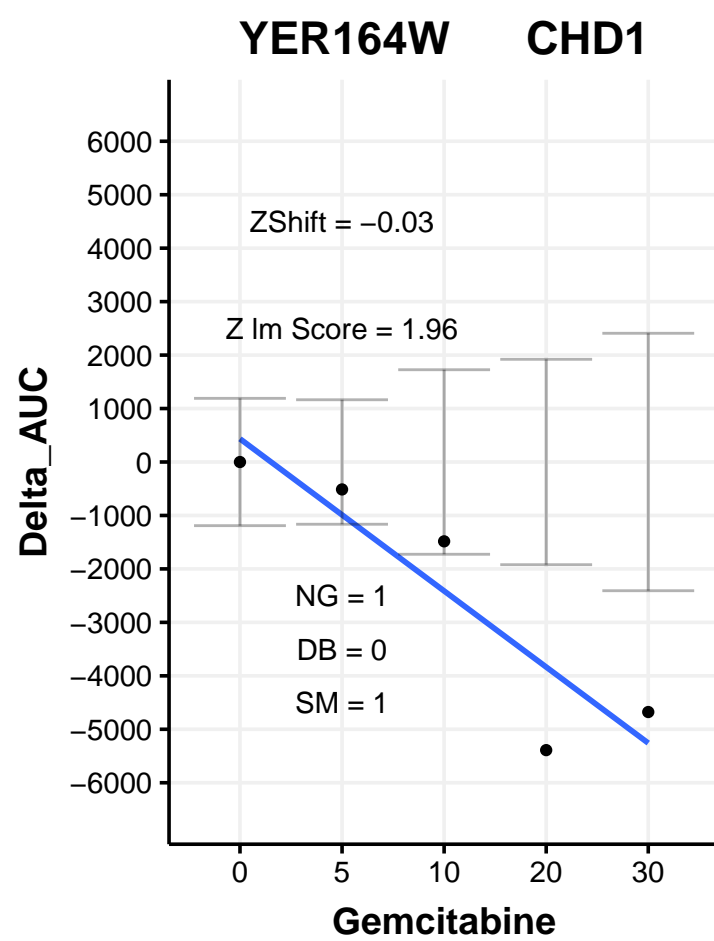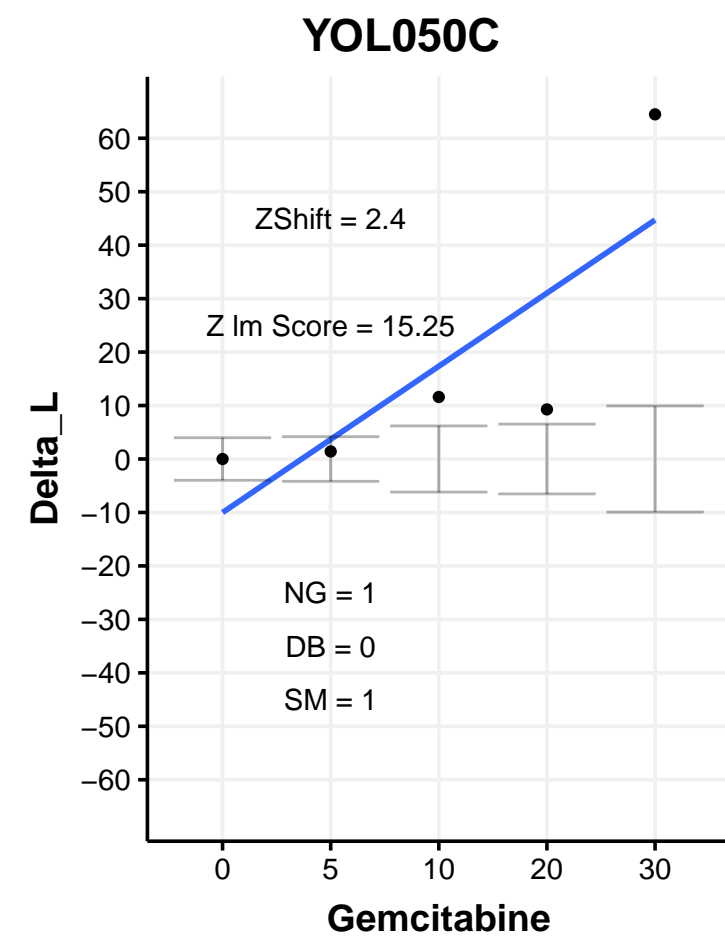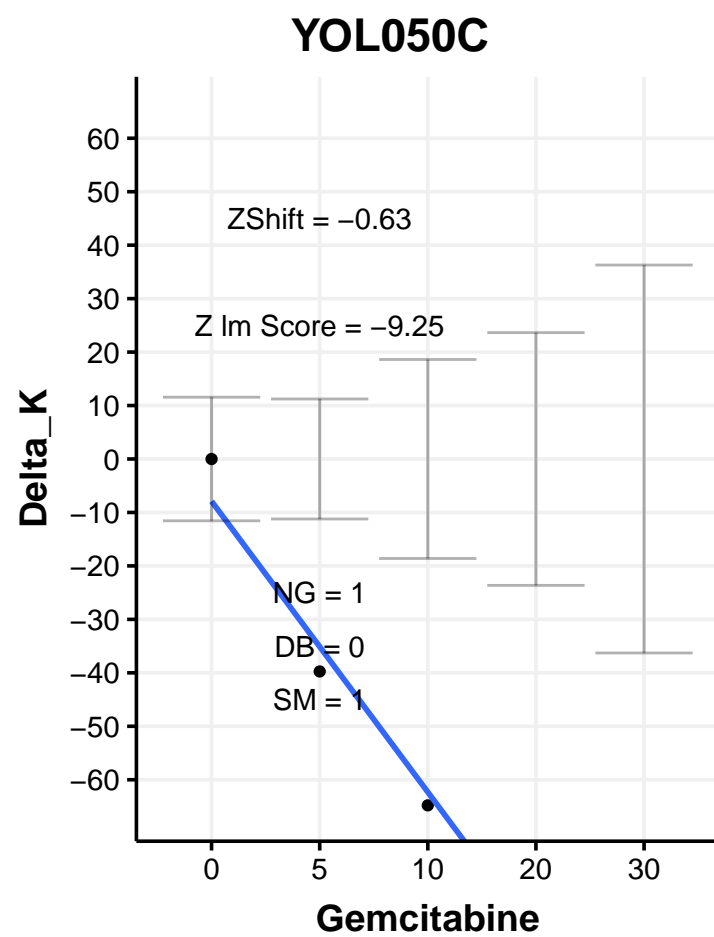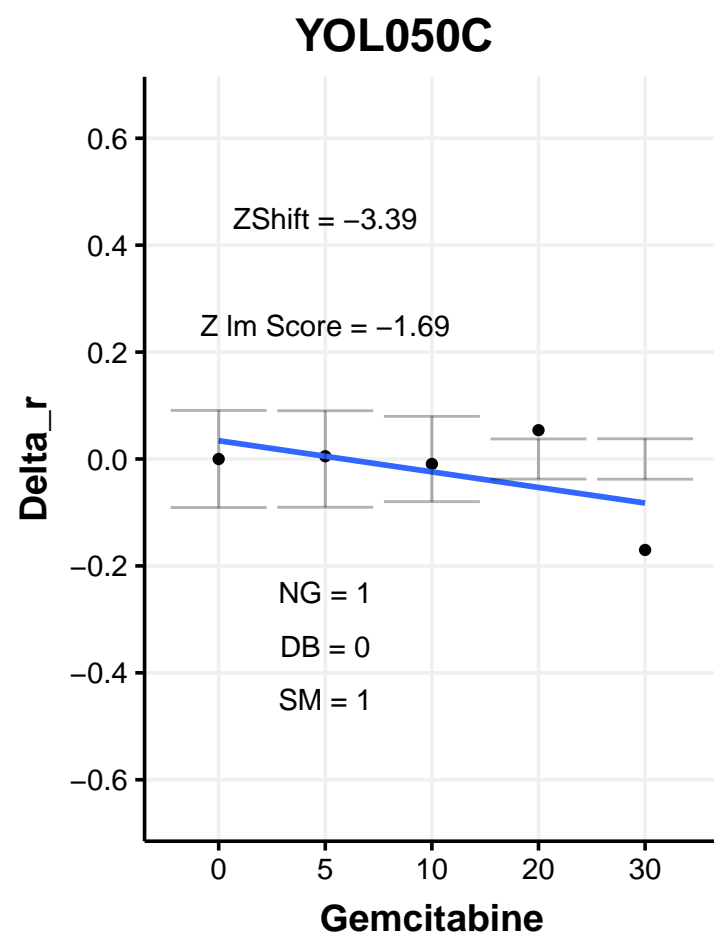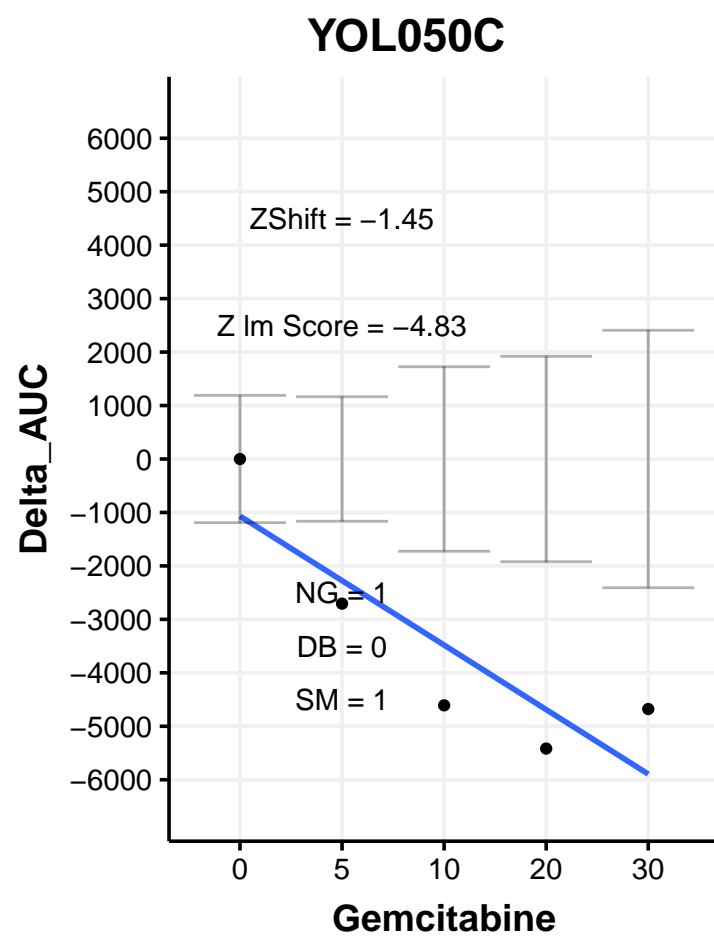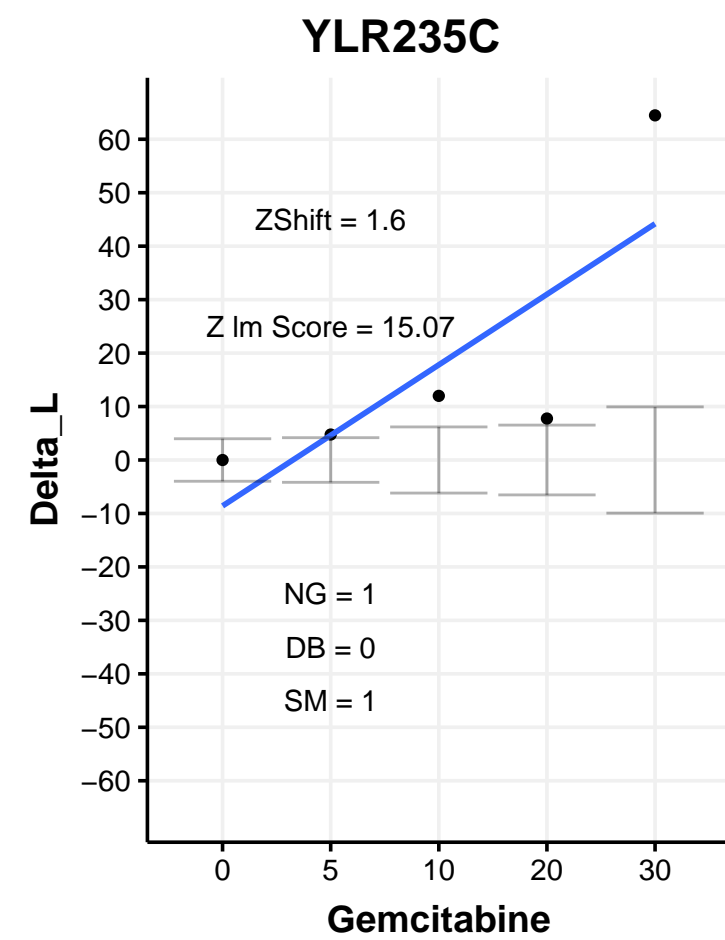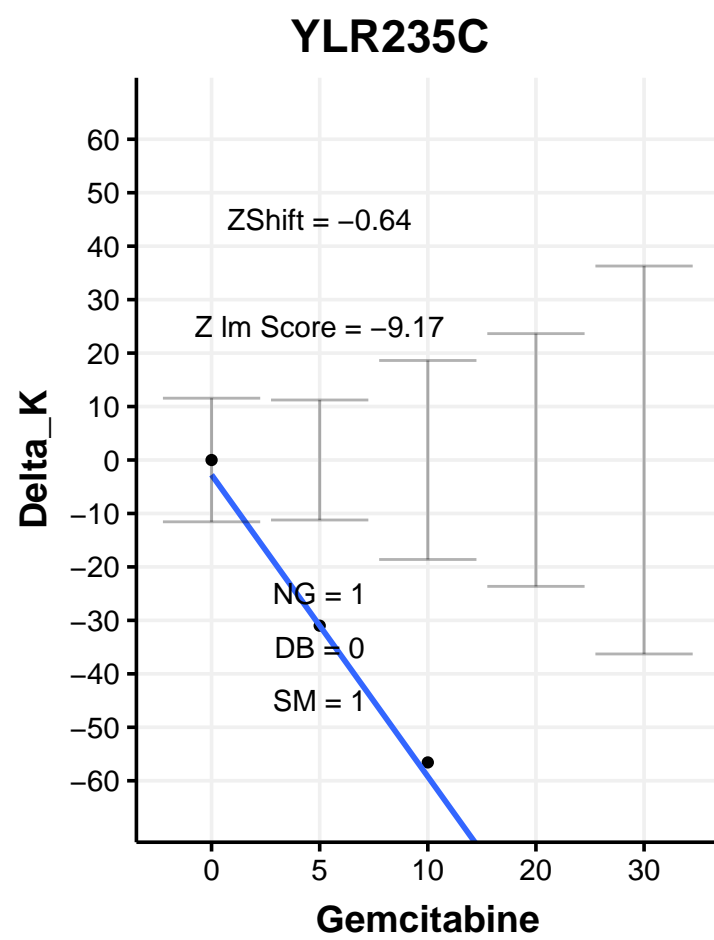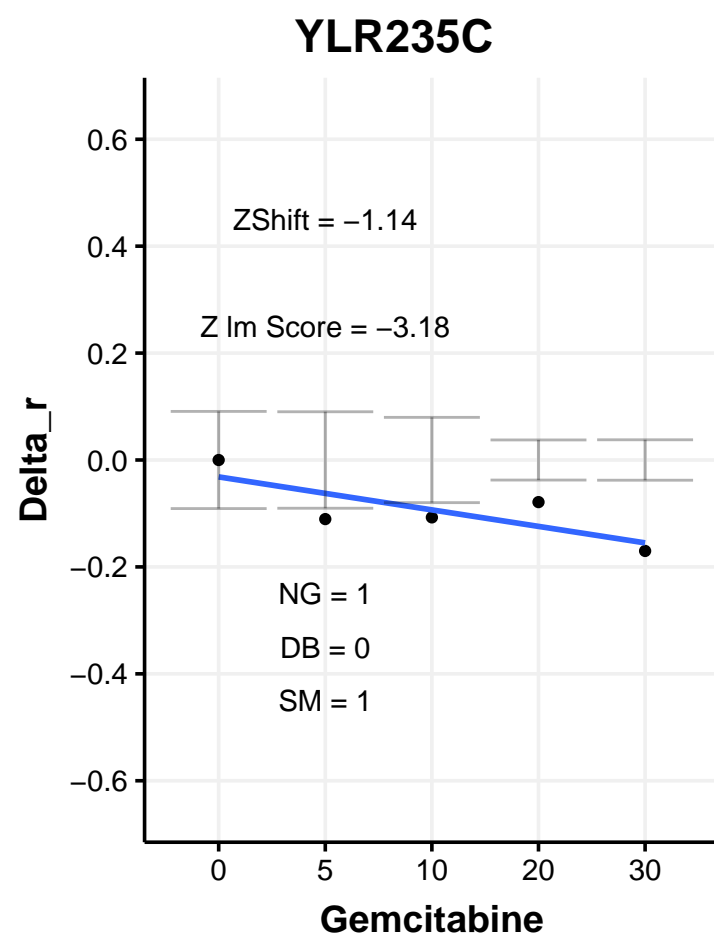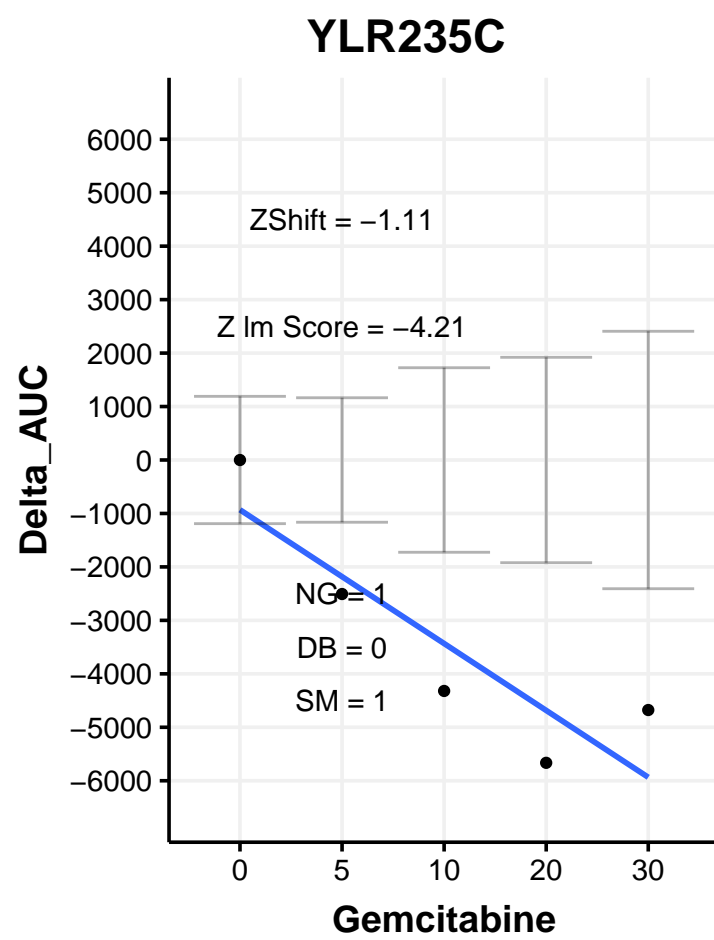

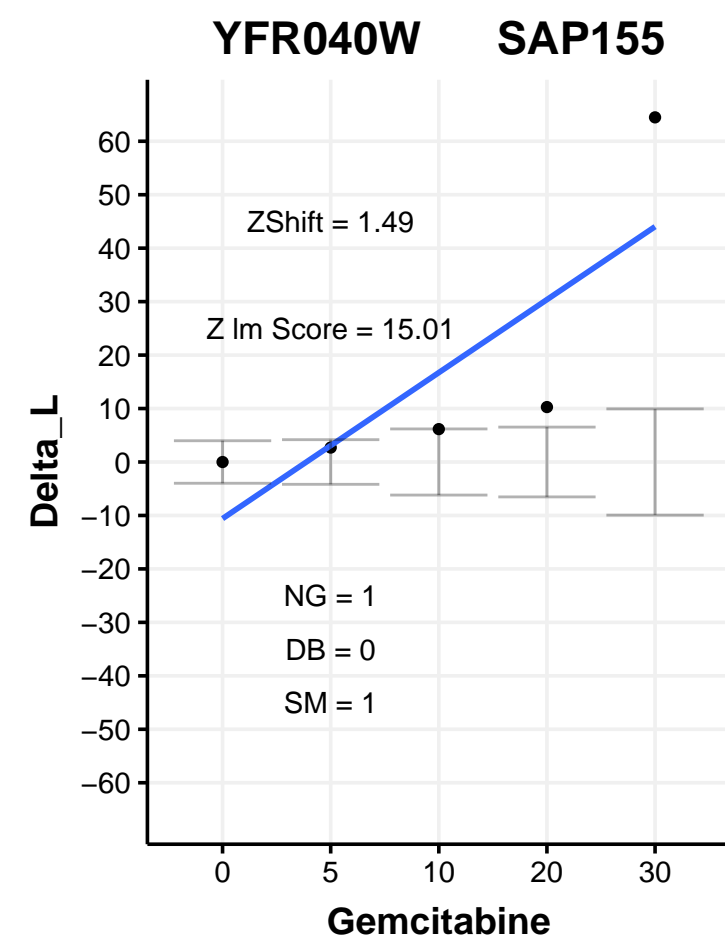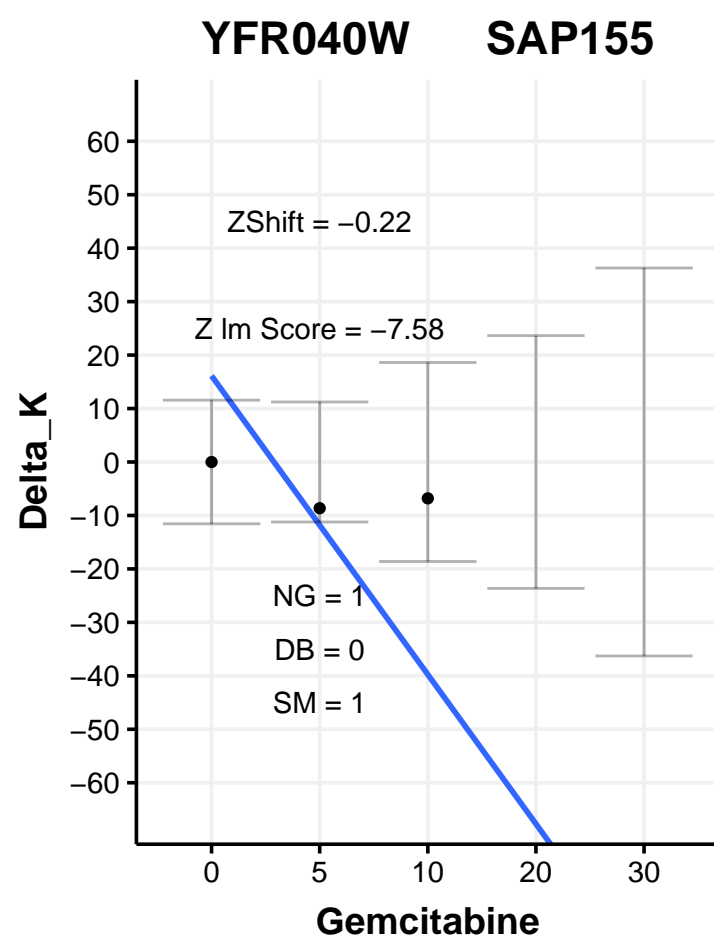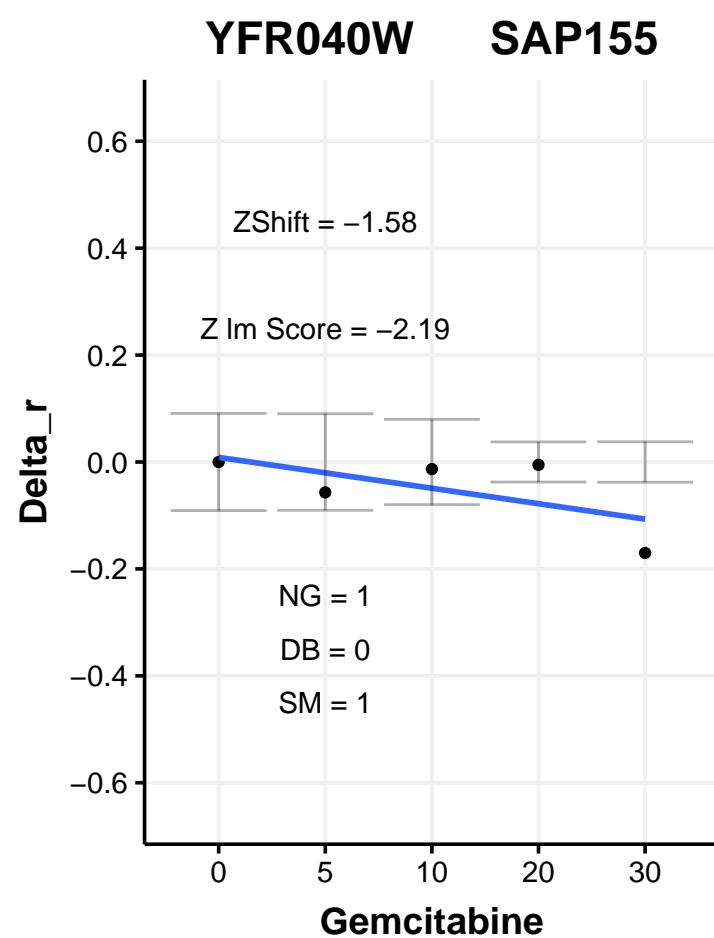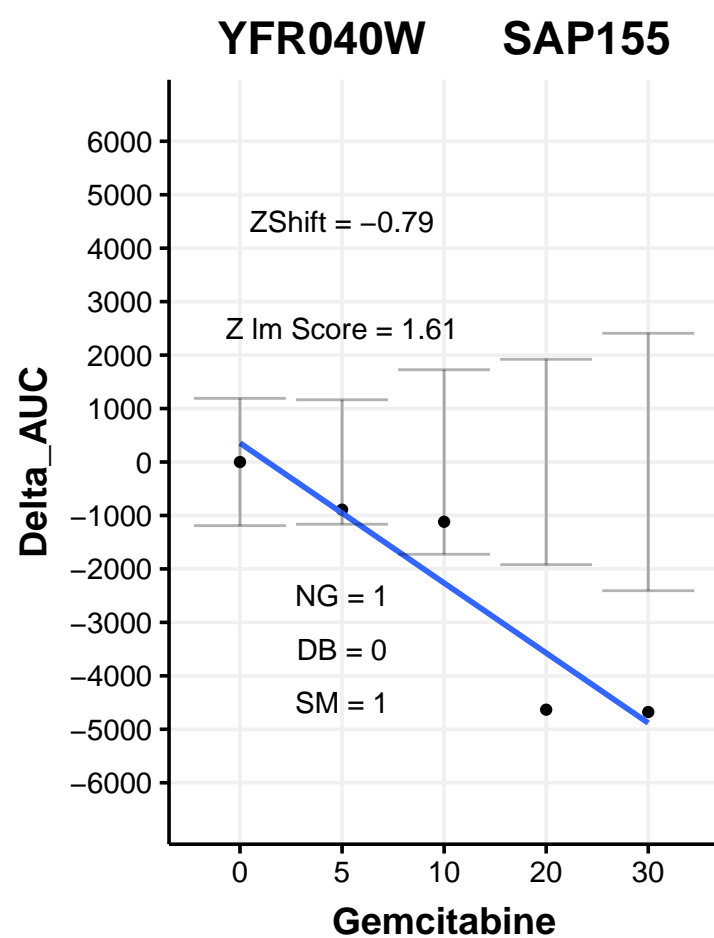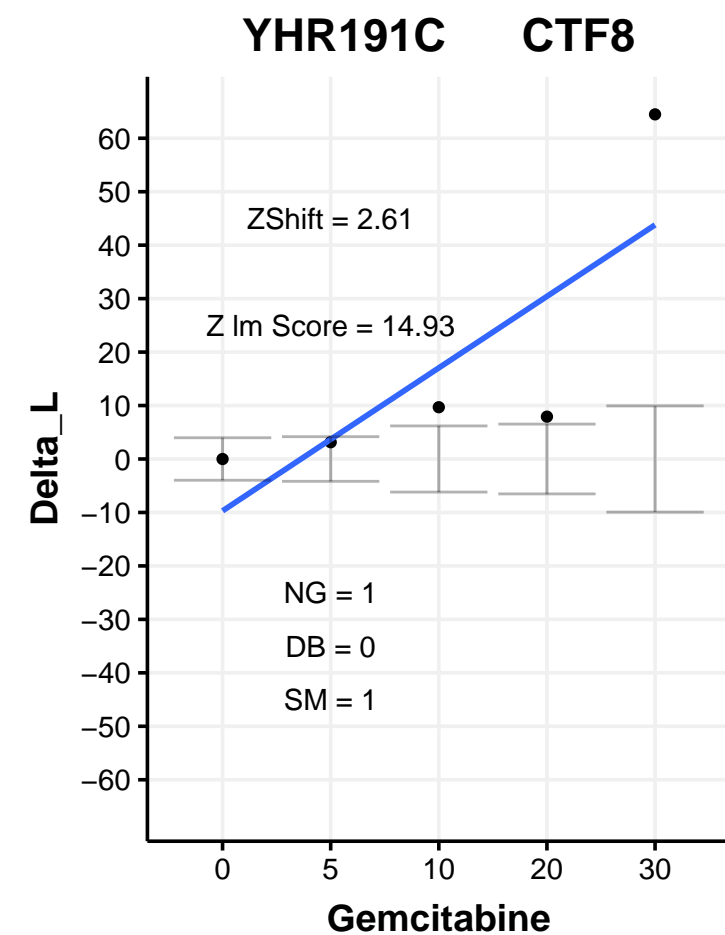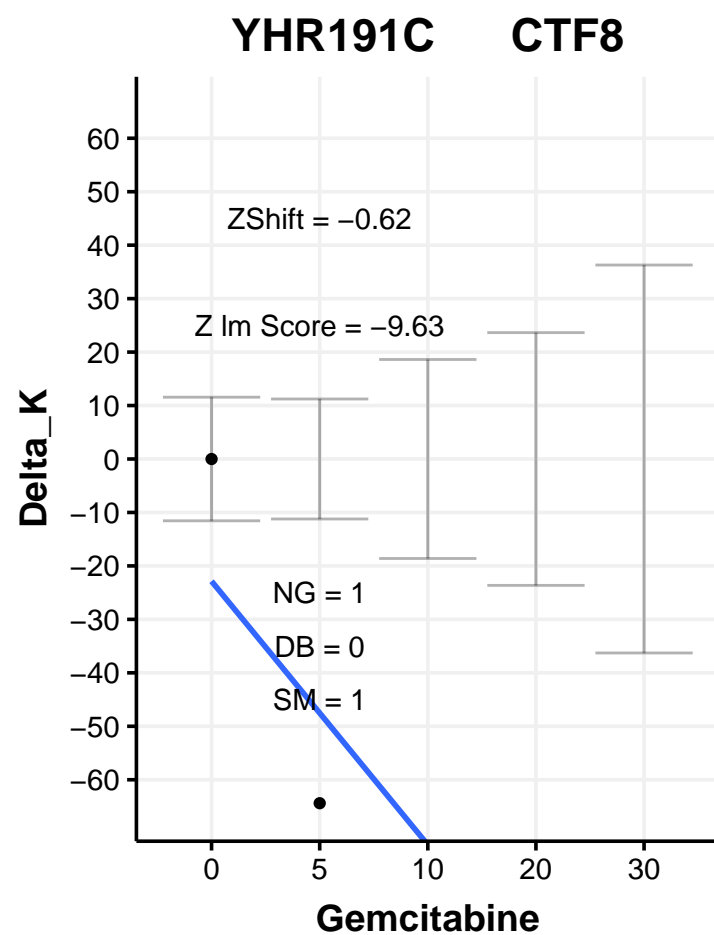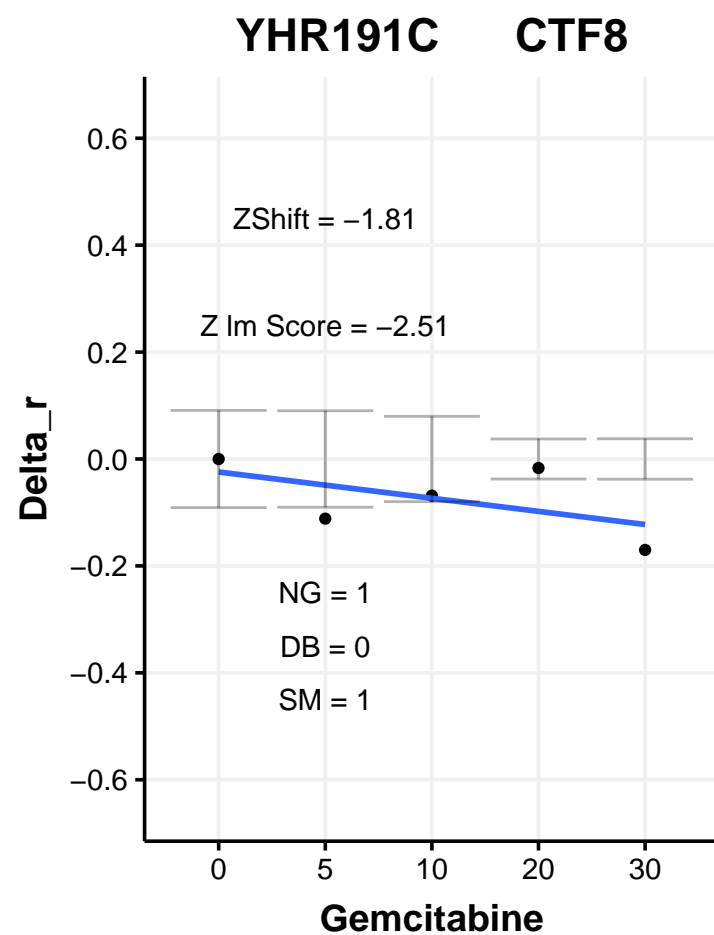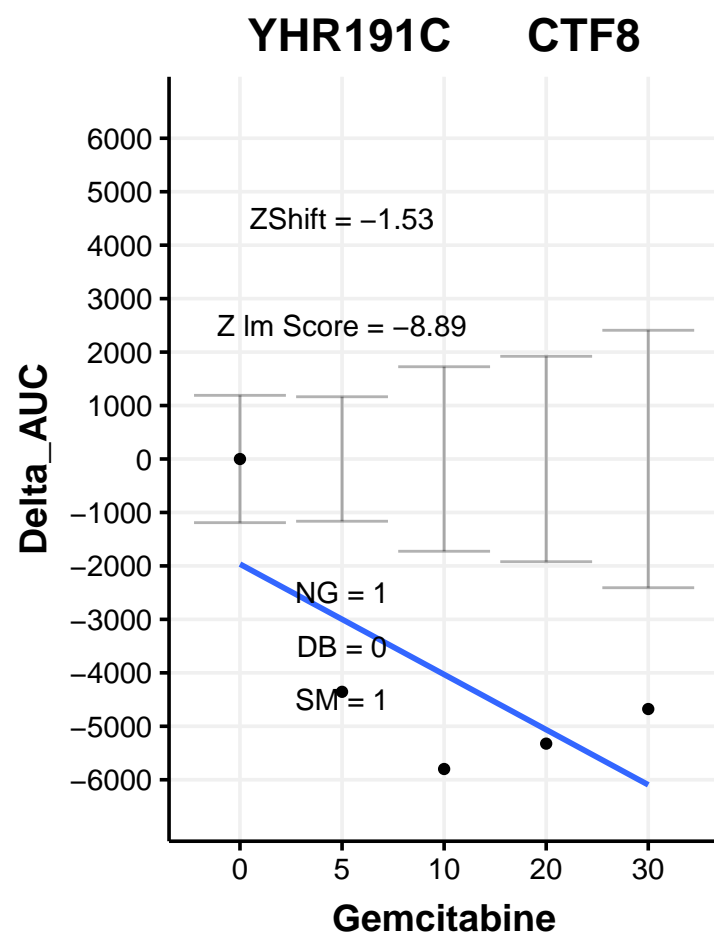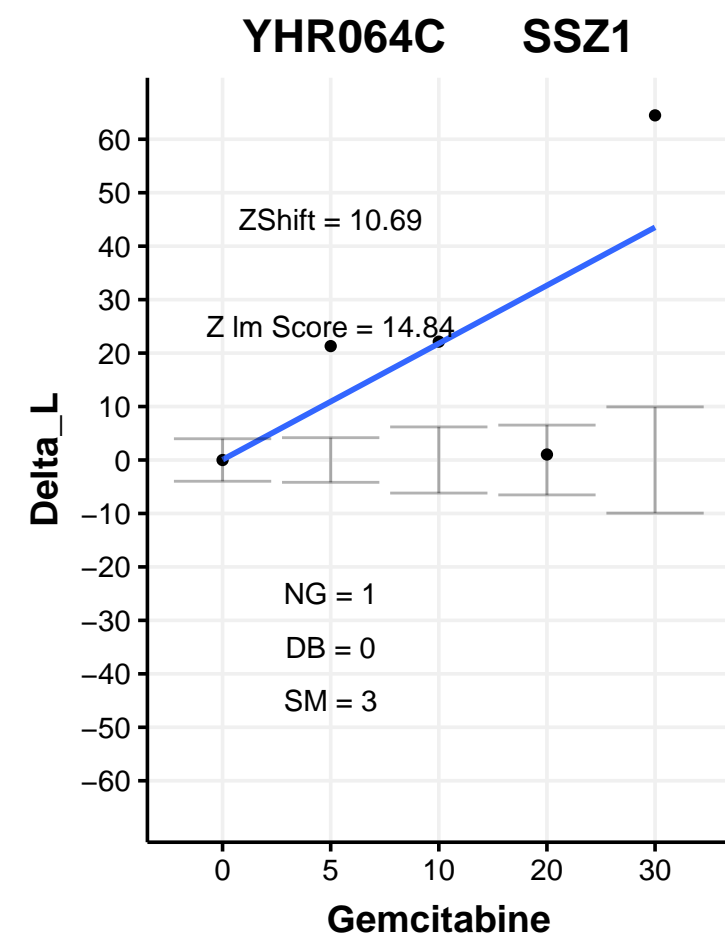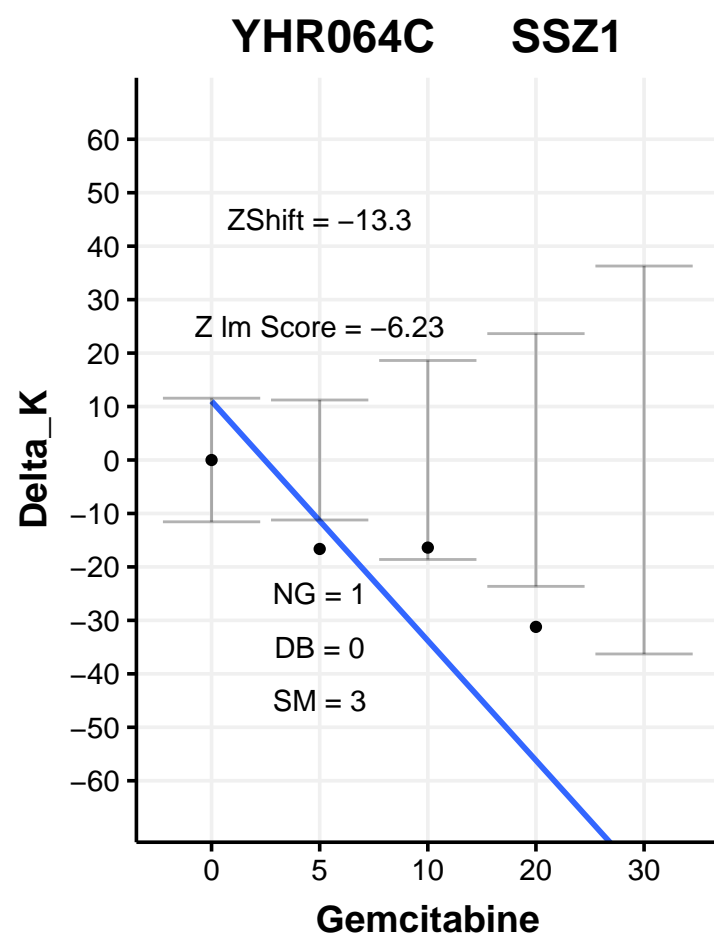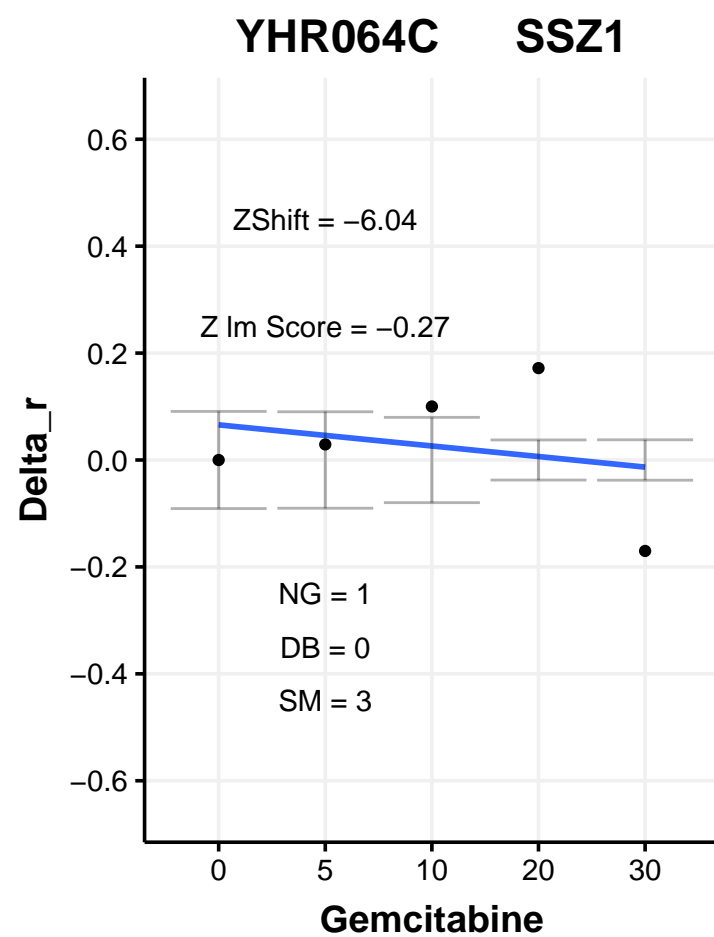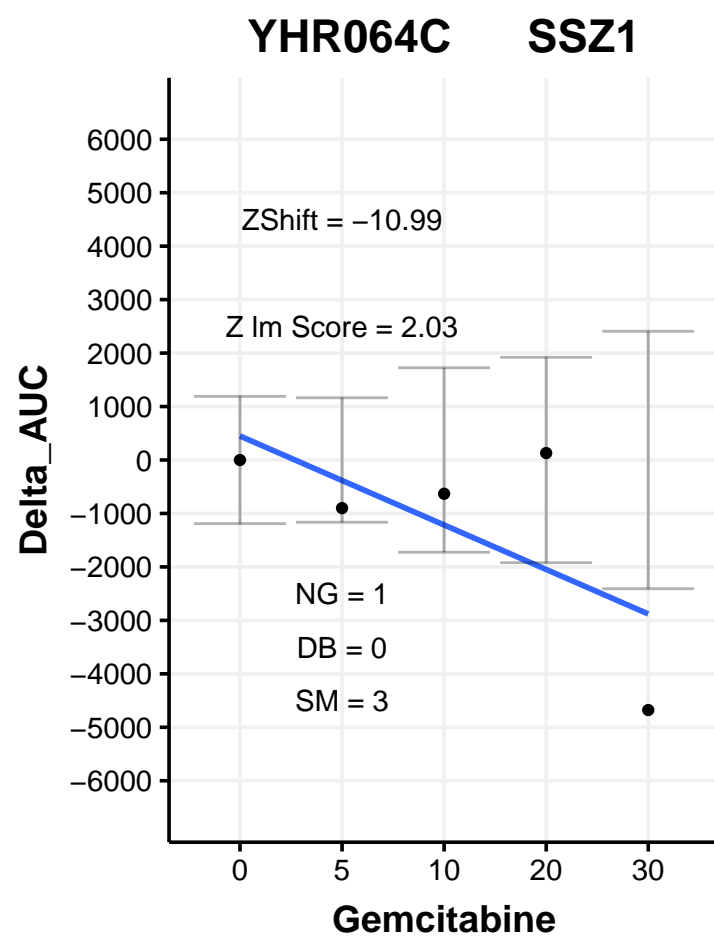

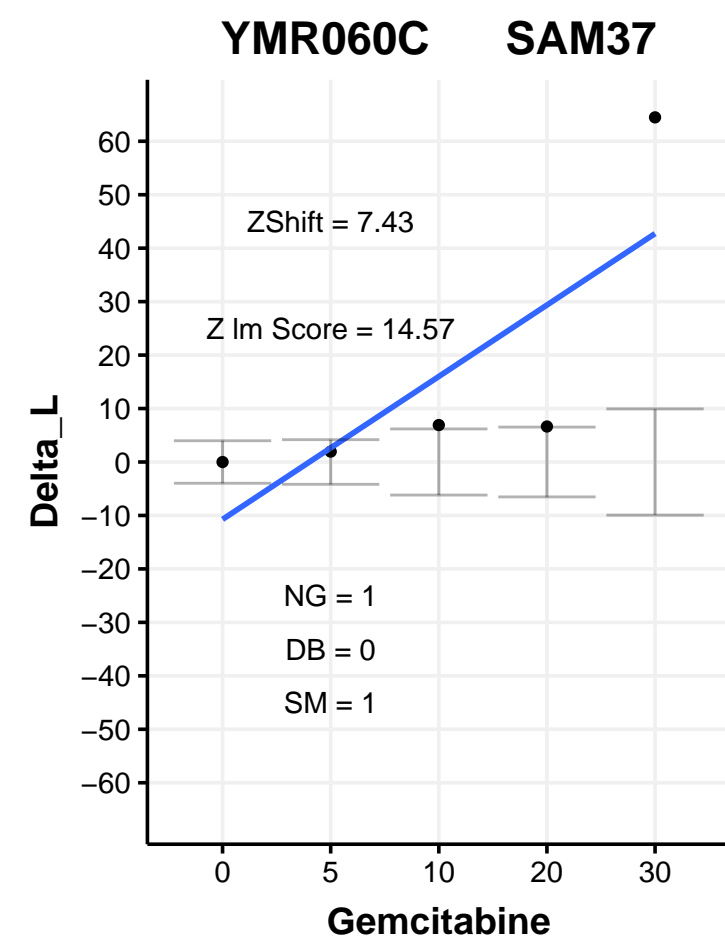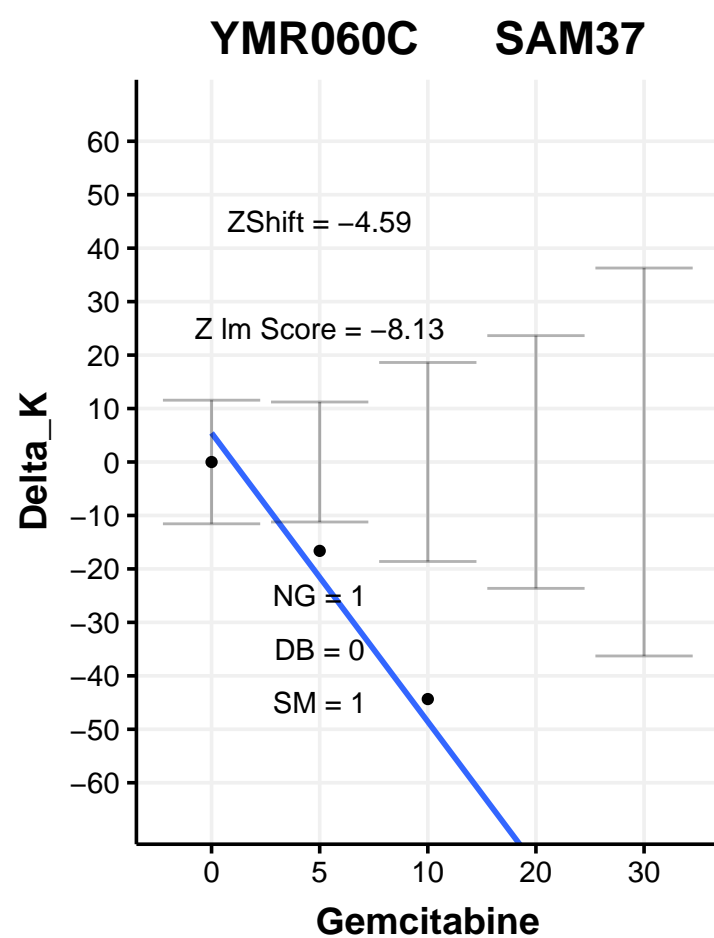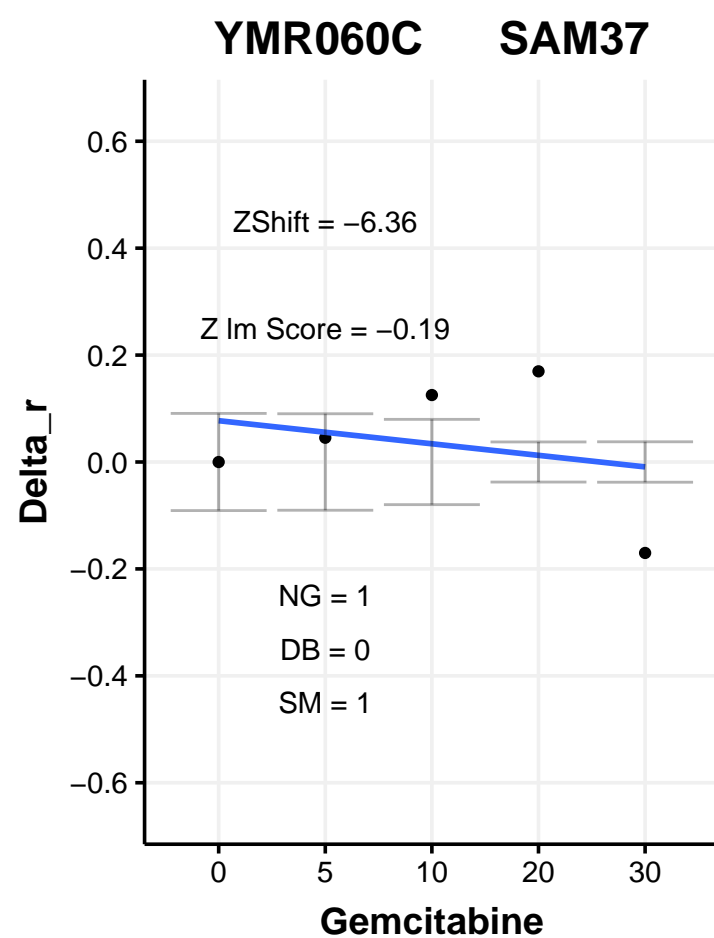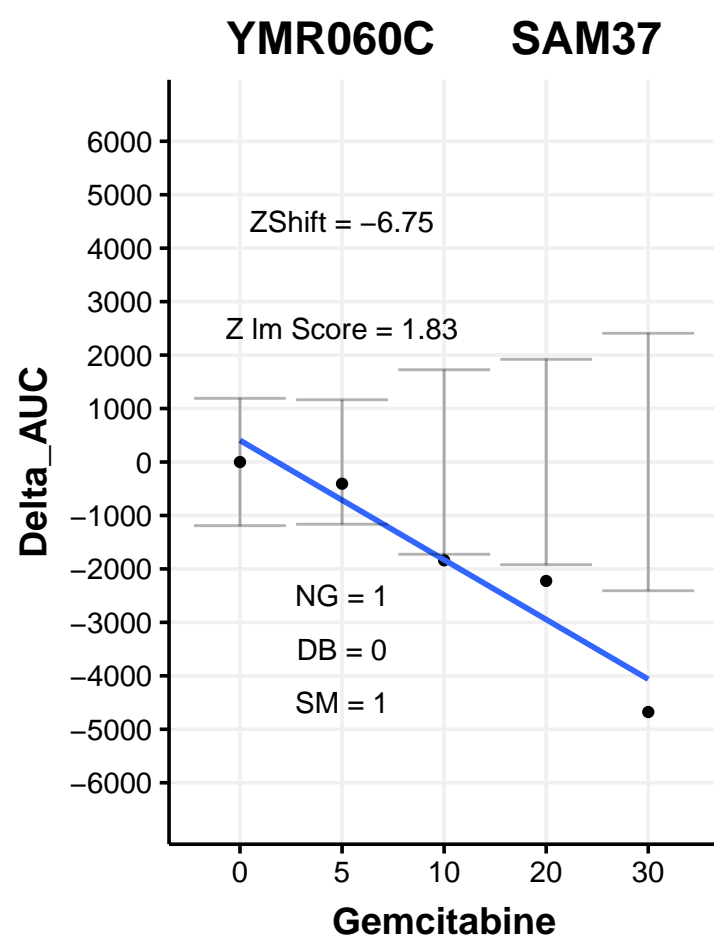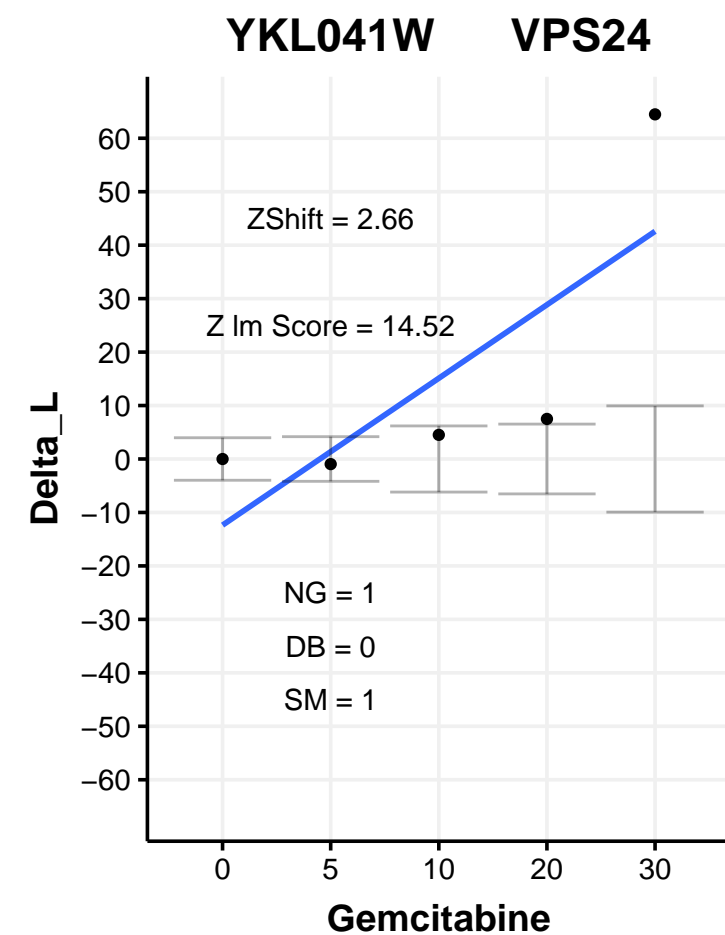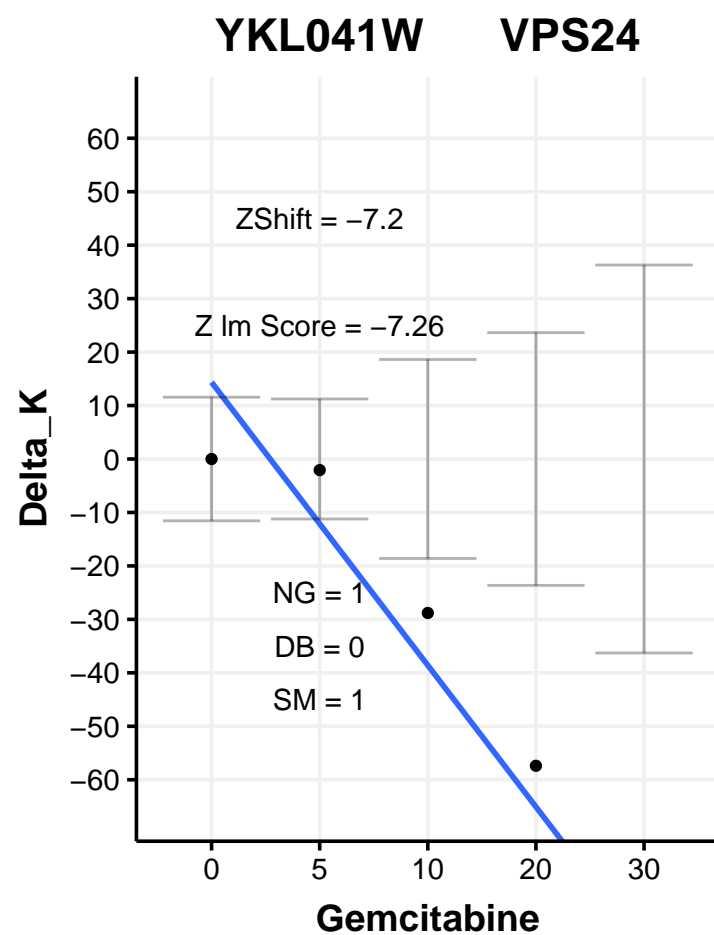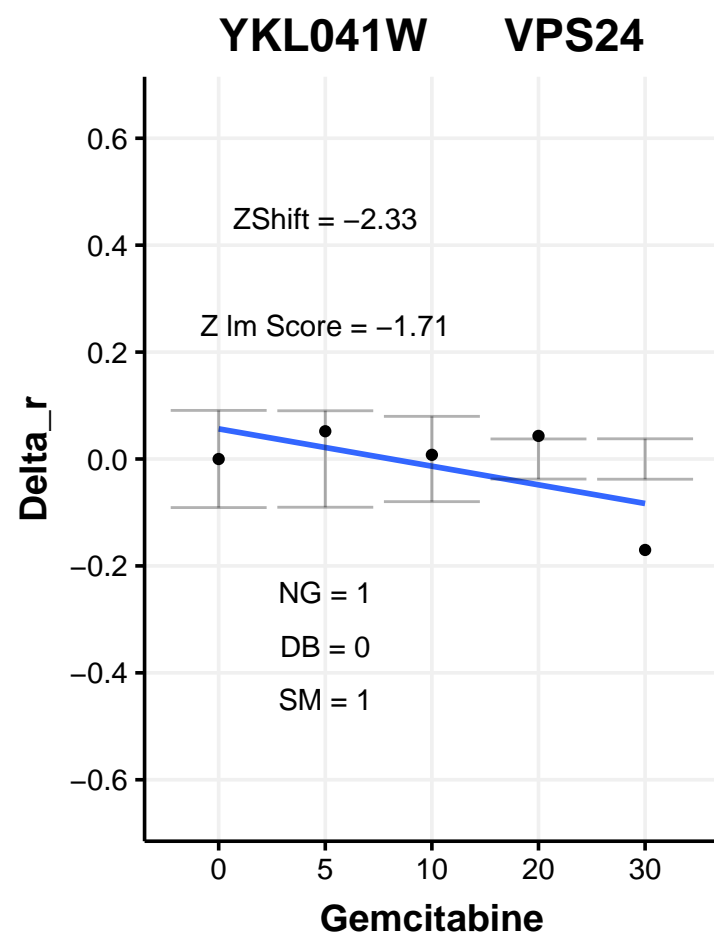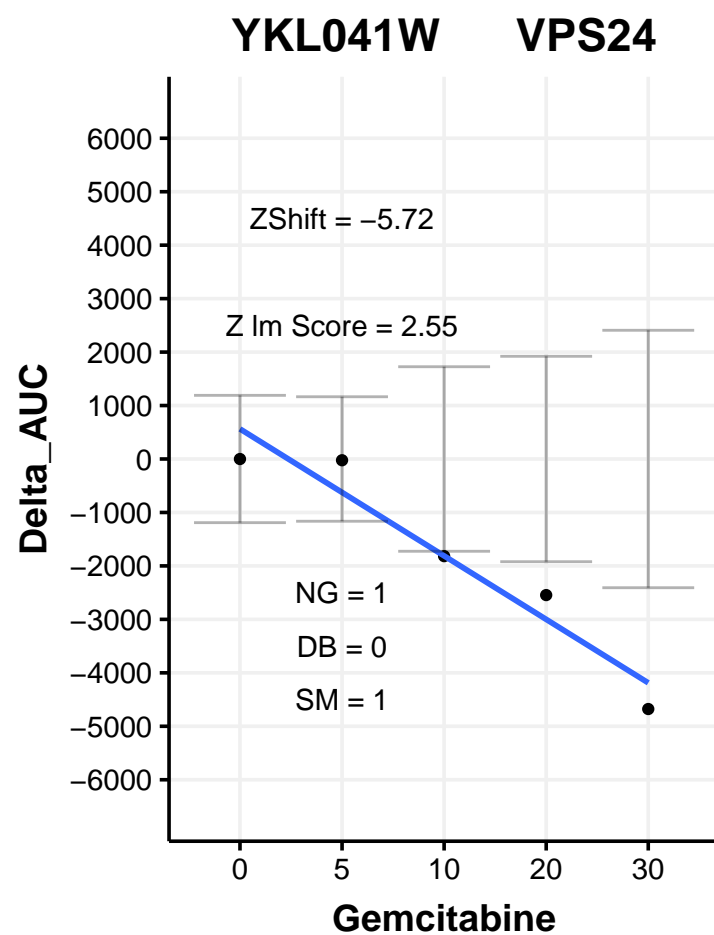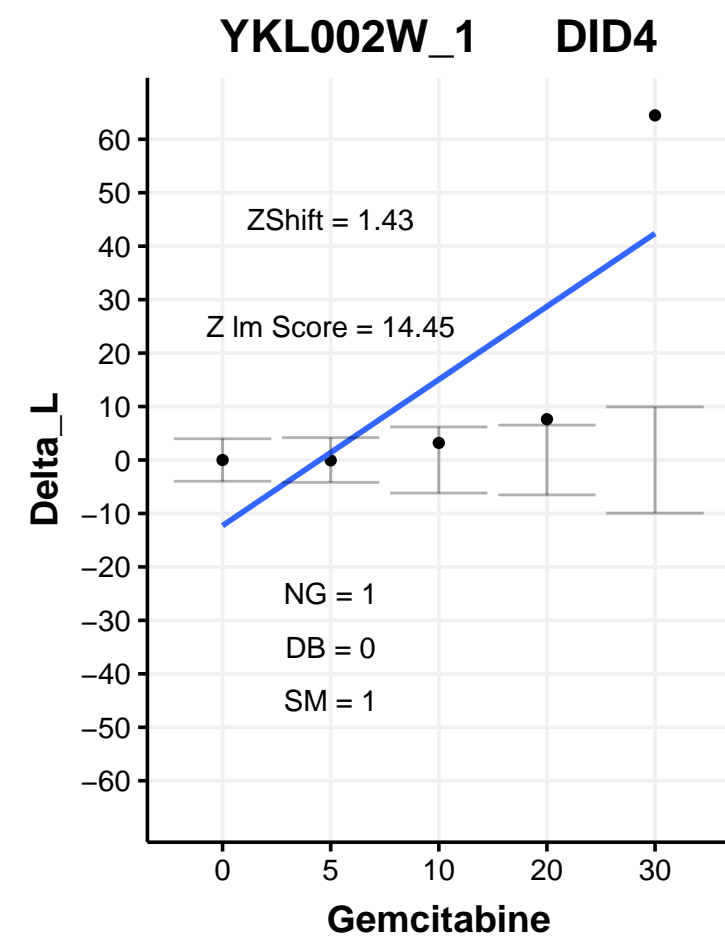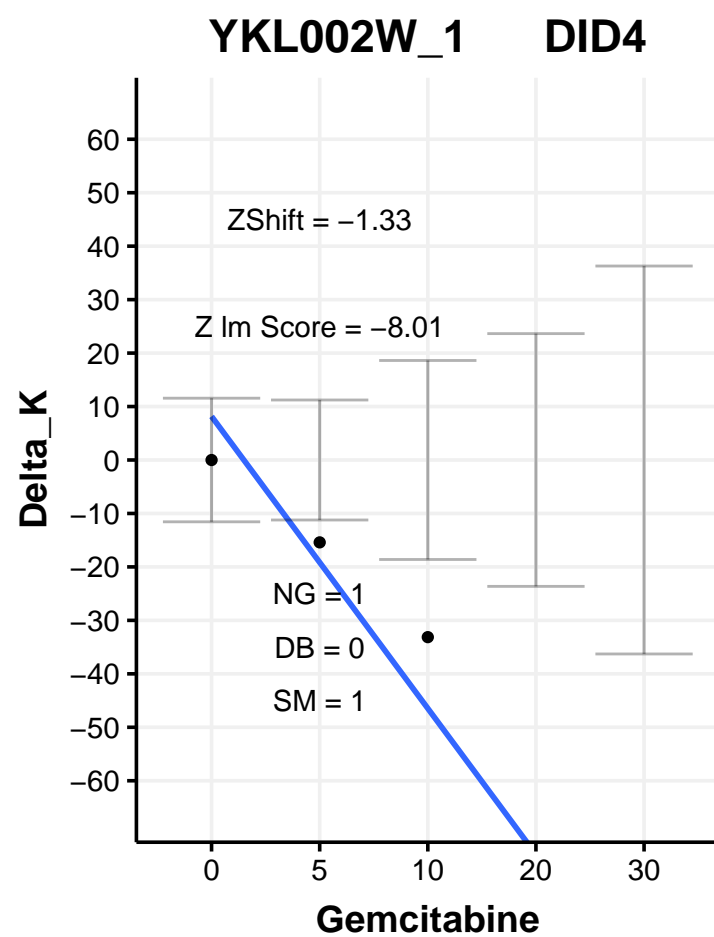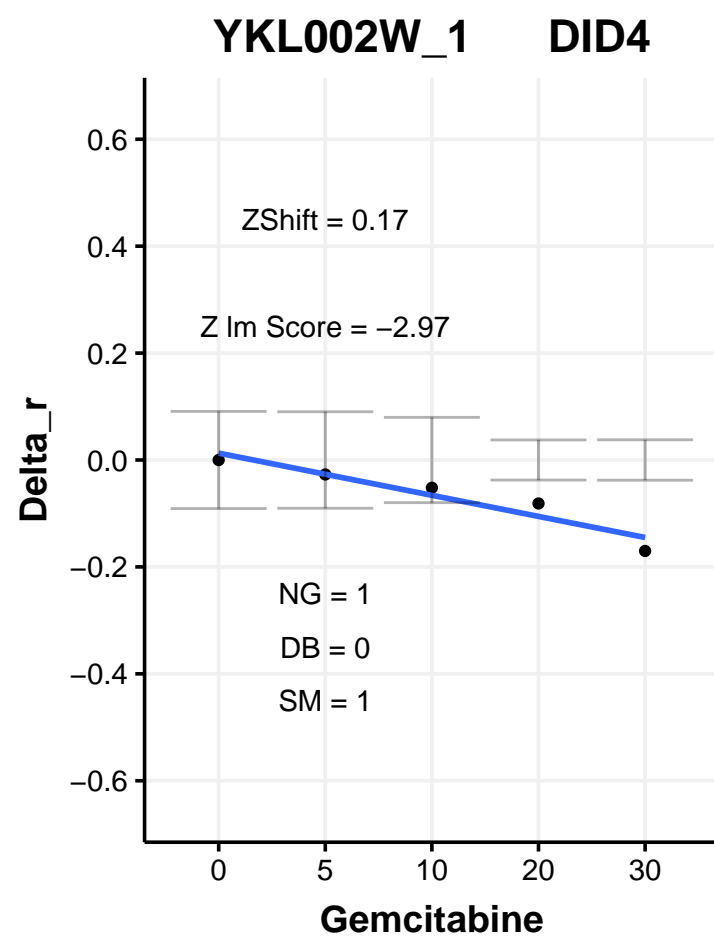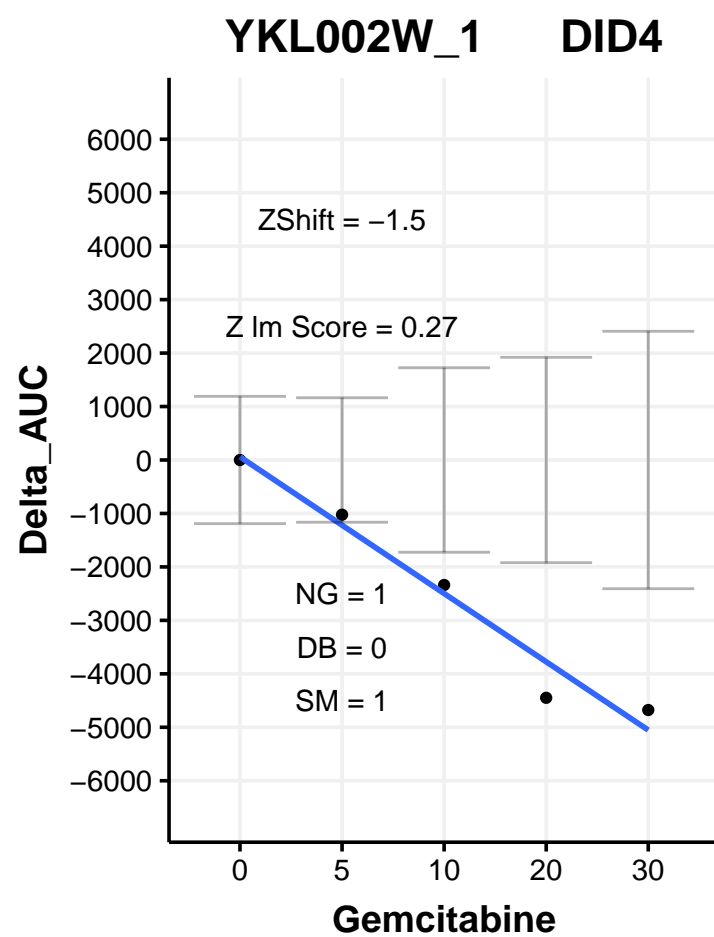

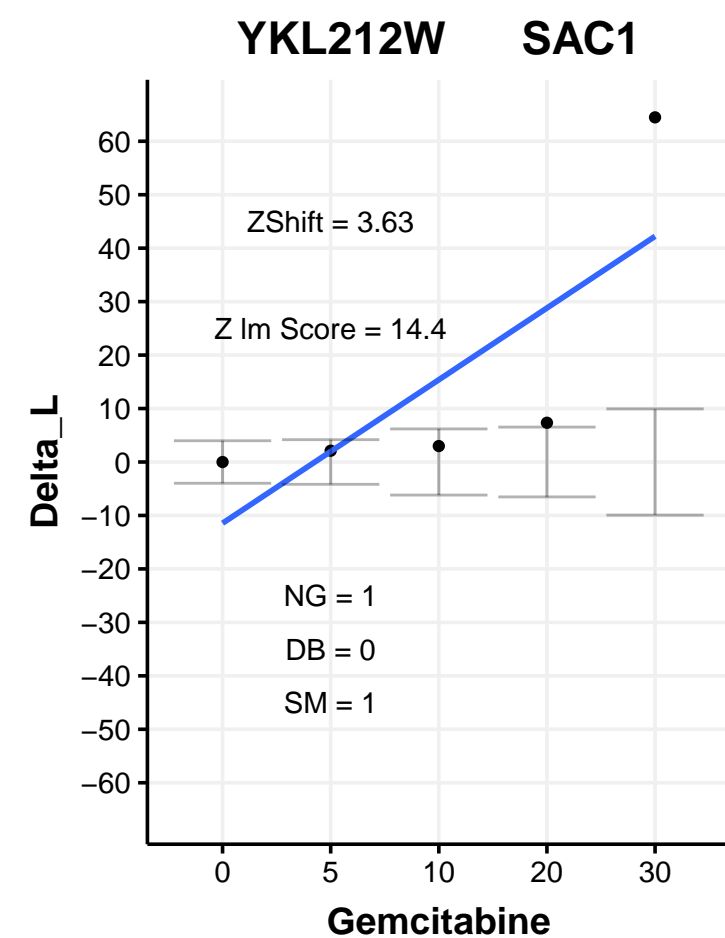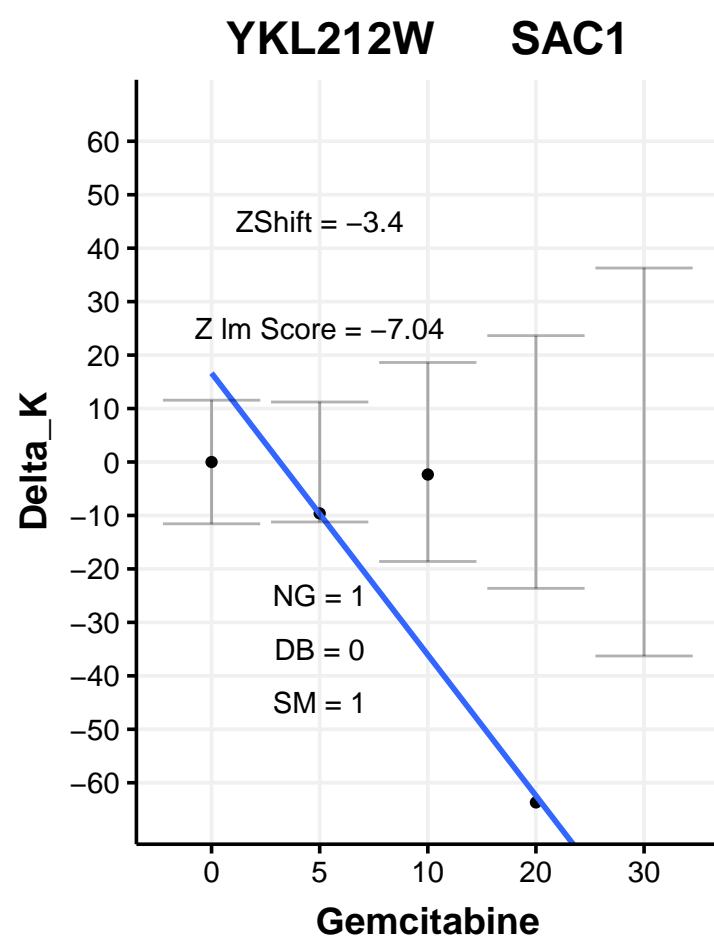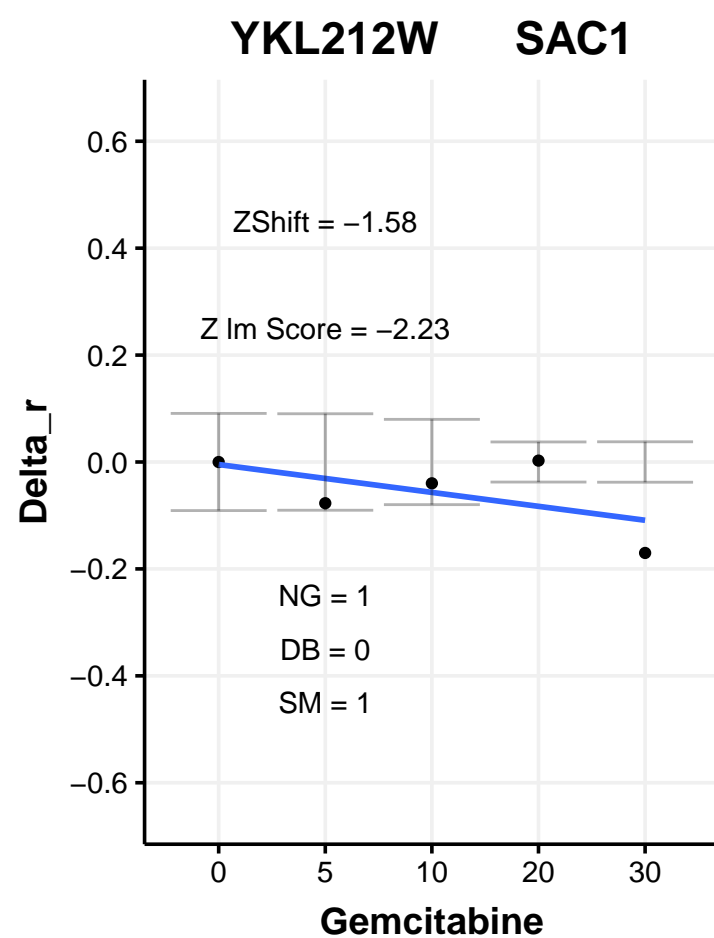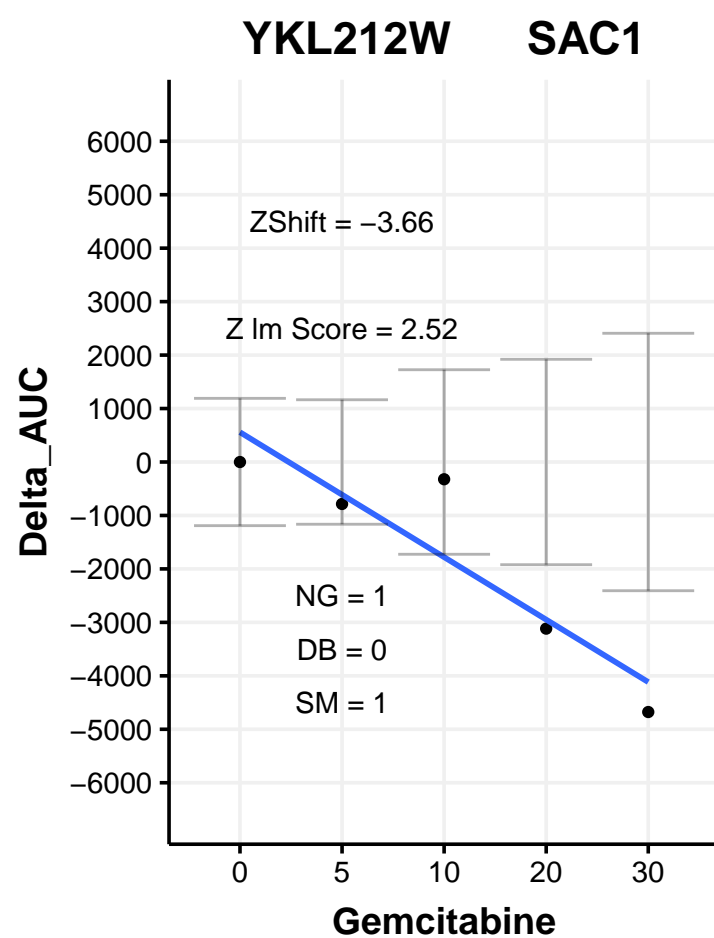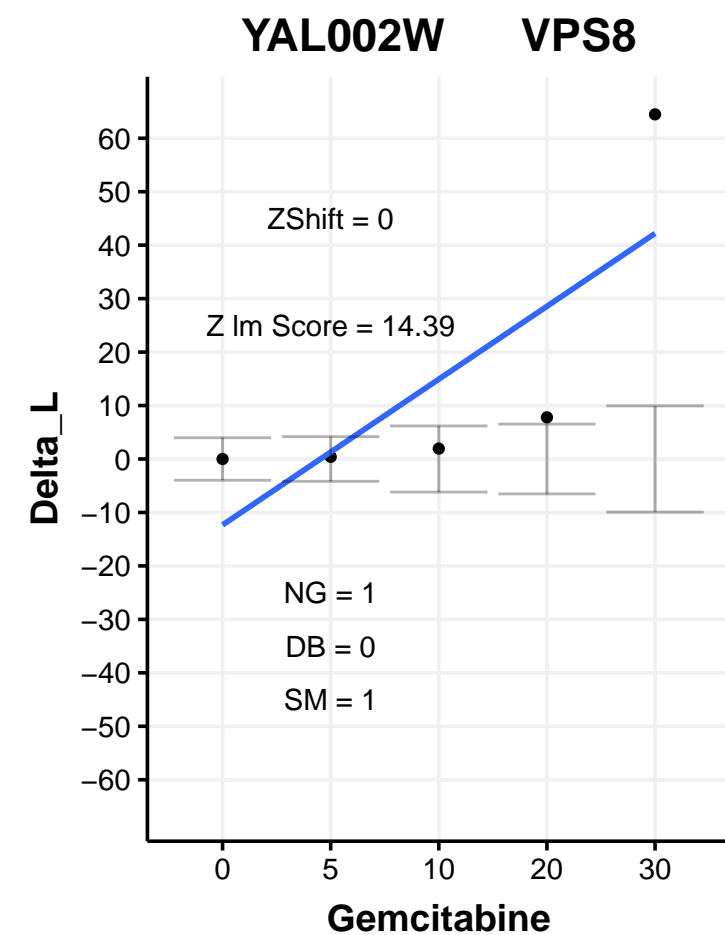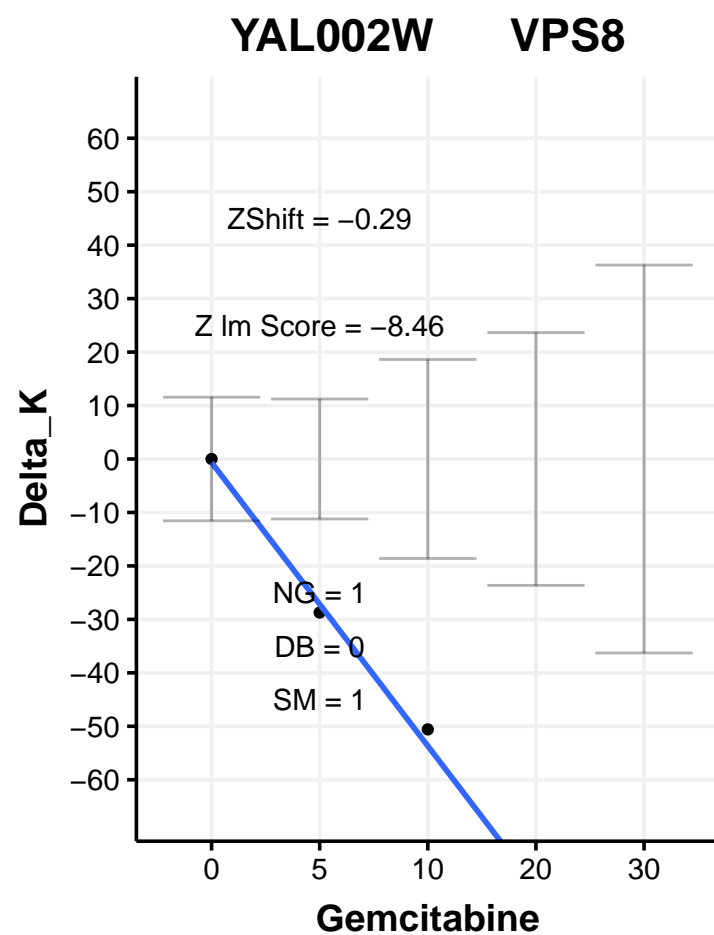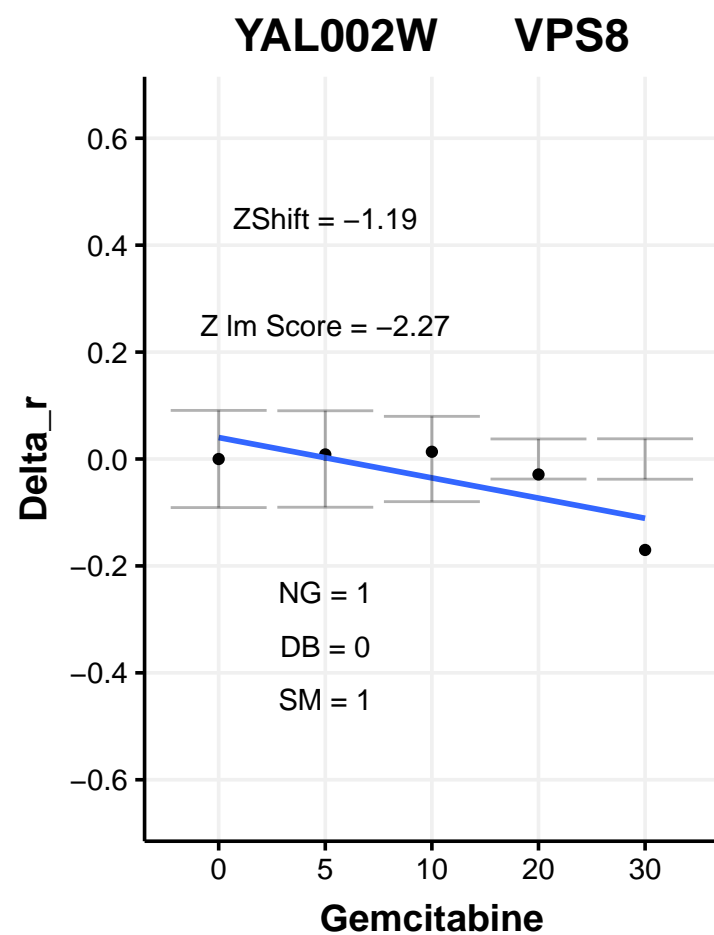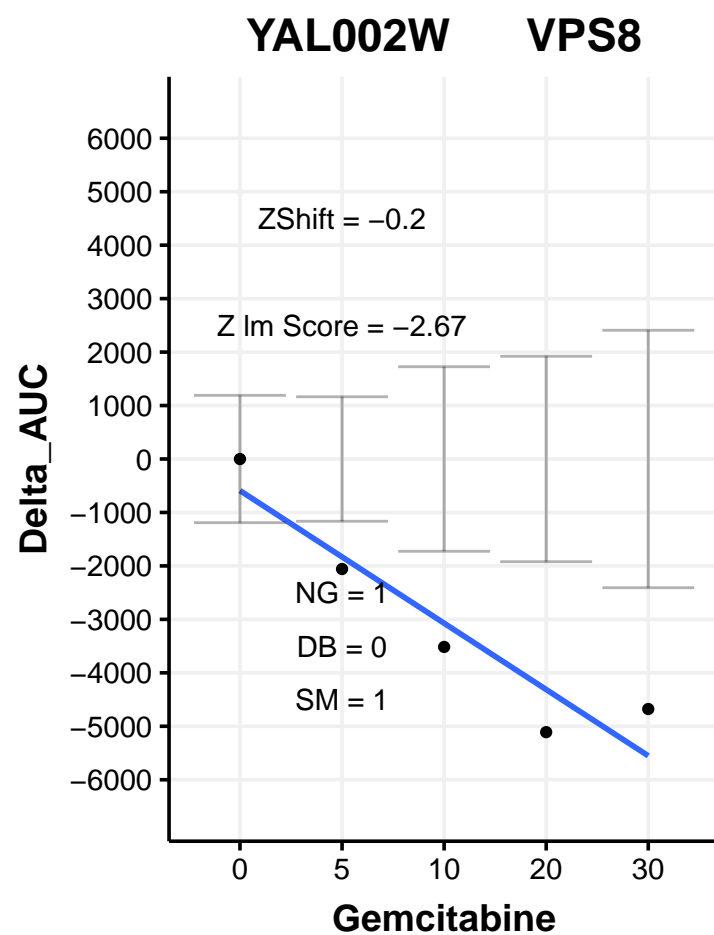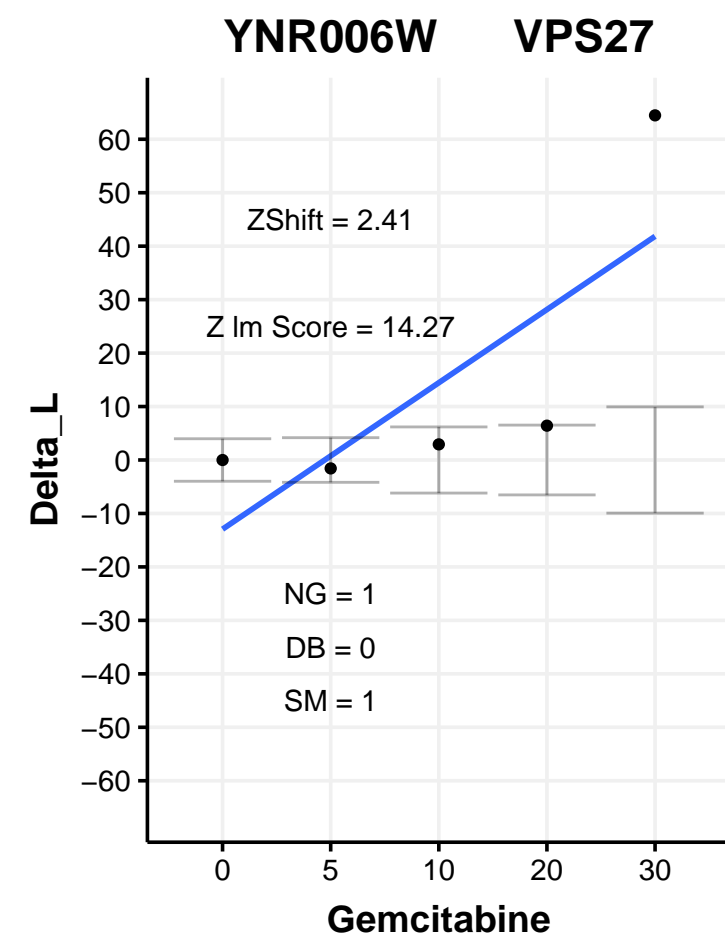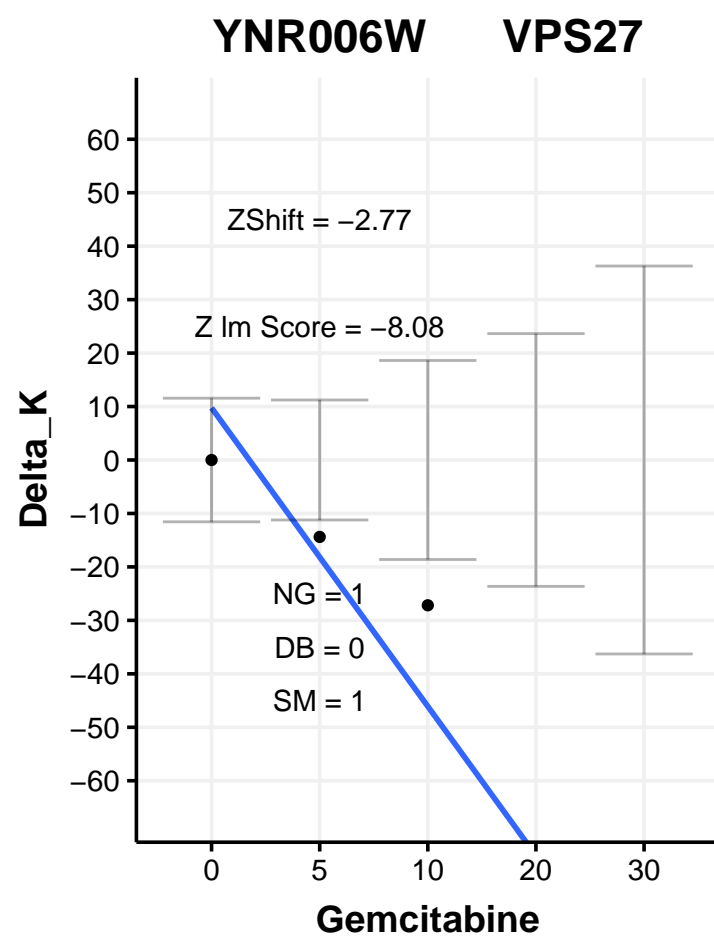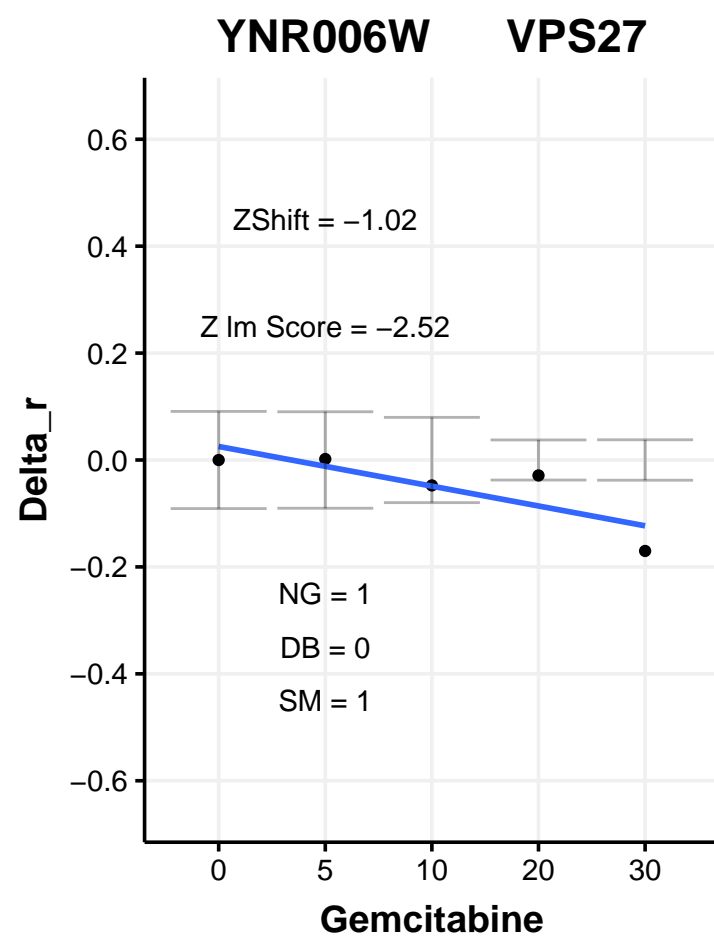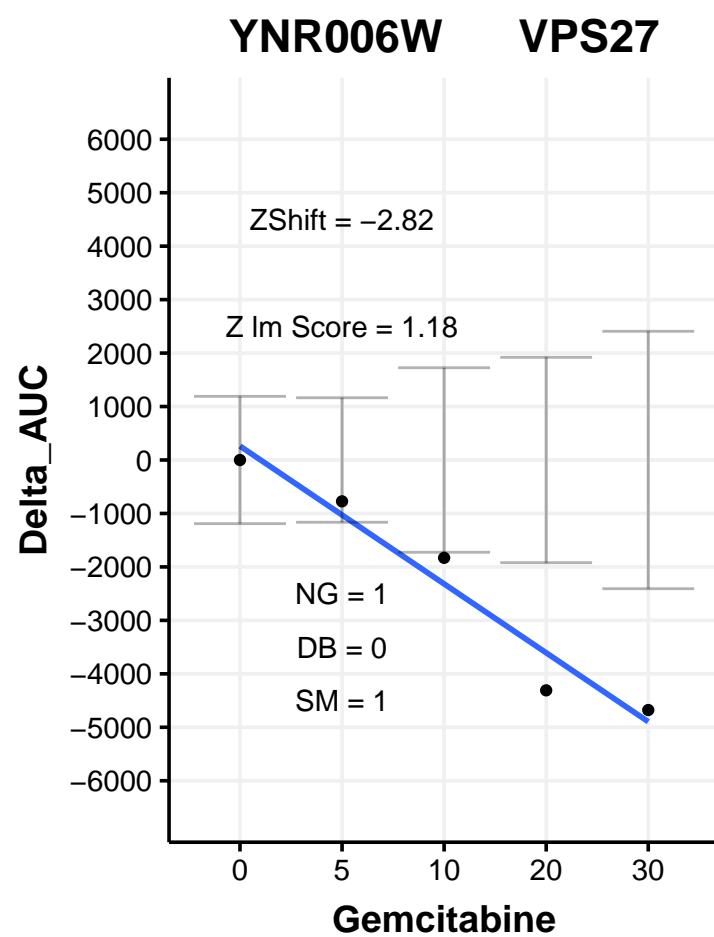

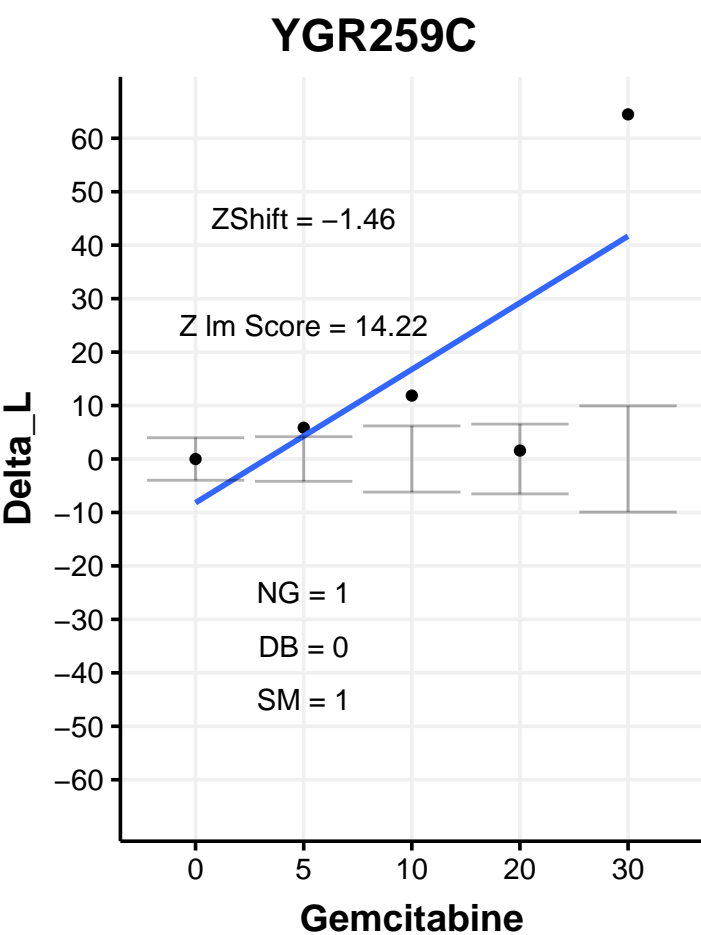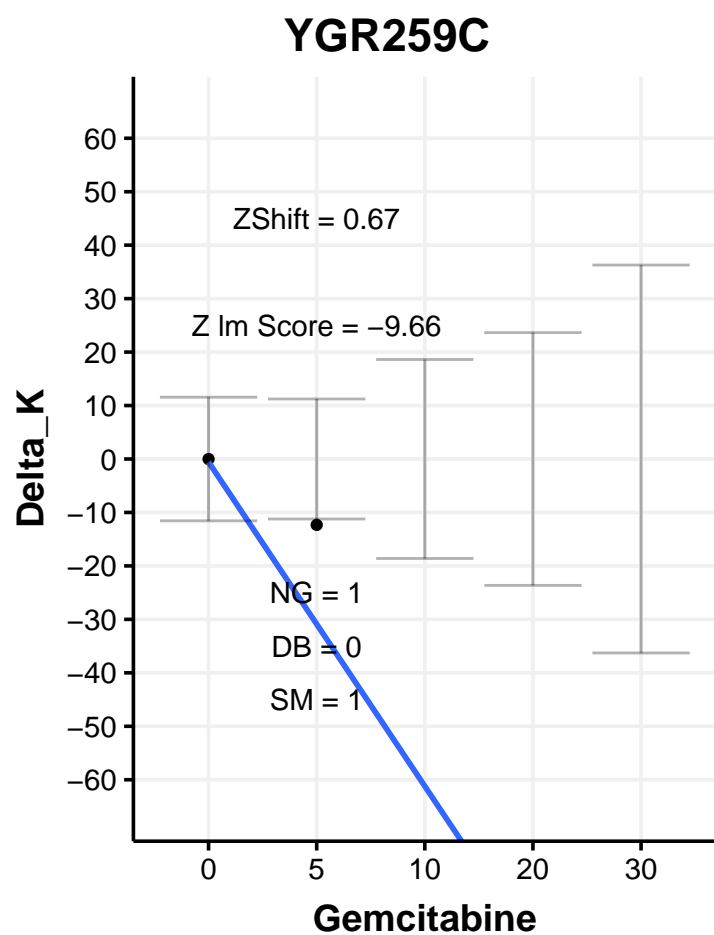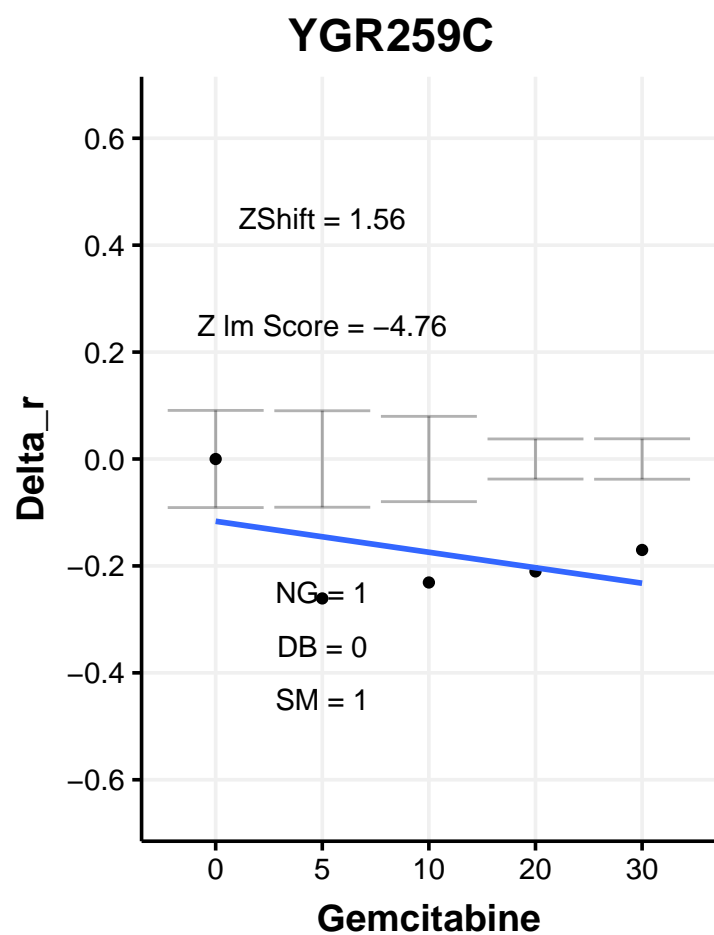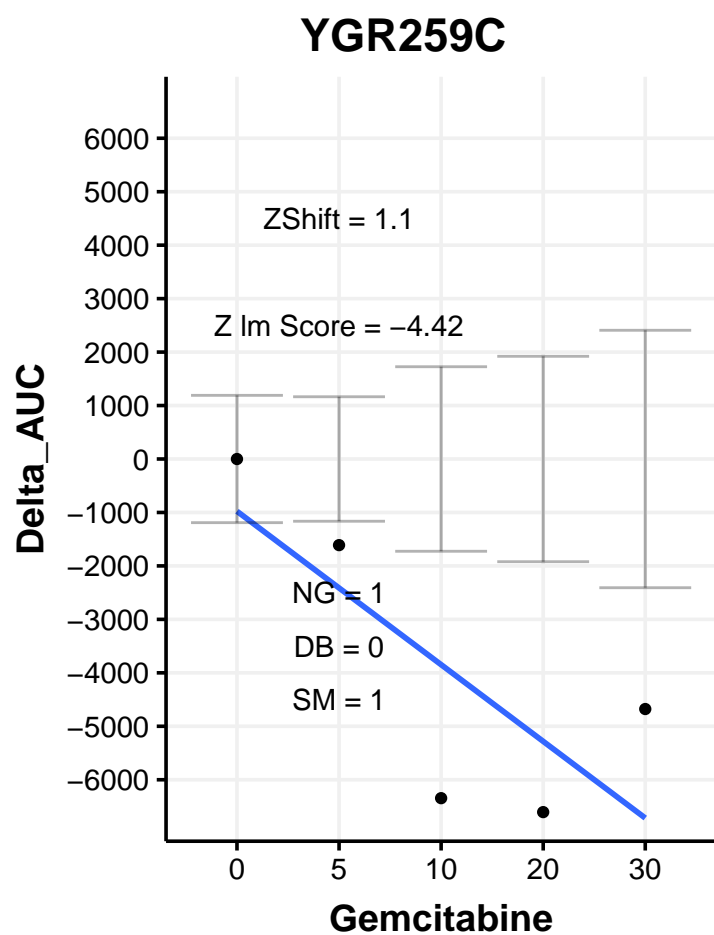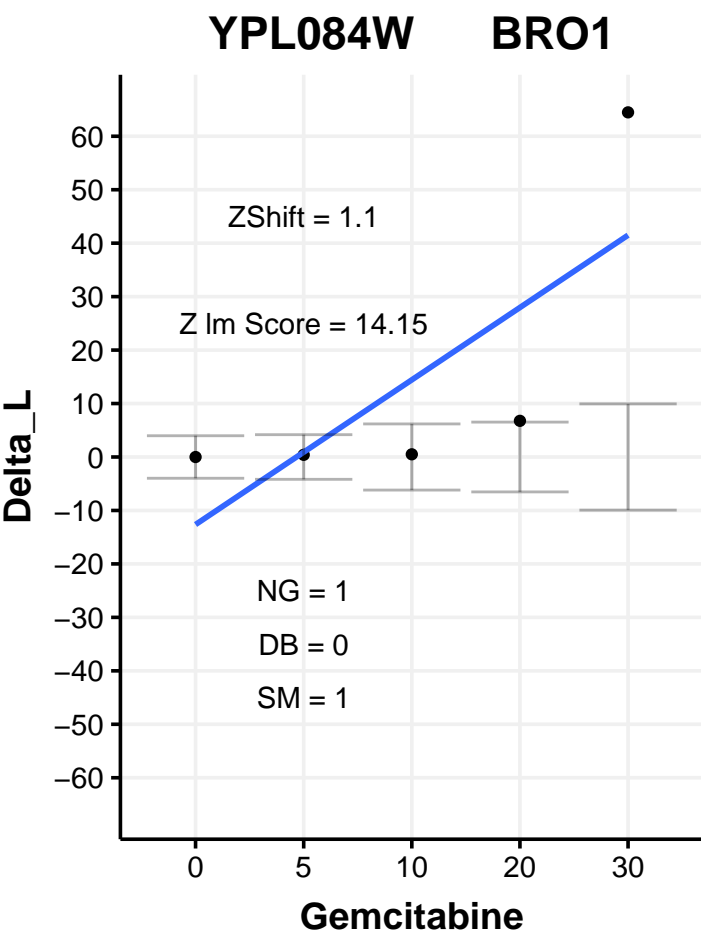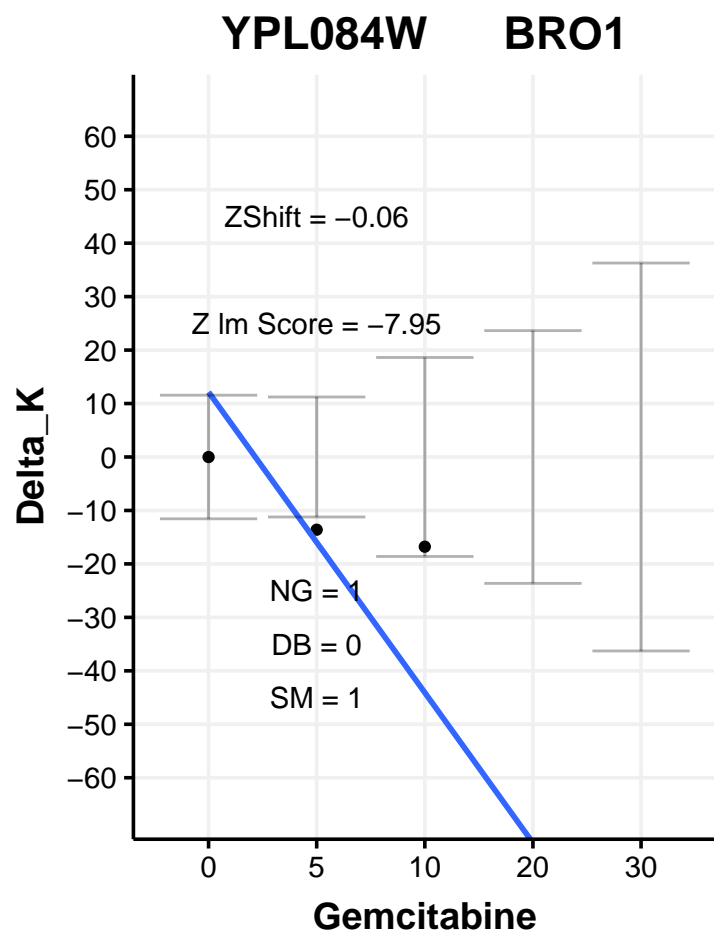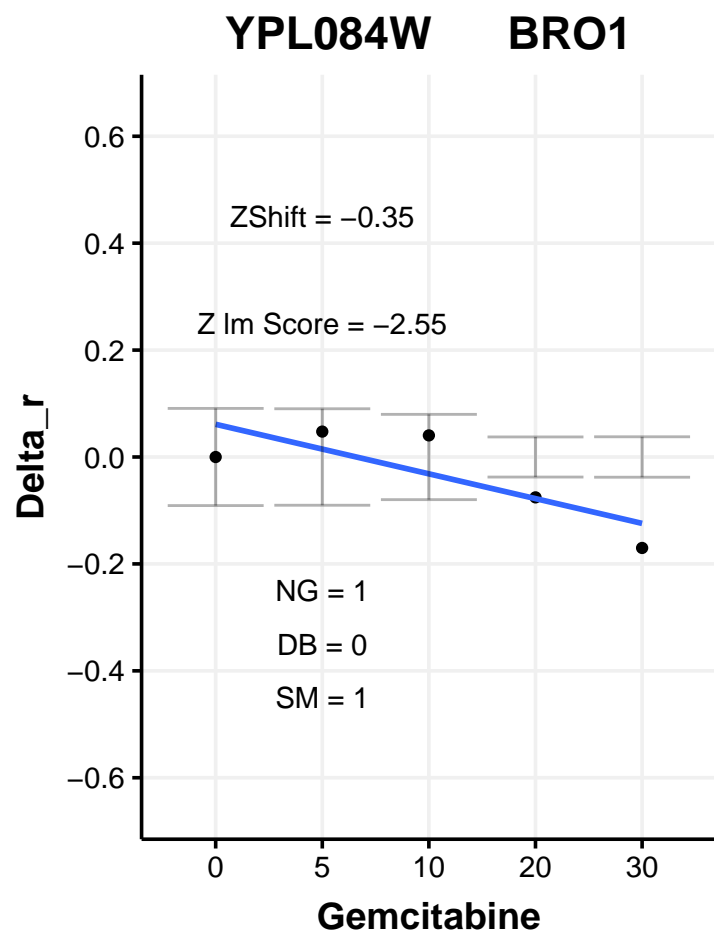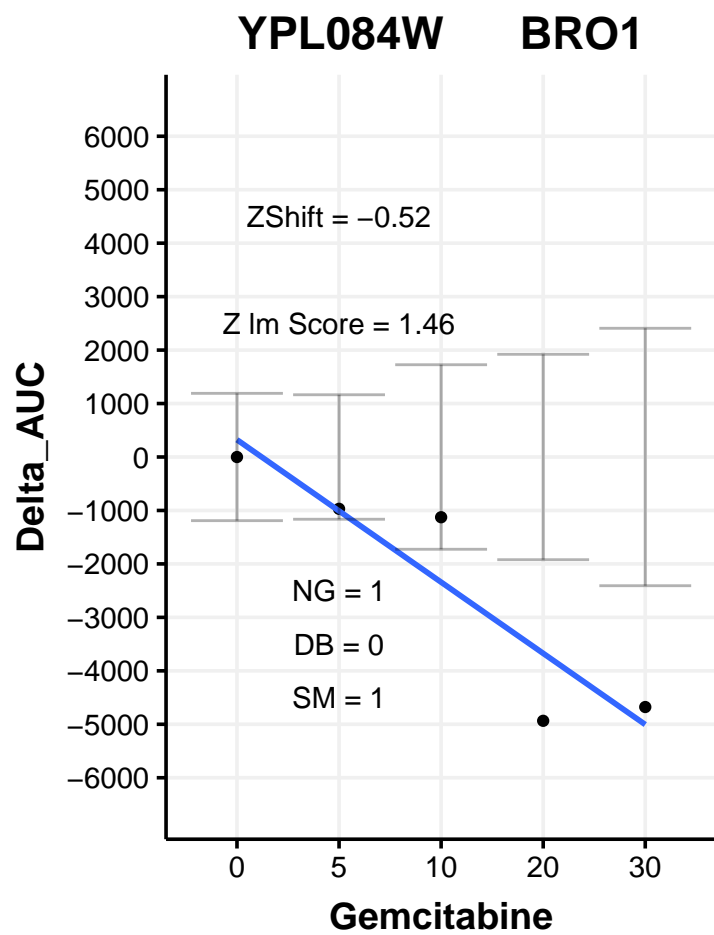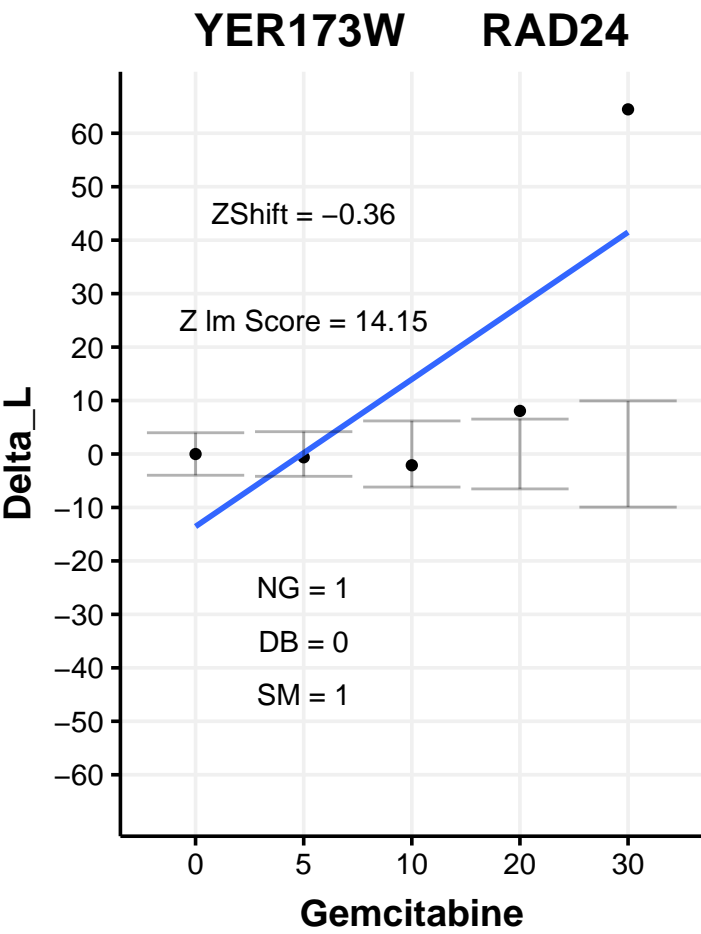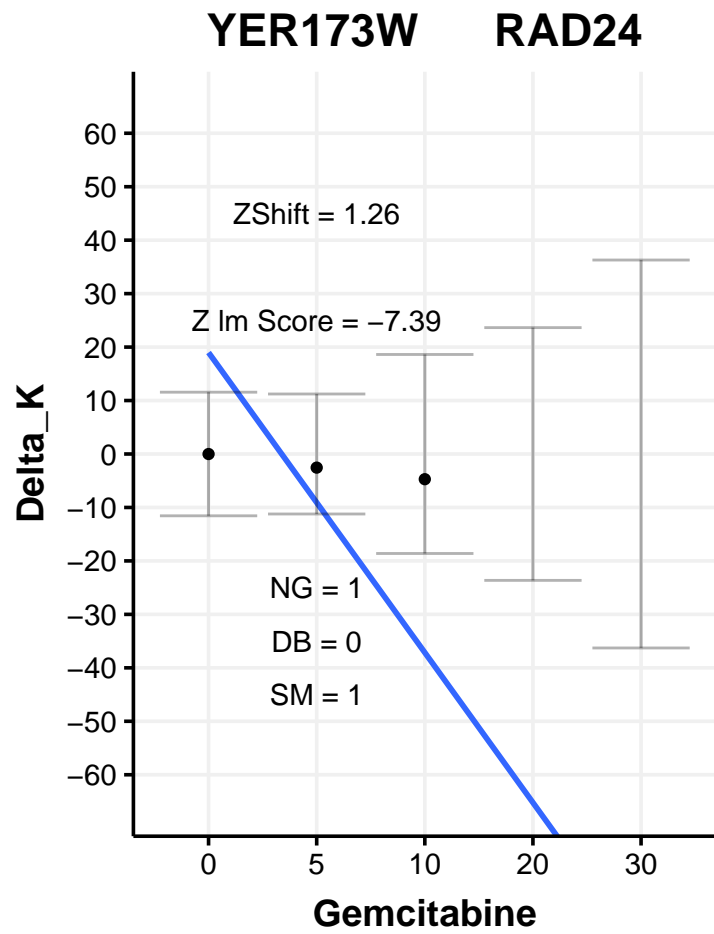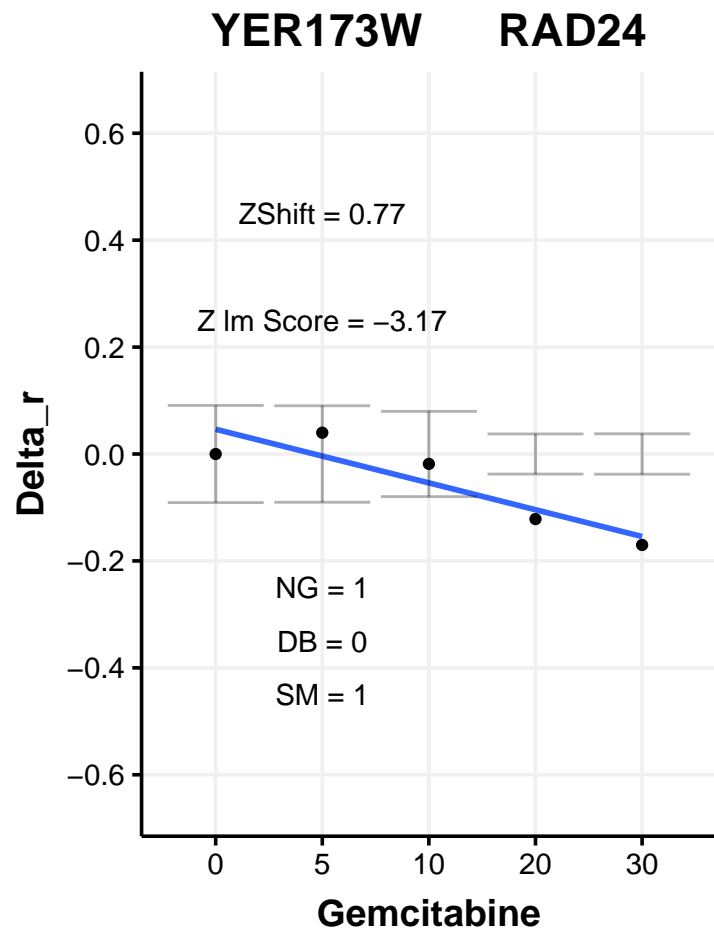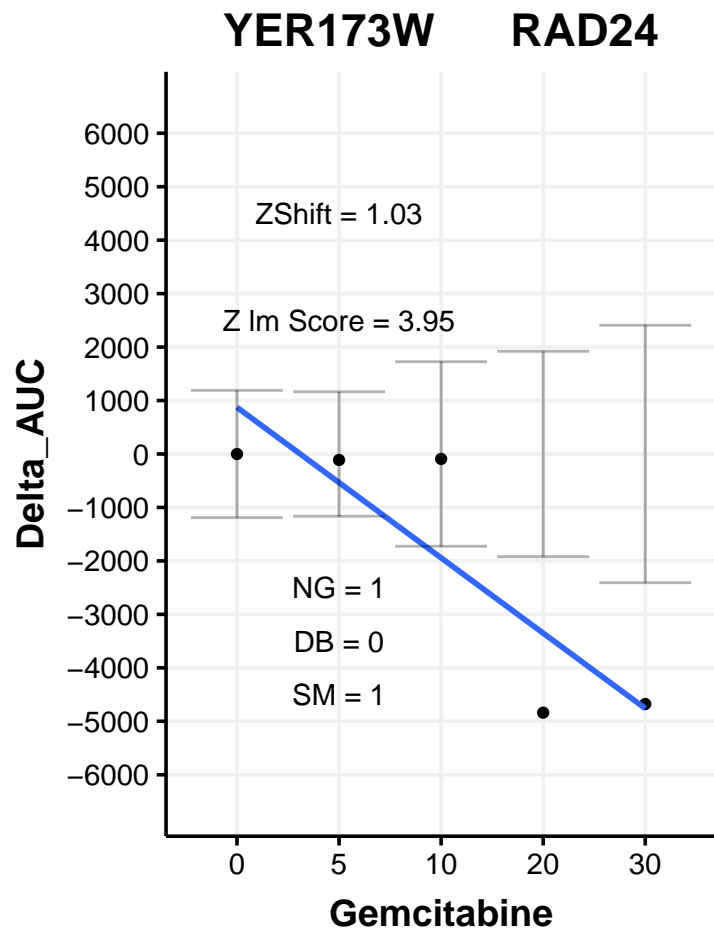

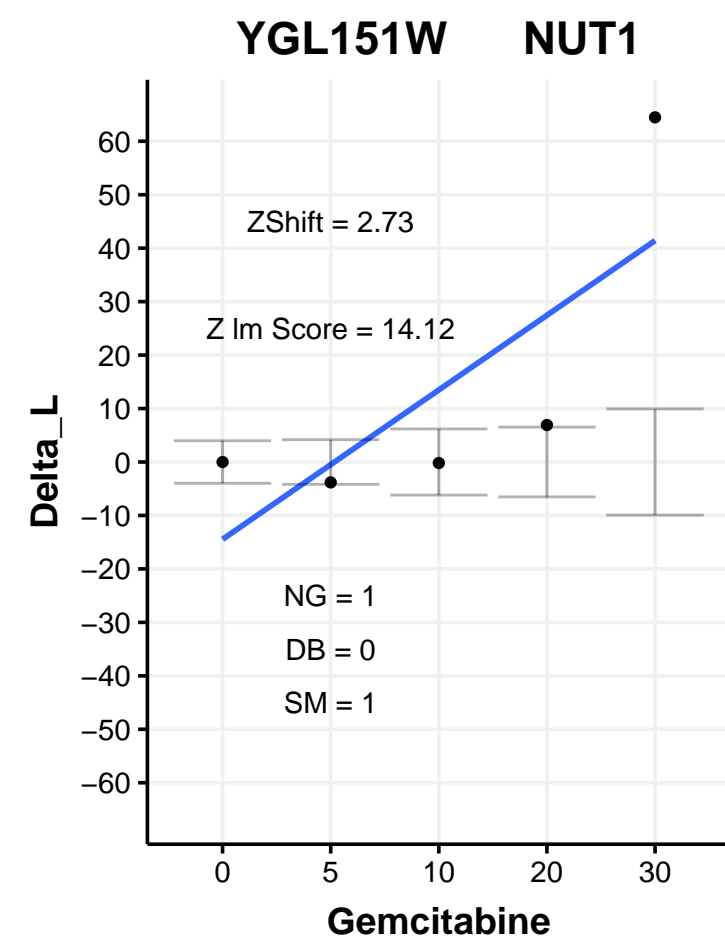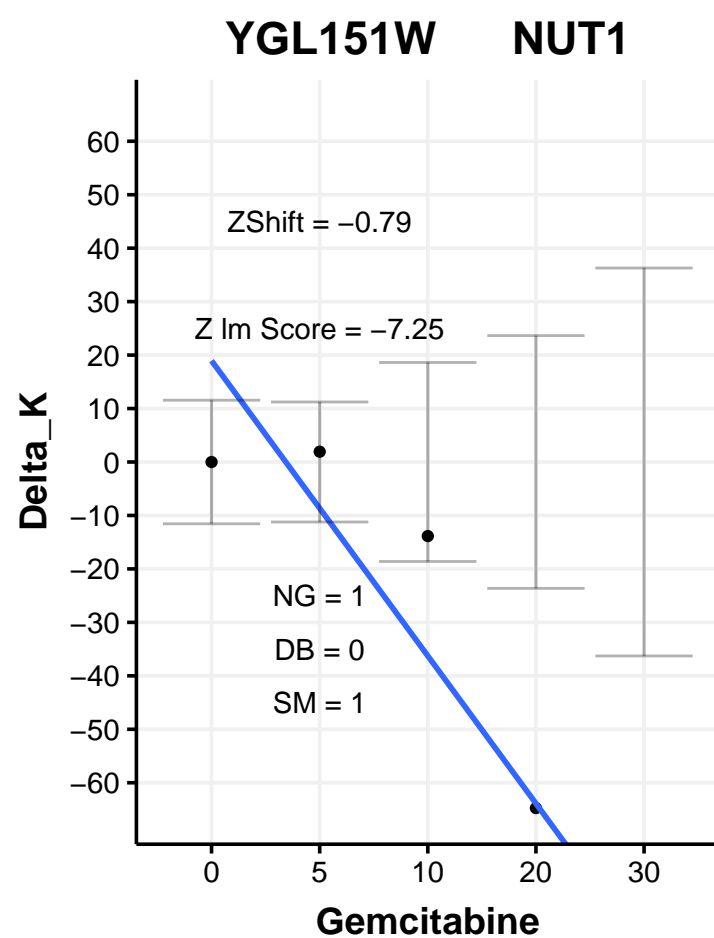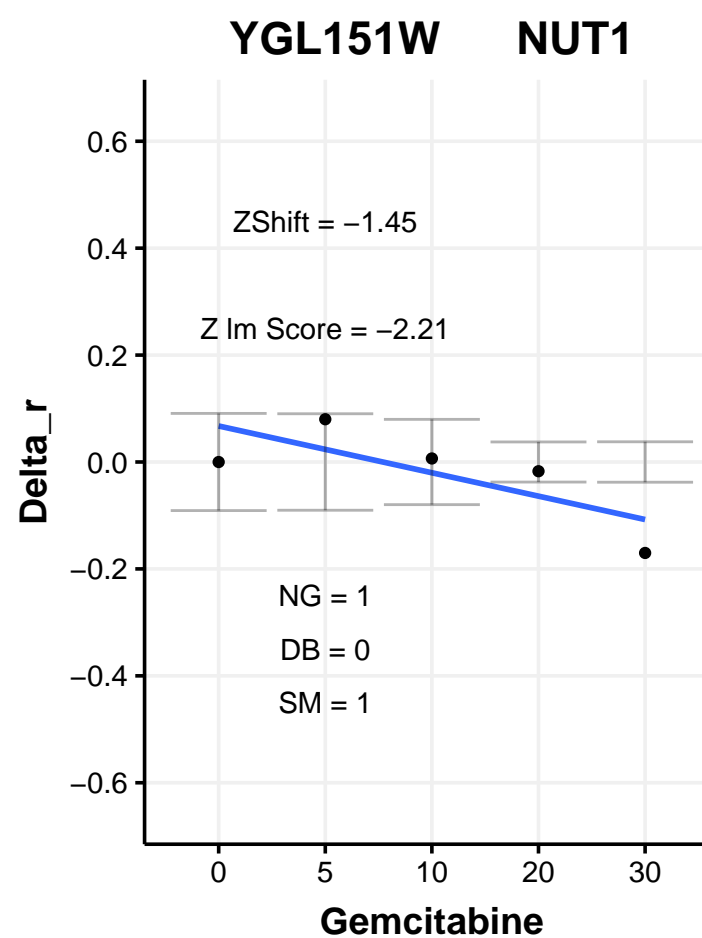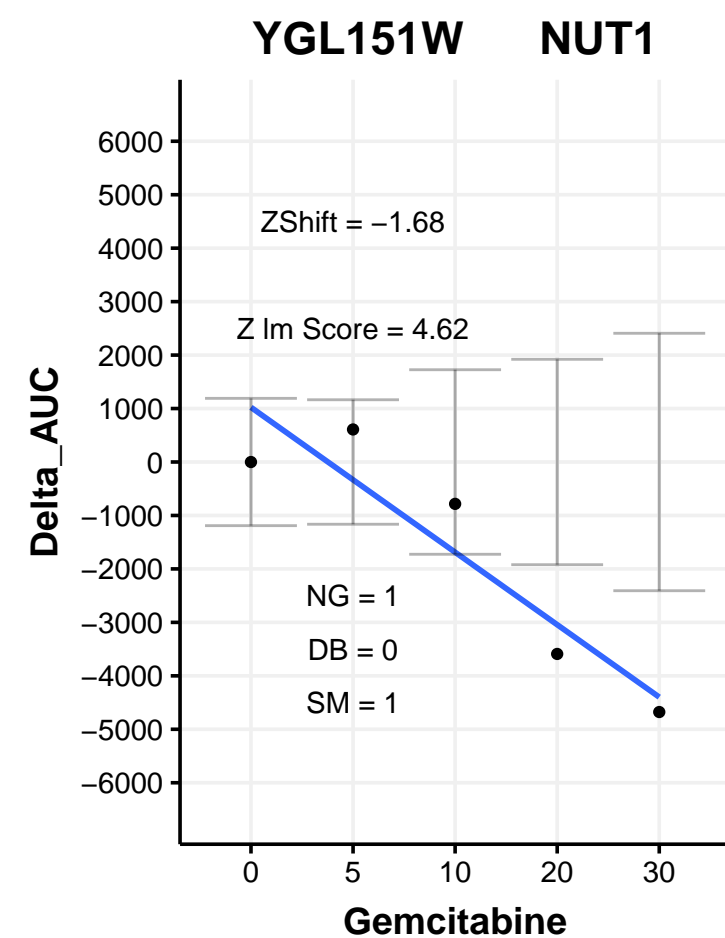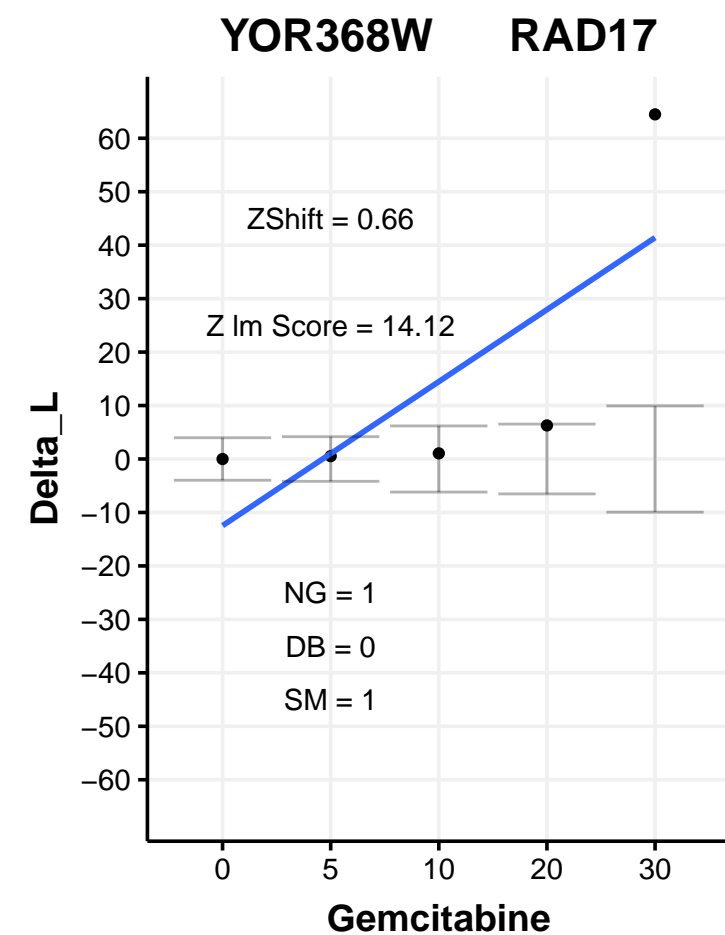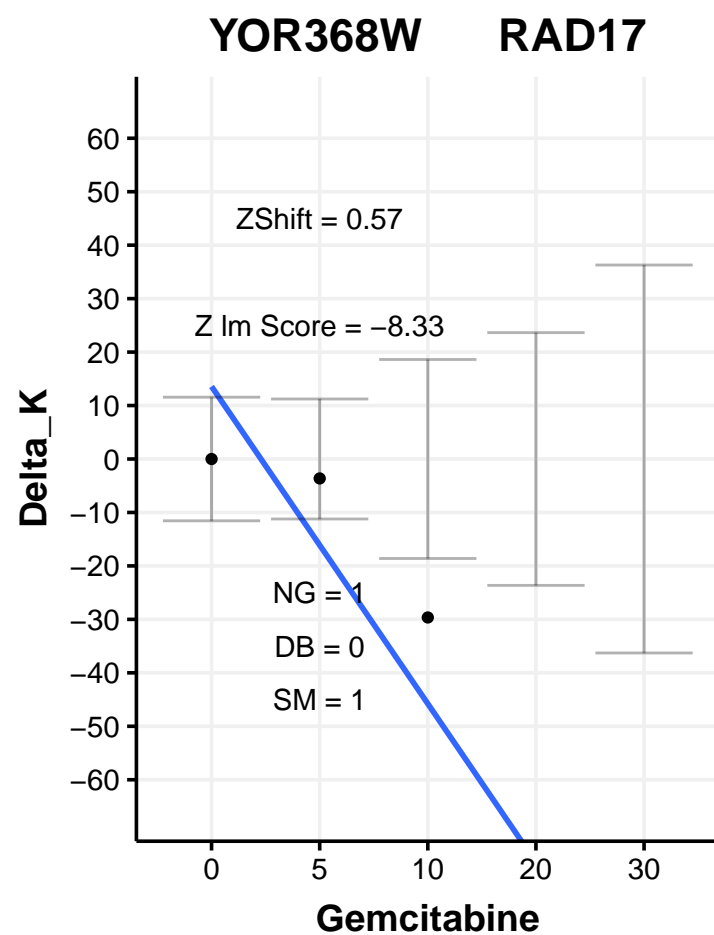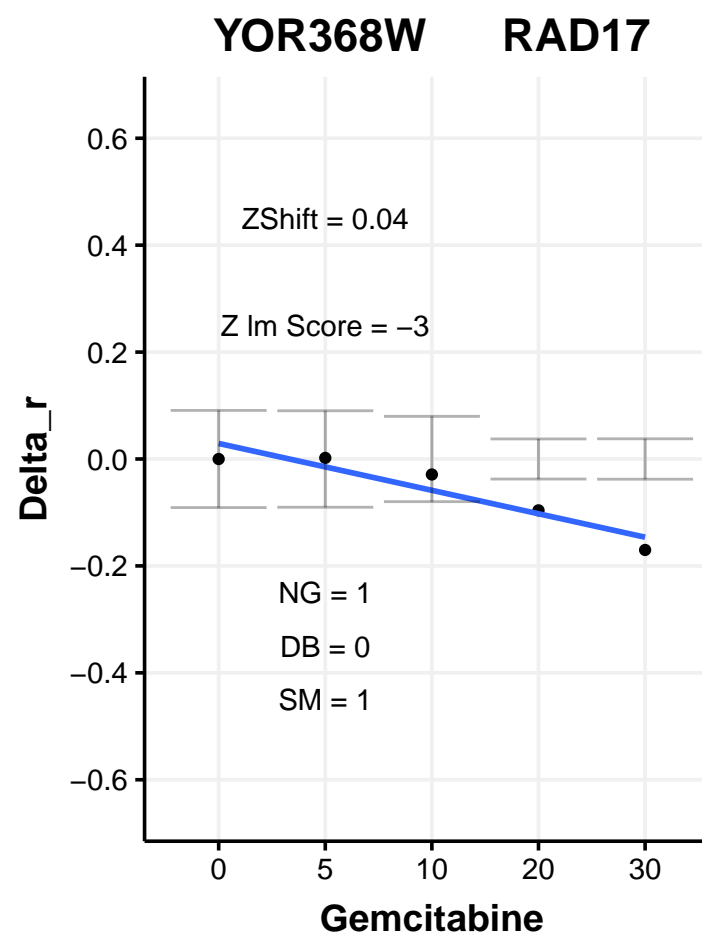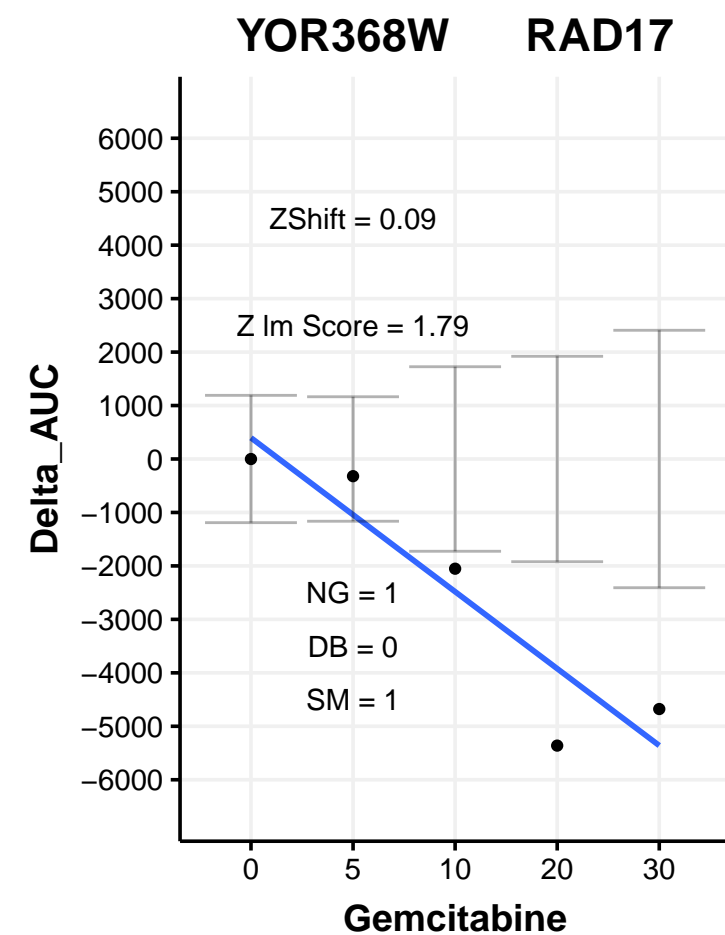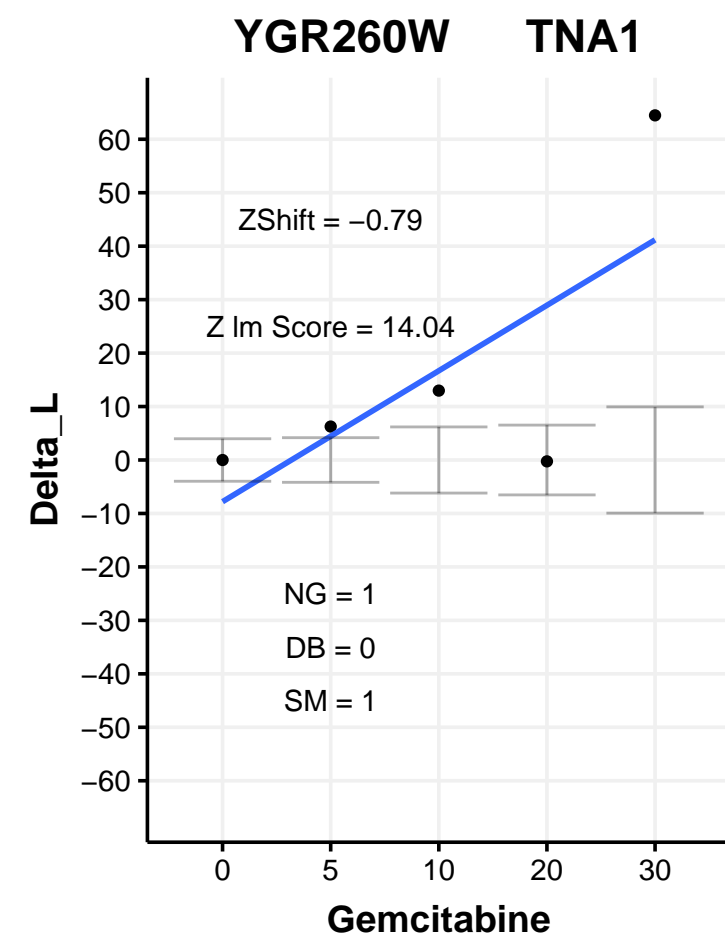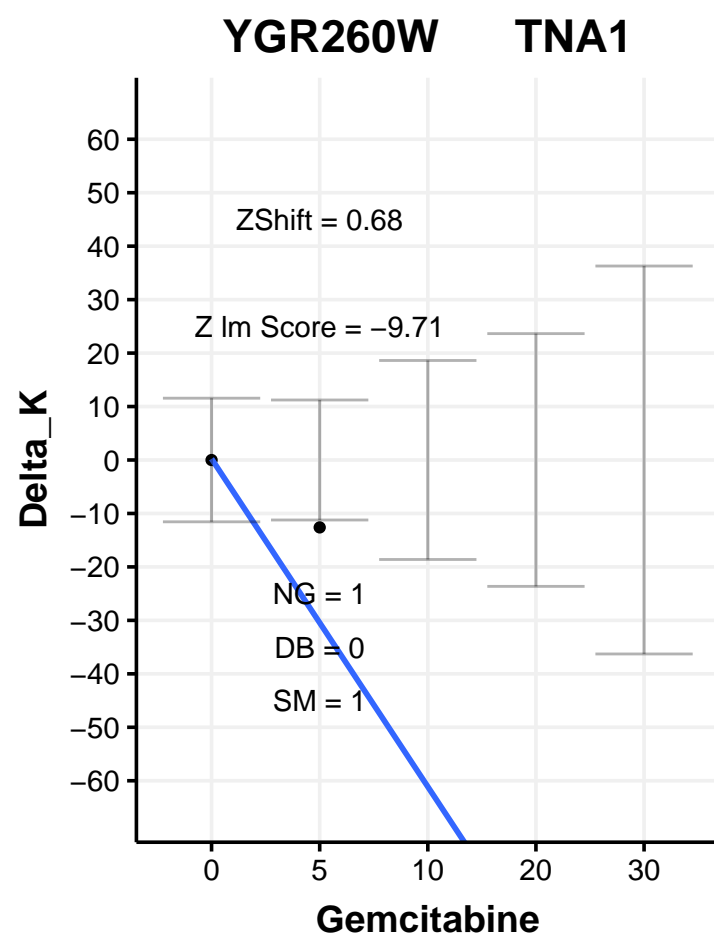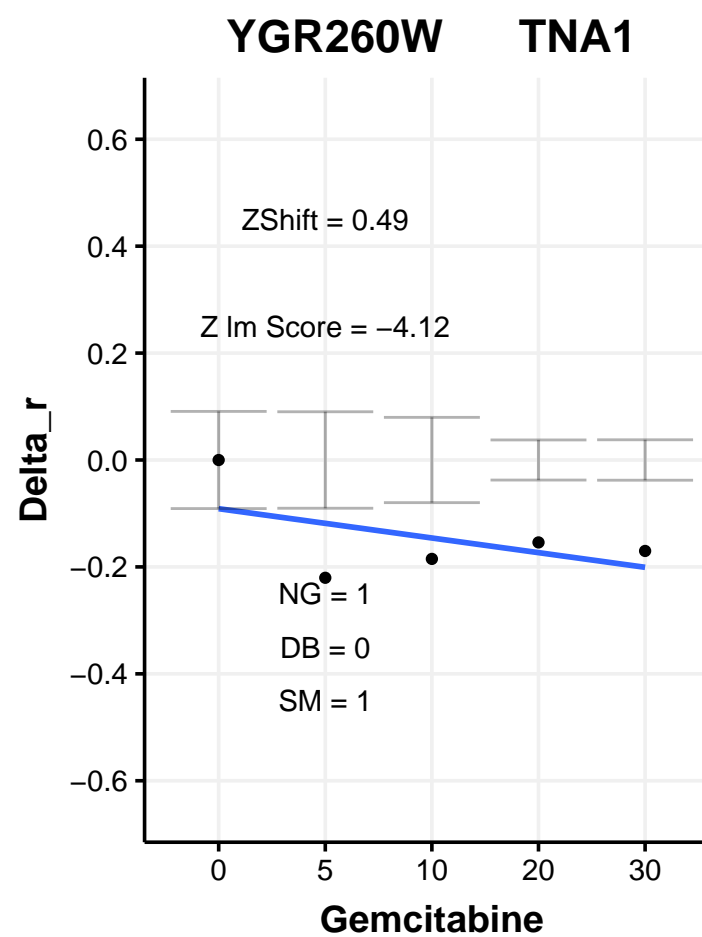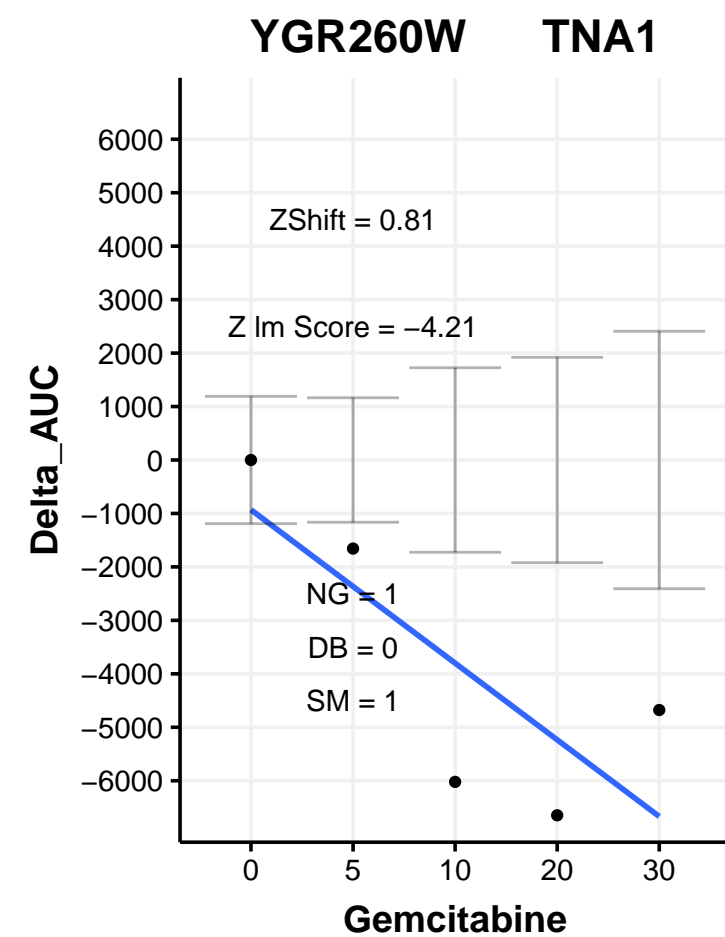



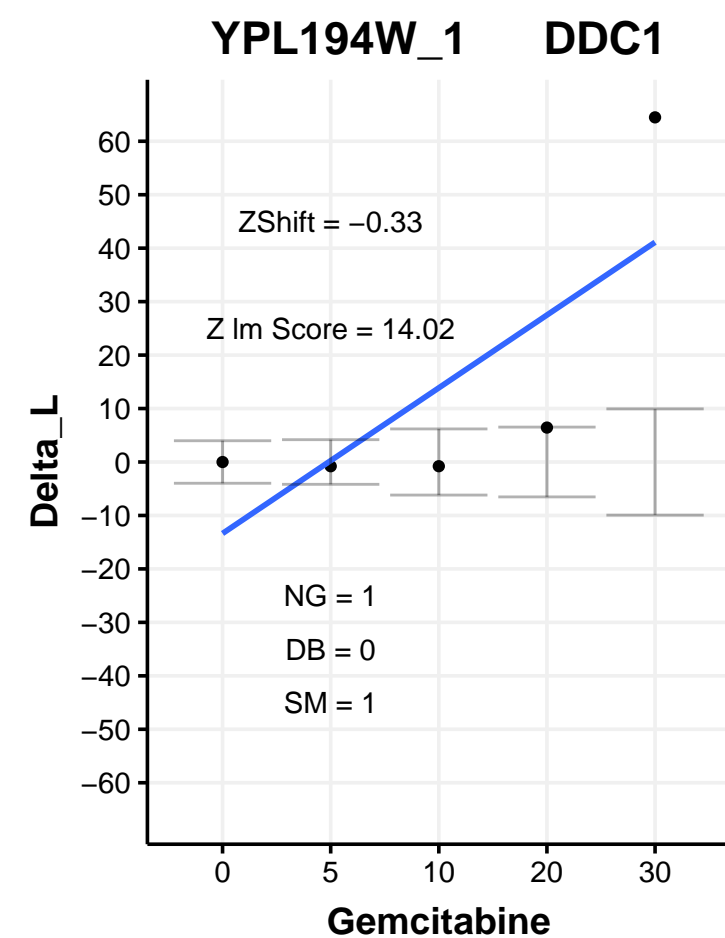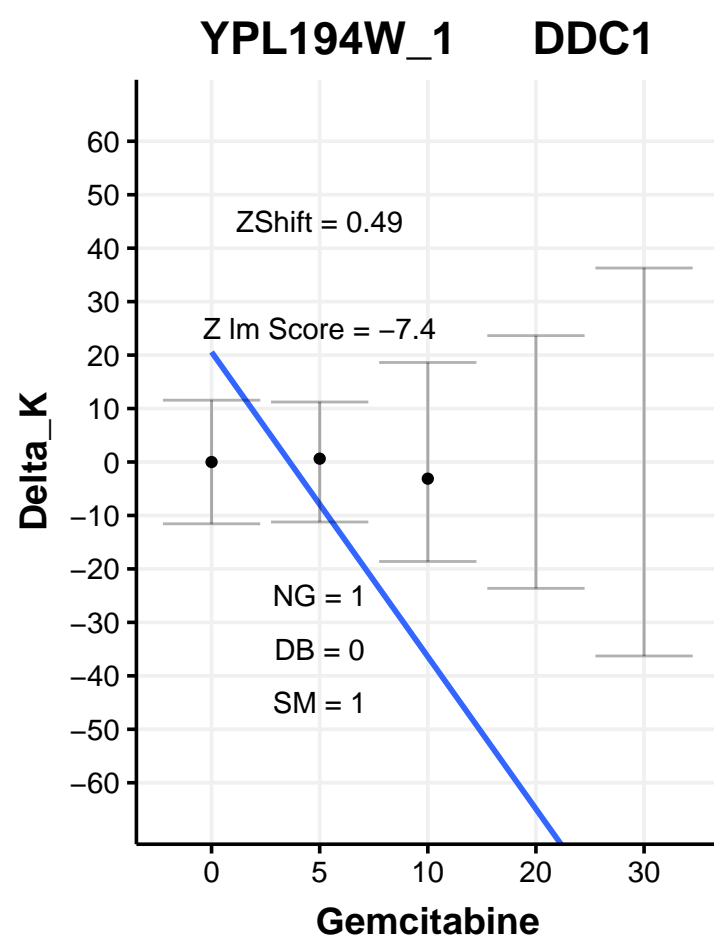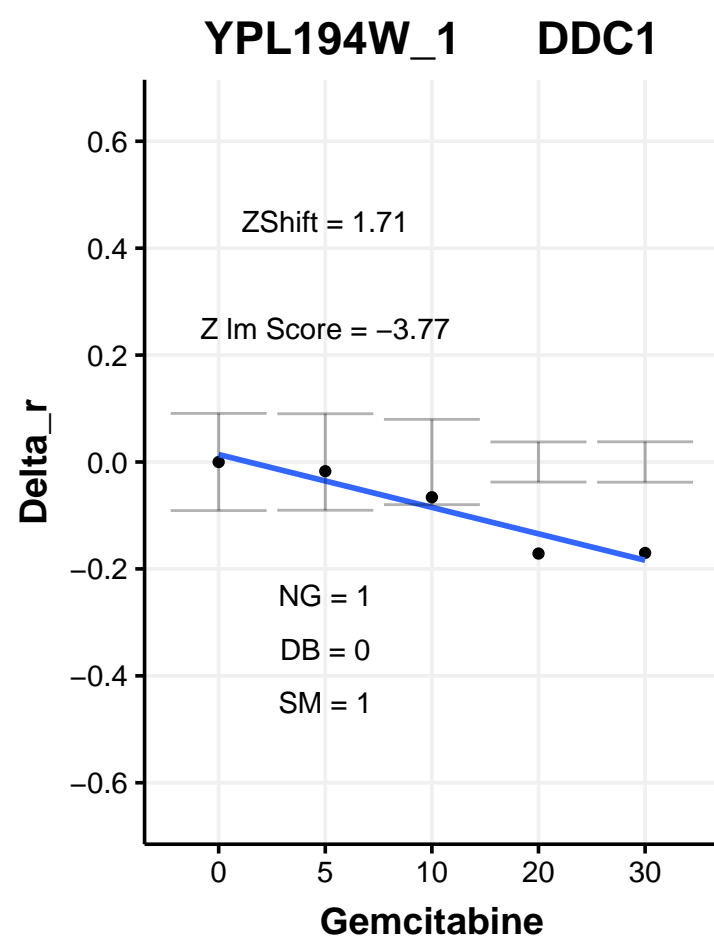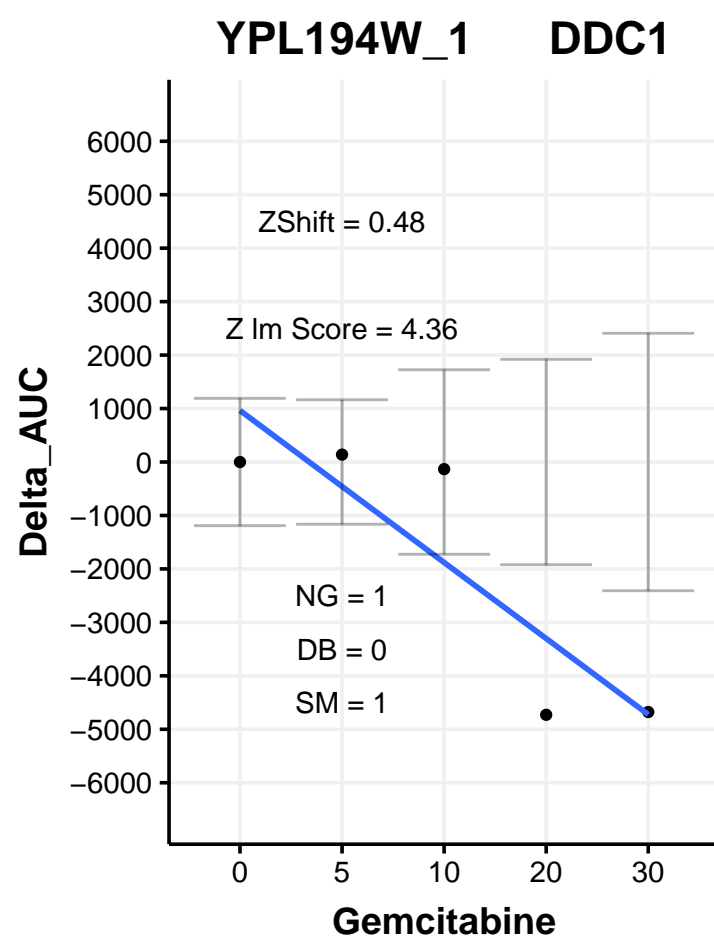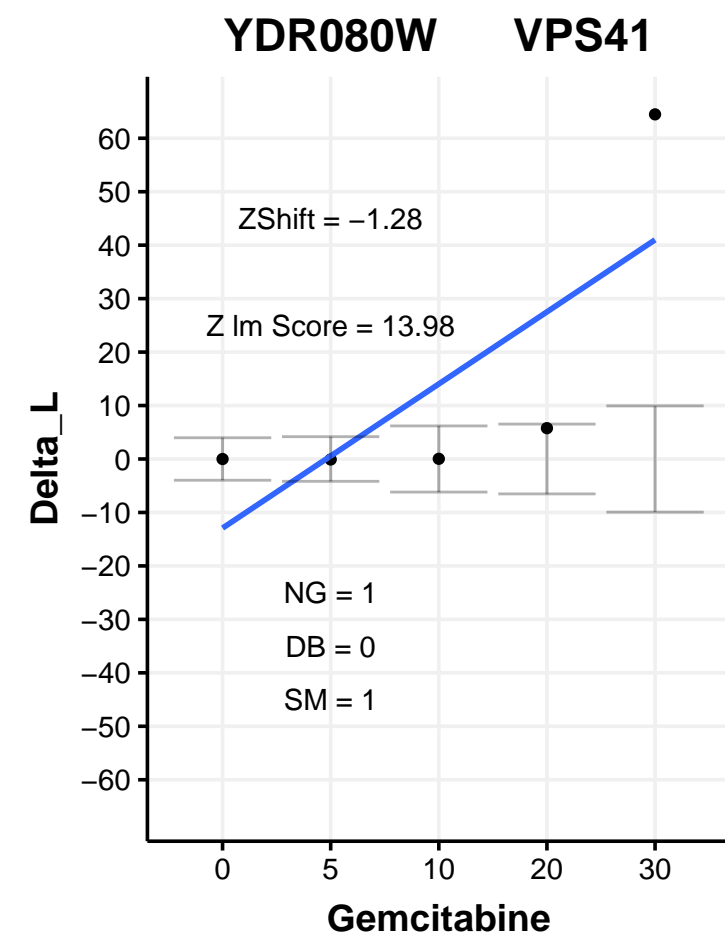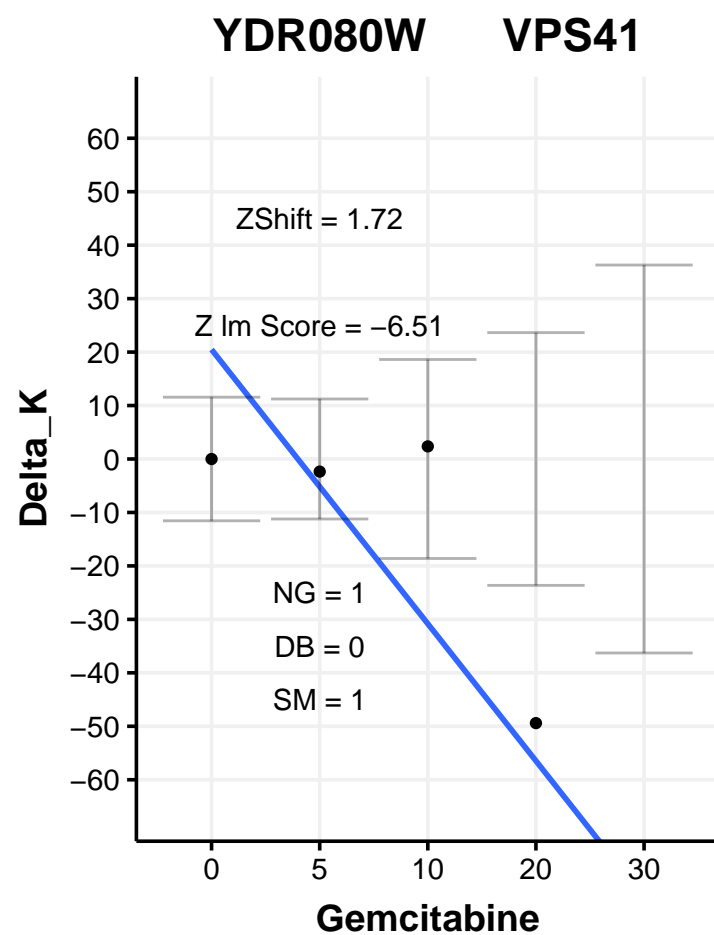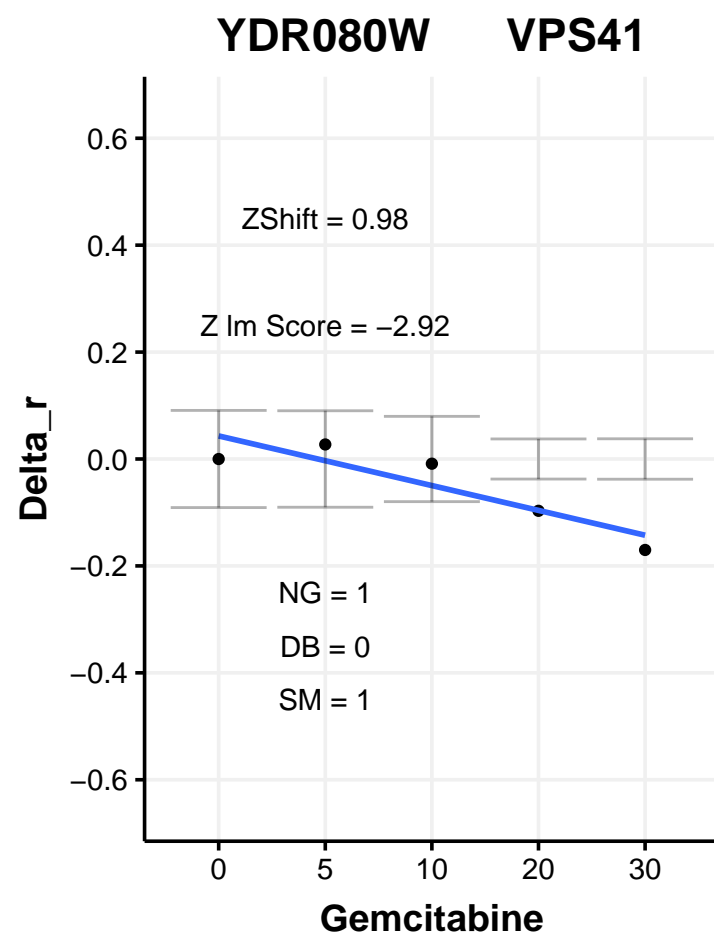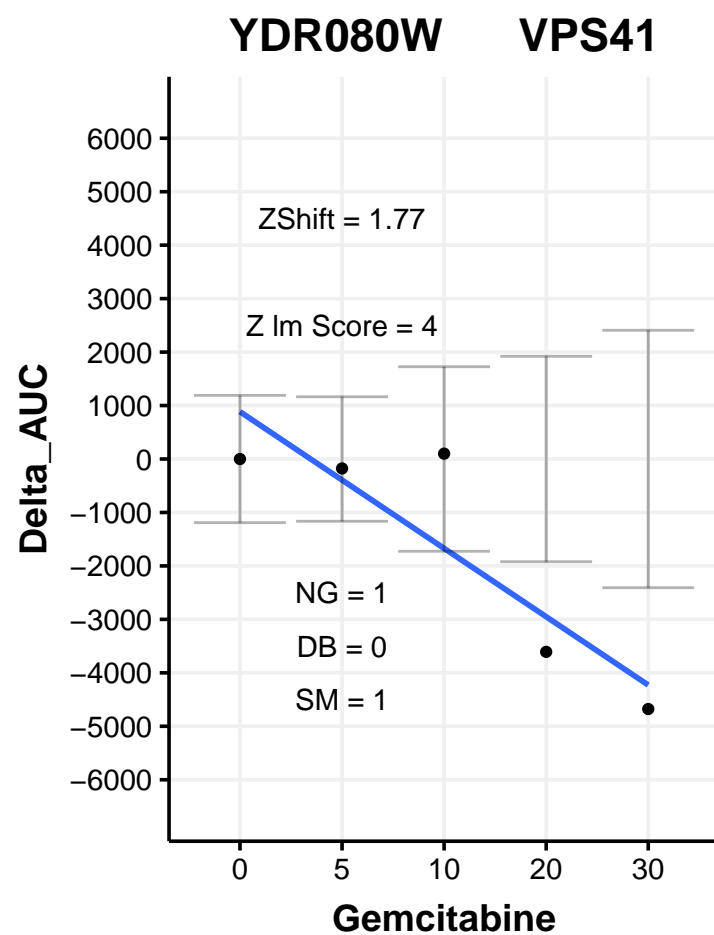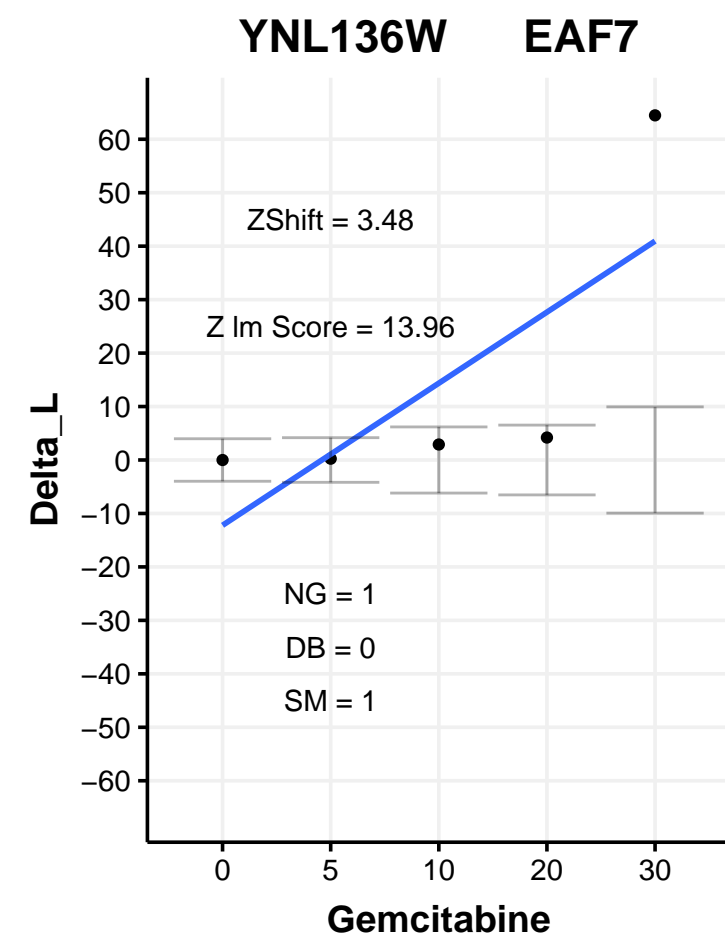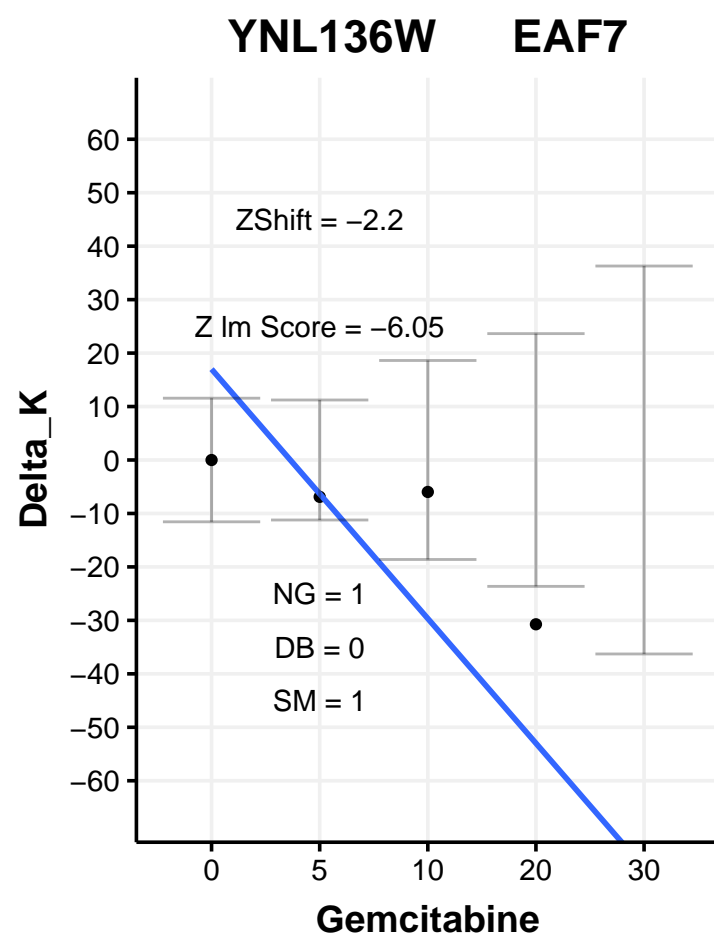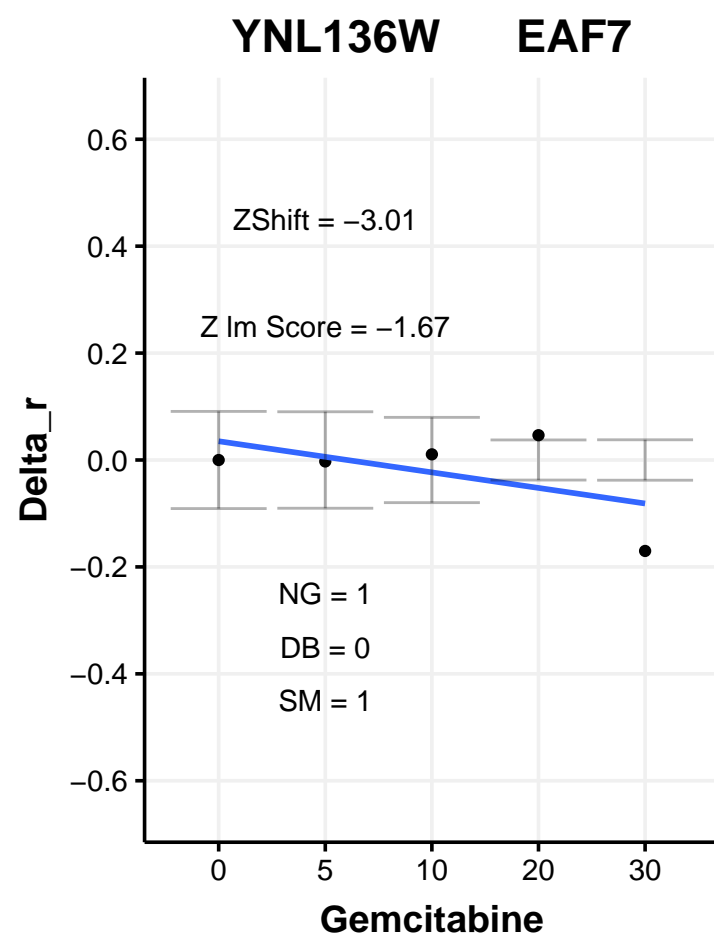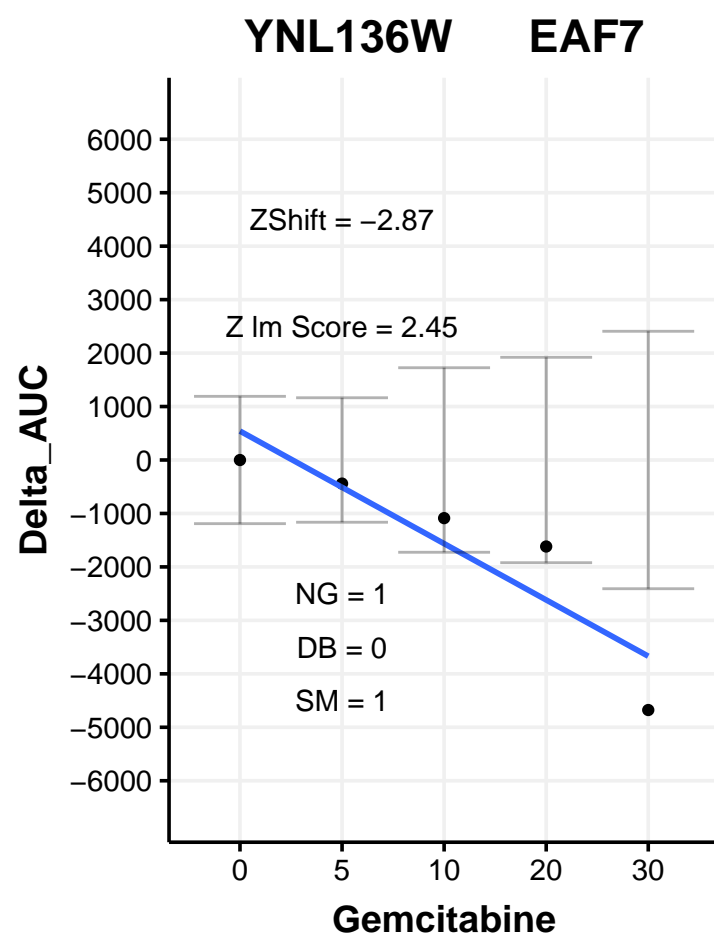

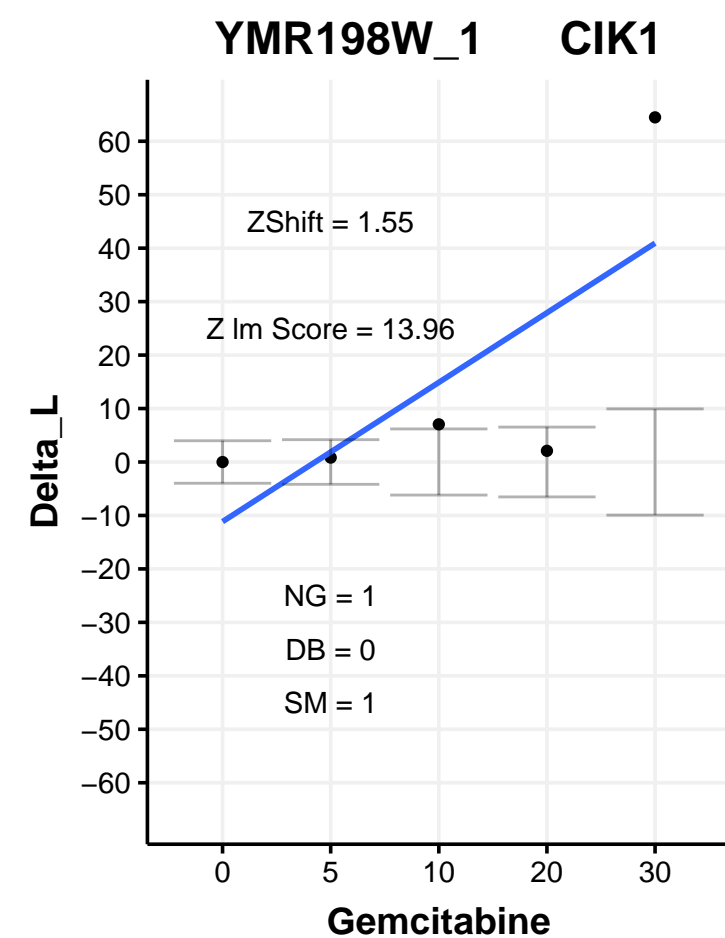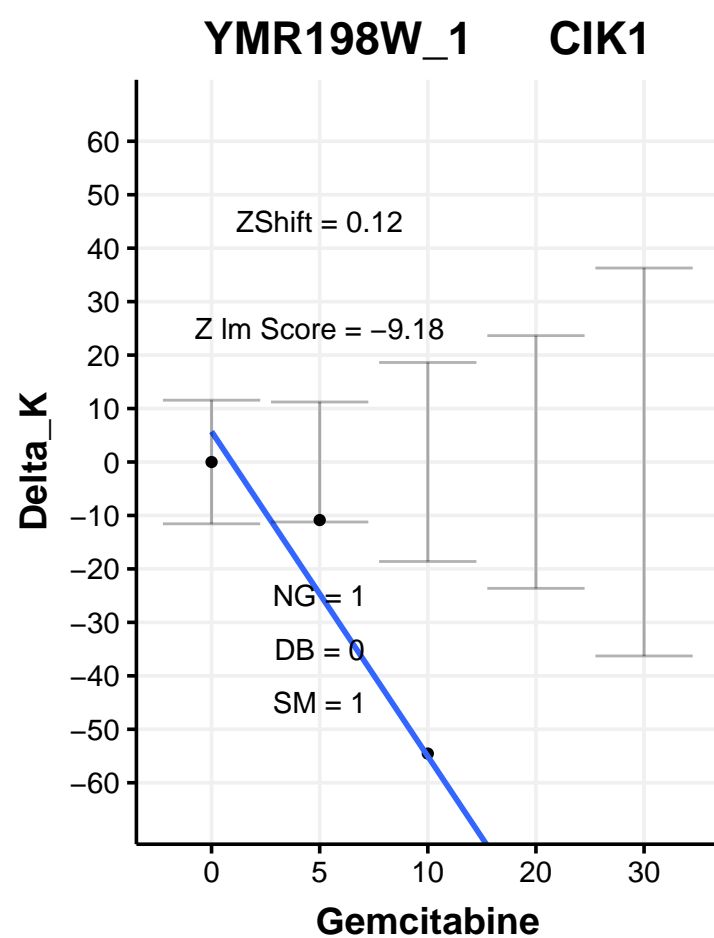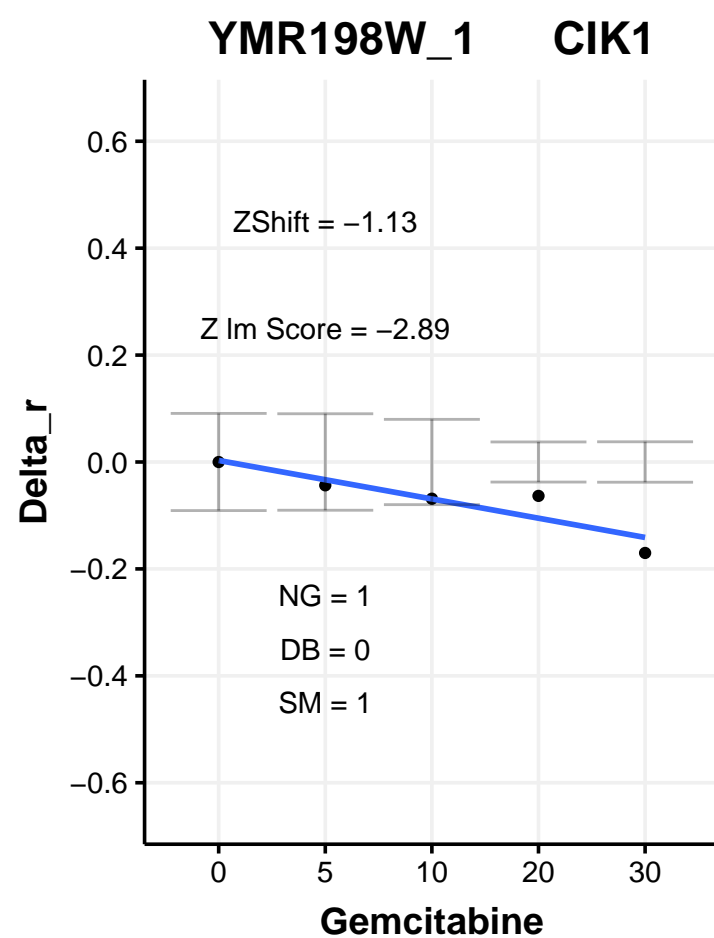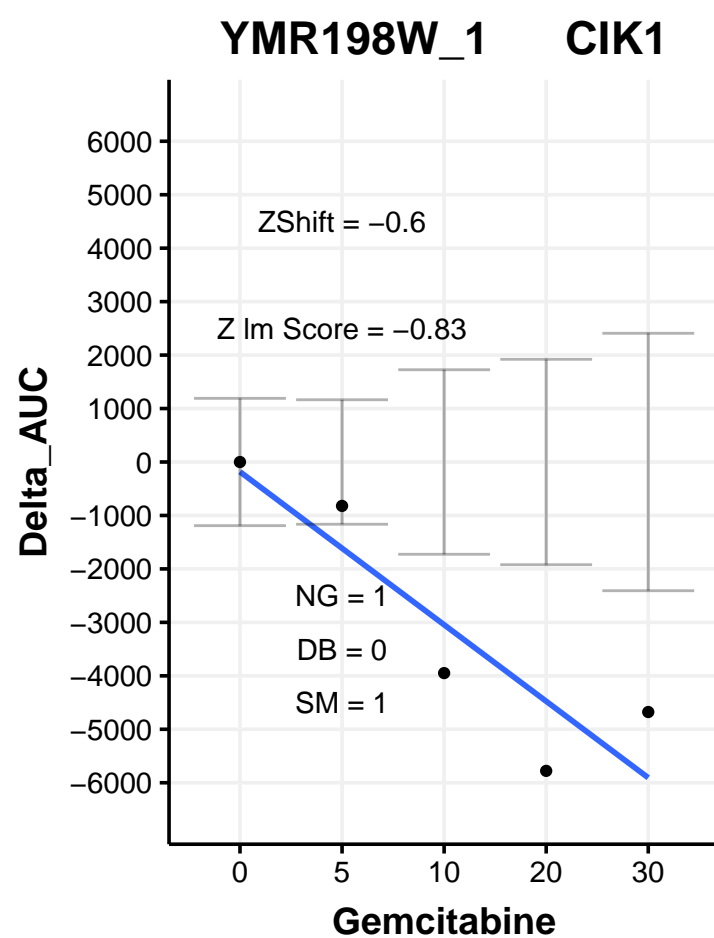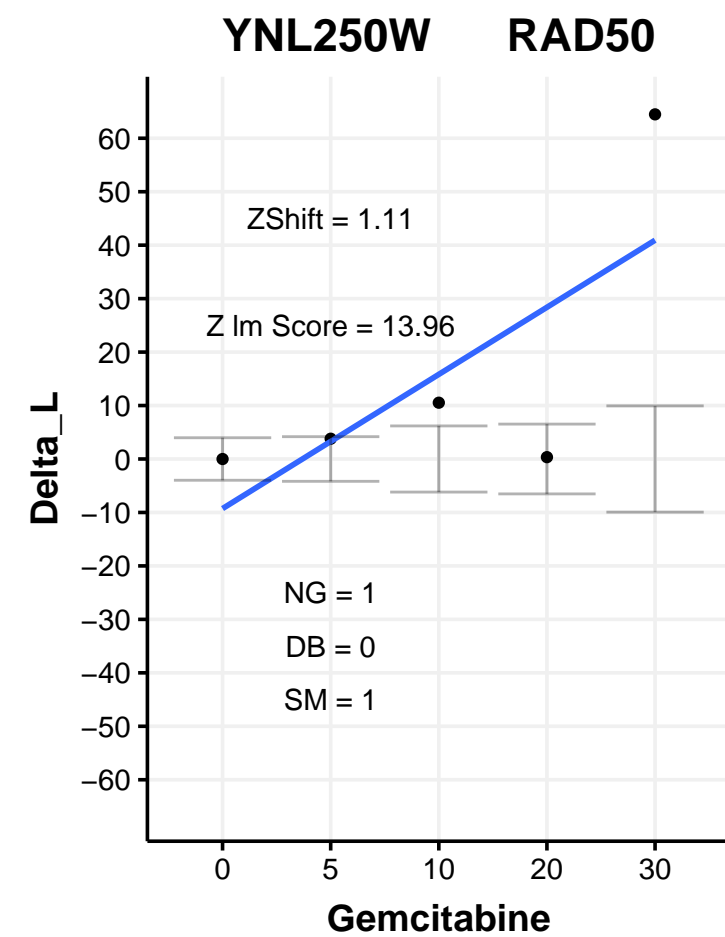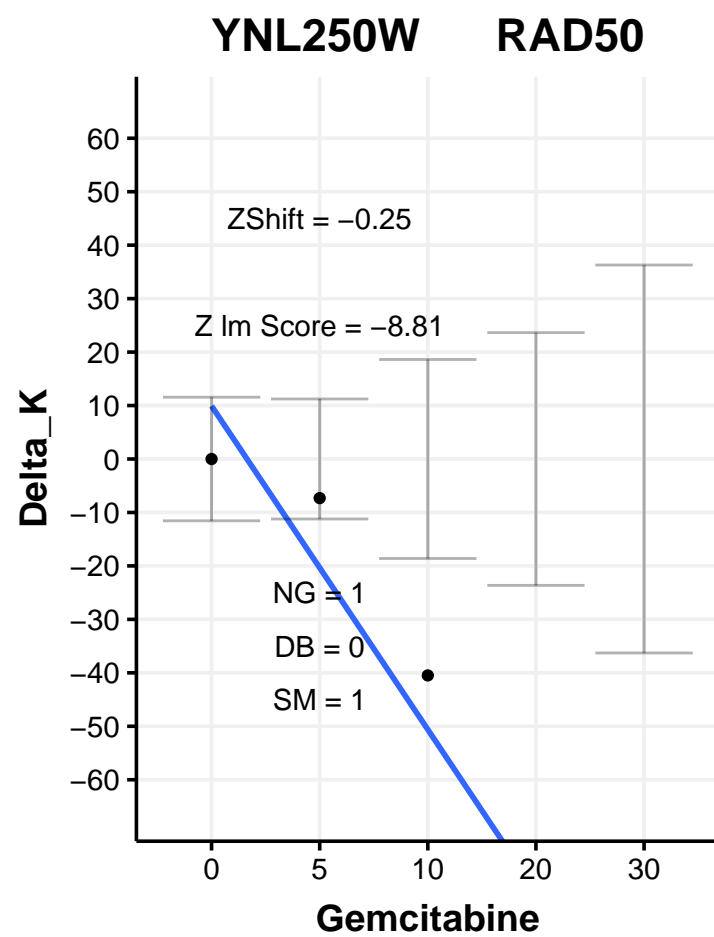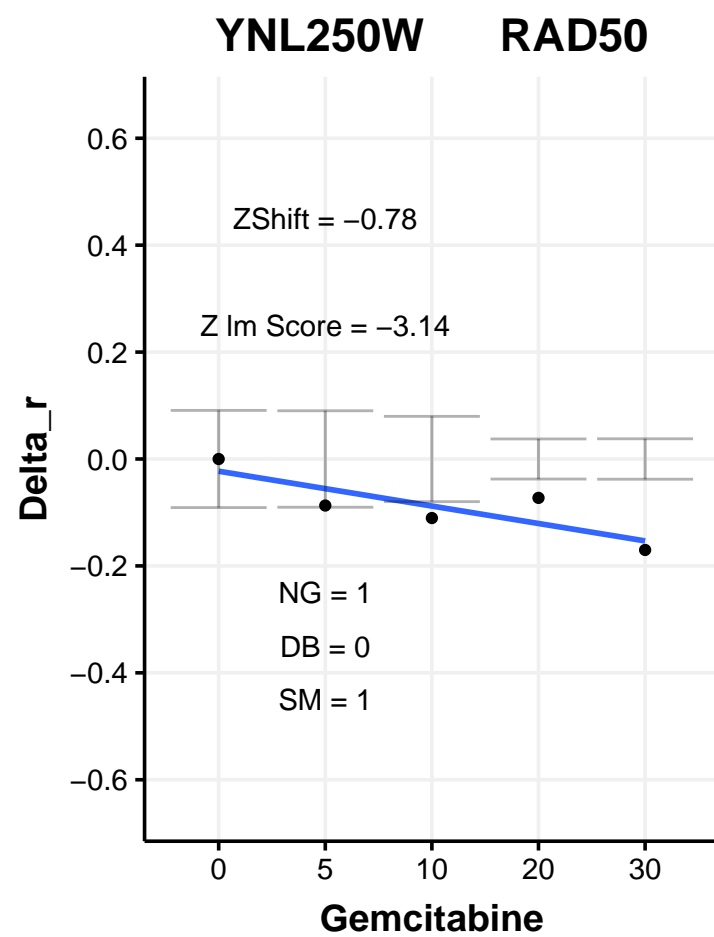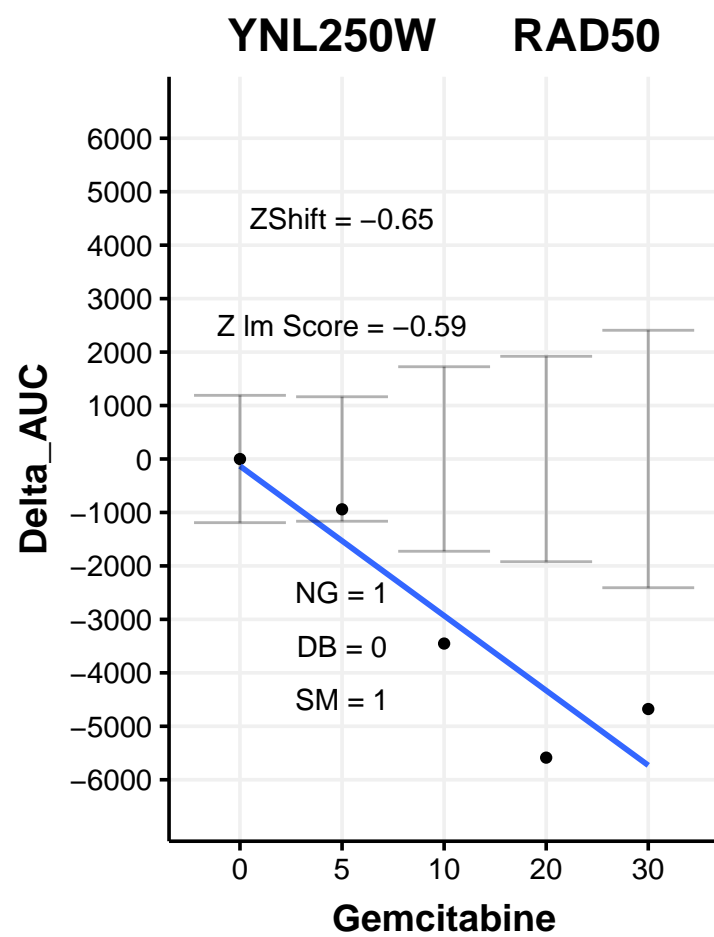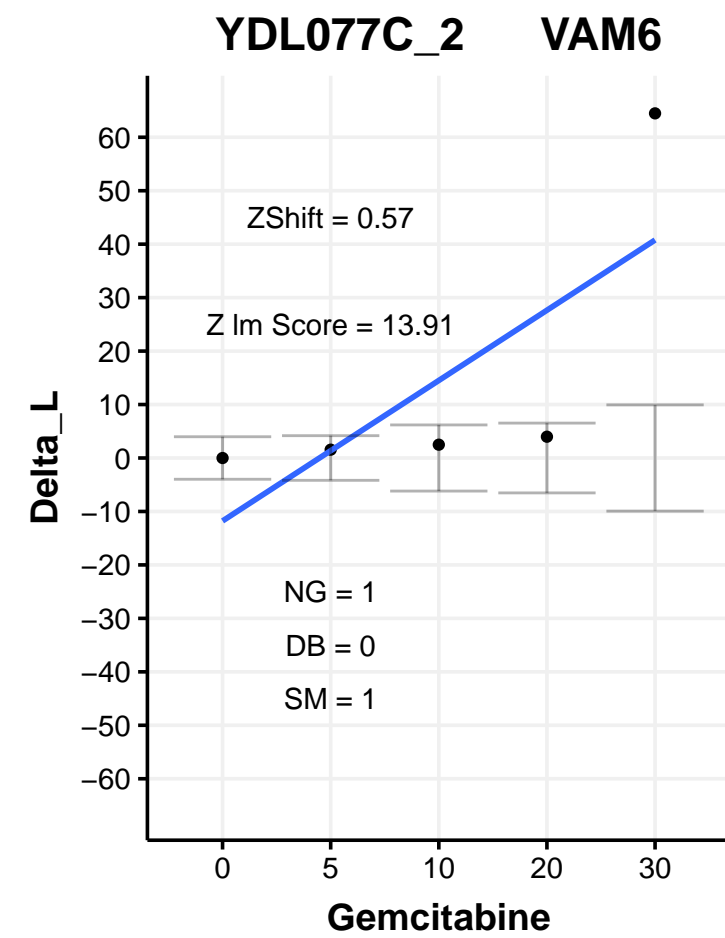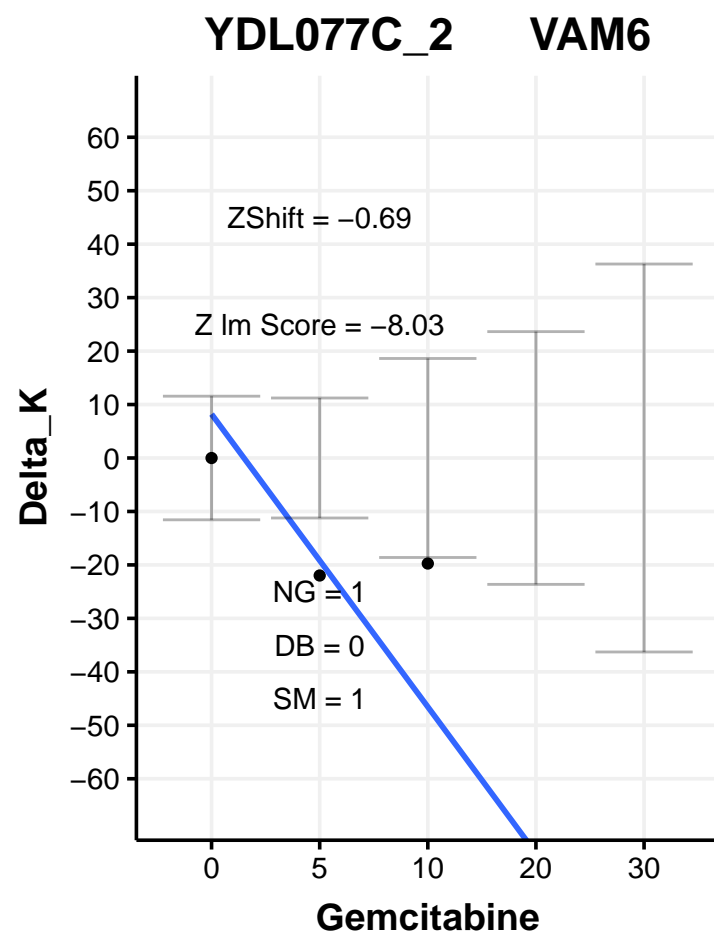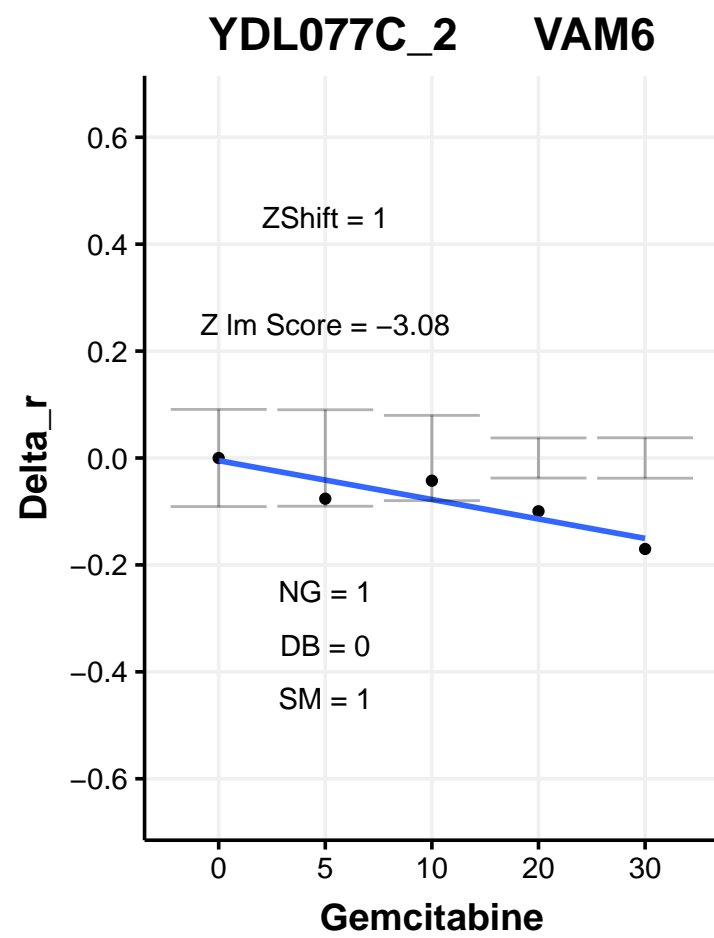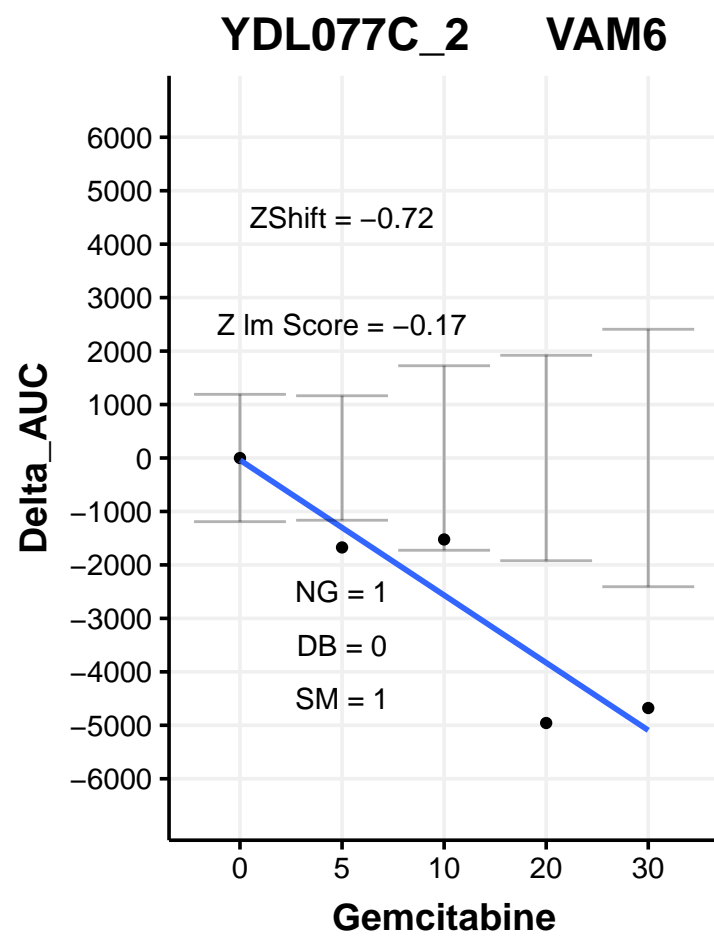

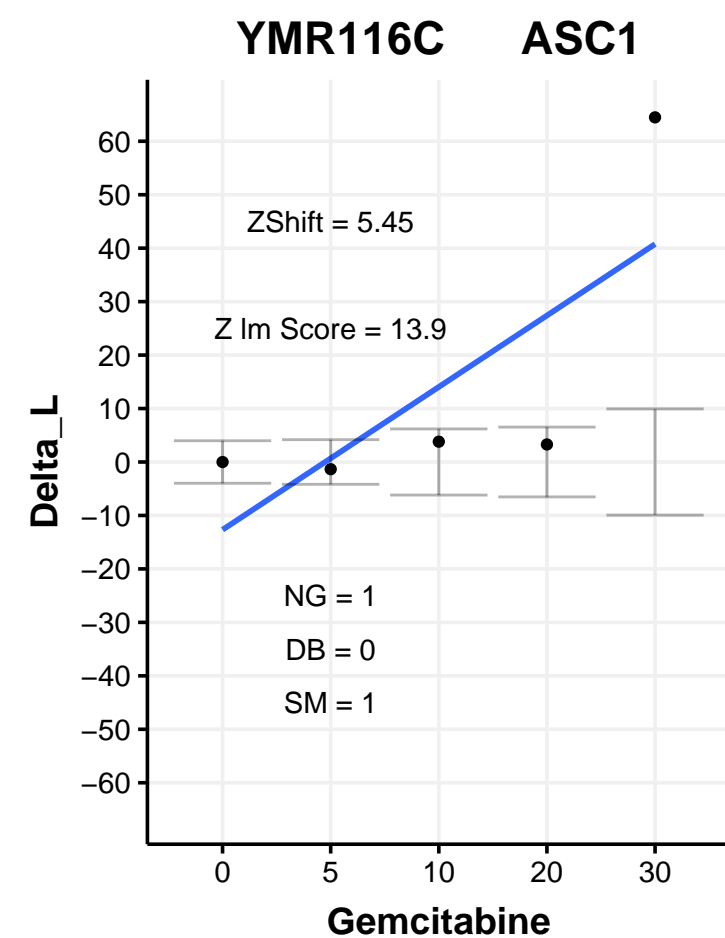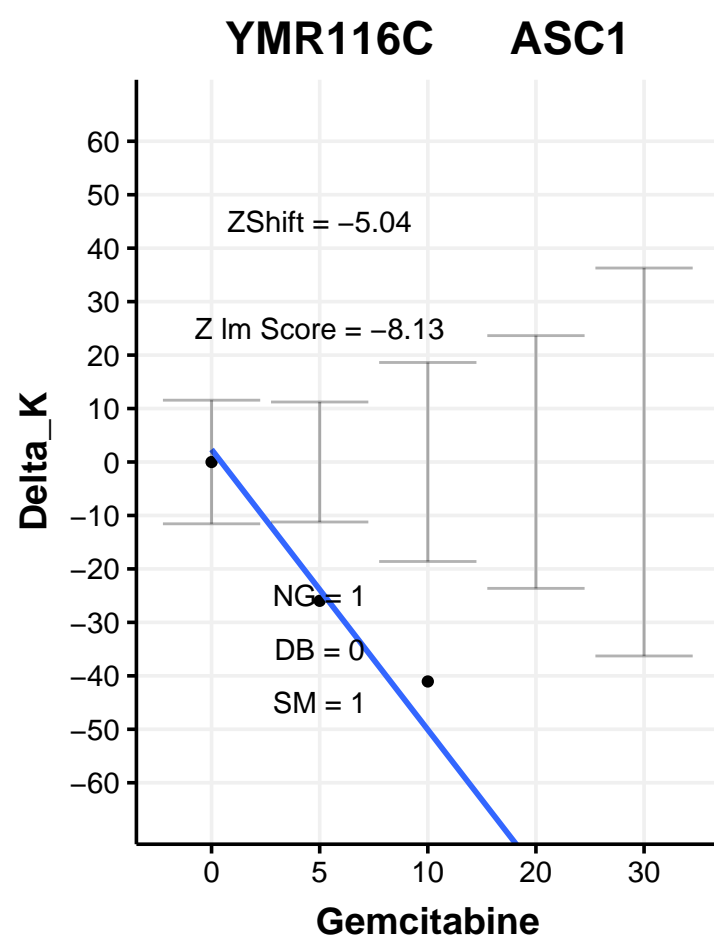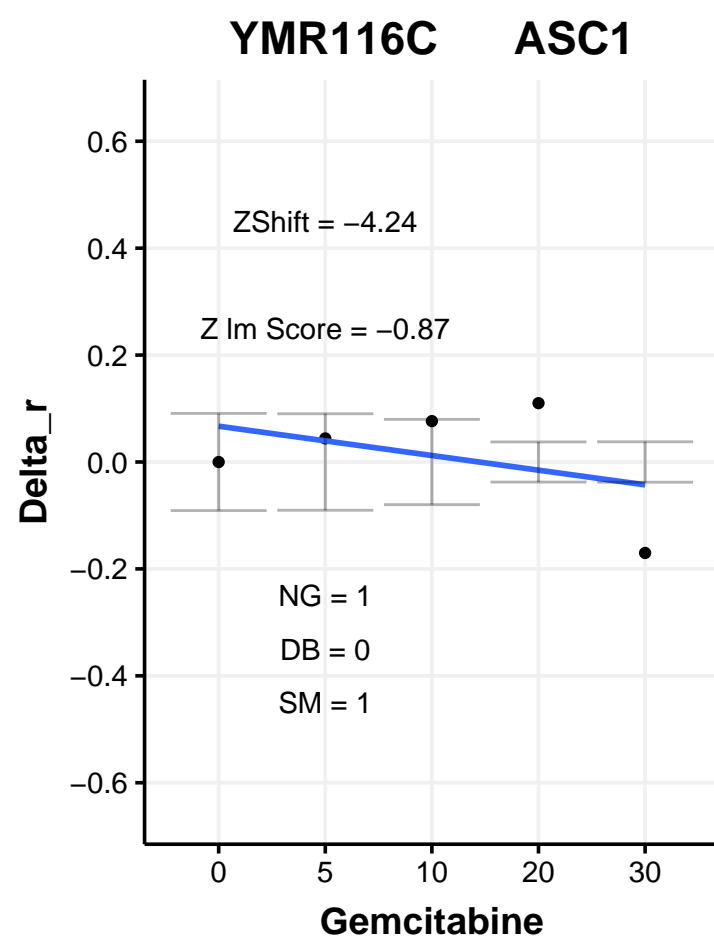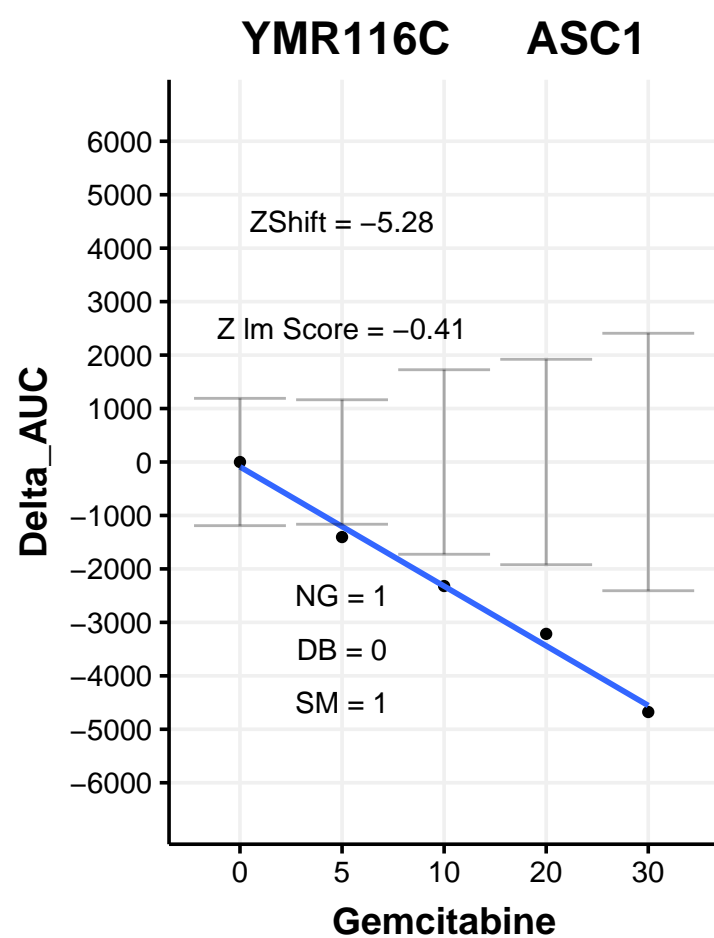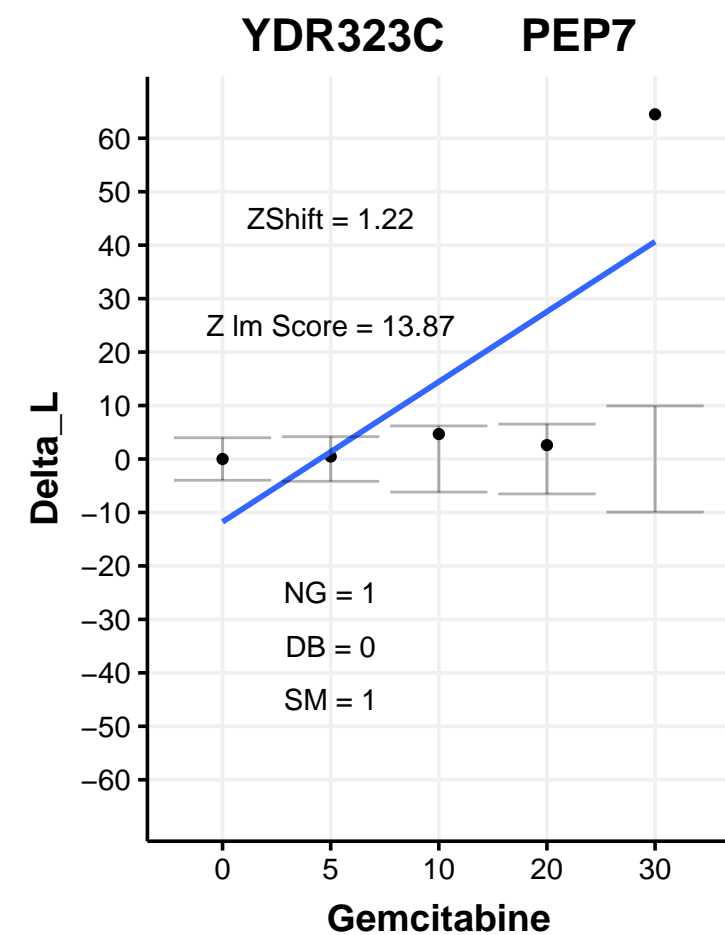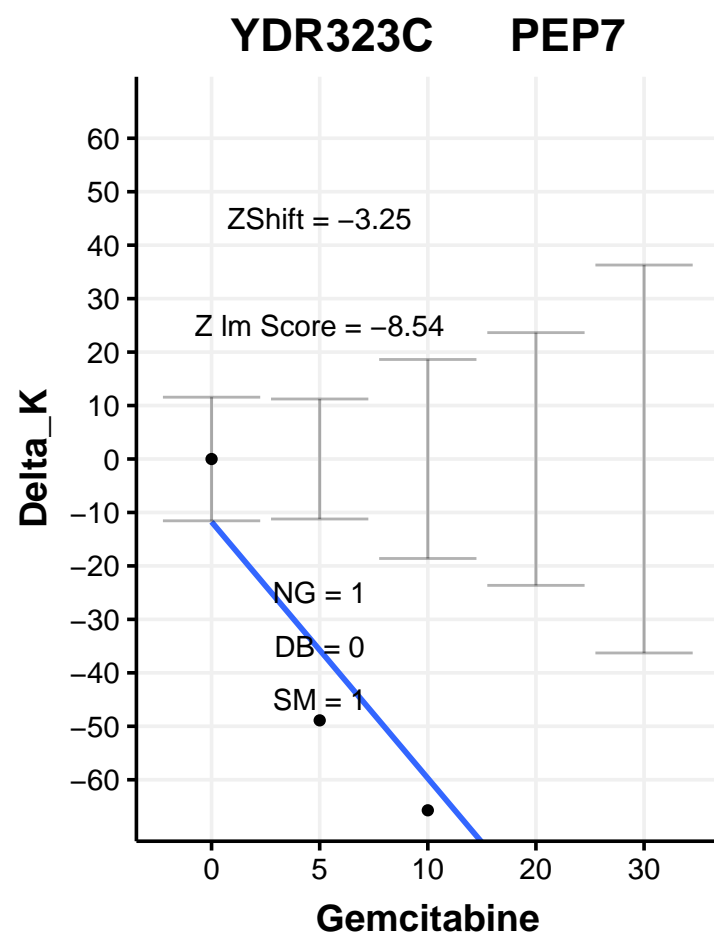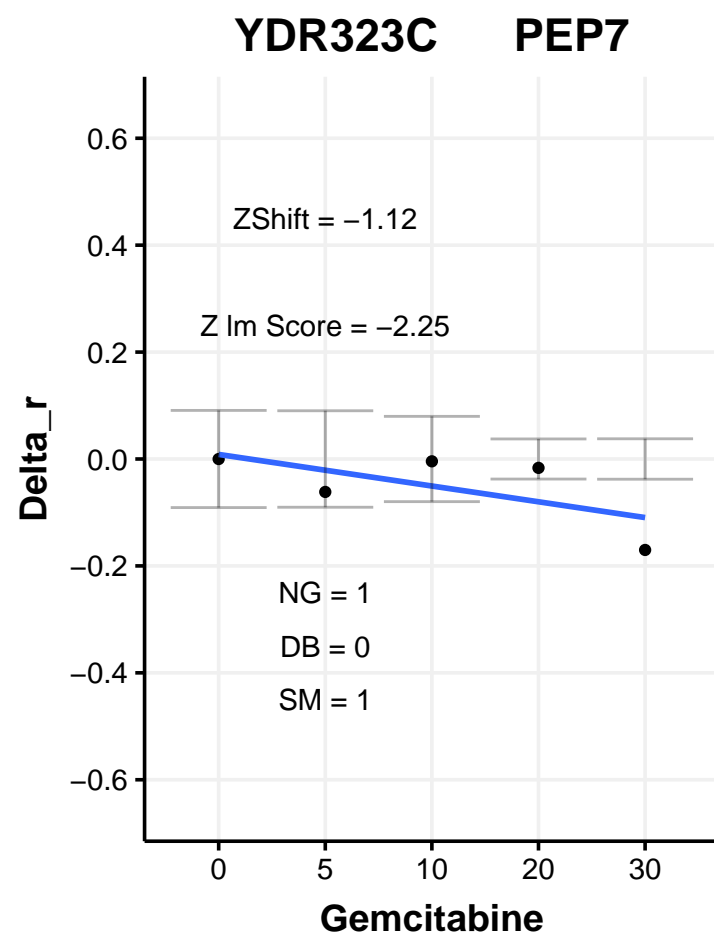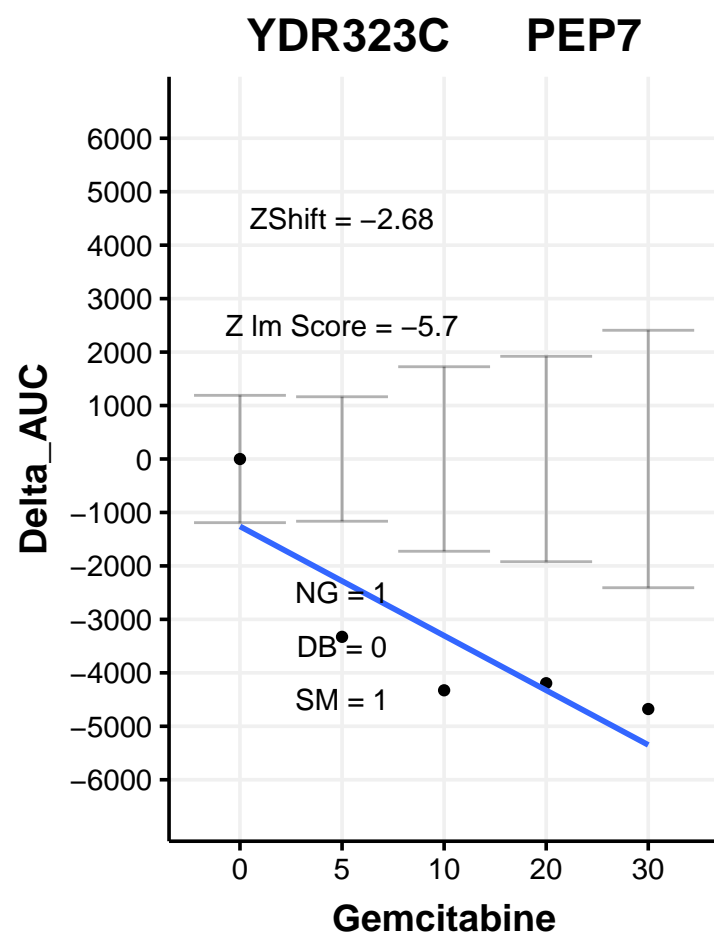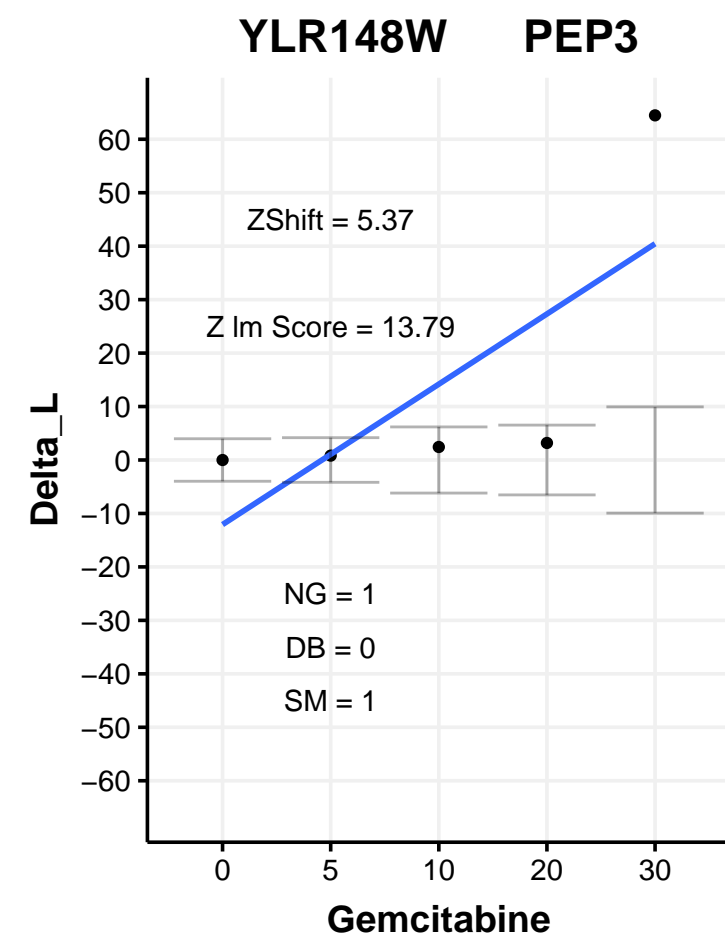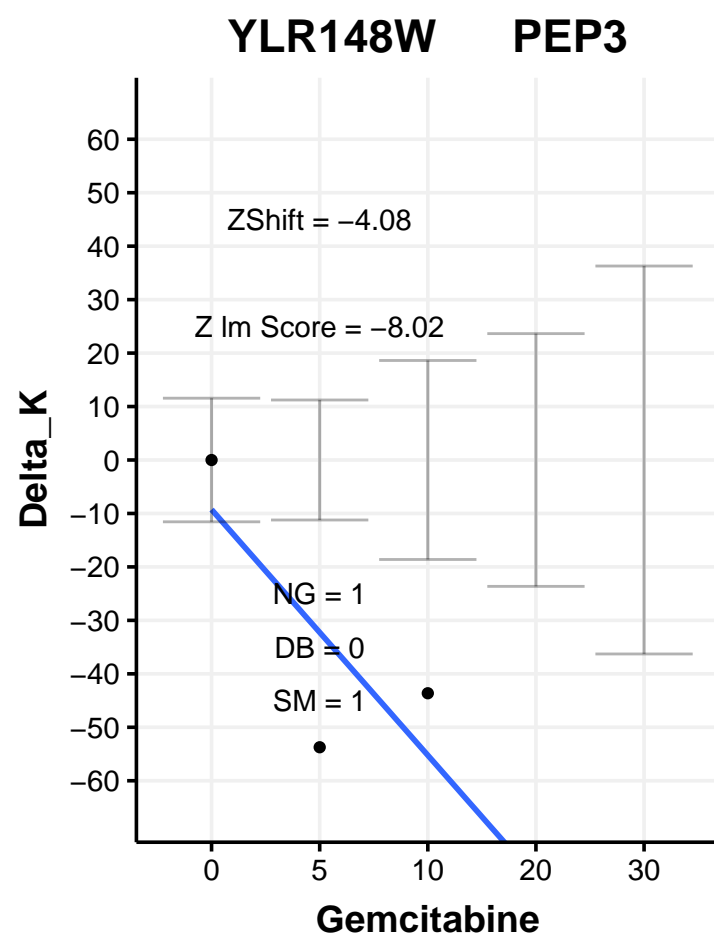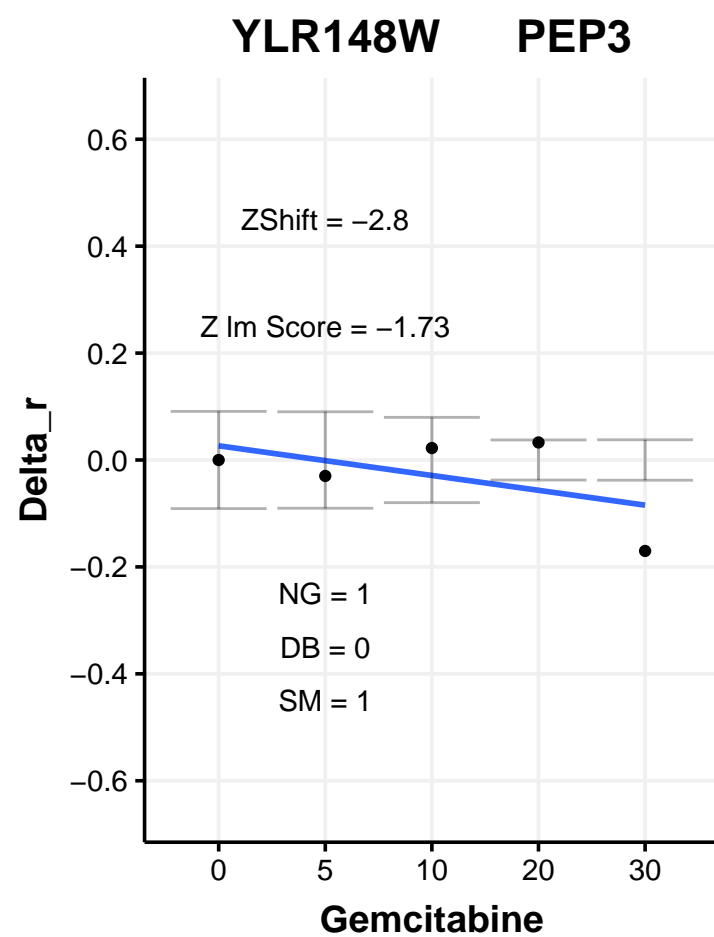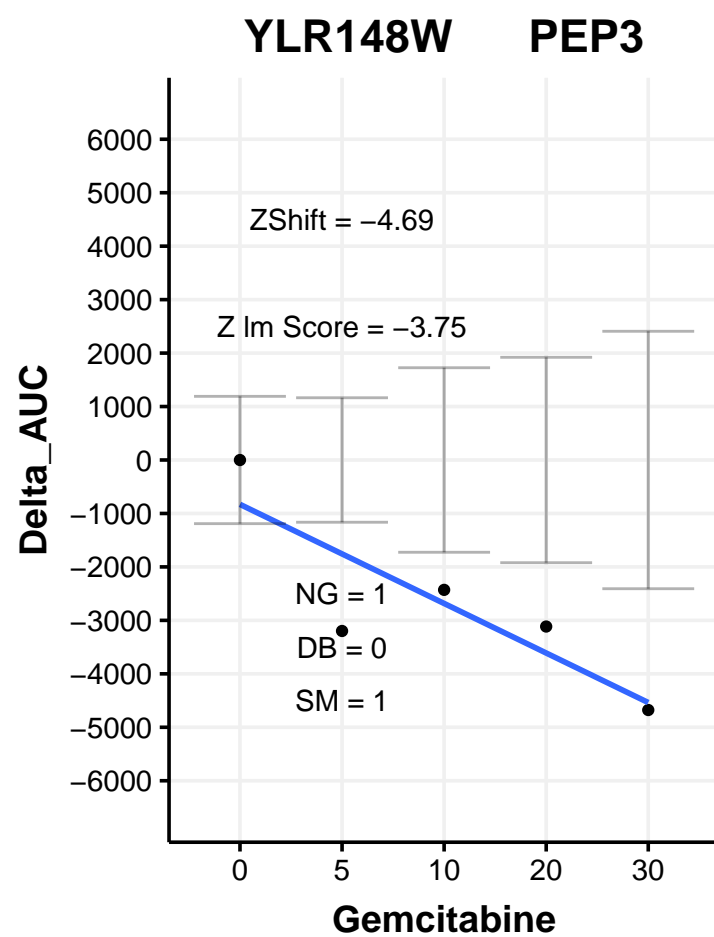

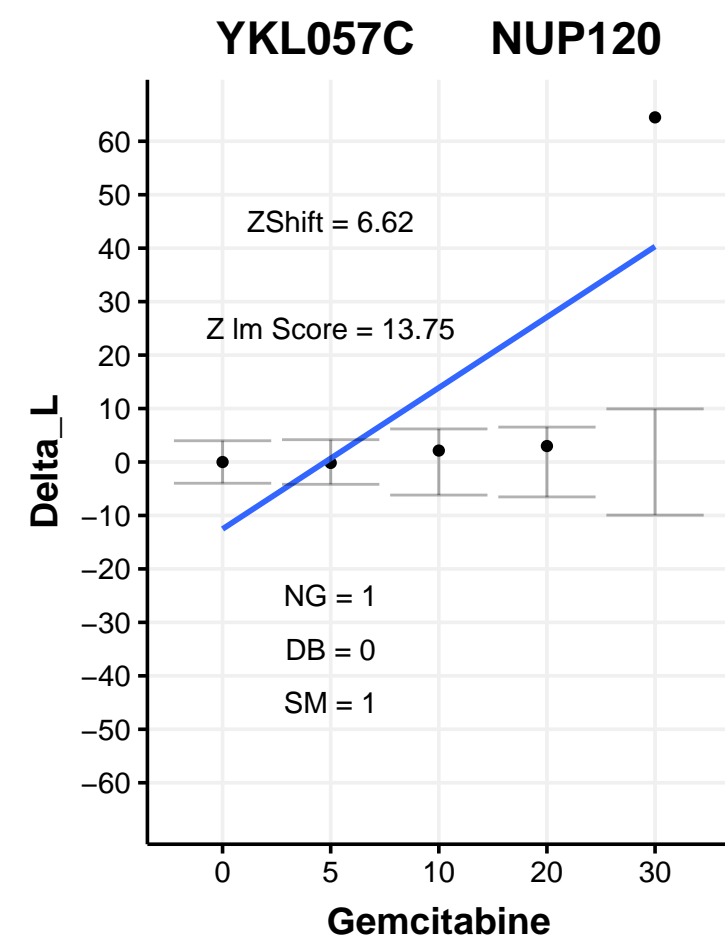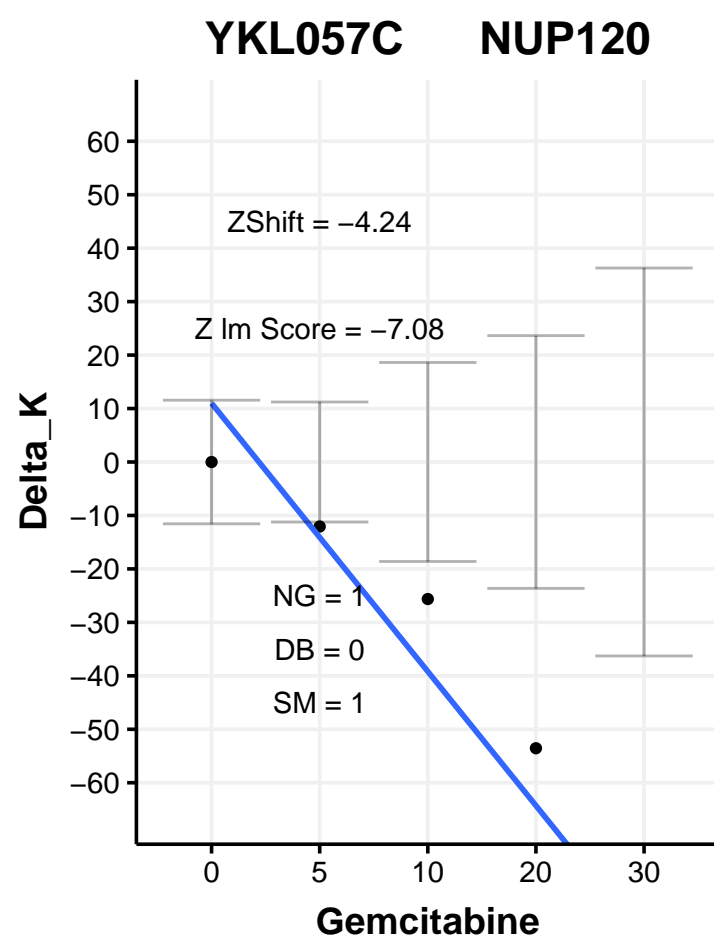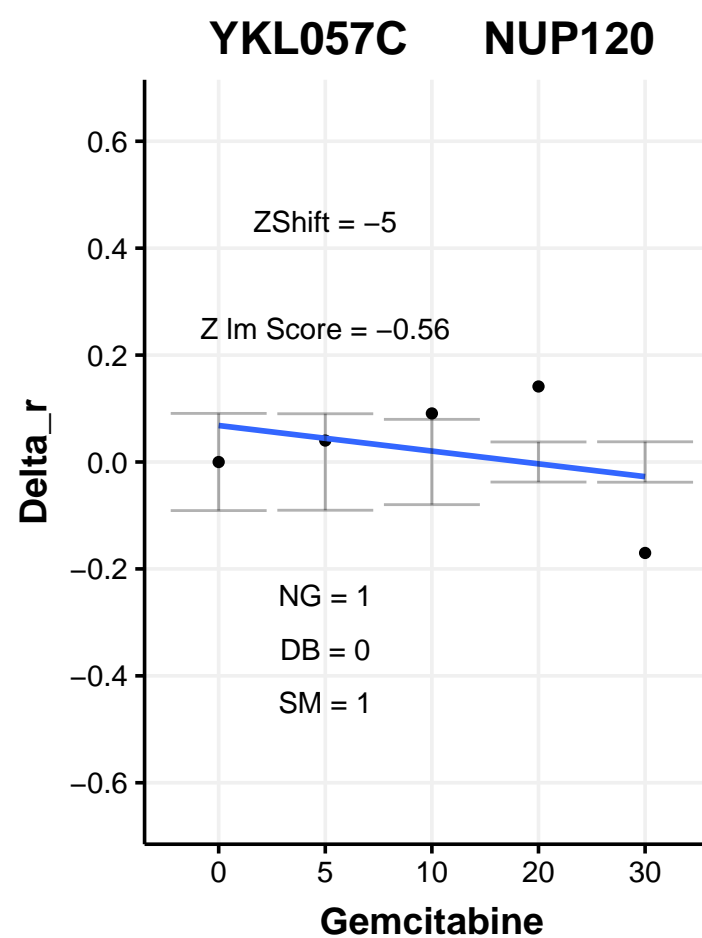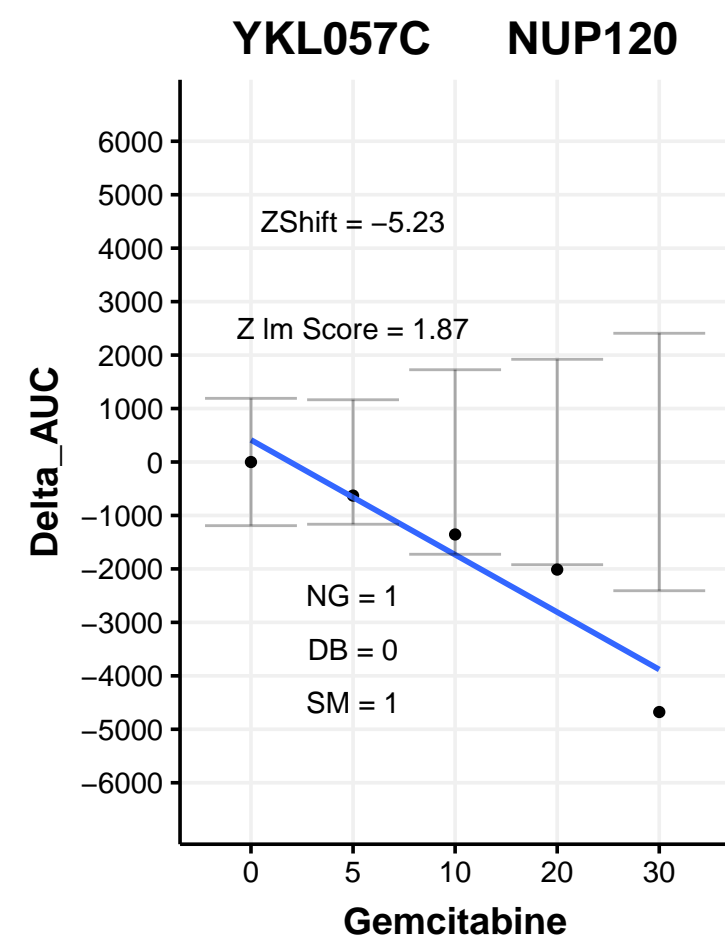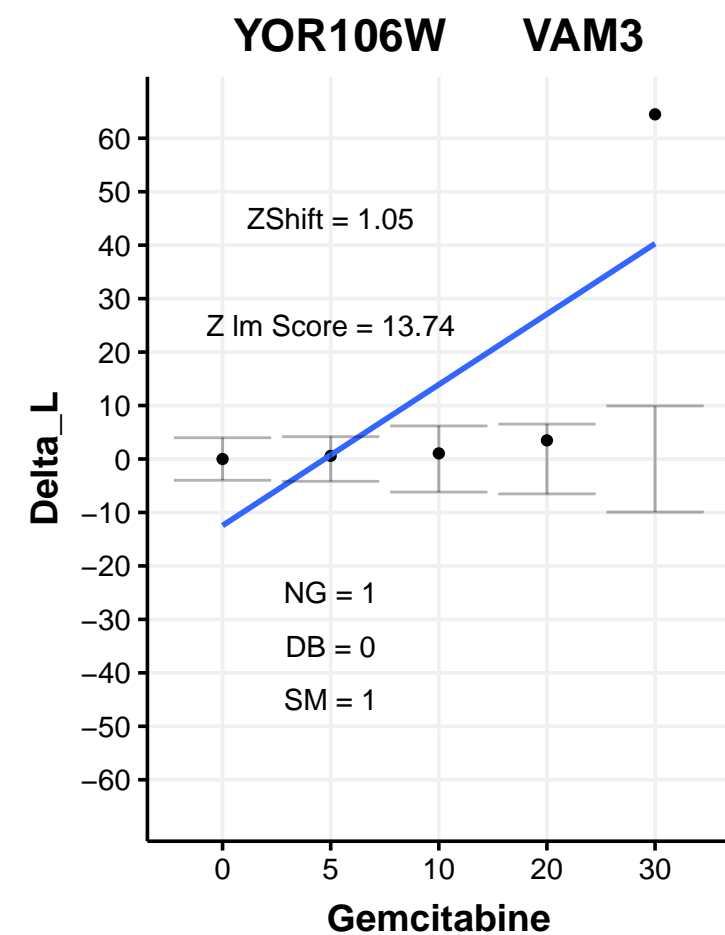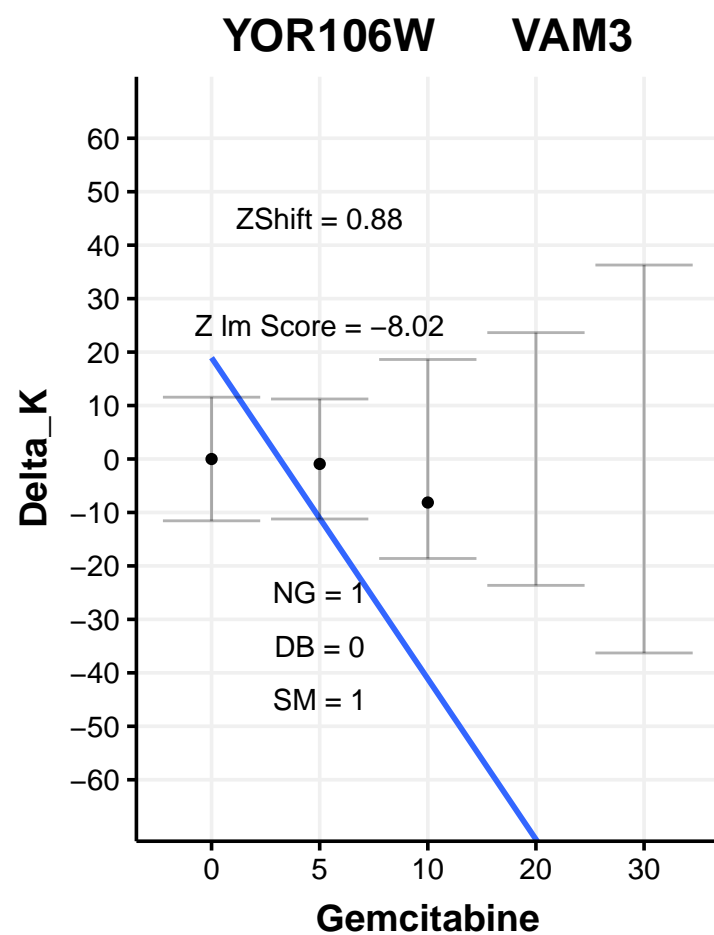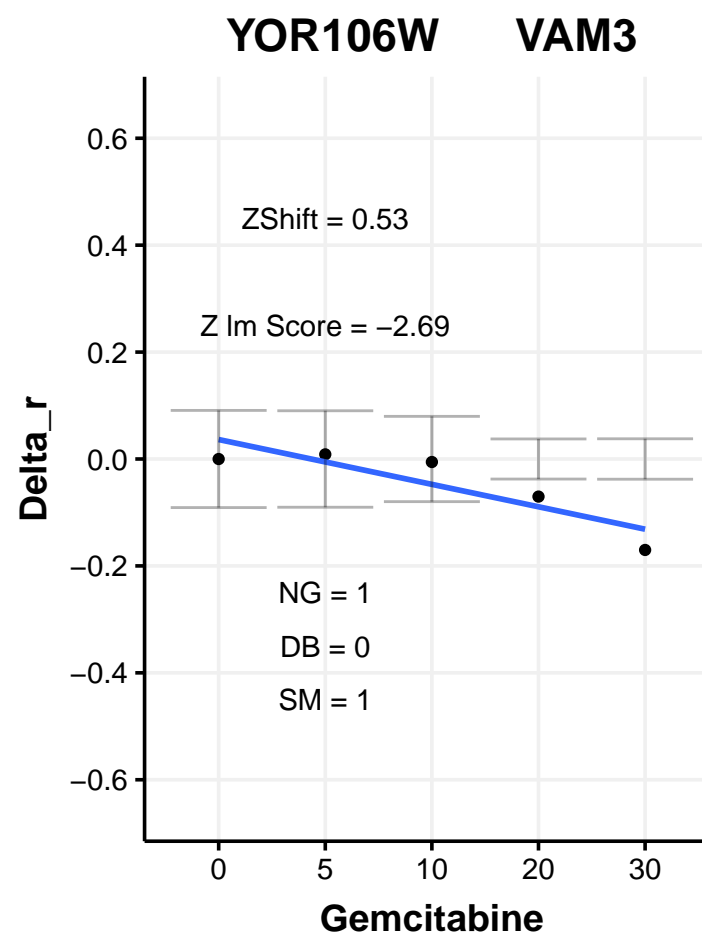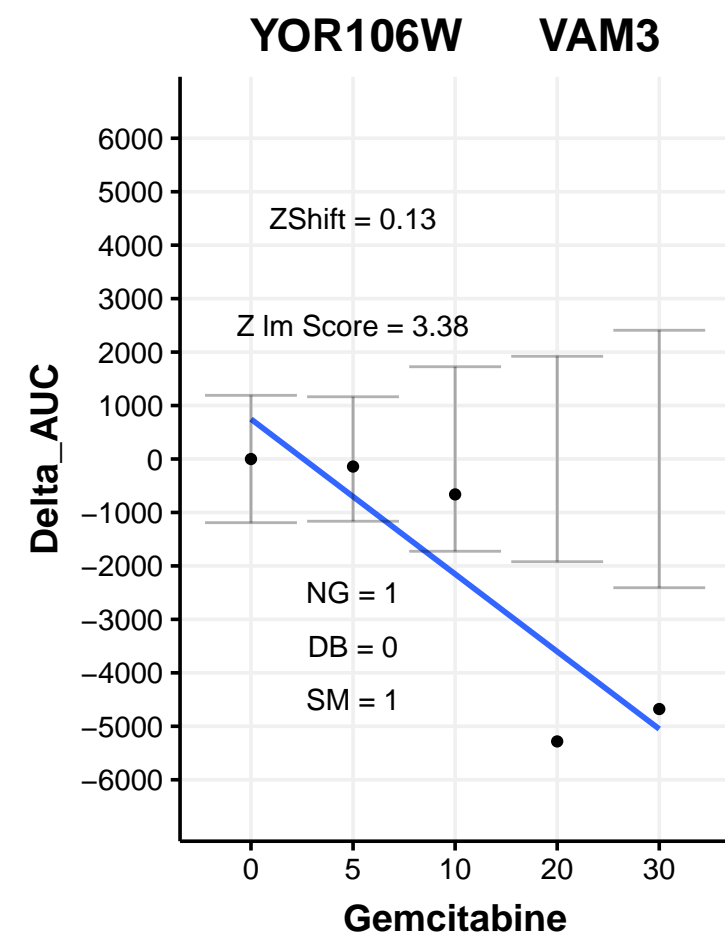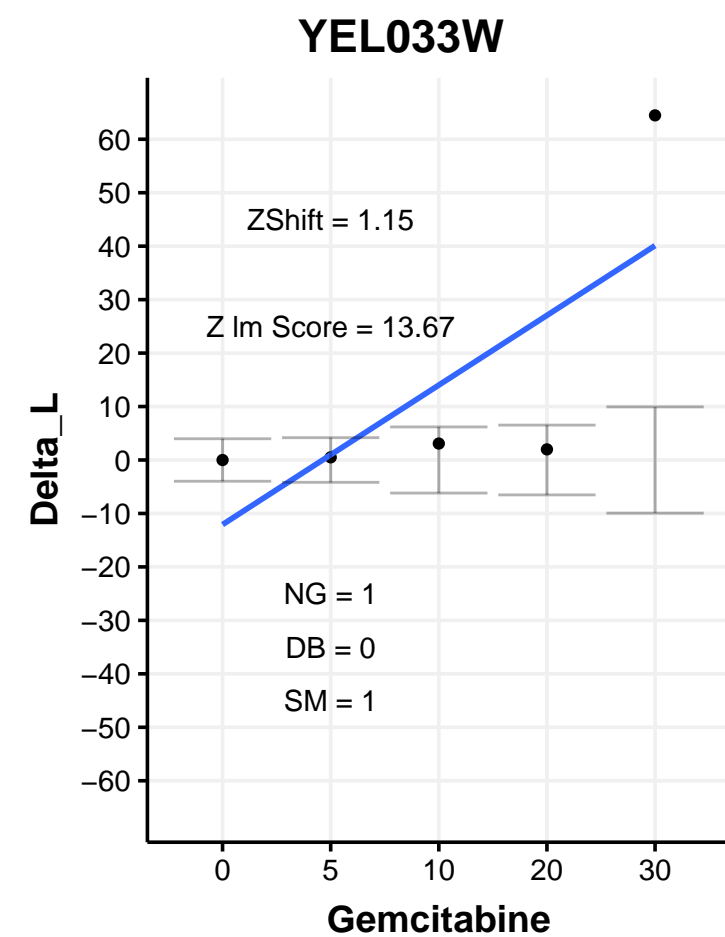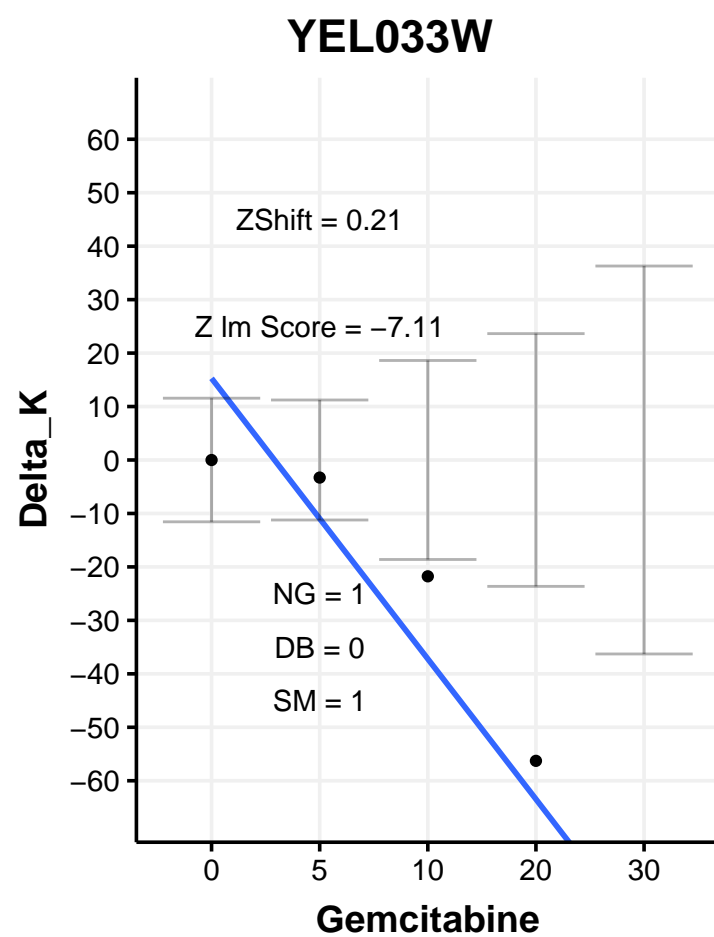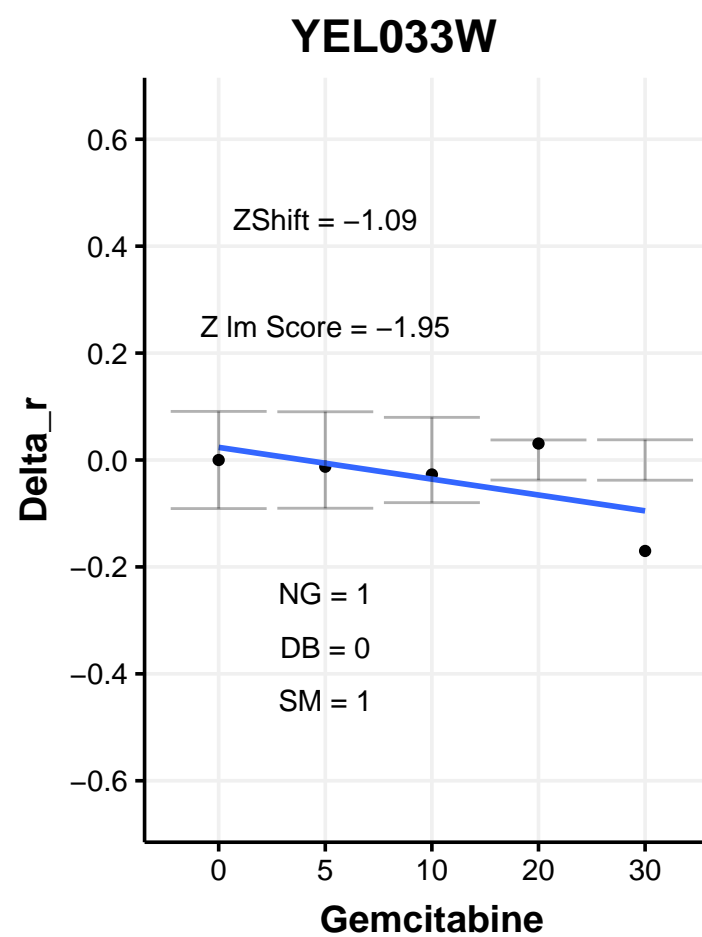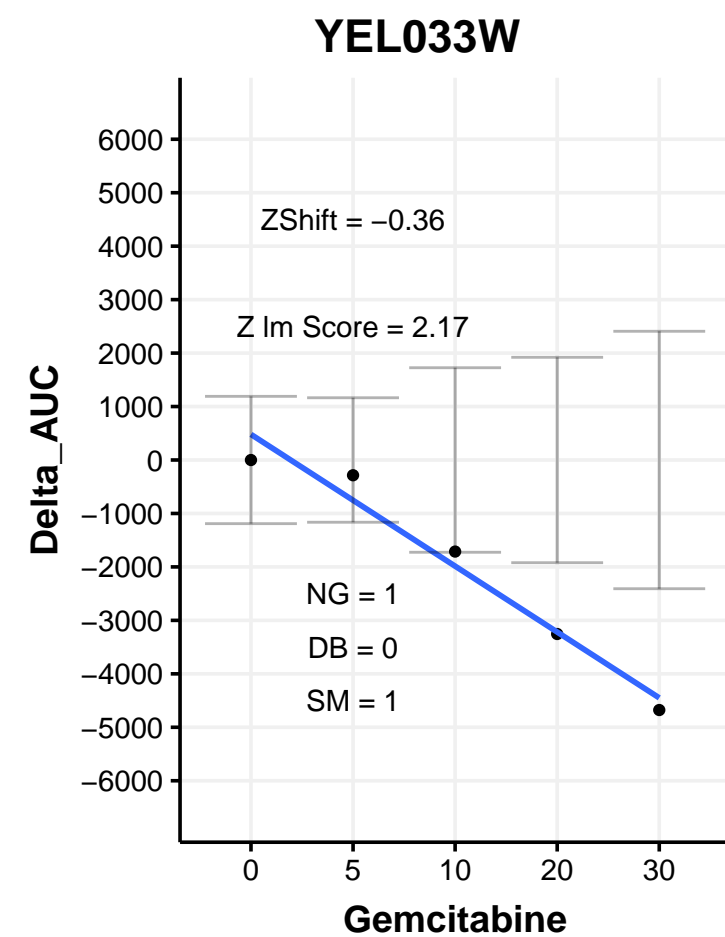

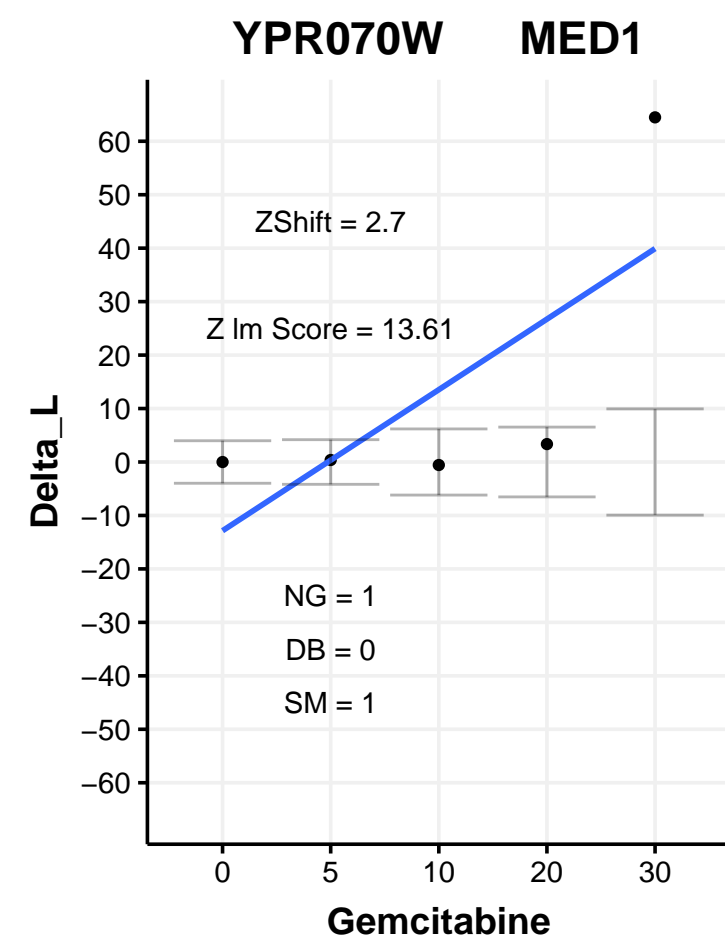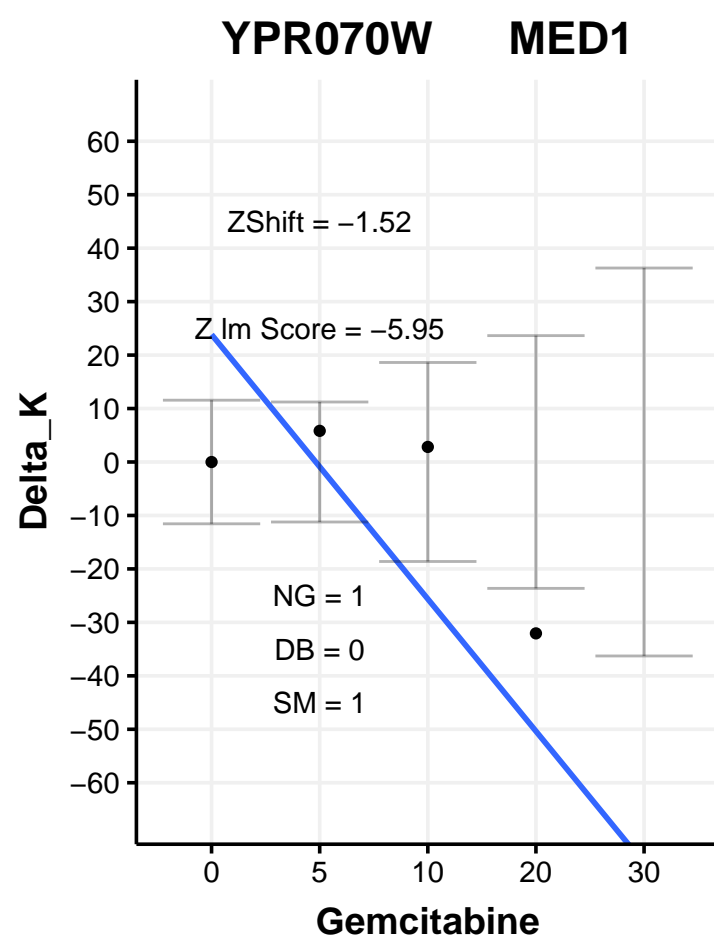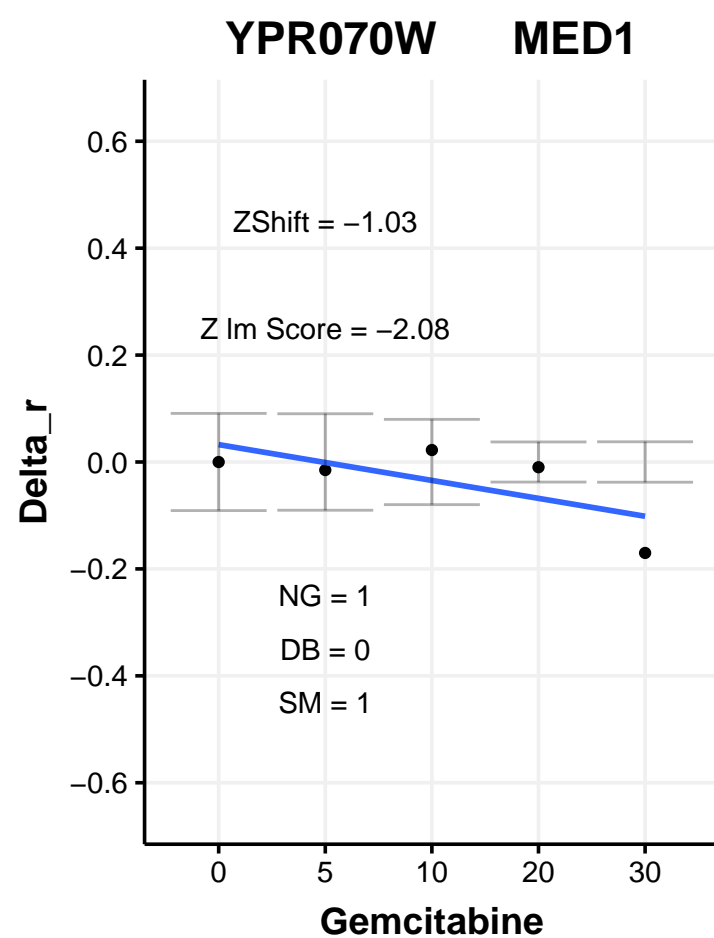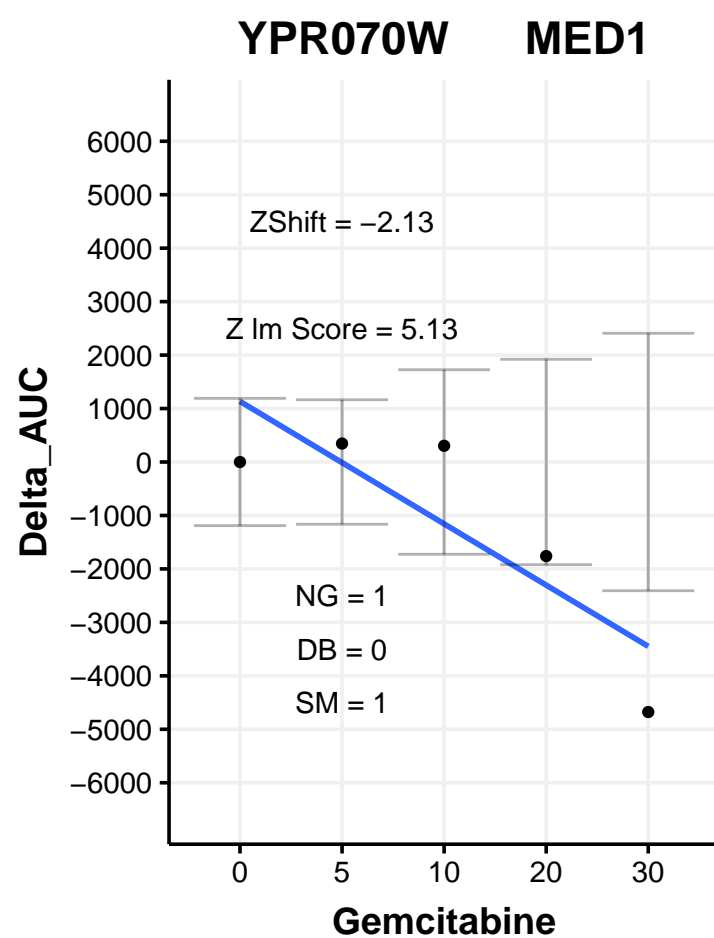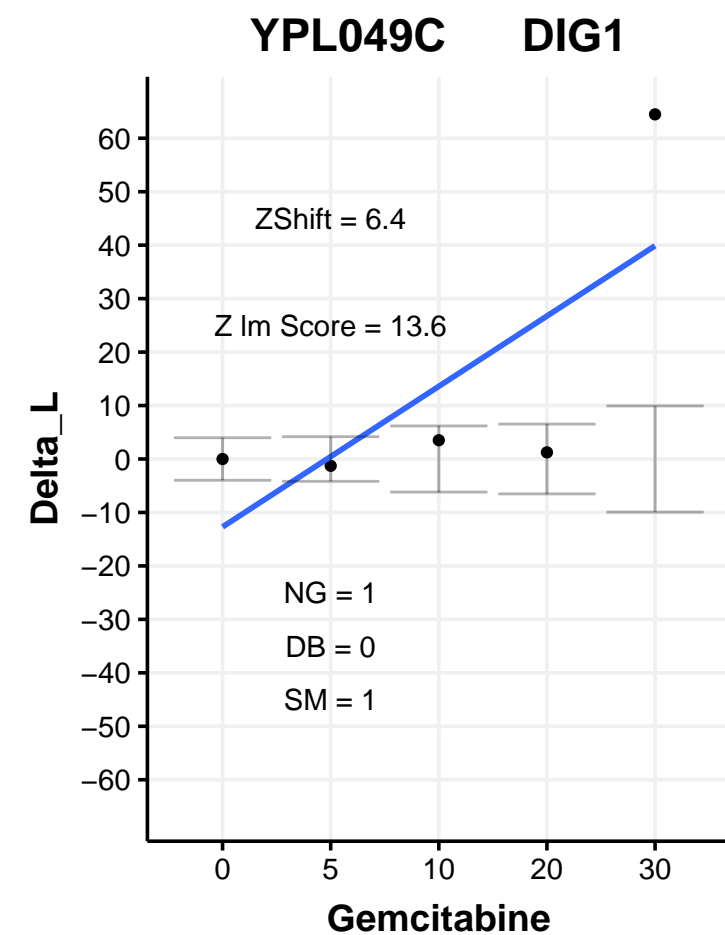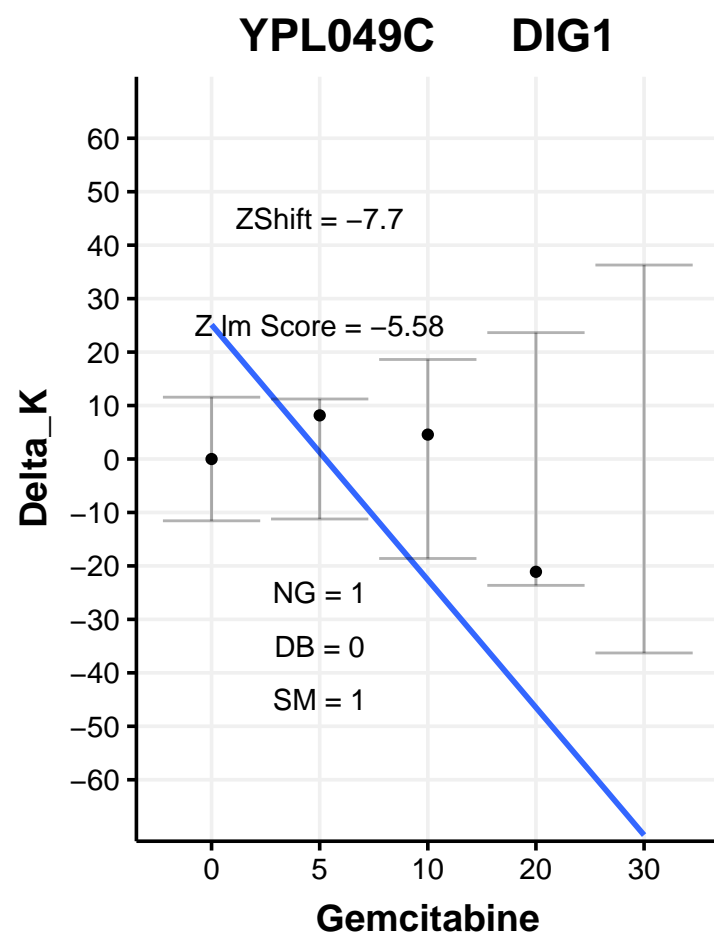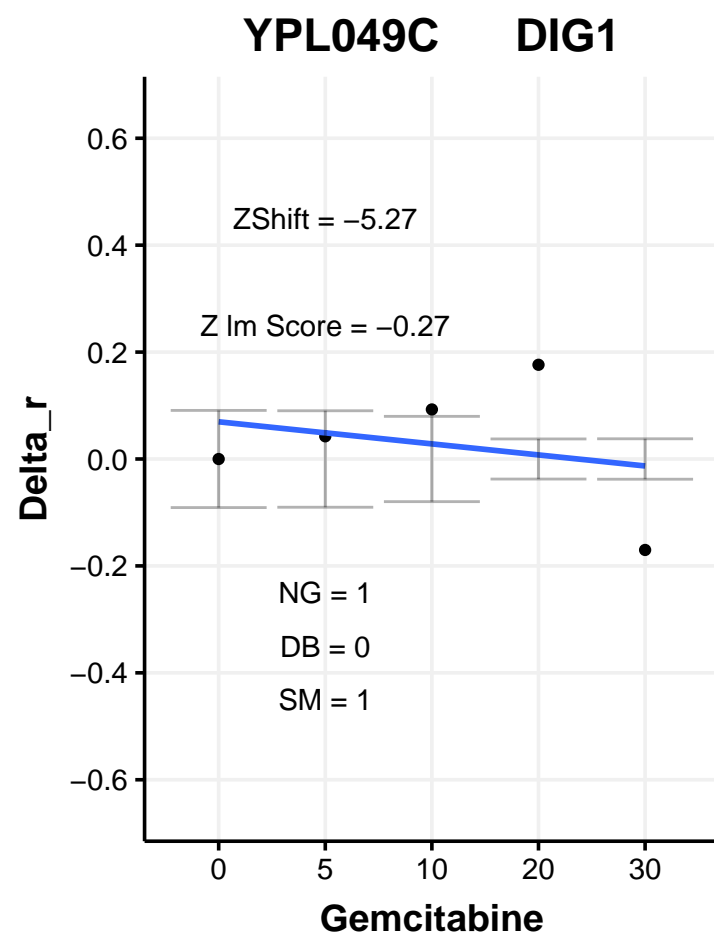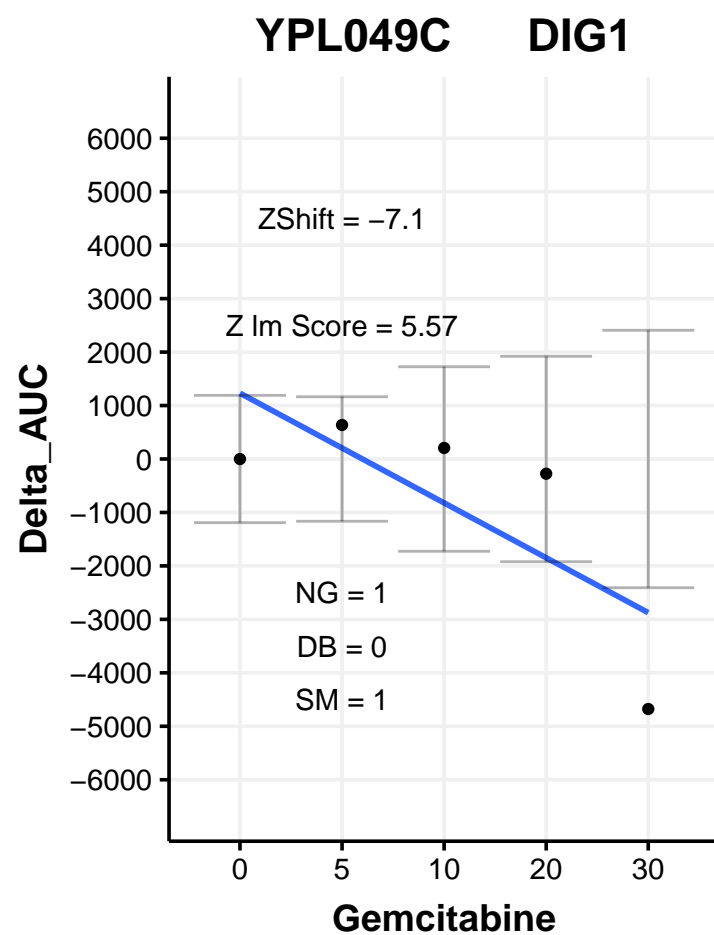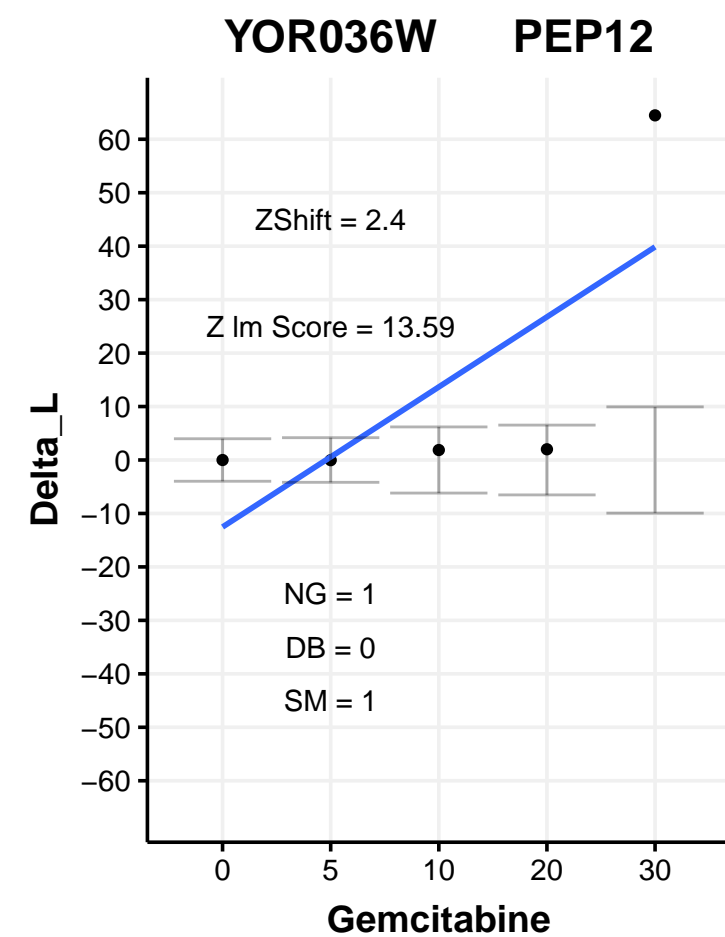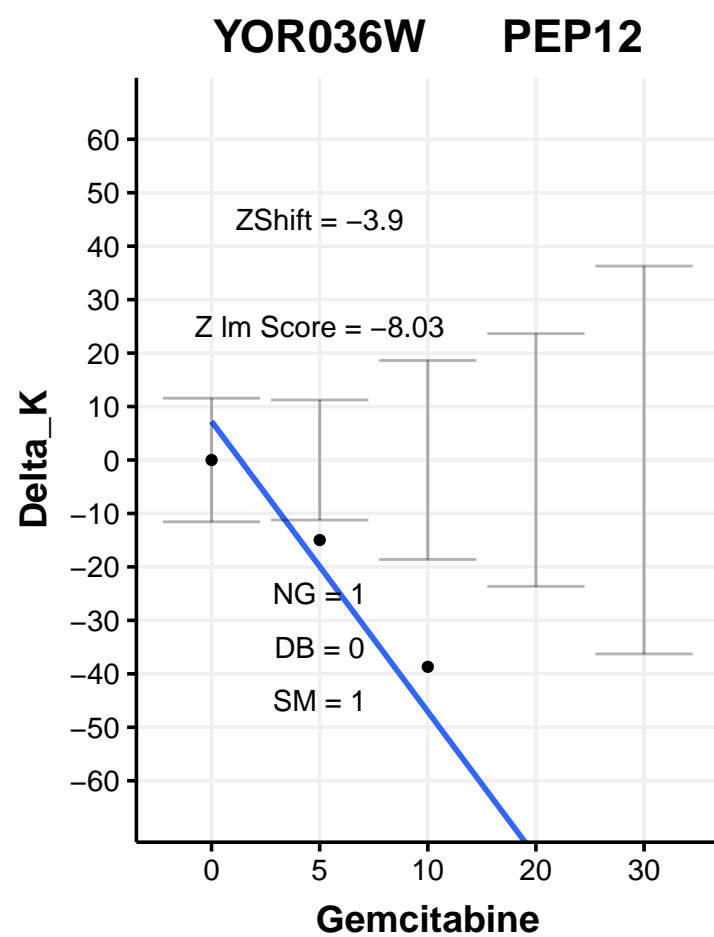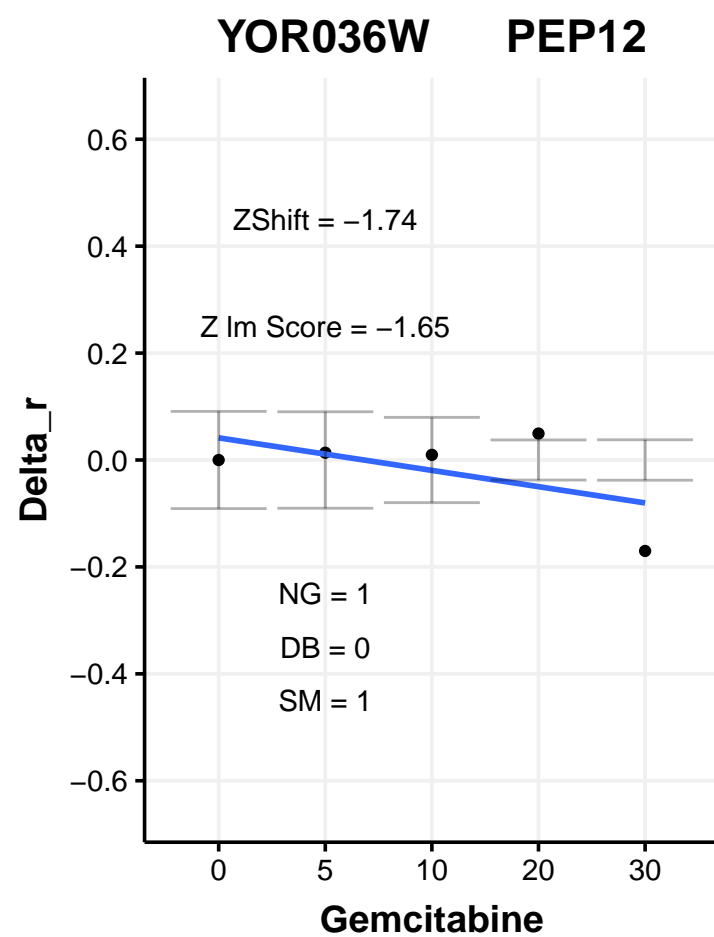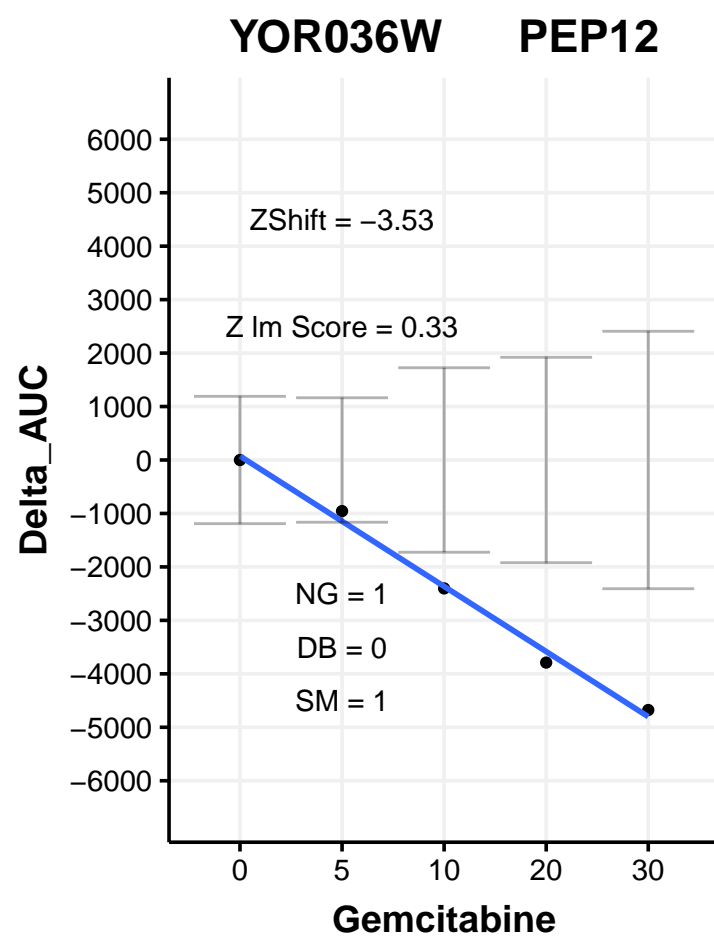

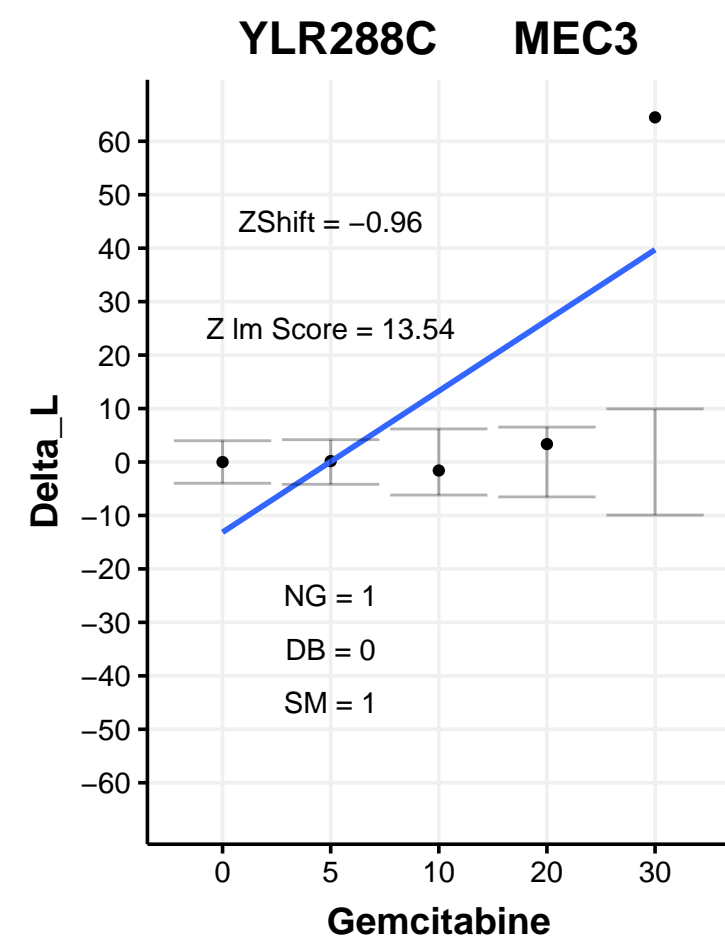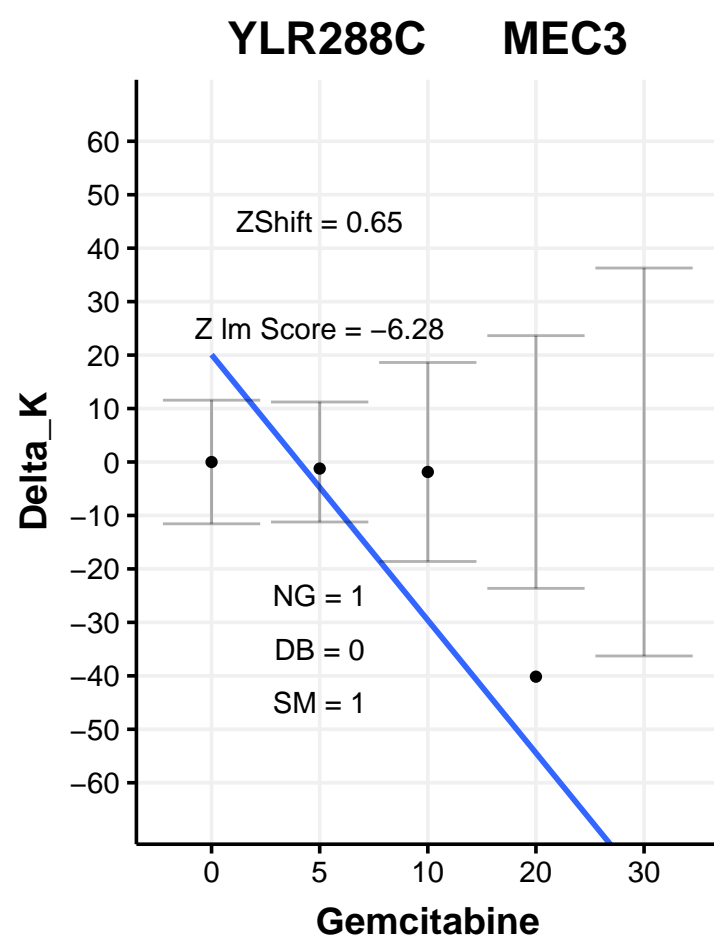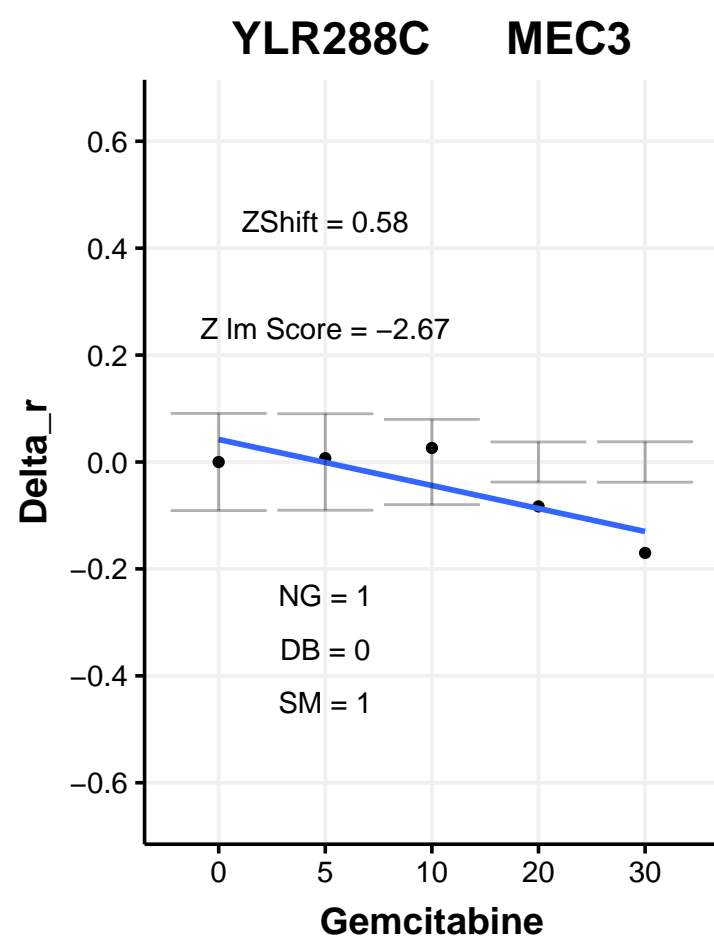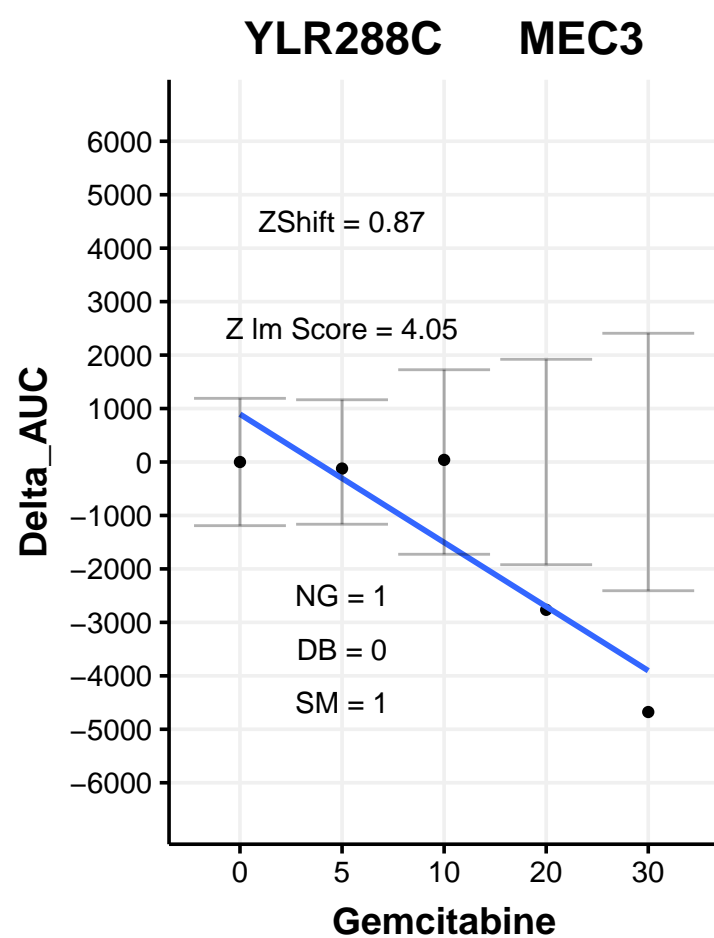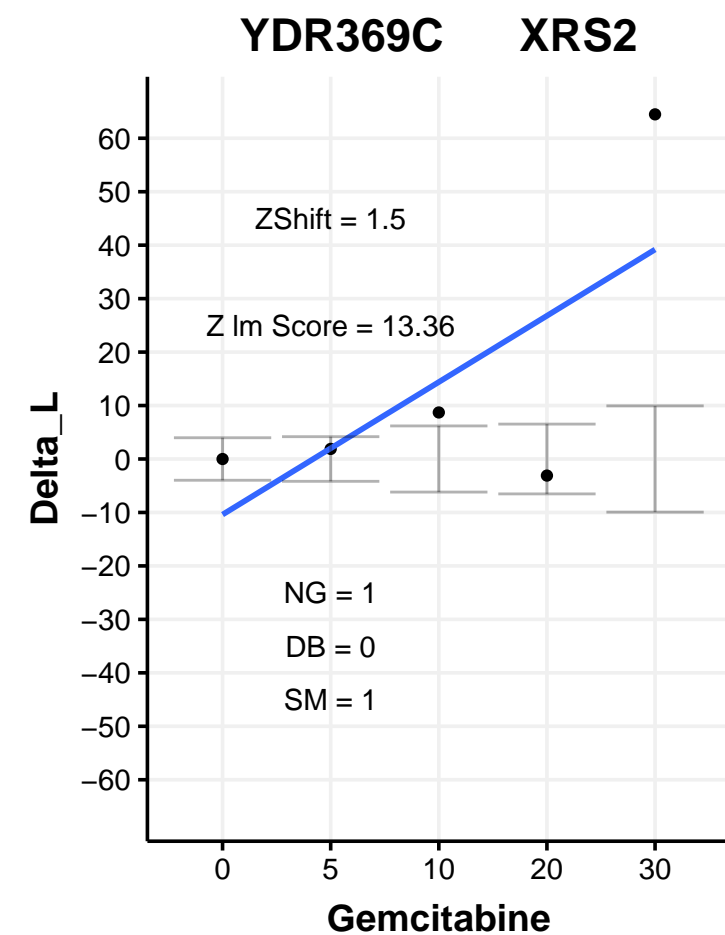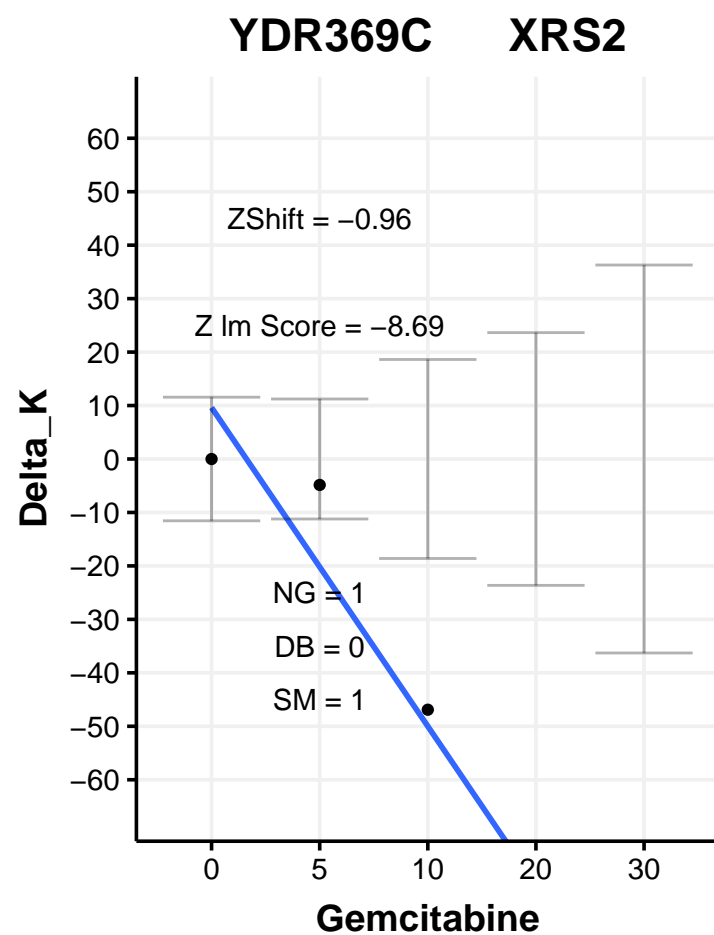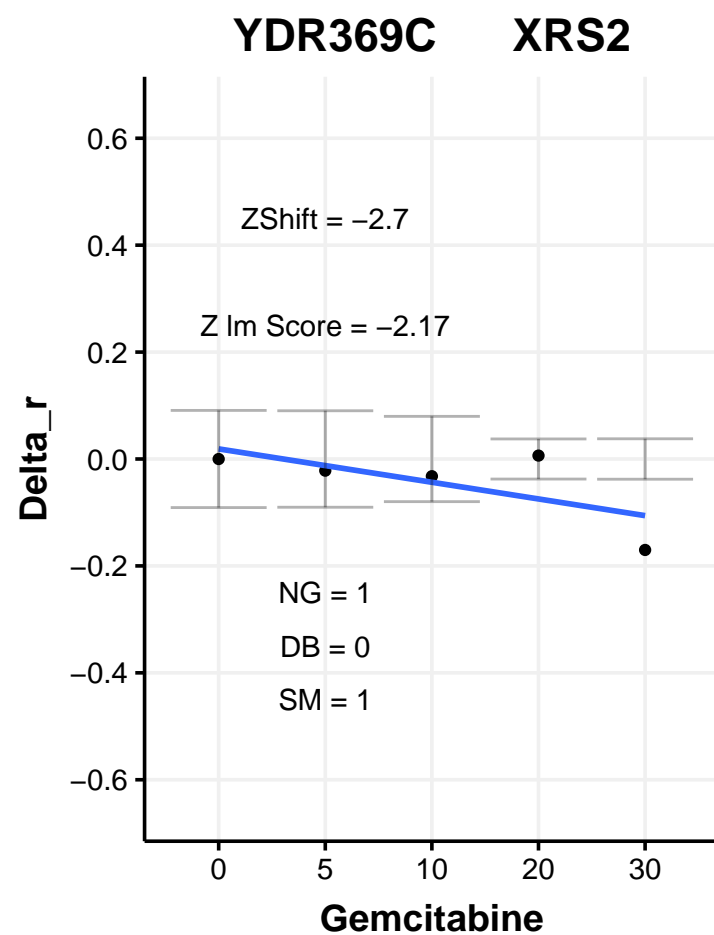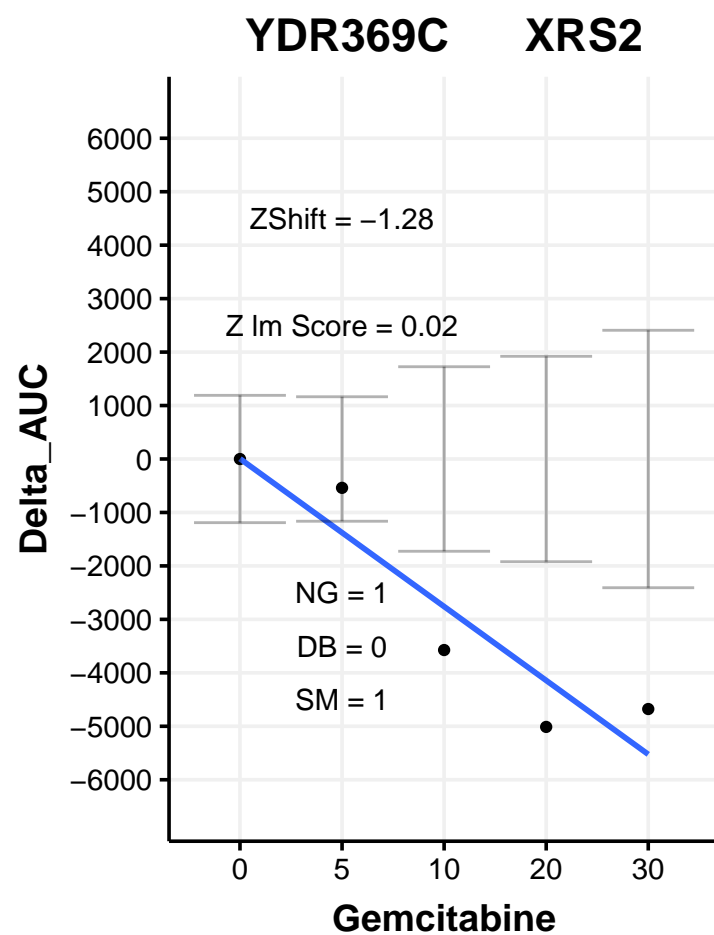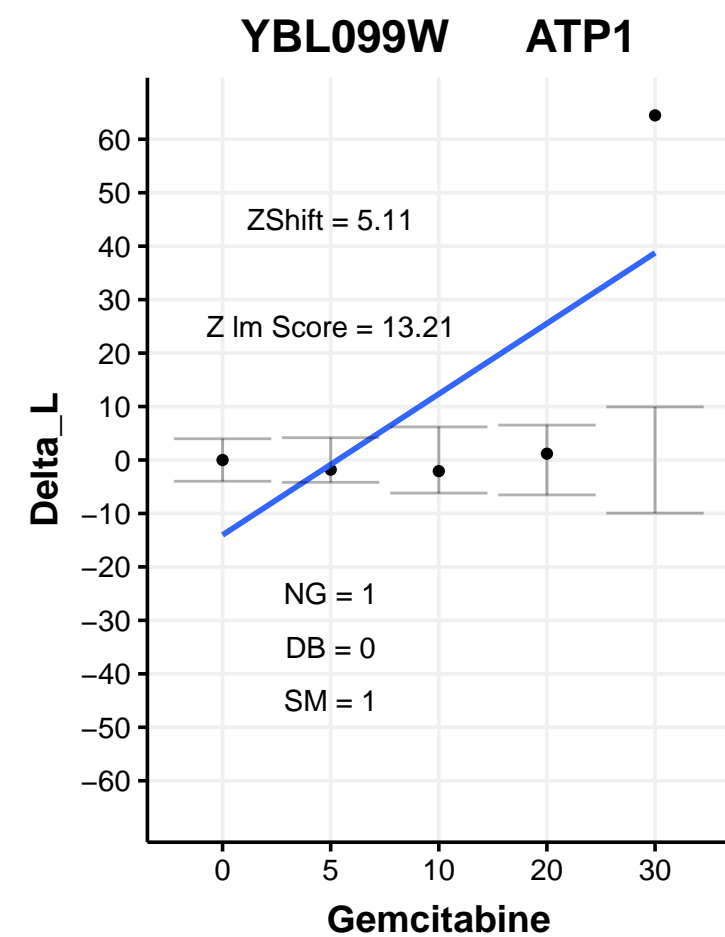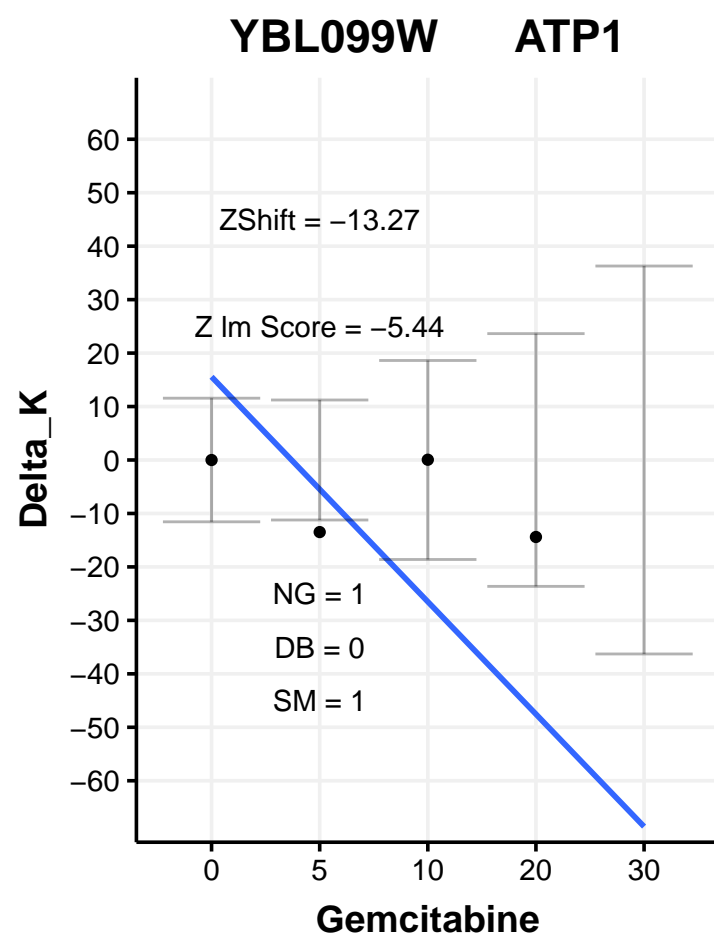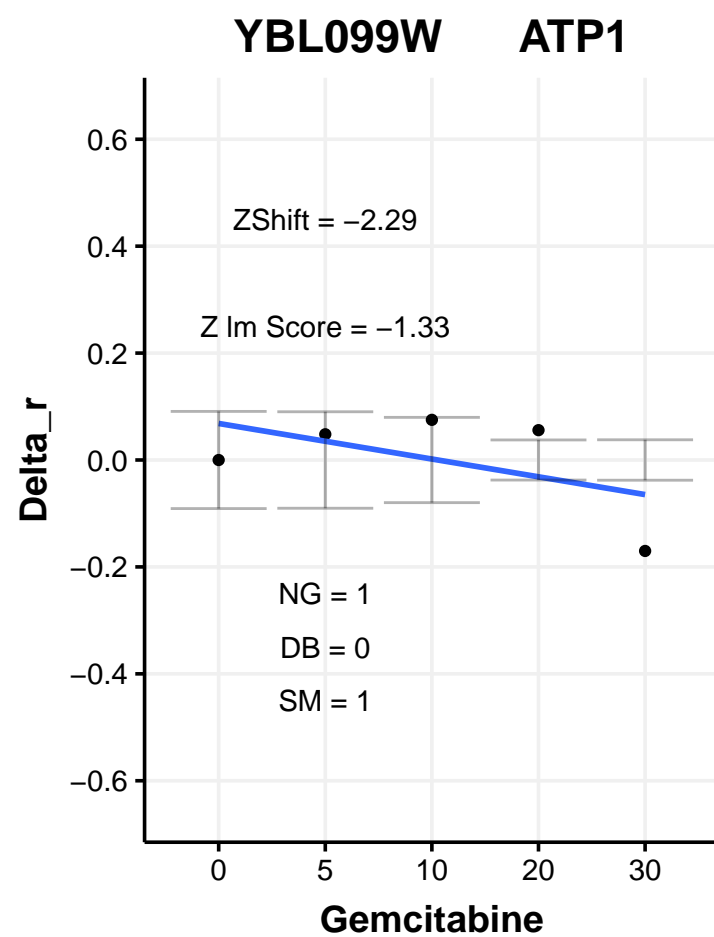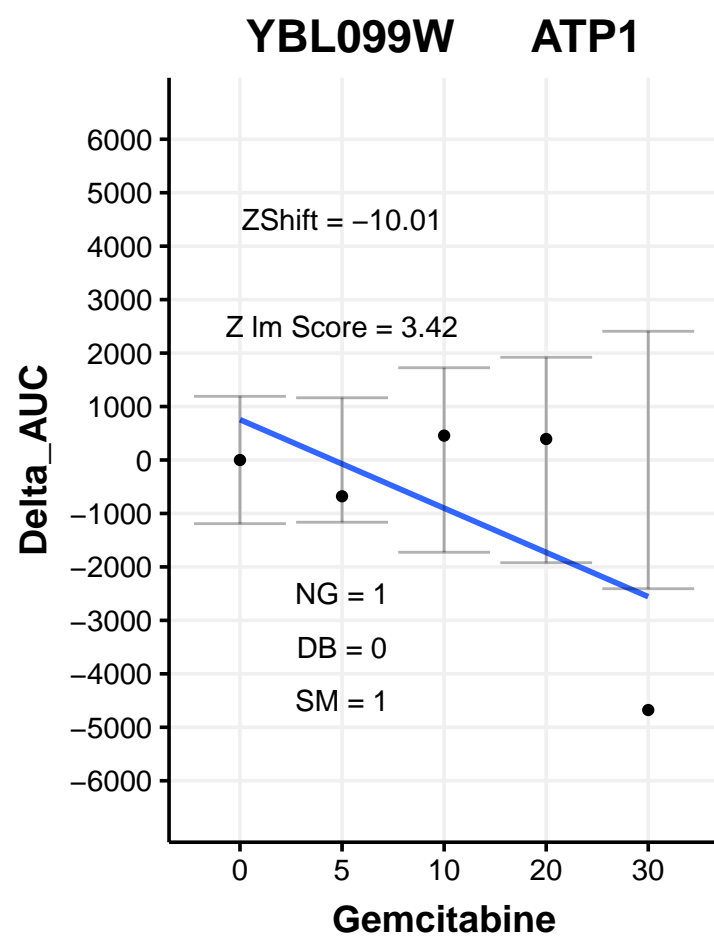

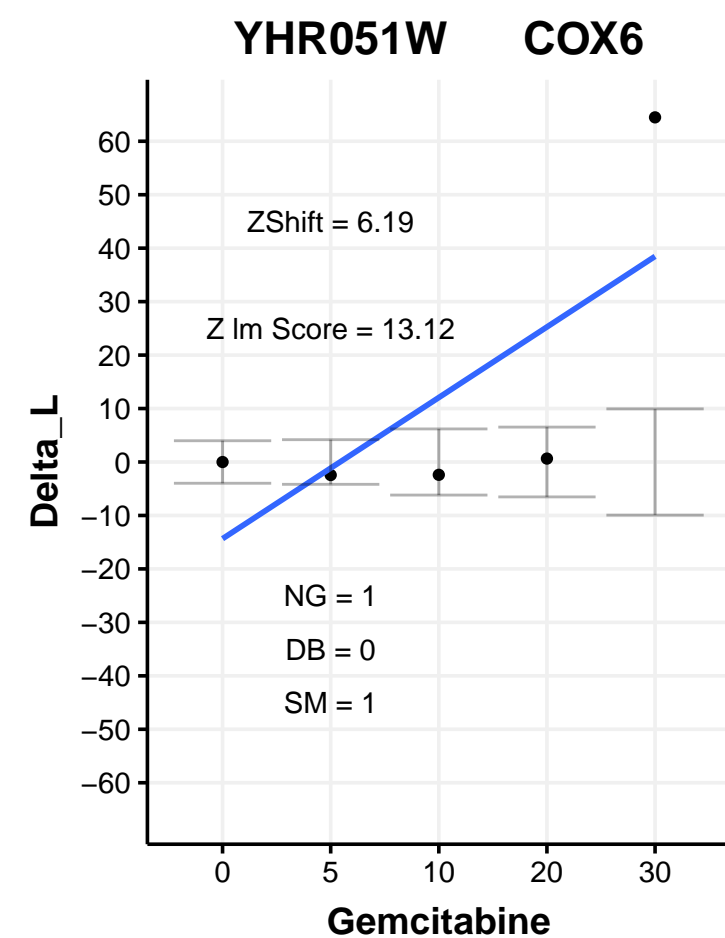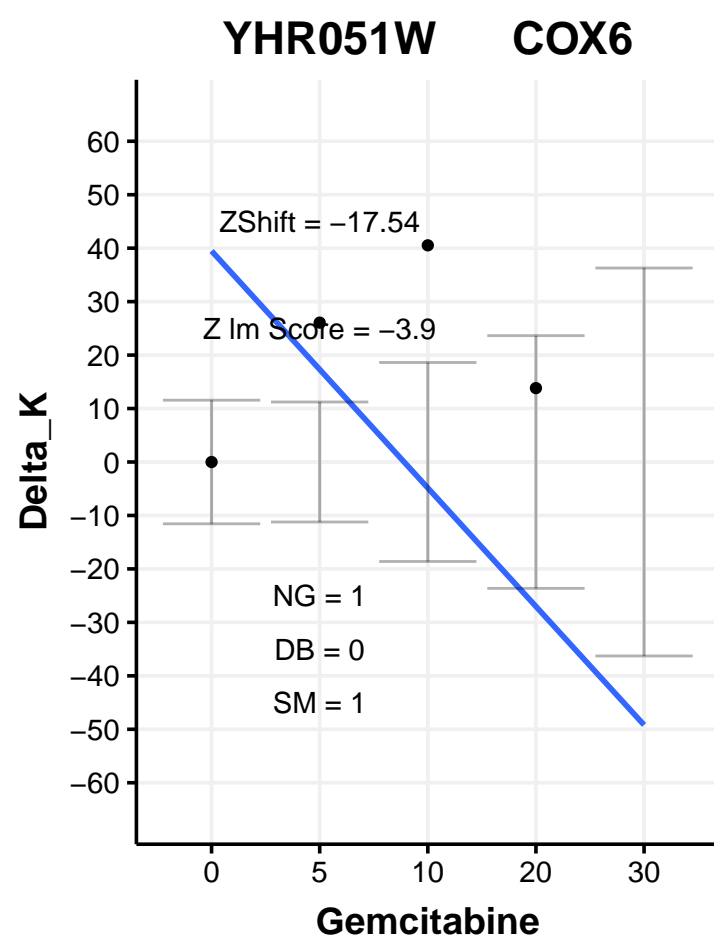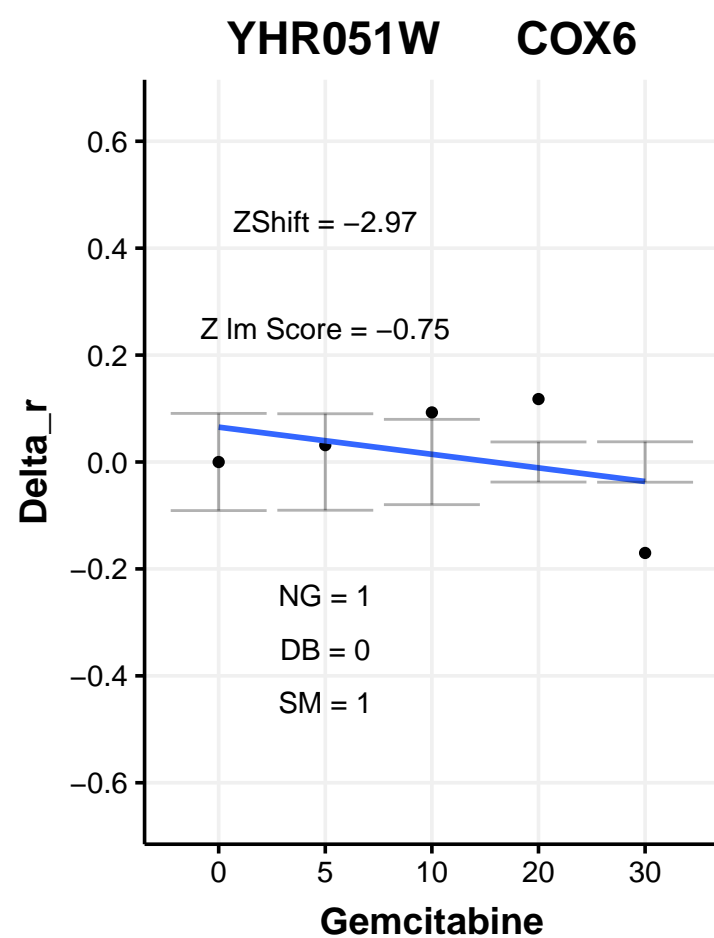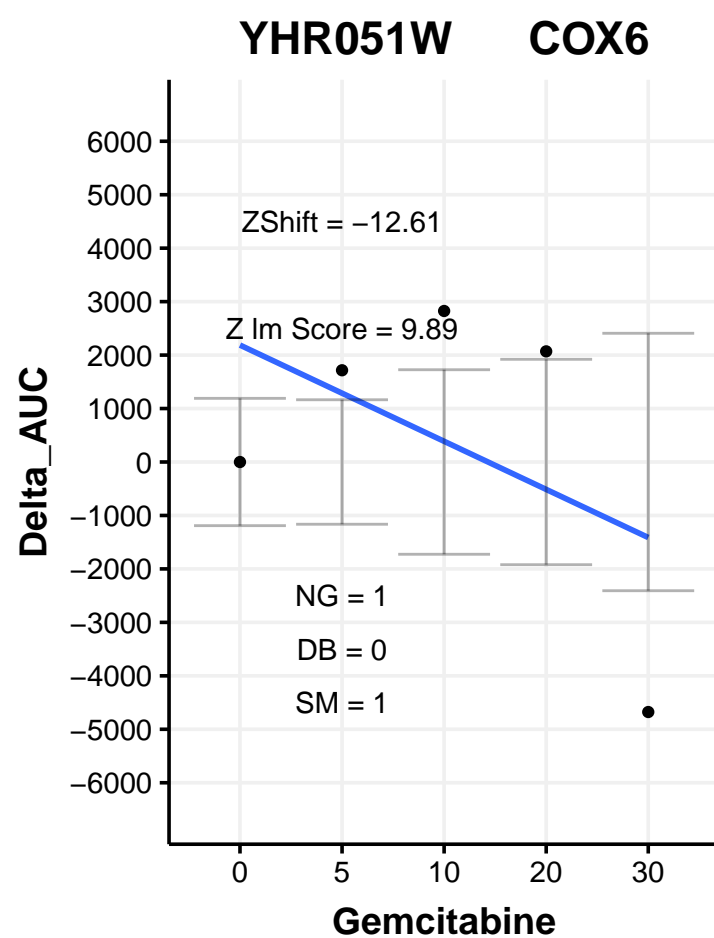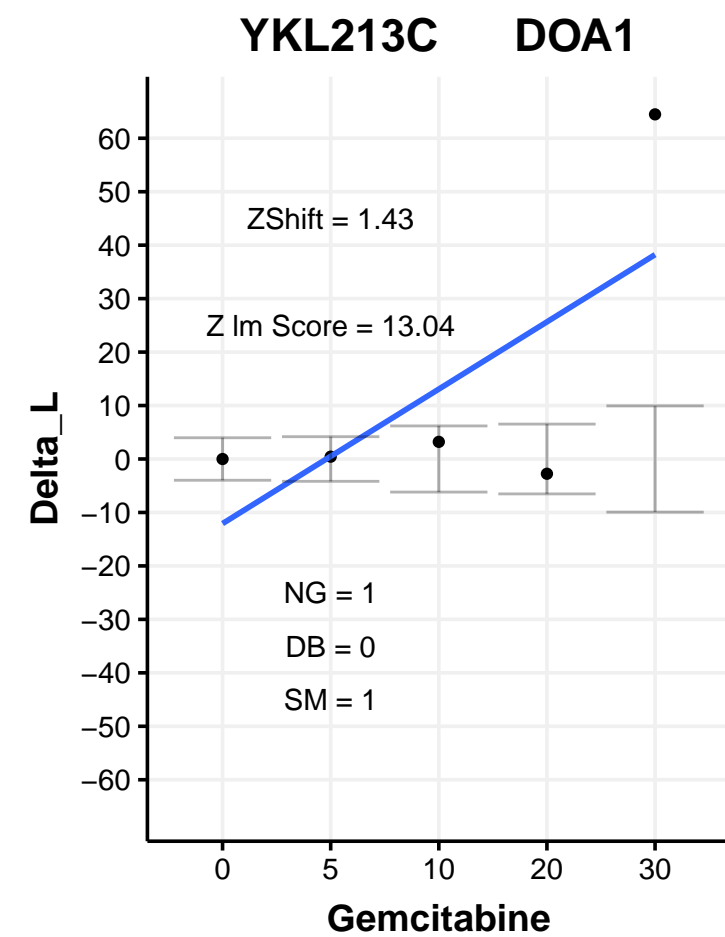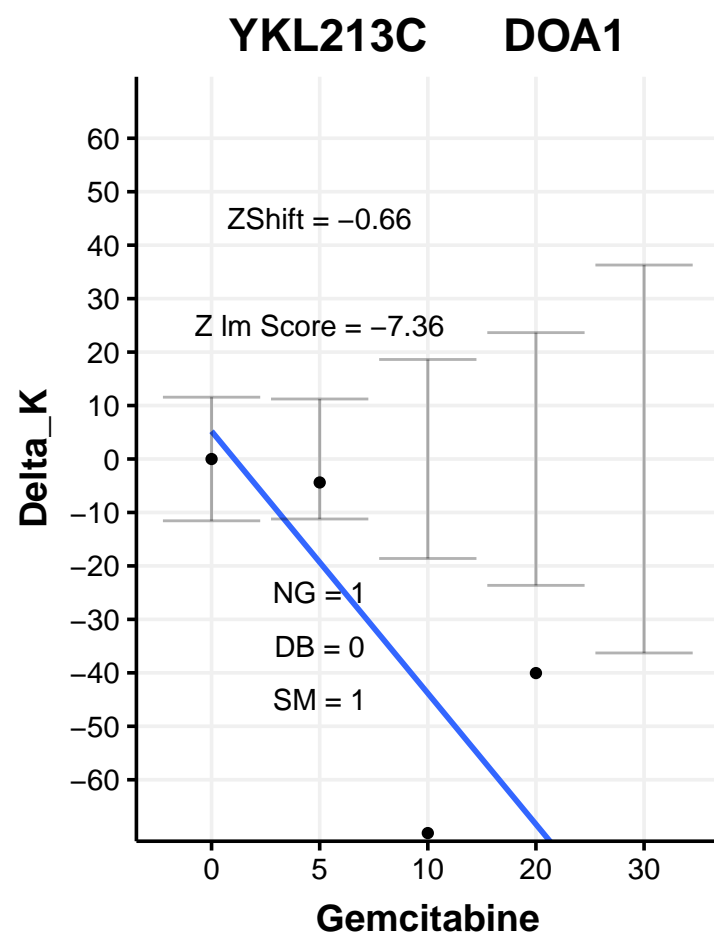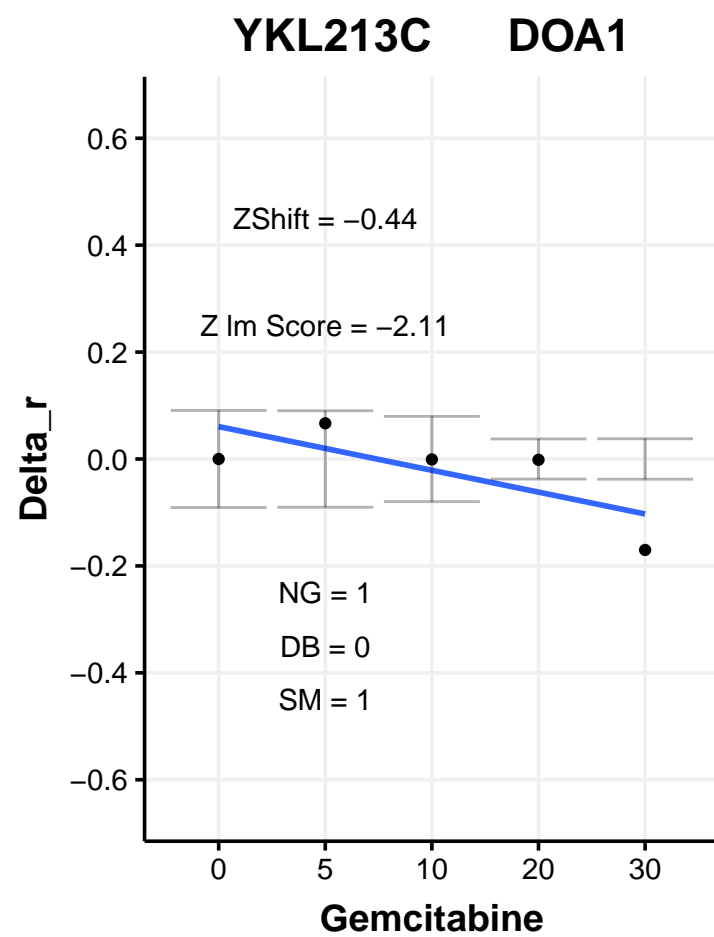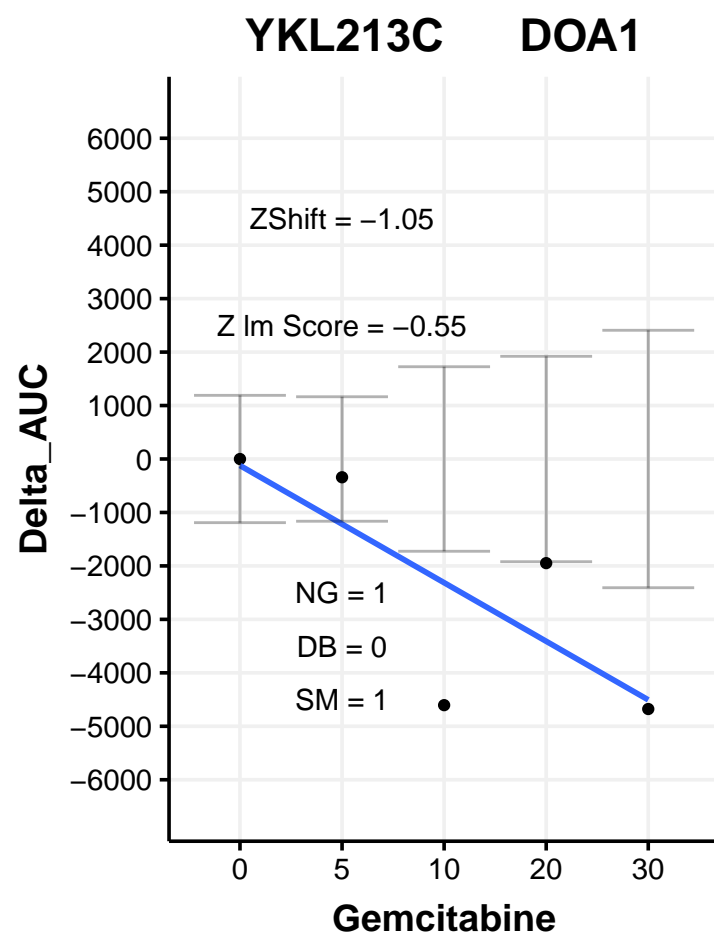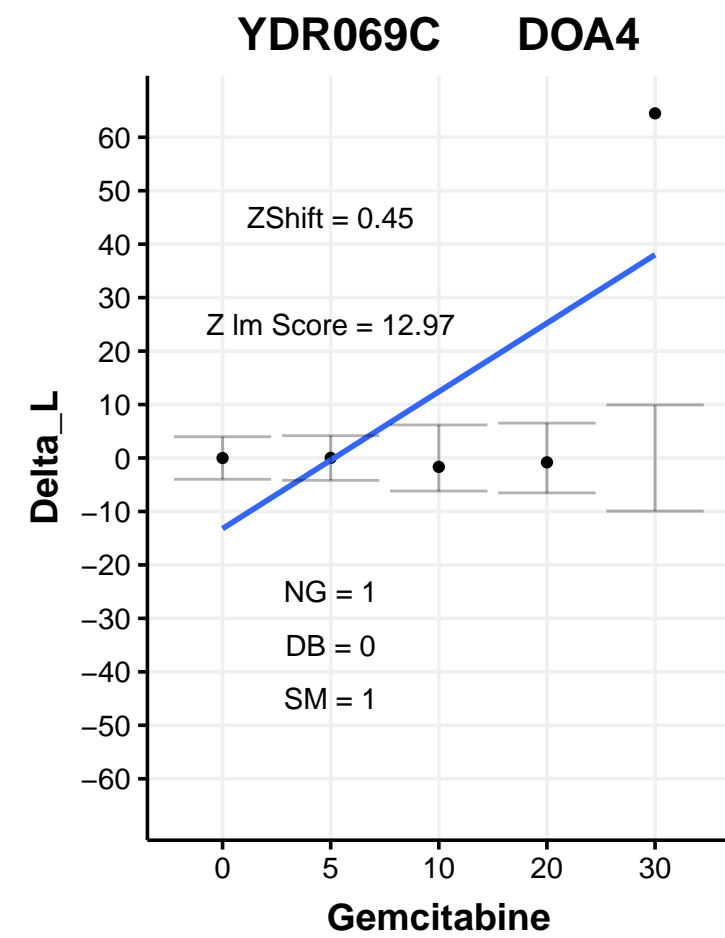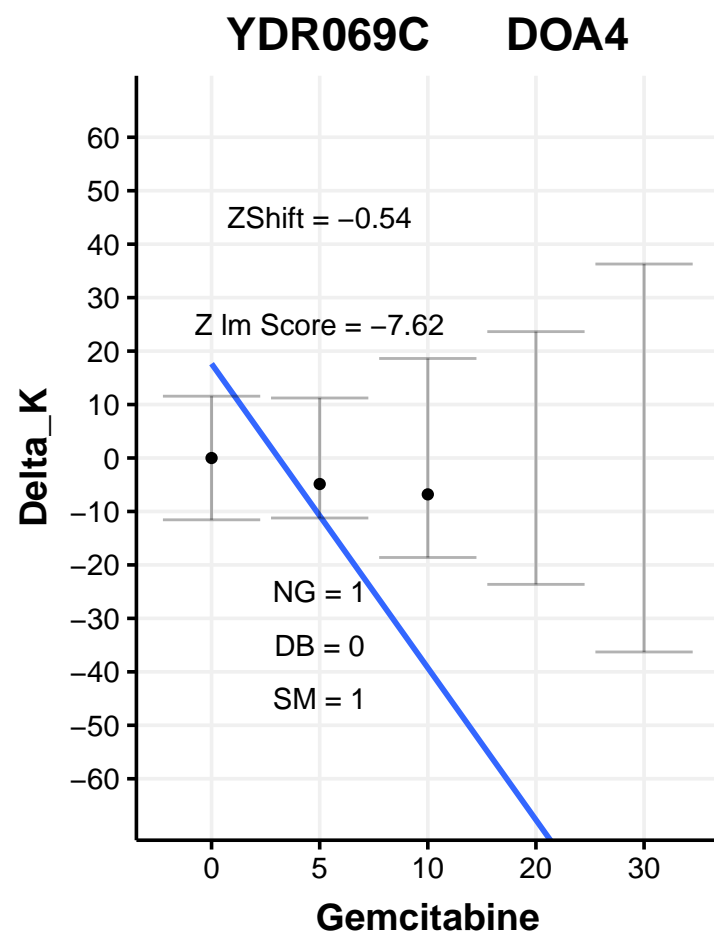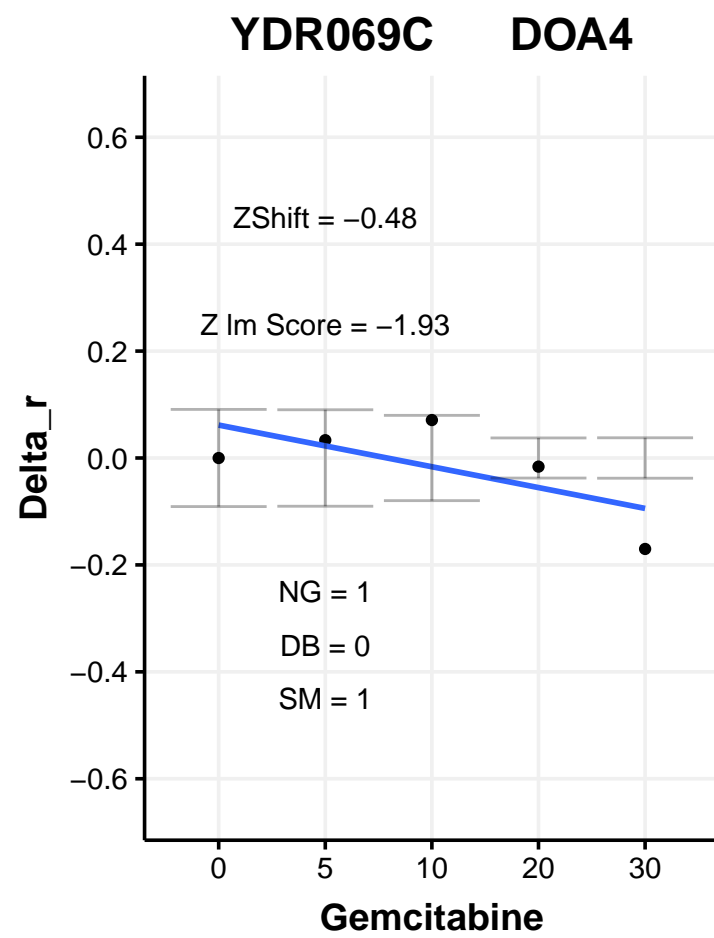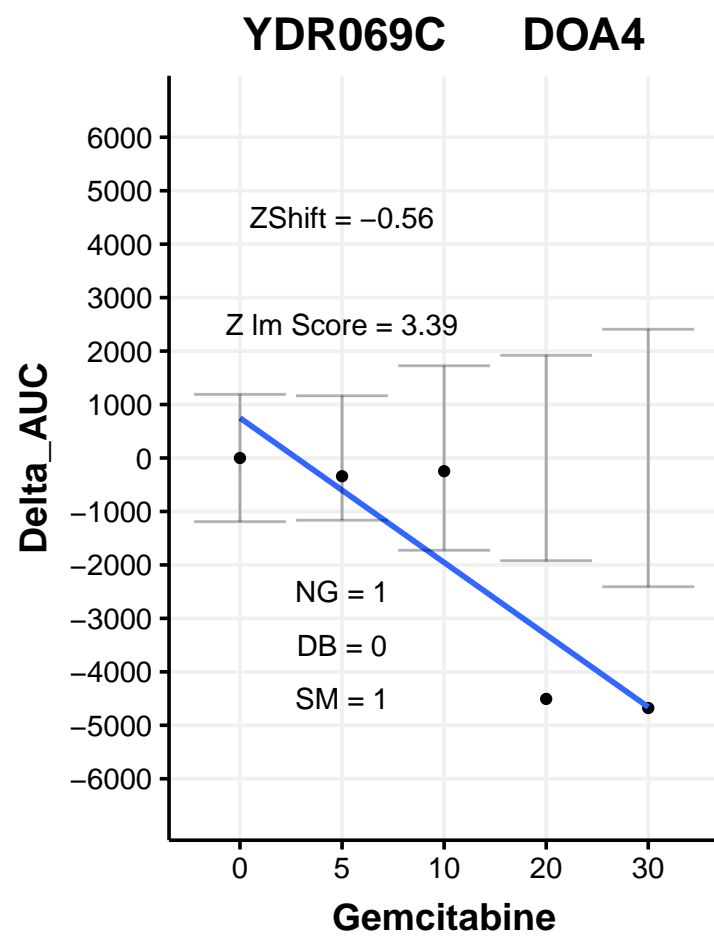



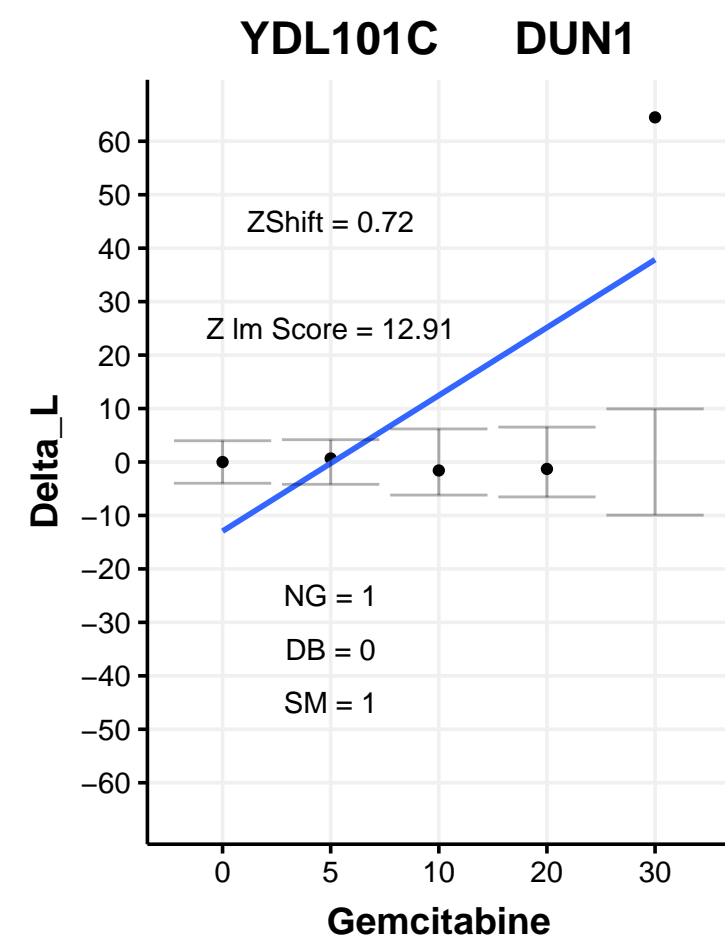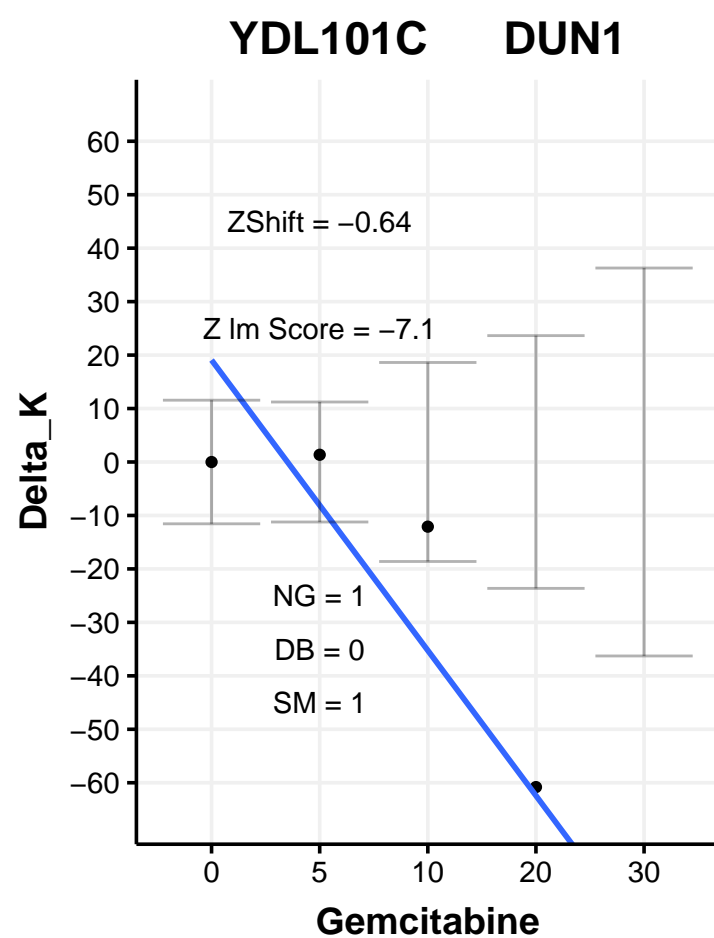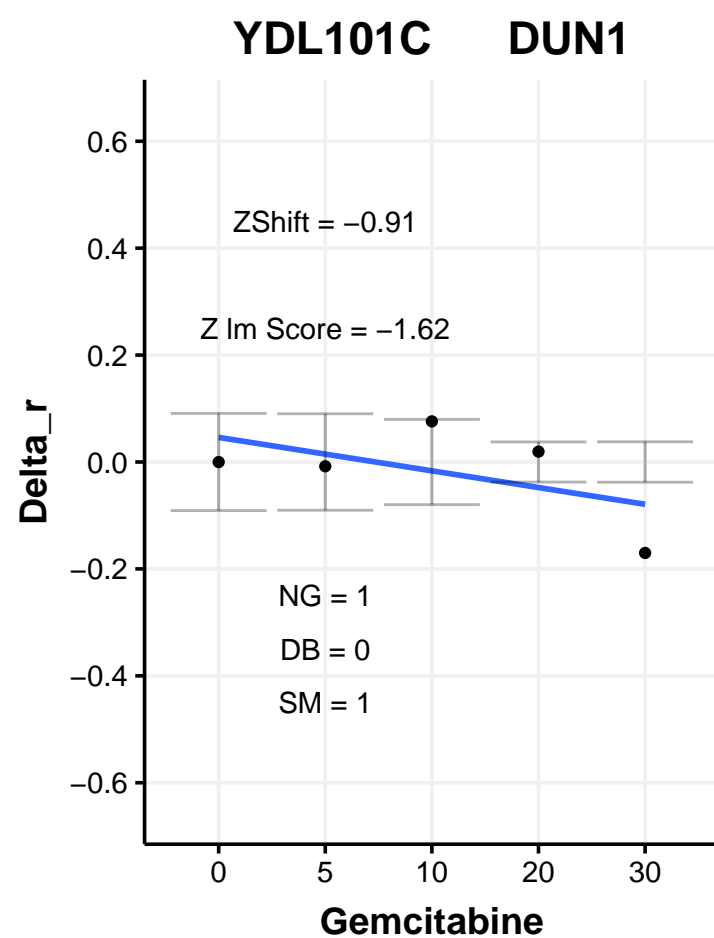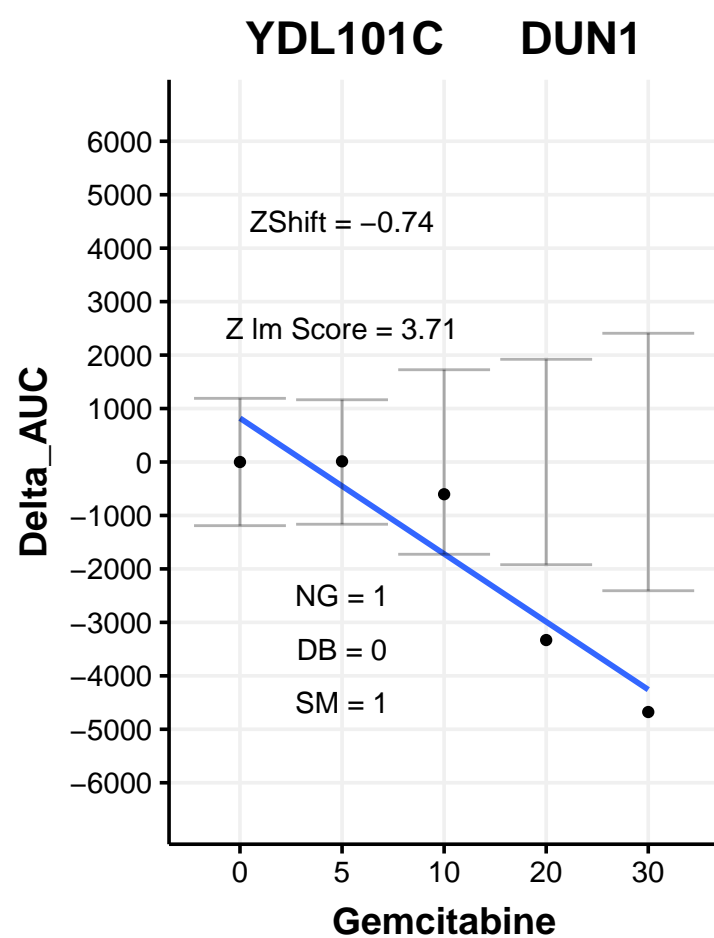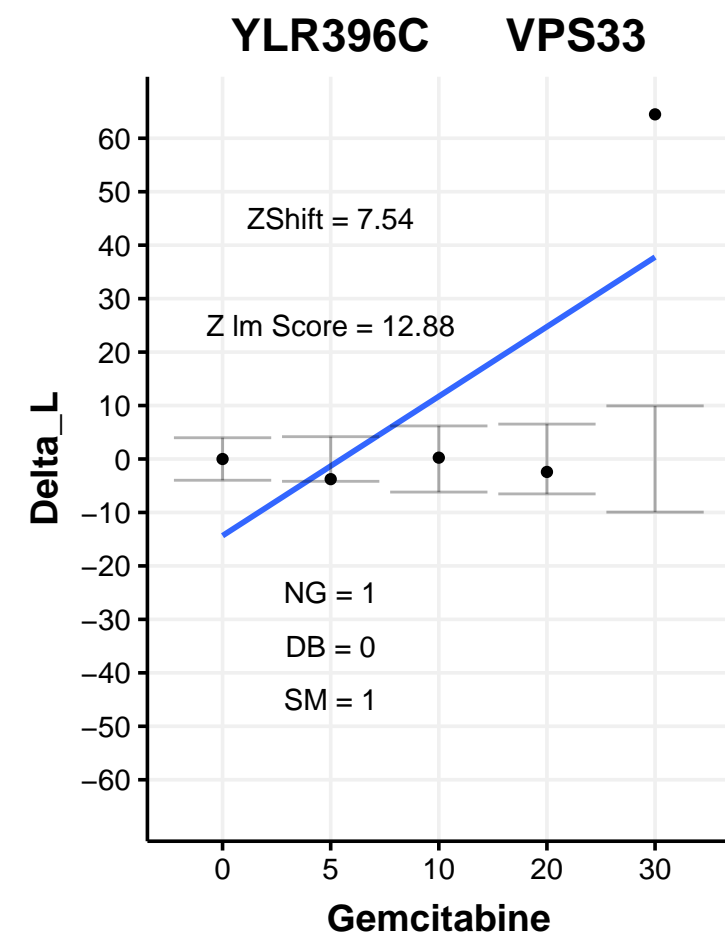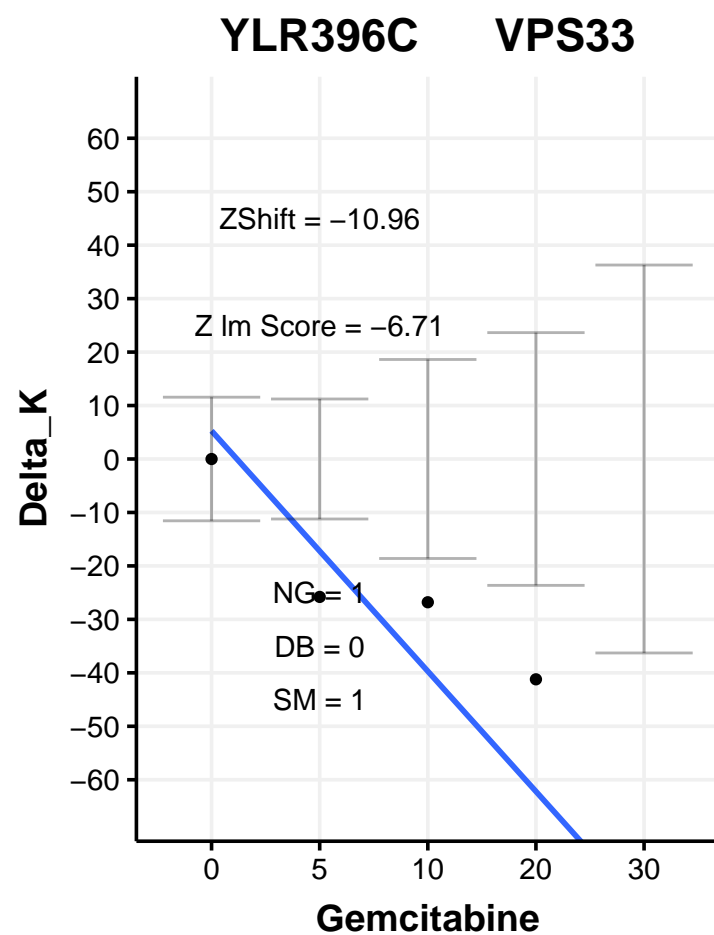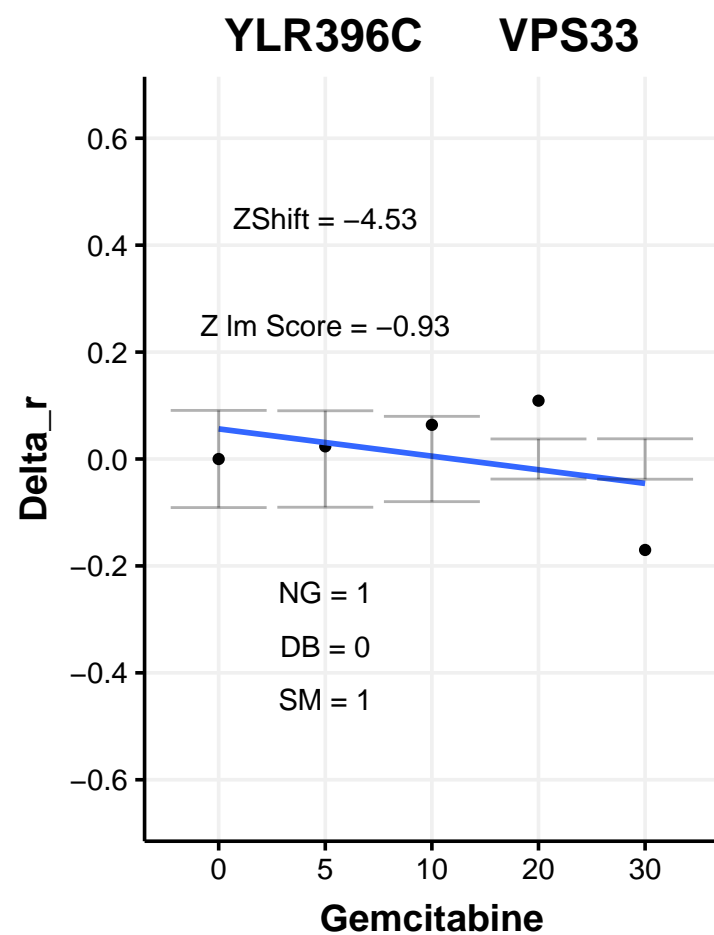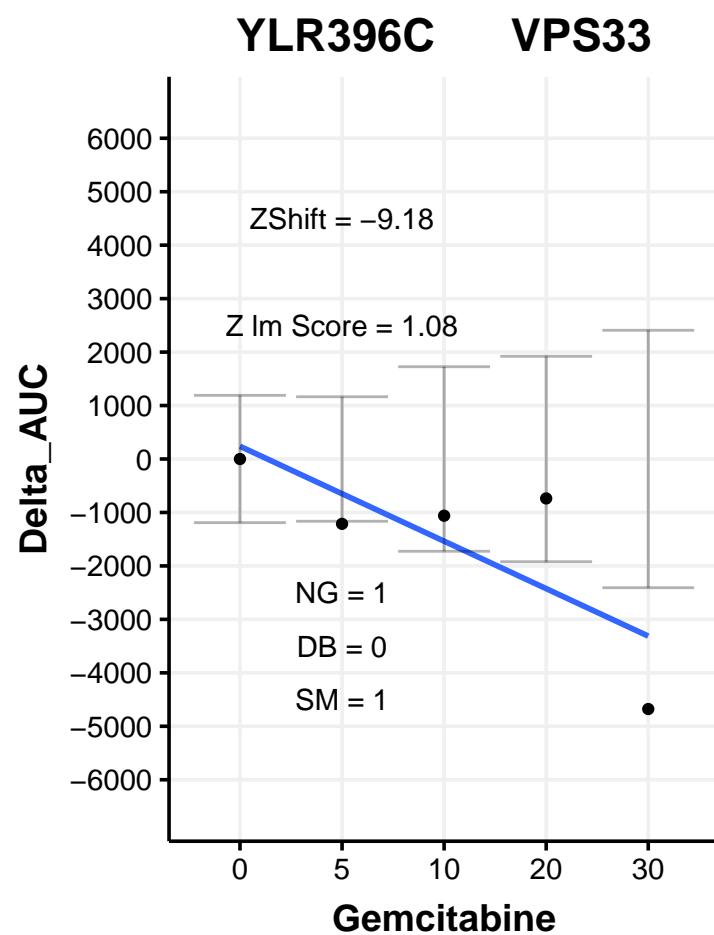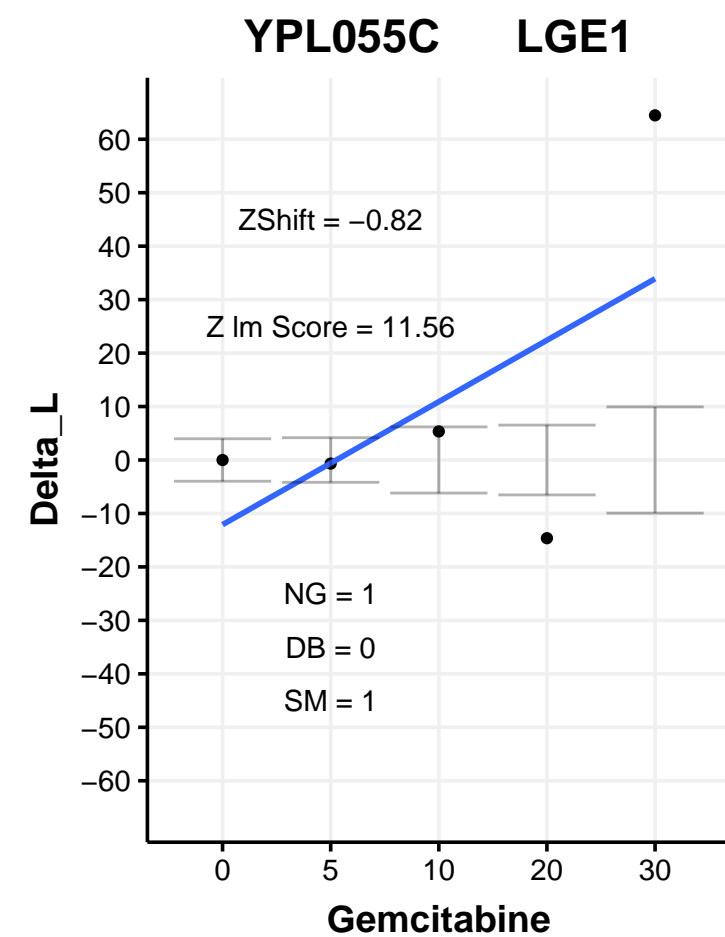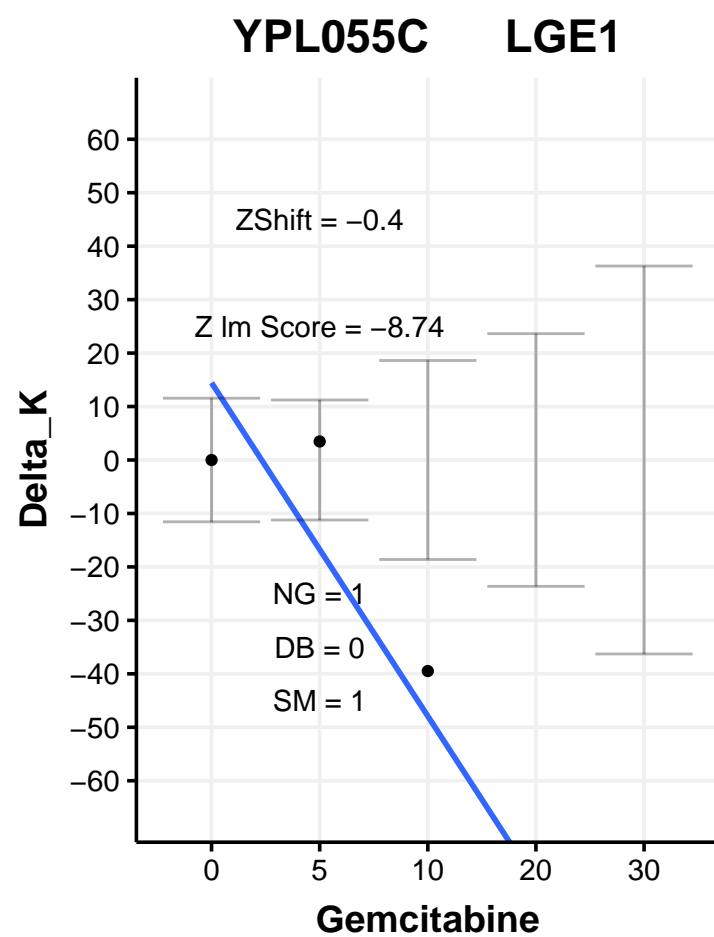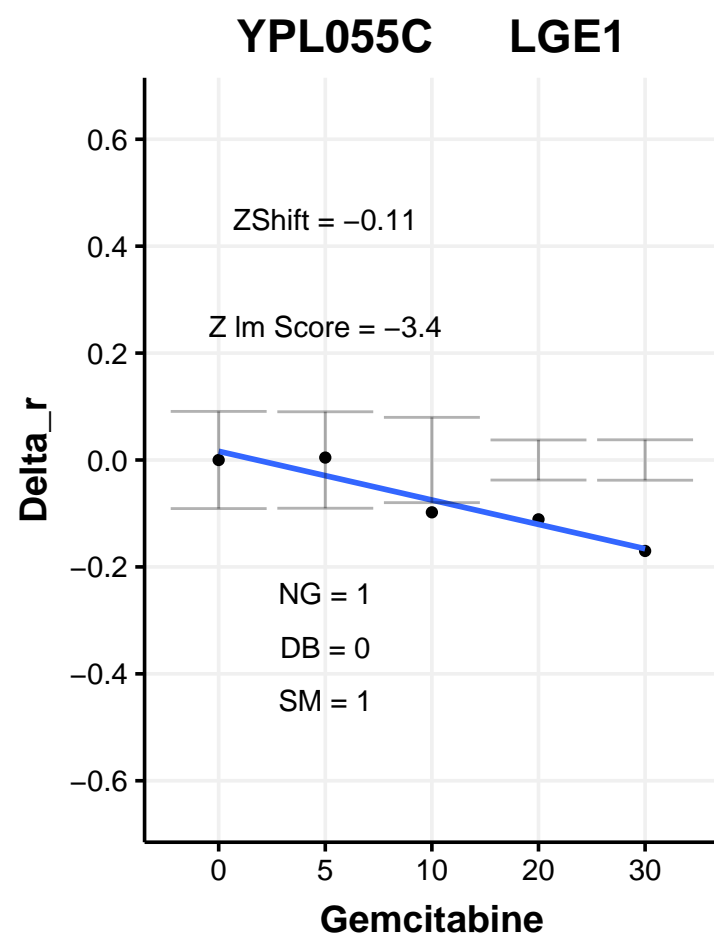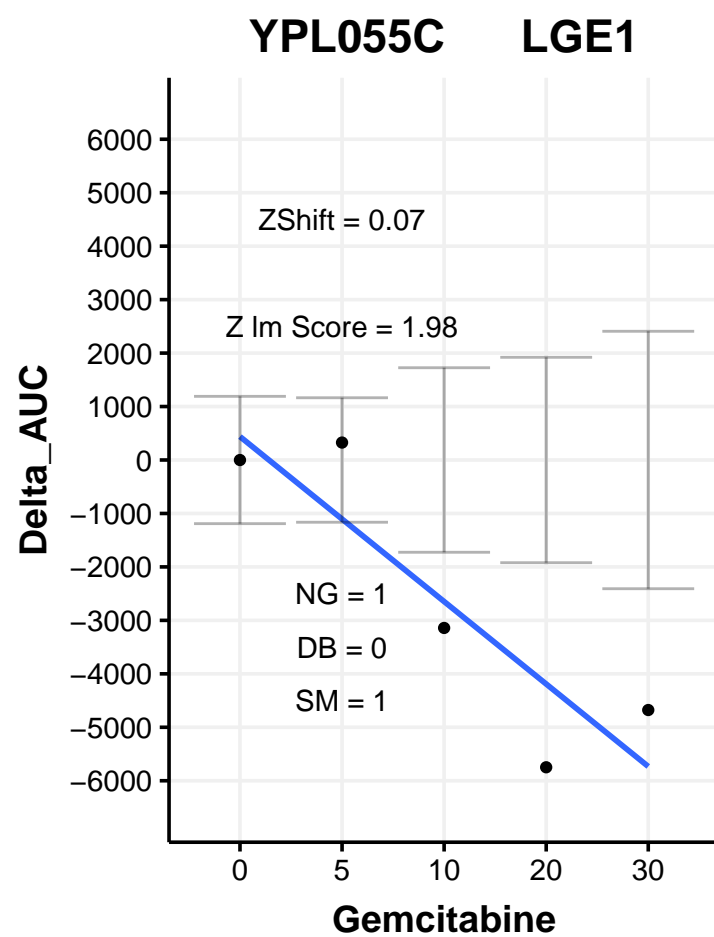

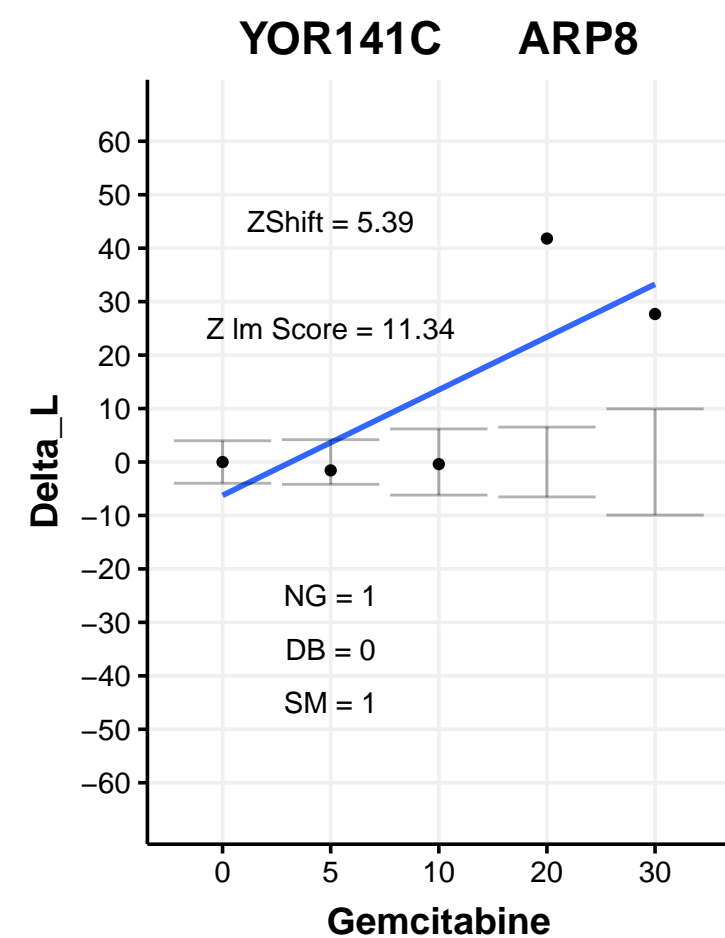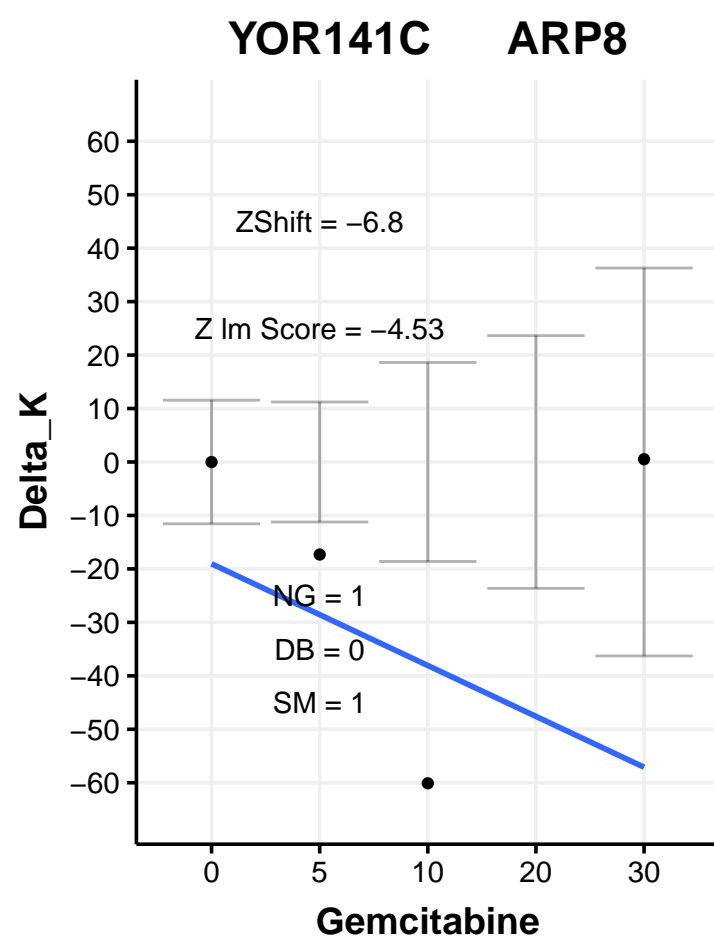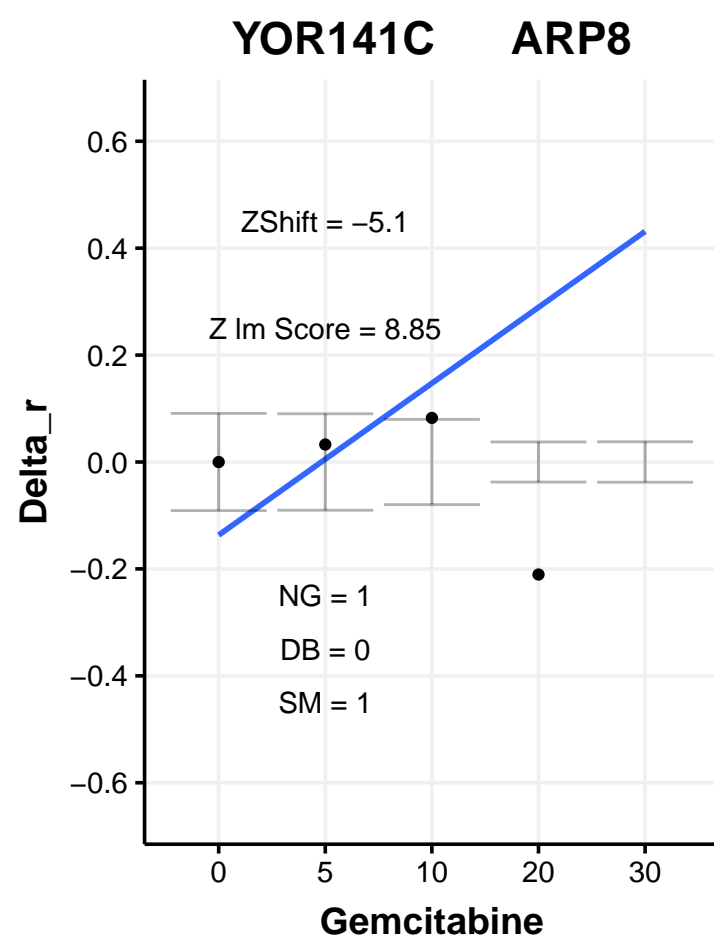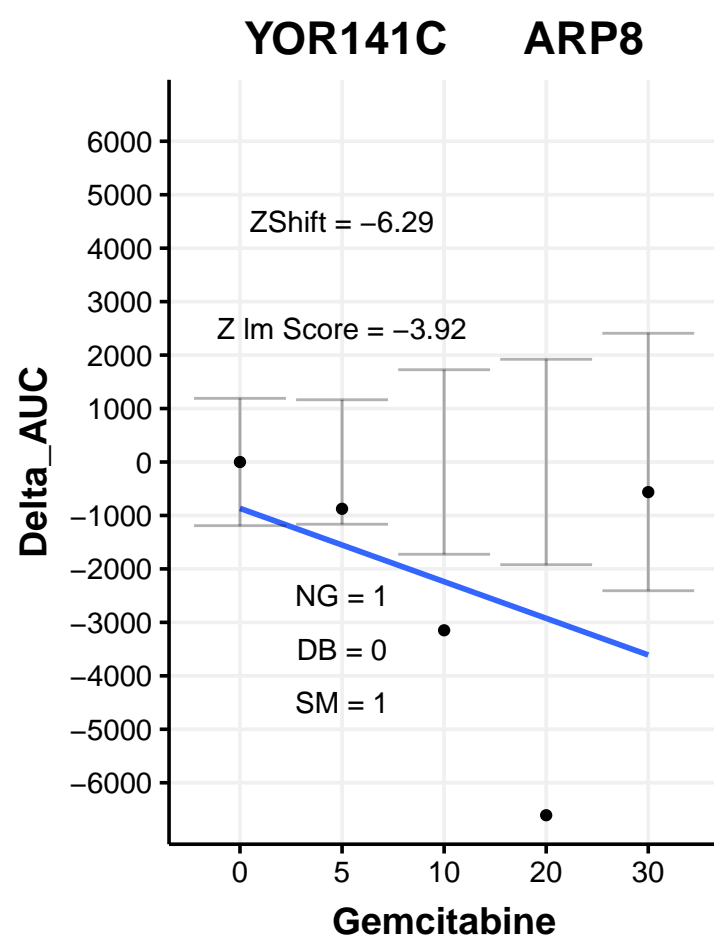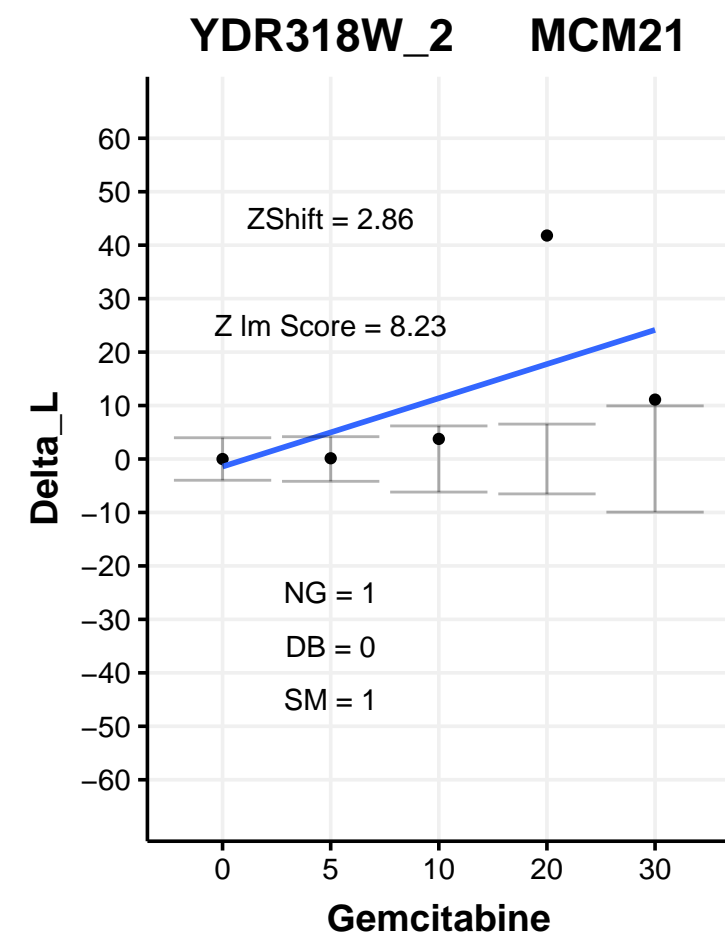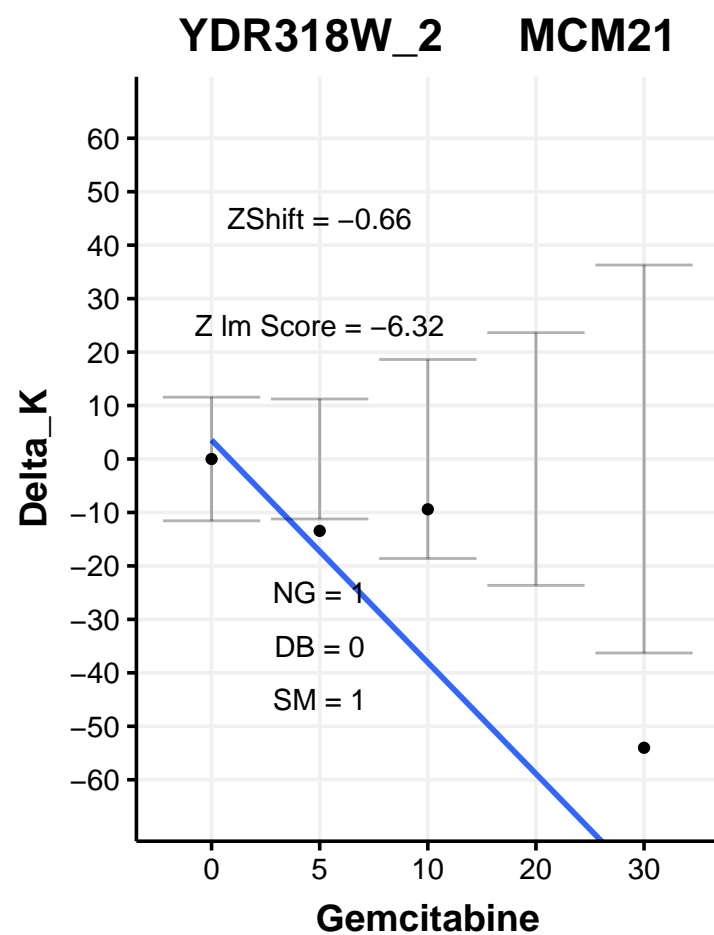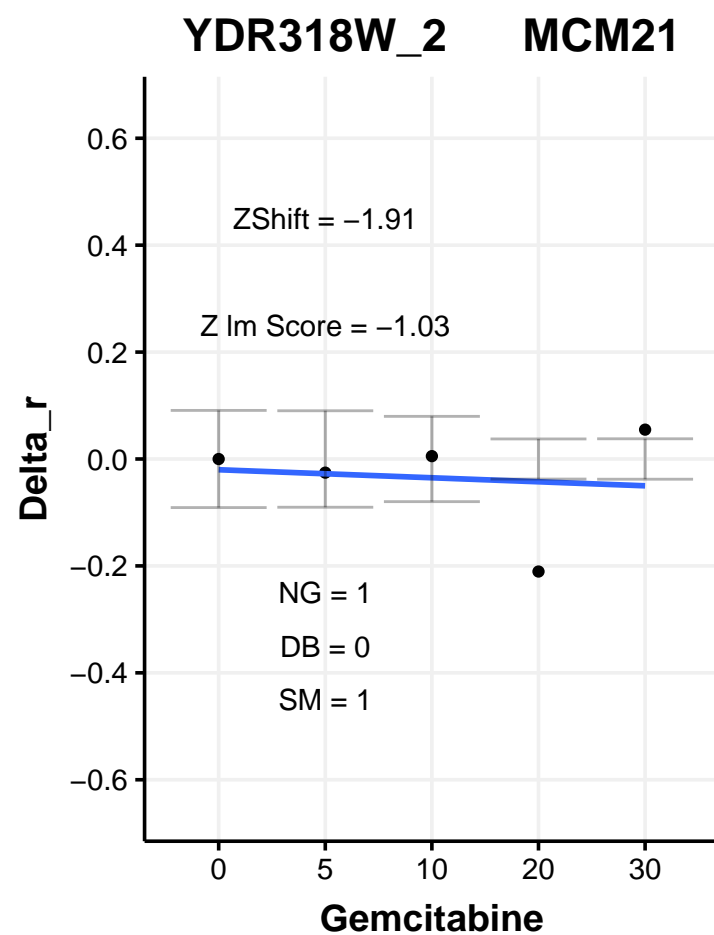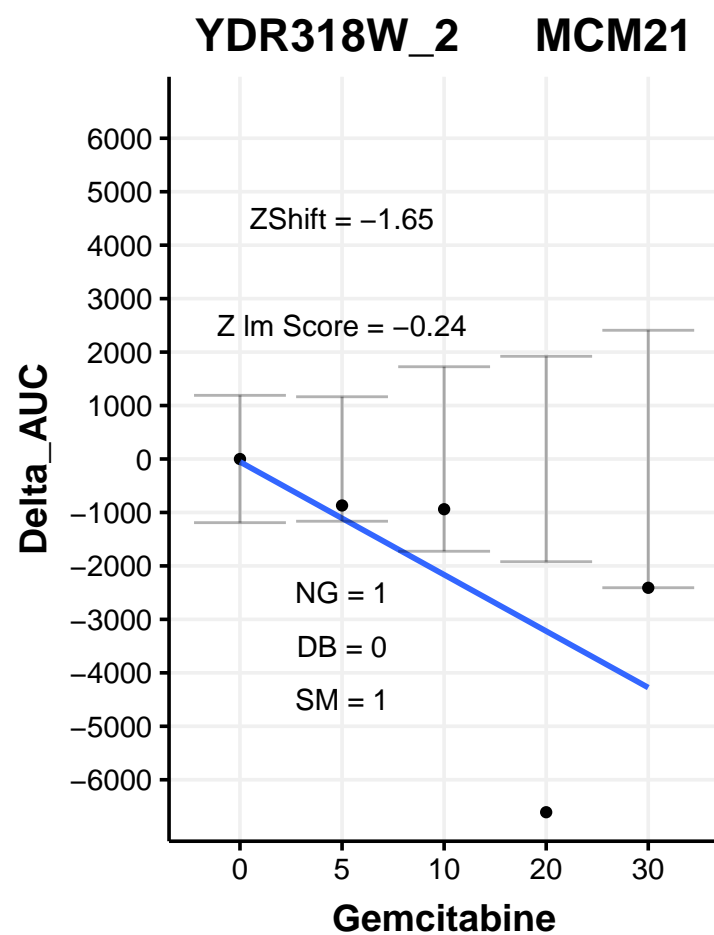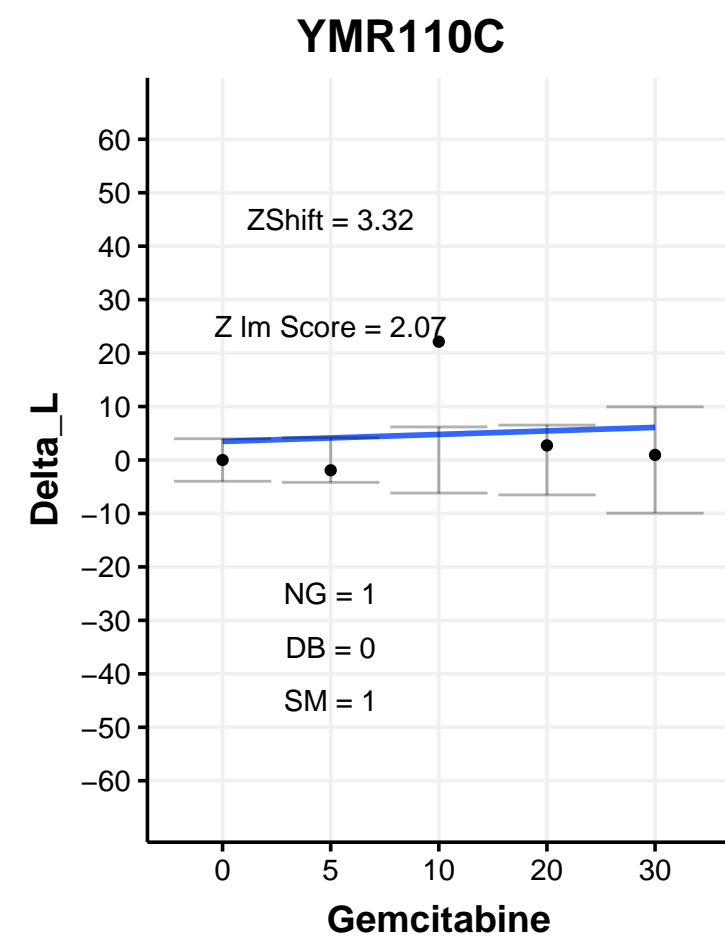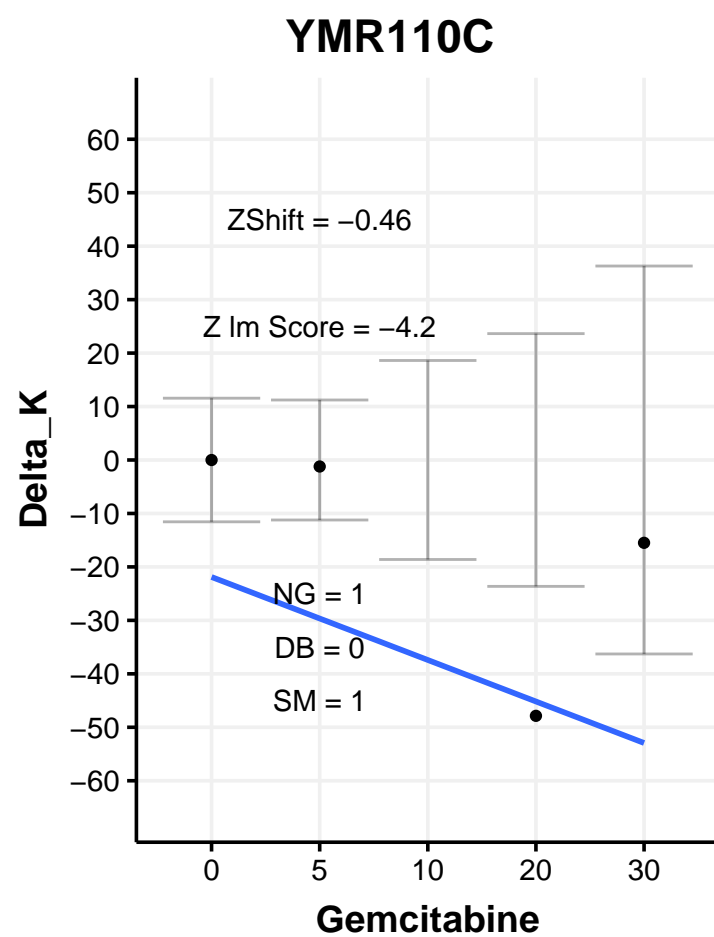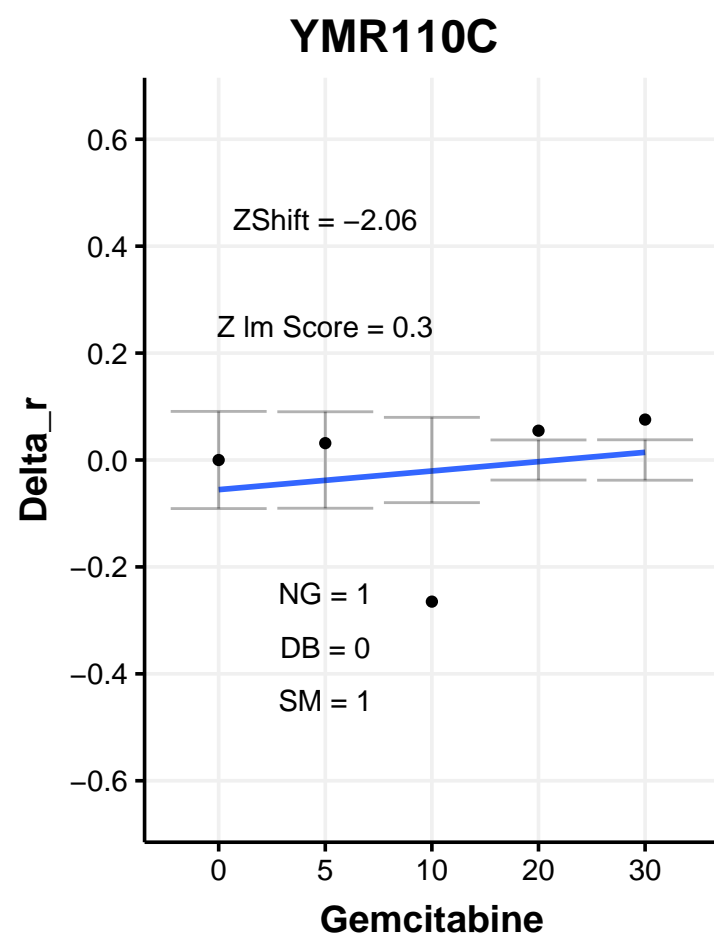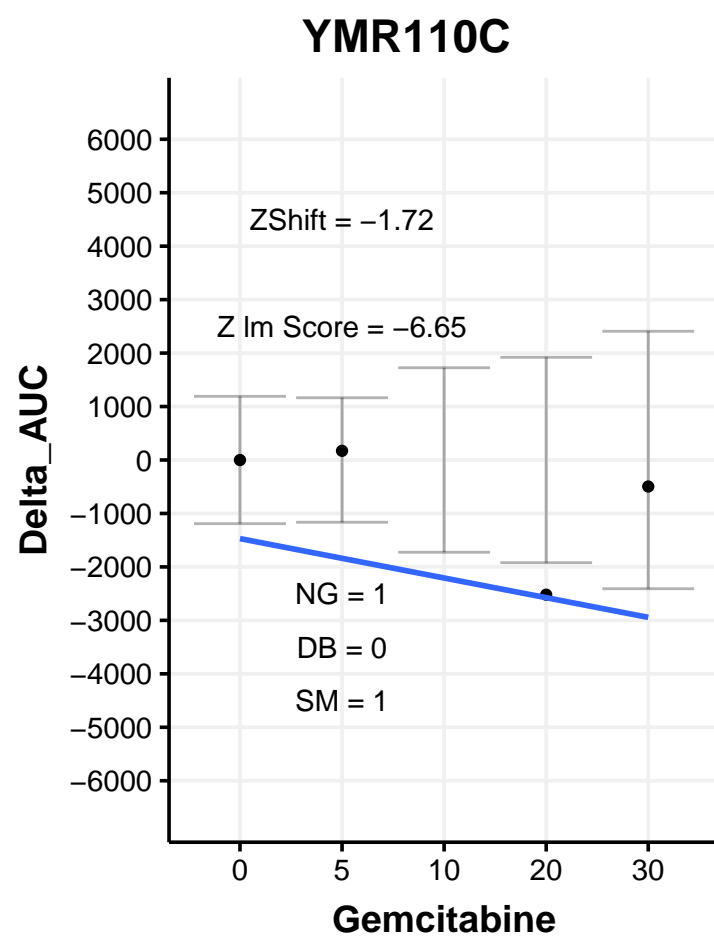

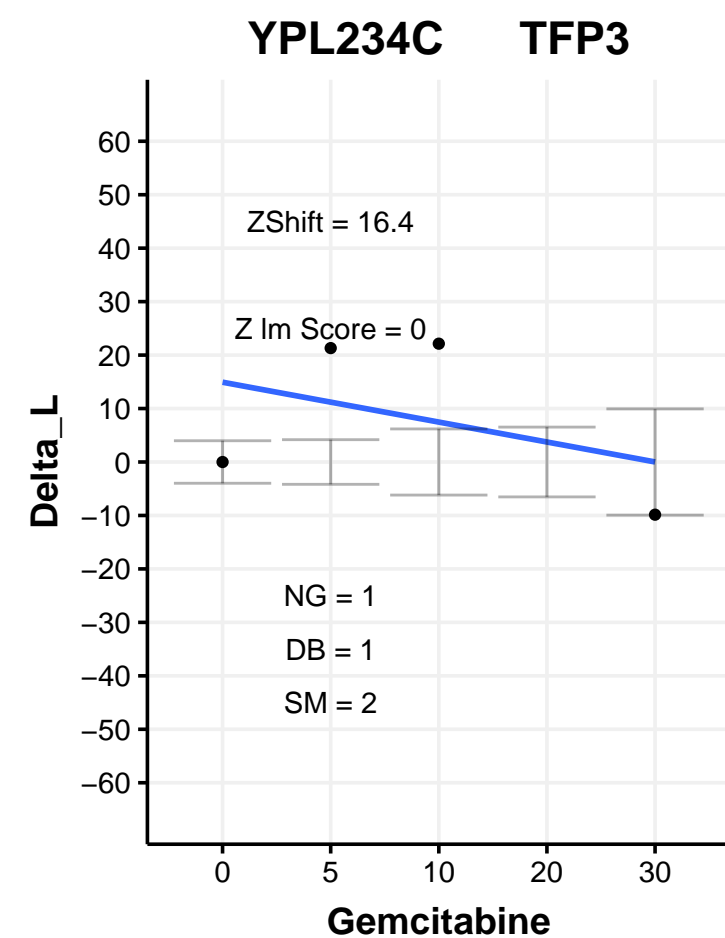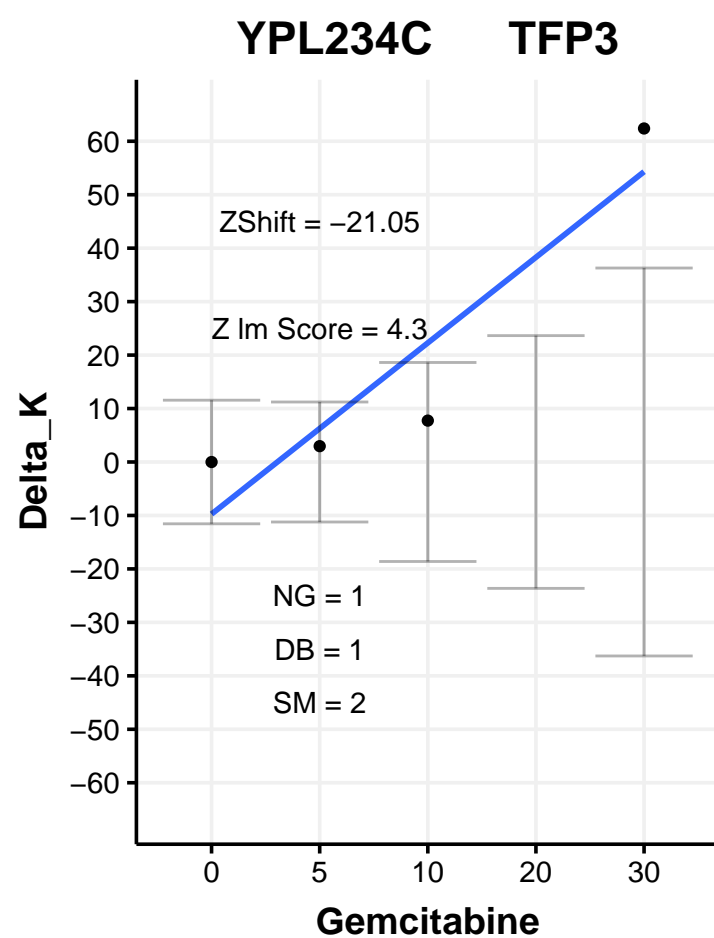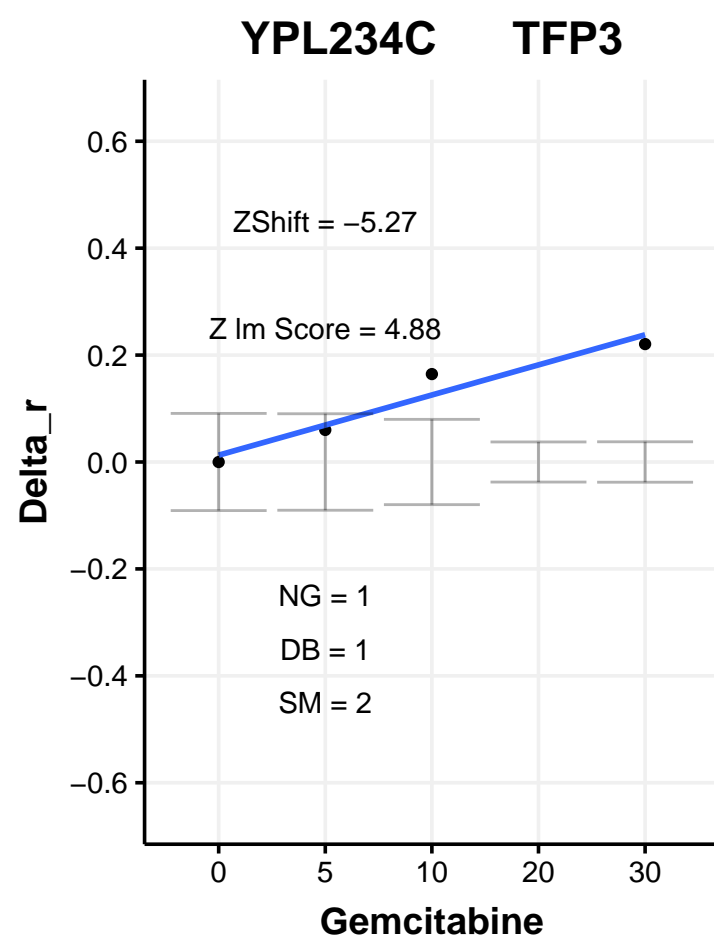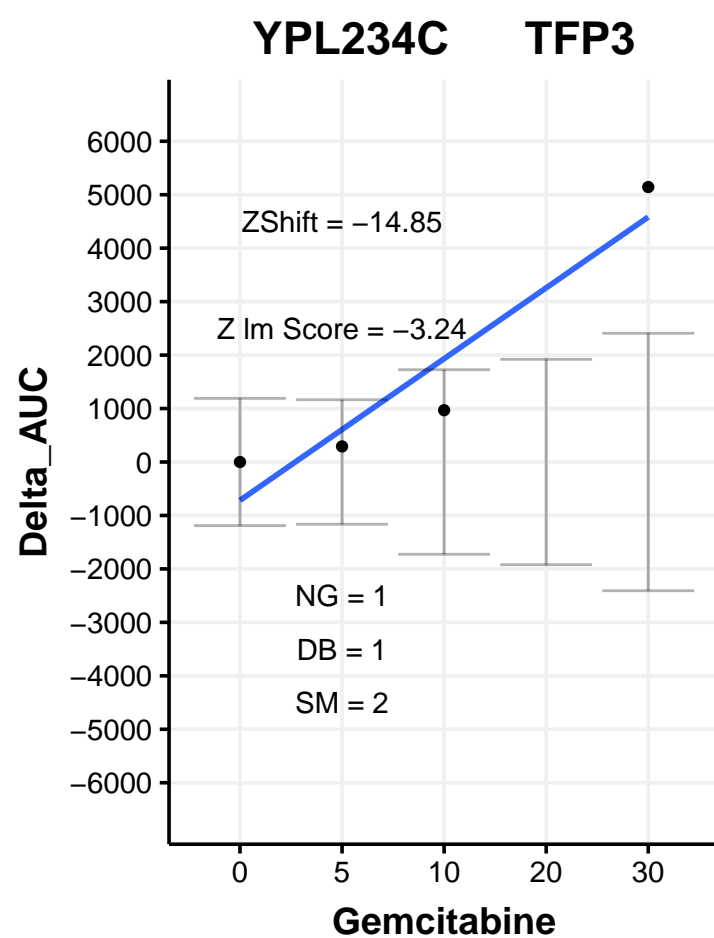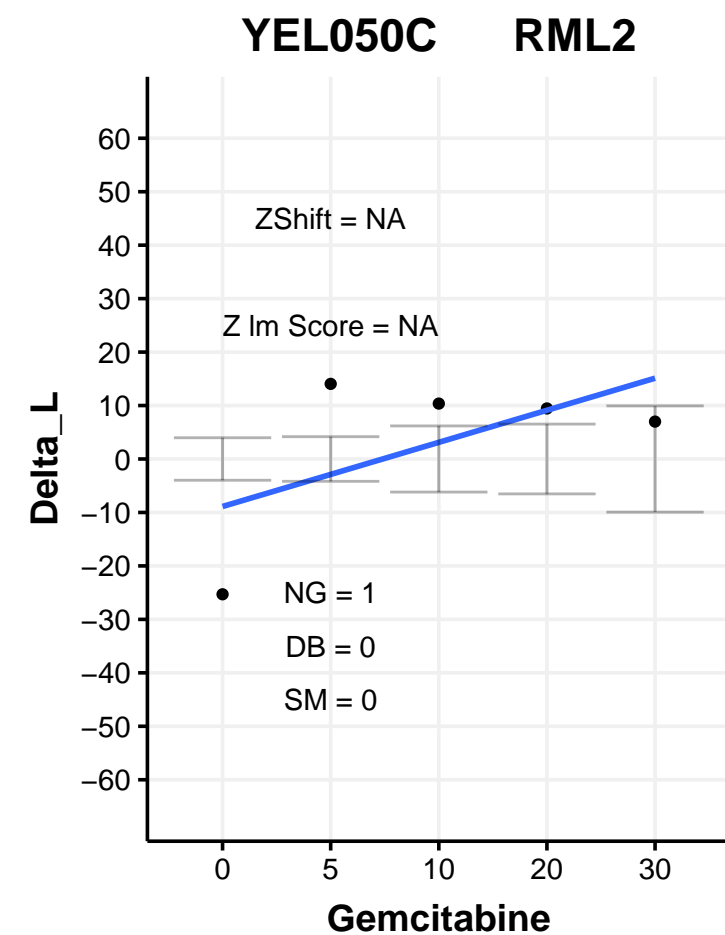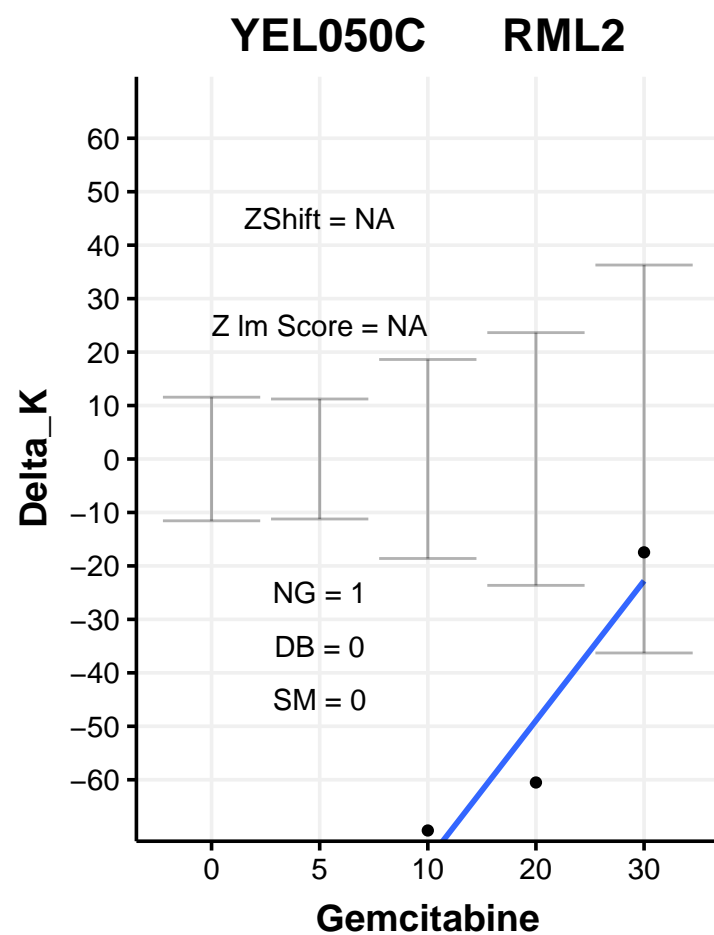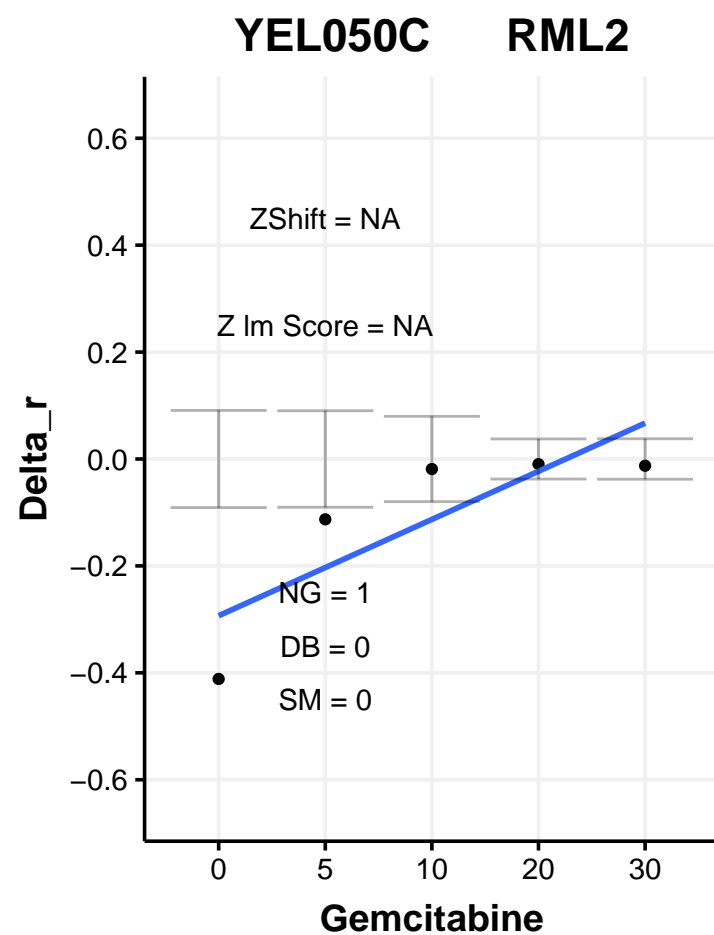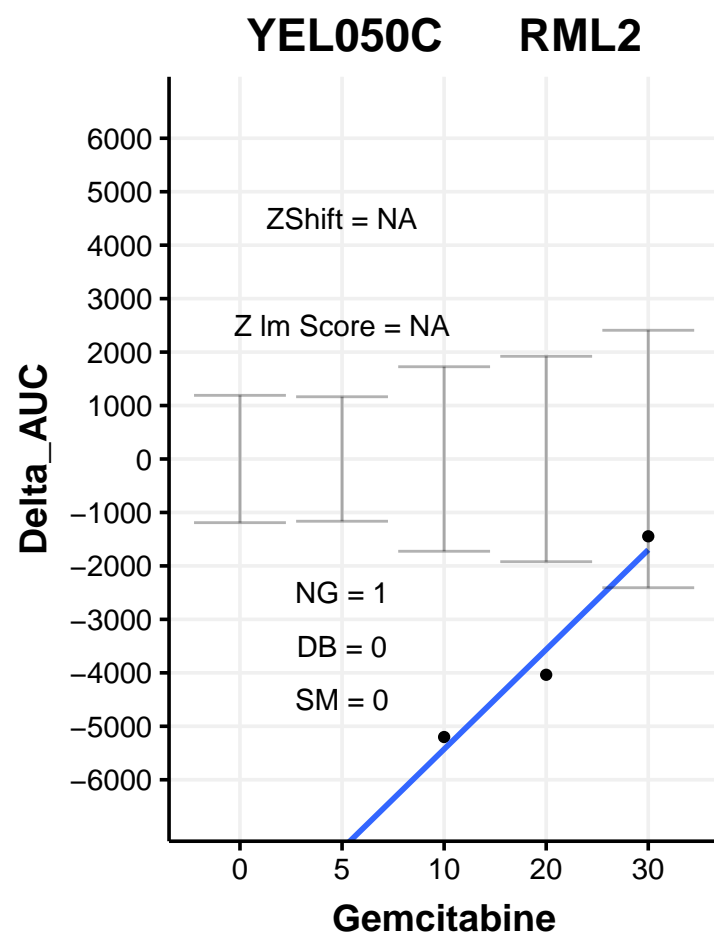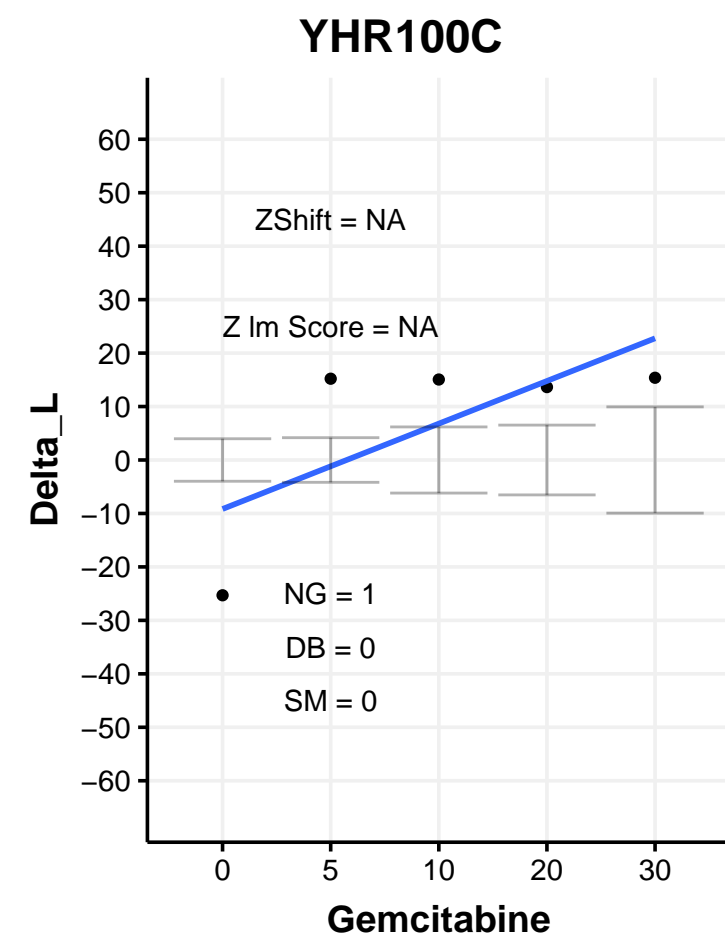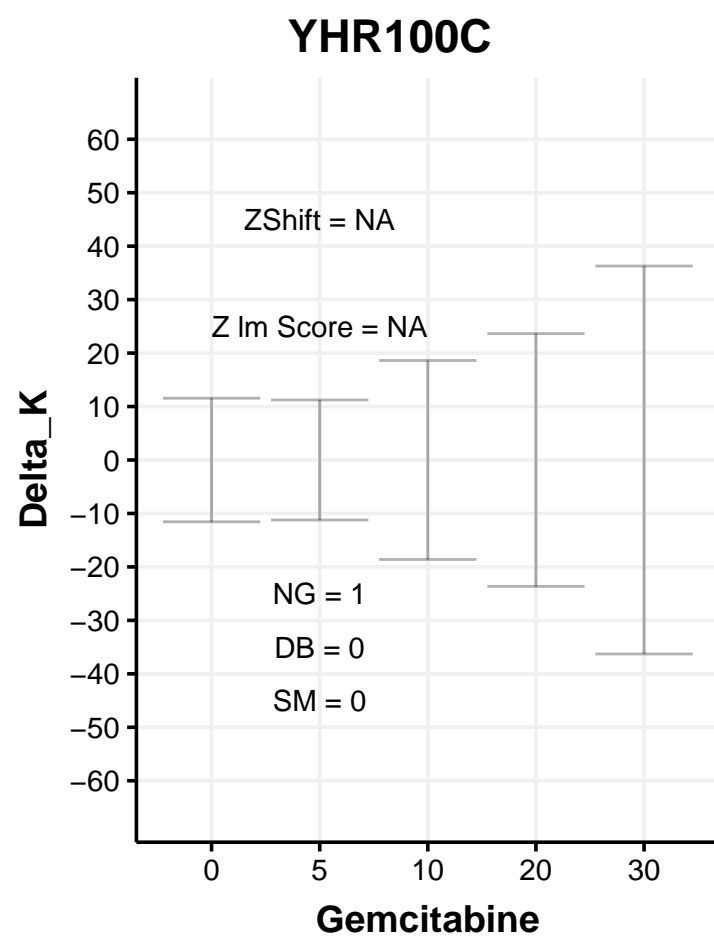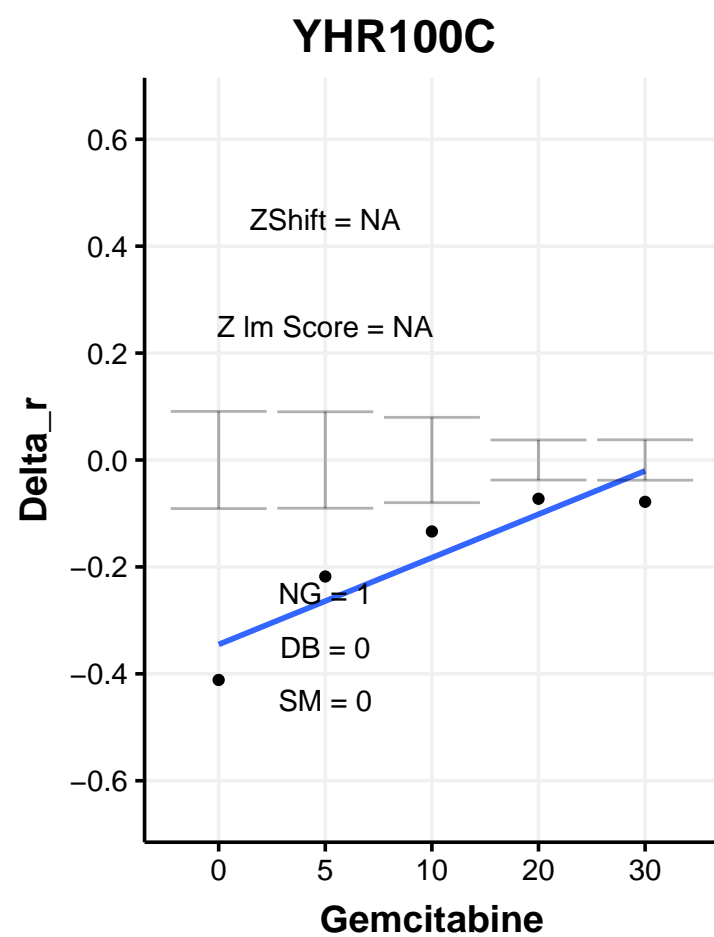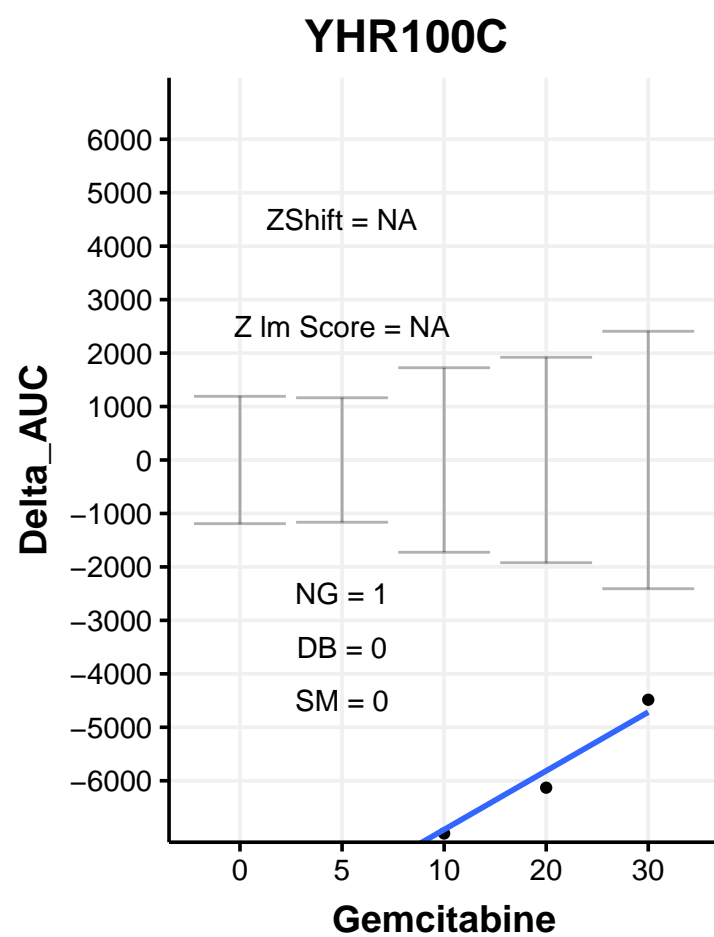

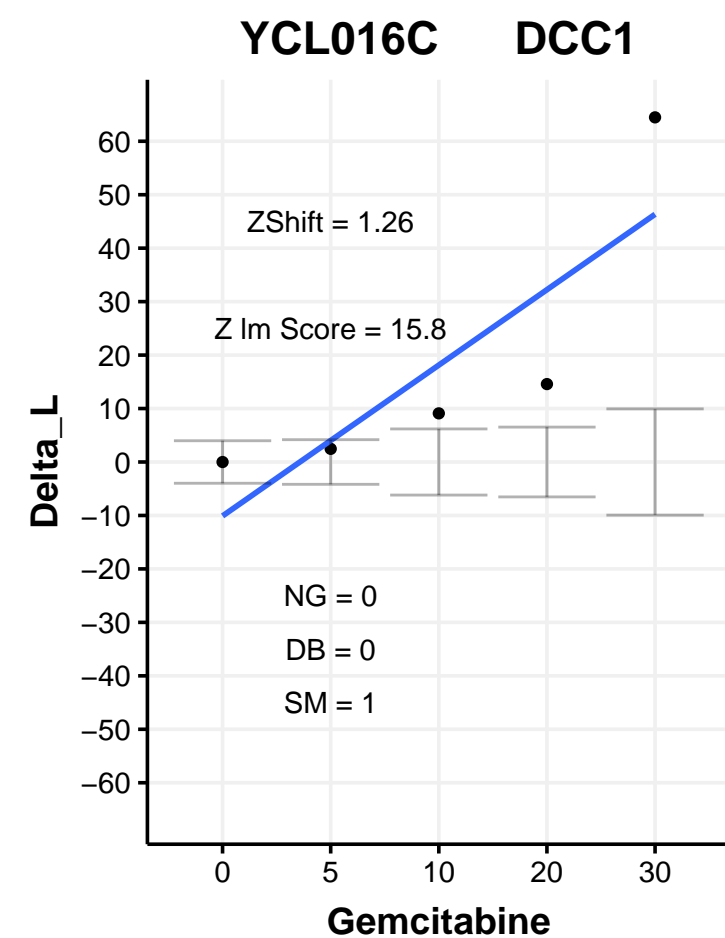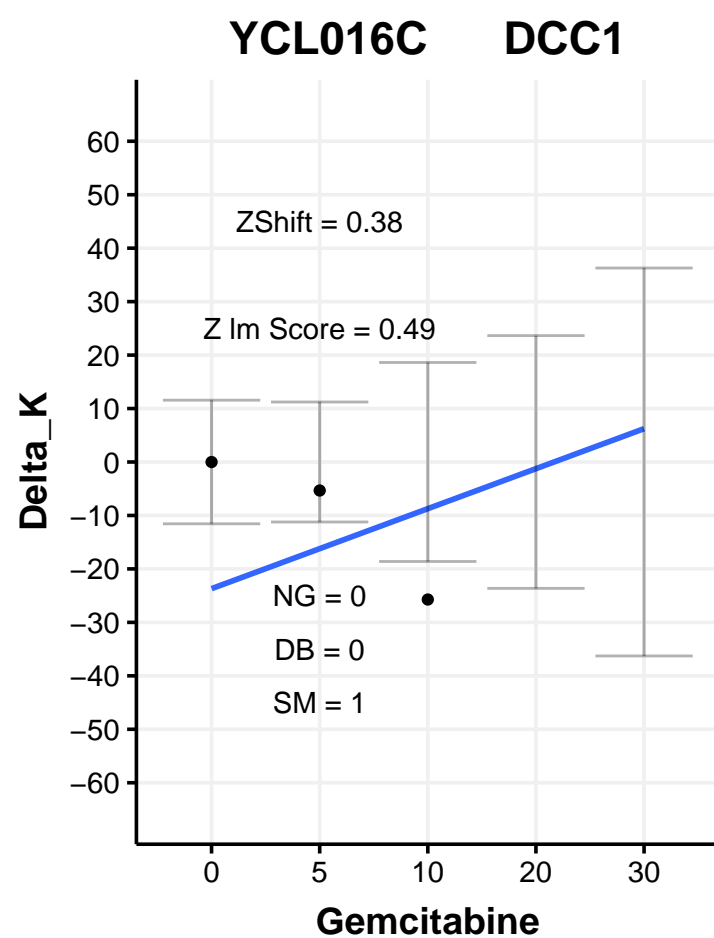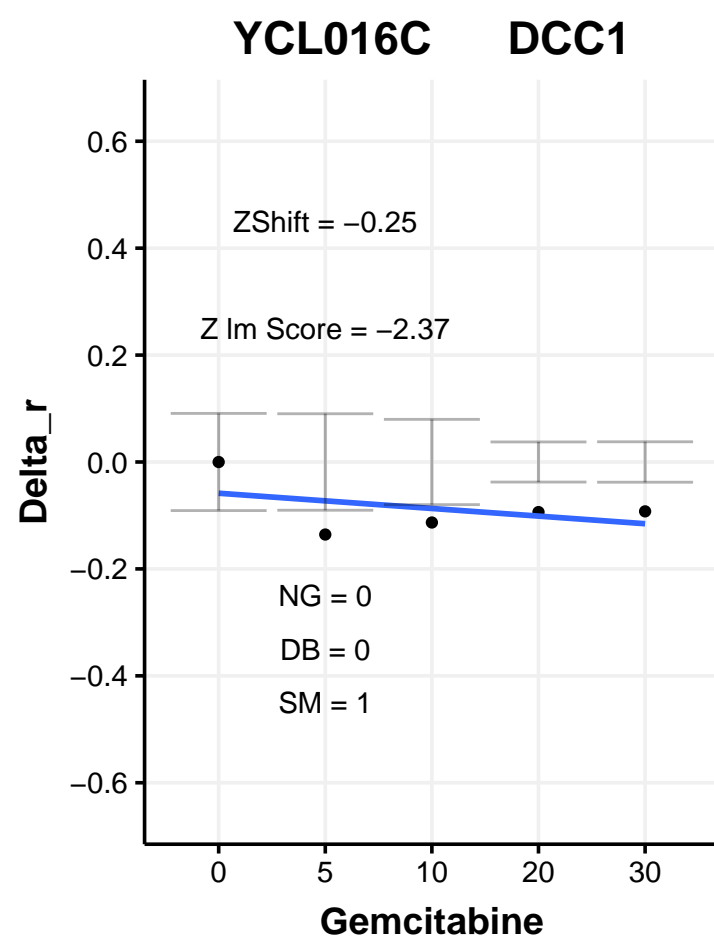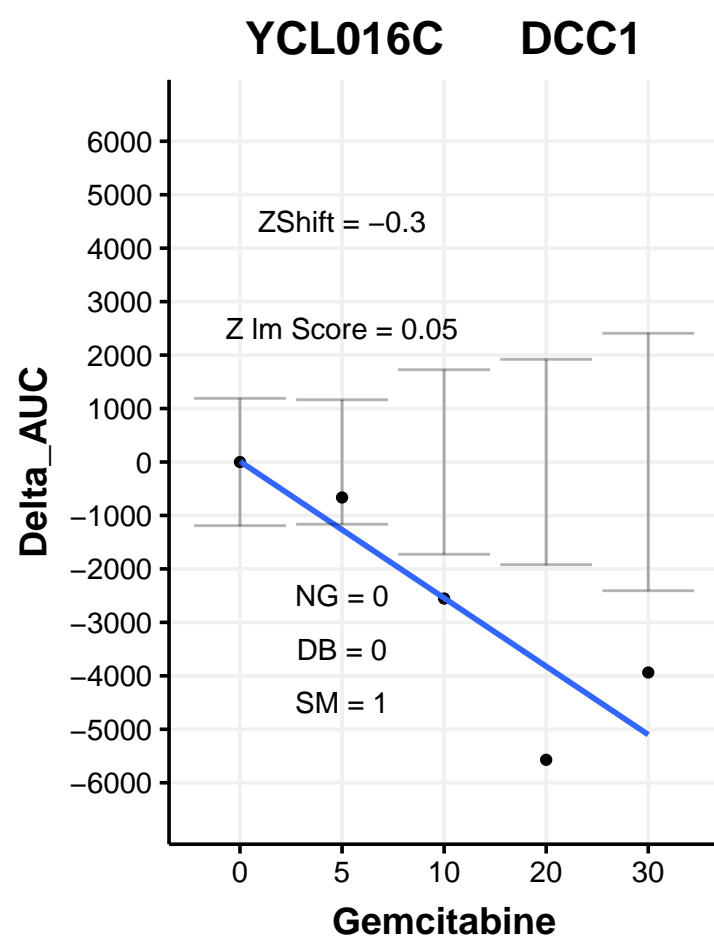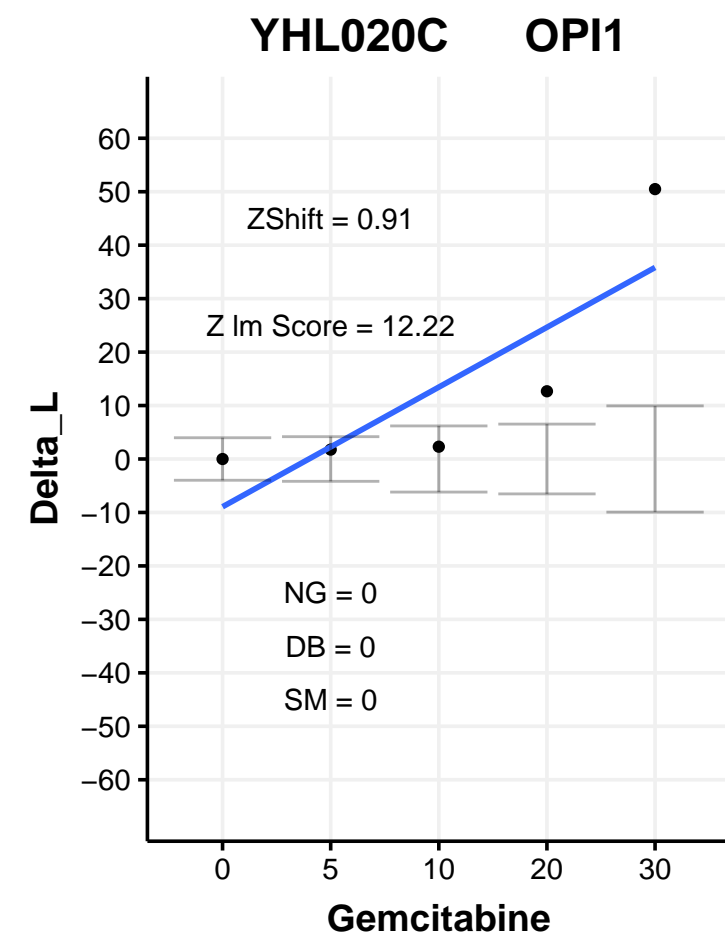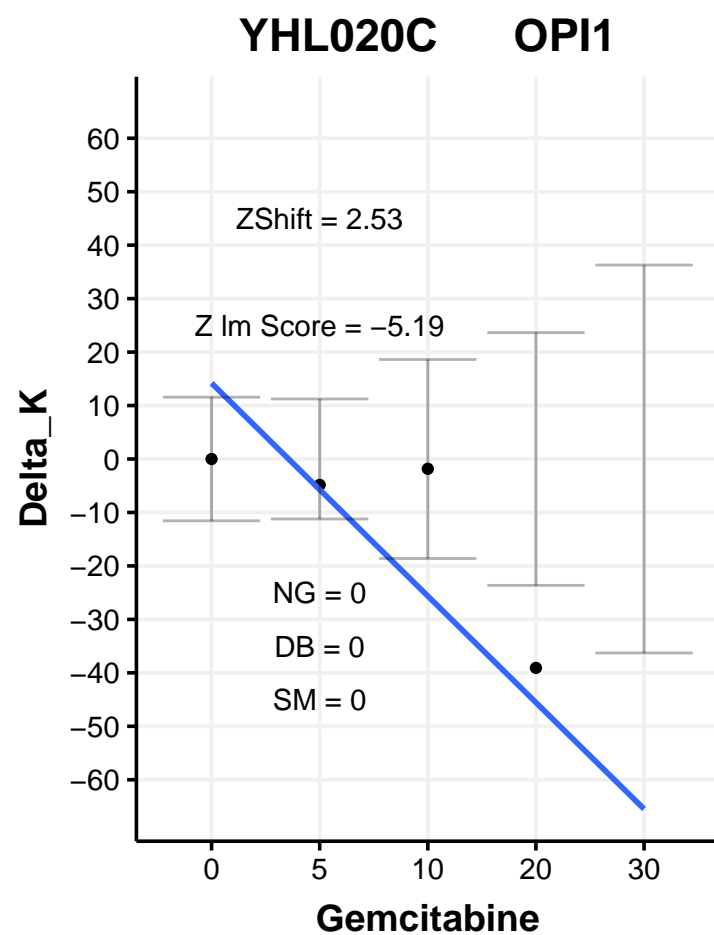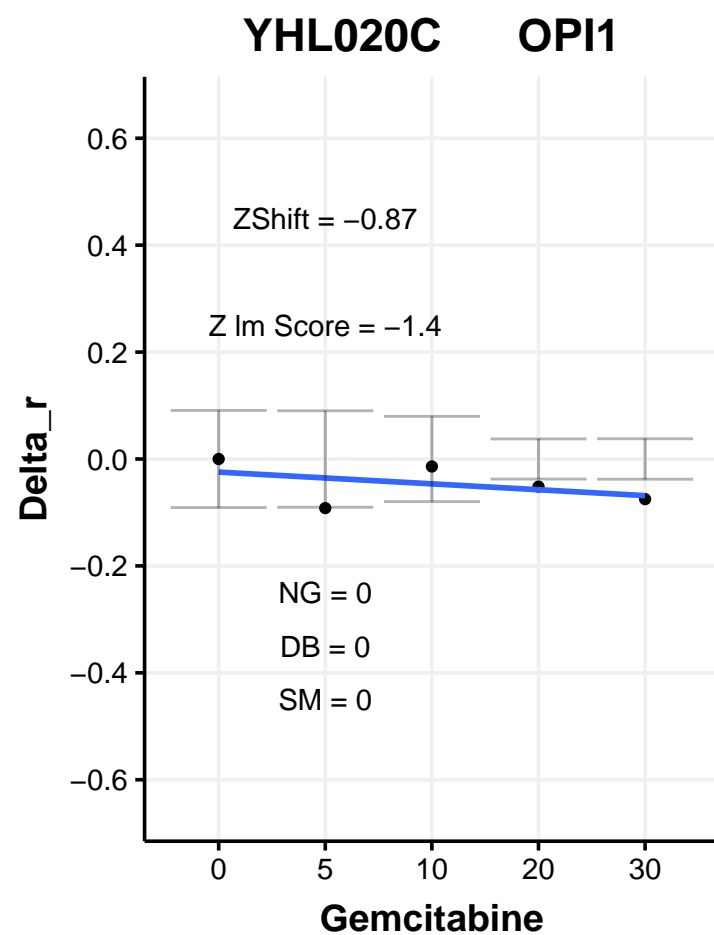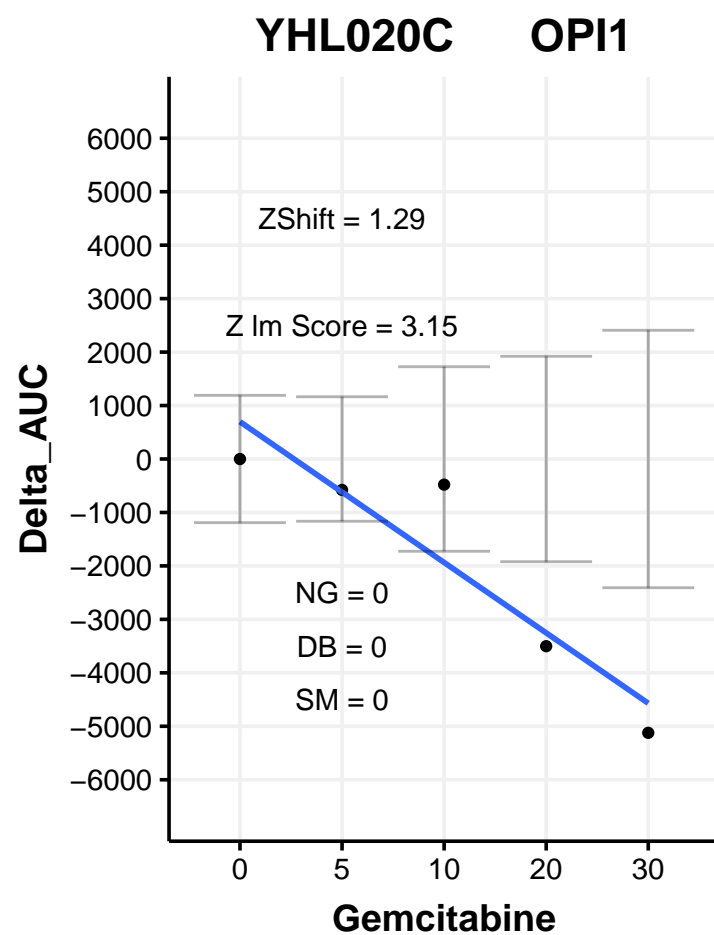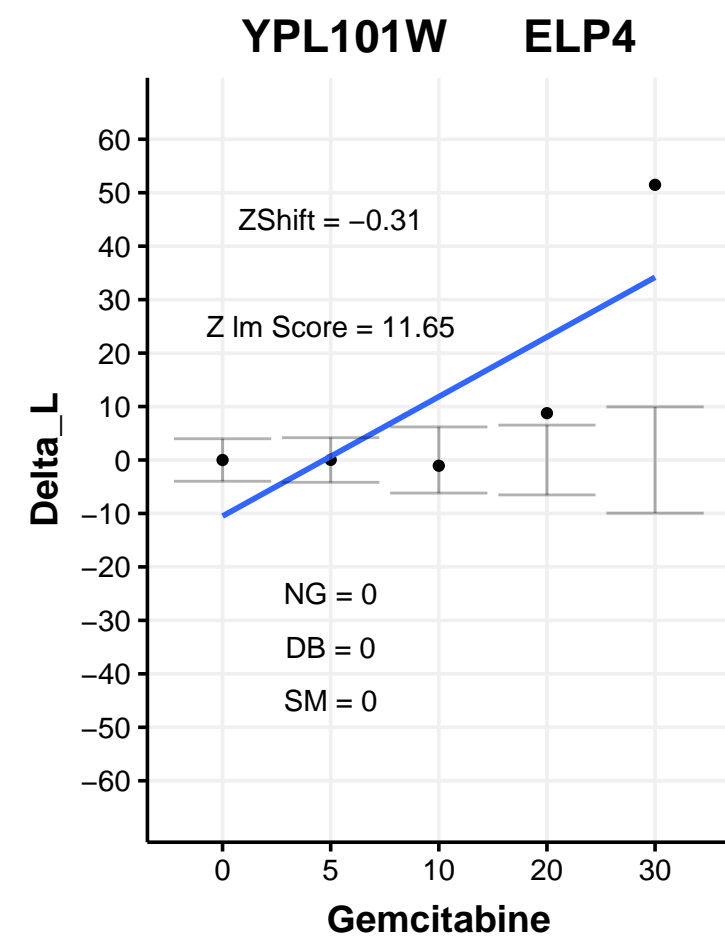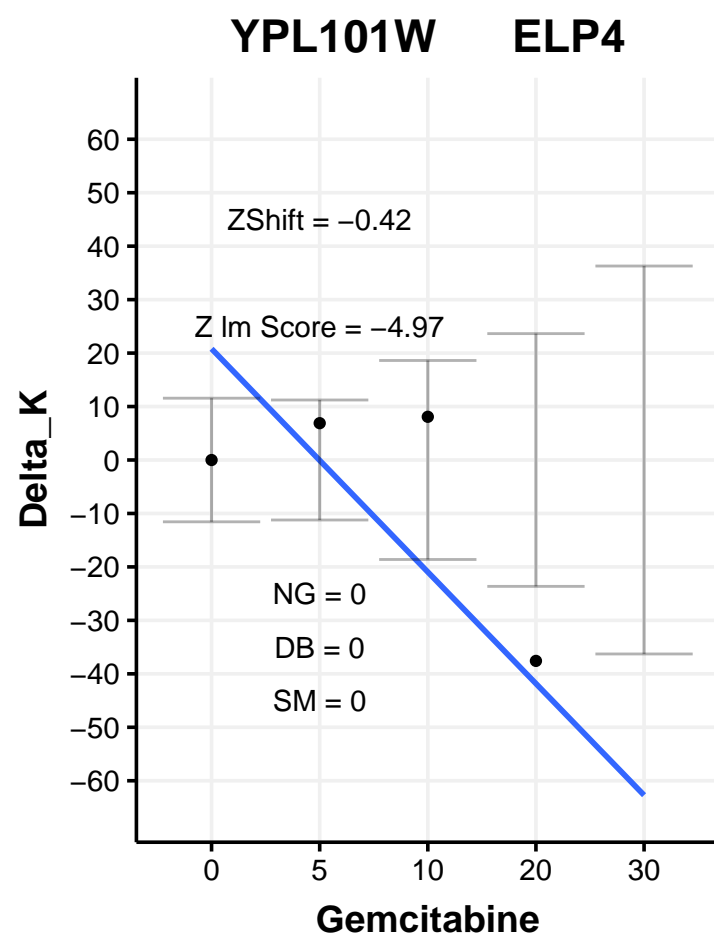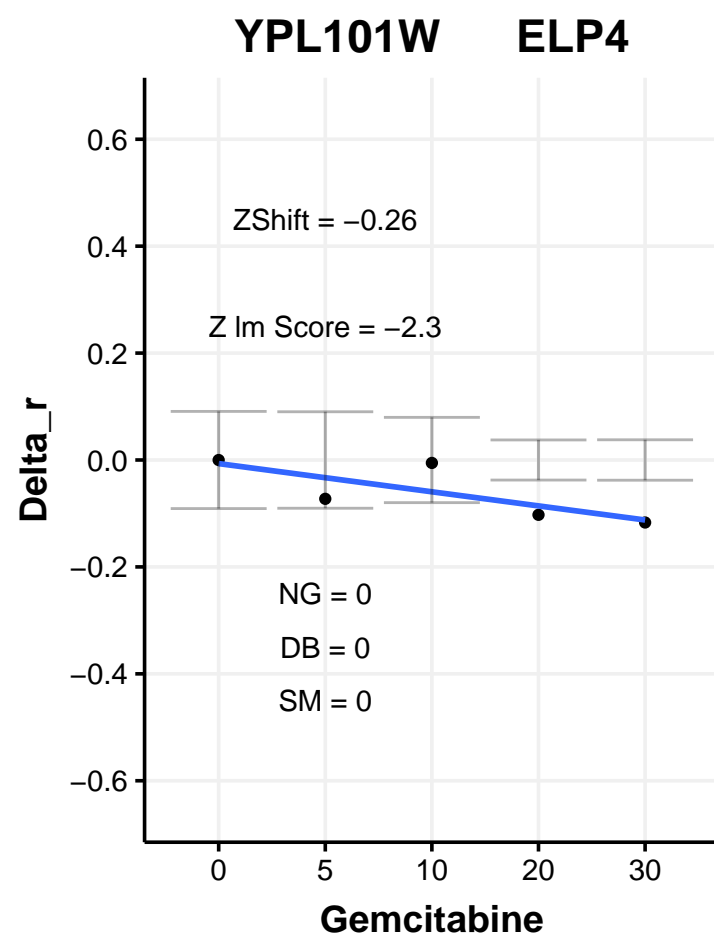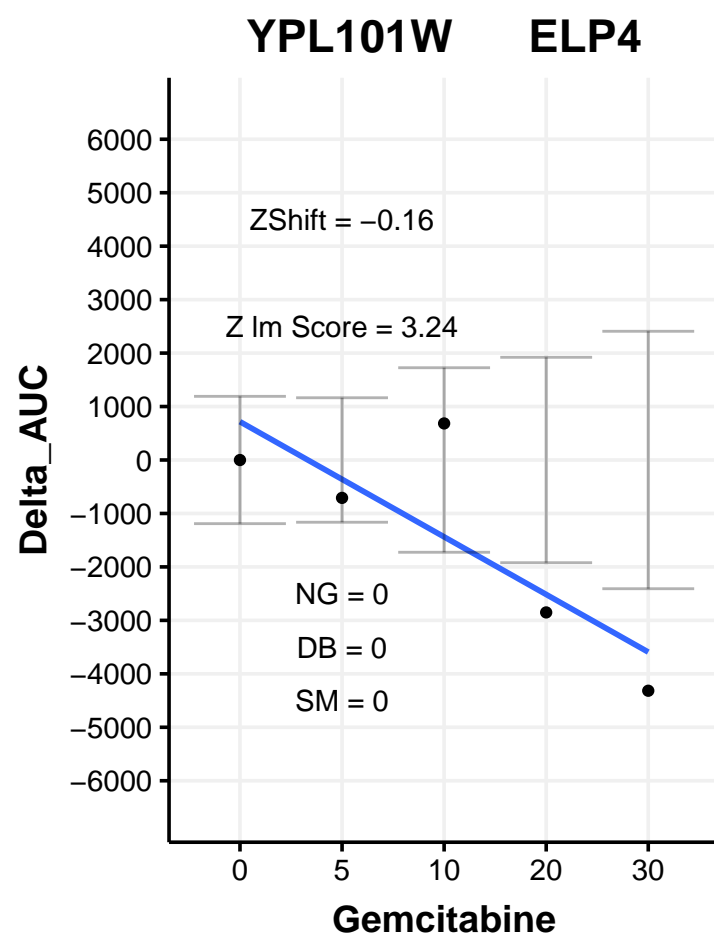

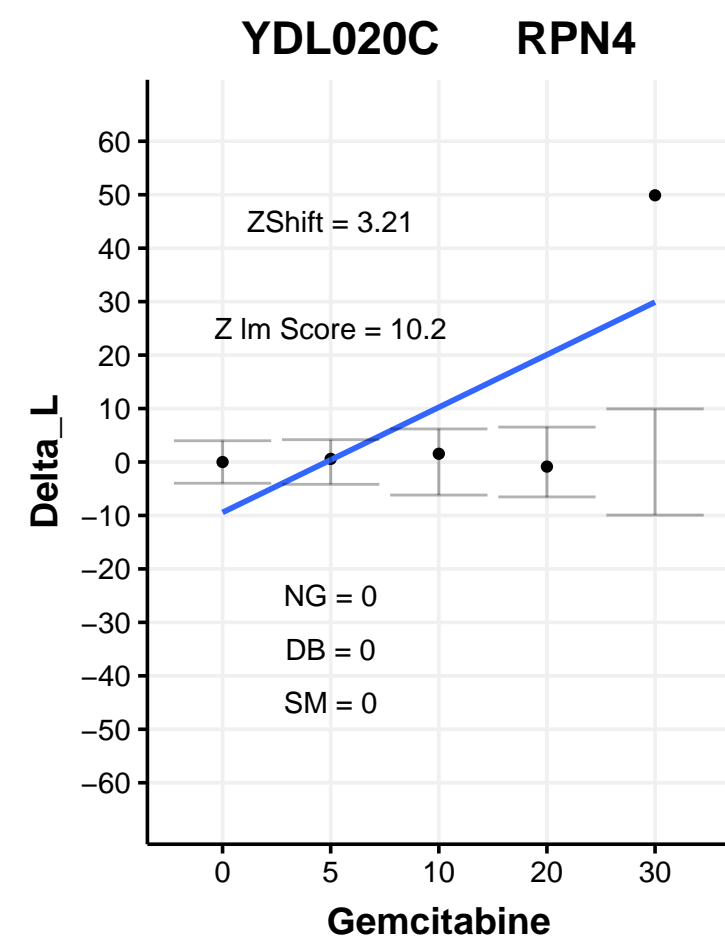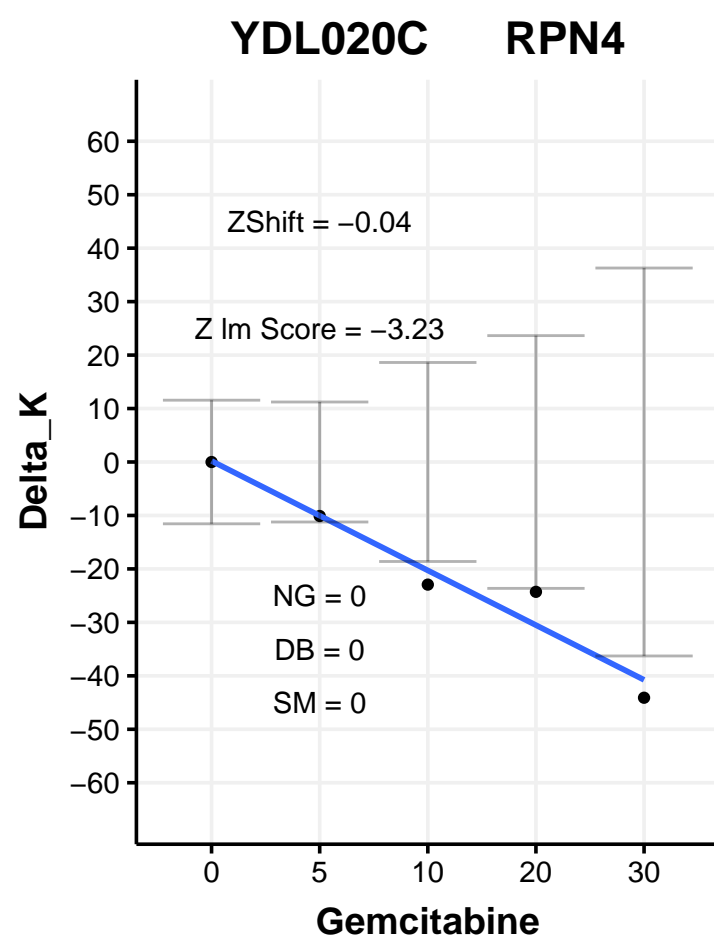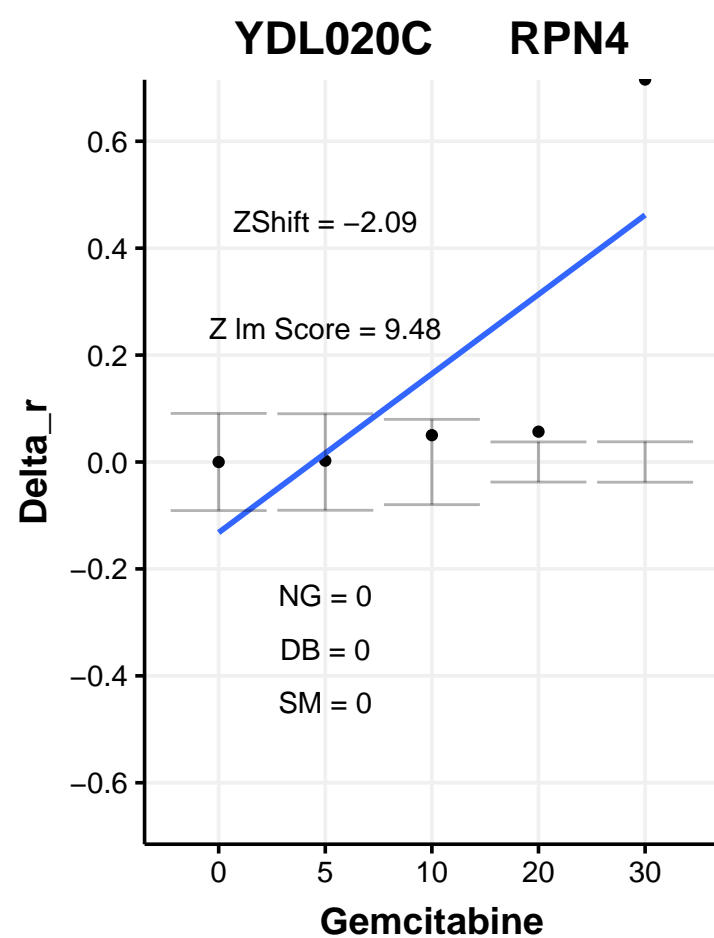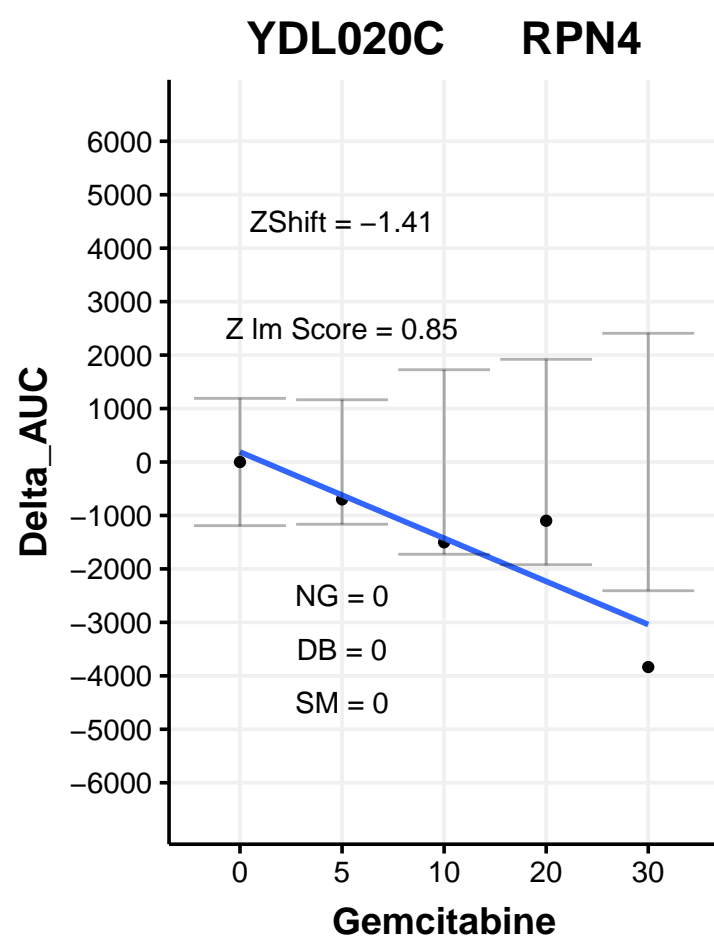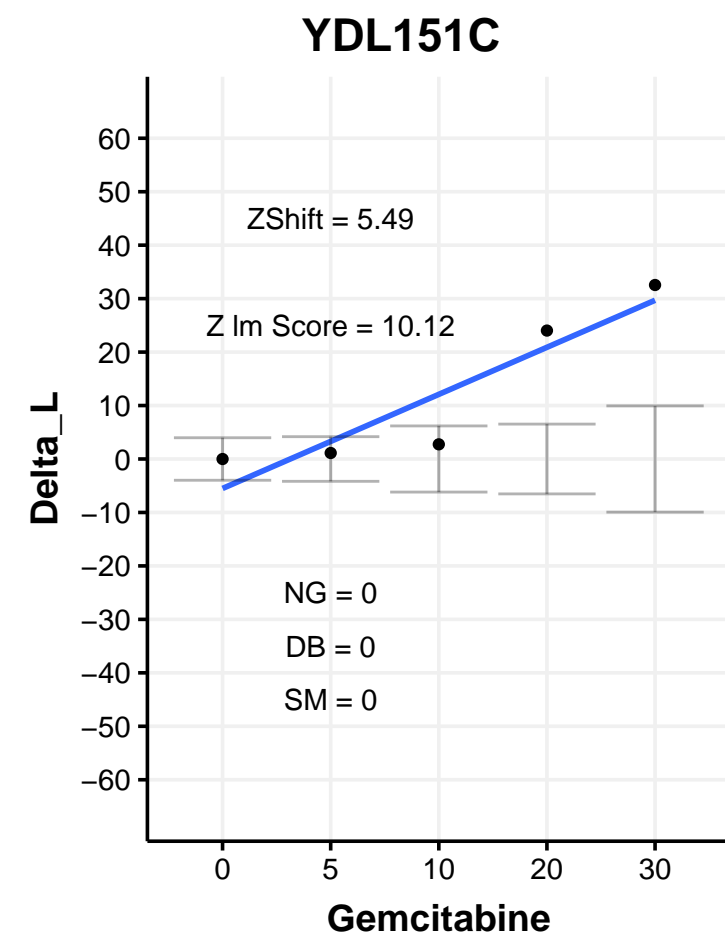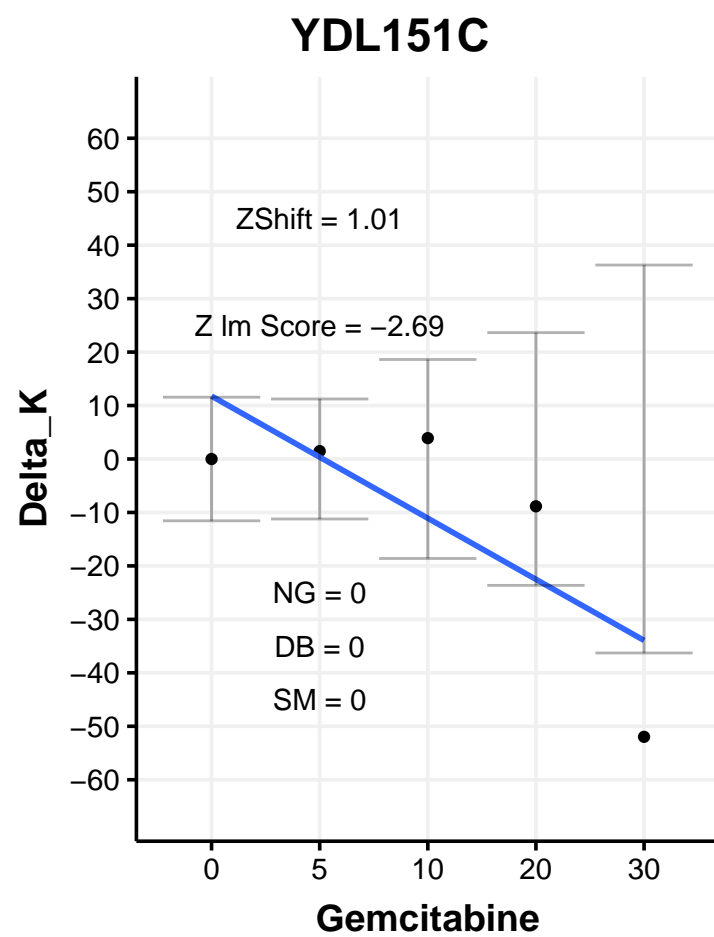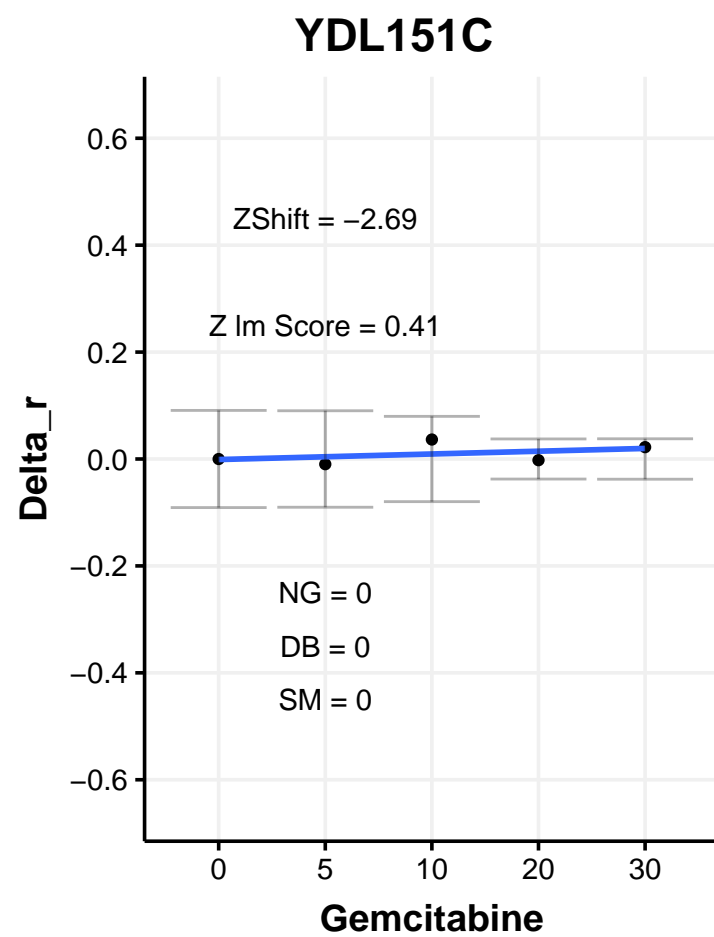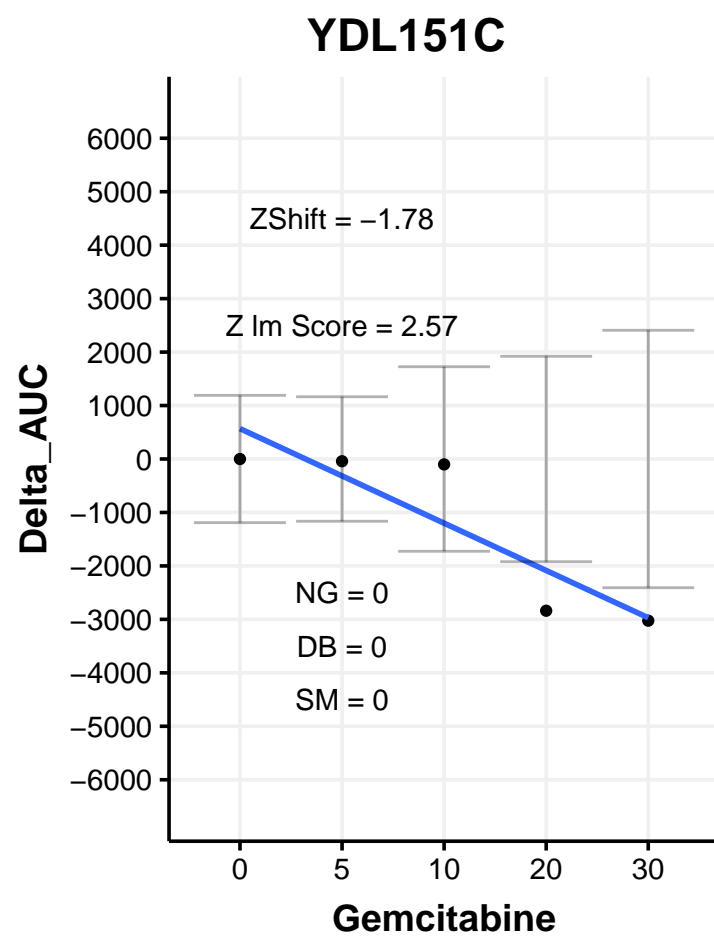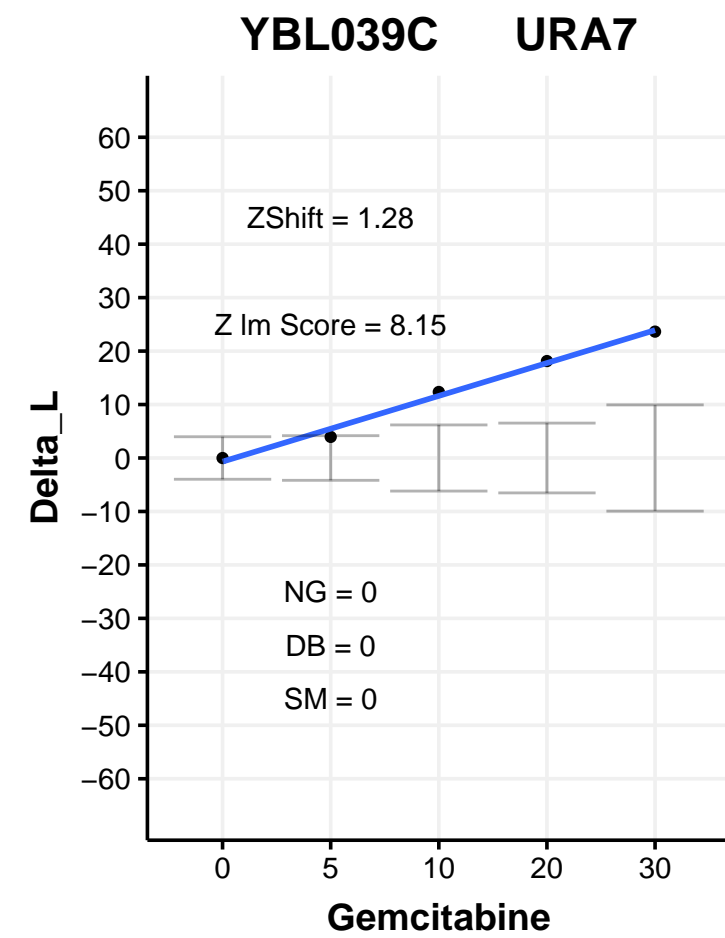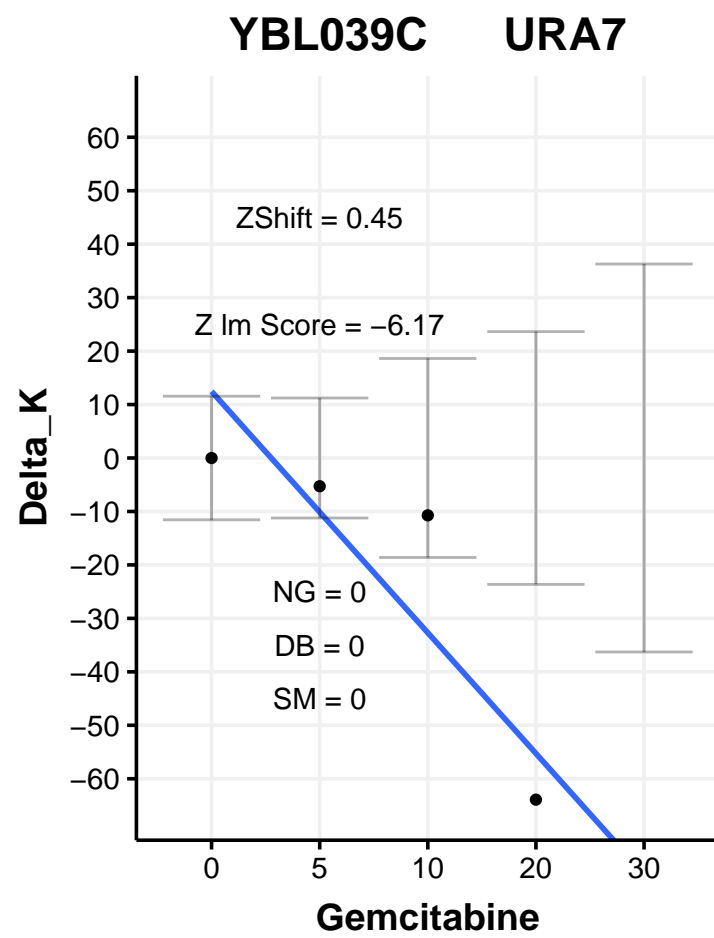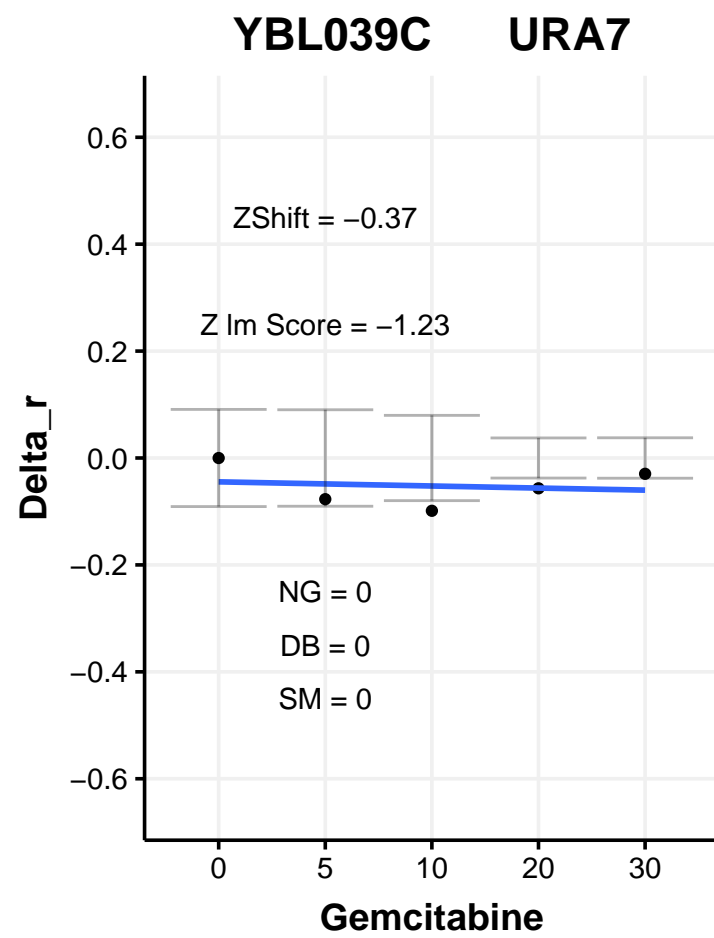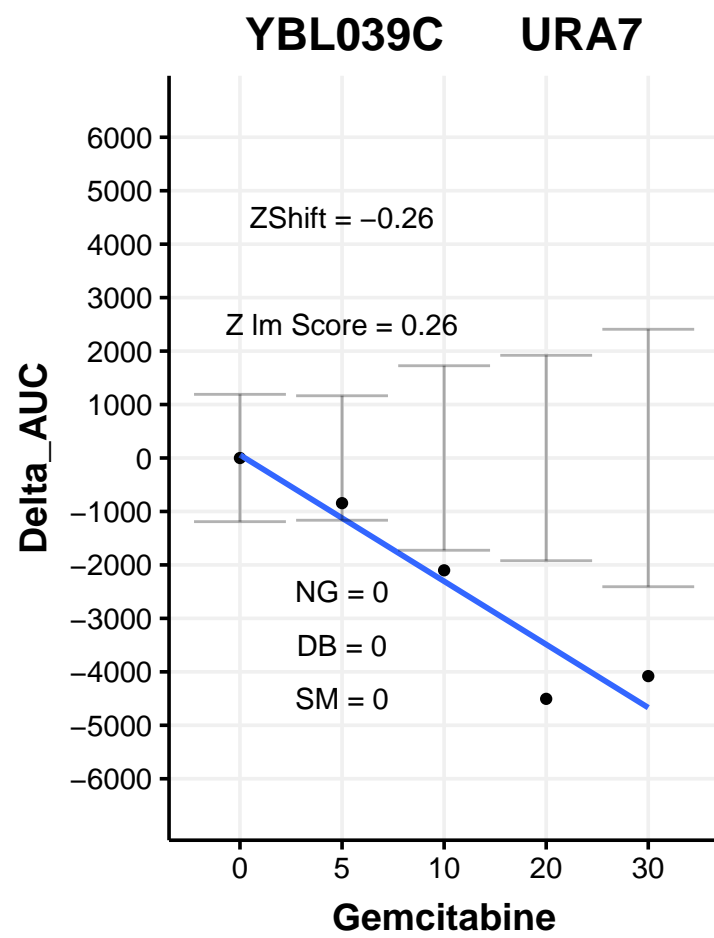

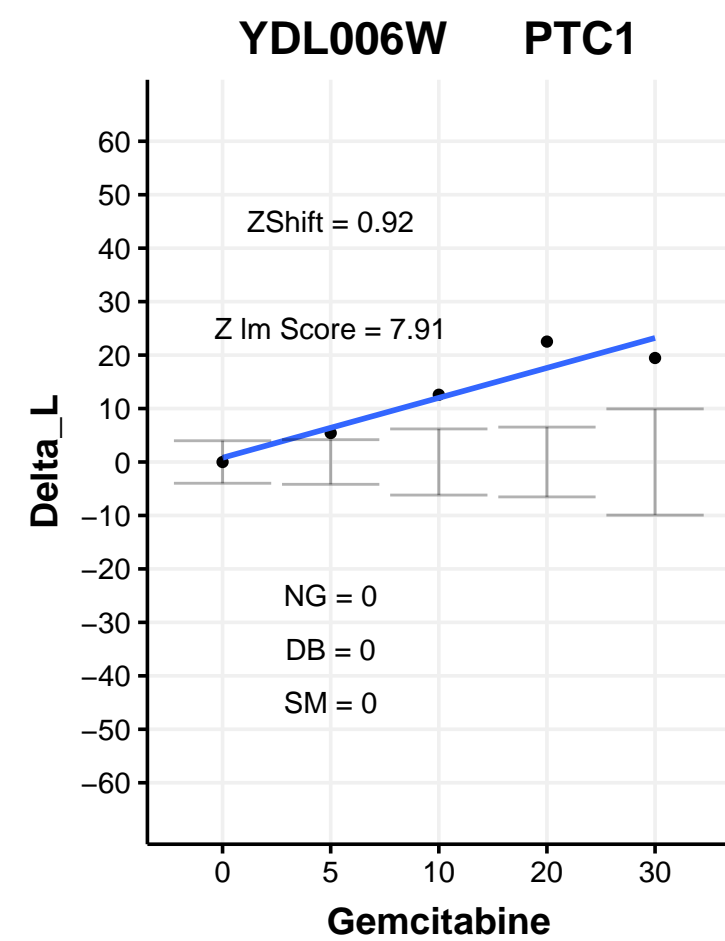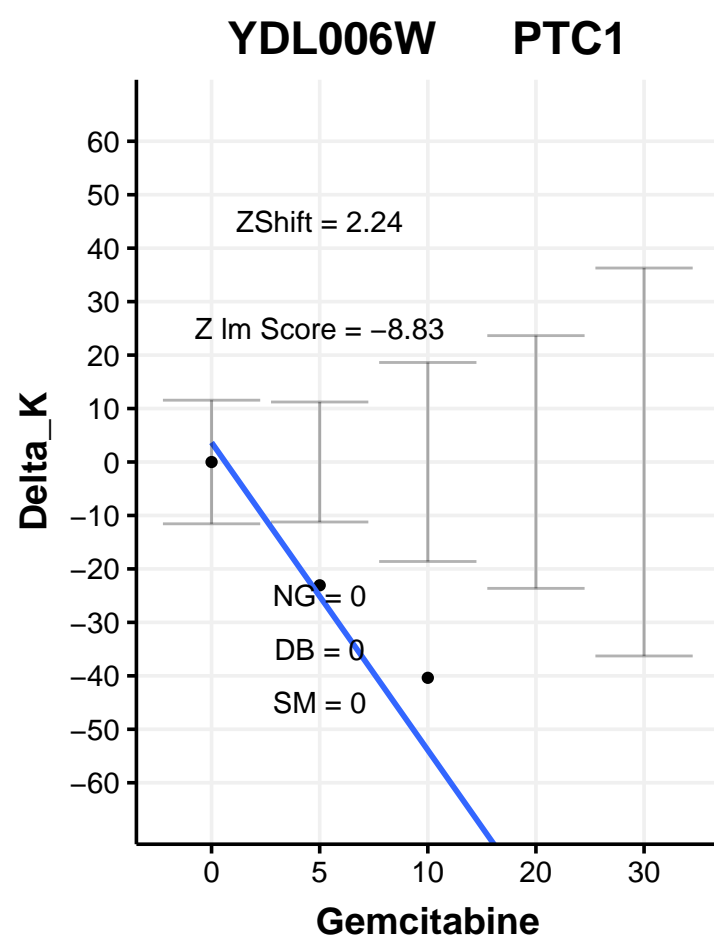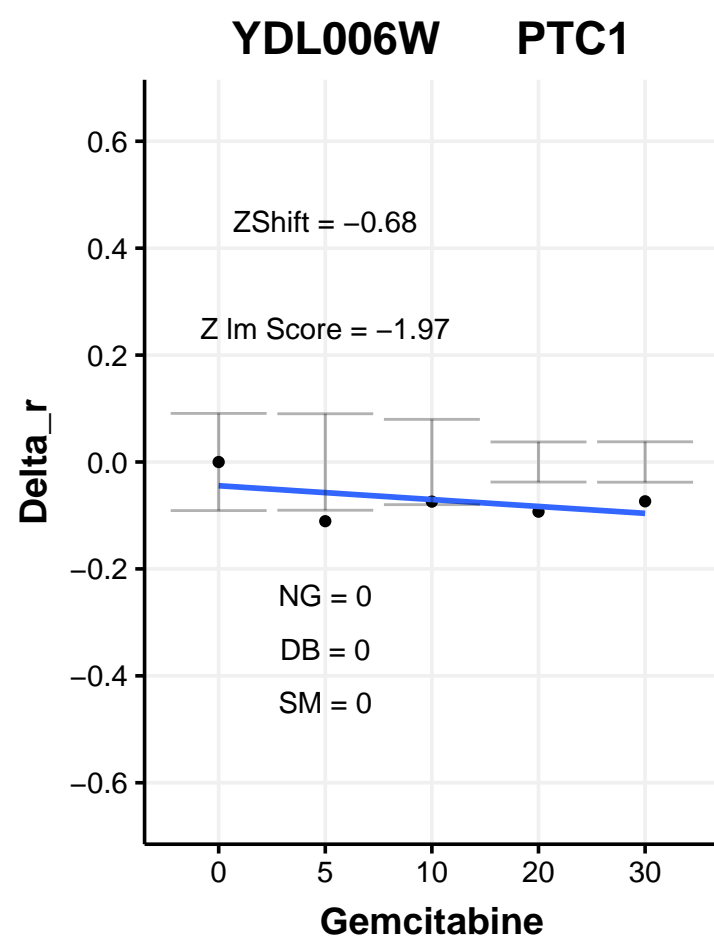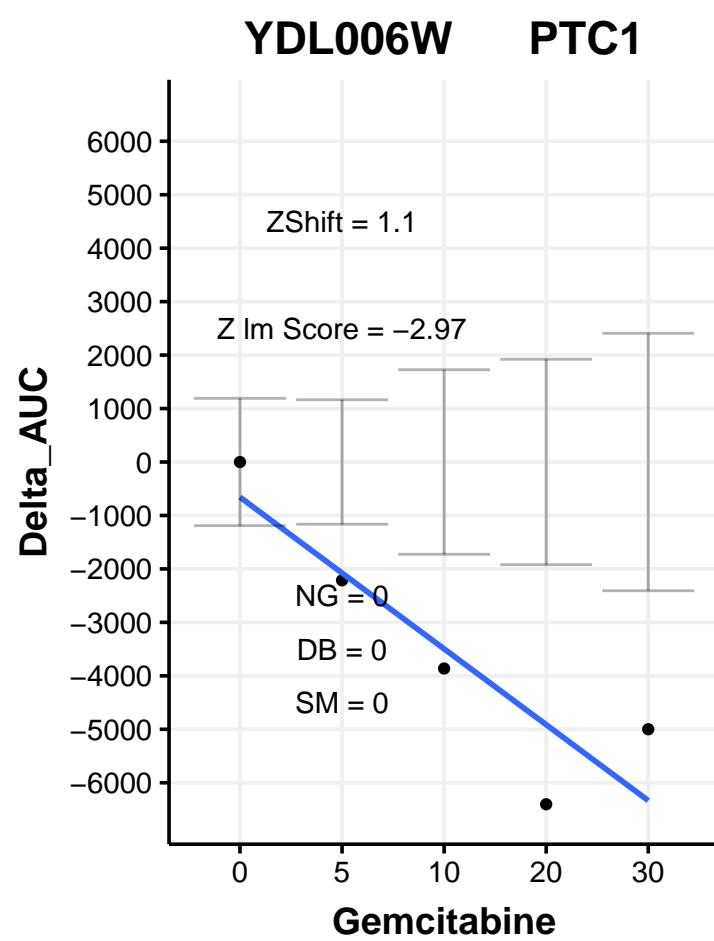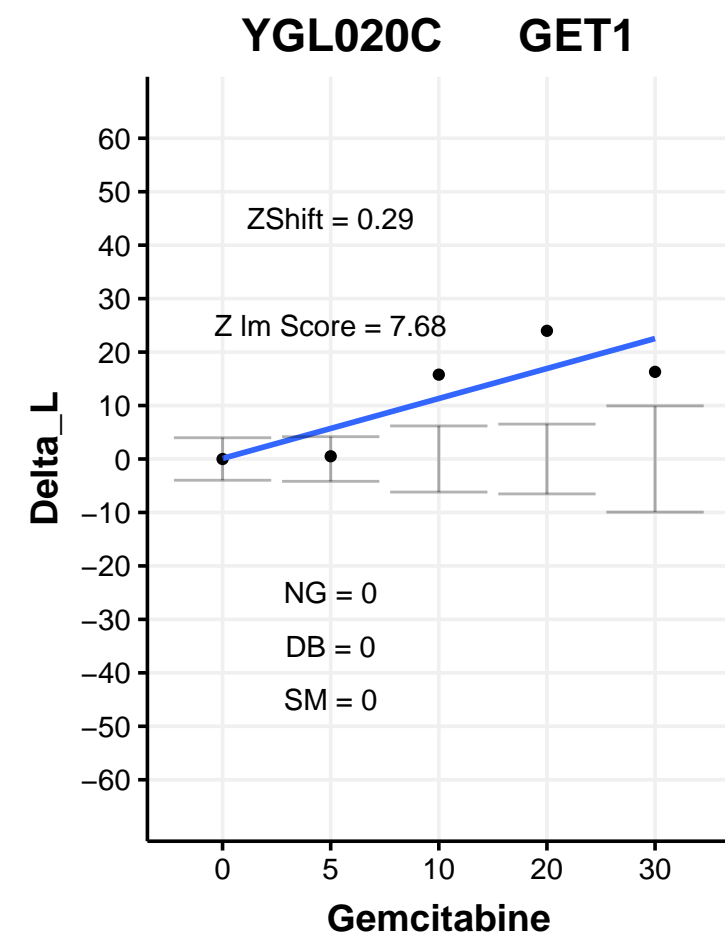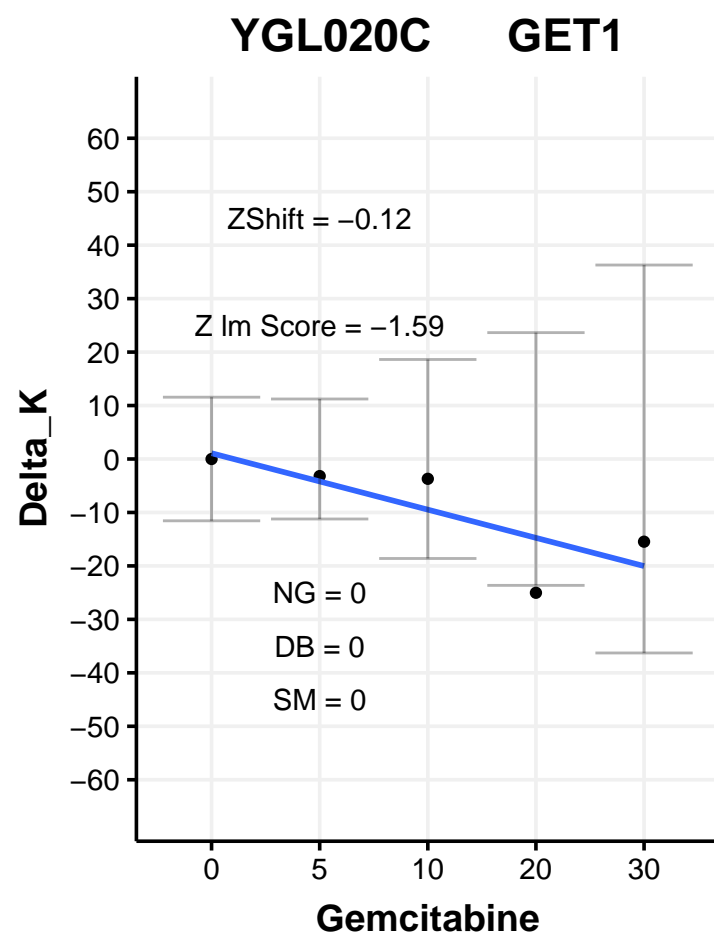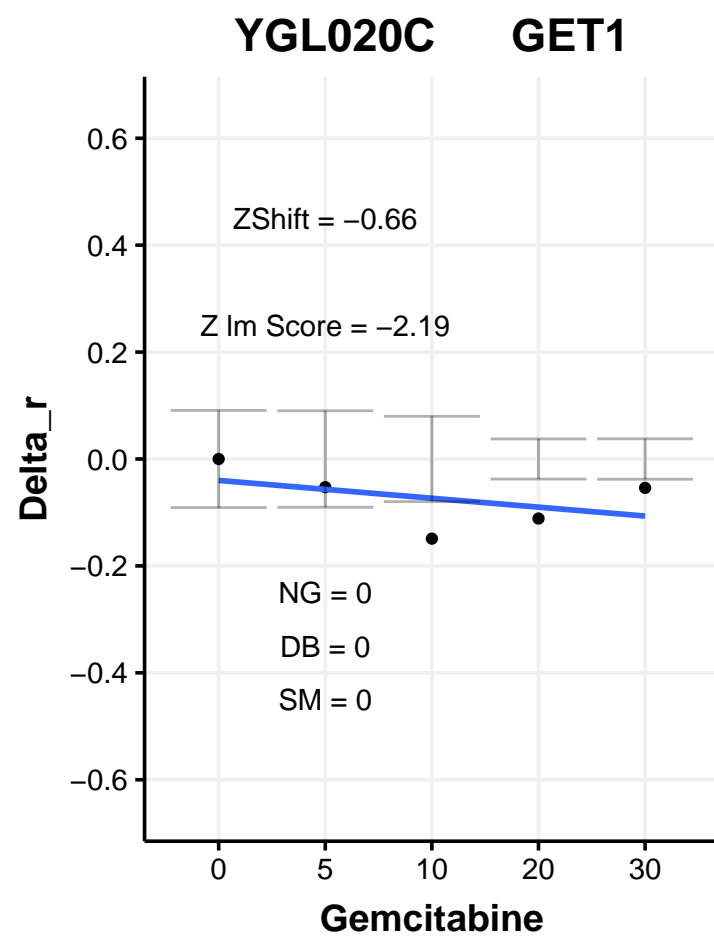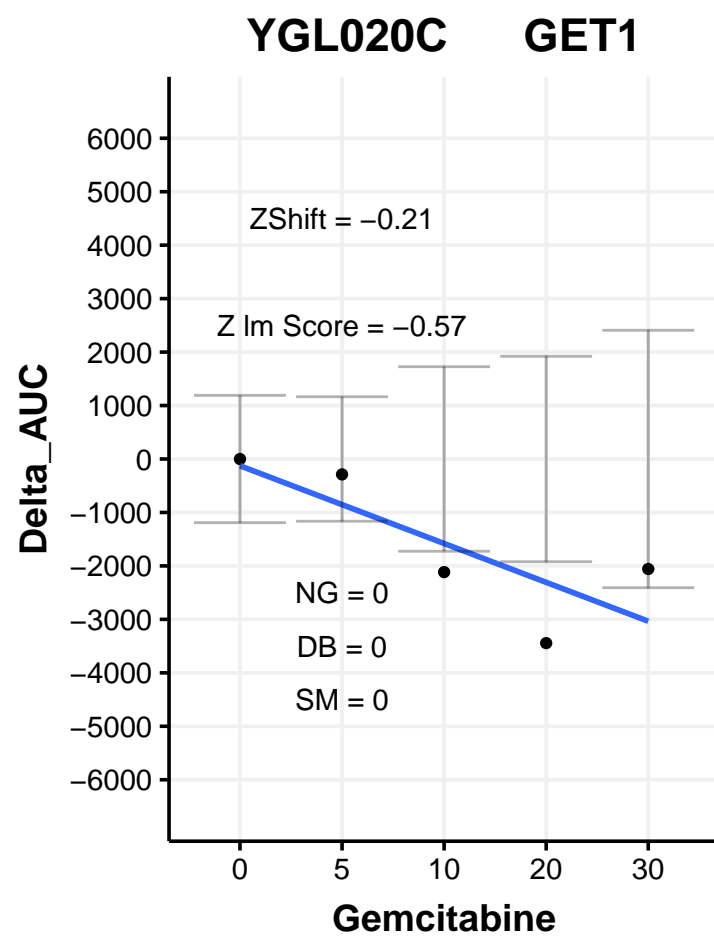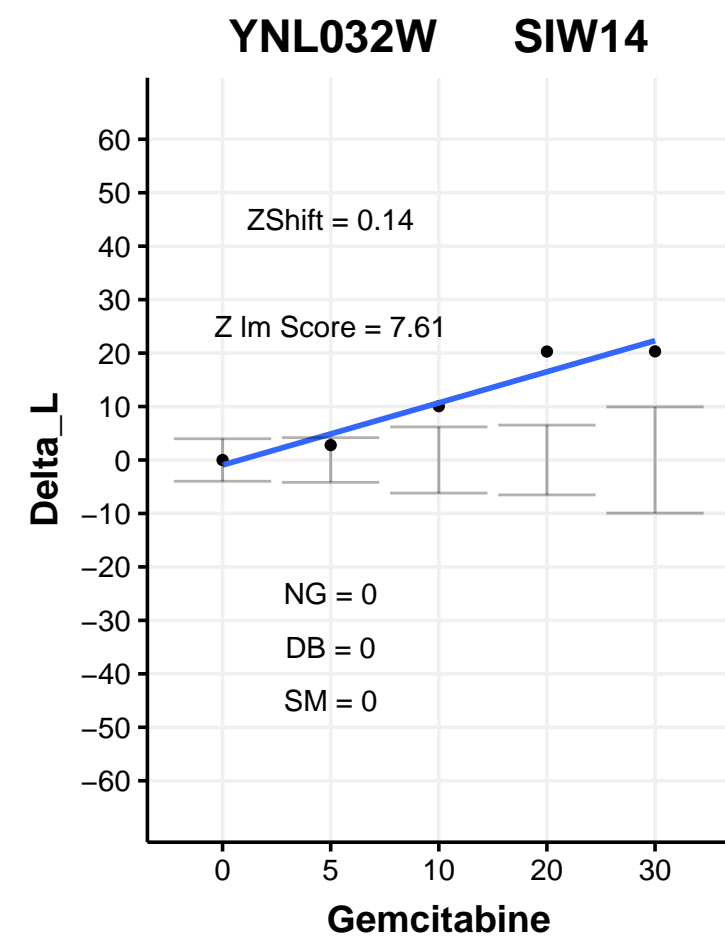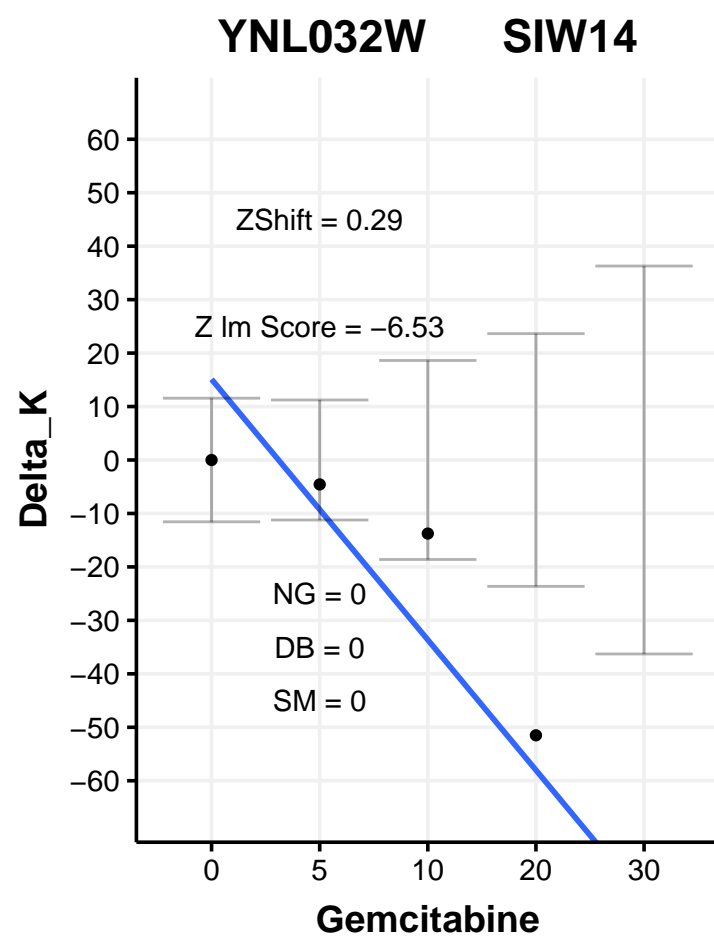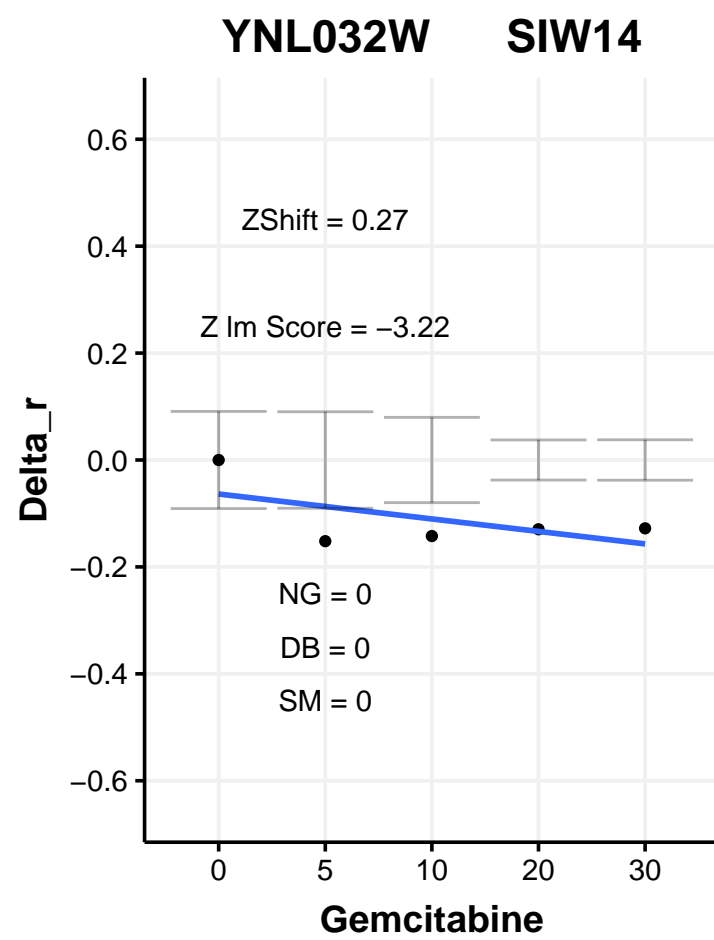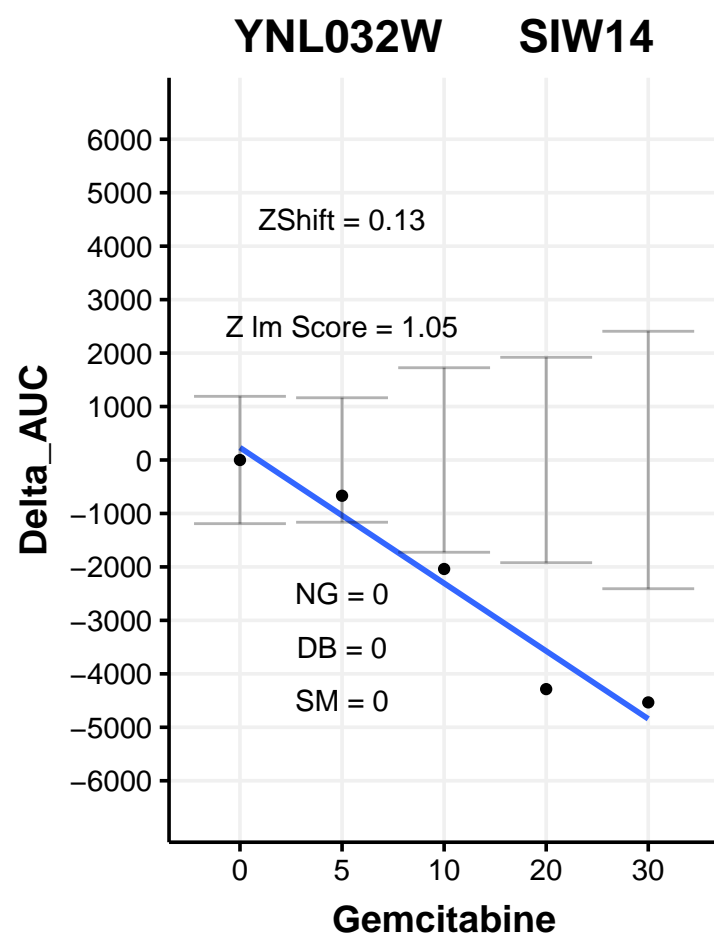

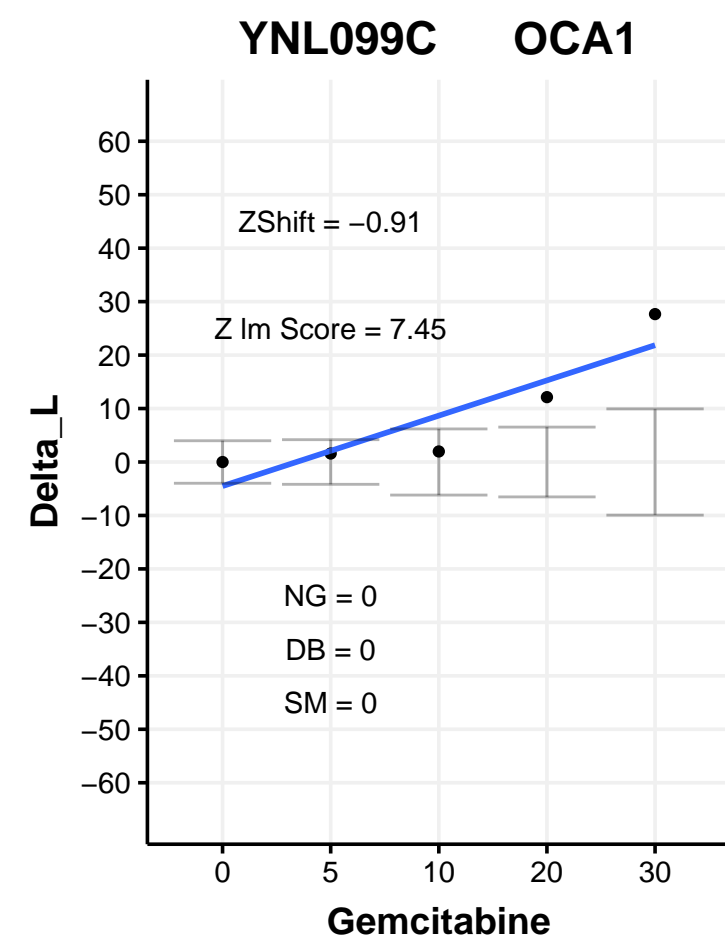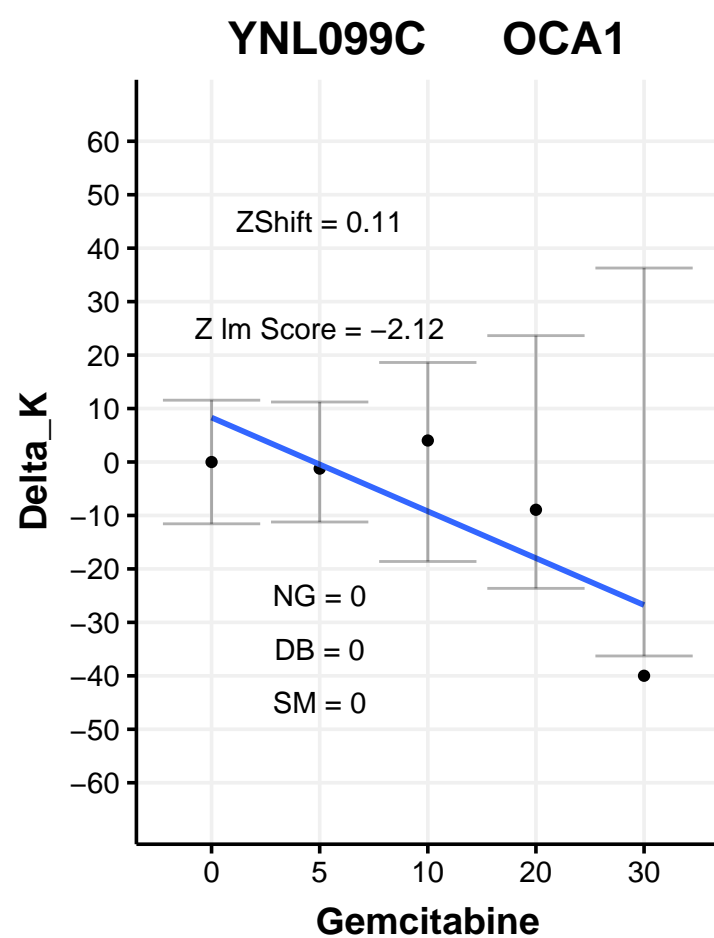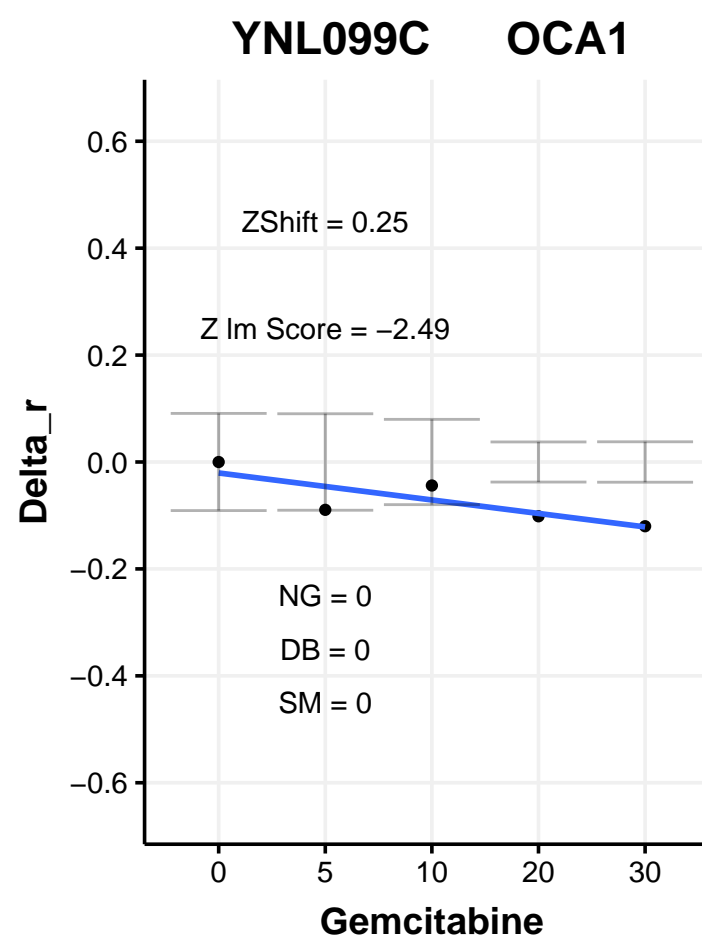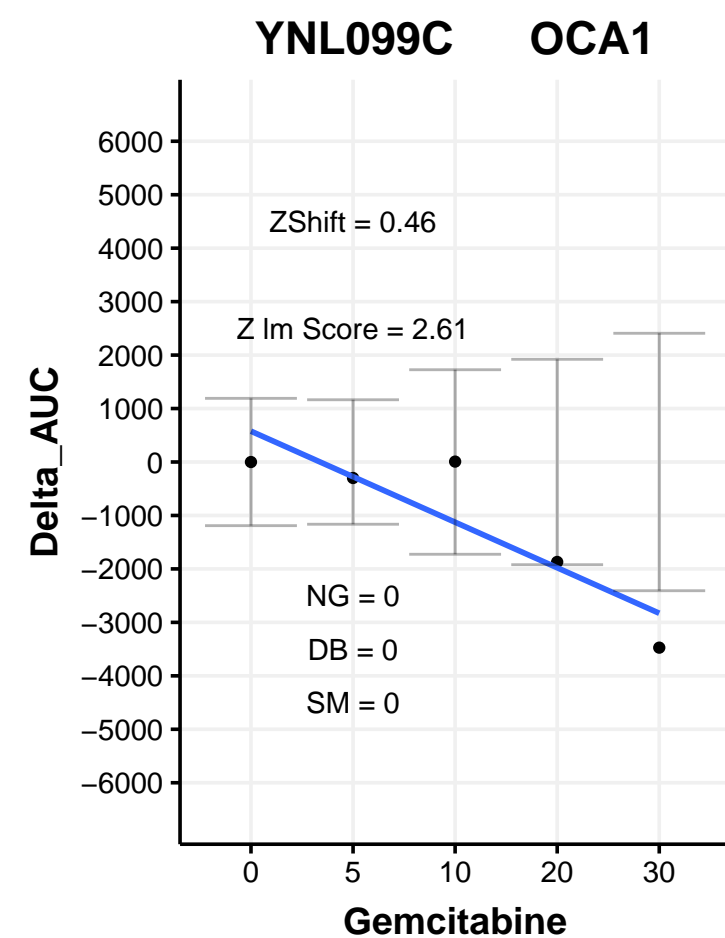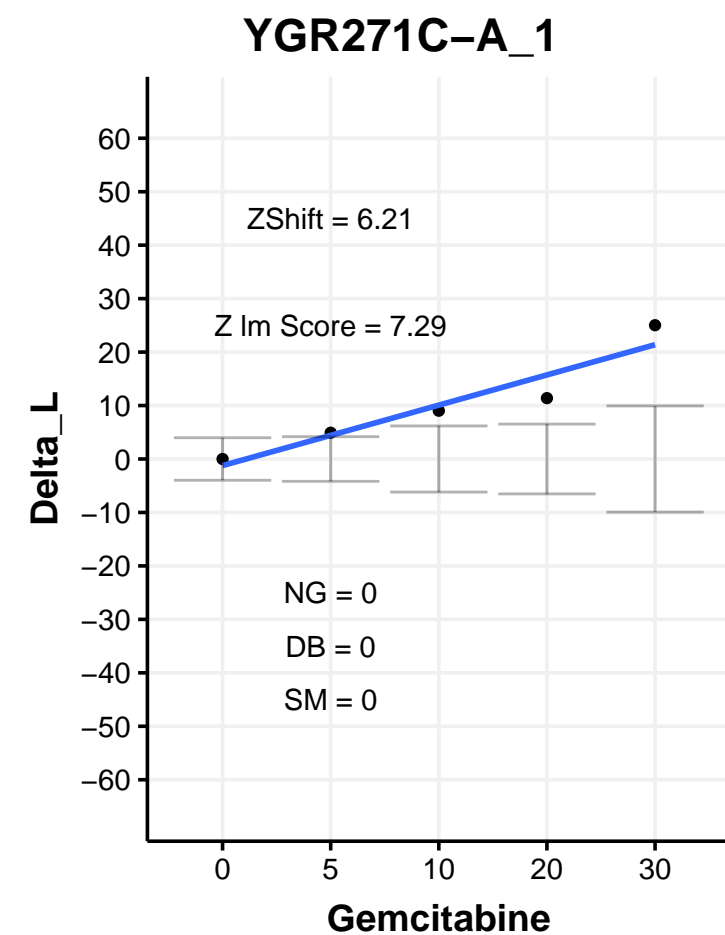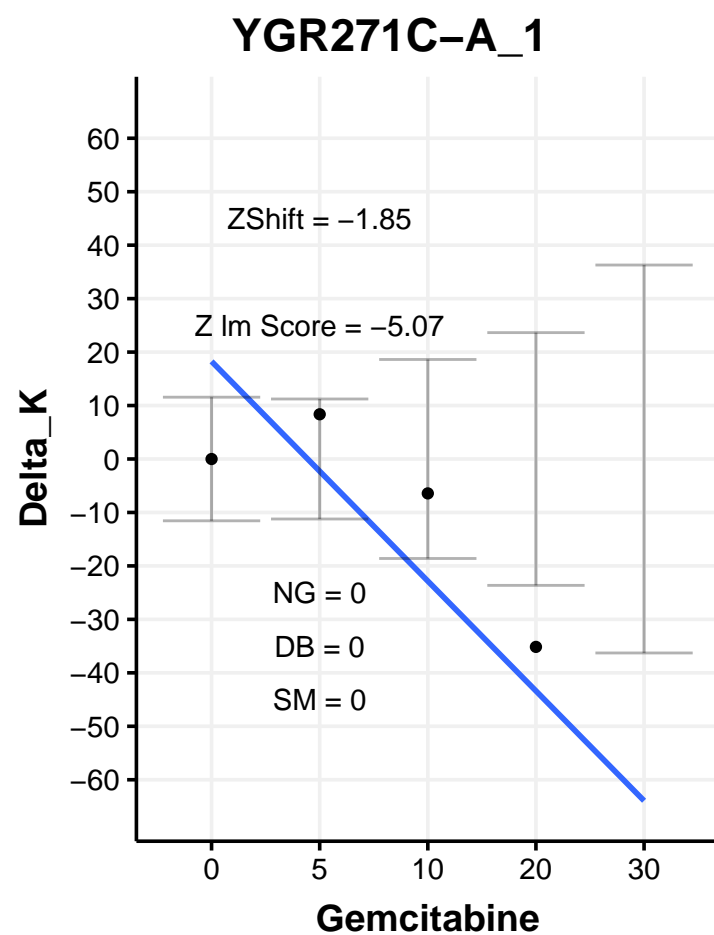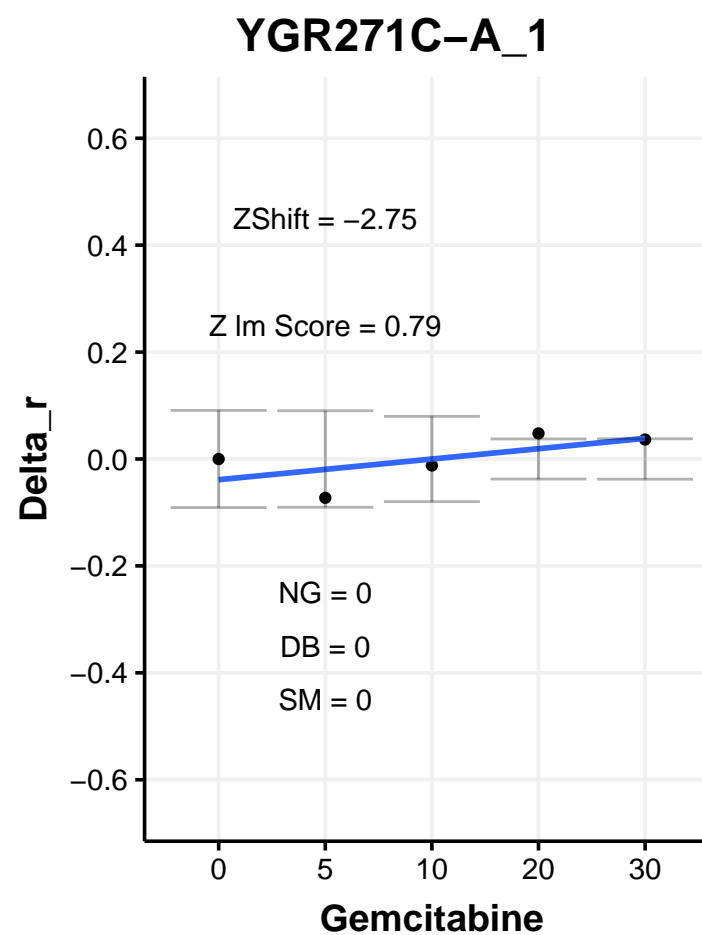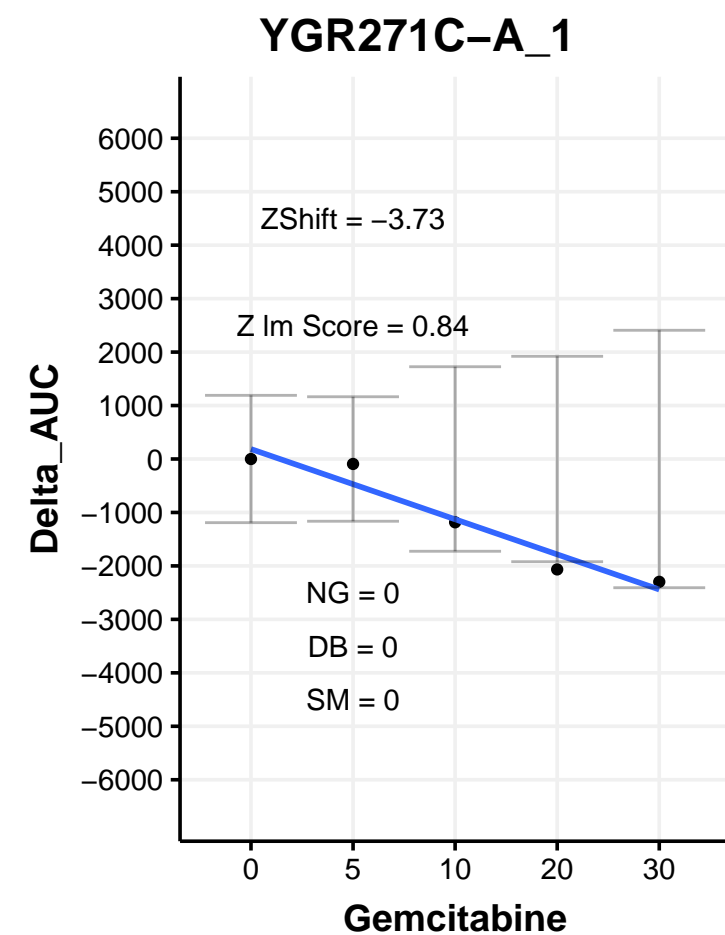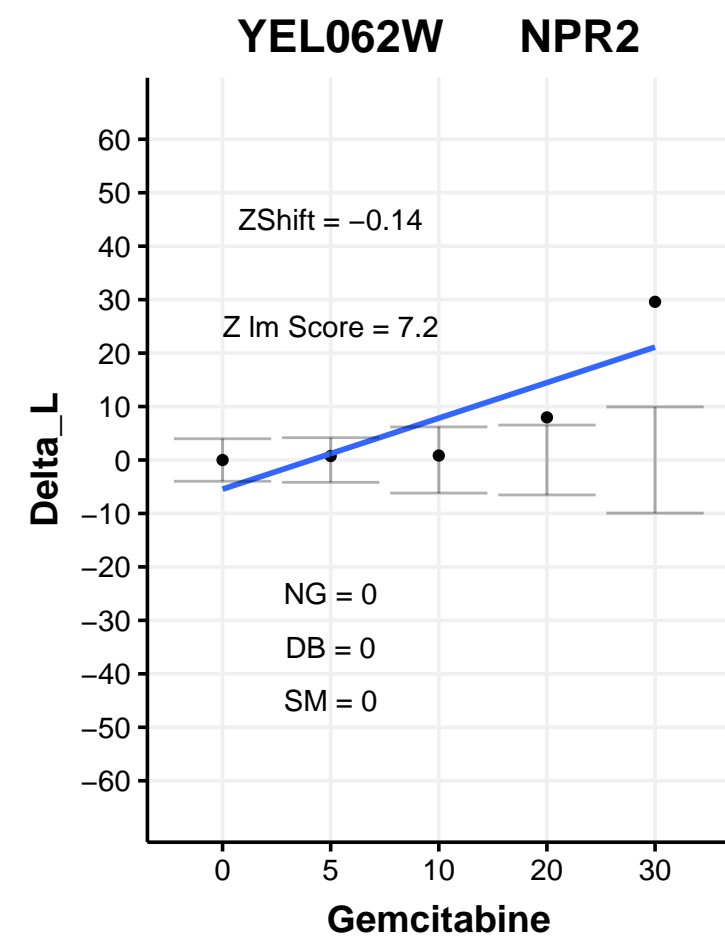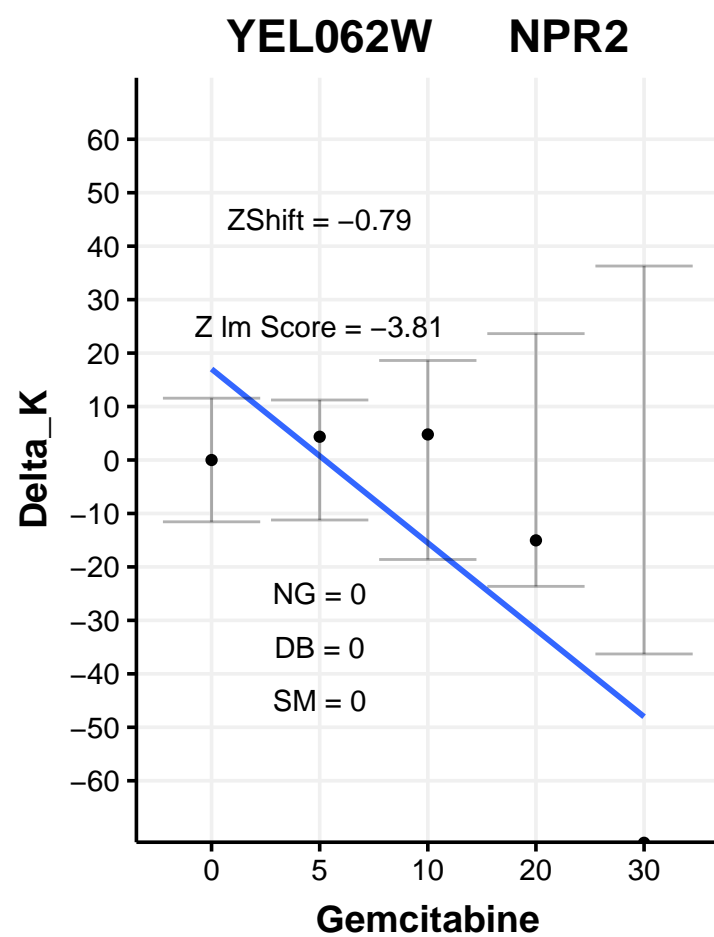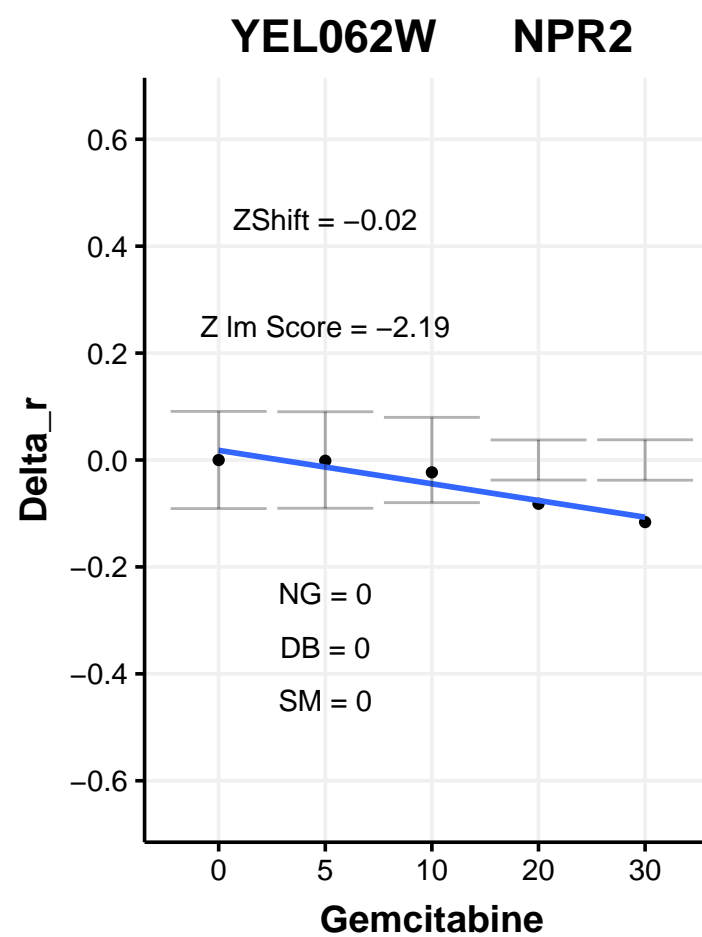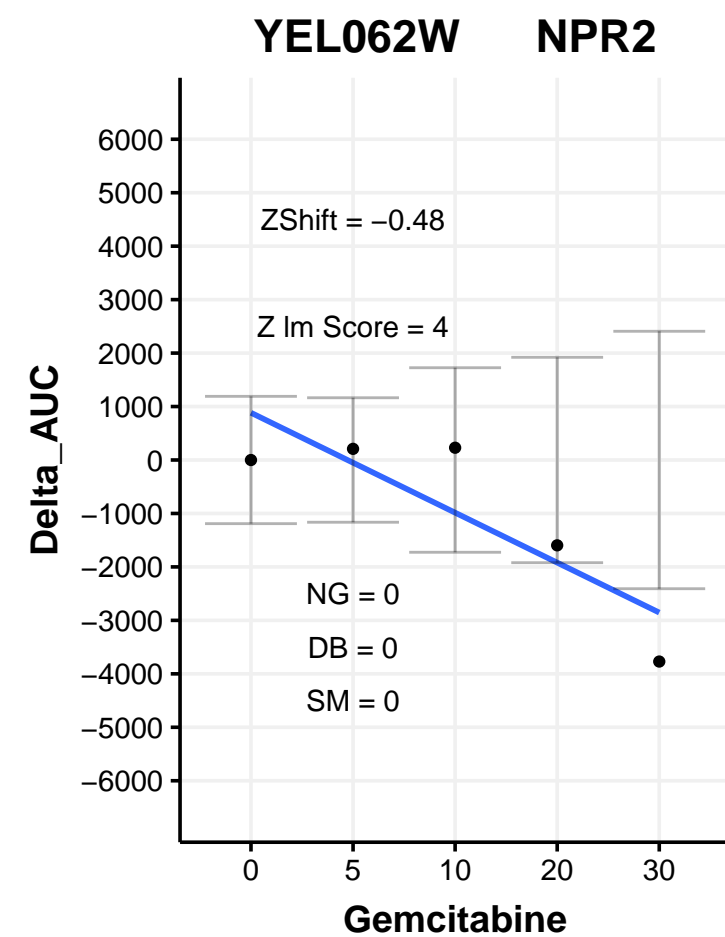



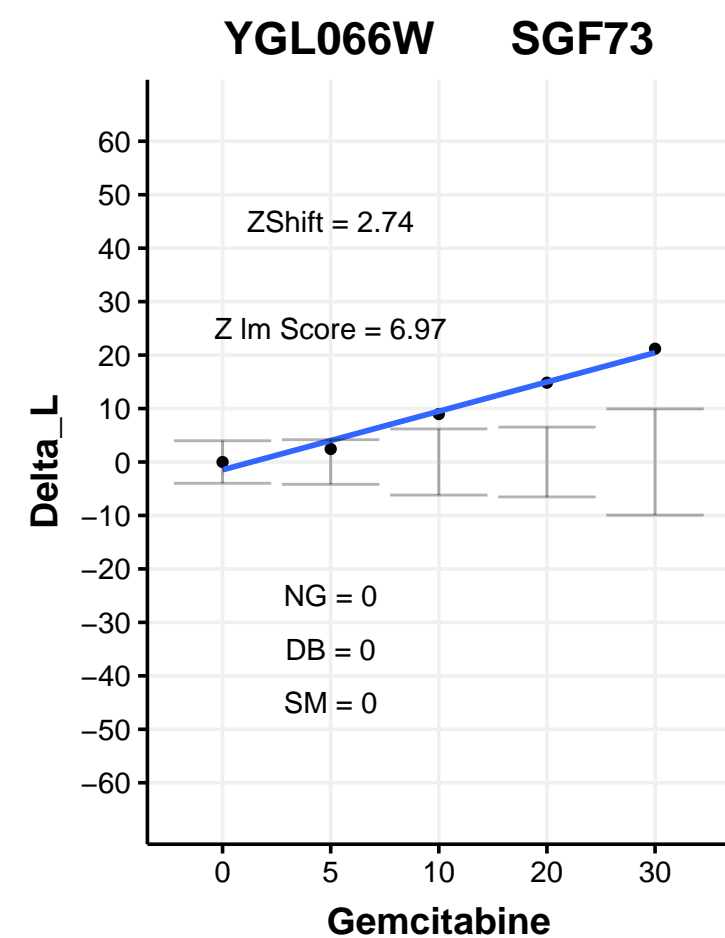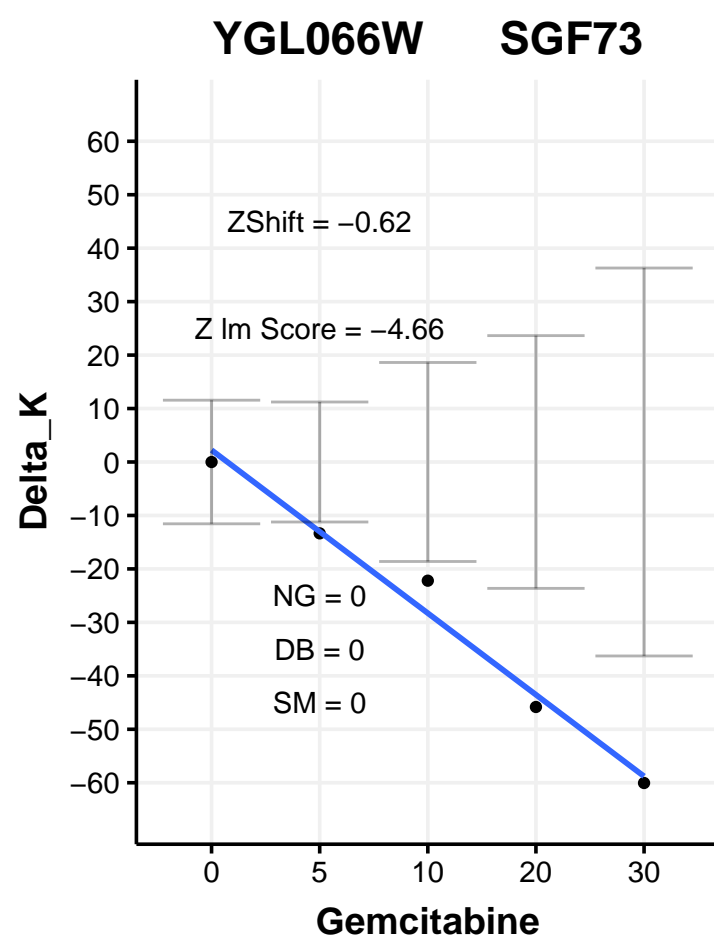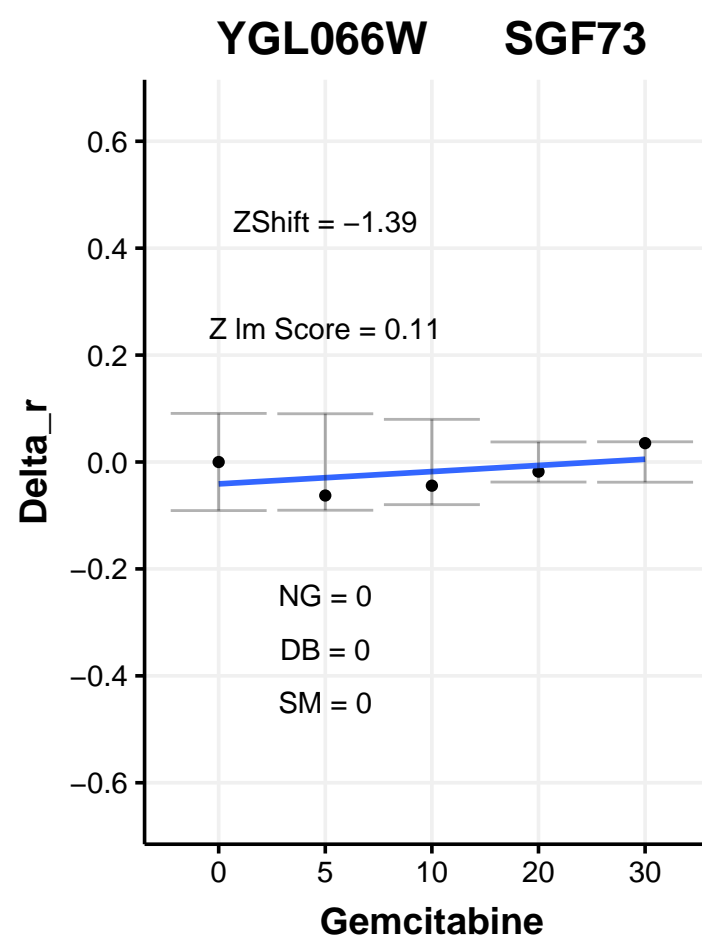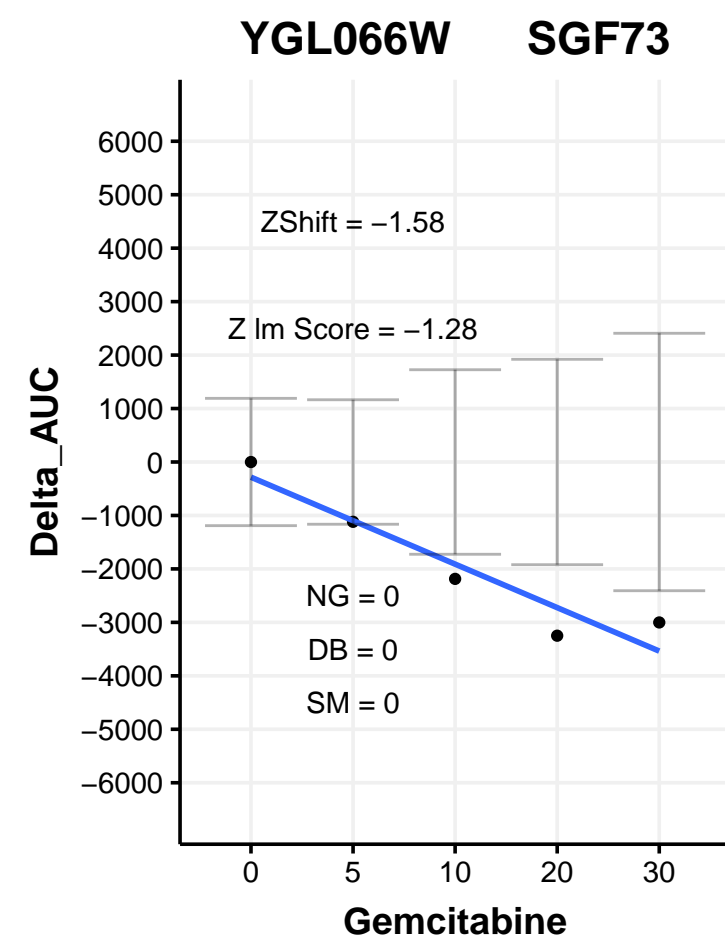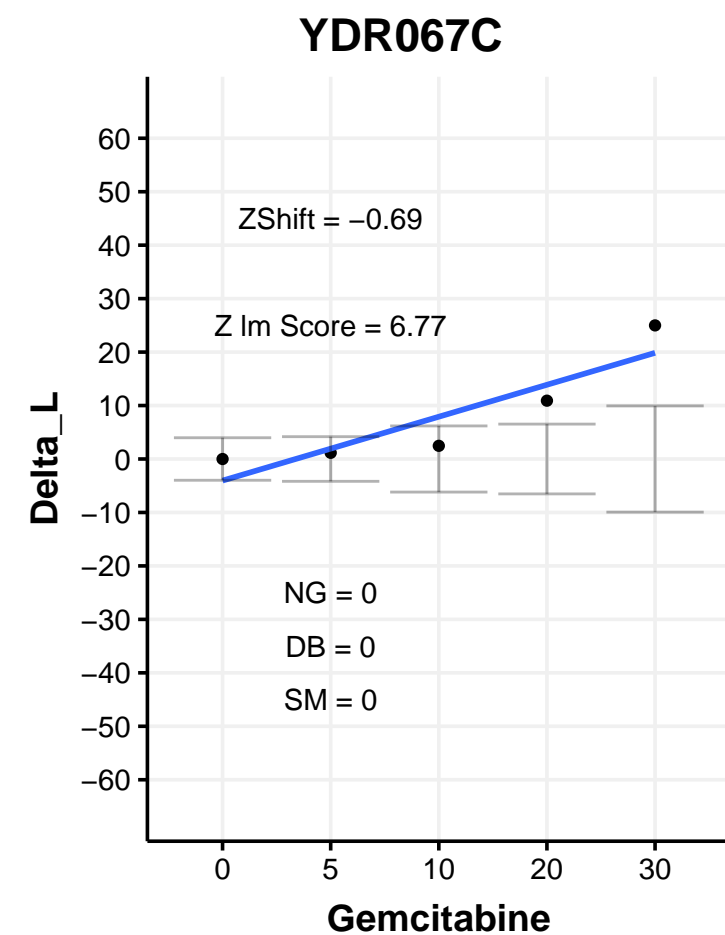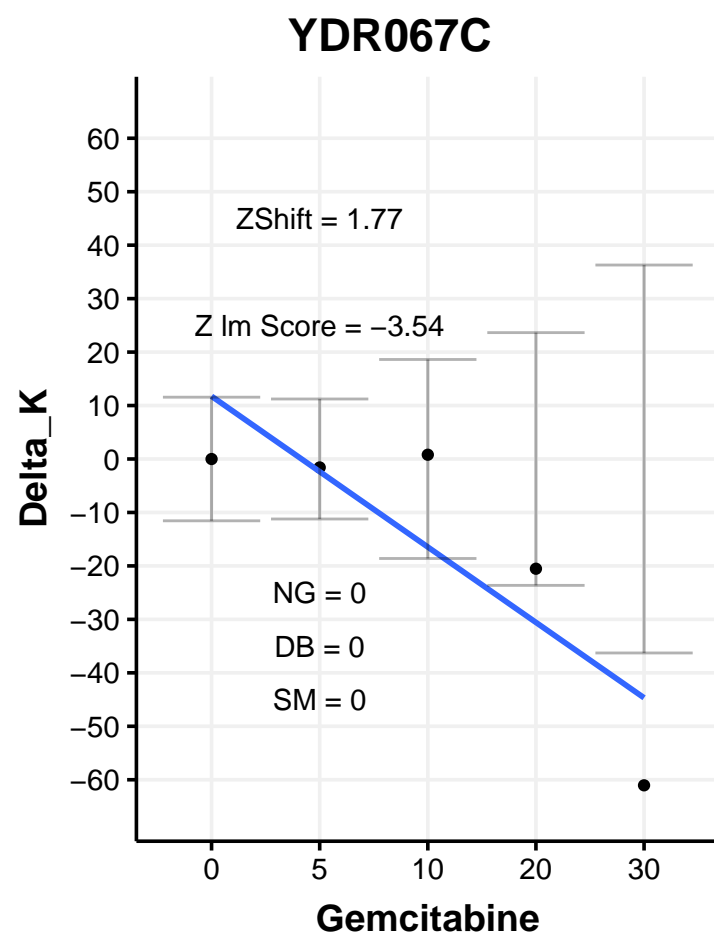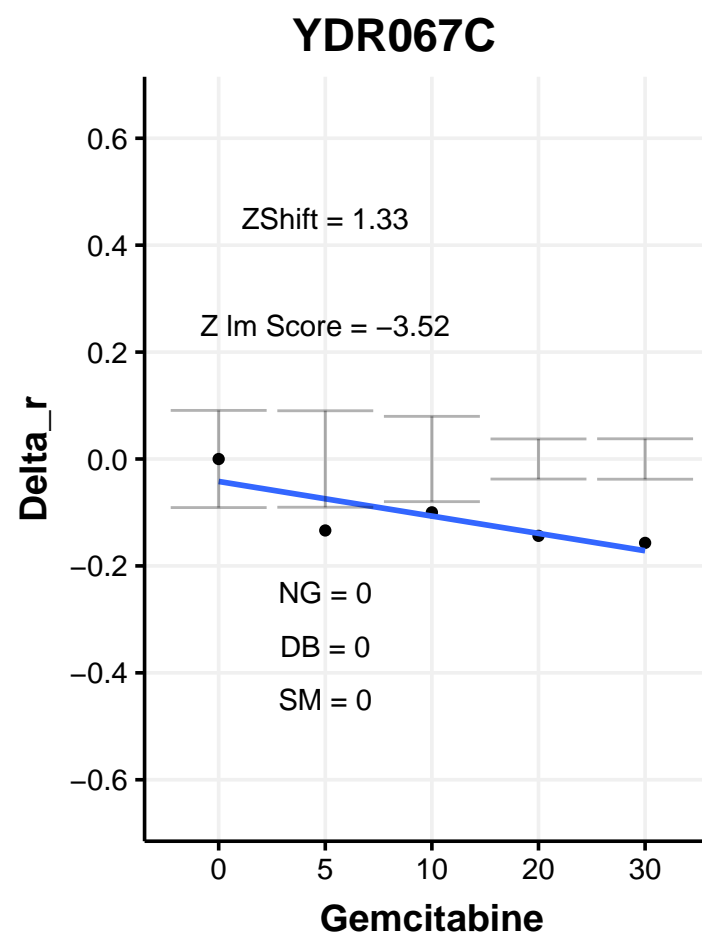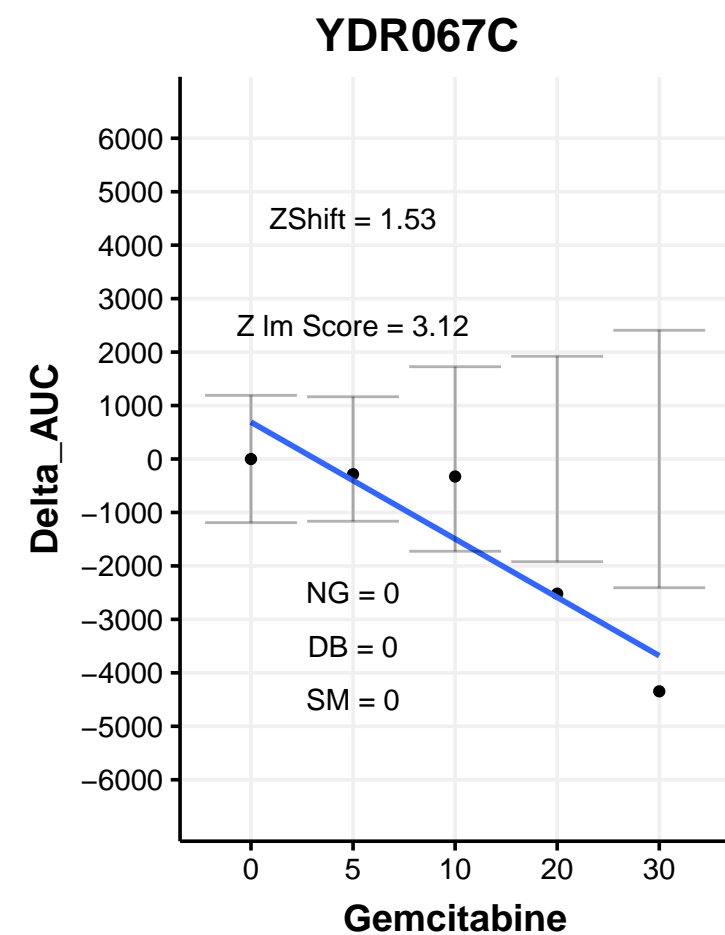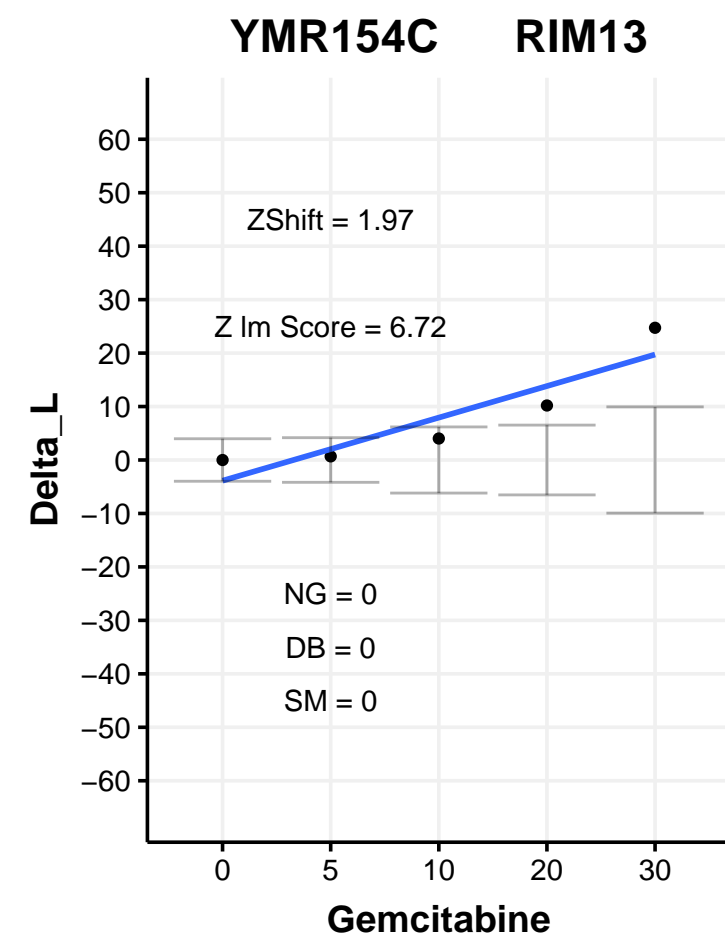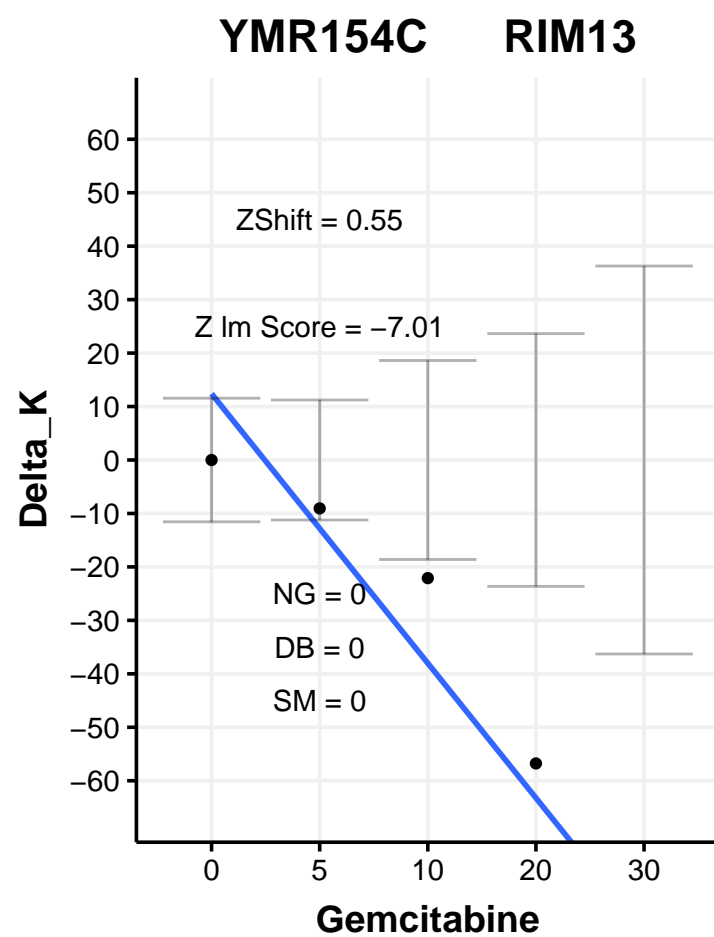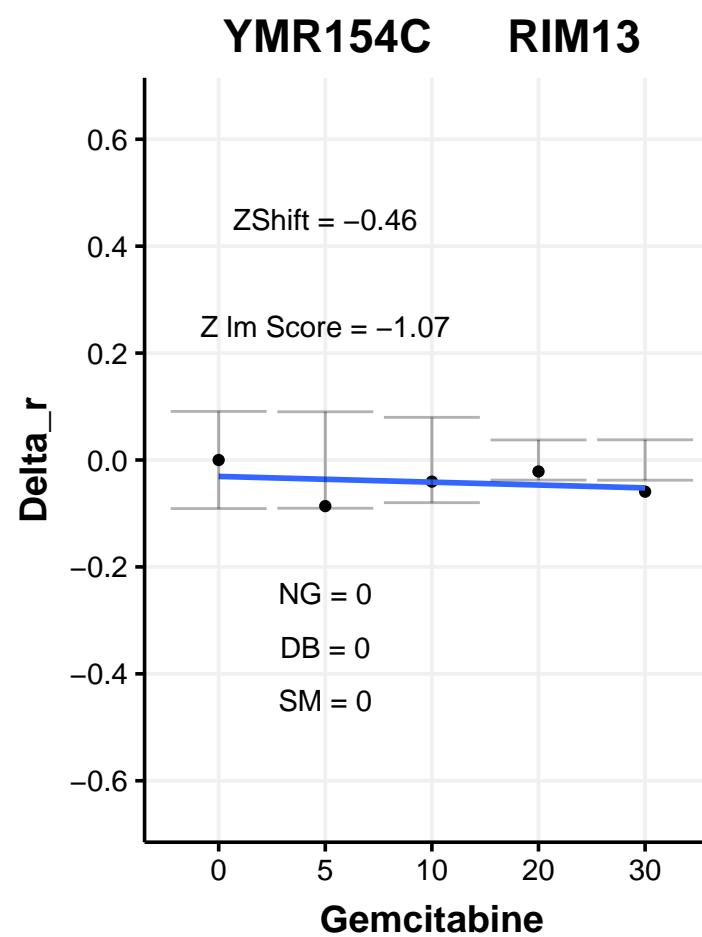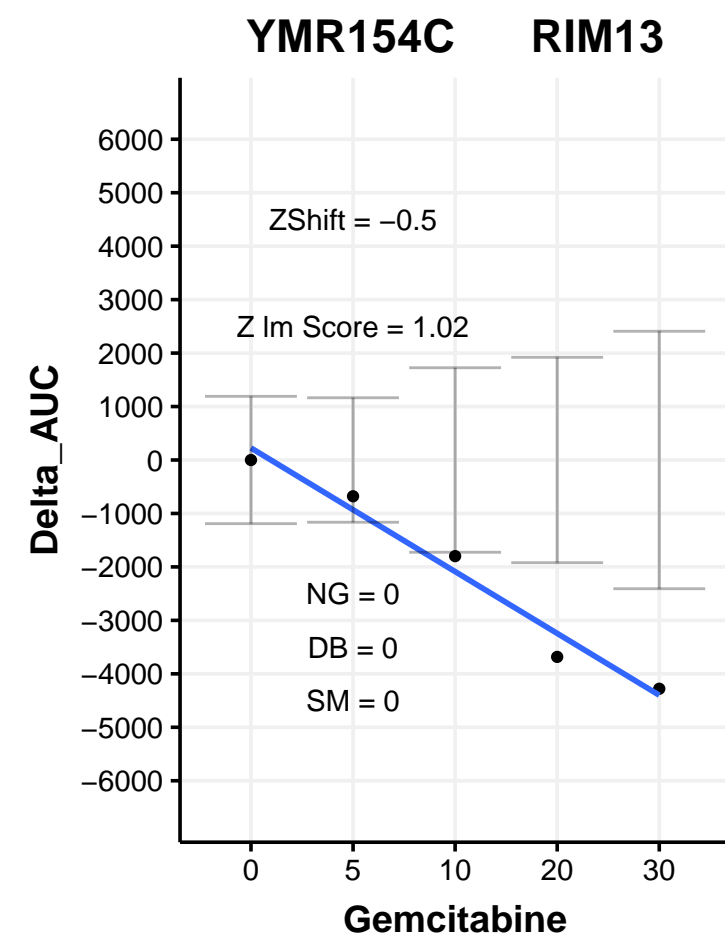

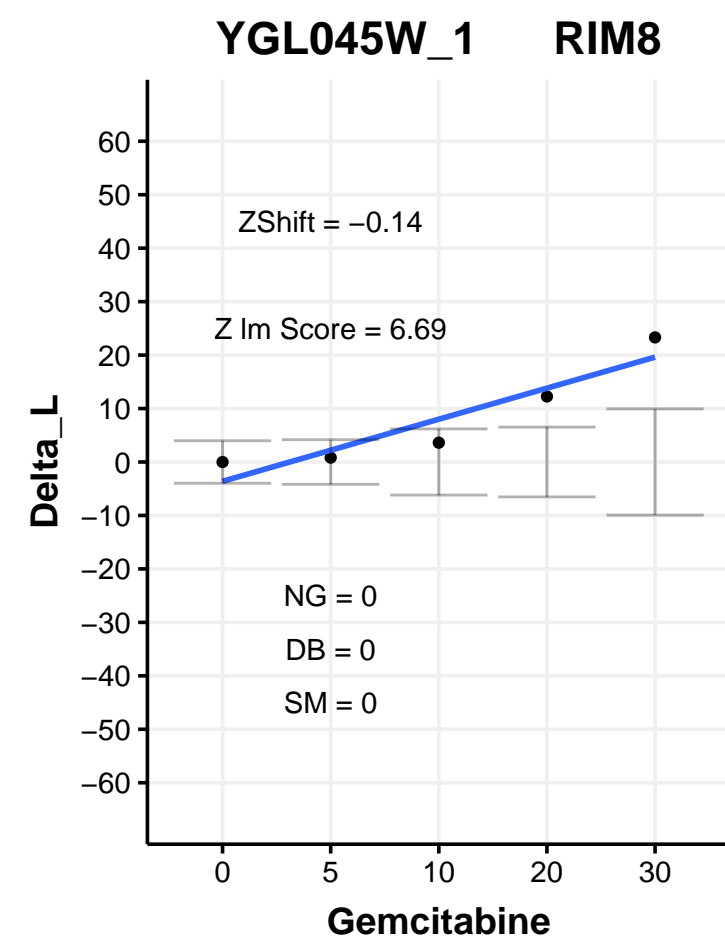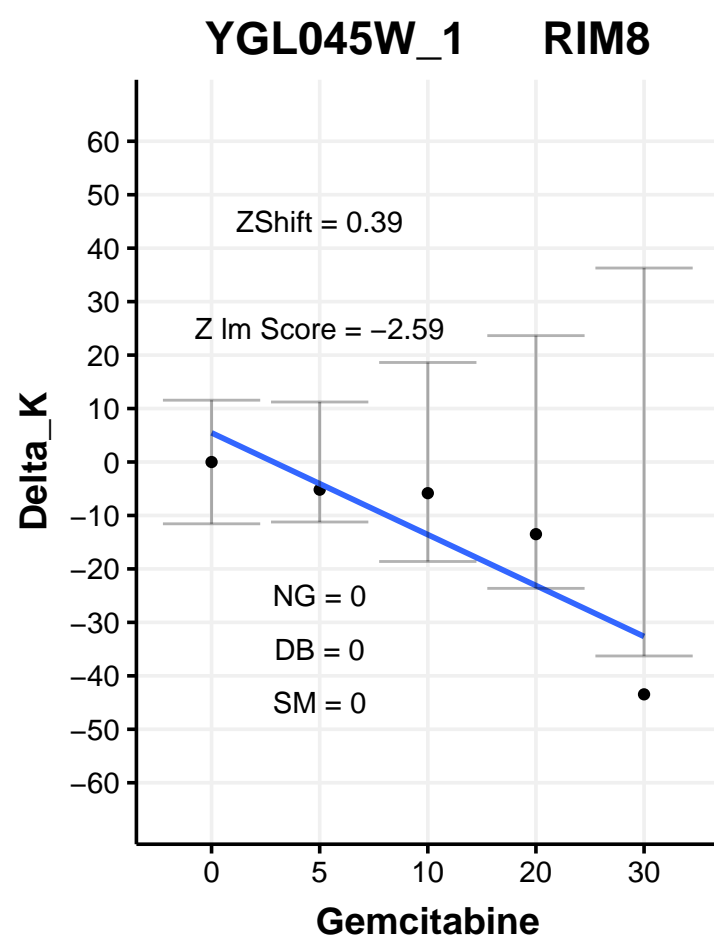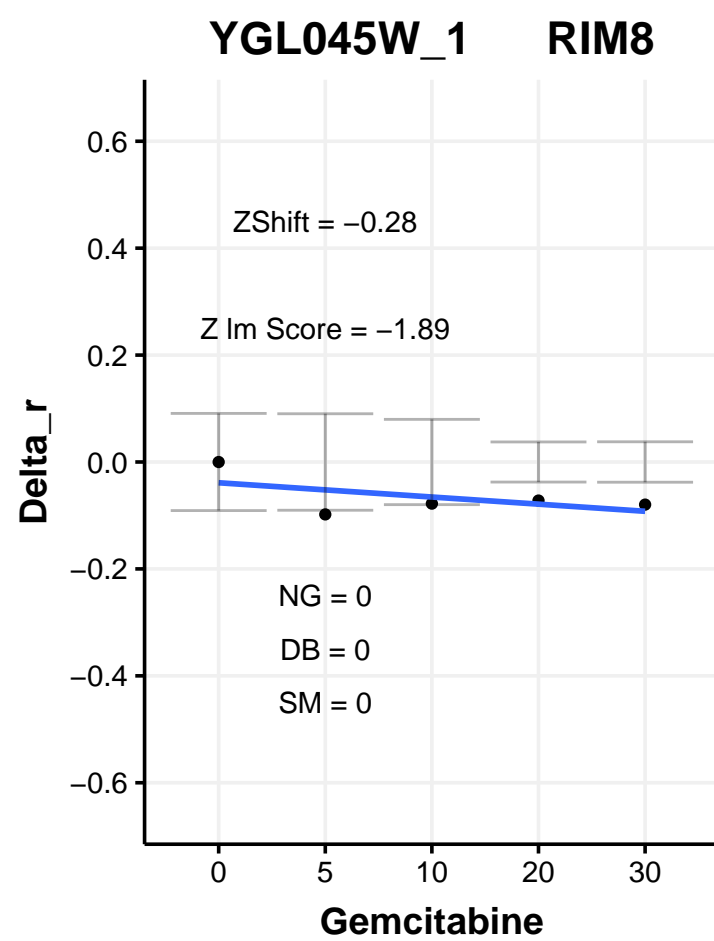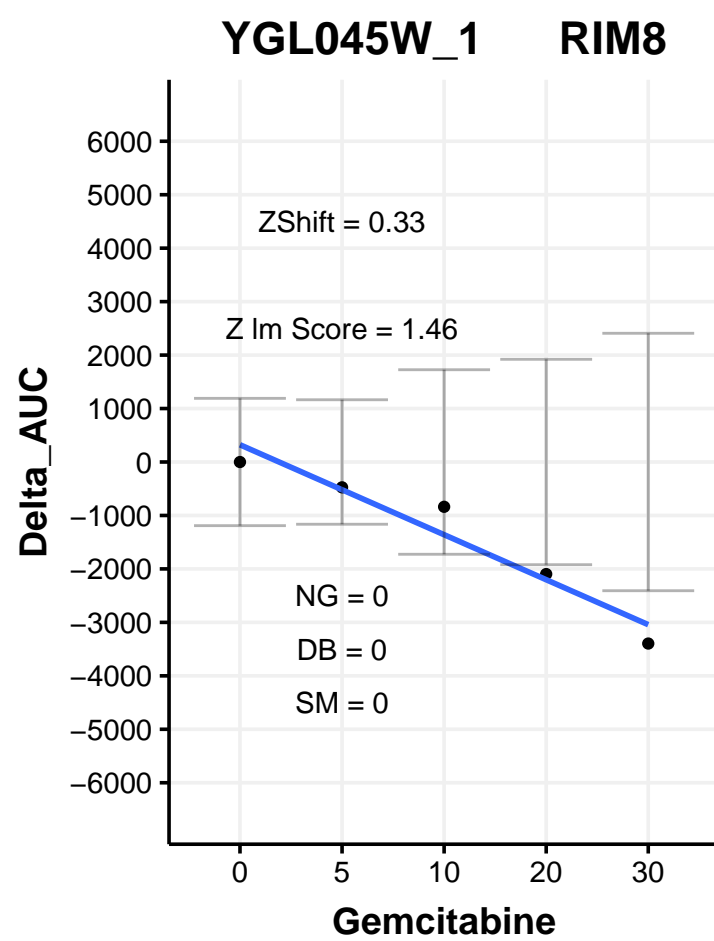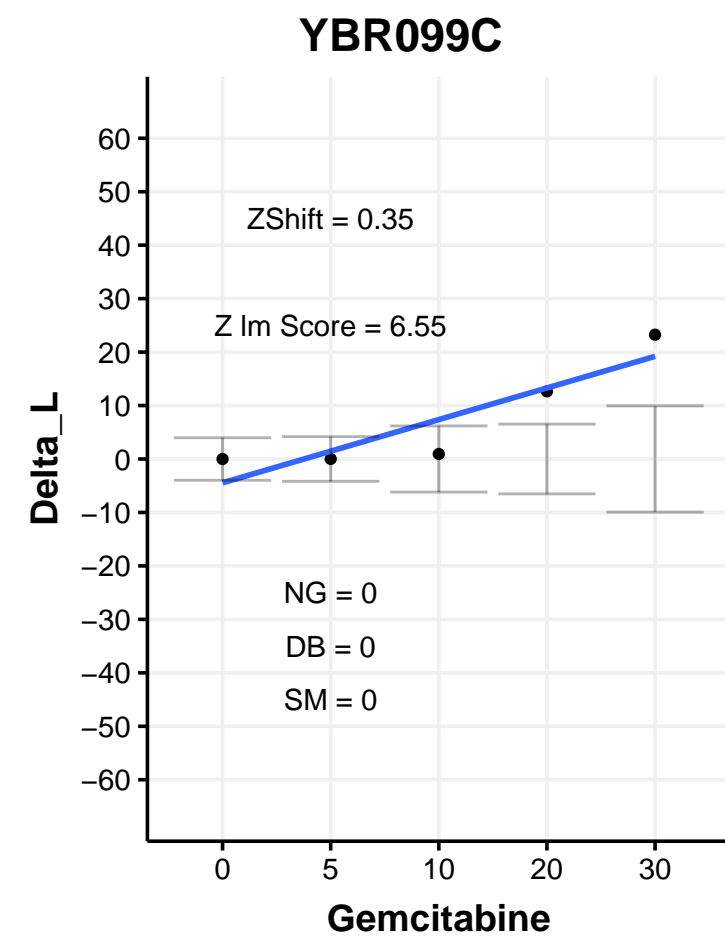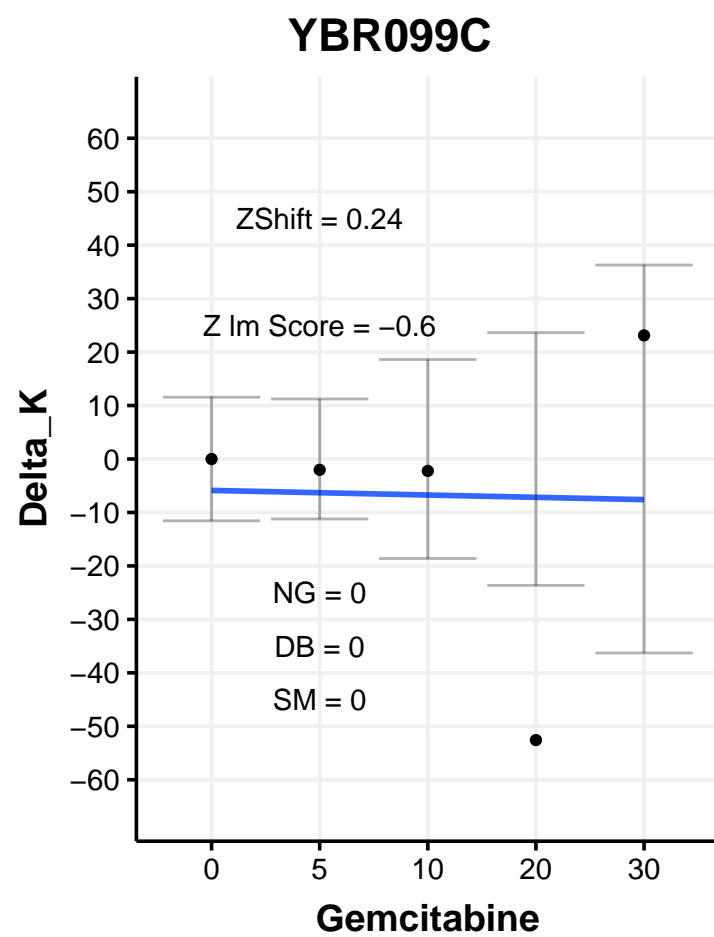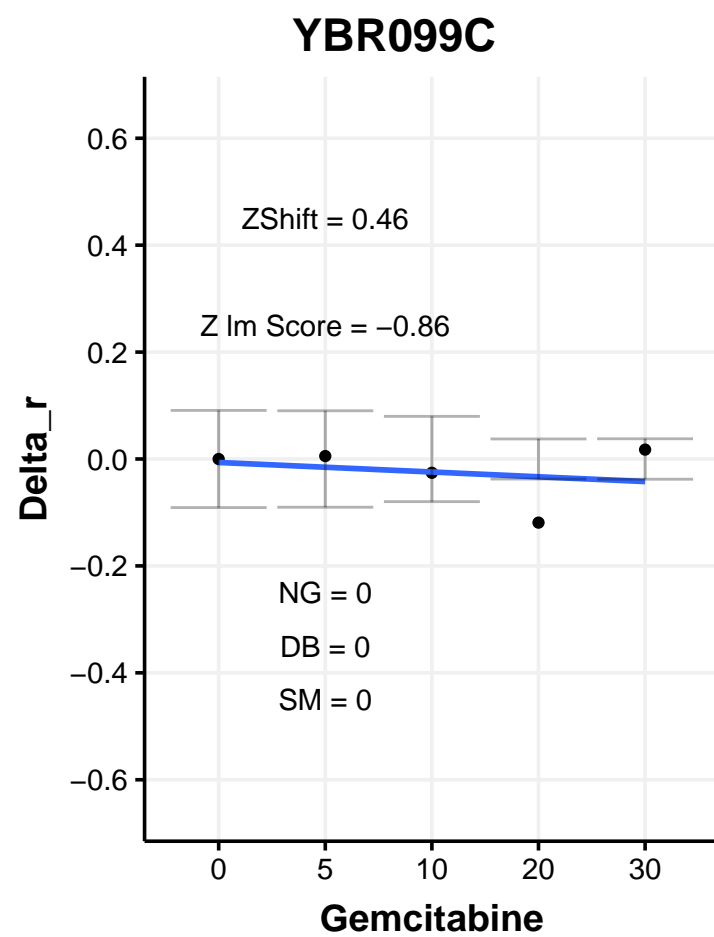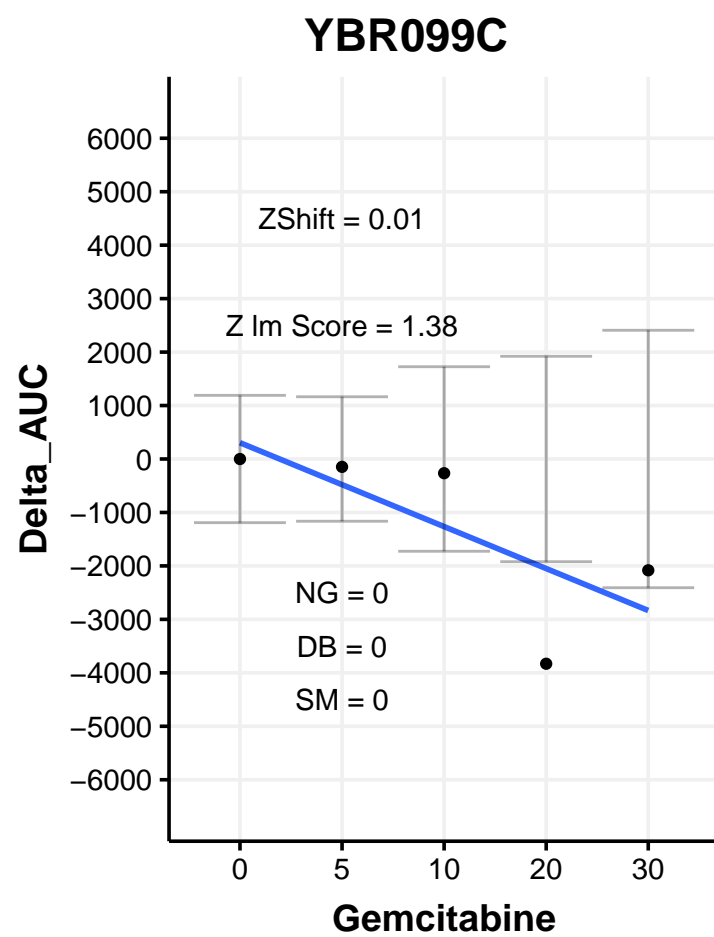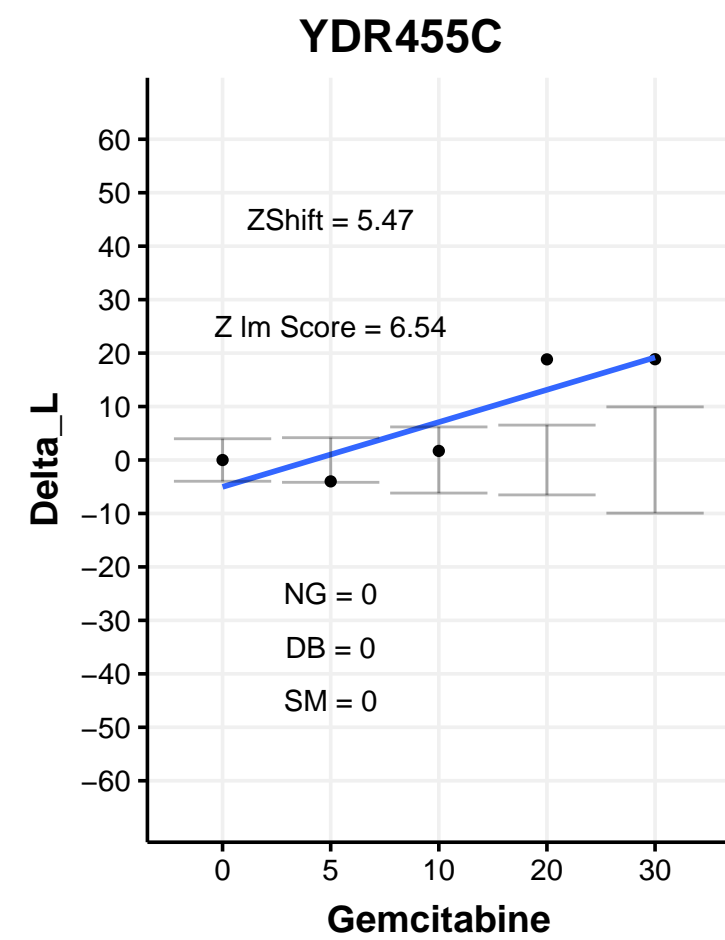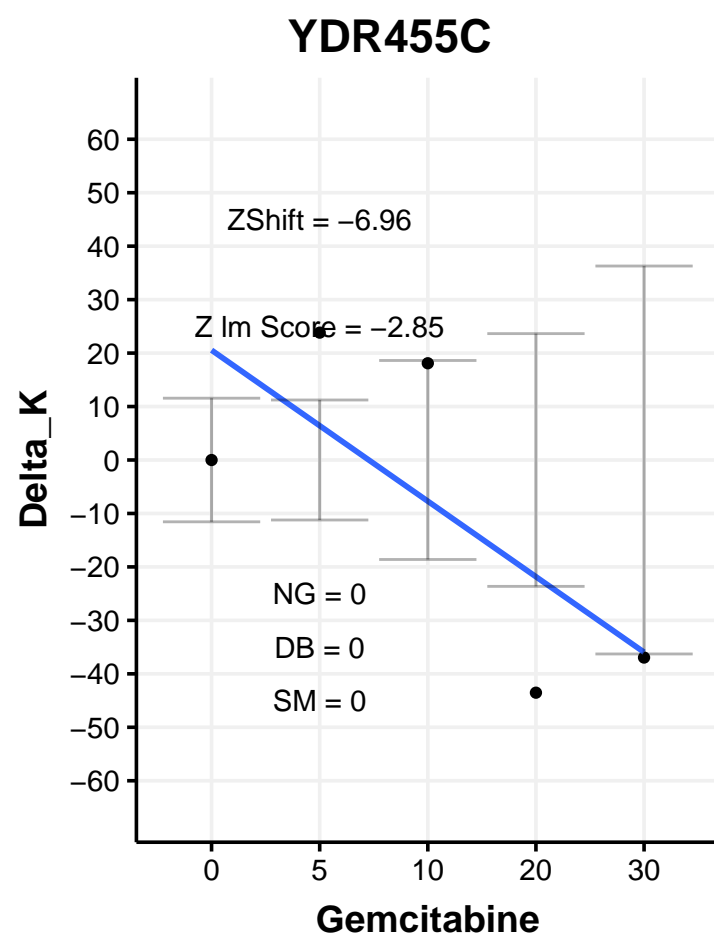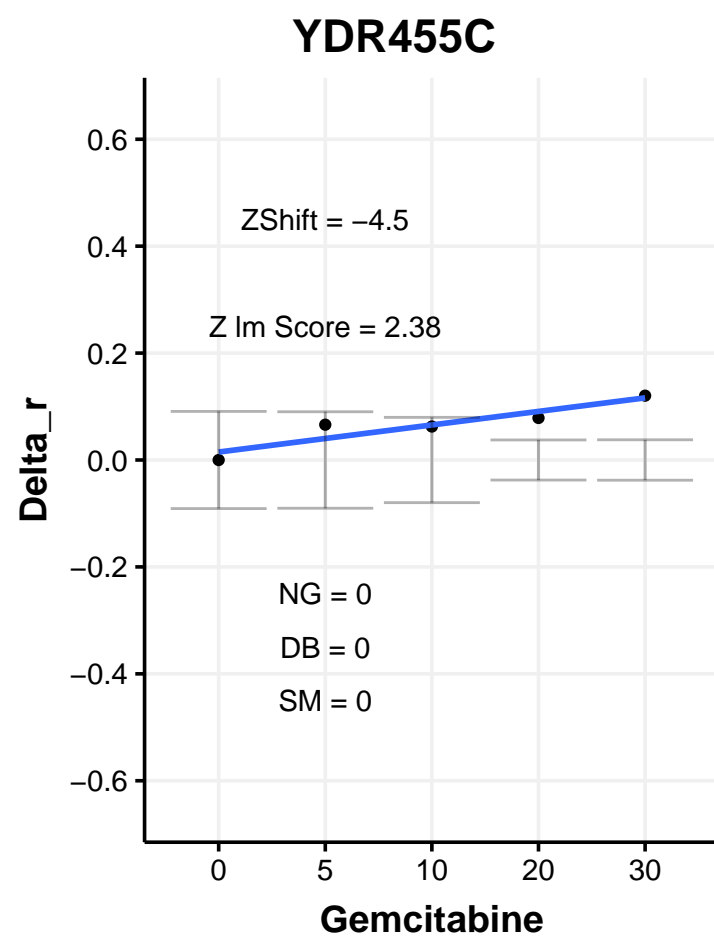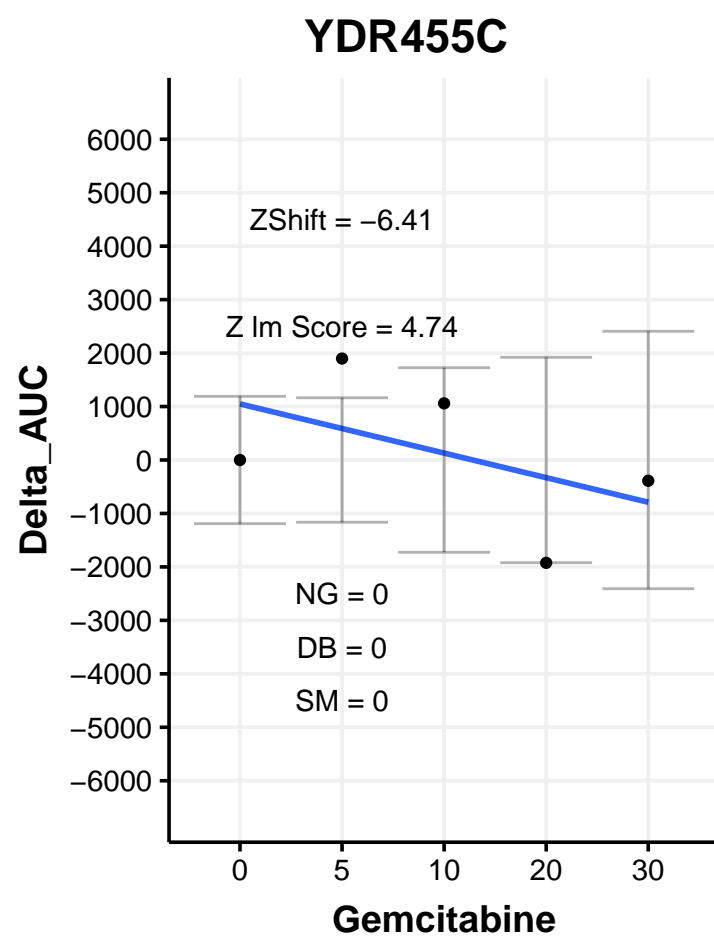

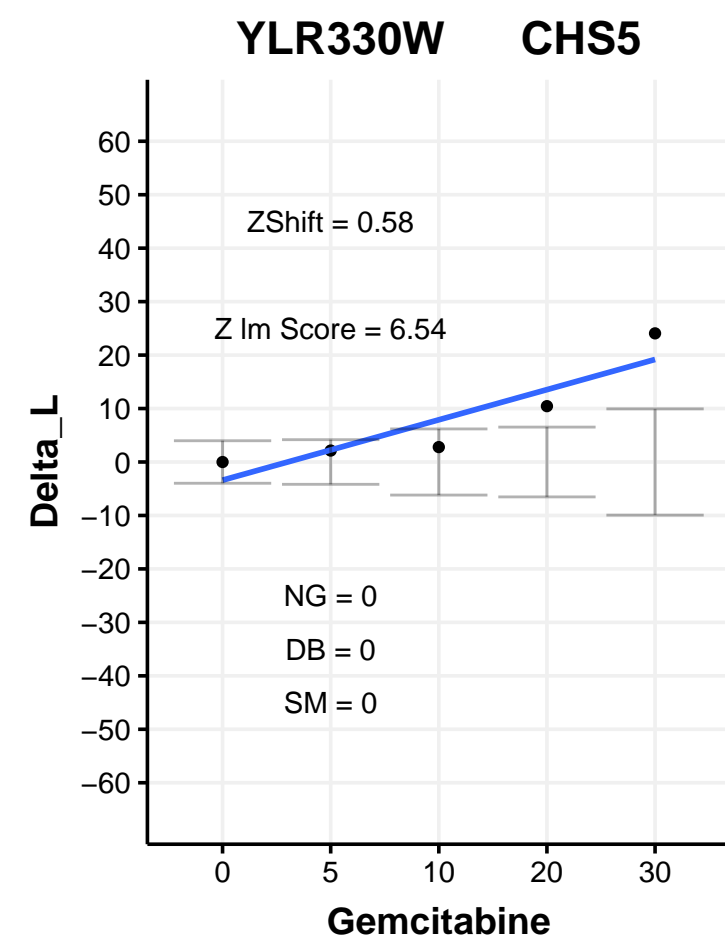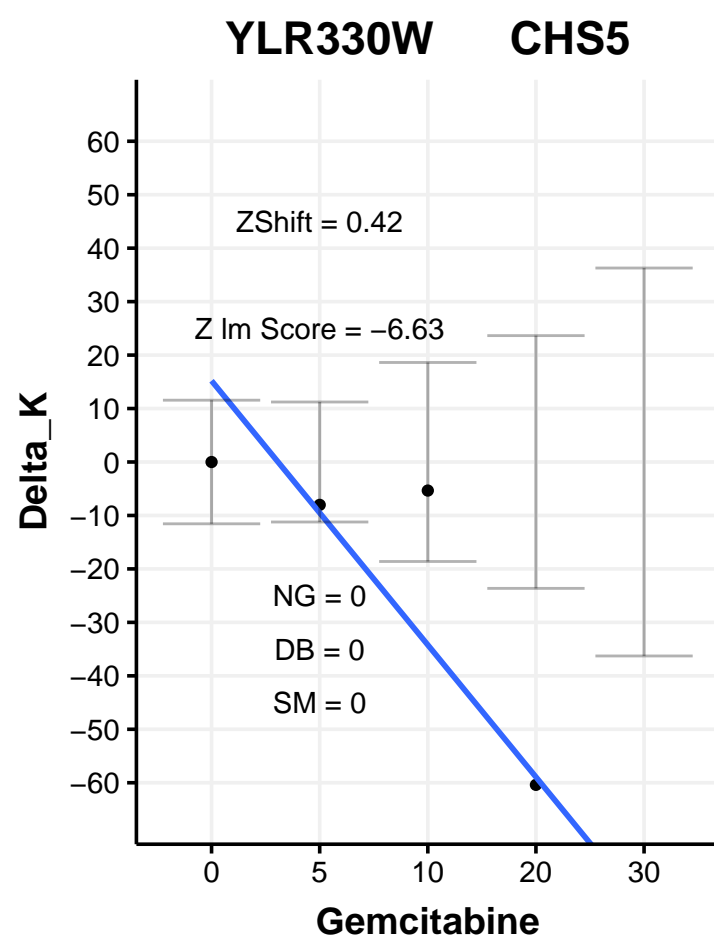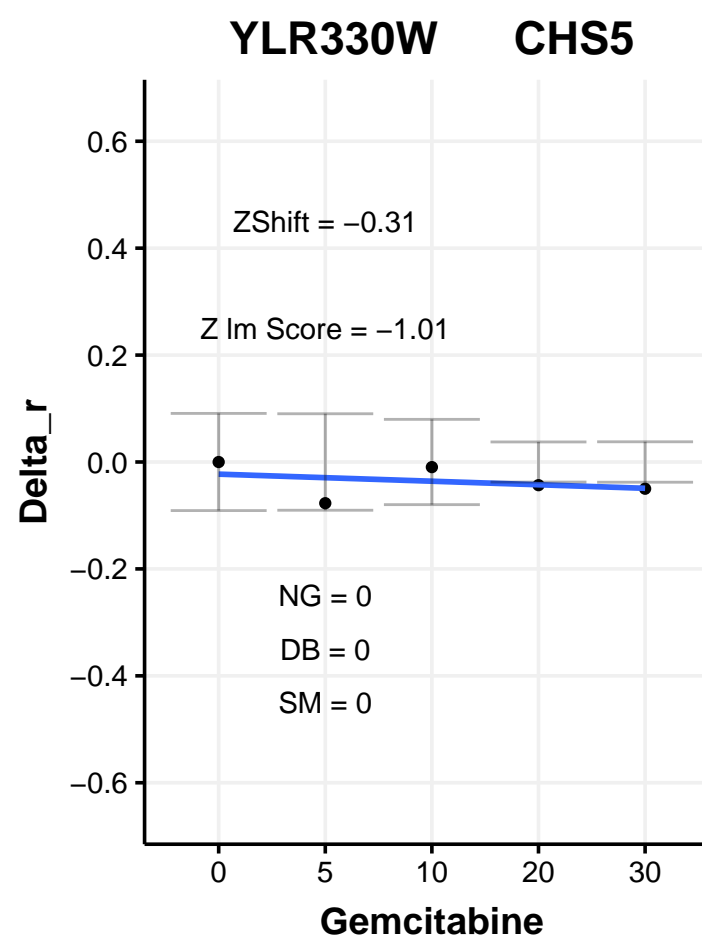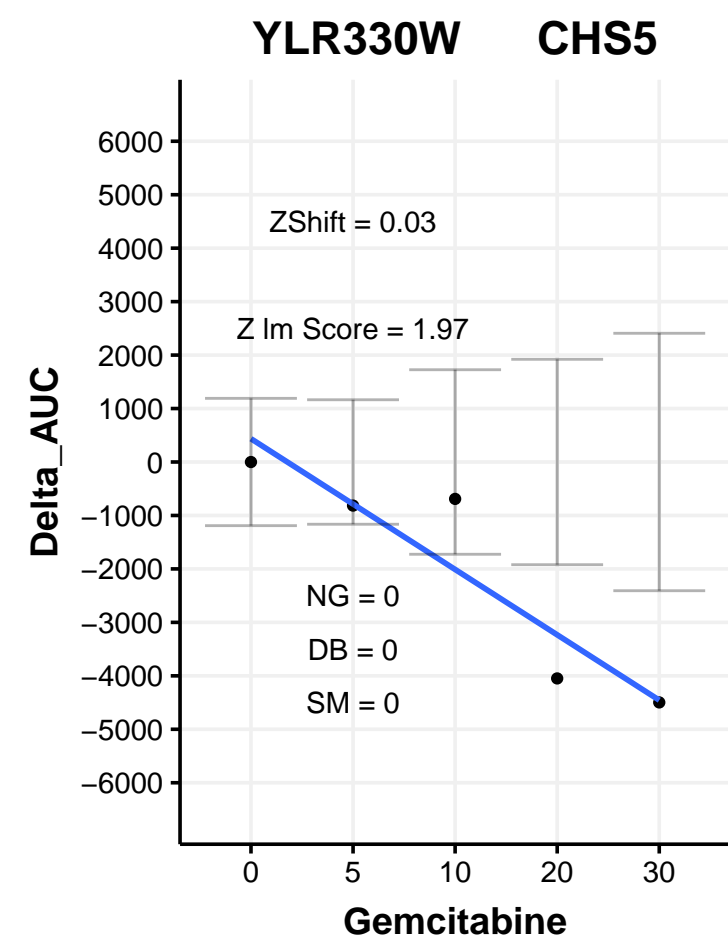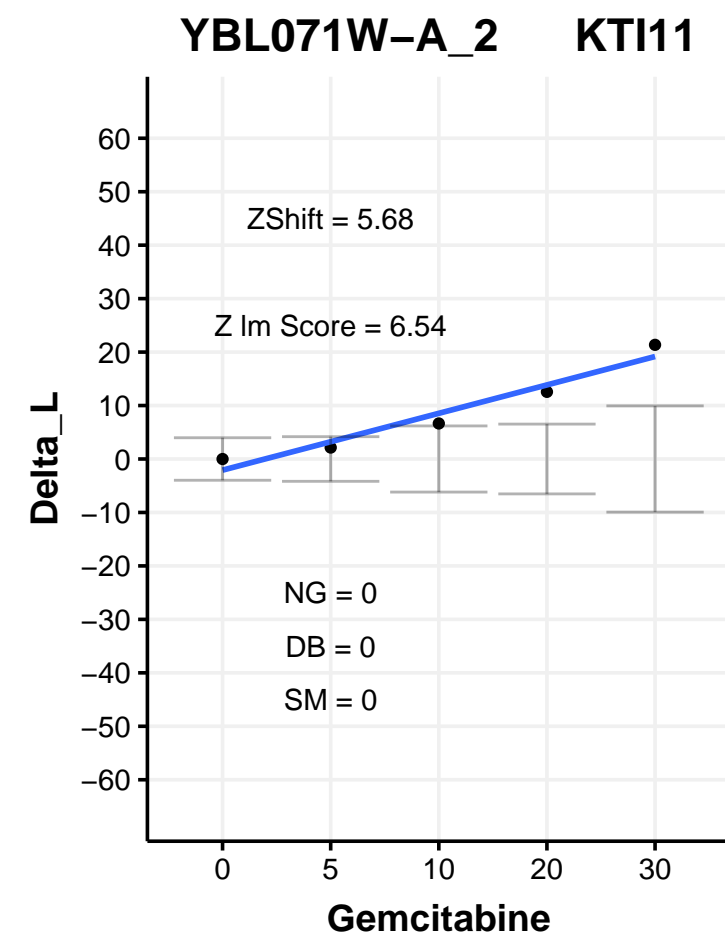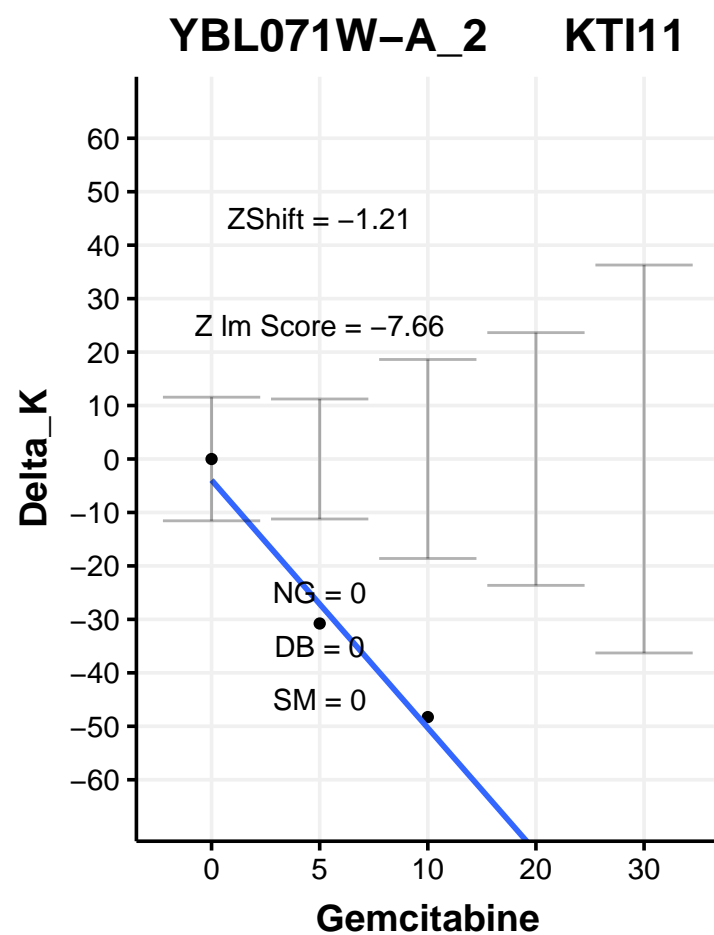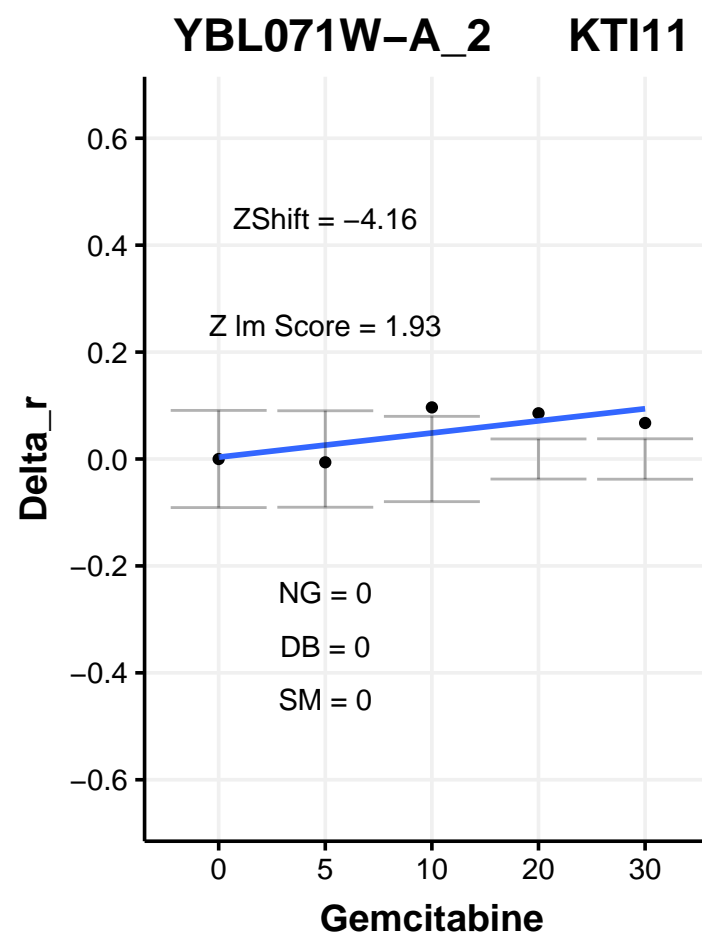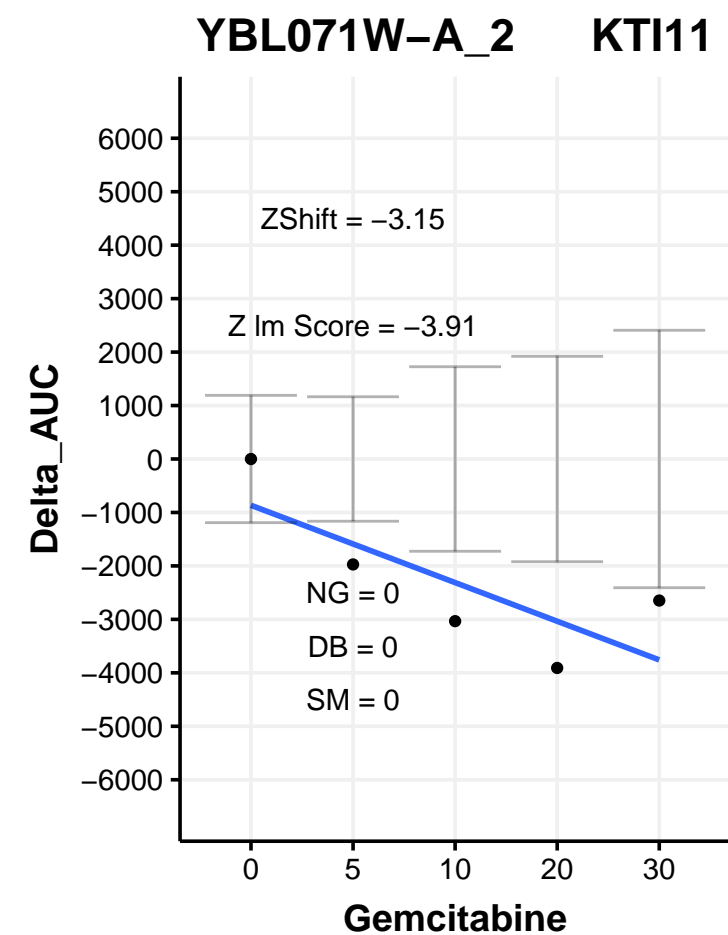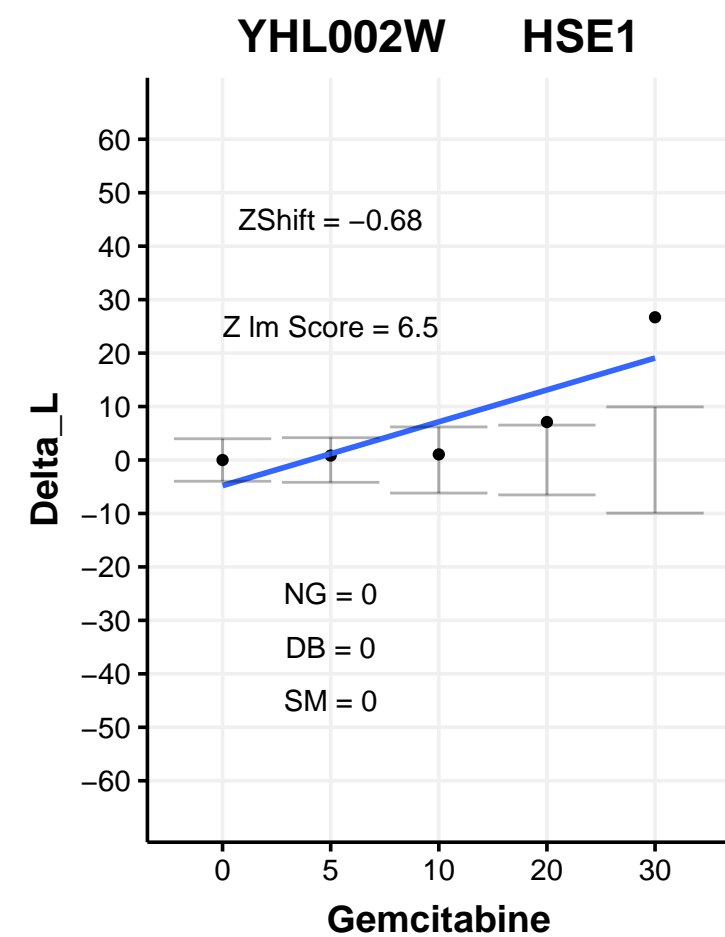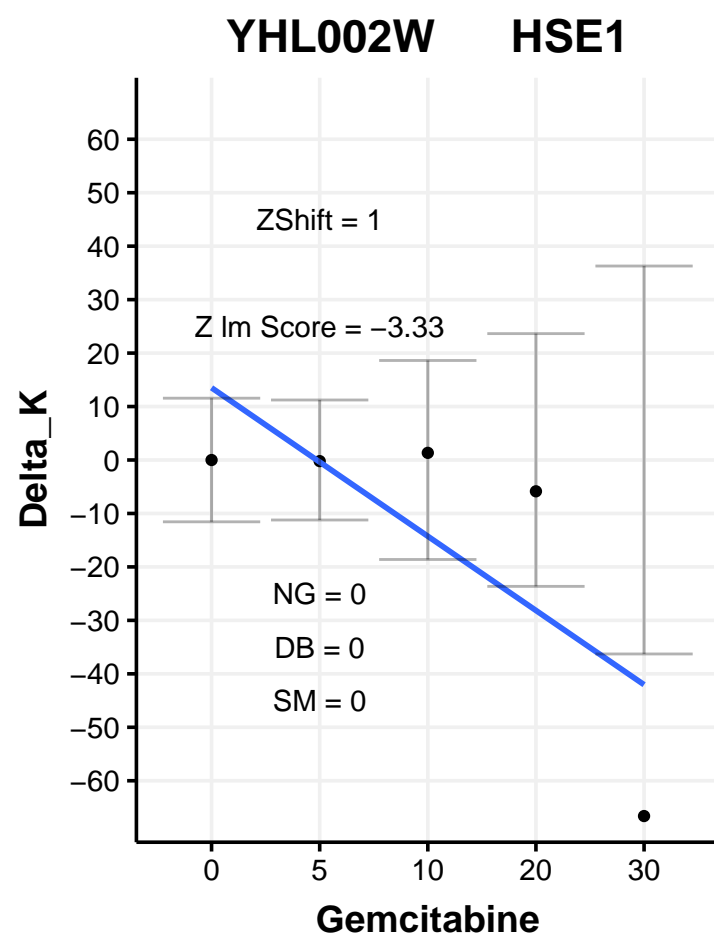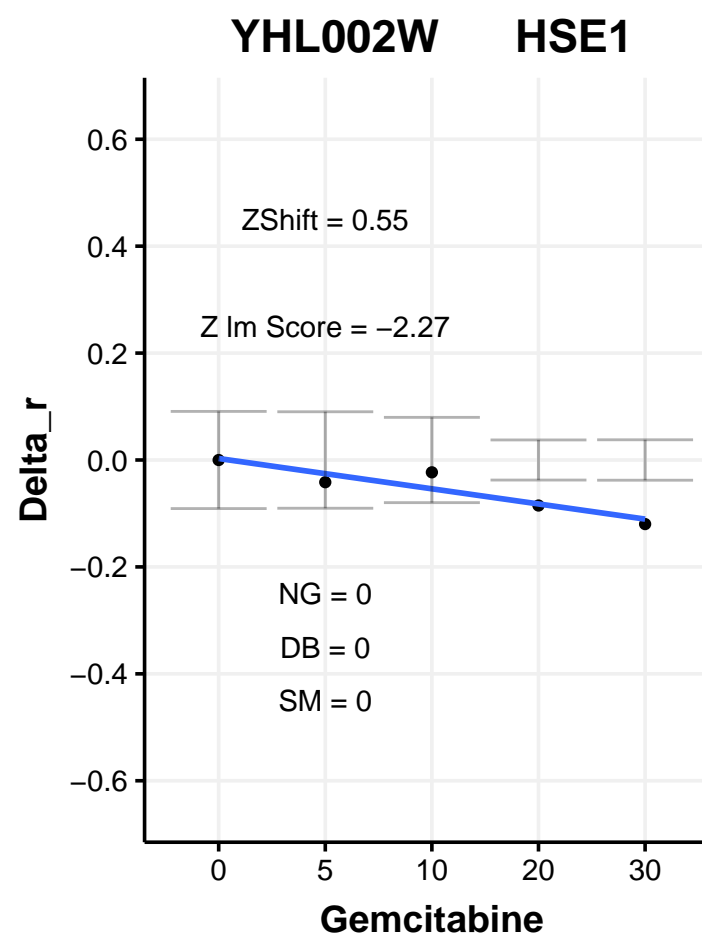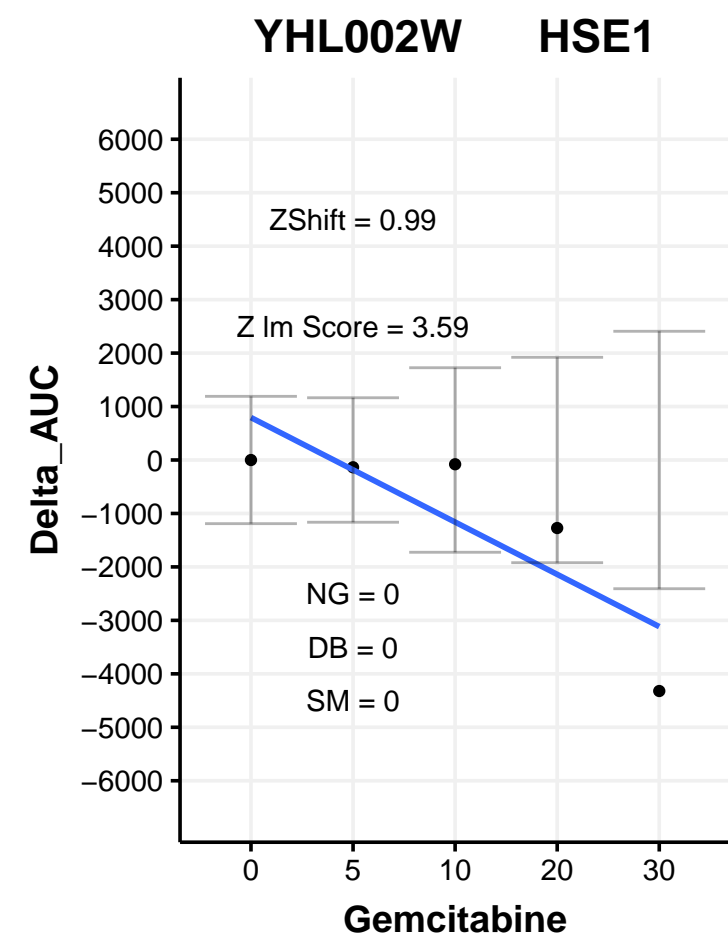

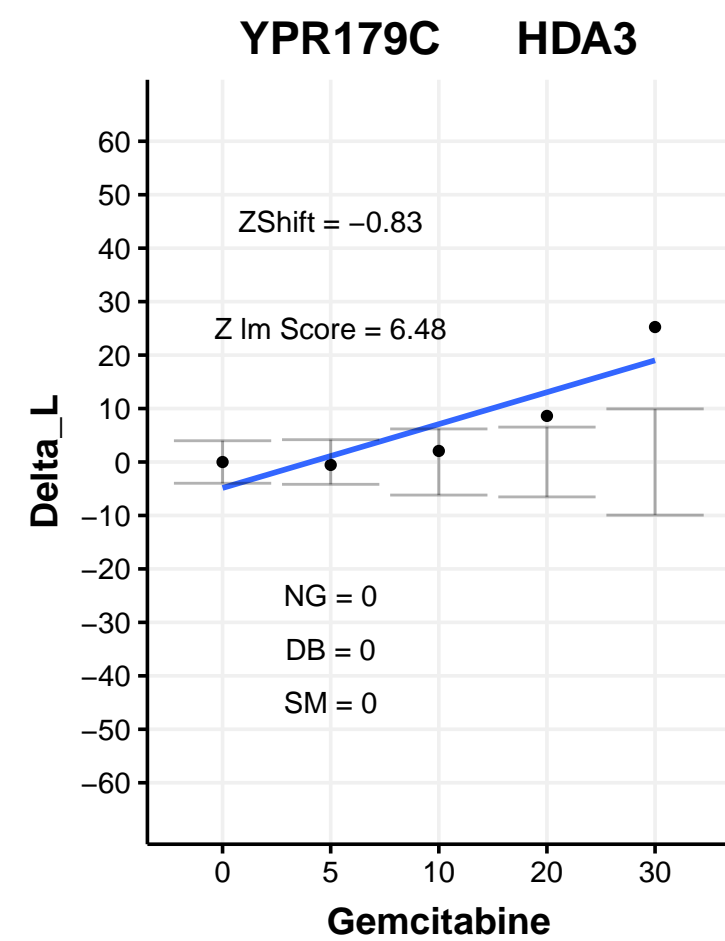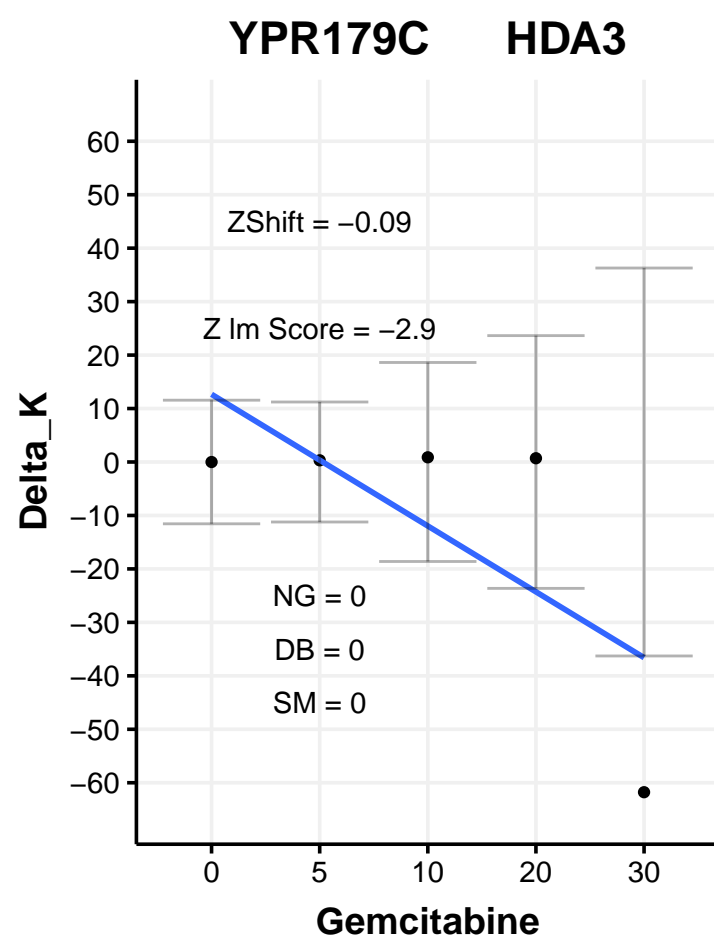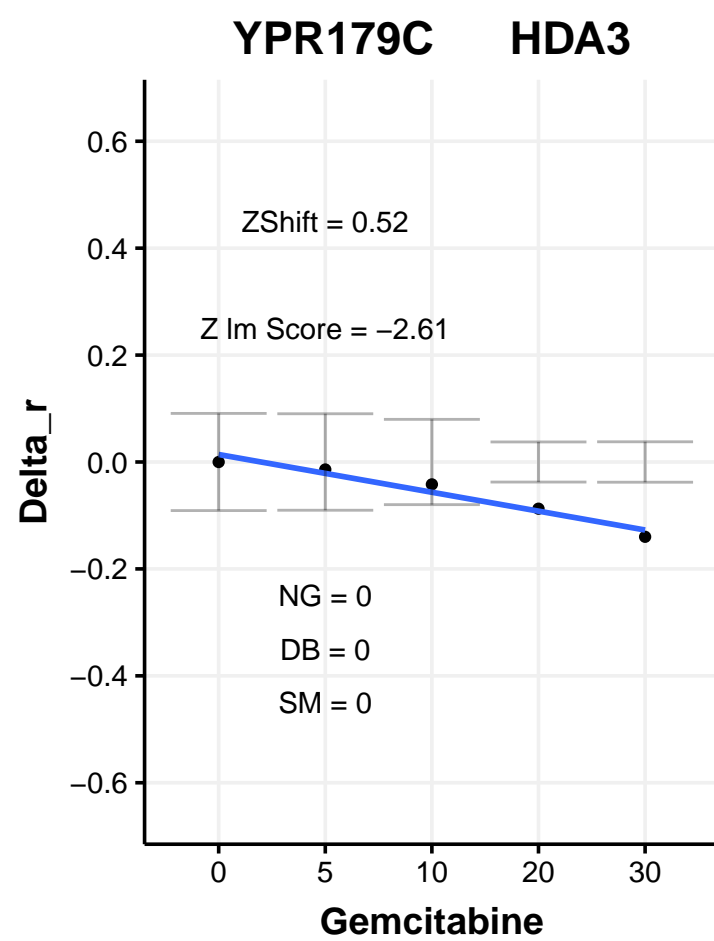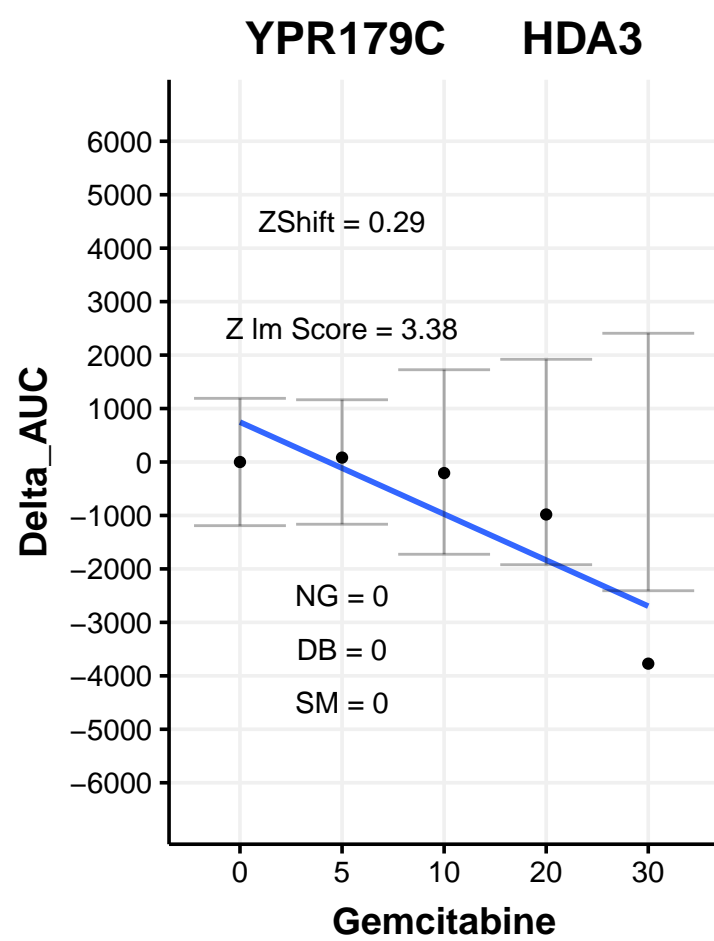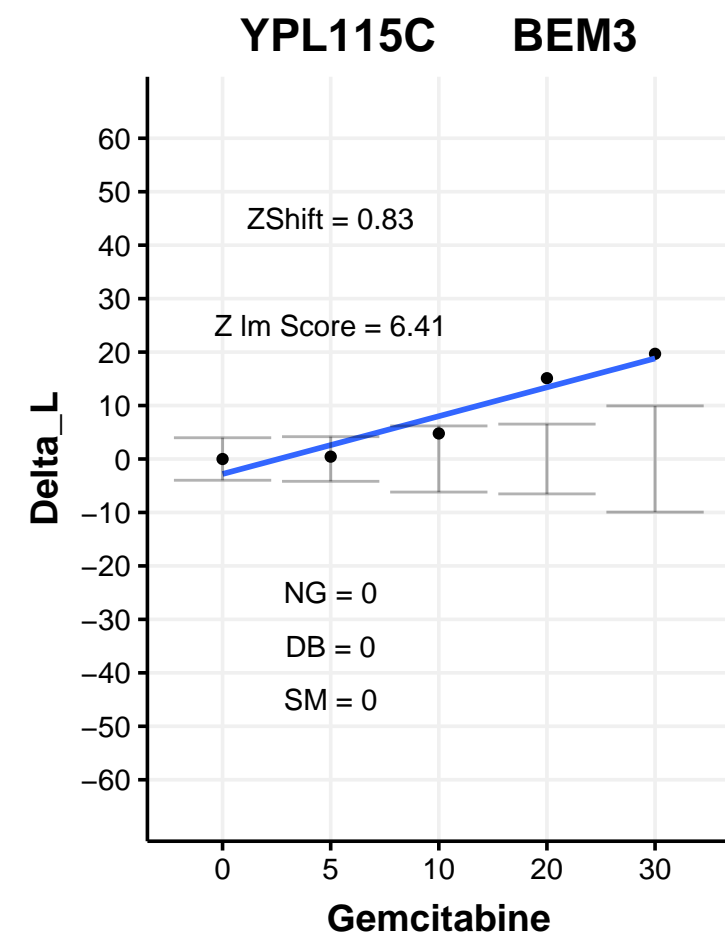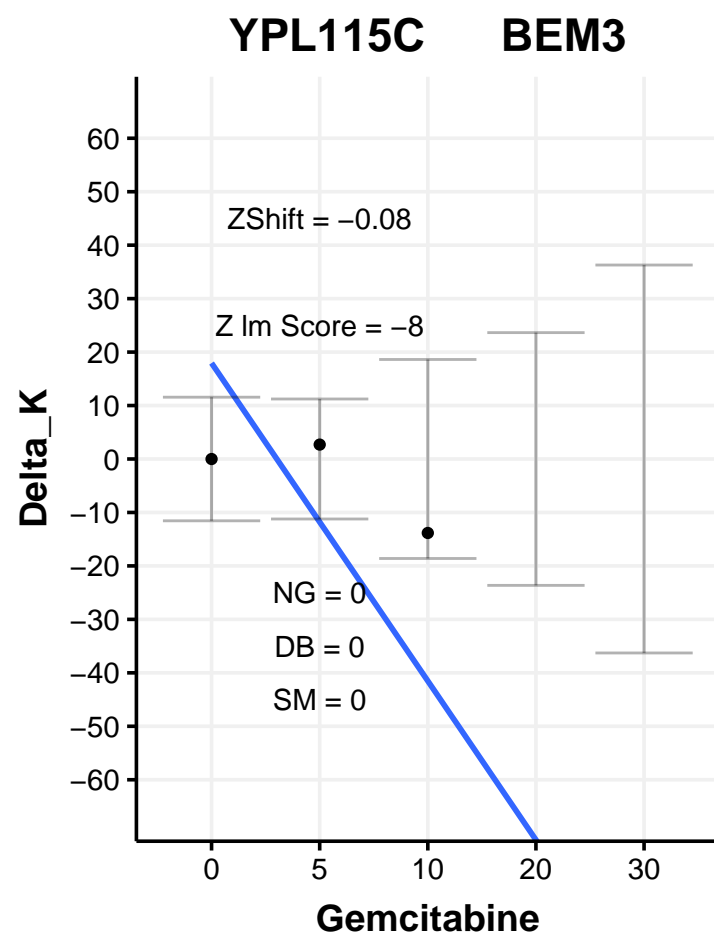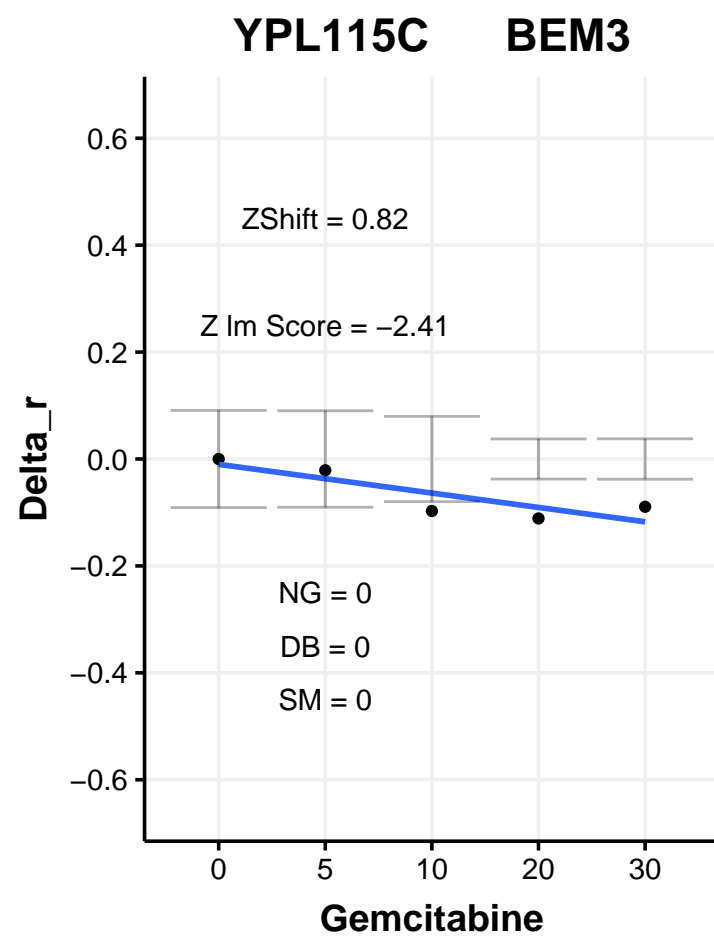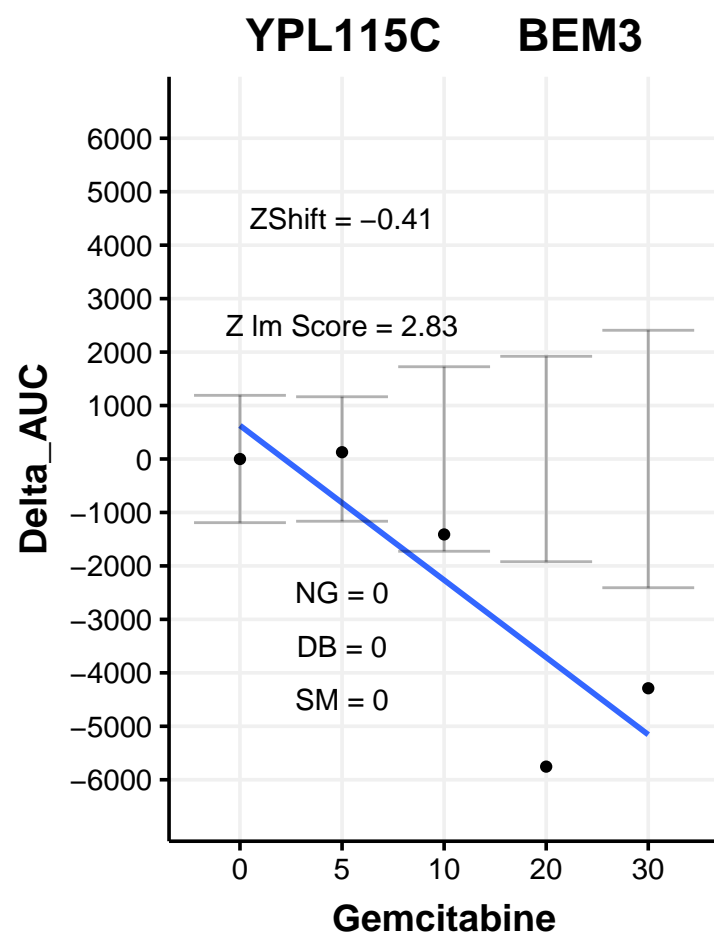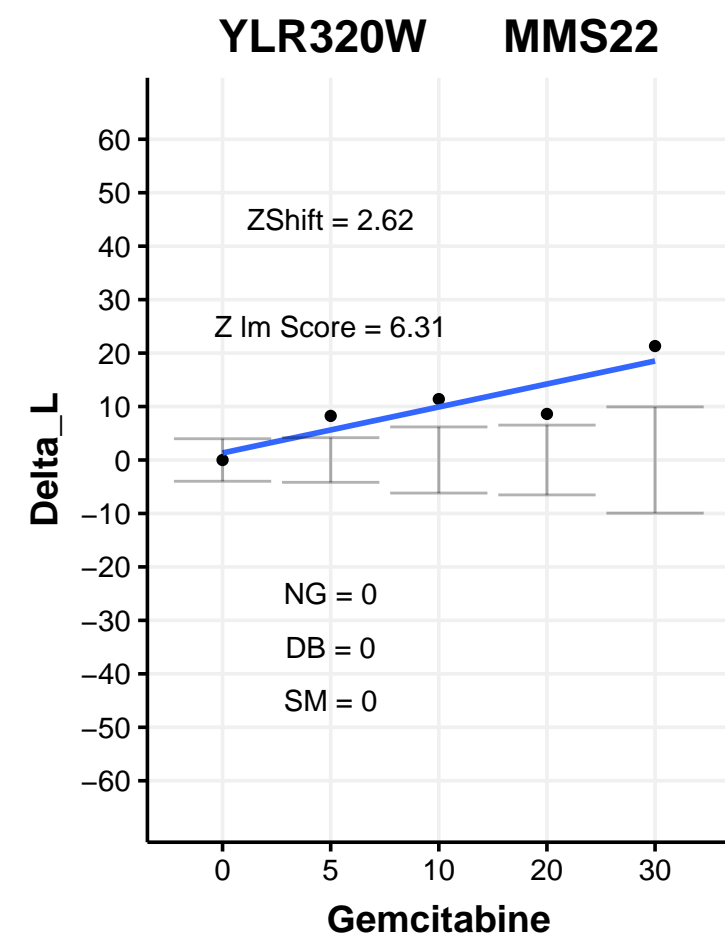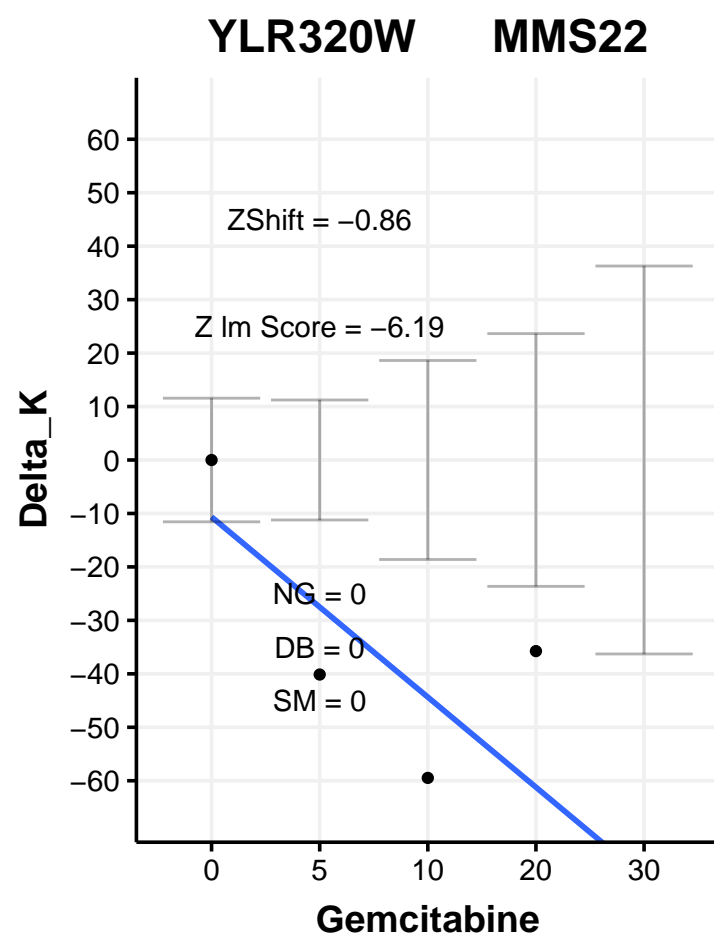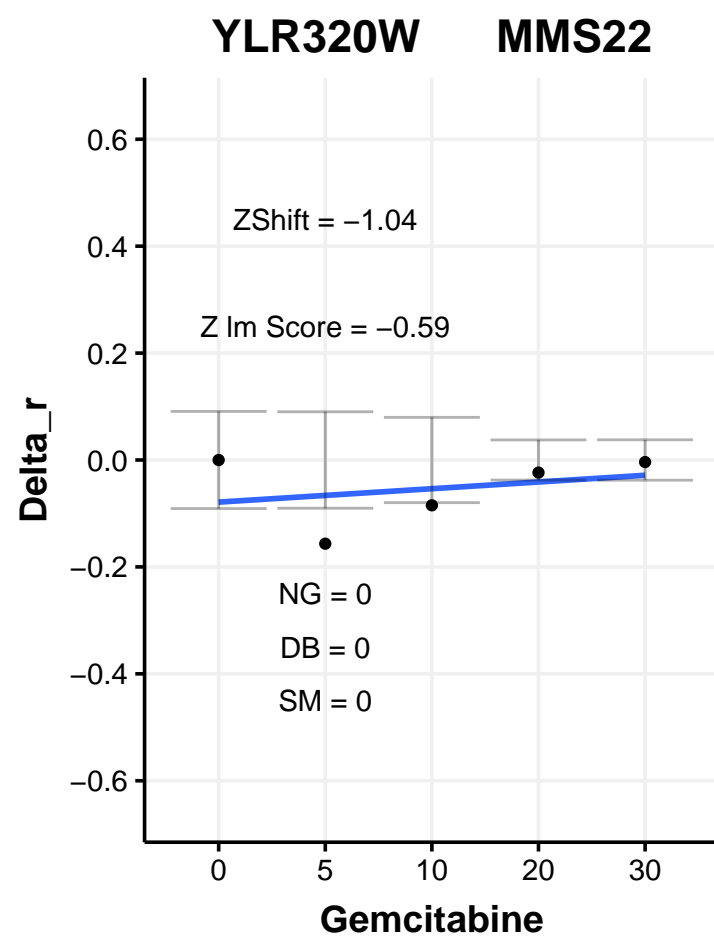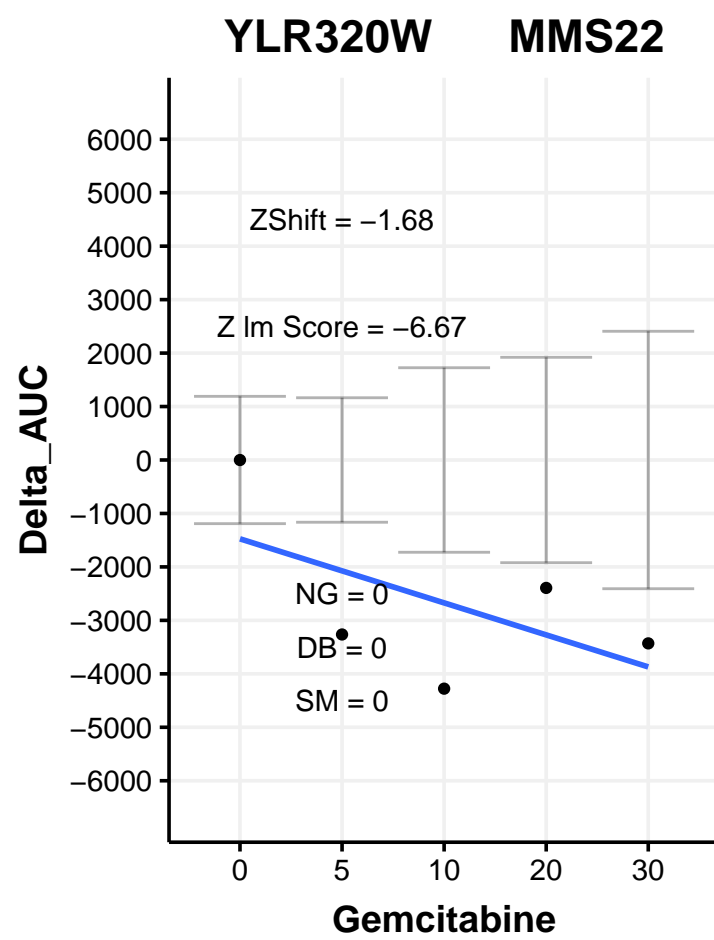

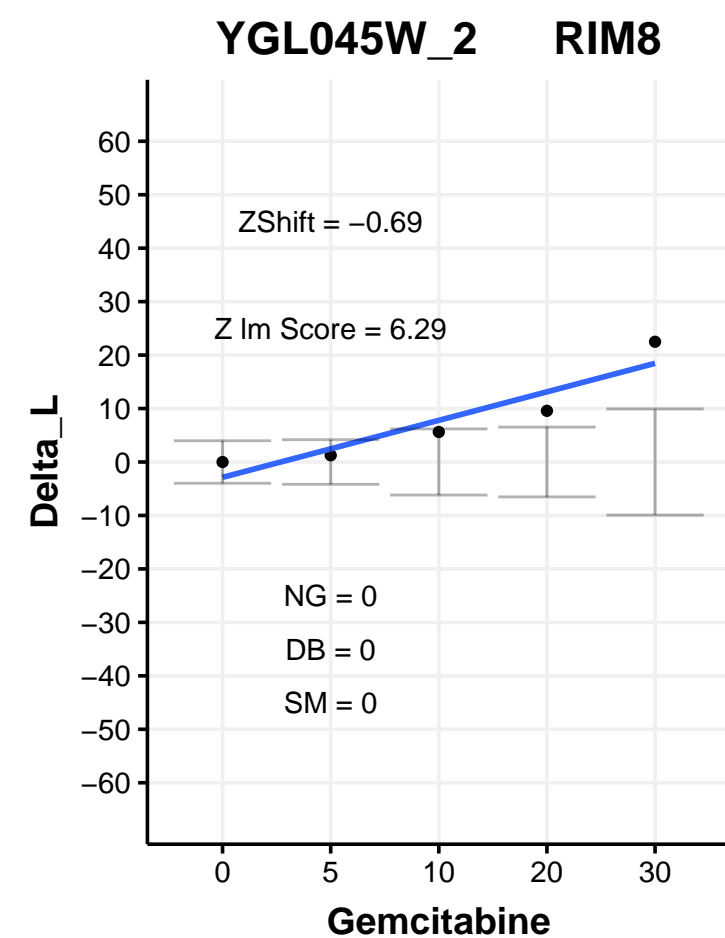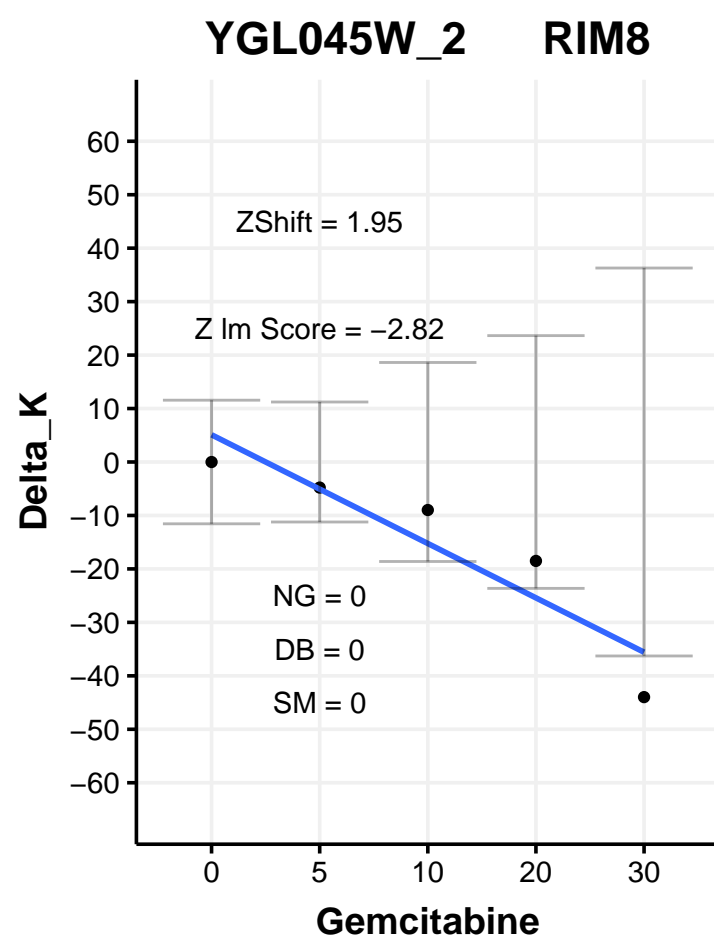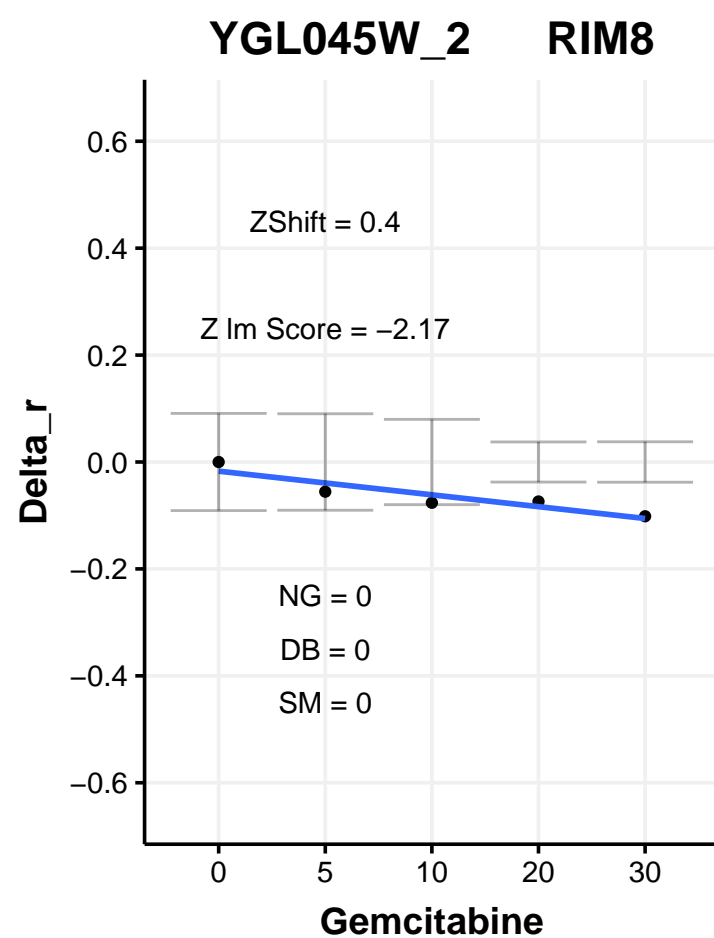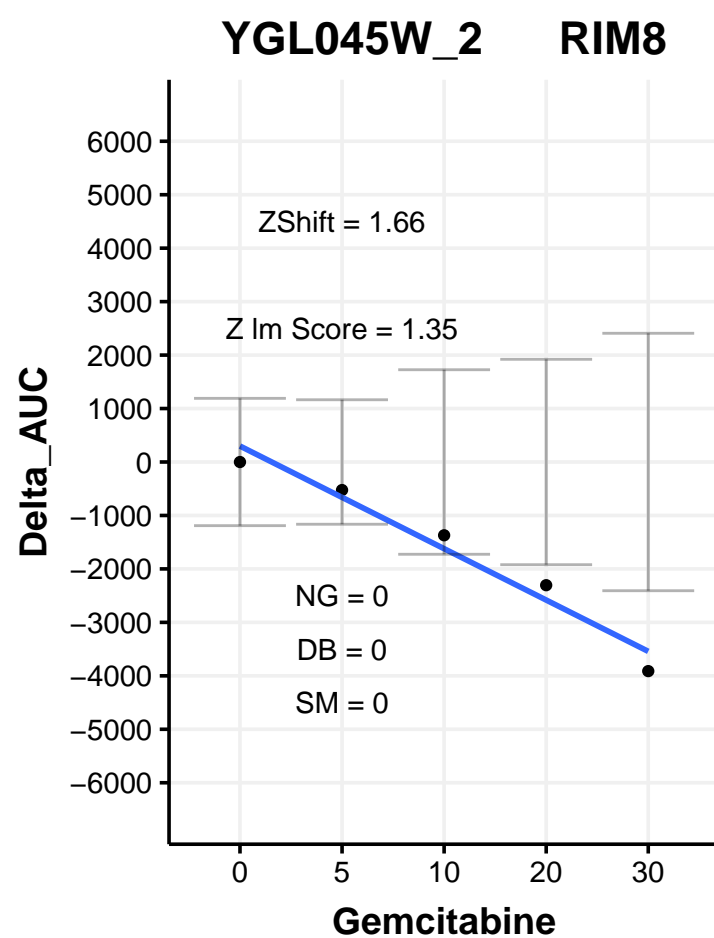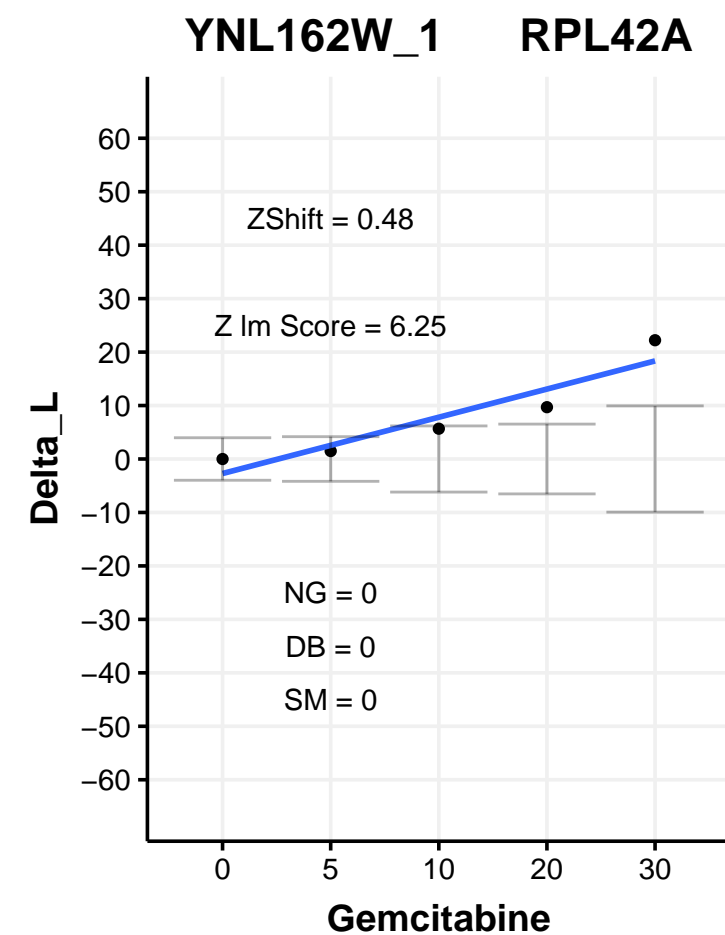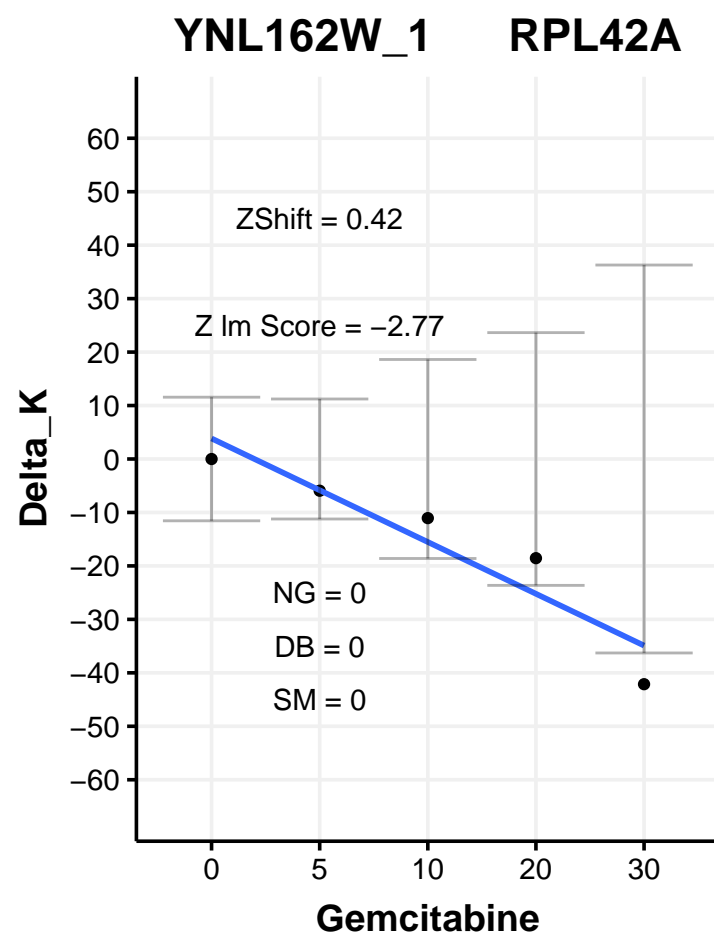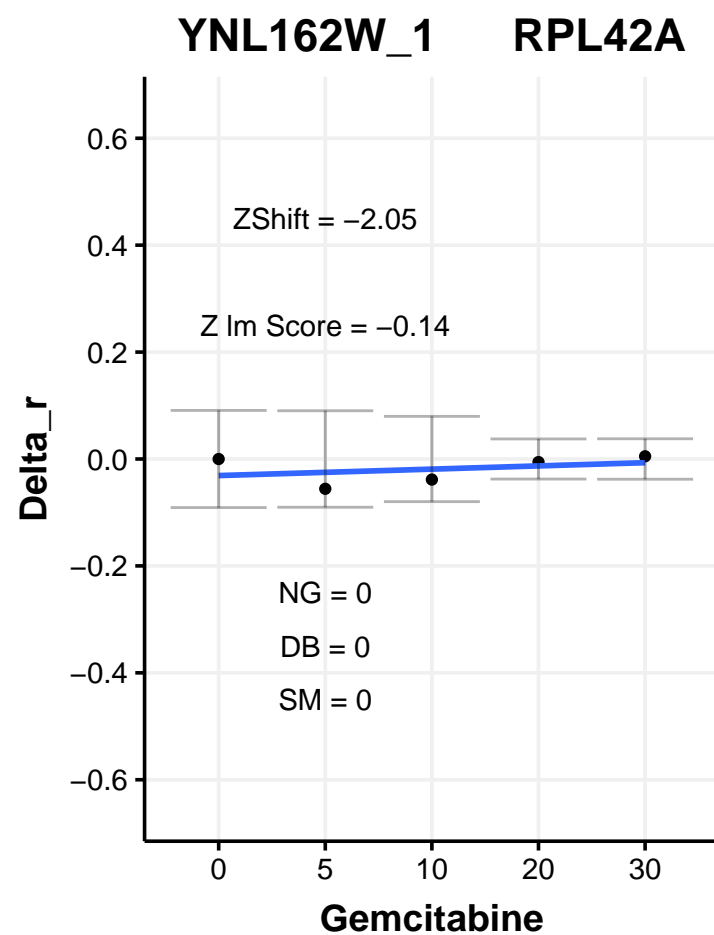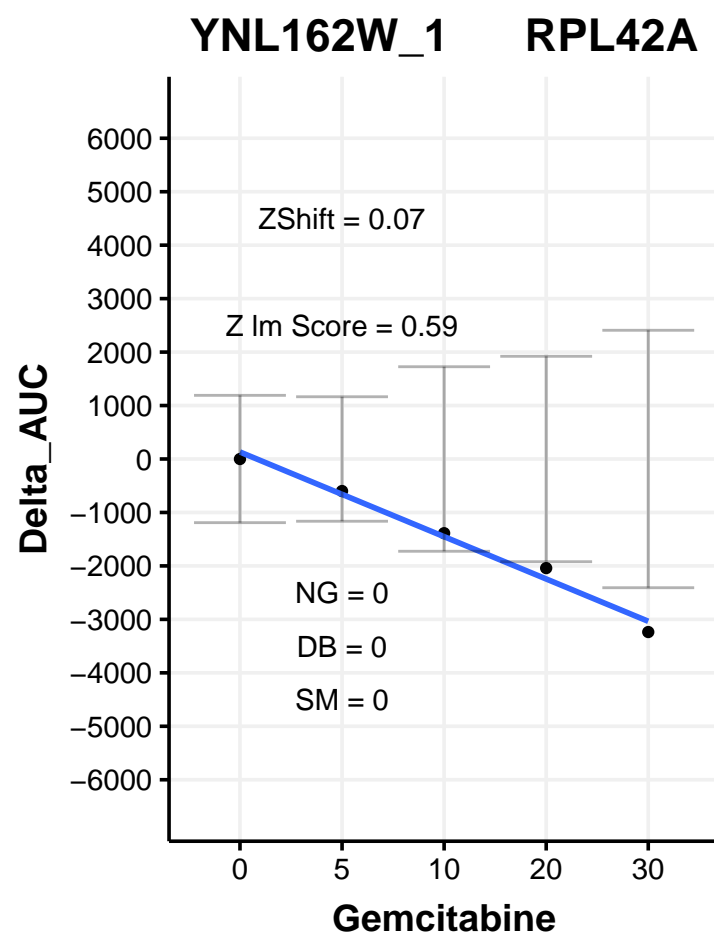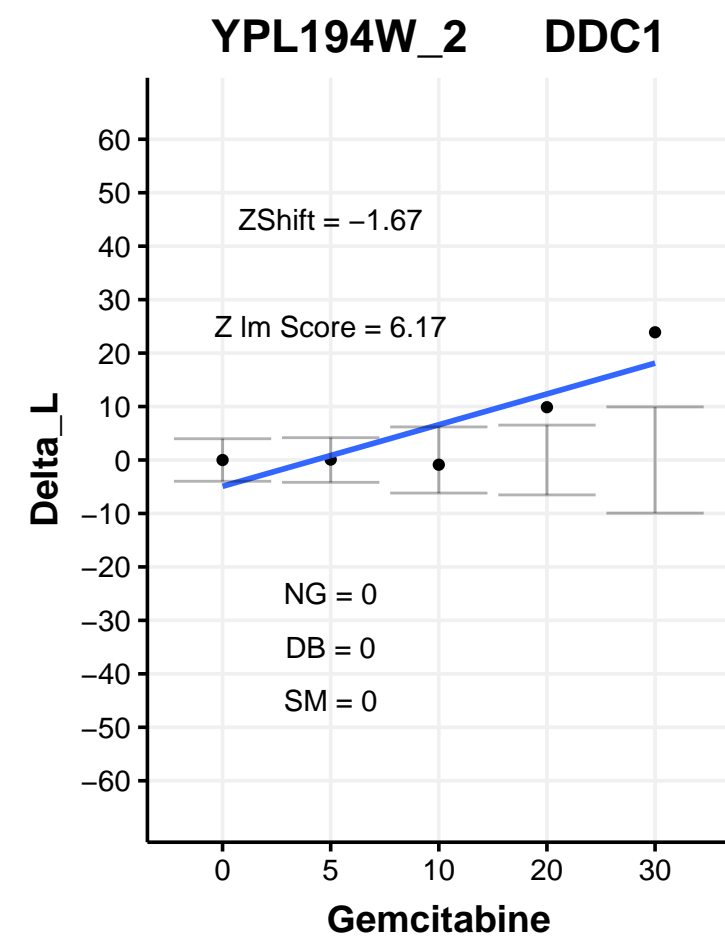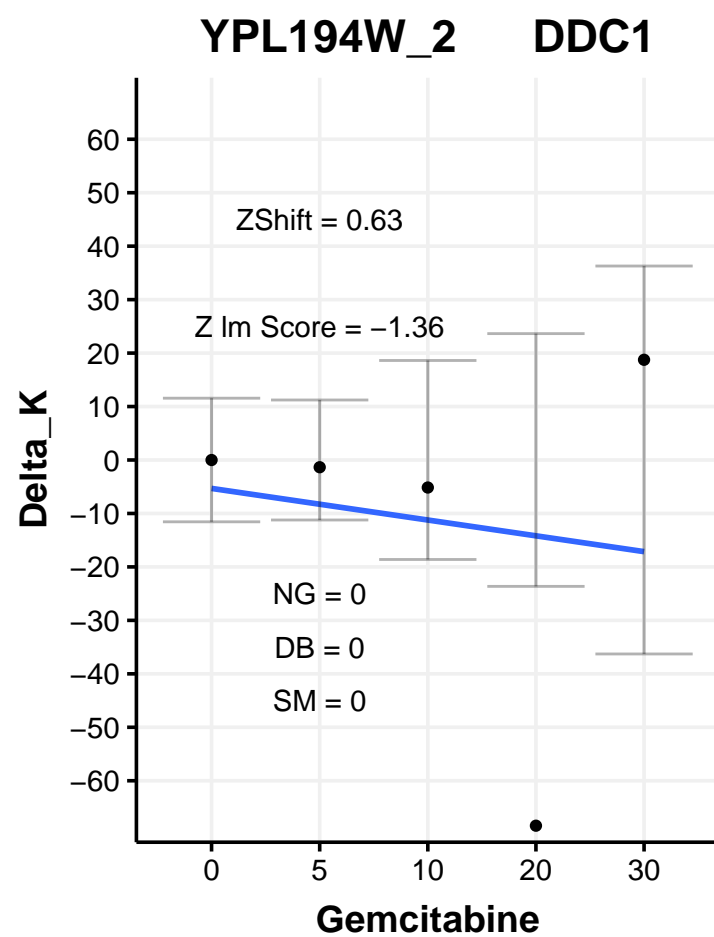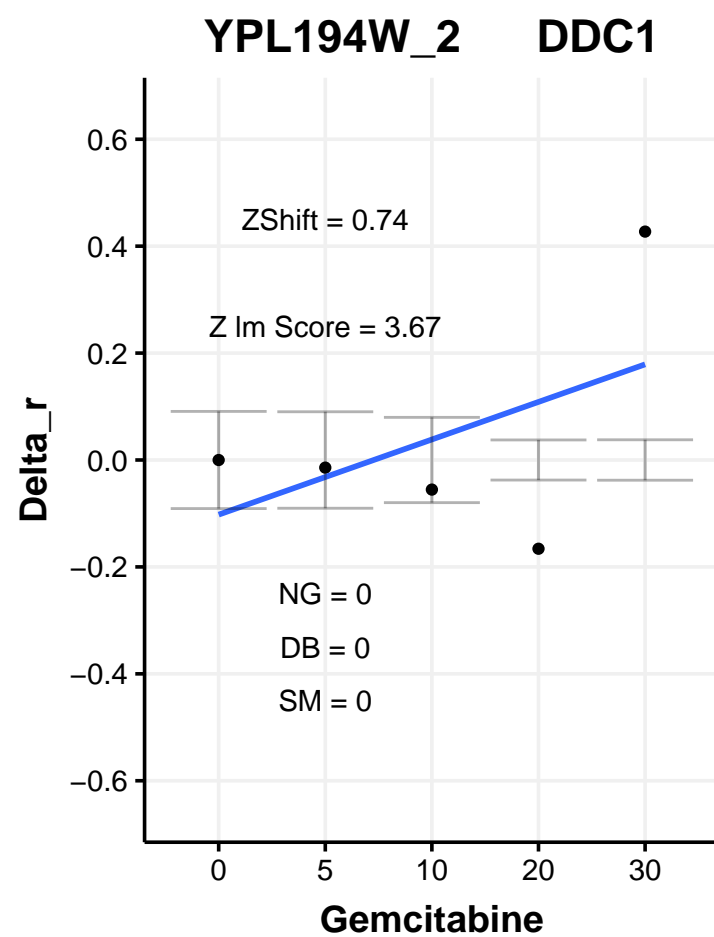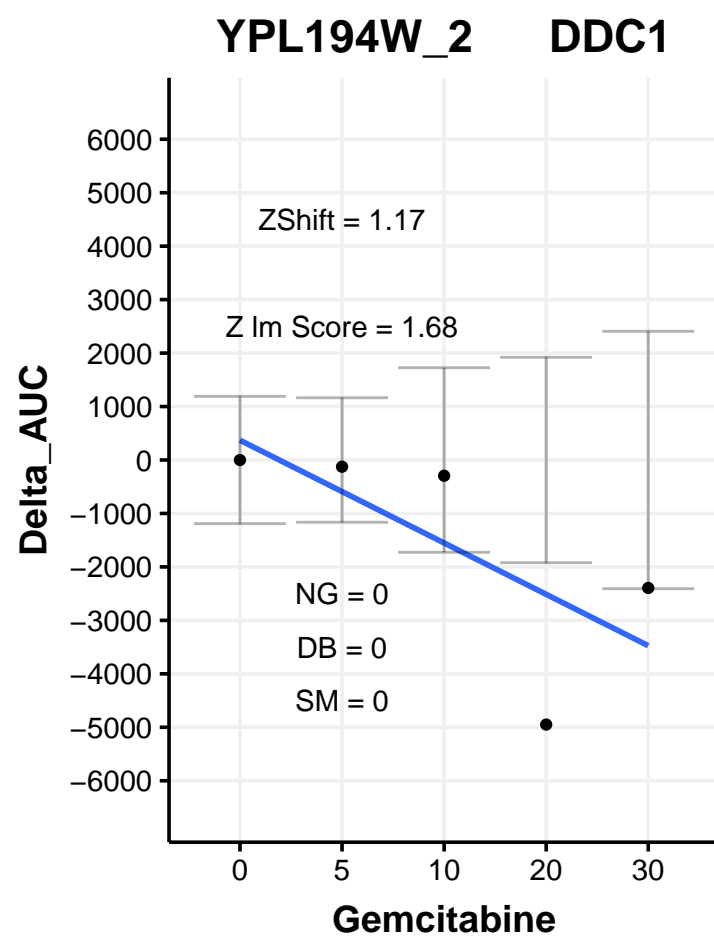

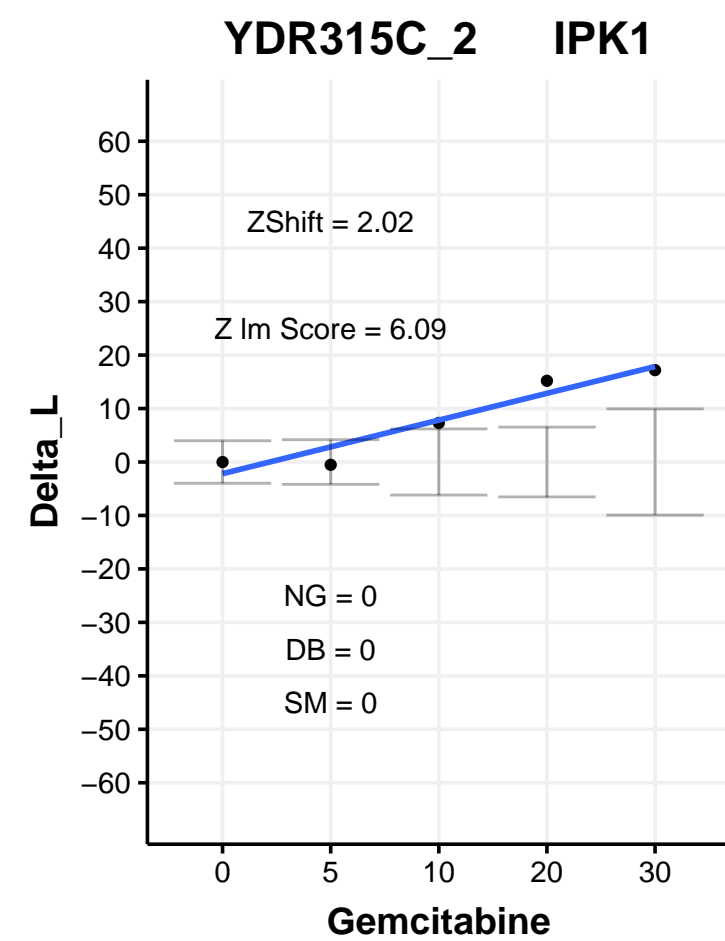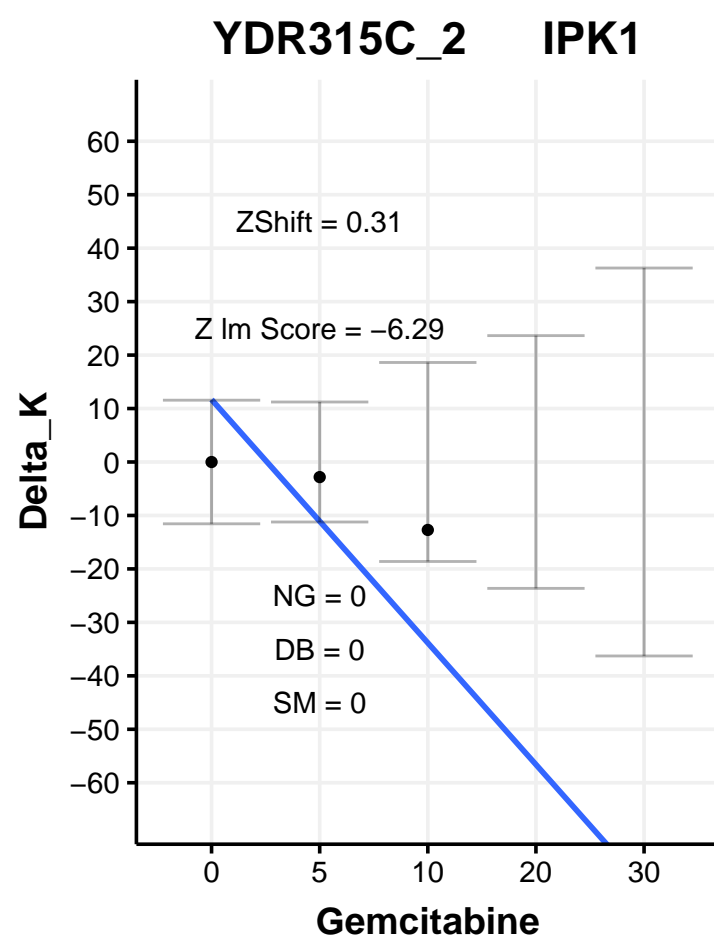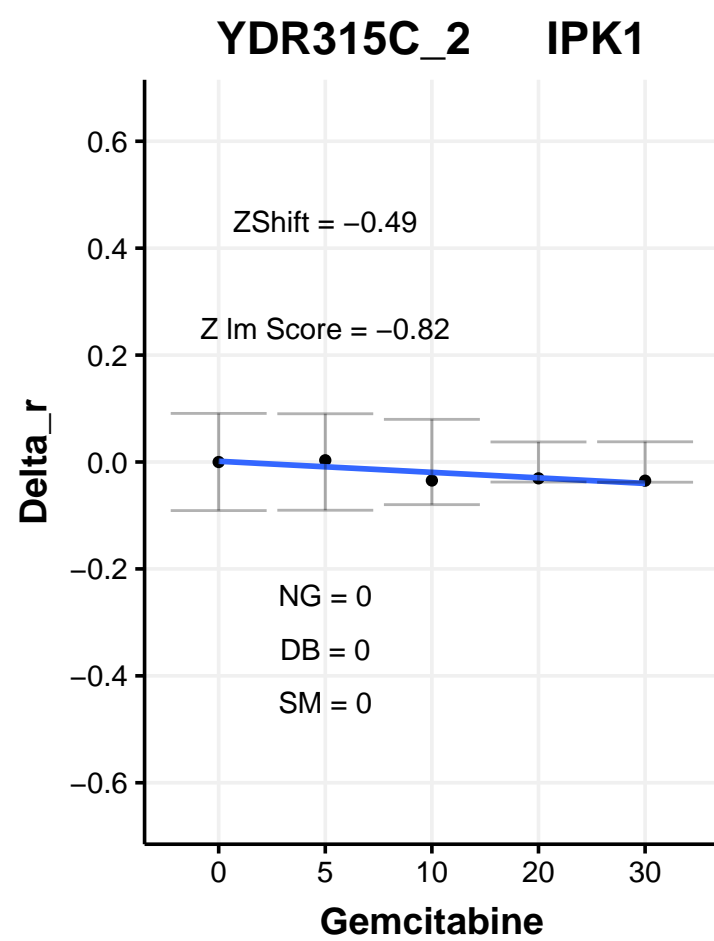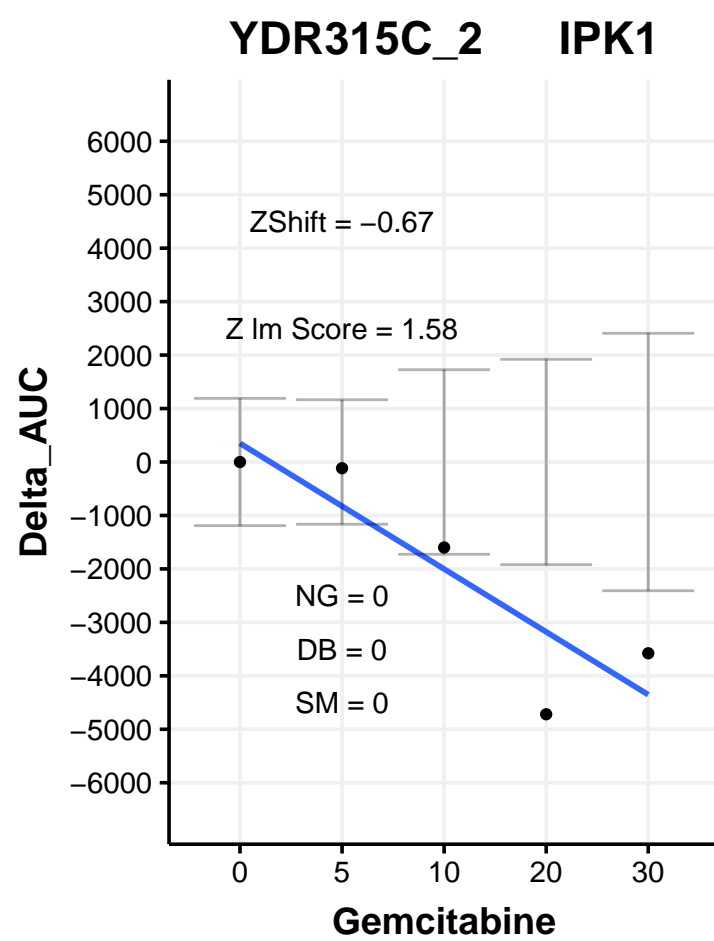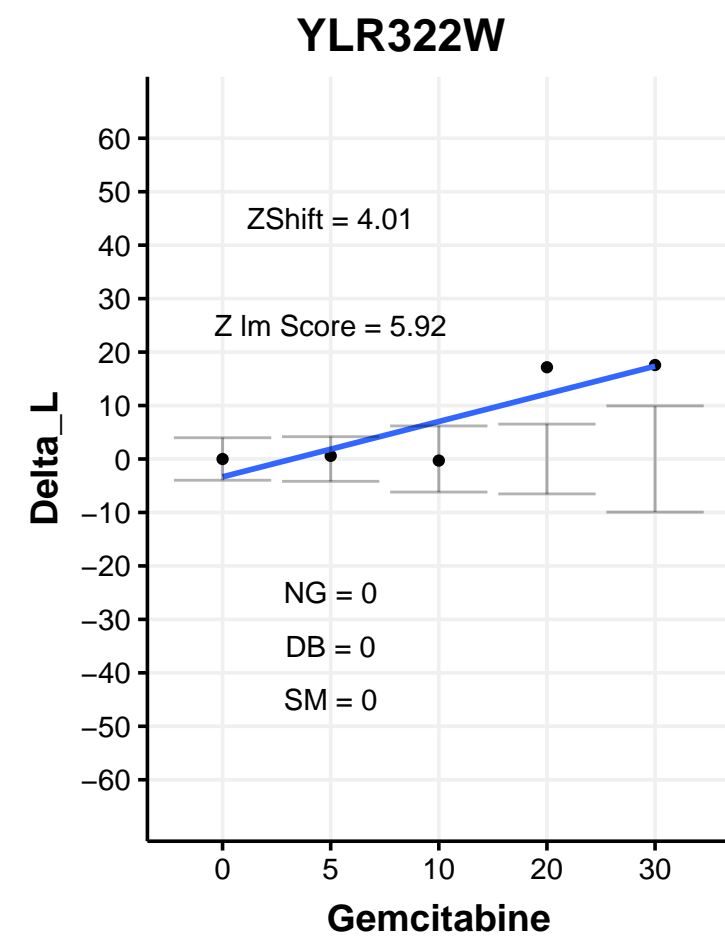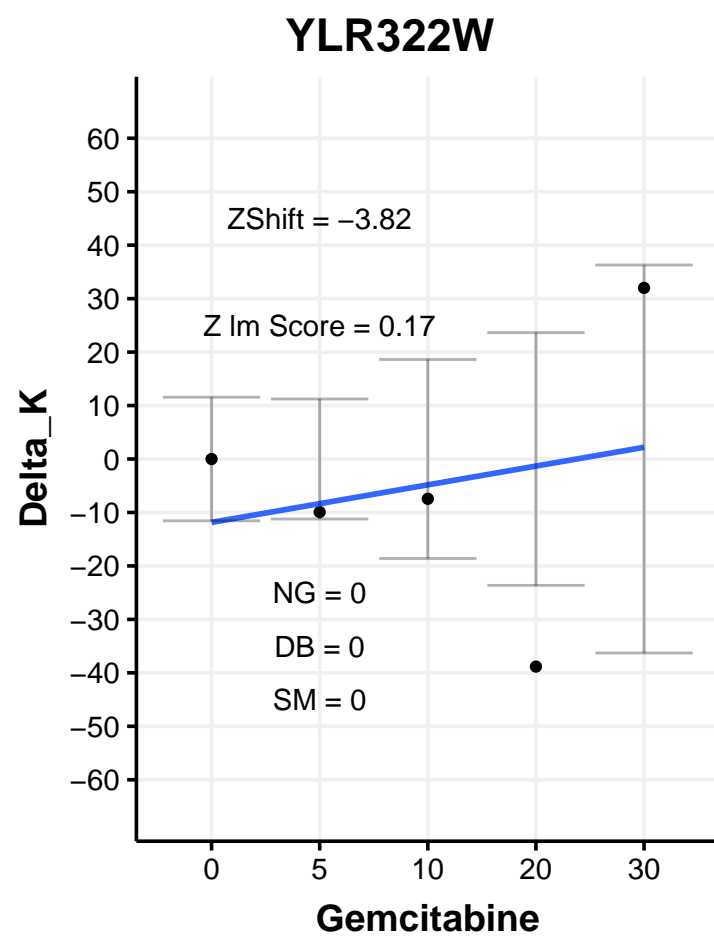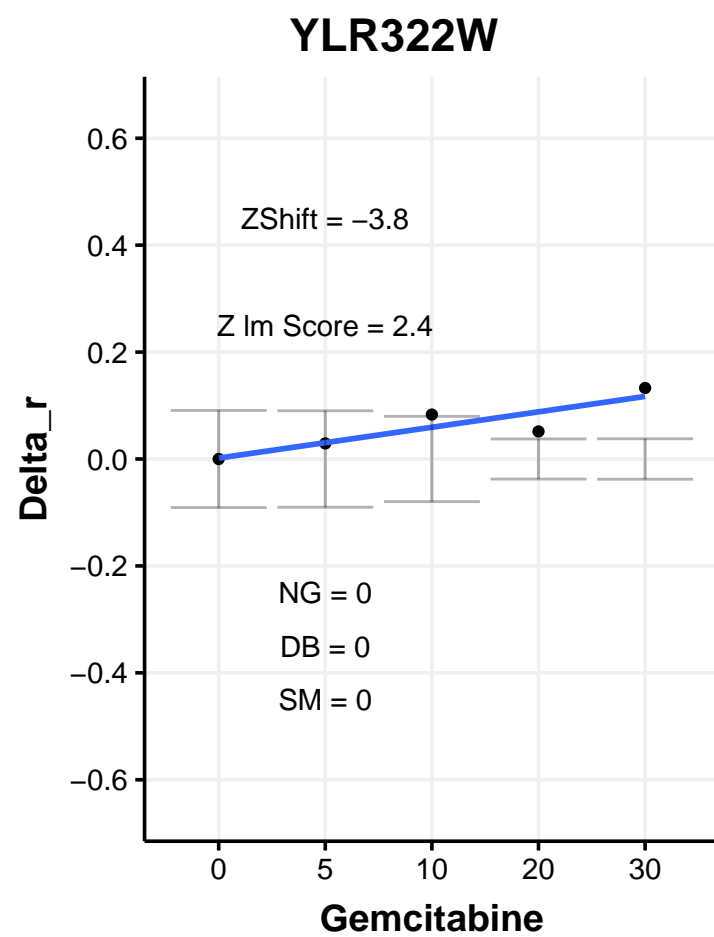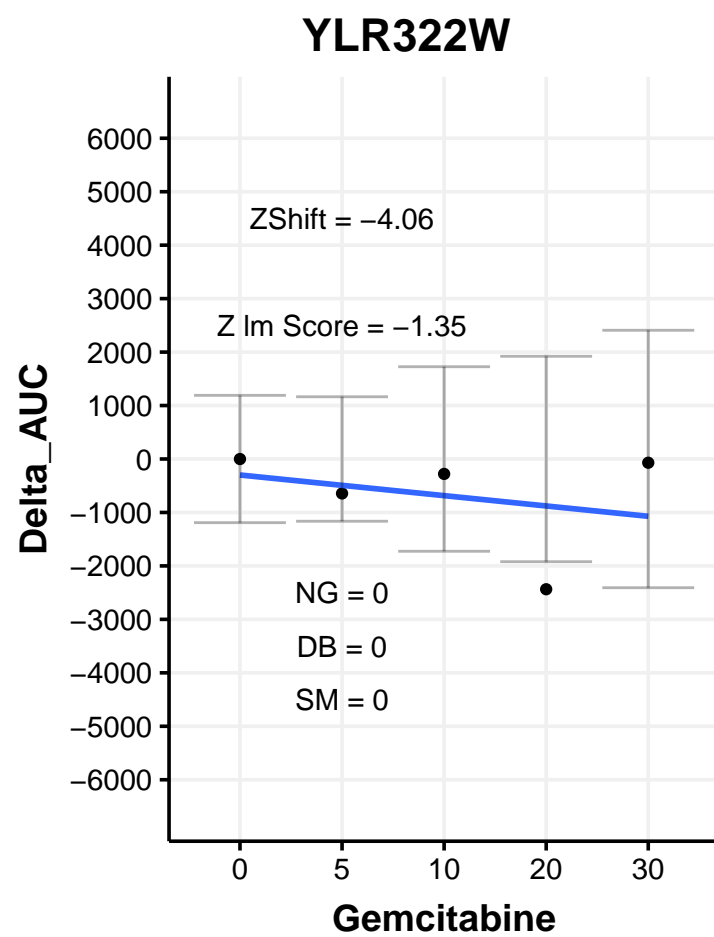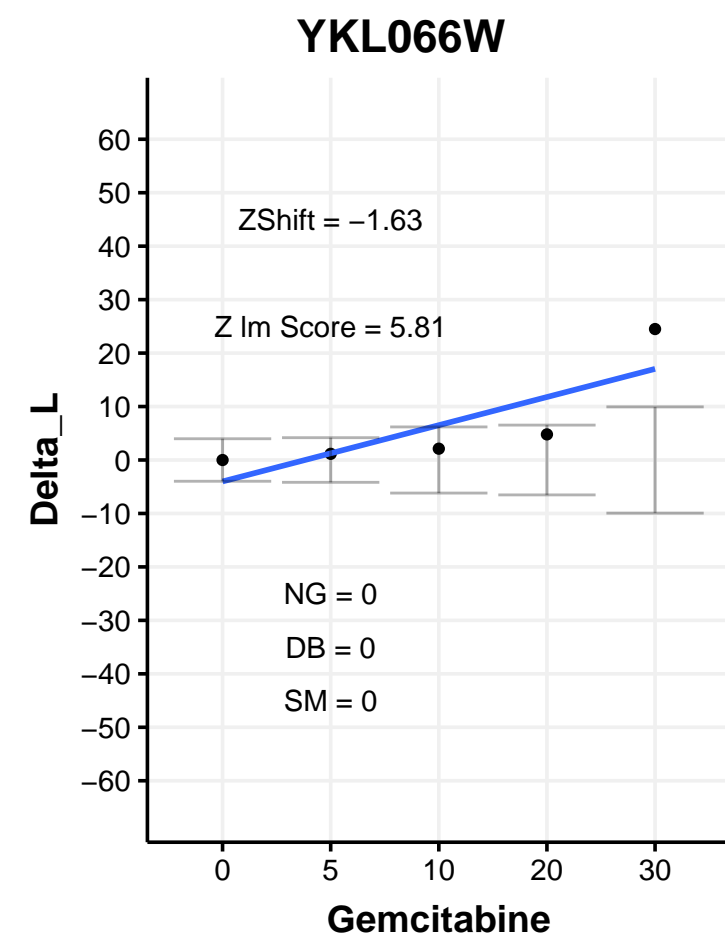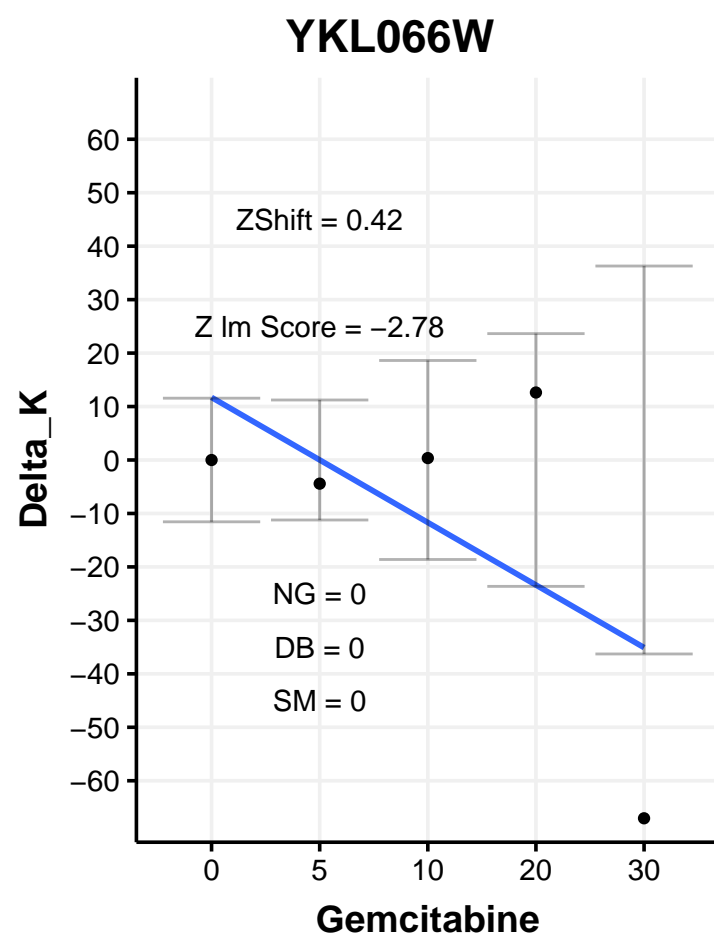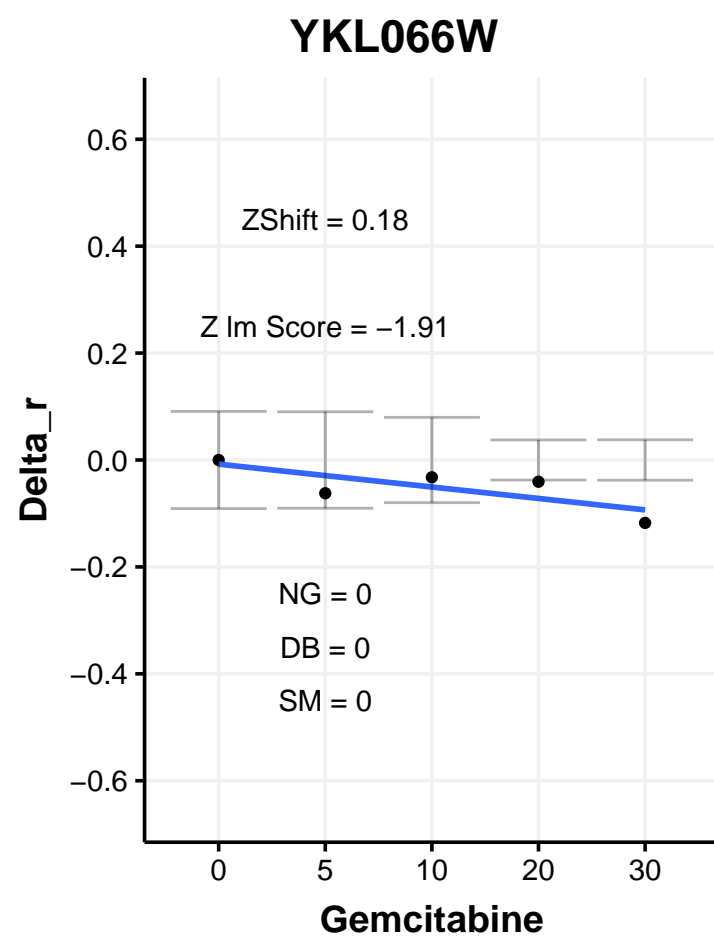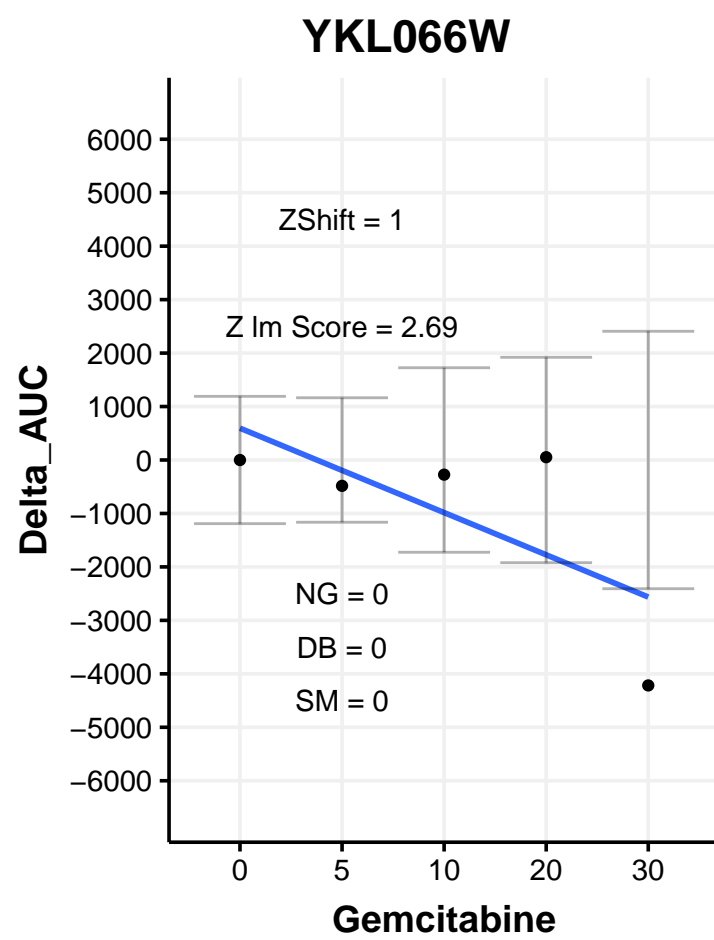

YGL046W

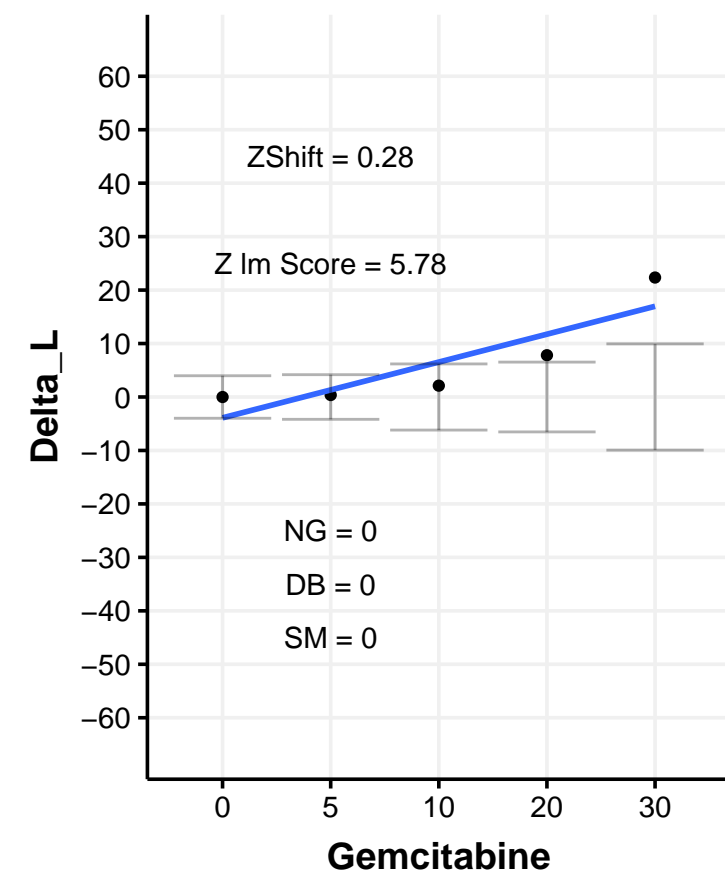

YGL046W

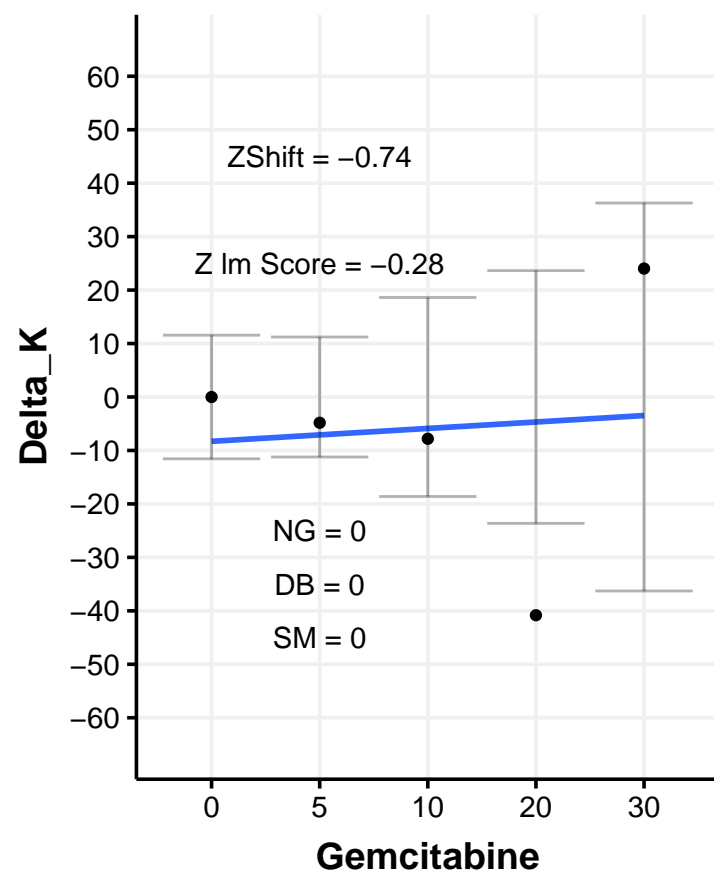

YGL046W

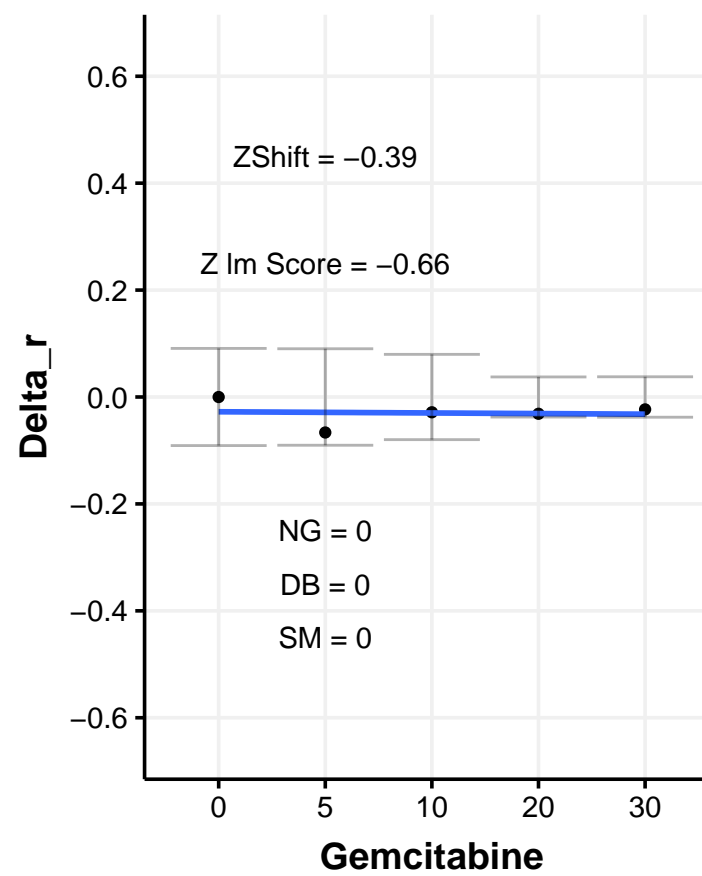

YGL046W

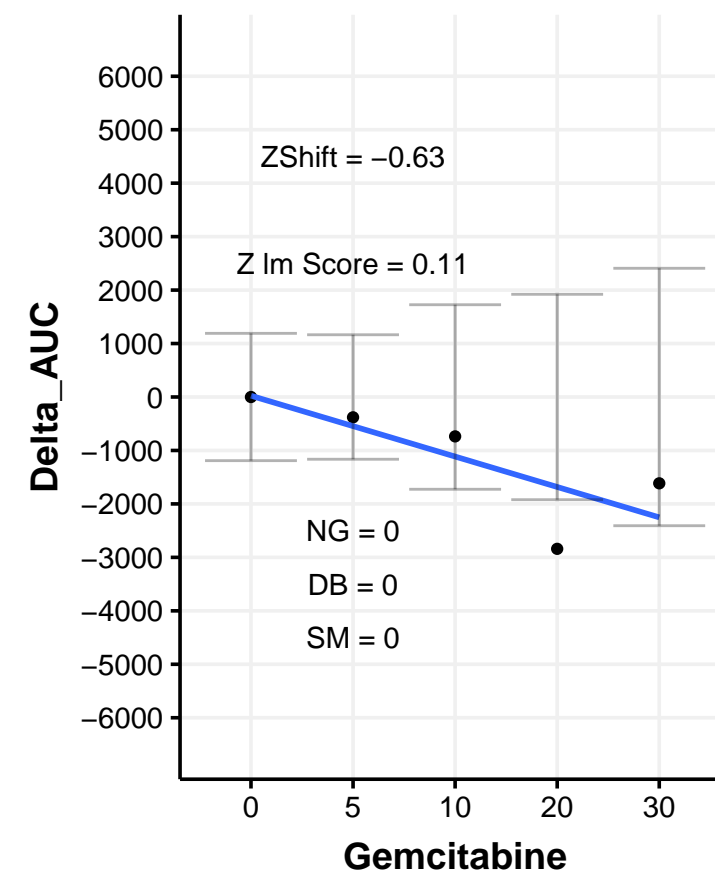

YHL023C RMD11

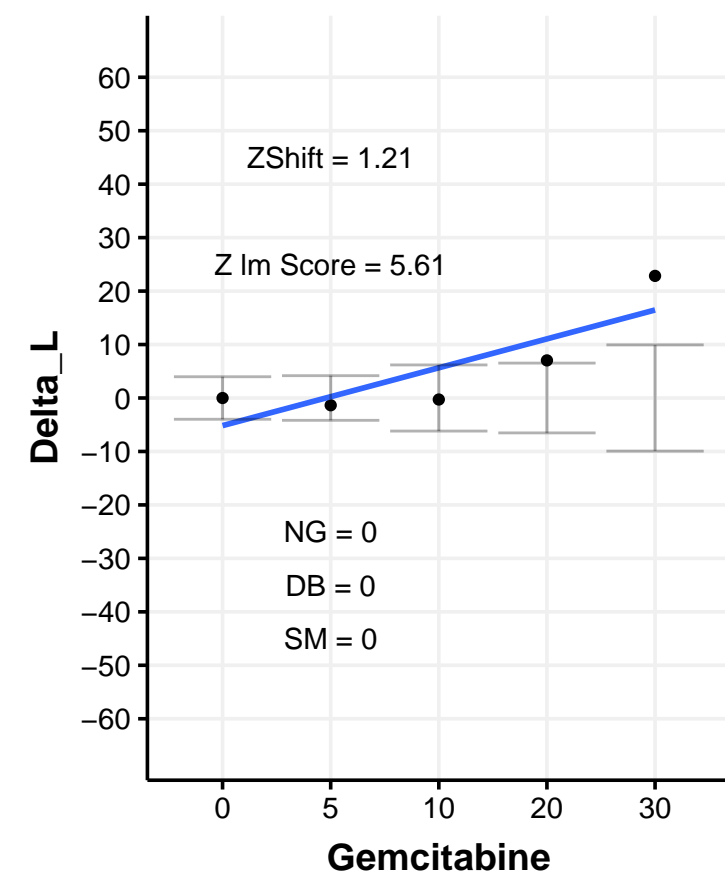

YHL023C RMD11

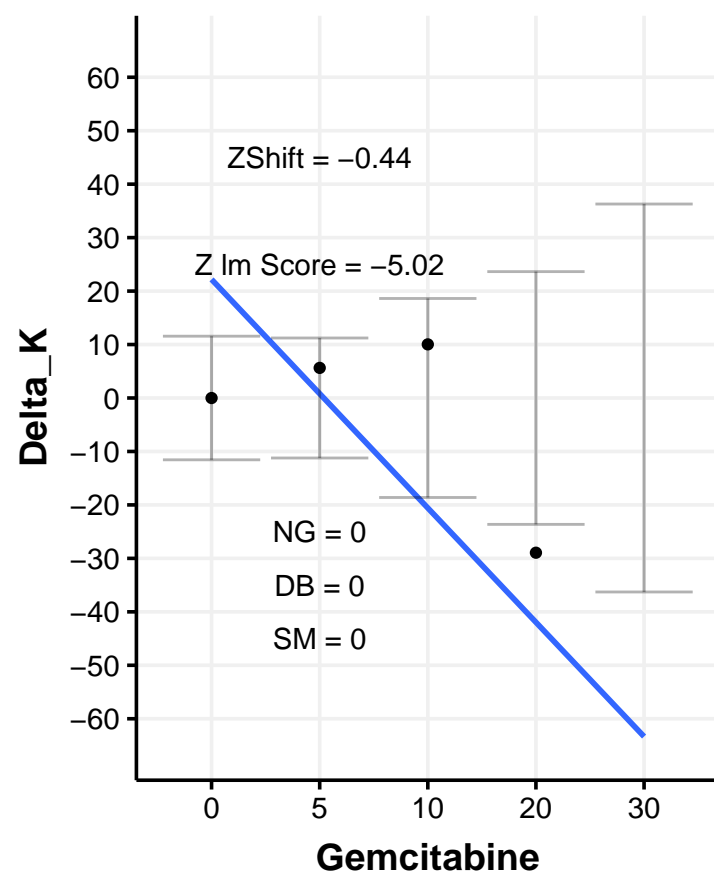

YHL023C RMD11

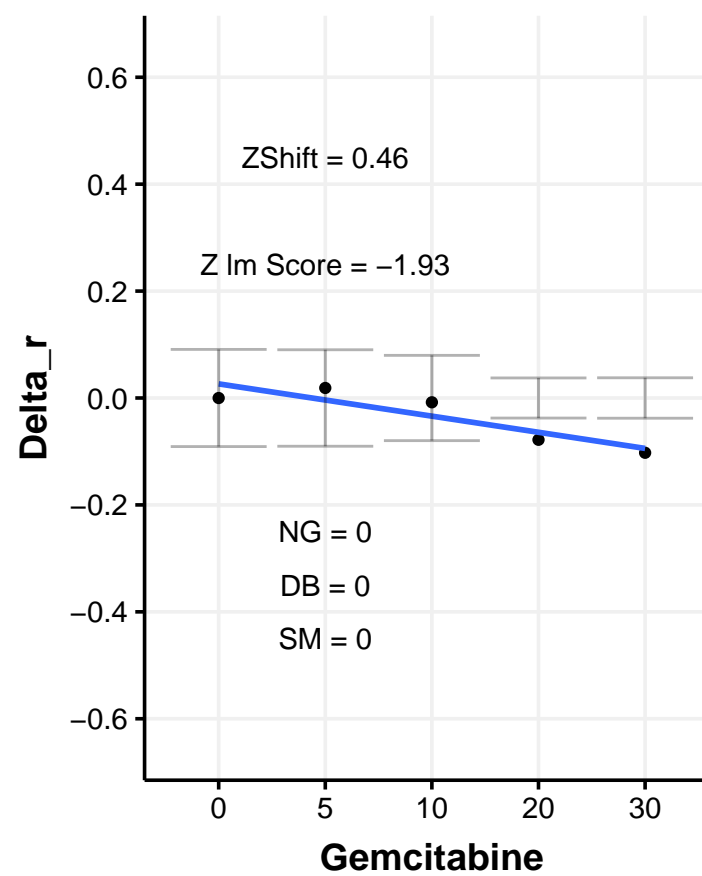

YHL023C RMD11

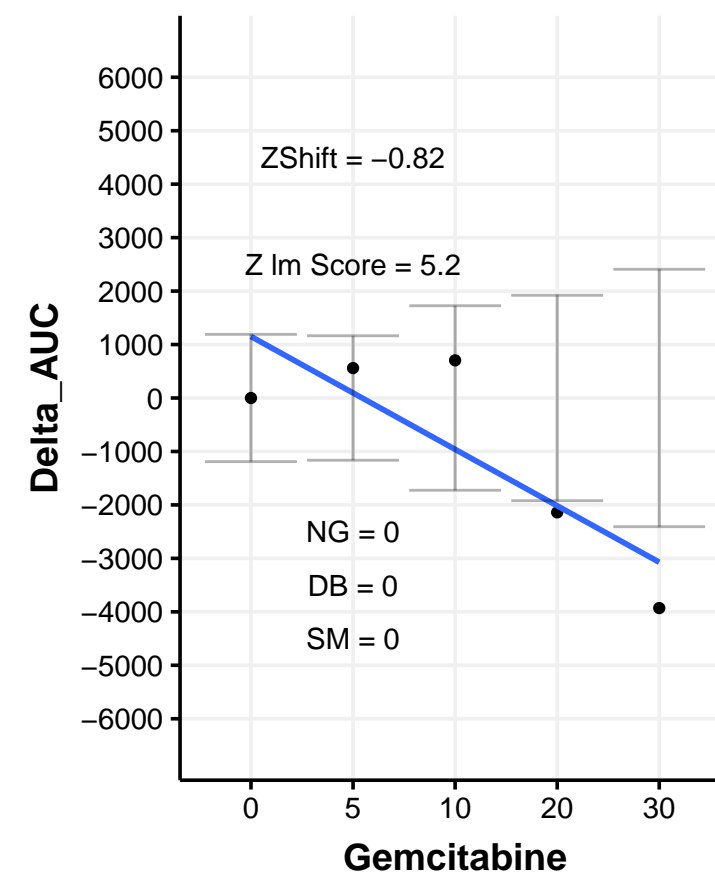

YCL010C SGF29

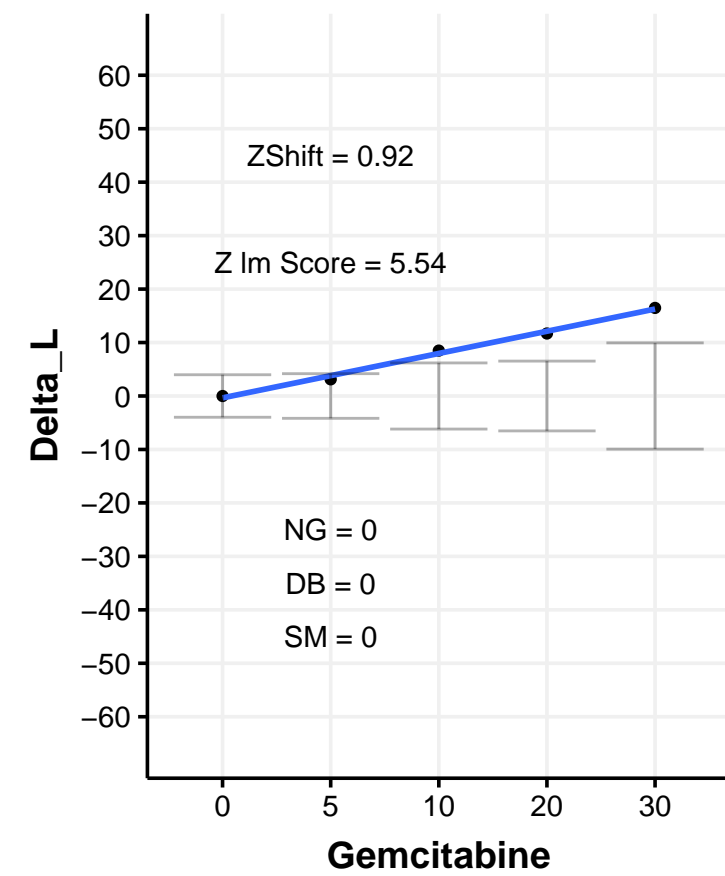

YCL010C SGF29

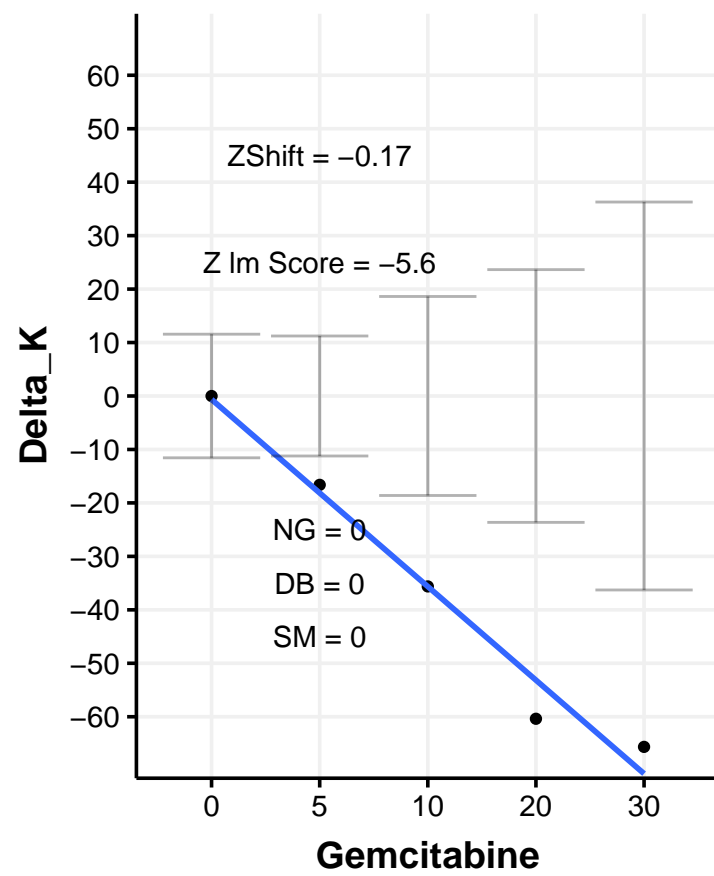

YCL010C SGF29

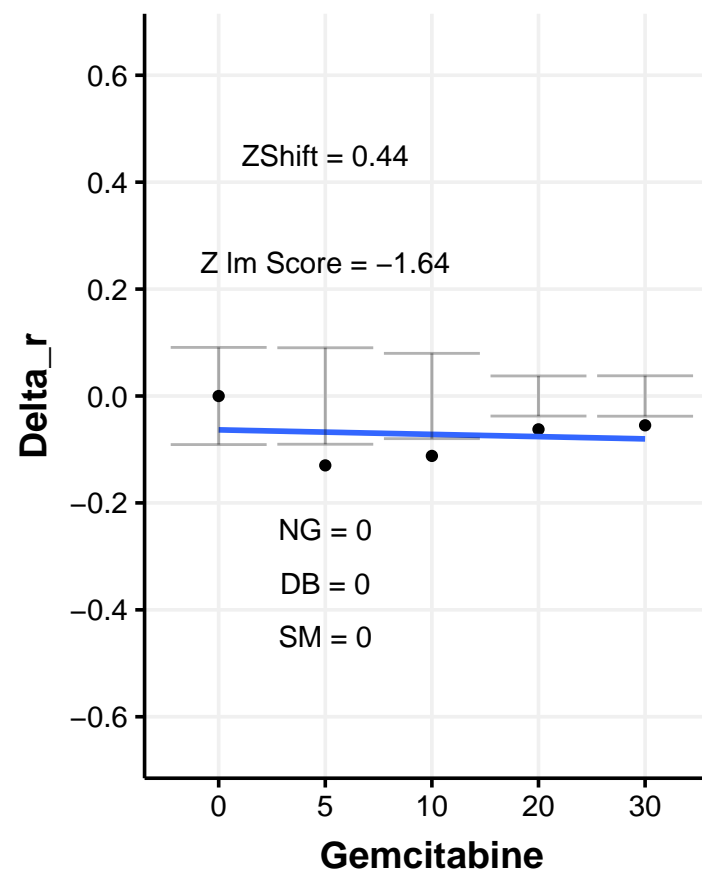

YCL010C SGF29

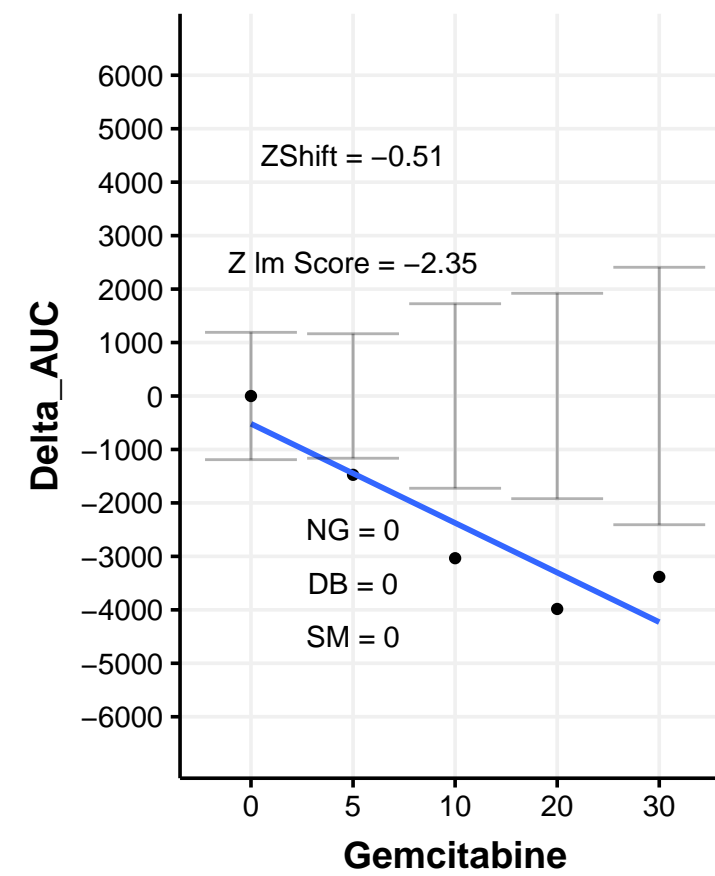



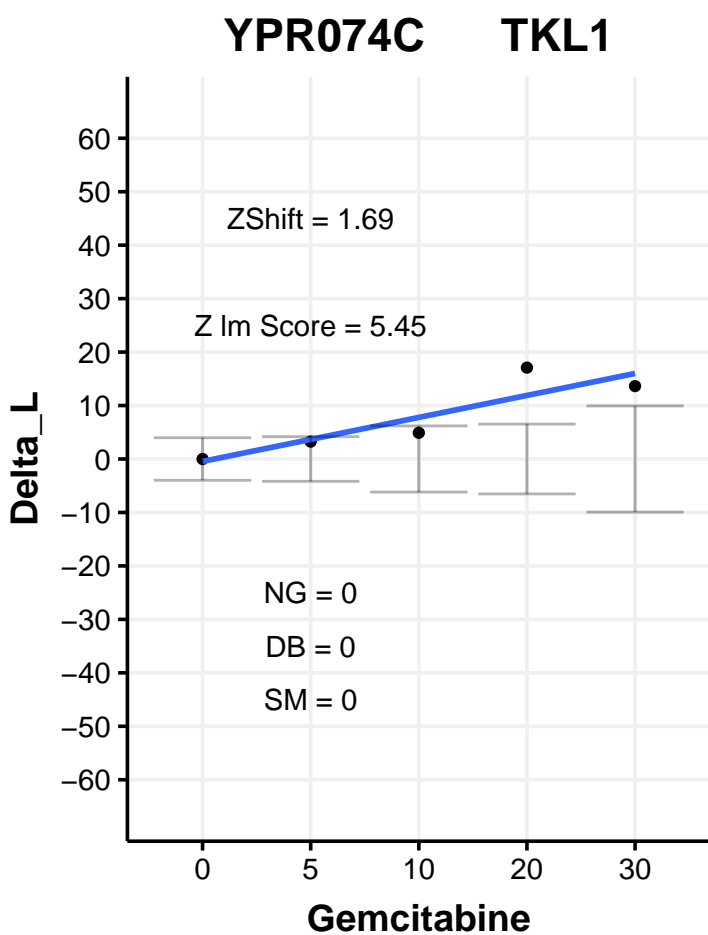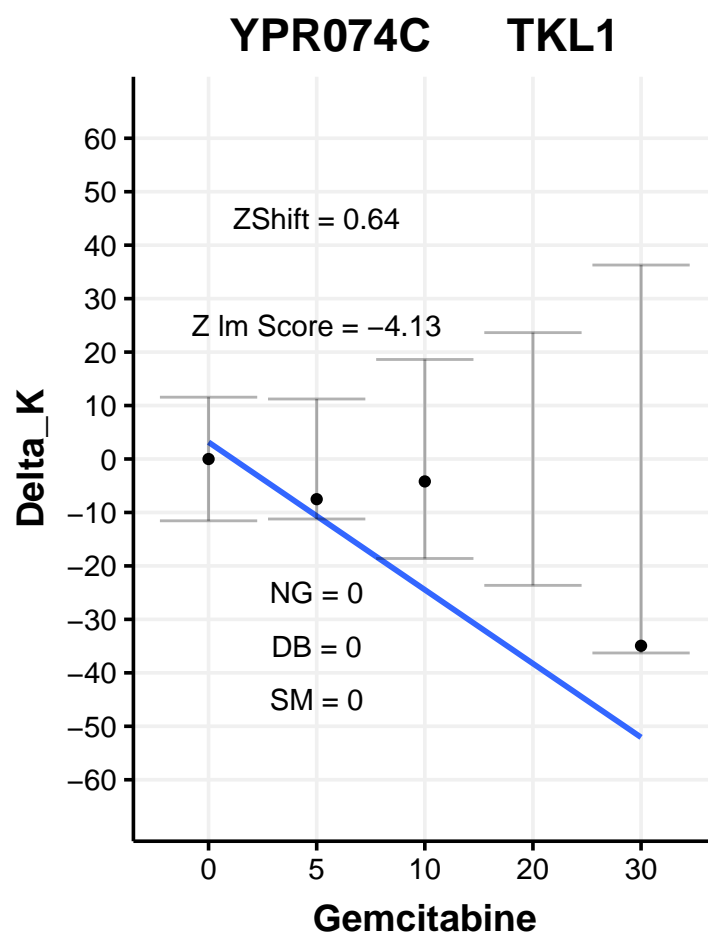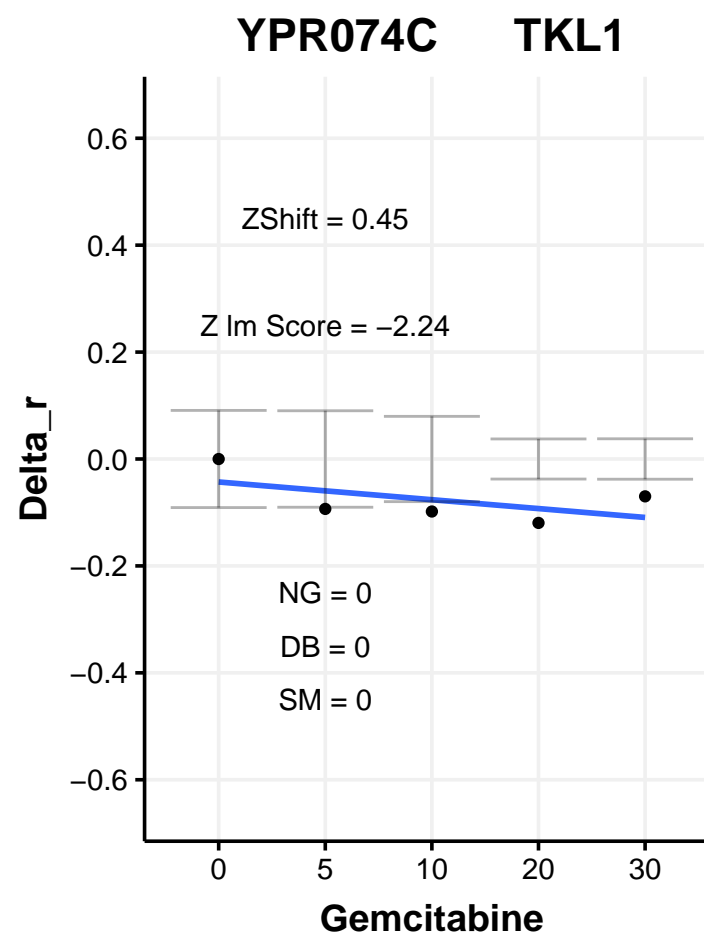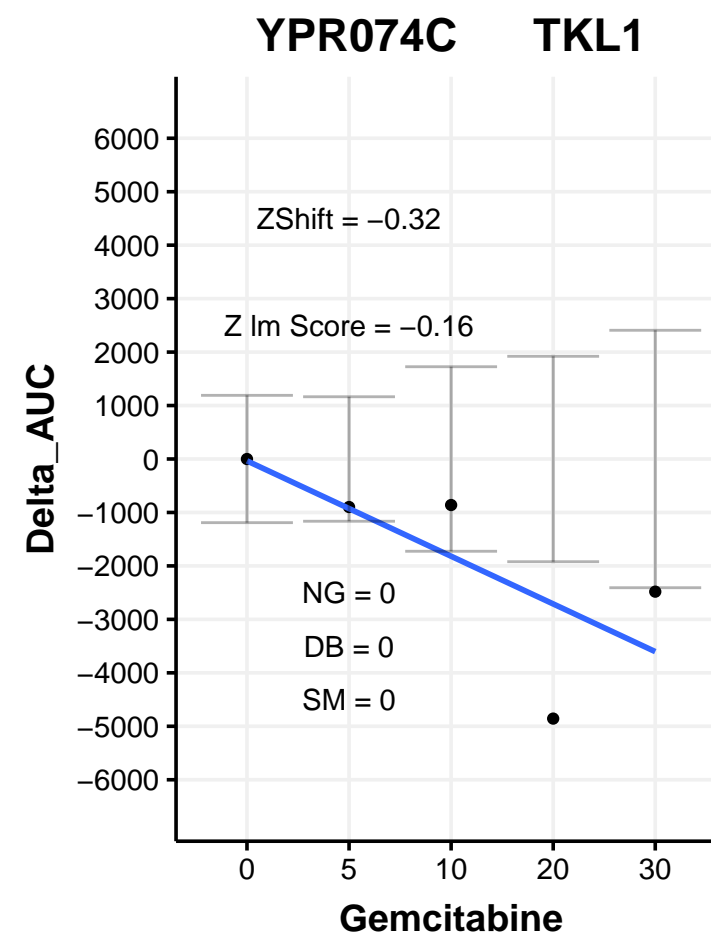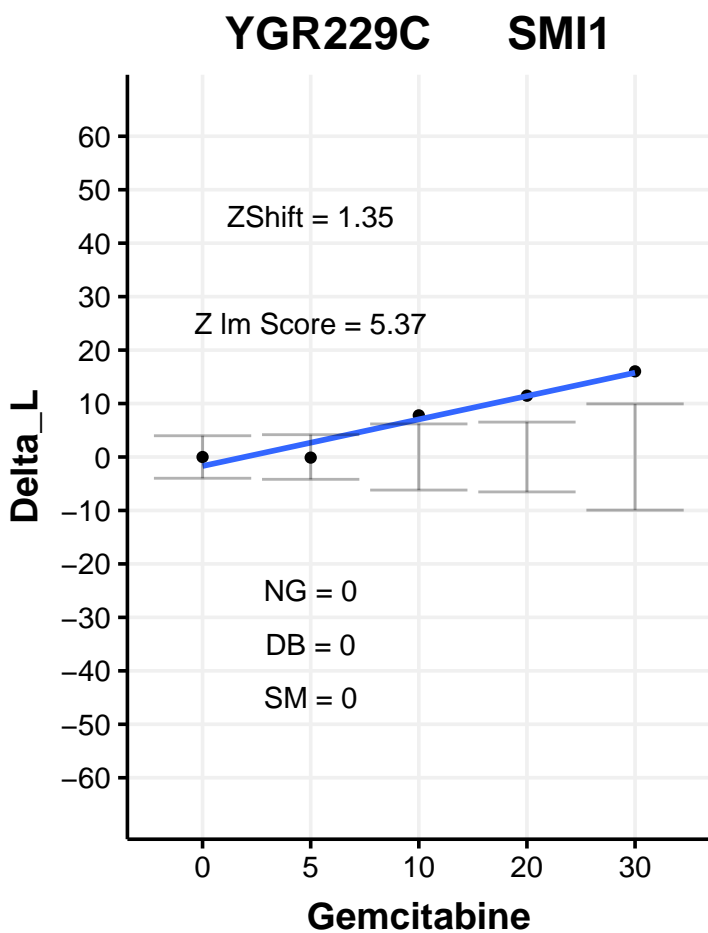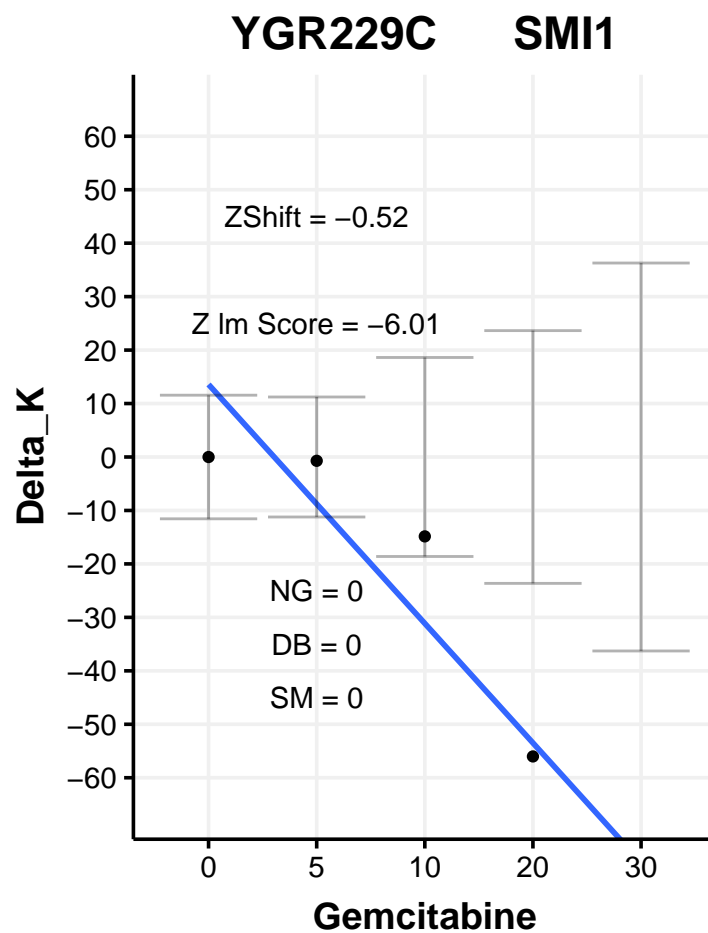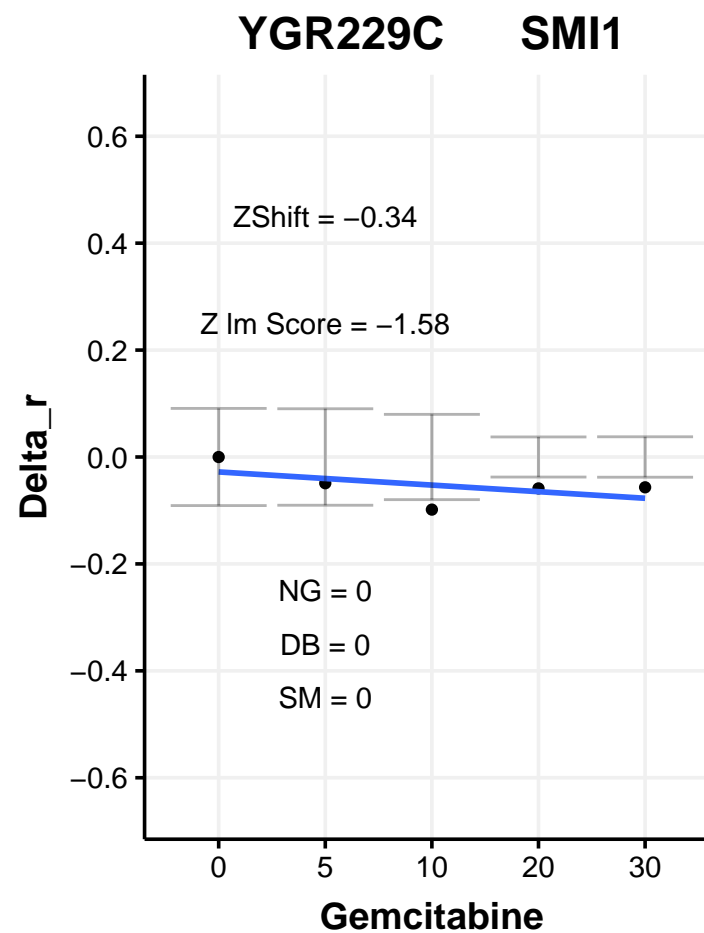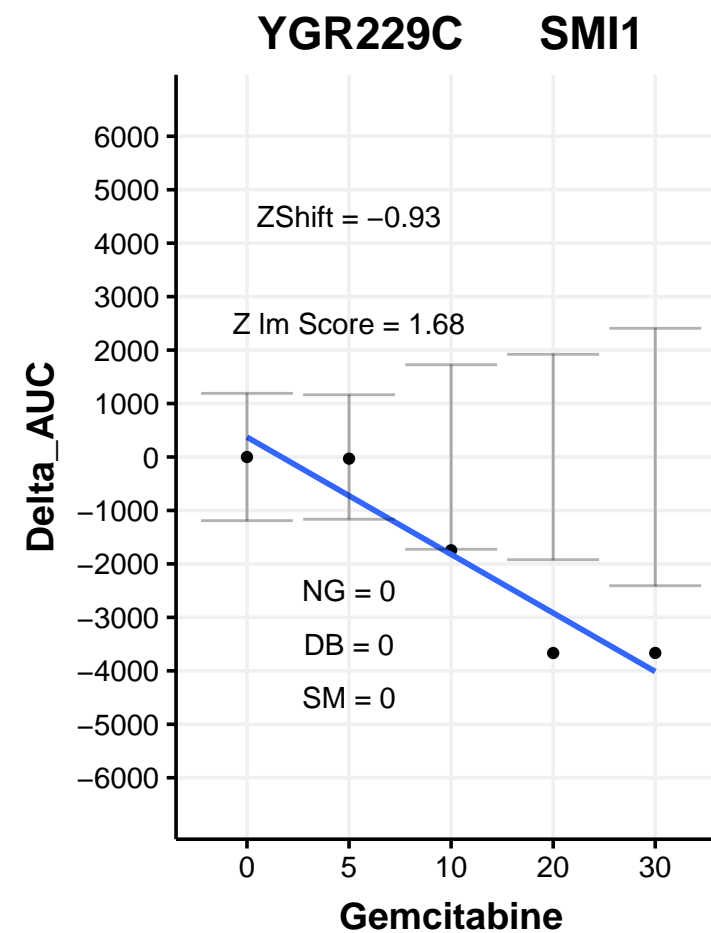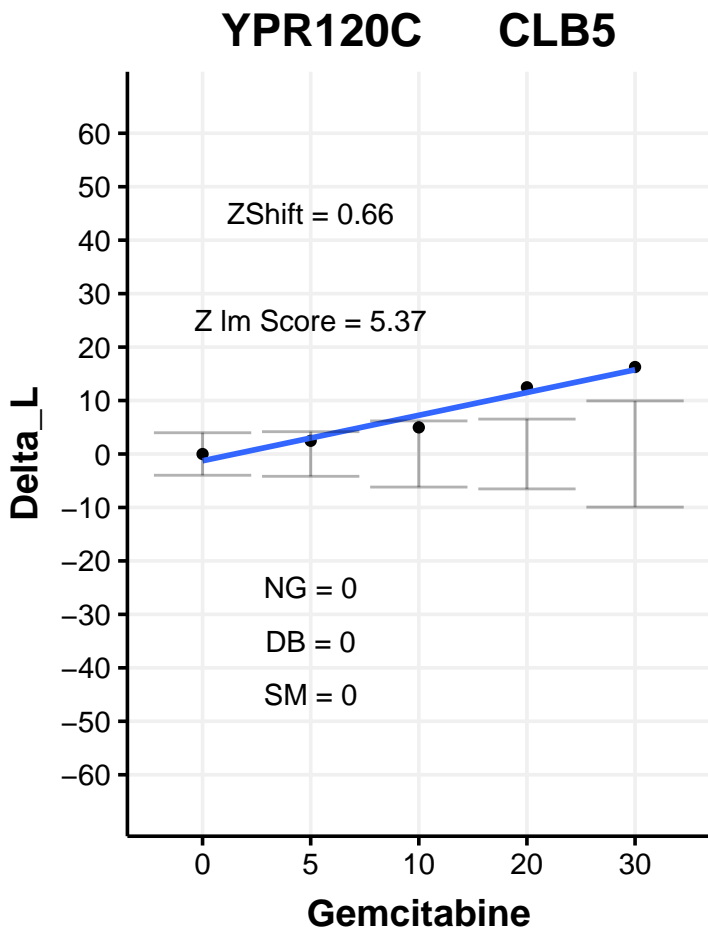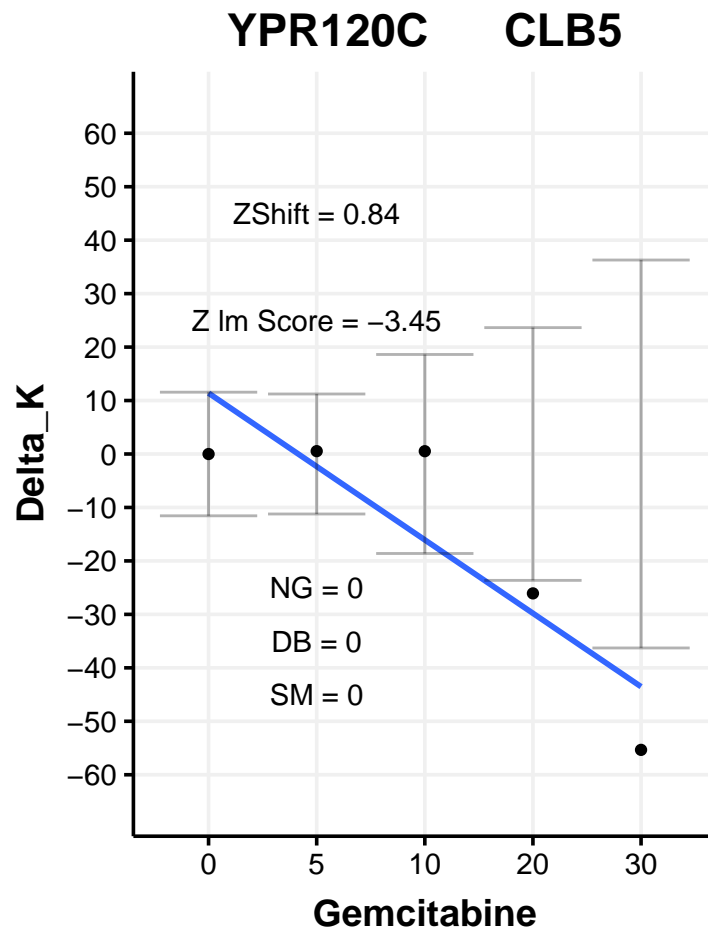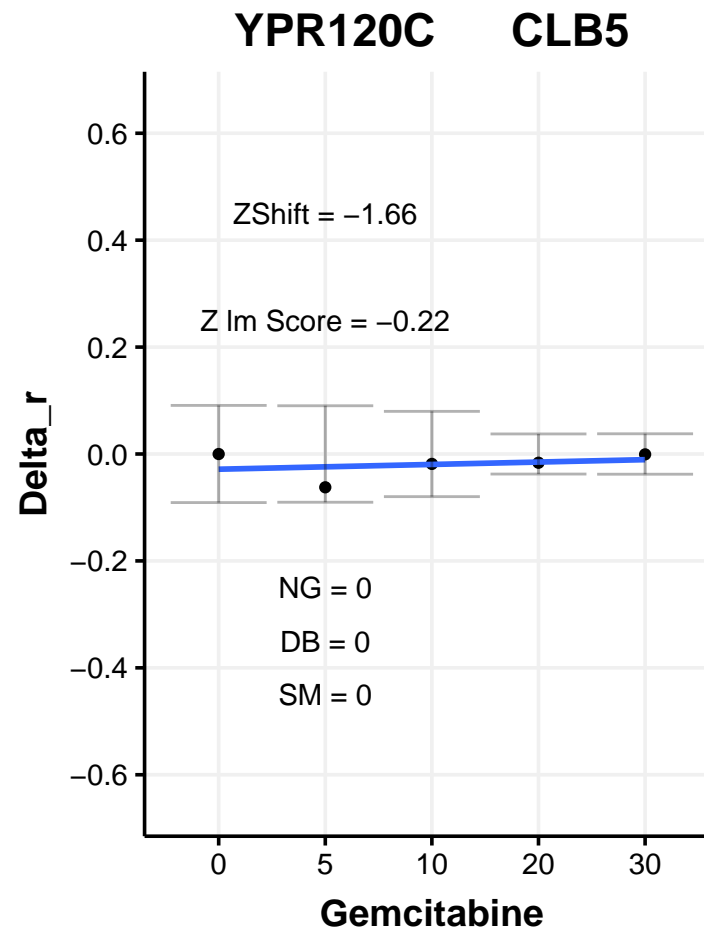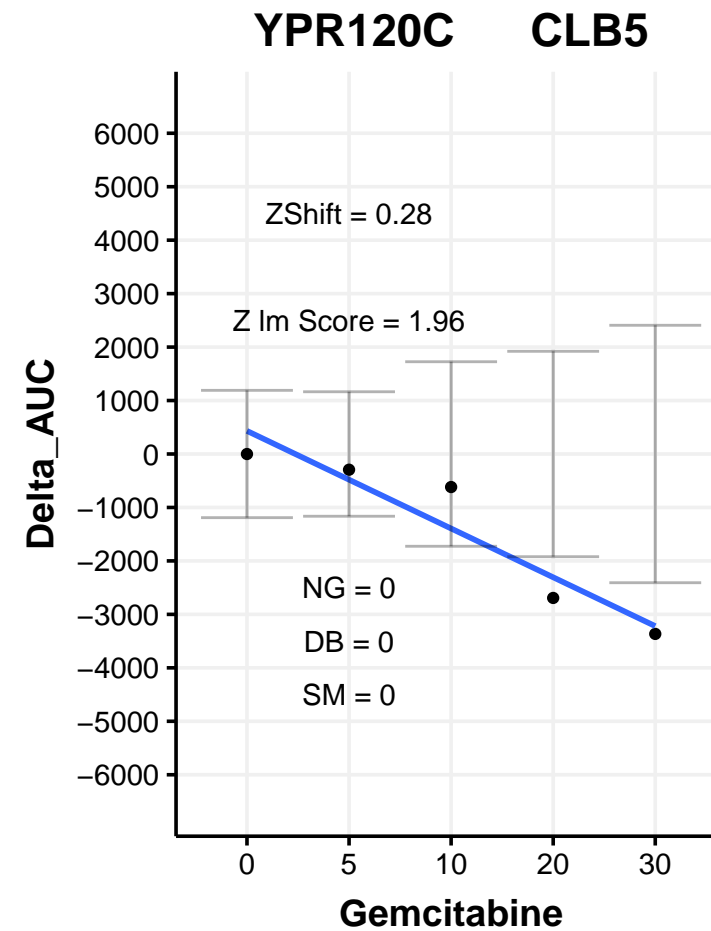

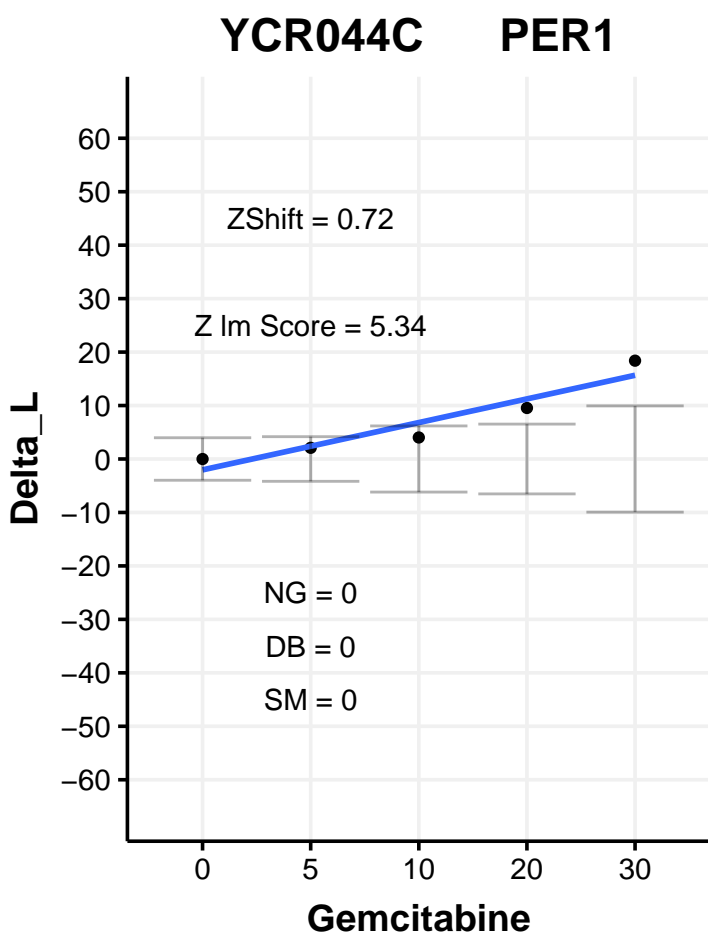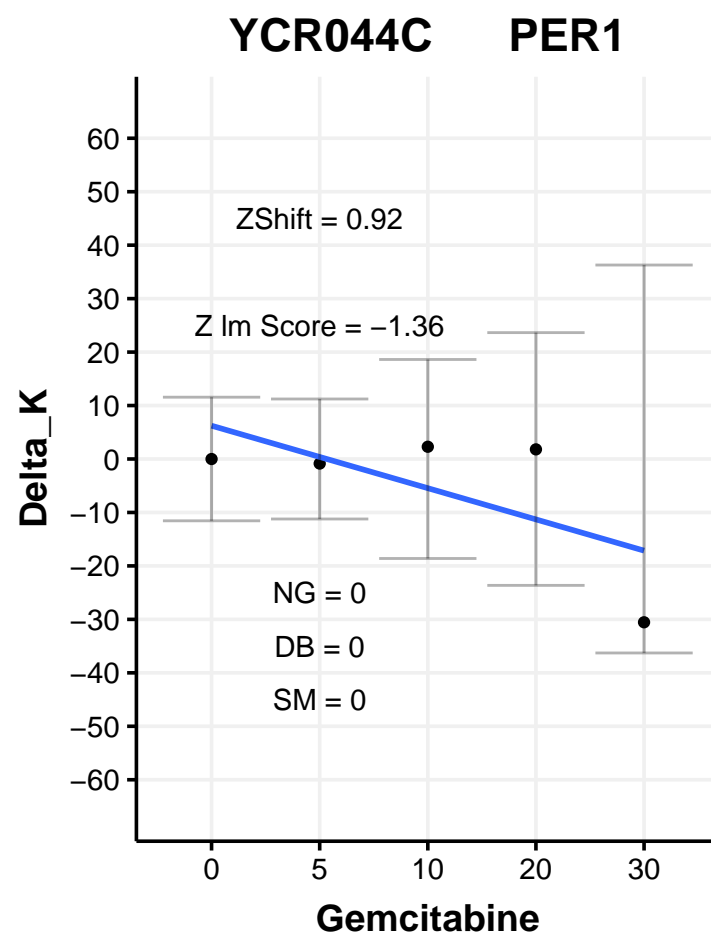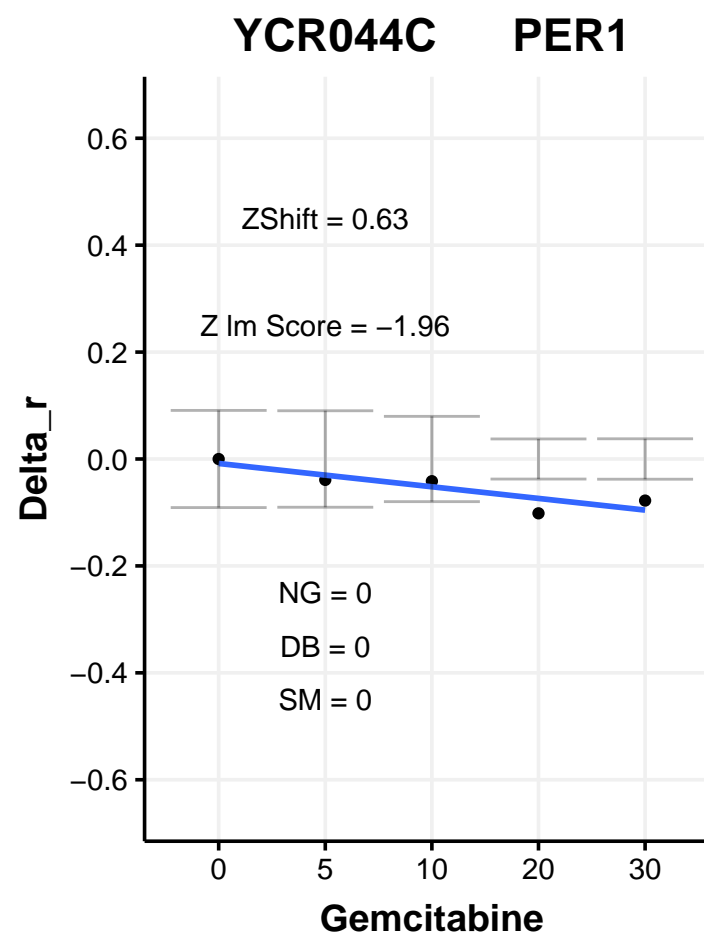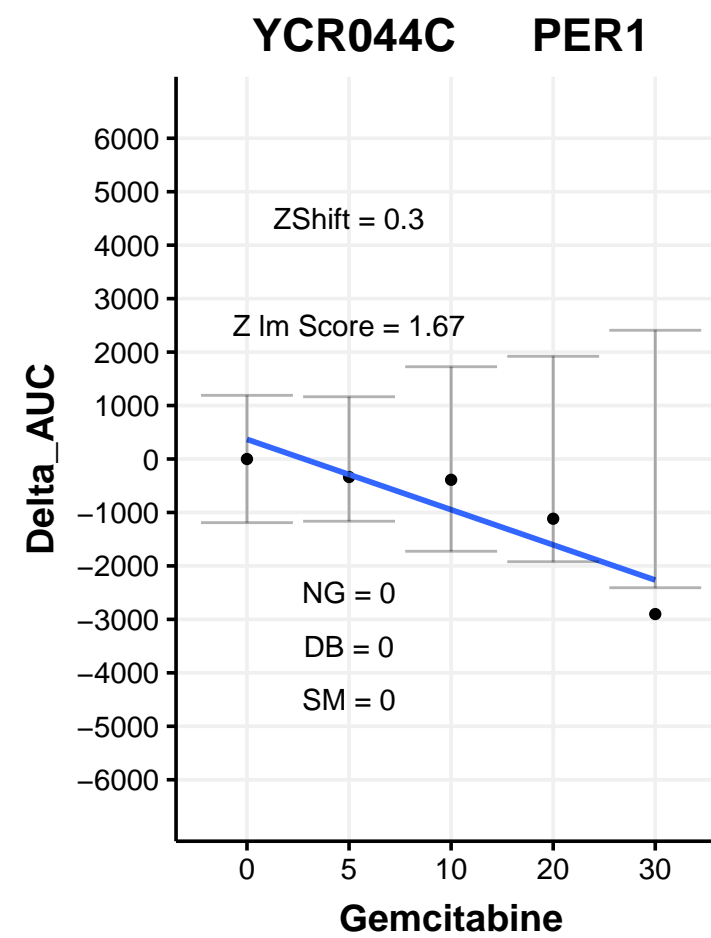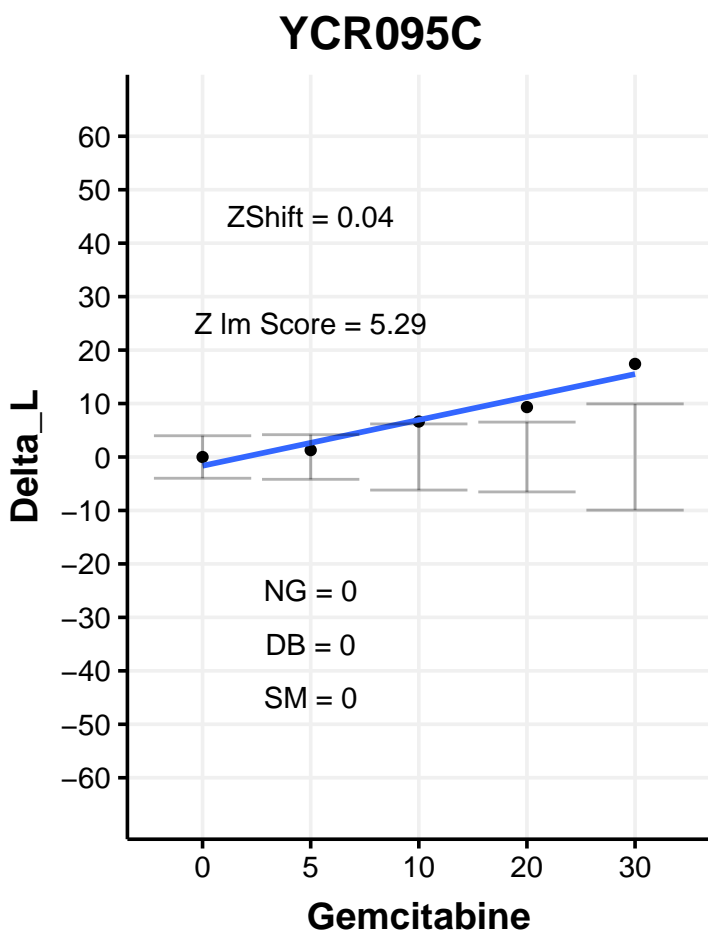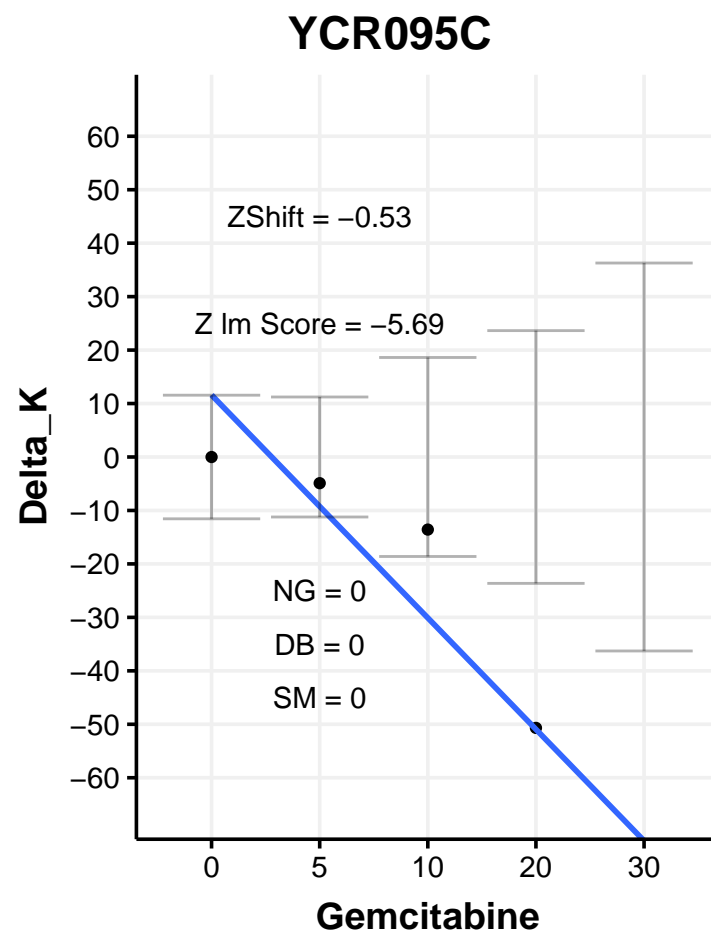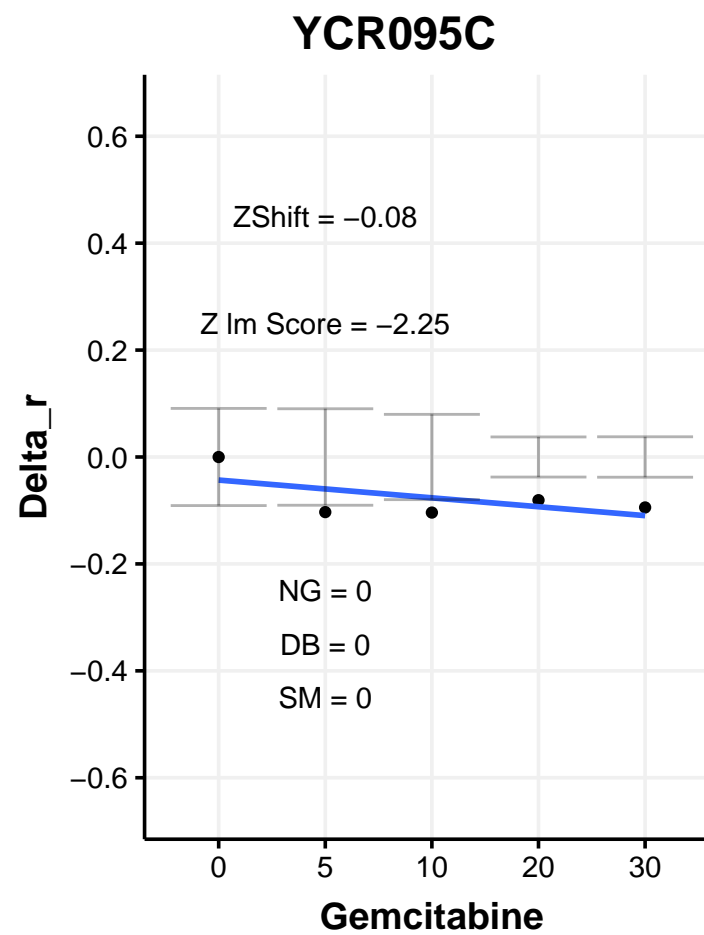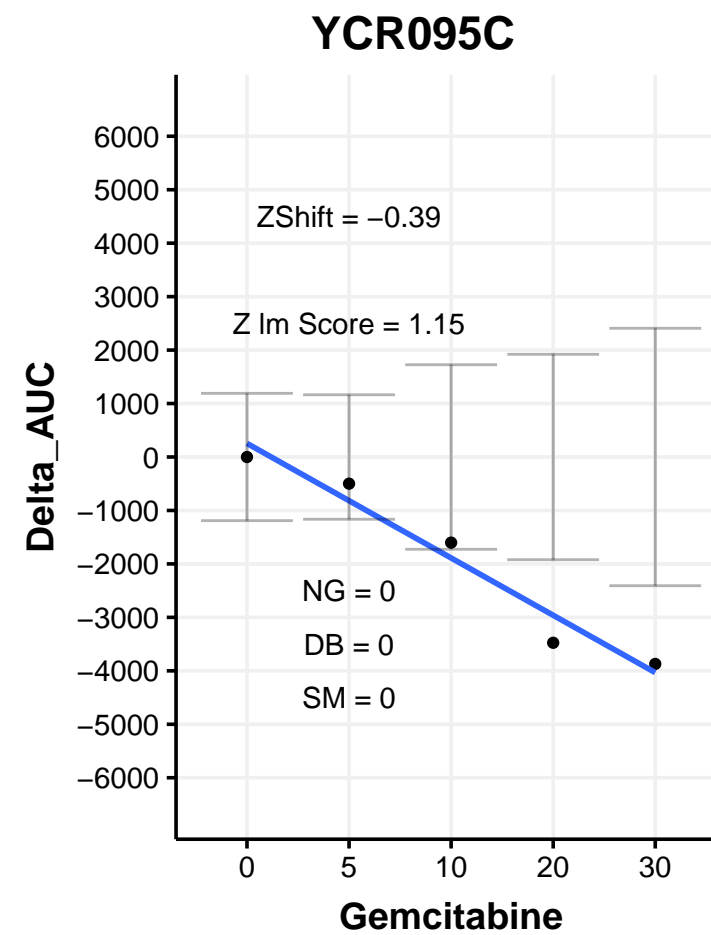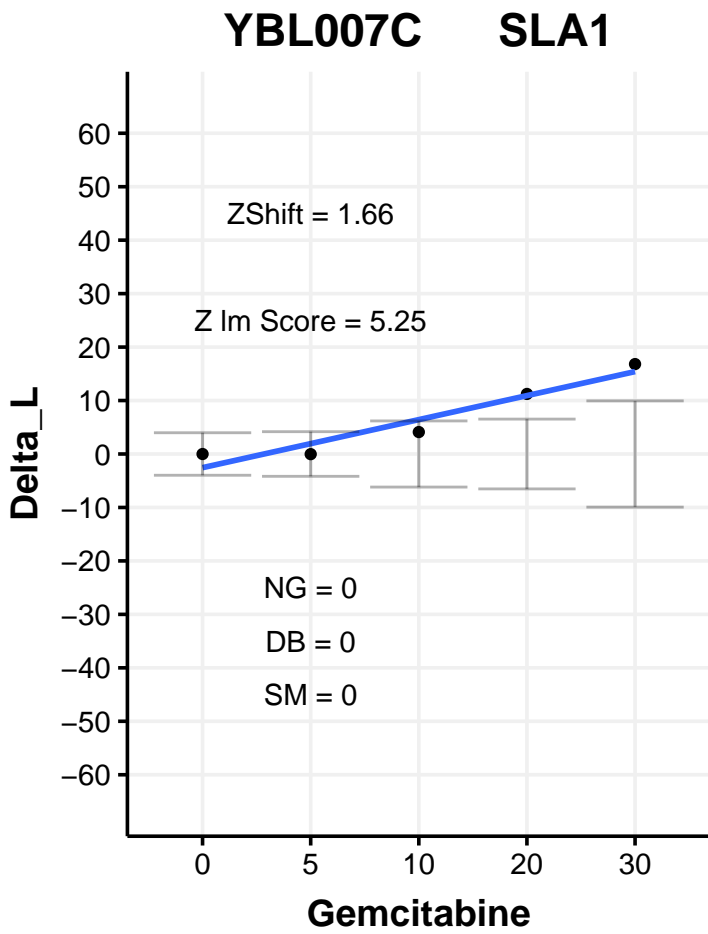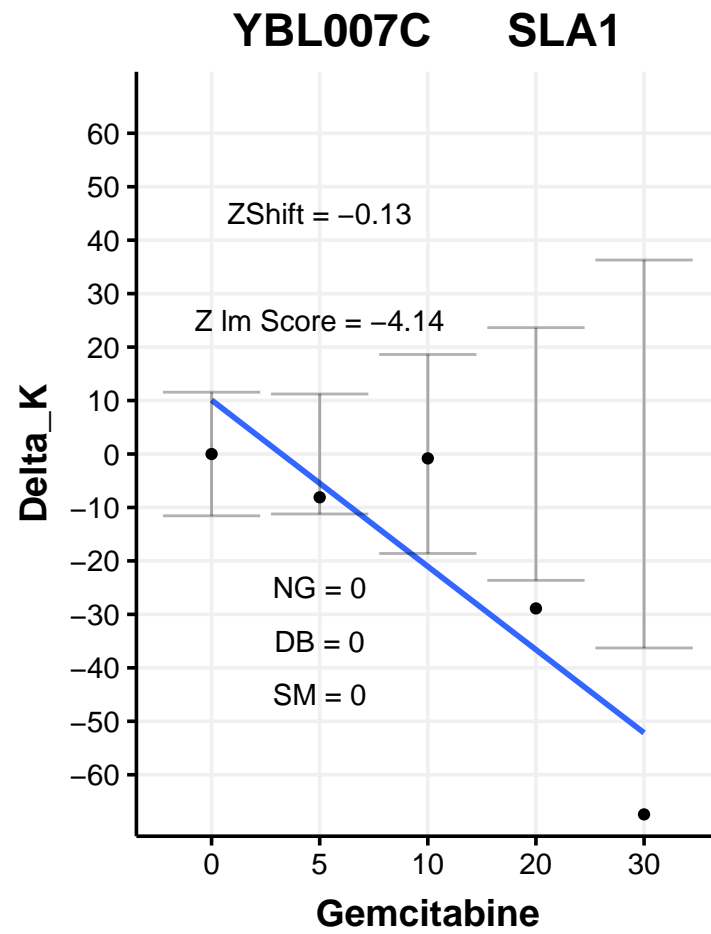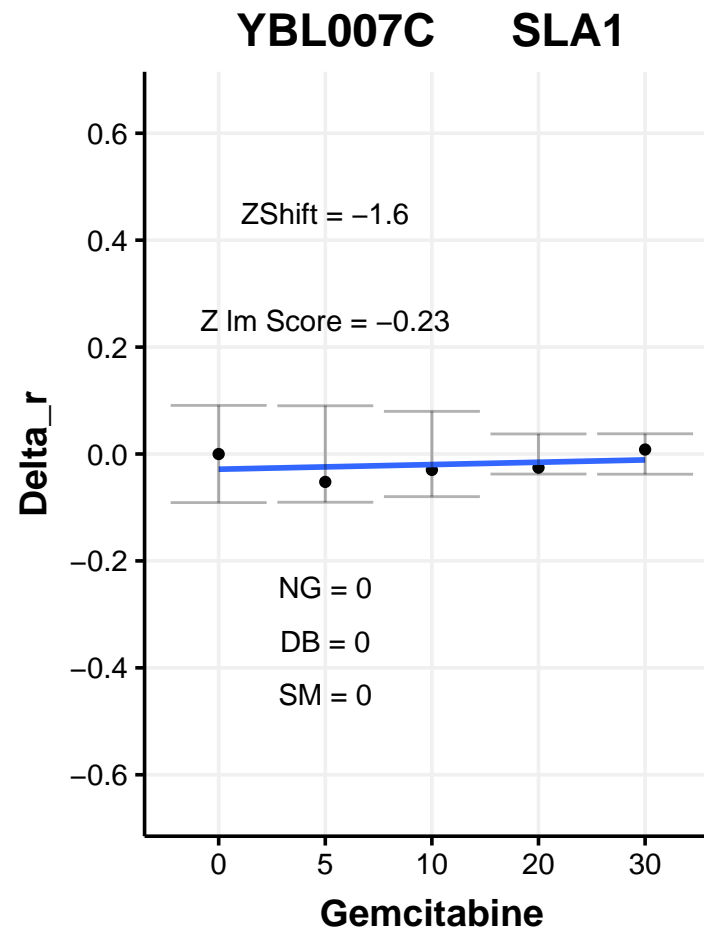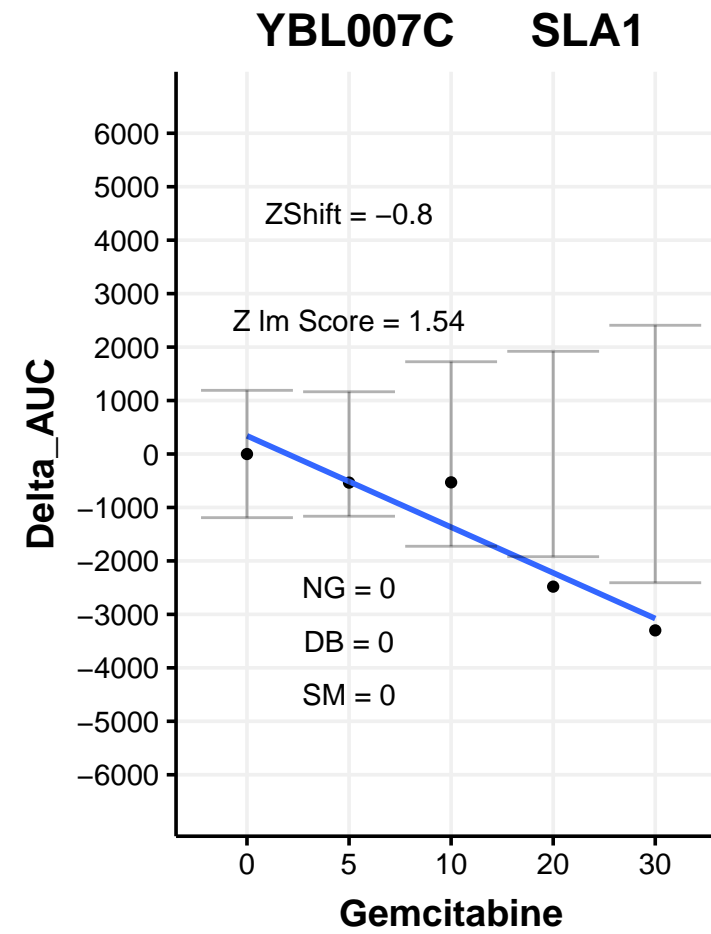

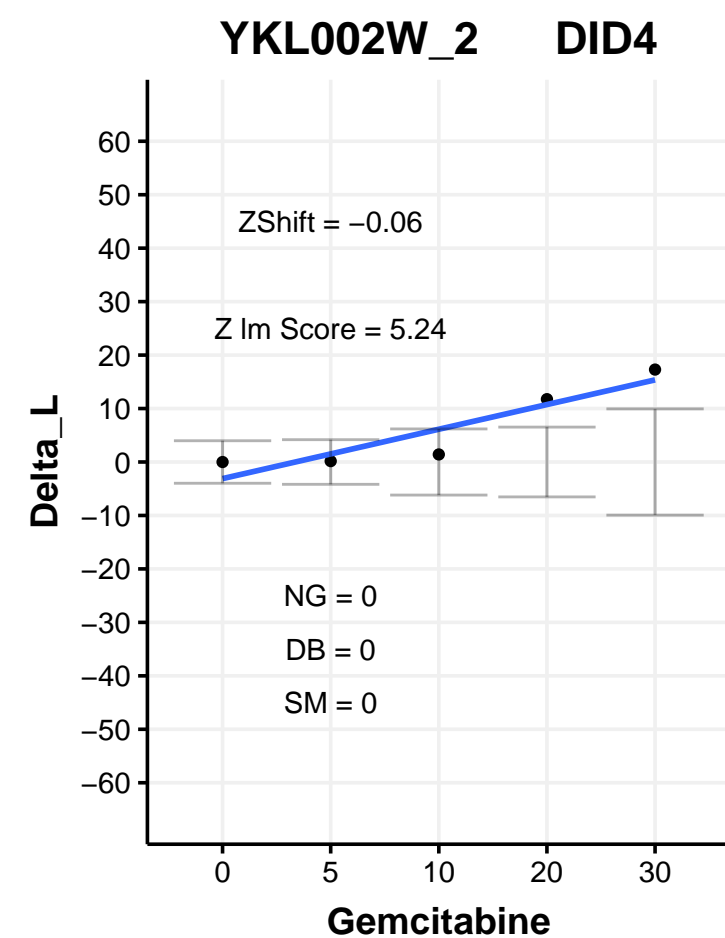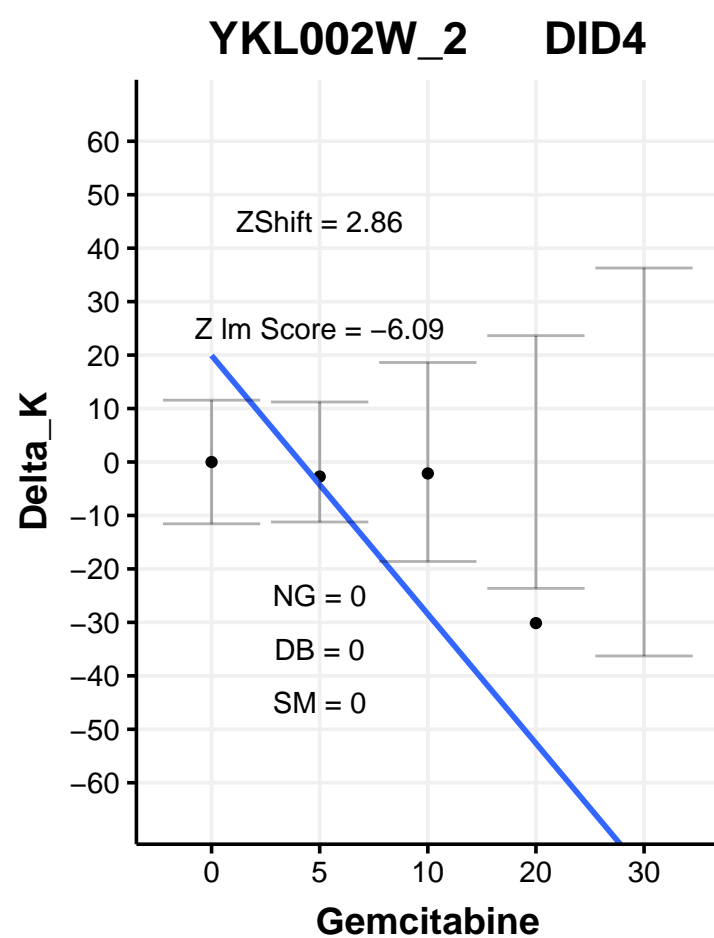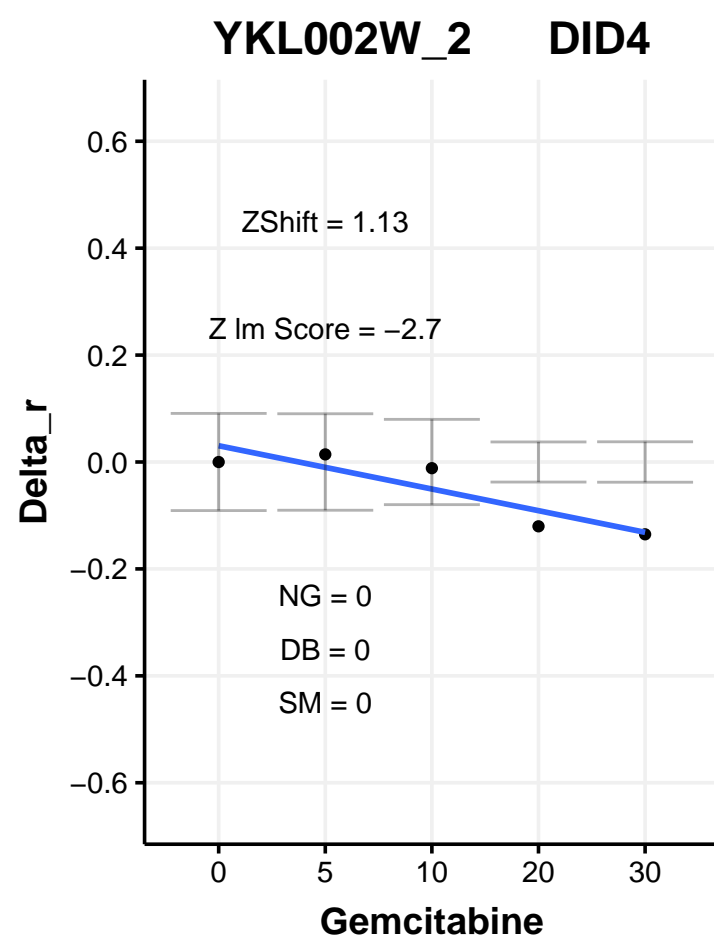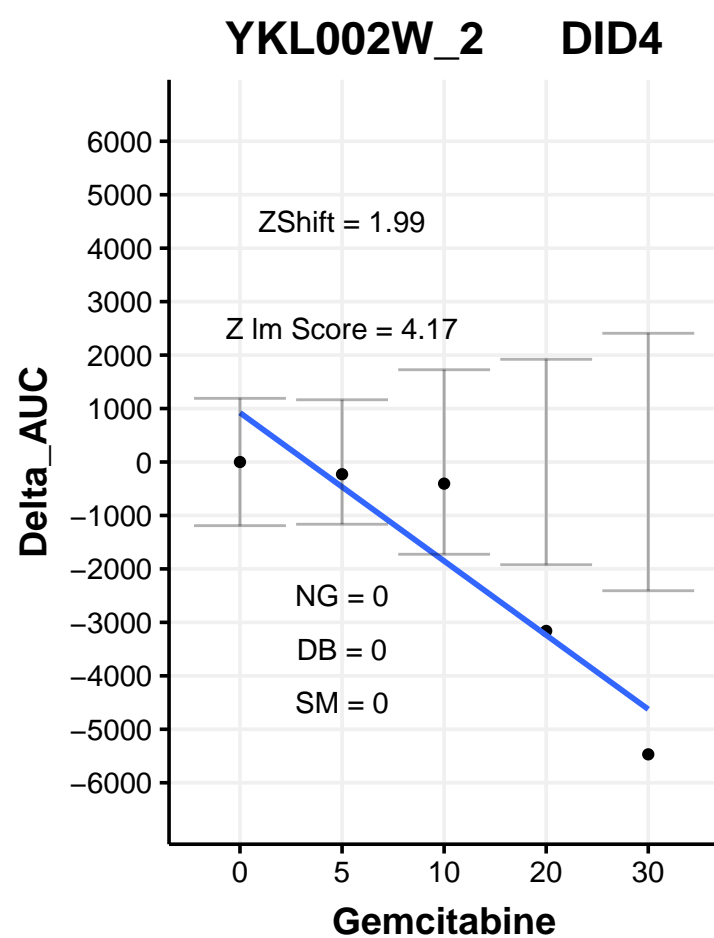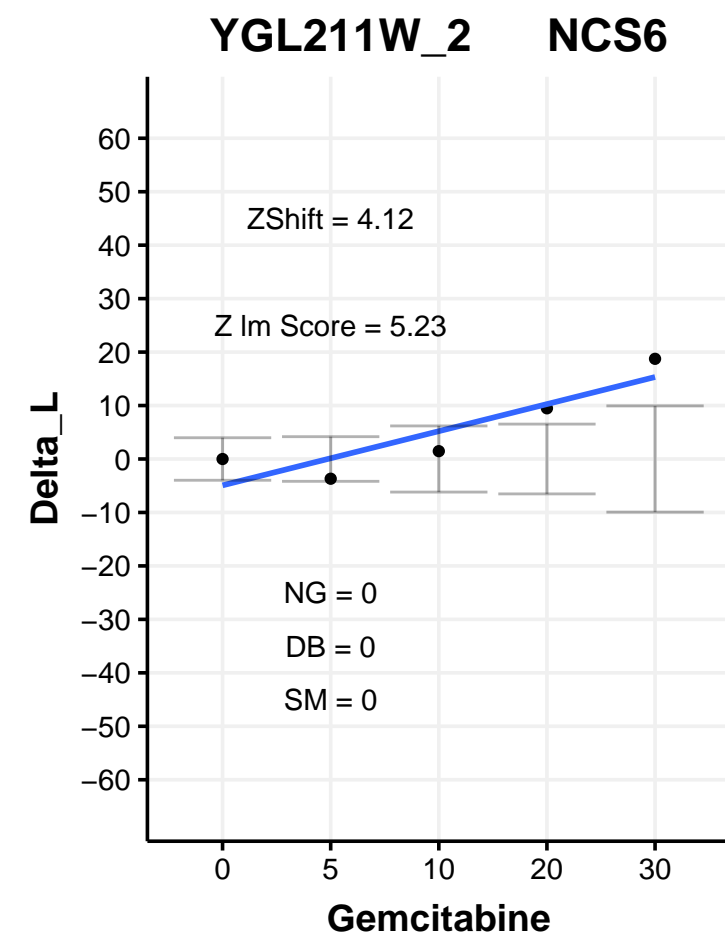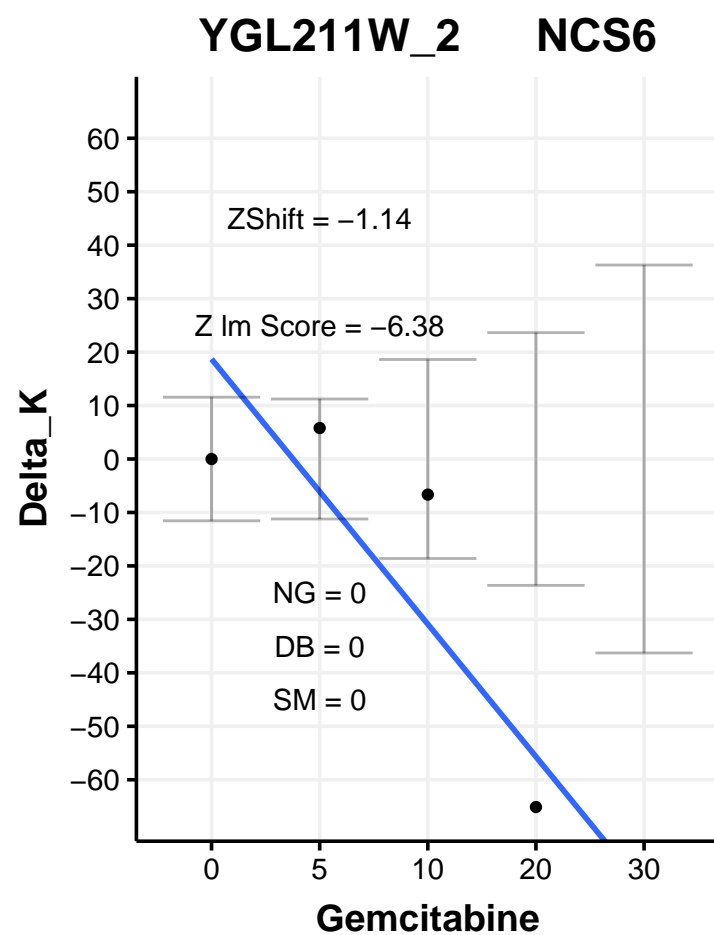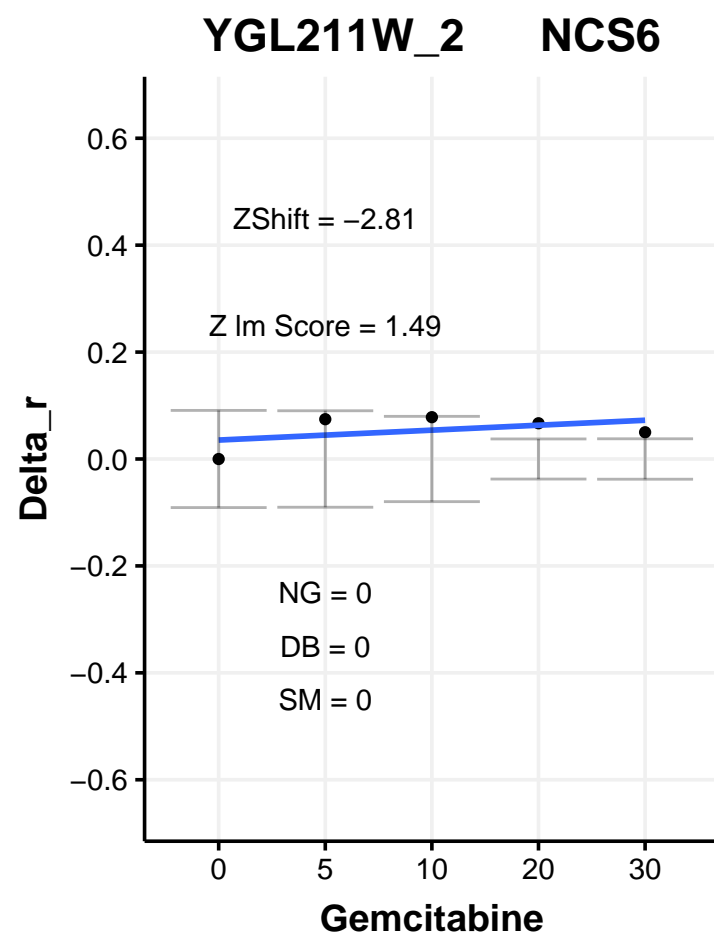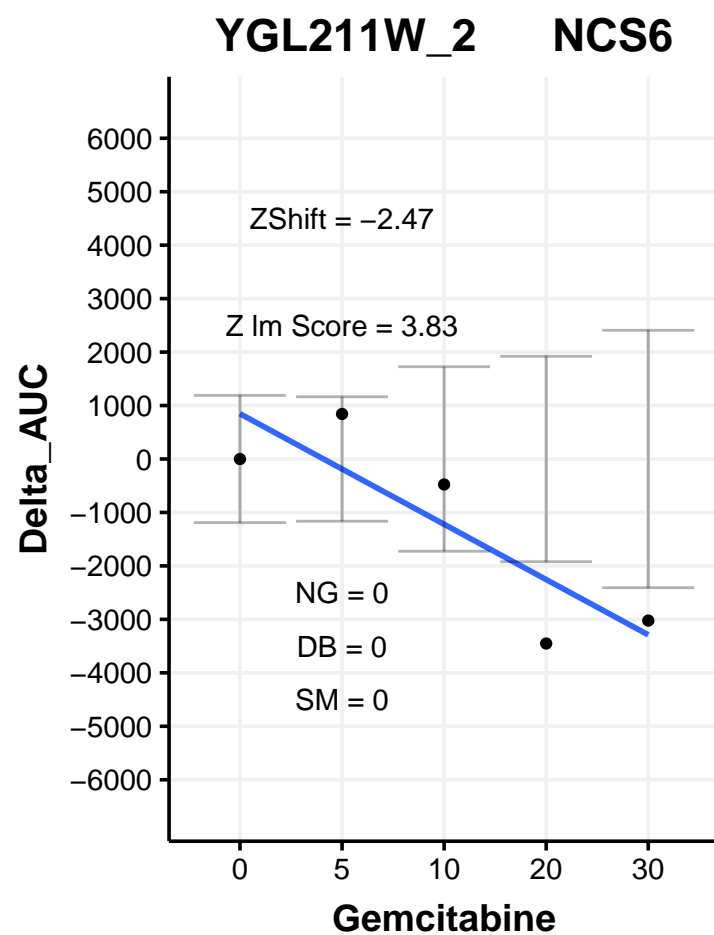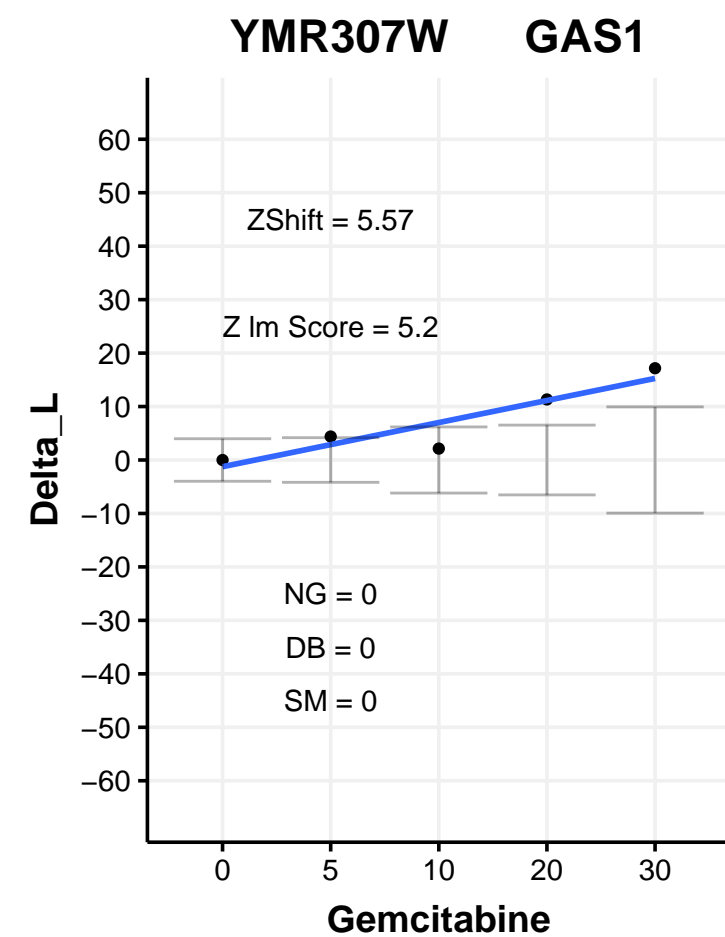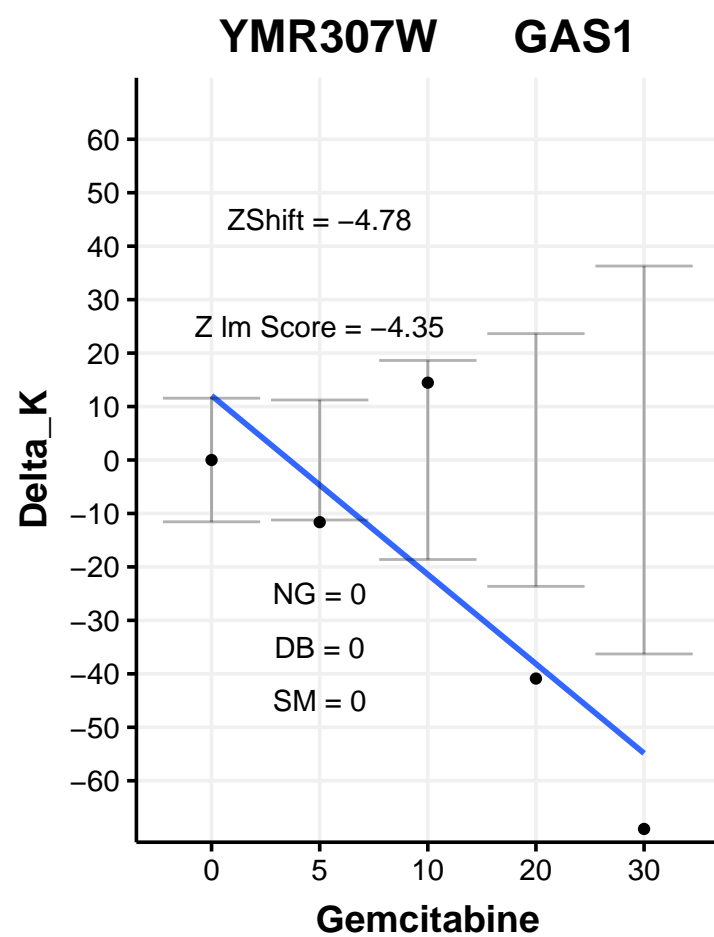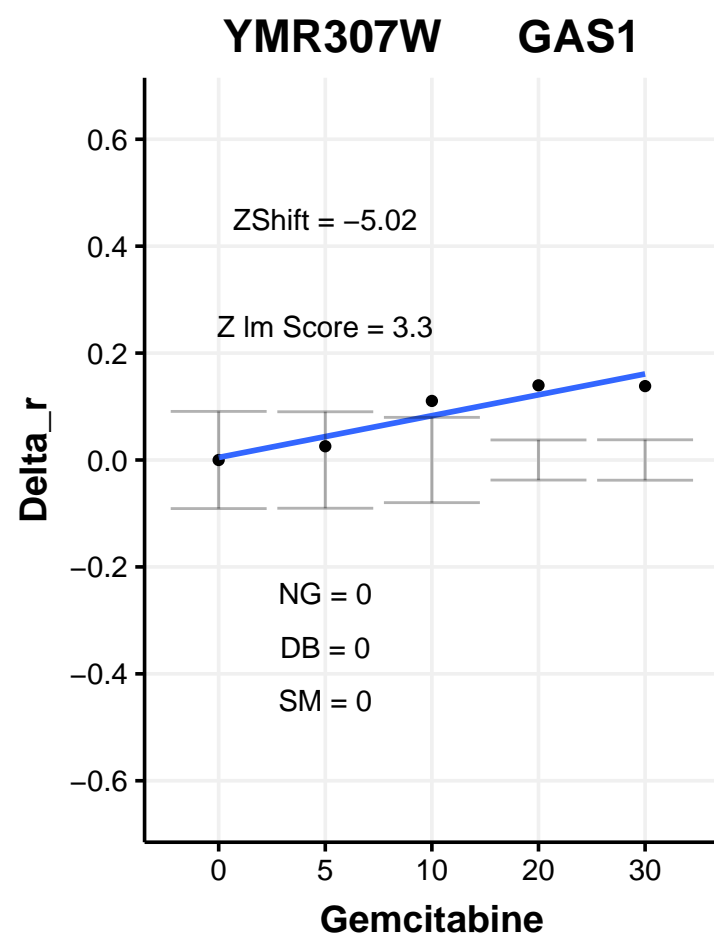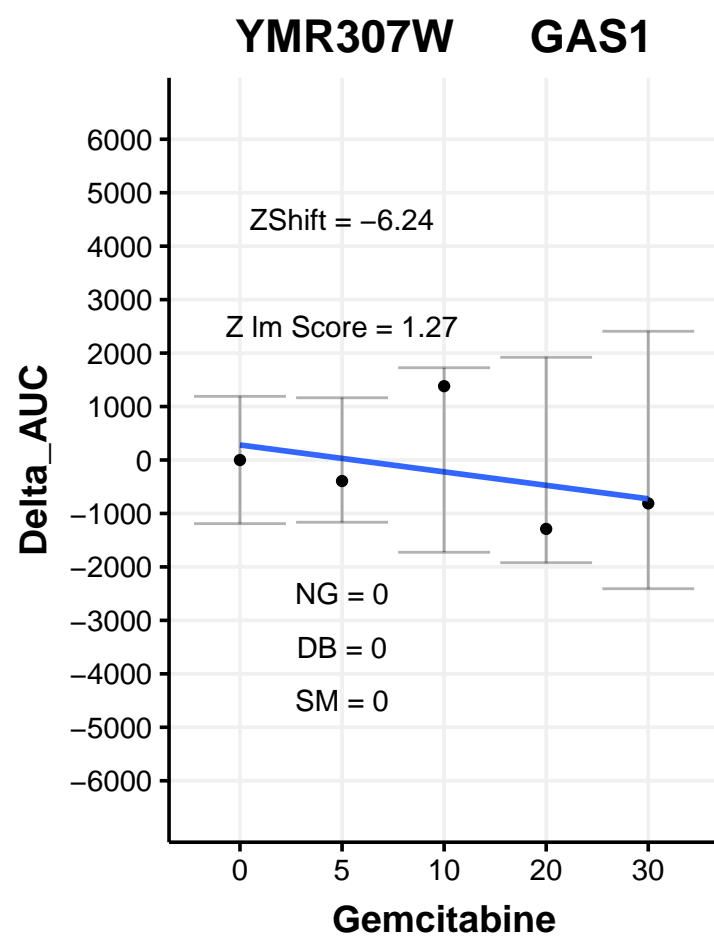

YGL218W\_1

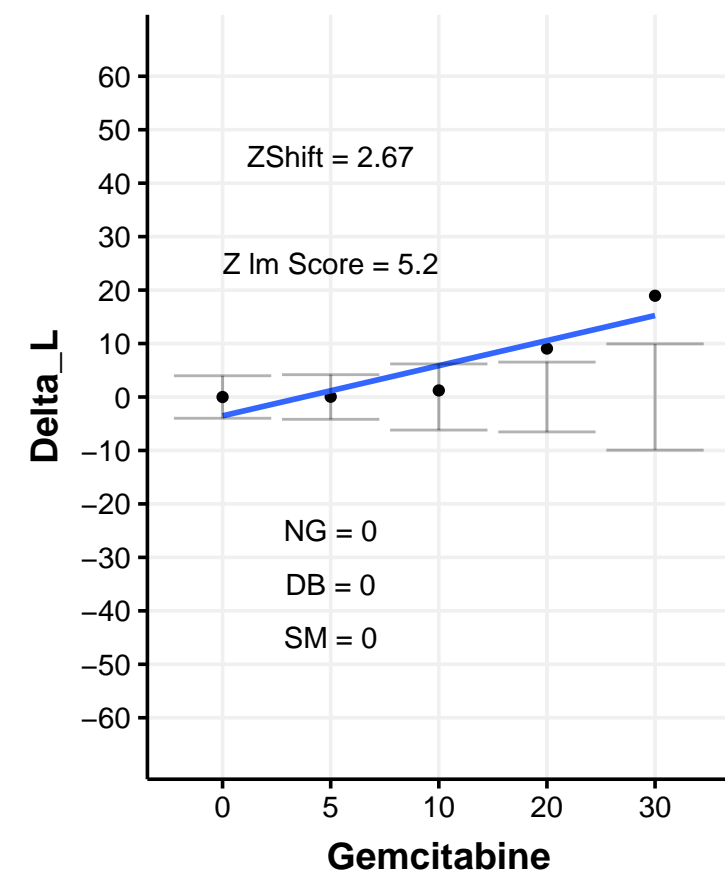

YGL218W\_1

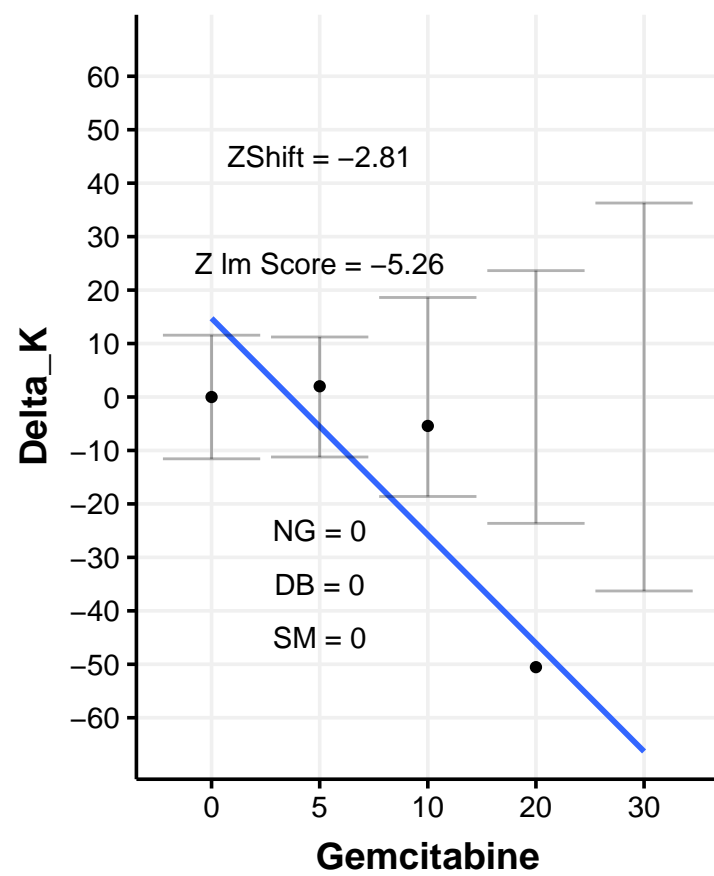

YGL218W\_1

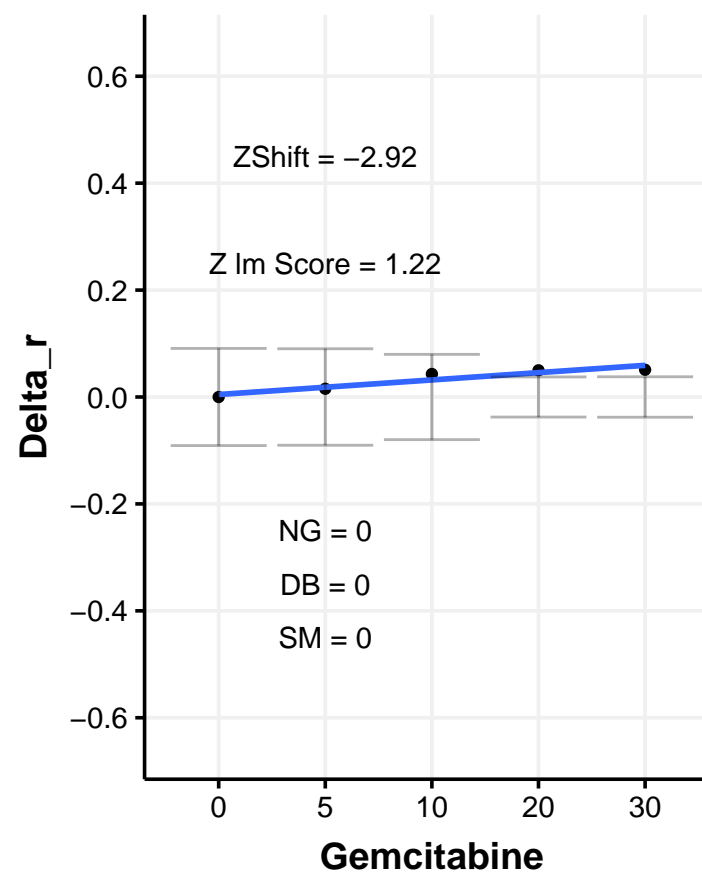

YGL218W\_1

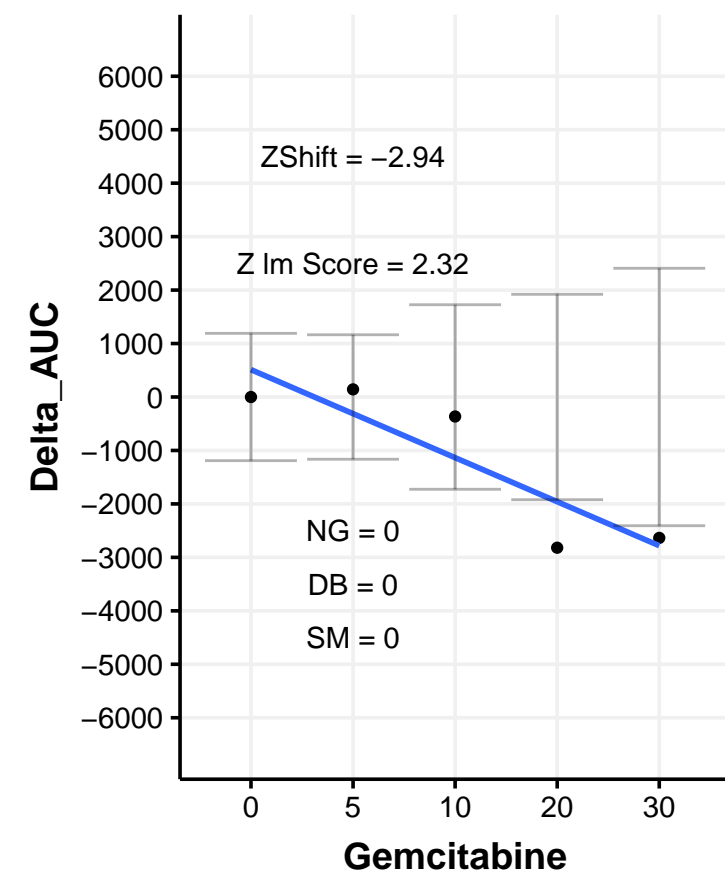

YJL211C

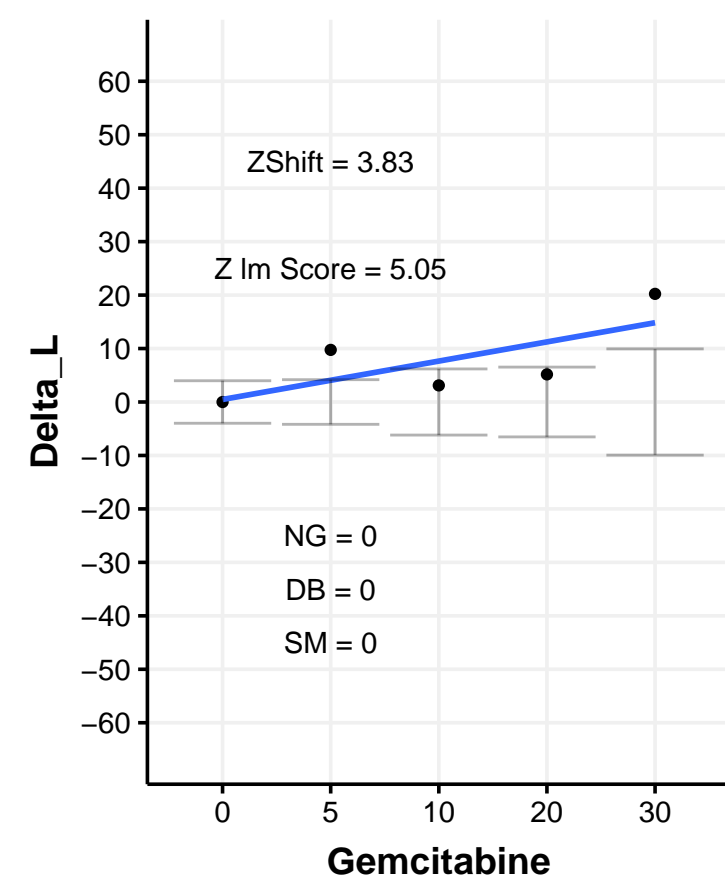

YJL211C

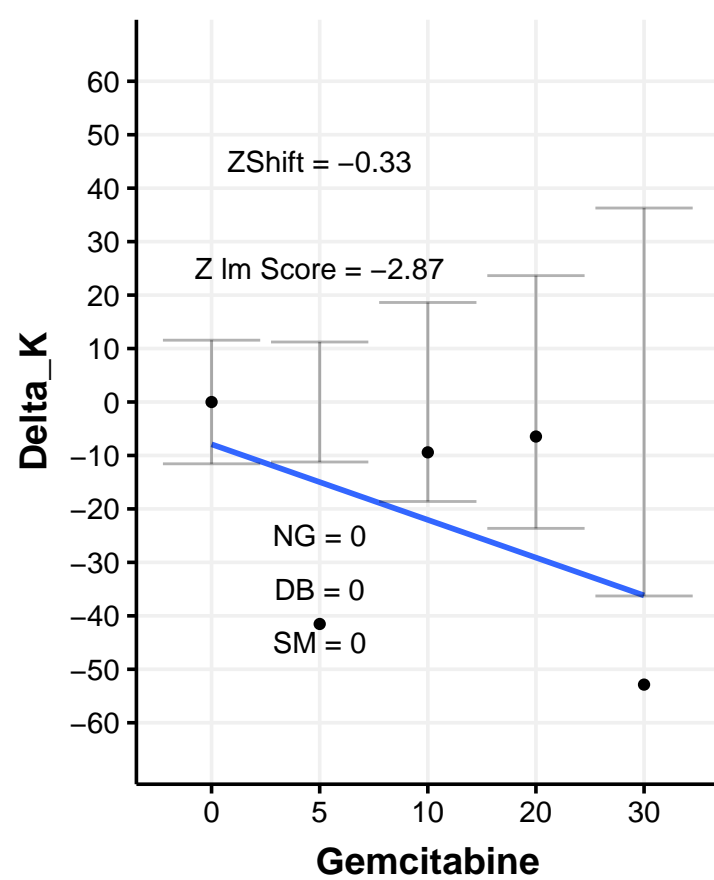

YJL211C

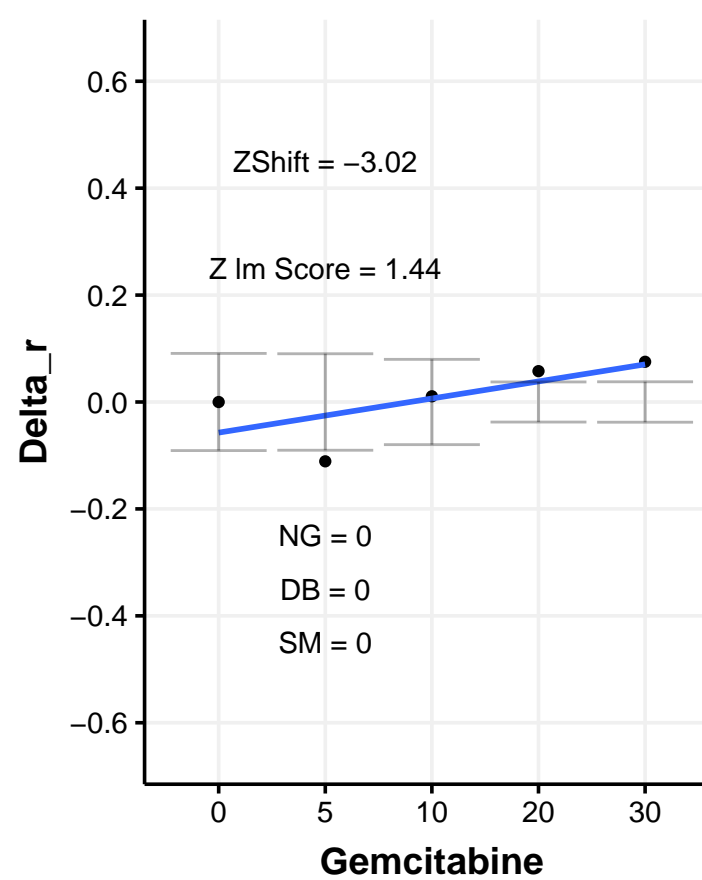

YJL211C

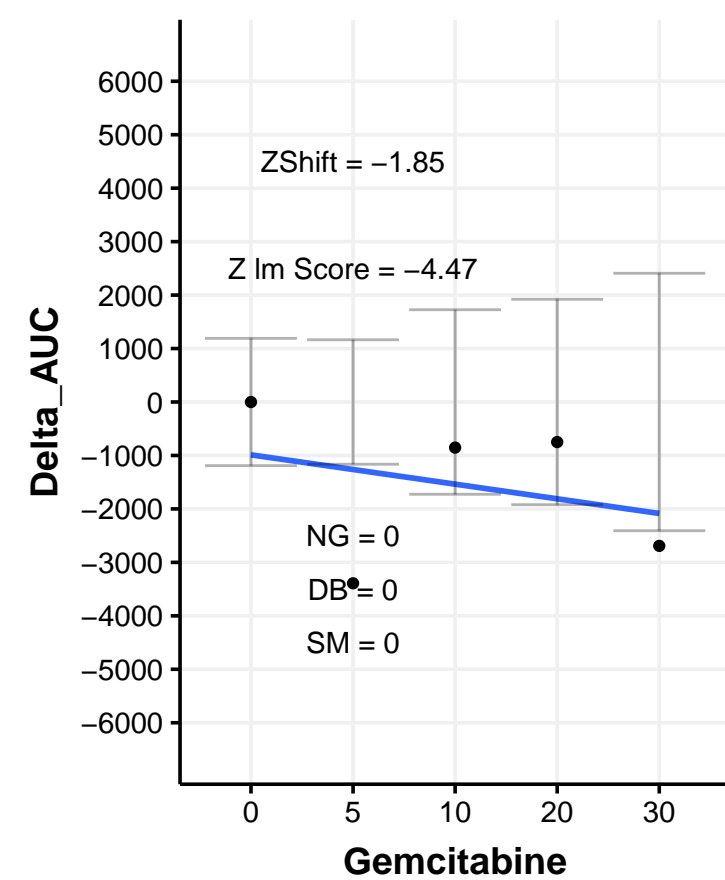

YPL026C SKS1

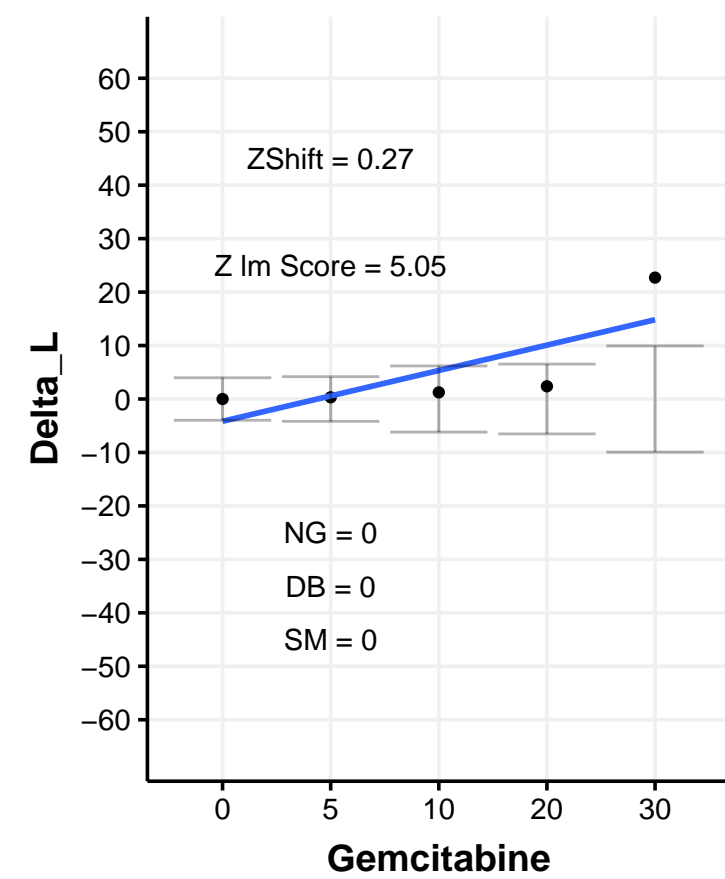

YPL026C SKS1

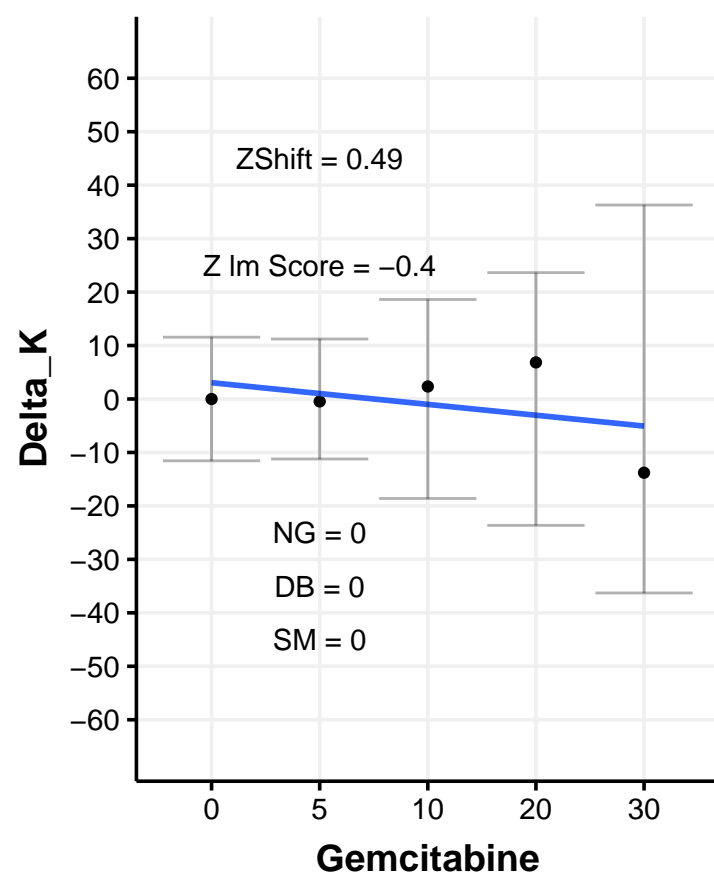

YPL026C SKS1

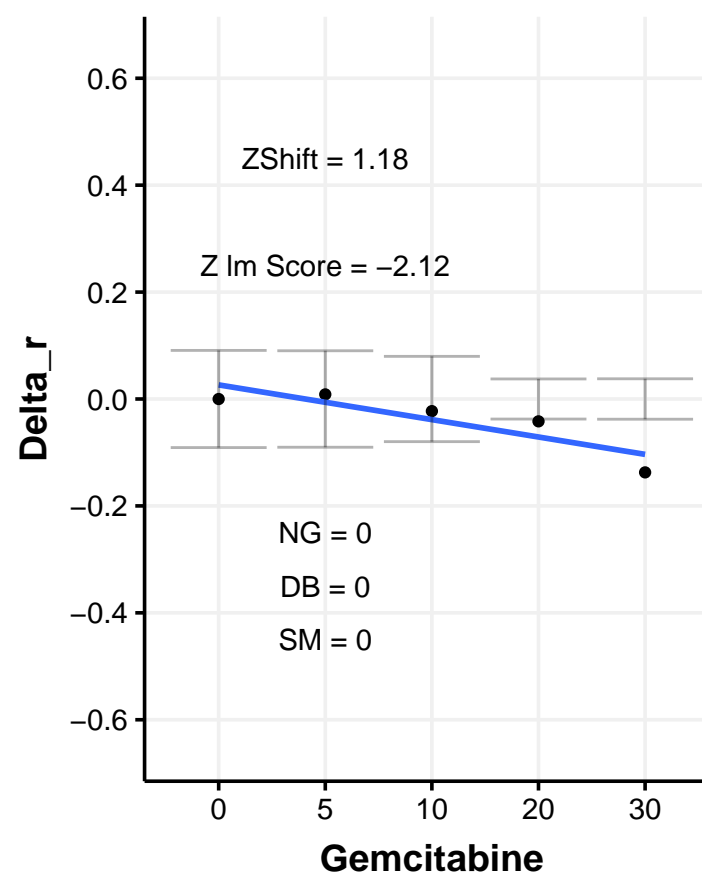

YPL026C SKS1

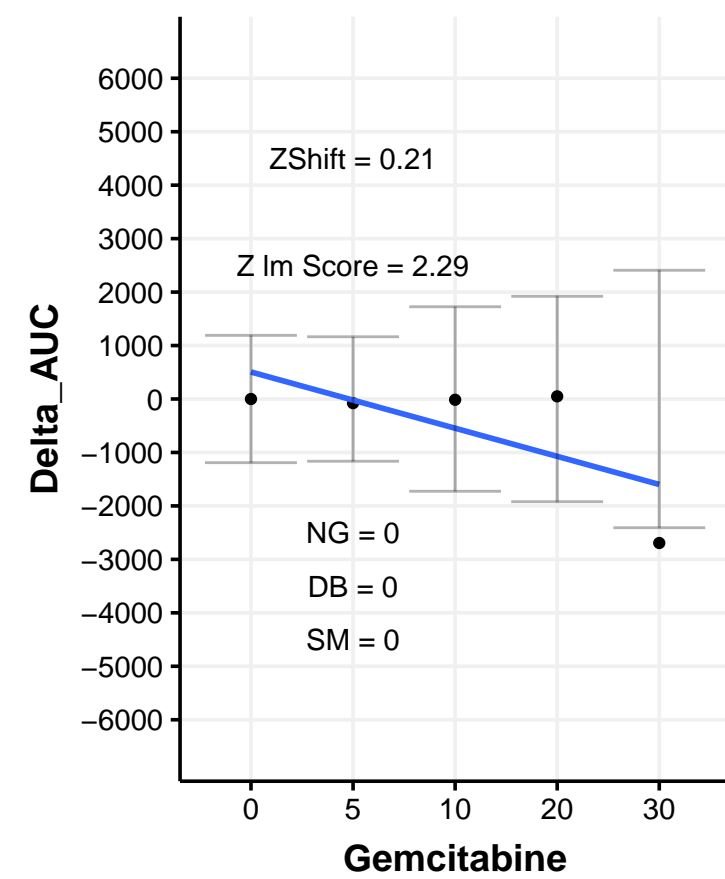

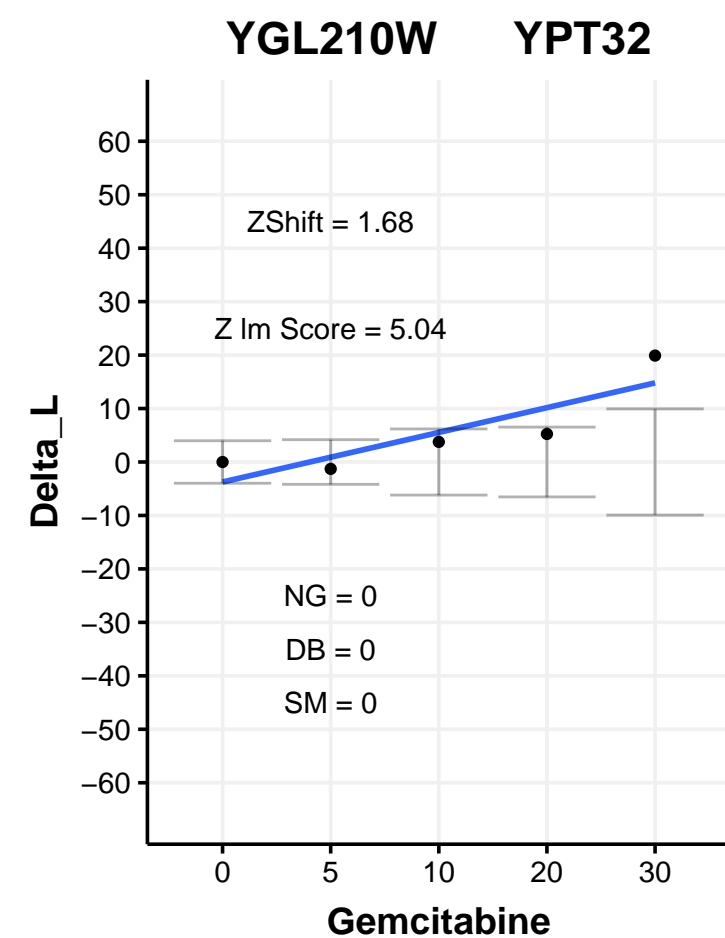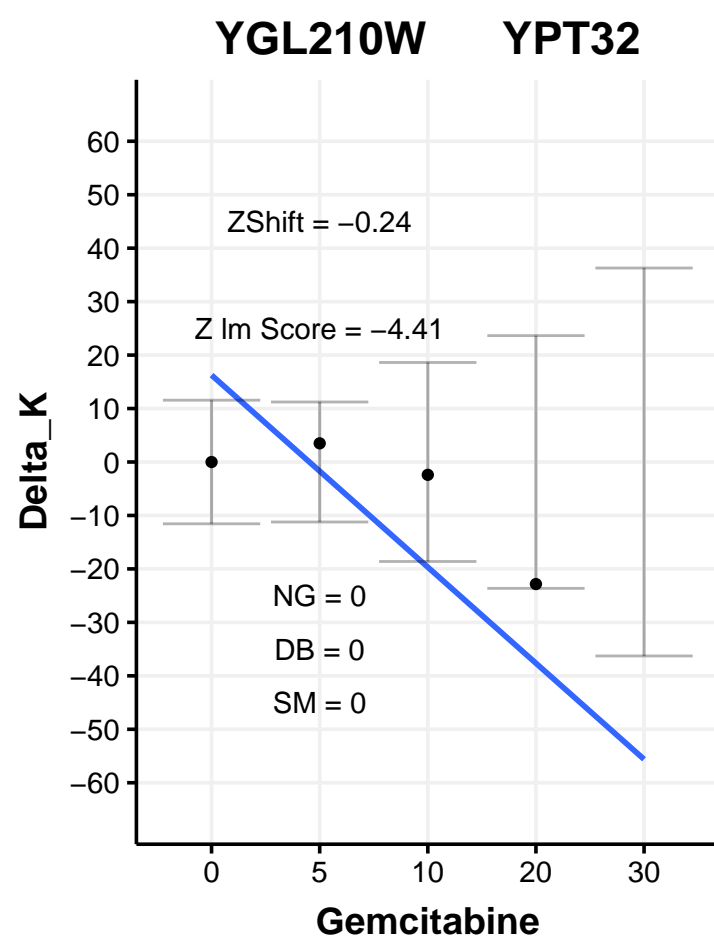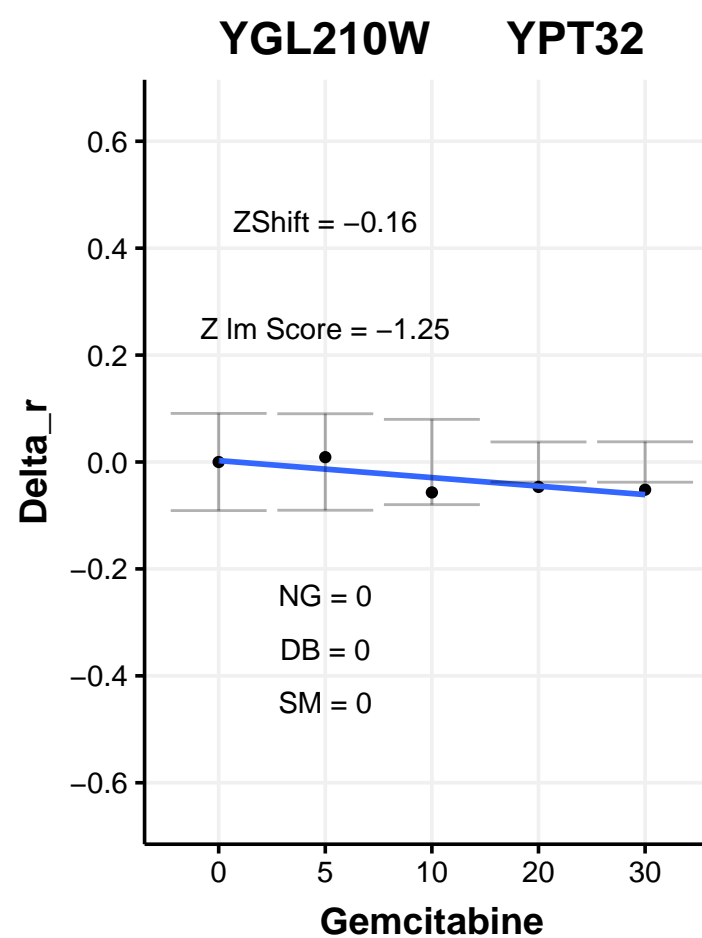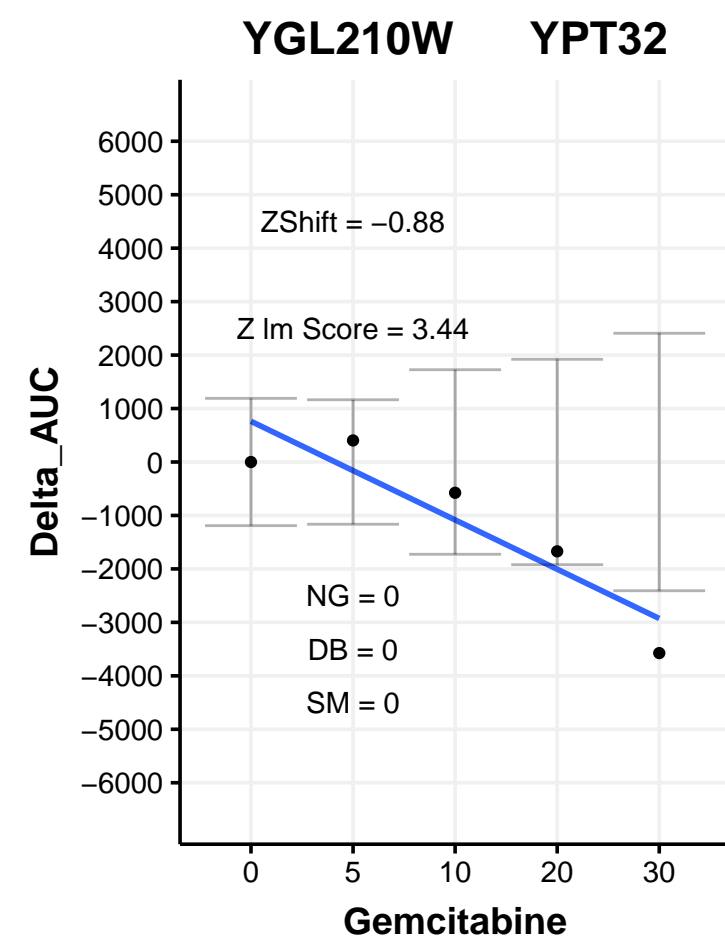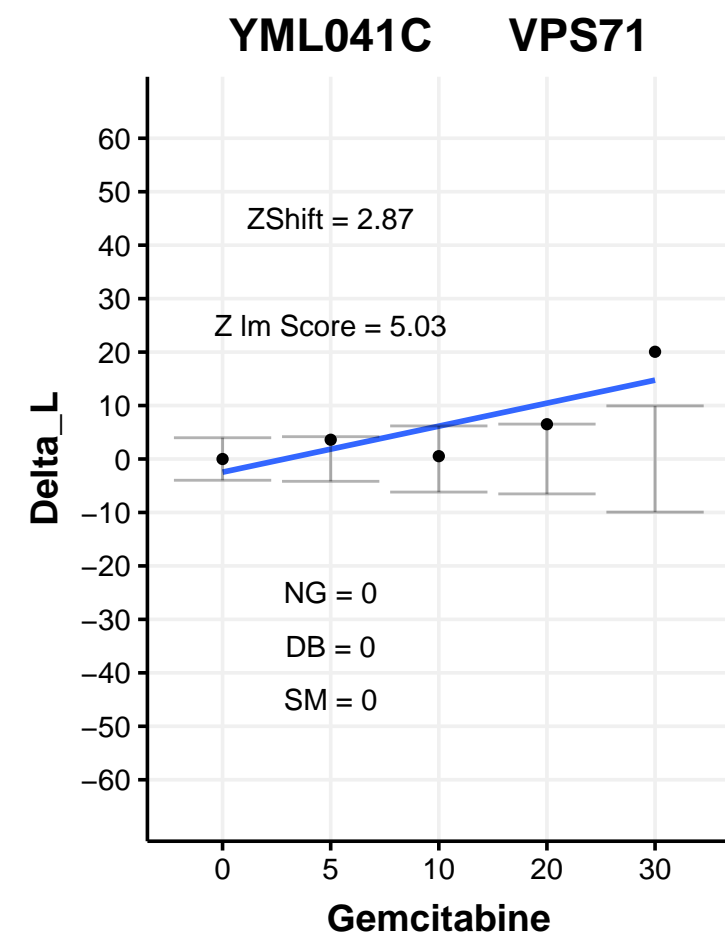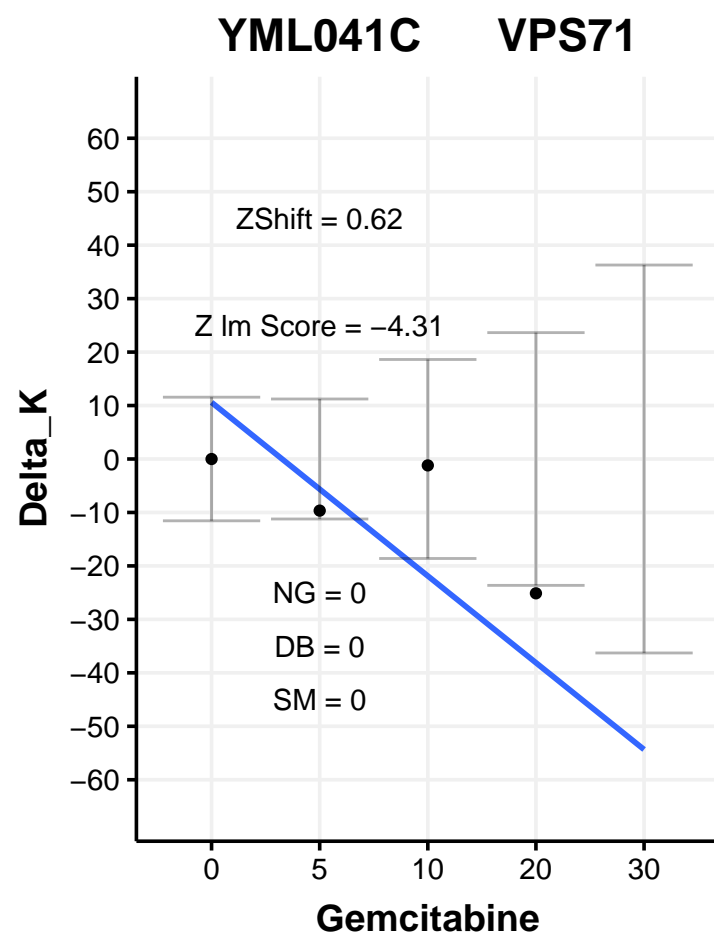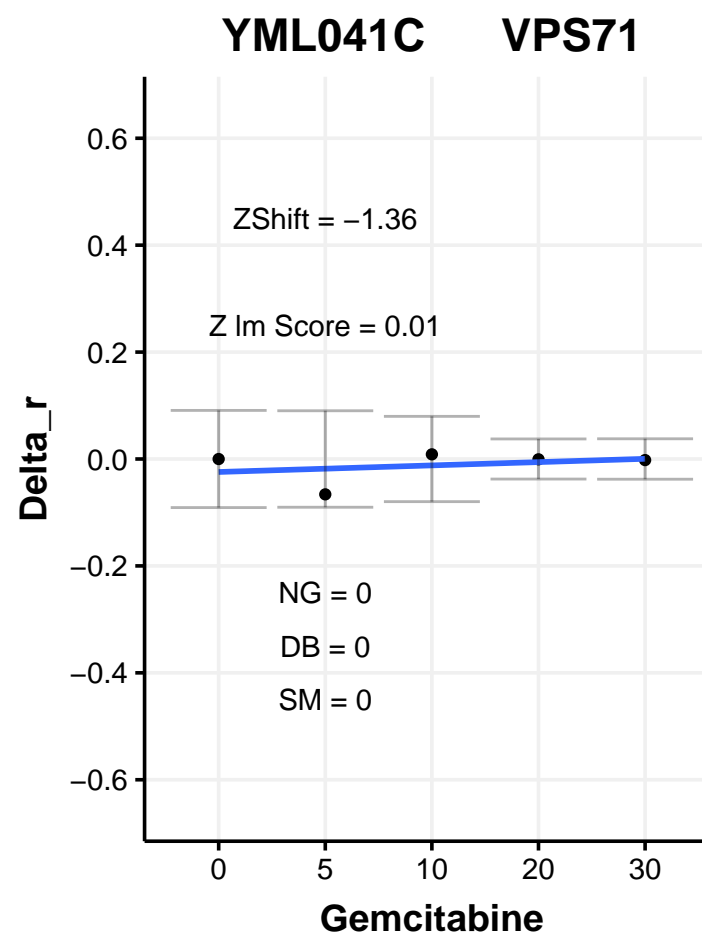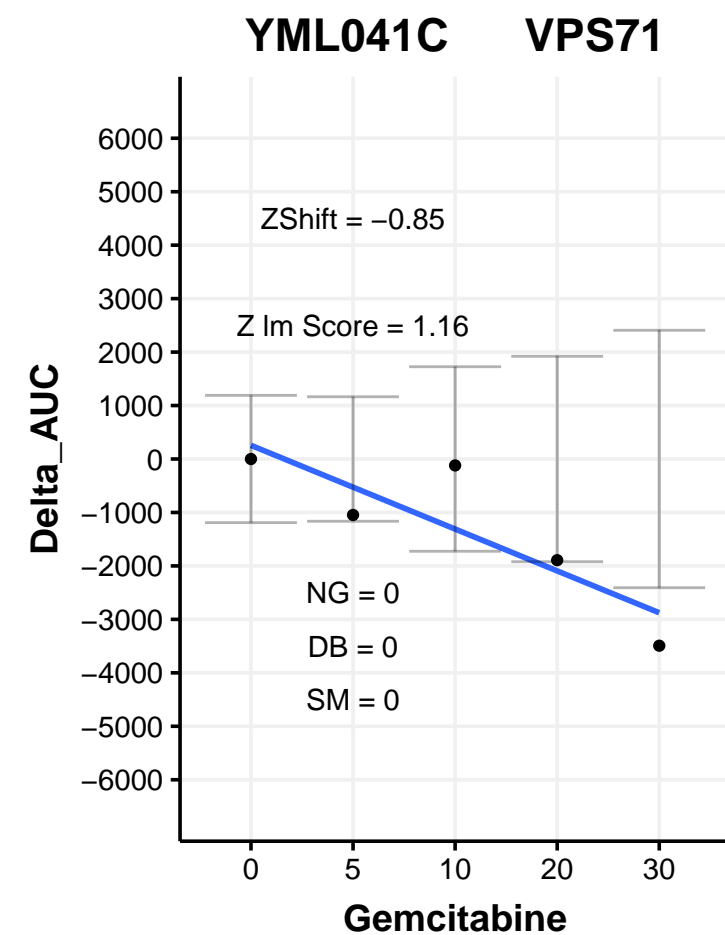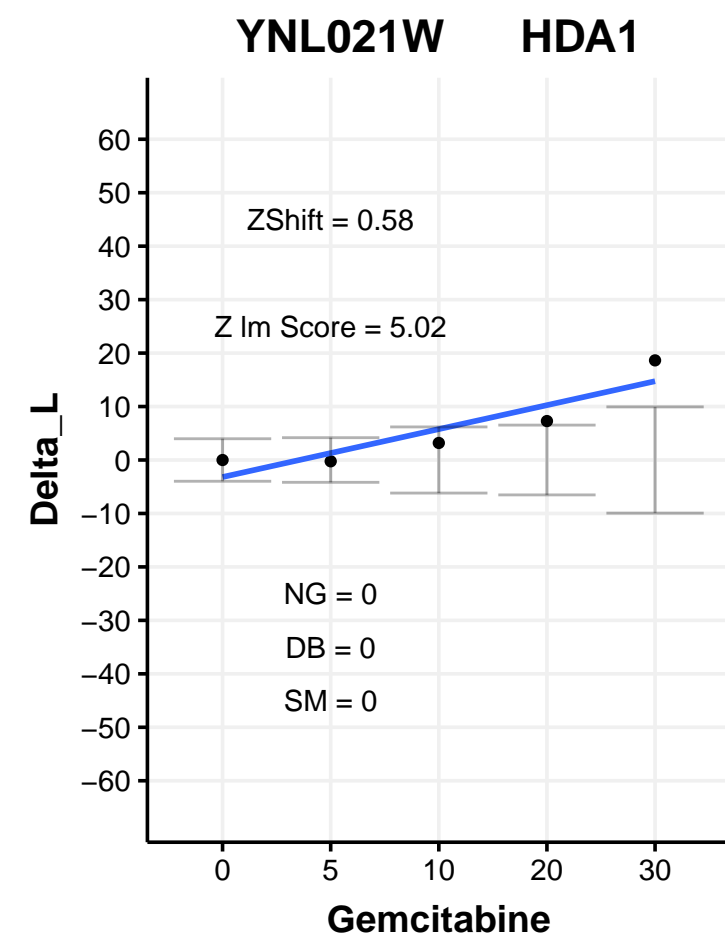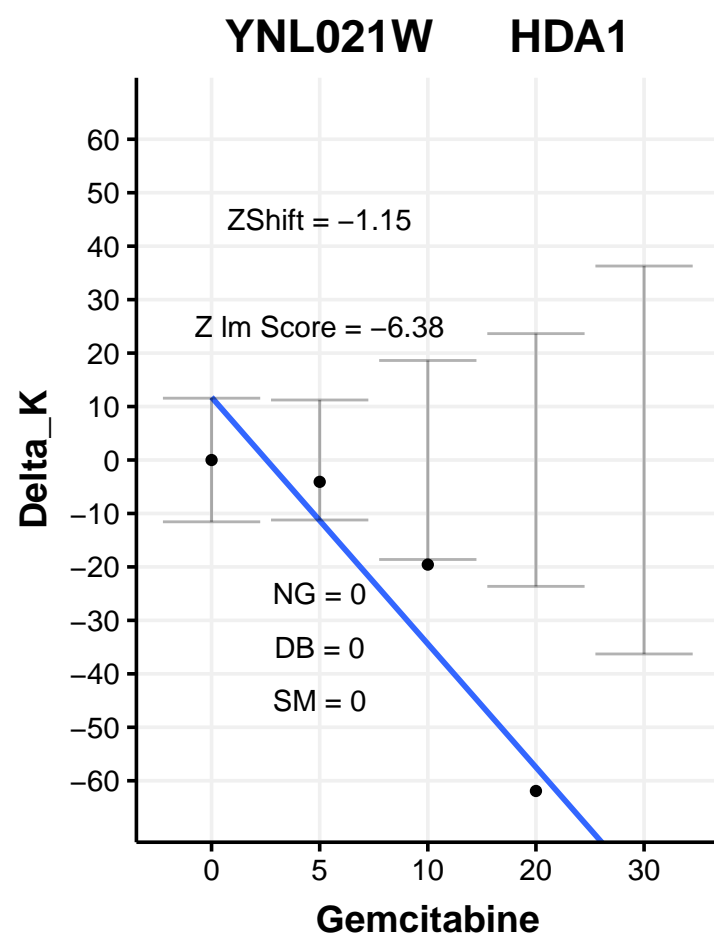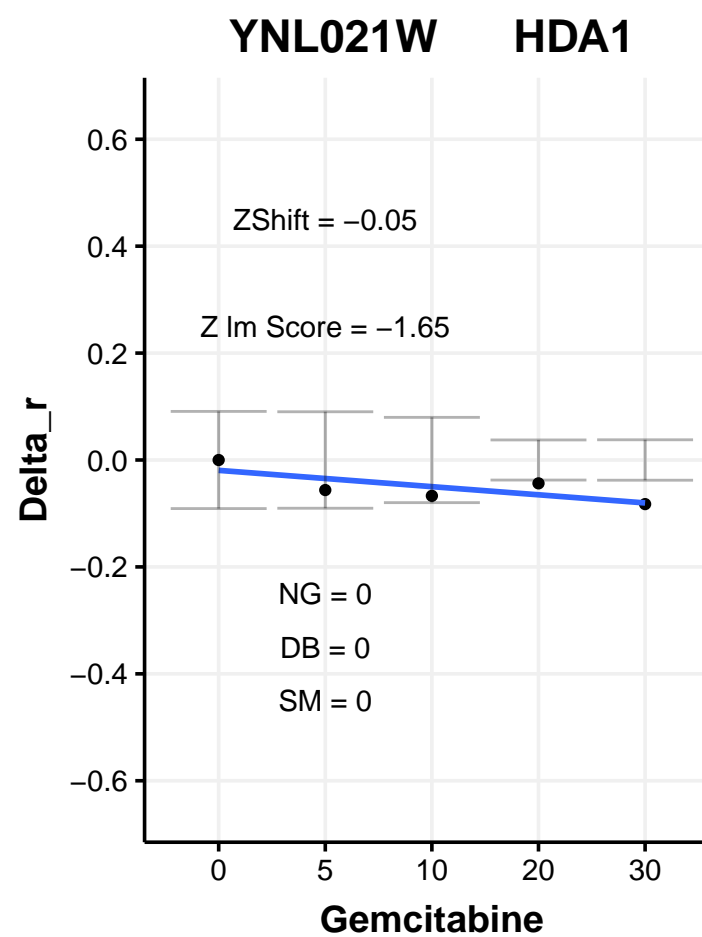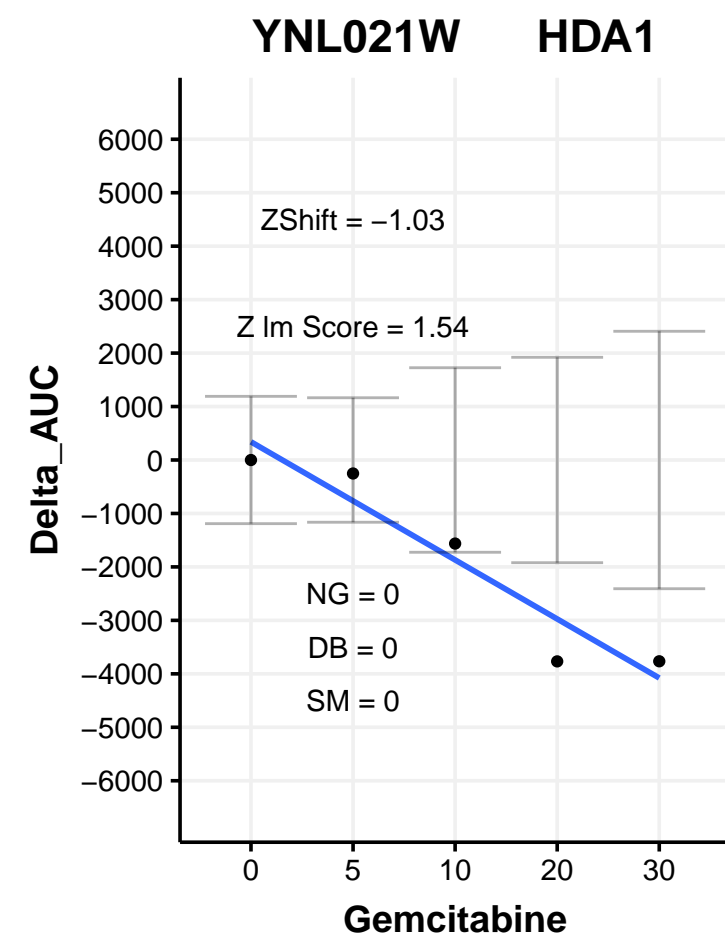

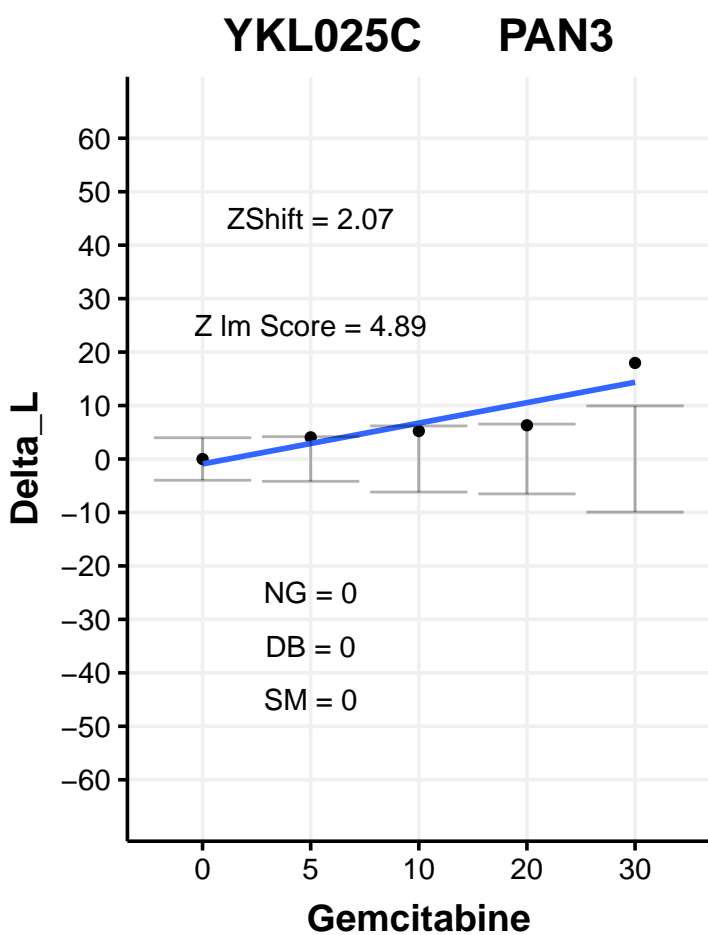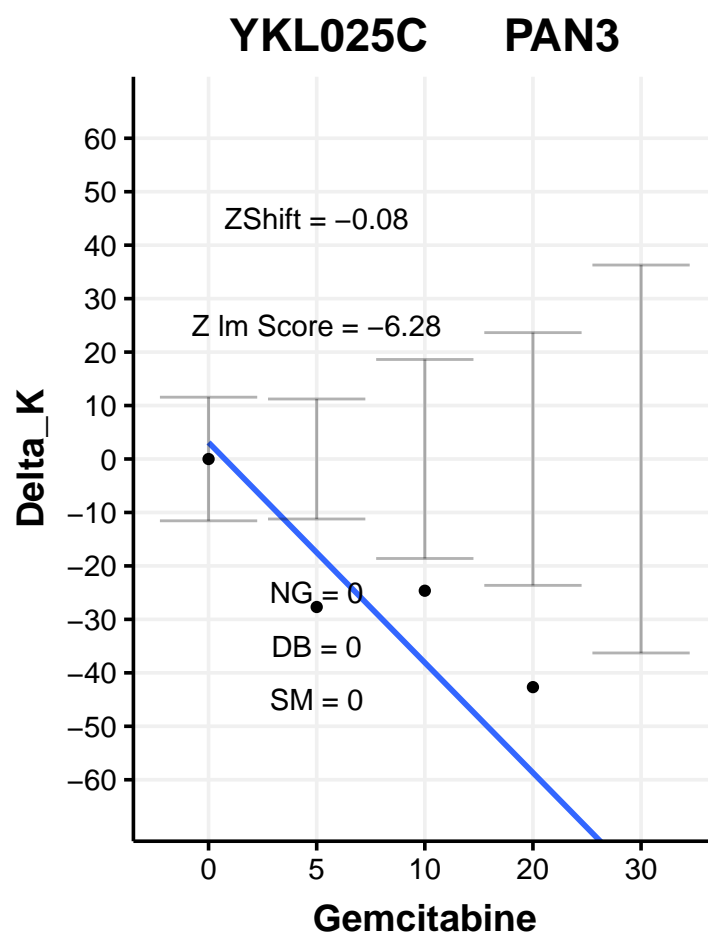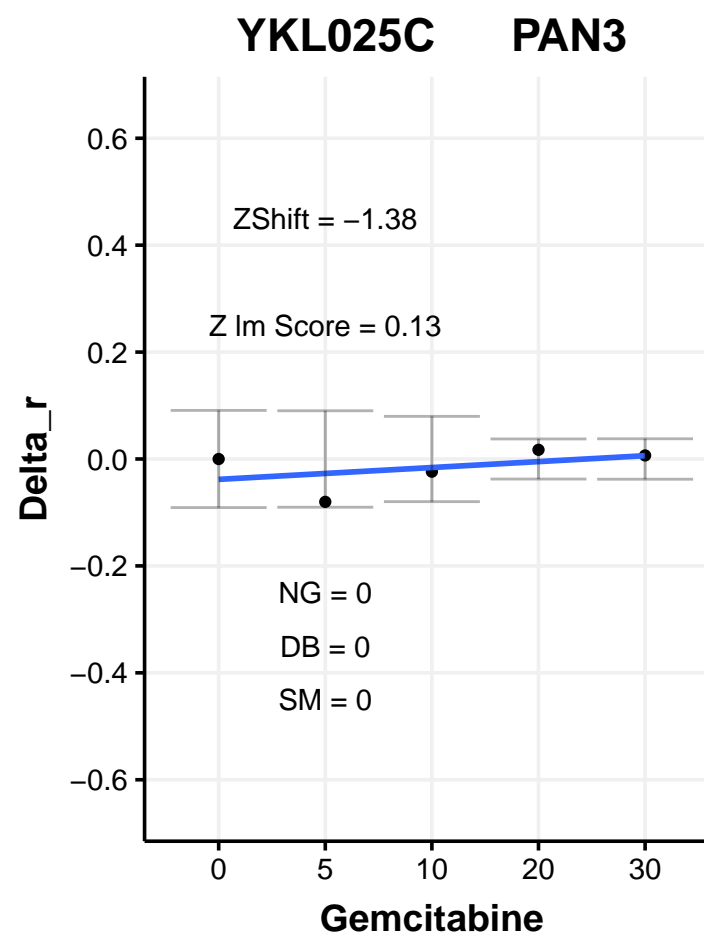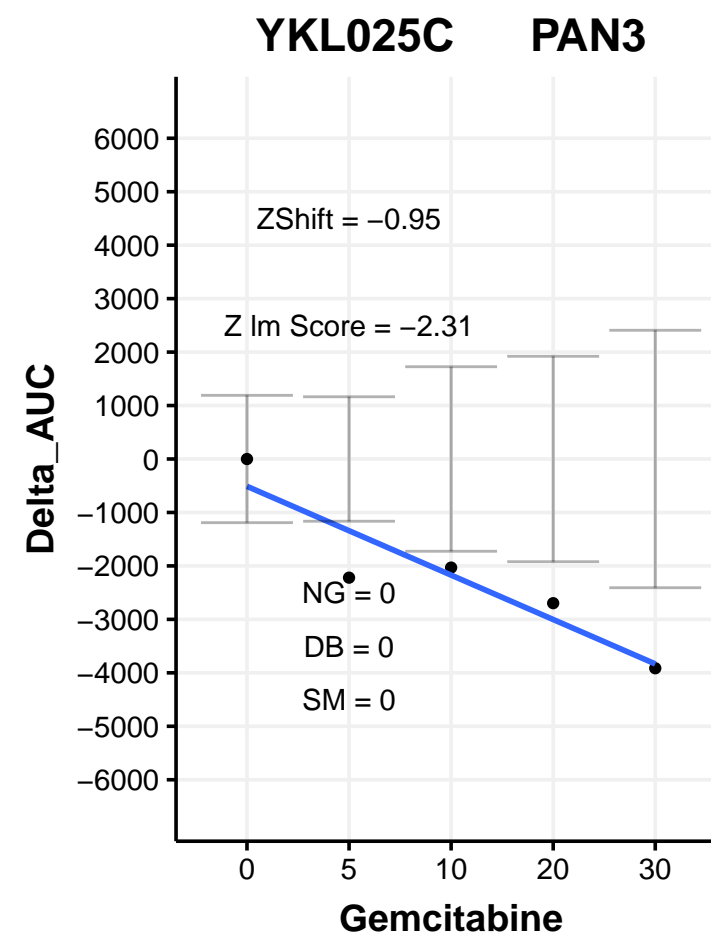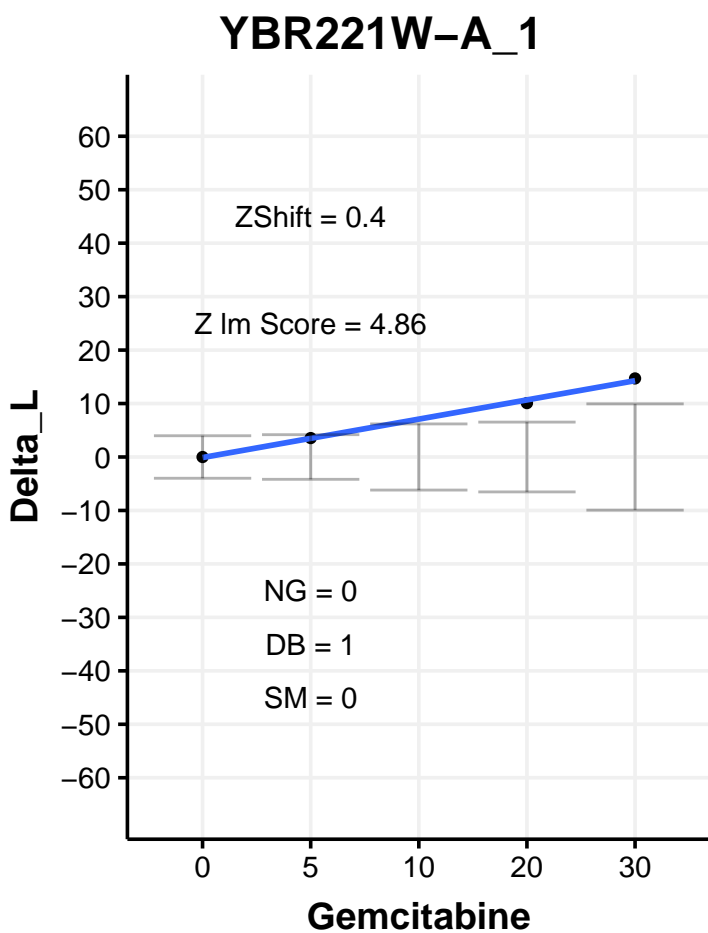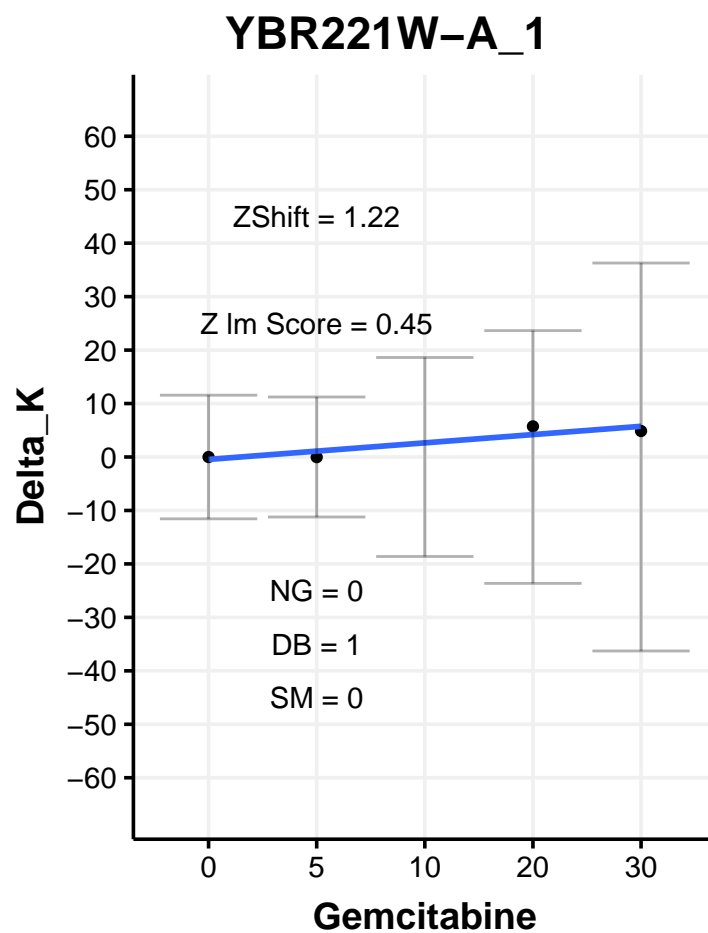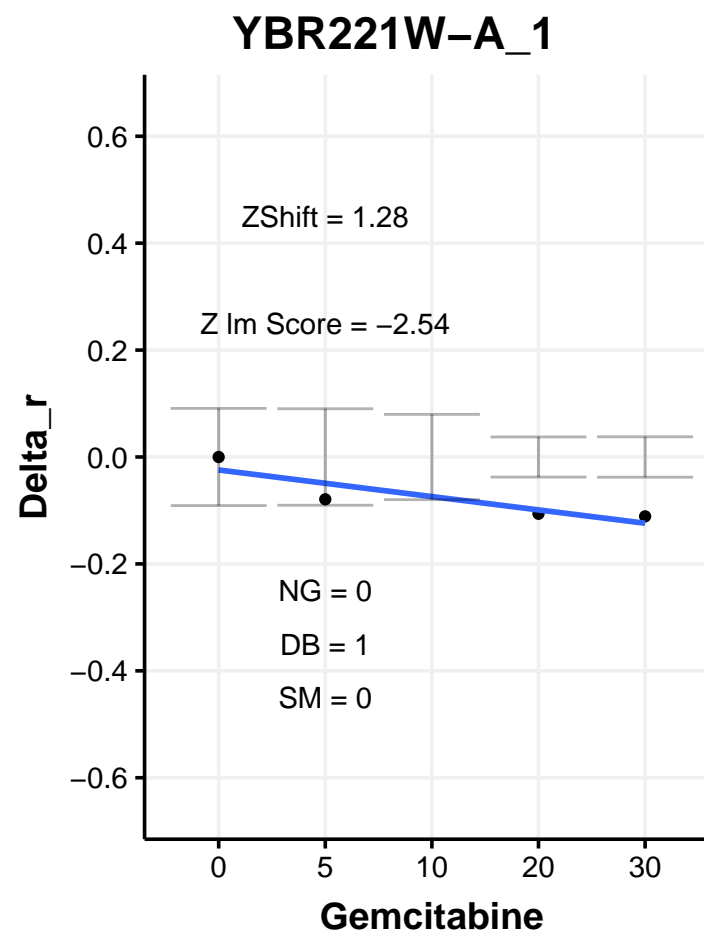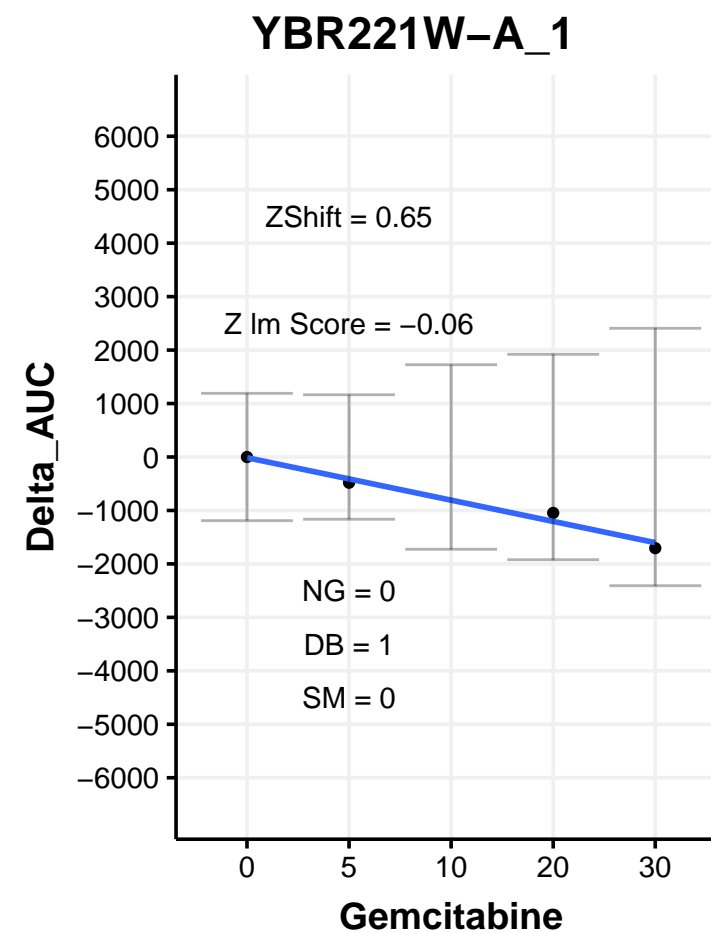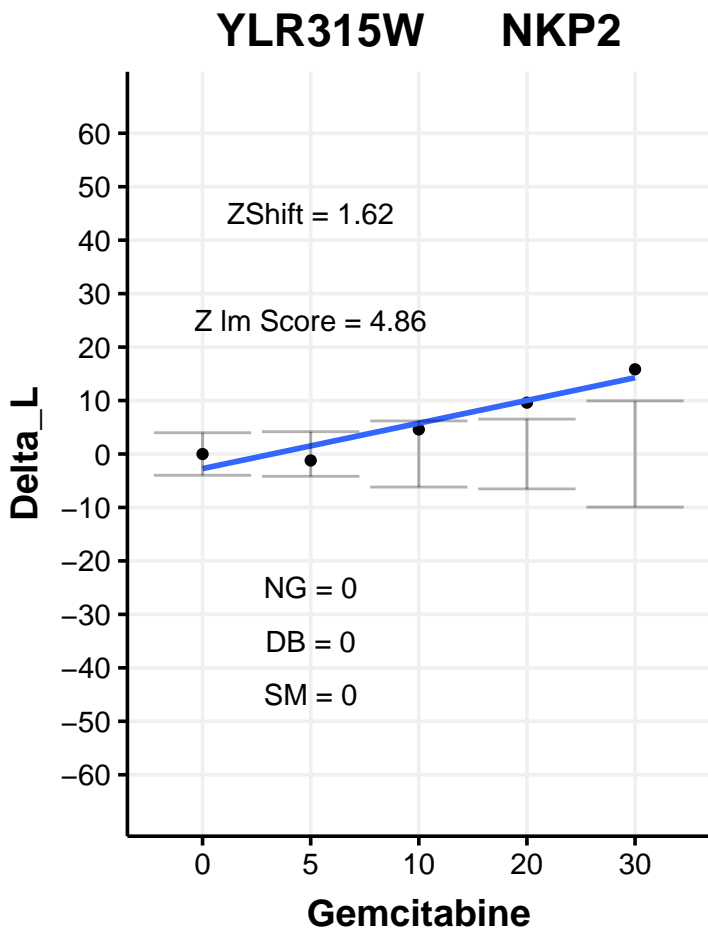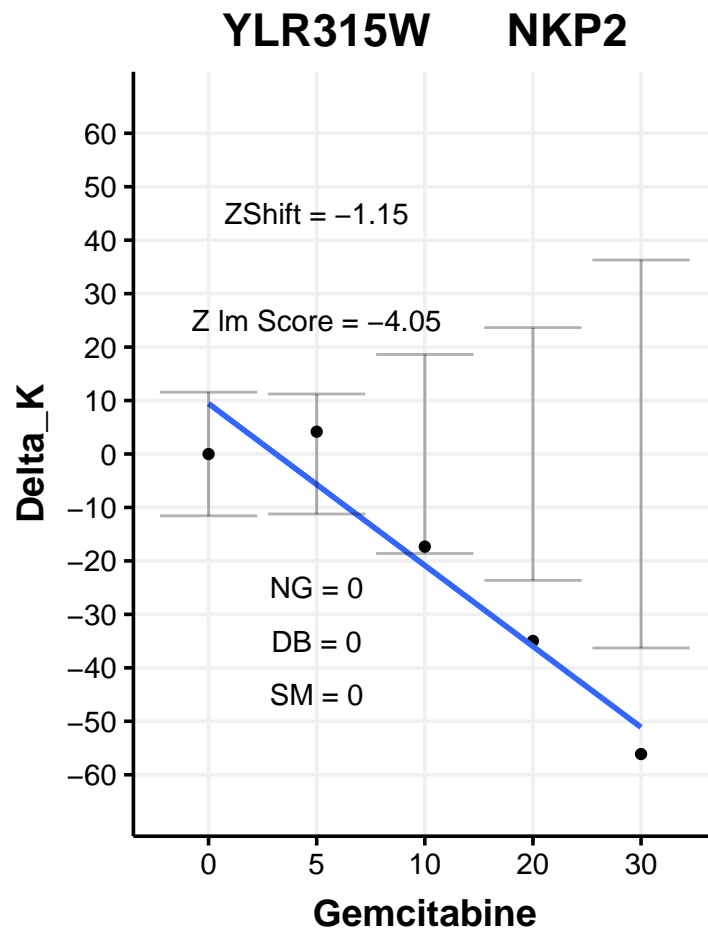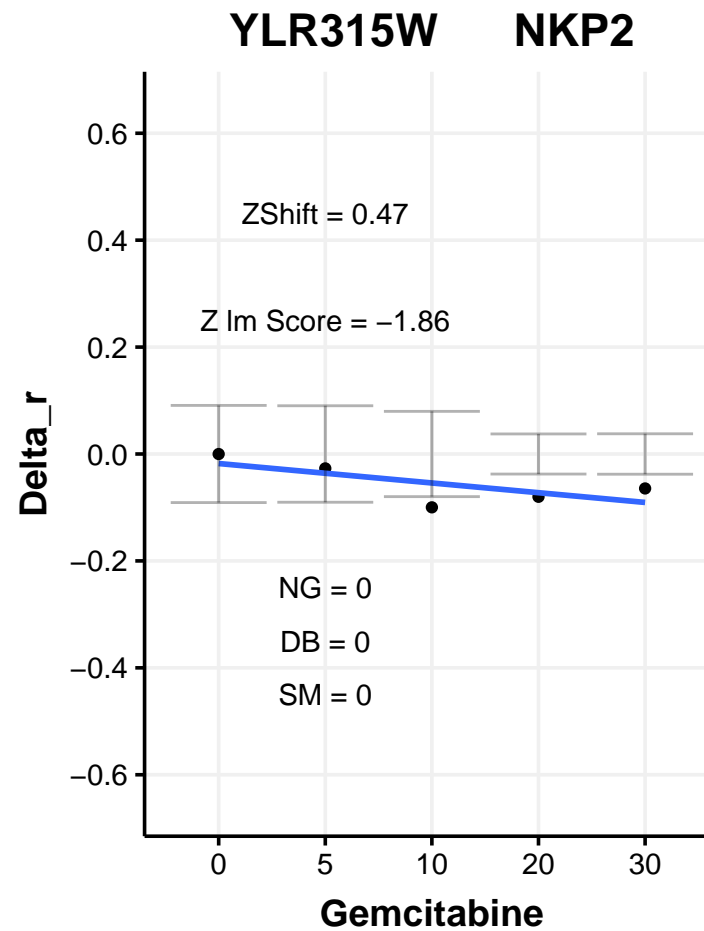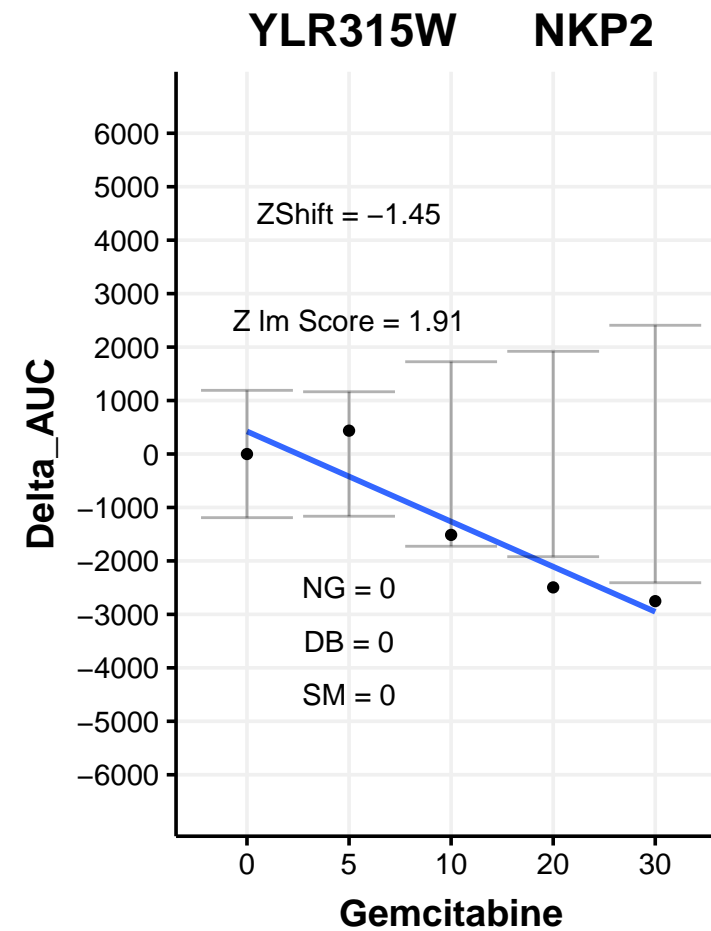

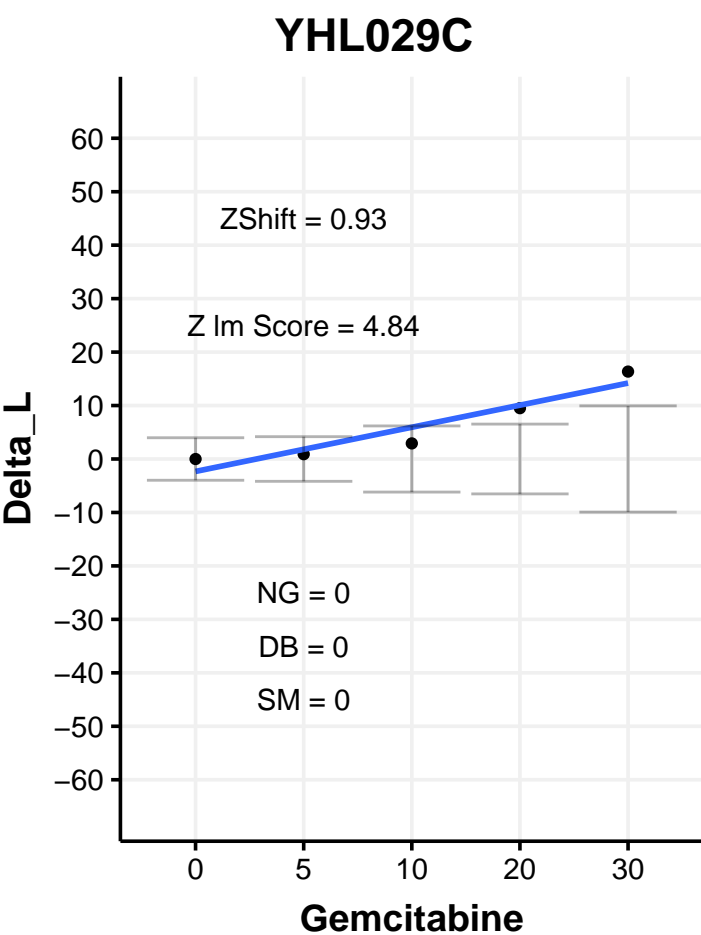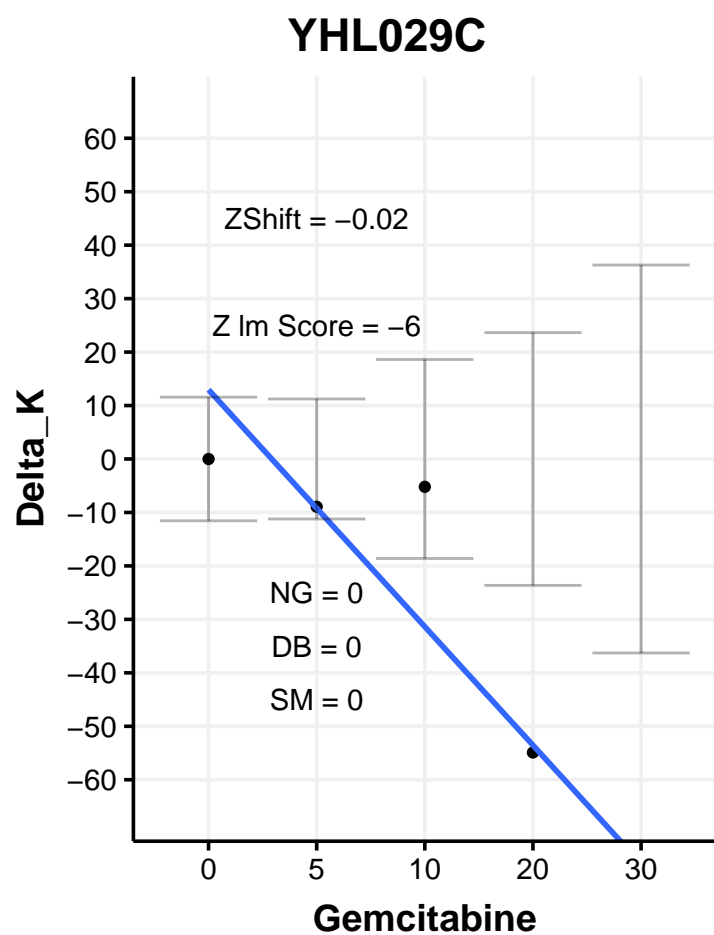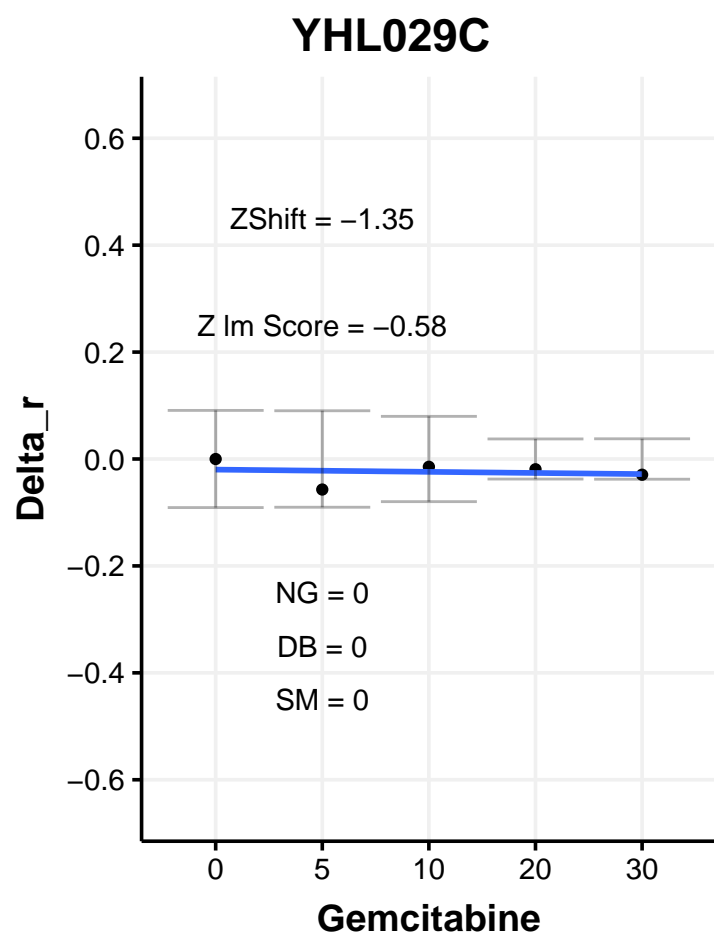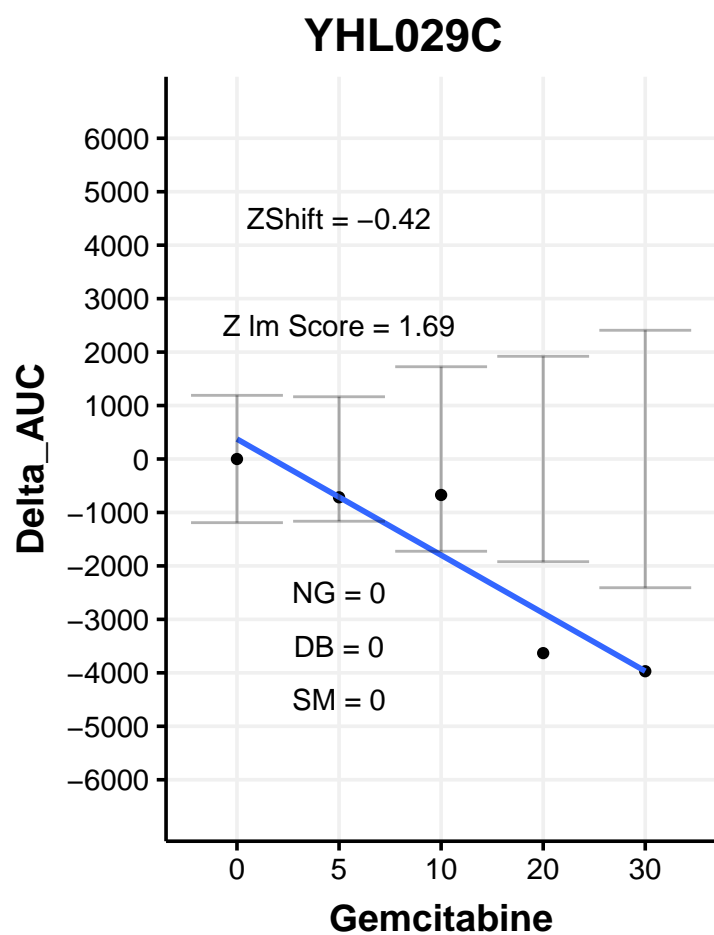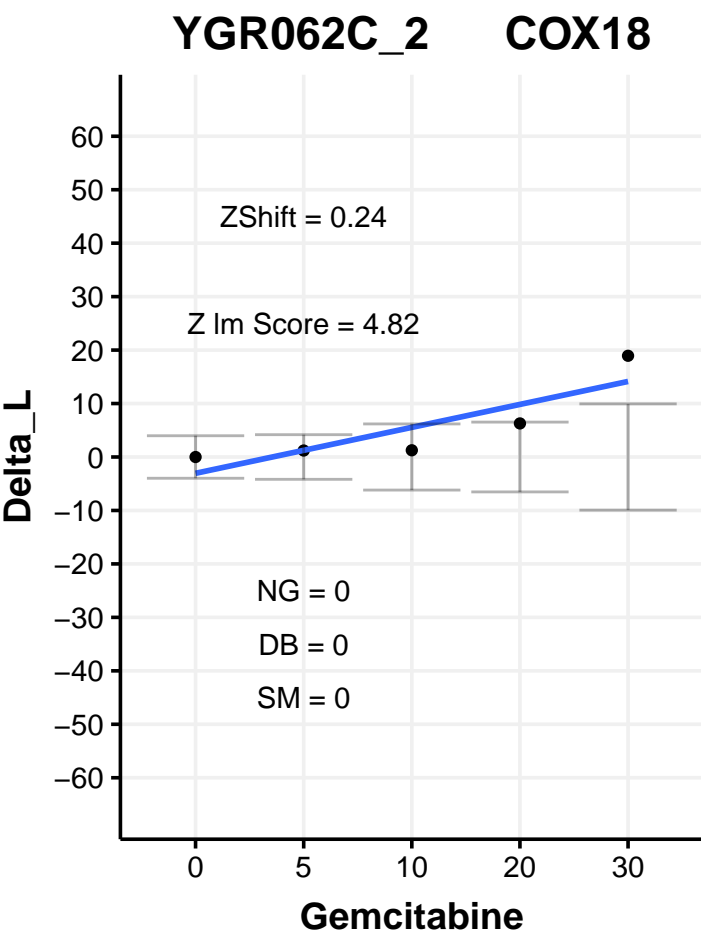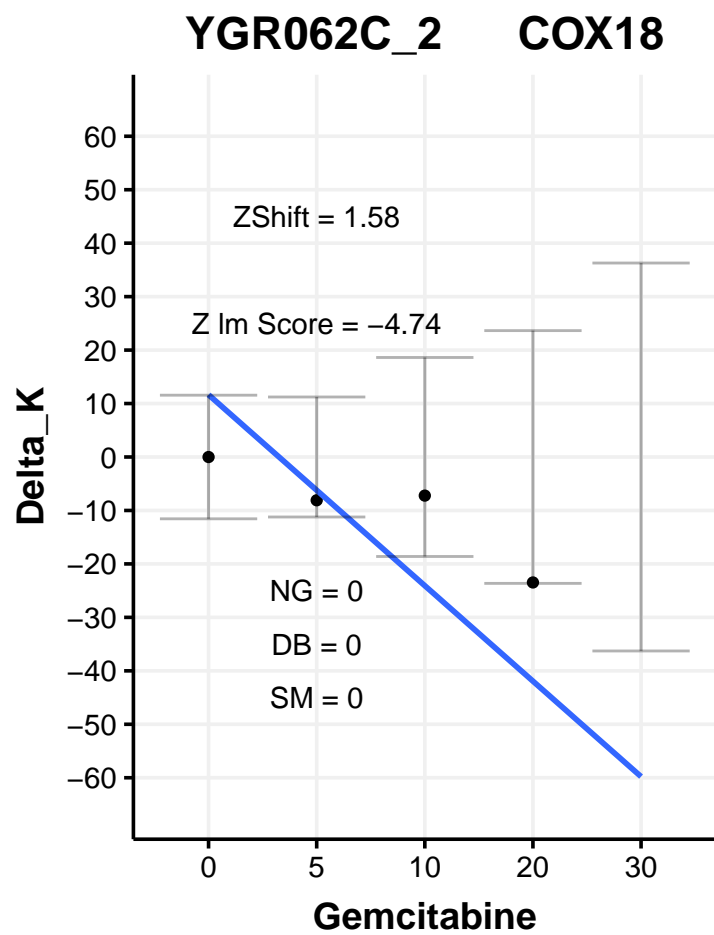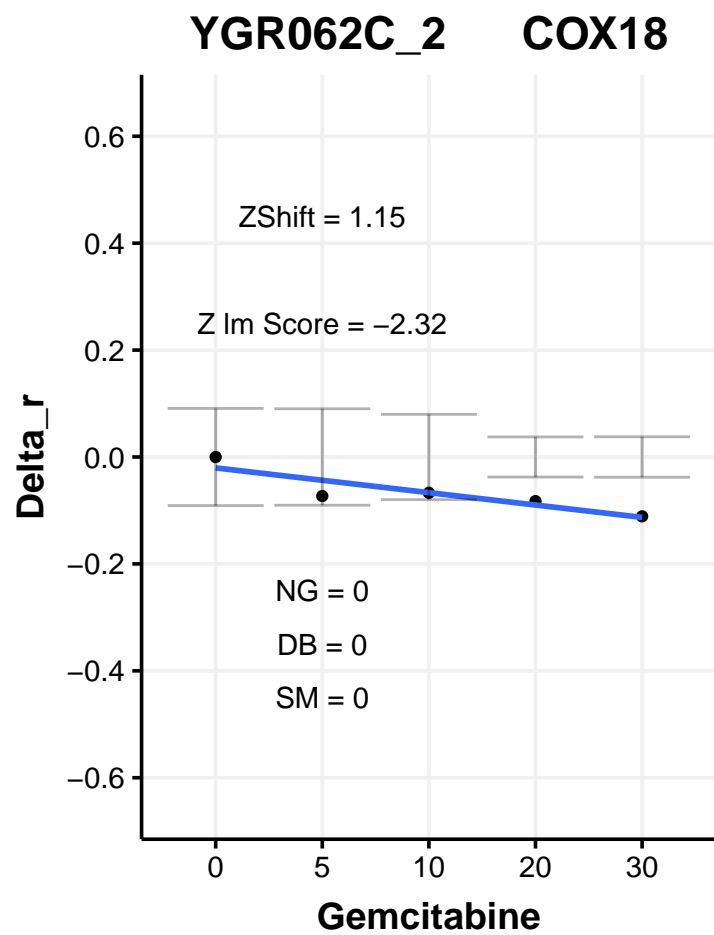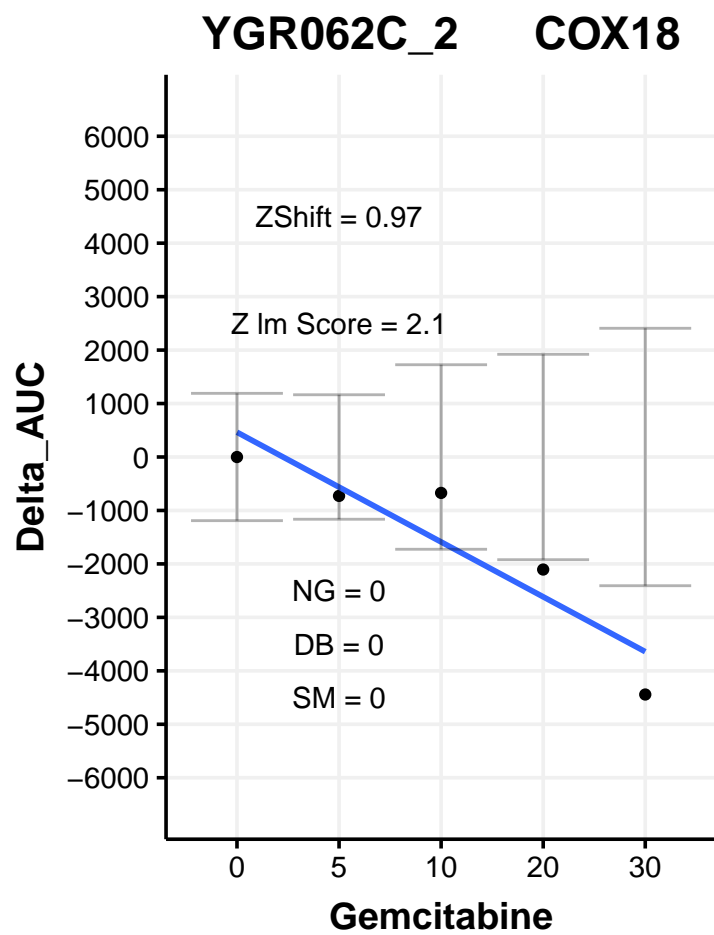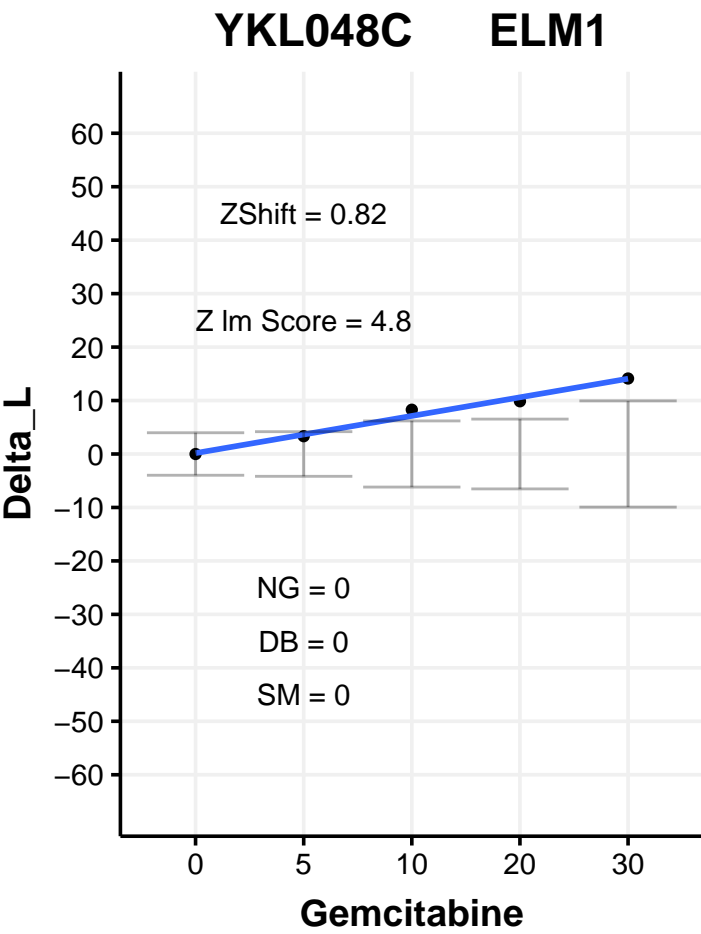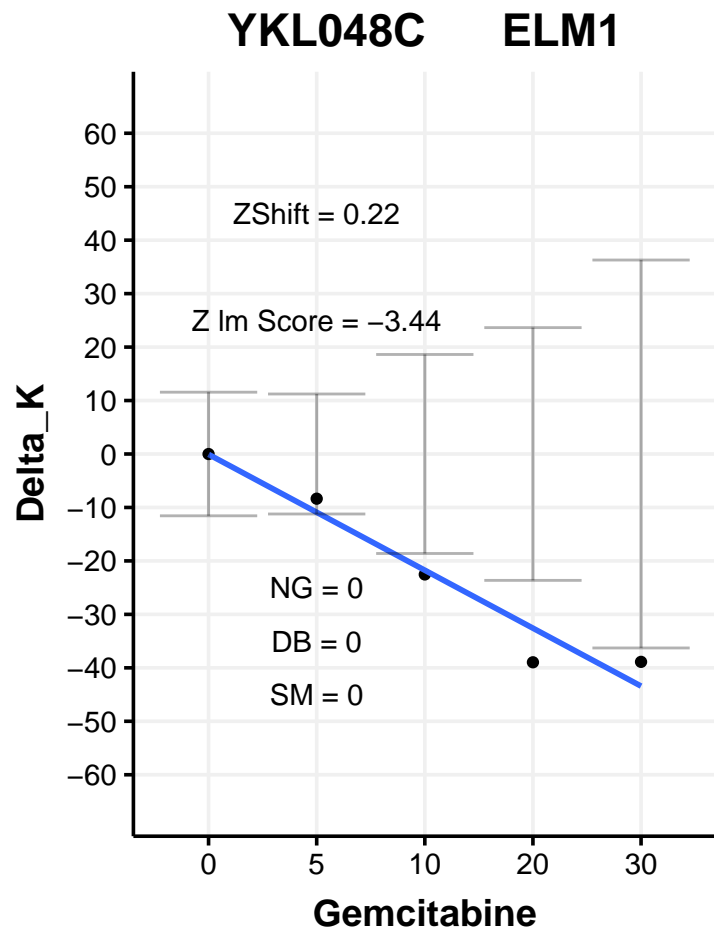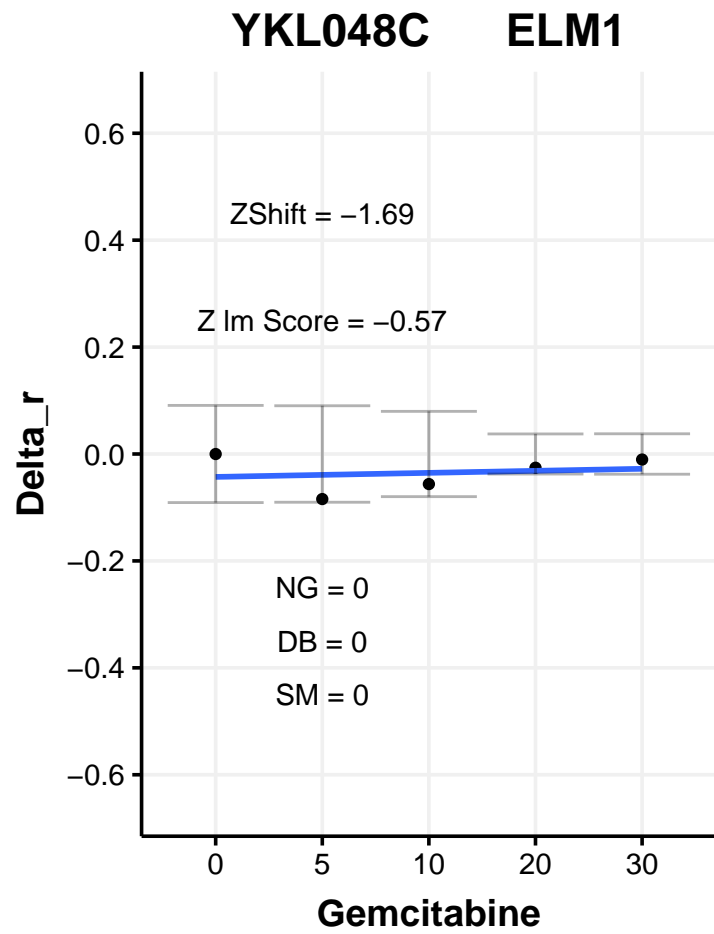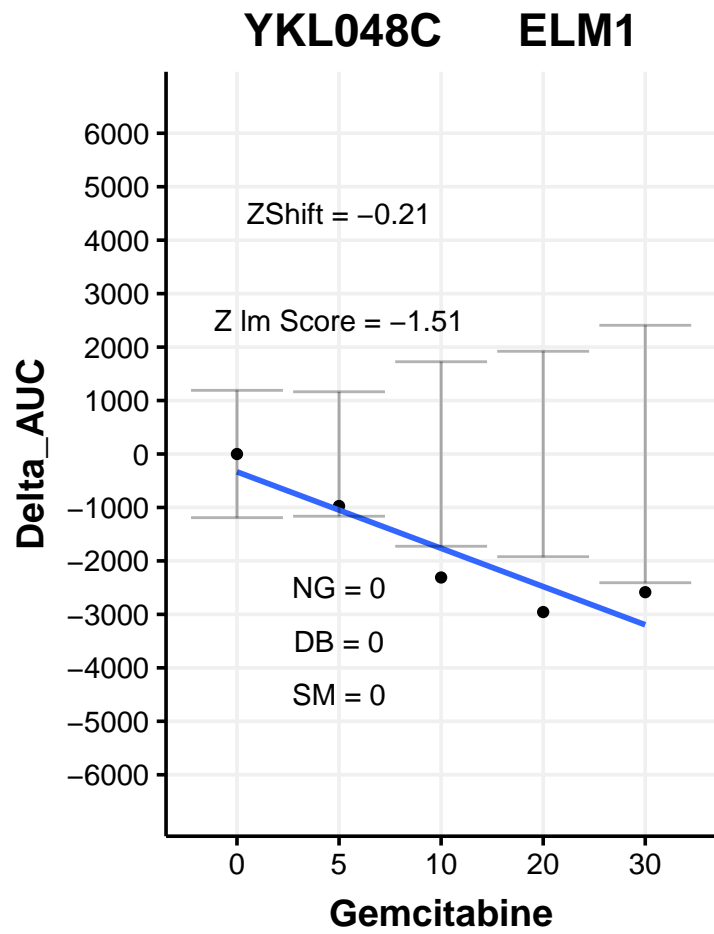



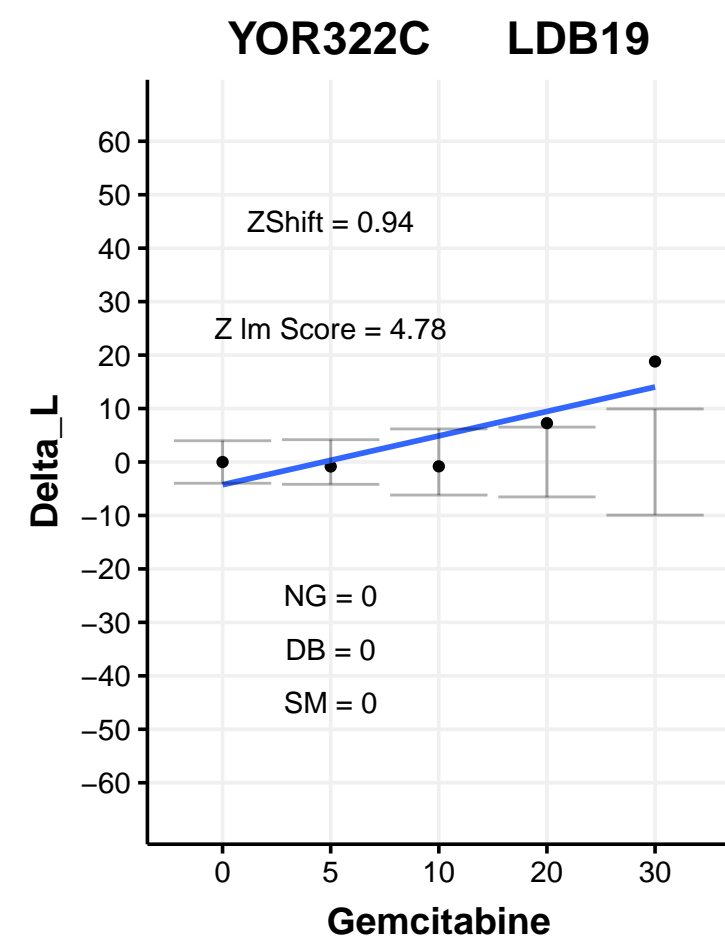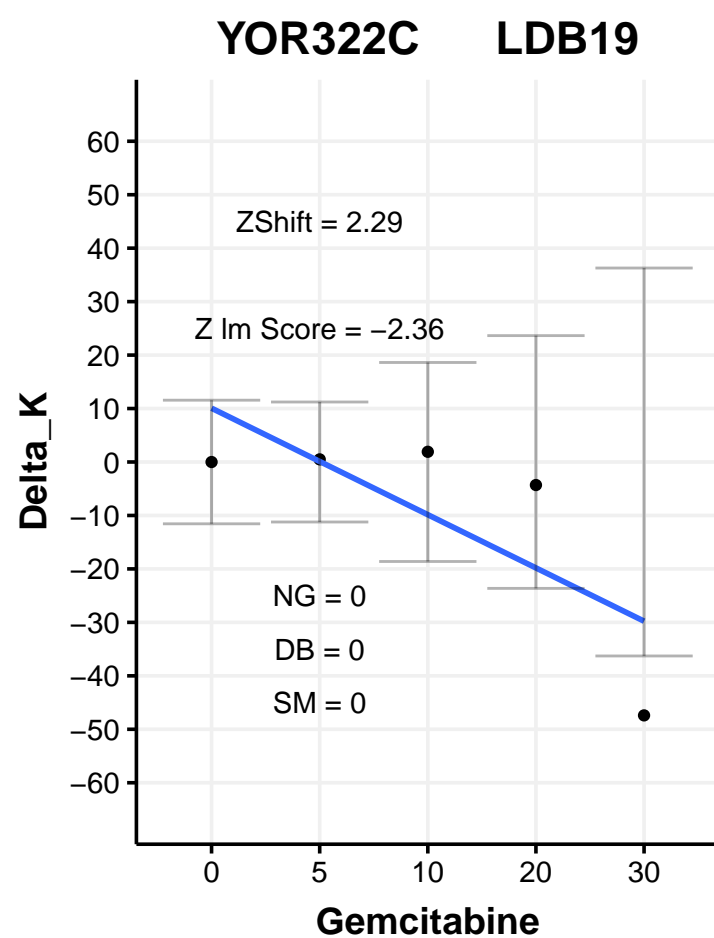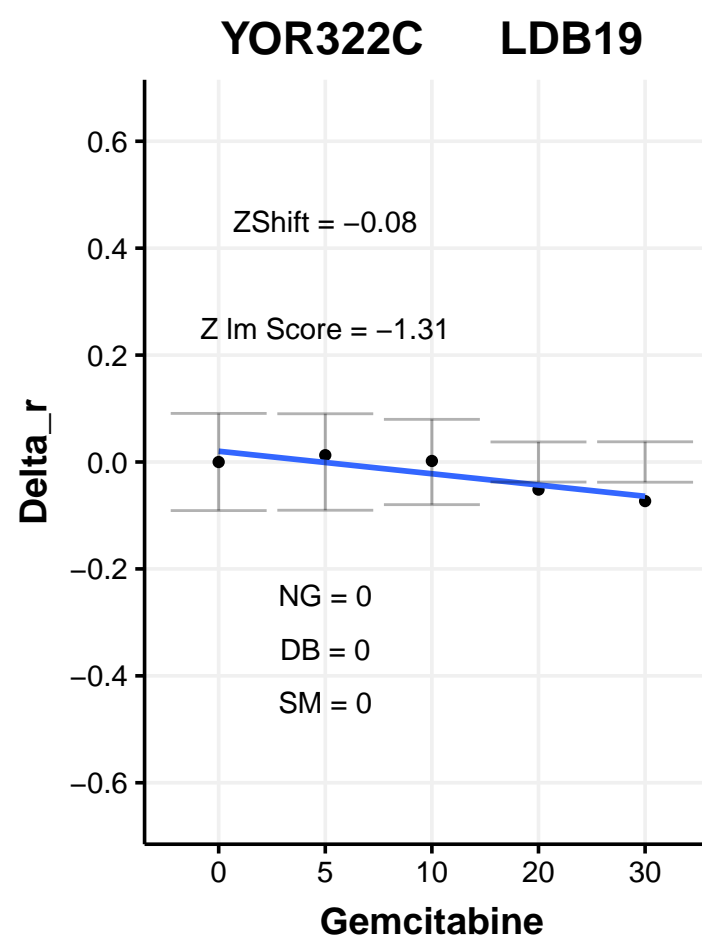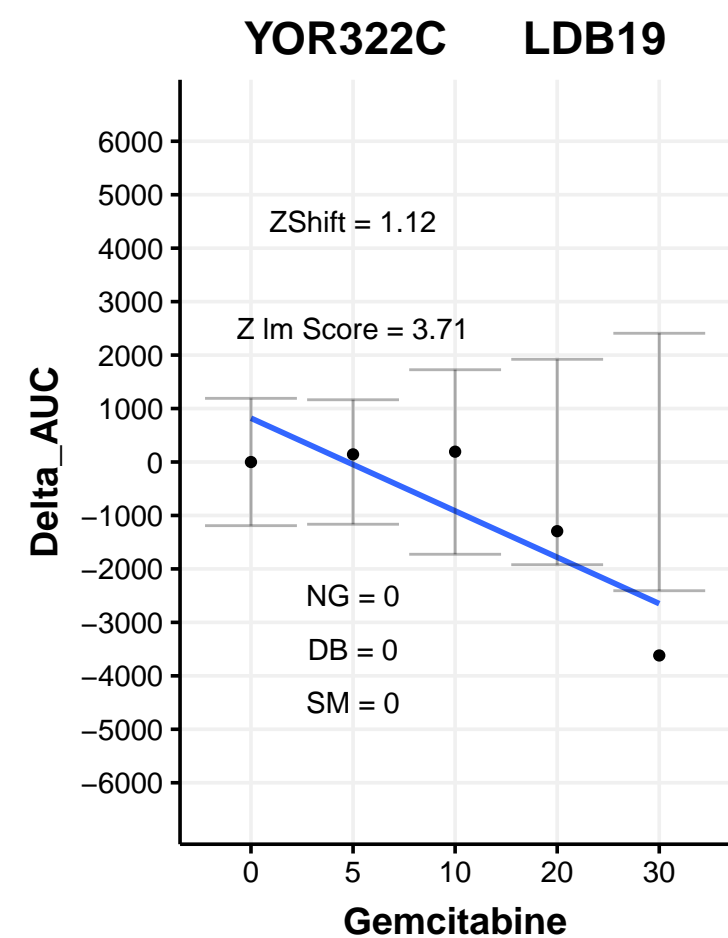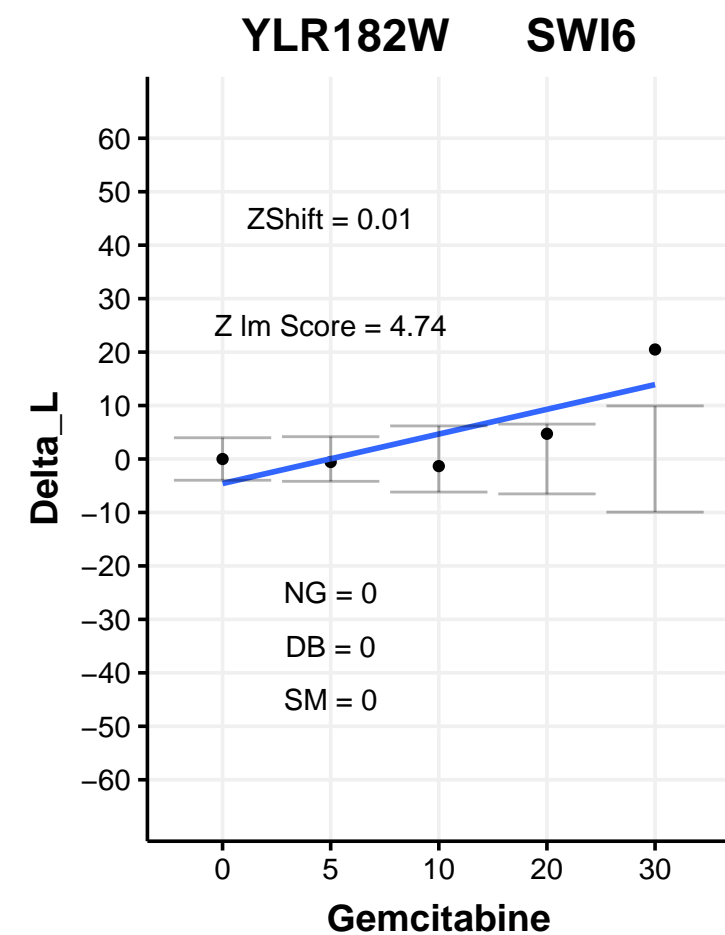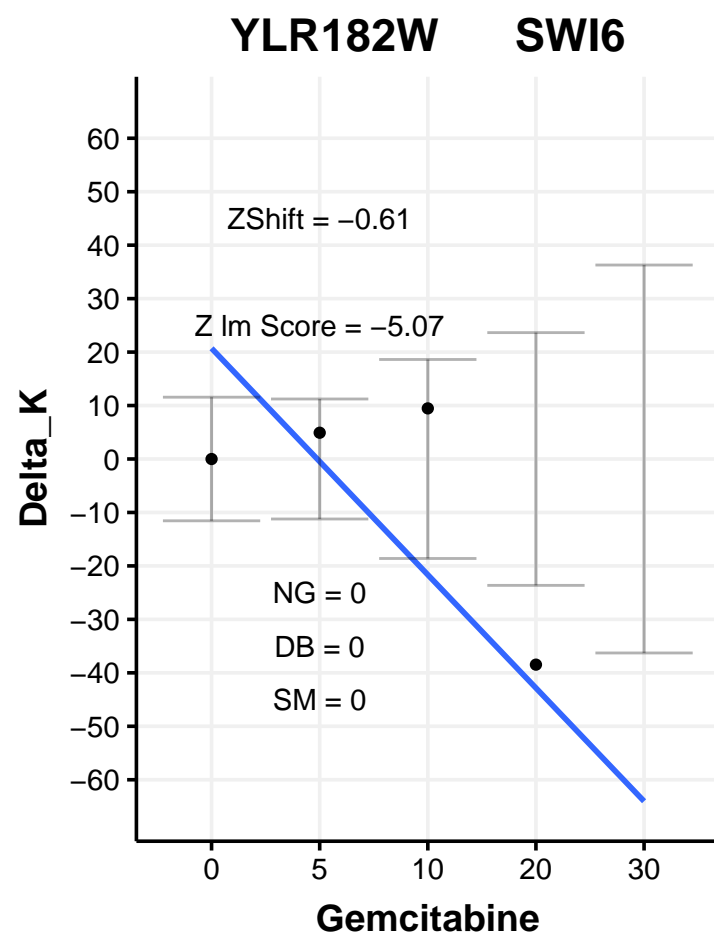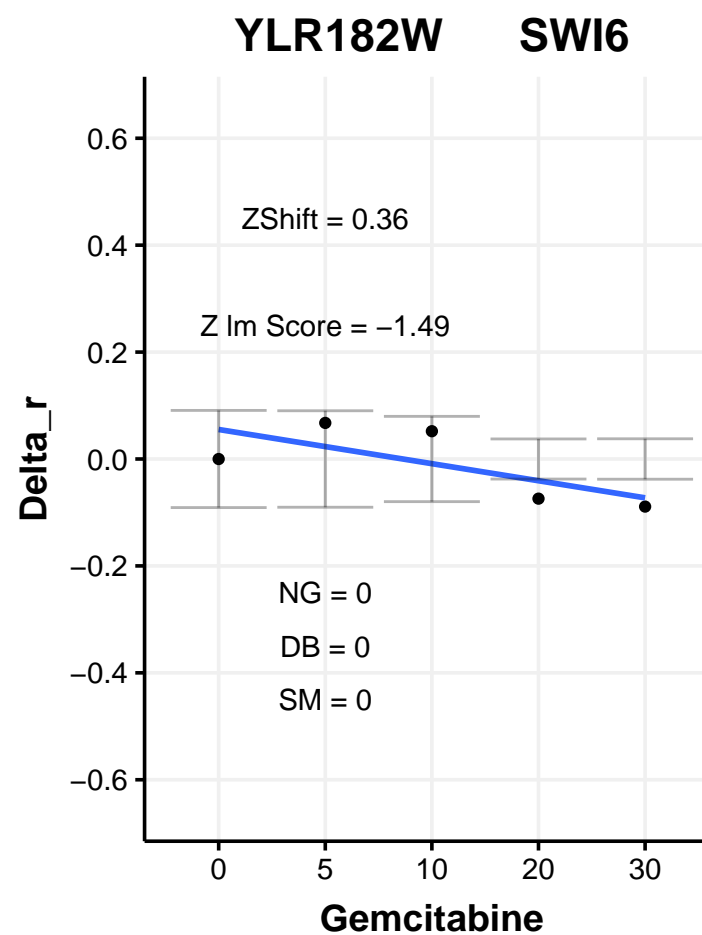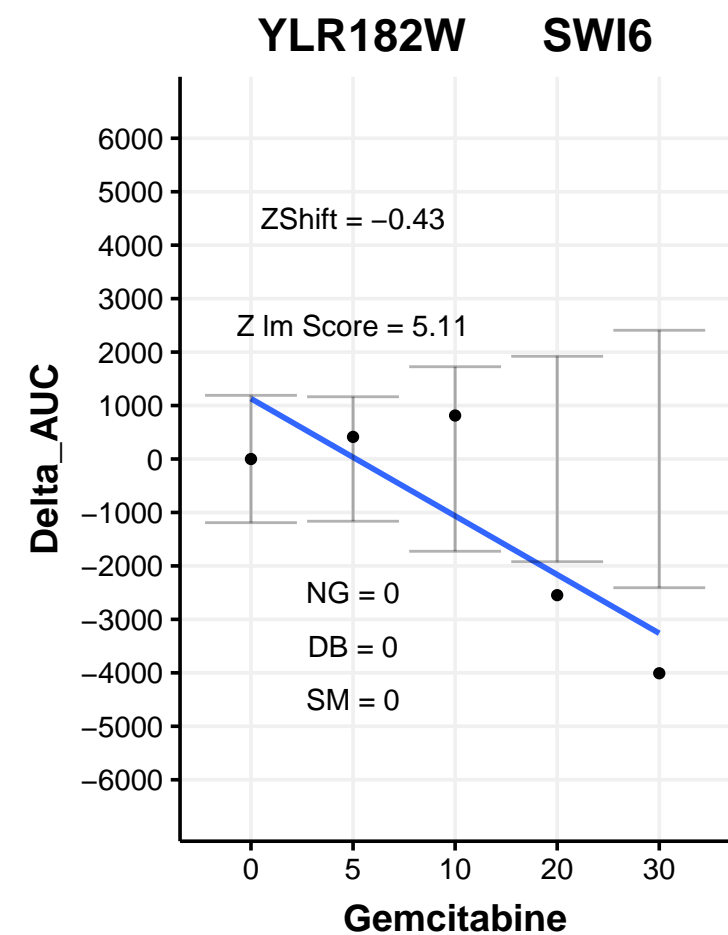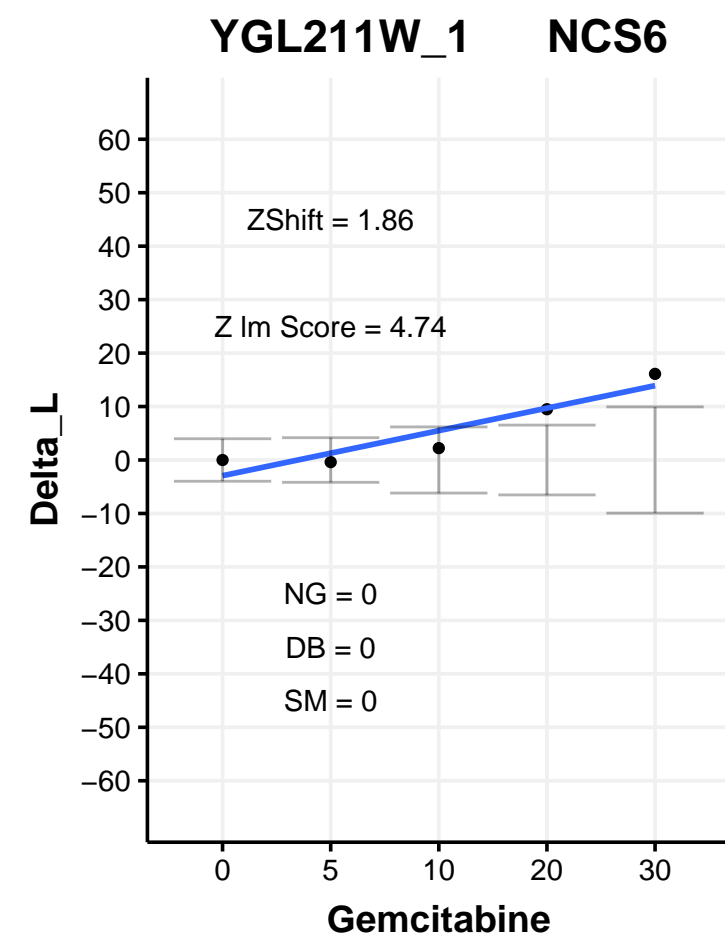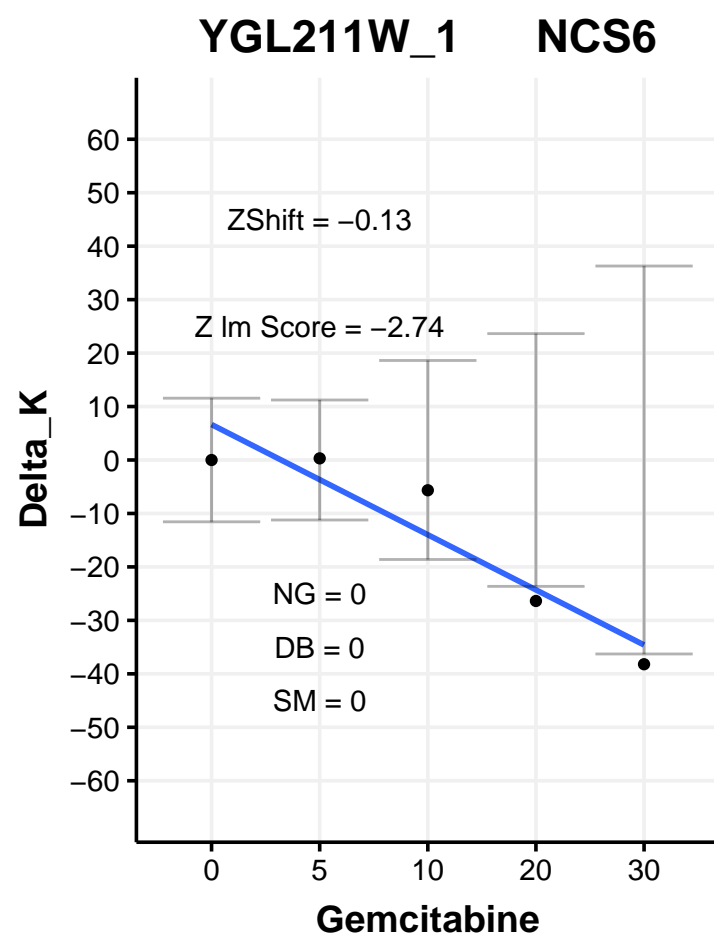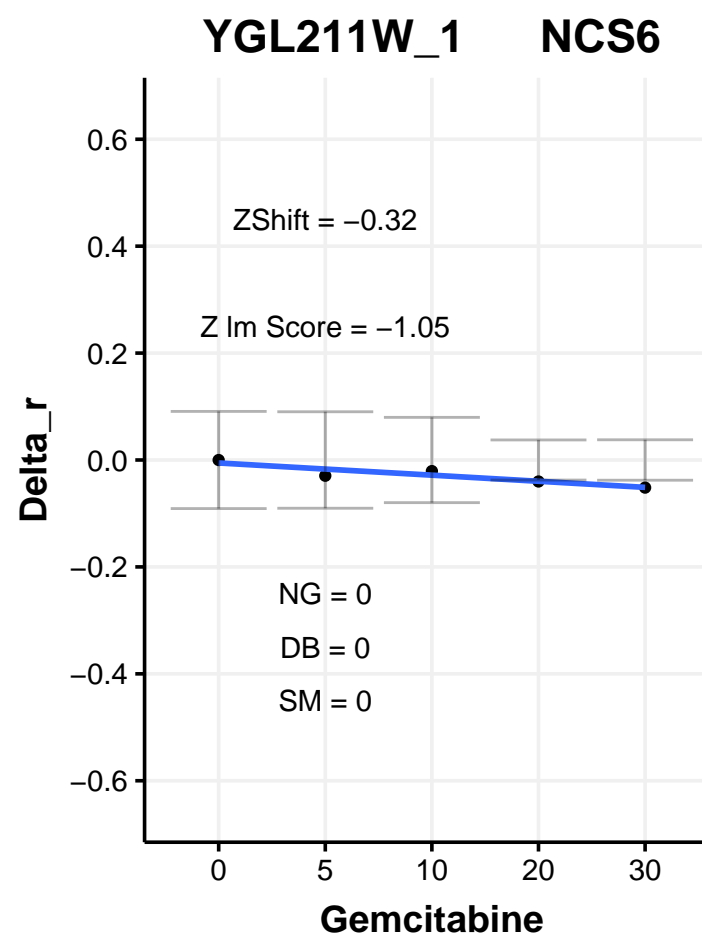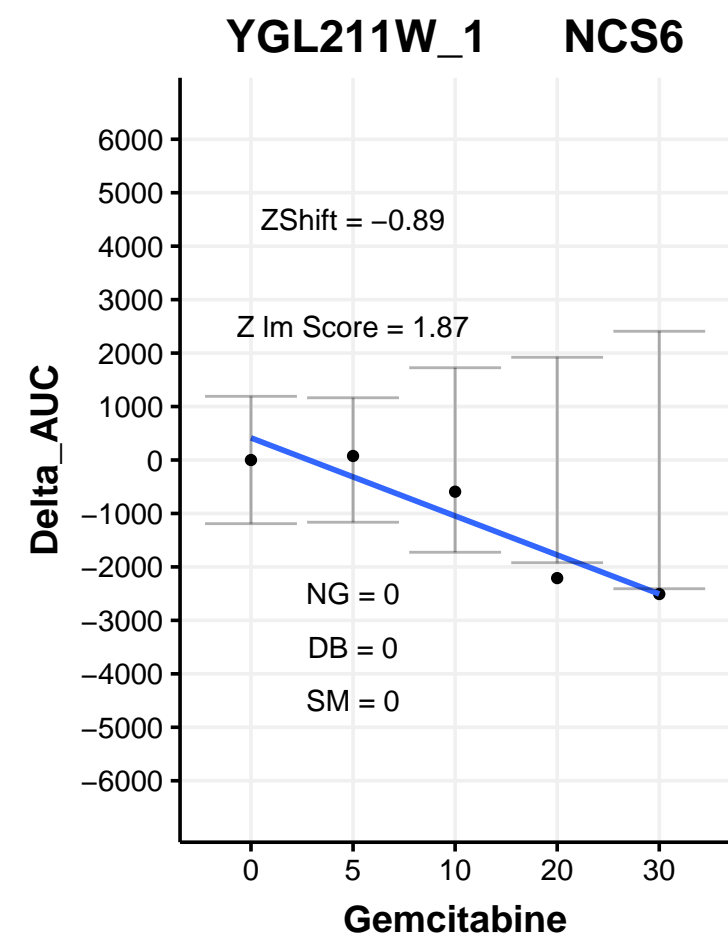

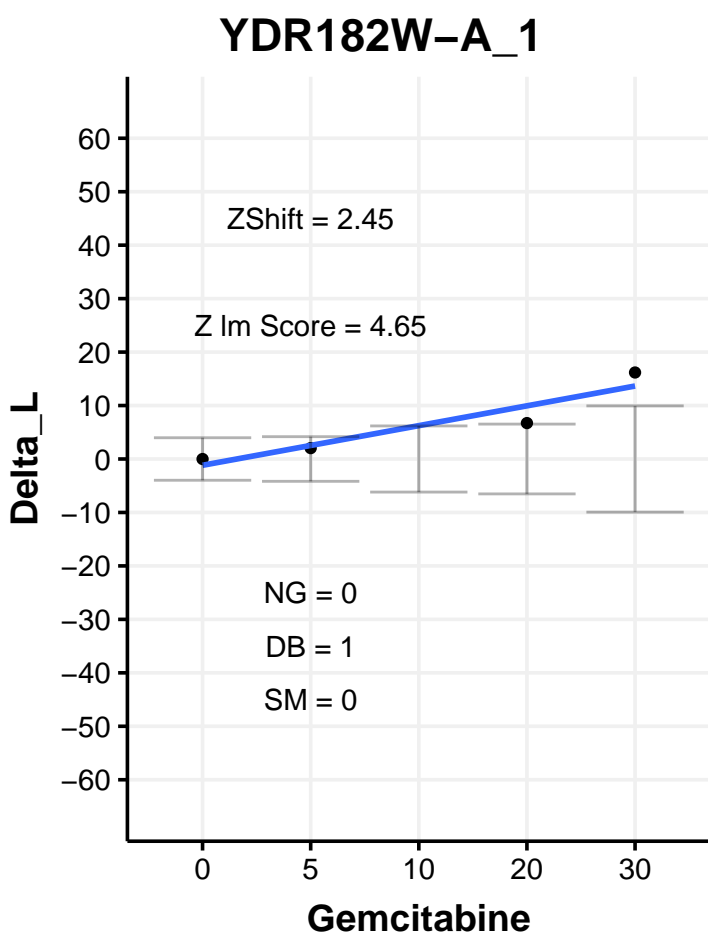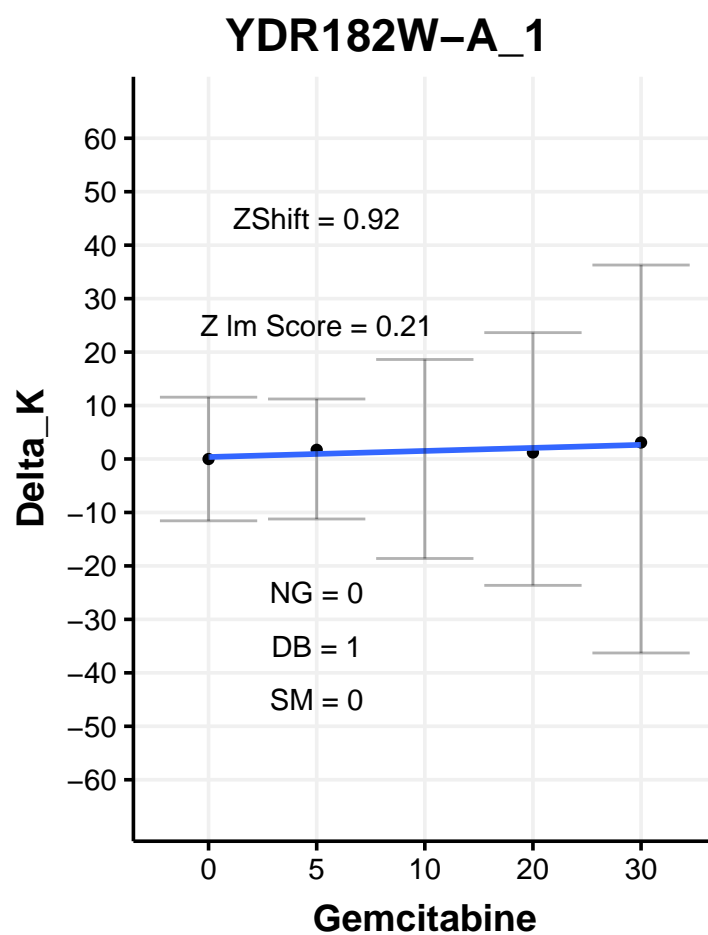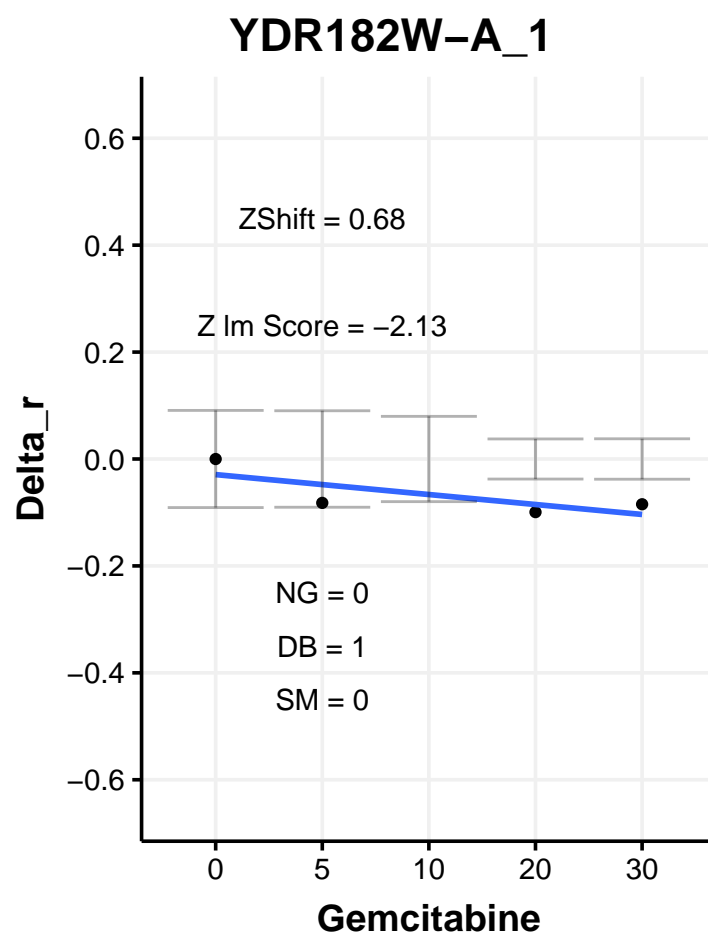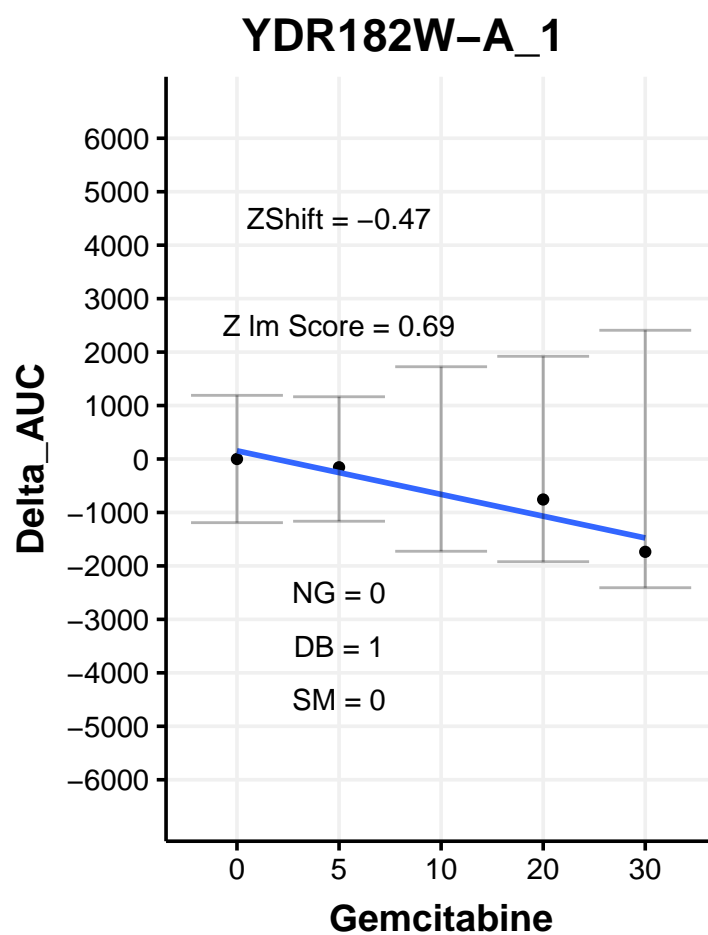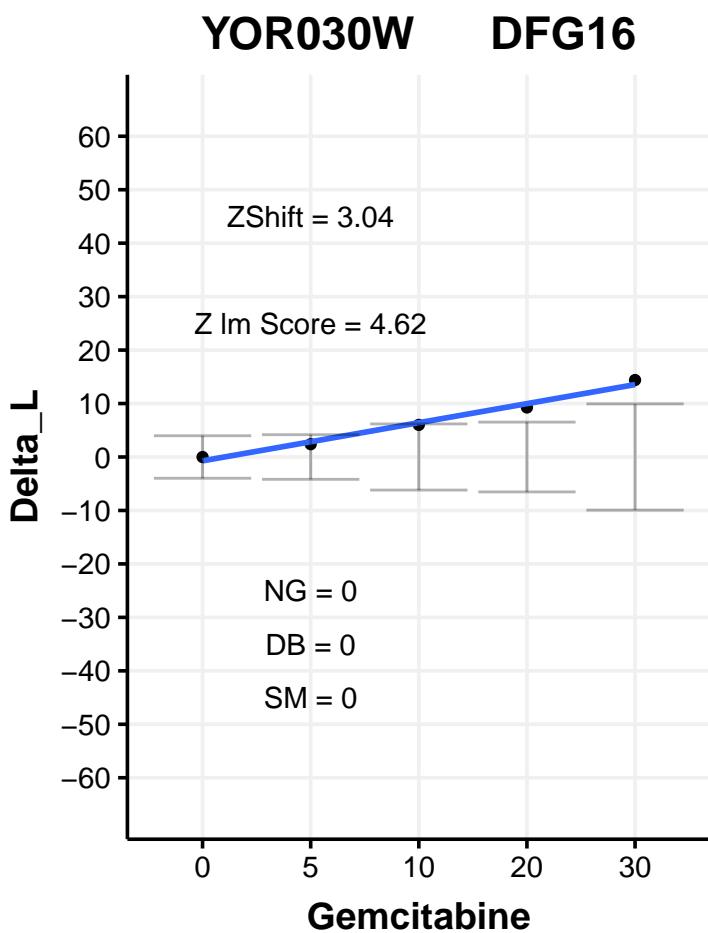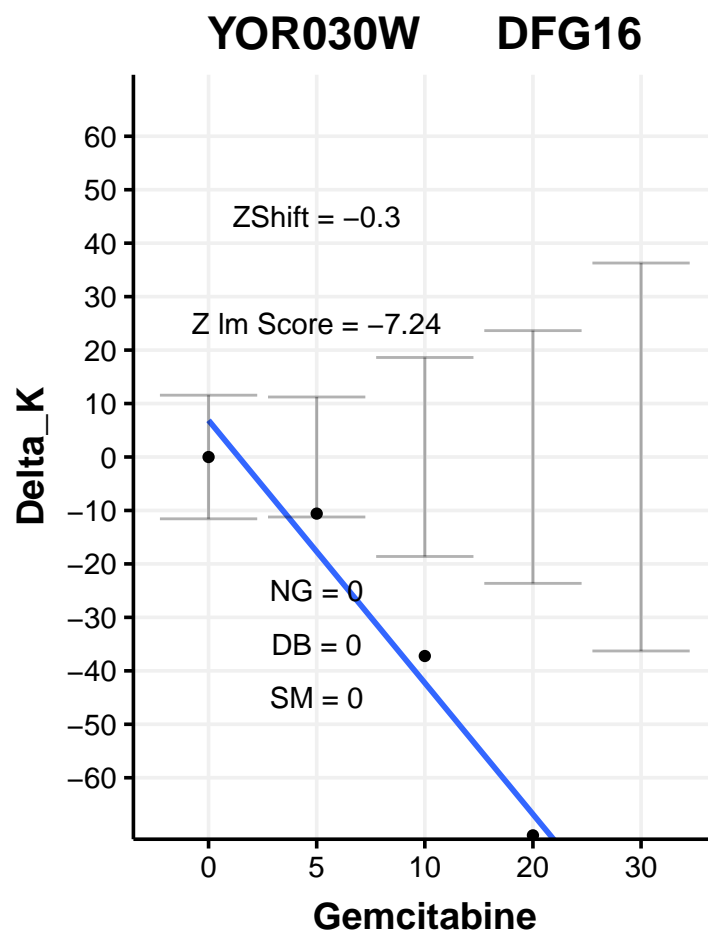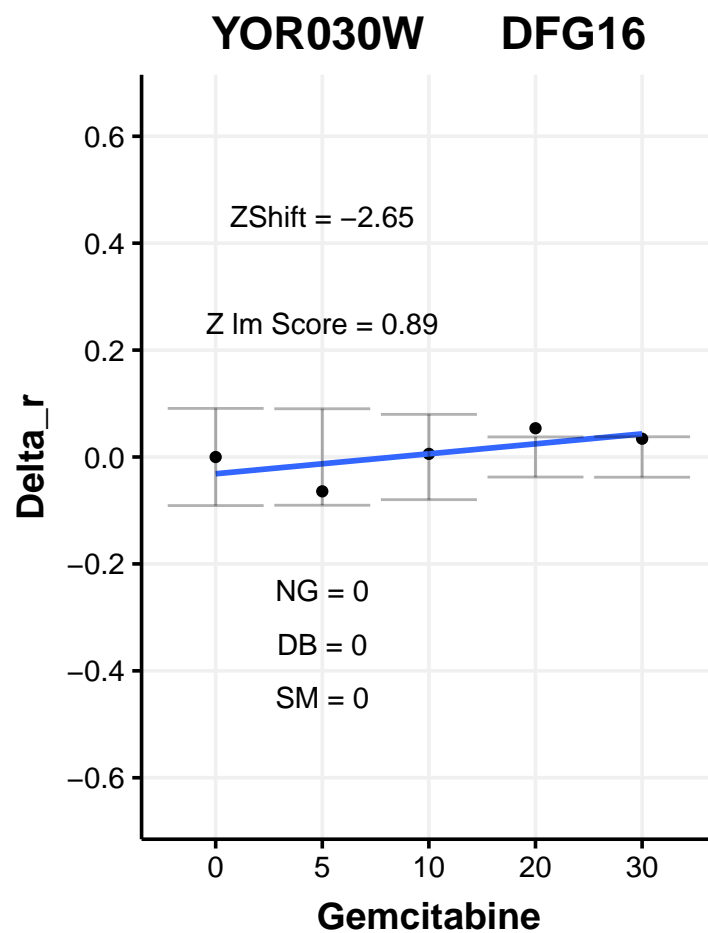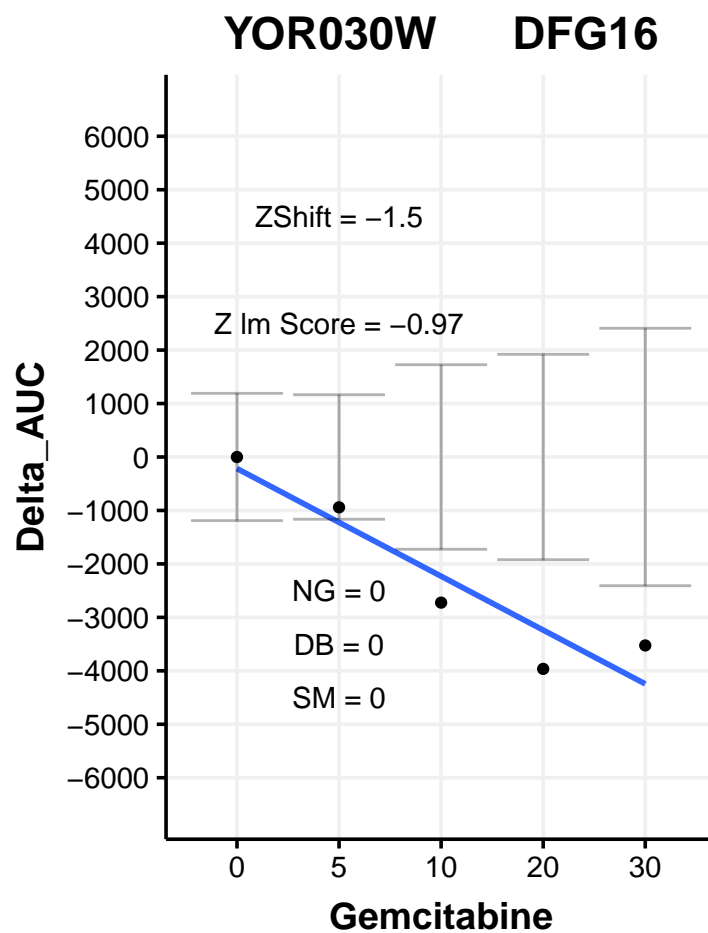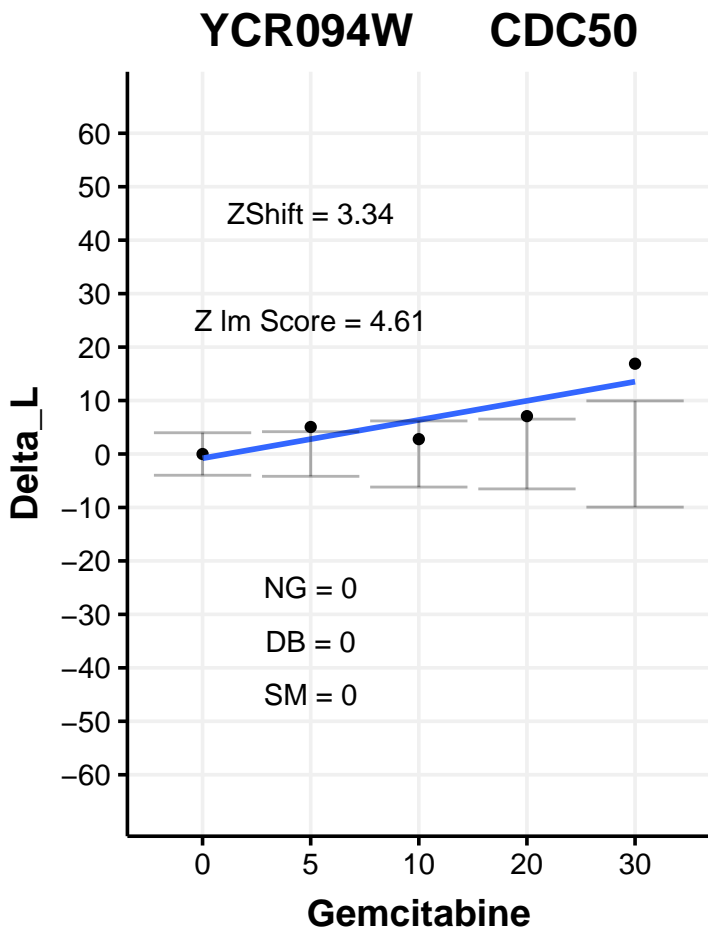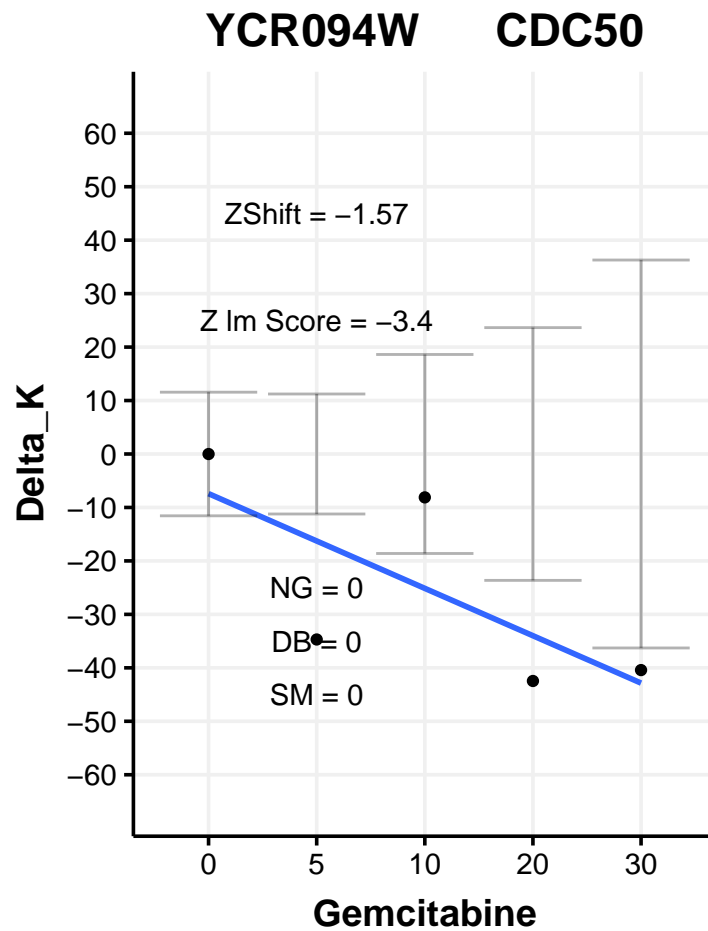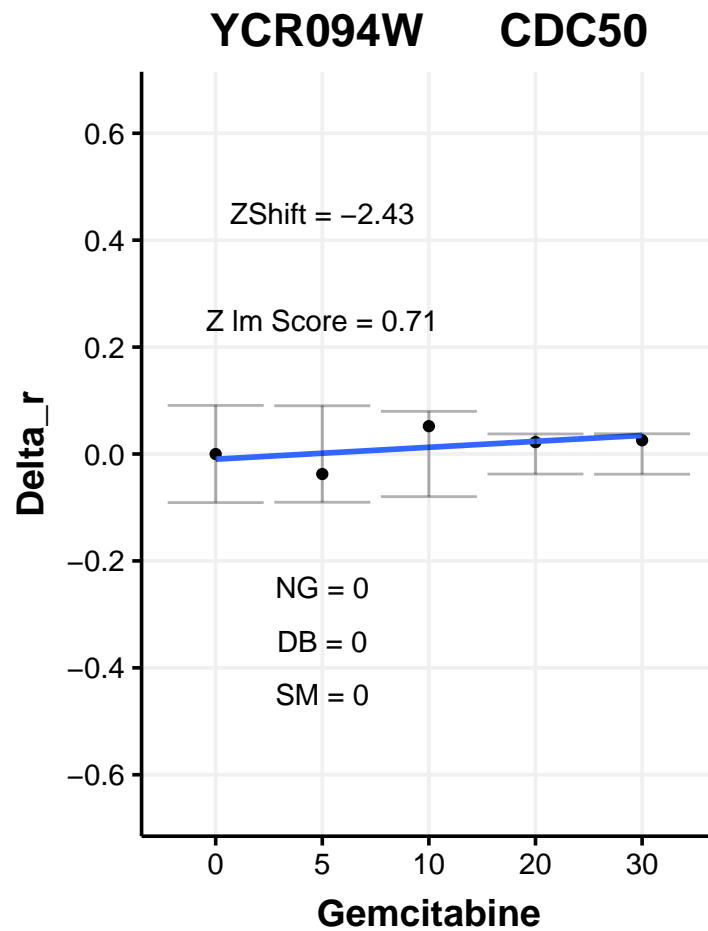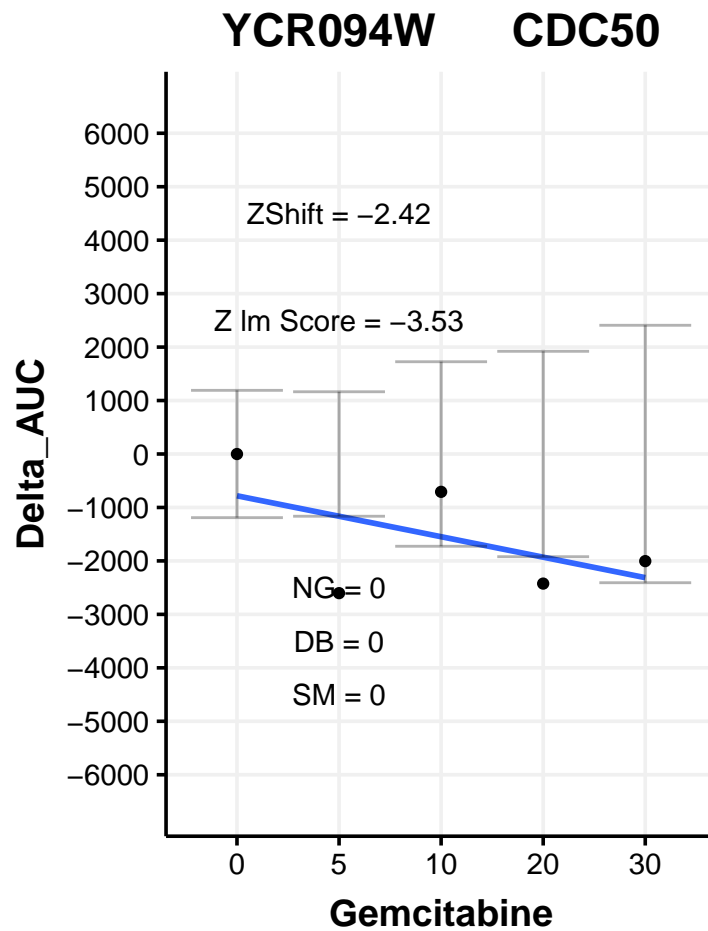

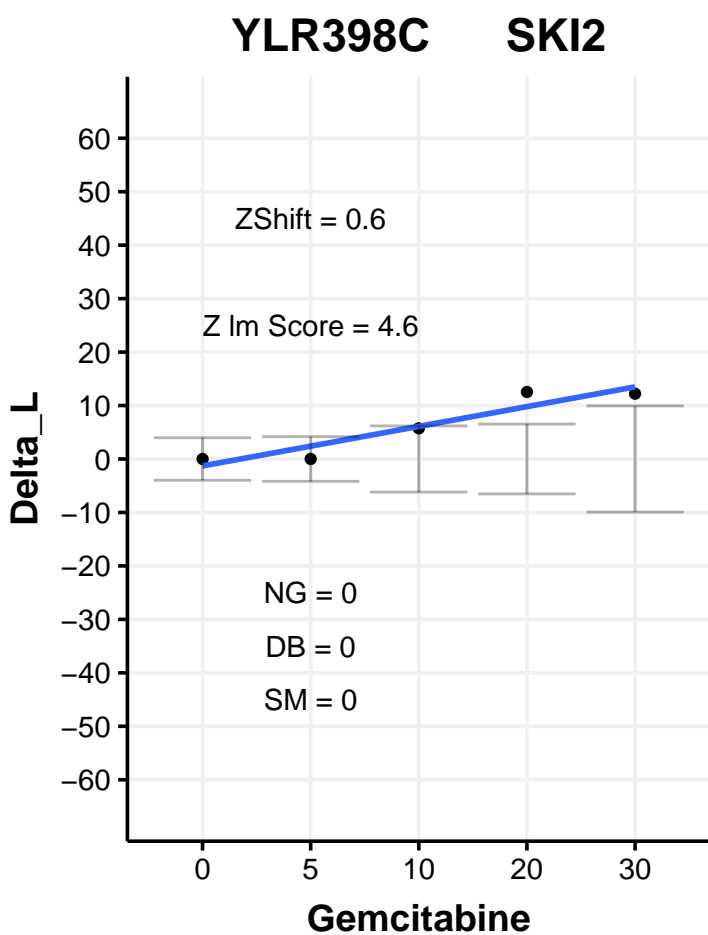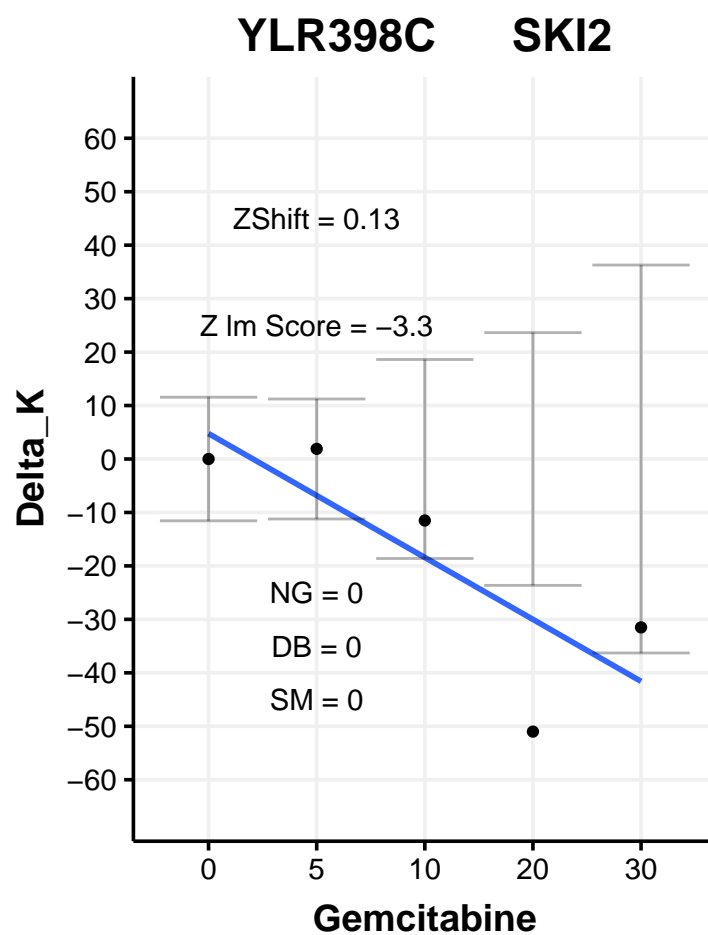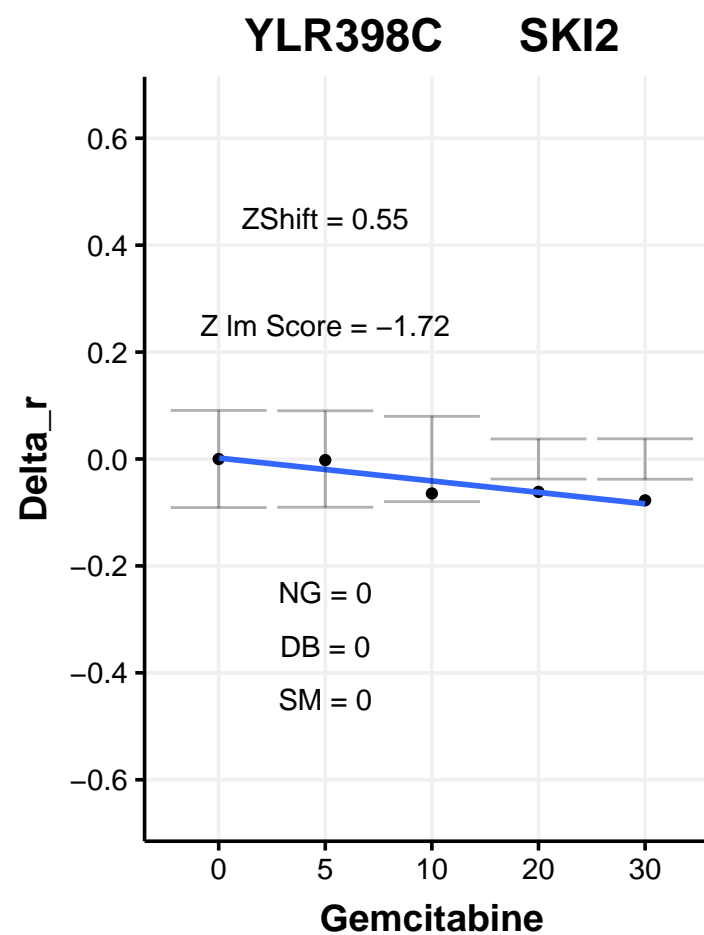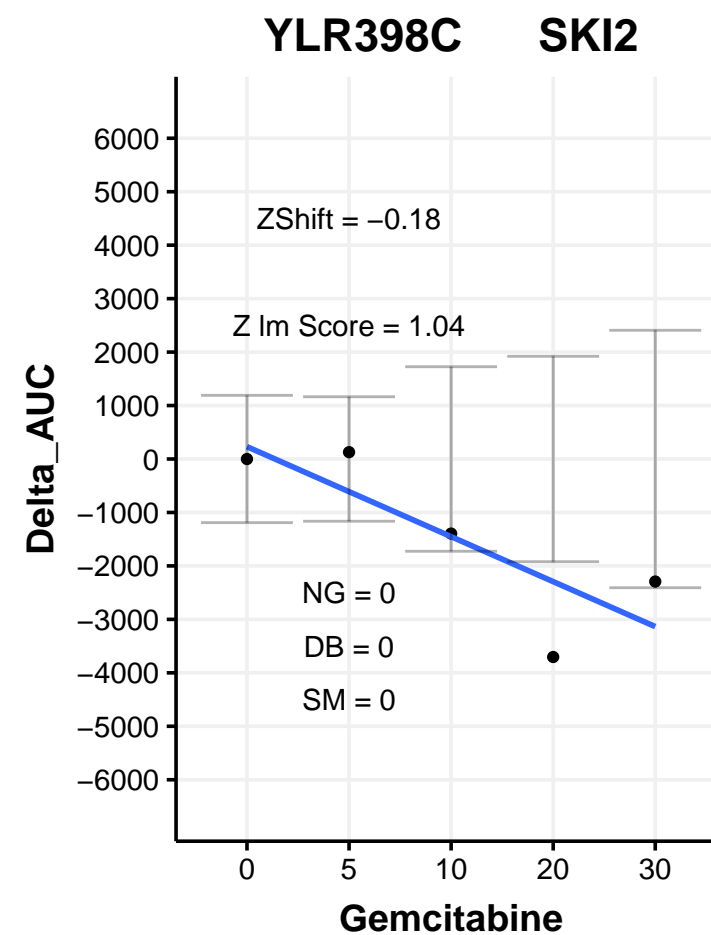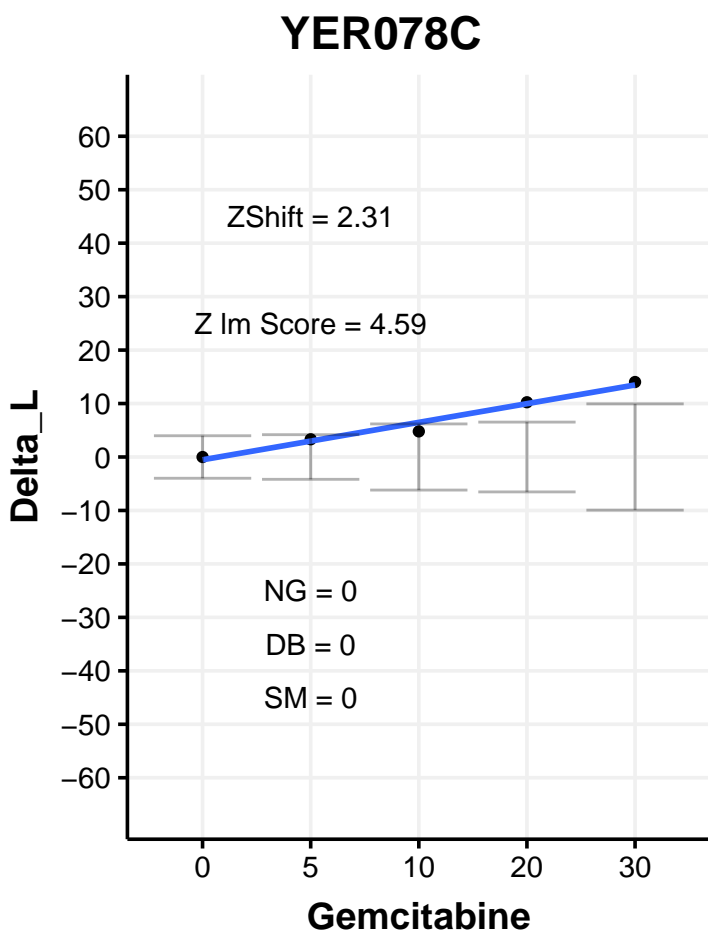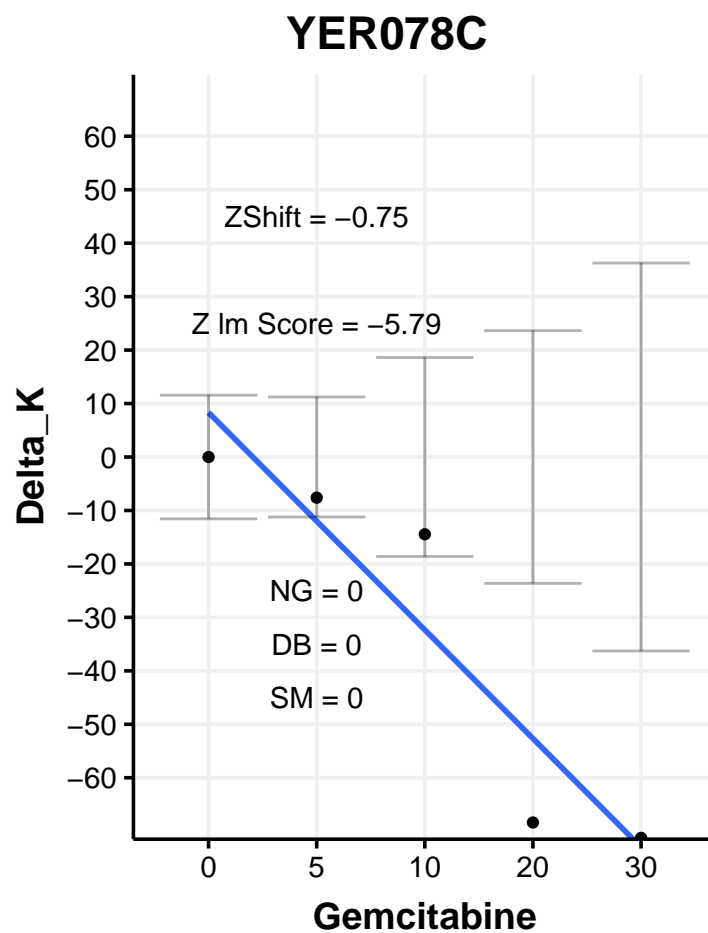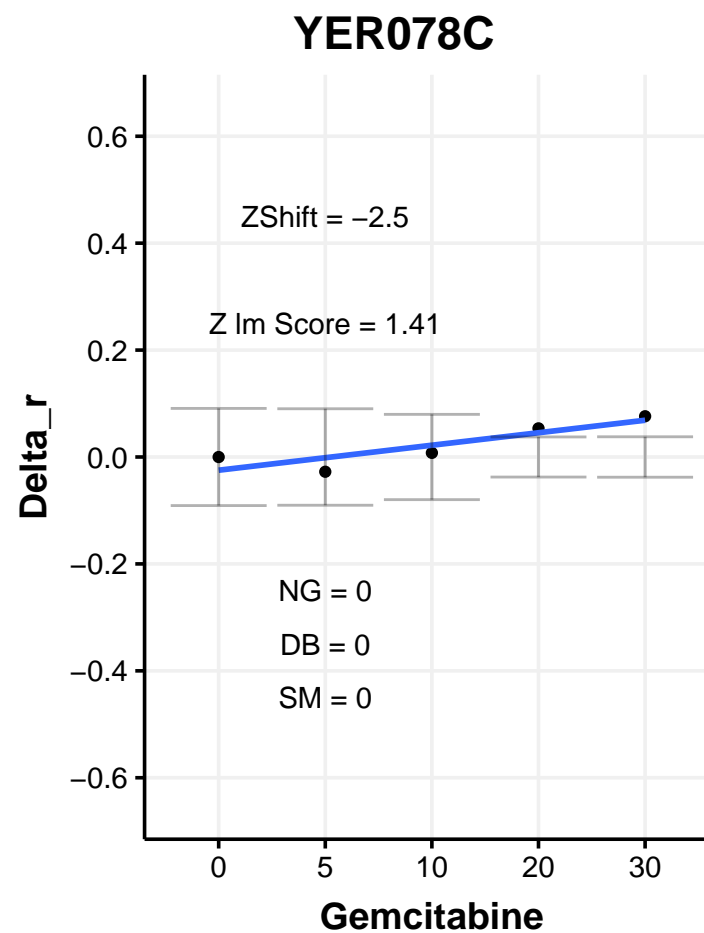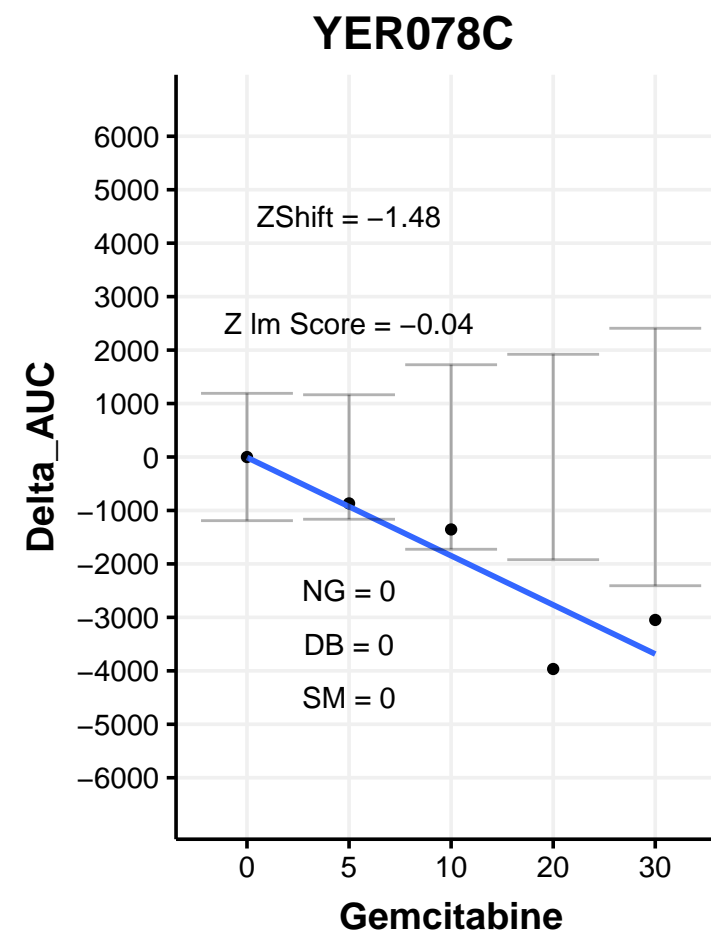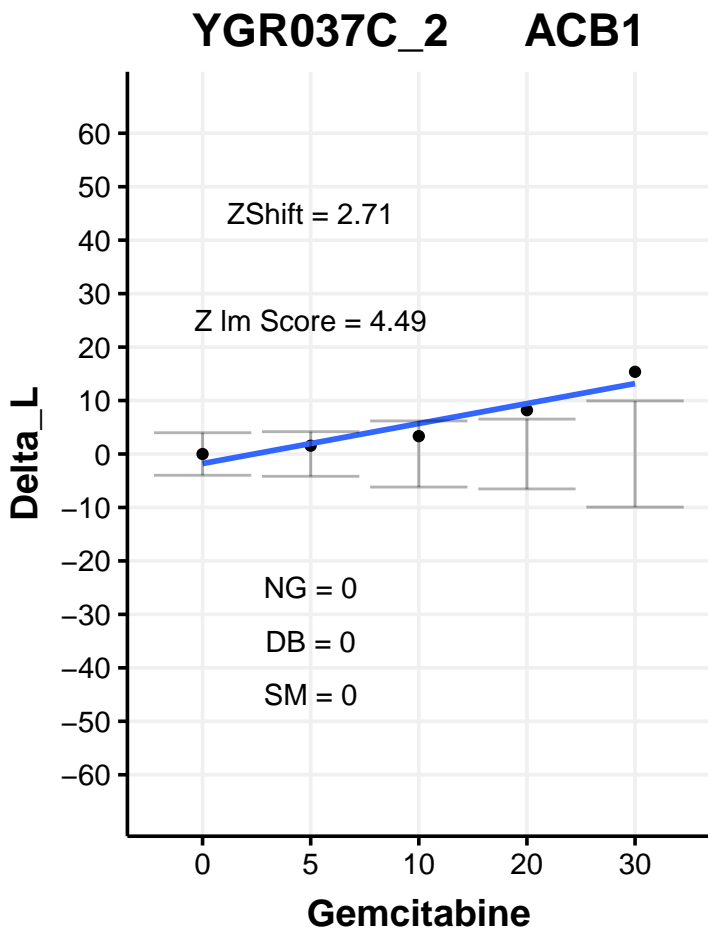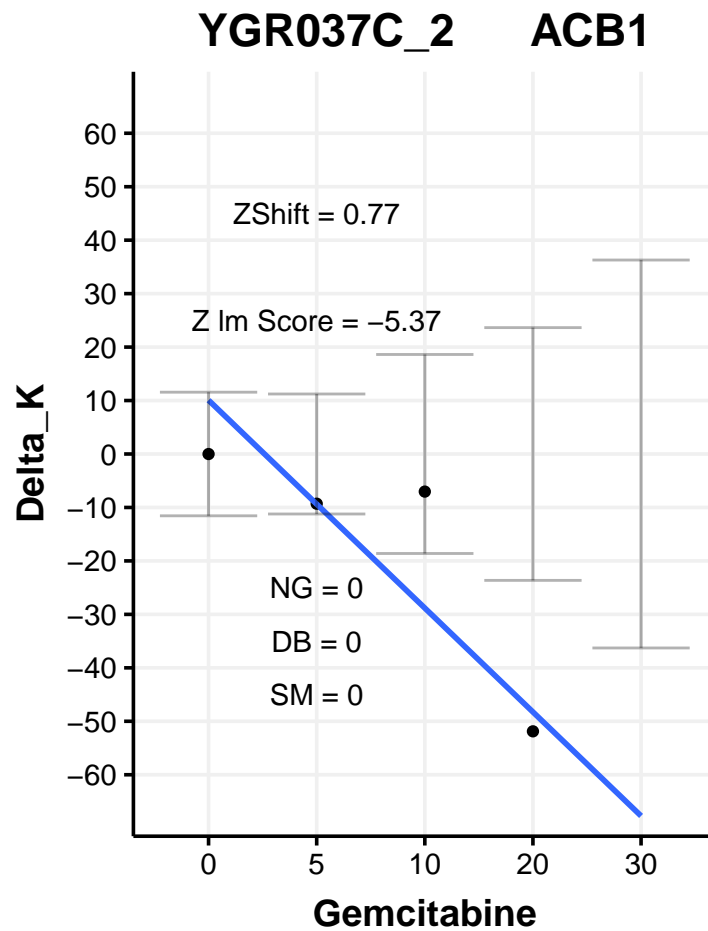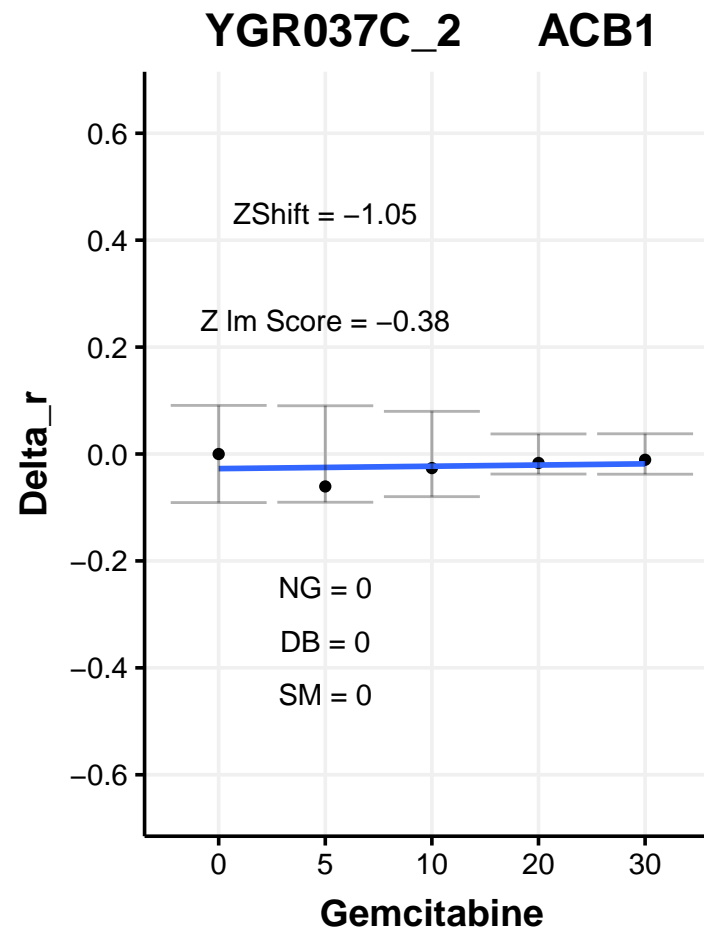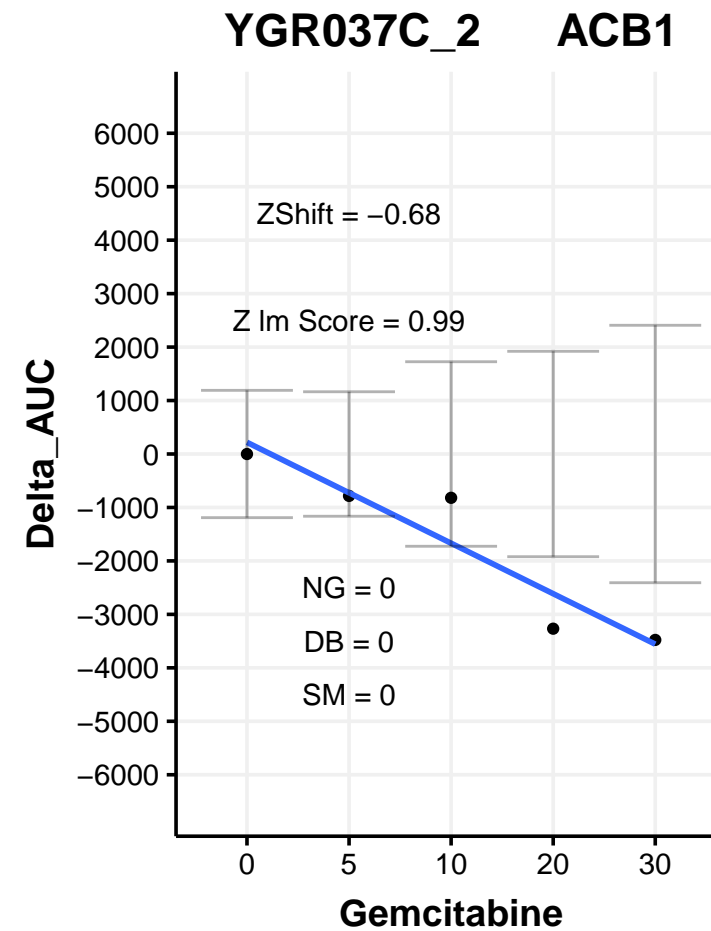

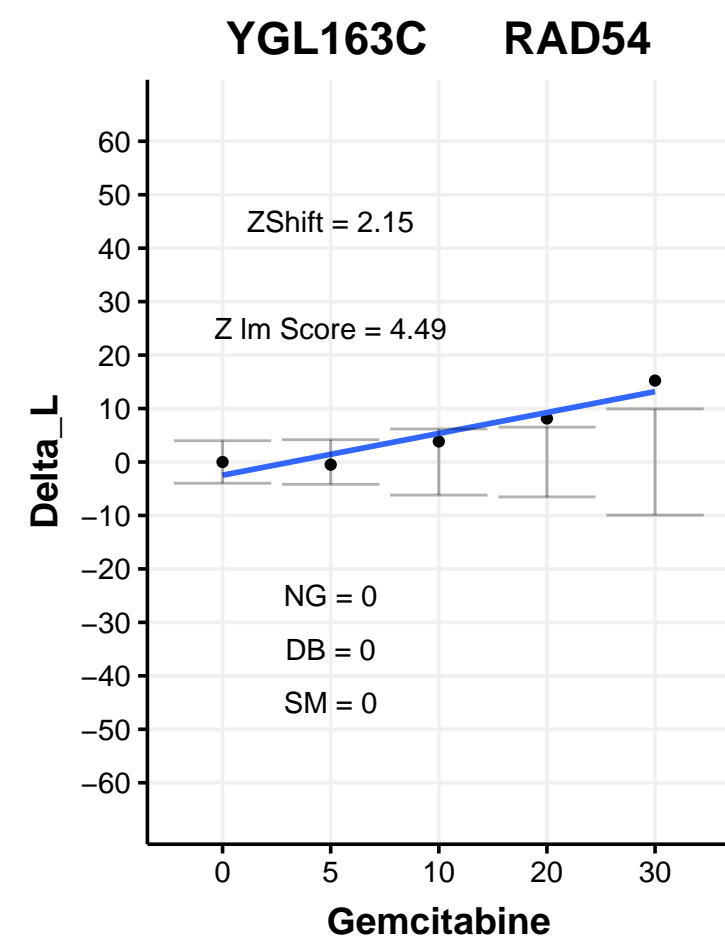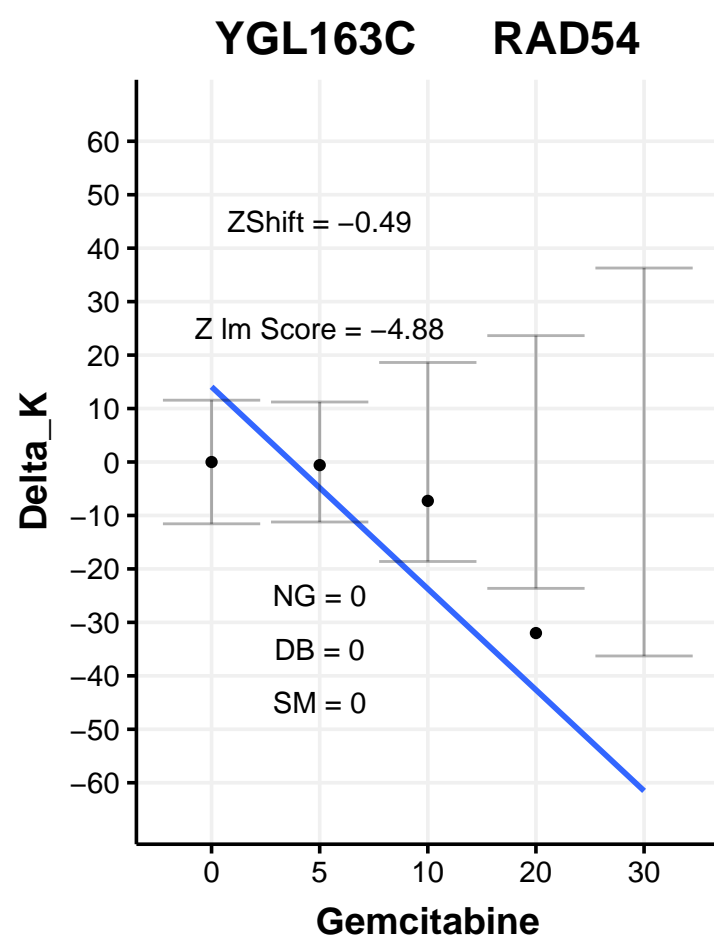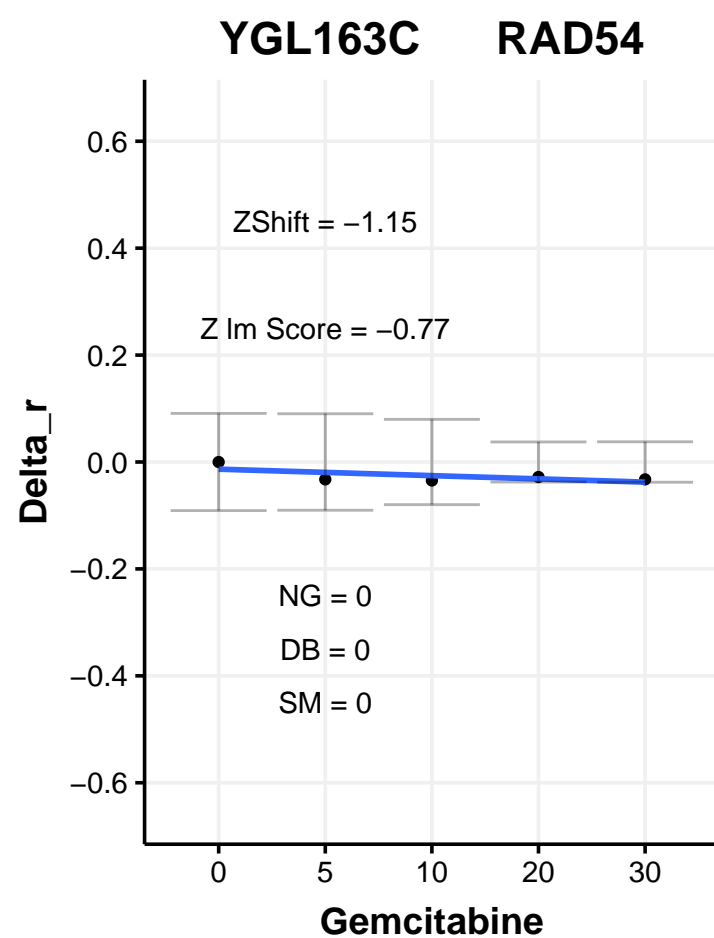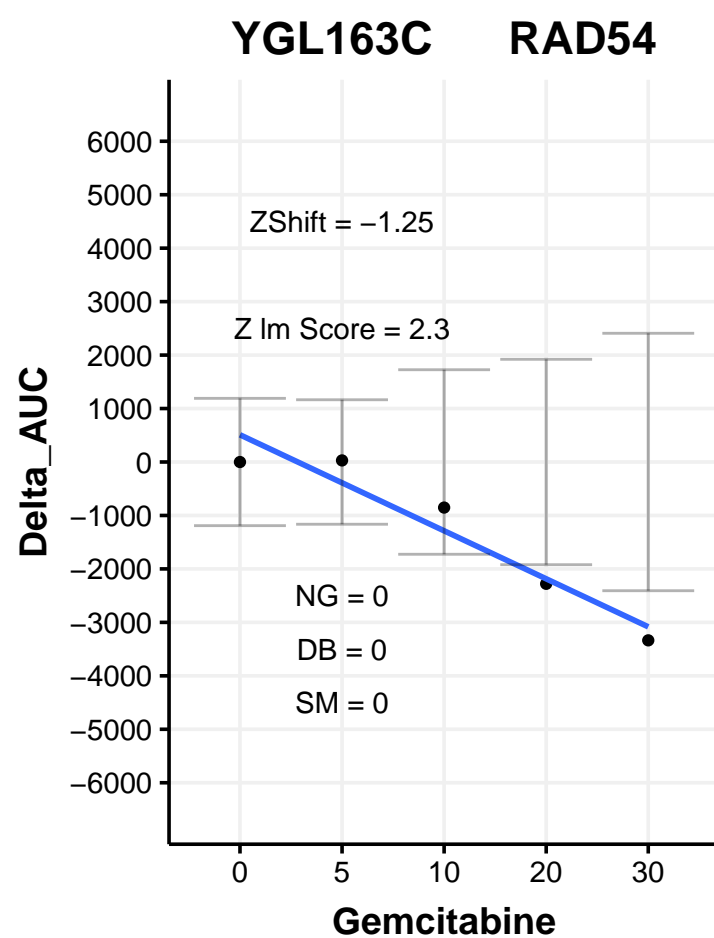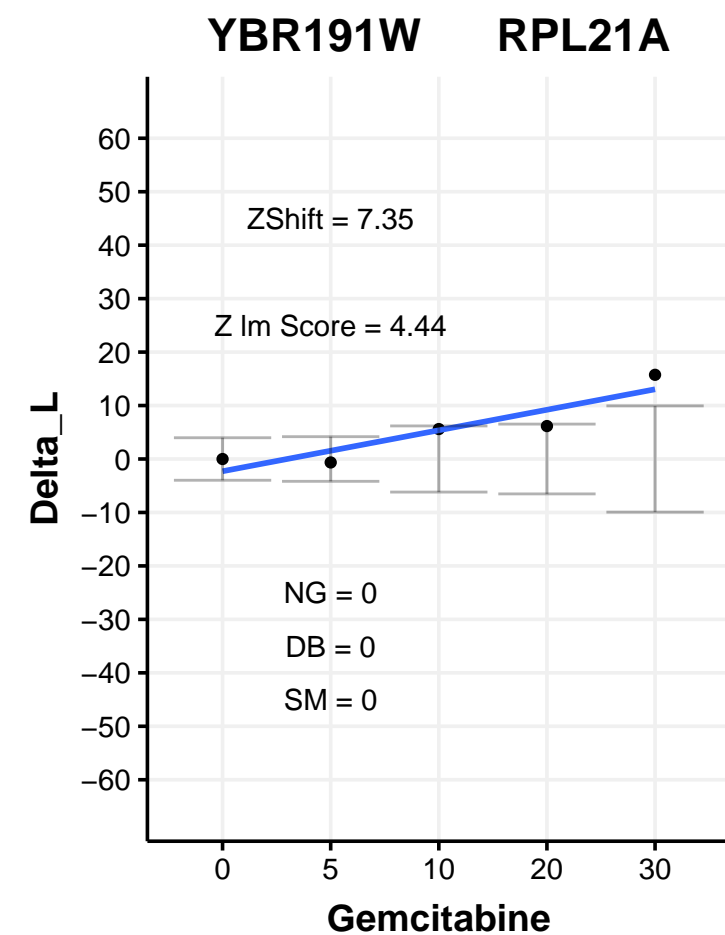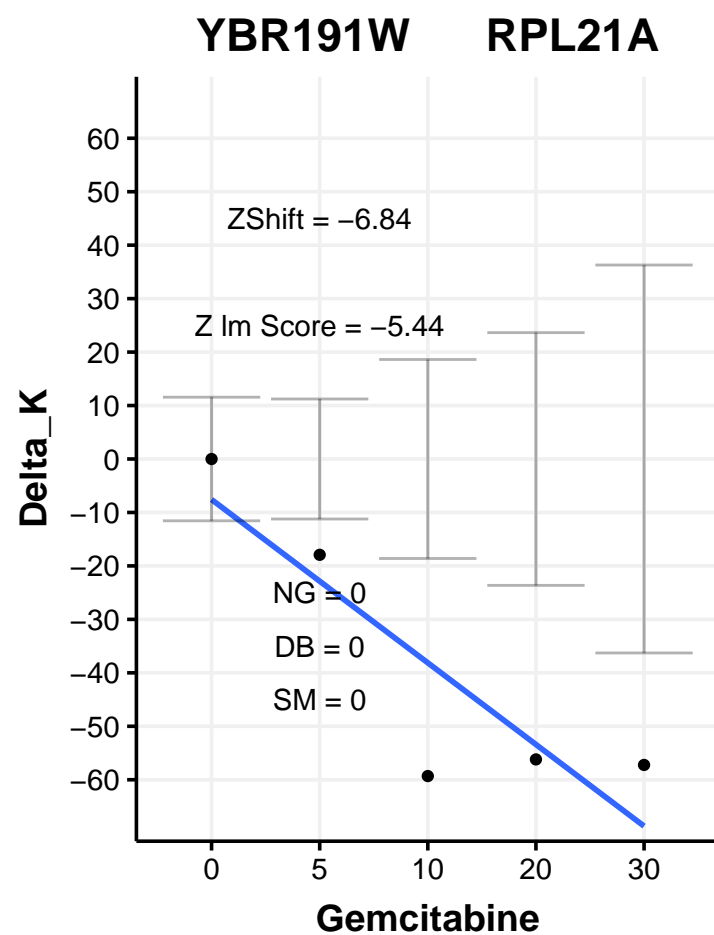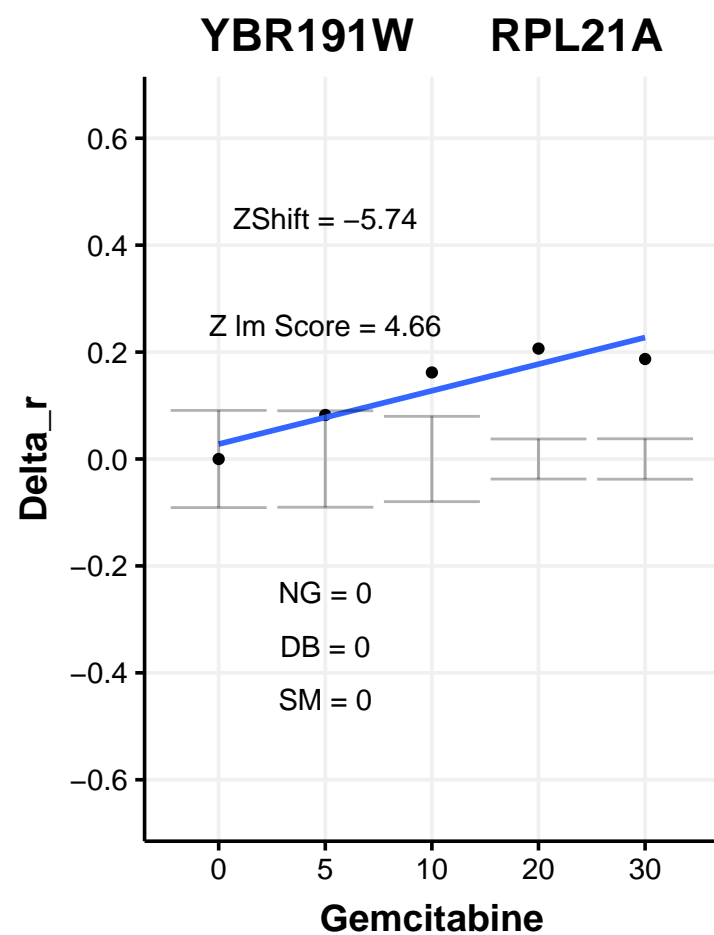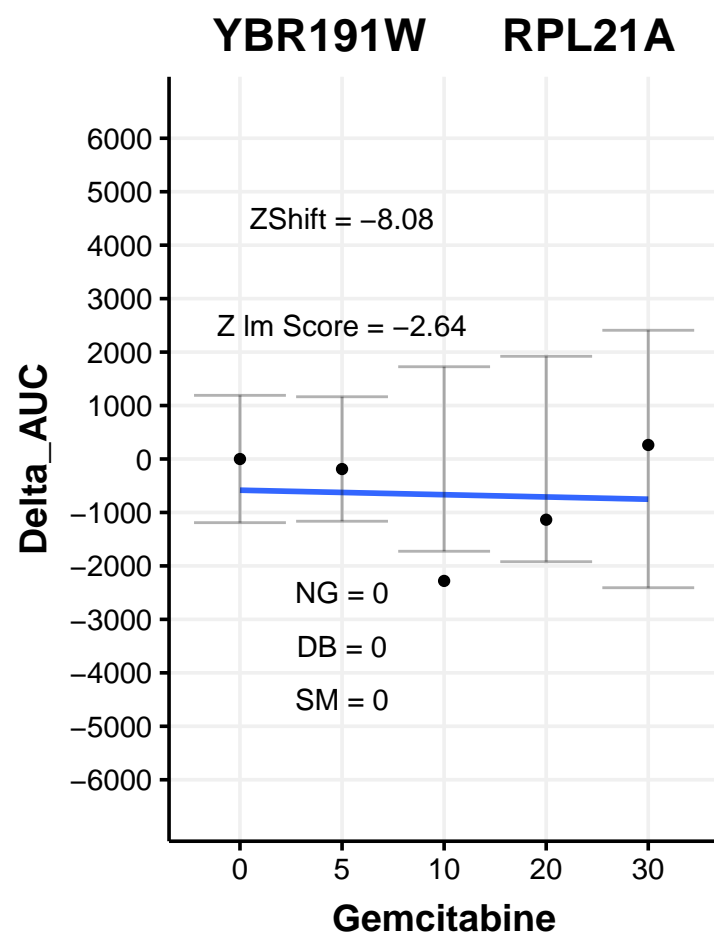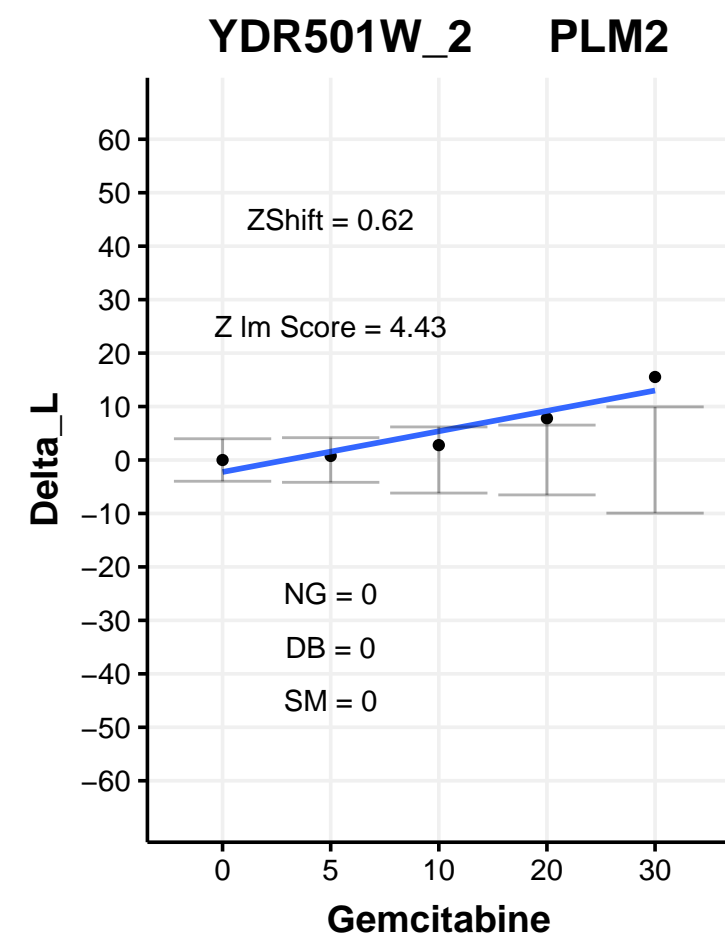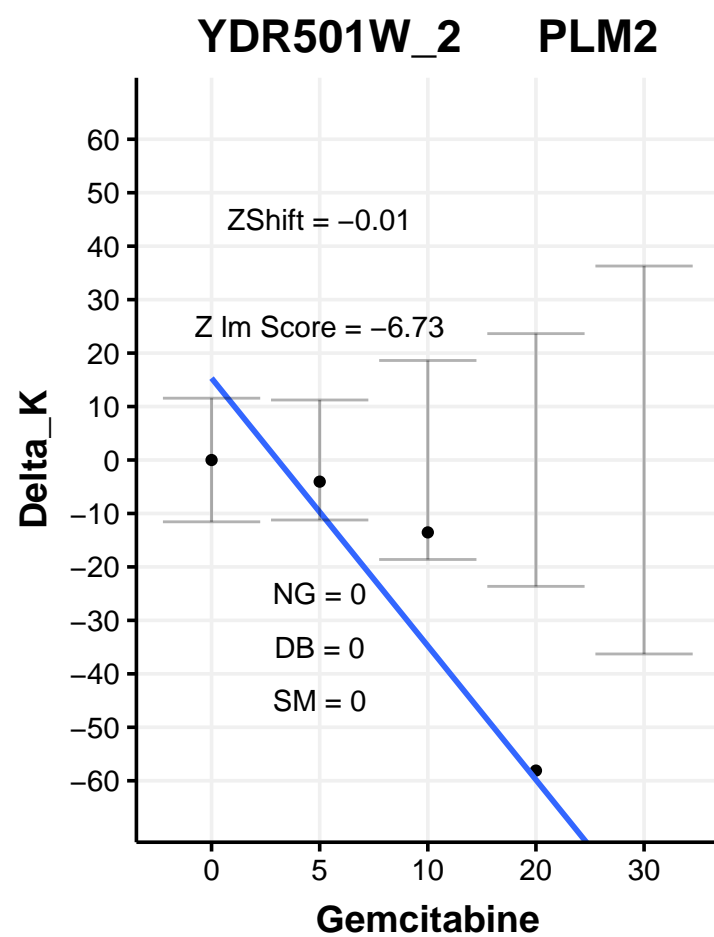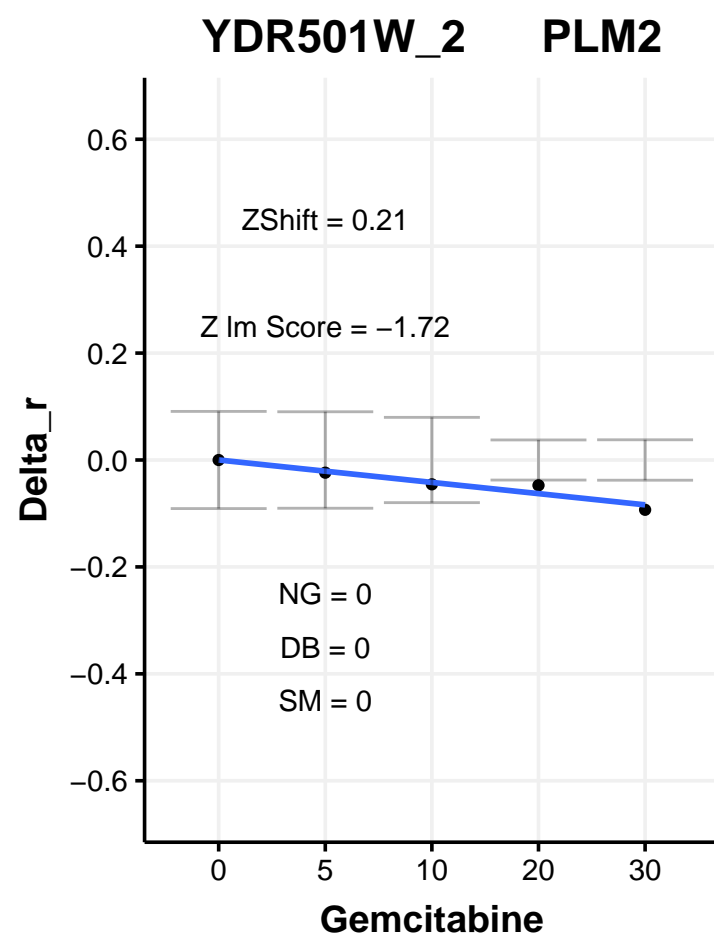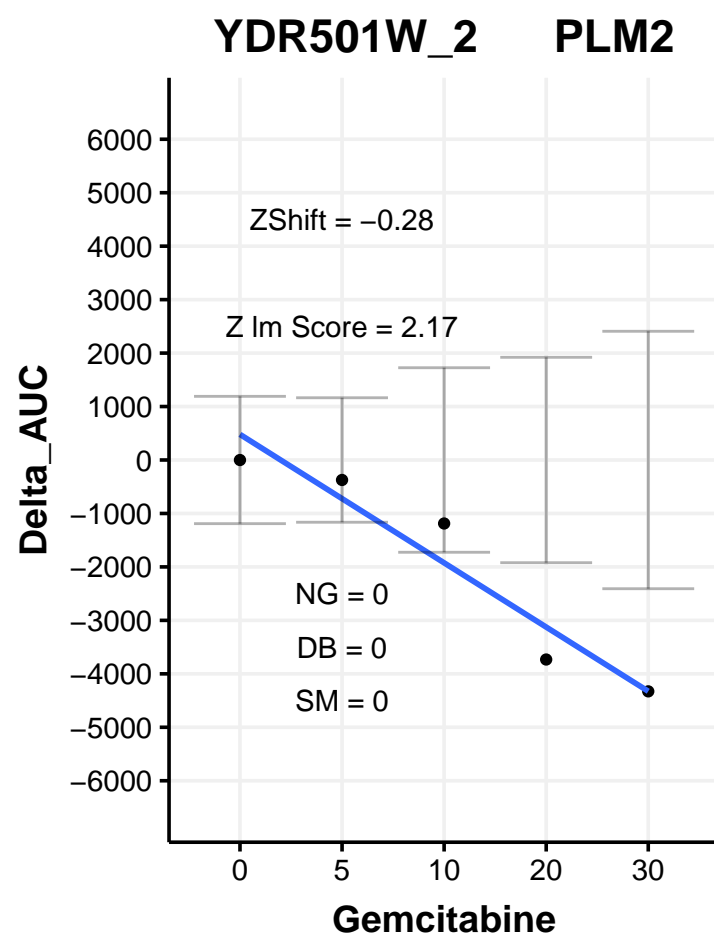

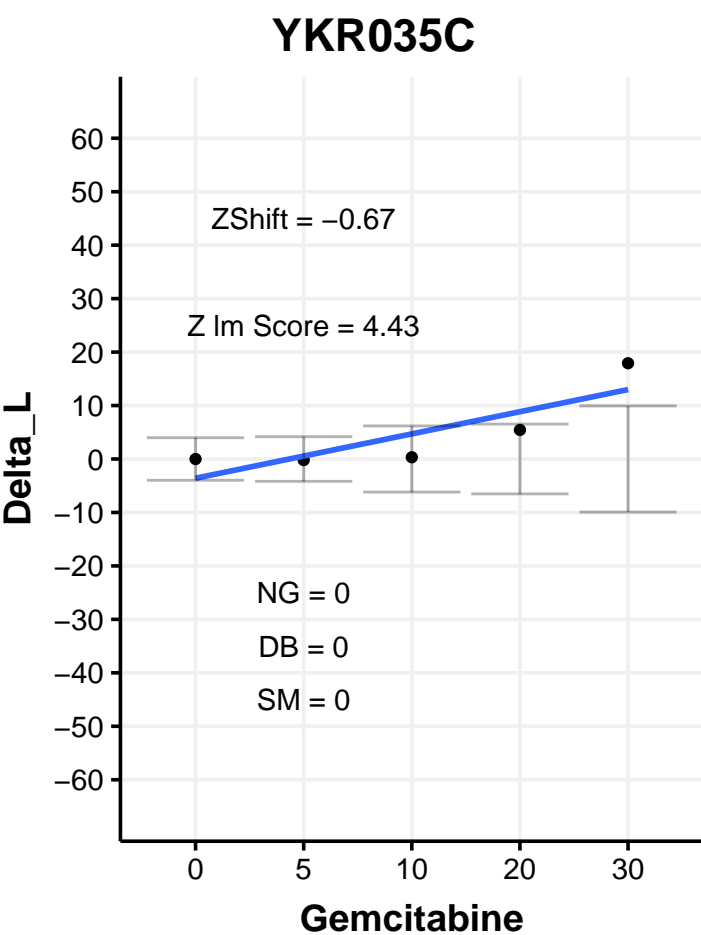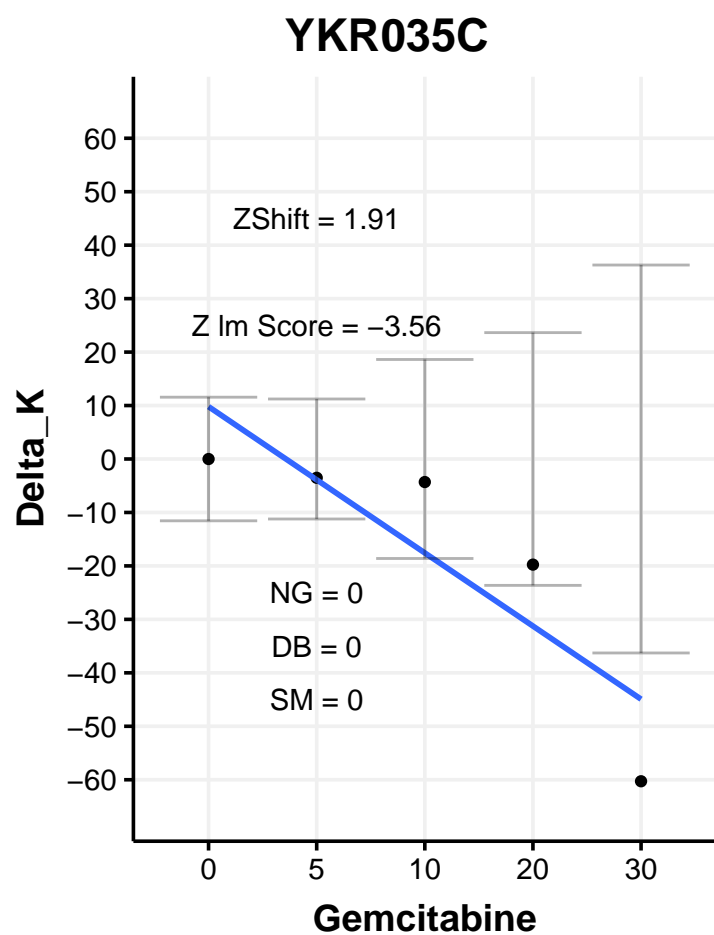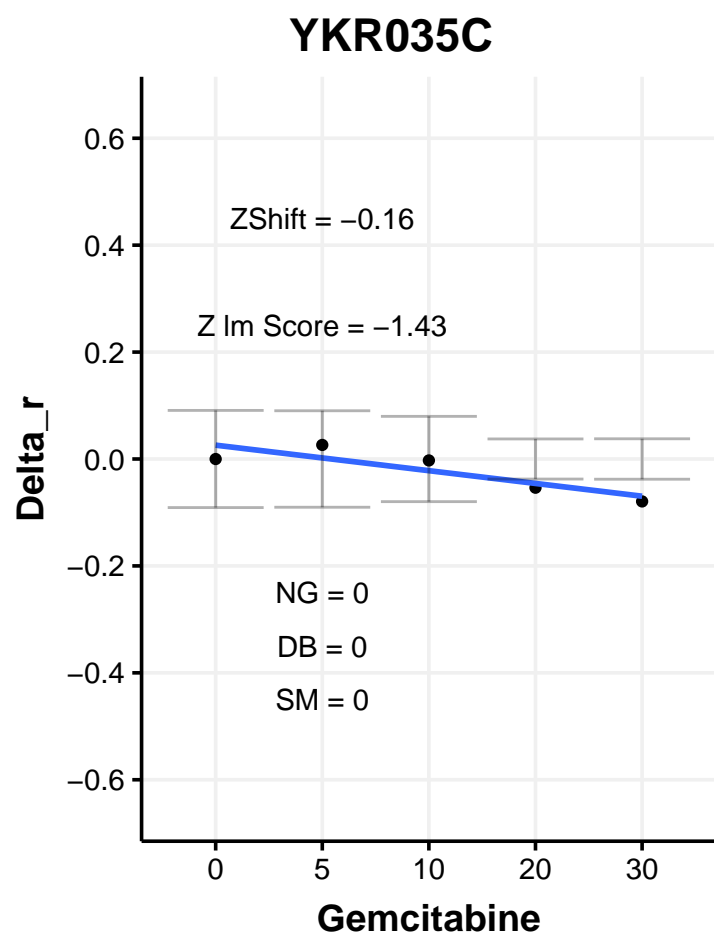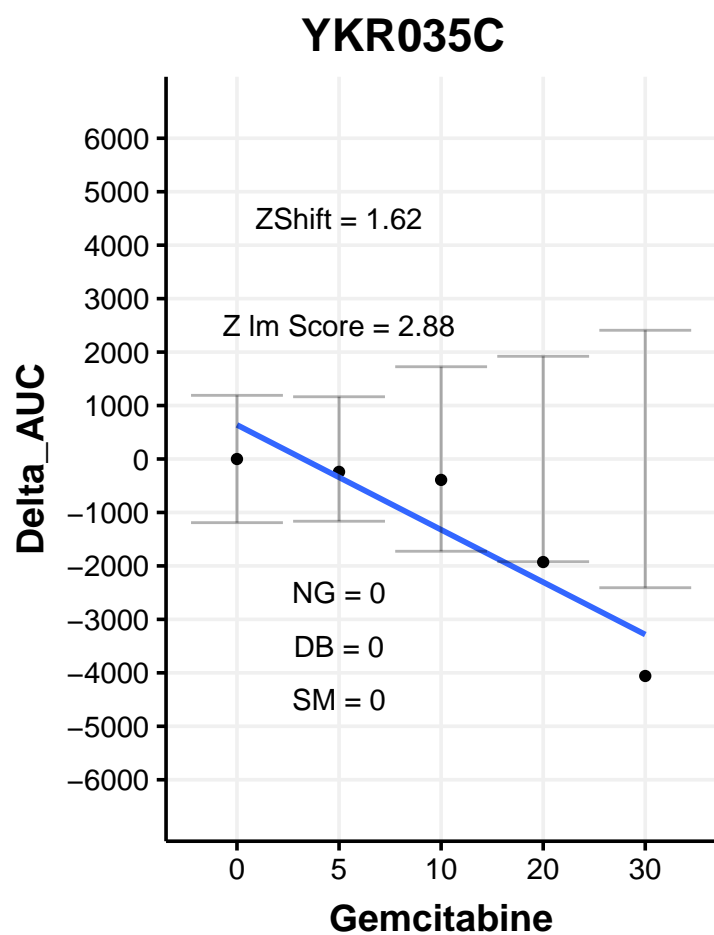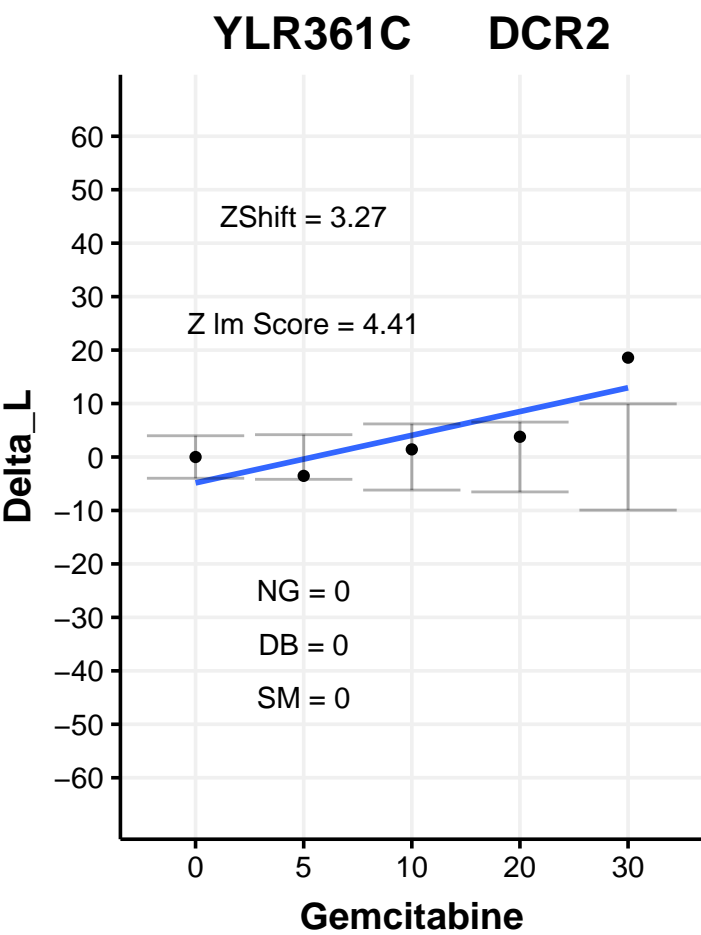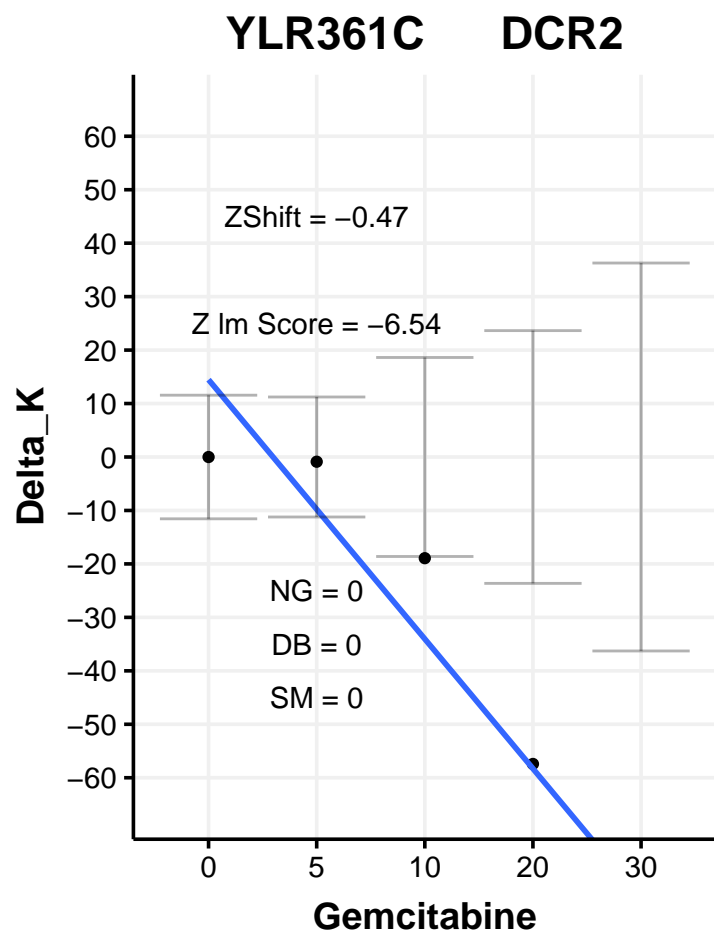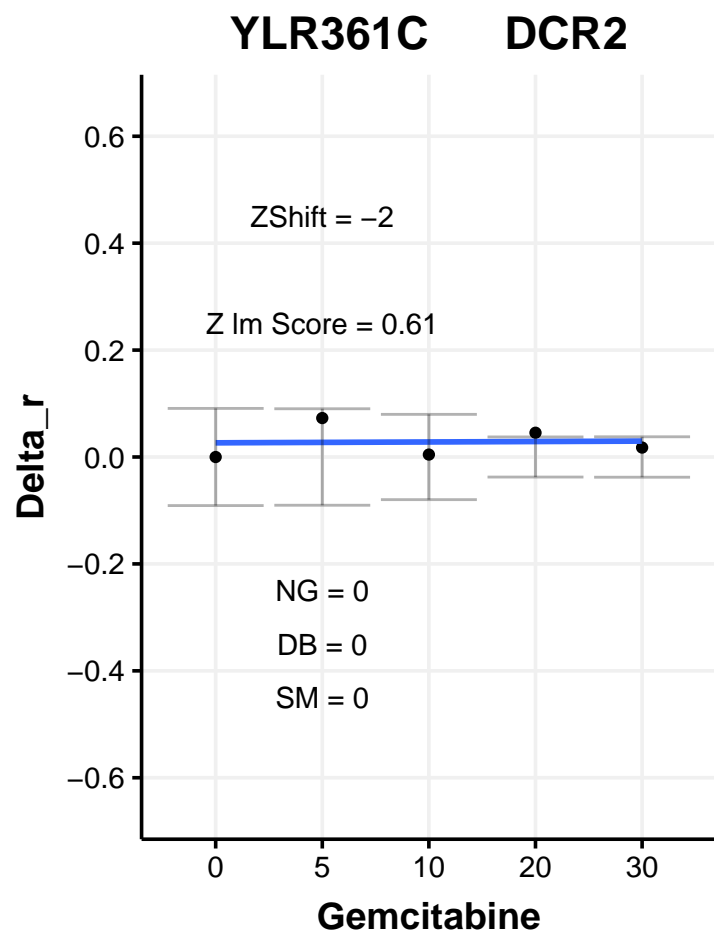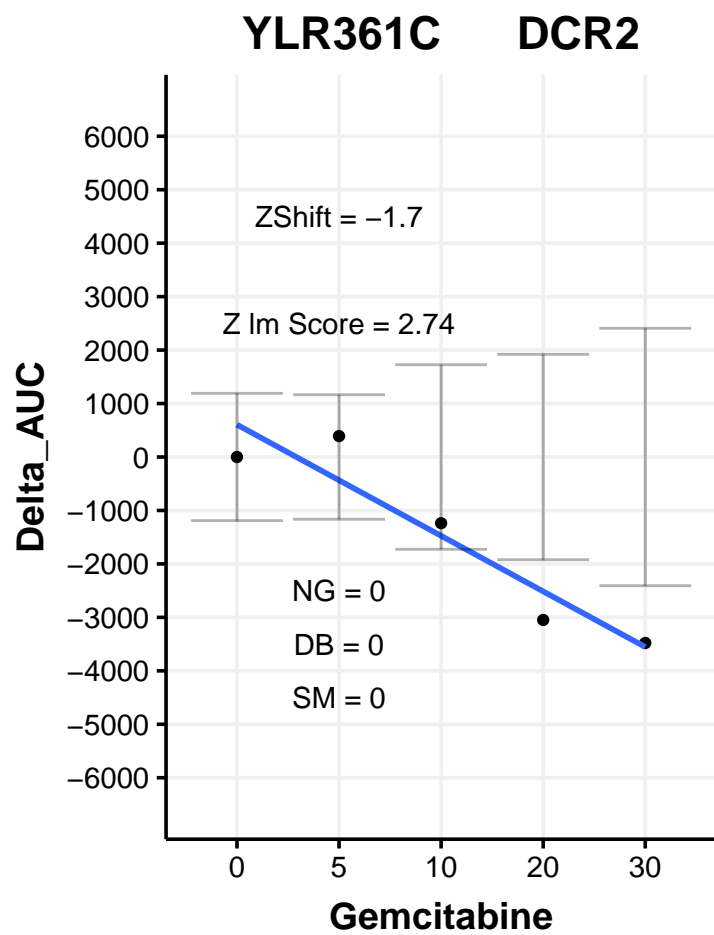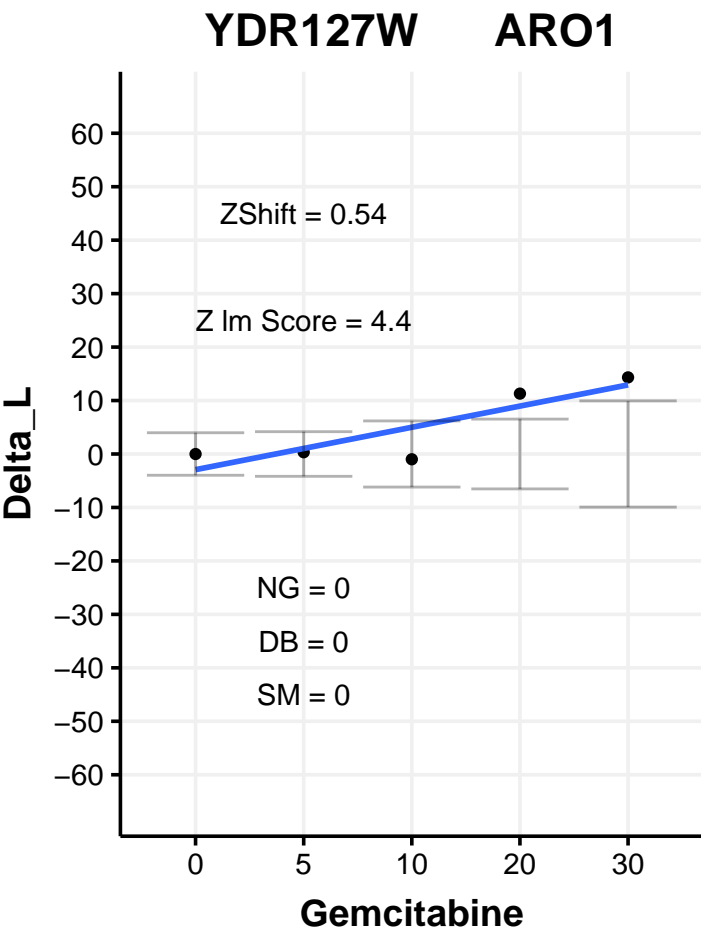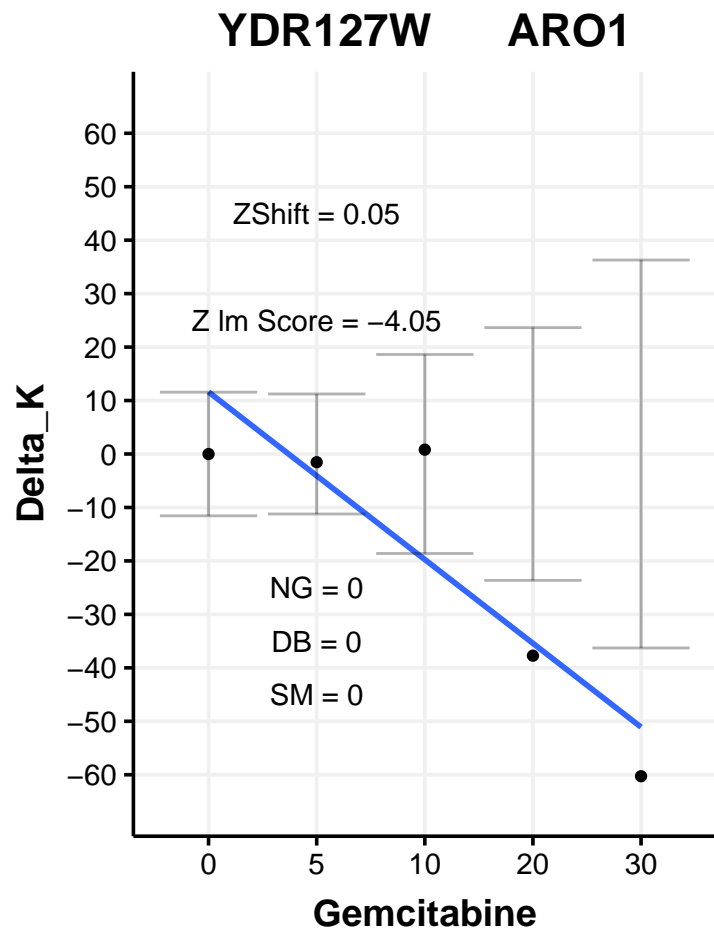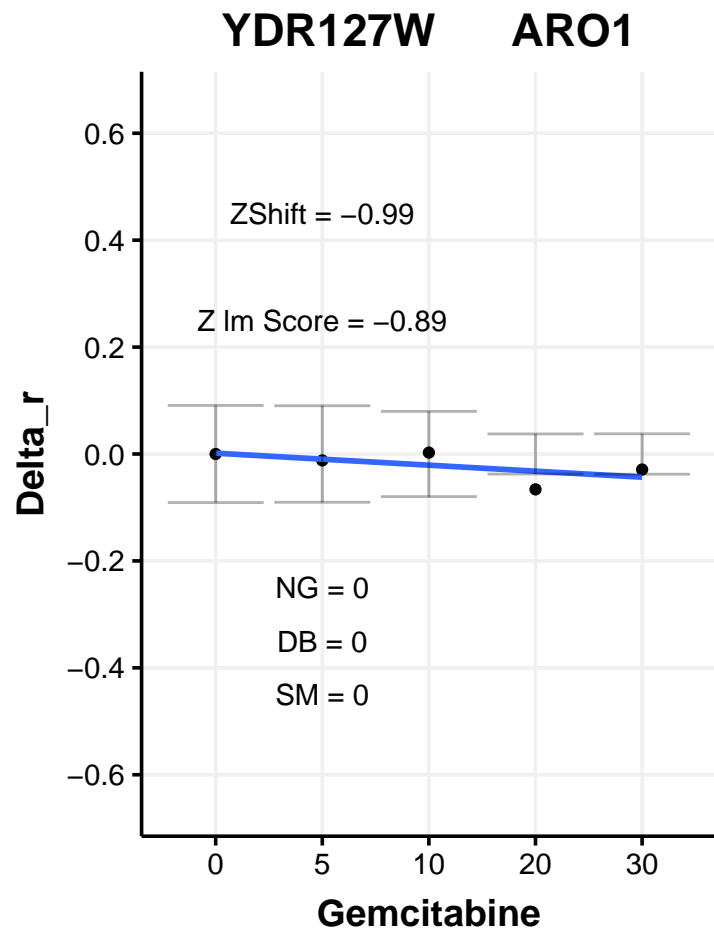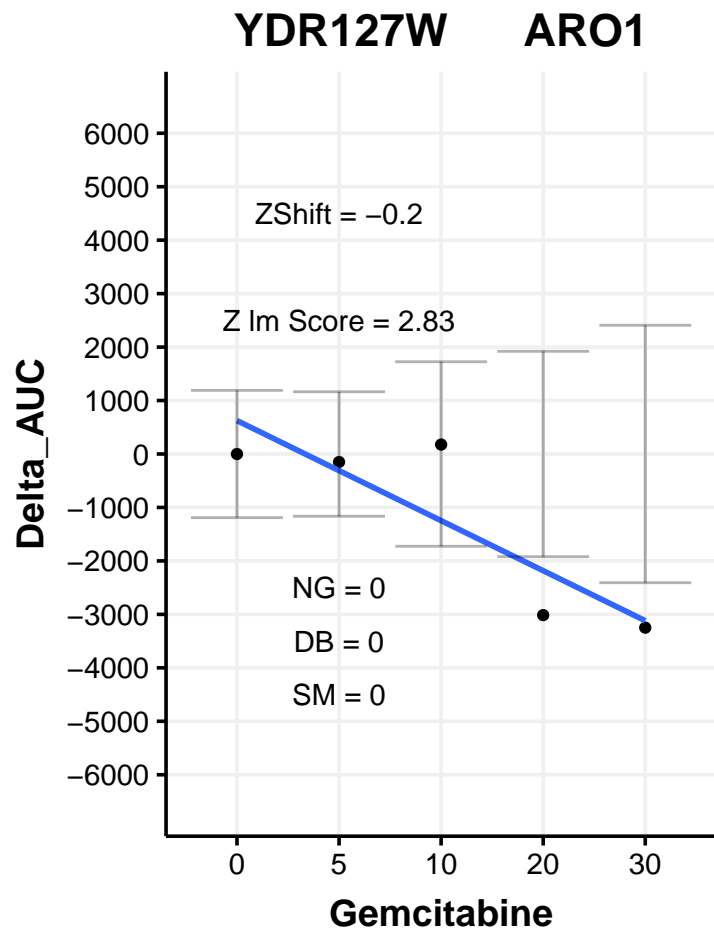

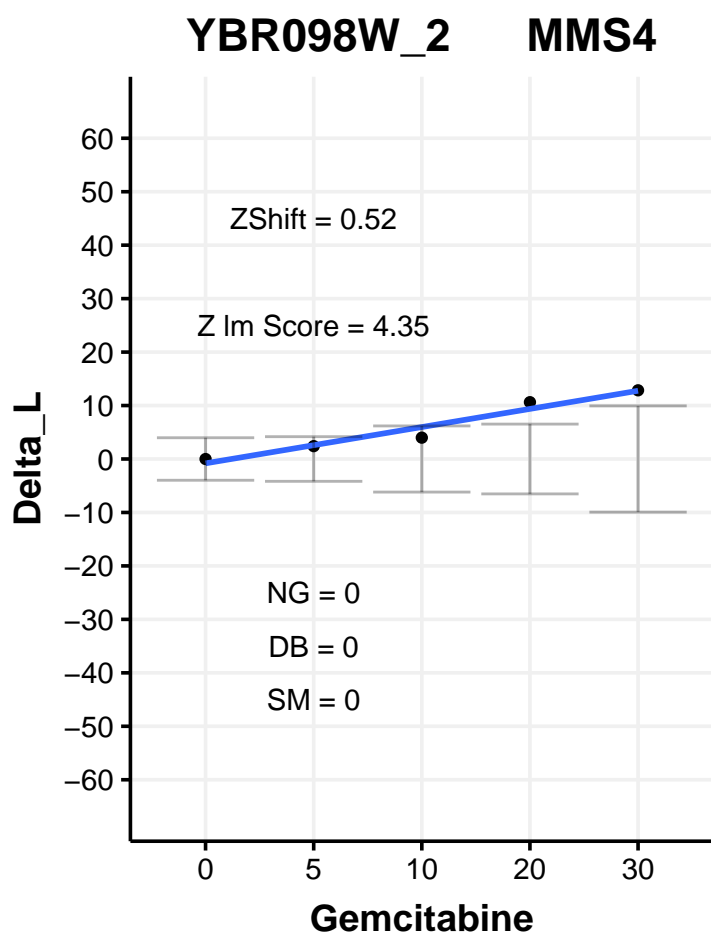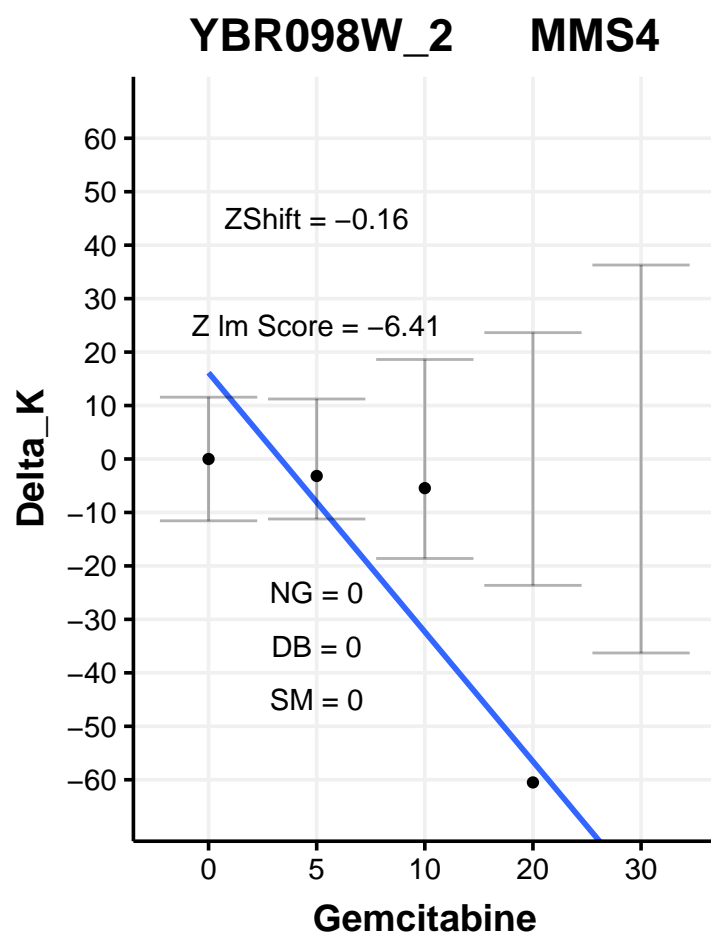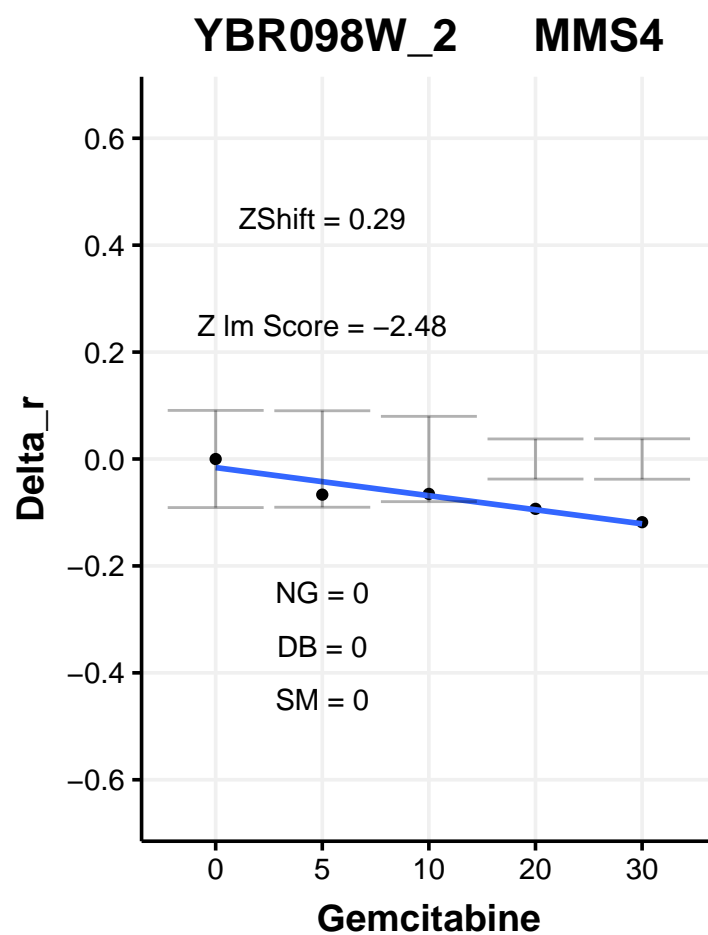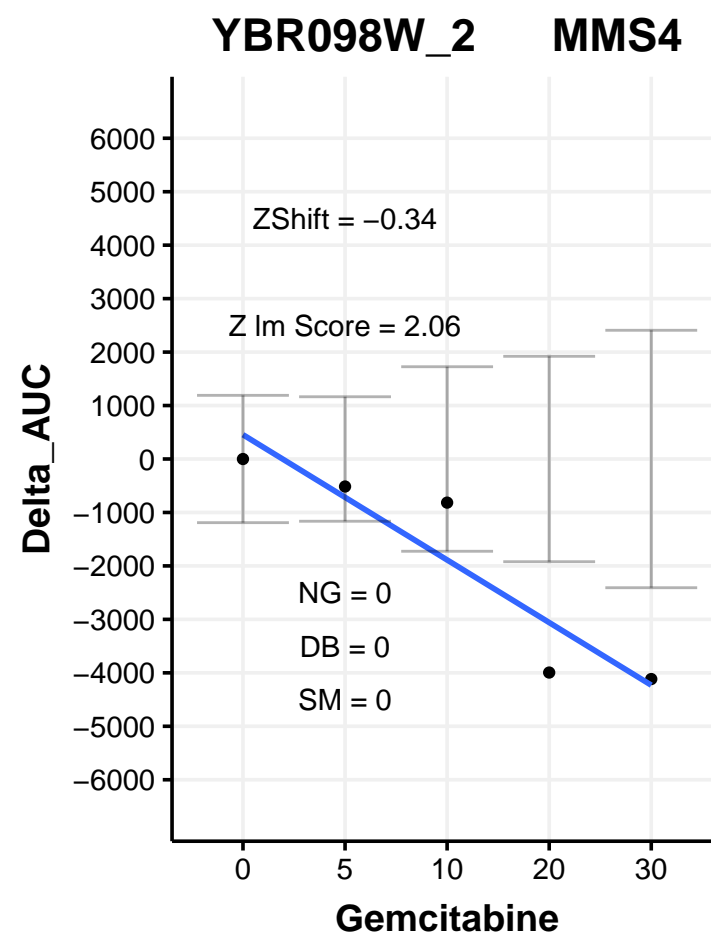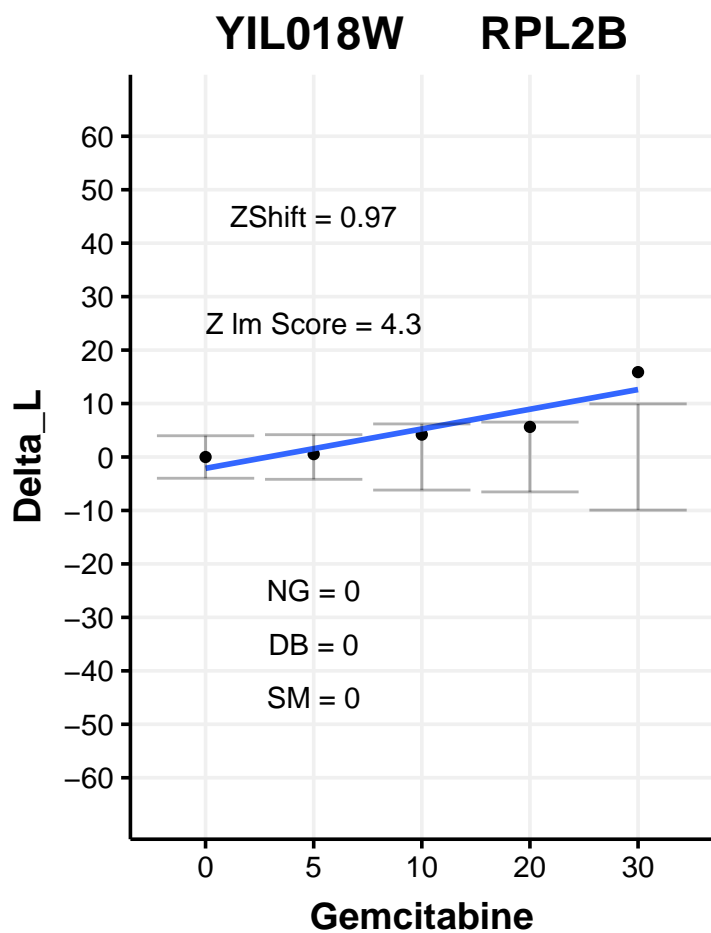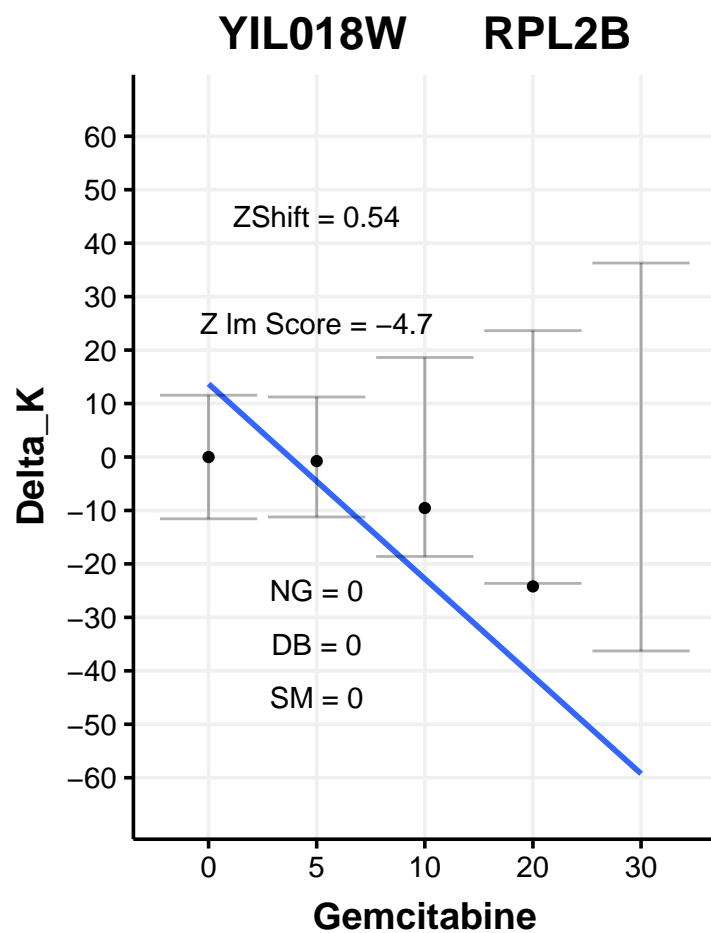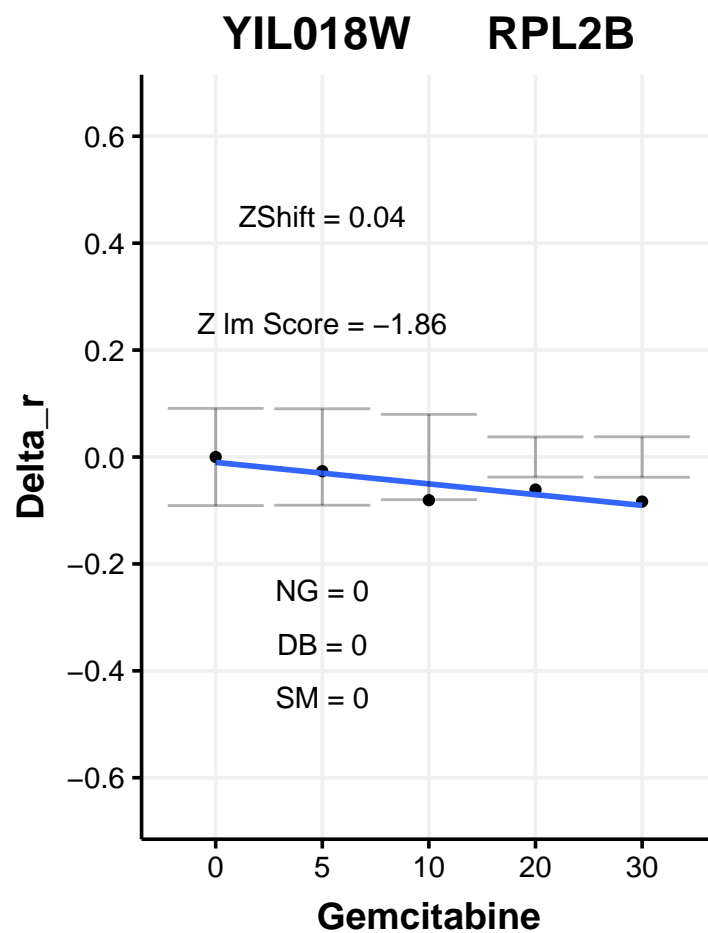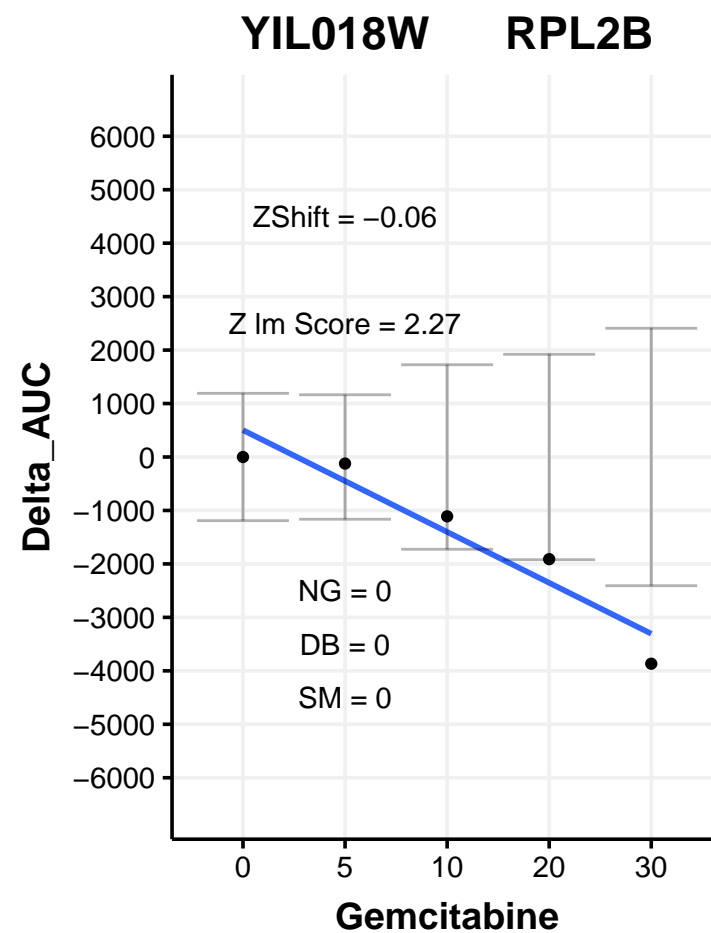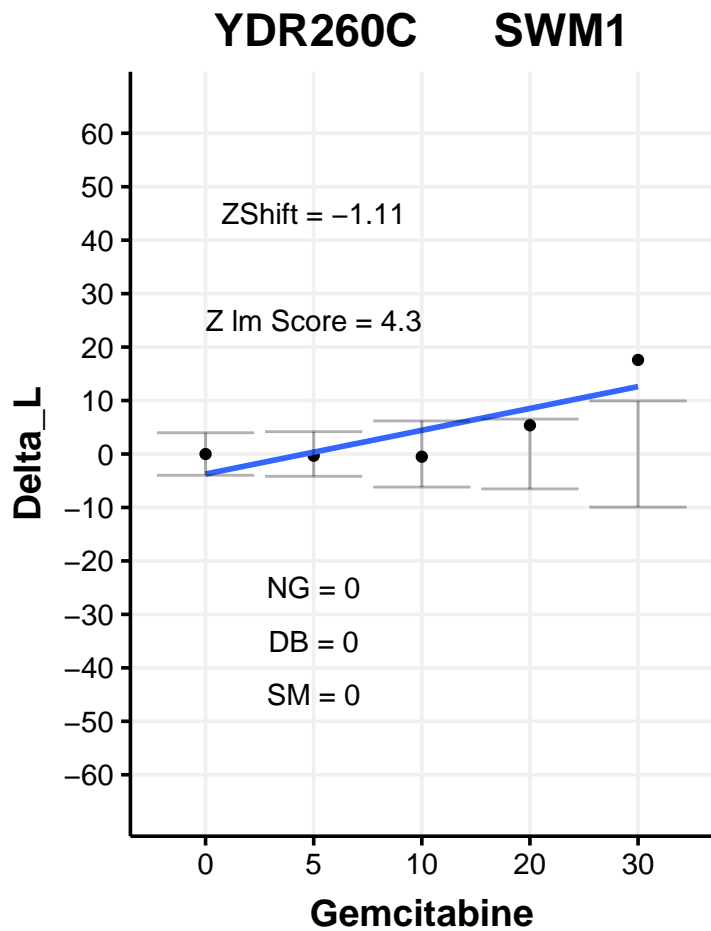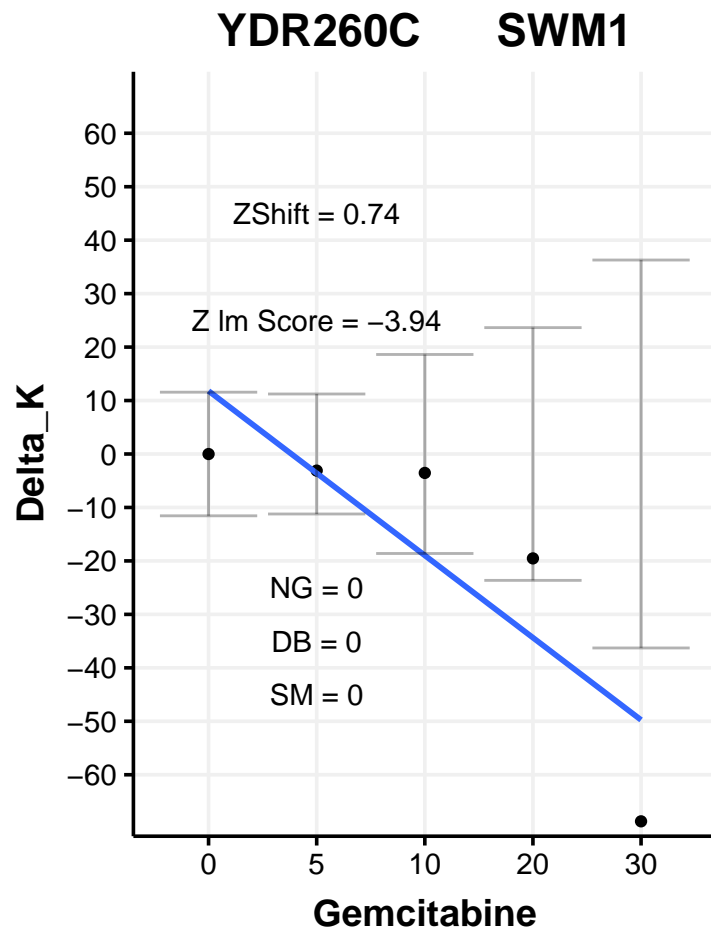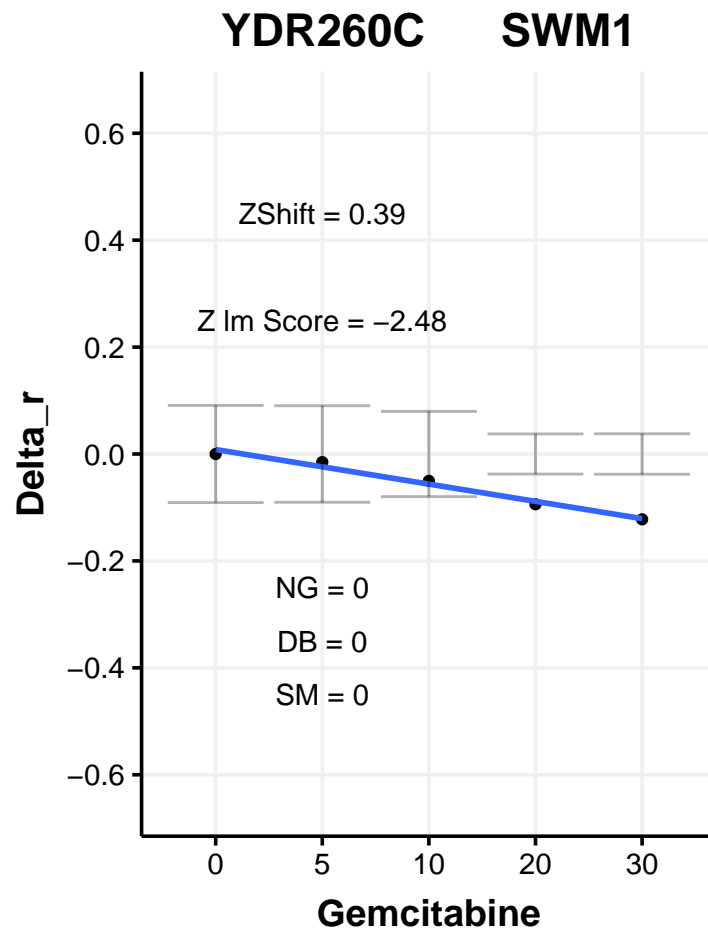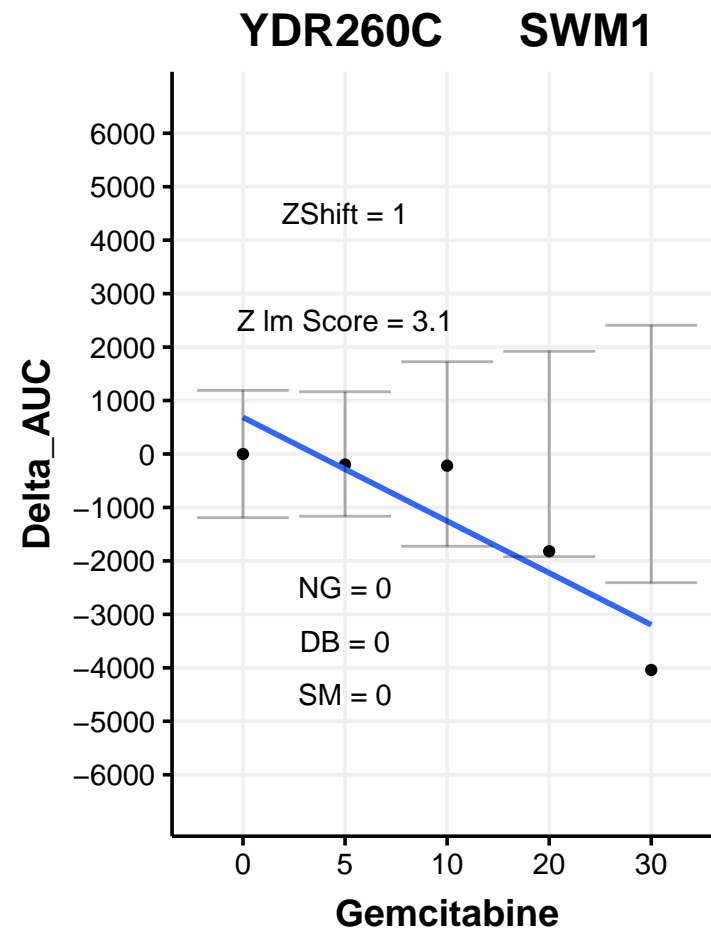

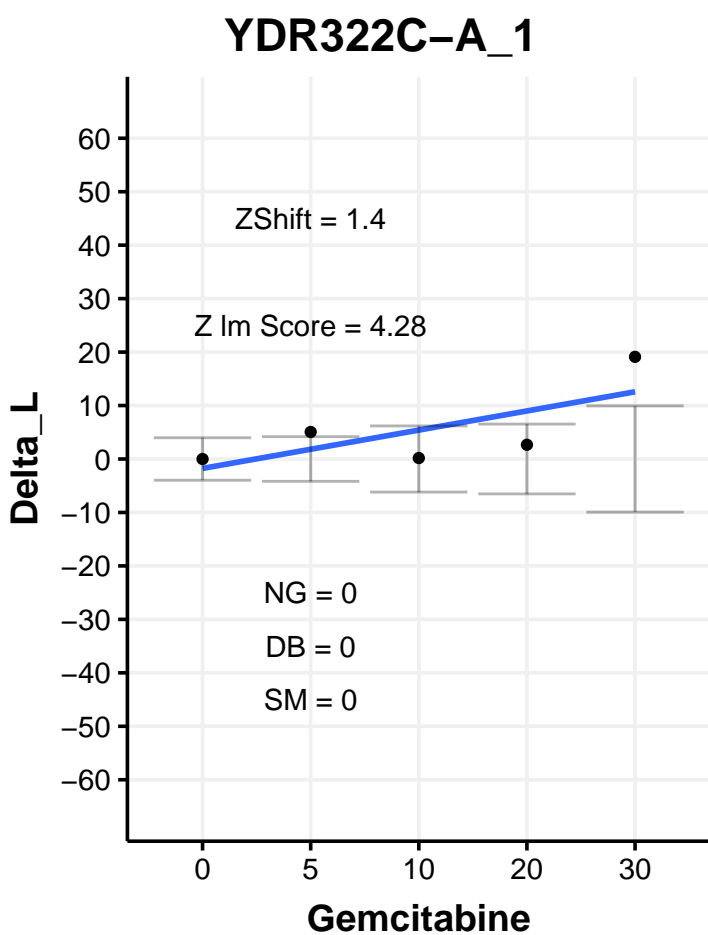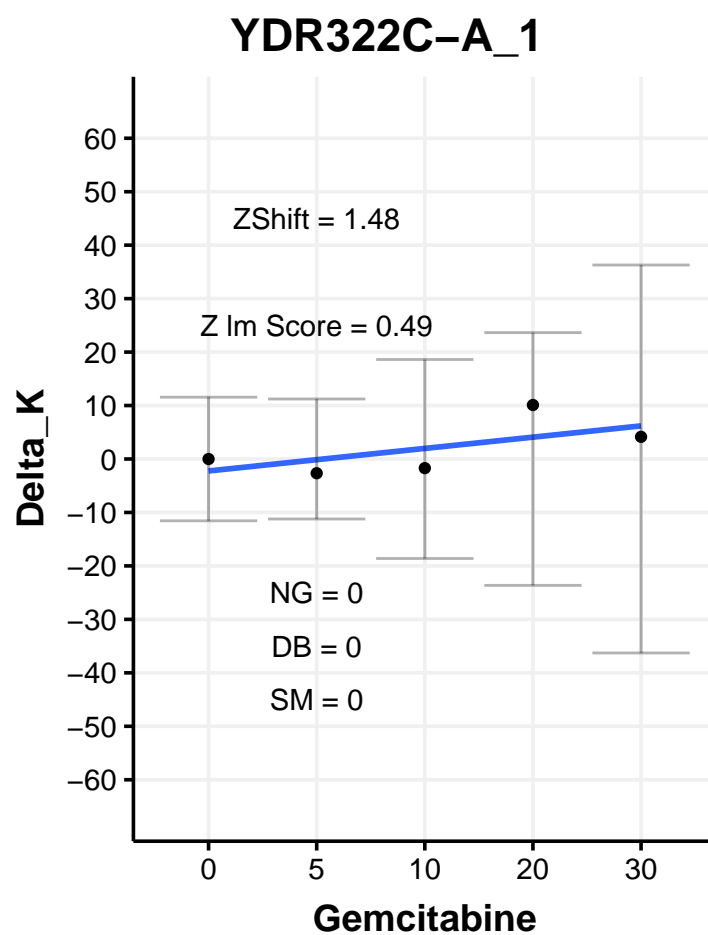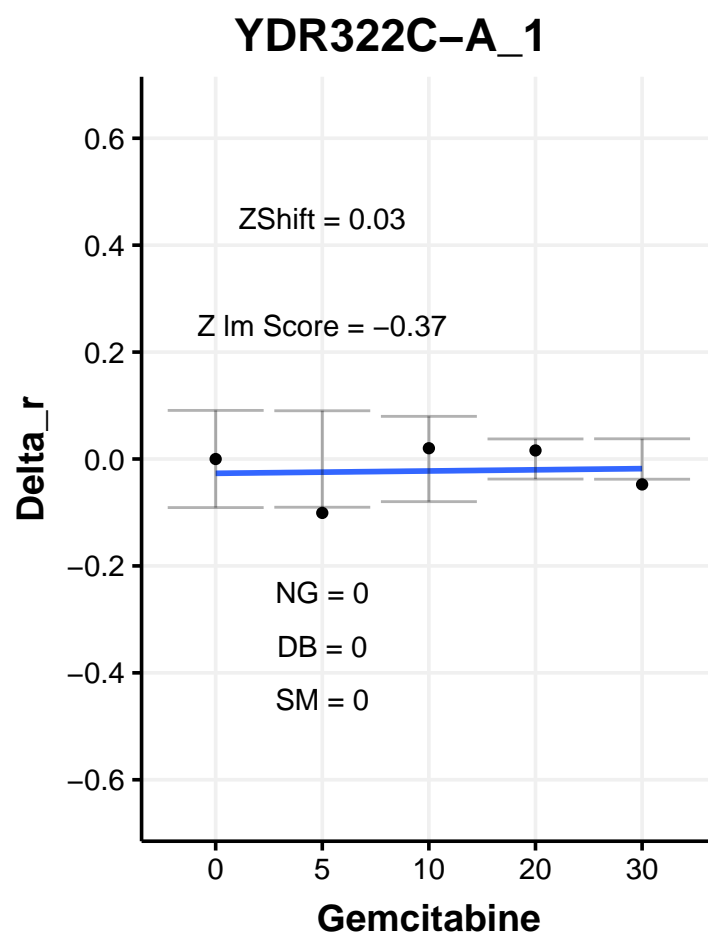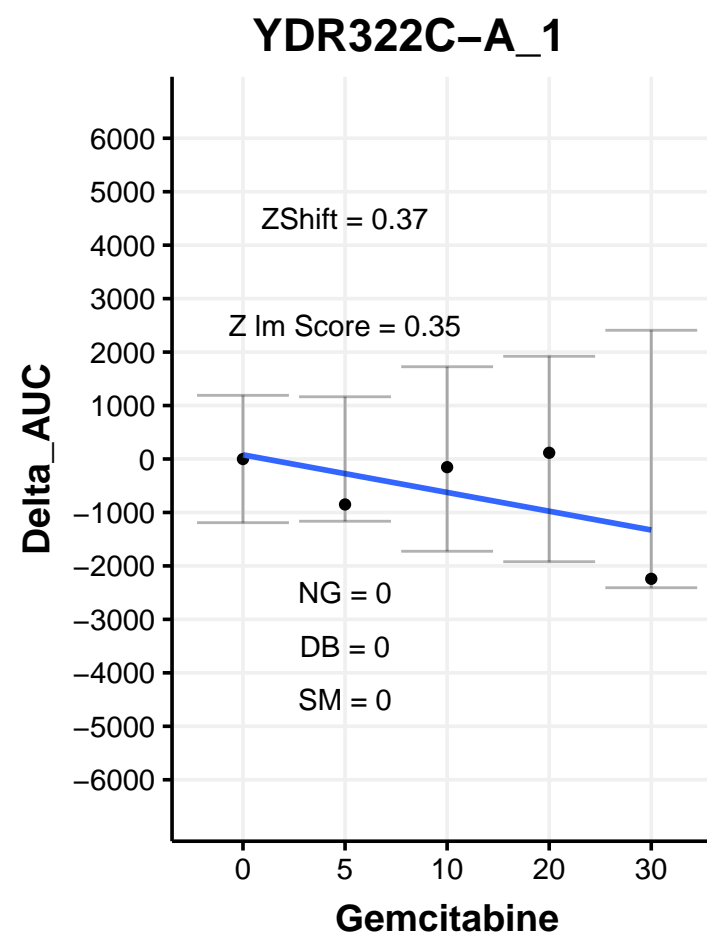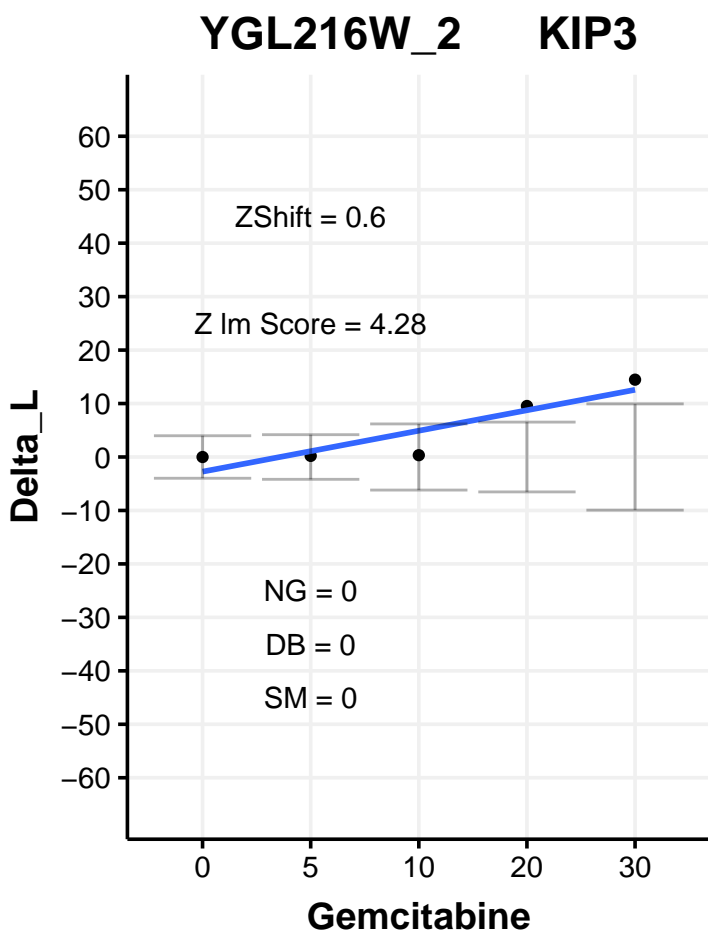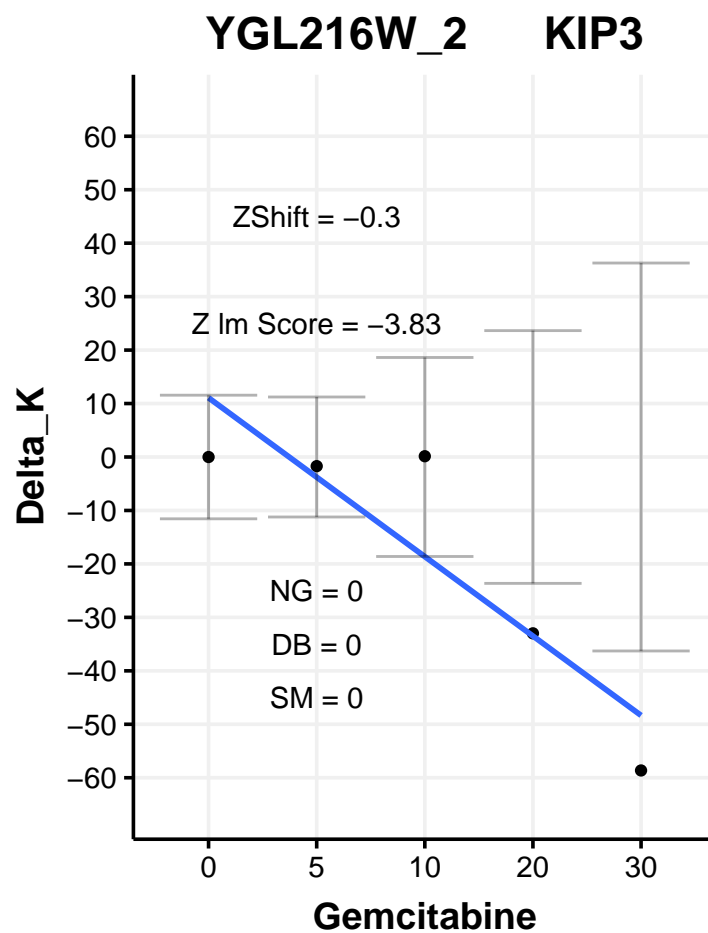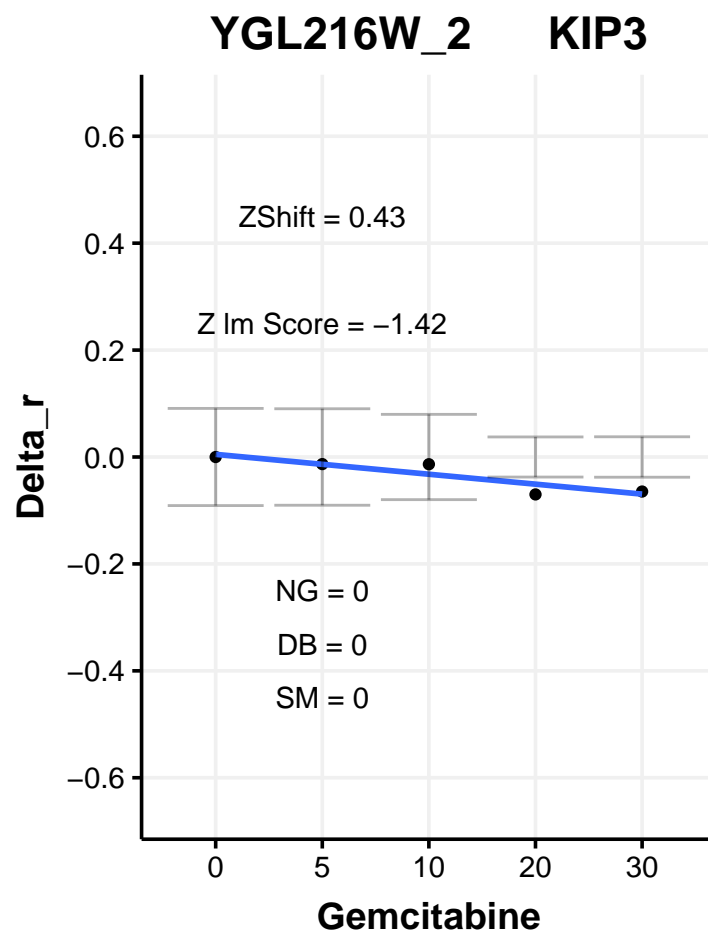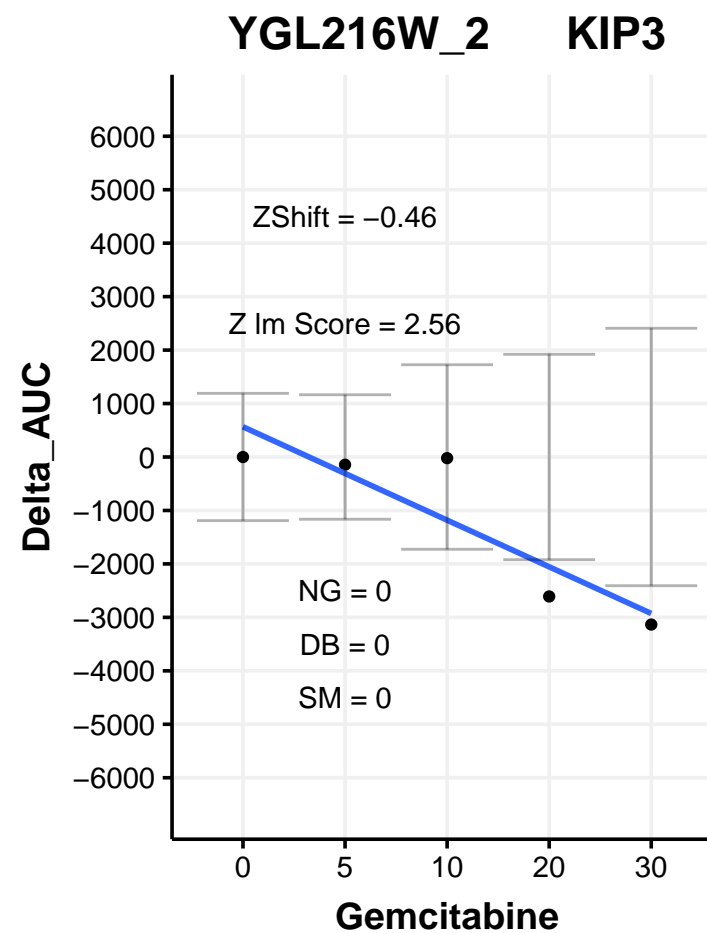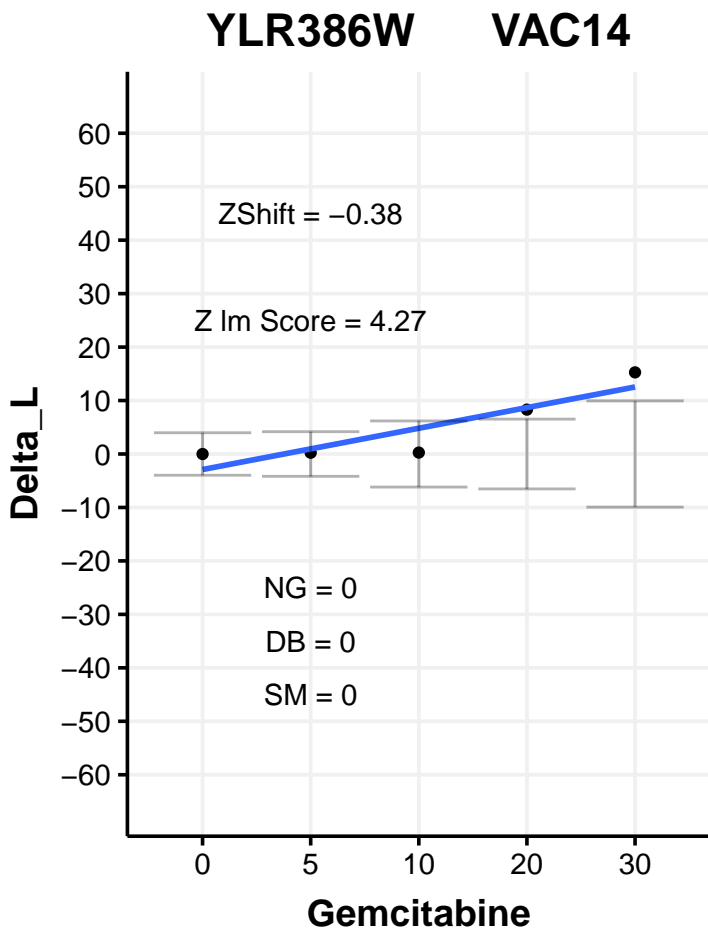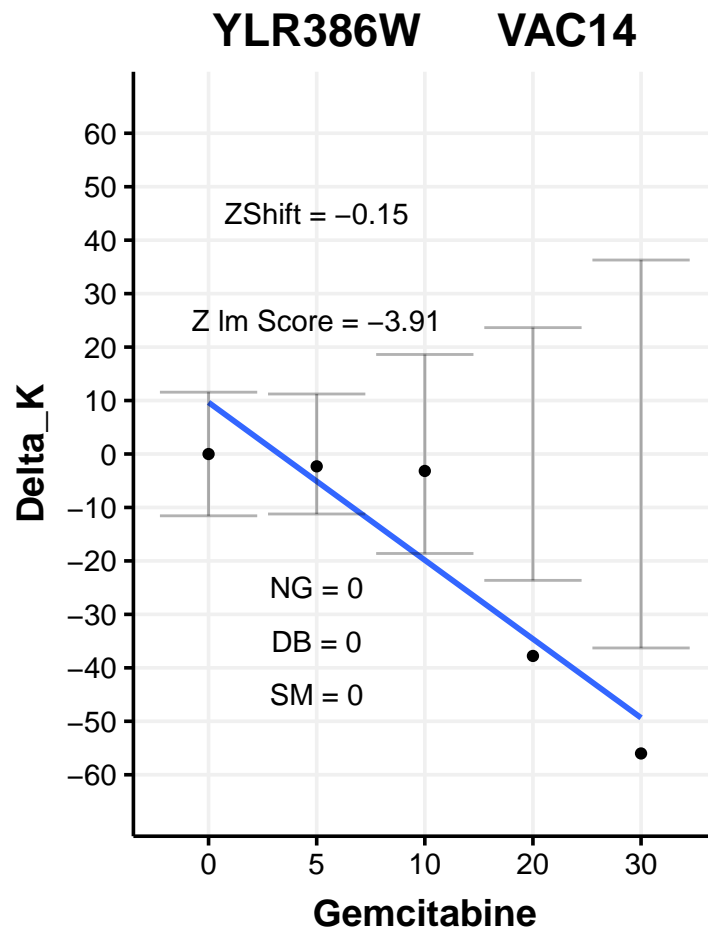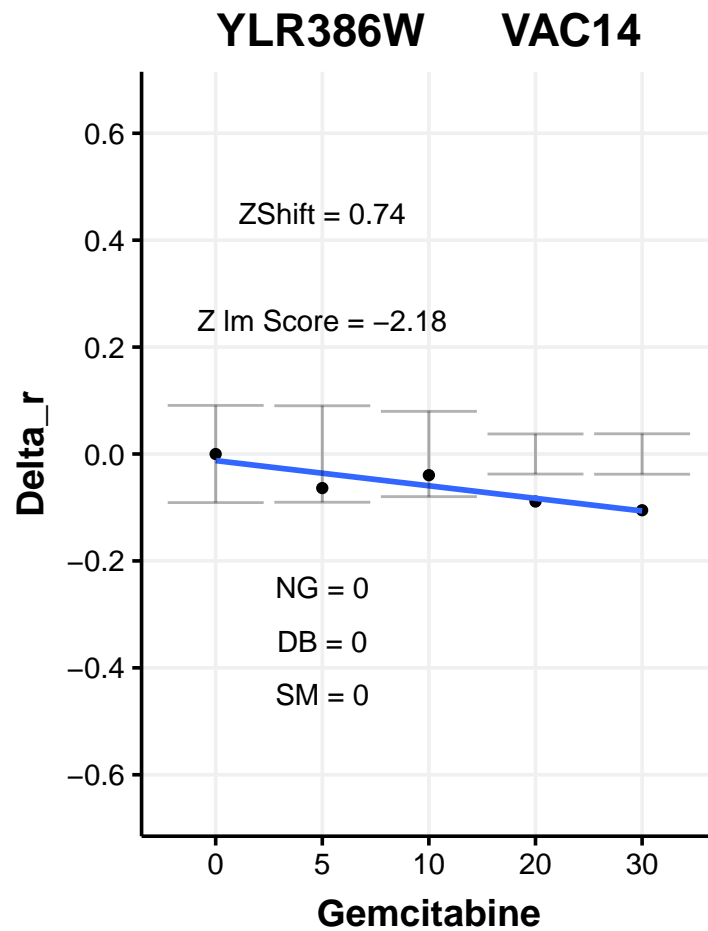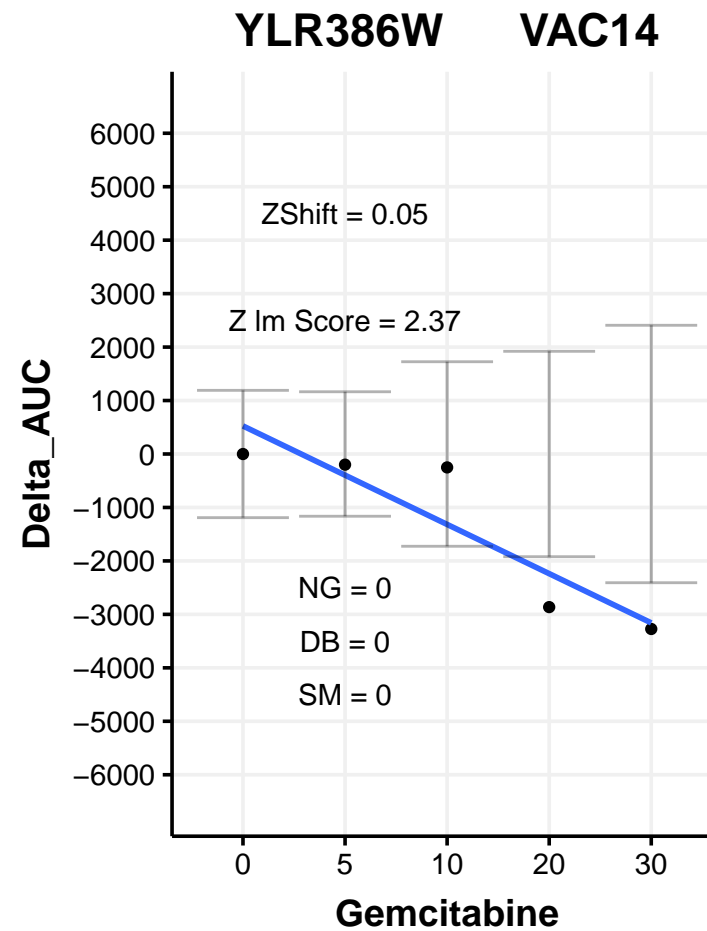



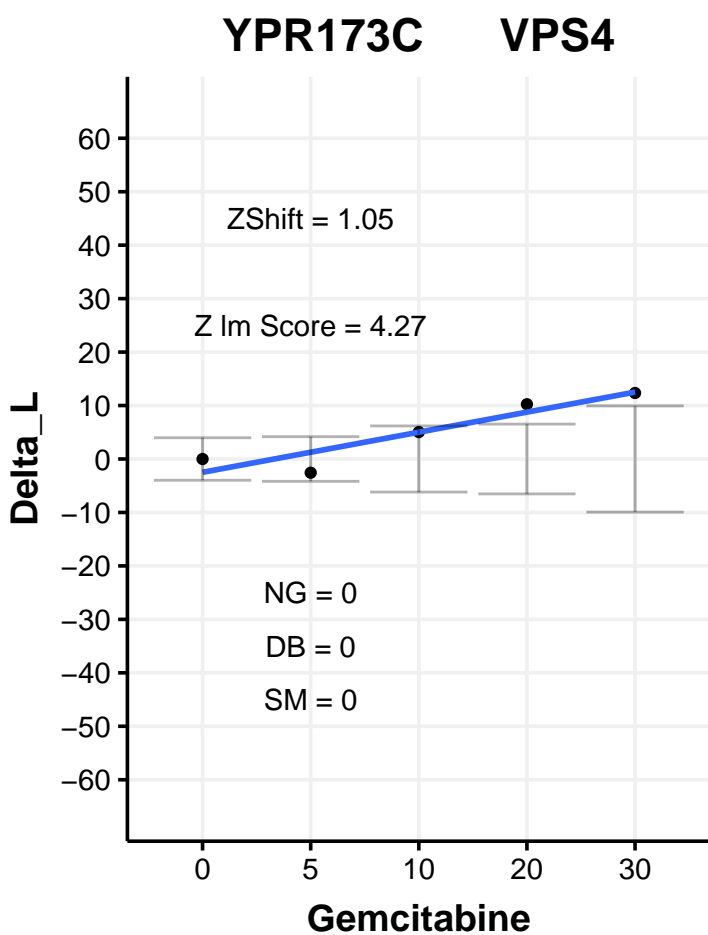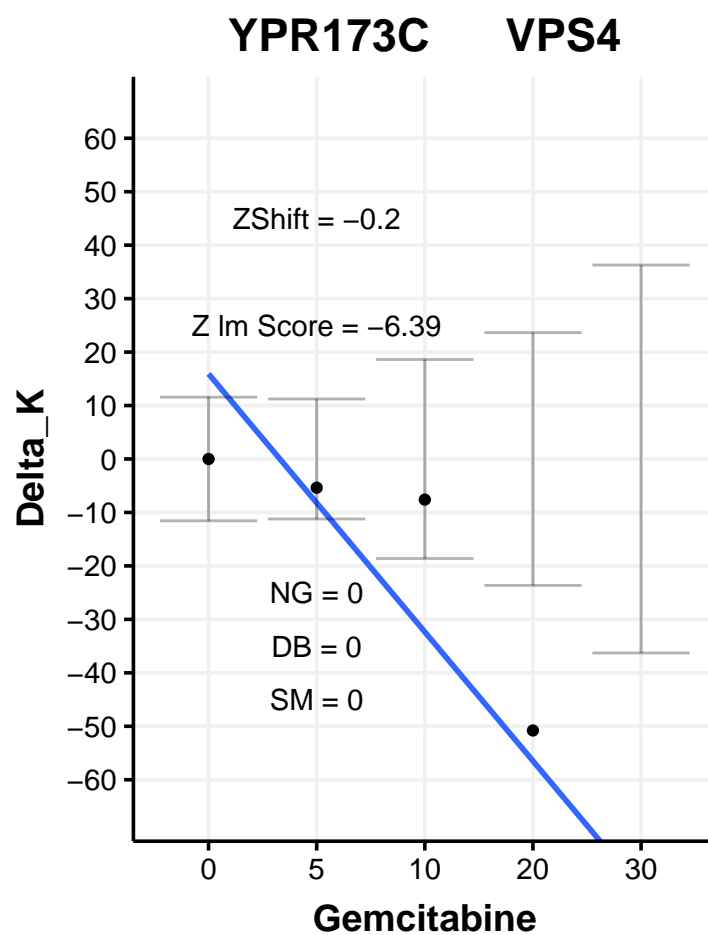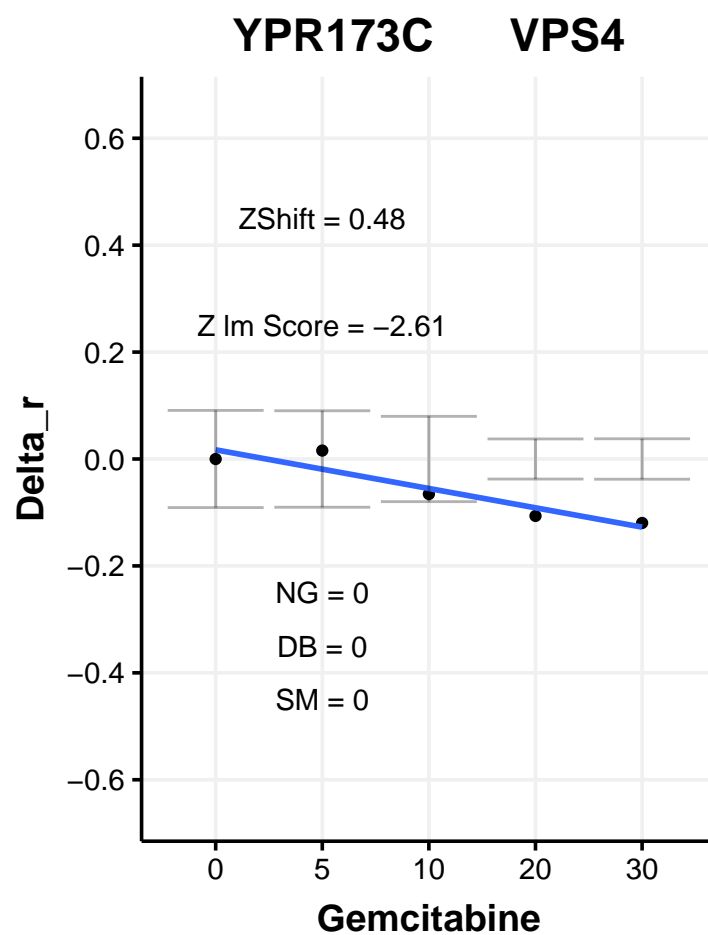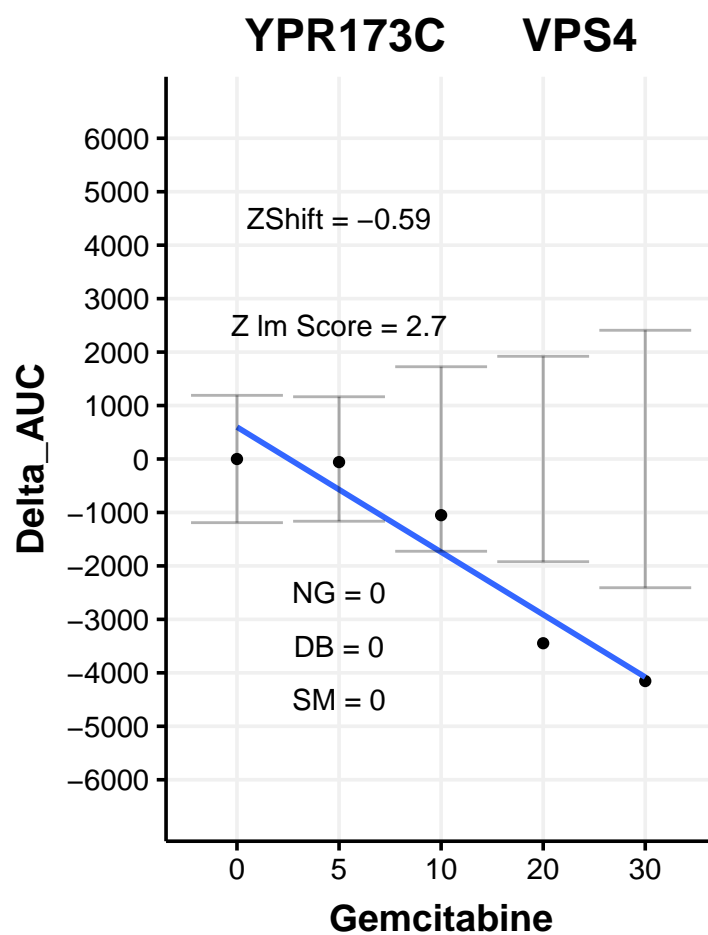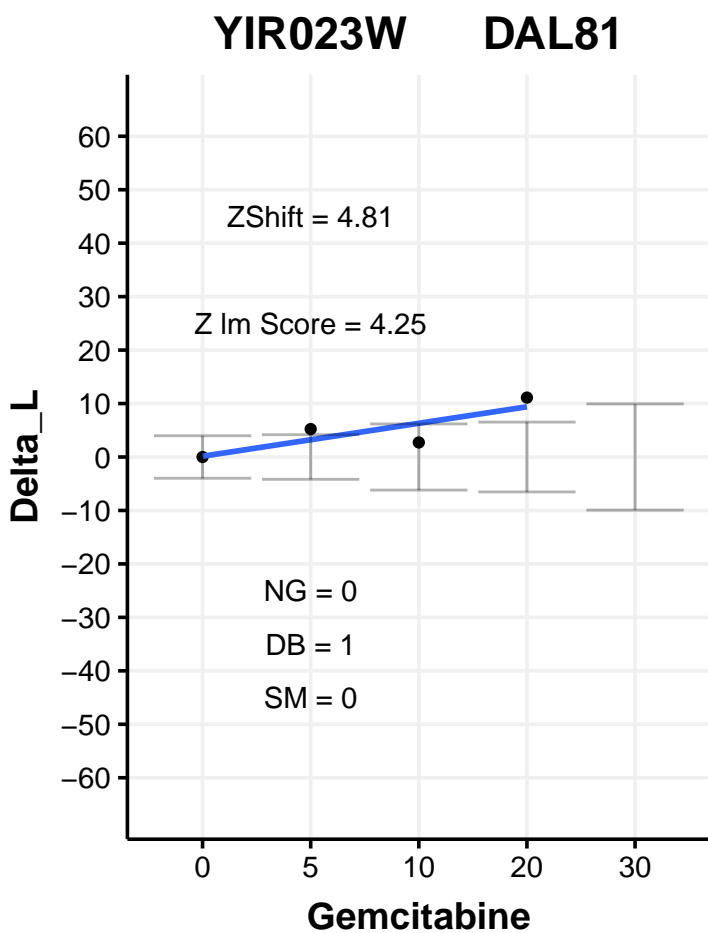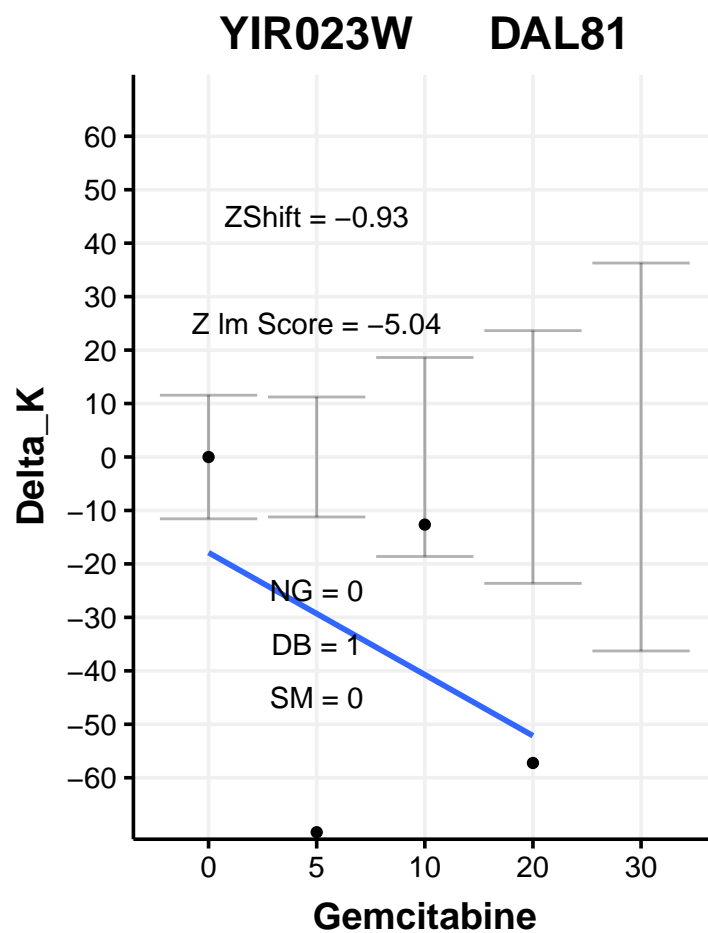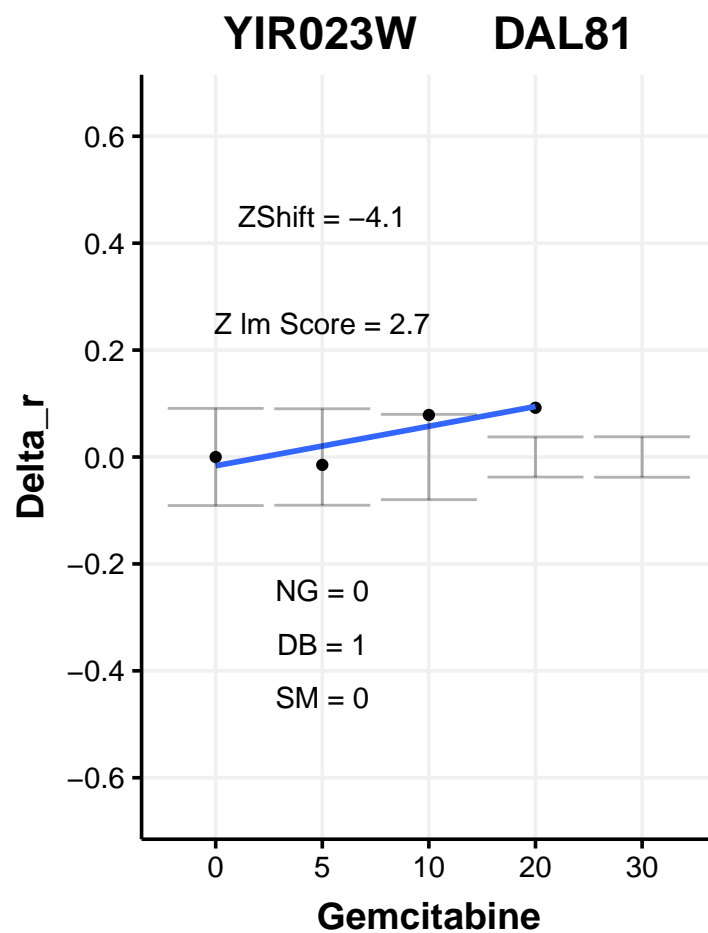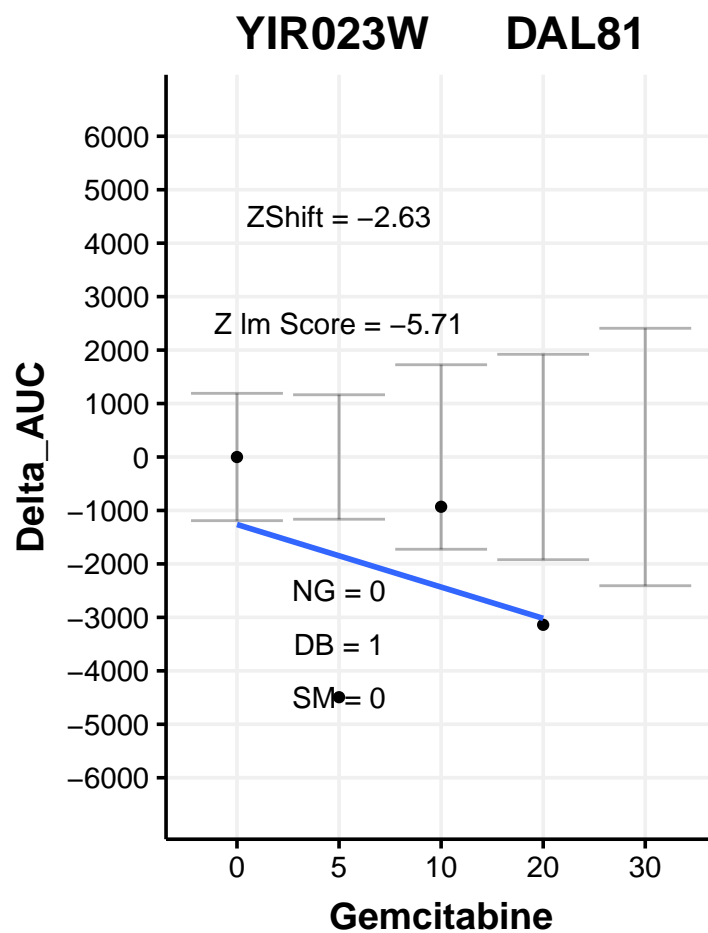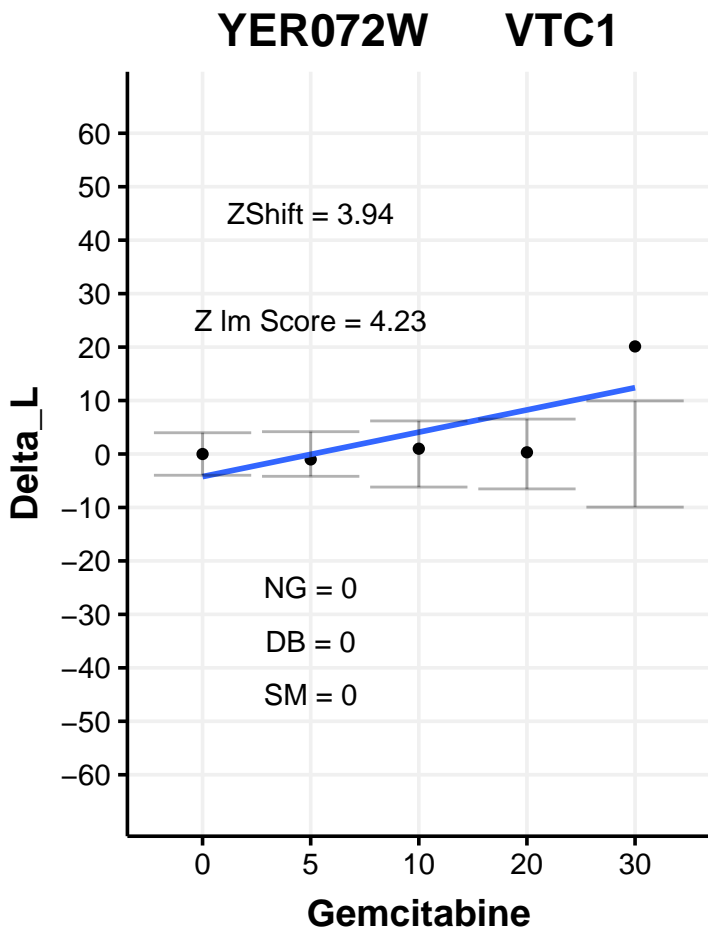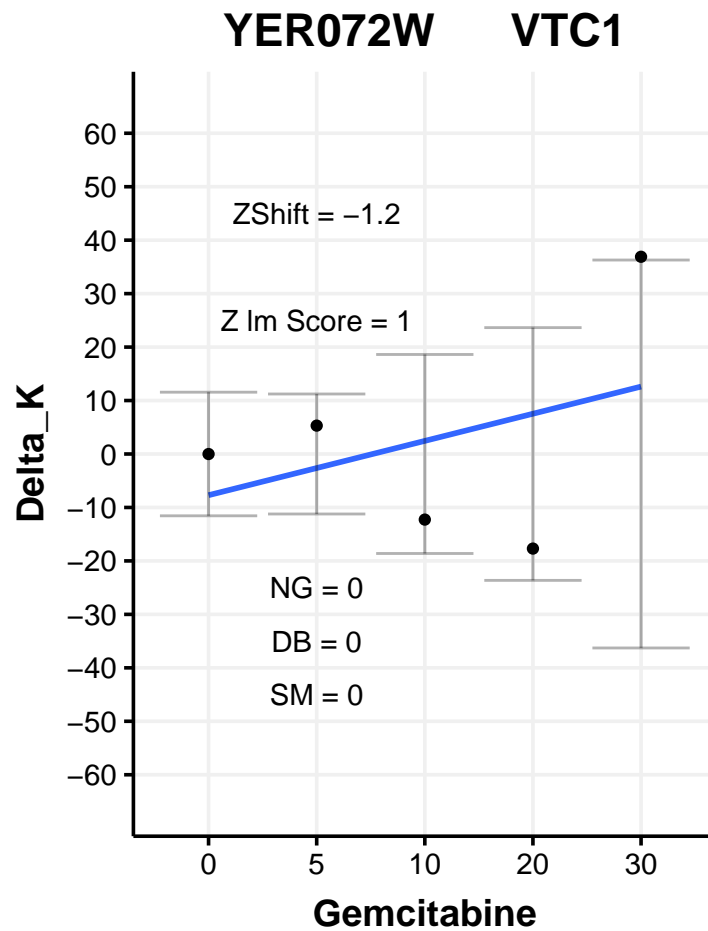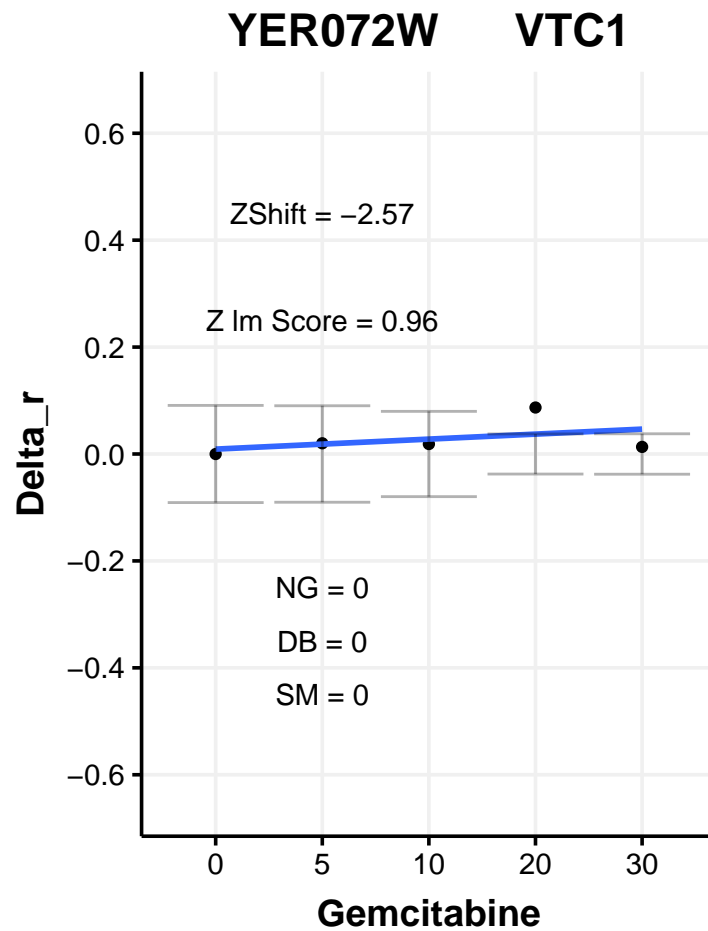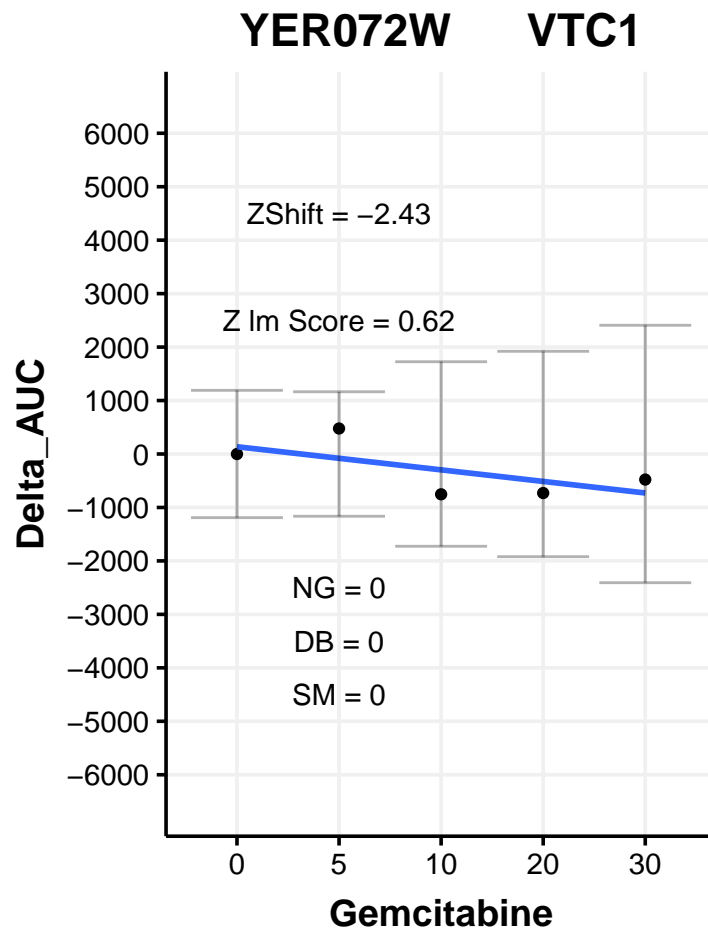

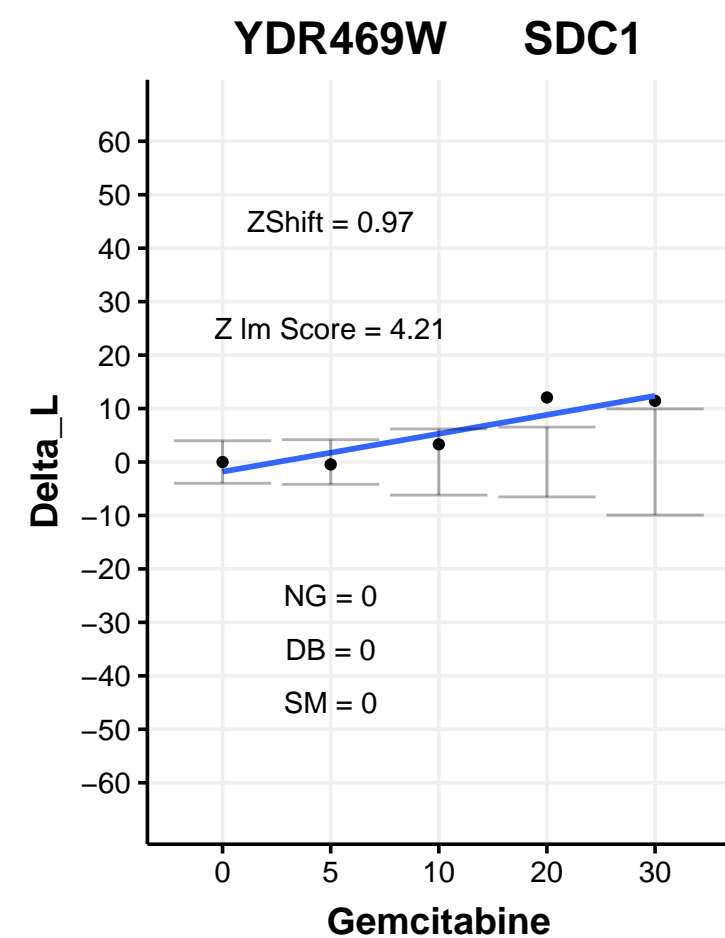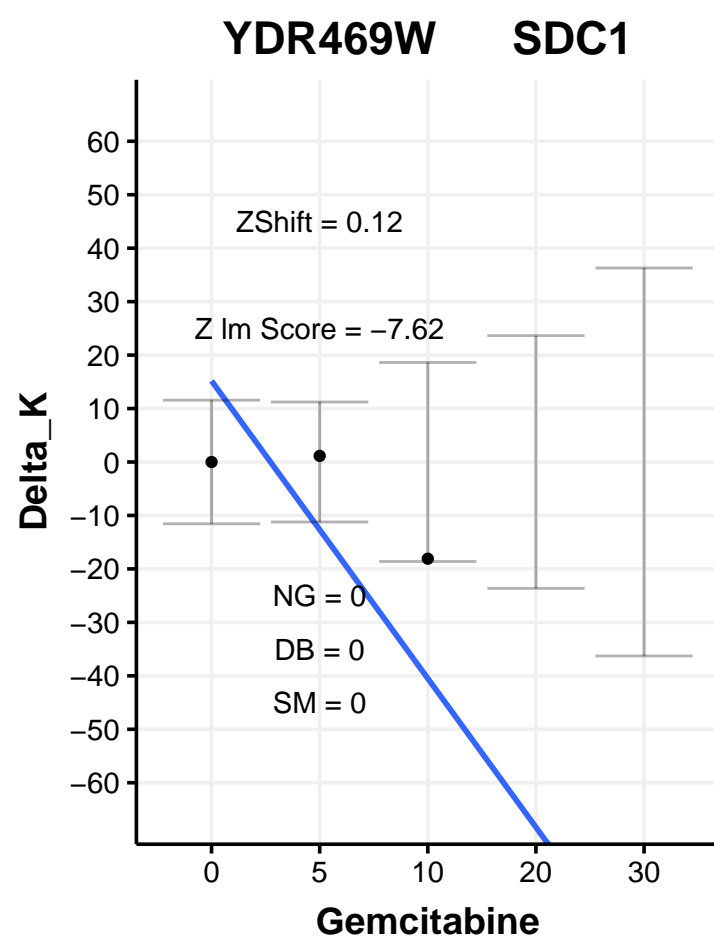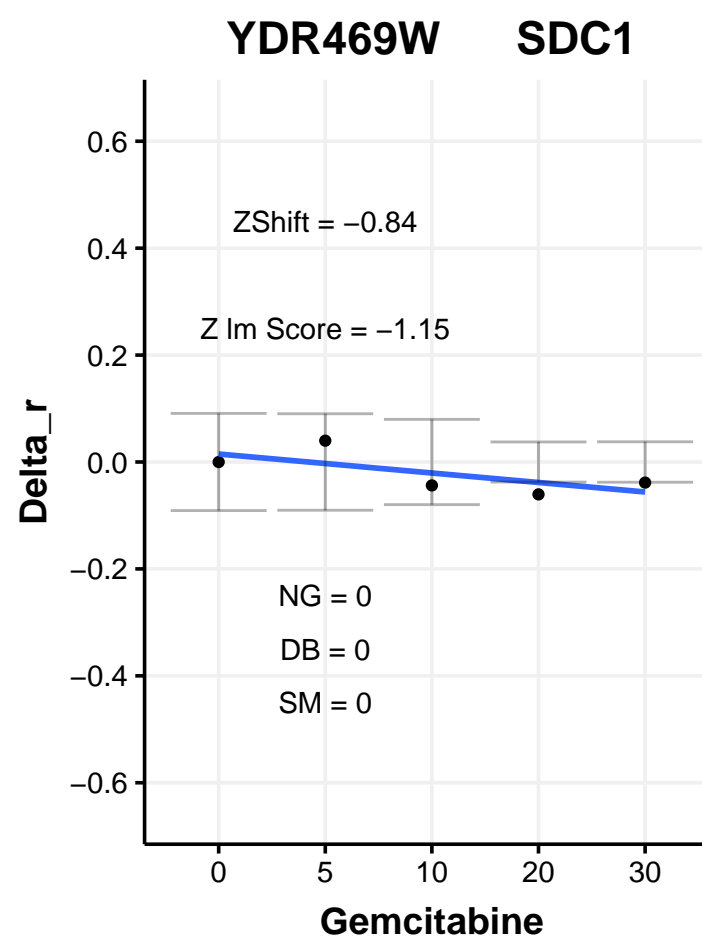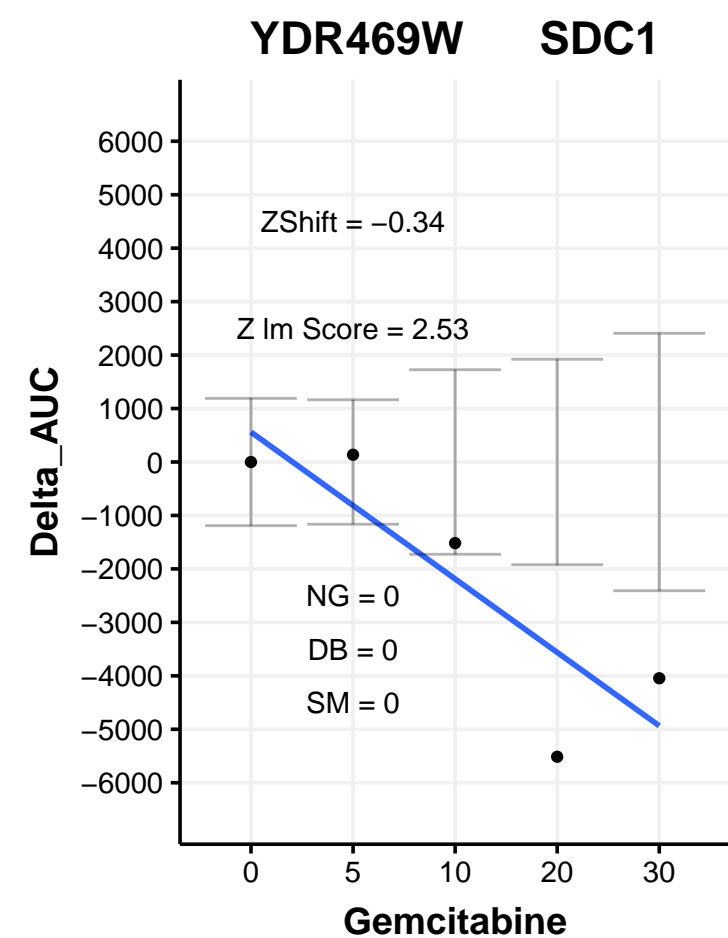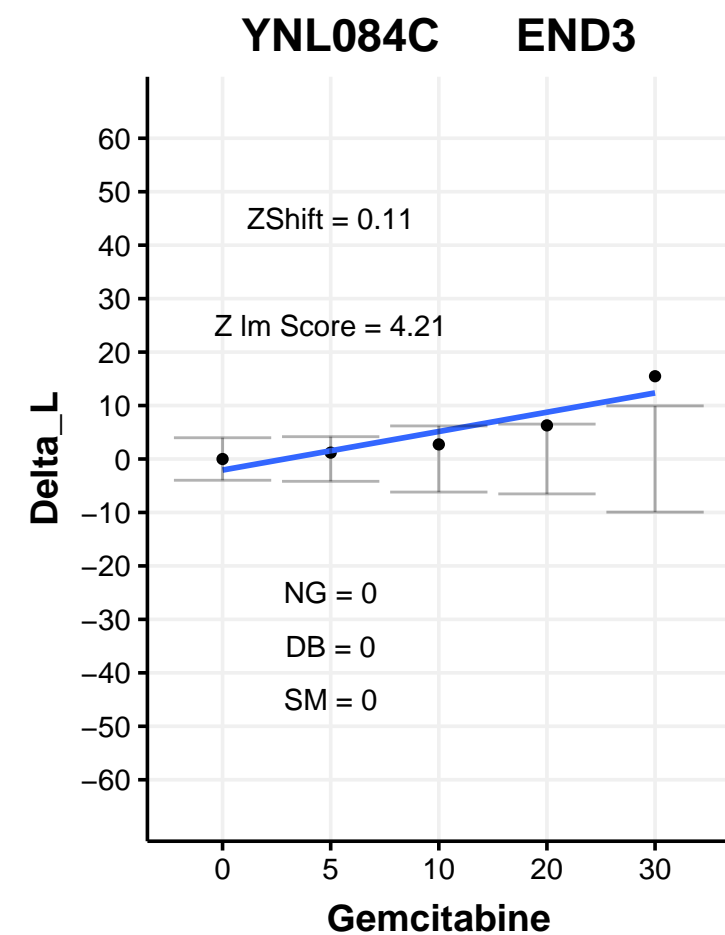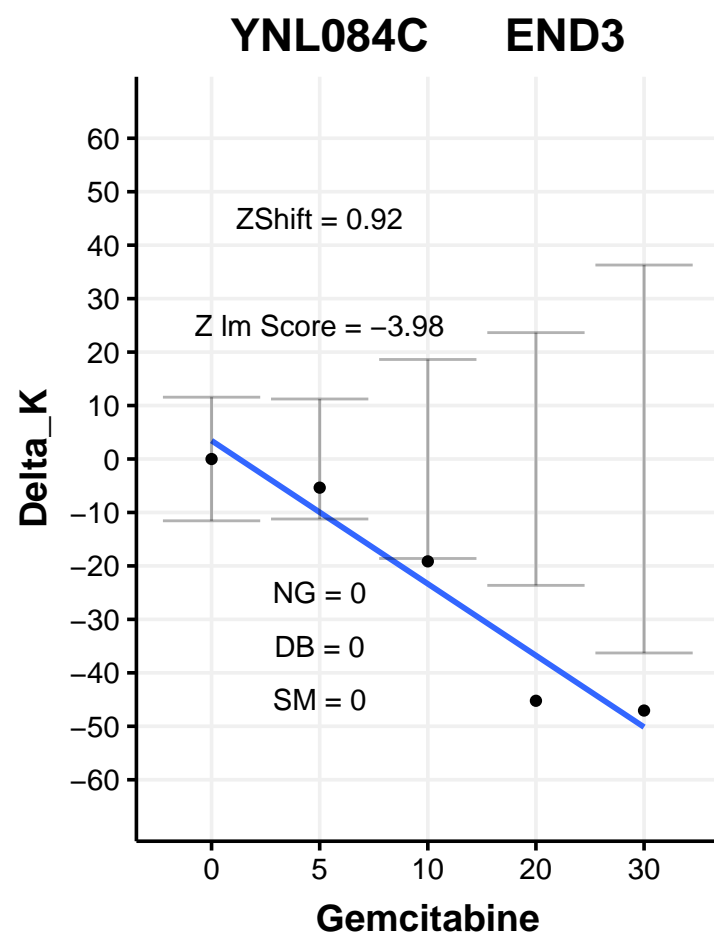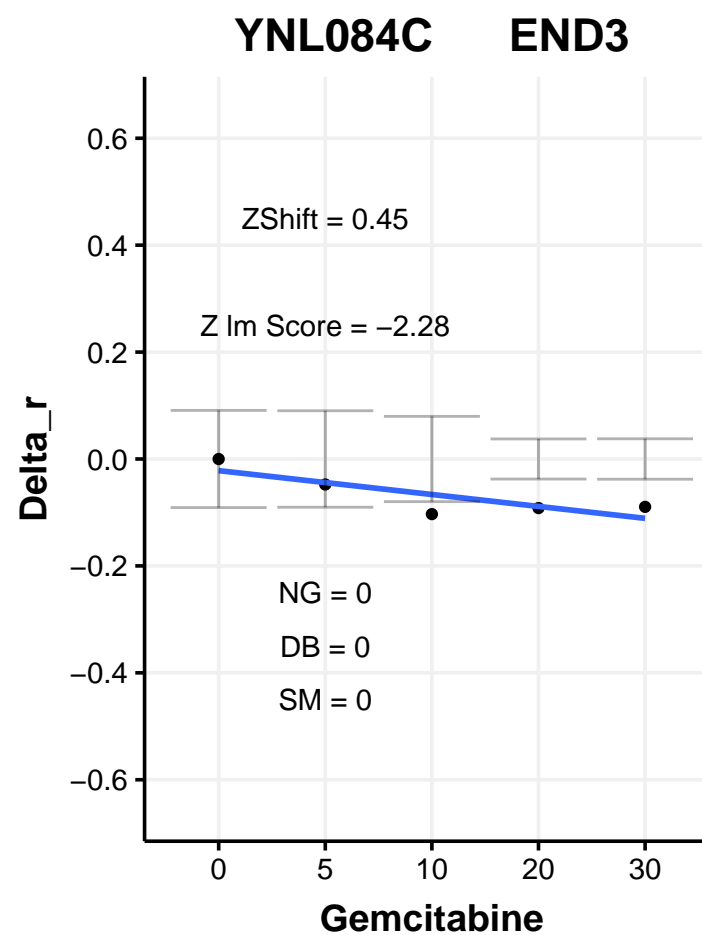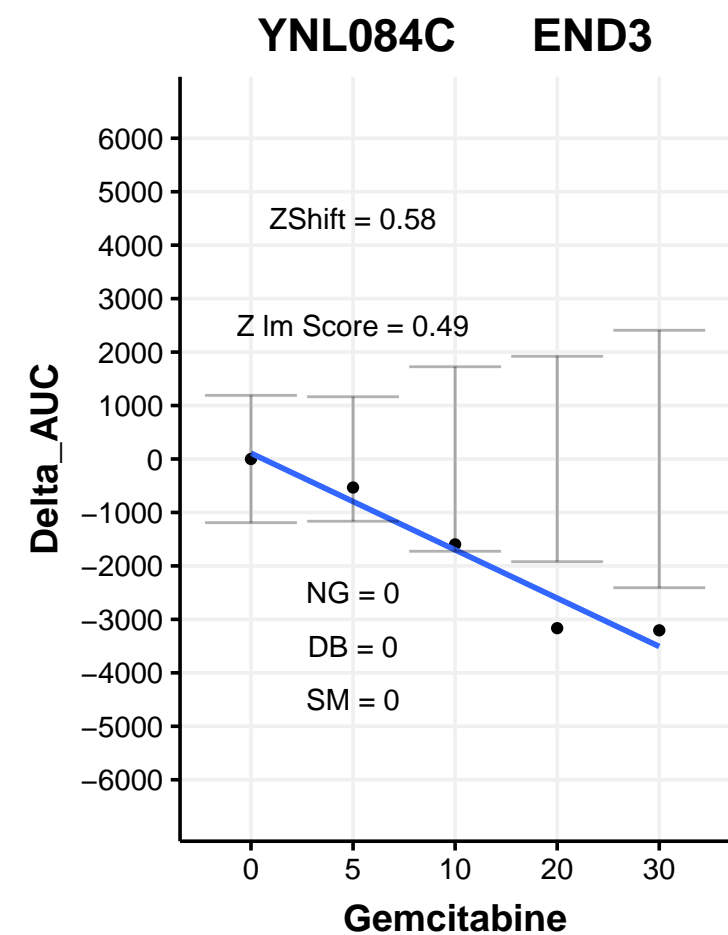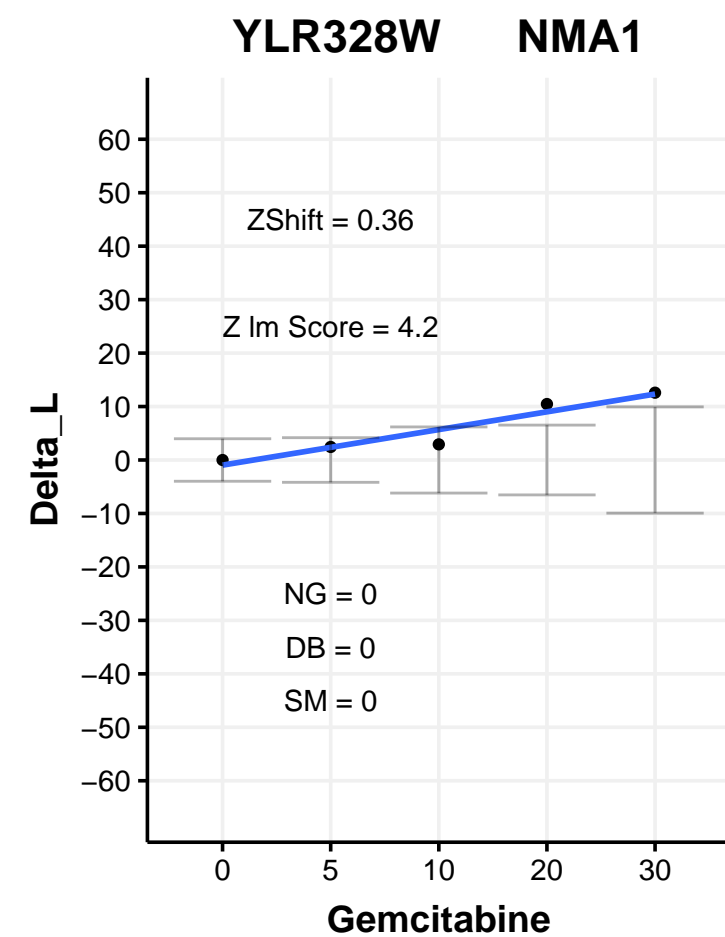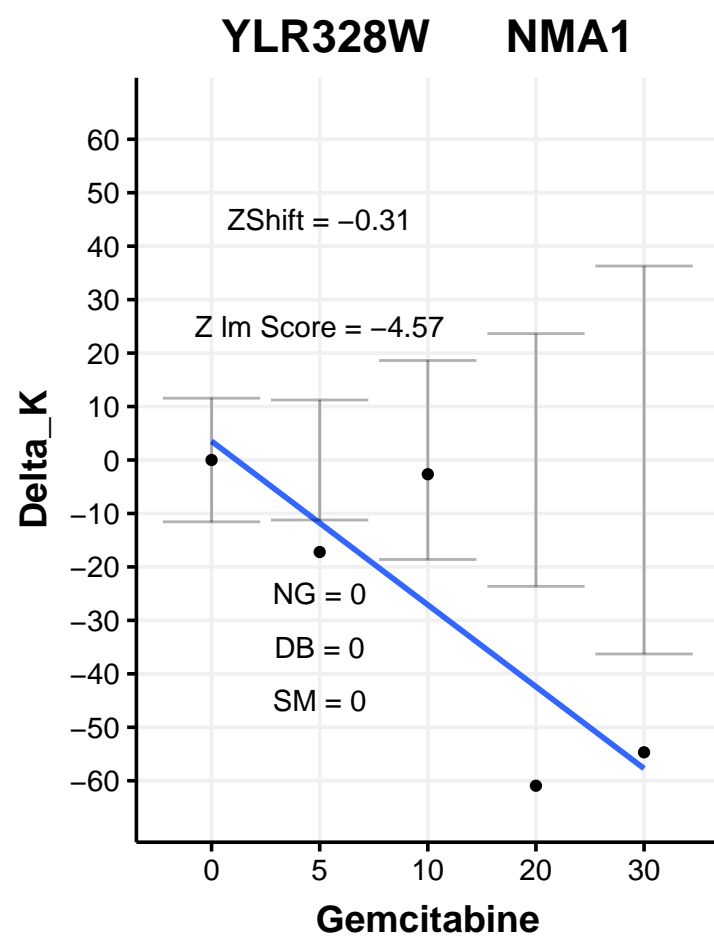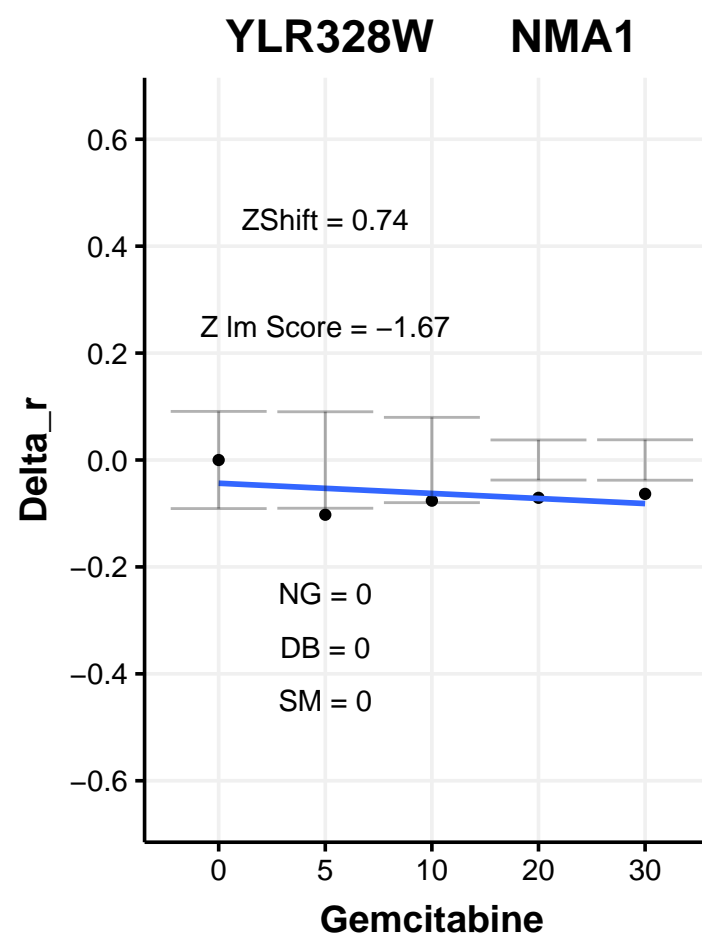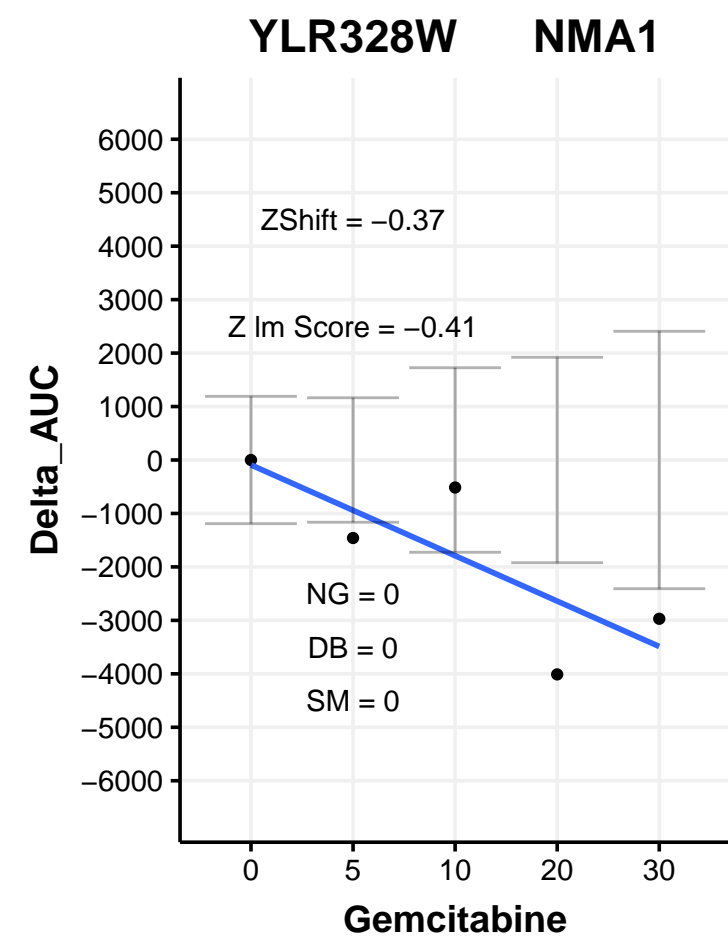

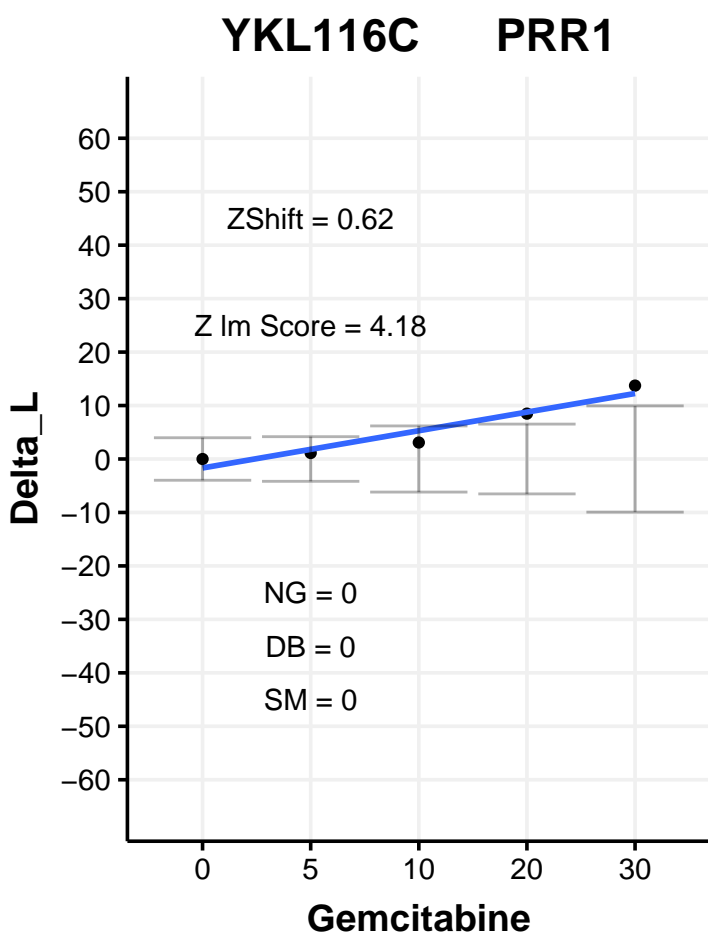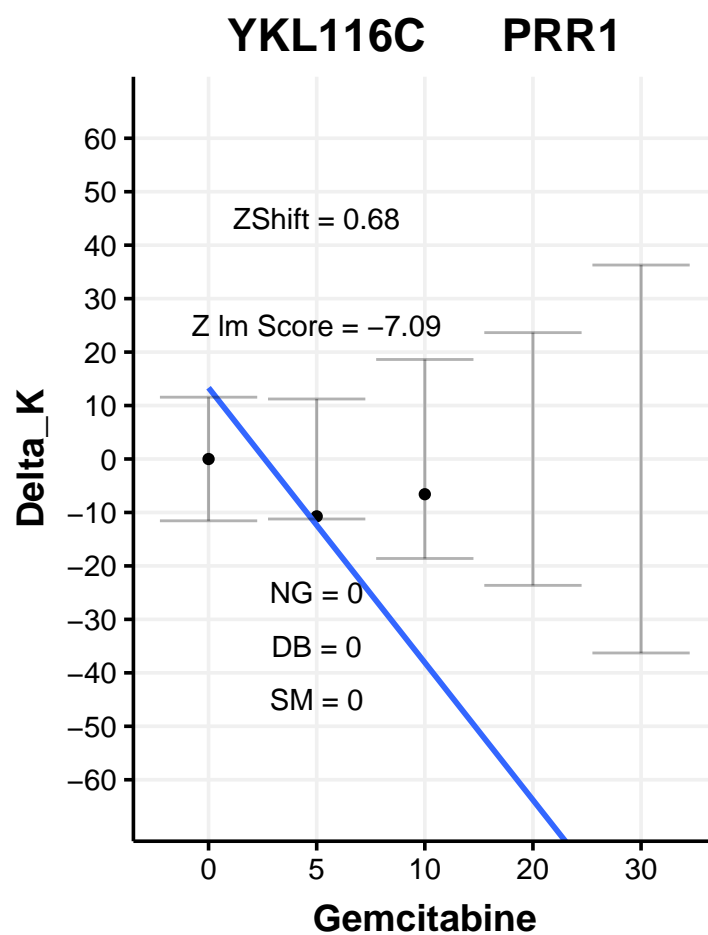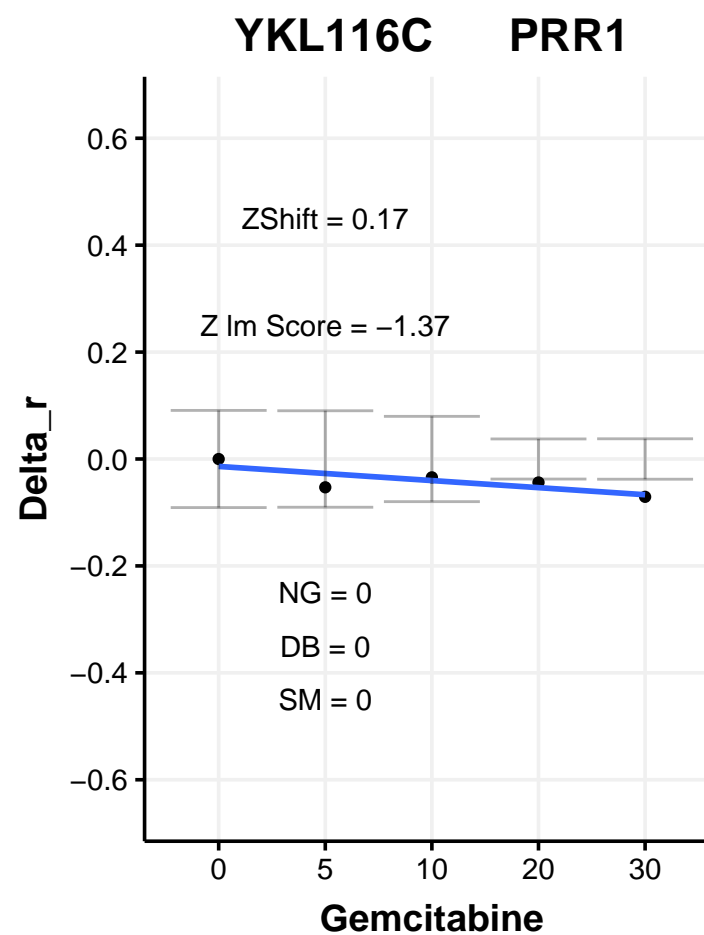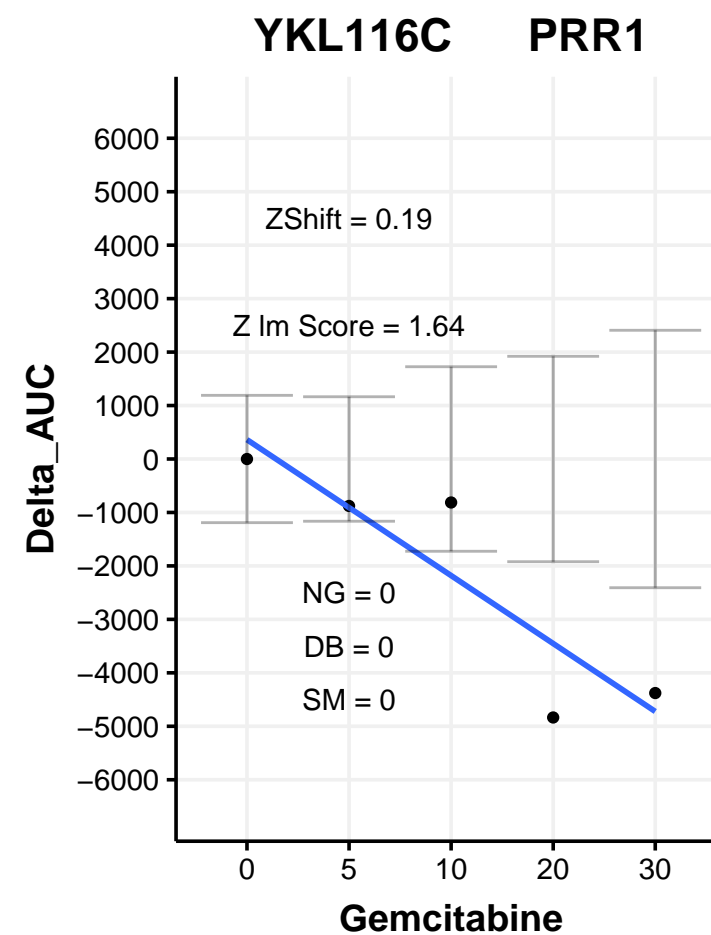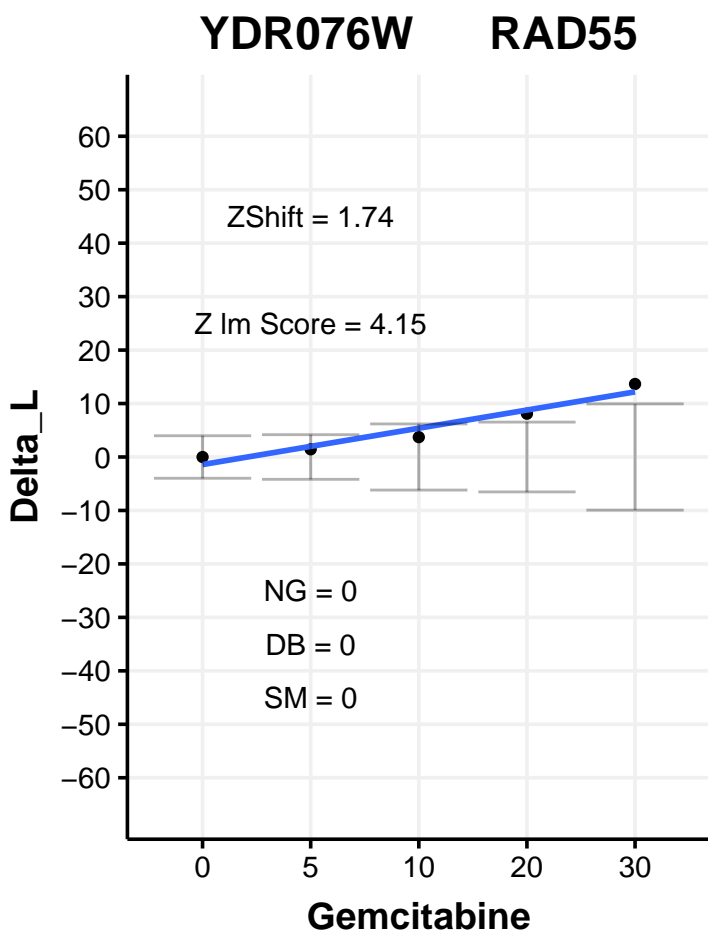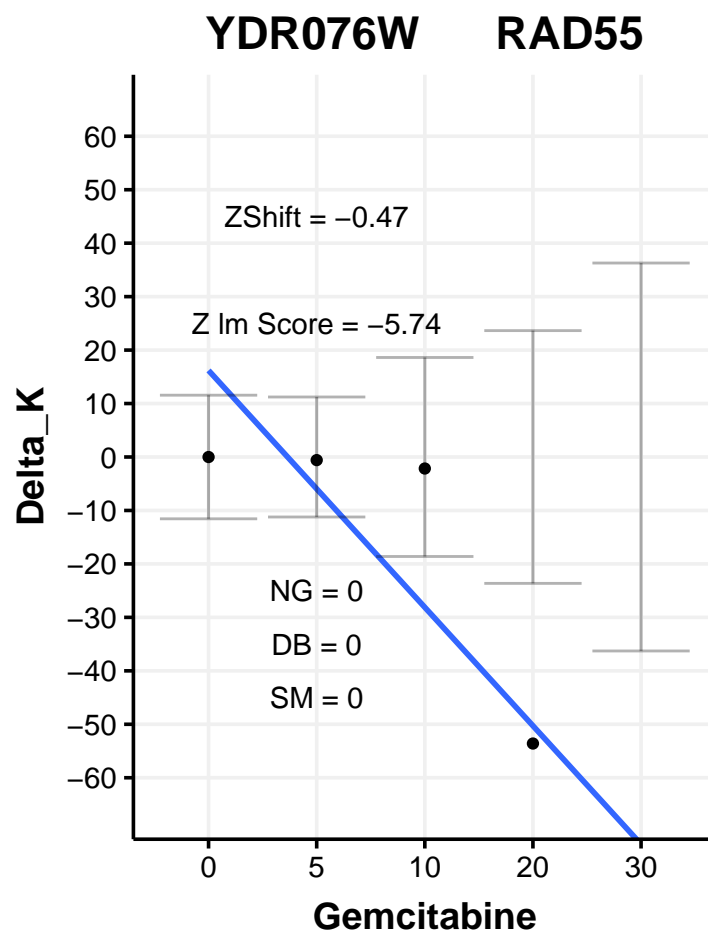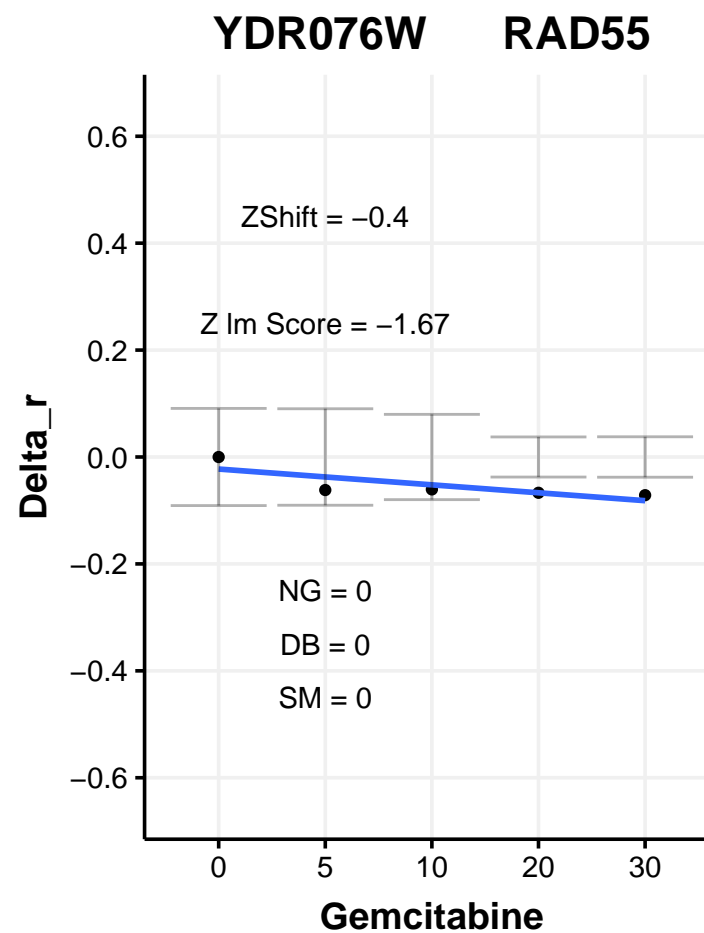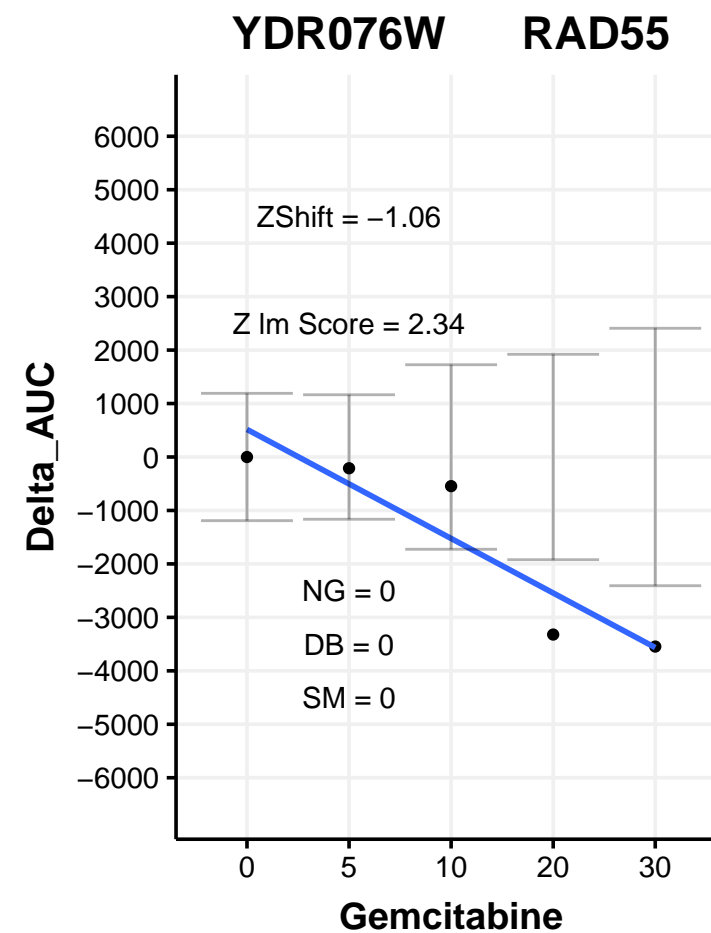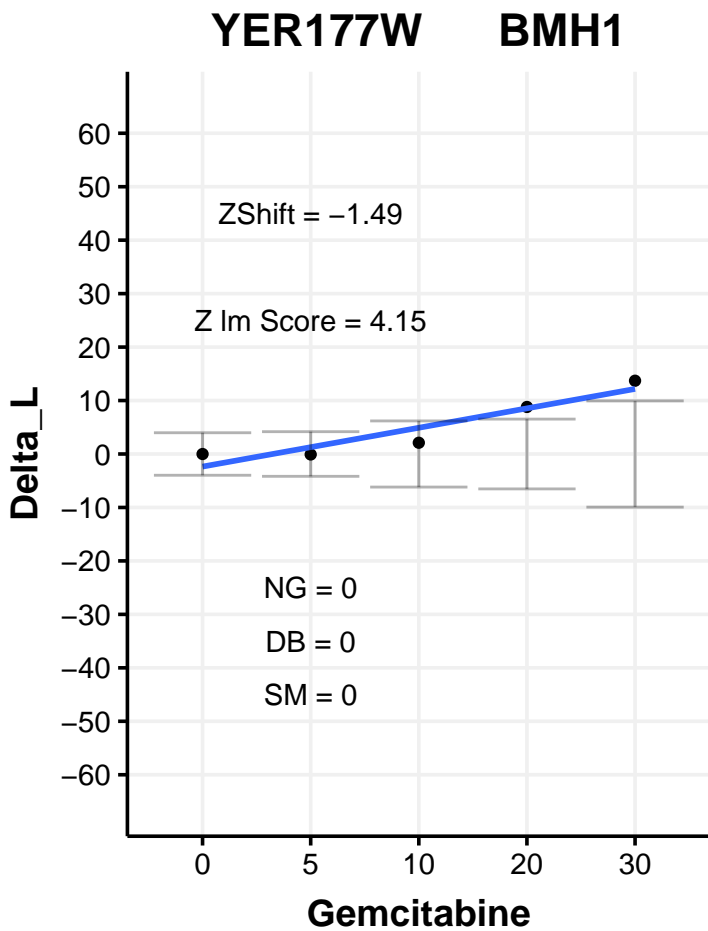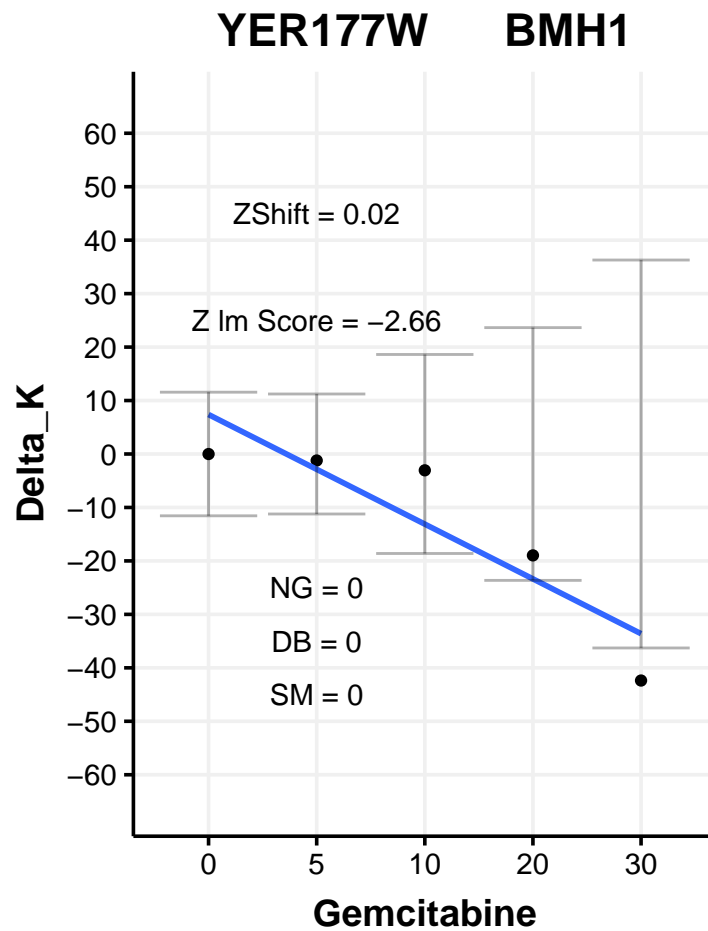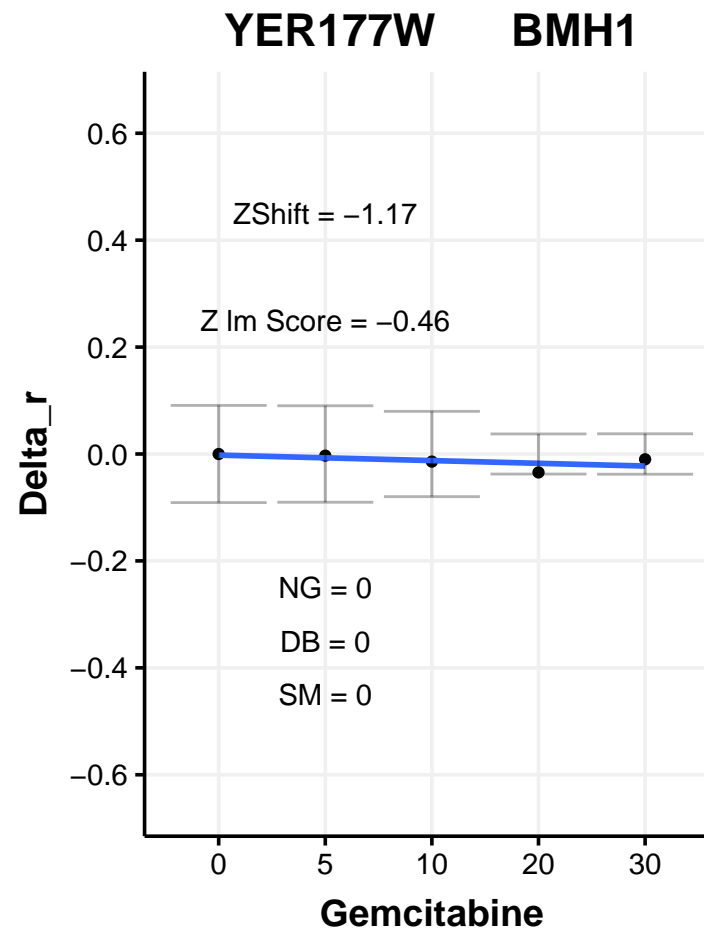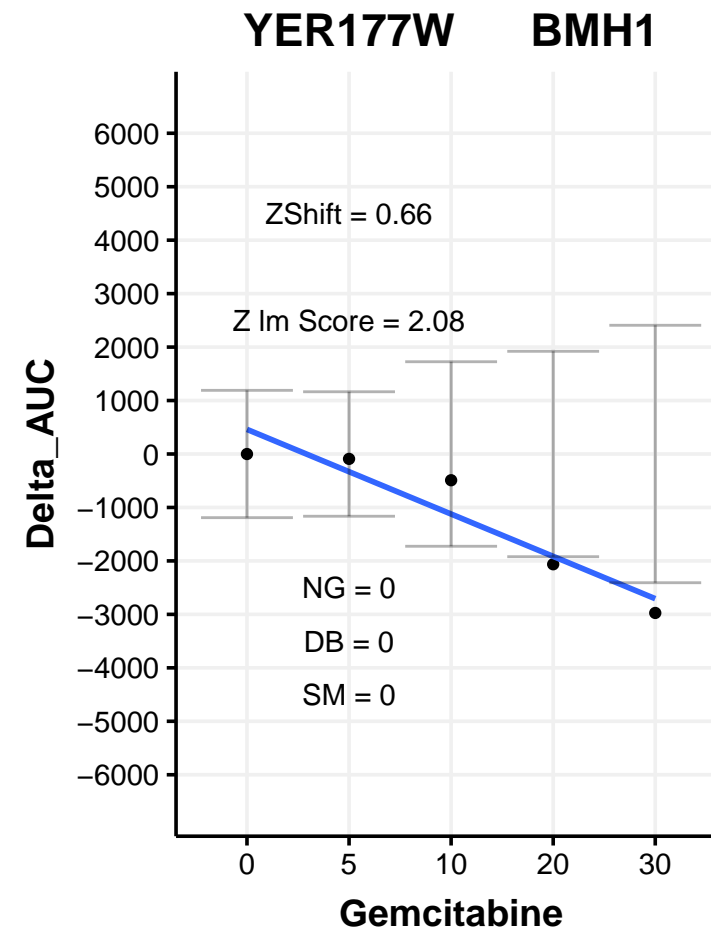

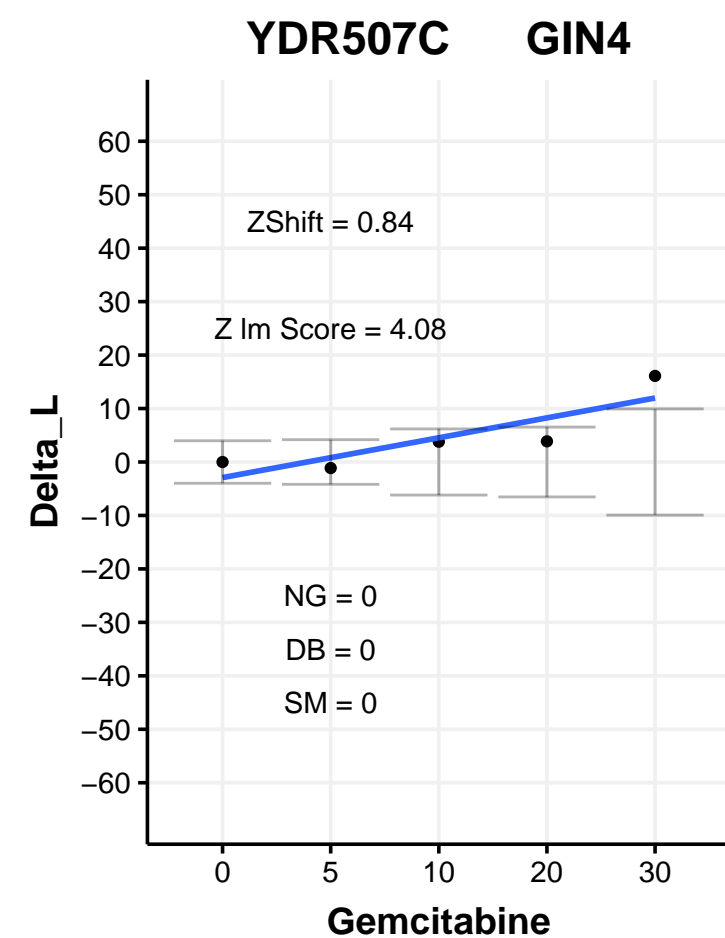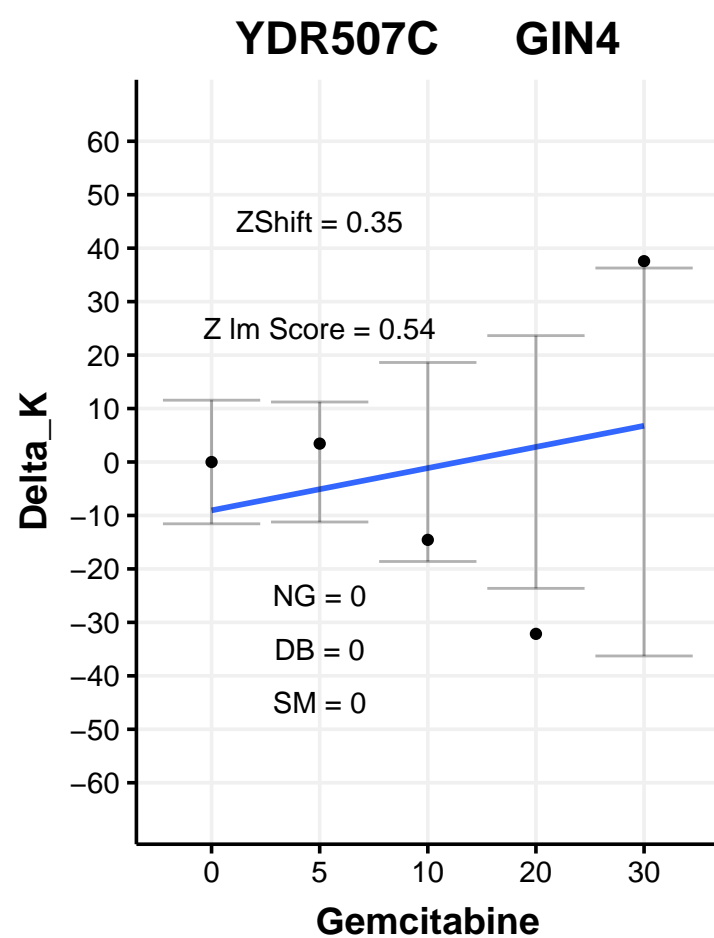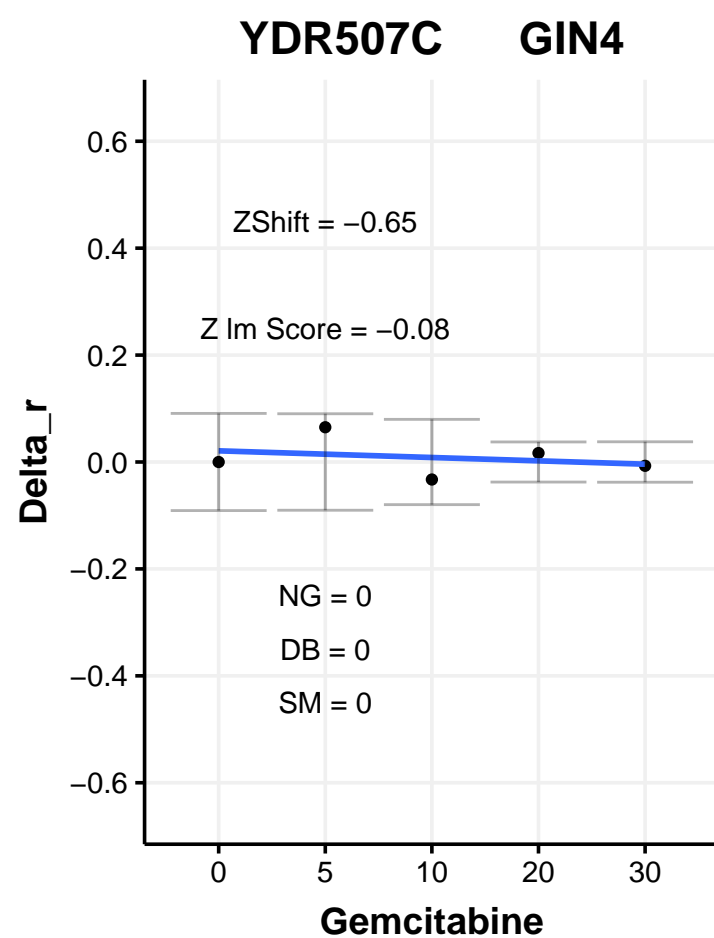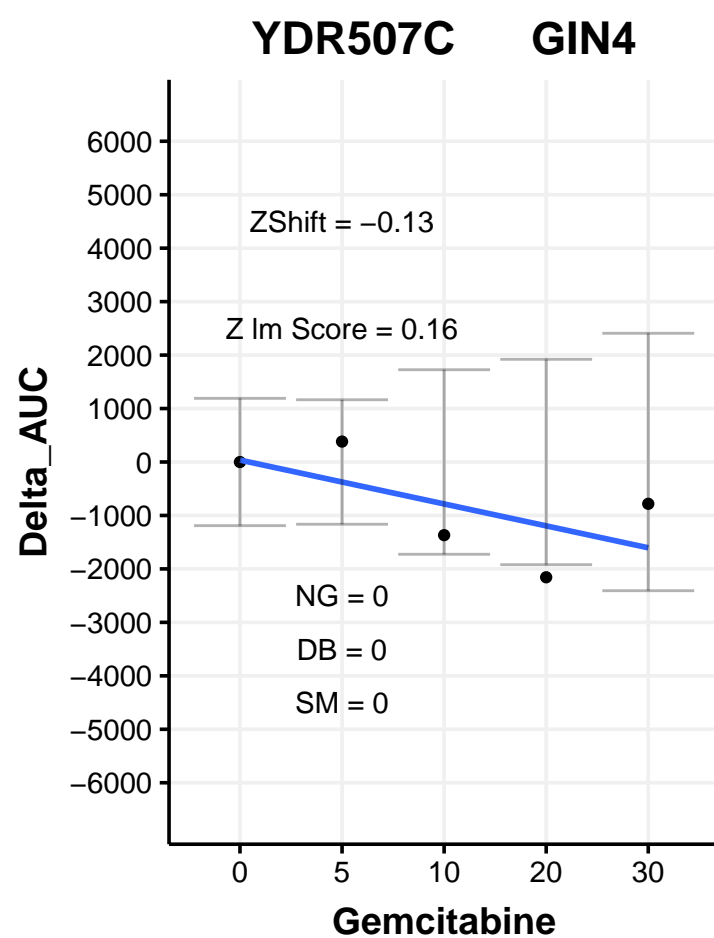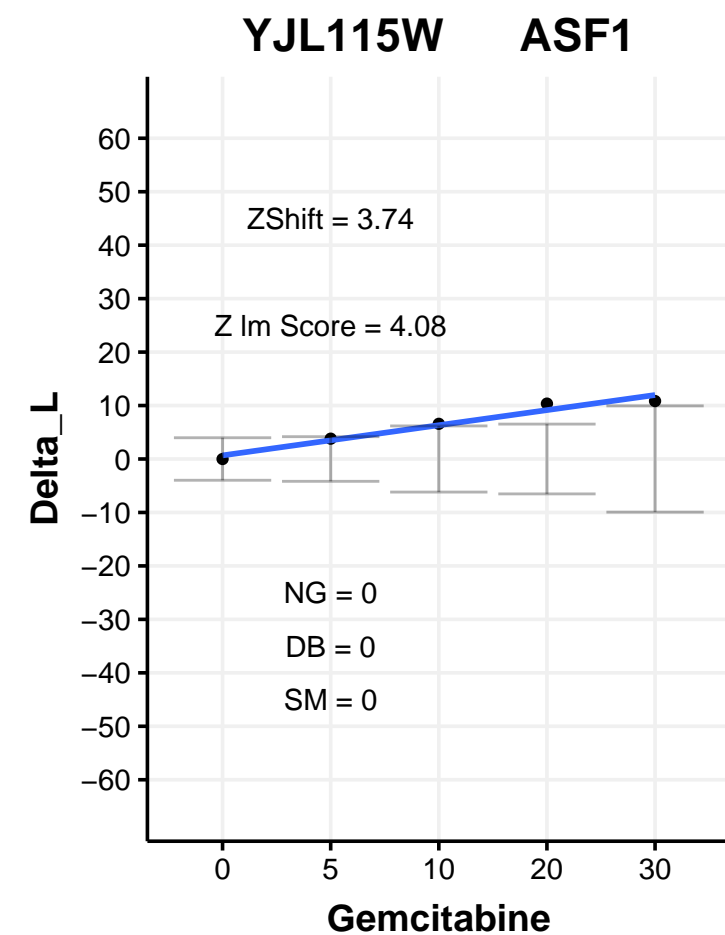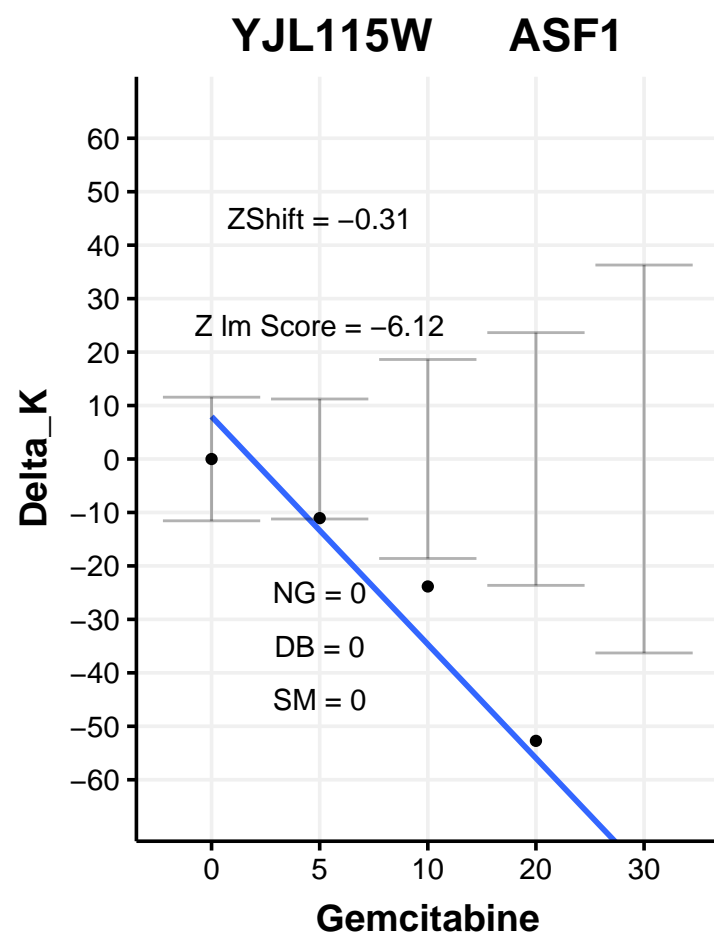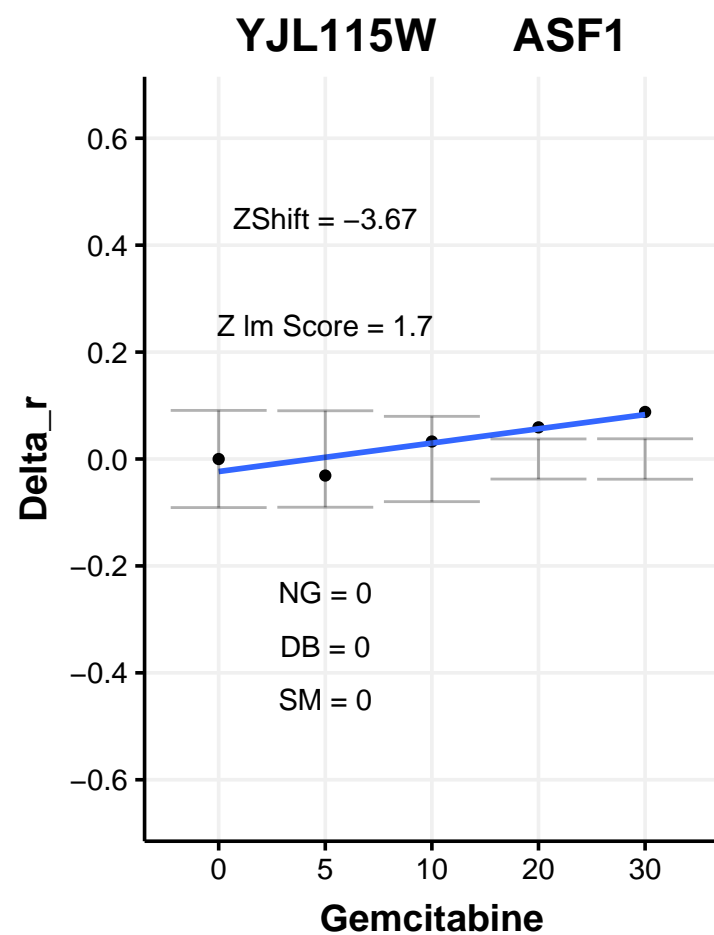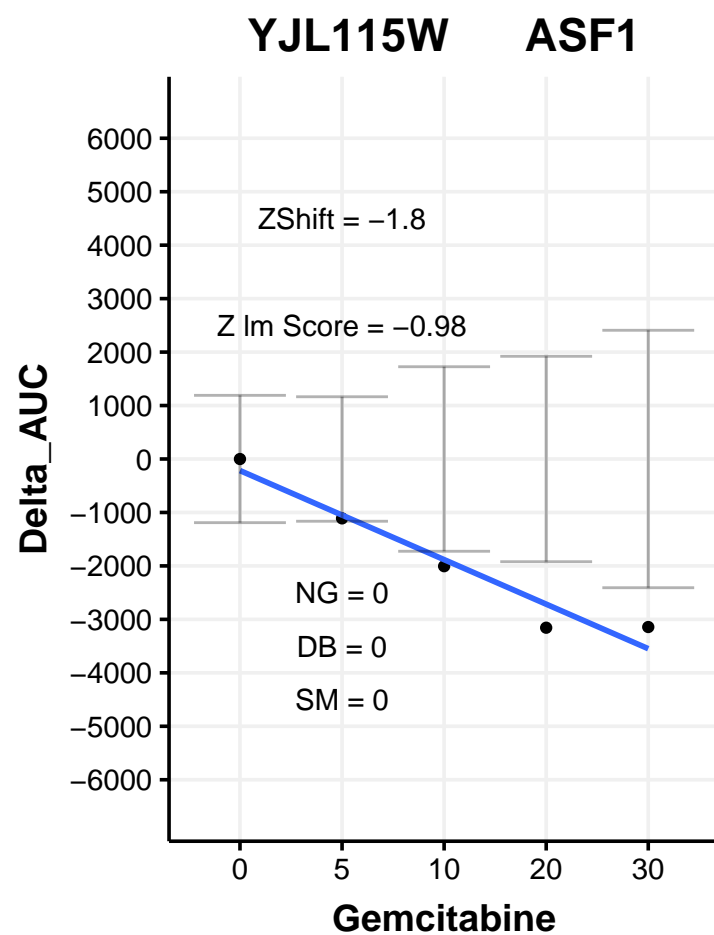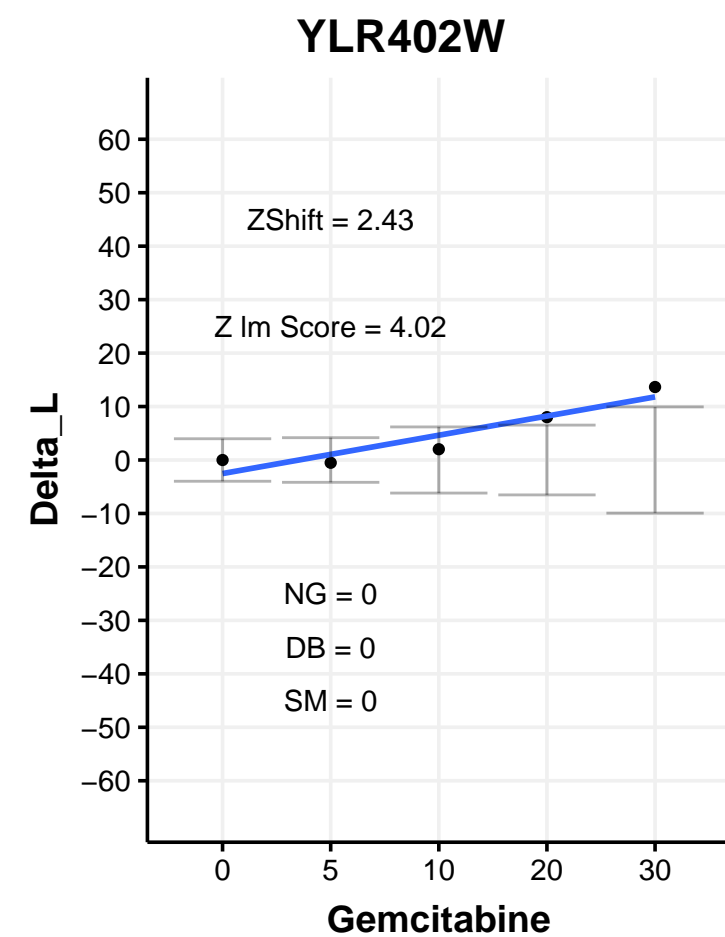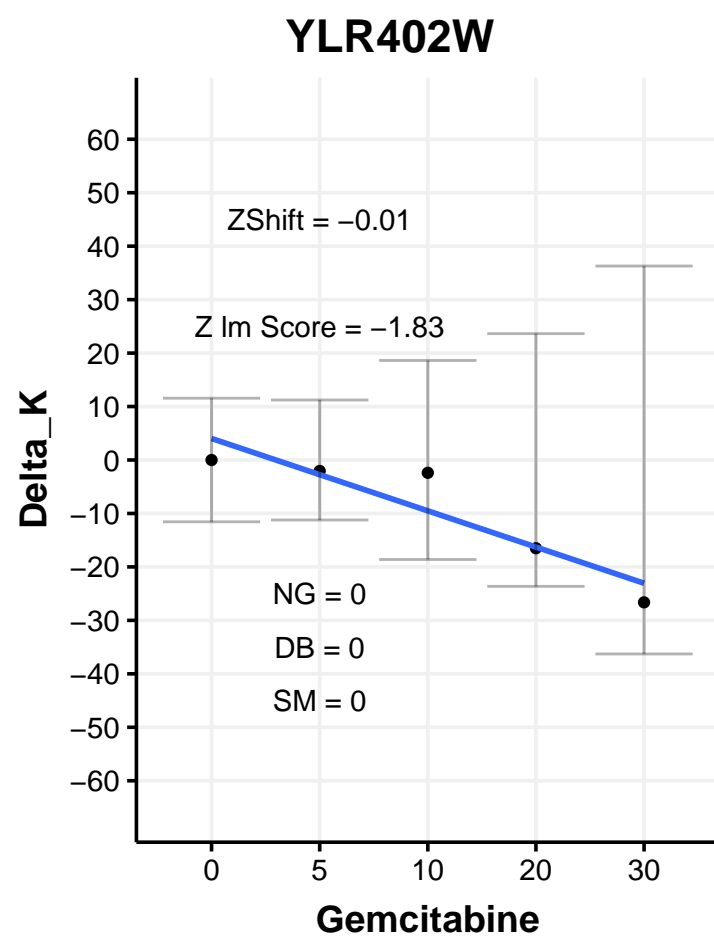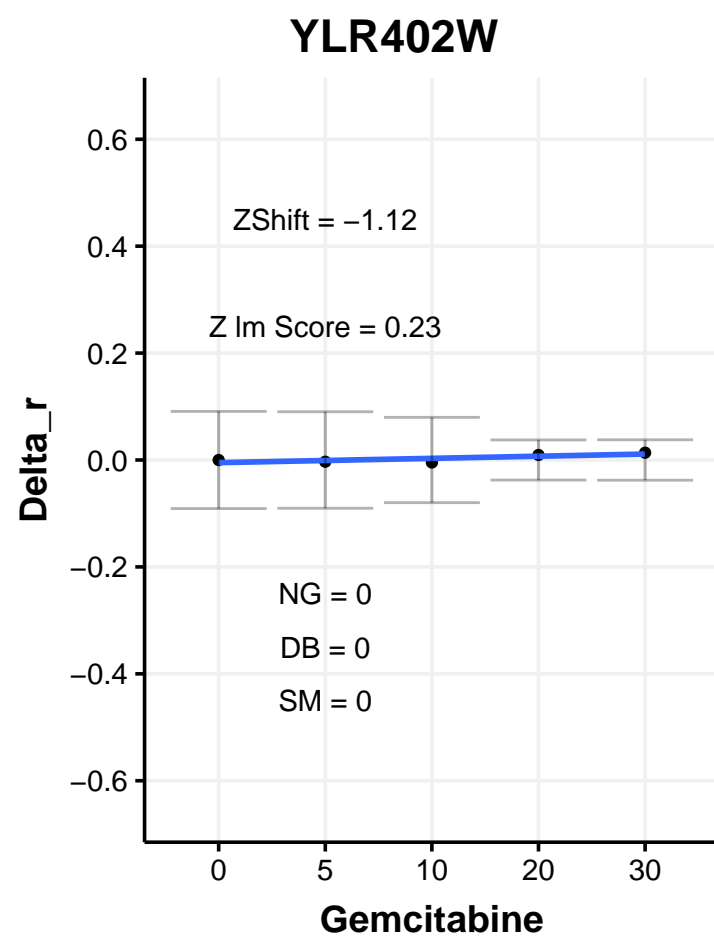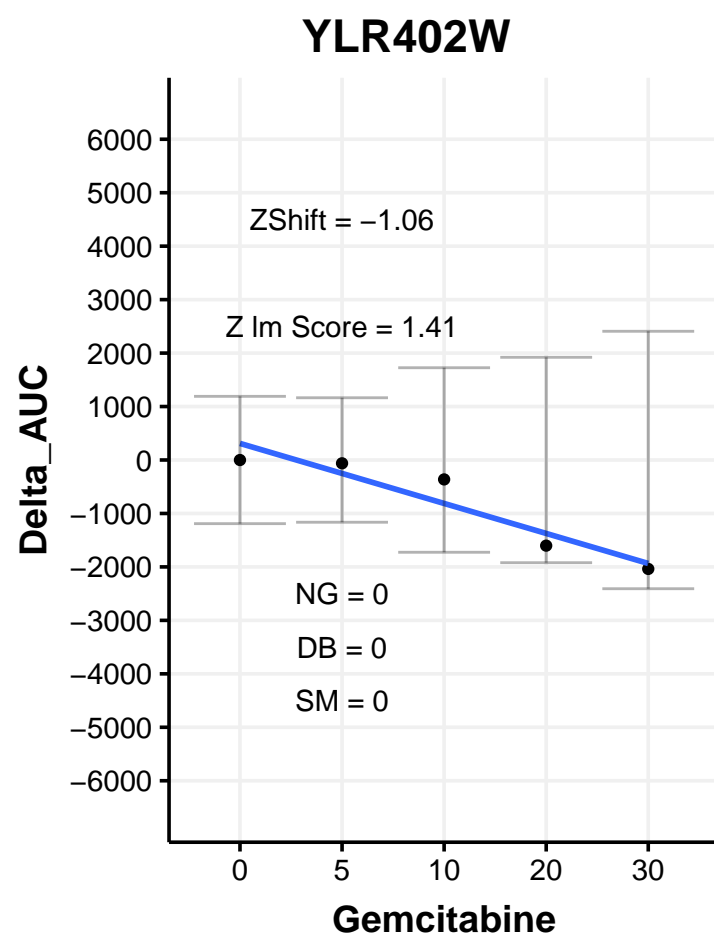

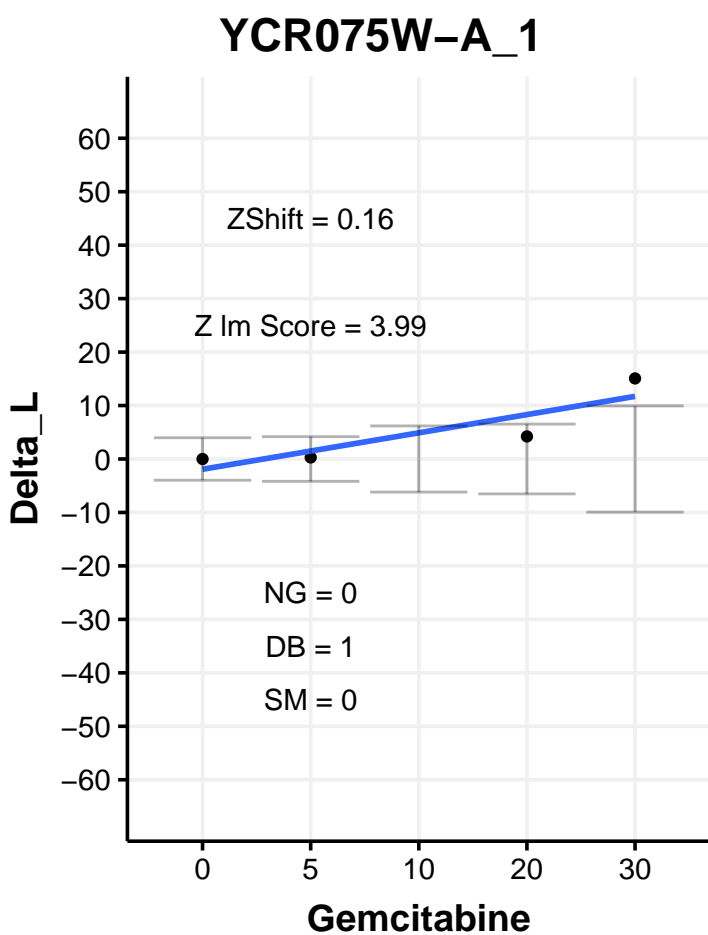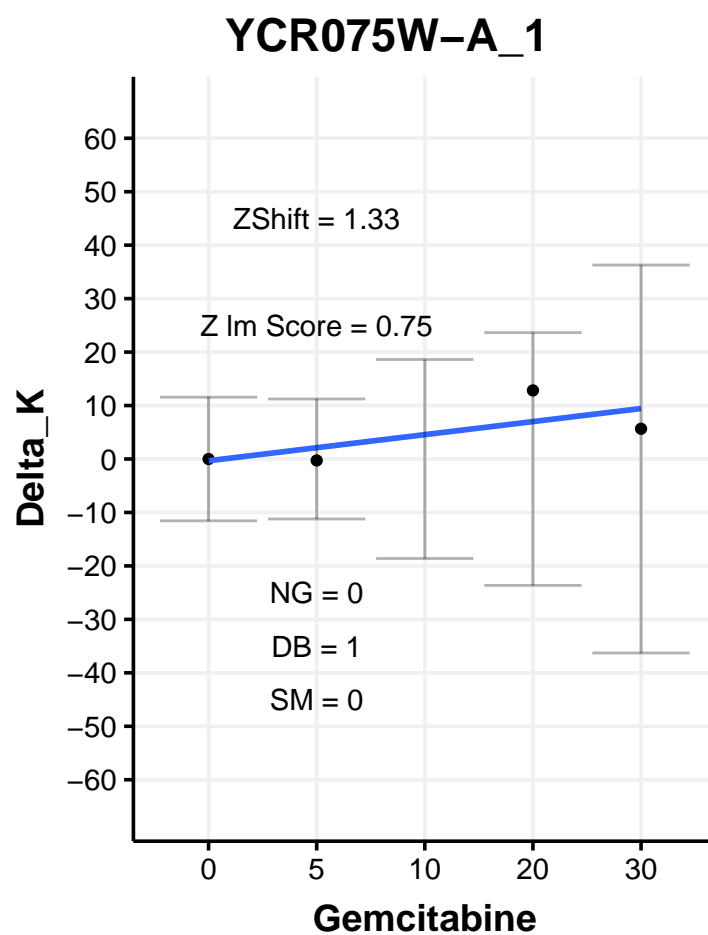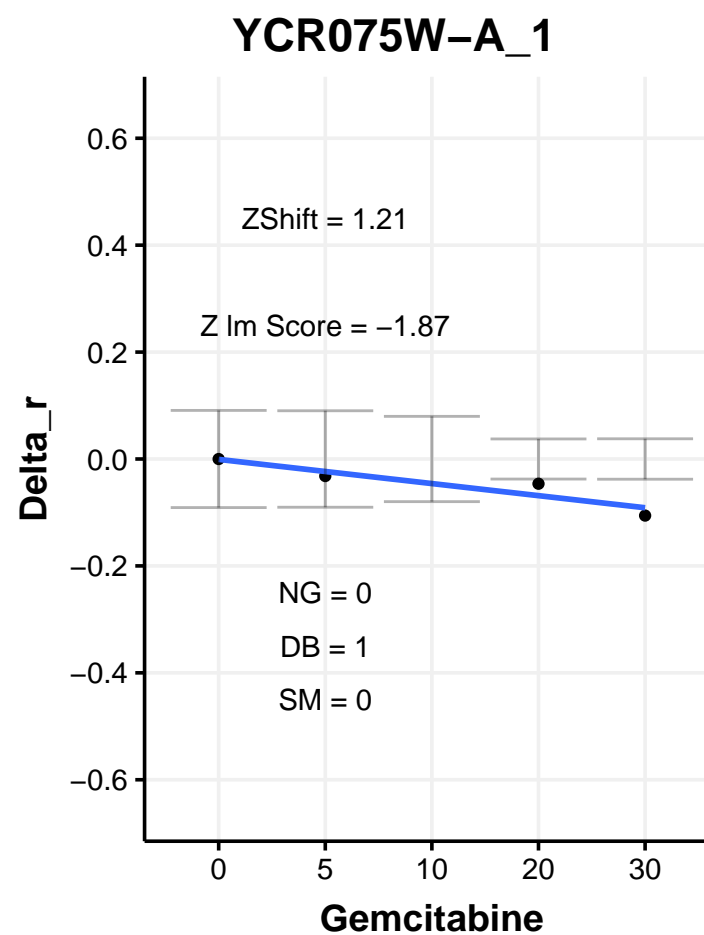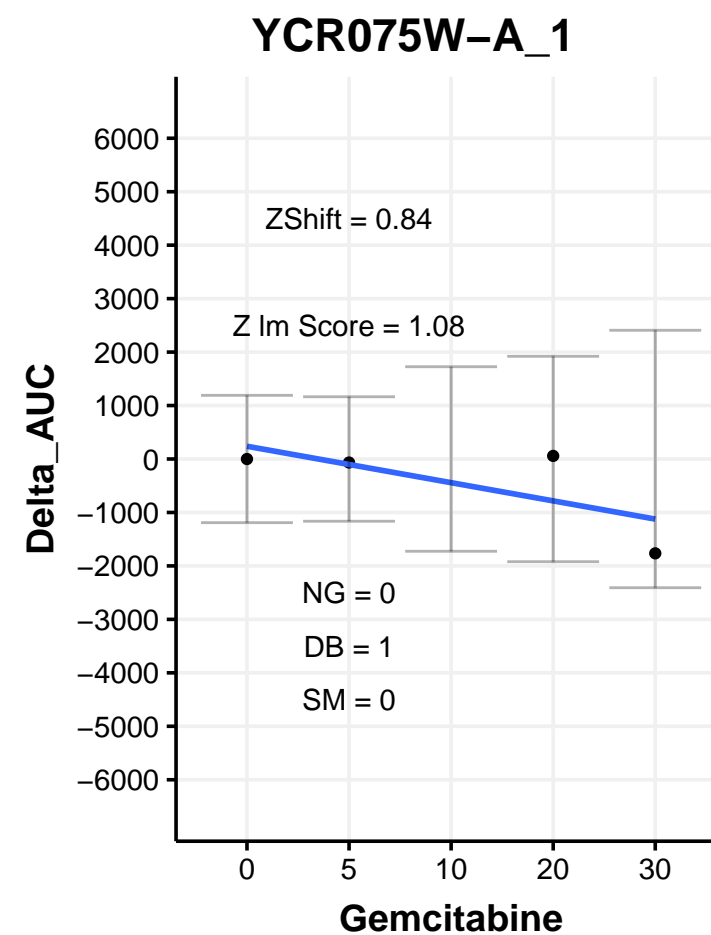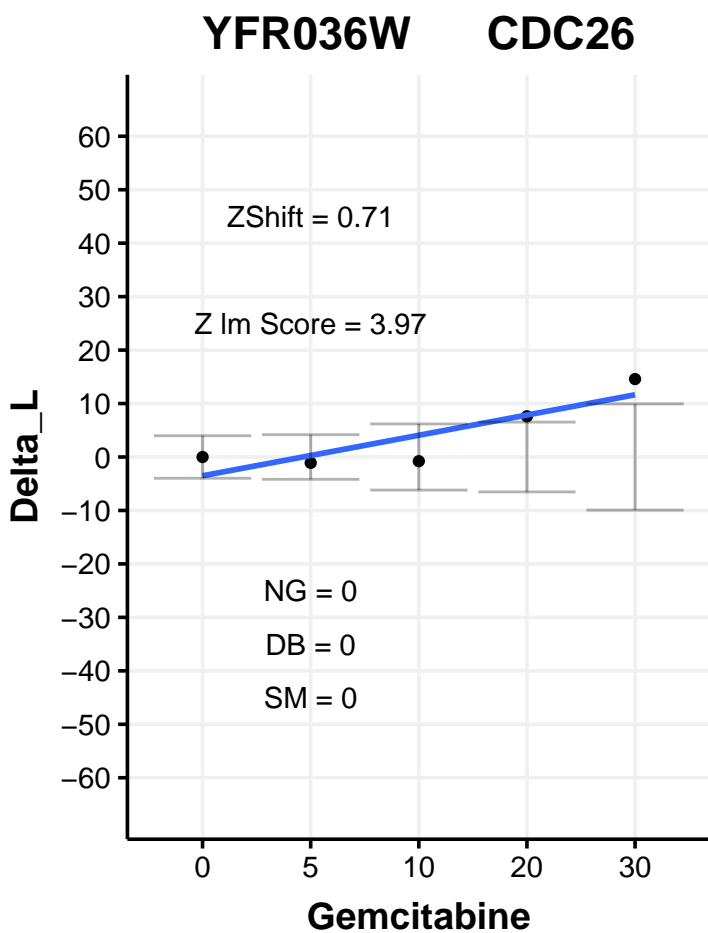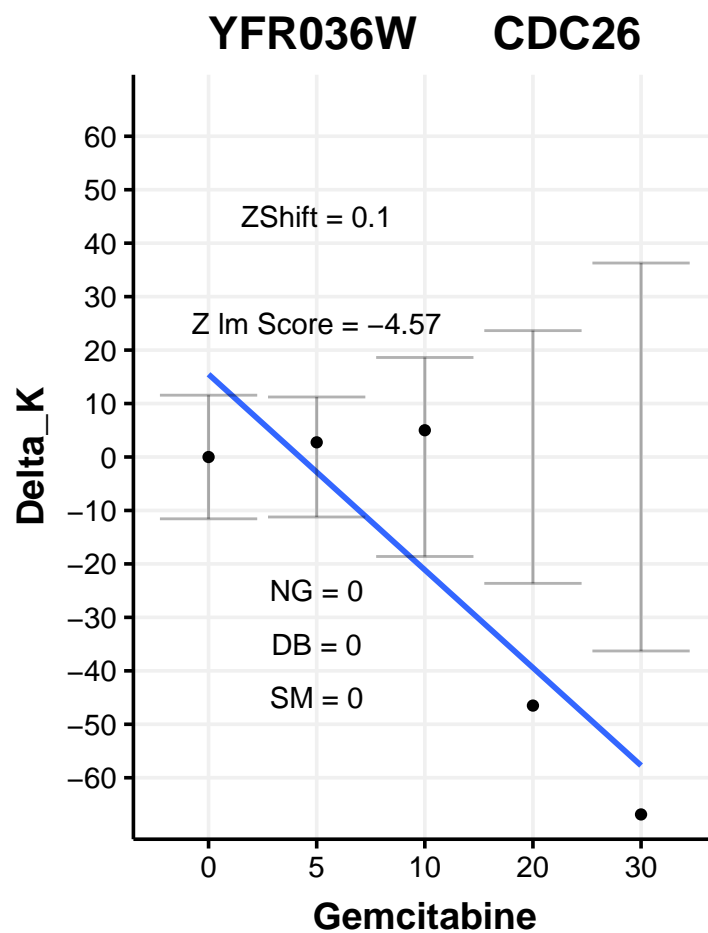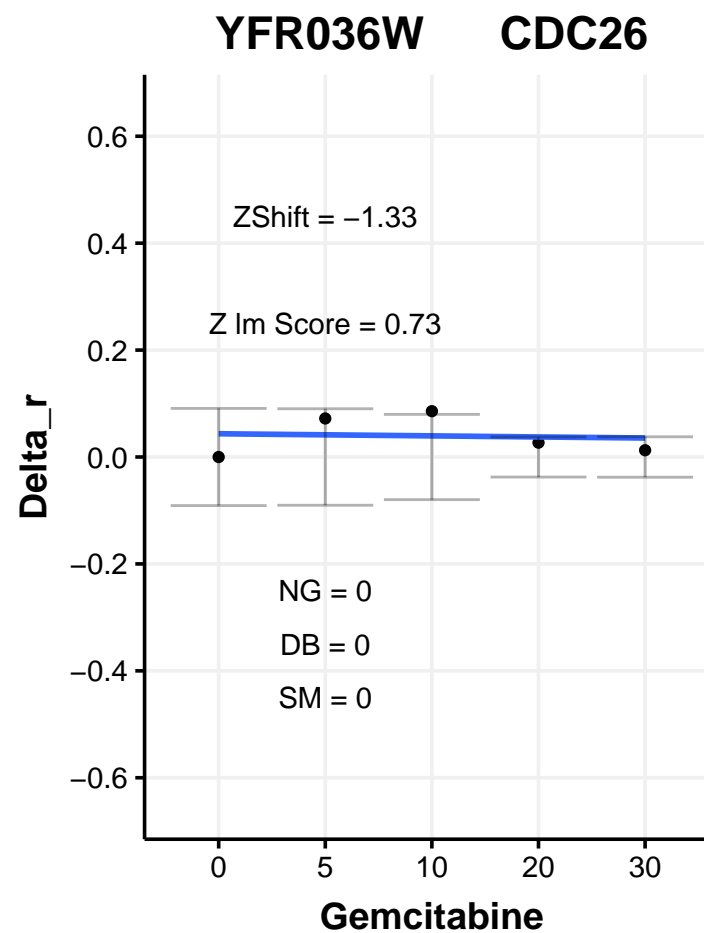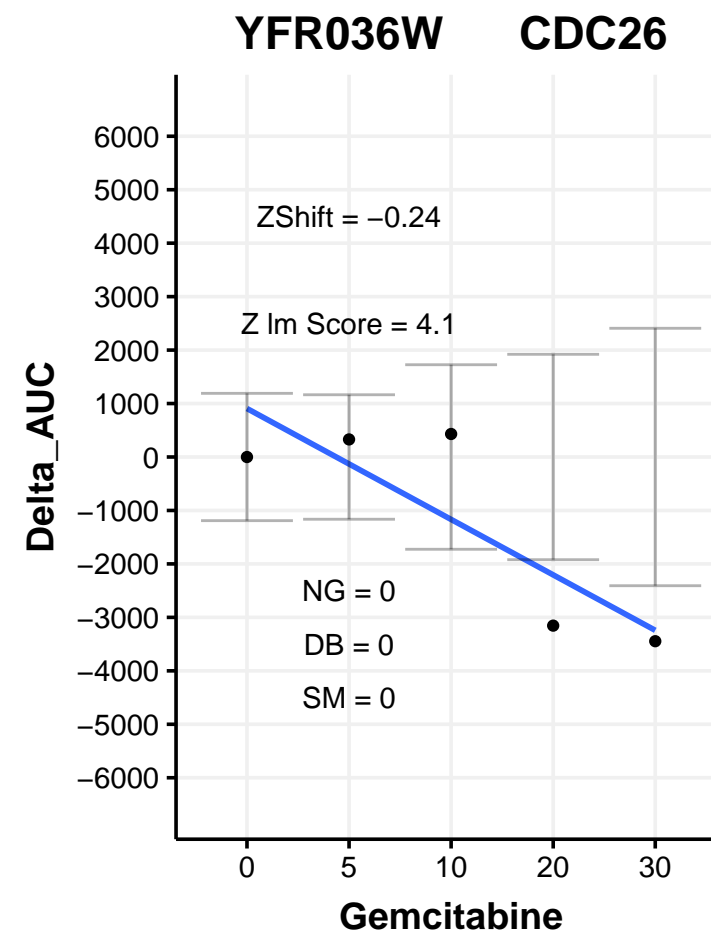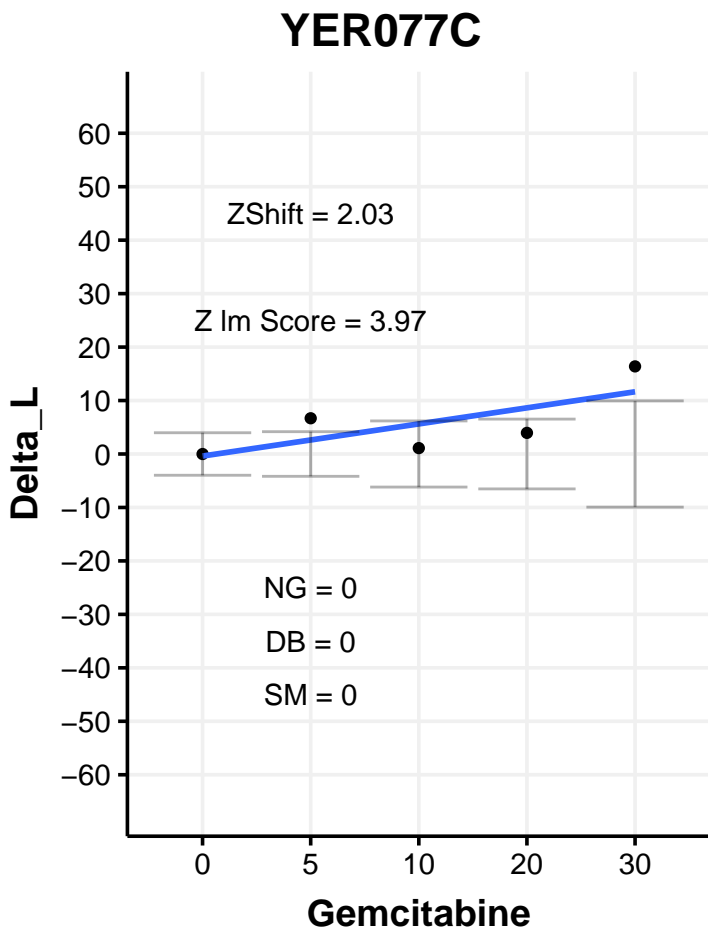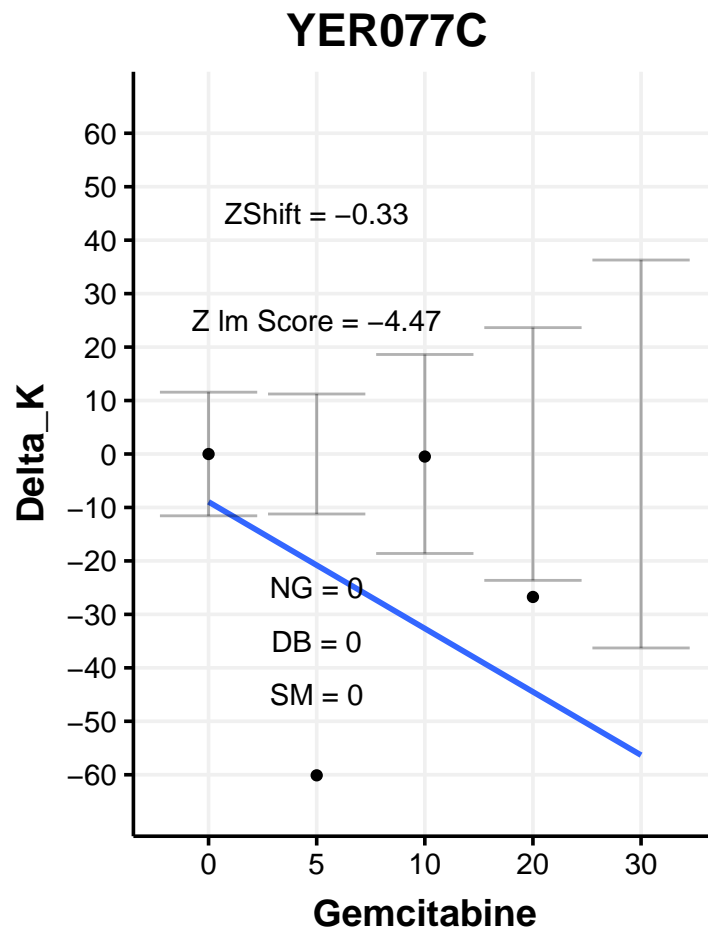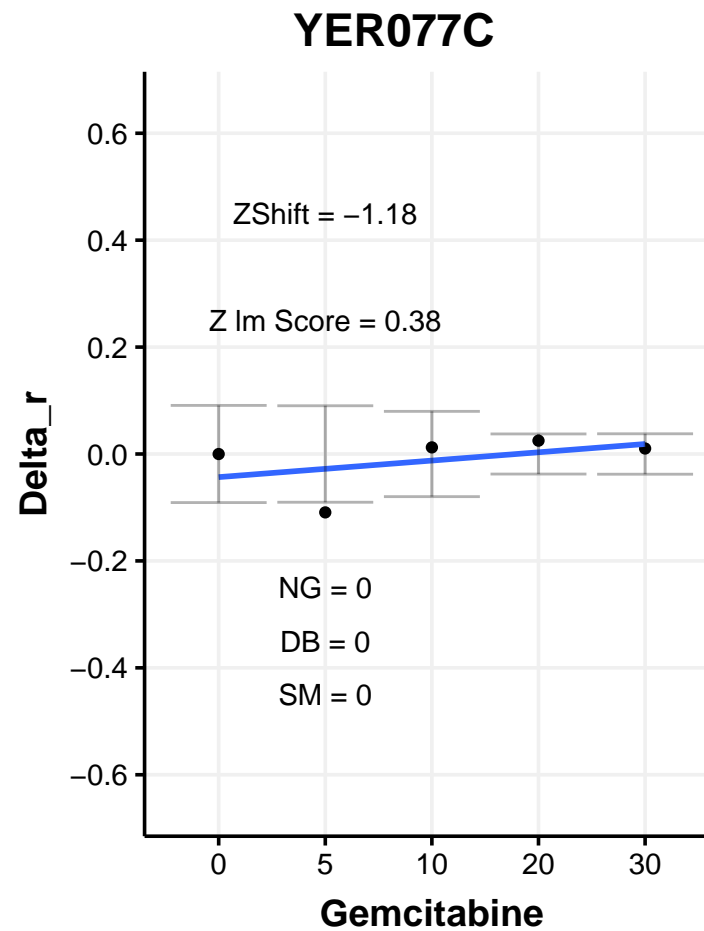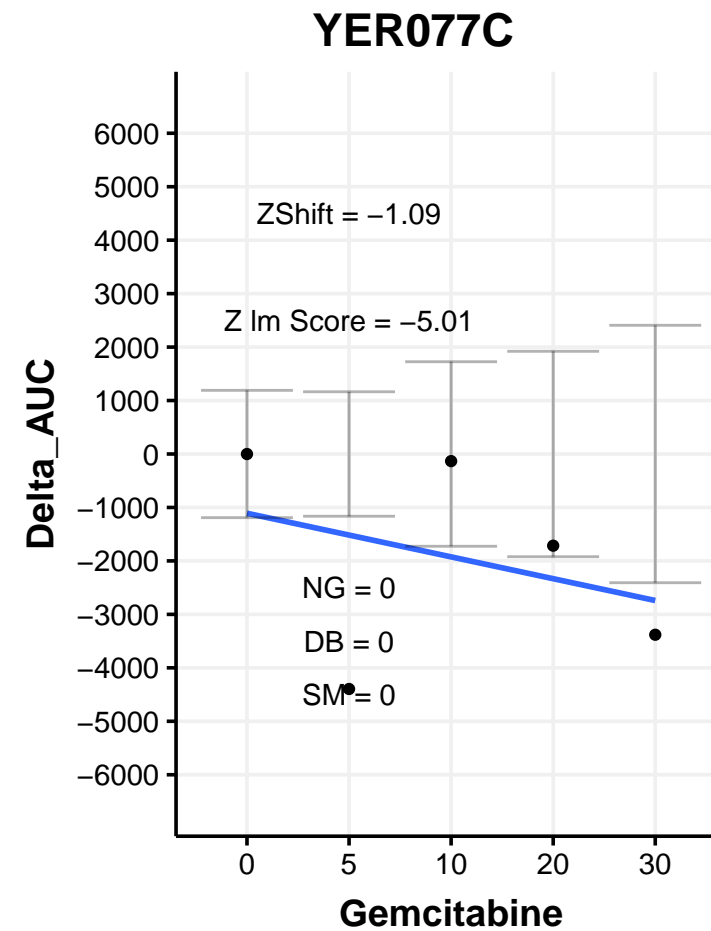

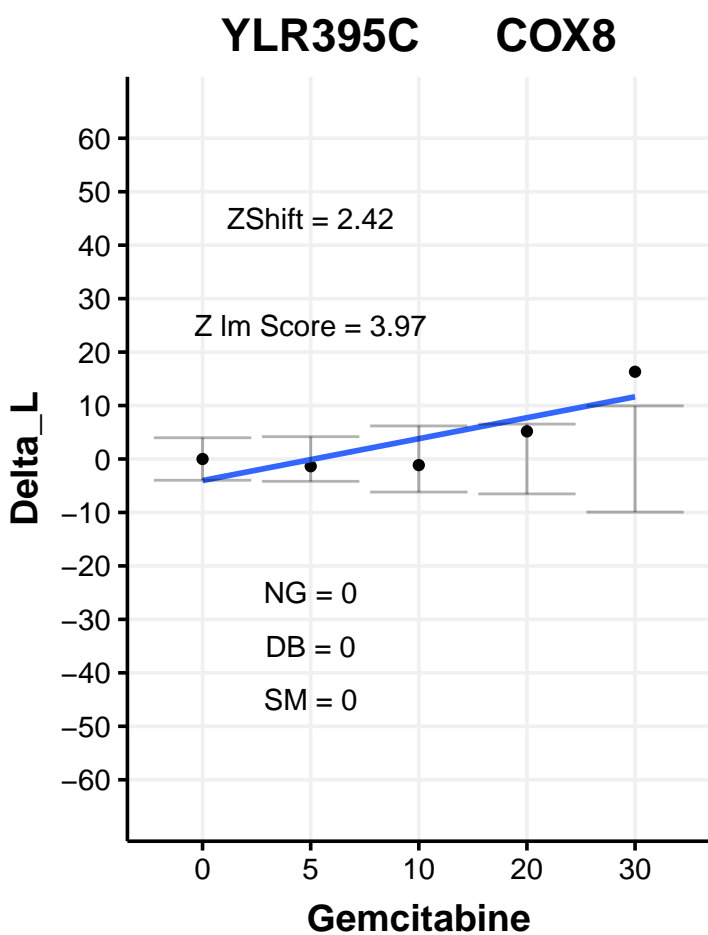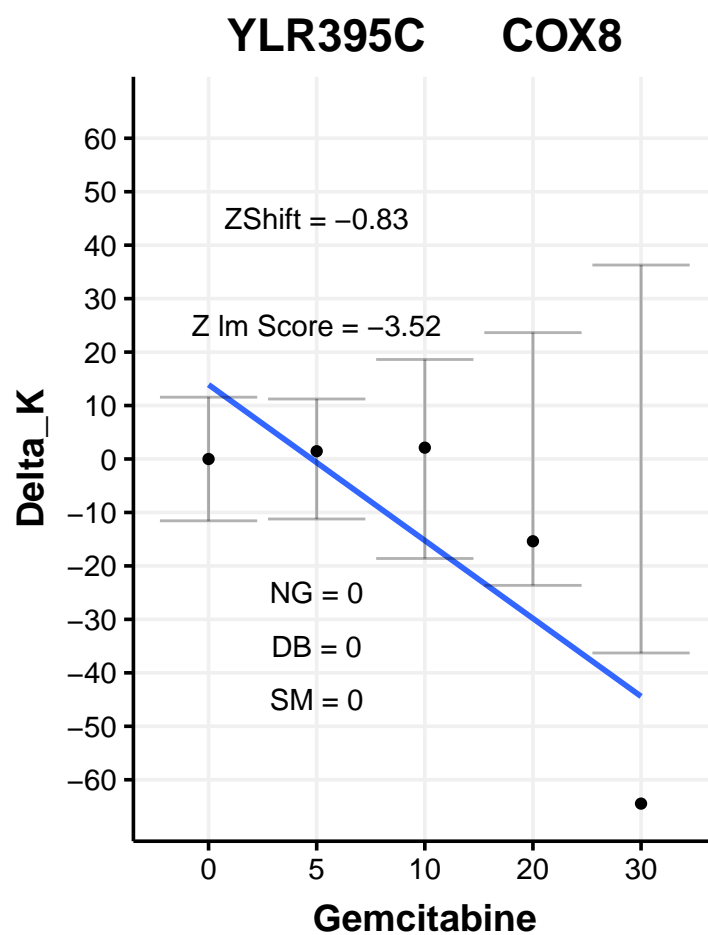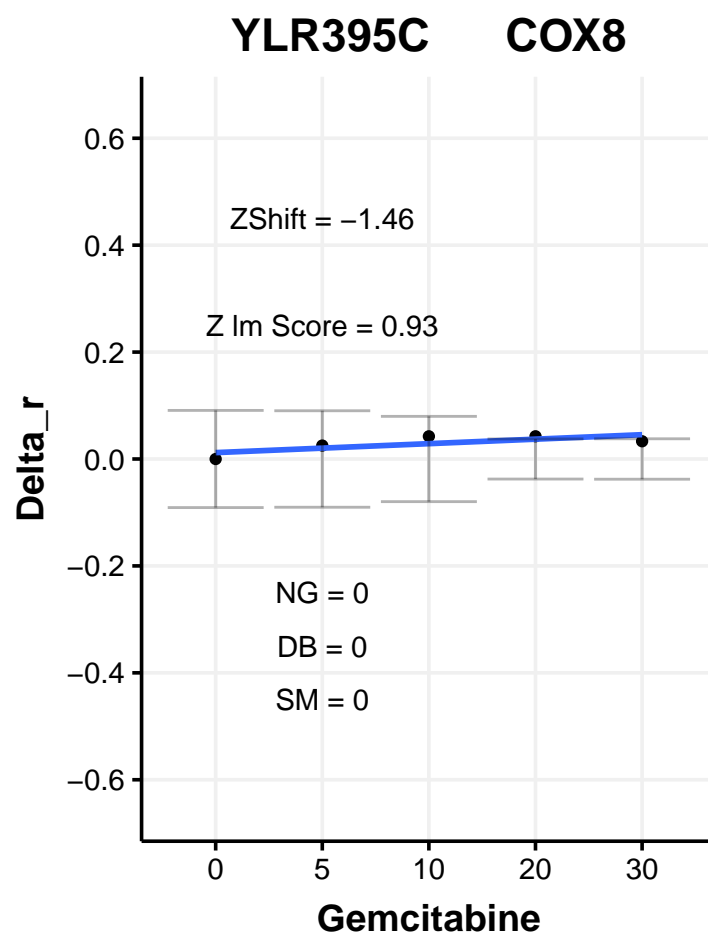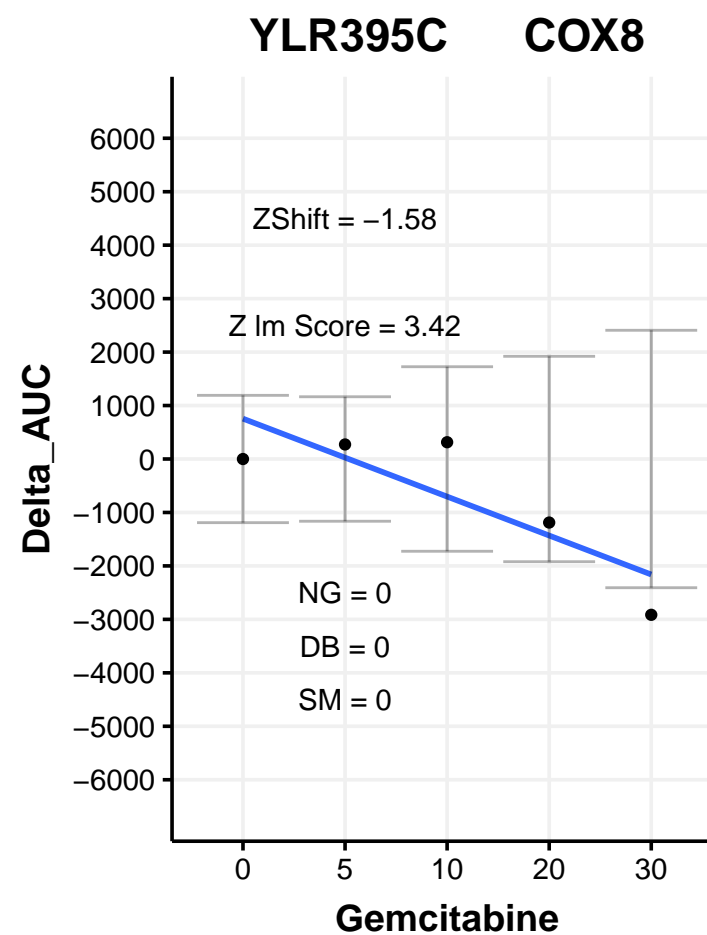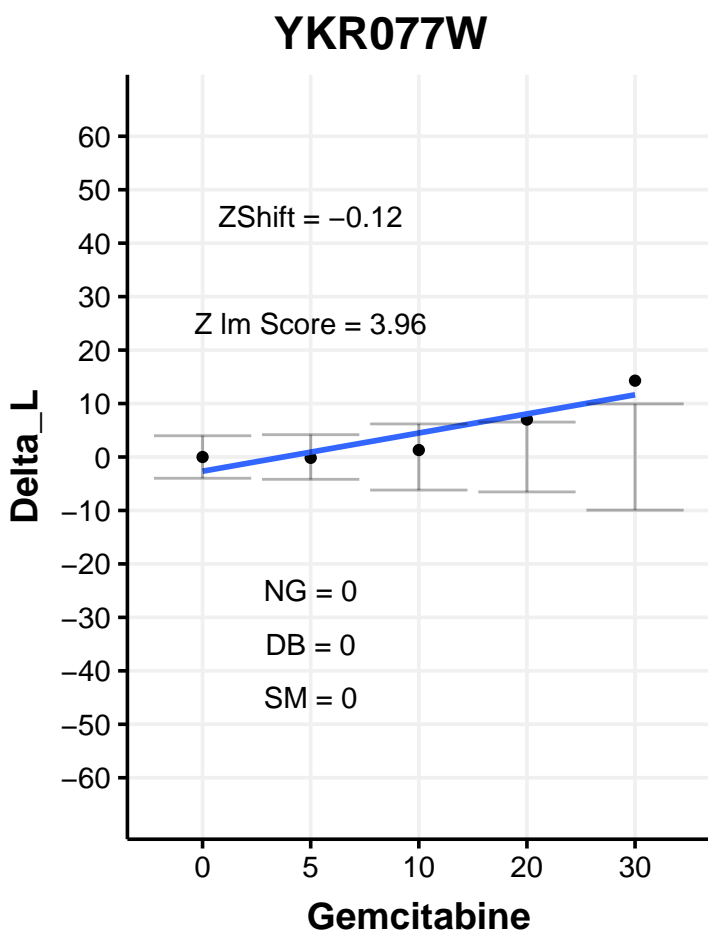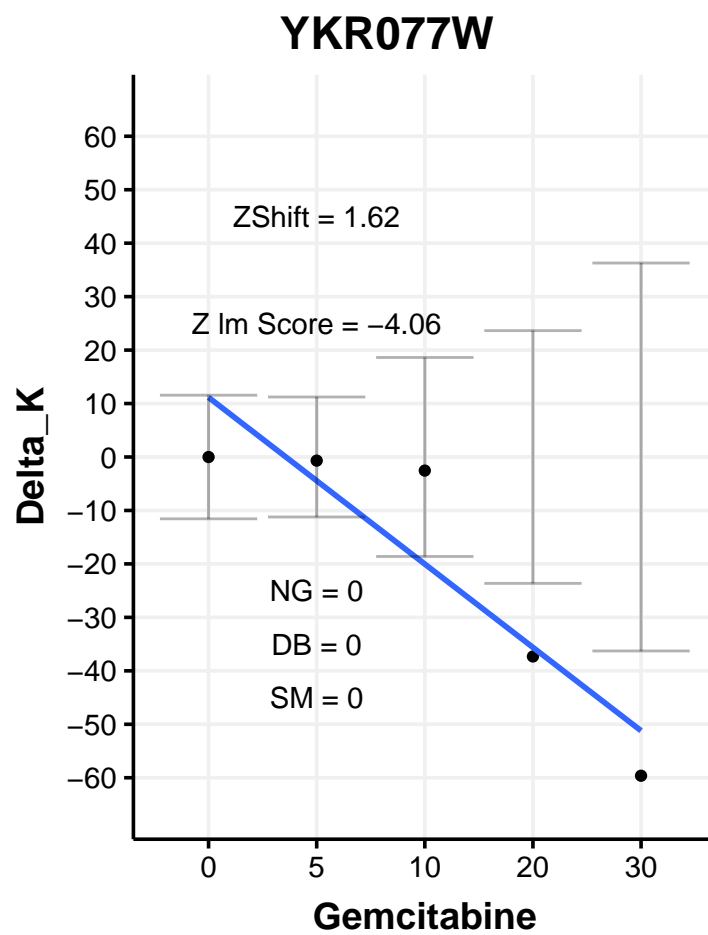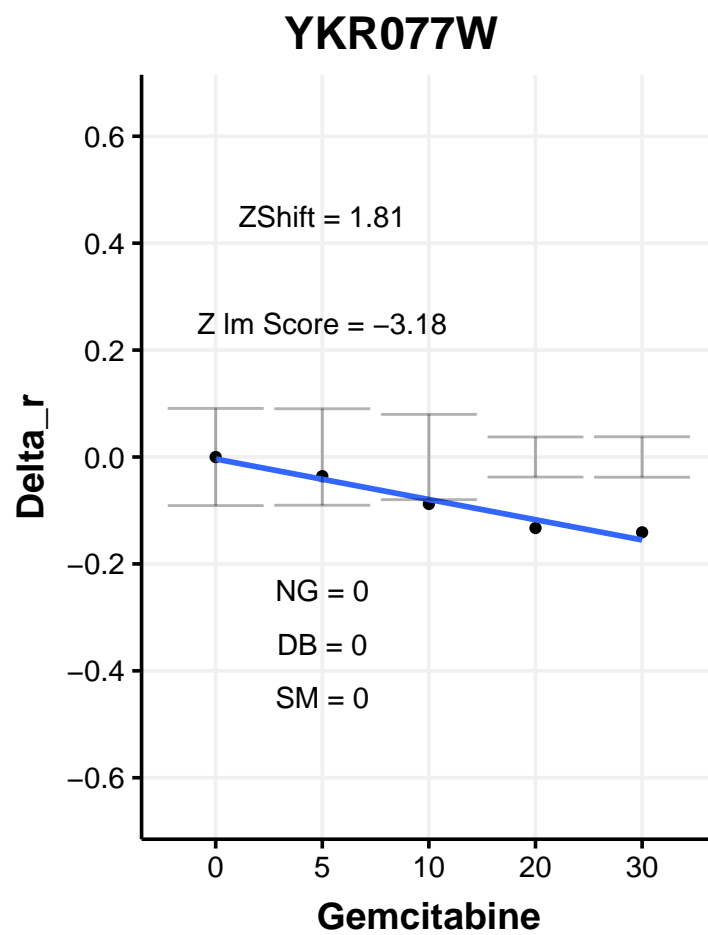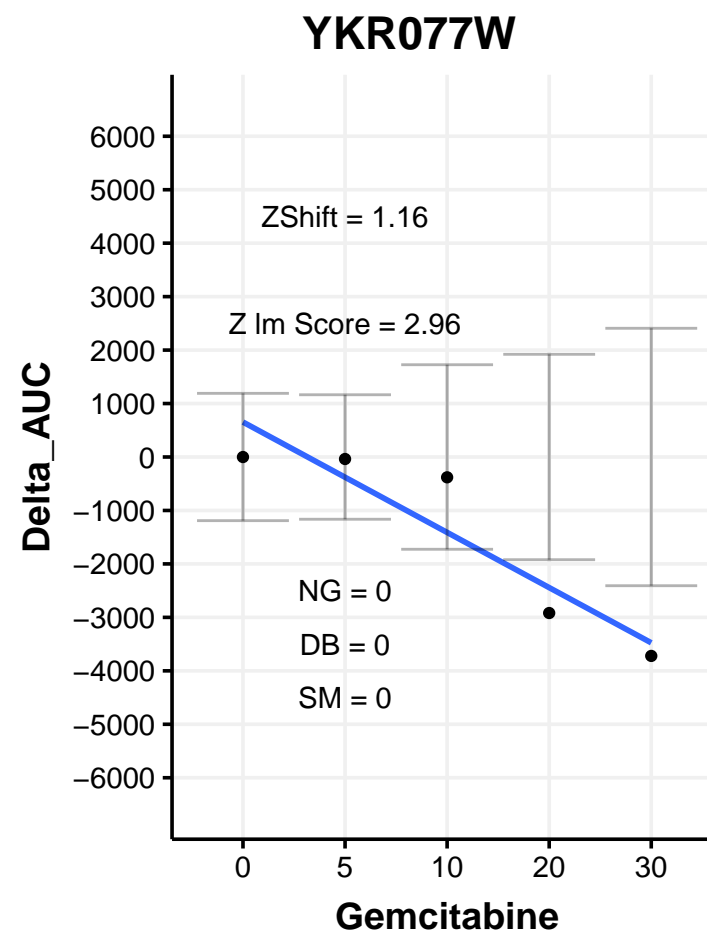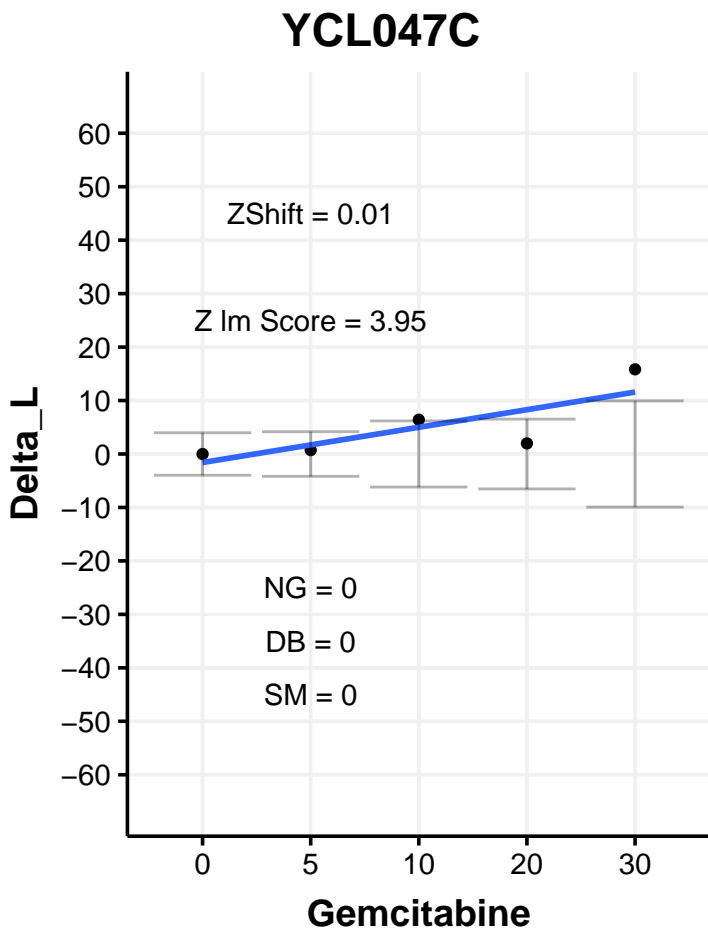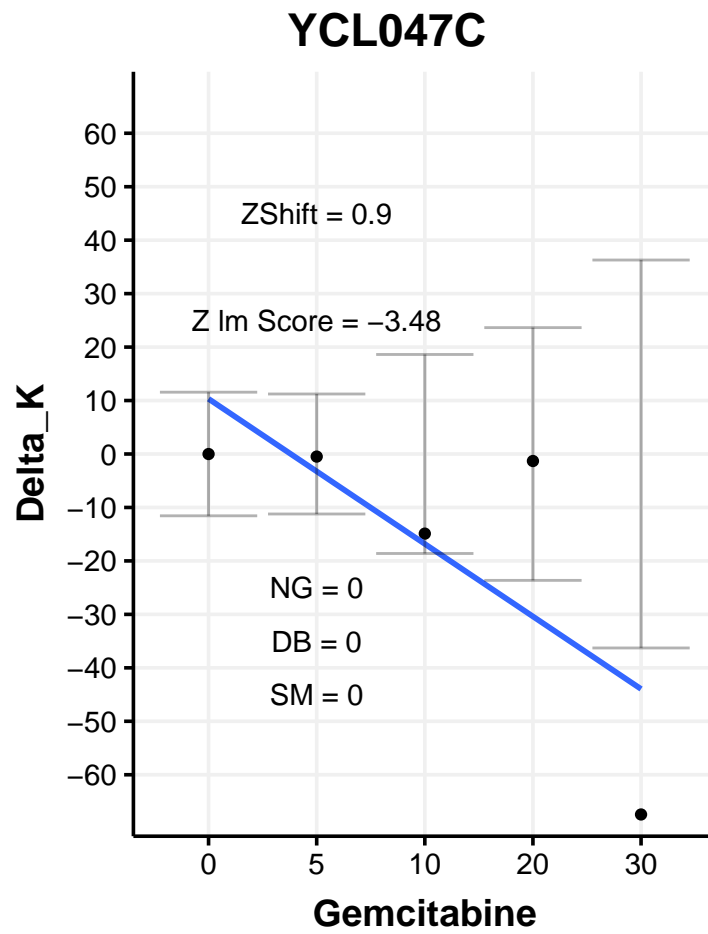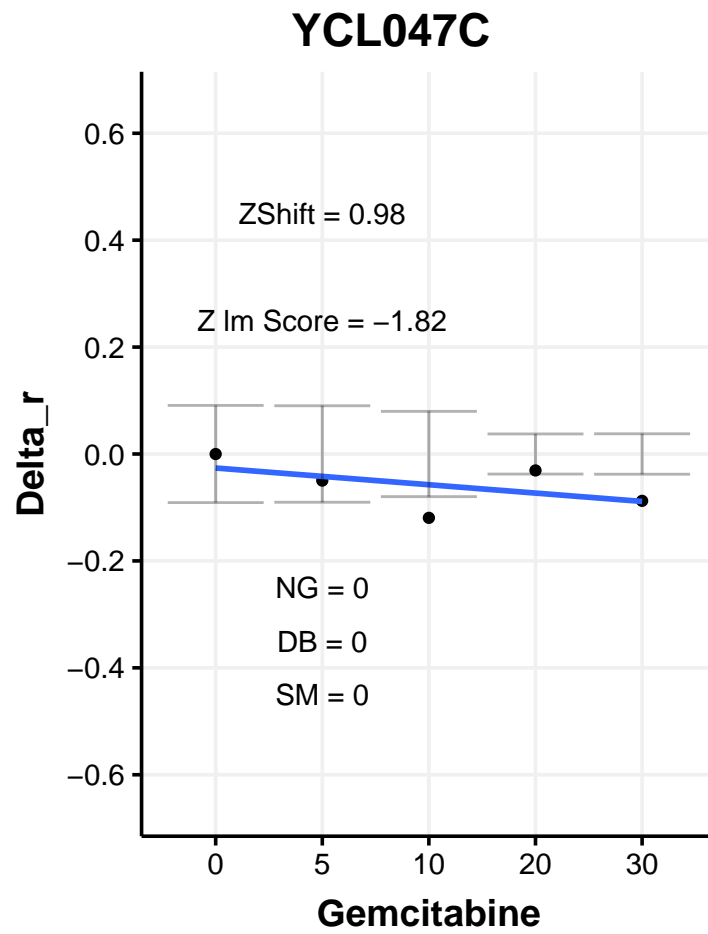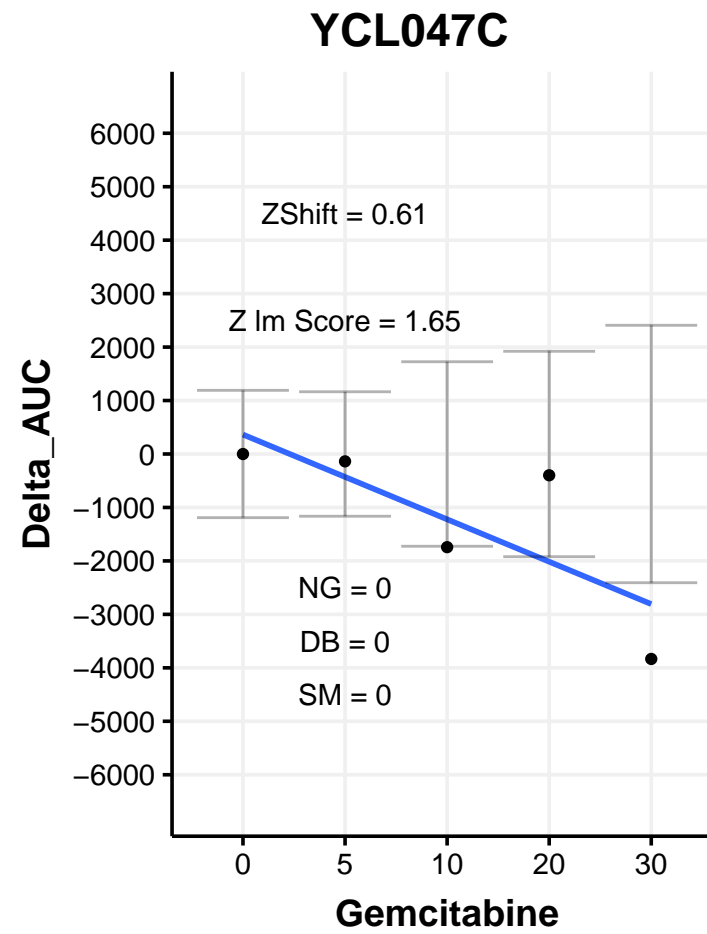

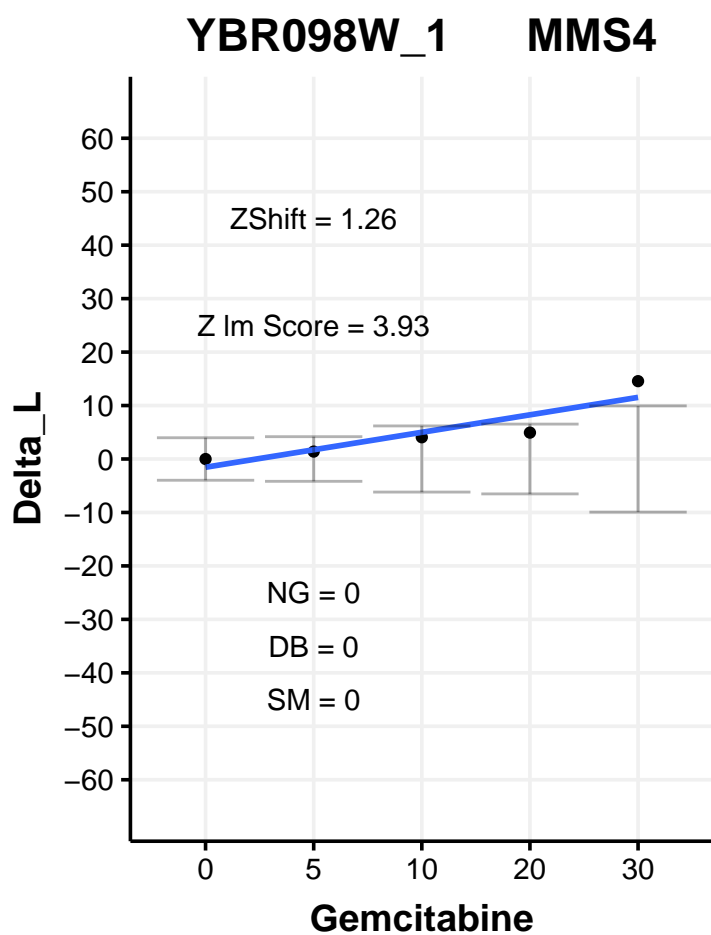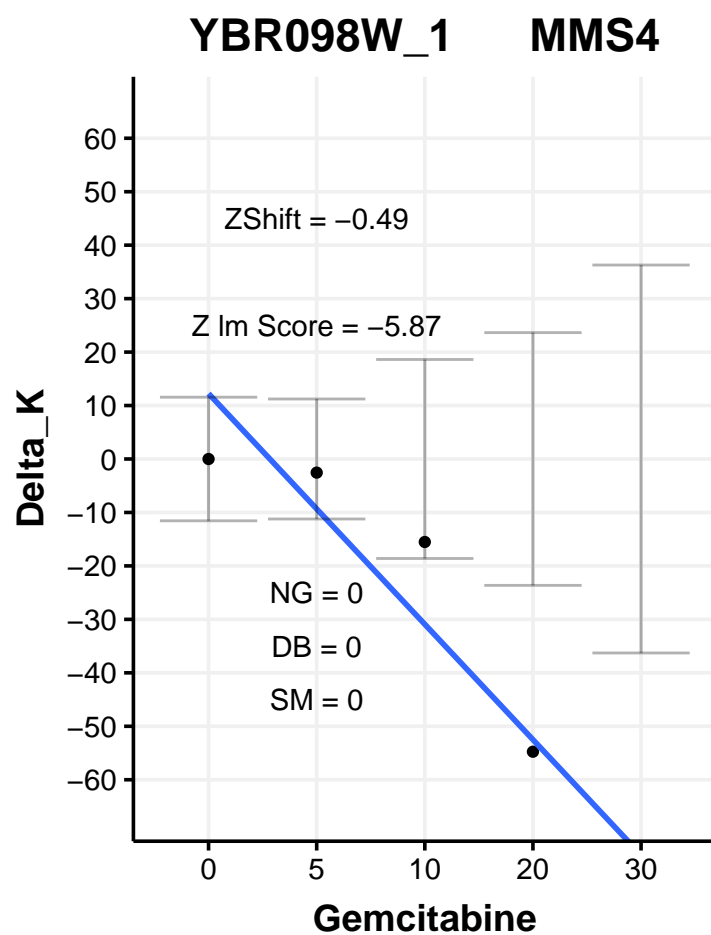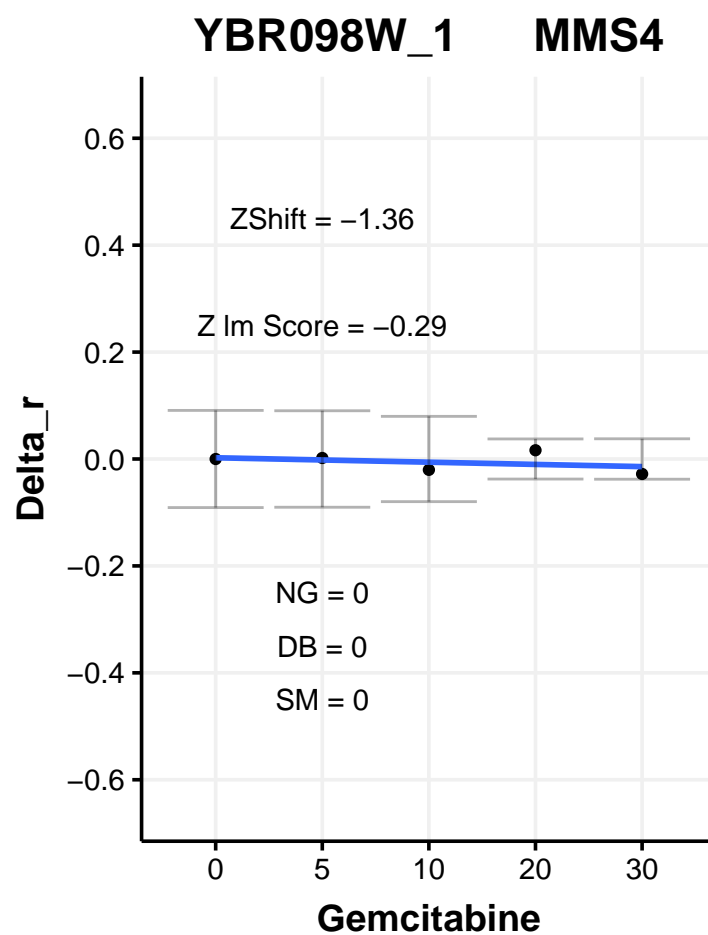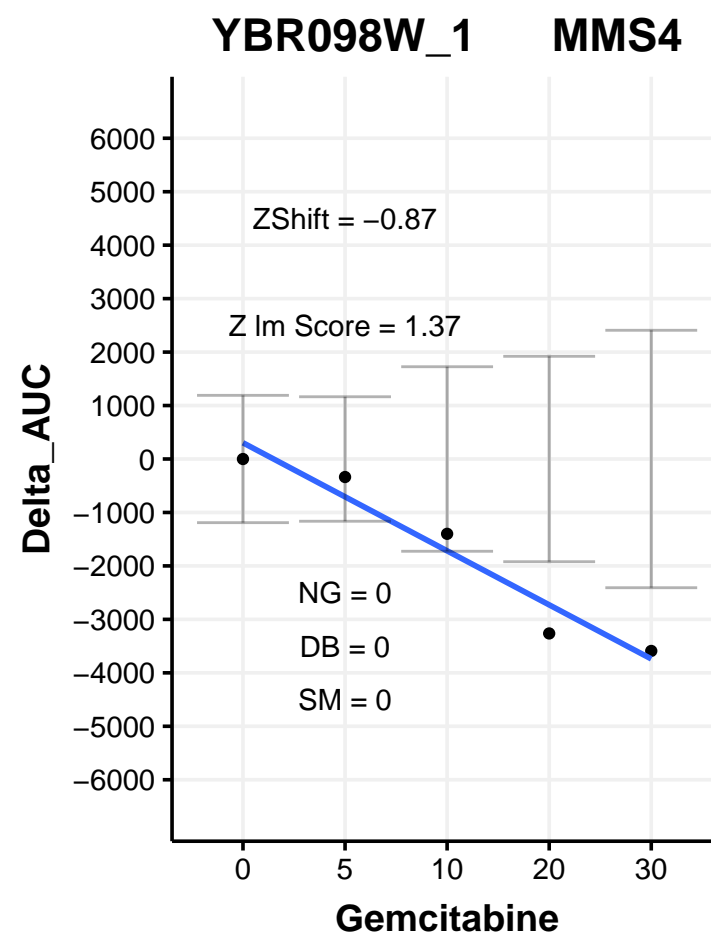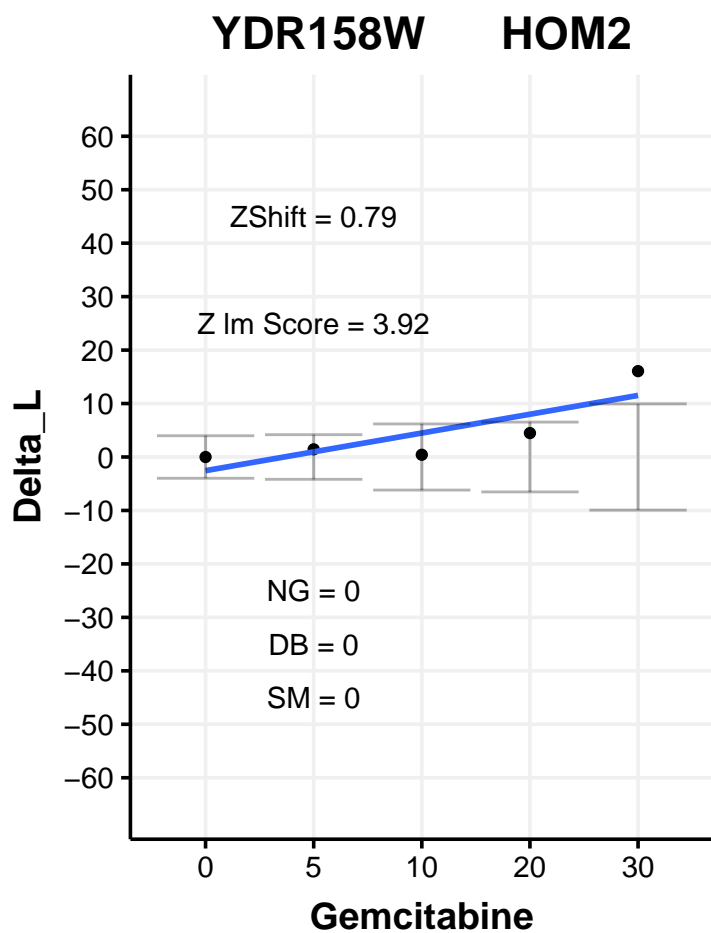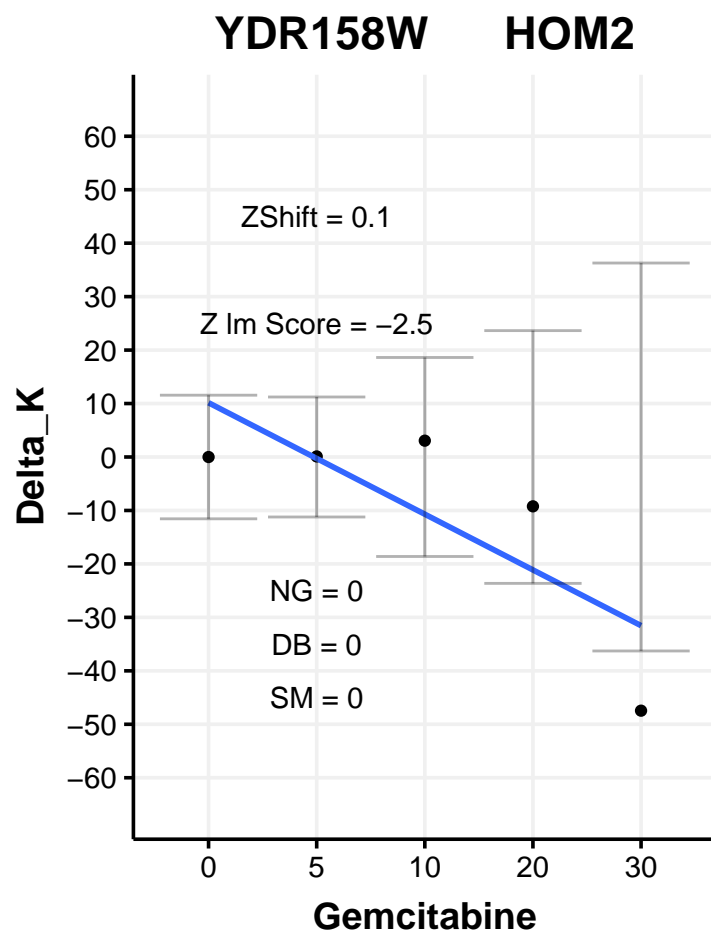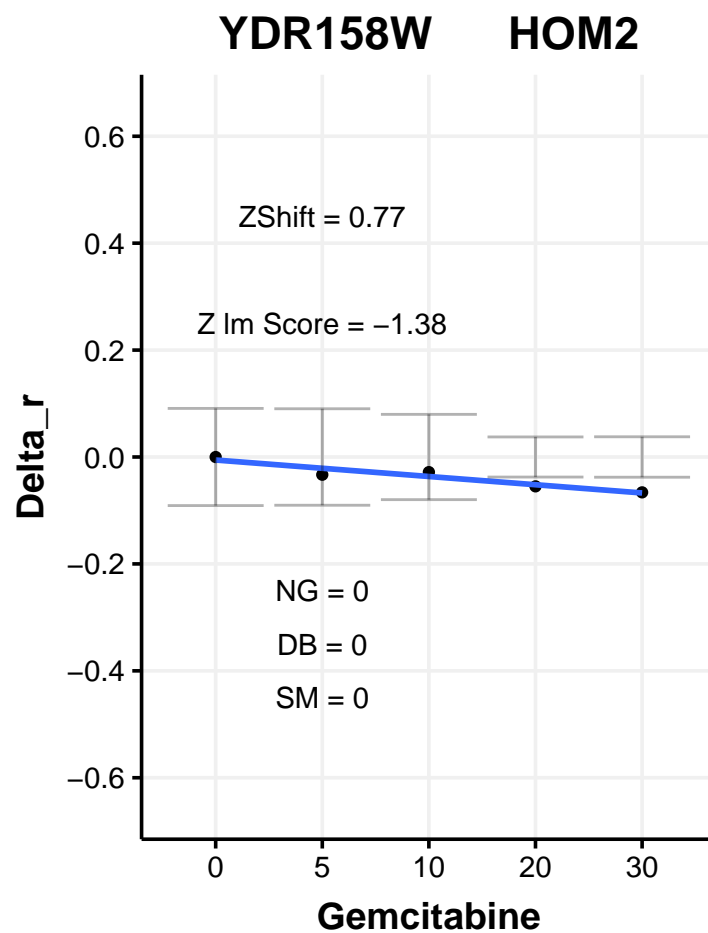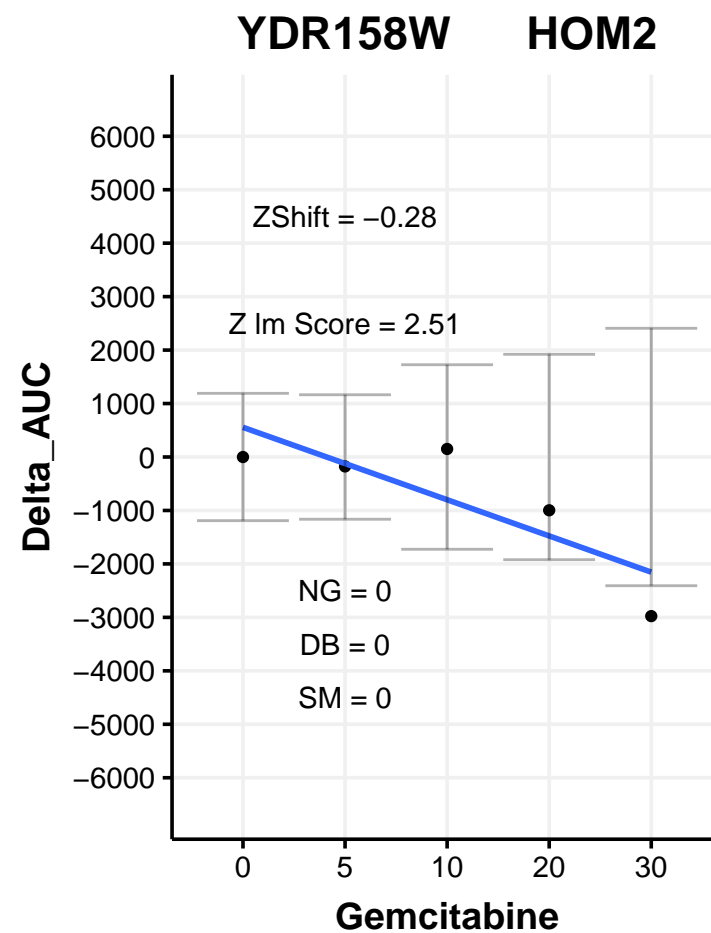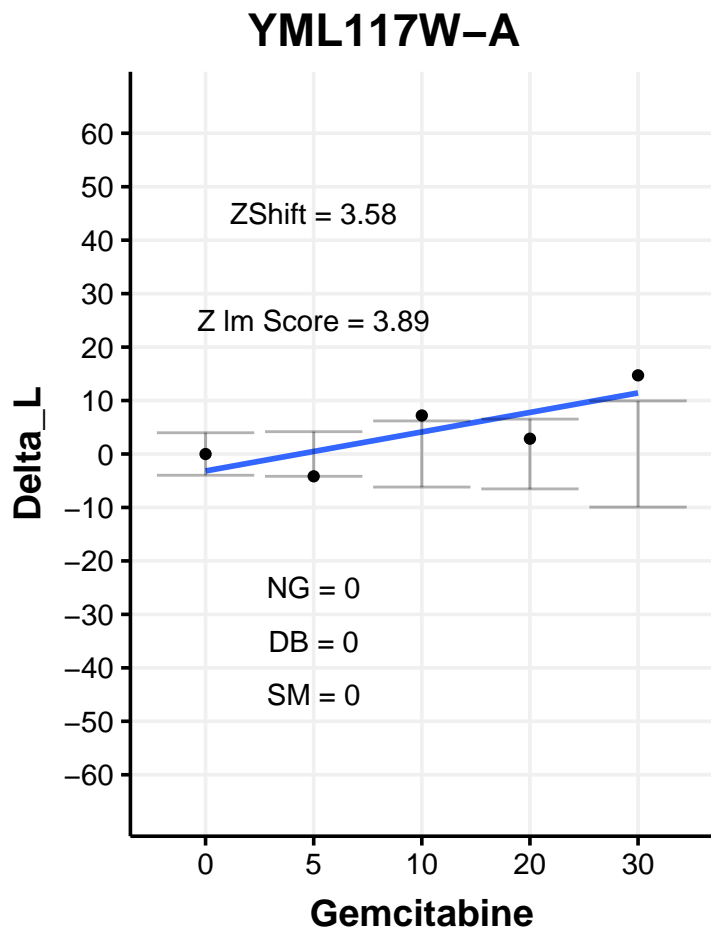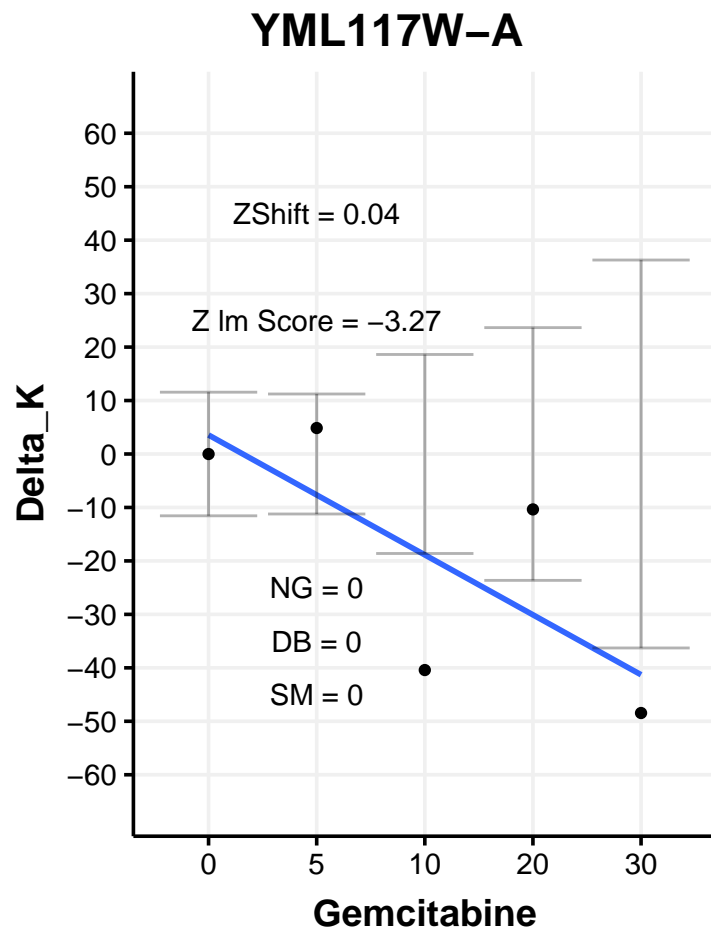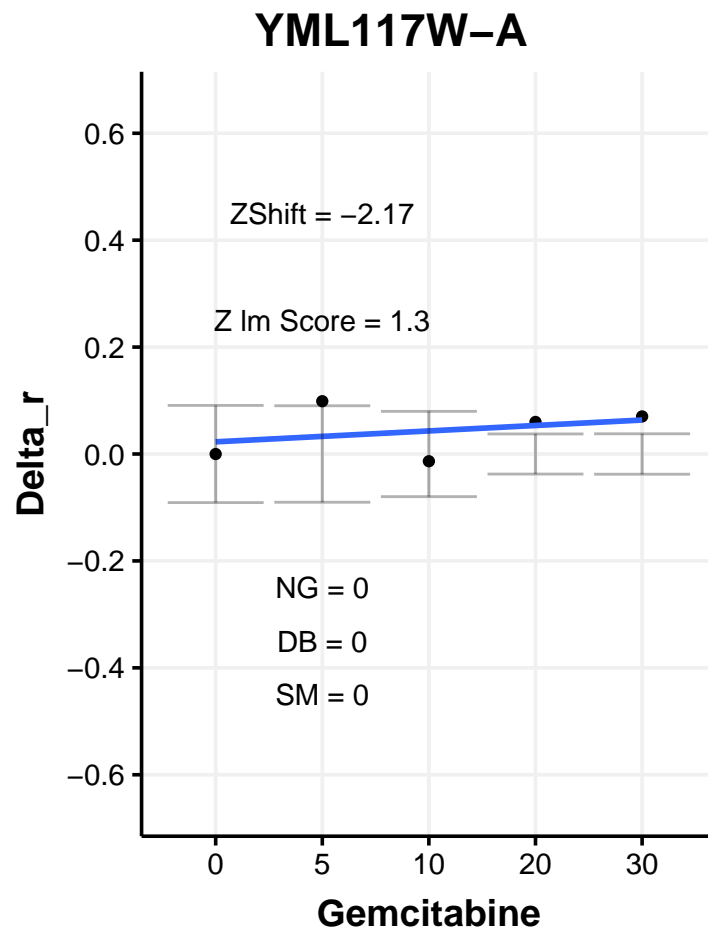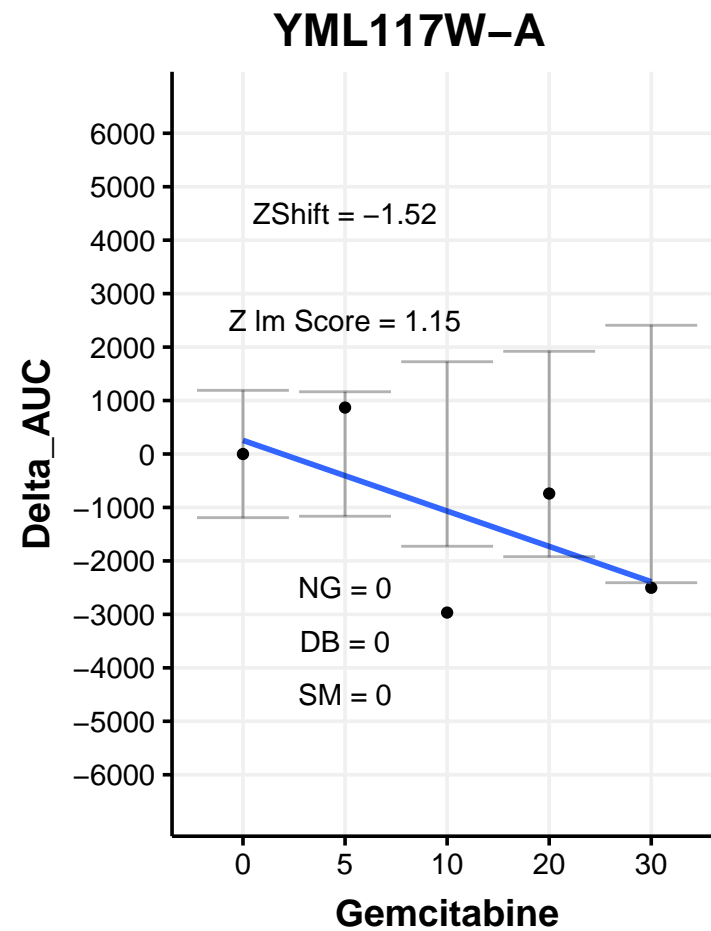



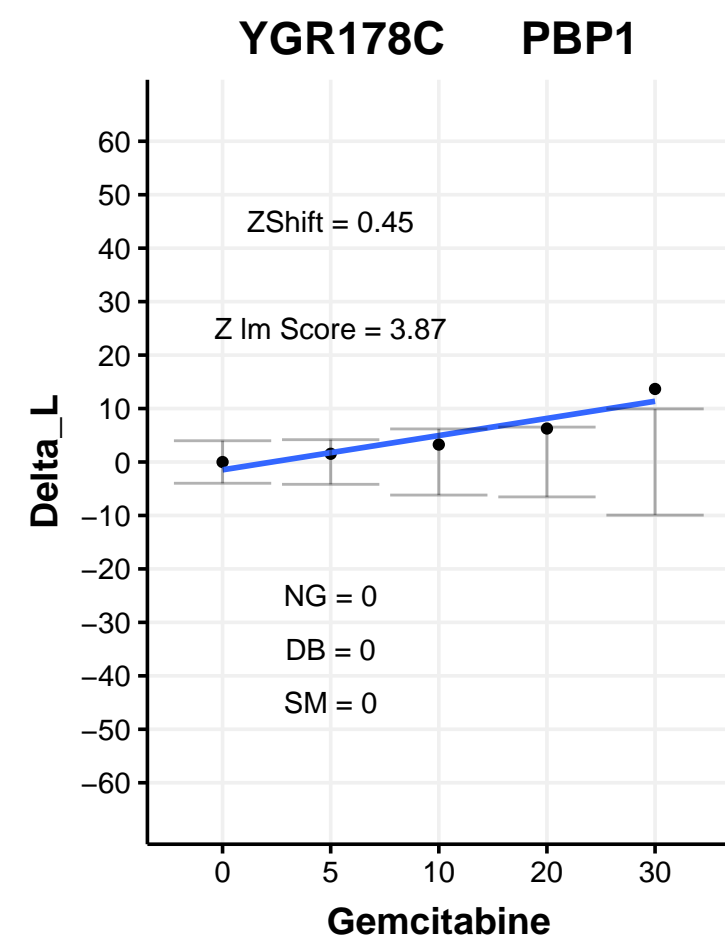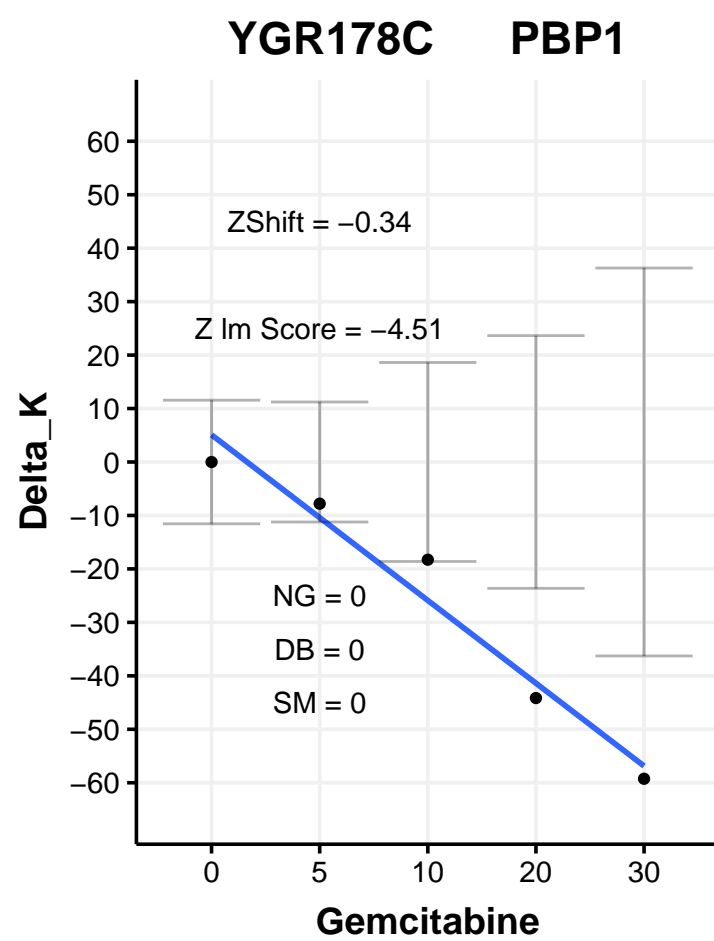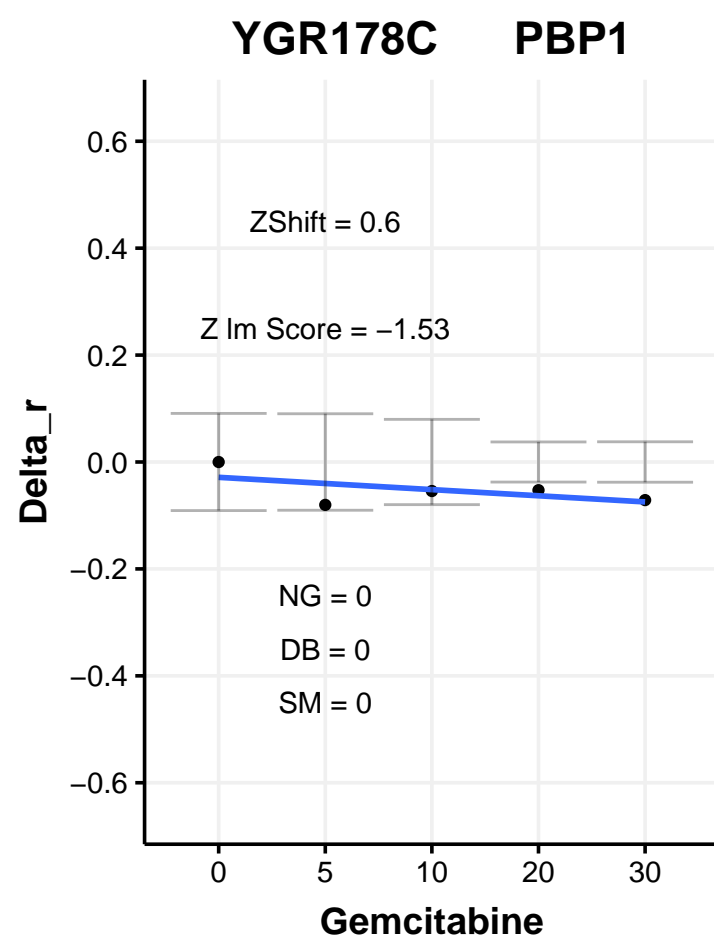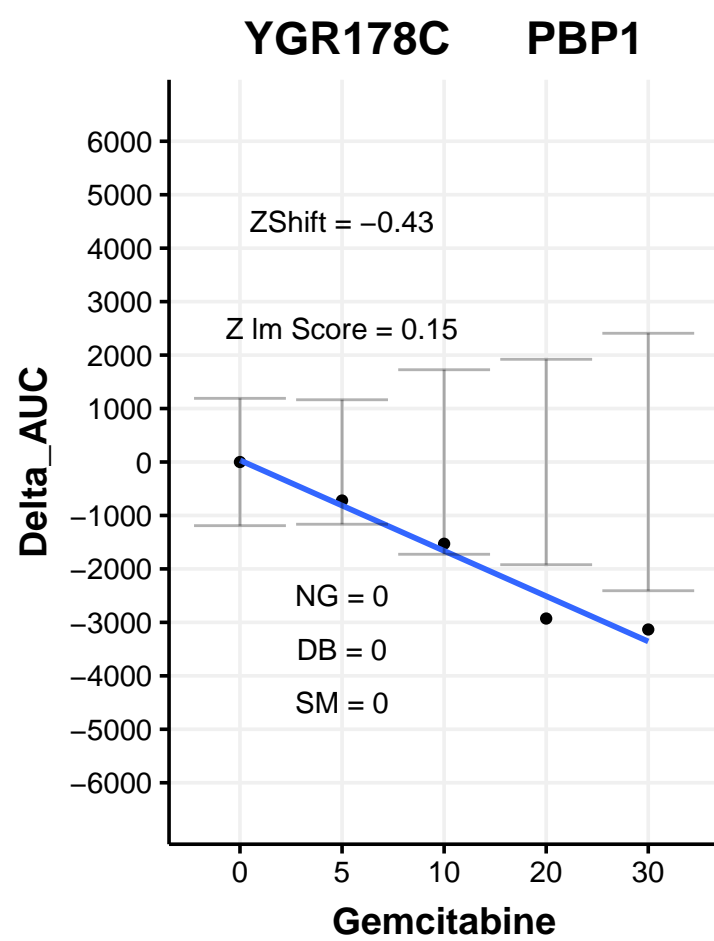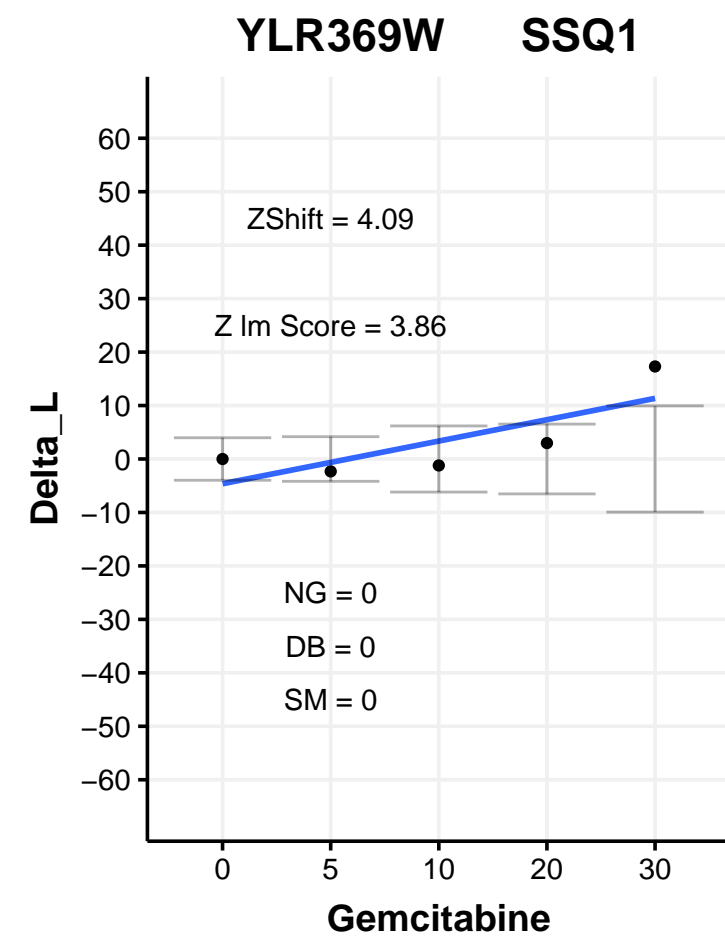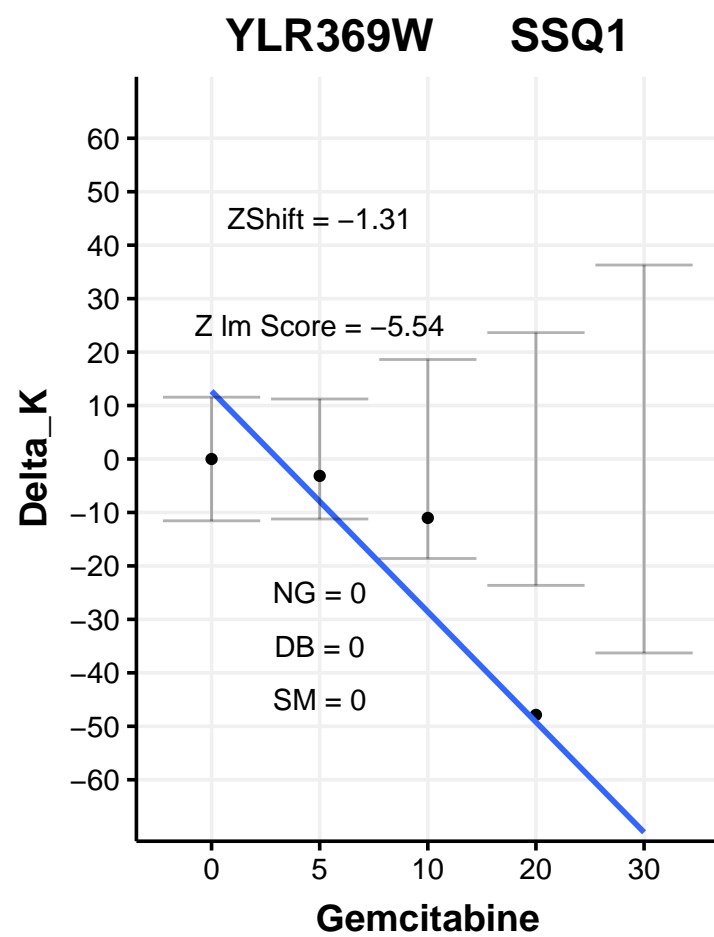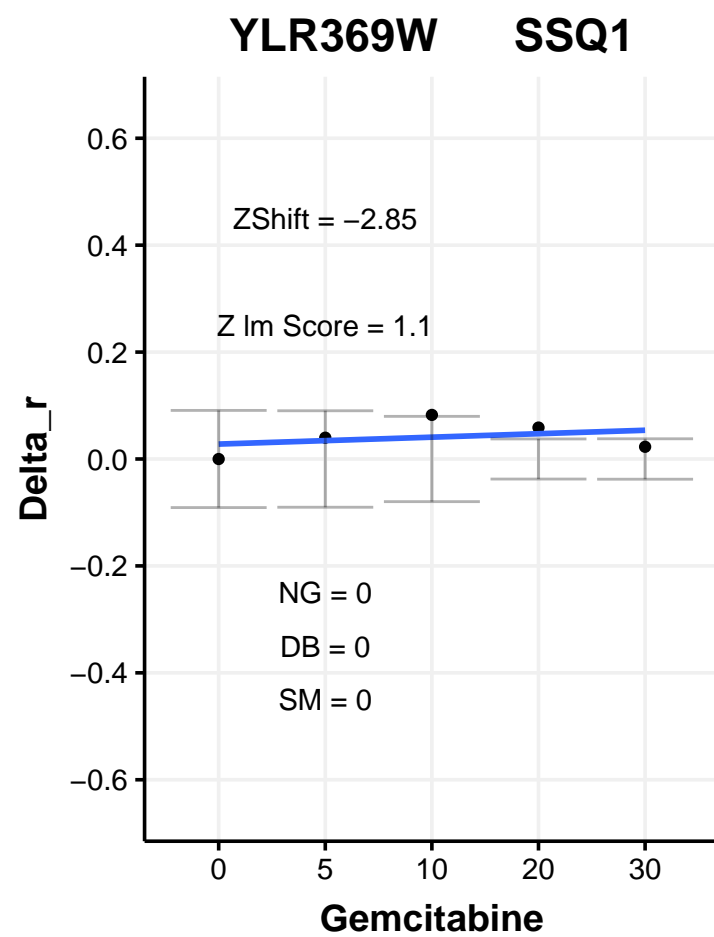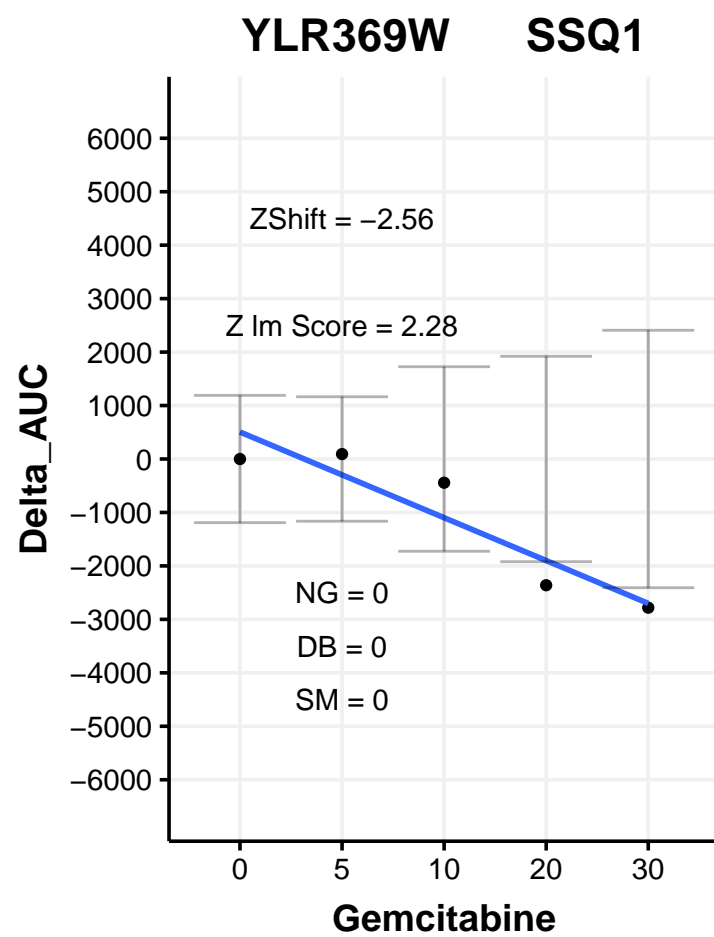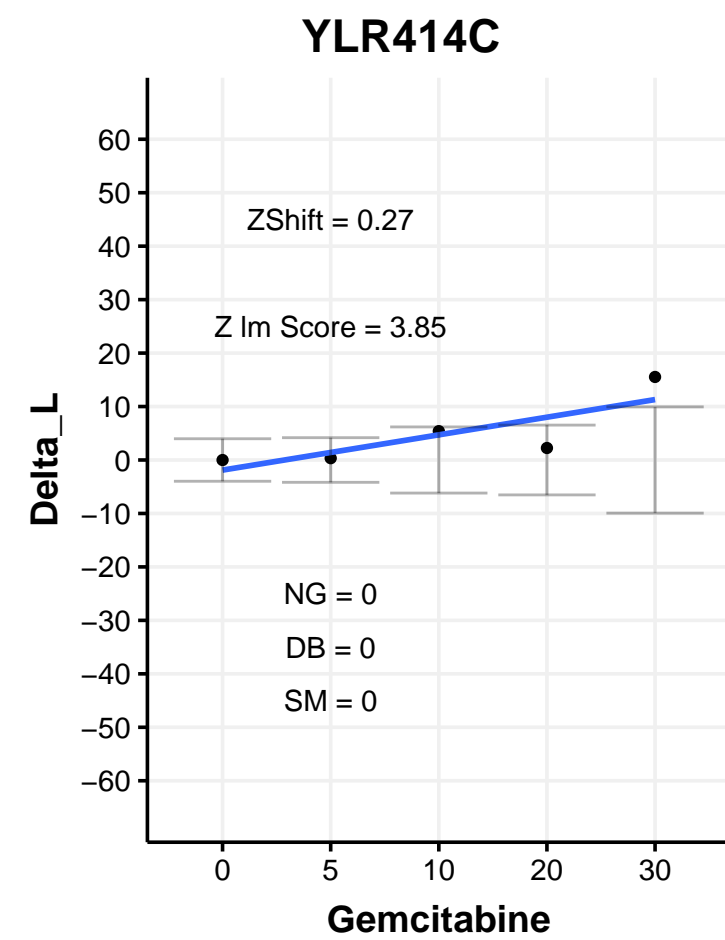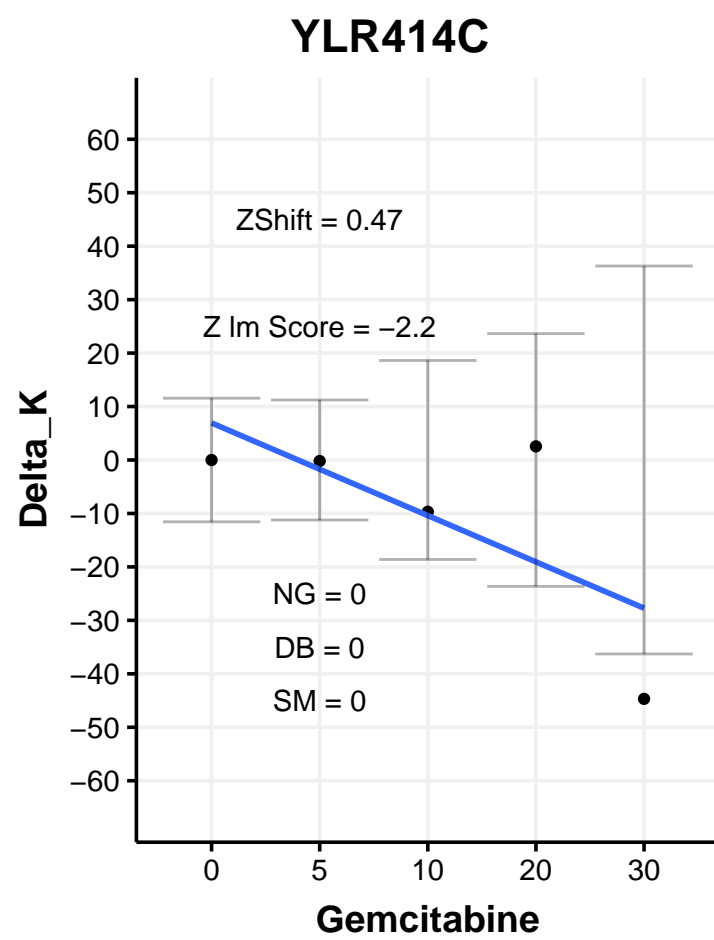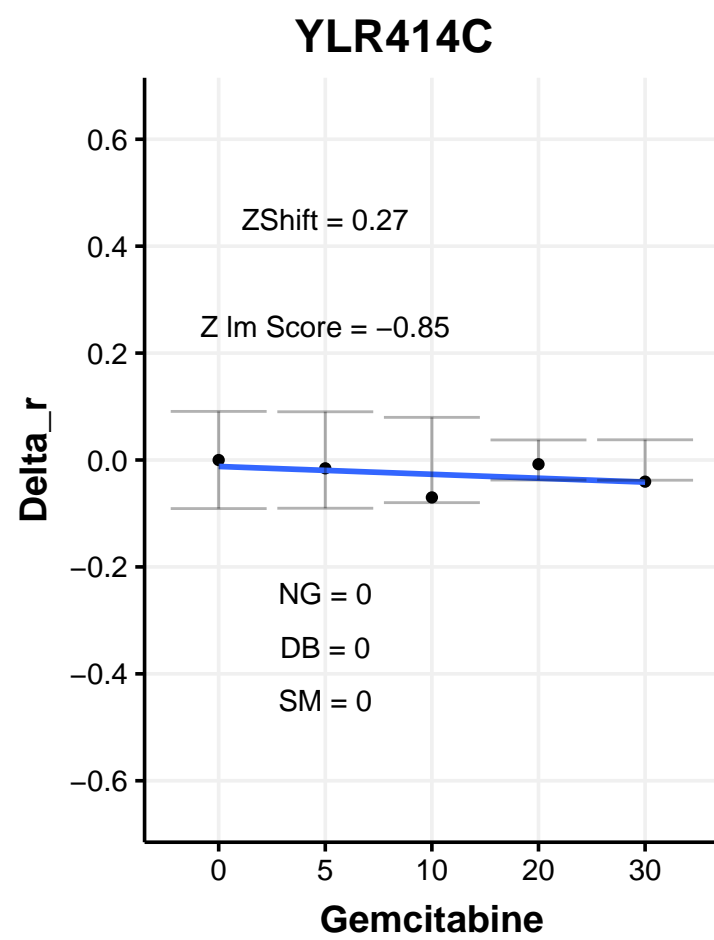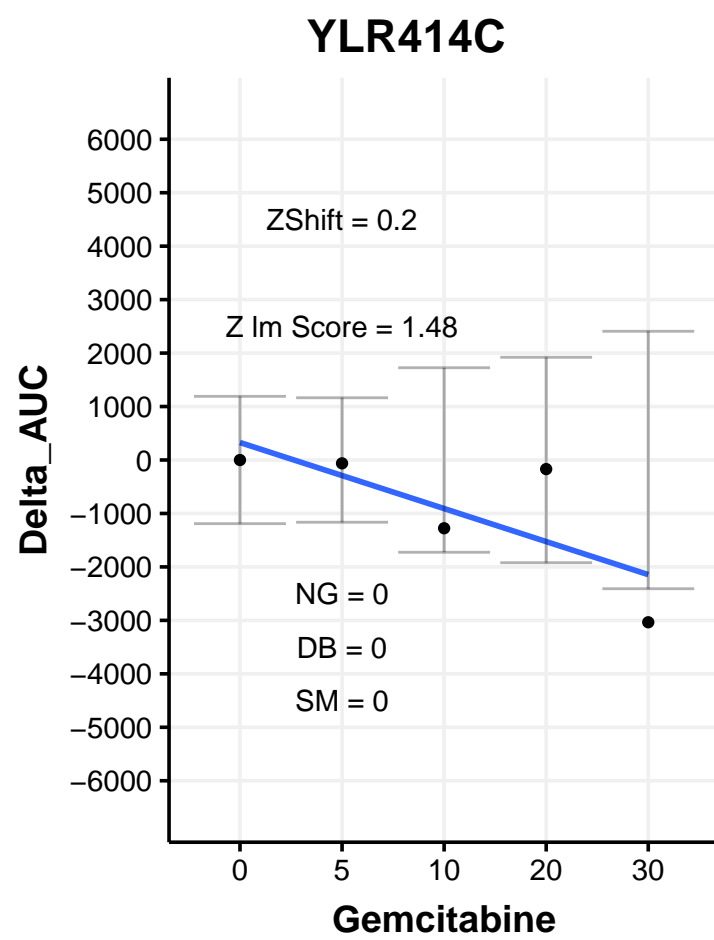

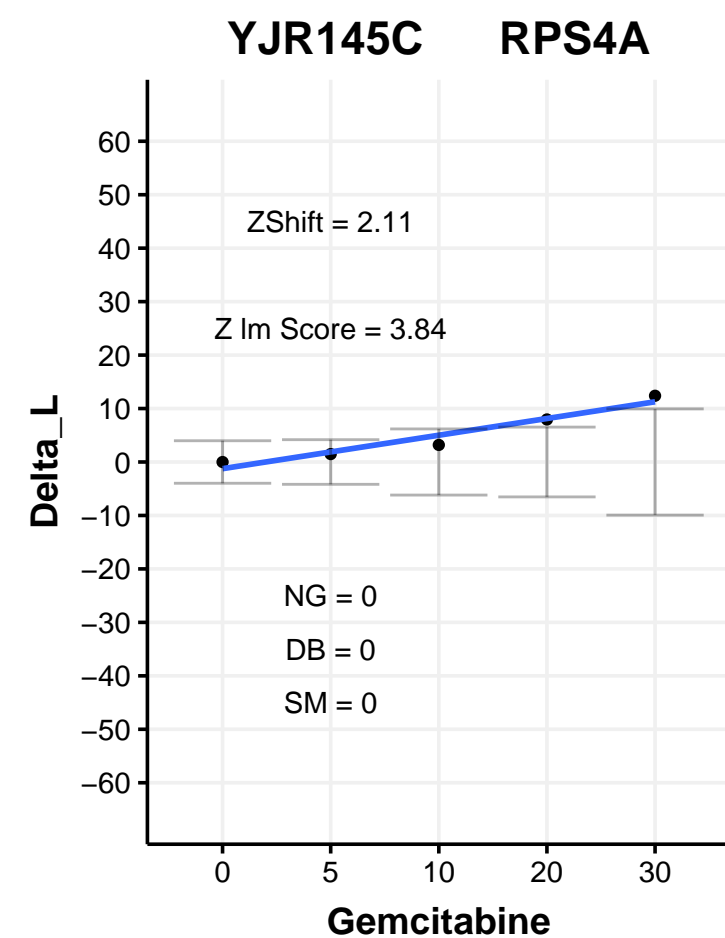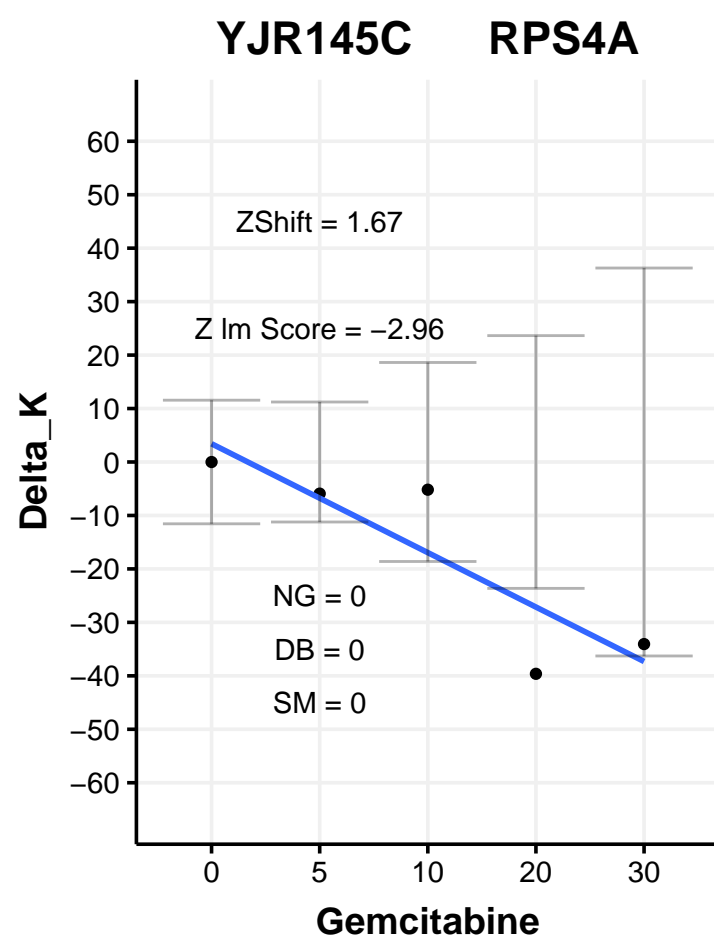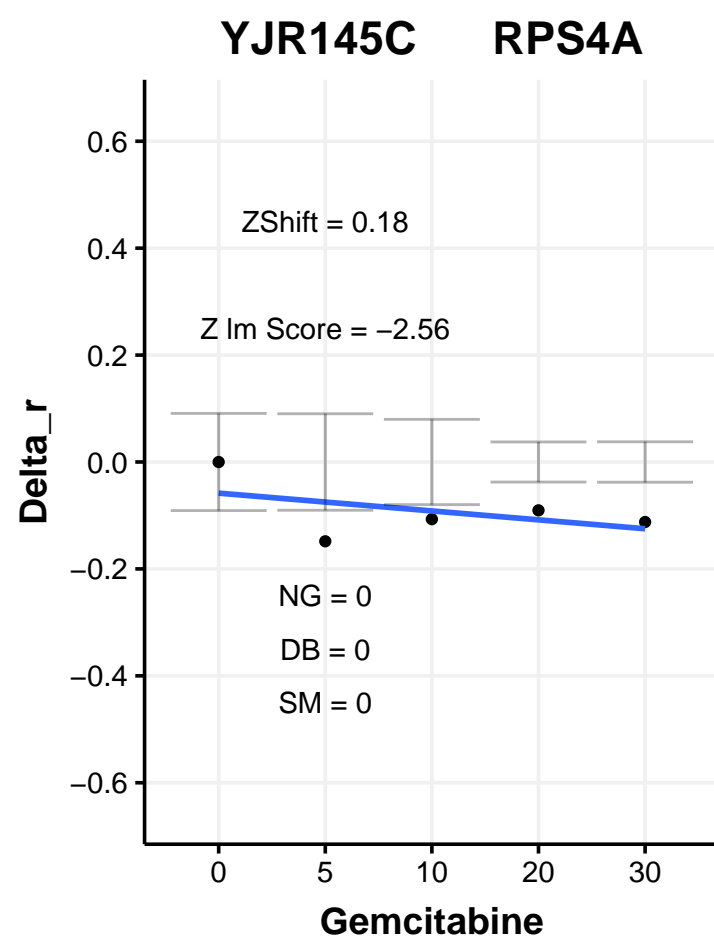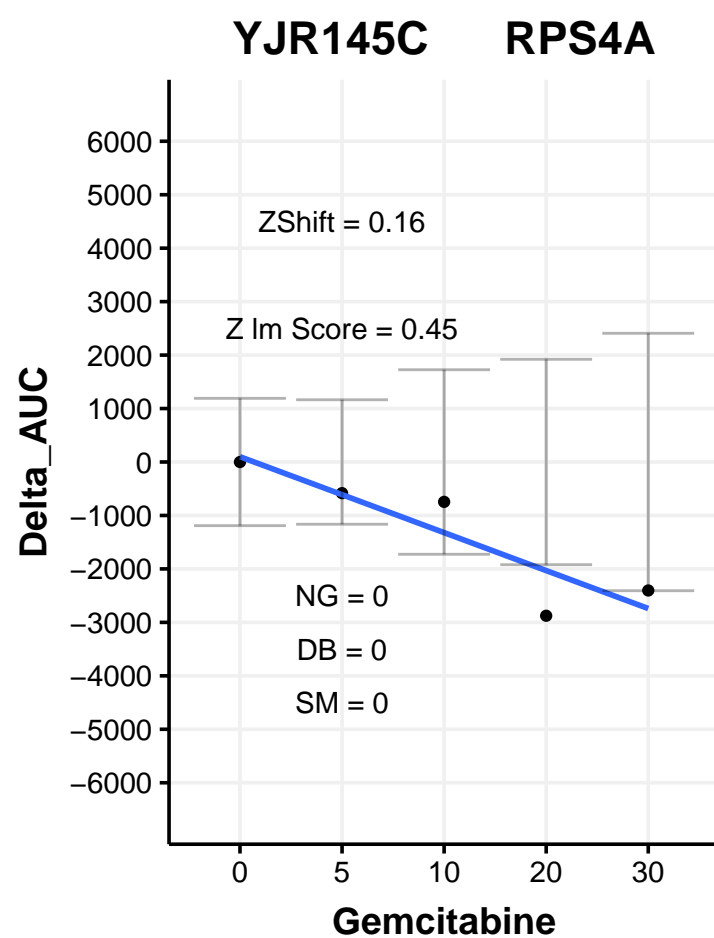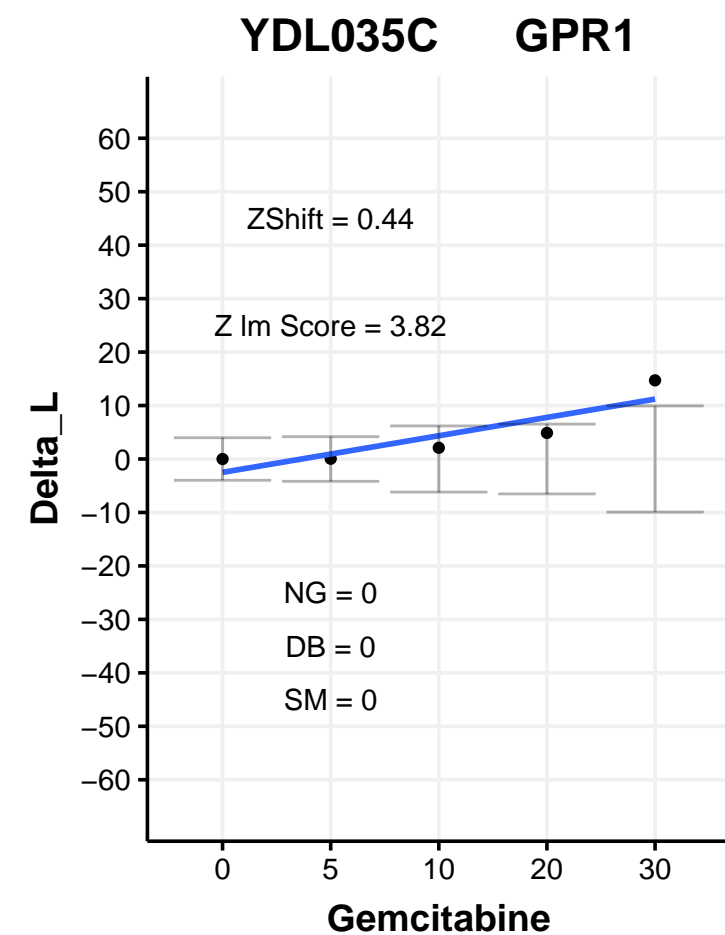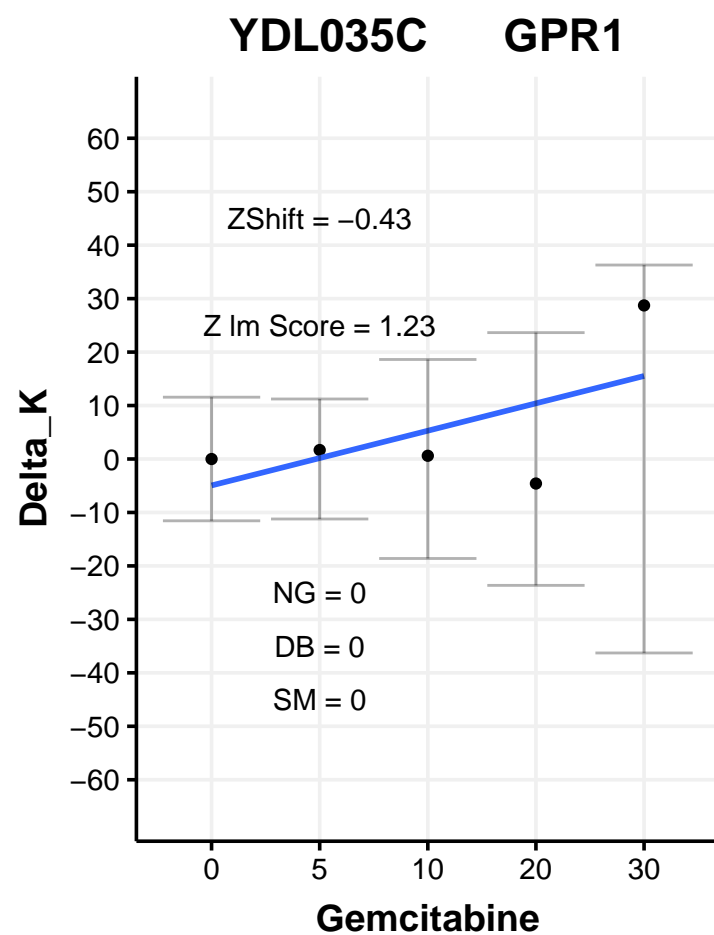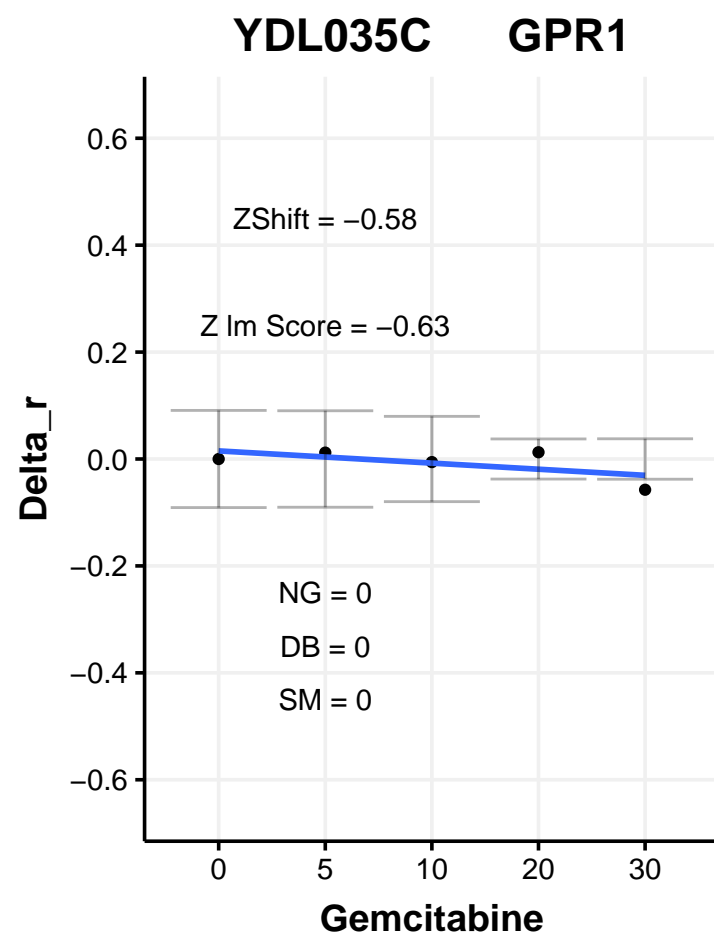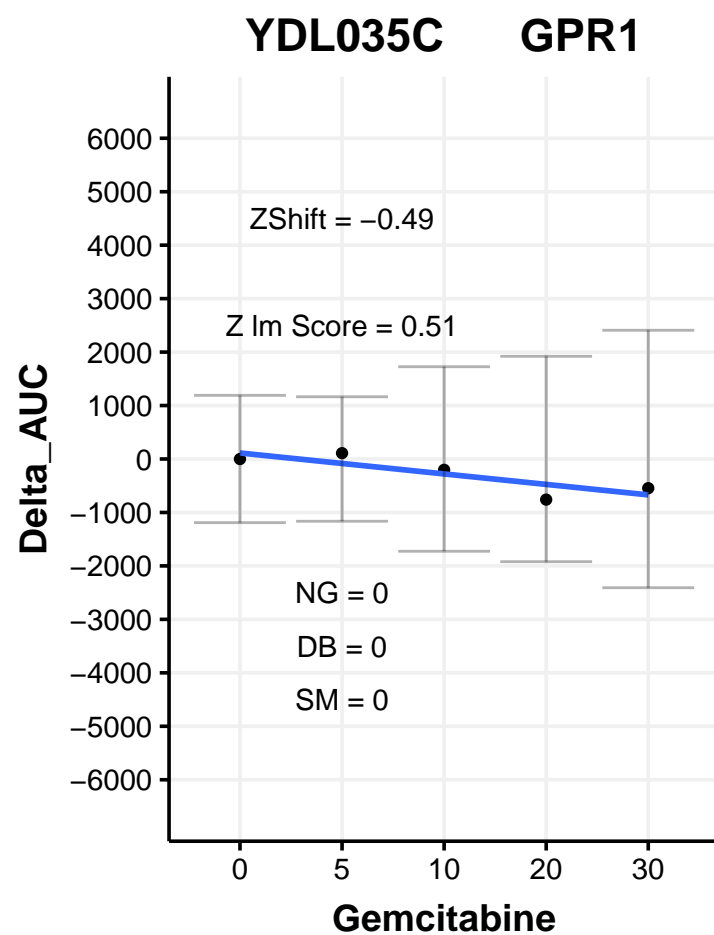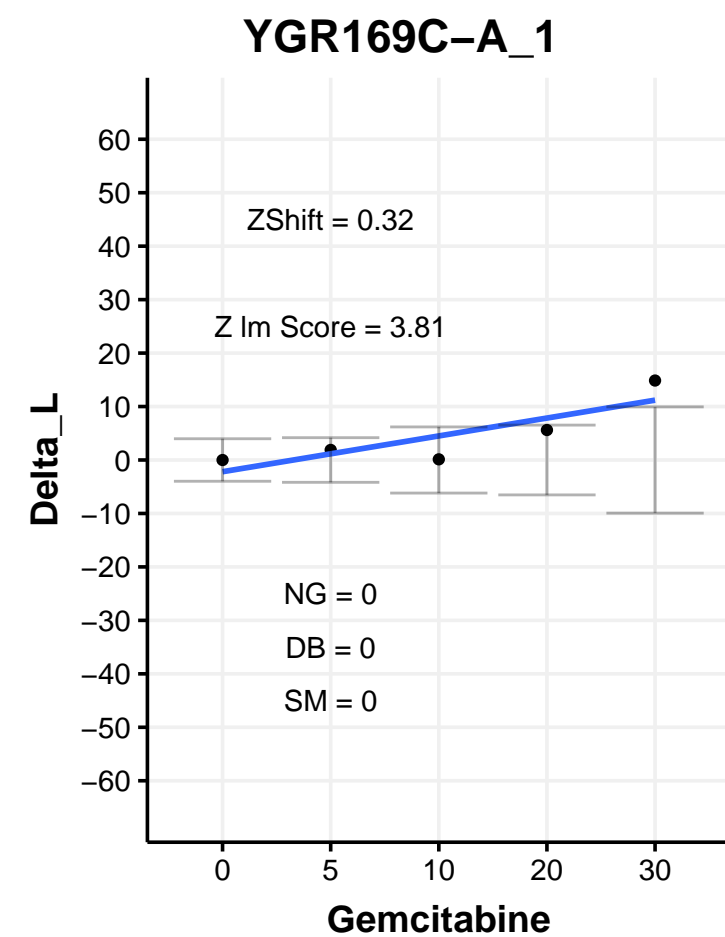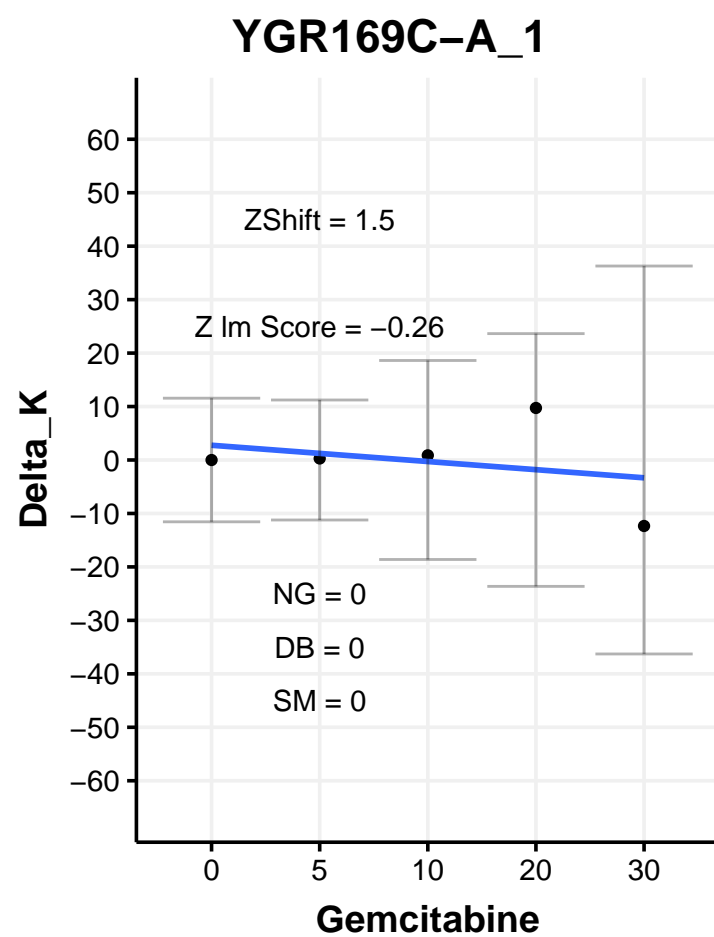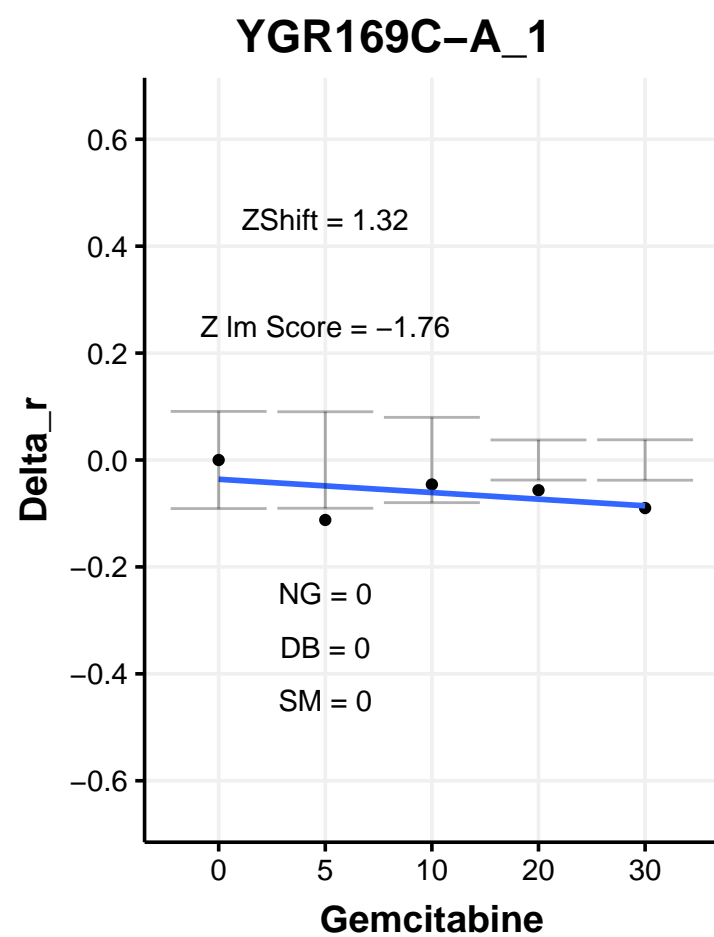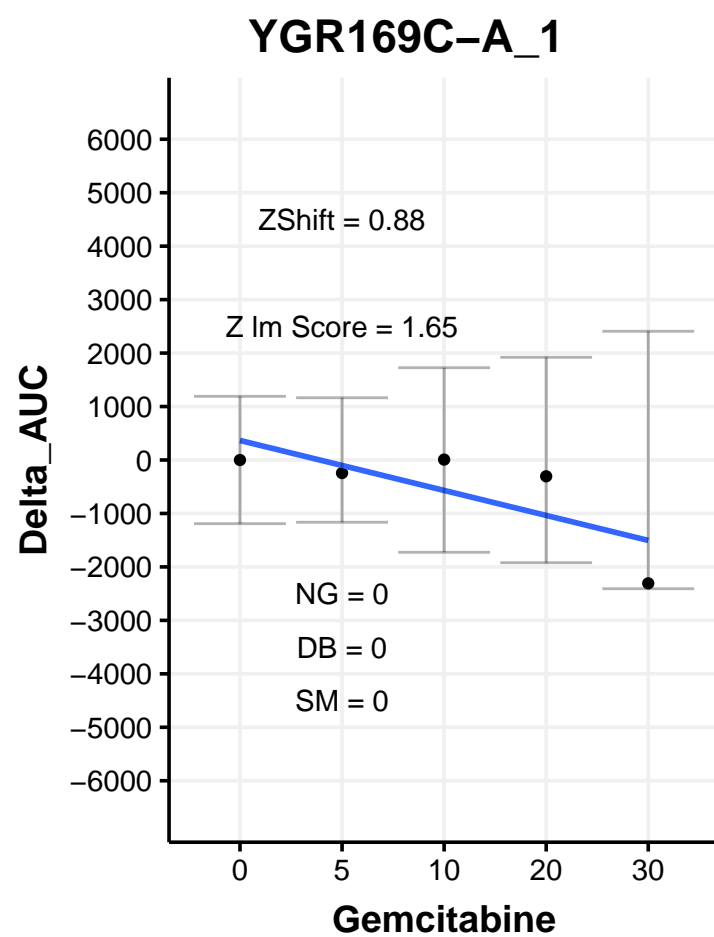

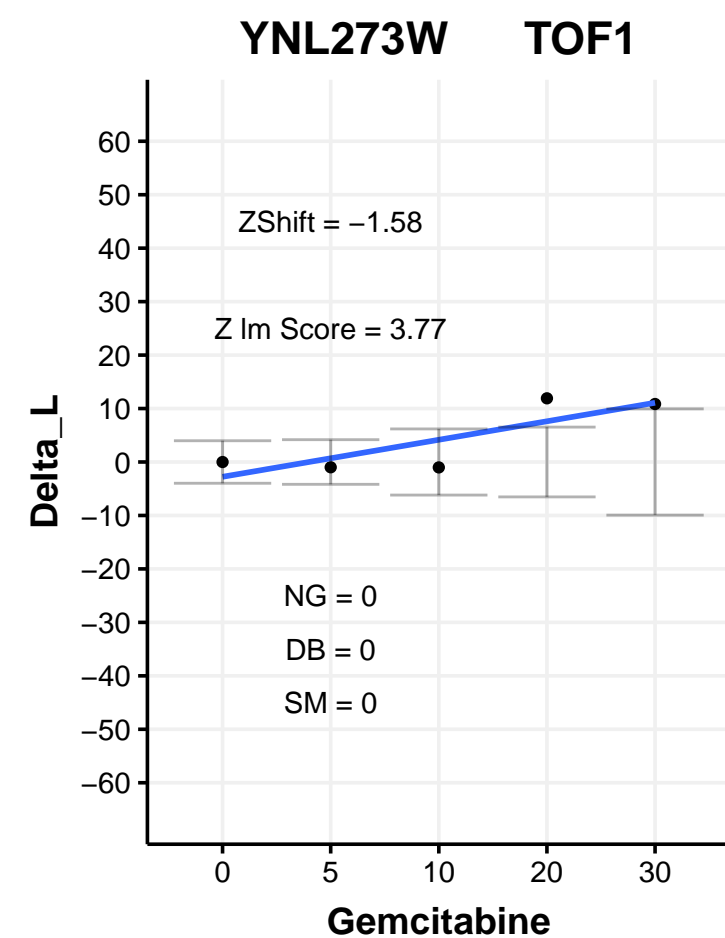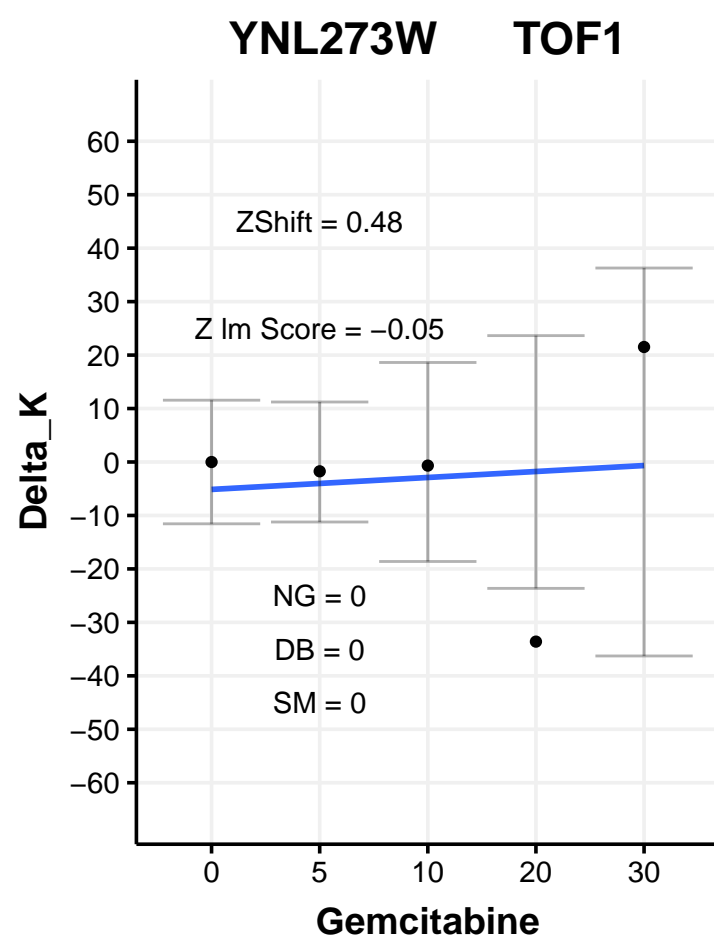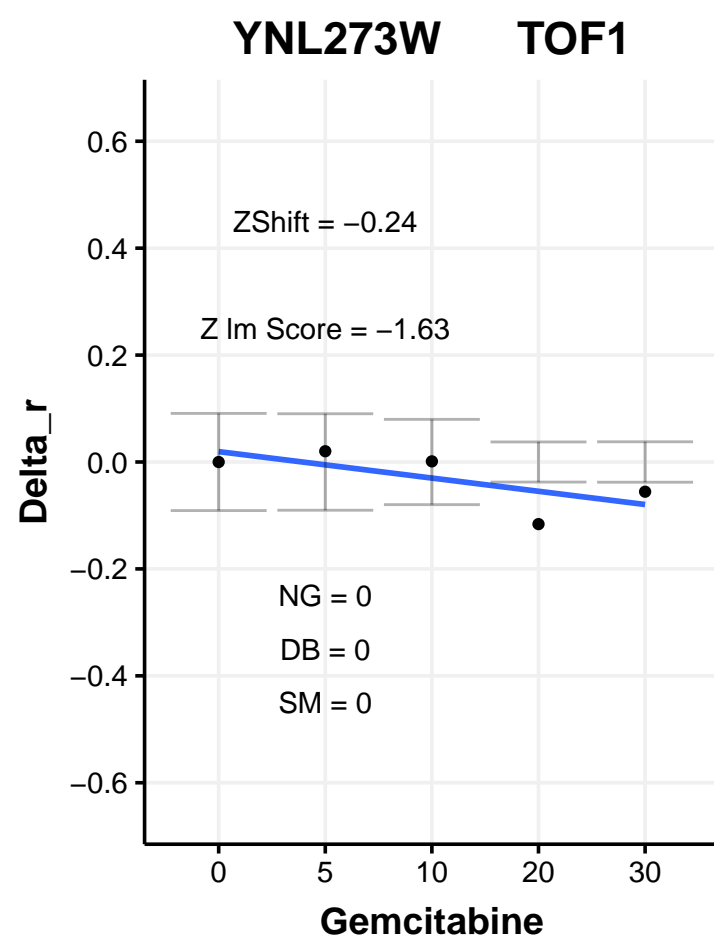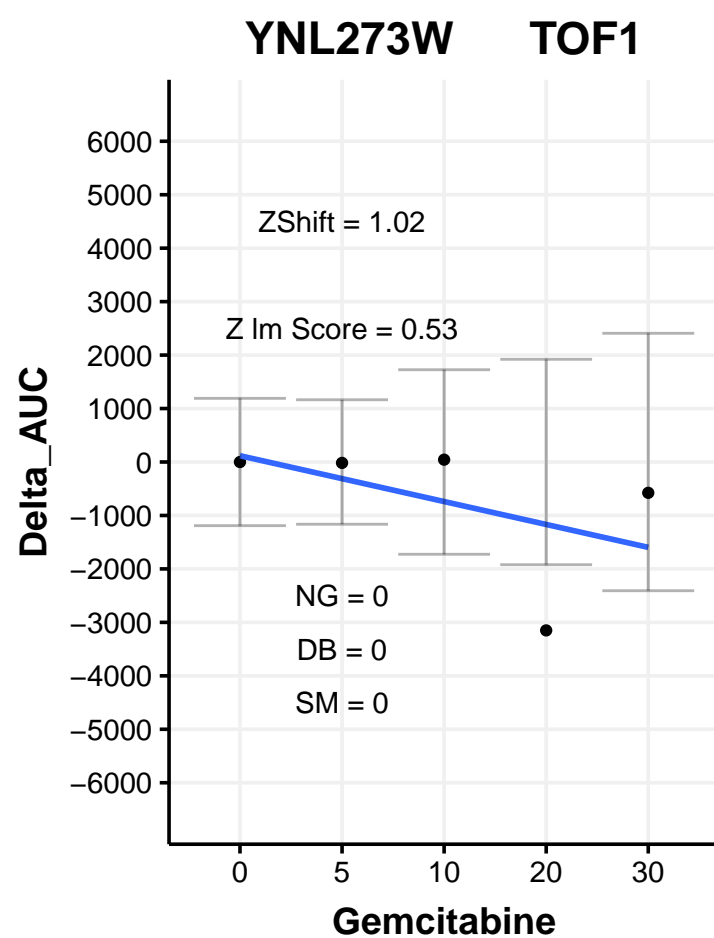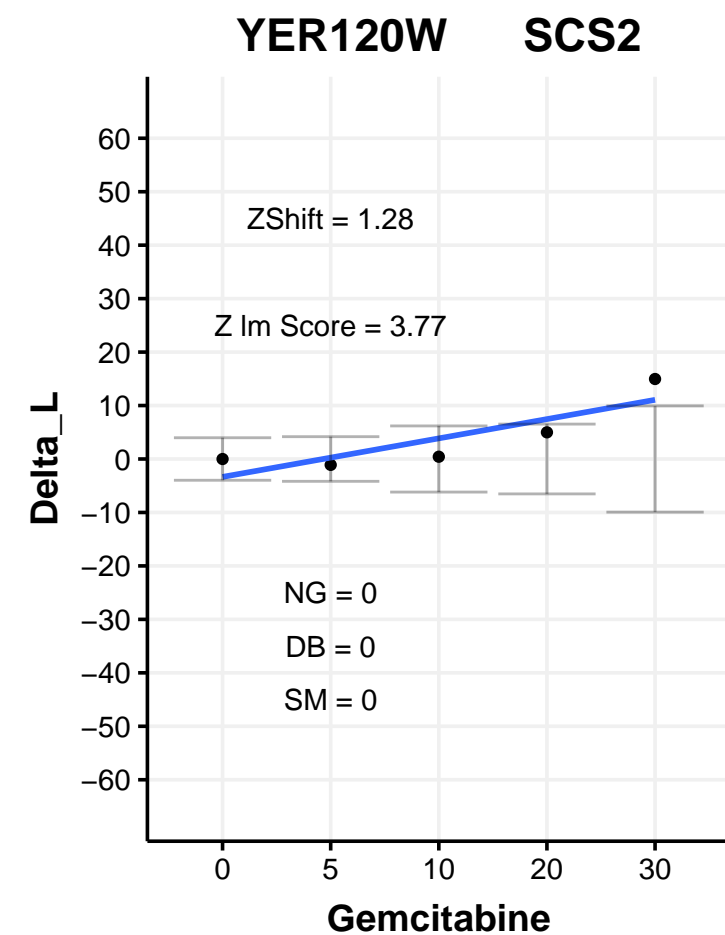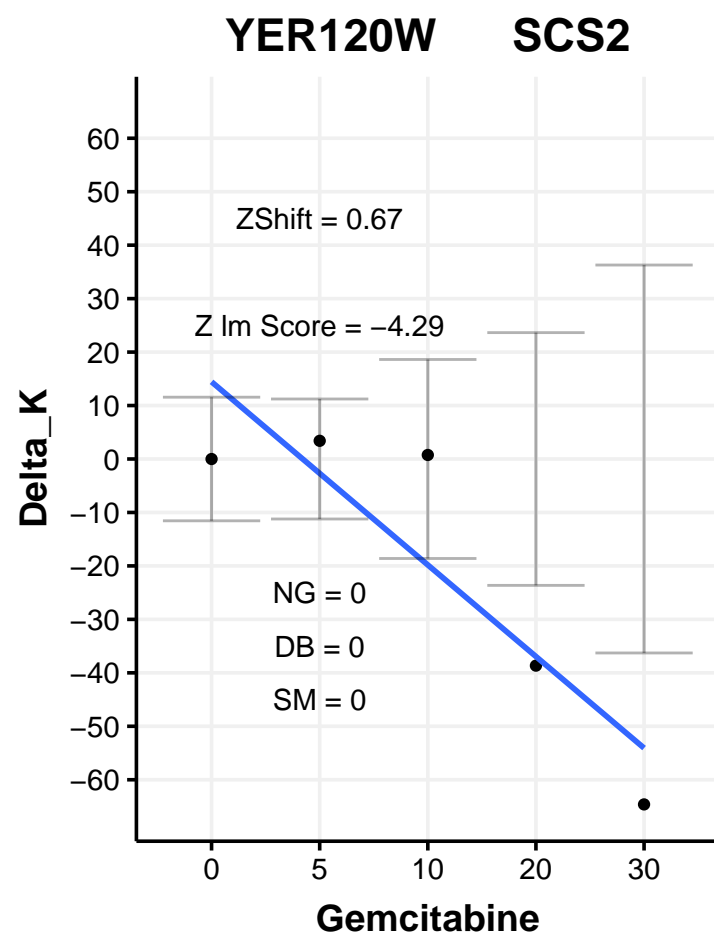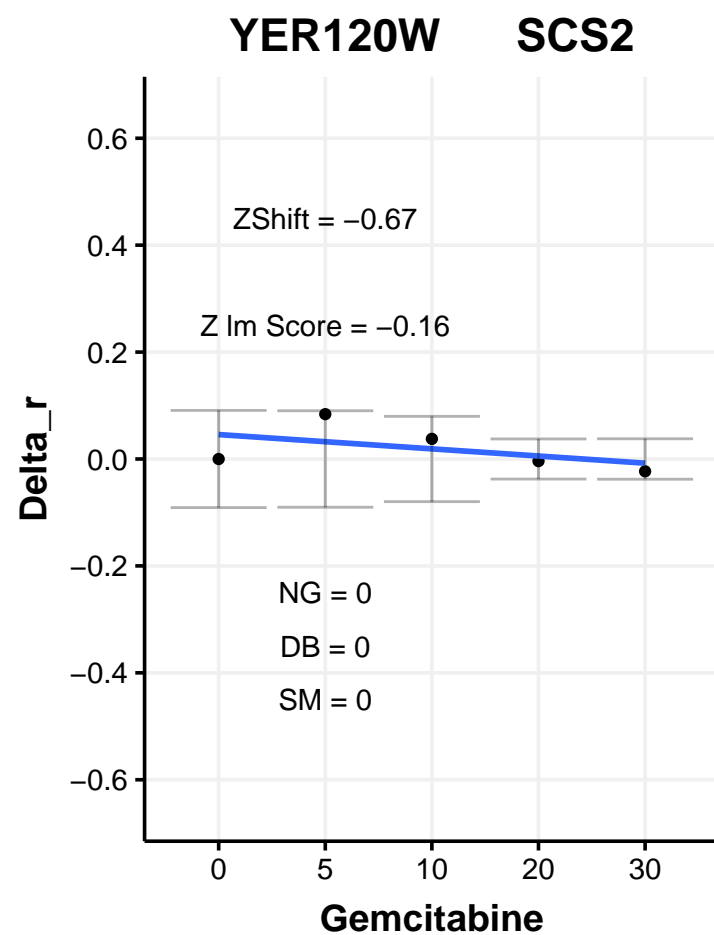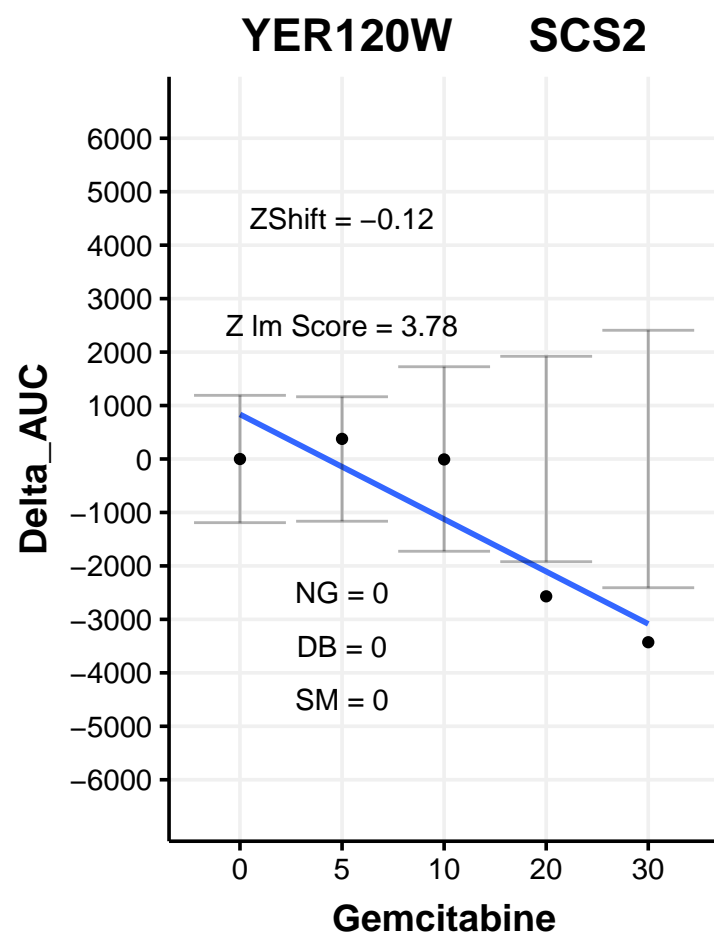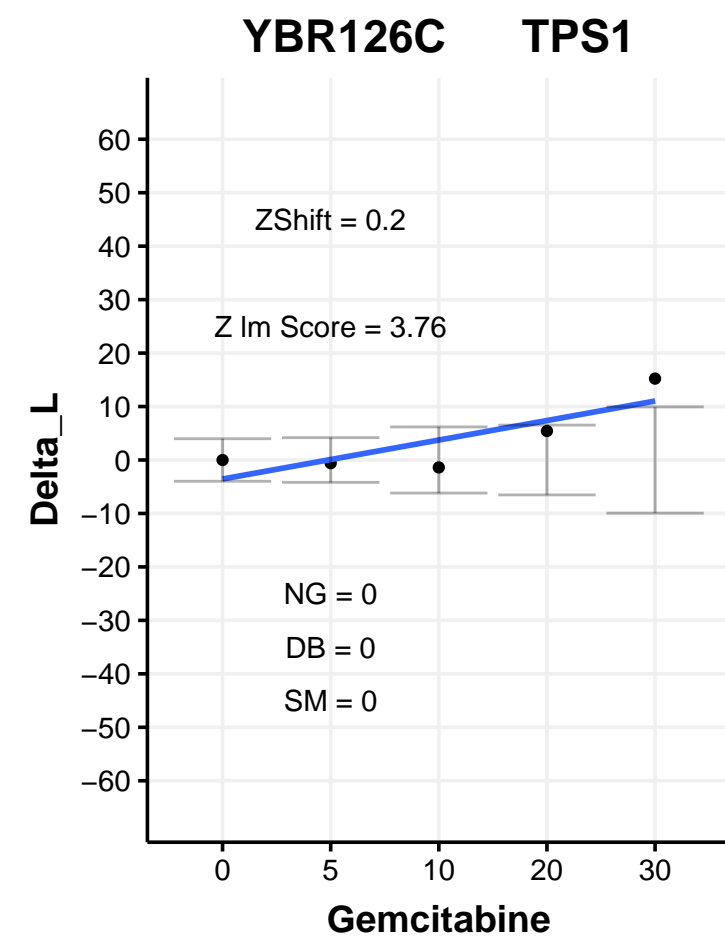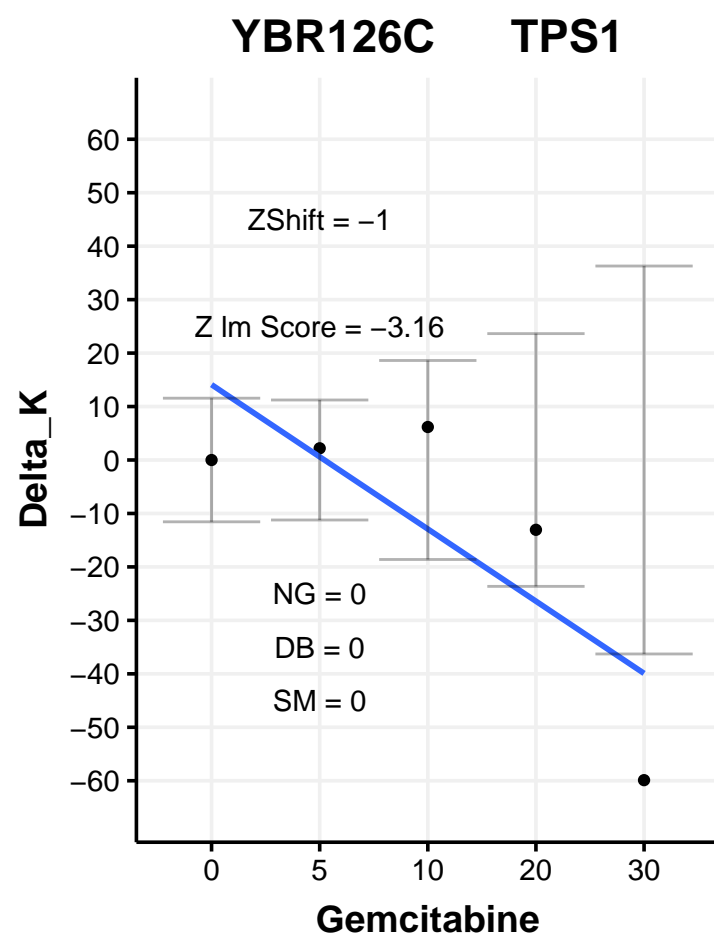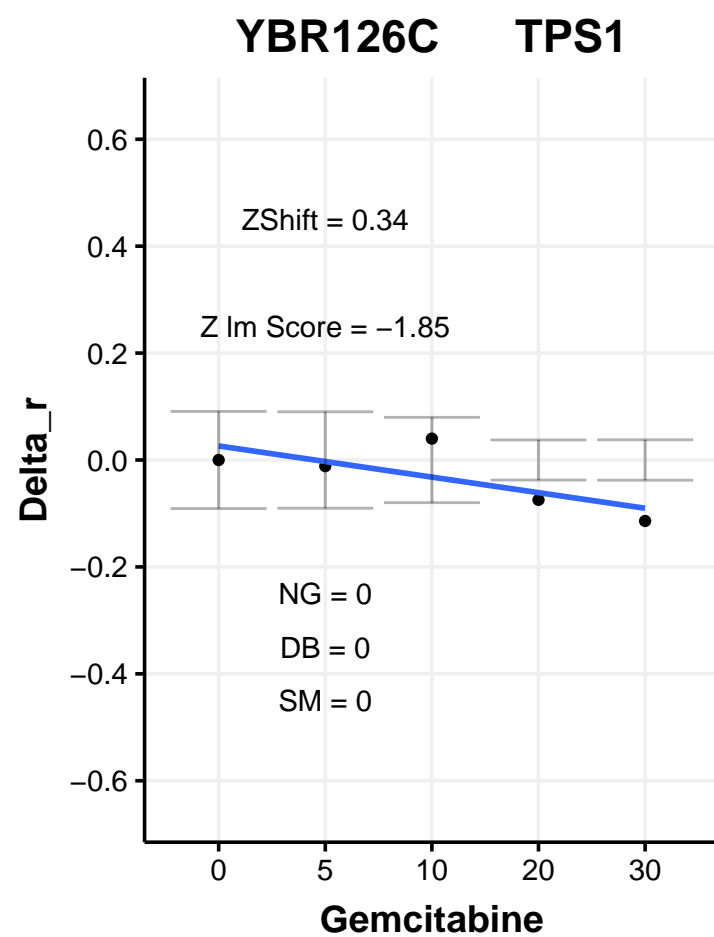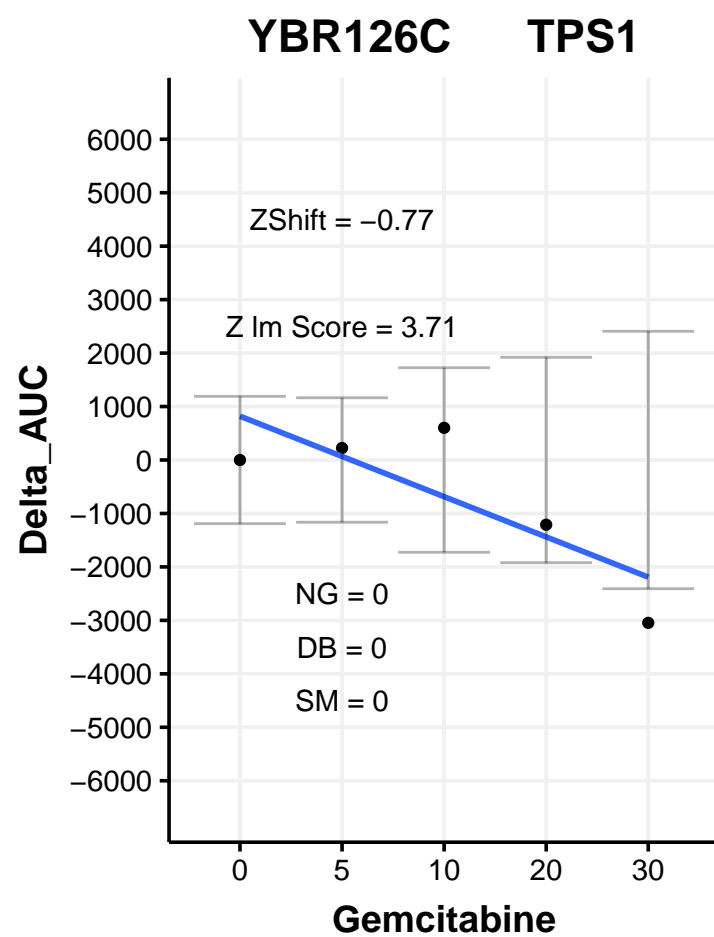

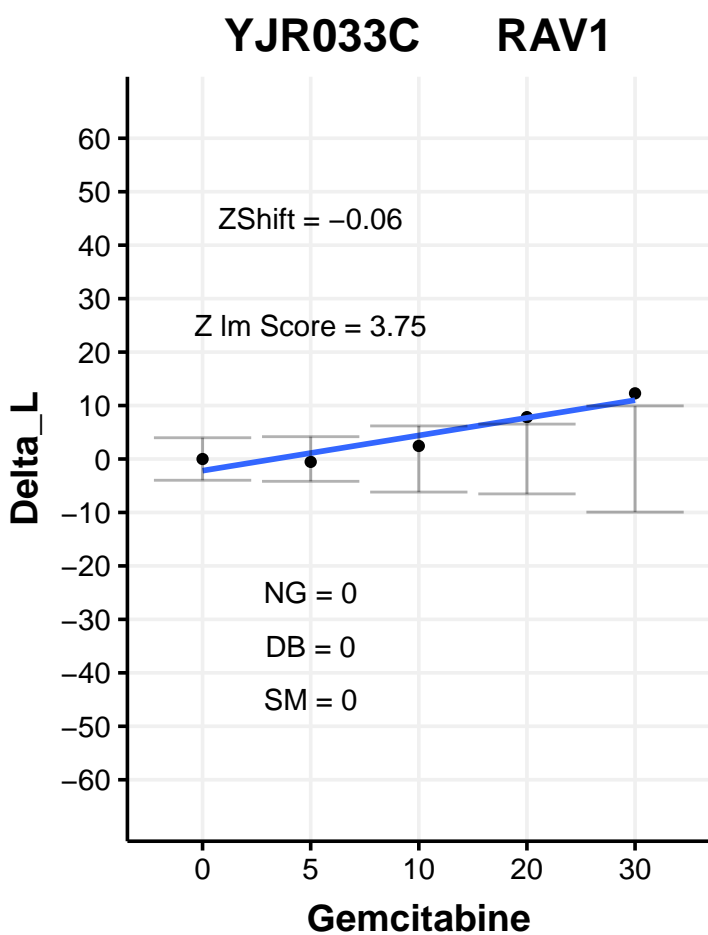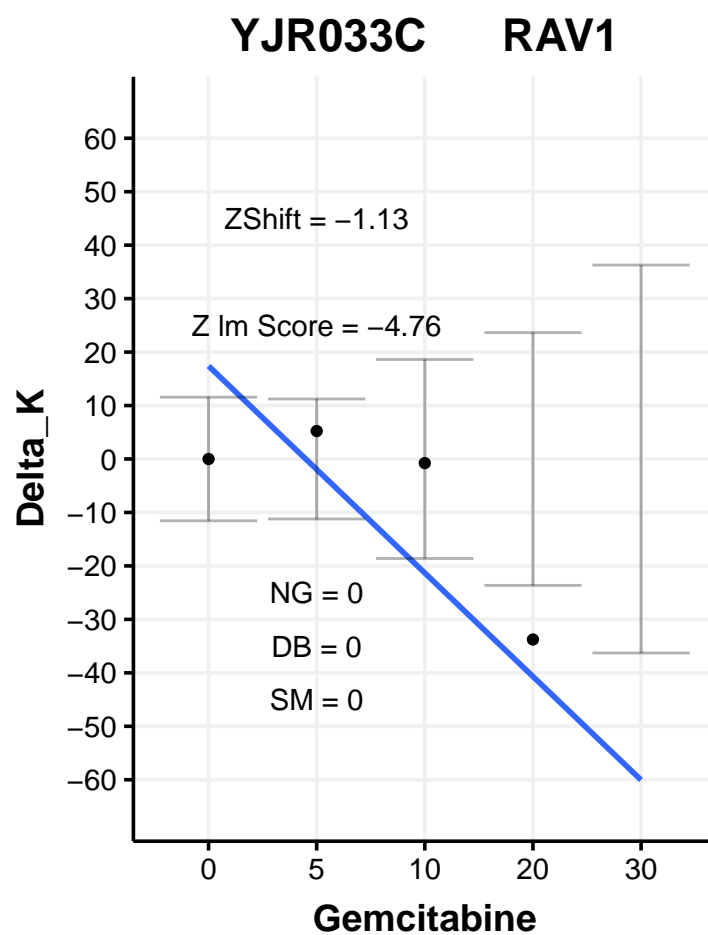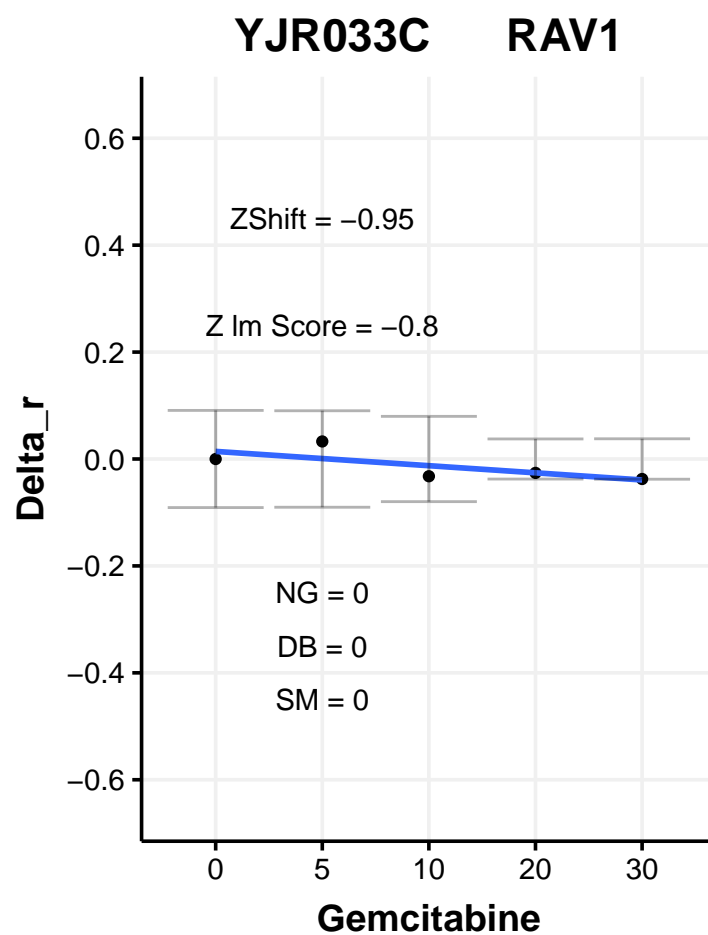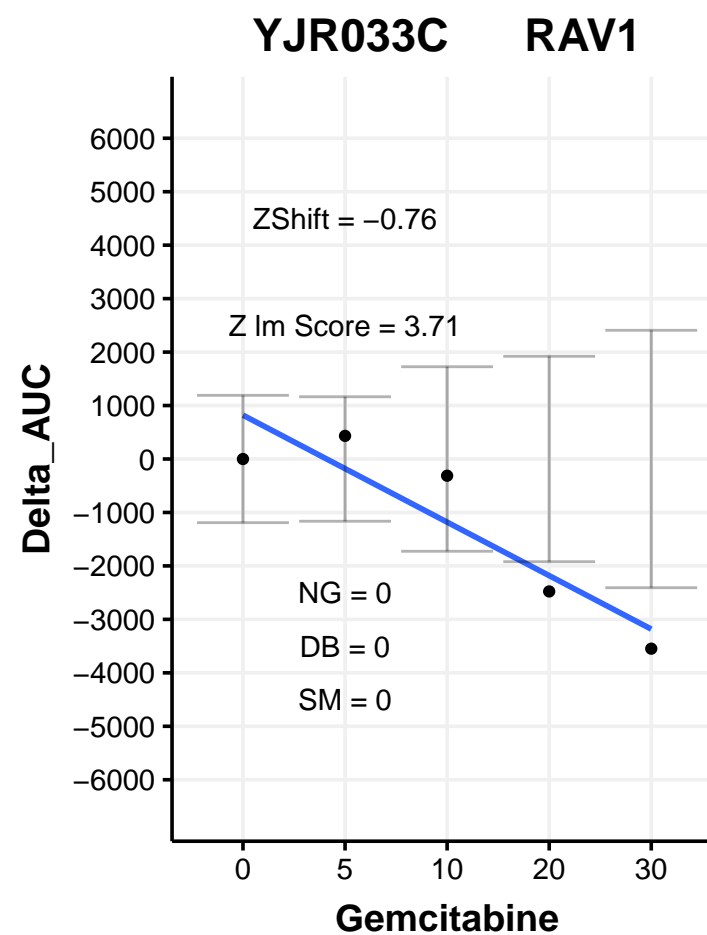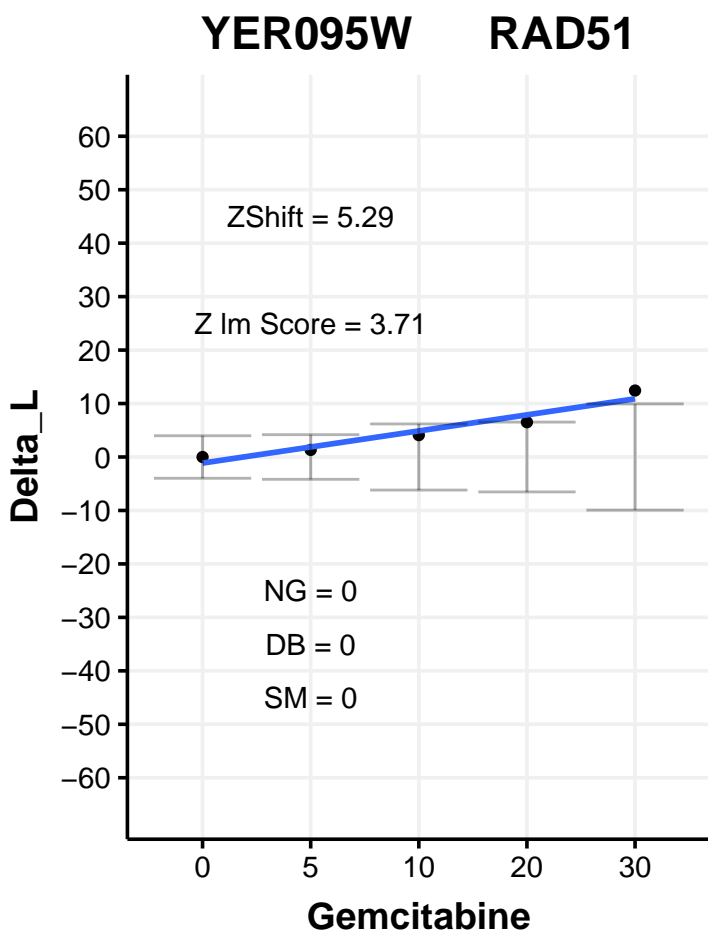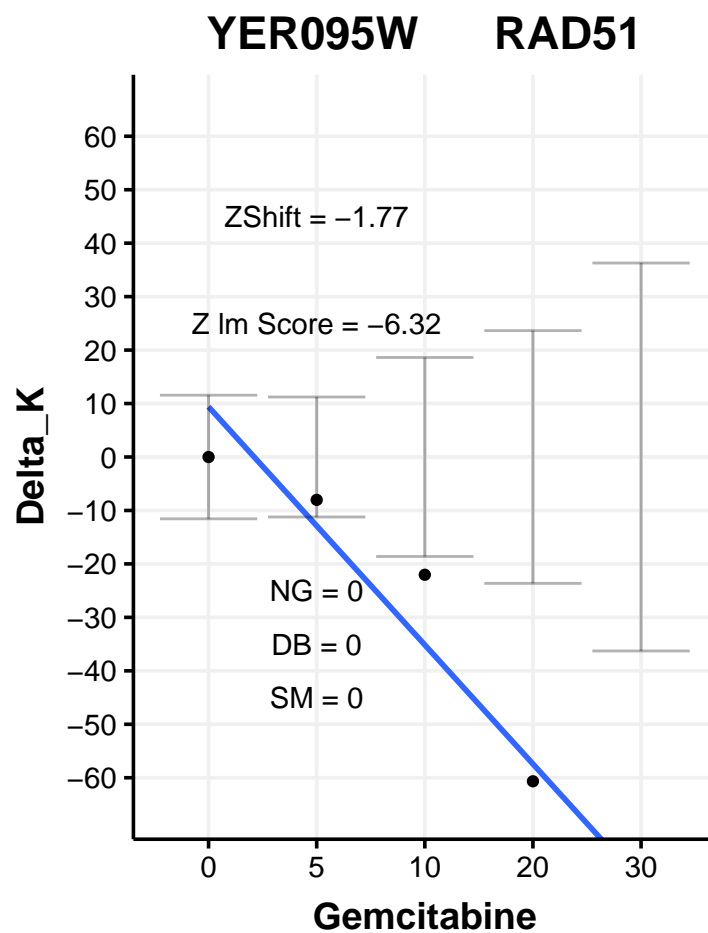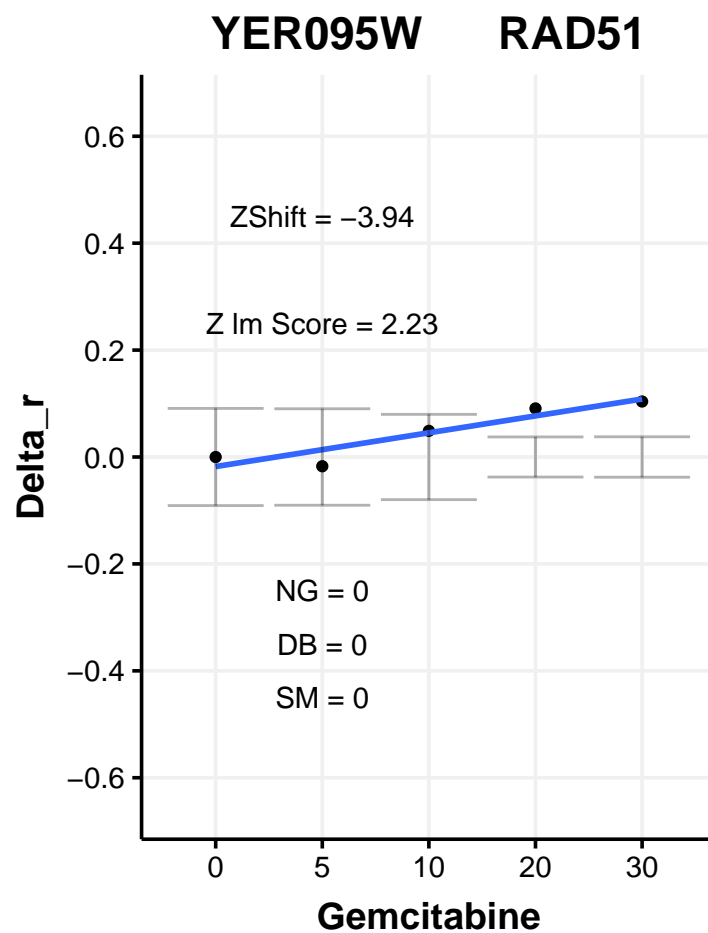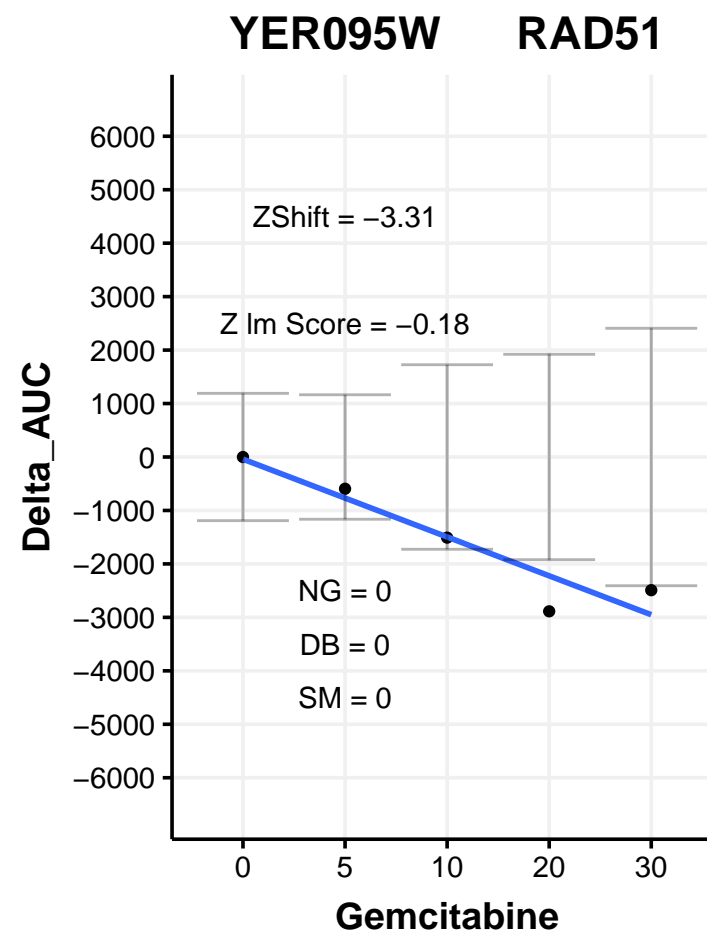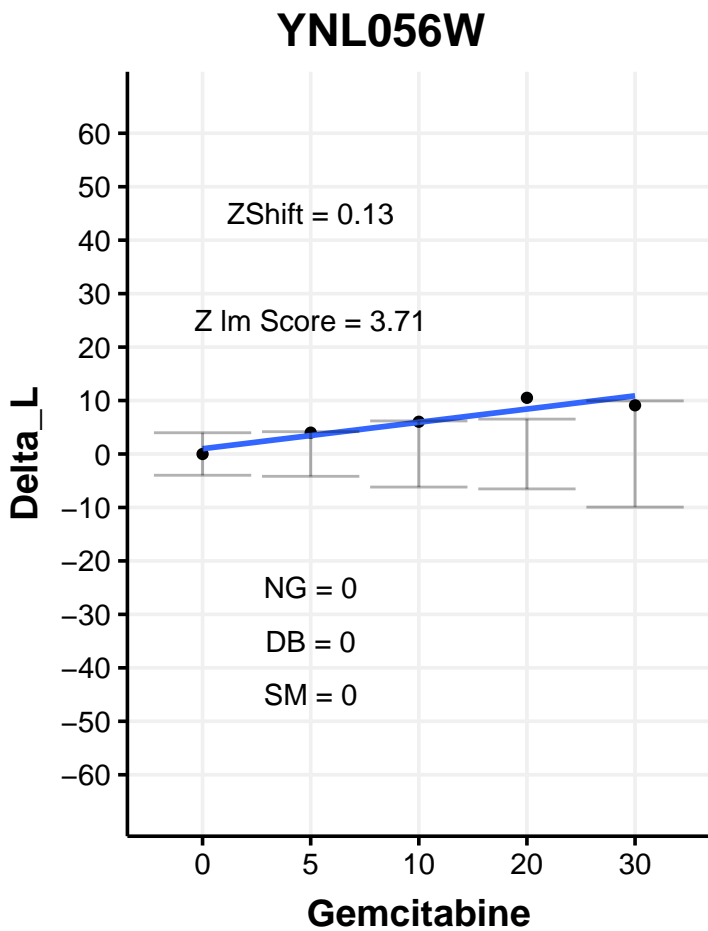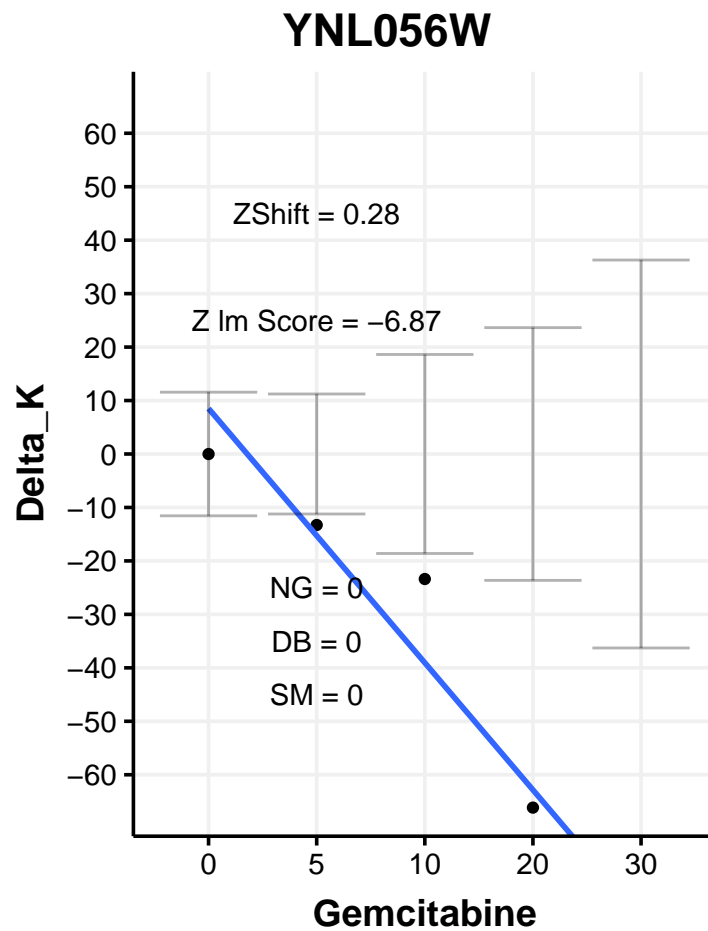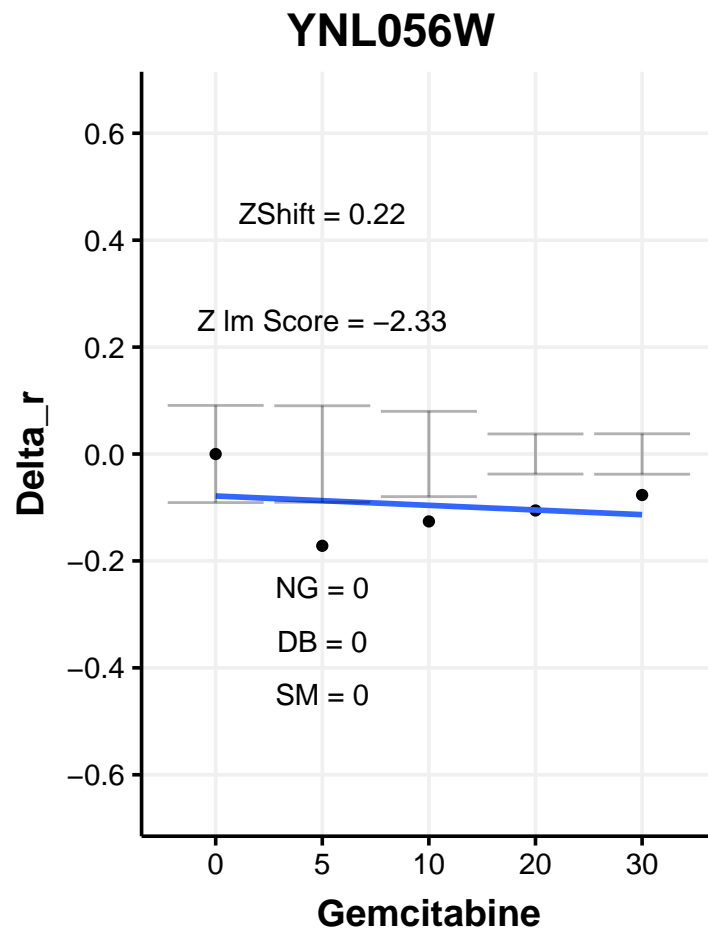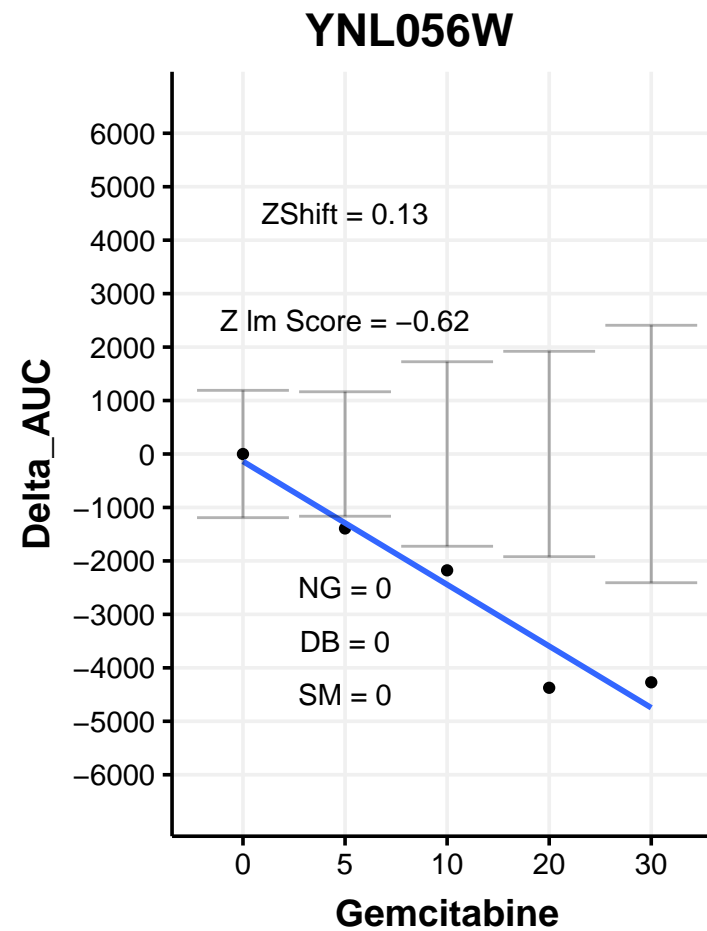

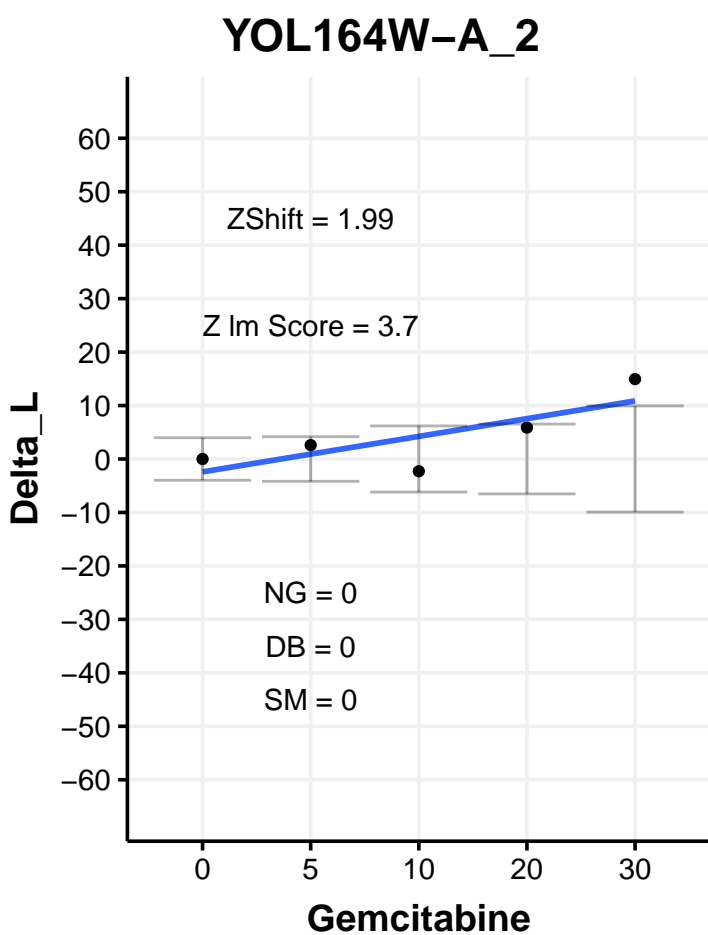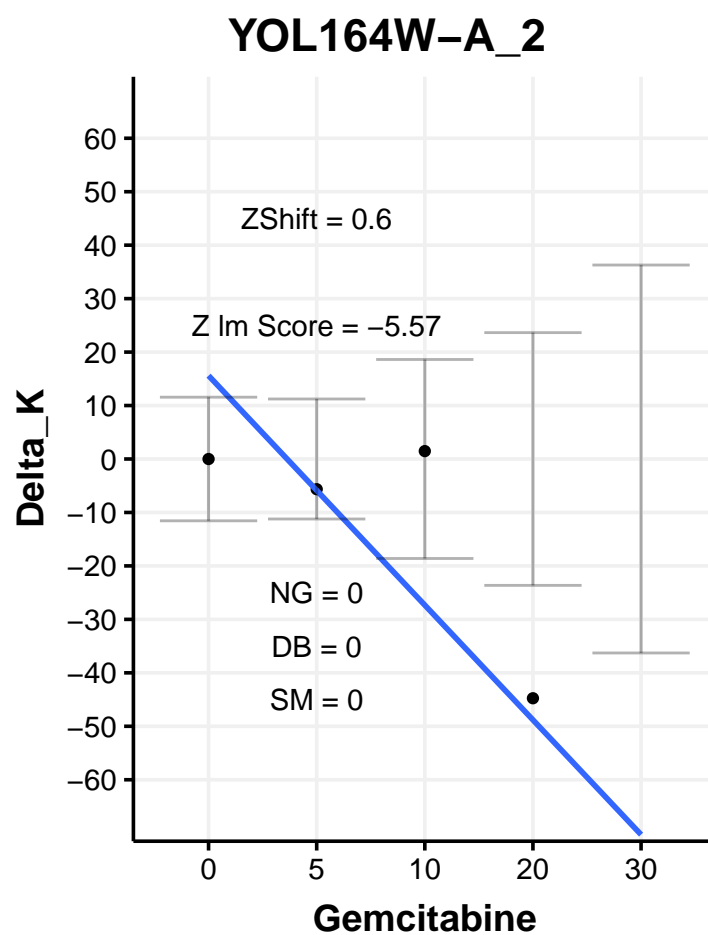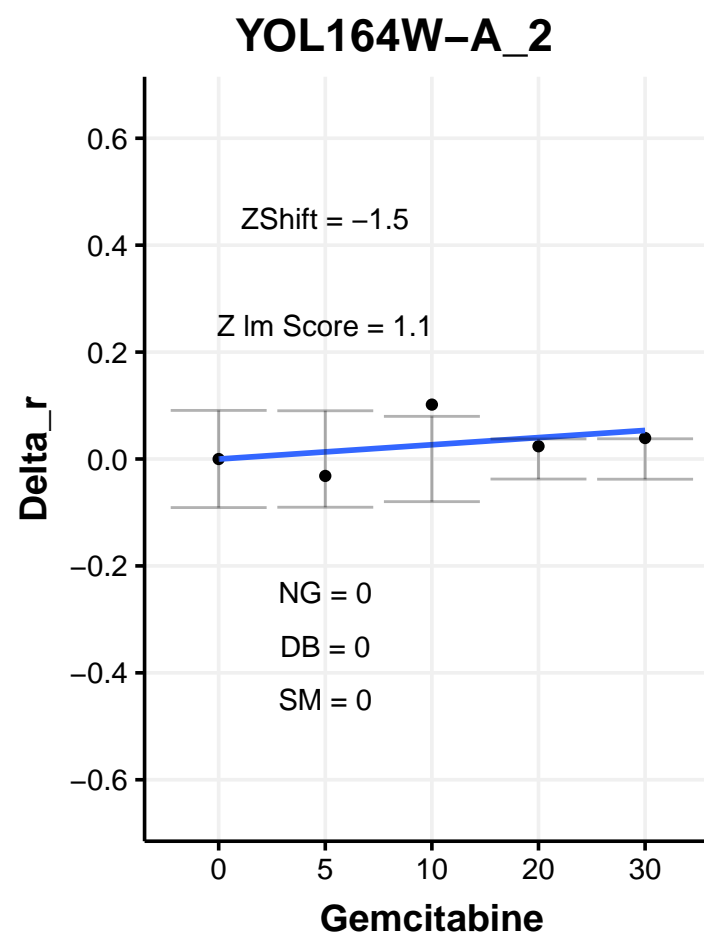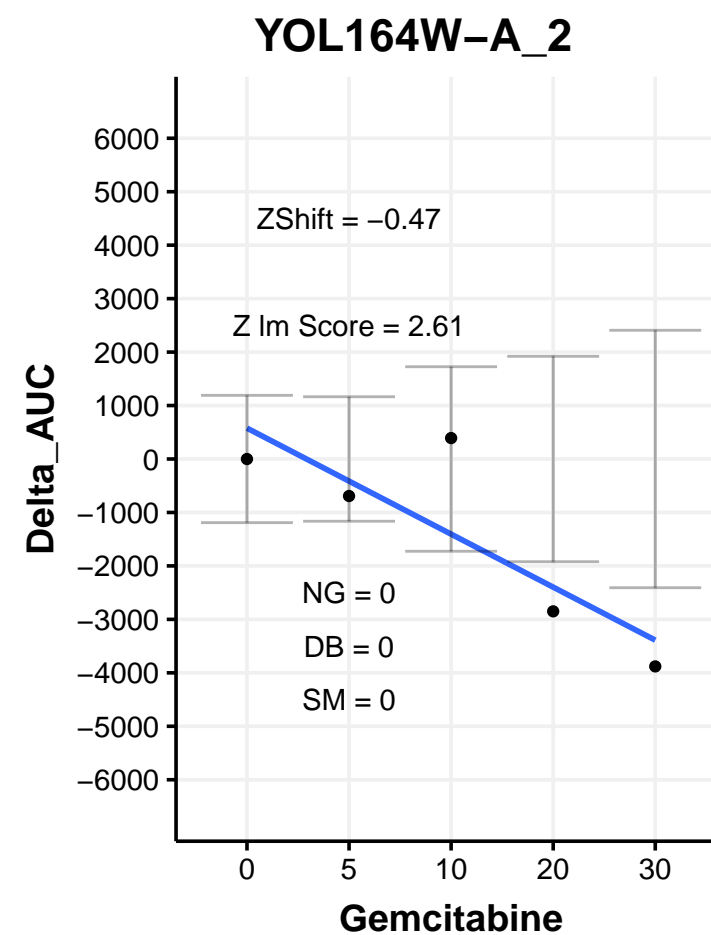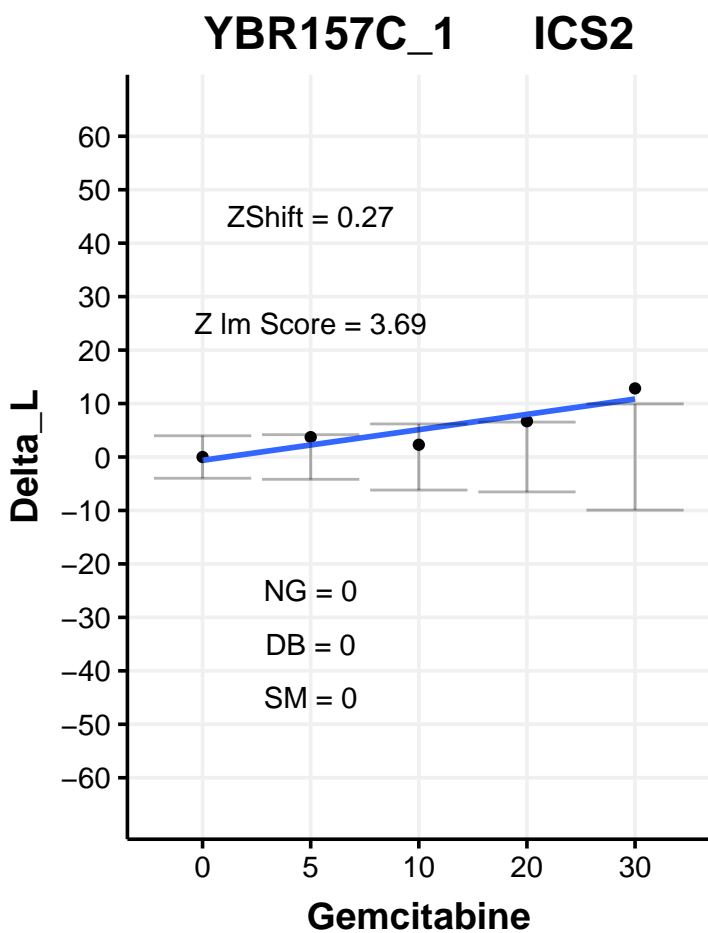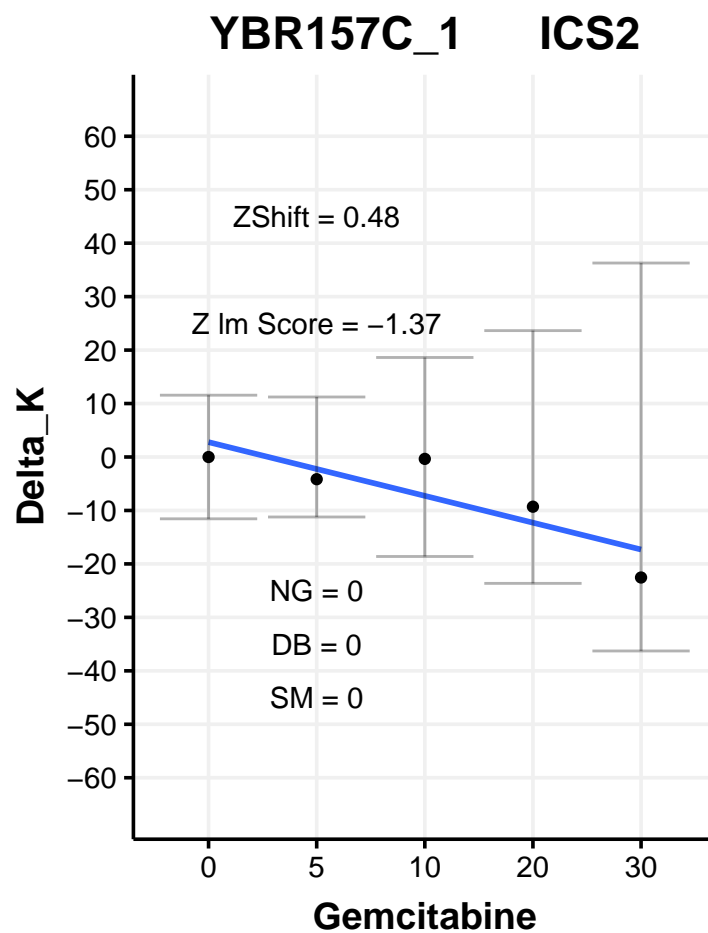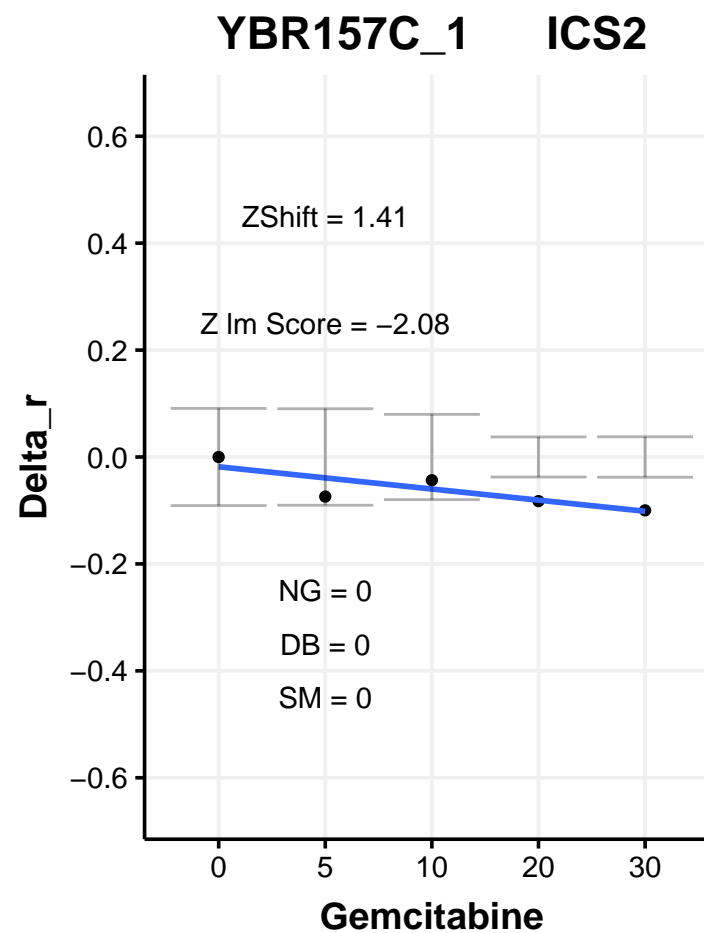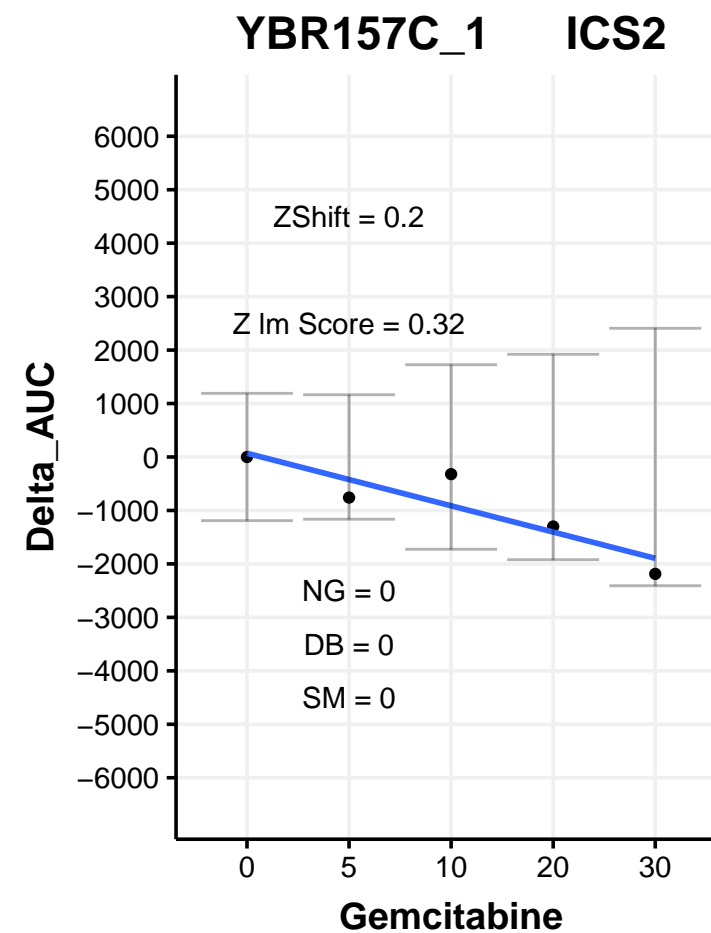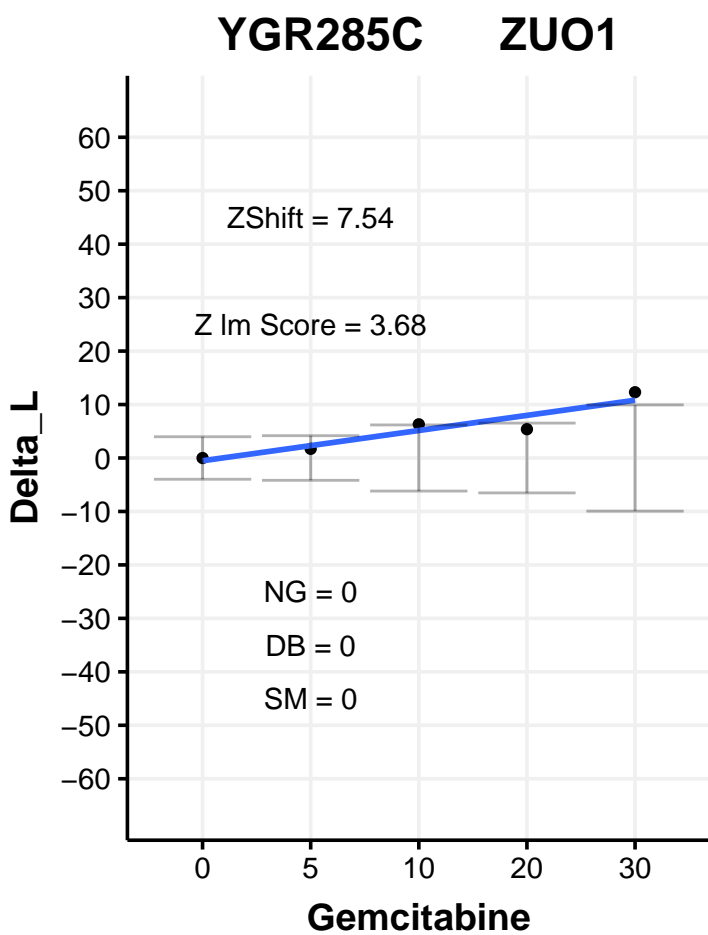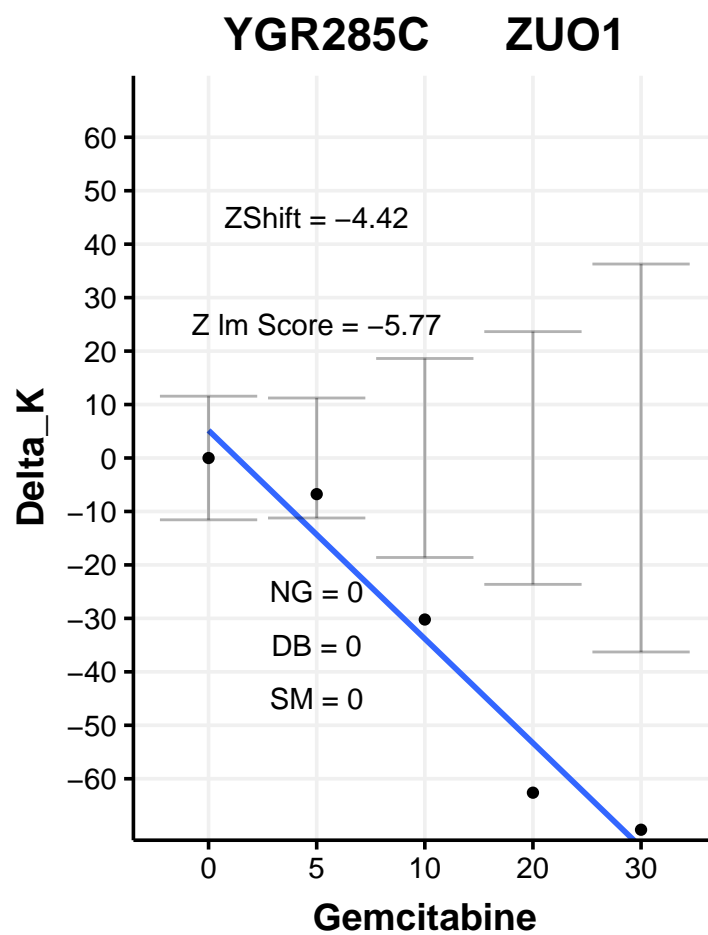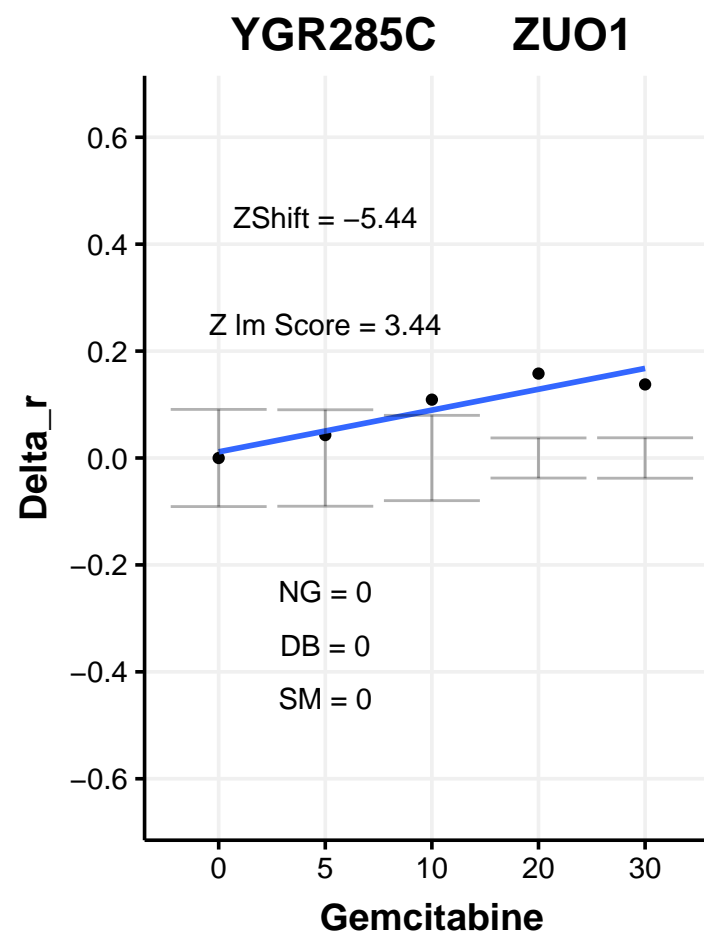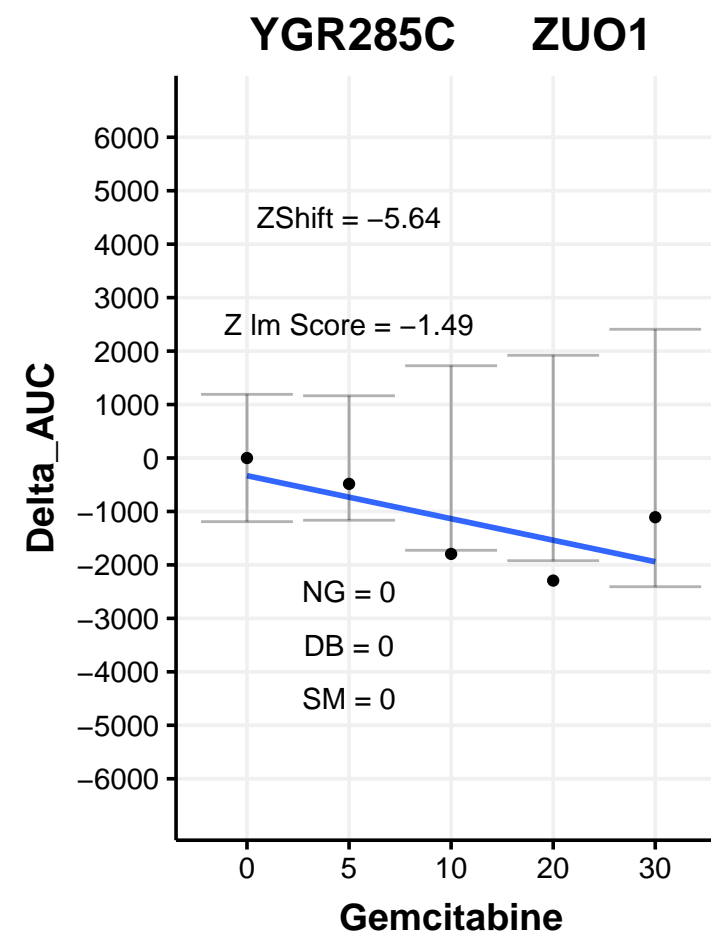

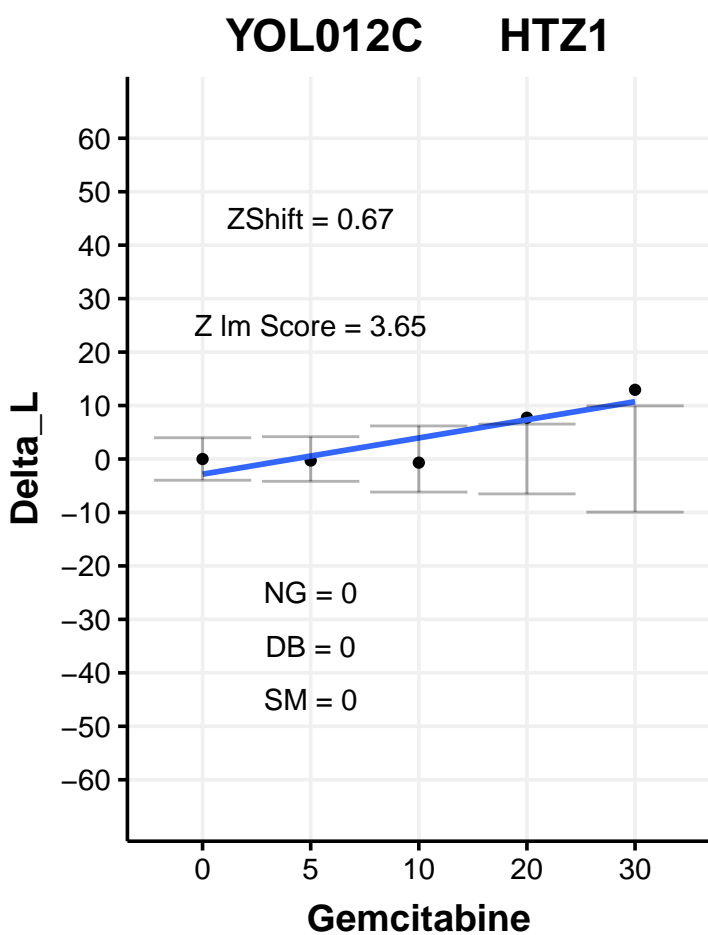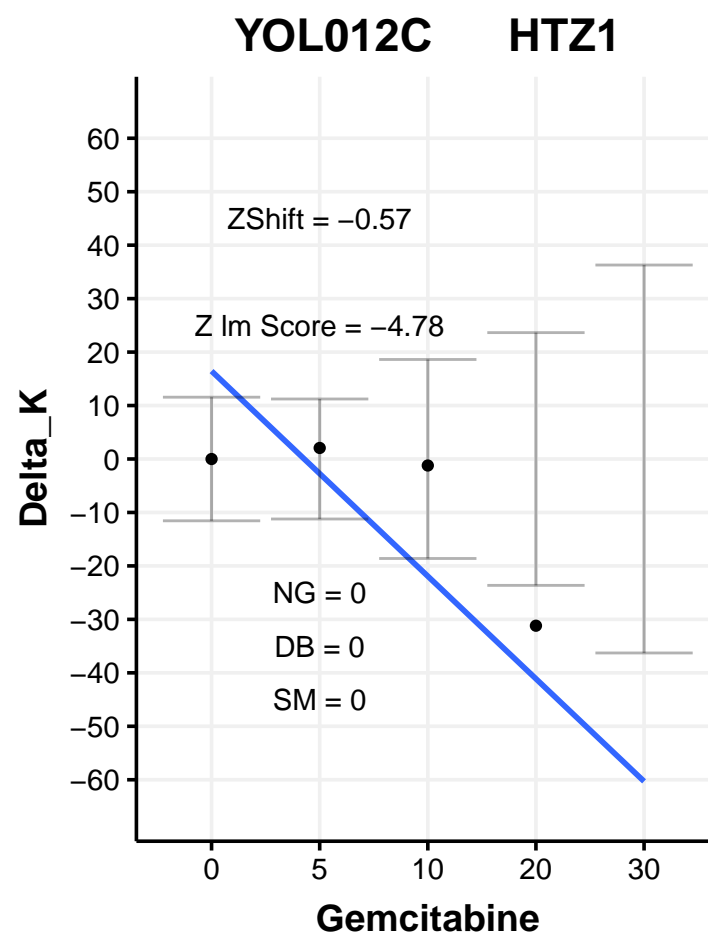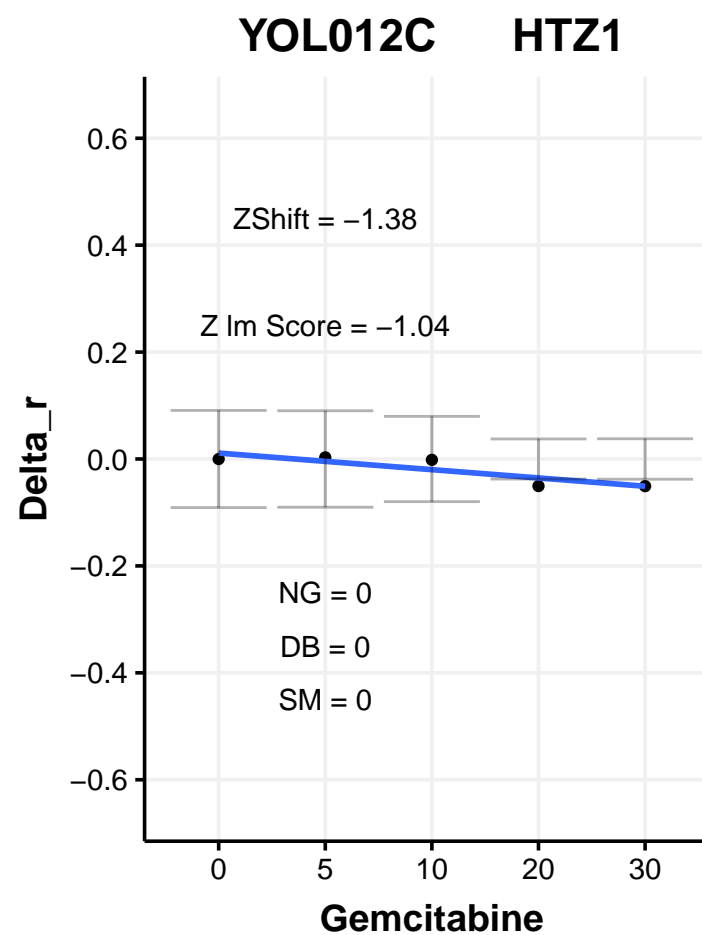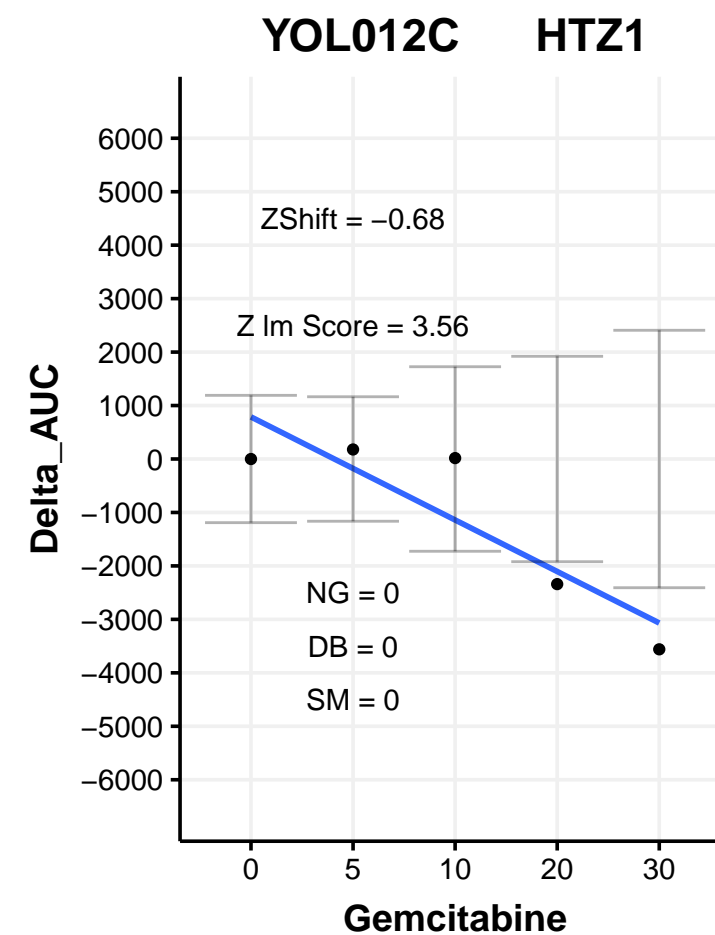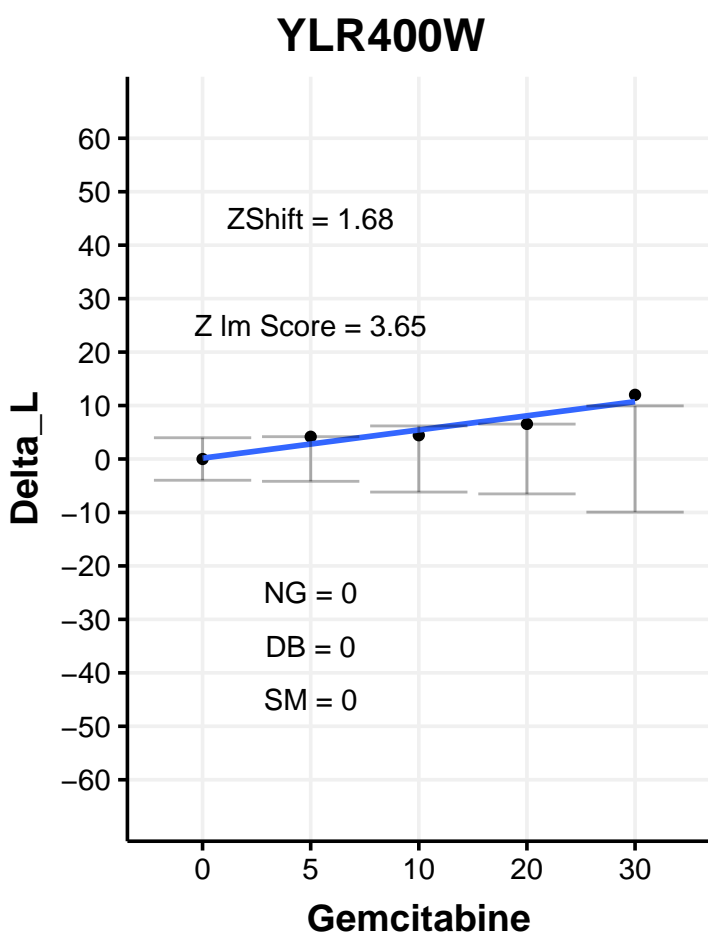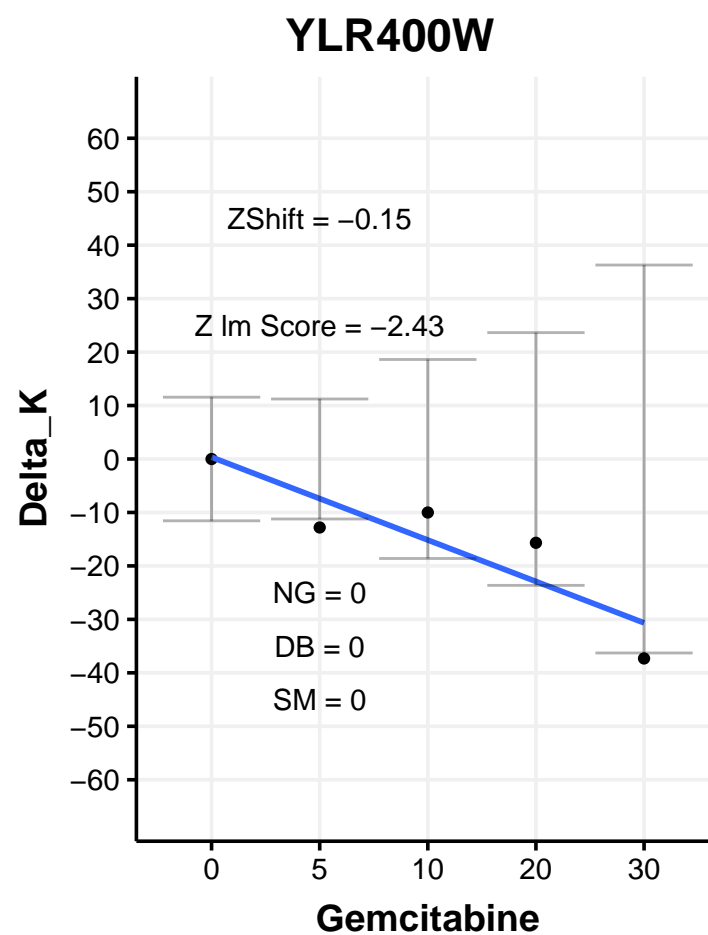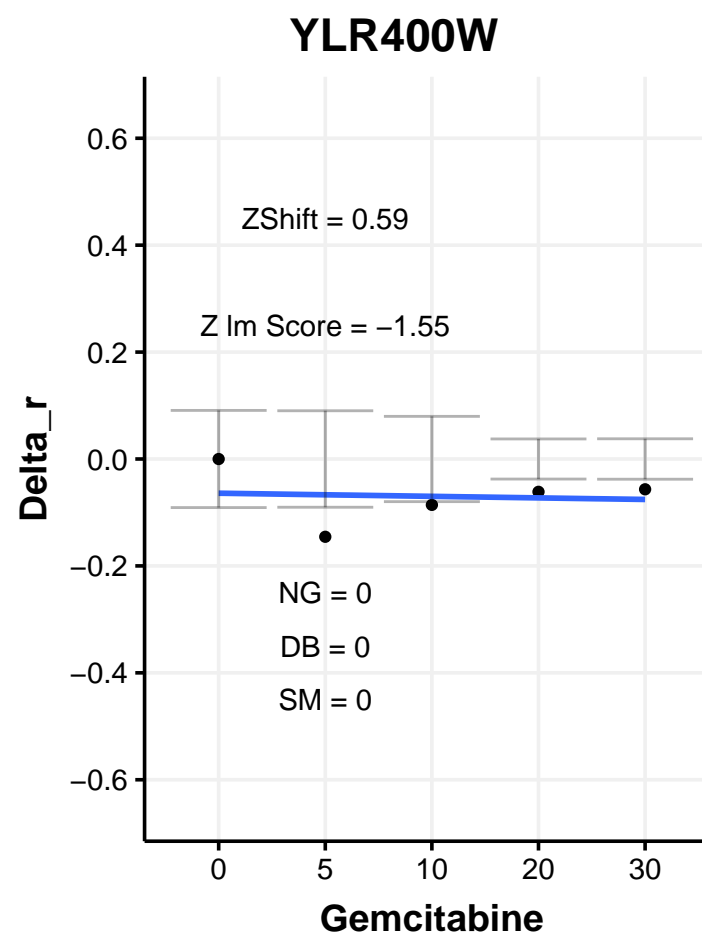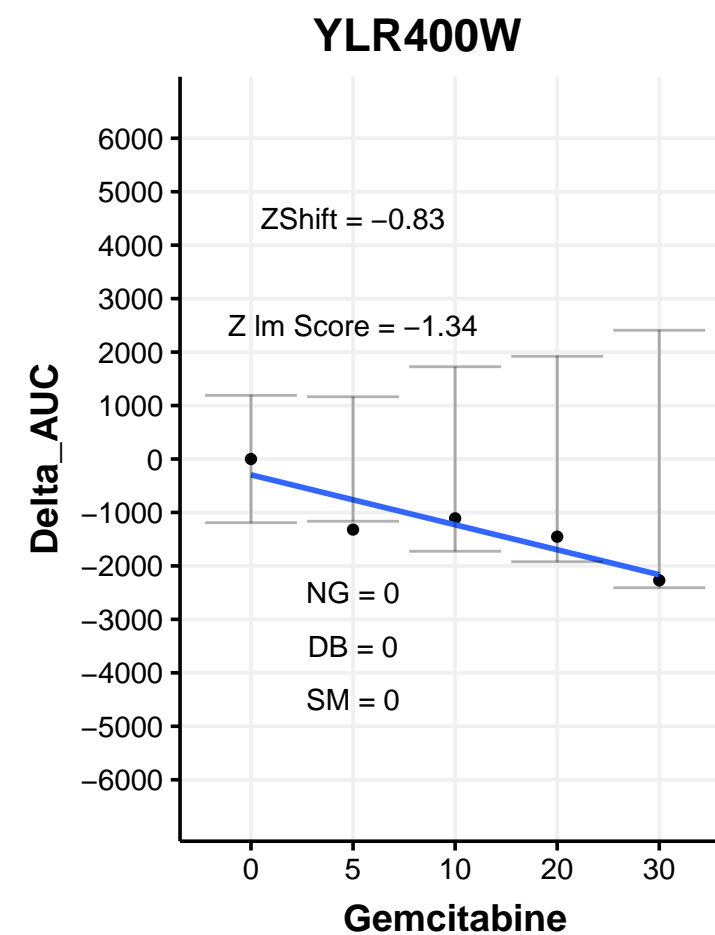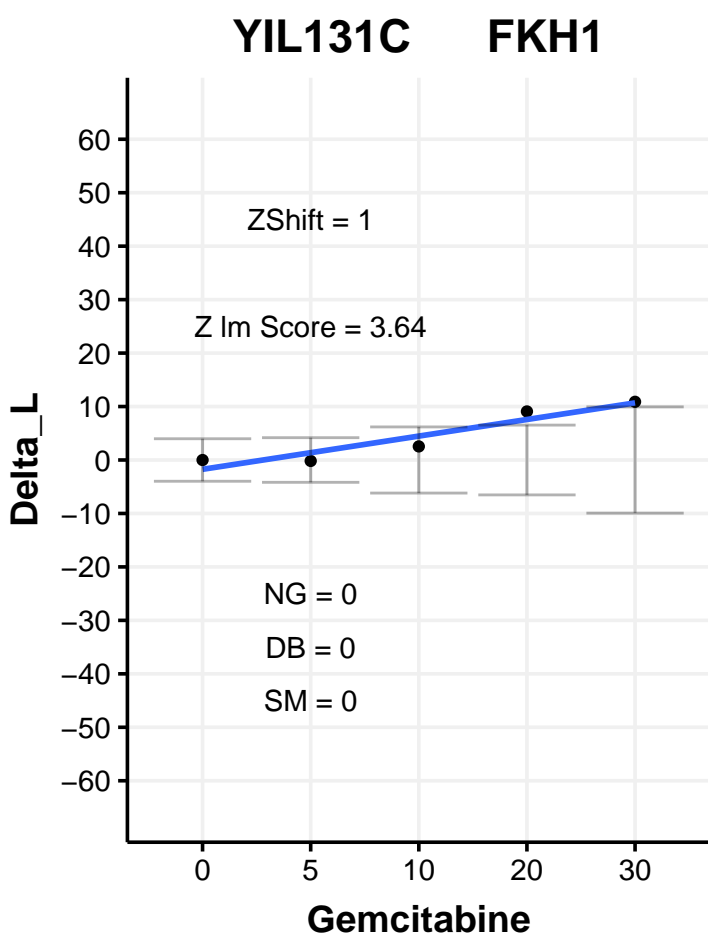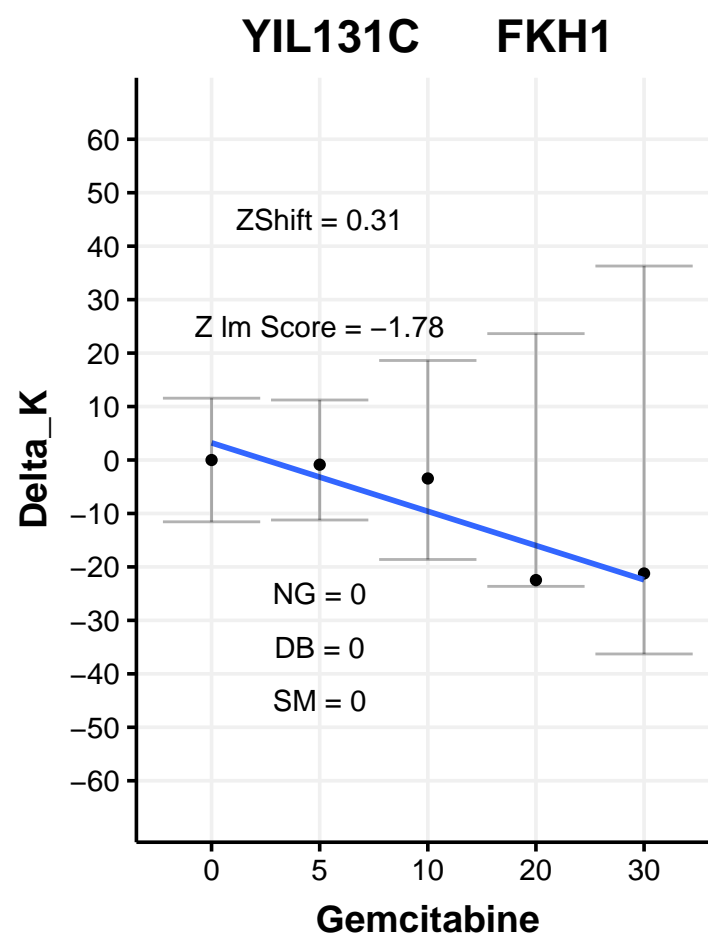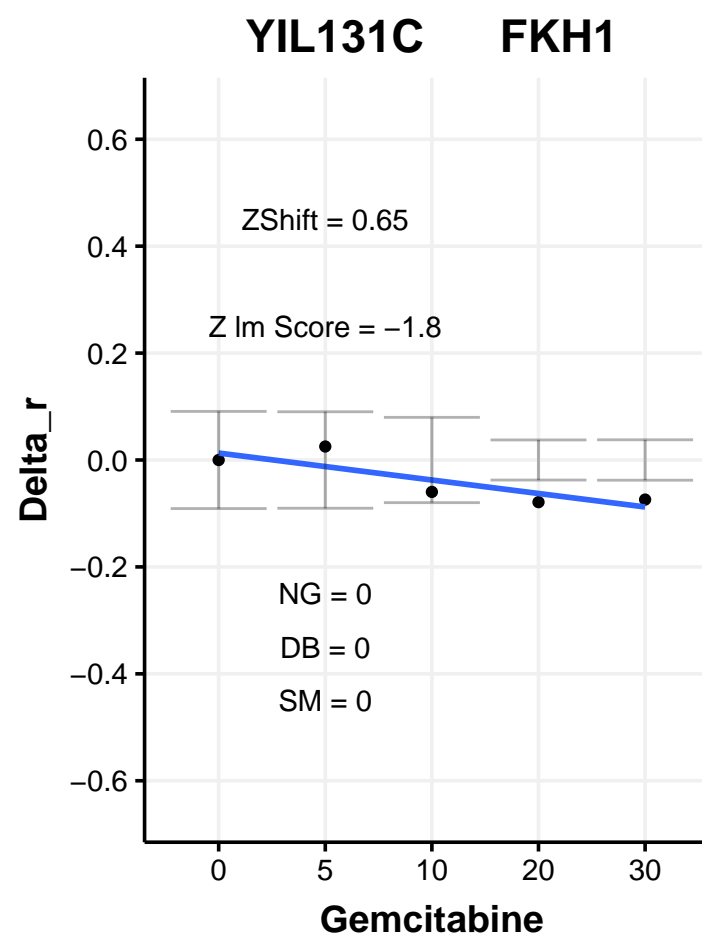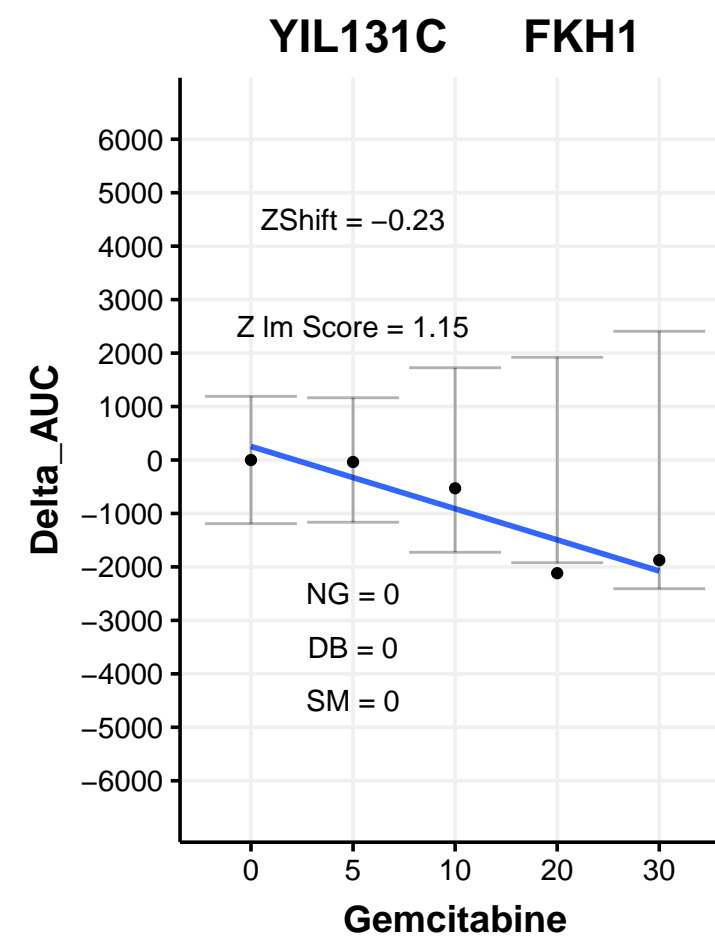

YCL057C-A\_1

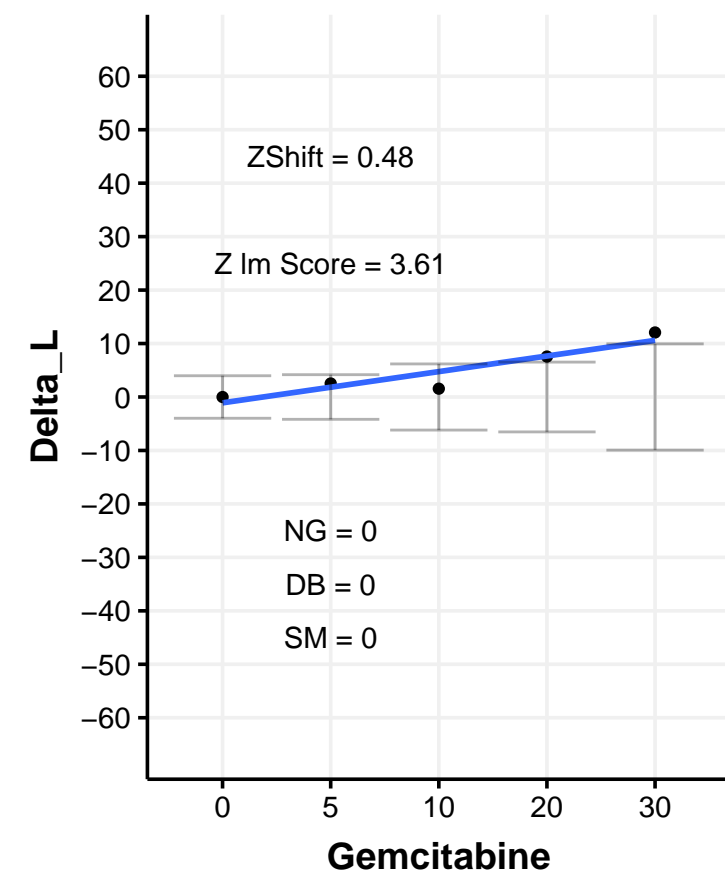

YCL057C-A\_1

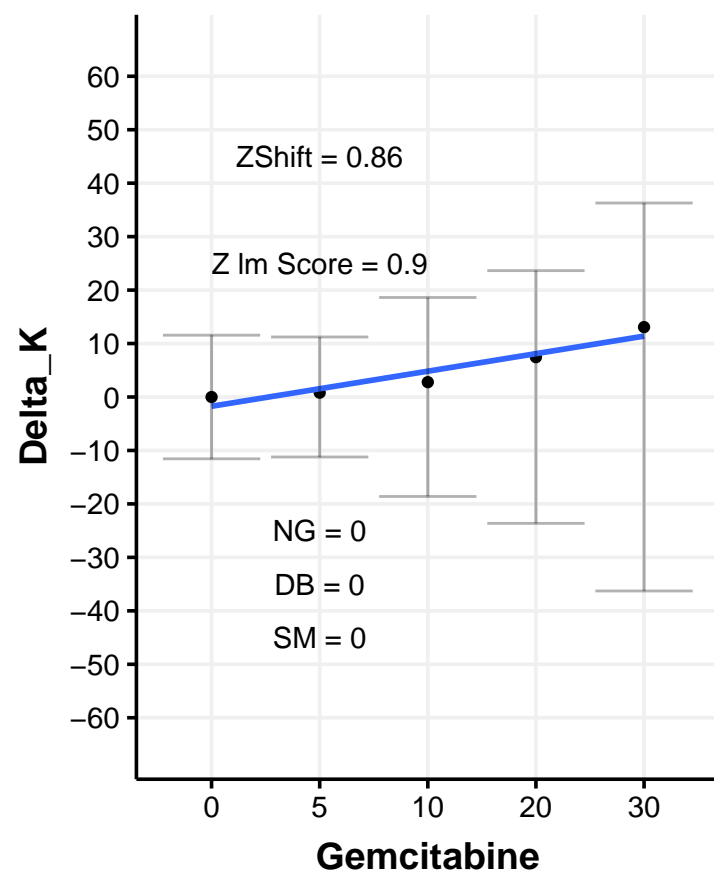

YCL057C-A\_1

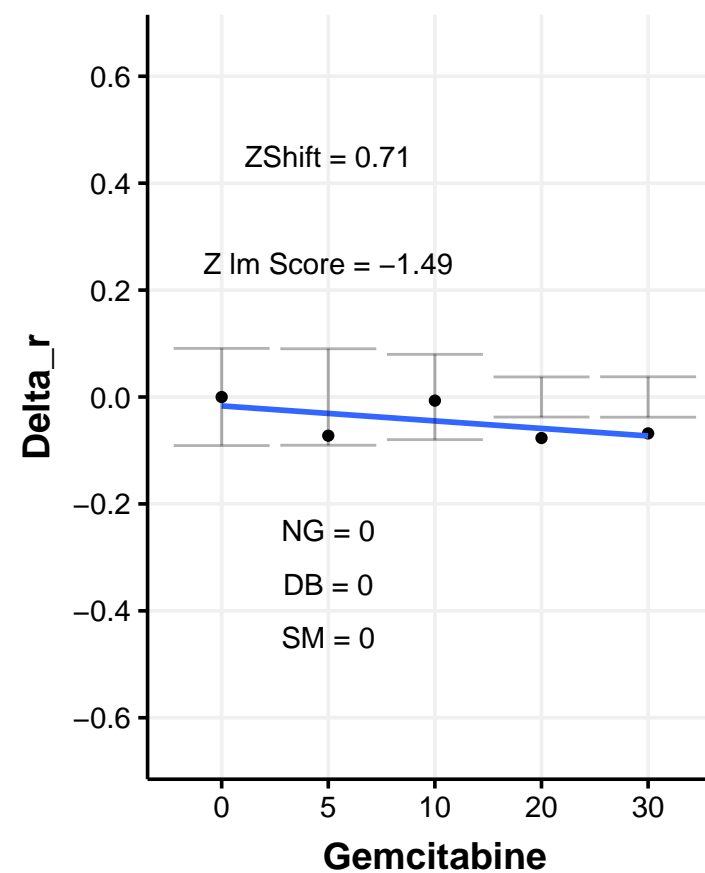

YCL057C-A\_1

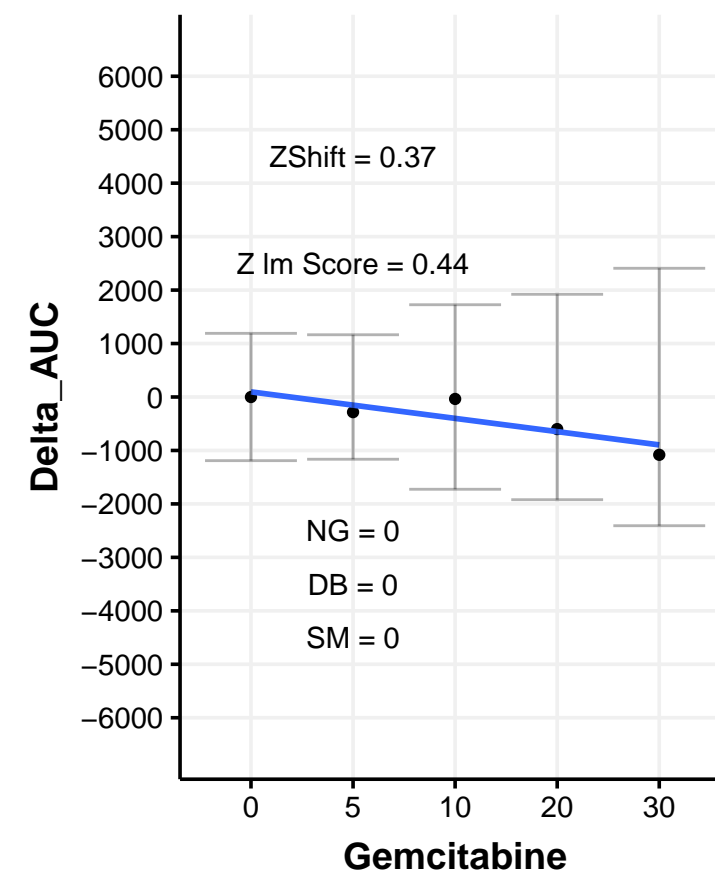

YMR032W\_2 HOF1

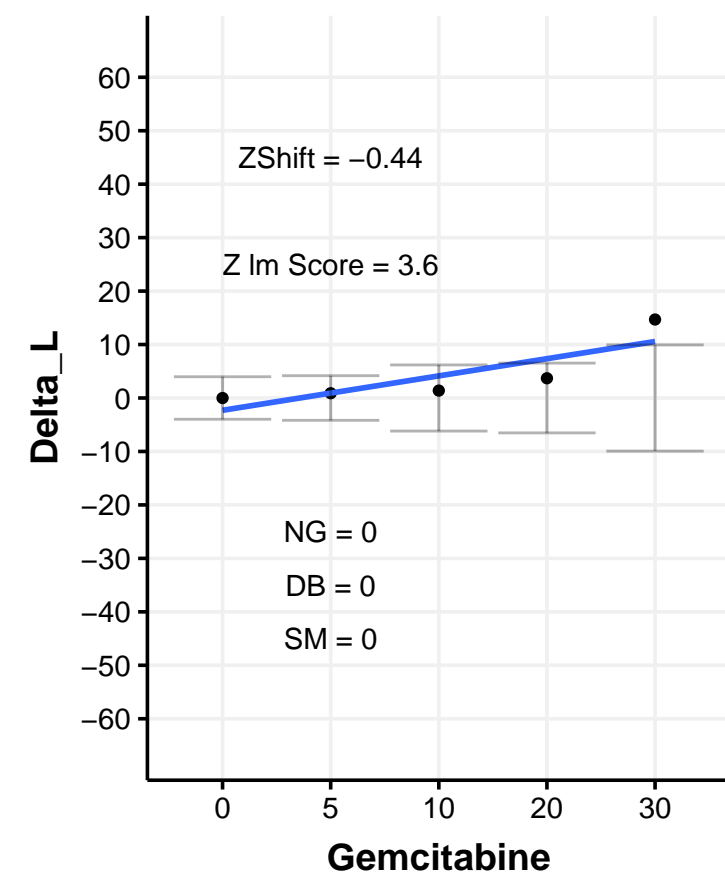

YMR032W\_2 HOF1

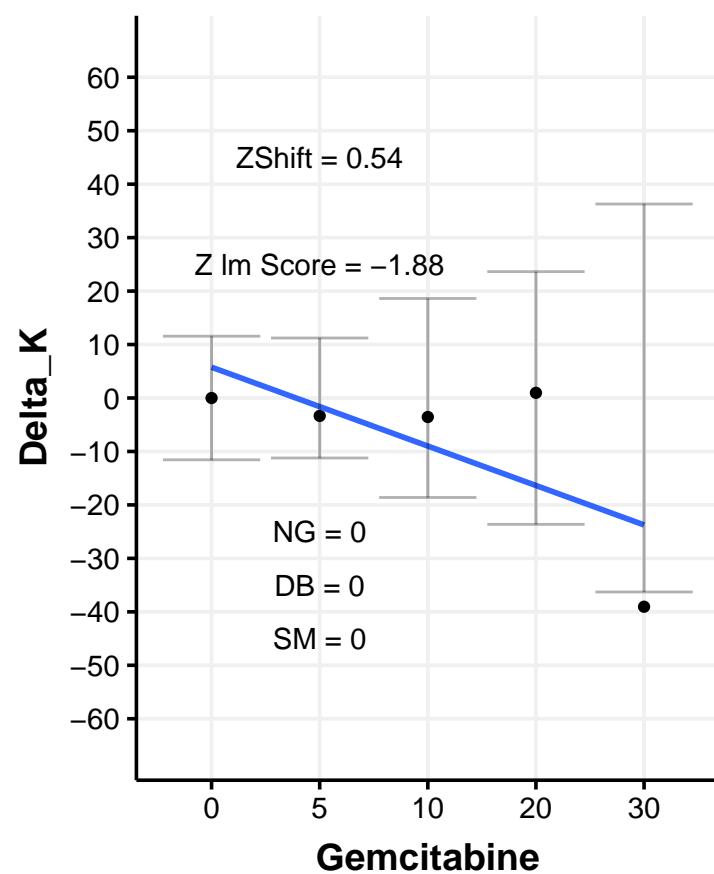

YMR032W\_2 HOF1

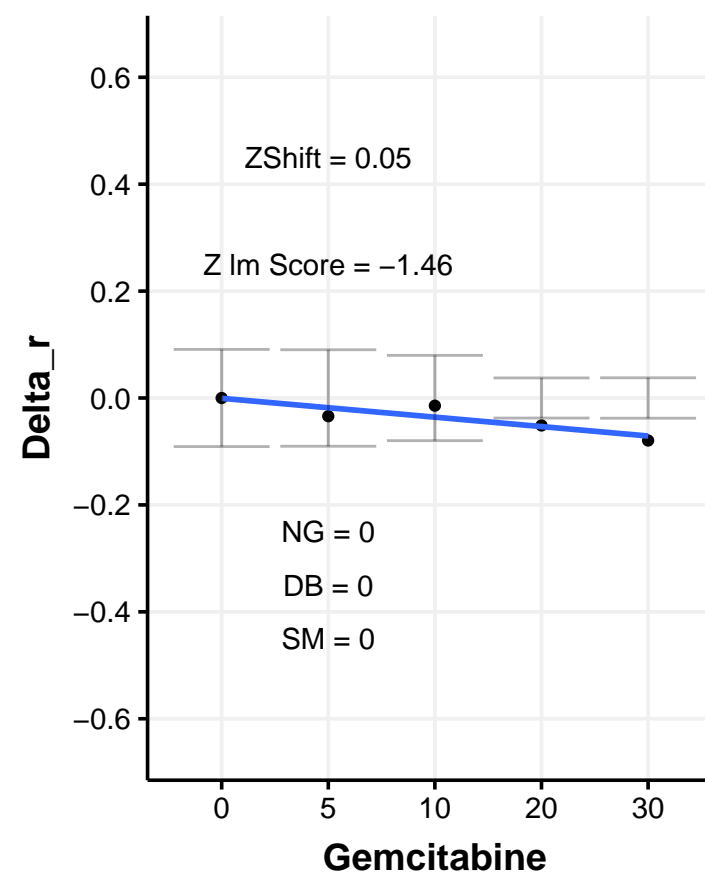

YMR032W\_2 HOF1

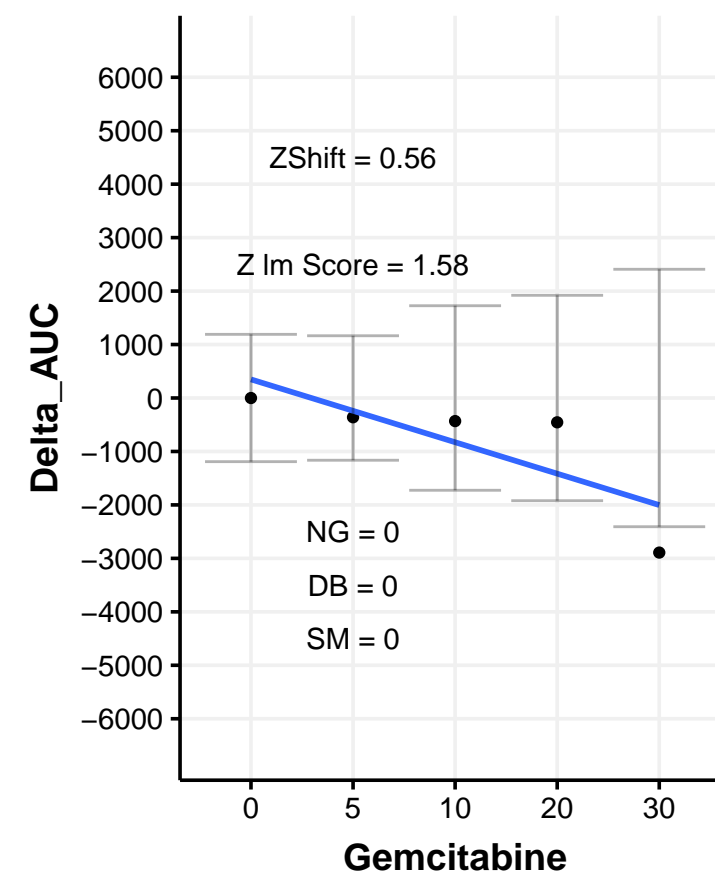

YDR392W SPT3

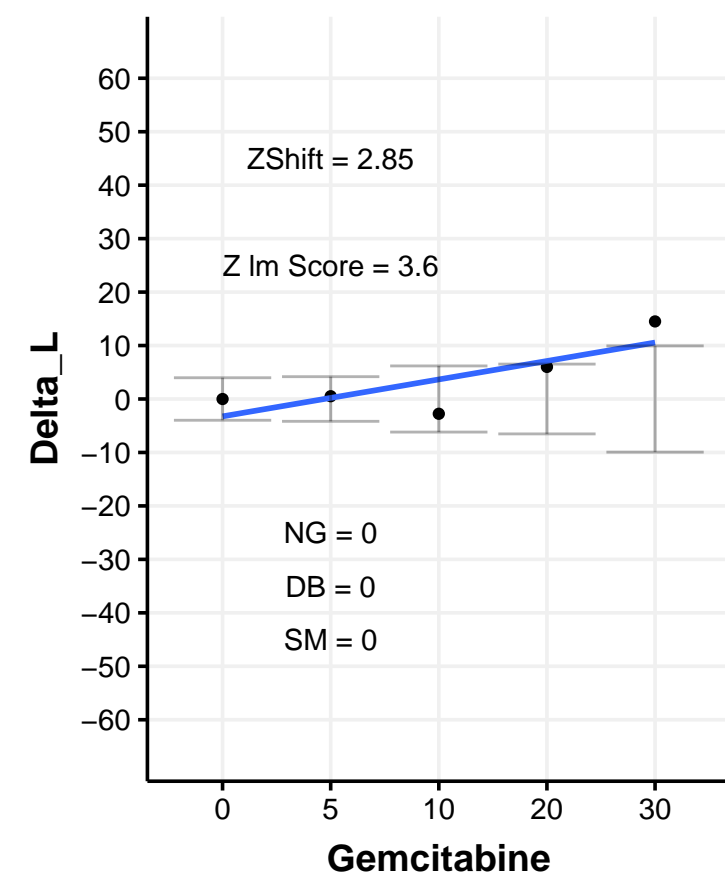

YDR392W SPT3

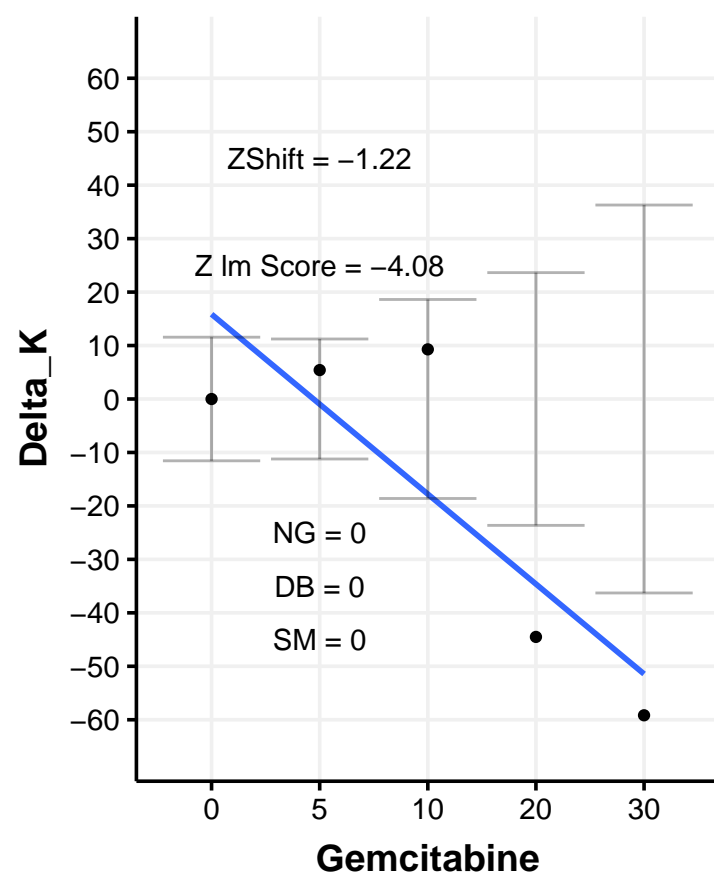

YDR392W SPT3

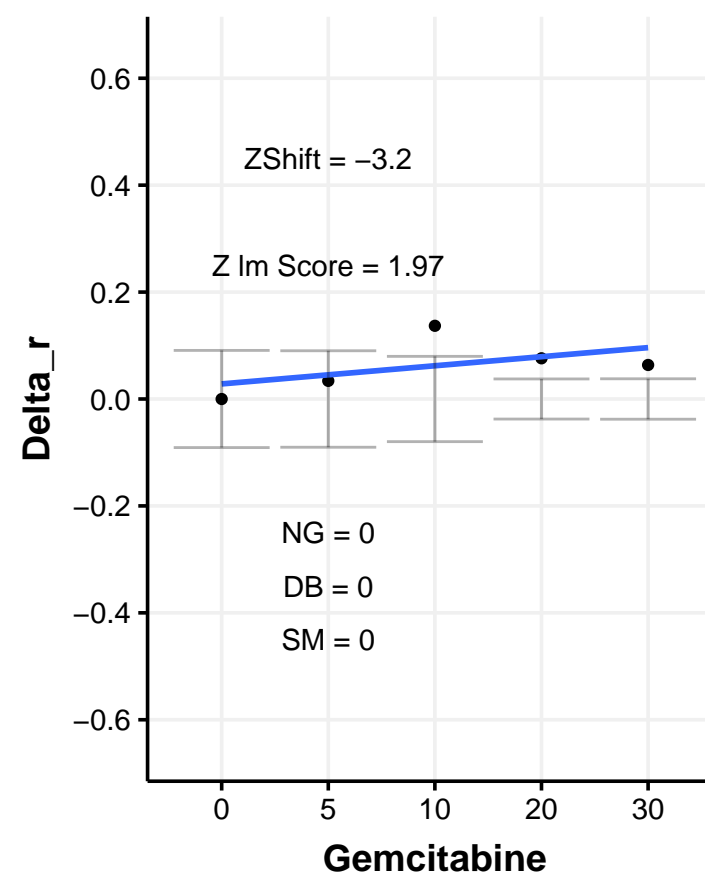

YDR392W SPT3

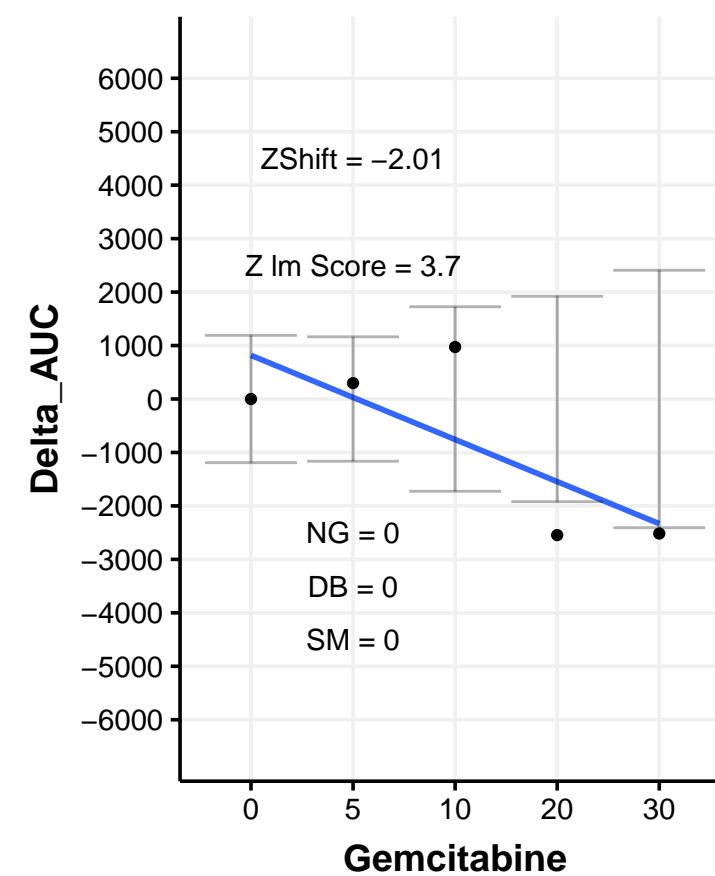



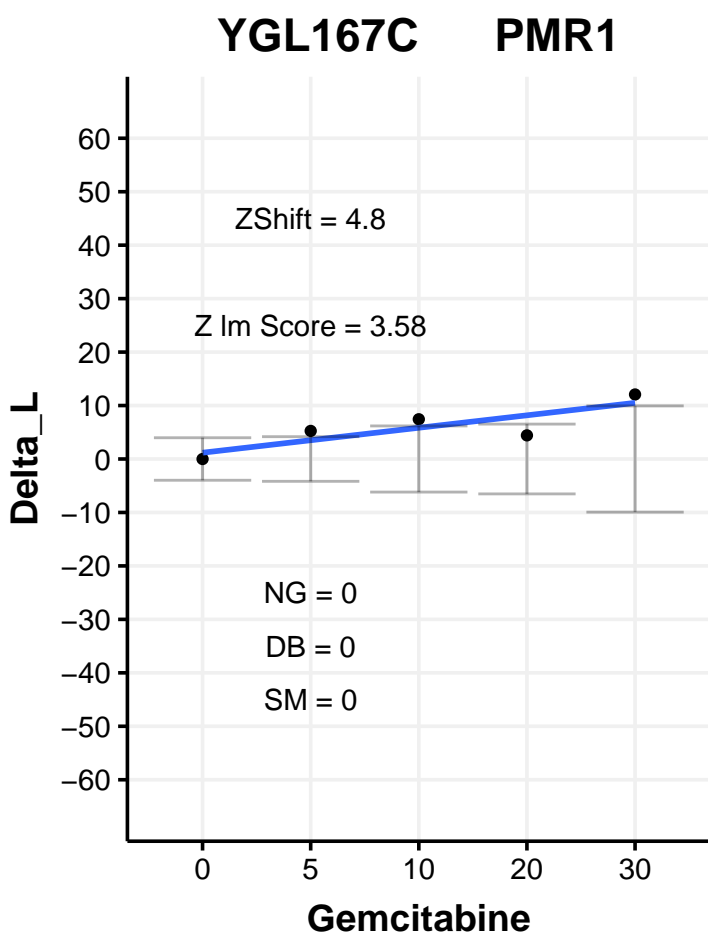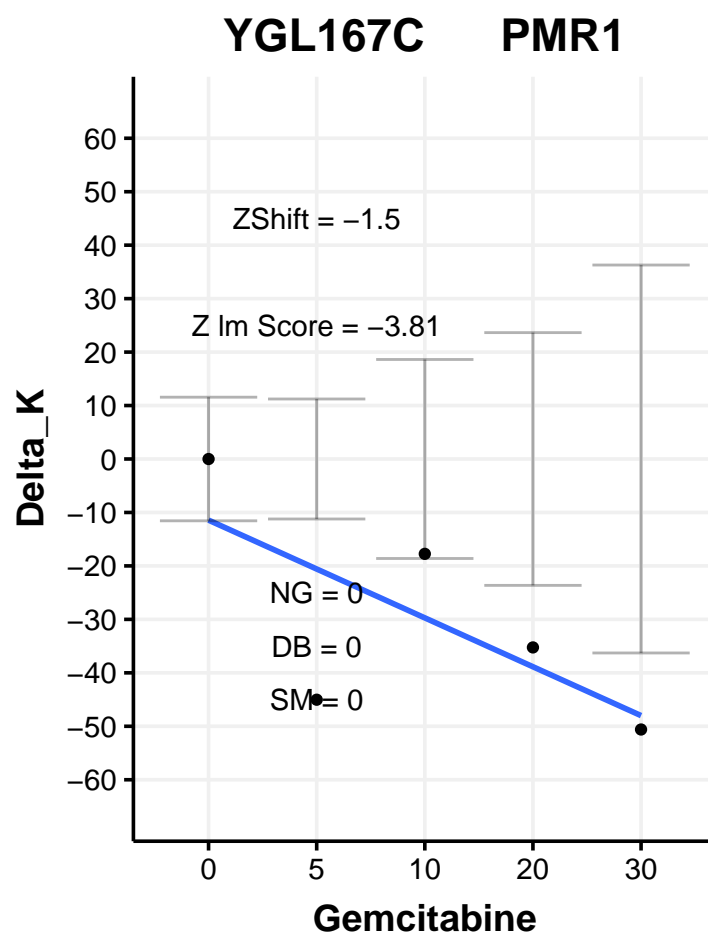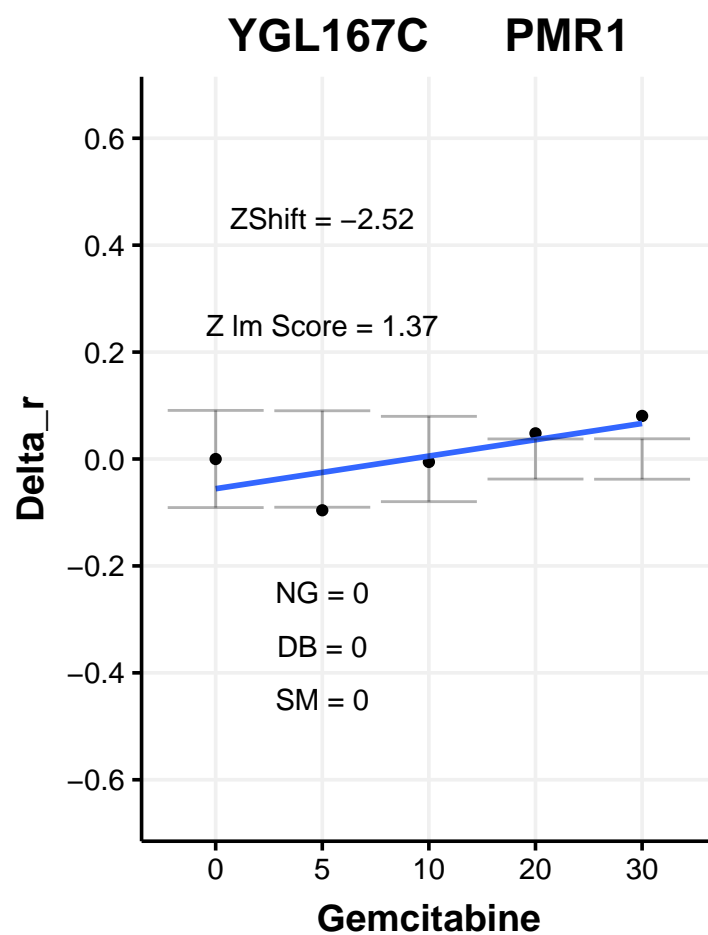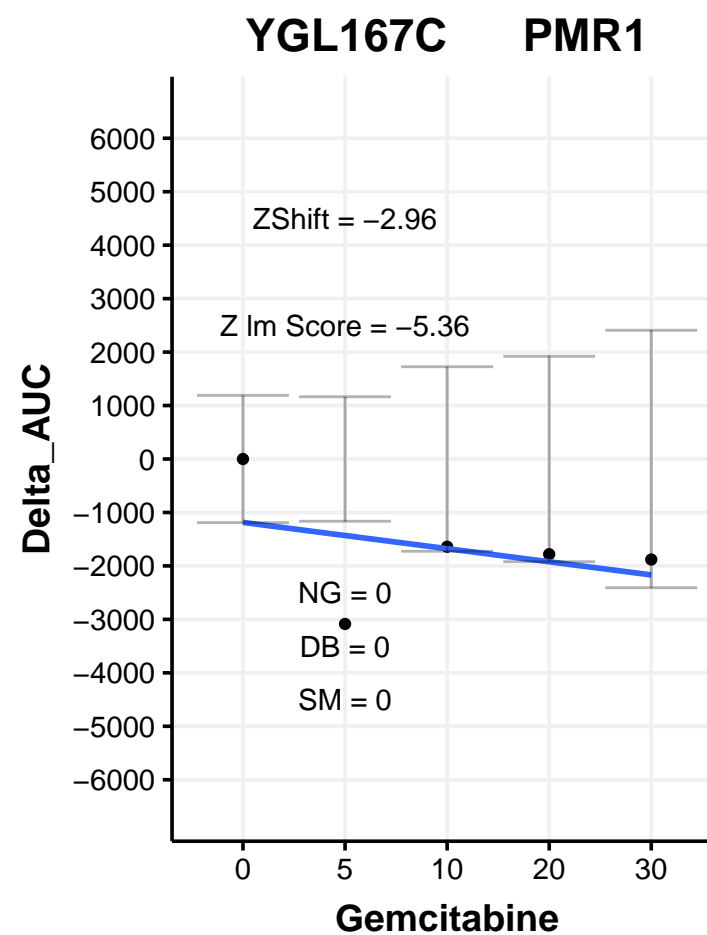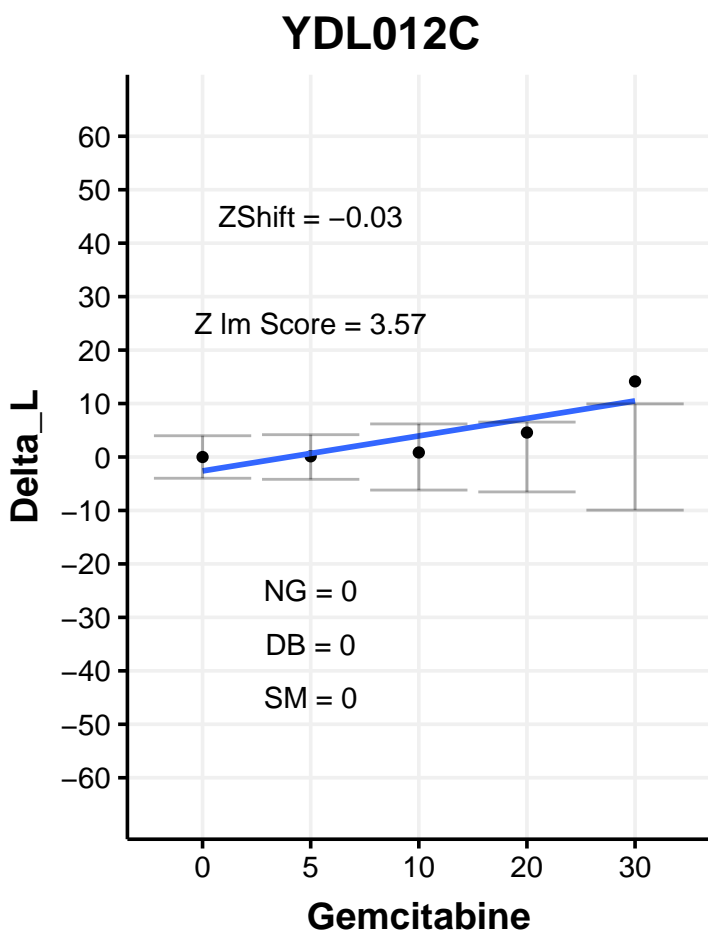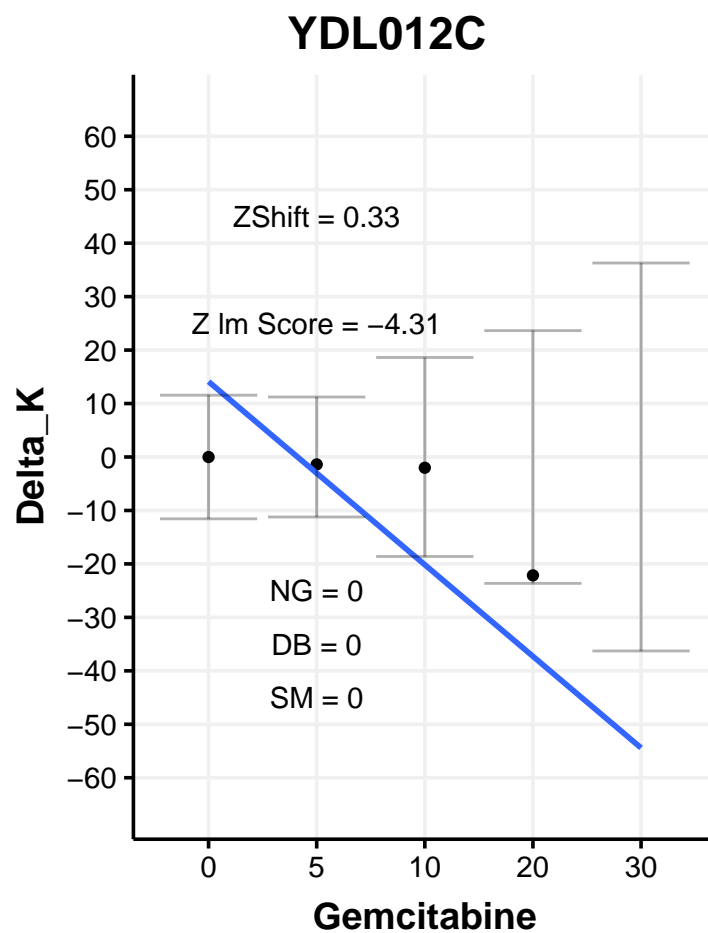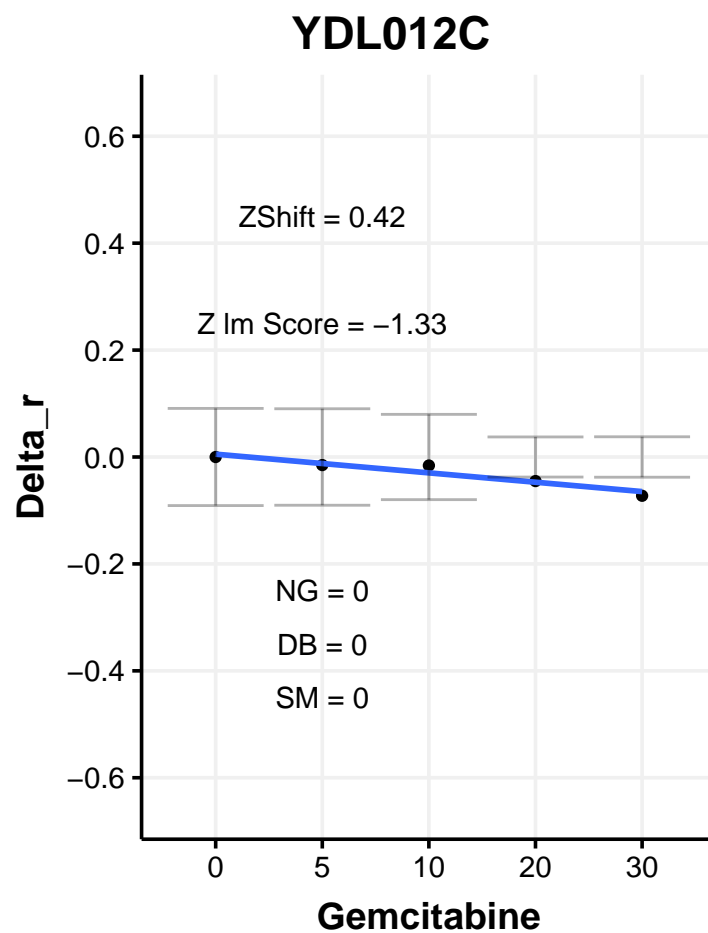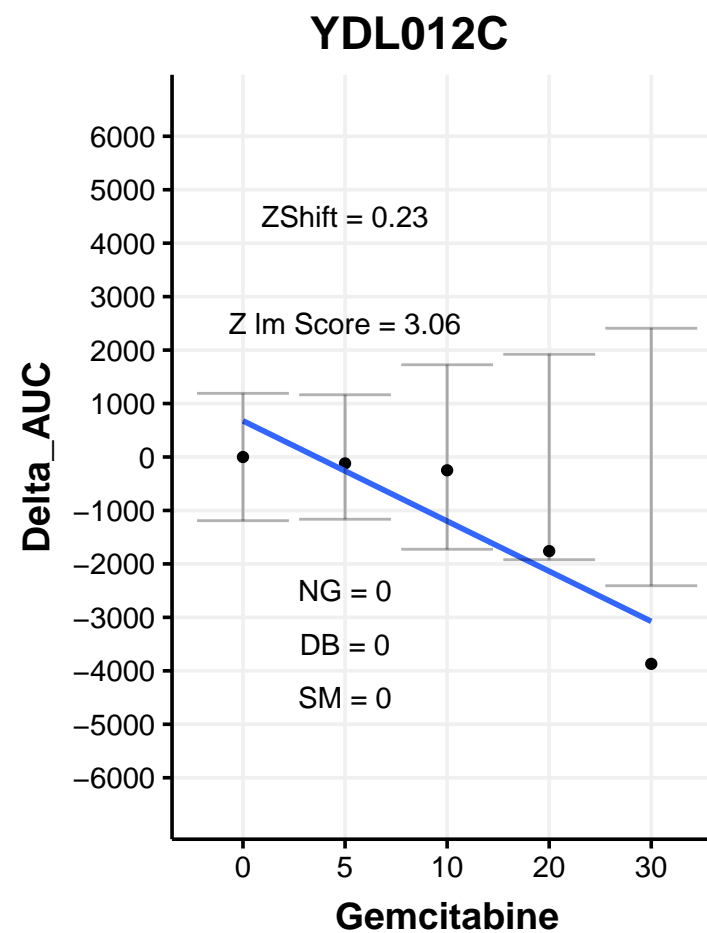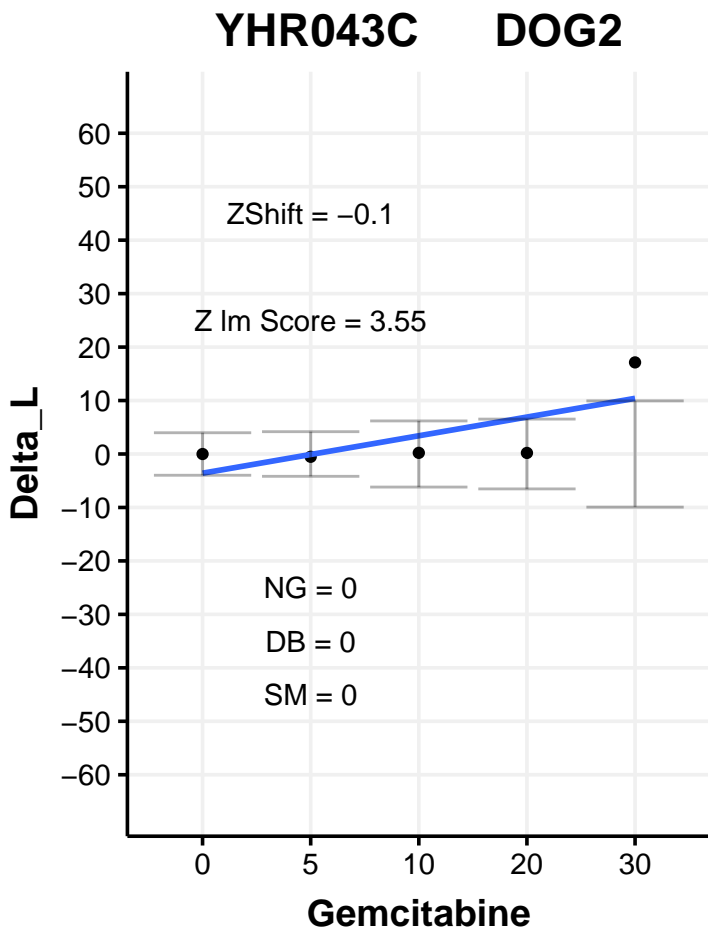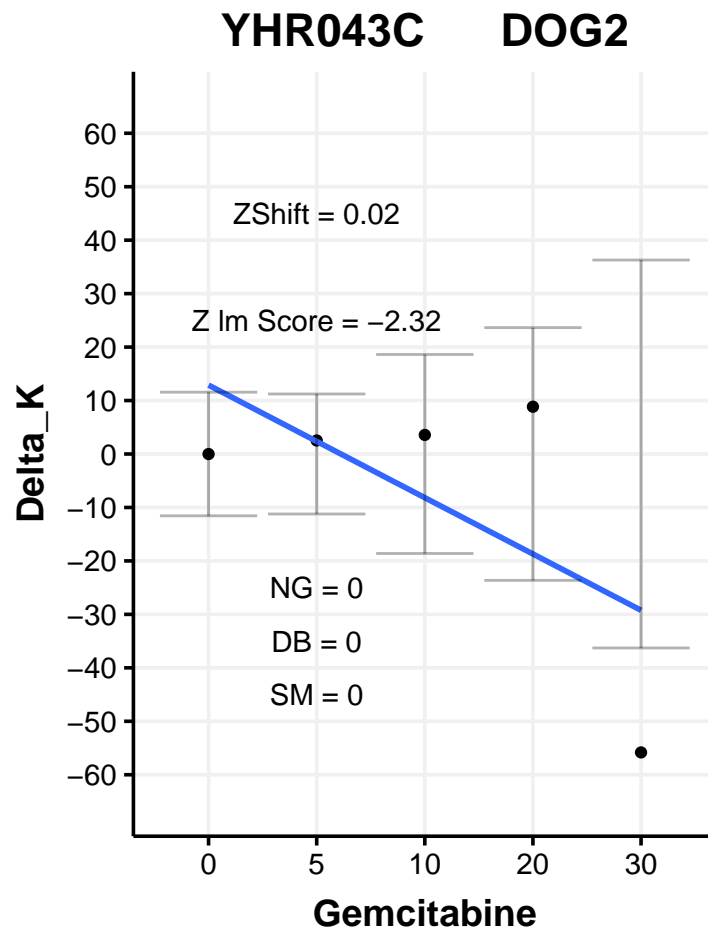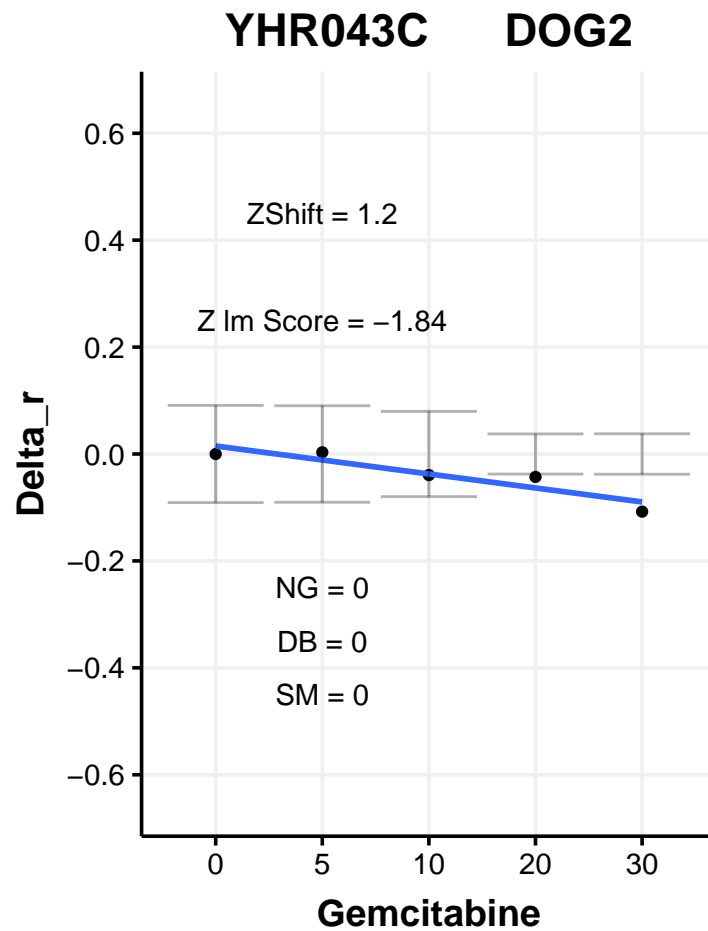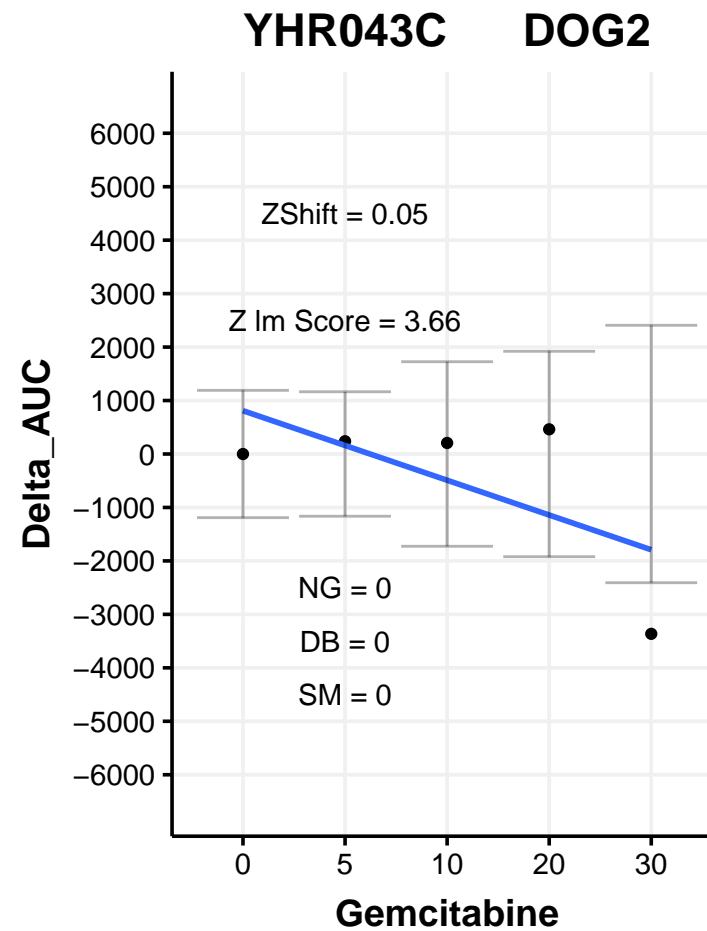

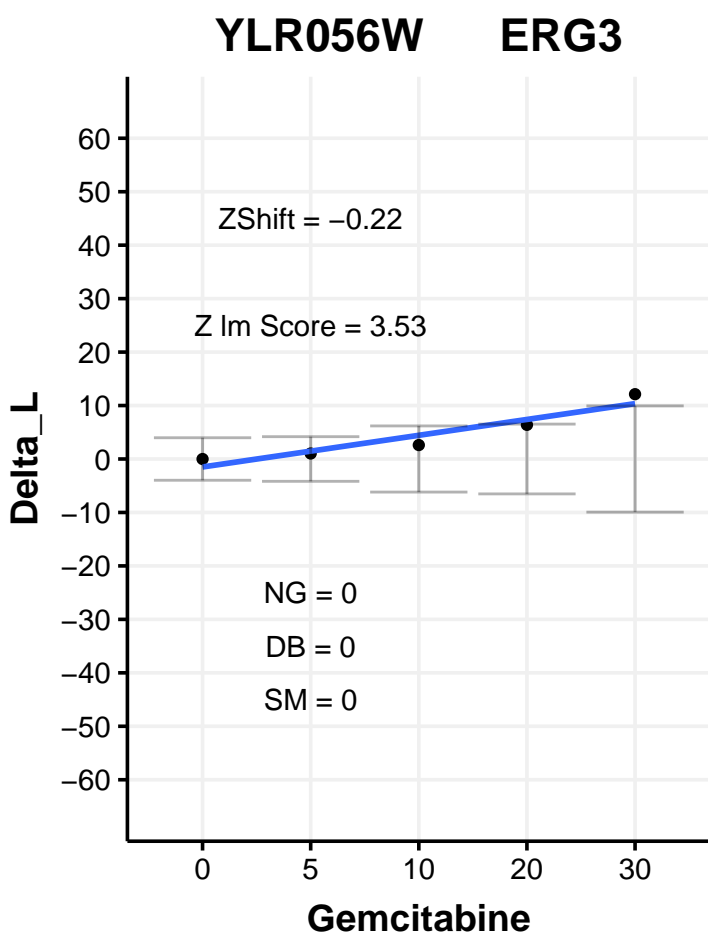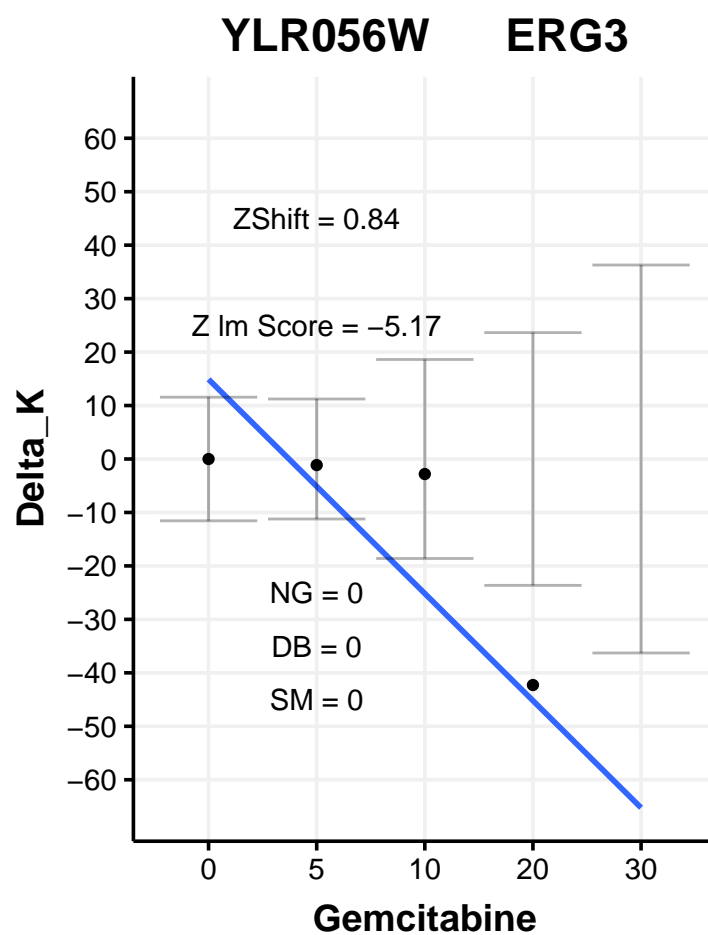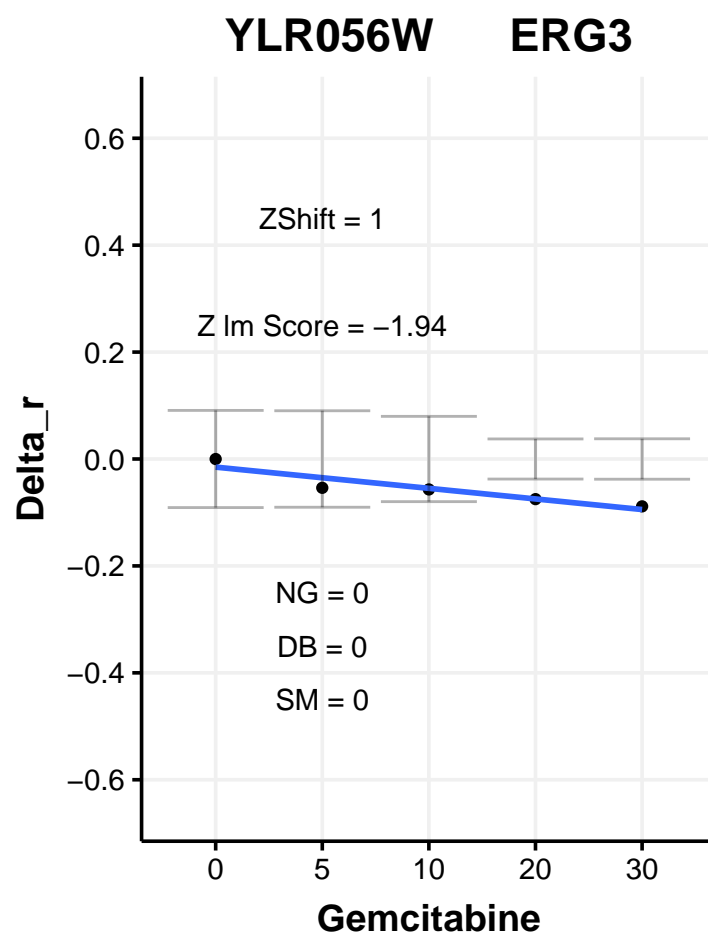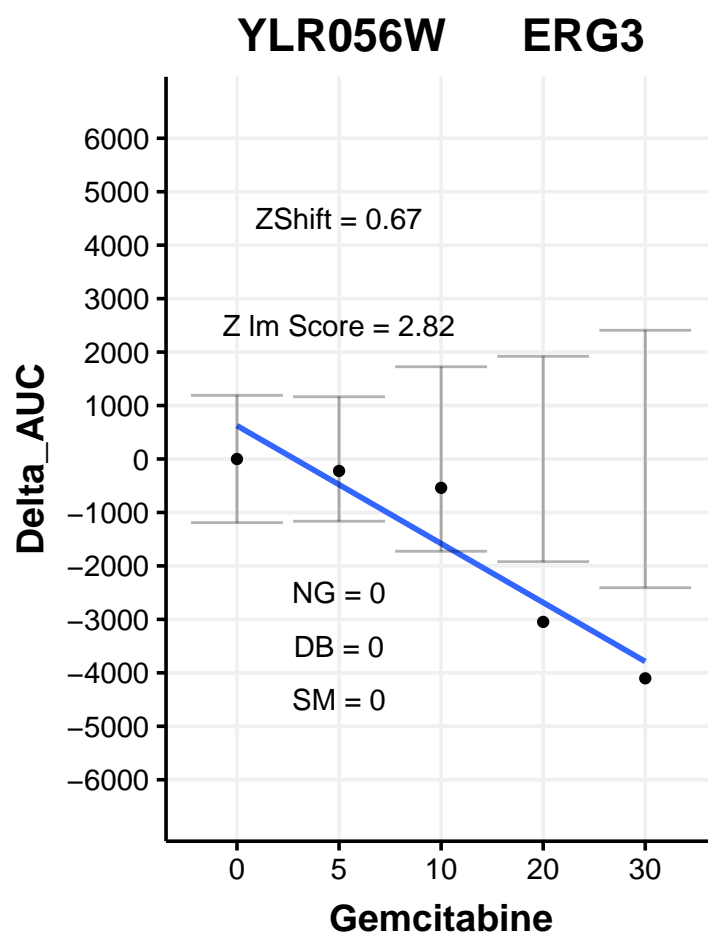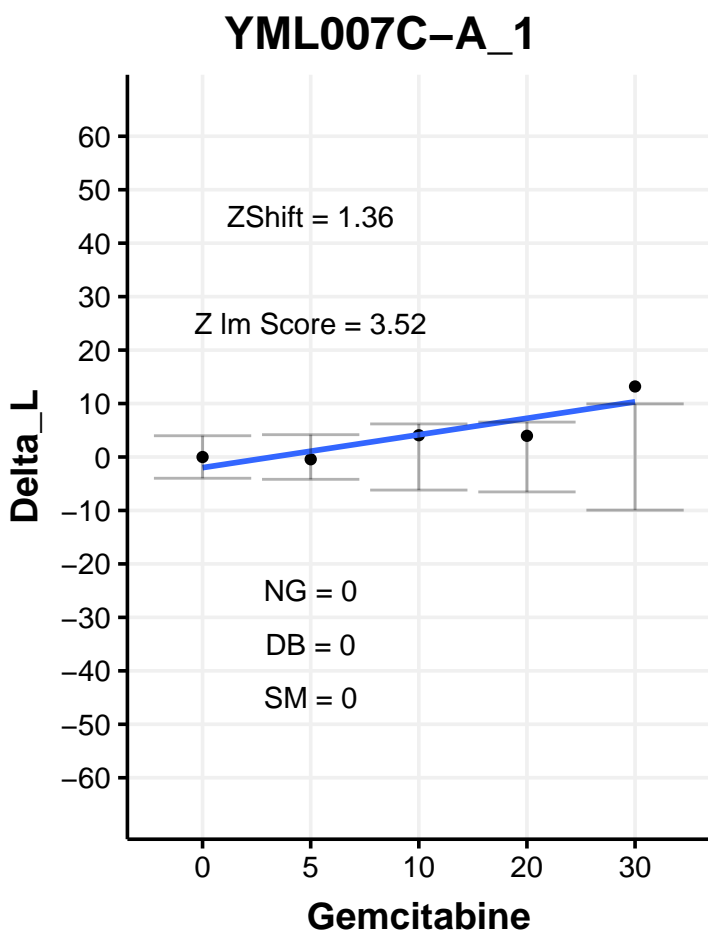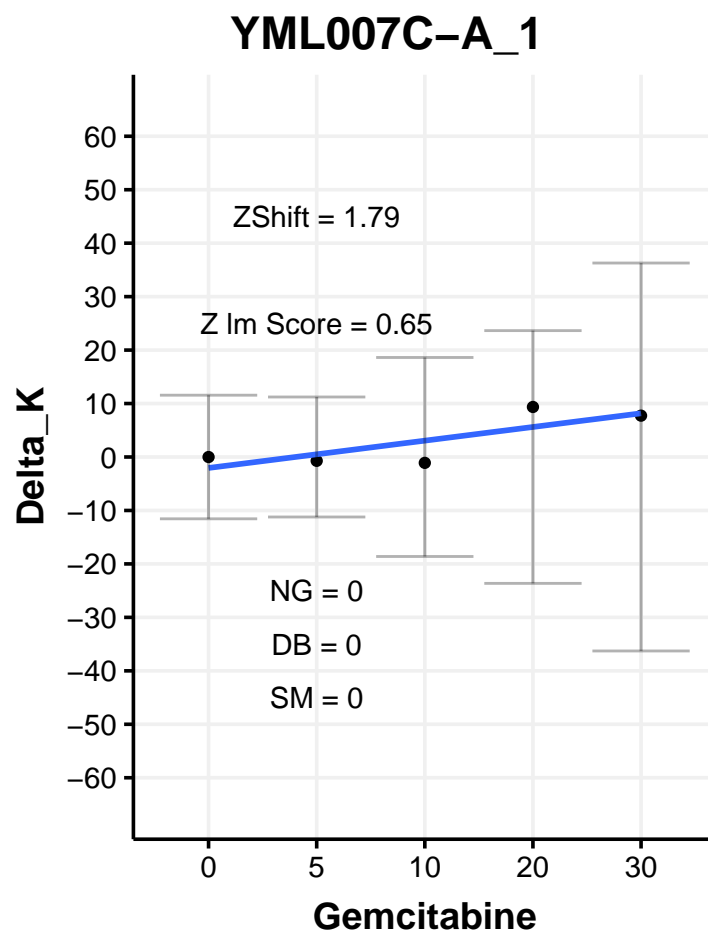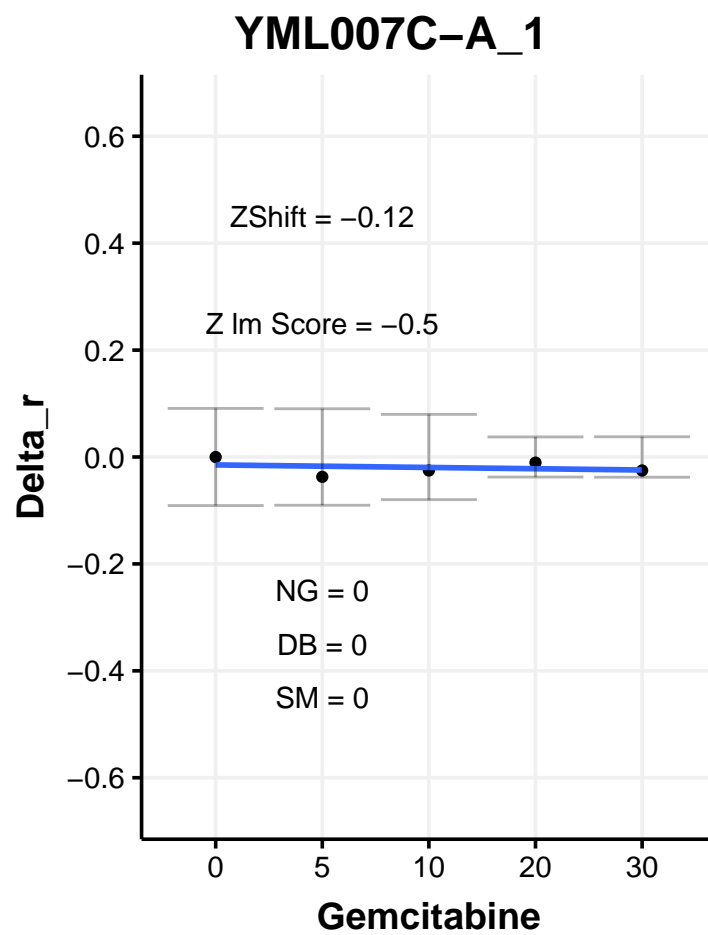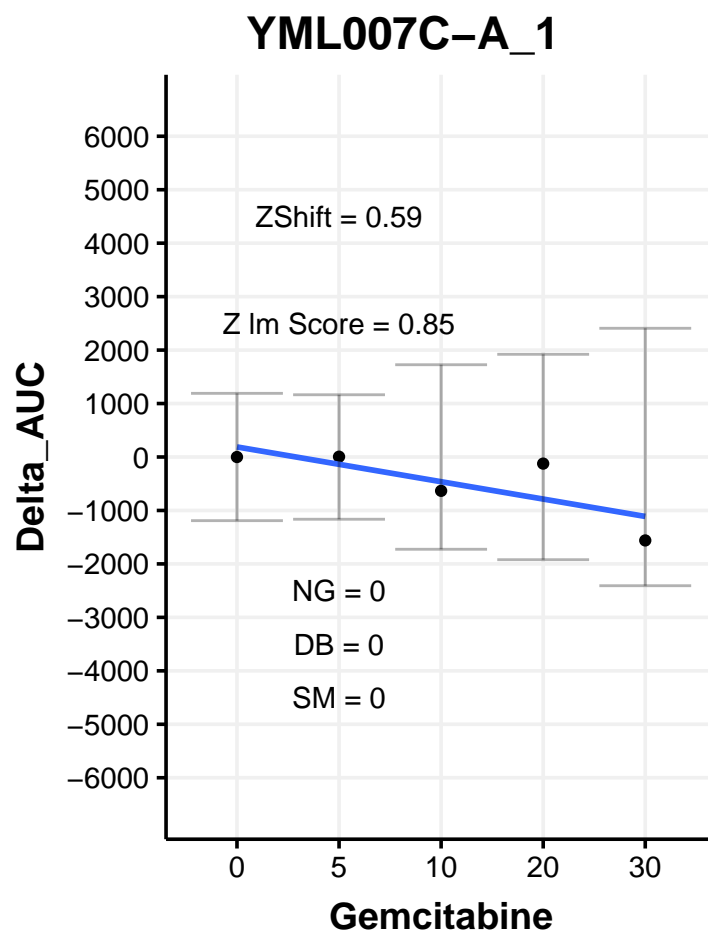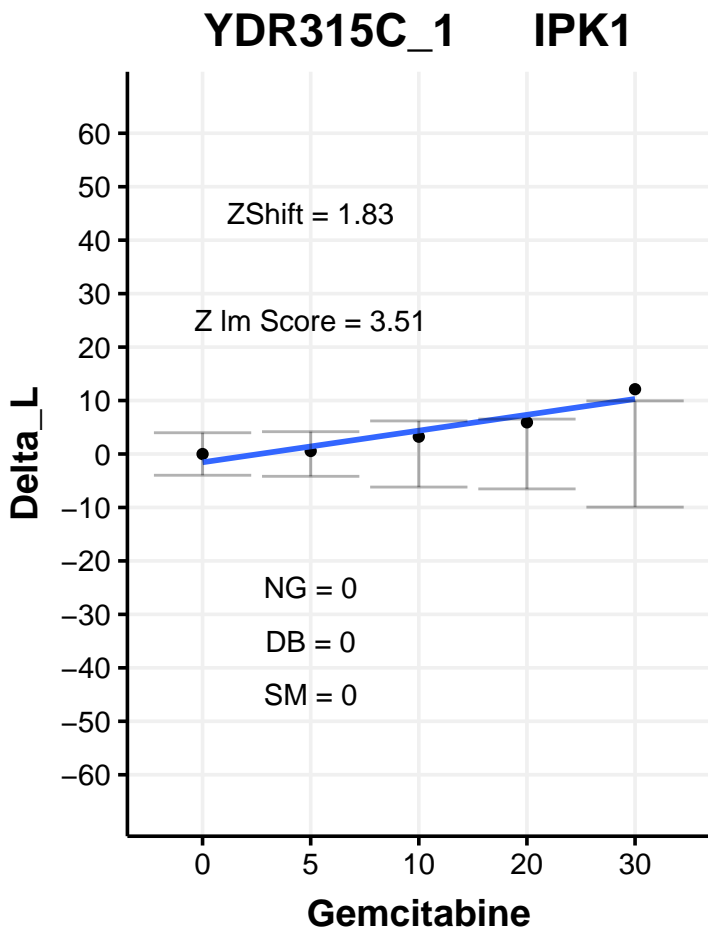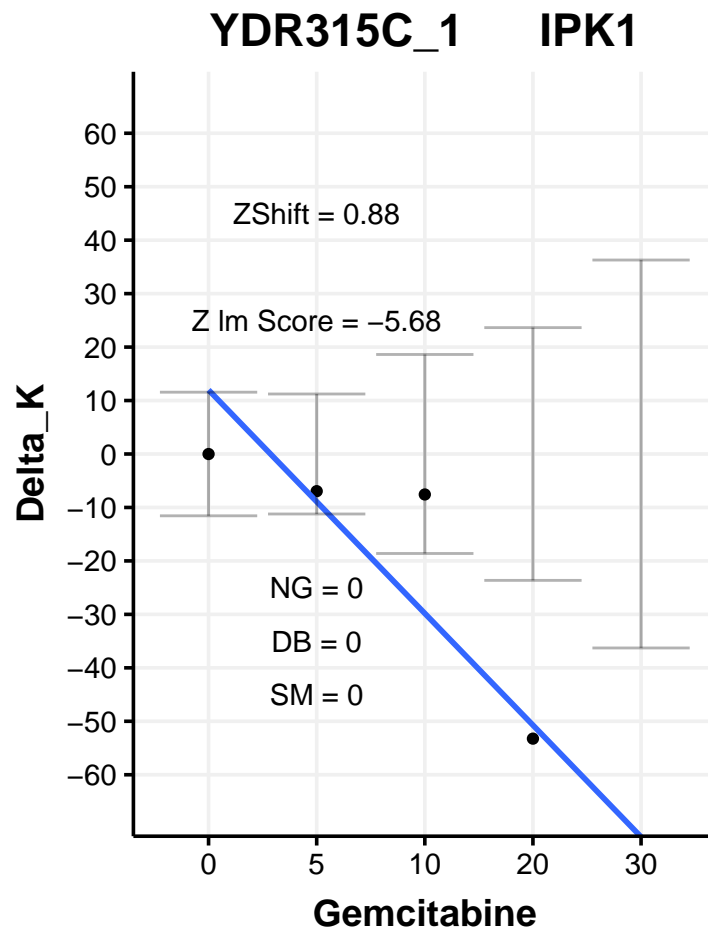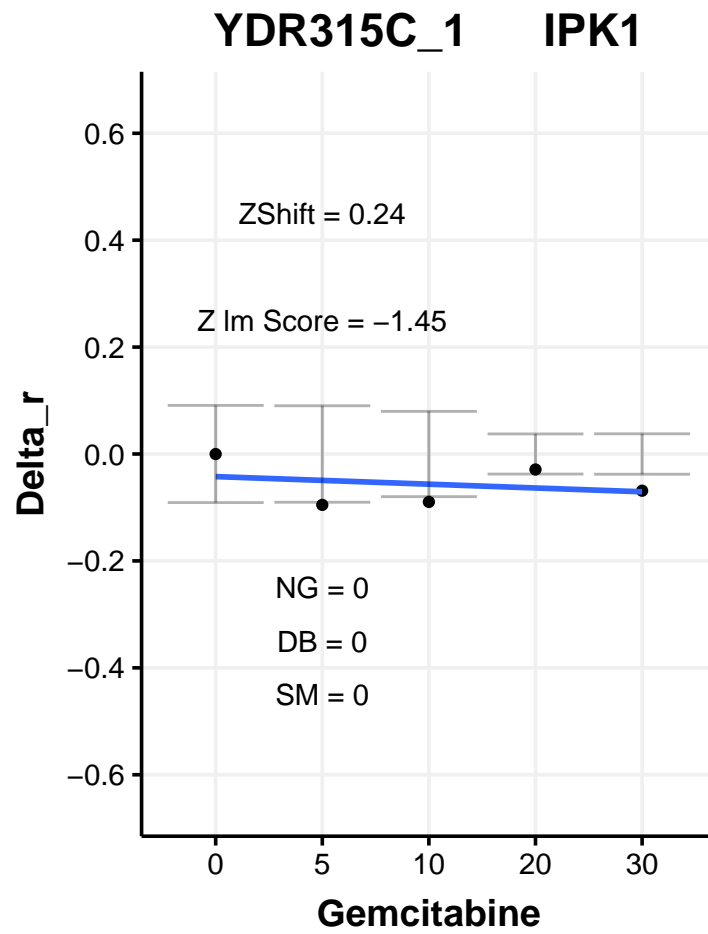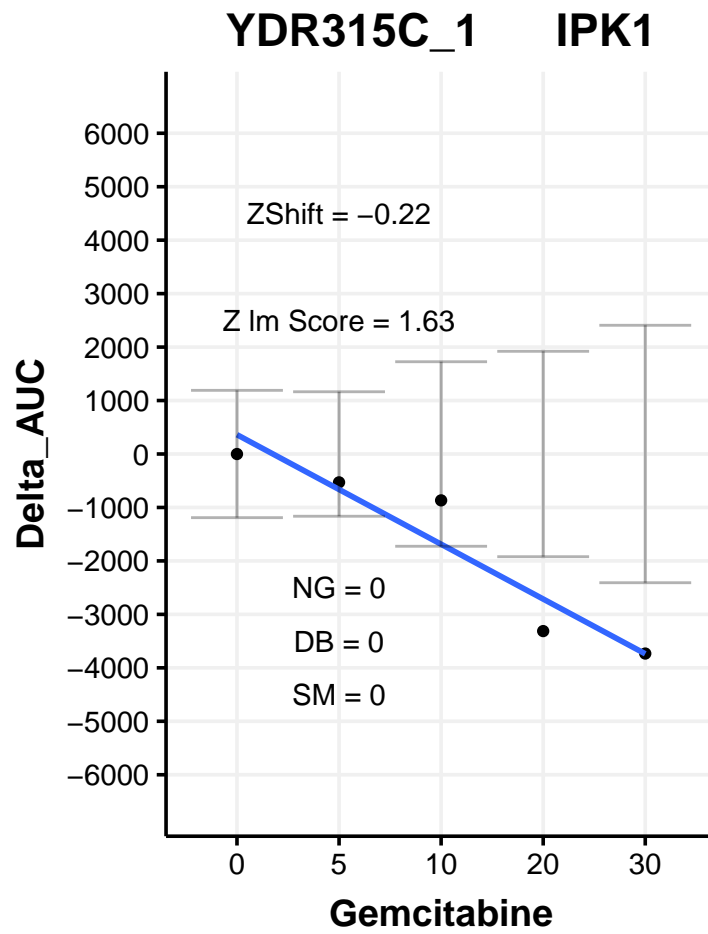

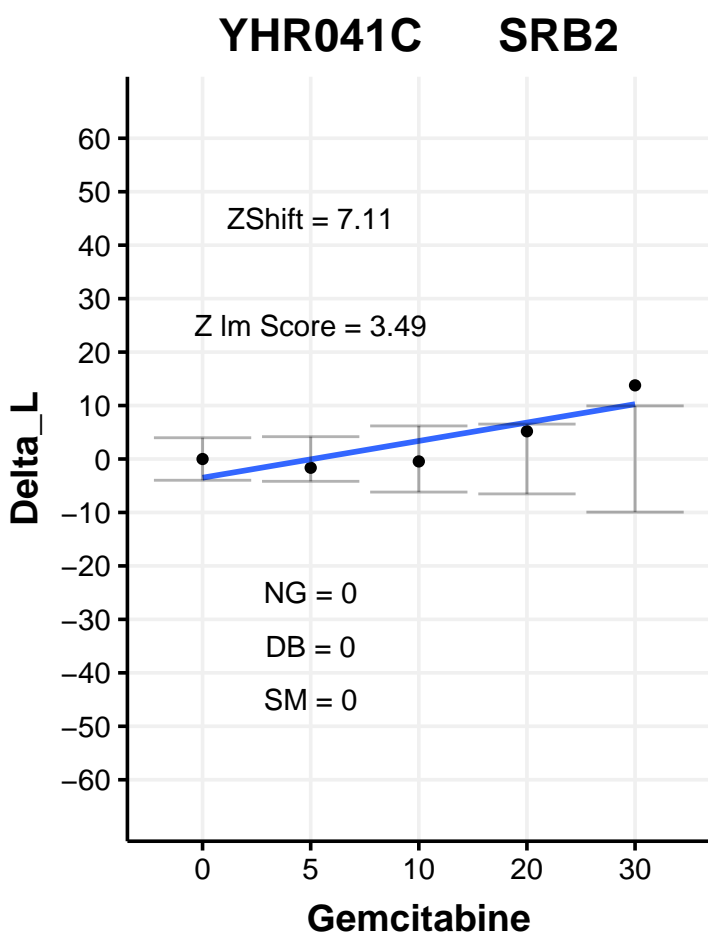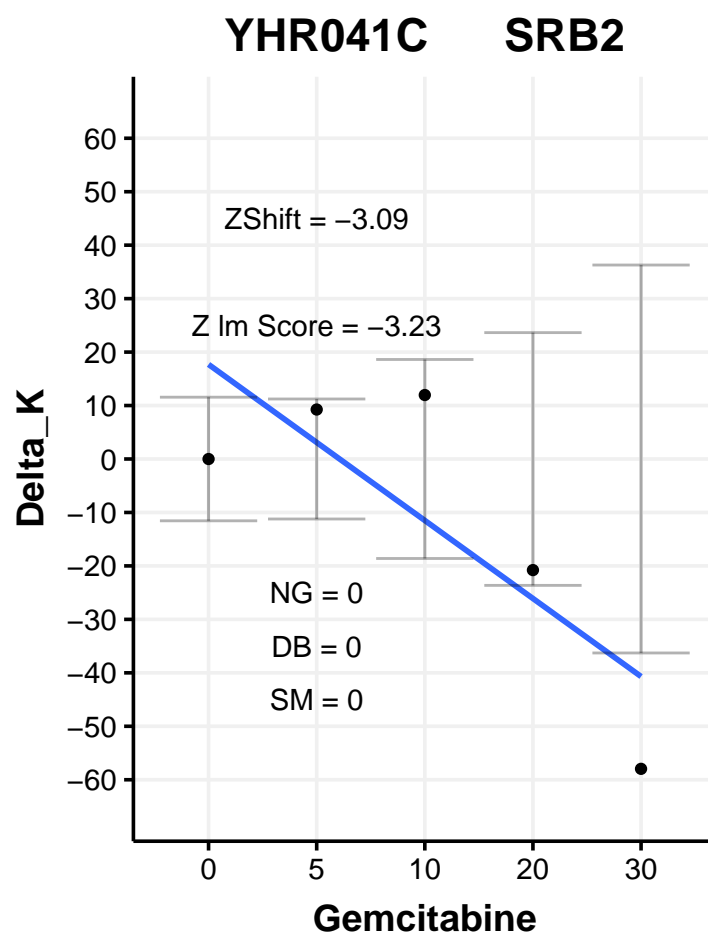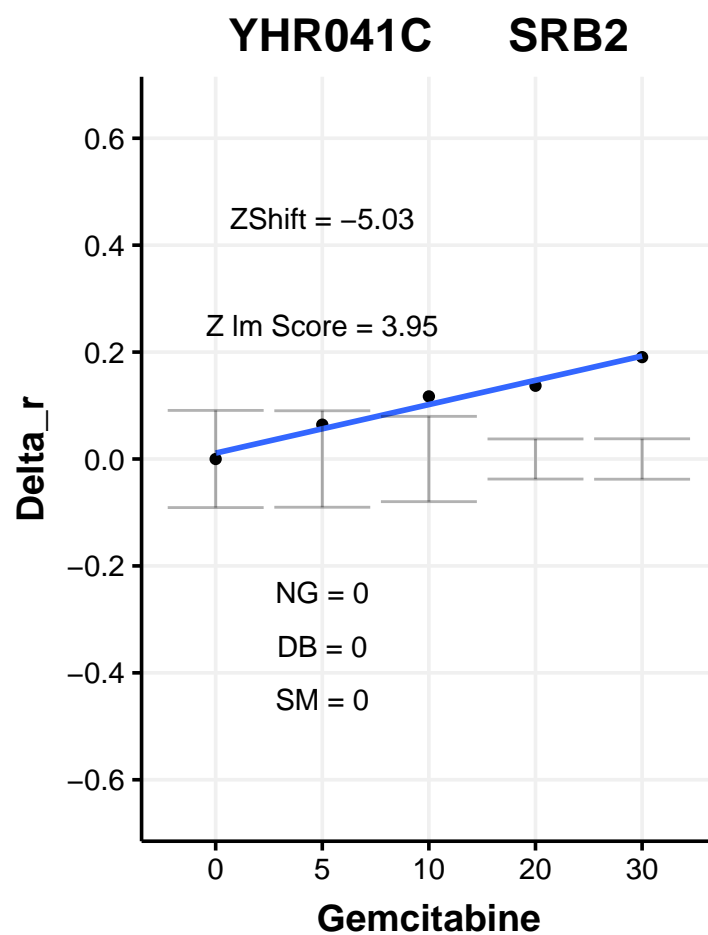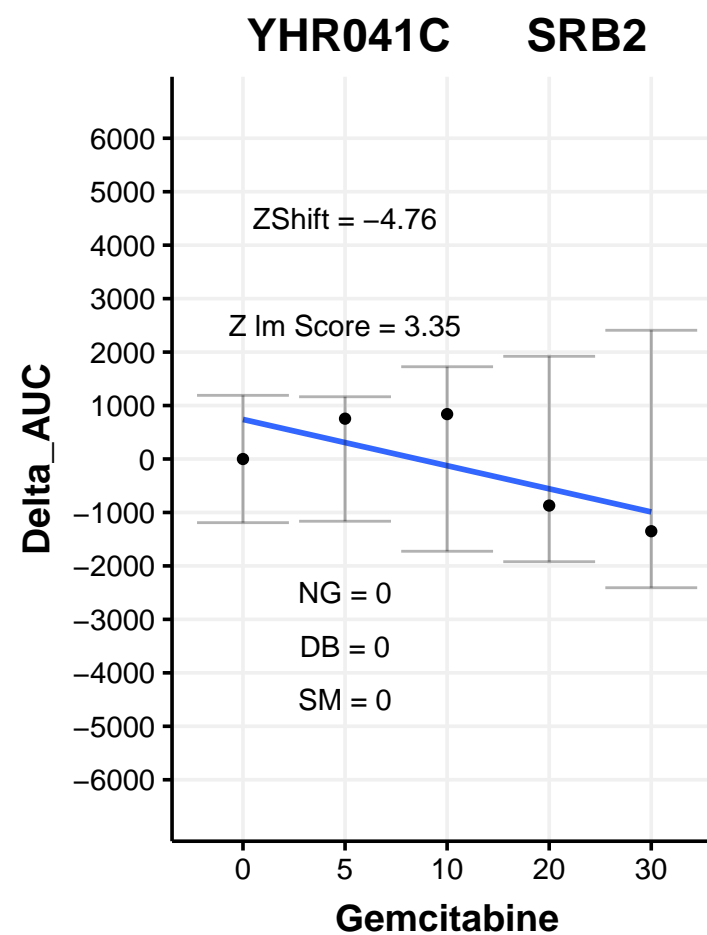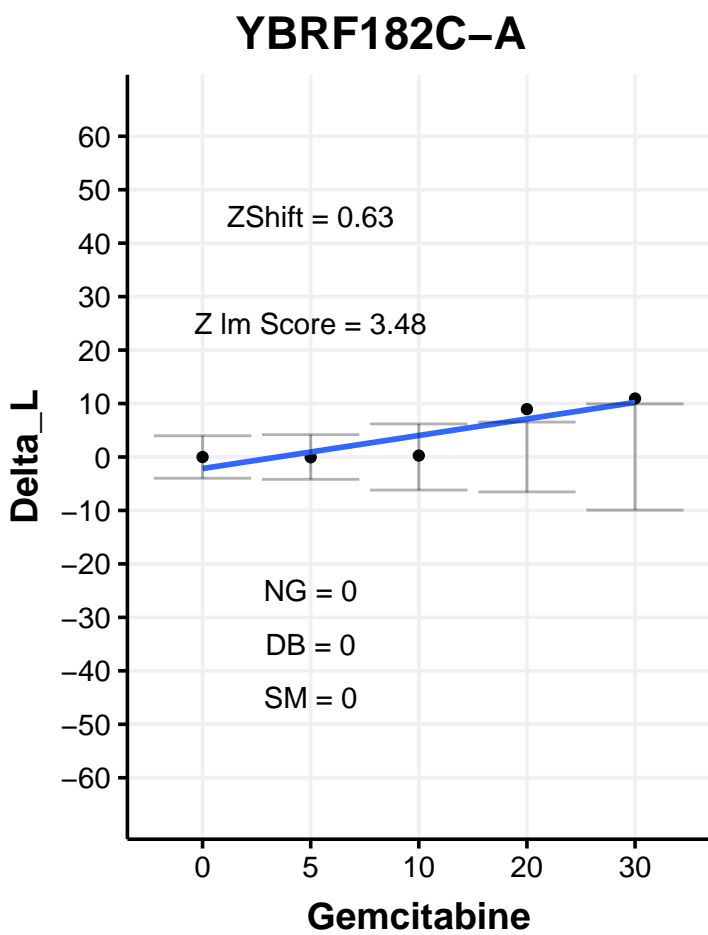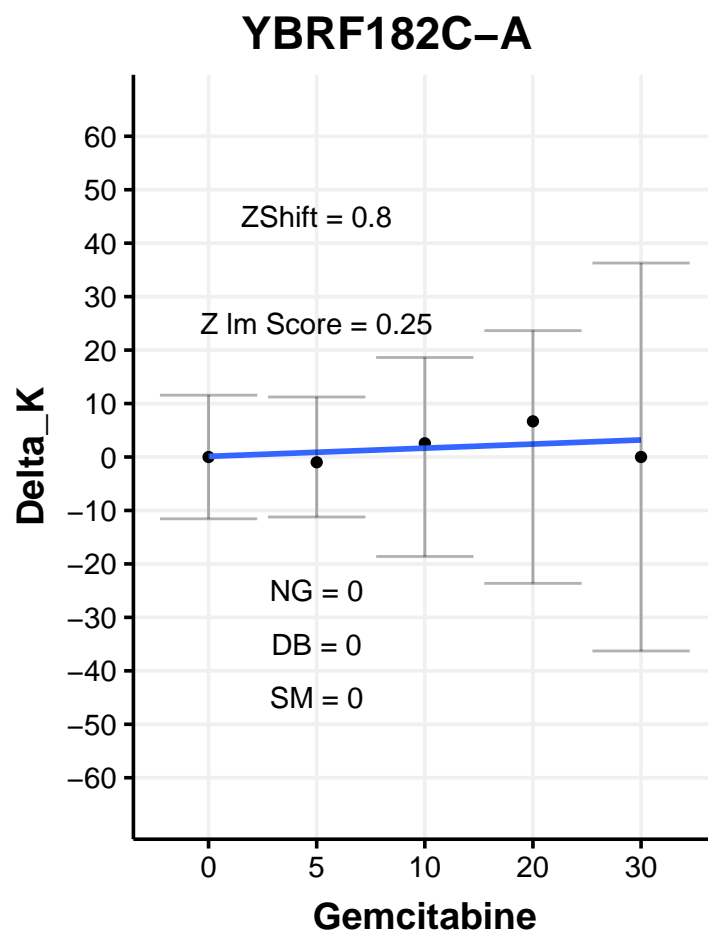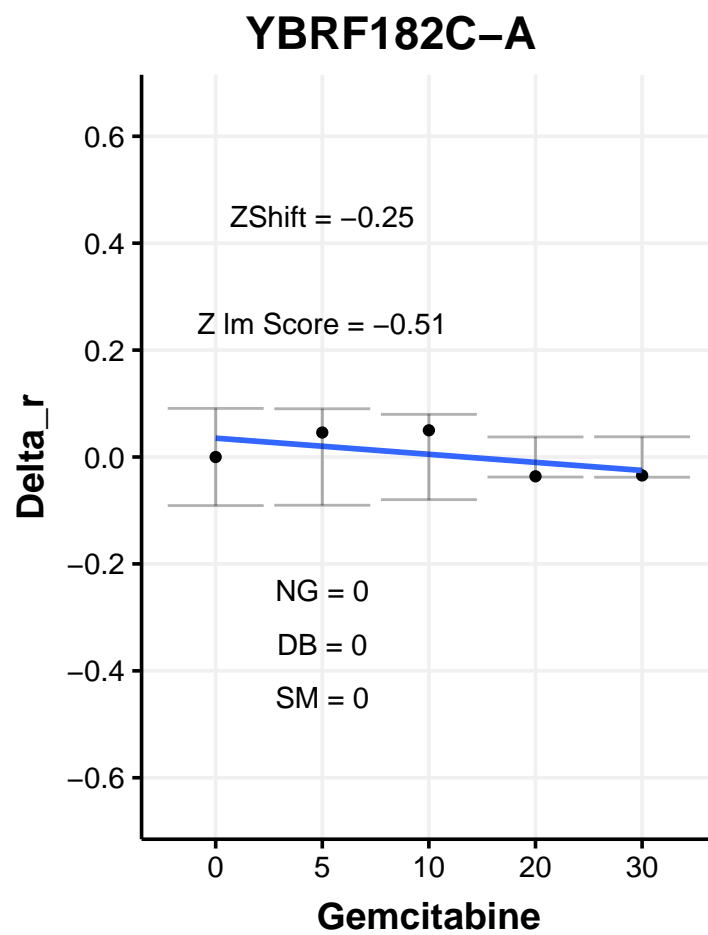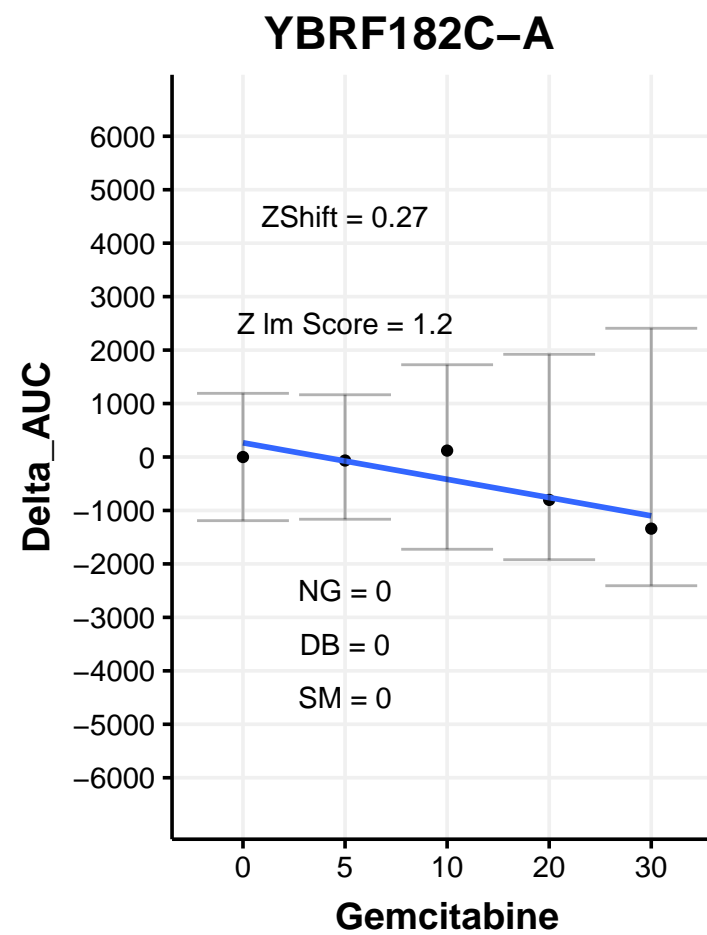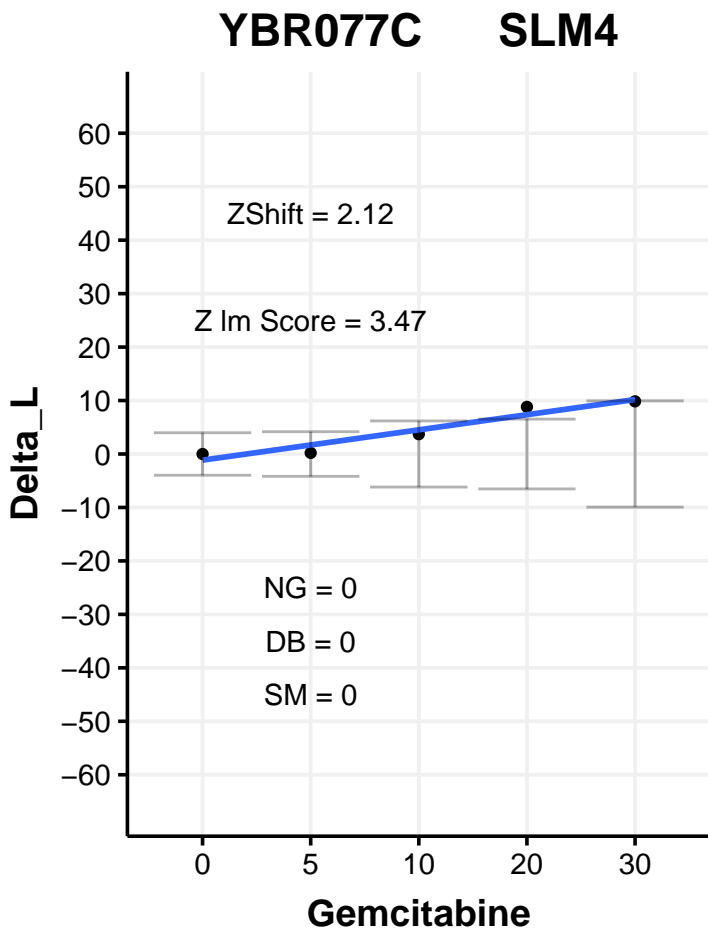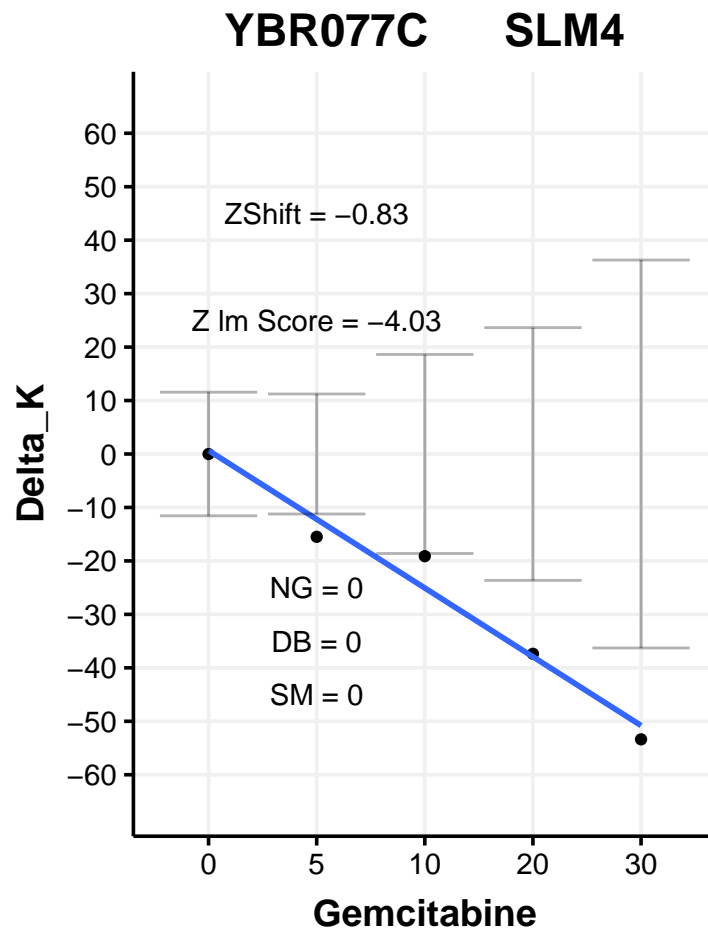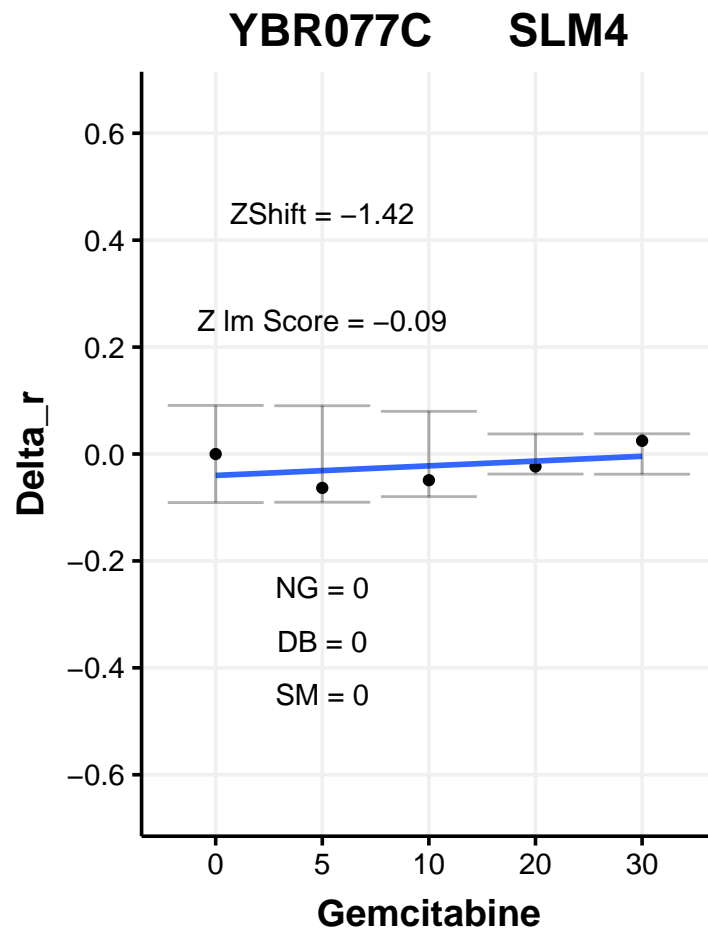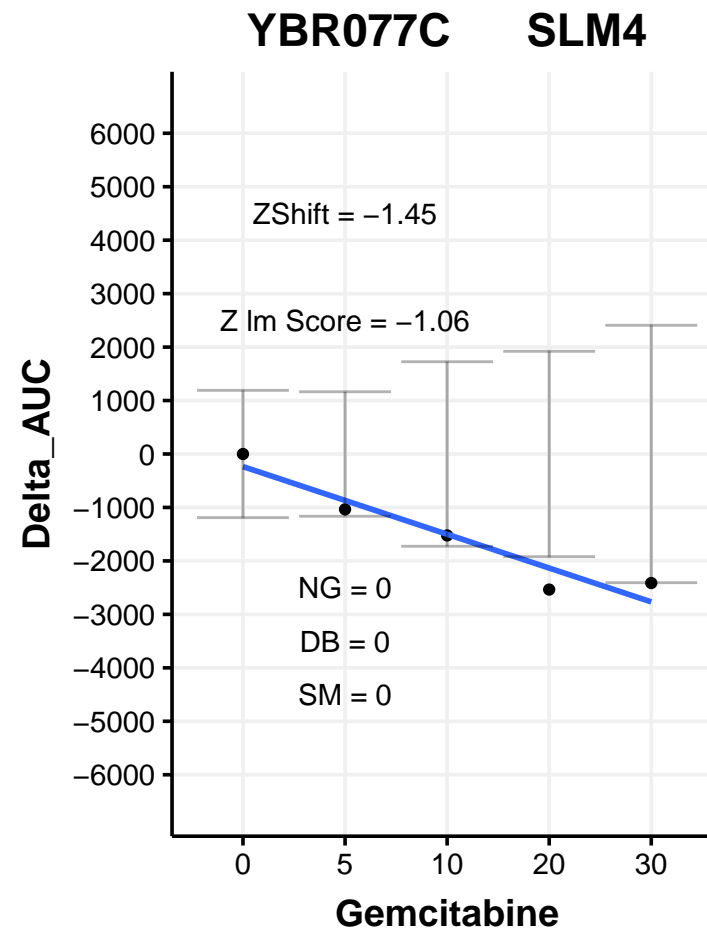

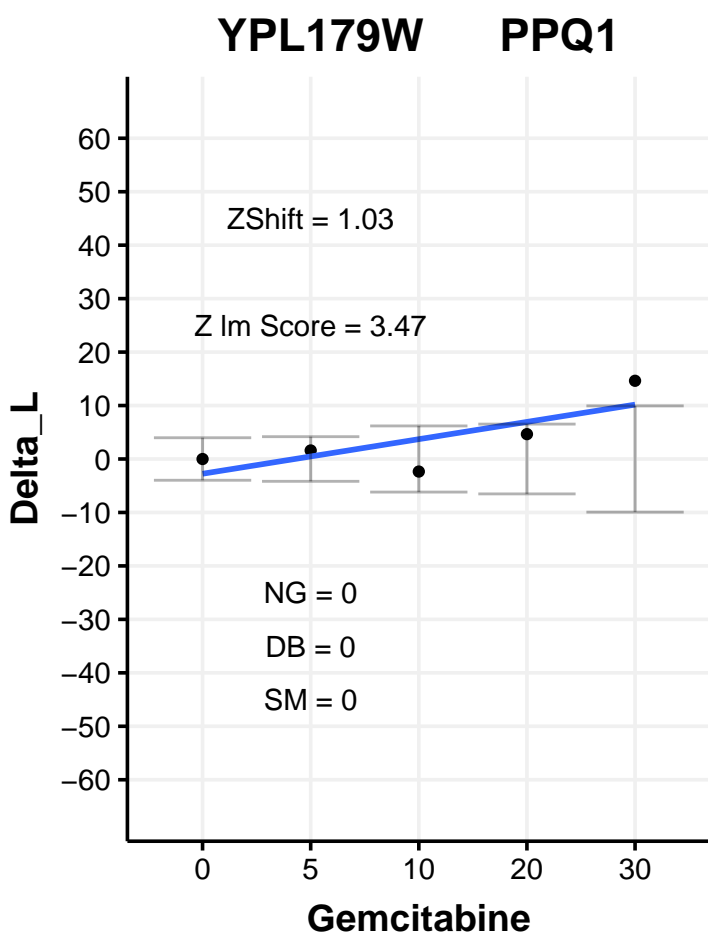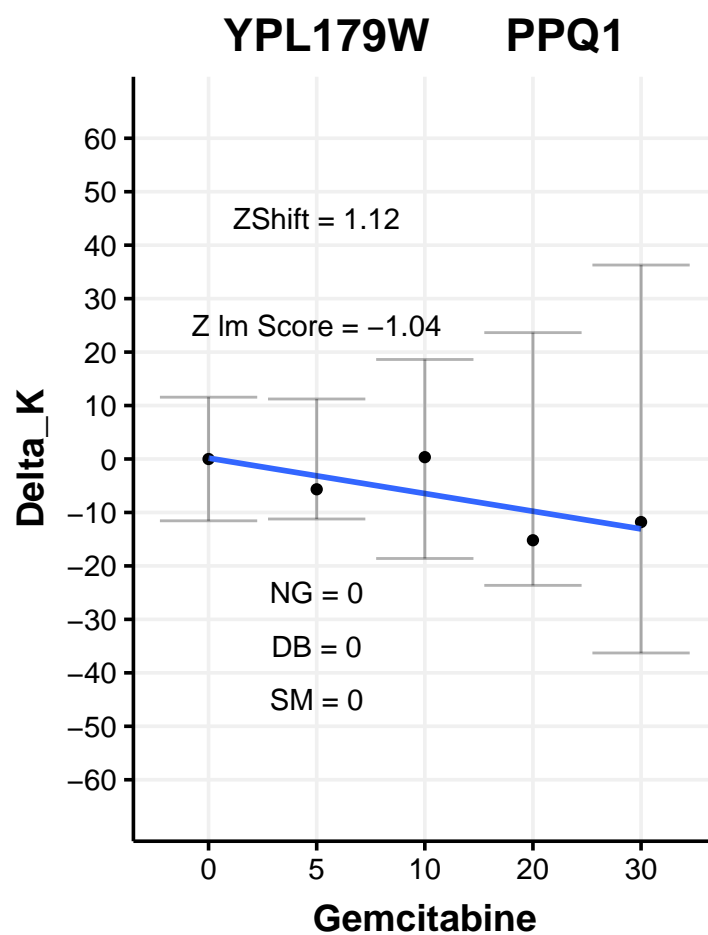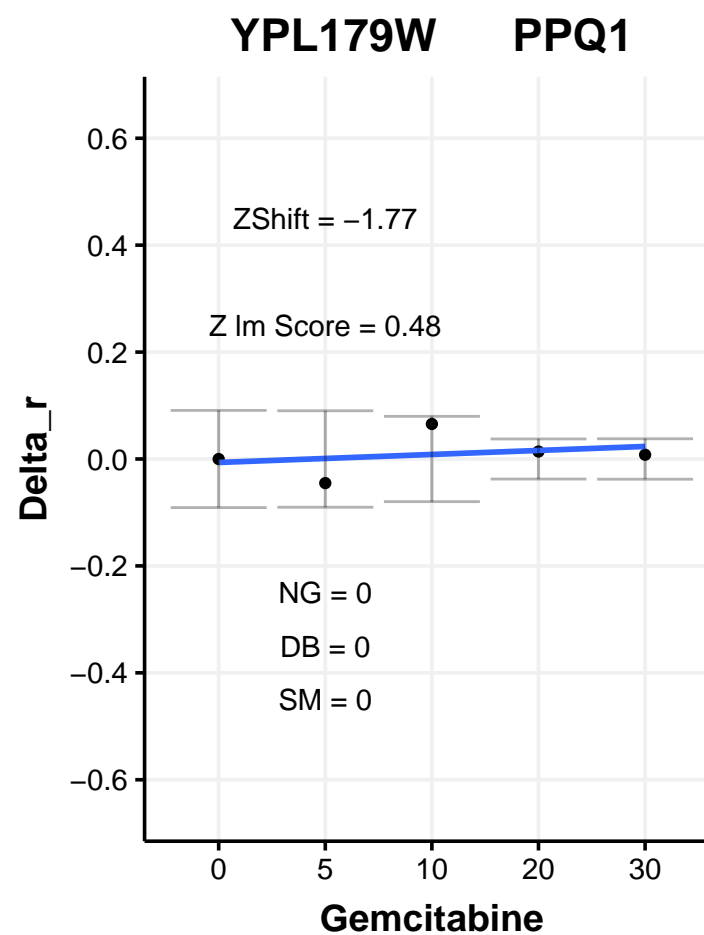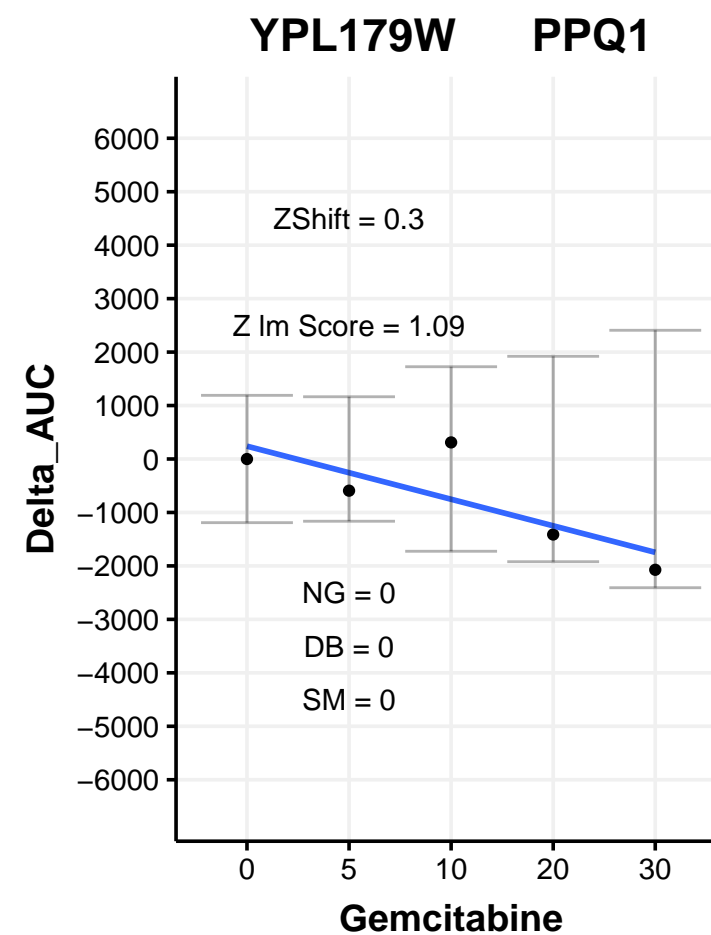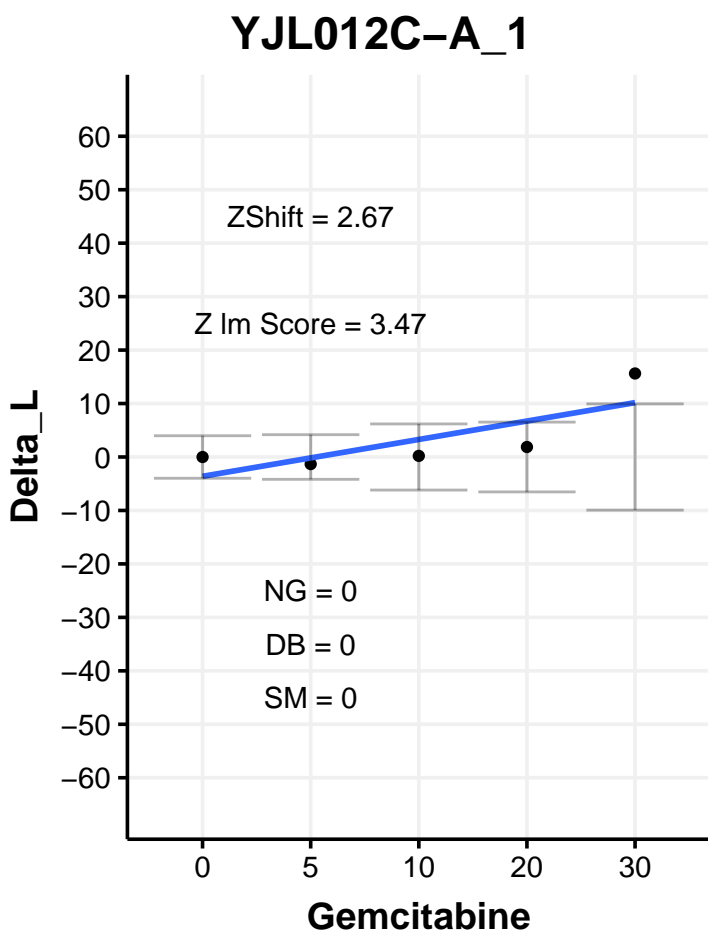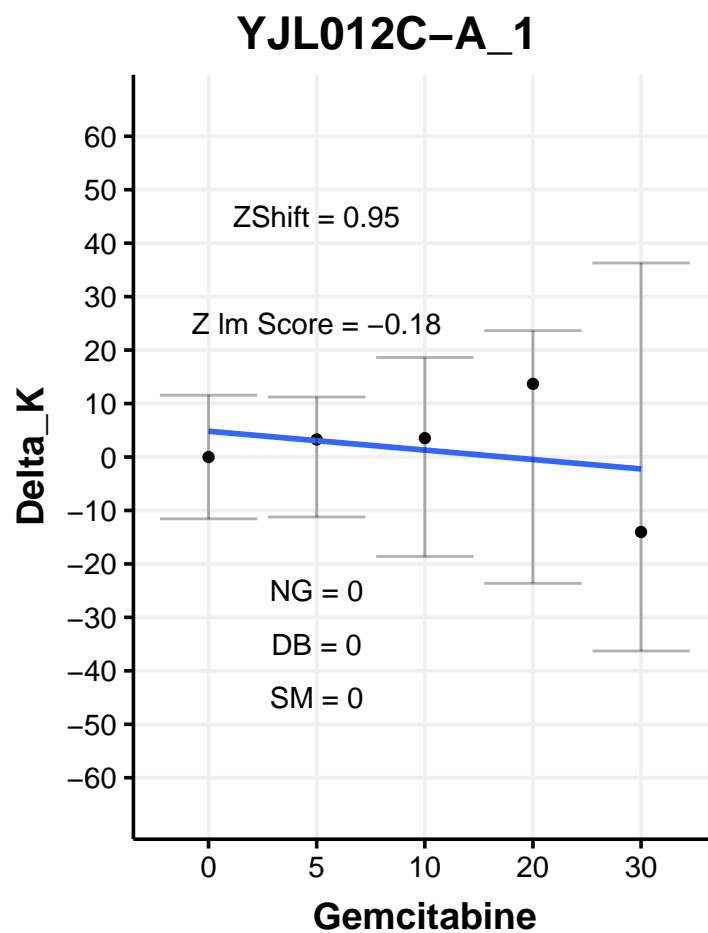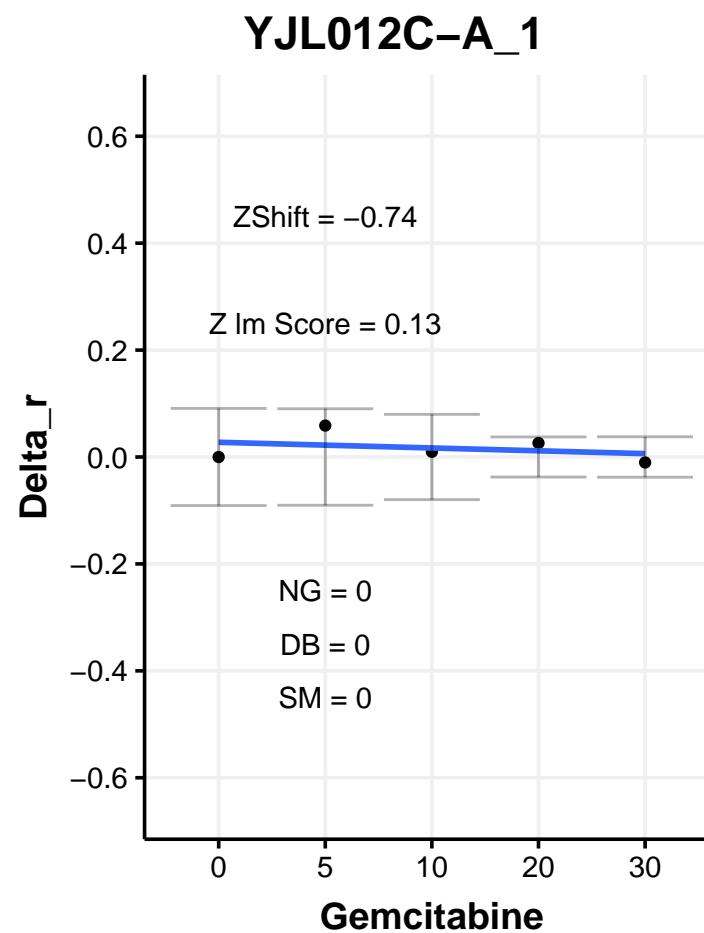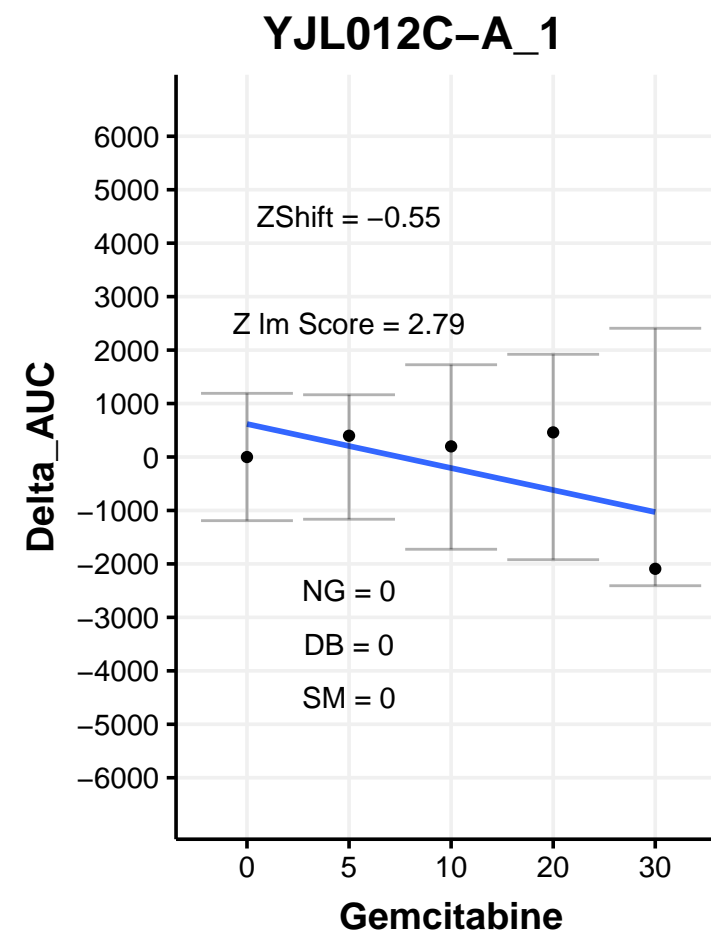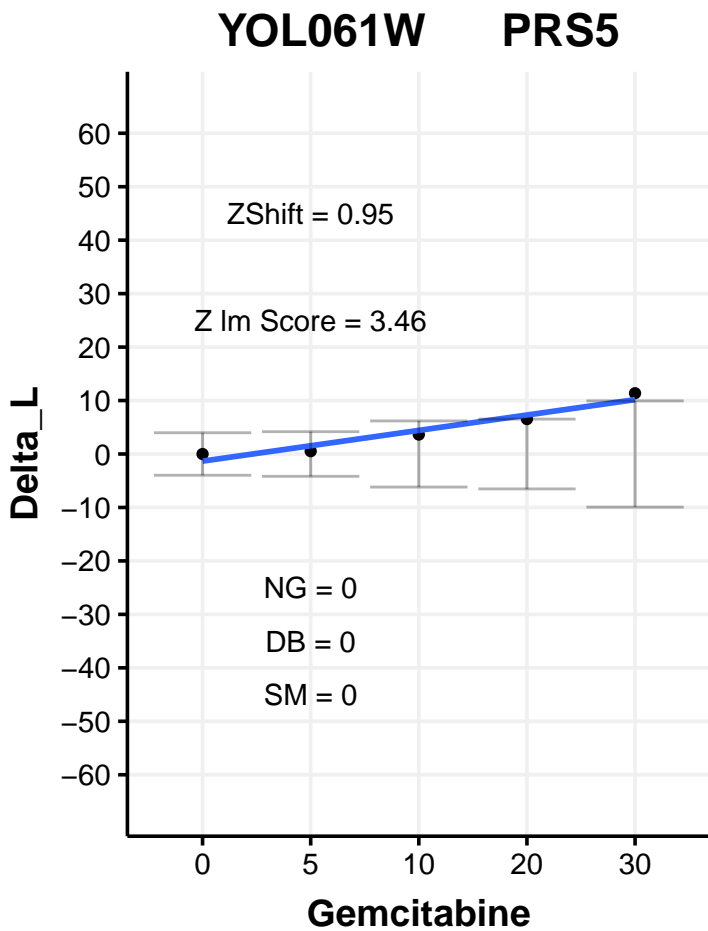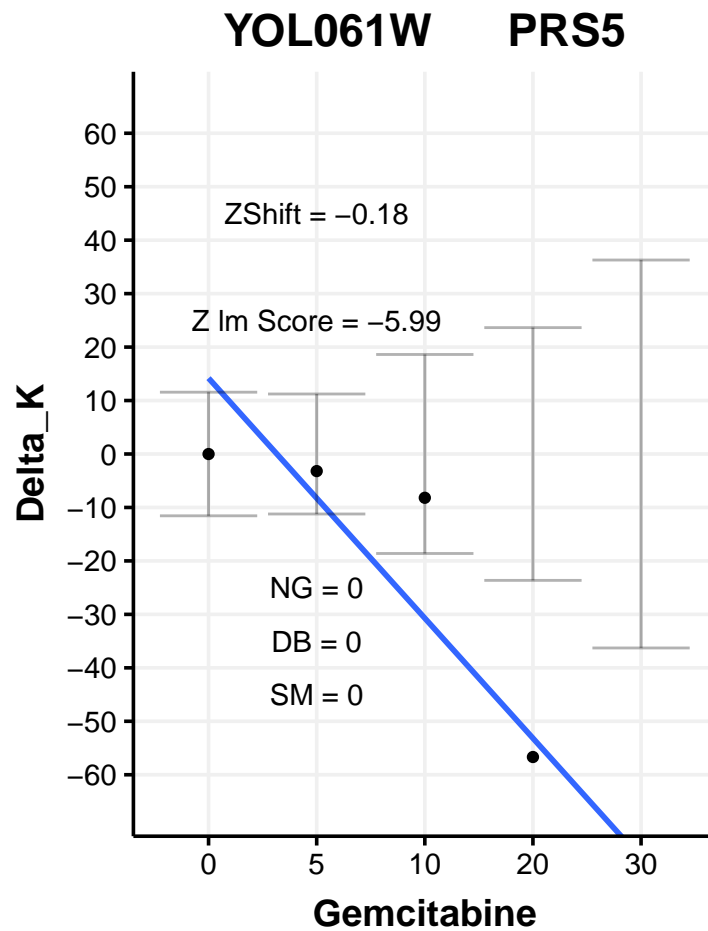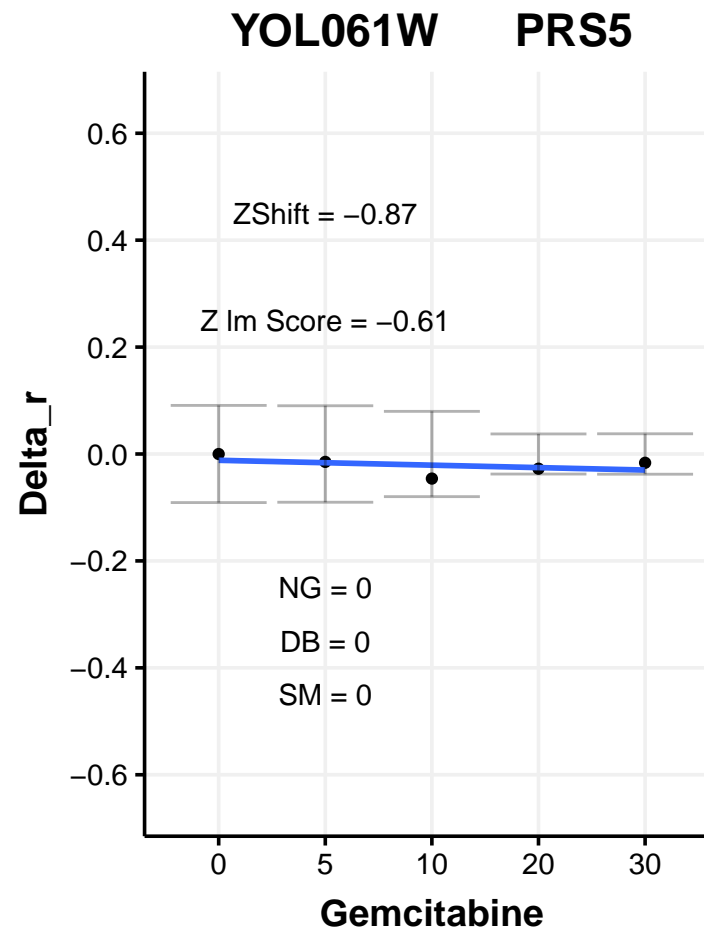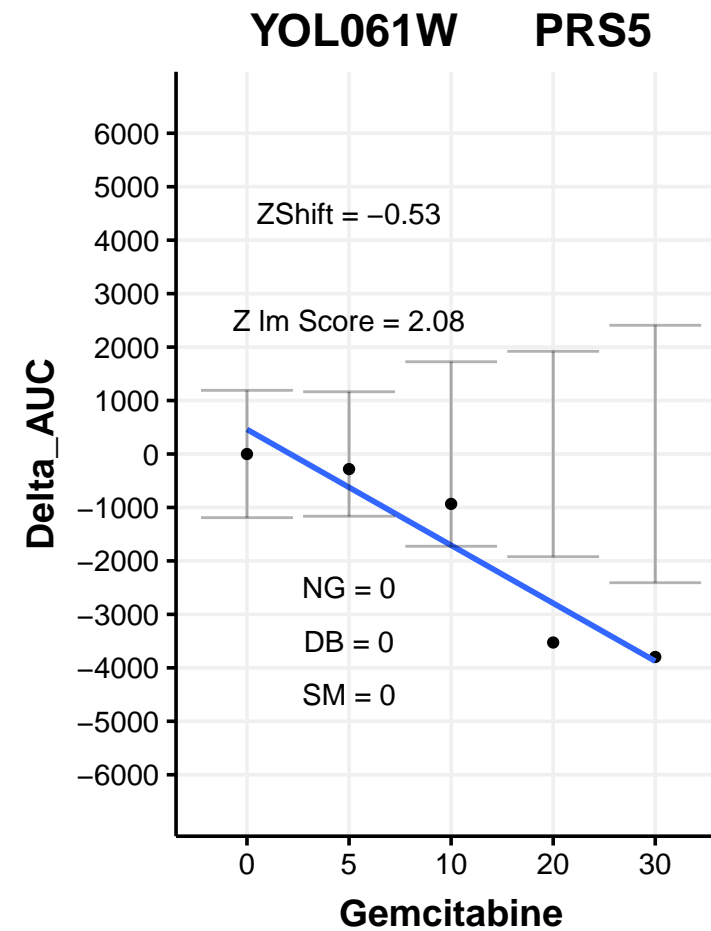

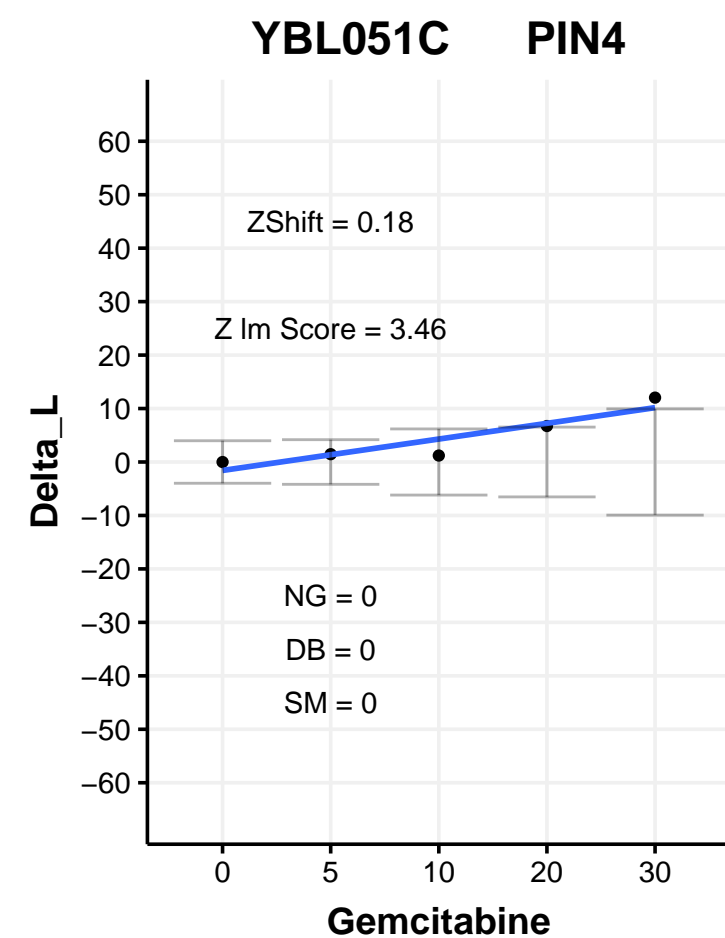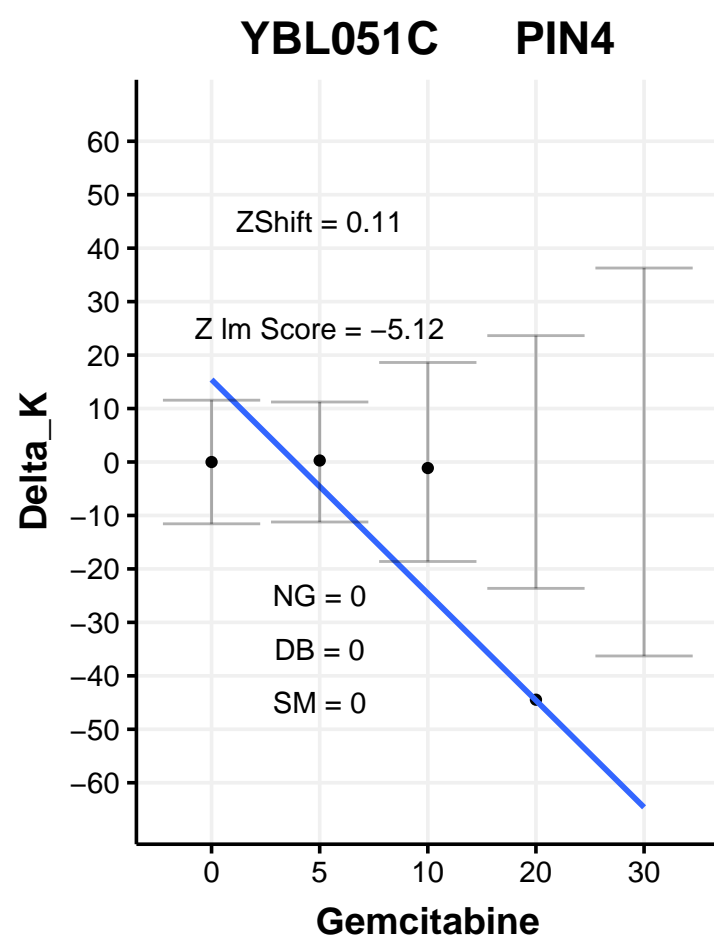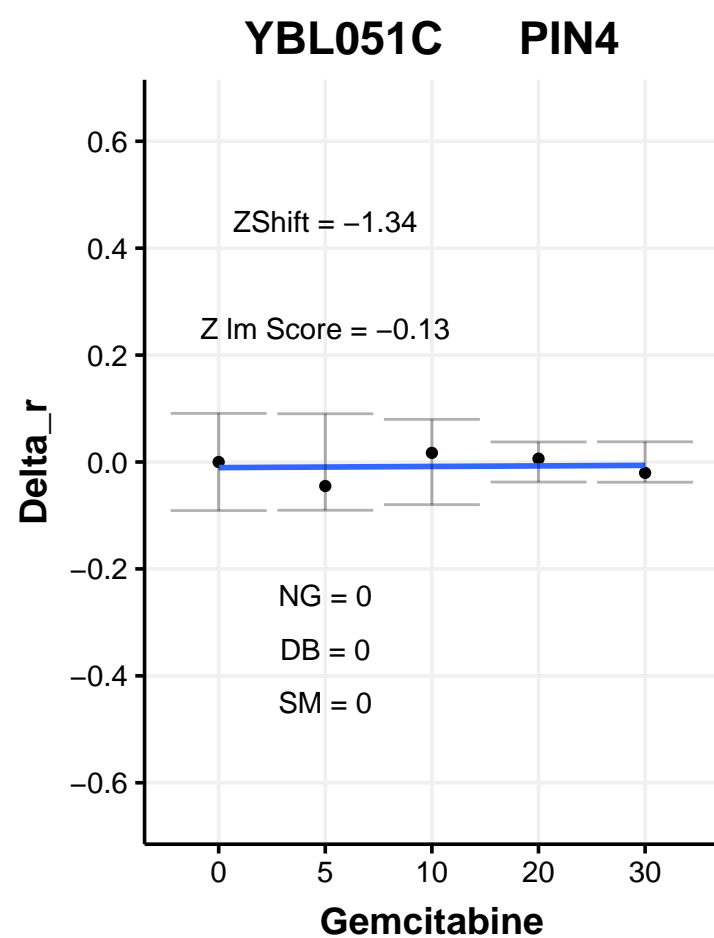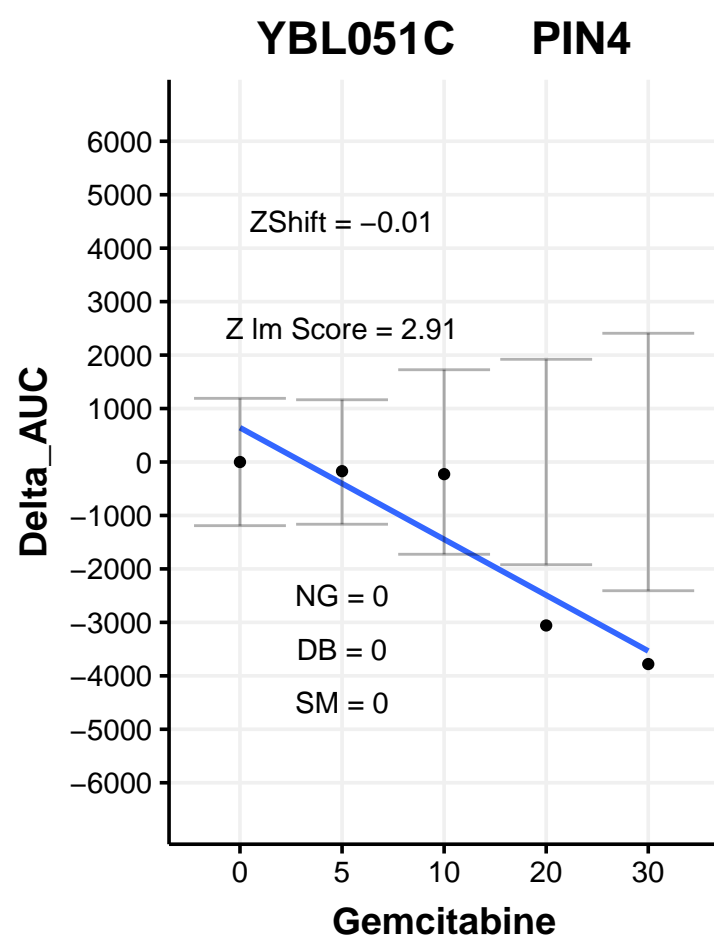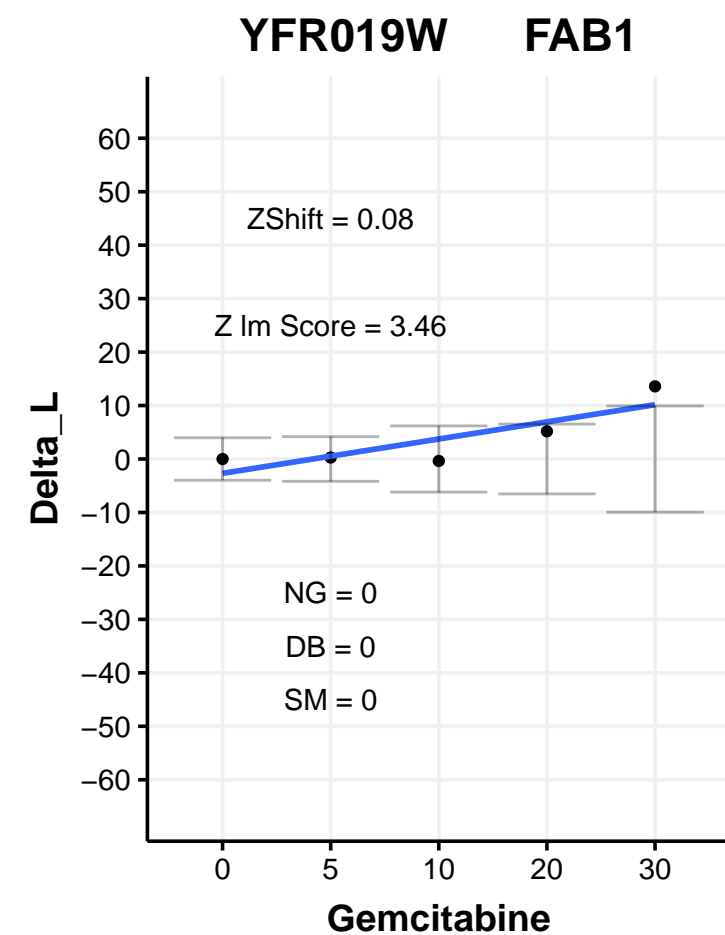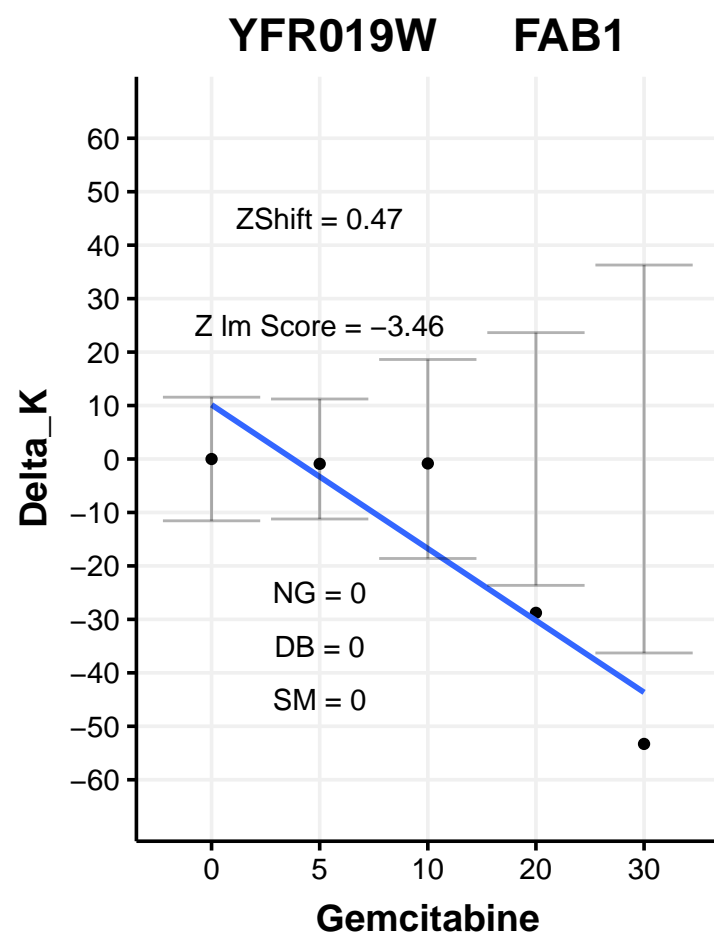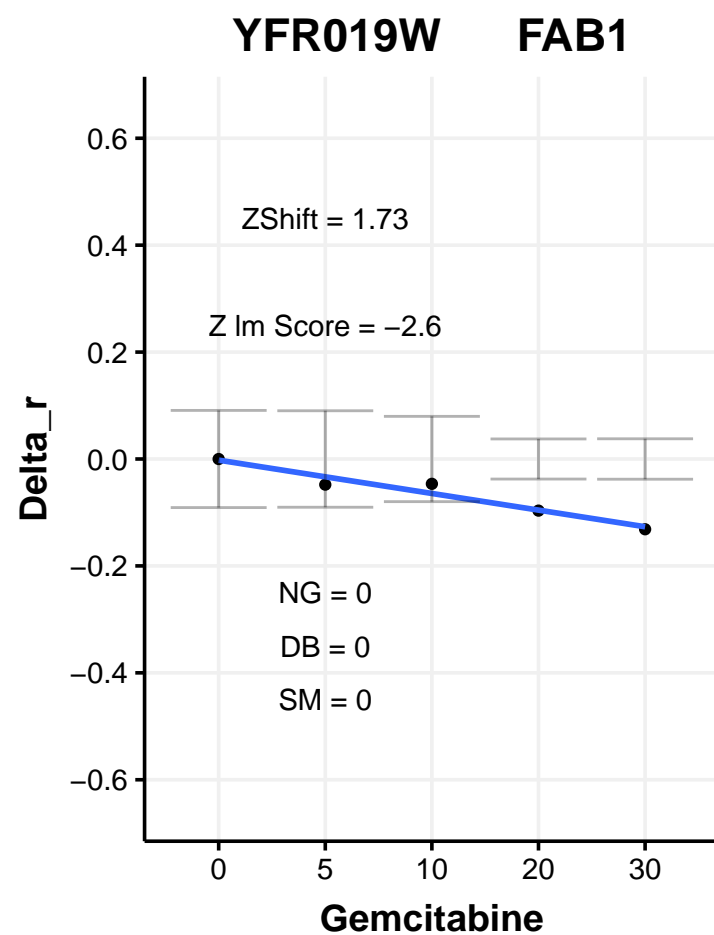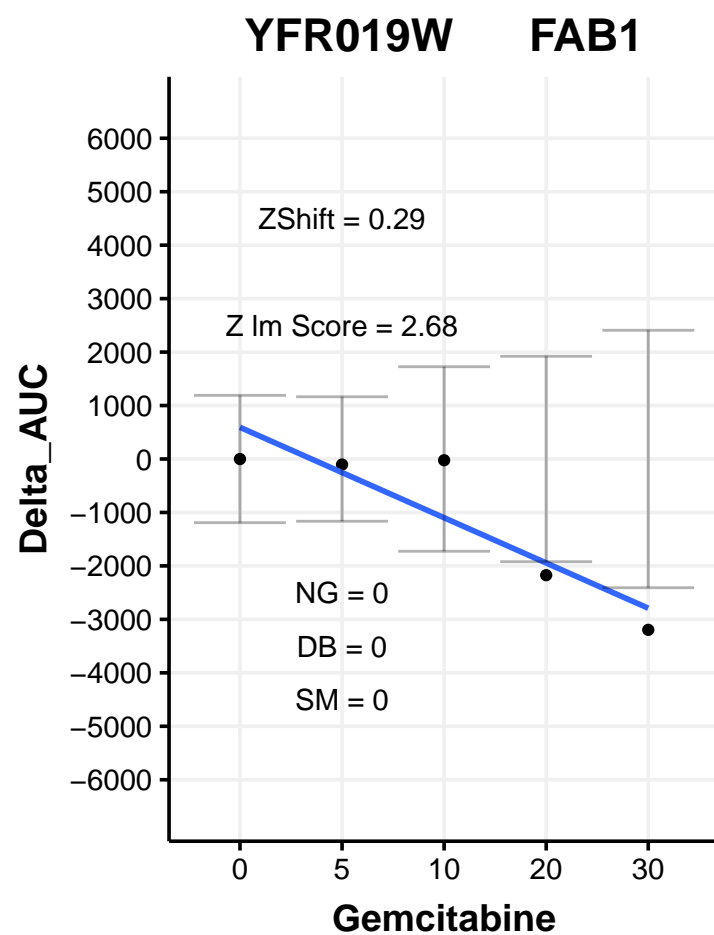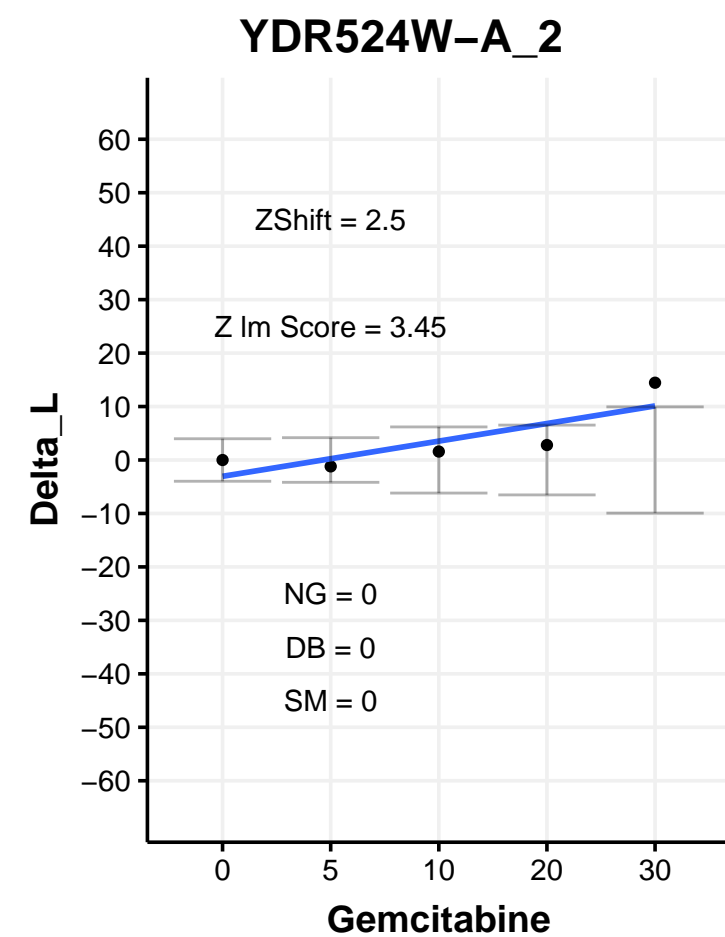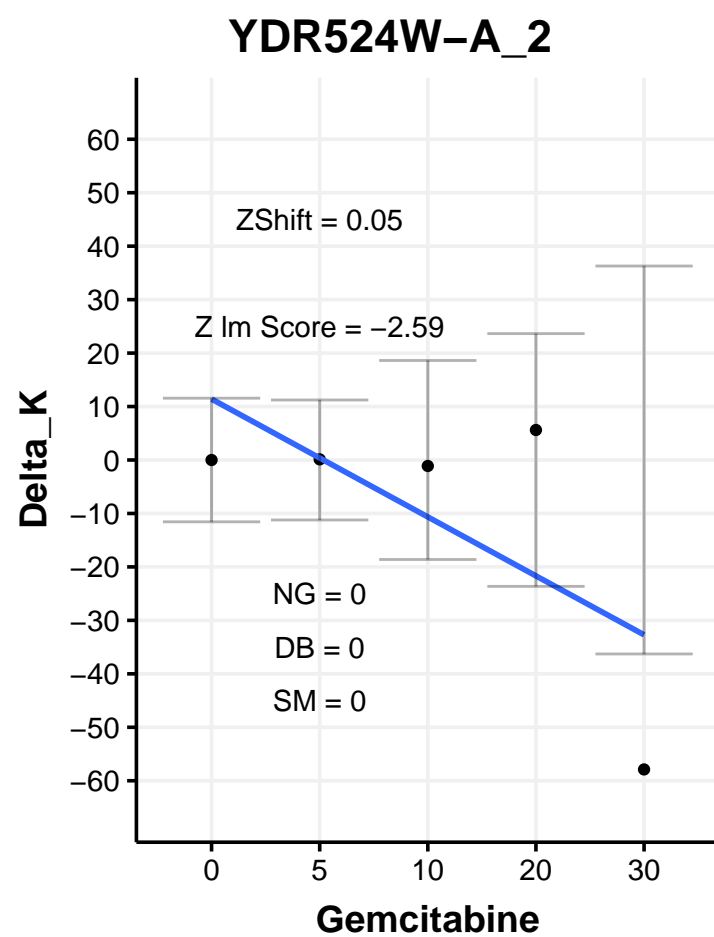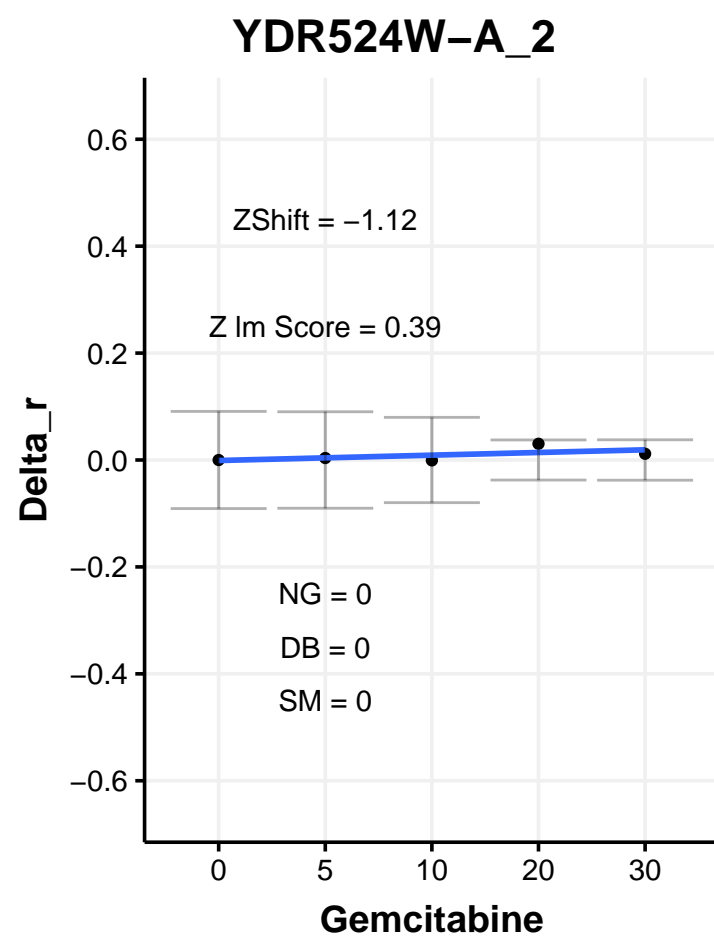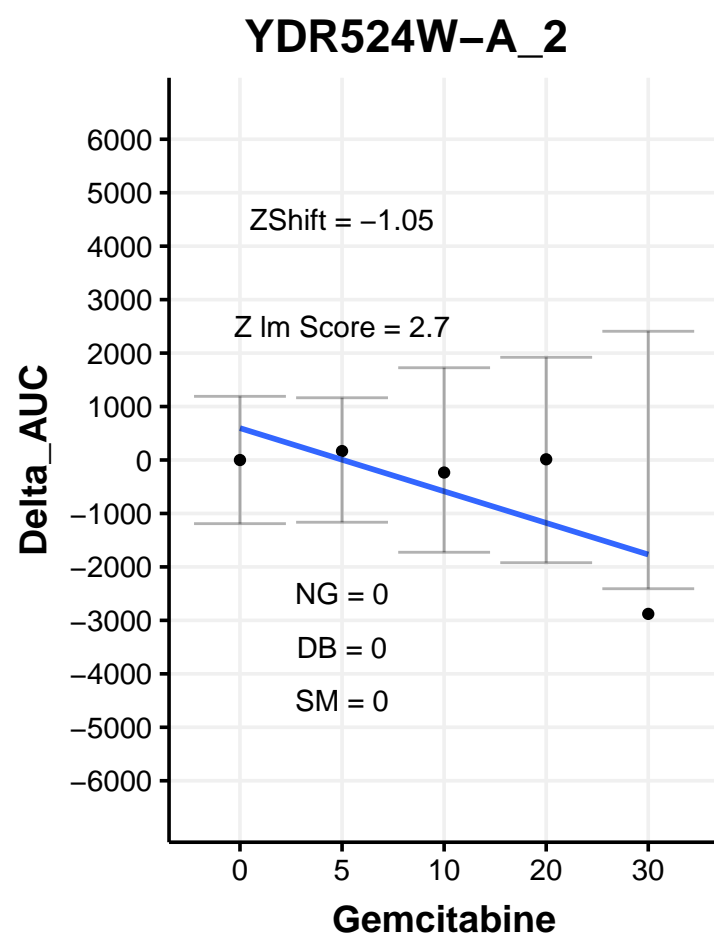

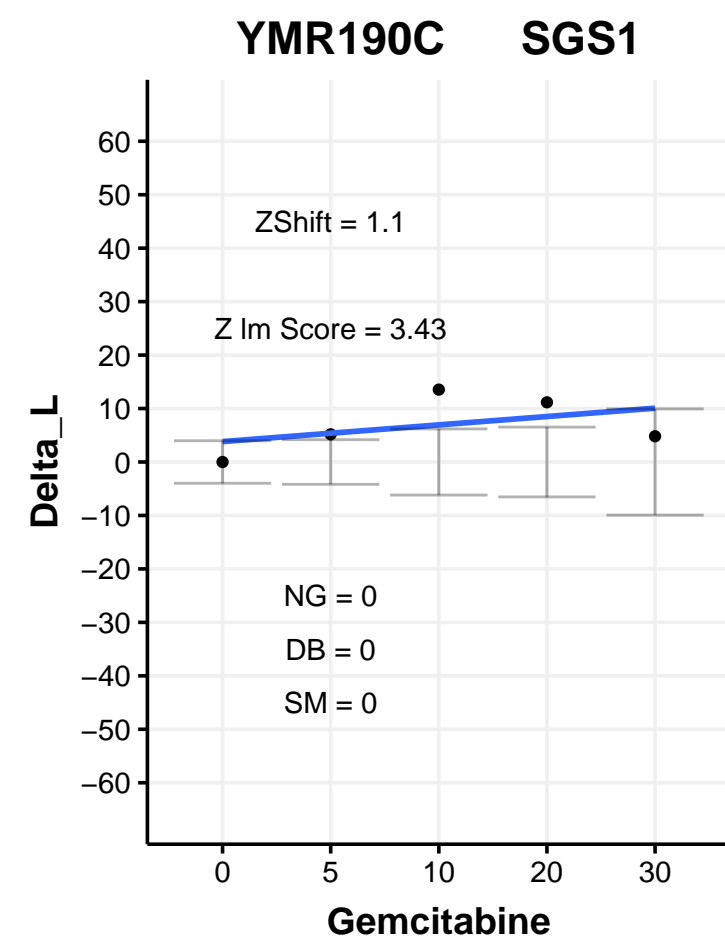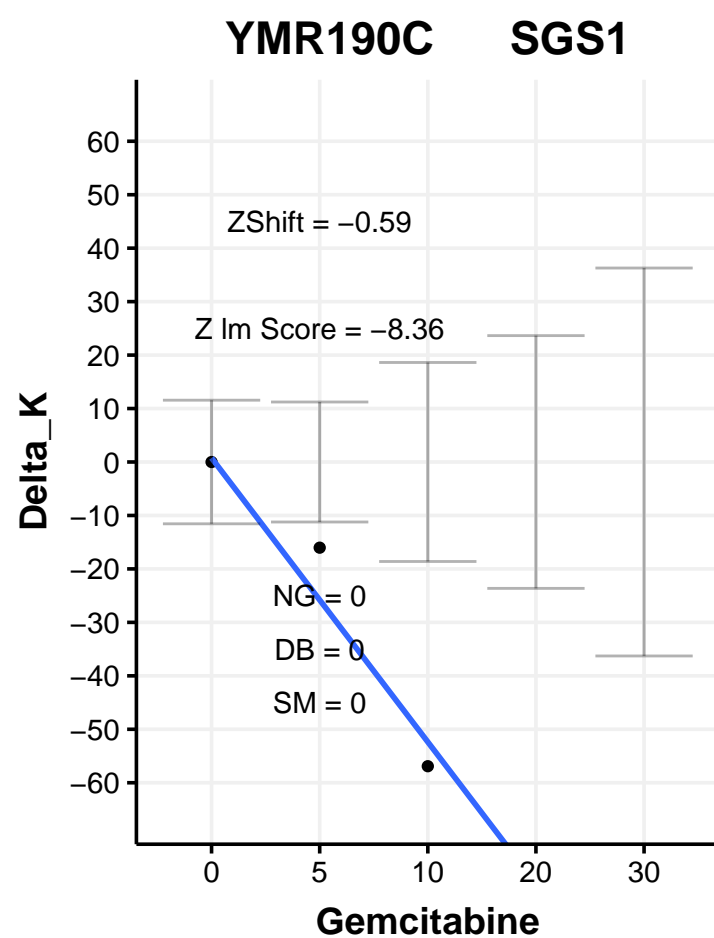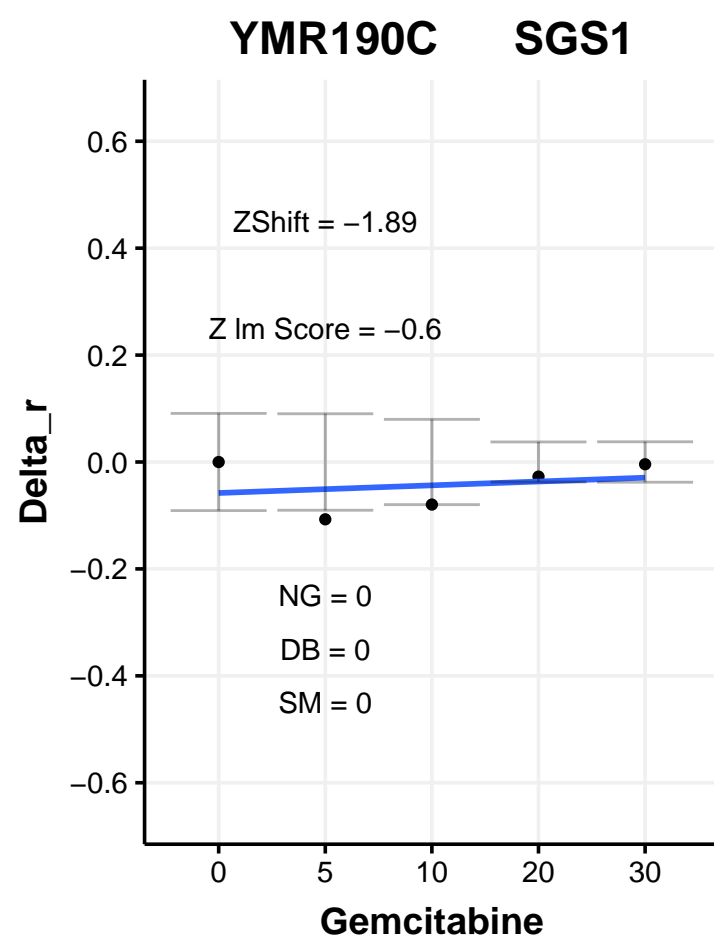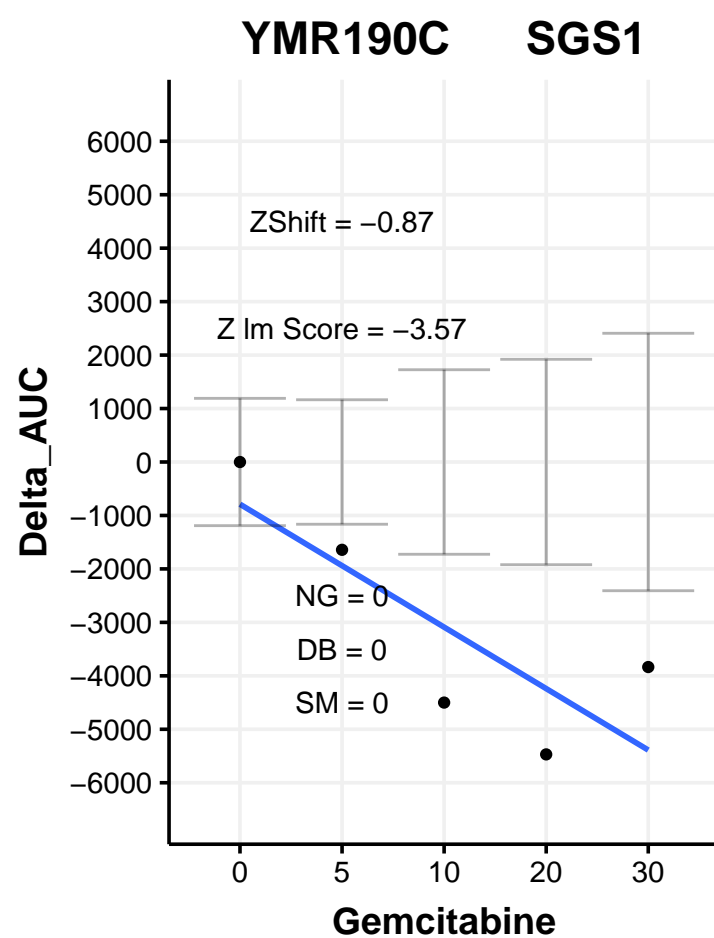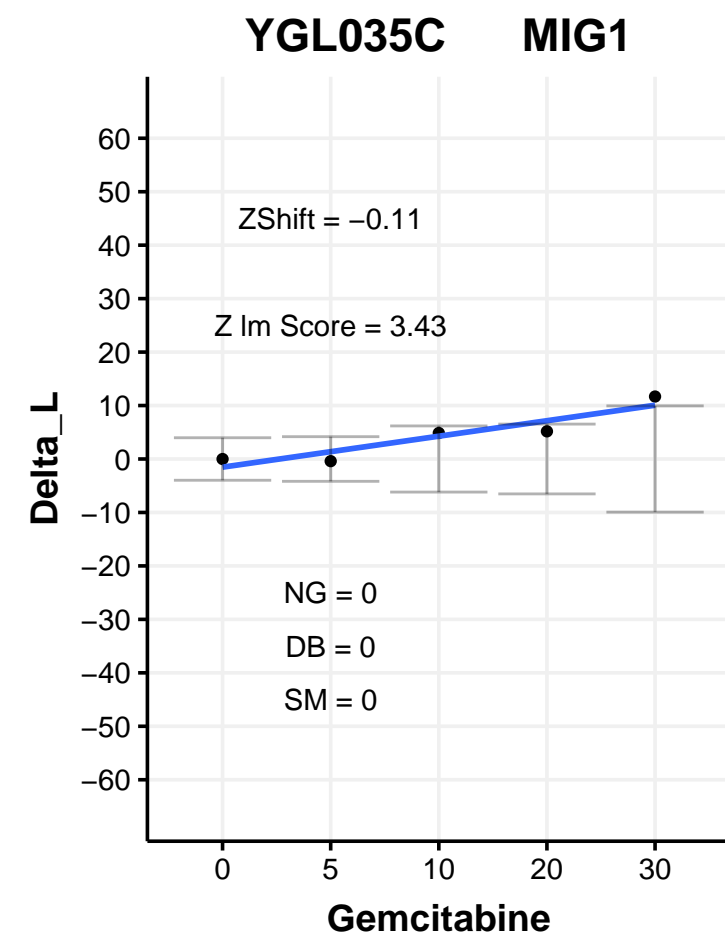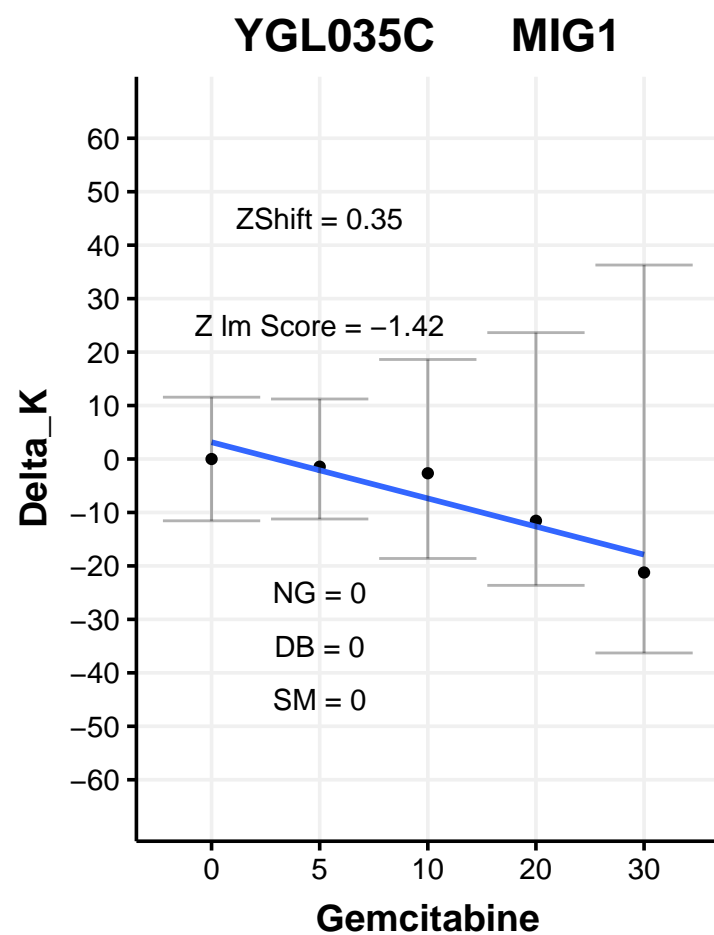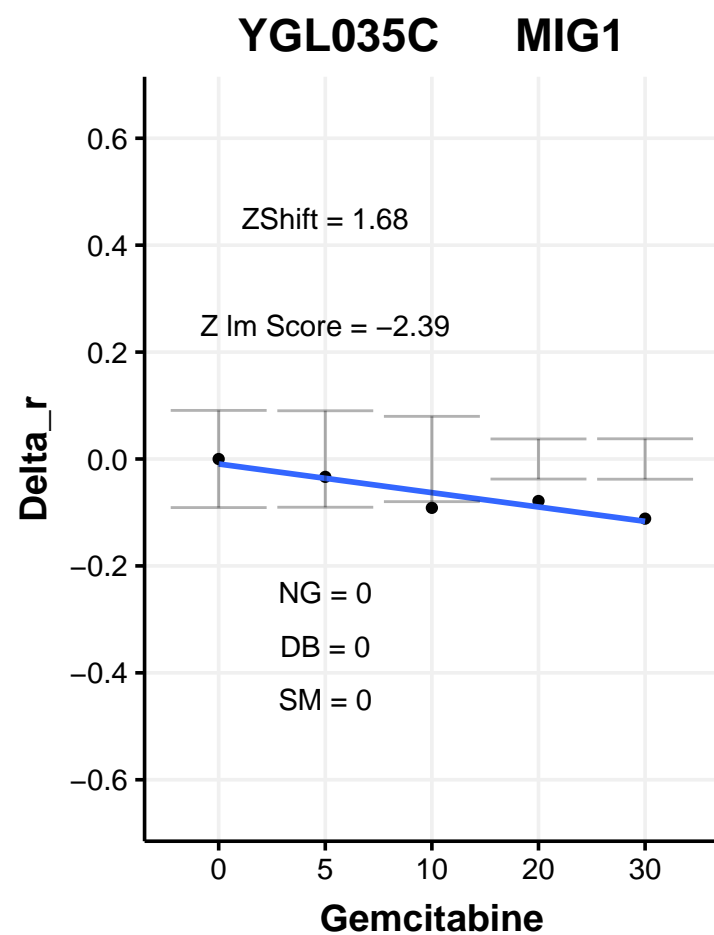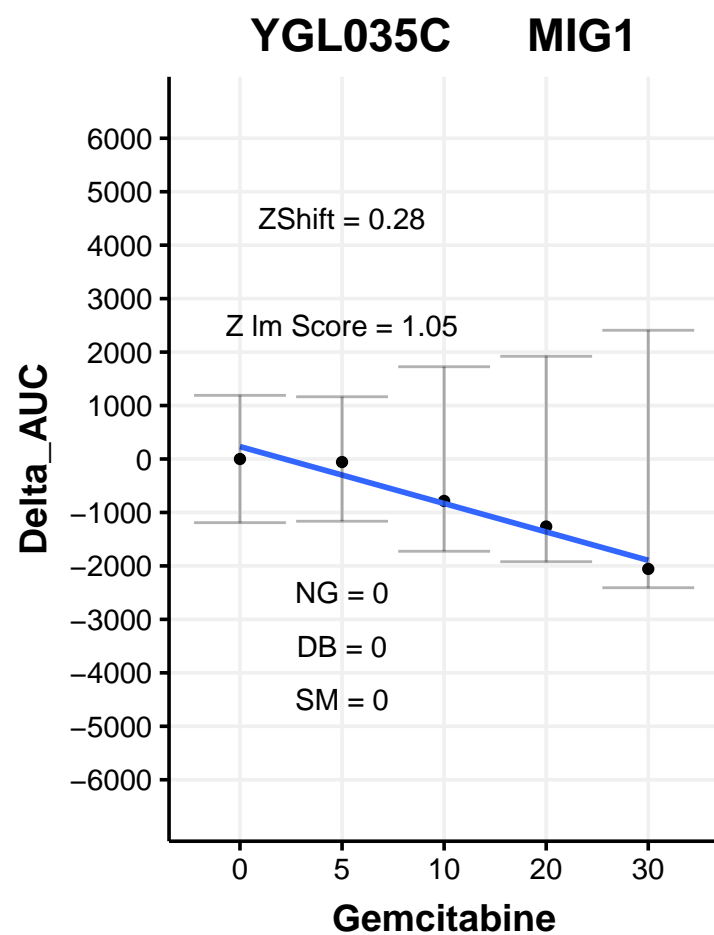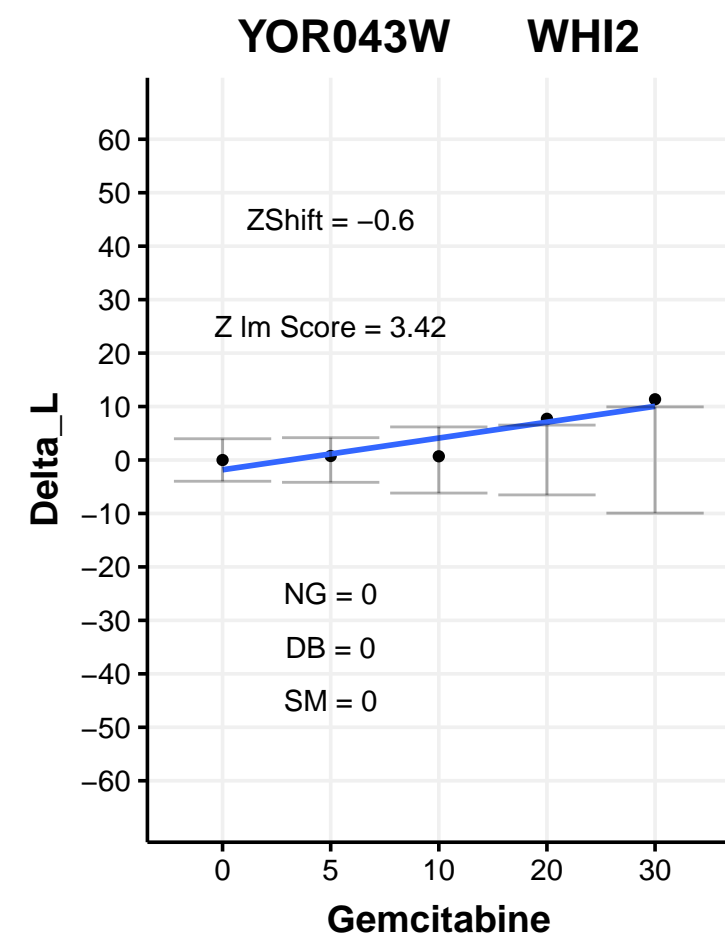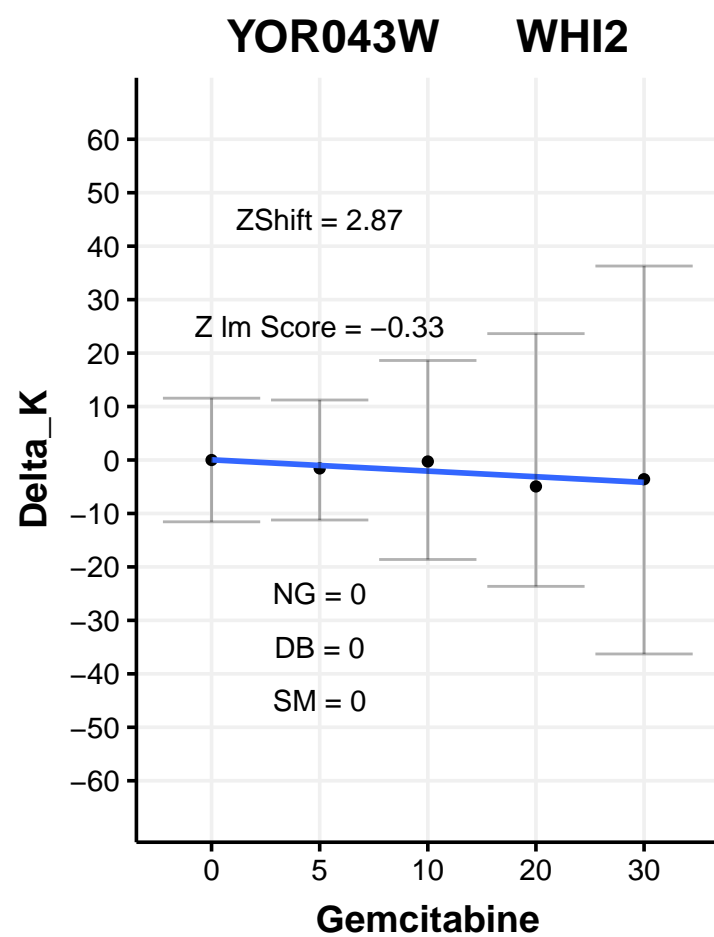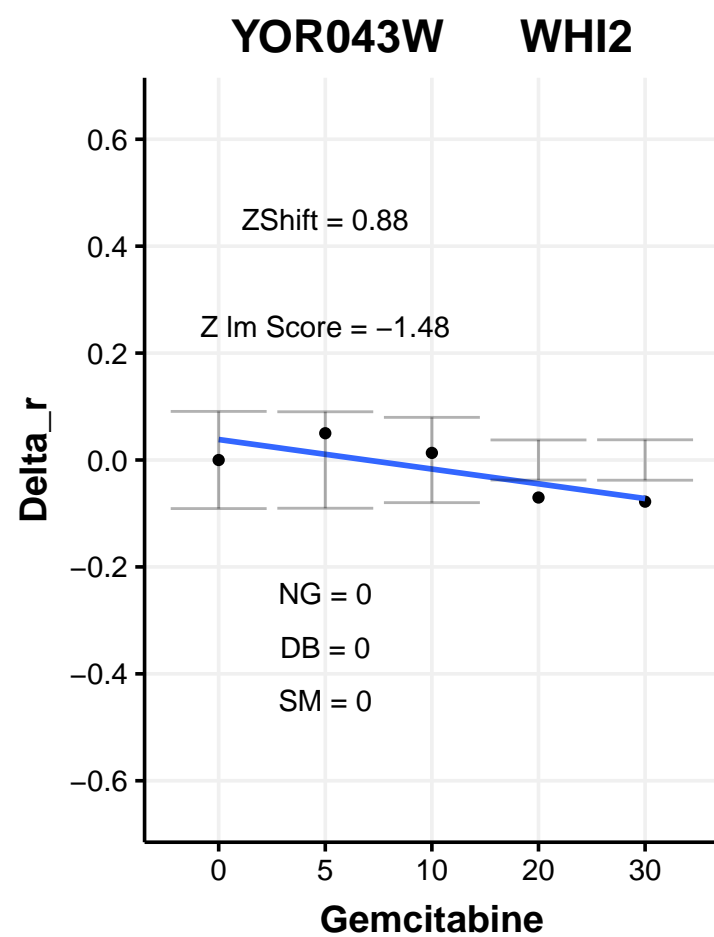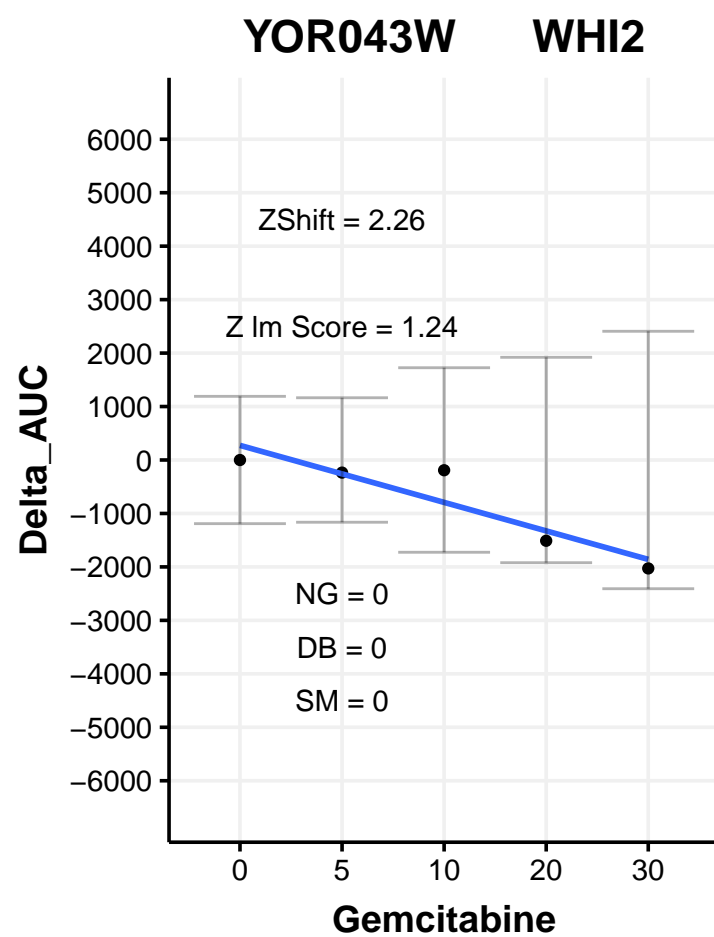

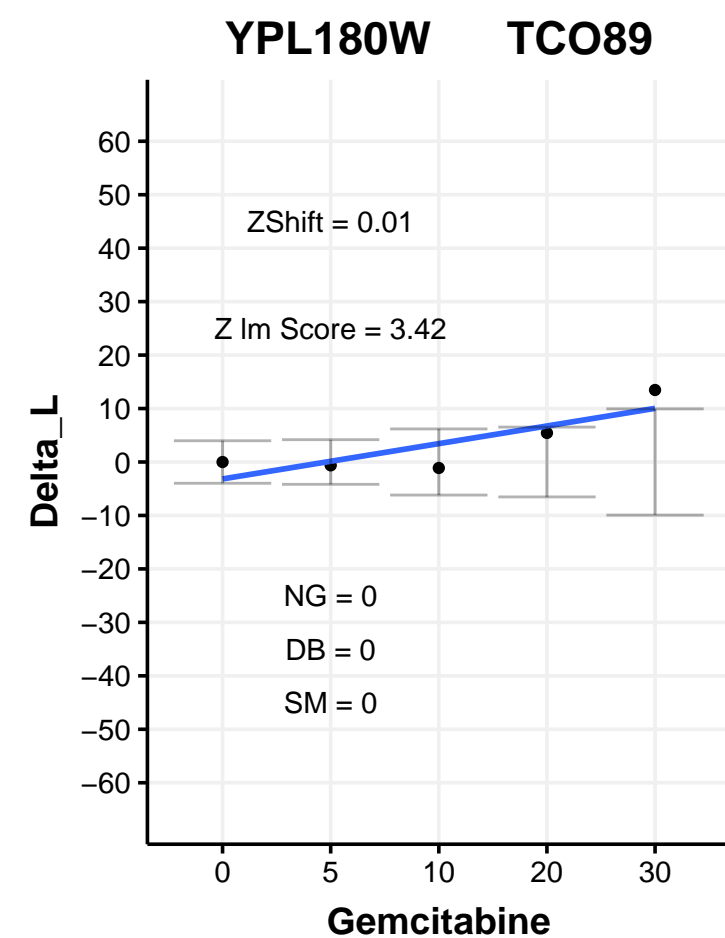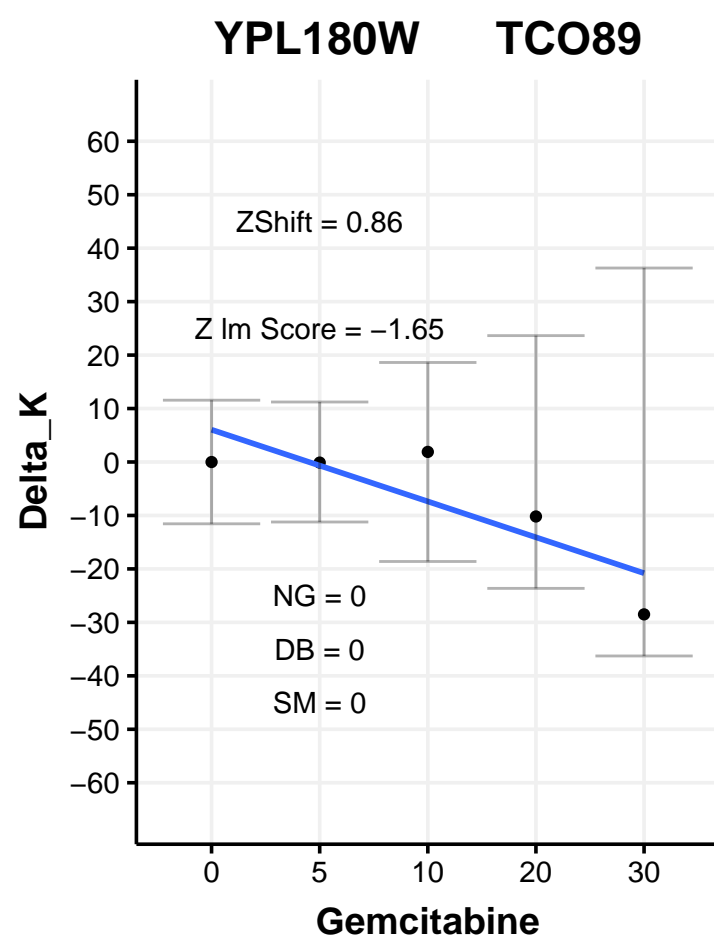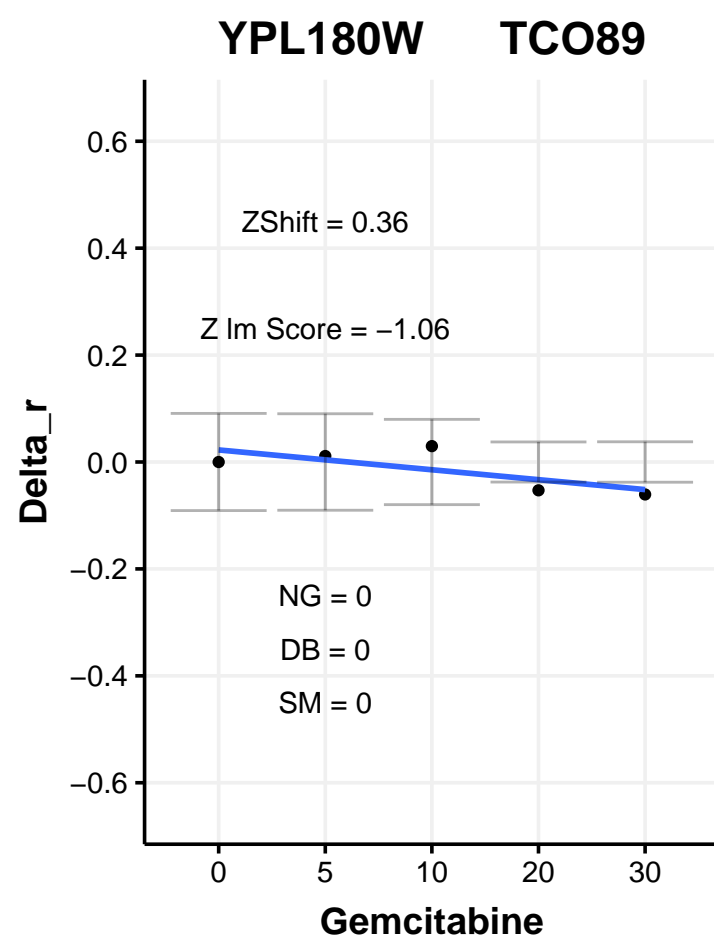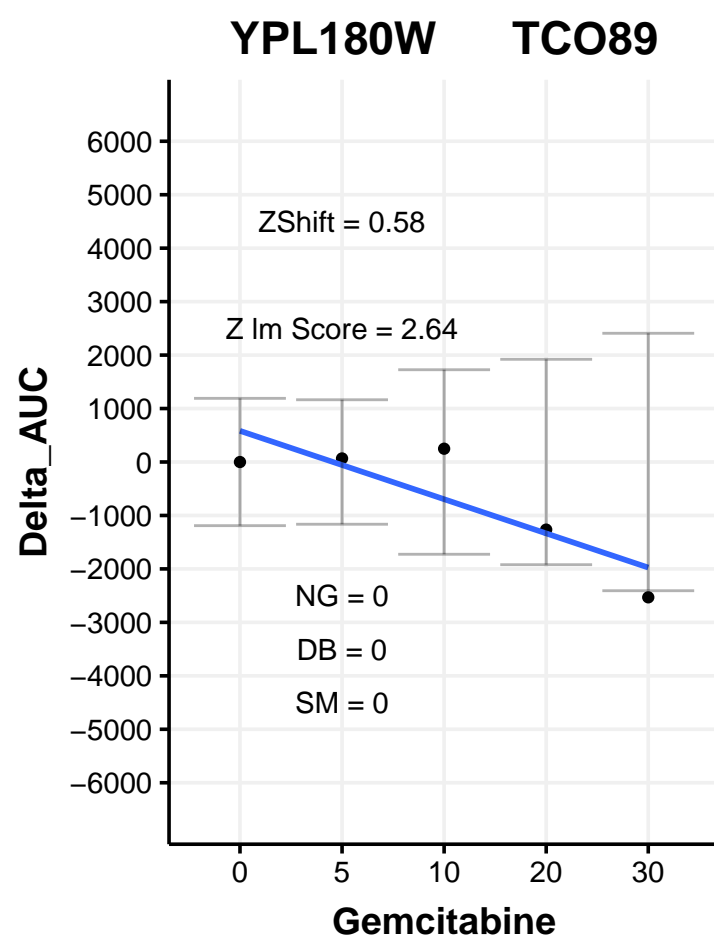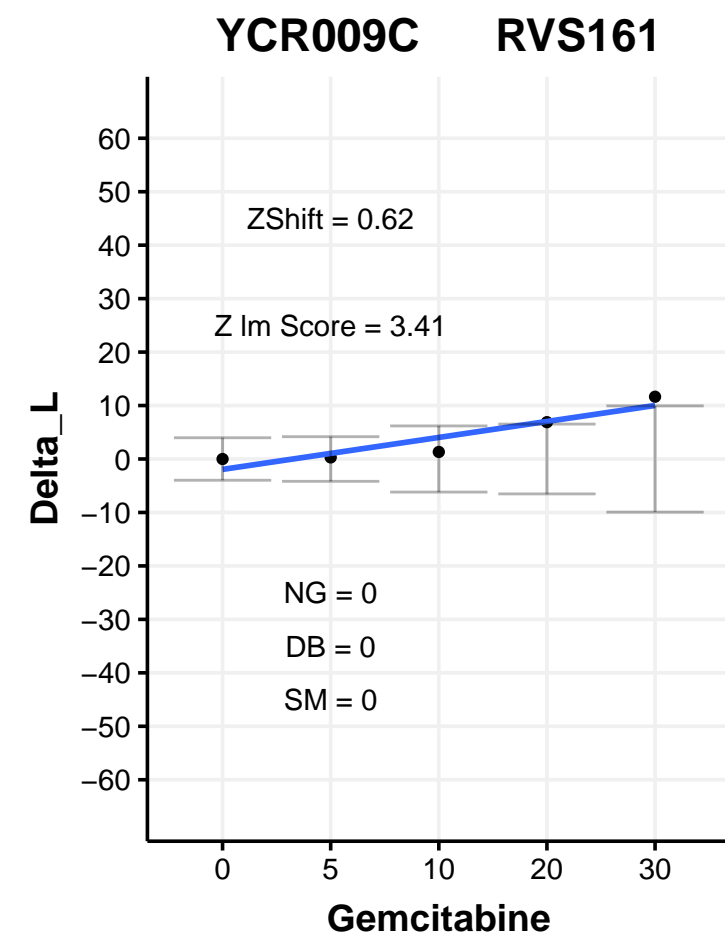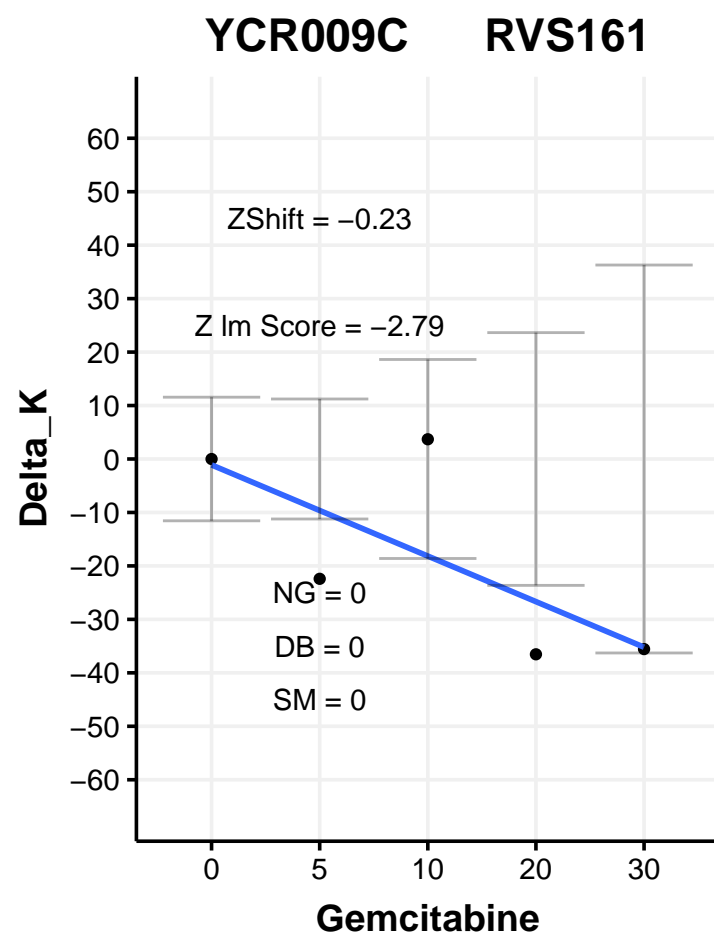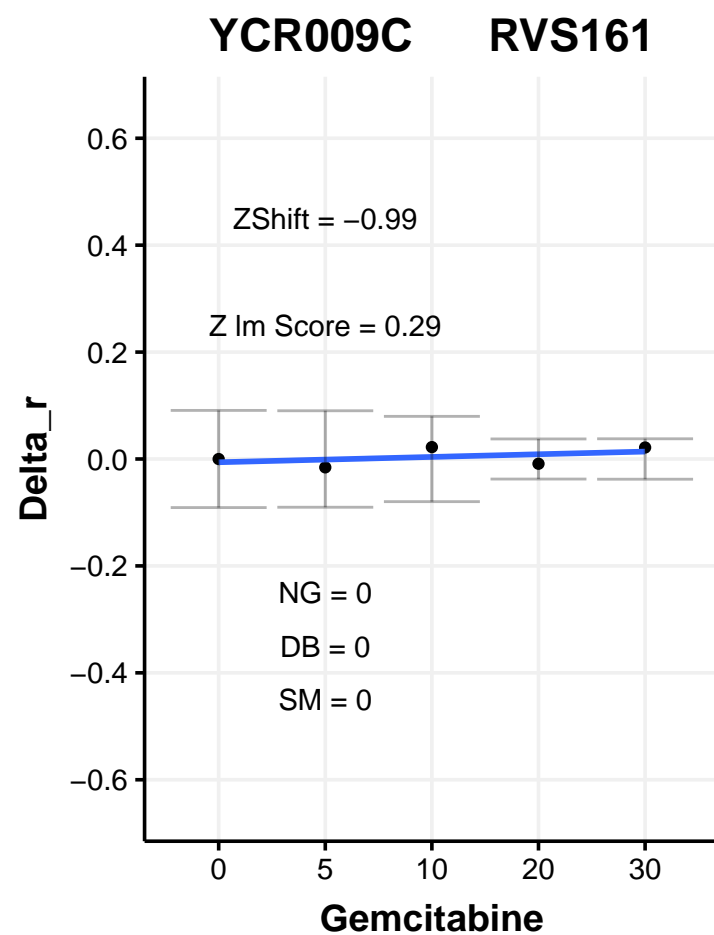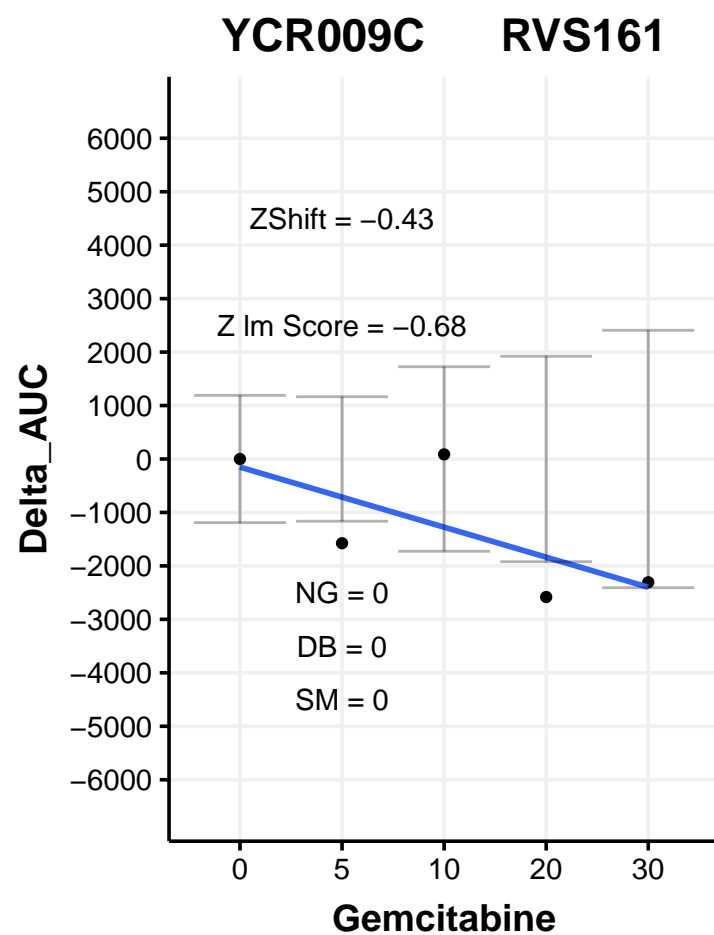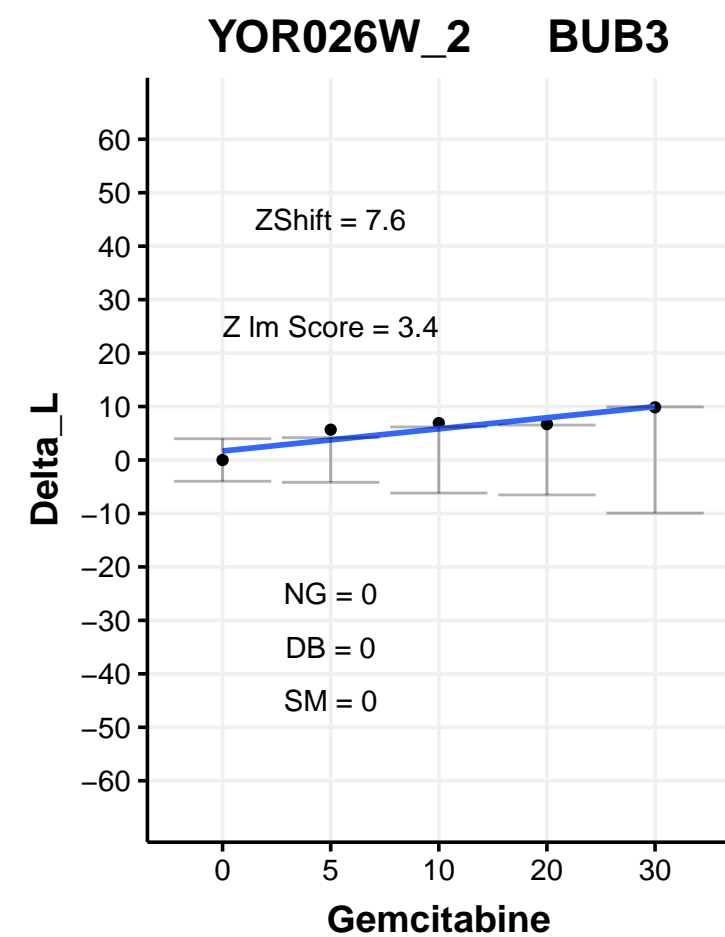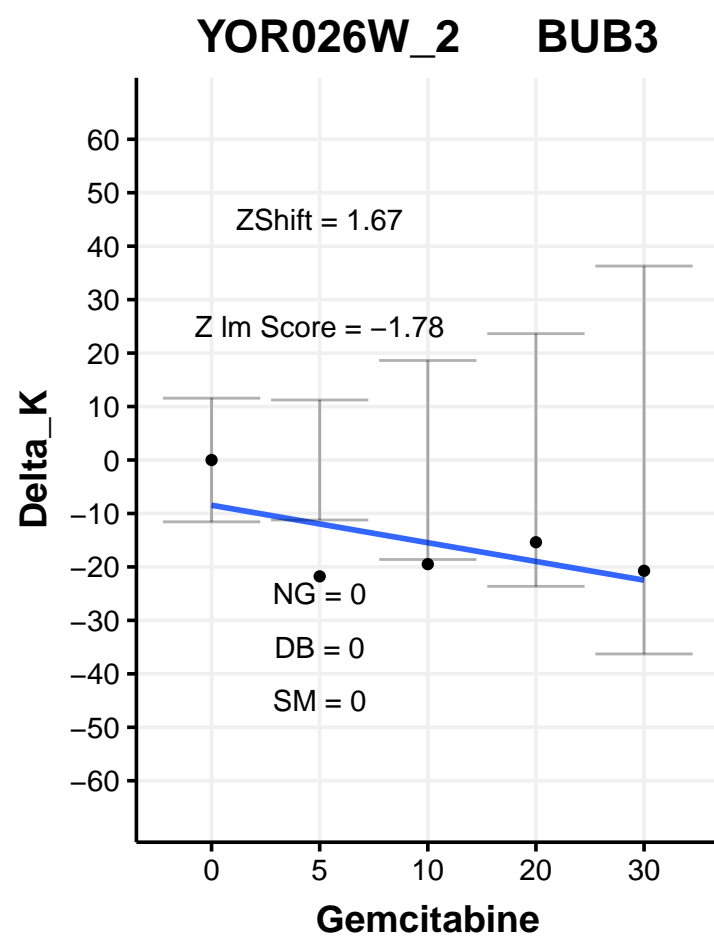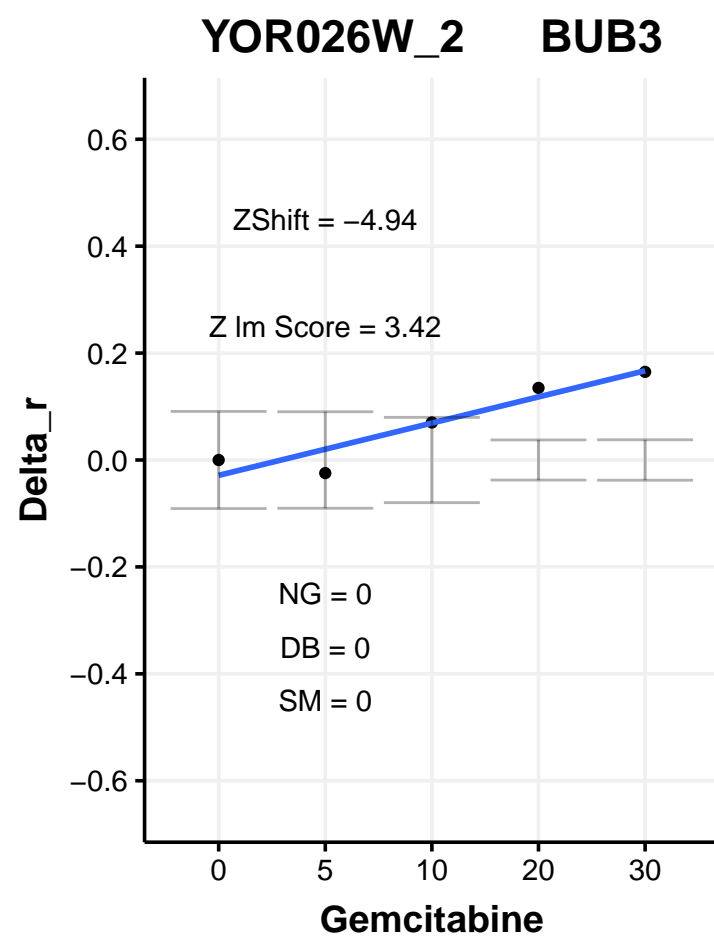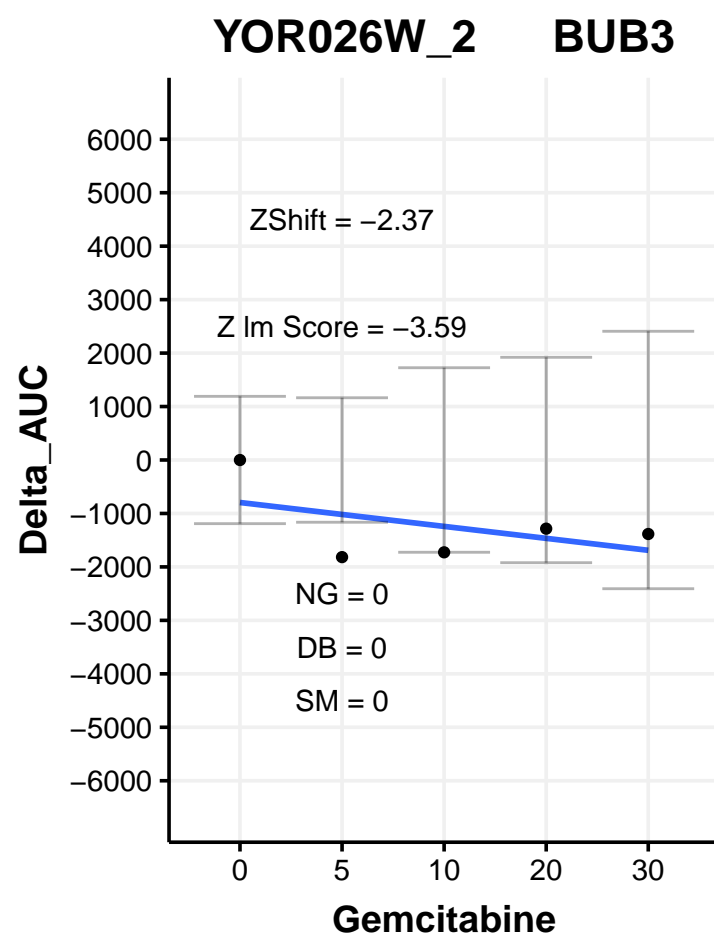



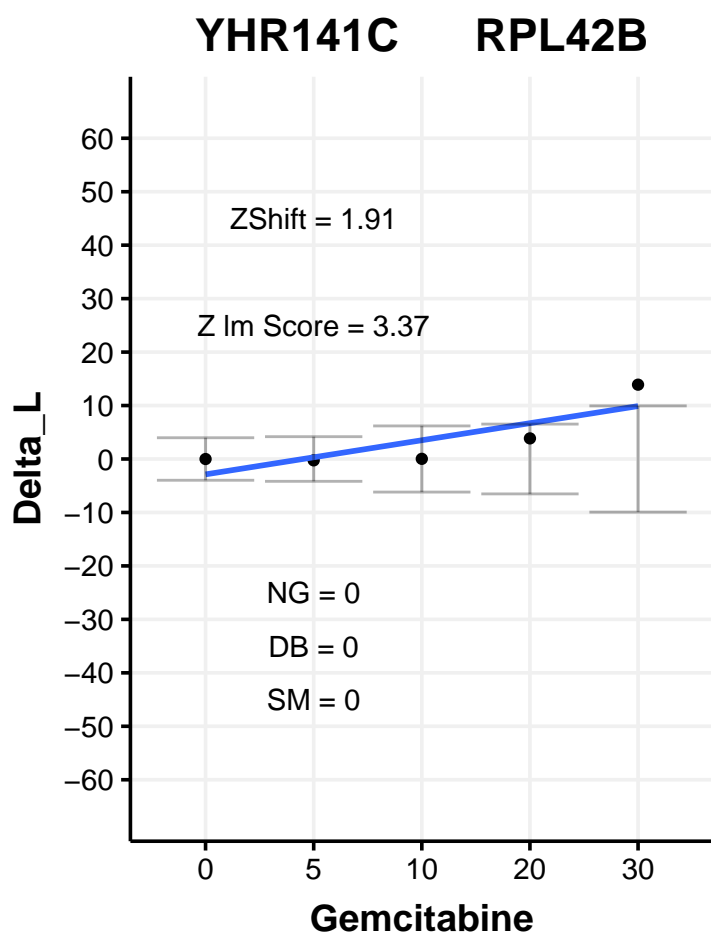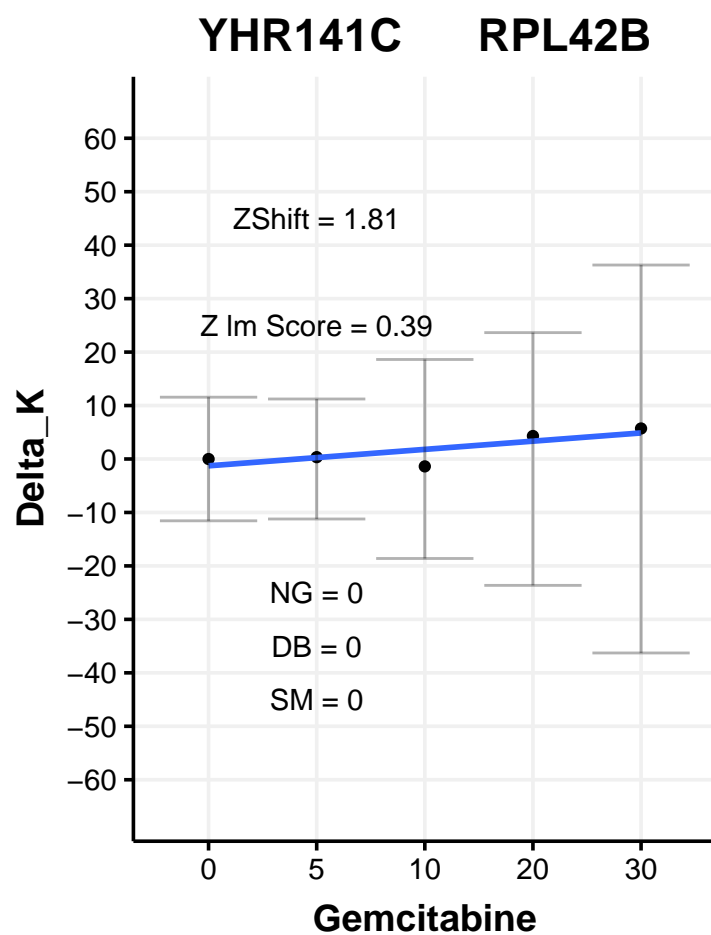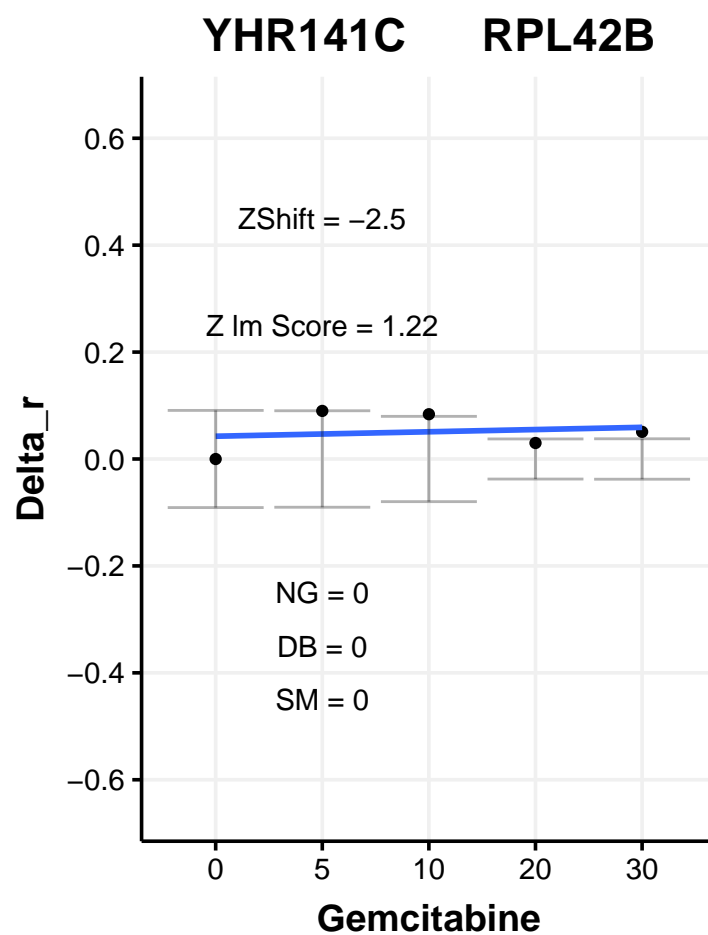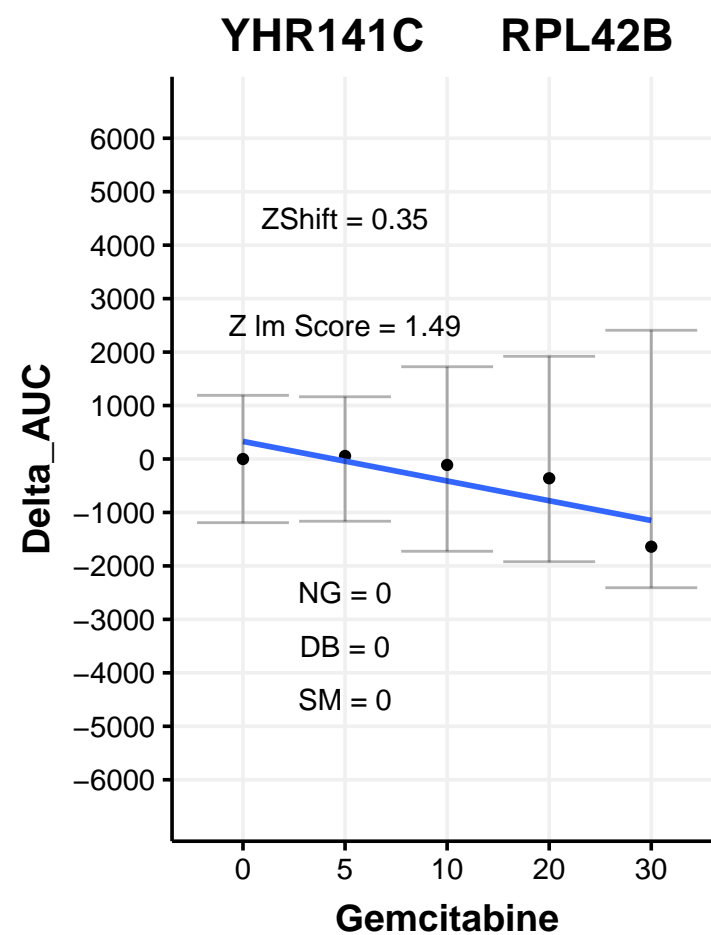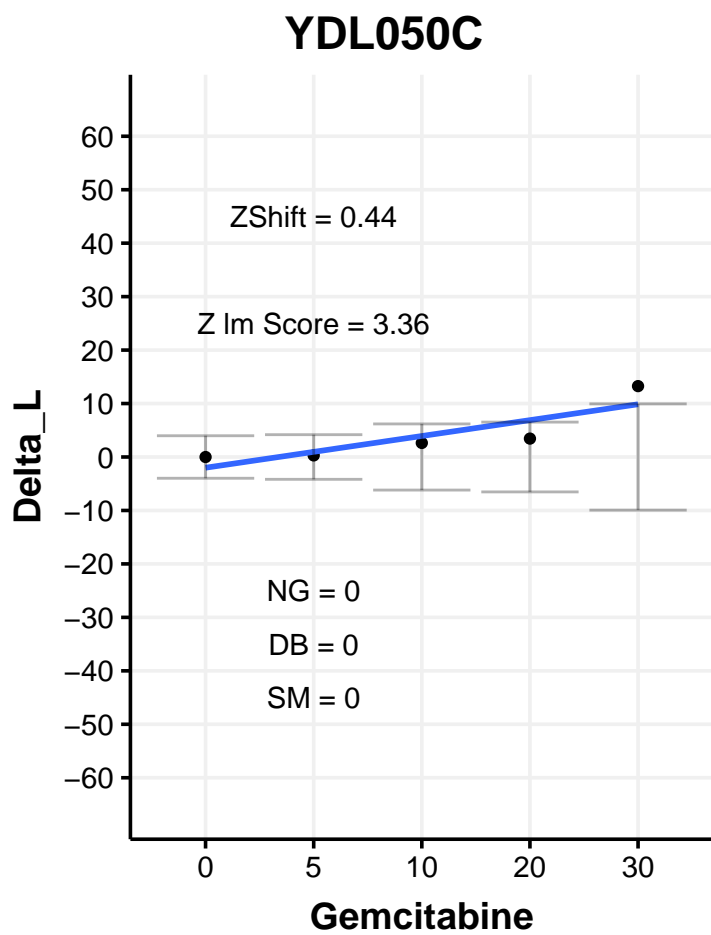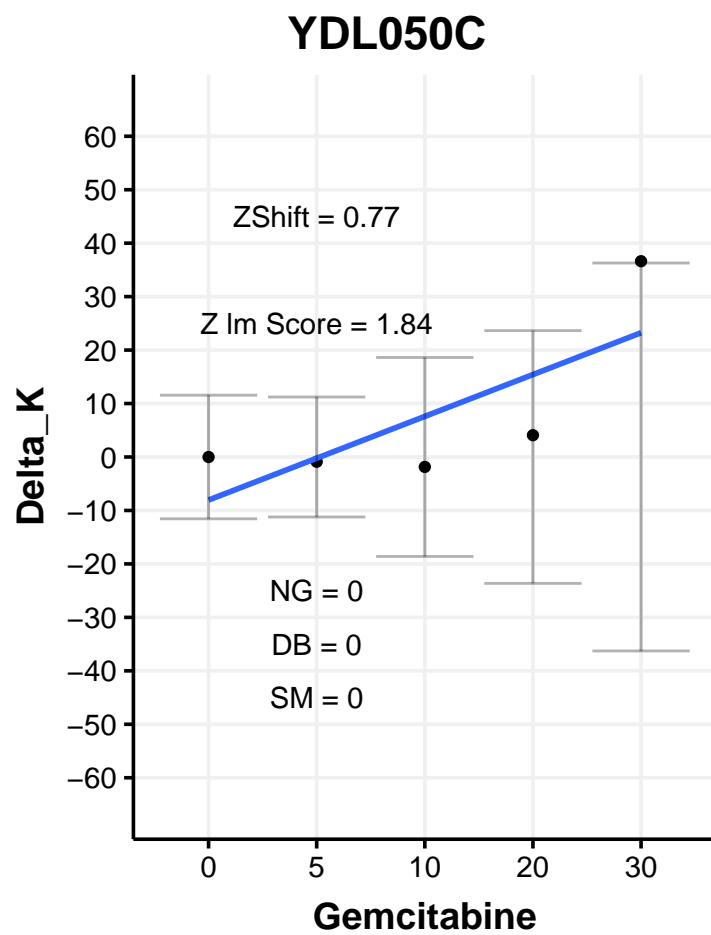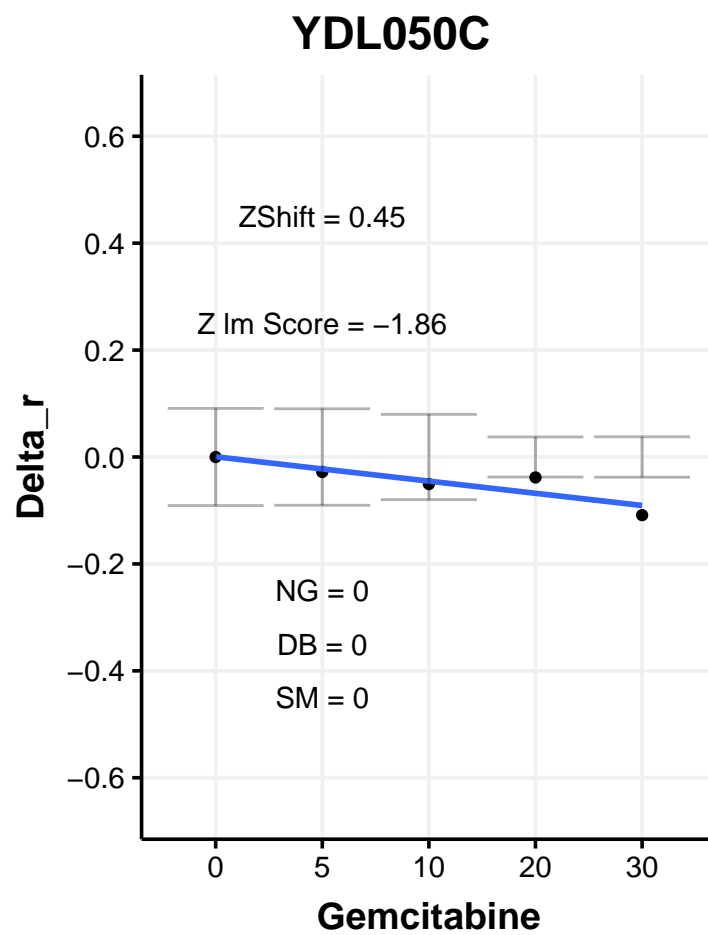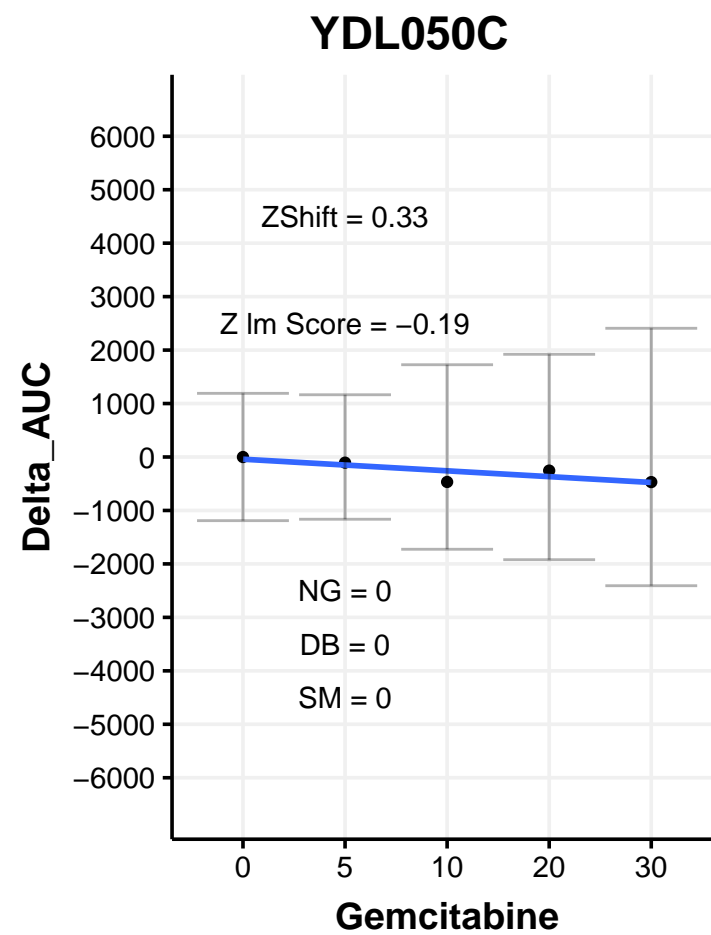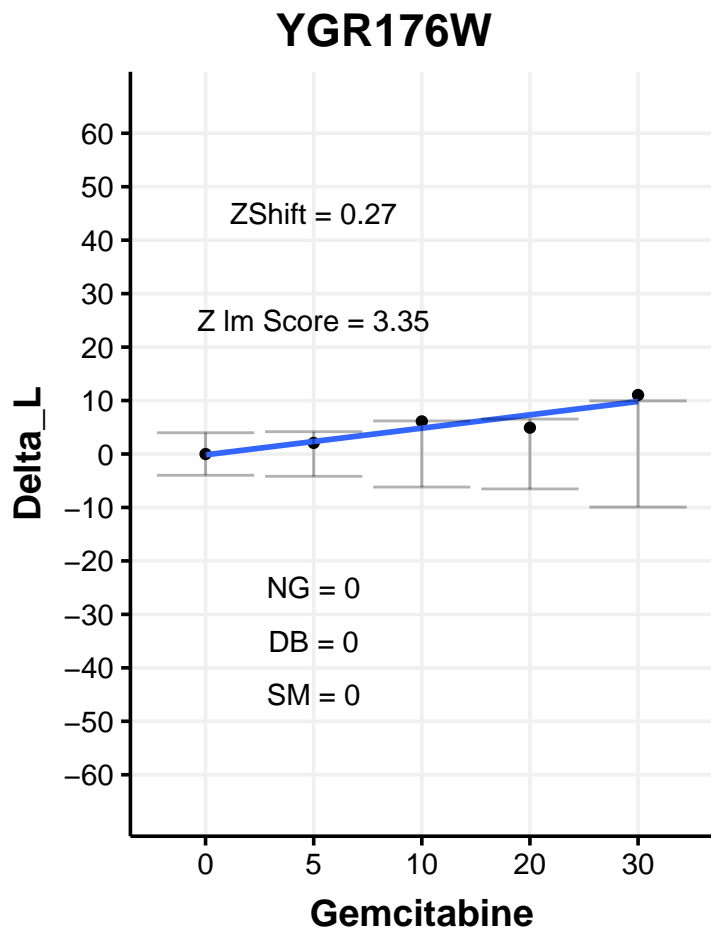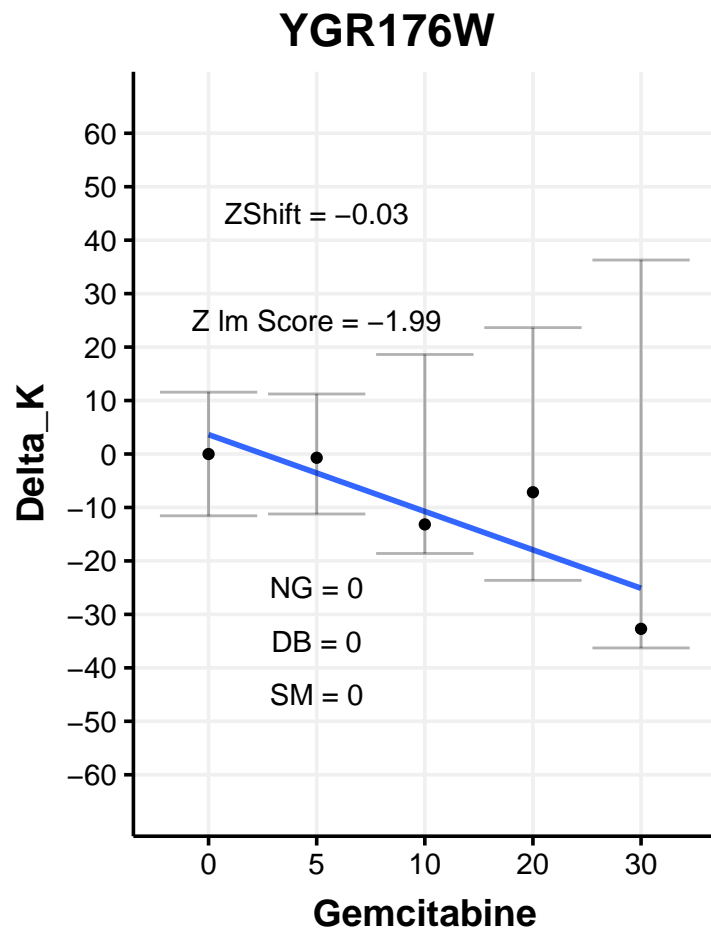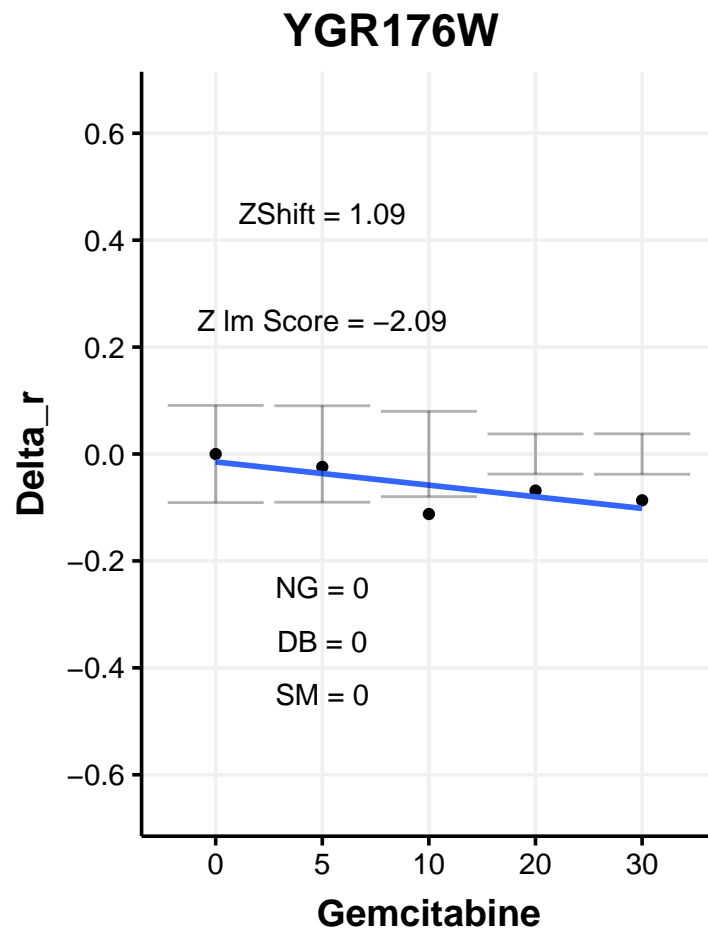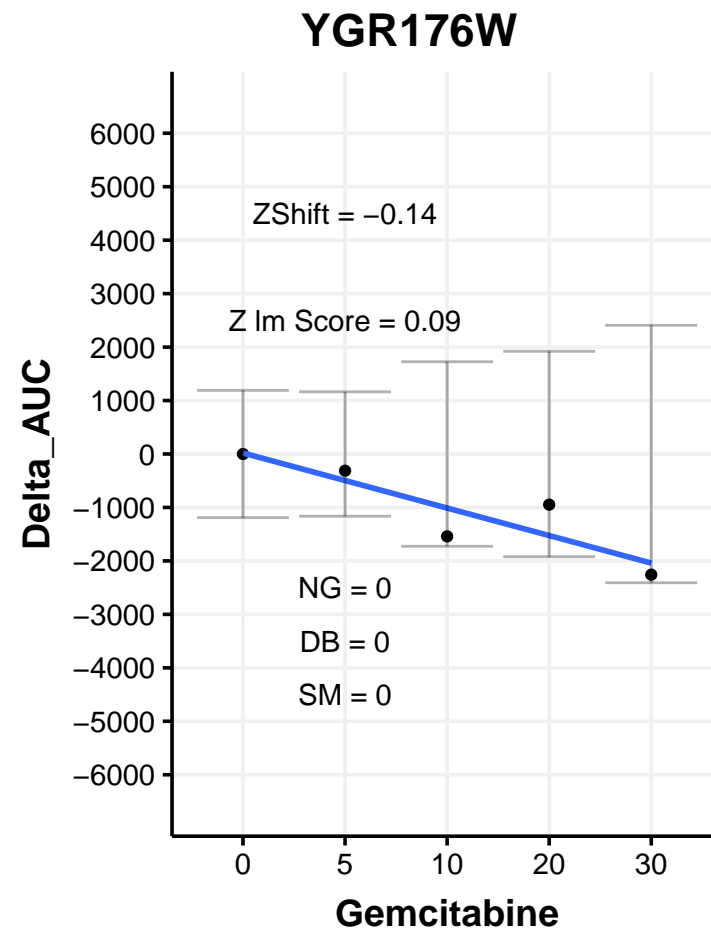

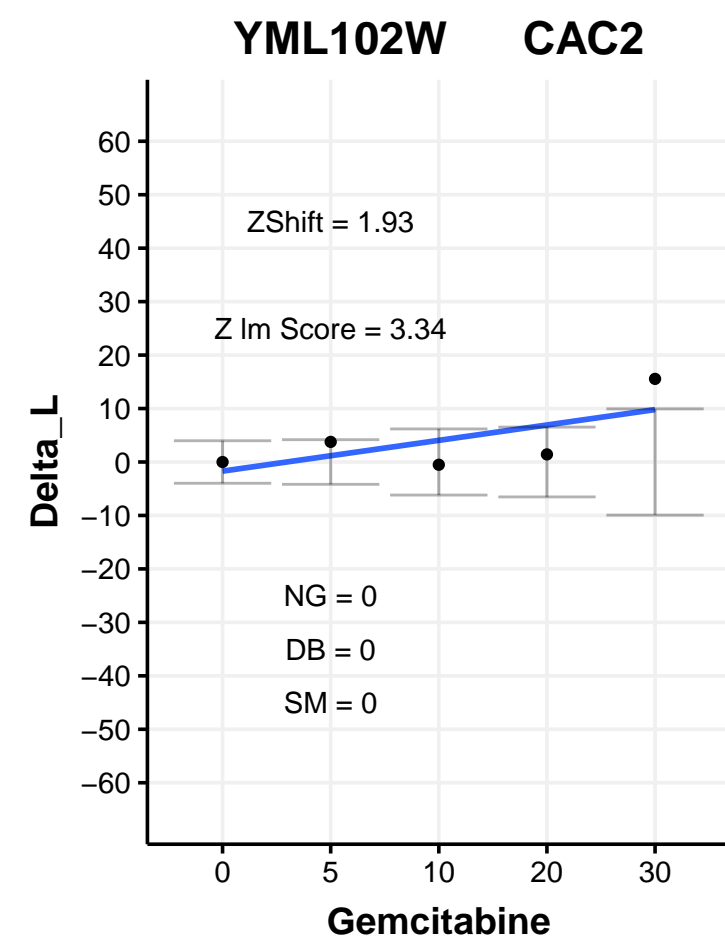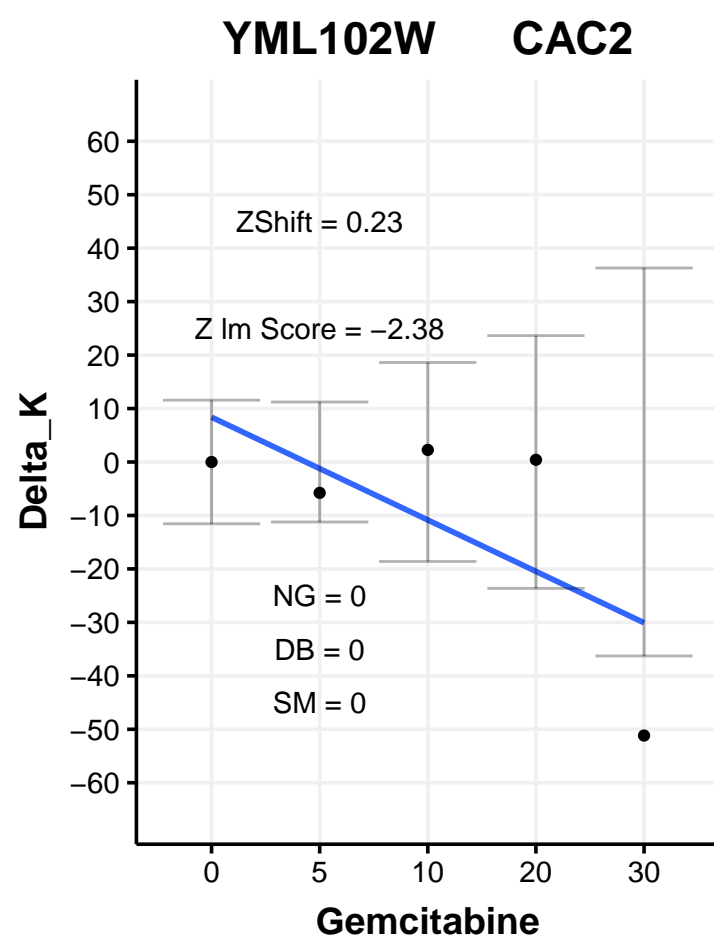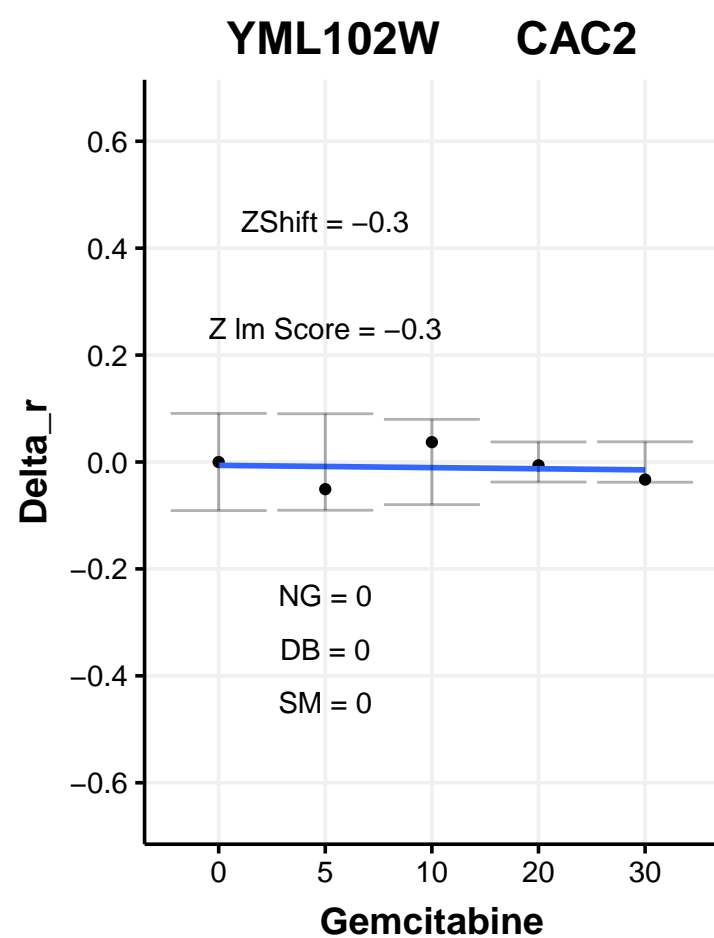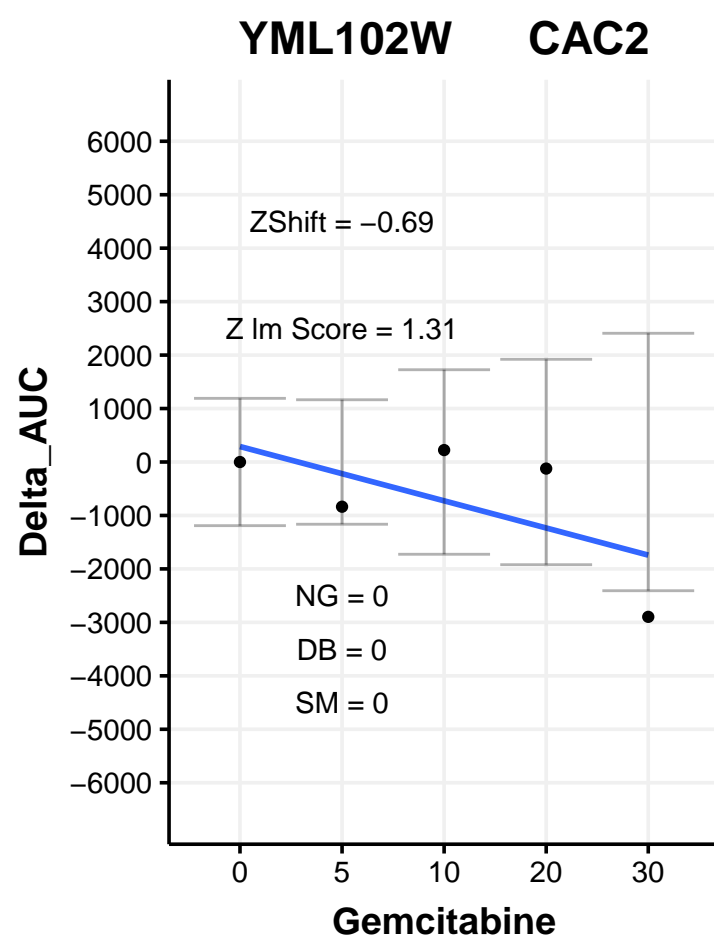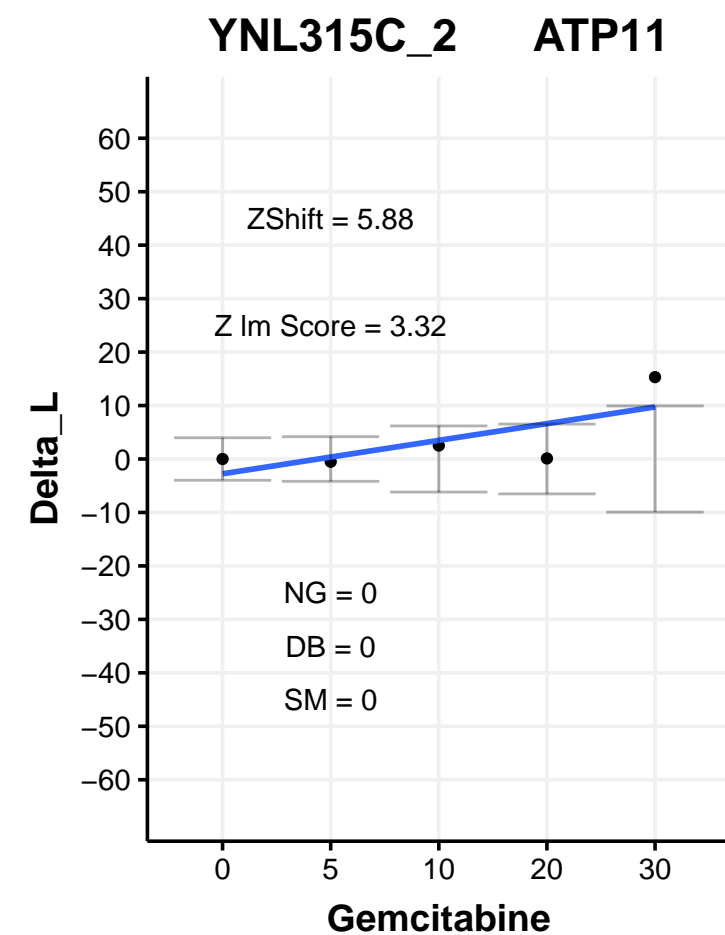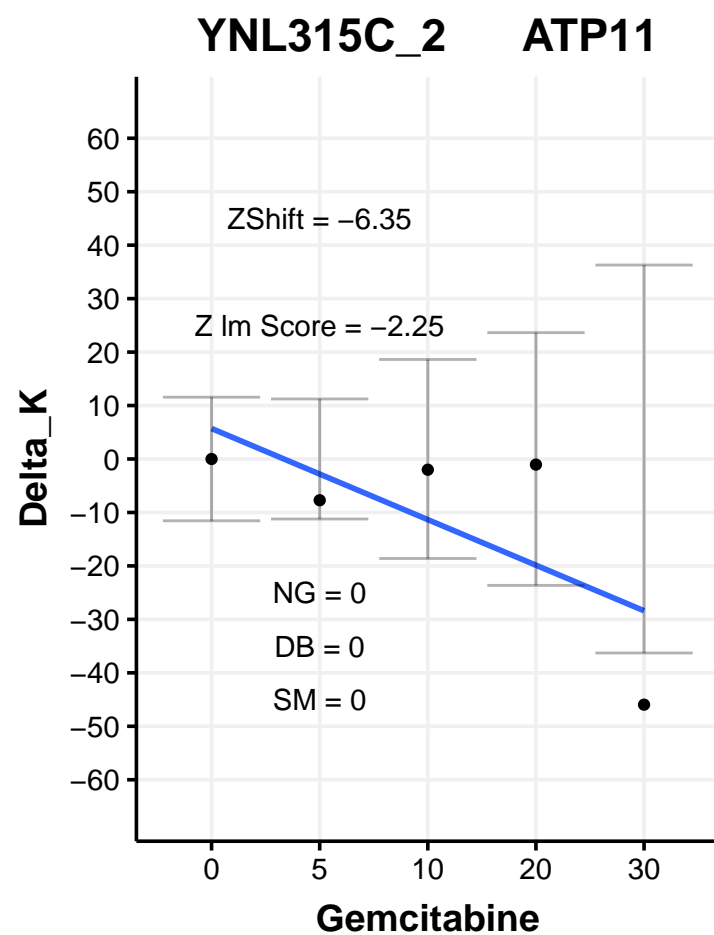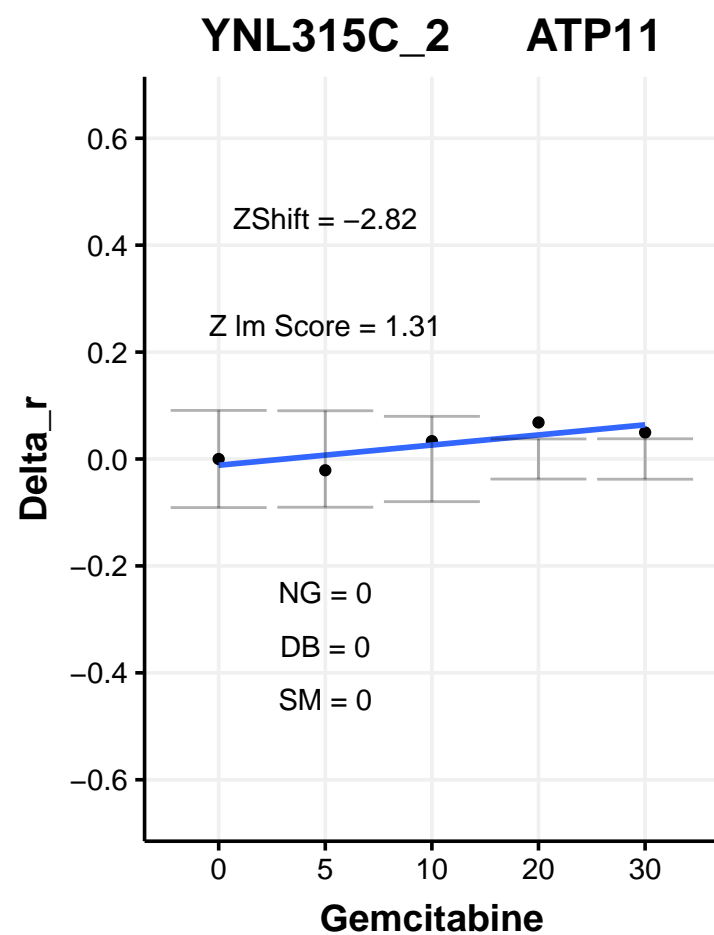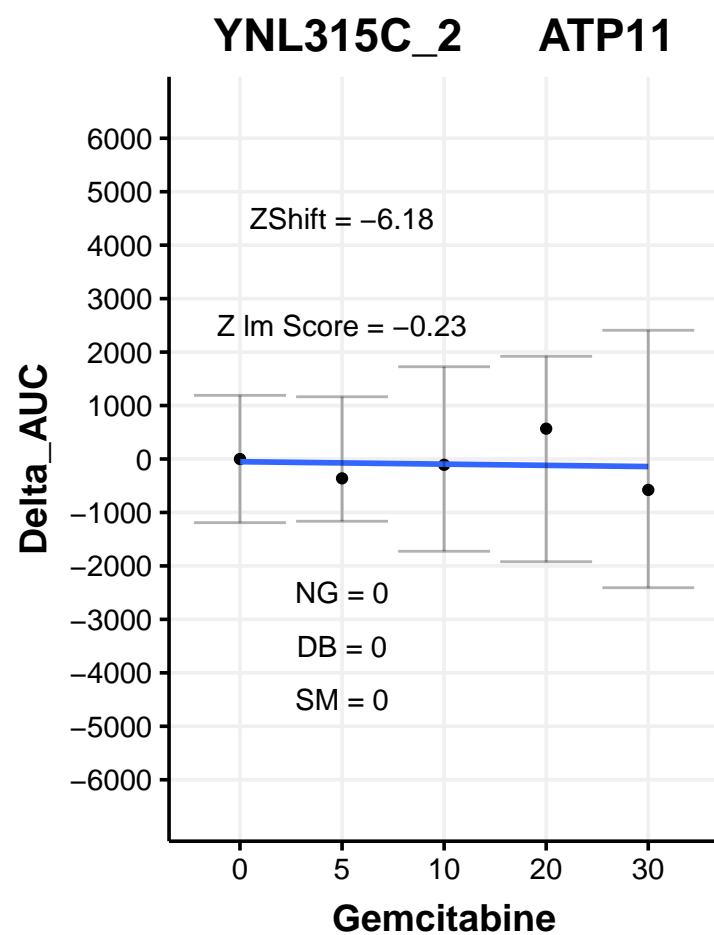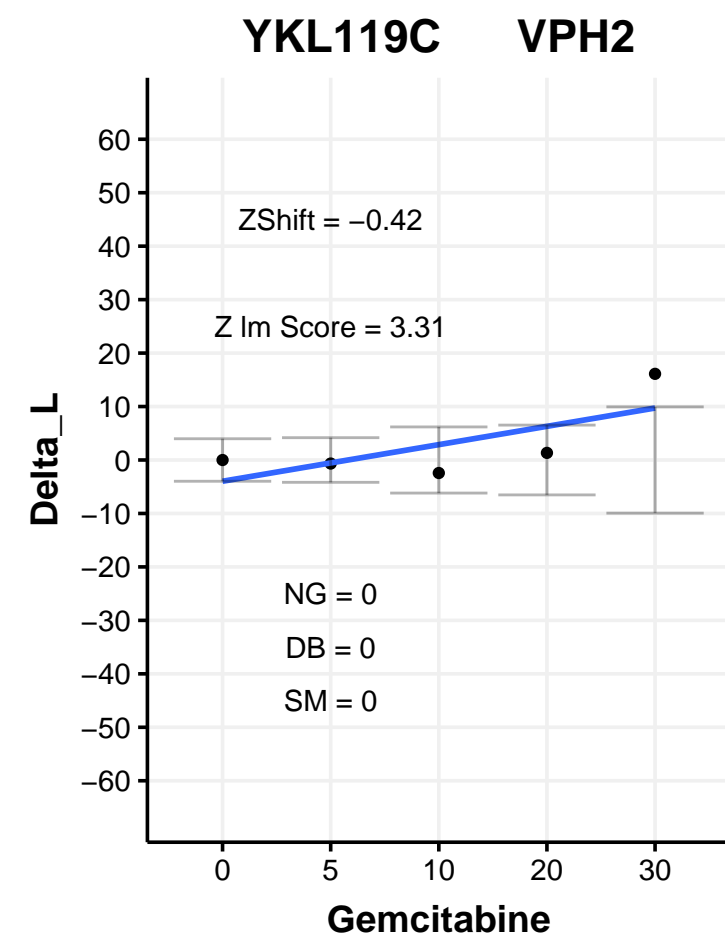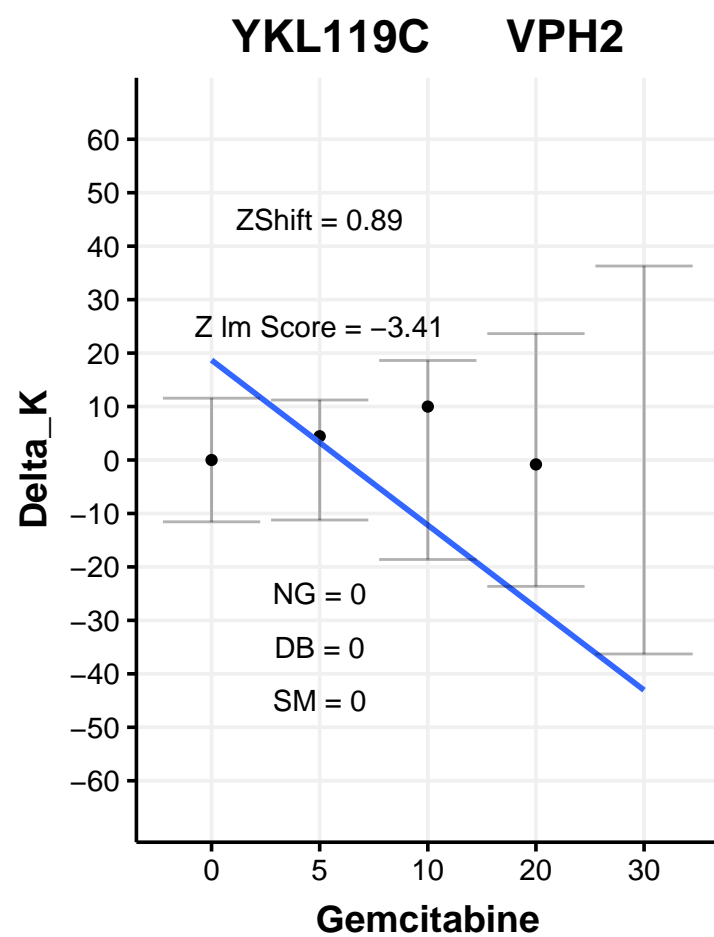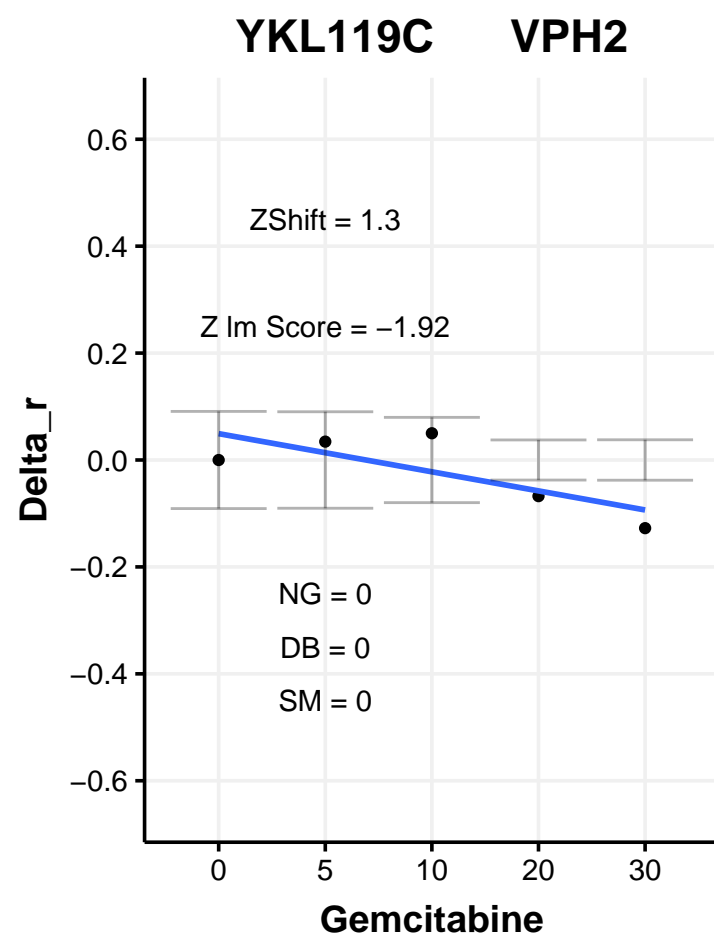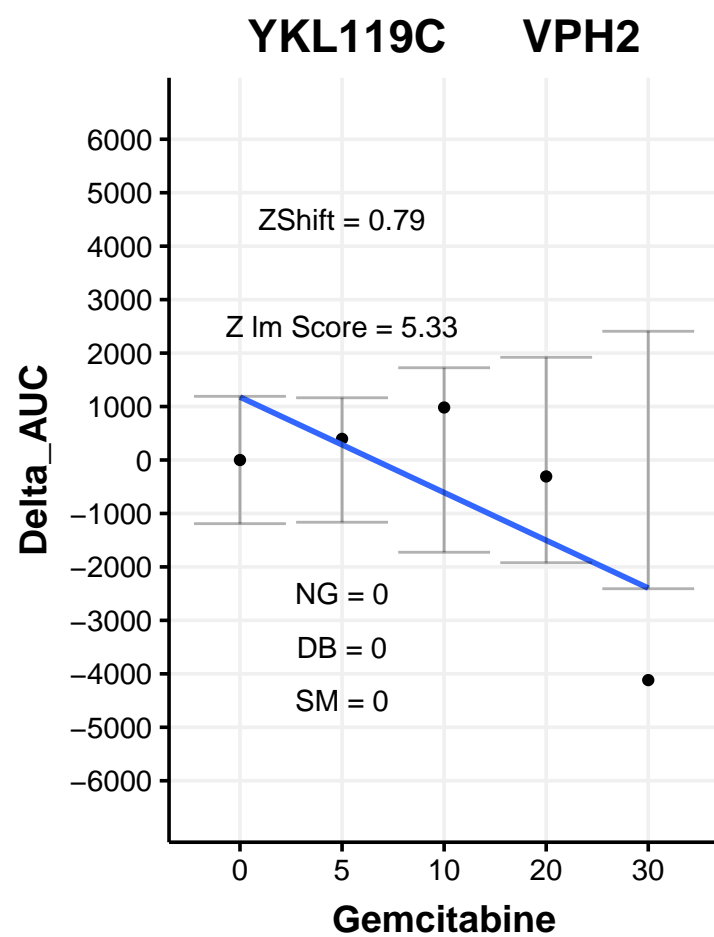

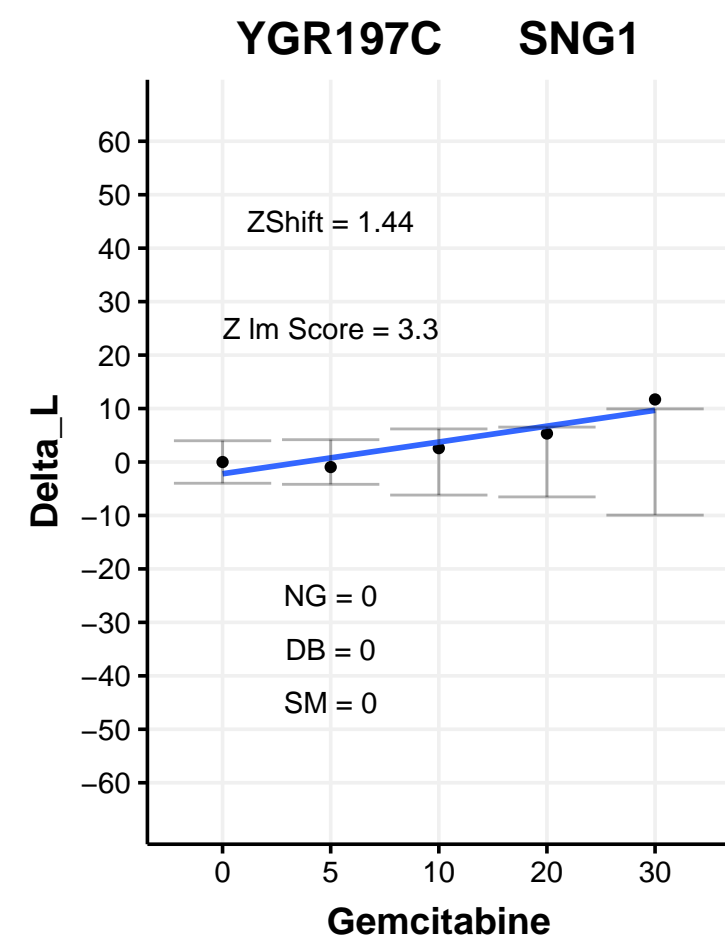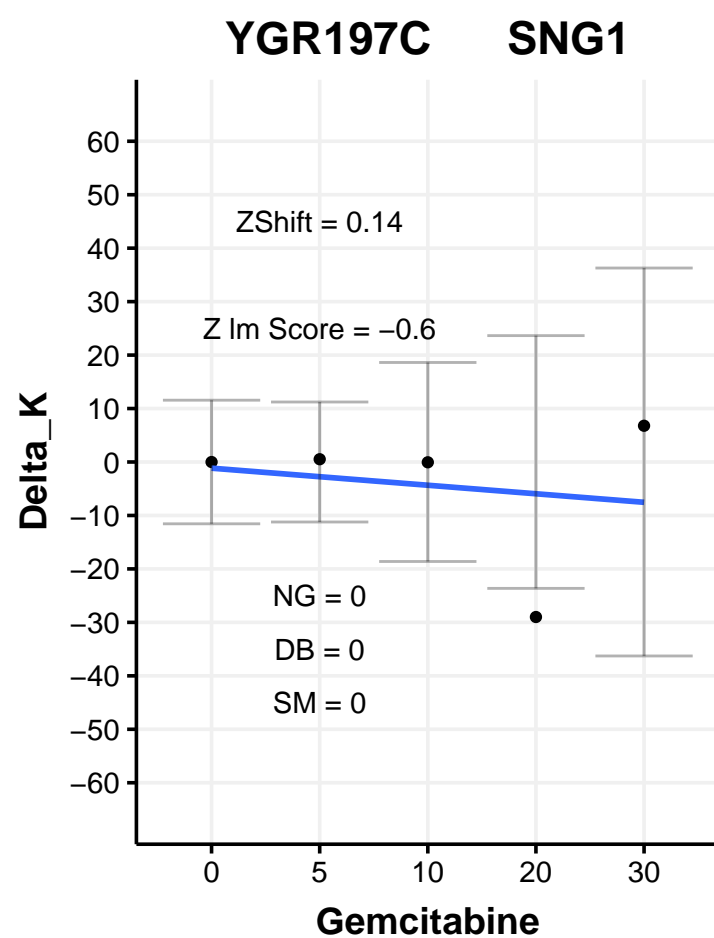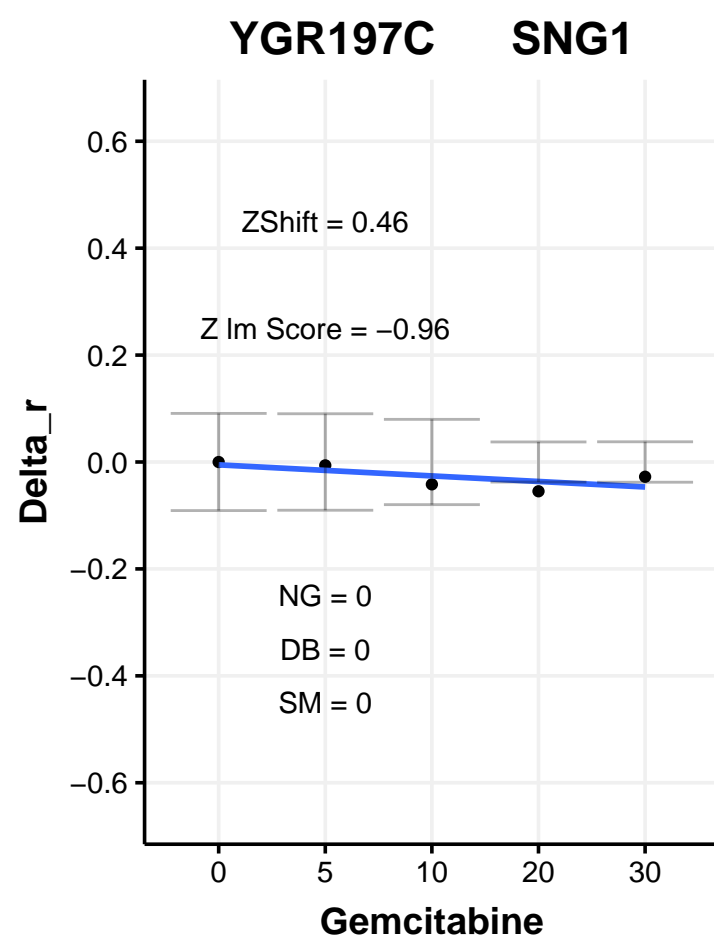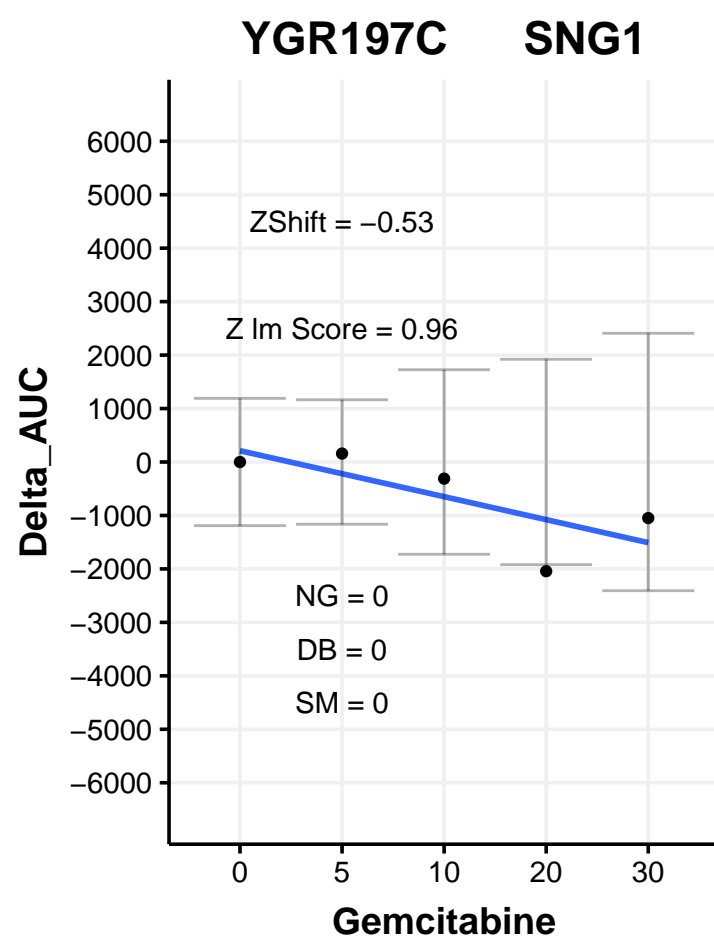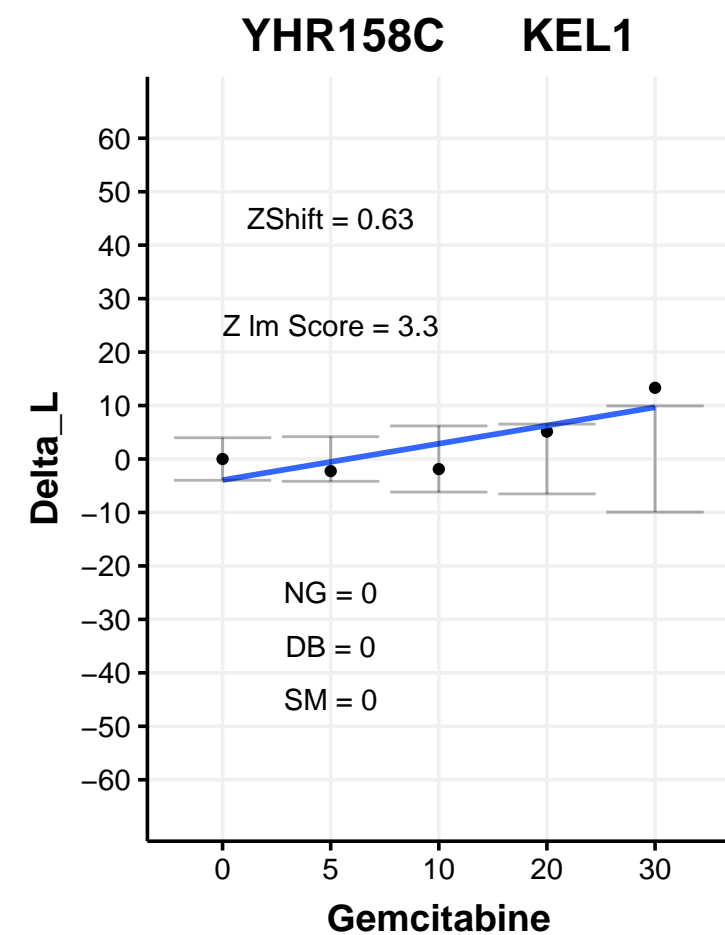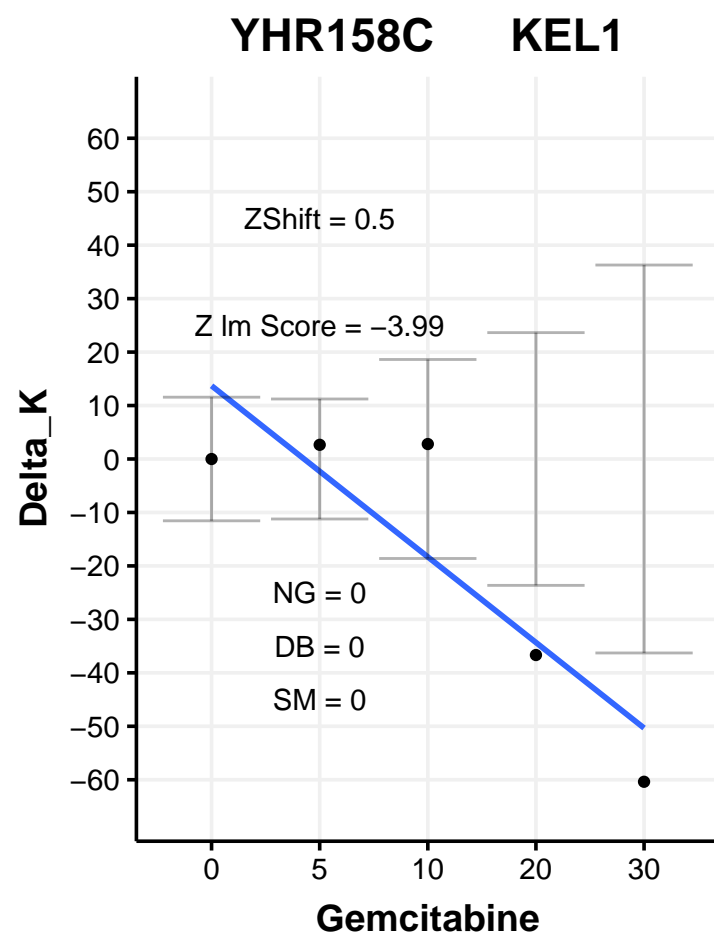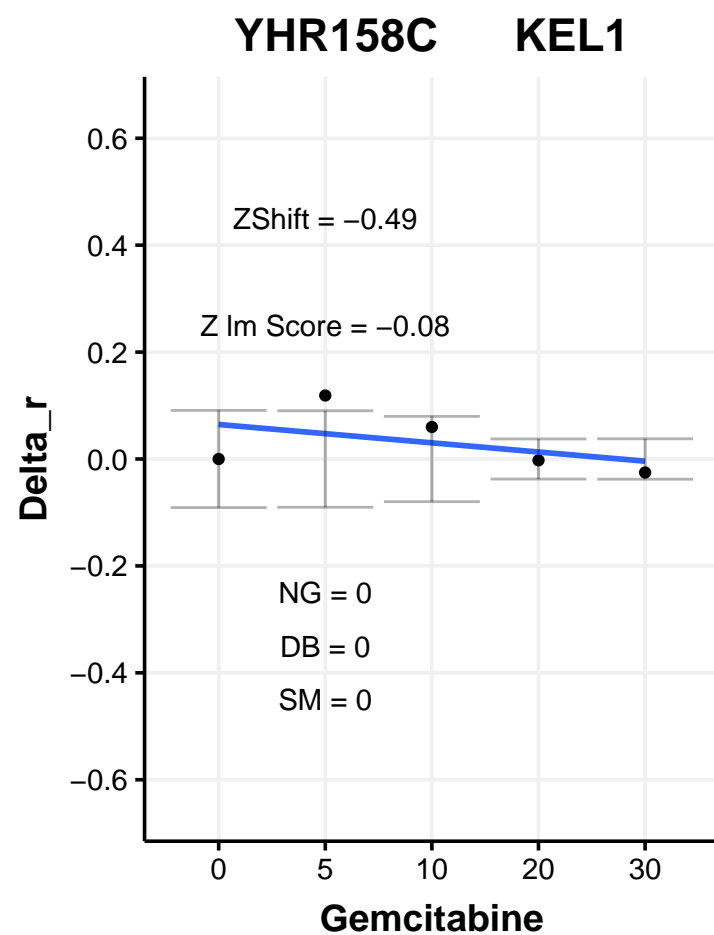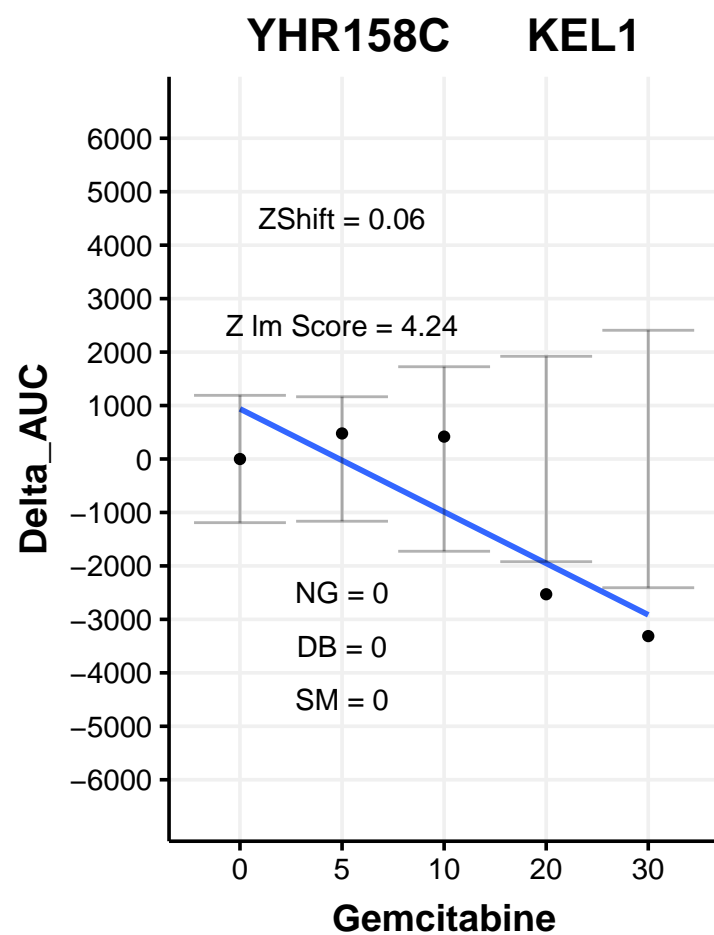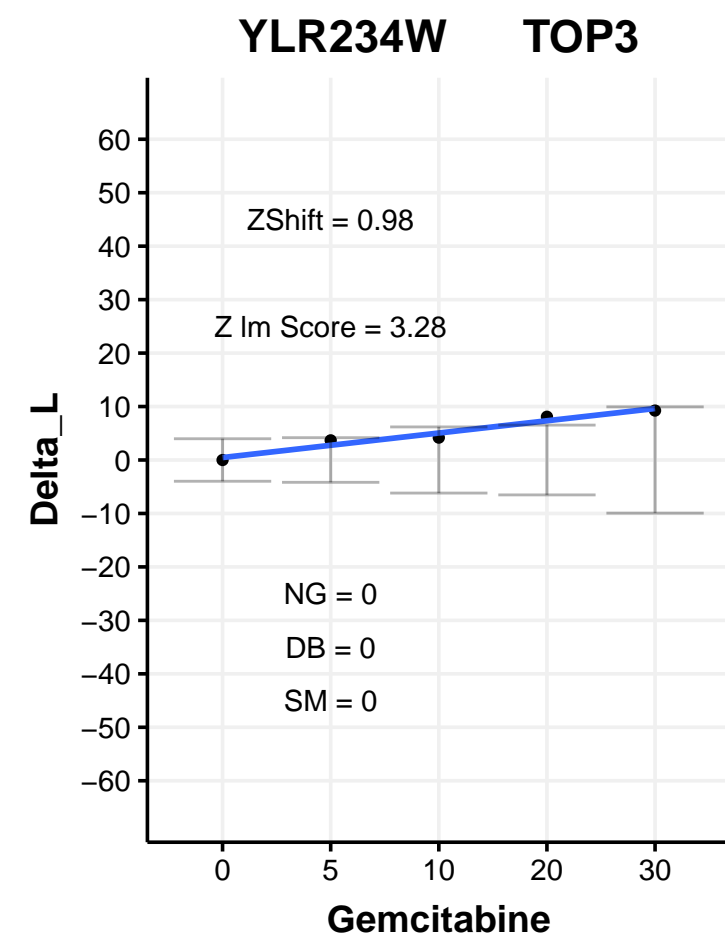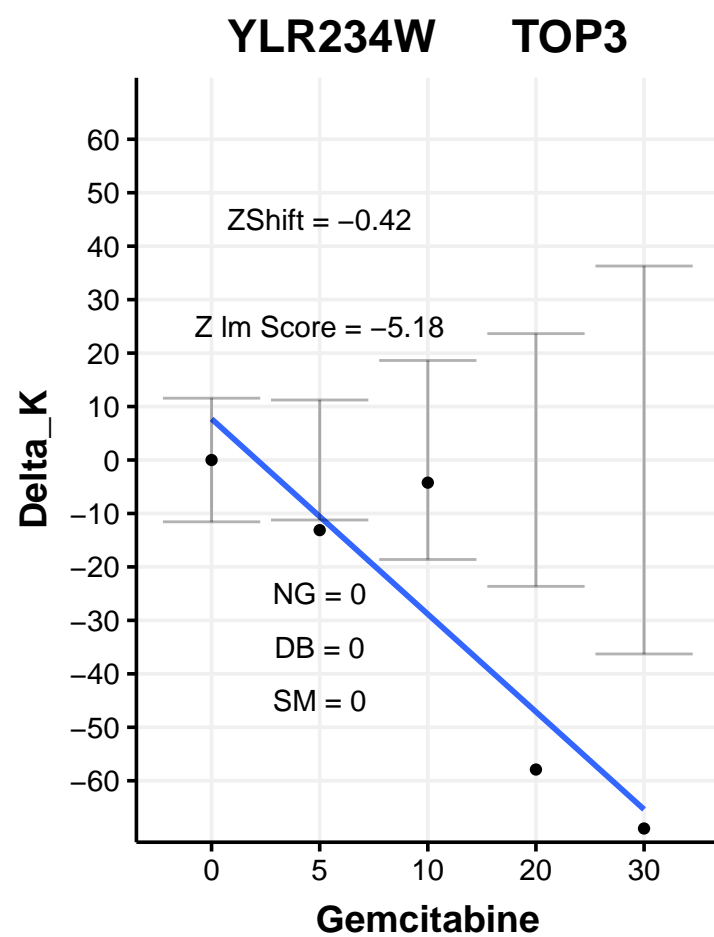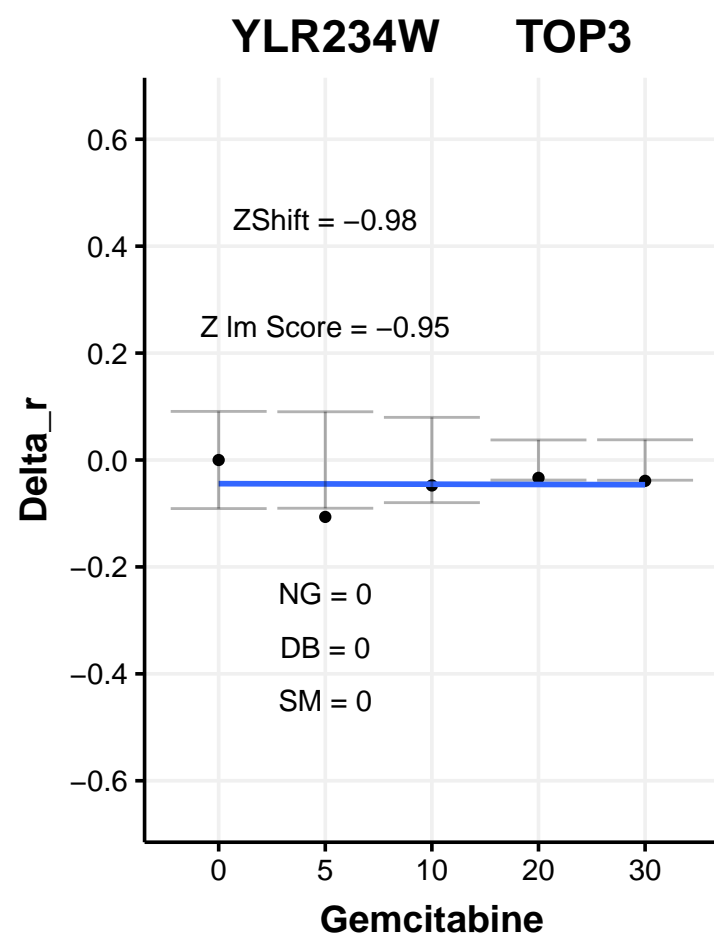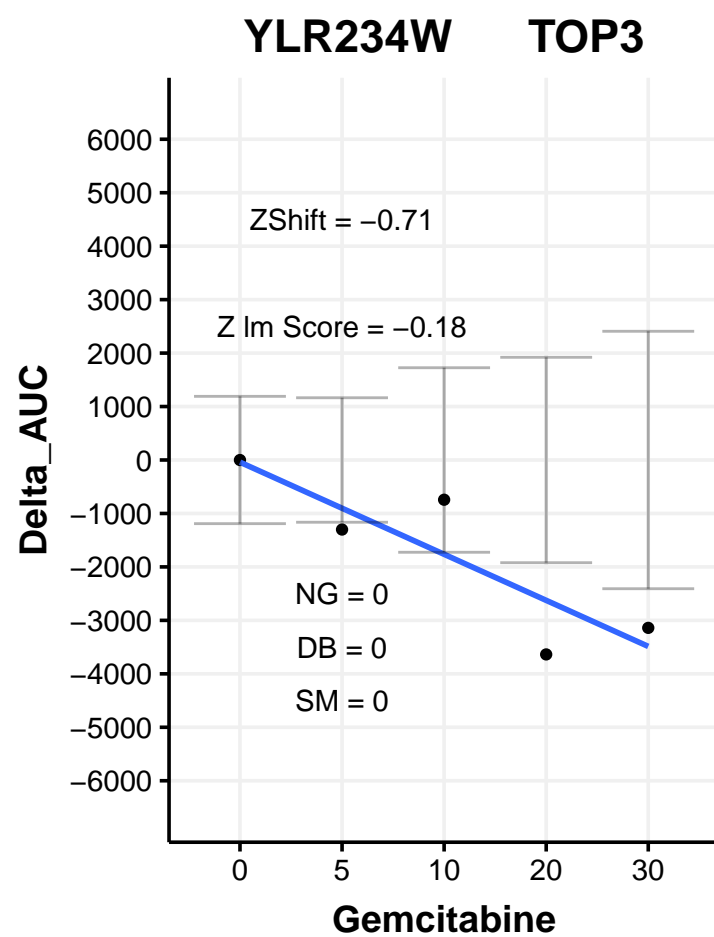

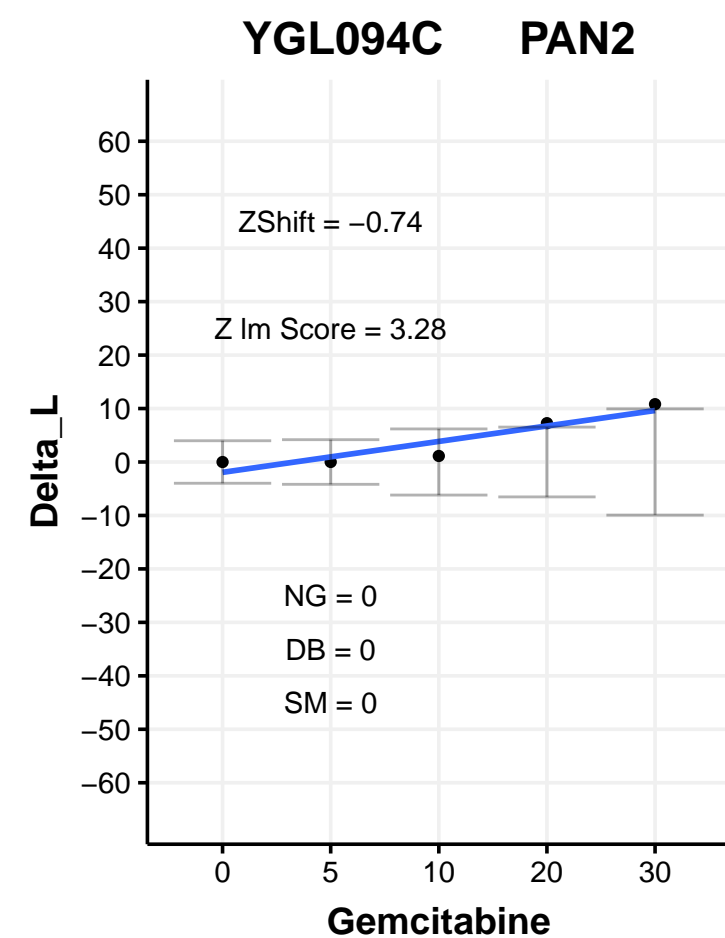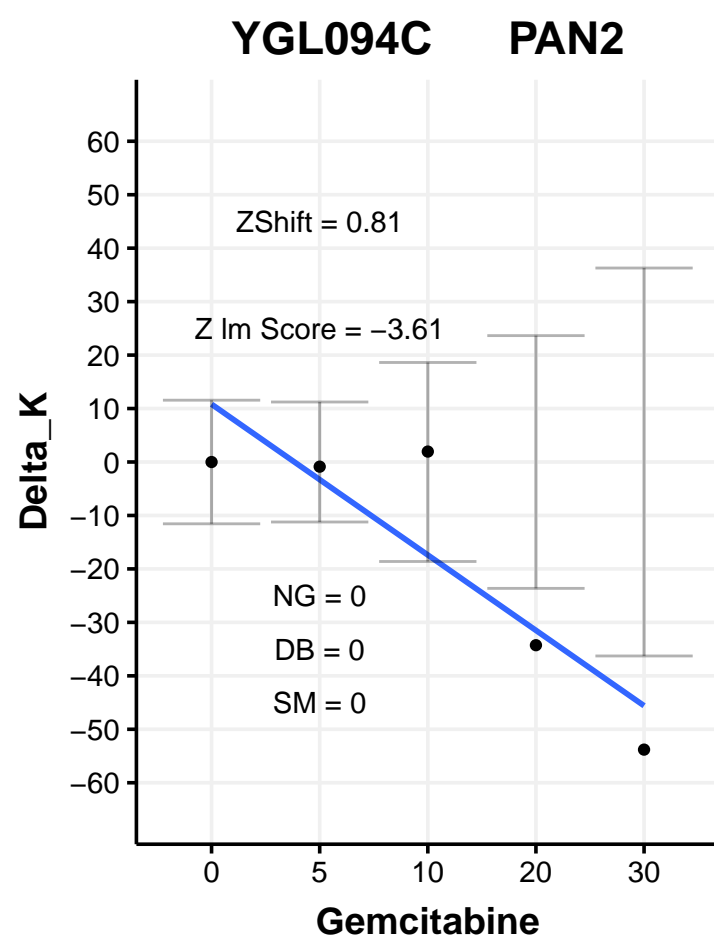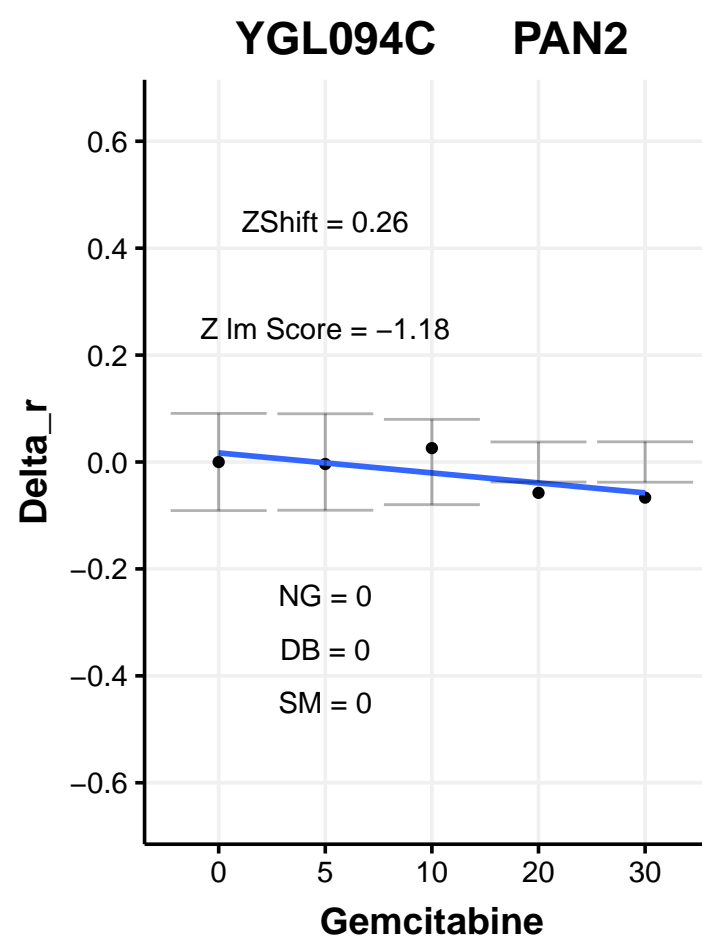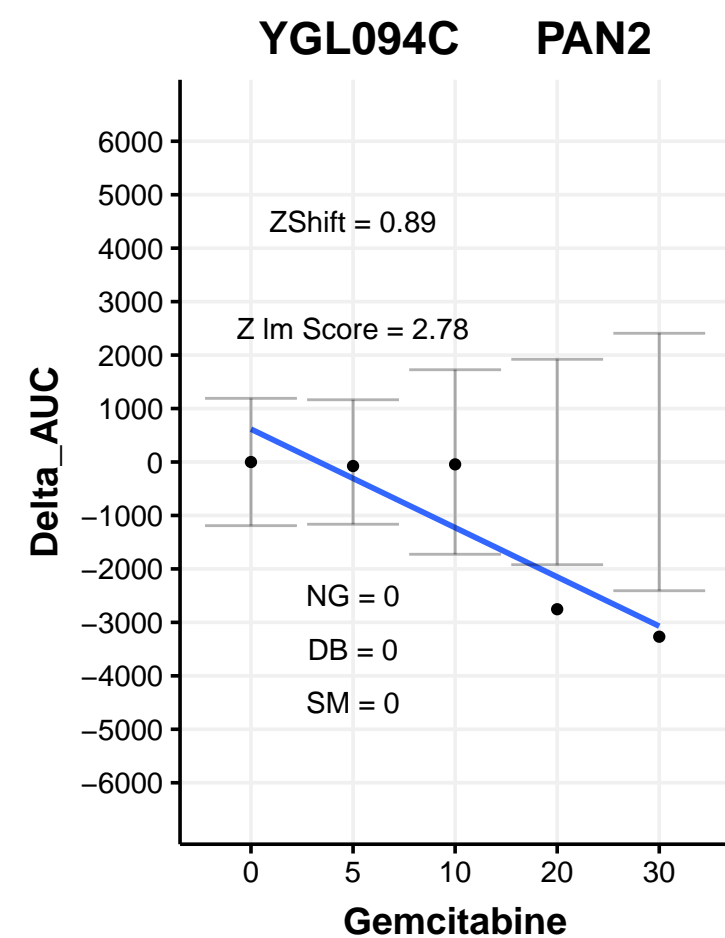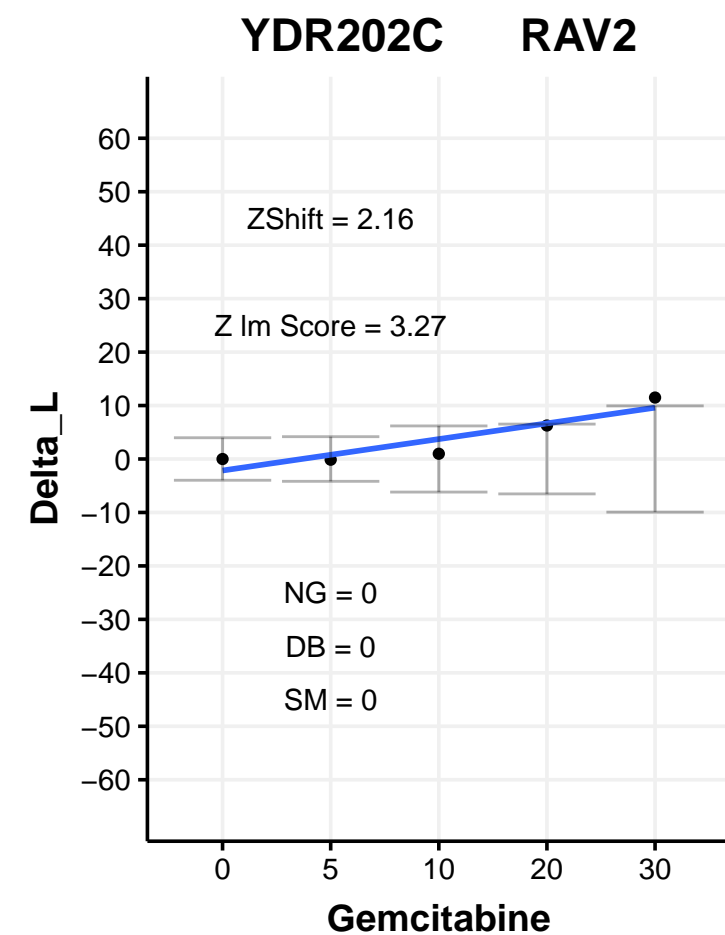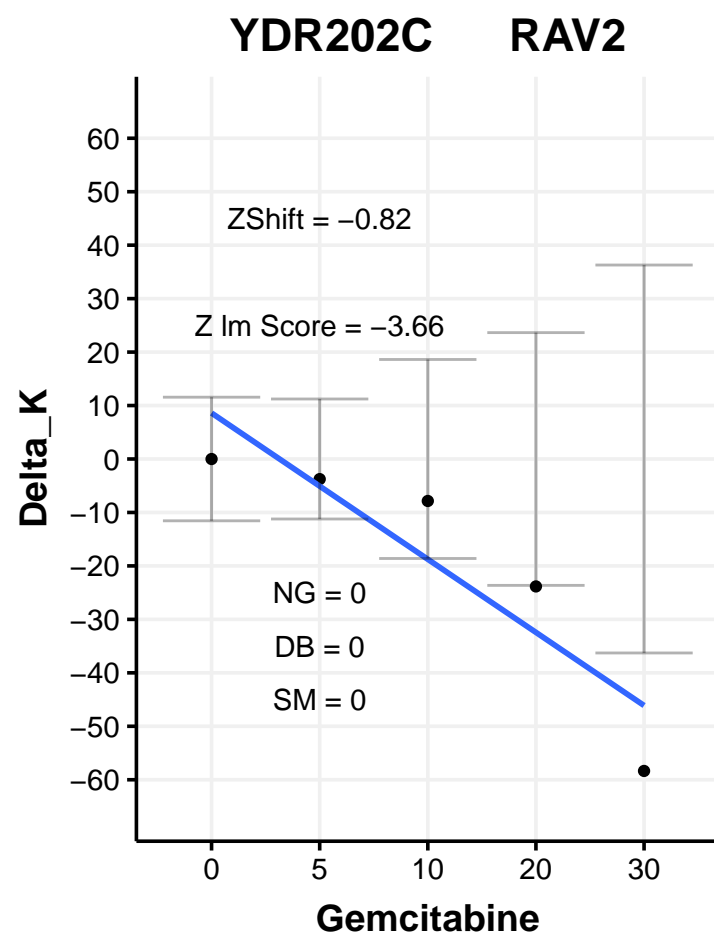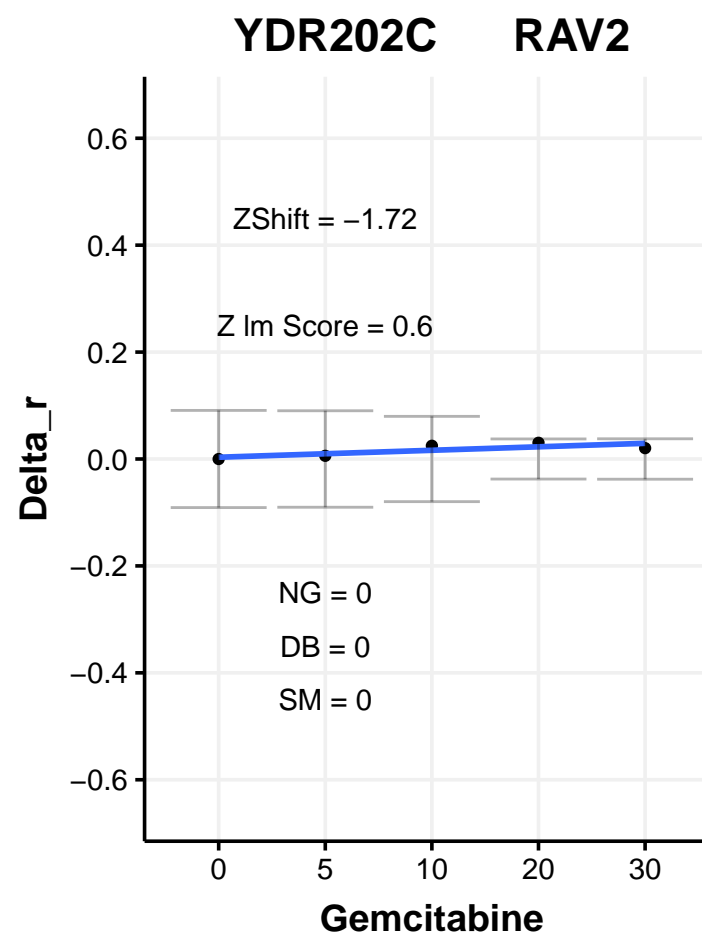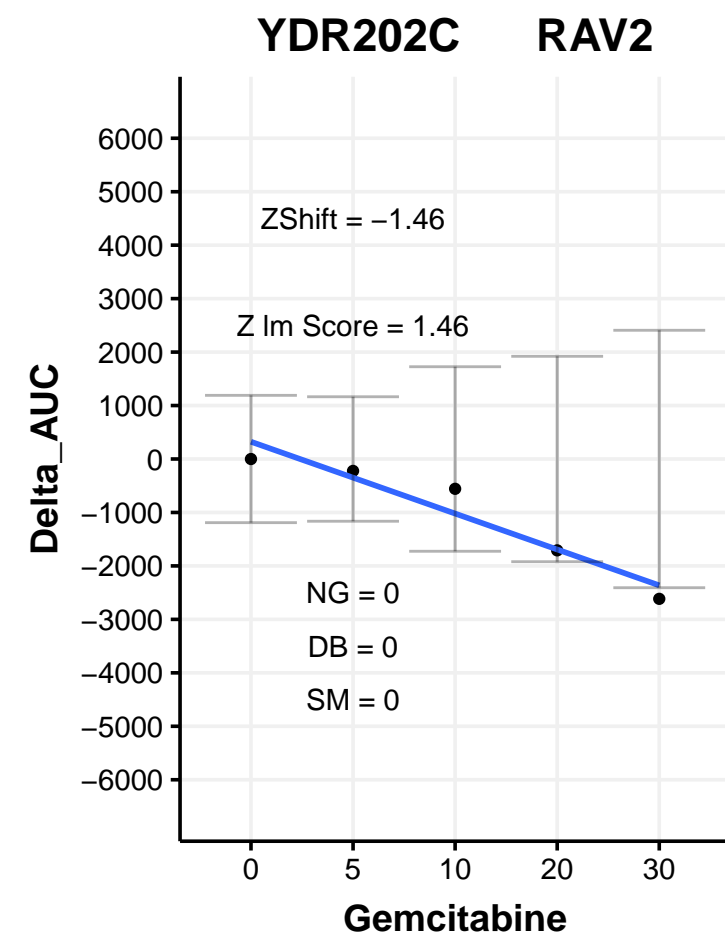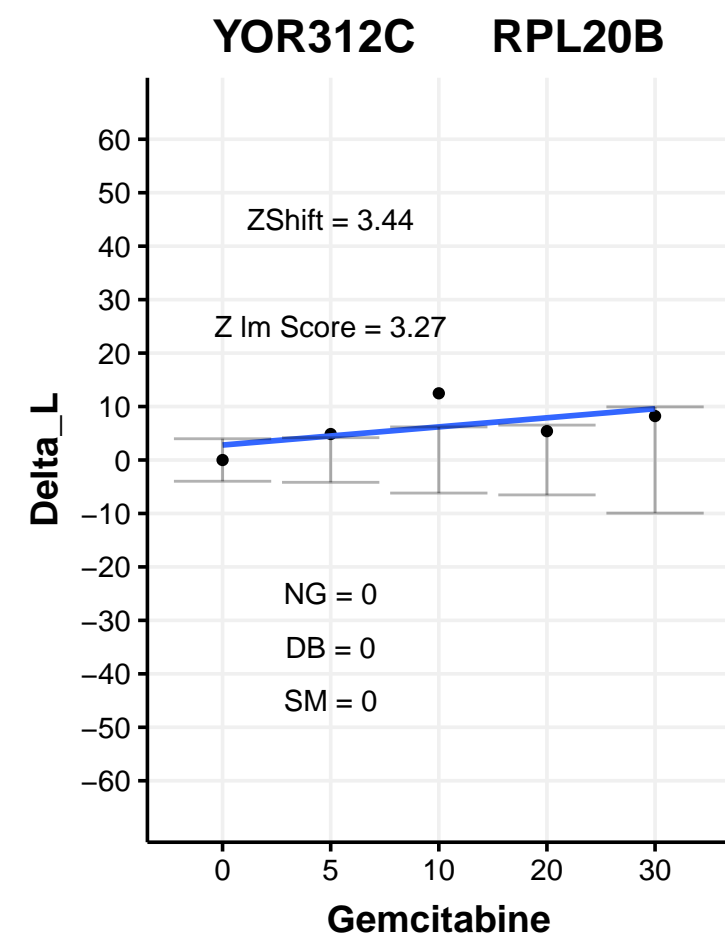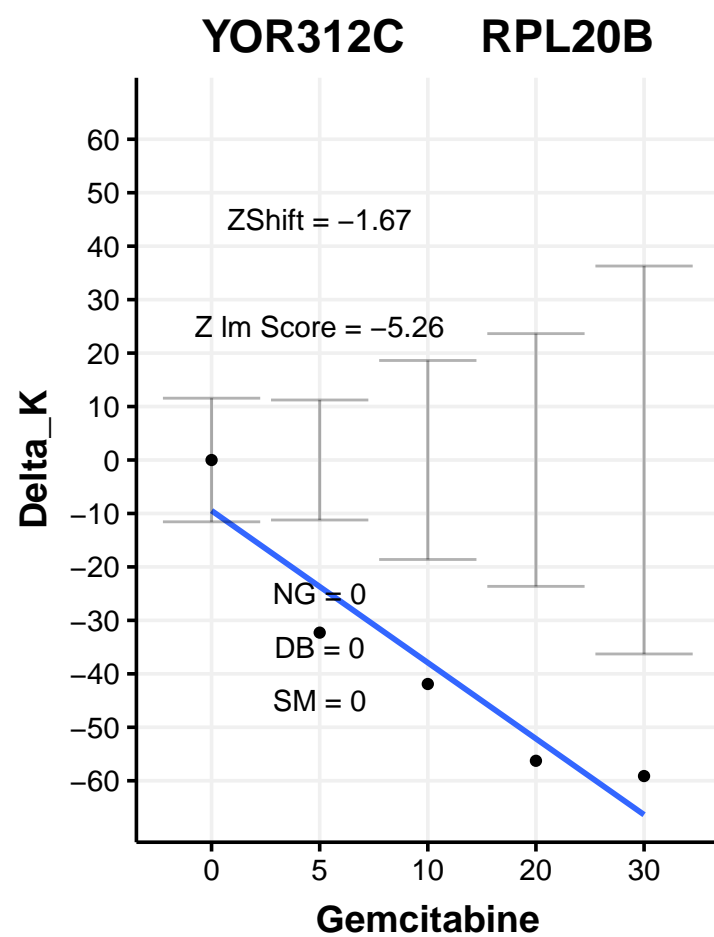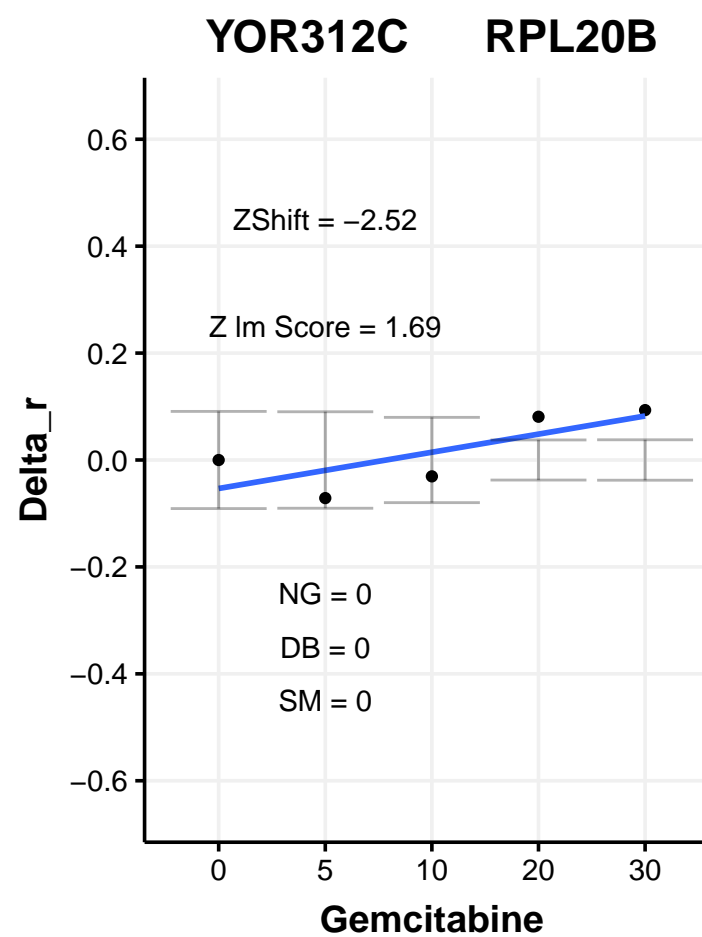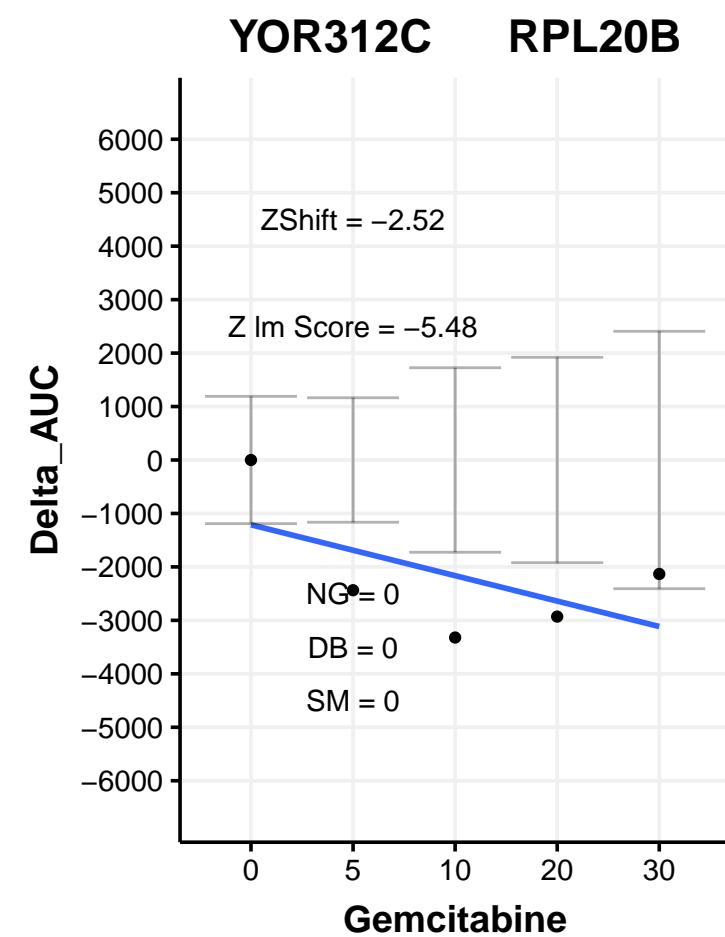

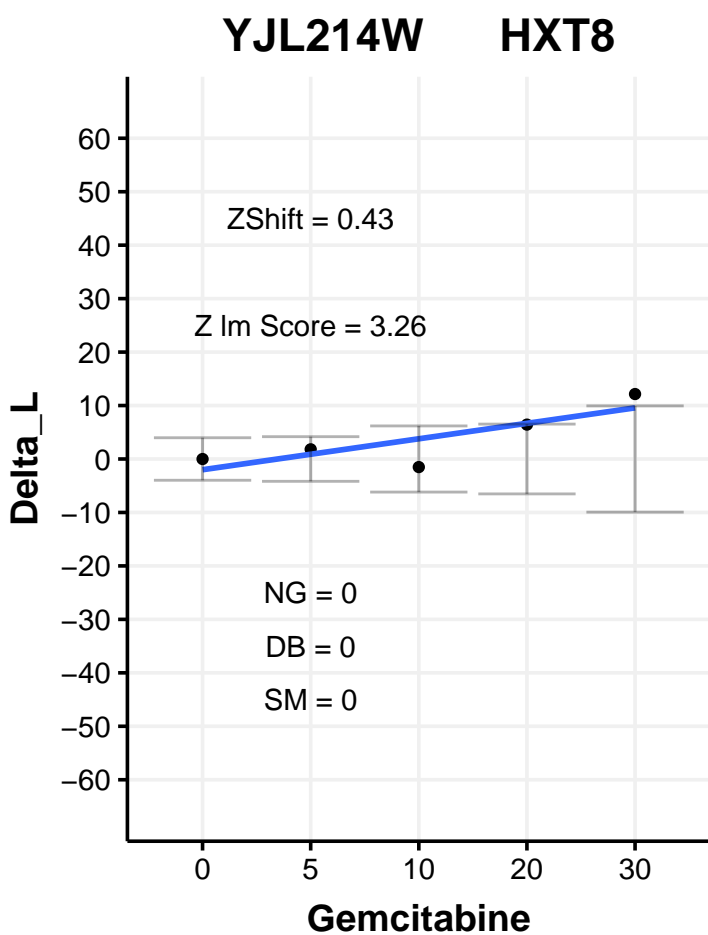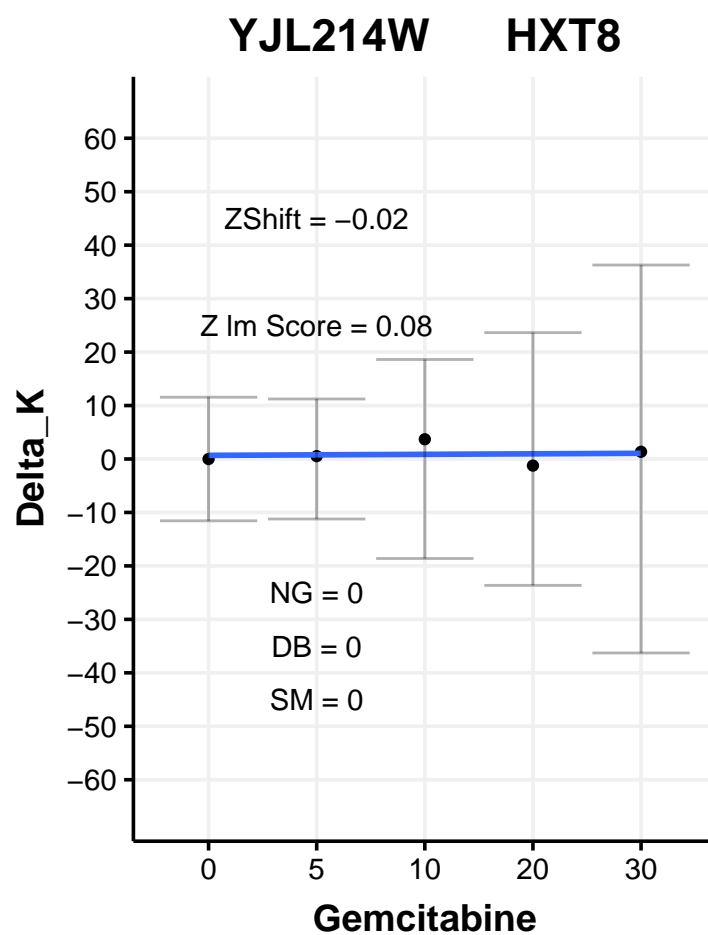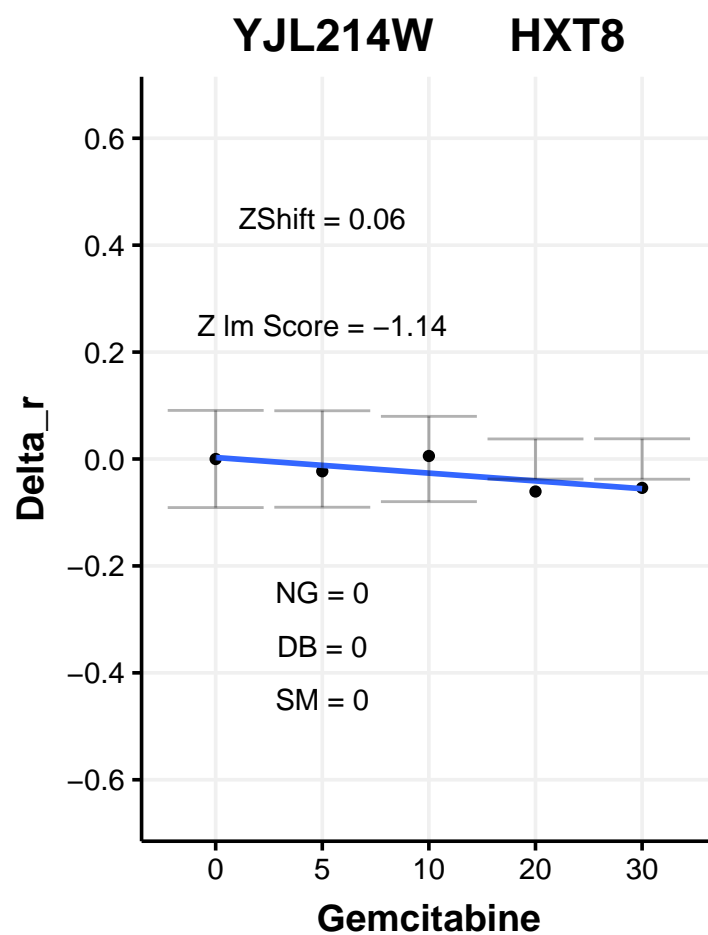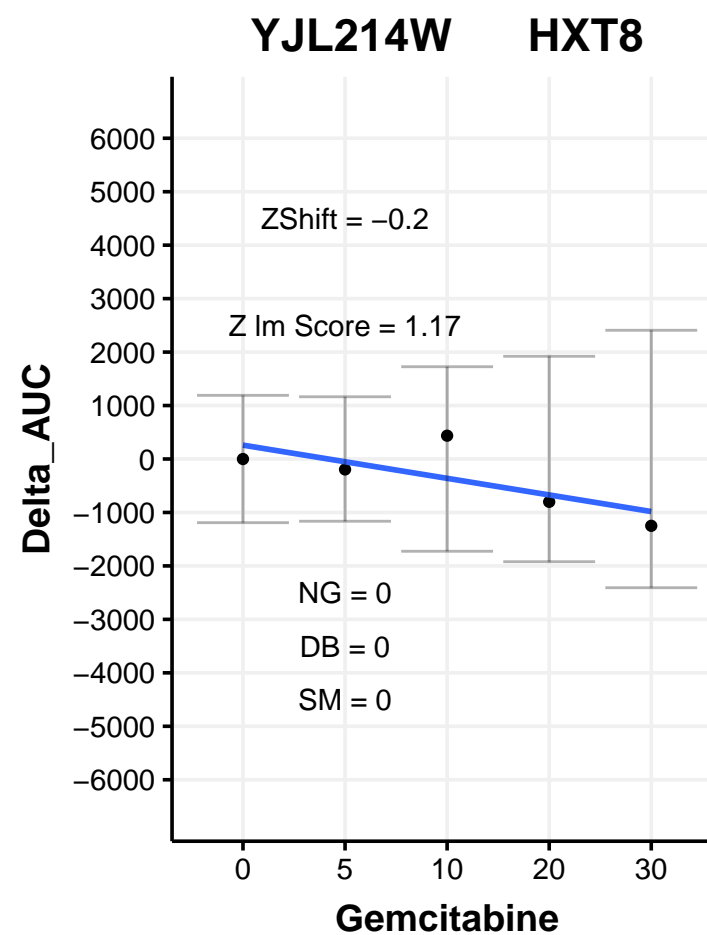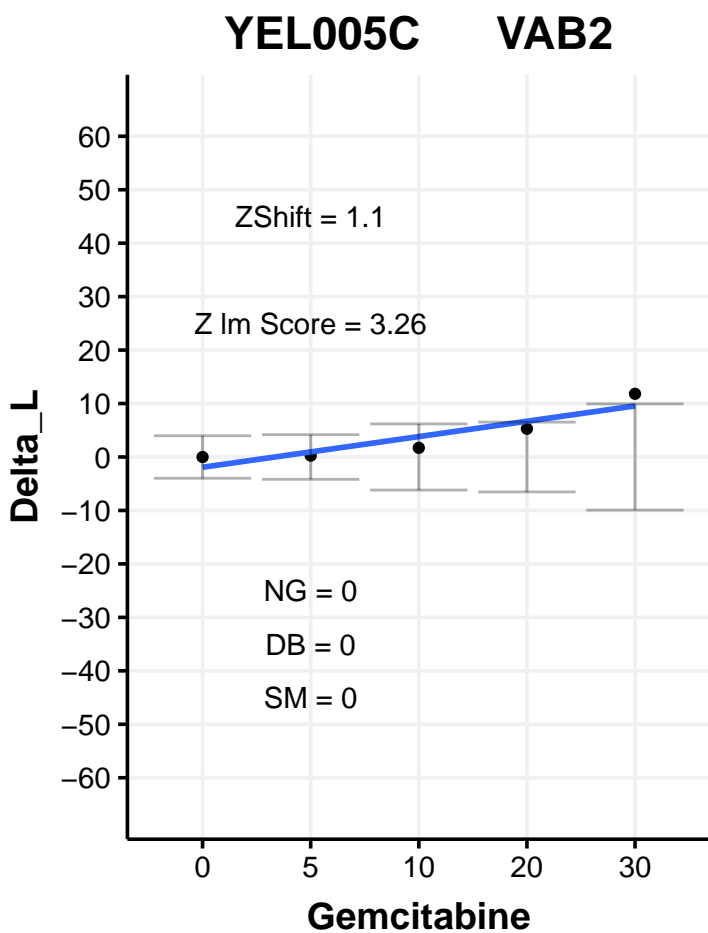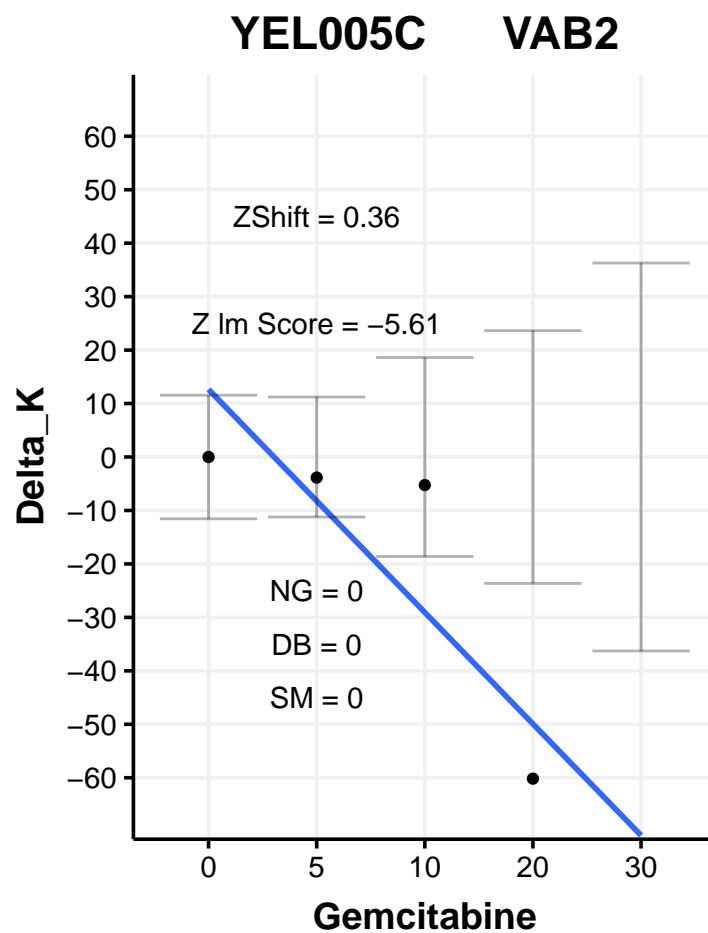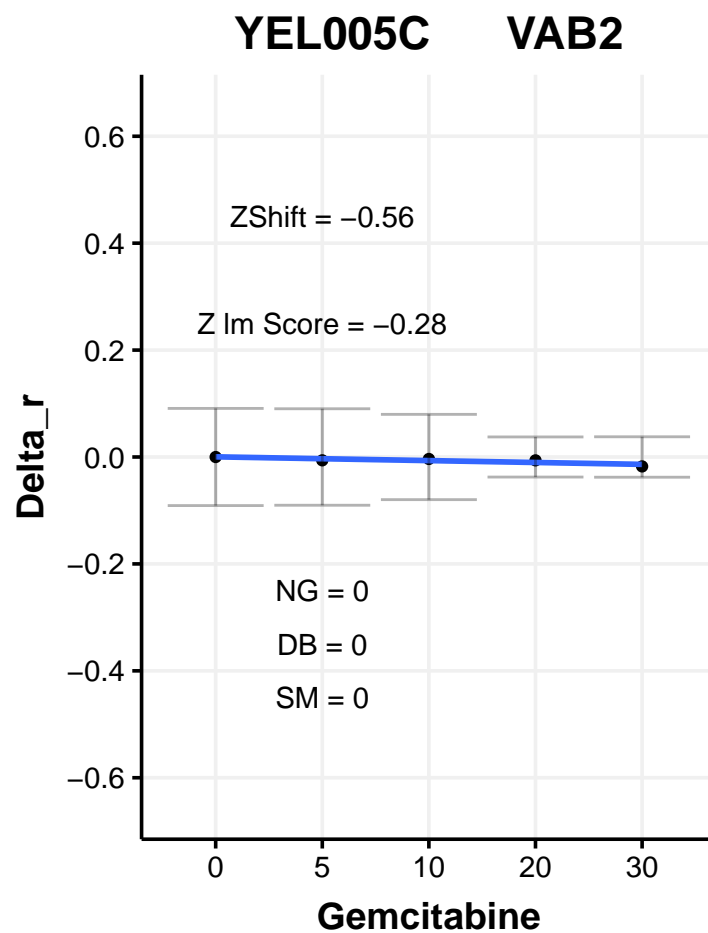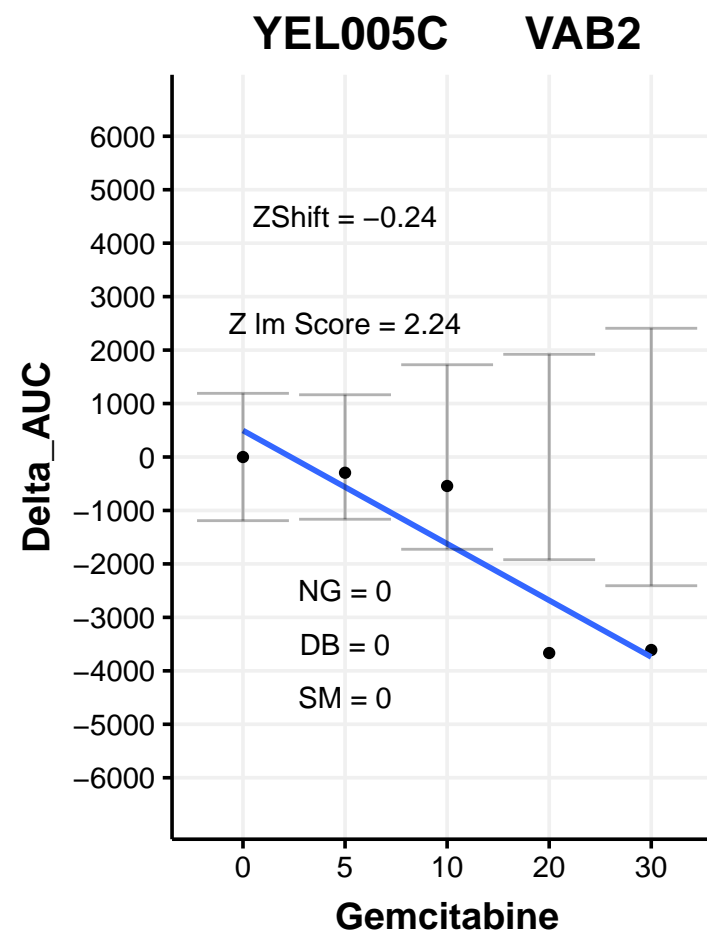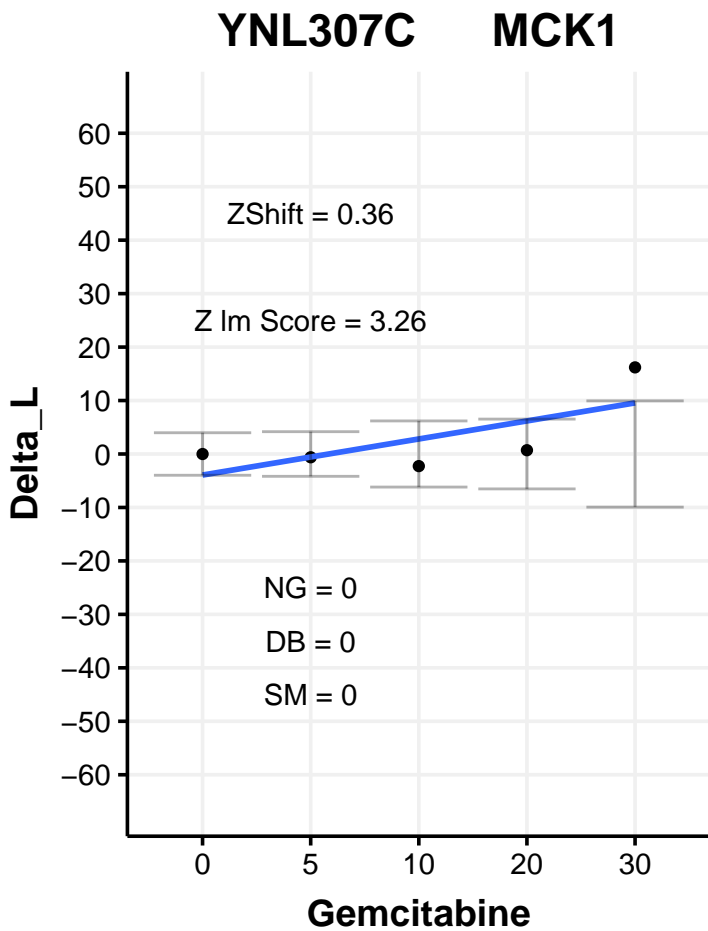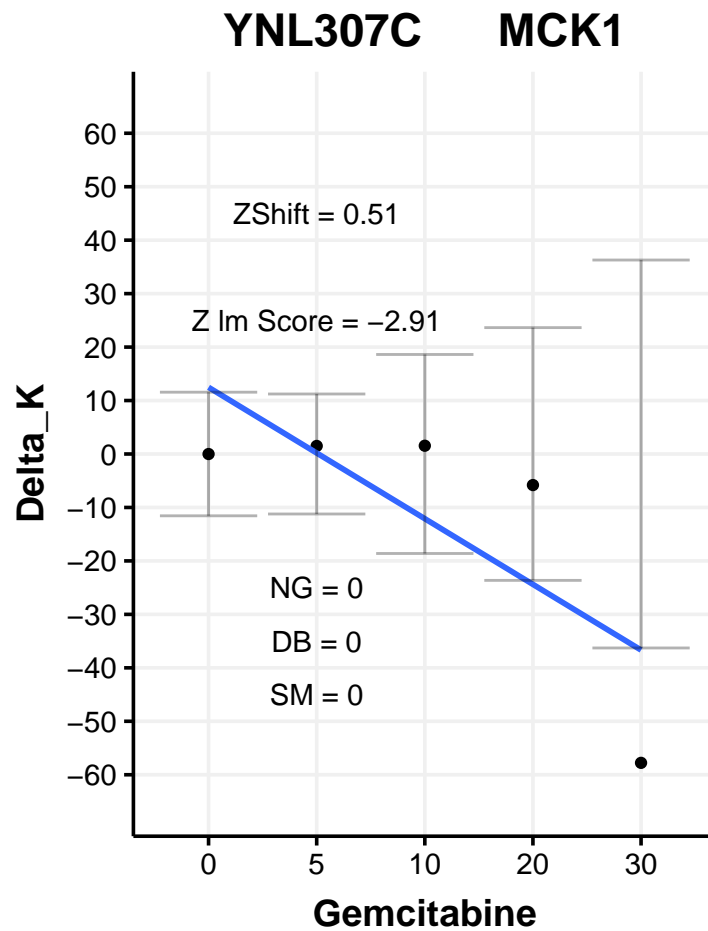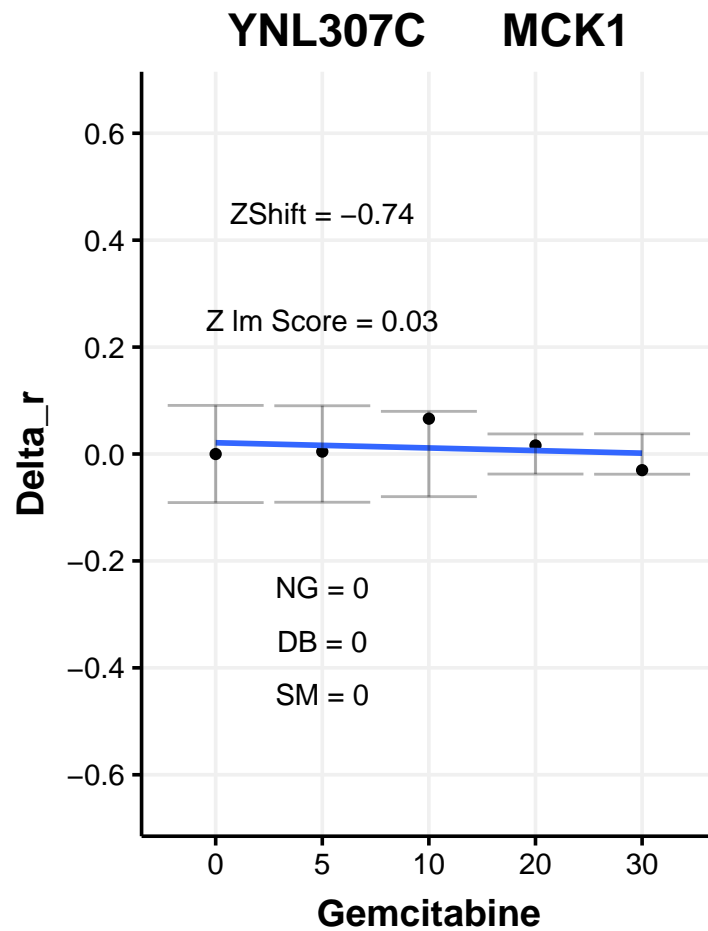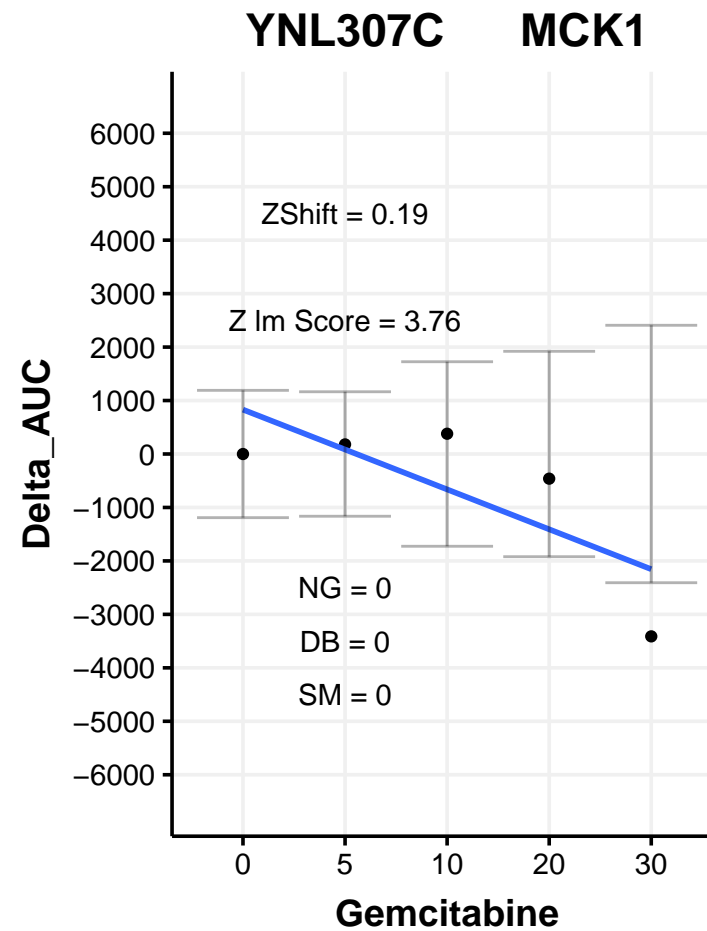

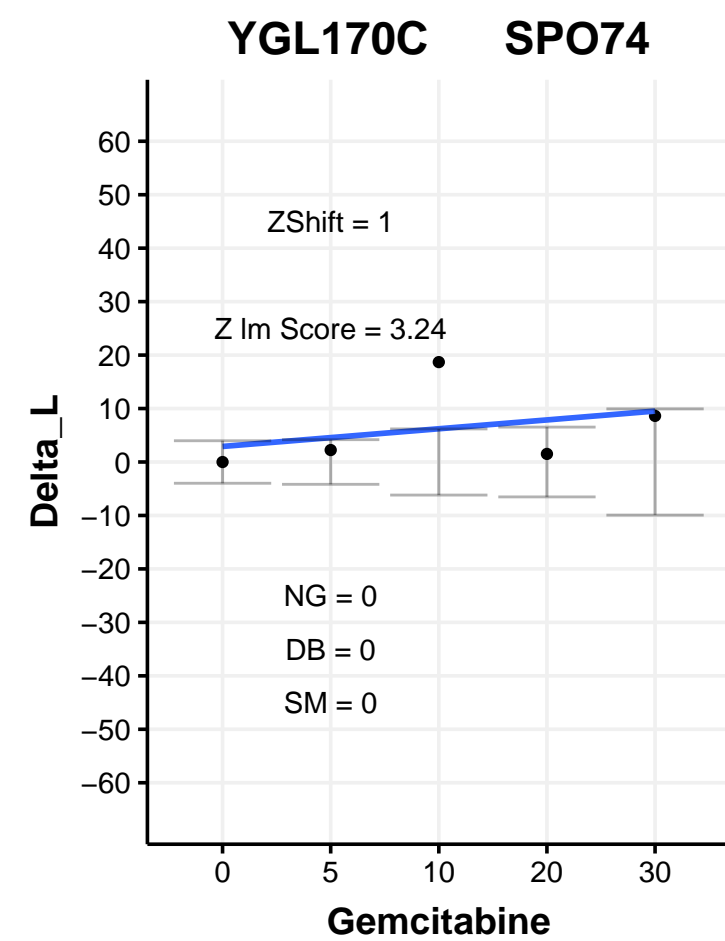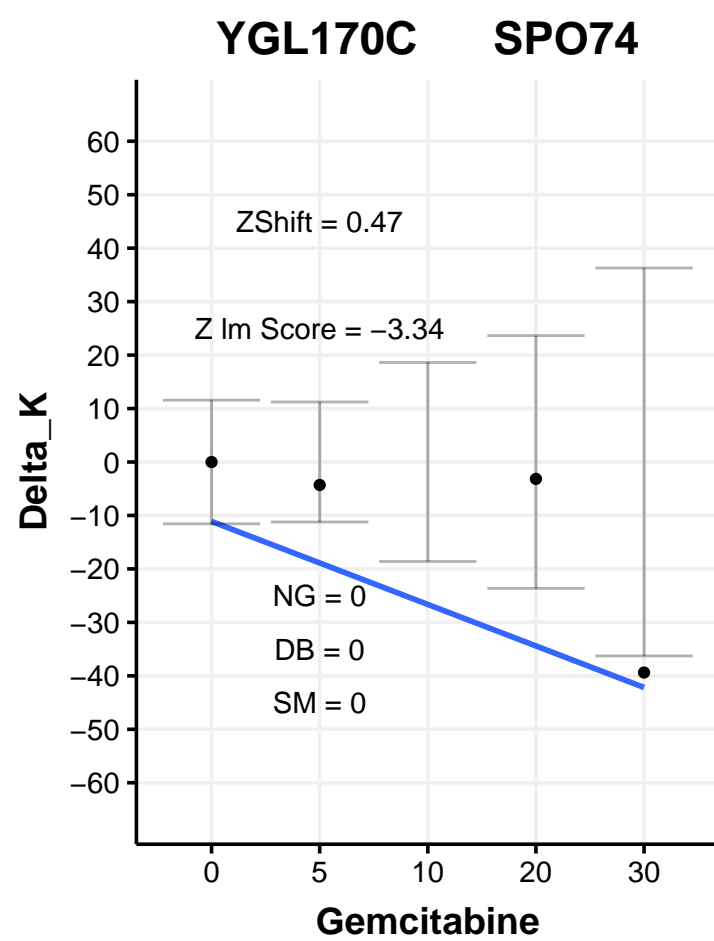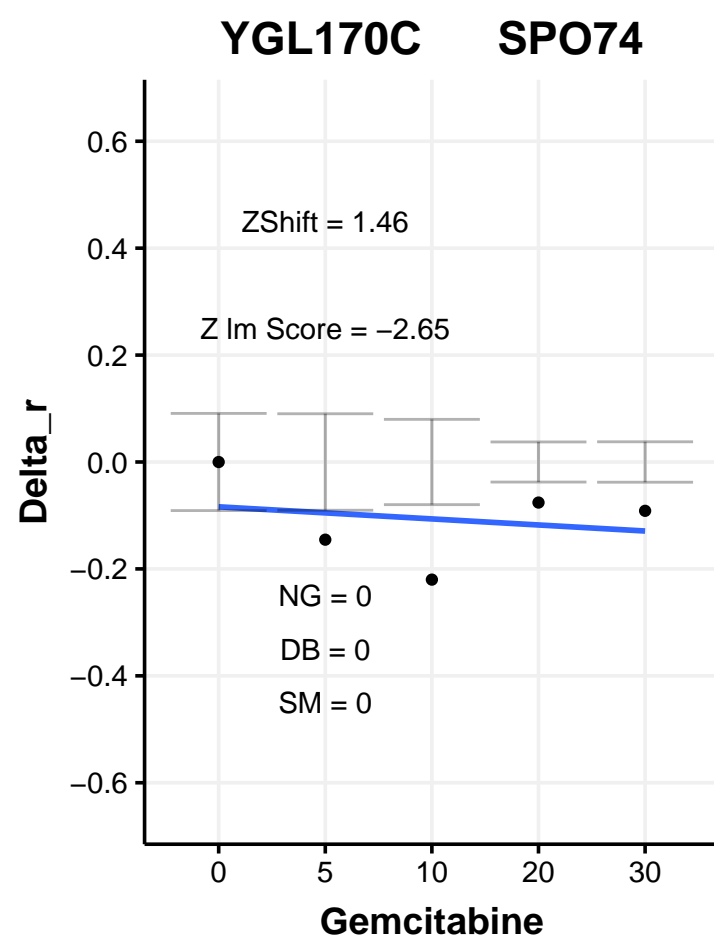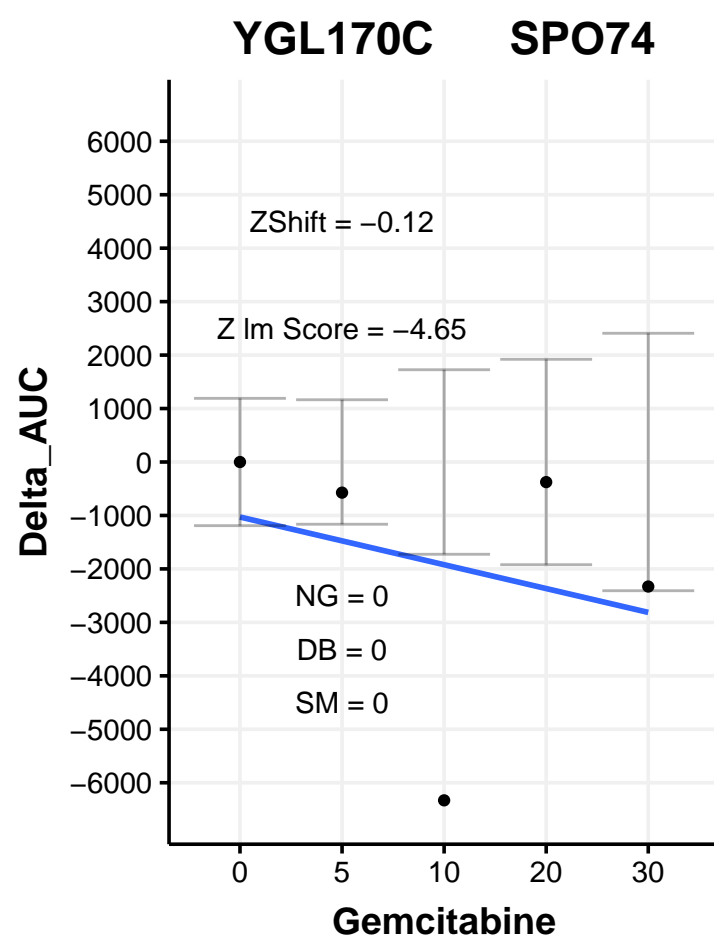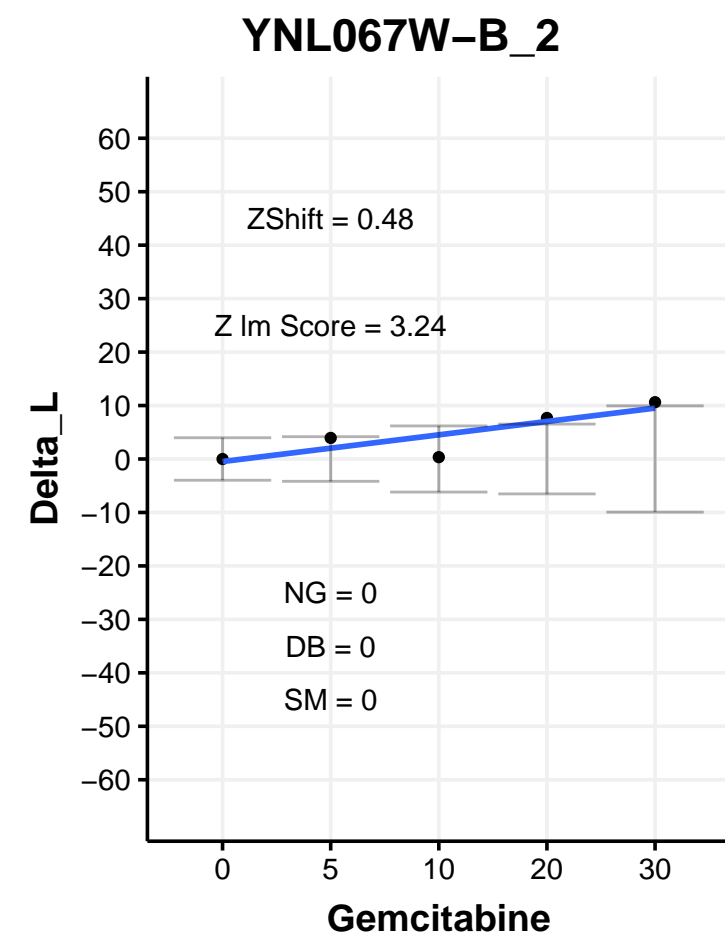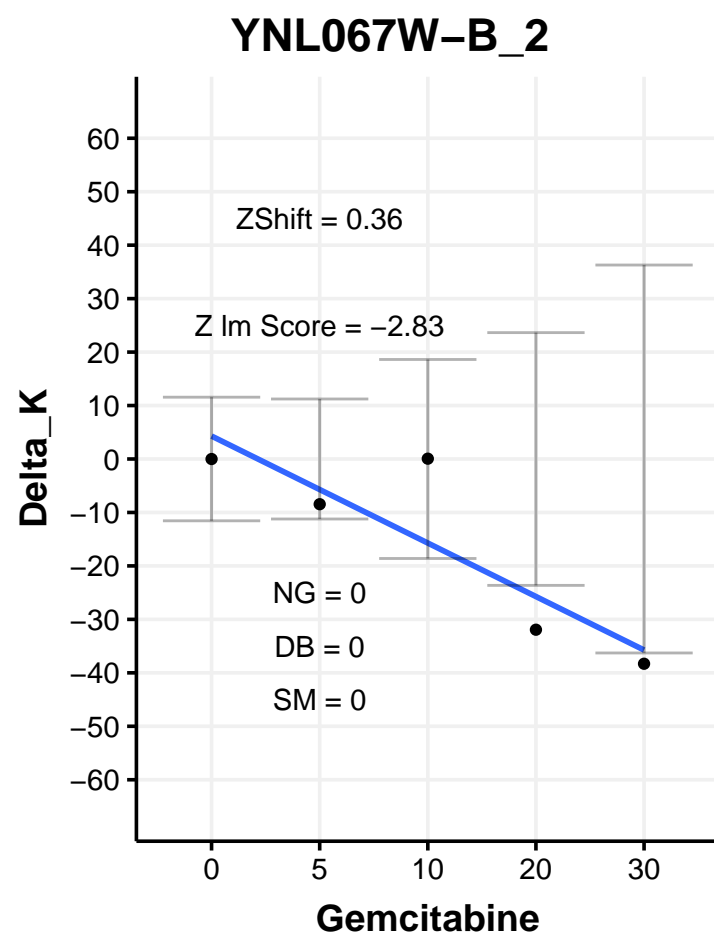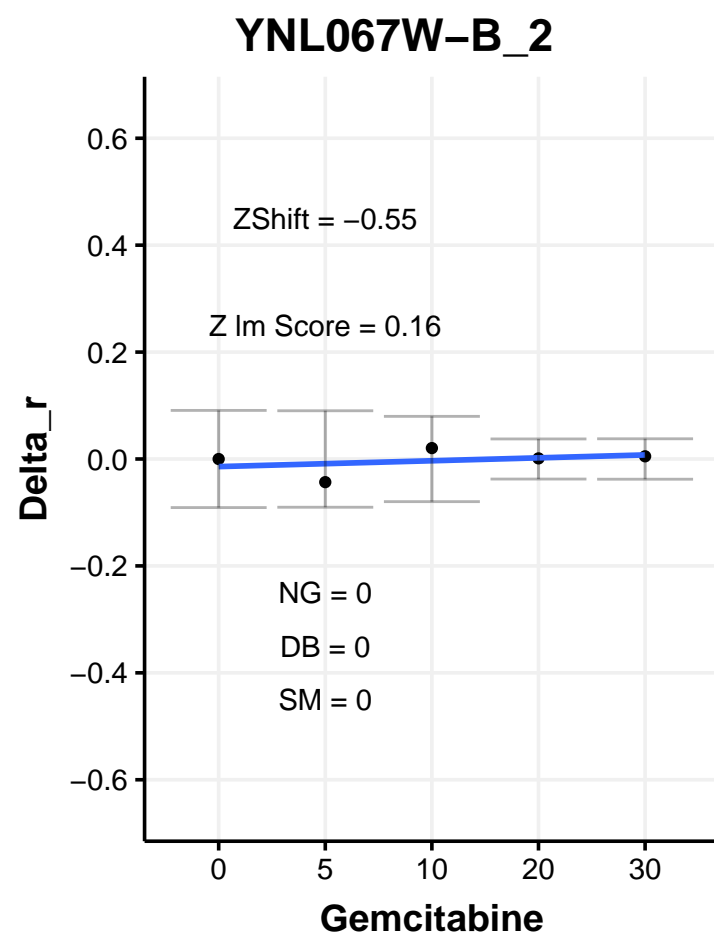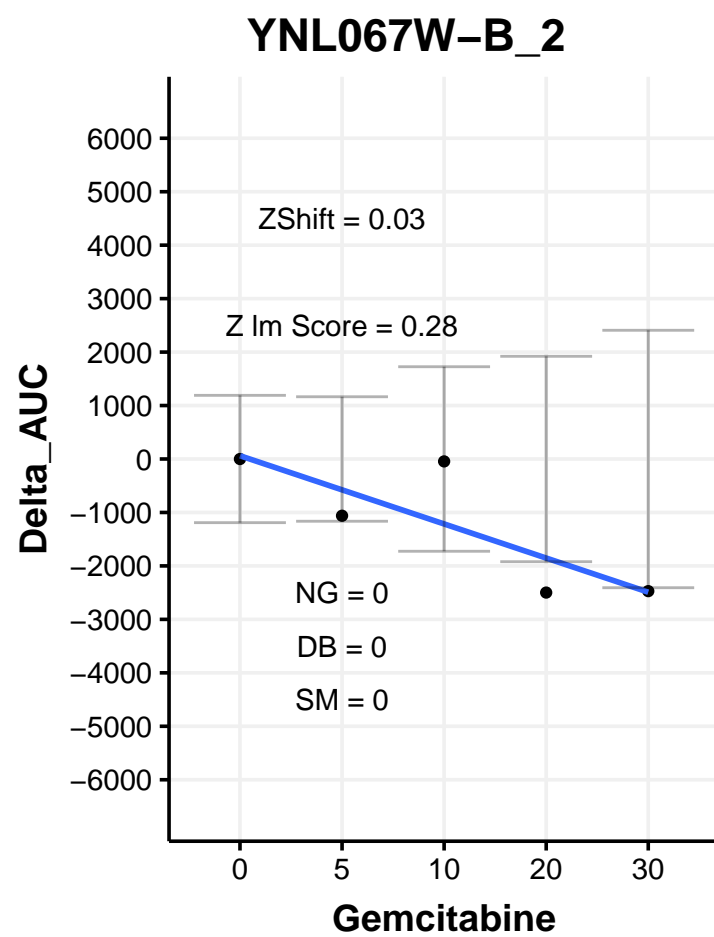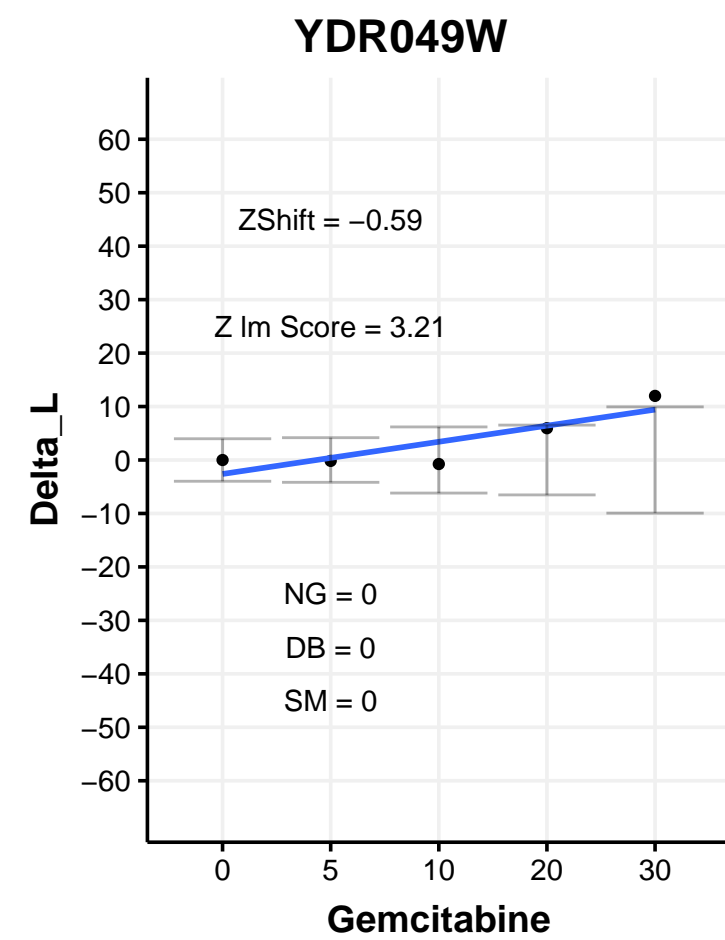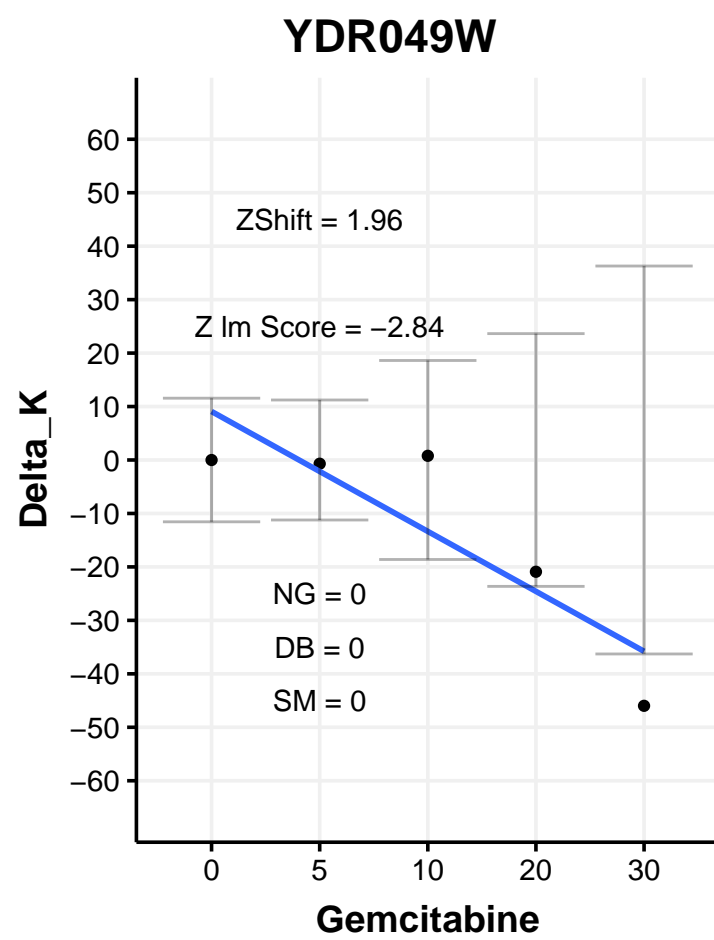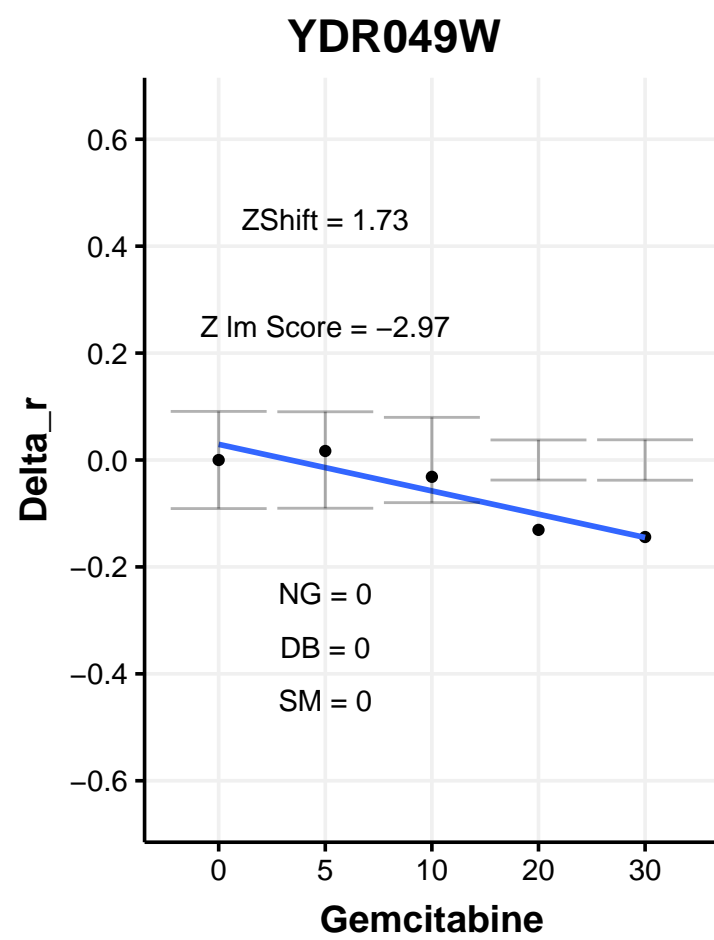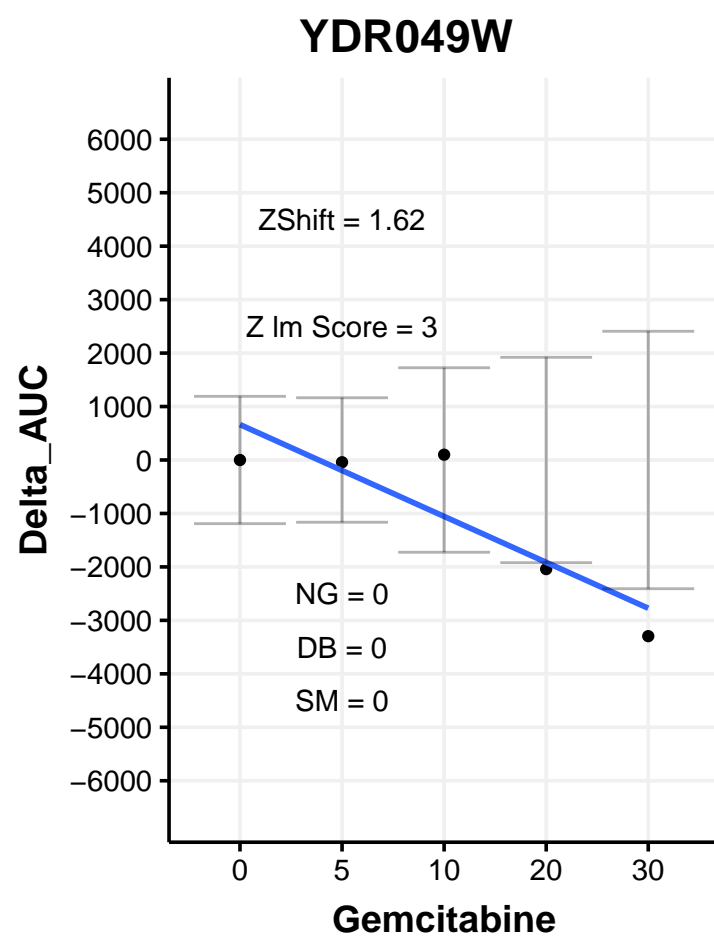

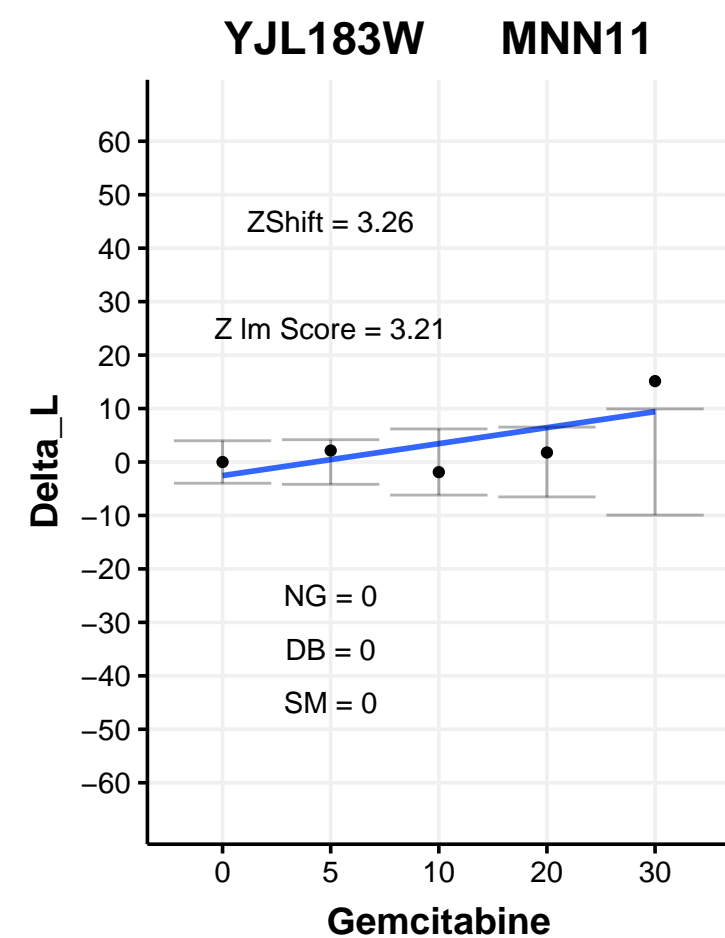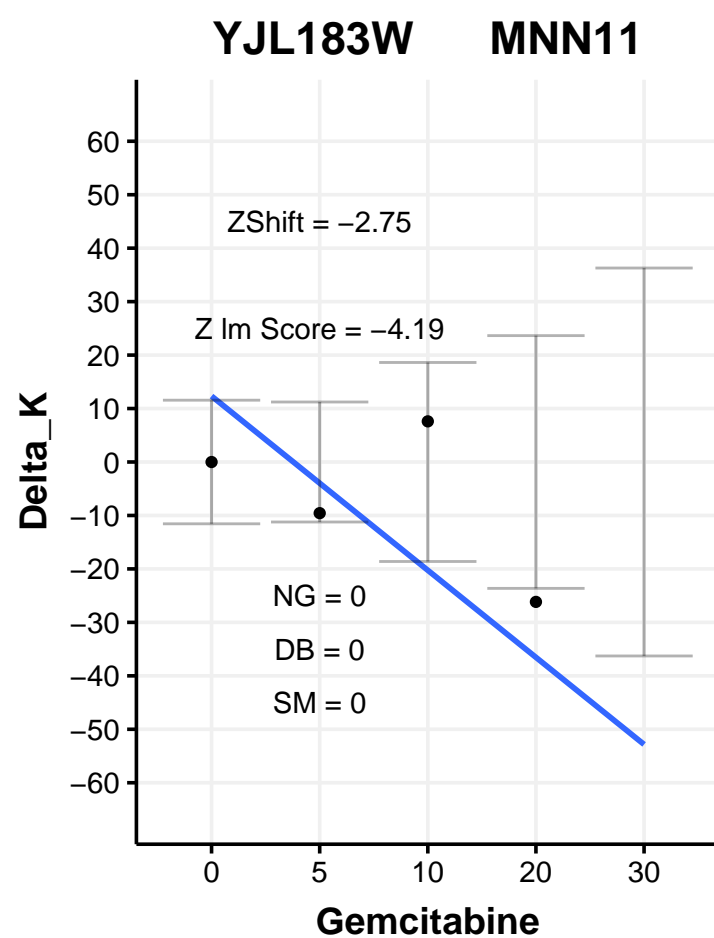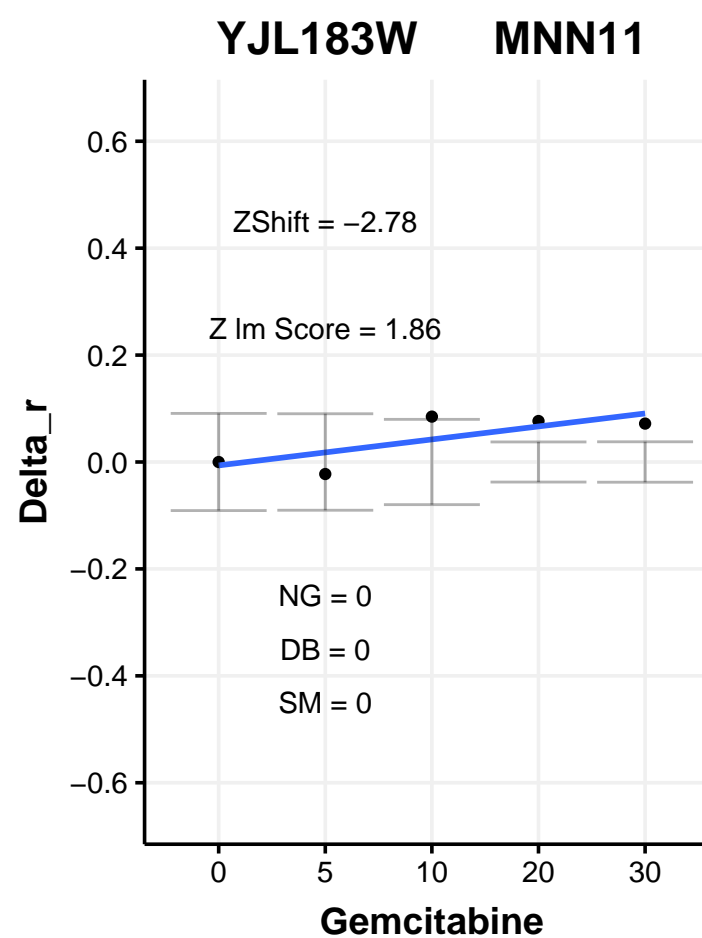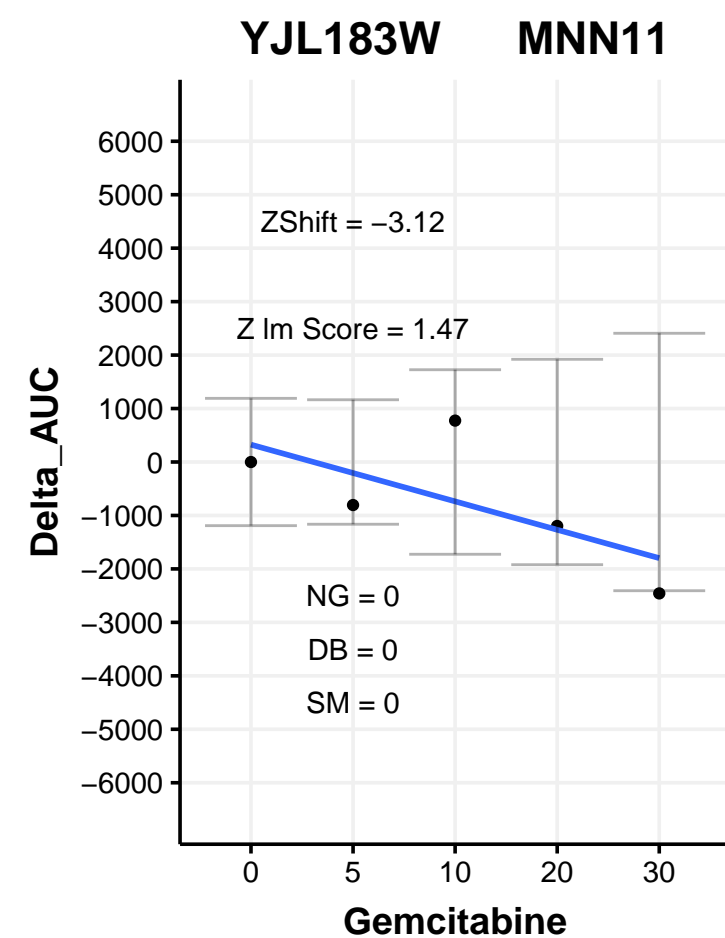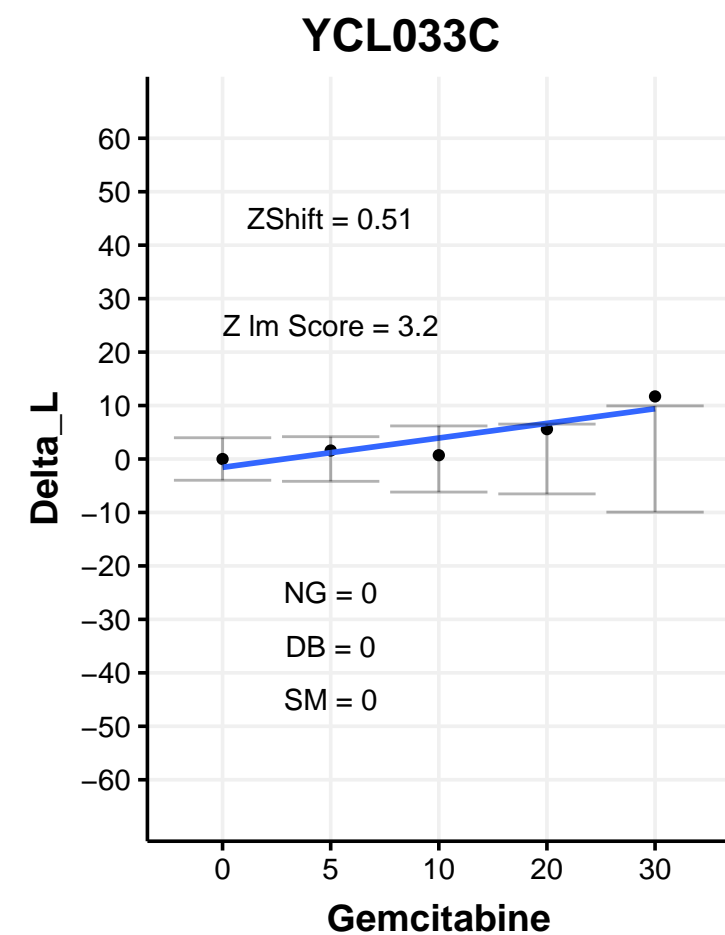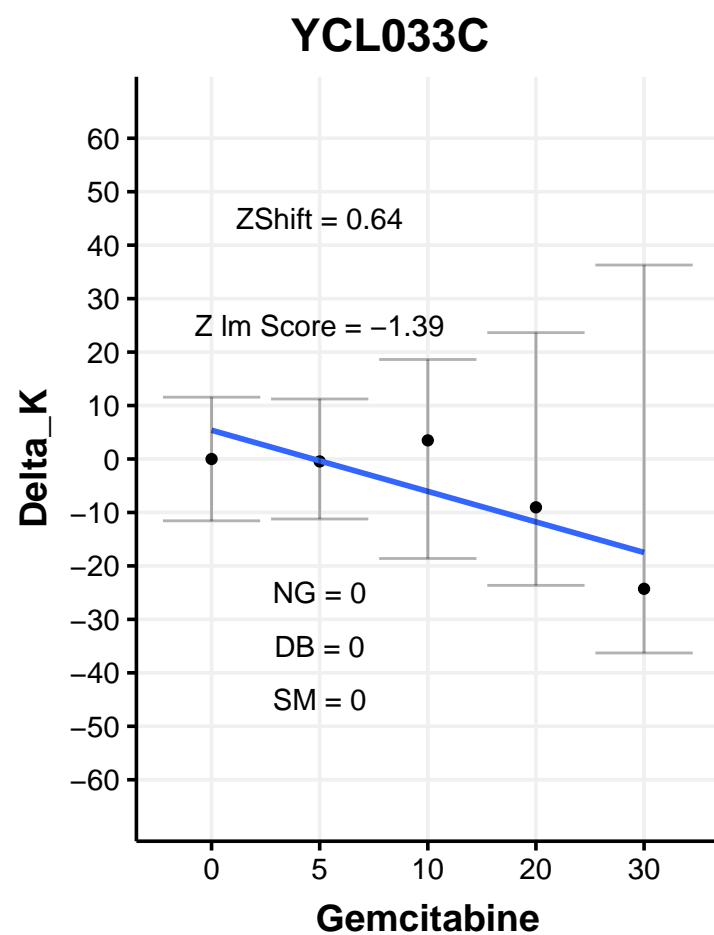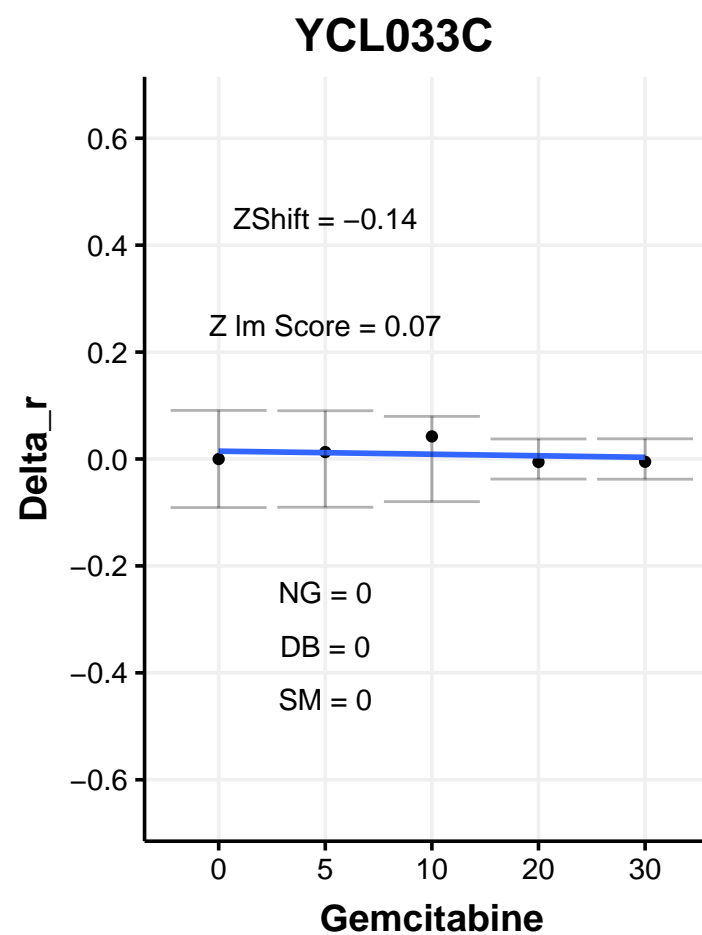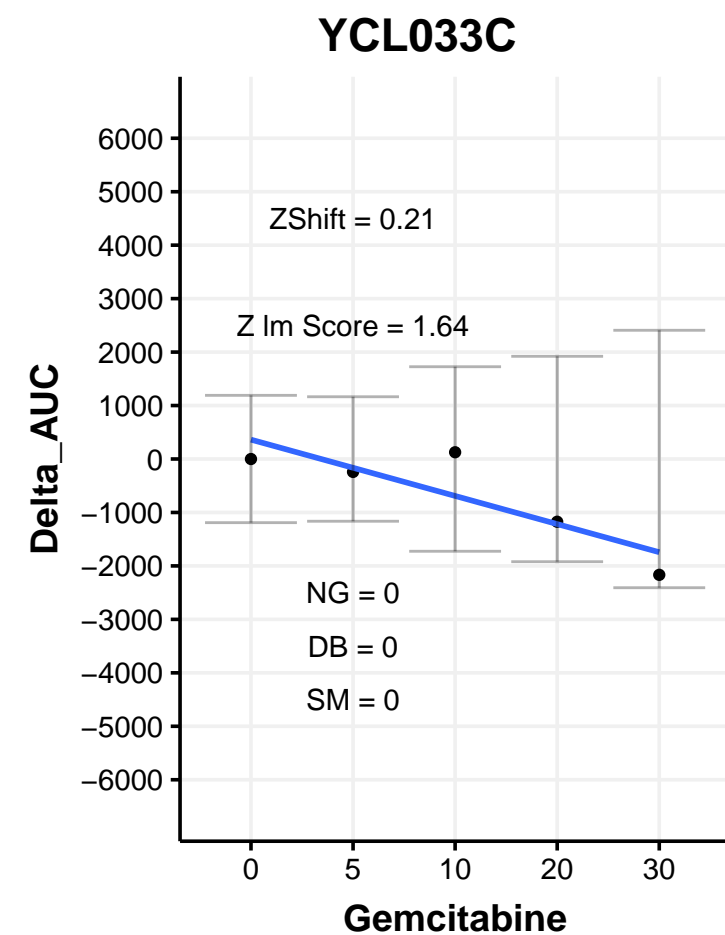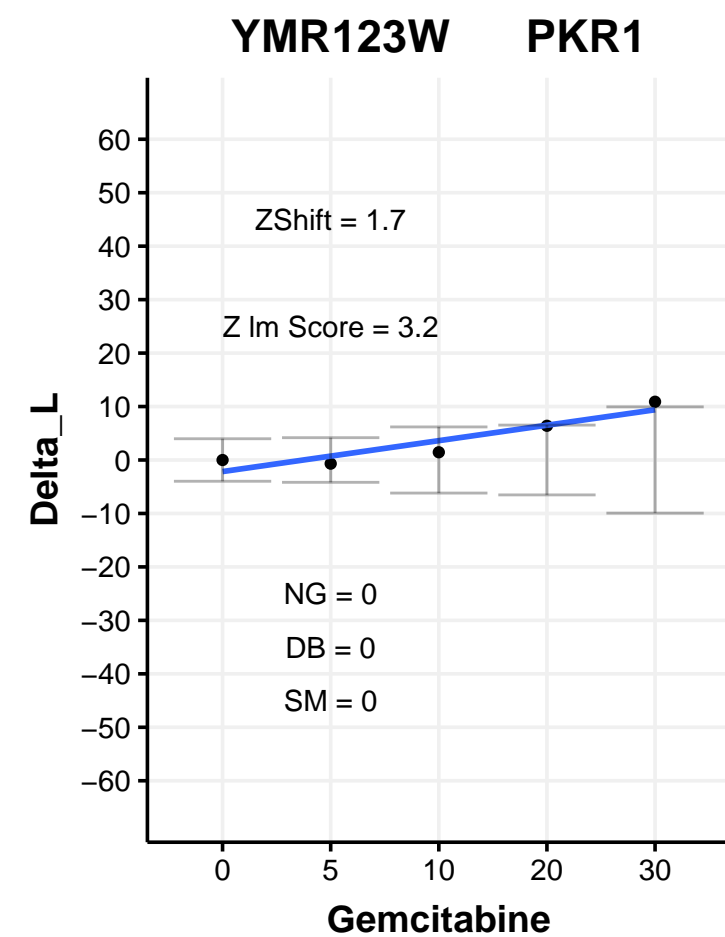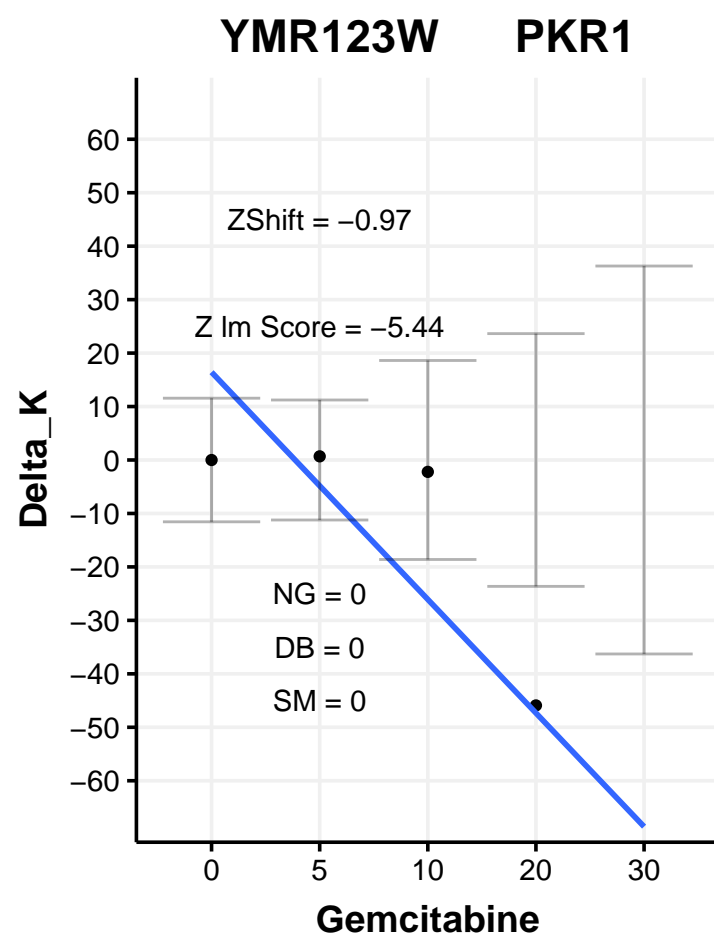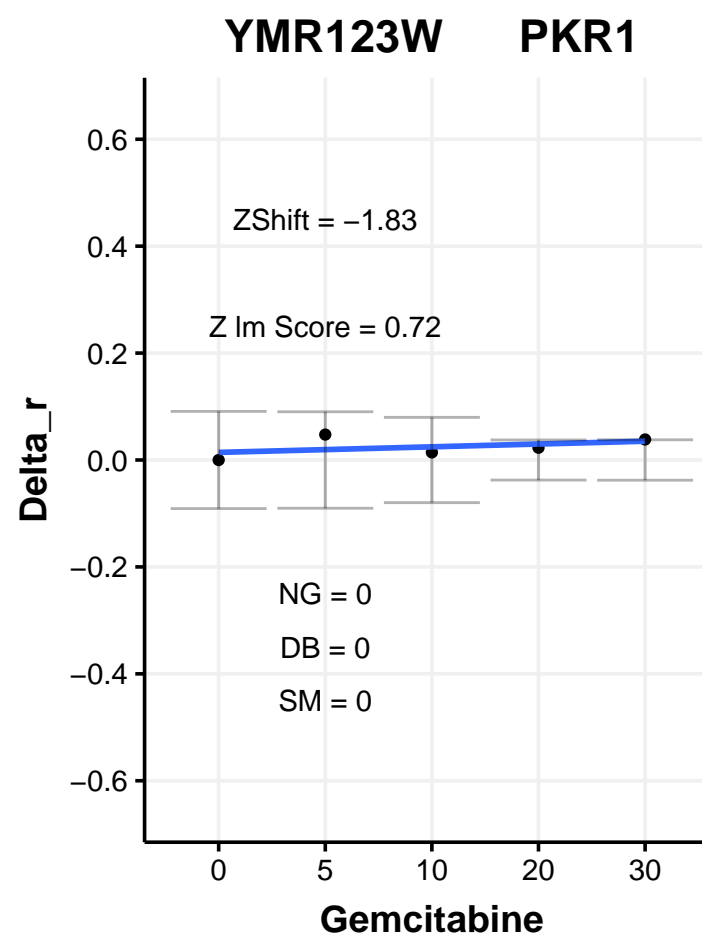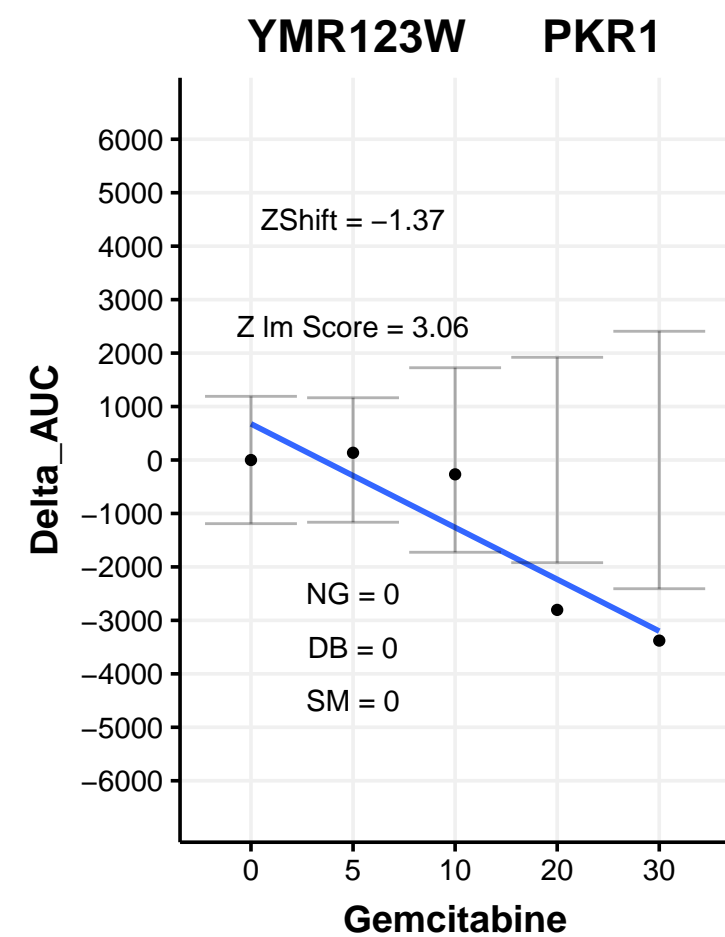



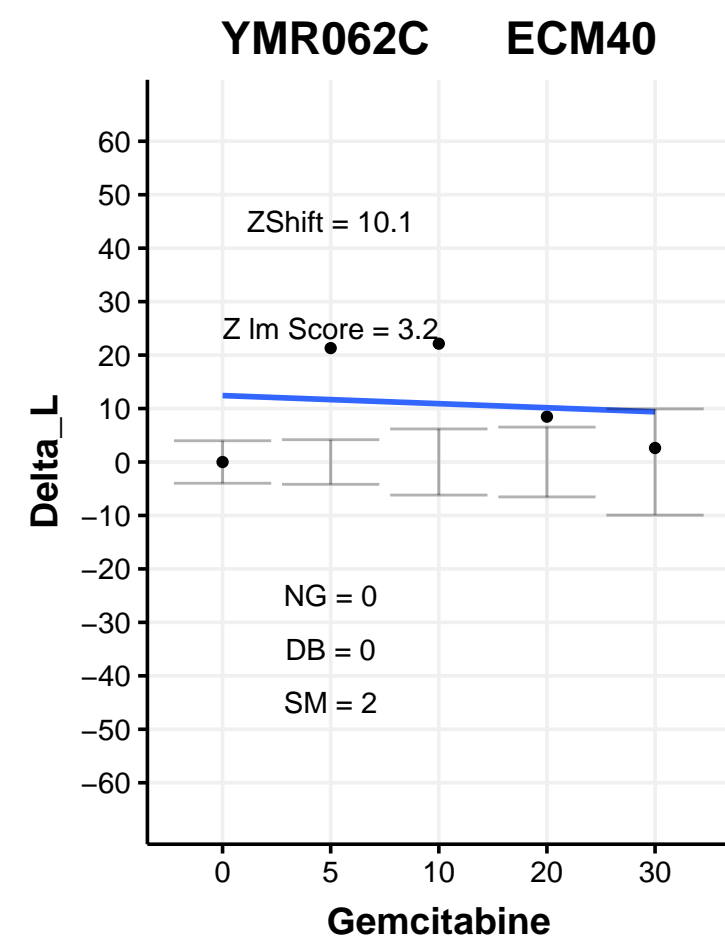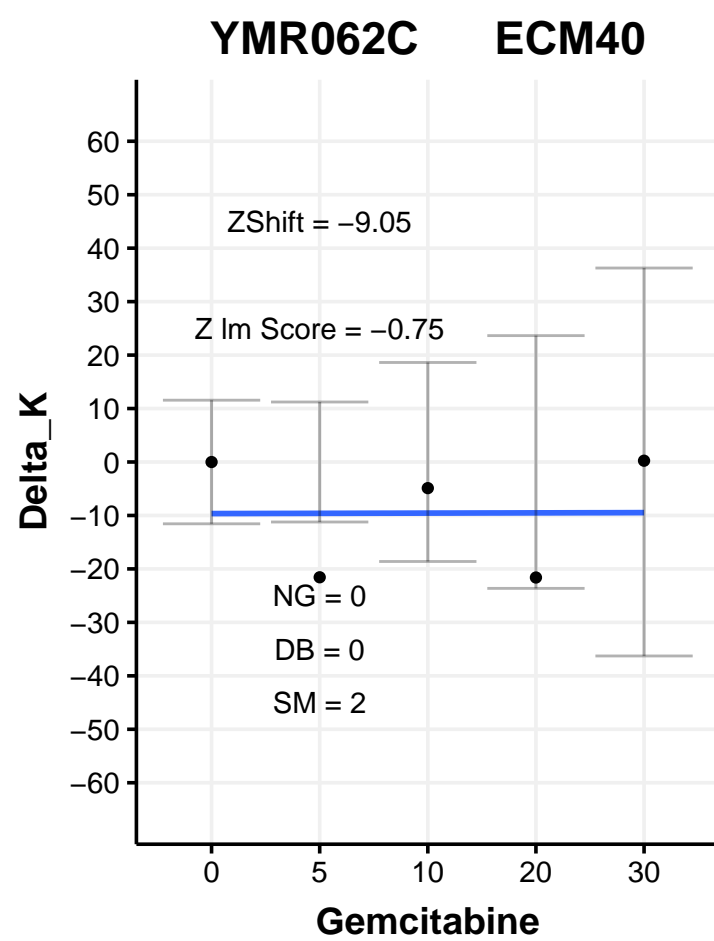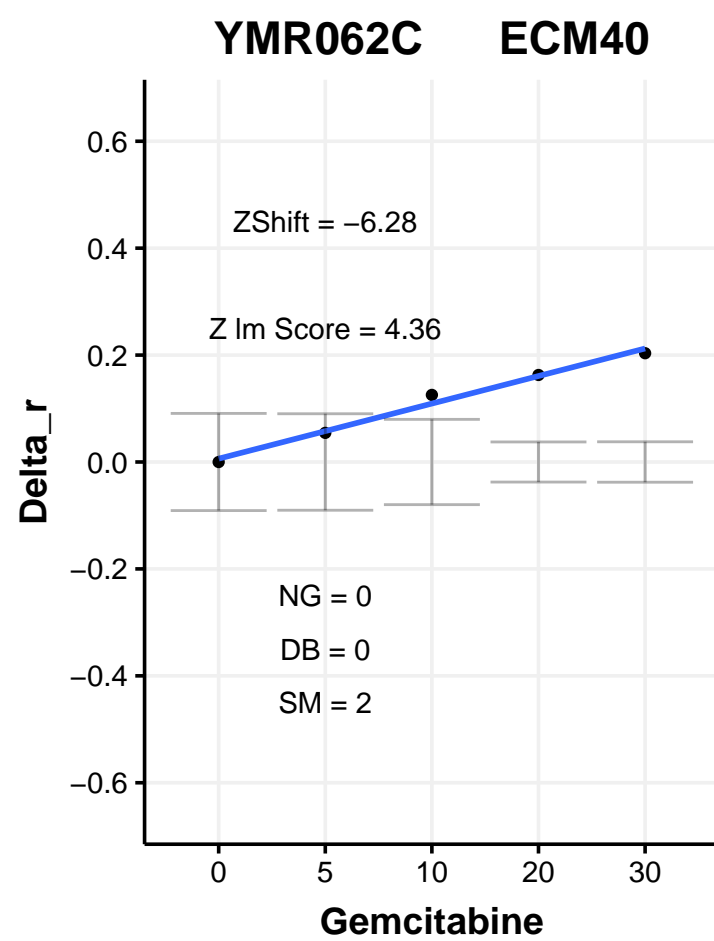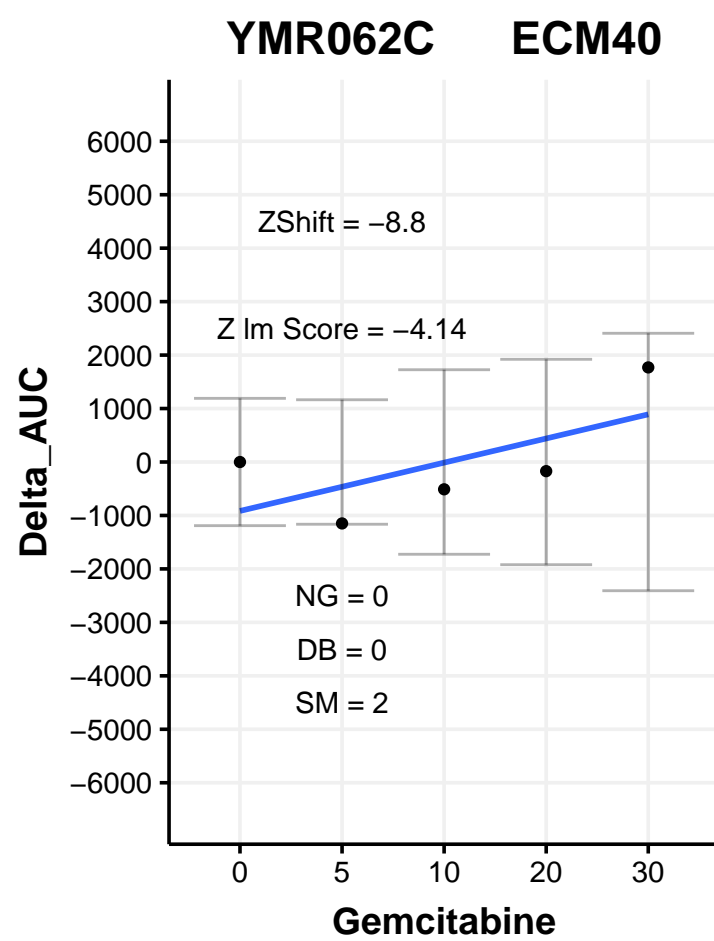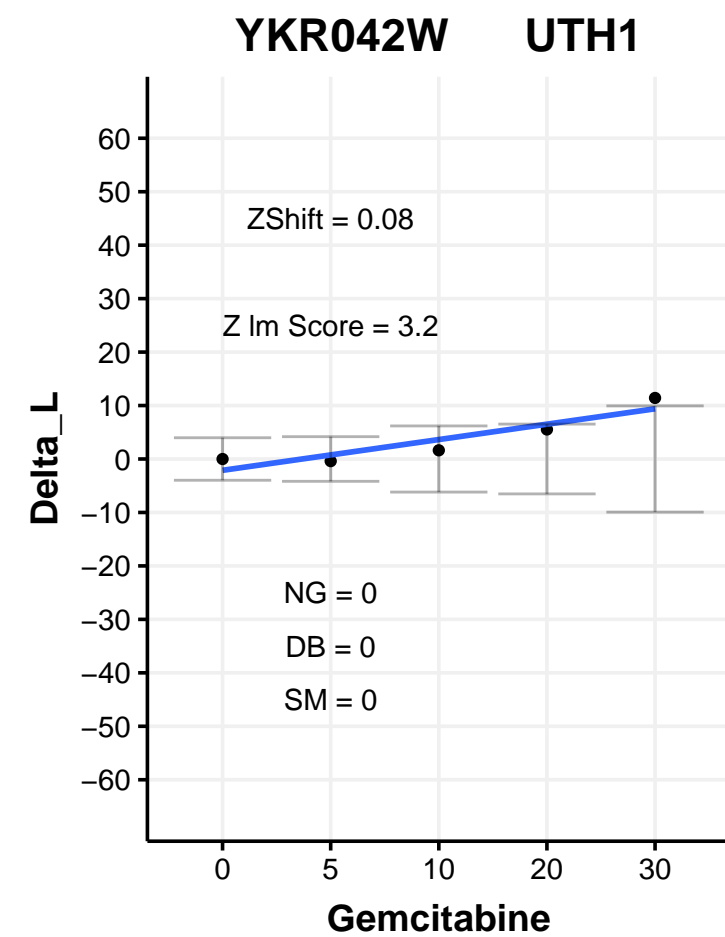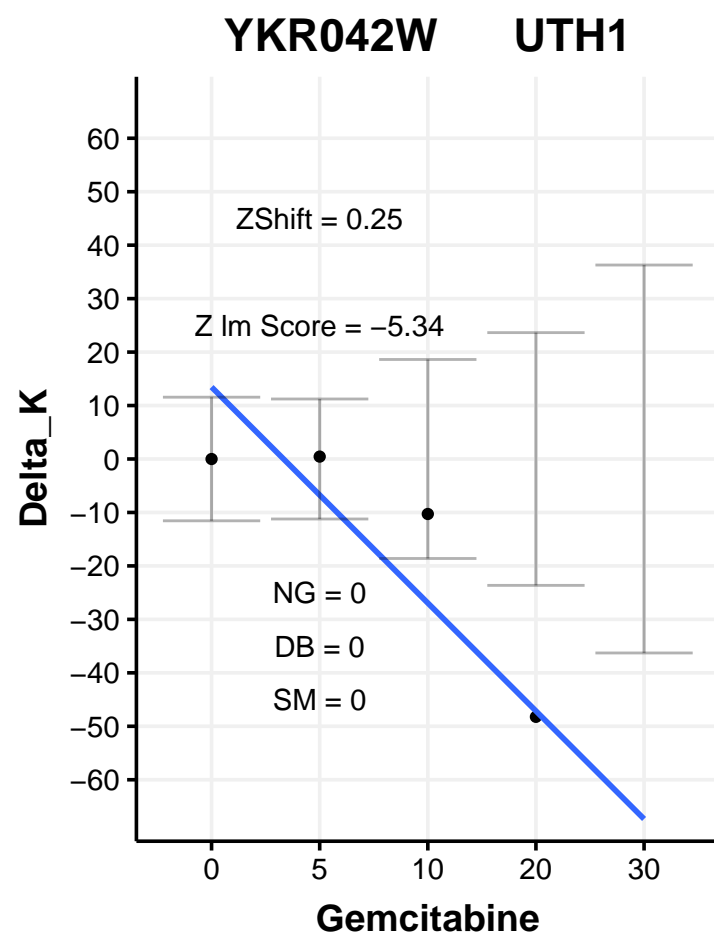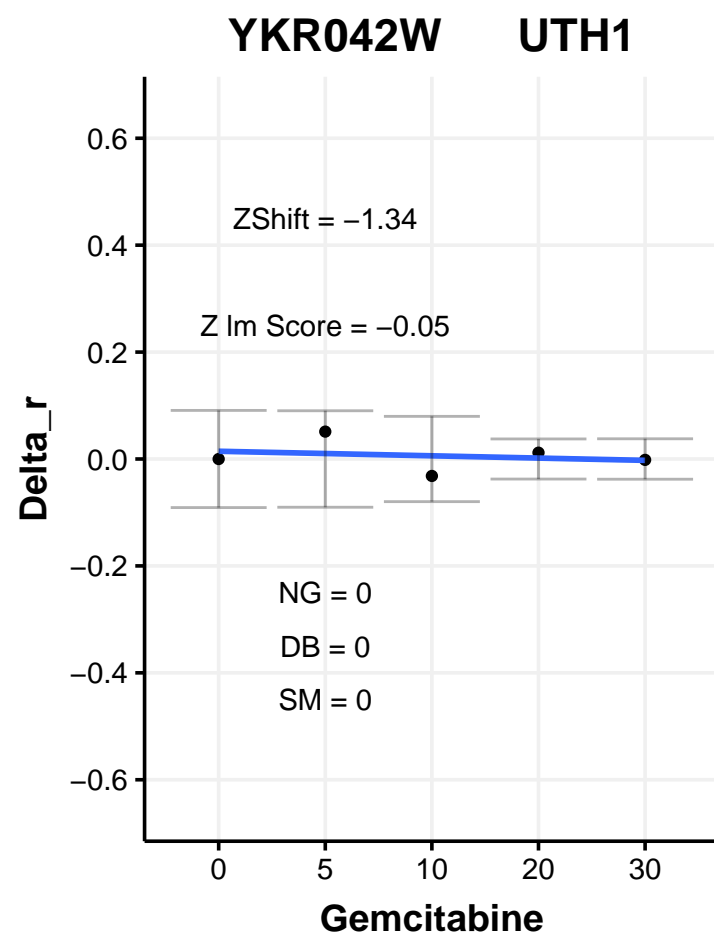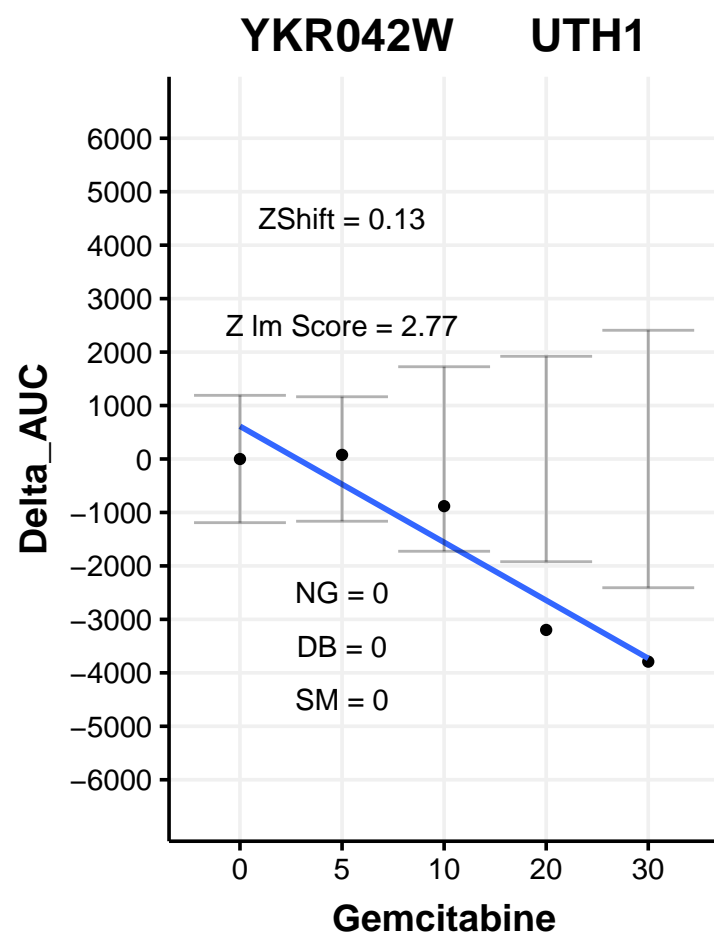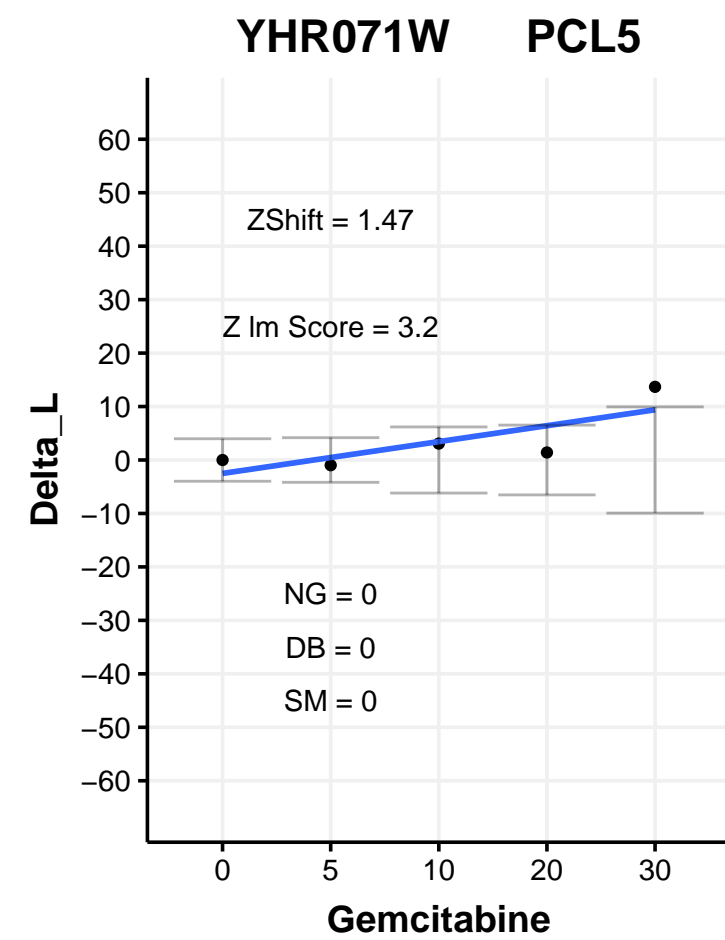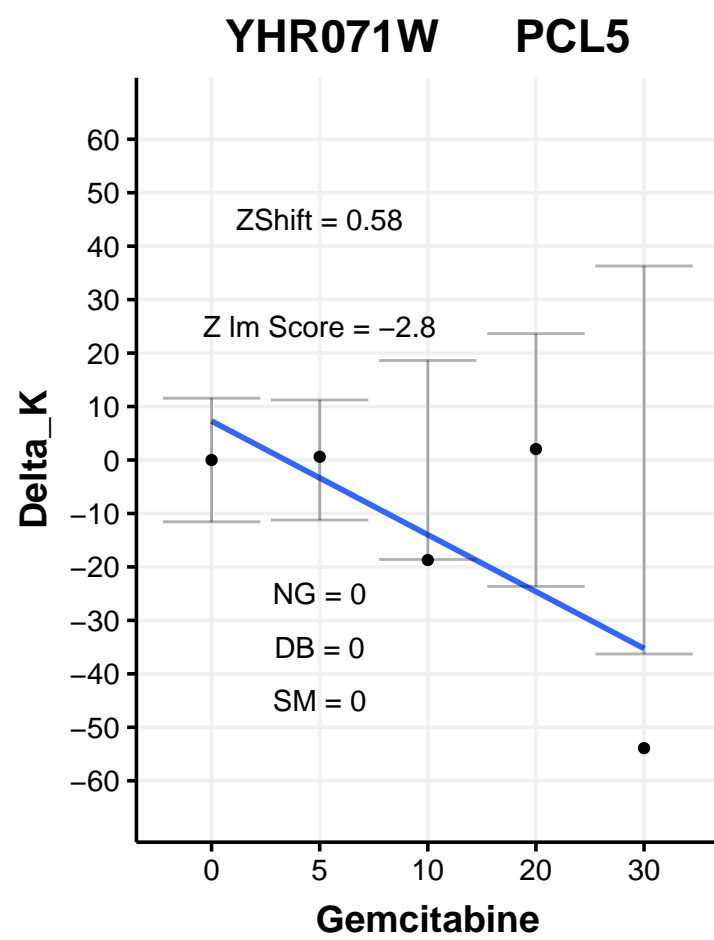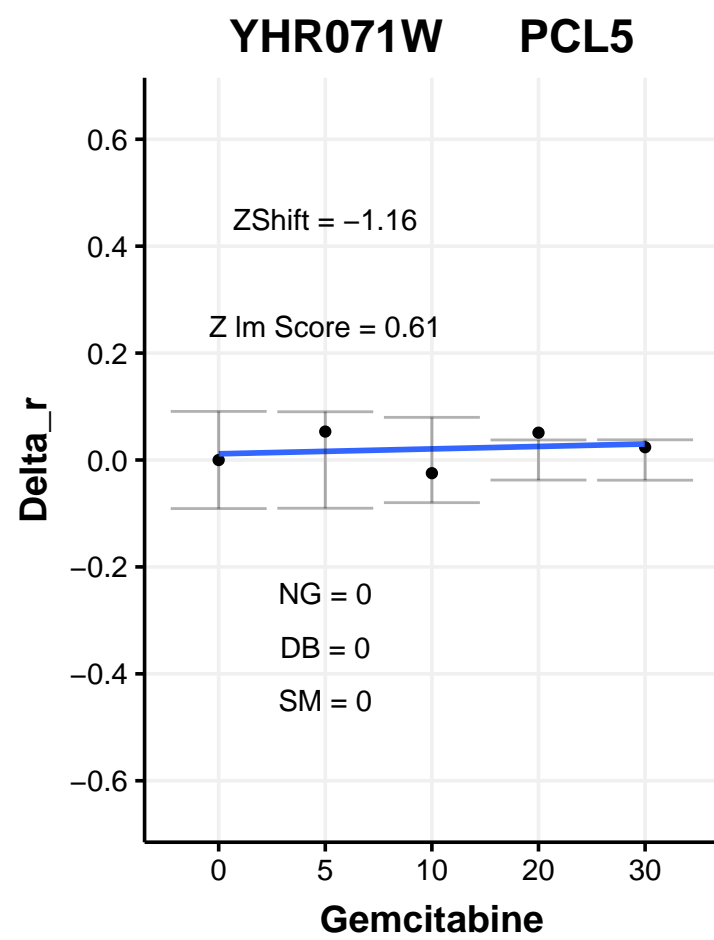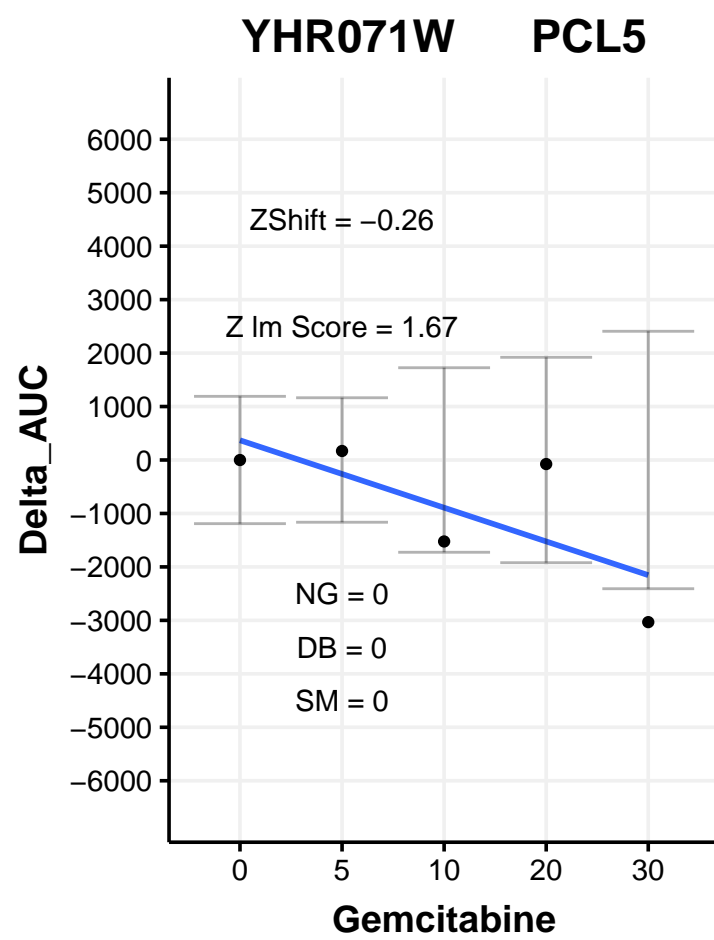

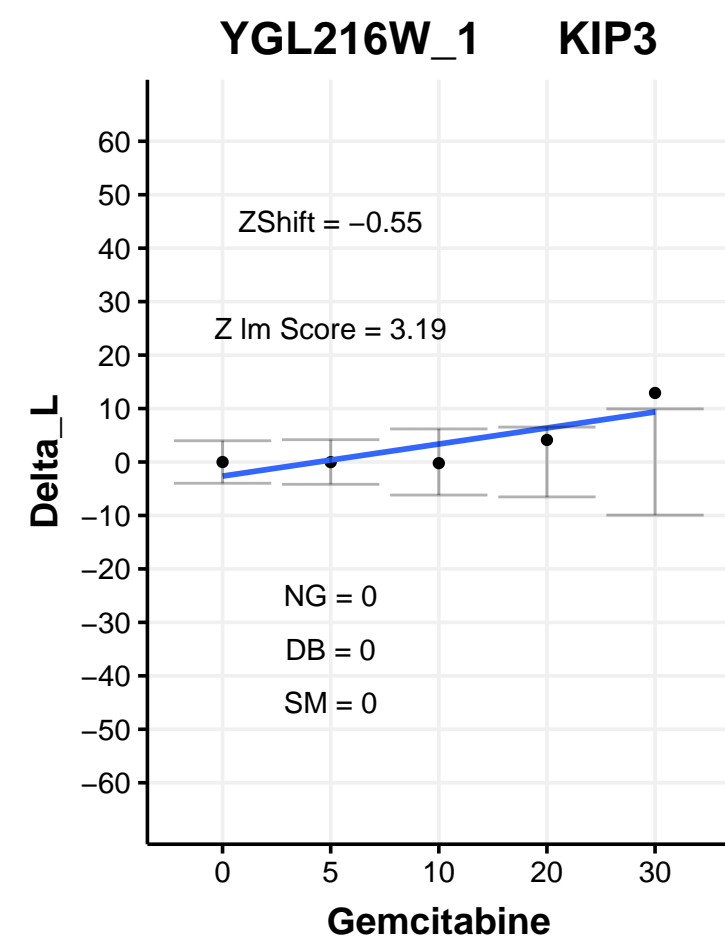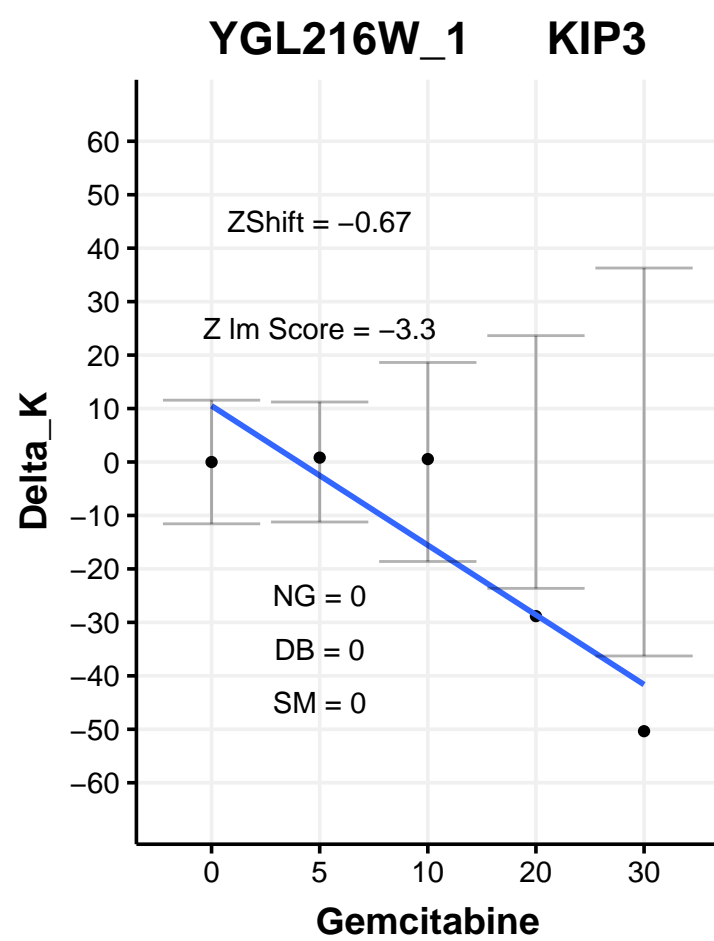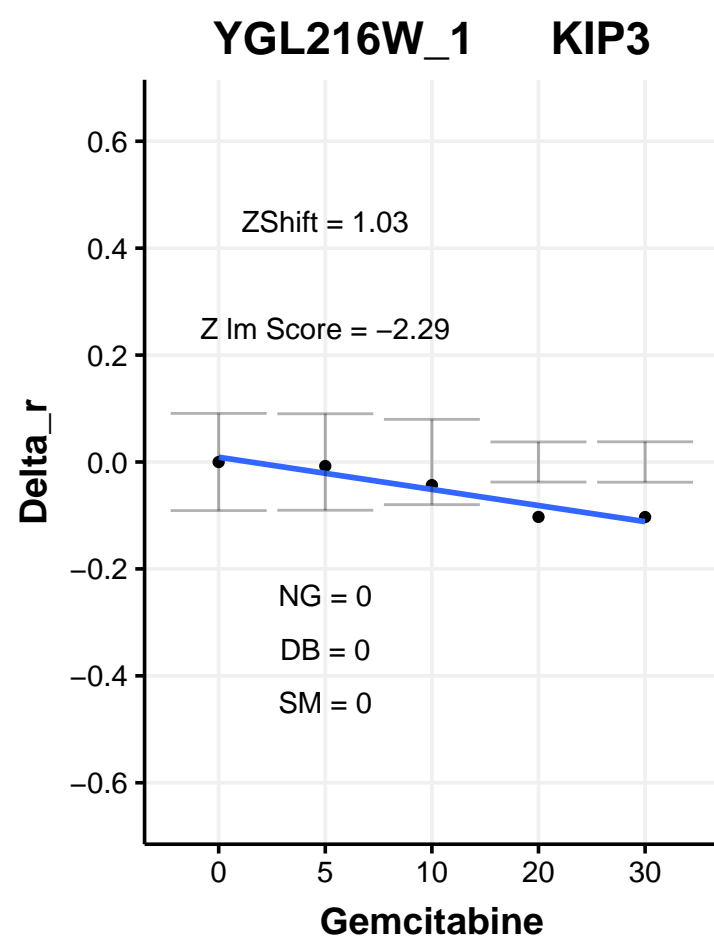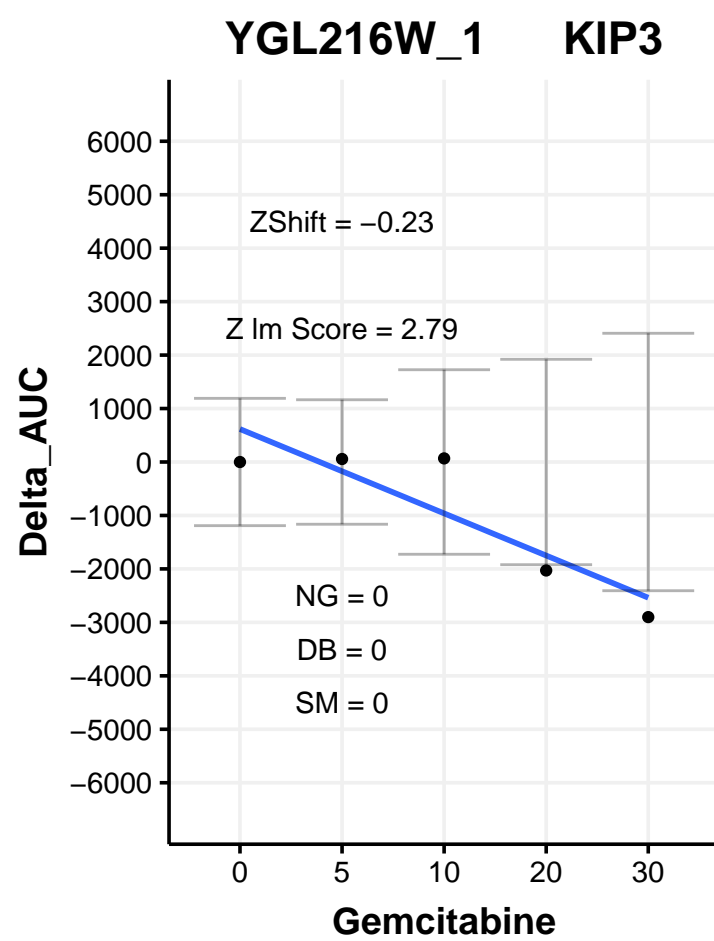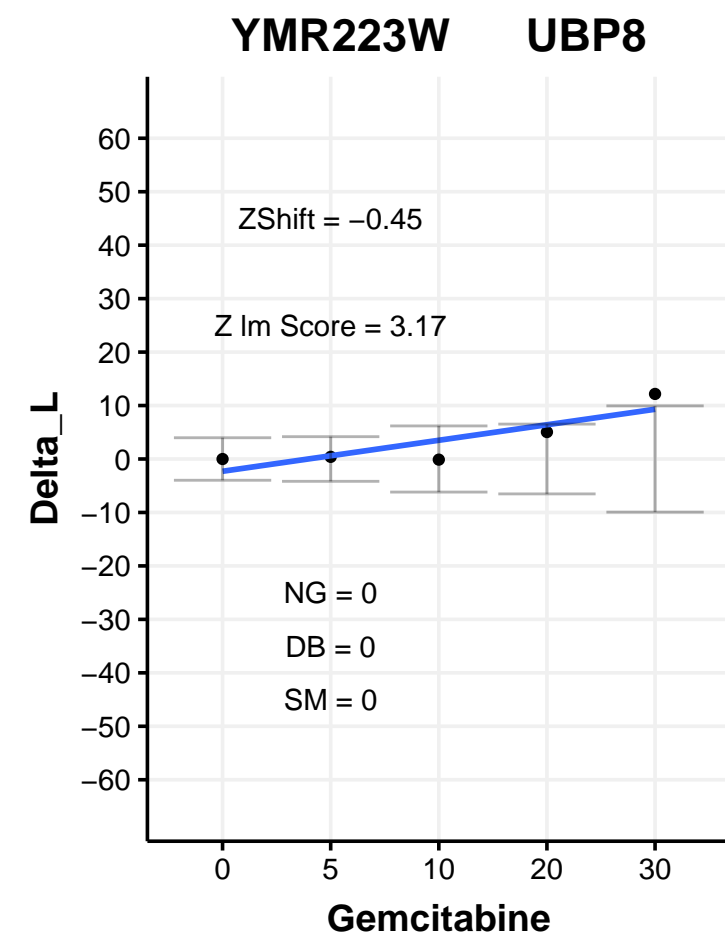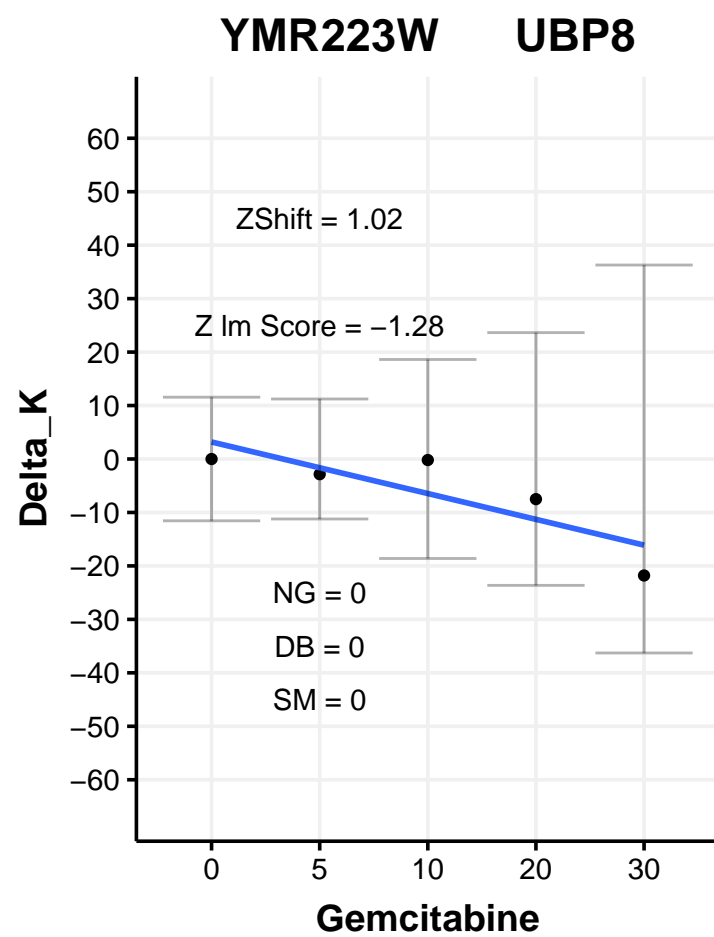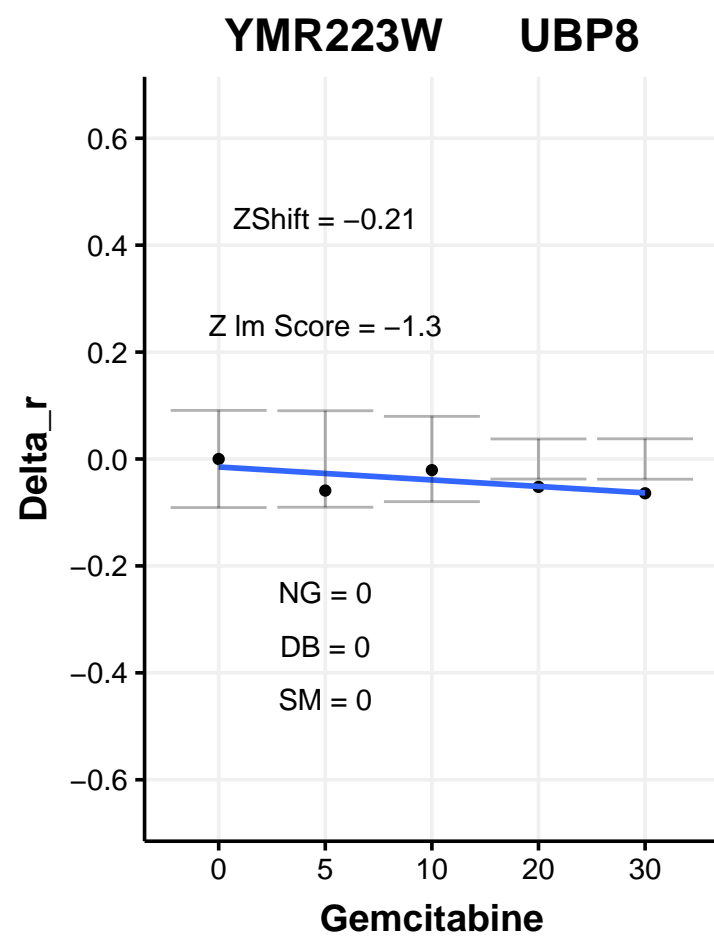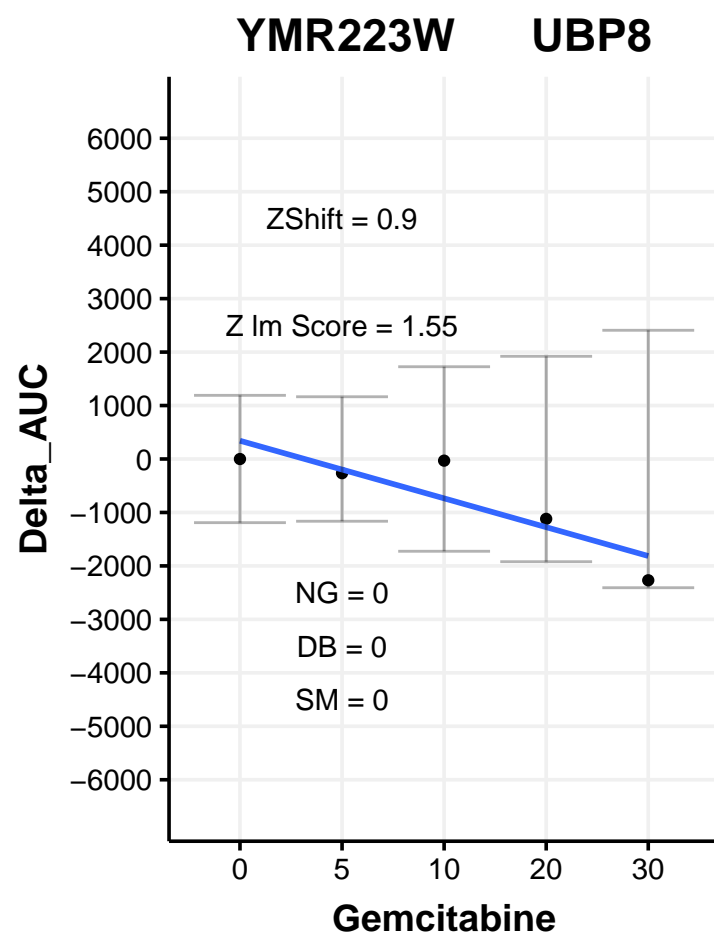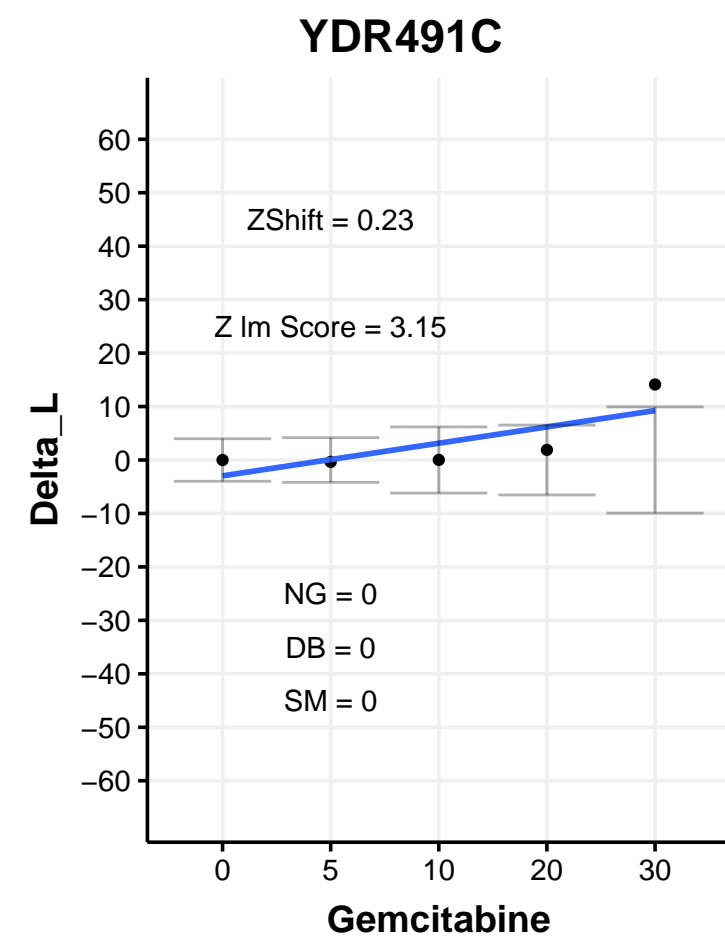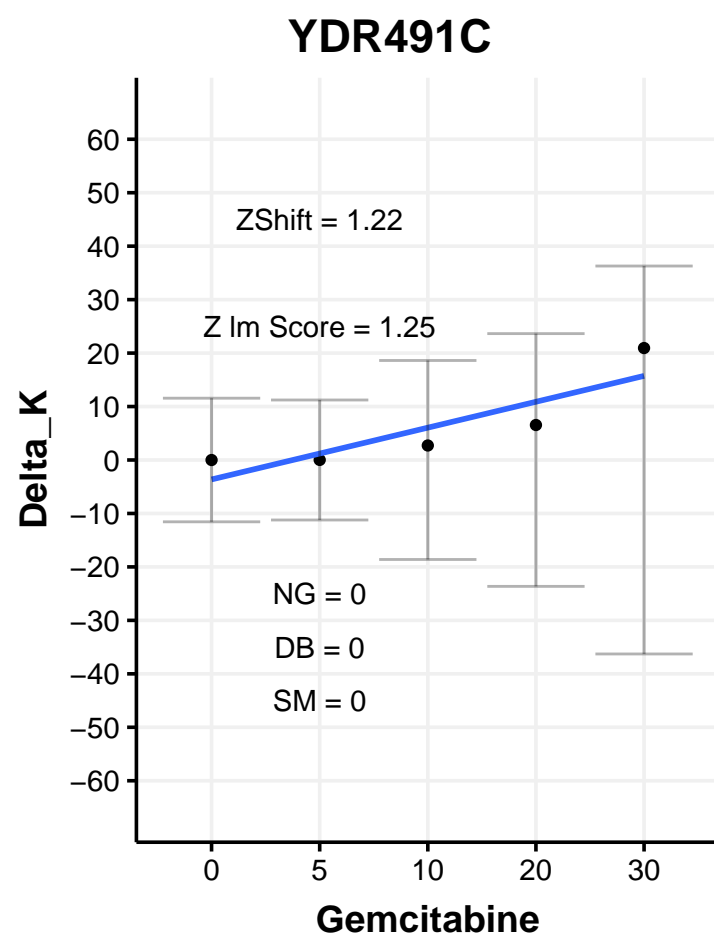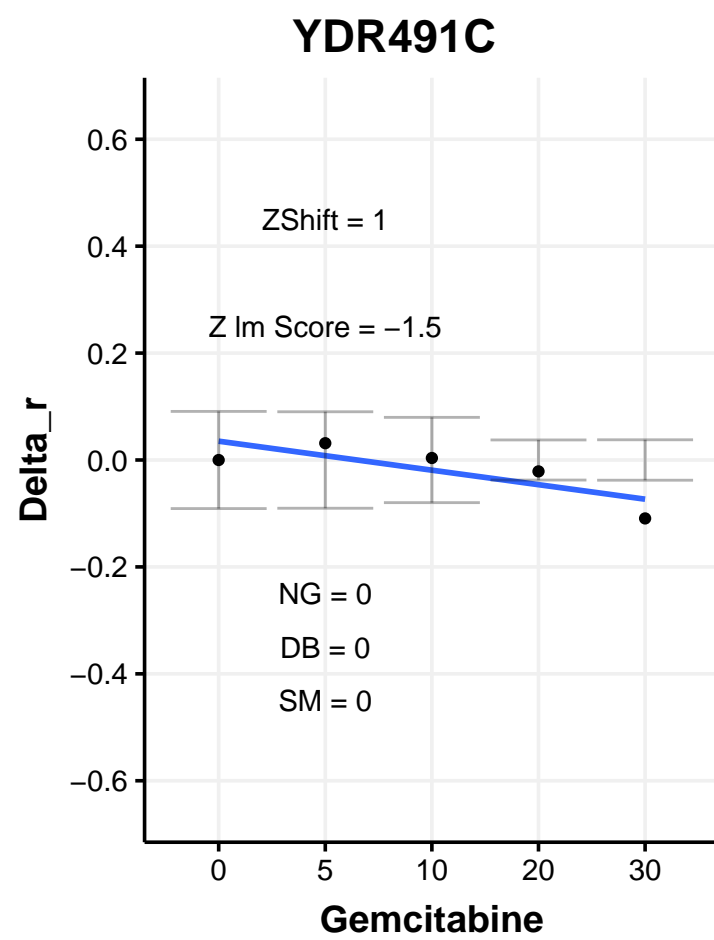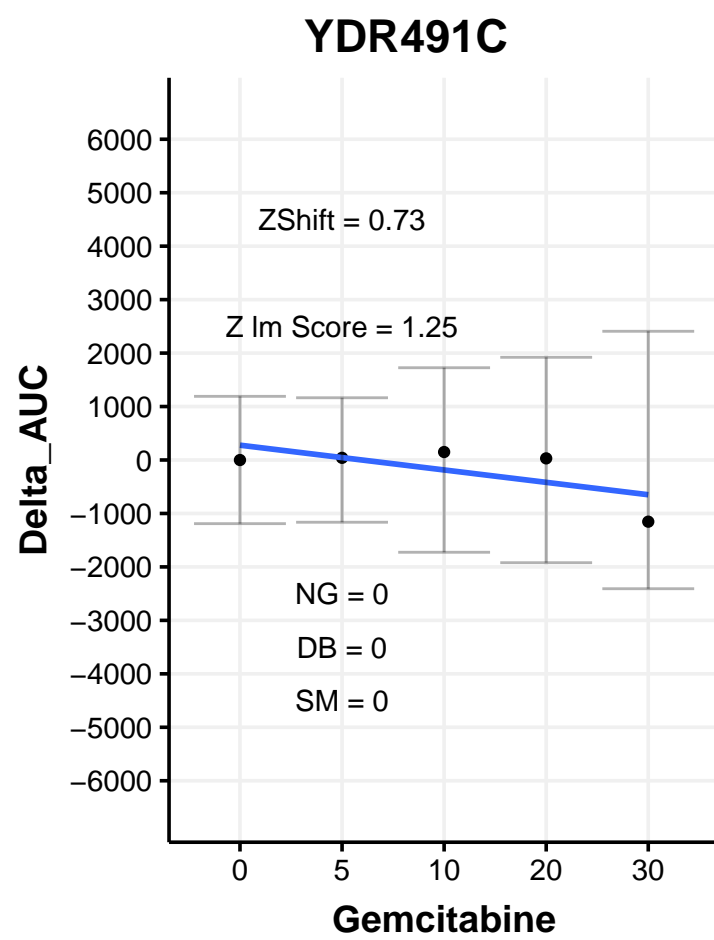

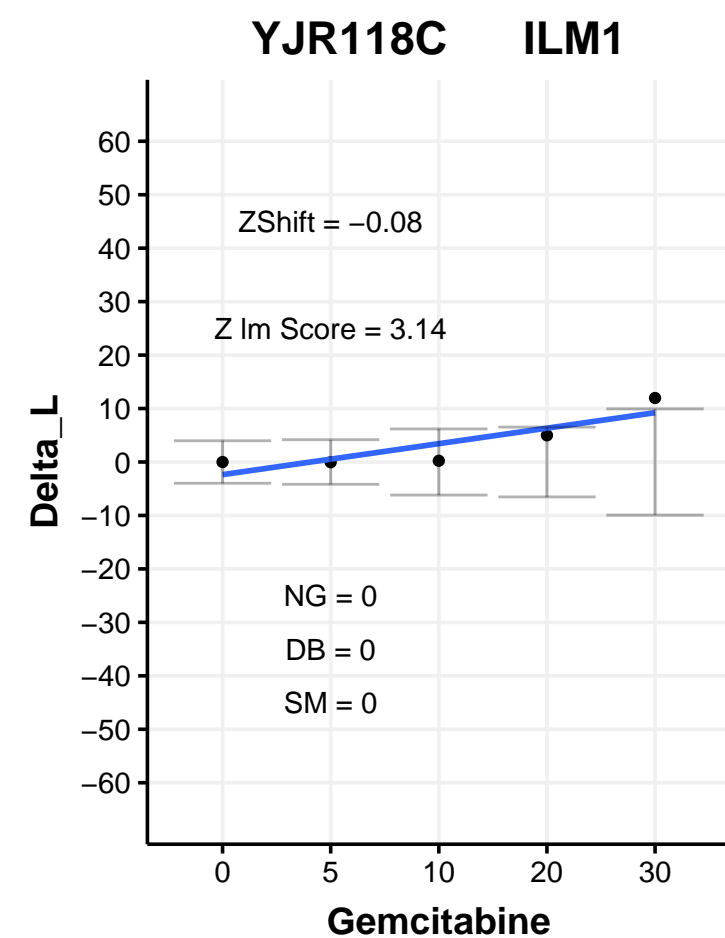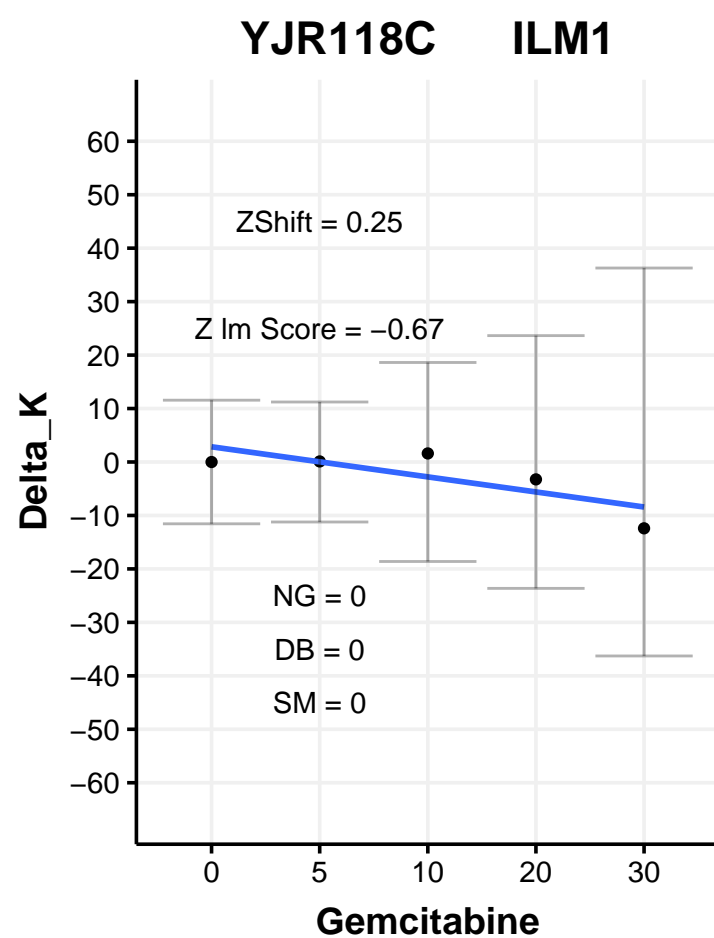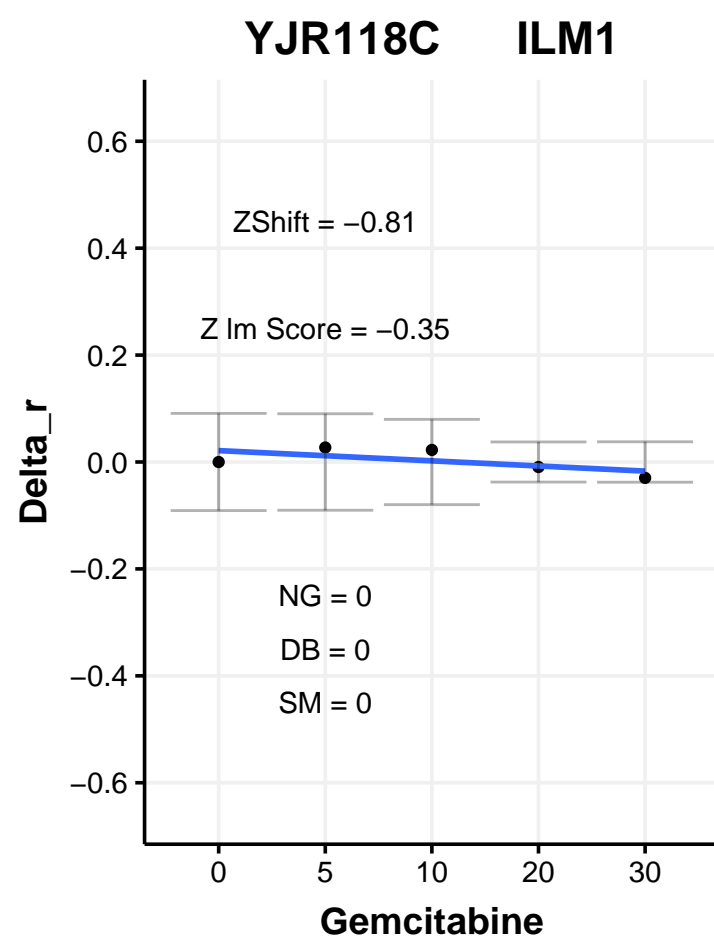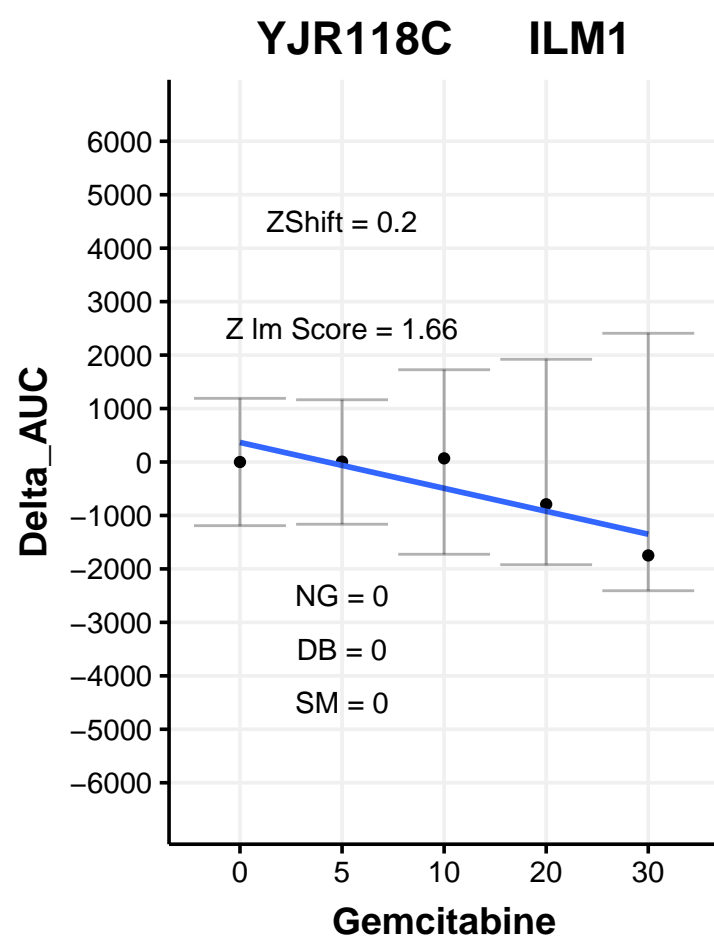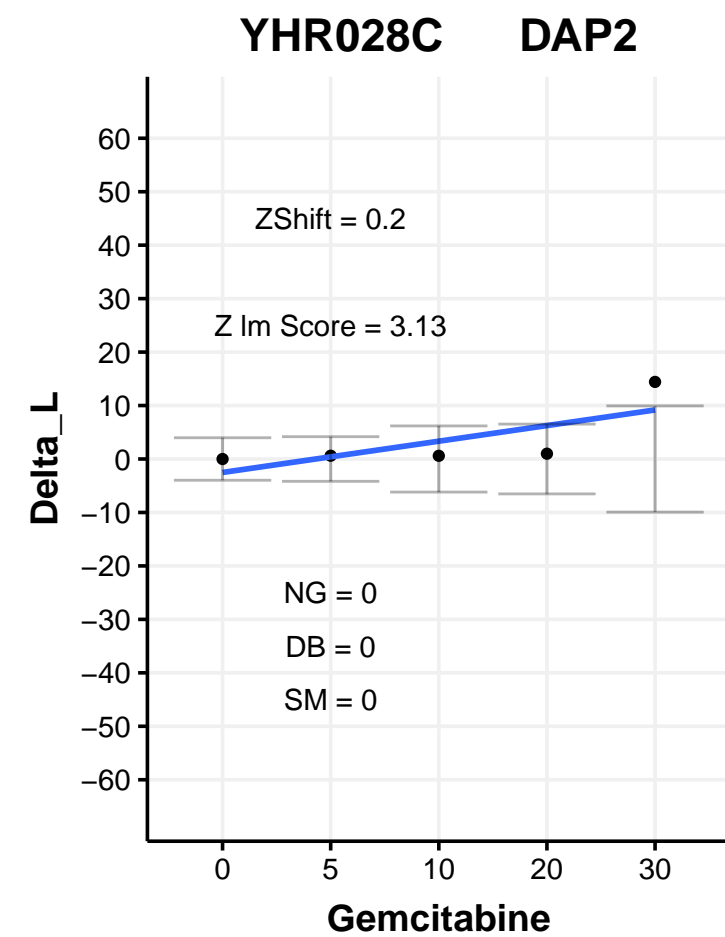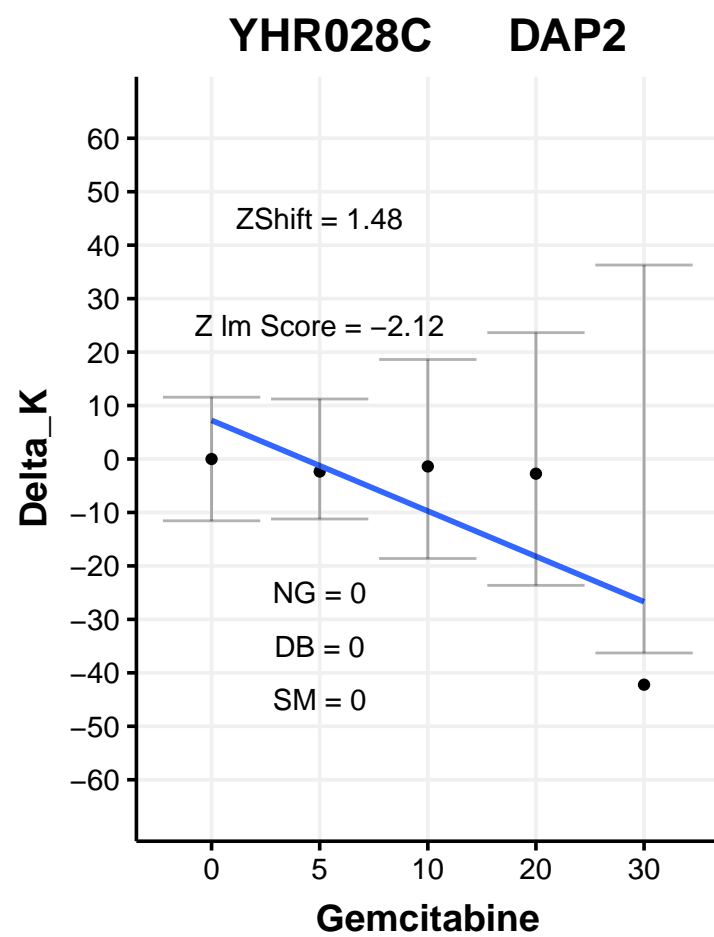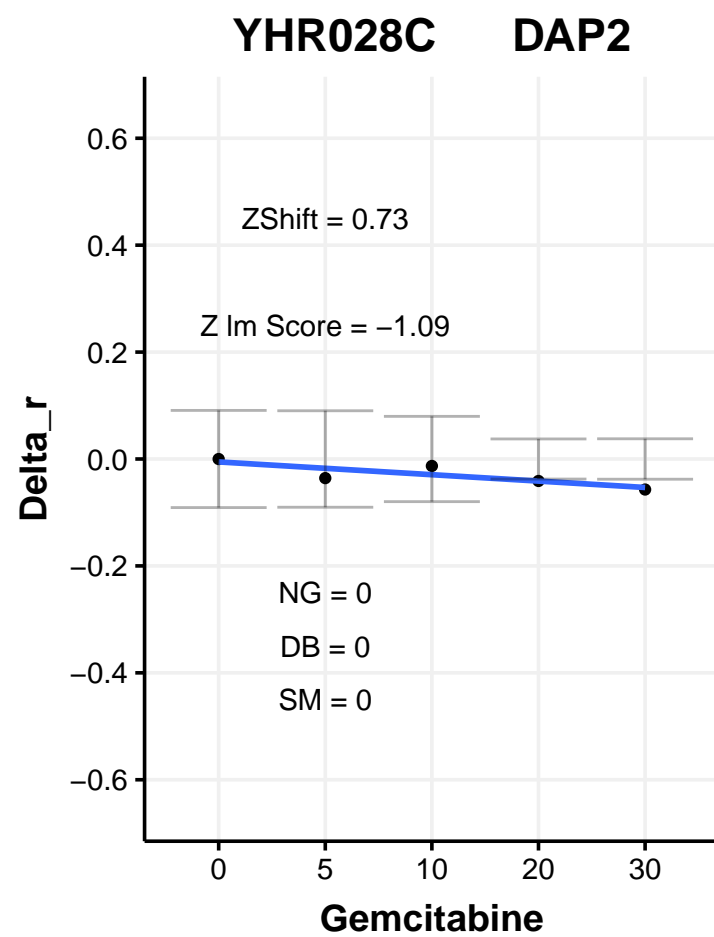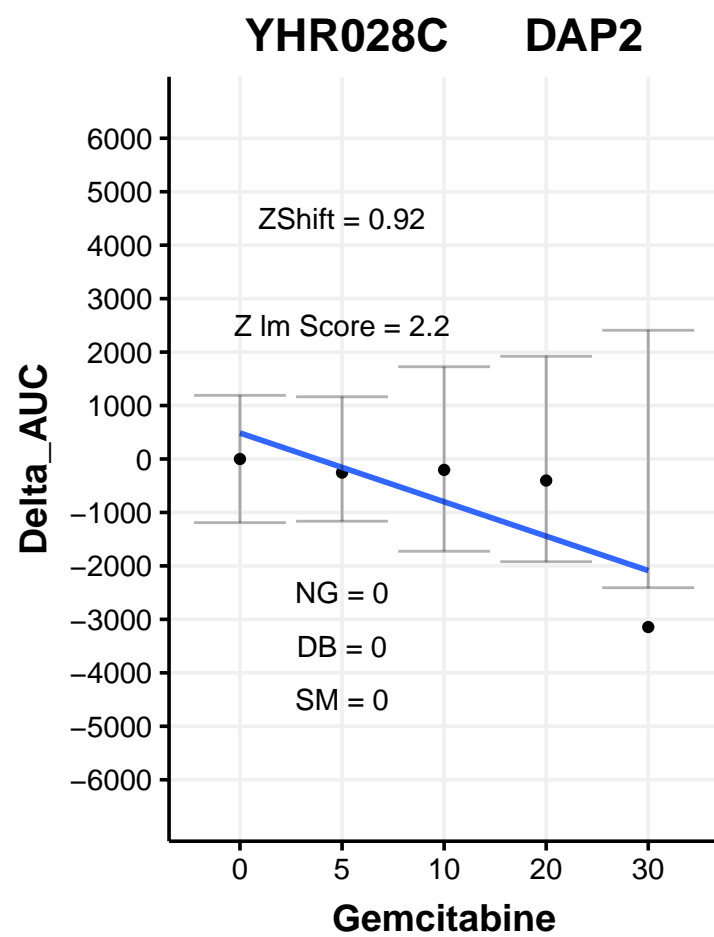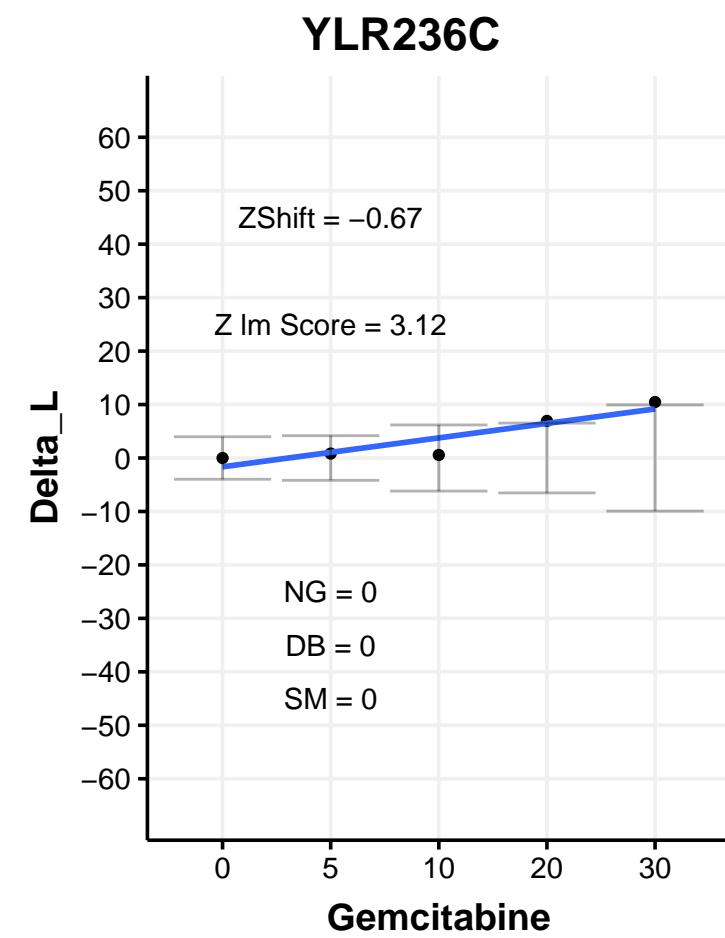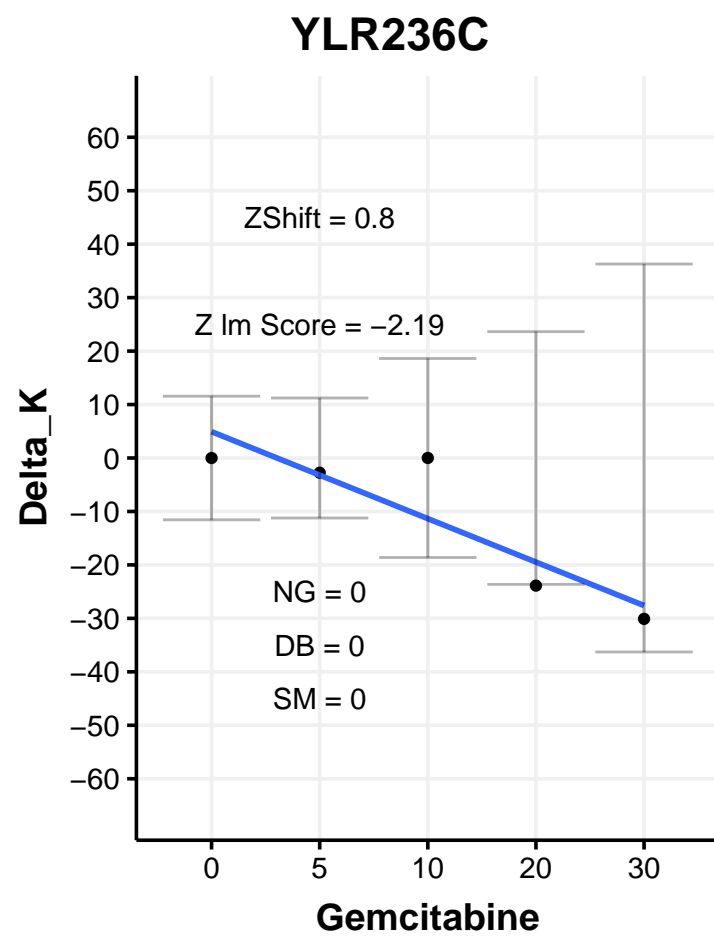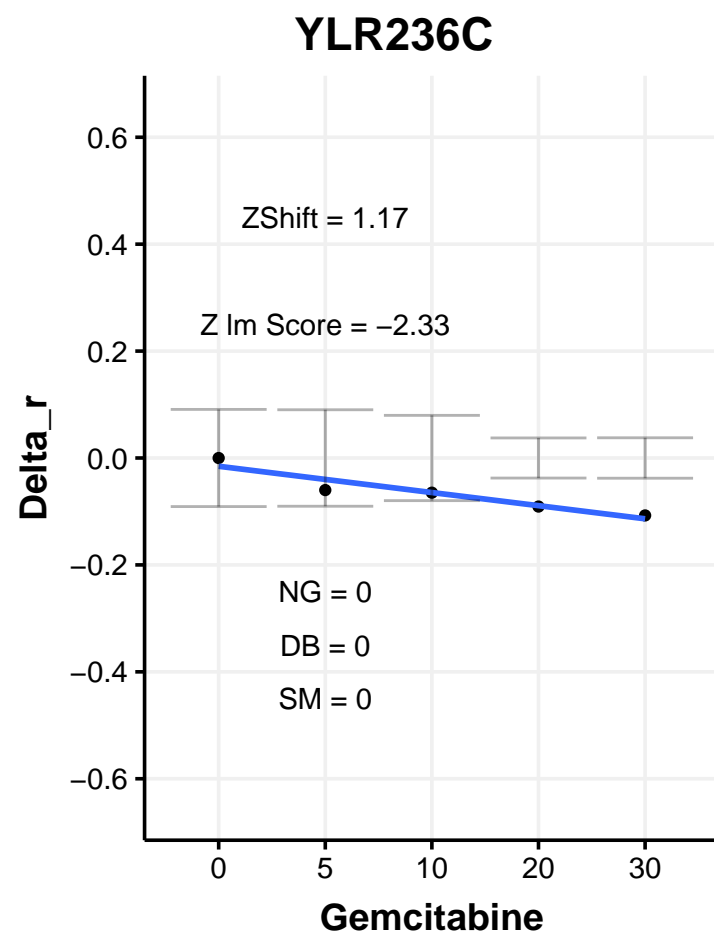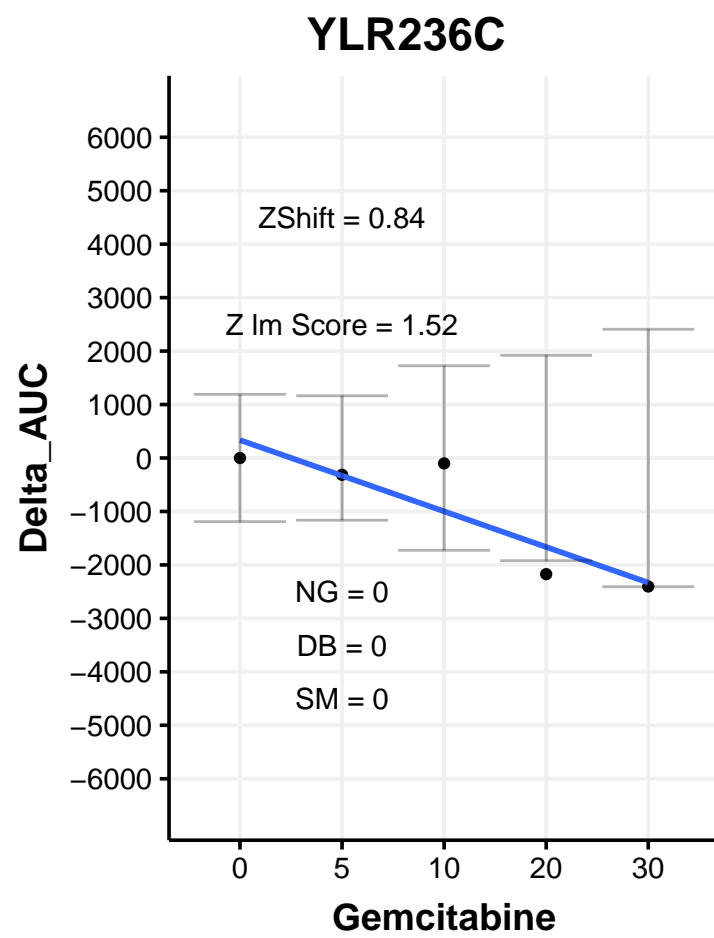

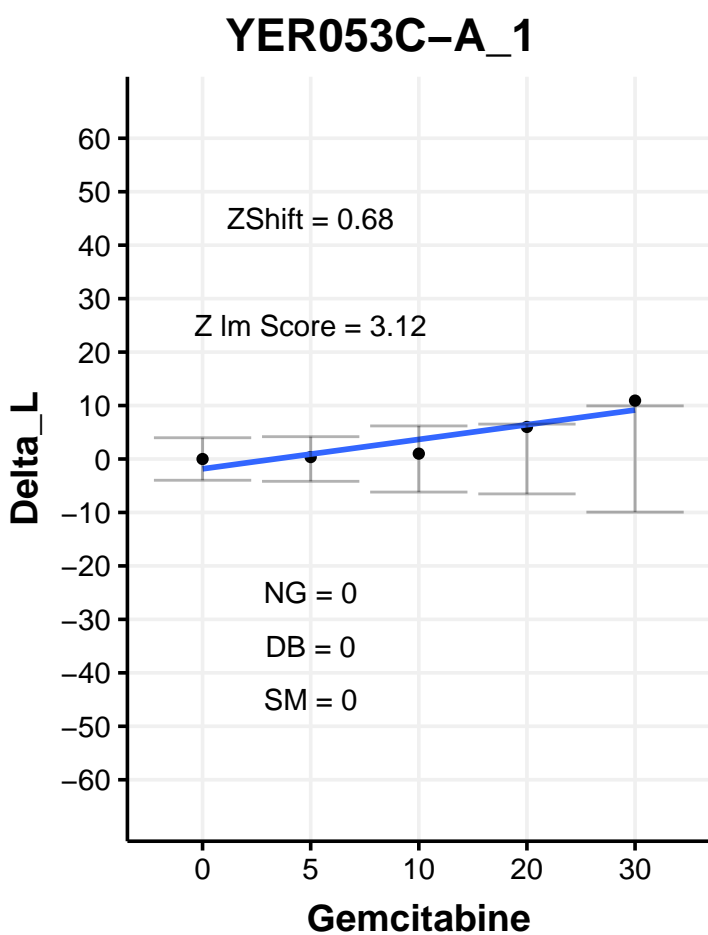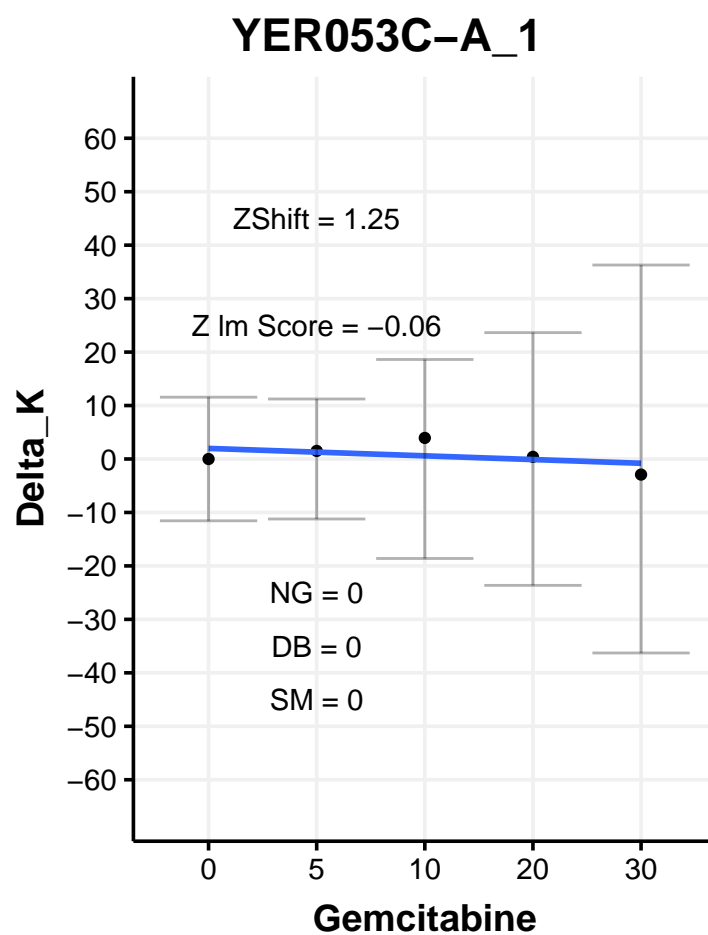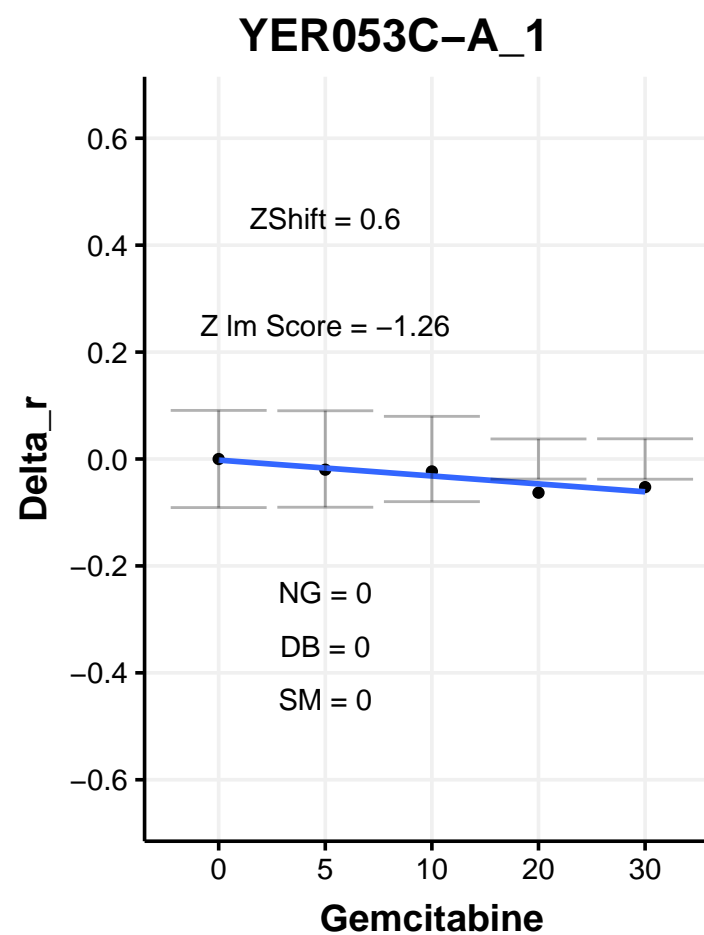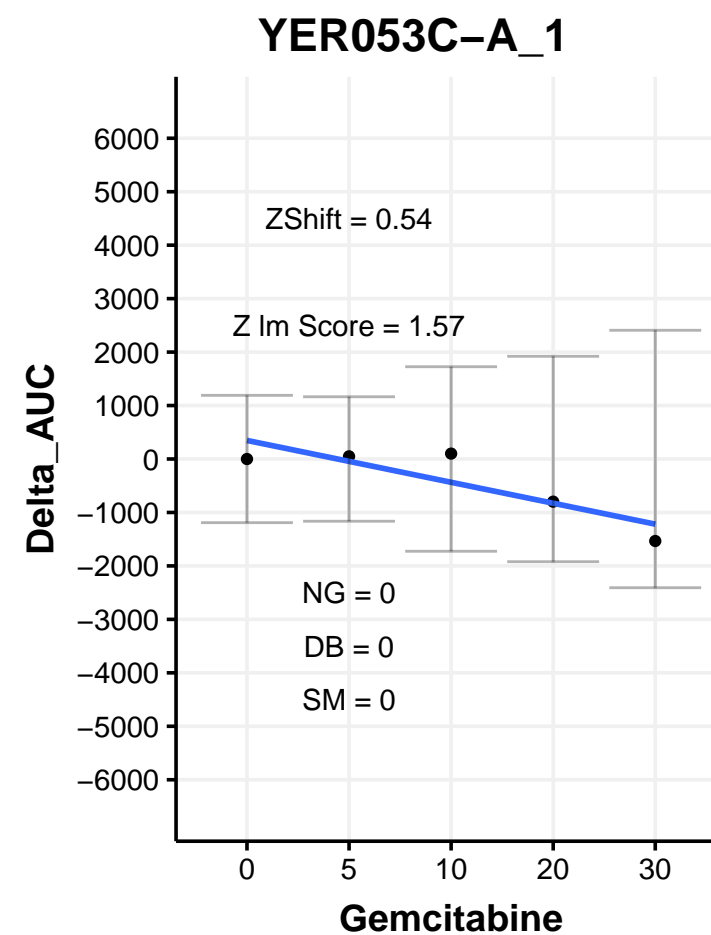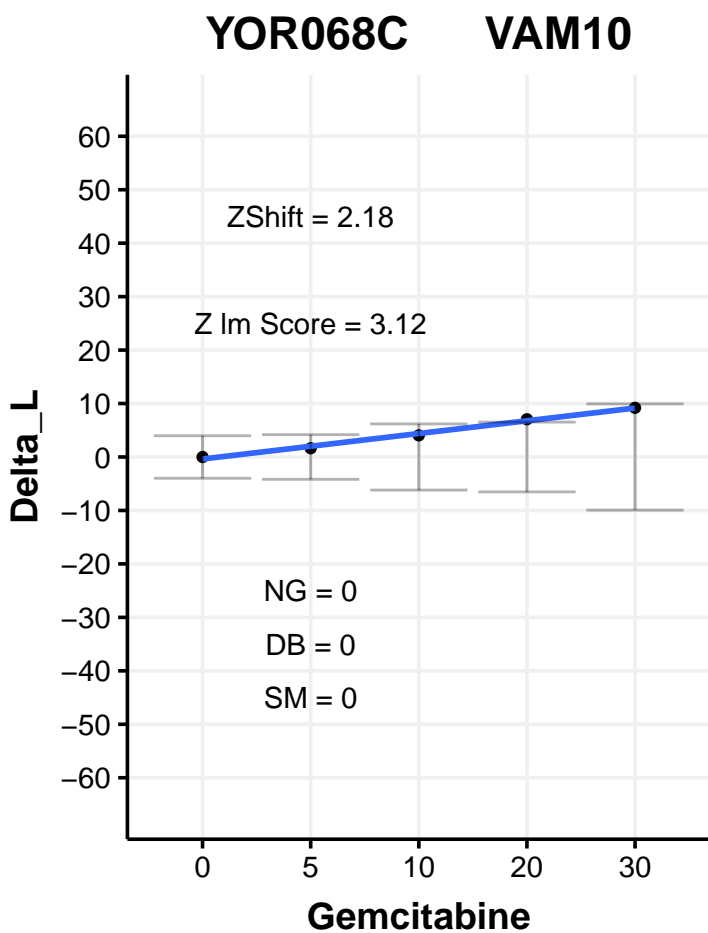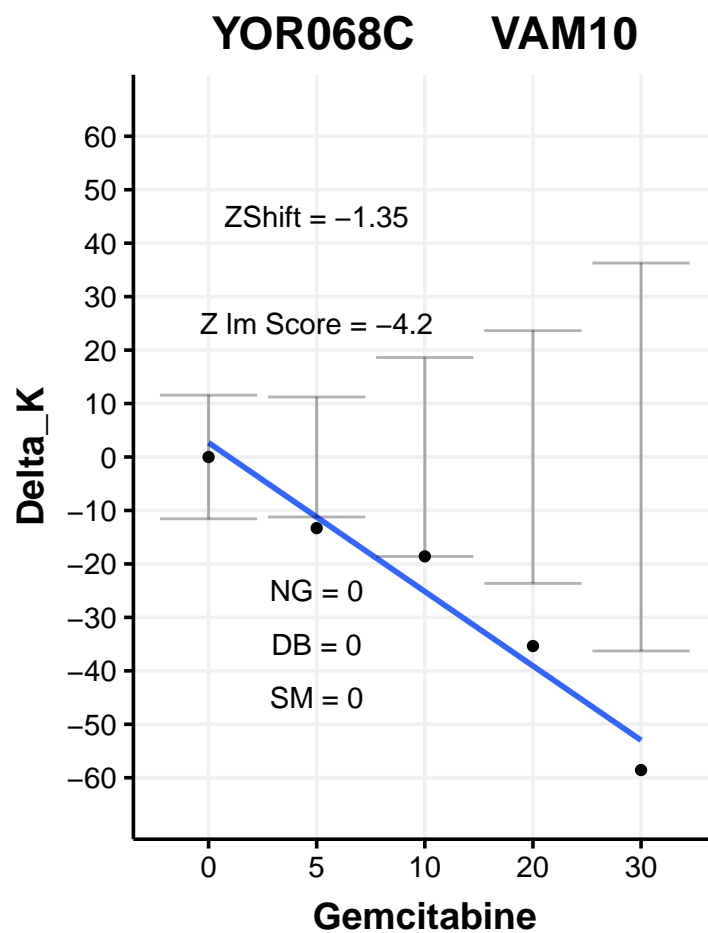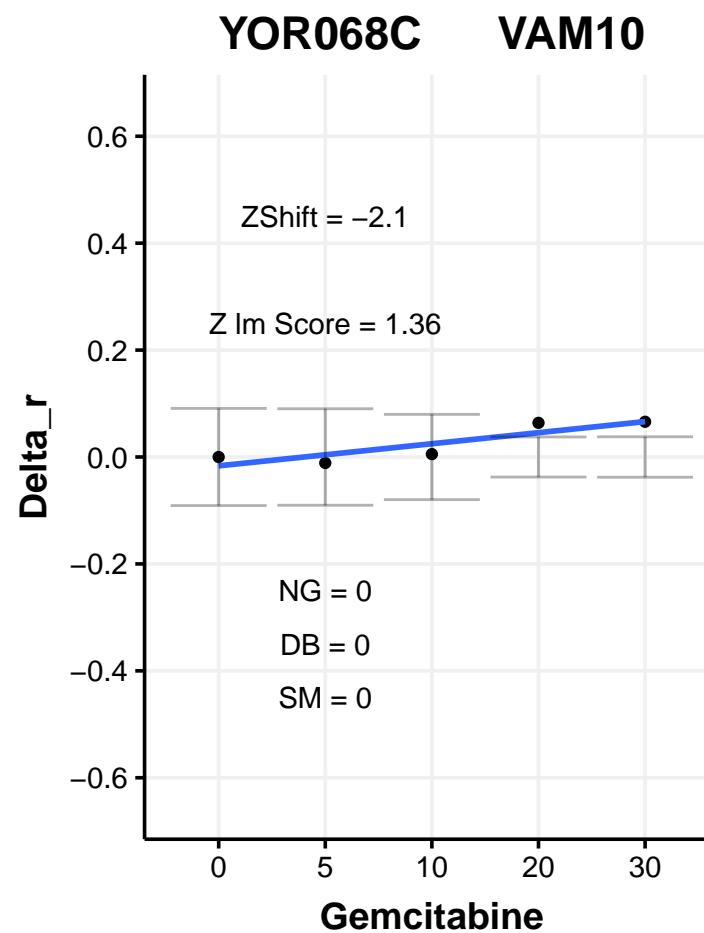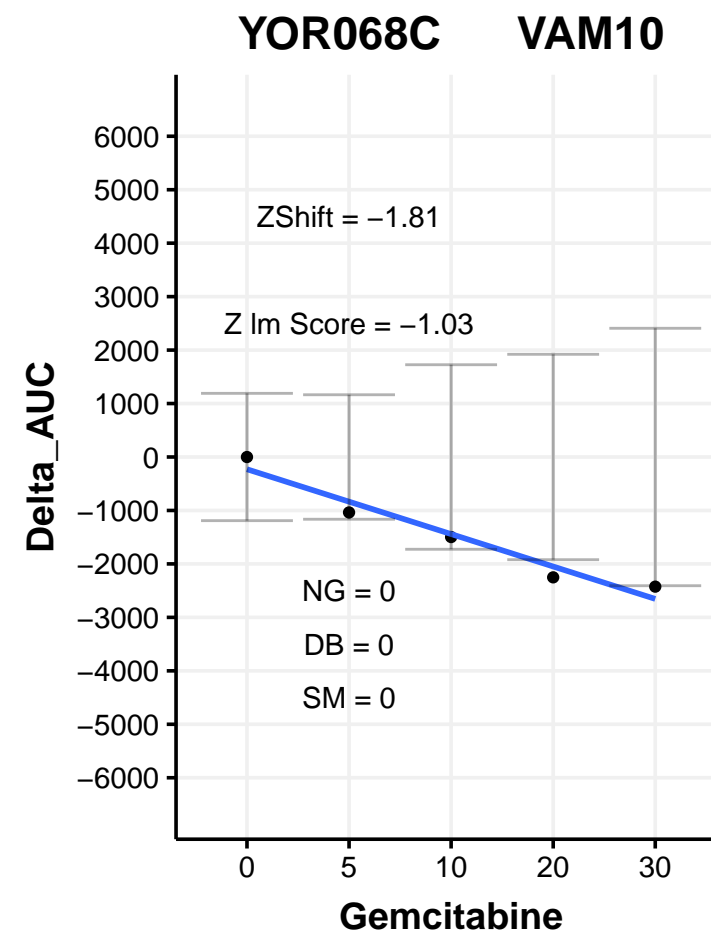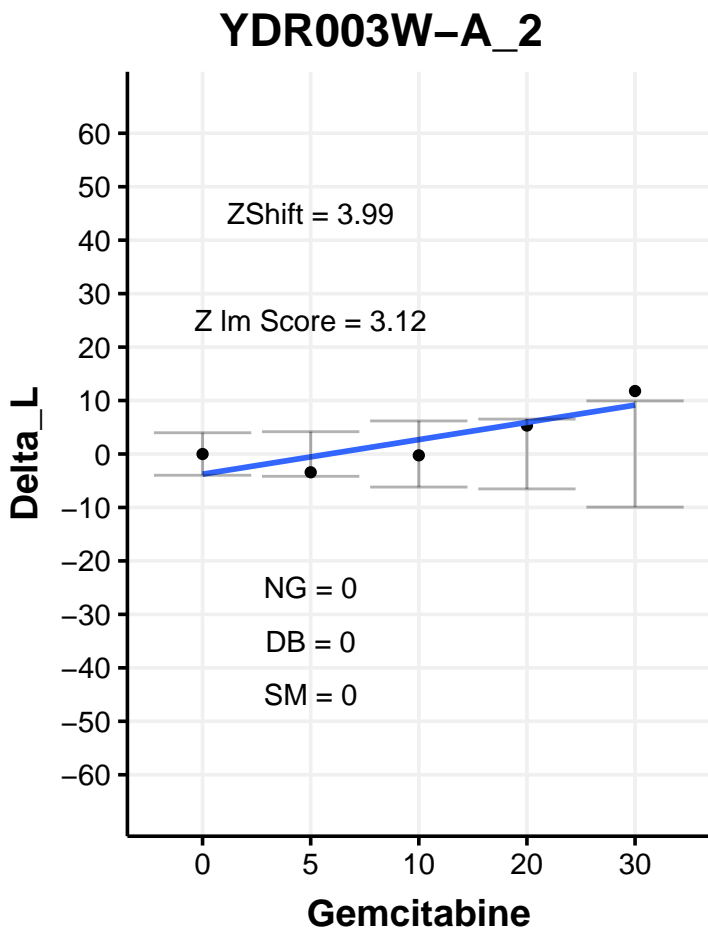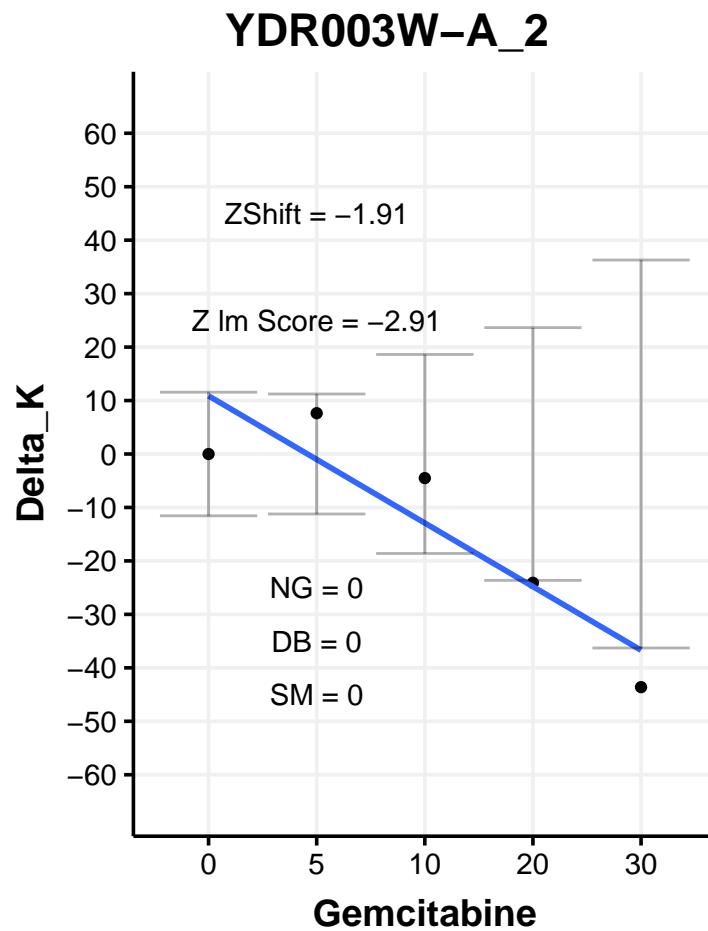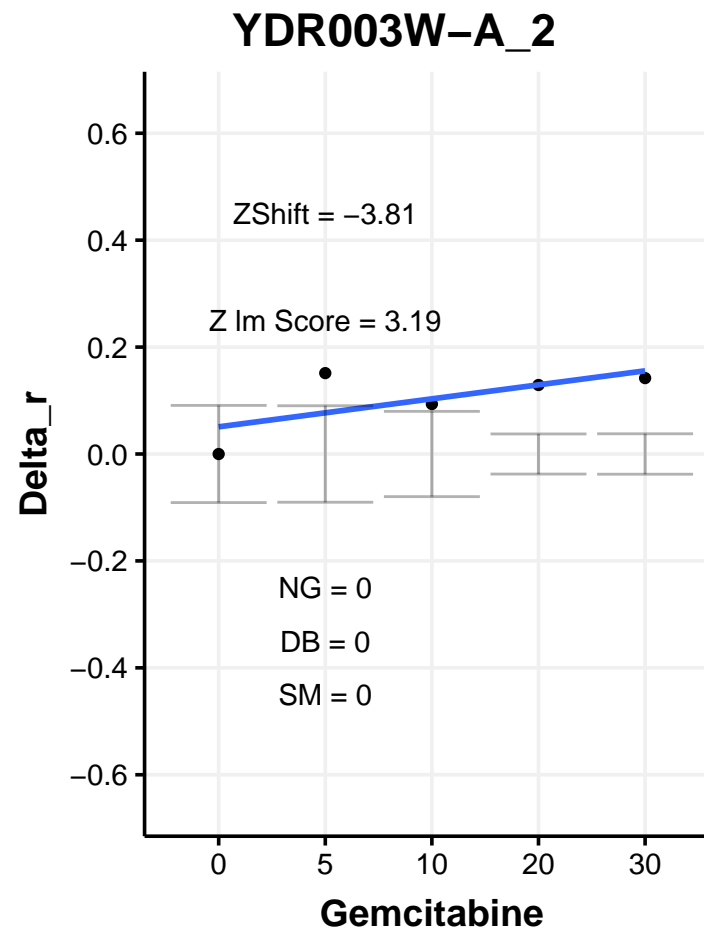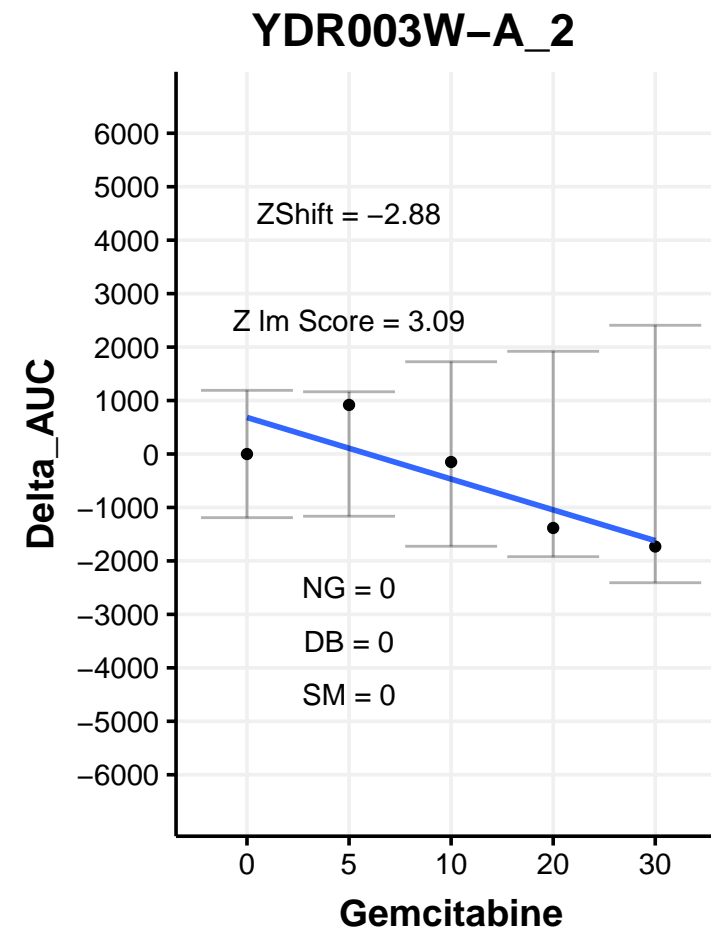

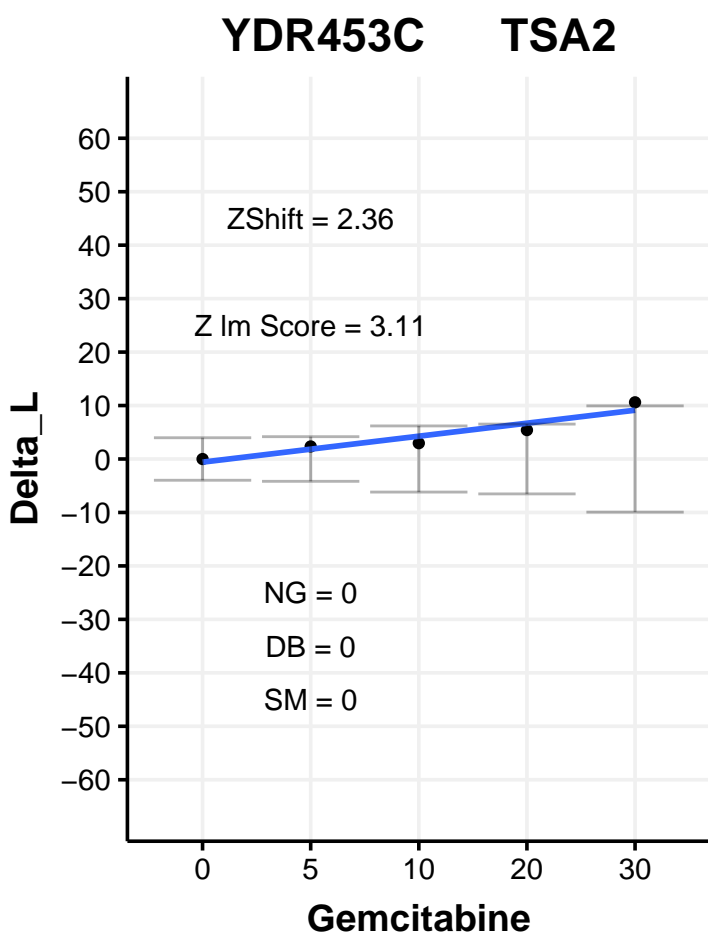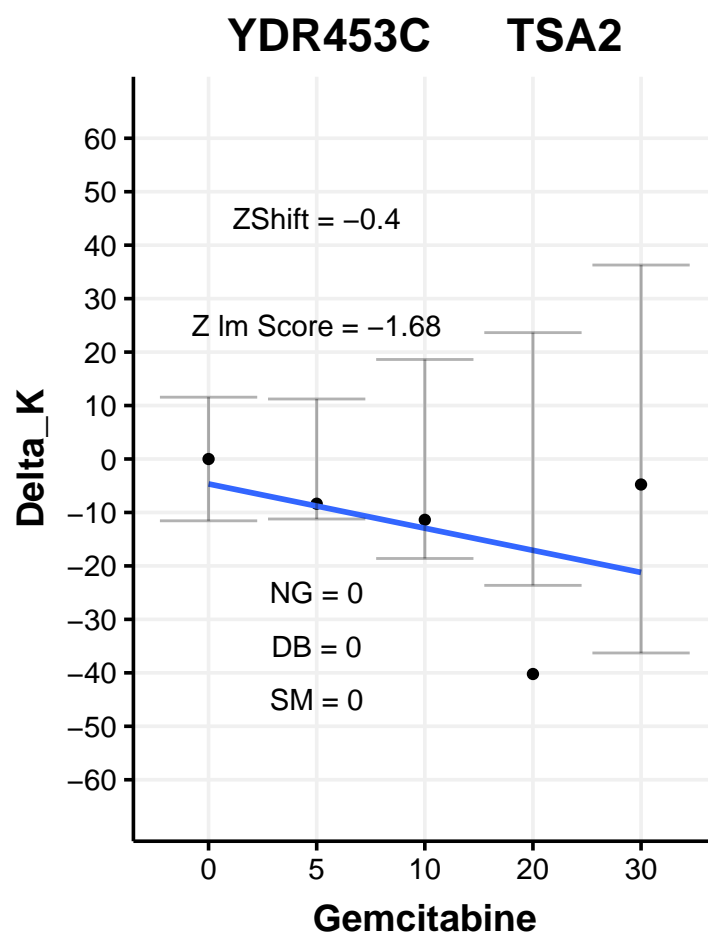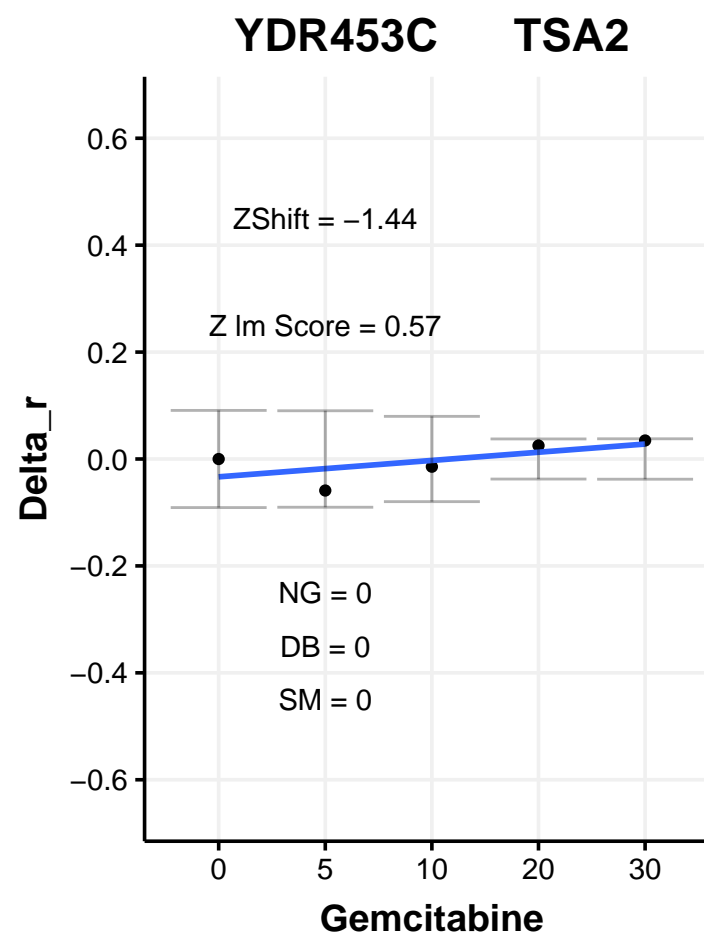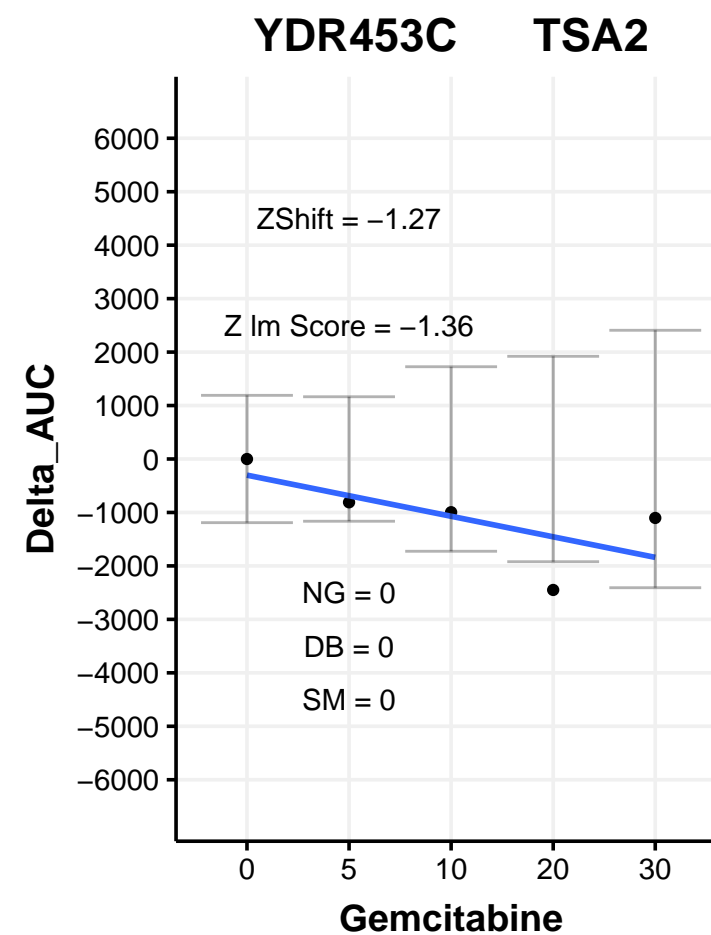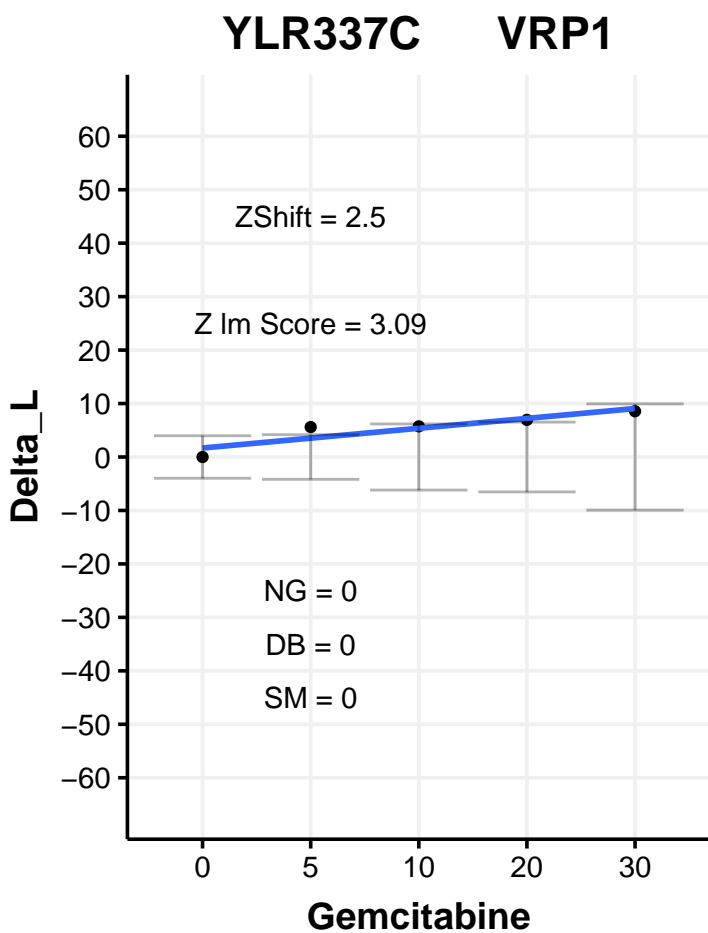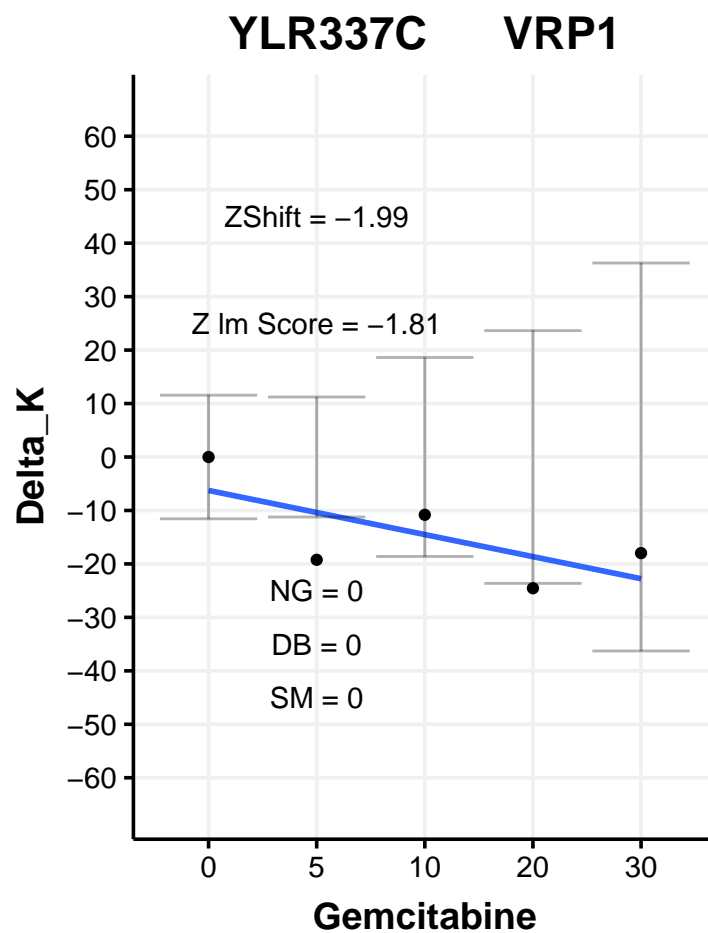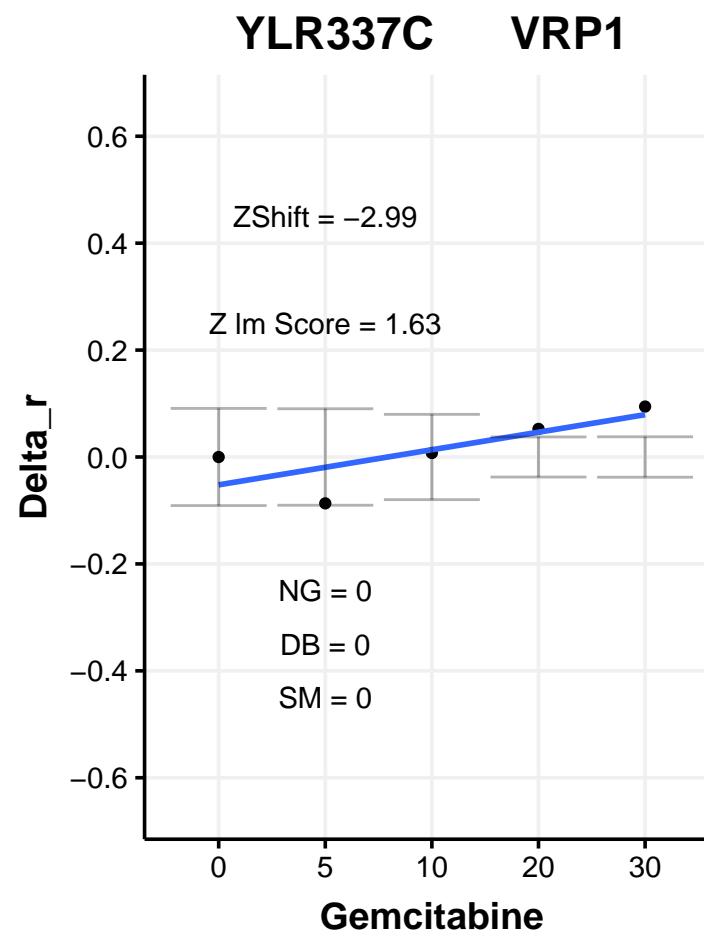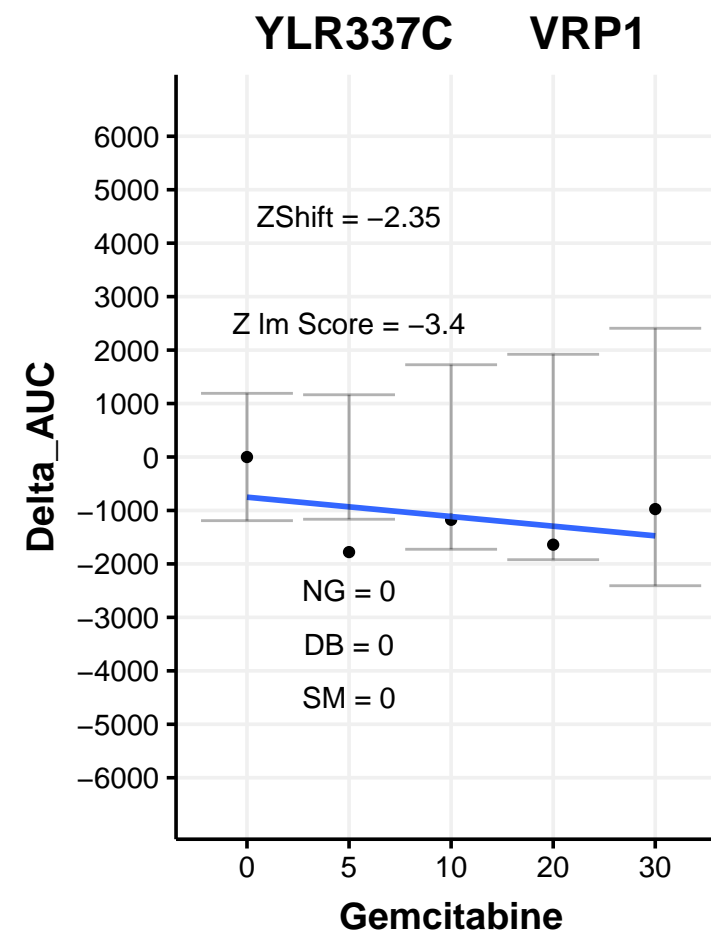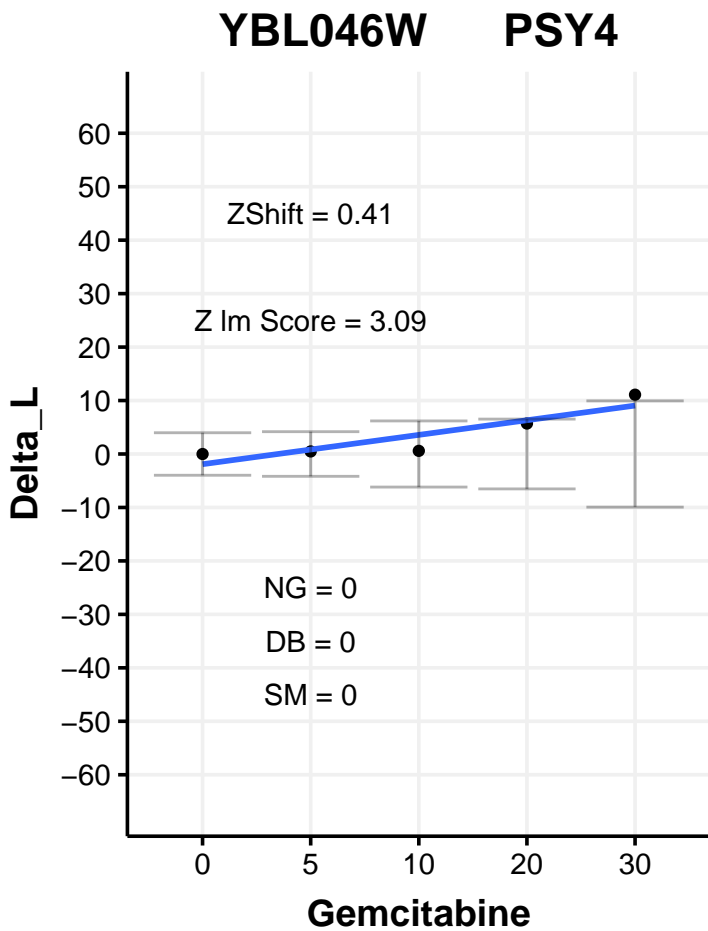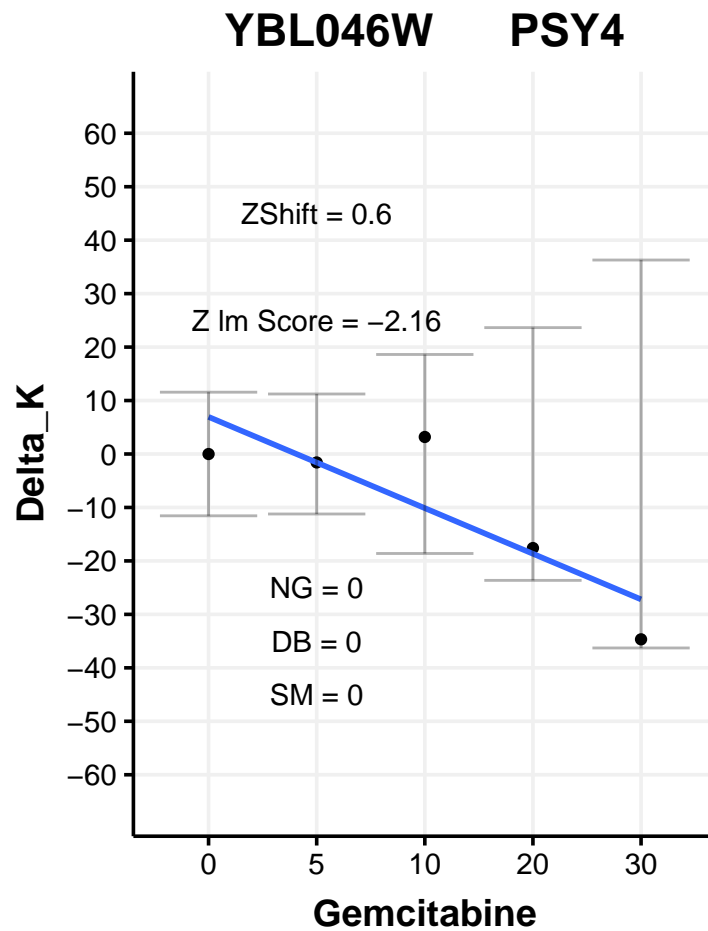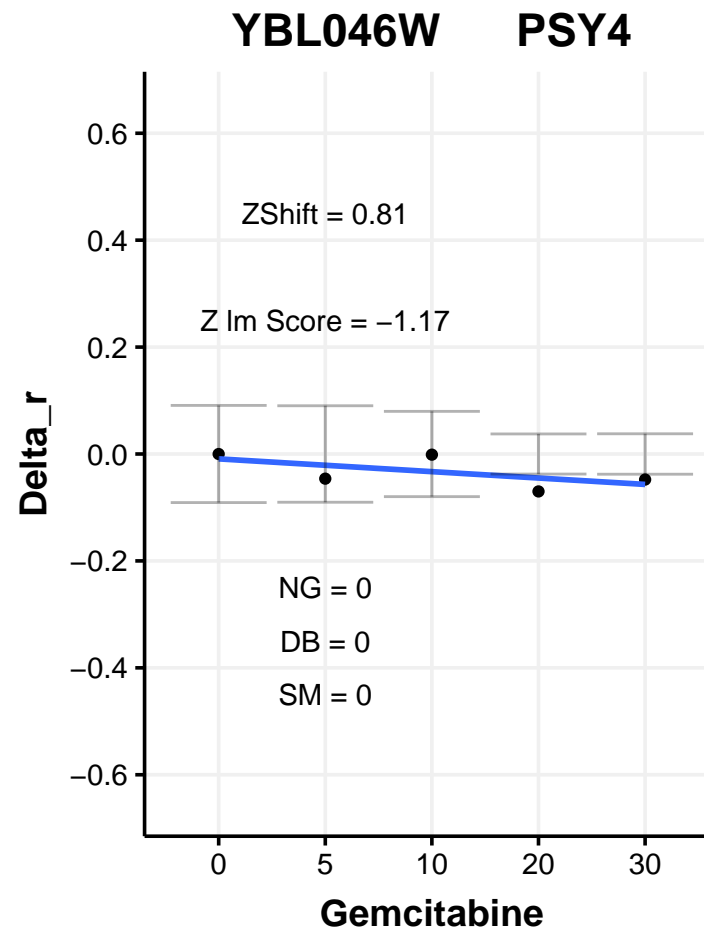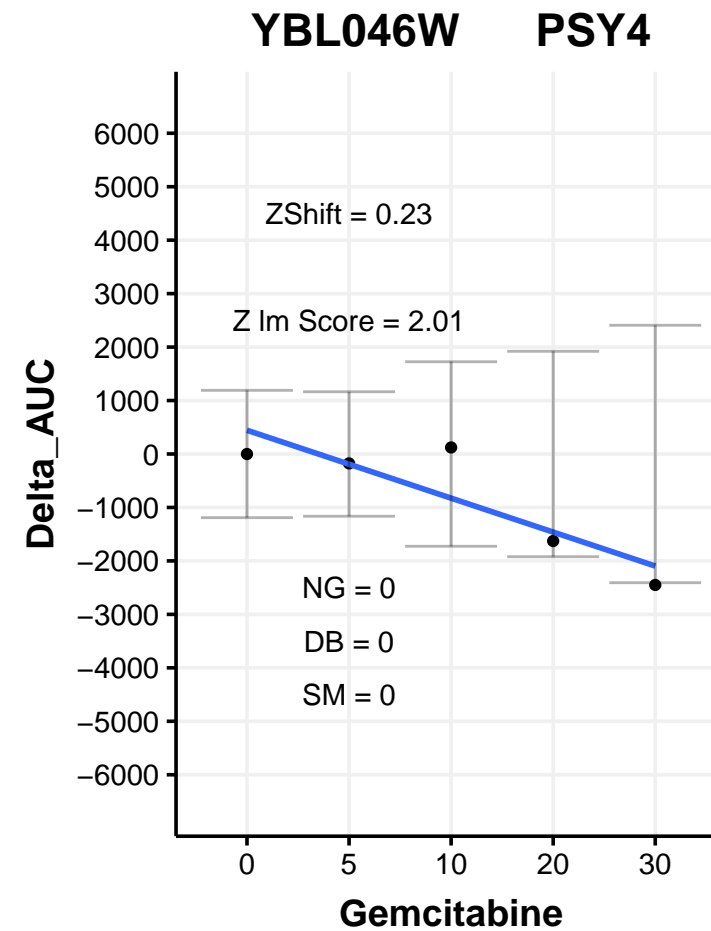

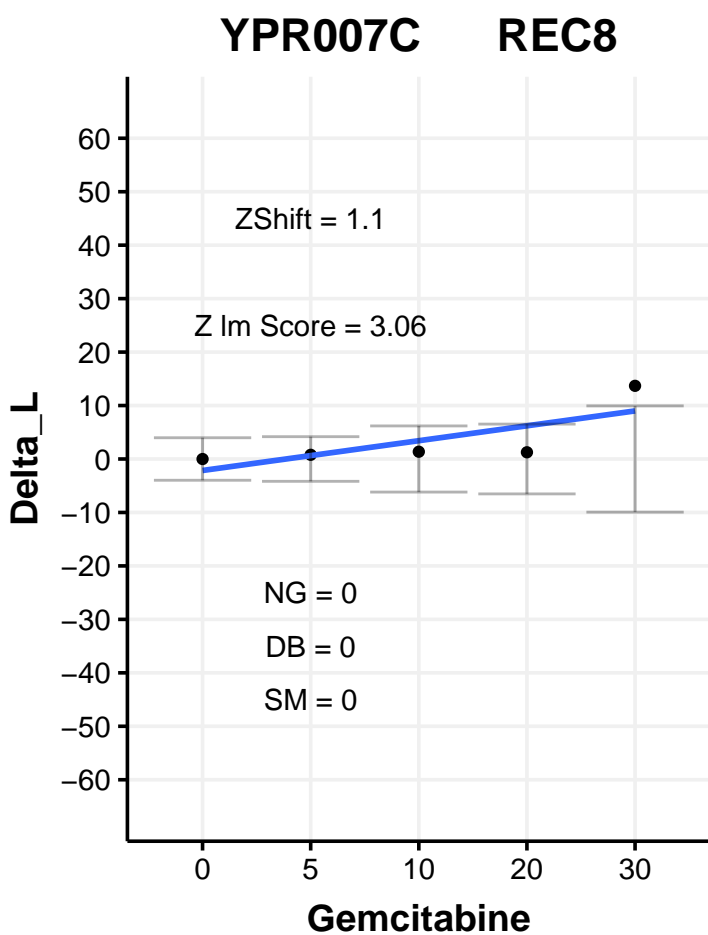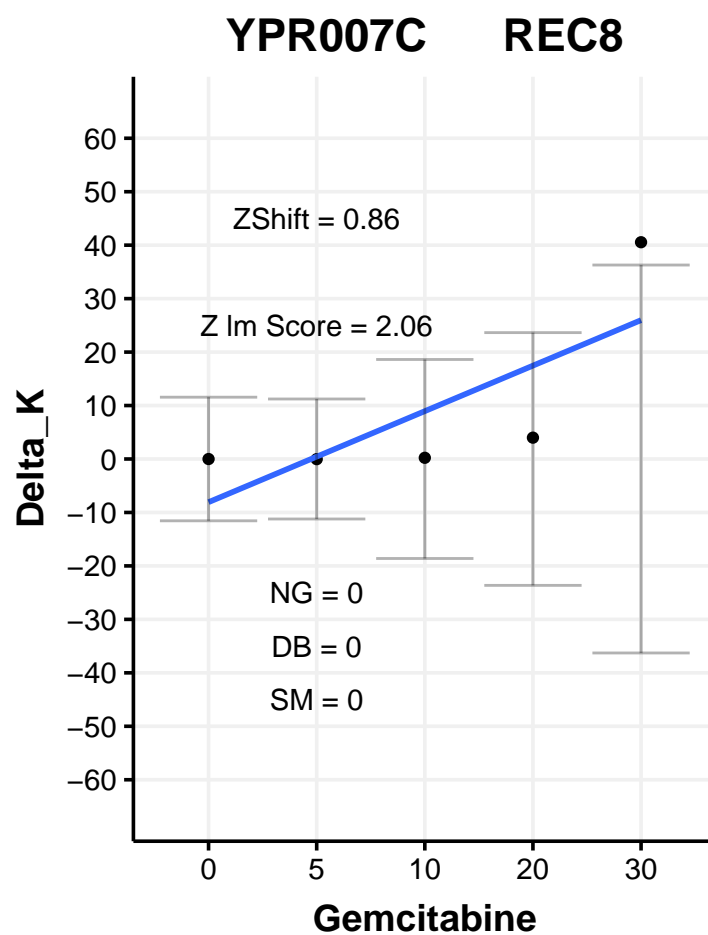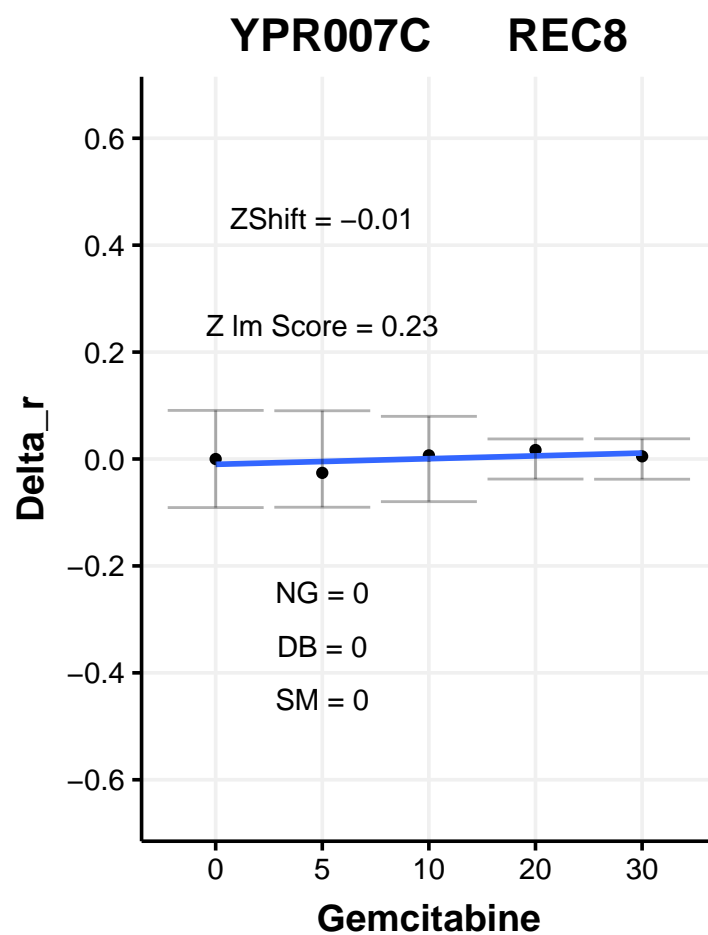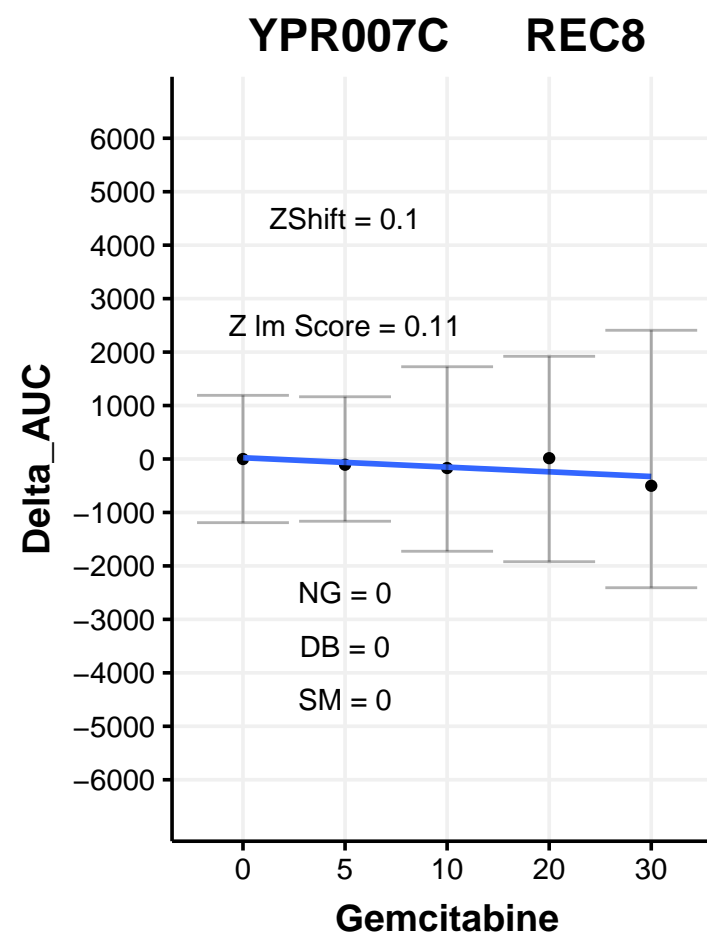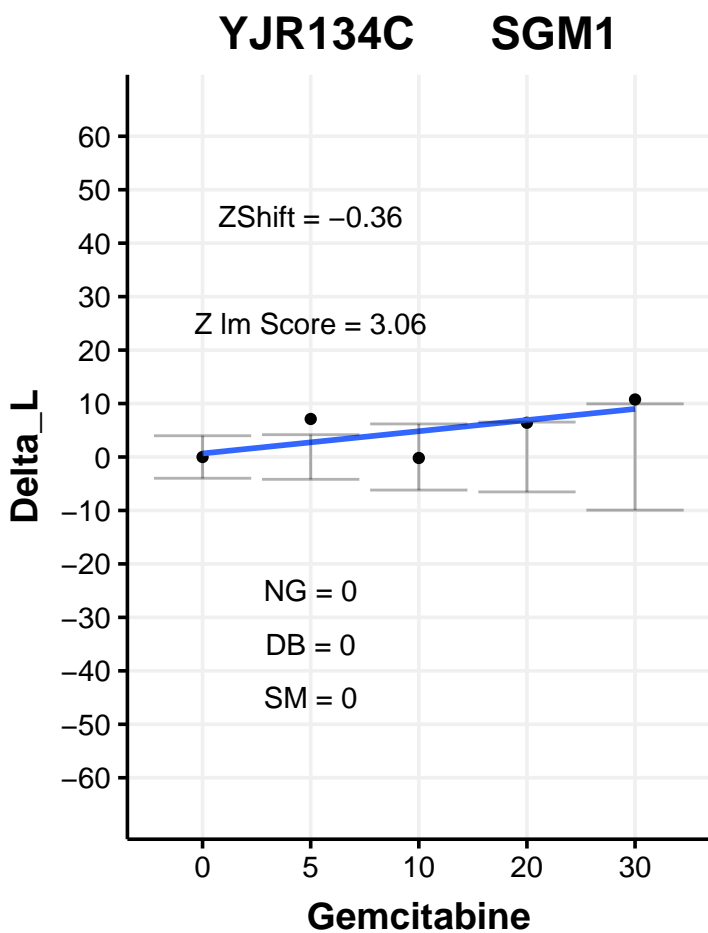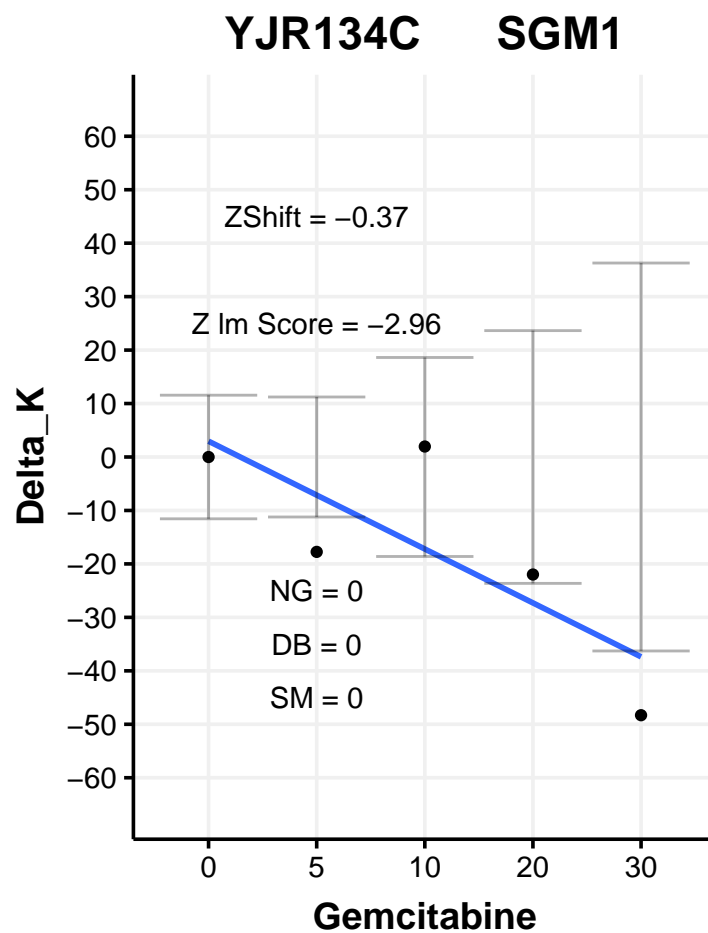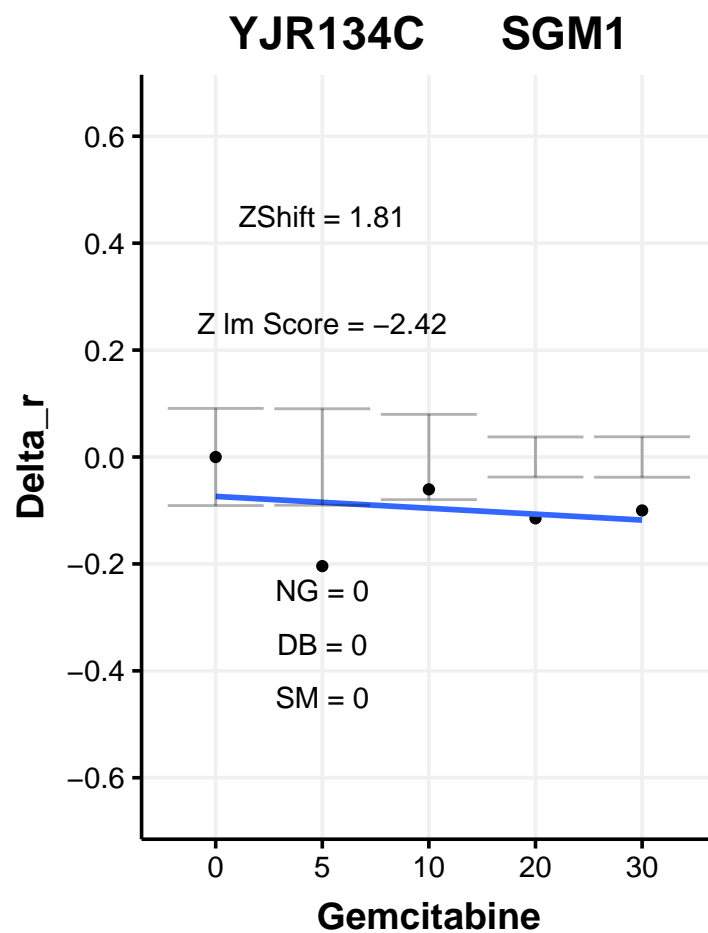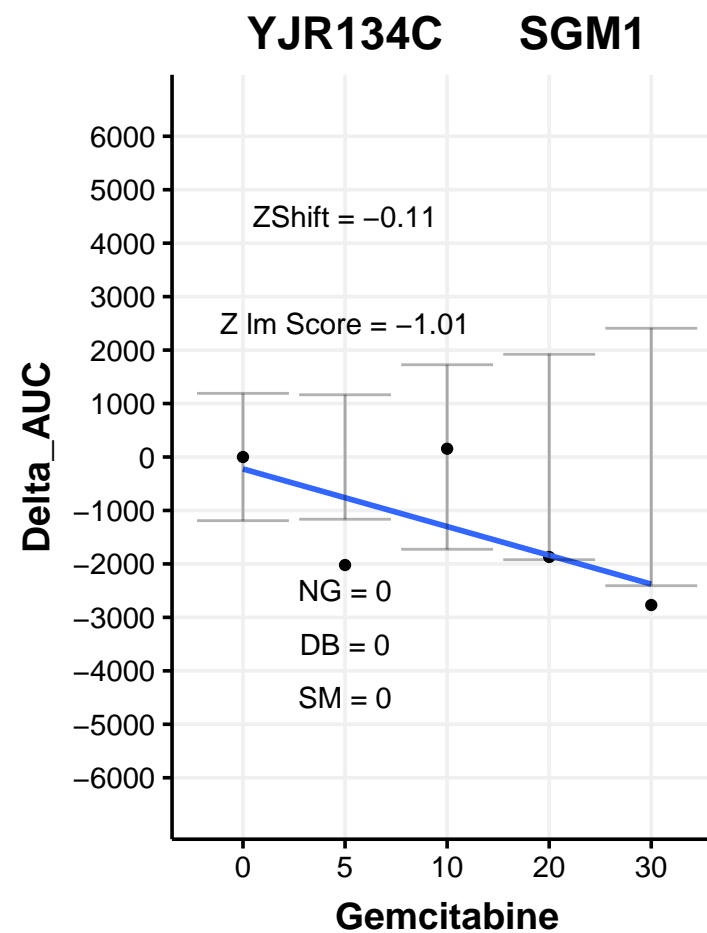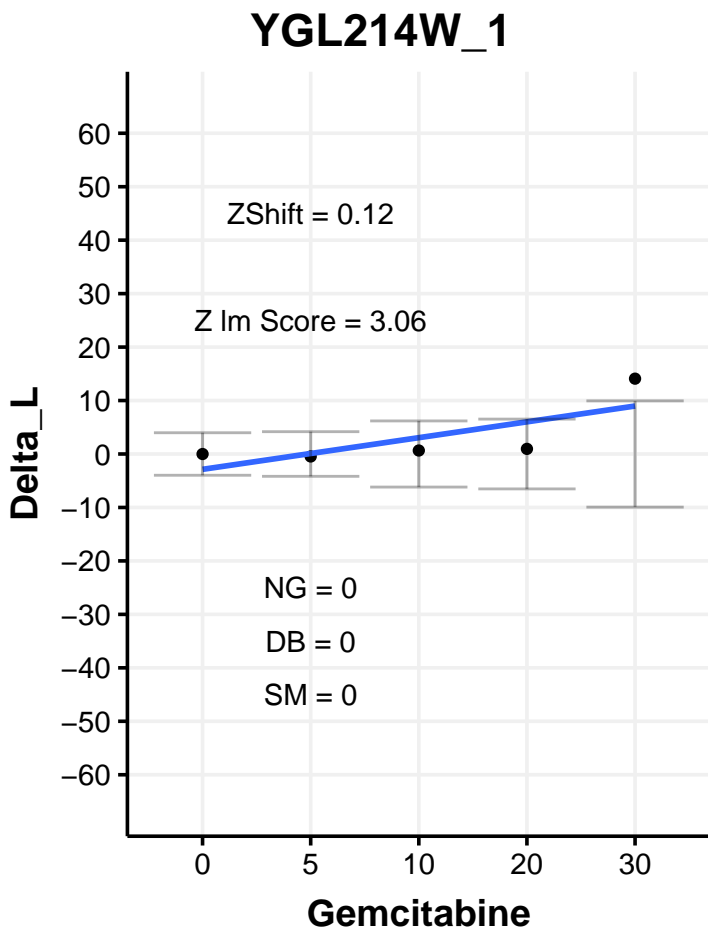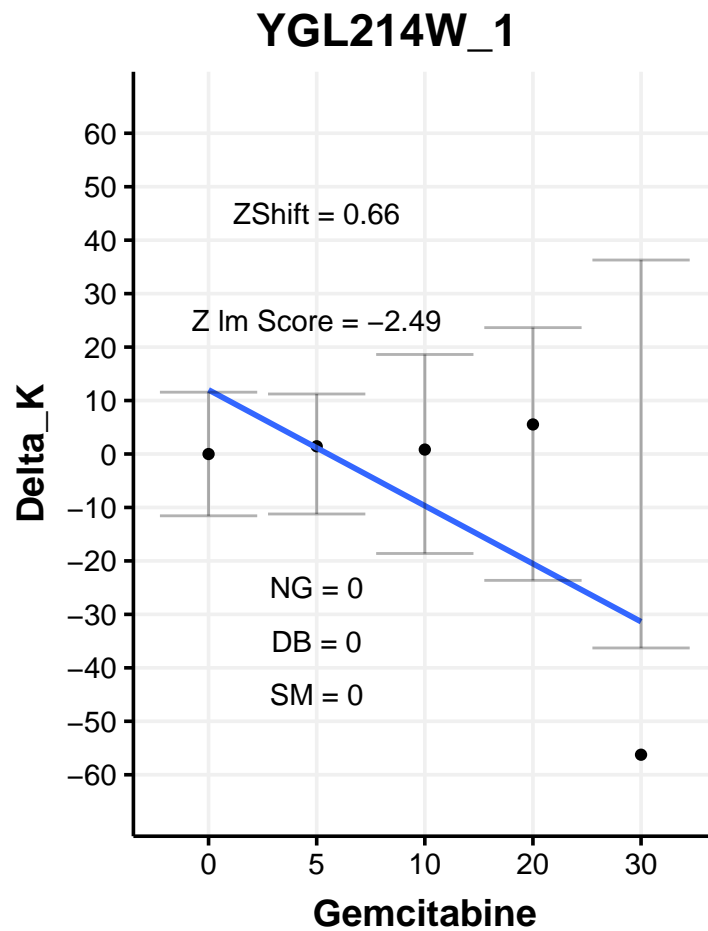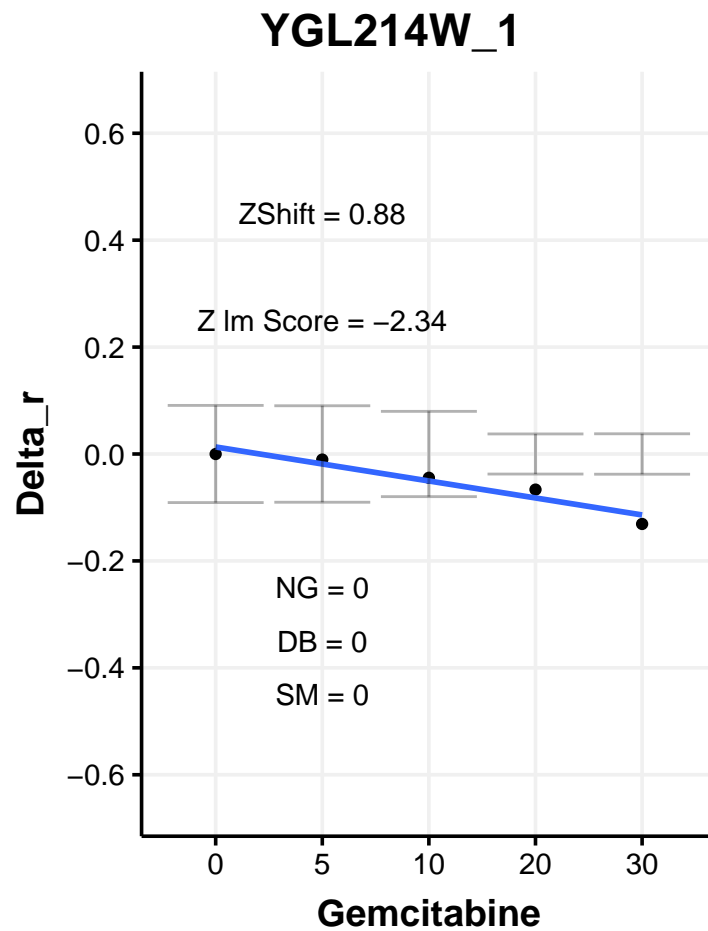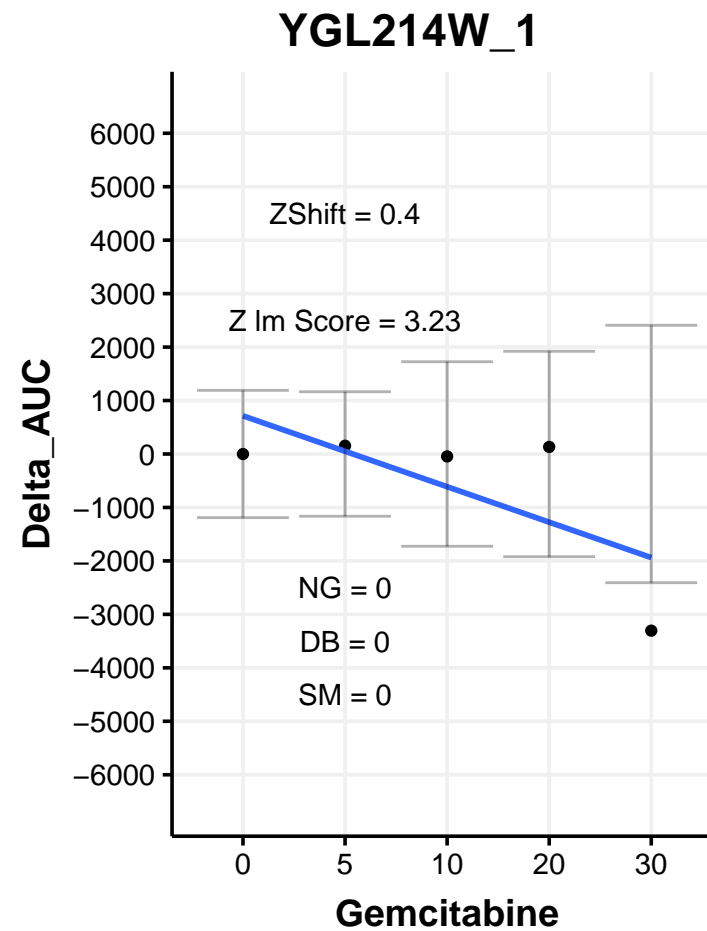

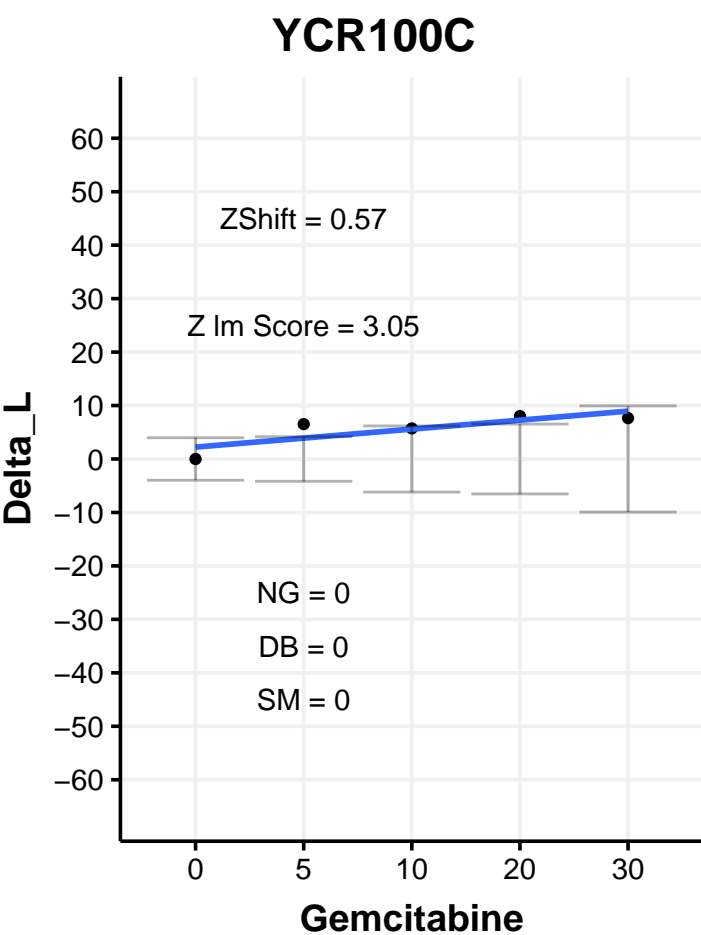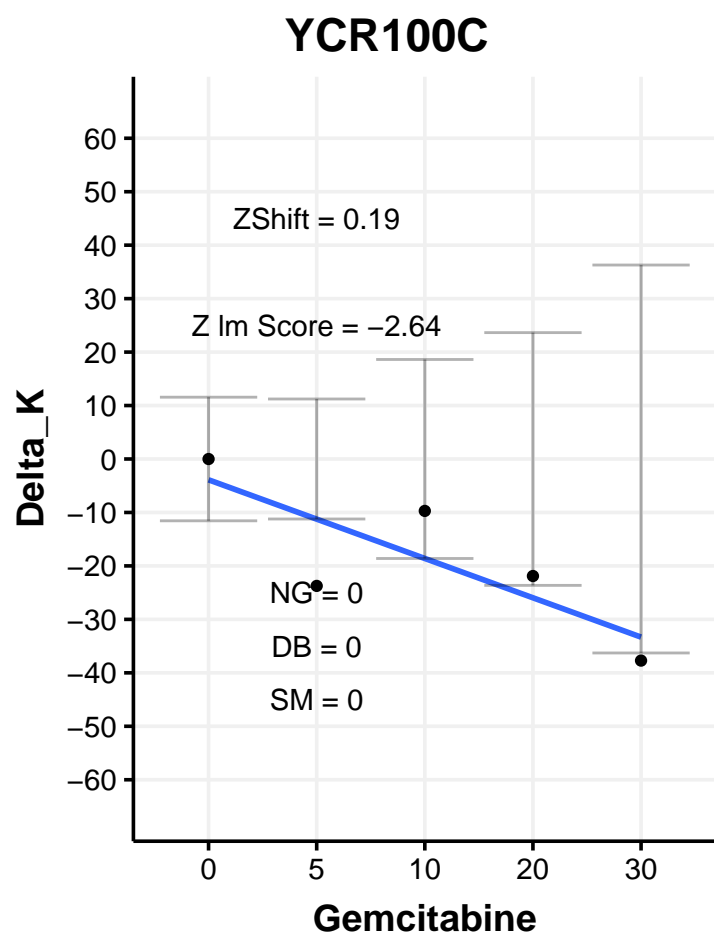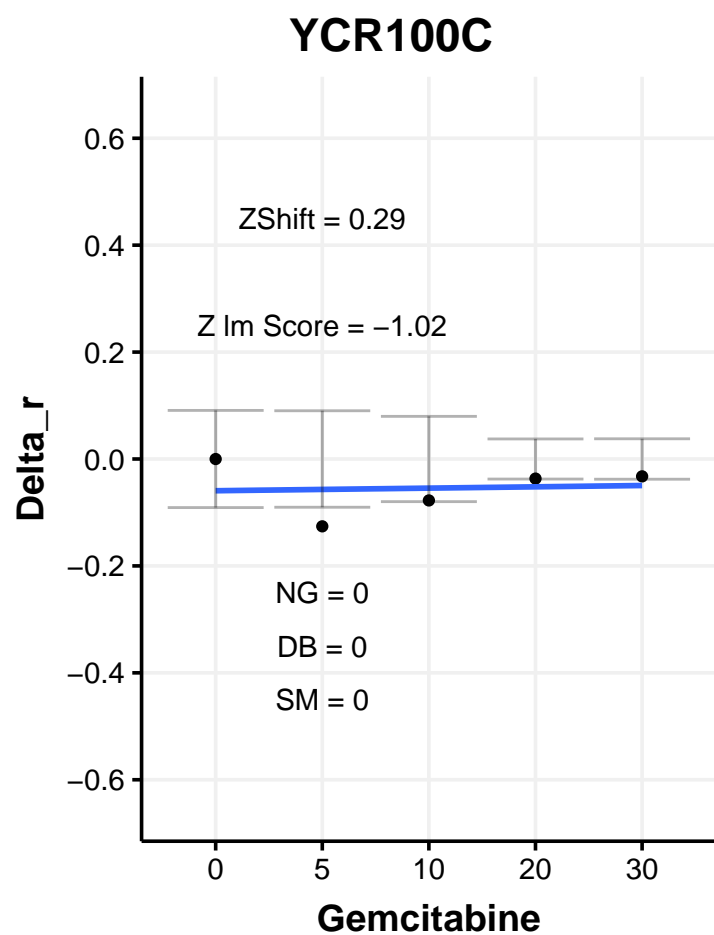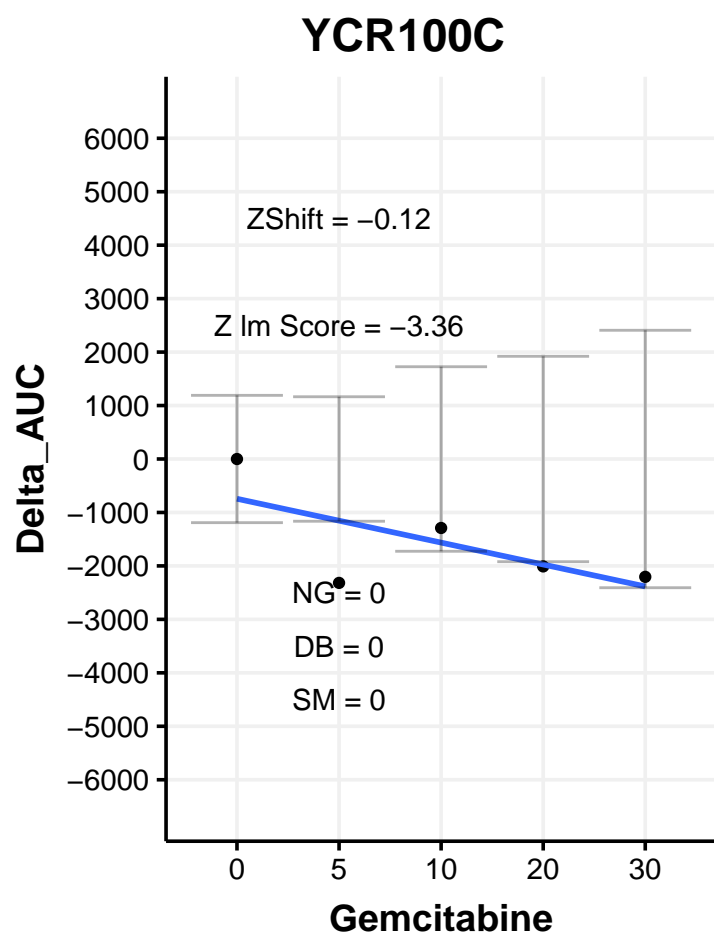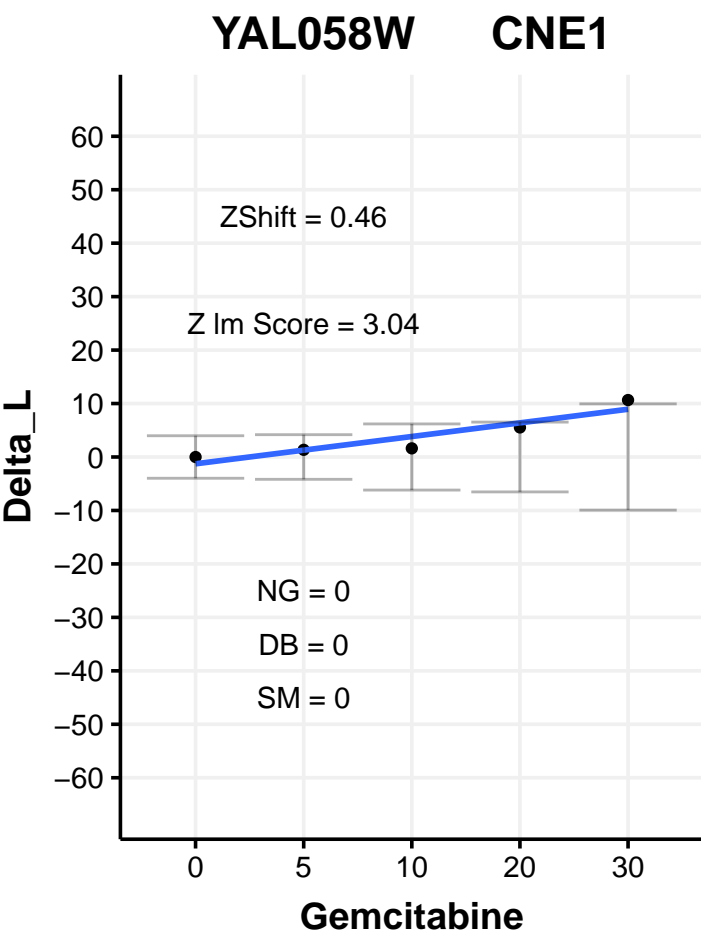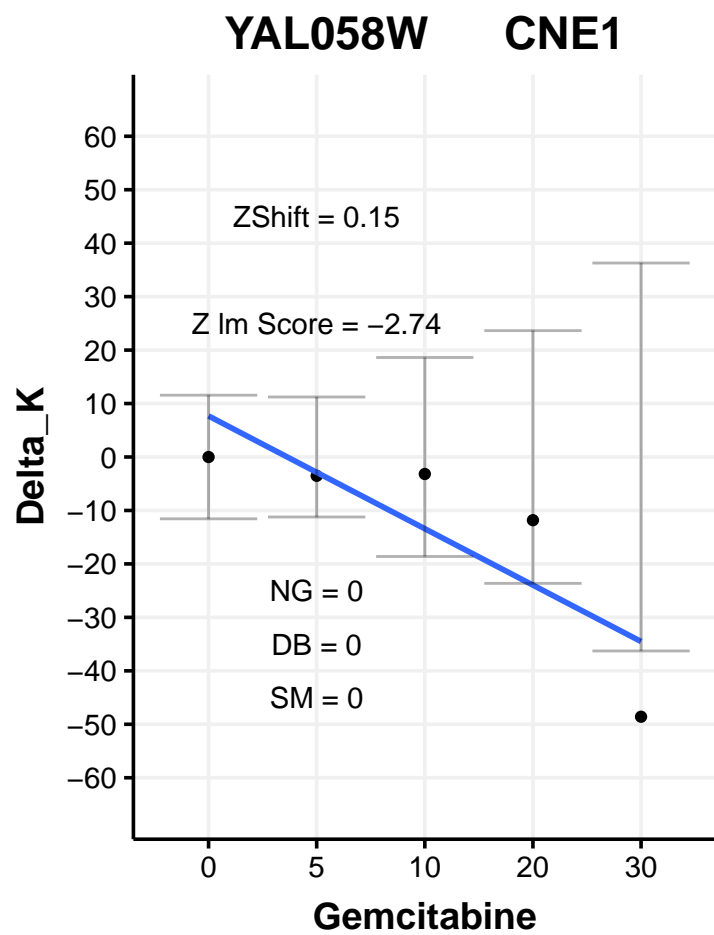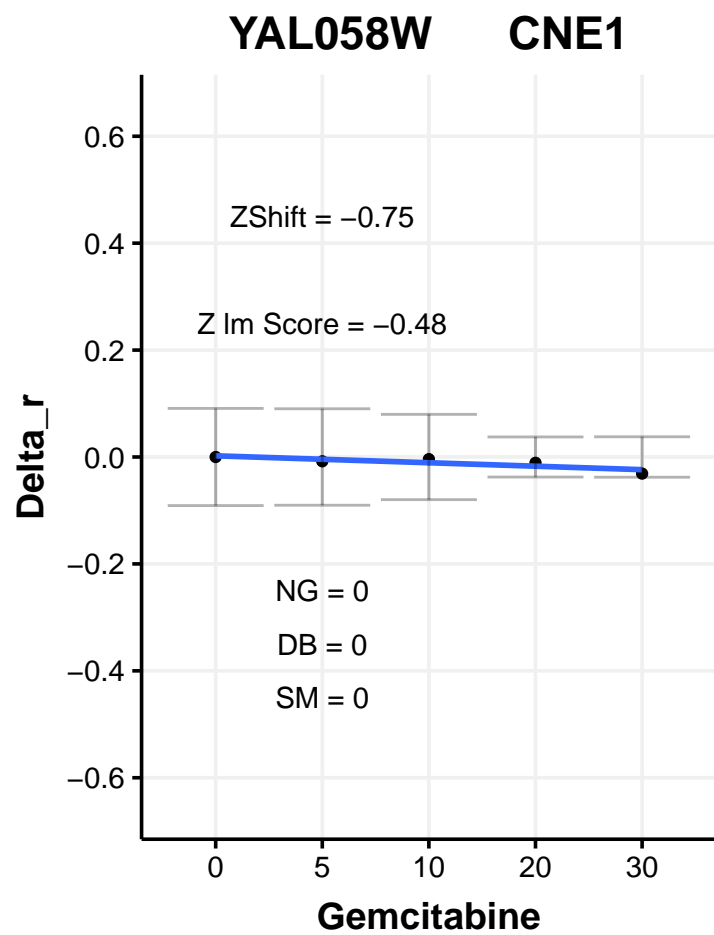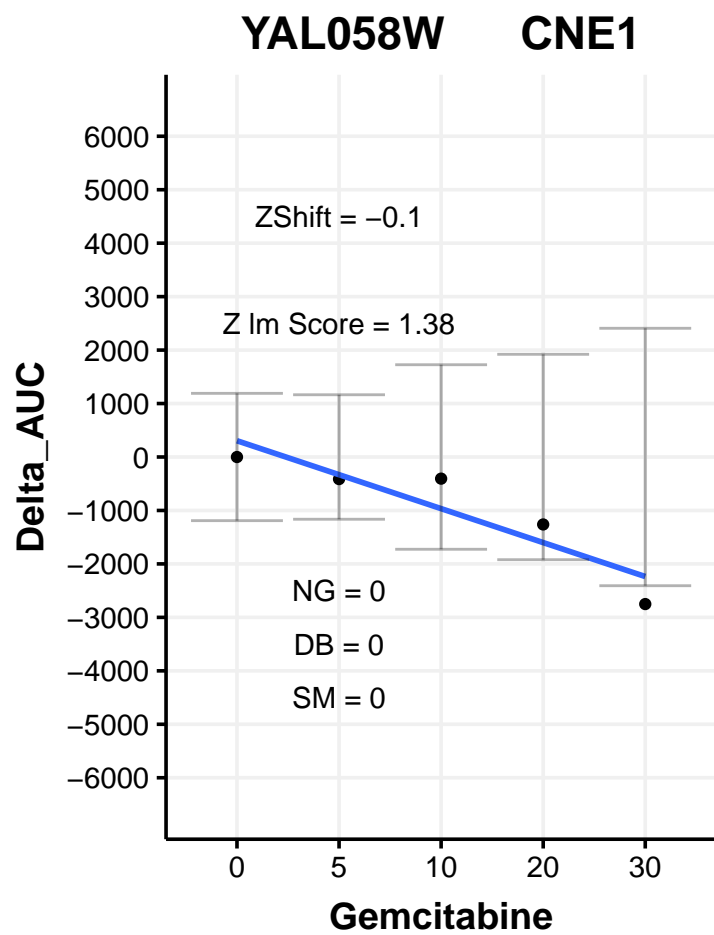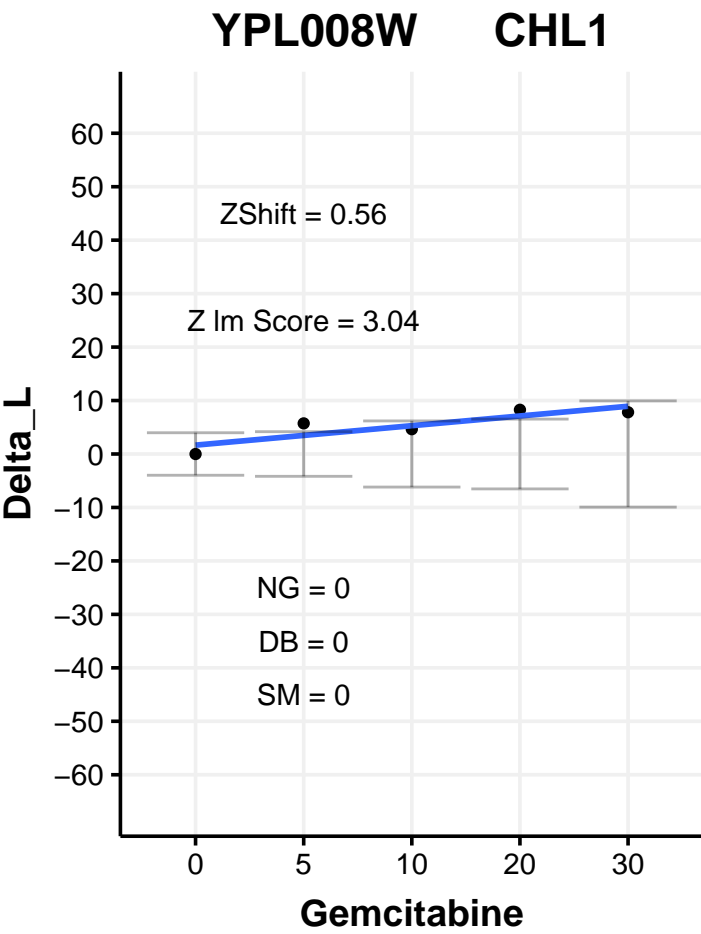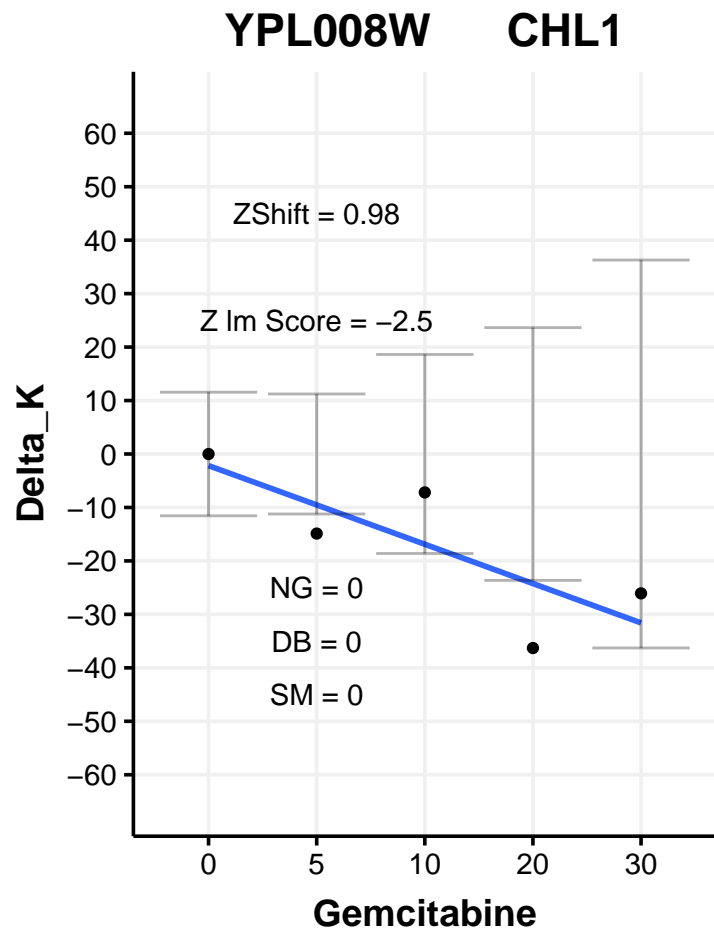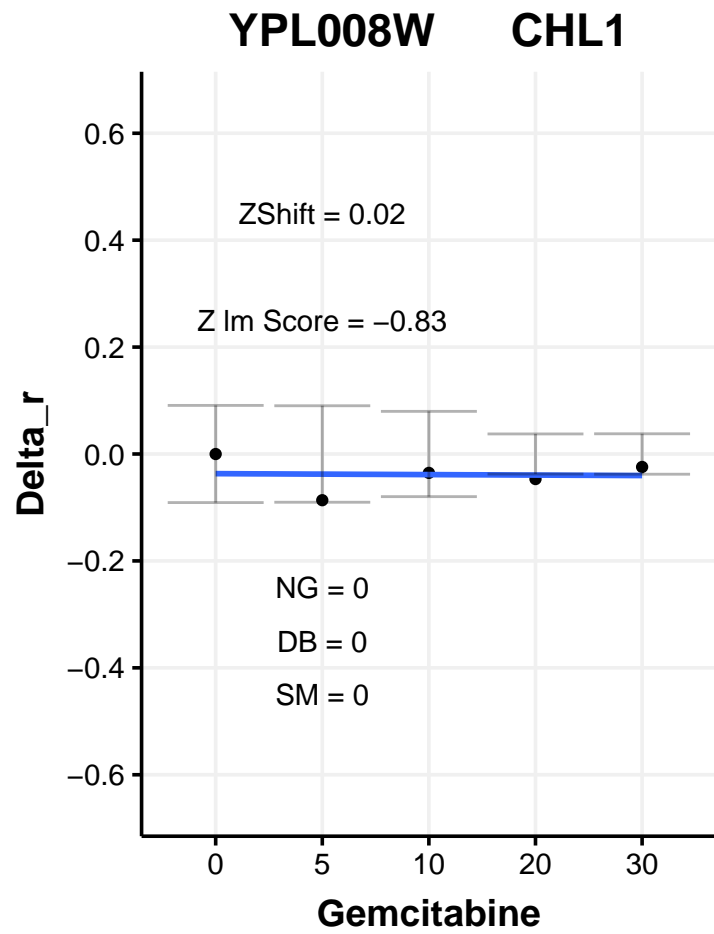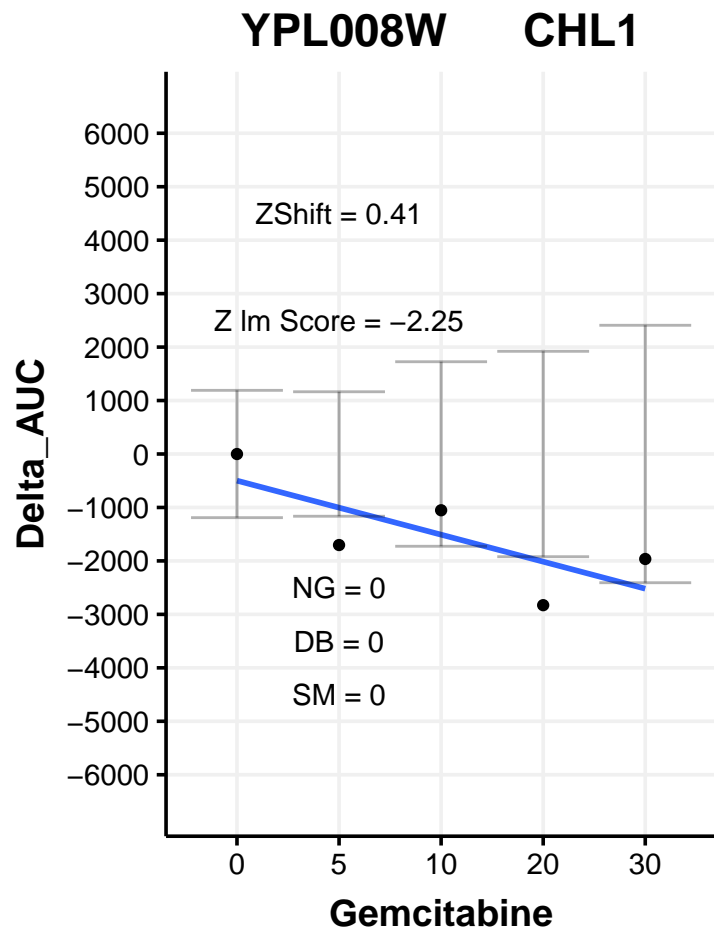



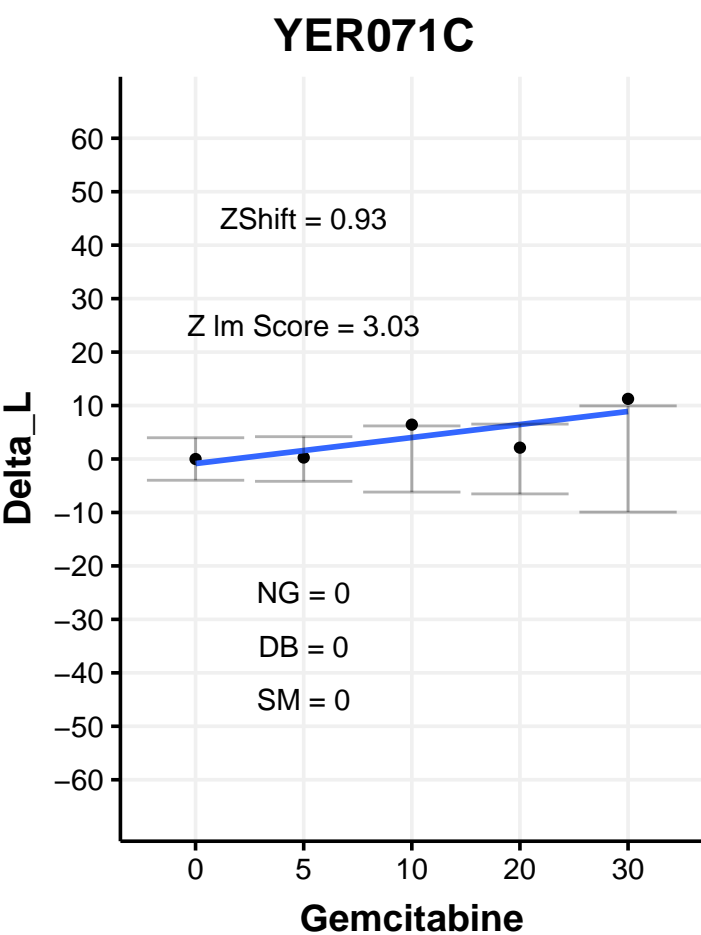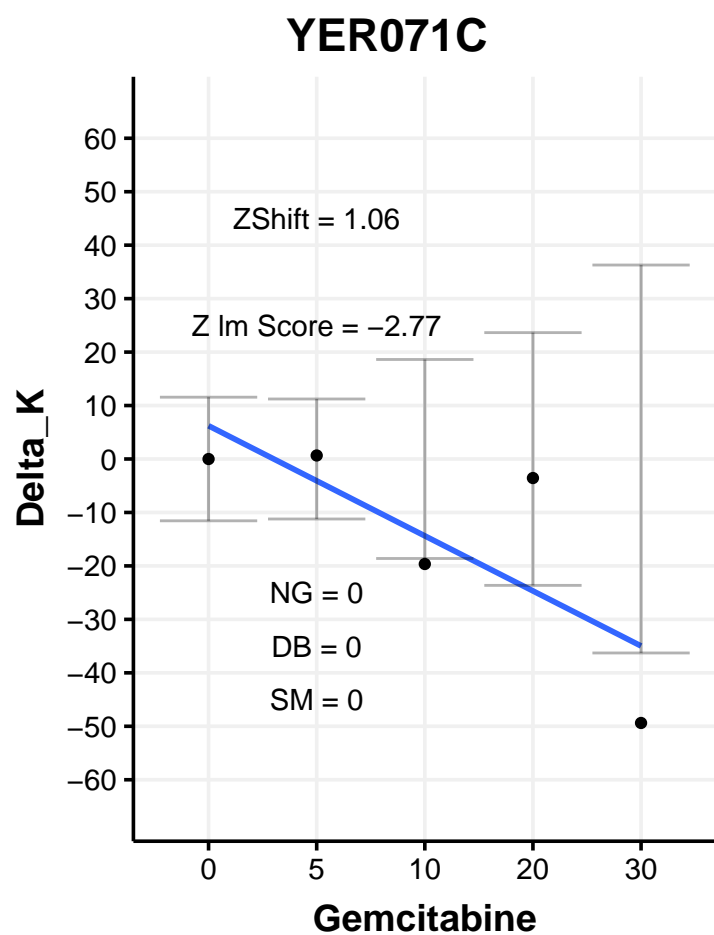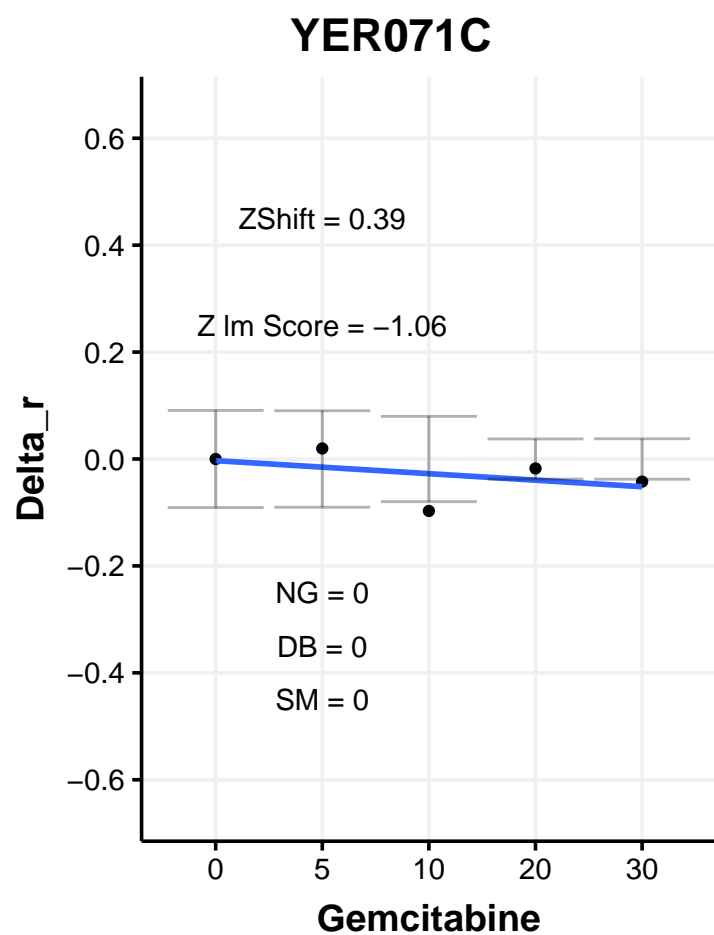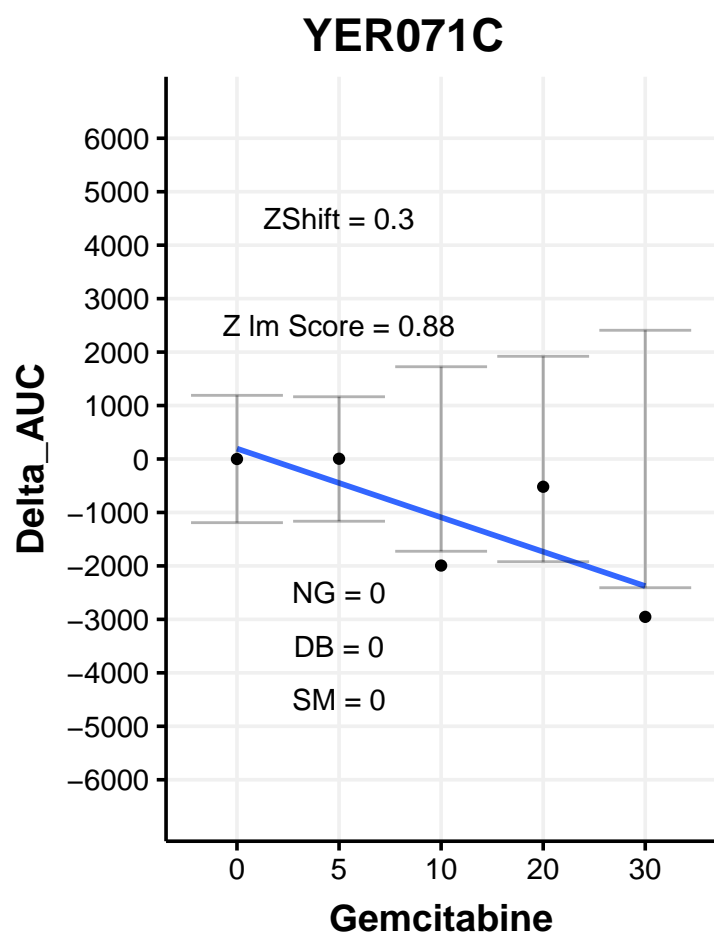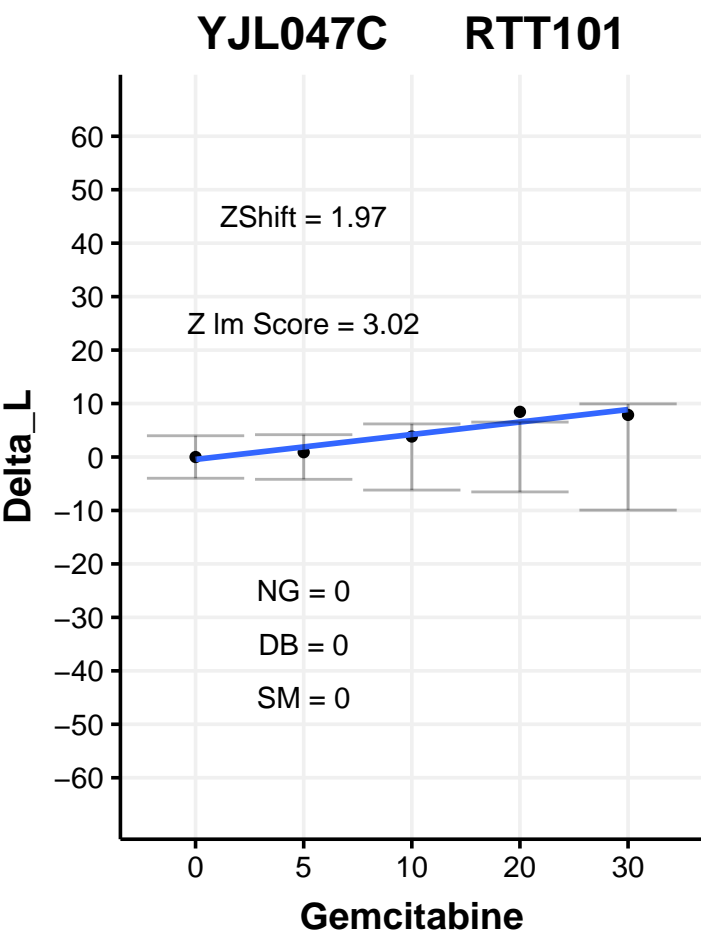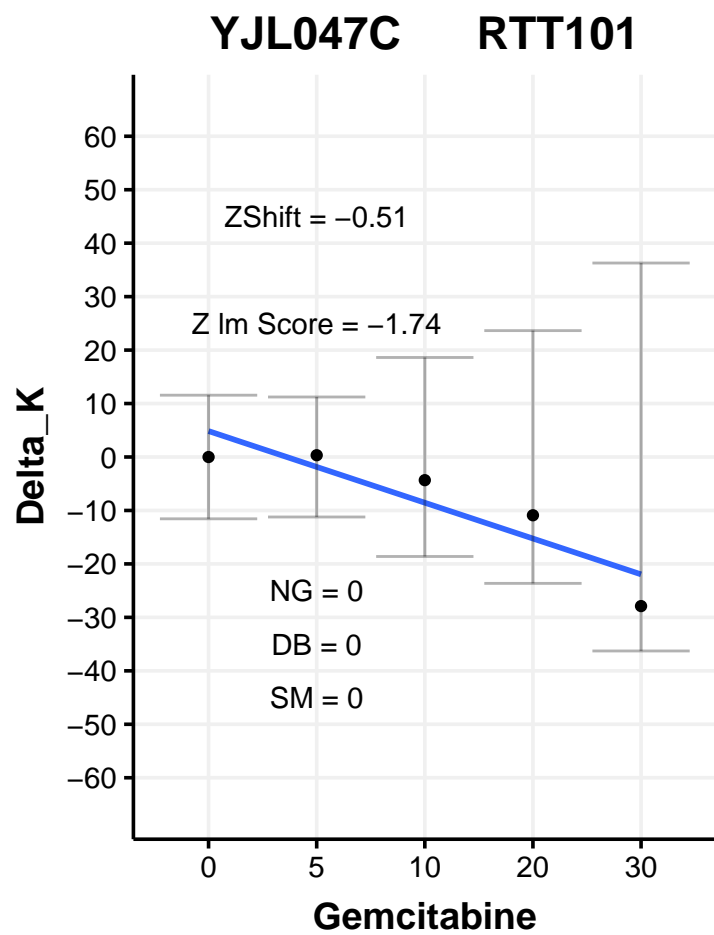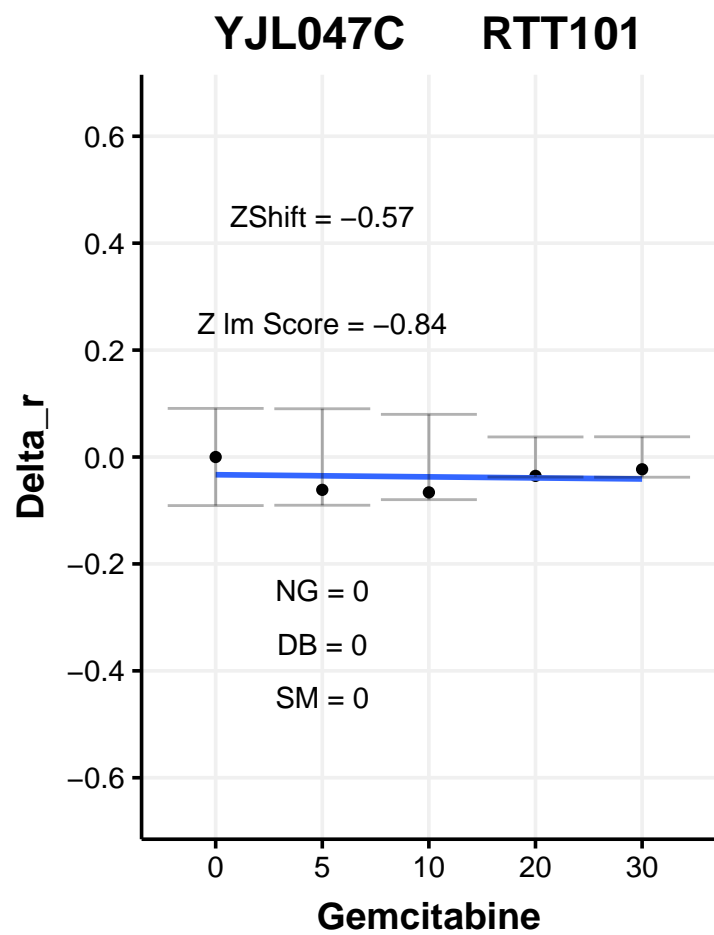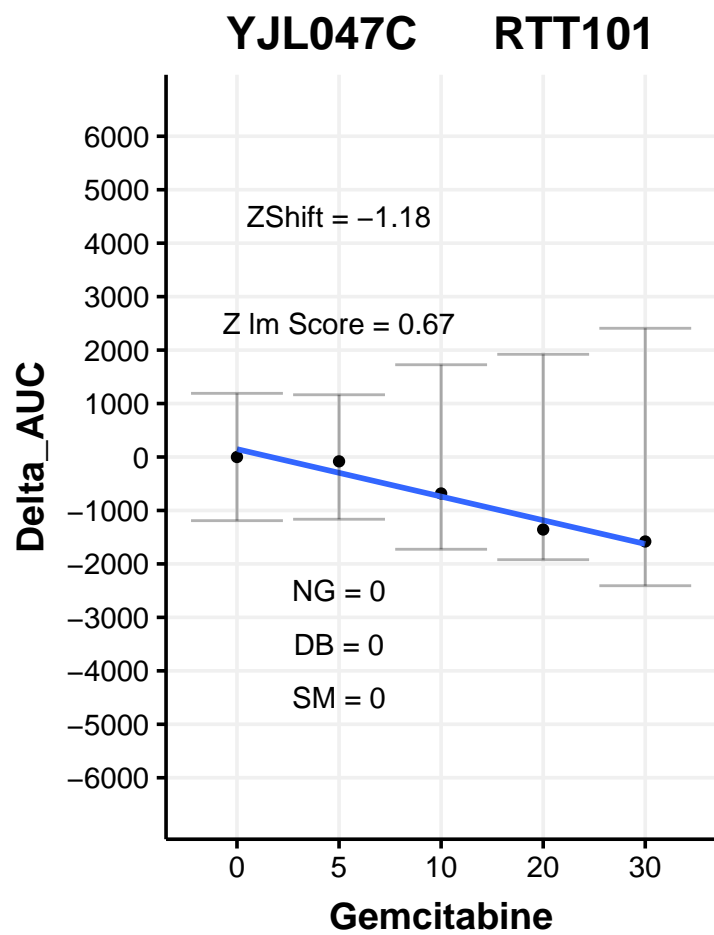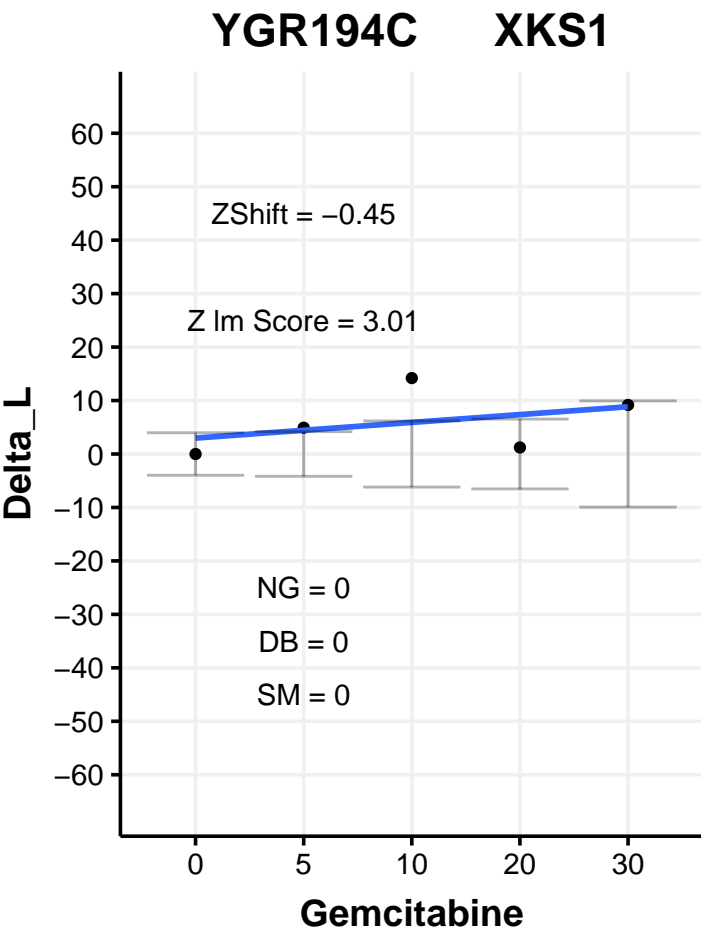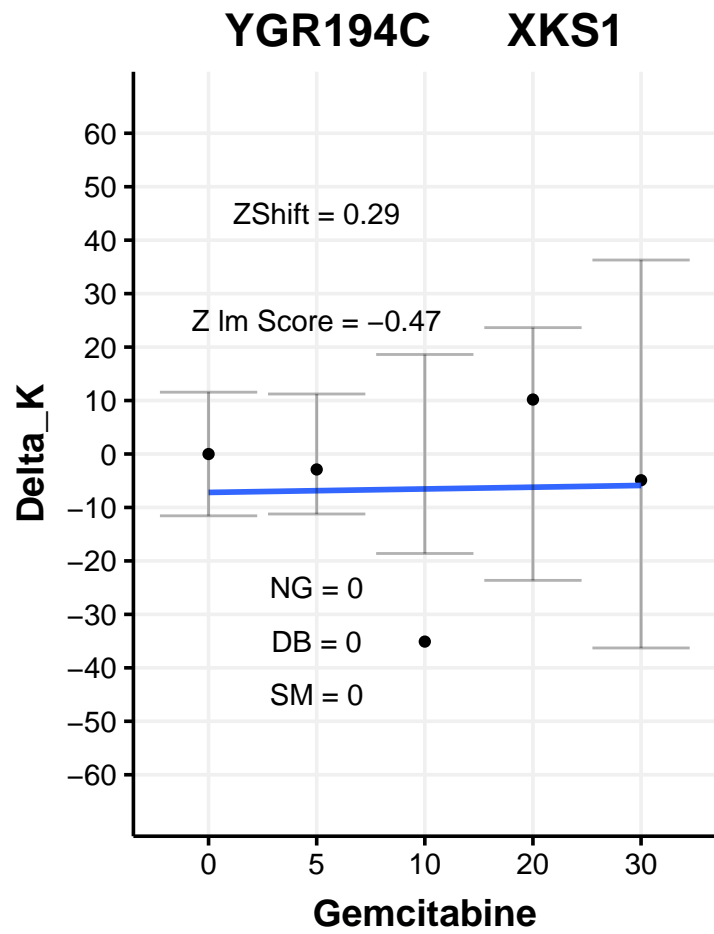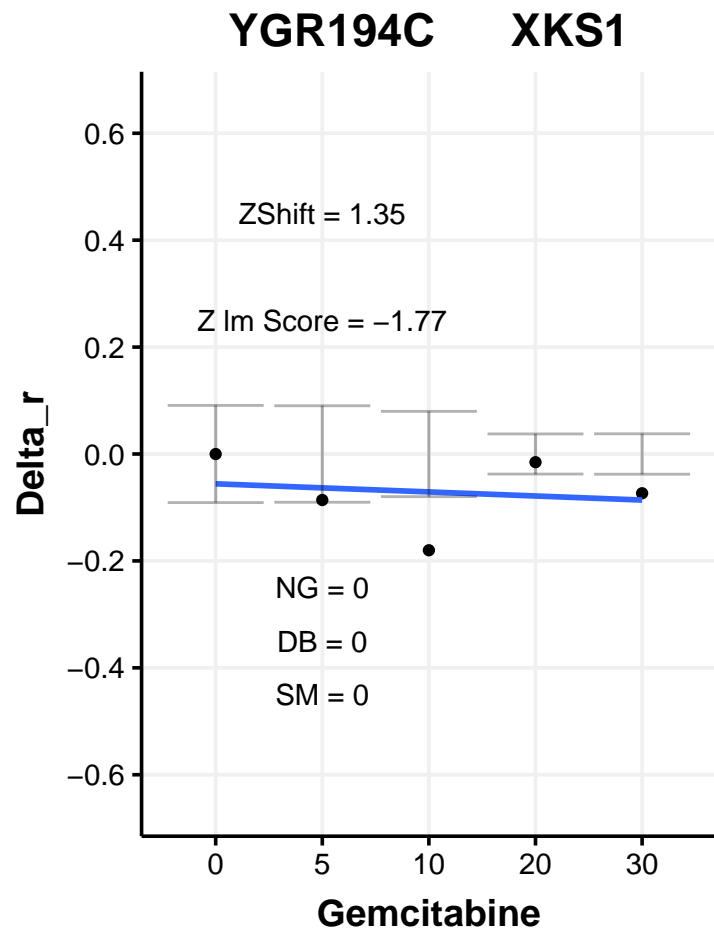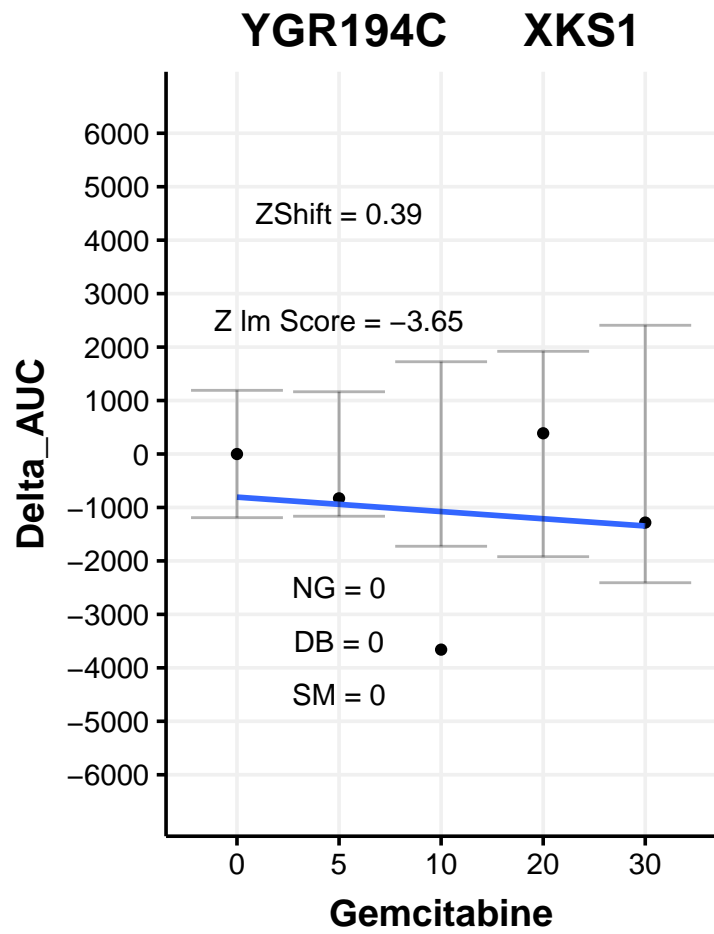

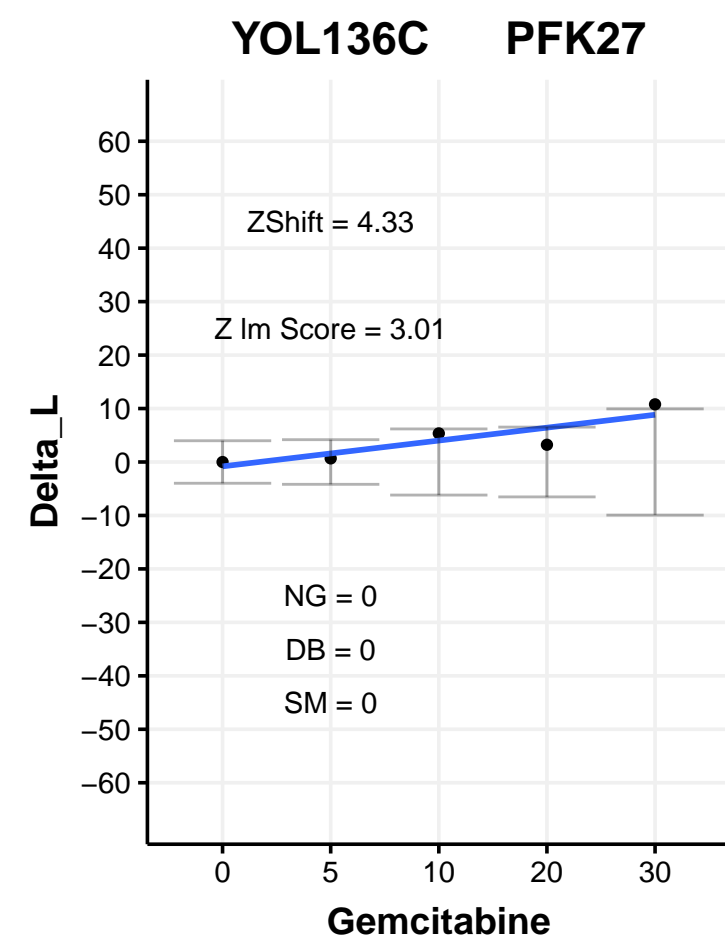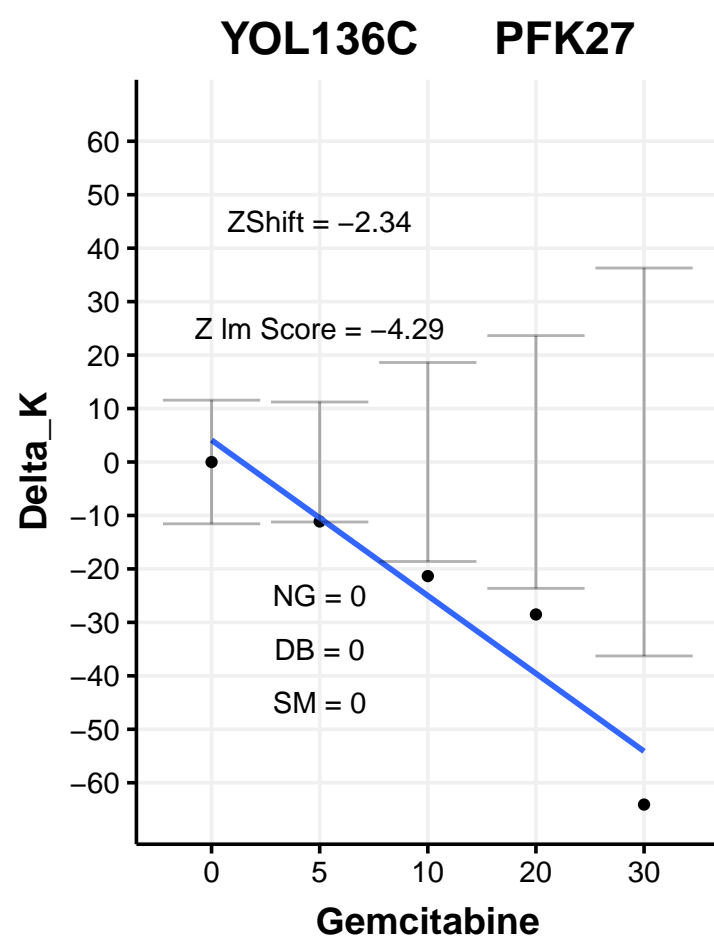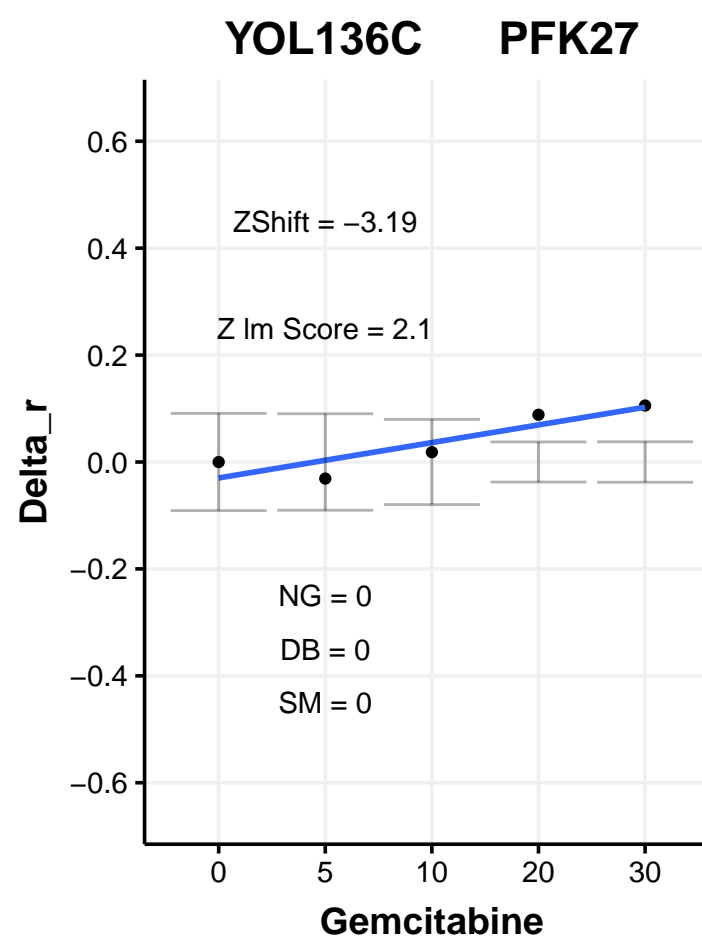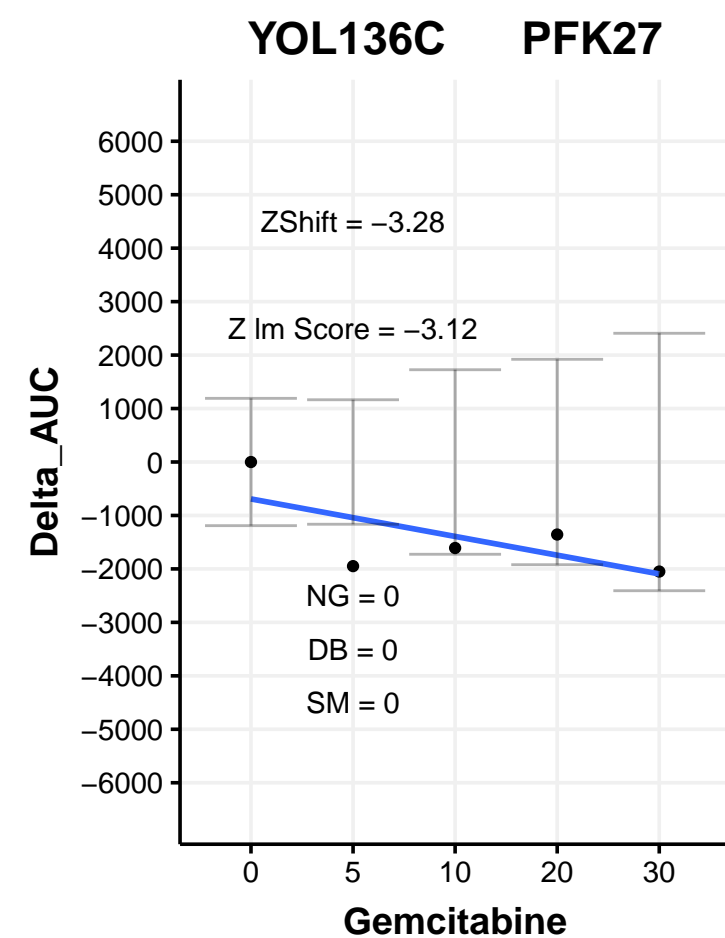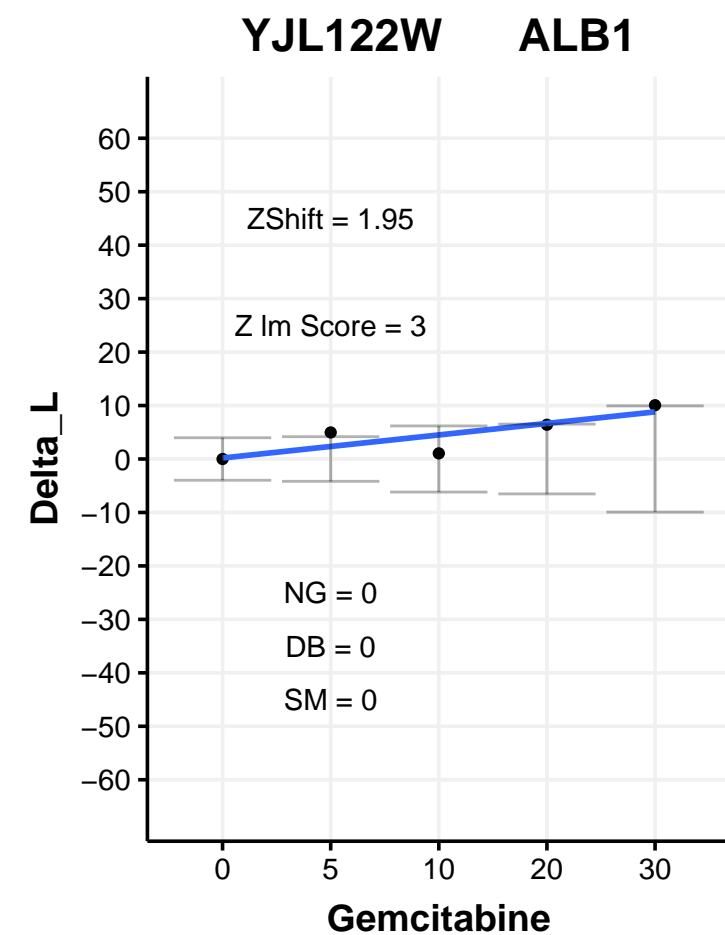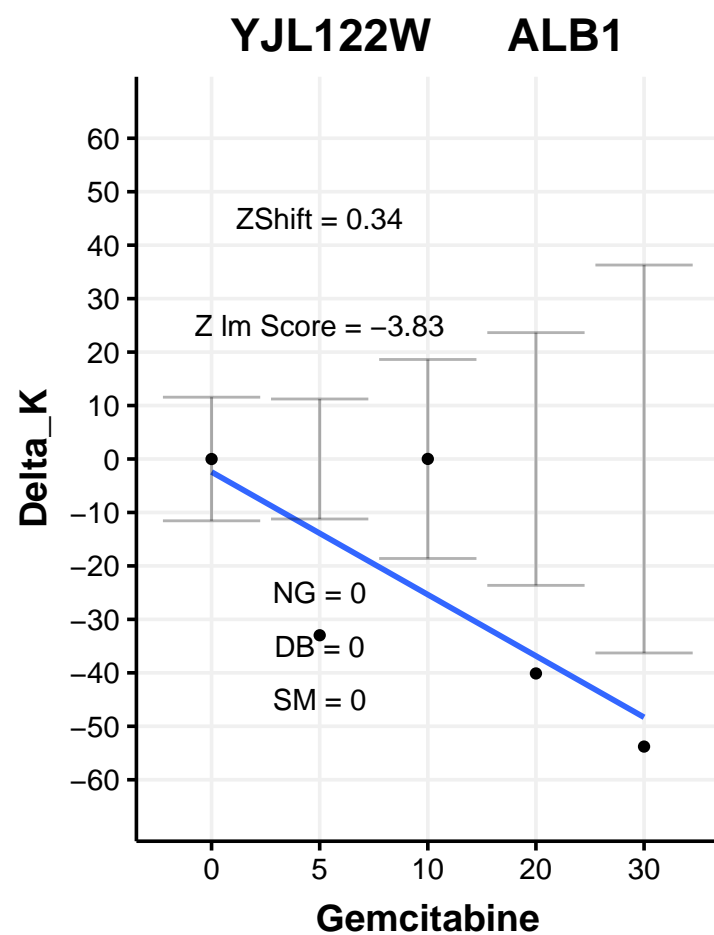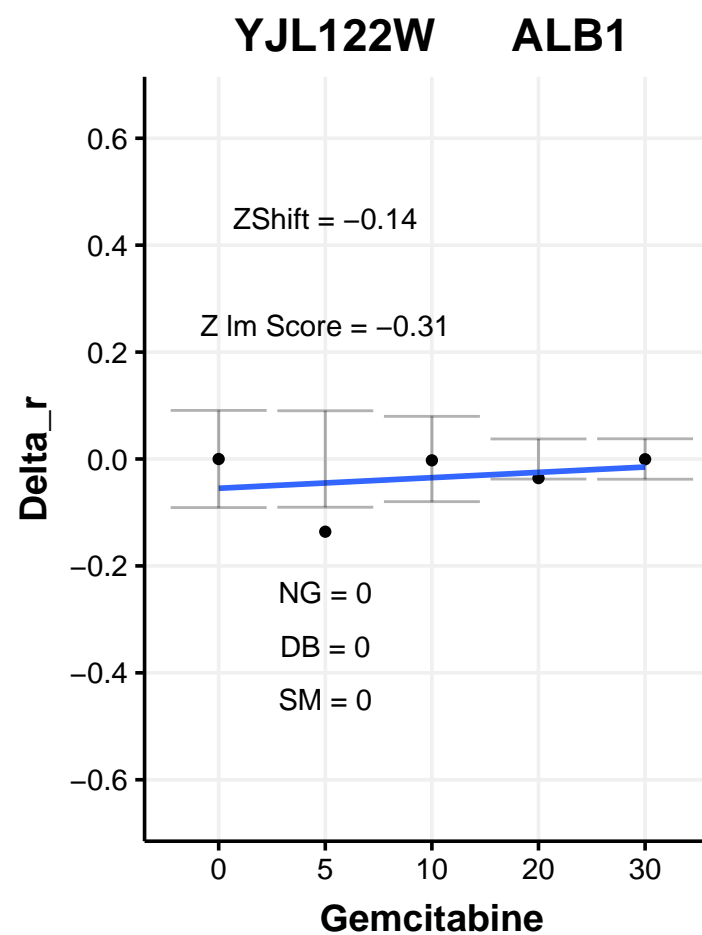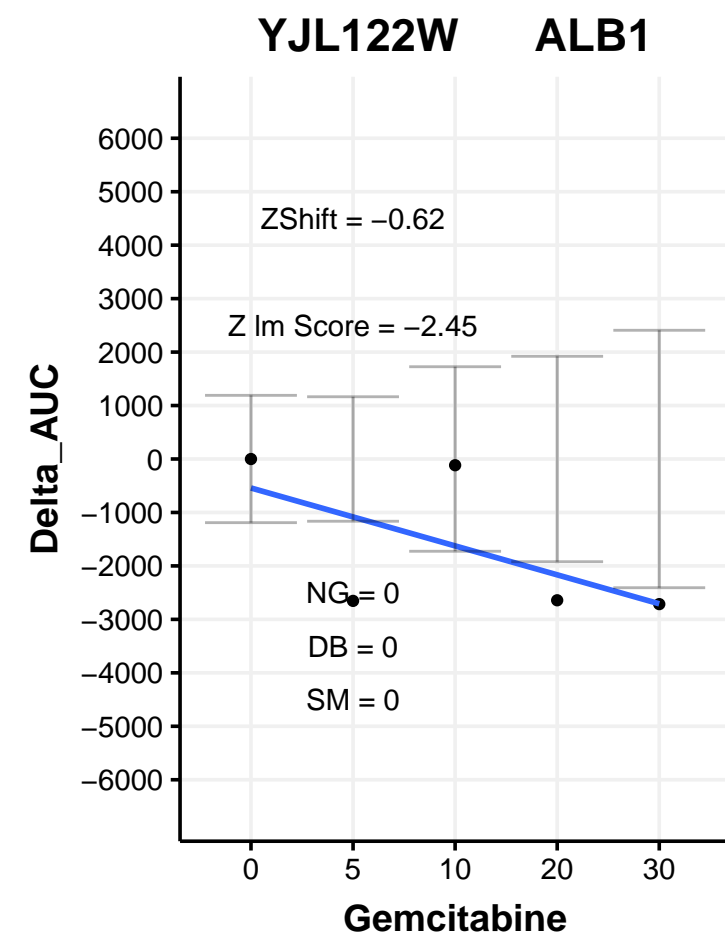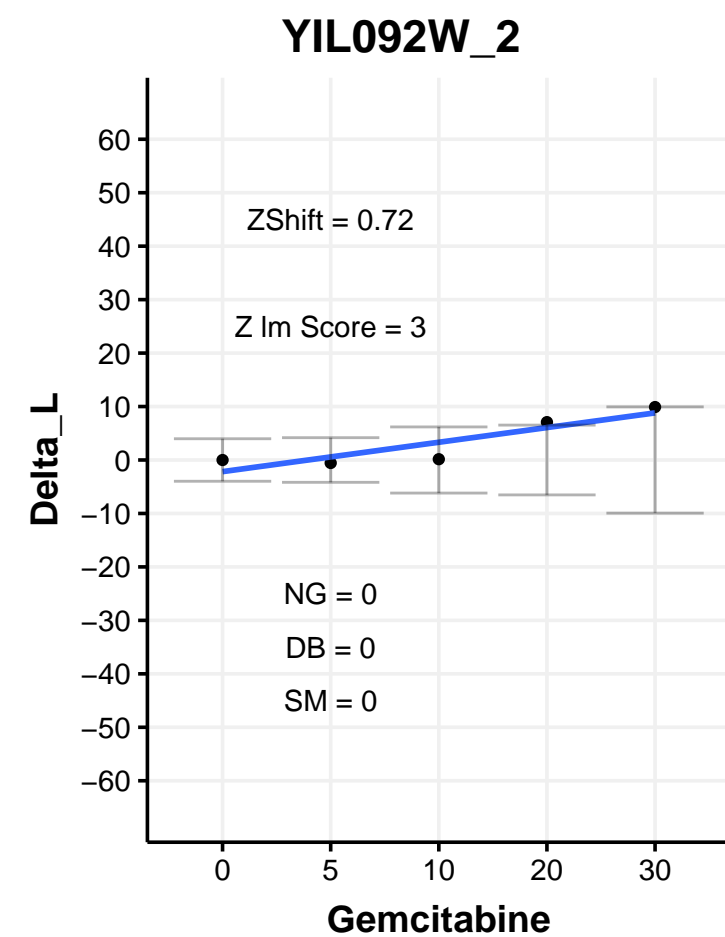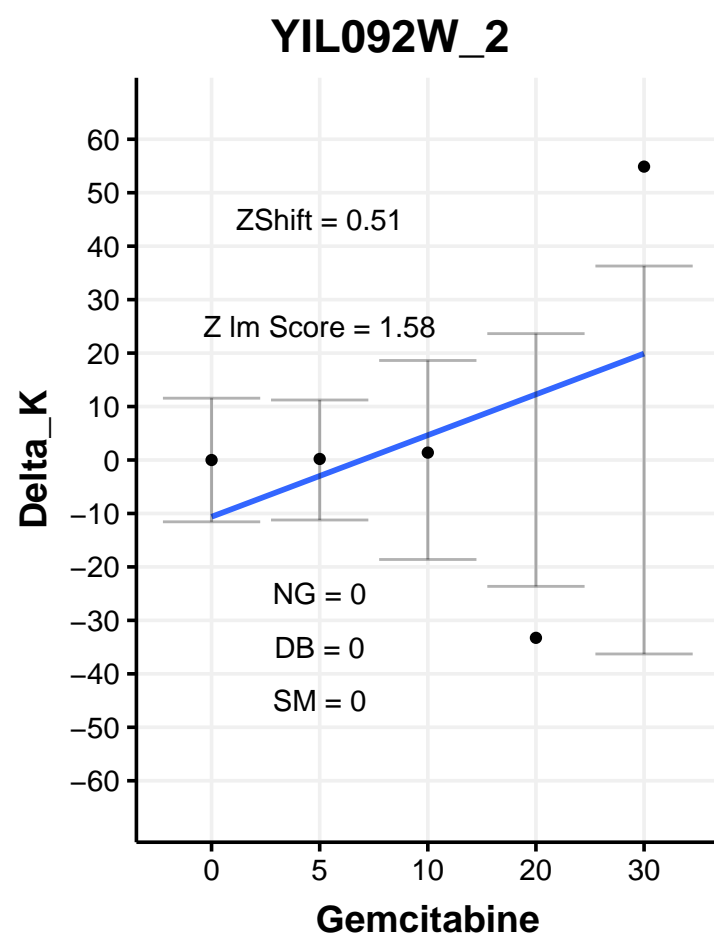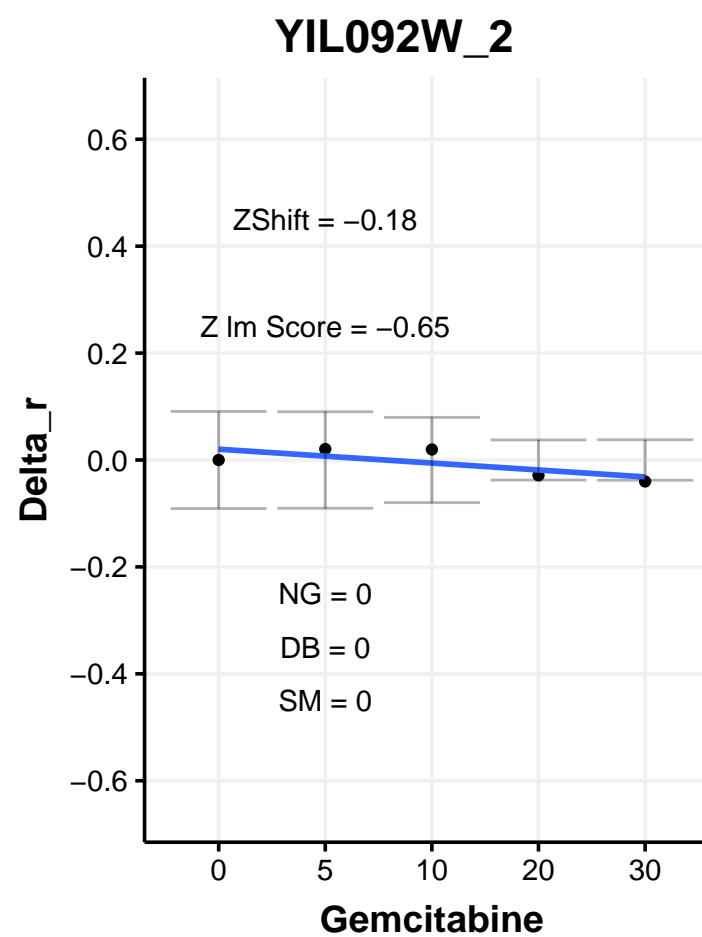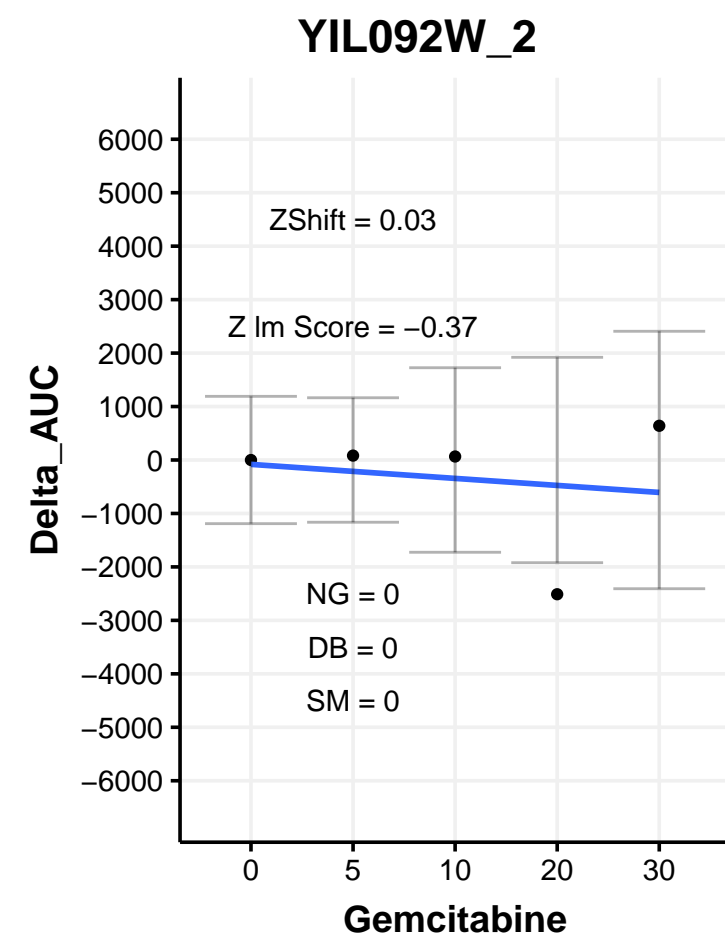

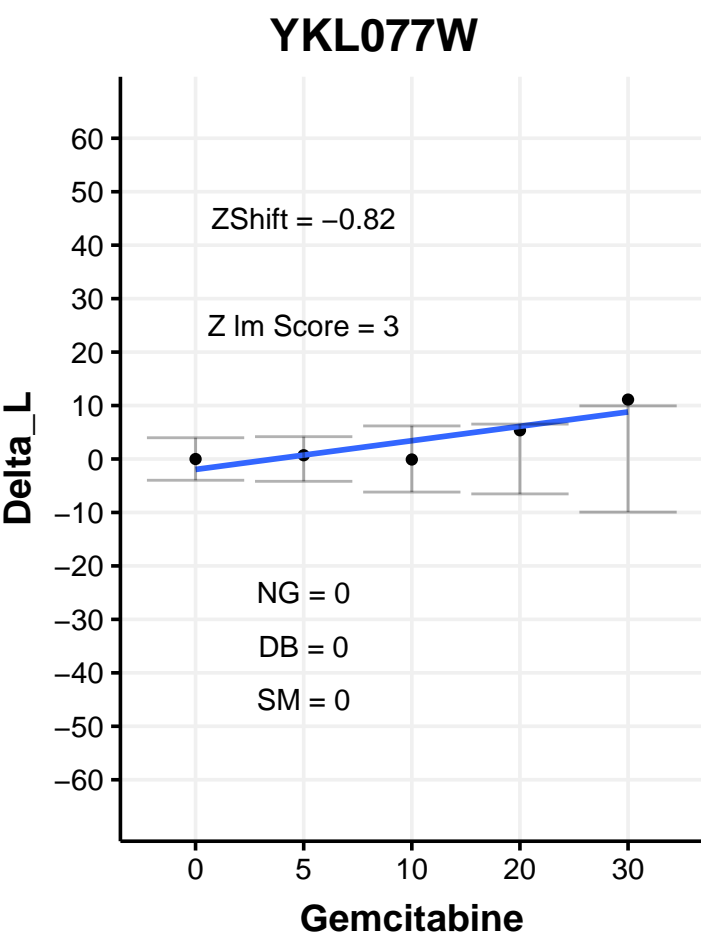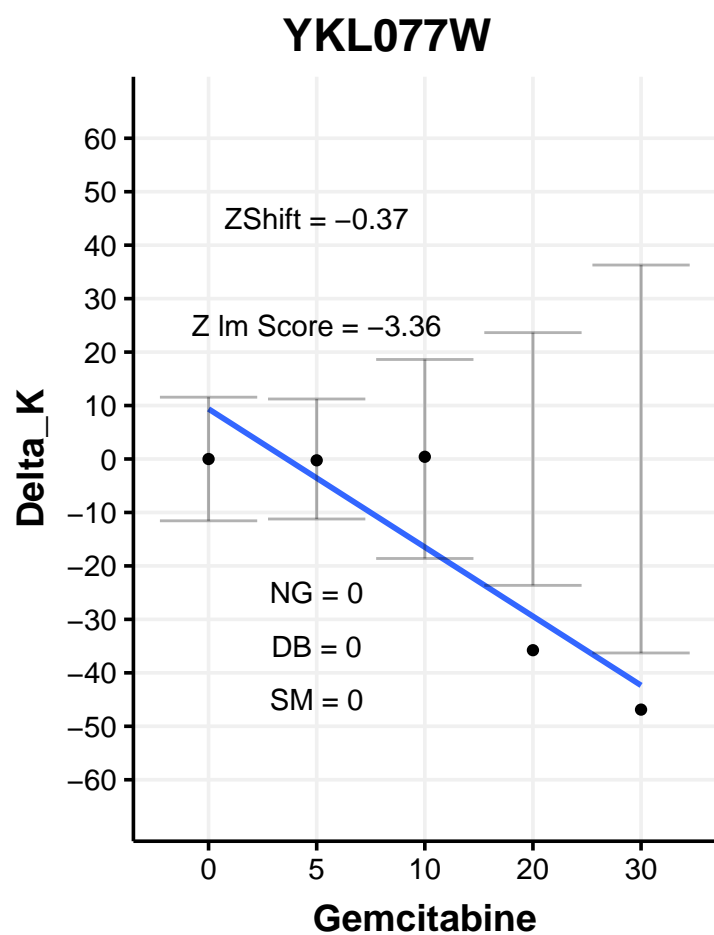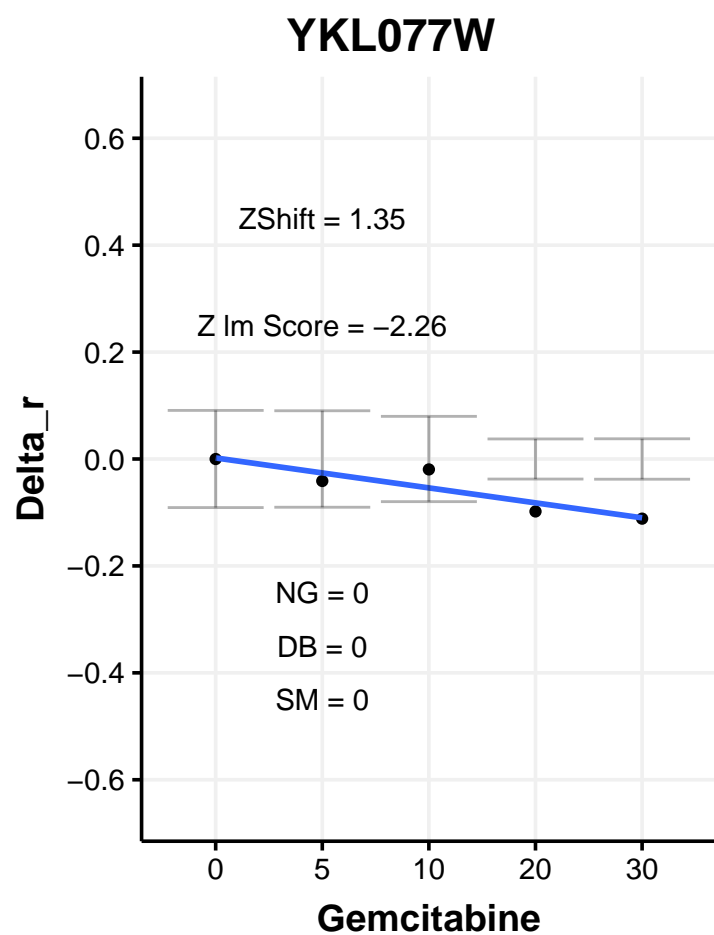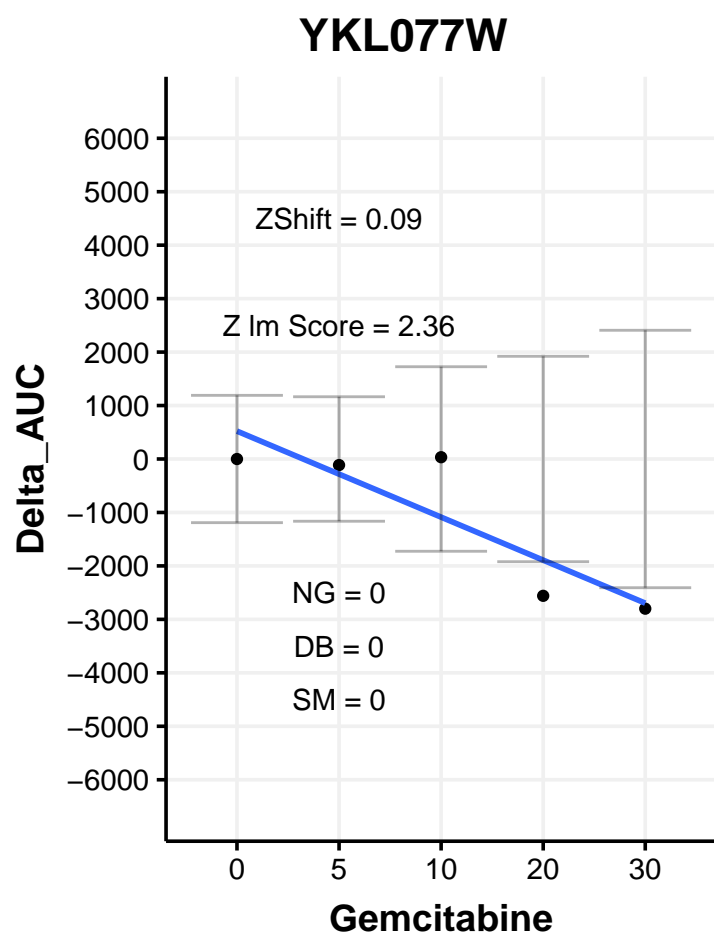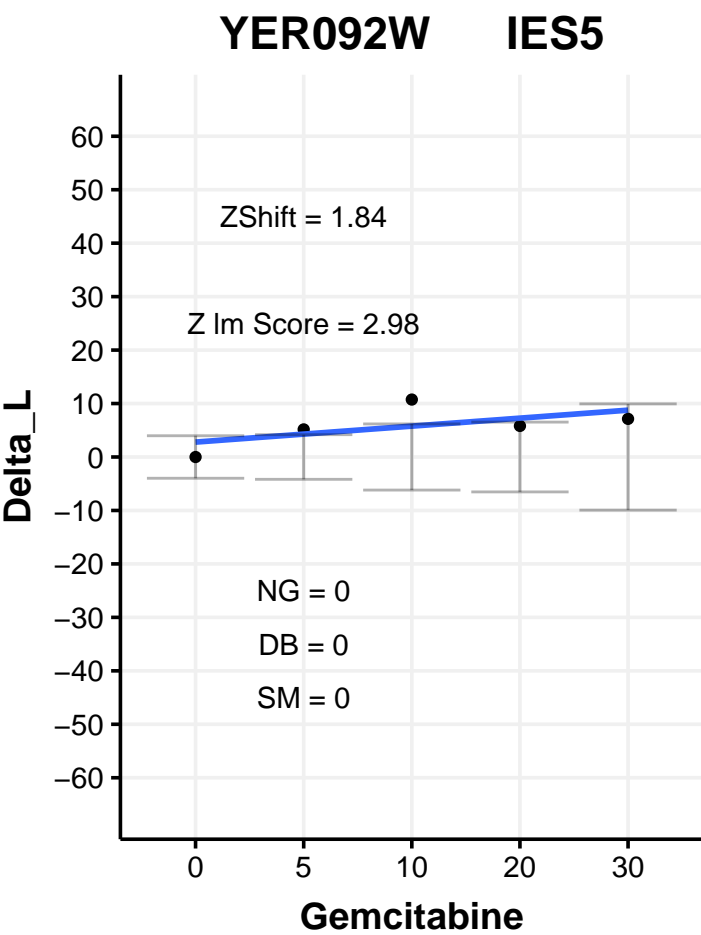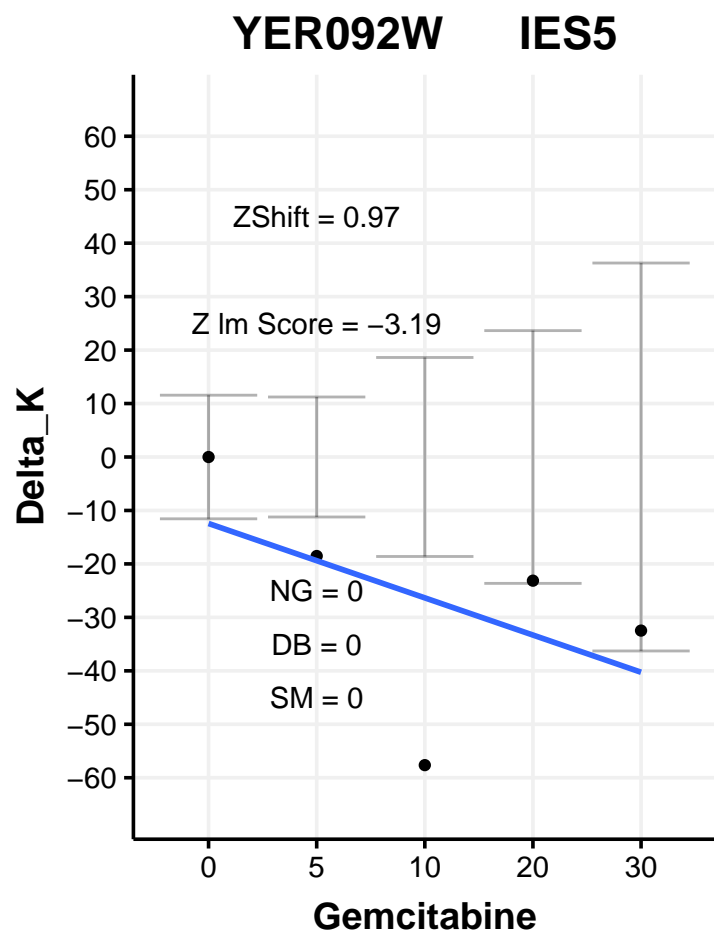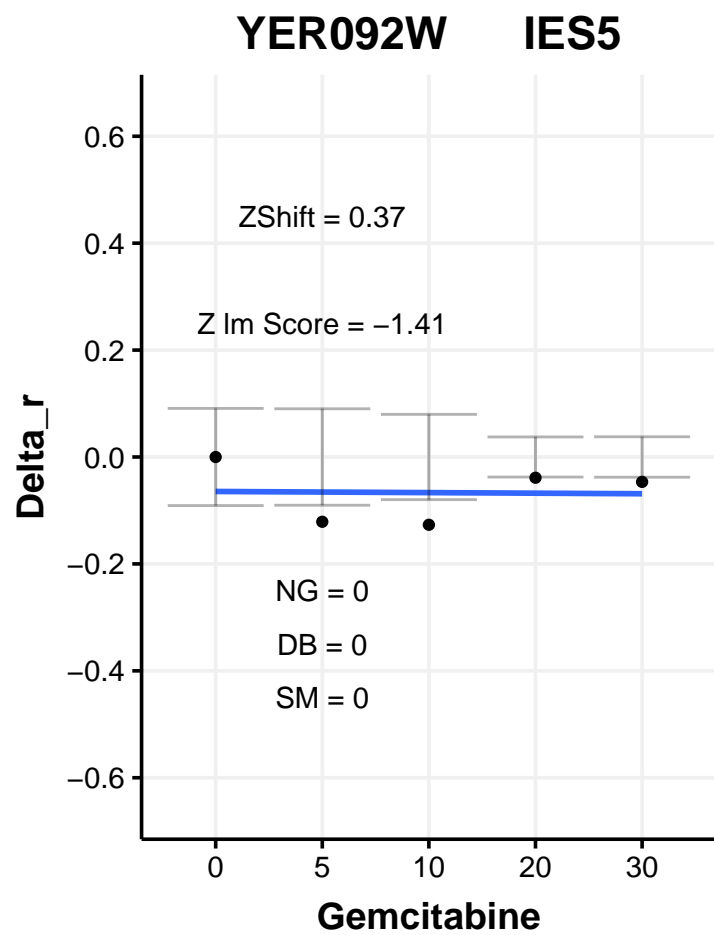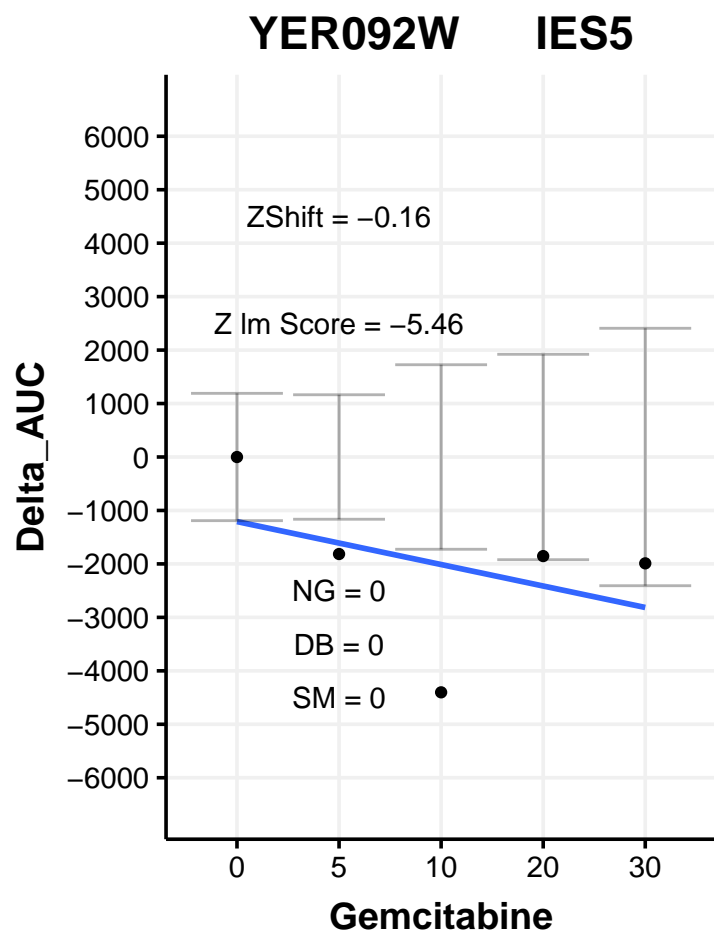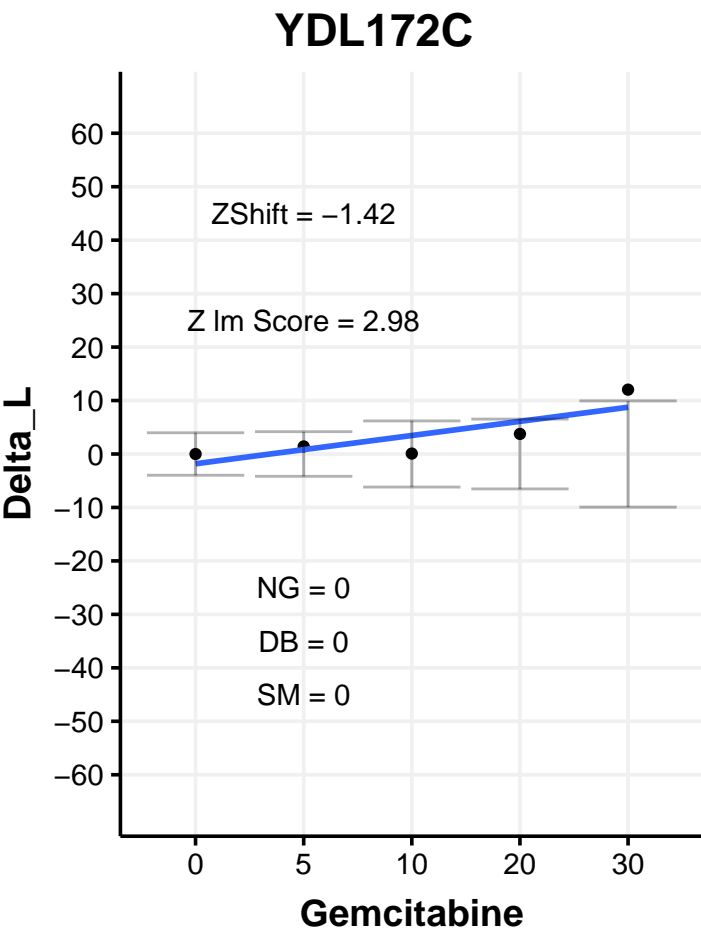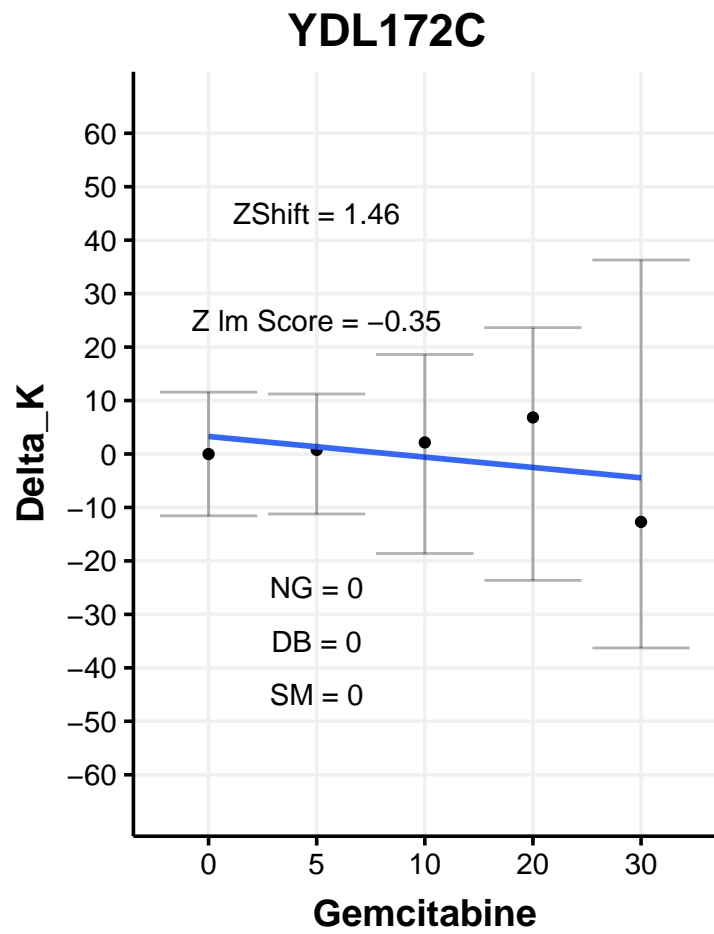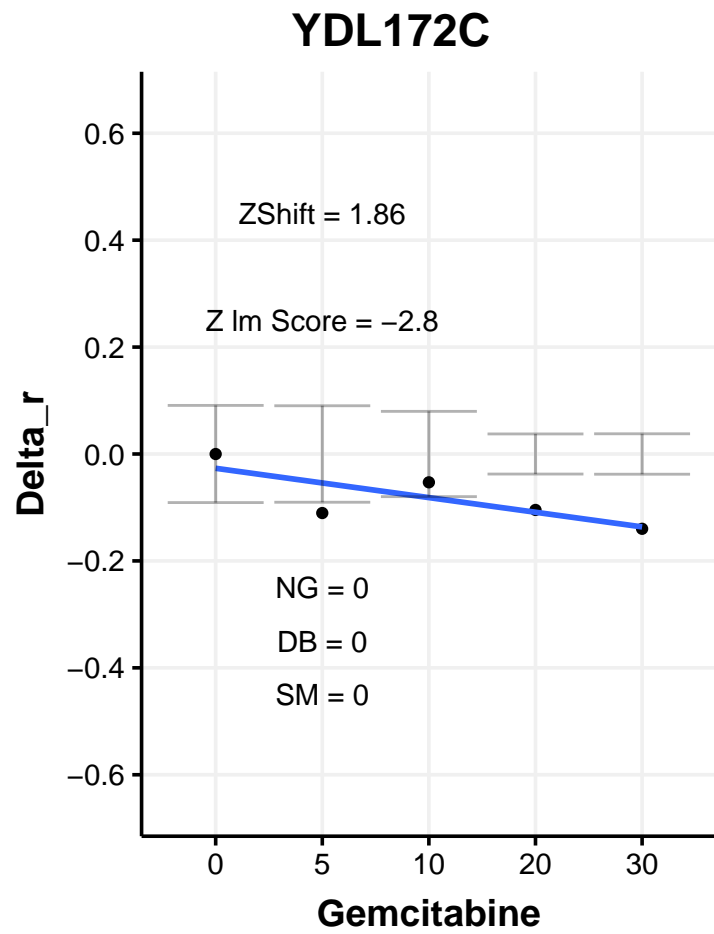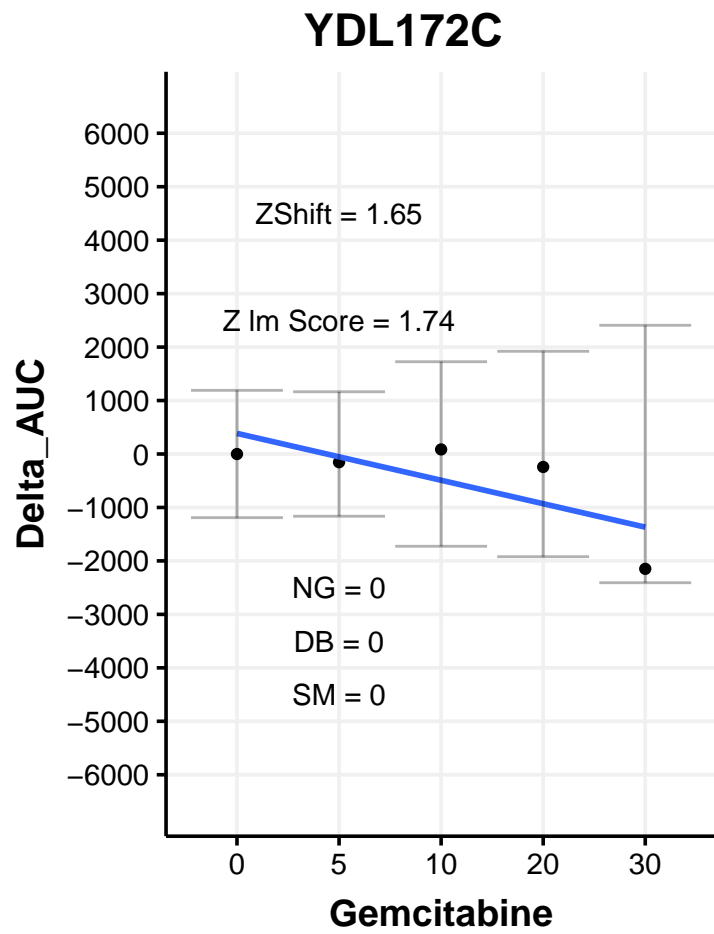

YBL029C-A\_1

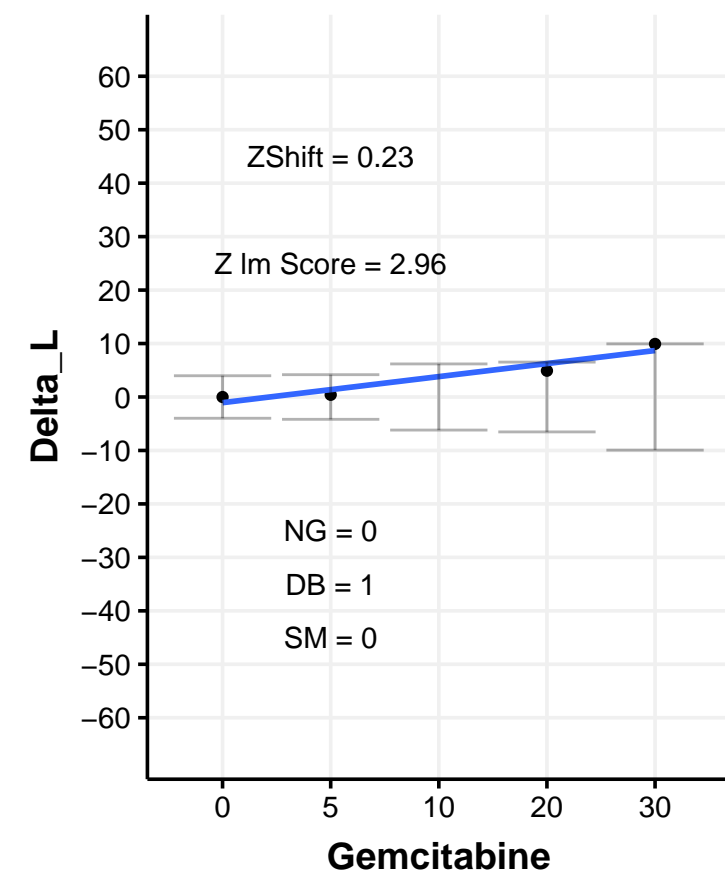

YBL029C-A\_1

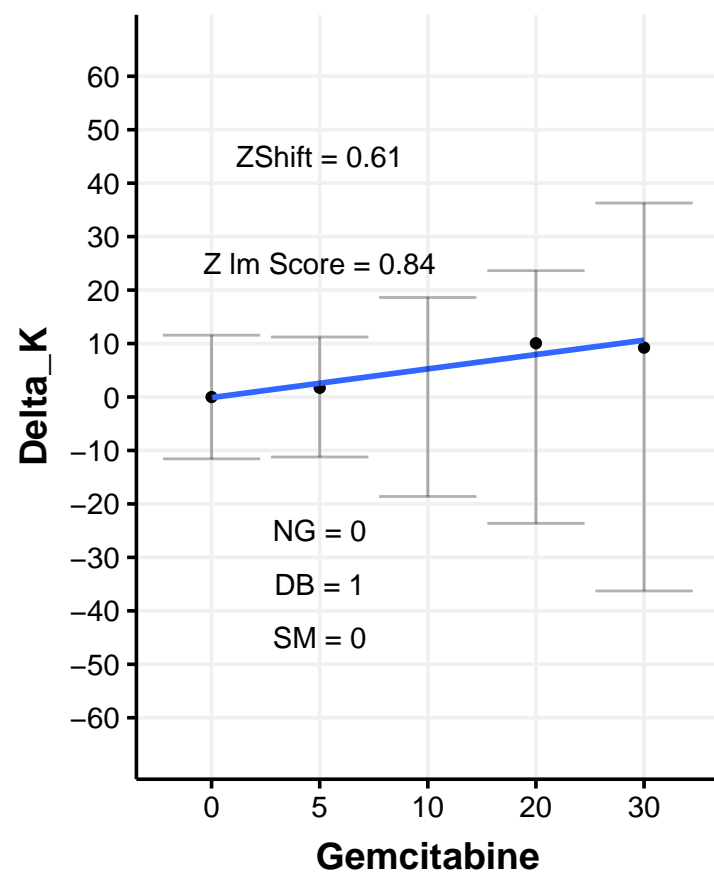

YBL029C-A\_1

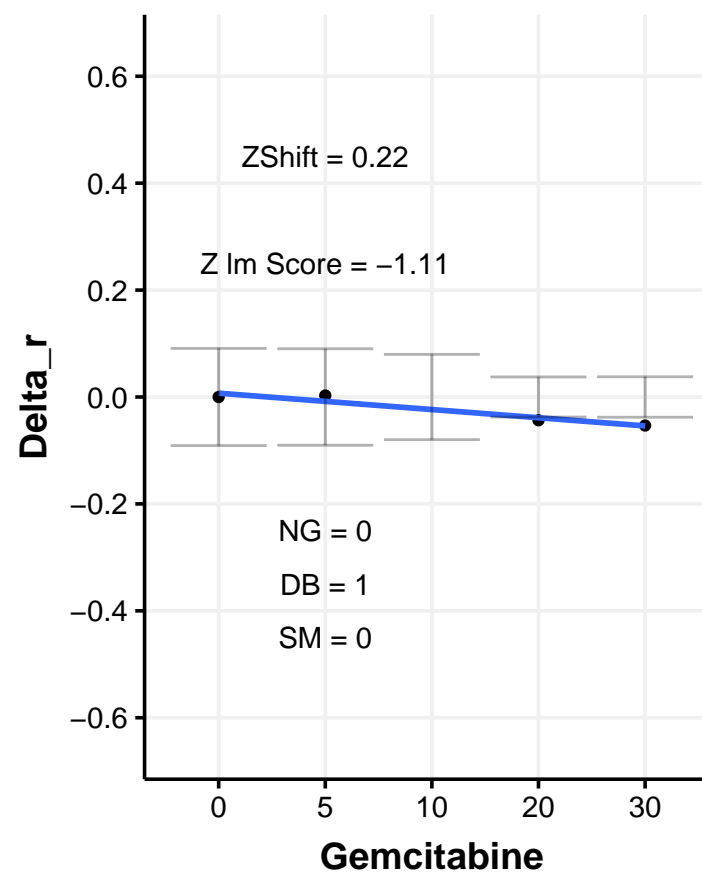

YBL029C-A\_1

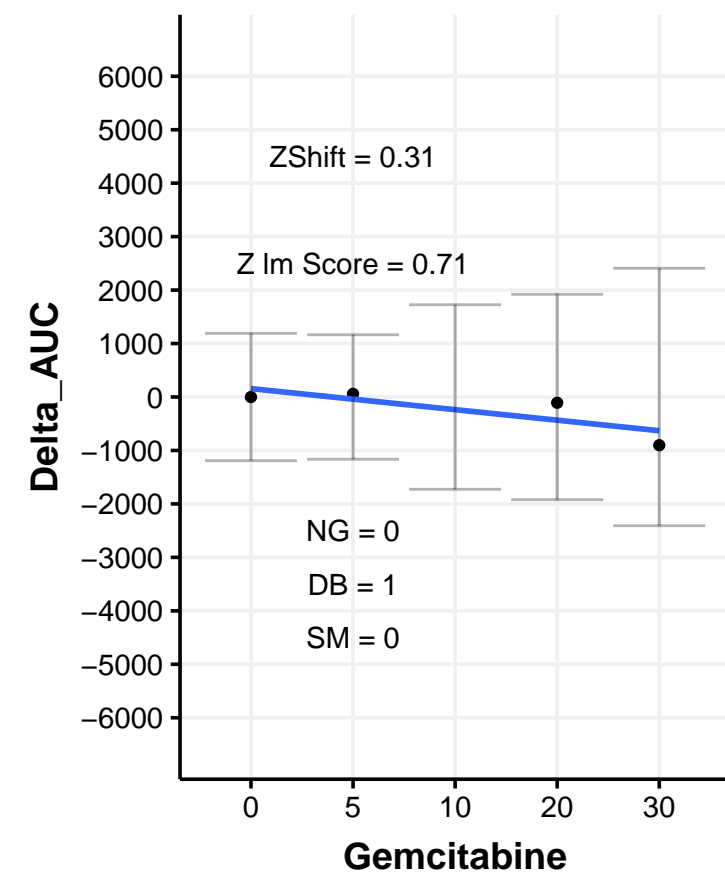

YDR295C HDA2

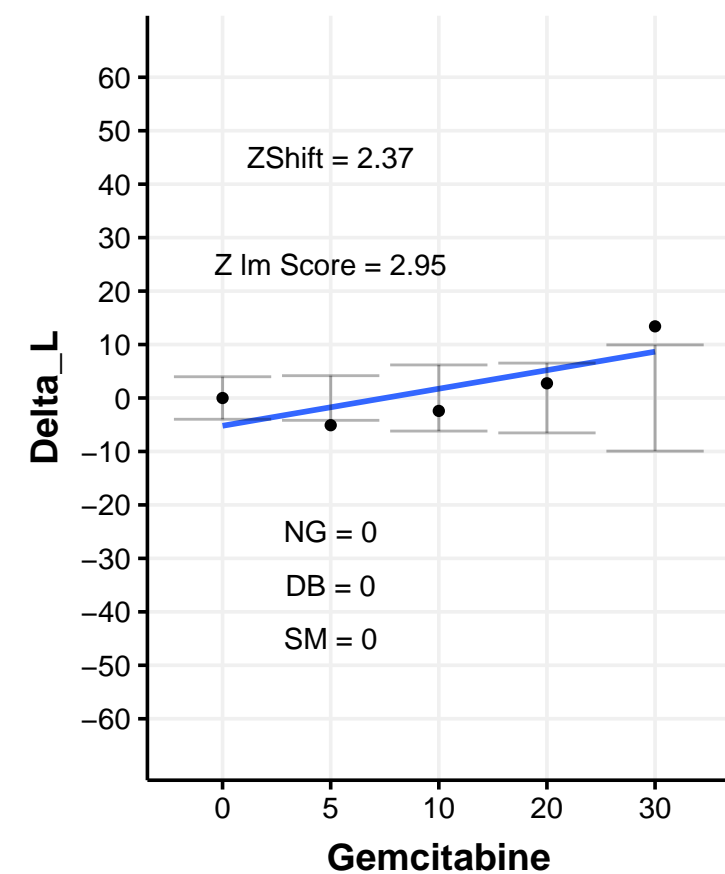

YDR295C HDA2

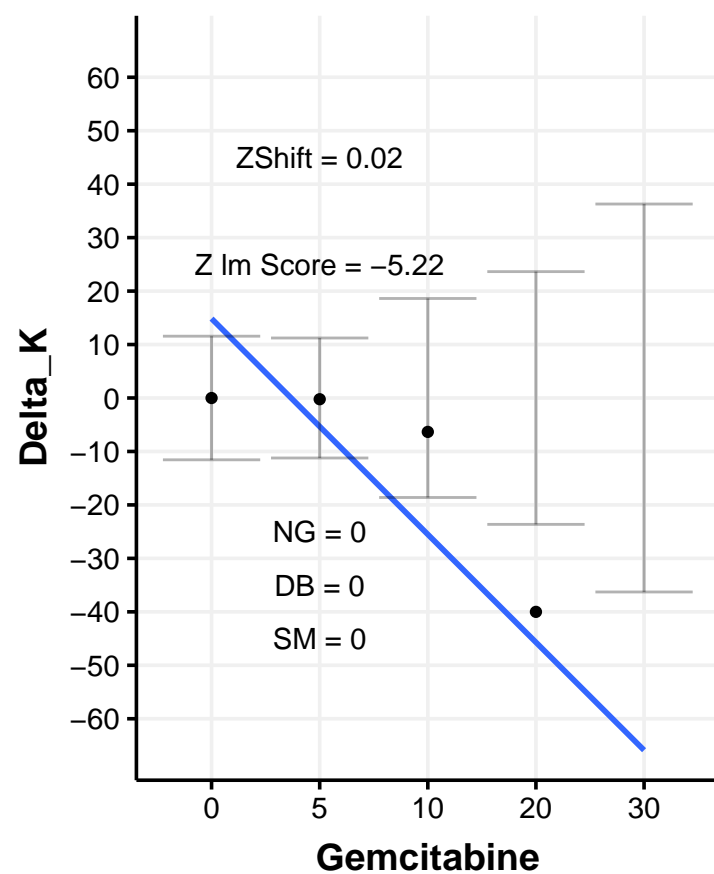

YDR295C HDA2

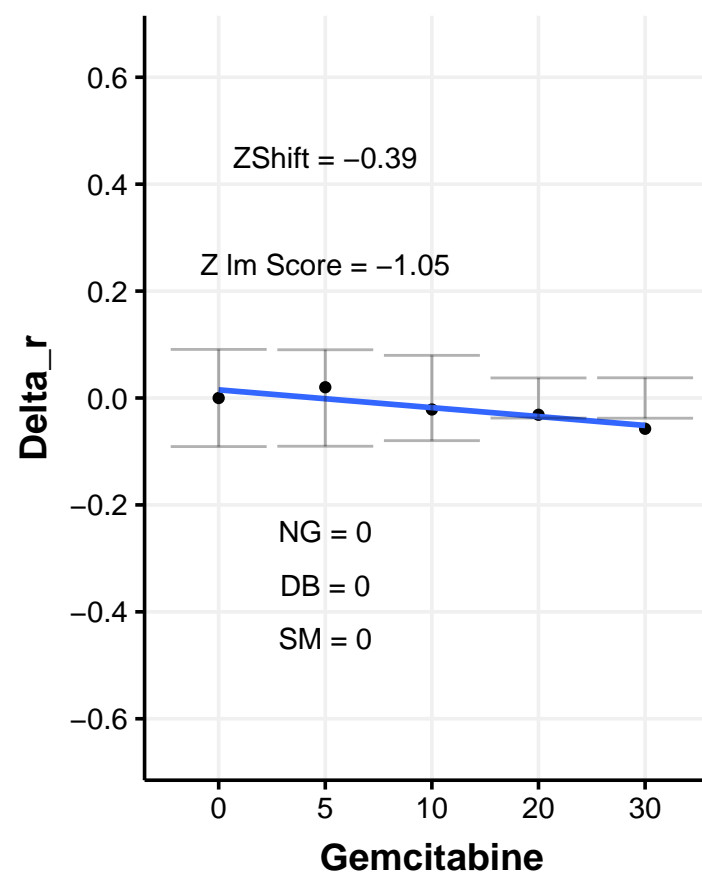

YDR295C HDA2

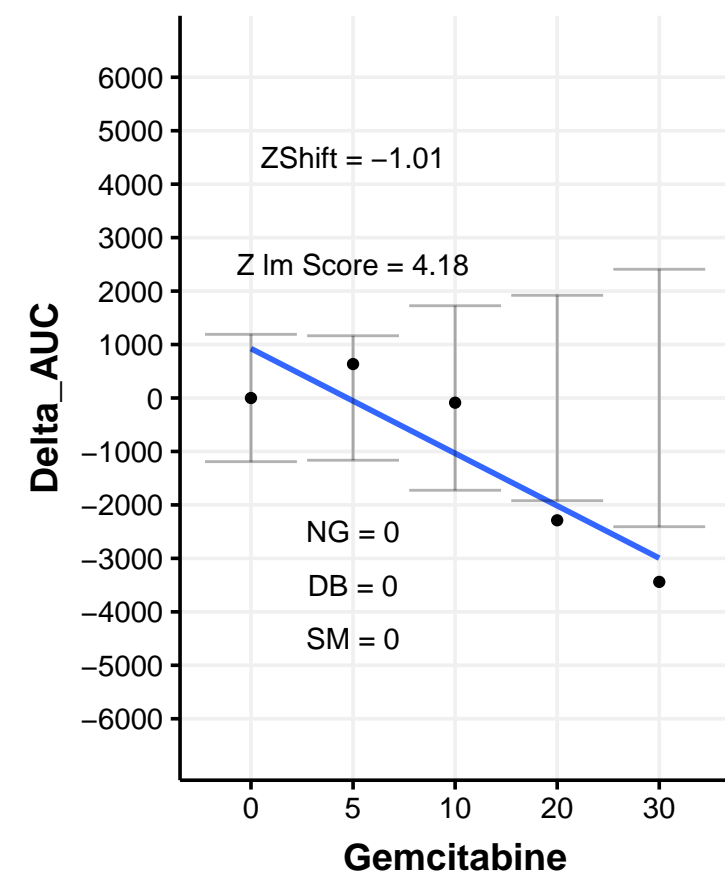

YHR082C KSP1

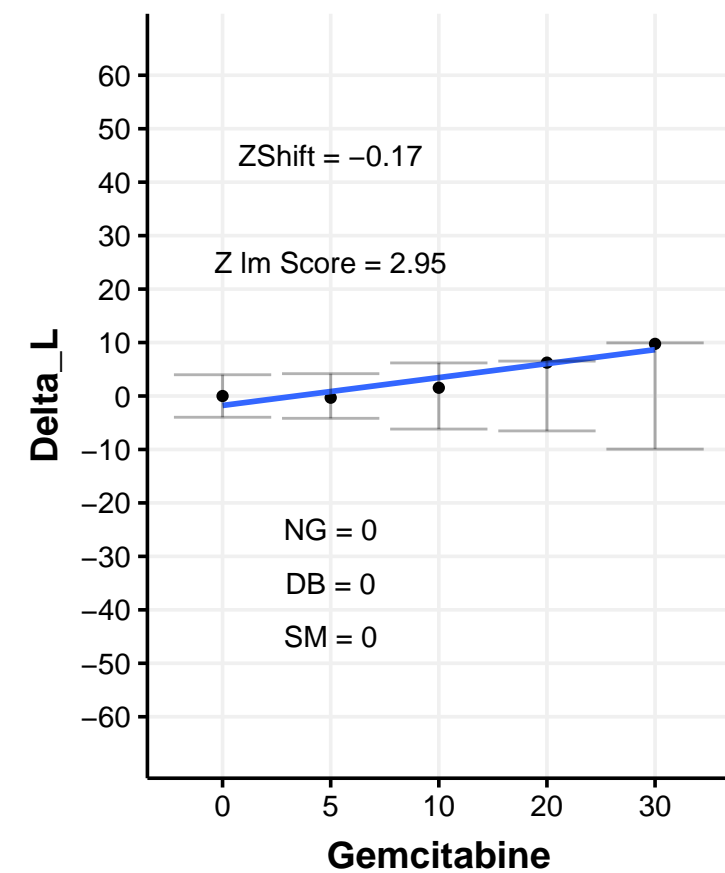

YHR082C KSP1

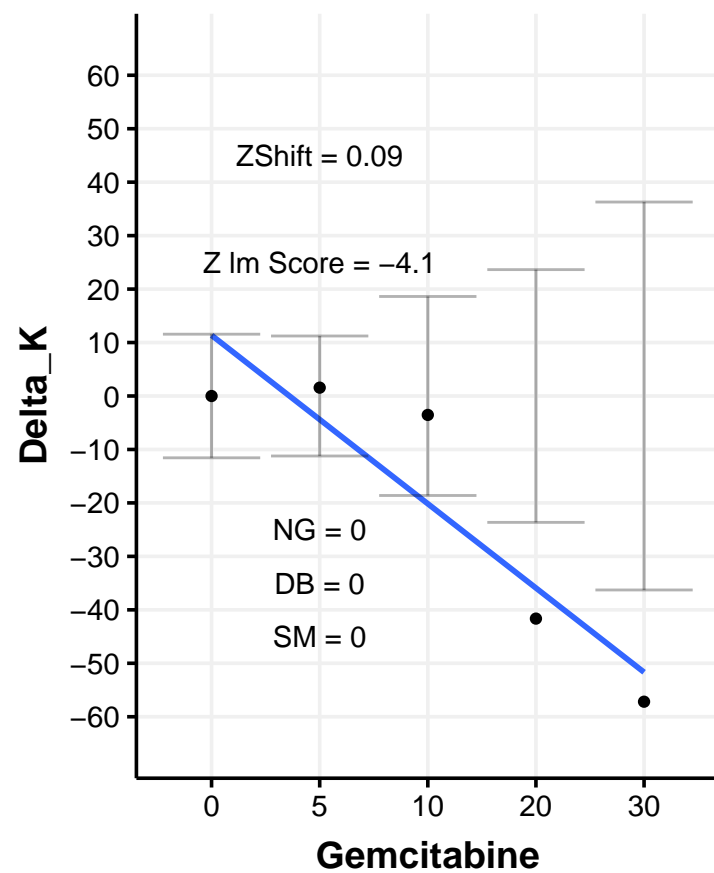

YHR082C KSP1

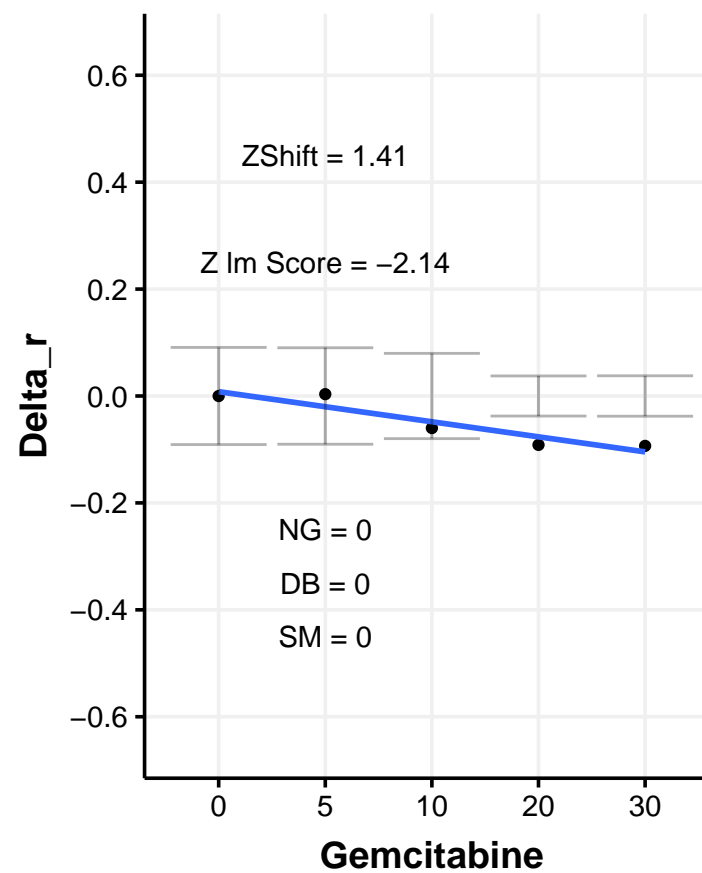

YHR082C KSP1

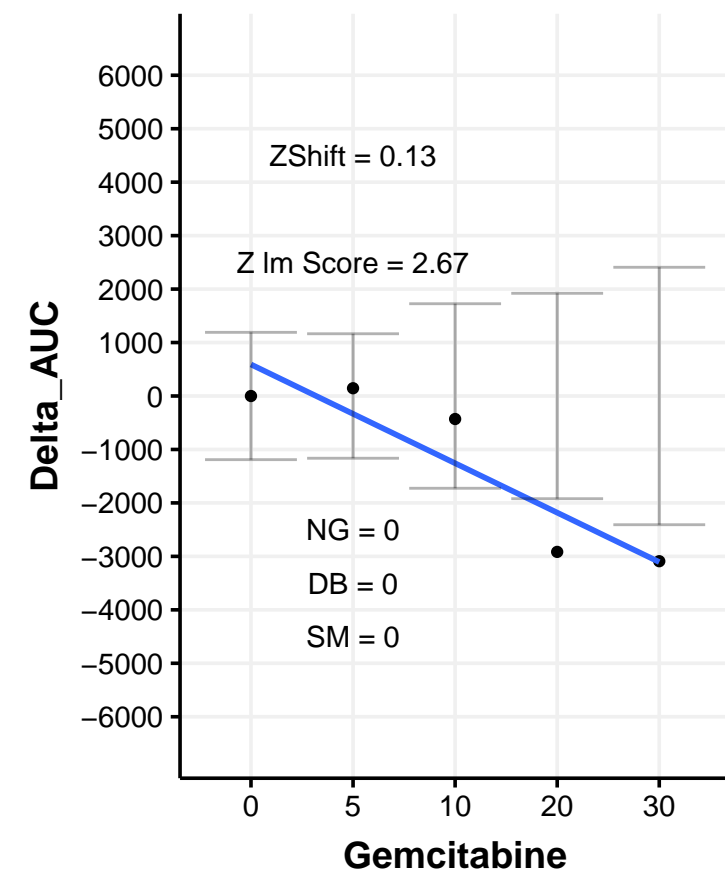

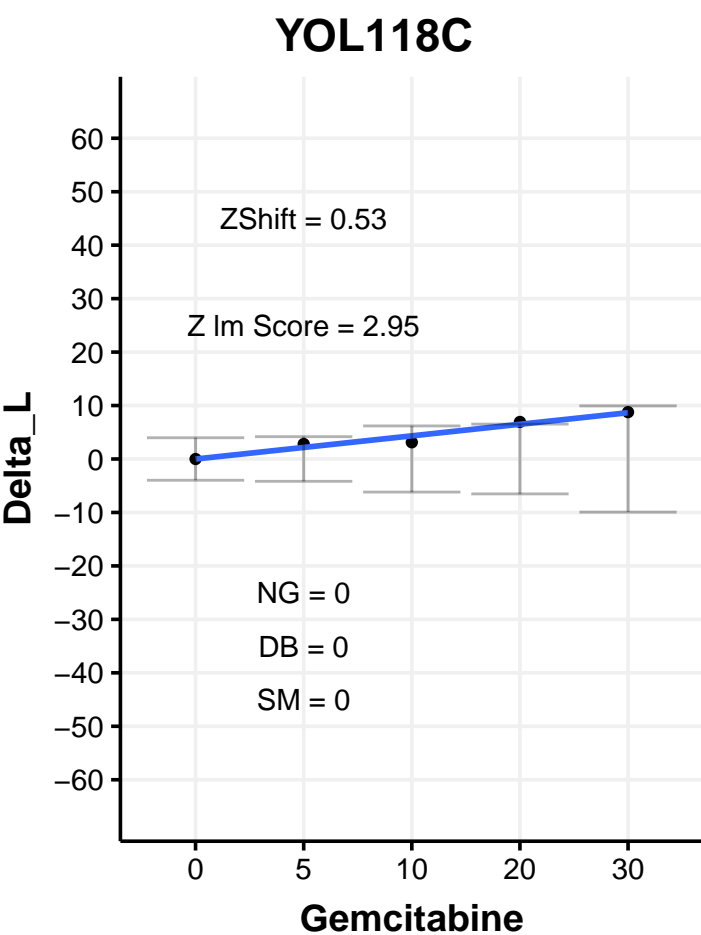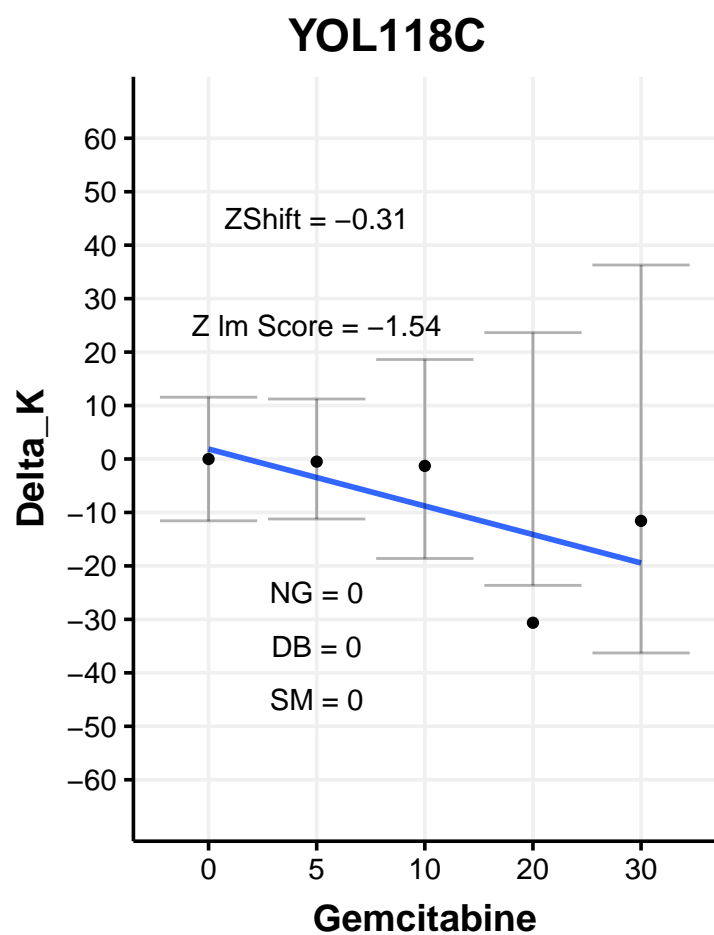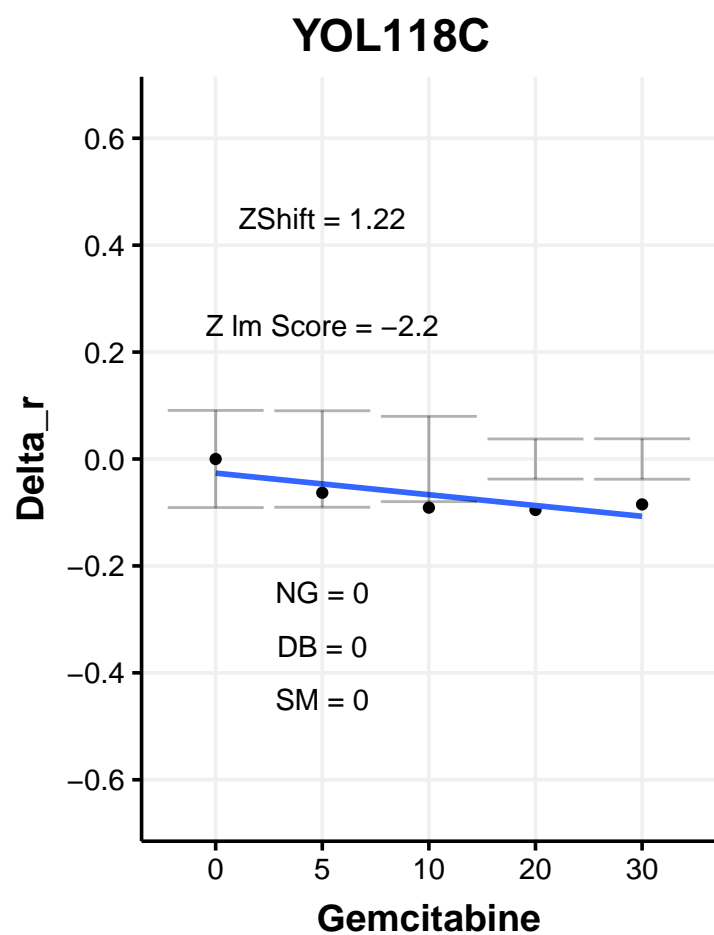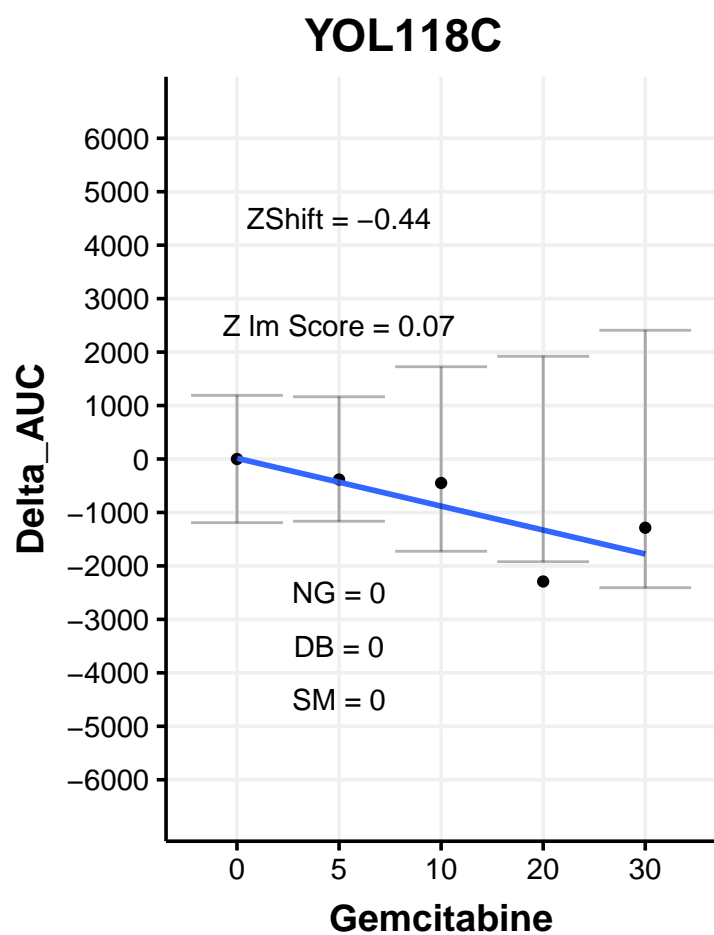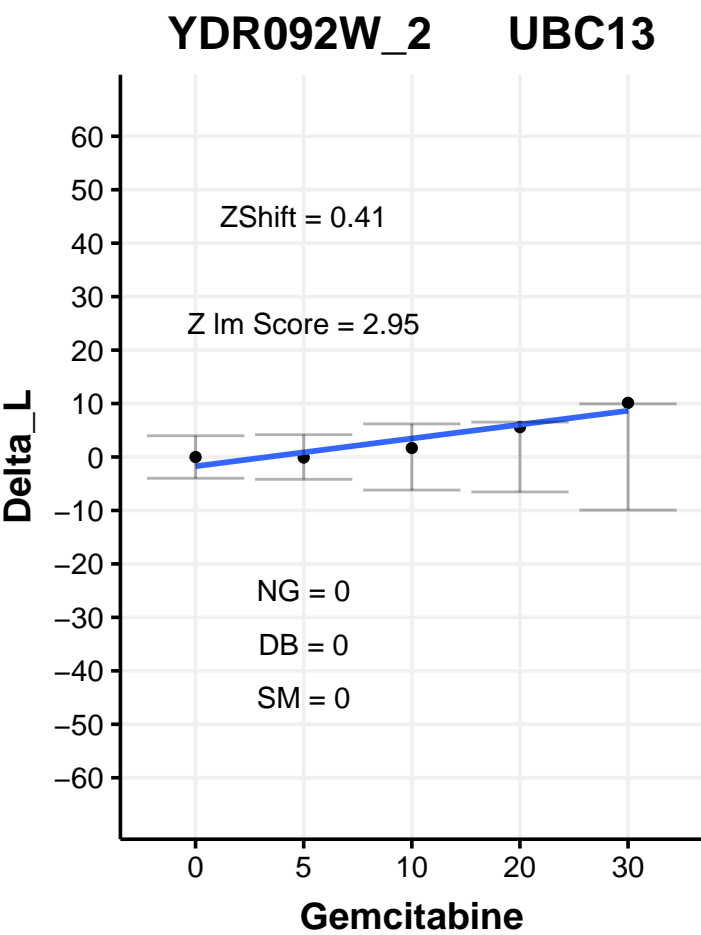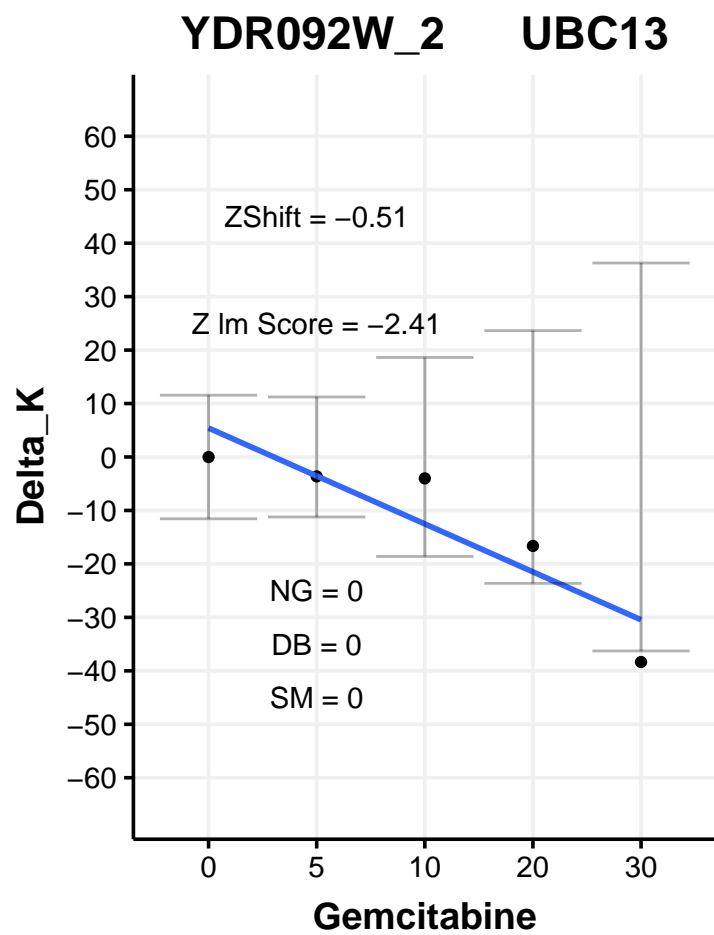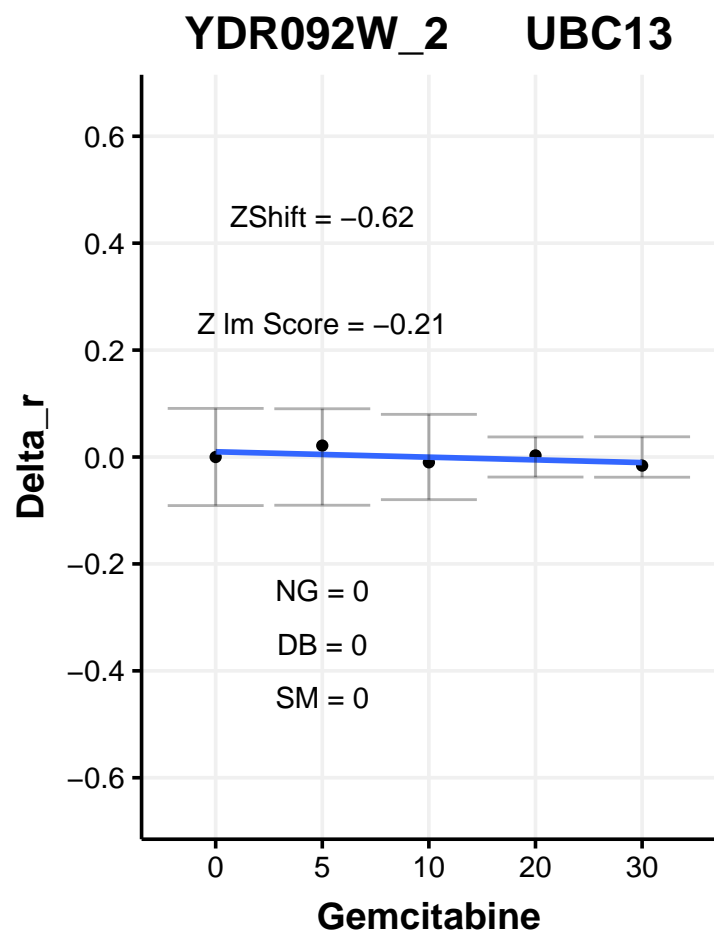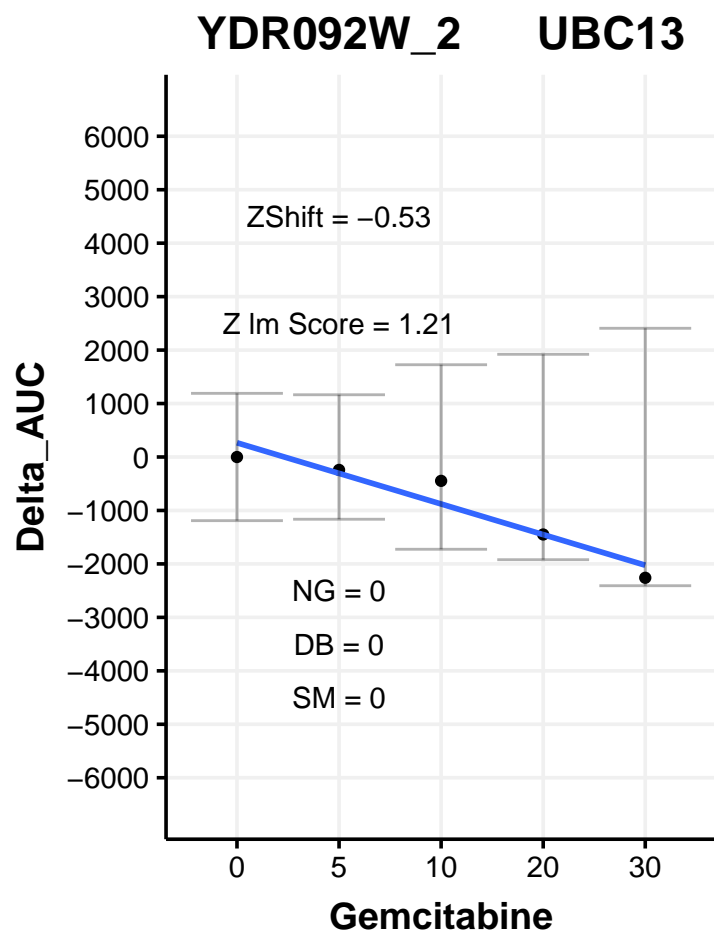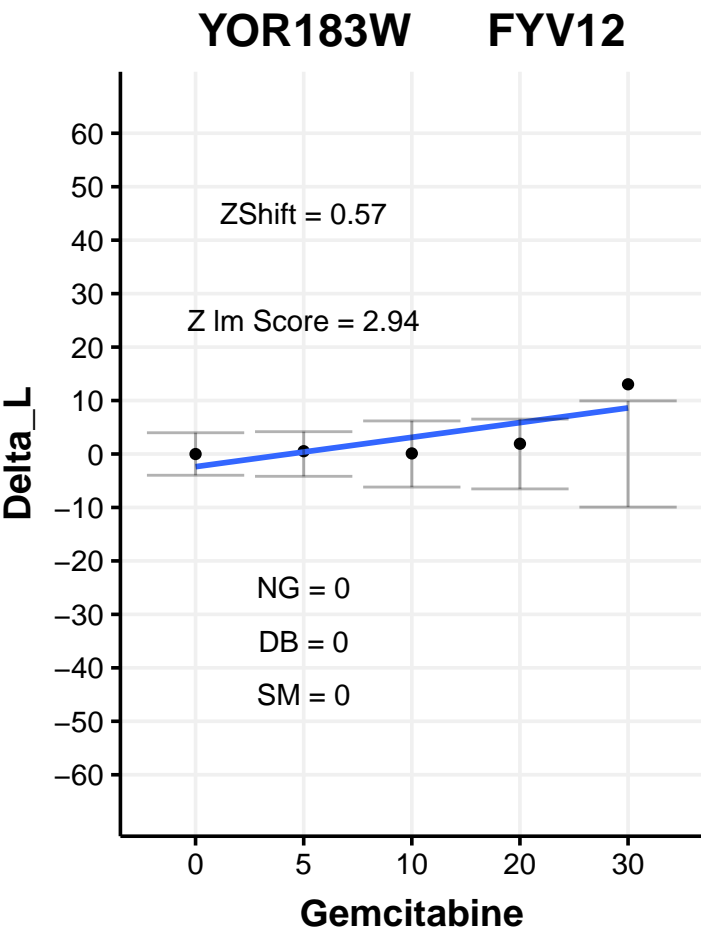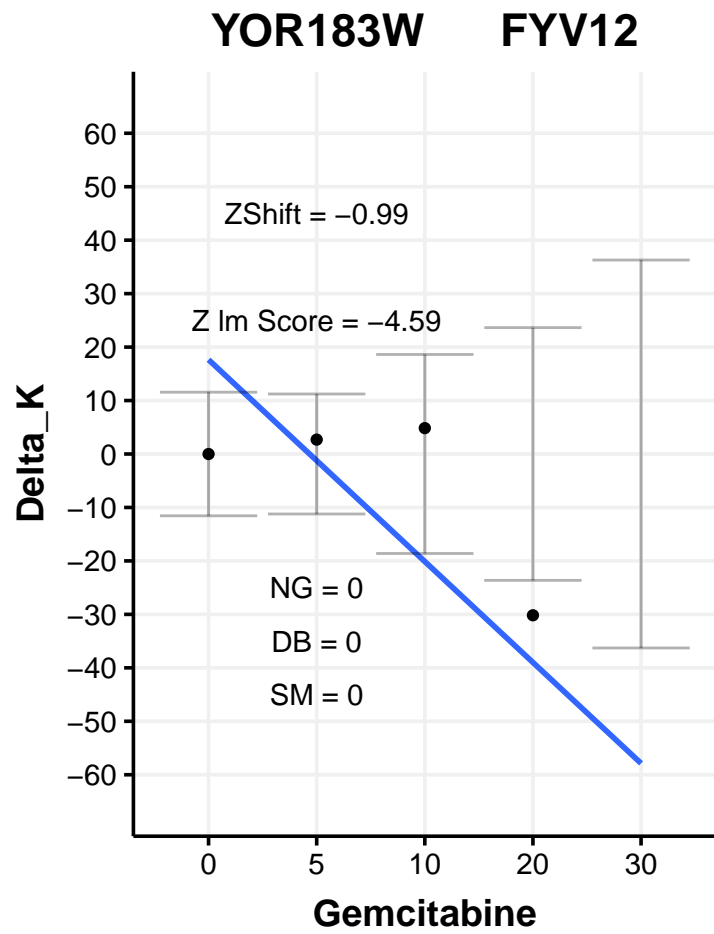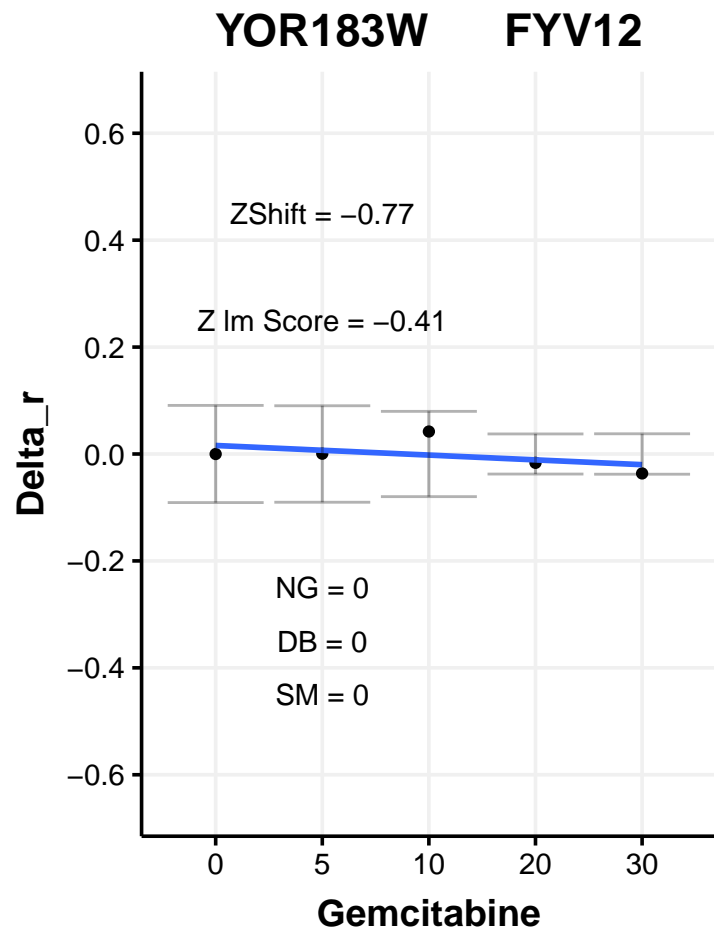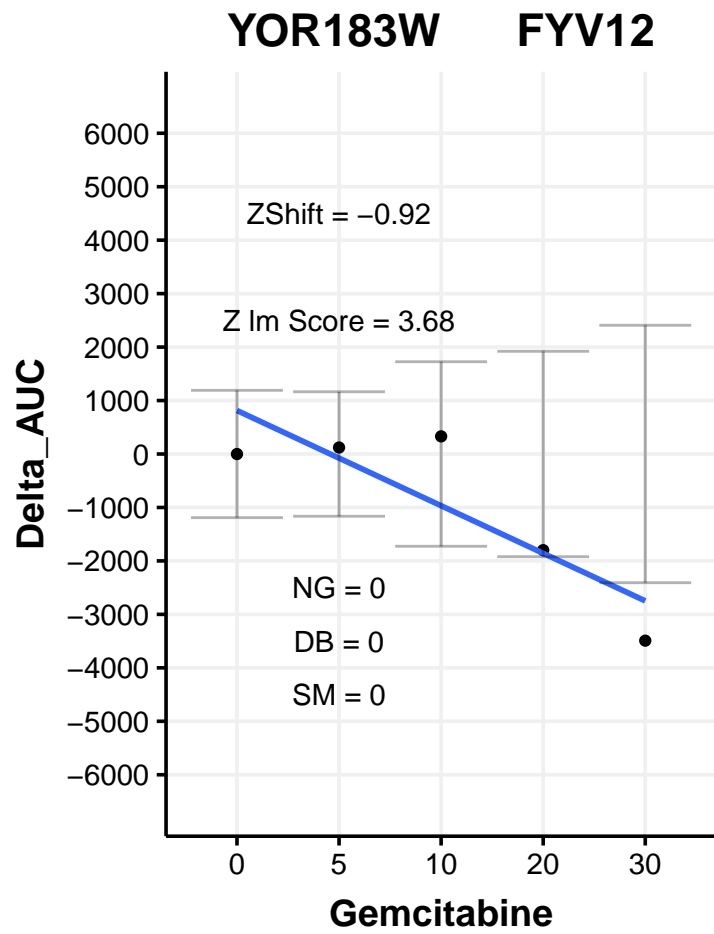

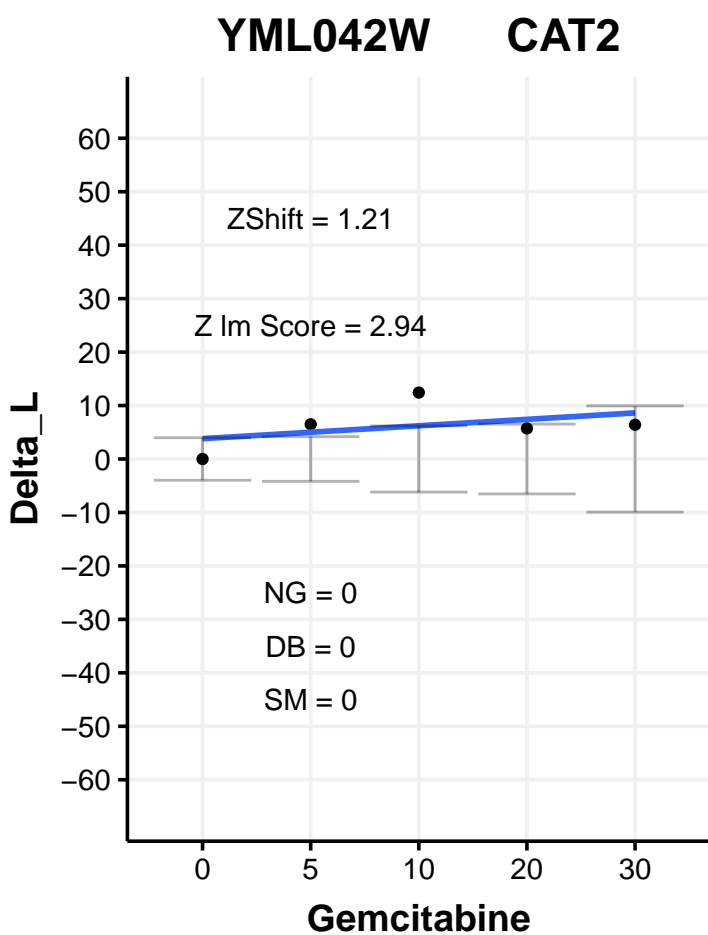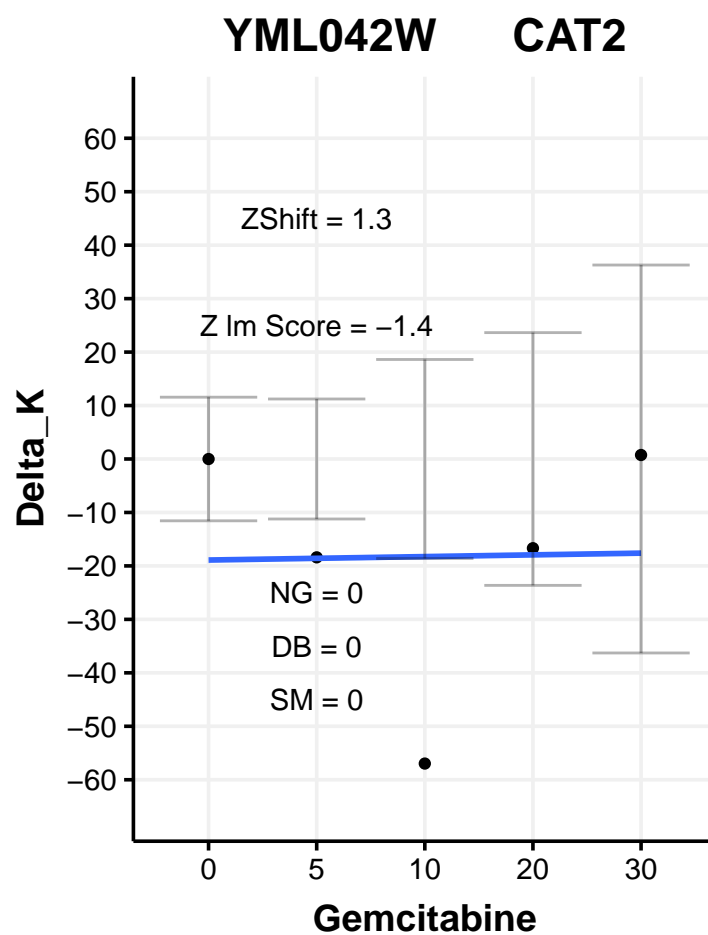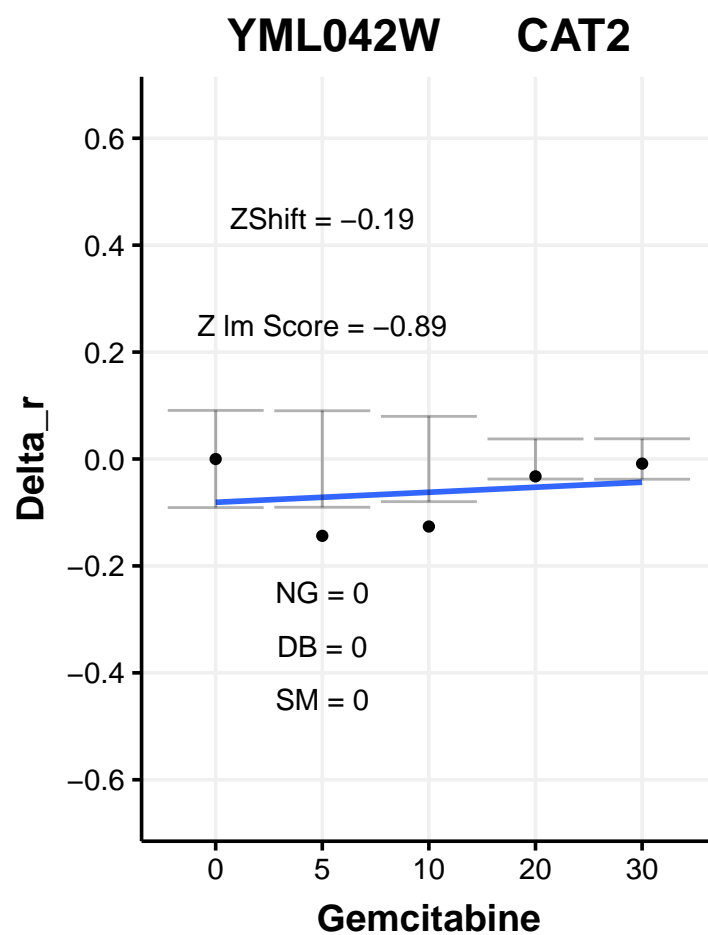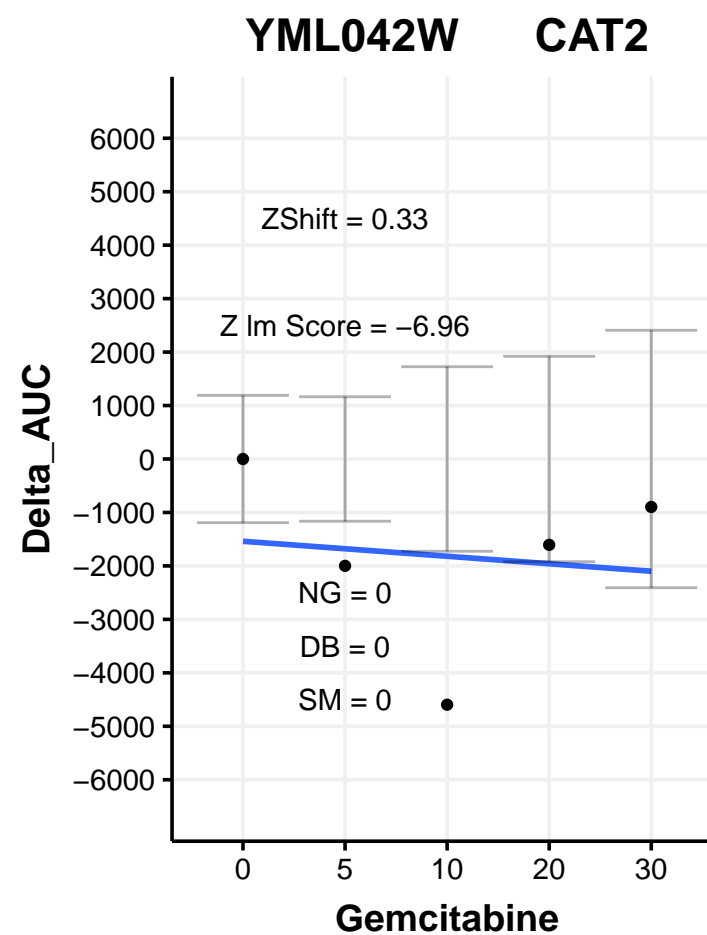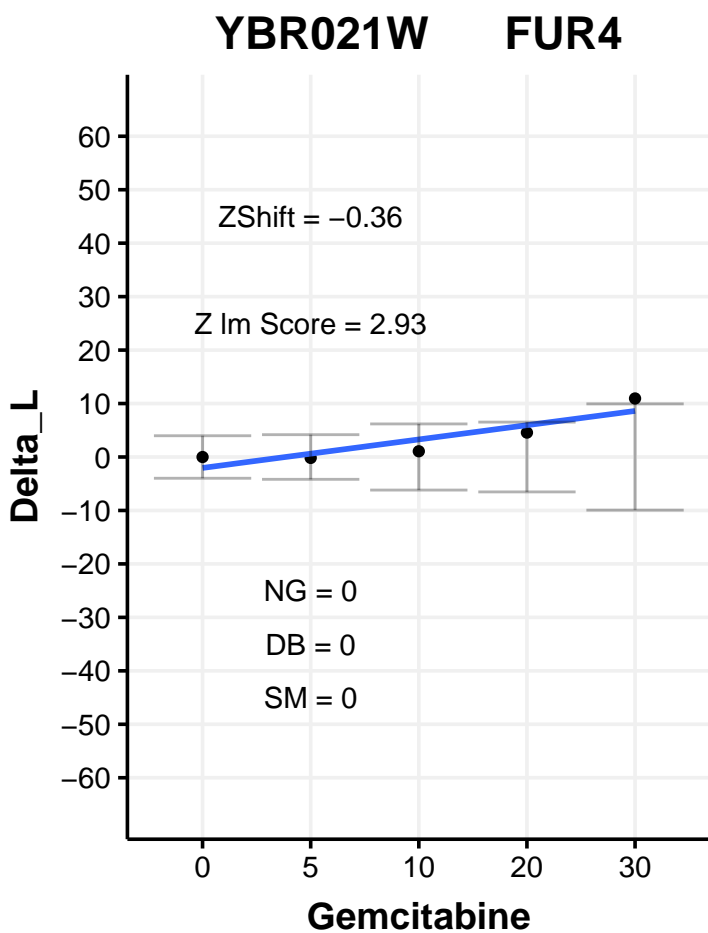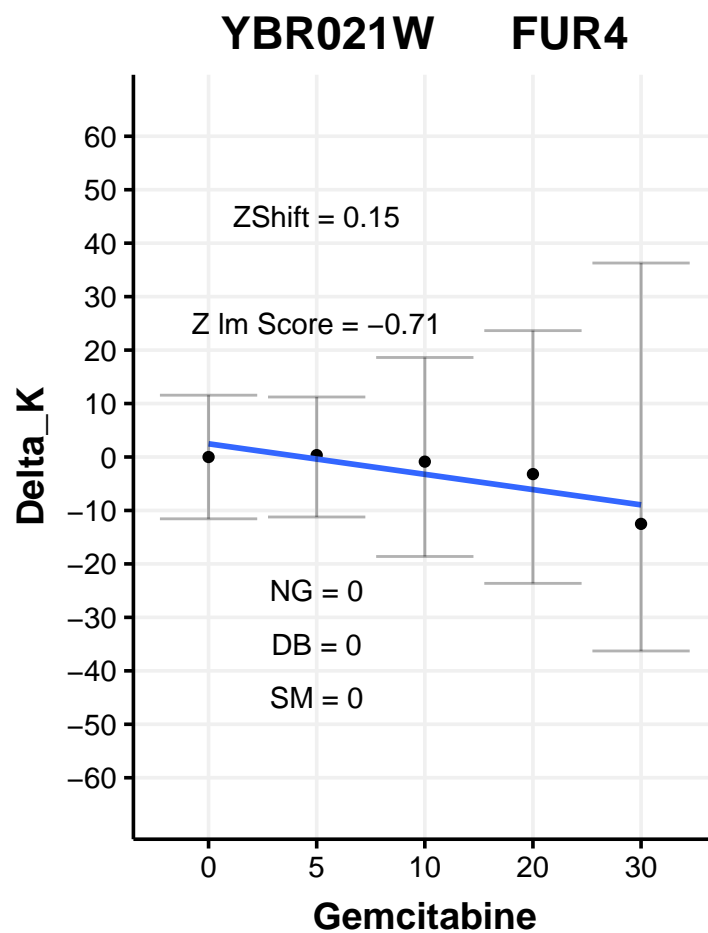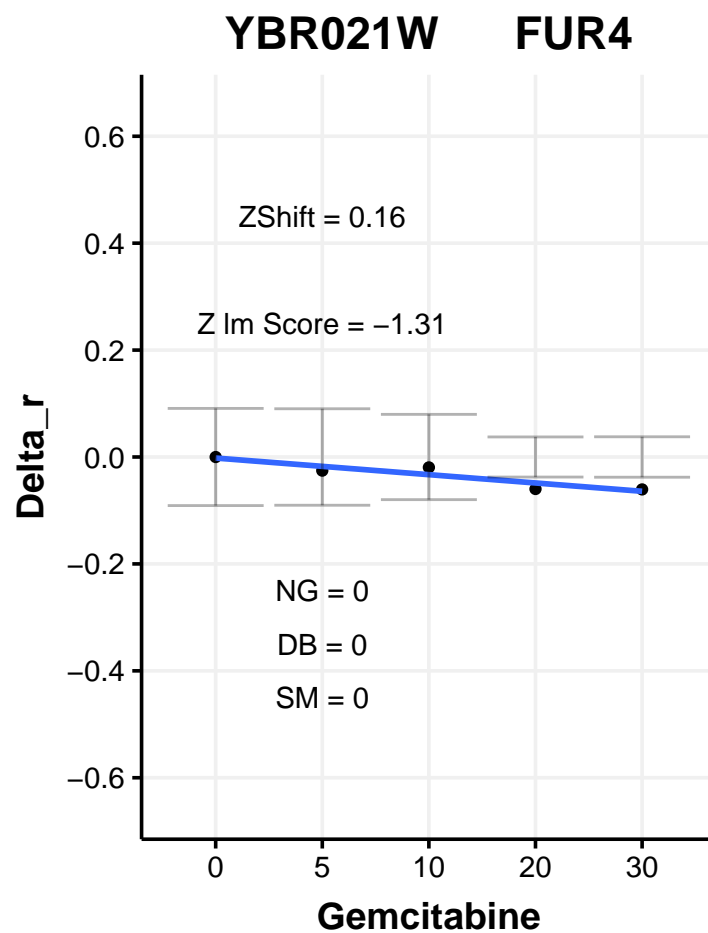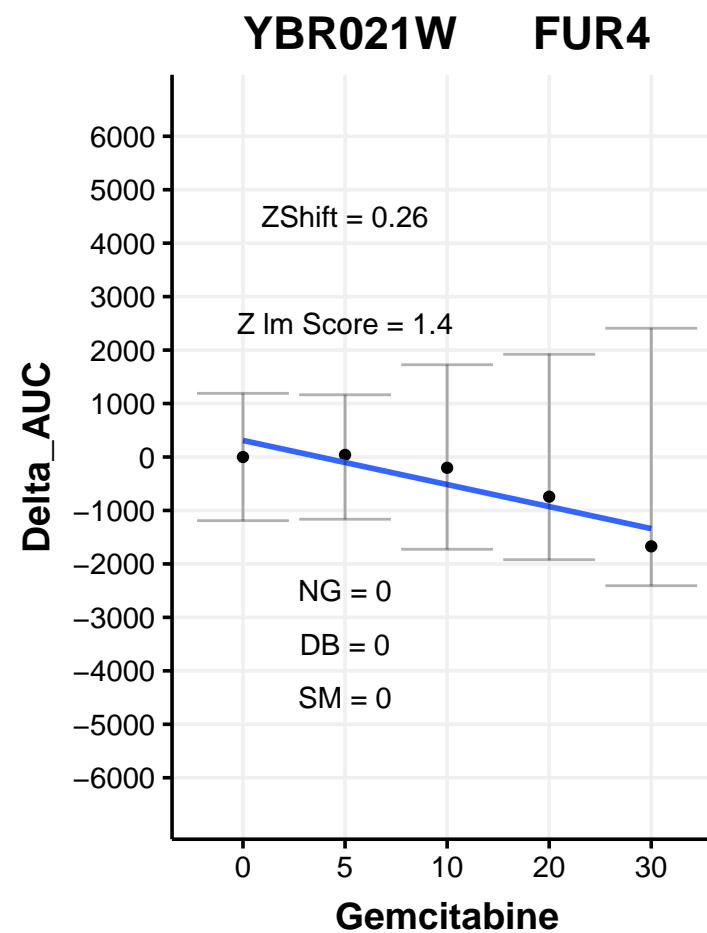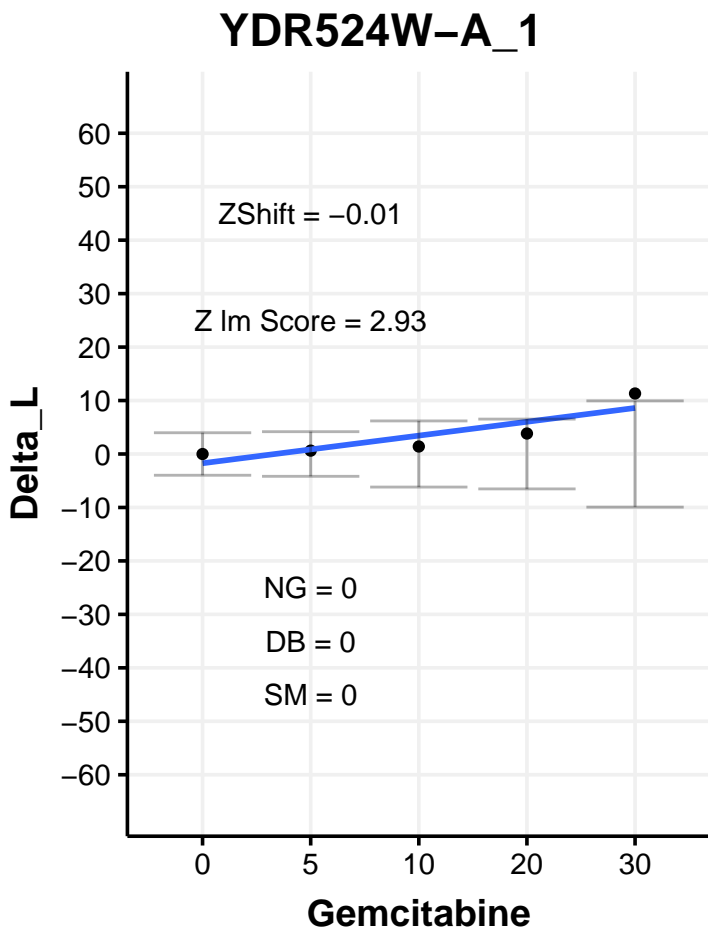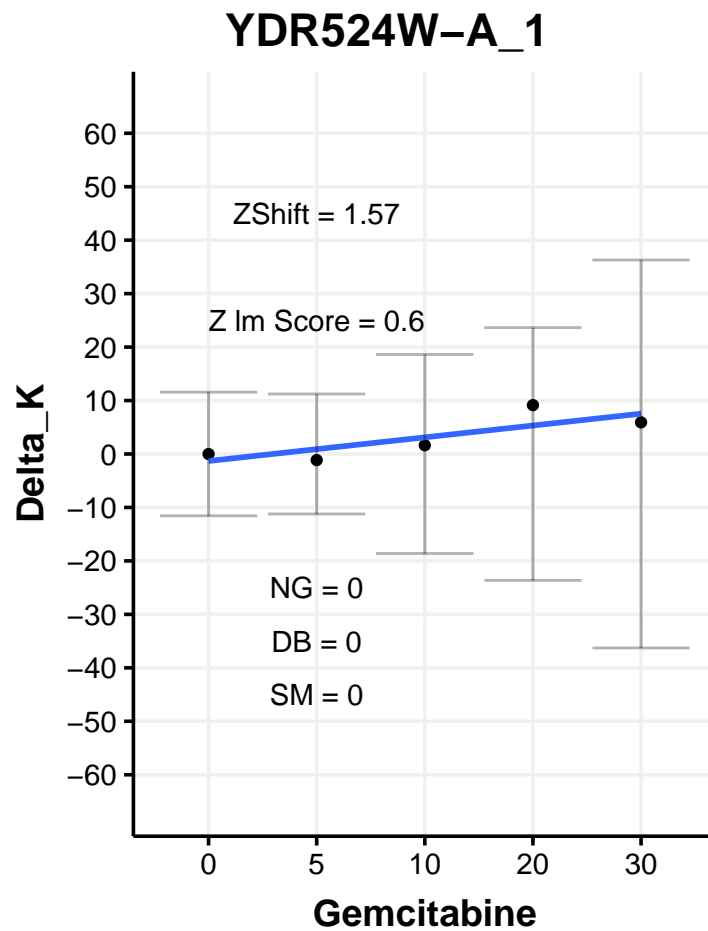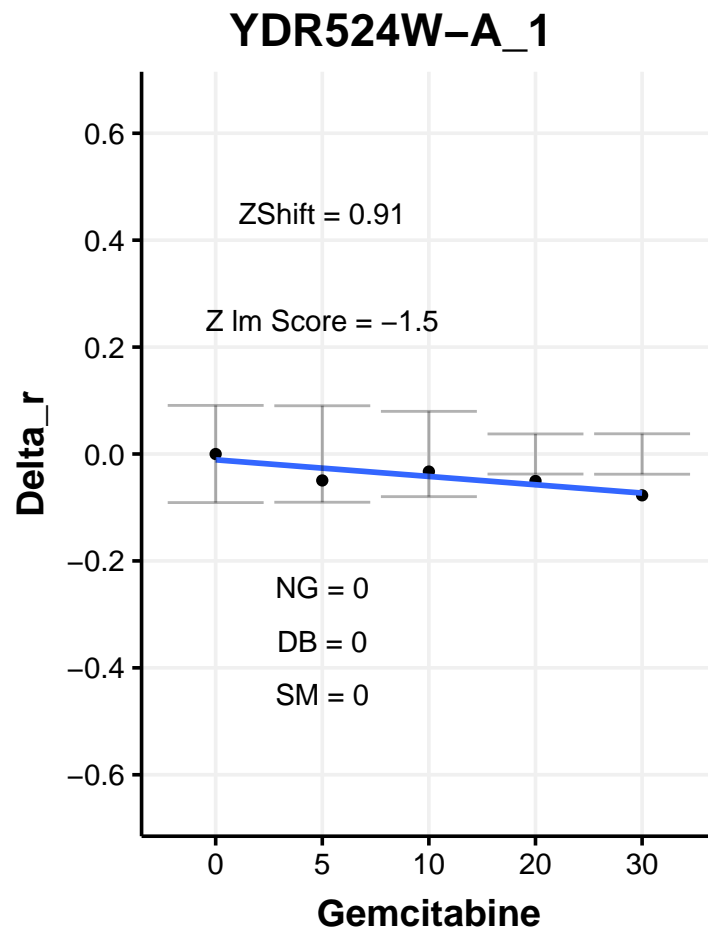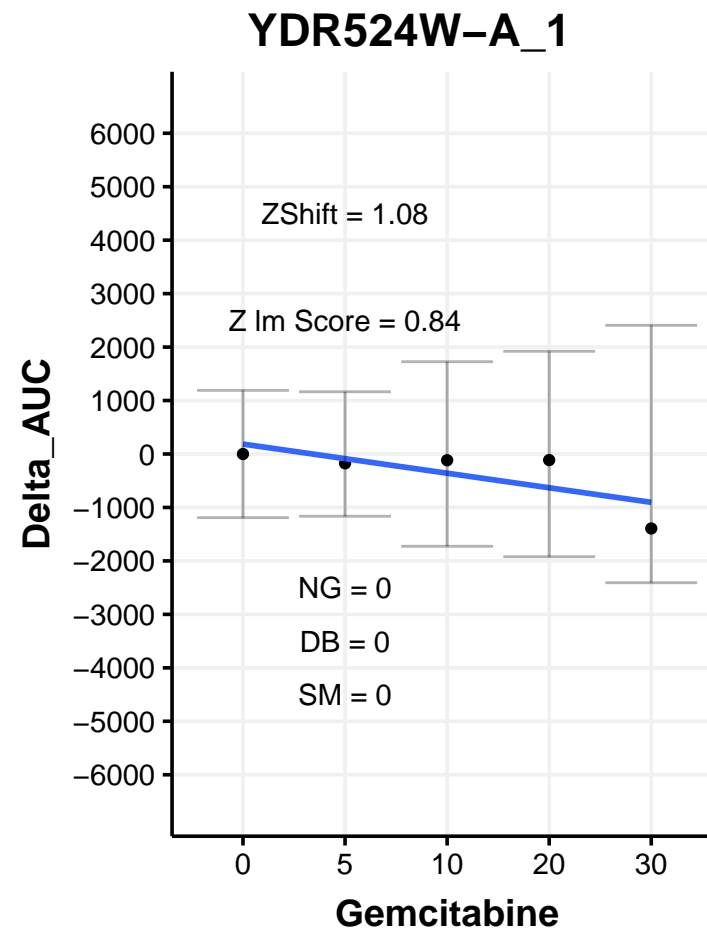

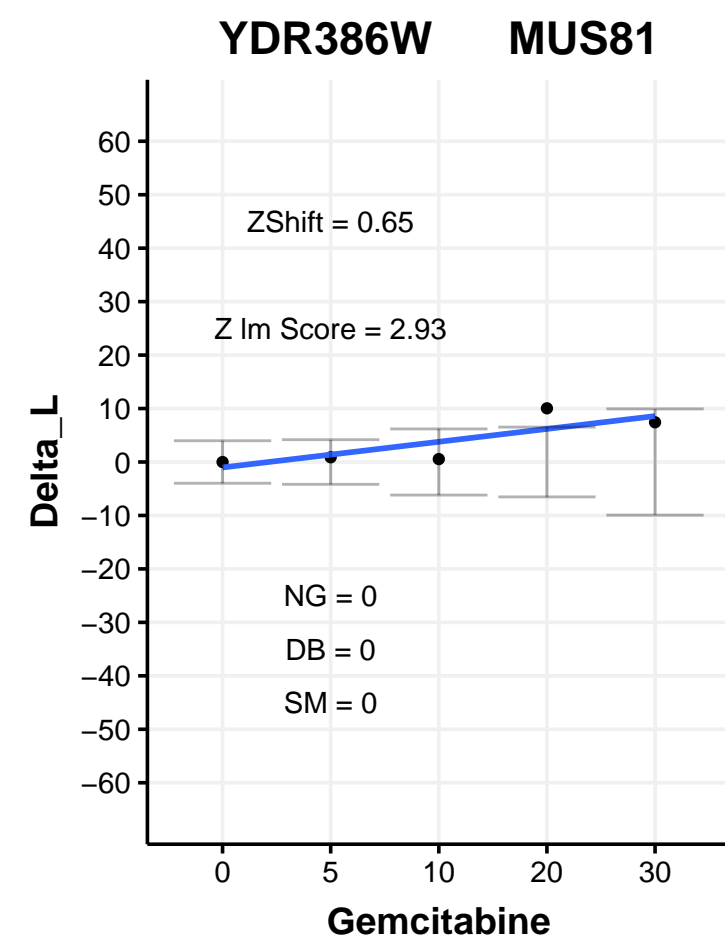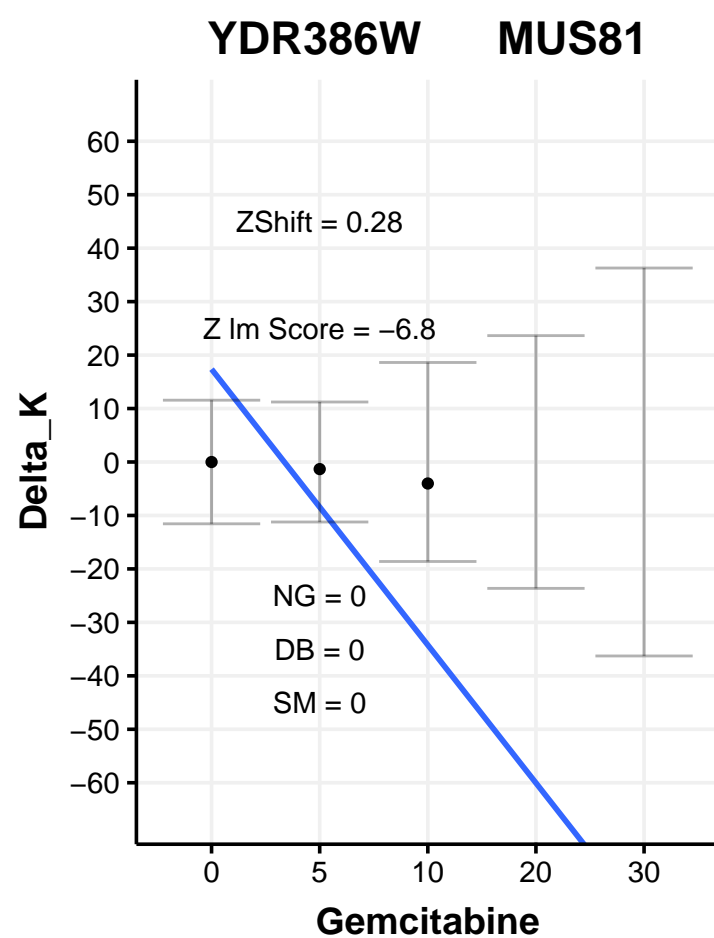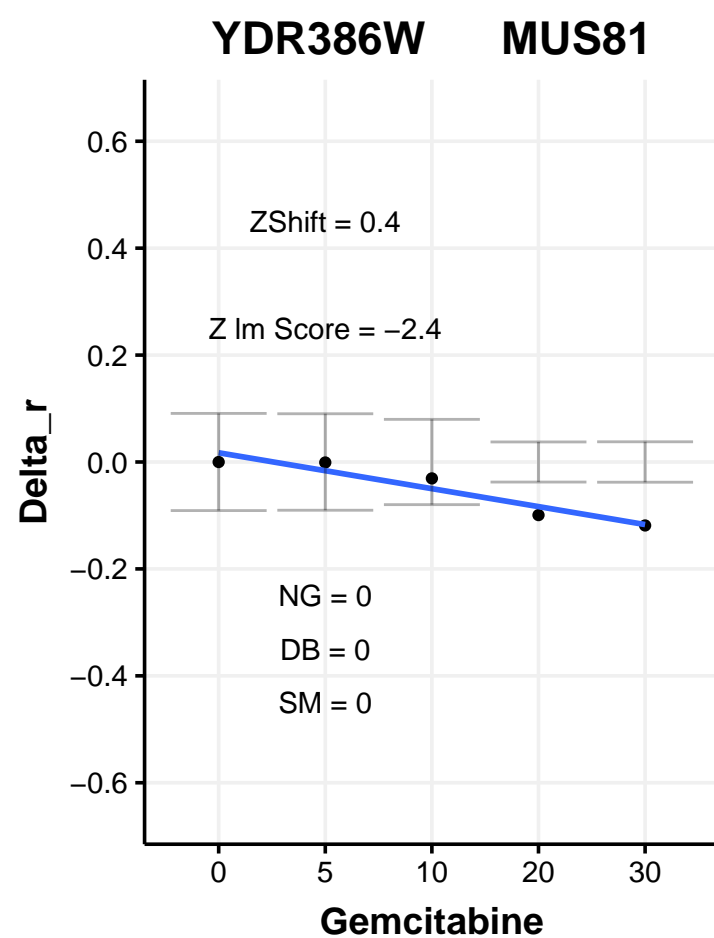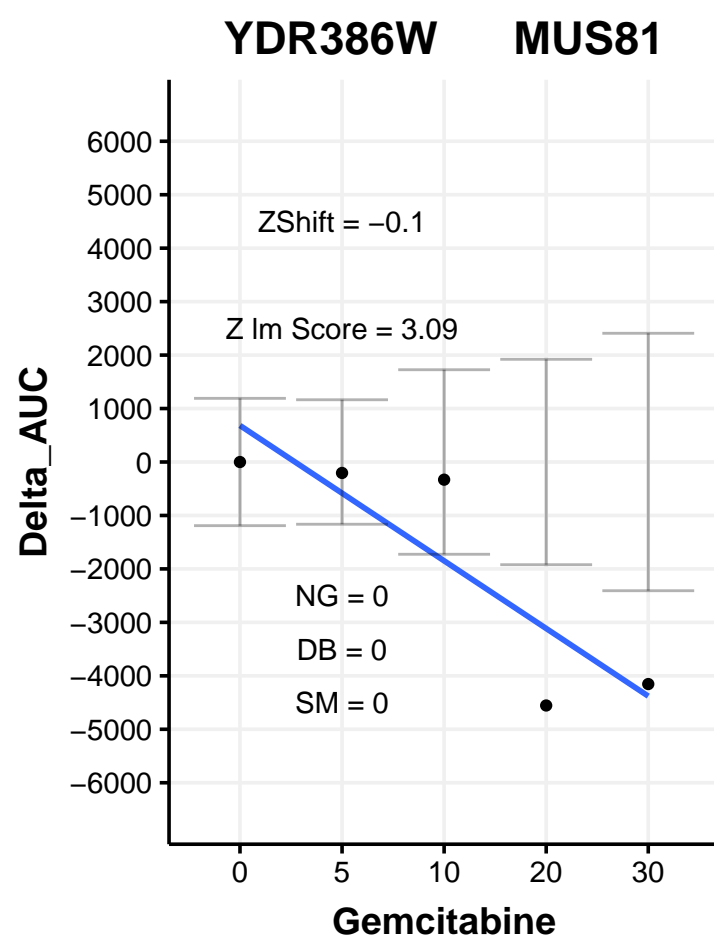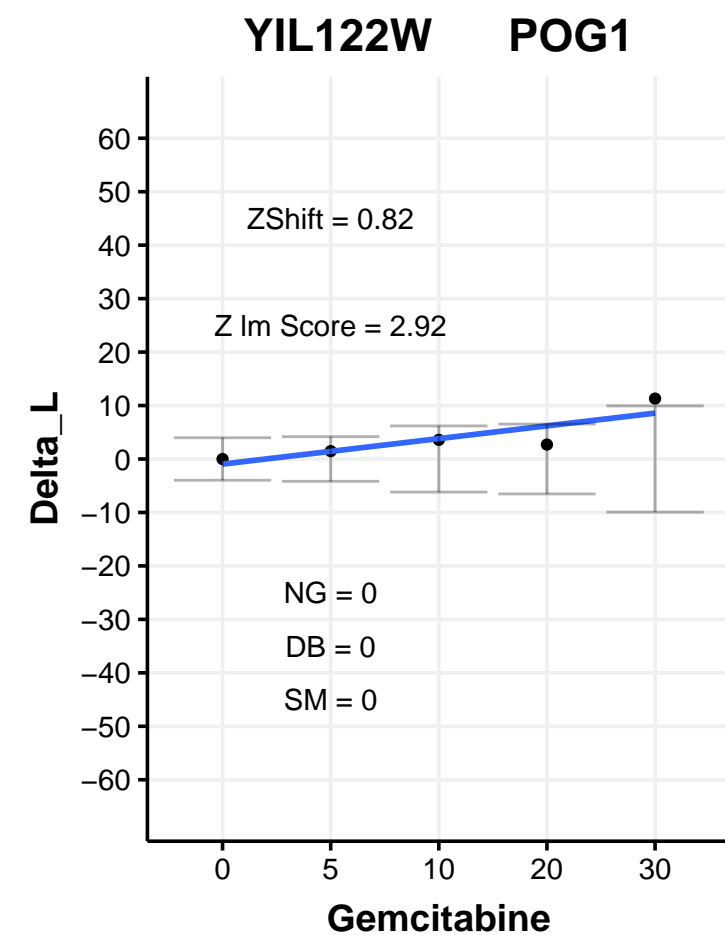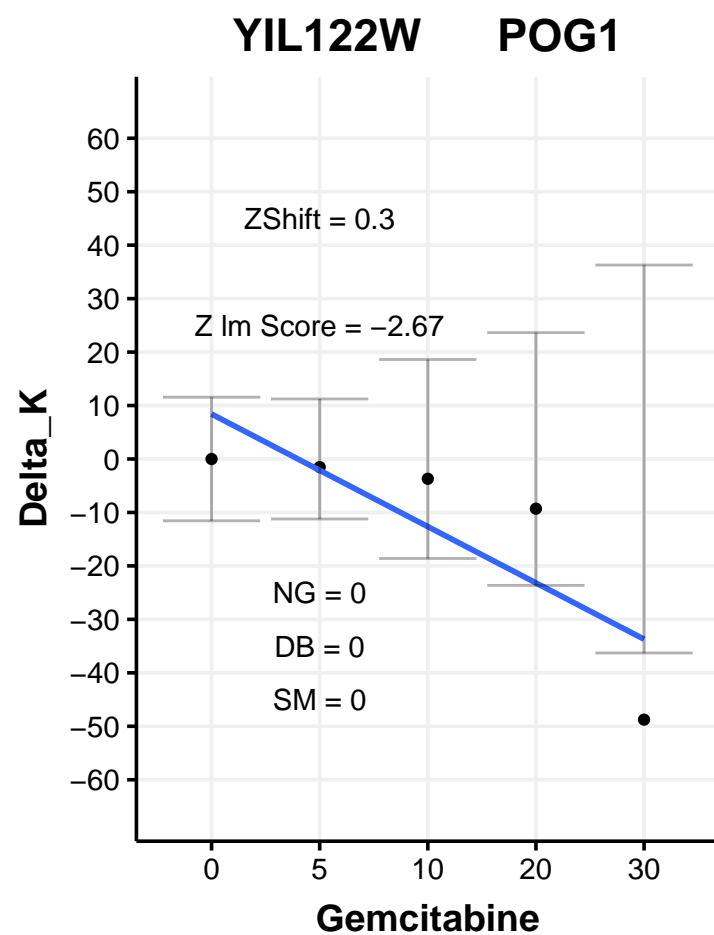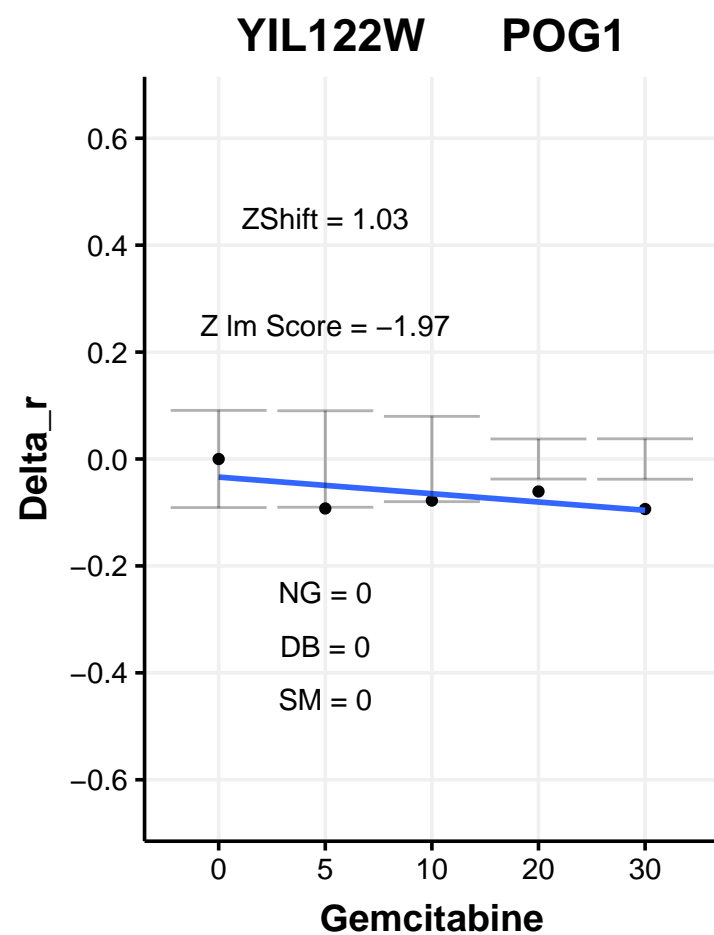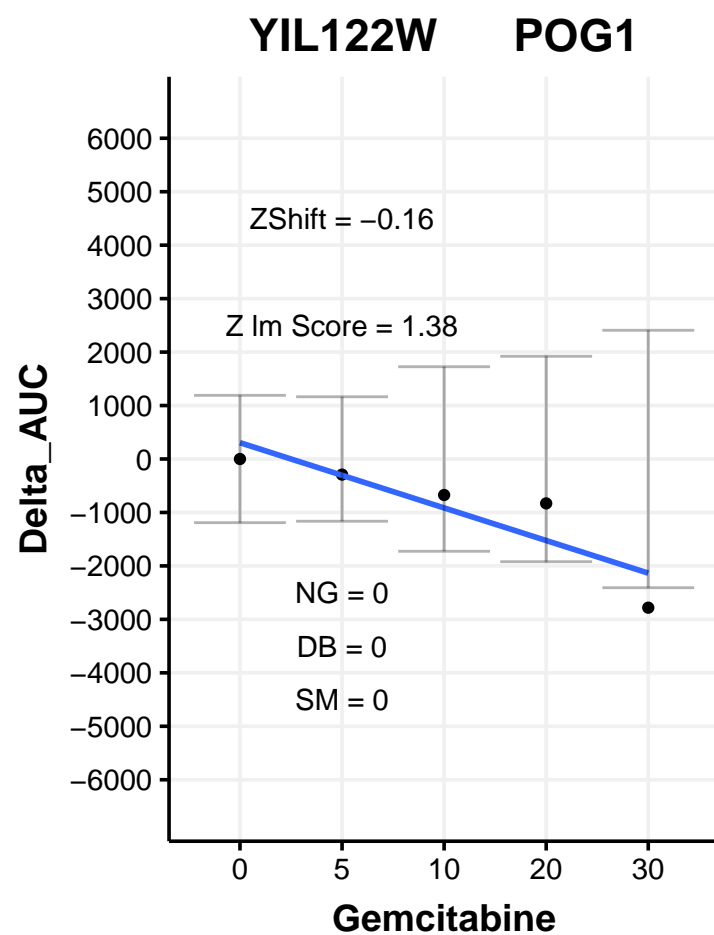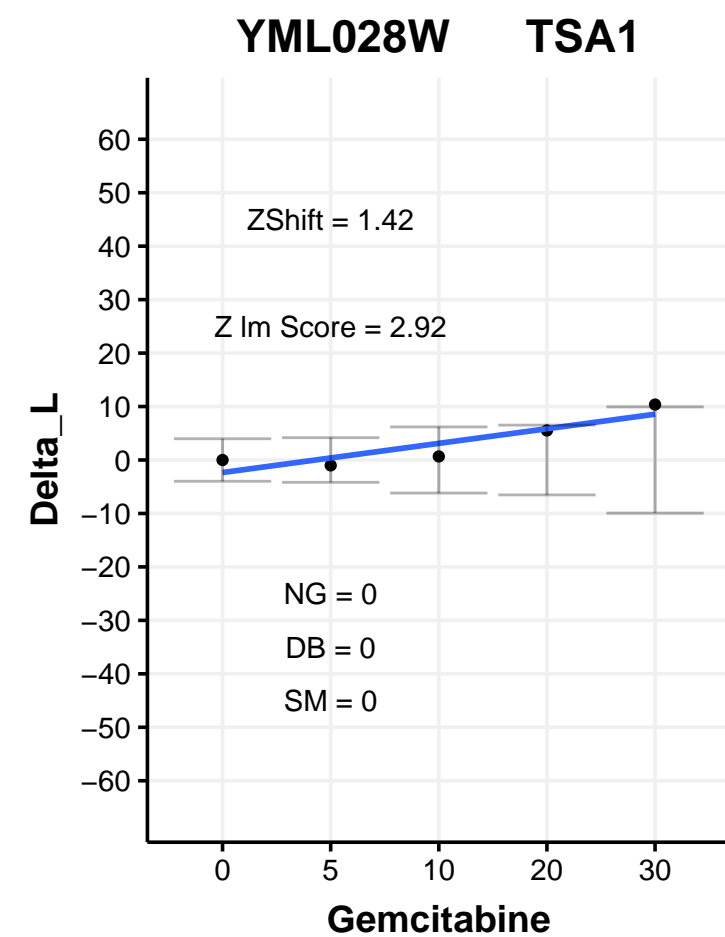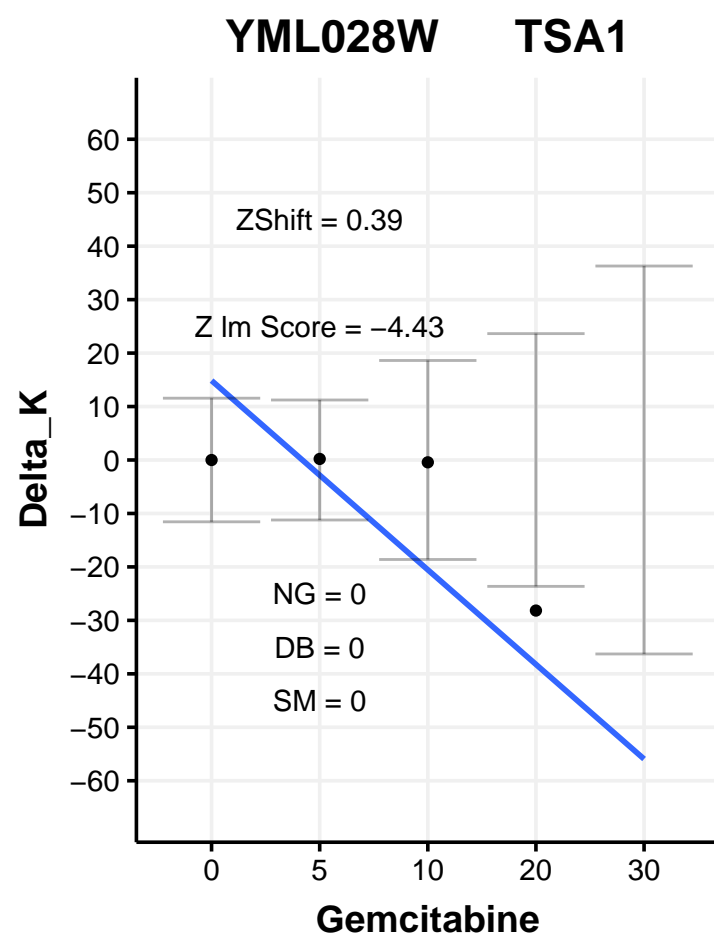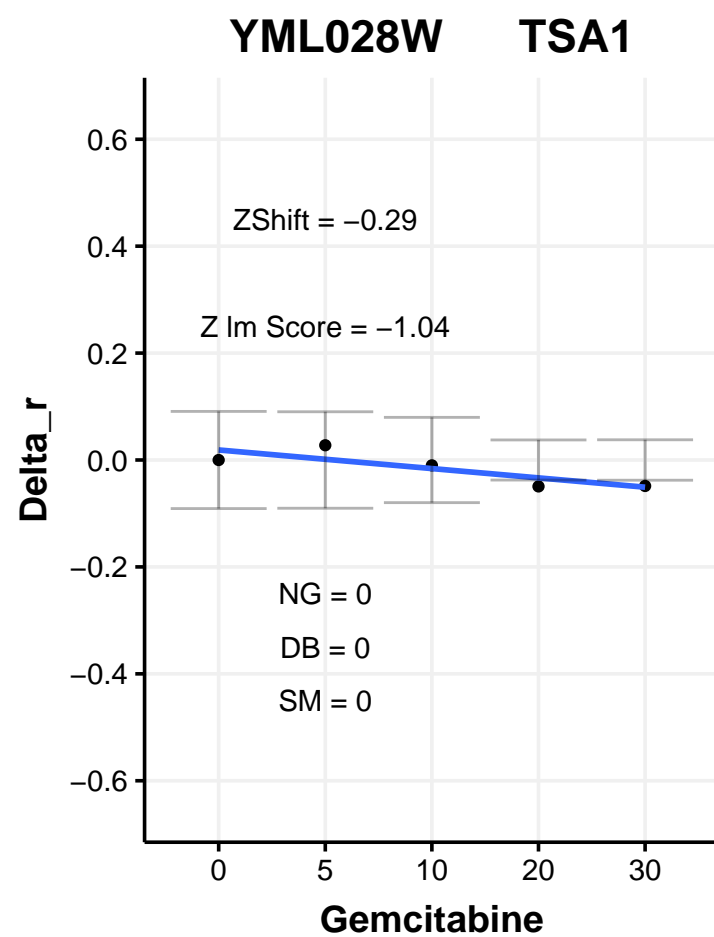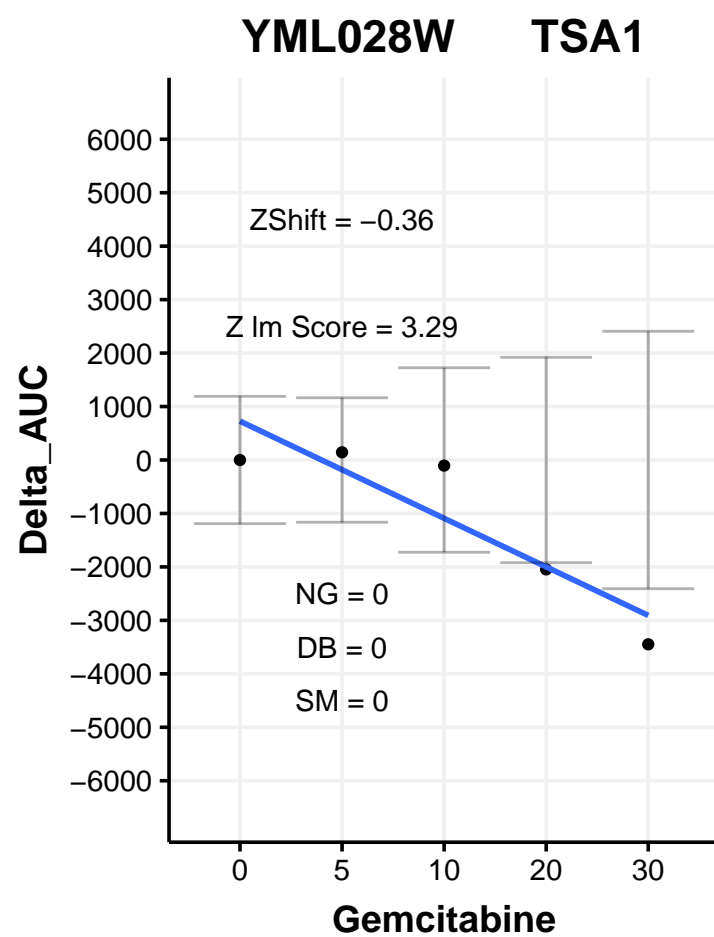



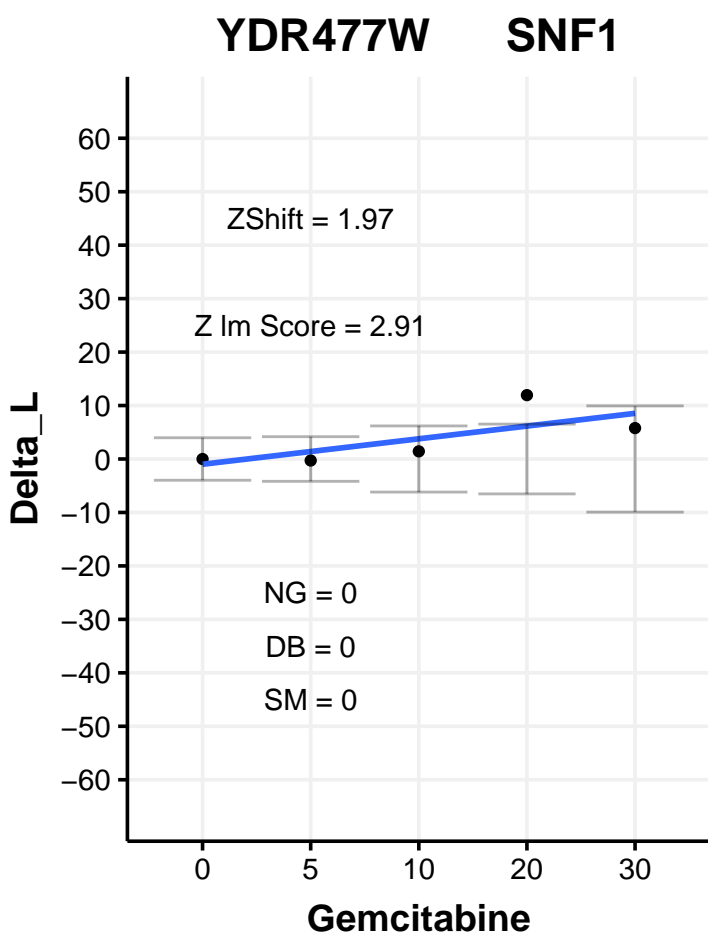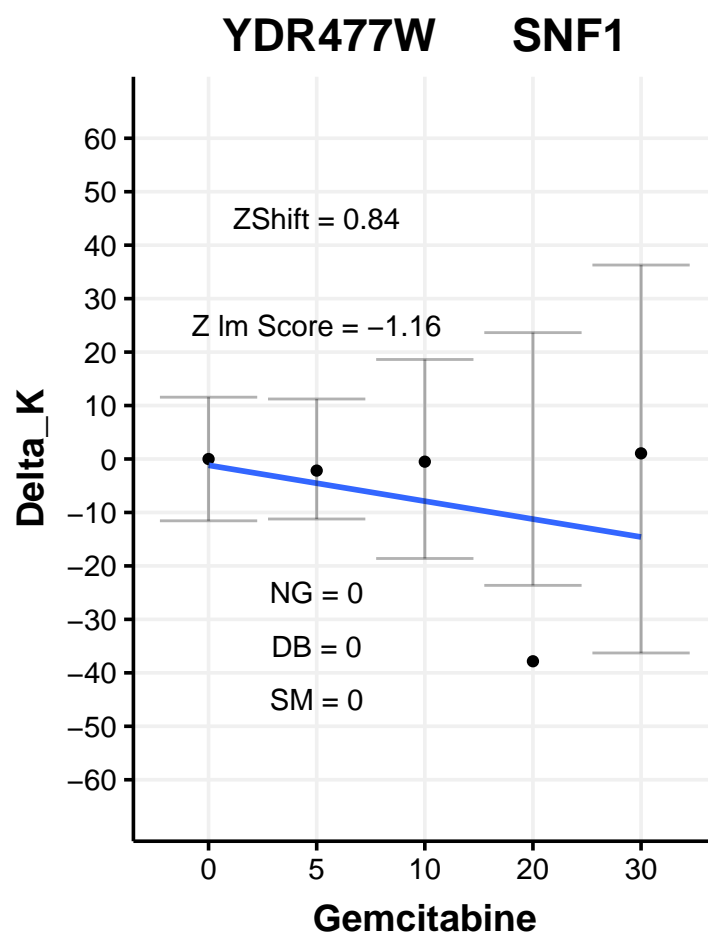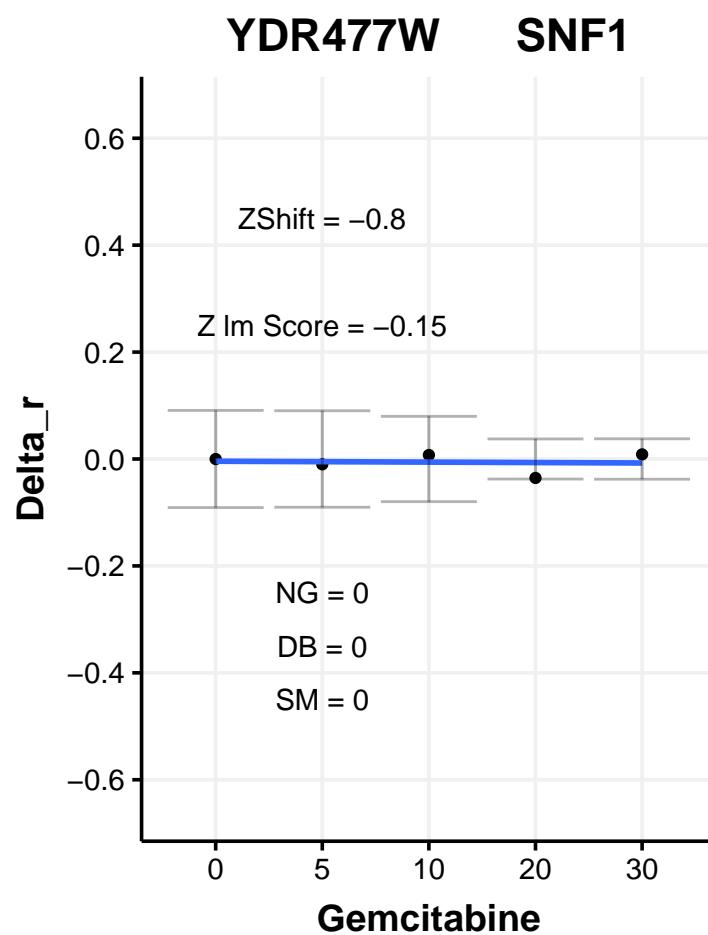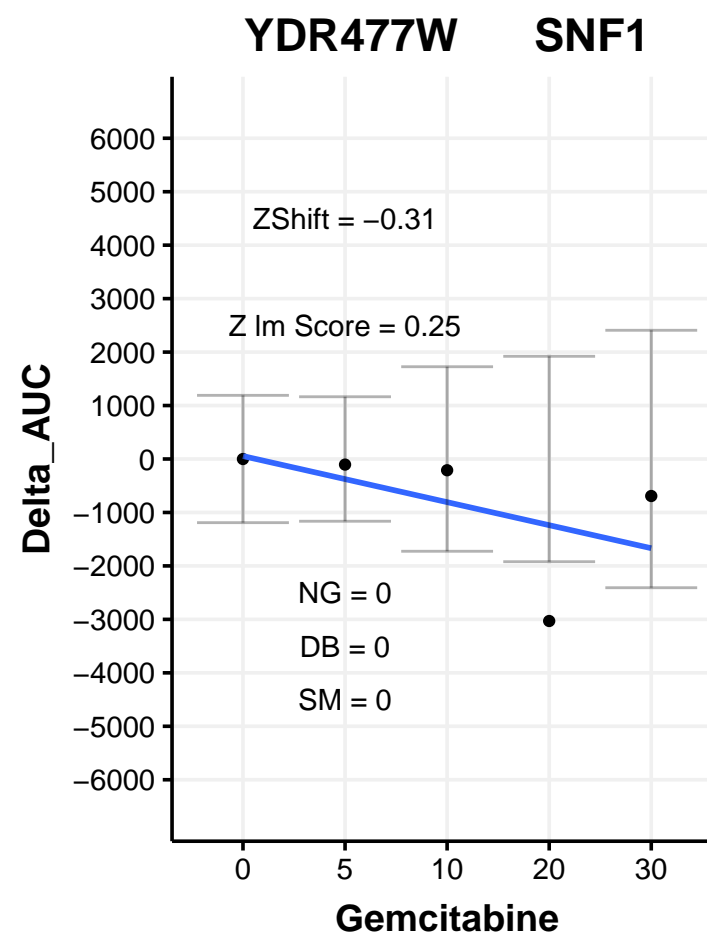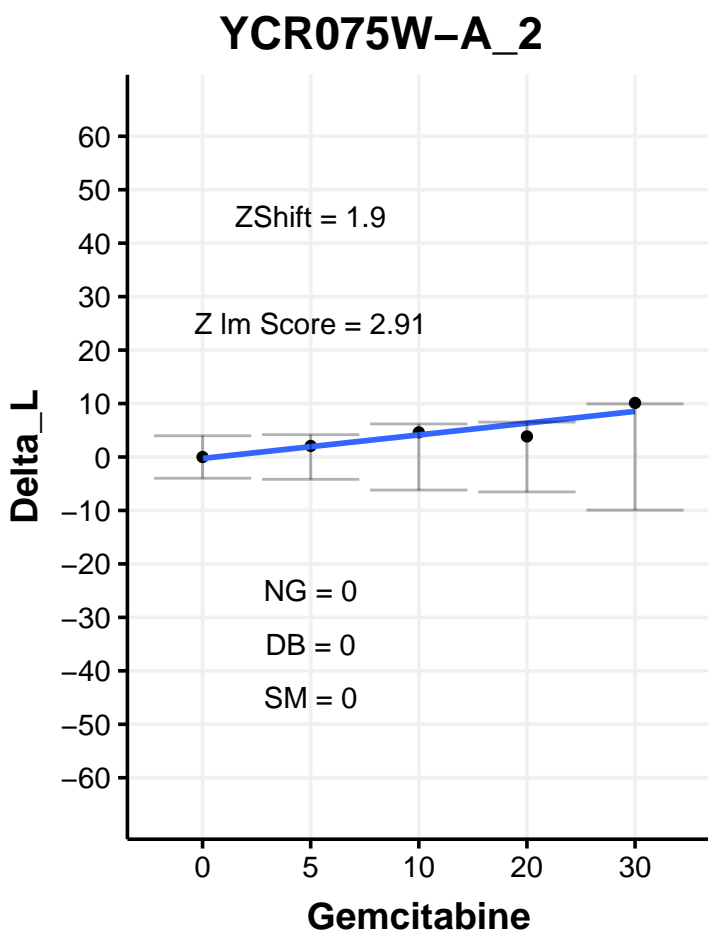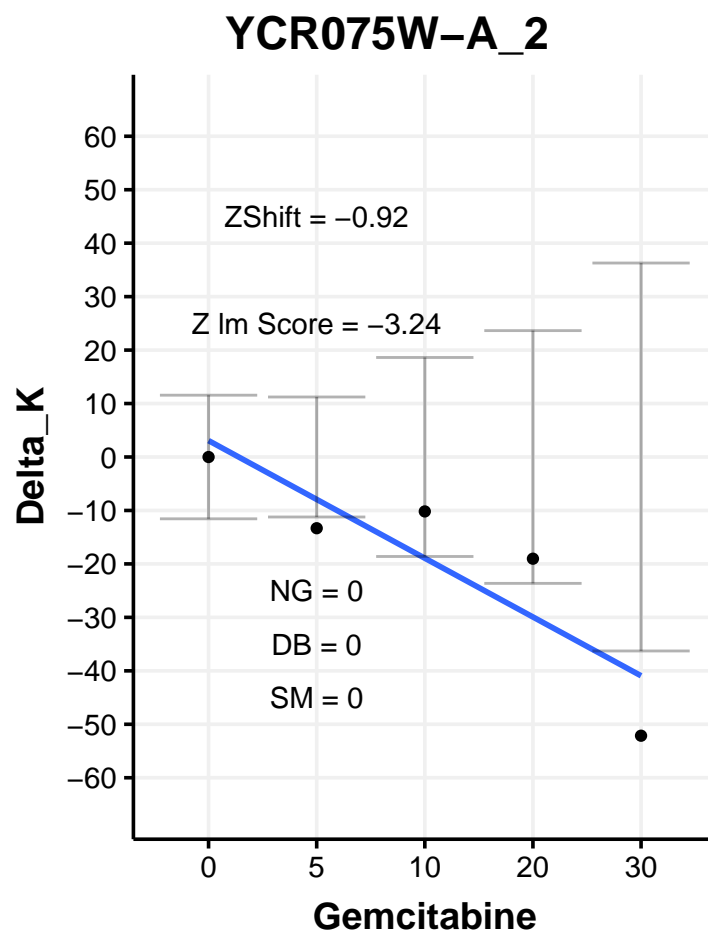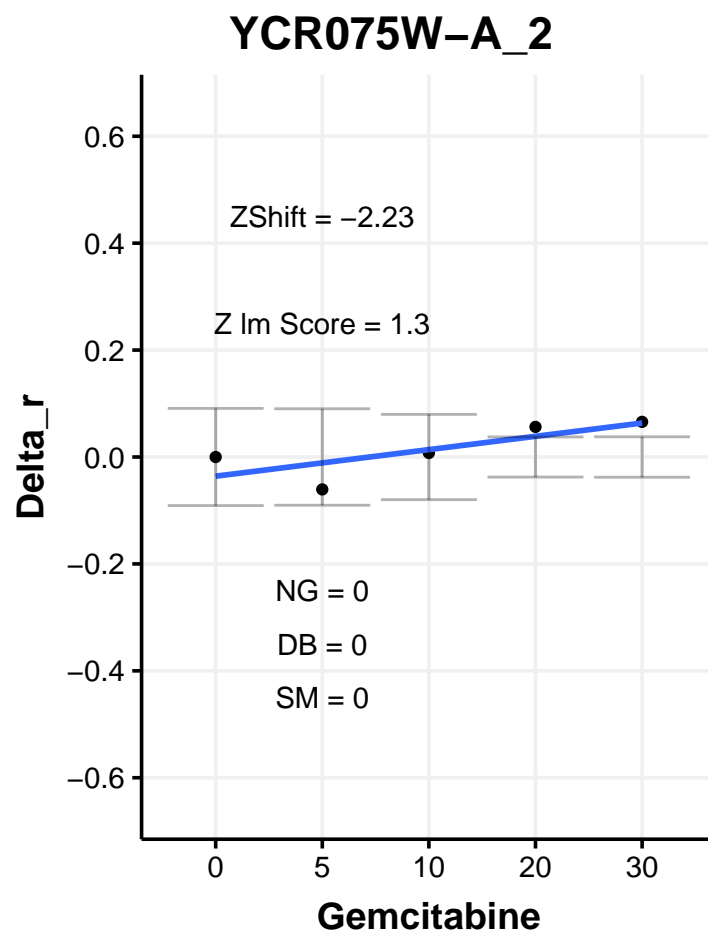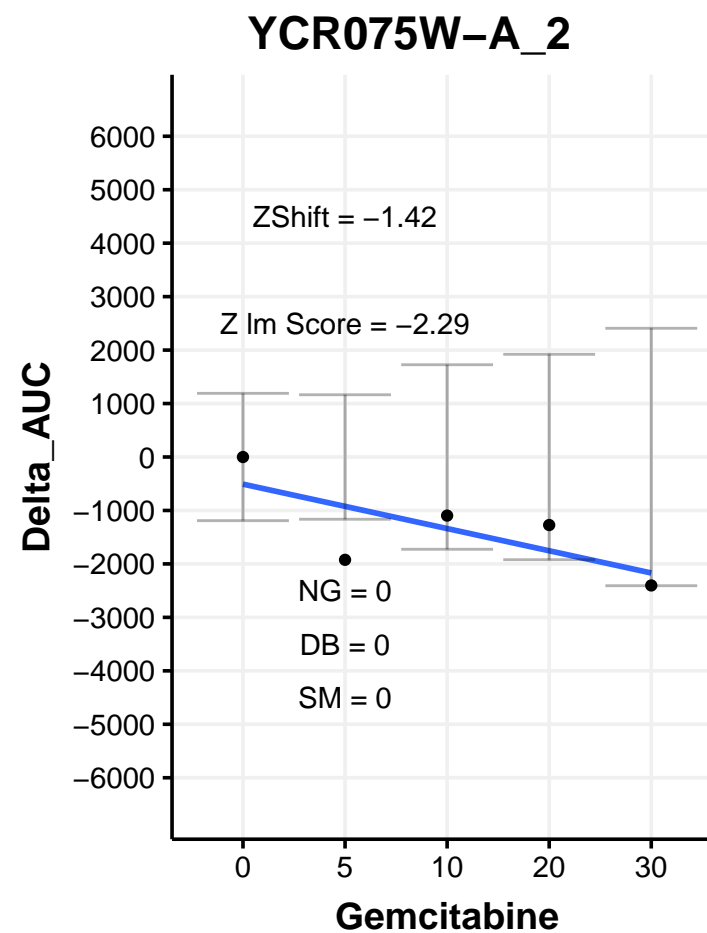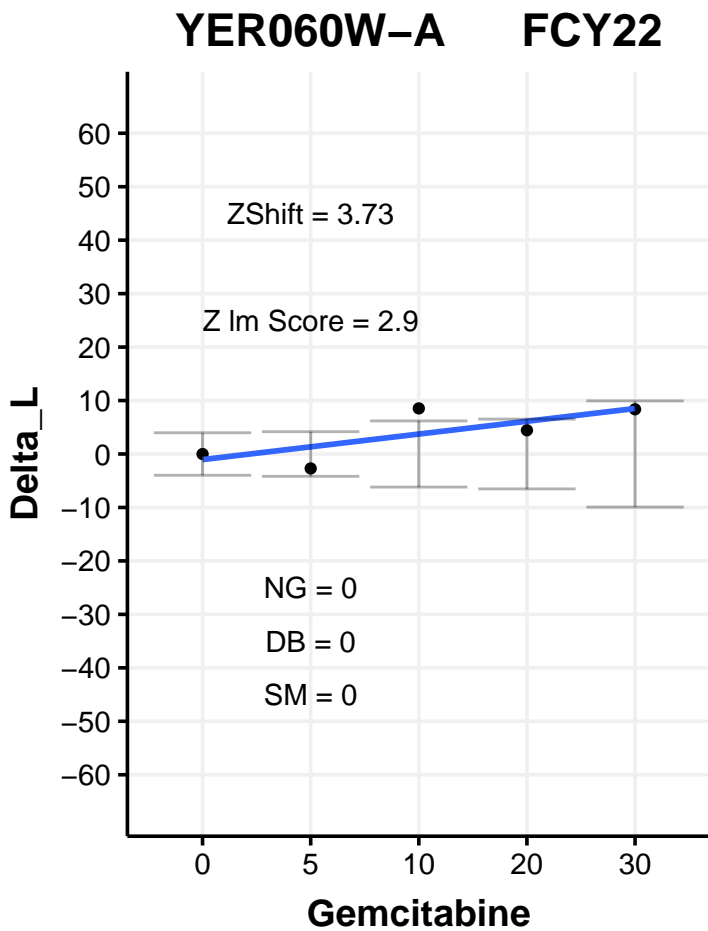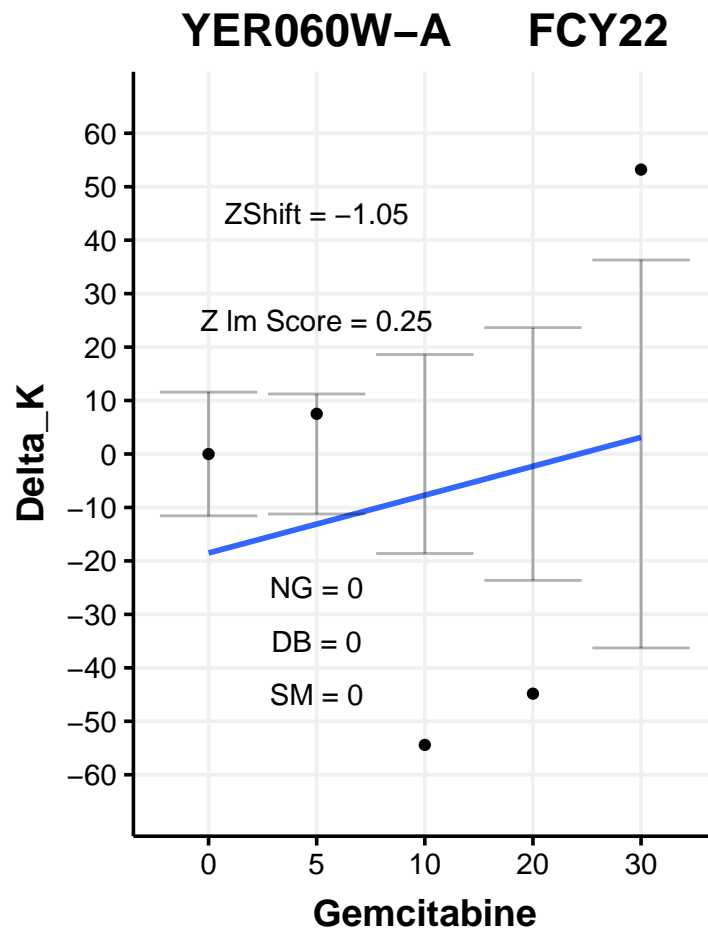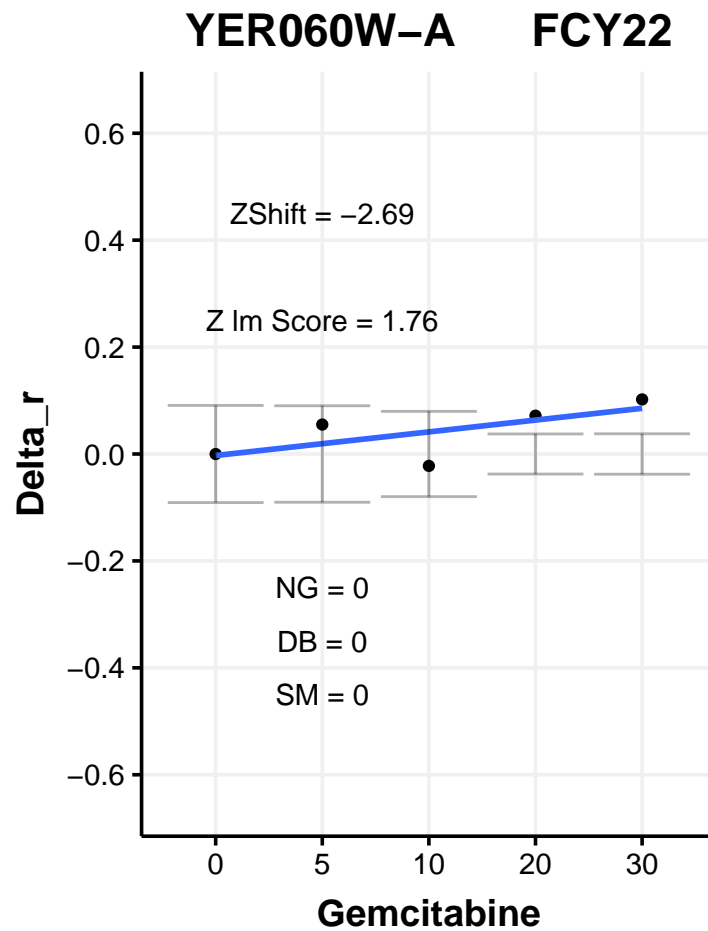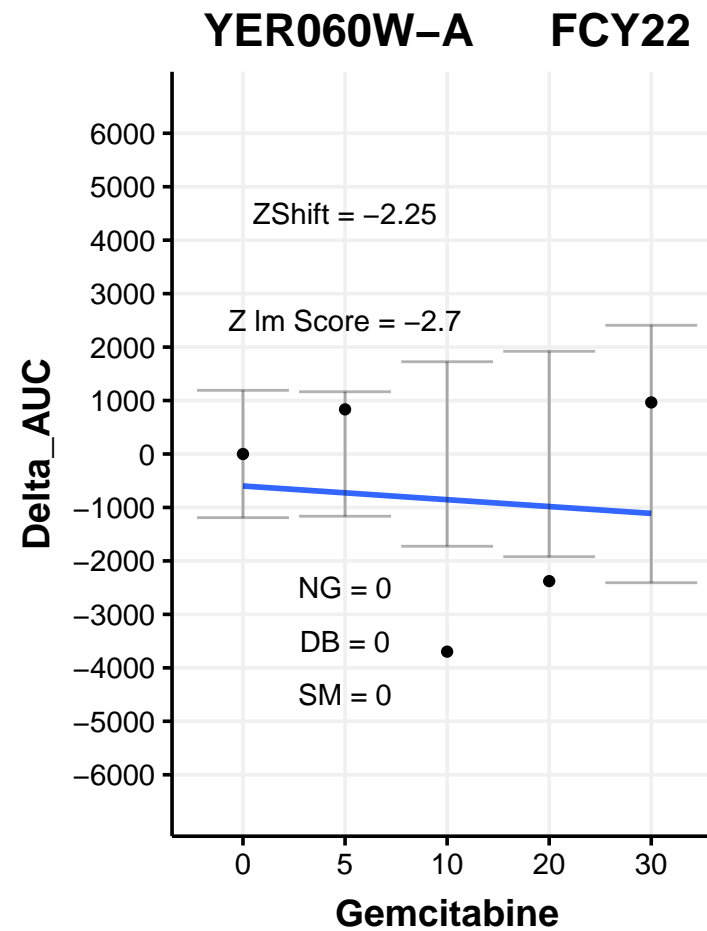

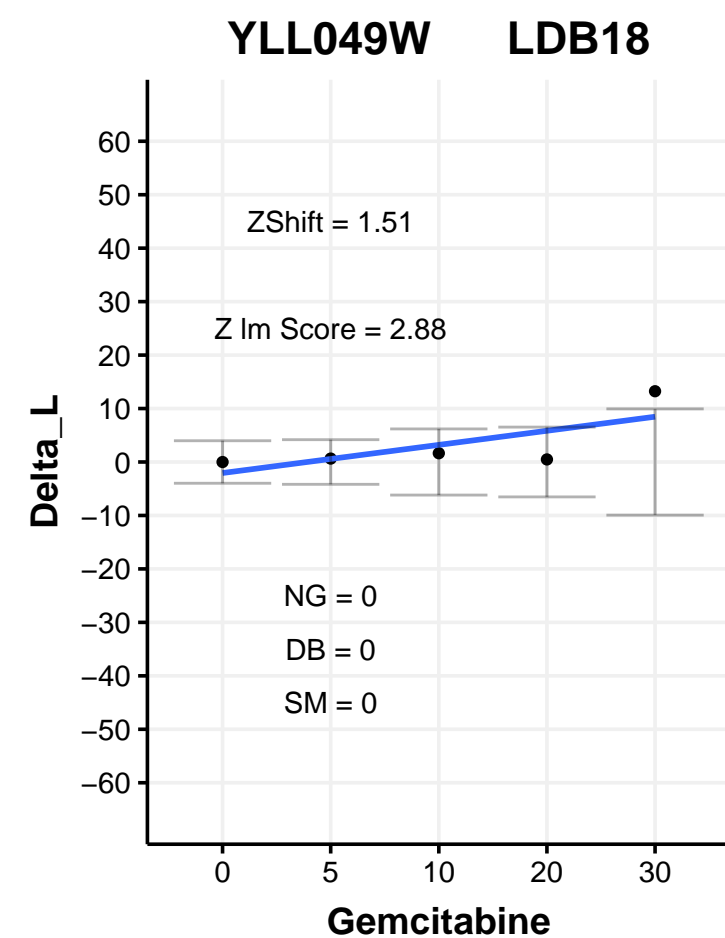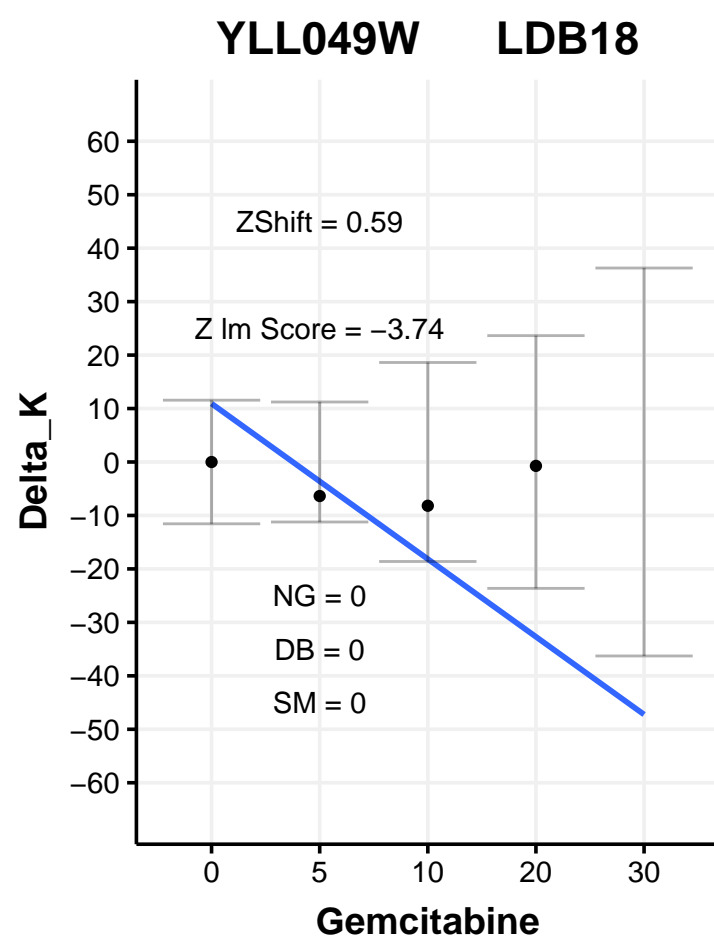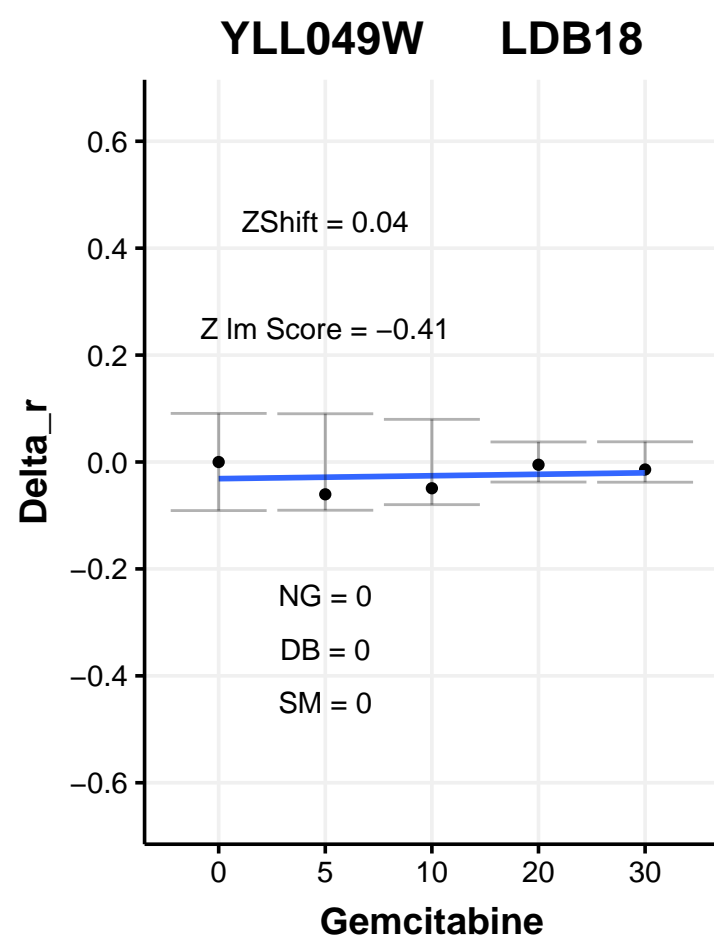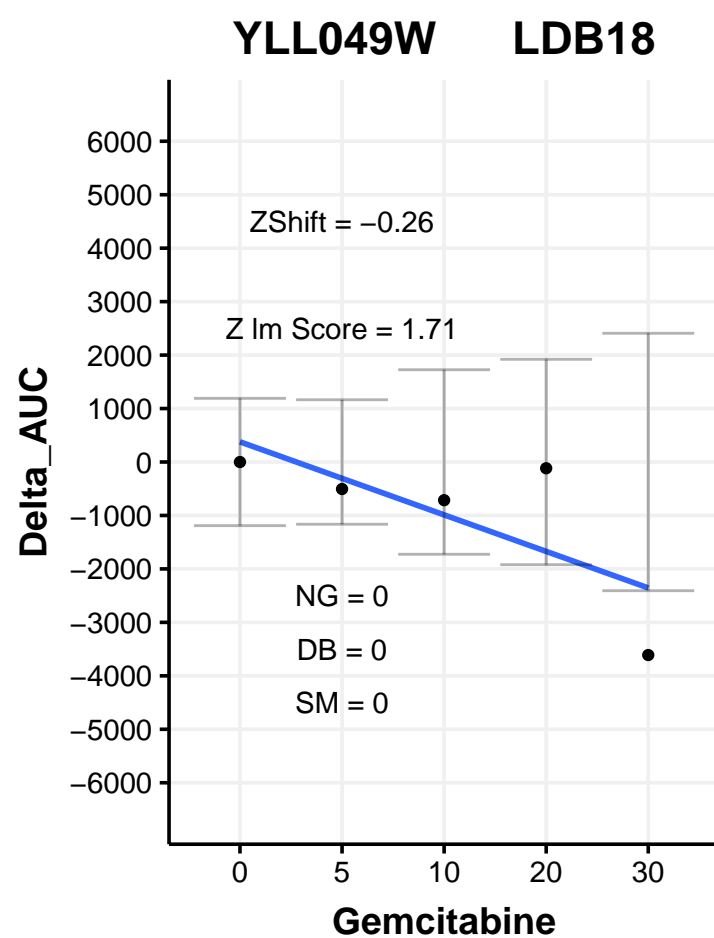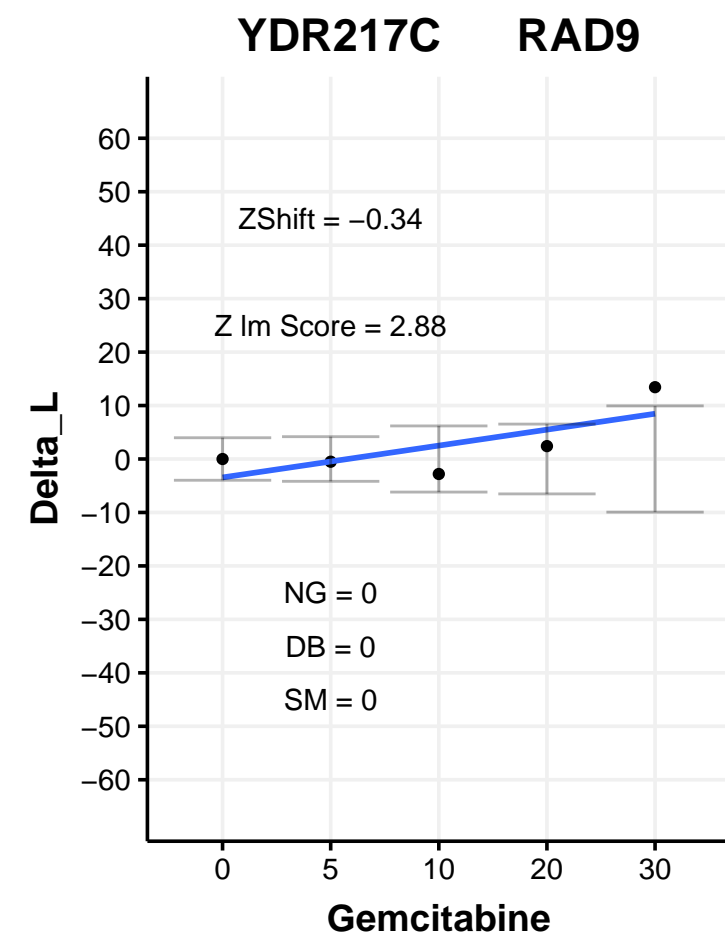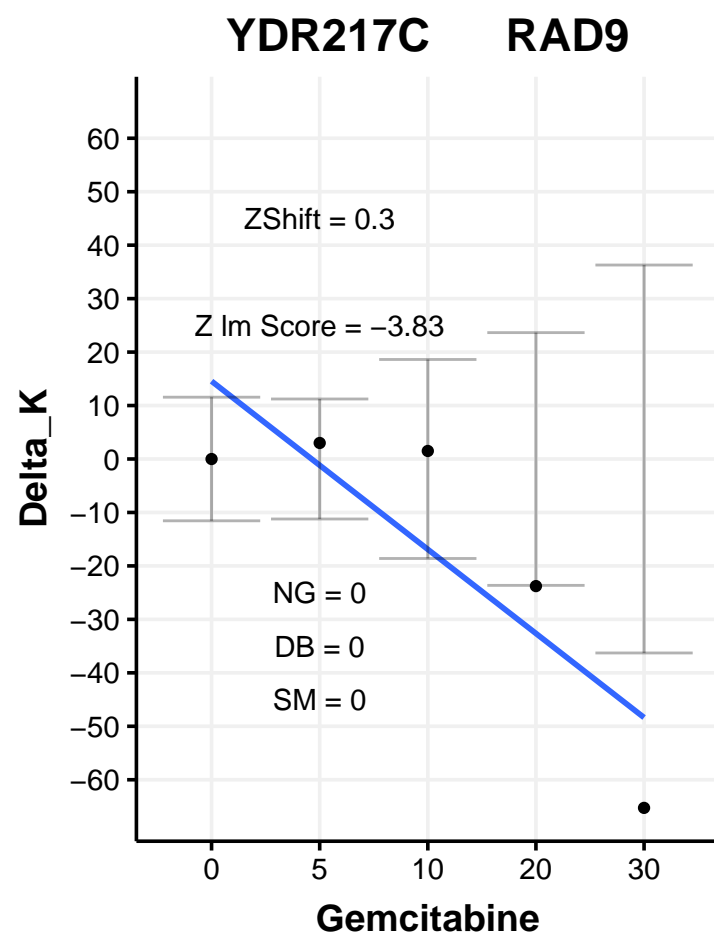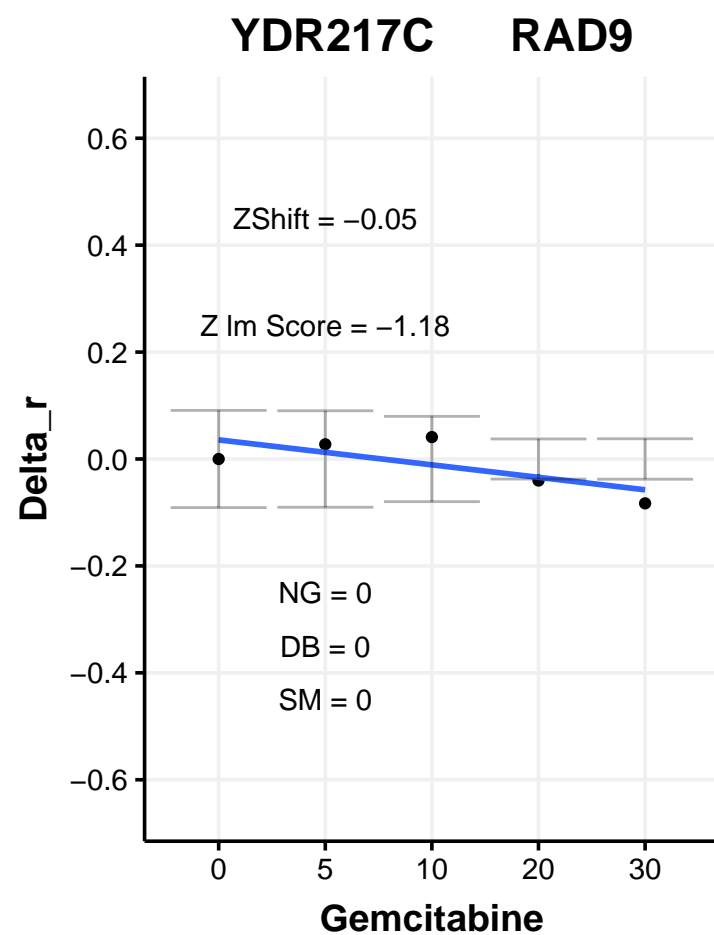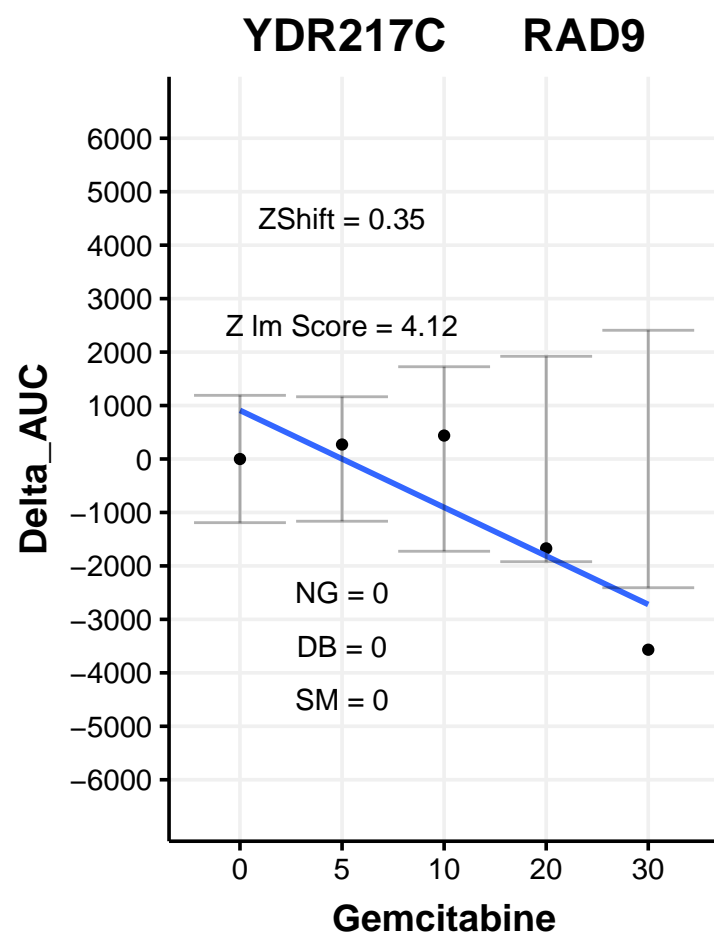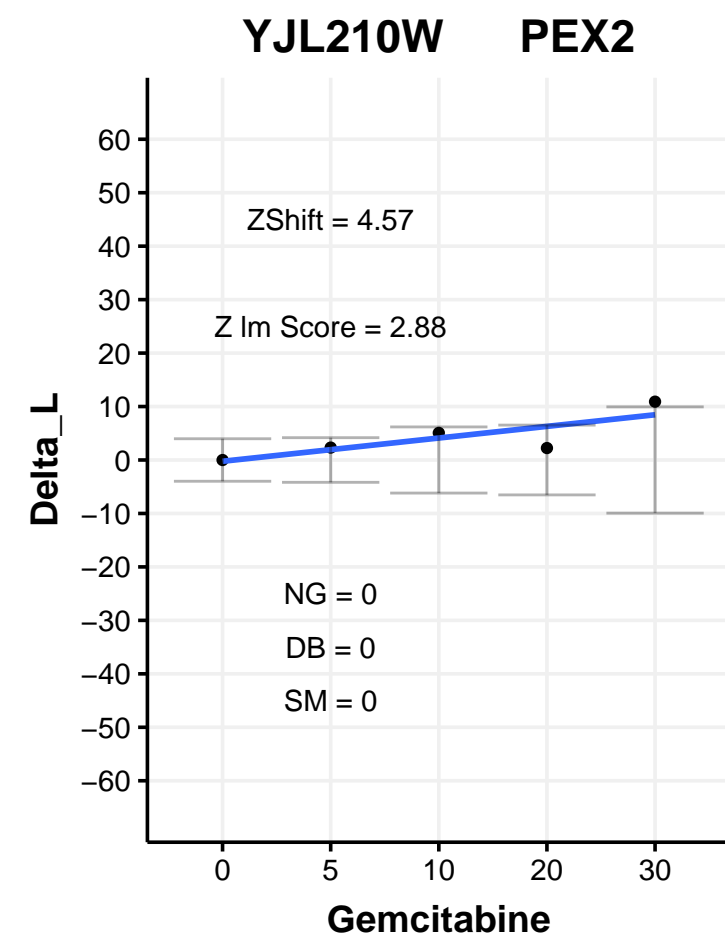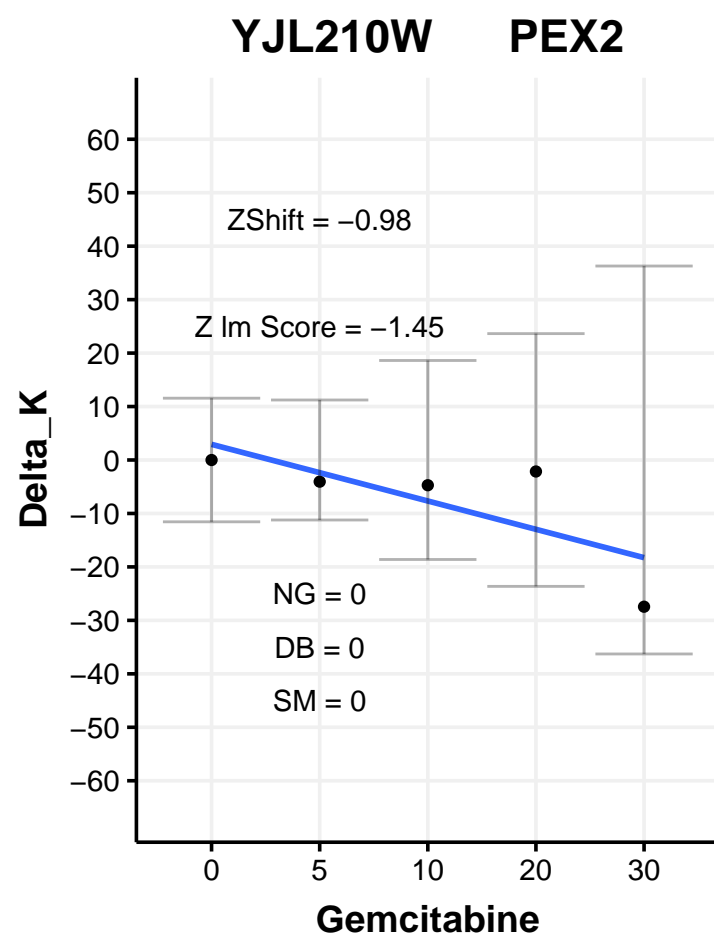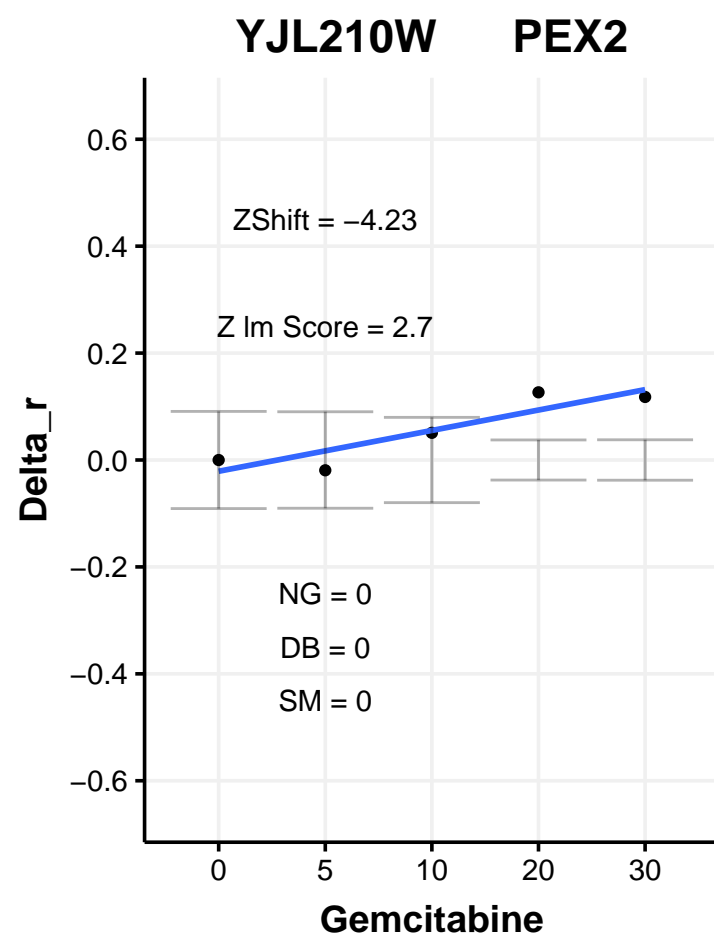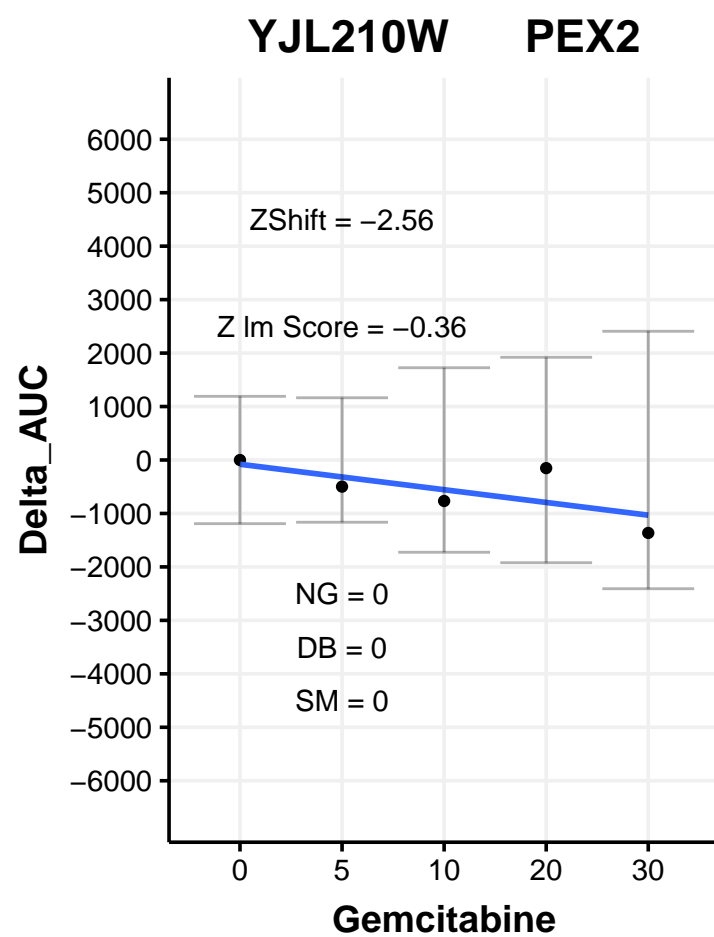

YGL217C\_1

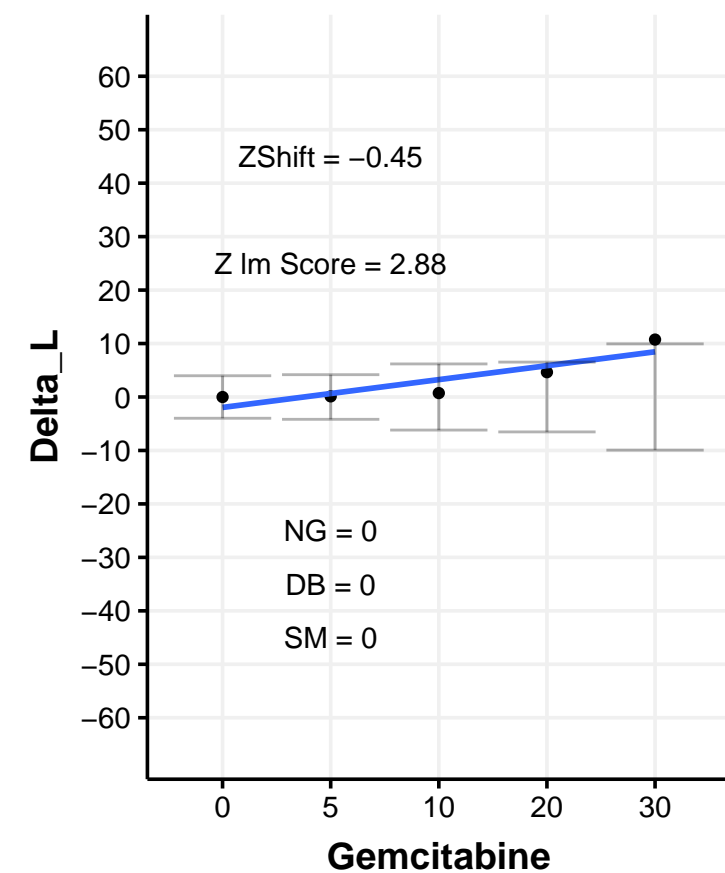

YGL217C\_1

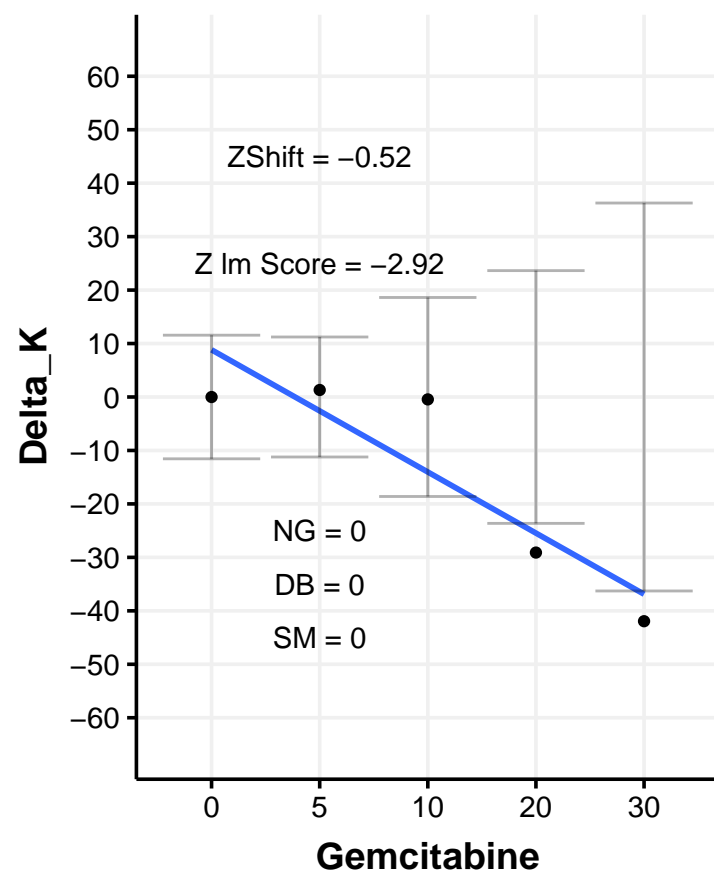

YGL217C\_1

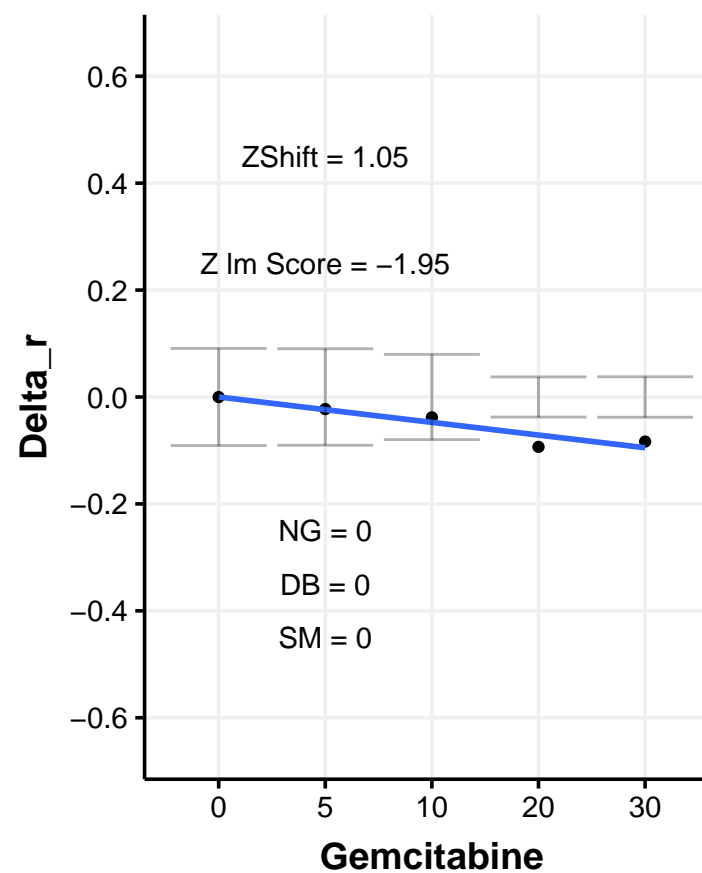

YGL217C\_1

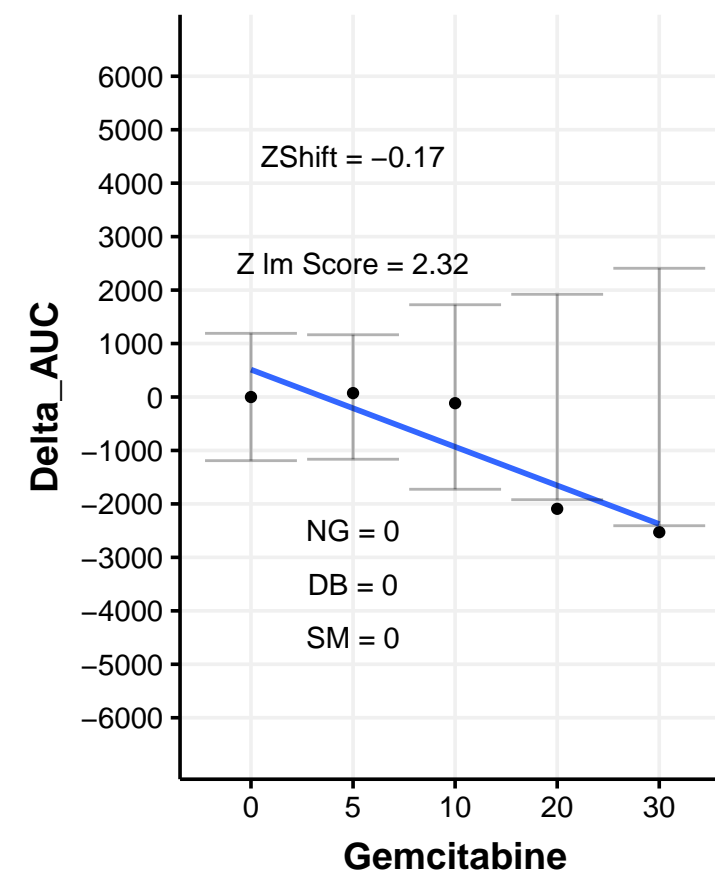

YHR194W MDM31

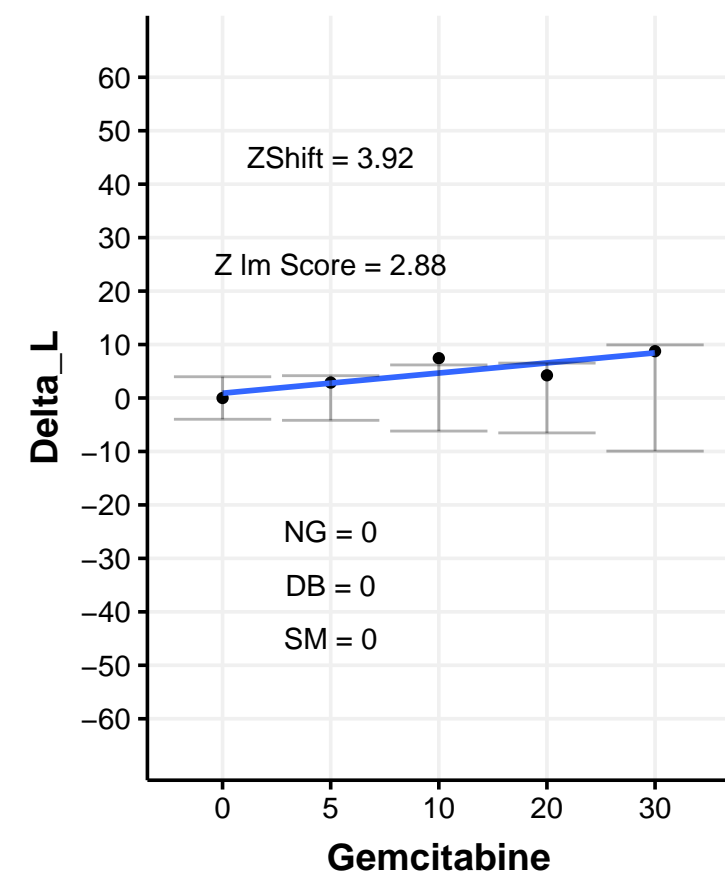

YHR194W MDM31

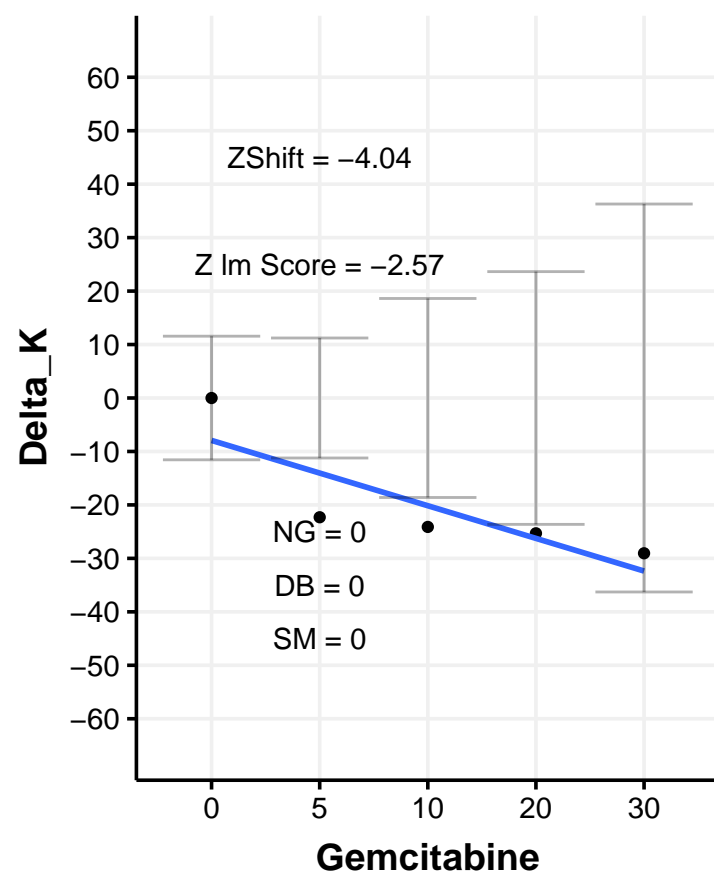

YHR194W MDM31

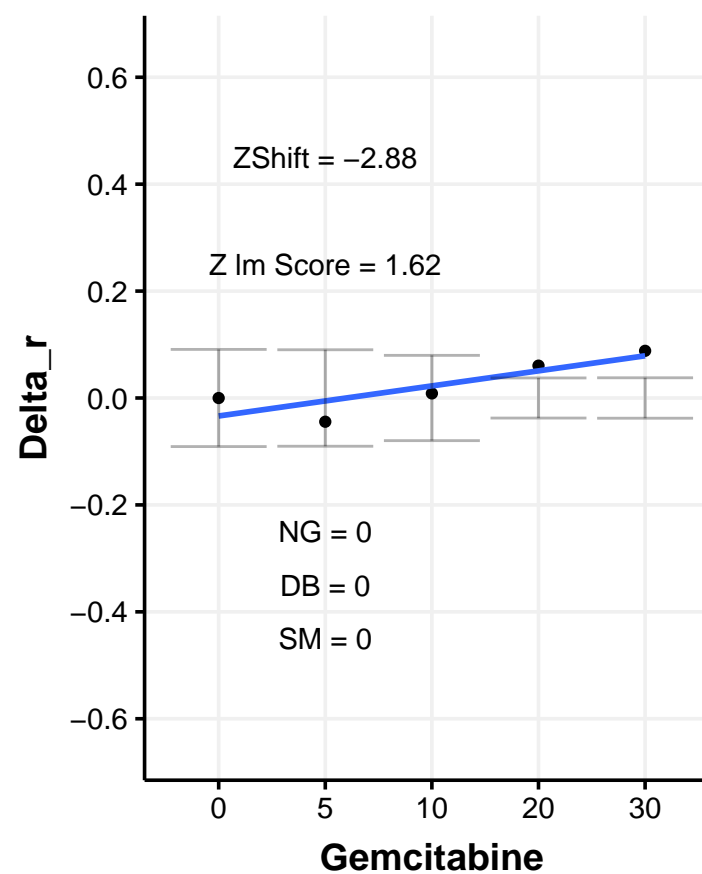

YHR194W MDM31

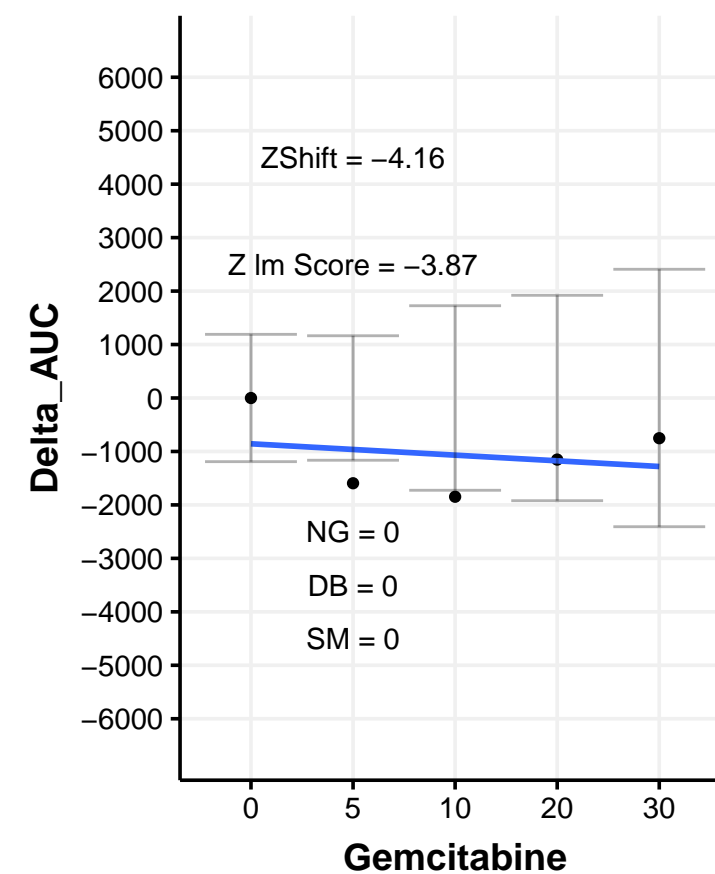

YMR175W-A\_1

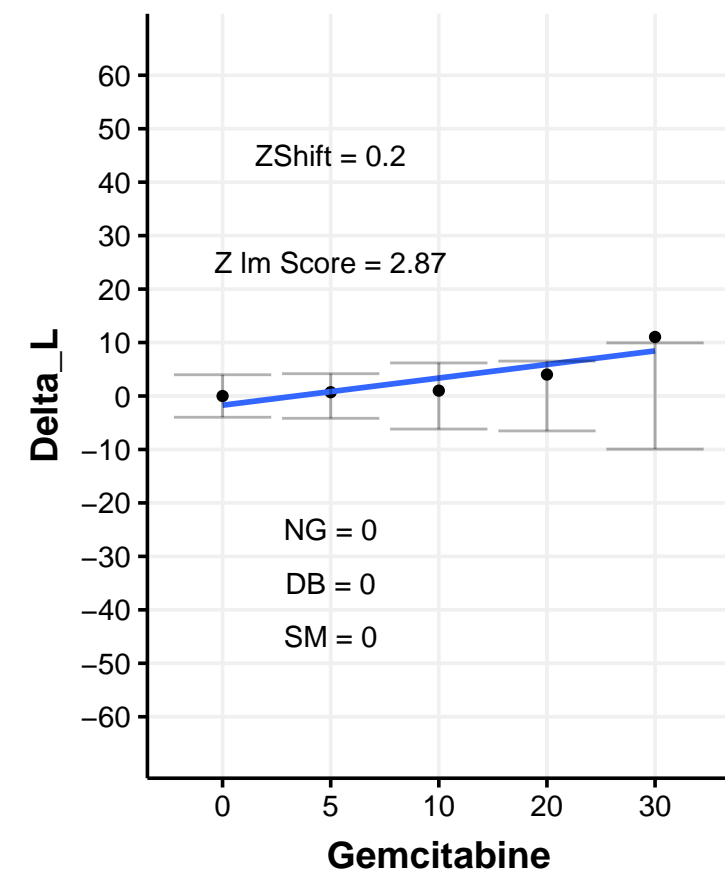

YMR175W-A\_1

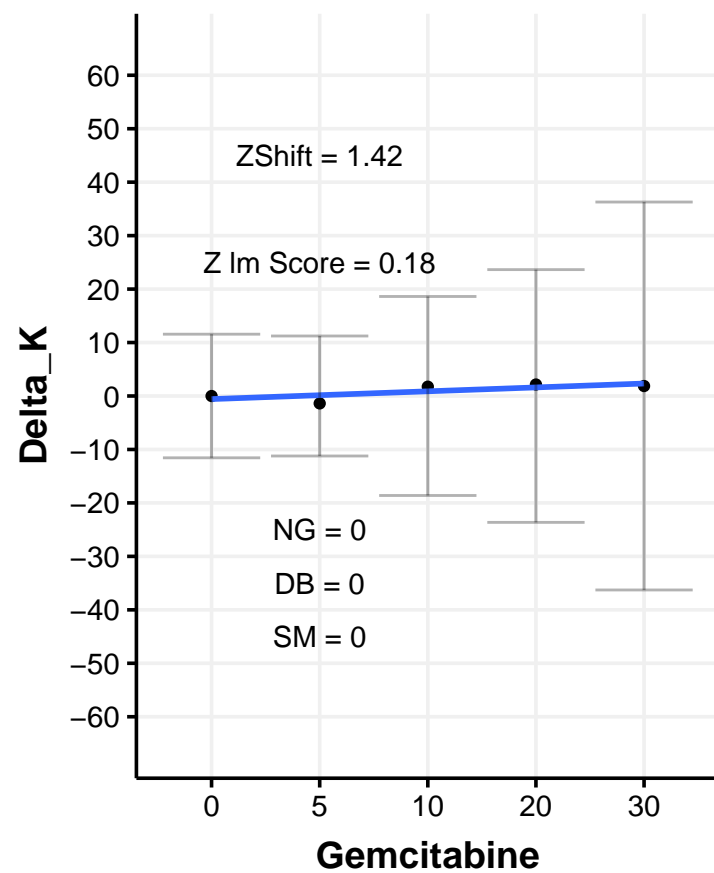

YMR175W-A\_1

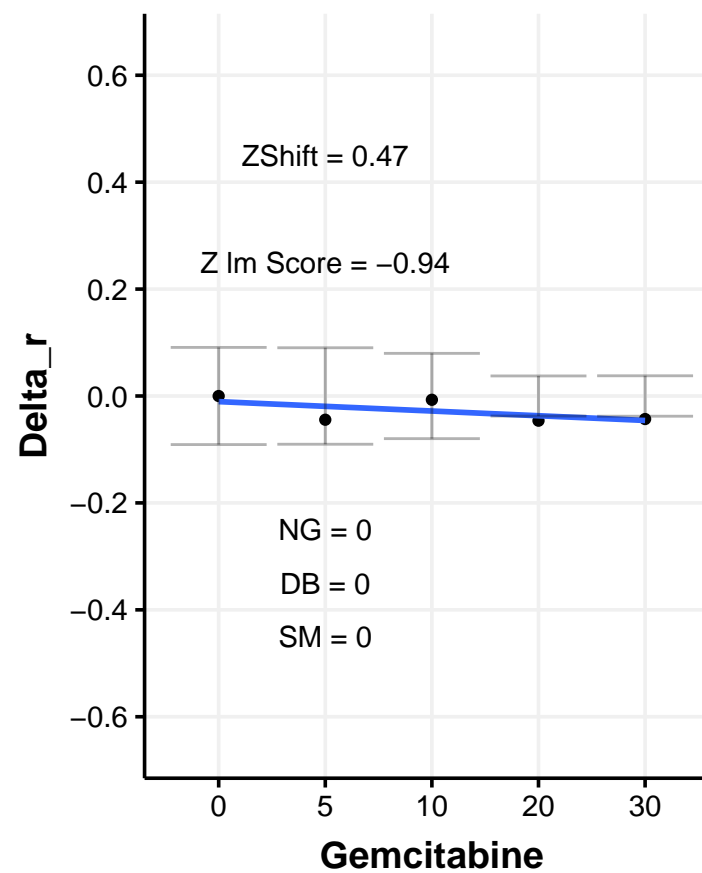

YMR175W-A\_1

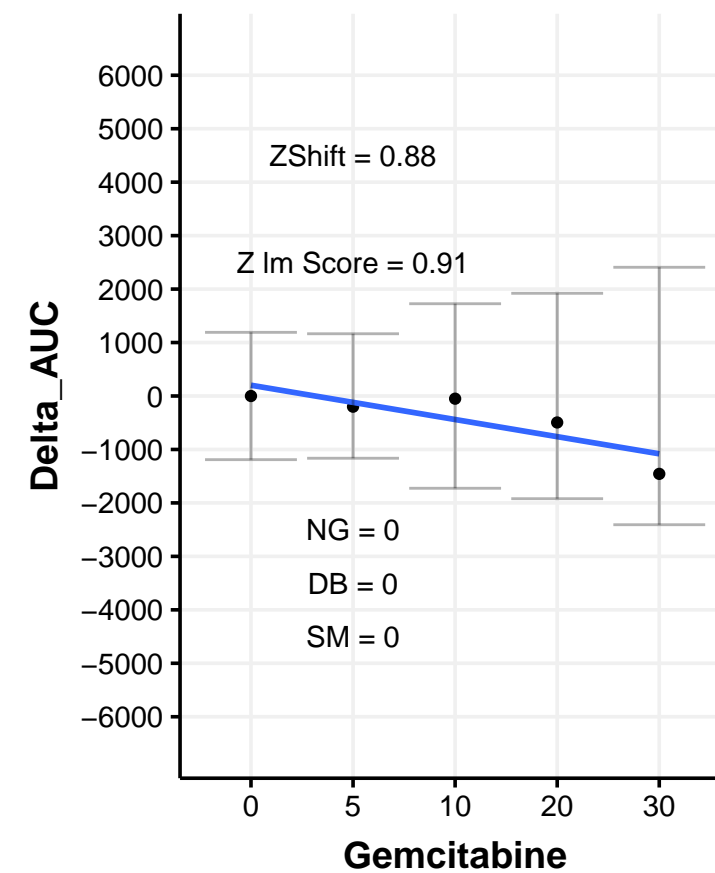

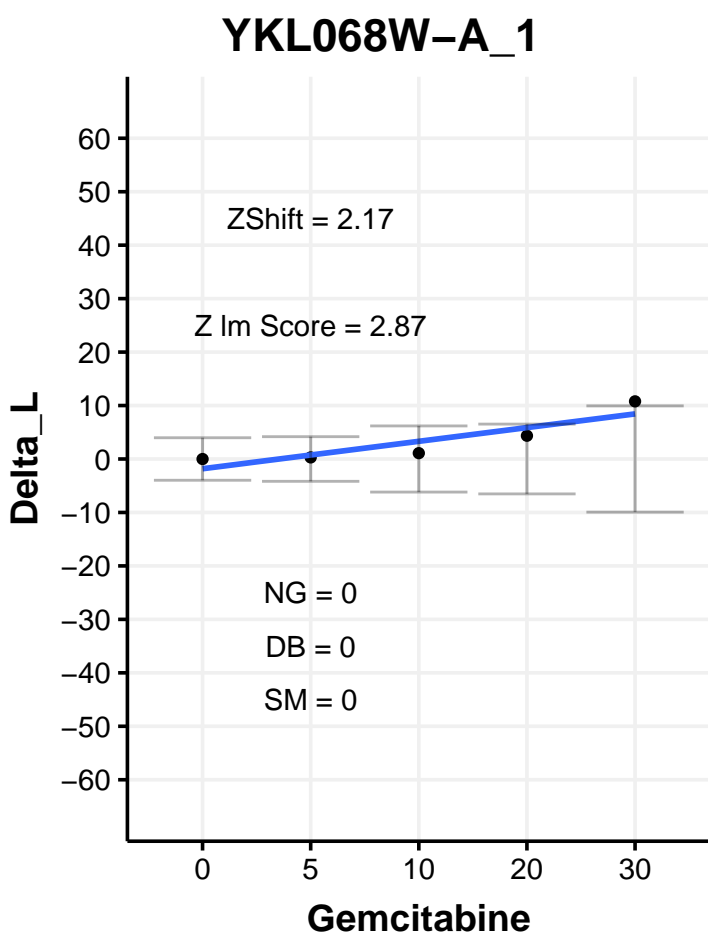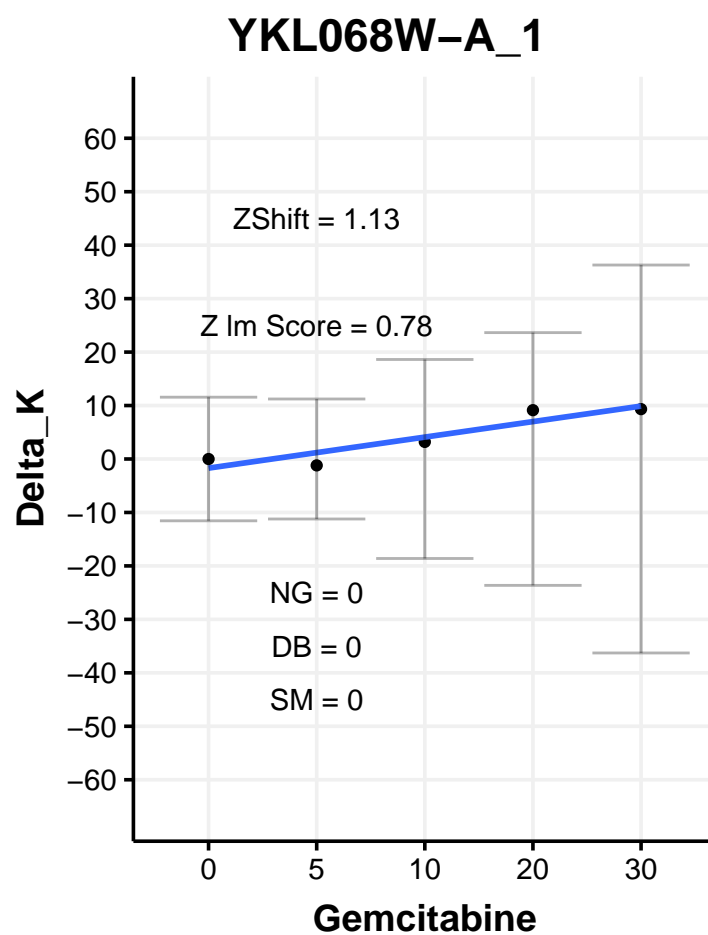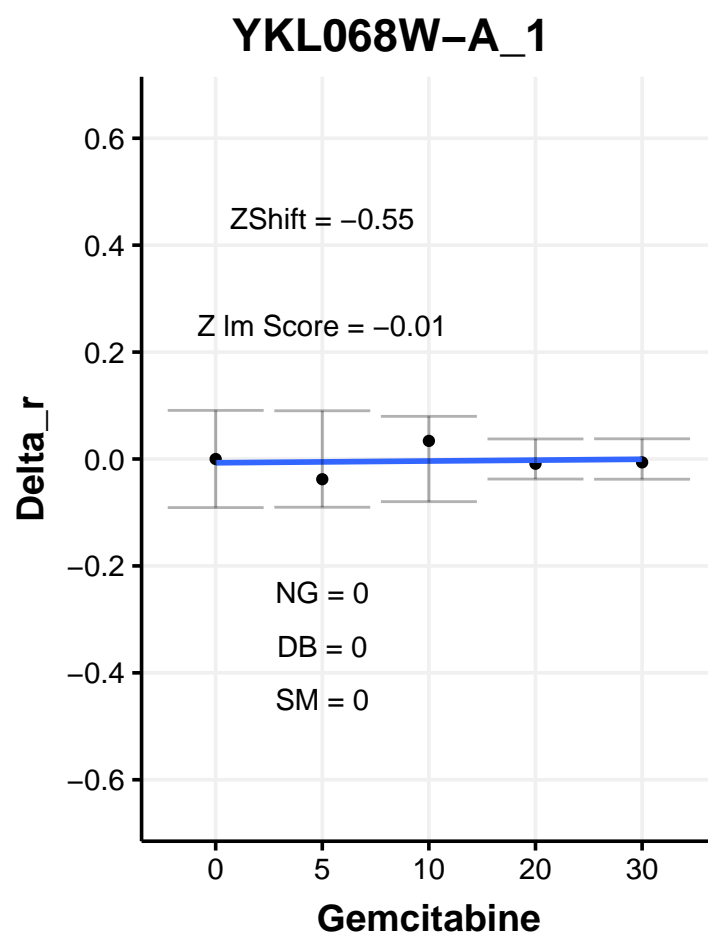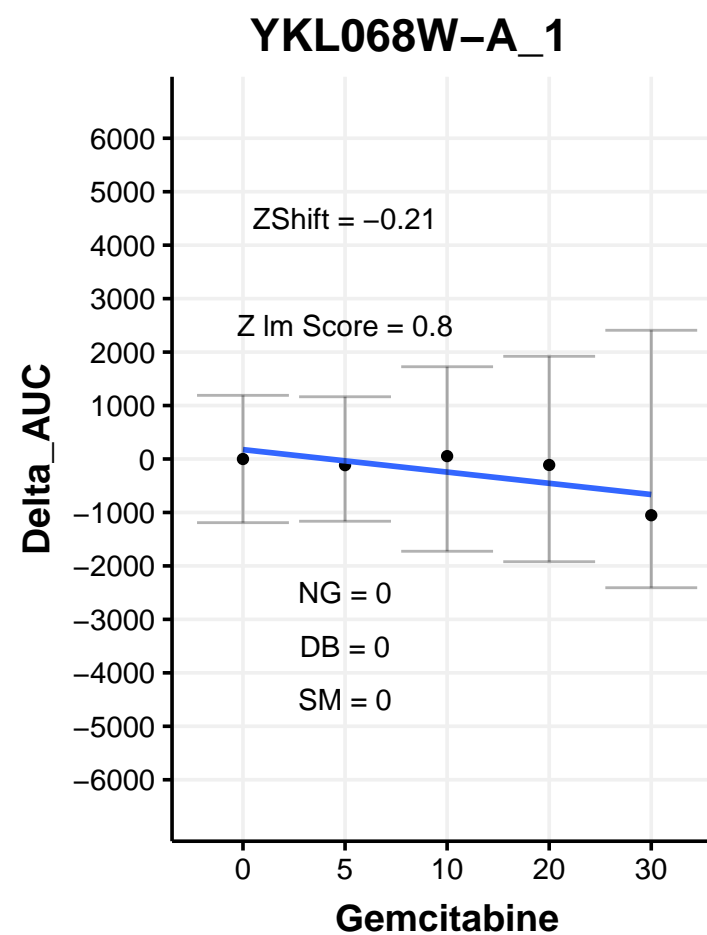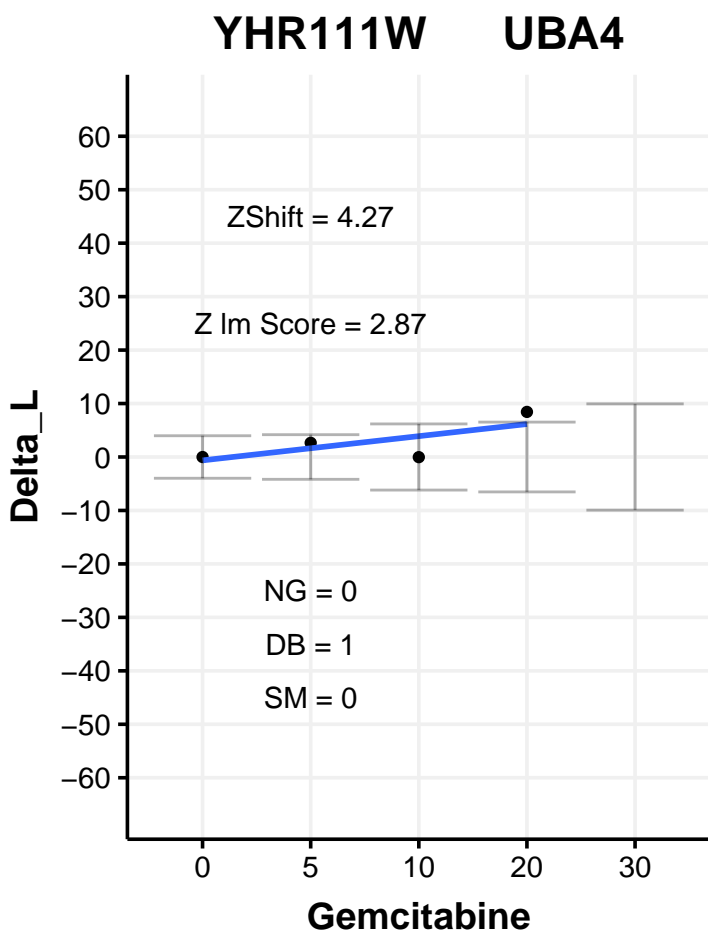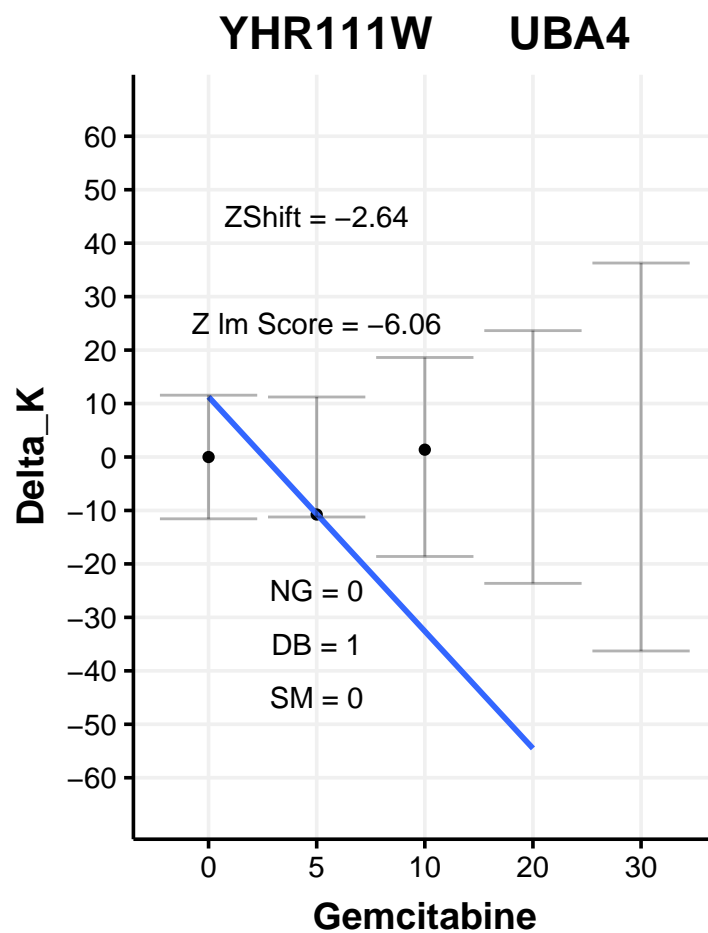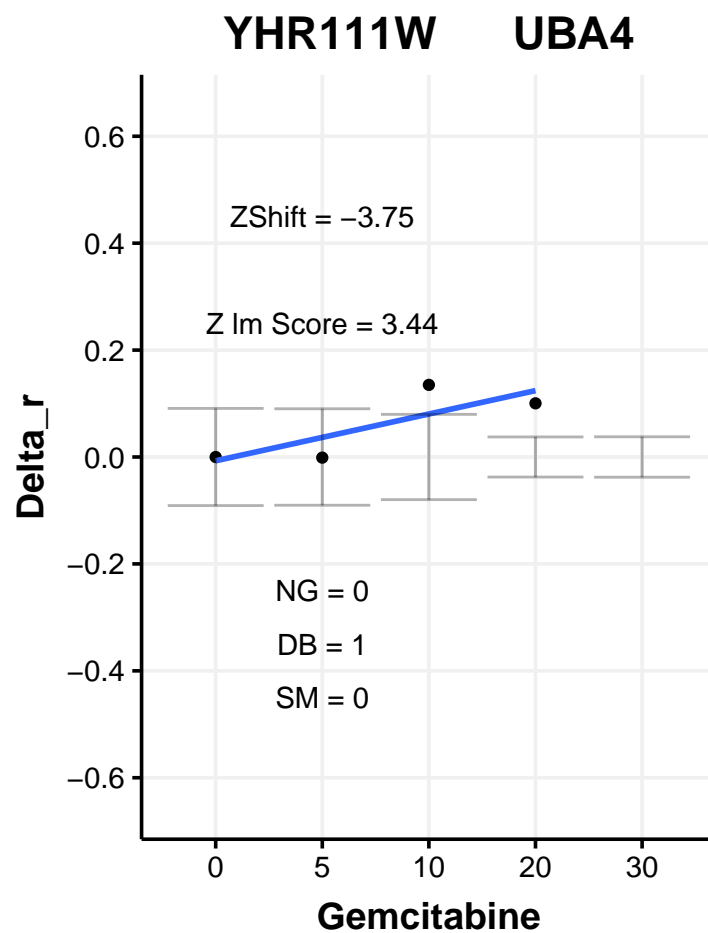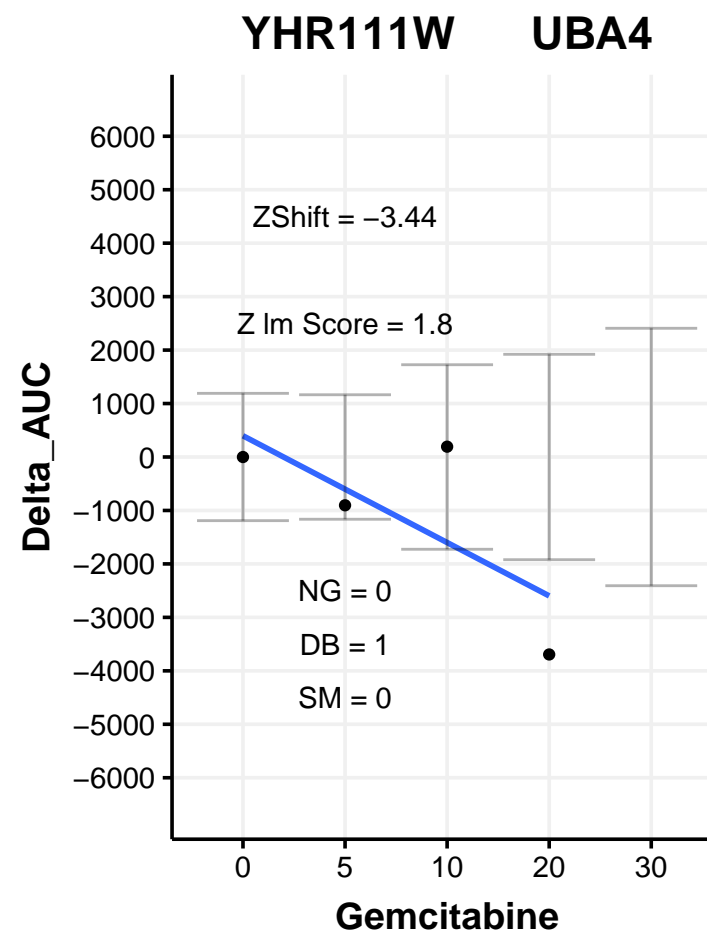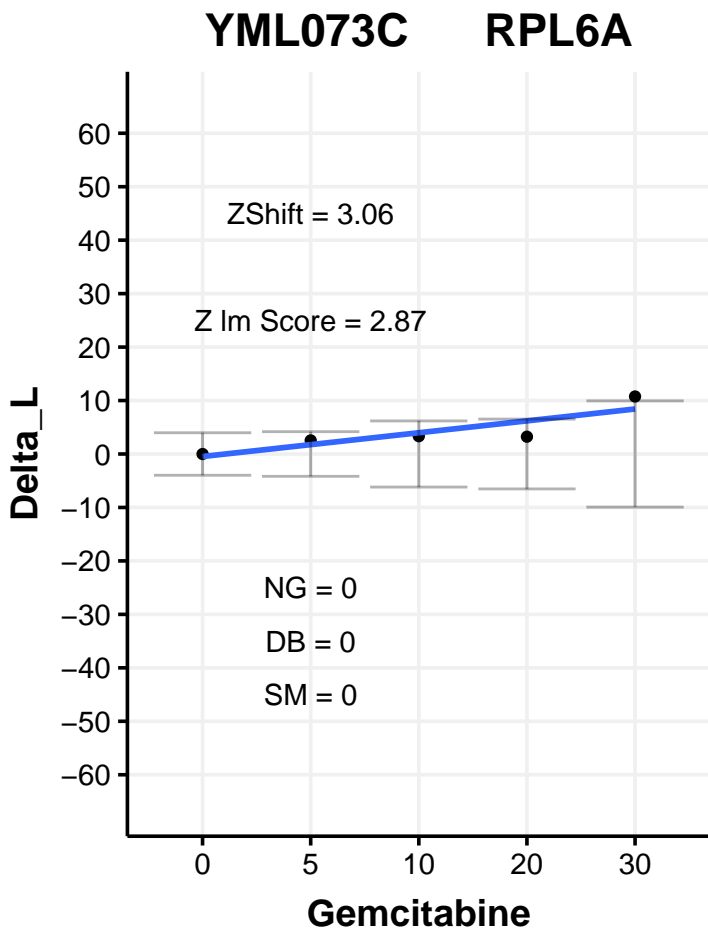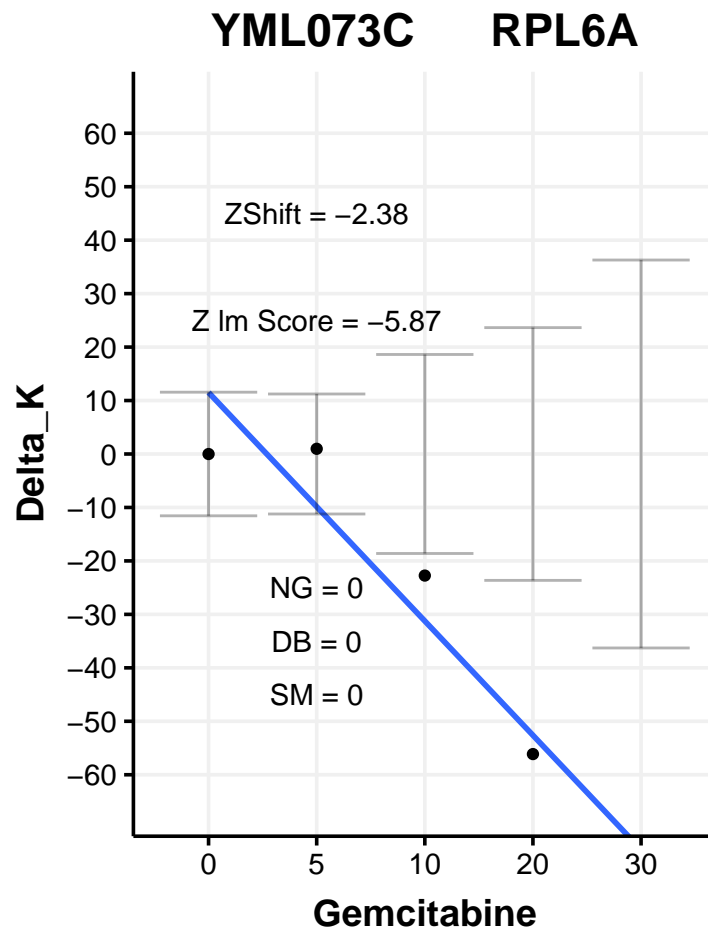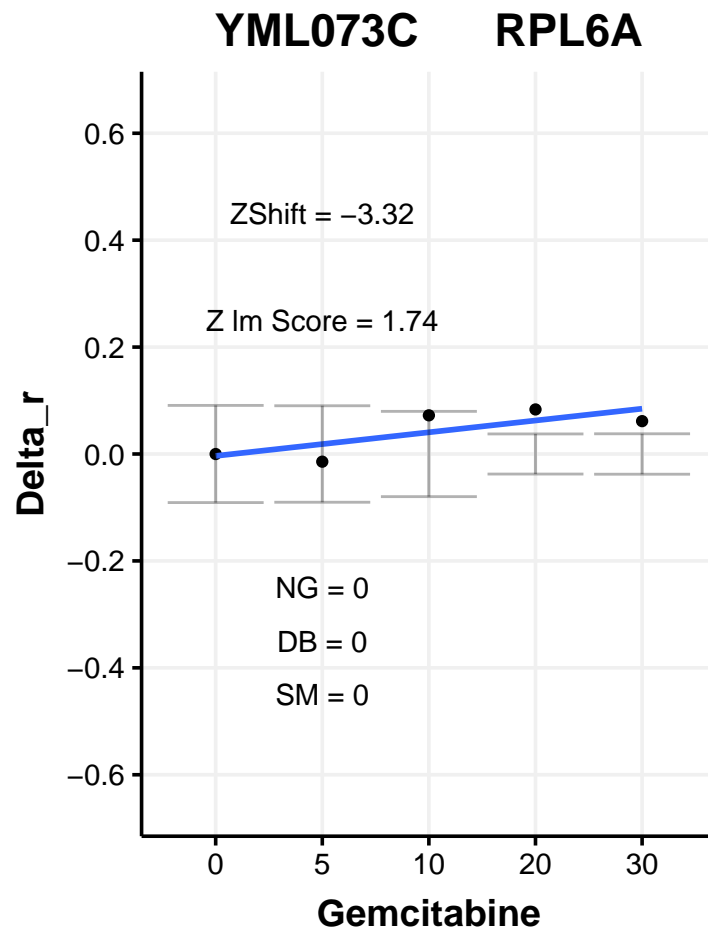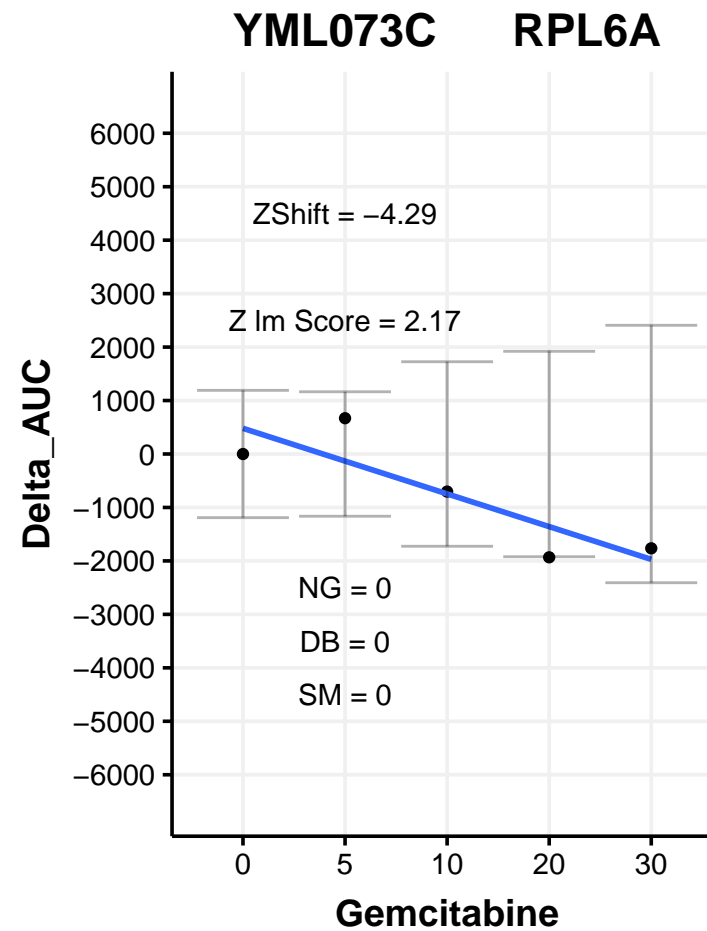

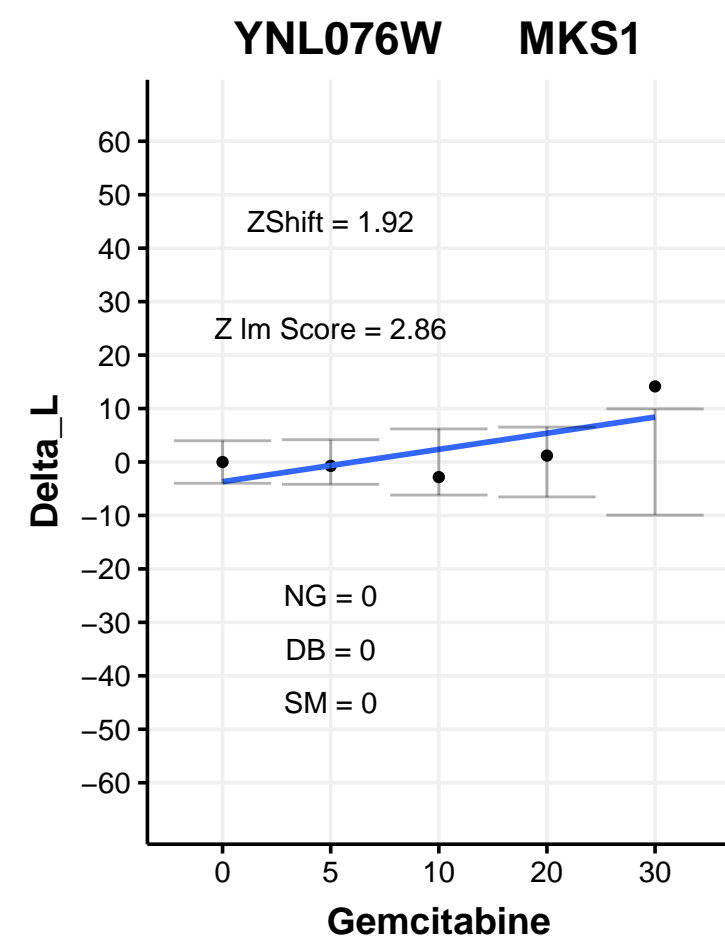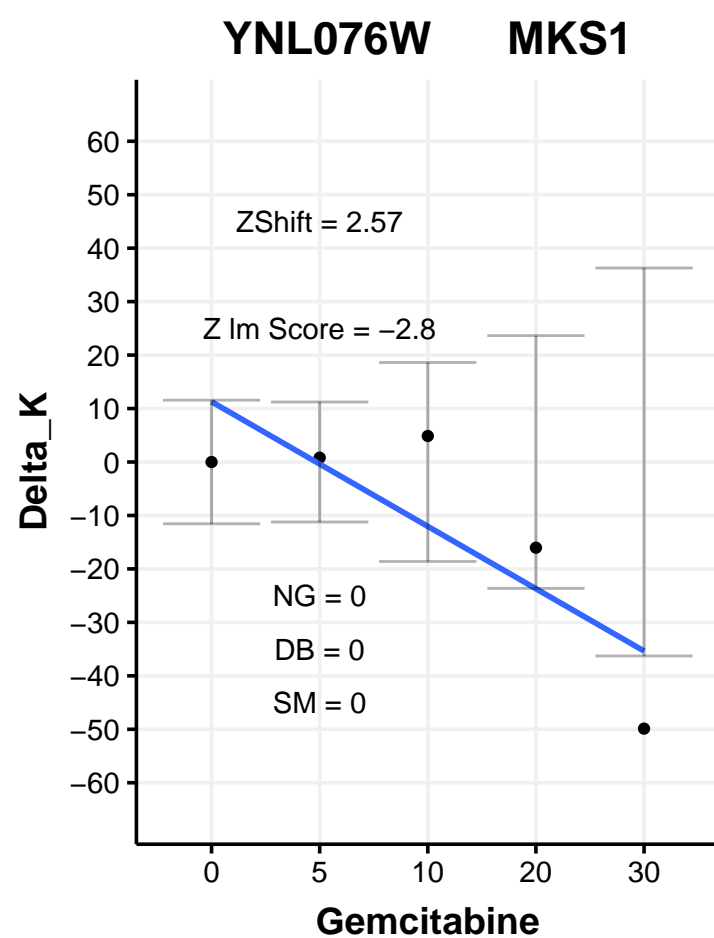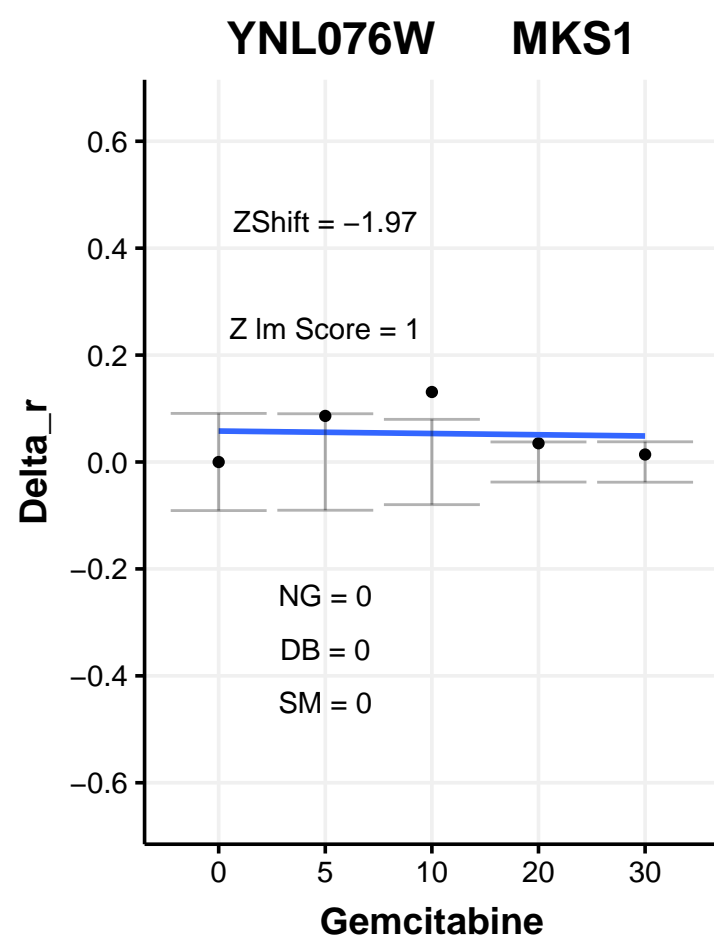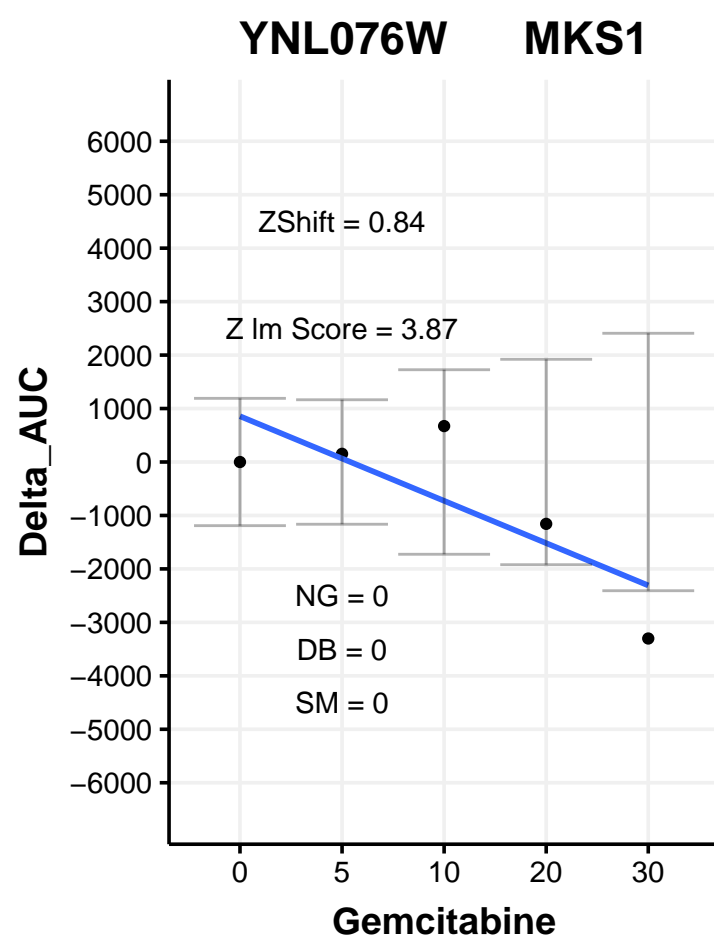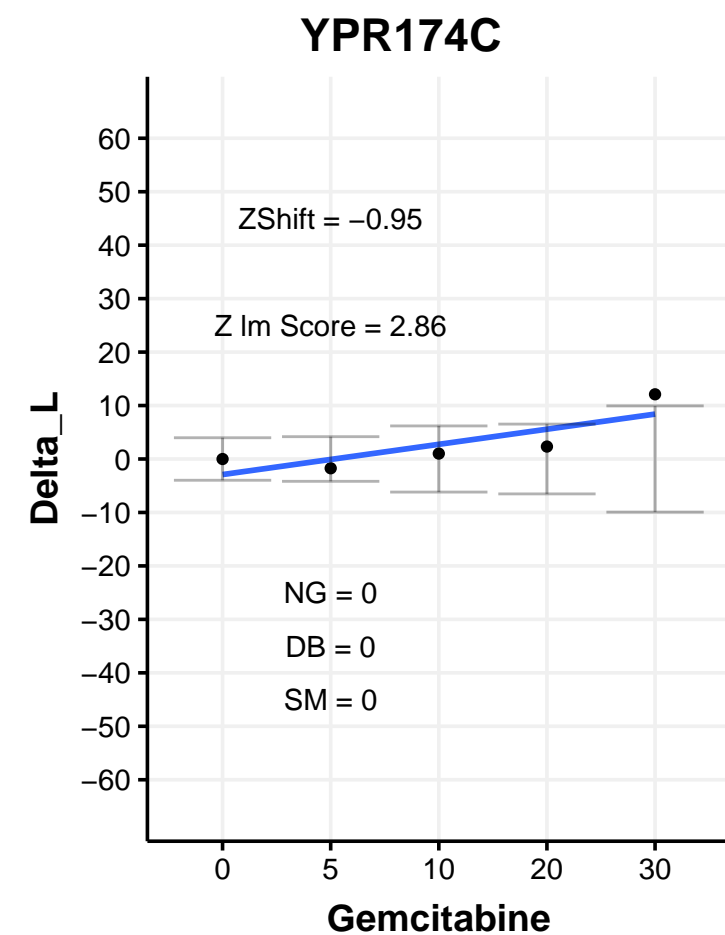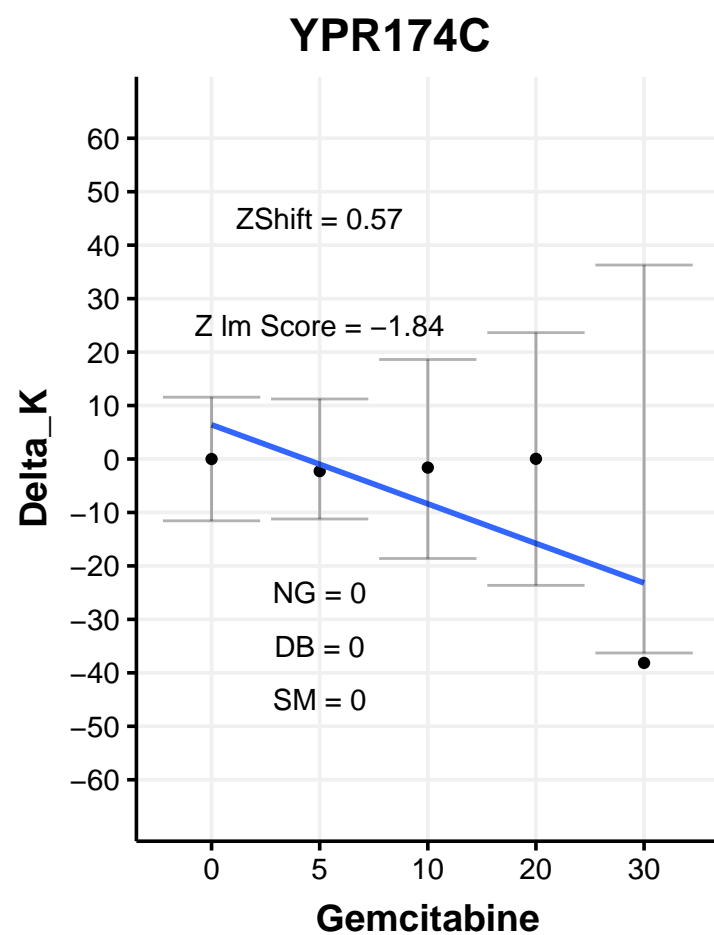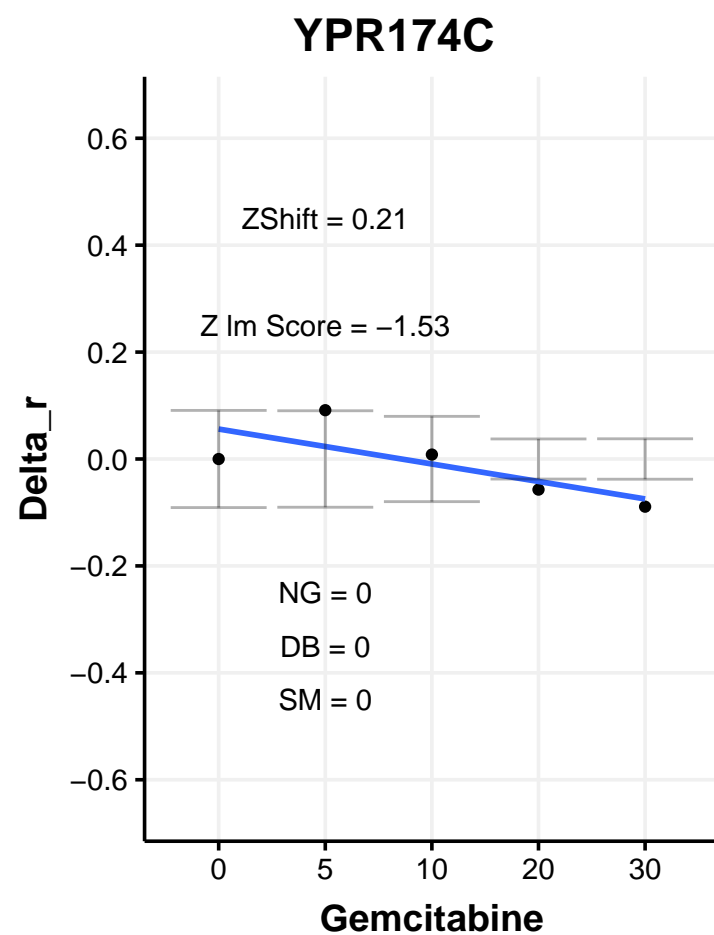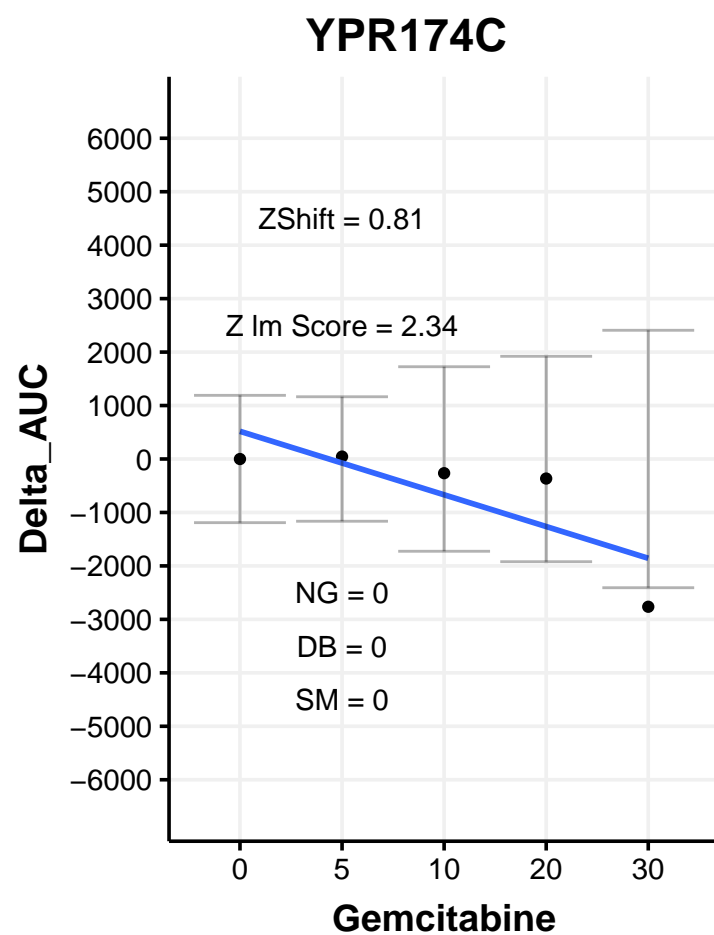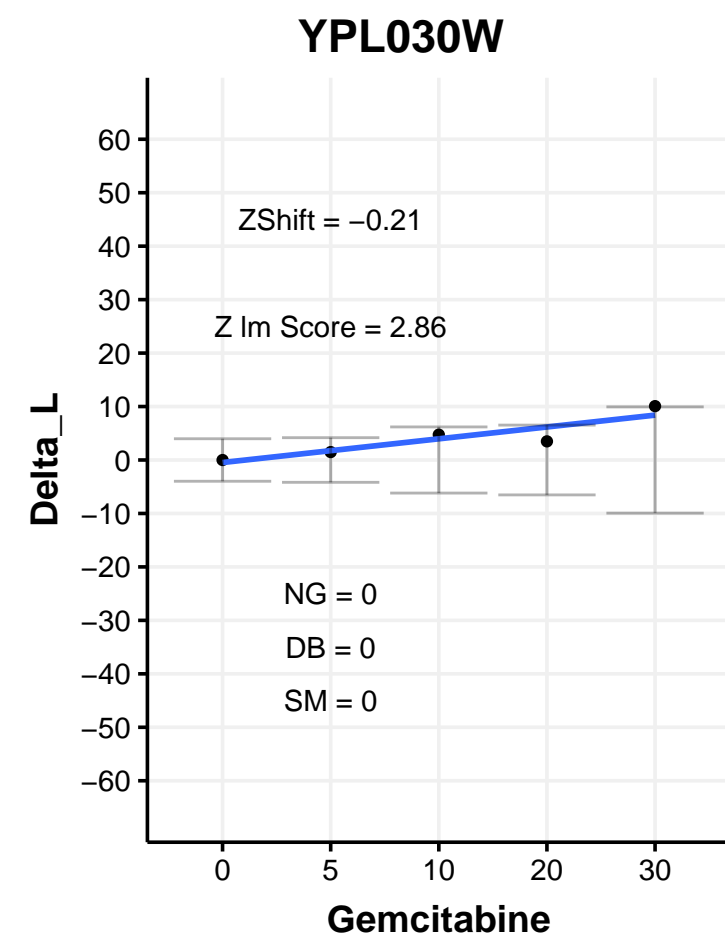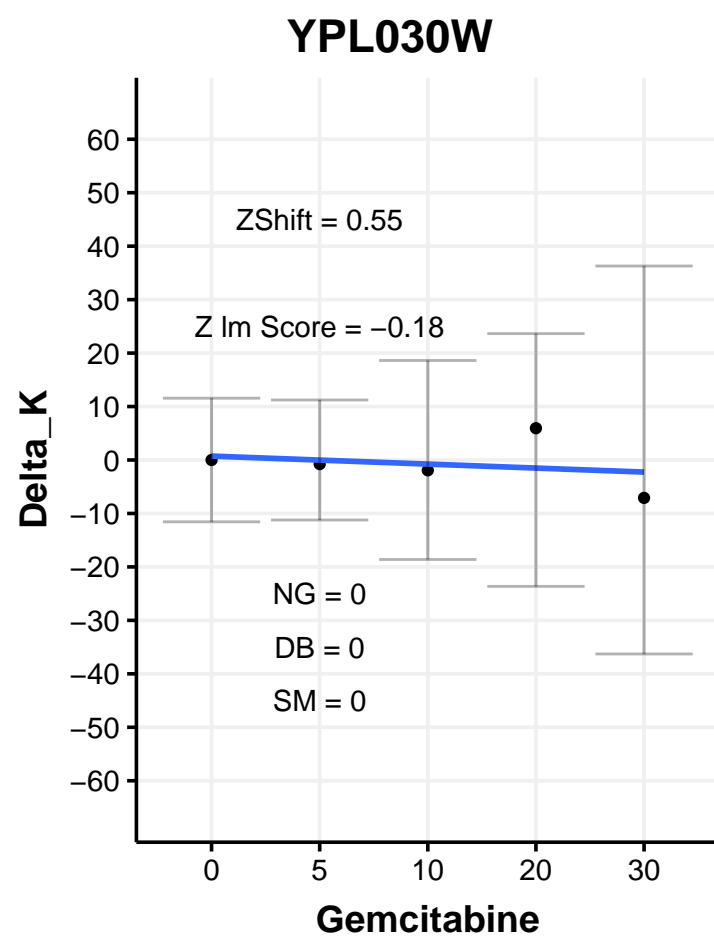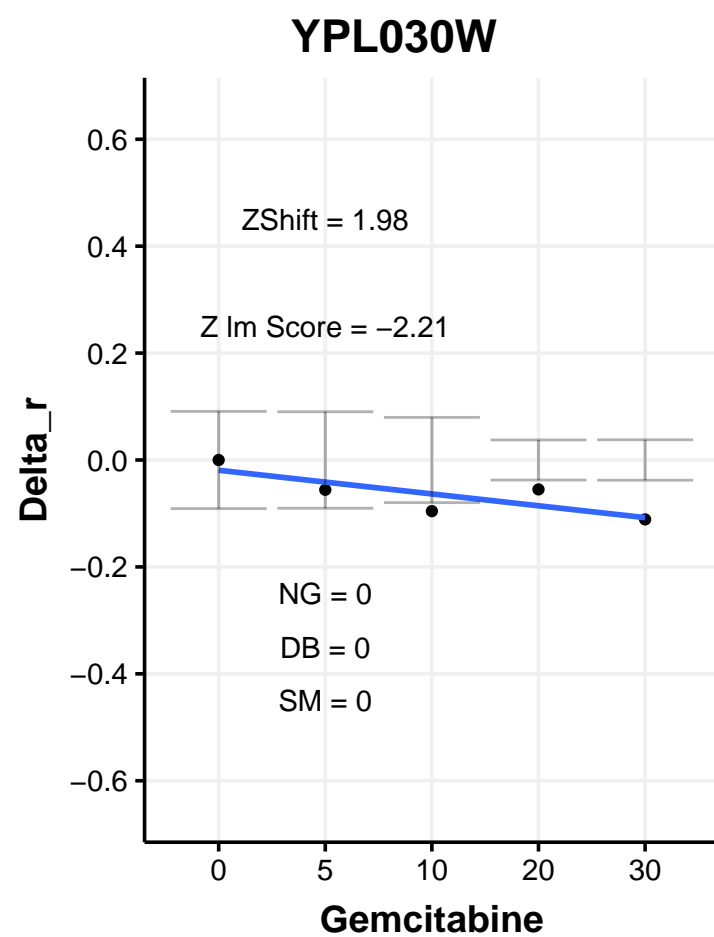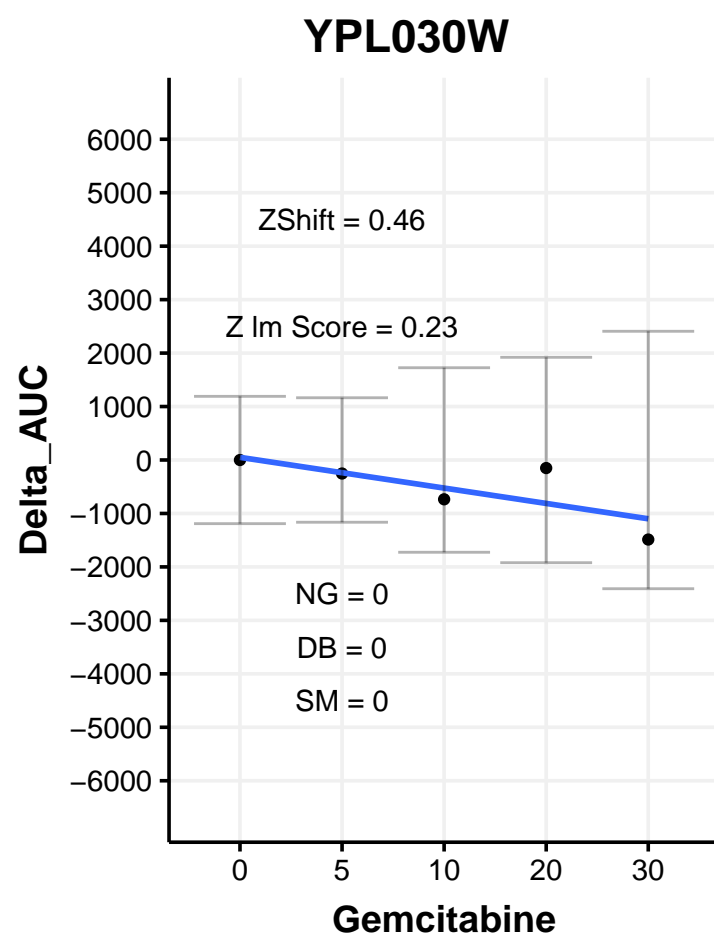

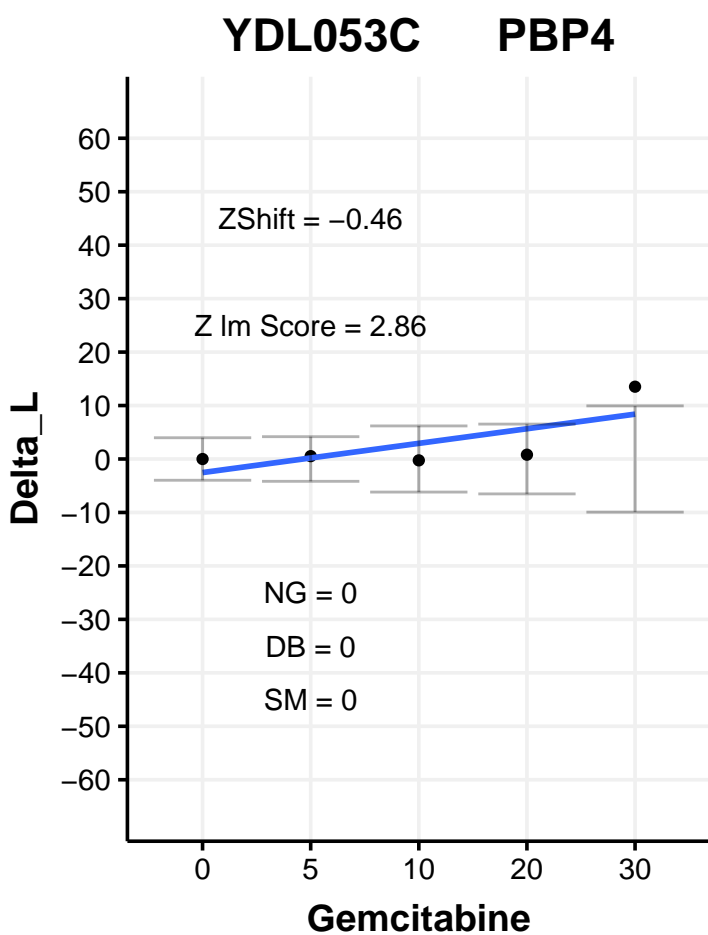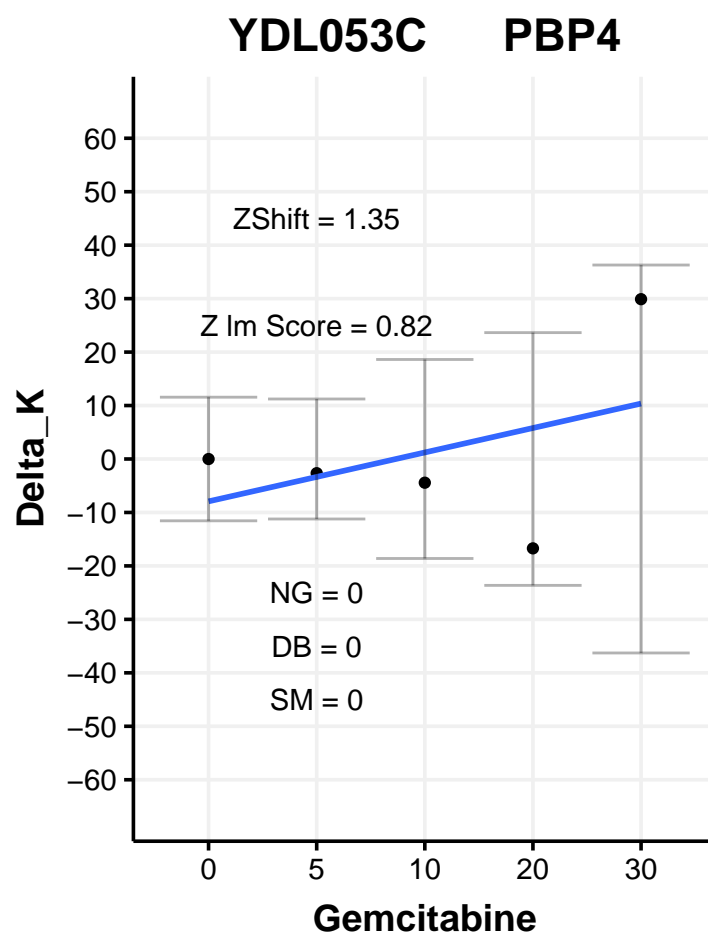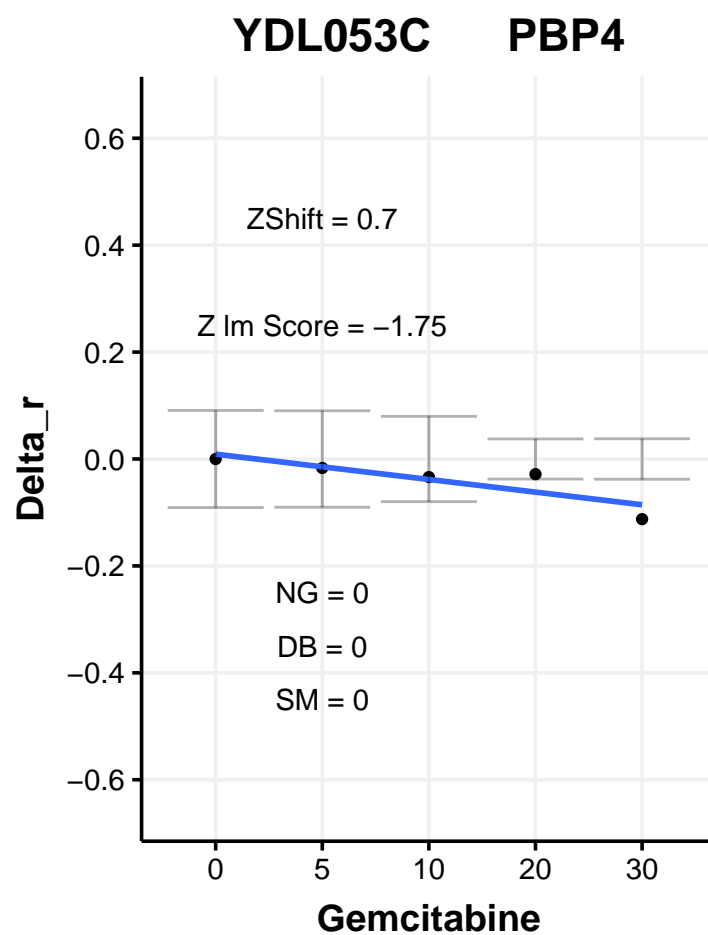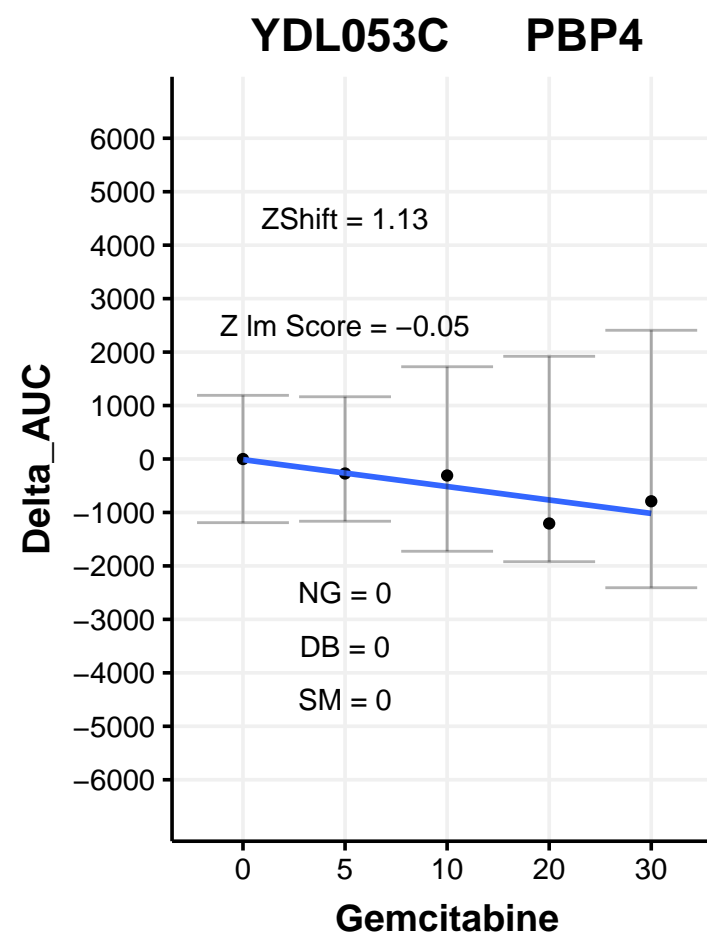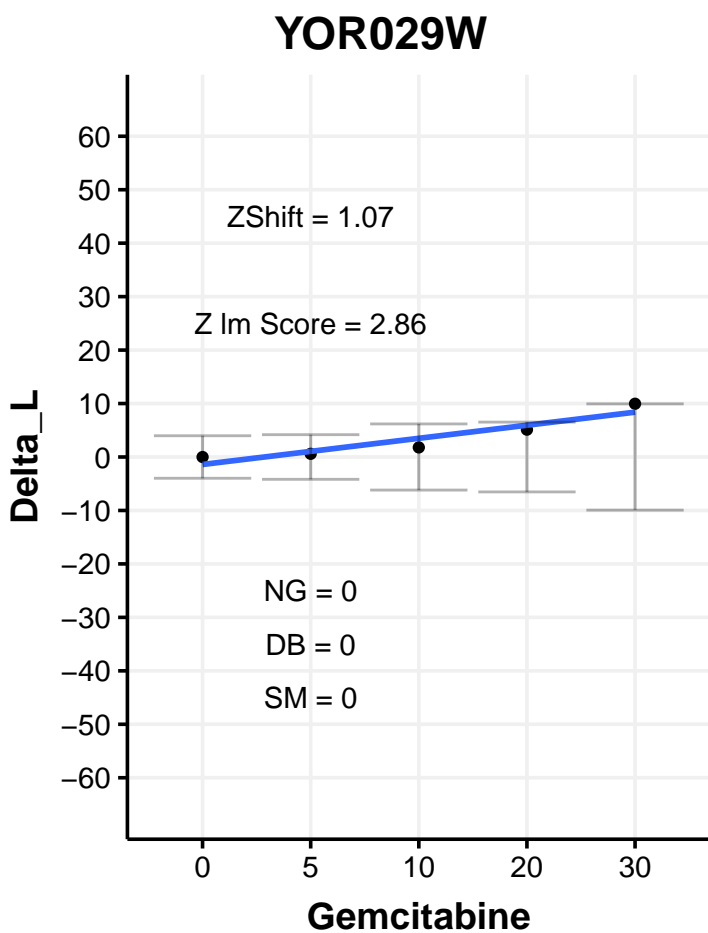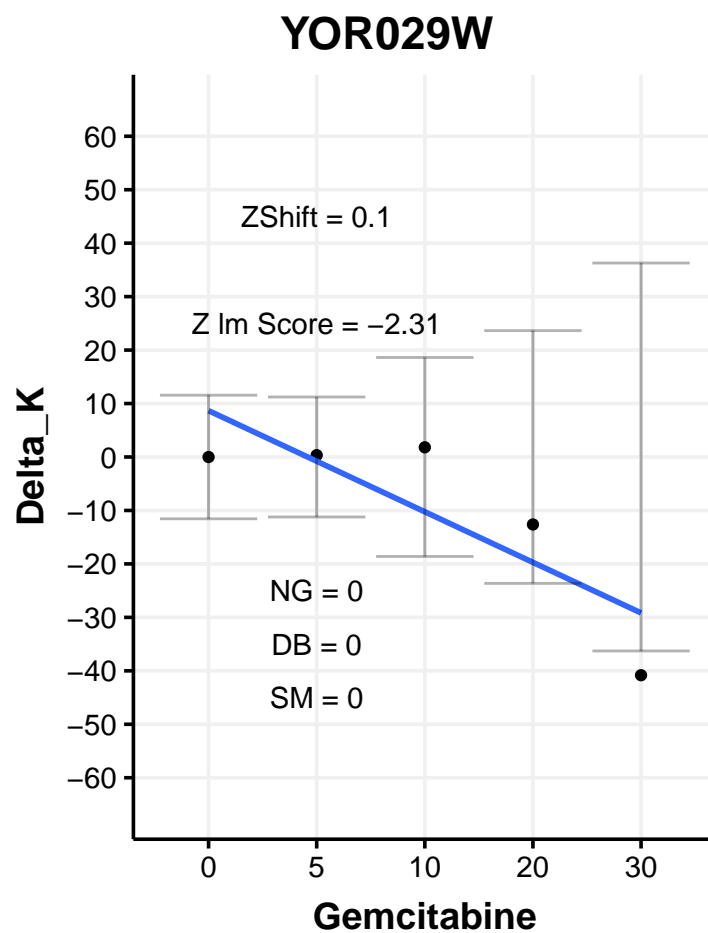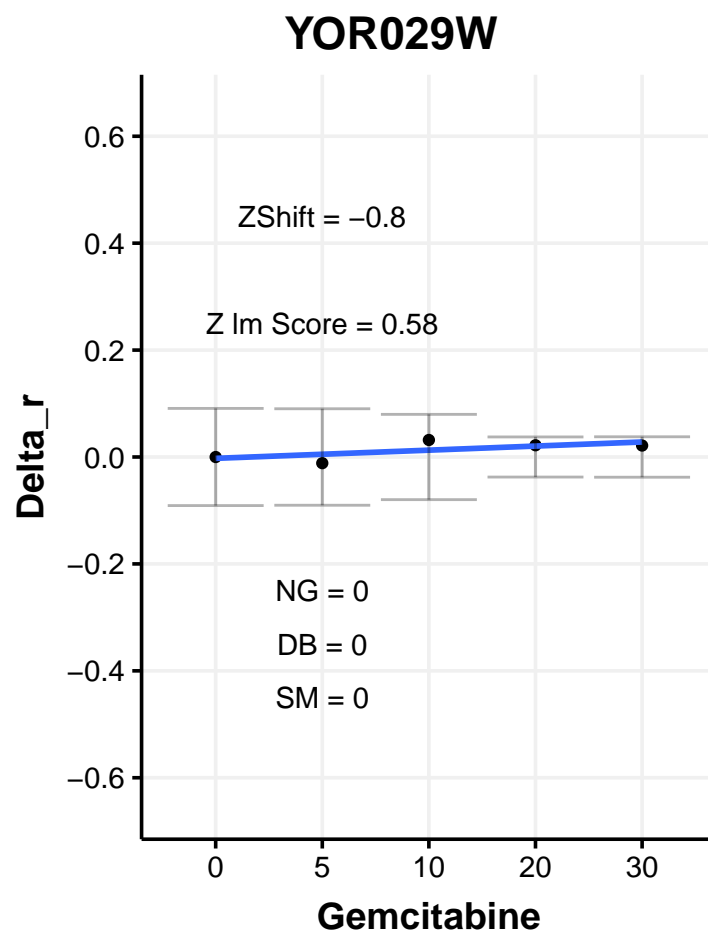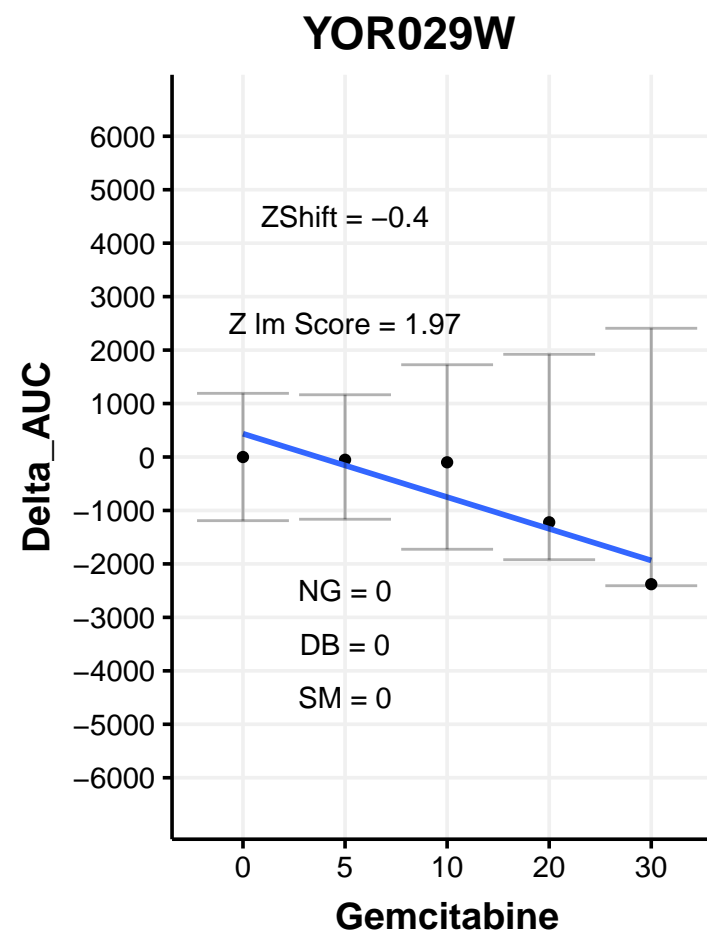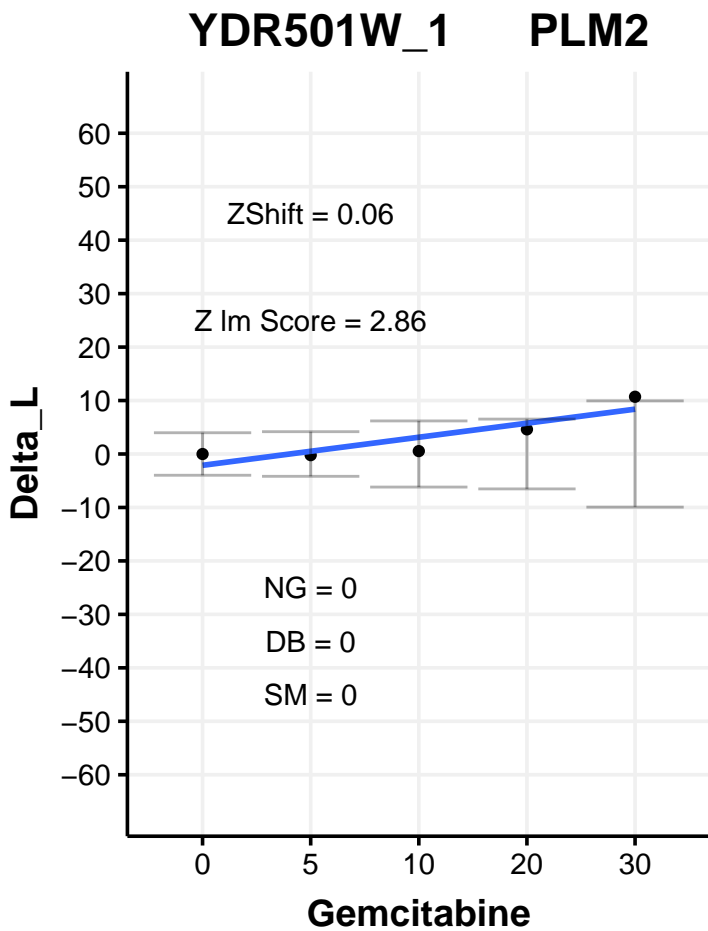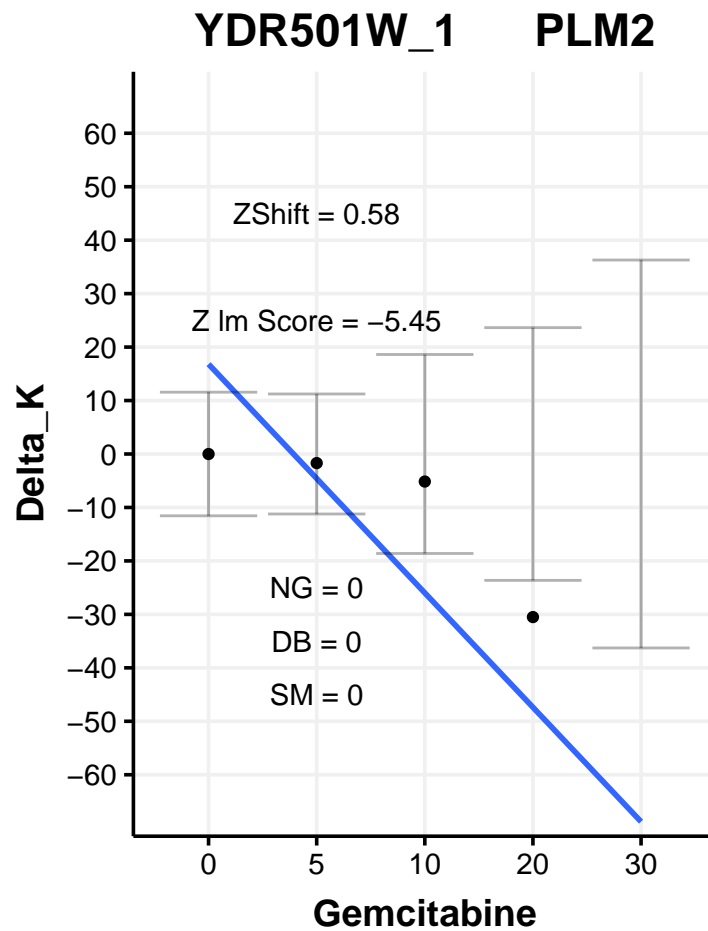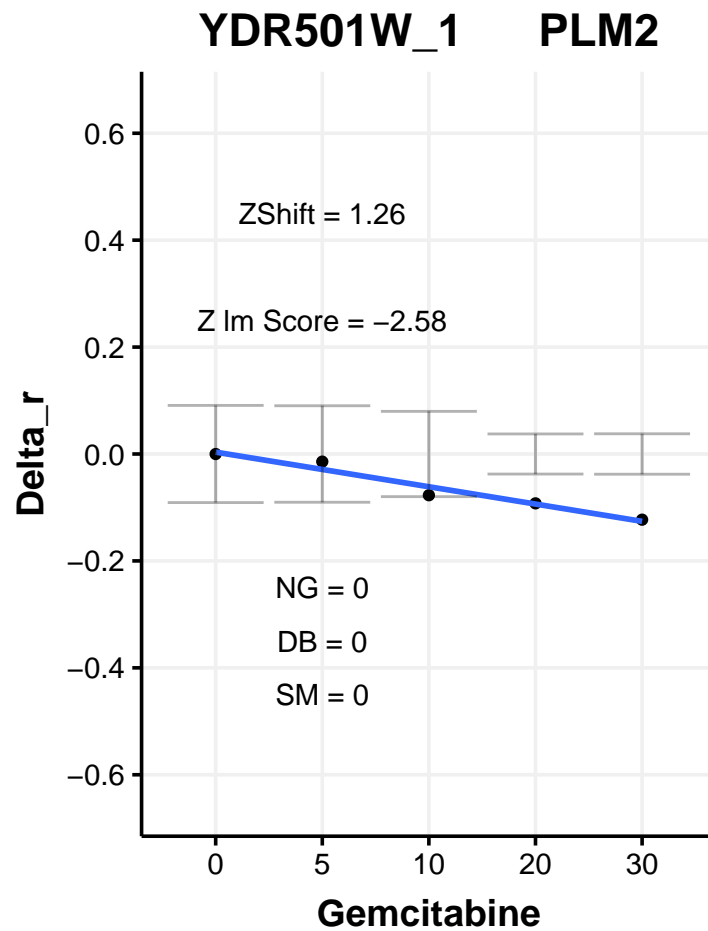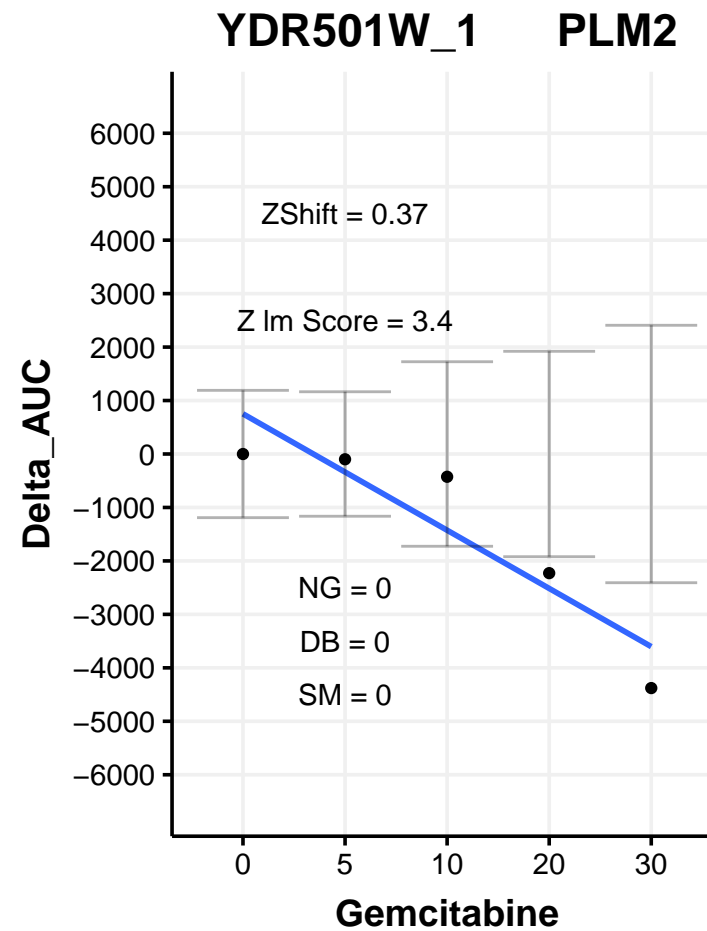

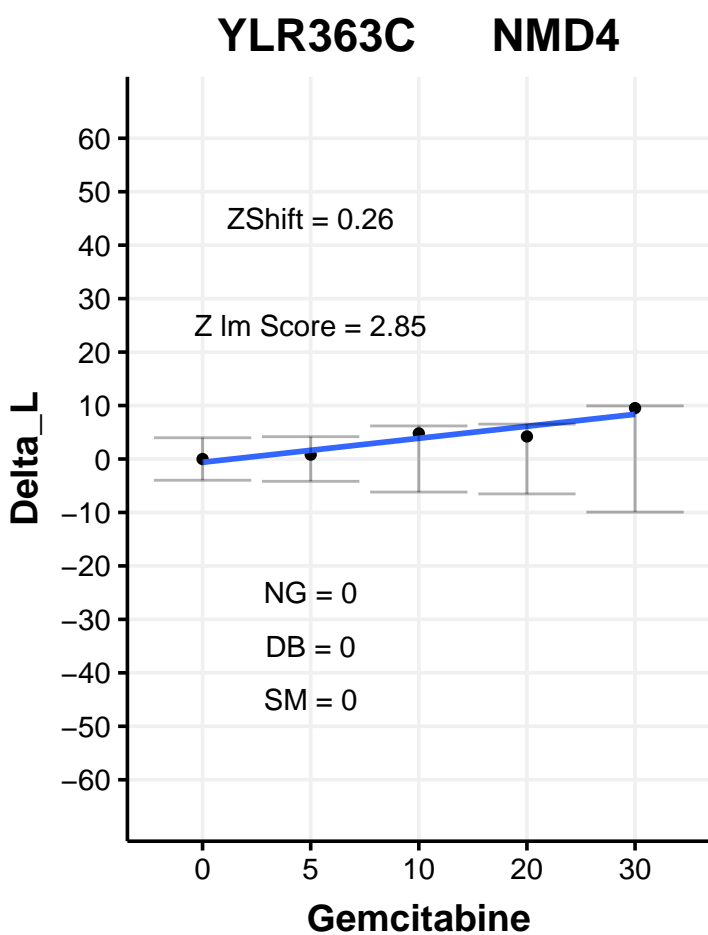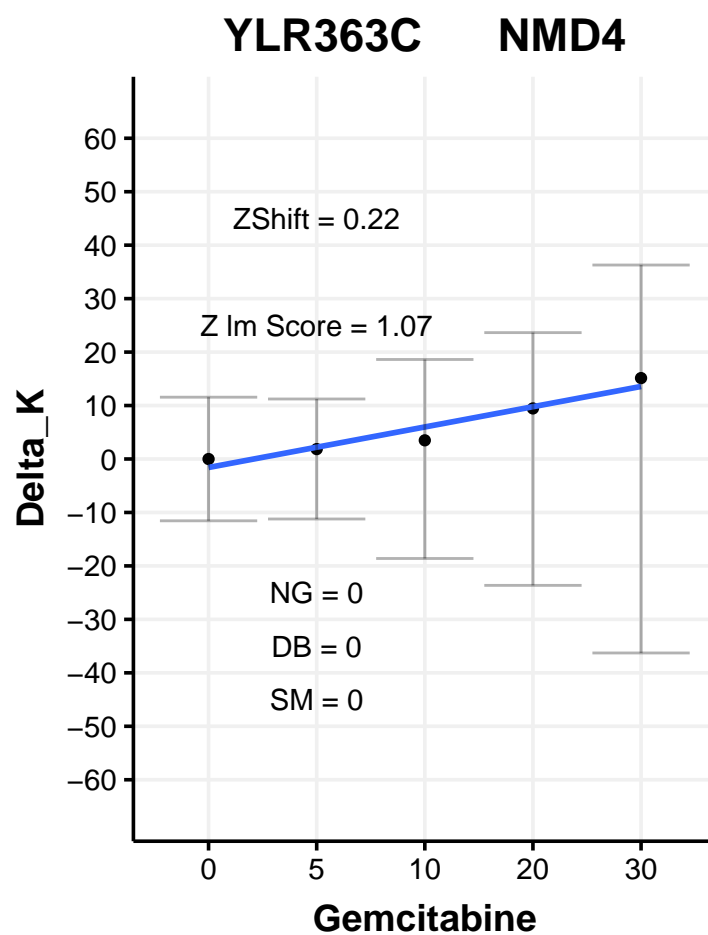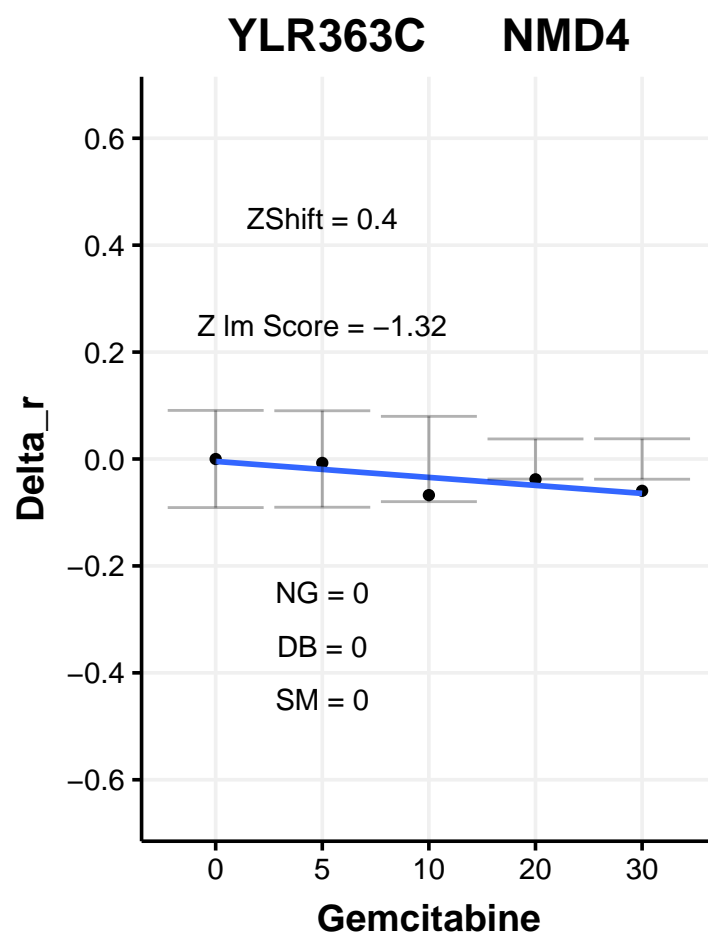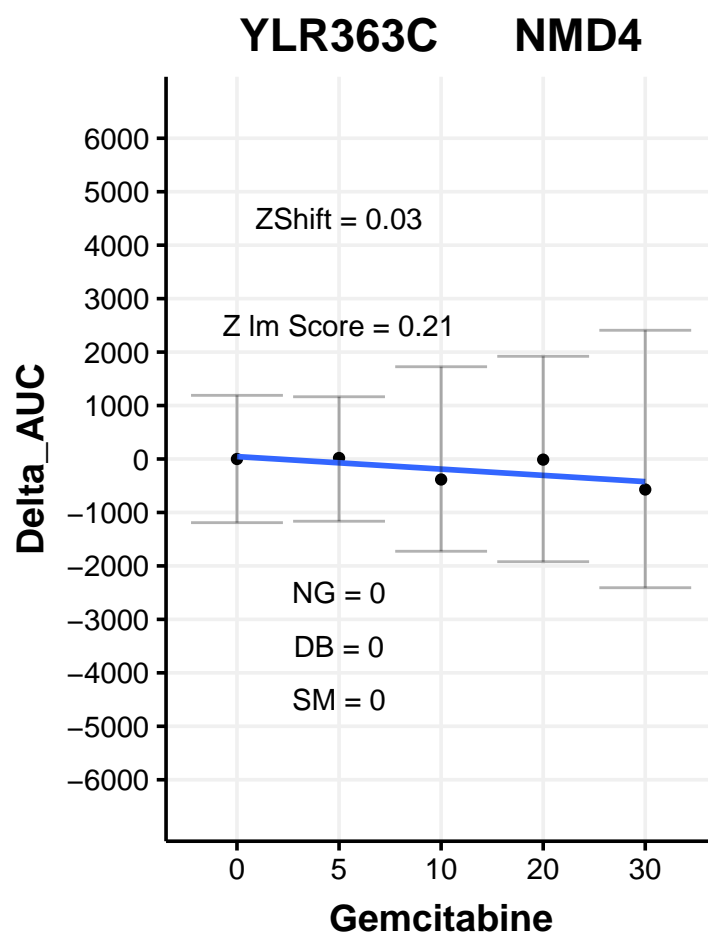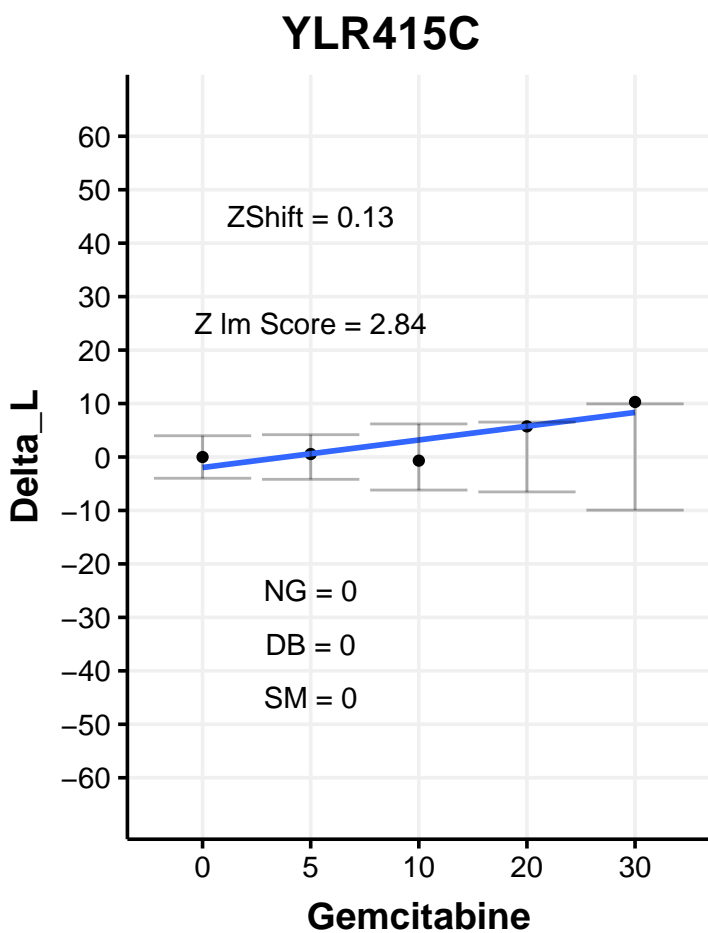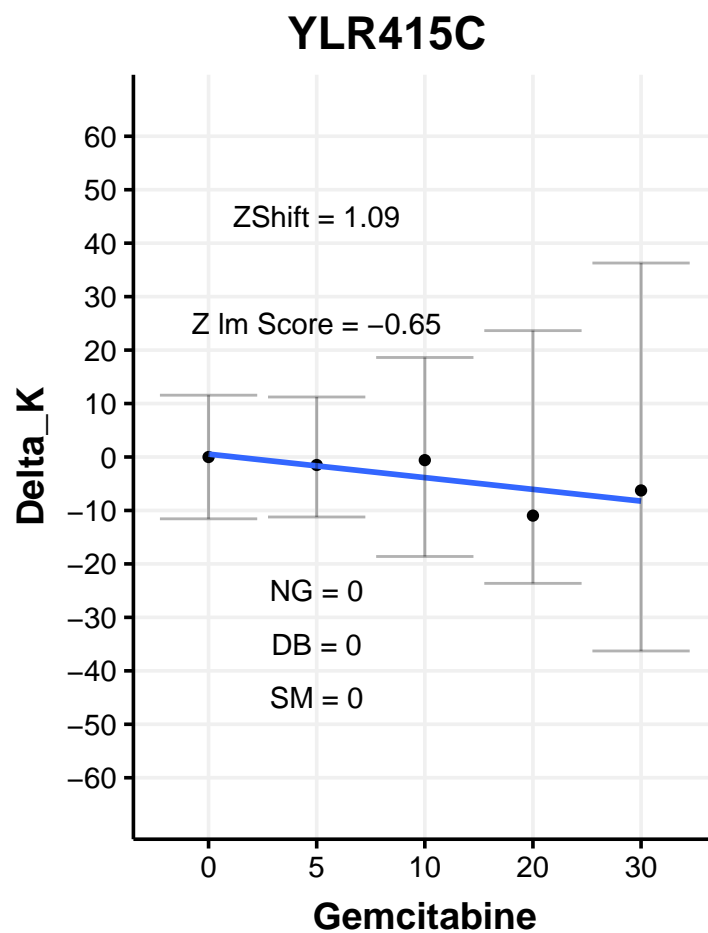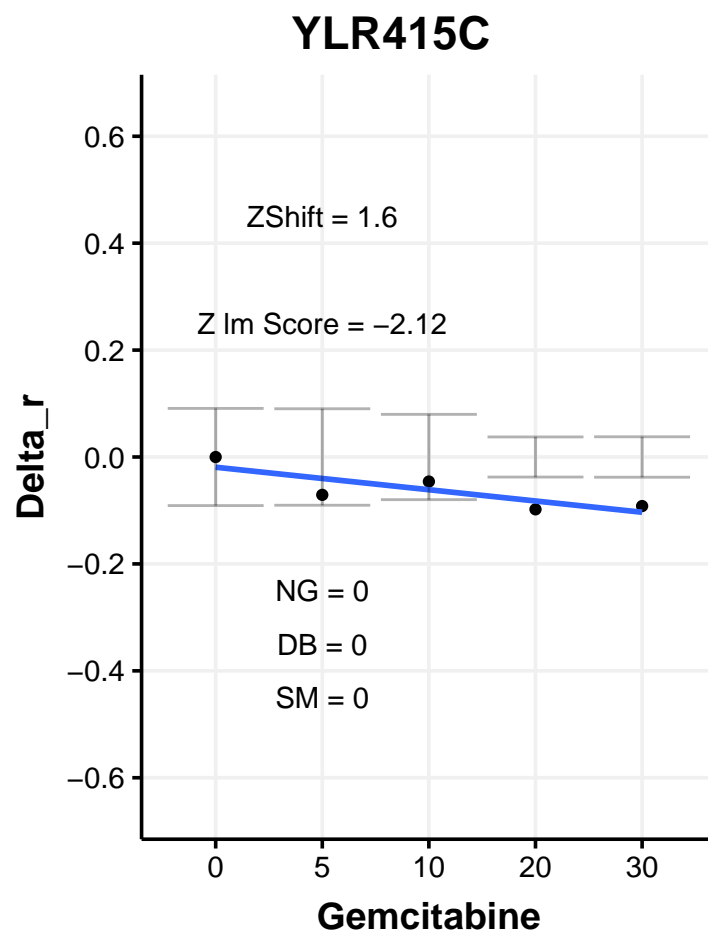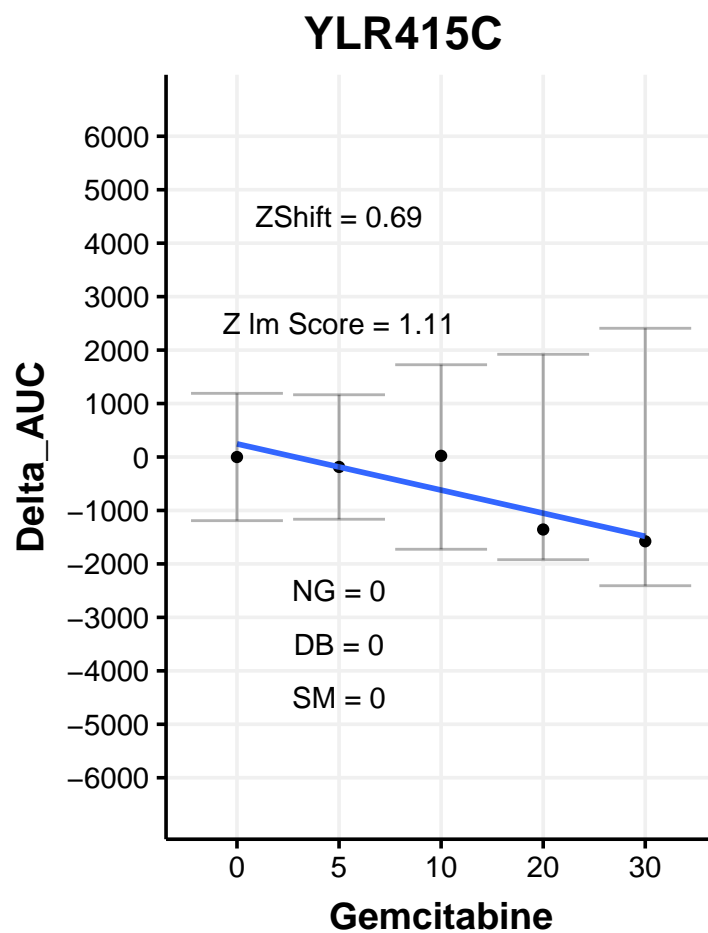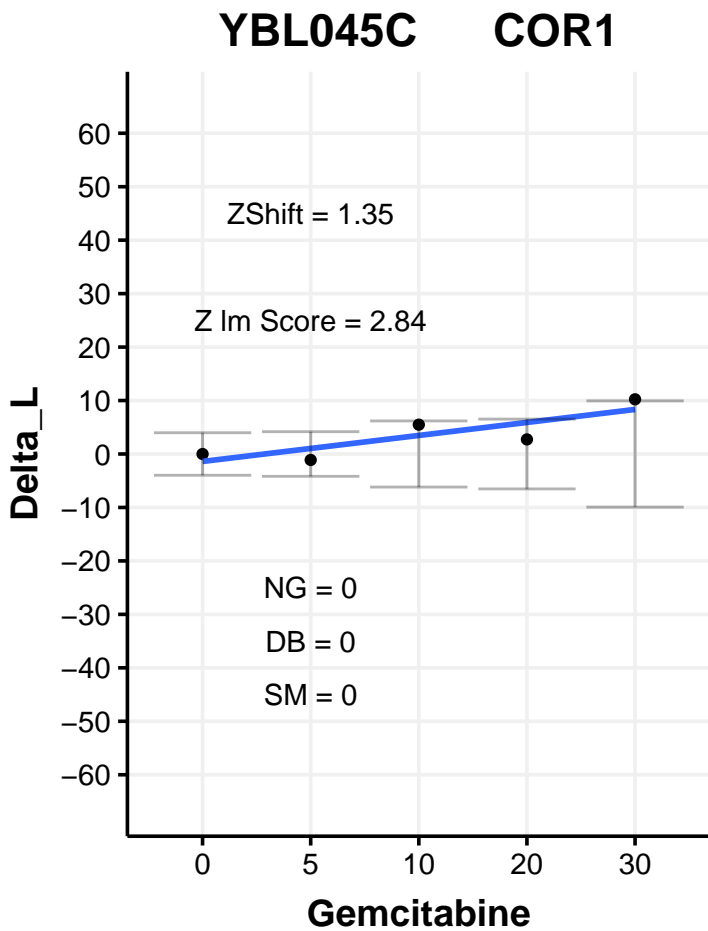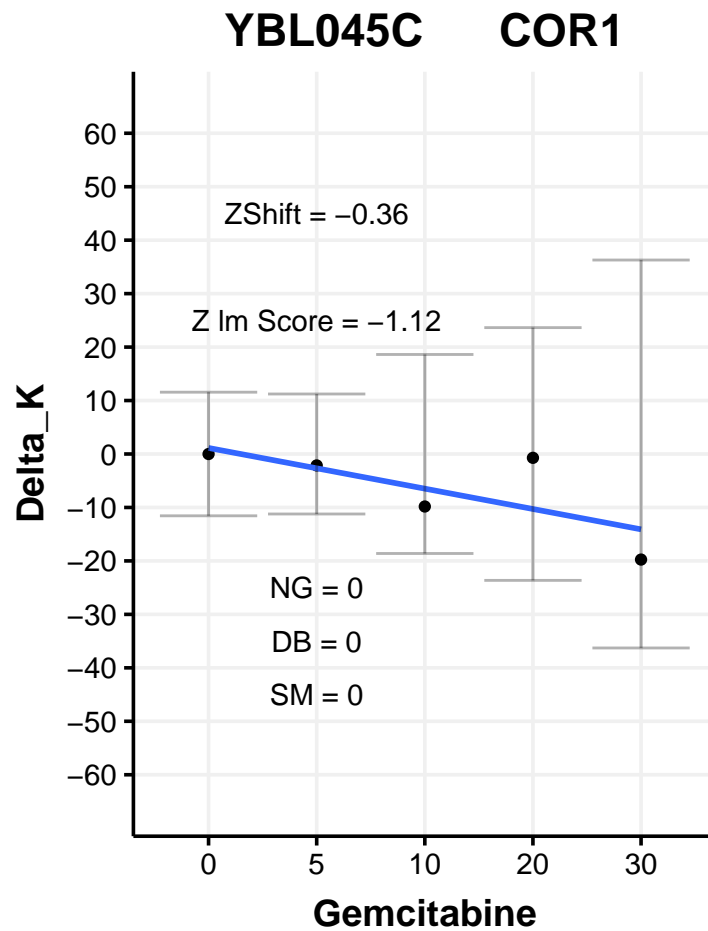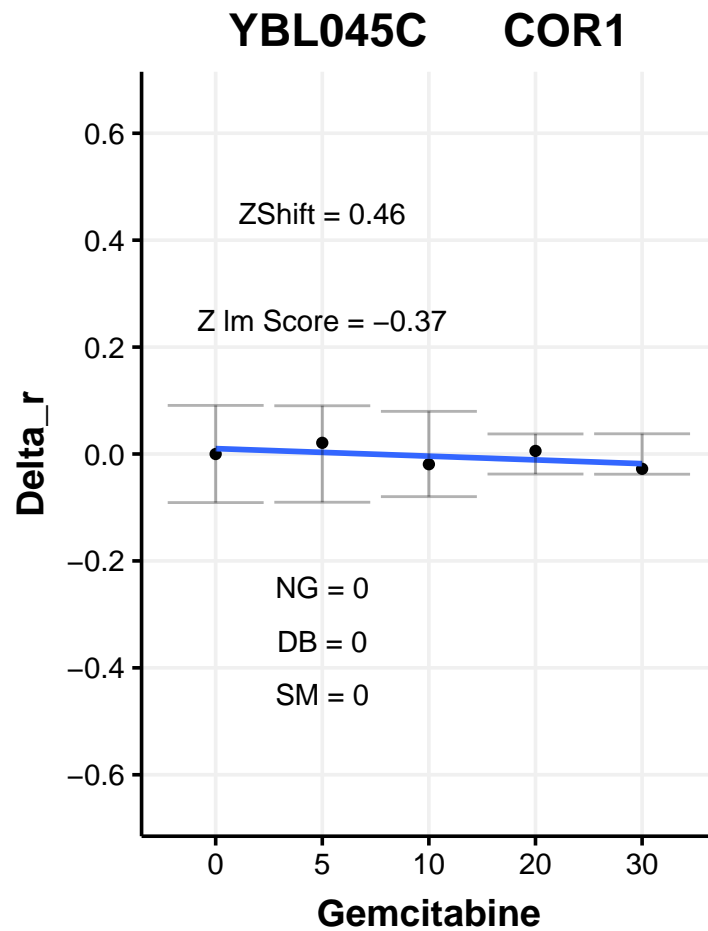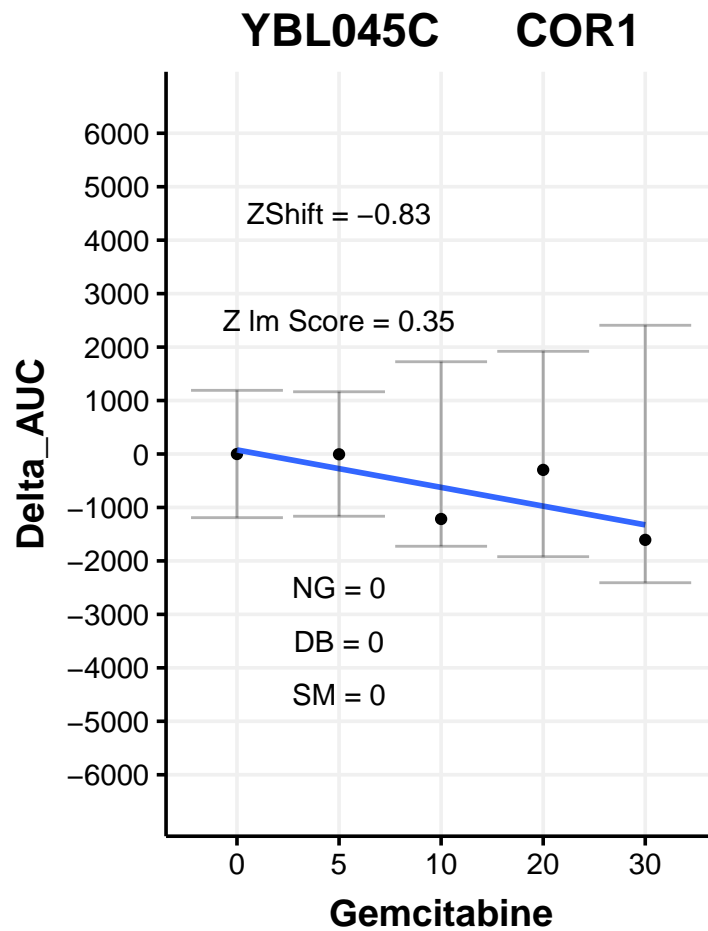



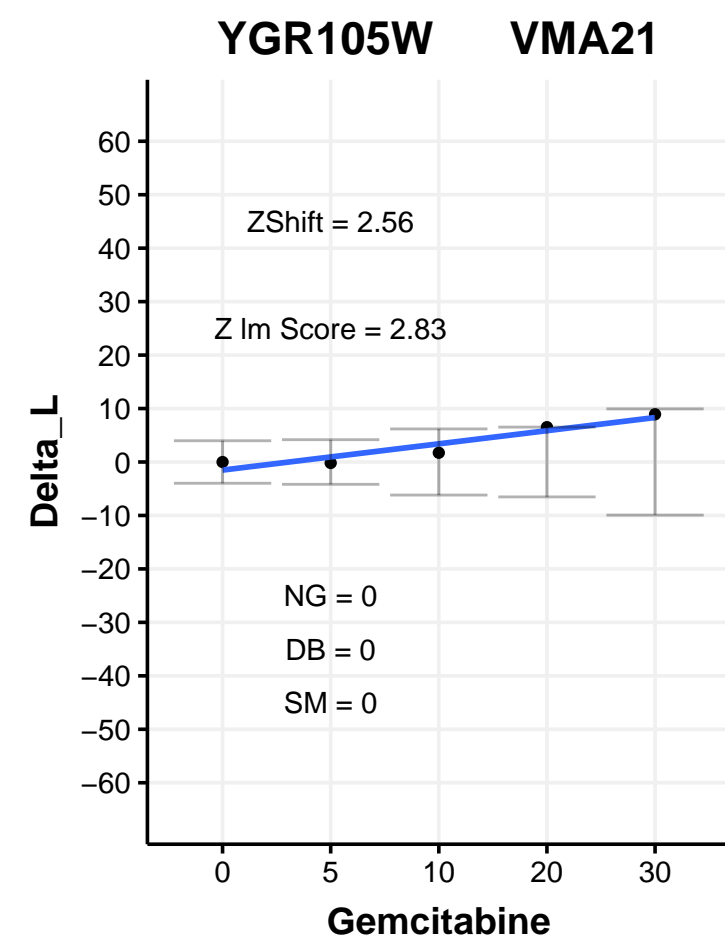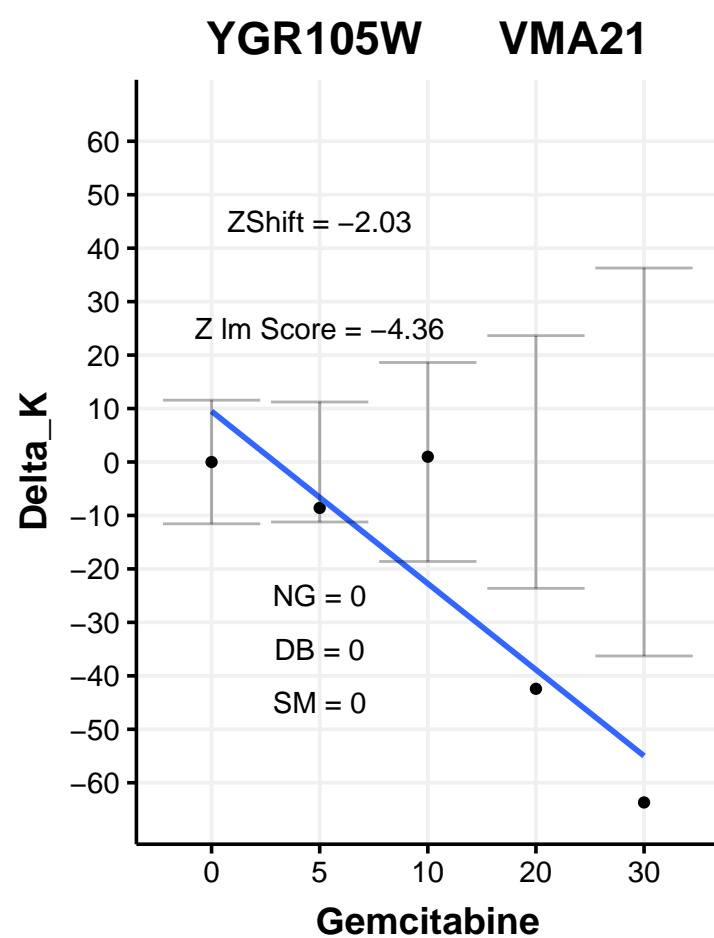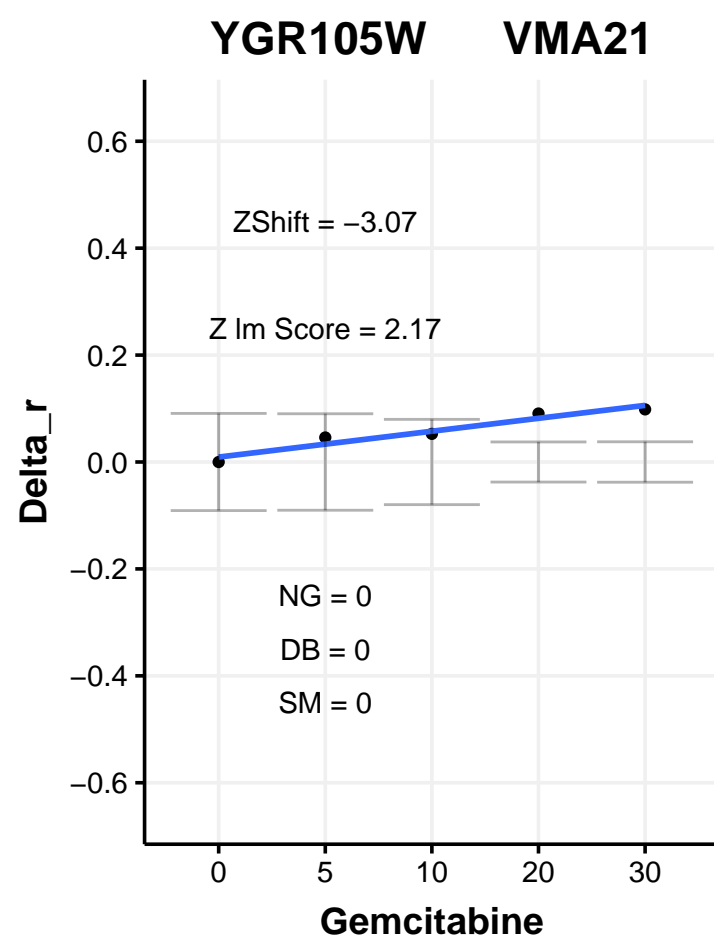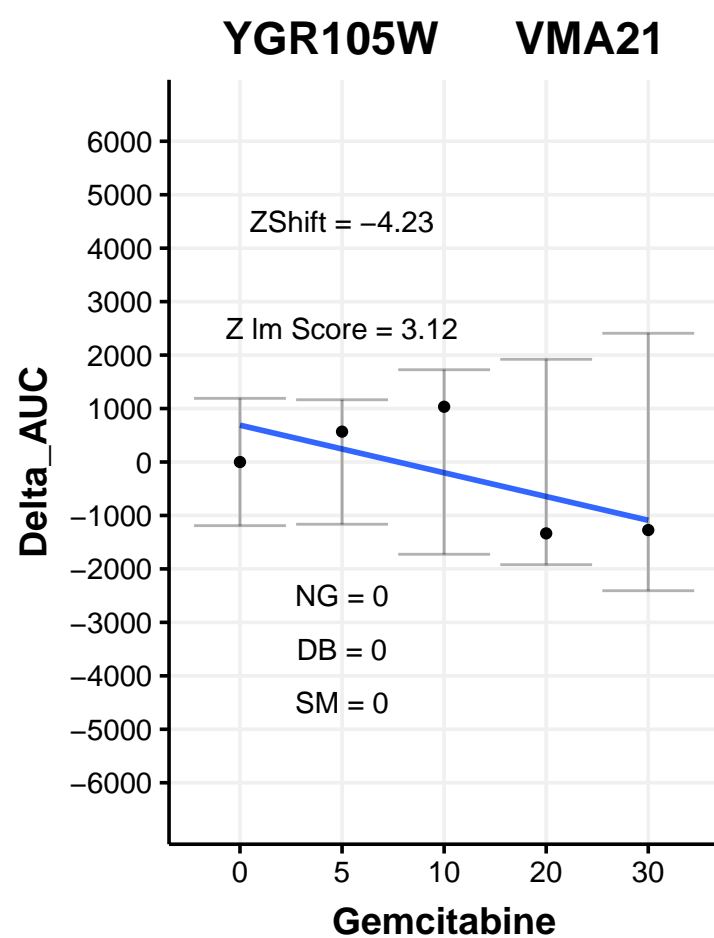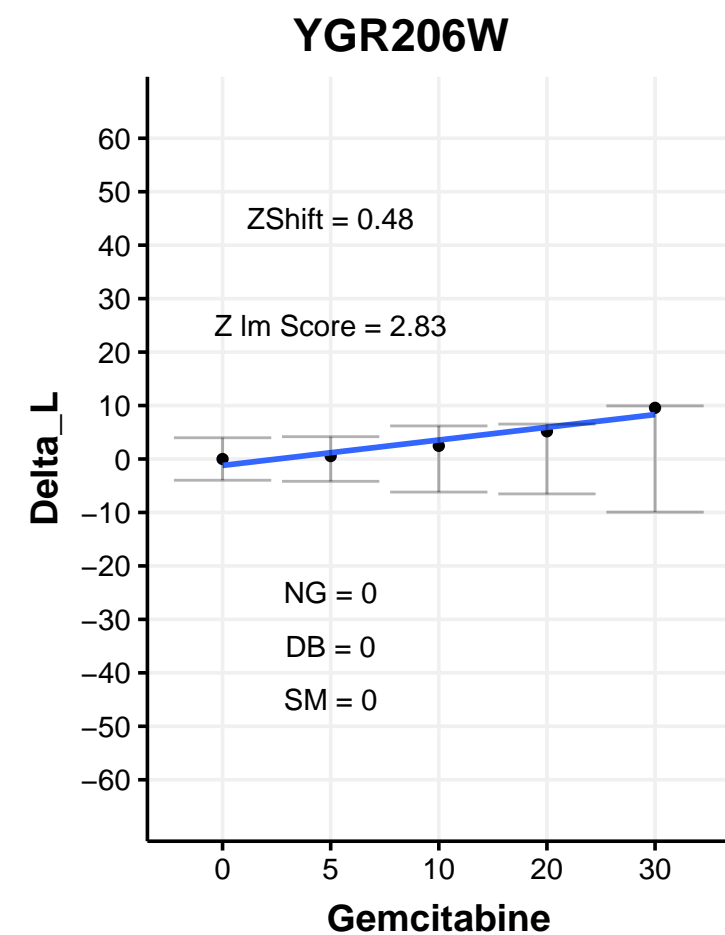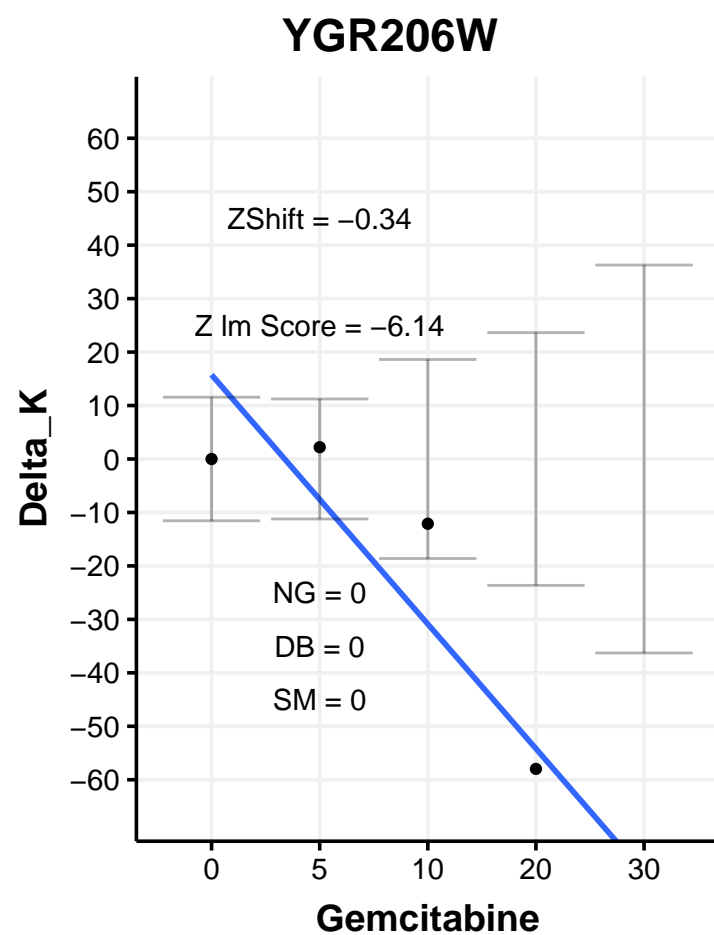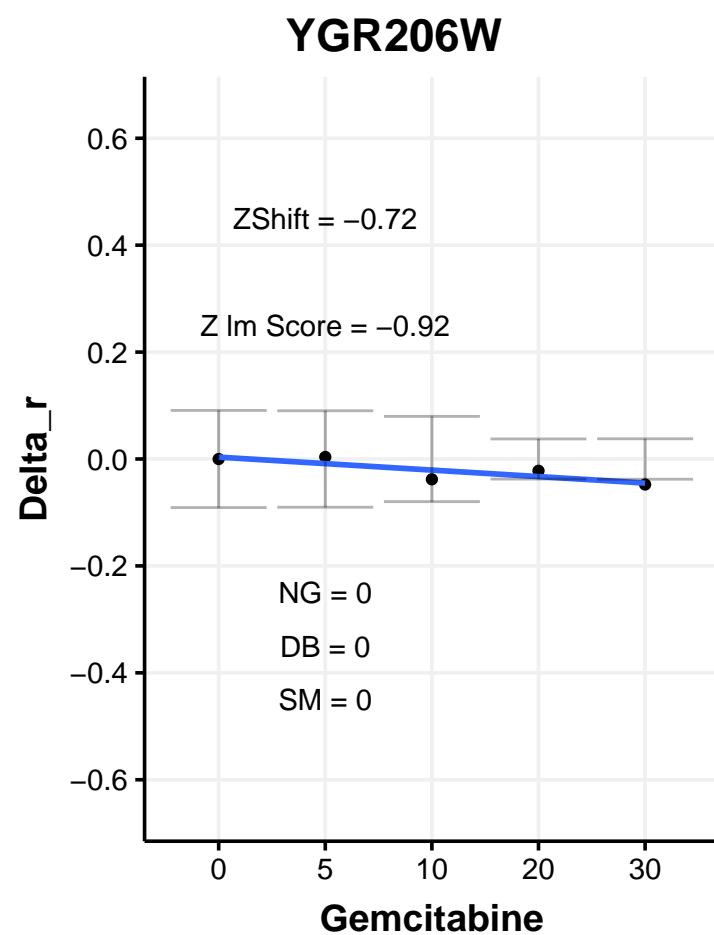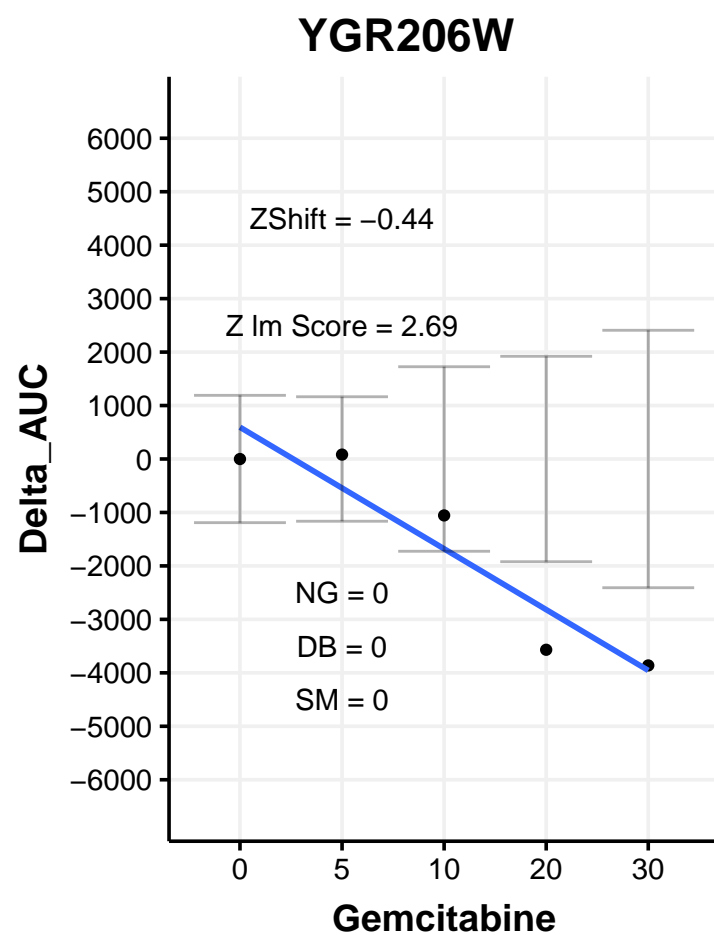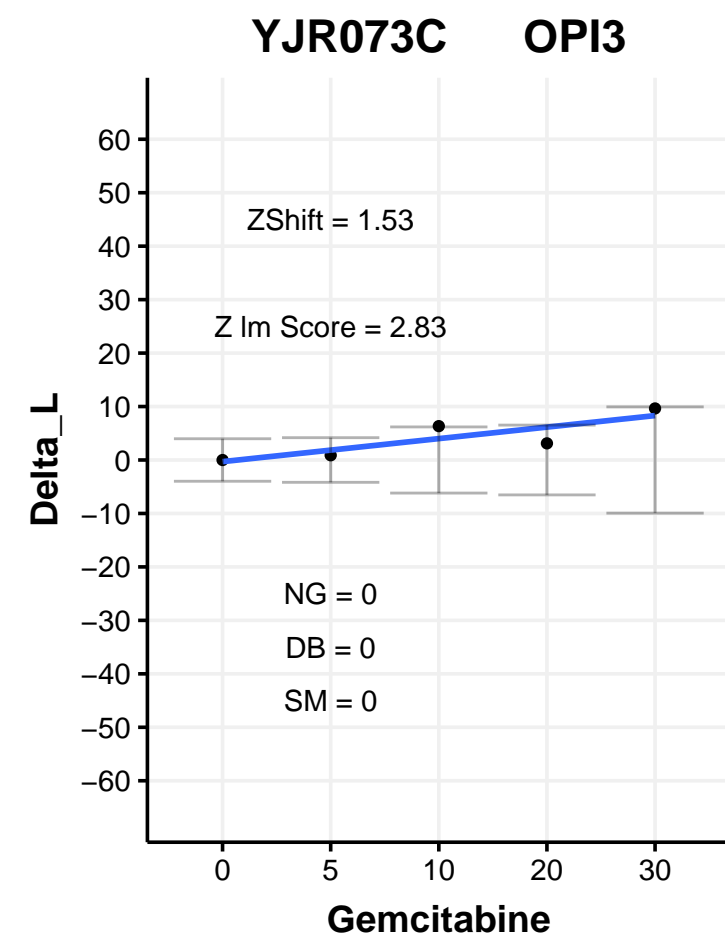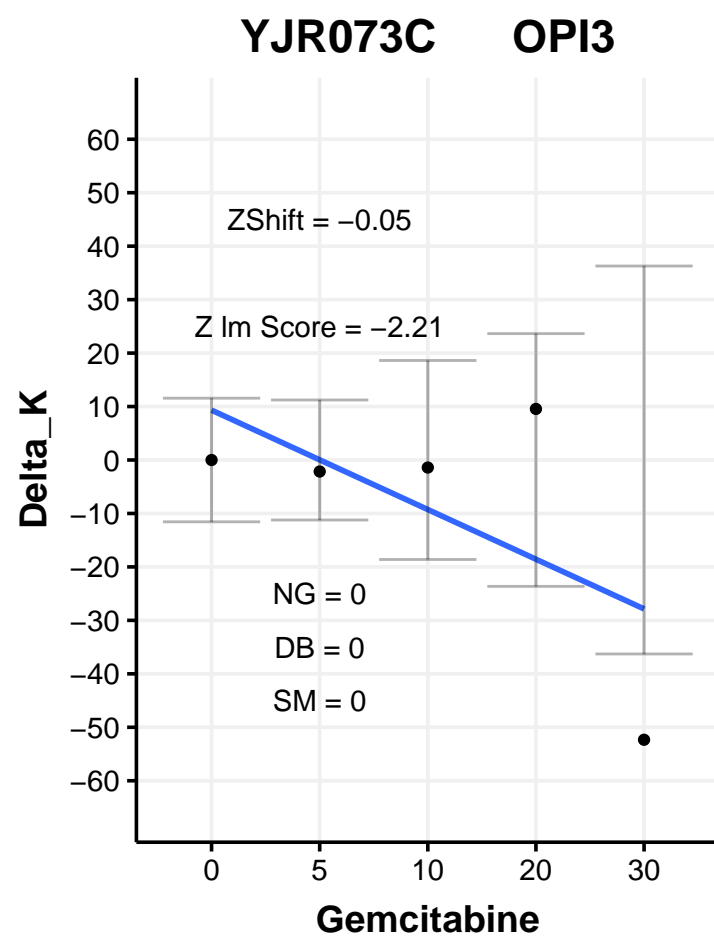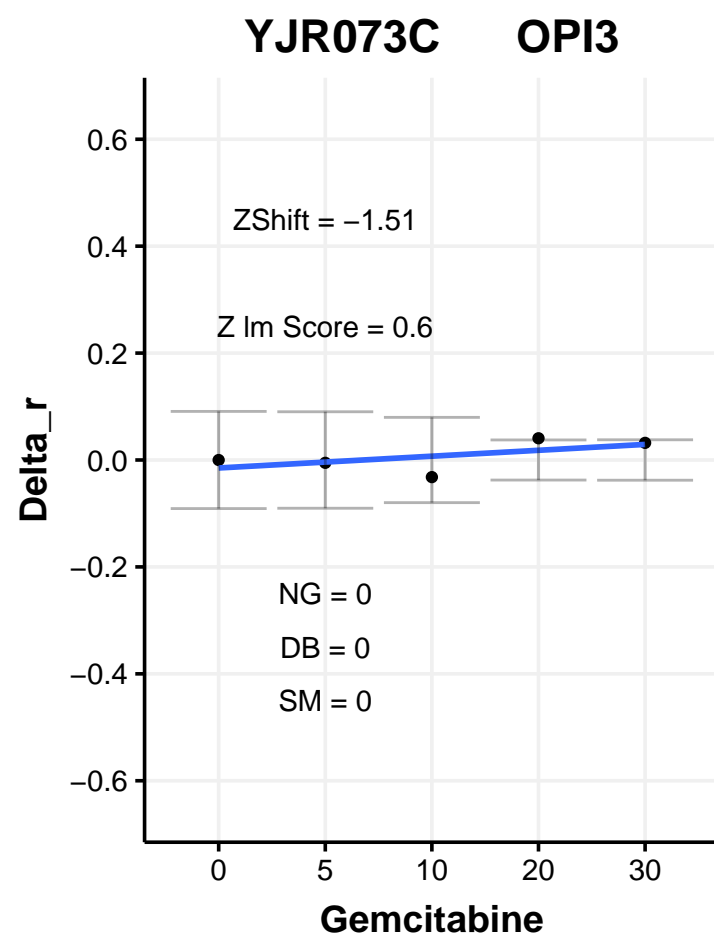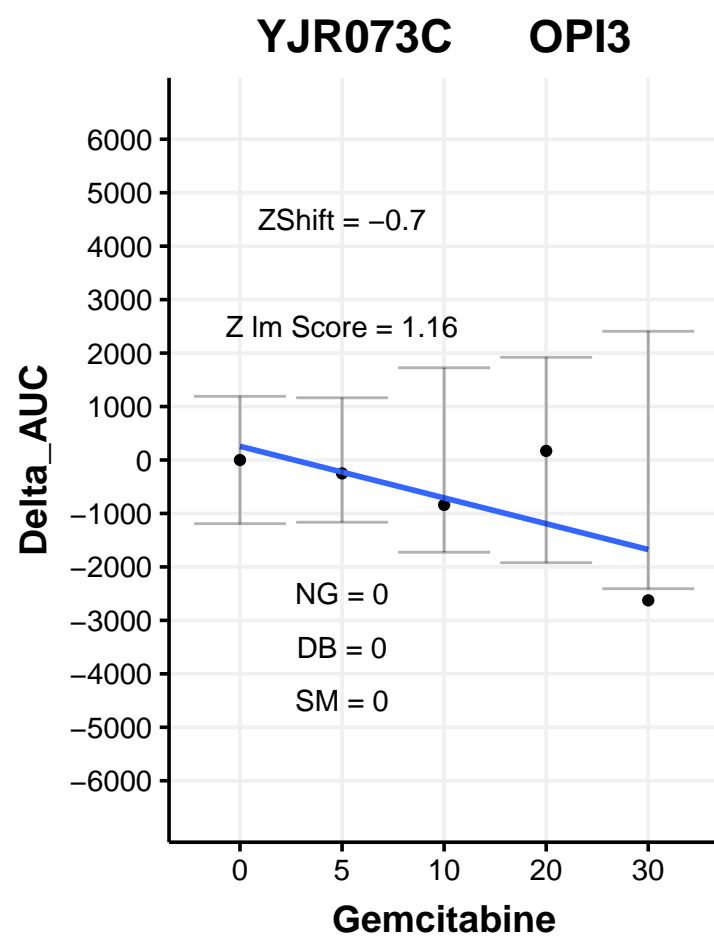

YPR084W

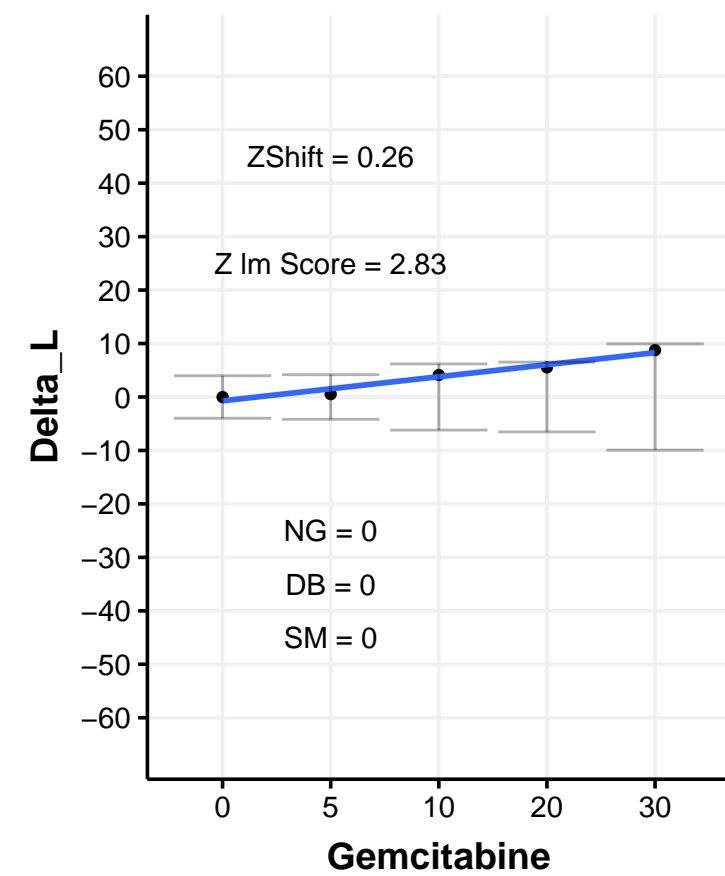

YPR084W

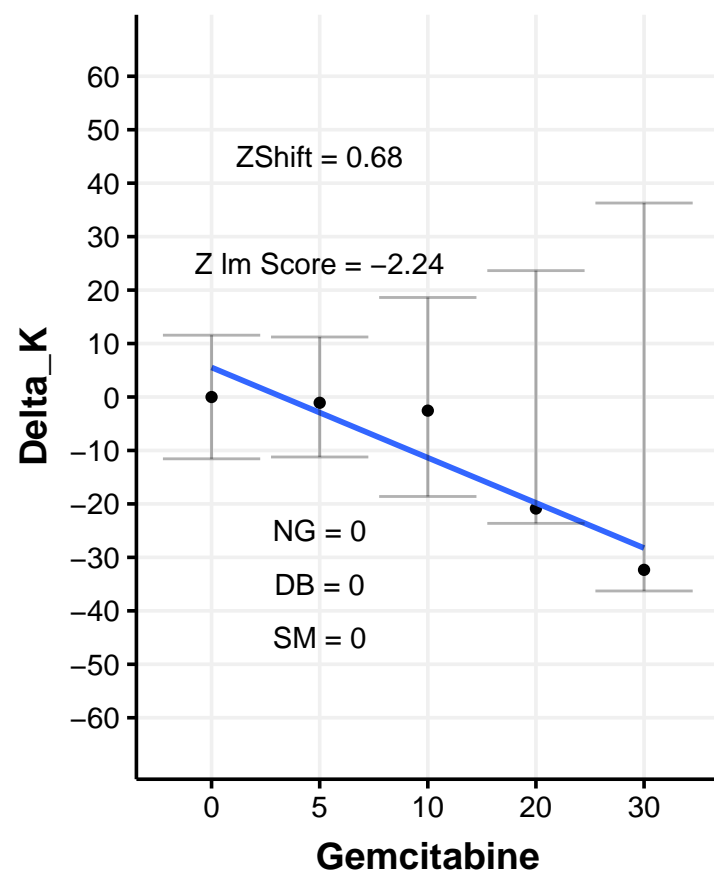

YPR084W

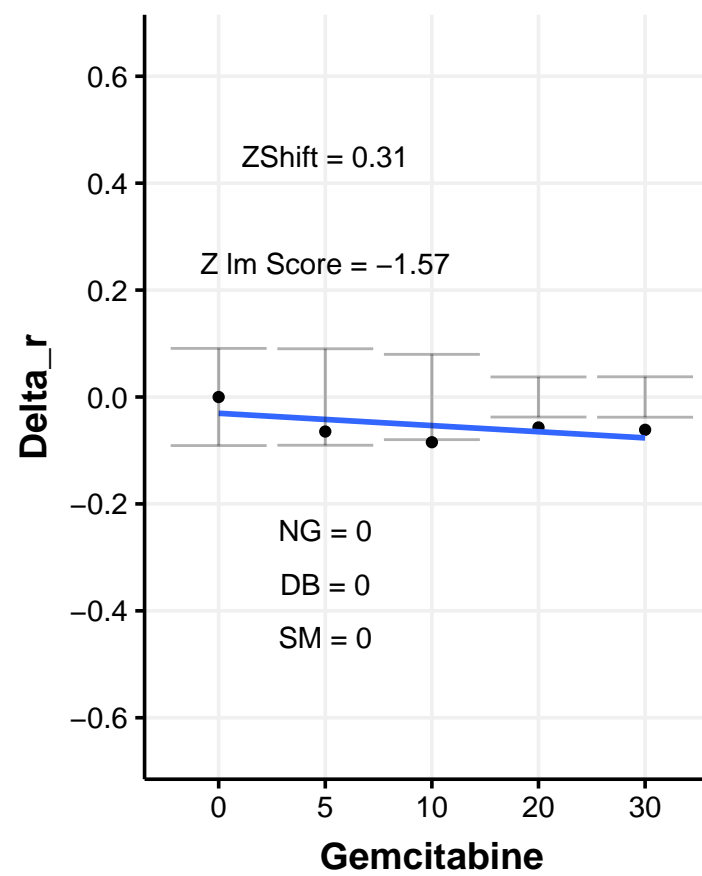

YPR084W

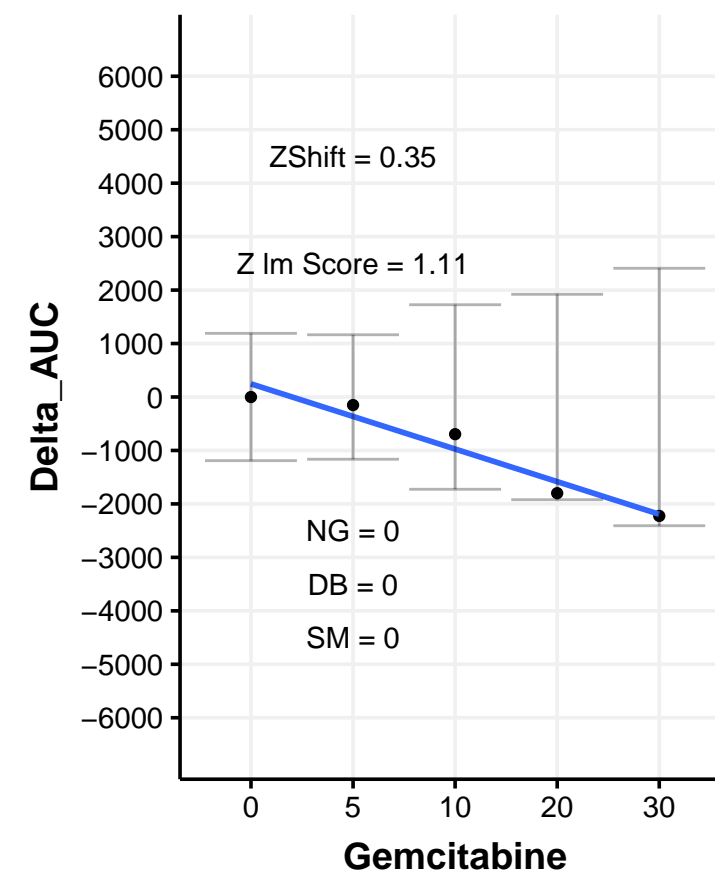

YER087C-B\_1

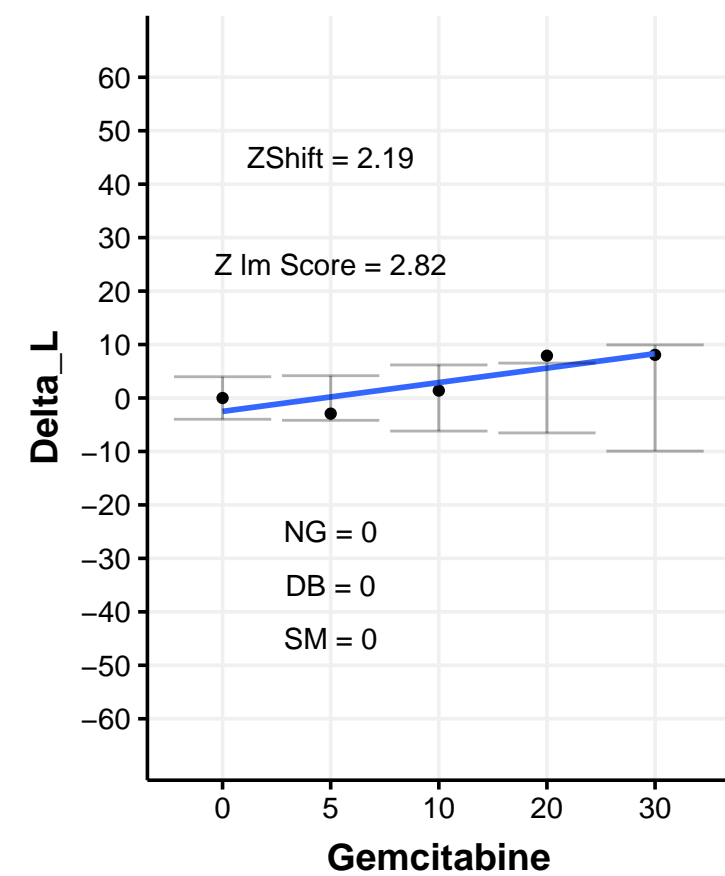

YER087C-B\_1

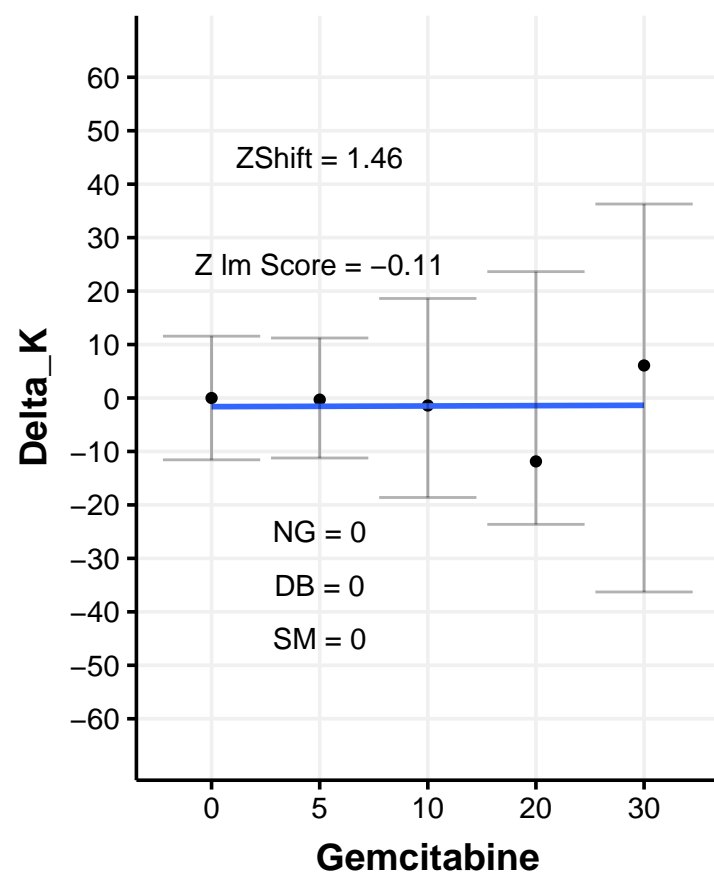

YER087C-B\_1

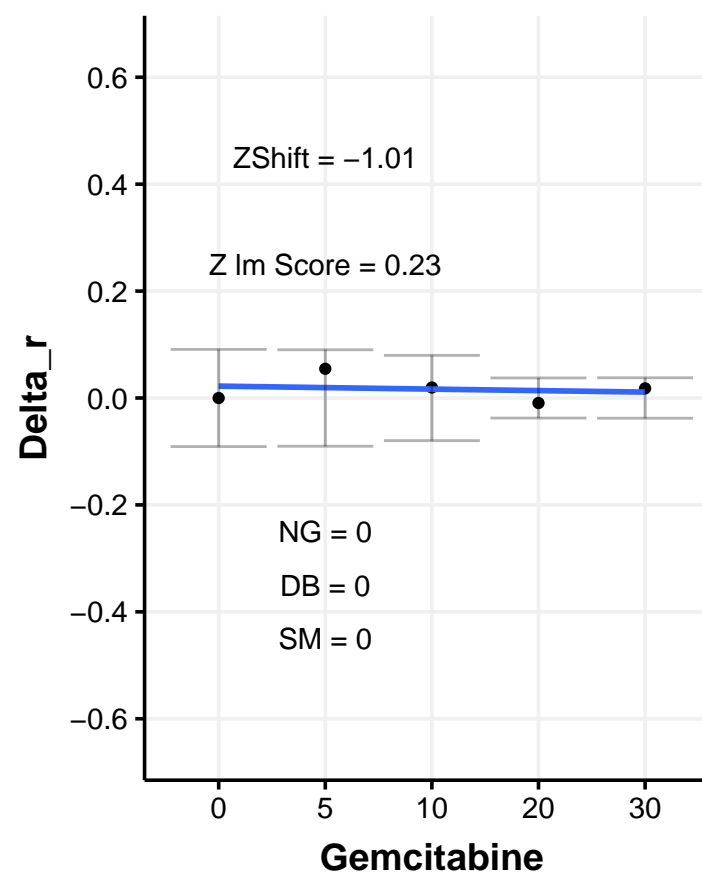

YER087C-B\_1

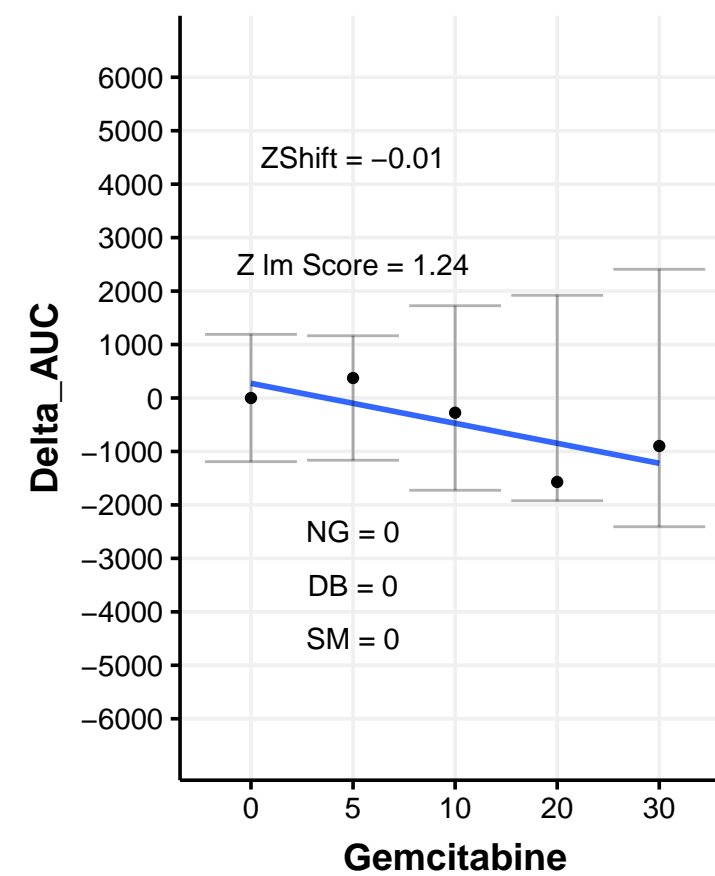

YDR003W-A\_1

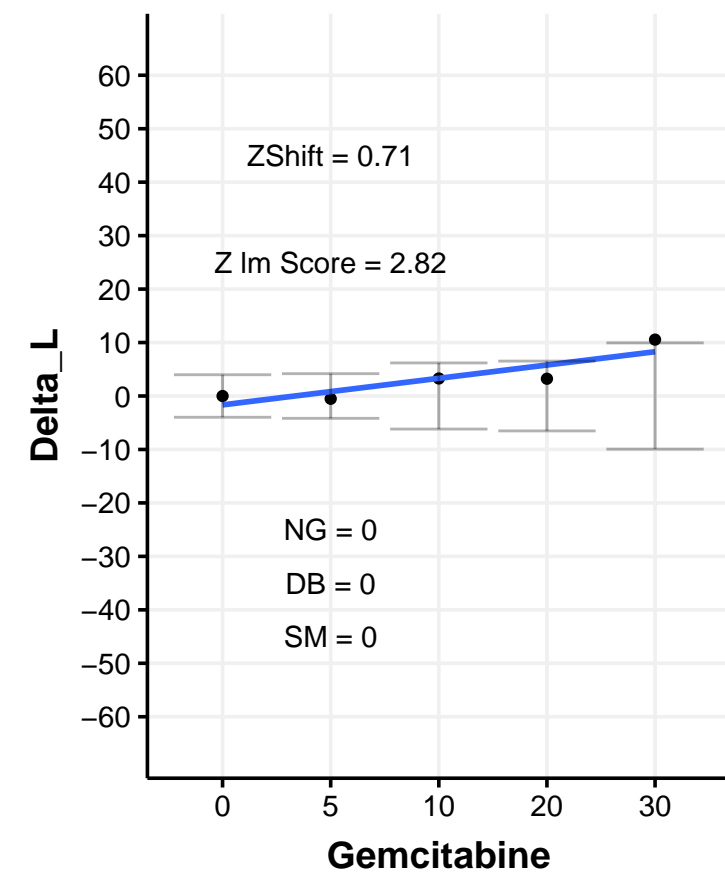

YDR003W-A\_1

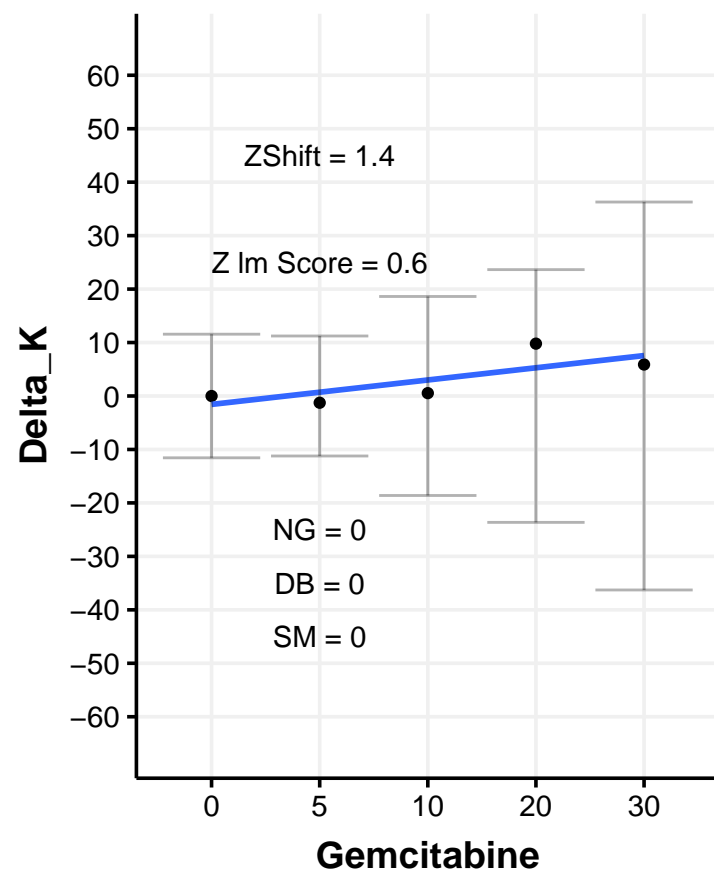

YDR003W-A\_1

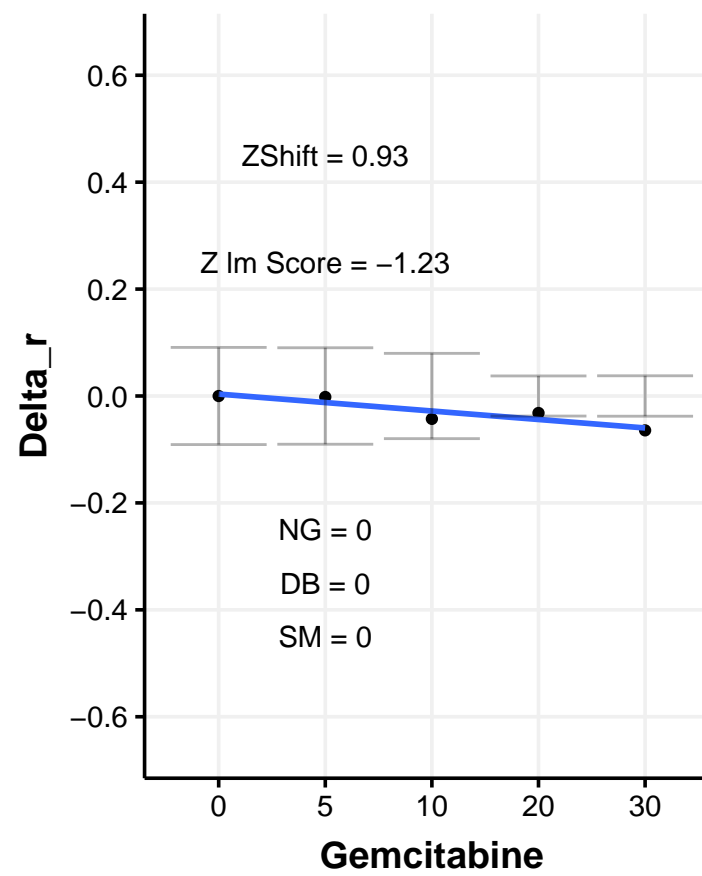

YDR003W-A\_1

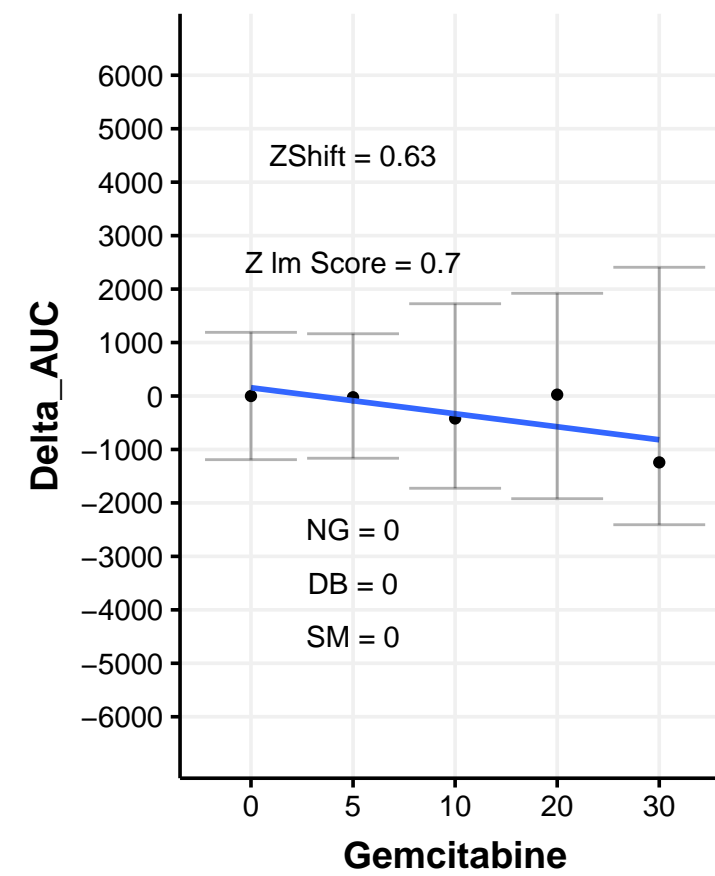

YDR524C-B\_1

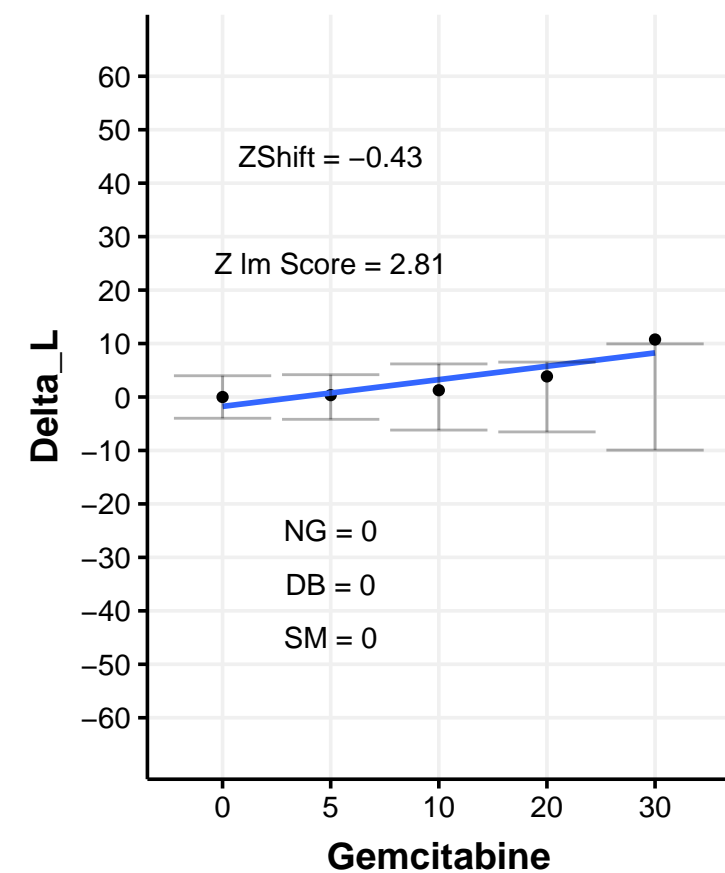

YDR524C-B\_1

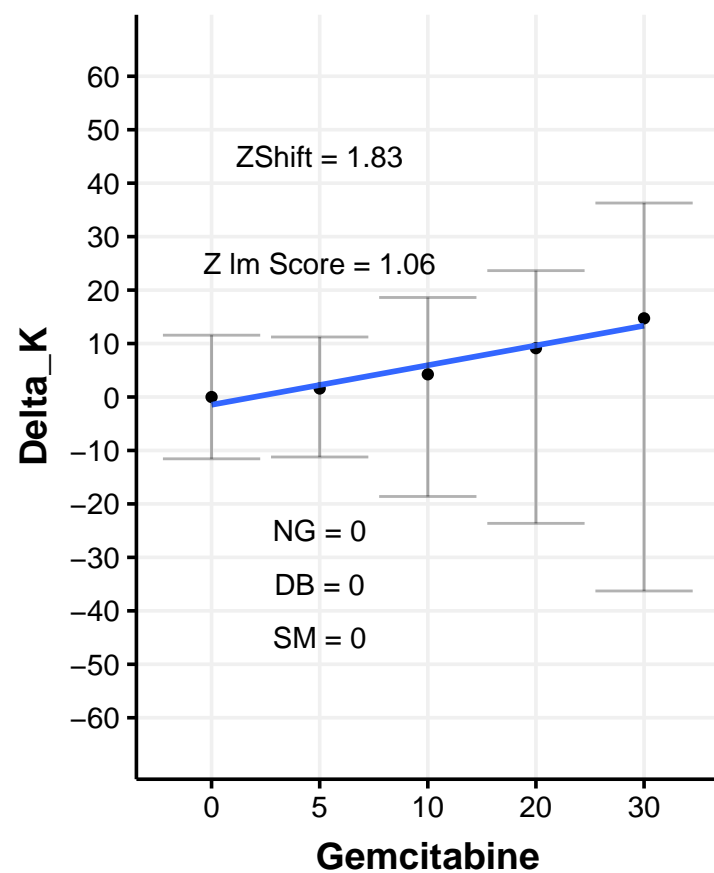

YDR524C-B\_1

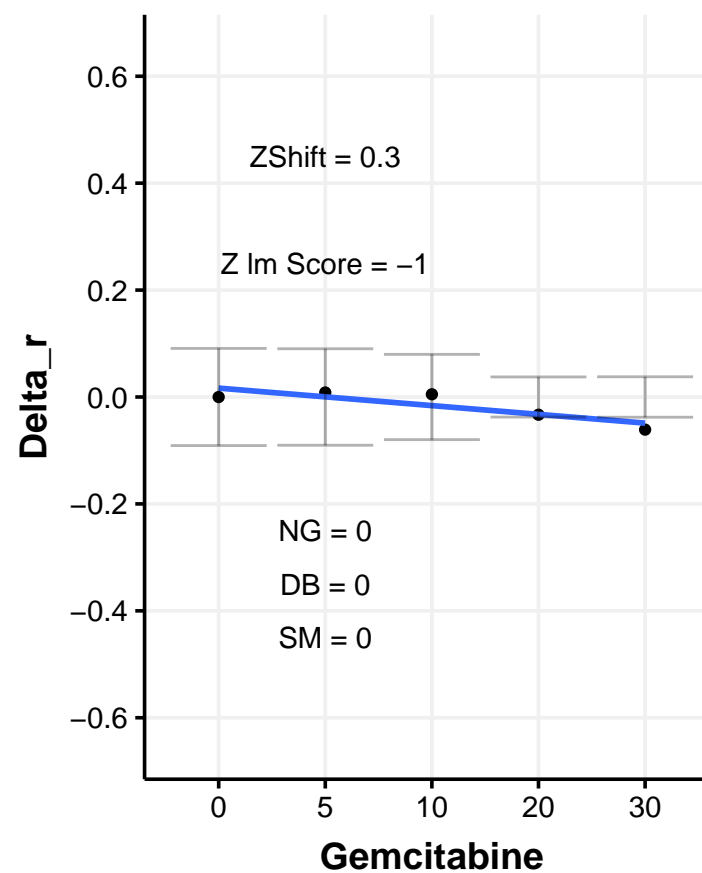

YDR524C-B\_1

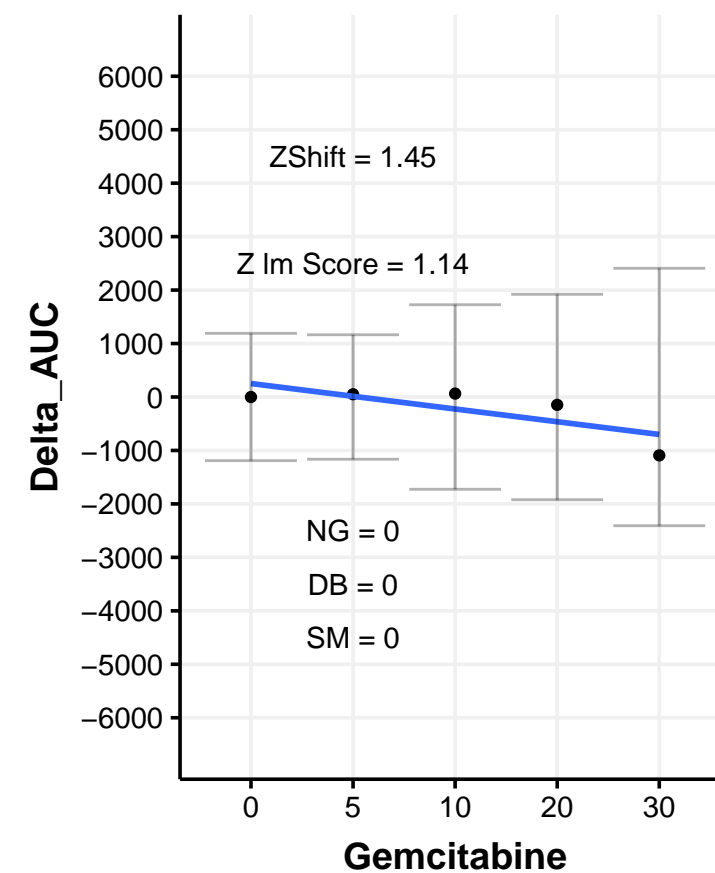

YGL107C RMD9

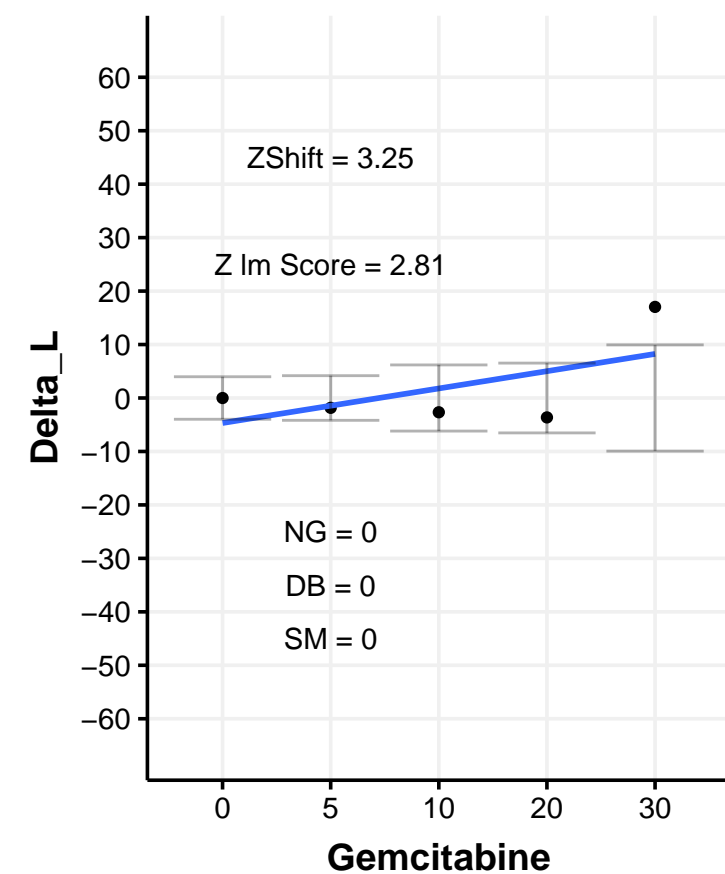

YGL107C RMD9

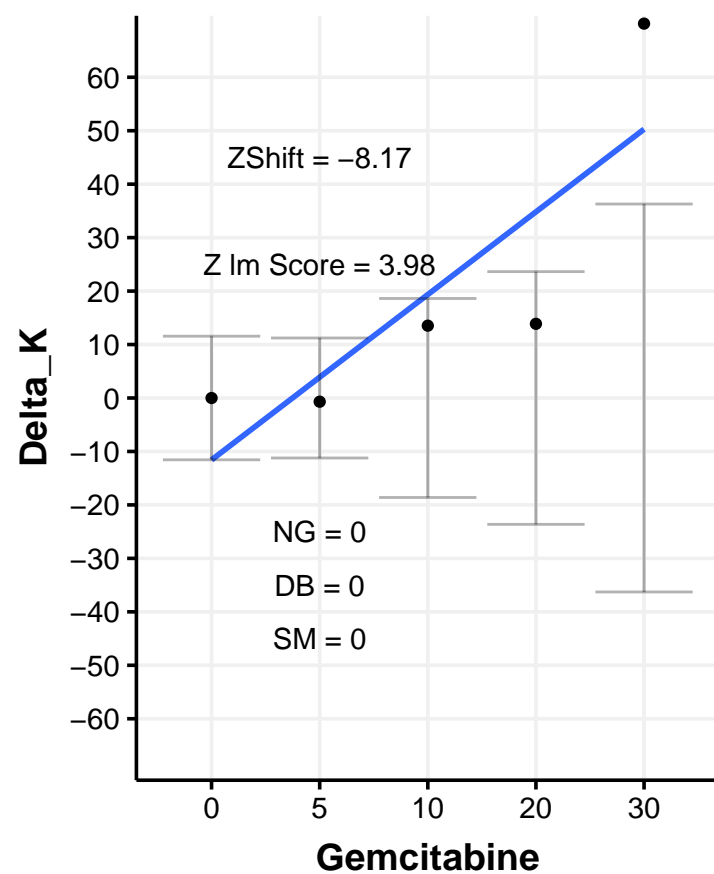

YGL107C RMD9

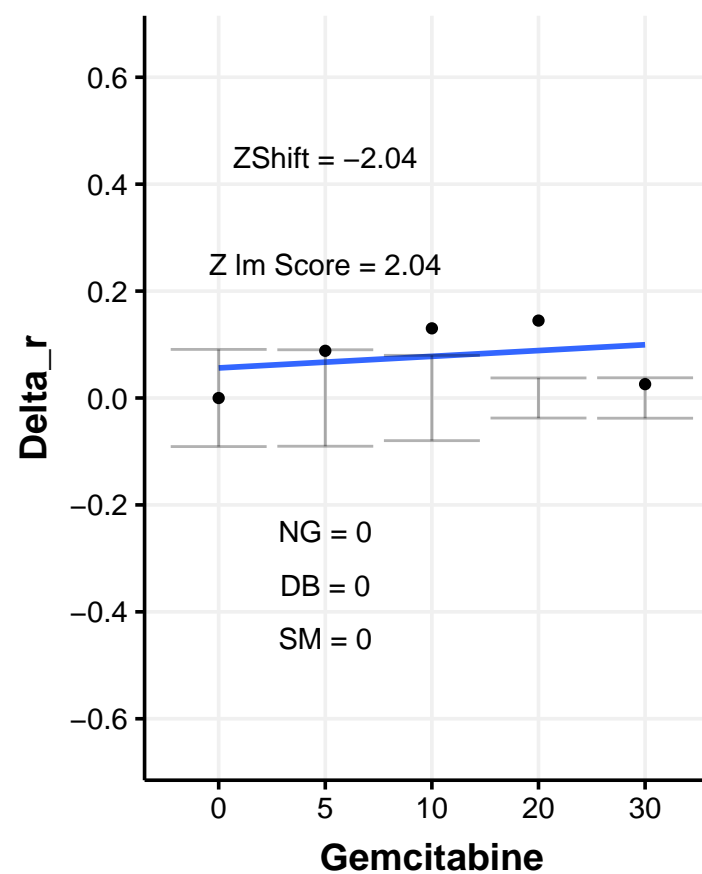

YGL107C RMD9

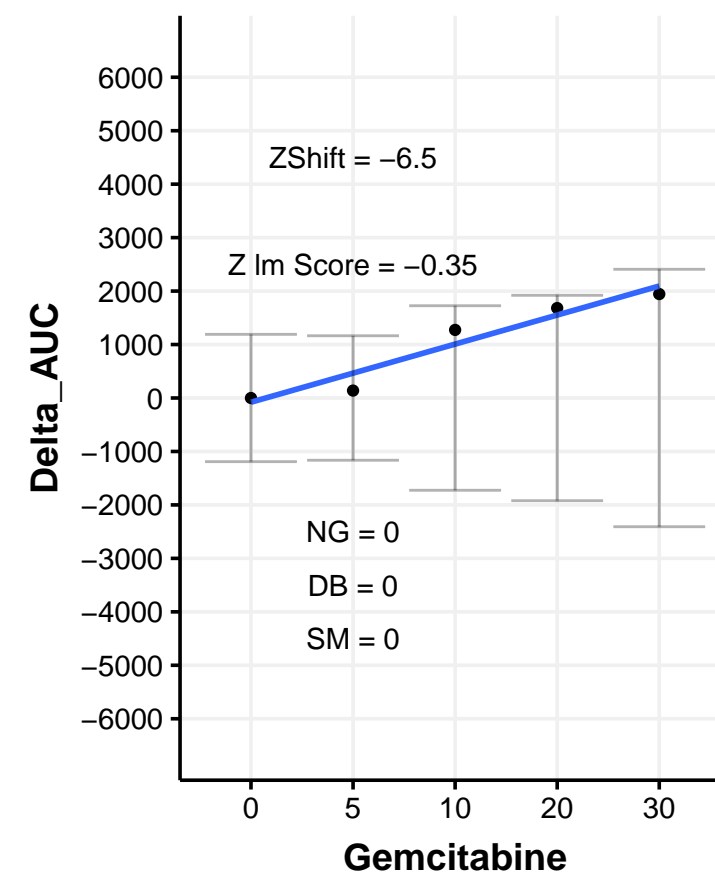

YDR075W PPH3

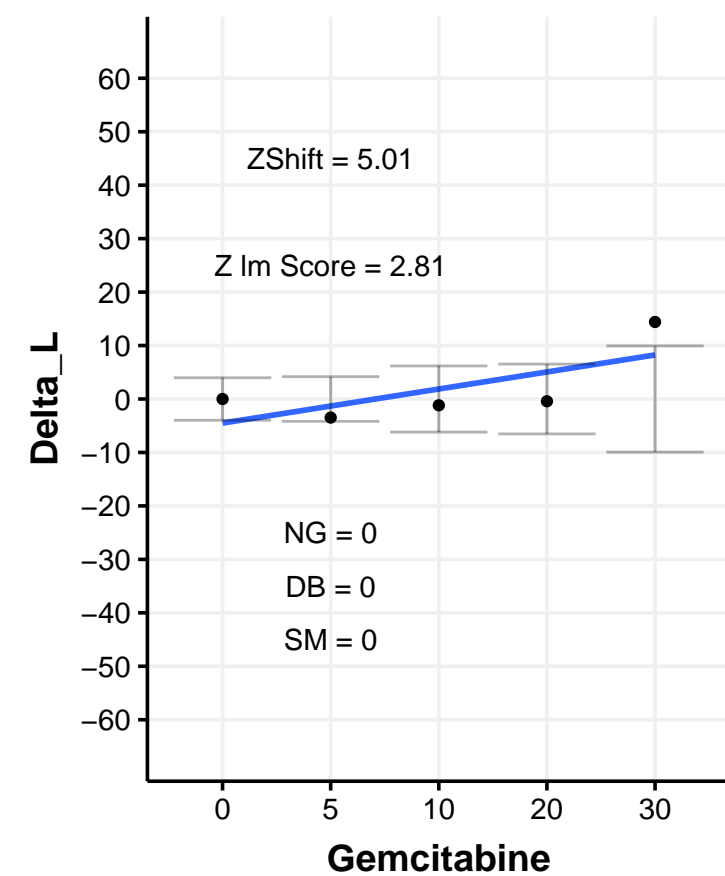

YDR075W PPH3

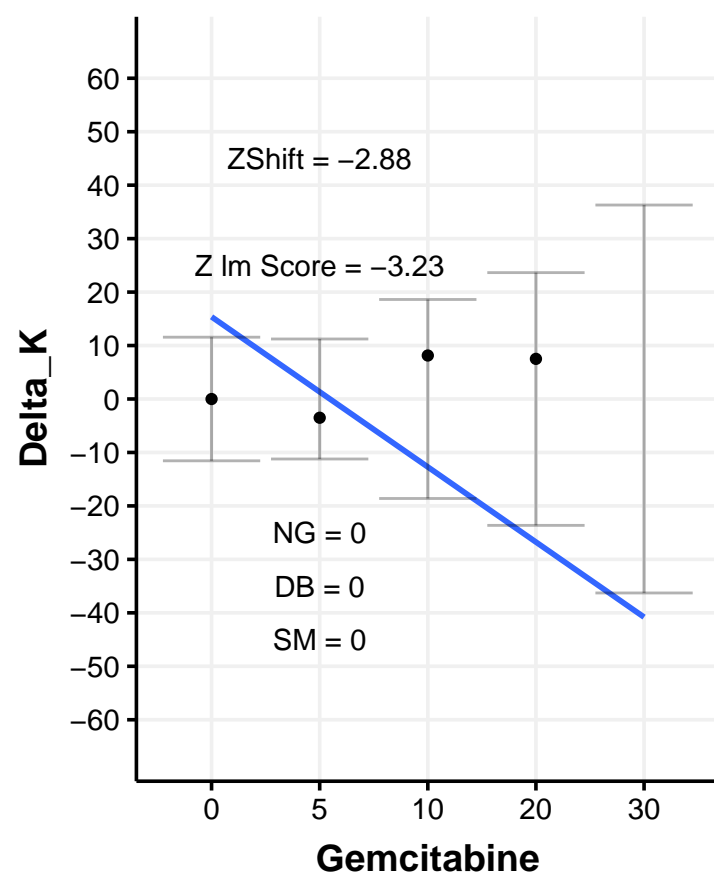

YDR075W PPH3

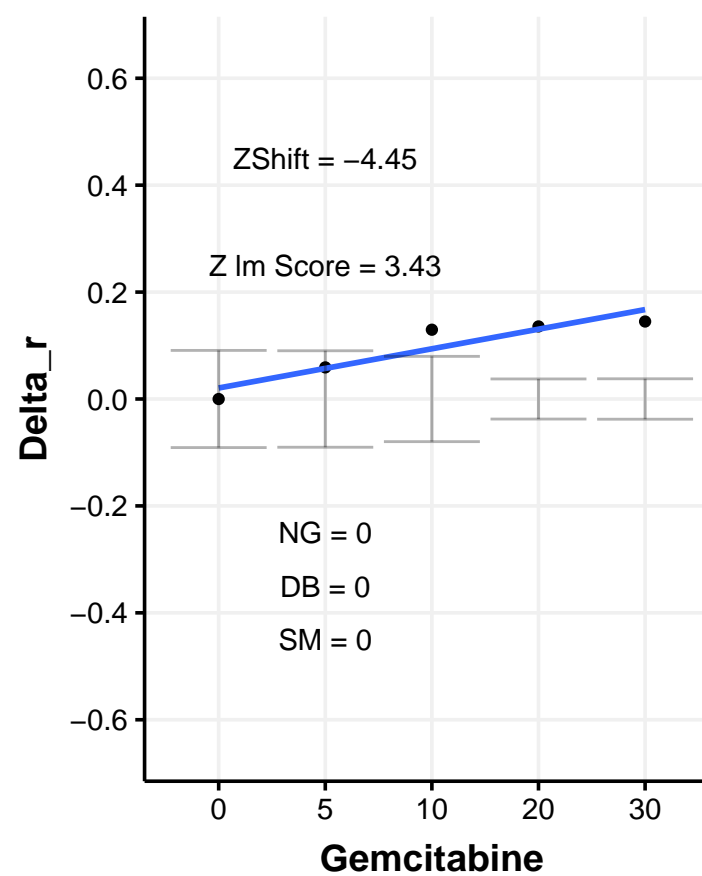

YDR075W PPH3

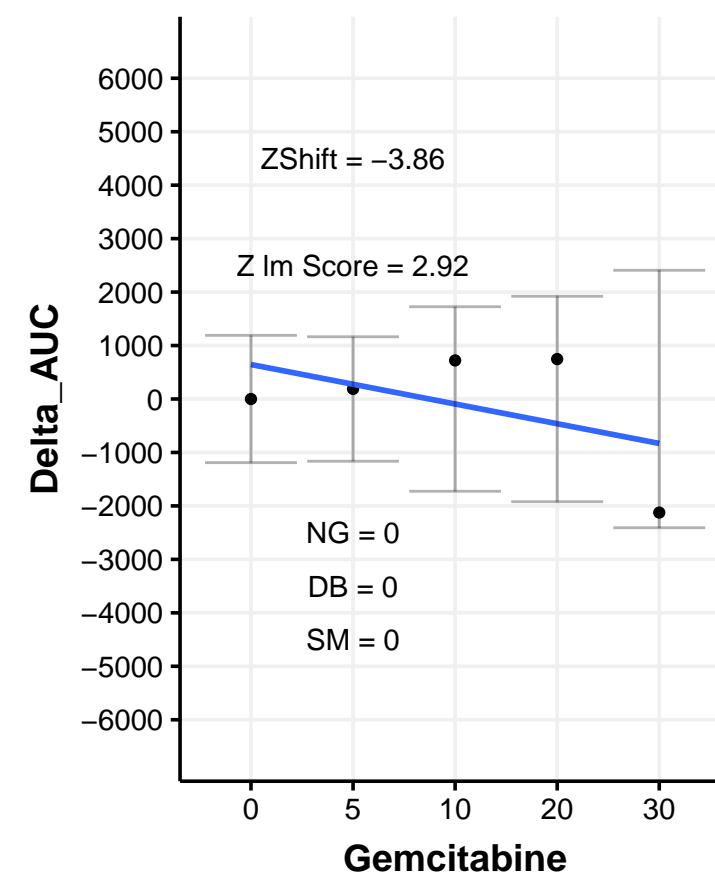

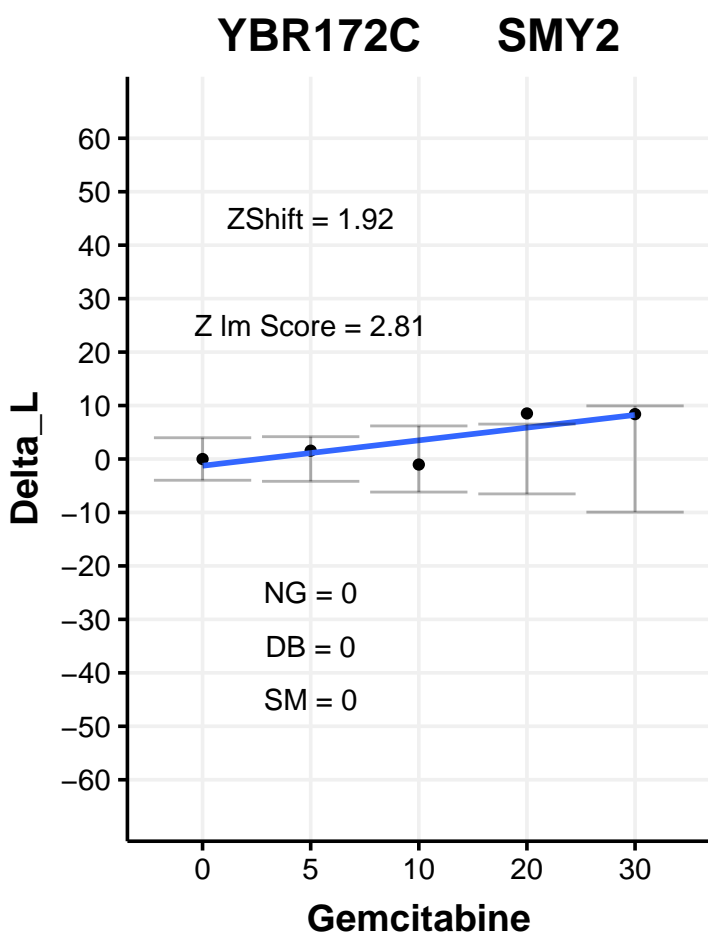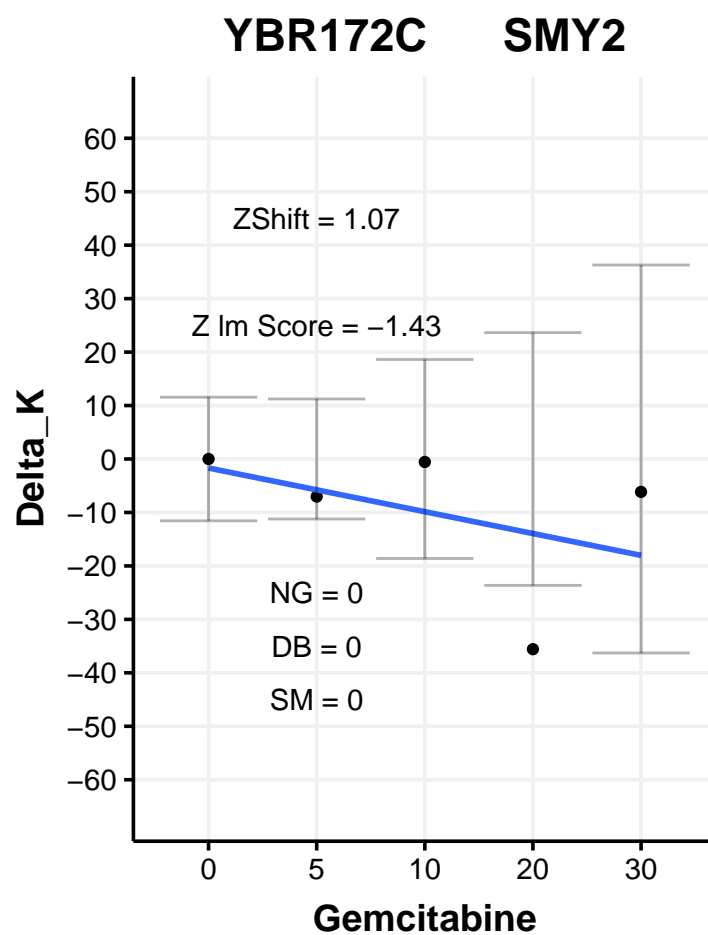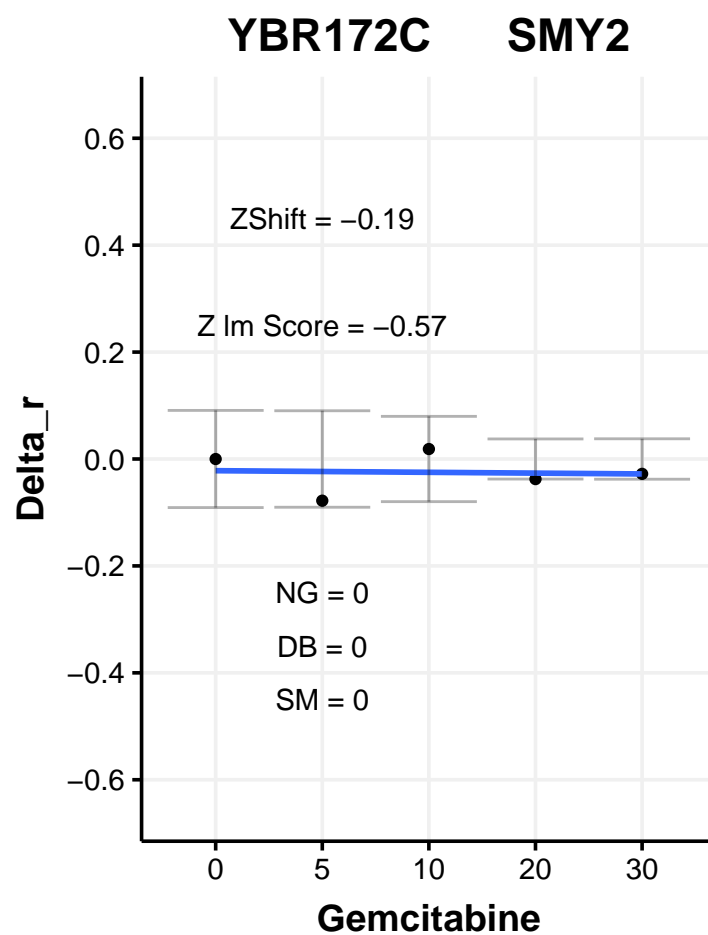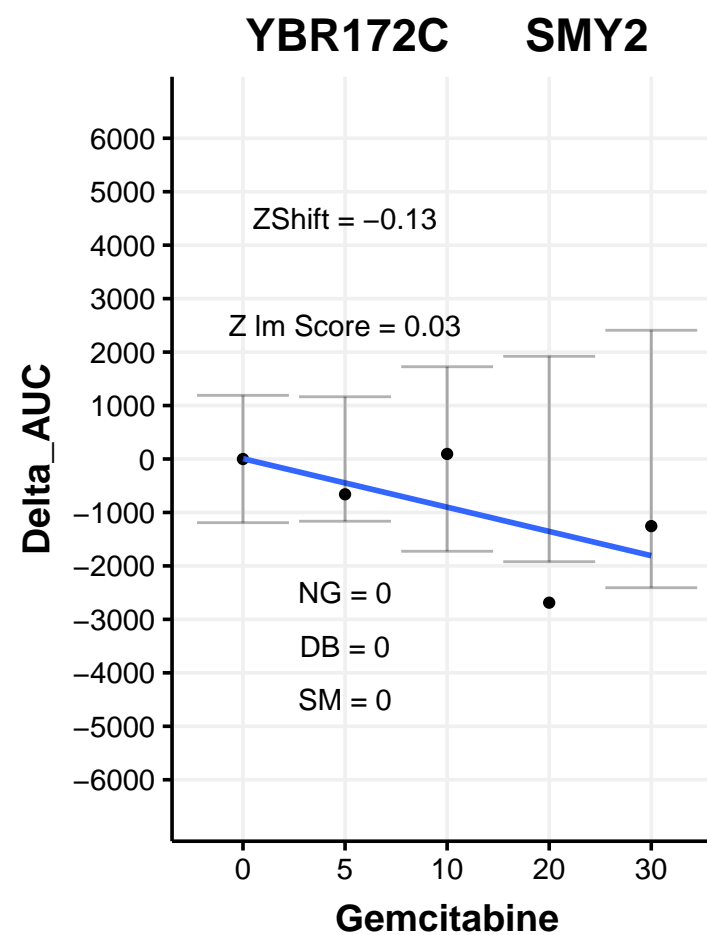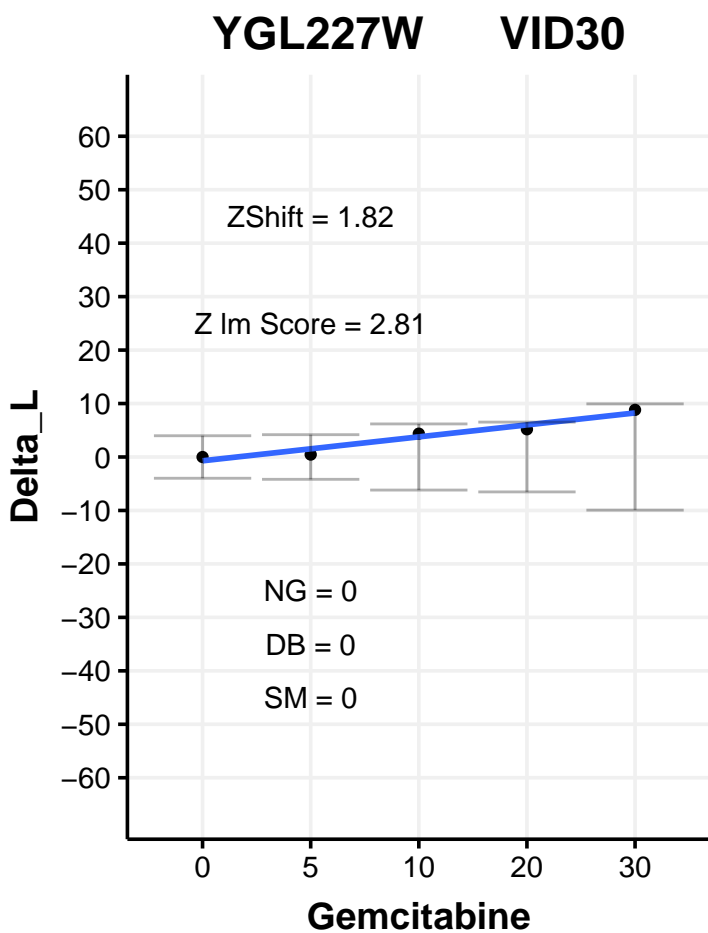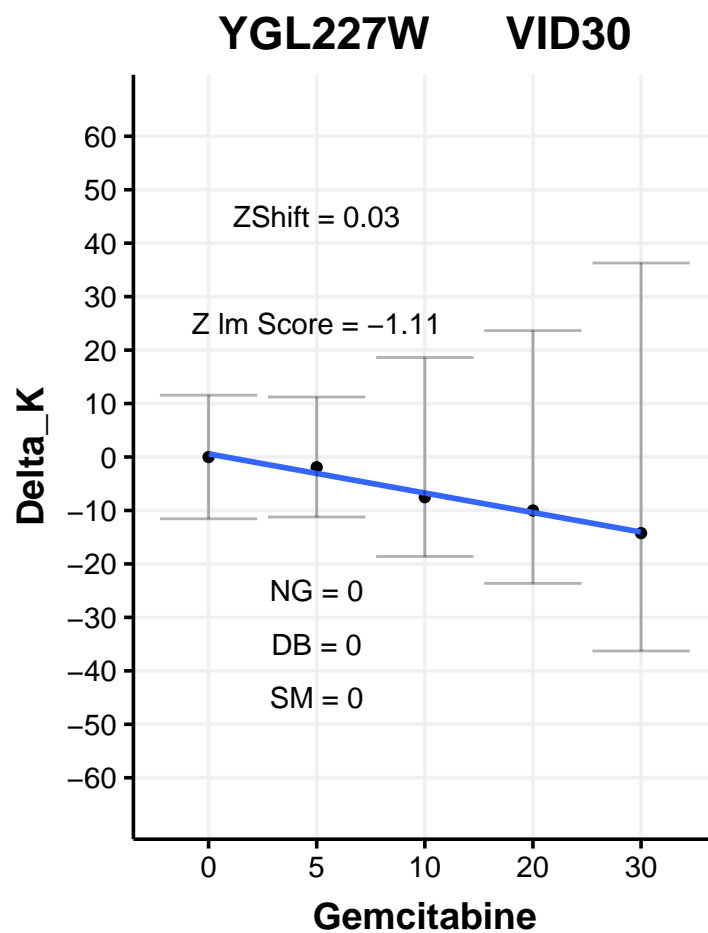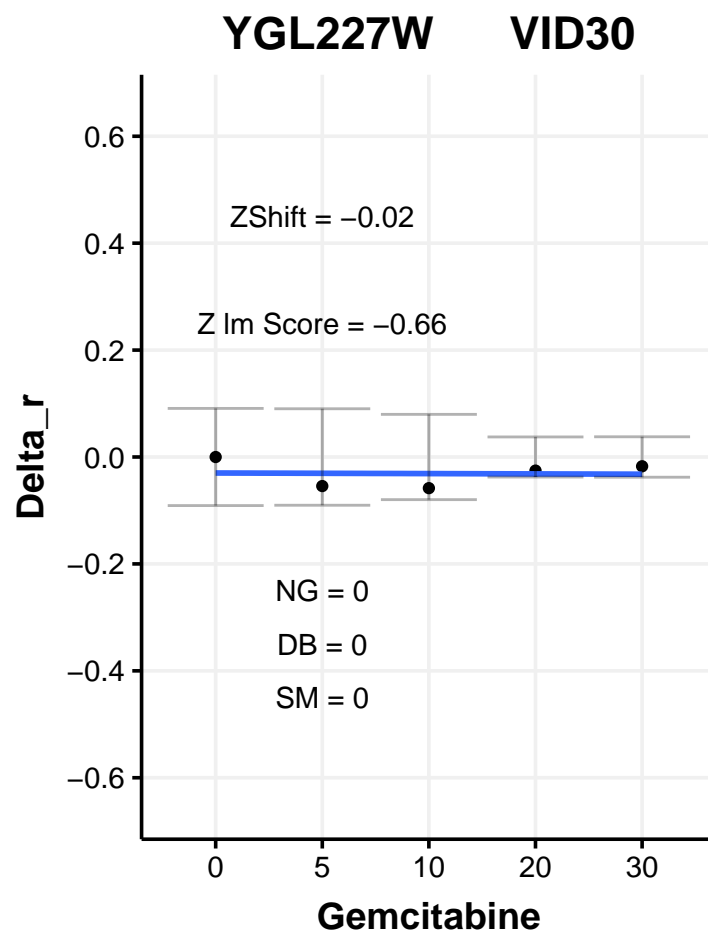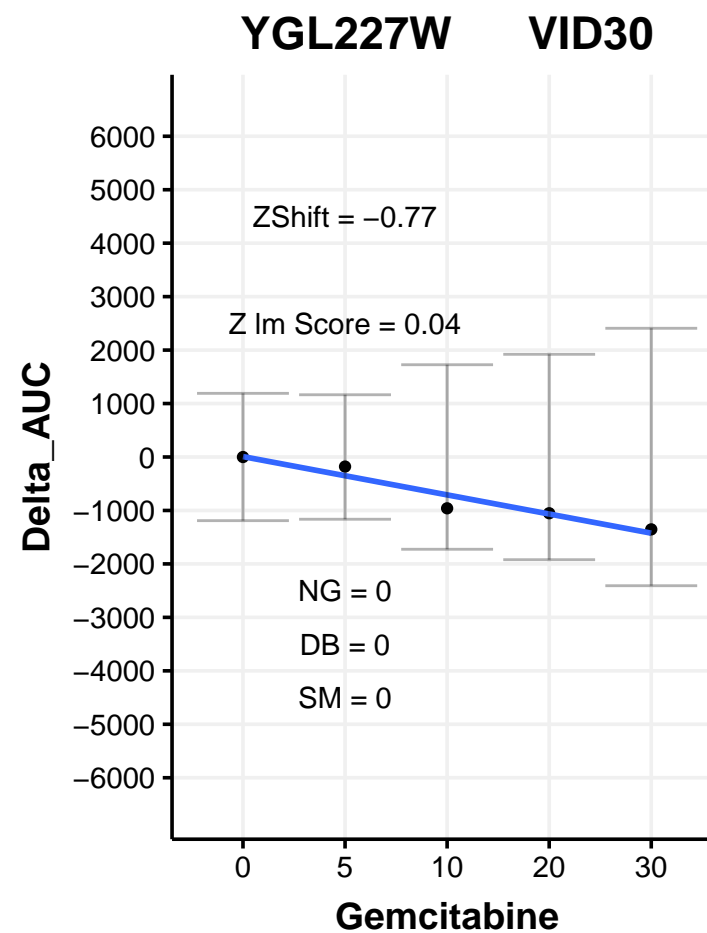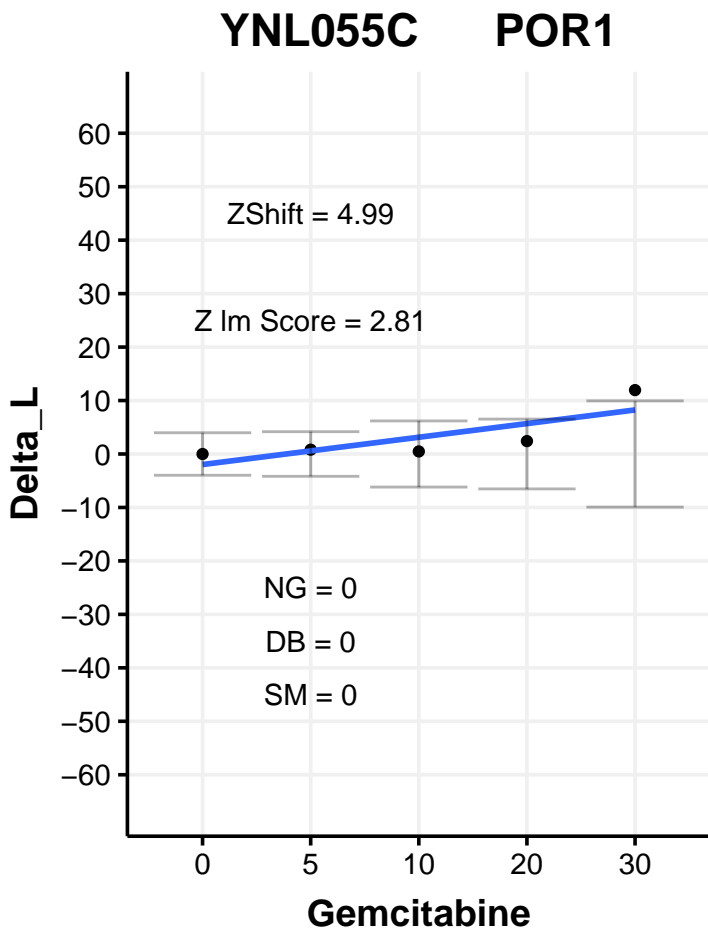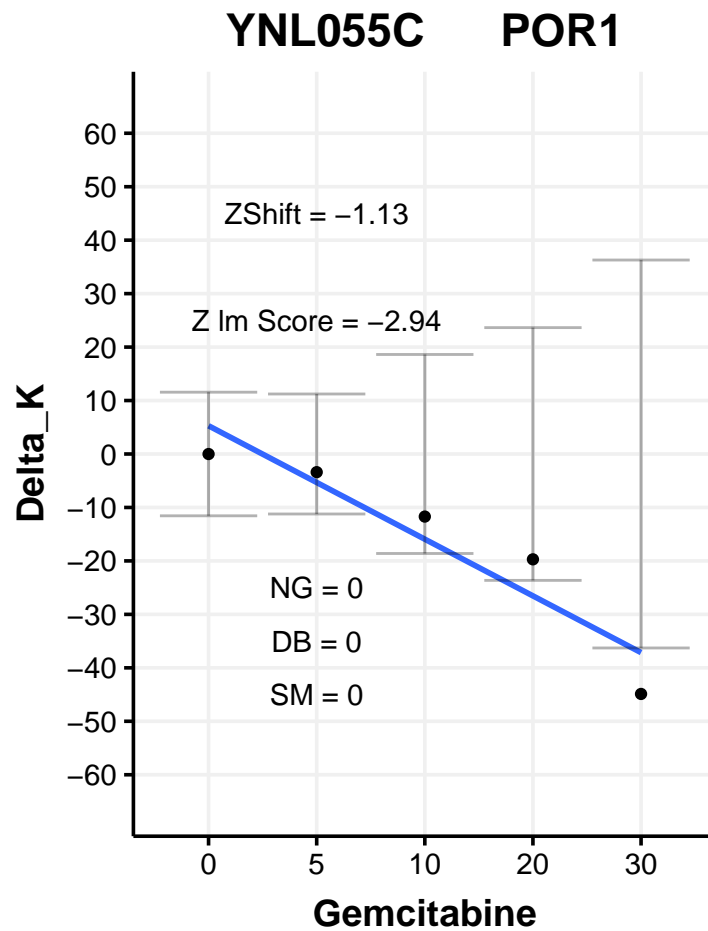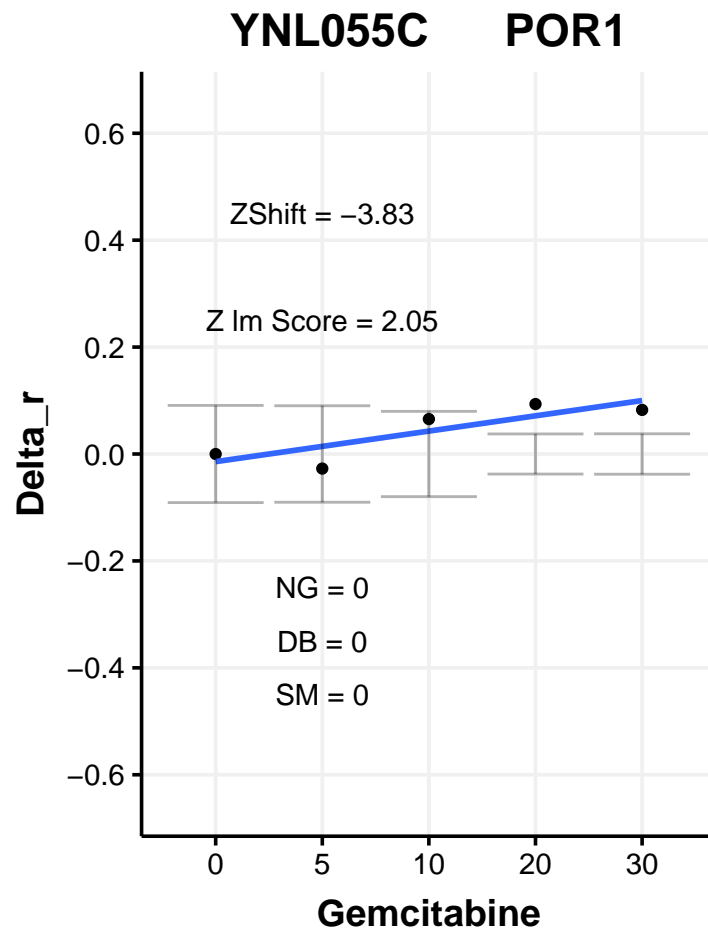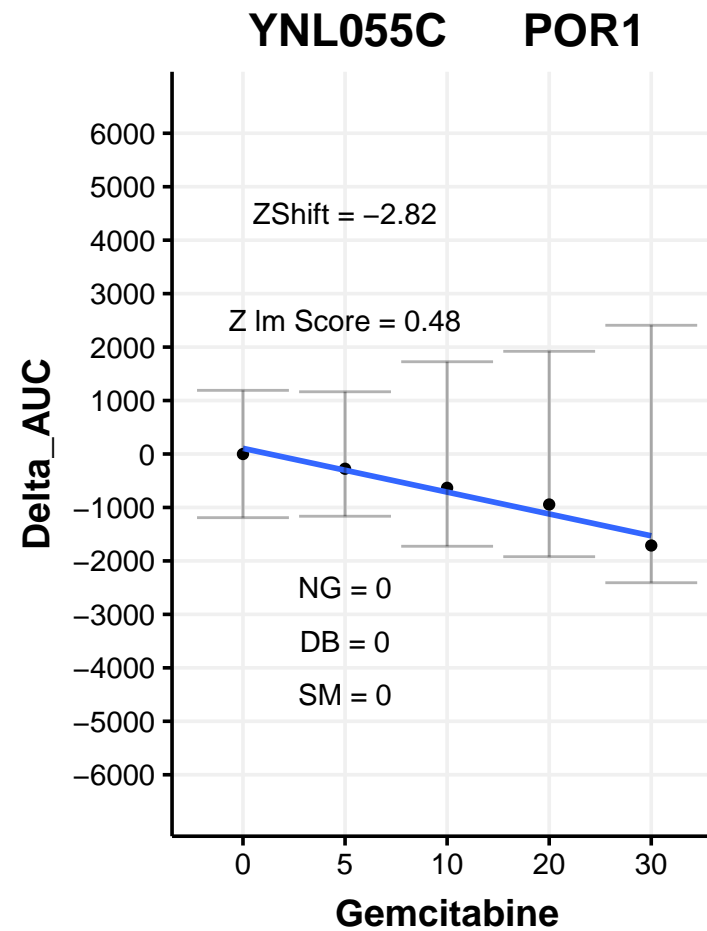

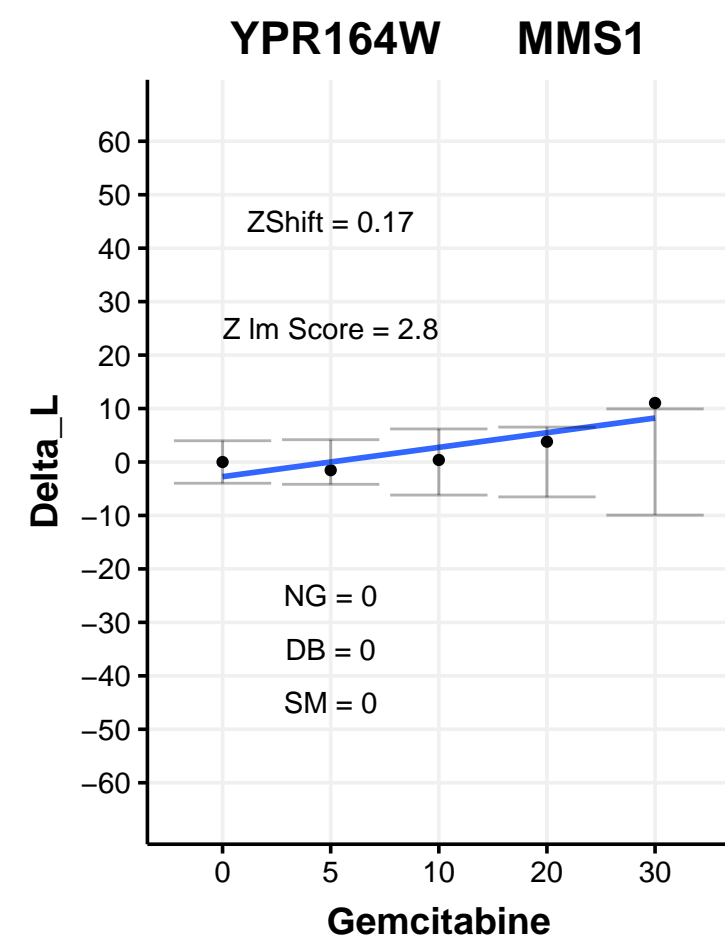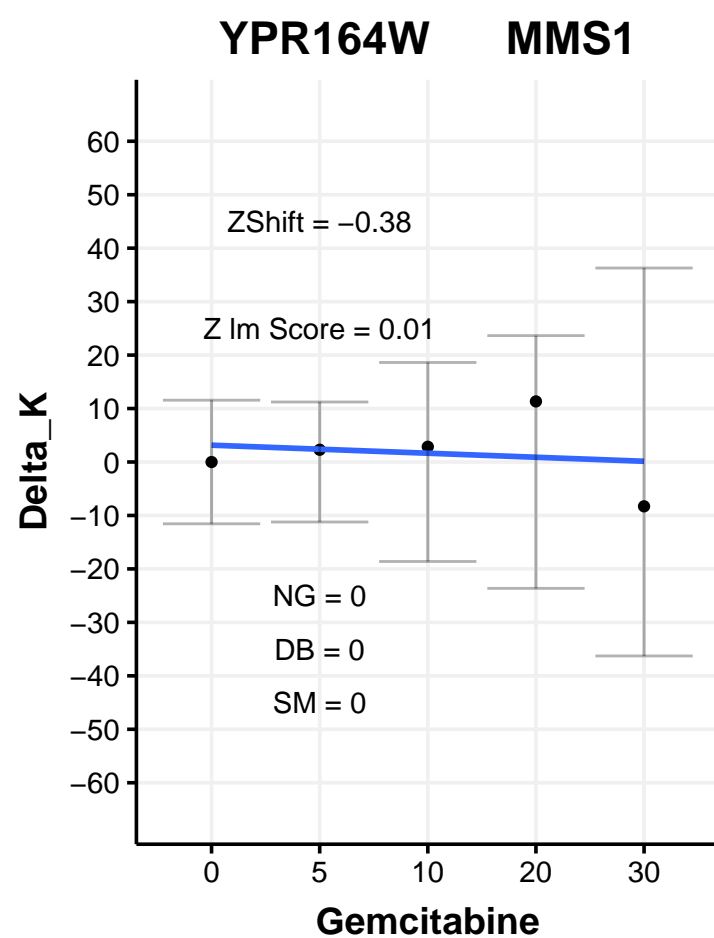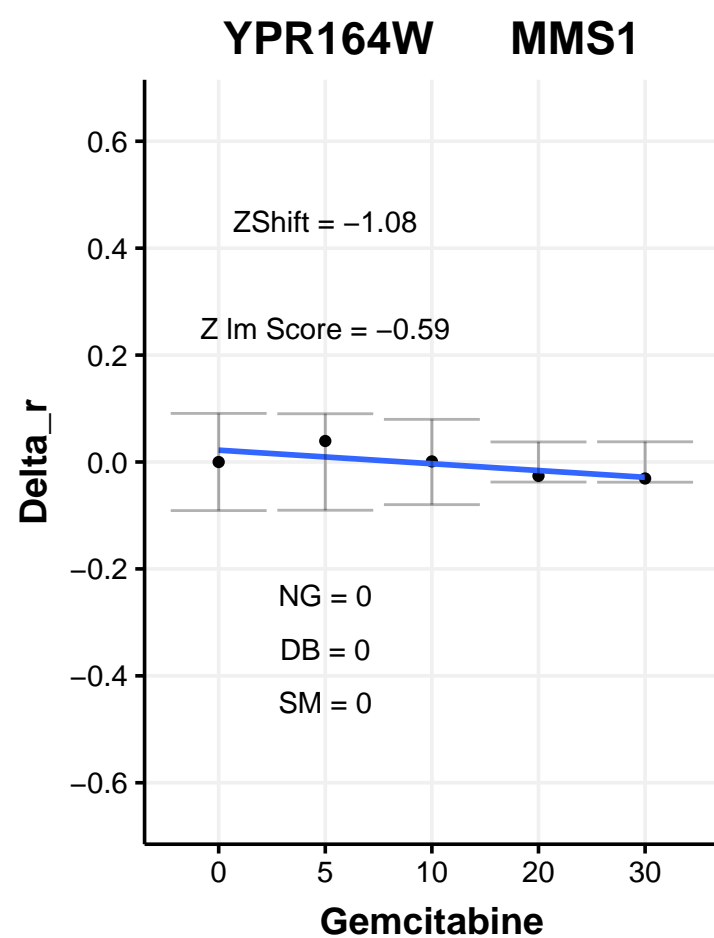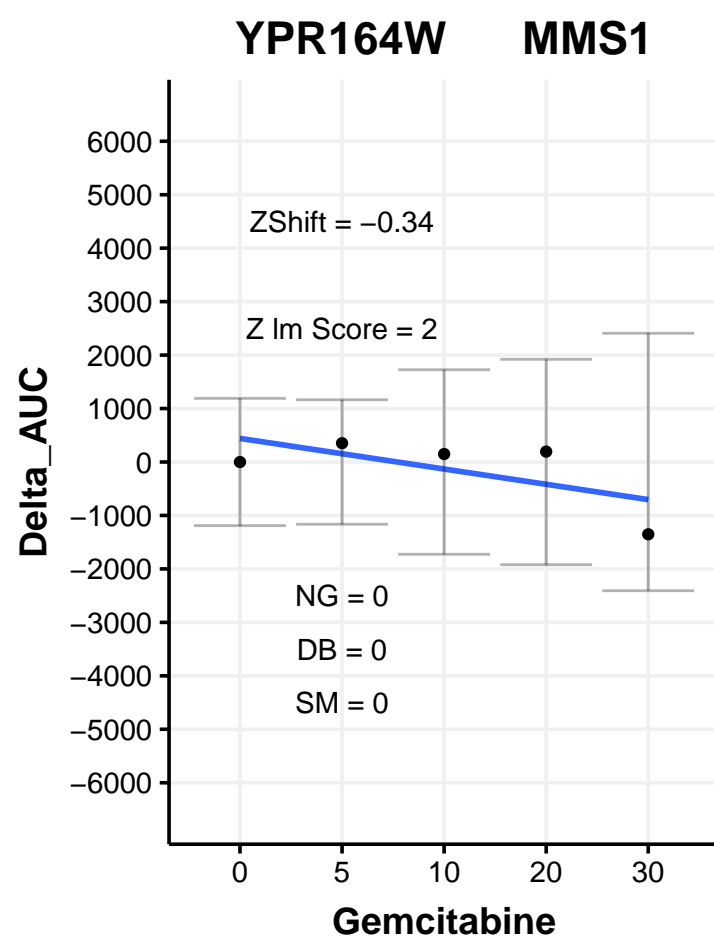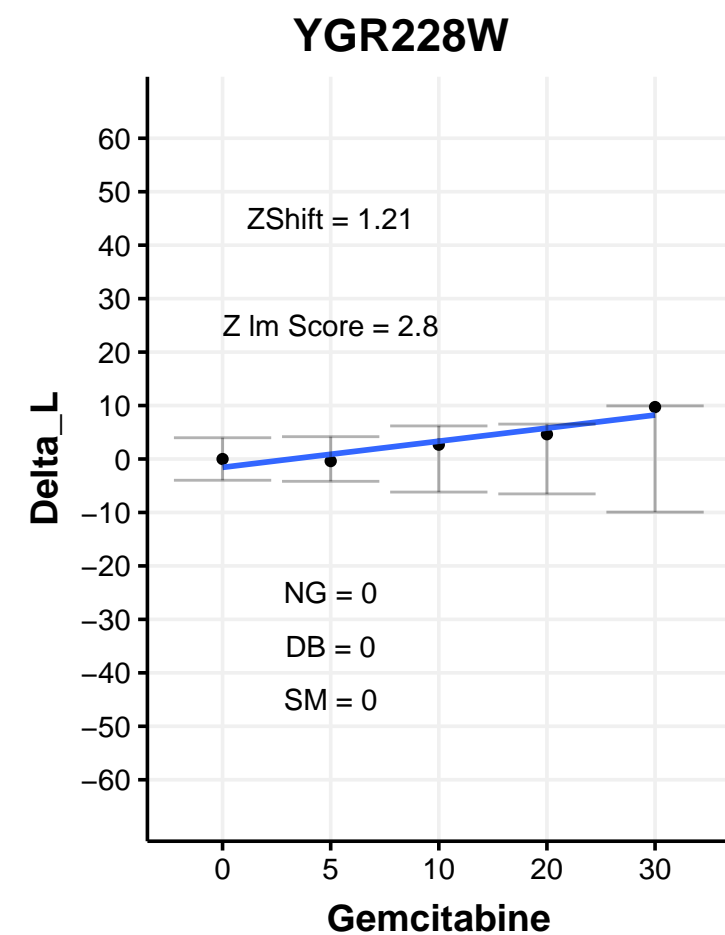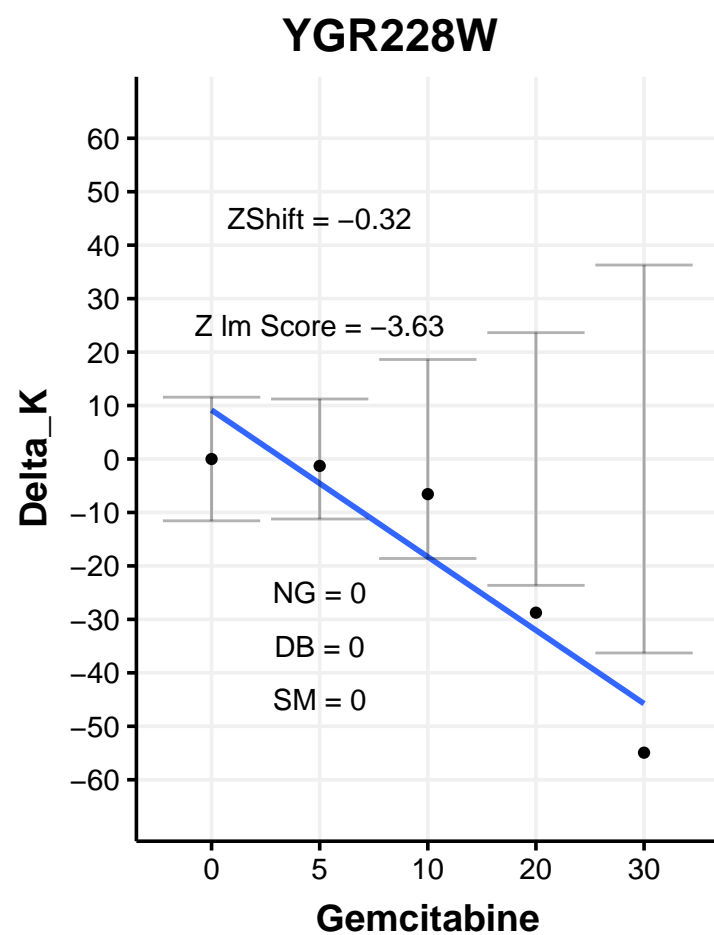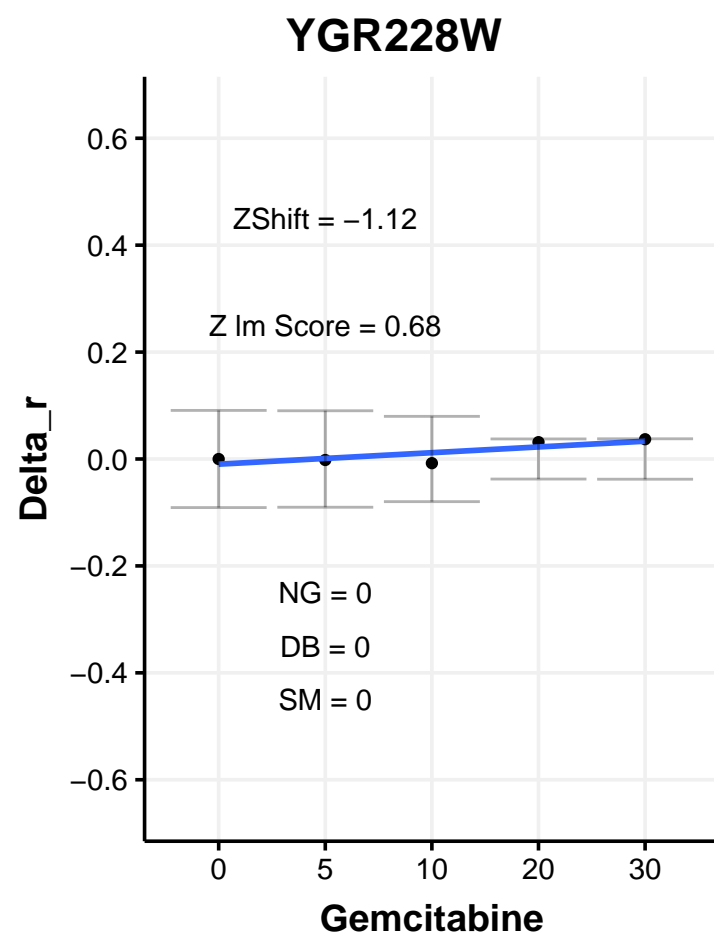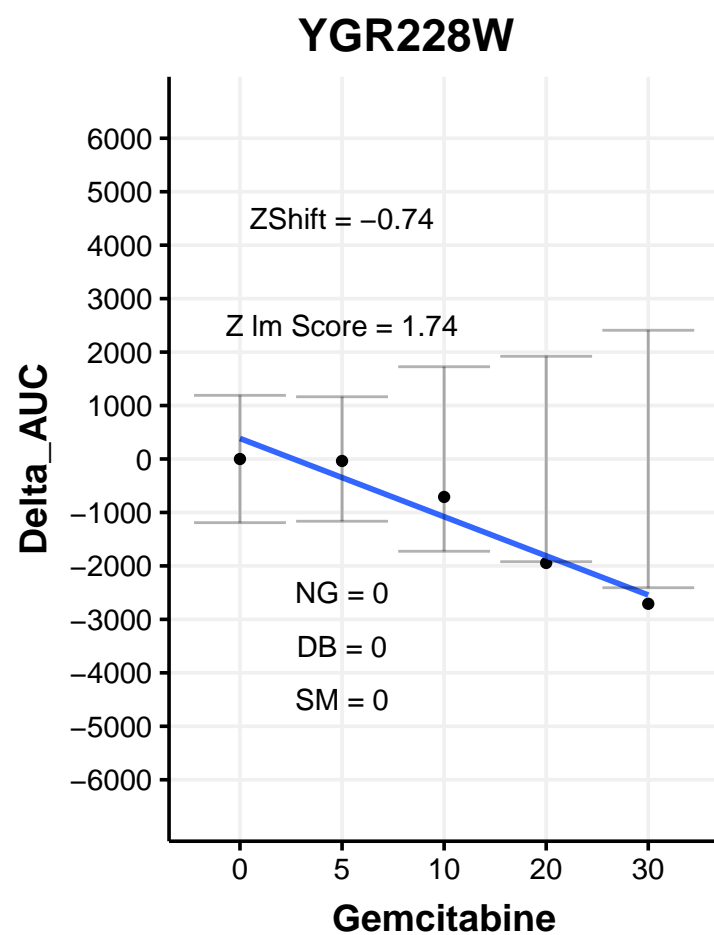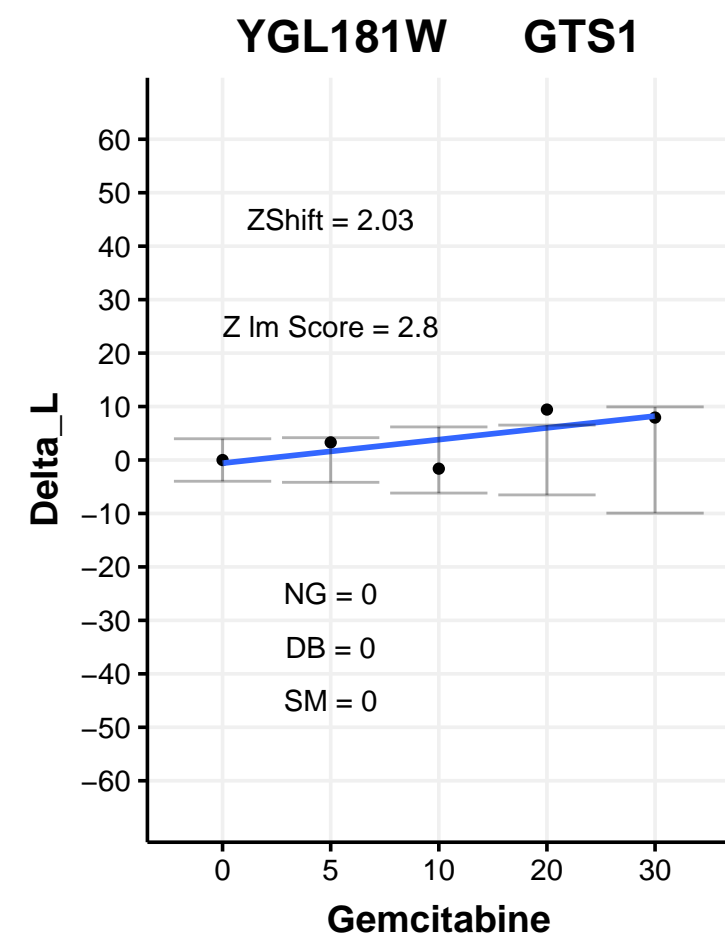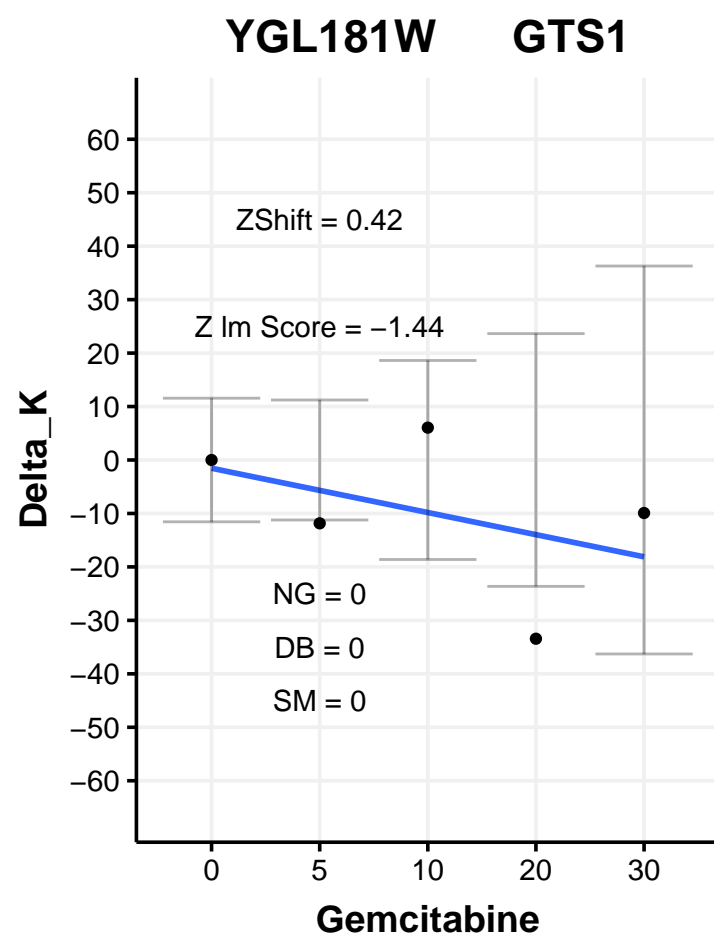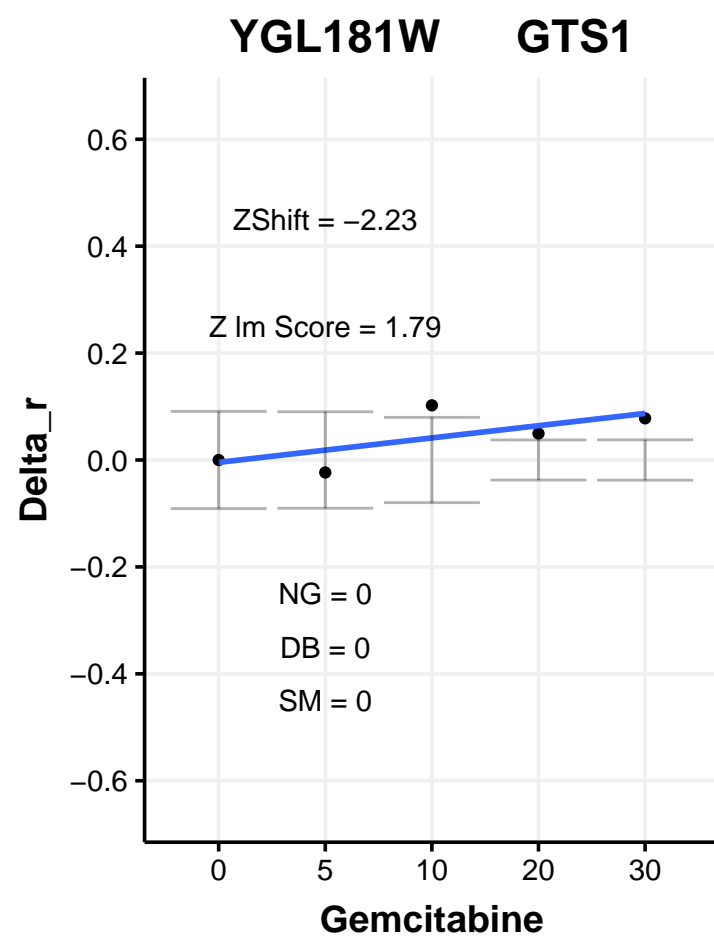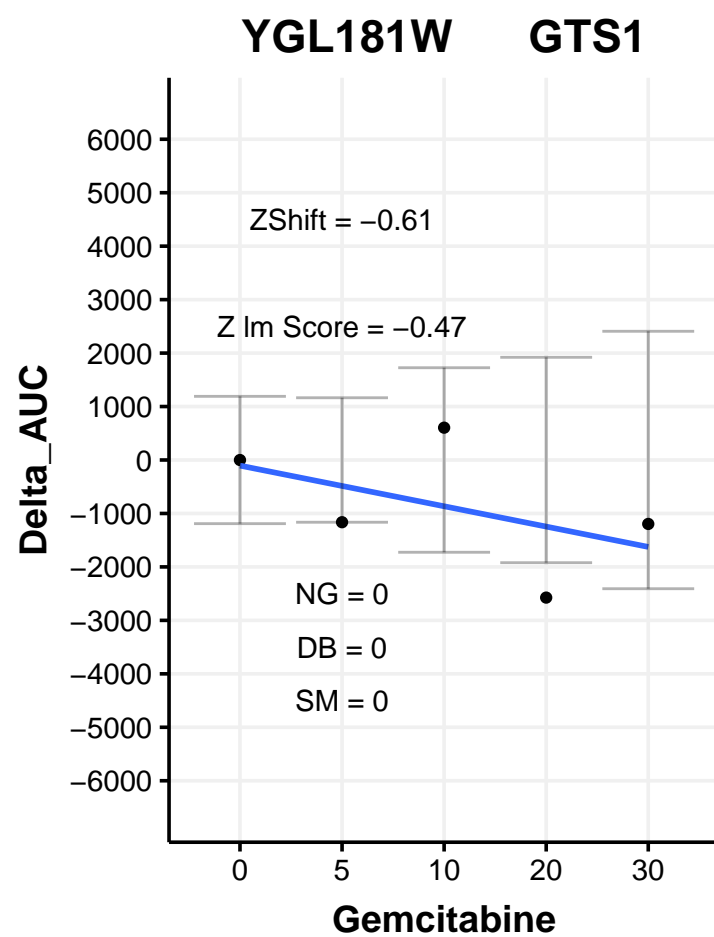

YDR524C-B\_2

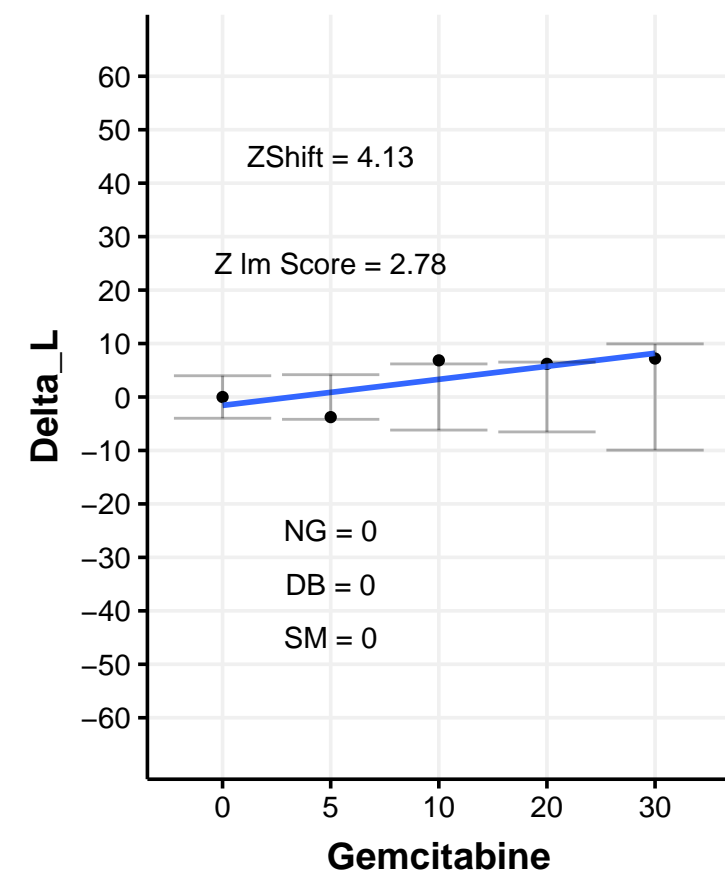

YDR524C-B\_2

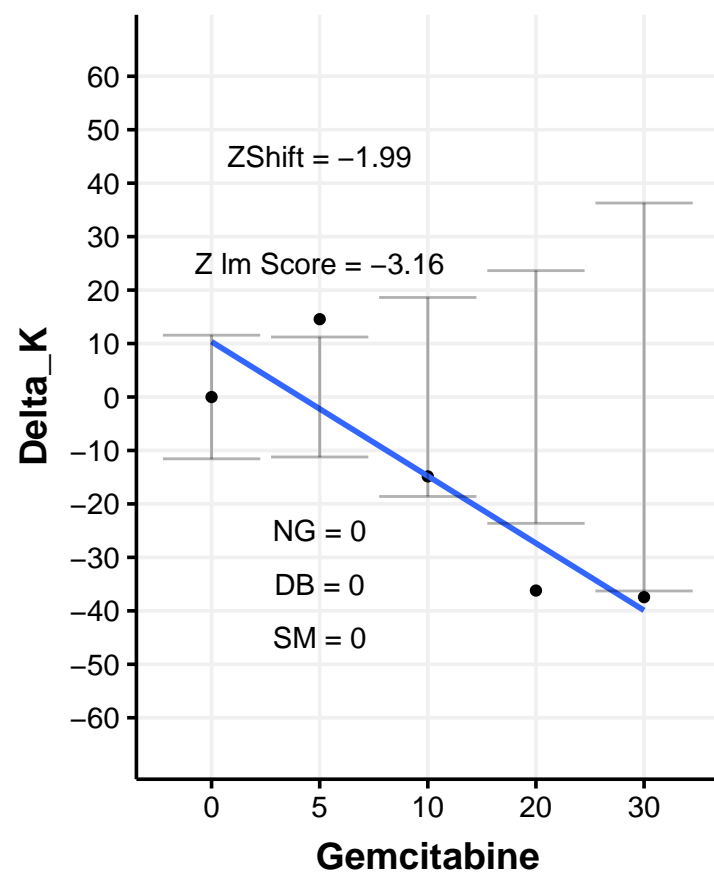

YDR524C-B\_2

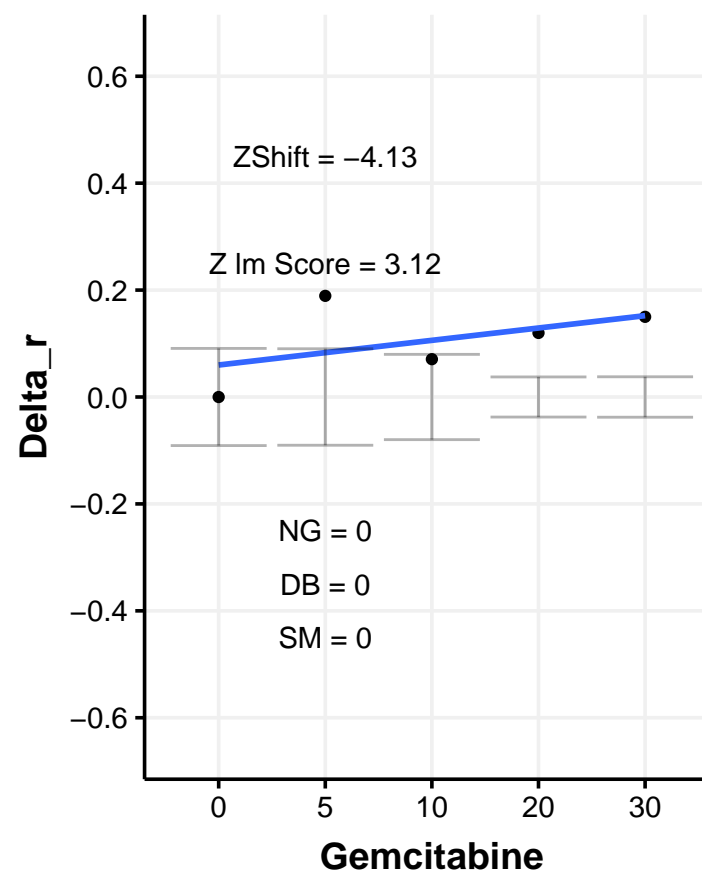

YDR524C-B\_2

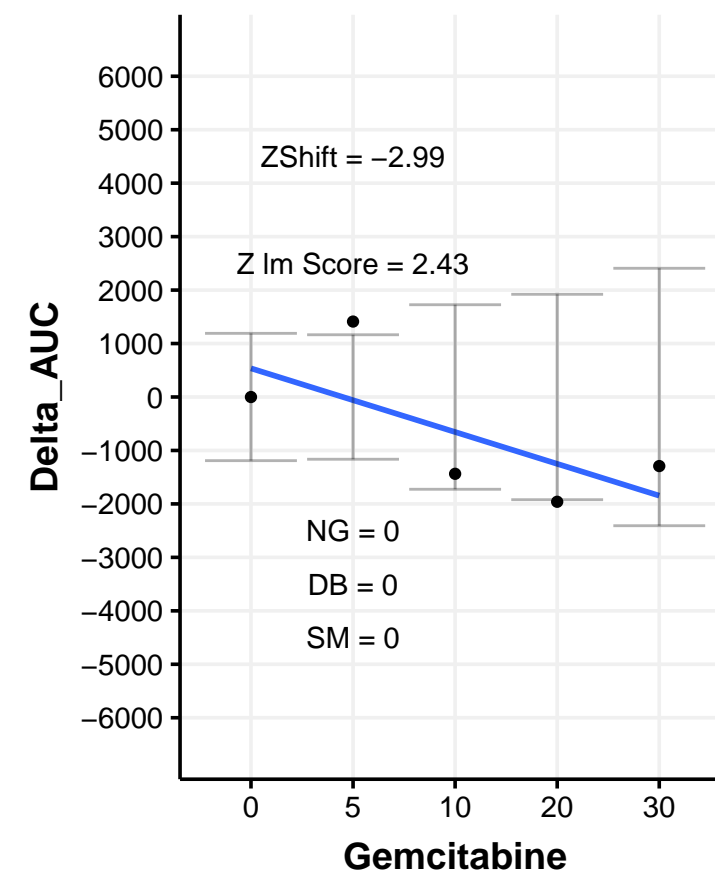

YNL086W

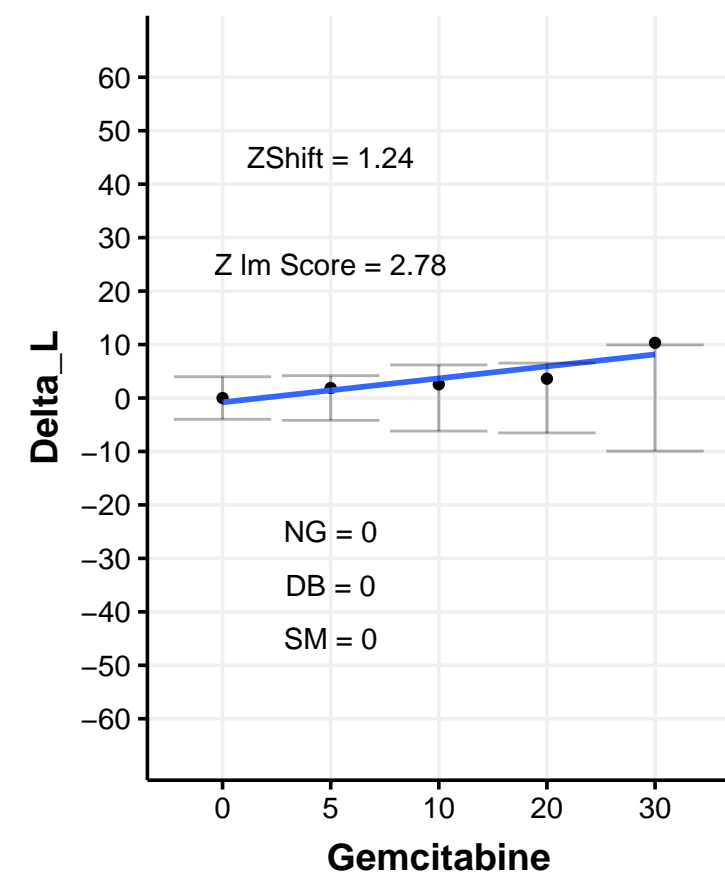

YNL086W

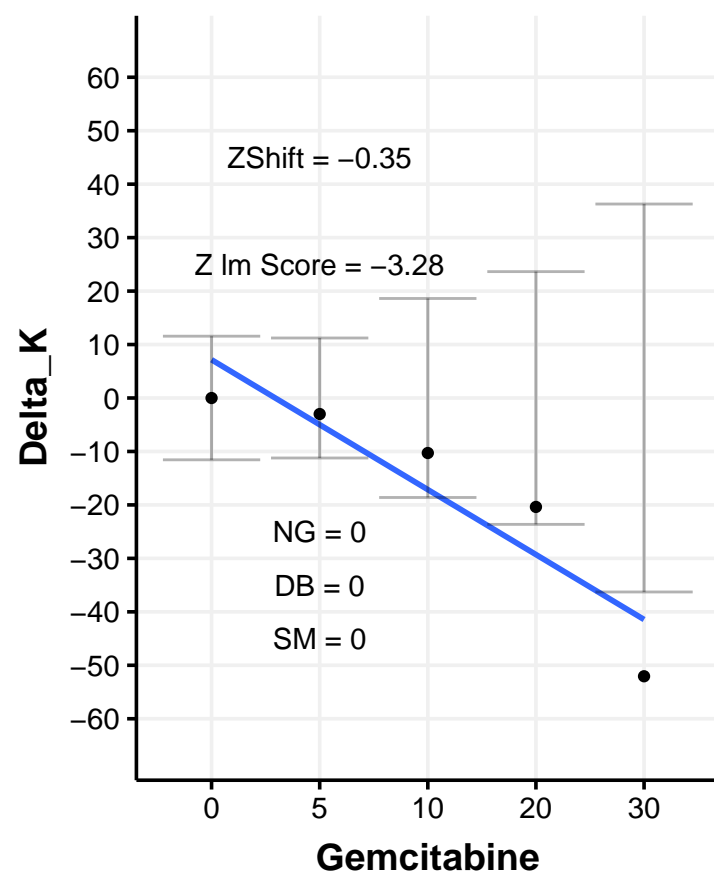

YNL086W

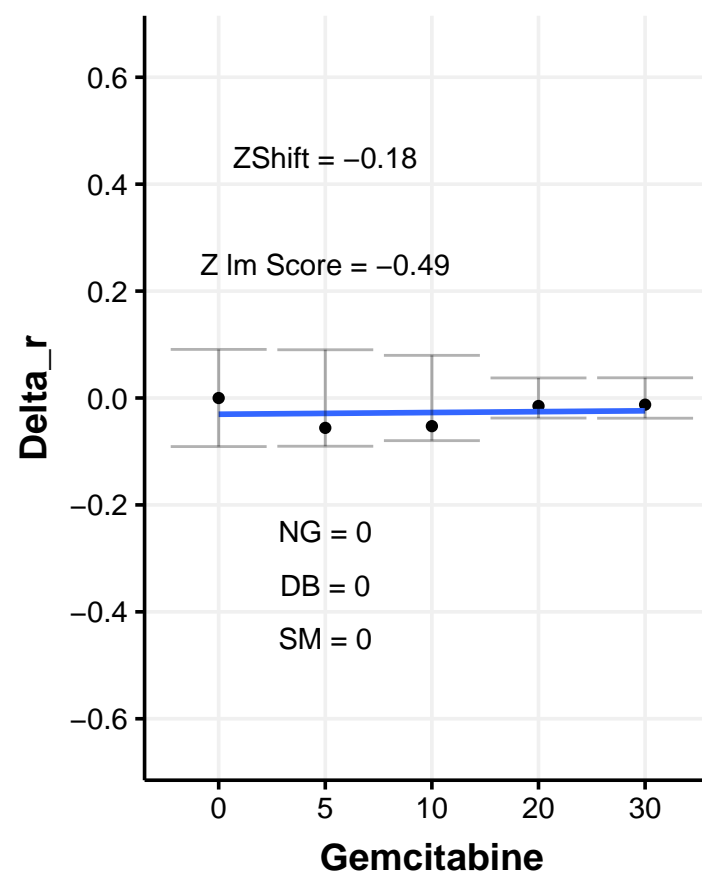

YNL086W

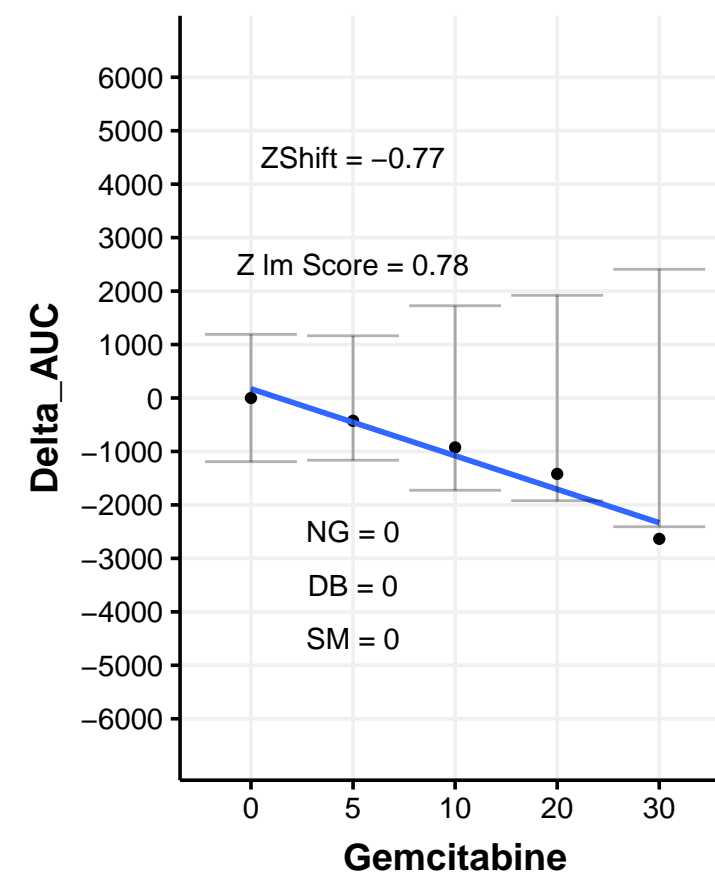

YDR486C VPS60

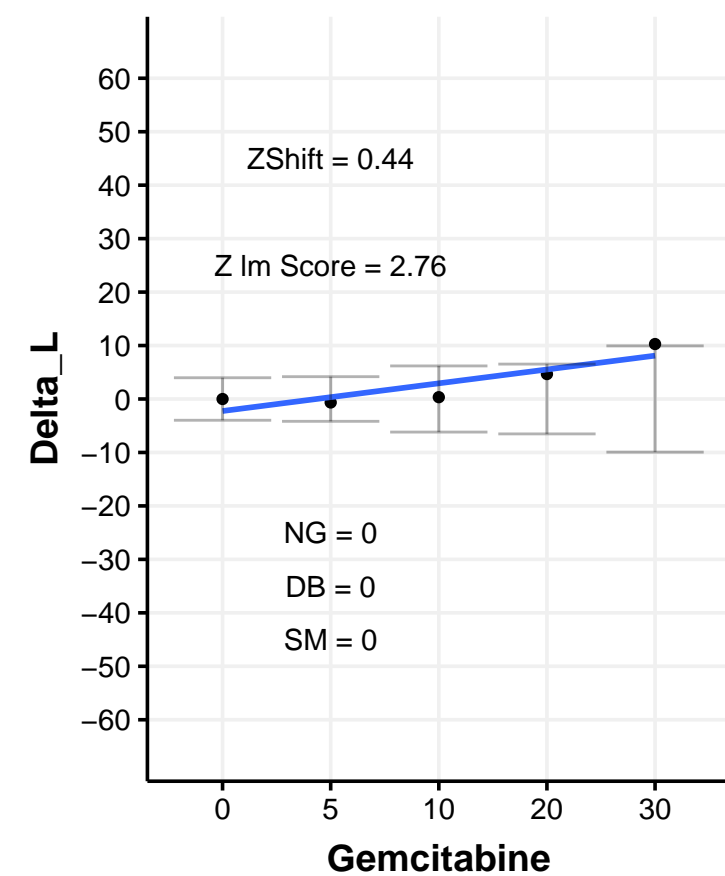

YDR486C VPS60

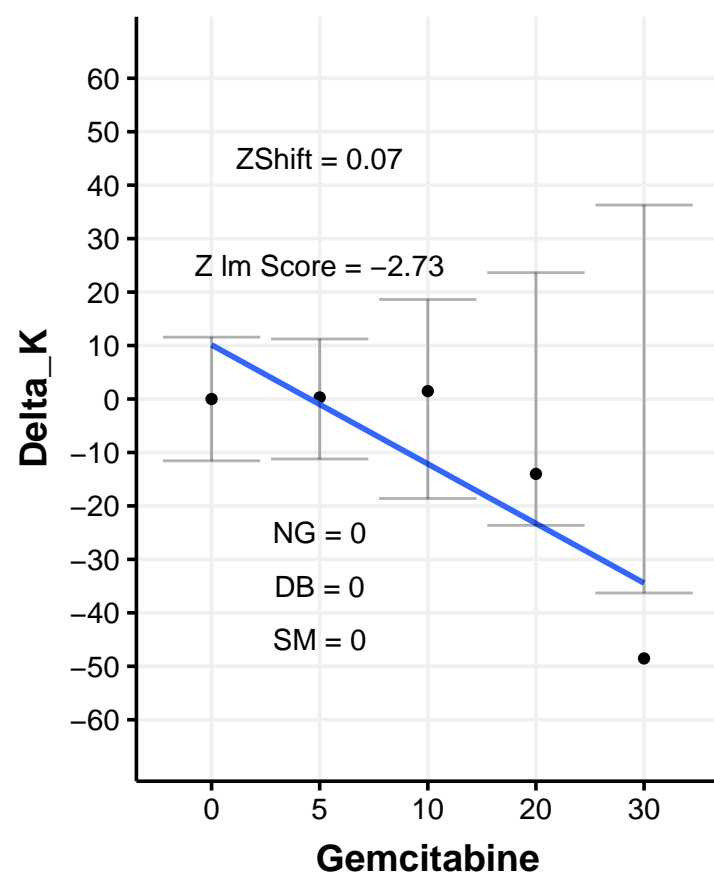

YDR486C VPS60

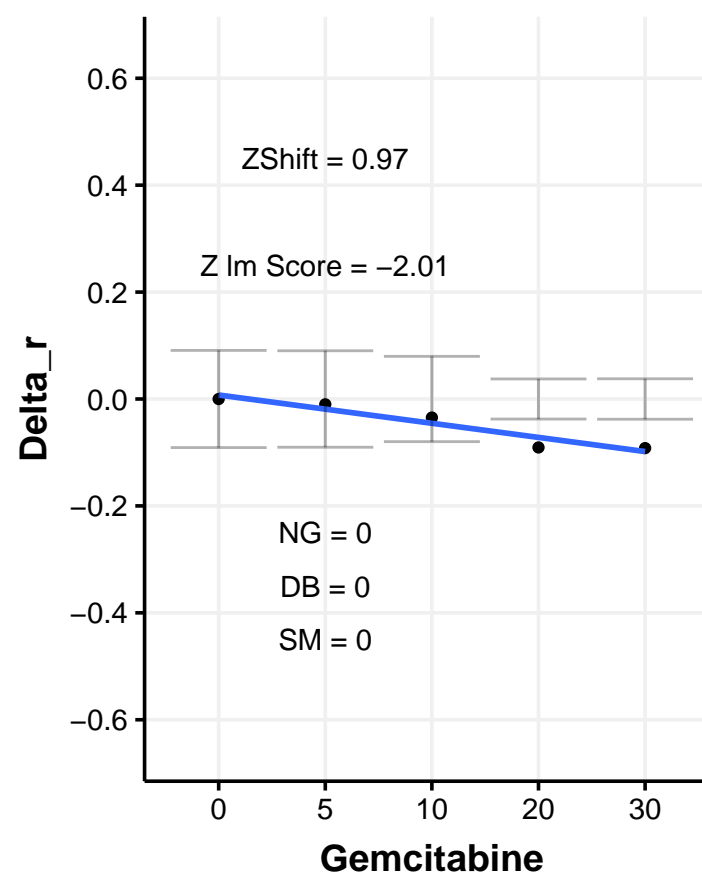

YDR486C VPS60

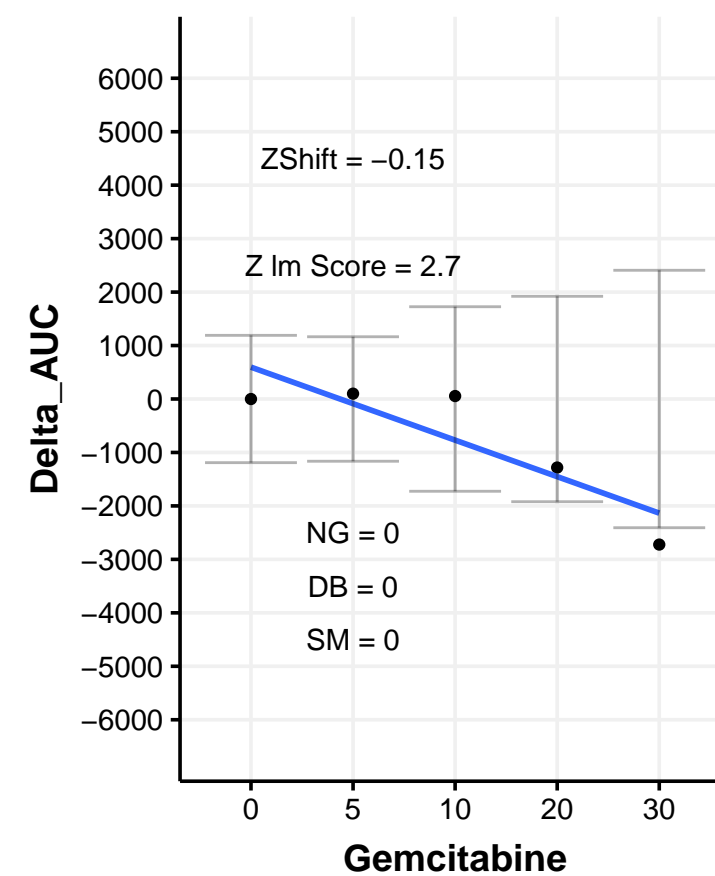

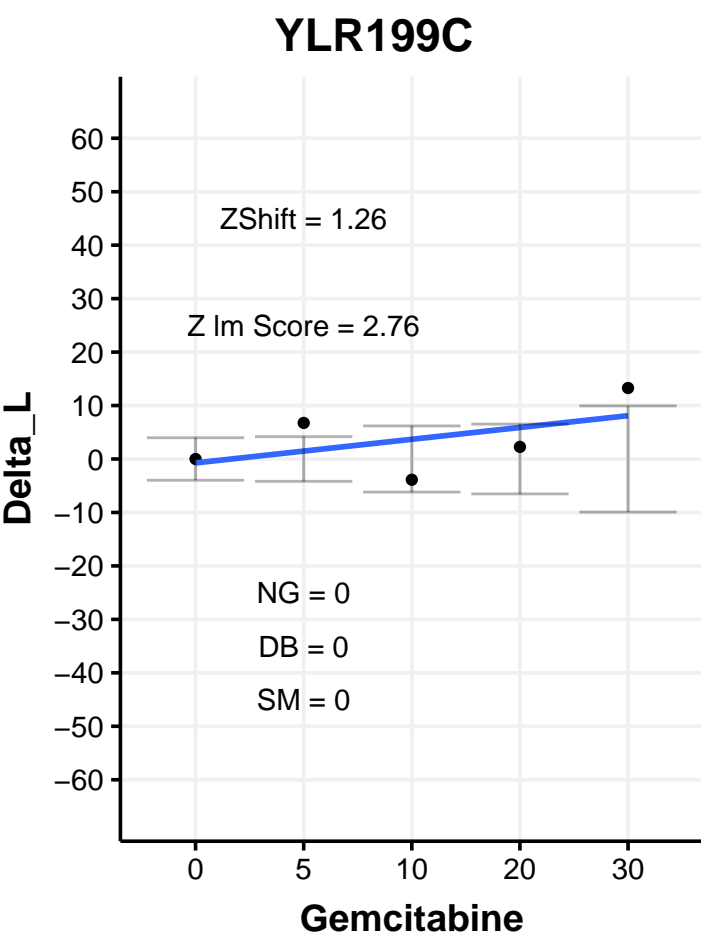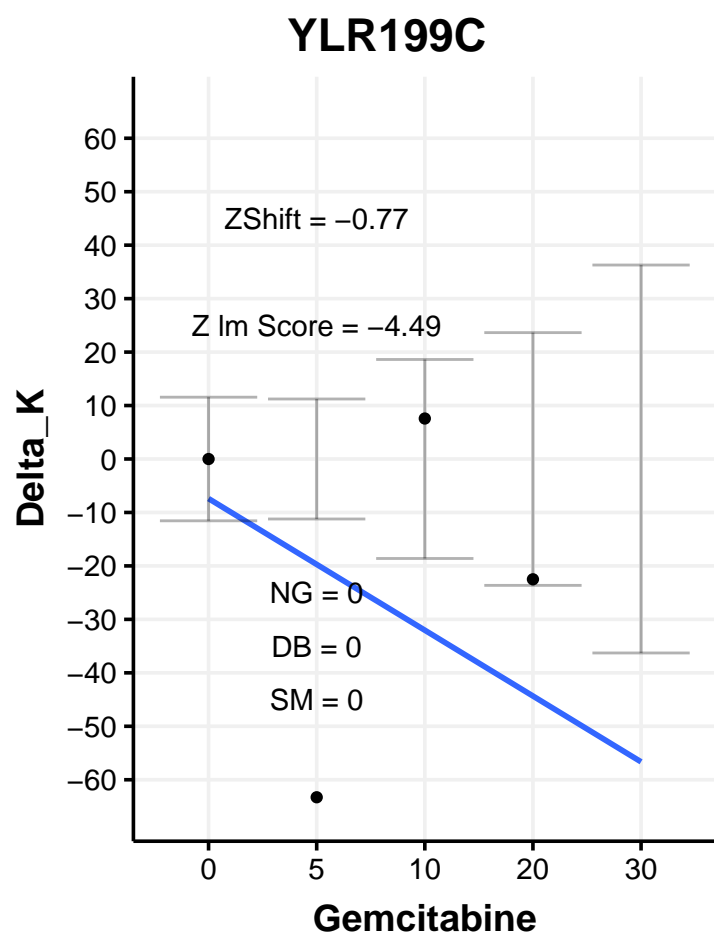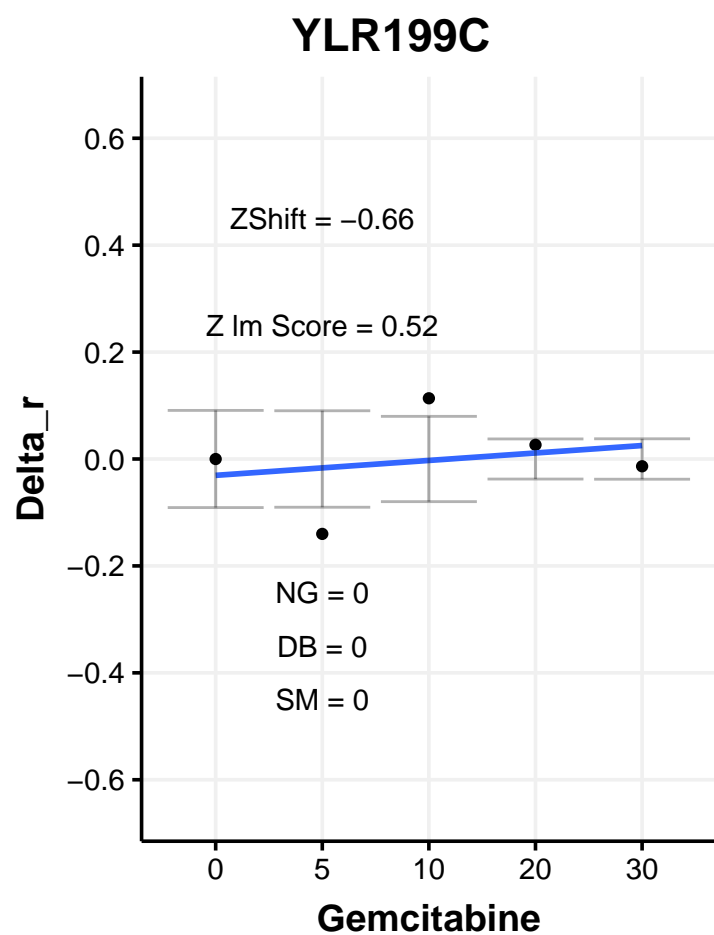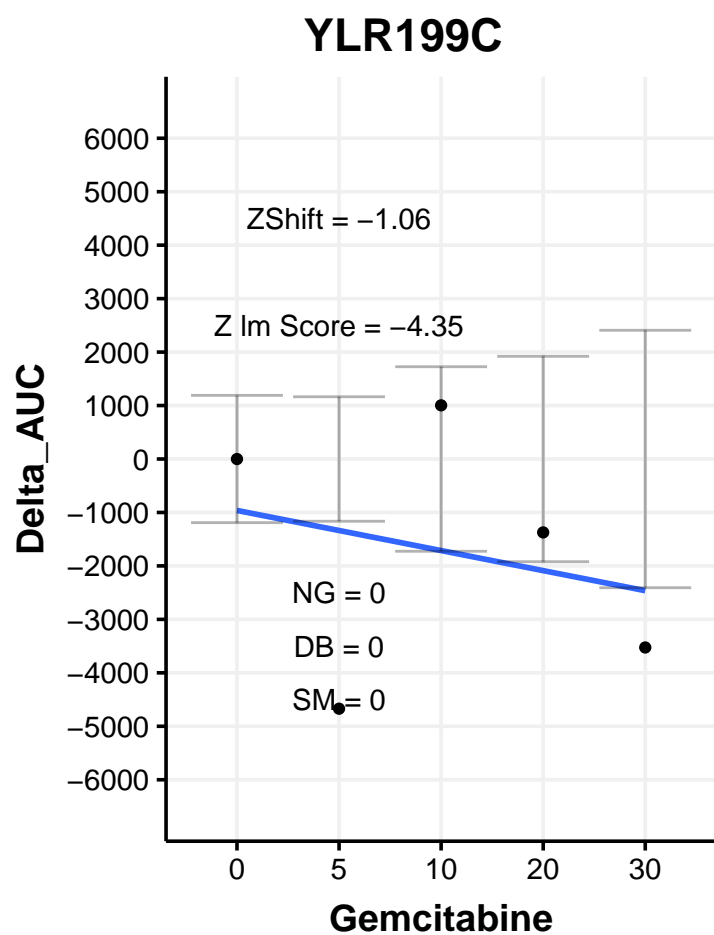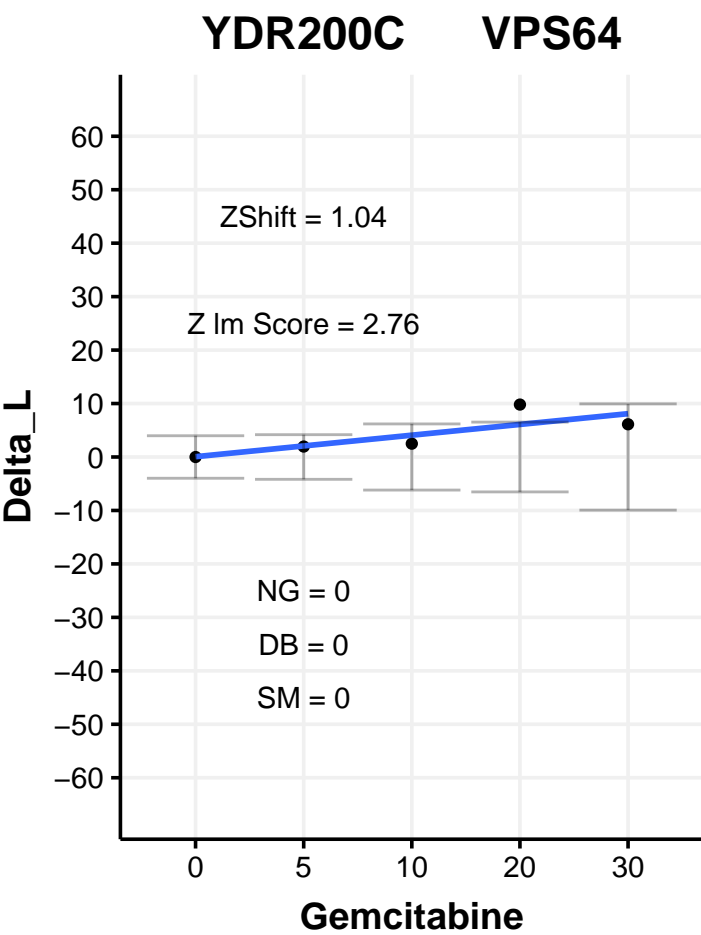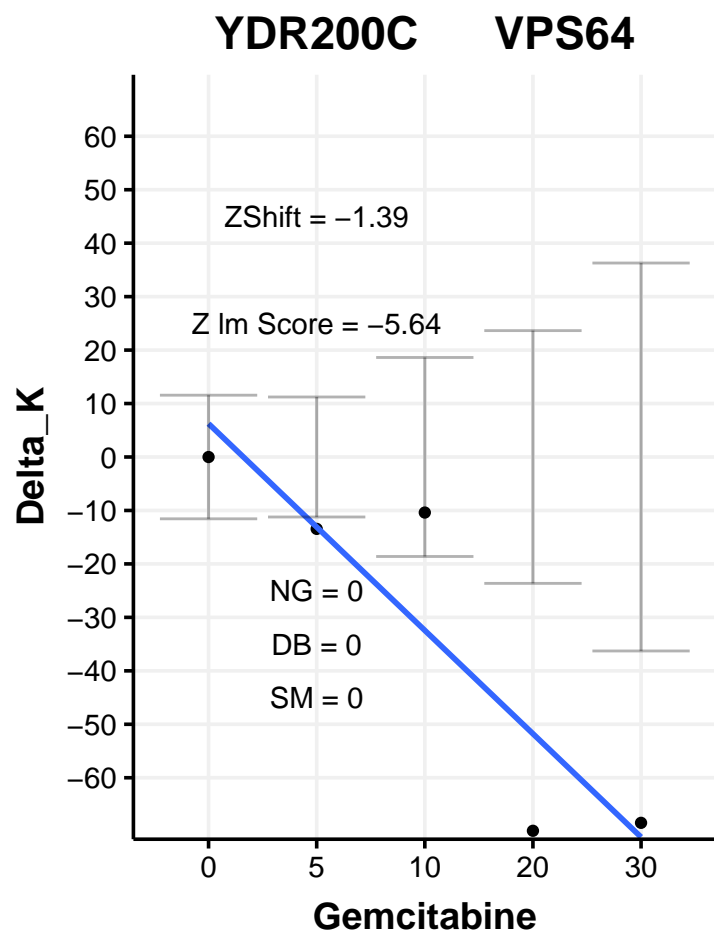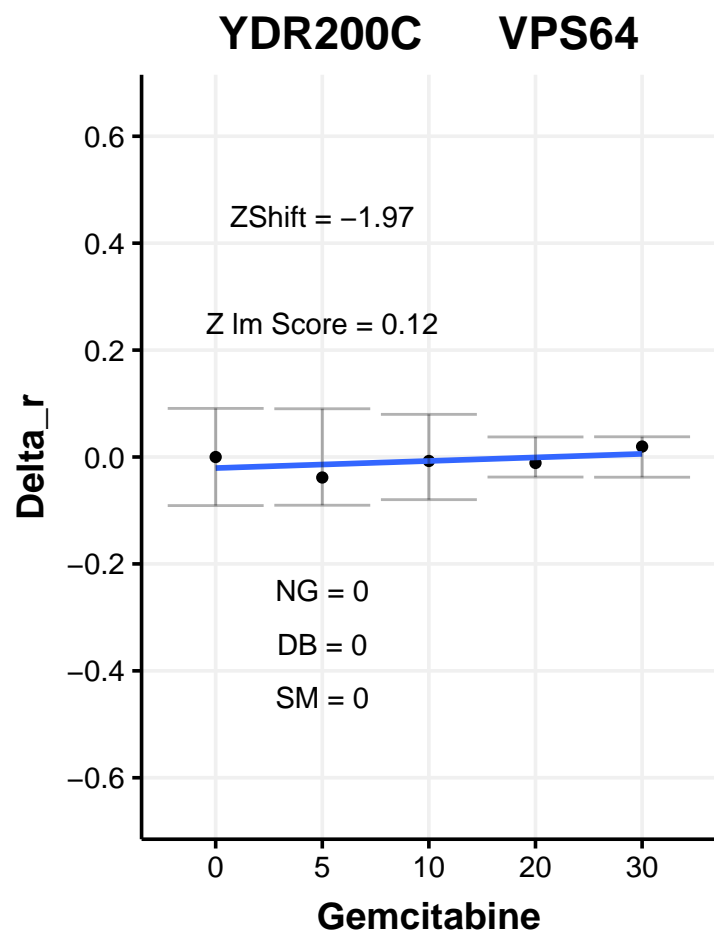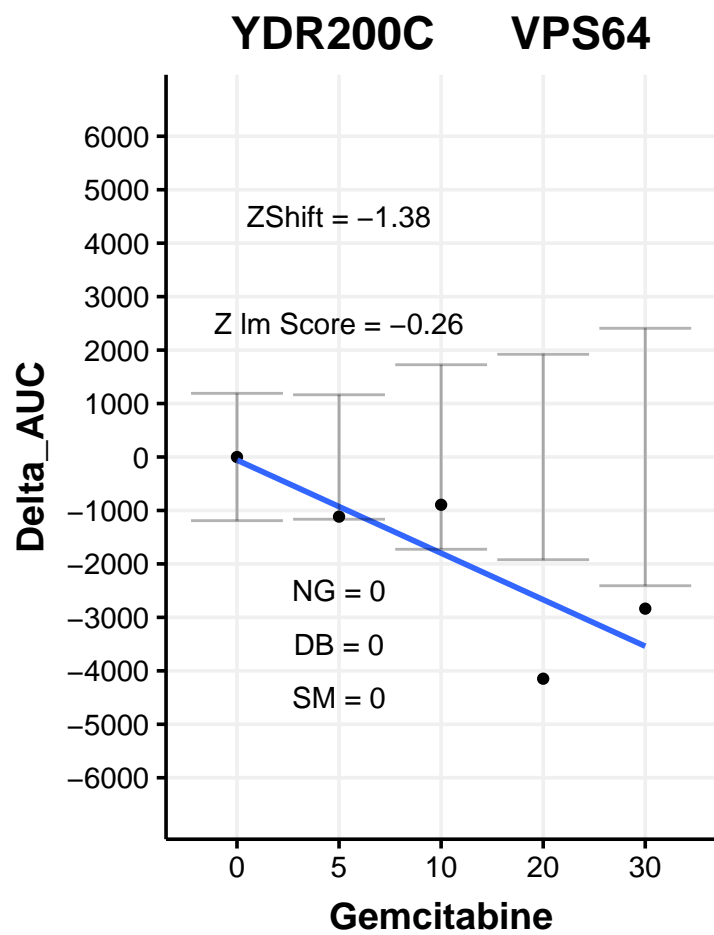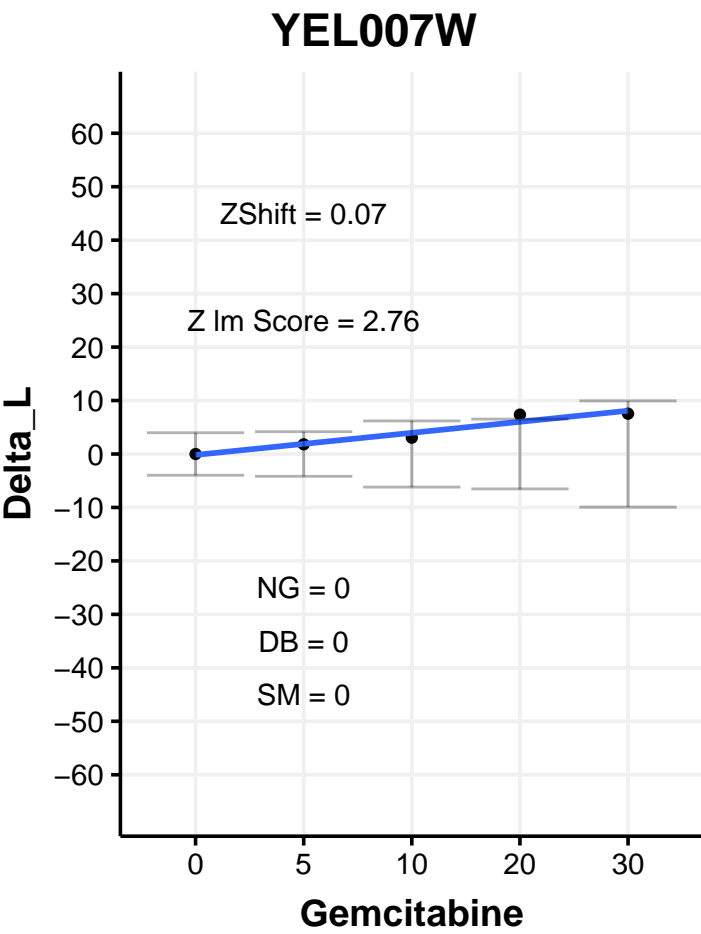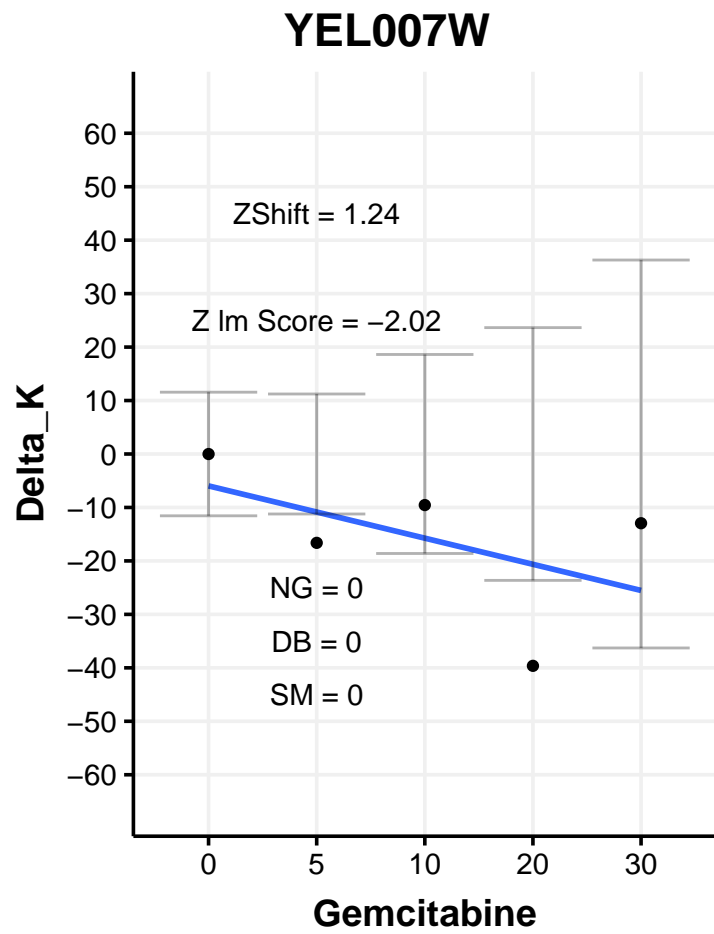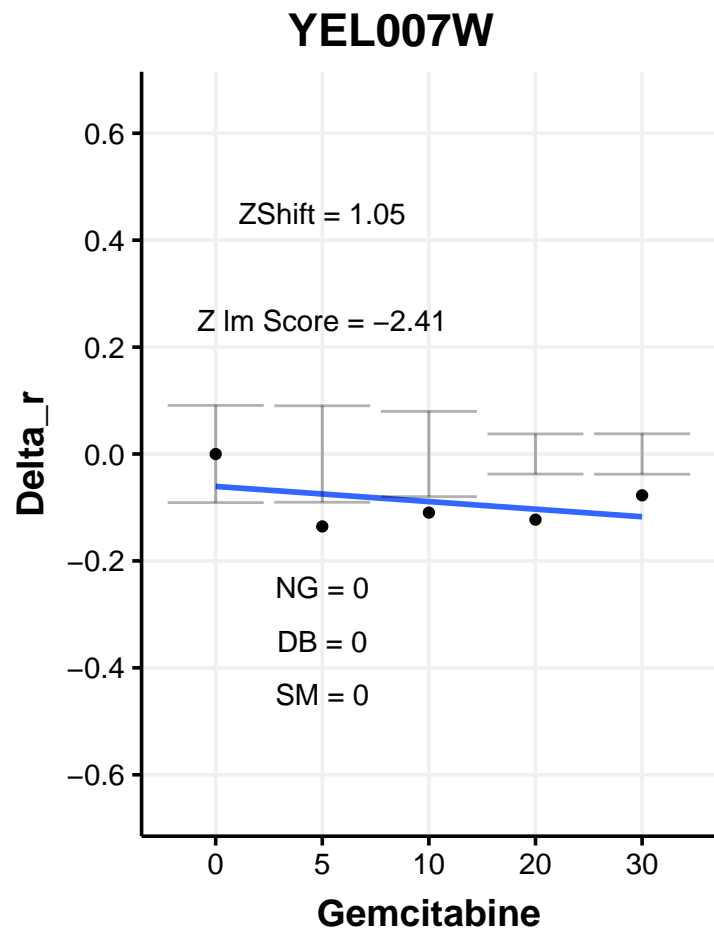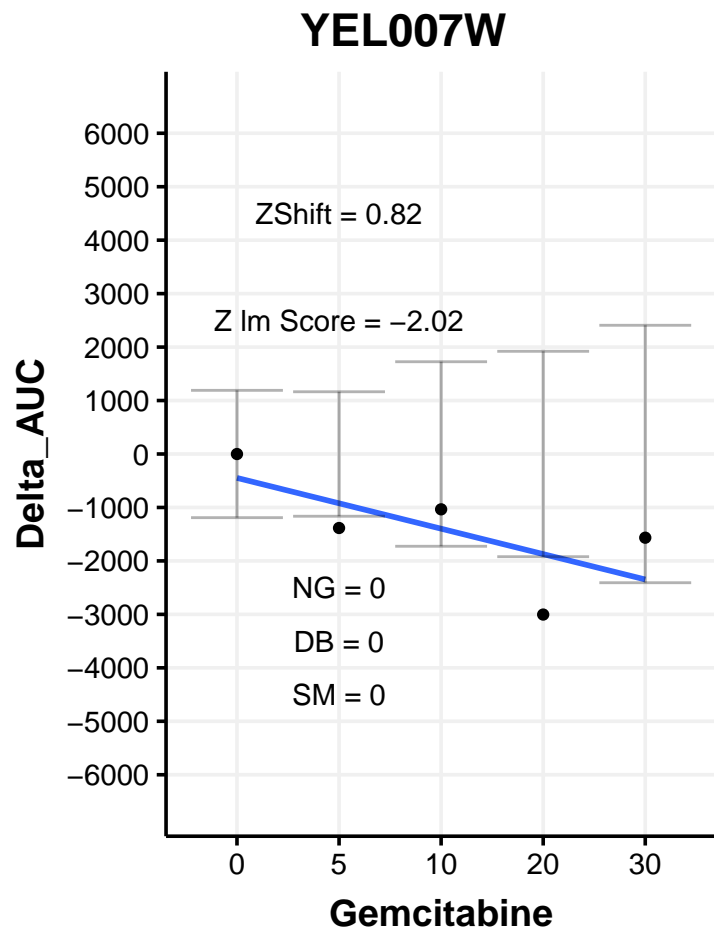



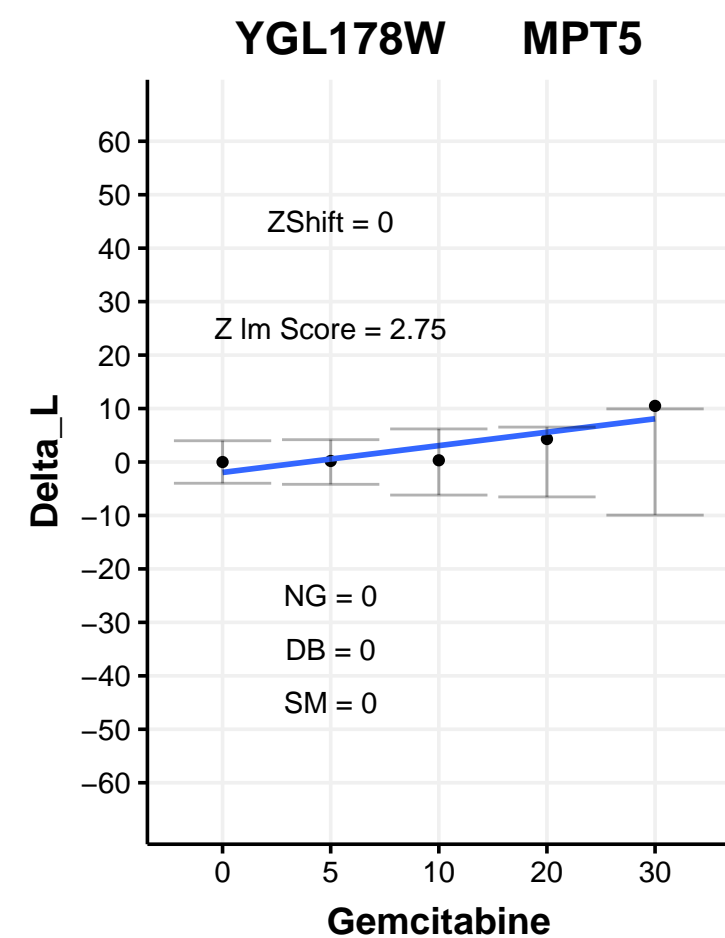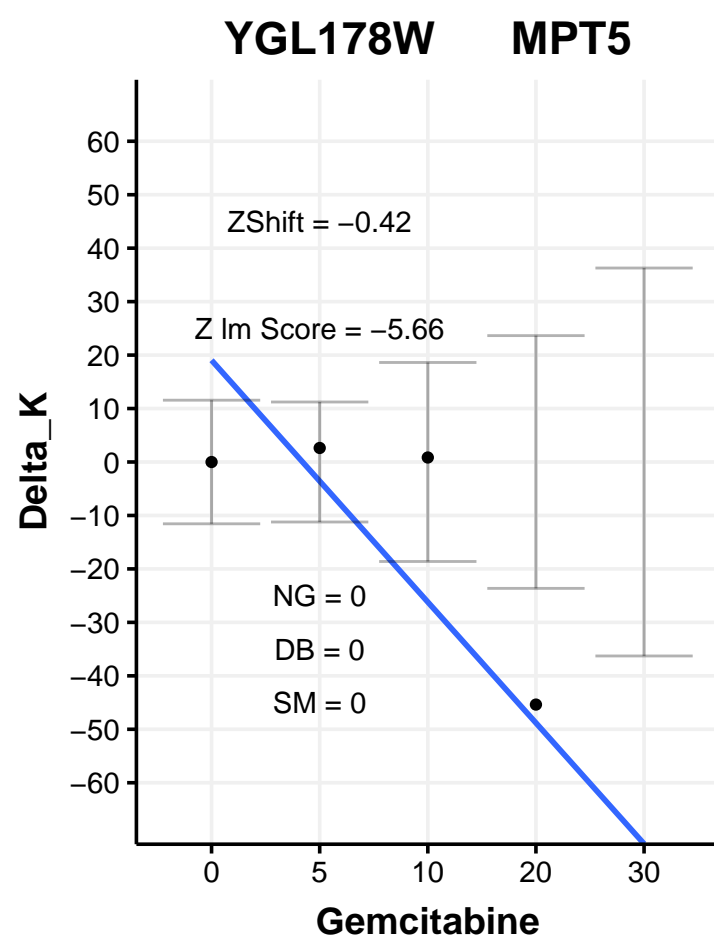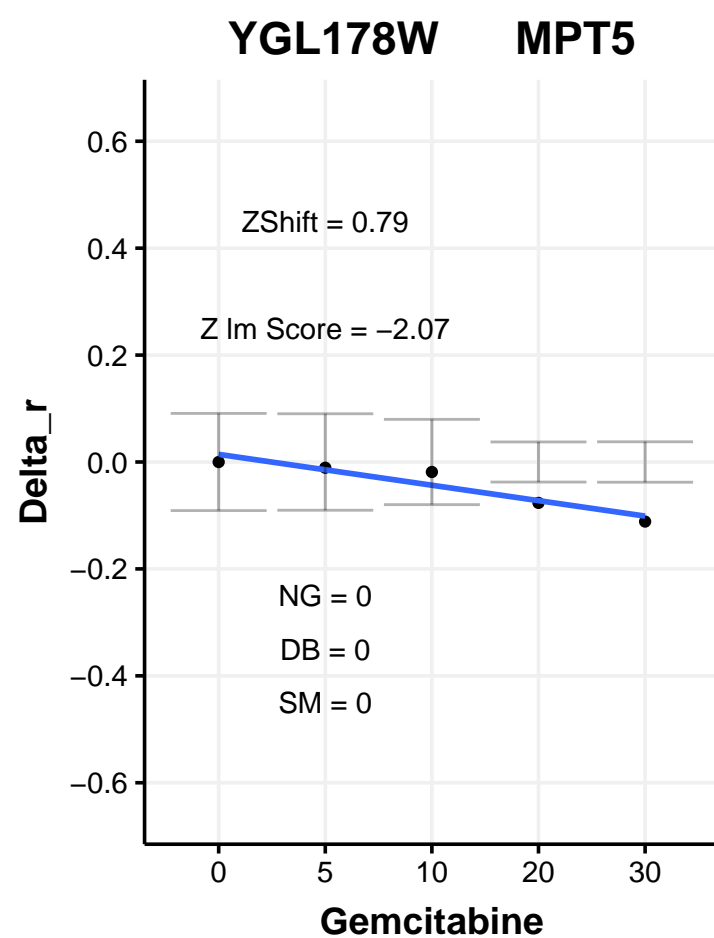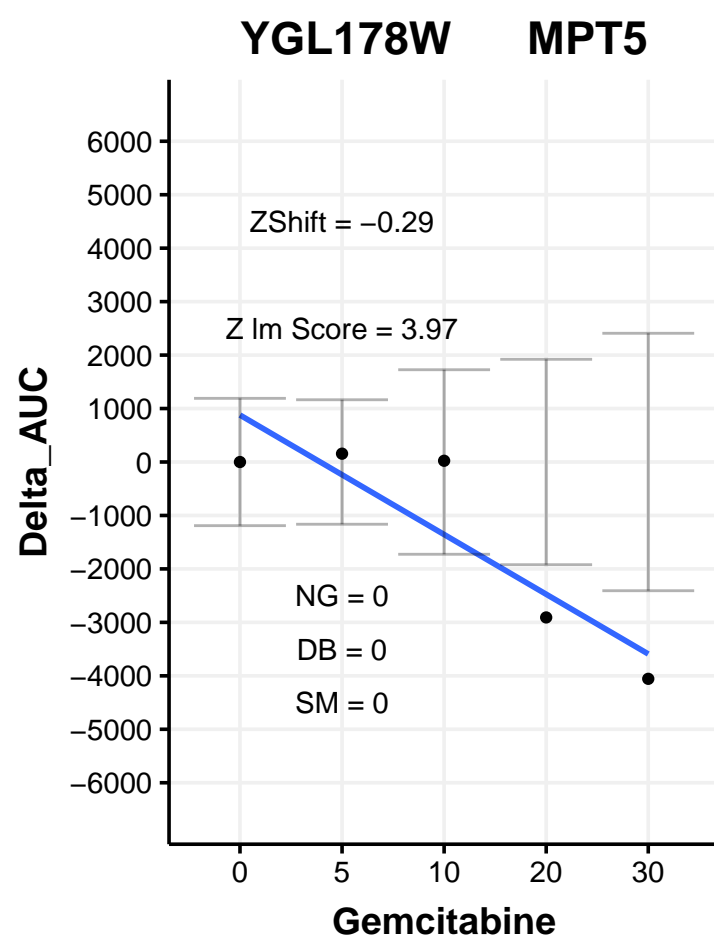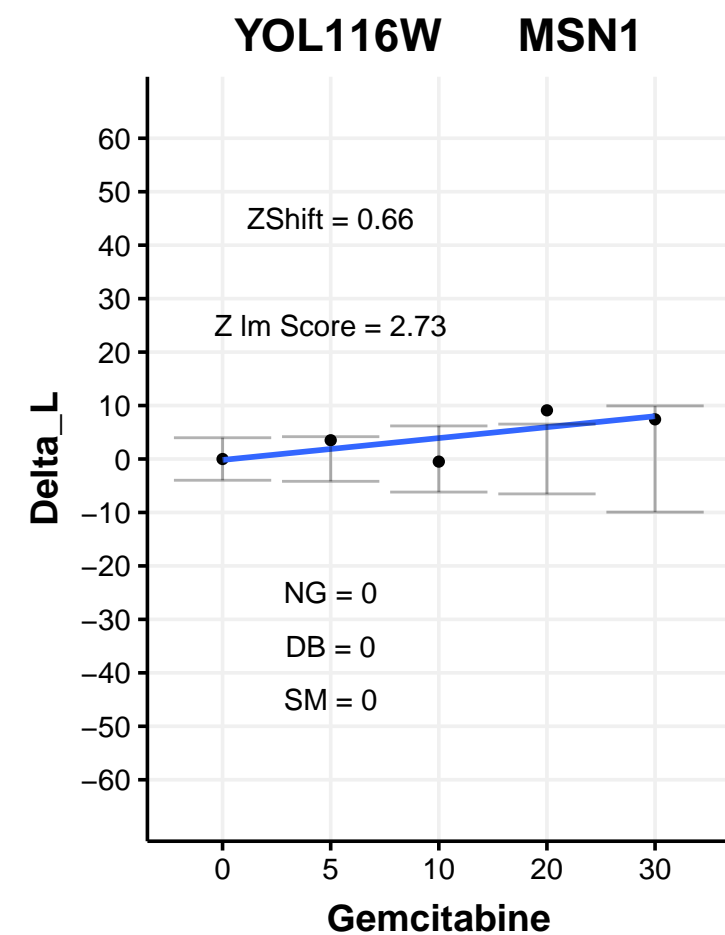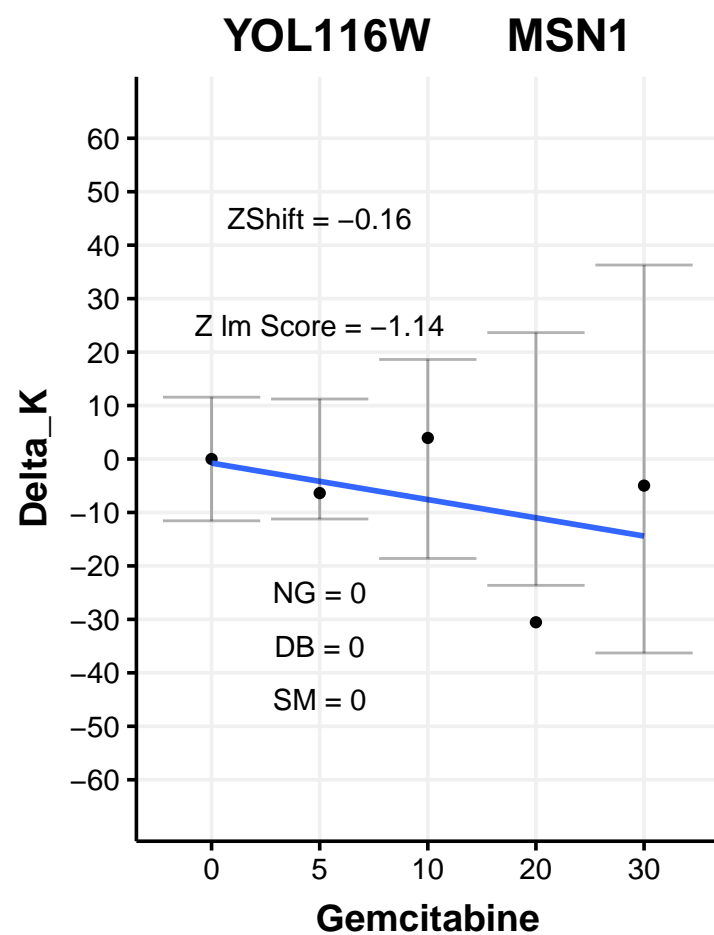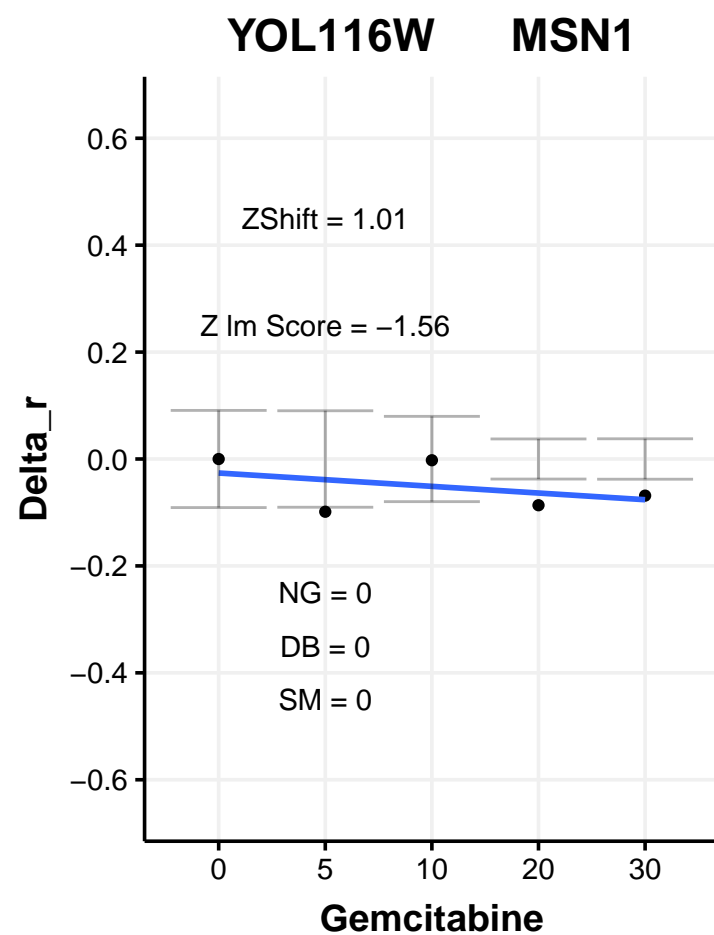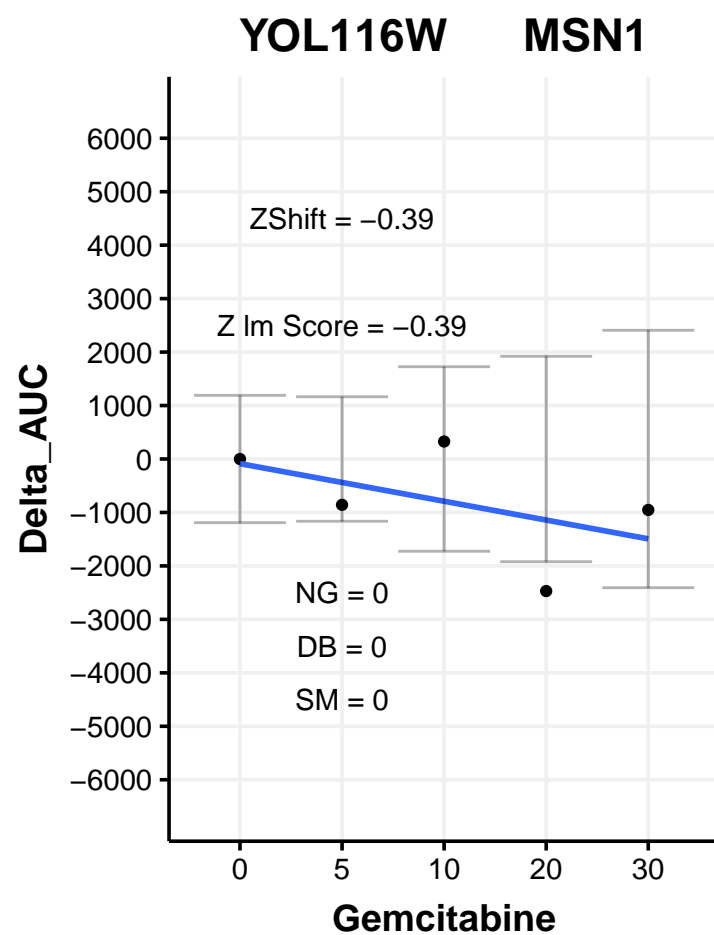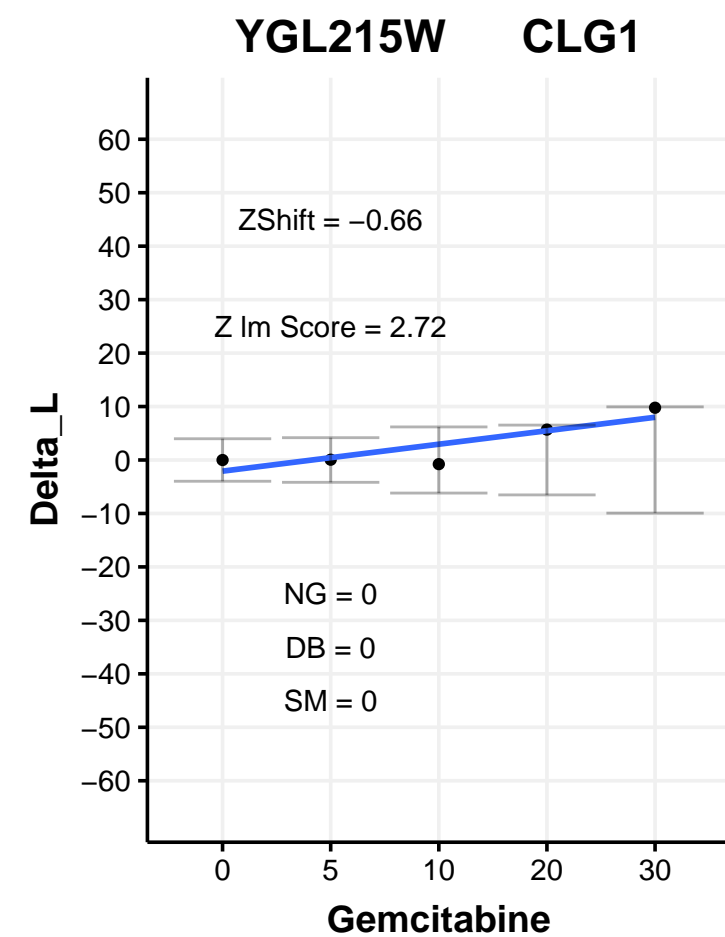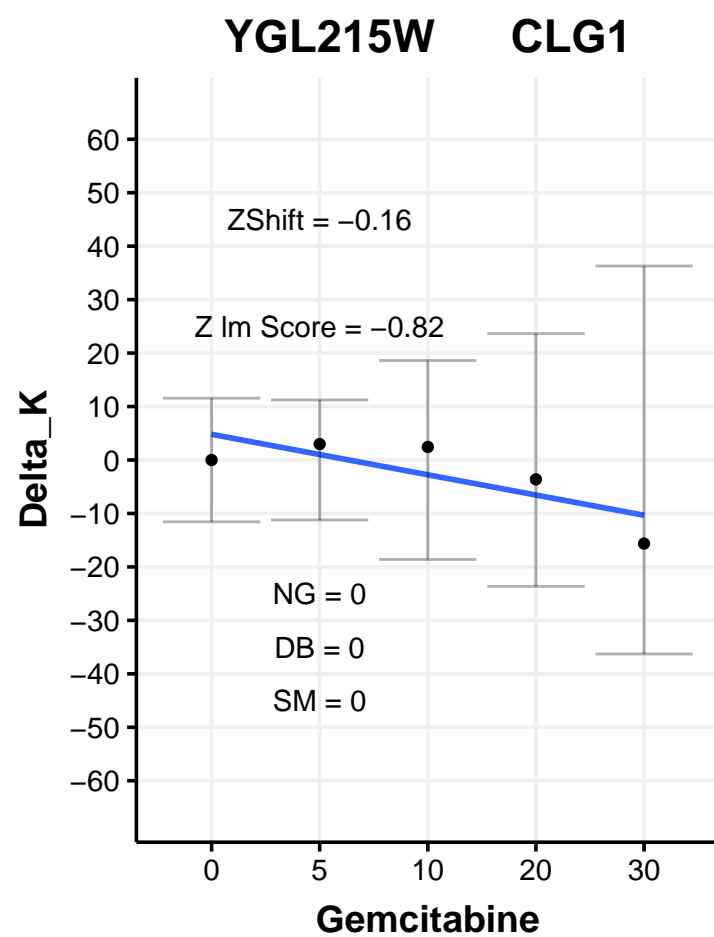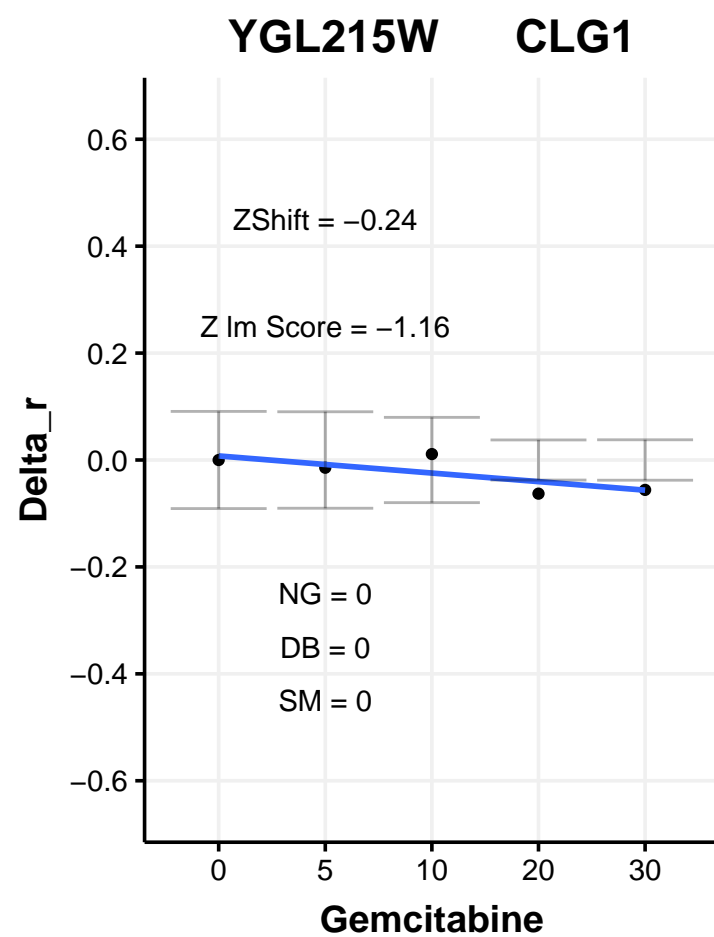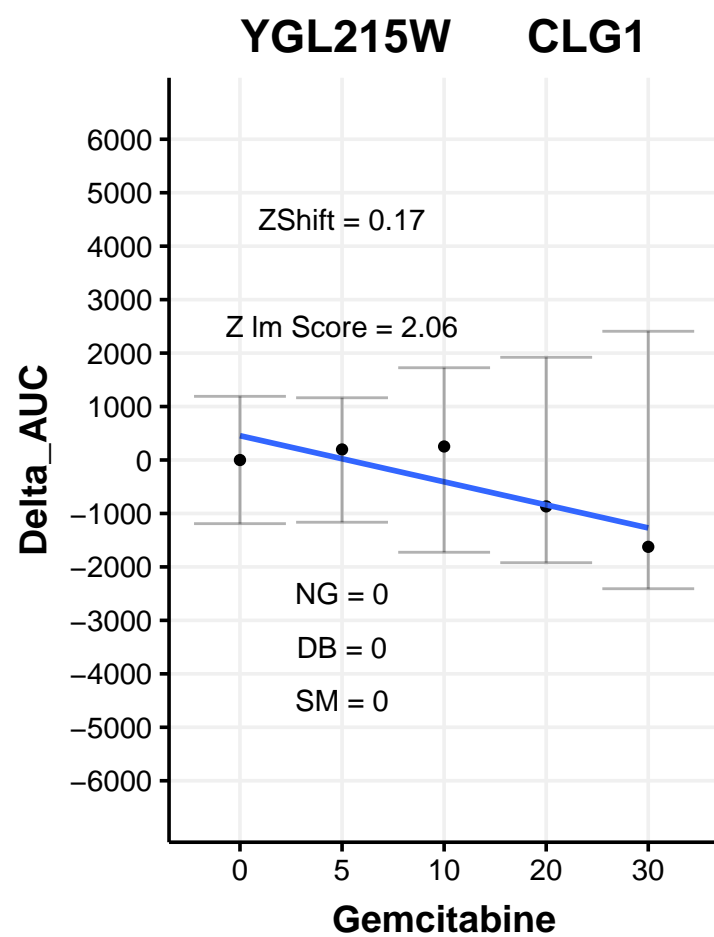

YER087C-A

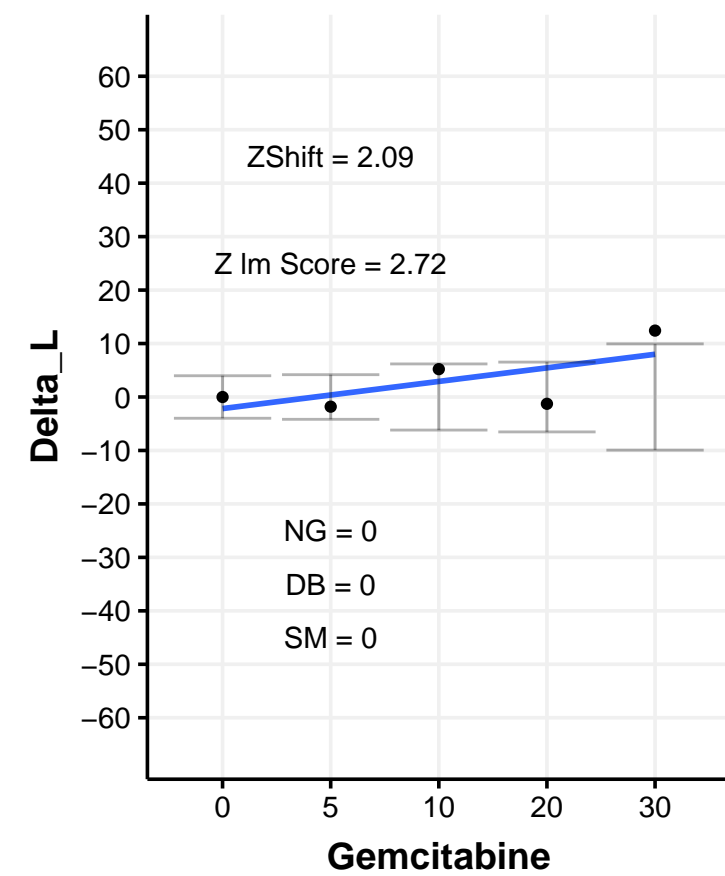

YER087C-A

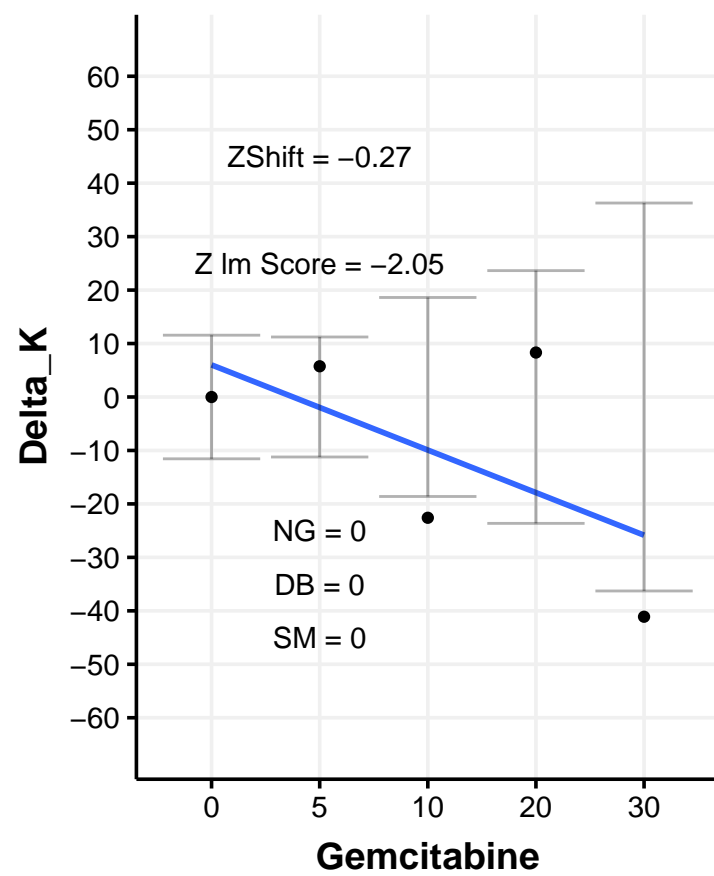

YER087C-A

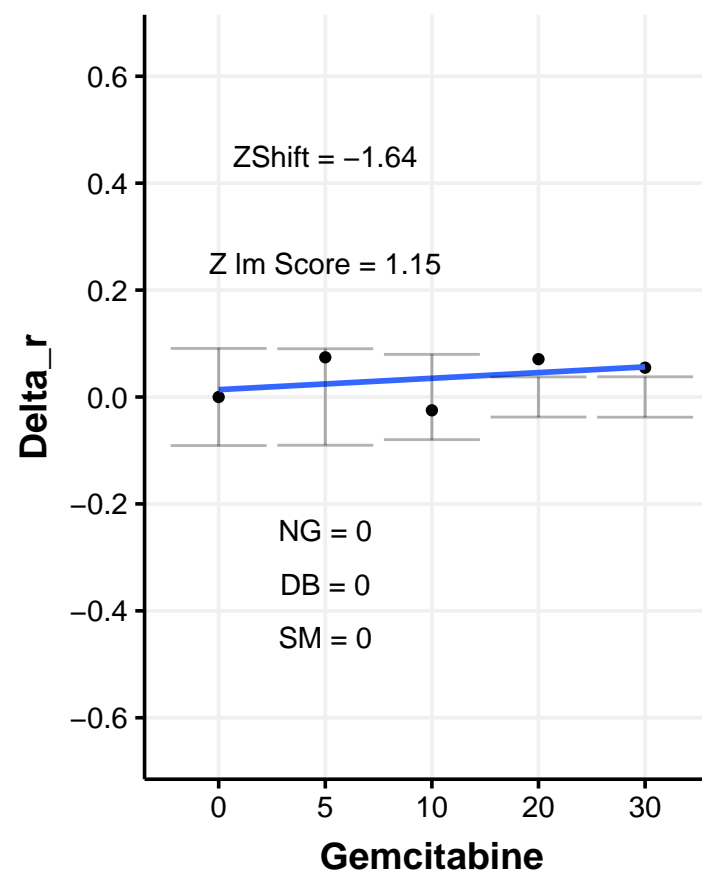

YER087C-A

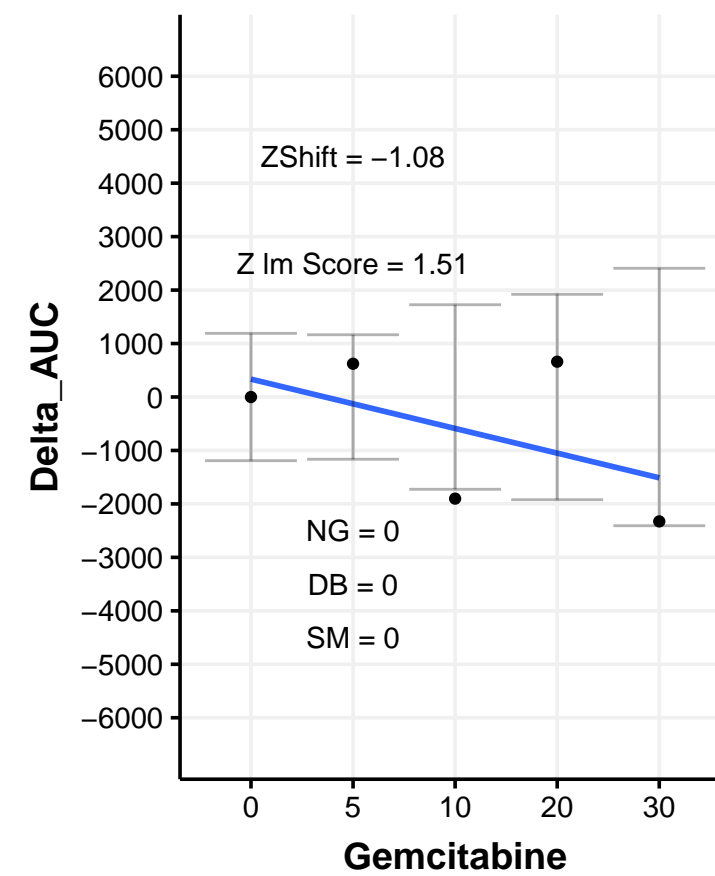

YCR088W ABP1

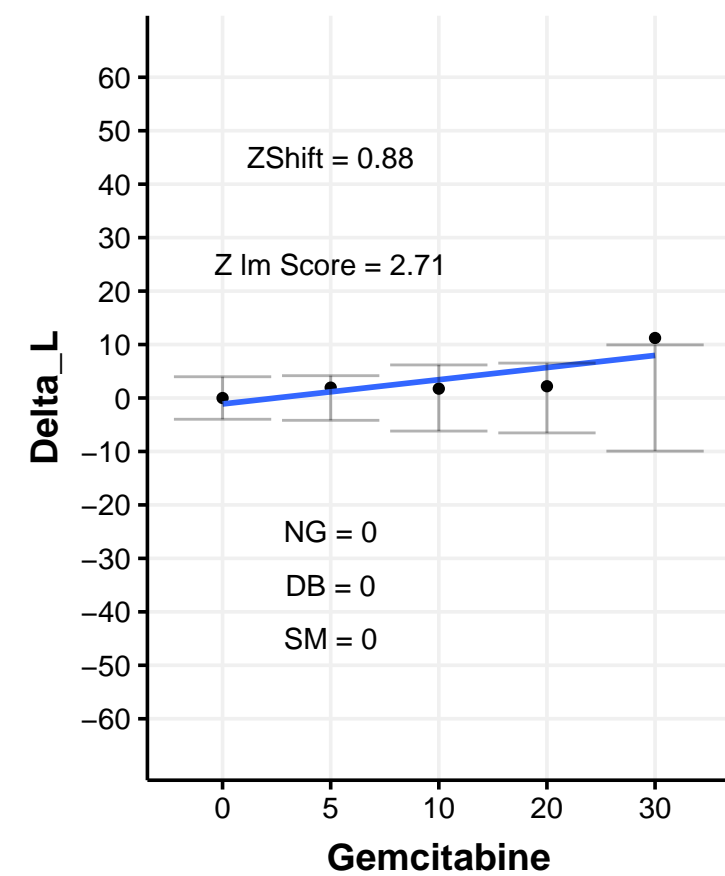

YCR088W ABP1

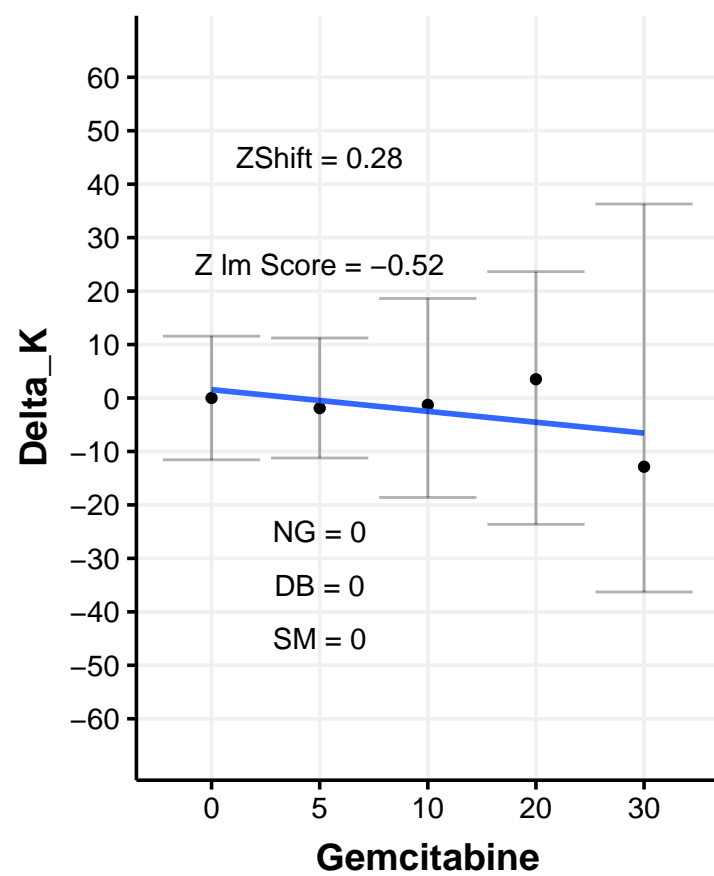

YCR088W ABP1

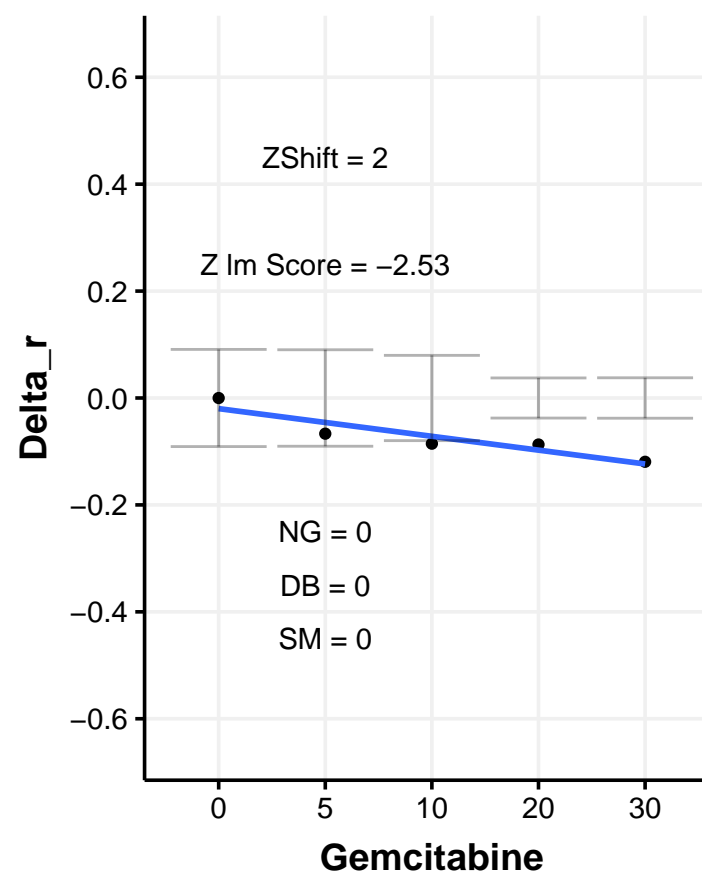

YCR088W ABP1

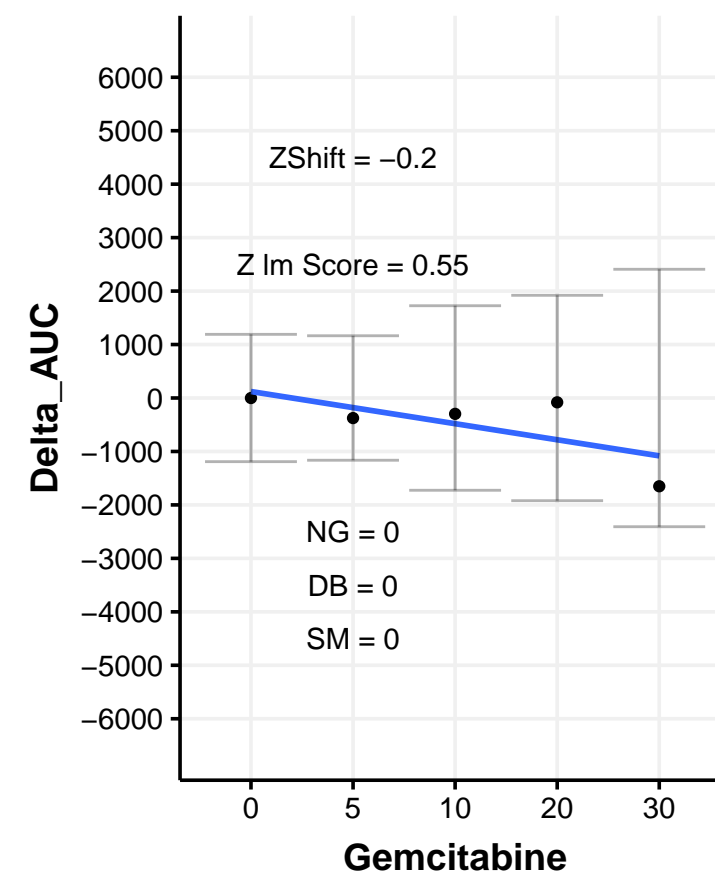

YER066W

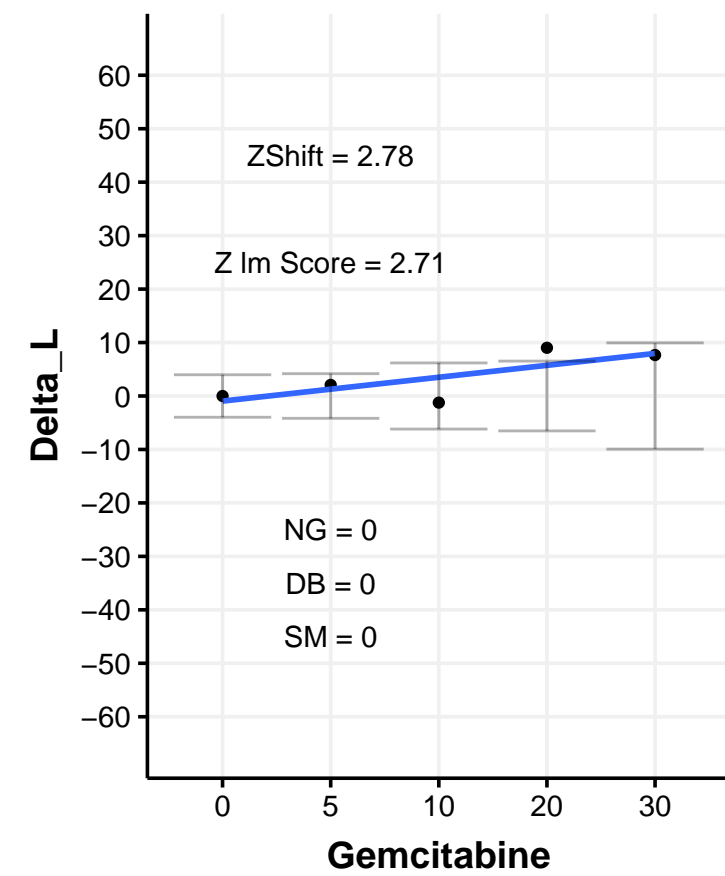

YER066W

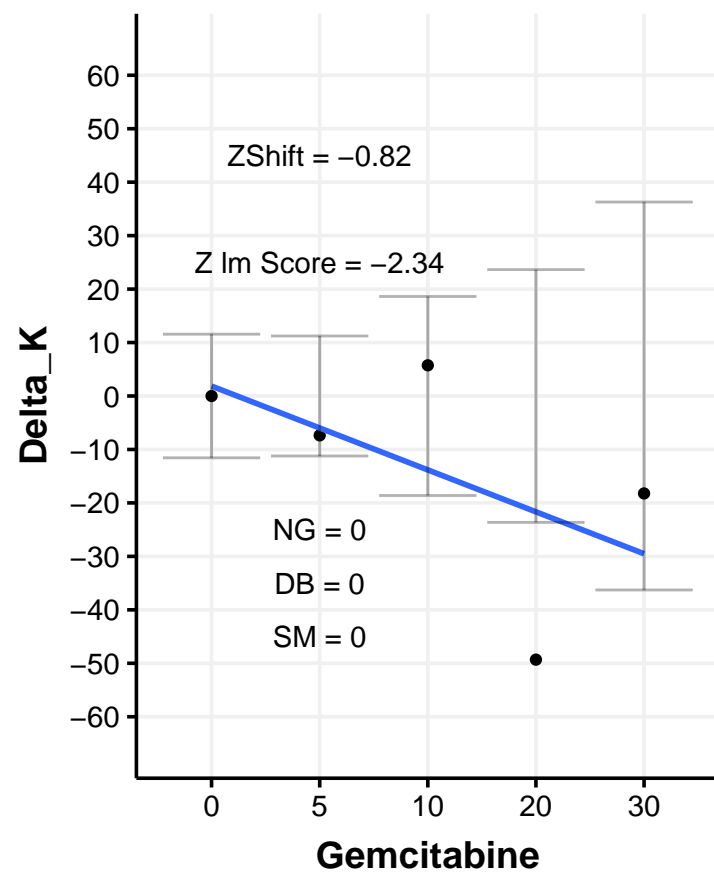

YER066W

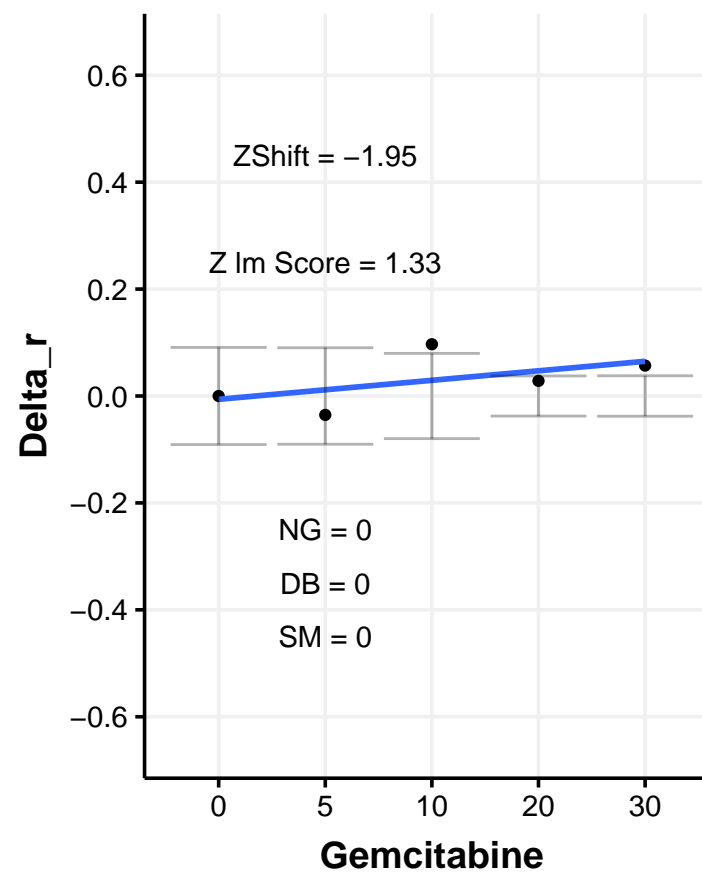

YER066W

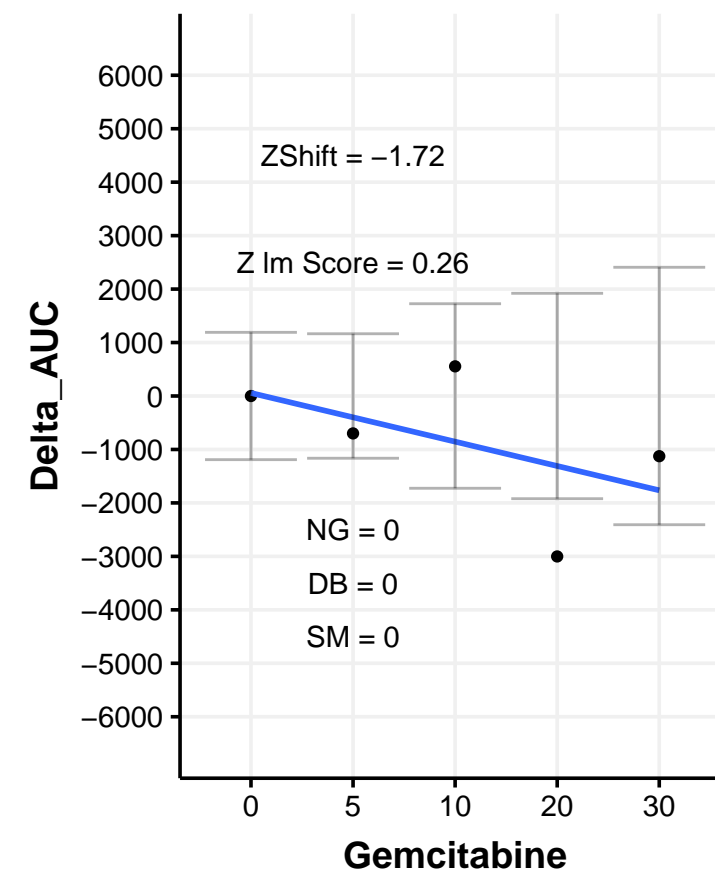

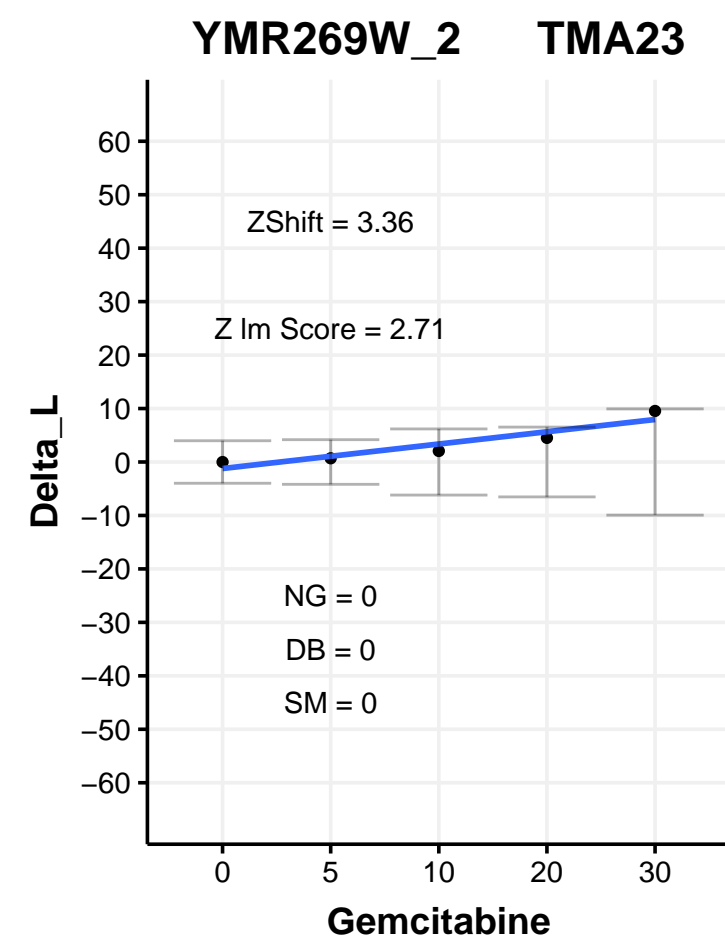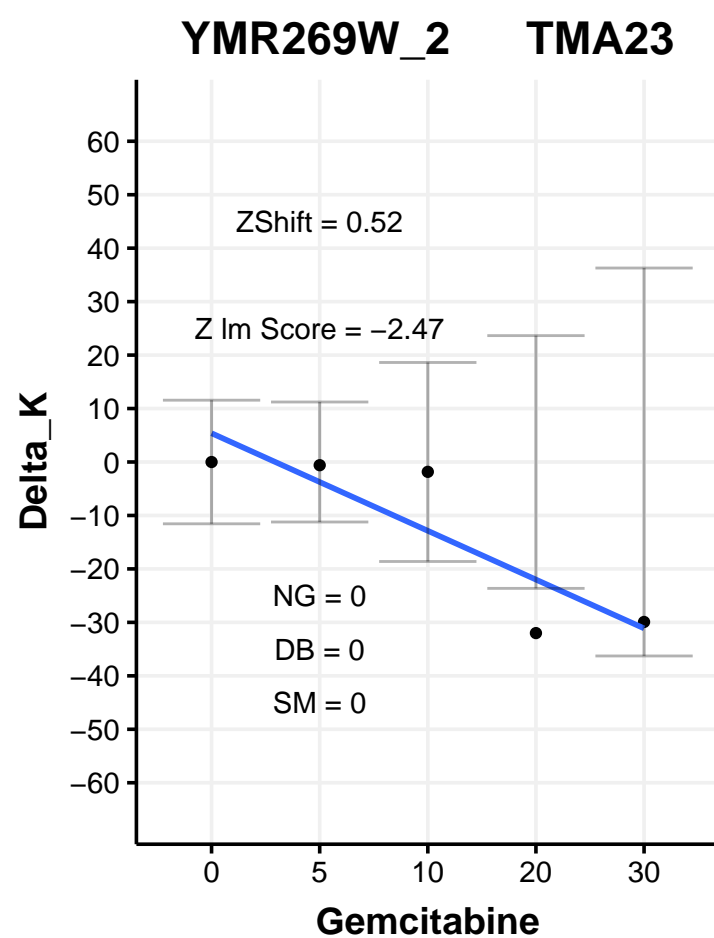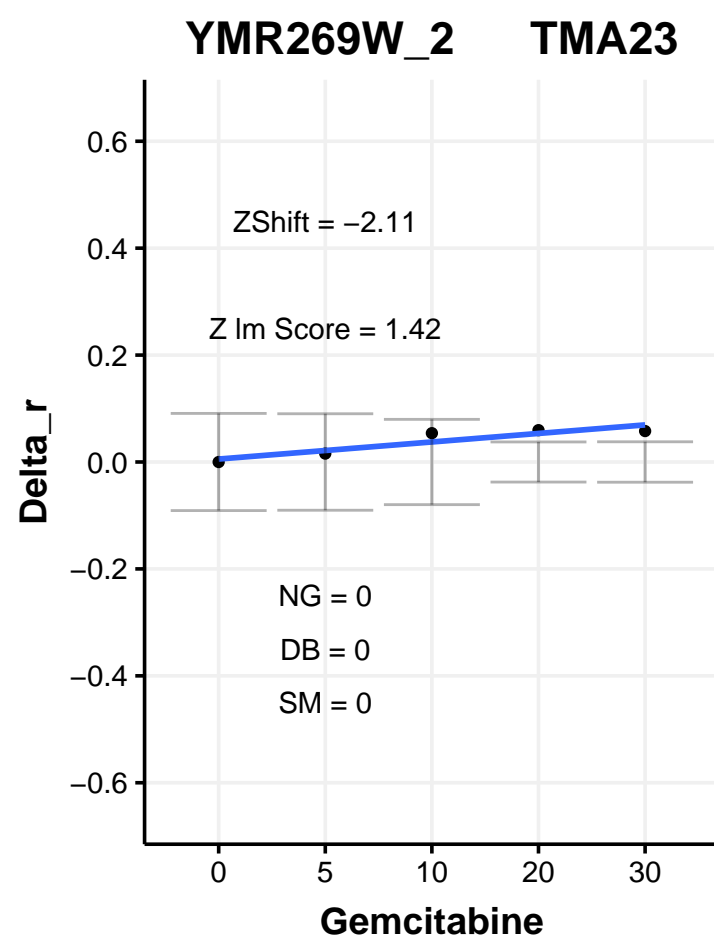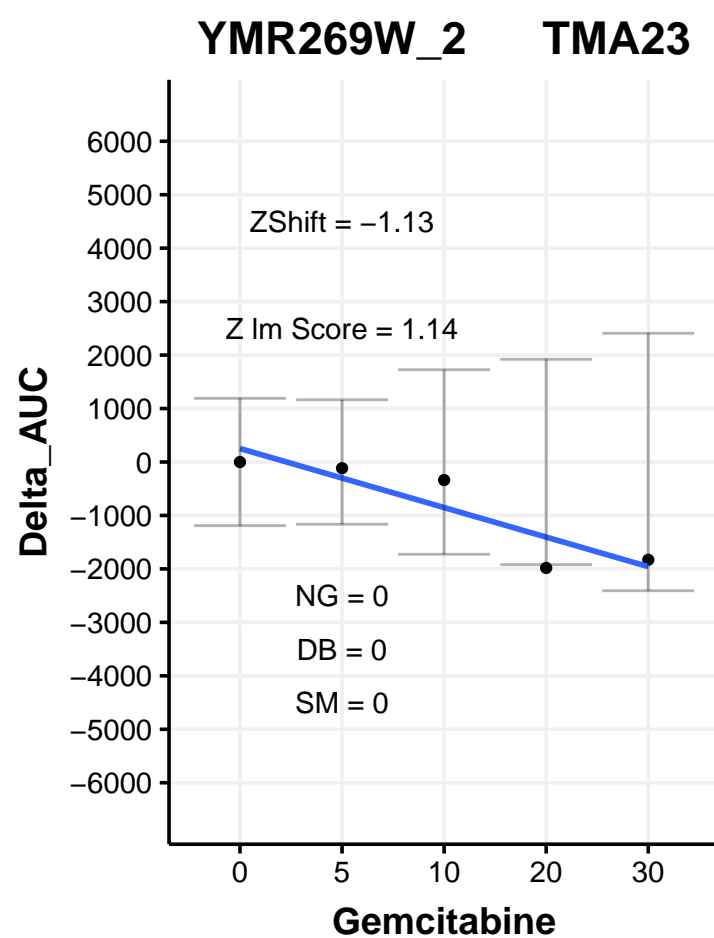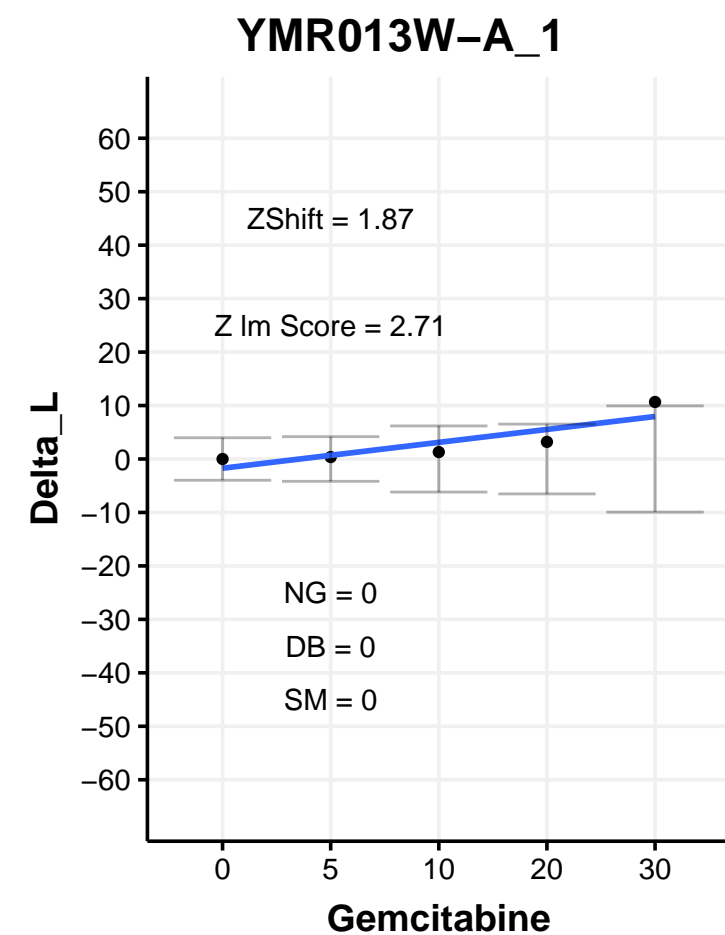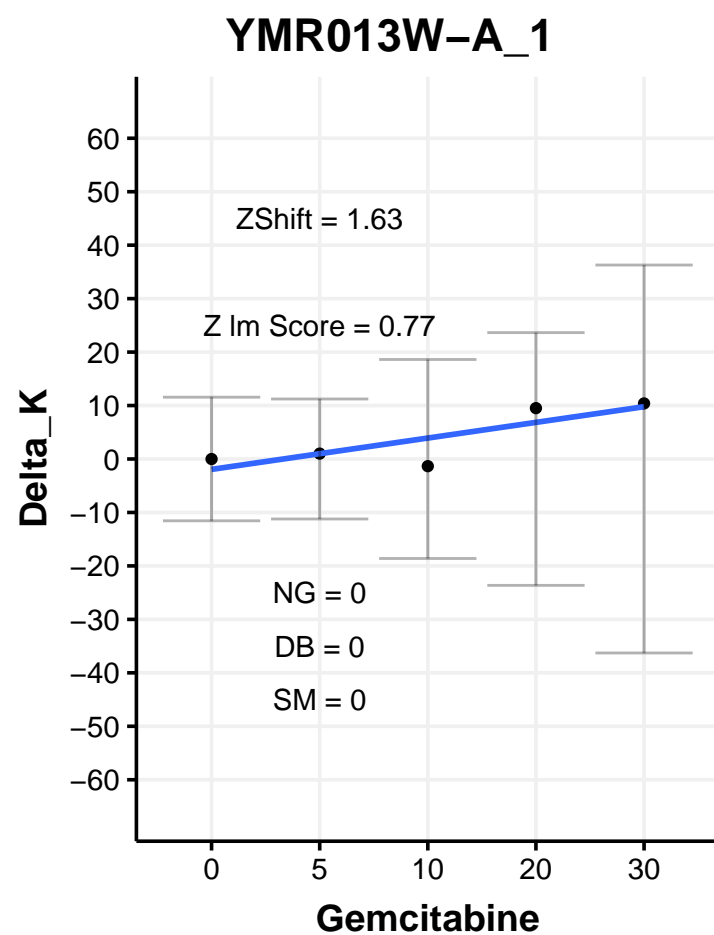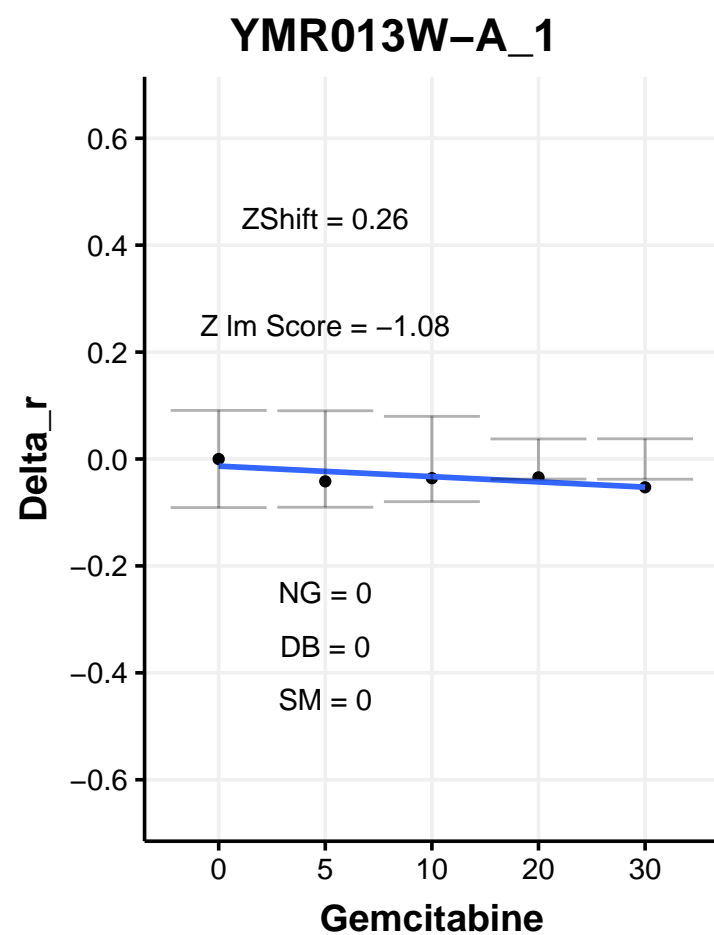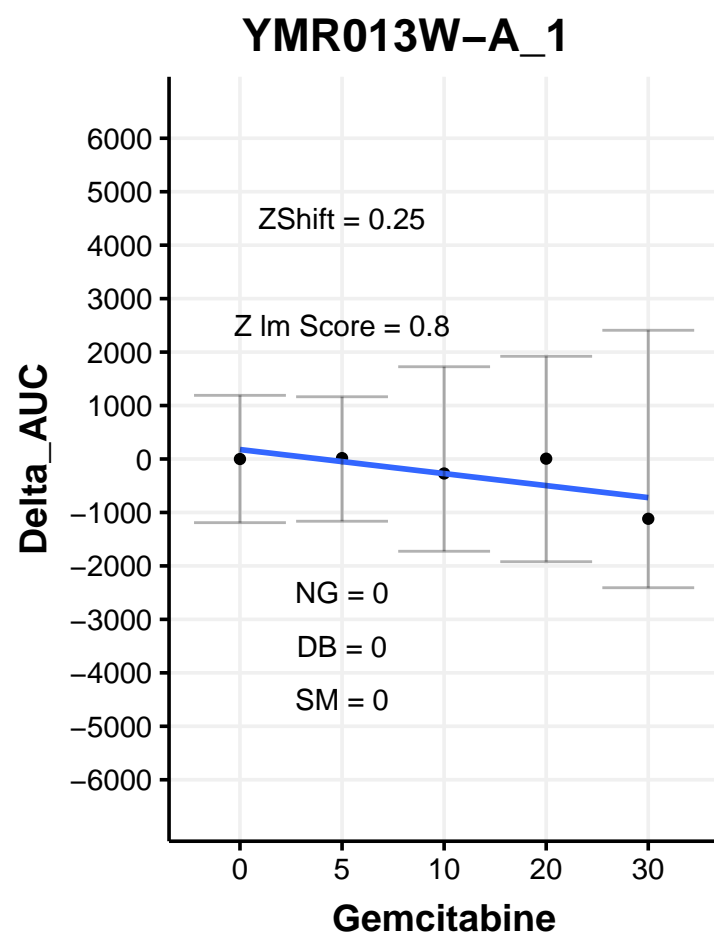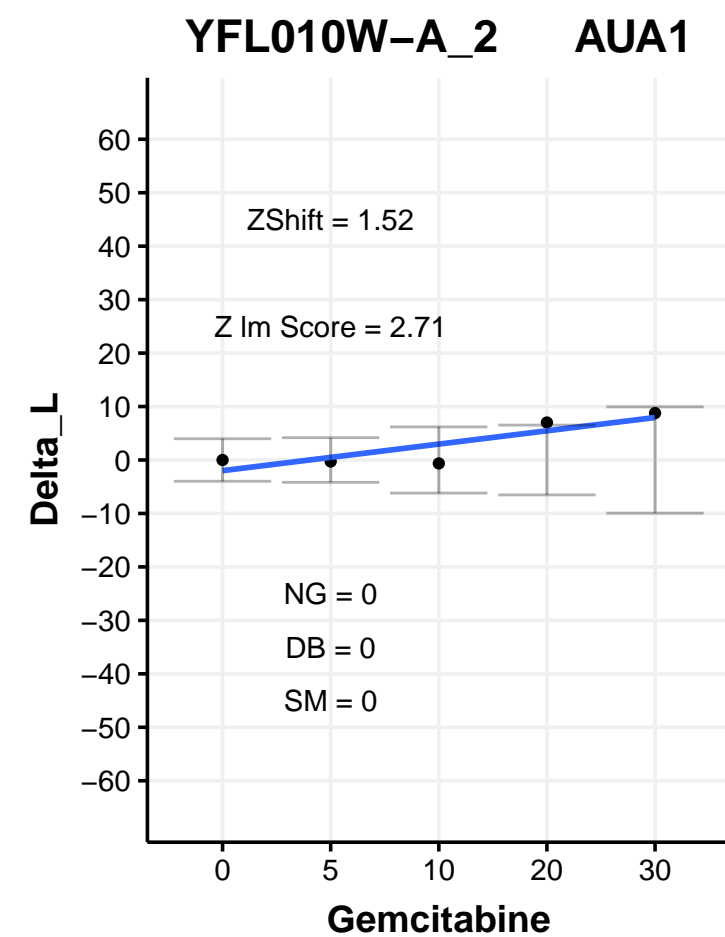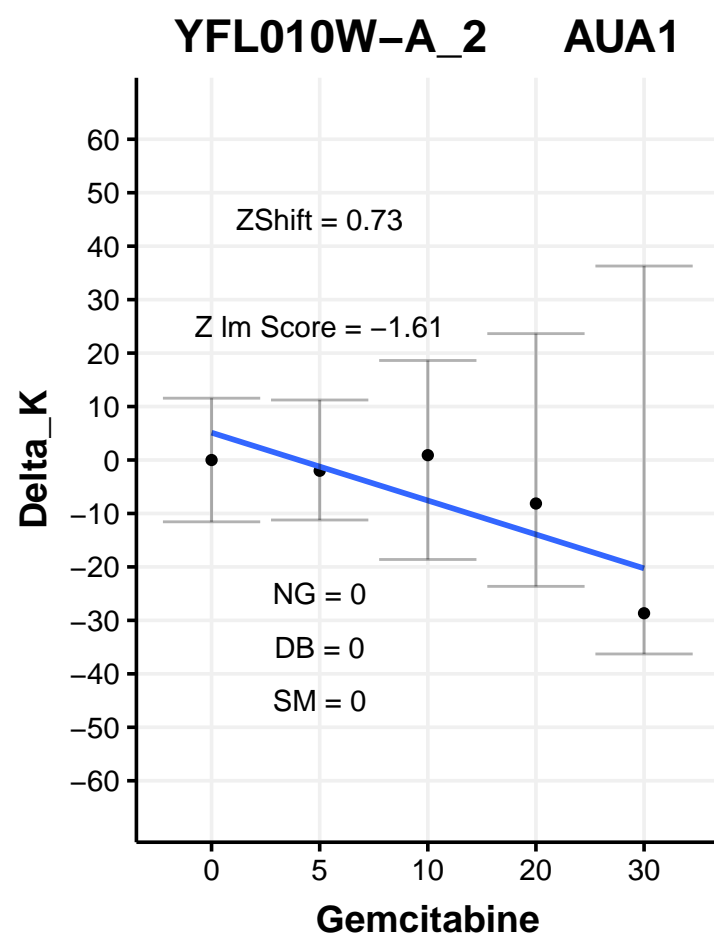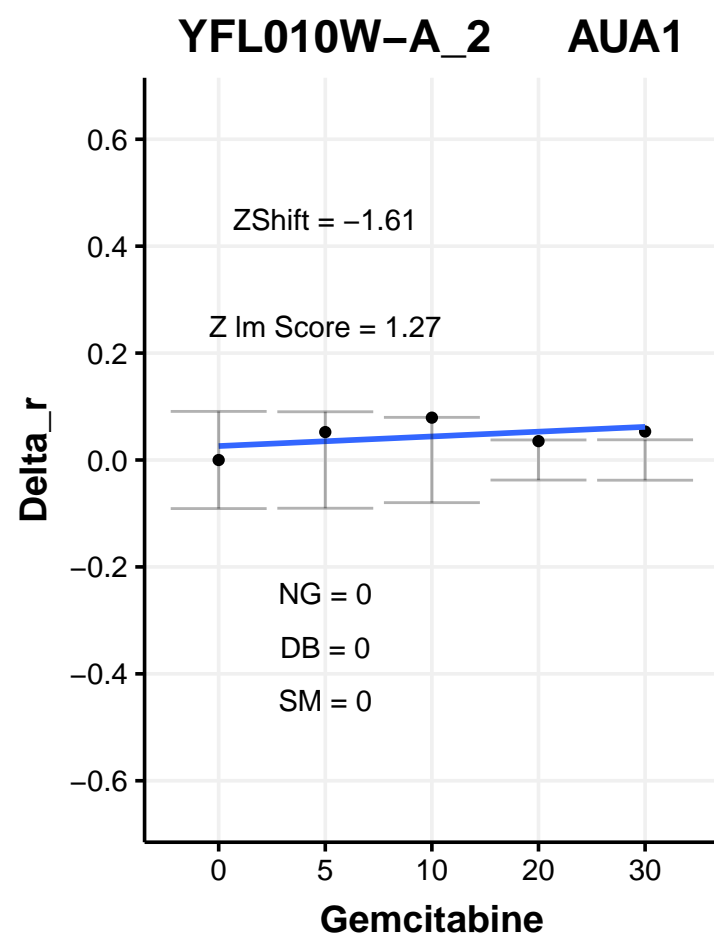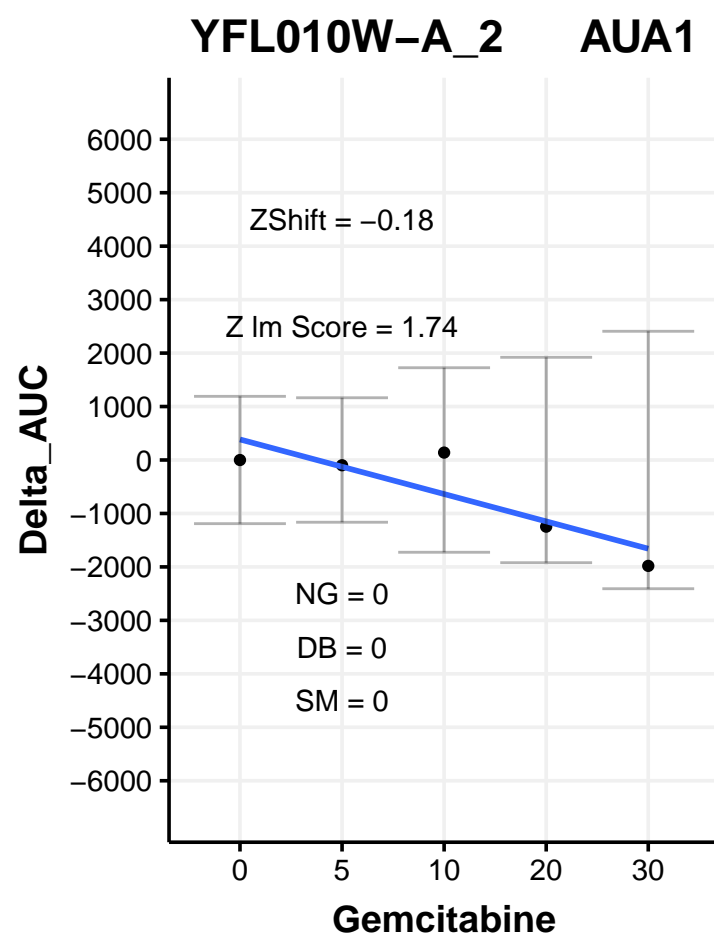

YLR384C IKI3

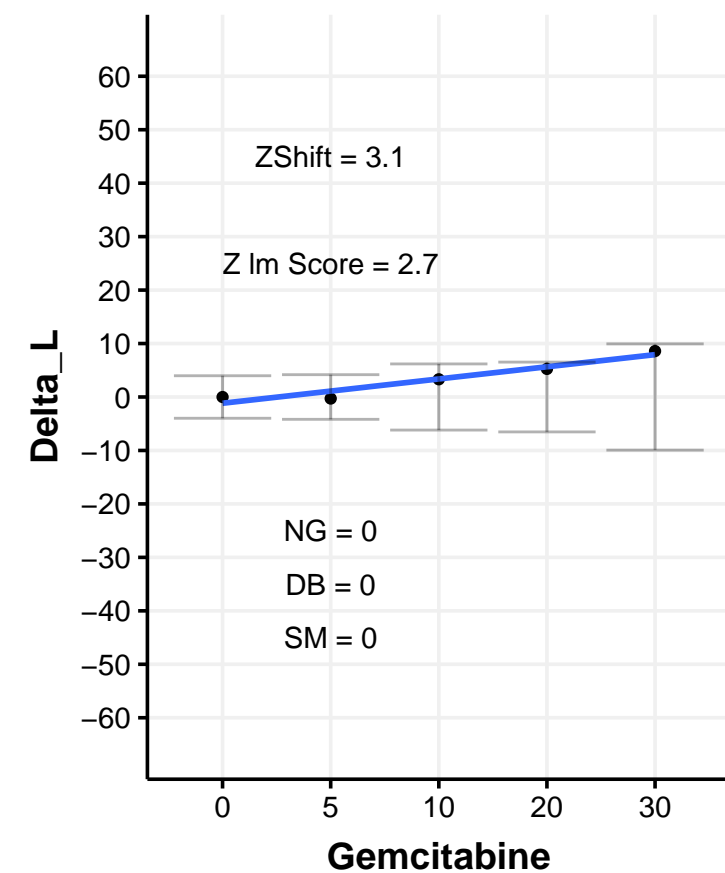

YLR384C IKI3

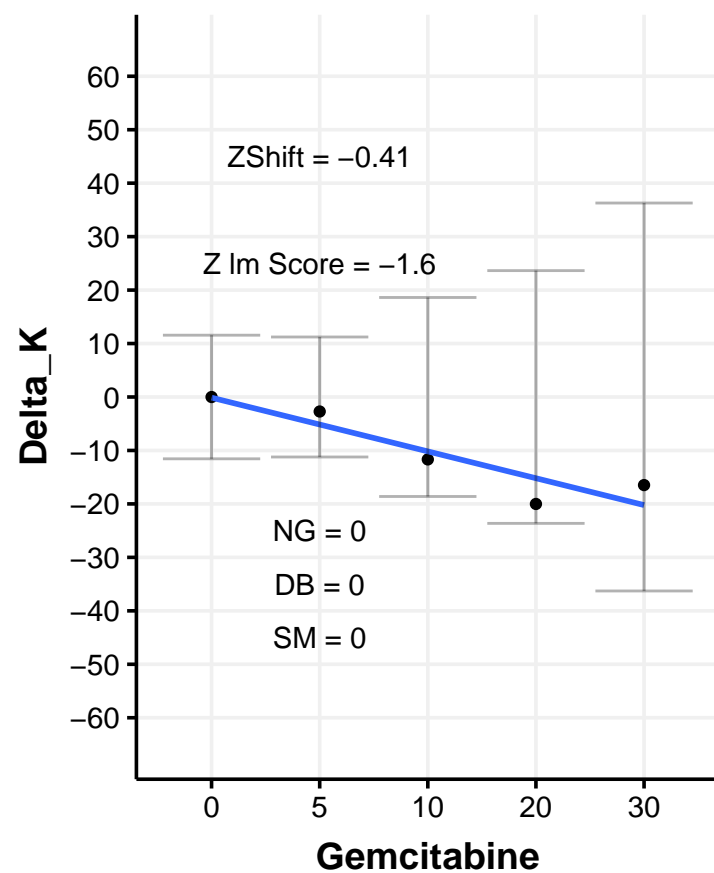

YLR384C IKI3

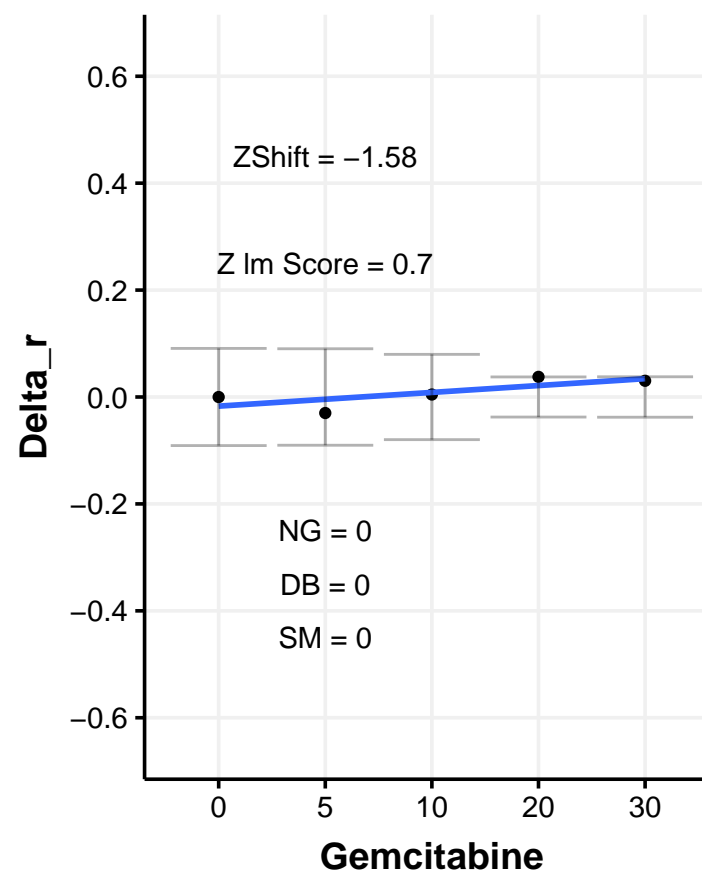

YLR384C IKI3

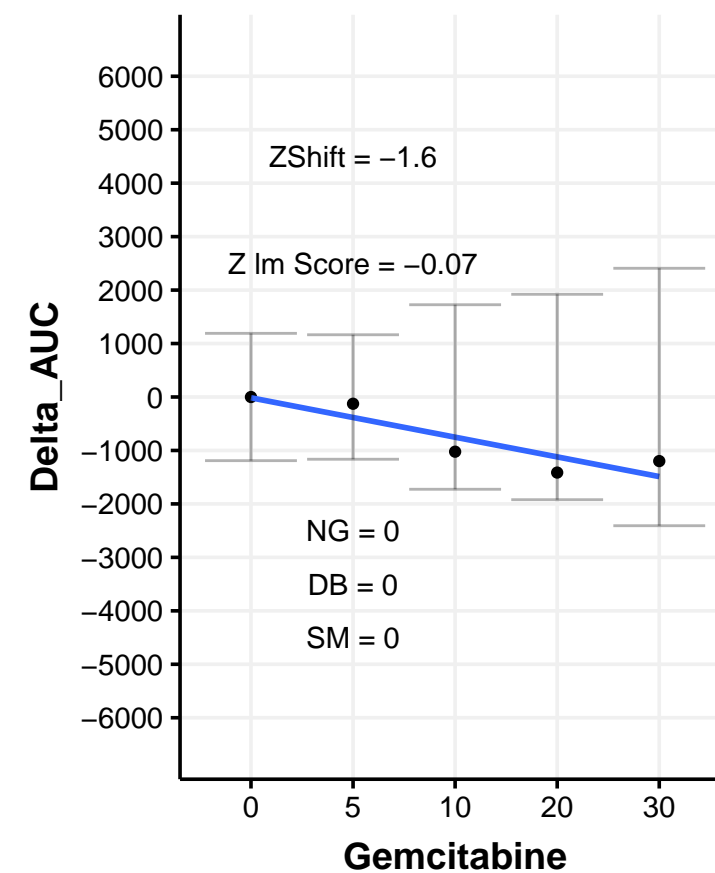

YHR105W YPT35

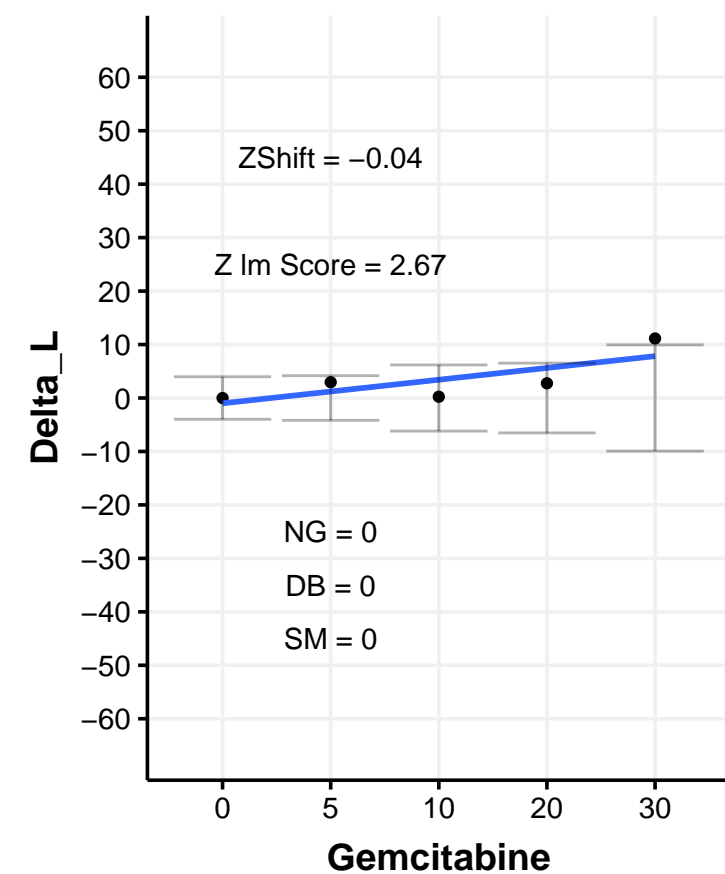

YHR105W YPT35

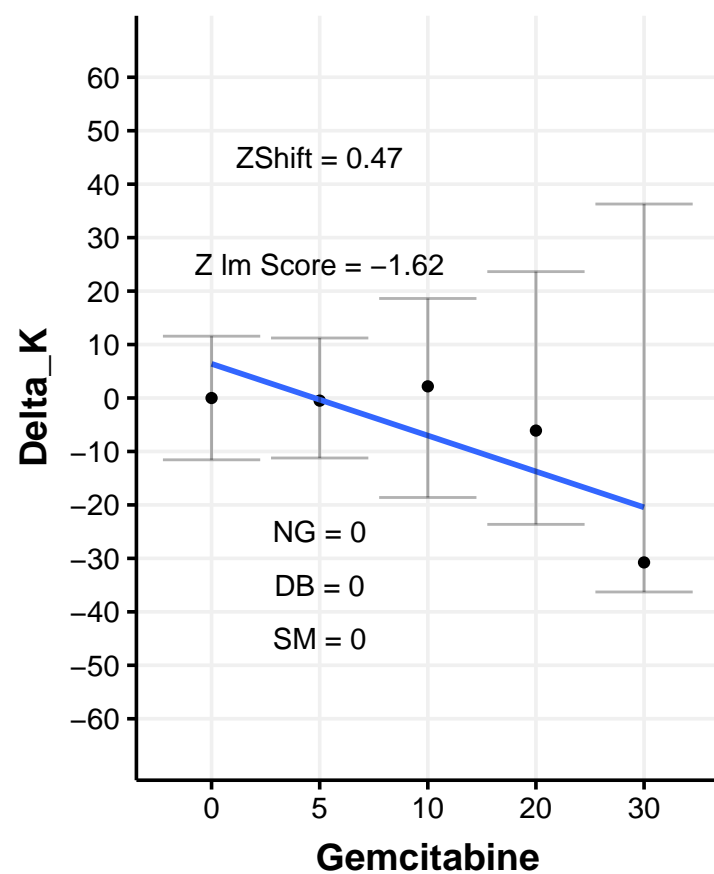

YHR105W YPT35

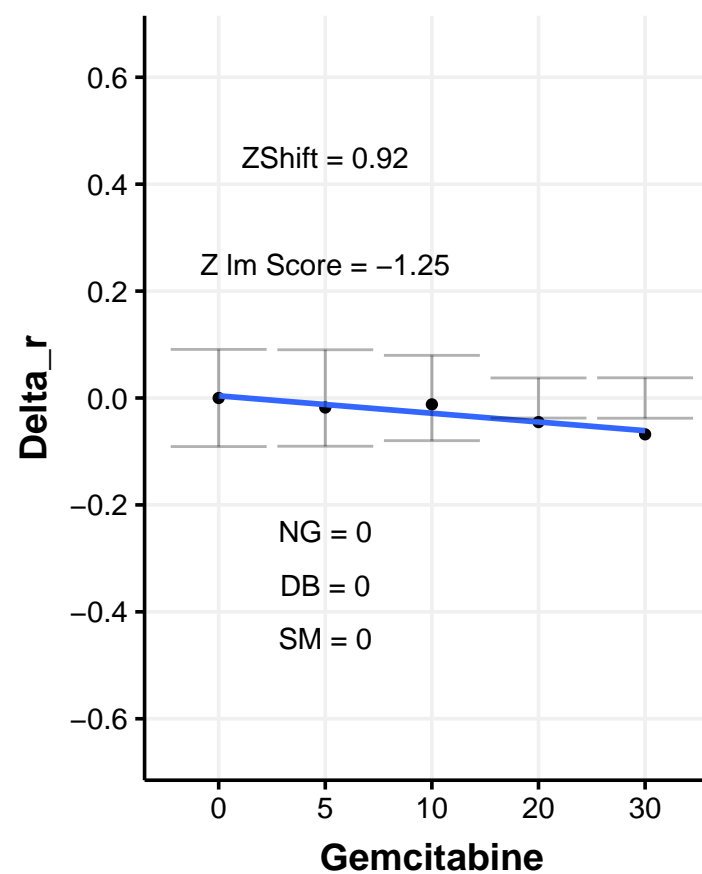

YHR105W YPT35

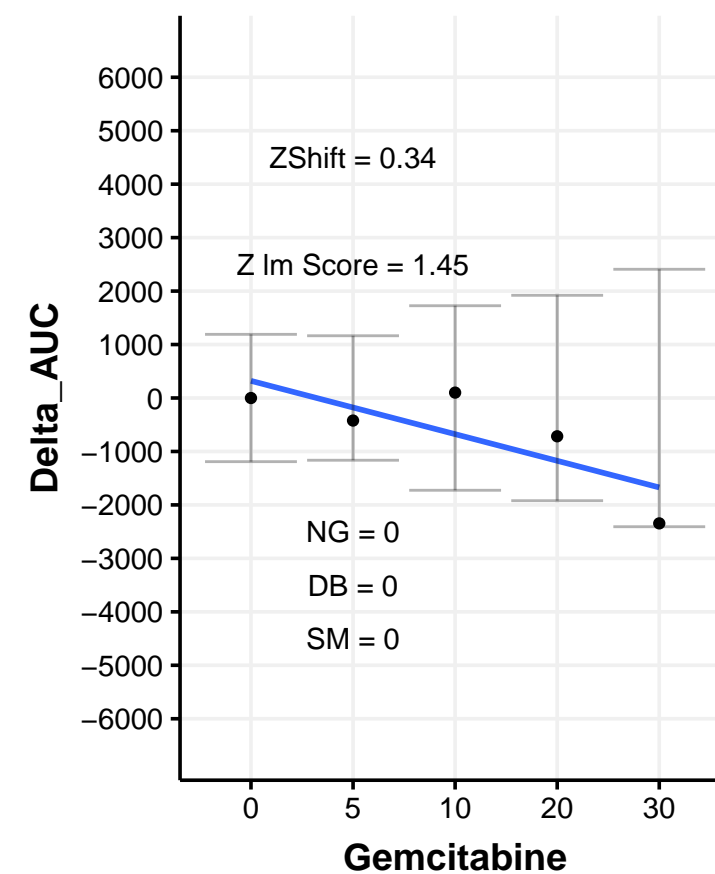

YLR370C ARC18

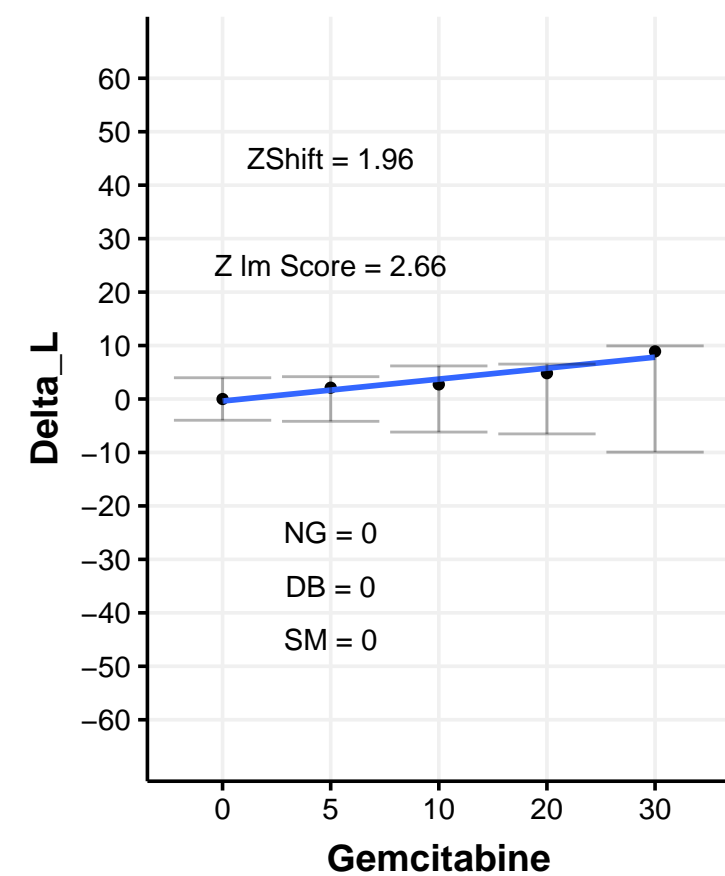

YLR370C ARC18

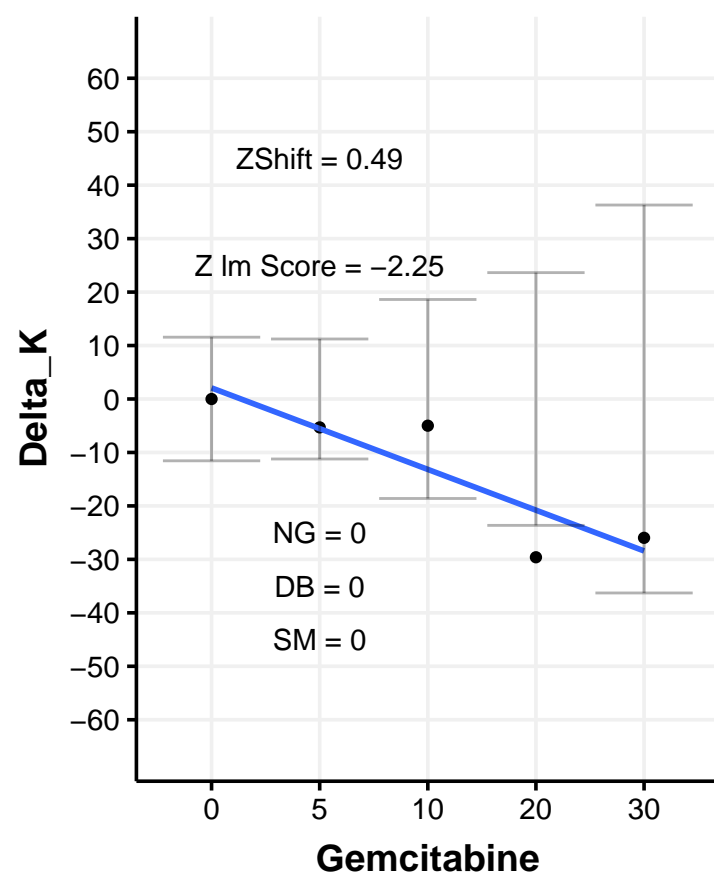

YLR370C ARC18

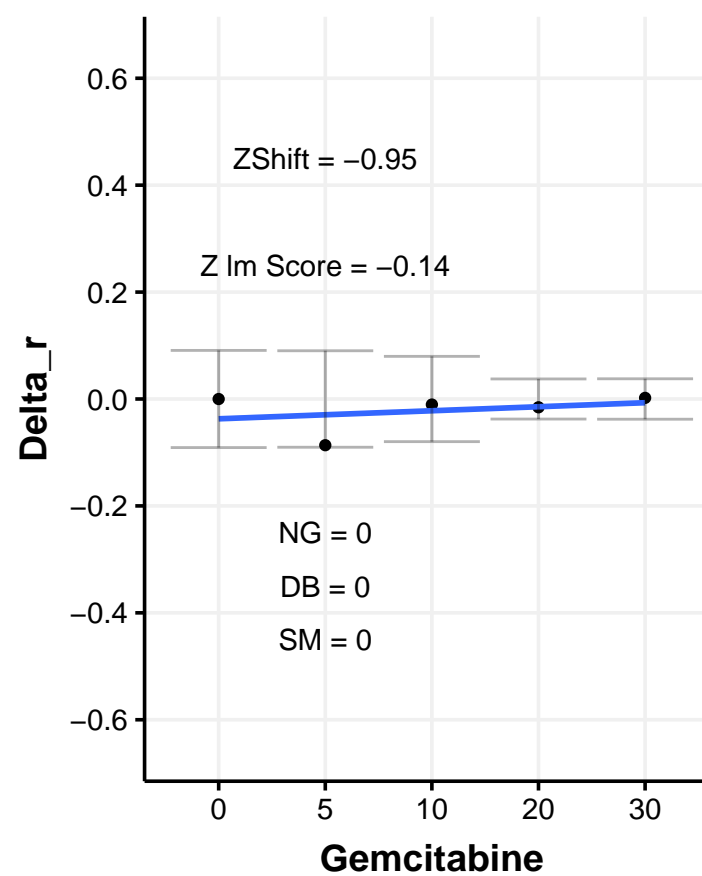

YLR370C ARC18

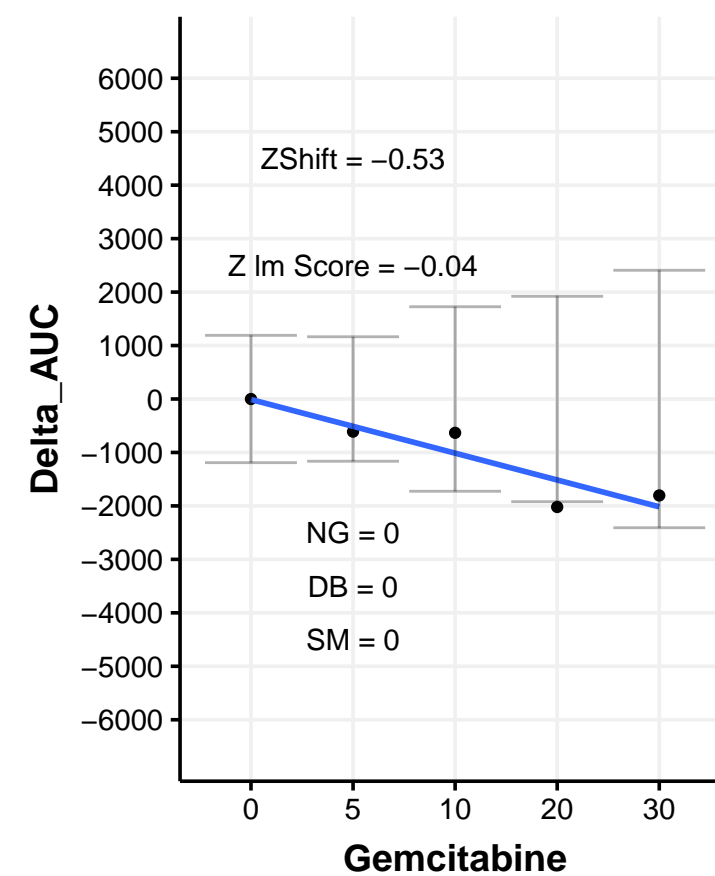

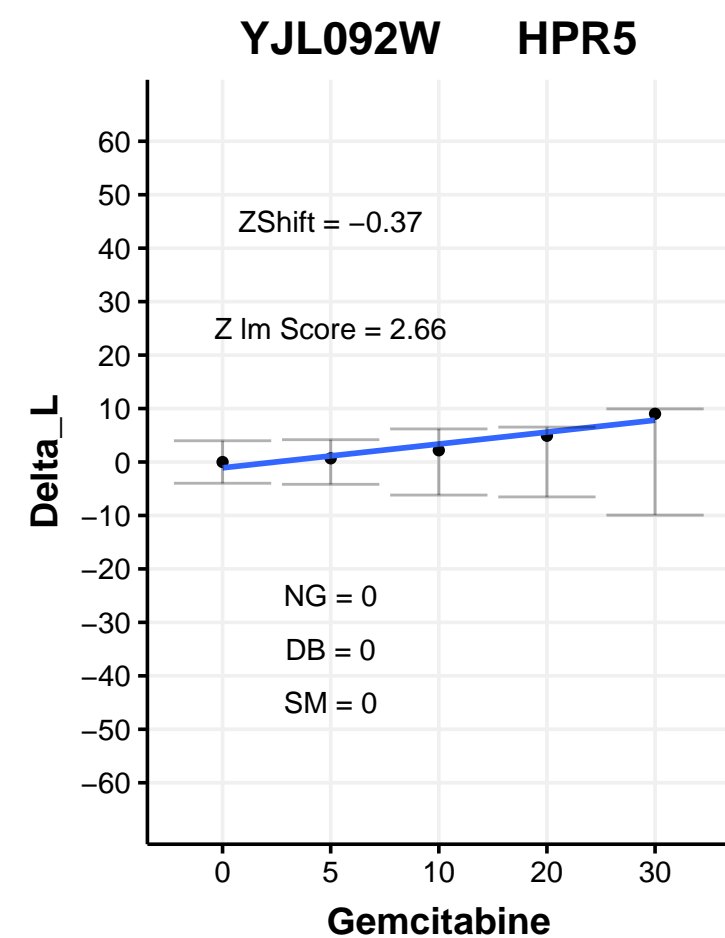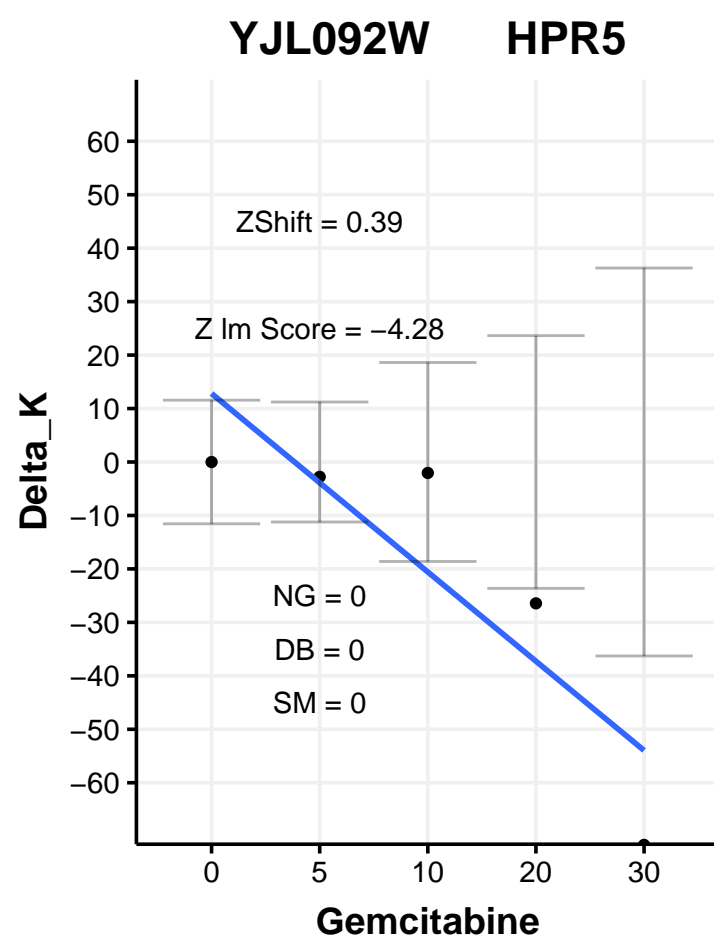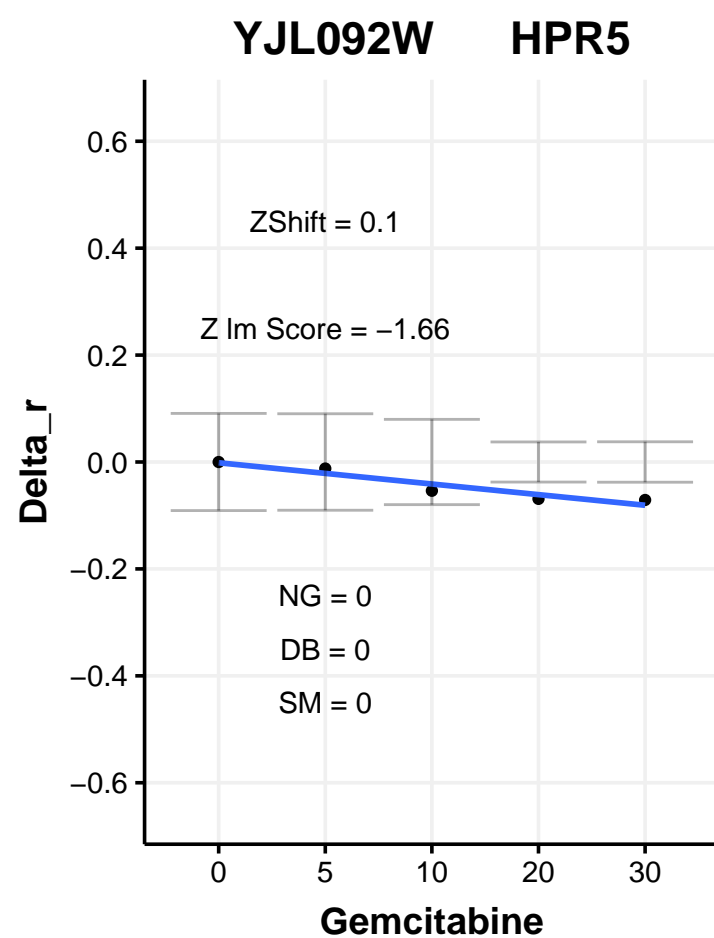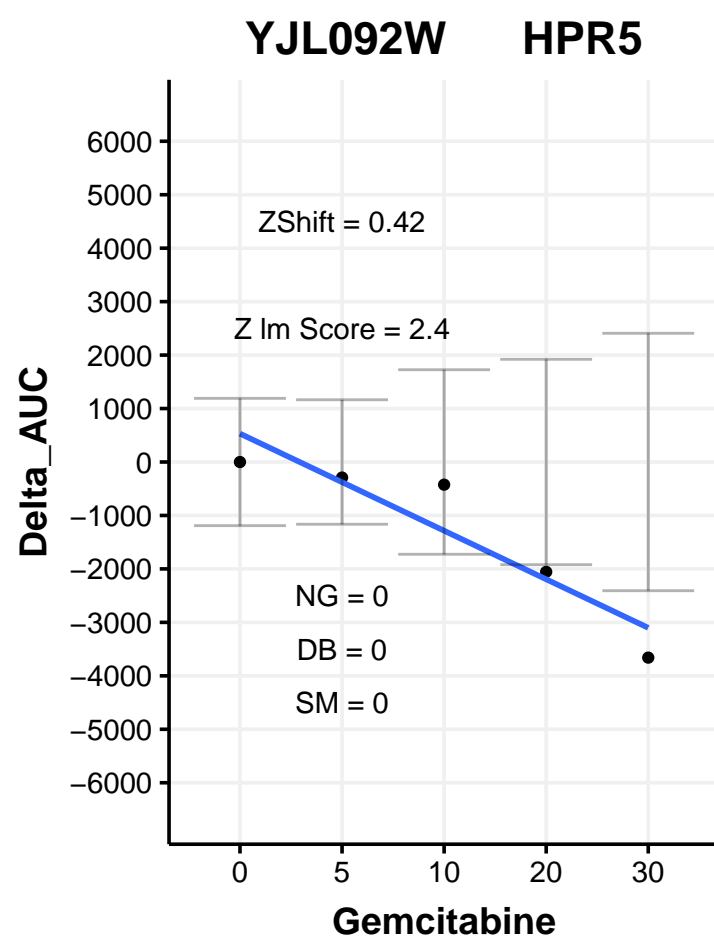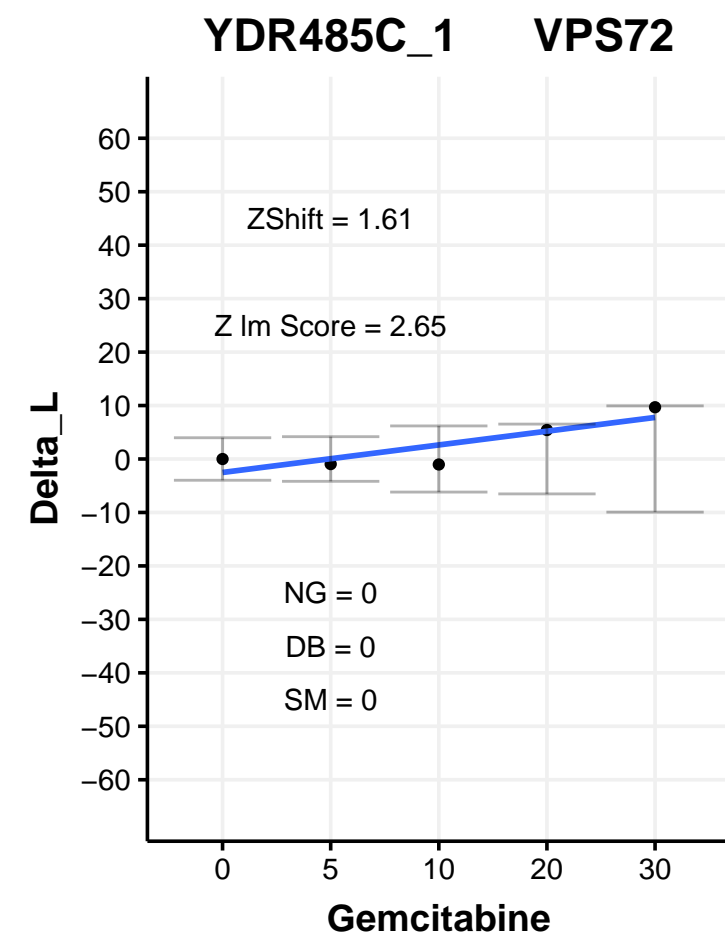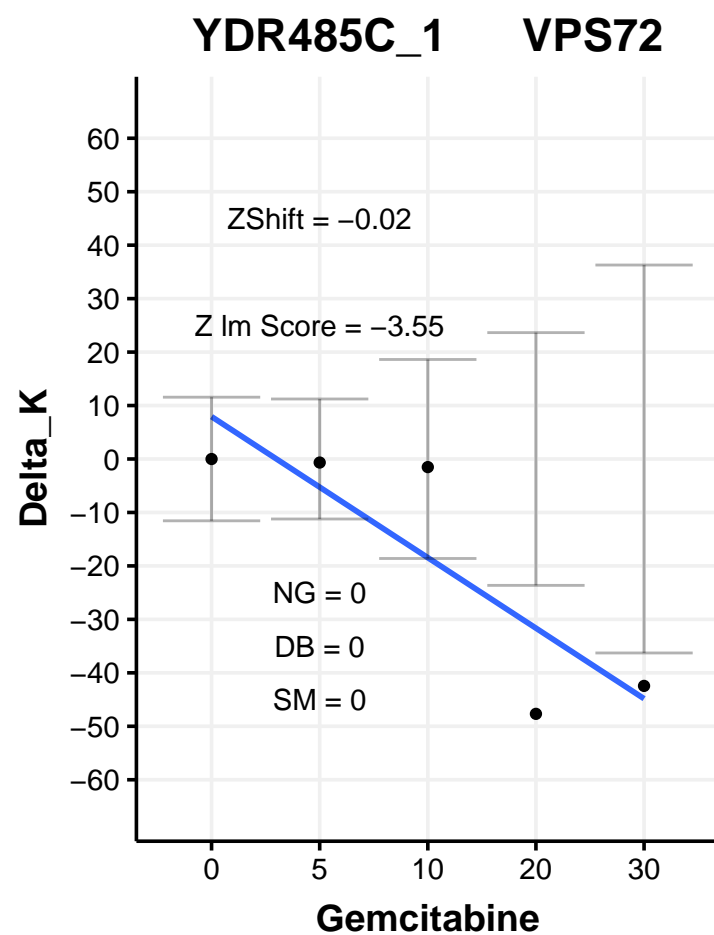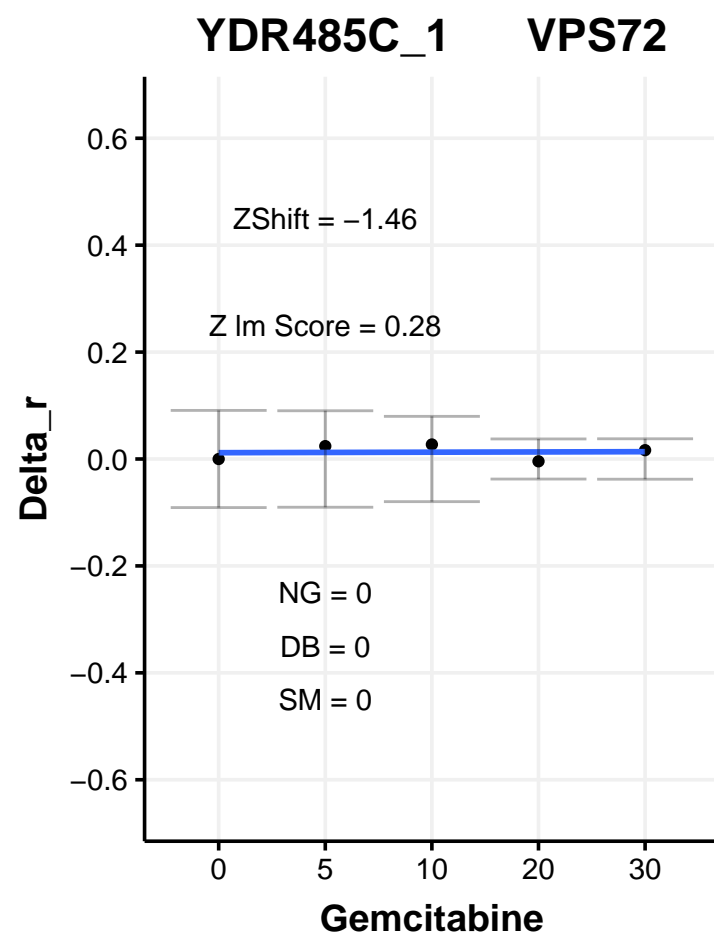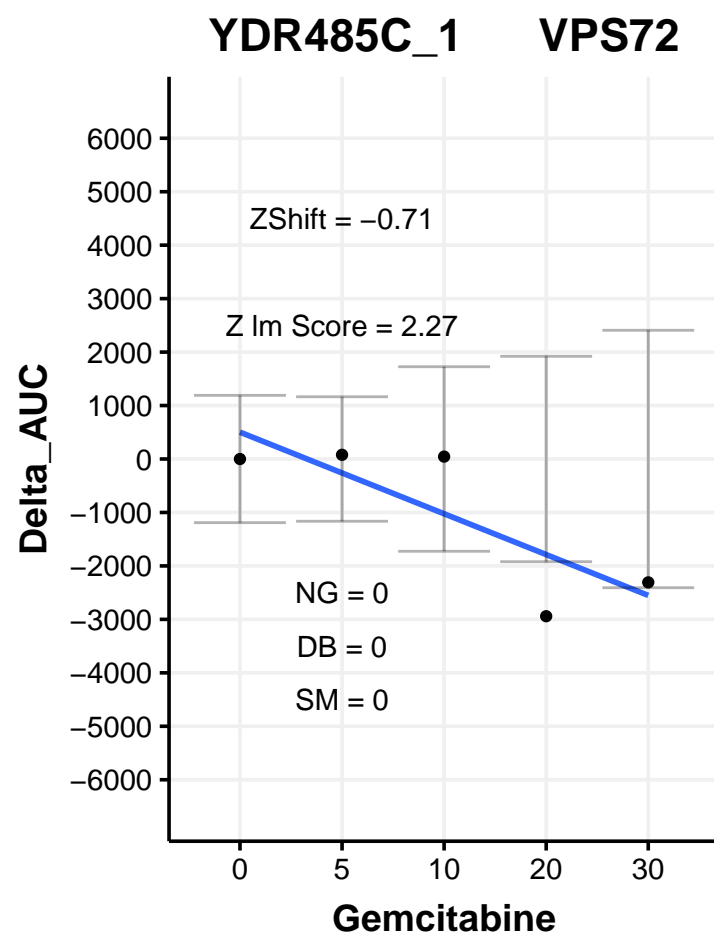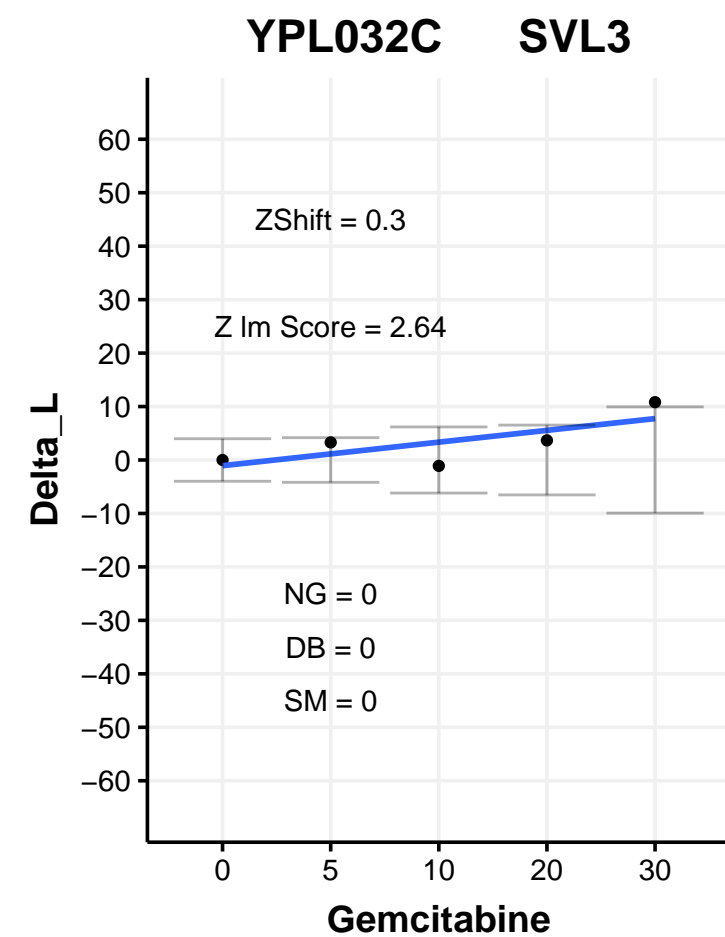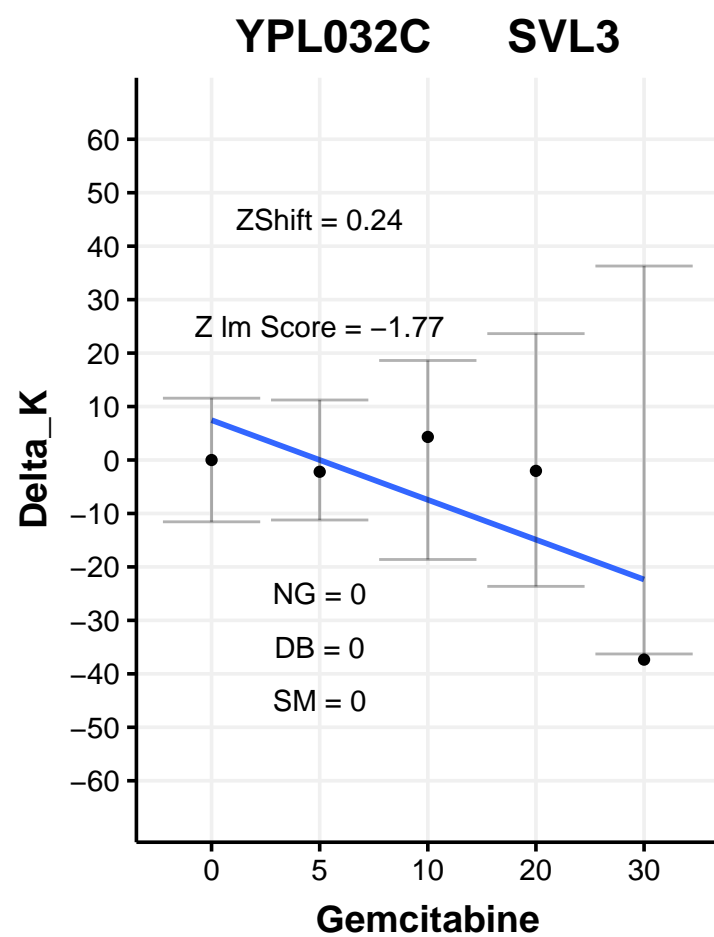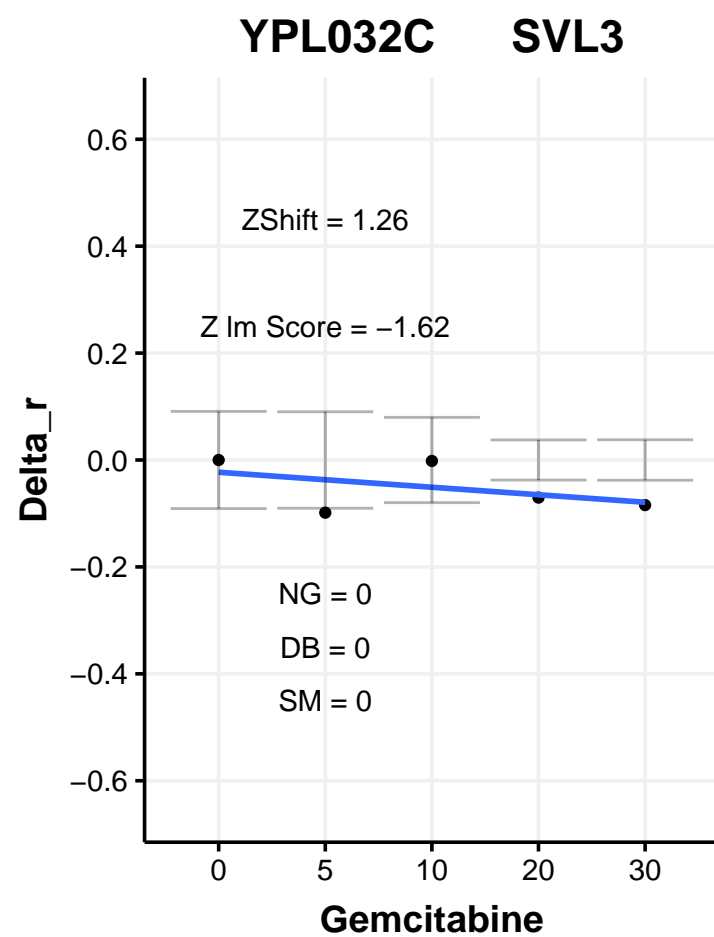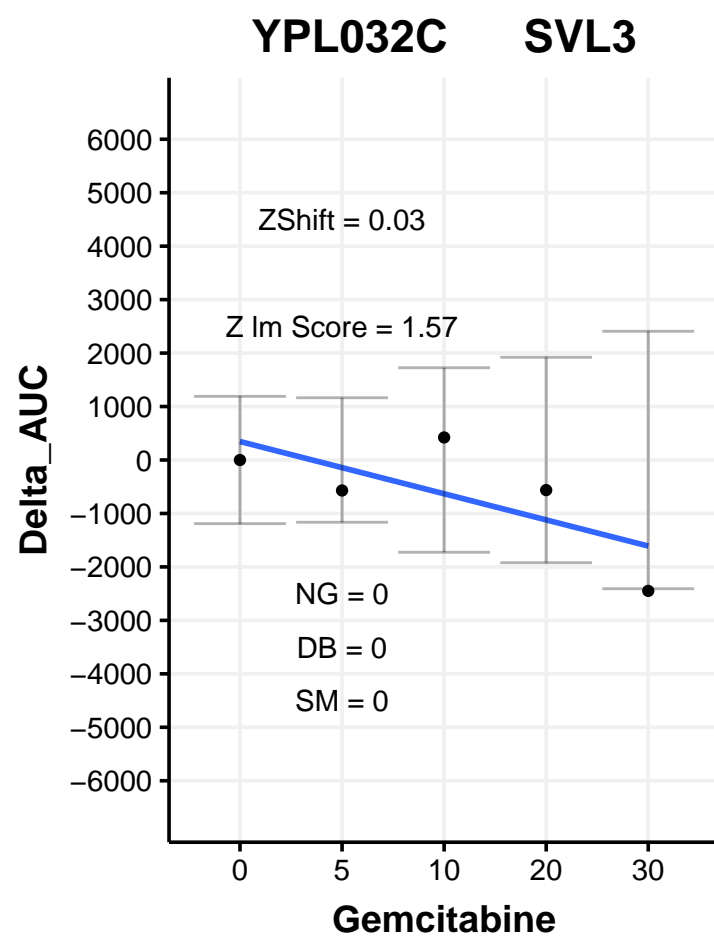

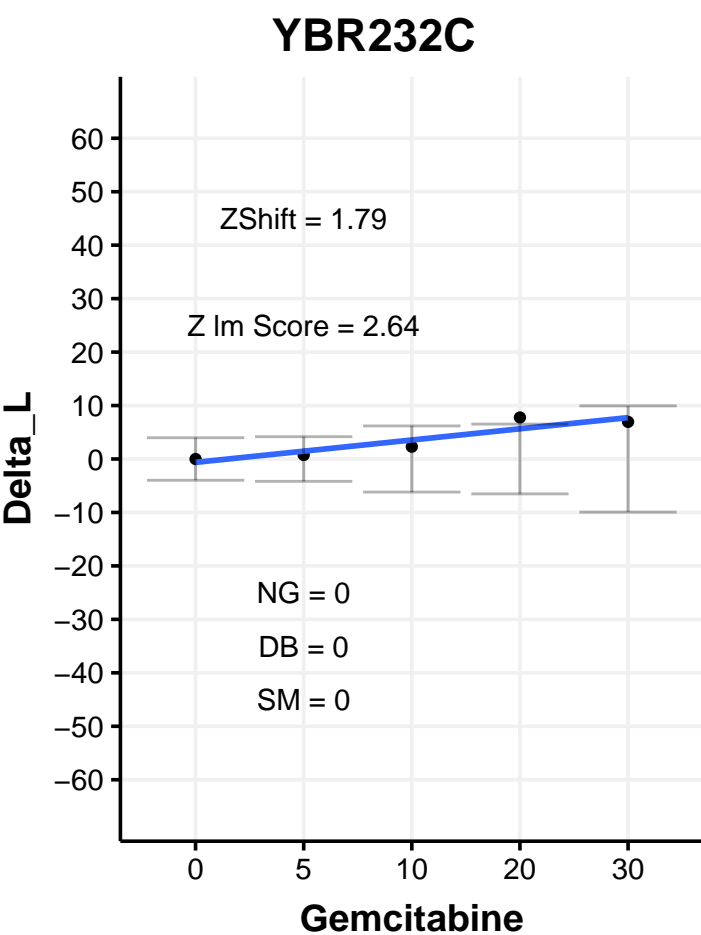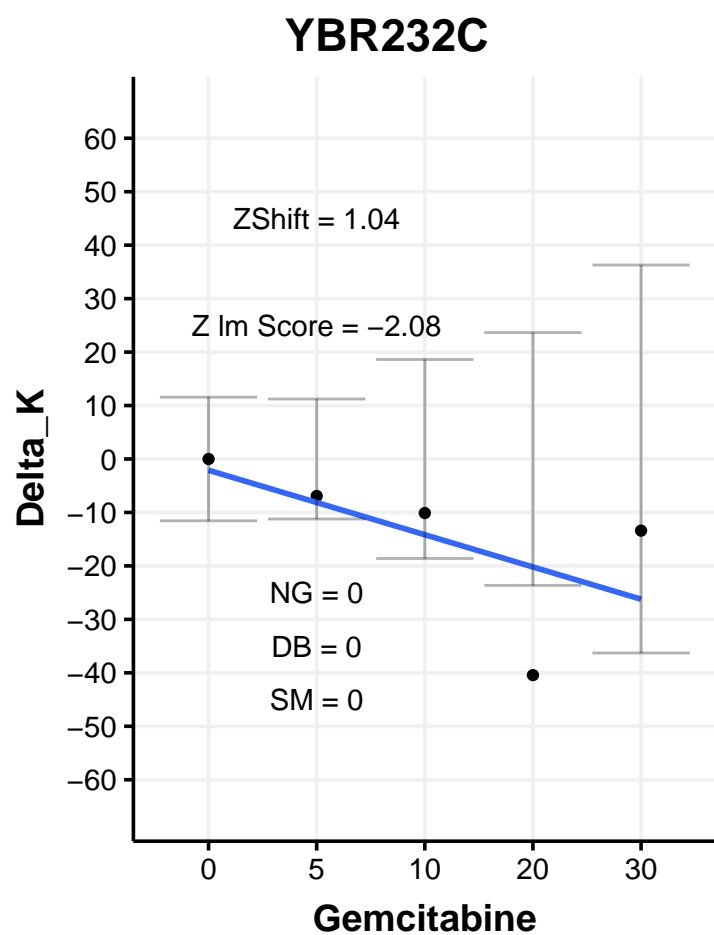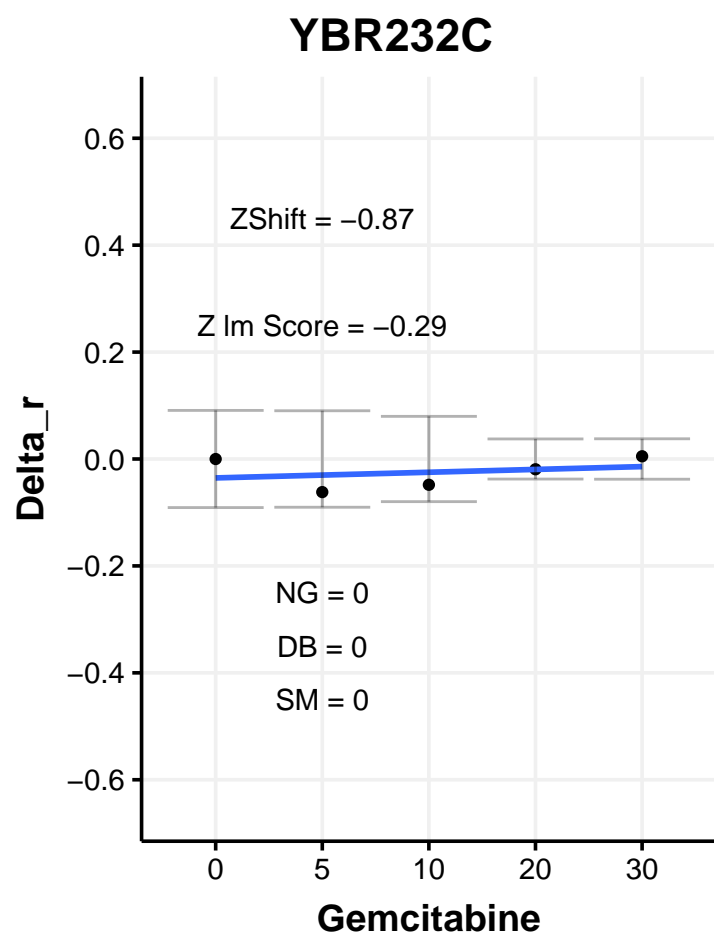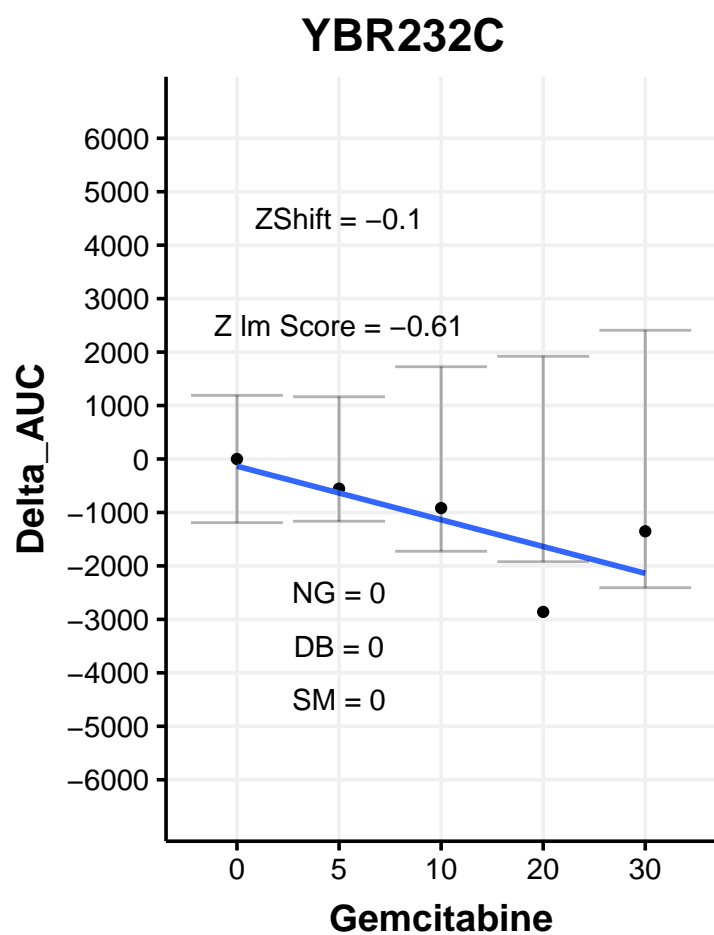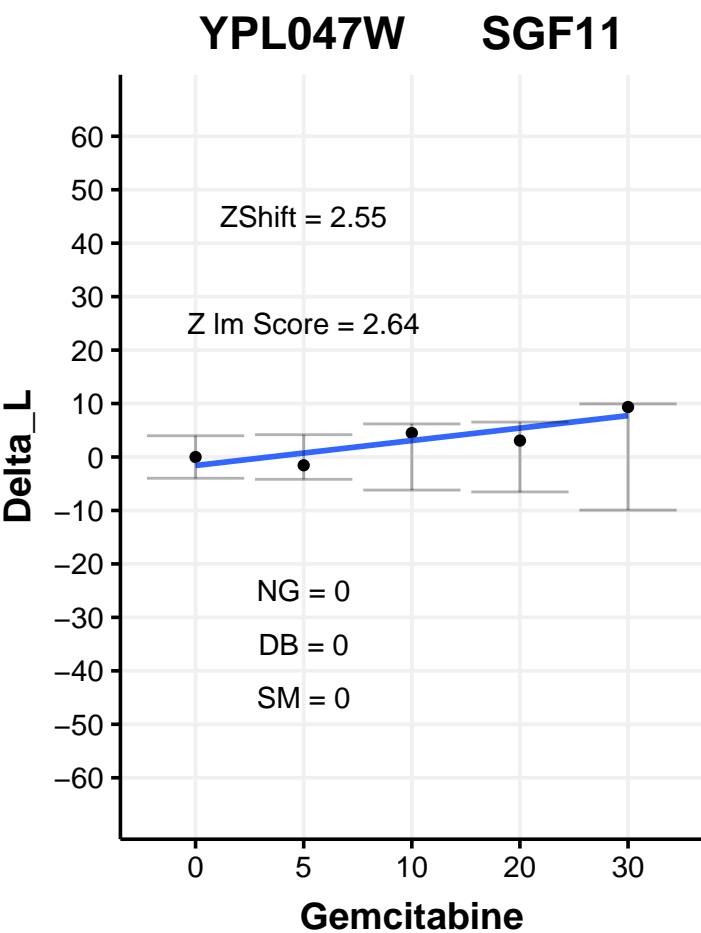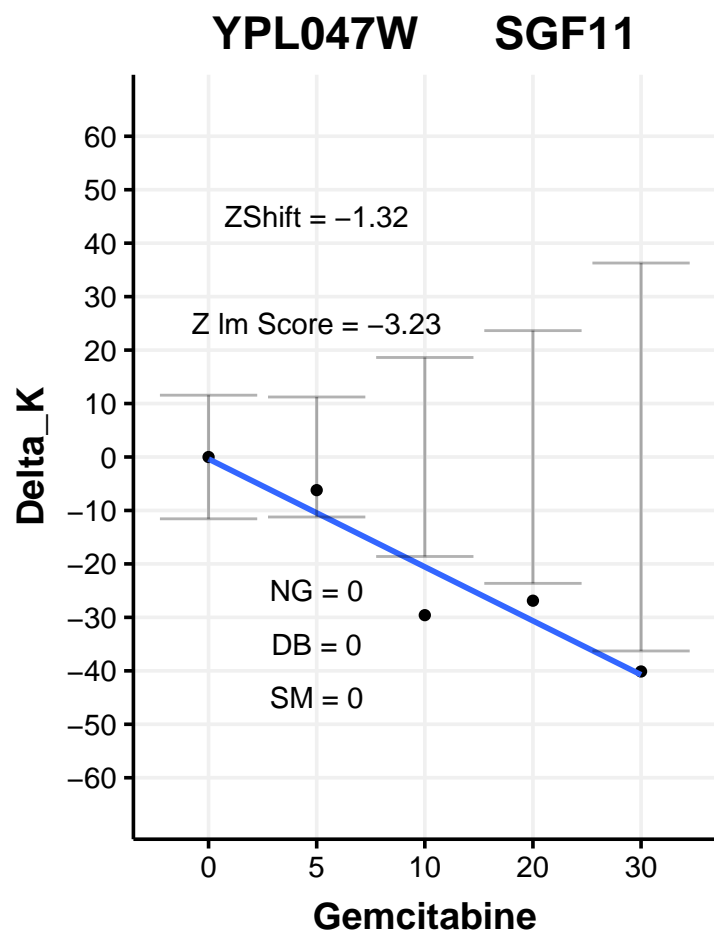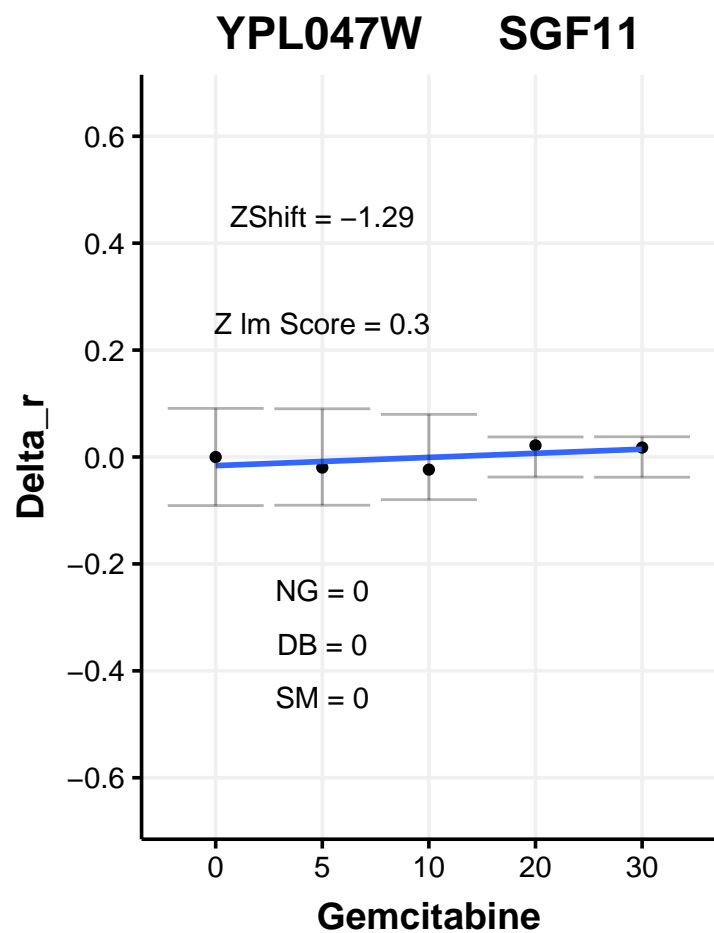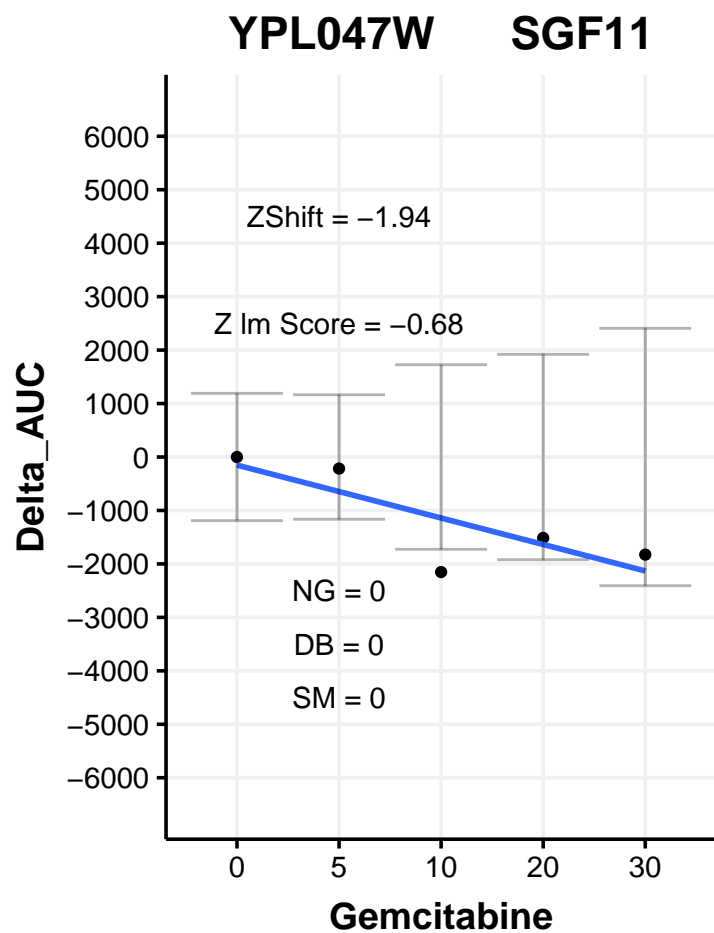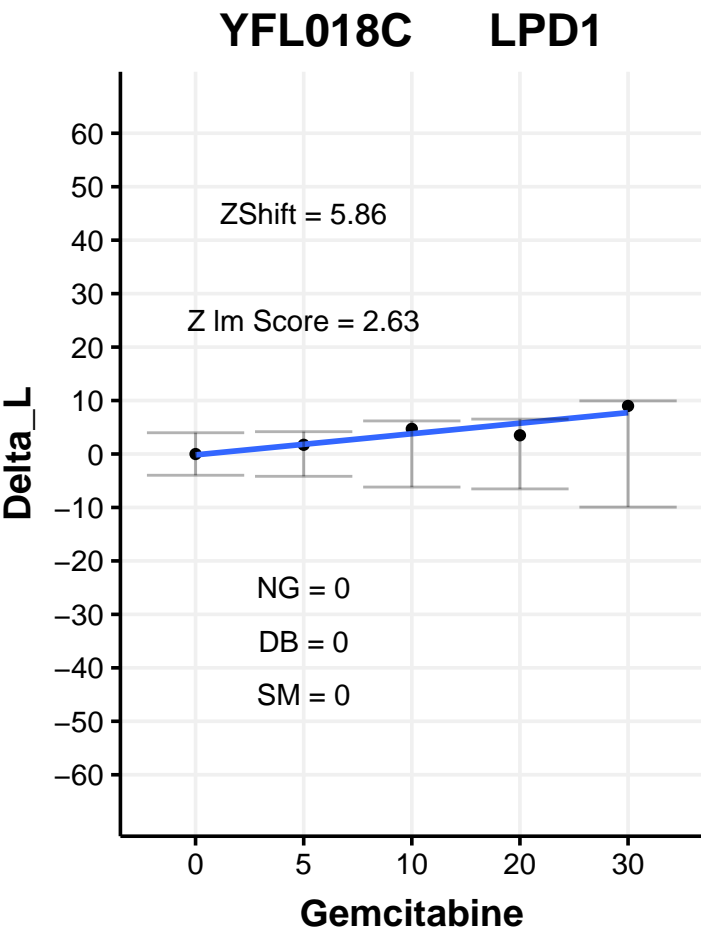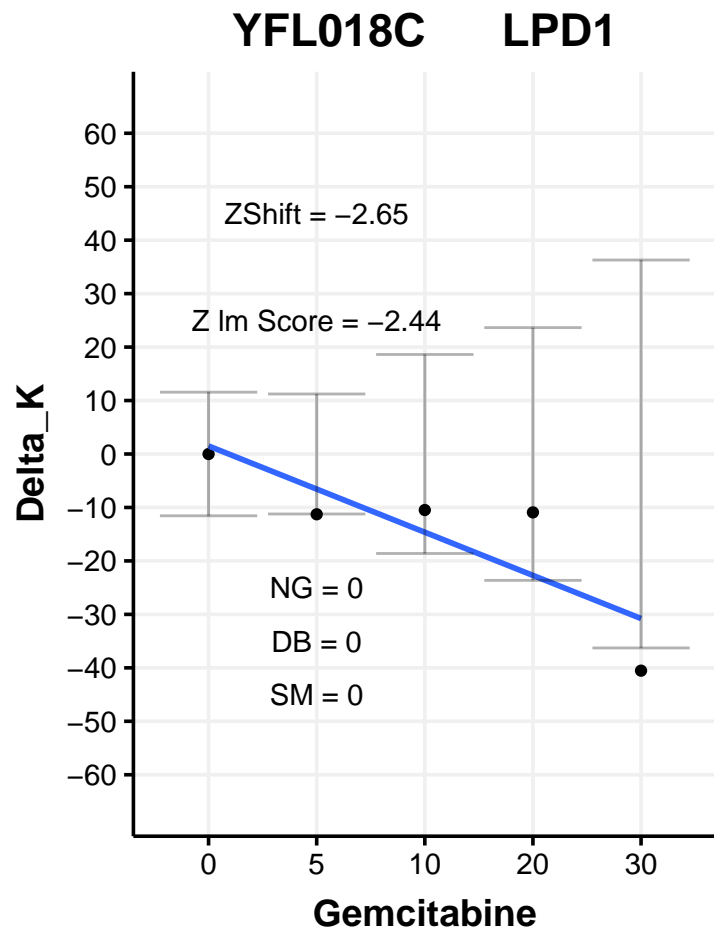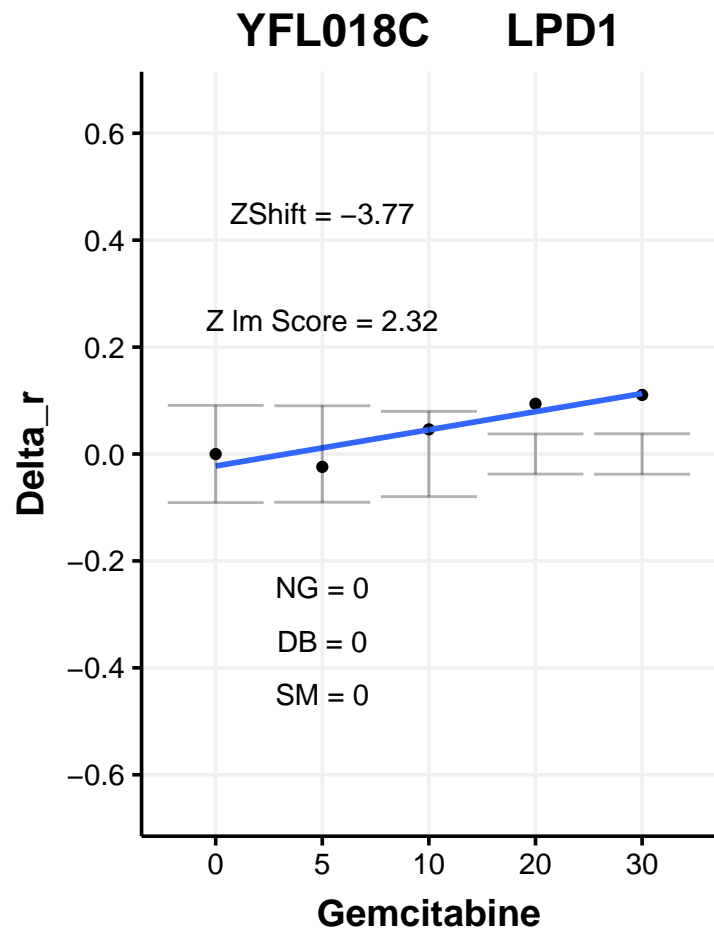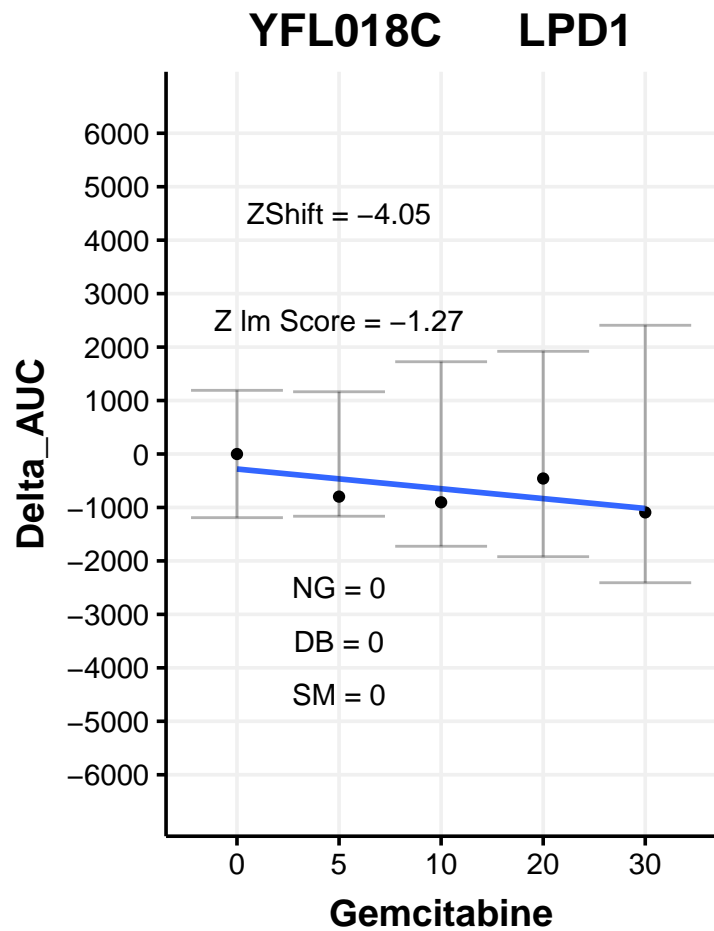

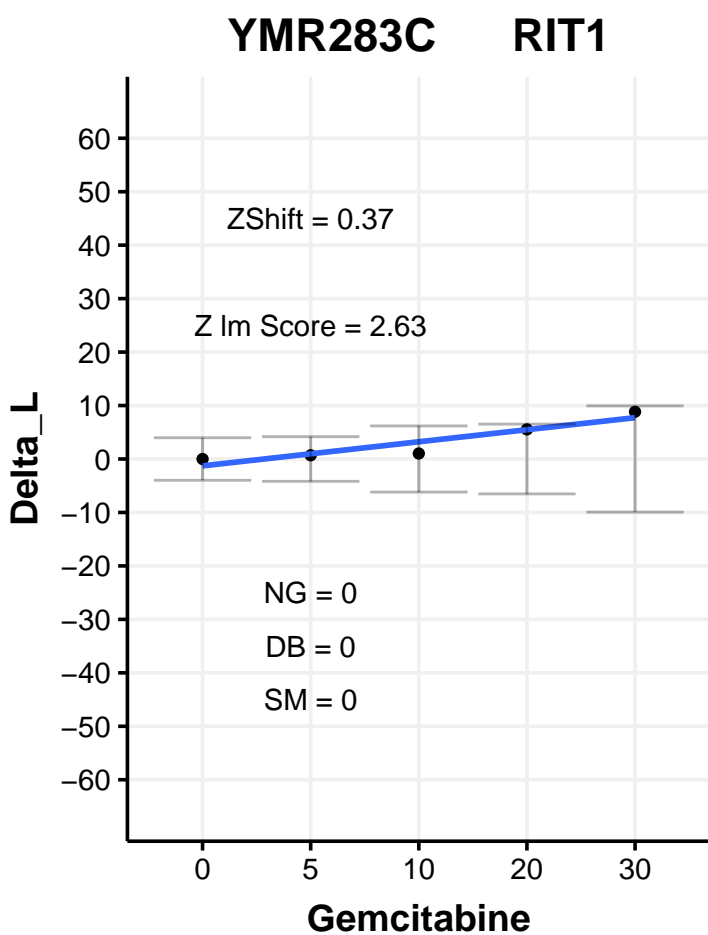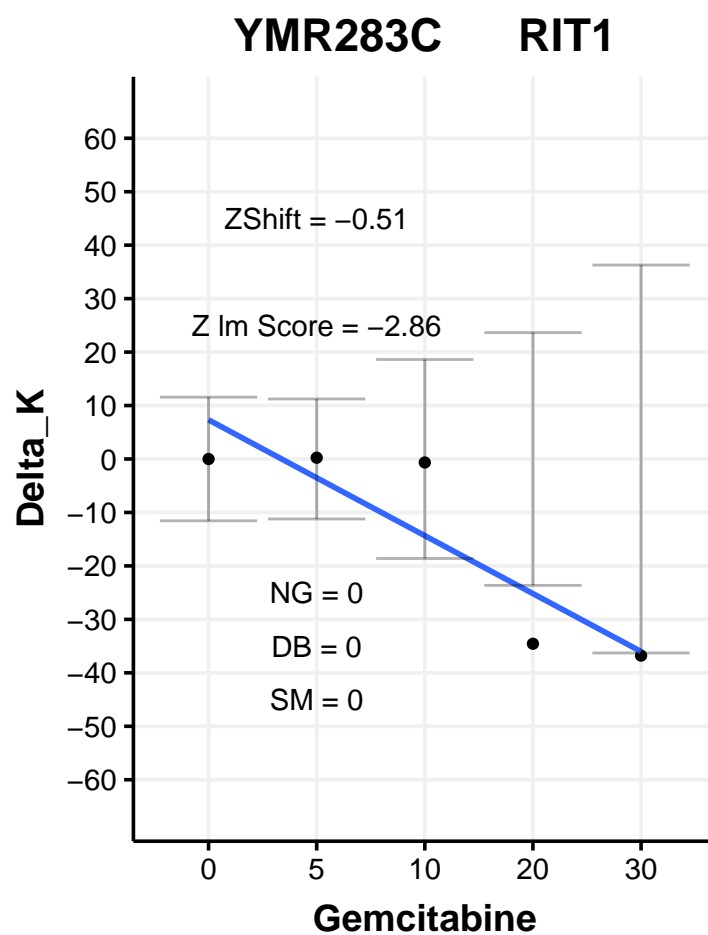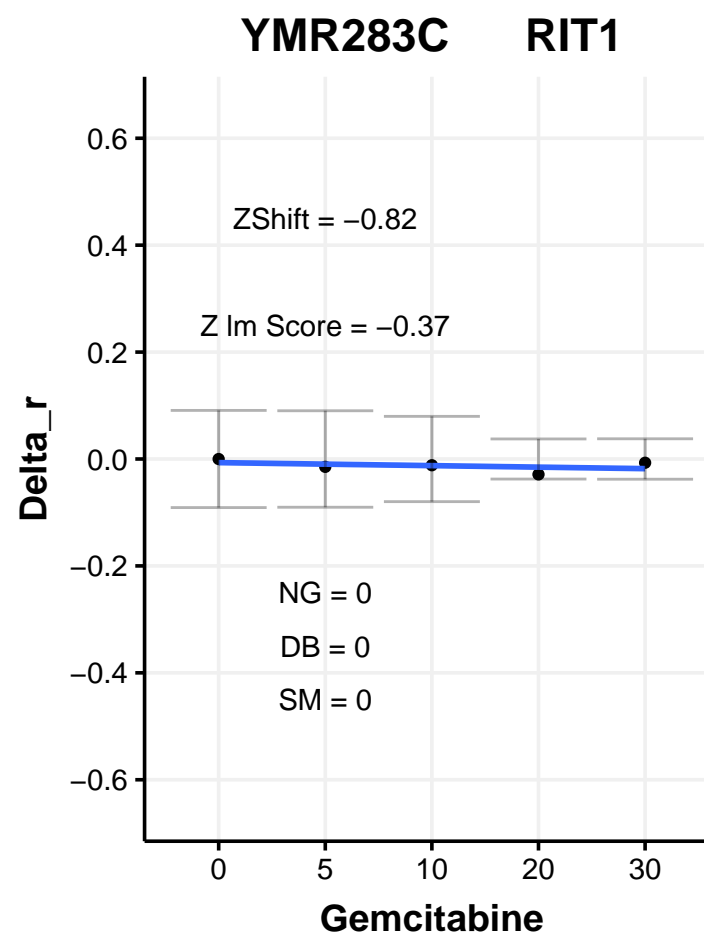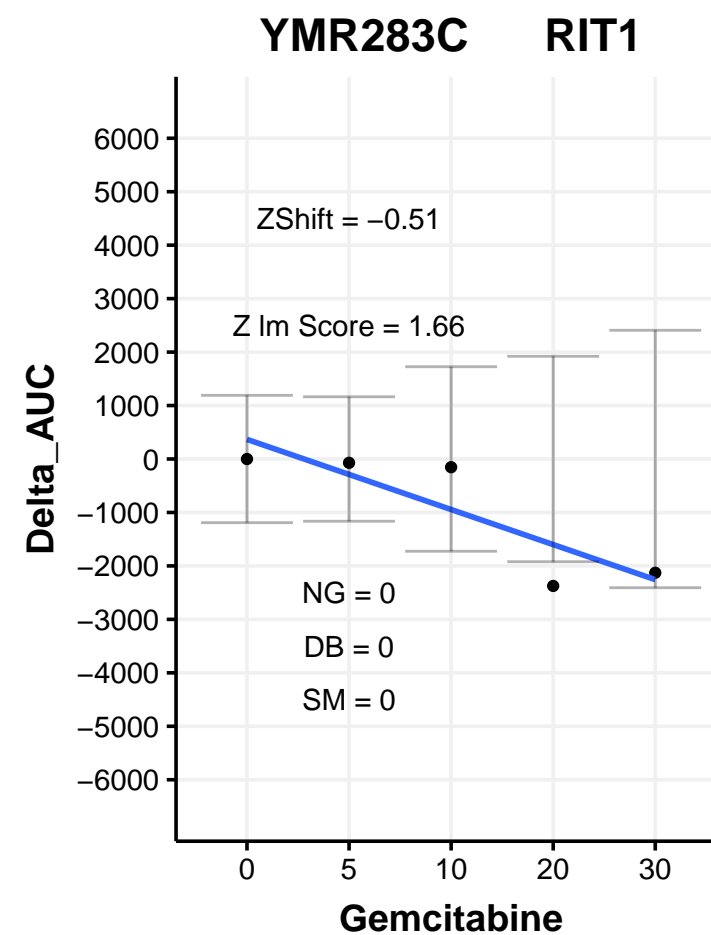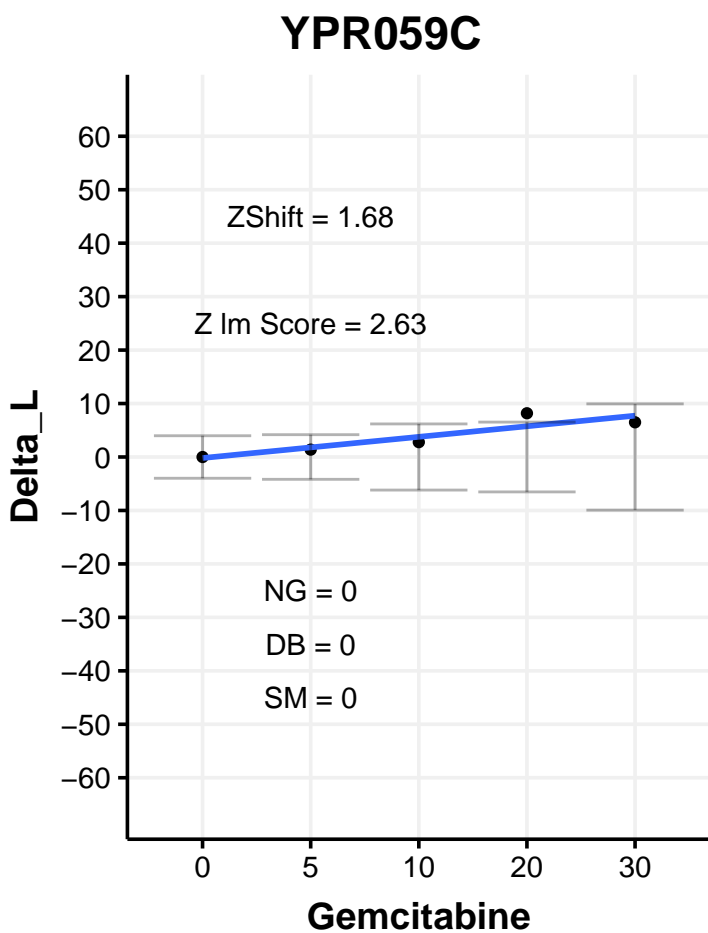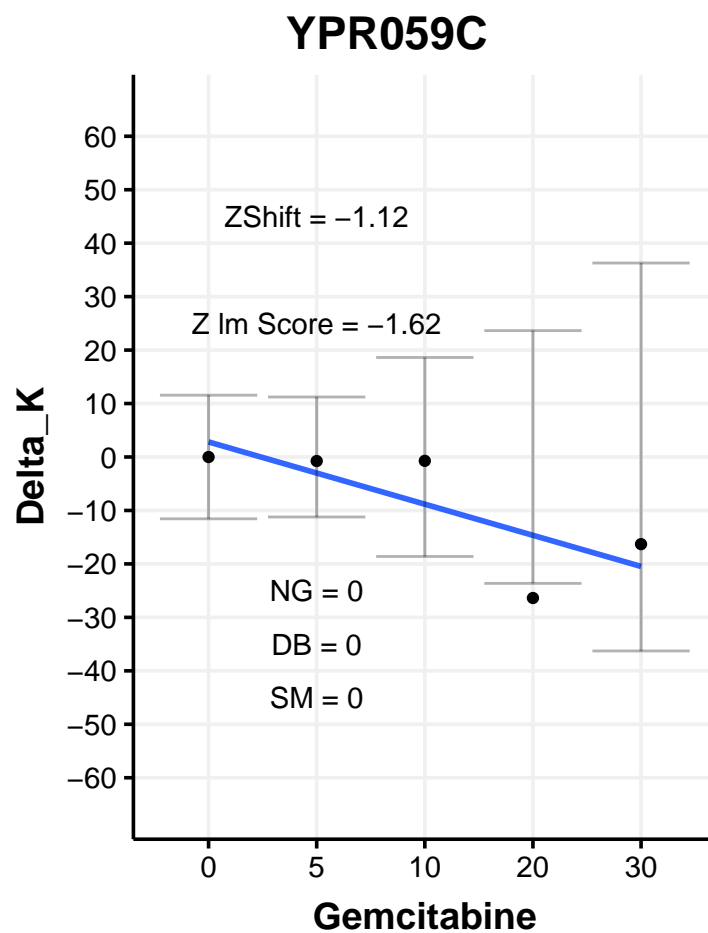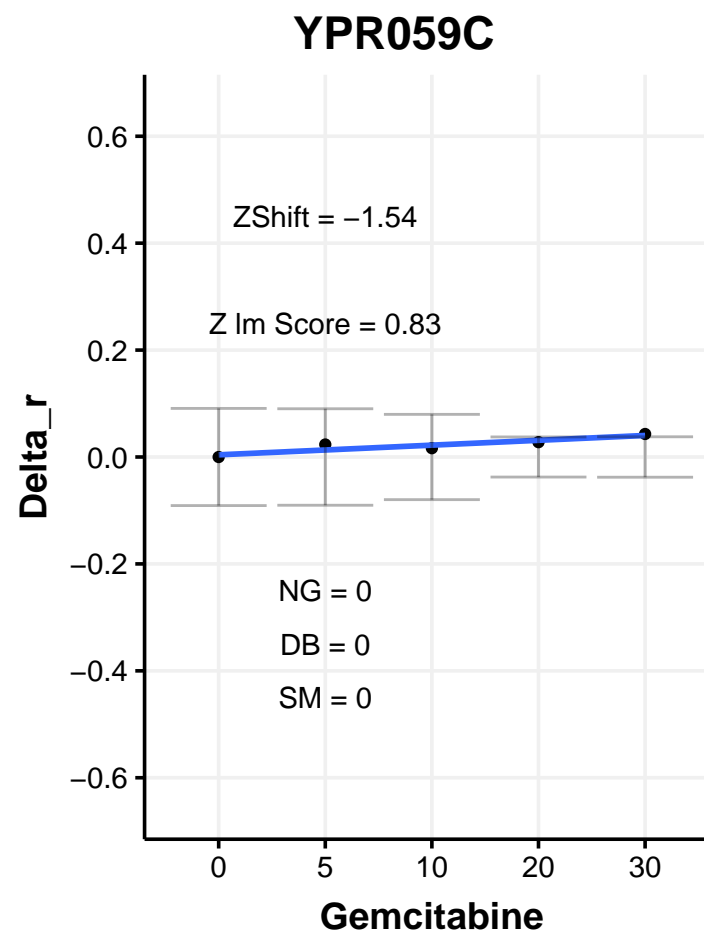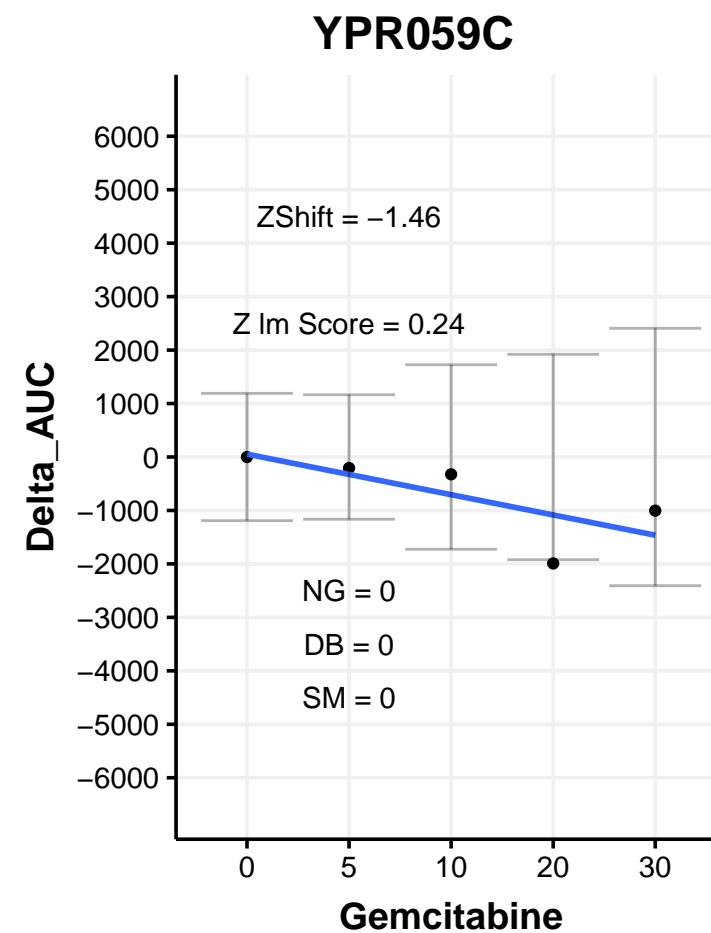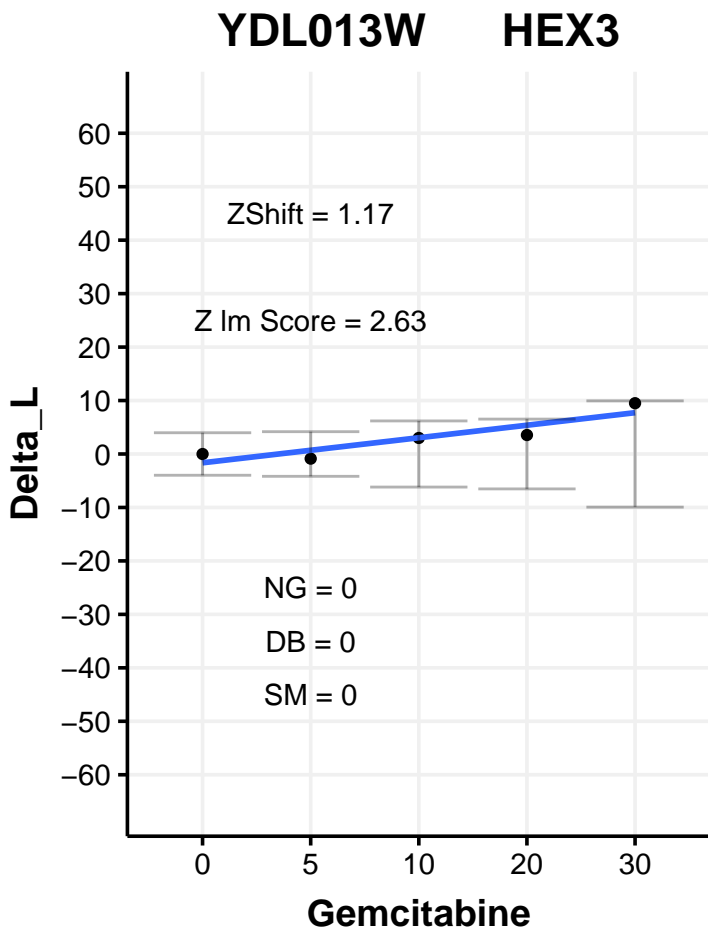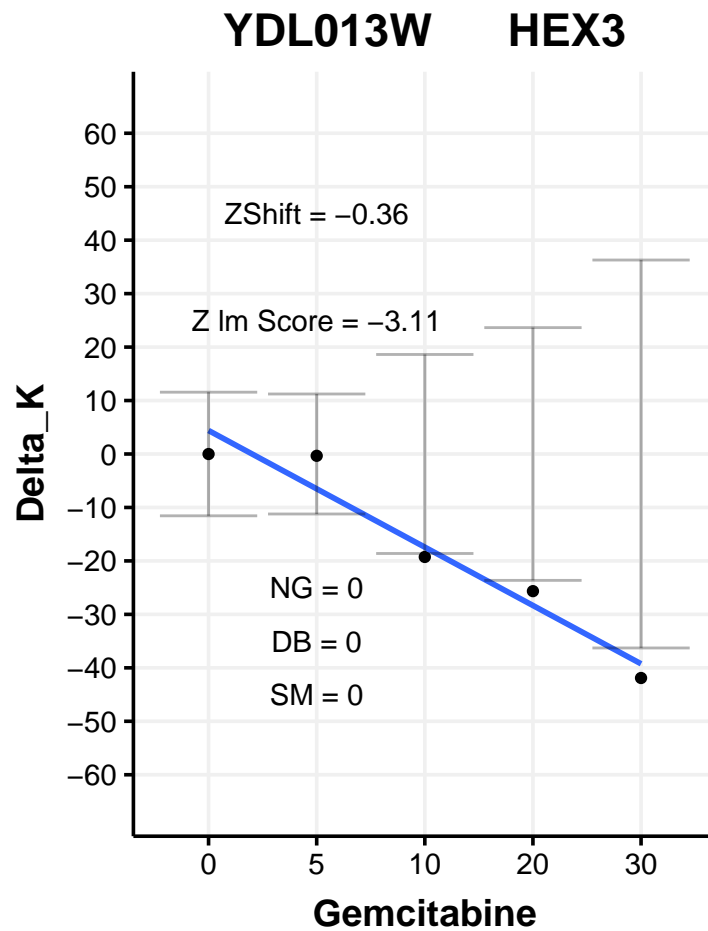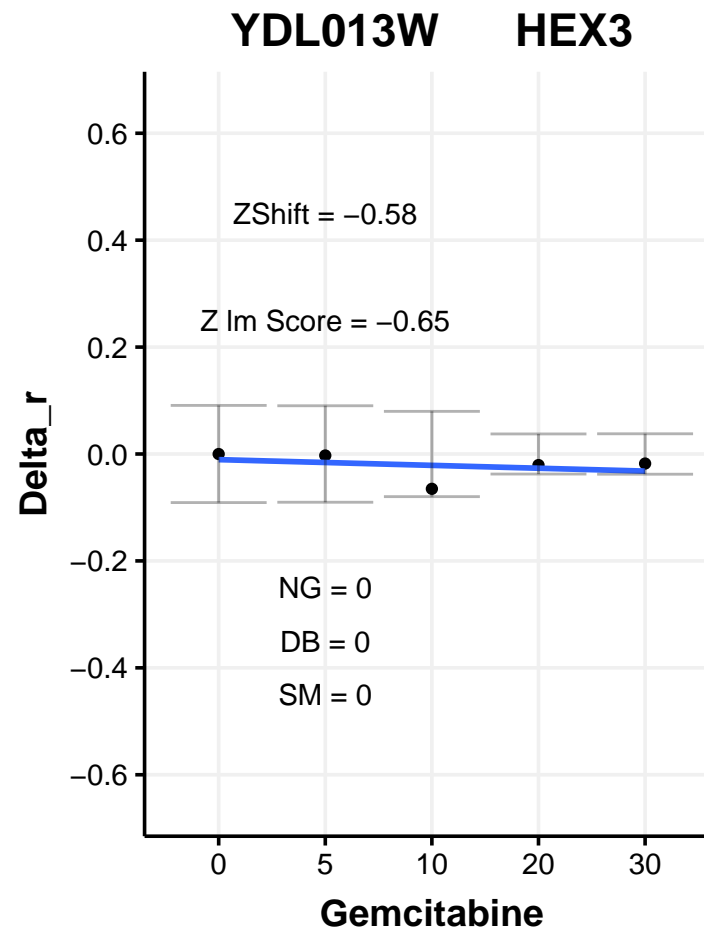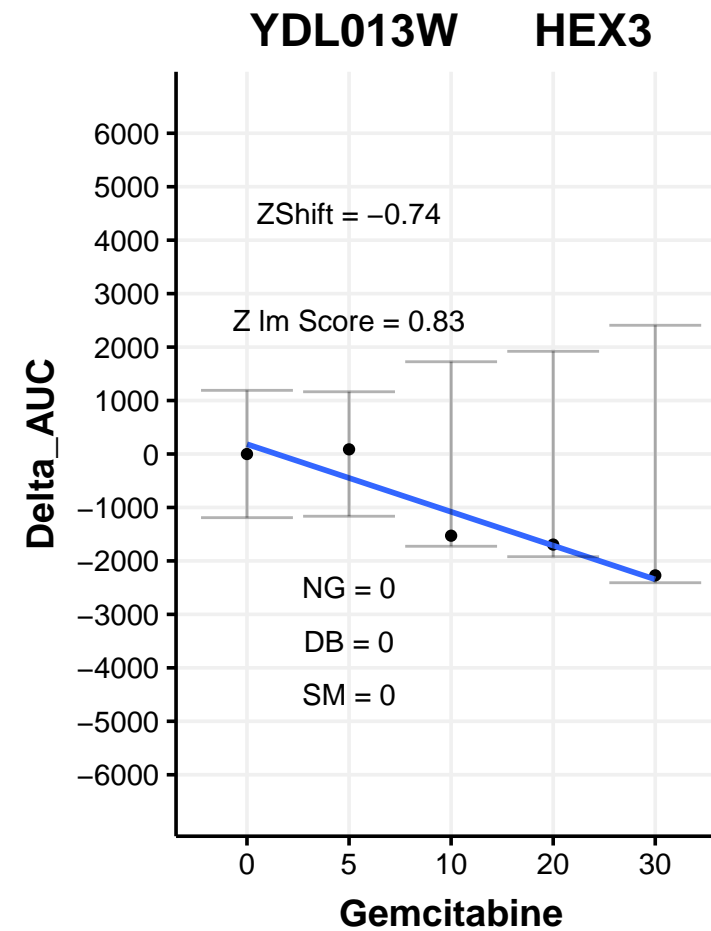



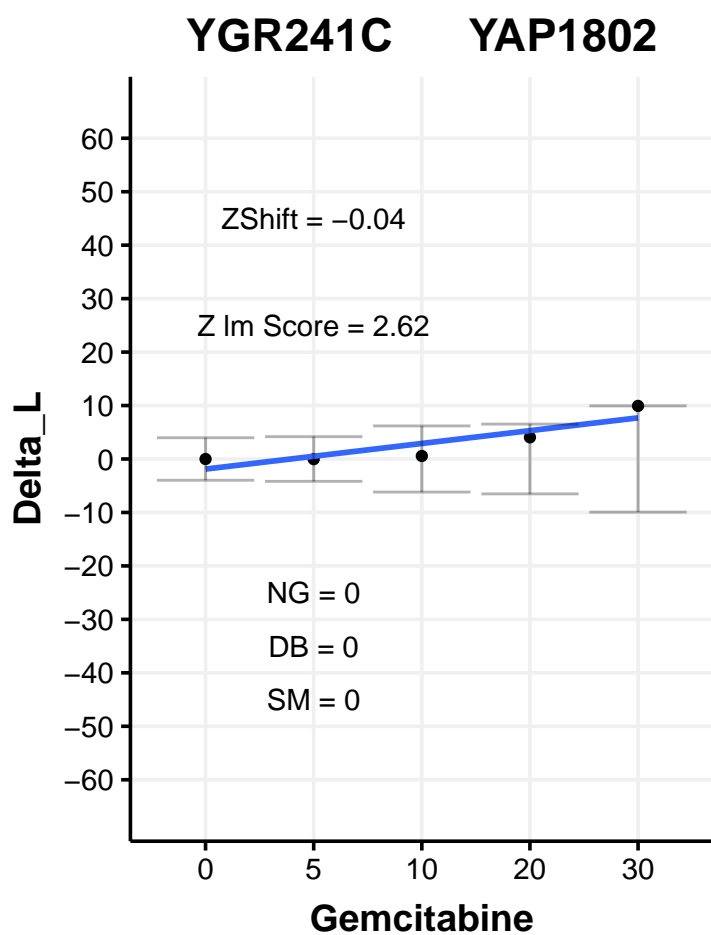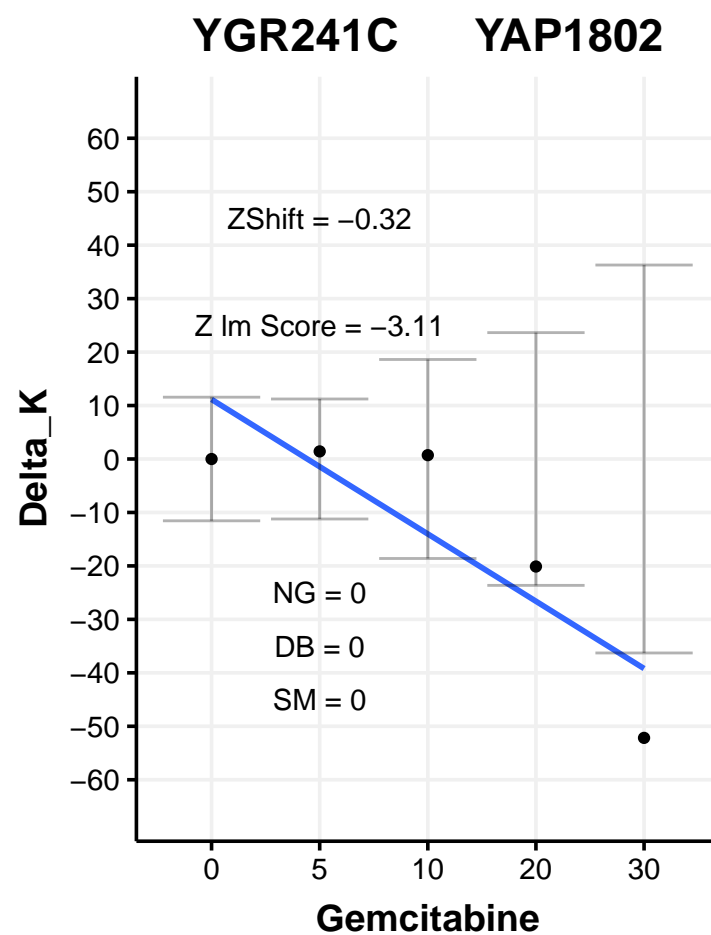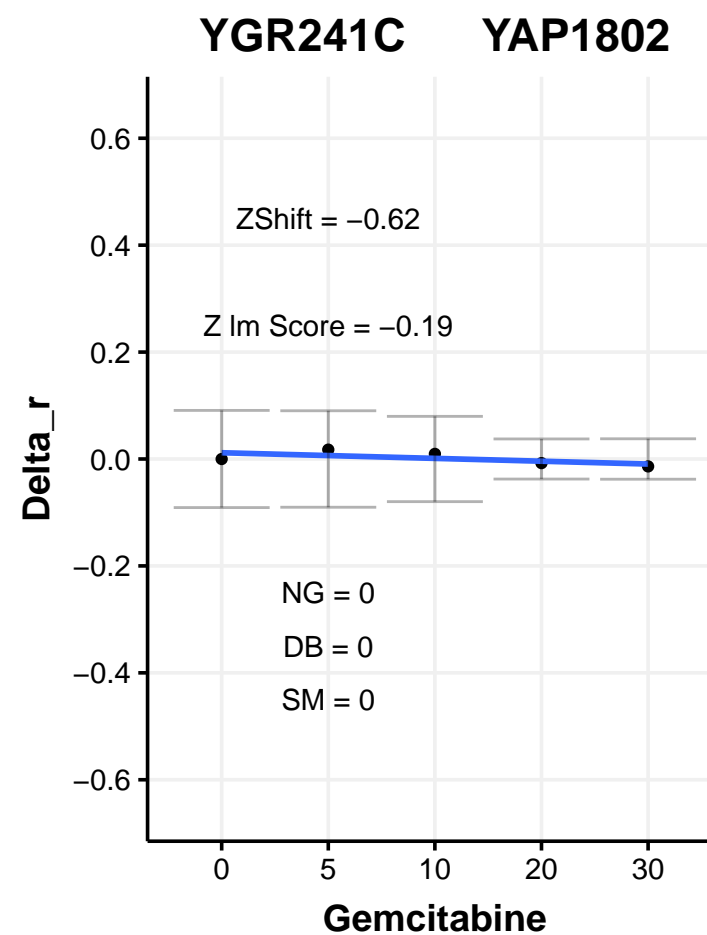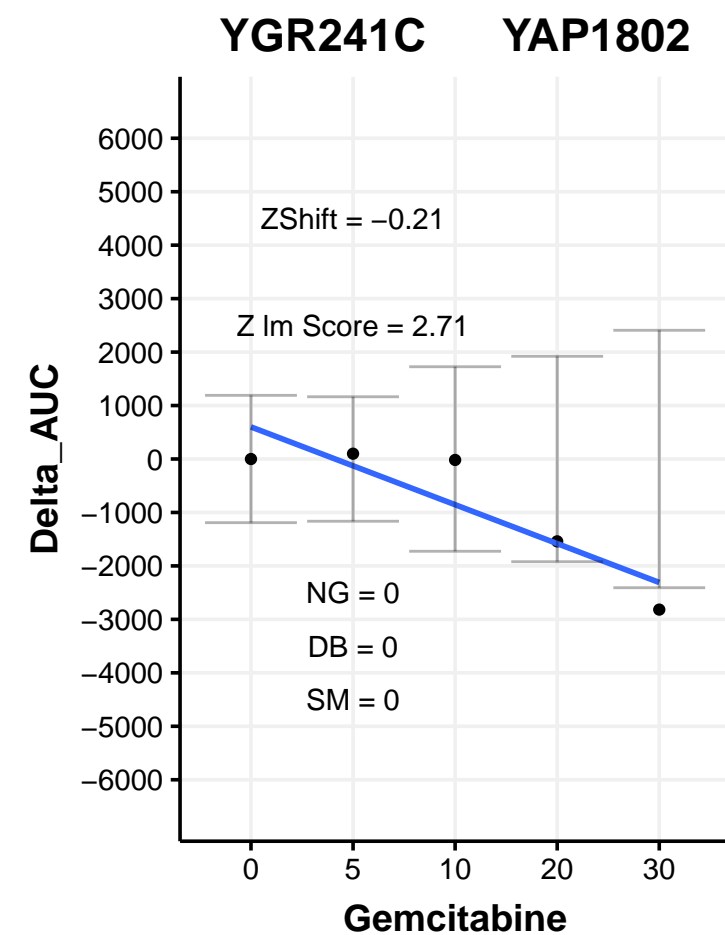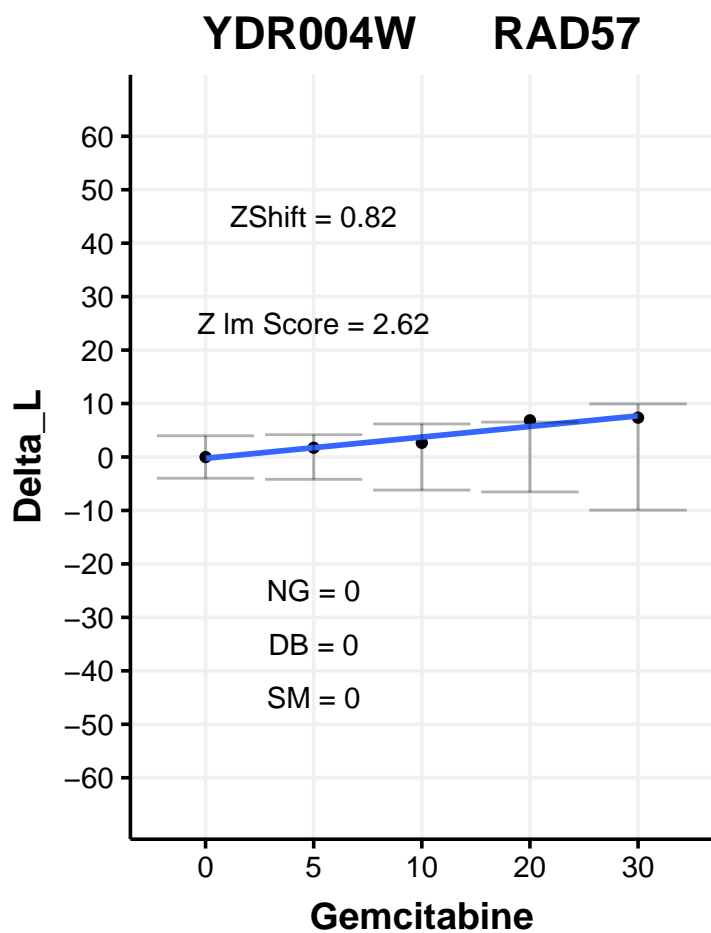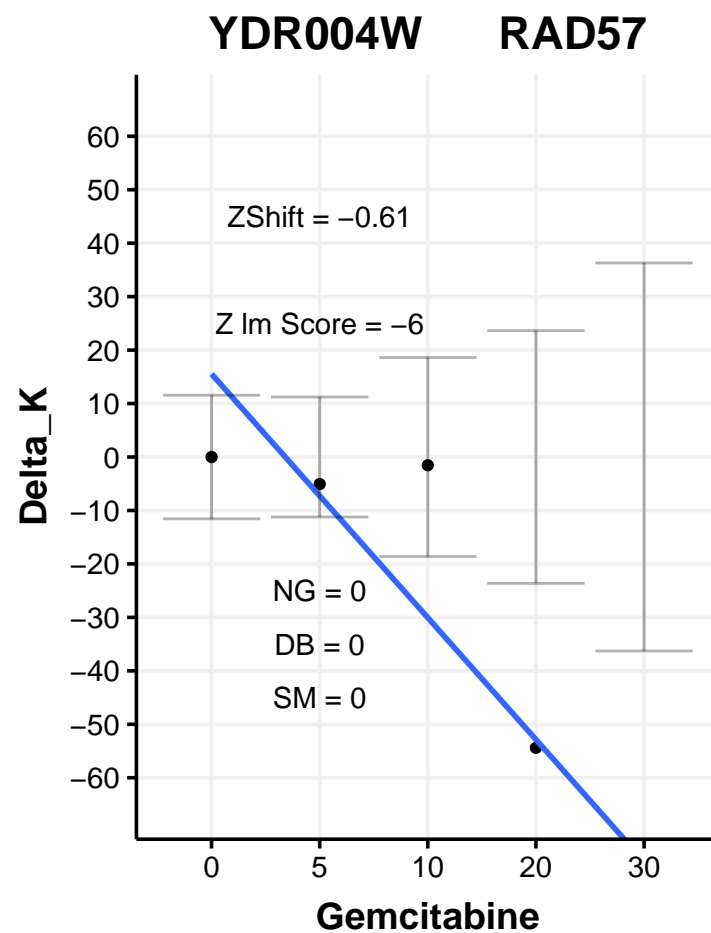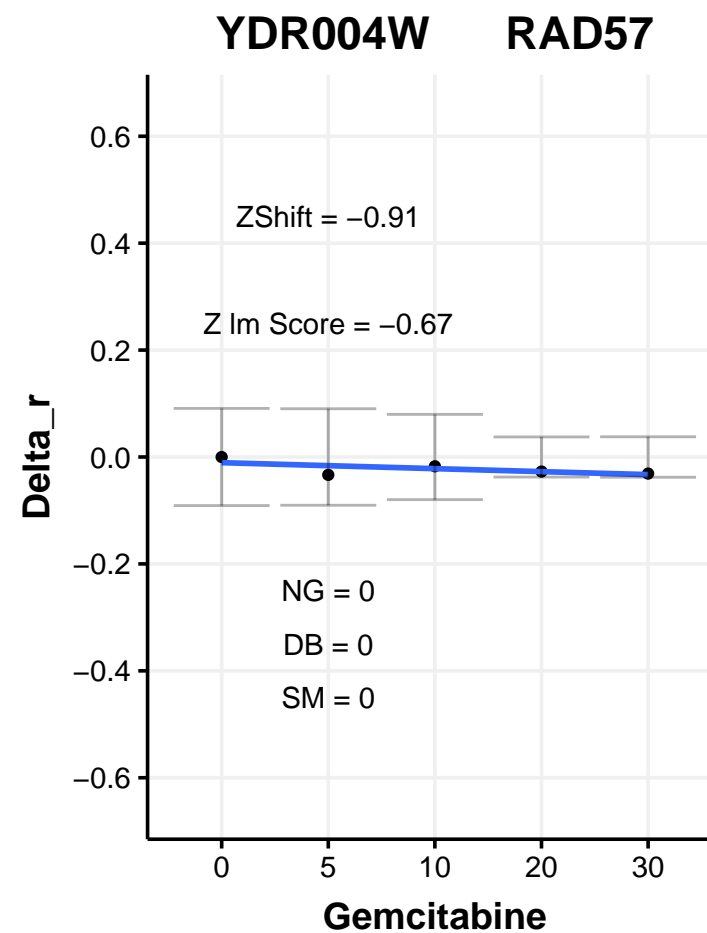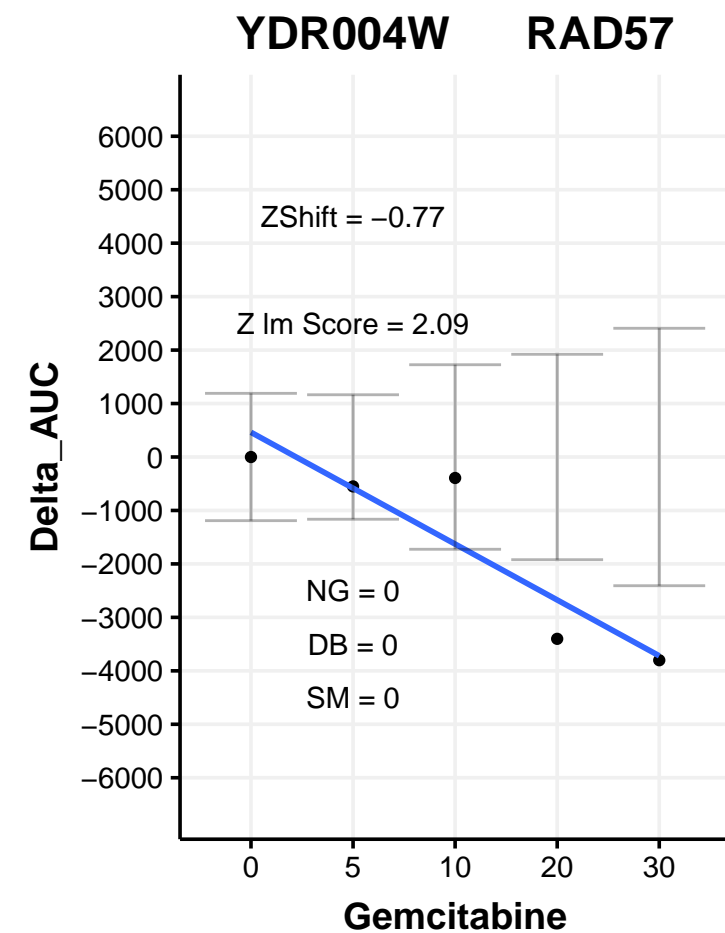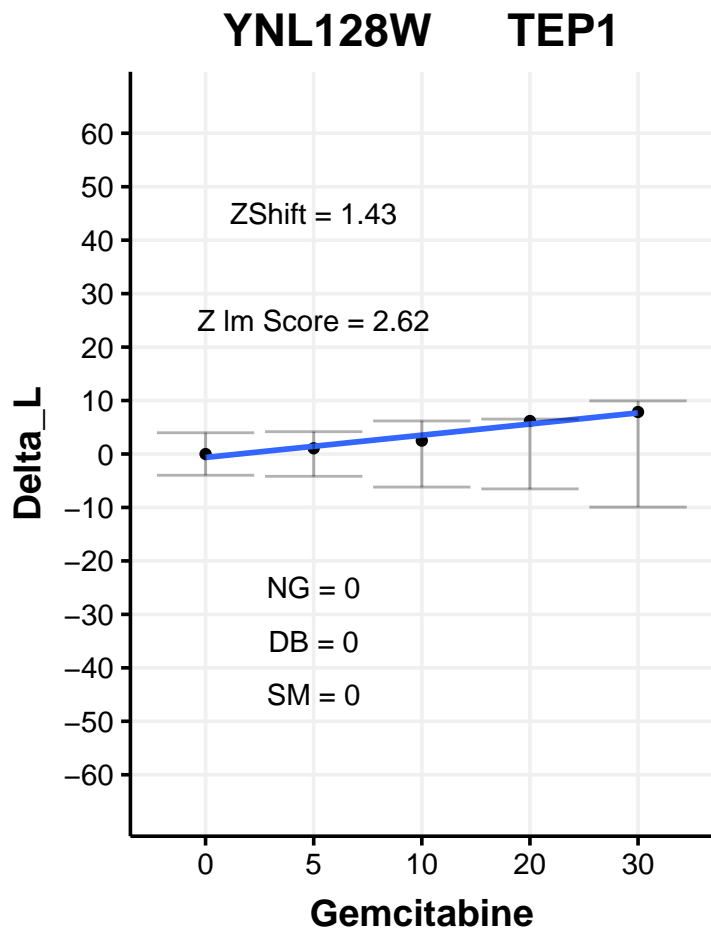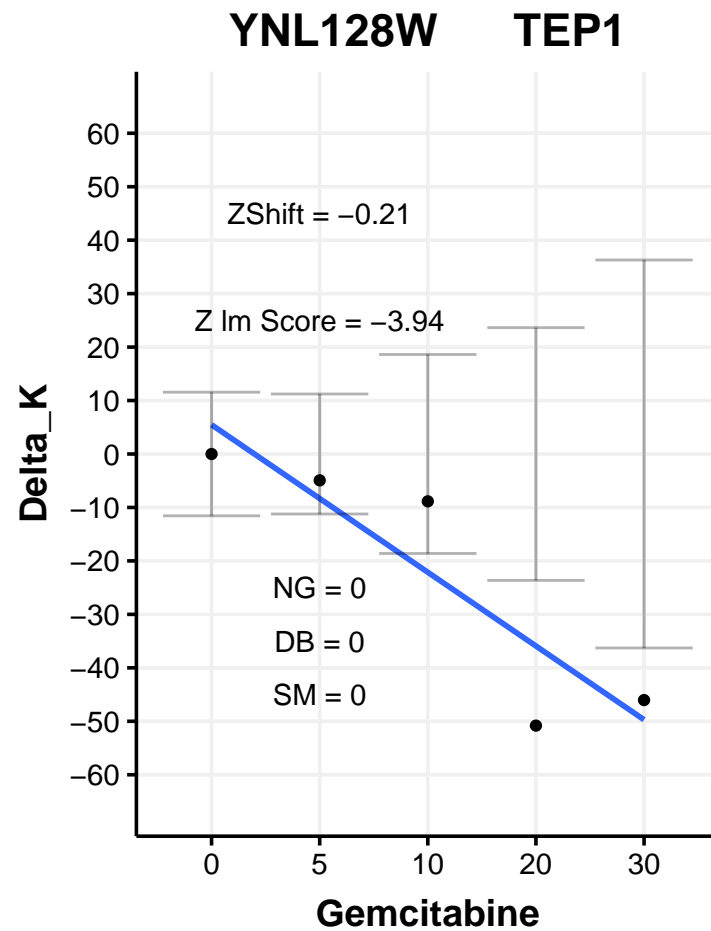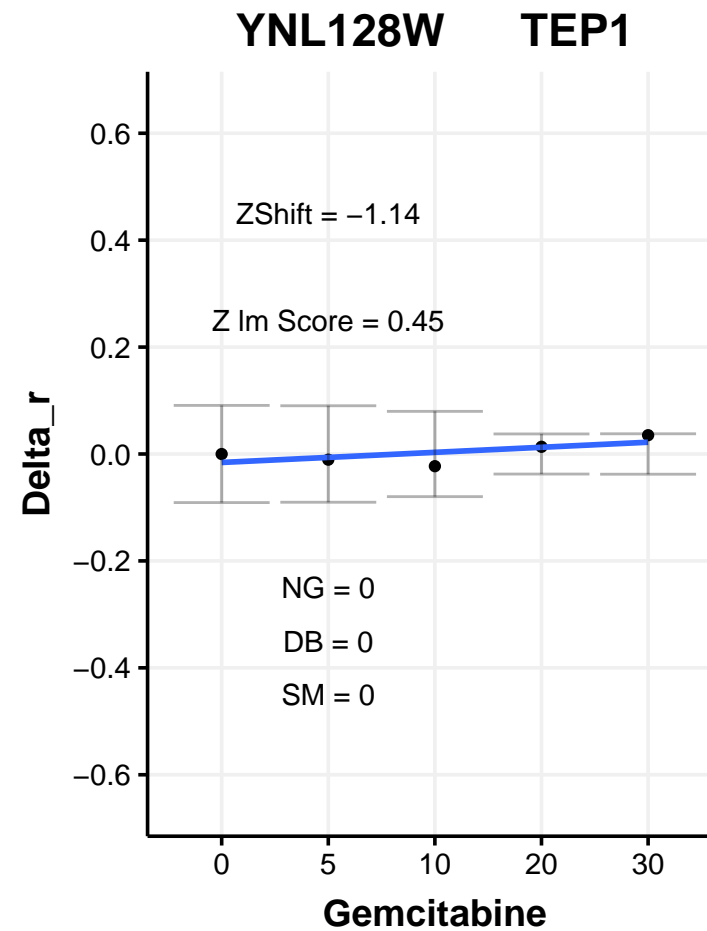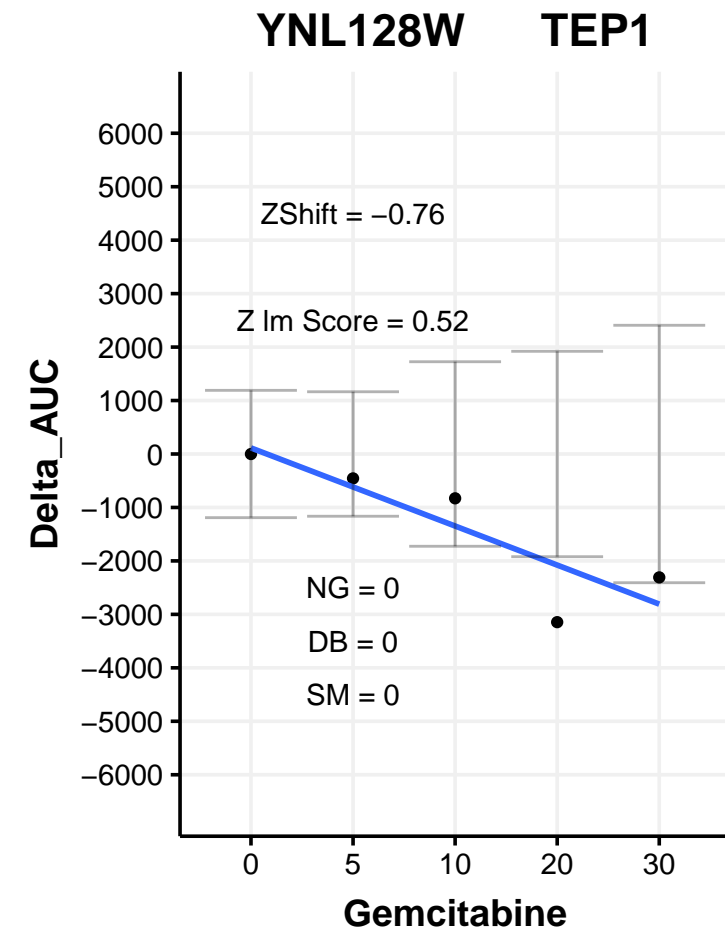

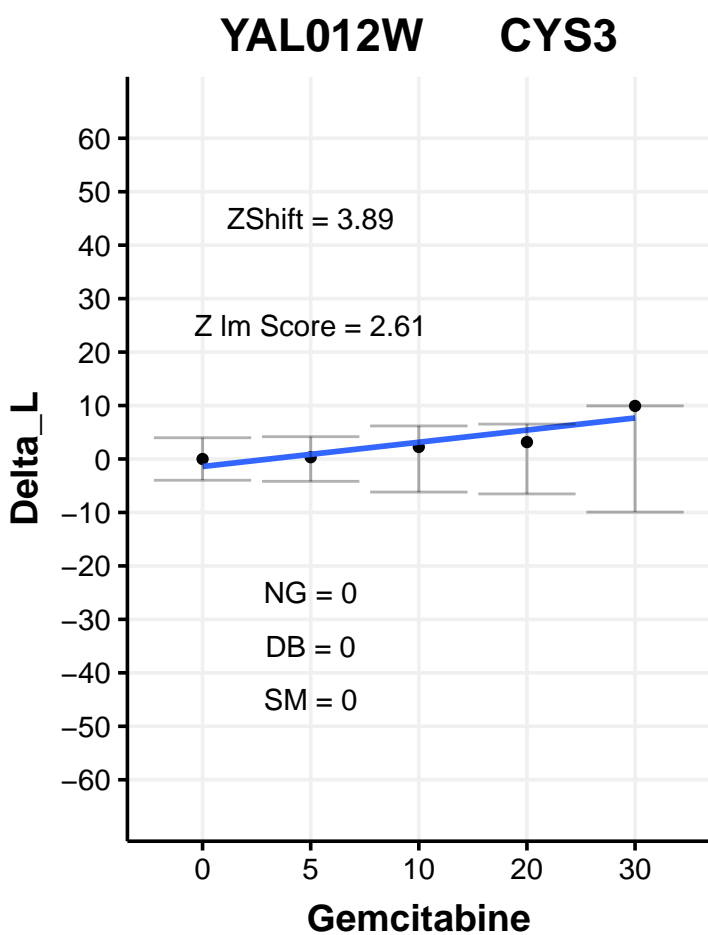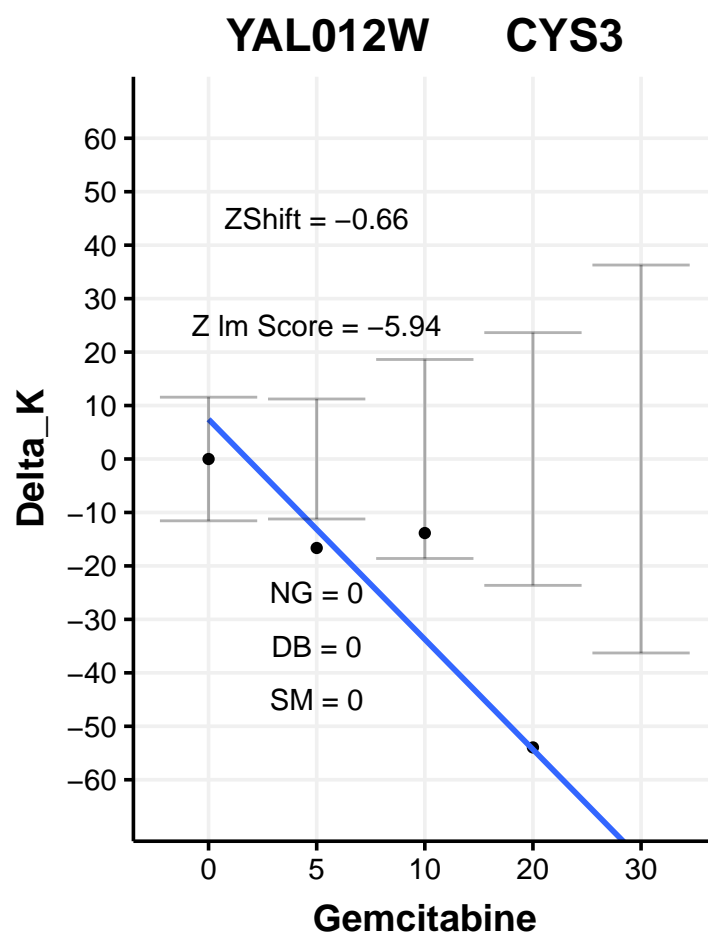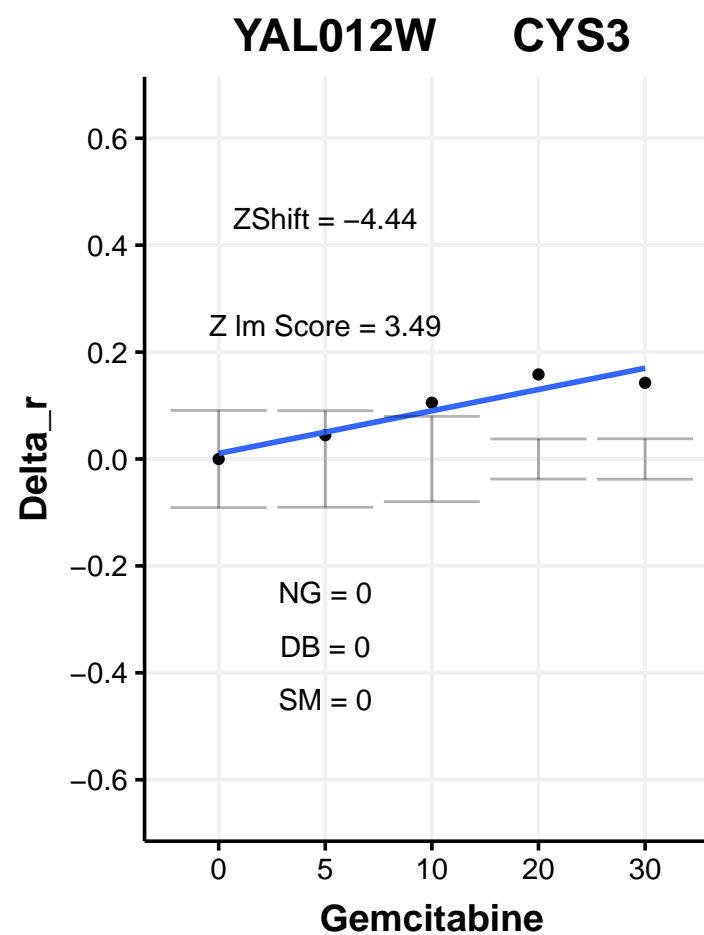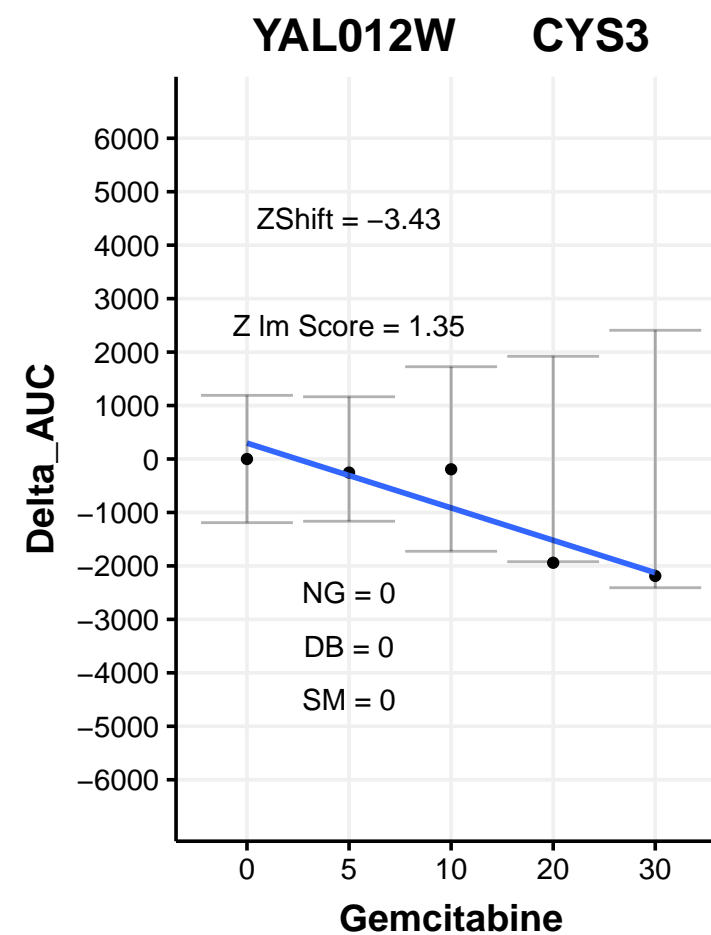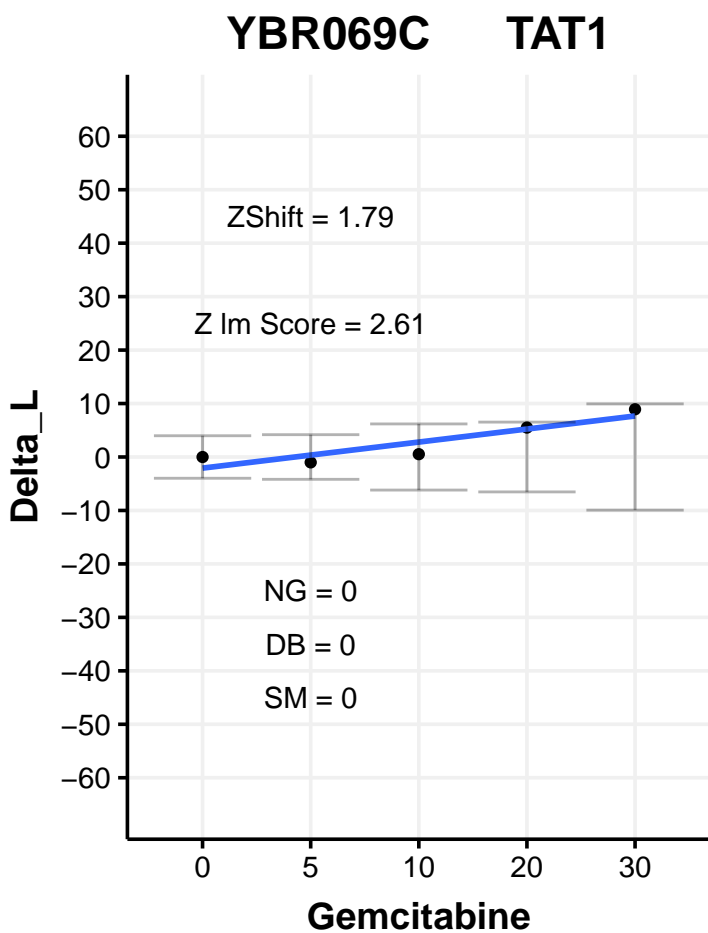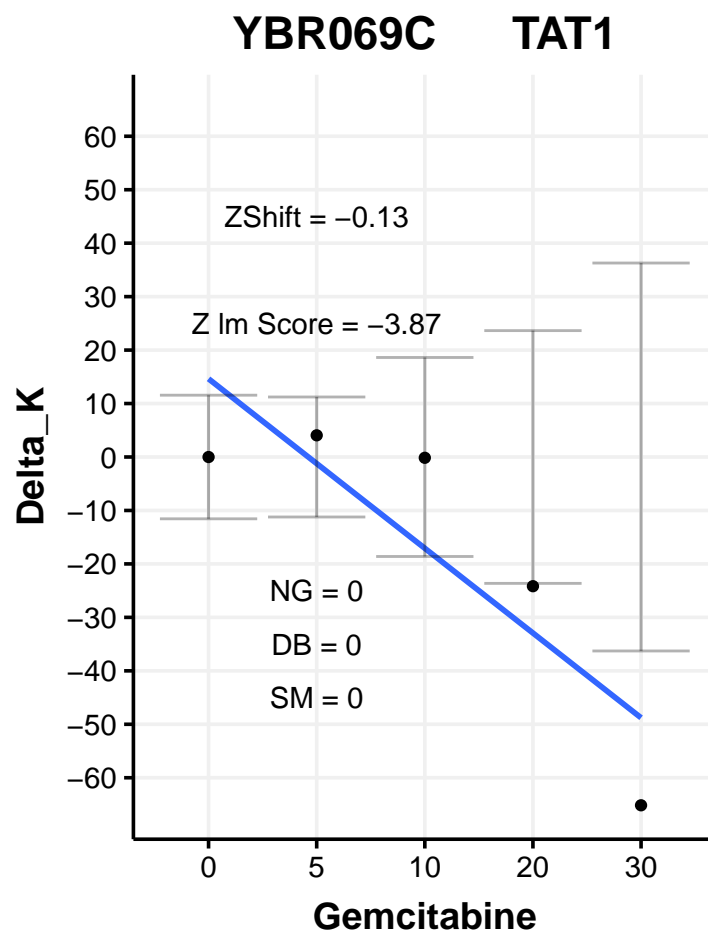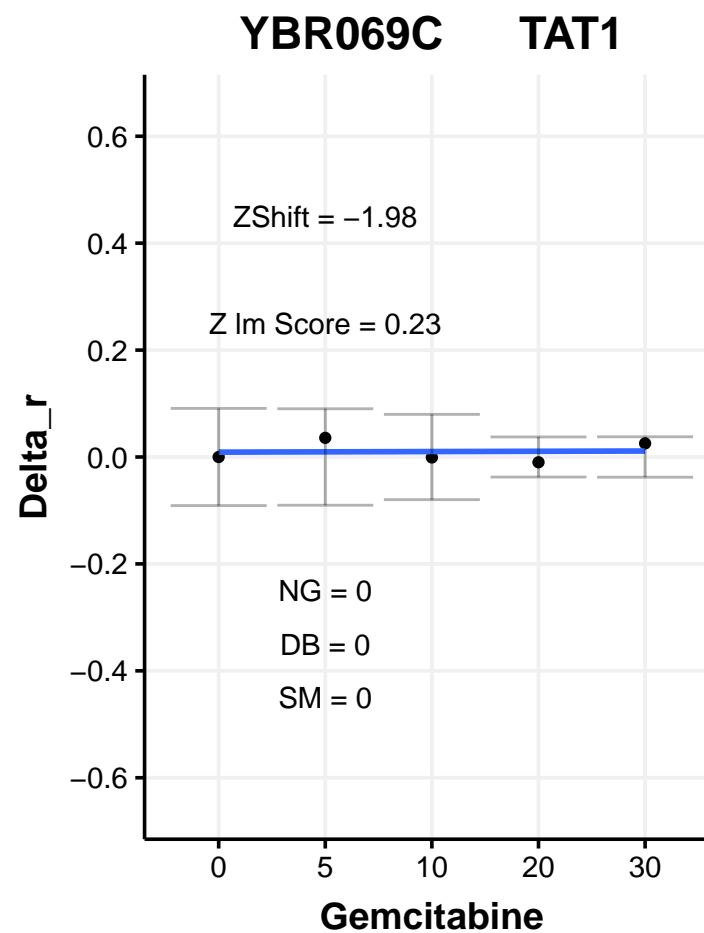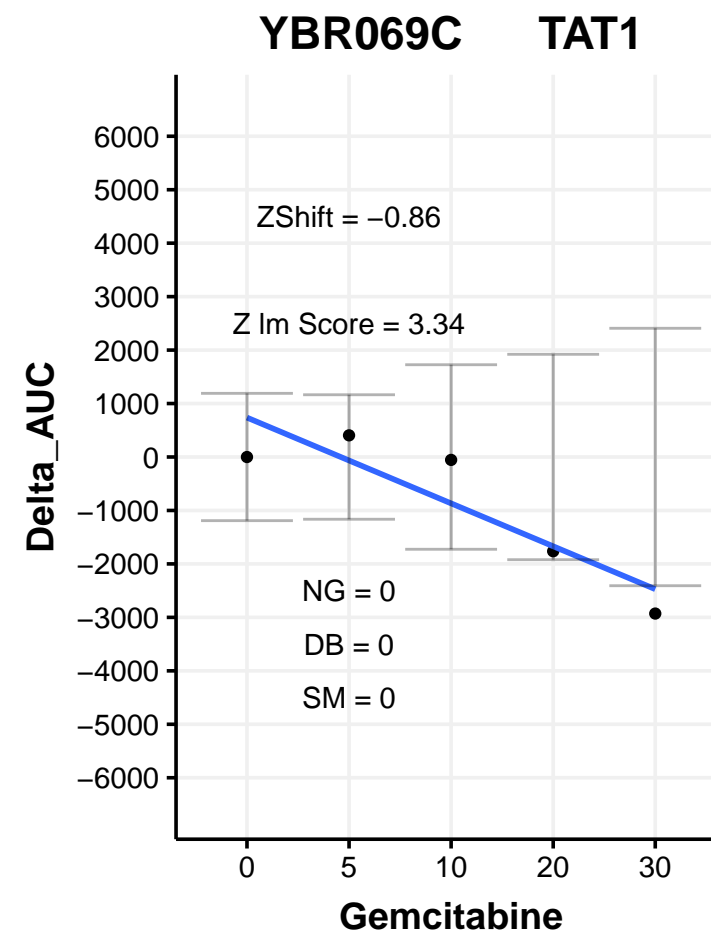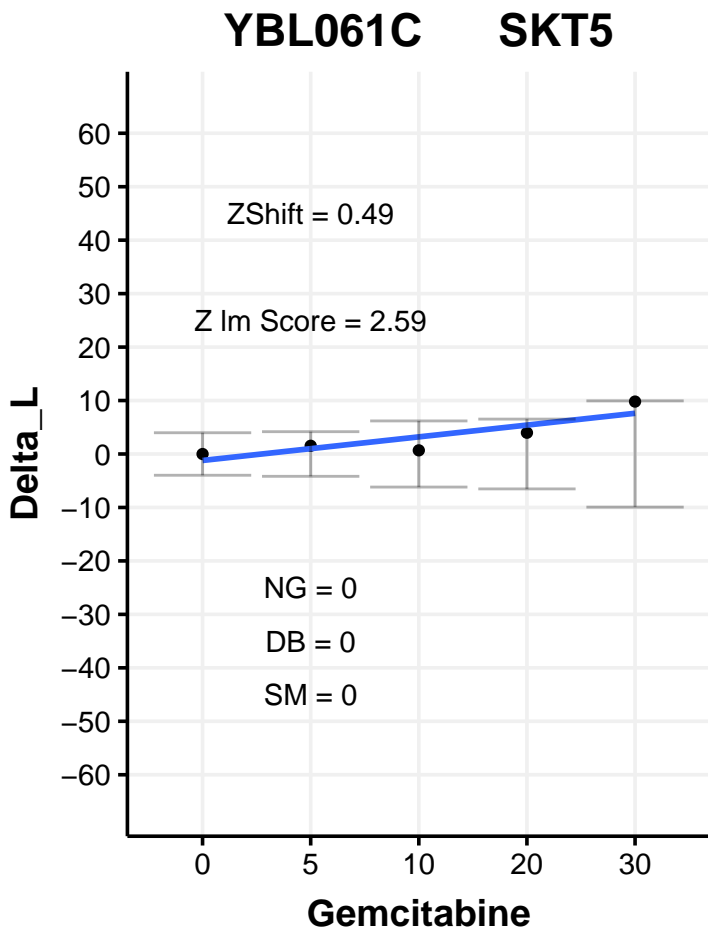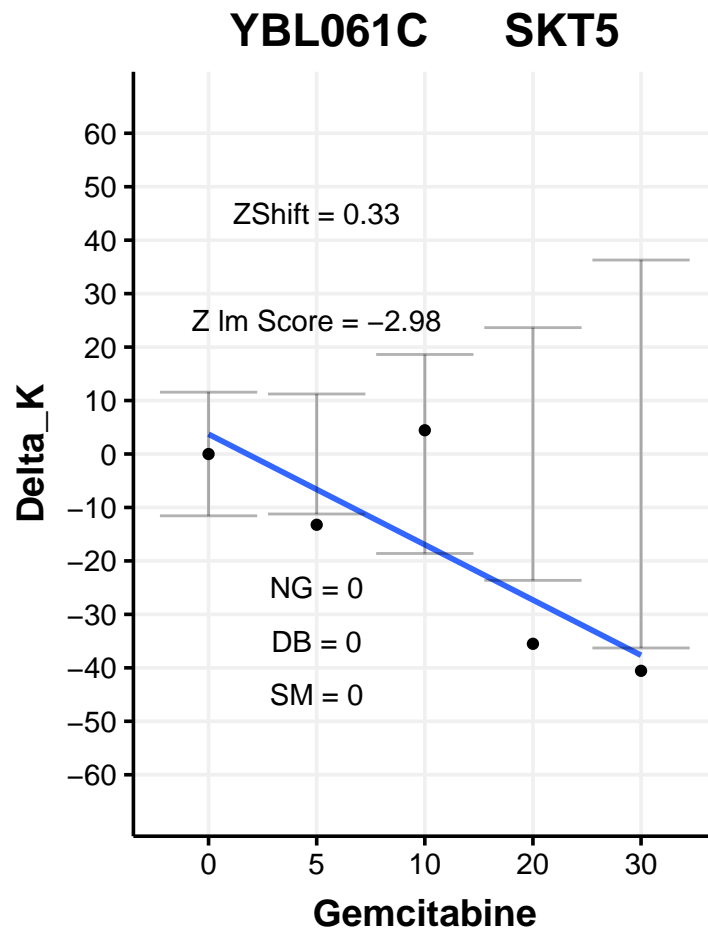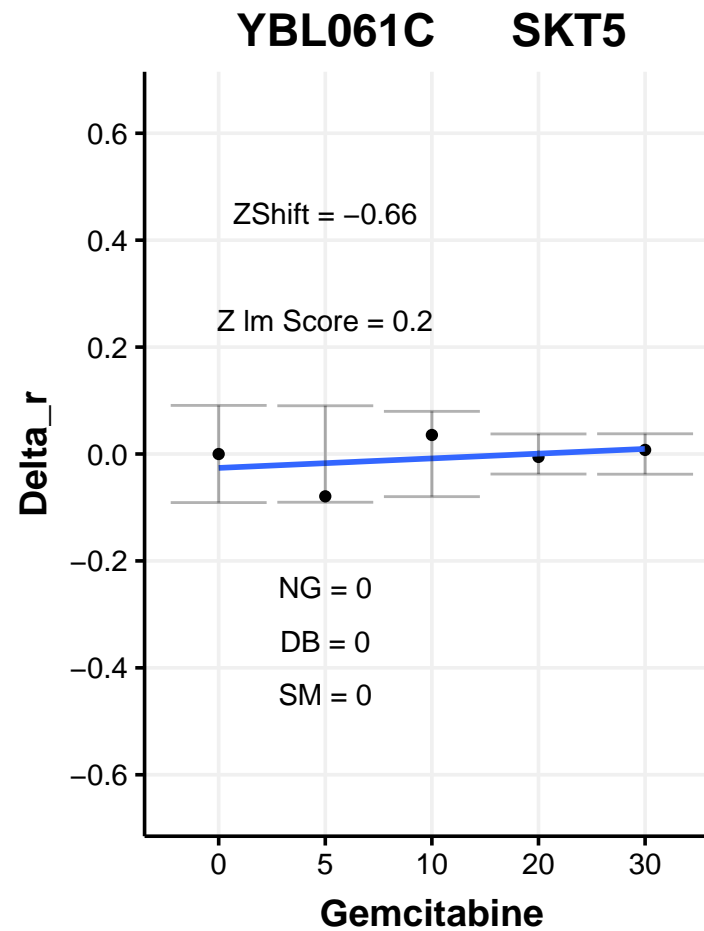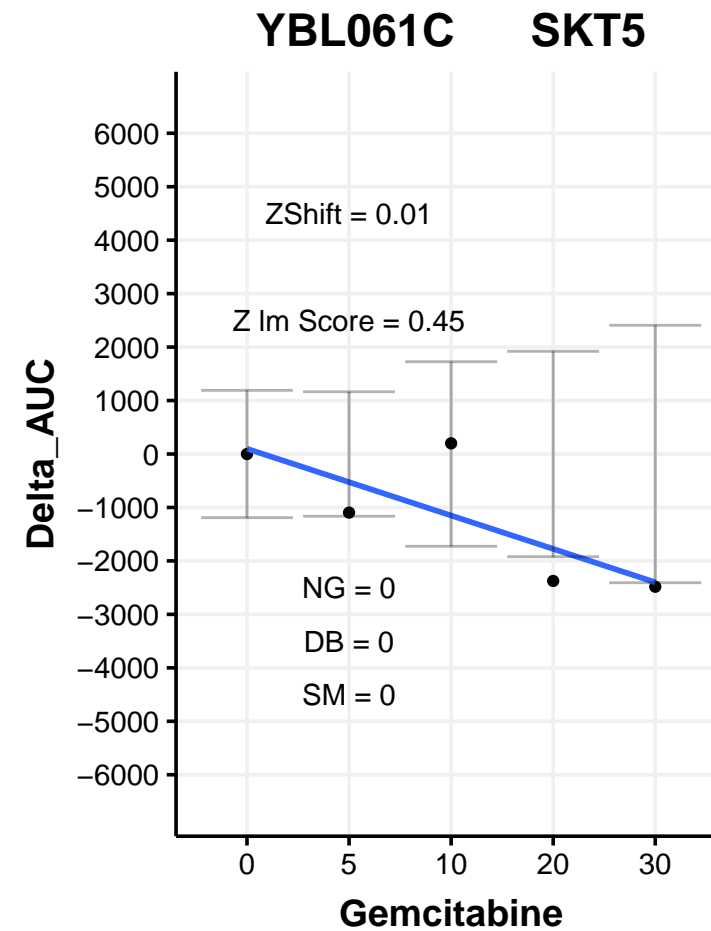

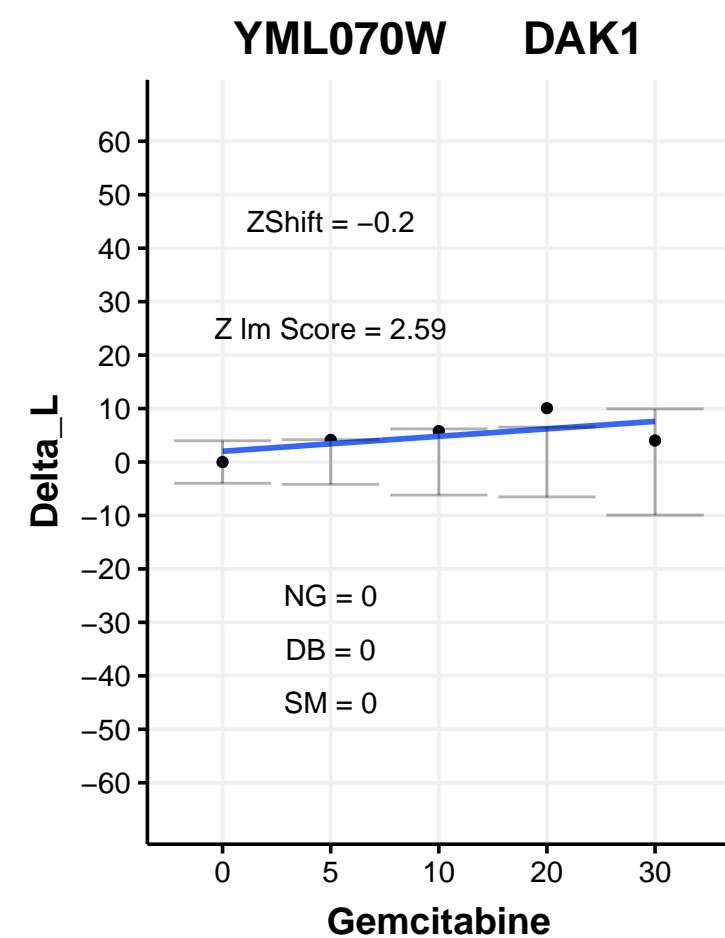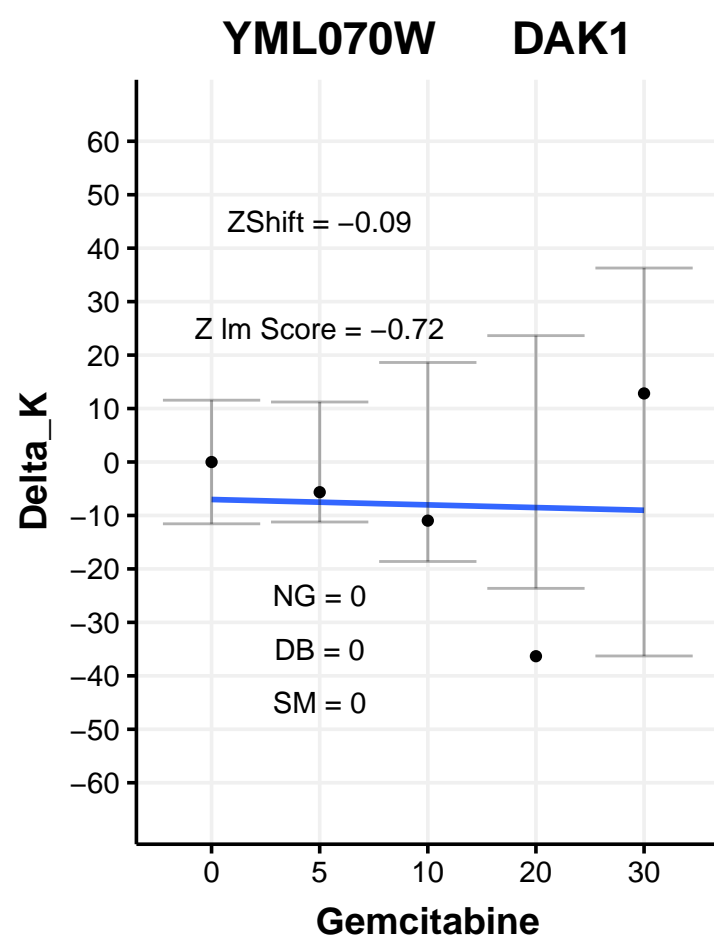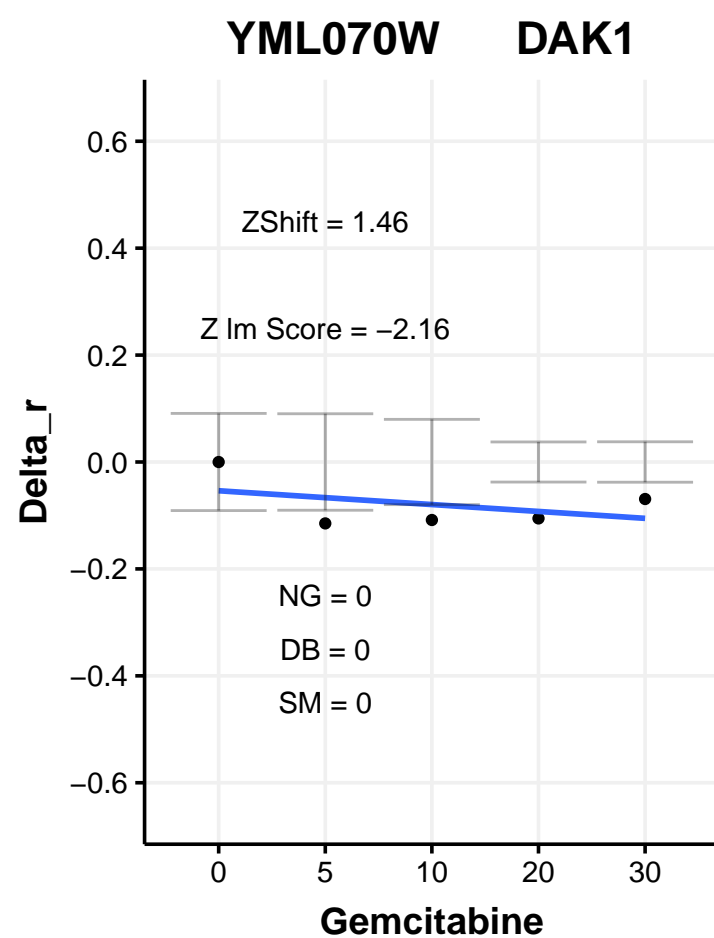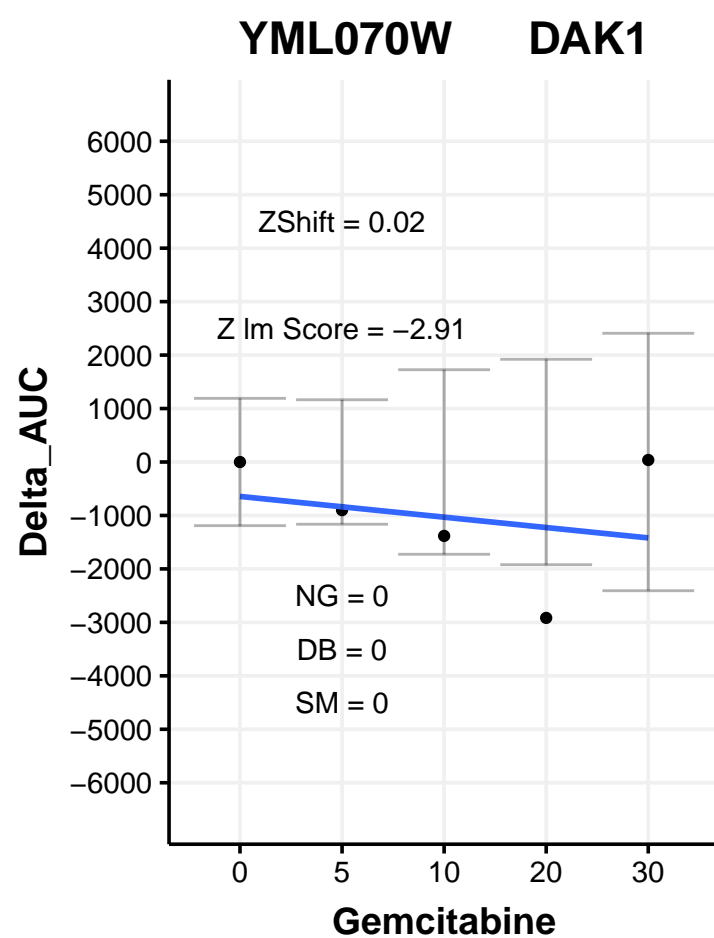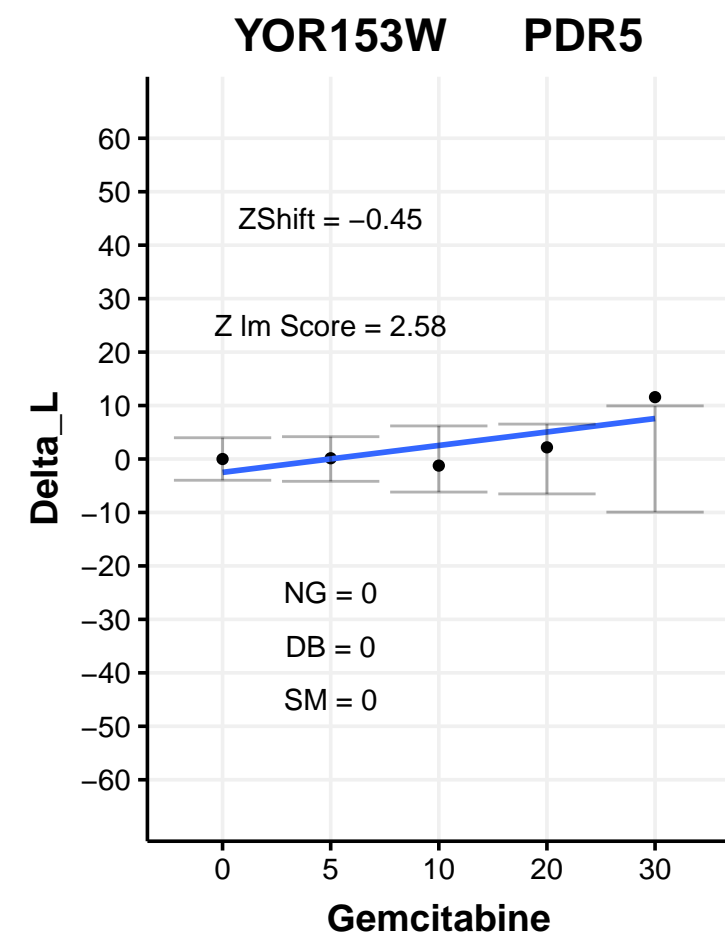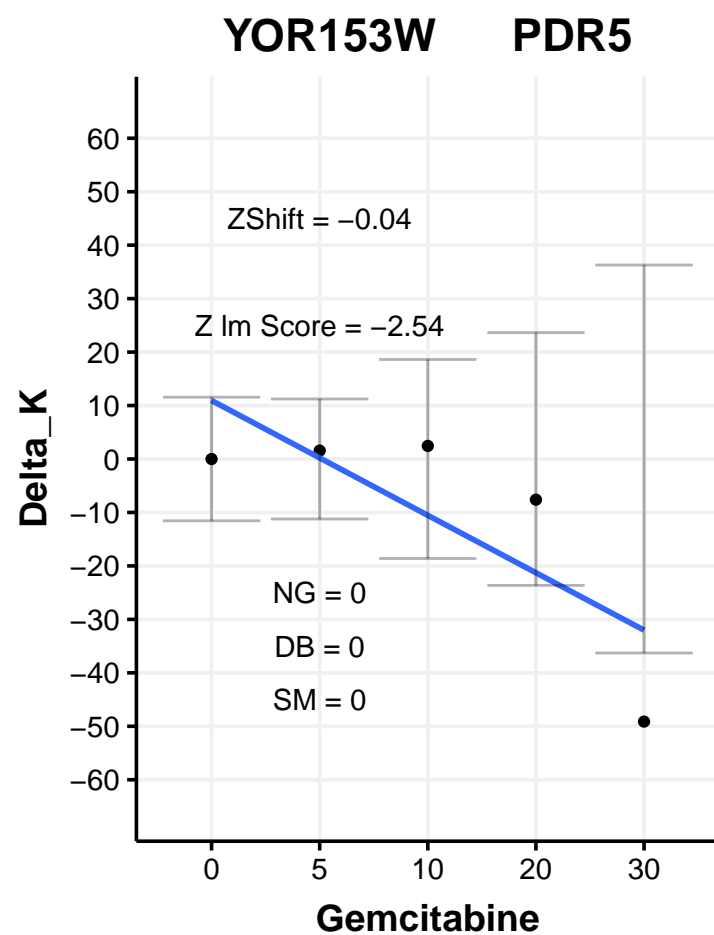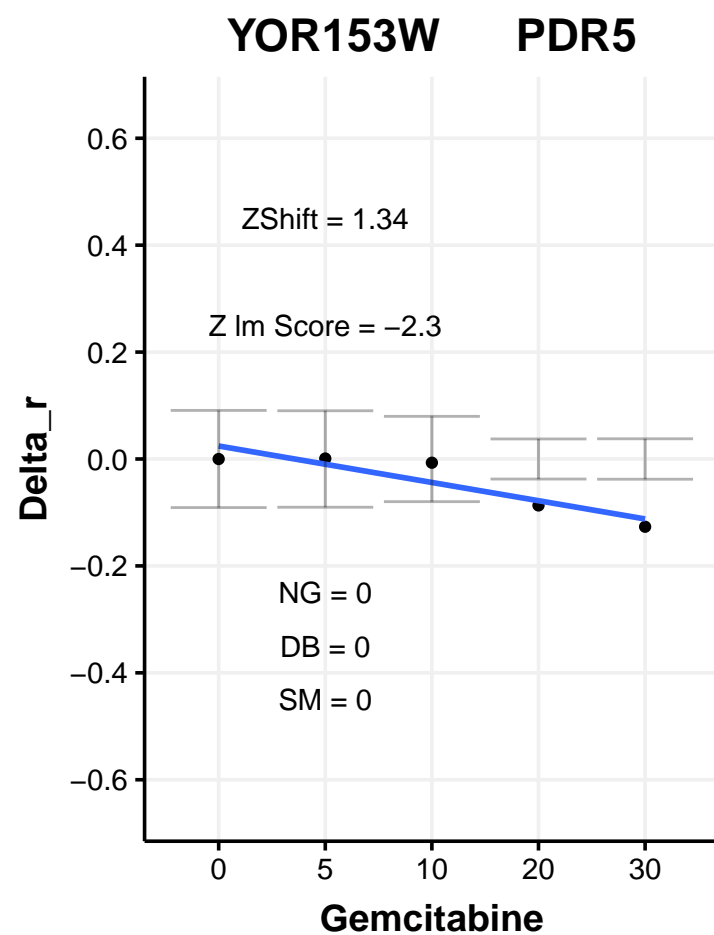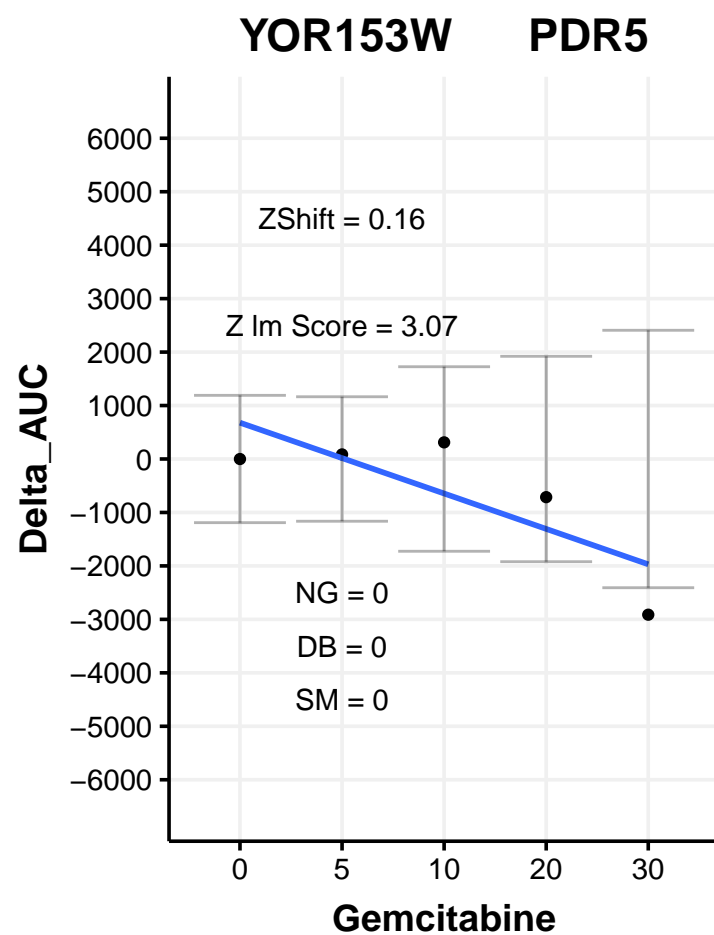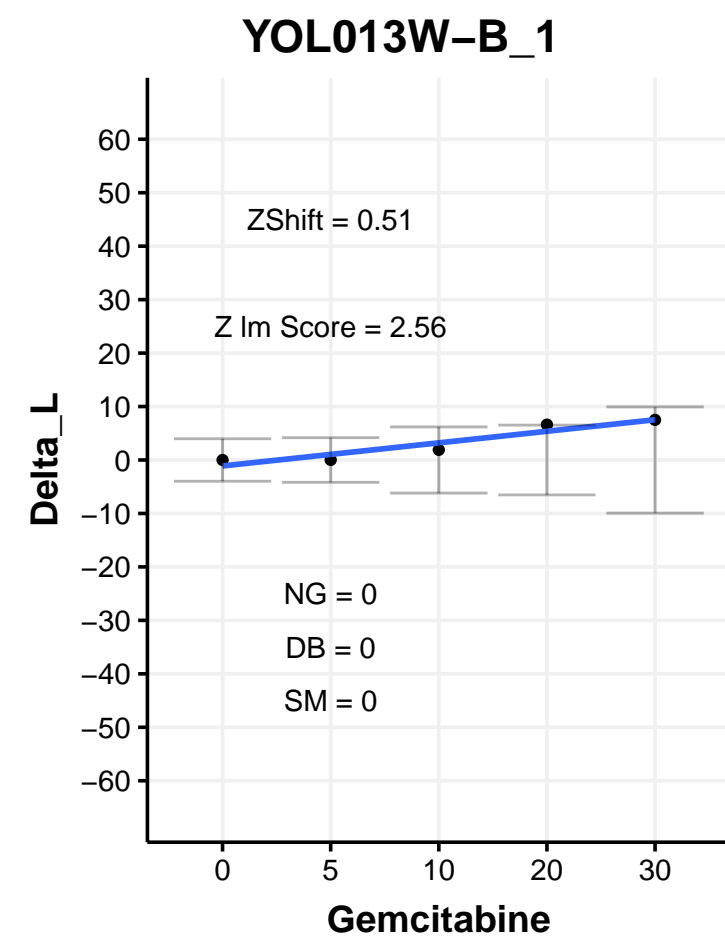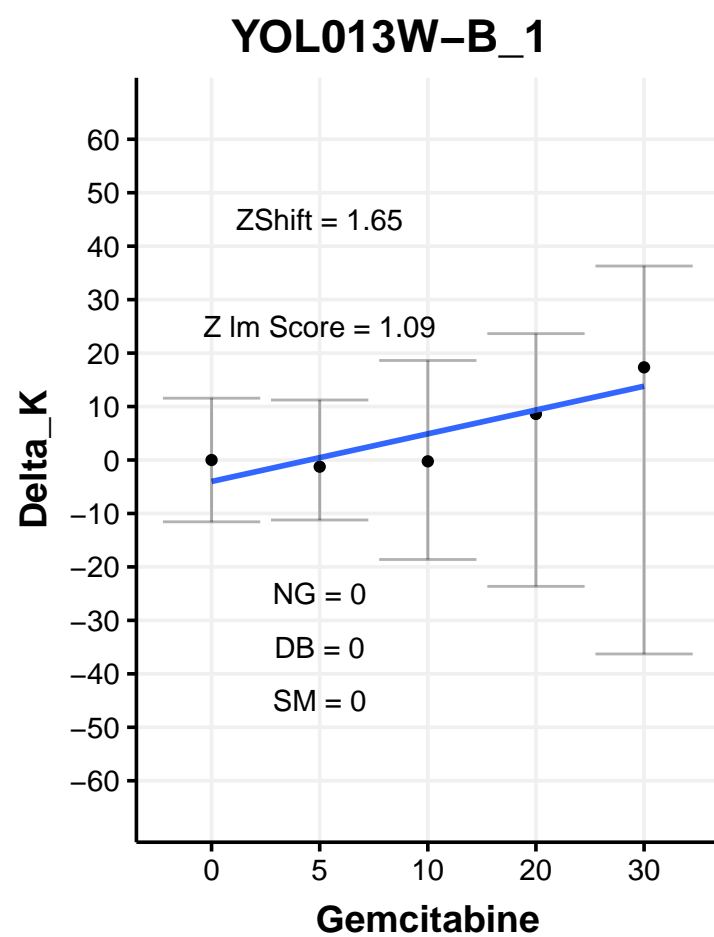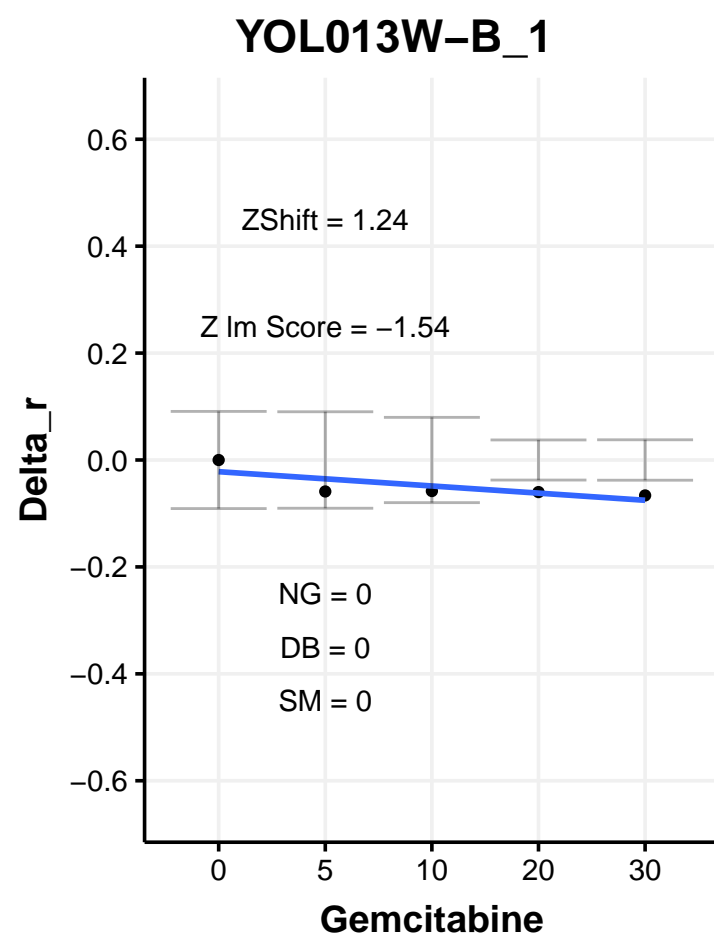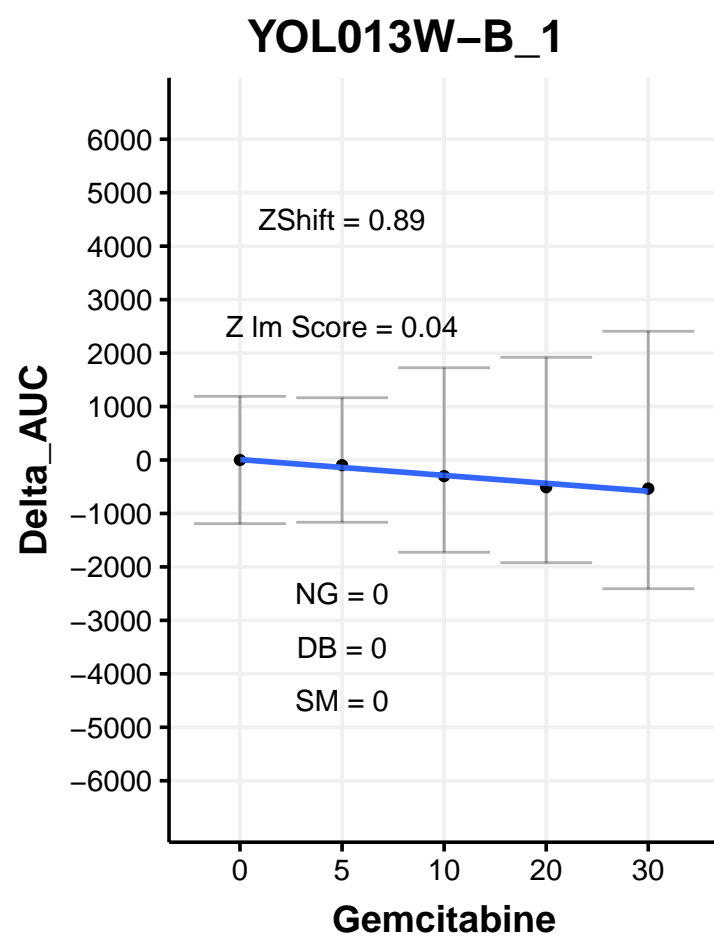

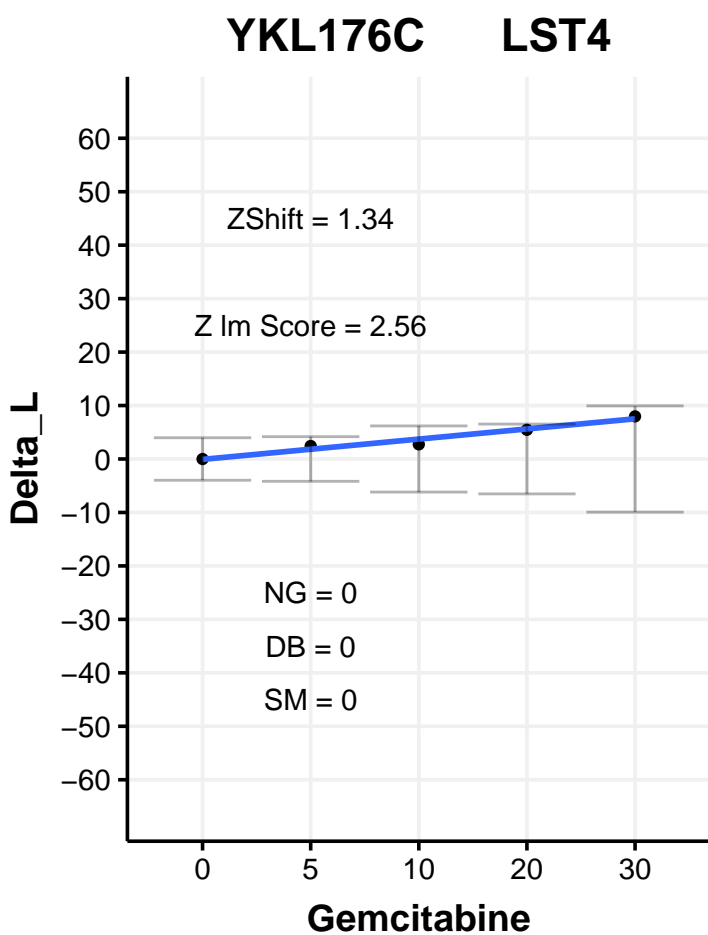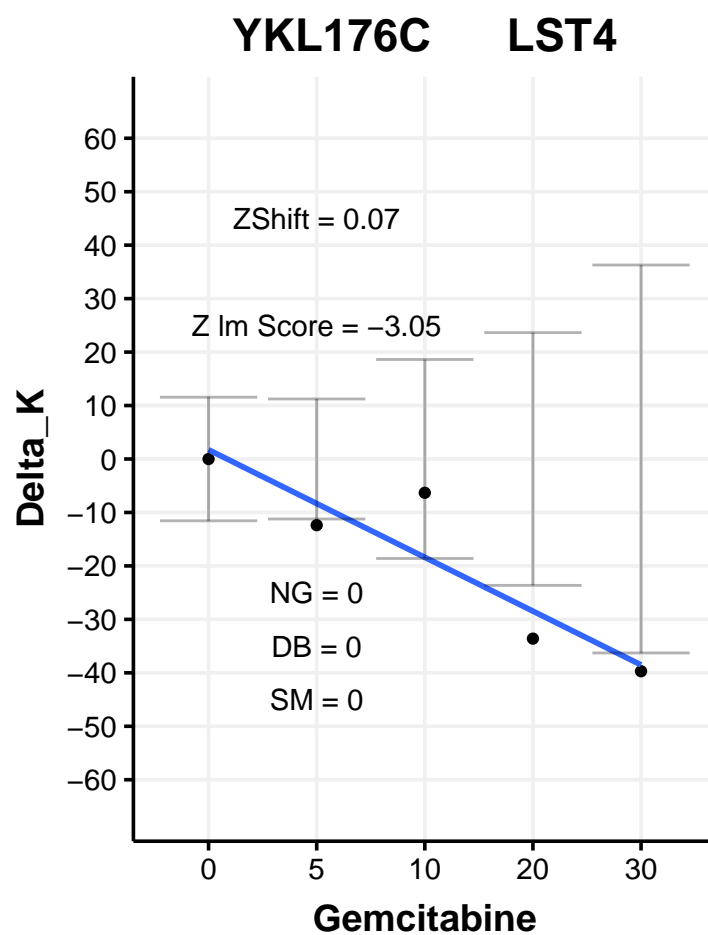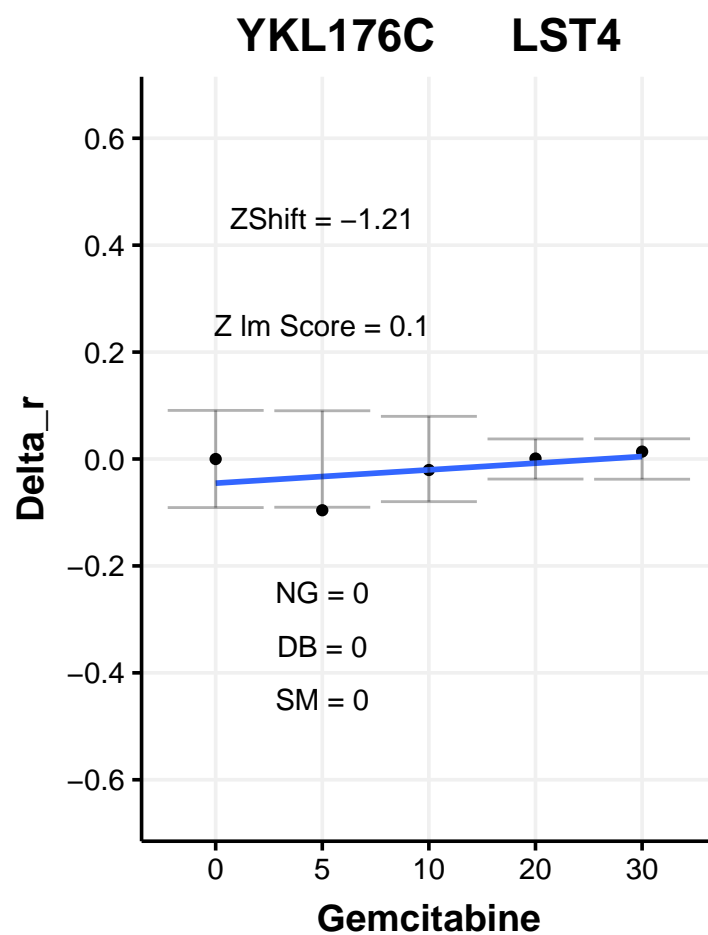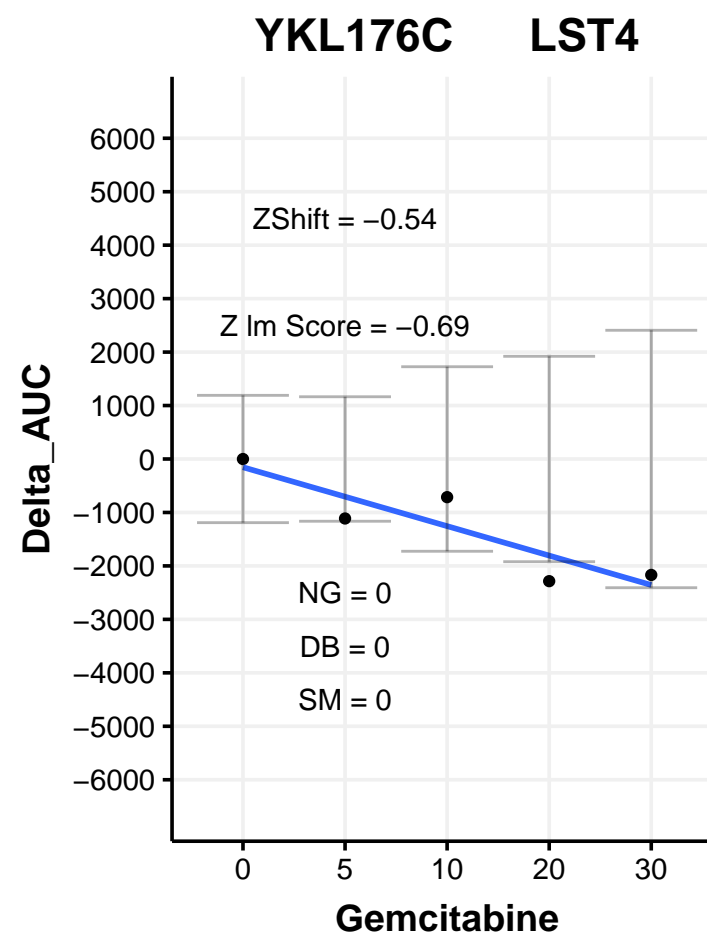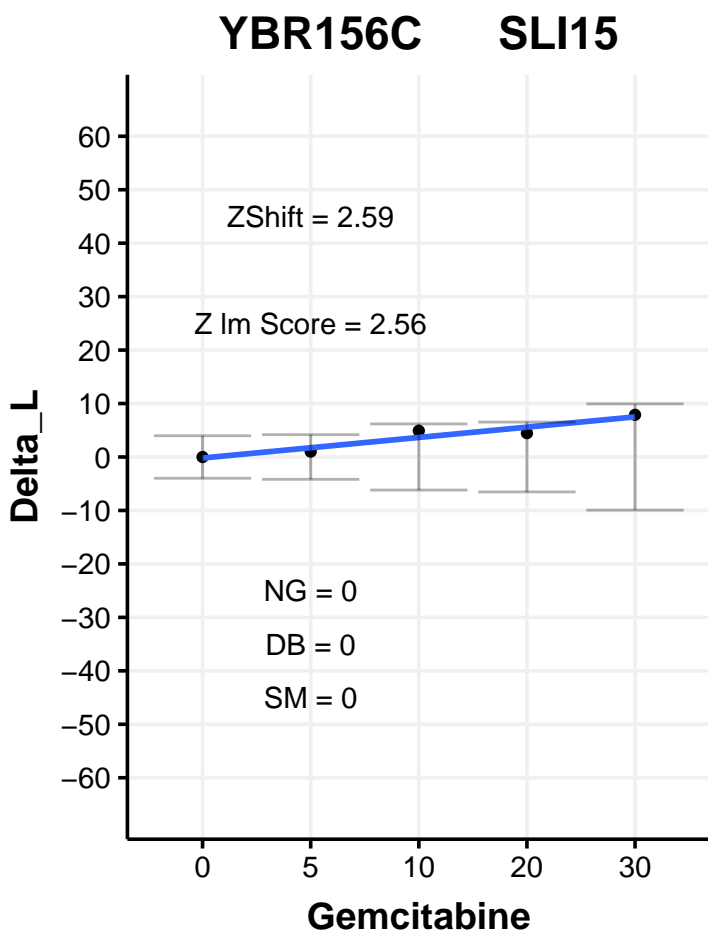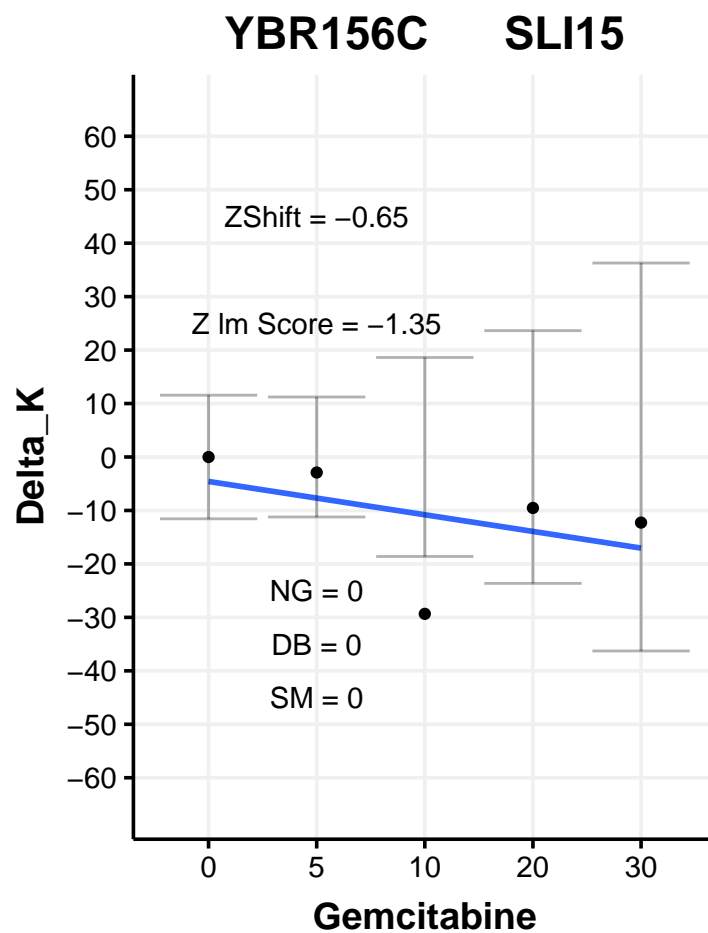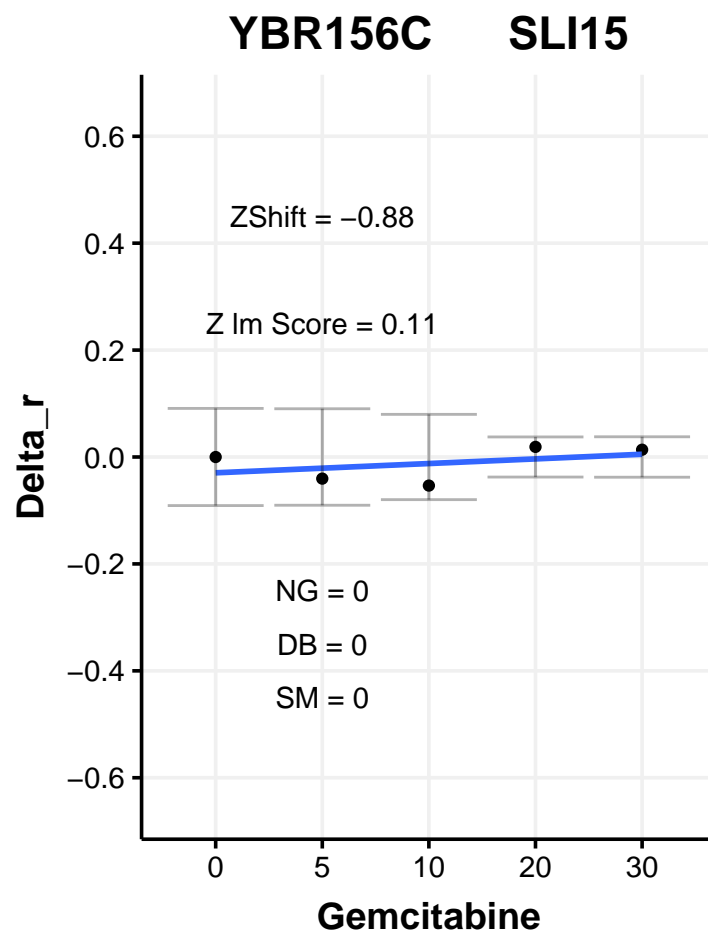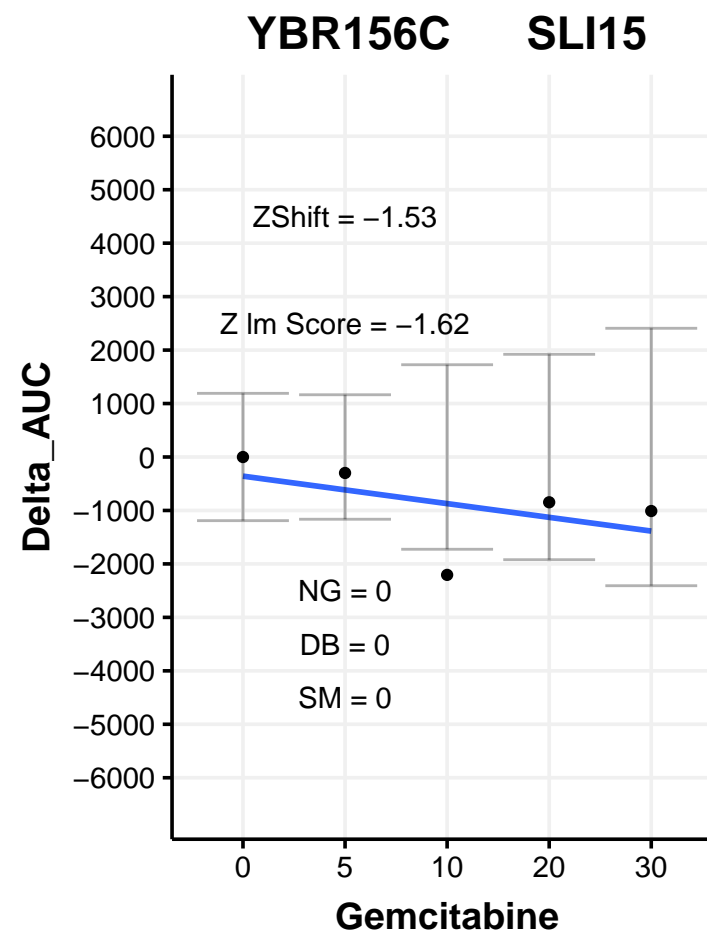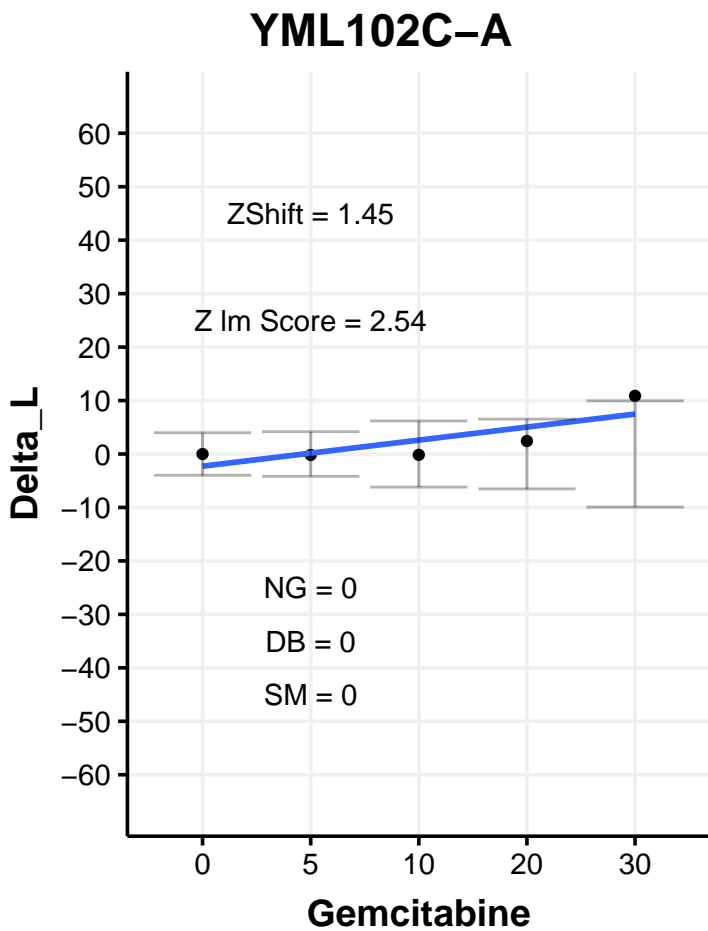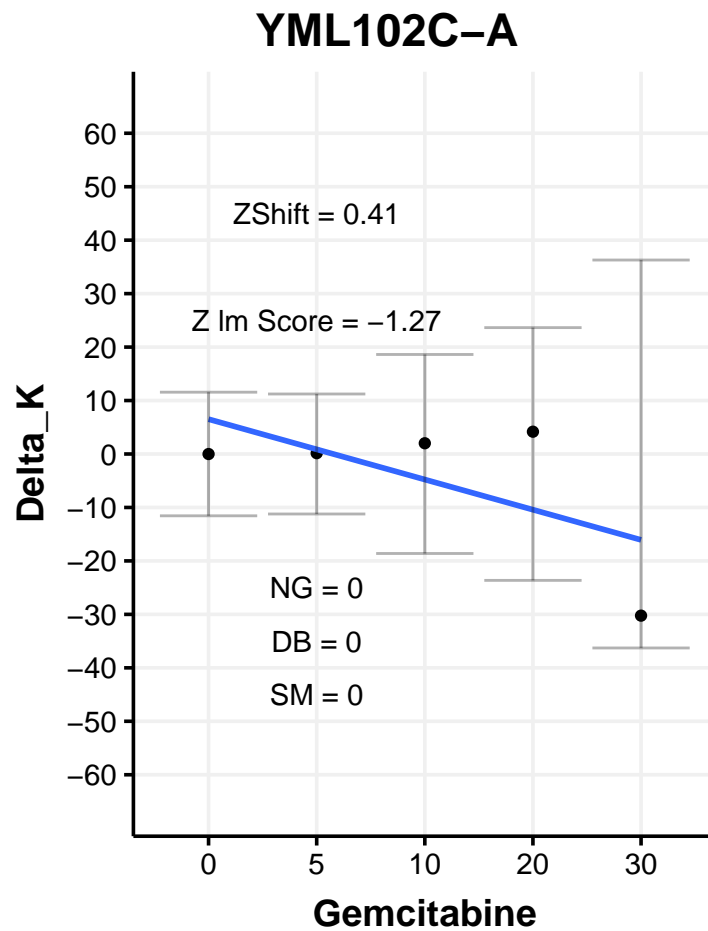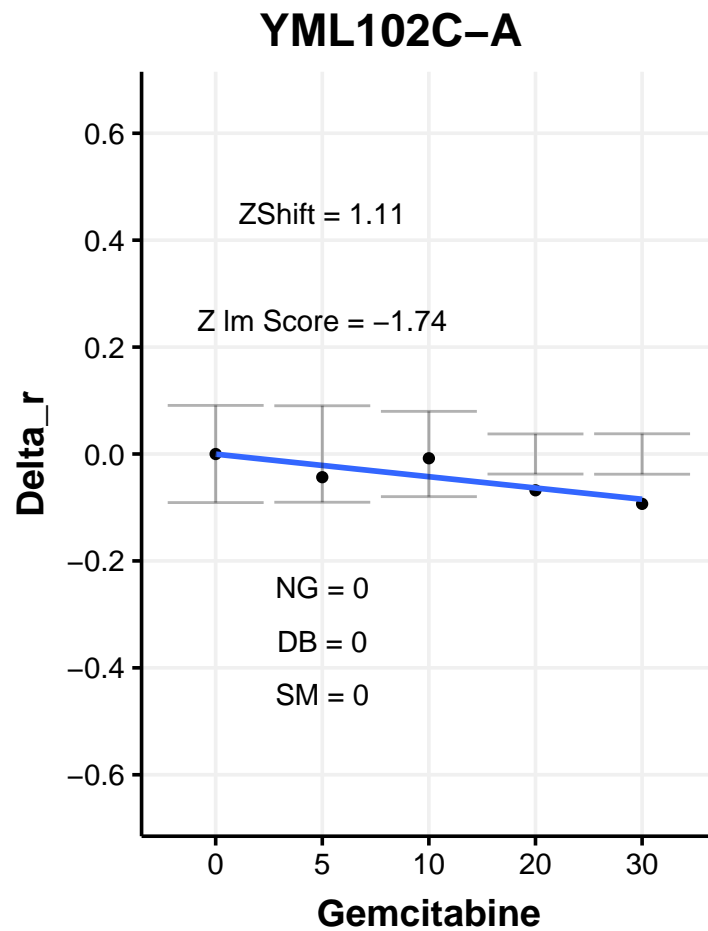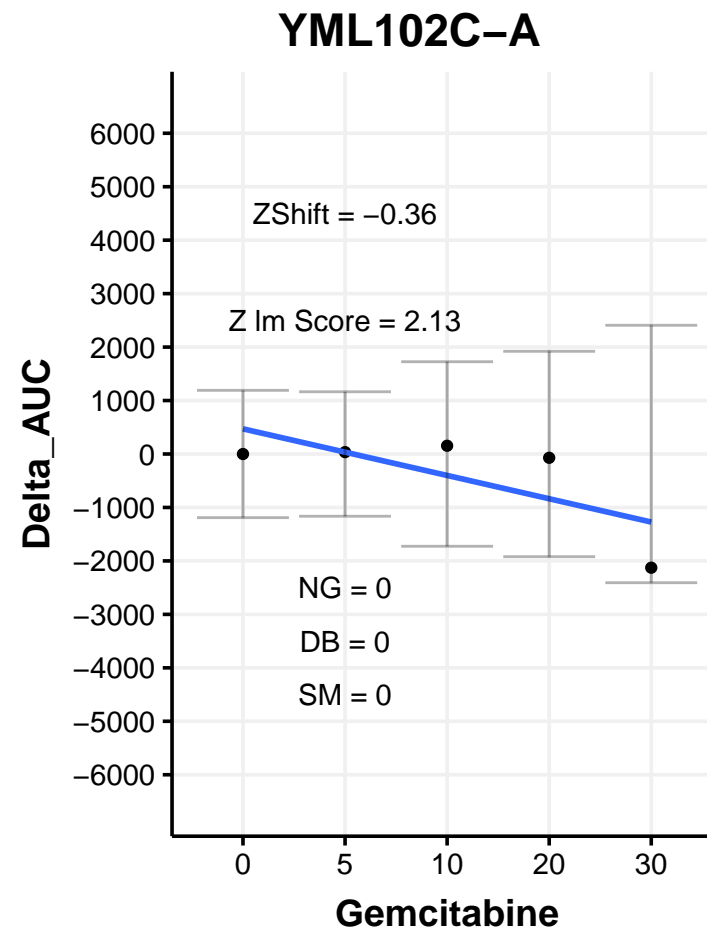

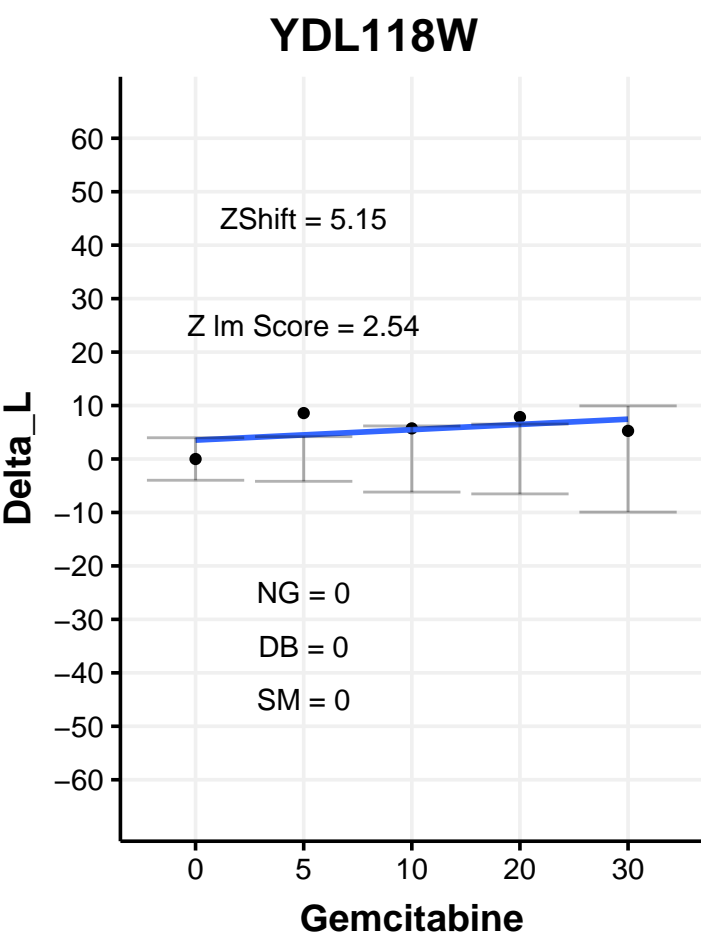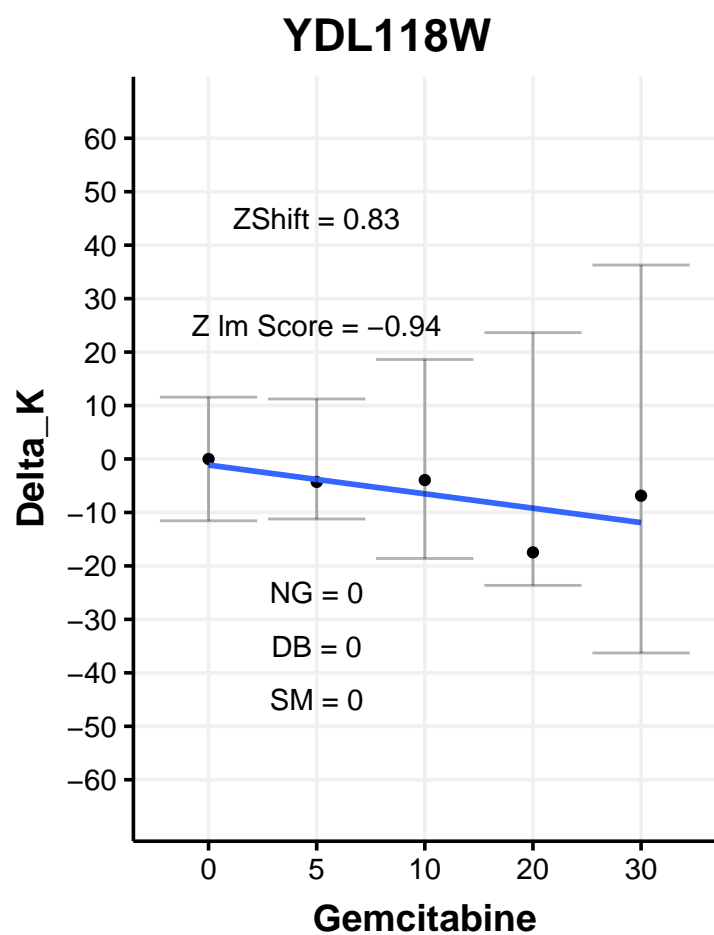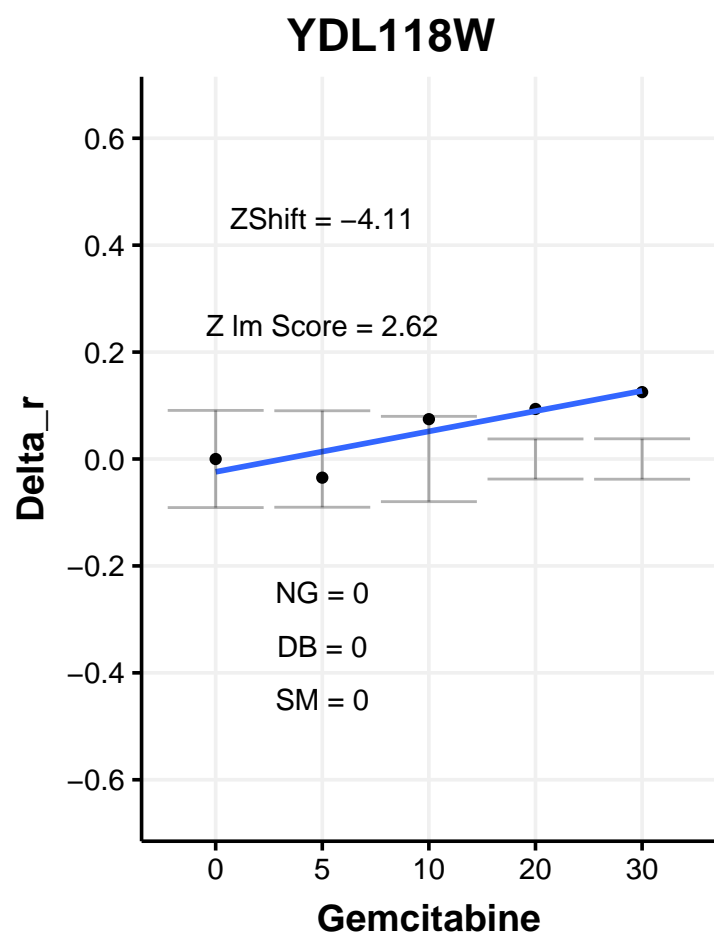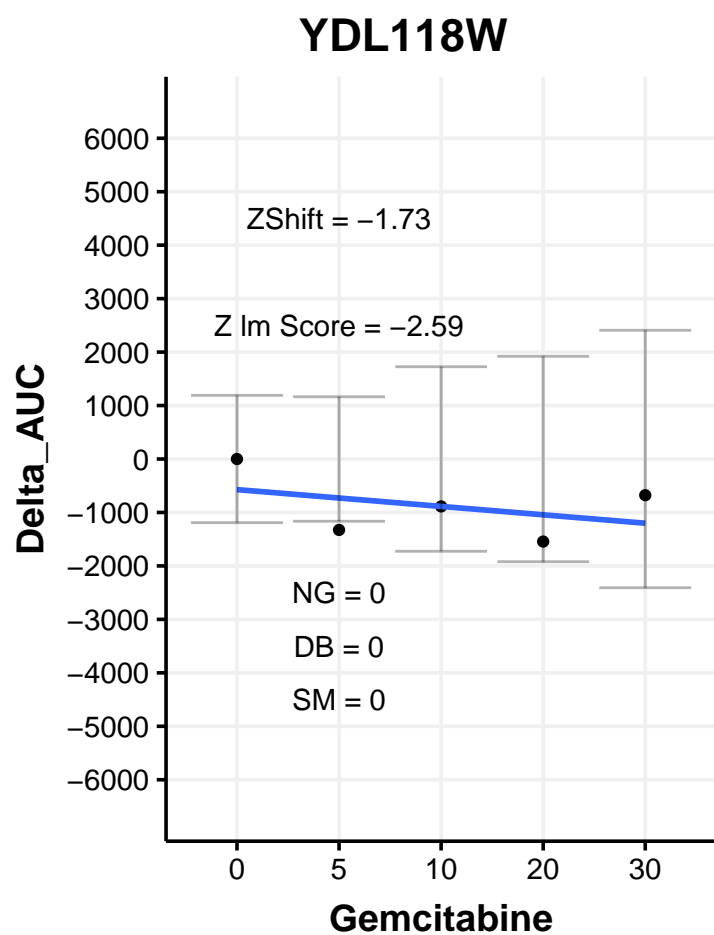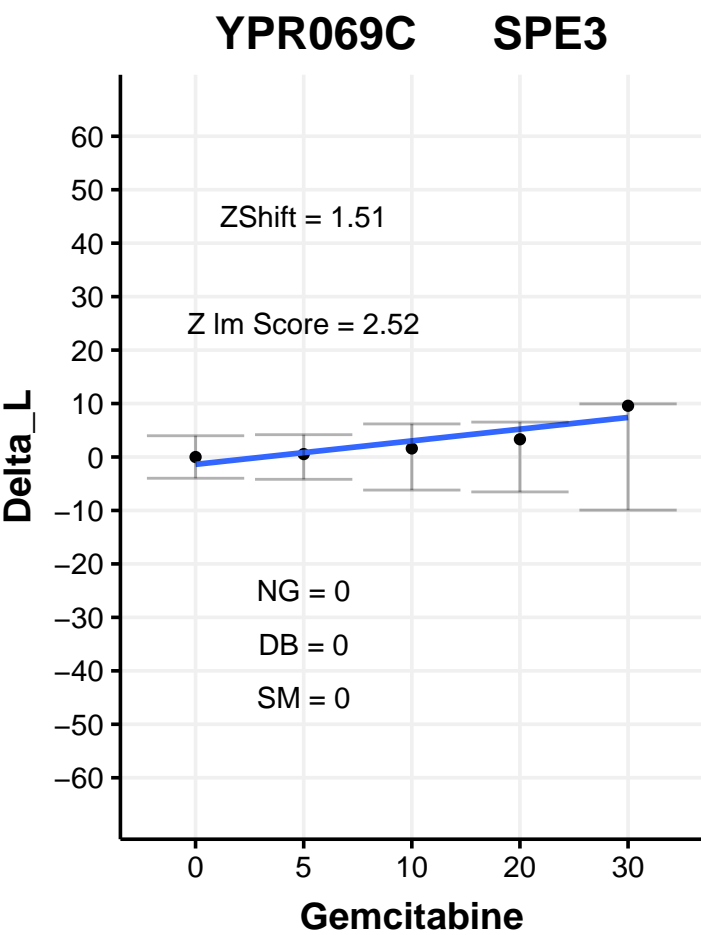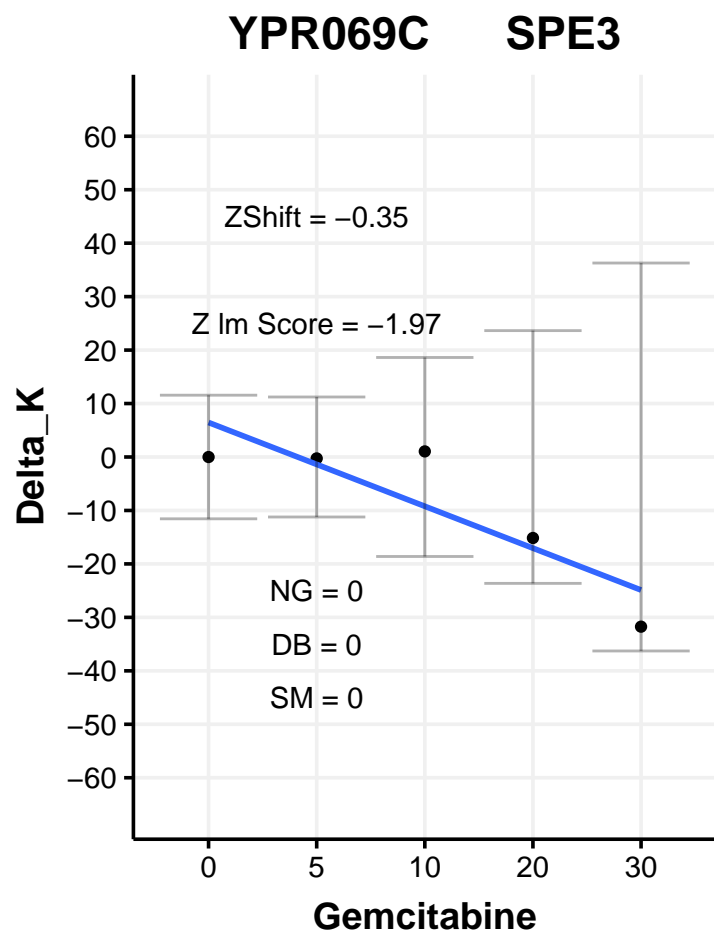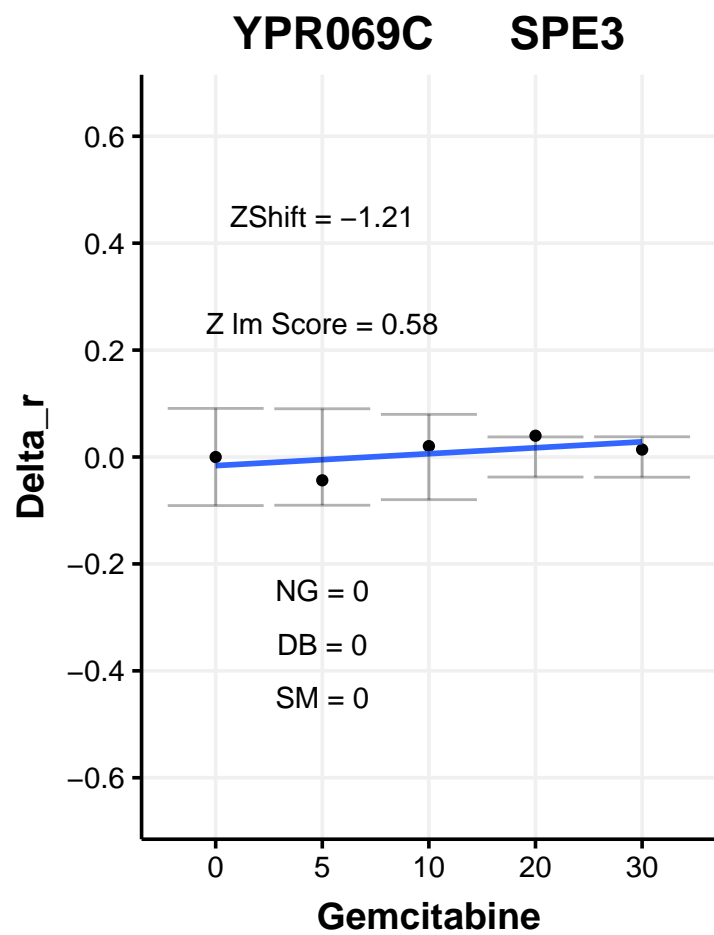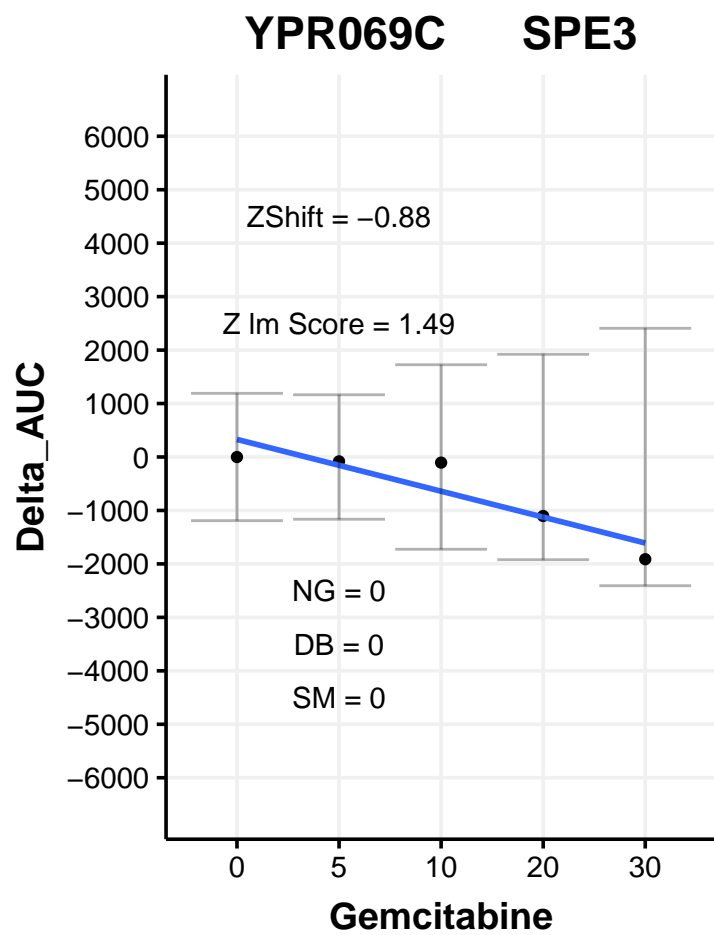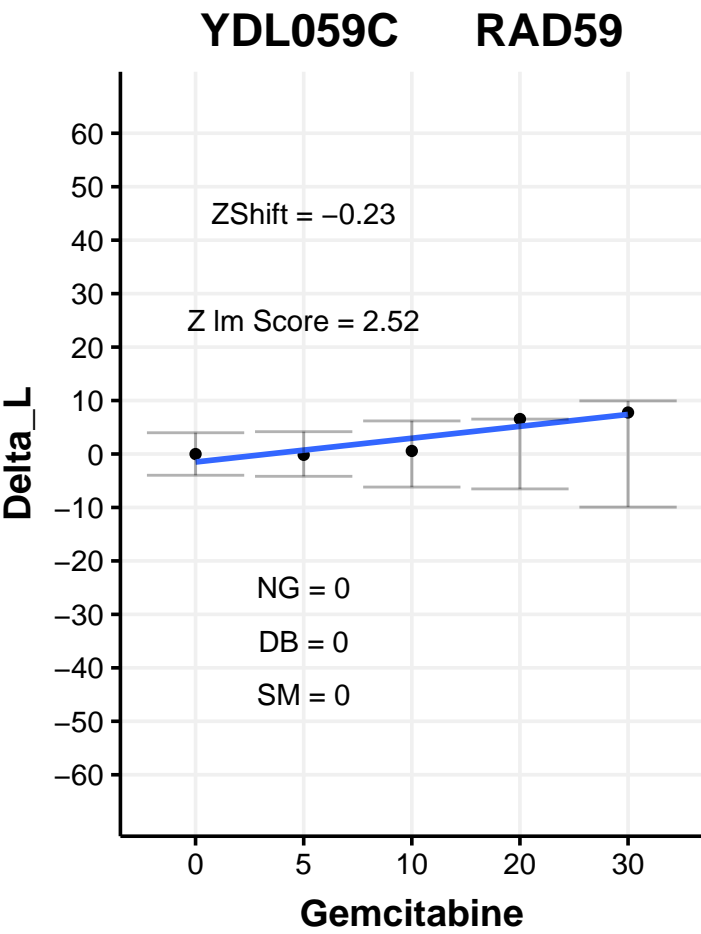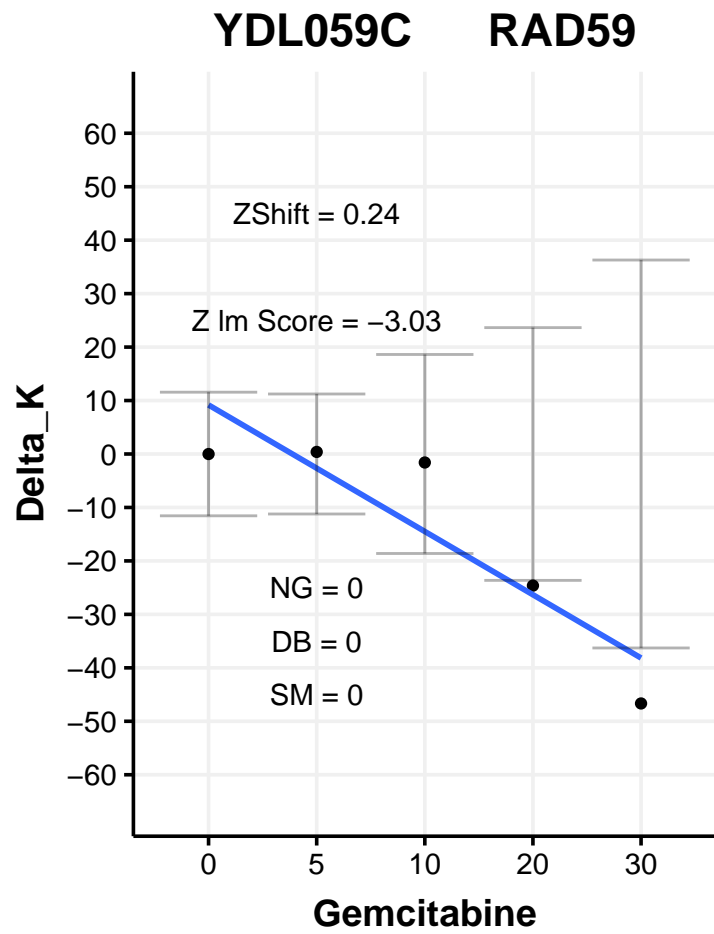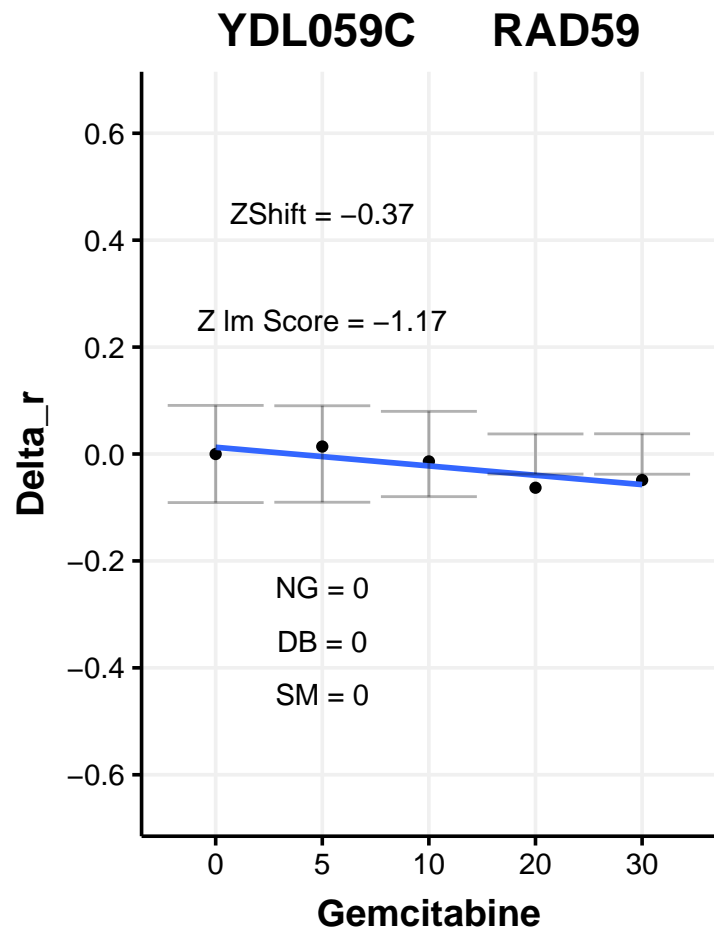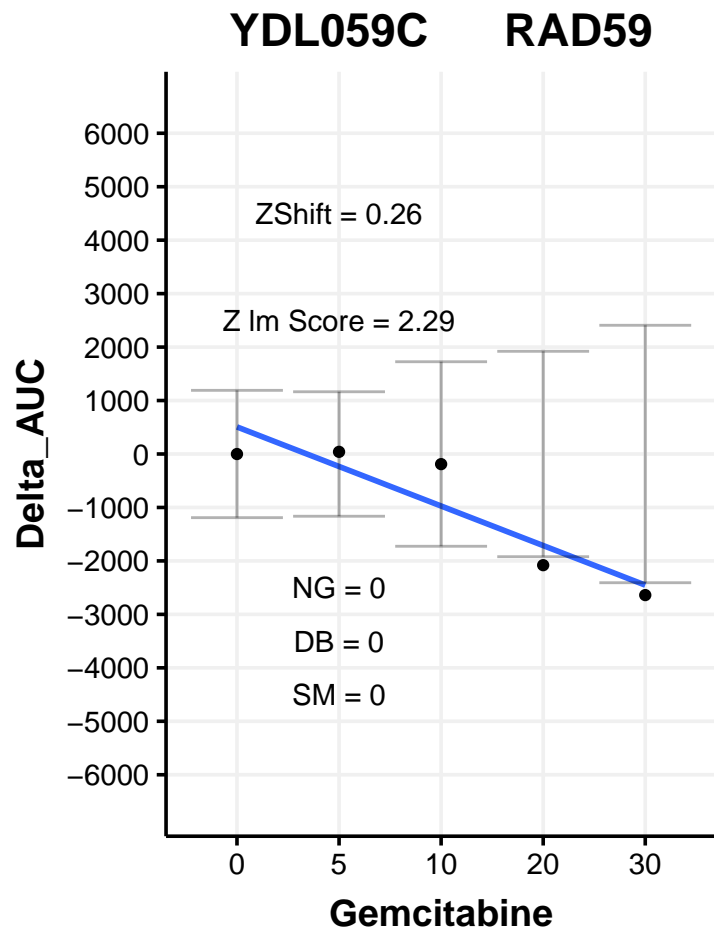

YDR525W

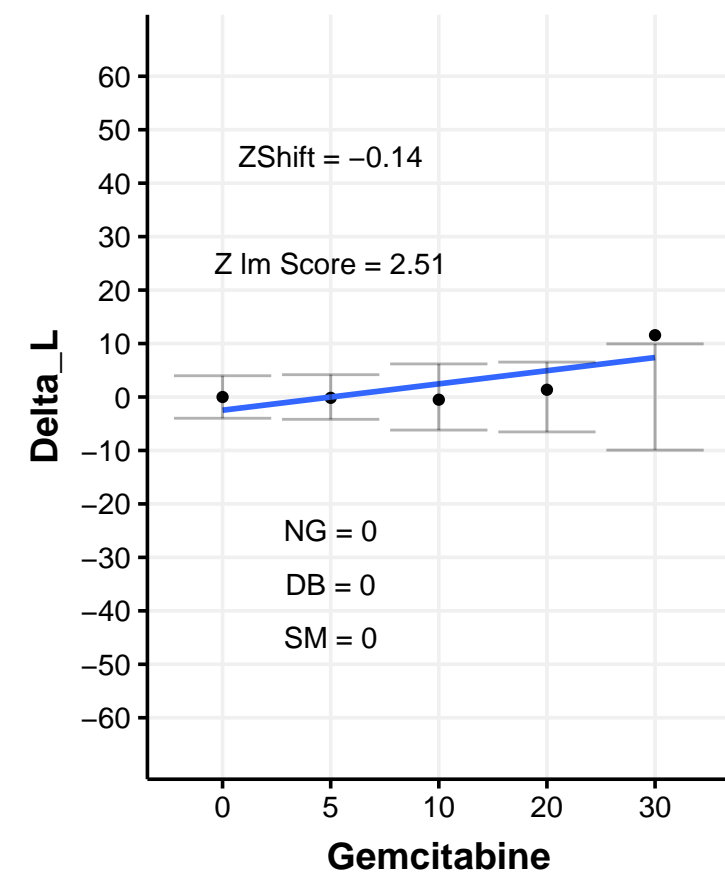

YDR525W

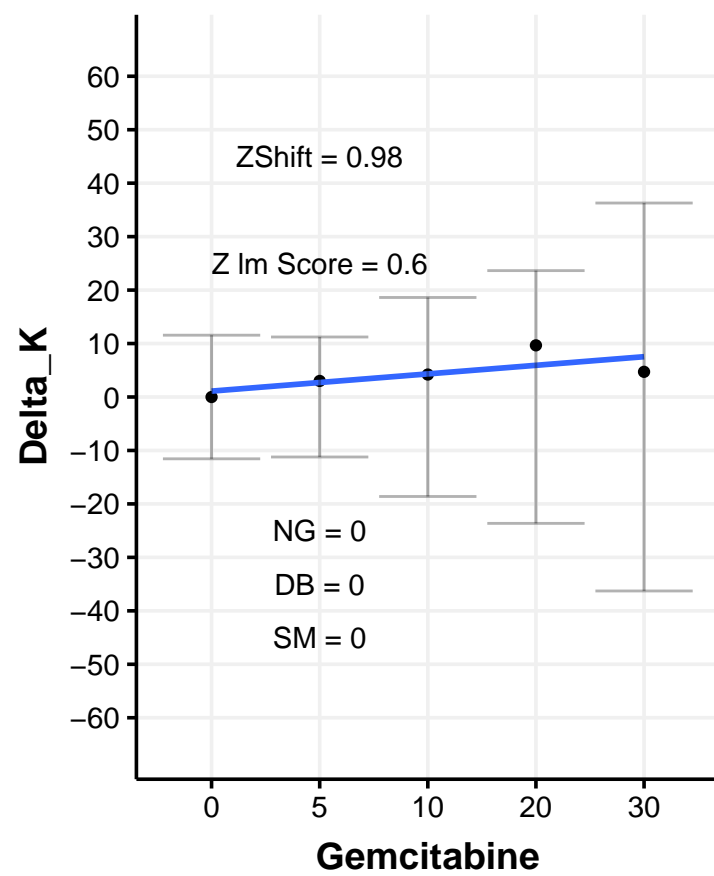

YDR525W

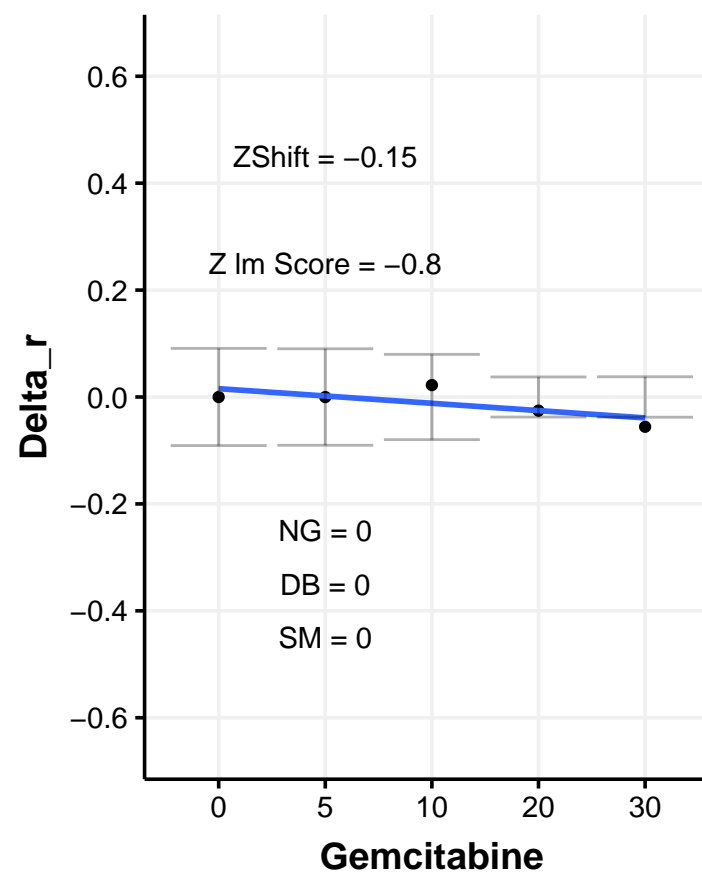

YDR525W

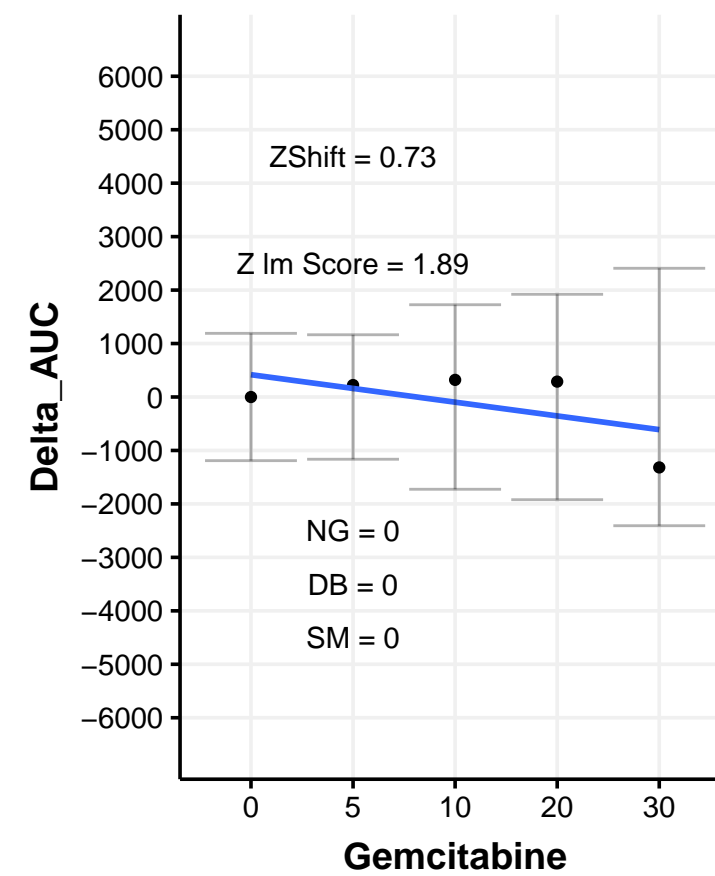

YJL136C RPS21B

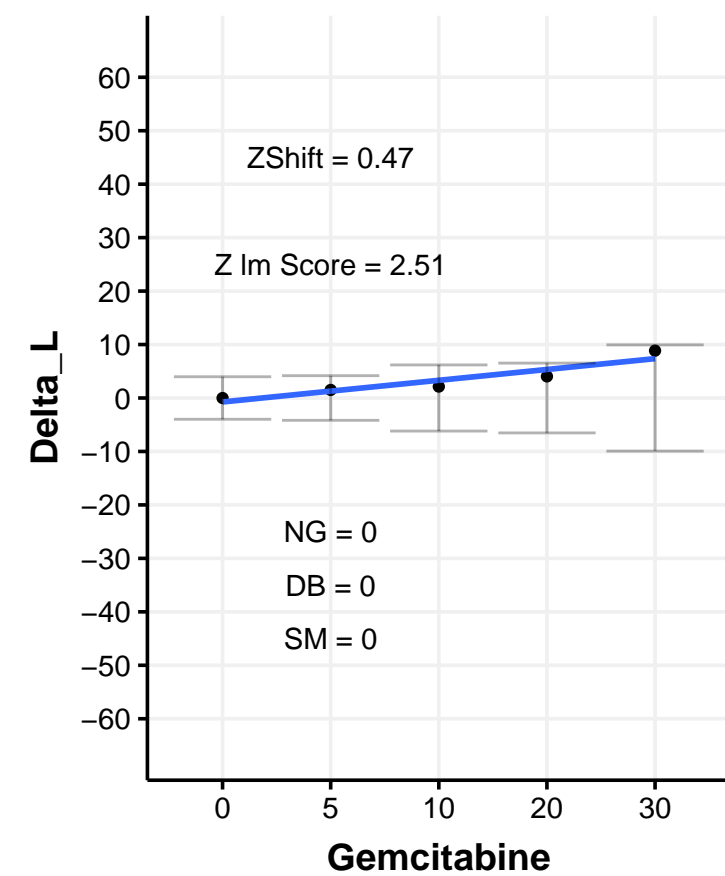

YJL136C RPS21B

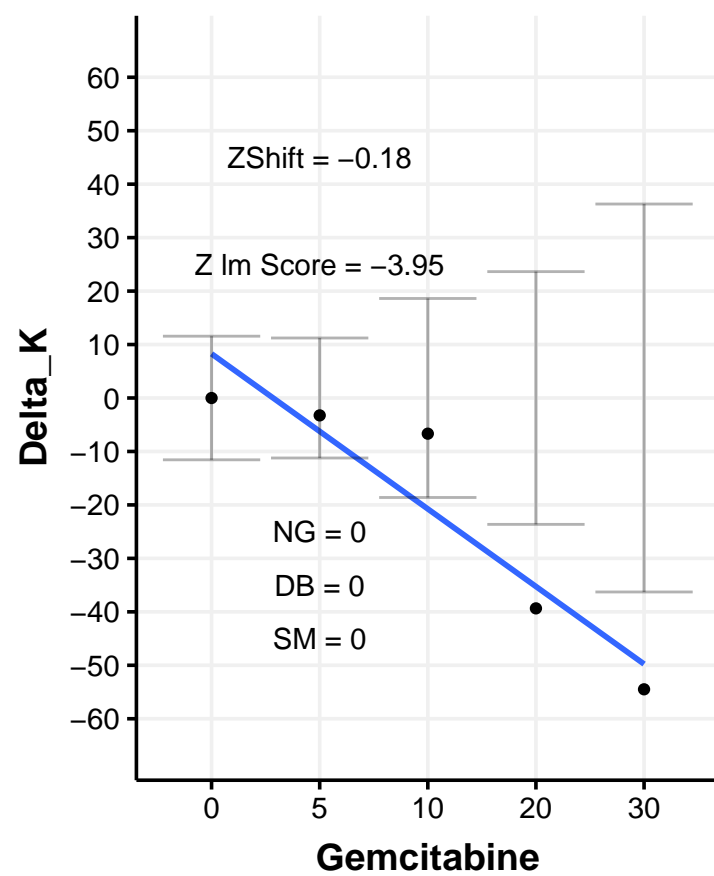

YJL136C RPS21B

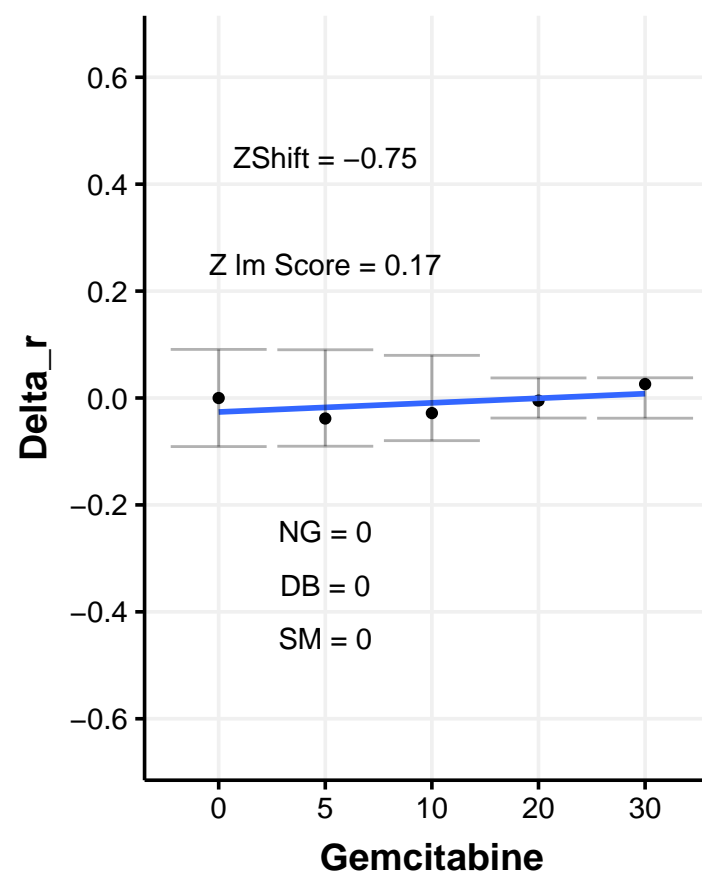

YJL136C RPS21B

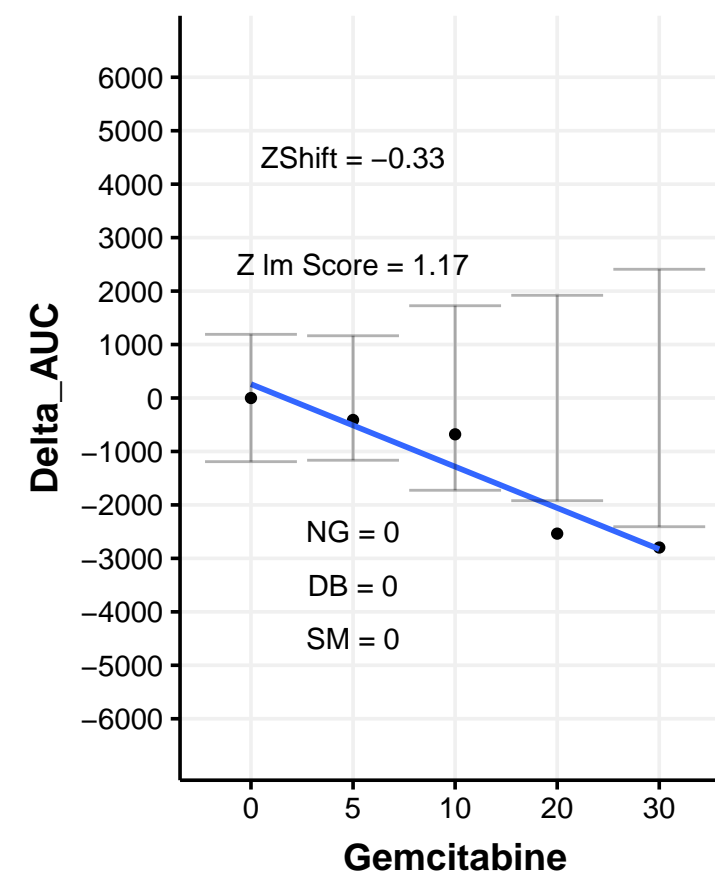

YJL179W PFD1

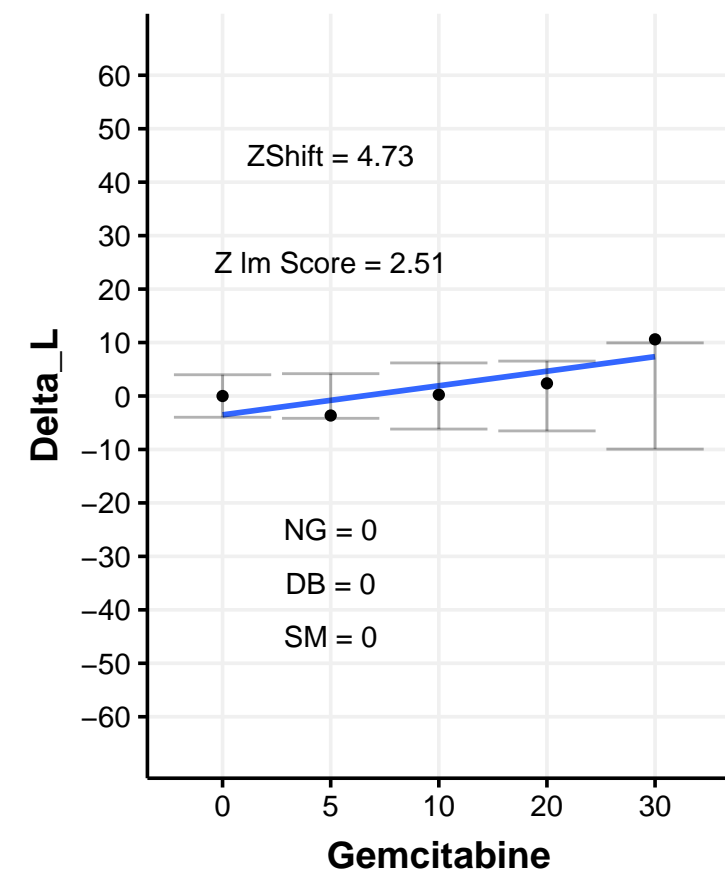

YJL179W PFD1

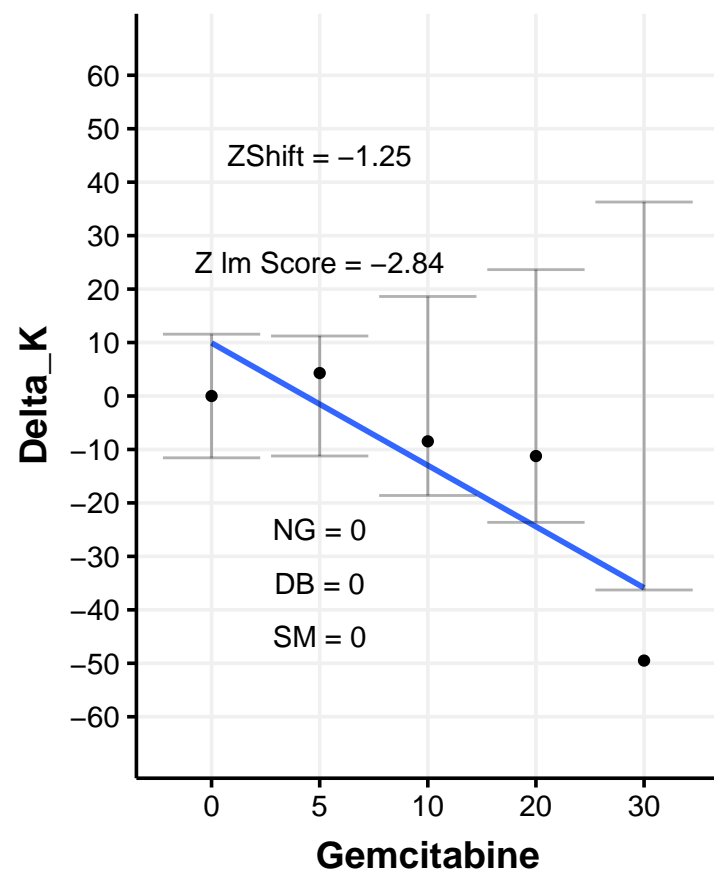

YJL179W PFD1

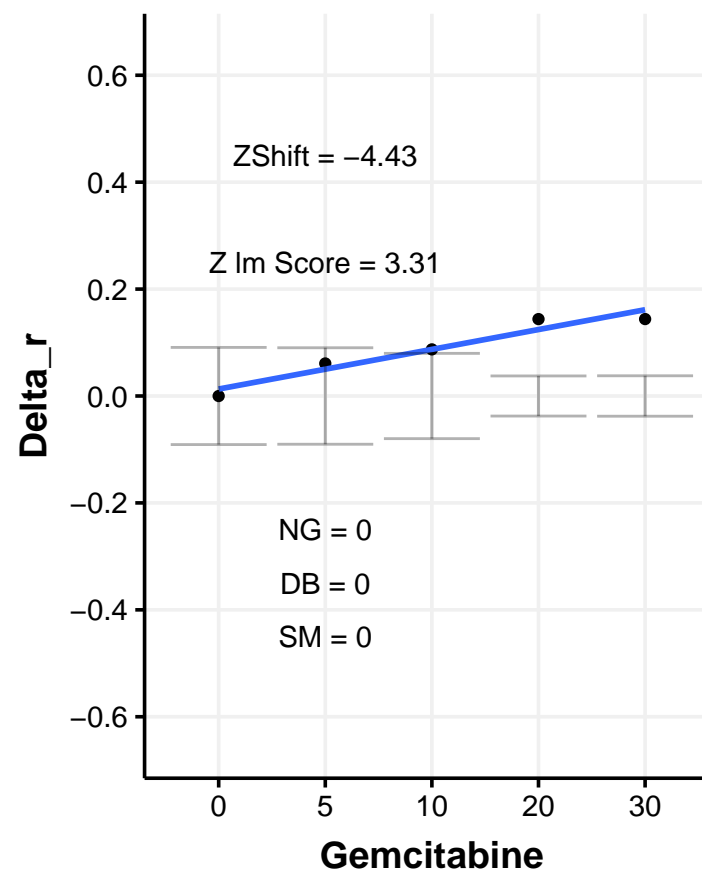

YJL179W PFD1

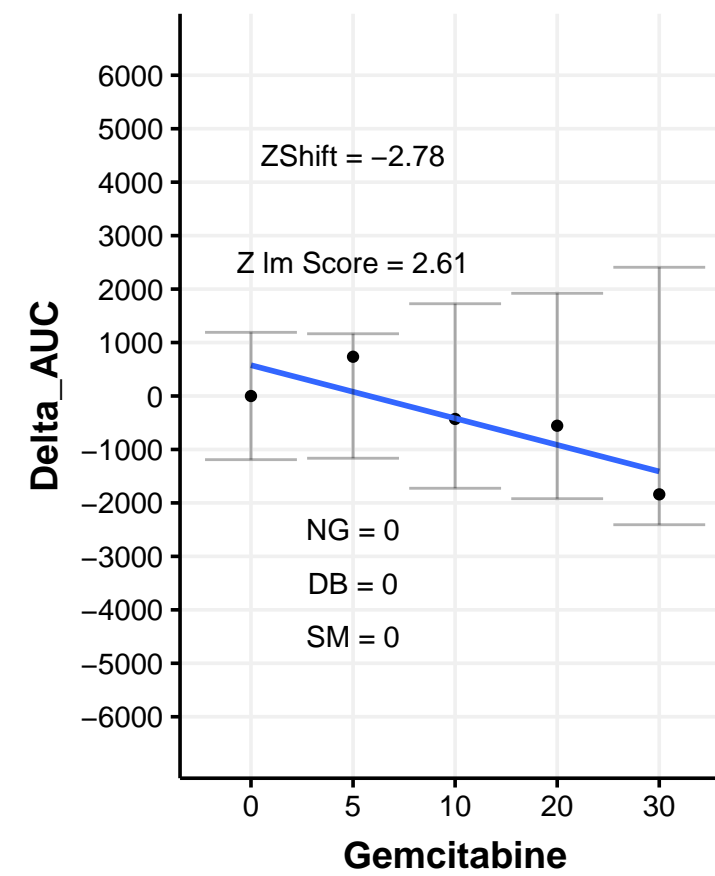

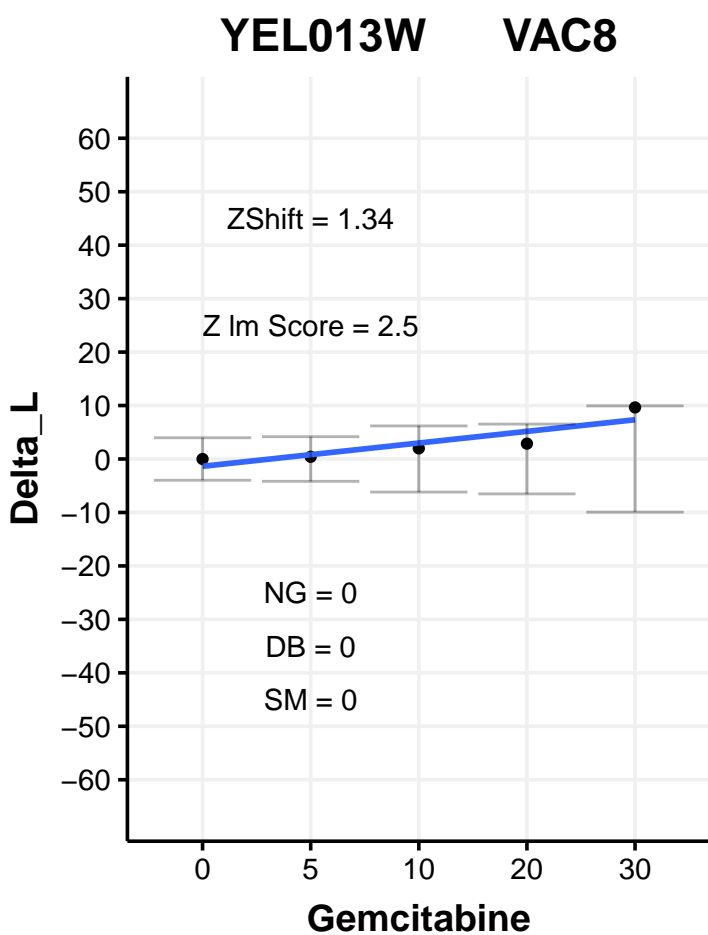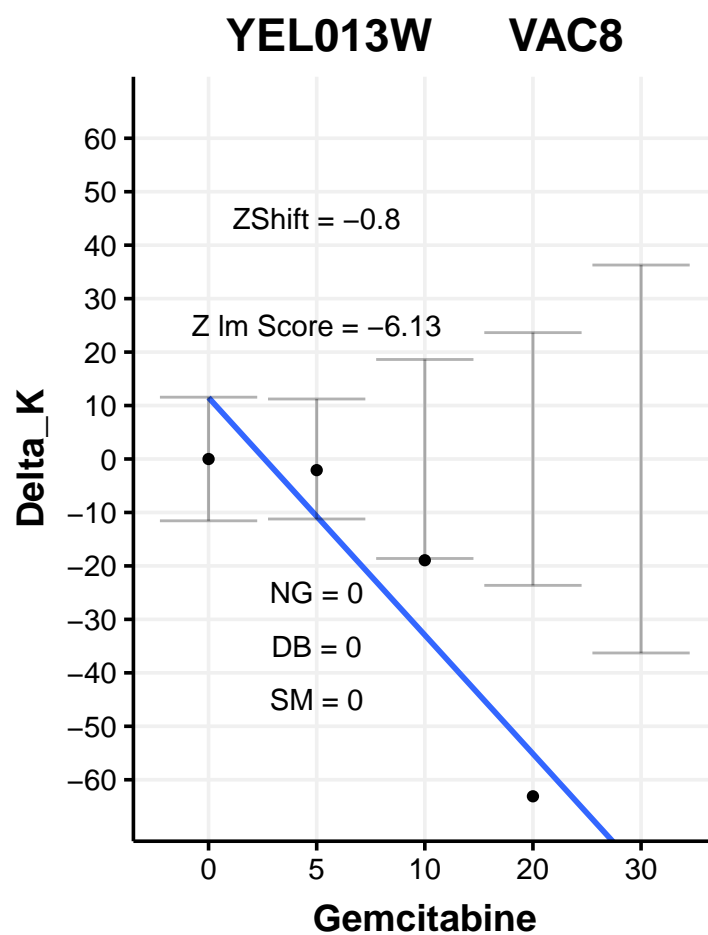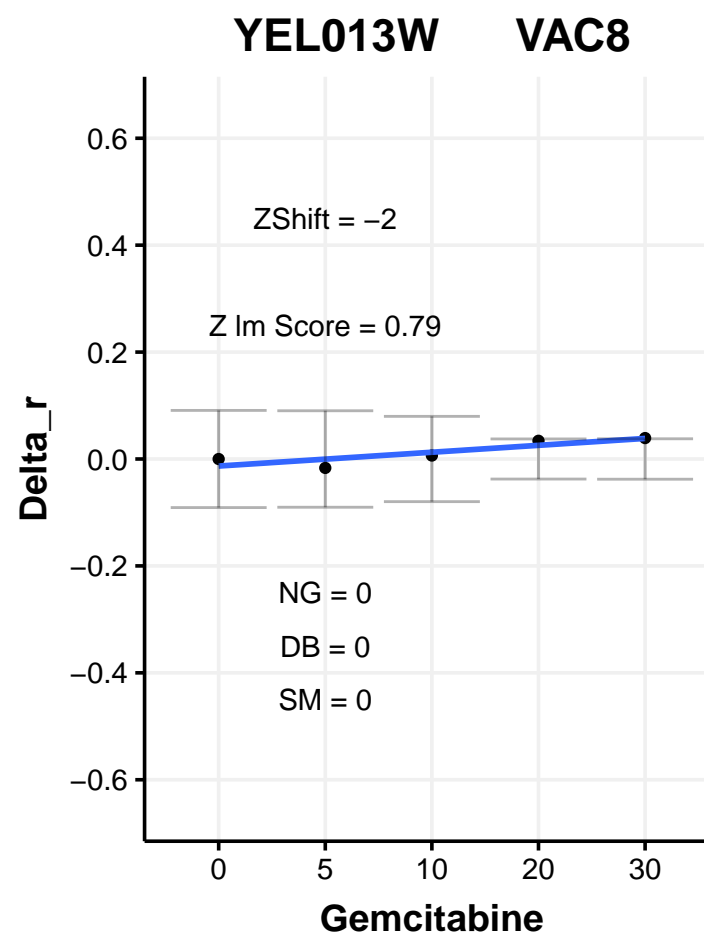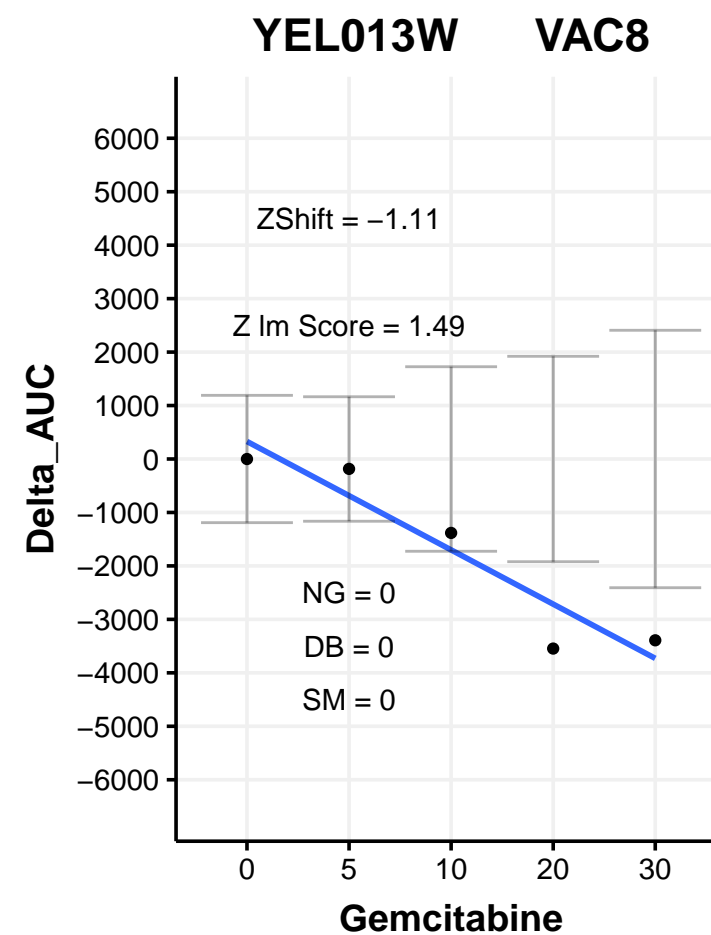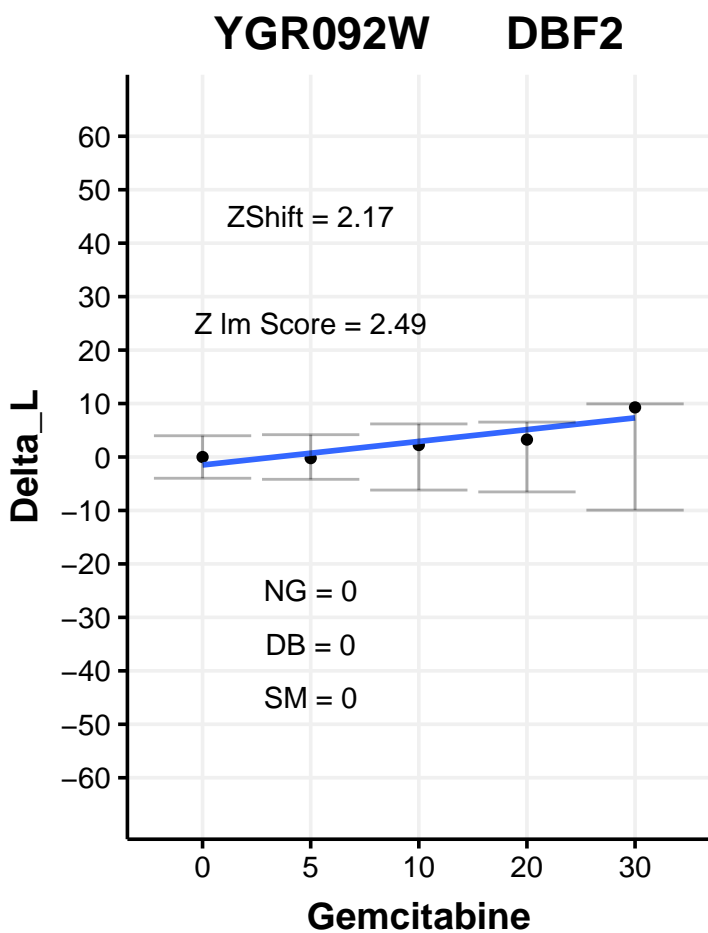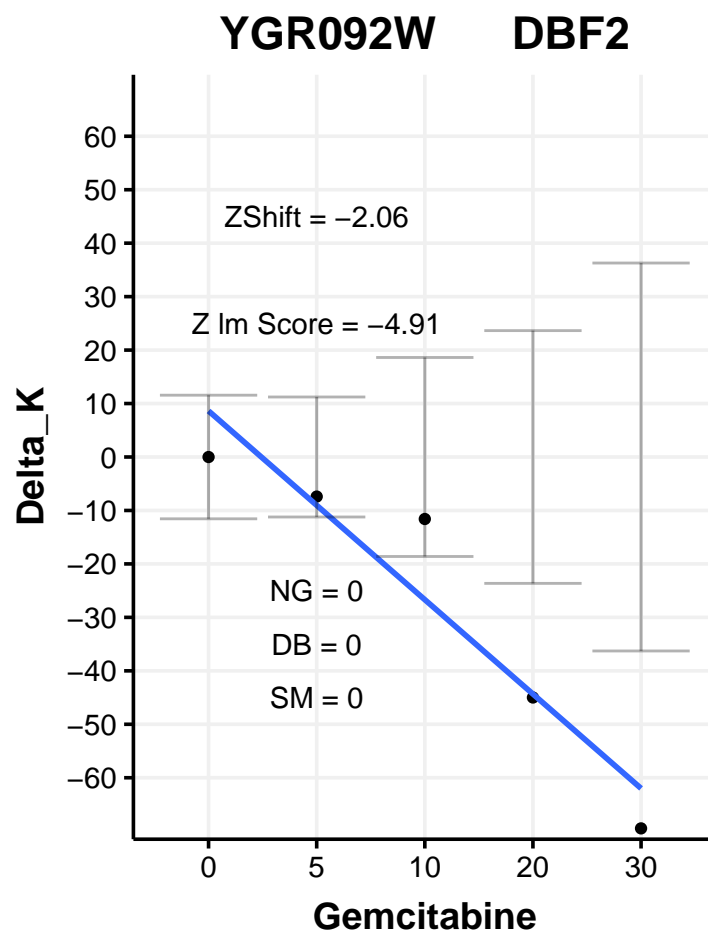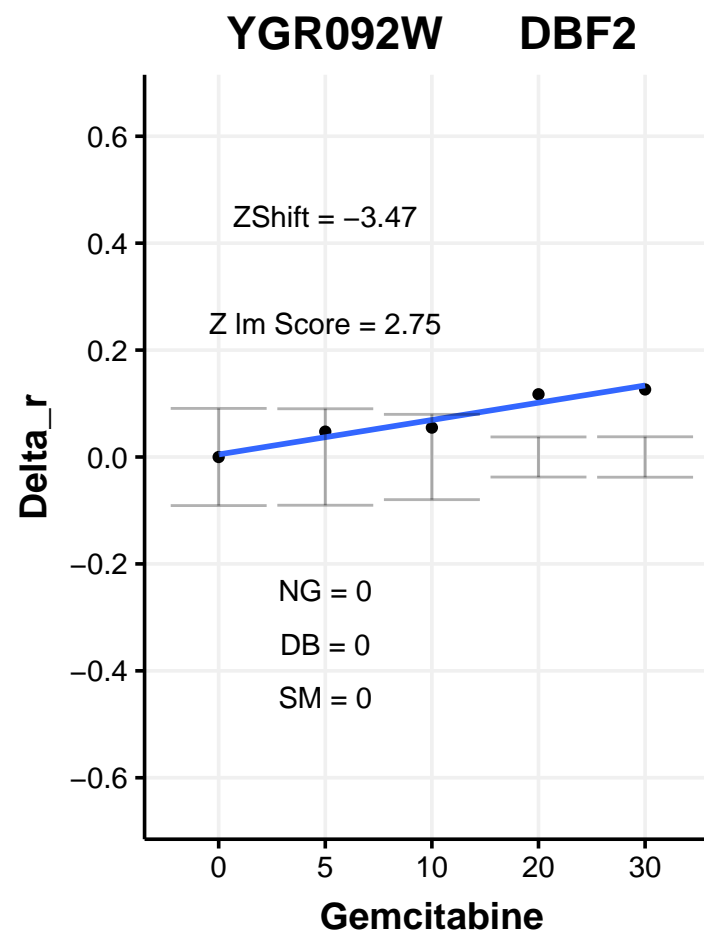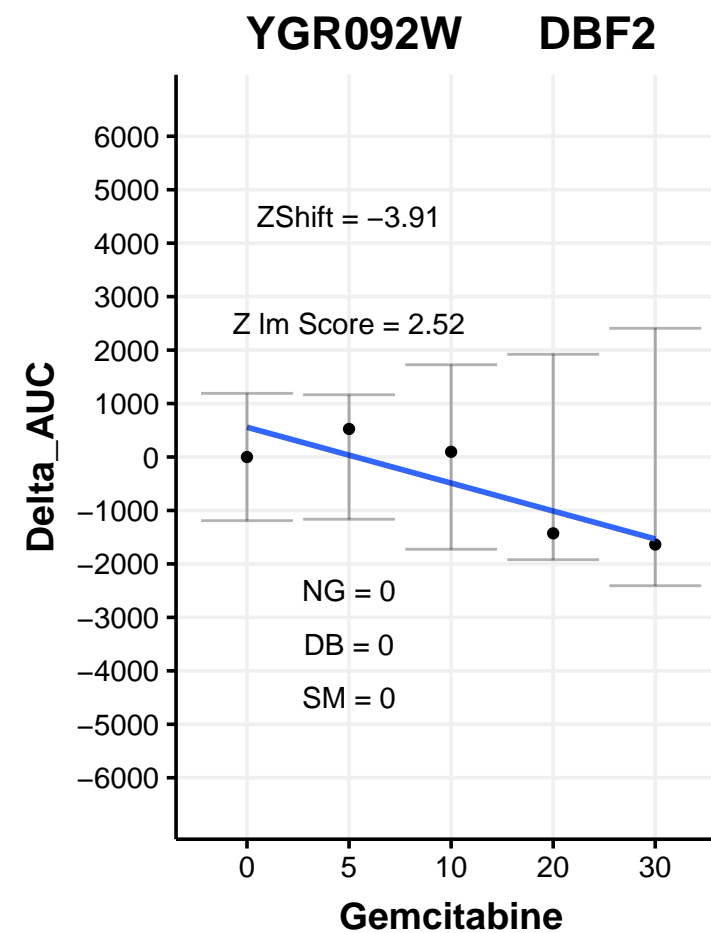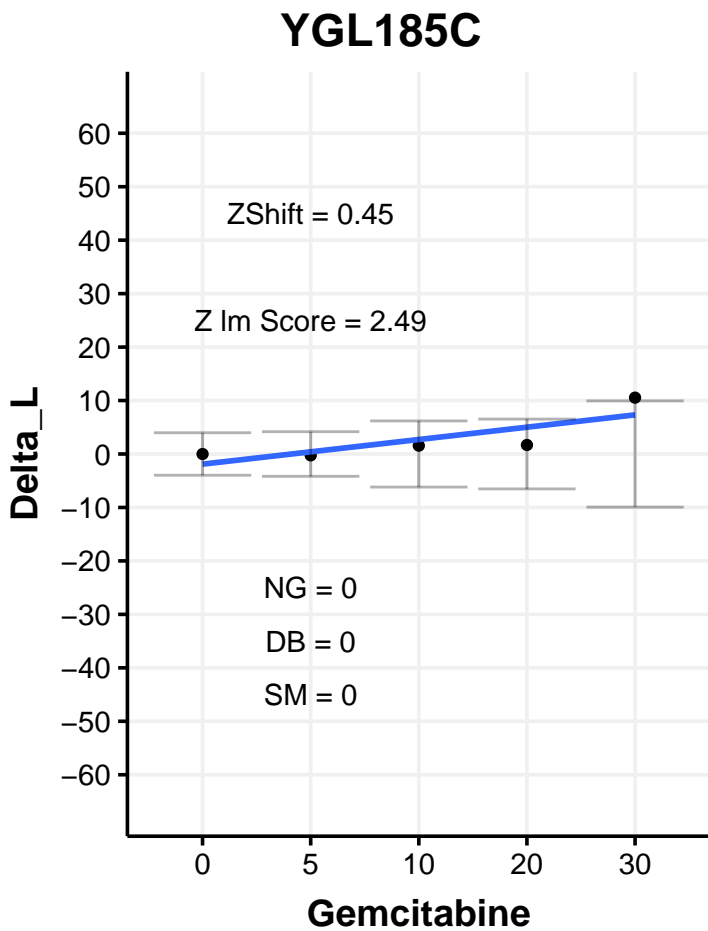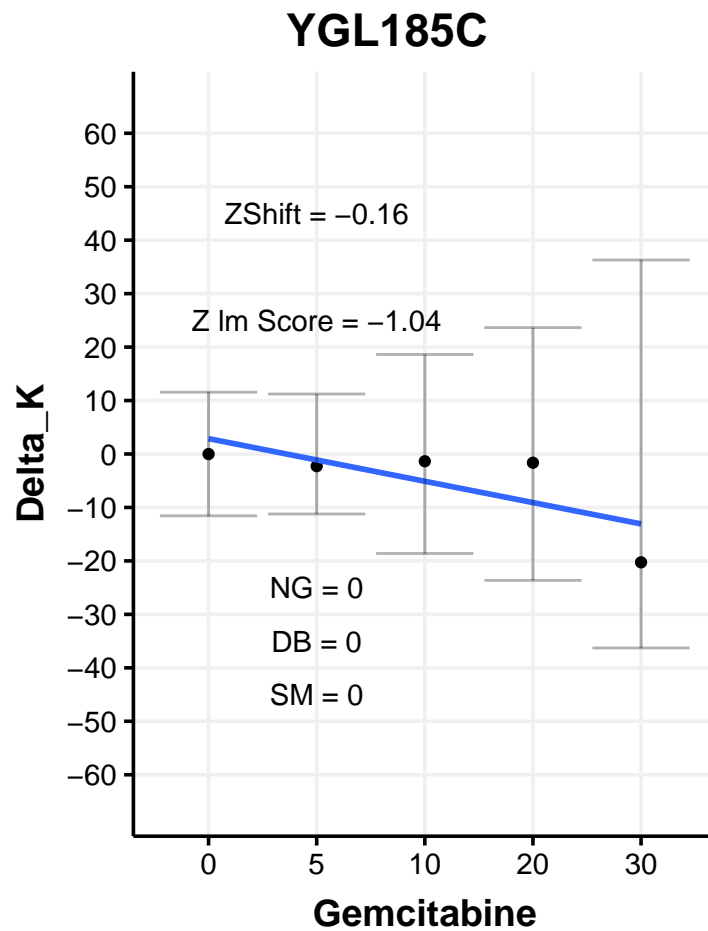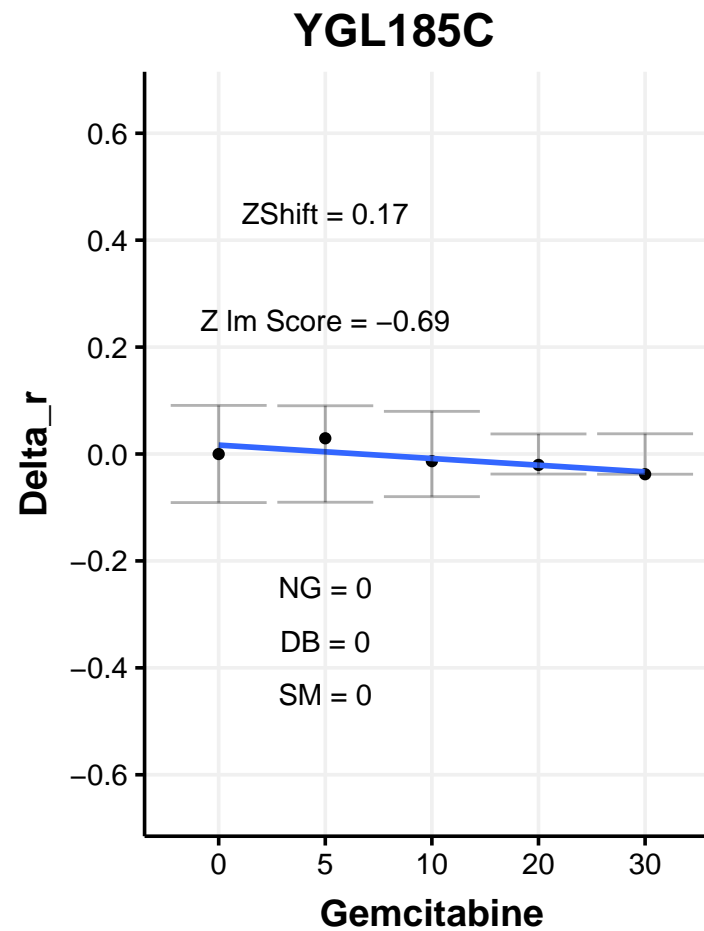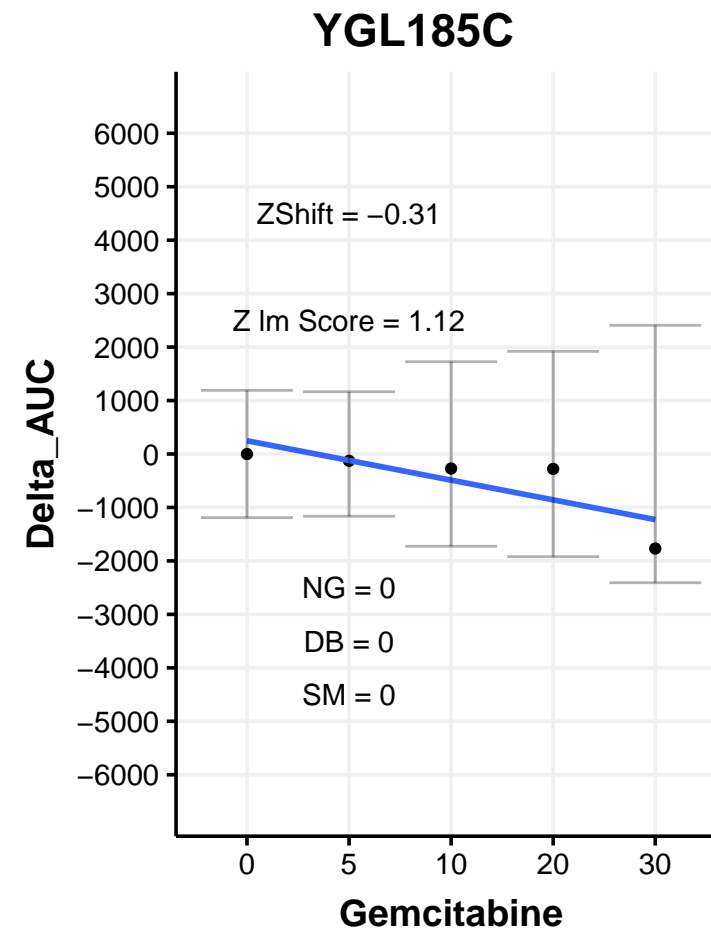



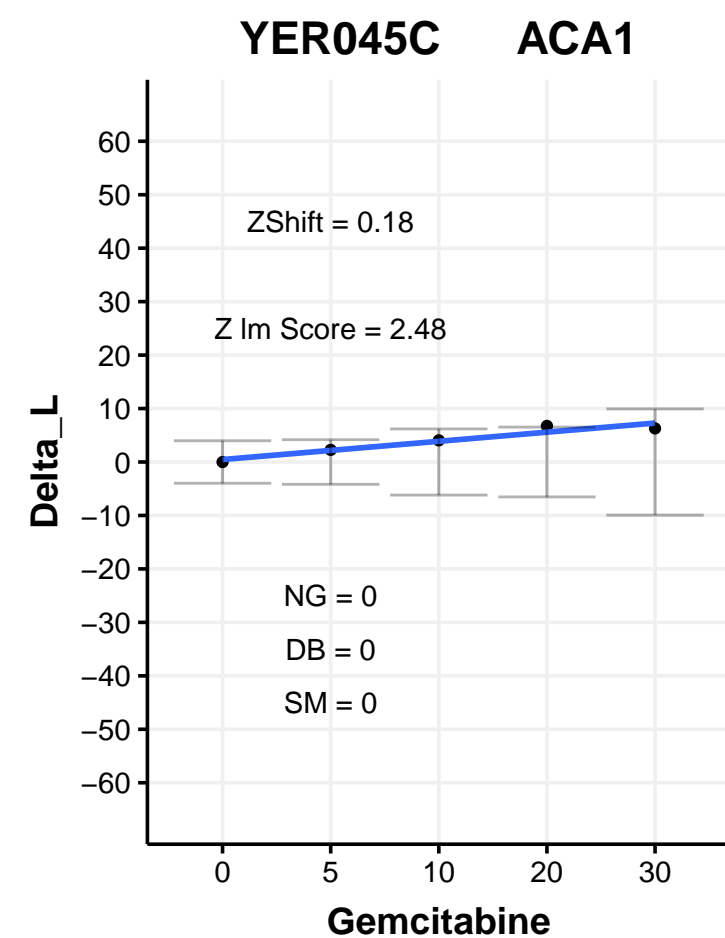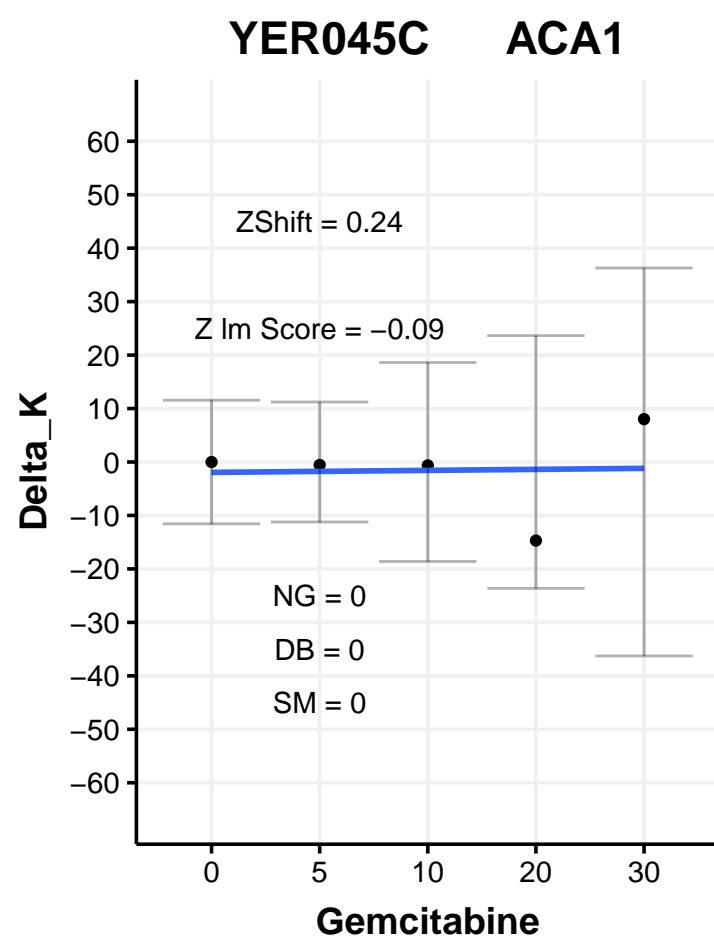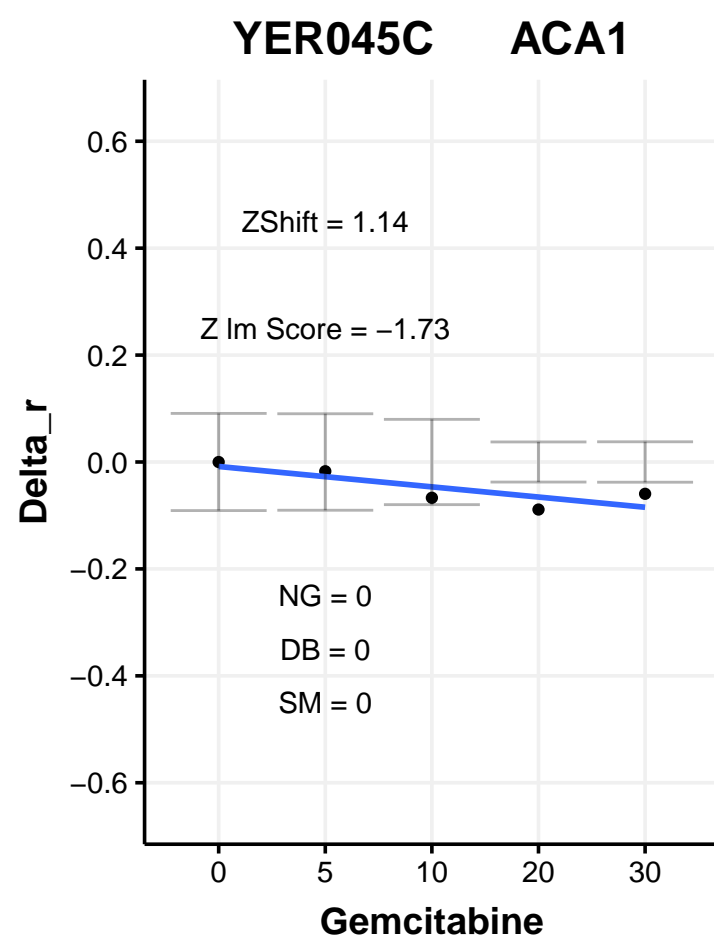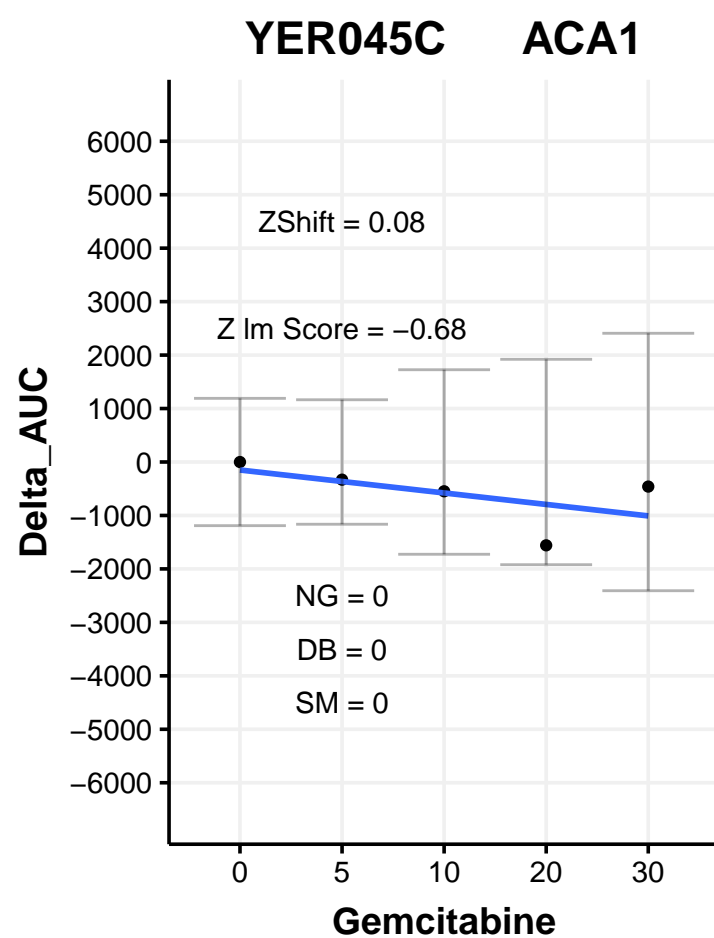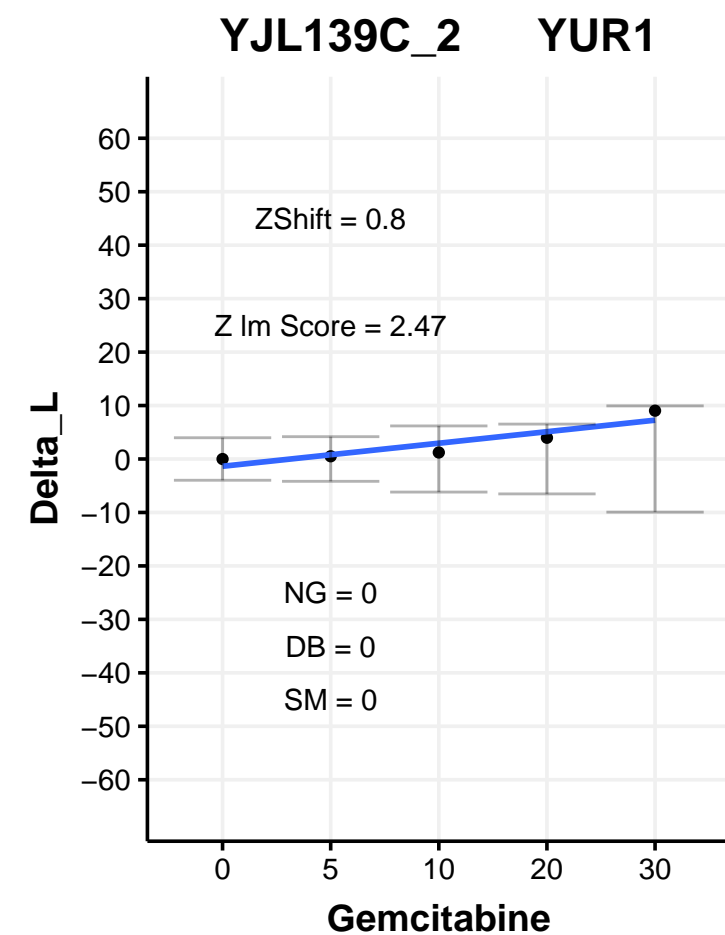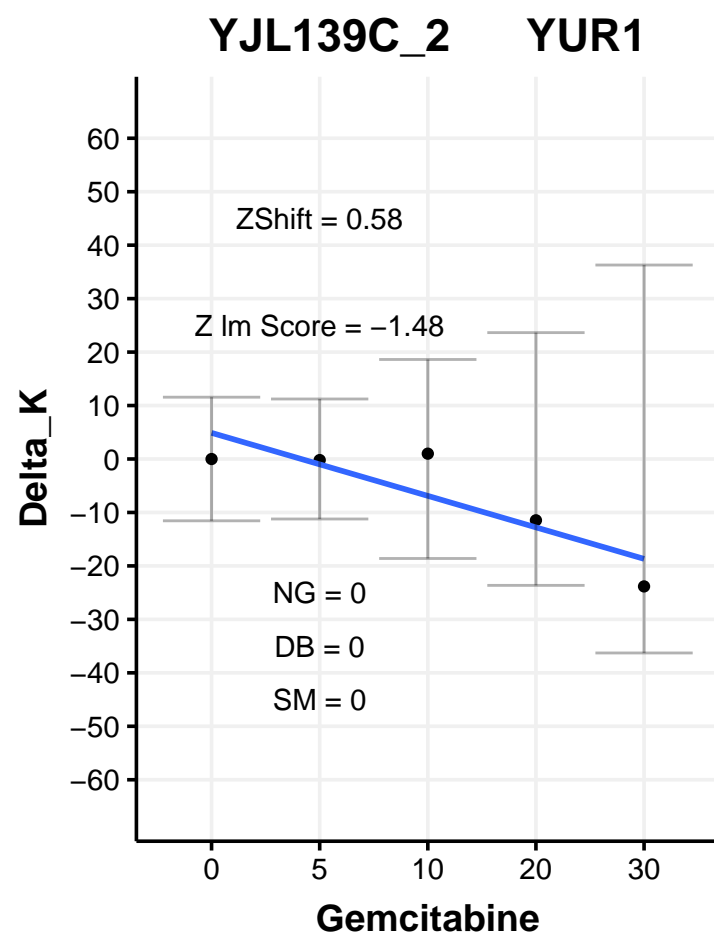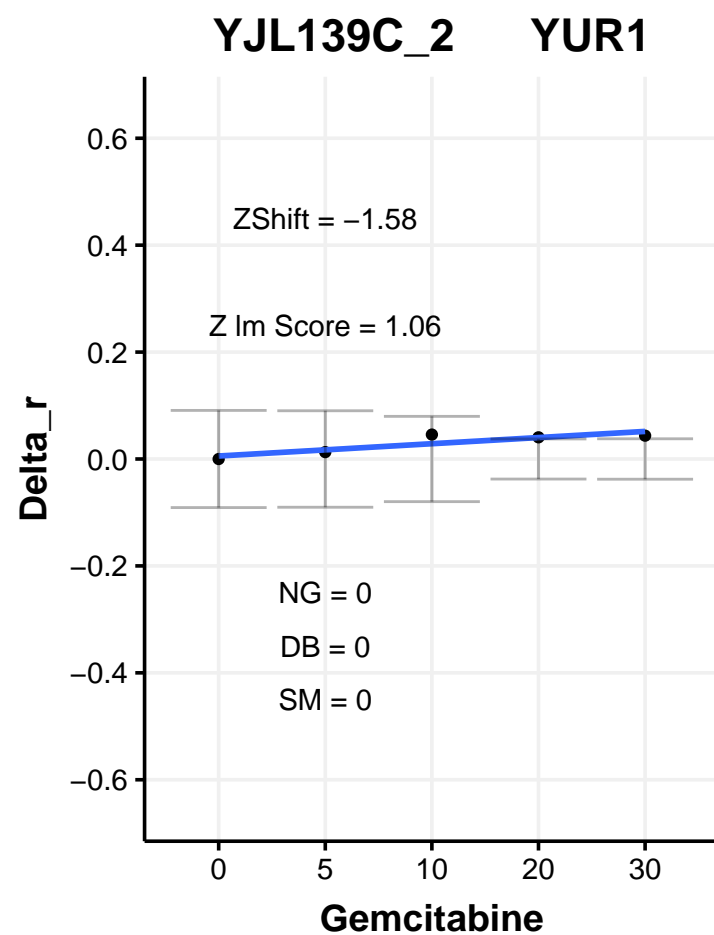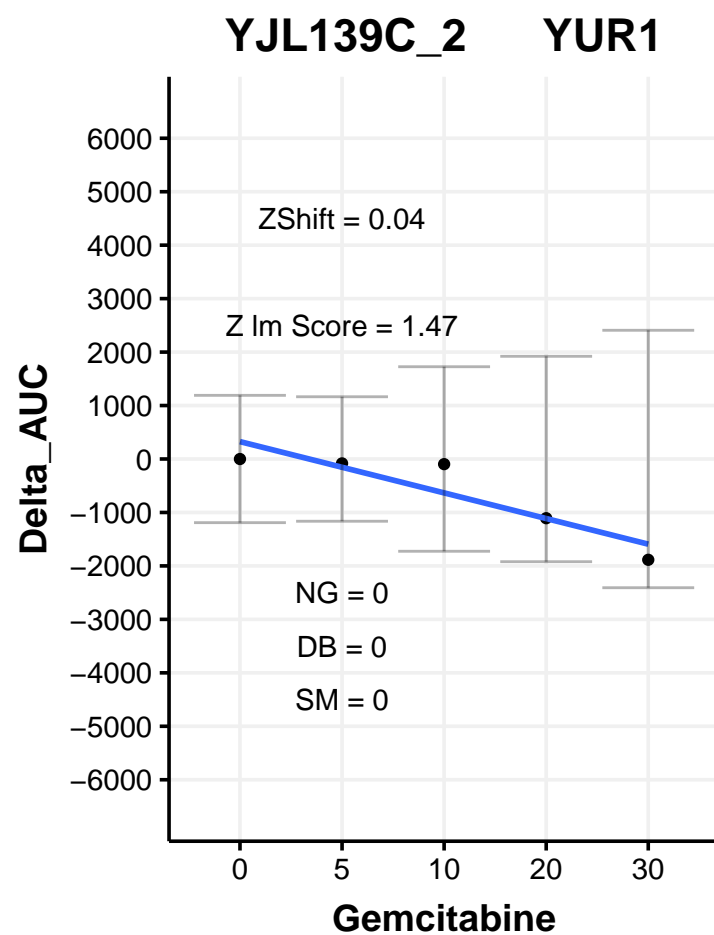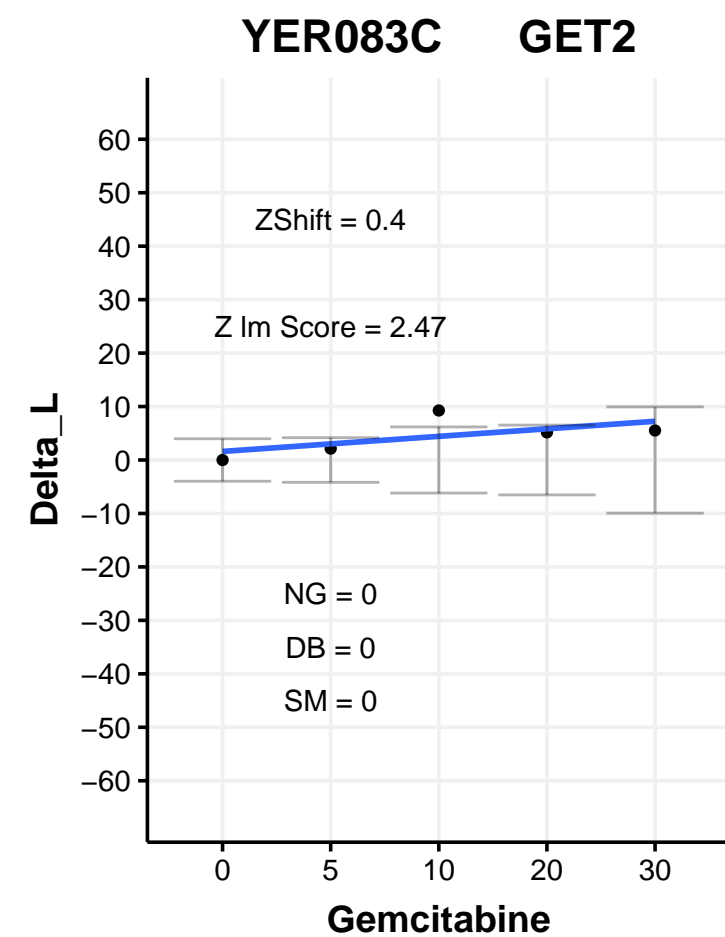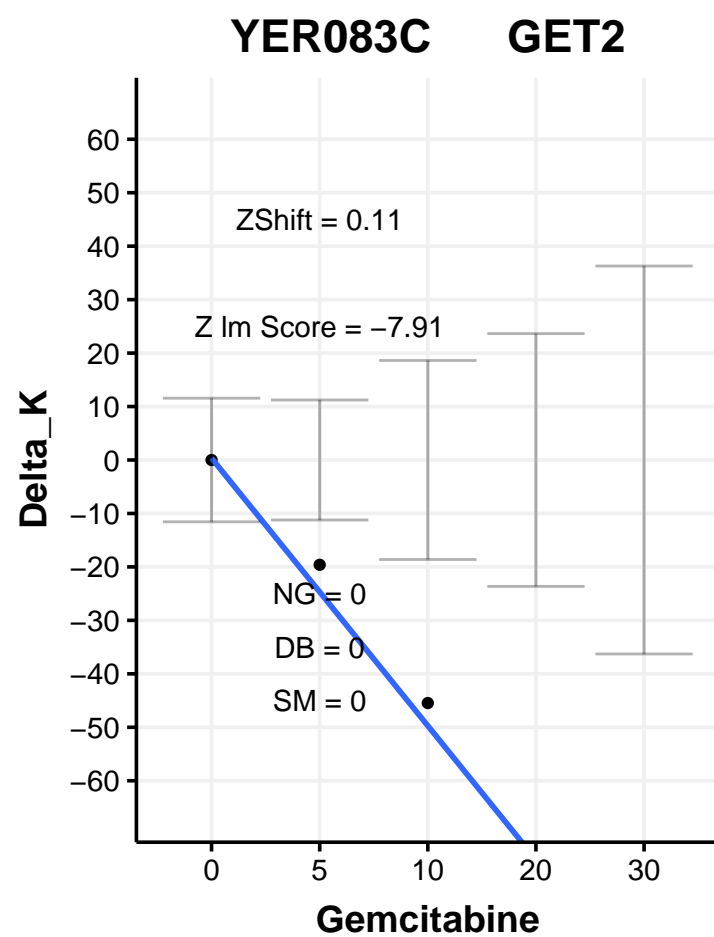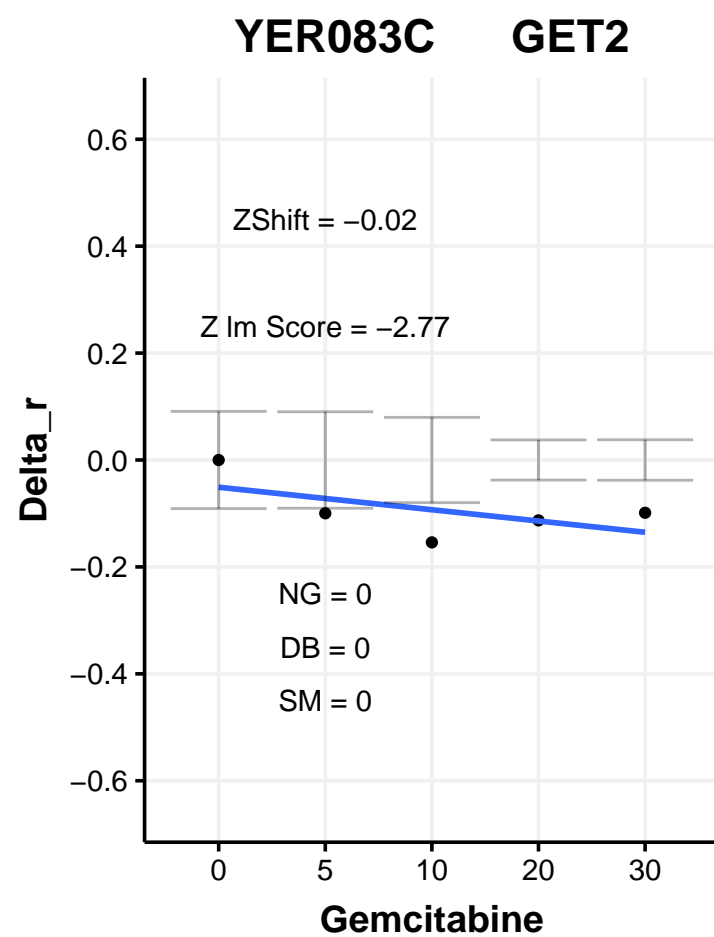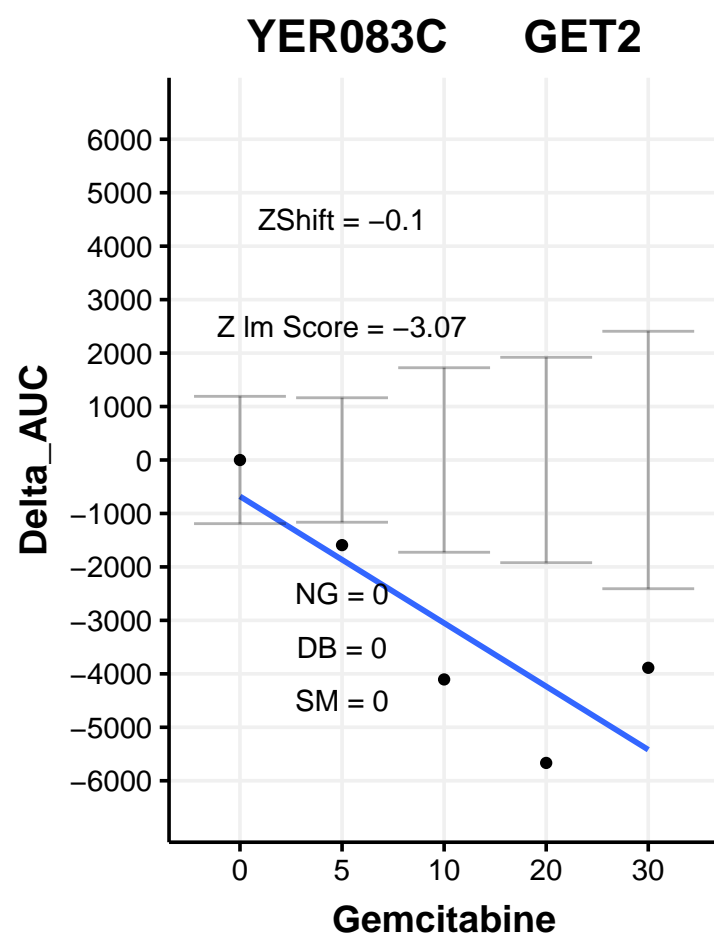

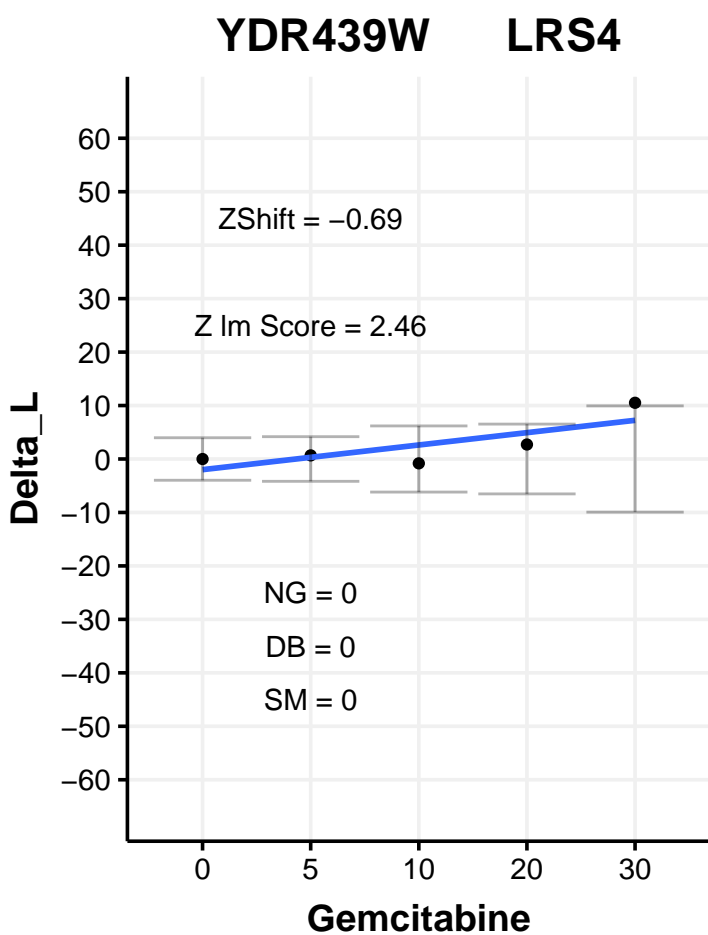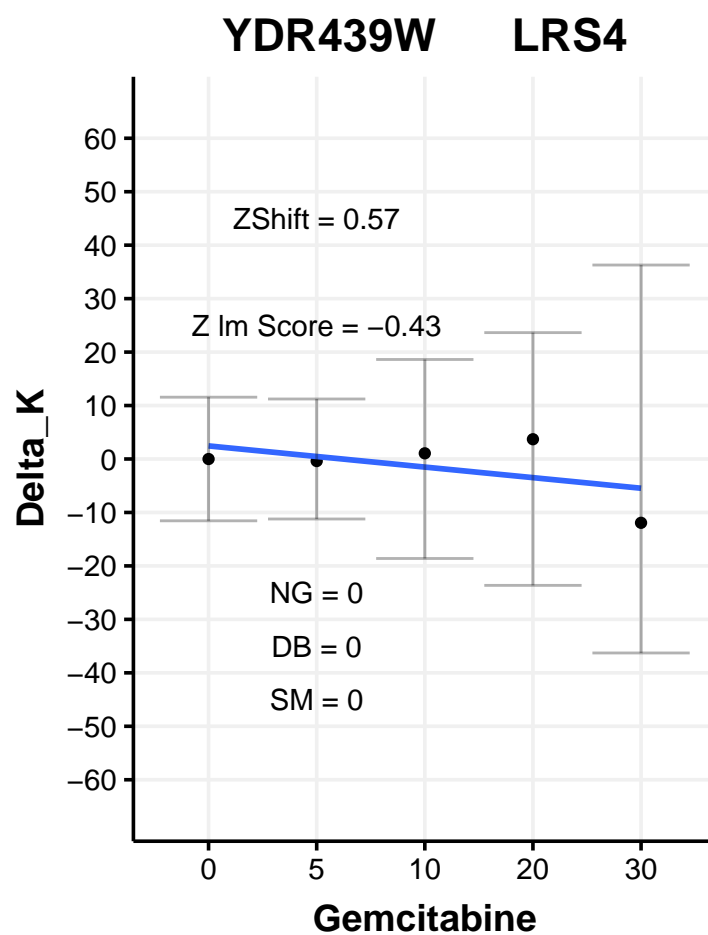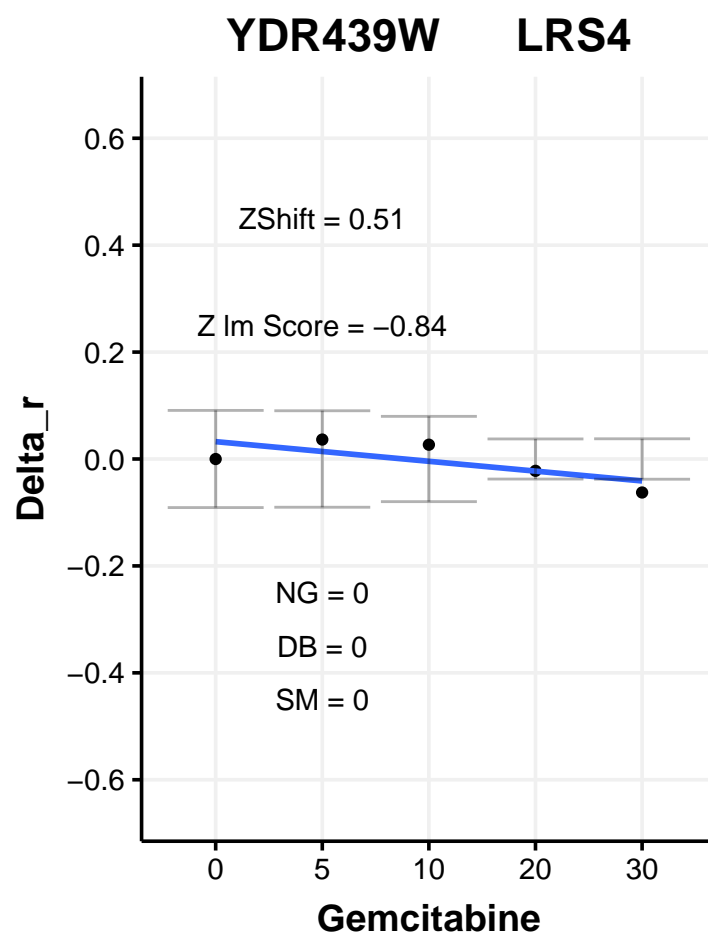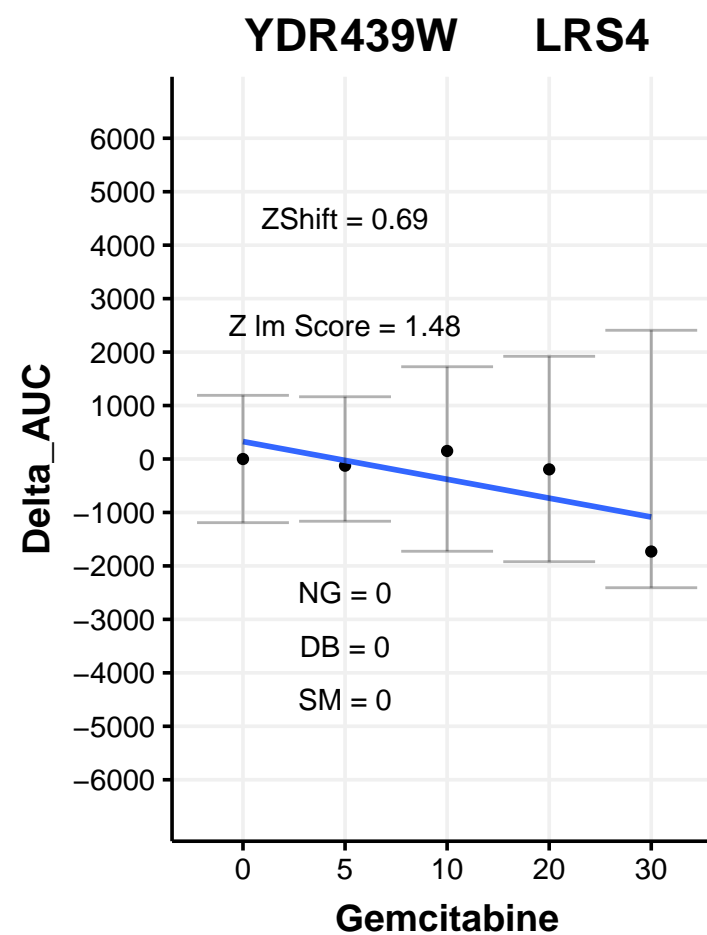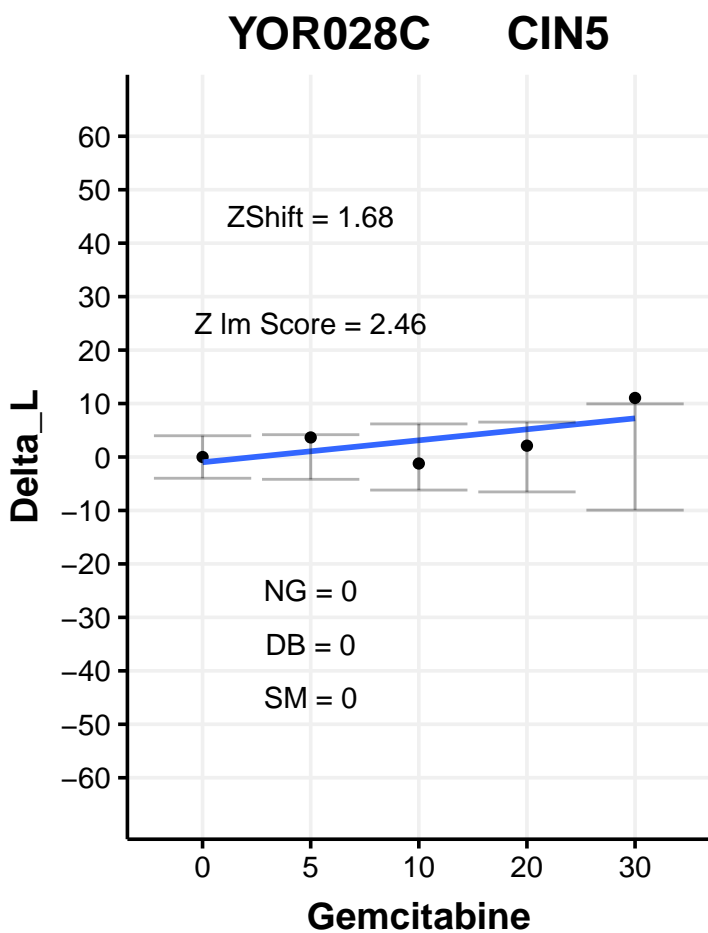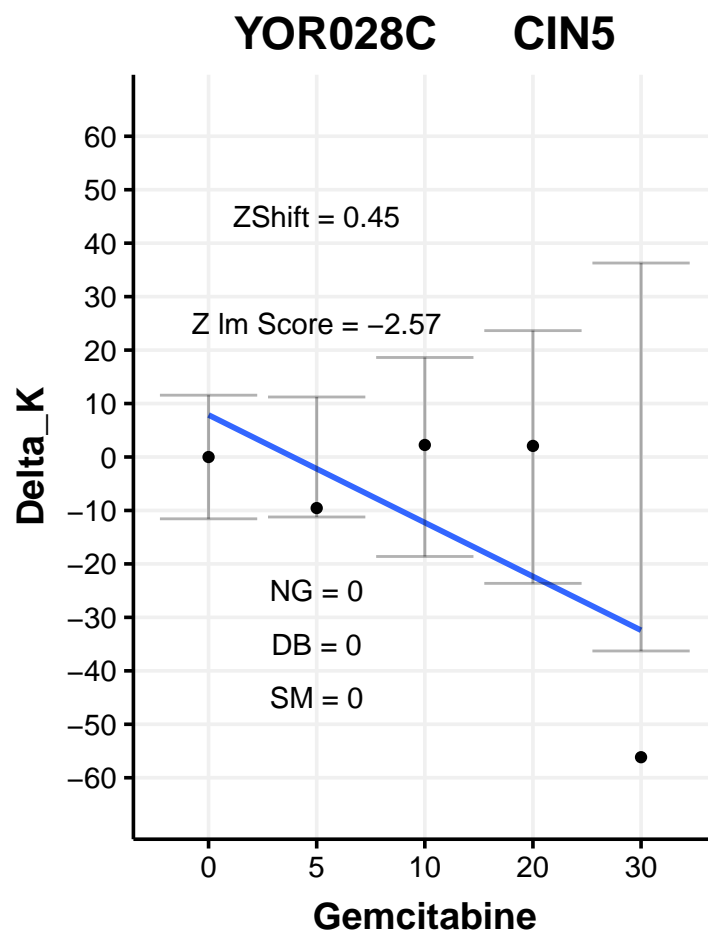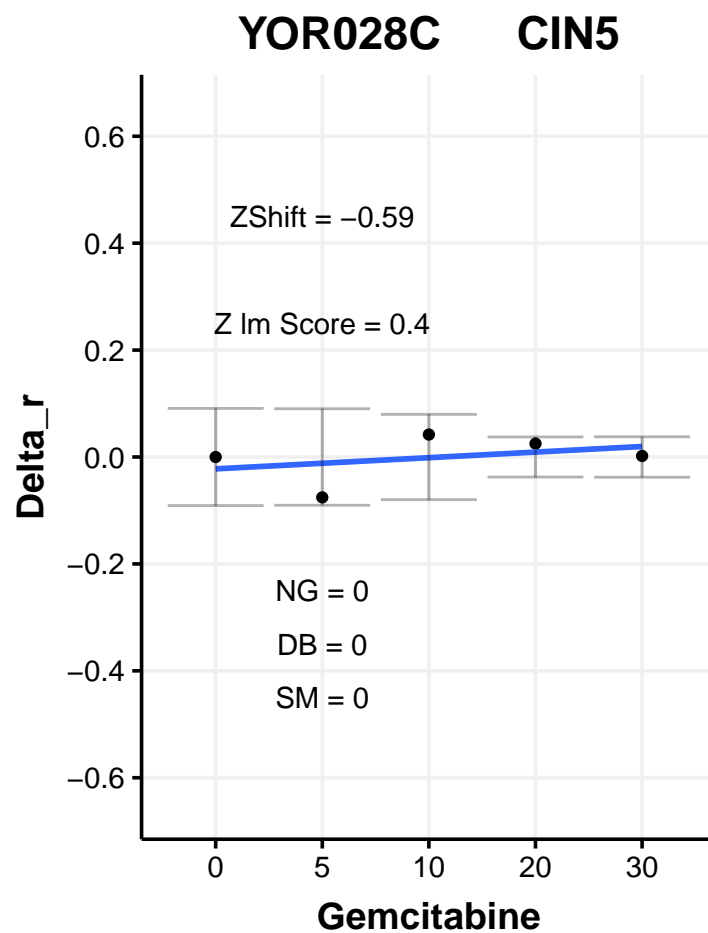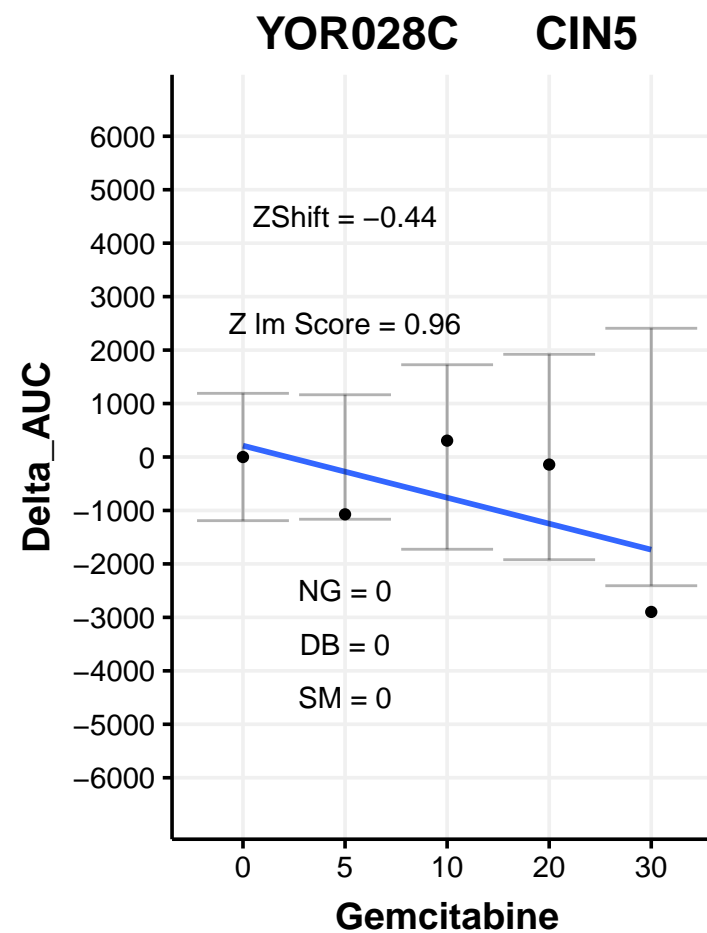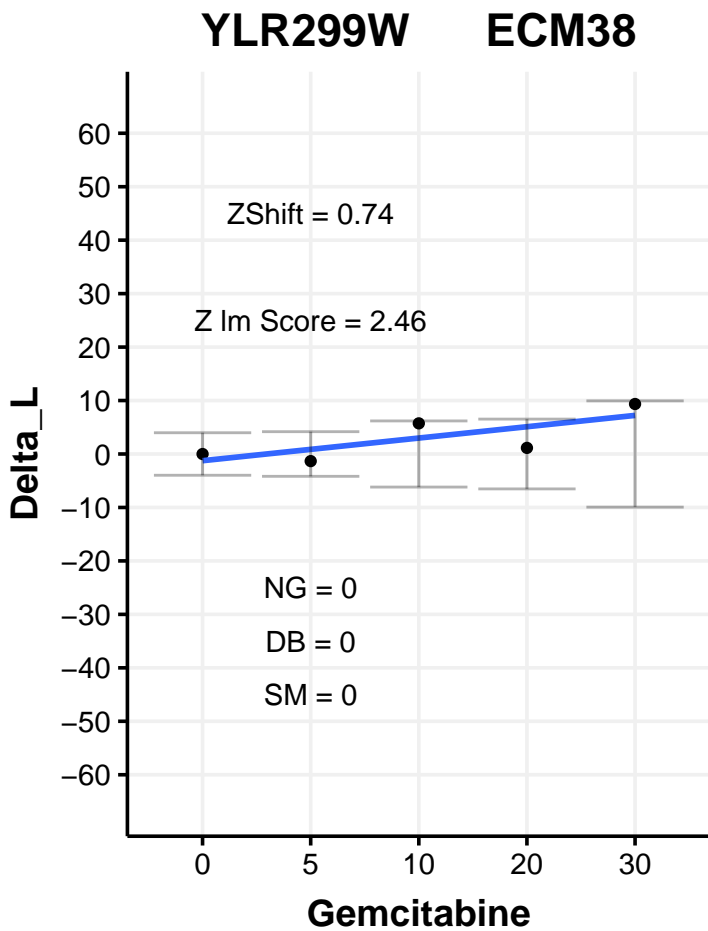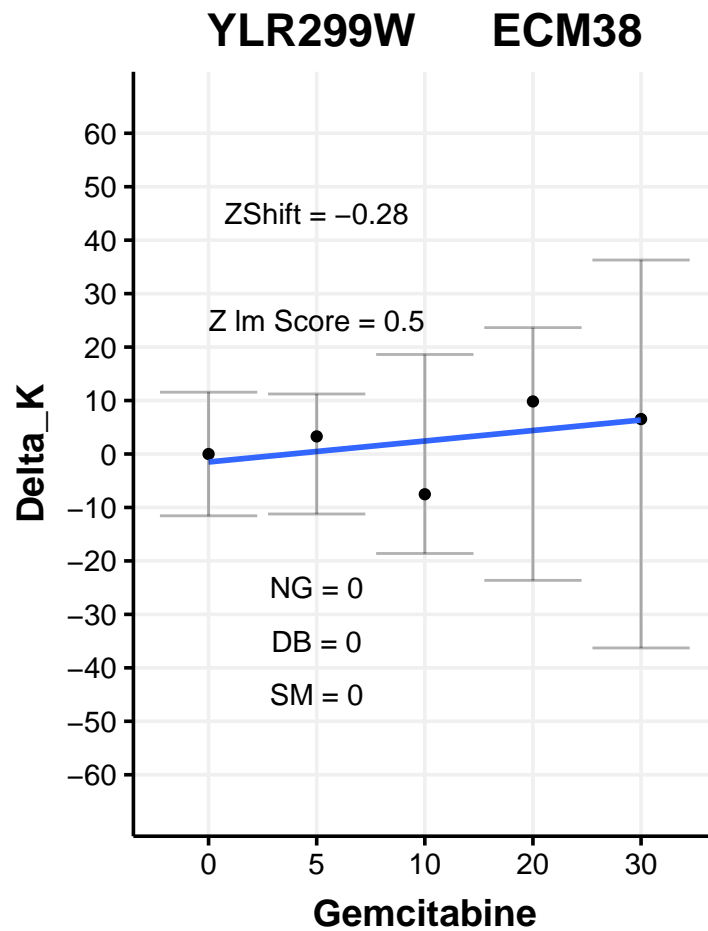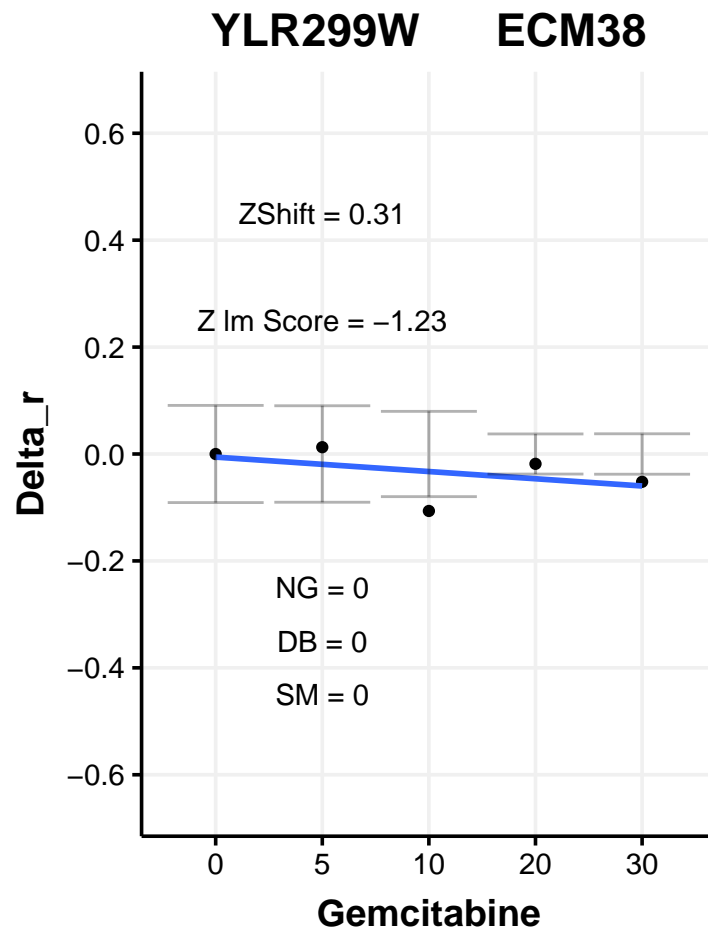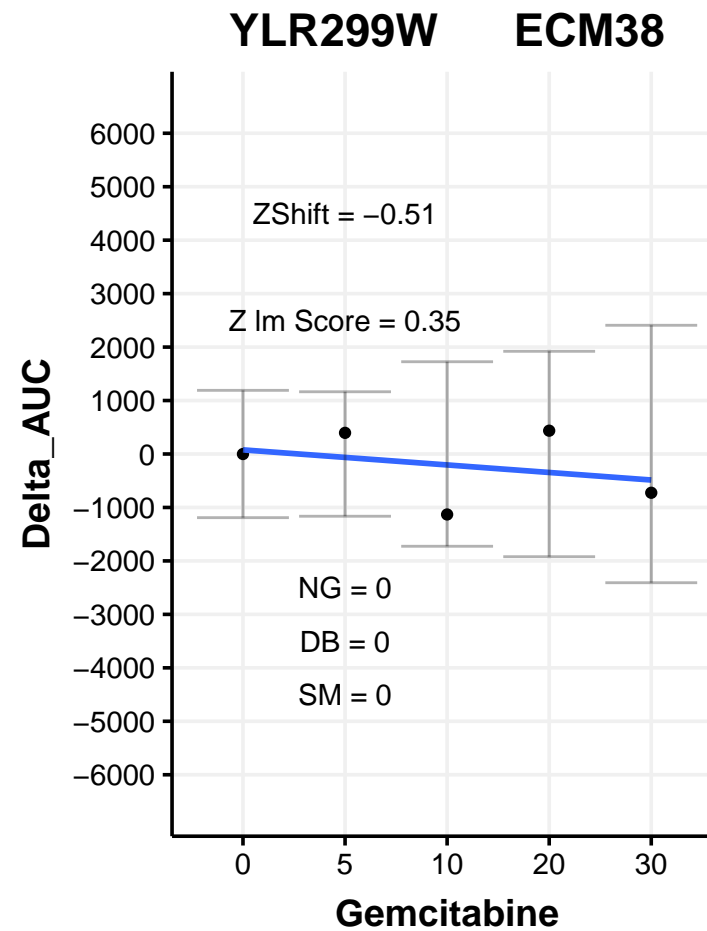

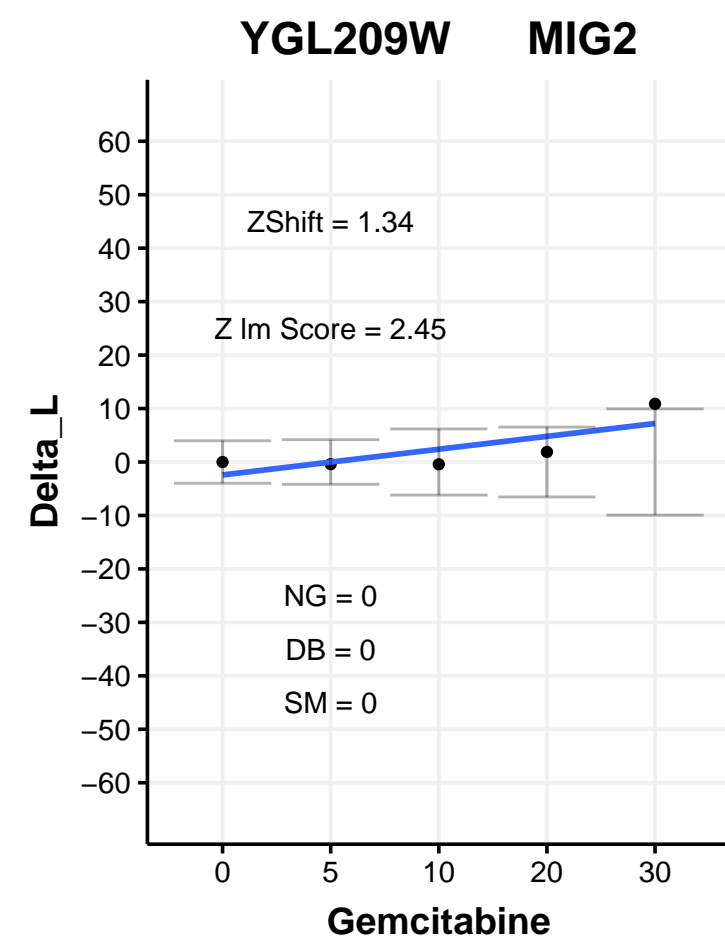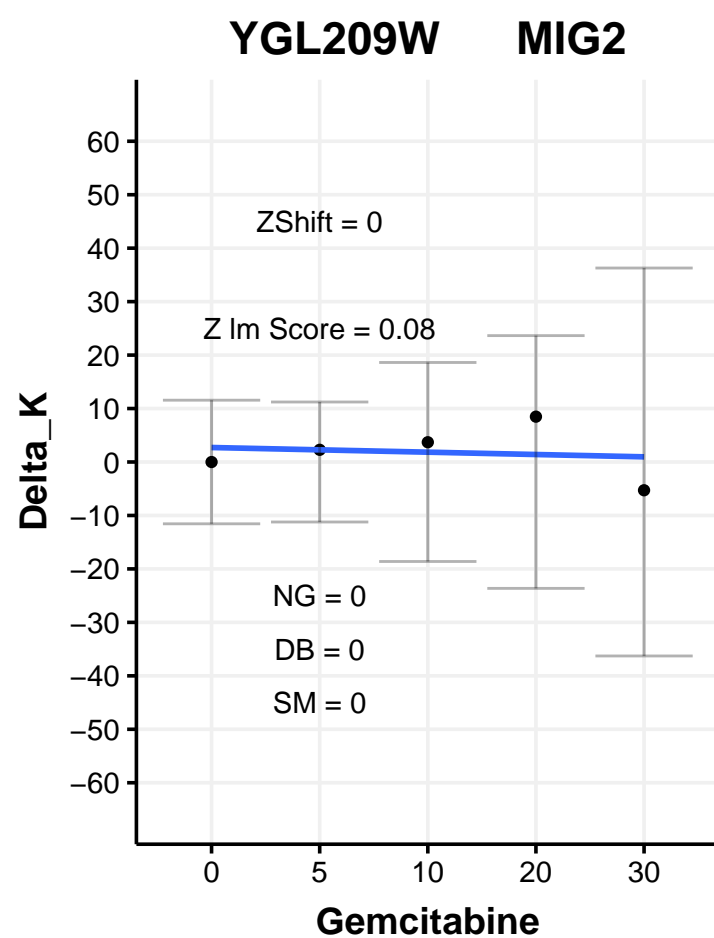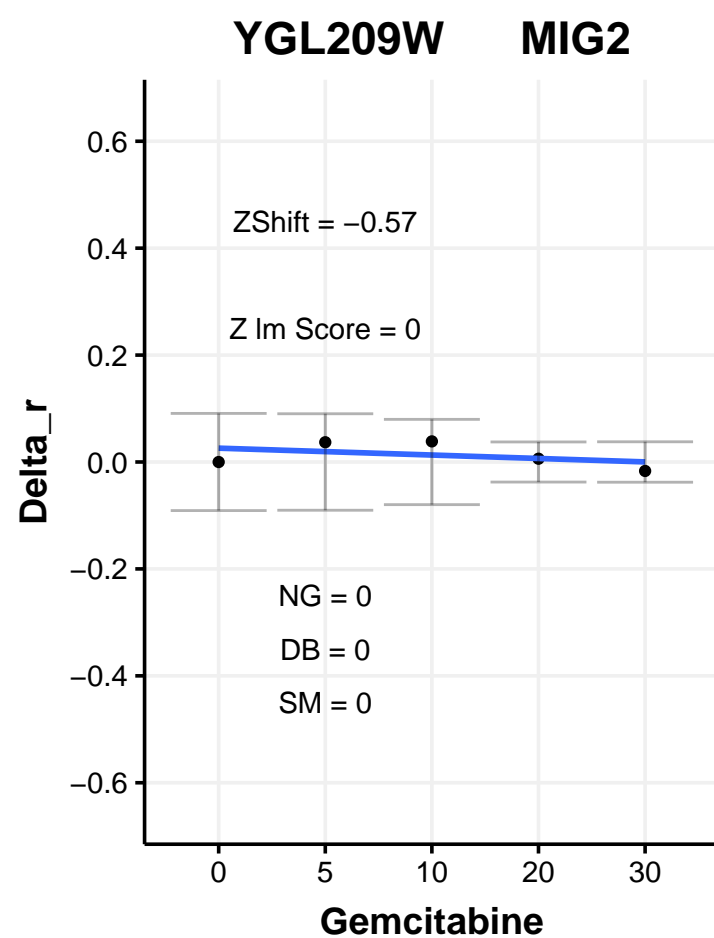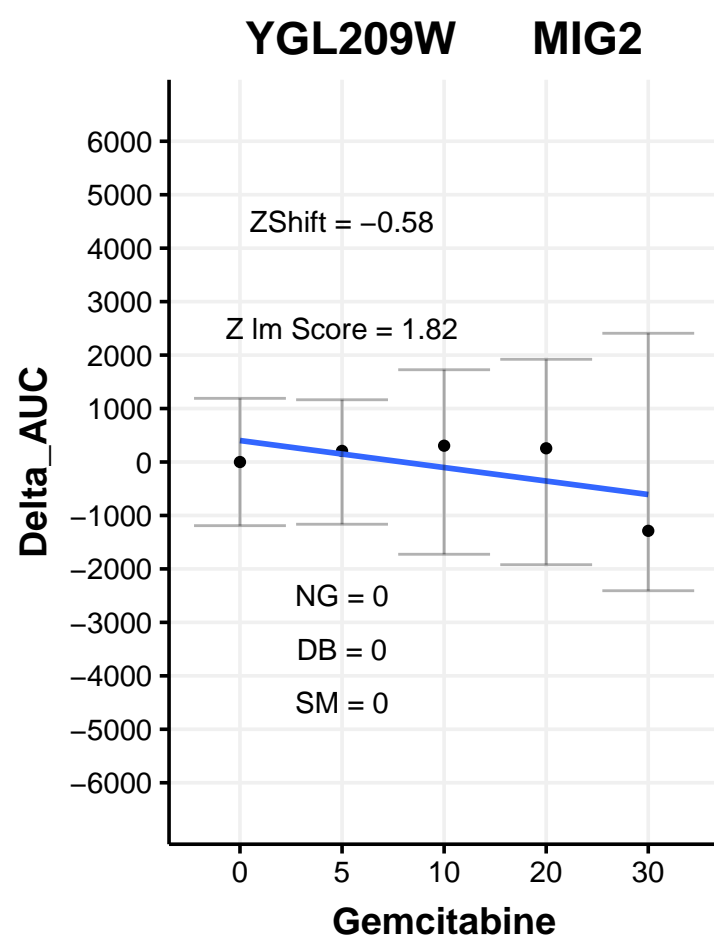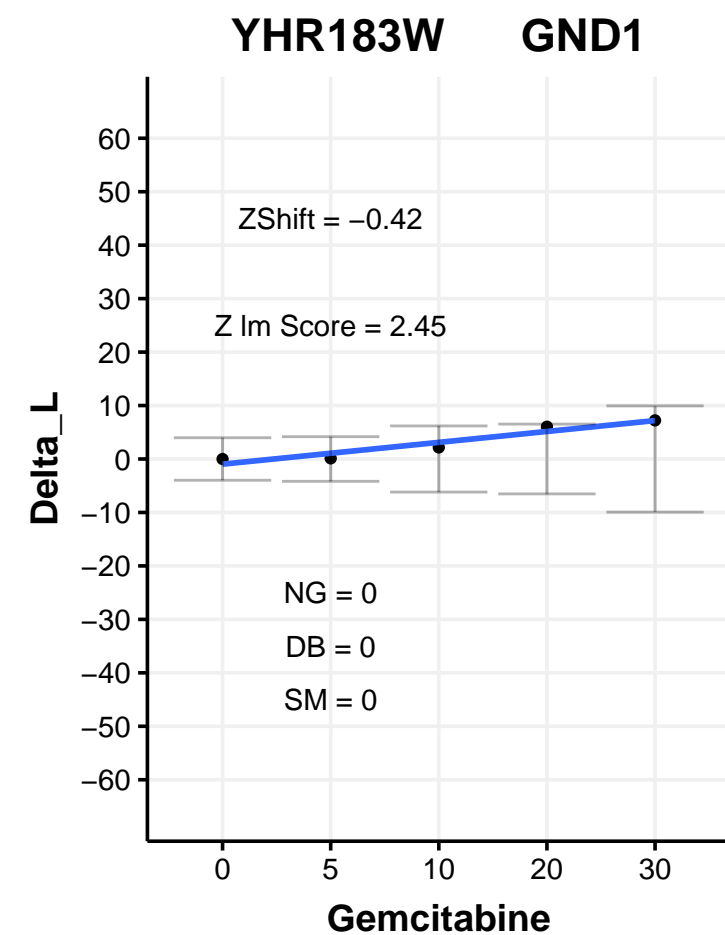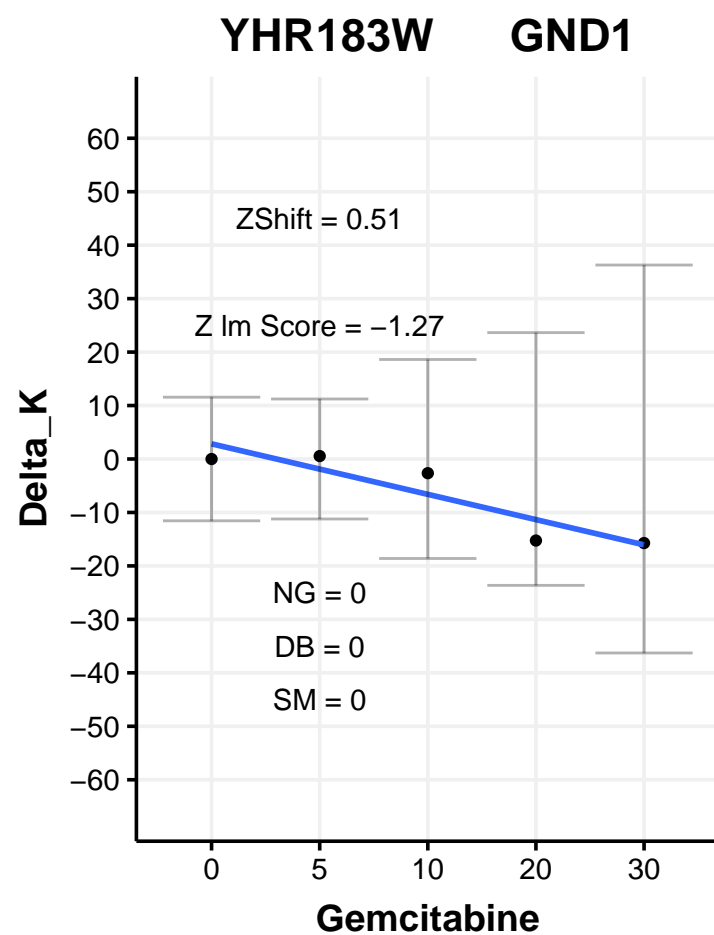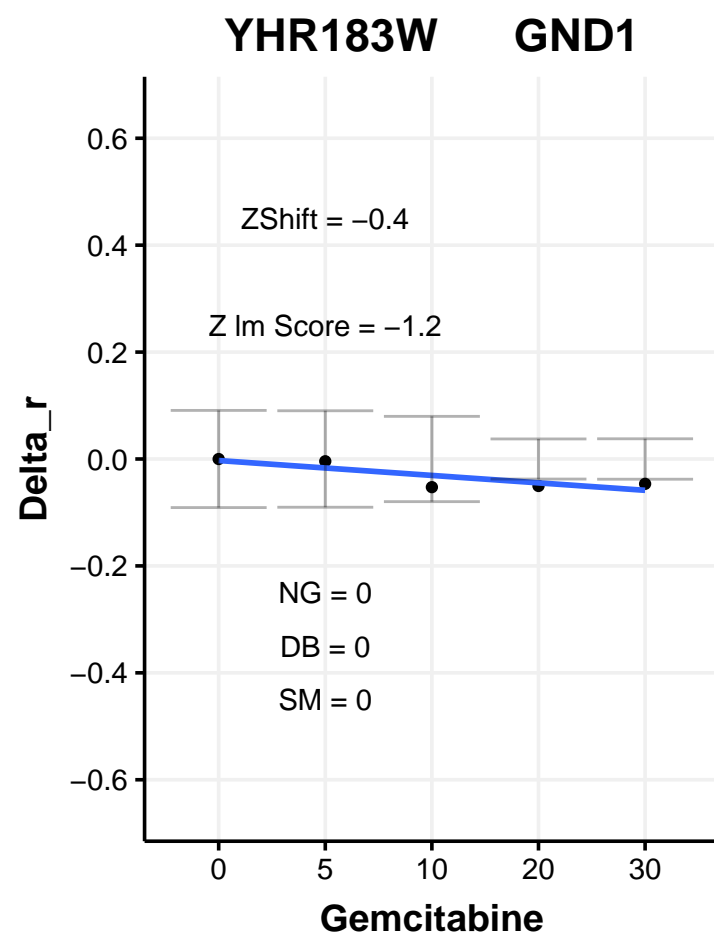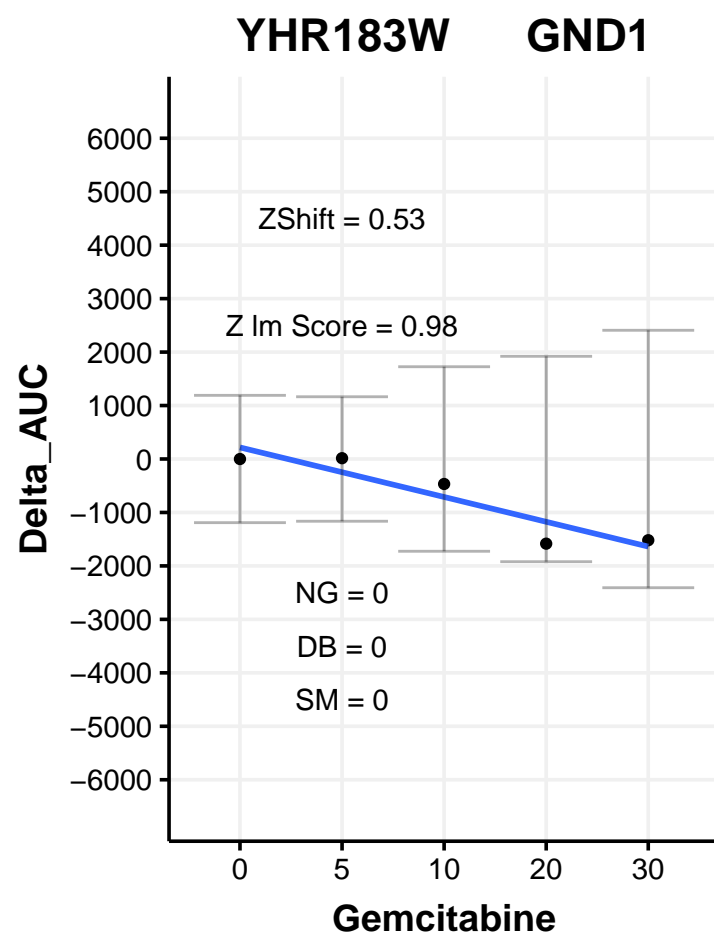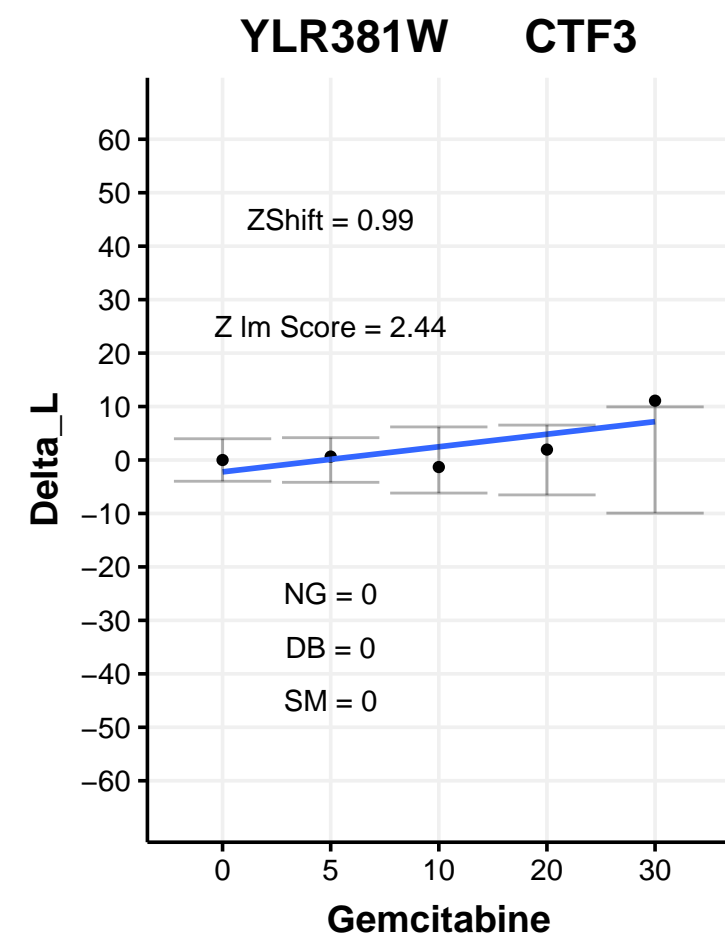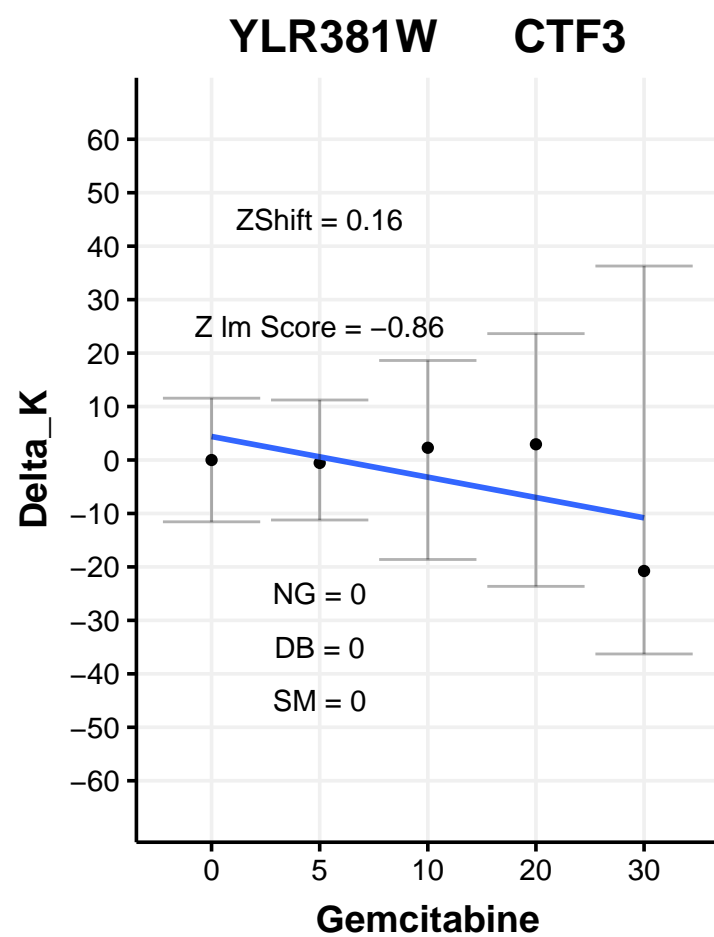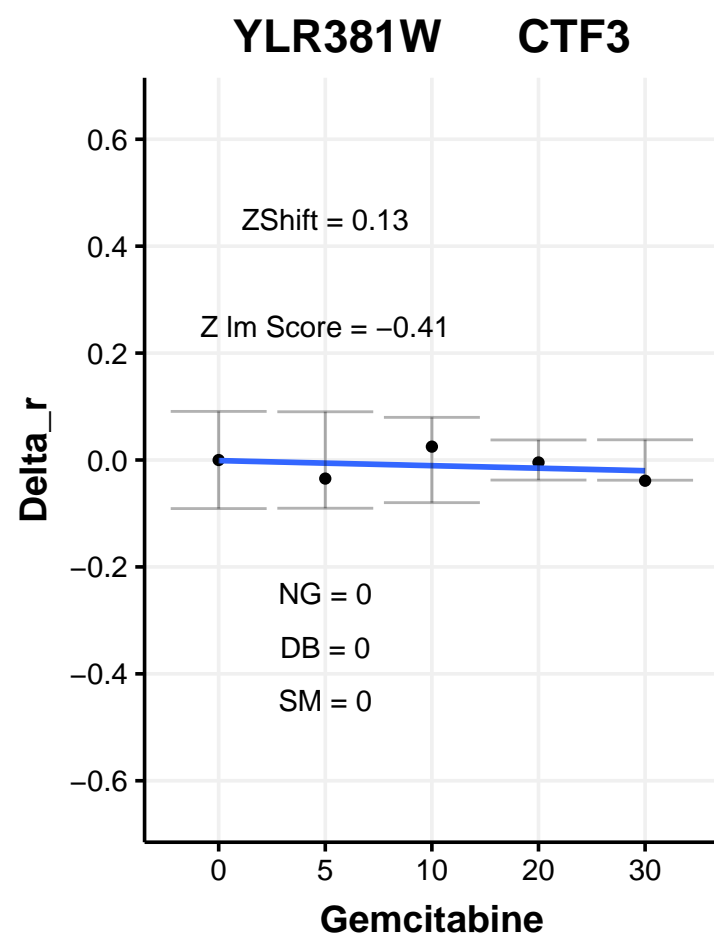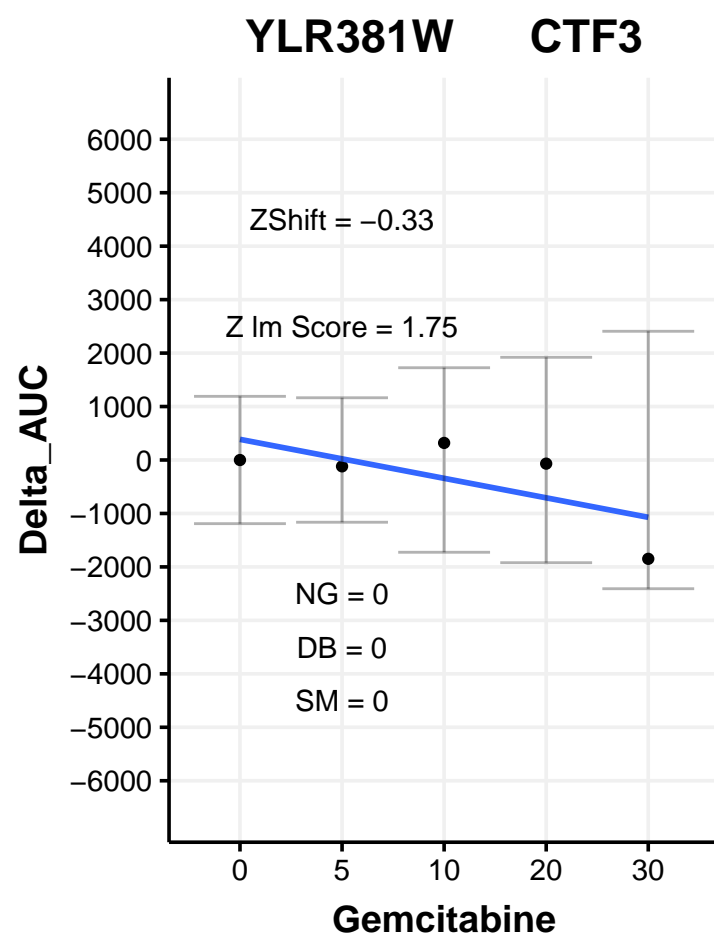

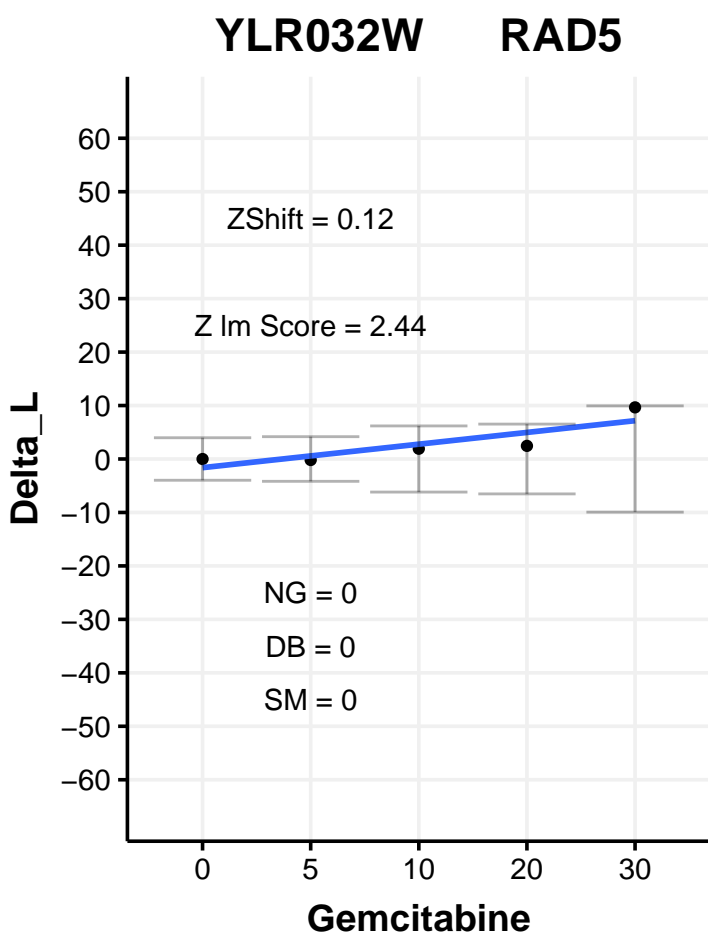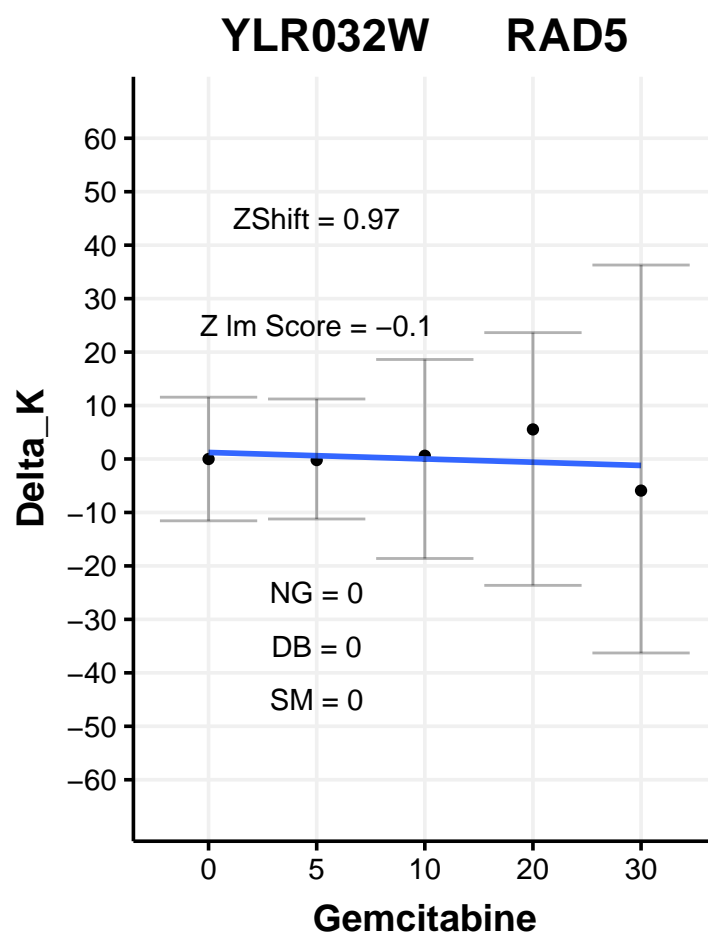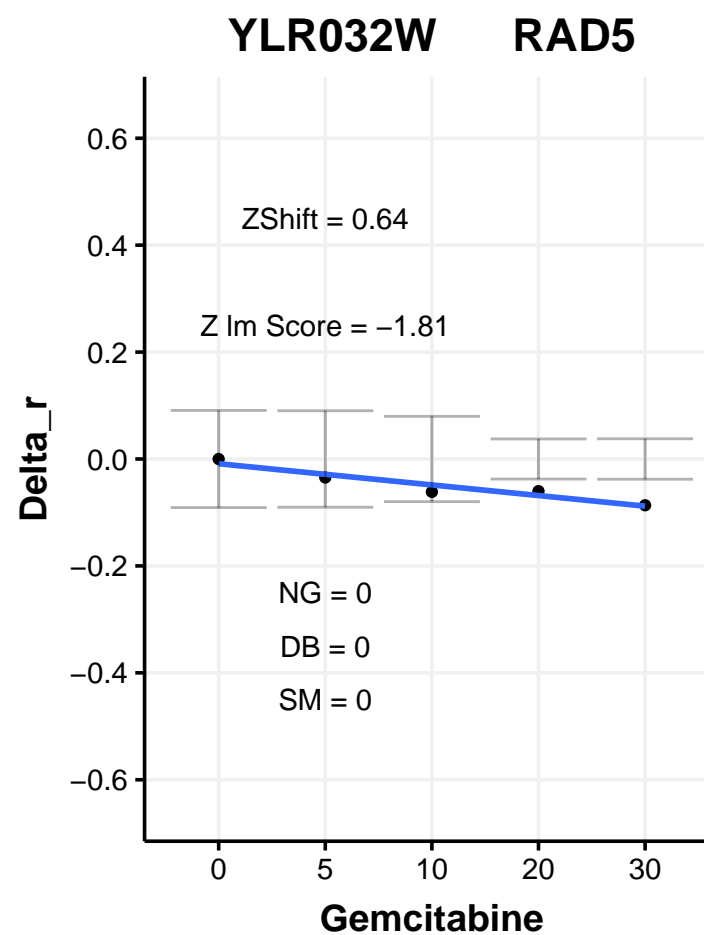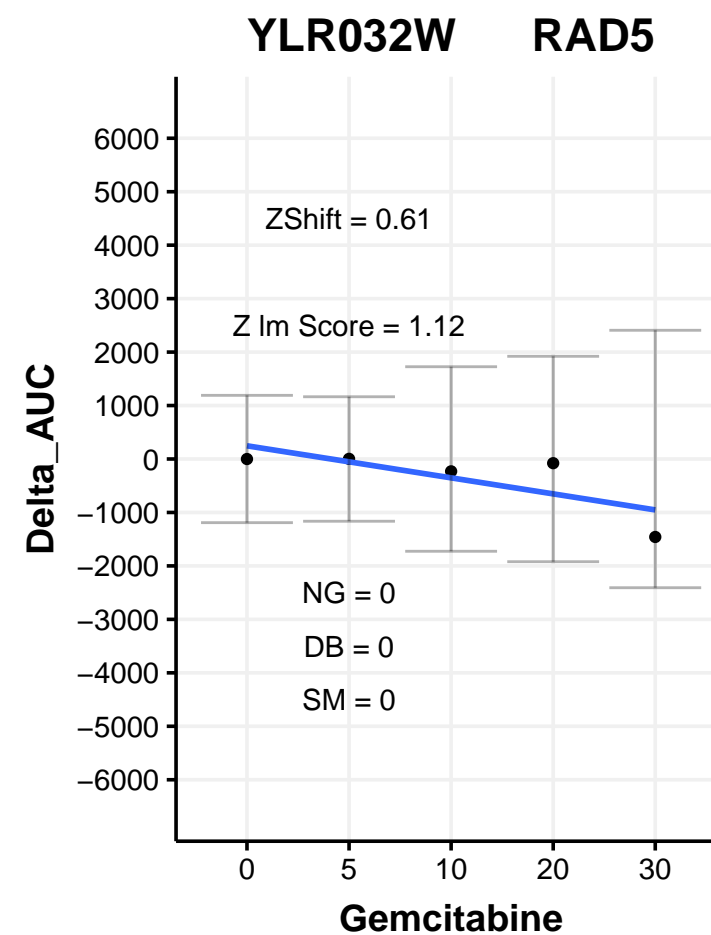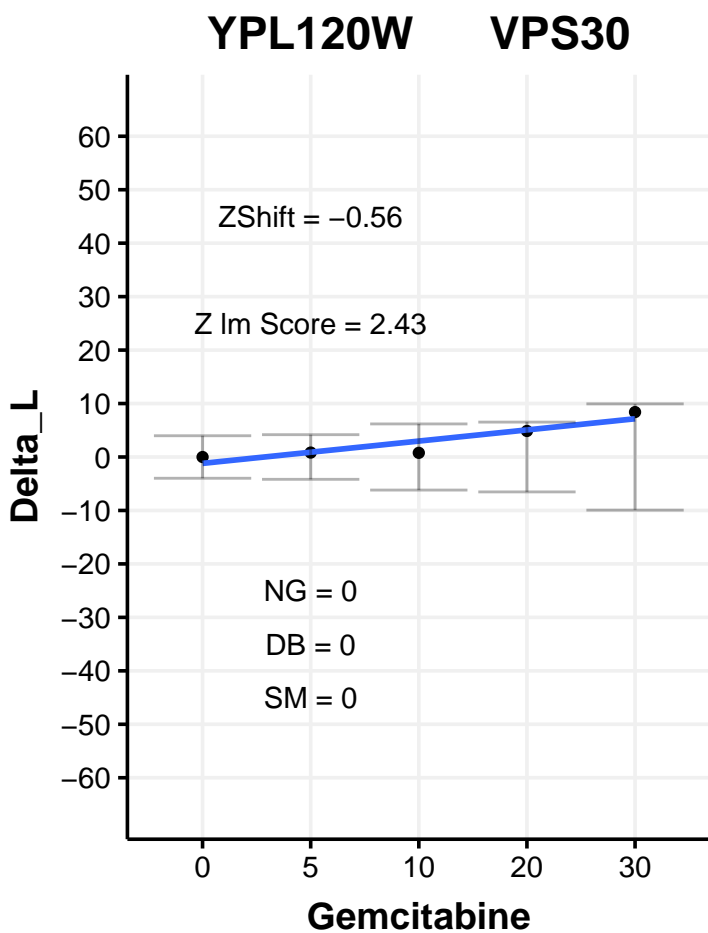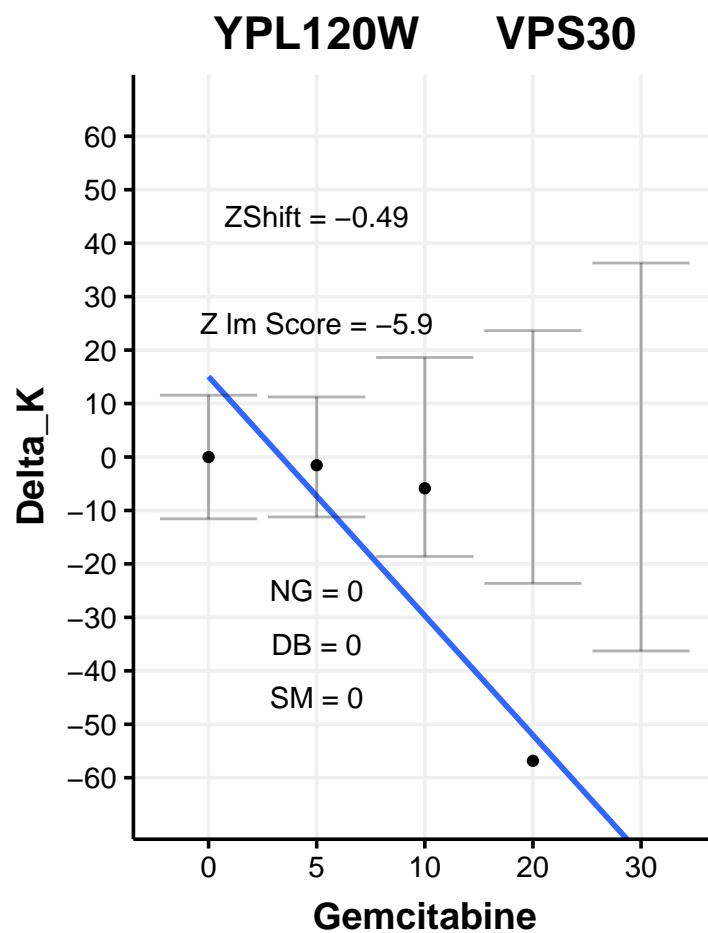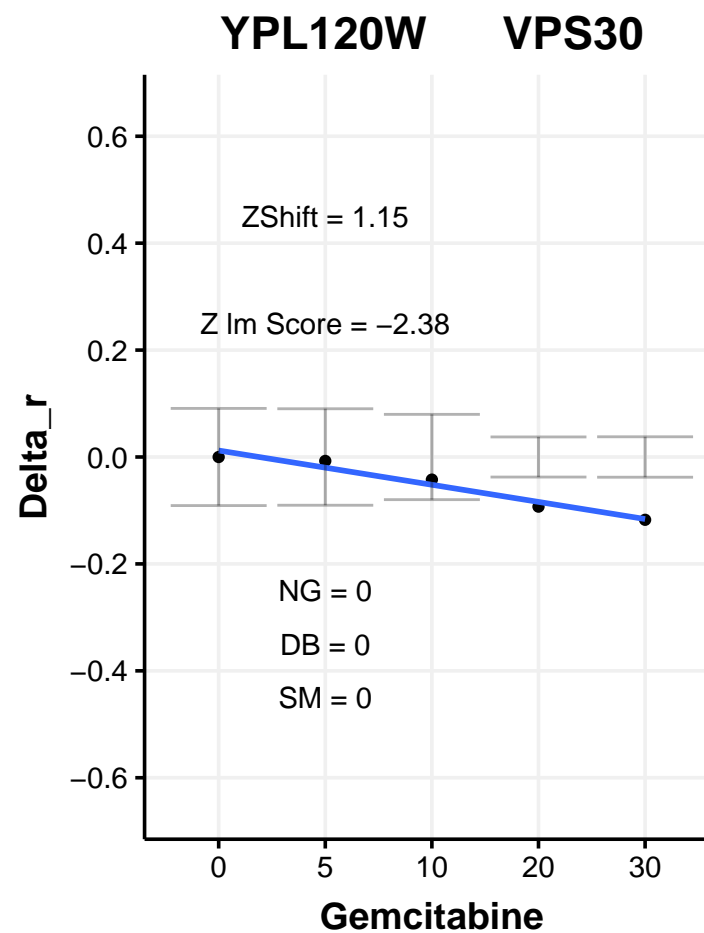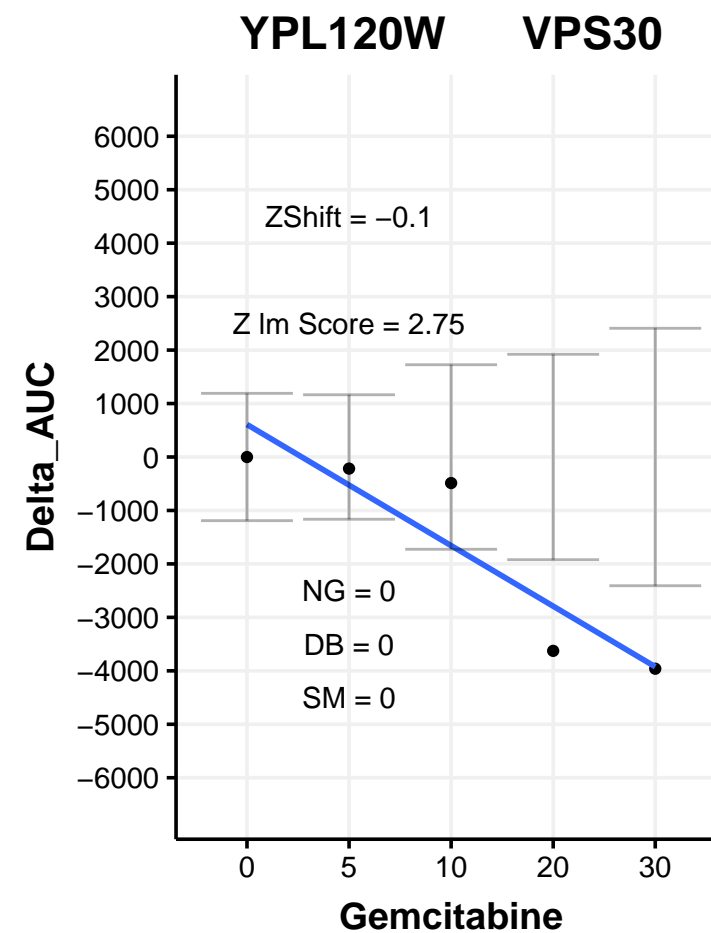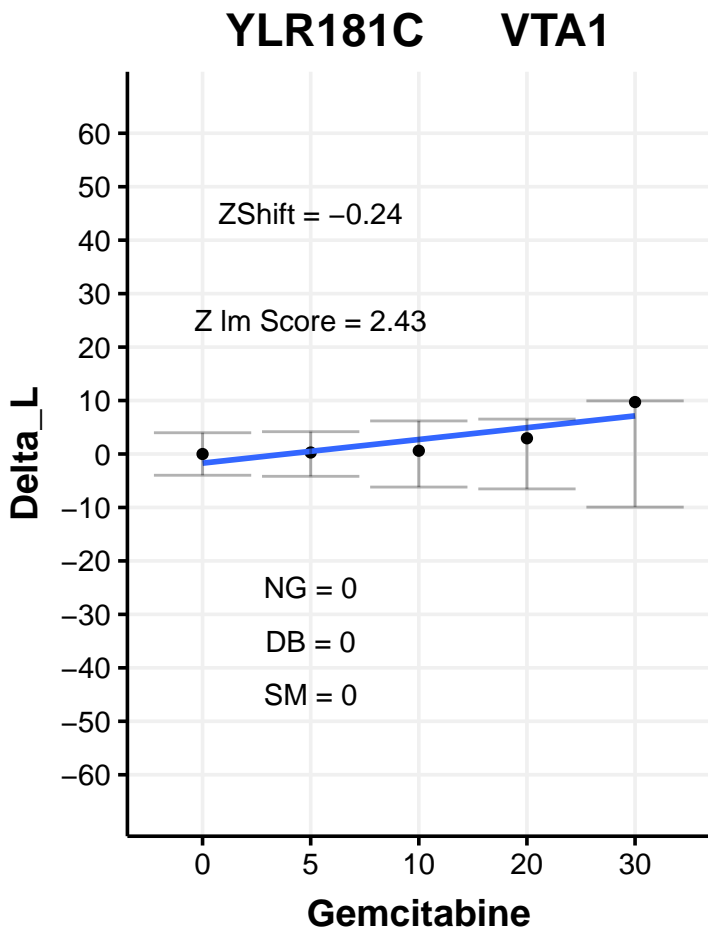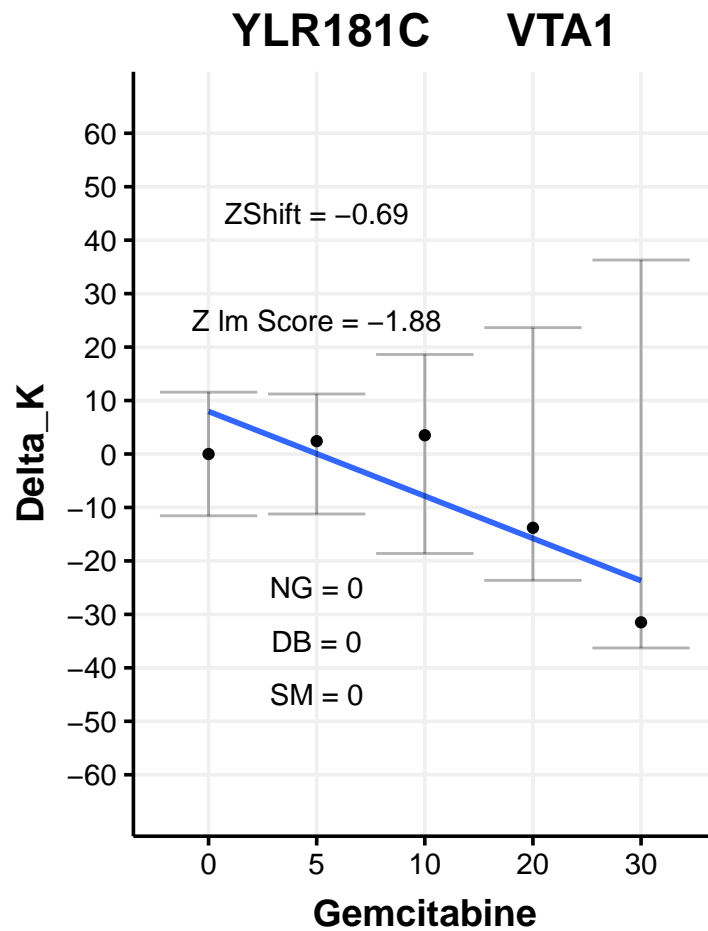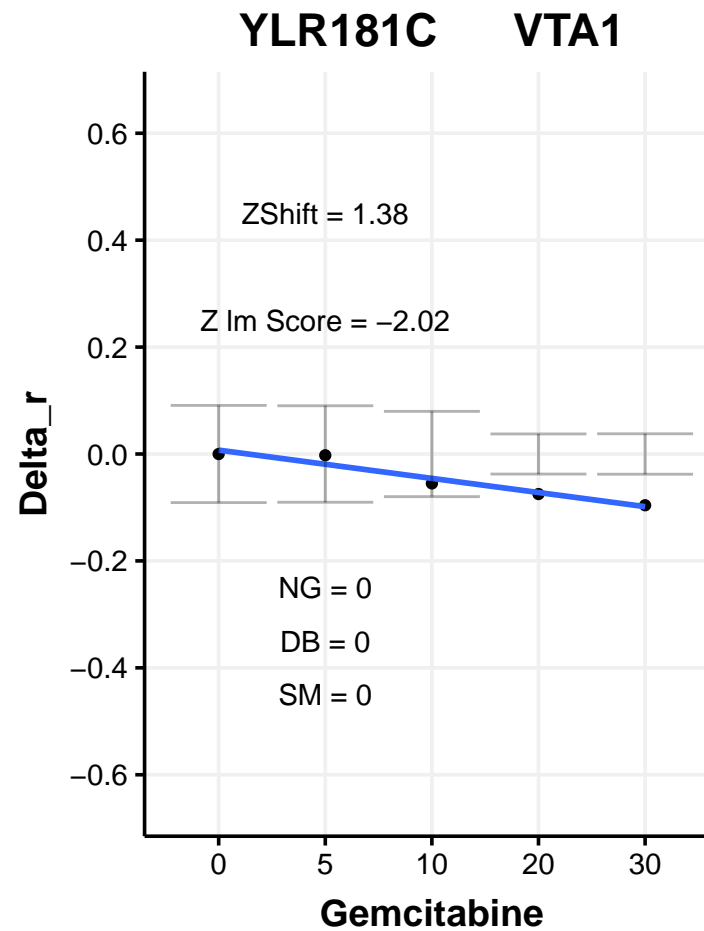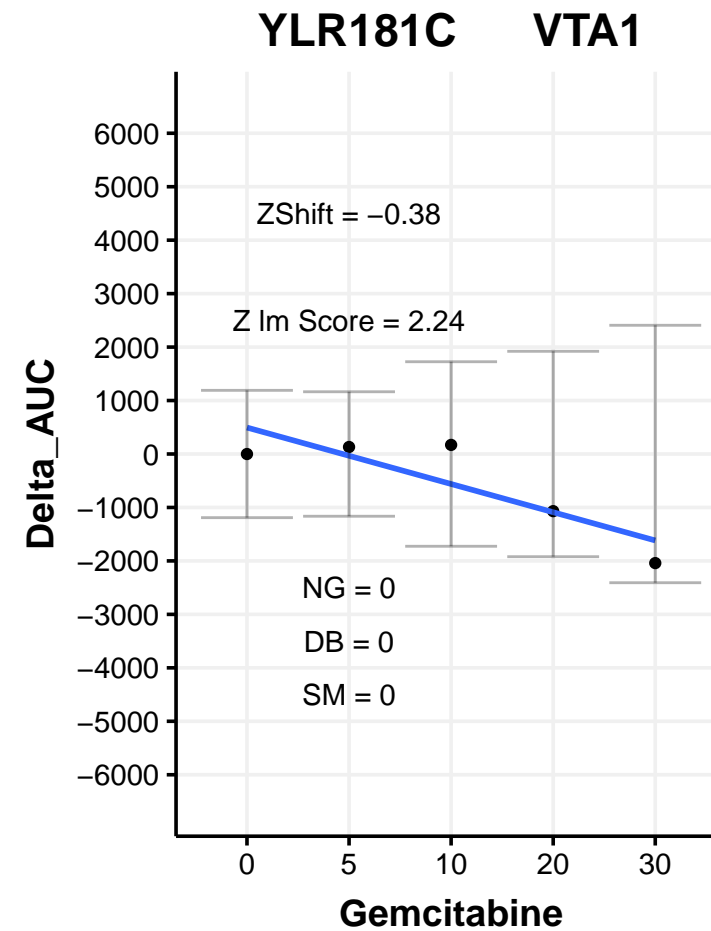

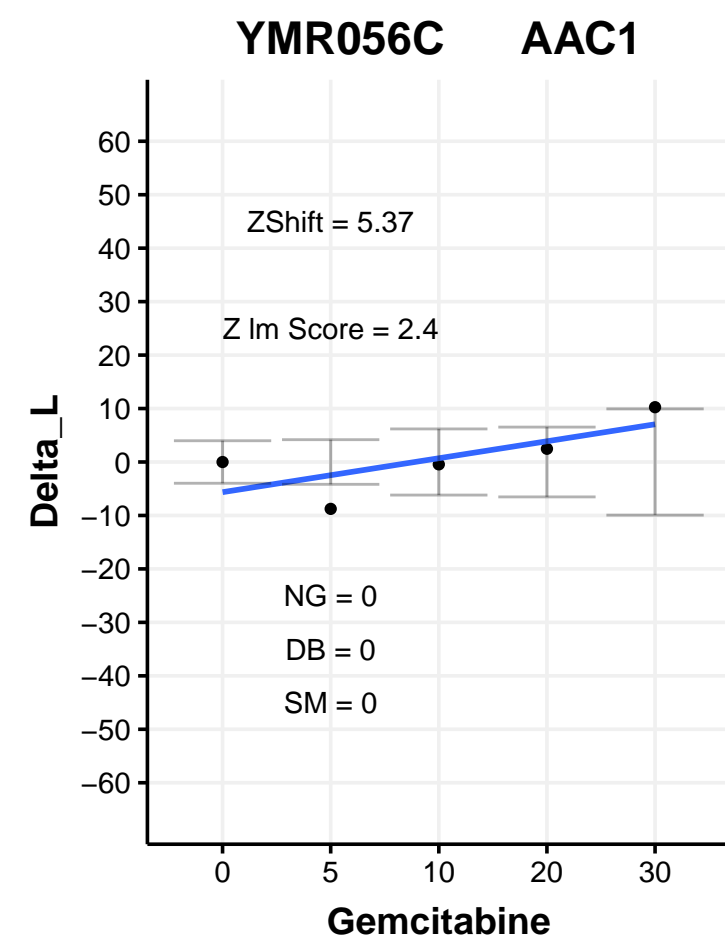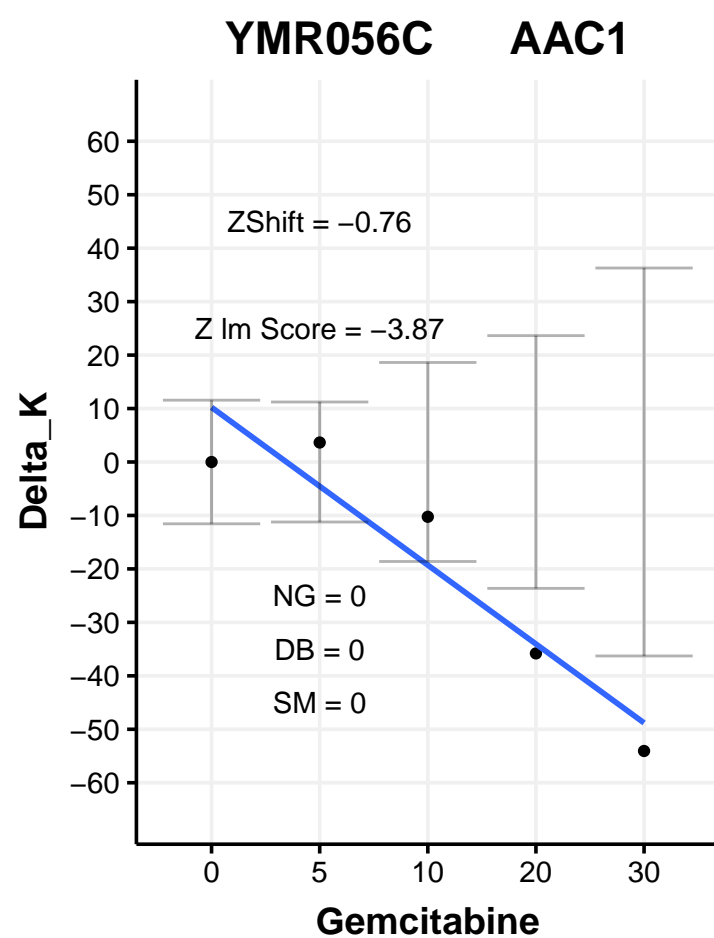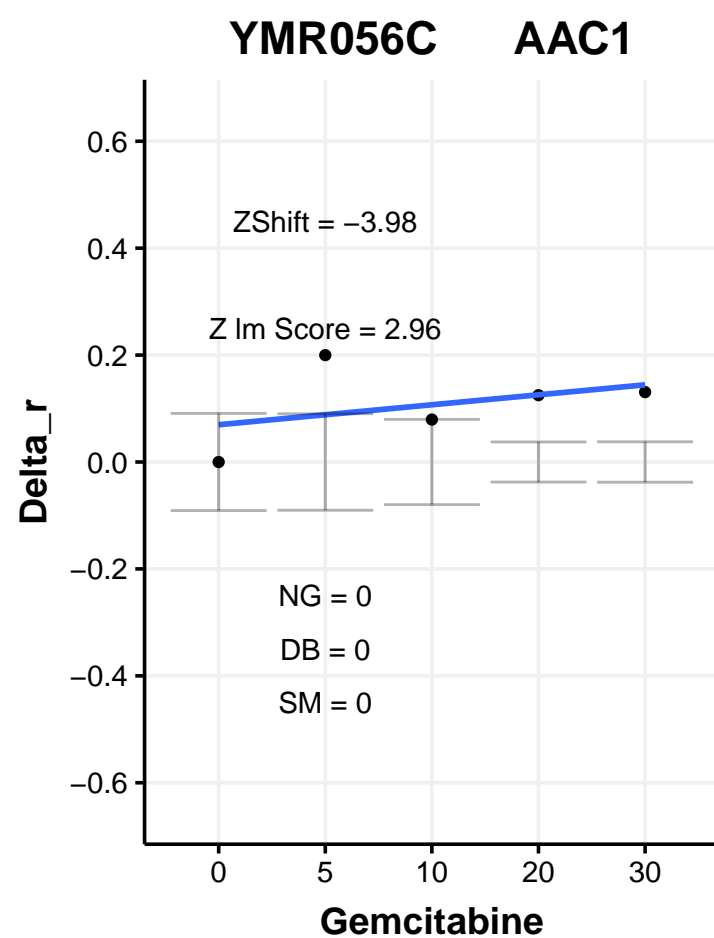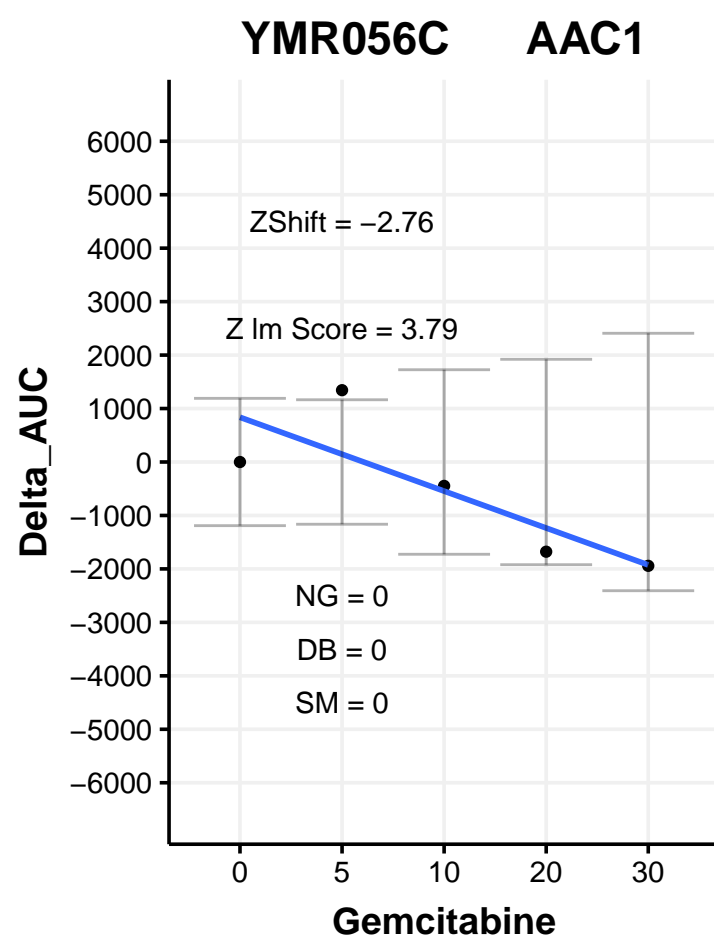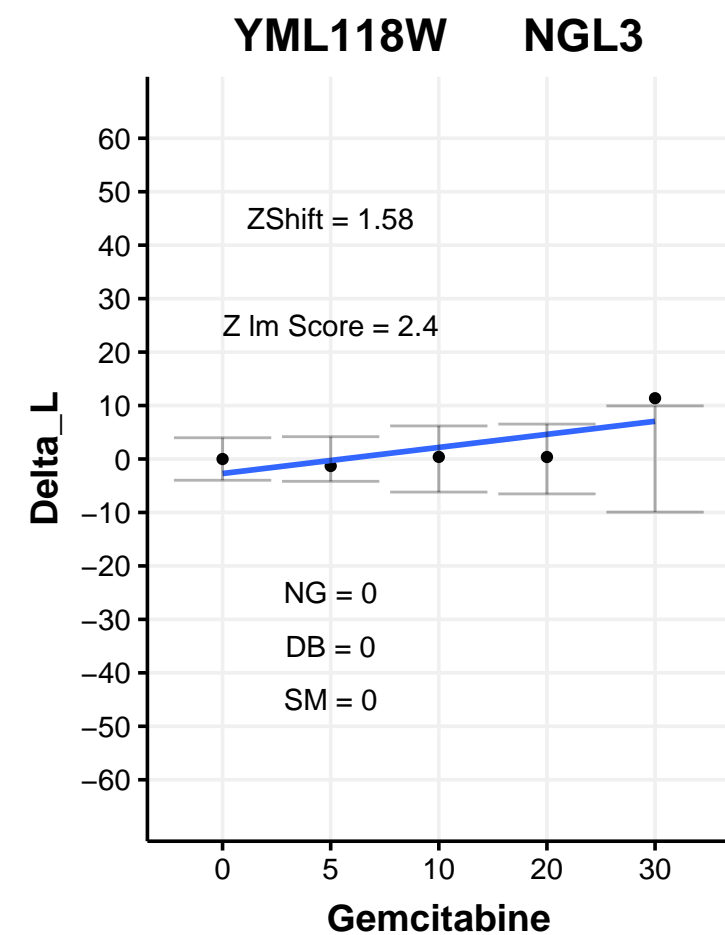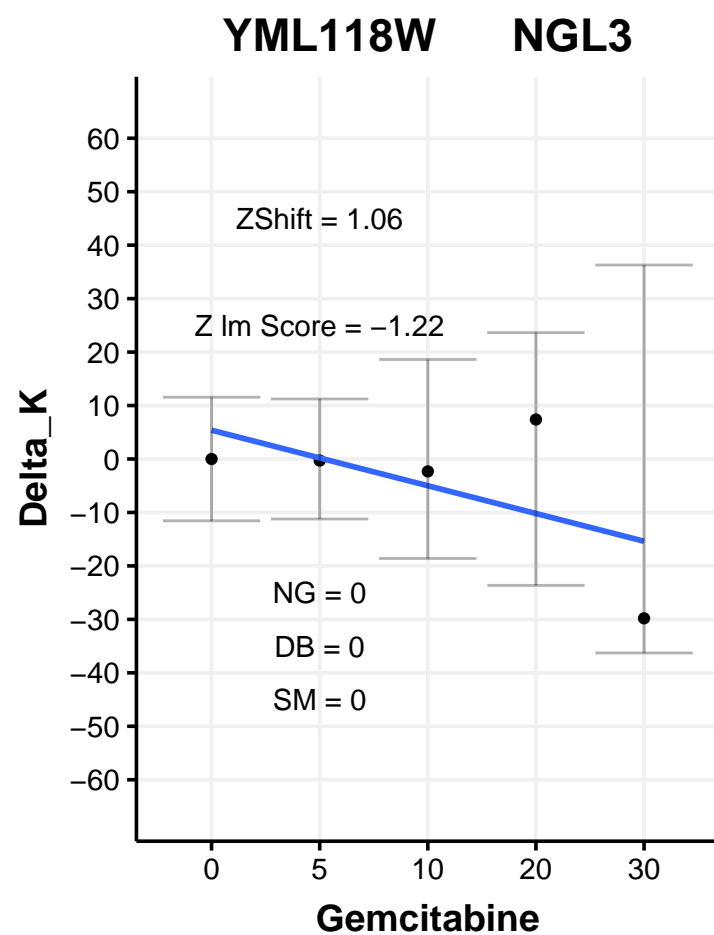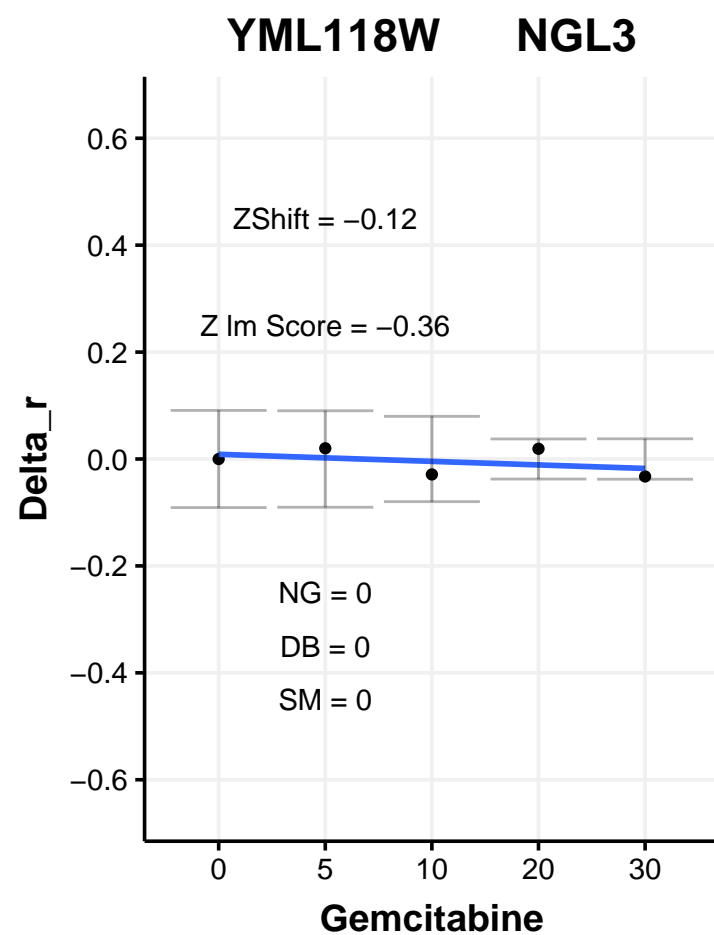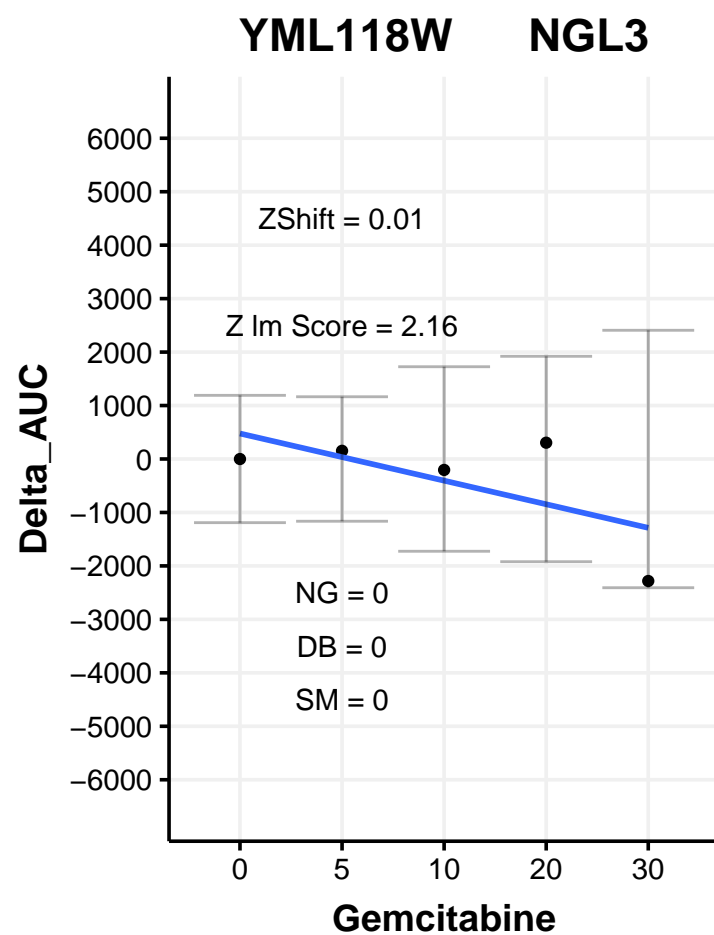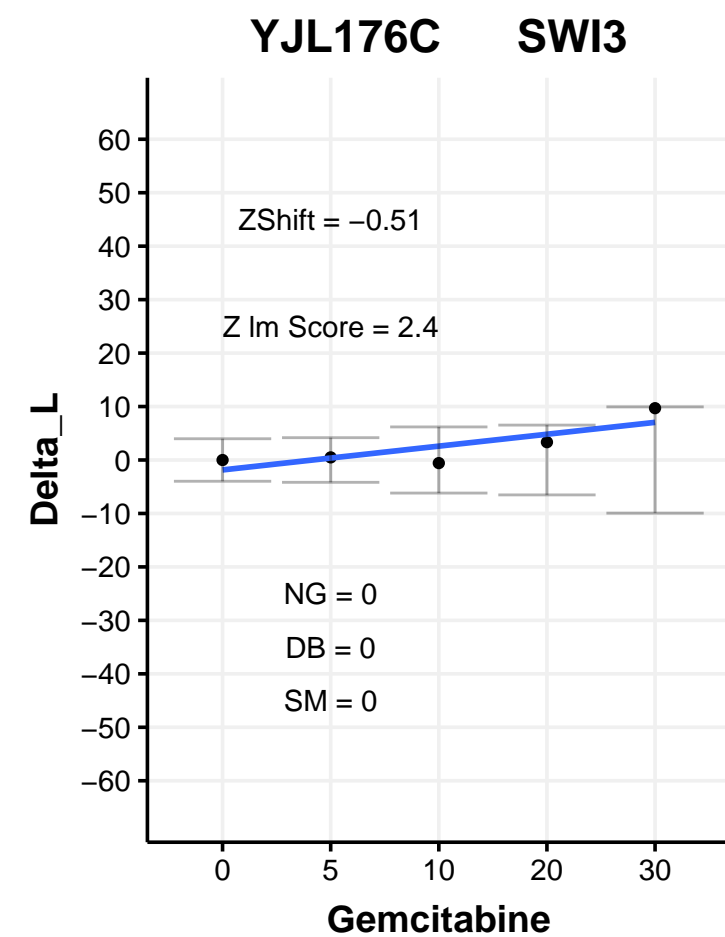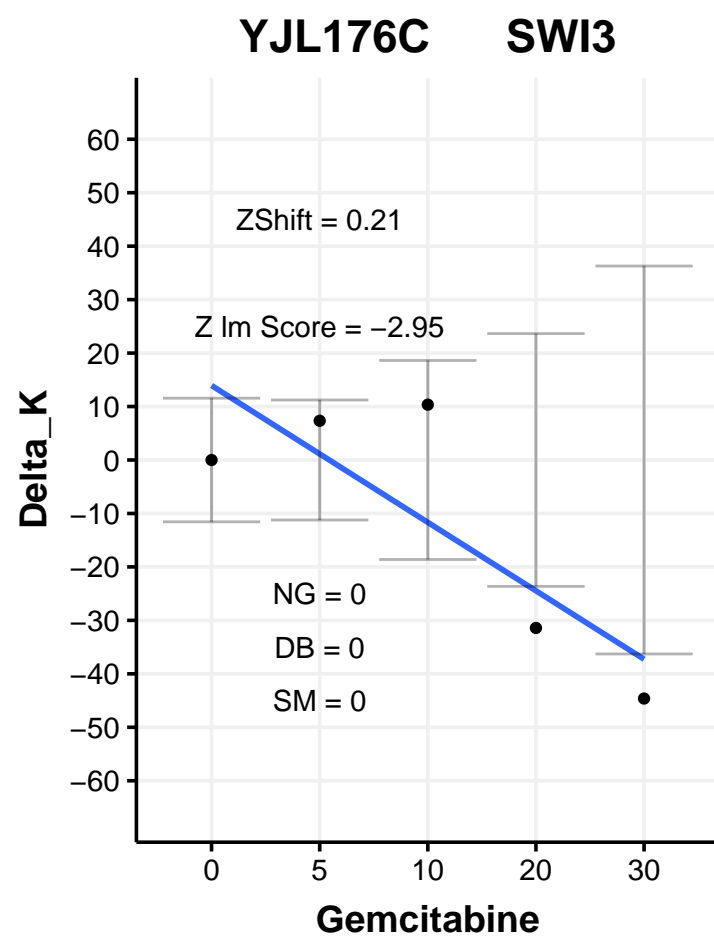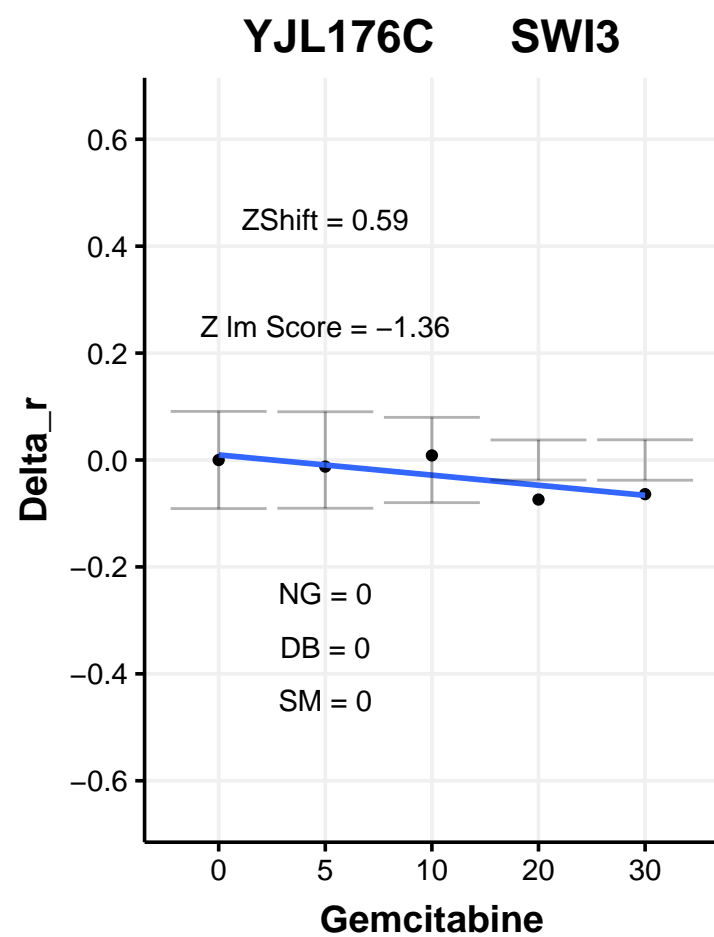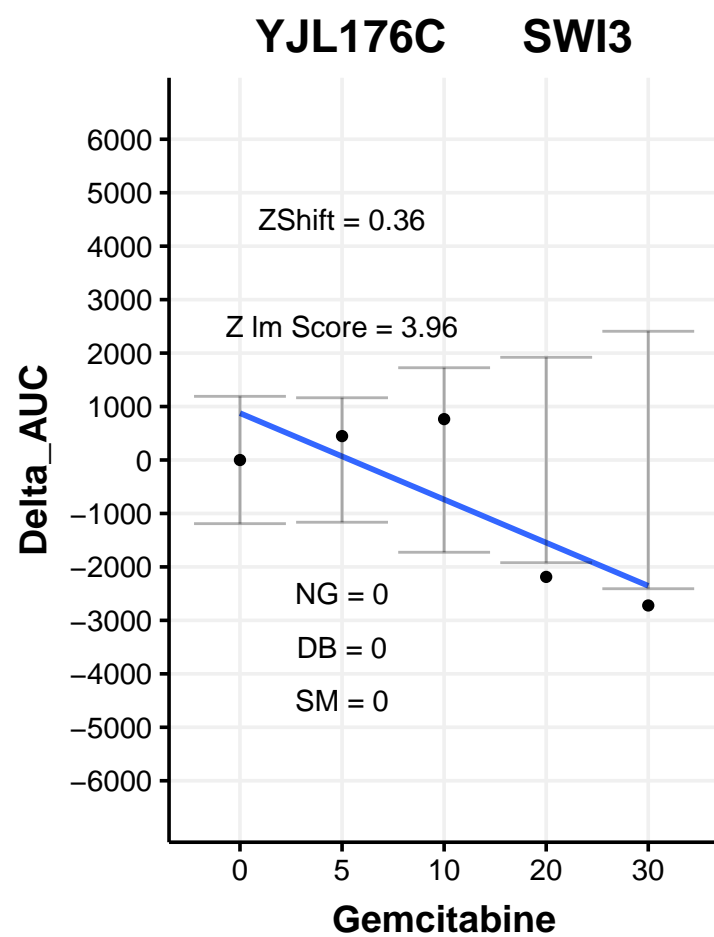

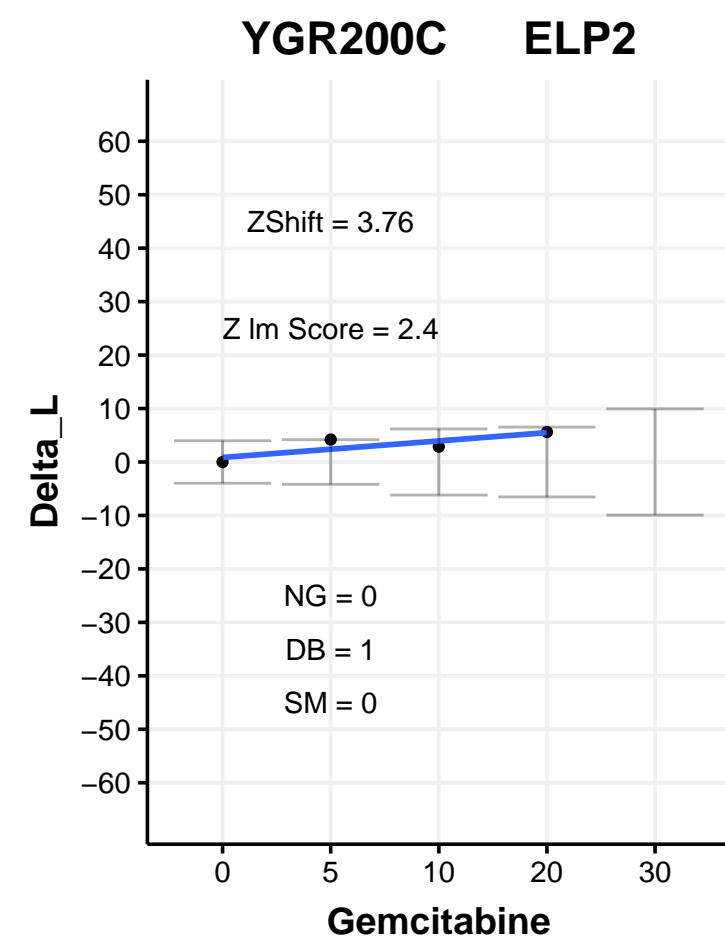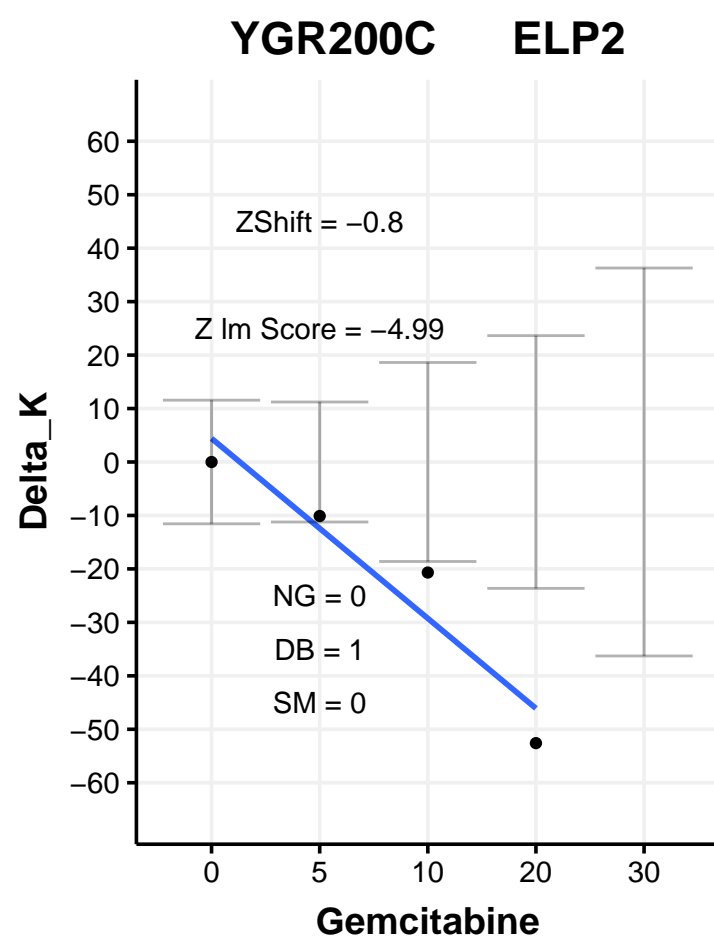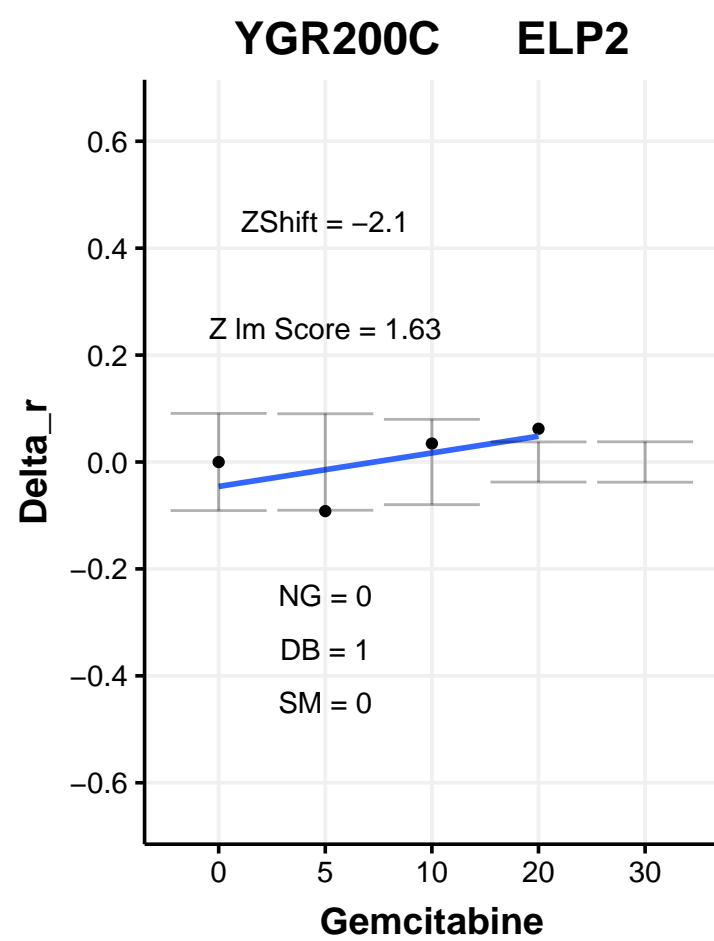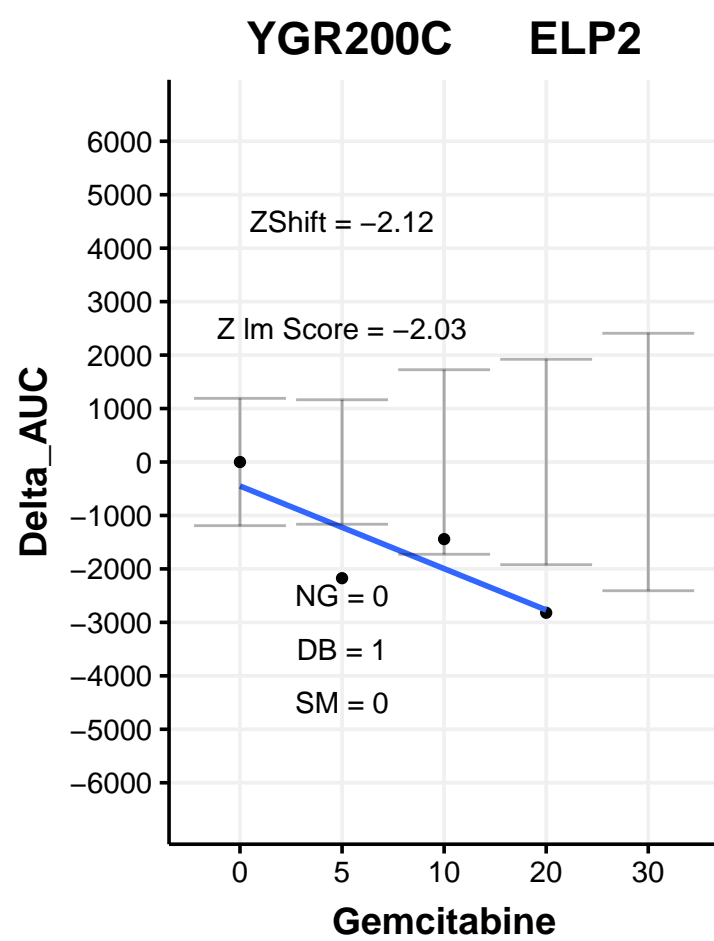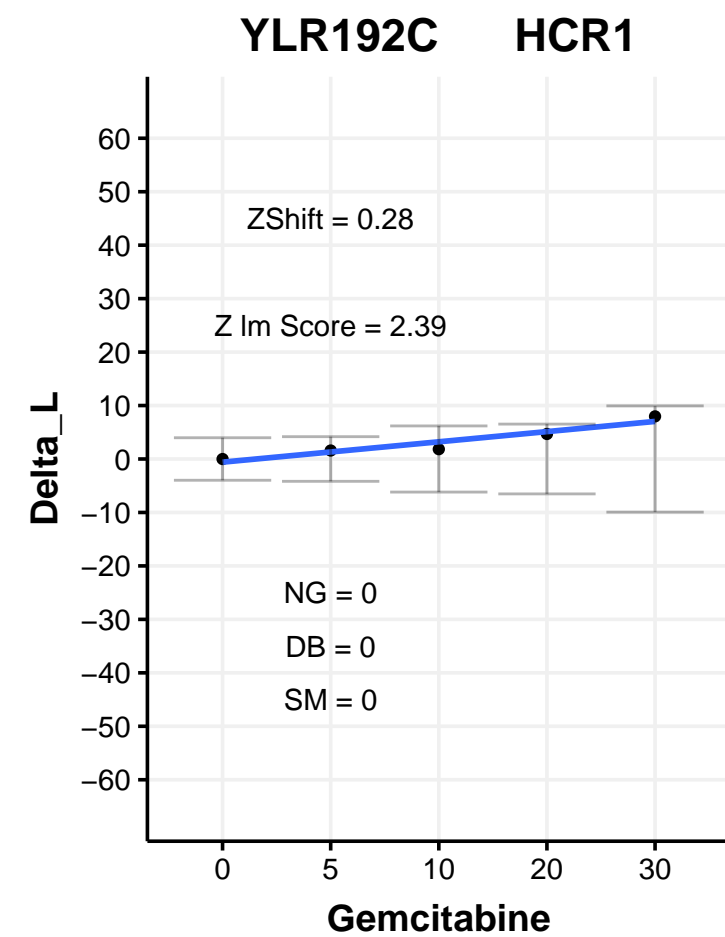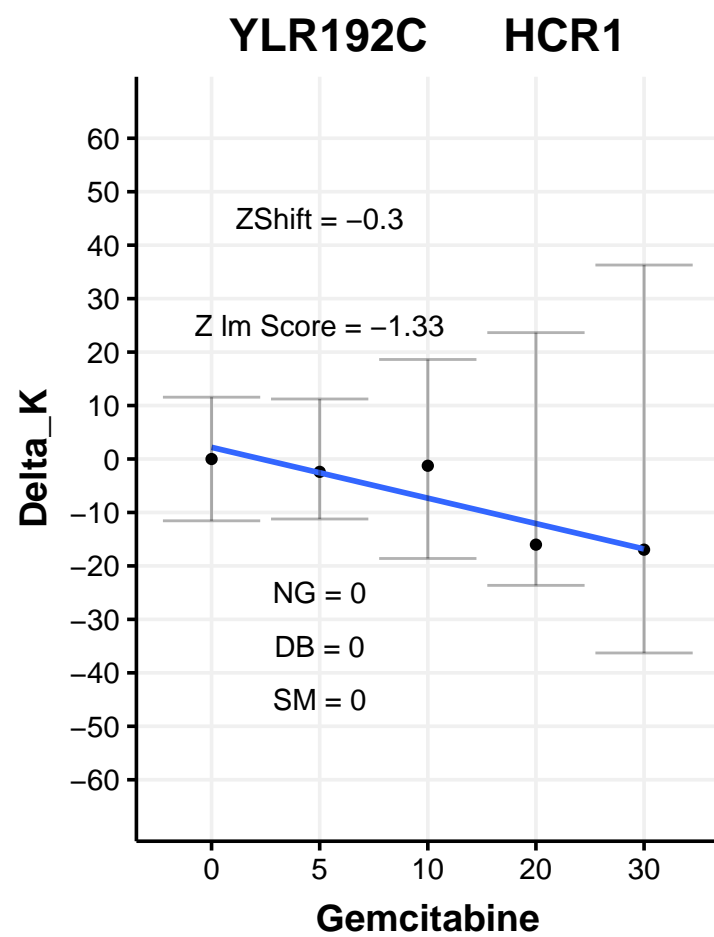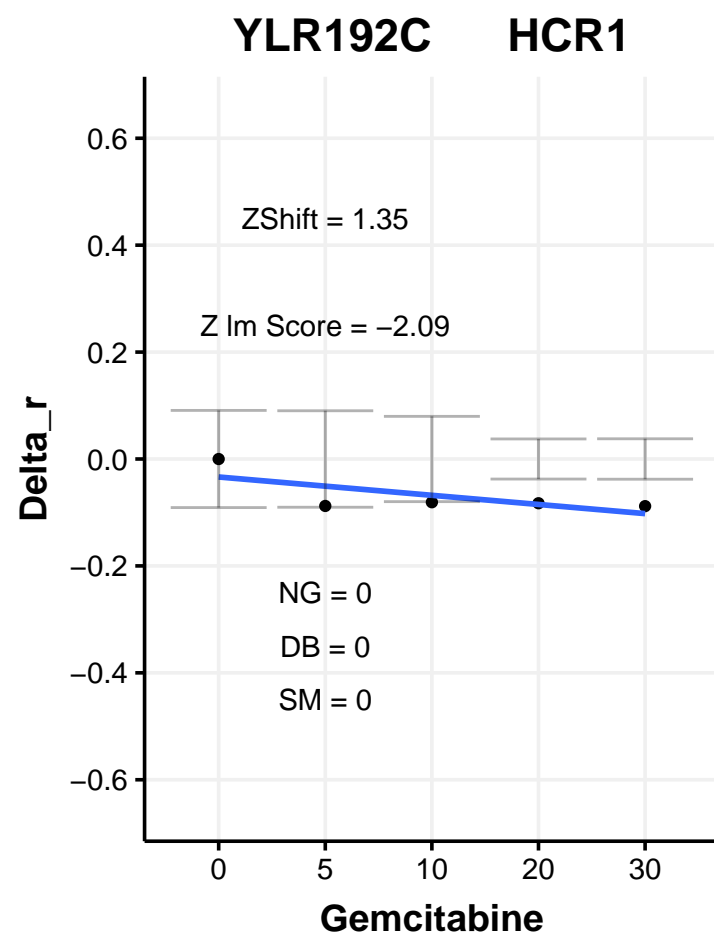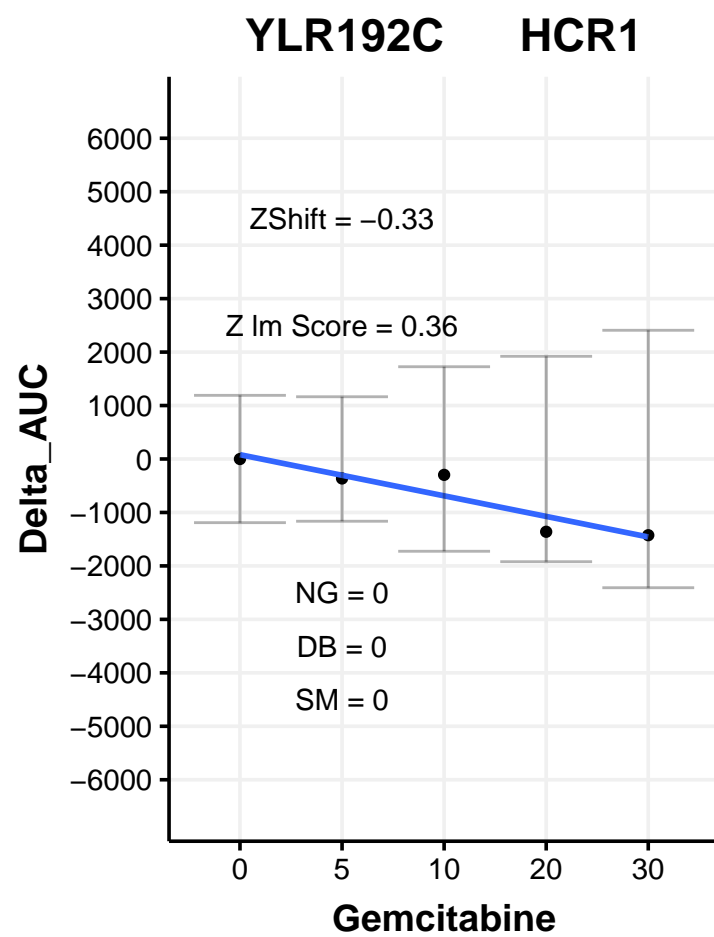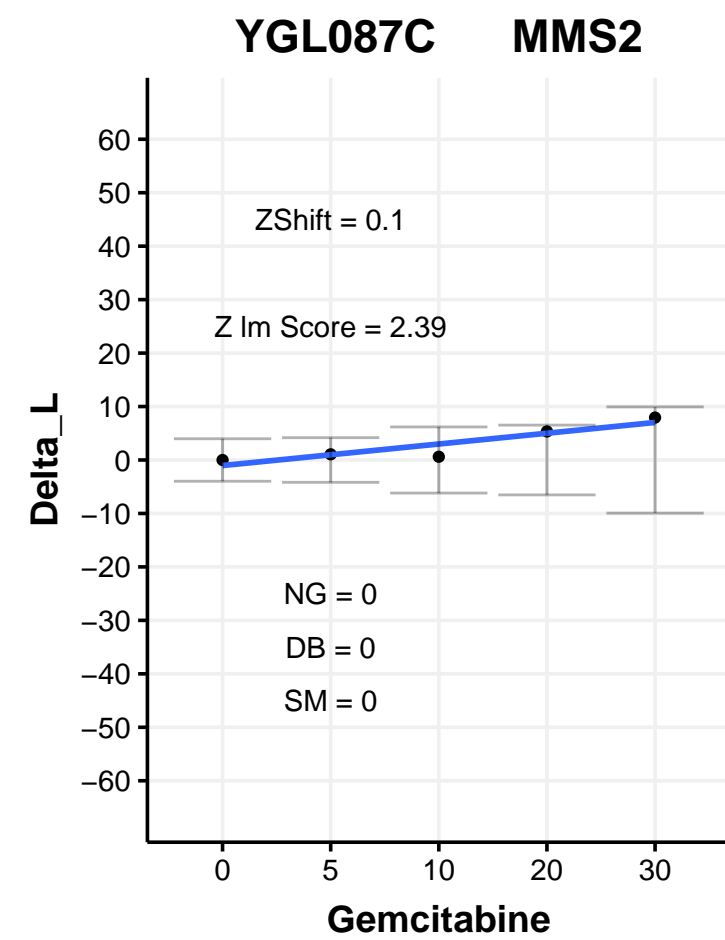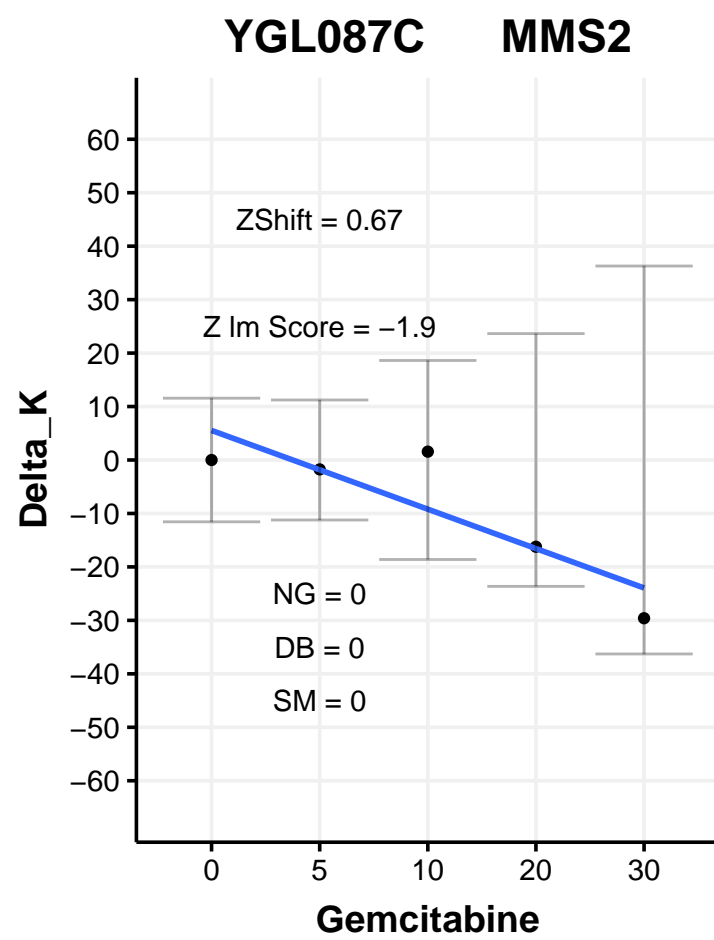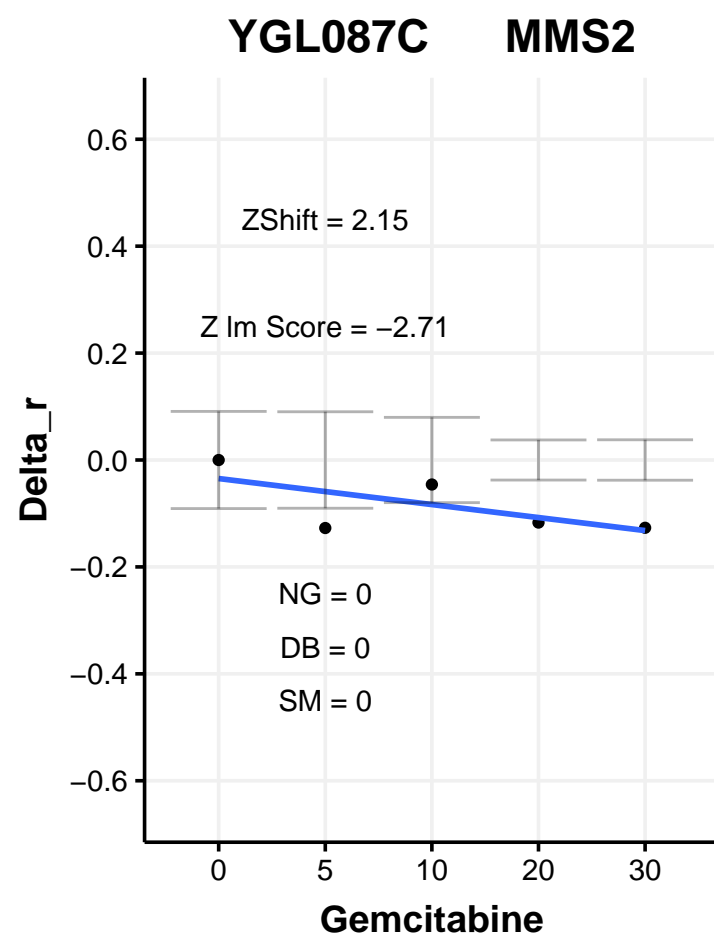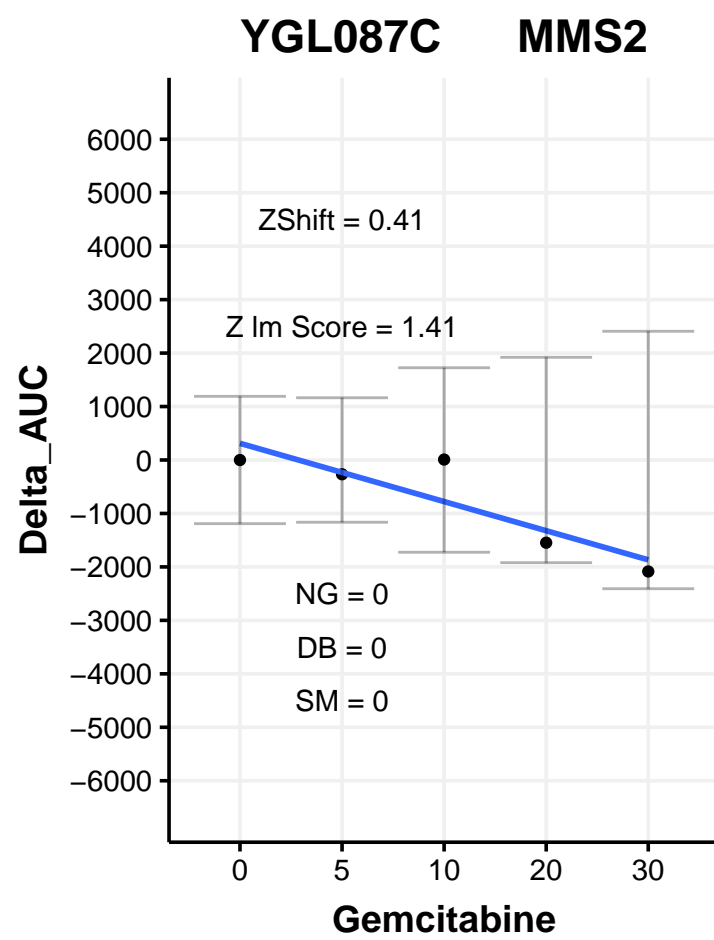

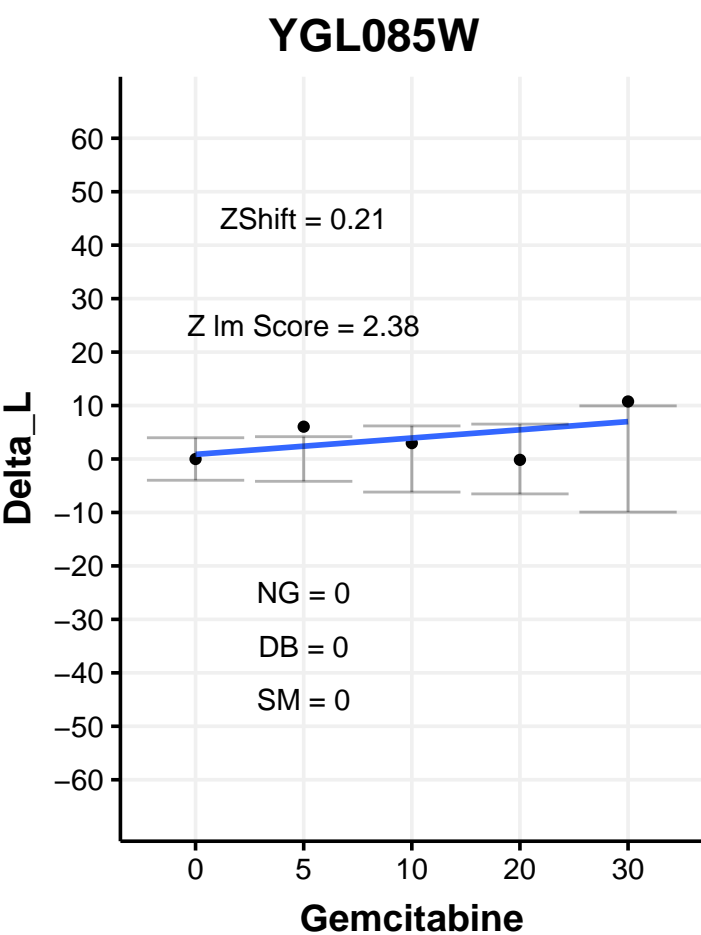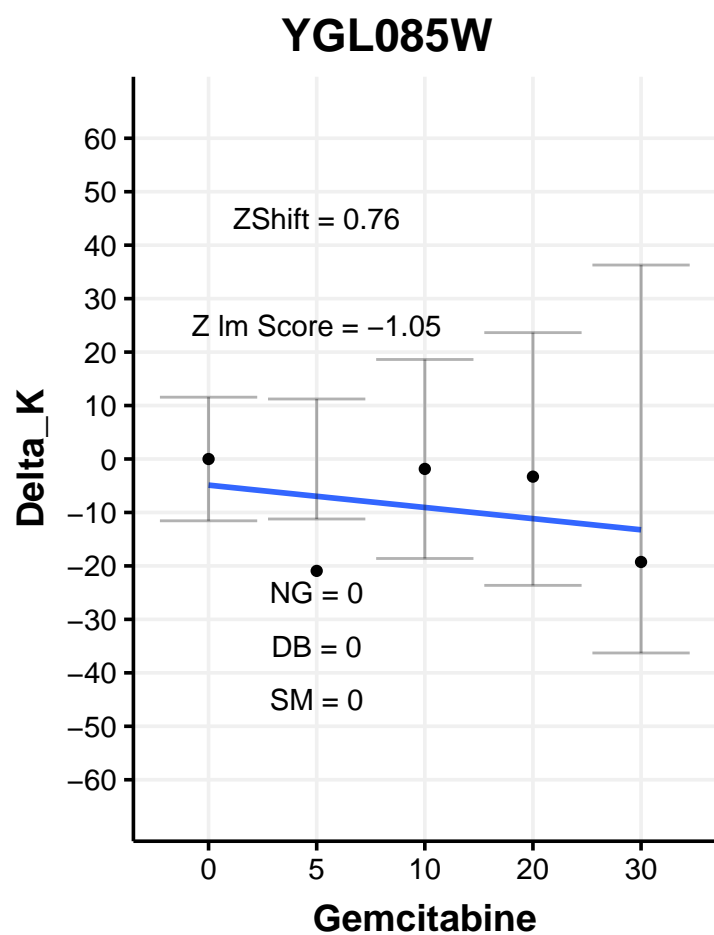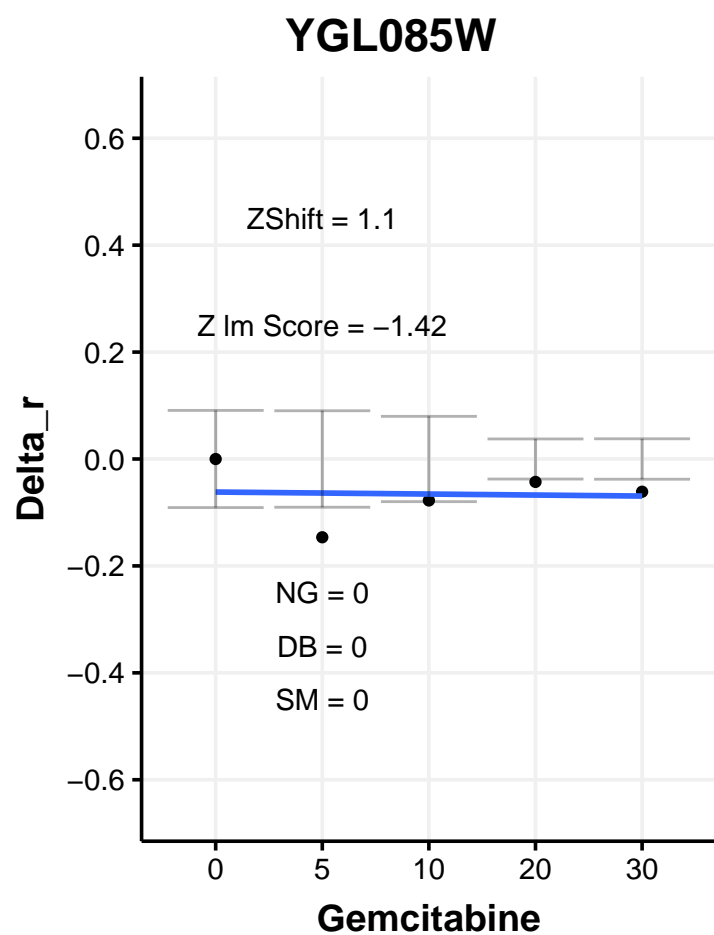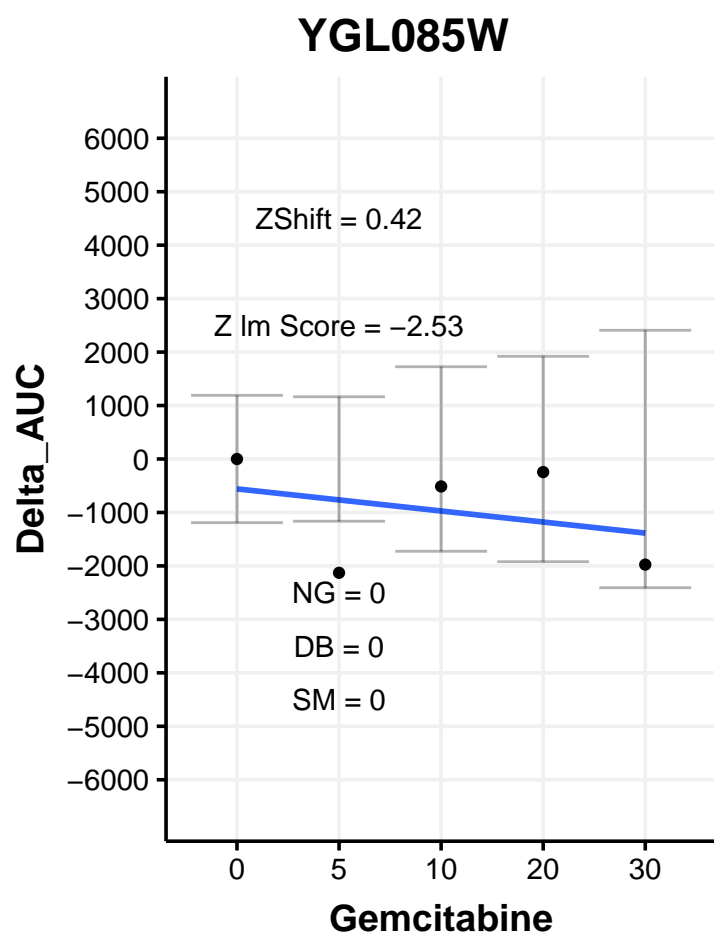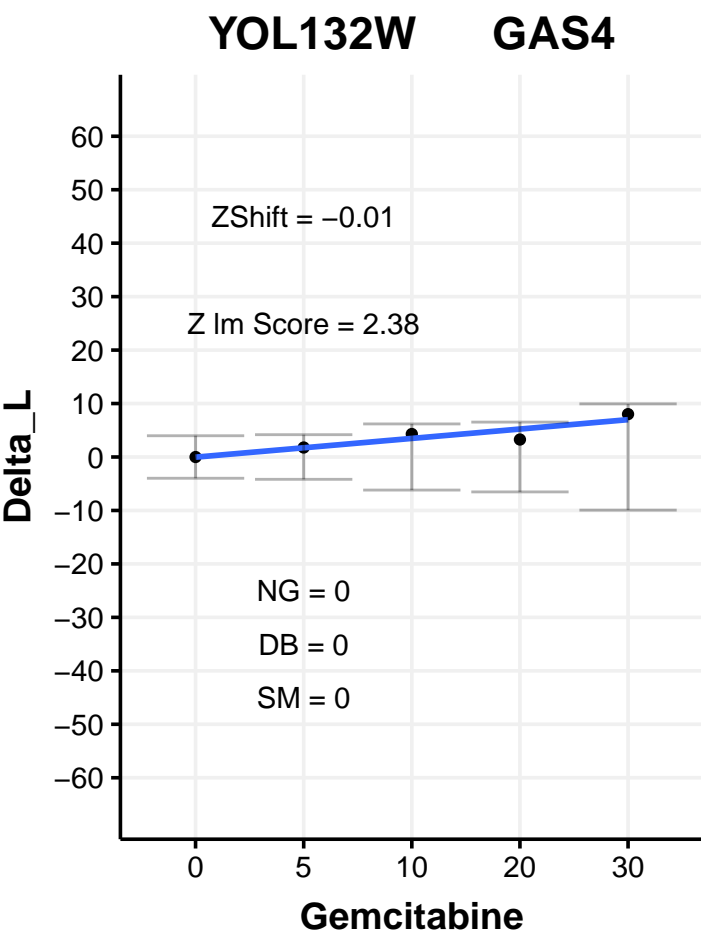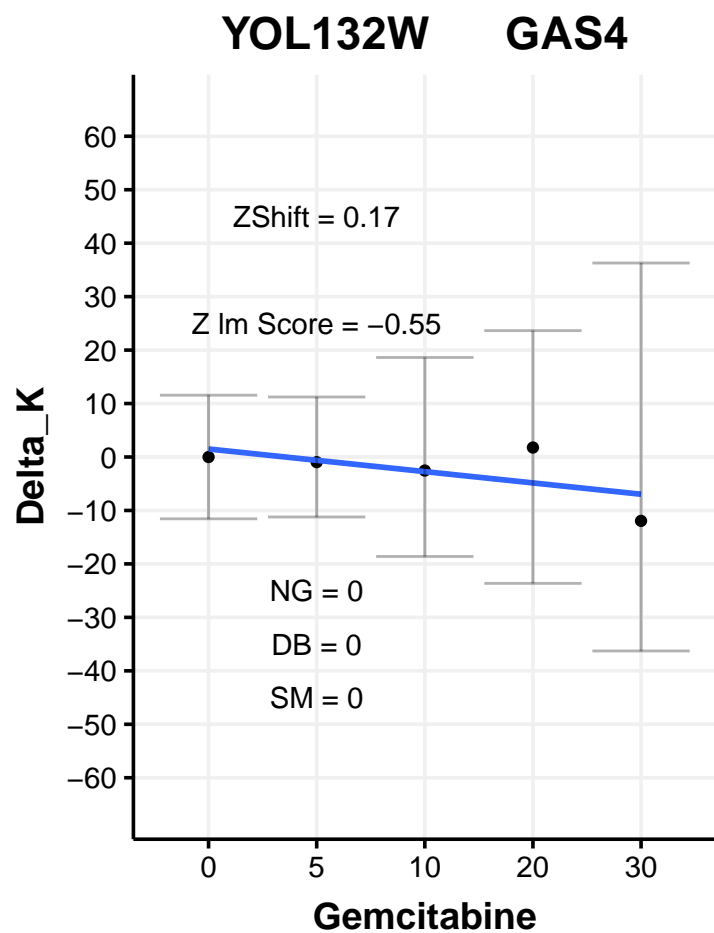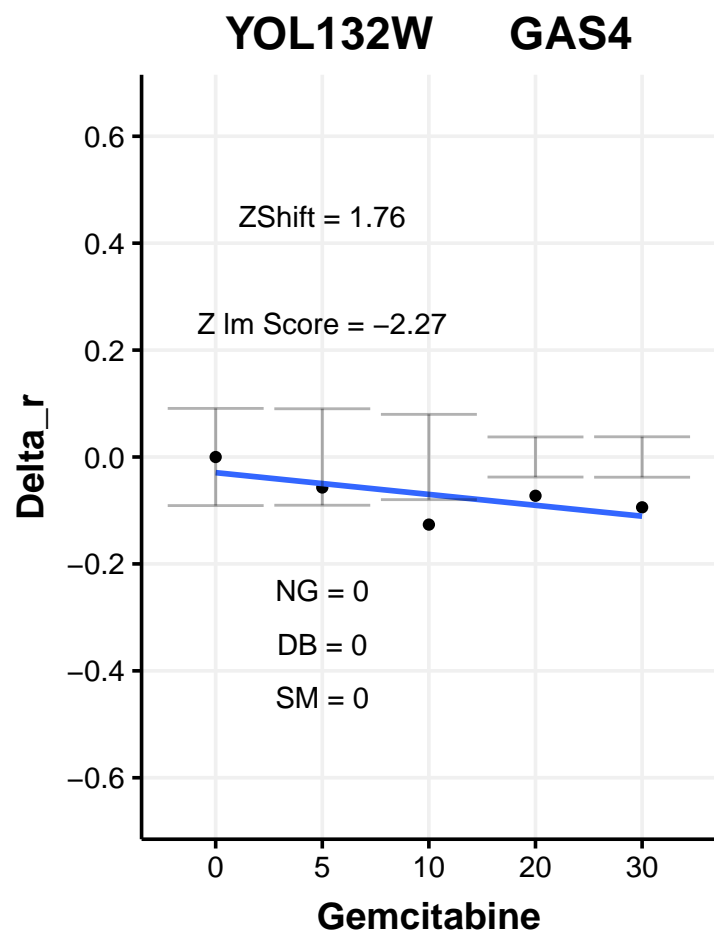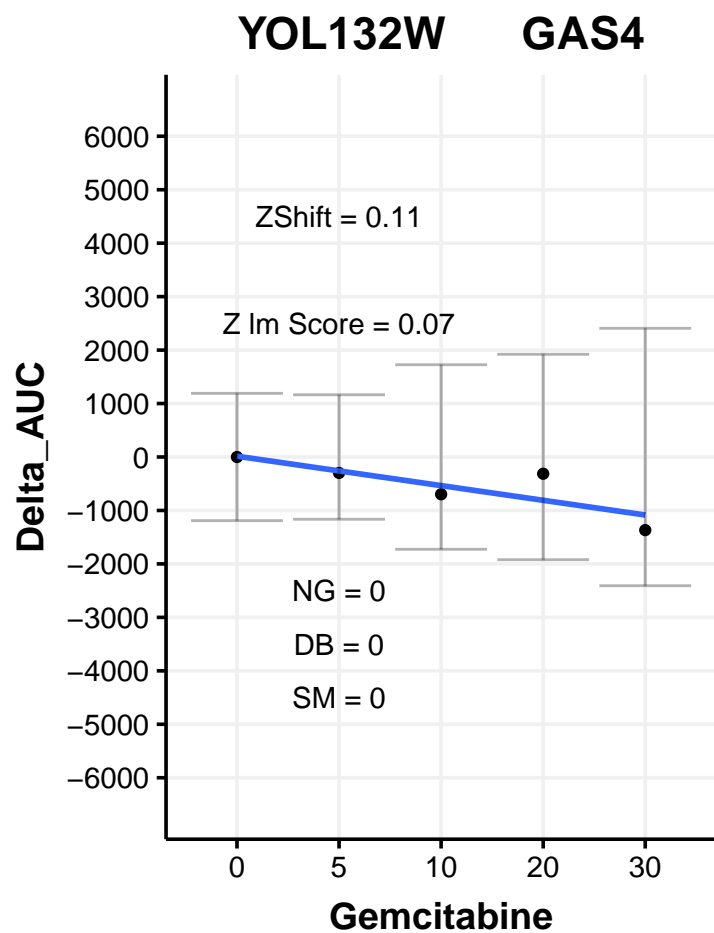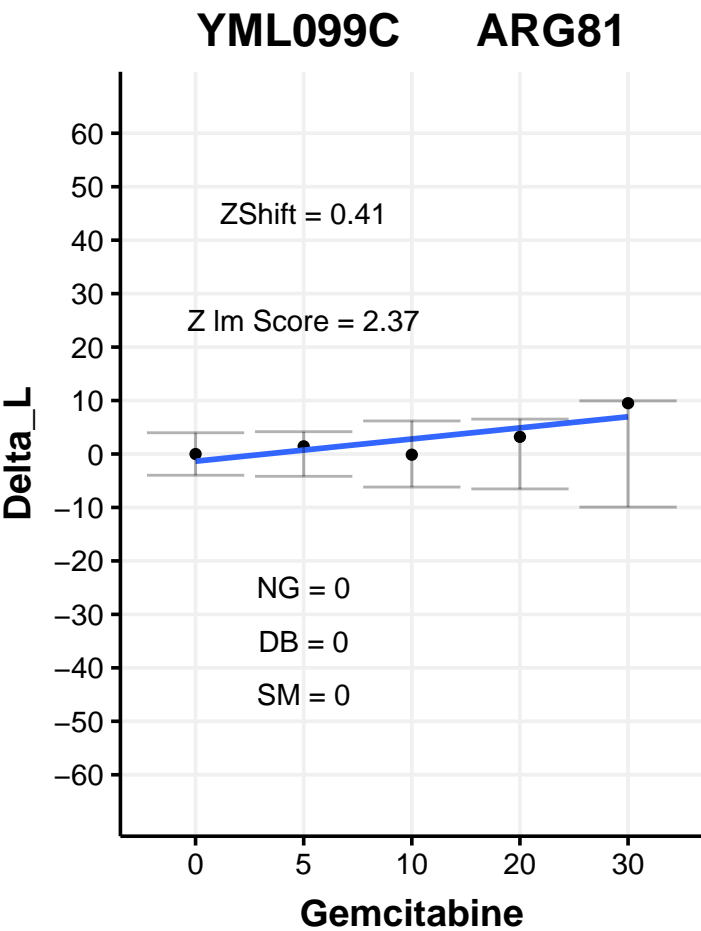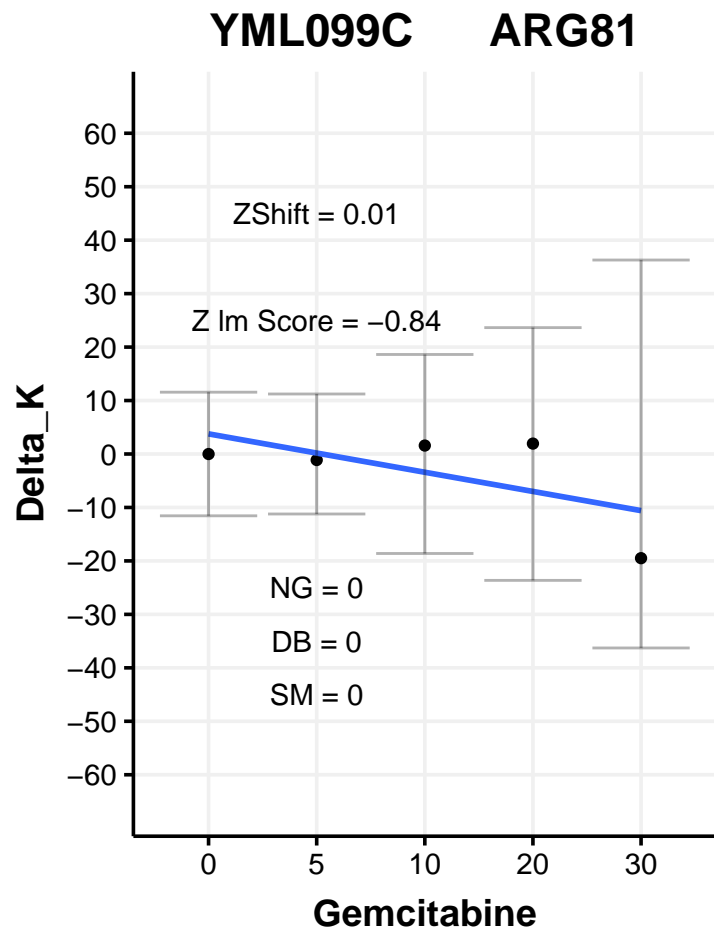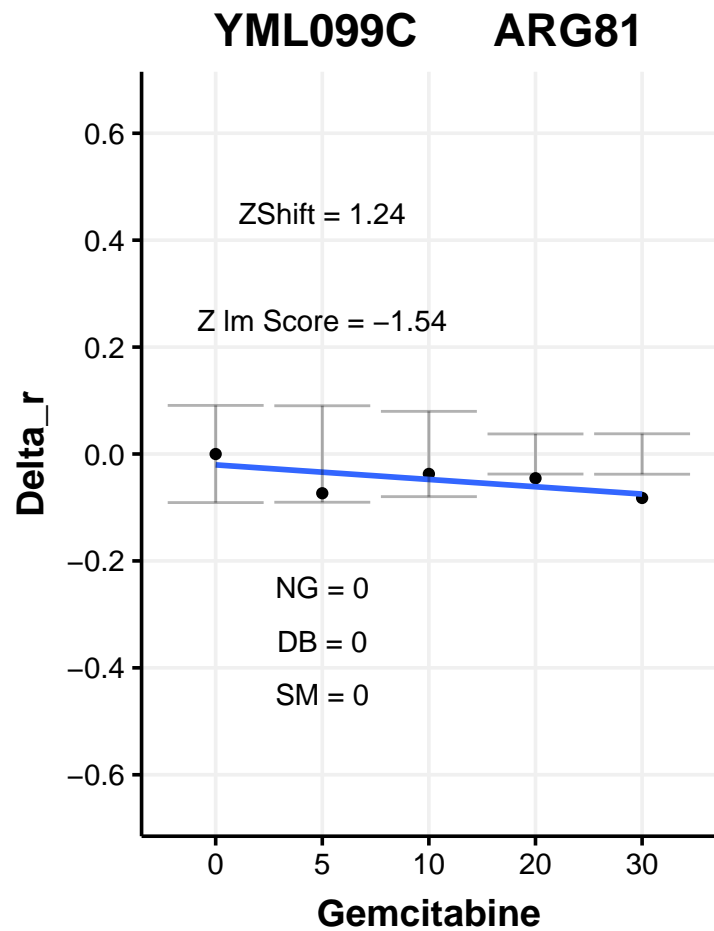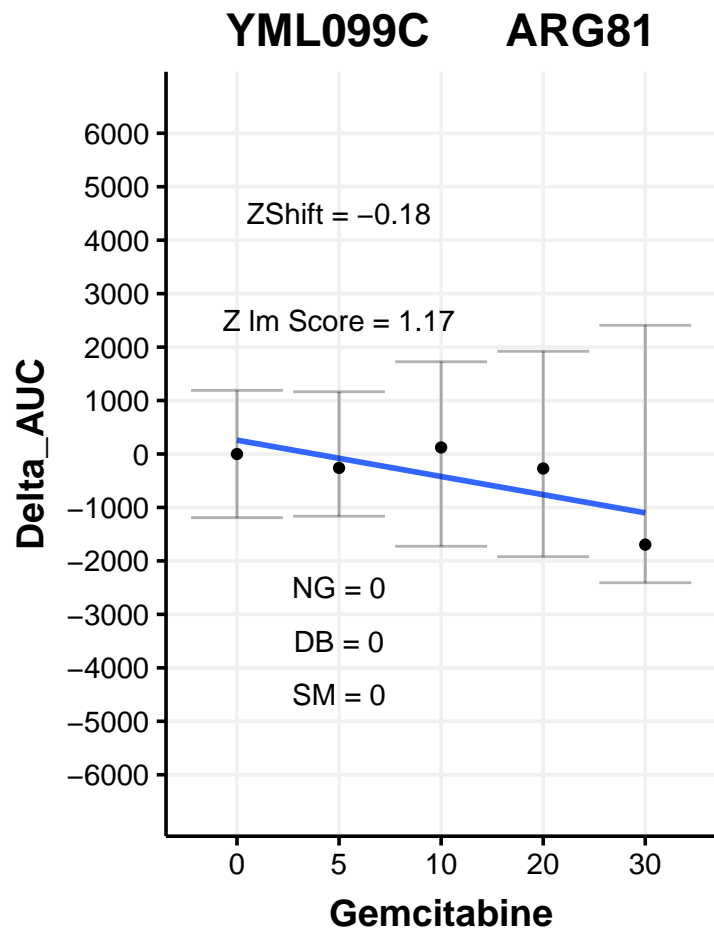



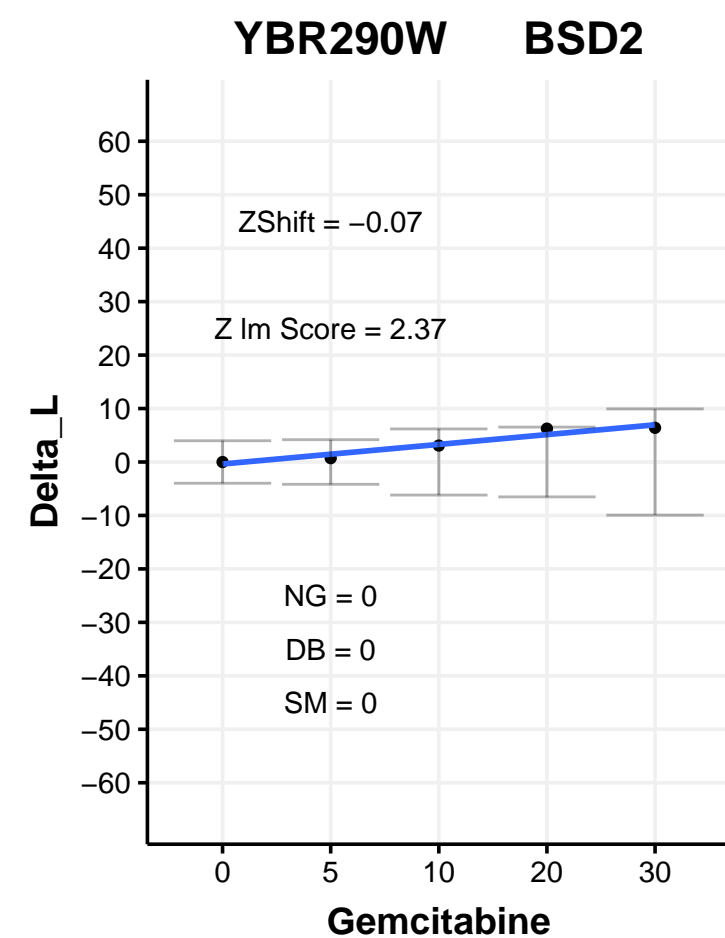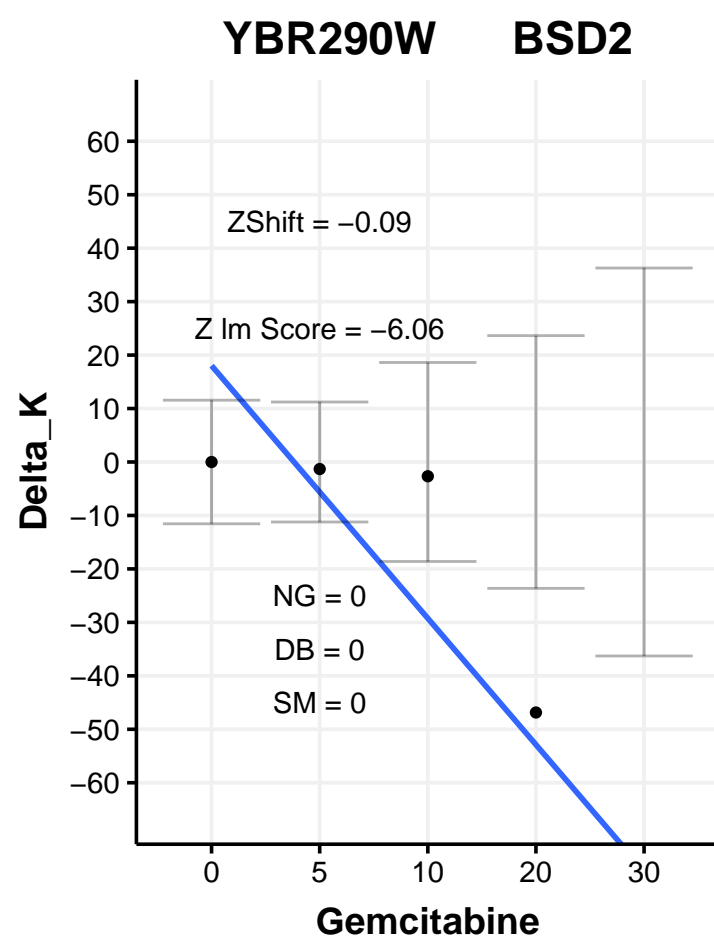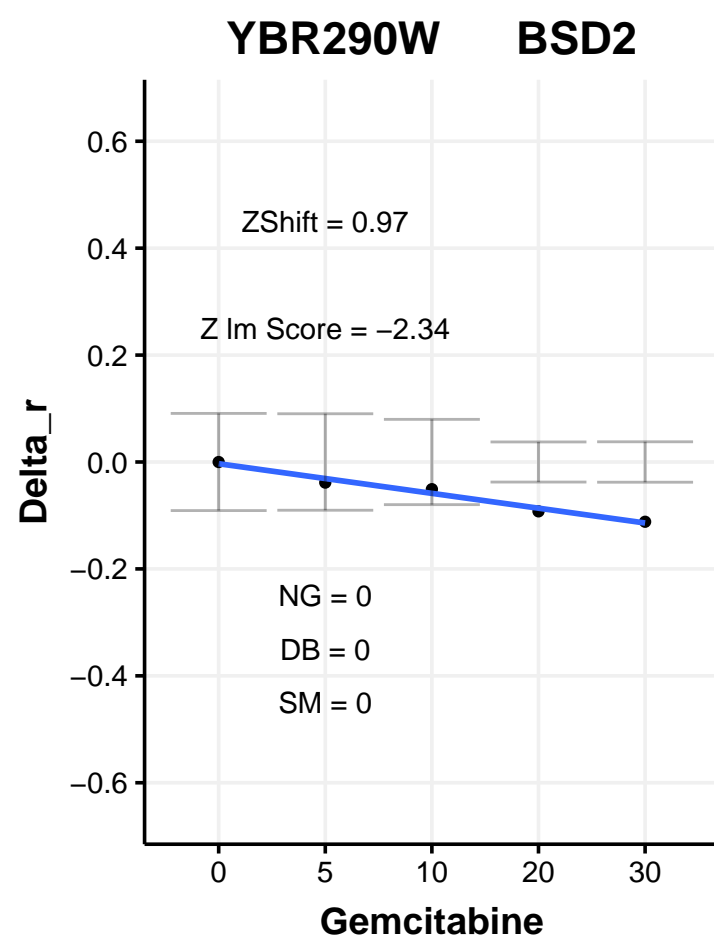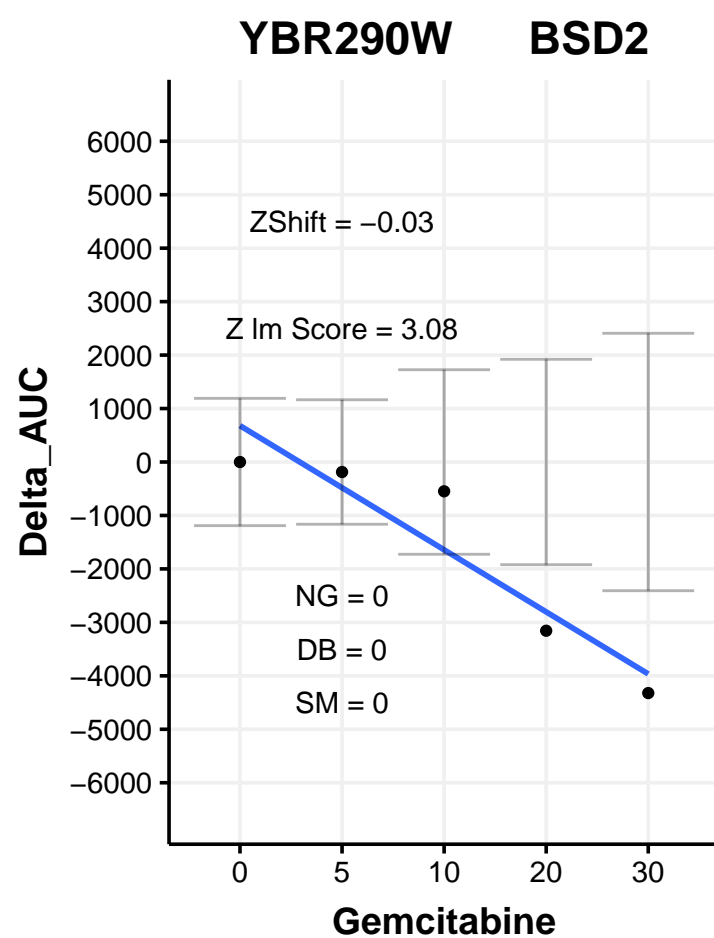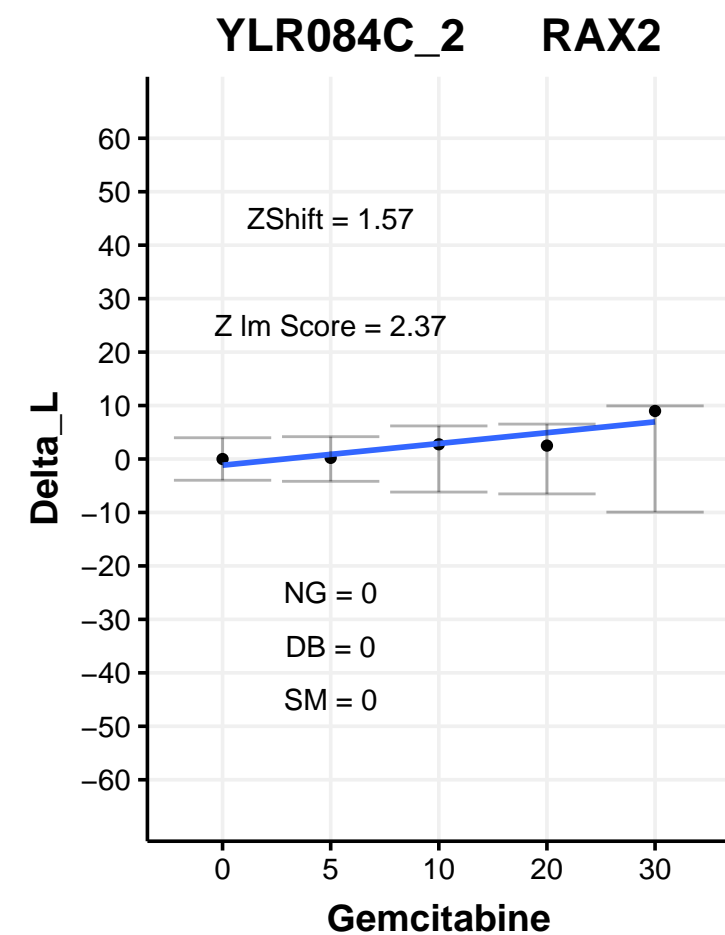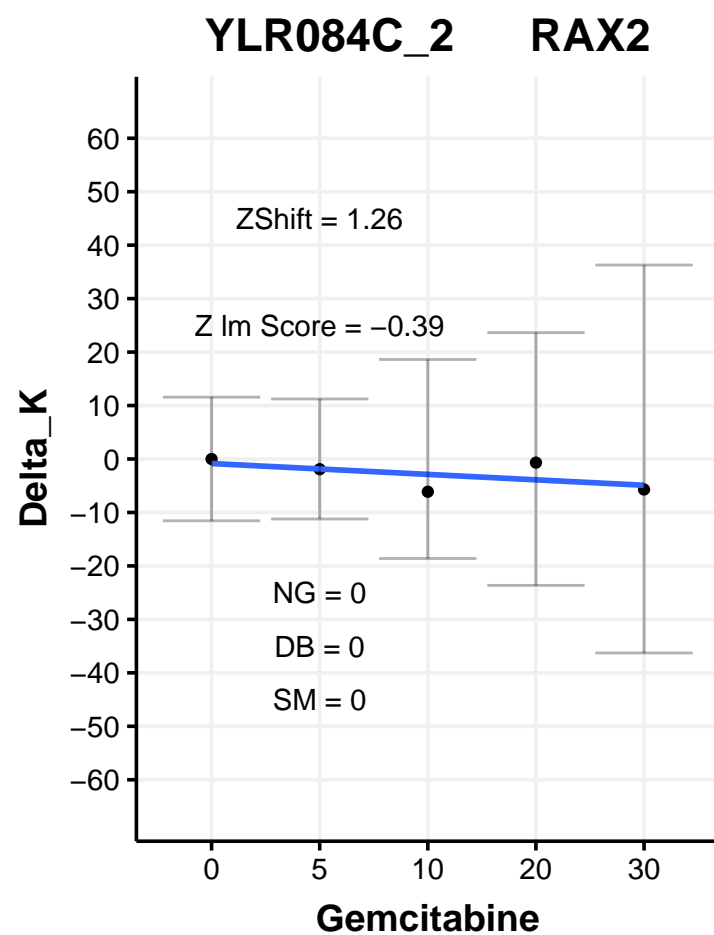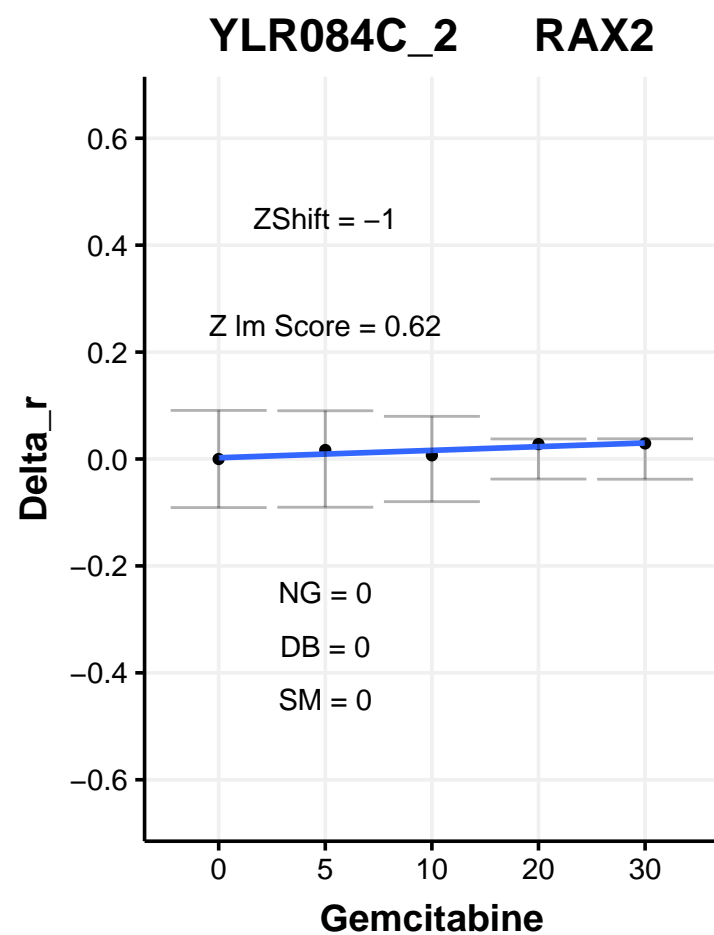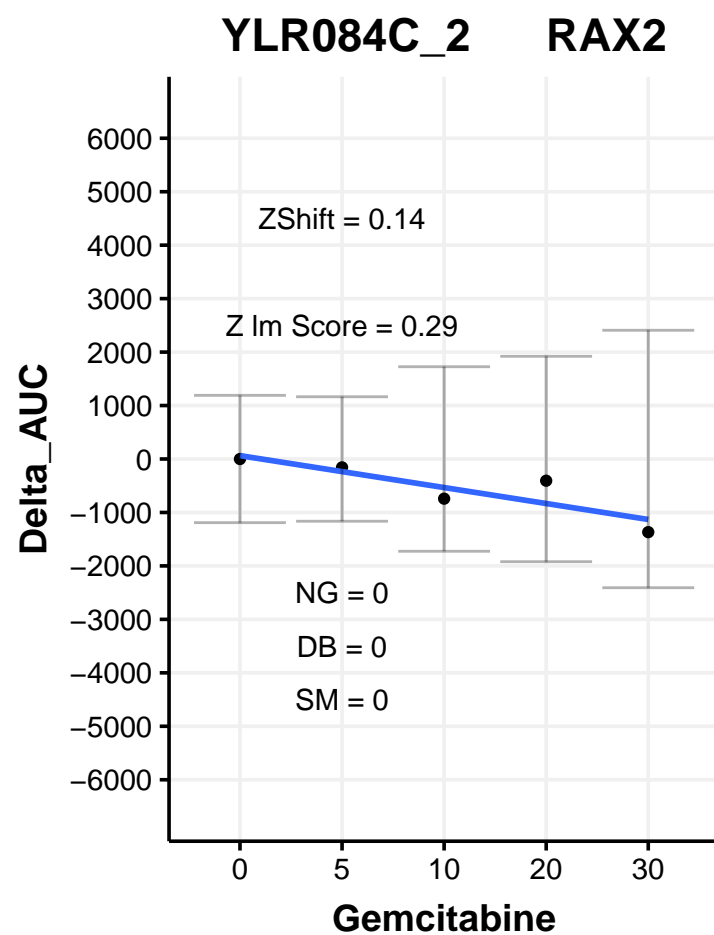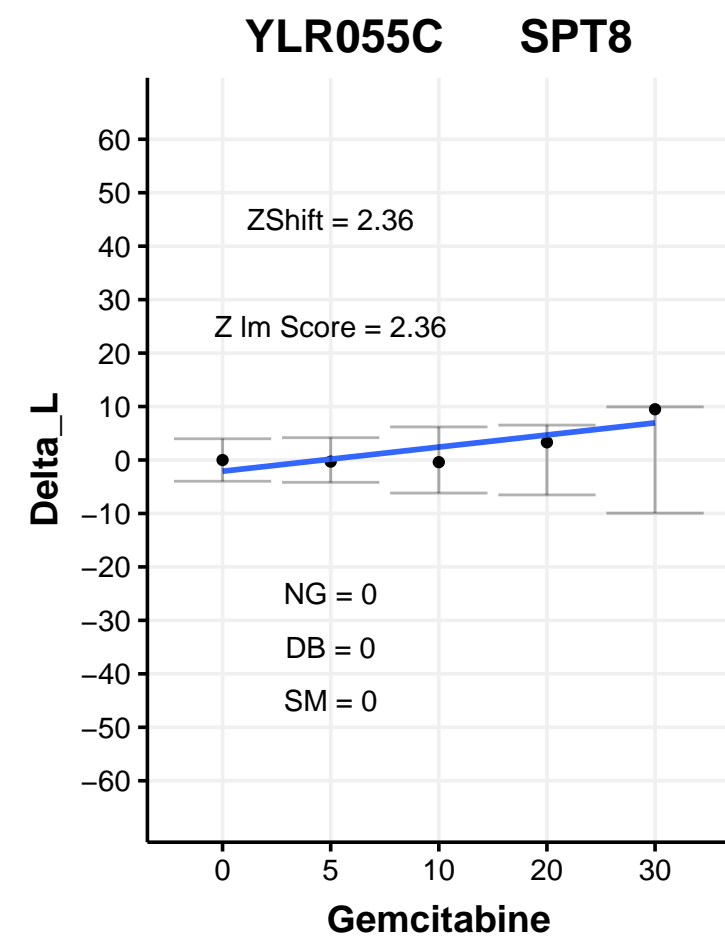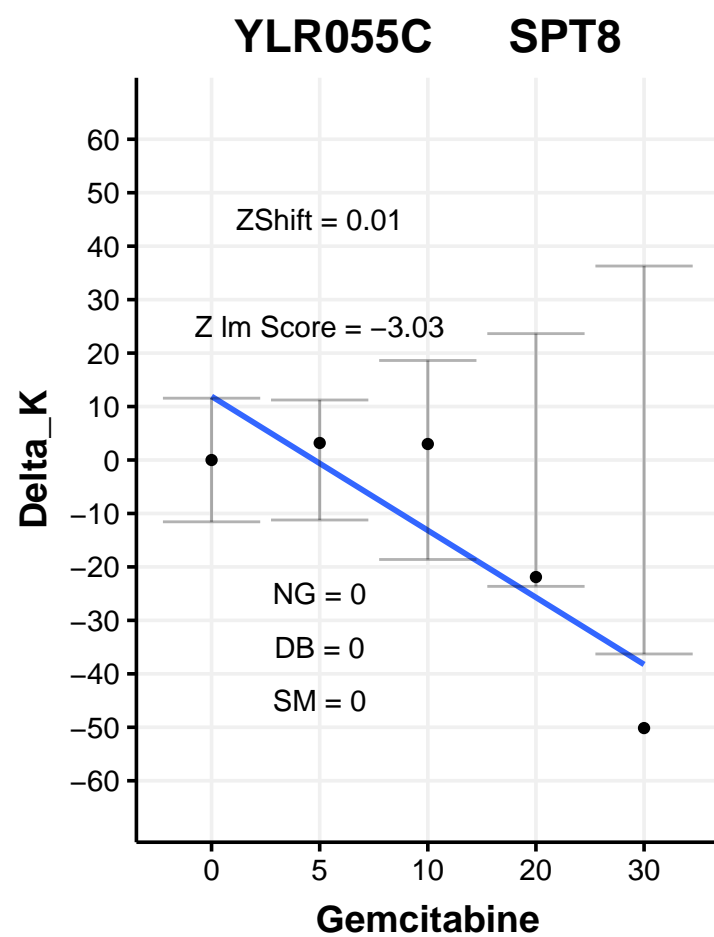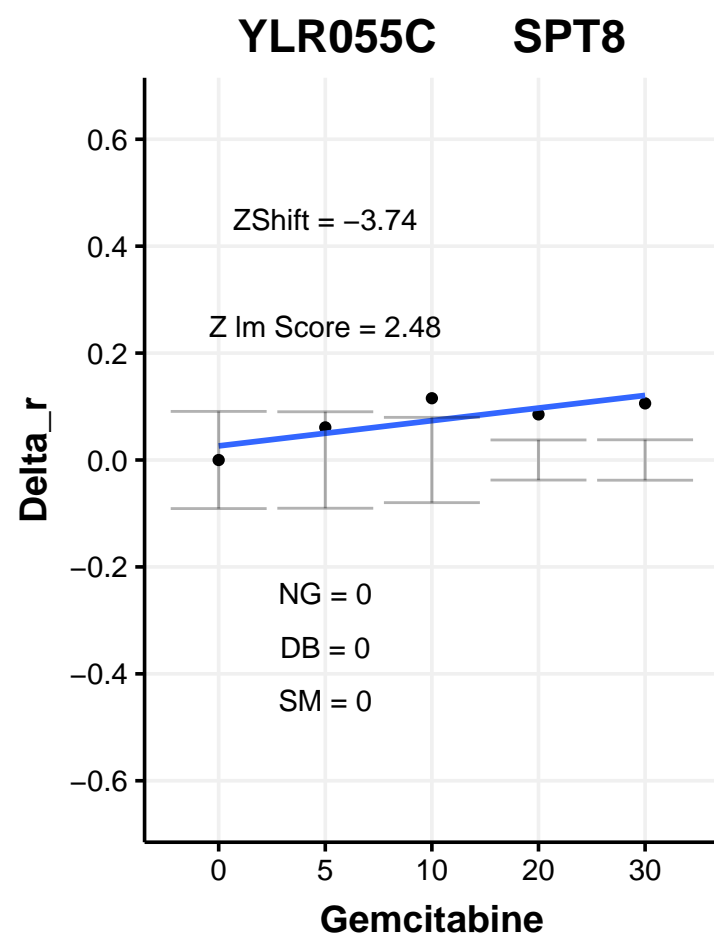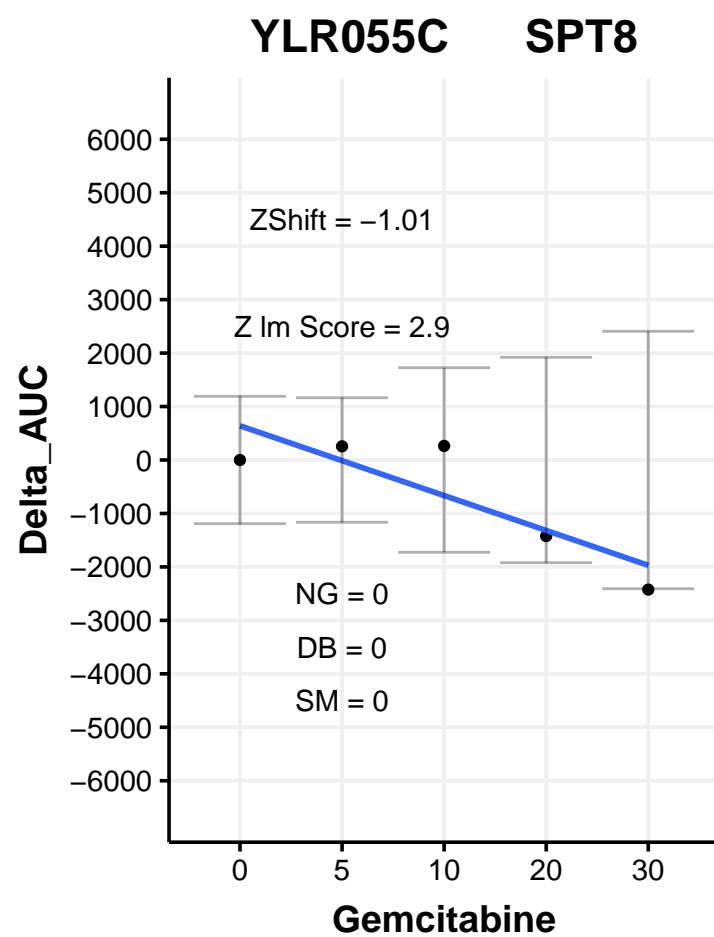

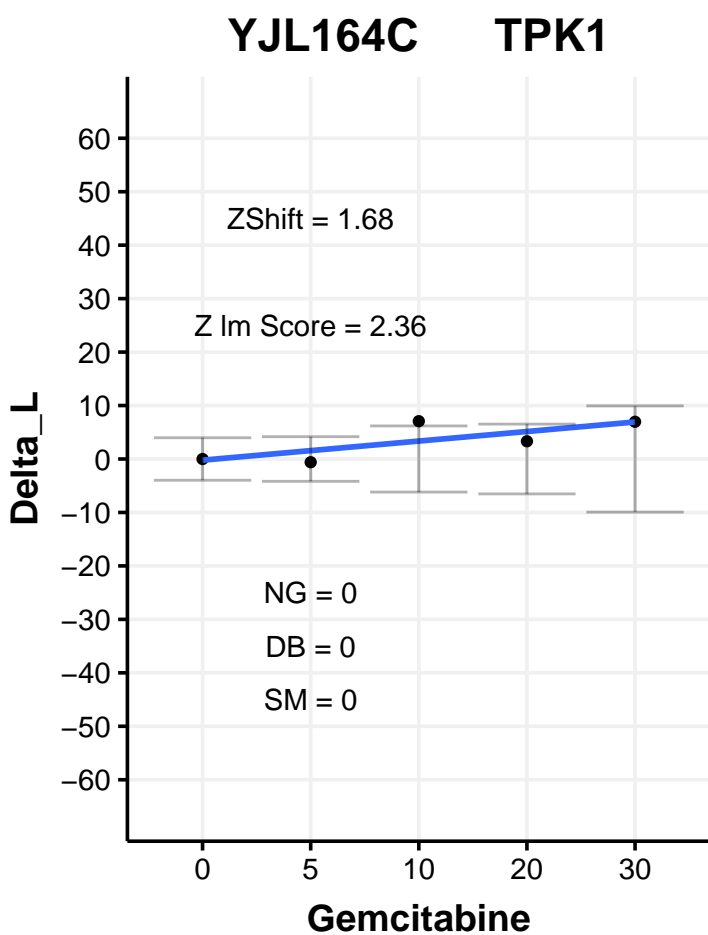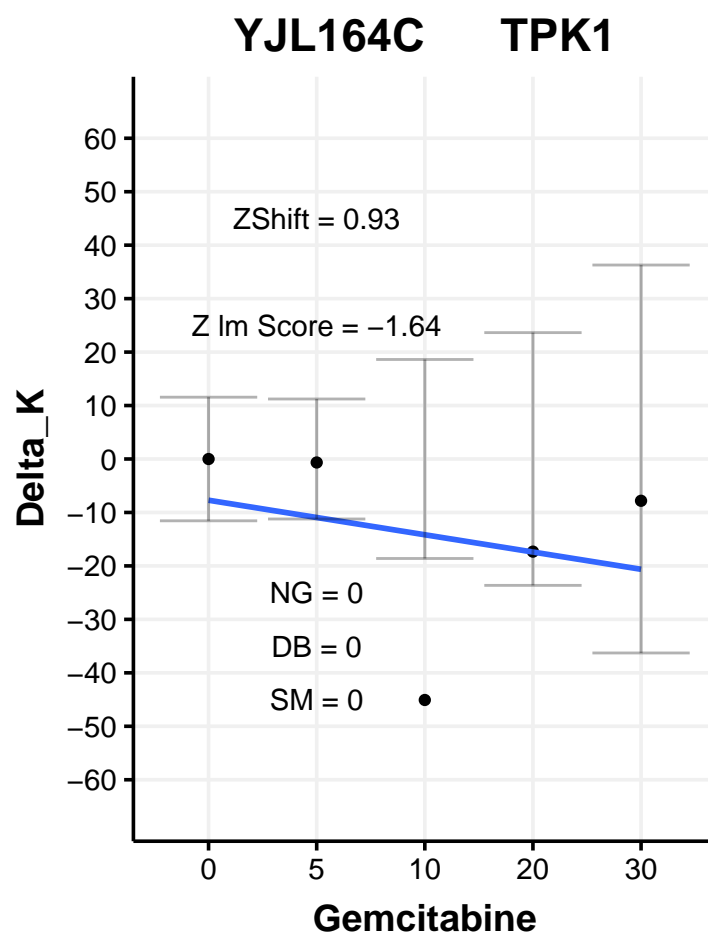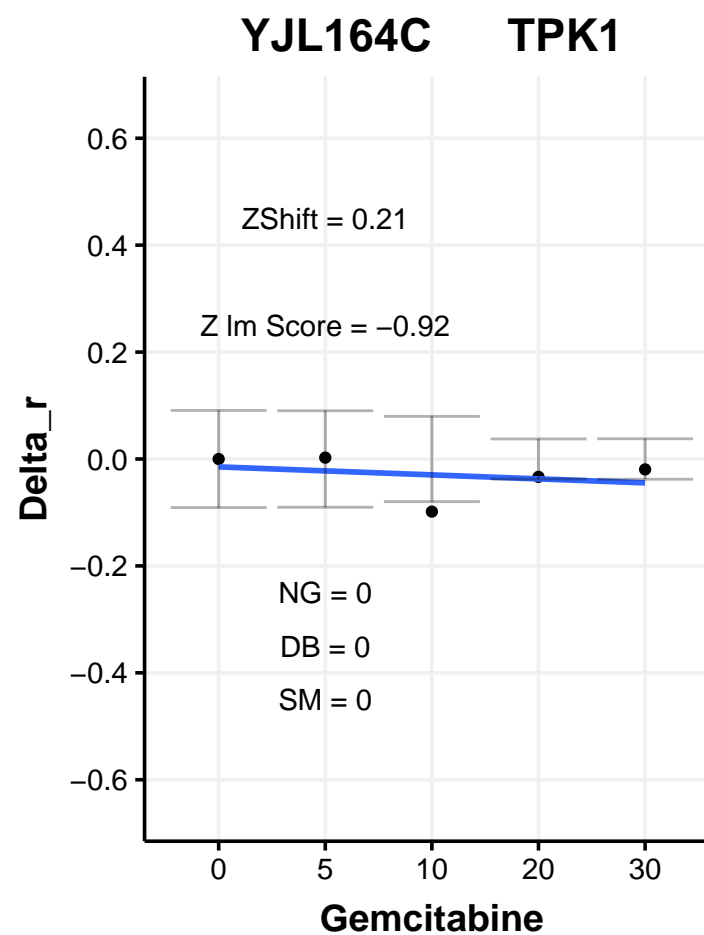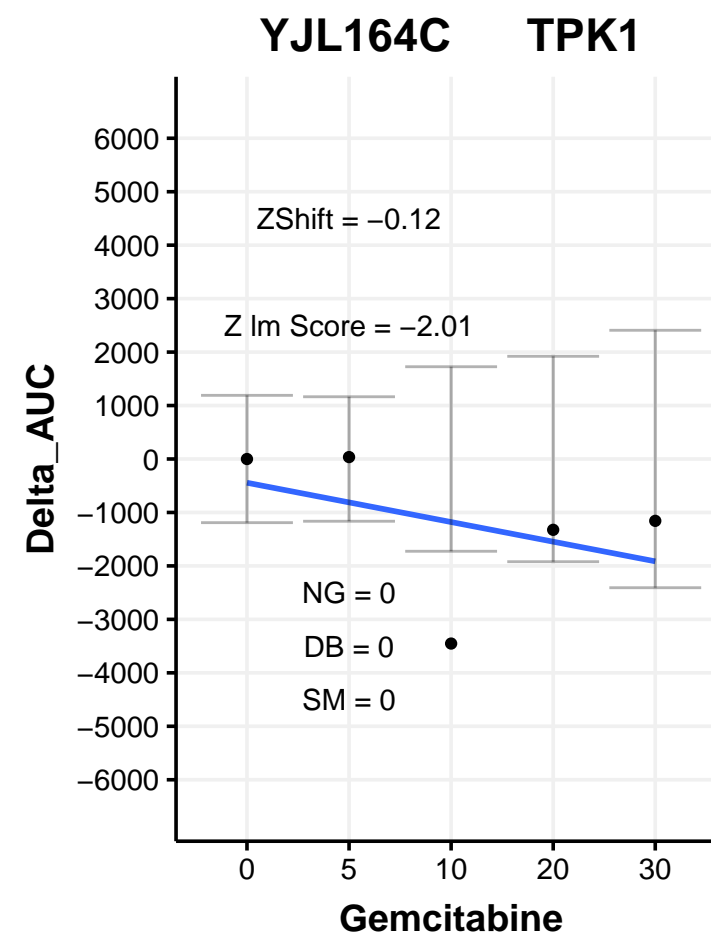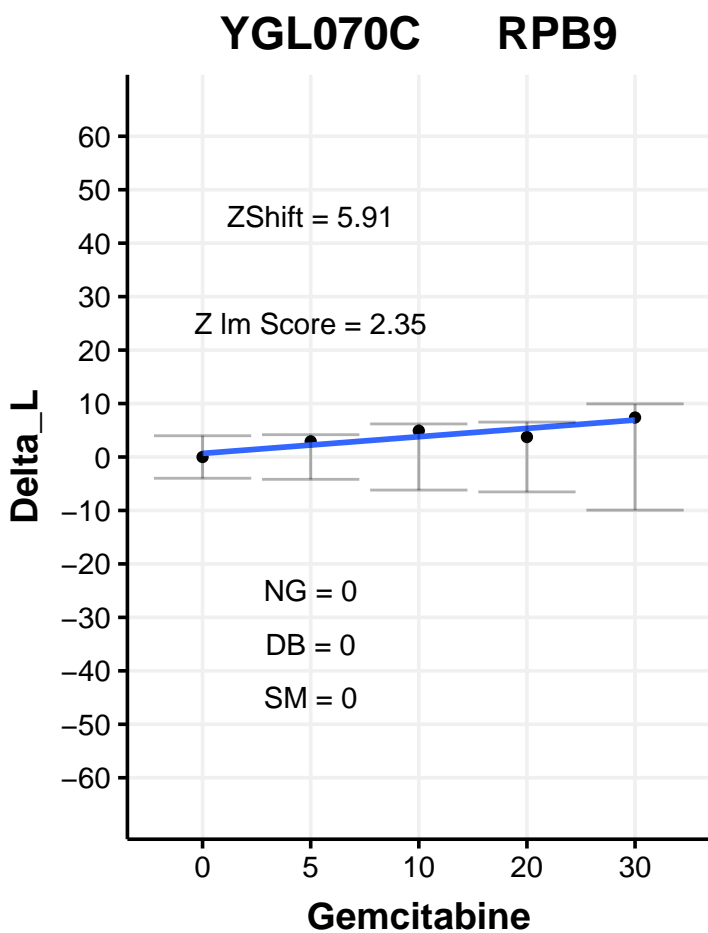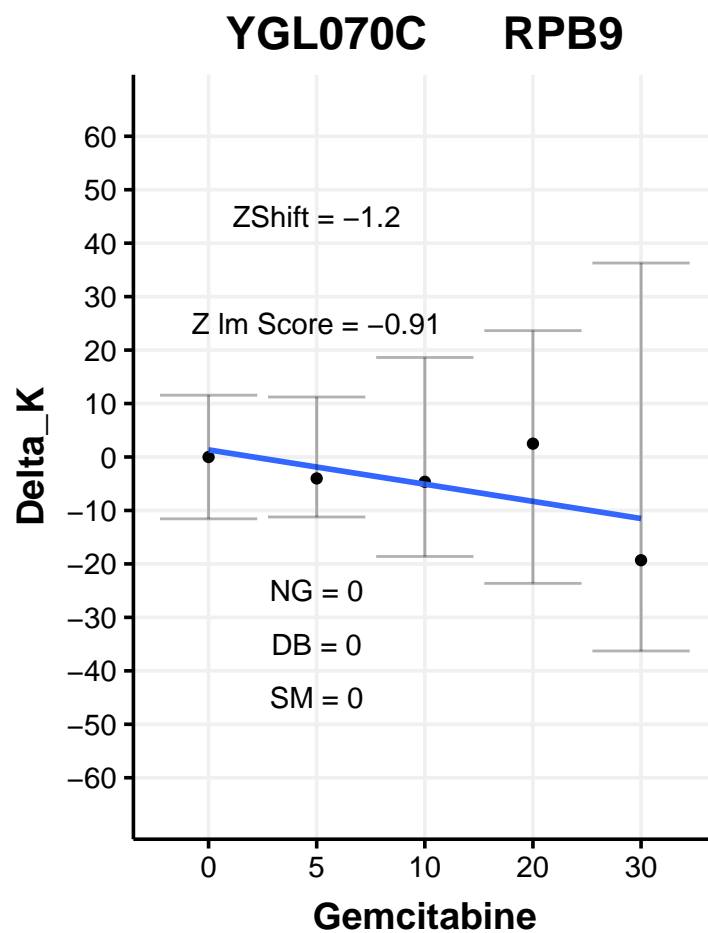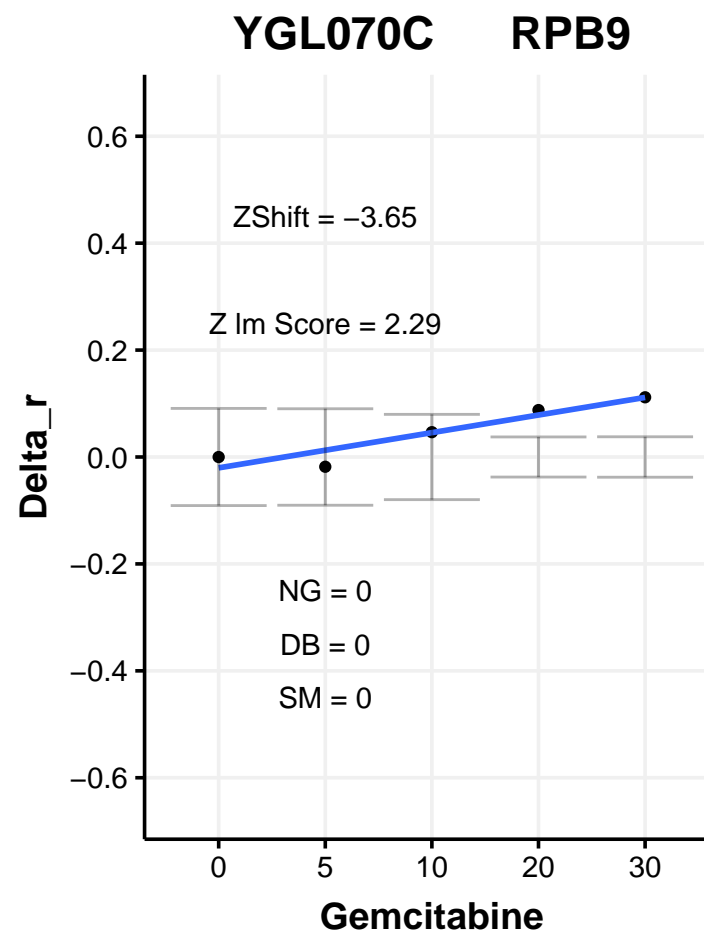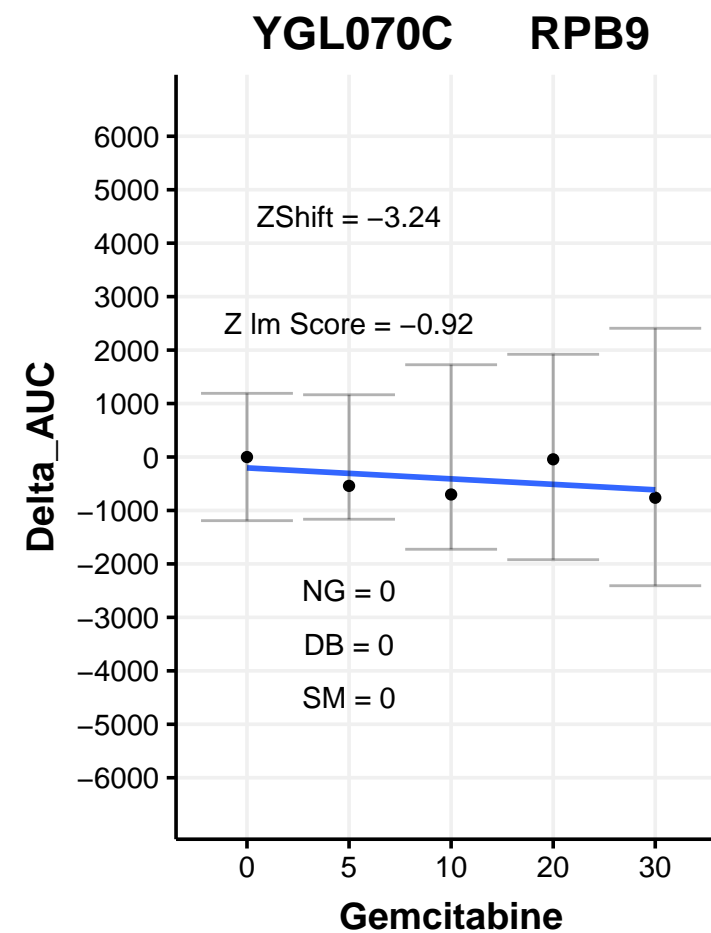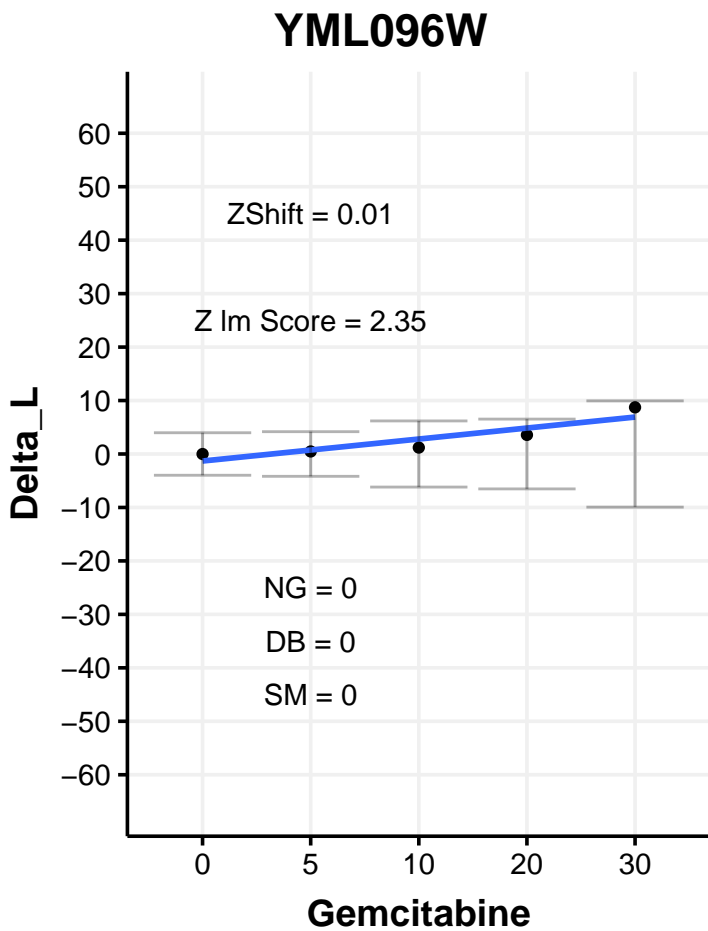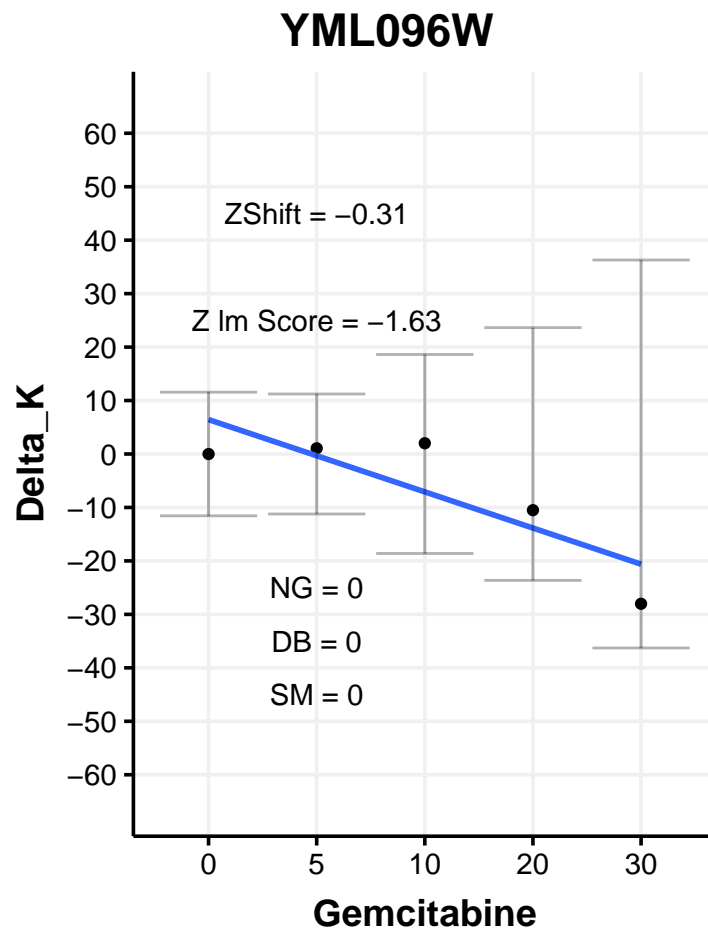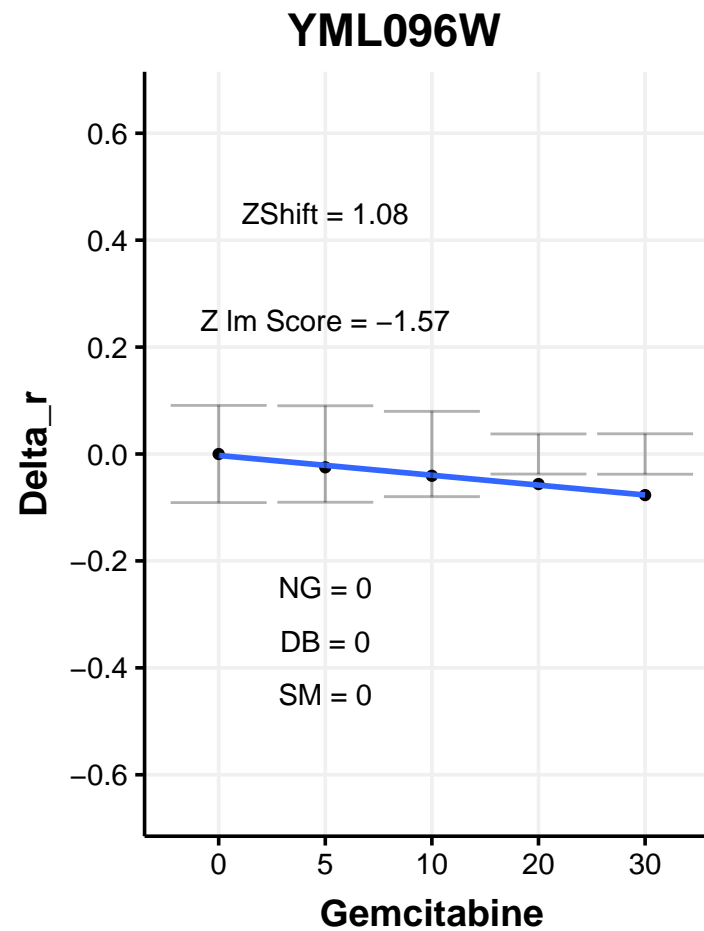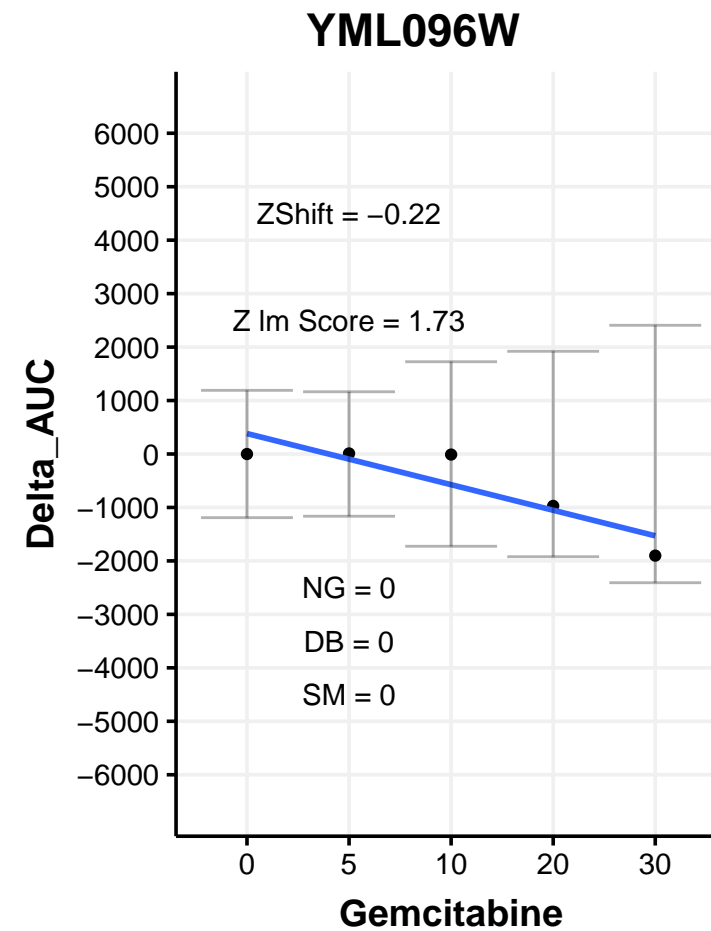

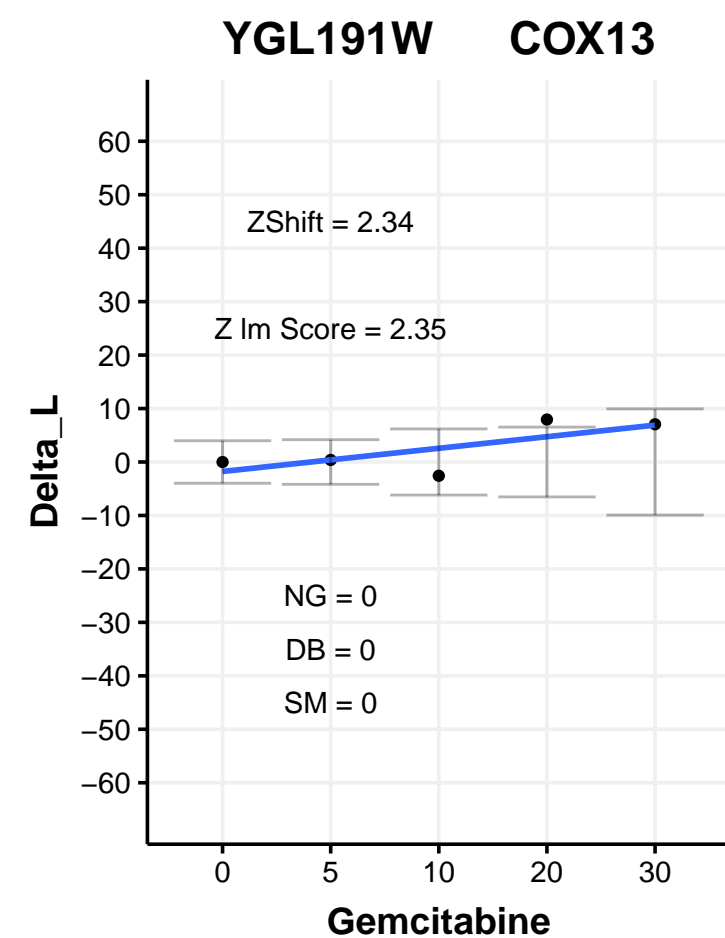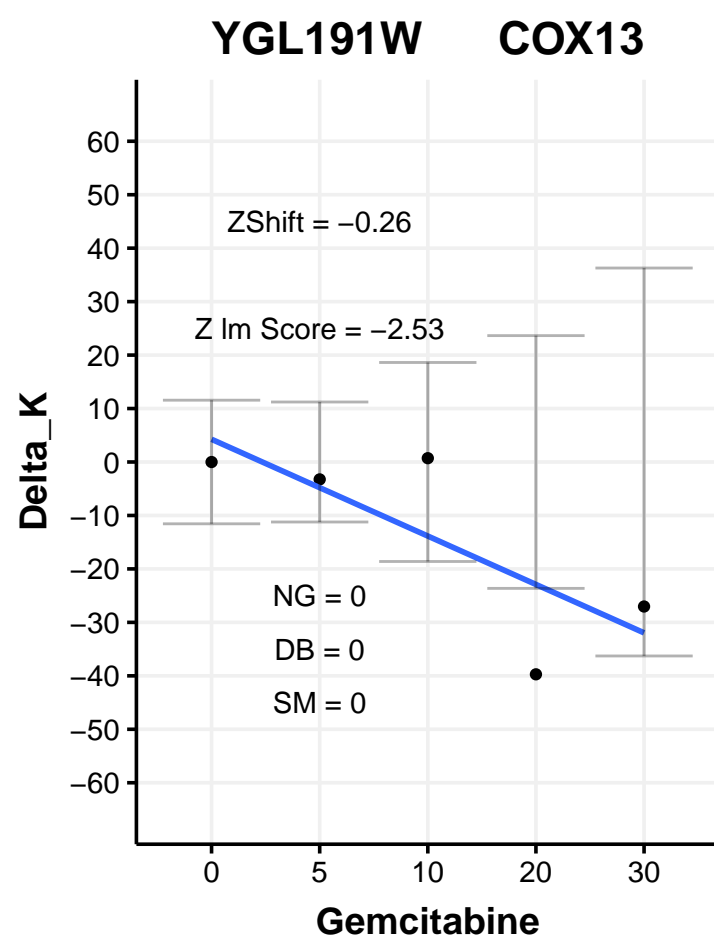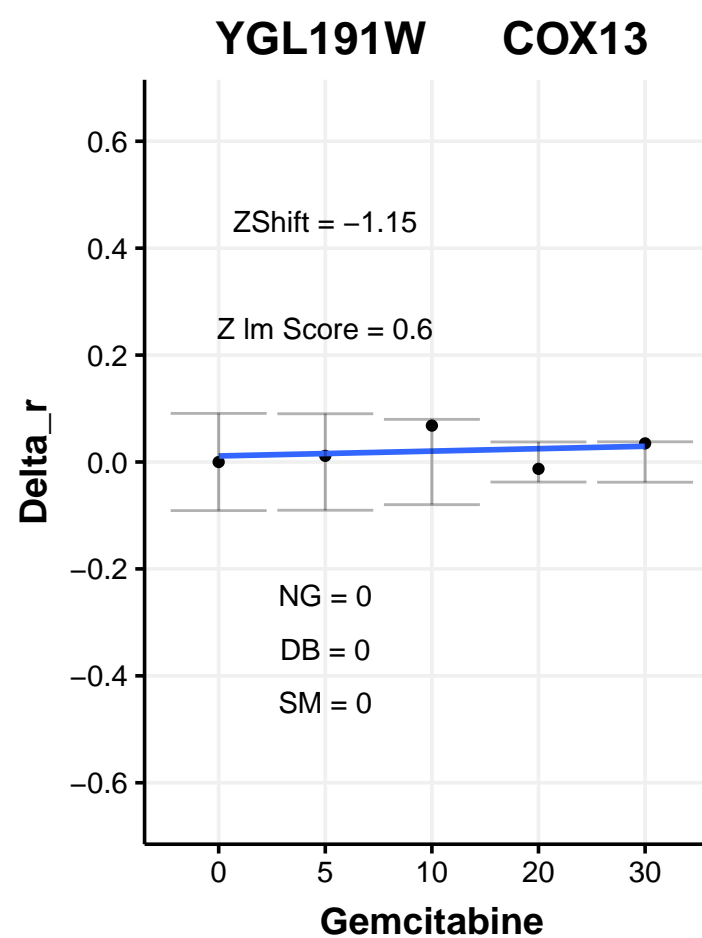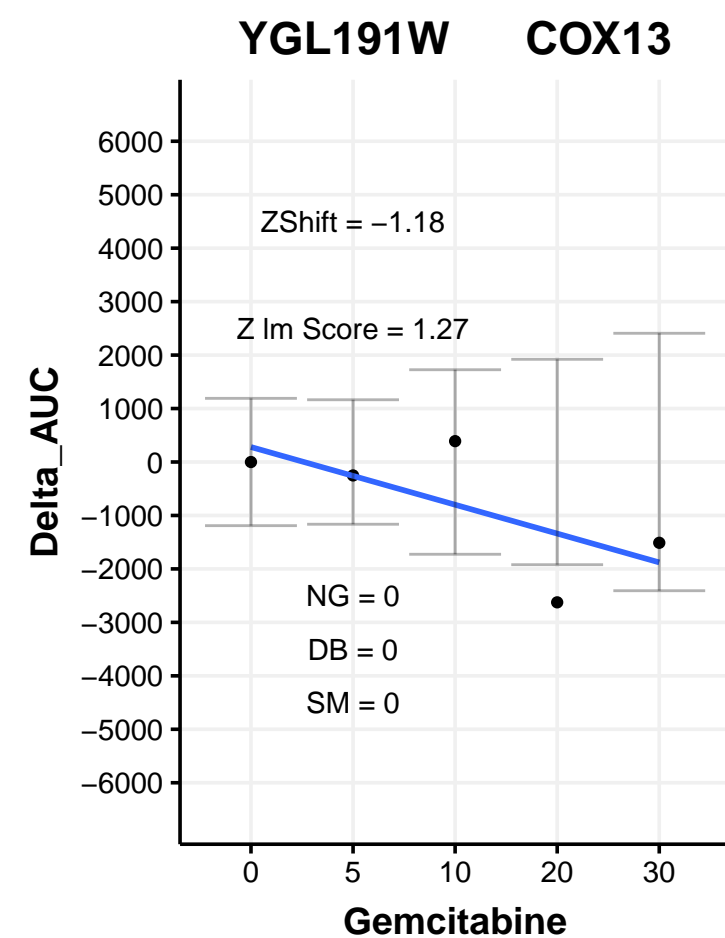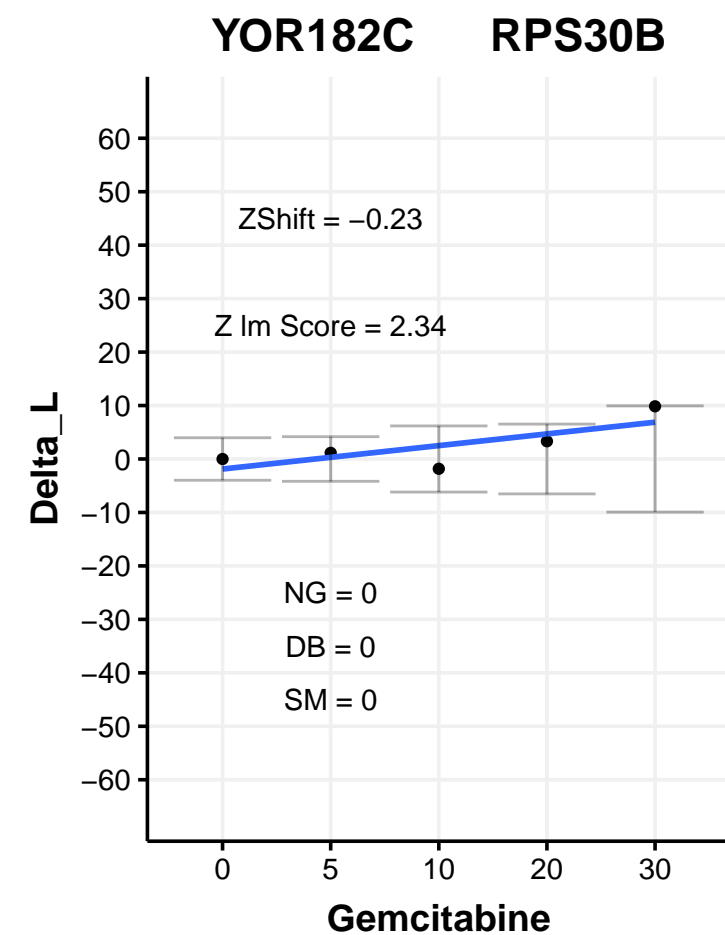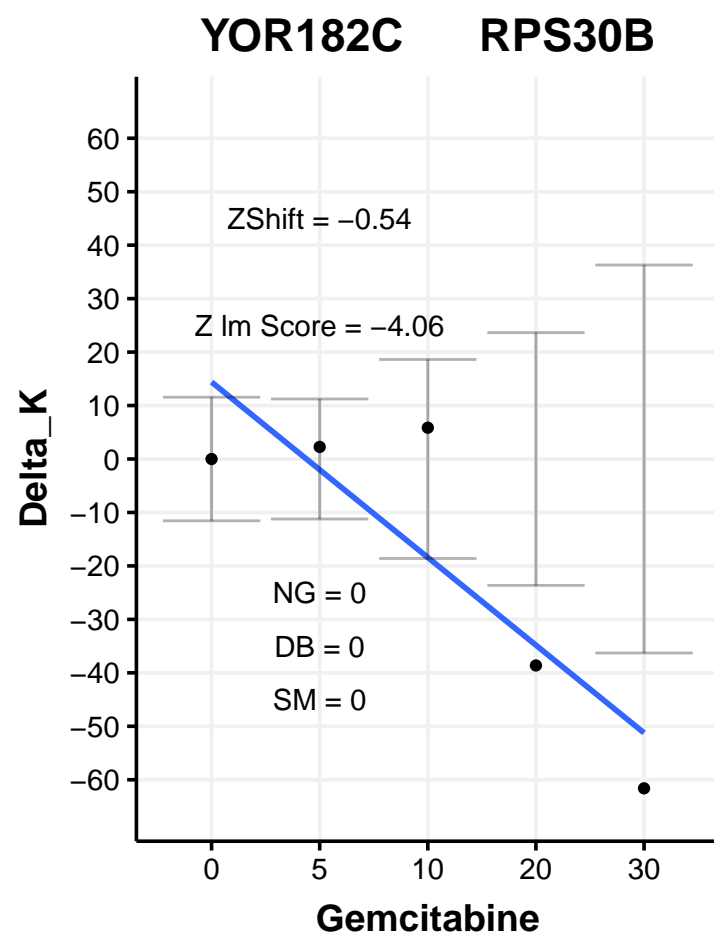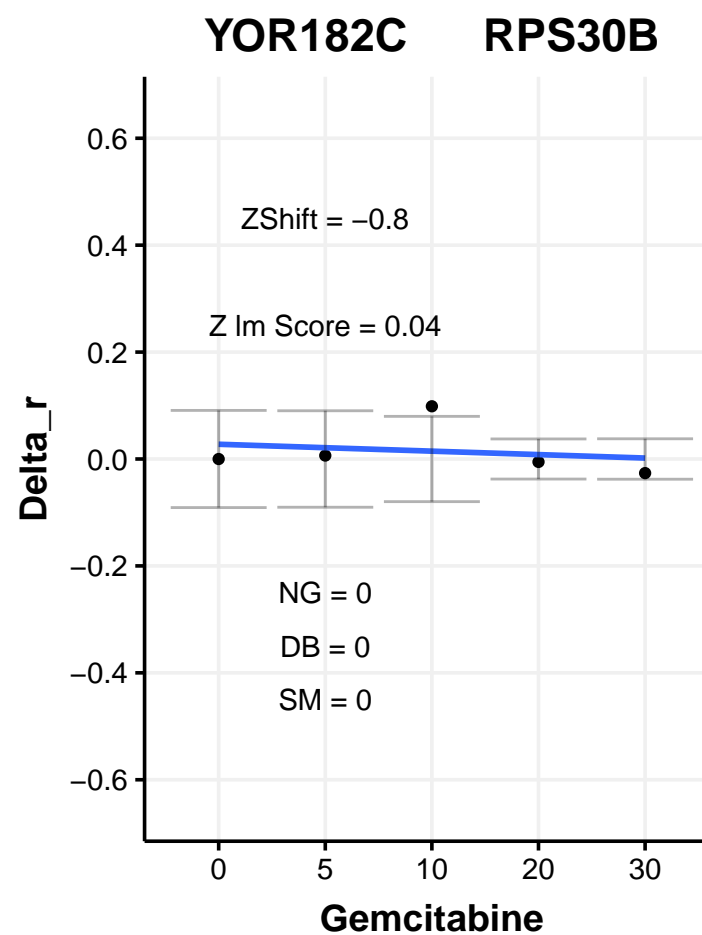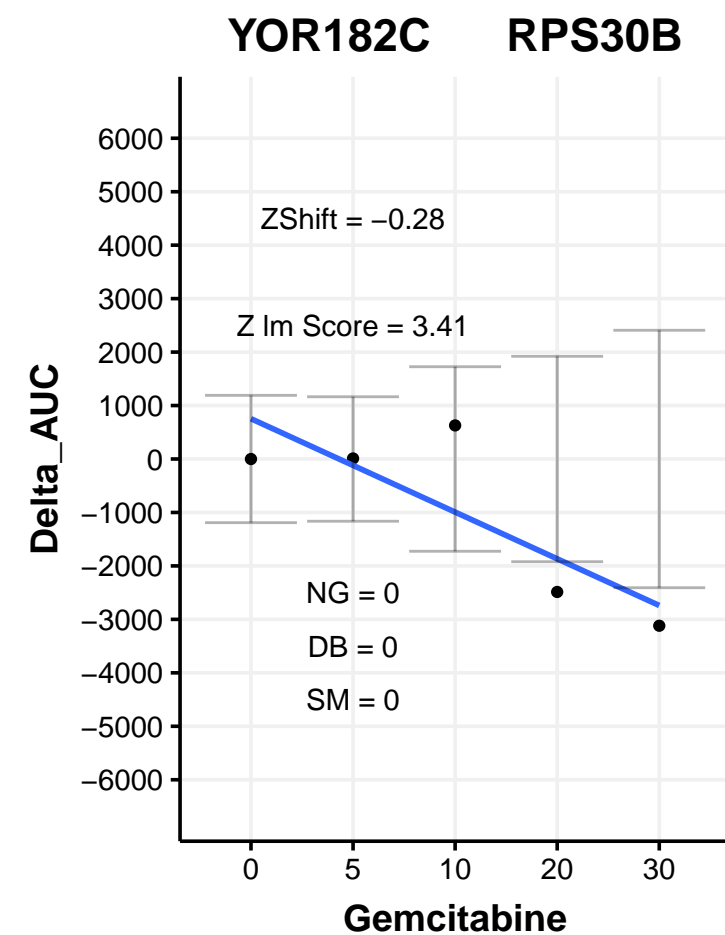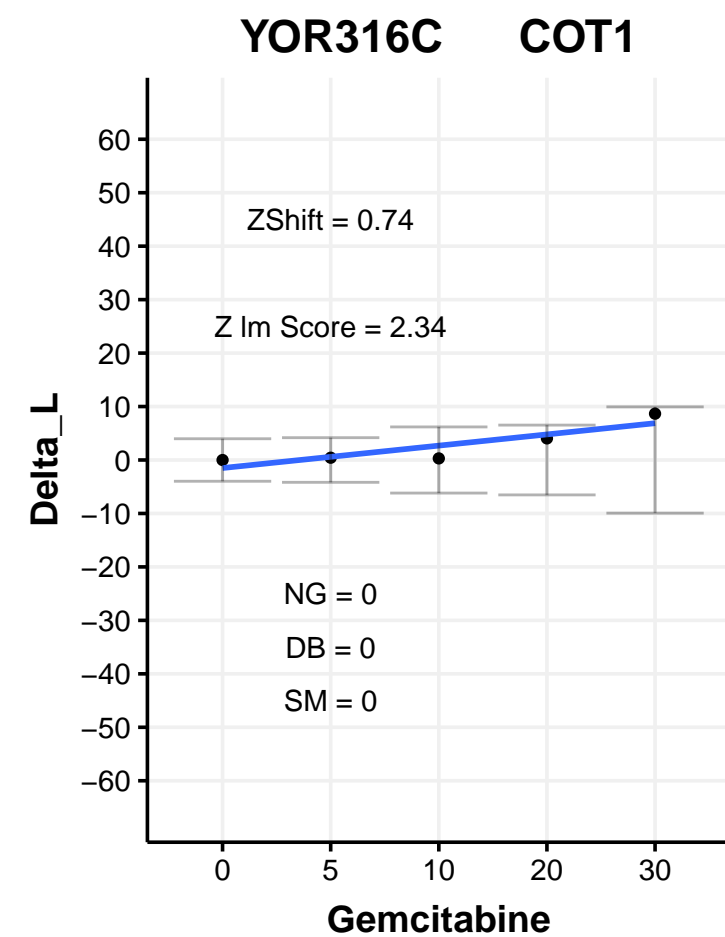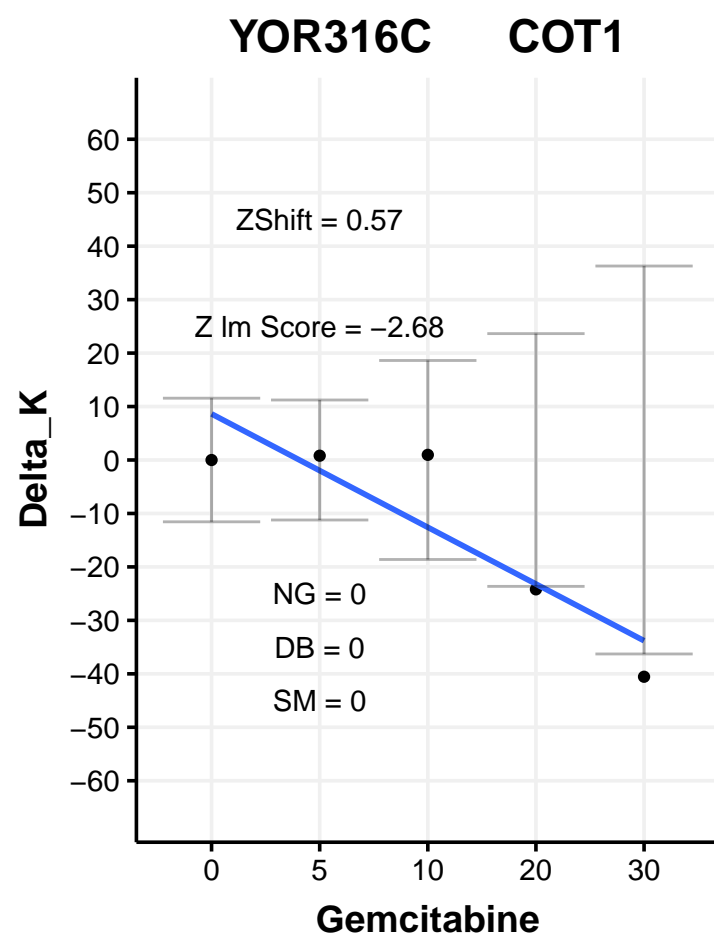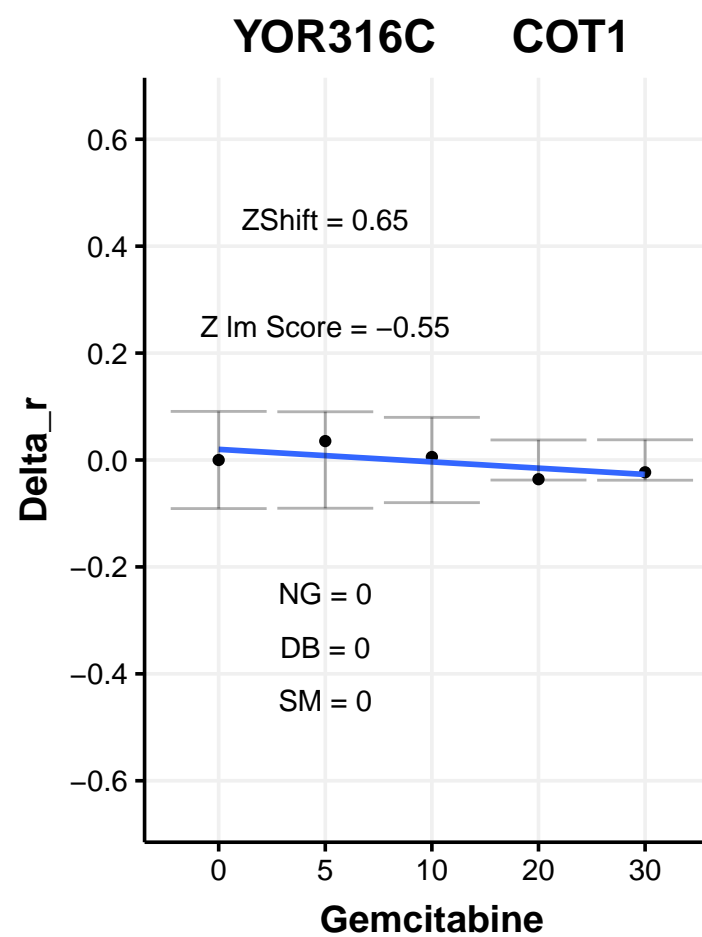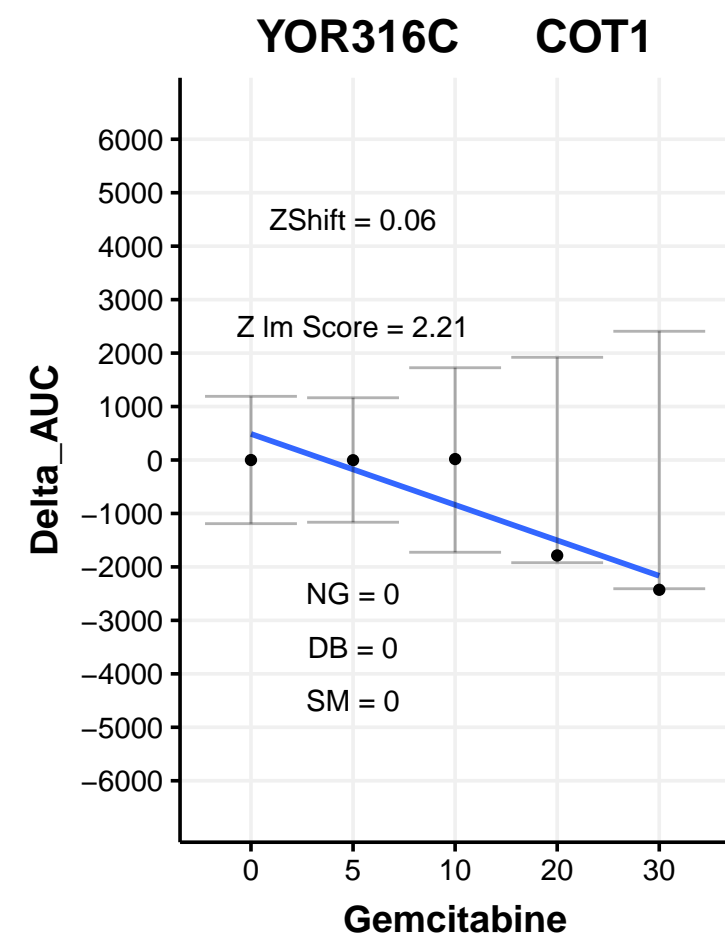

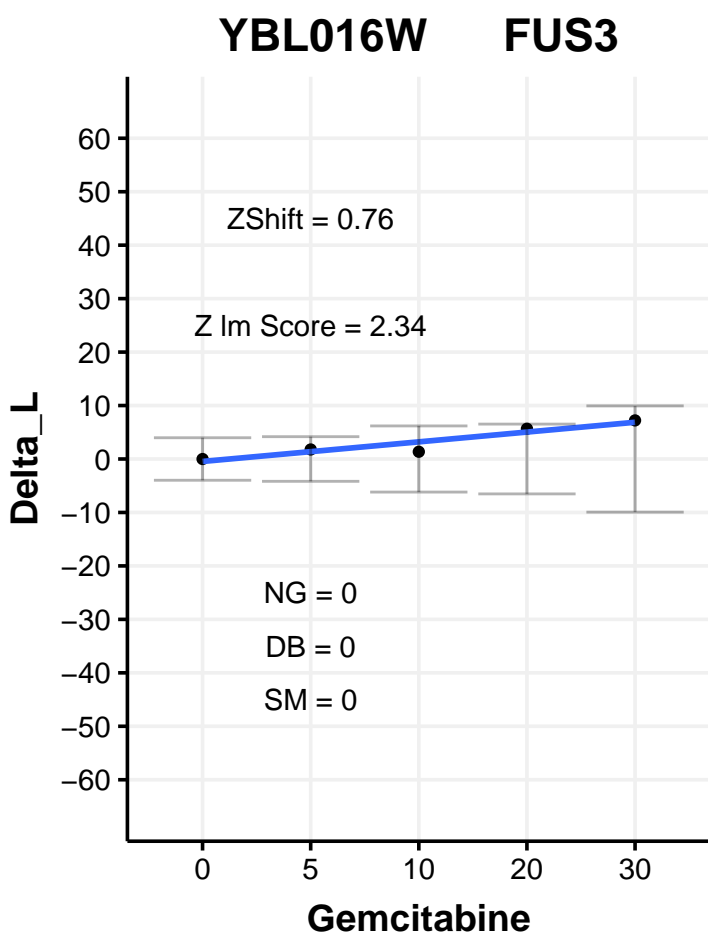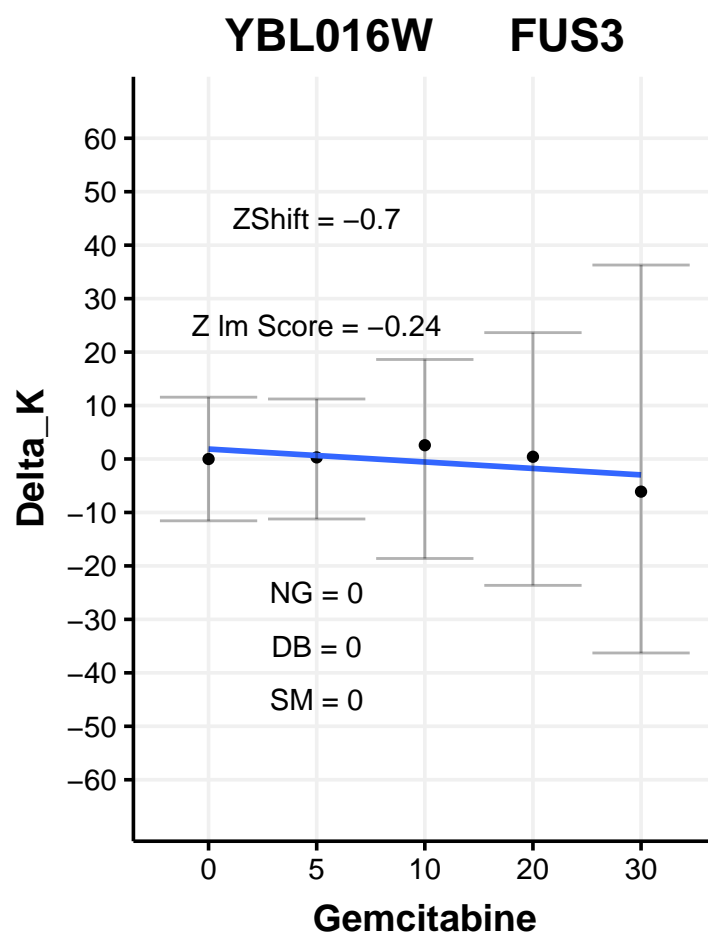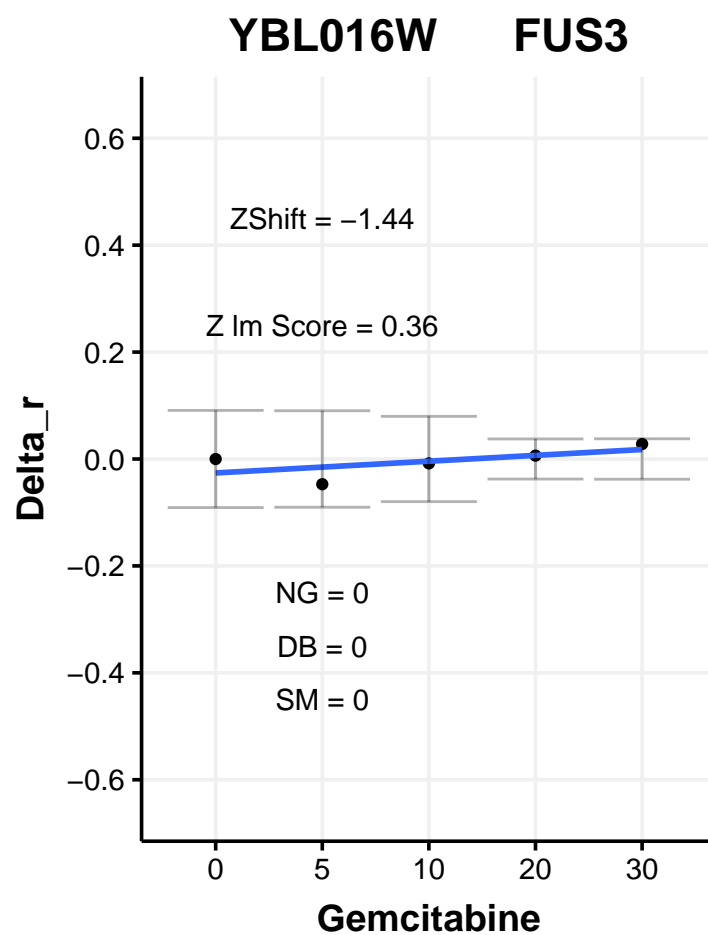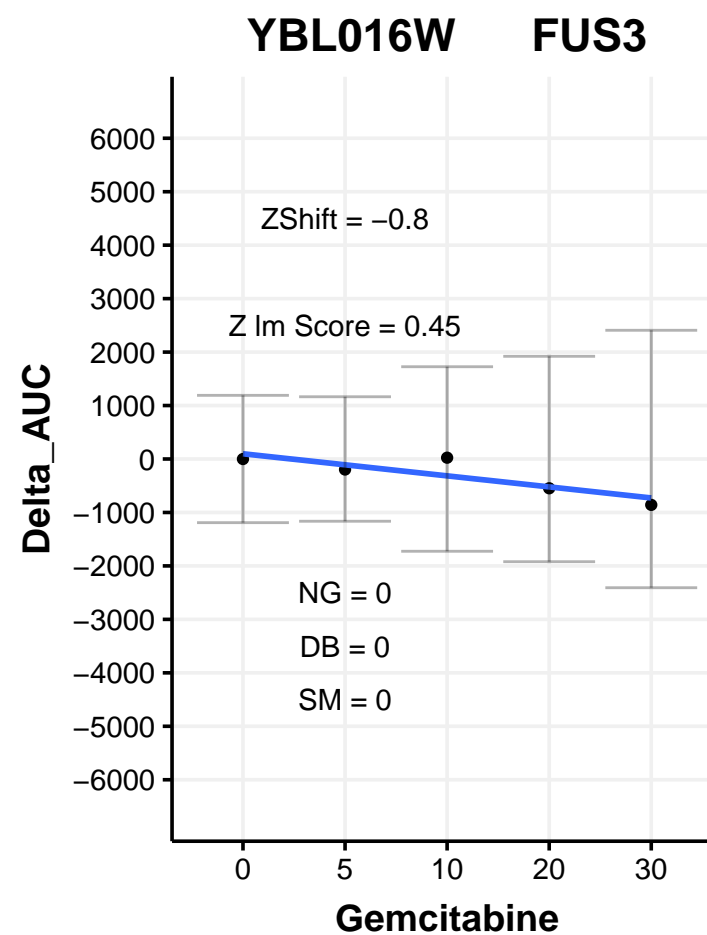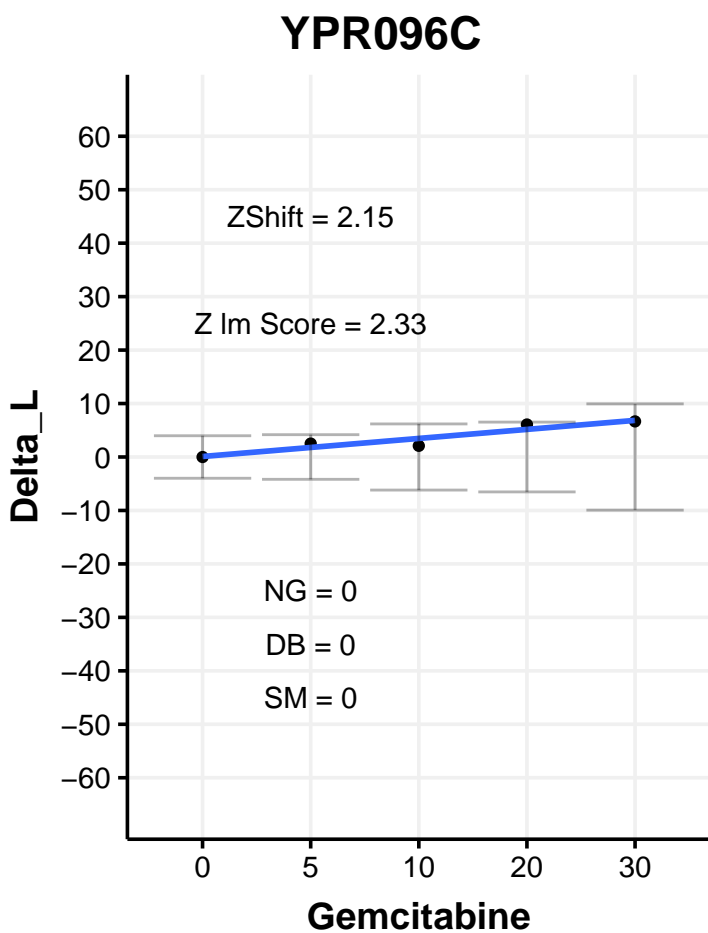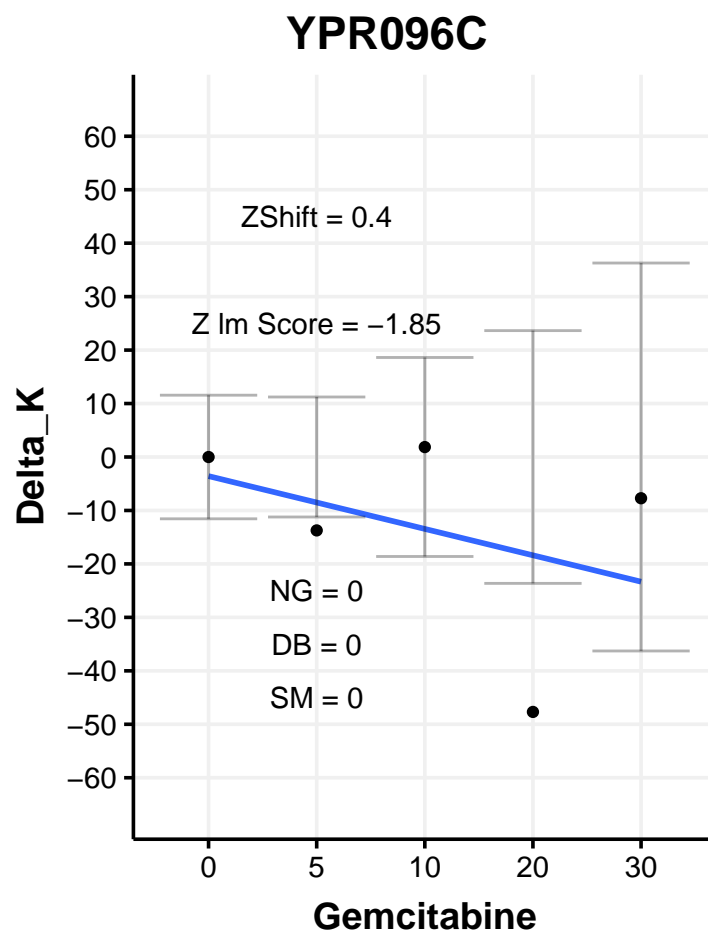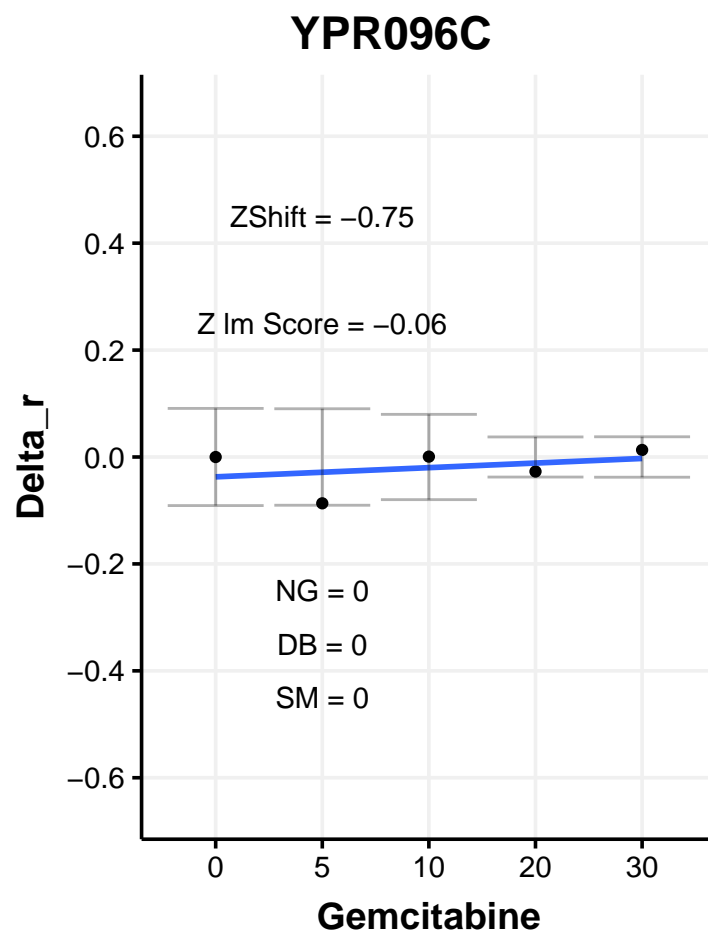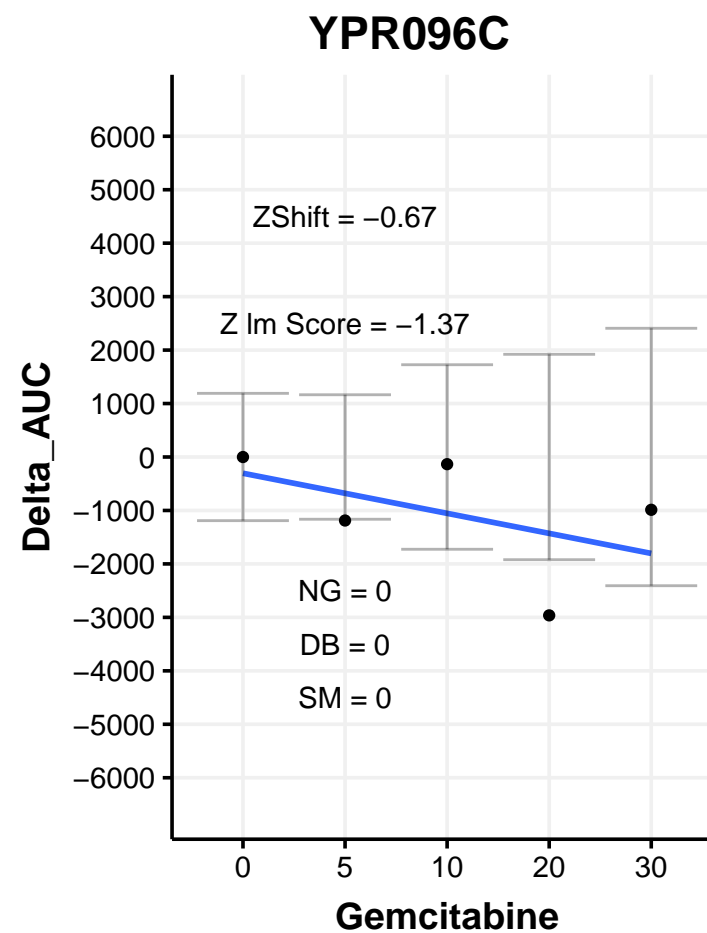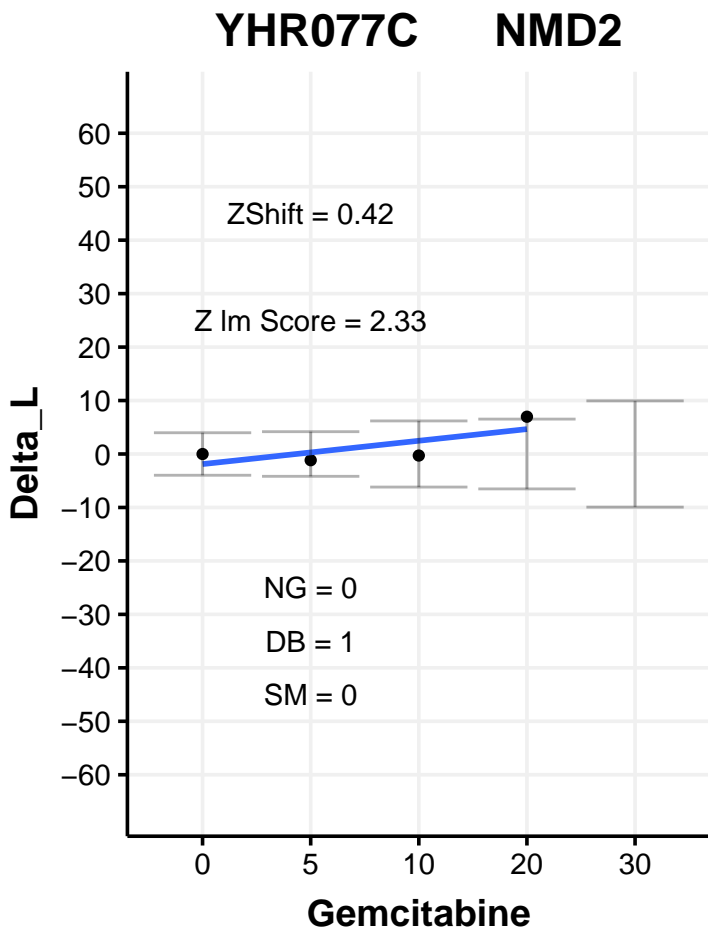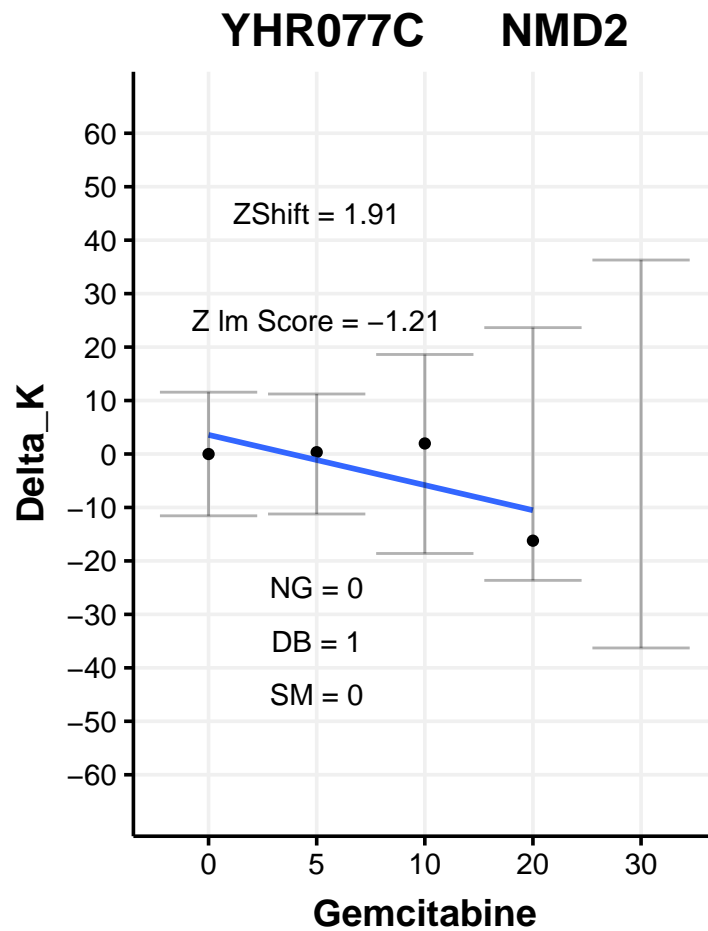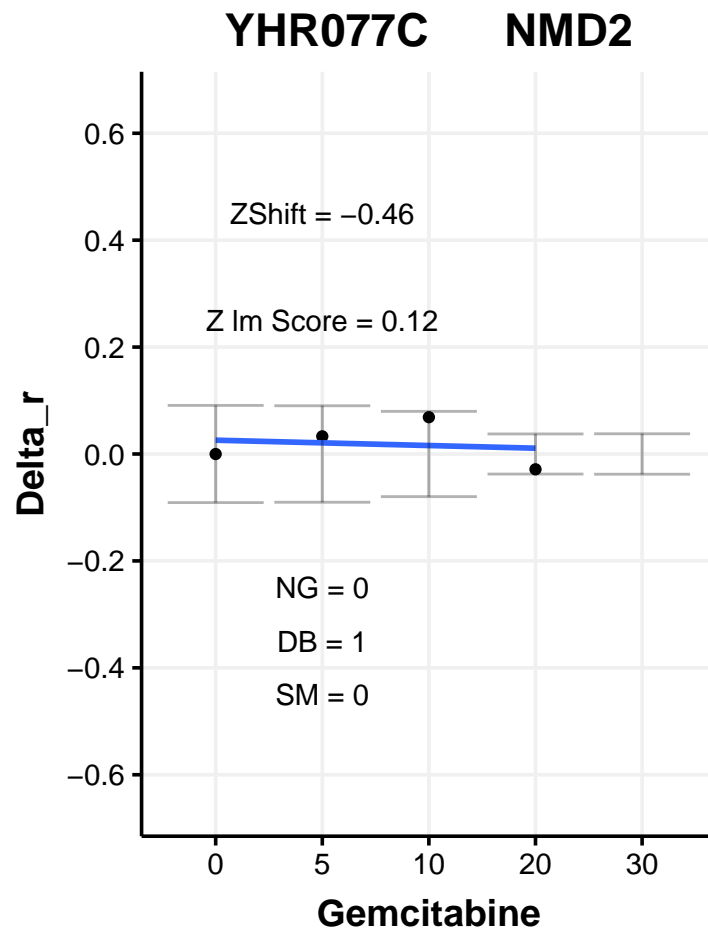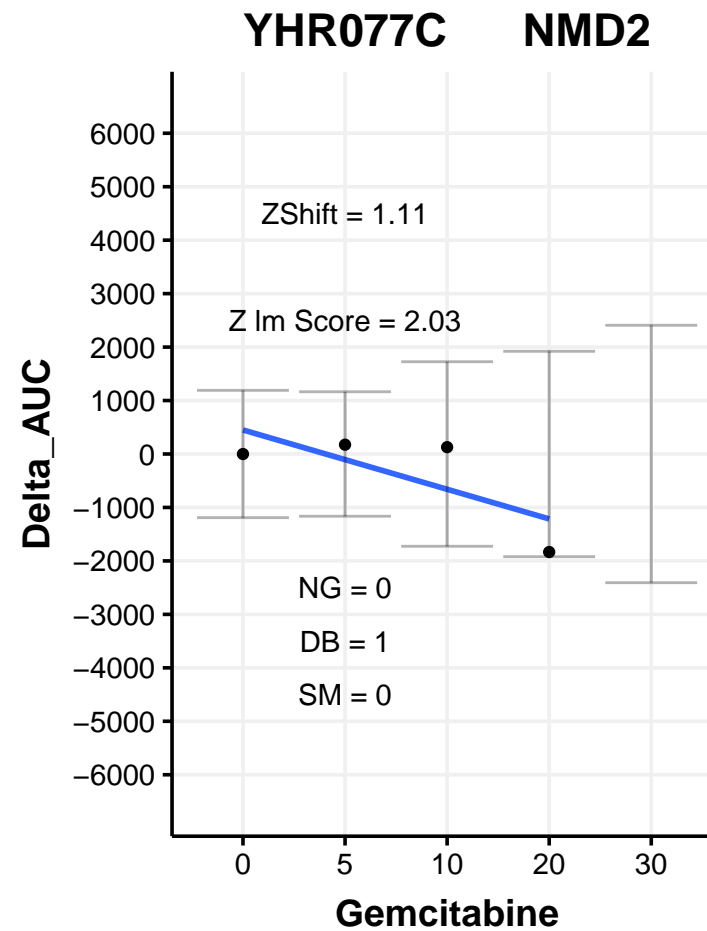

YCL046W

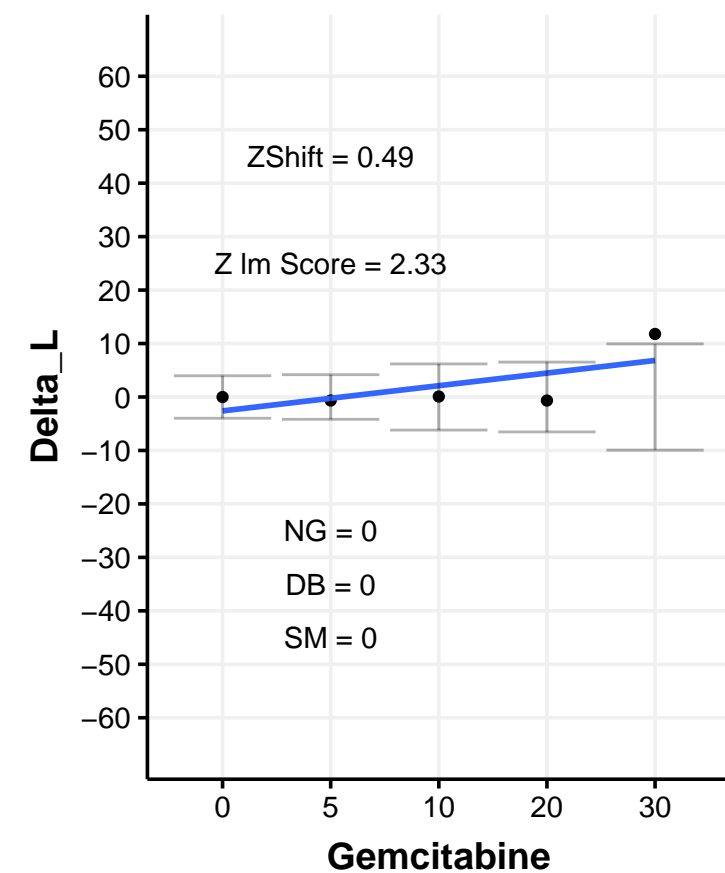

YCL046W

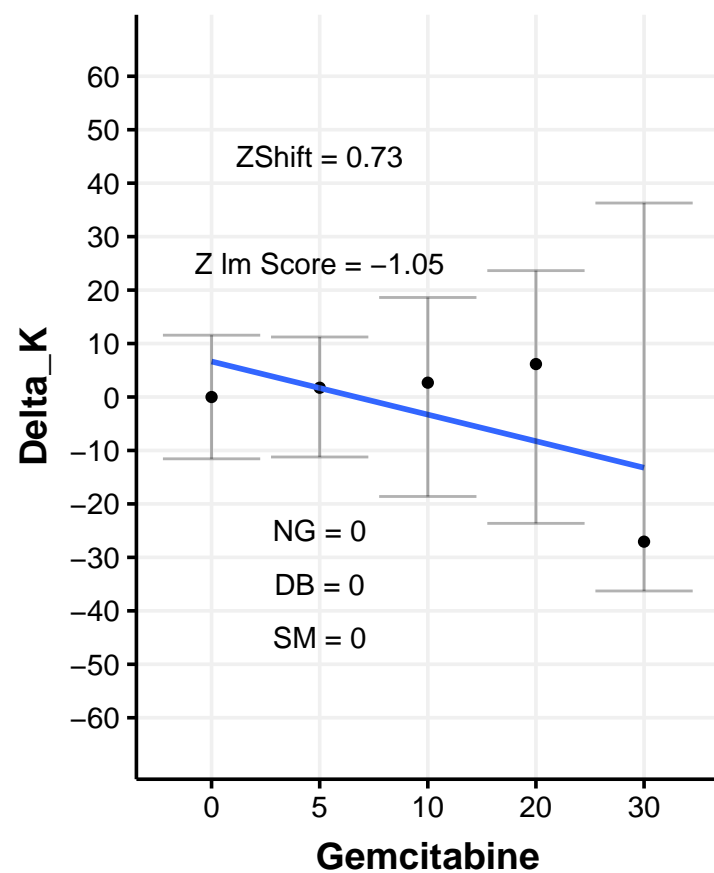

YCL046W

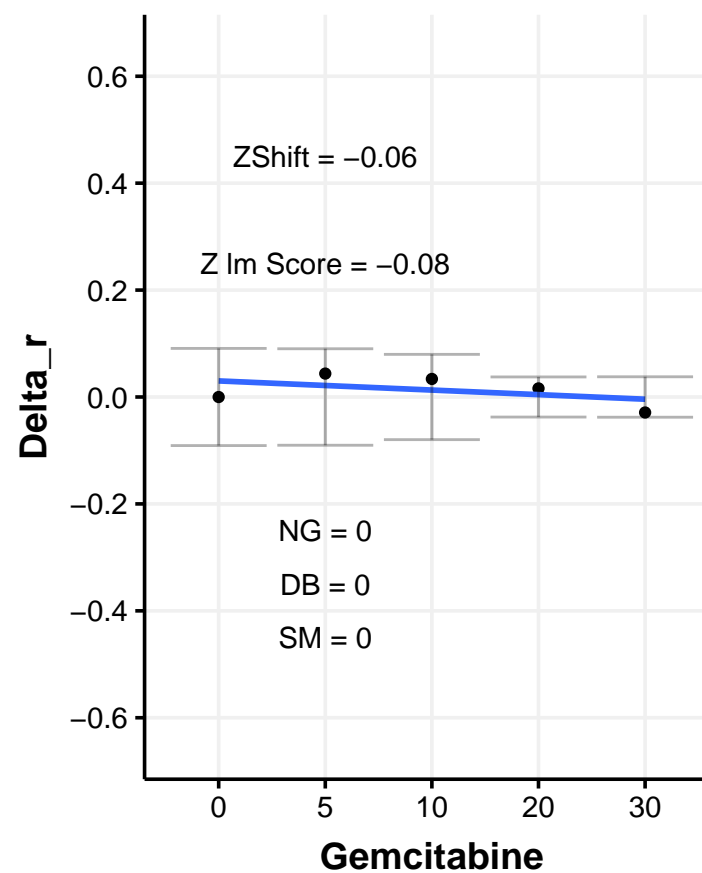

YCL046W

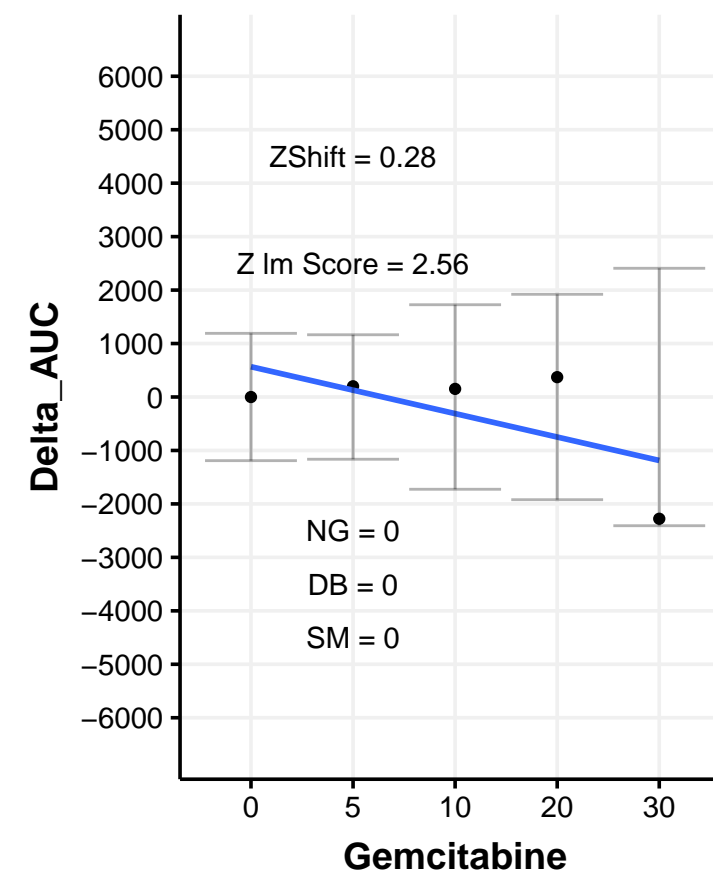

YGR174W-A\_1

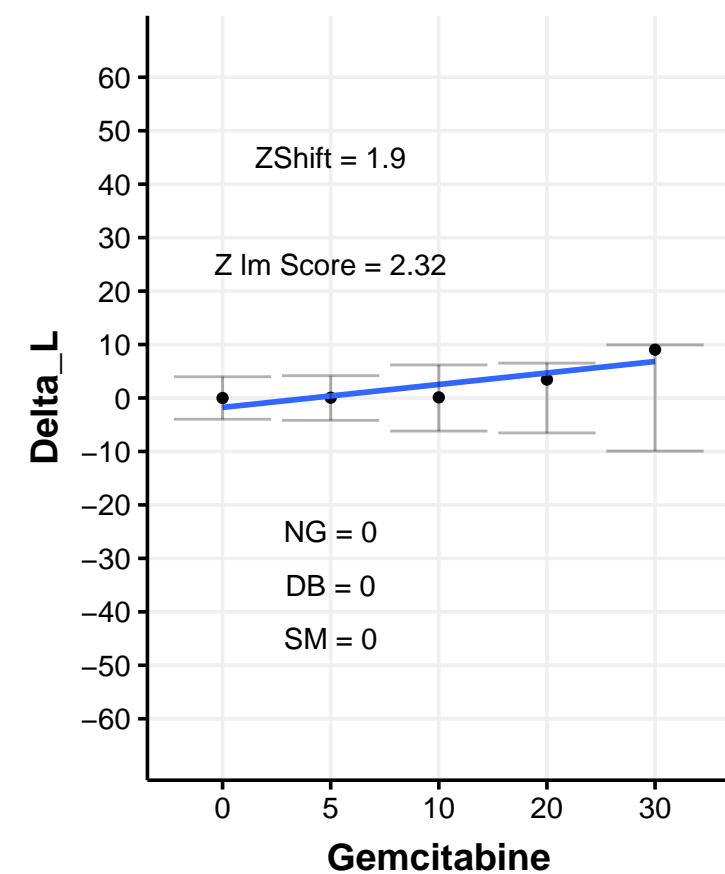

YGR174W-A\_1

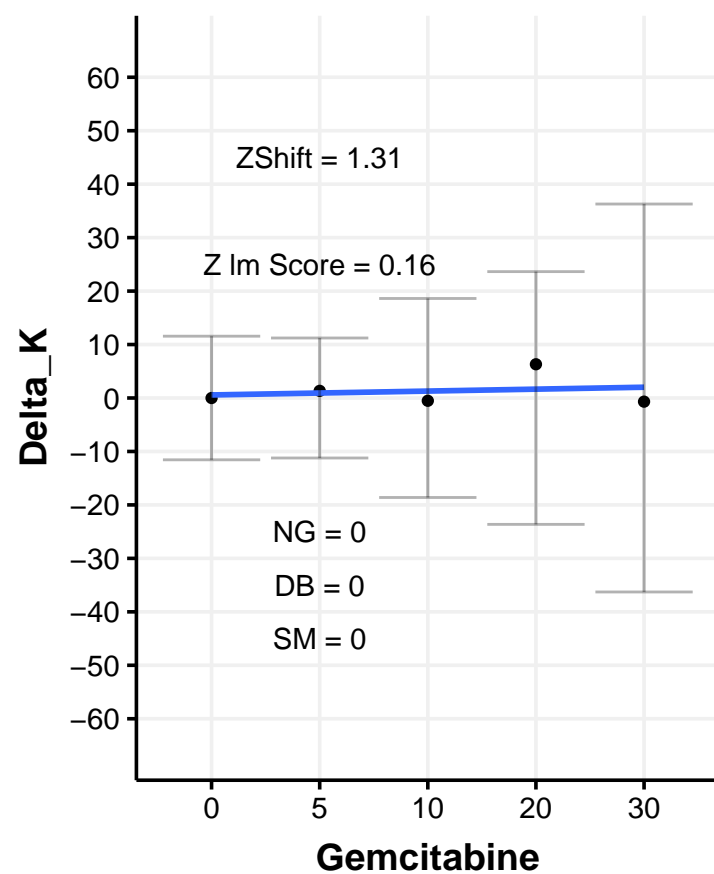

YGR174W-A\_1

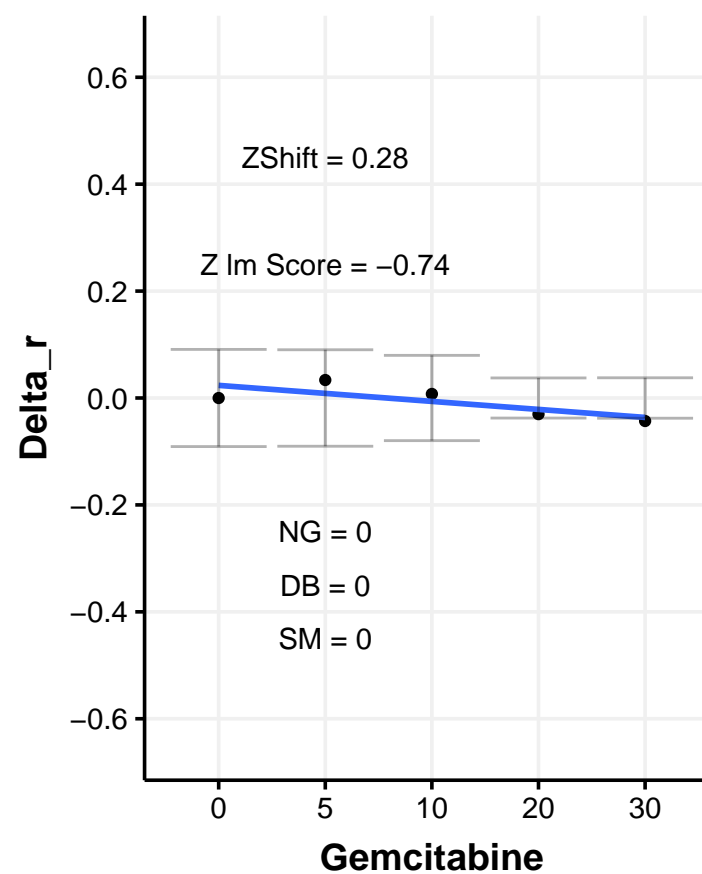

YGR174W-A\_1

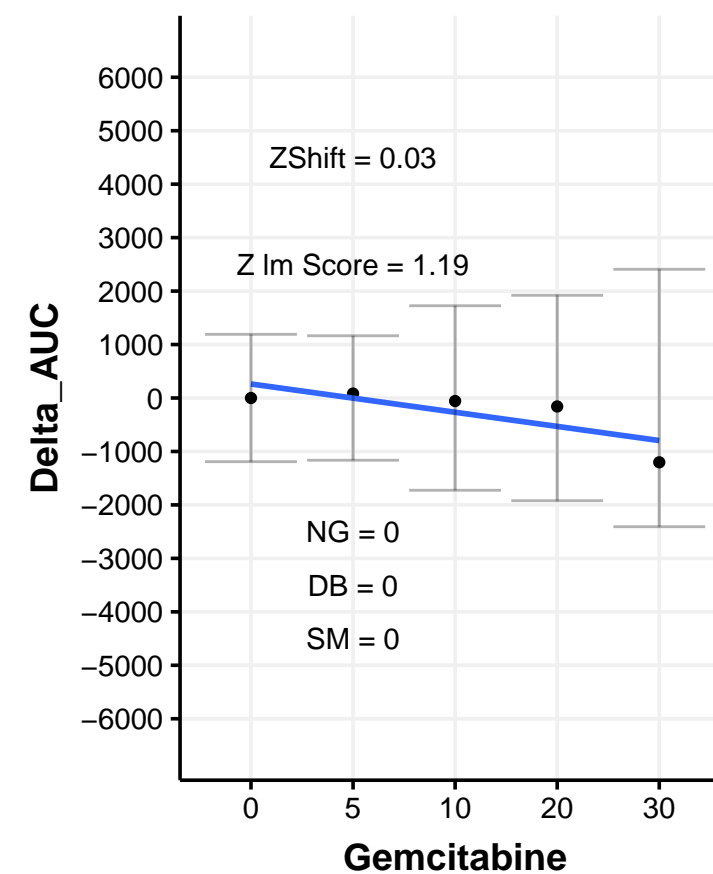

YNL120C

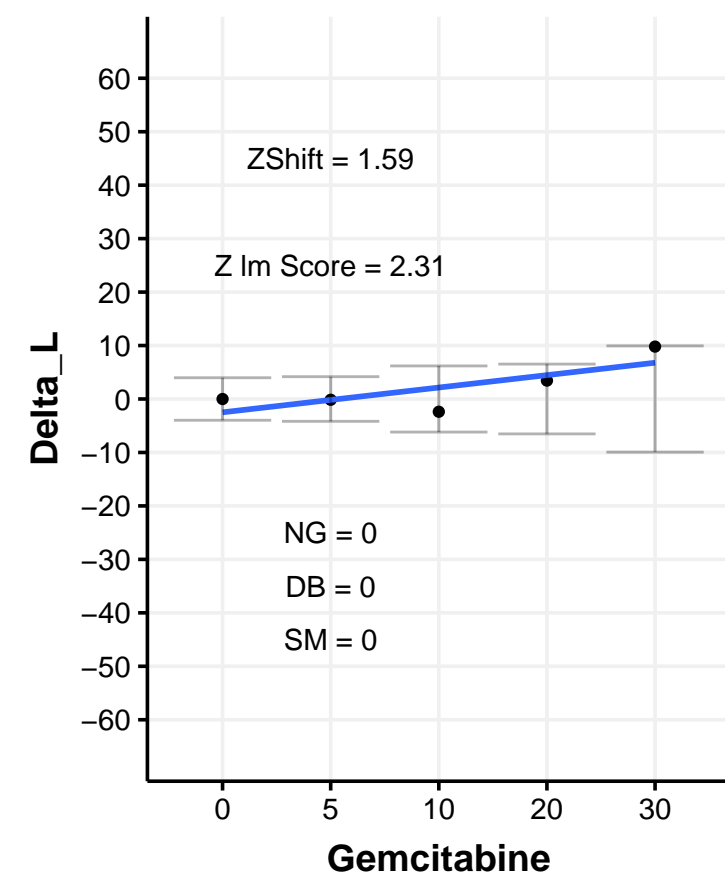

YNL120C

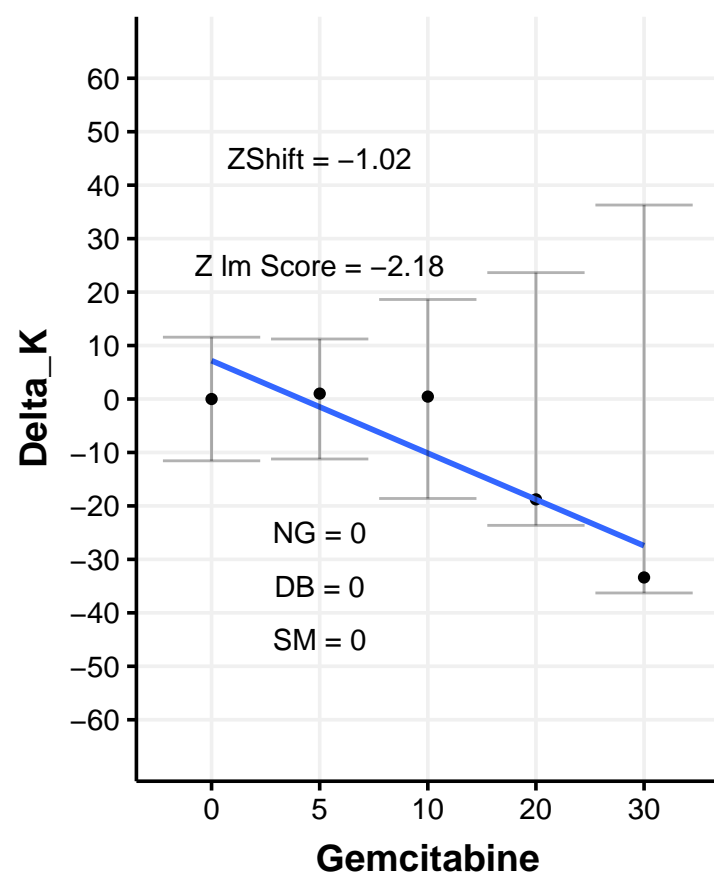

YNL120C

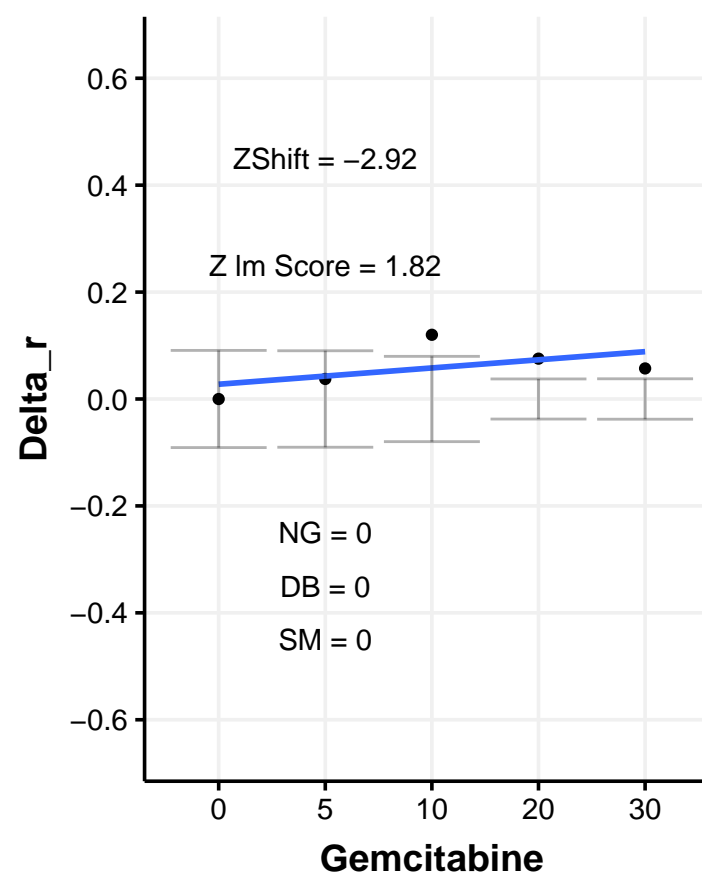

YNL120C

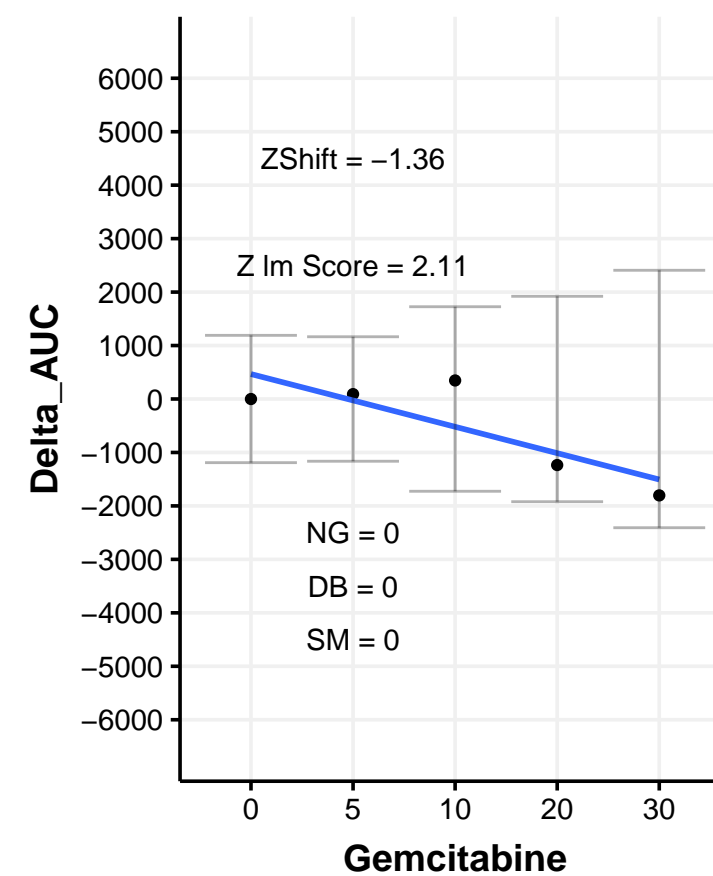

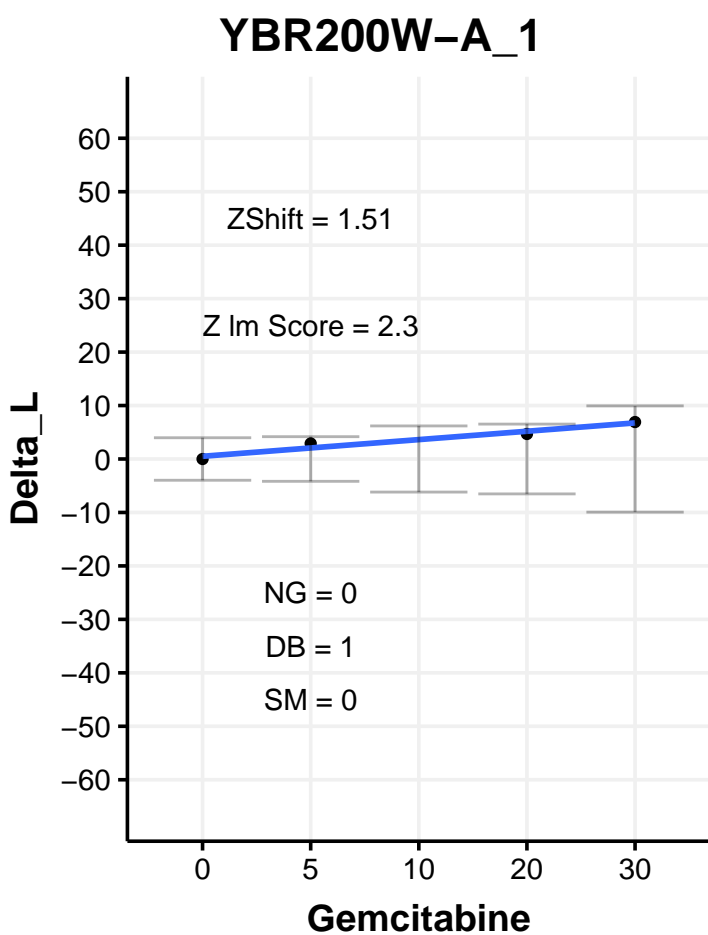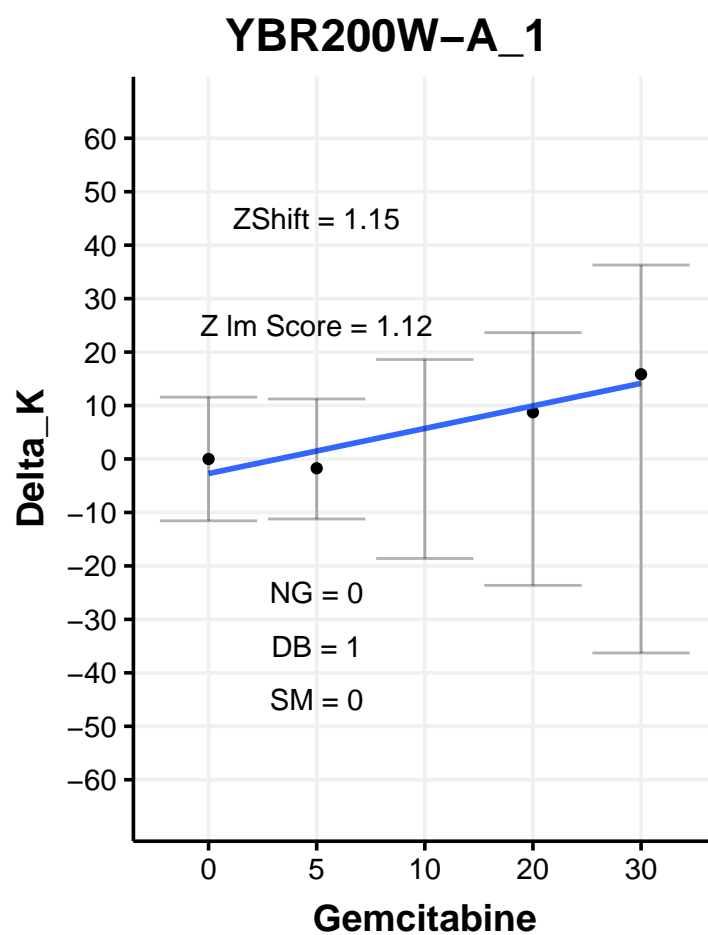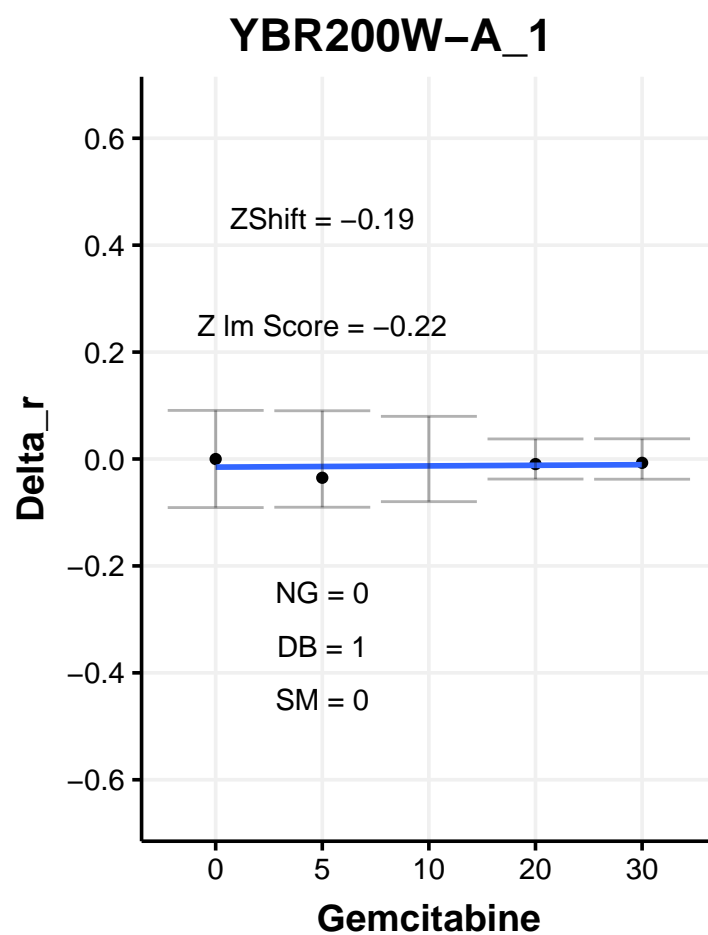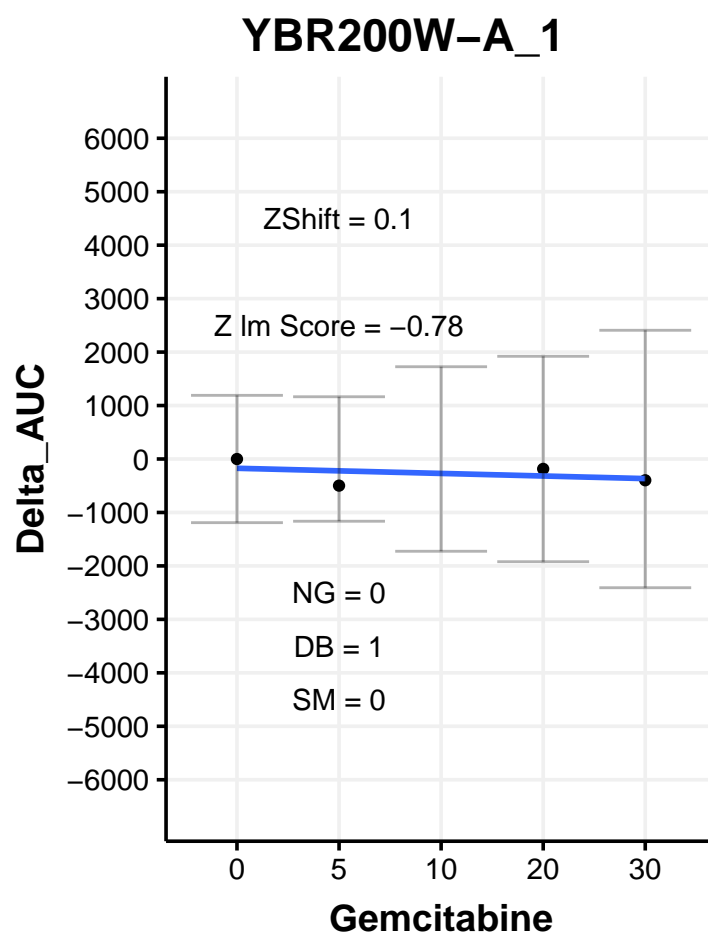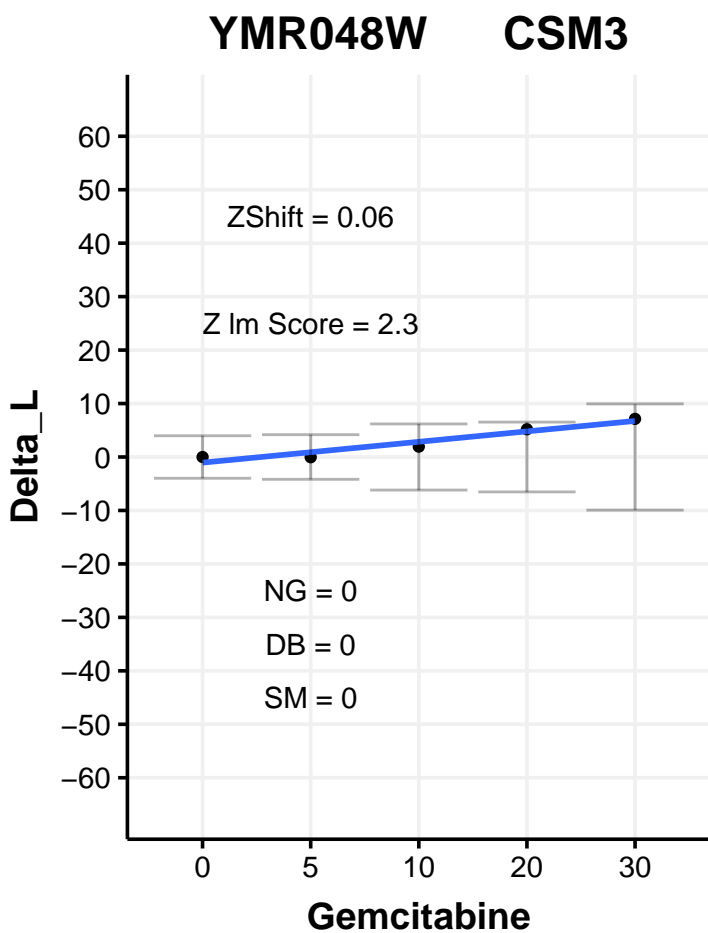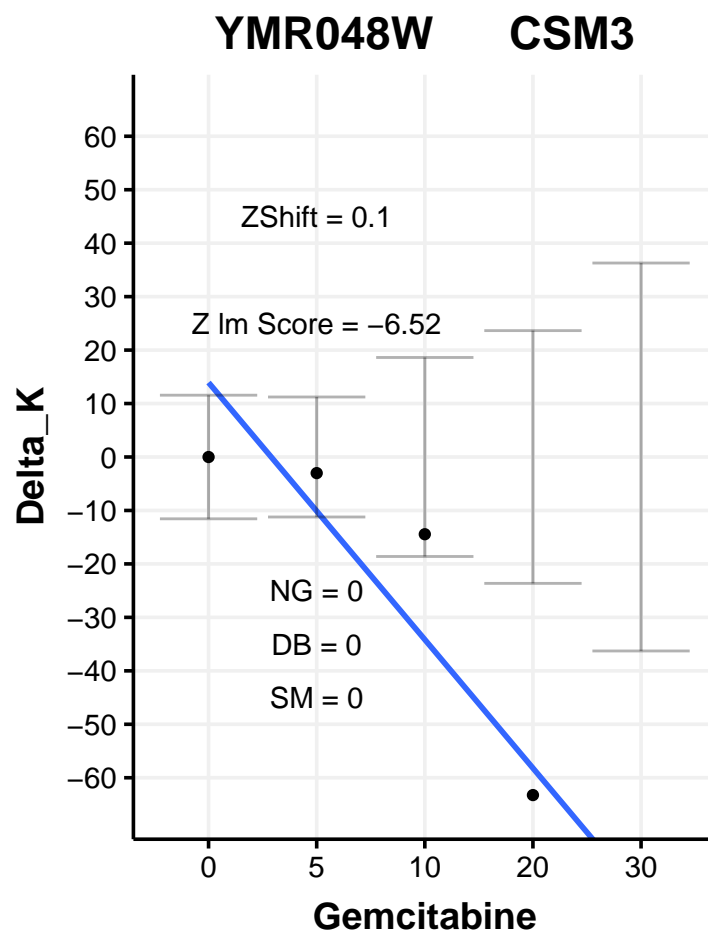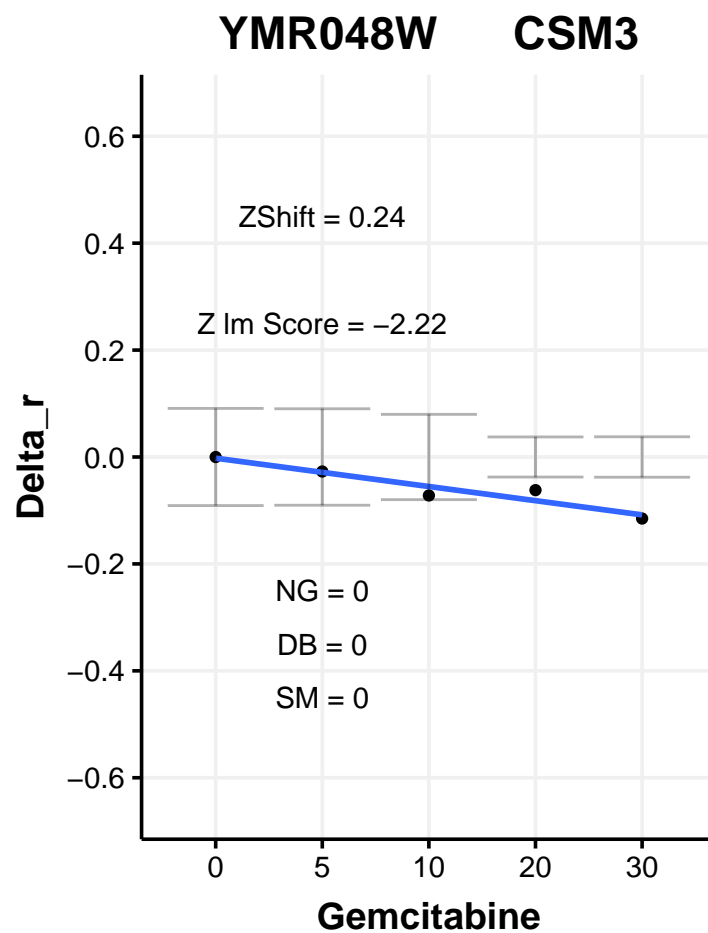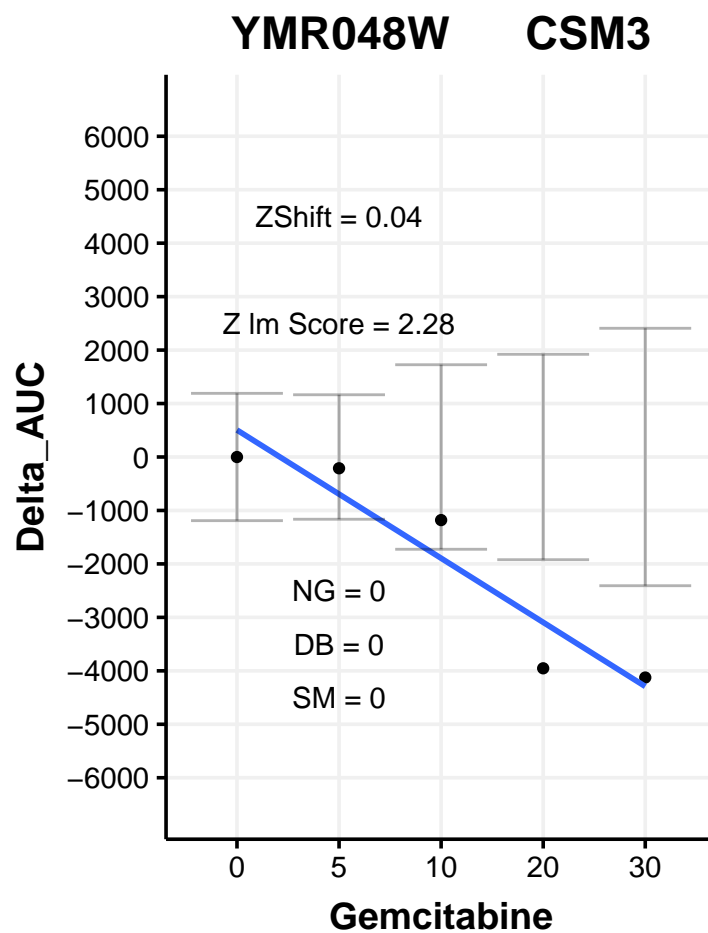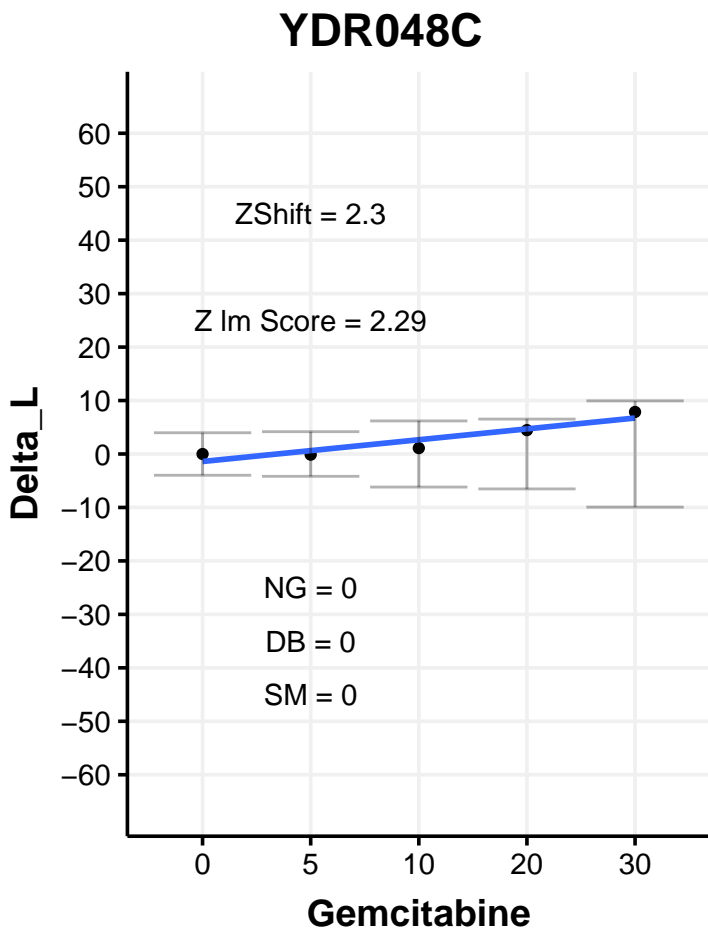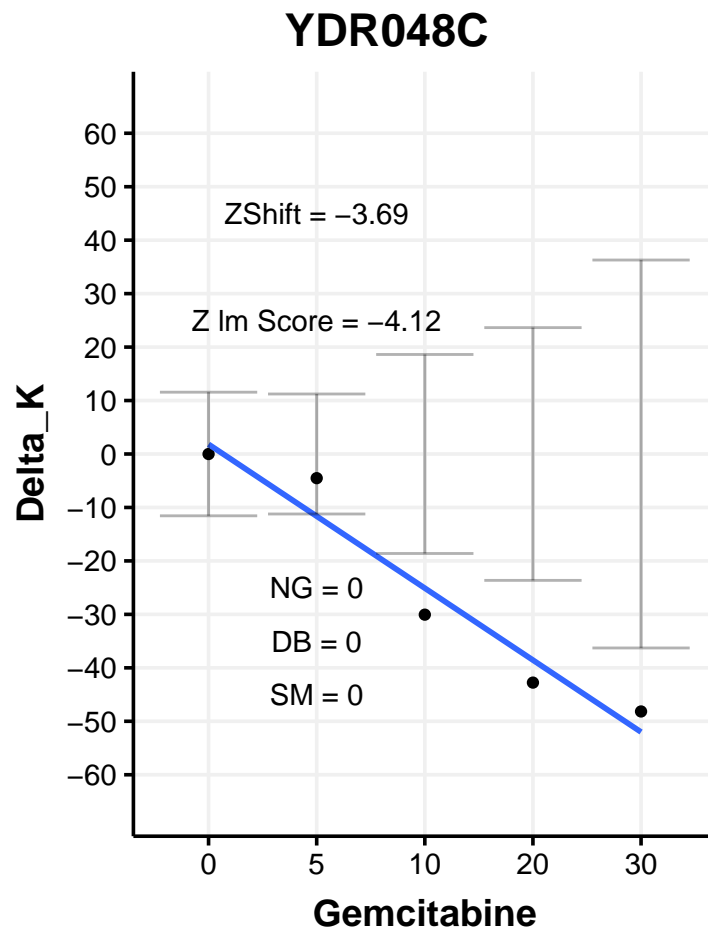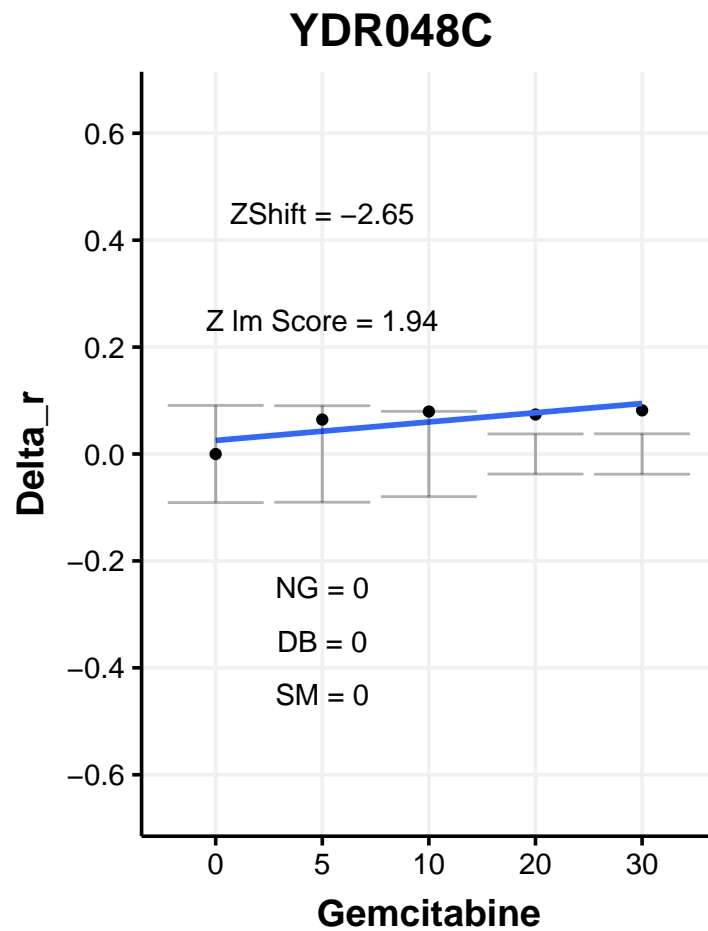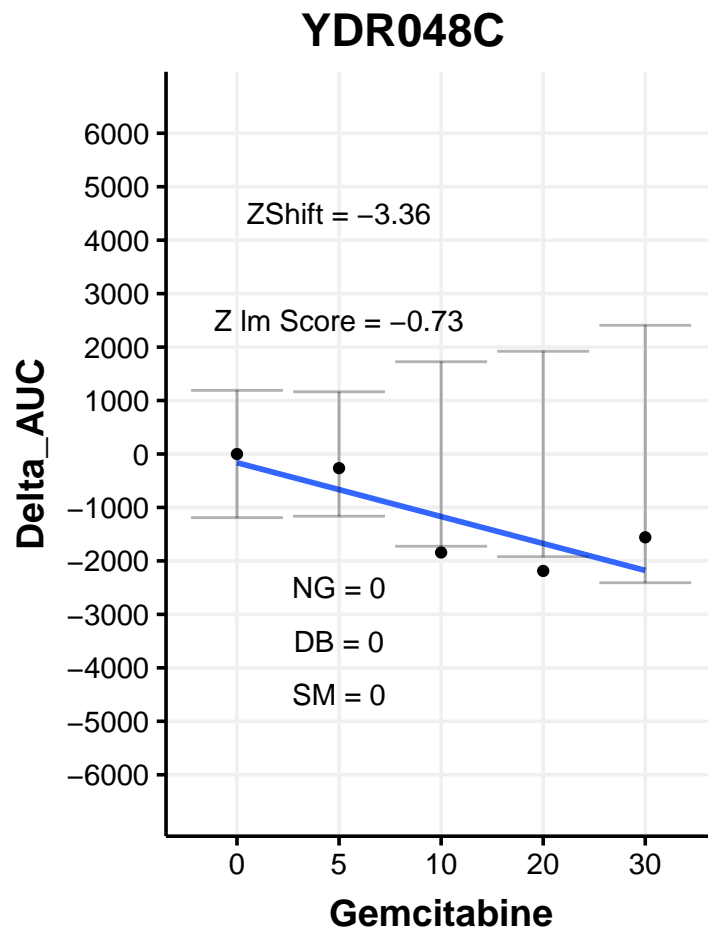

YOL101C IZH4

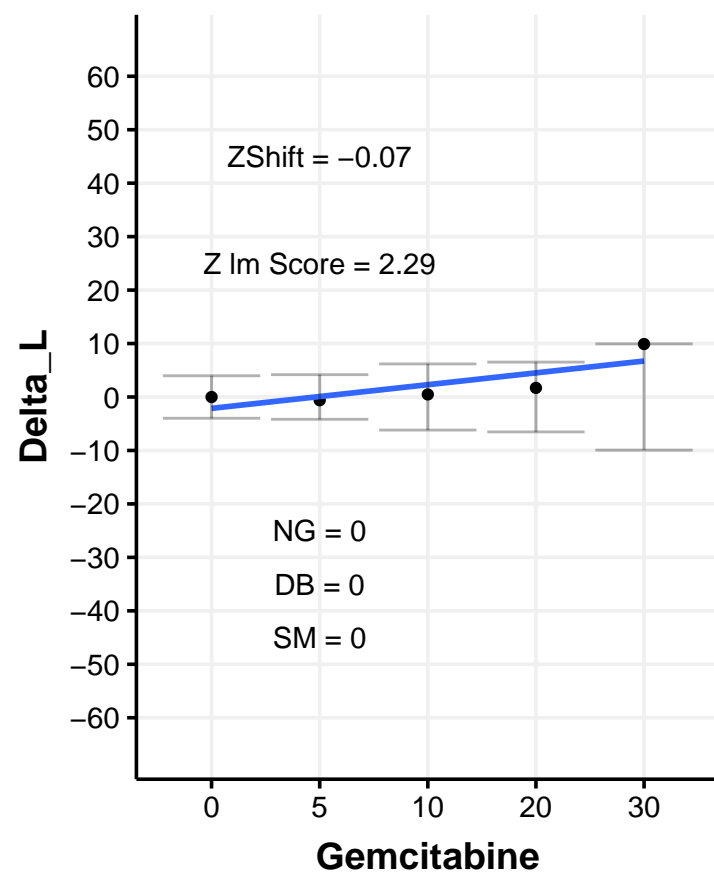

YOL101C IZH4

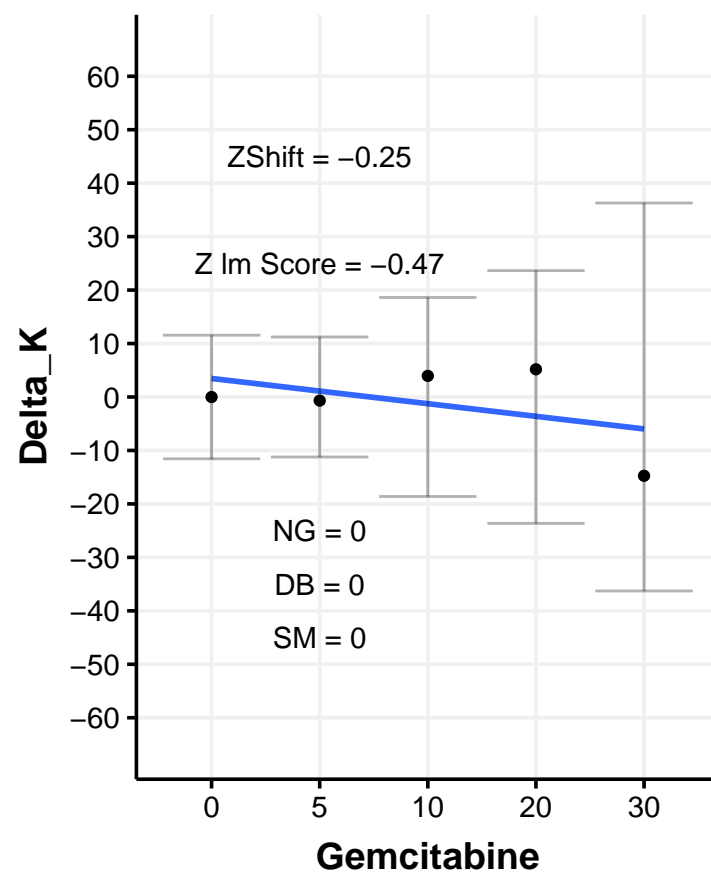

YOL101C IZH4

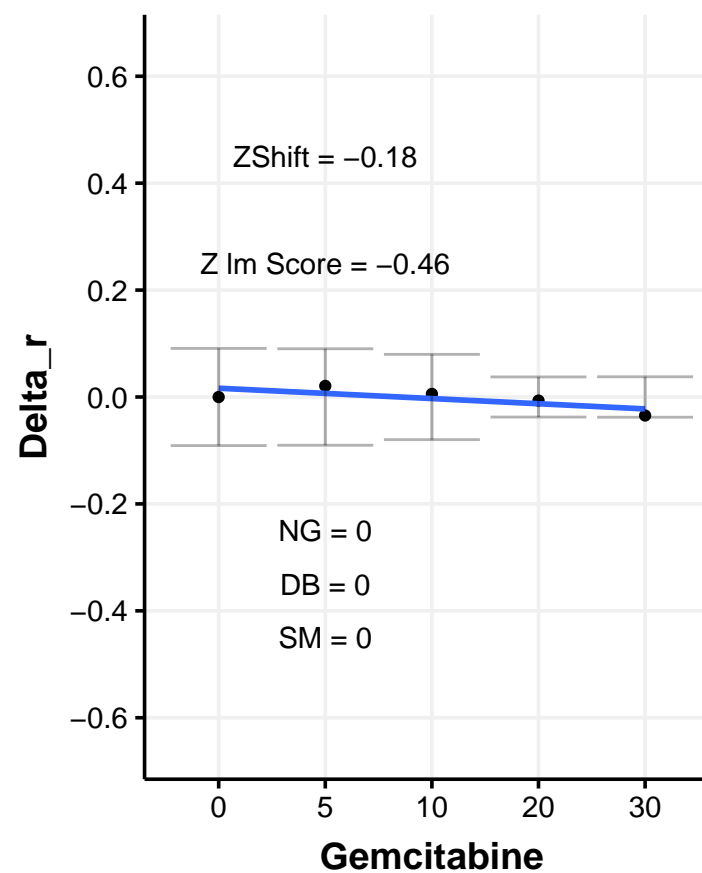

YOL101C IZH4

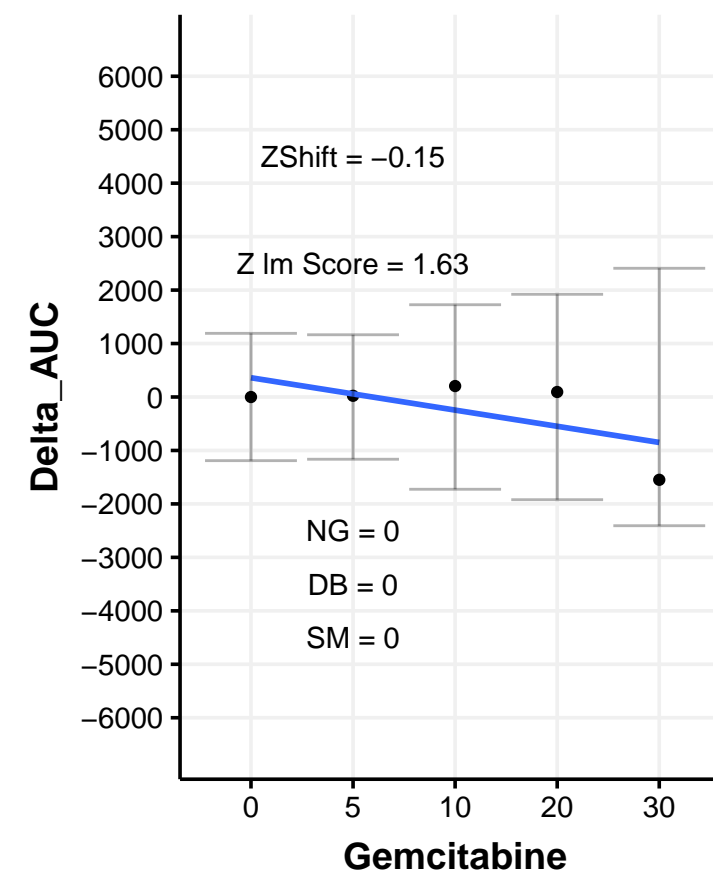

YJL182C

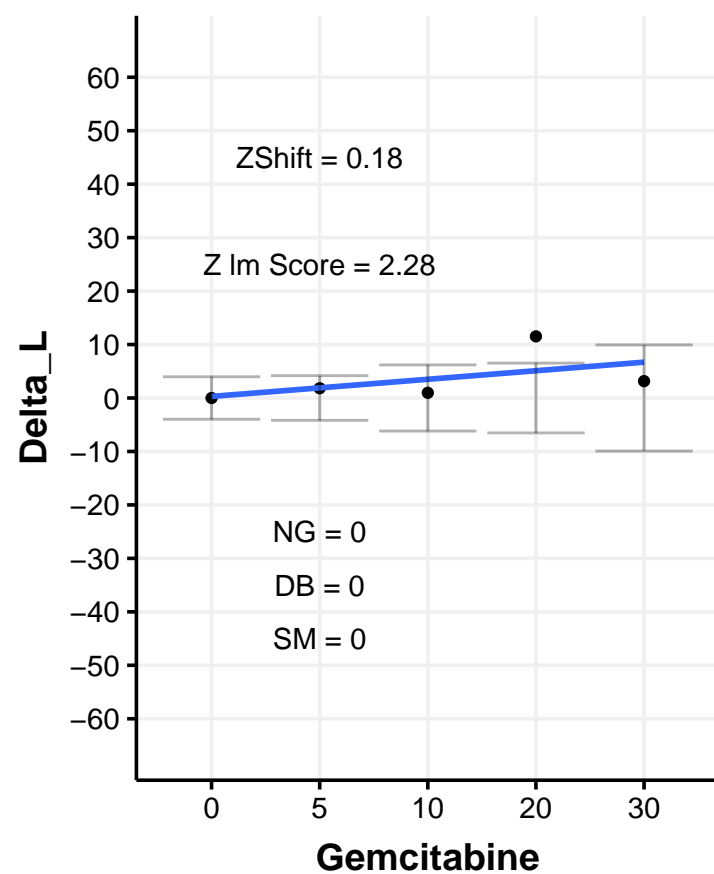

YJL182C

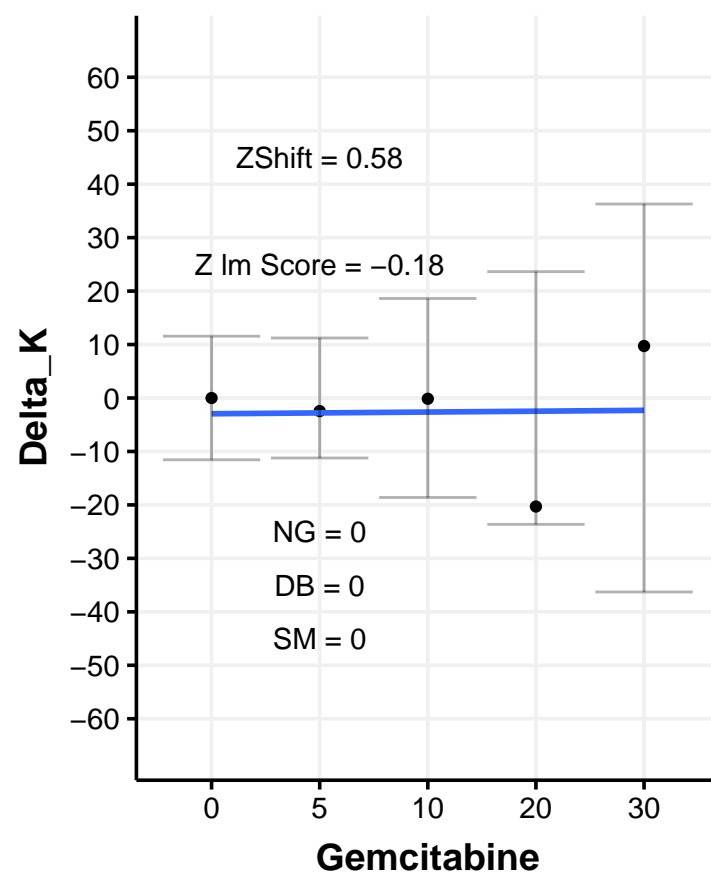

YJL182C

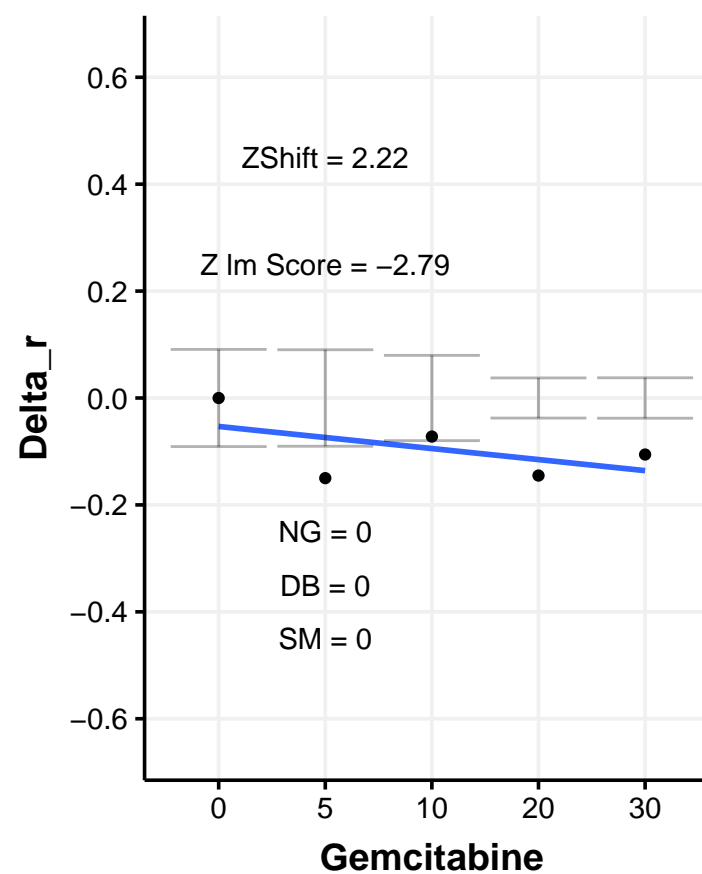

YJL182C

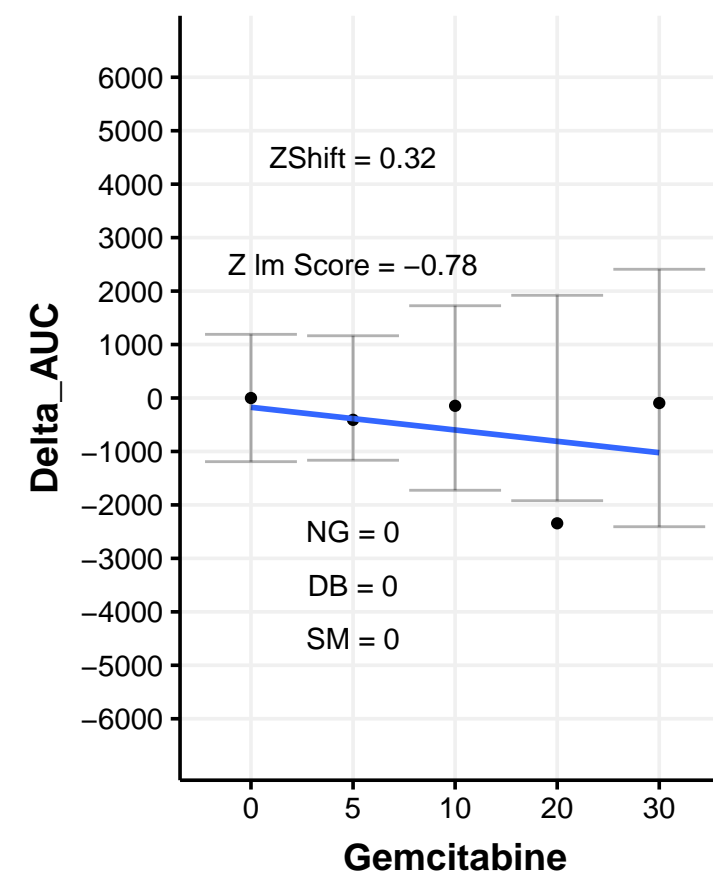

YJR079W

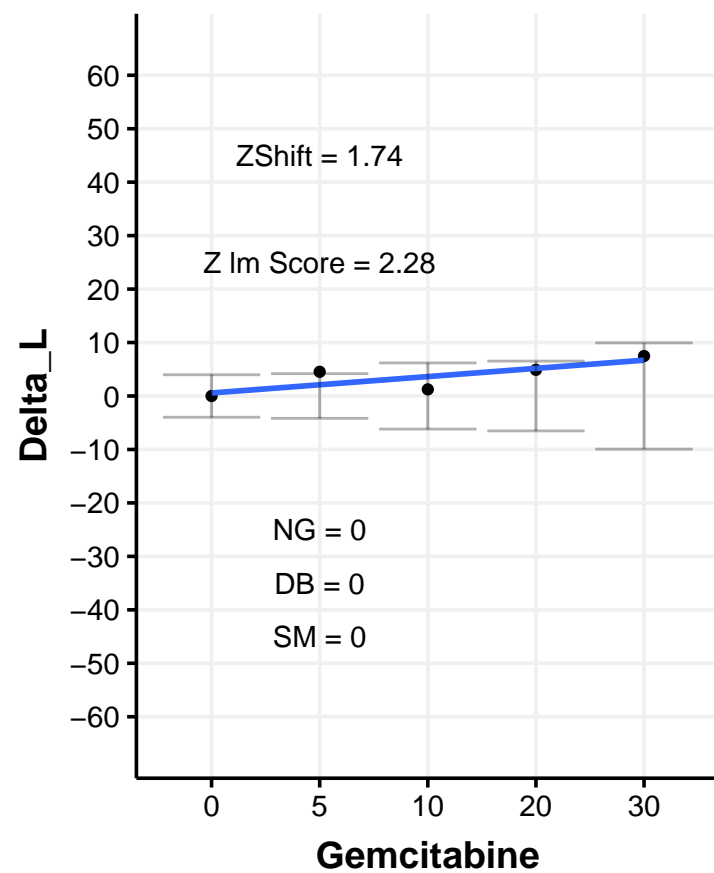

YJR079W

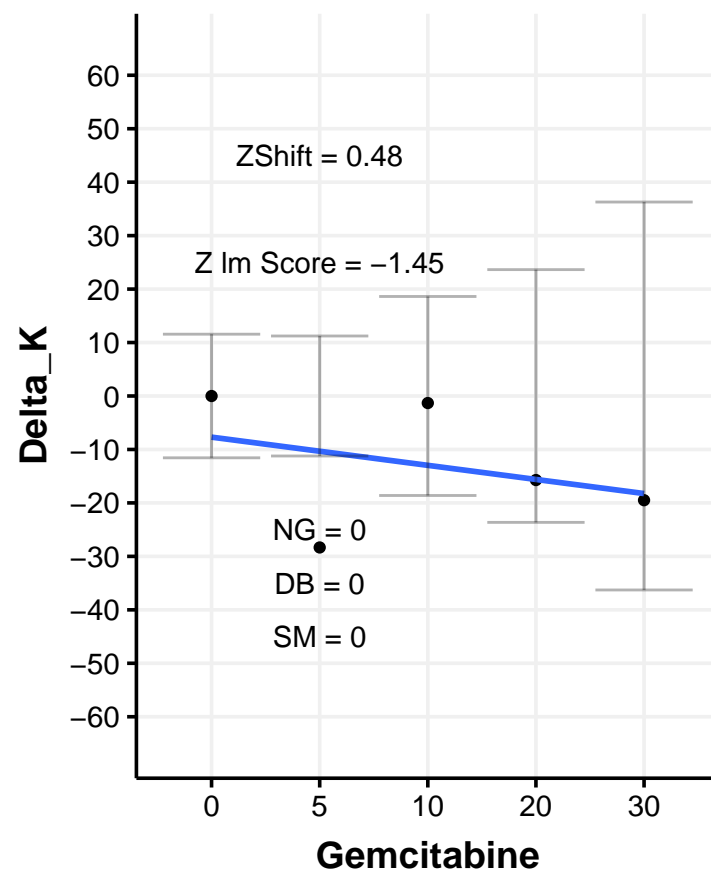

YJR079W

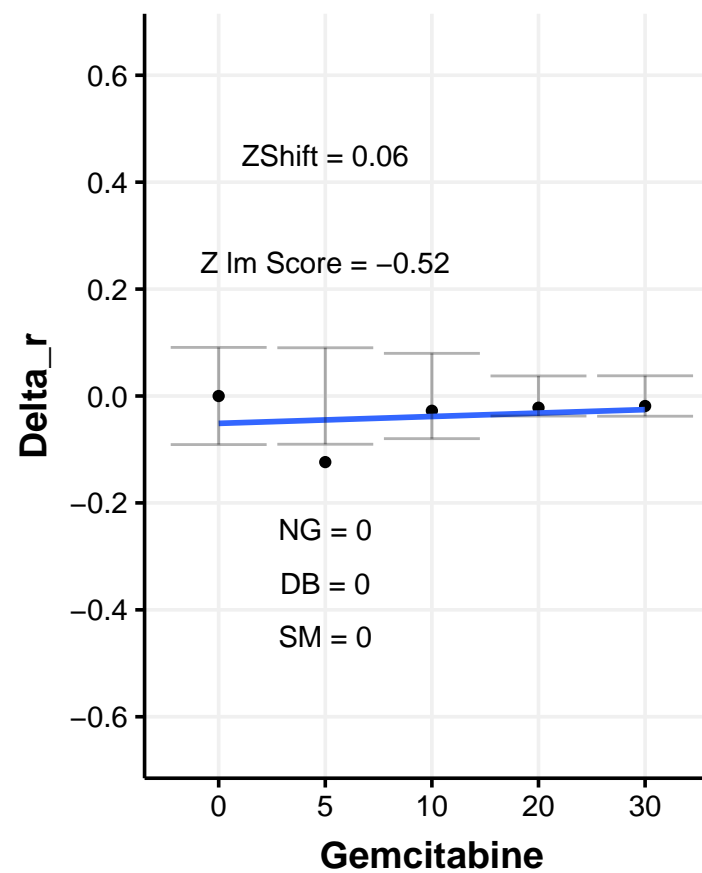

YJR079W

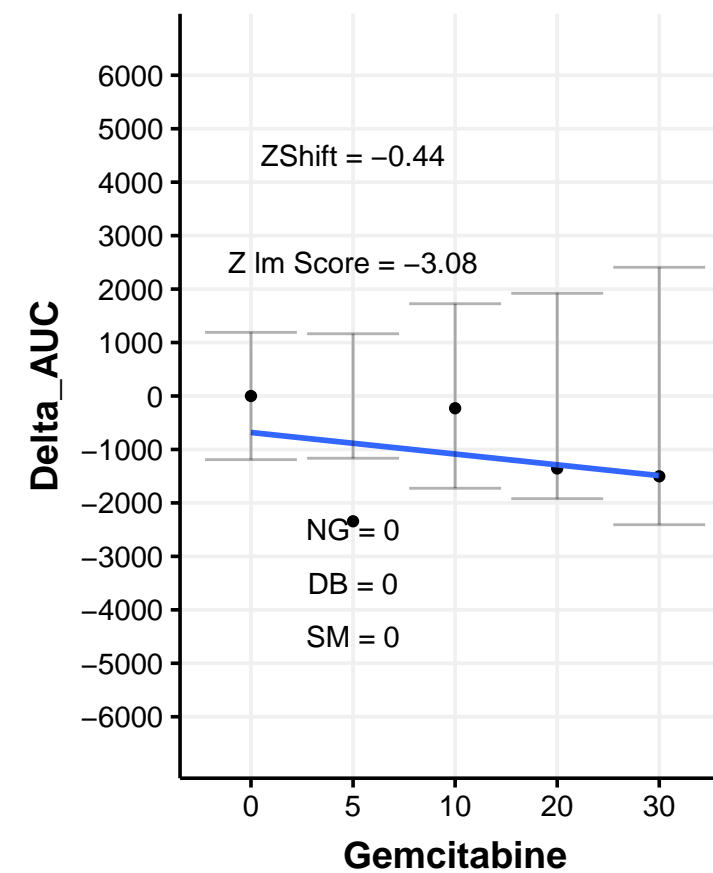



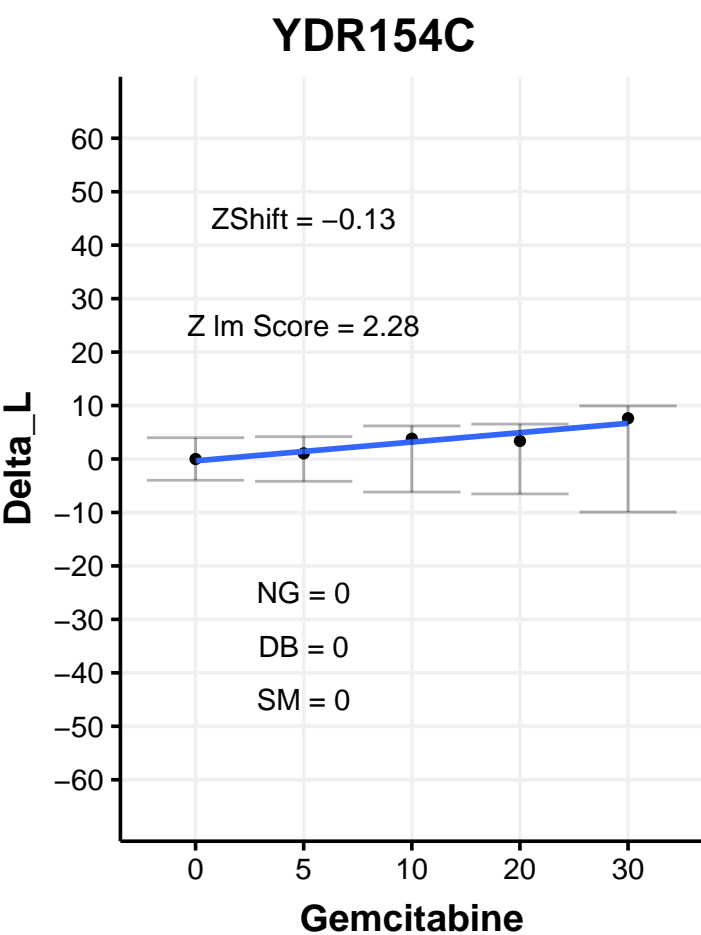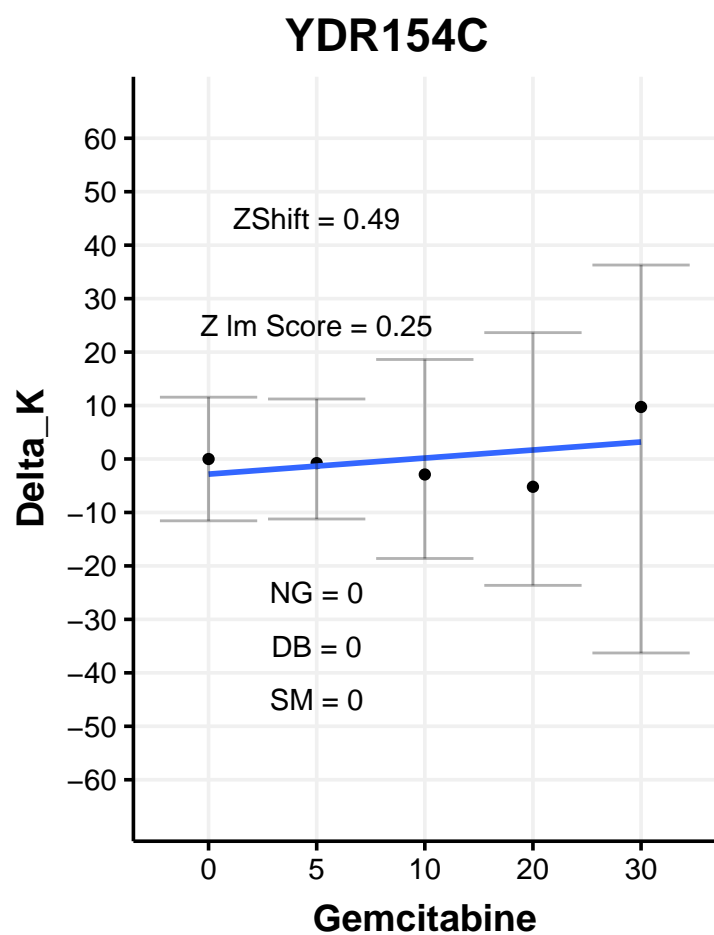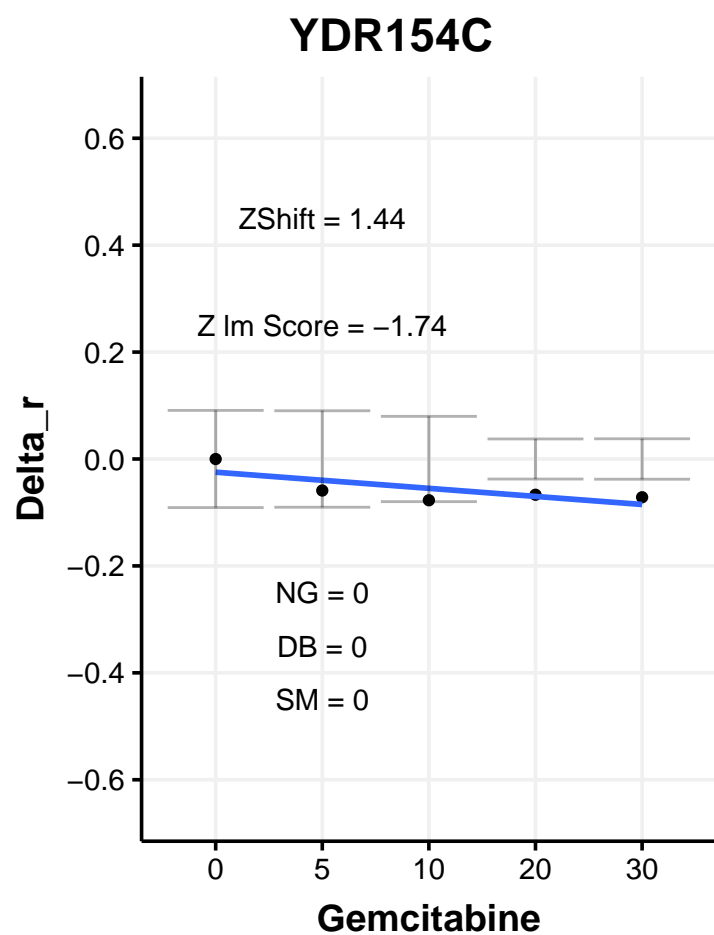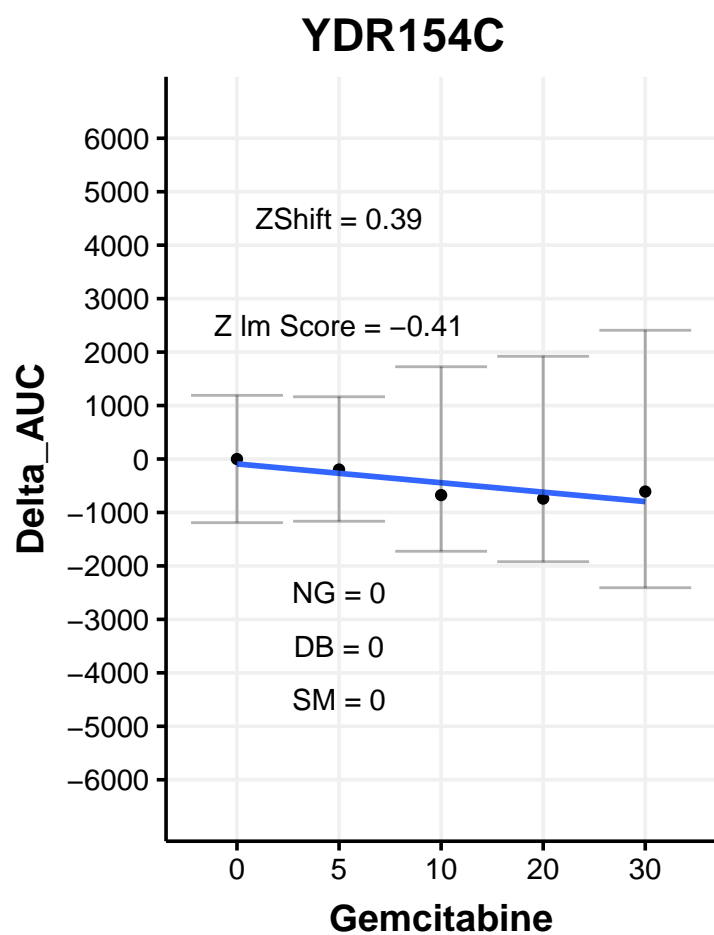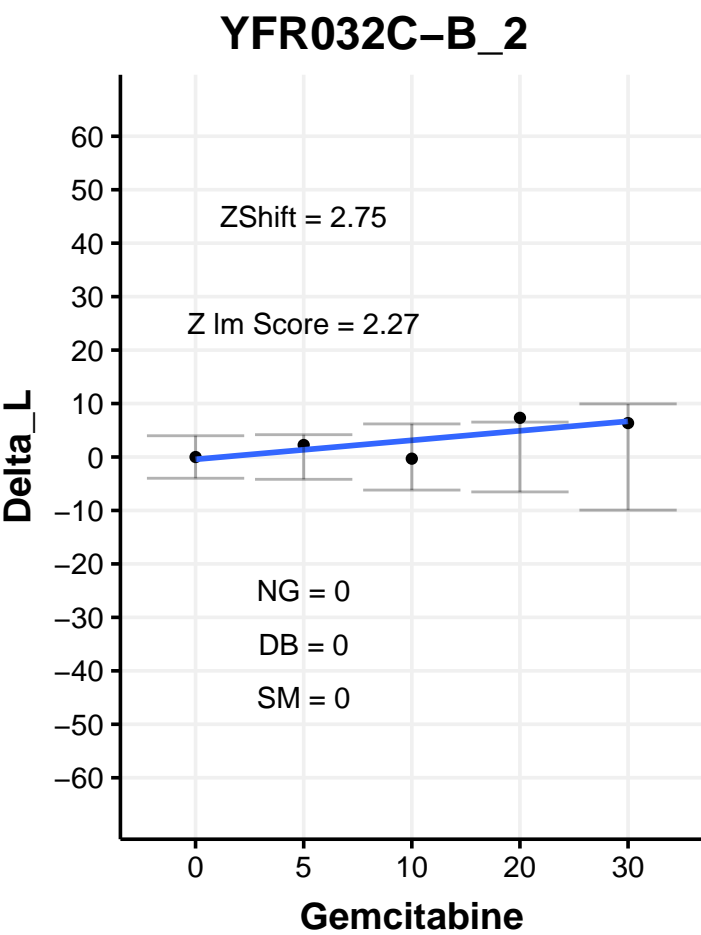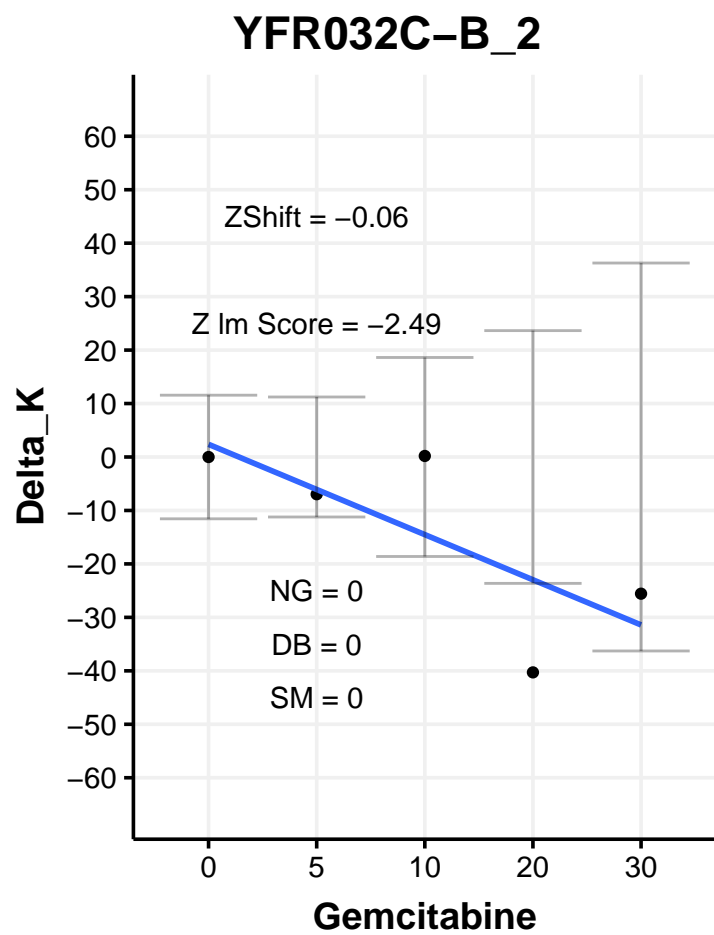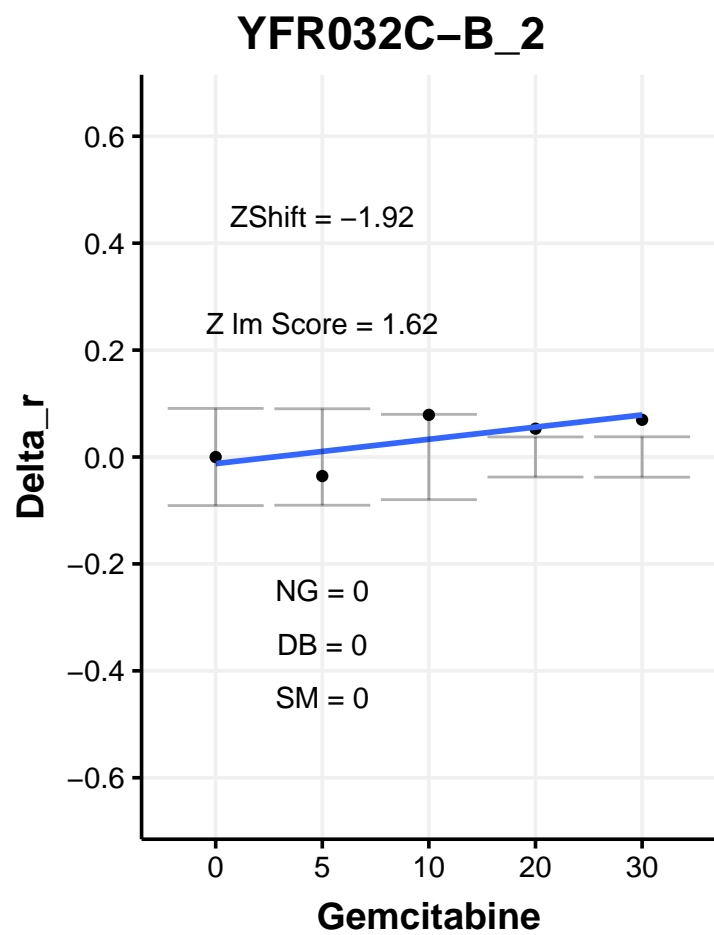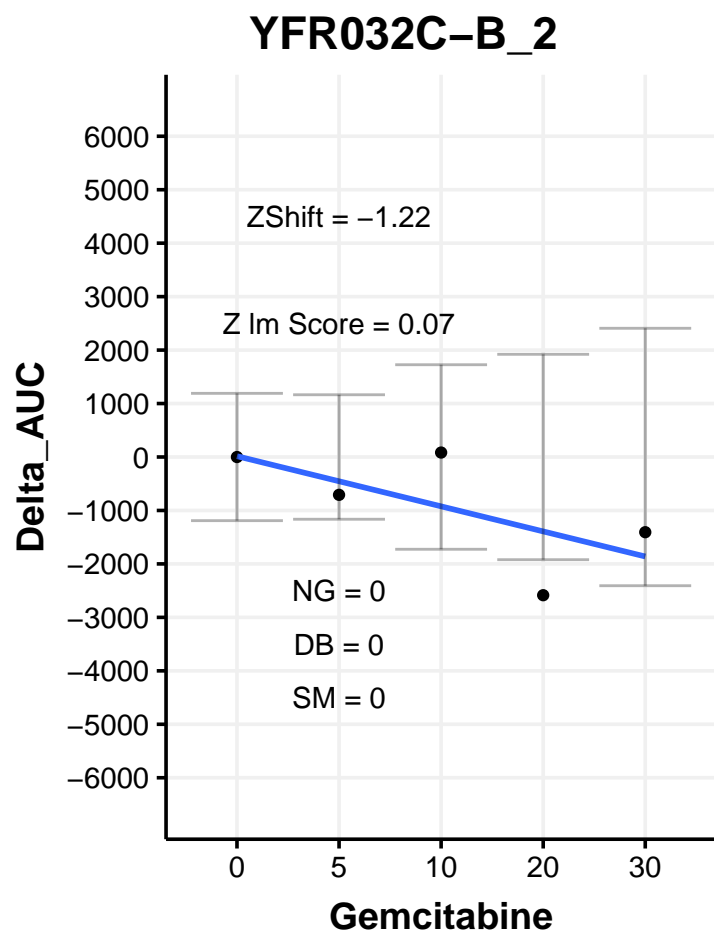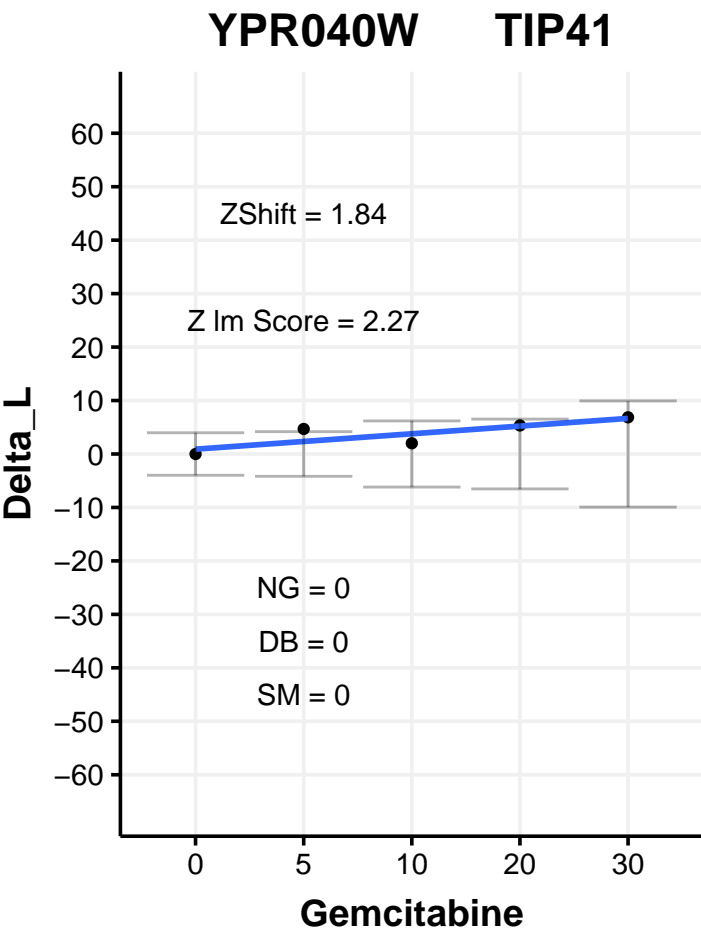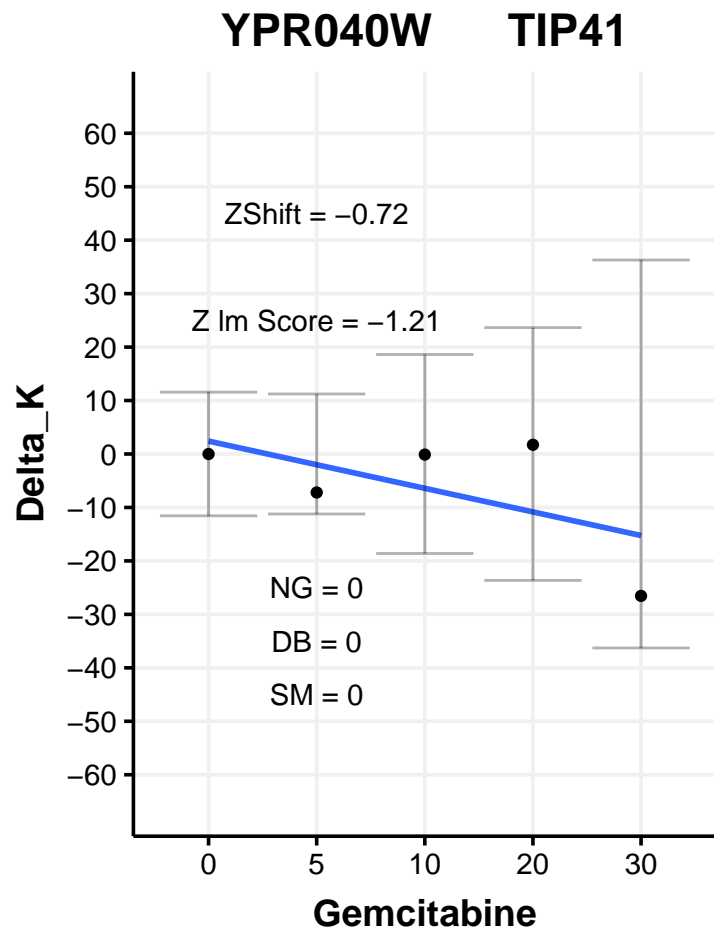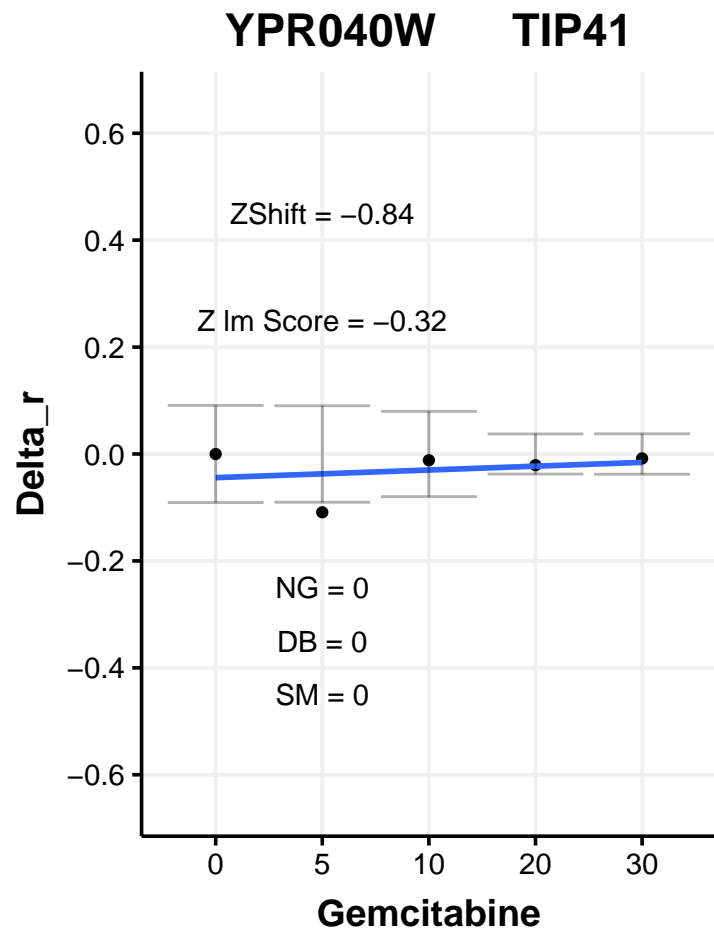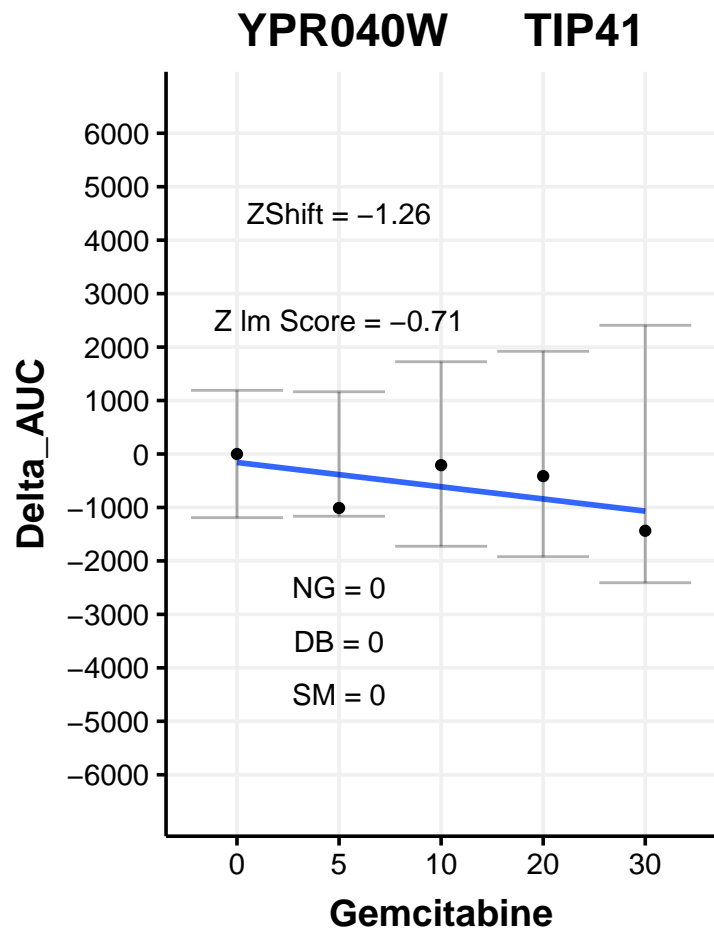

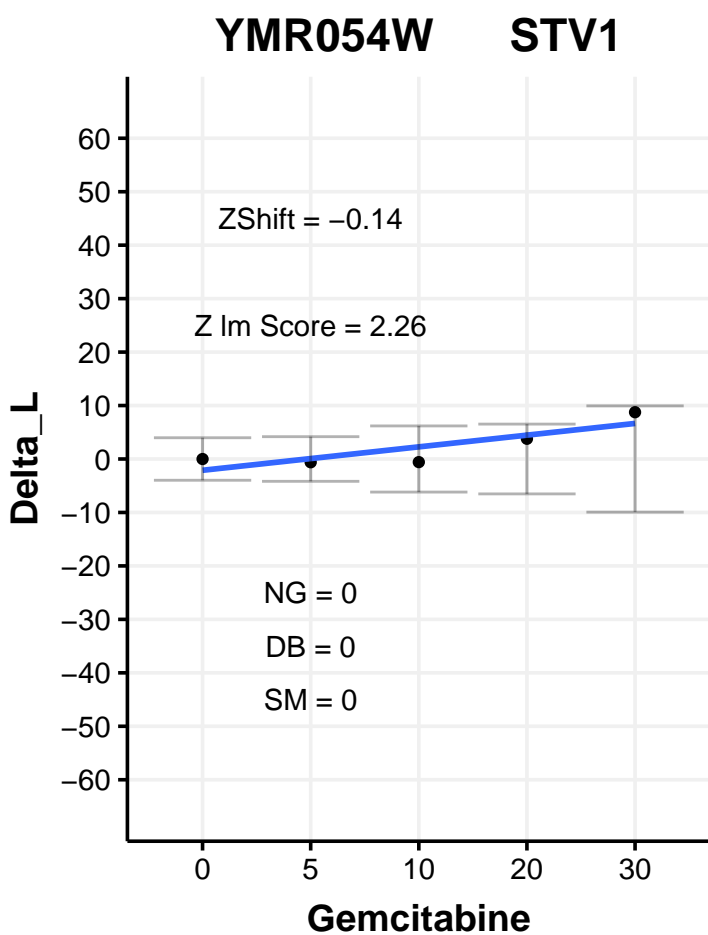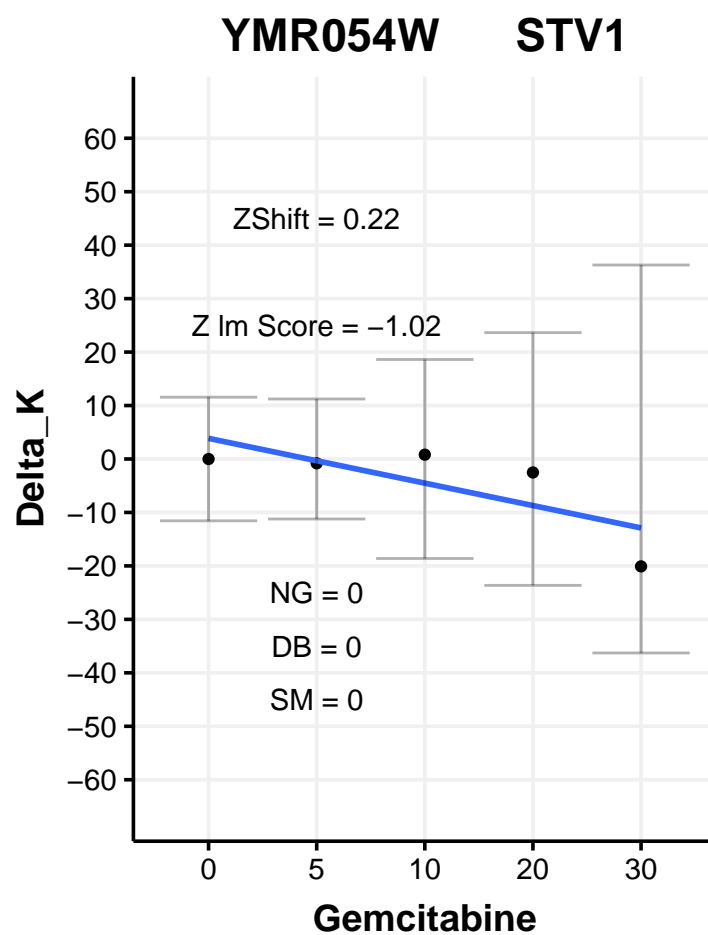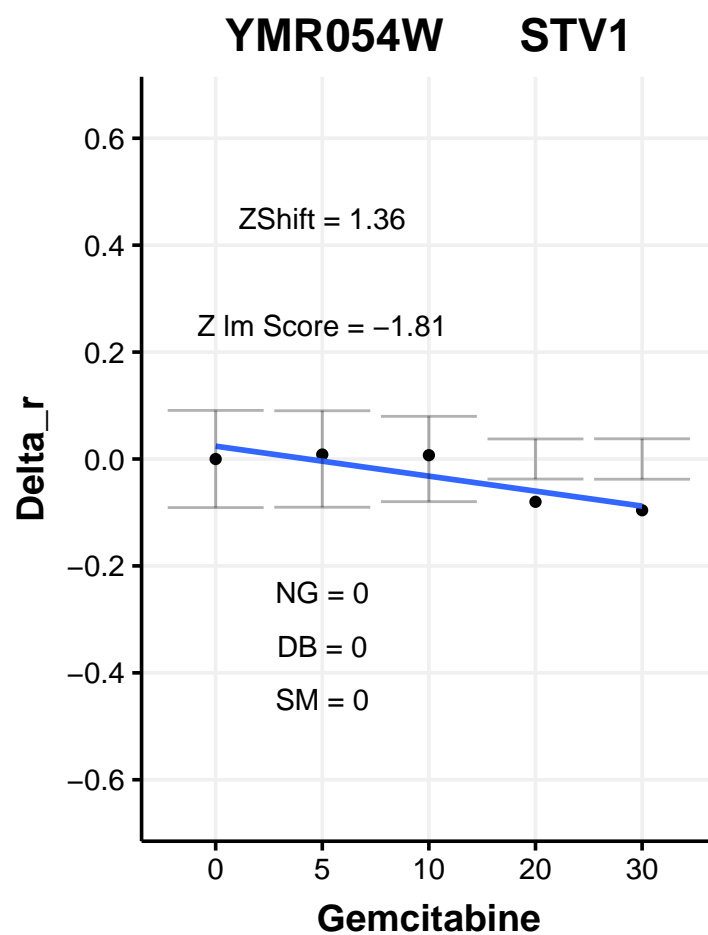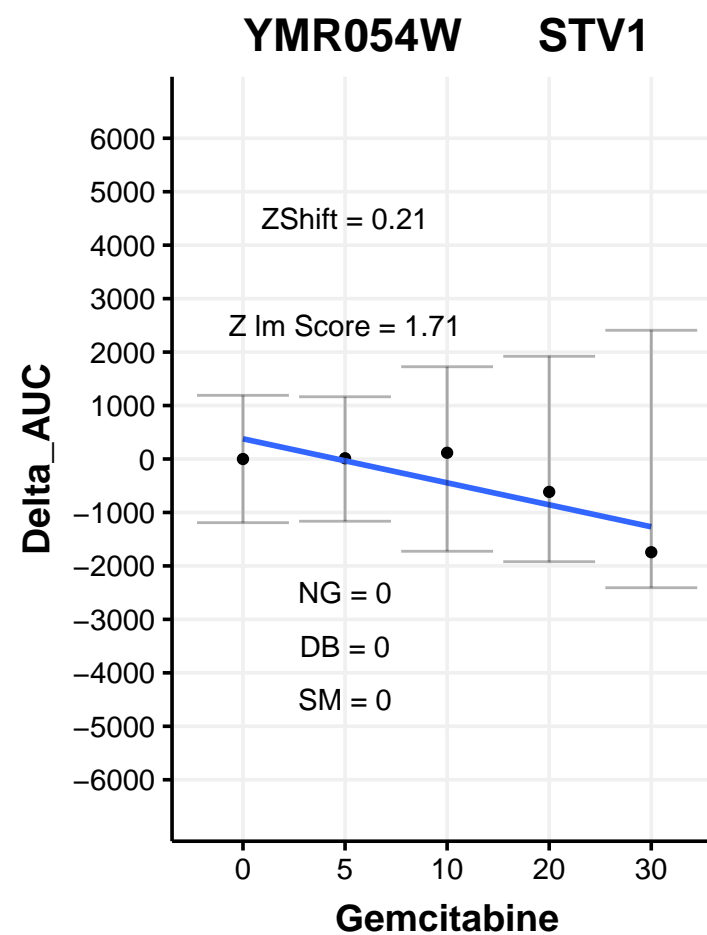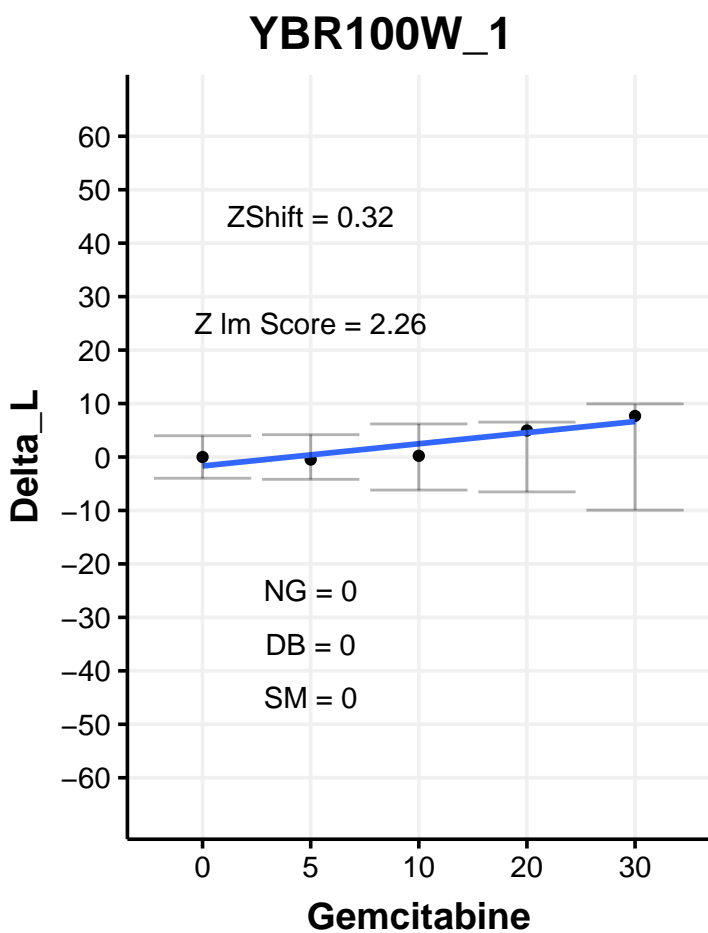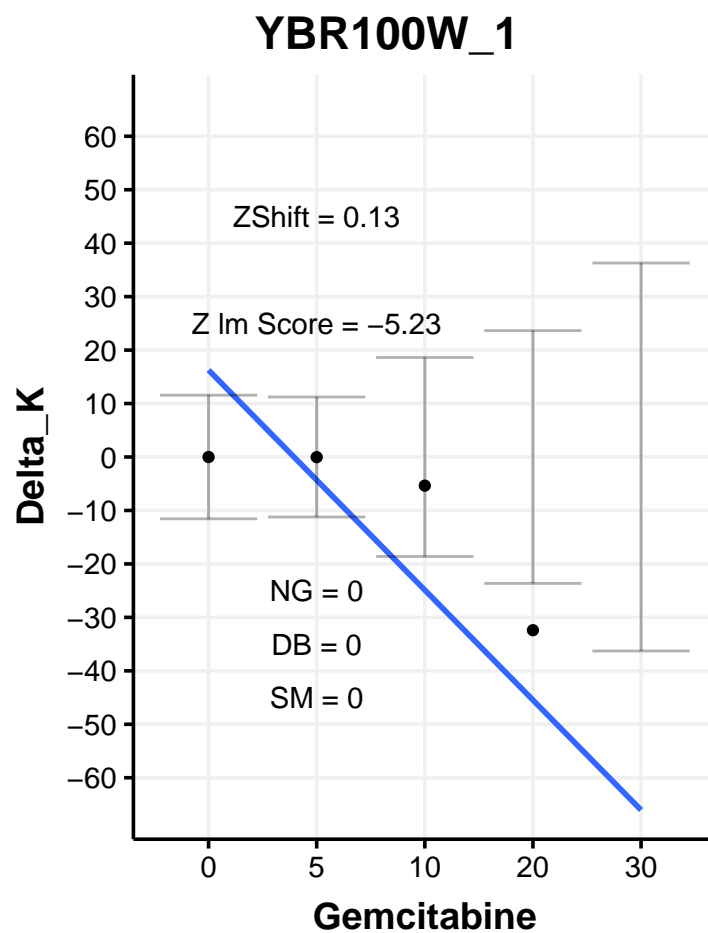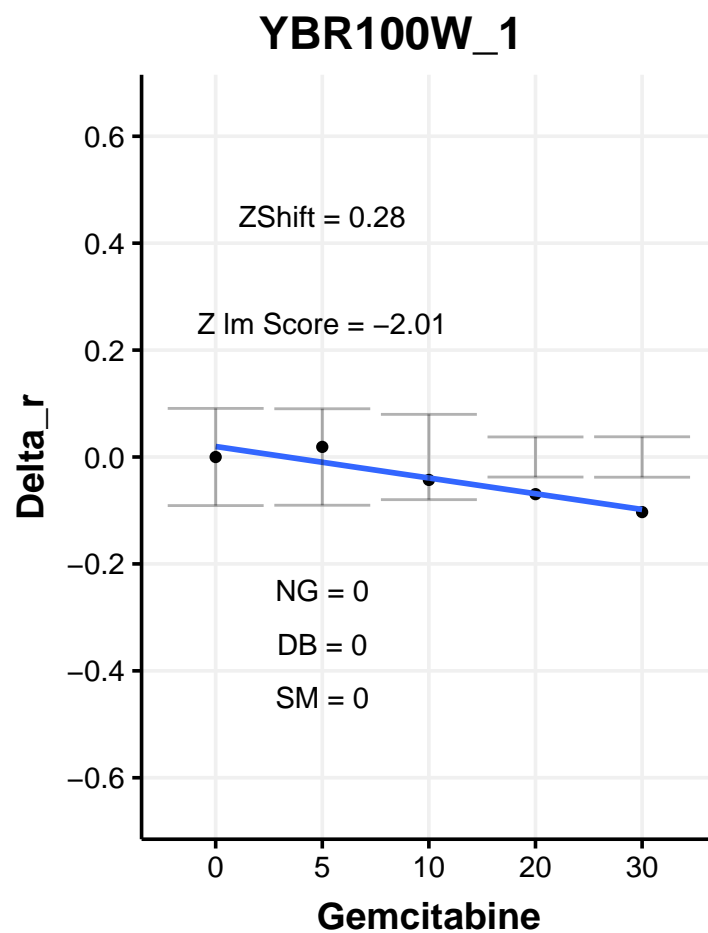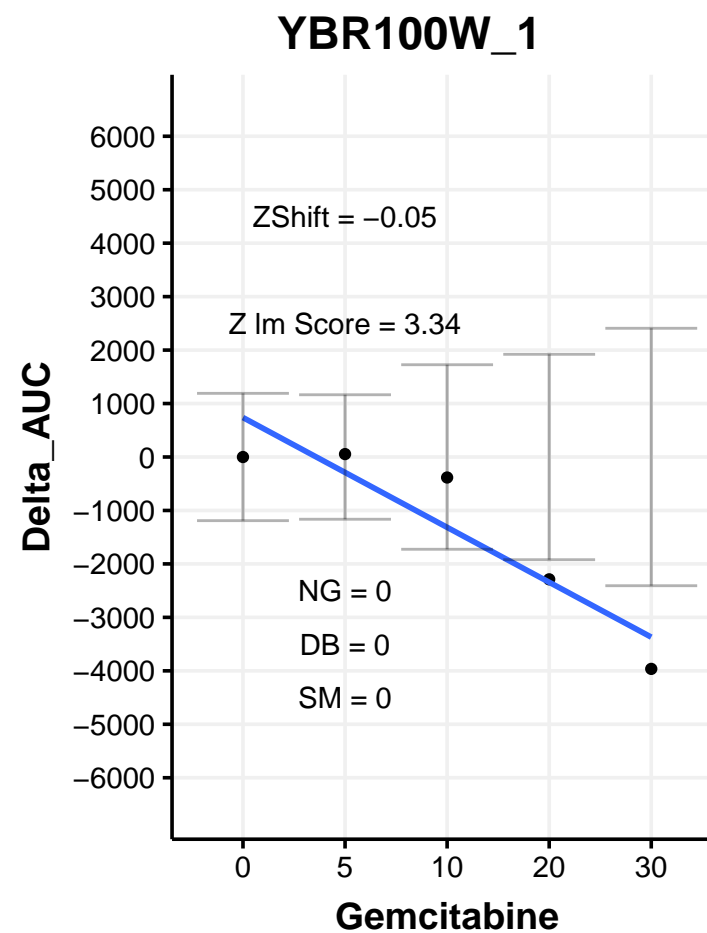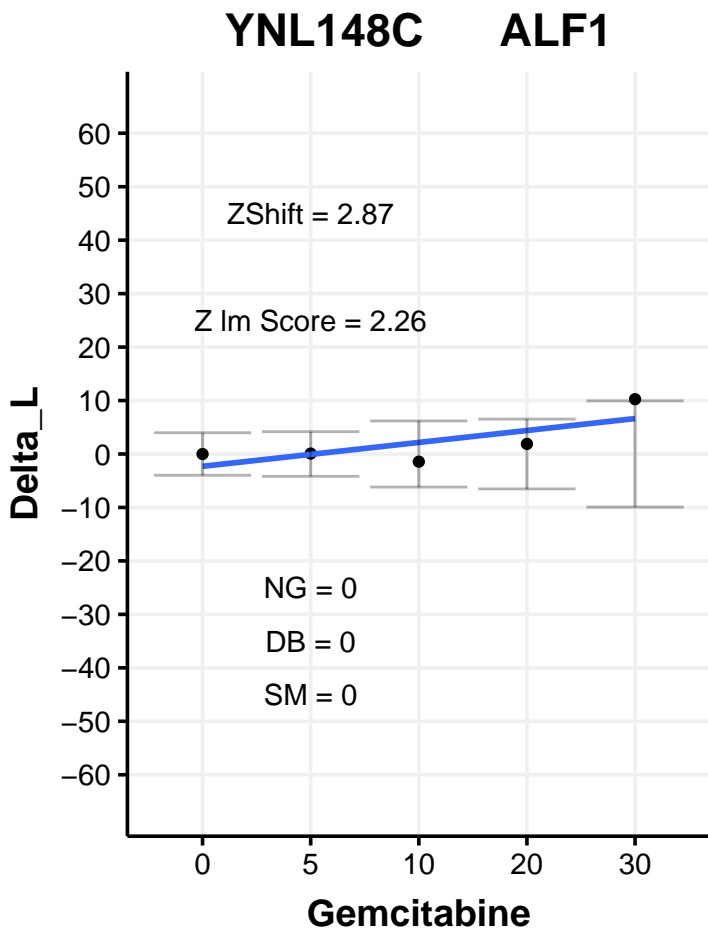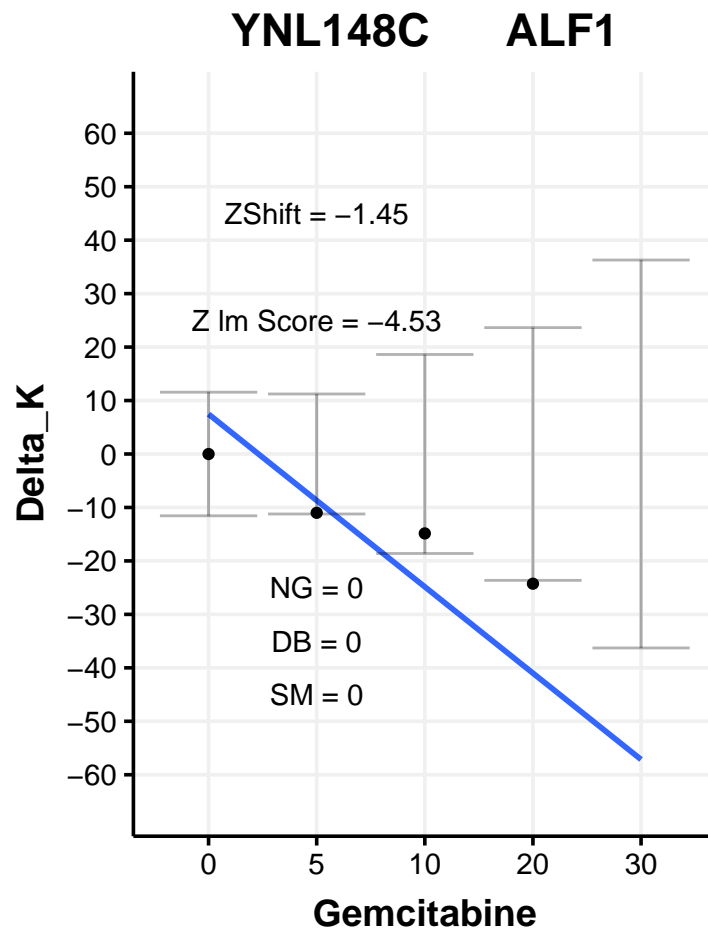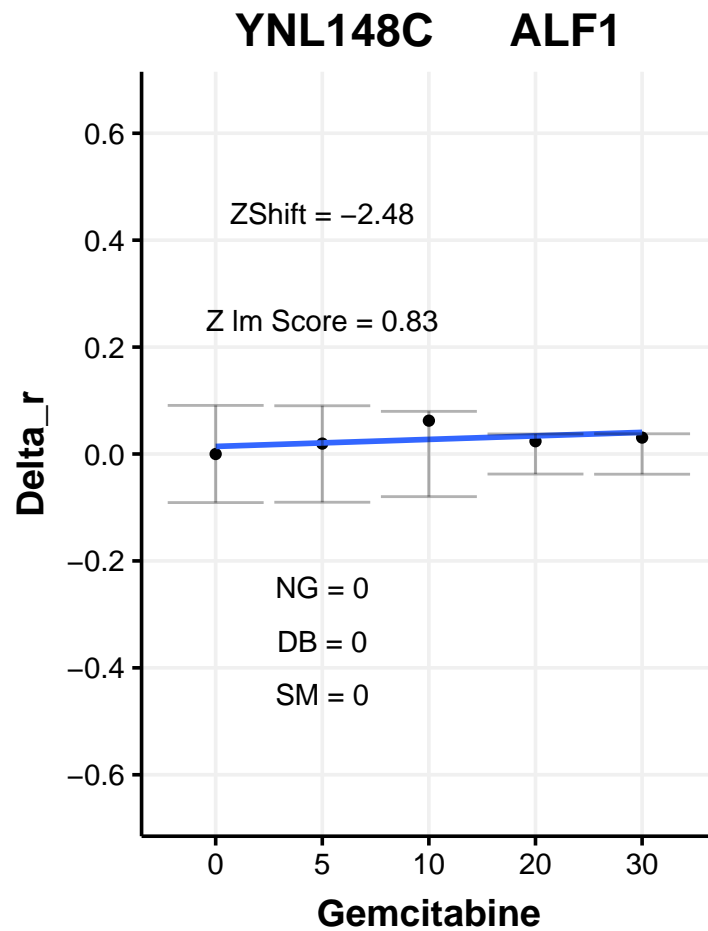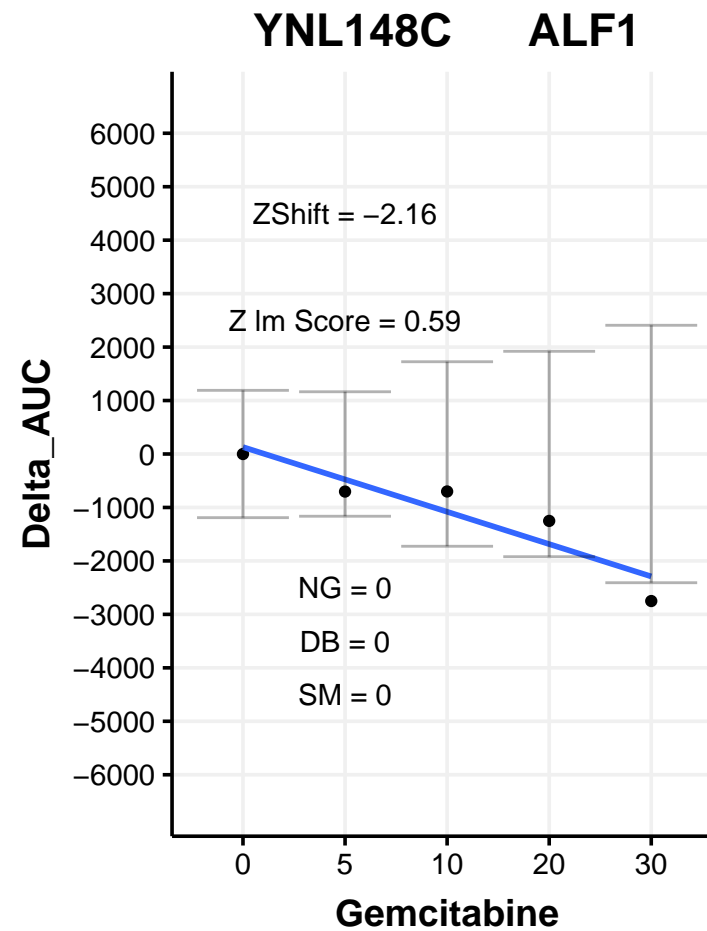

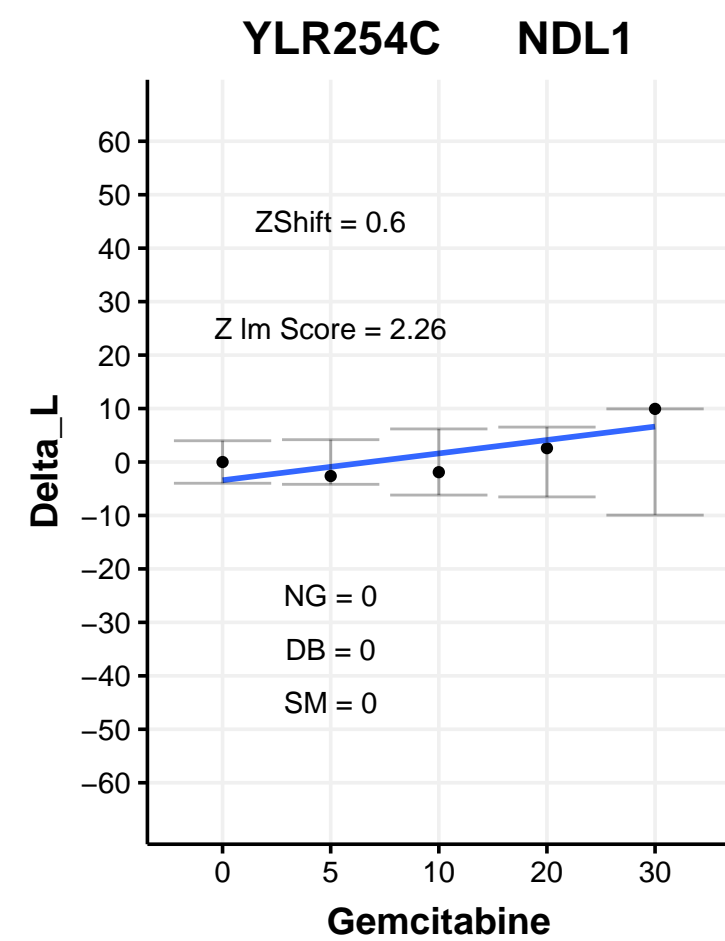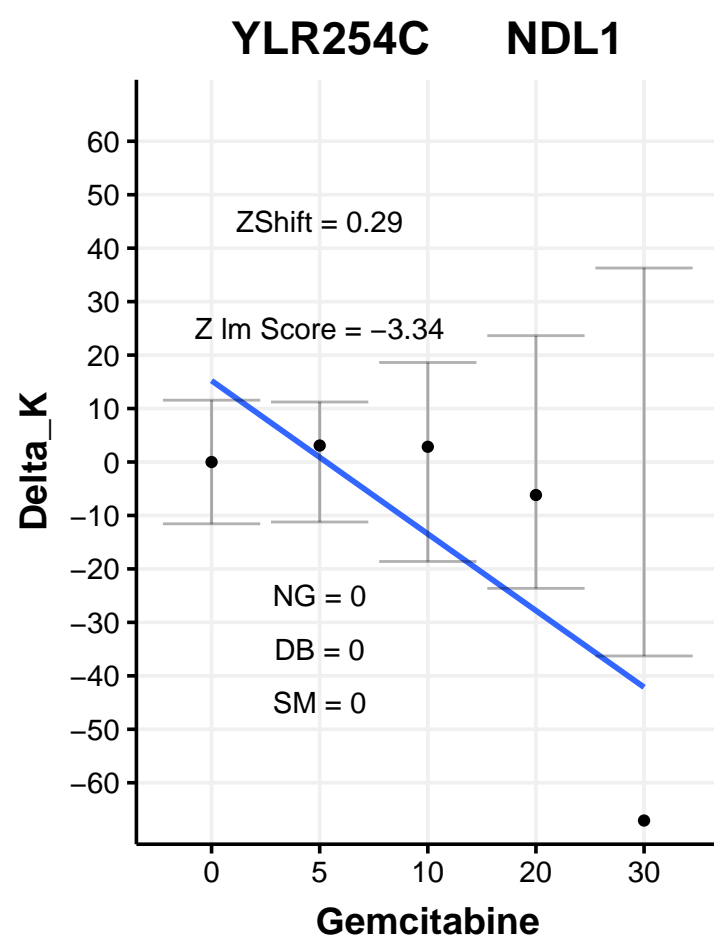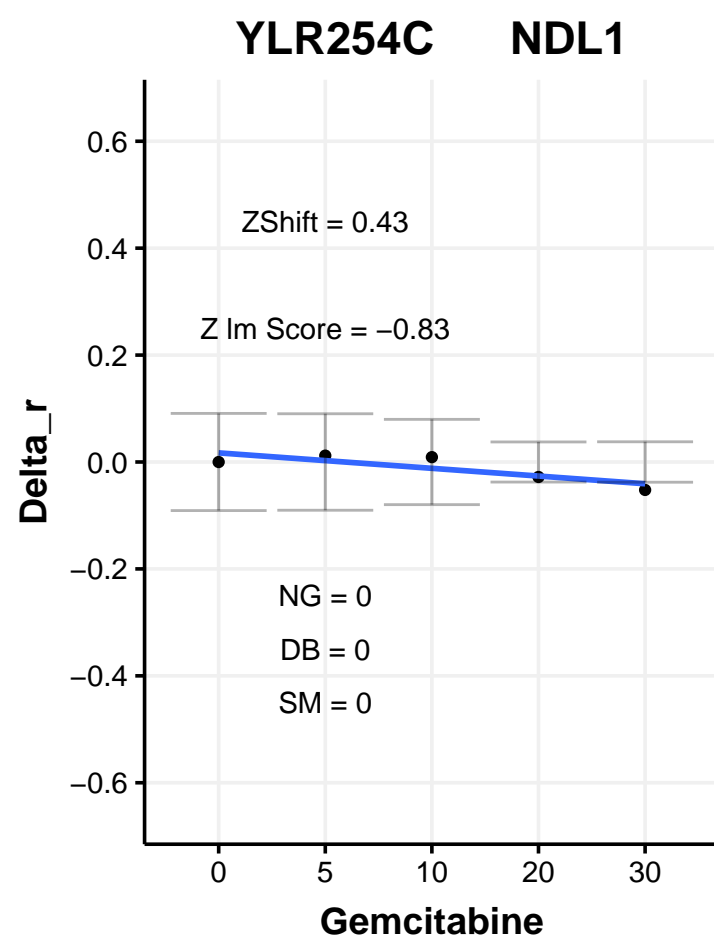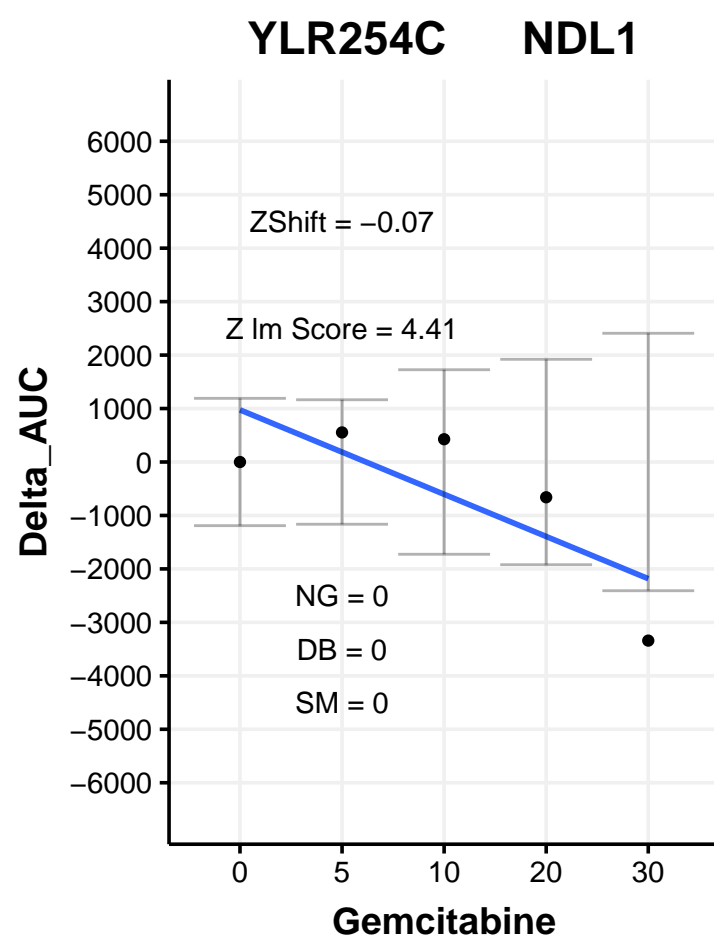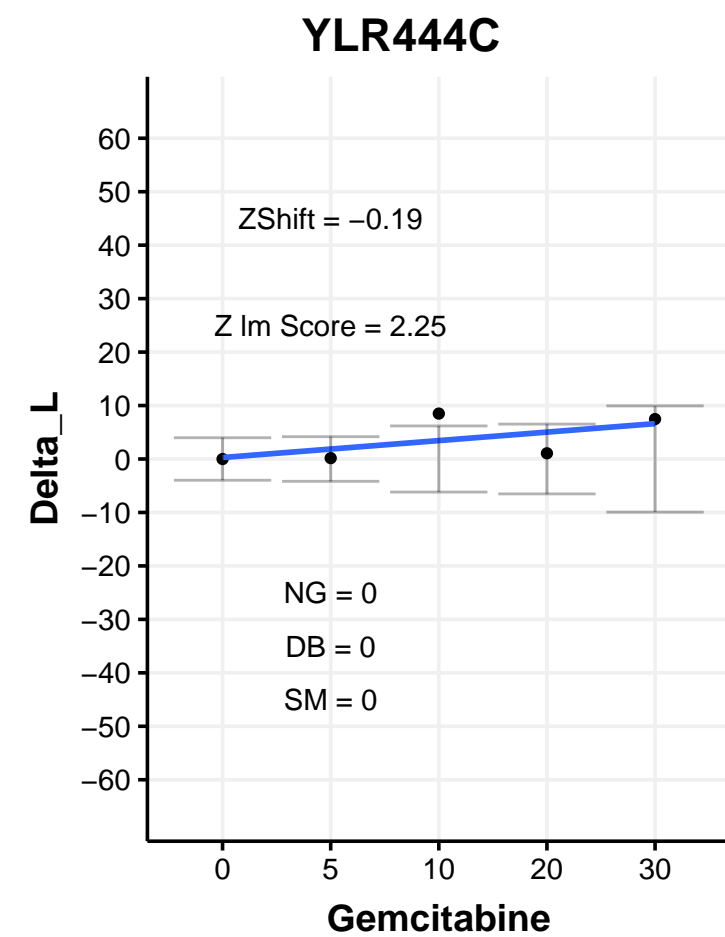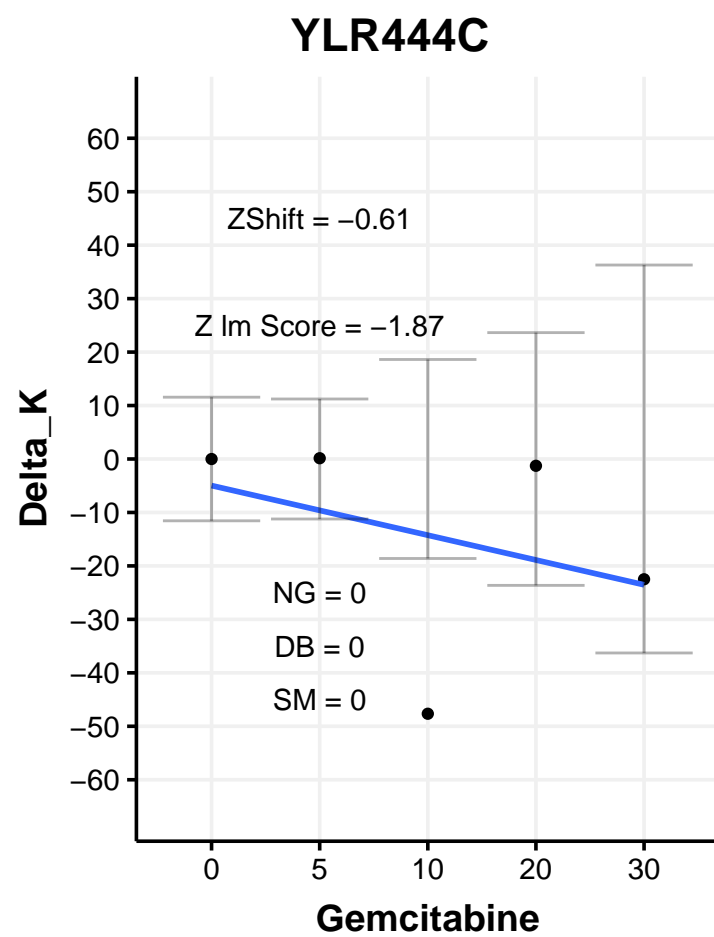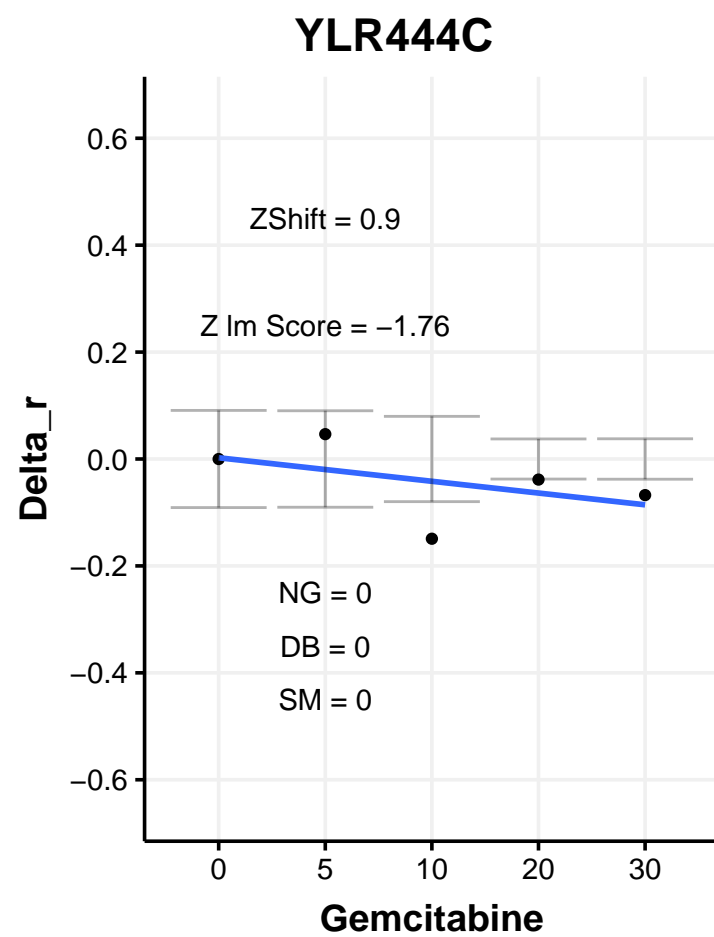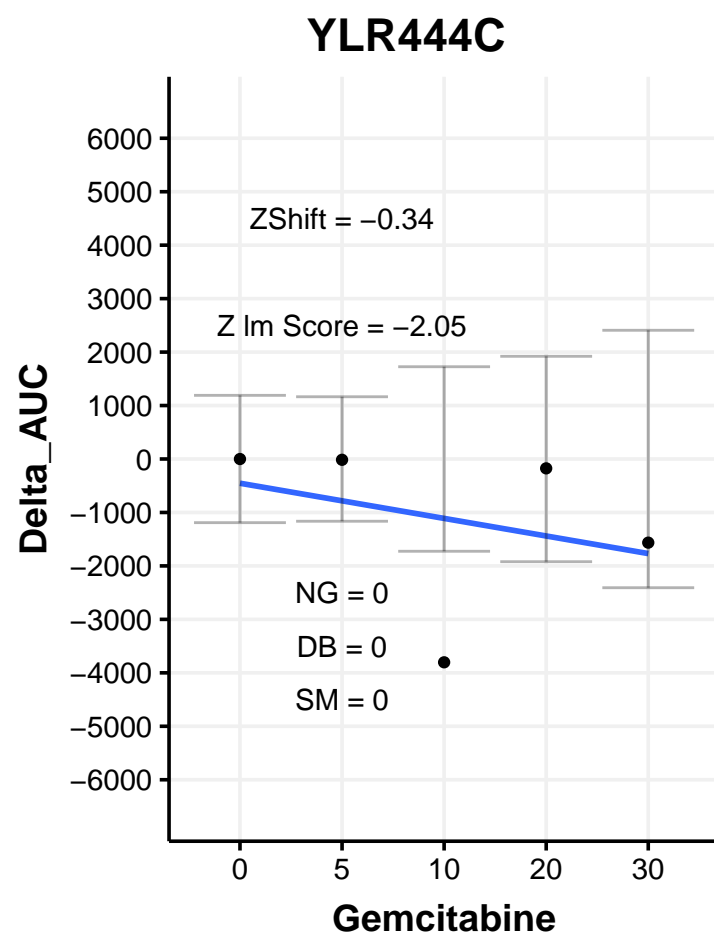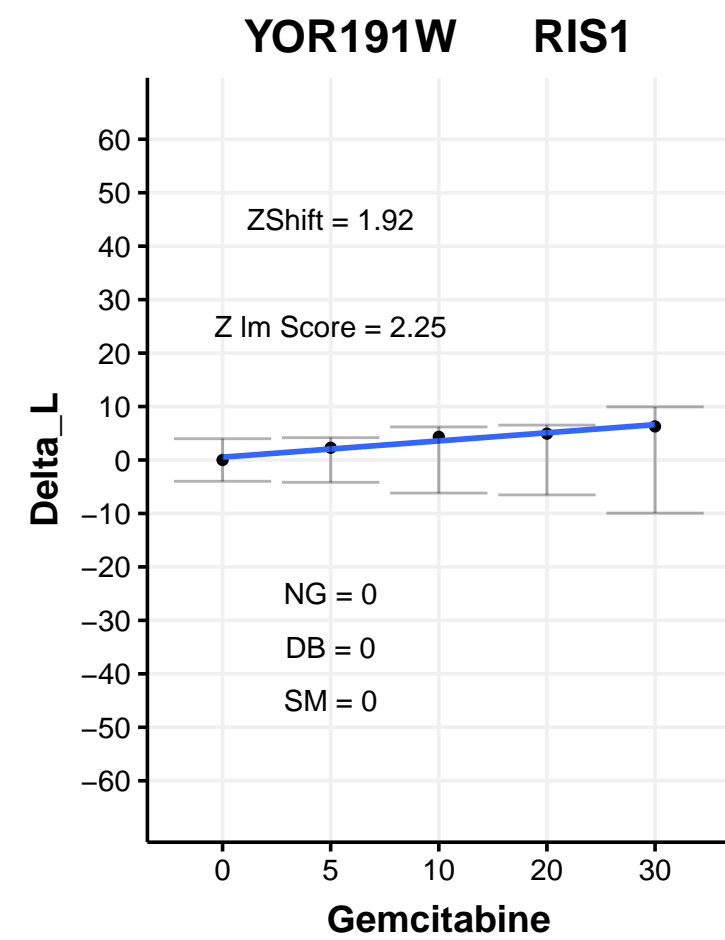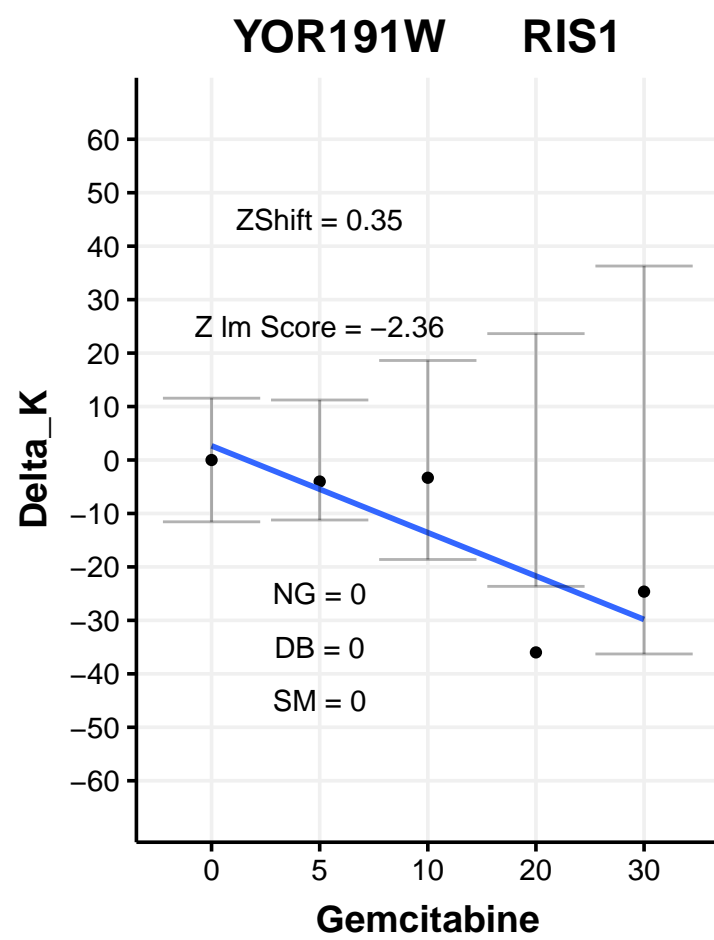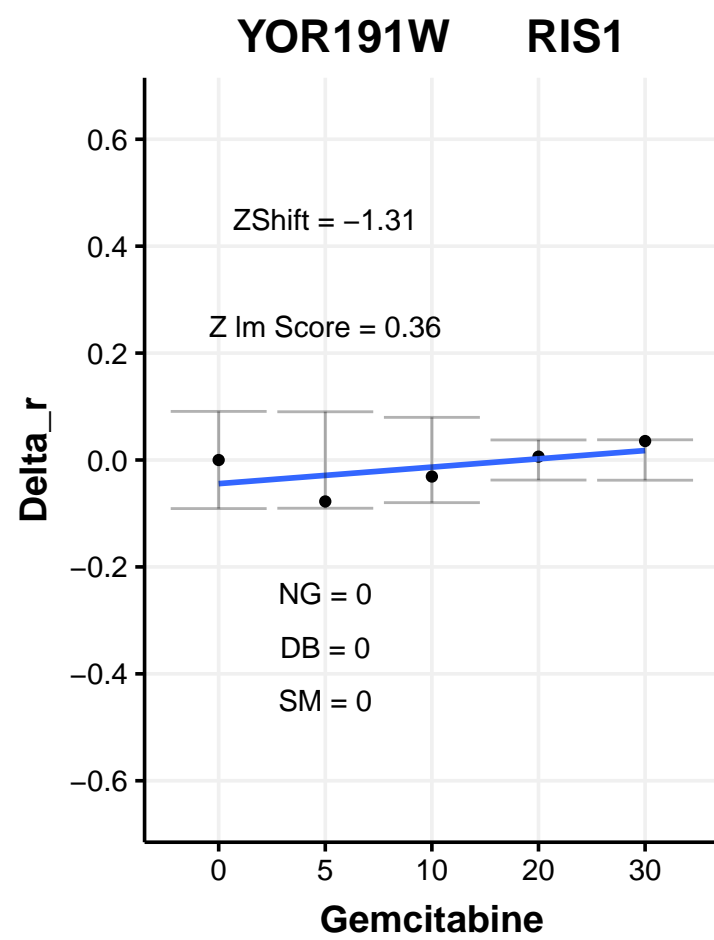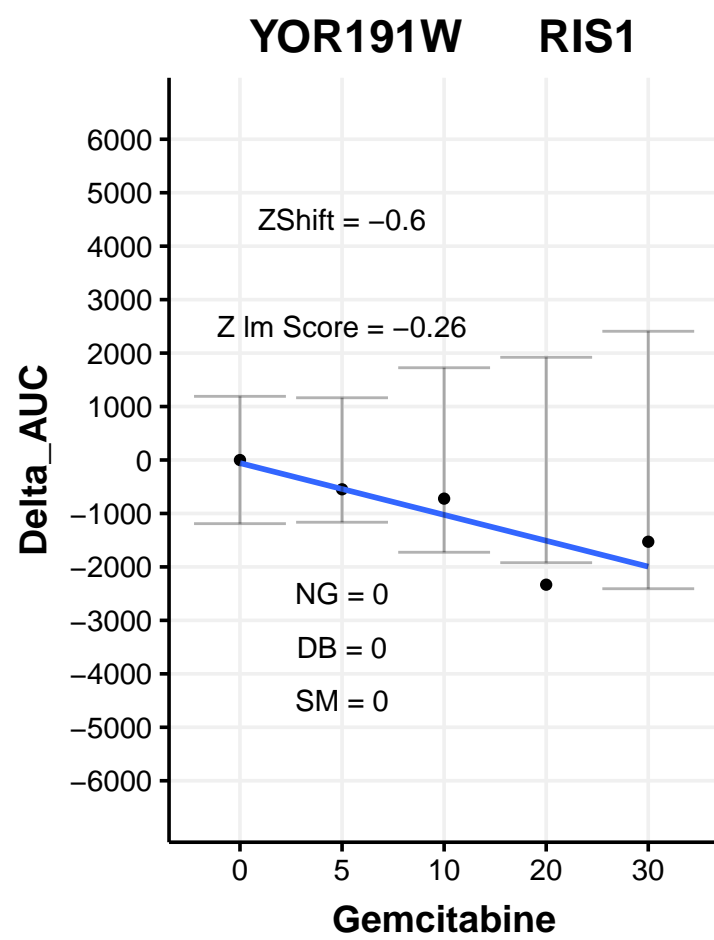

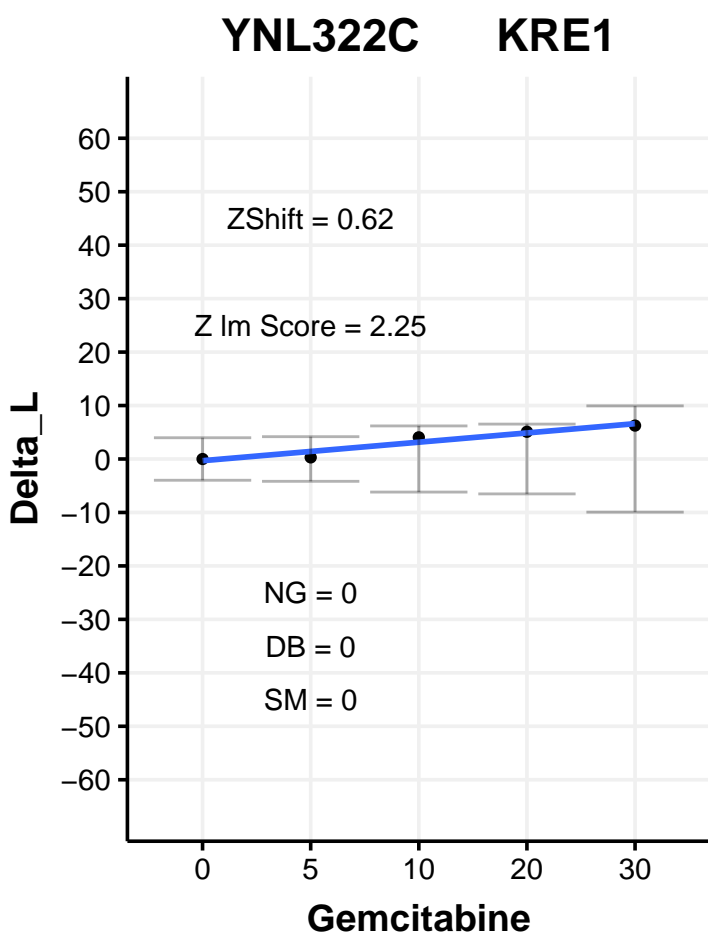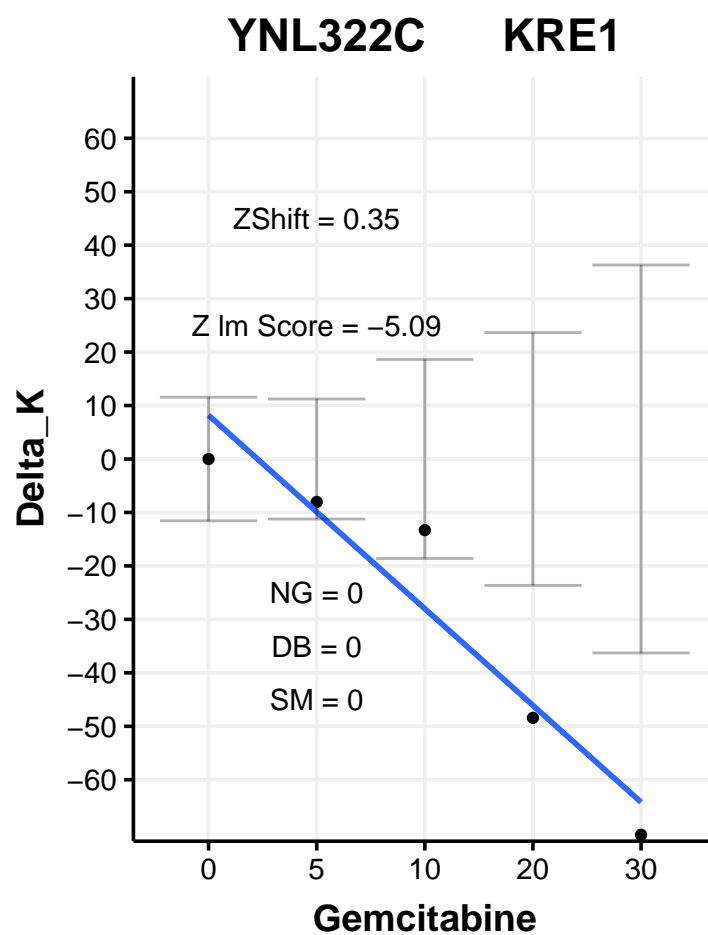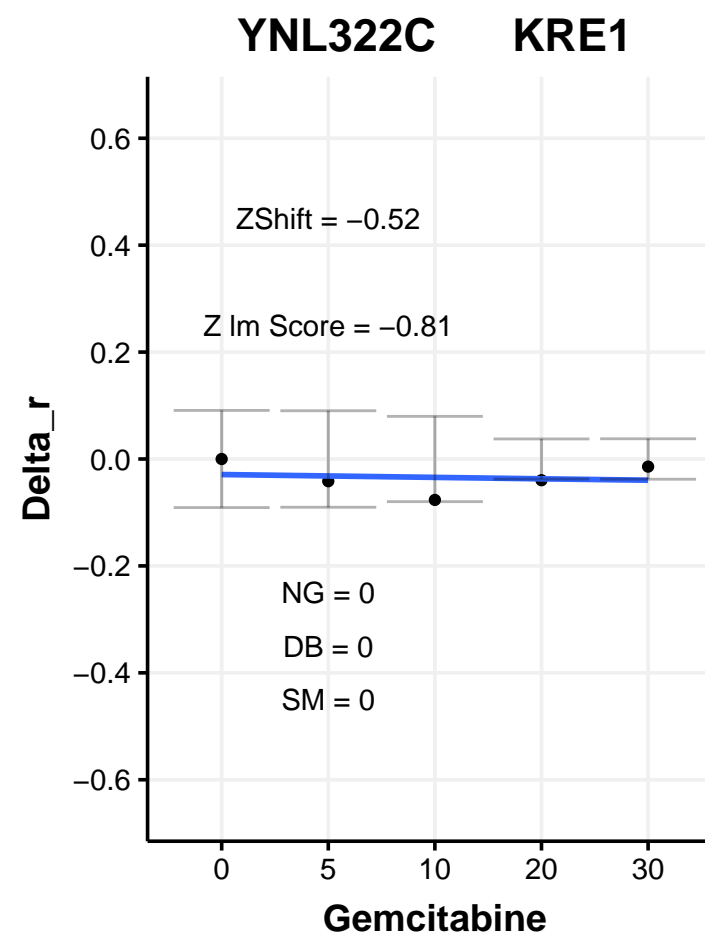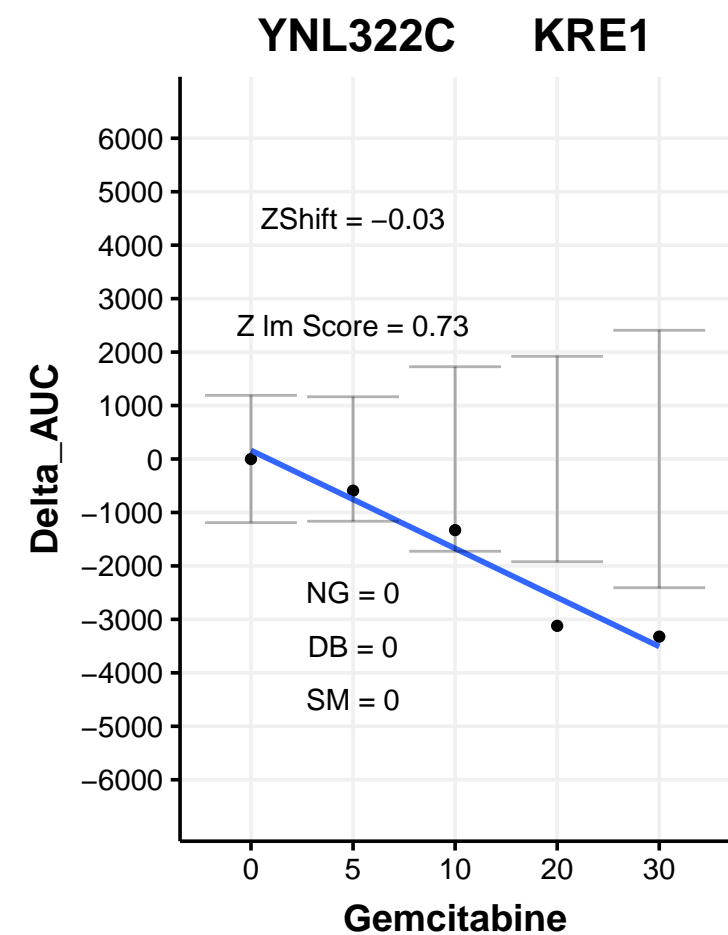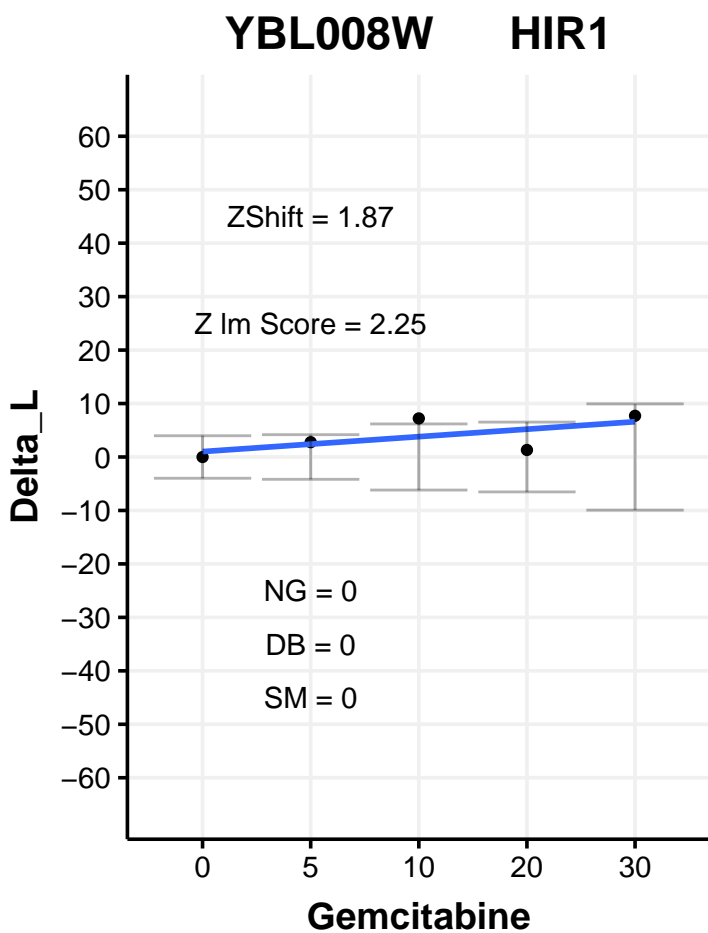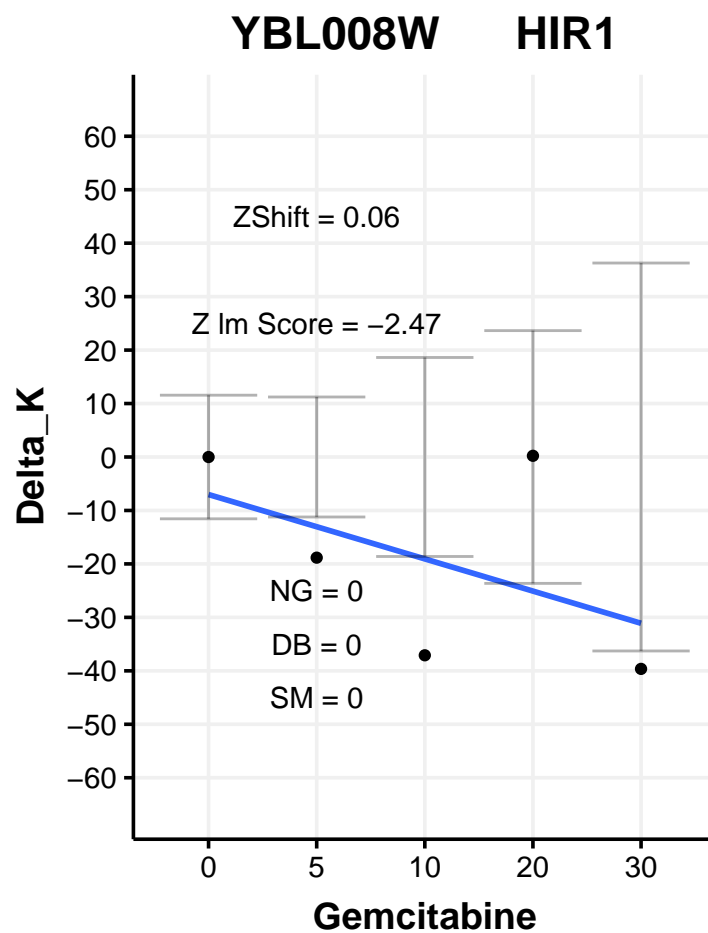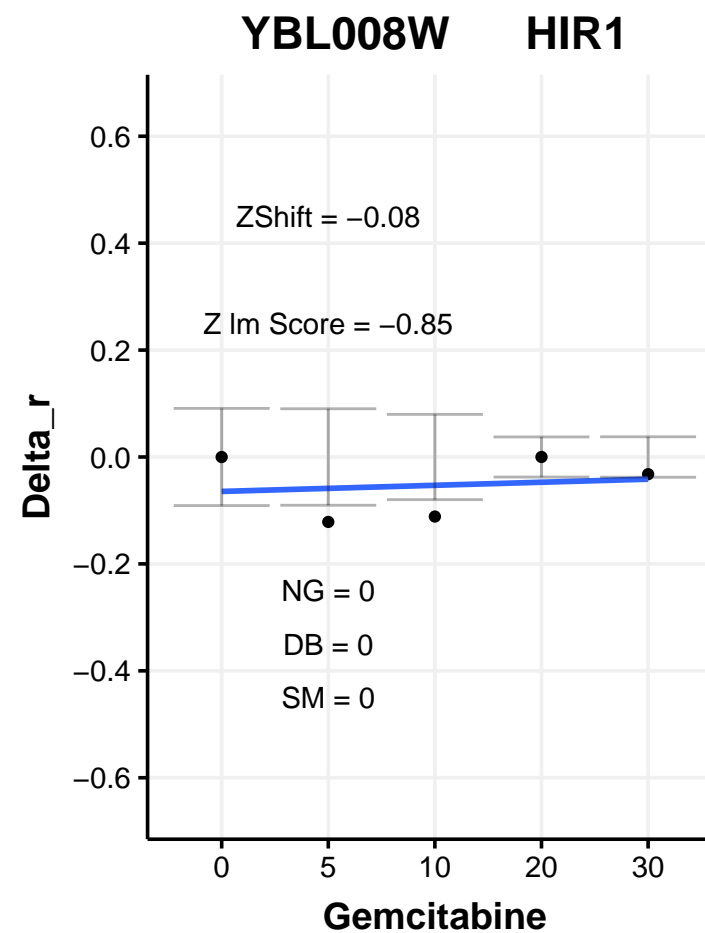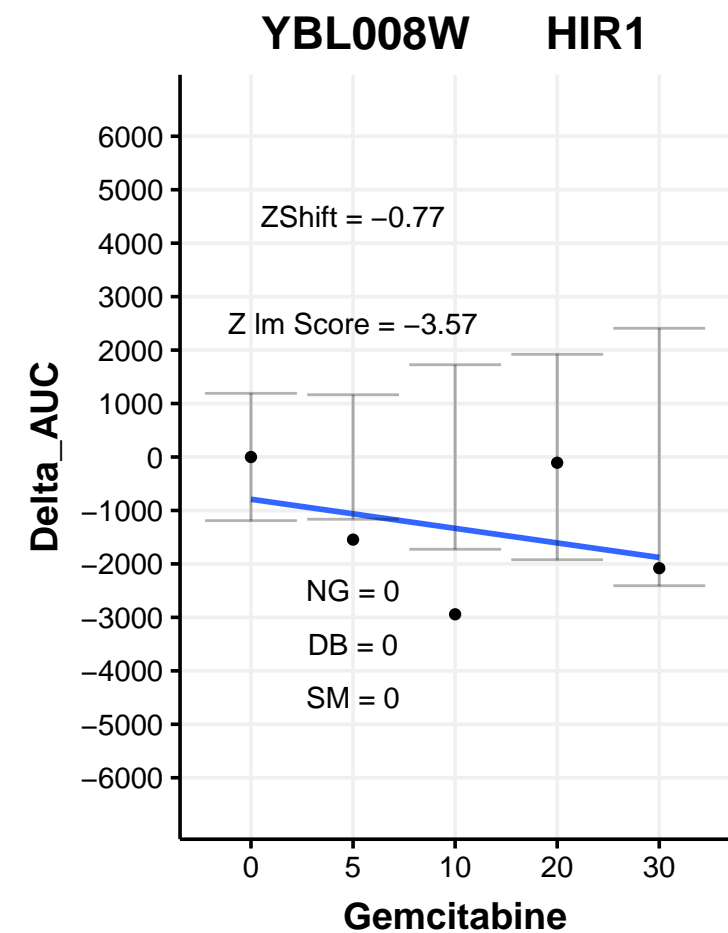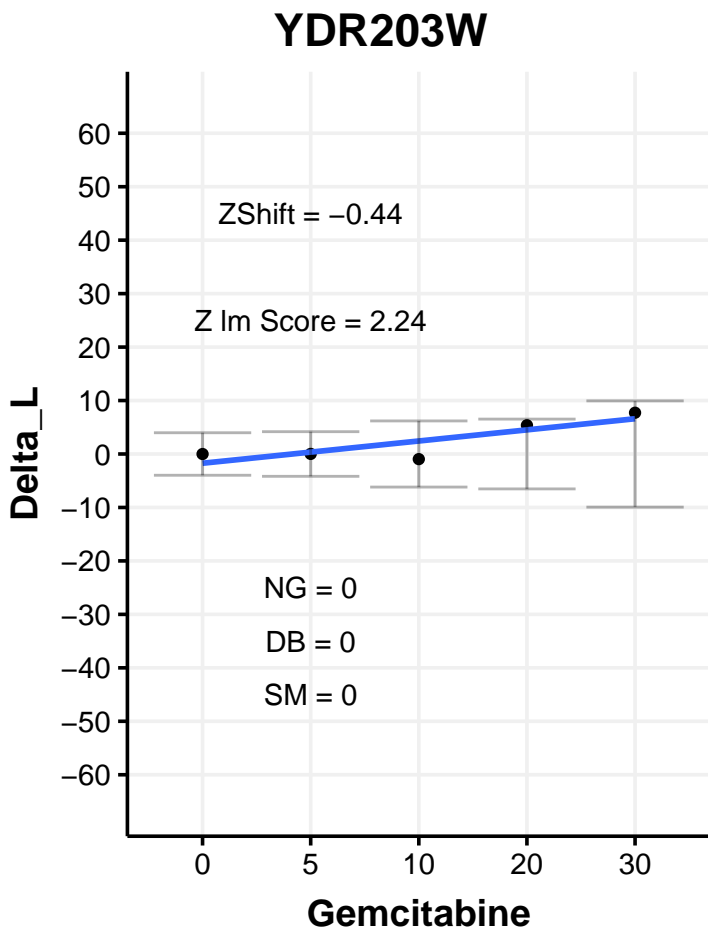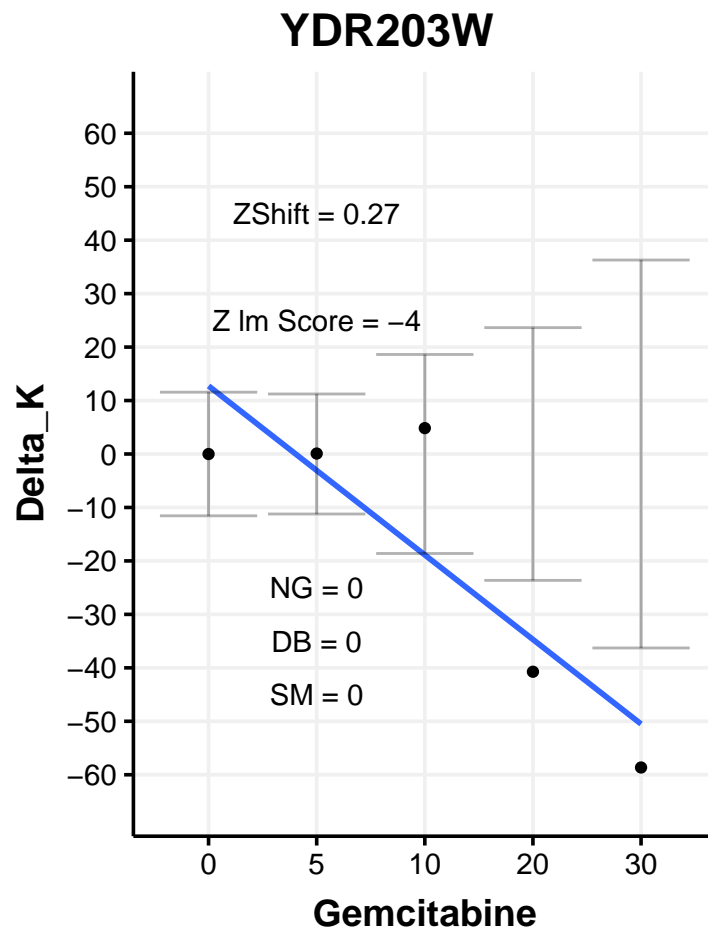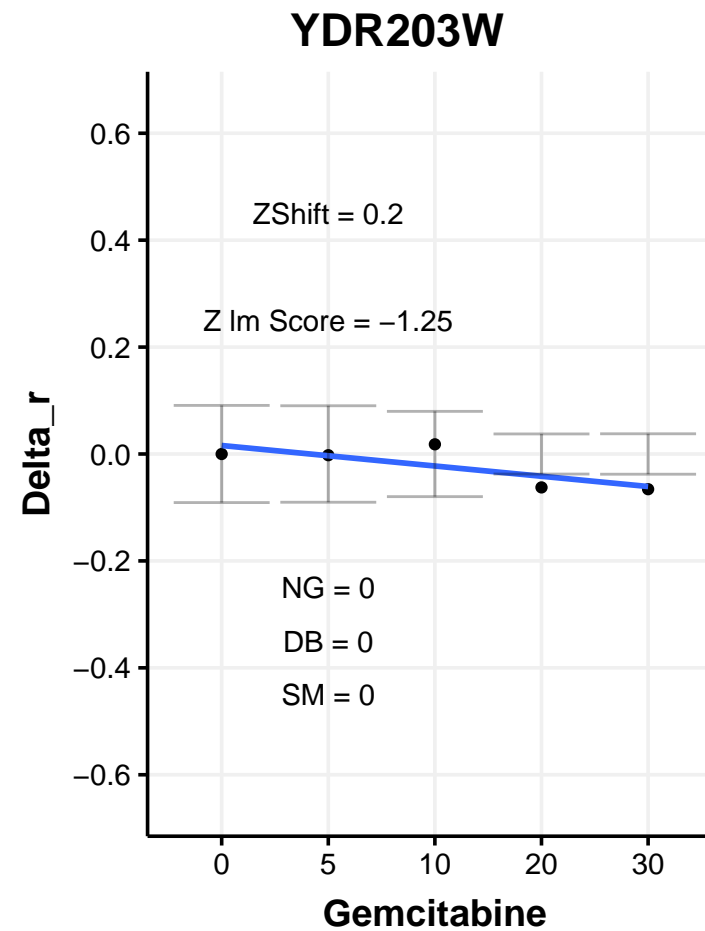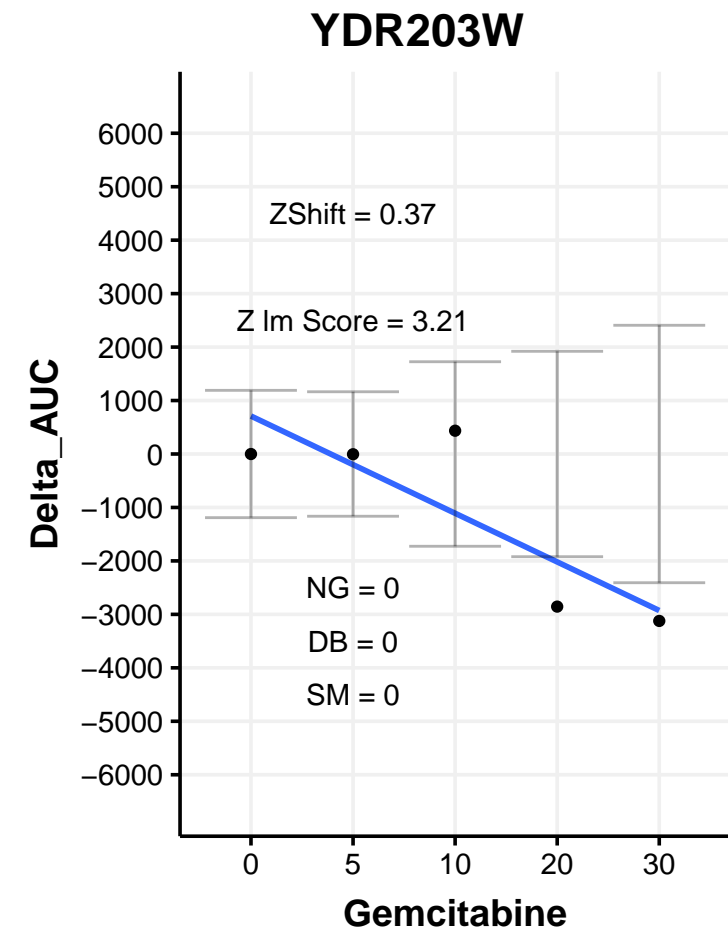

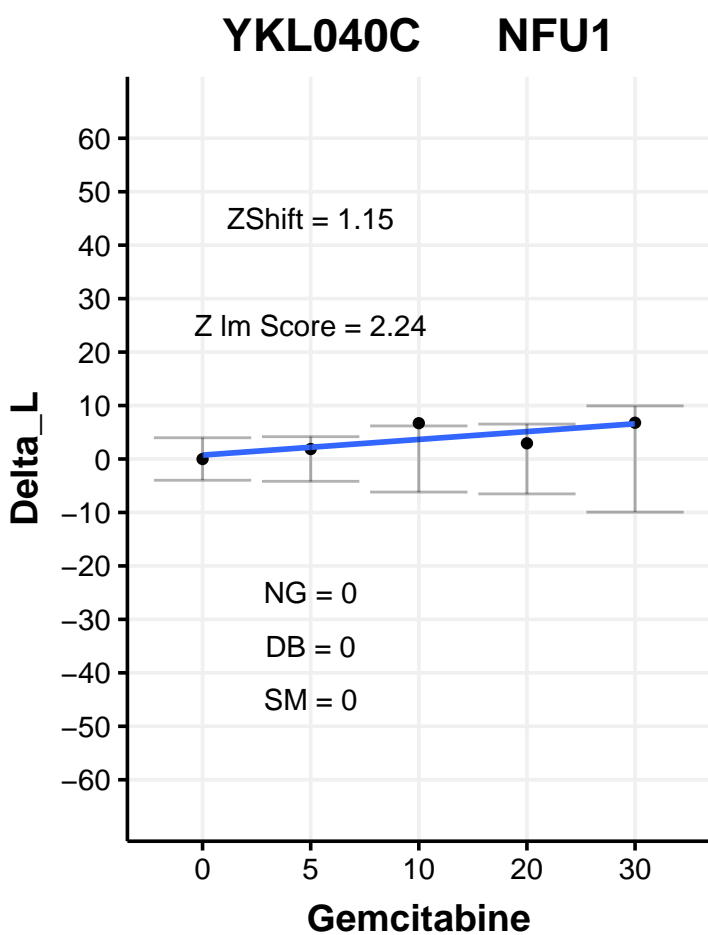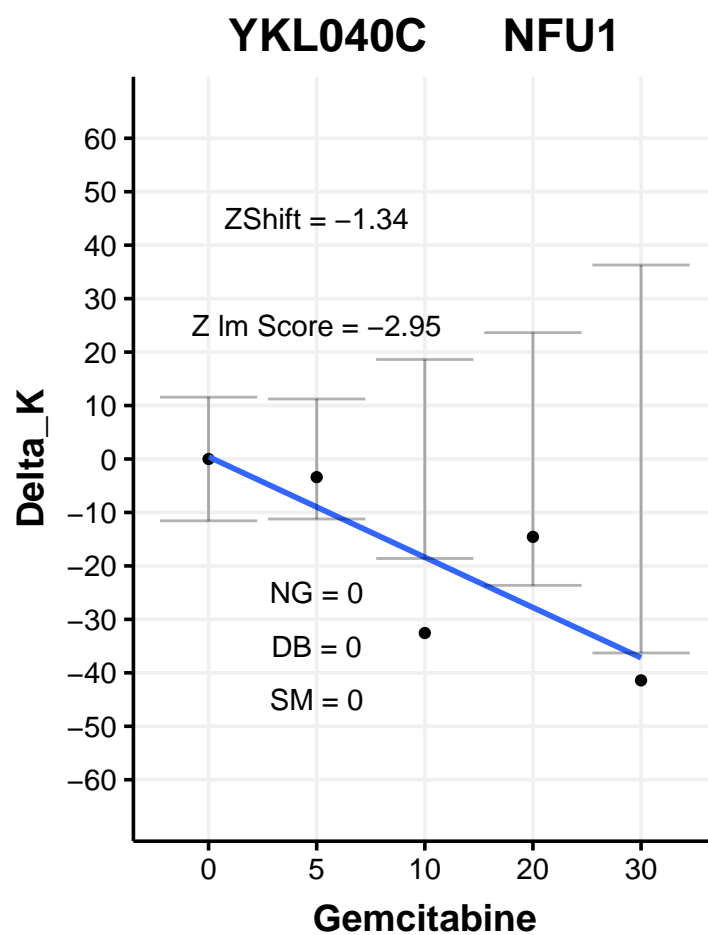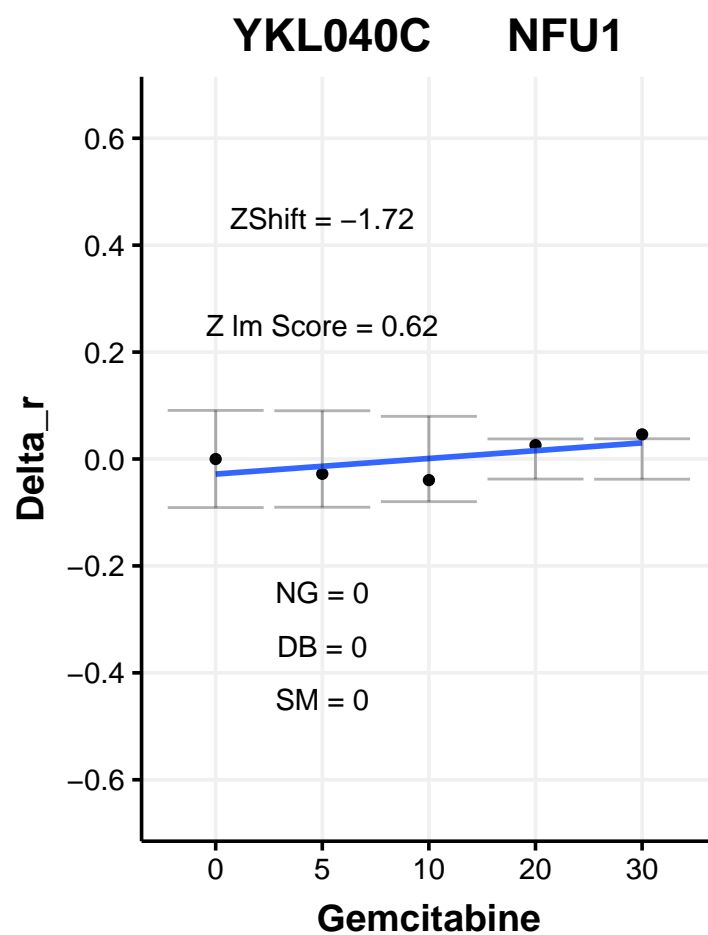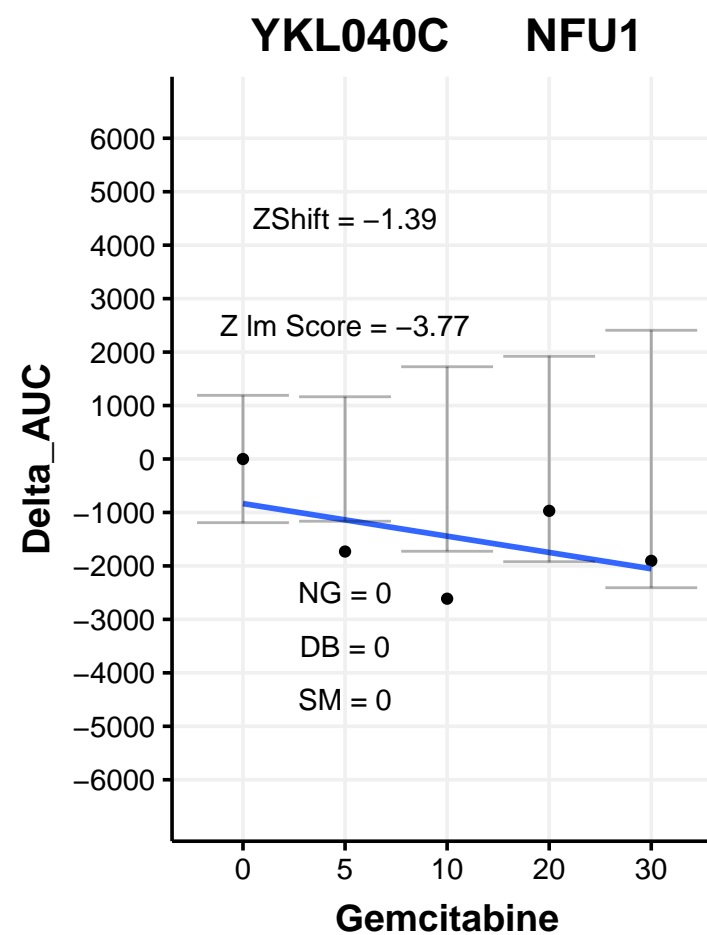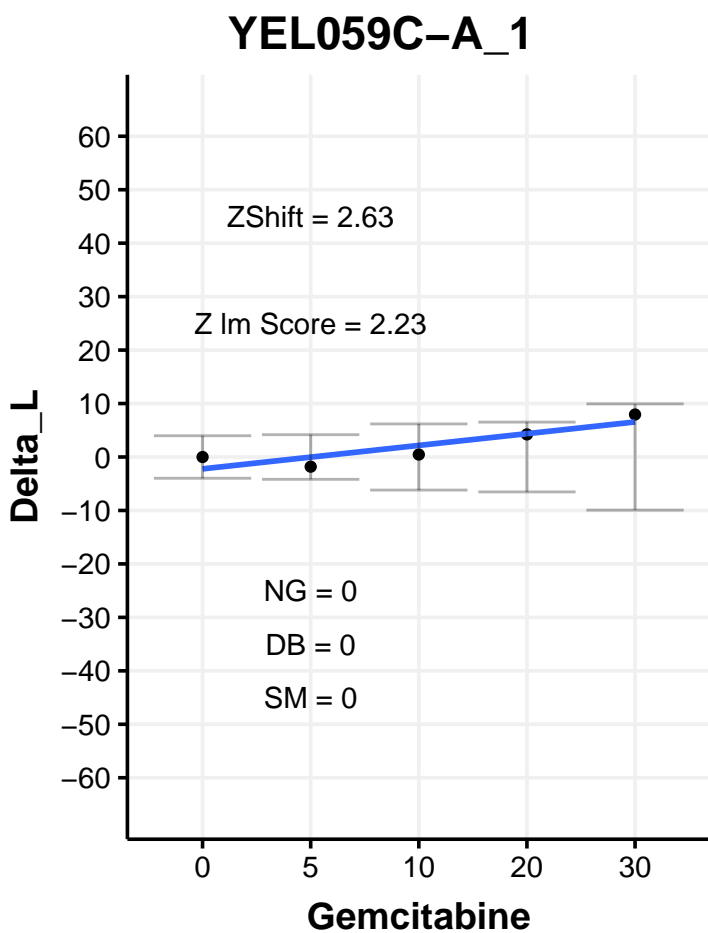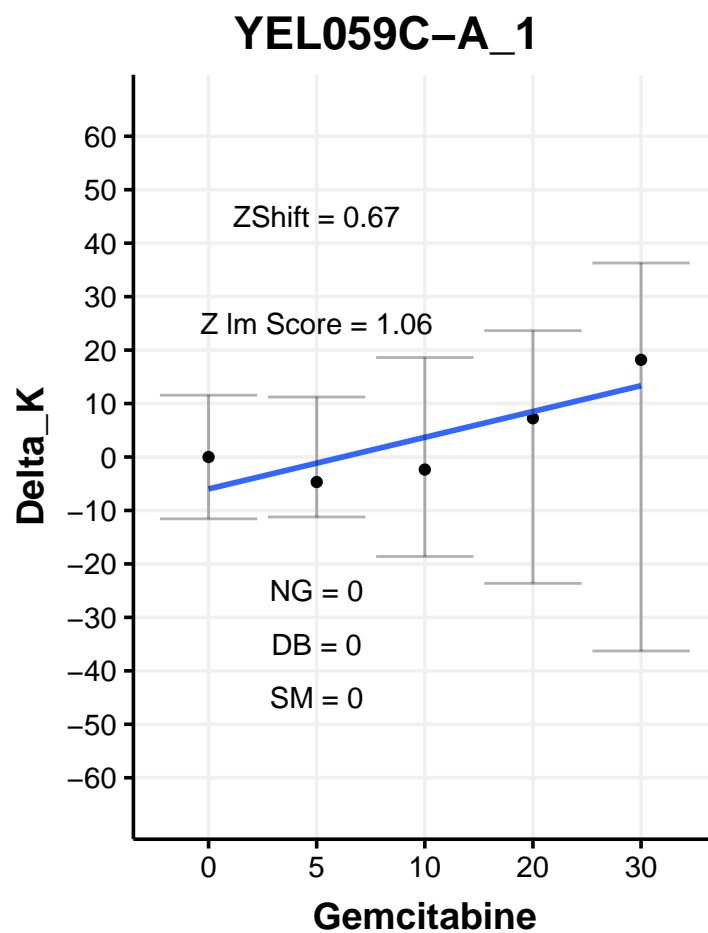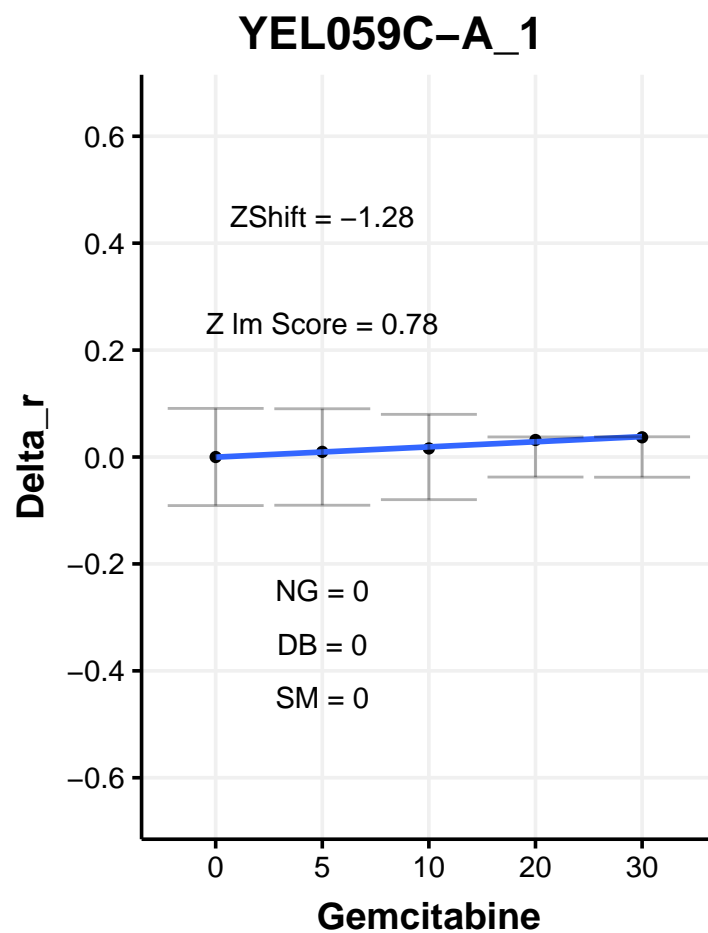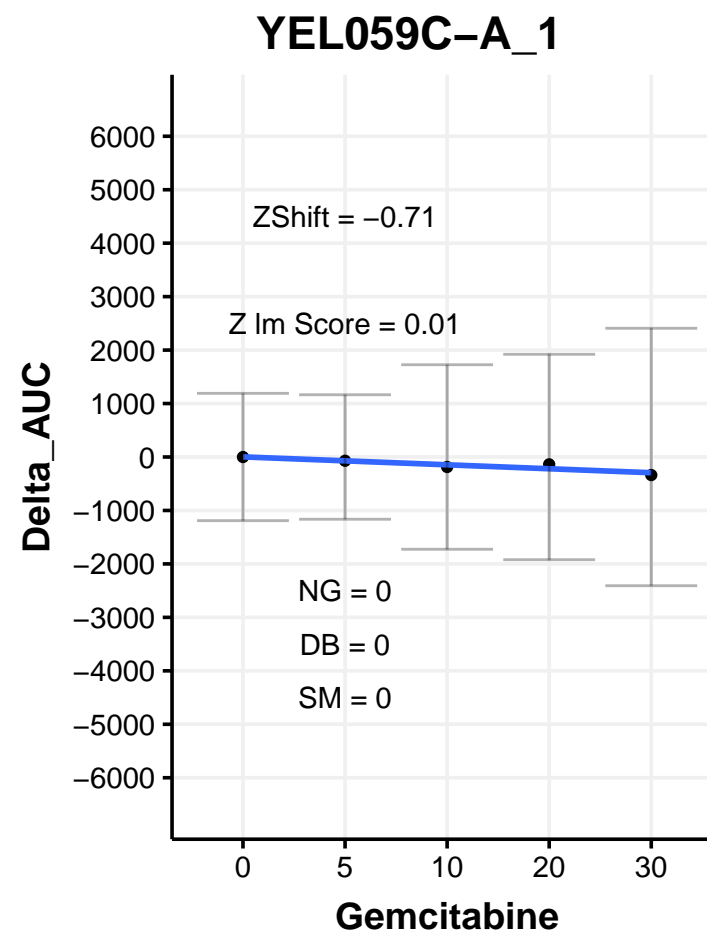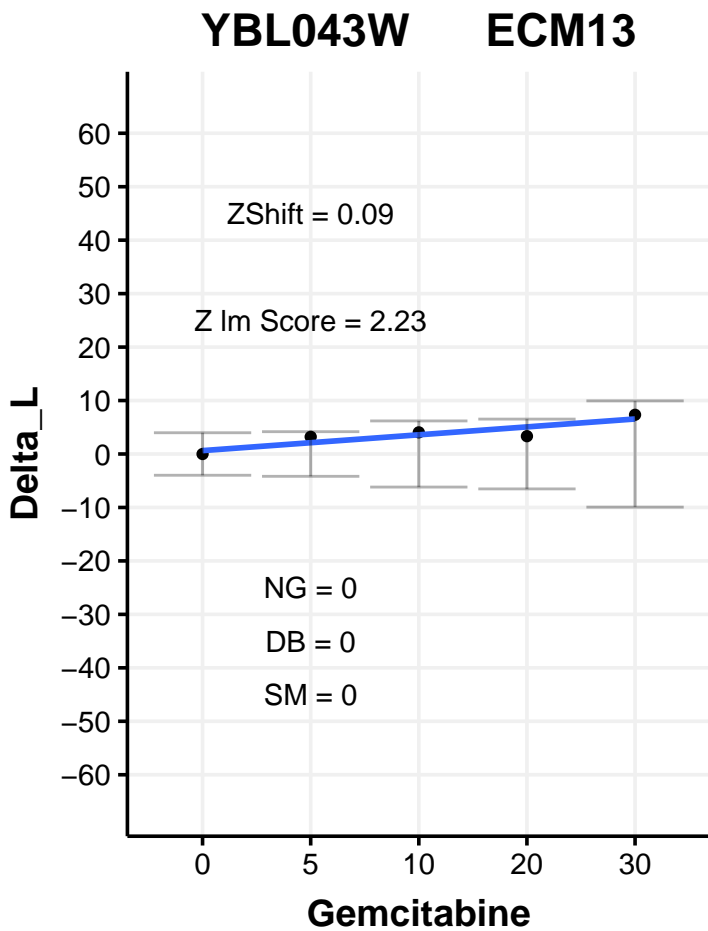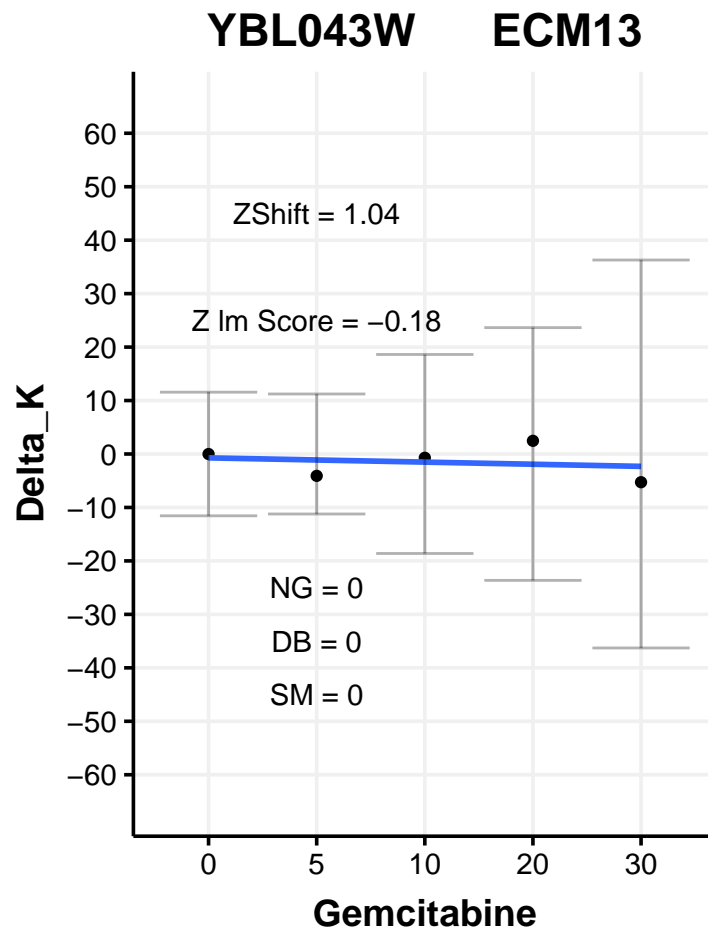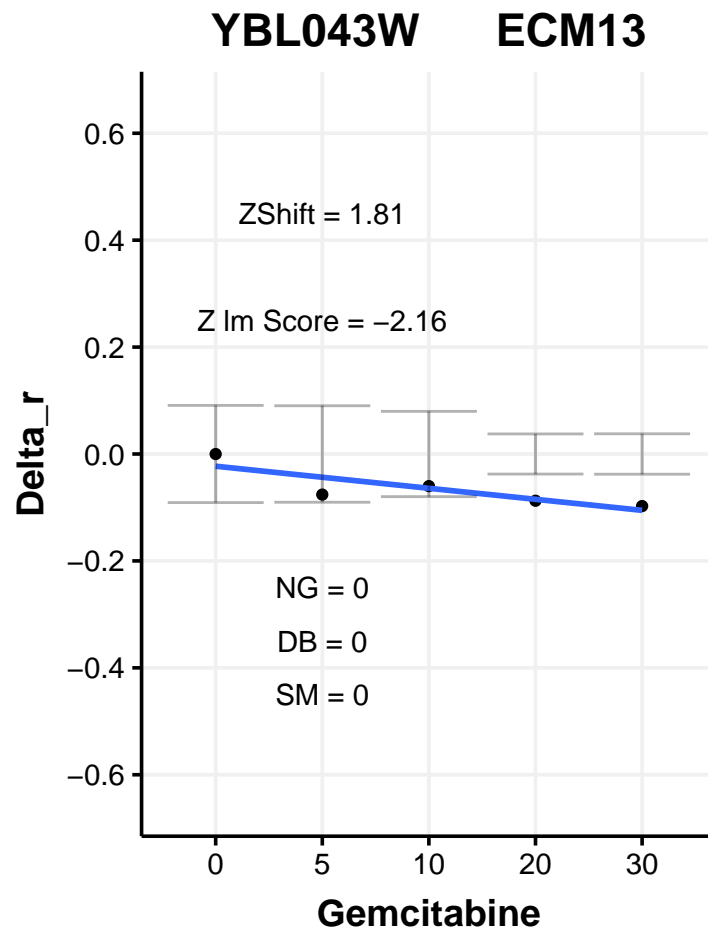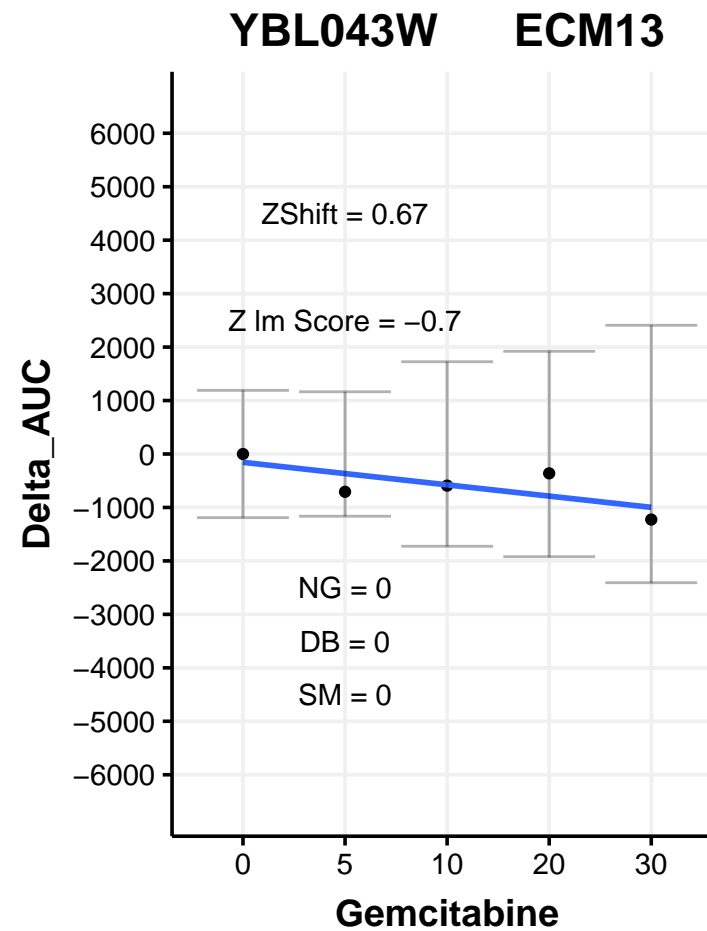

YML090W

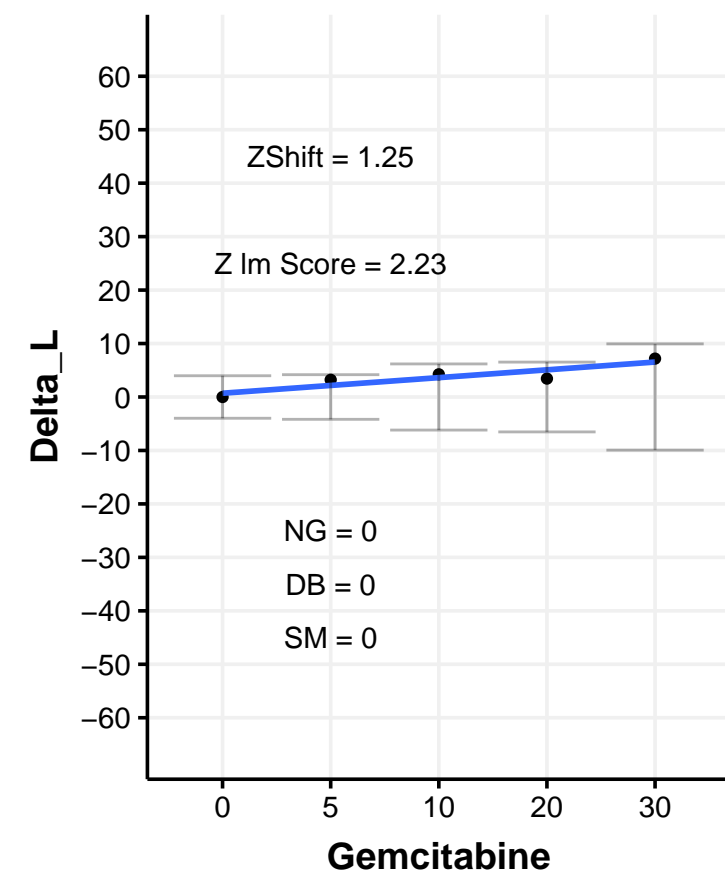

YML090W

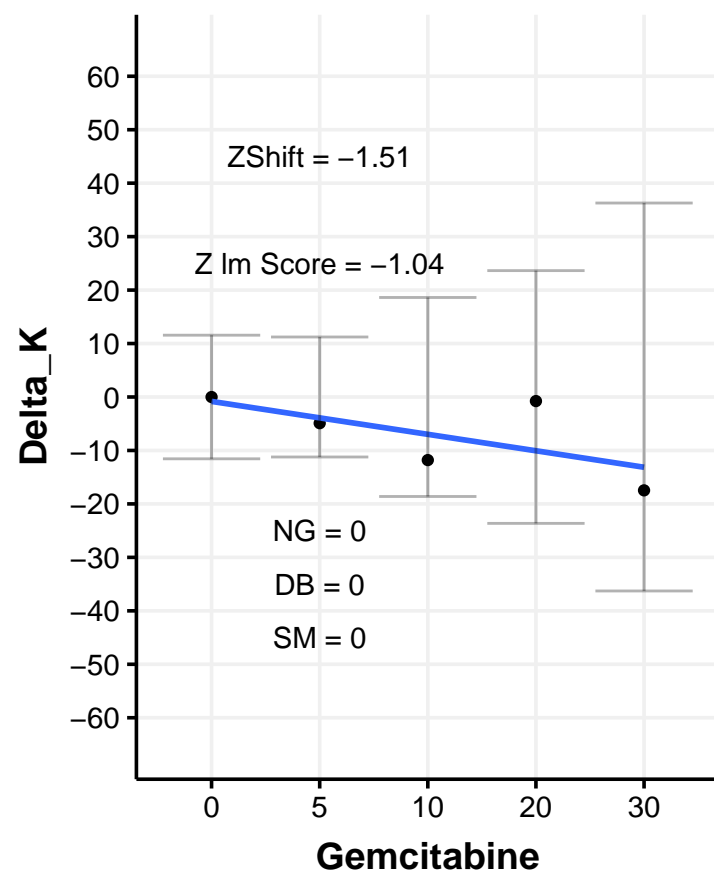

YML090W

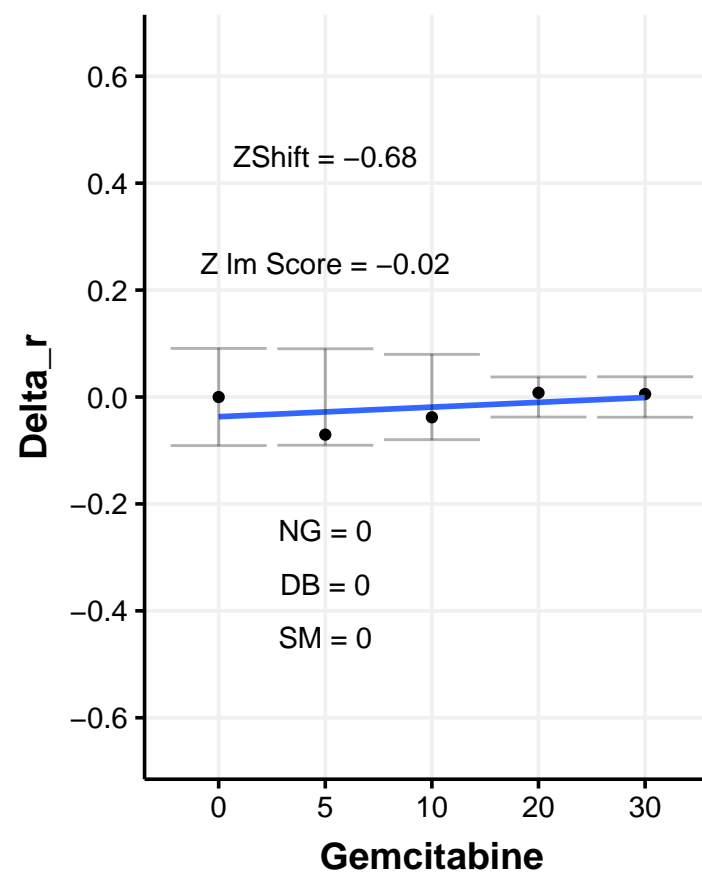

YML090W

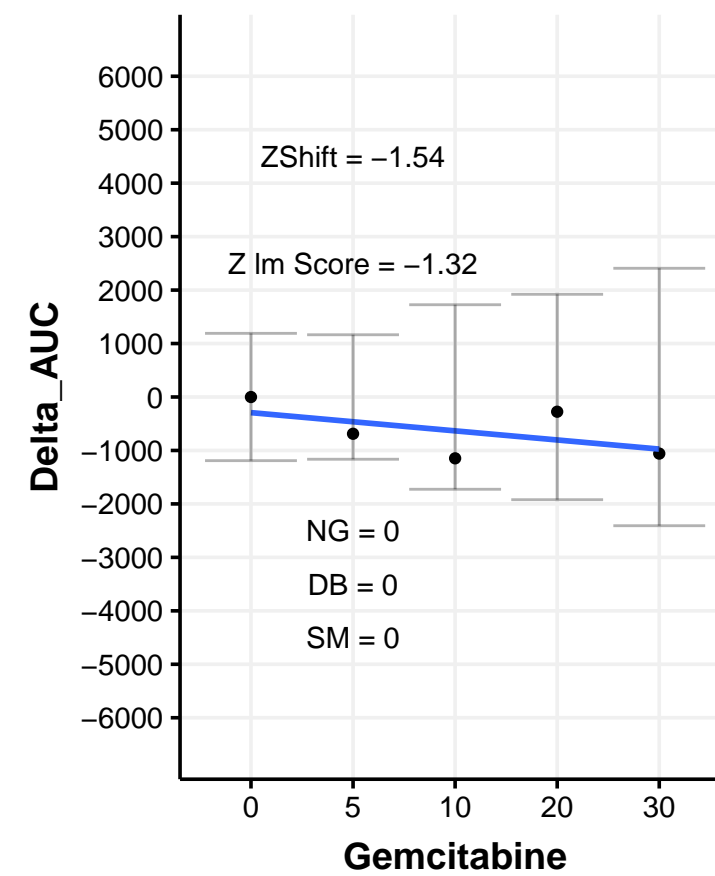

YIL153W RRD1

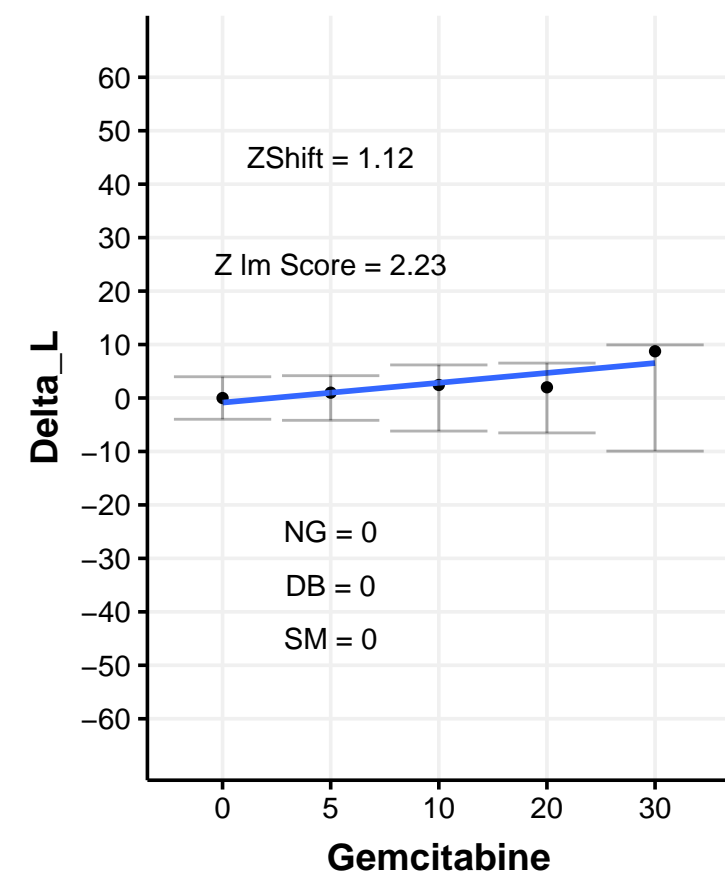

YIL153W RRD1

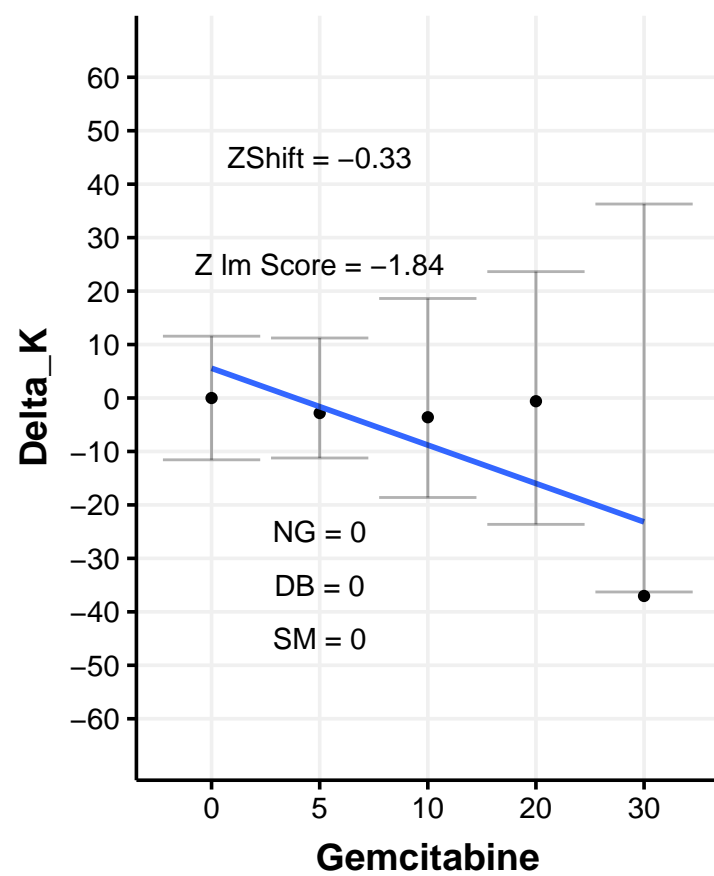

YIL153W RRD1

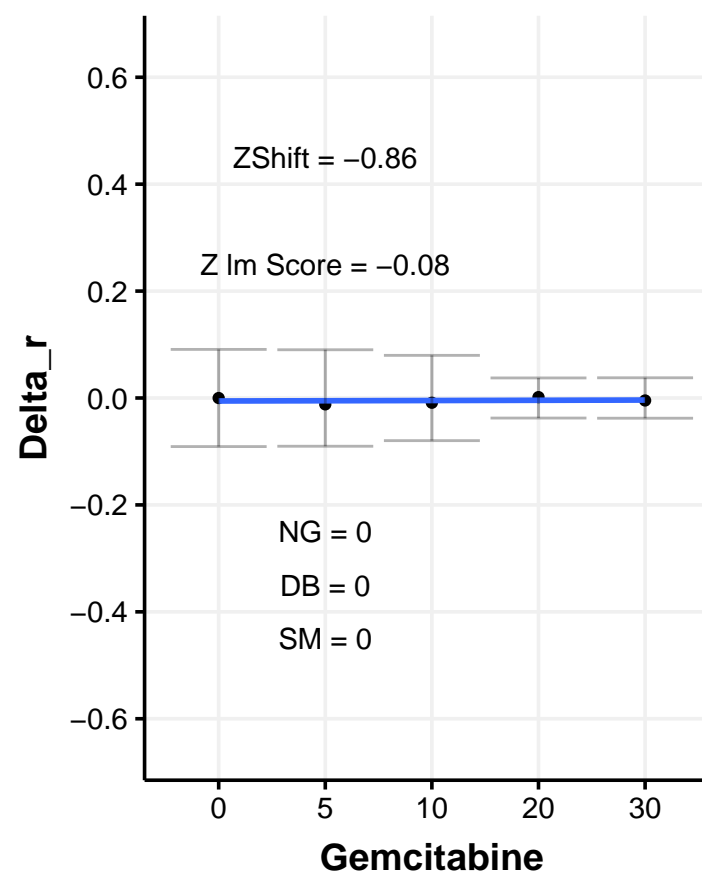

YIL153W RRD1

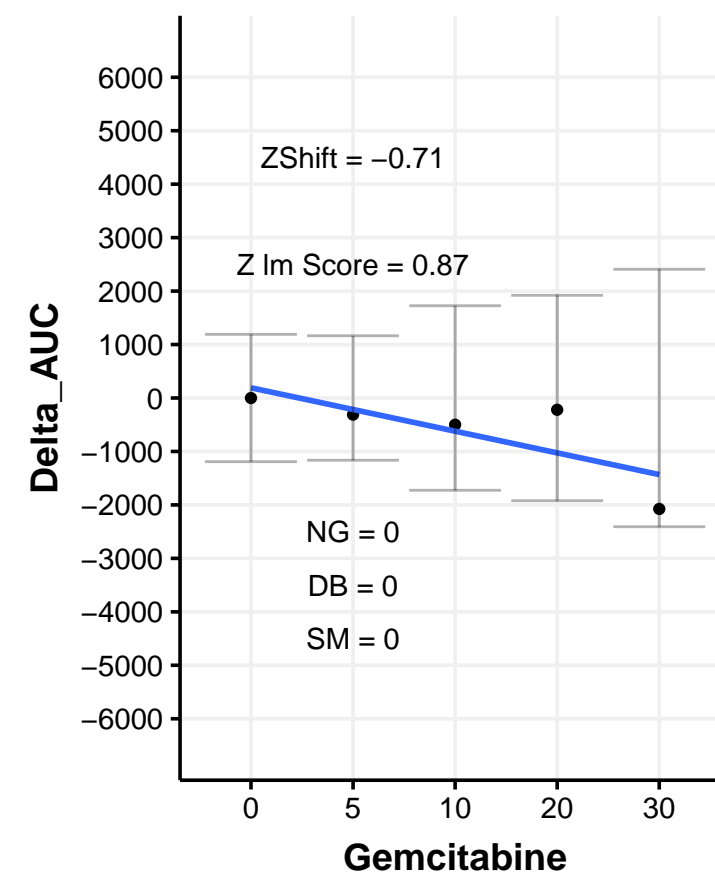

YLR300W EXG1

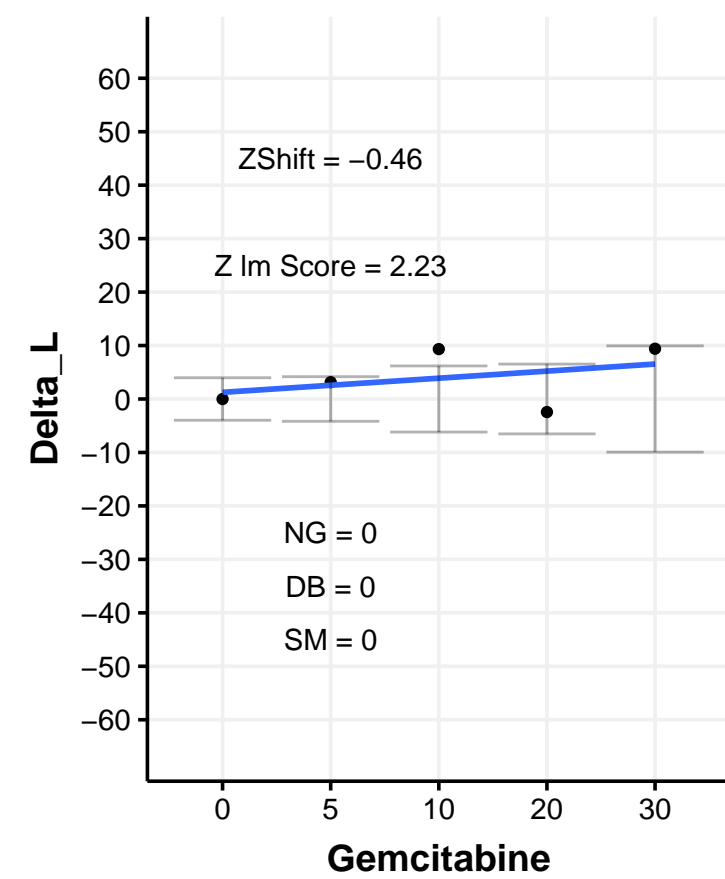

YLR300W EXG1

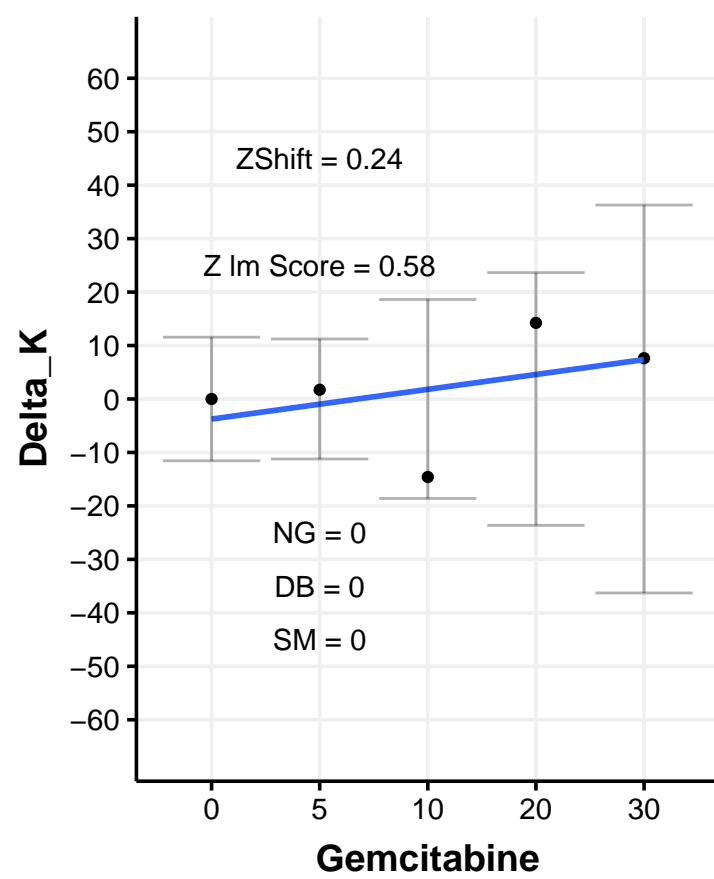

YLR300W EXG1

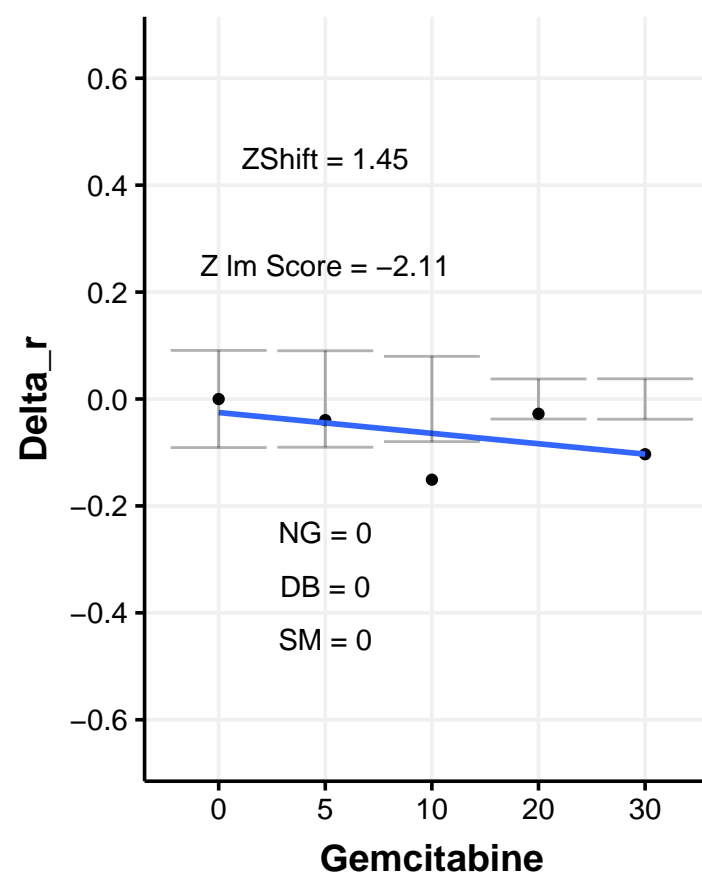

YLR300W EXG1

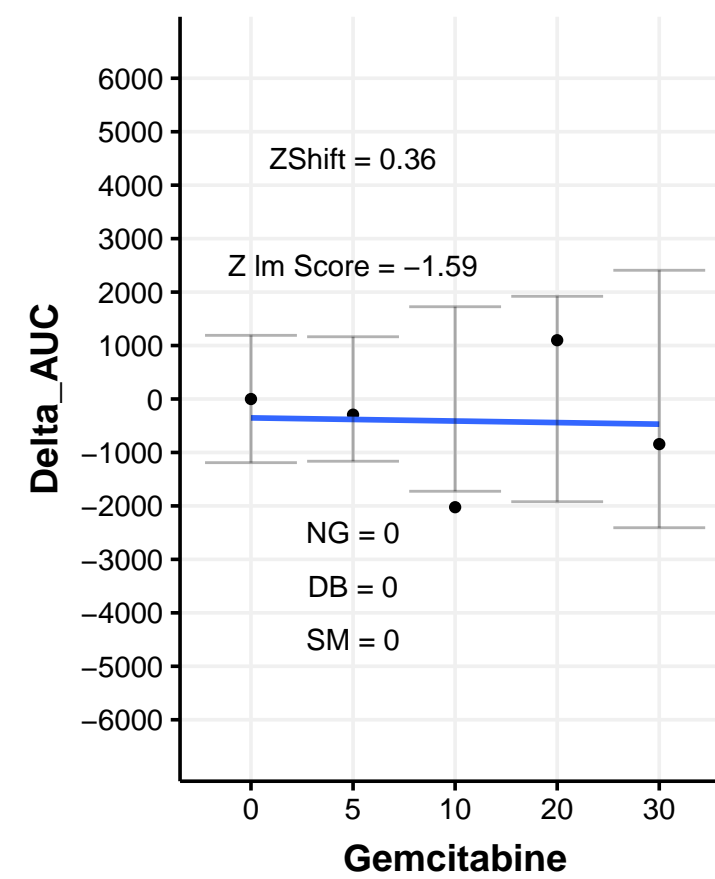

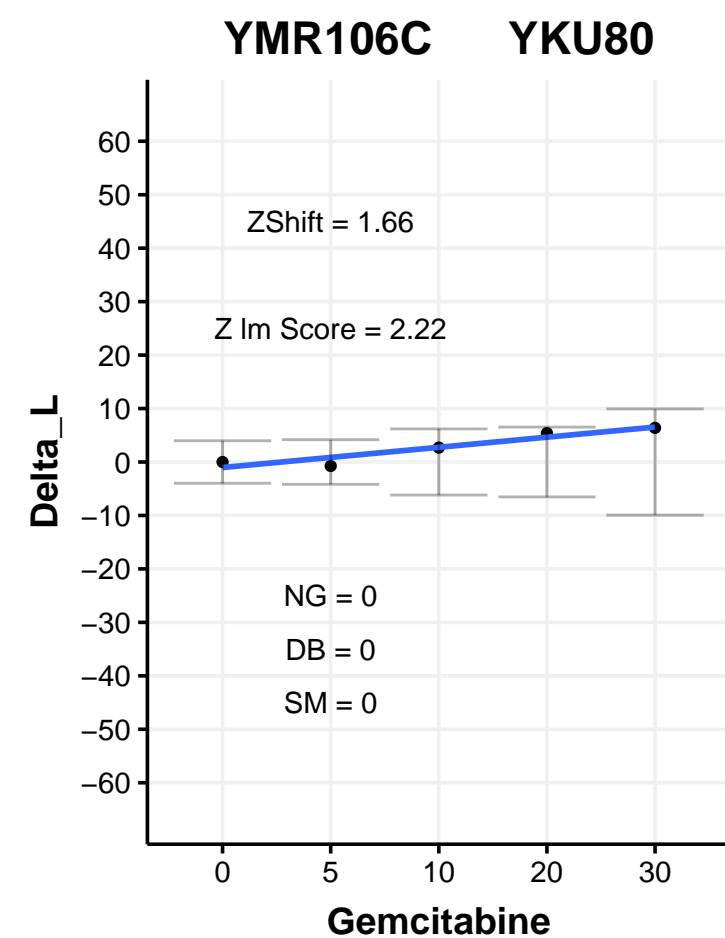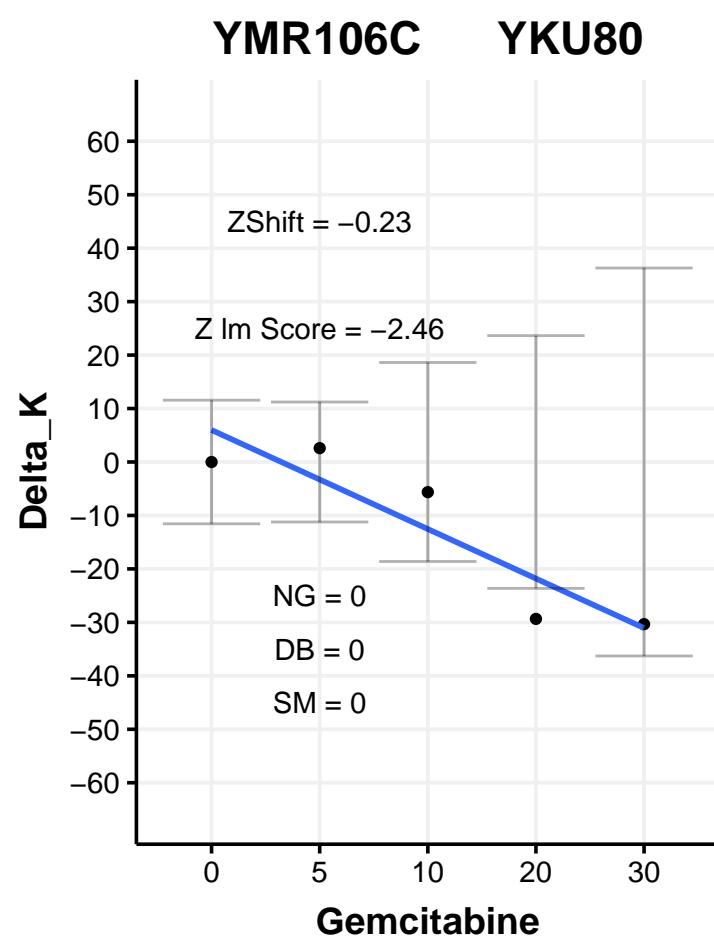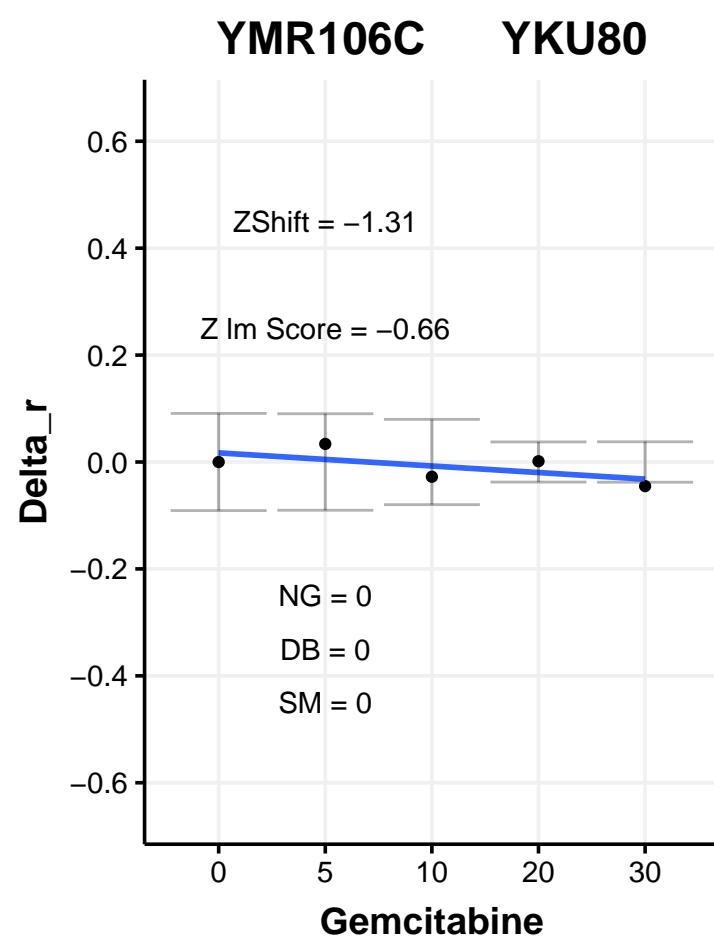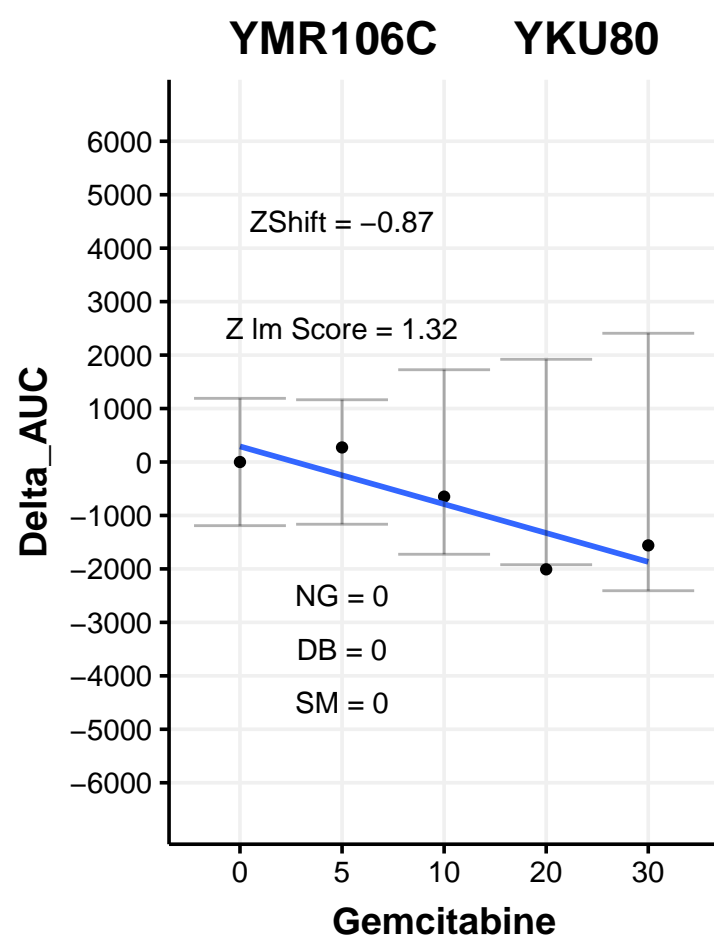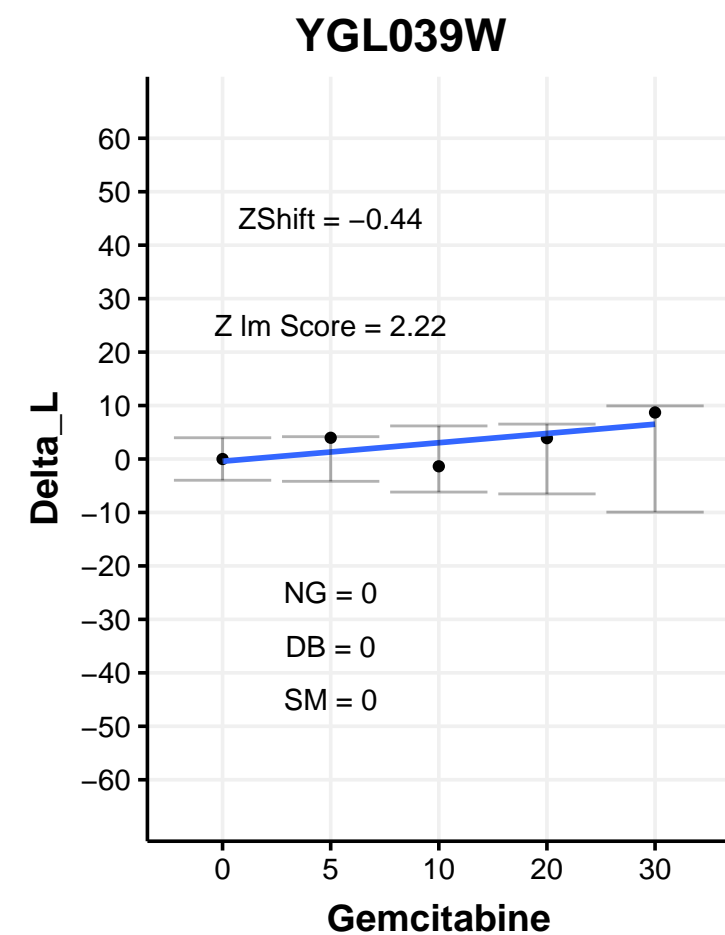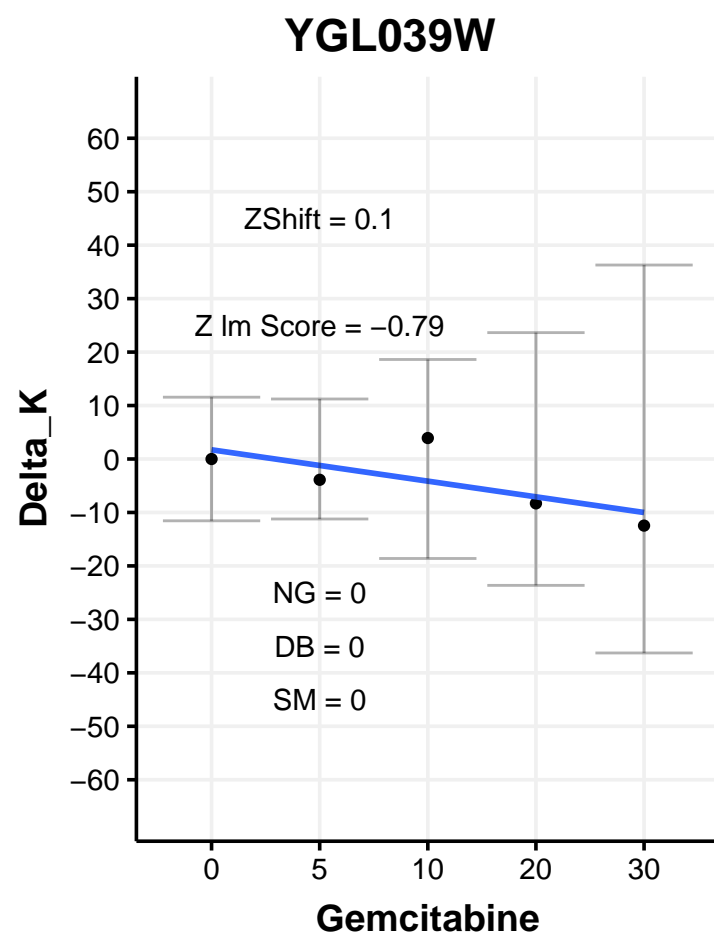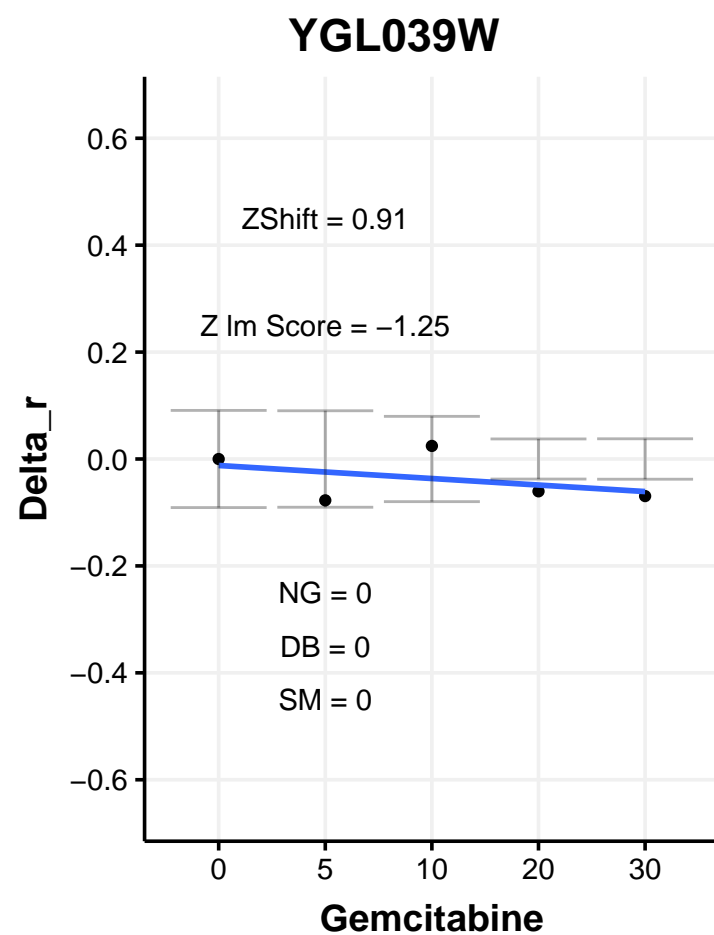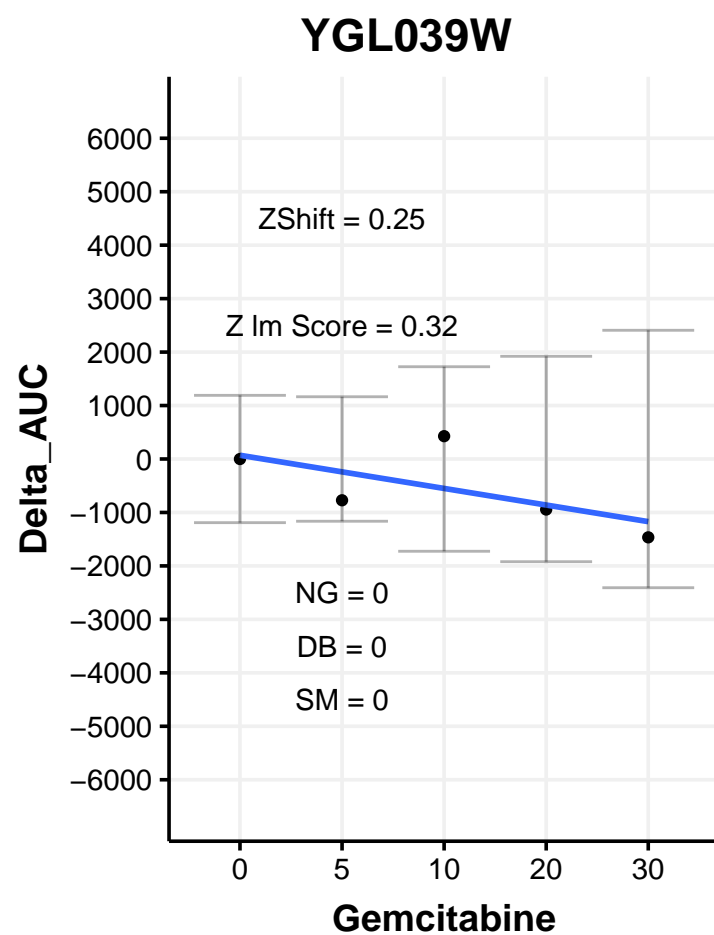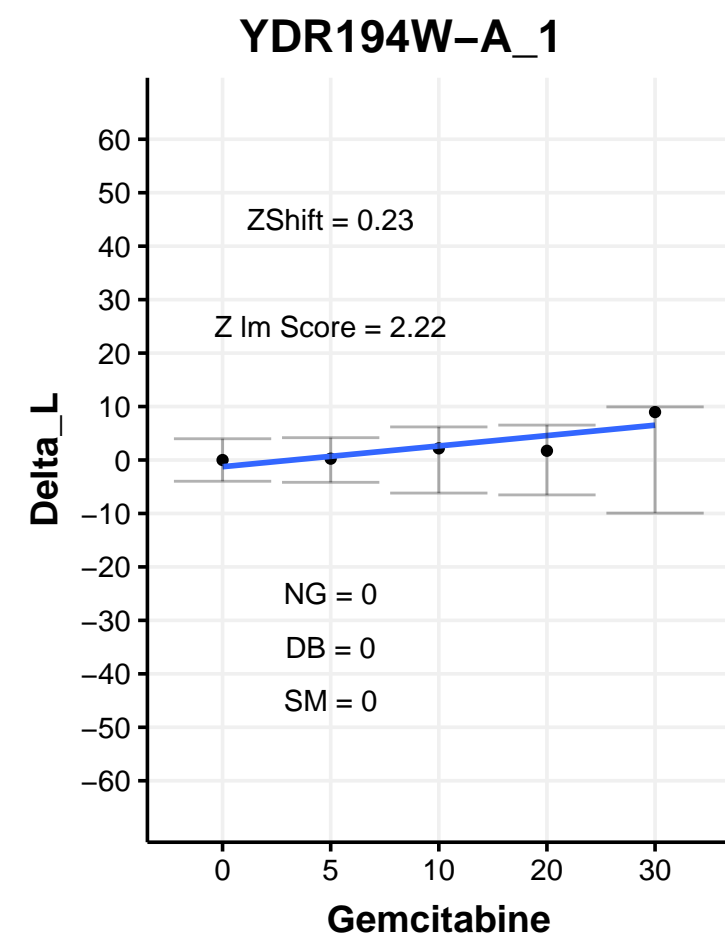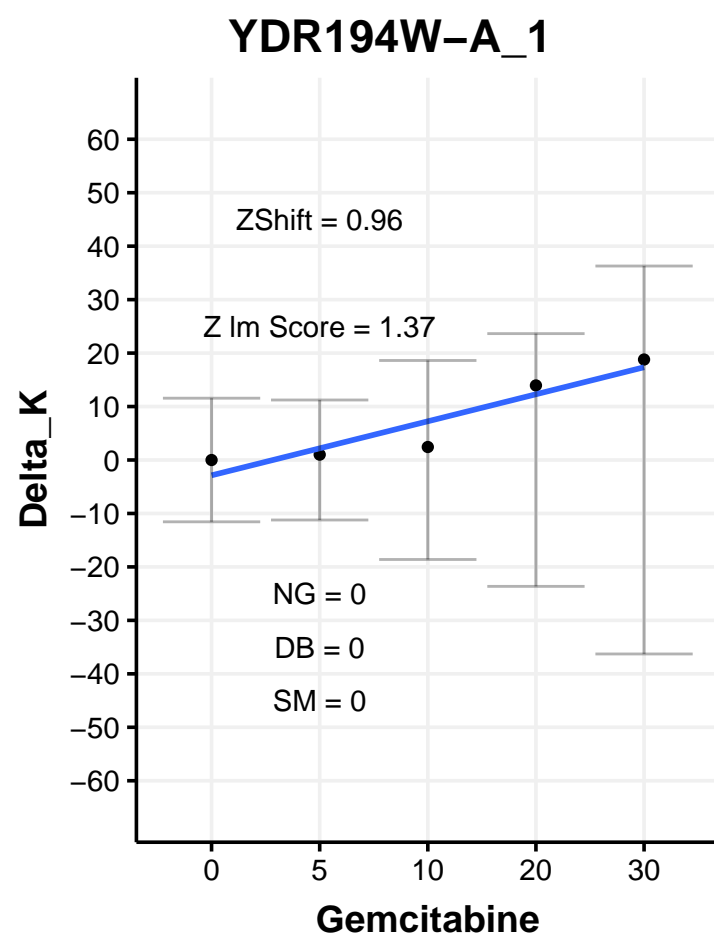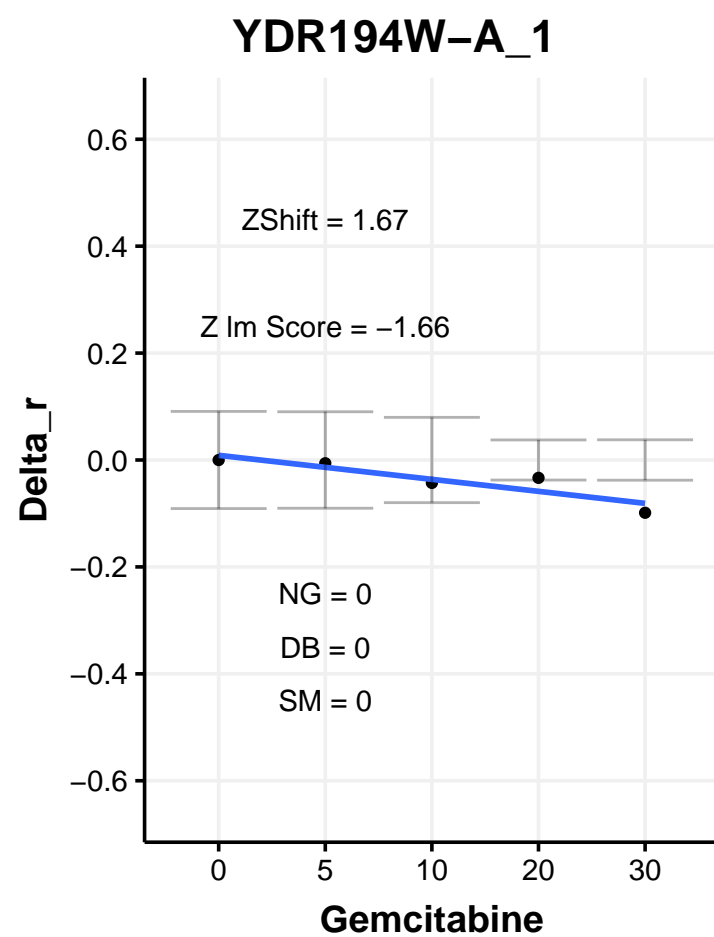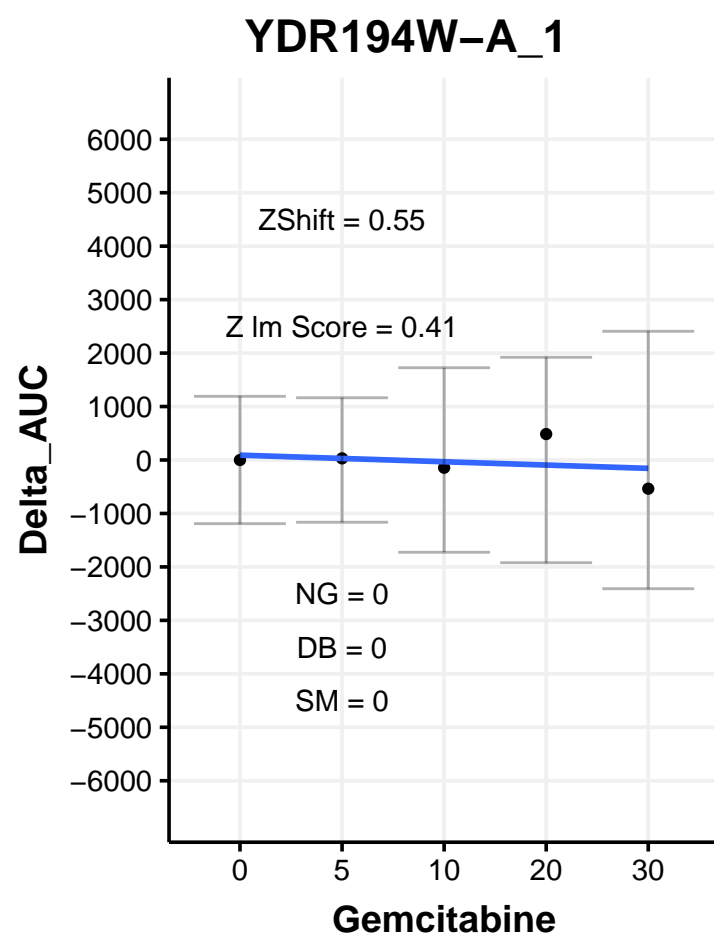



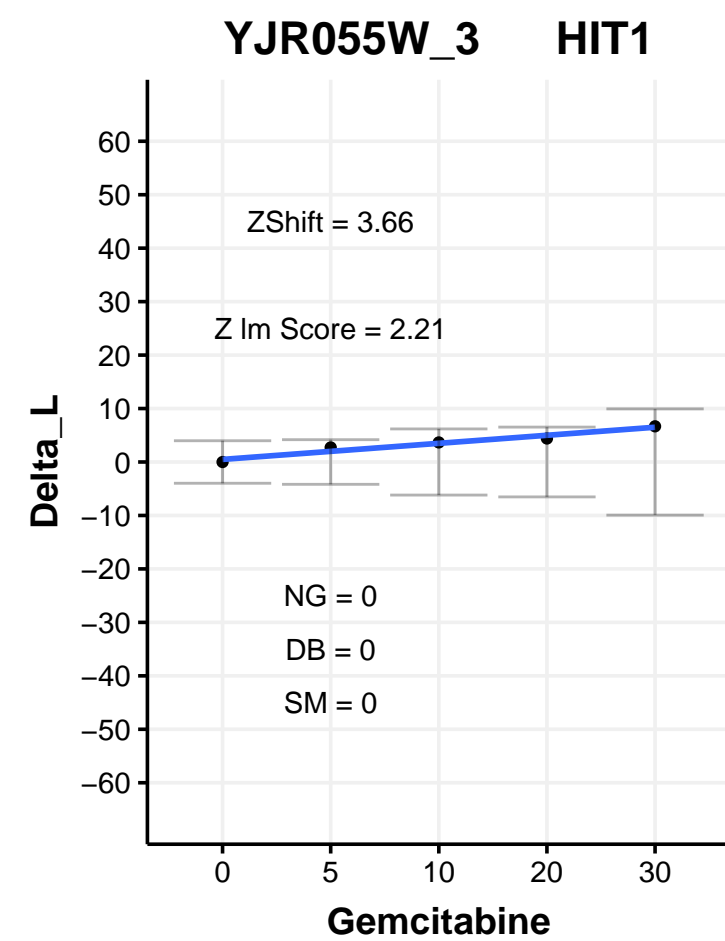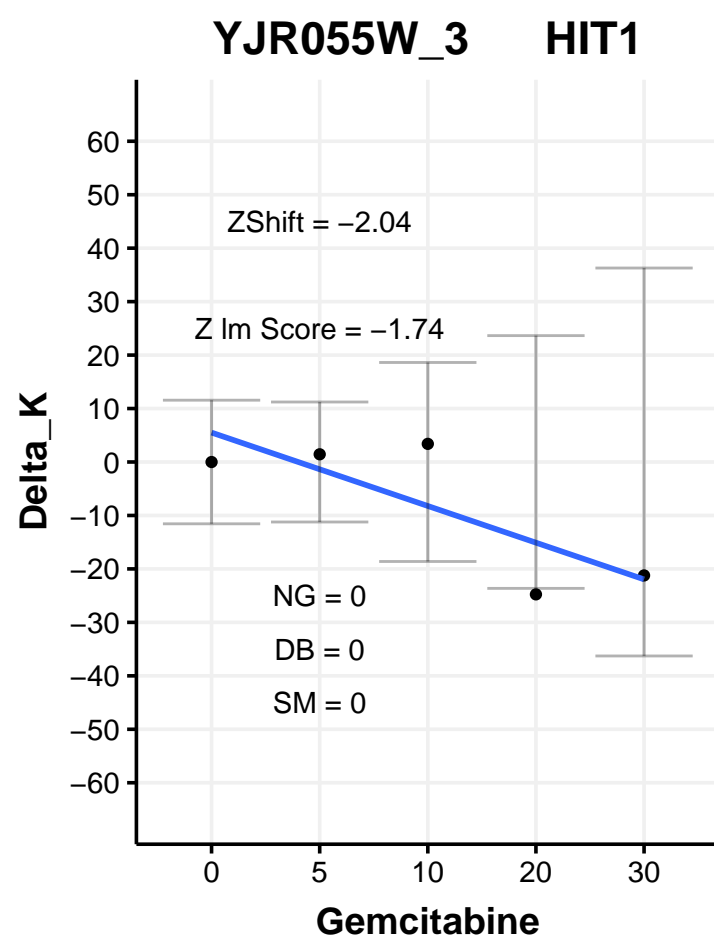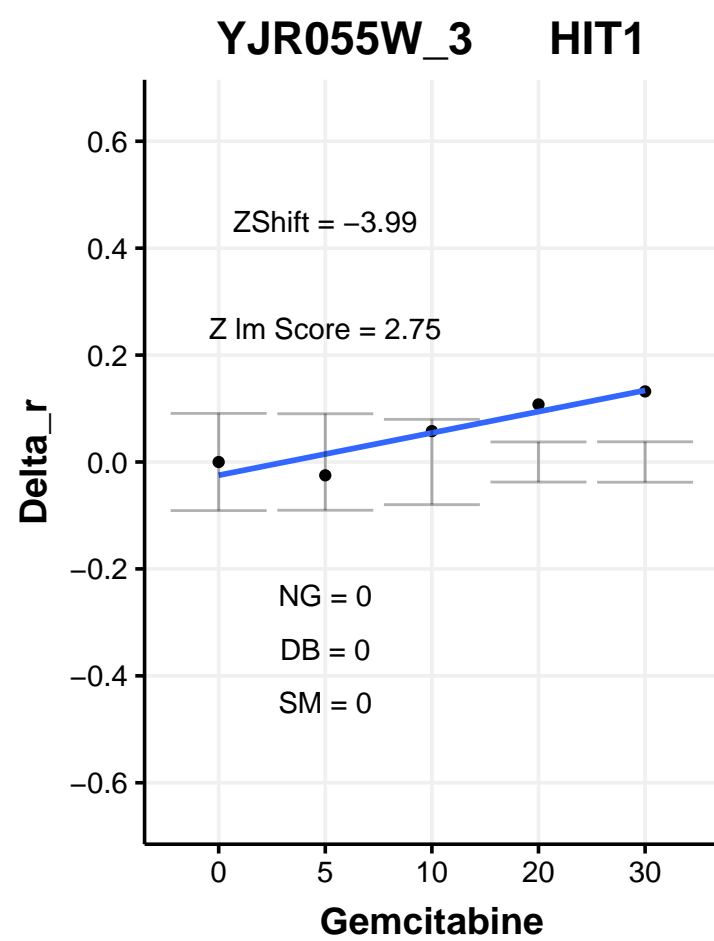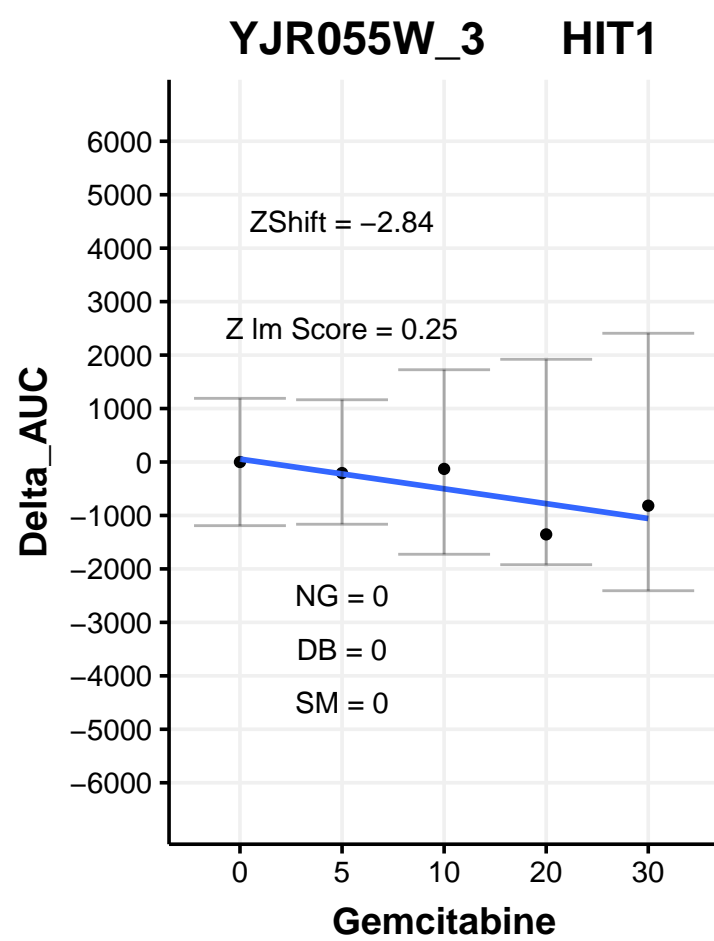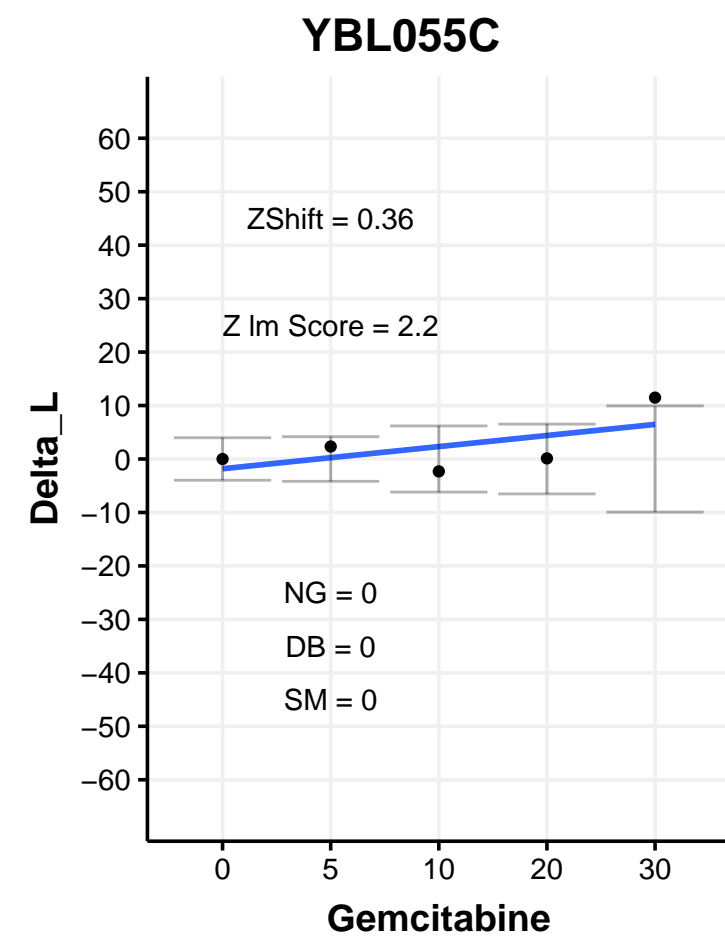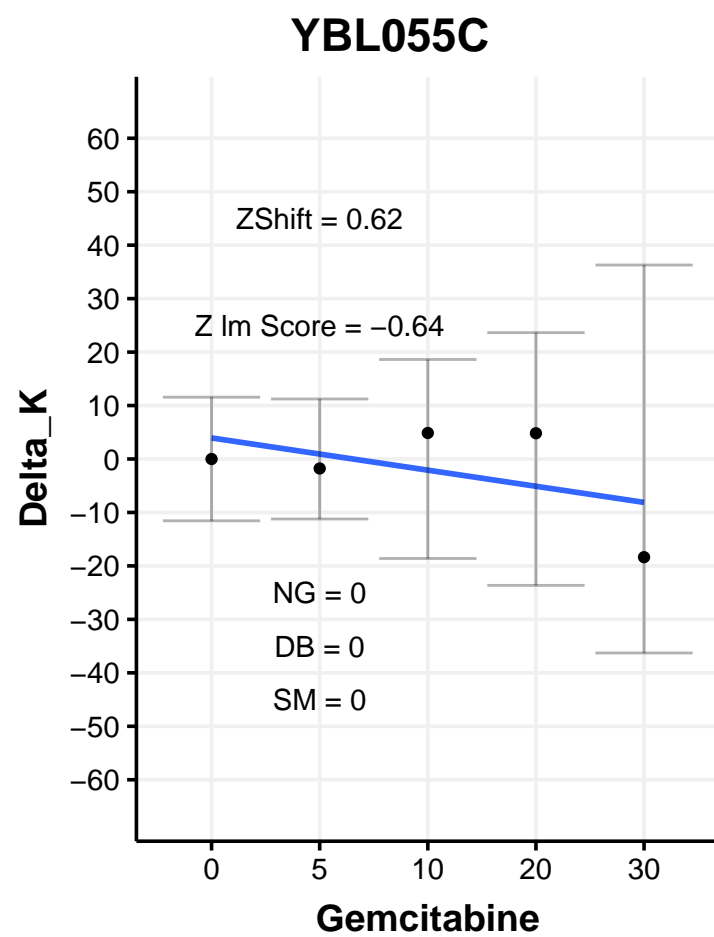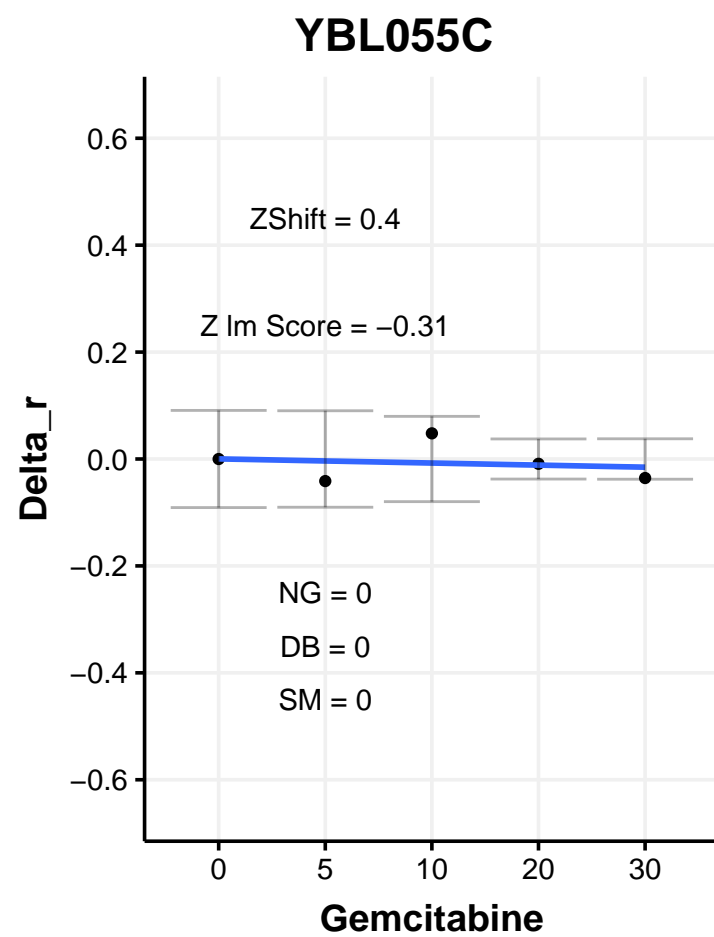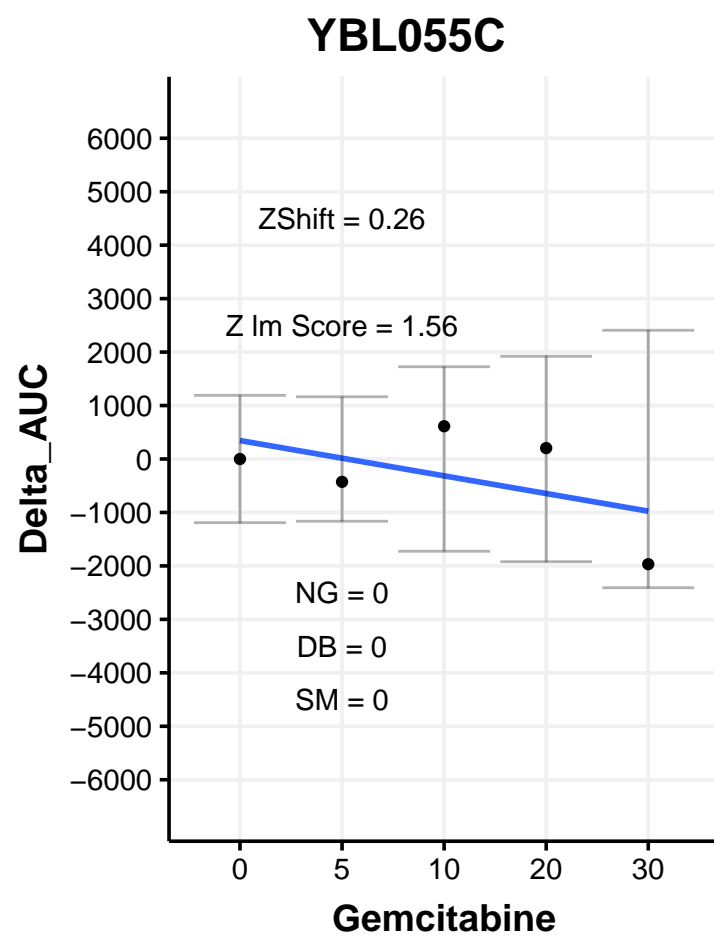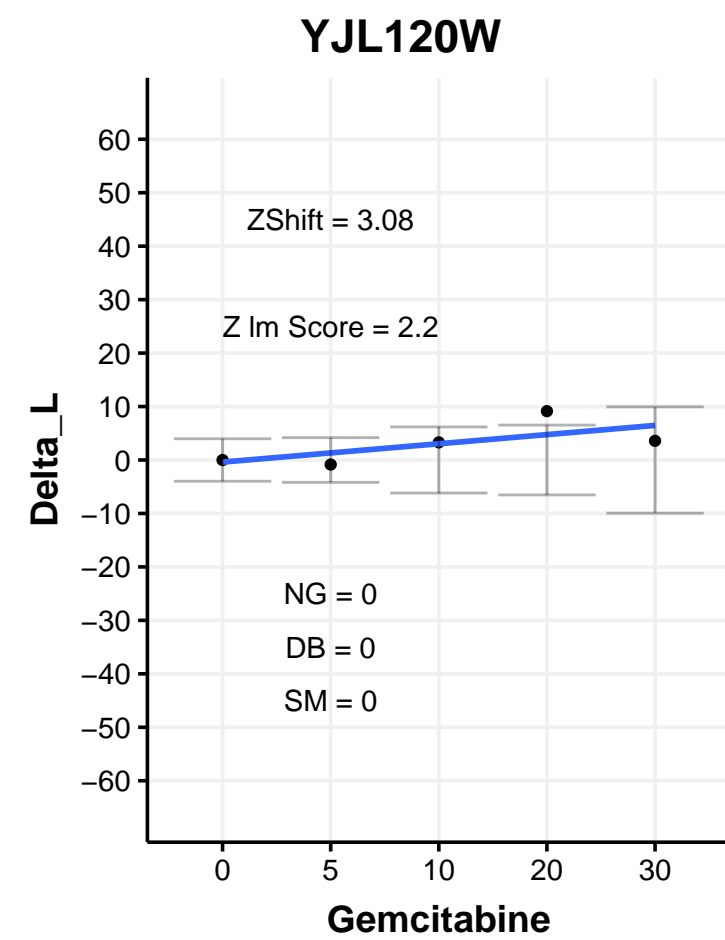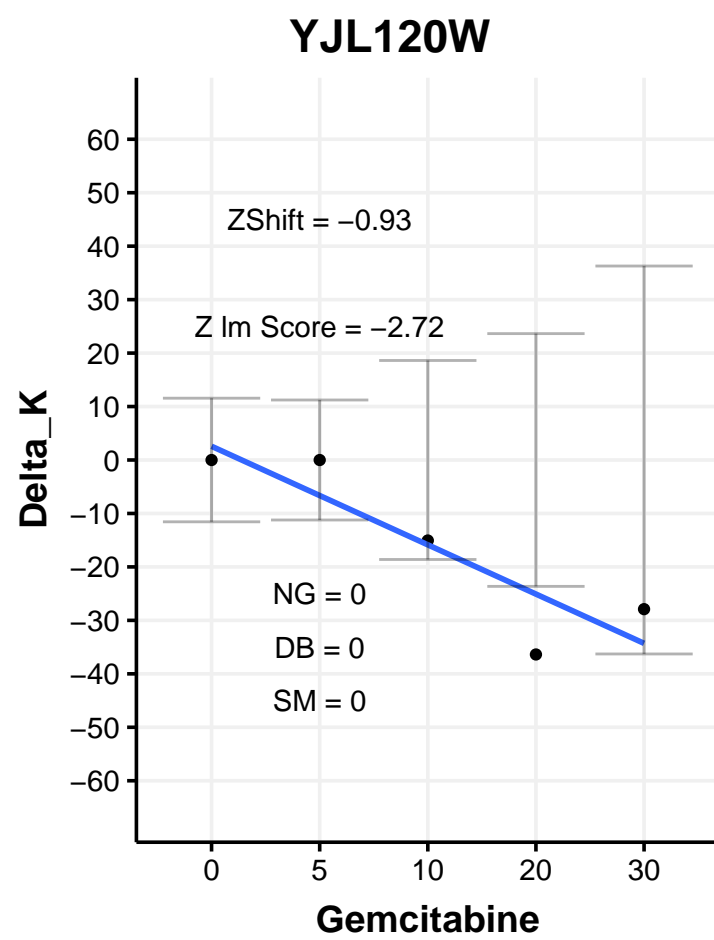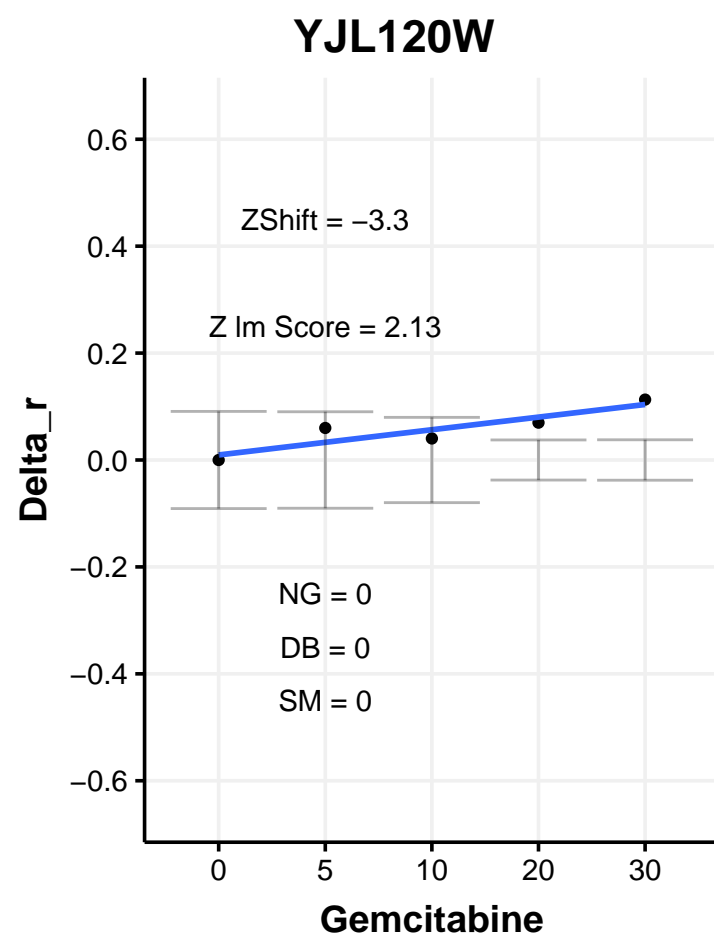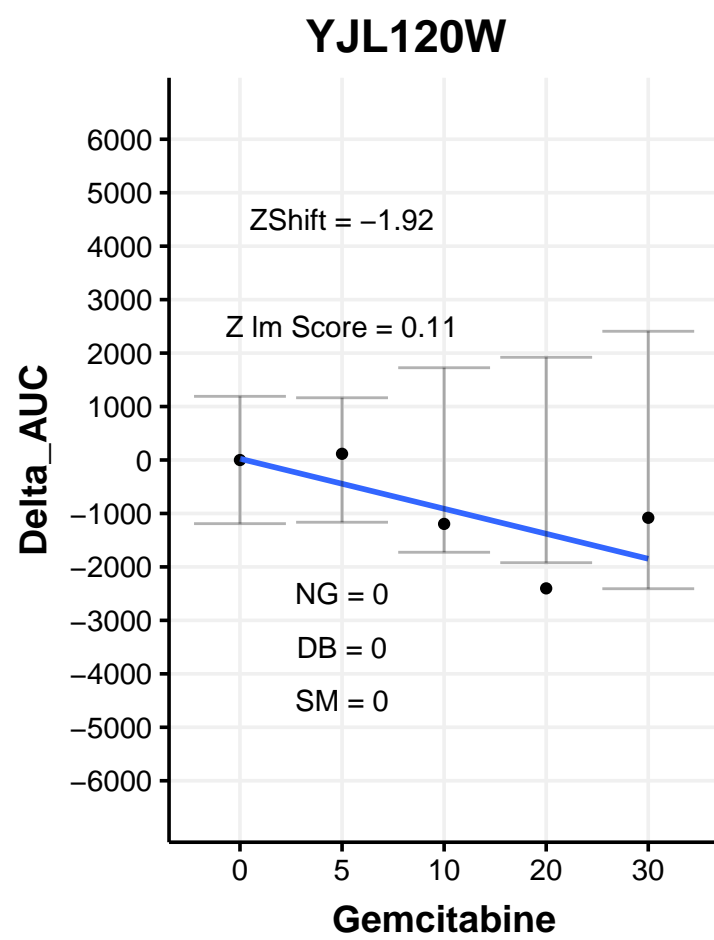

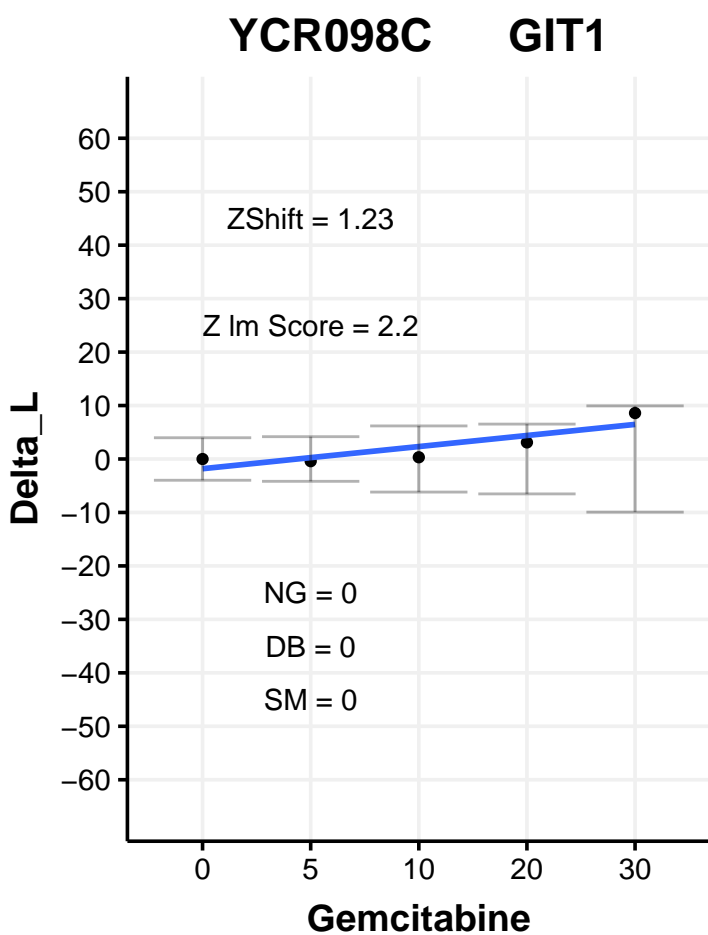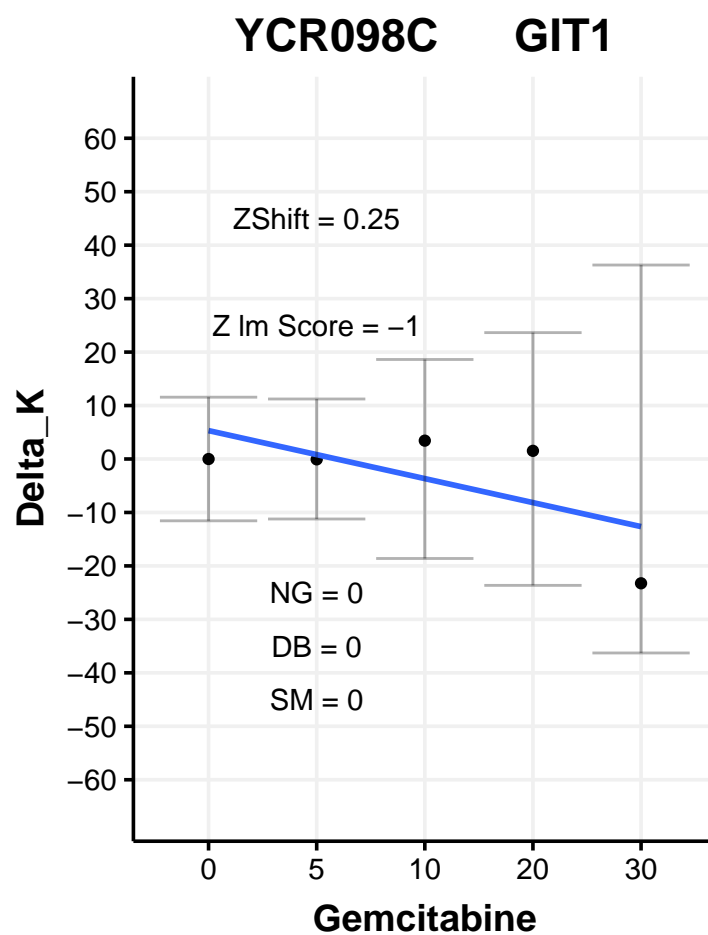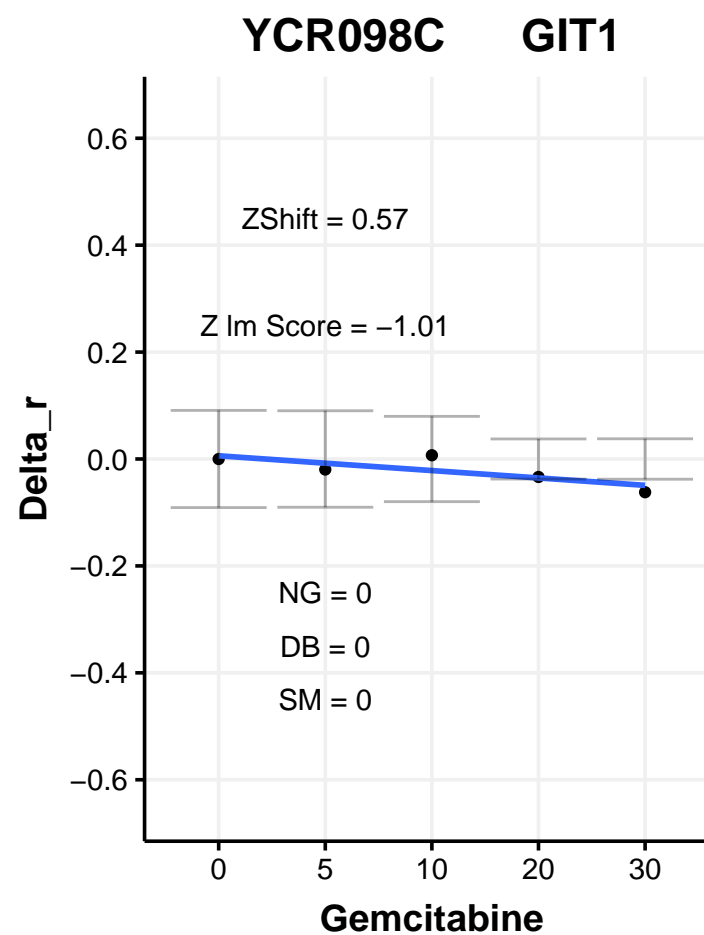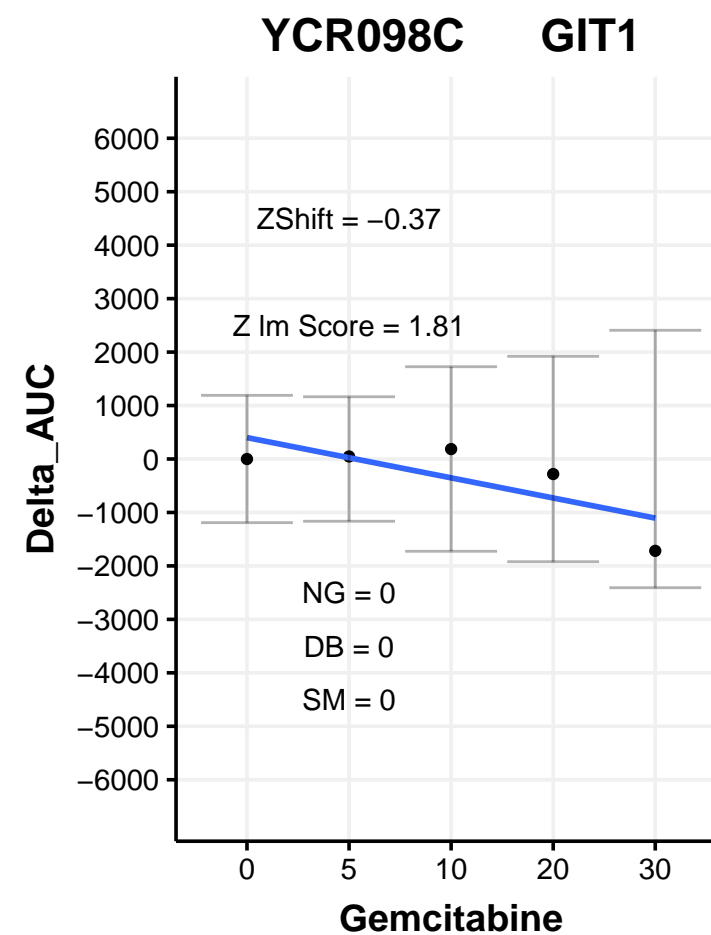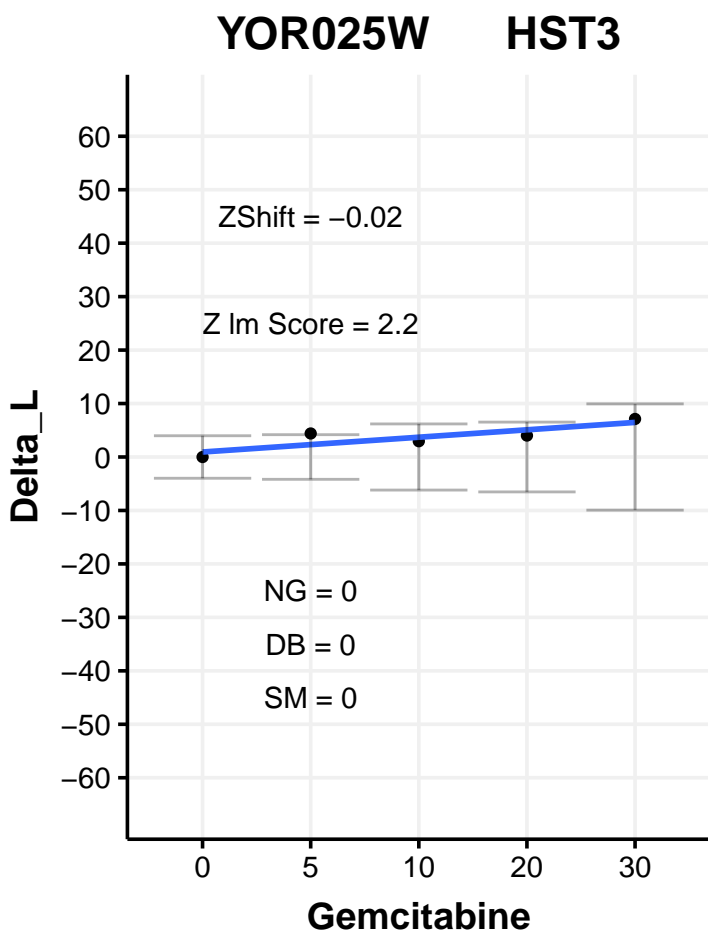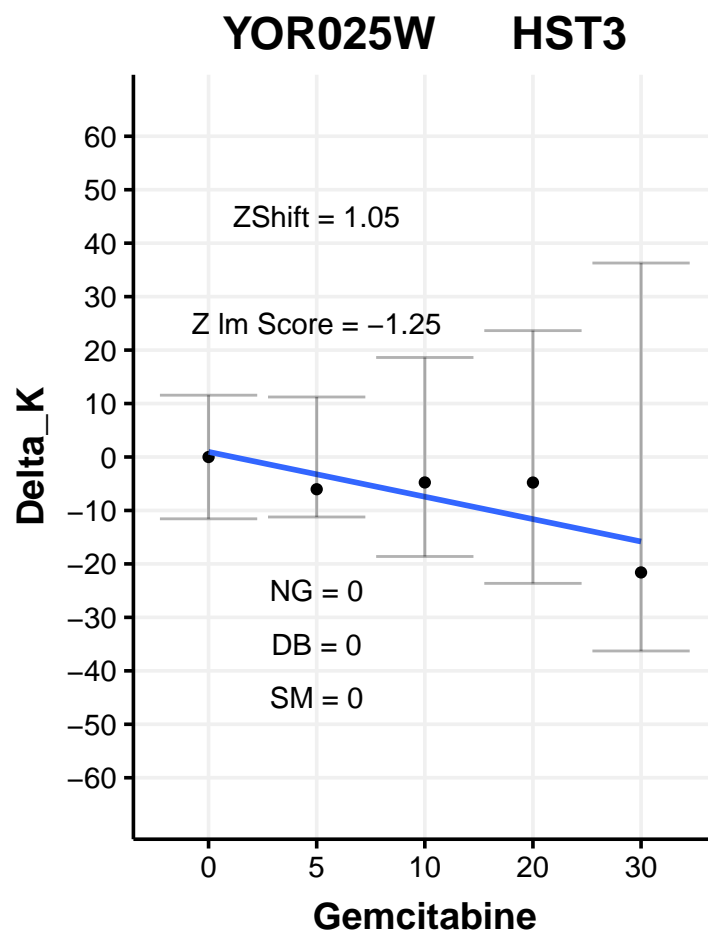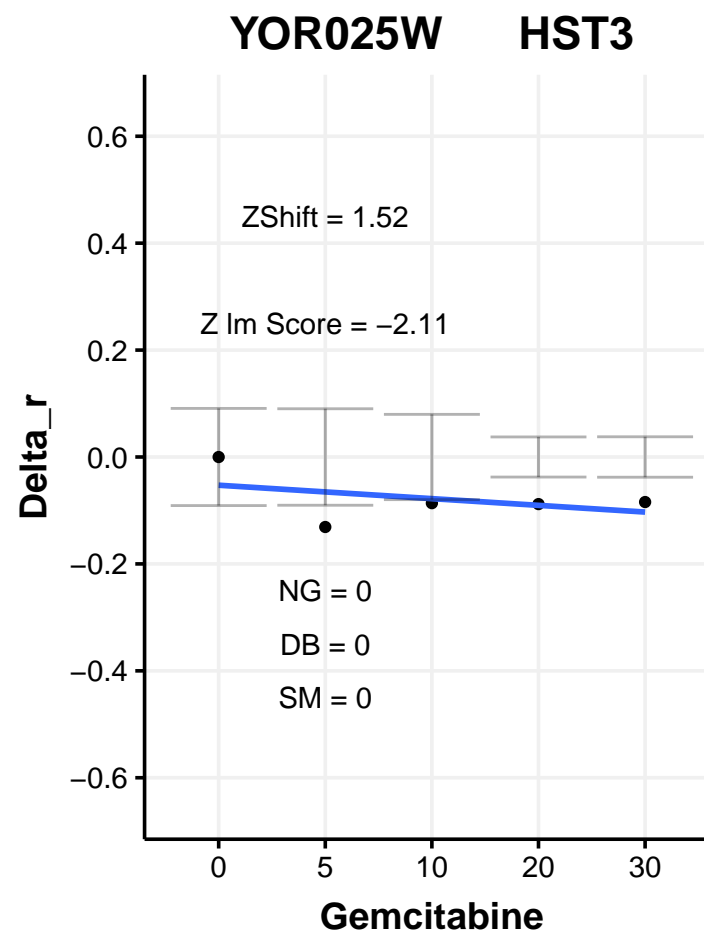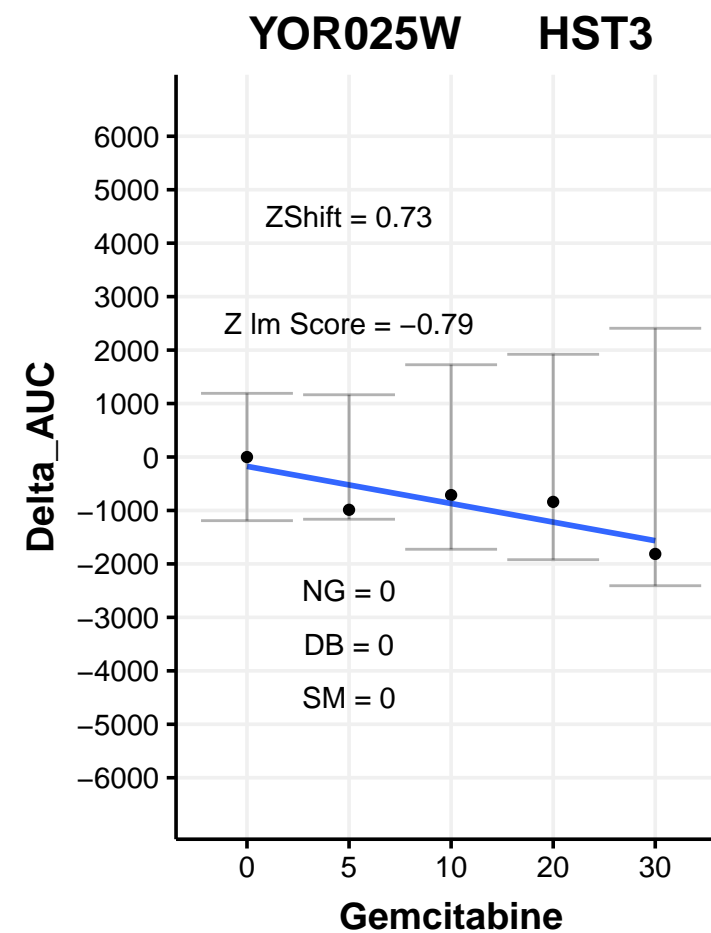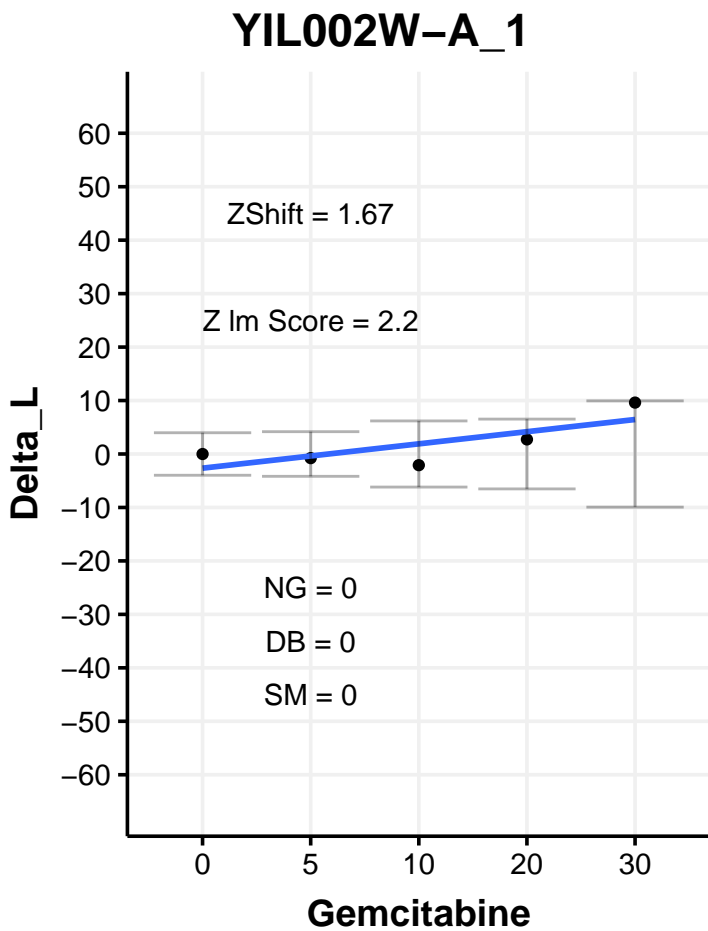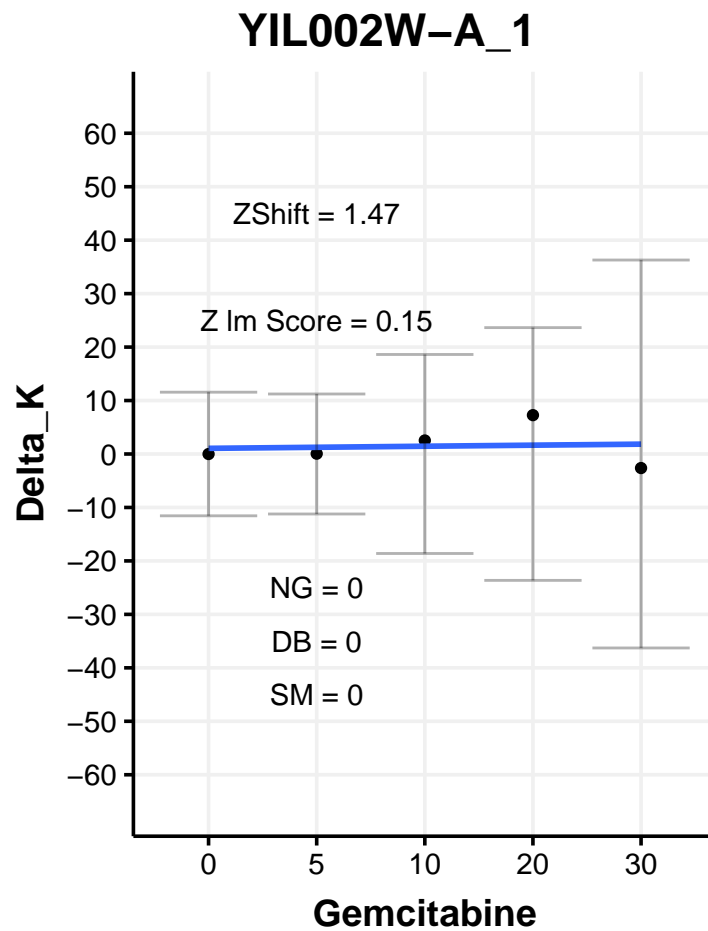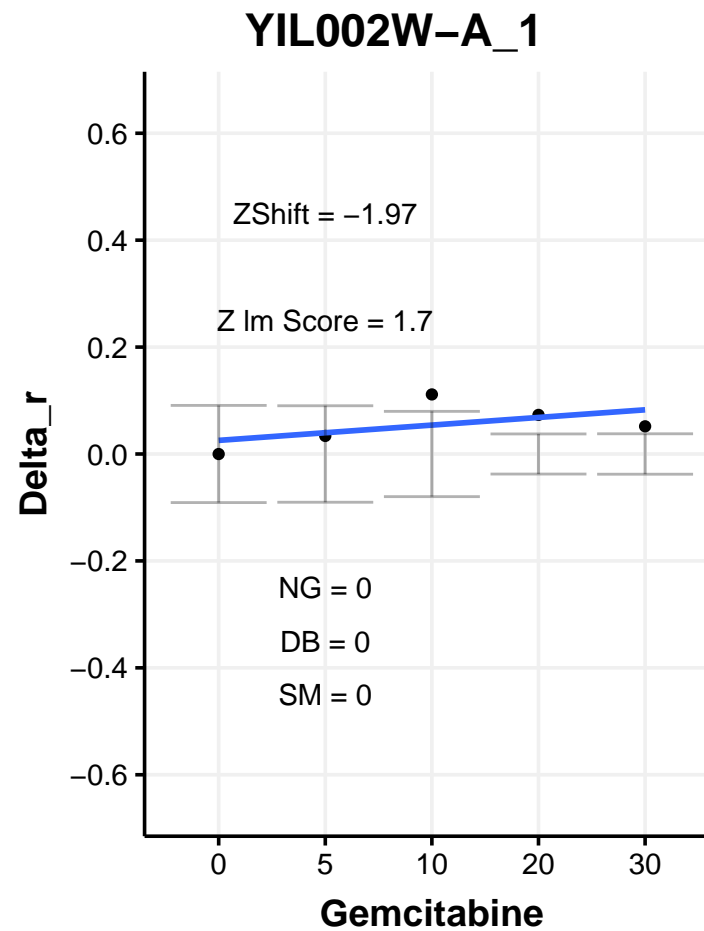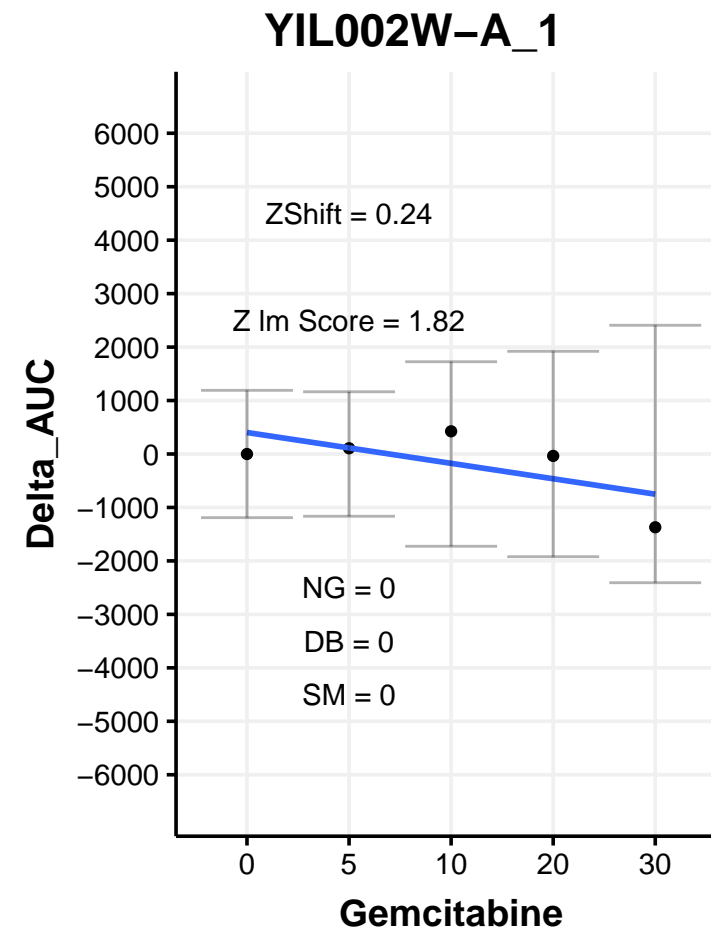

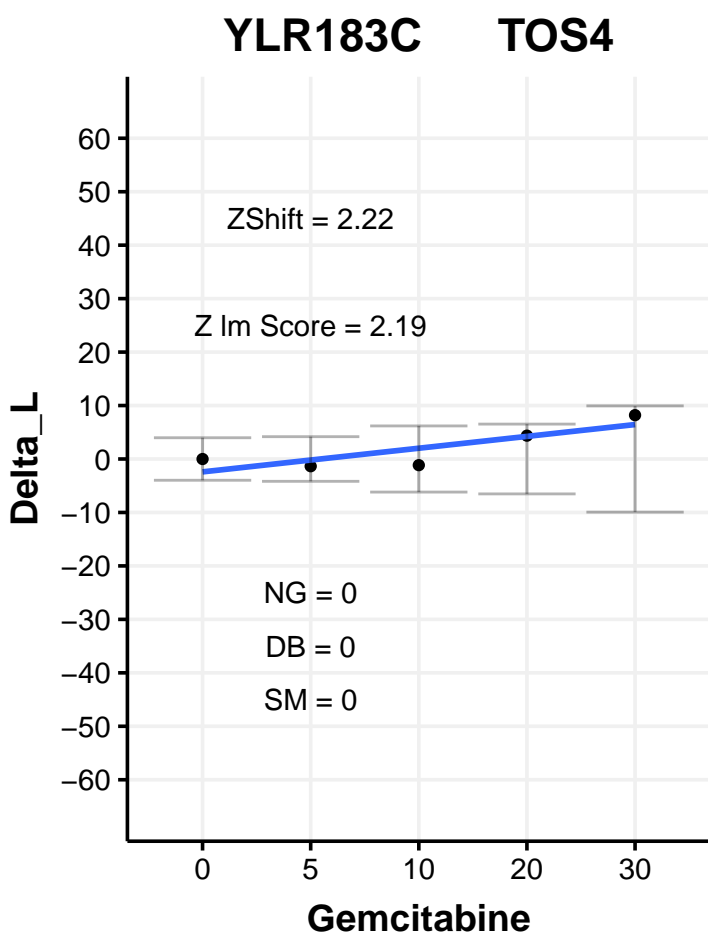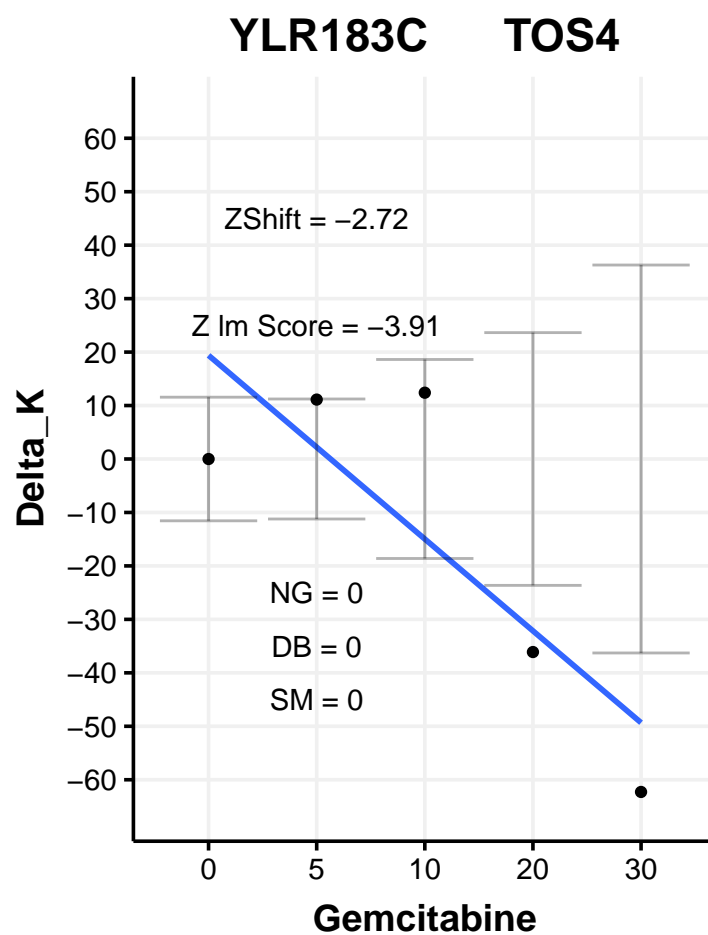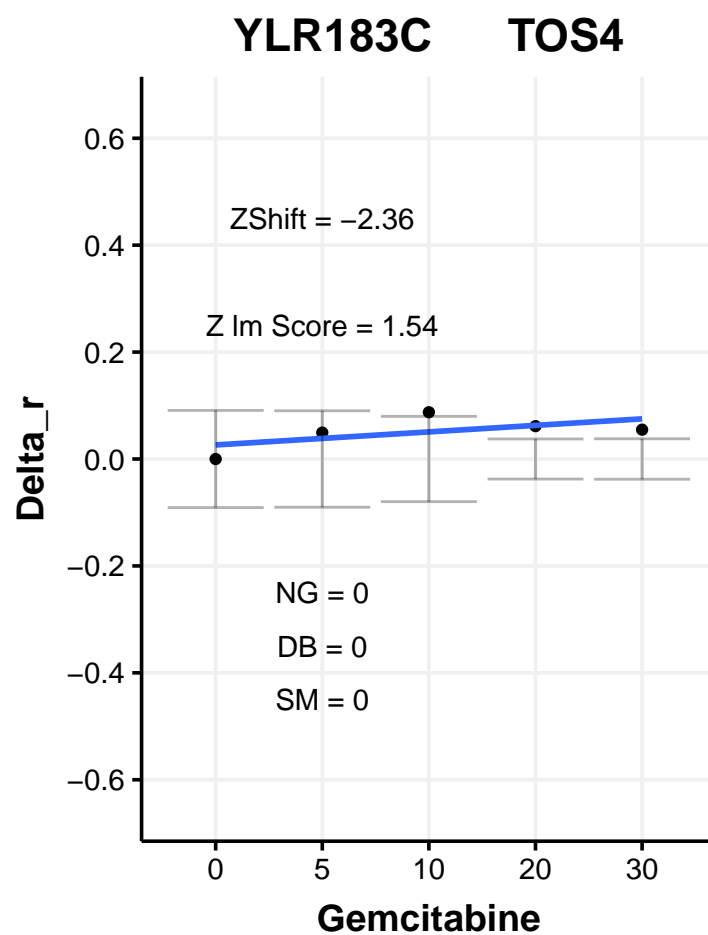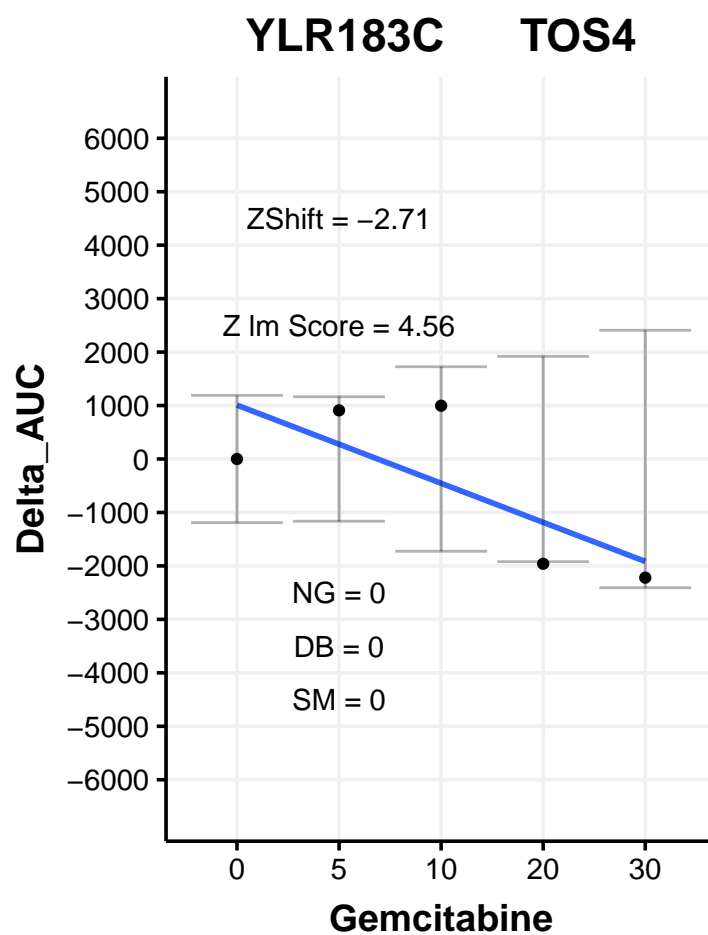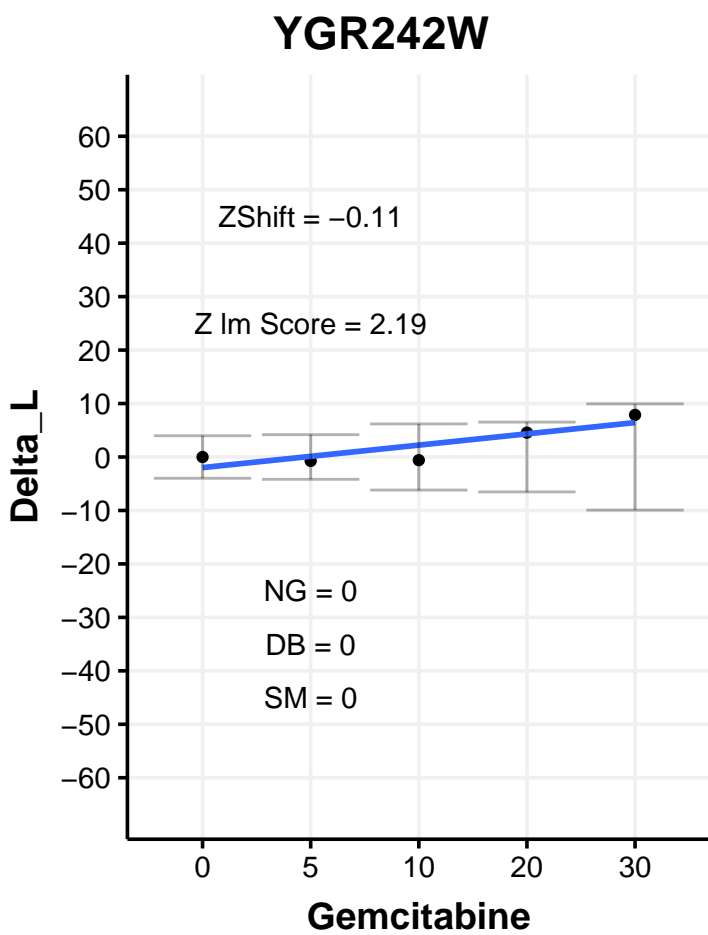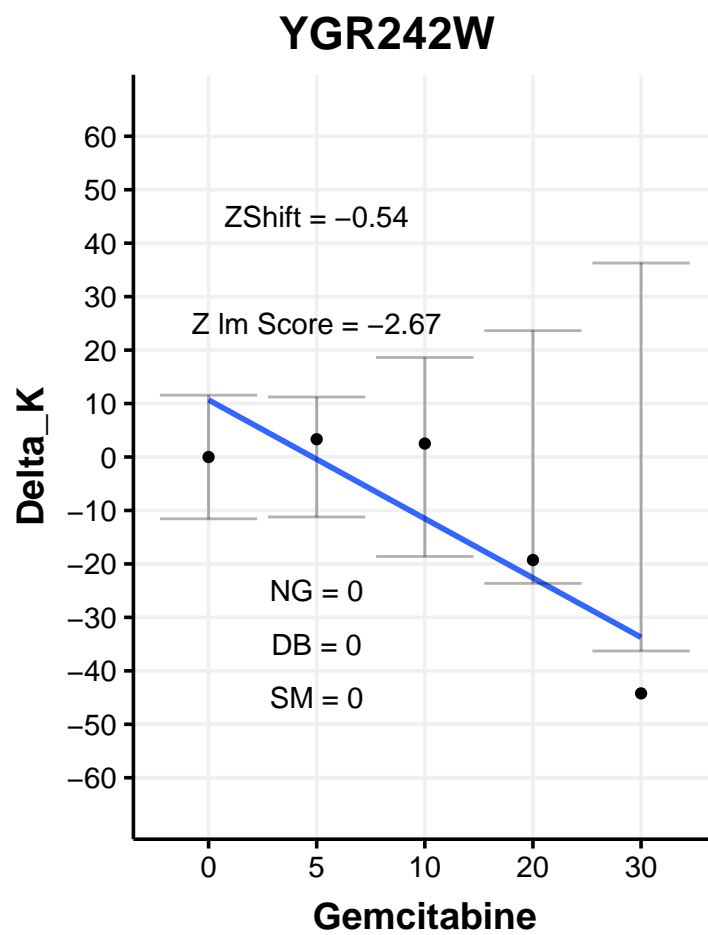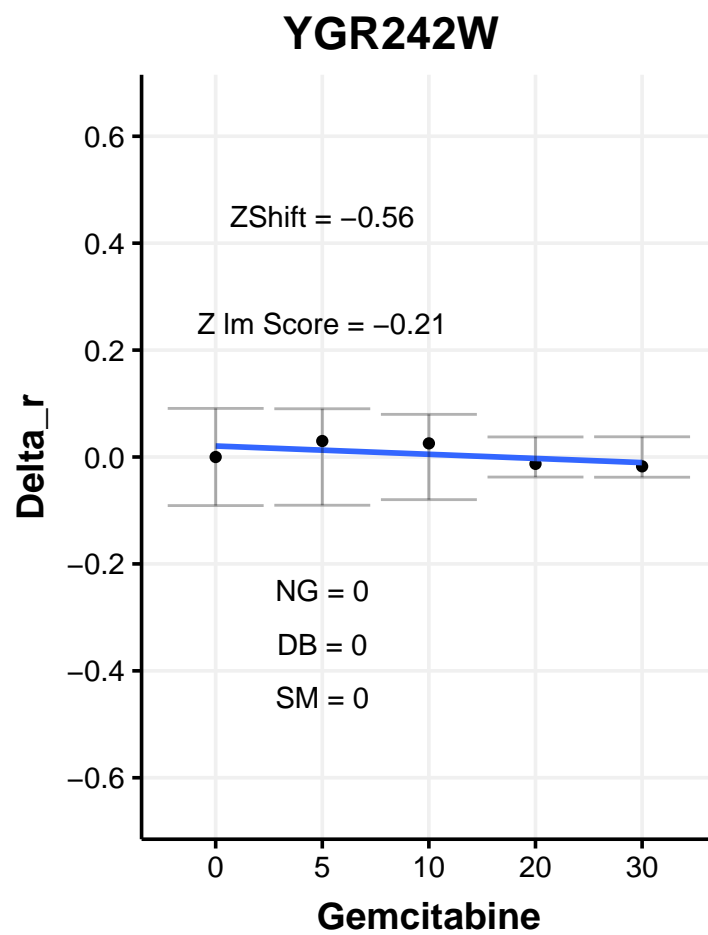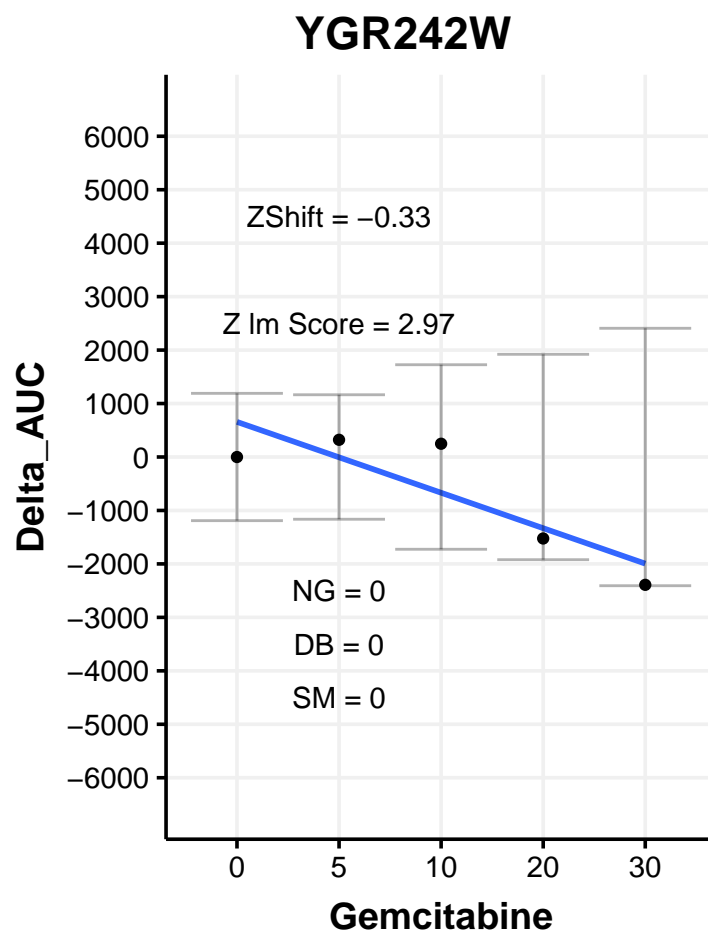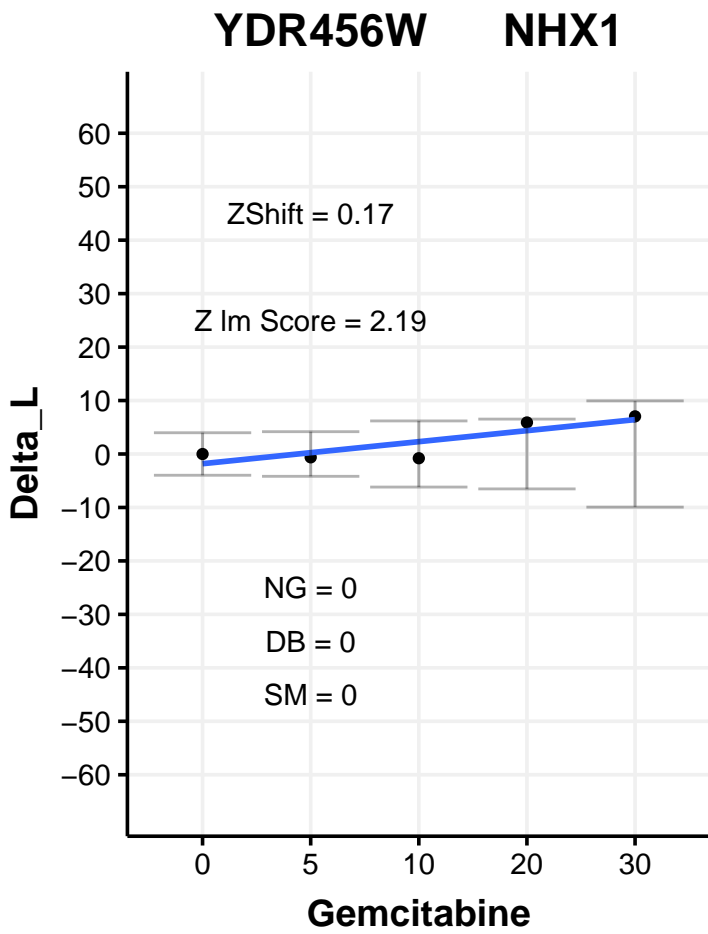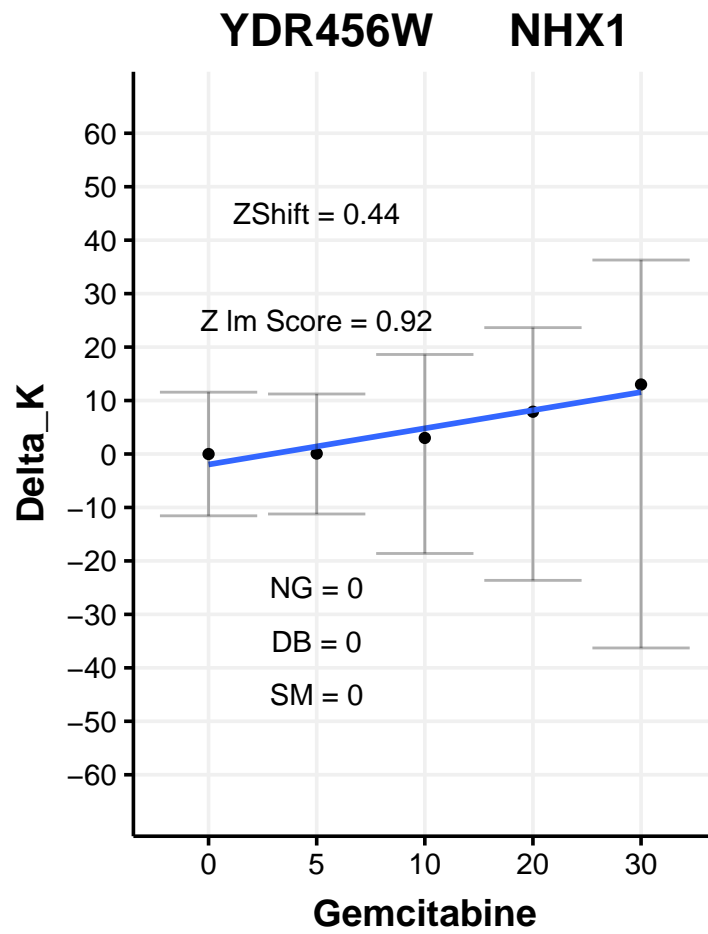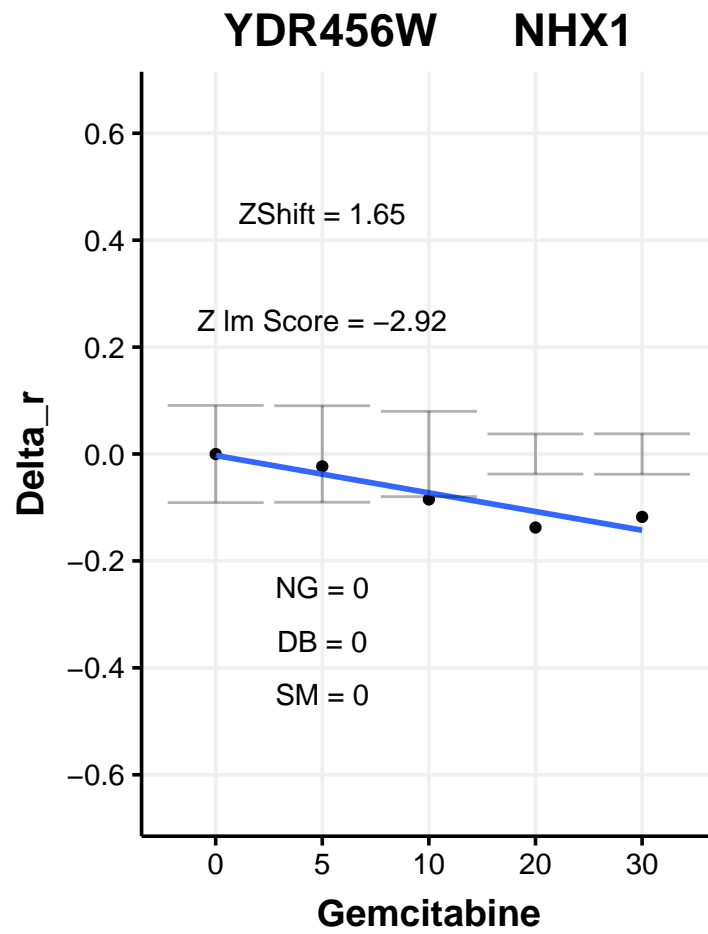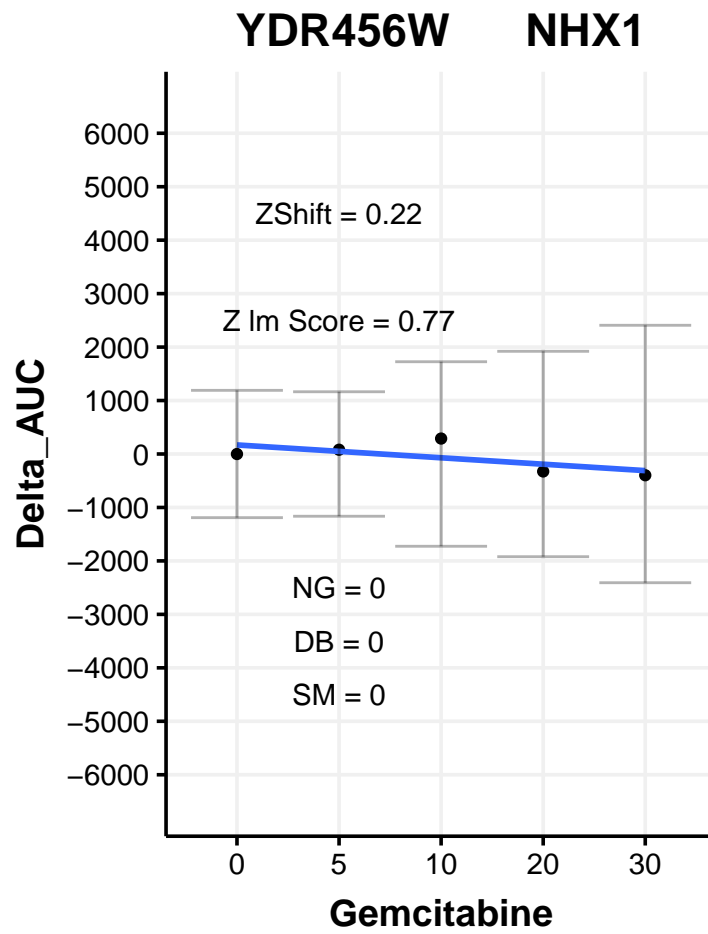

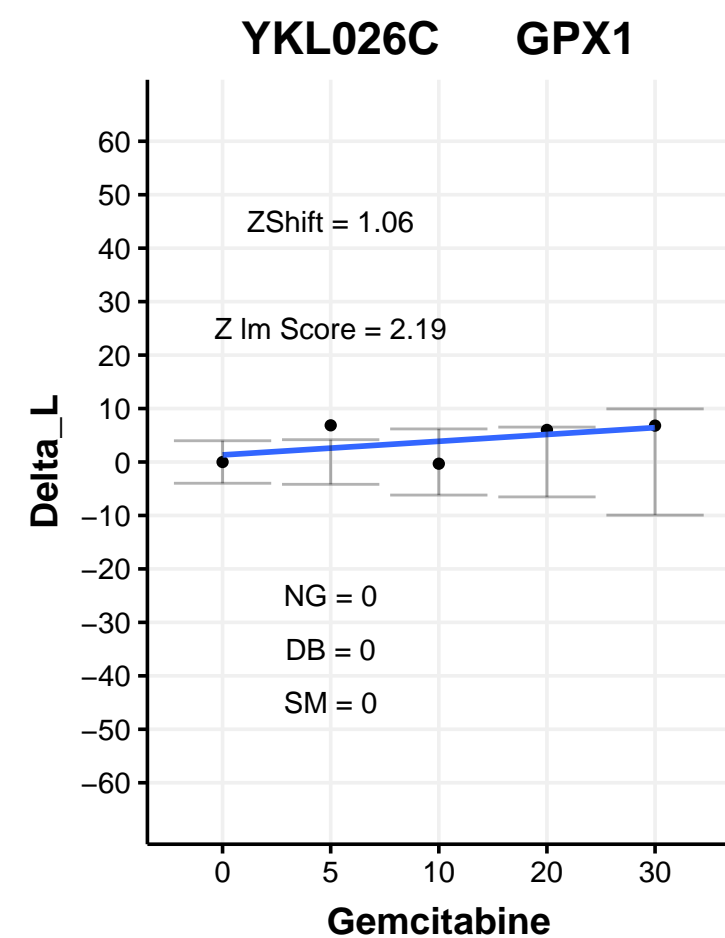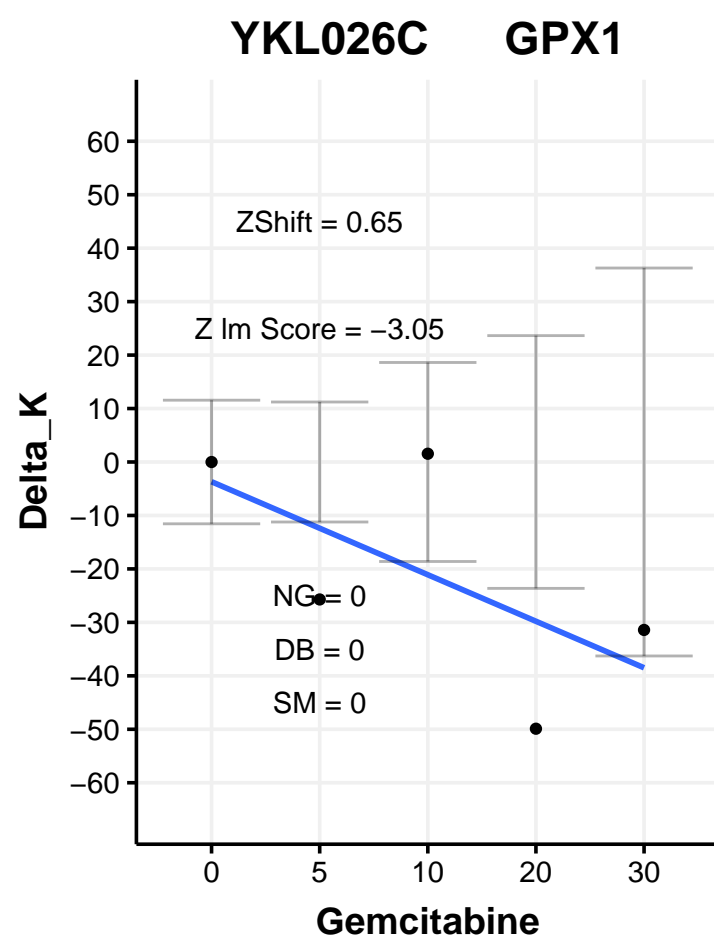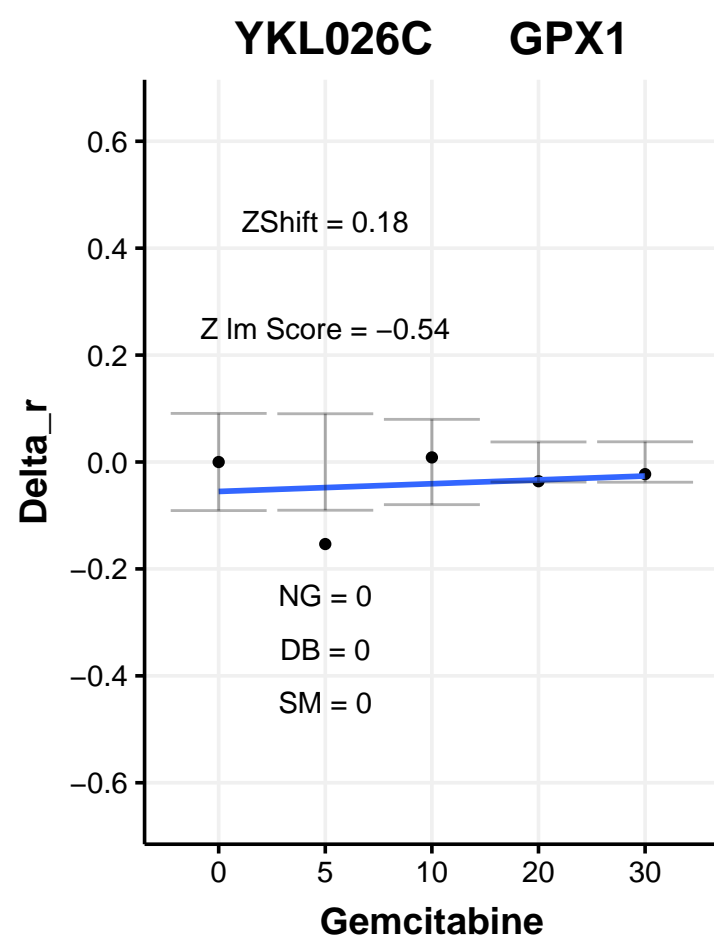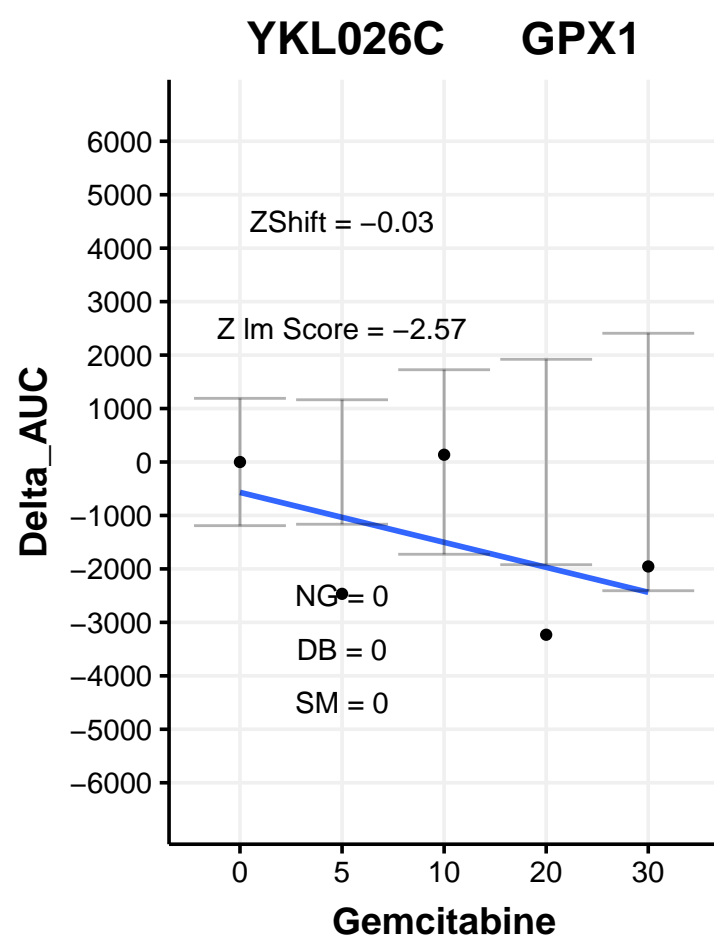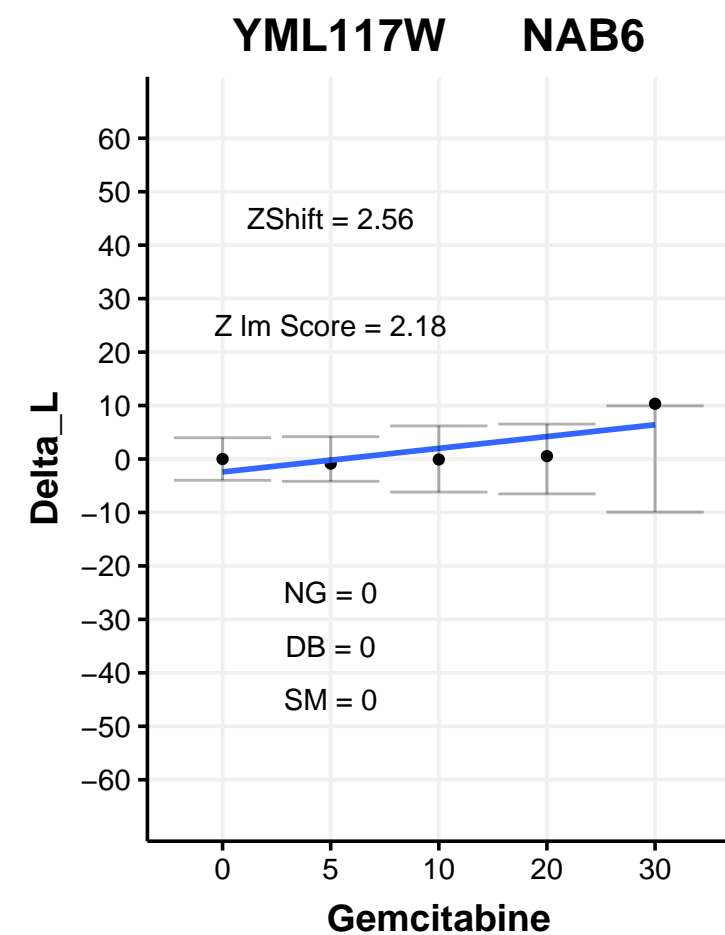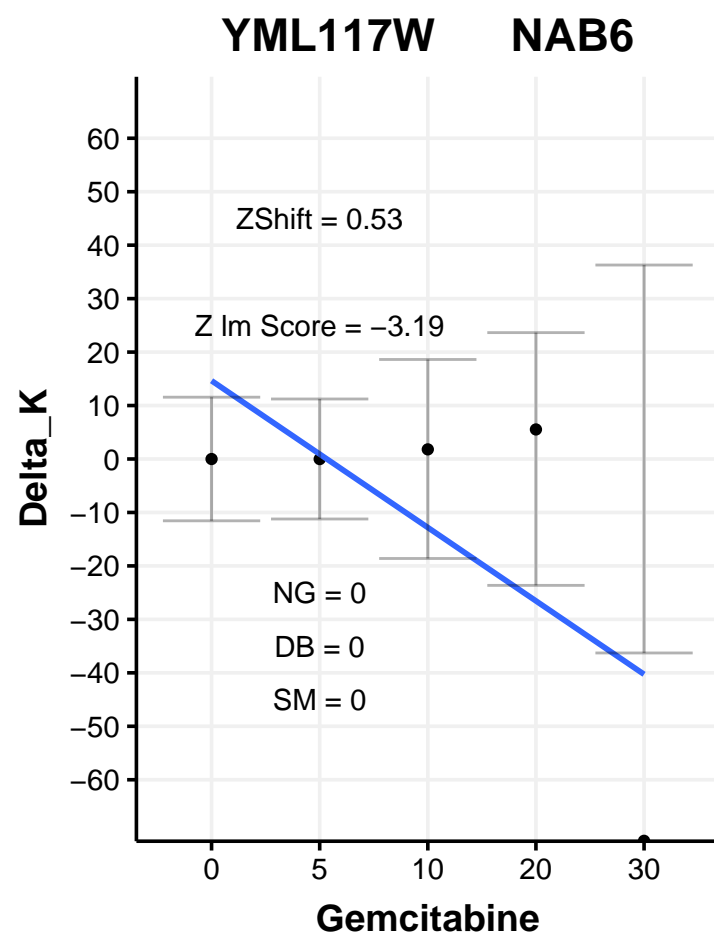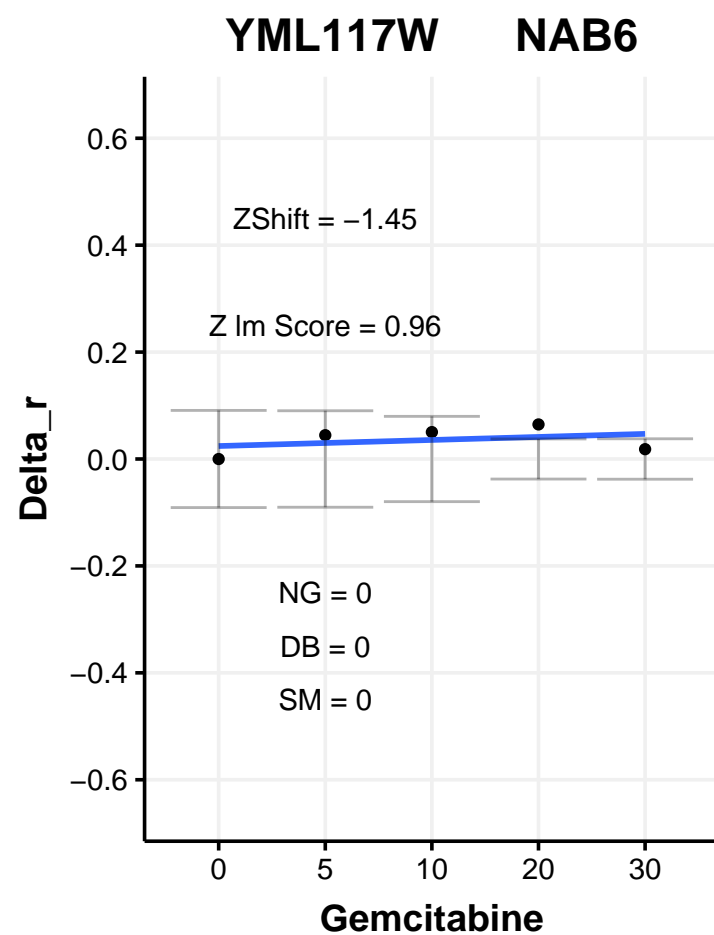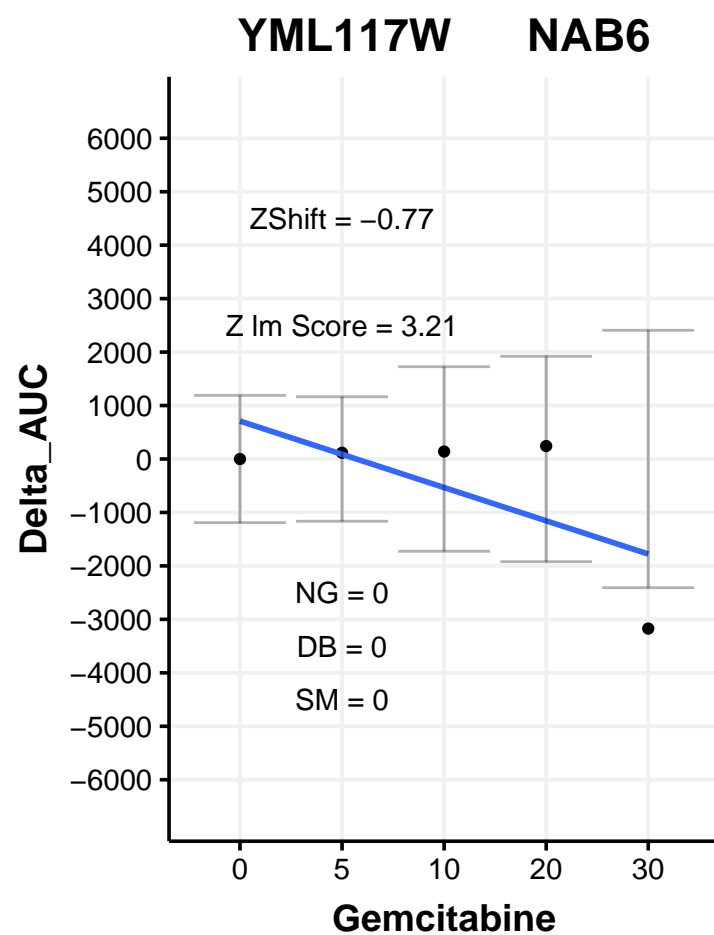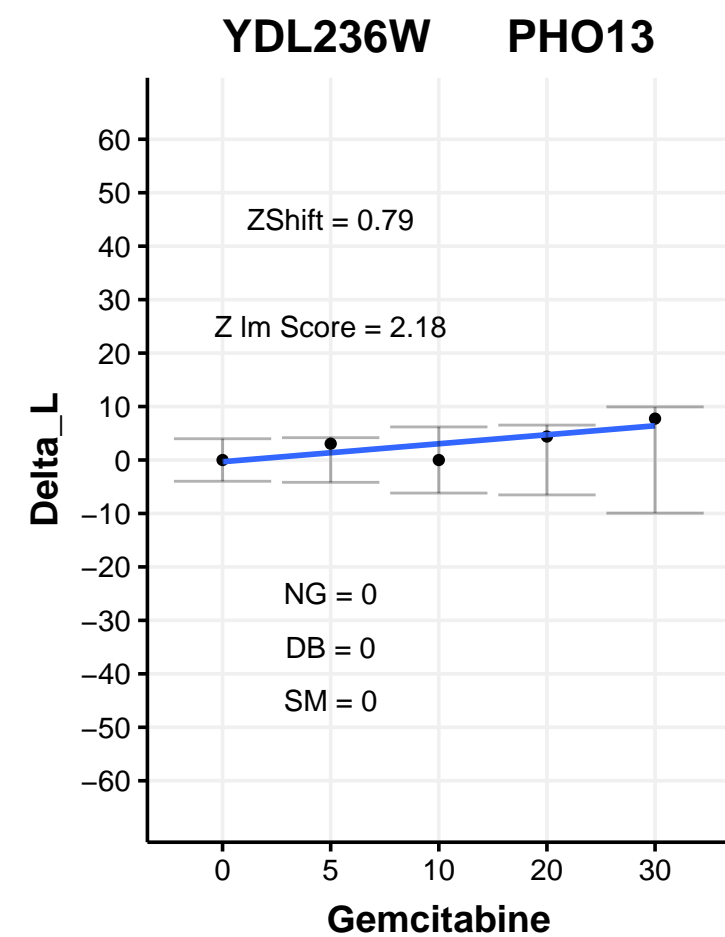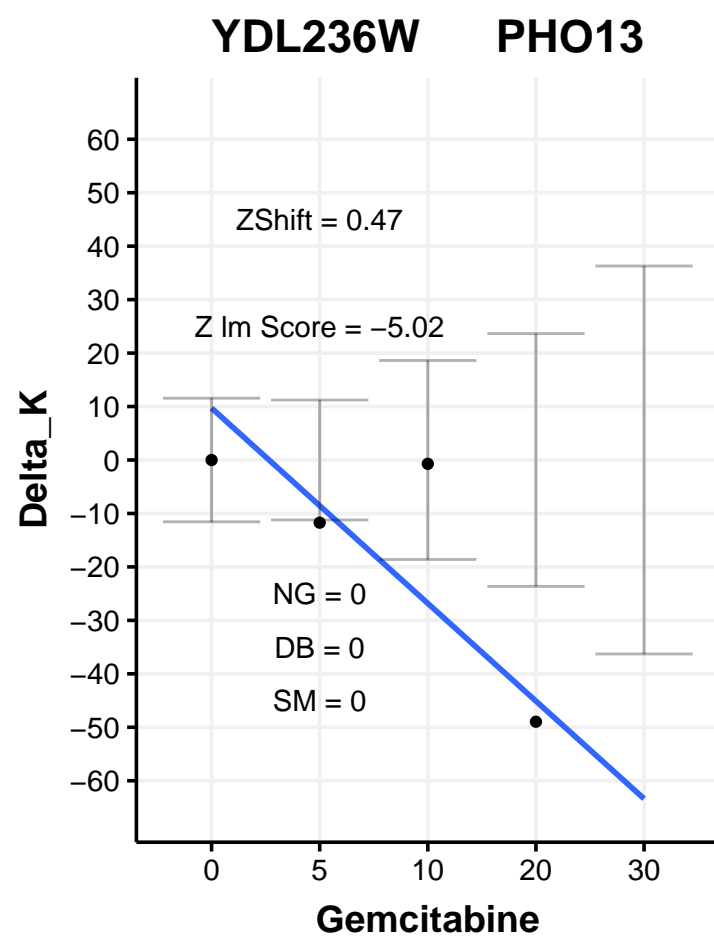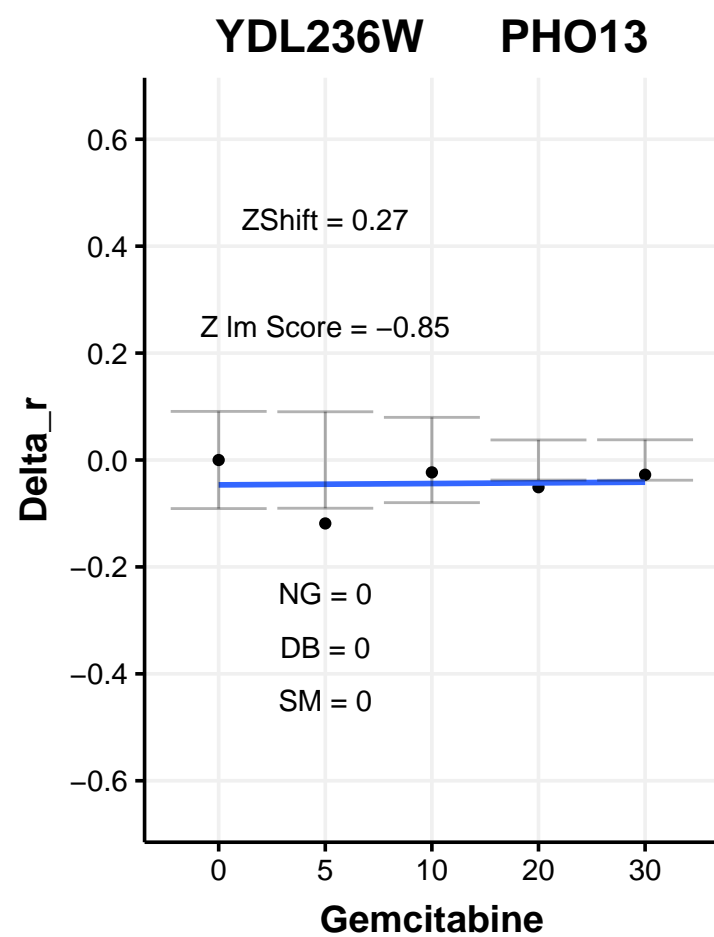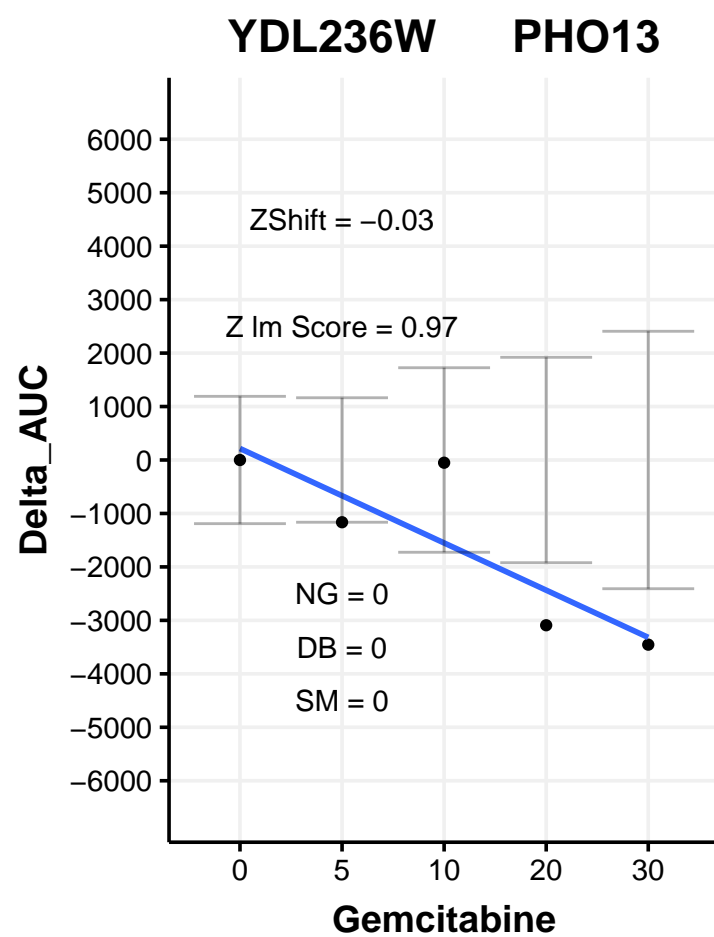

YLR312C-B\_2

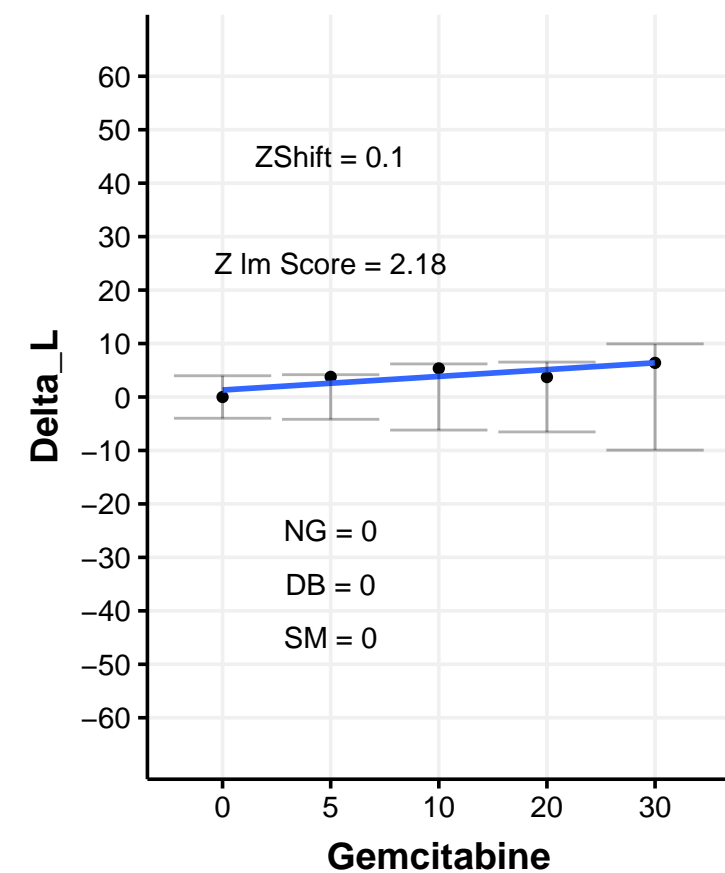

YLR312C-B\_2

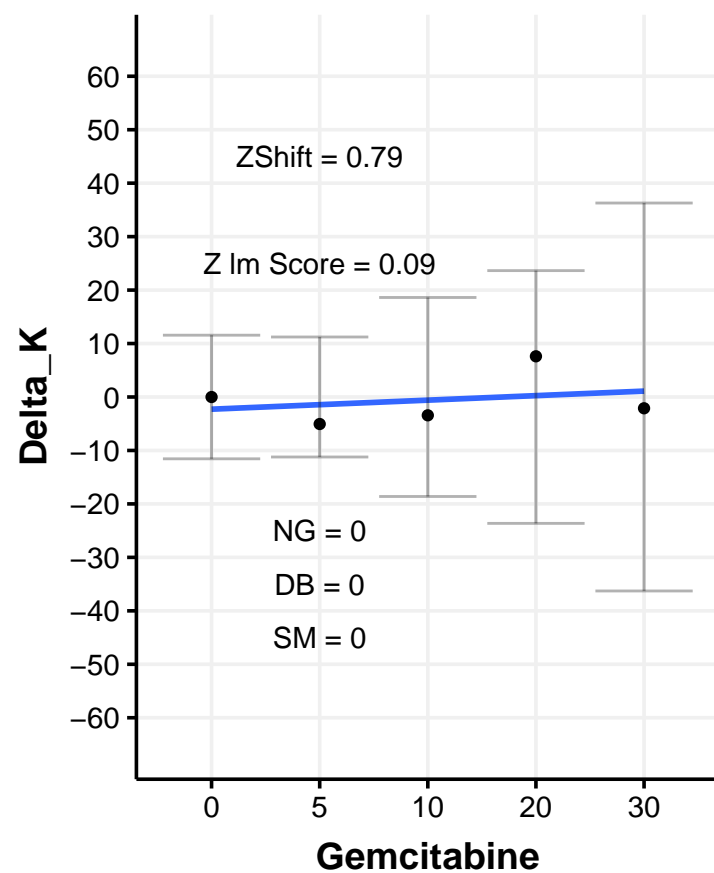

YLR312C-B\_2

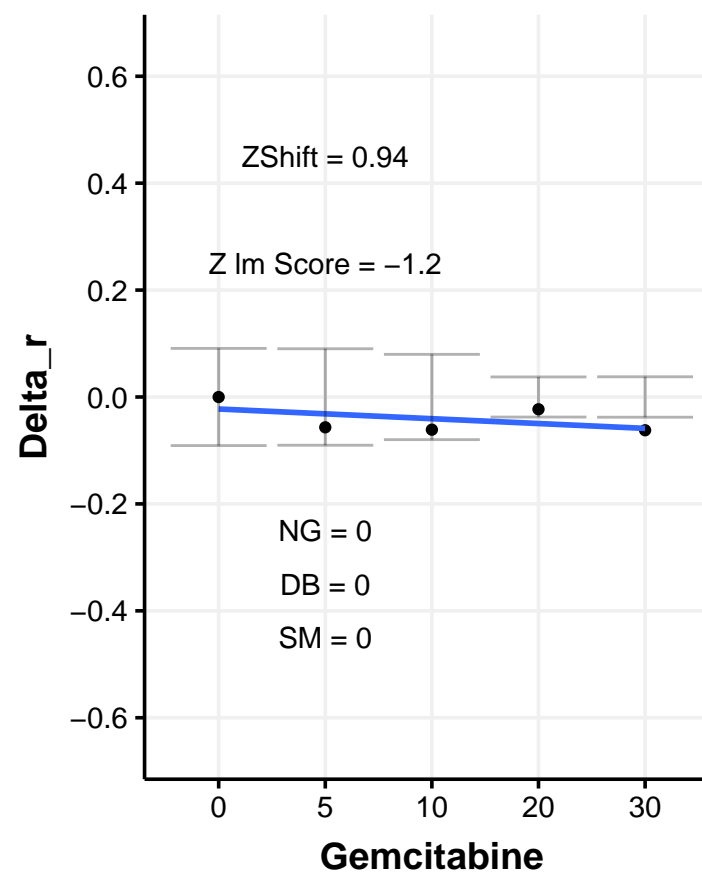

YLR312C-B\_2

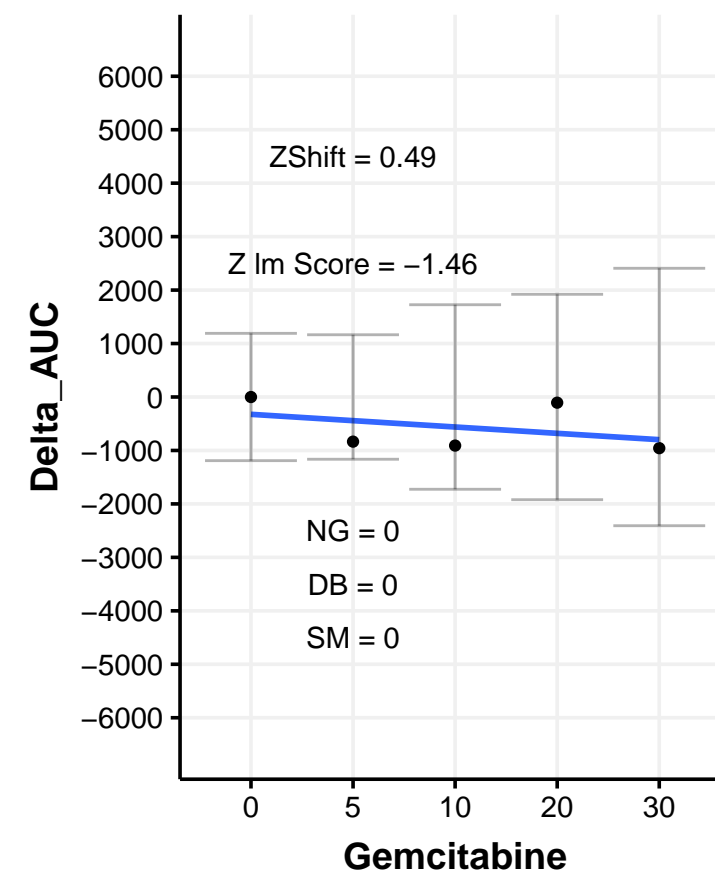

YHR016C YSC84

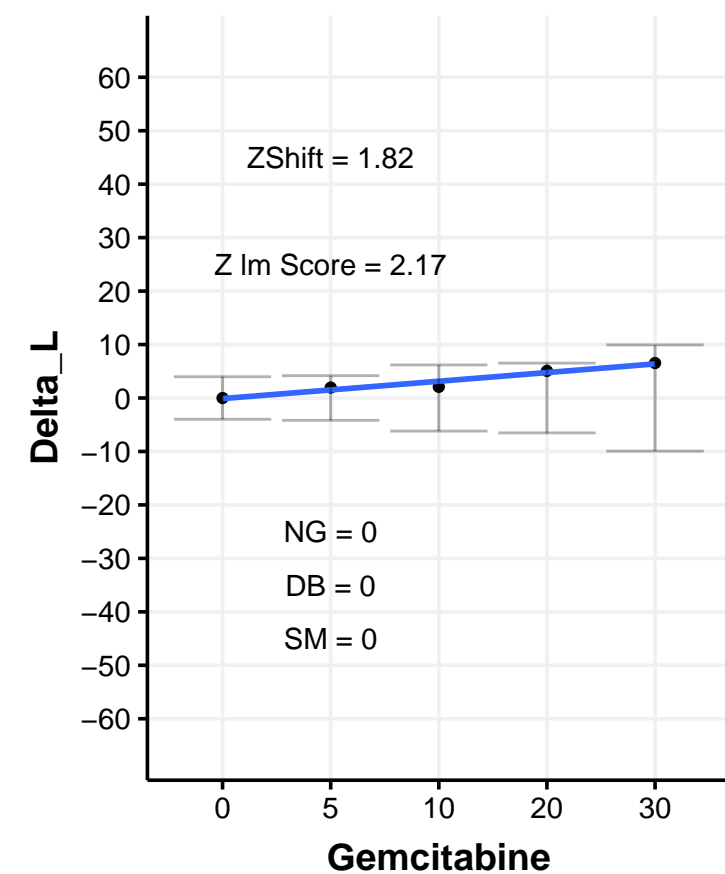

YHR016C YSC84

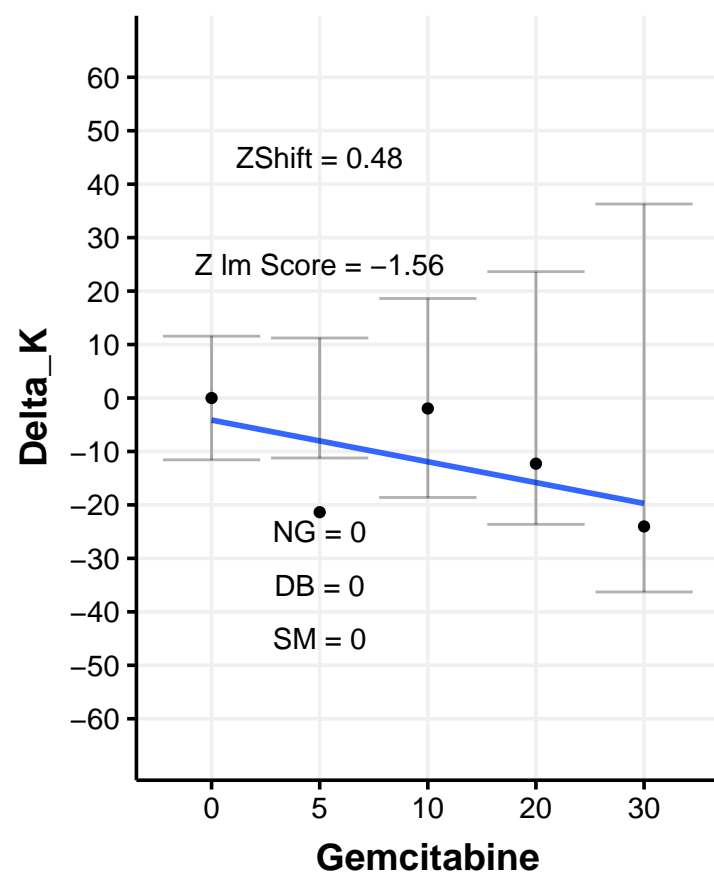

YHR016C YSC84

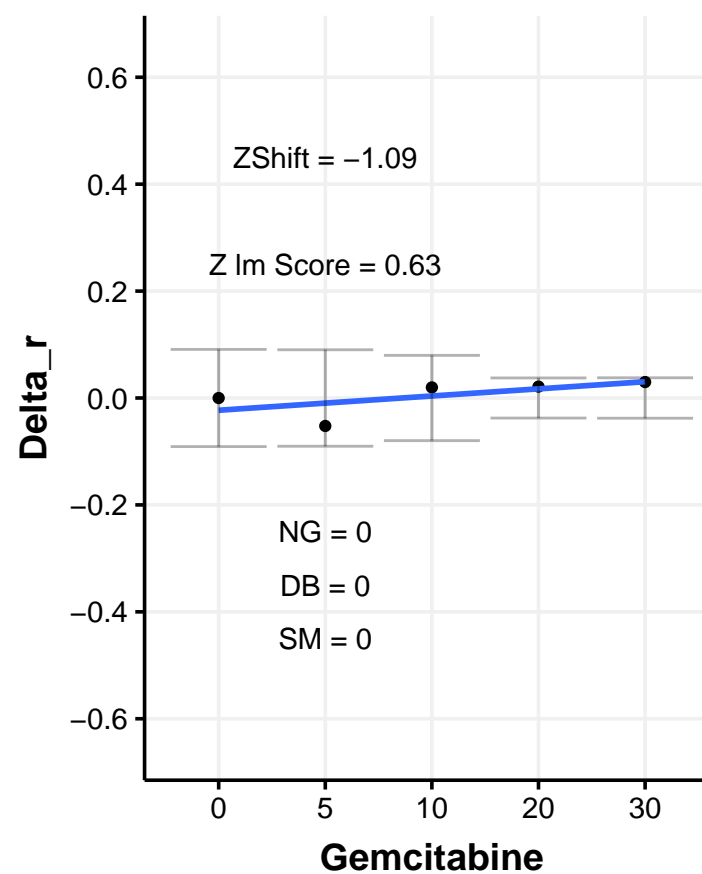

YHR016C YSC84

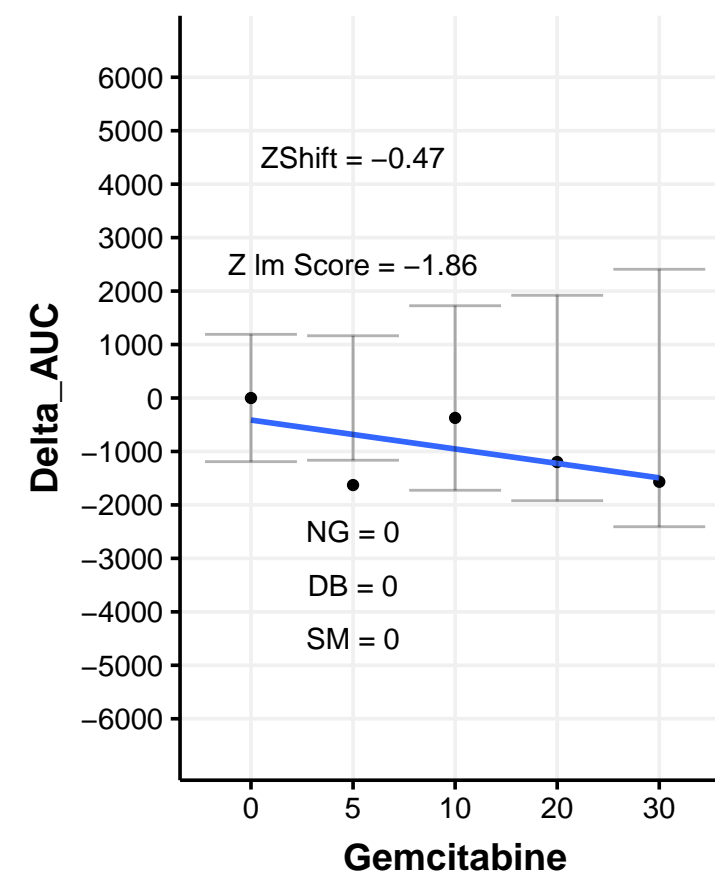

YJR053W BFA1

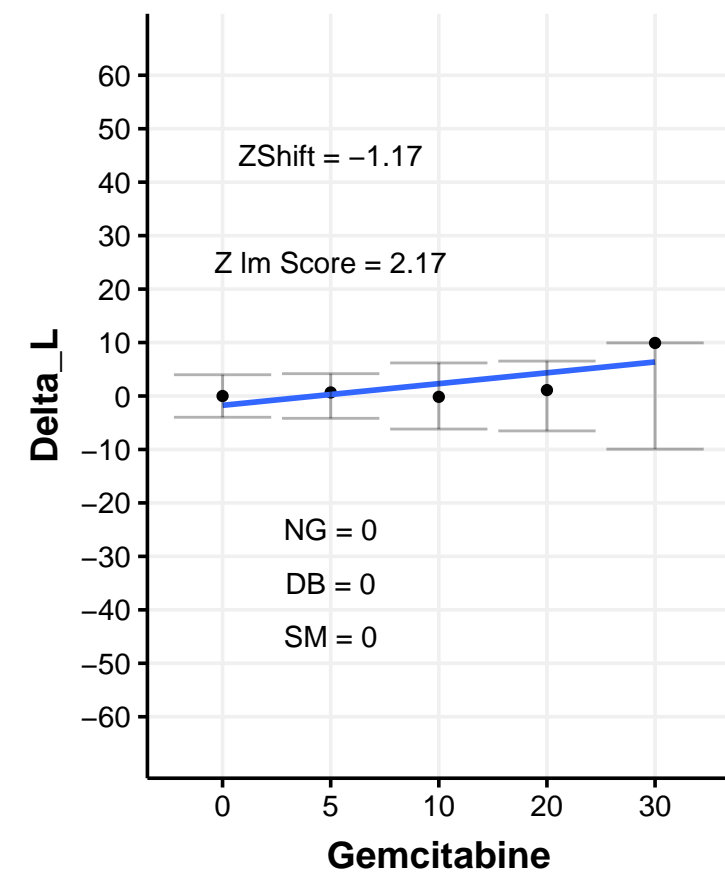

YJR053W BFA1

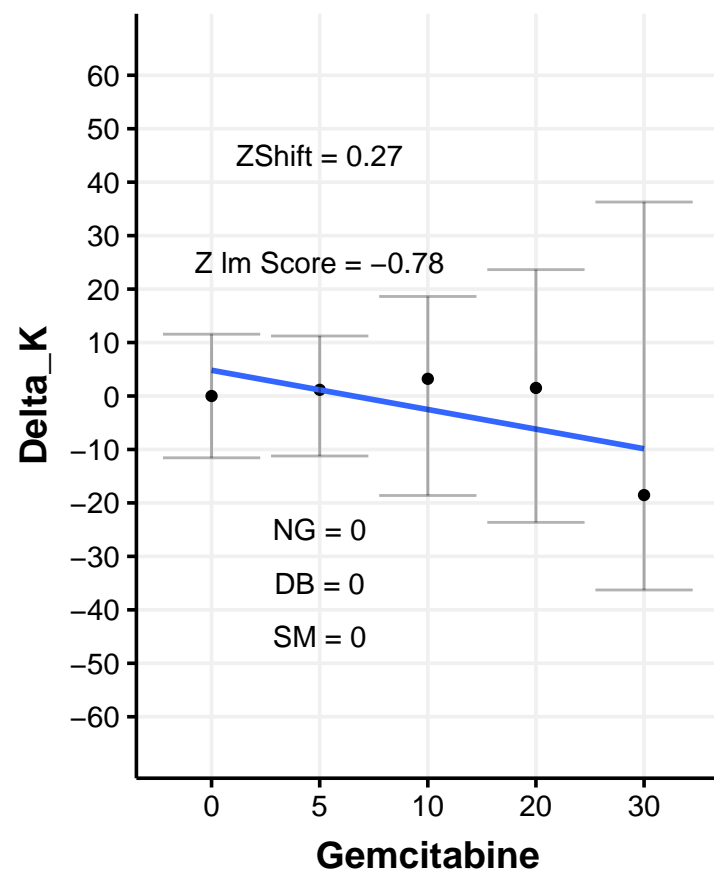

YJR053W BFA1

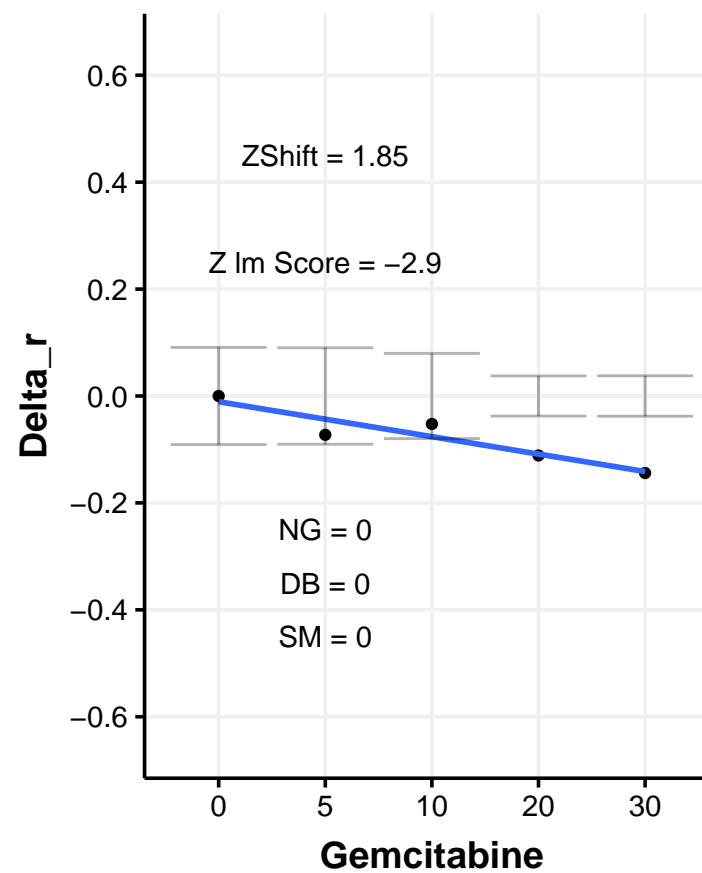

YJR053W BFA1

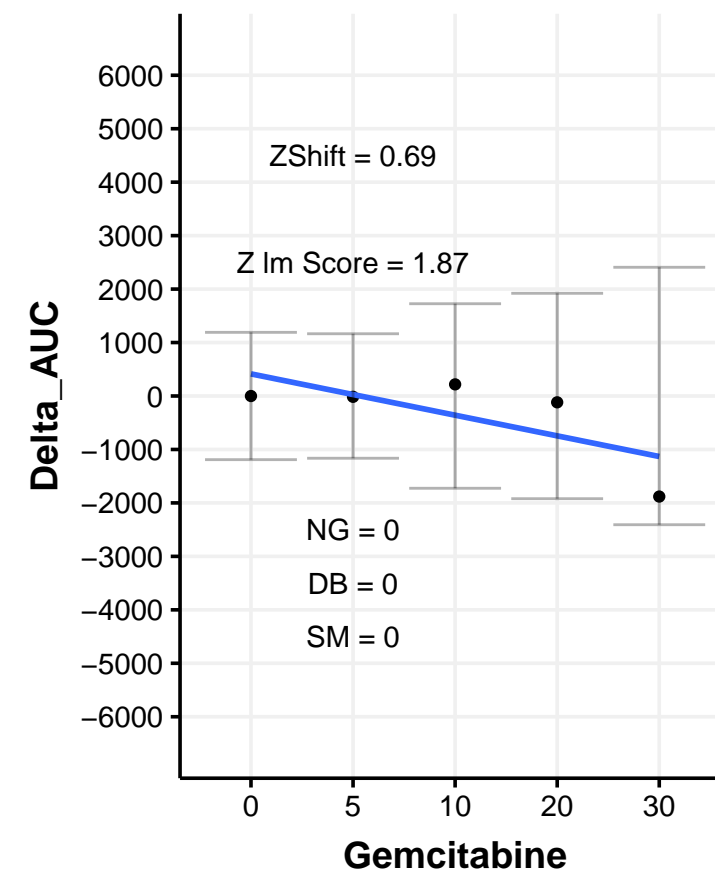

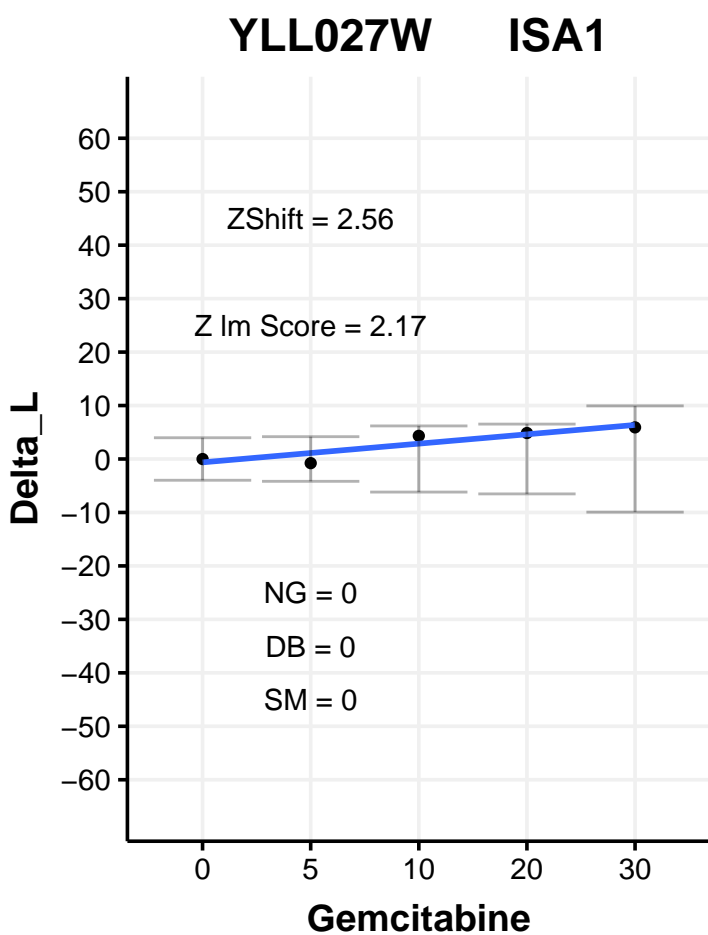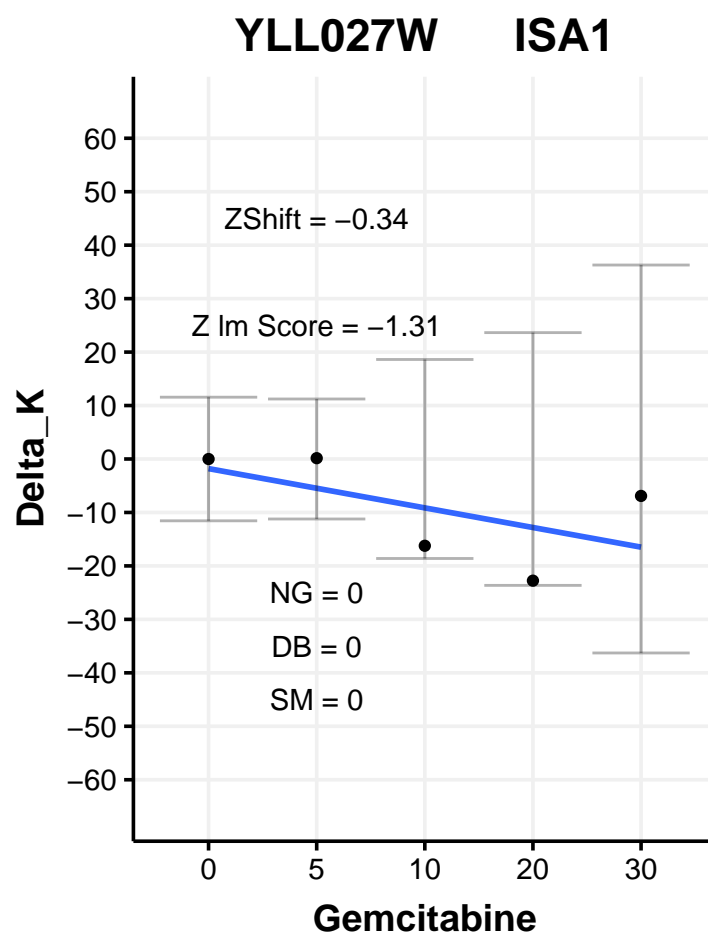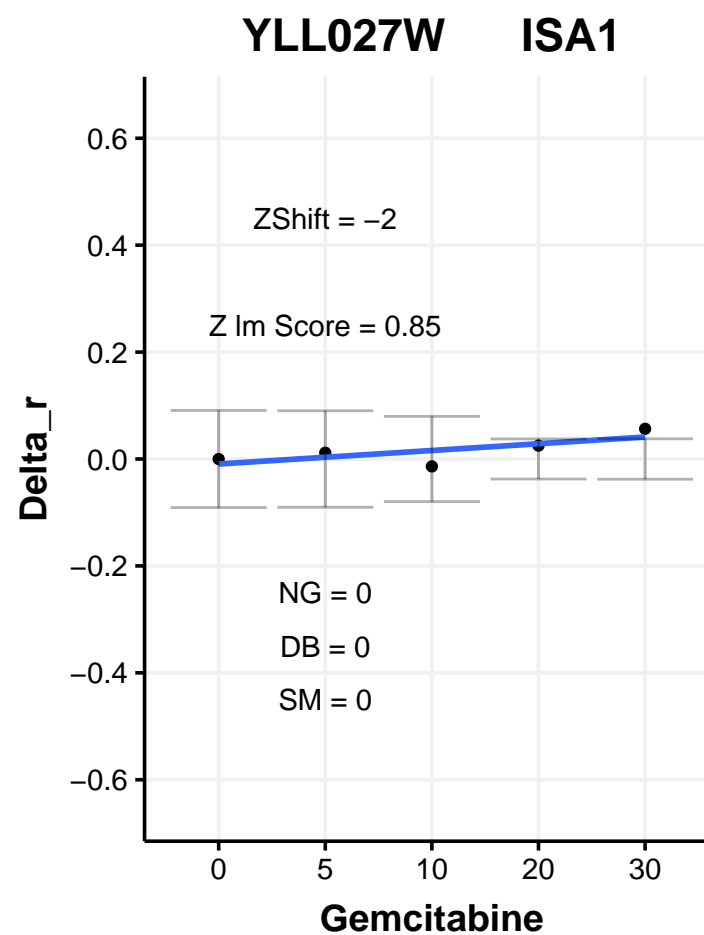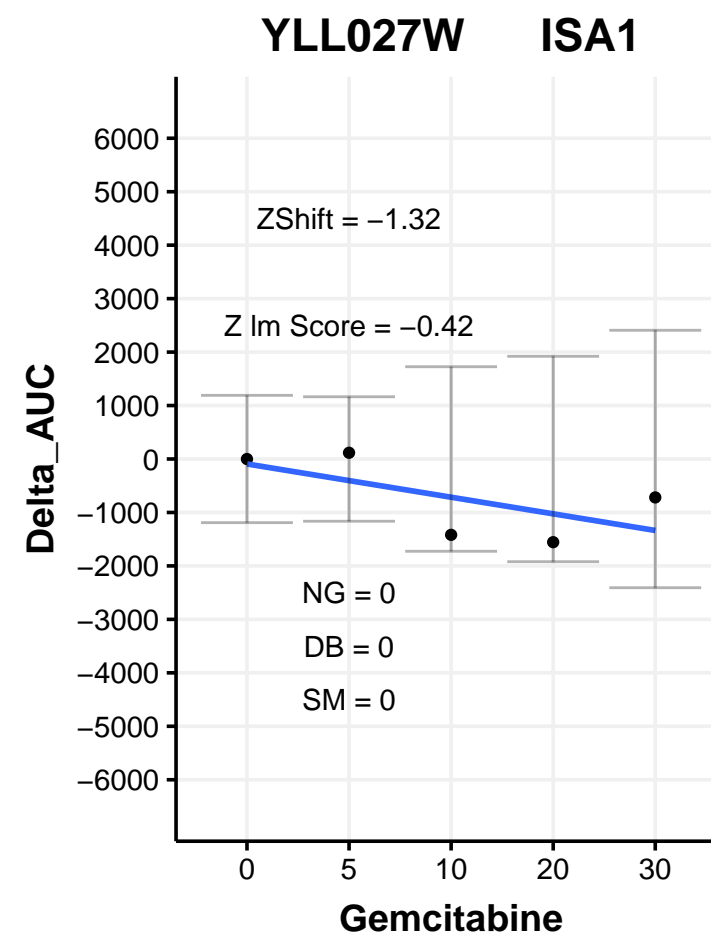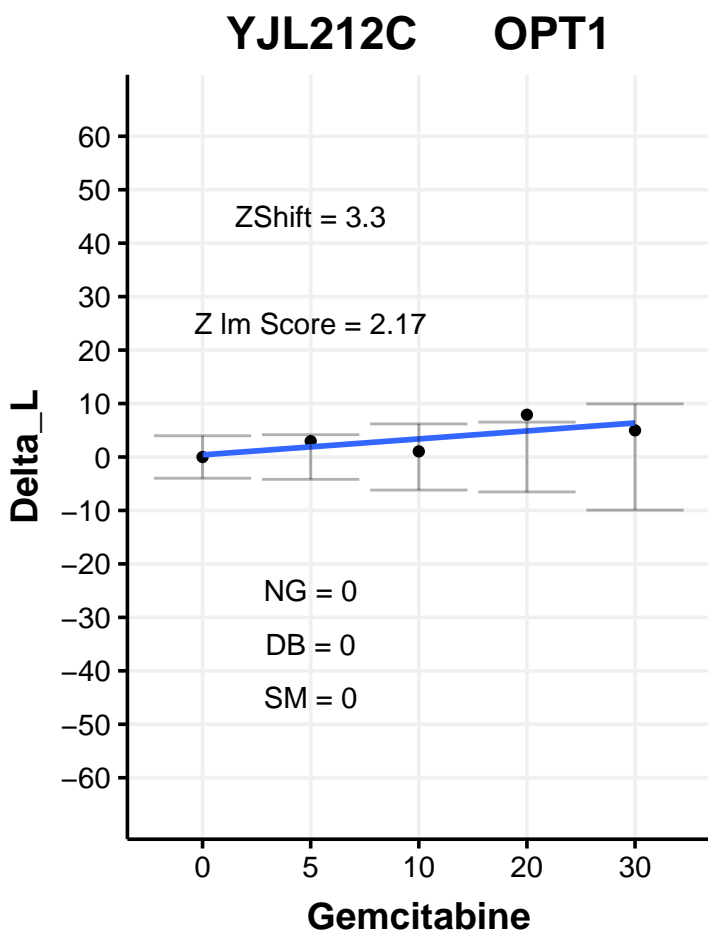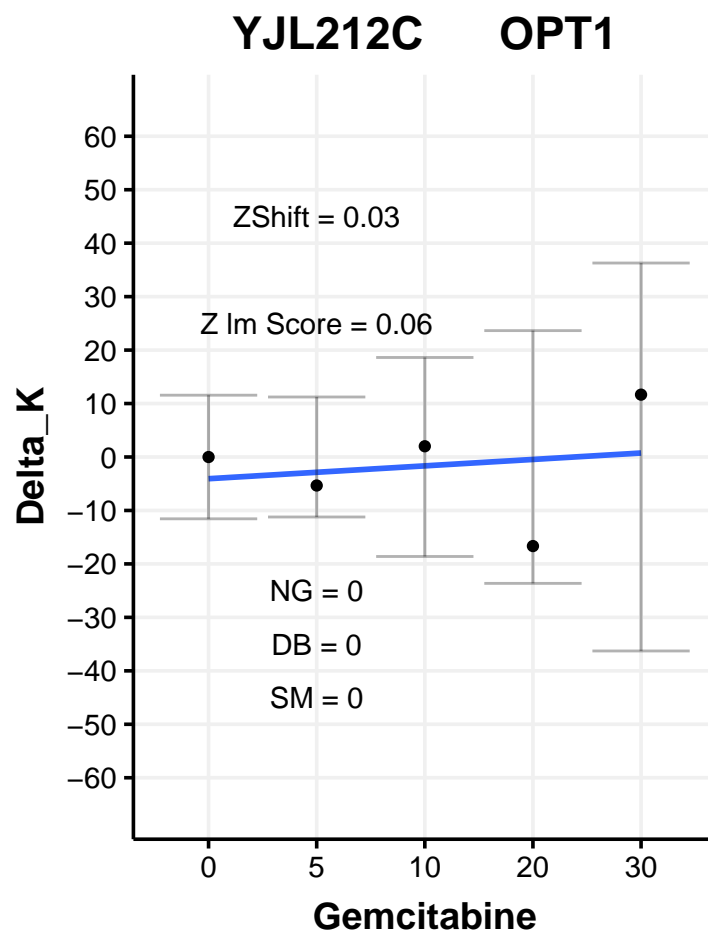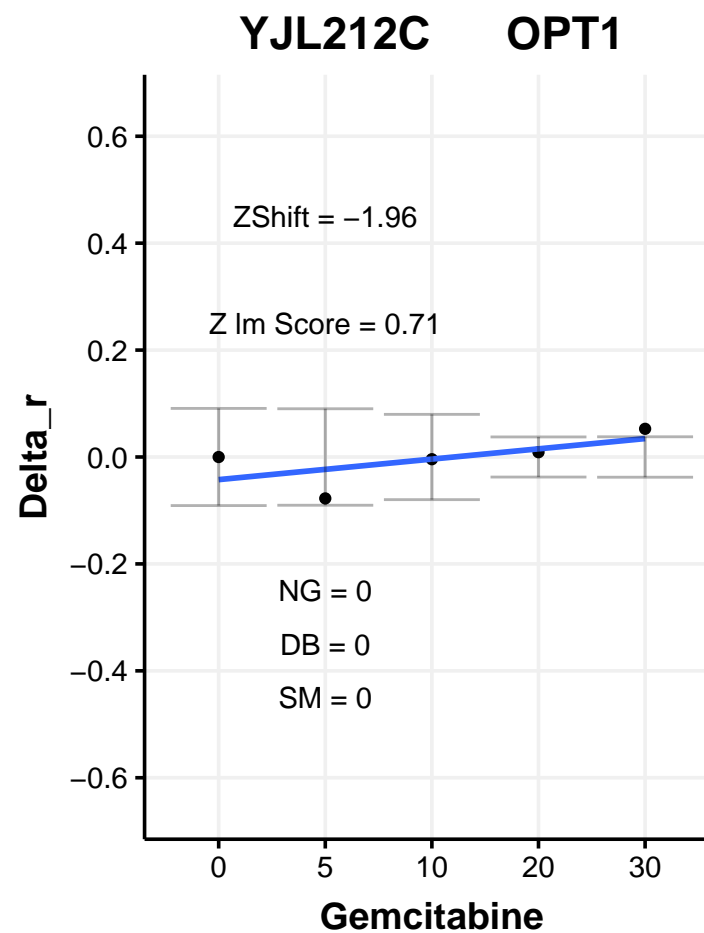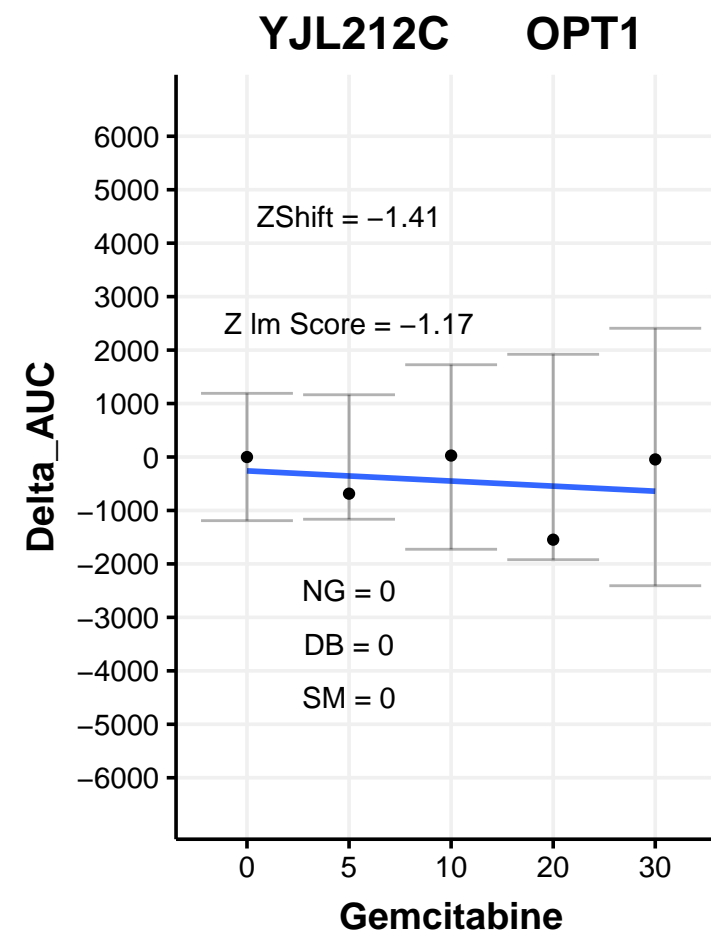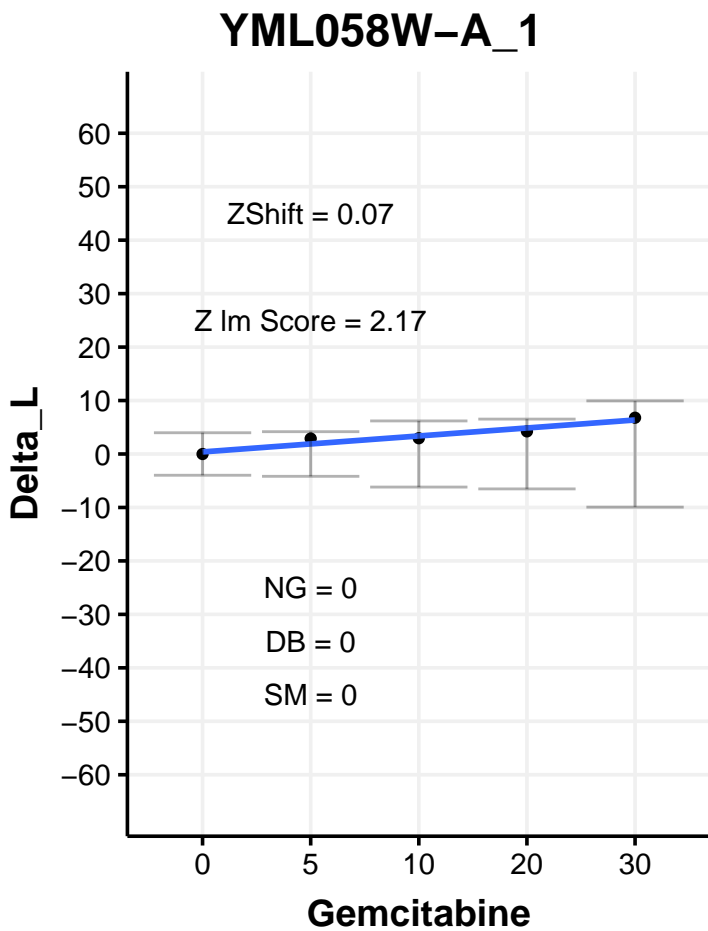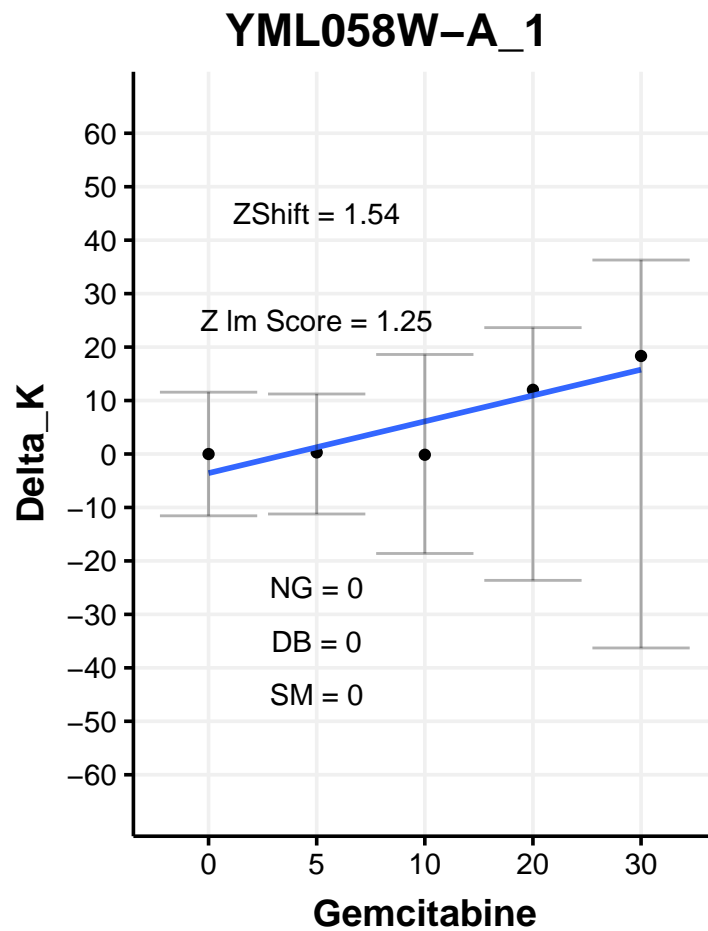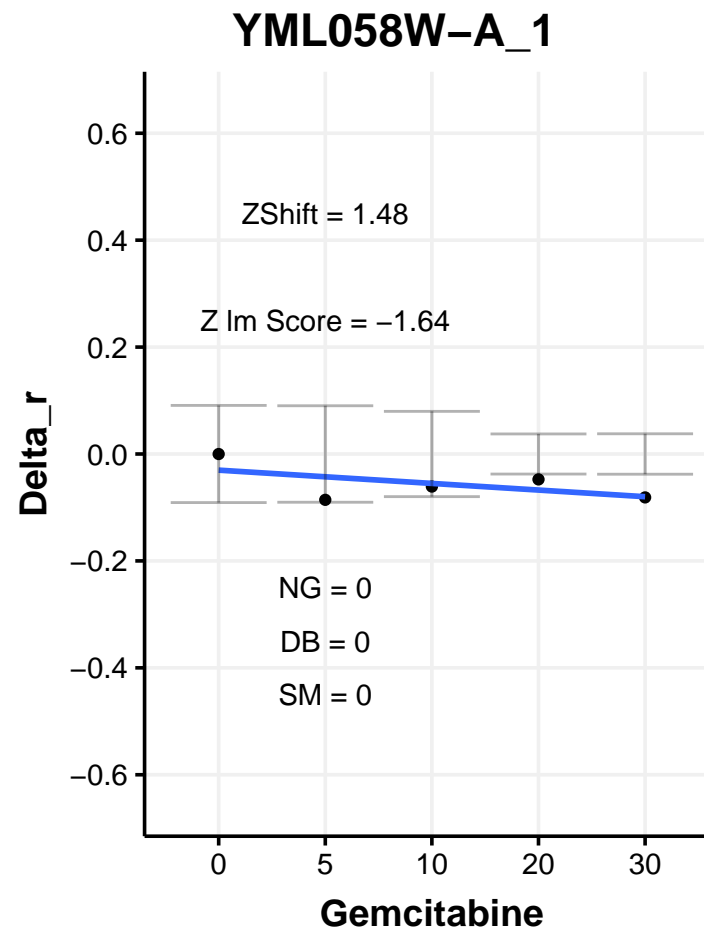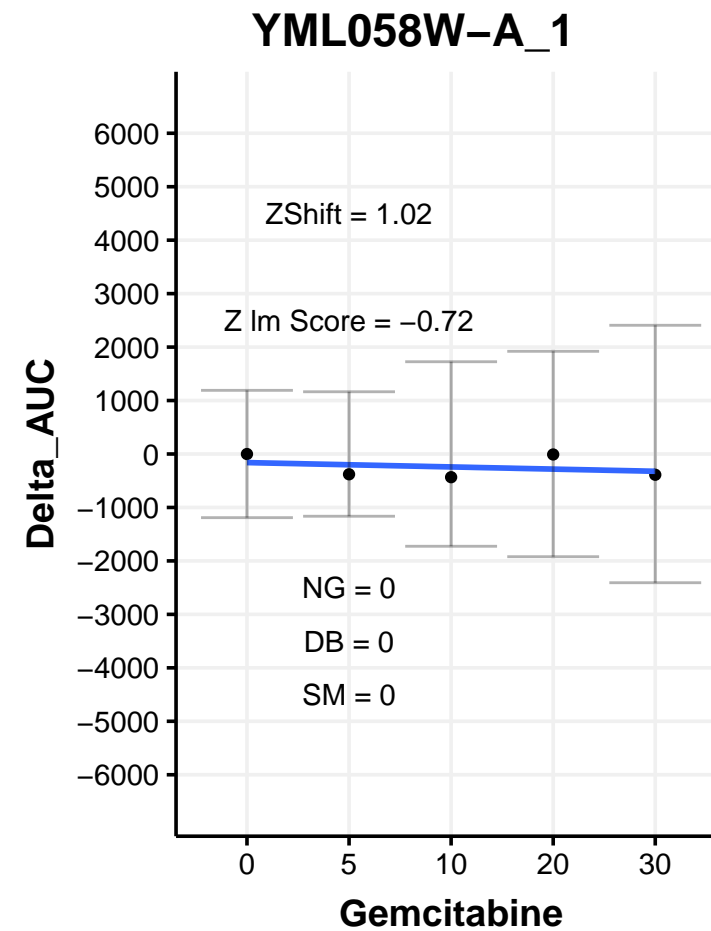

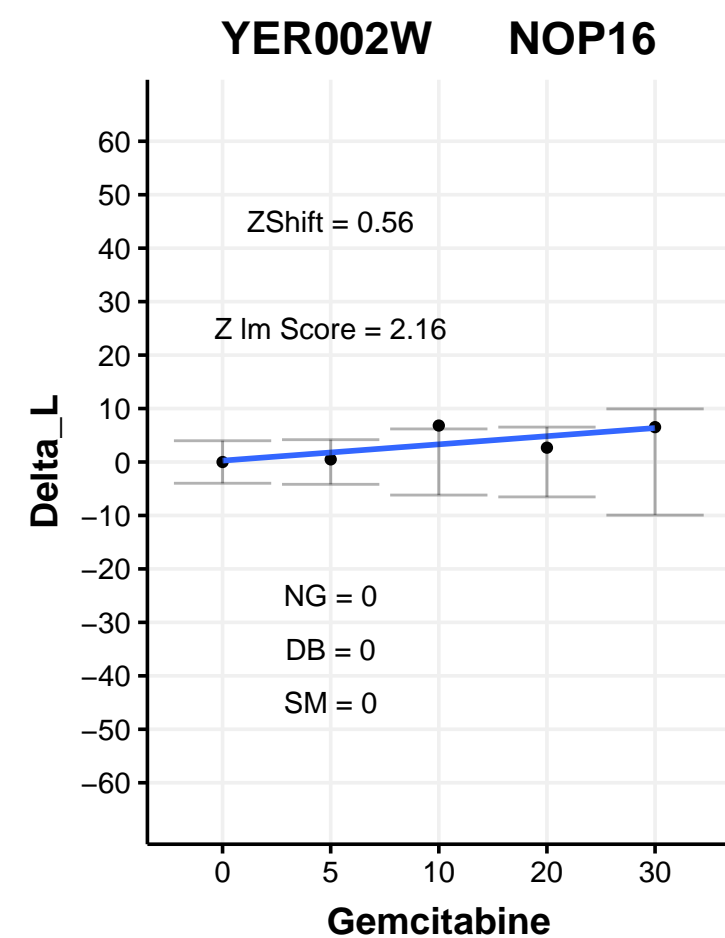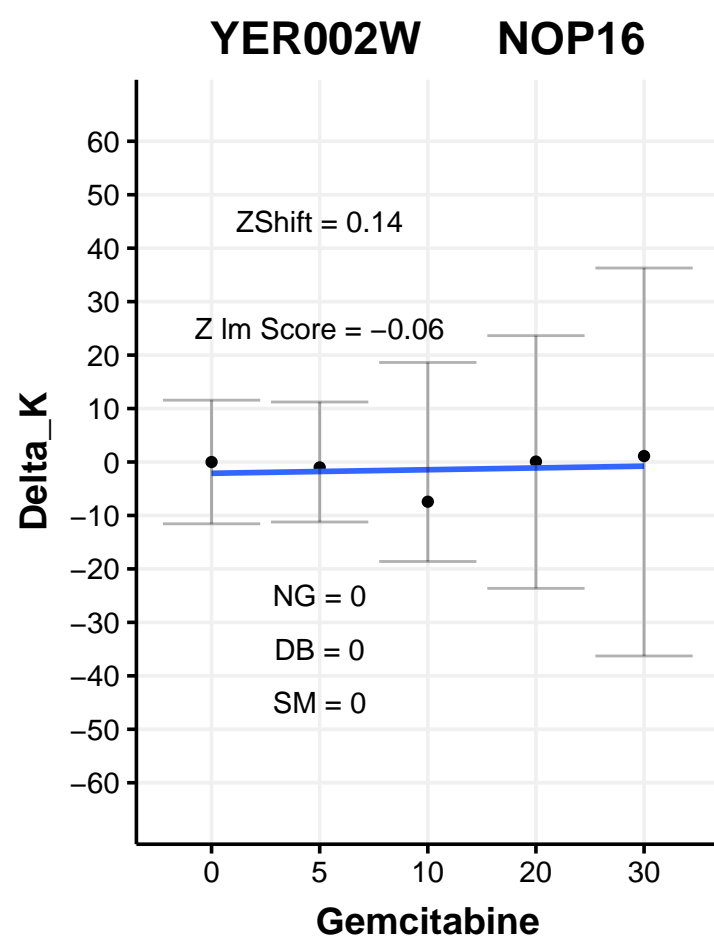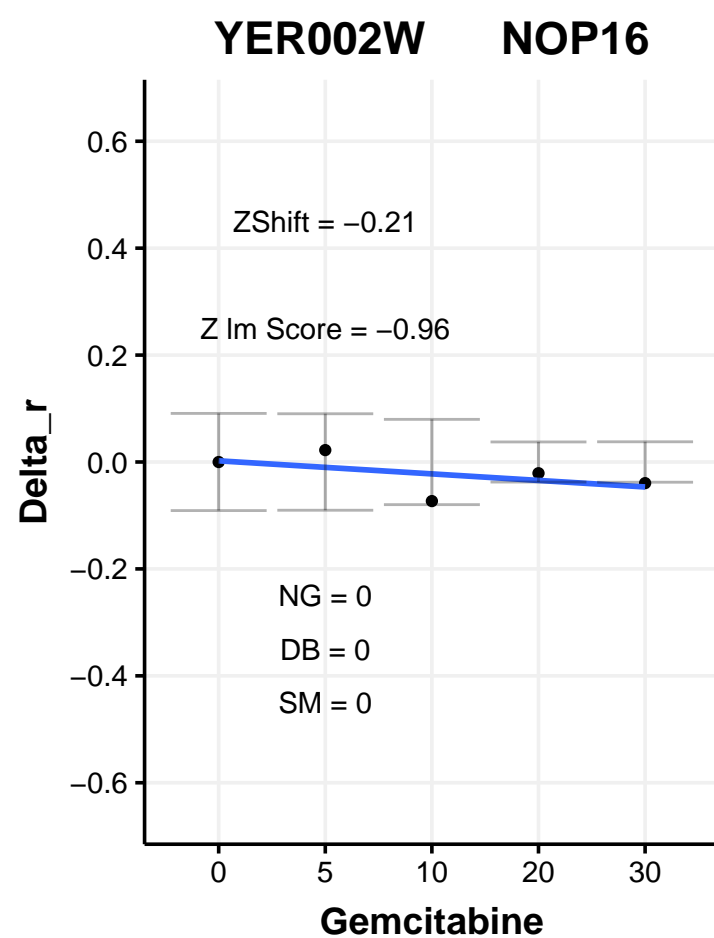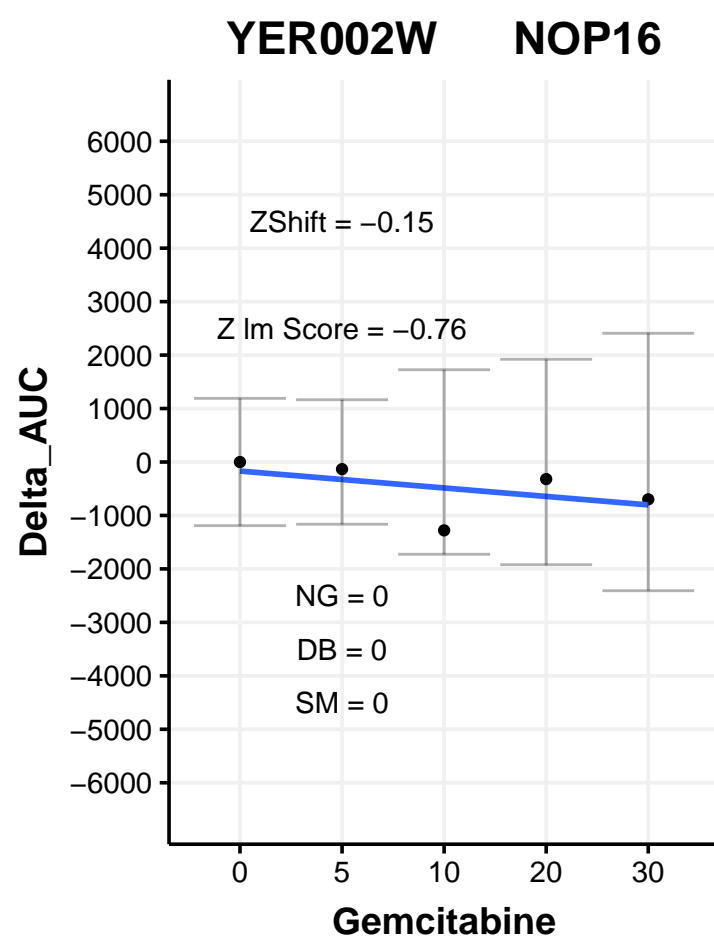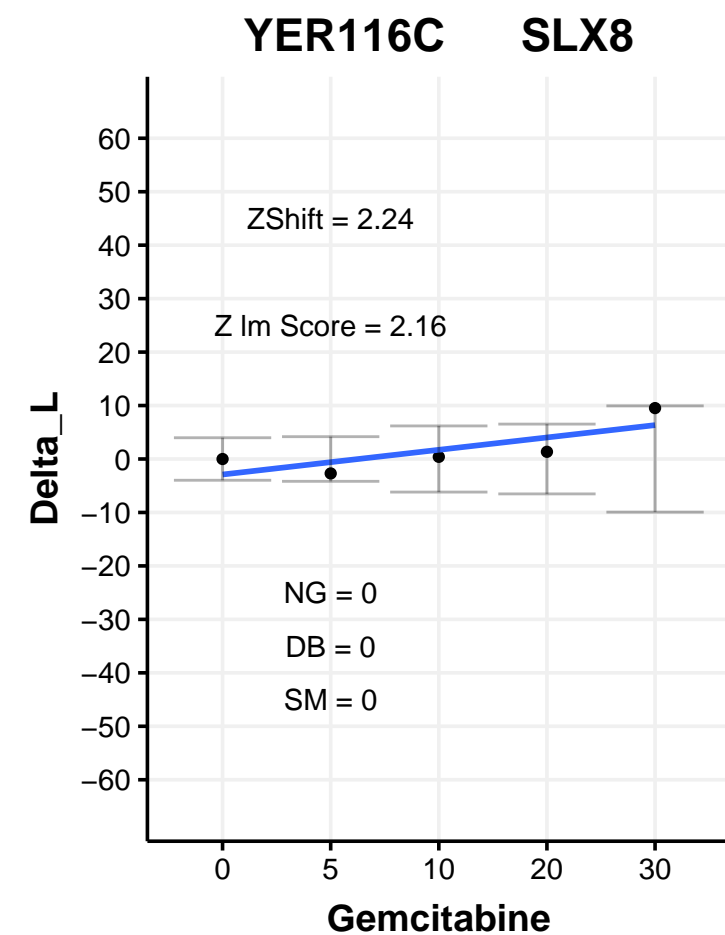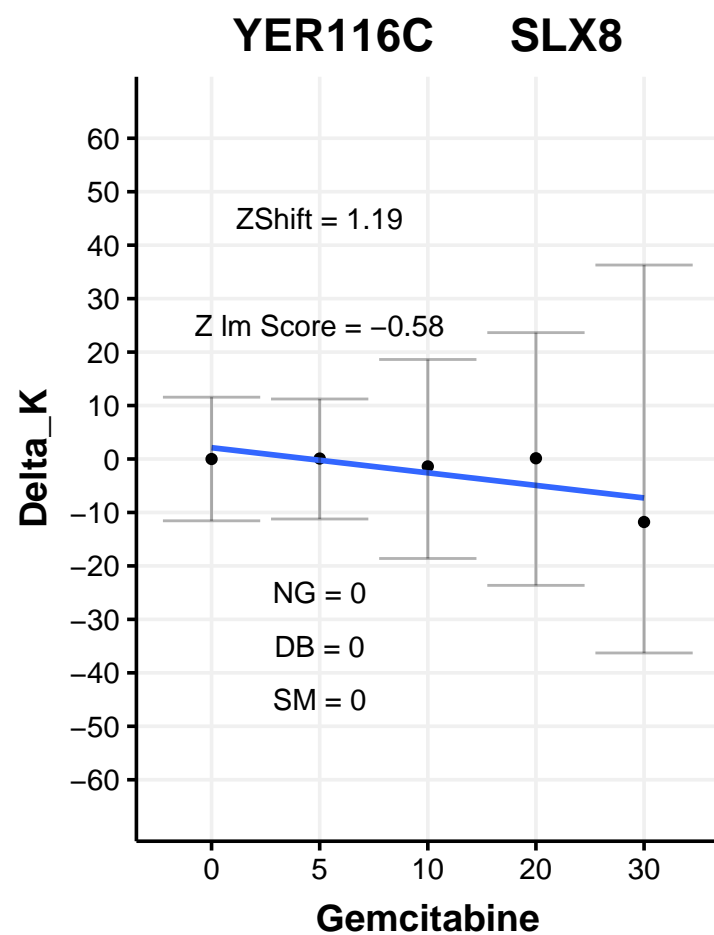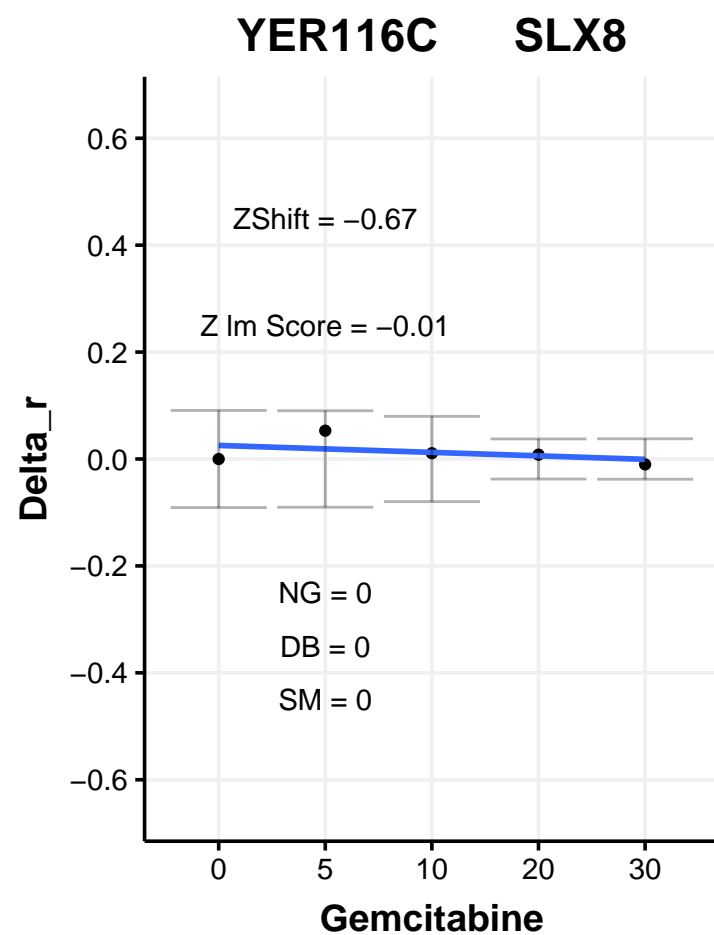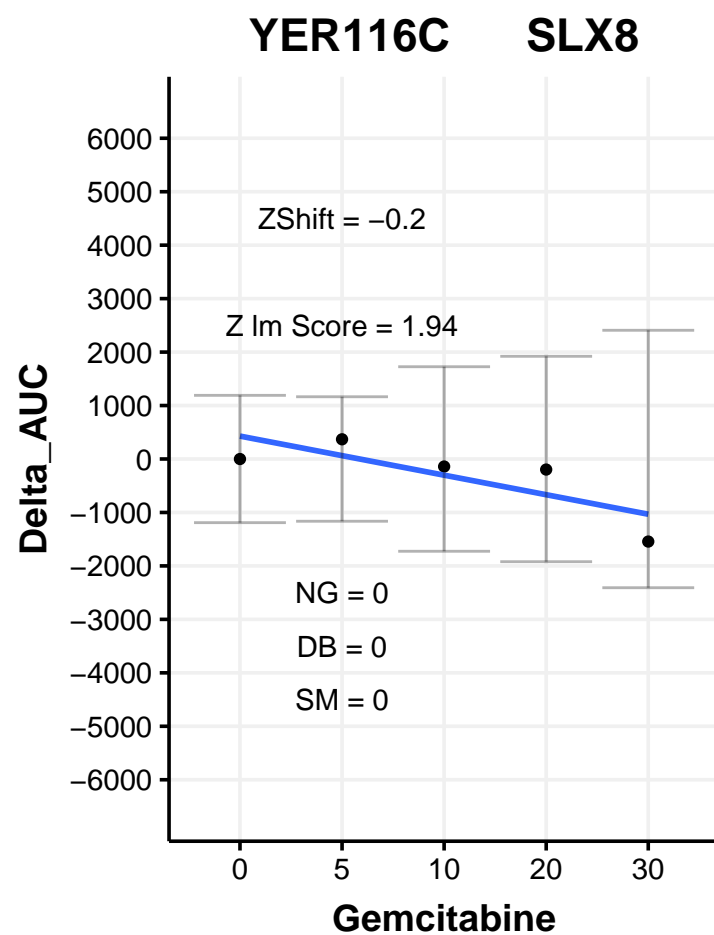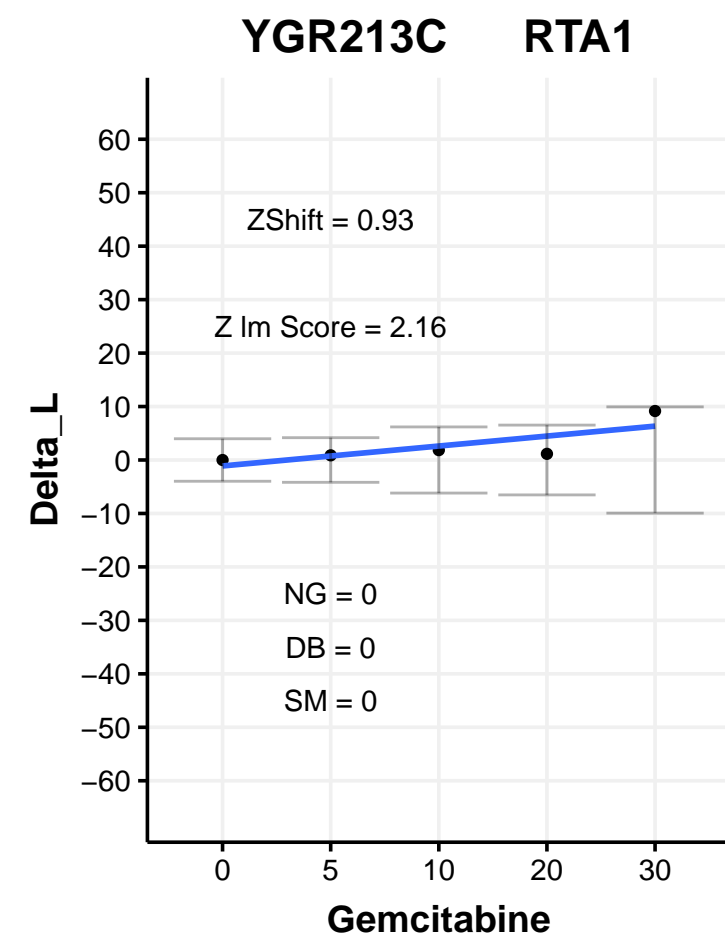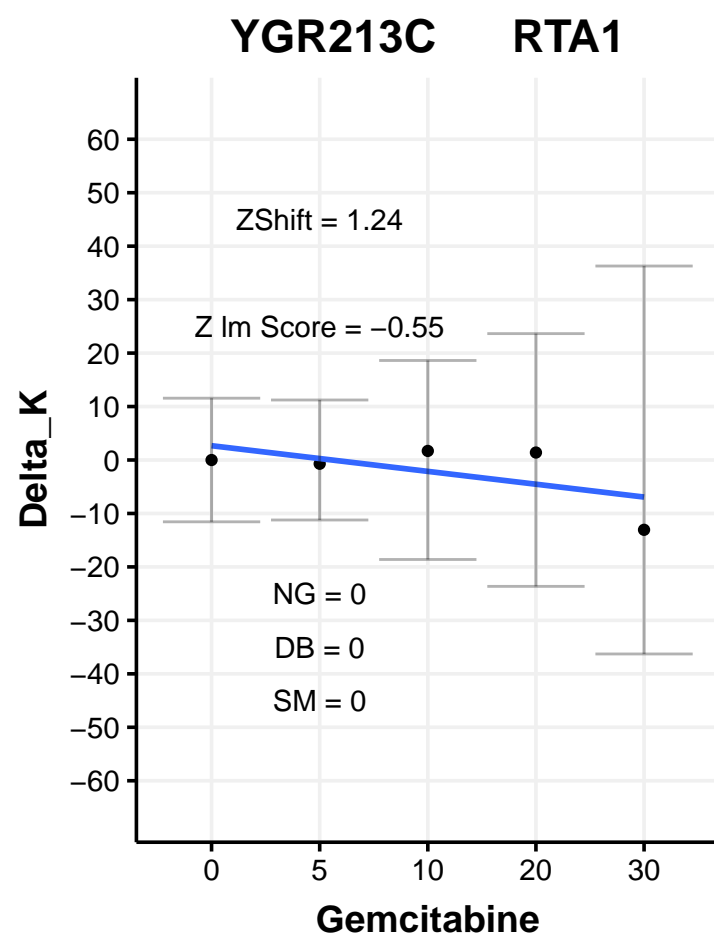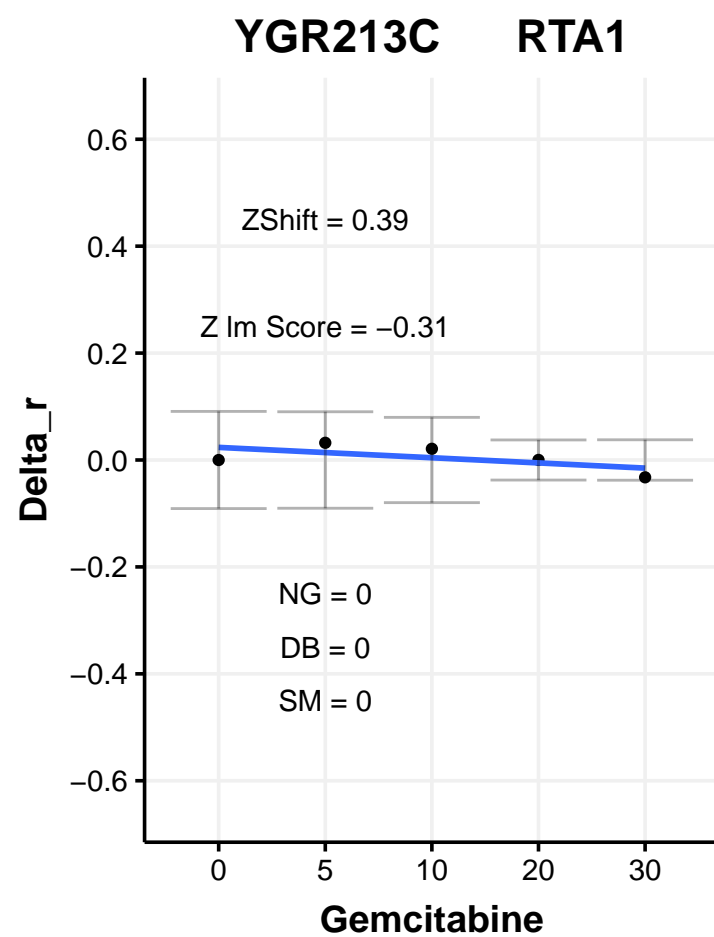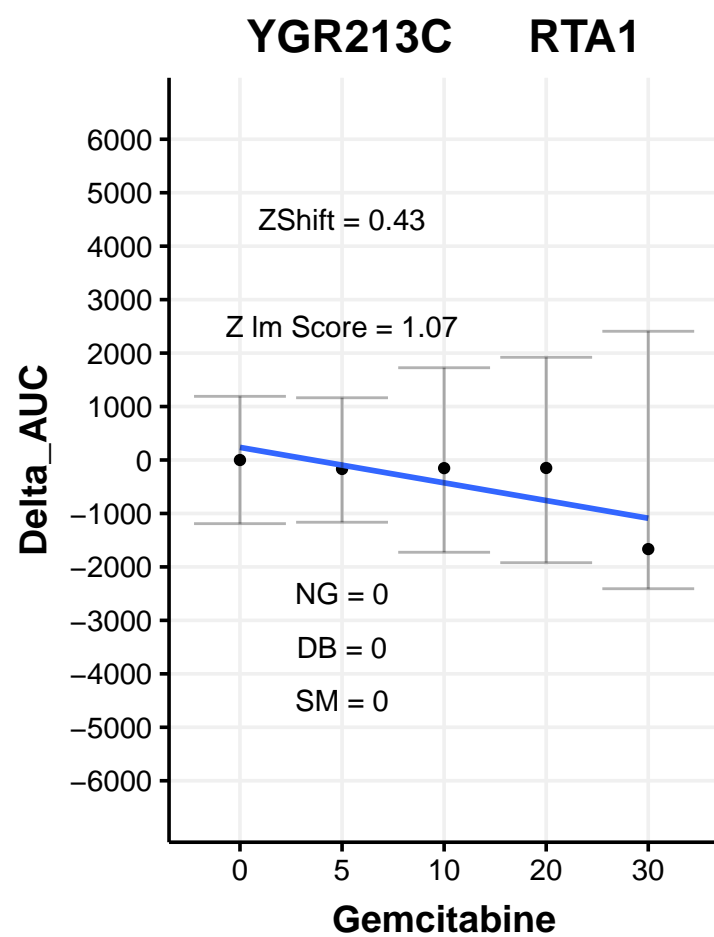



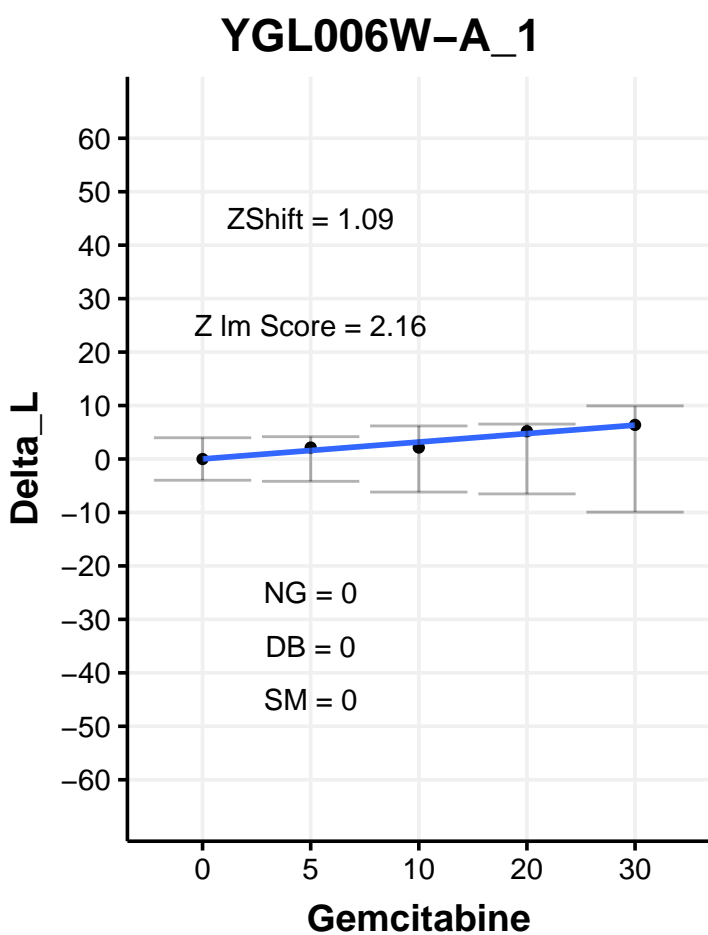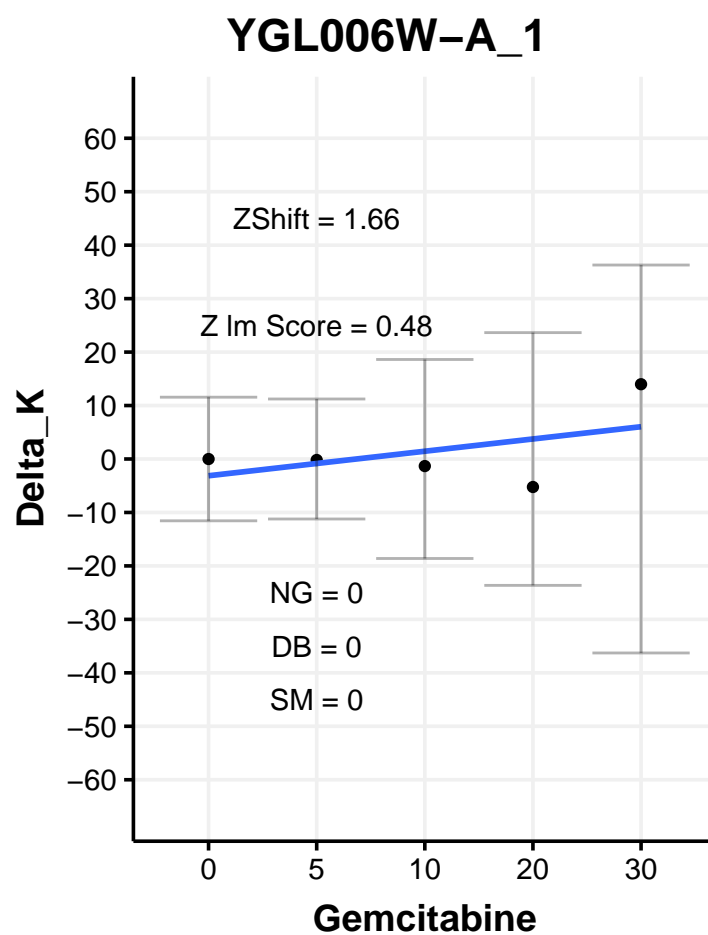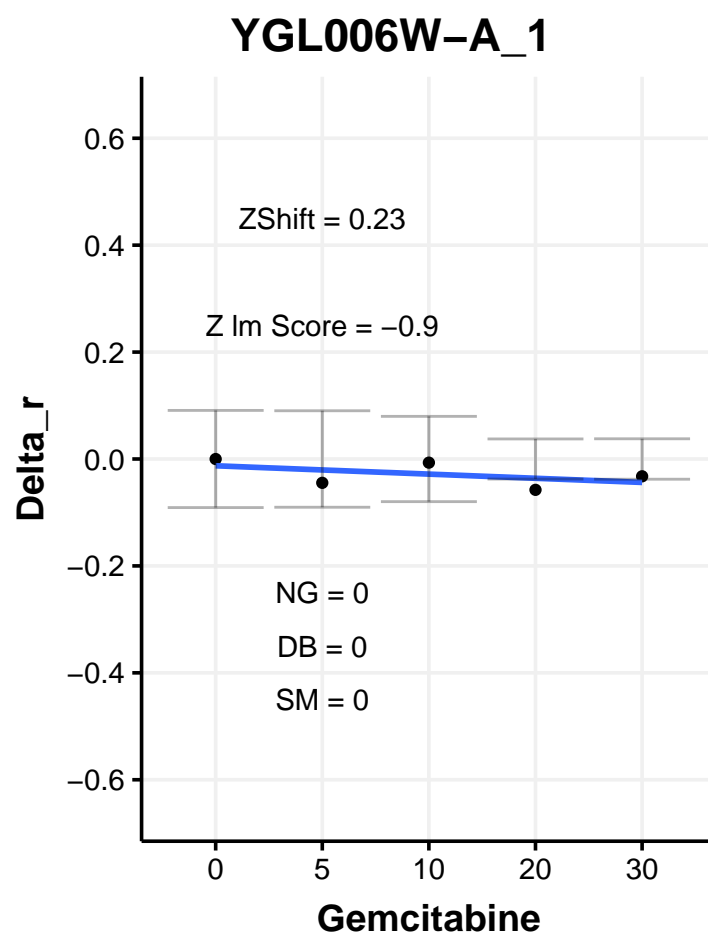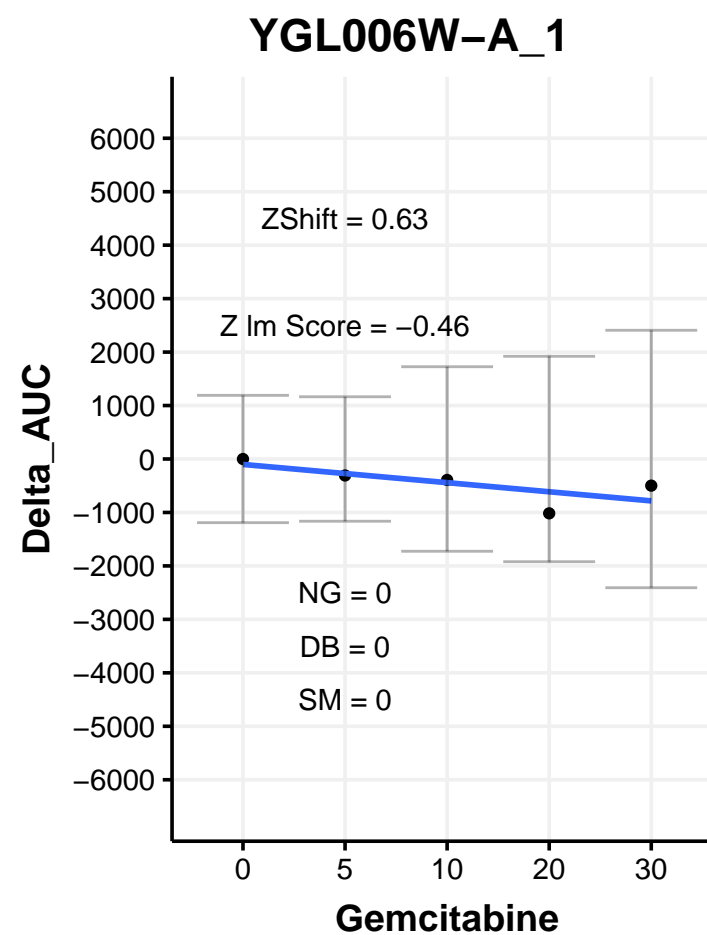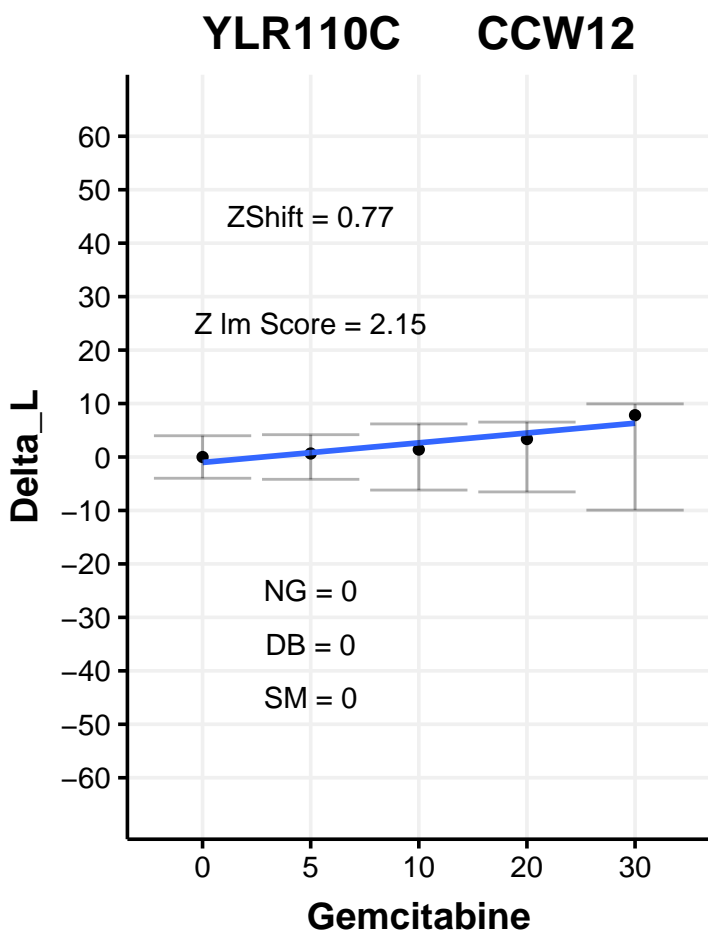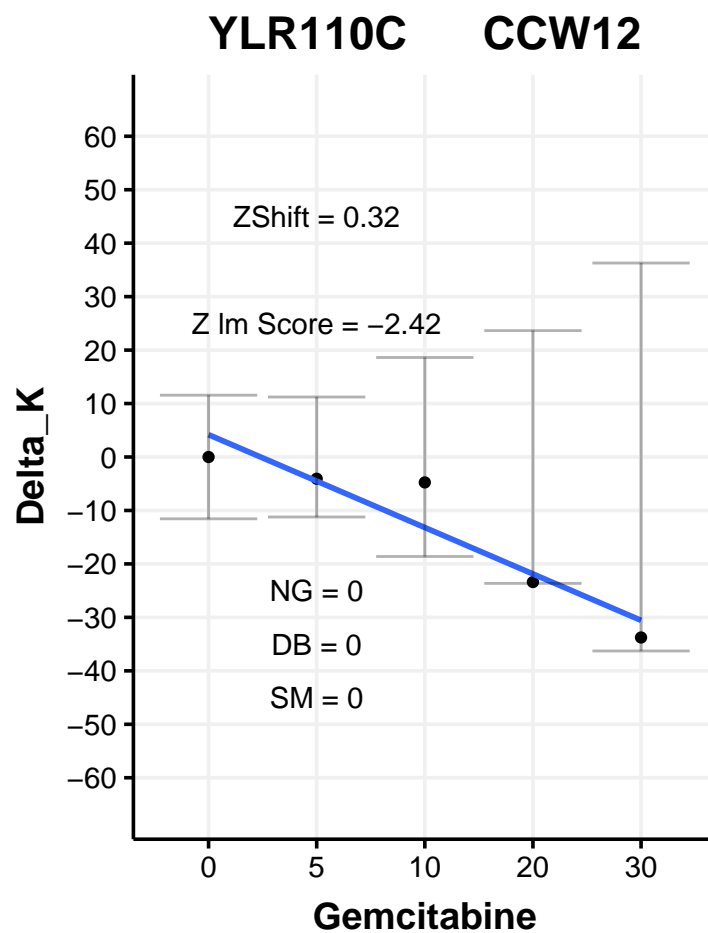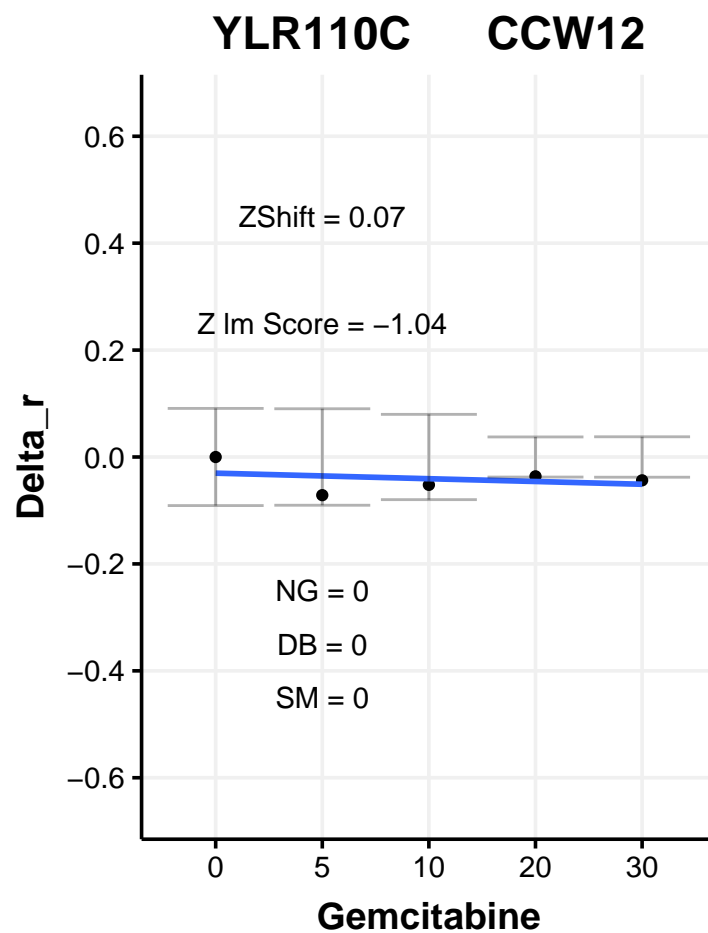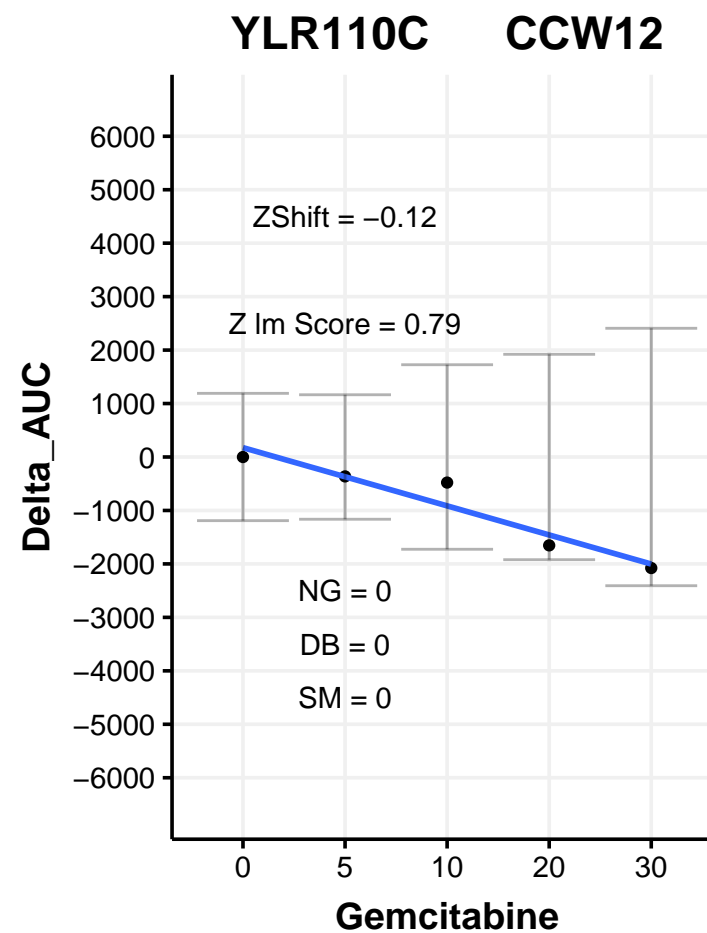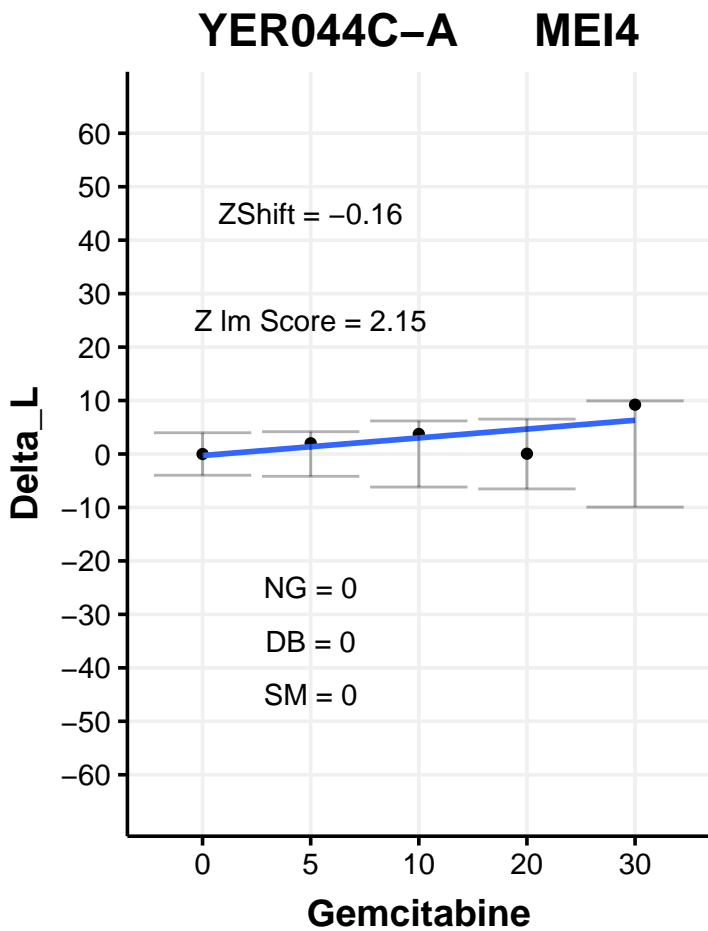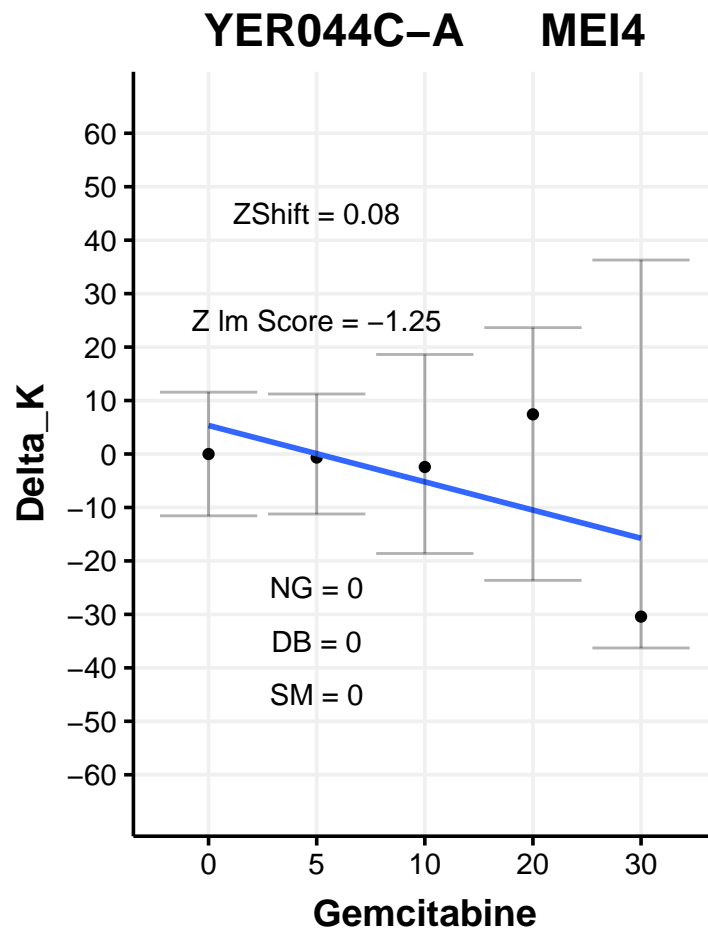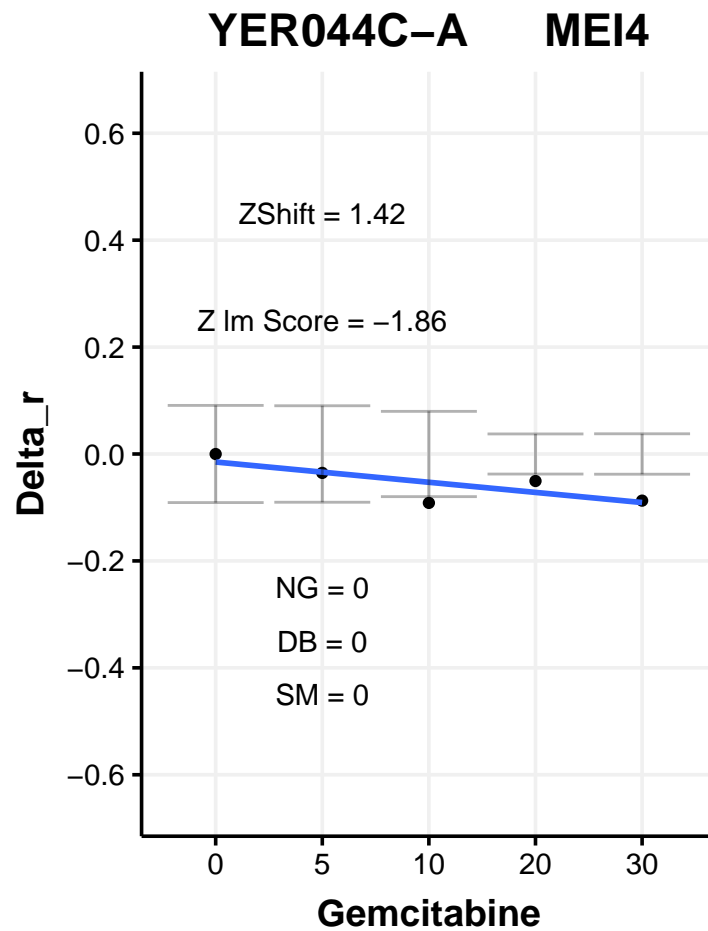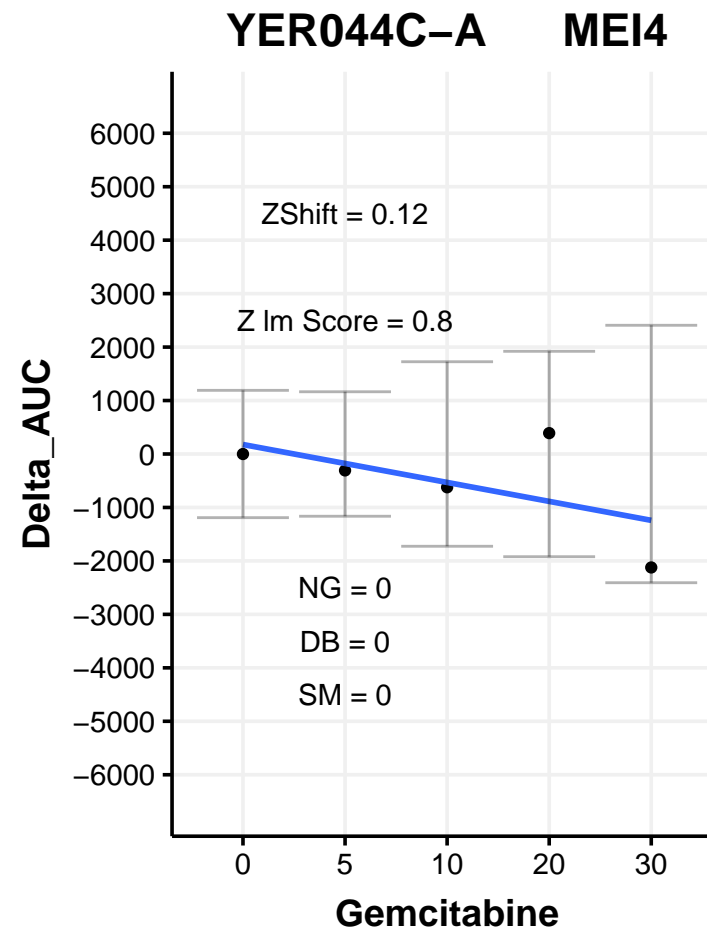

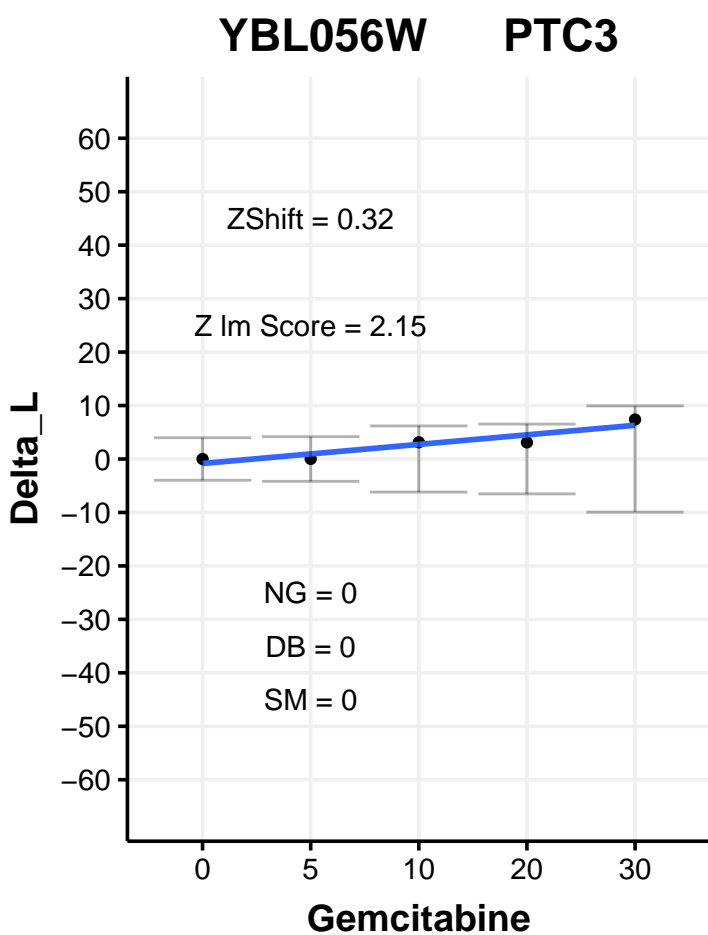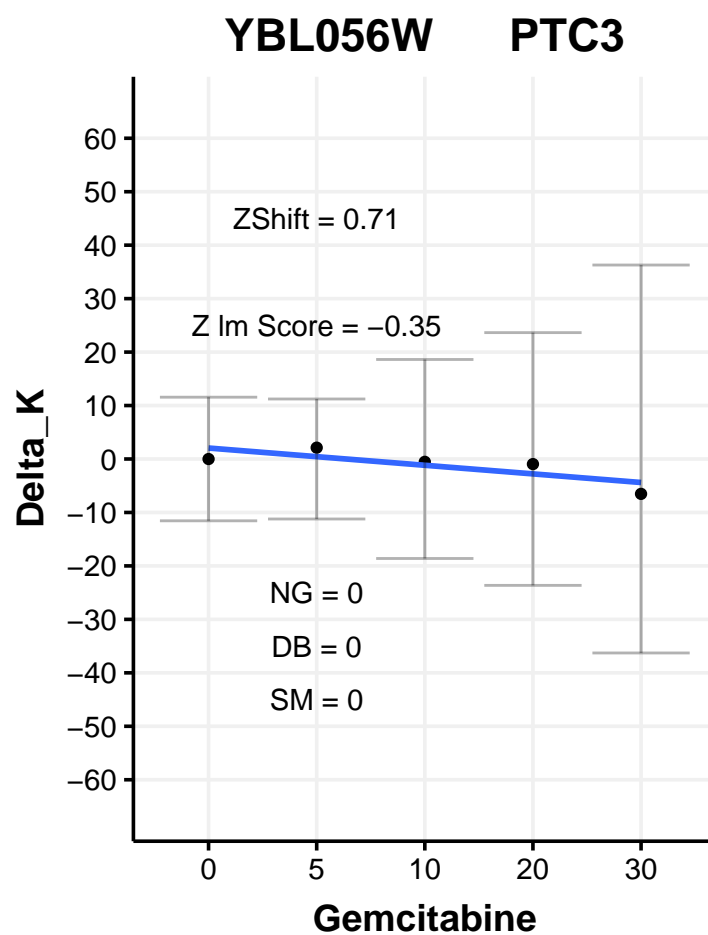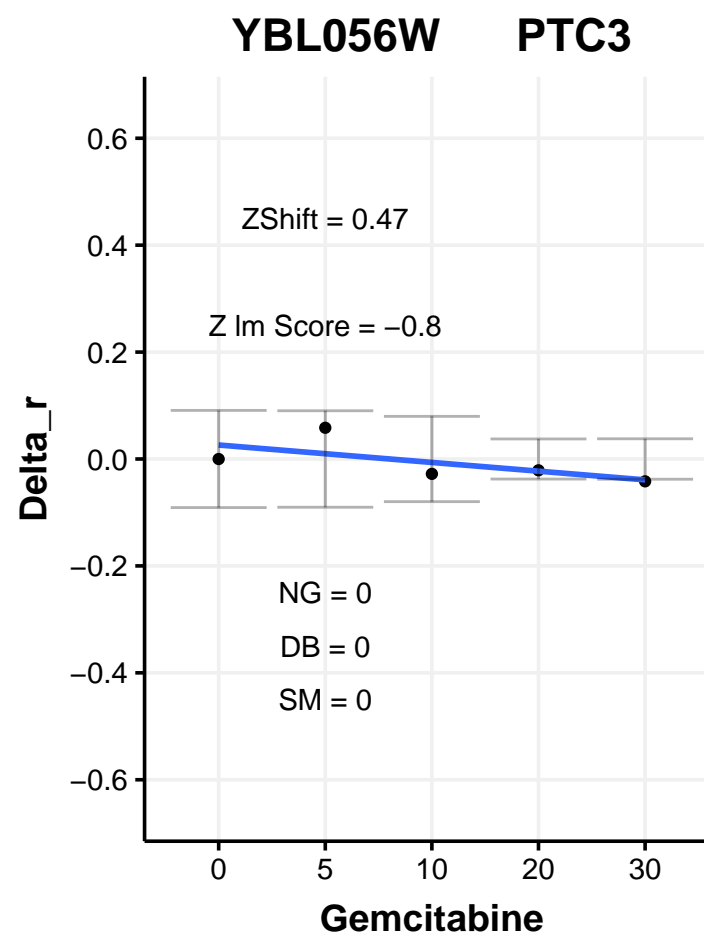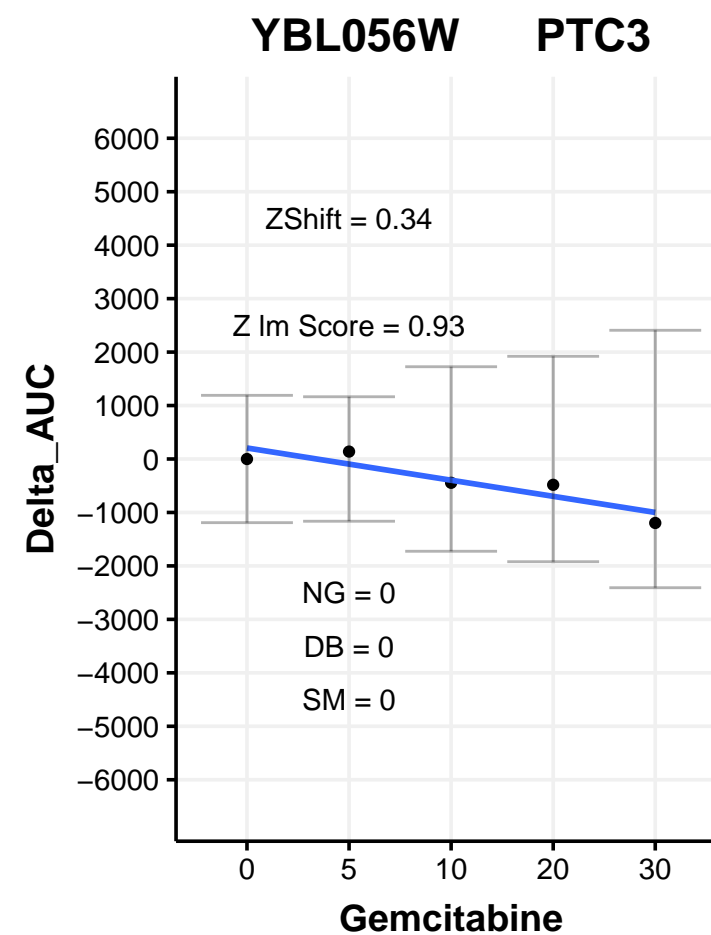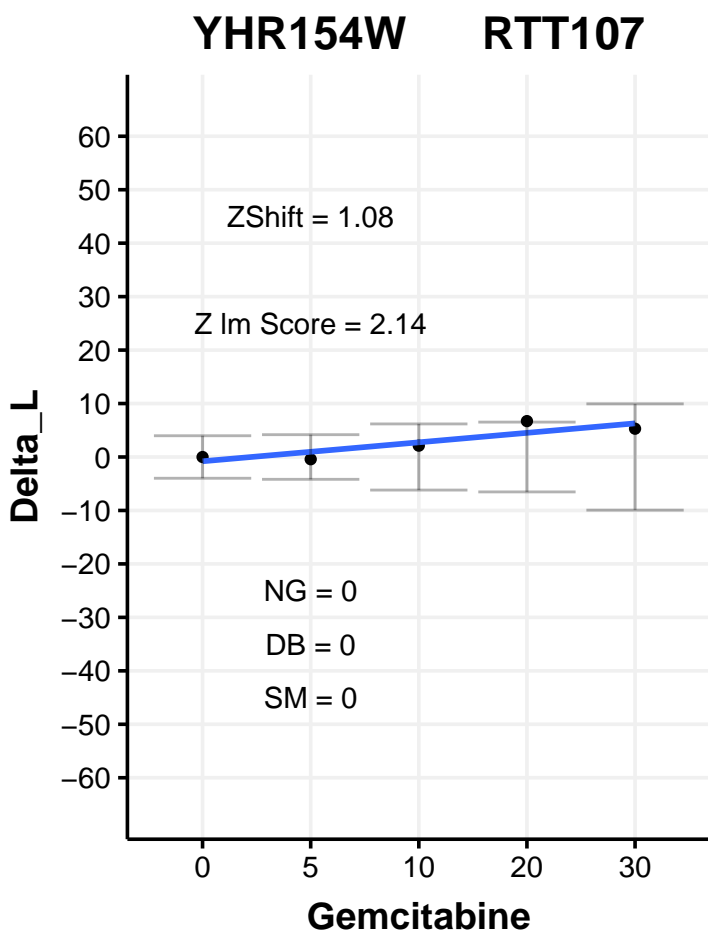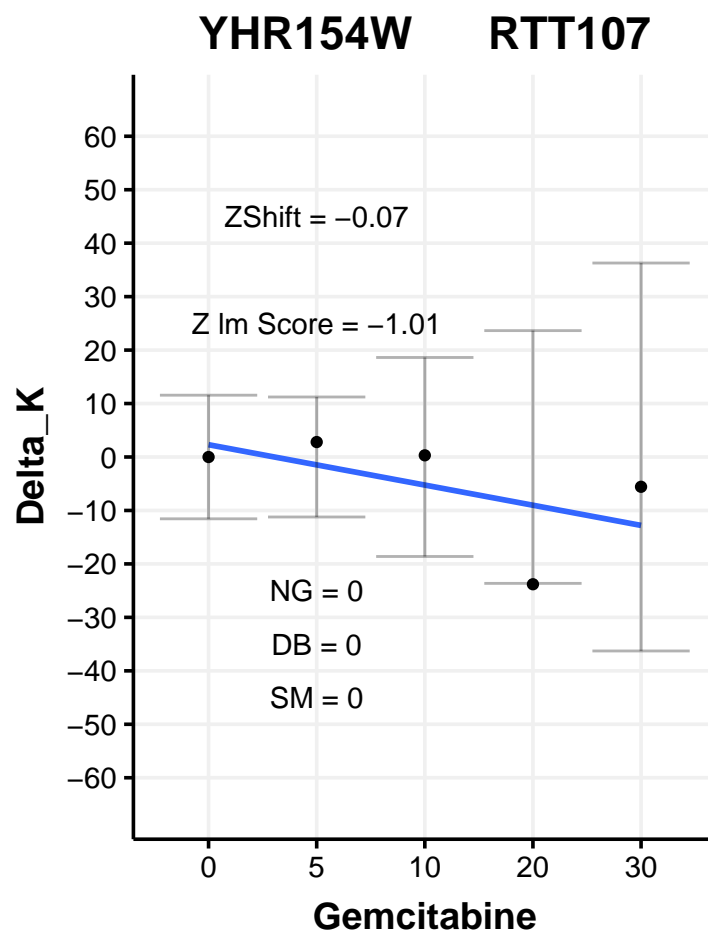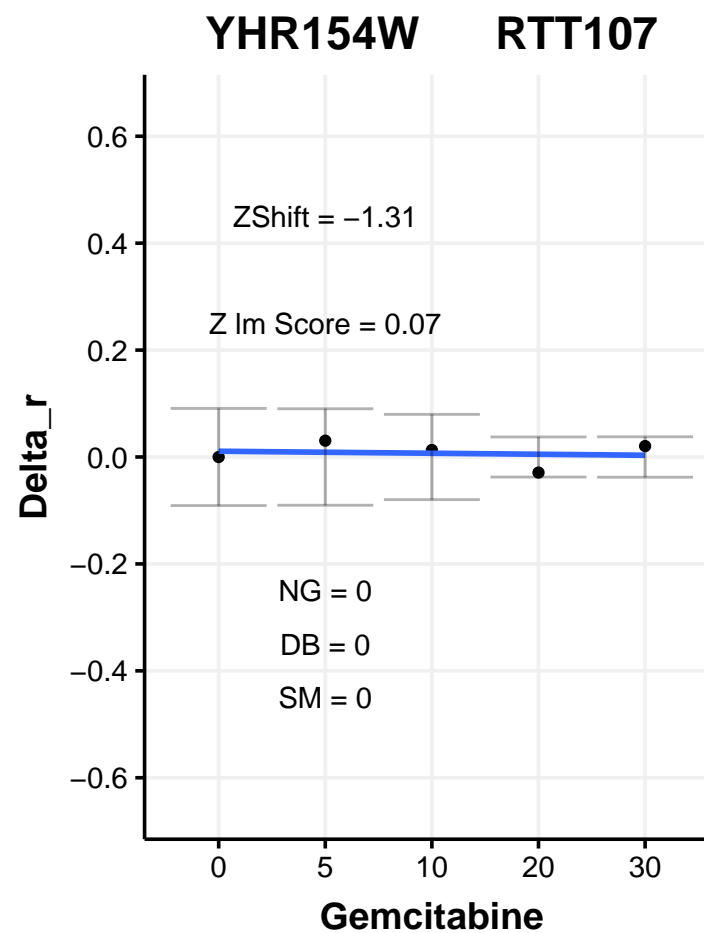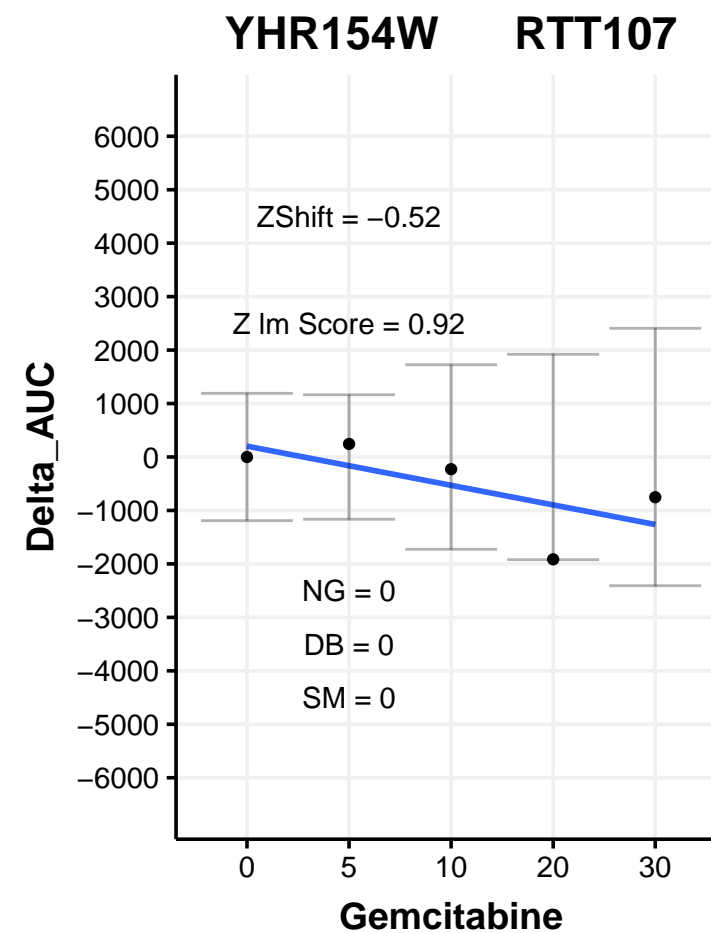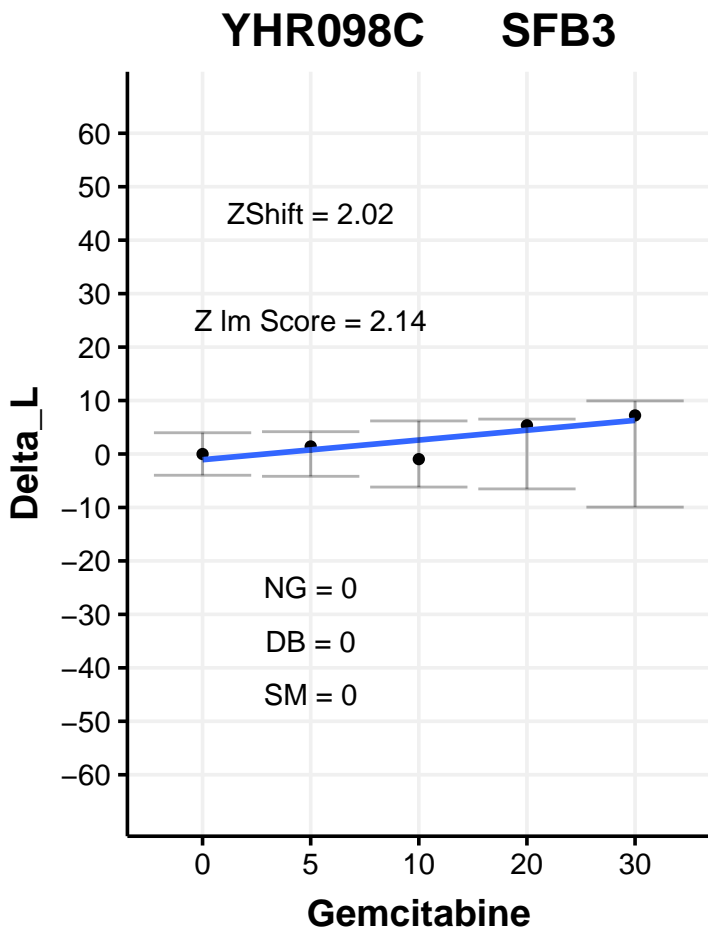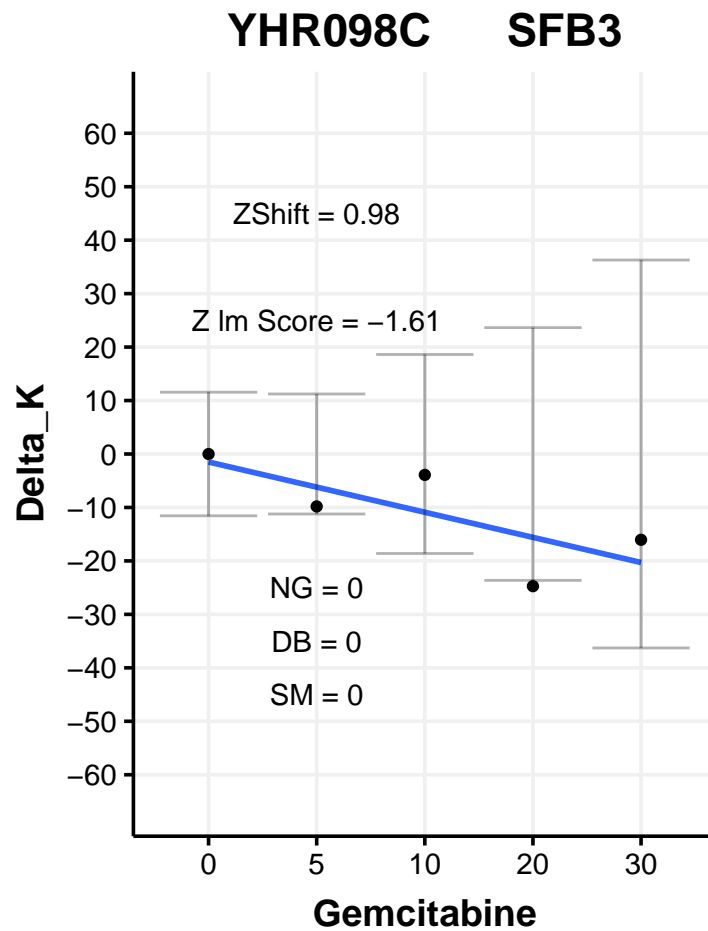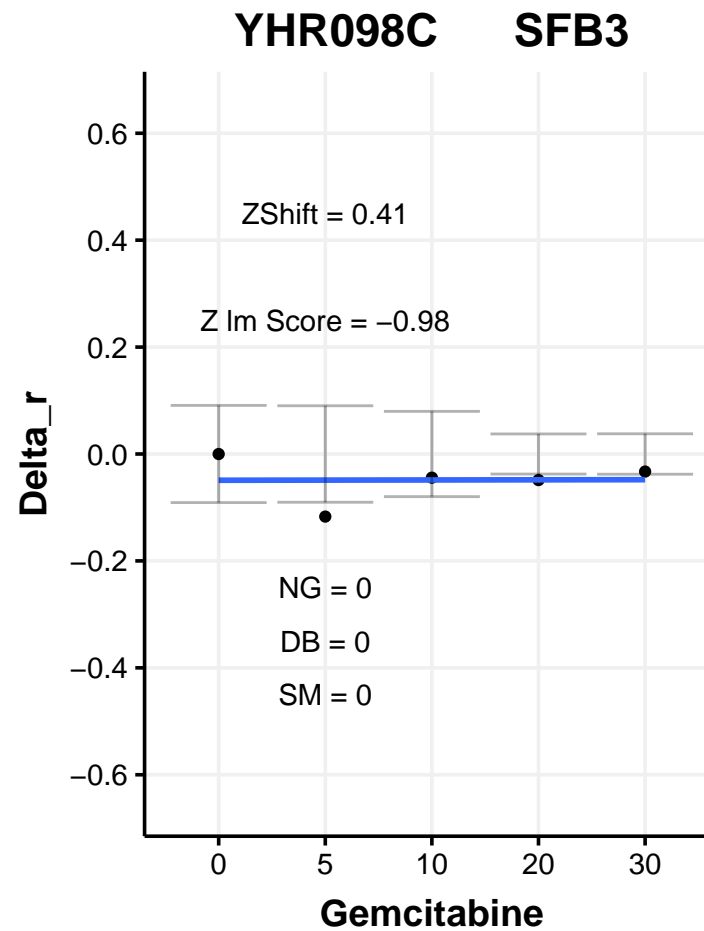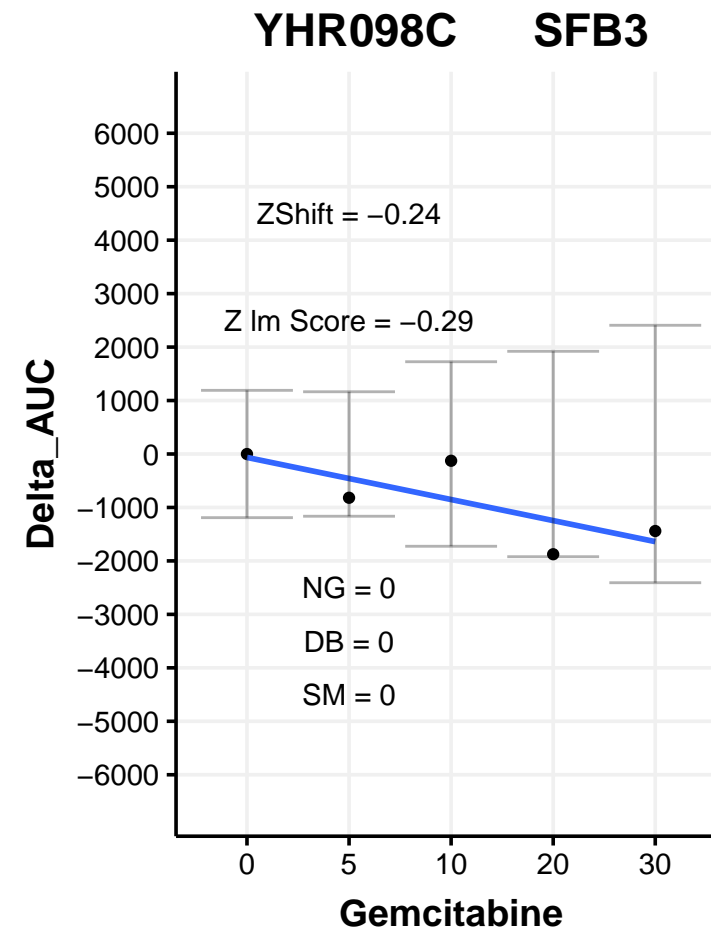

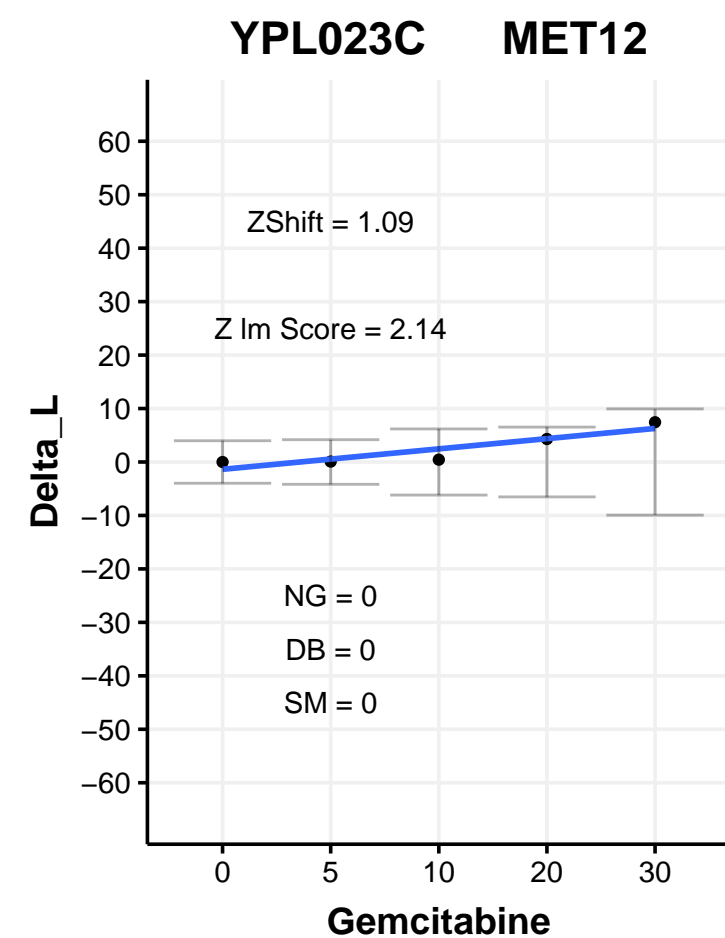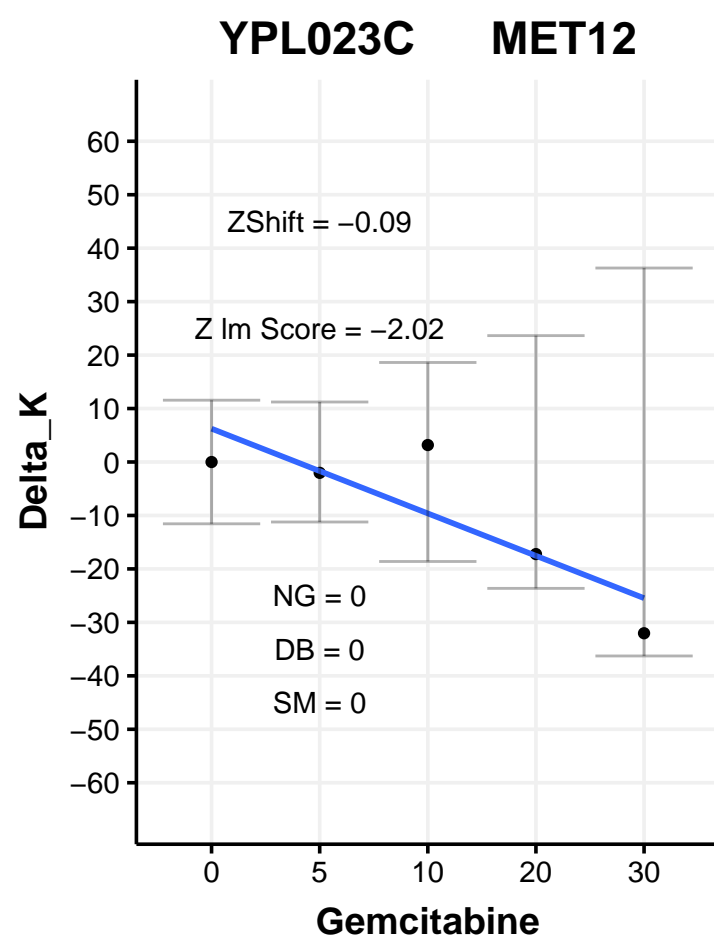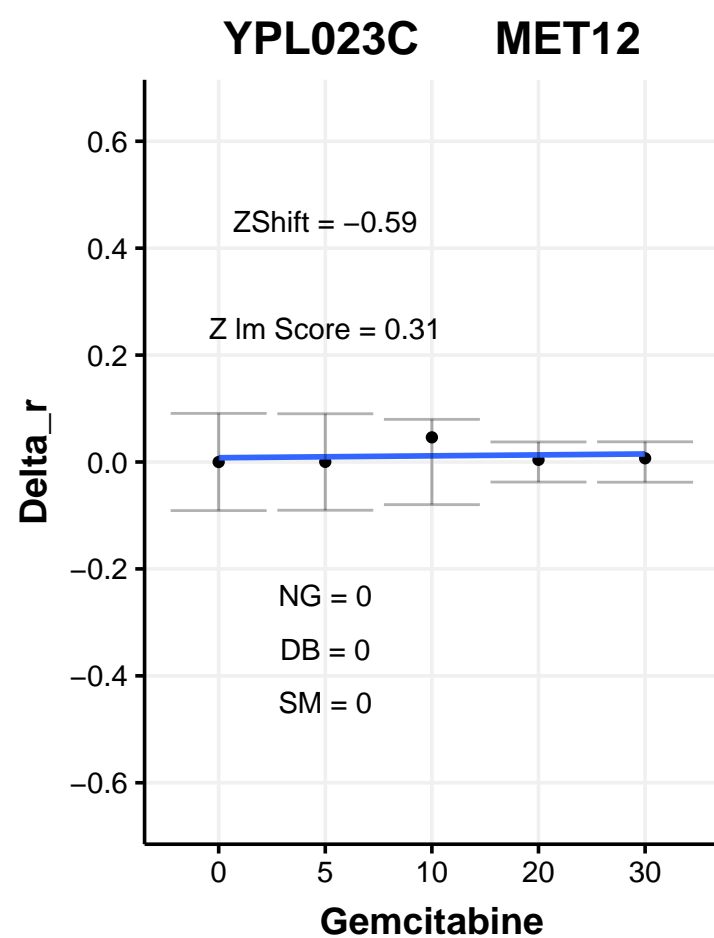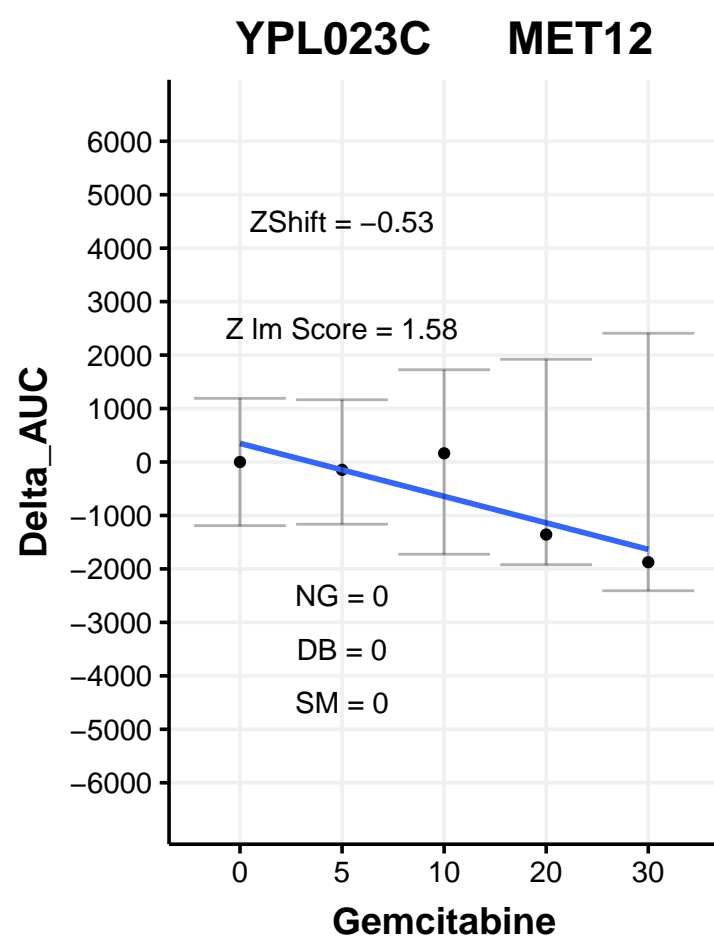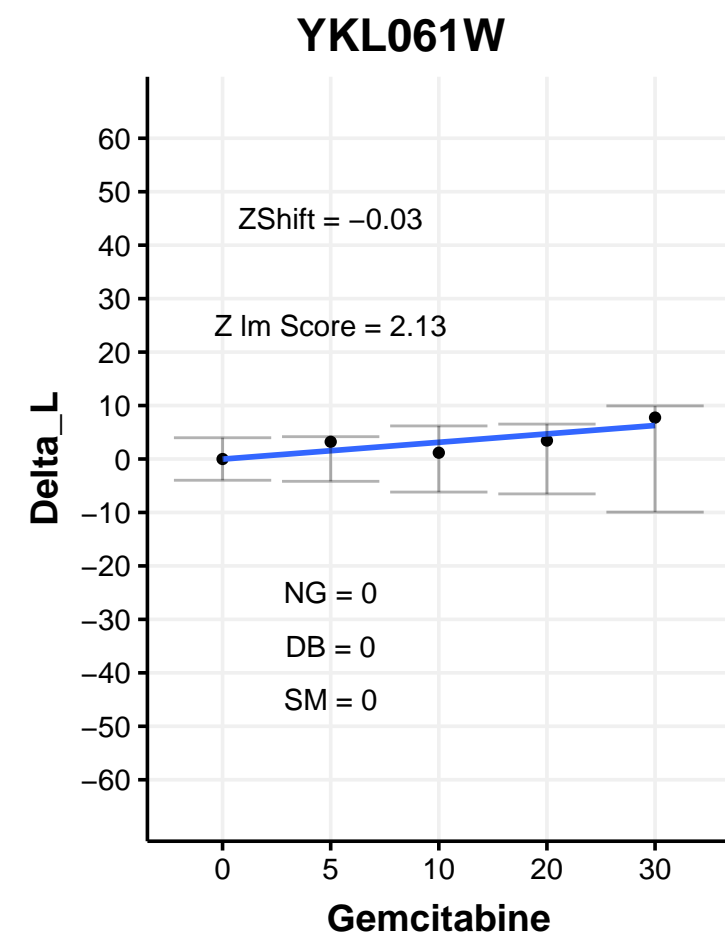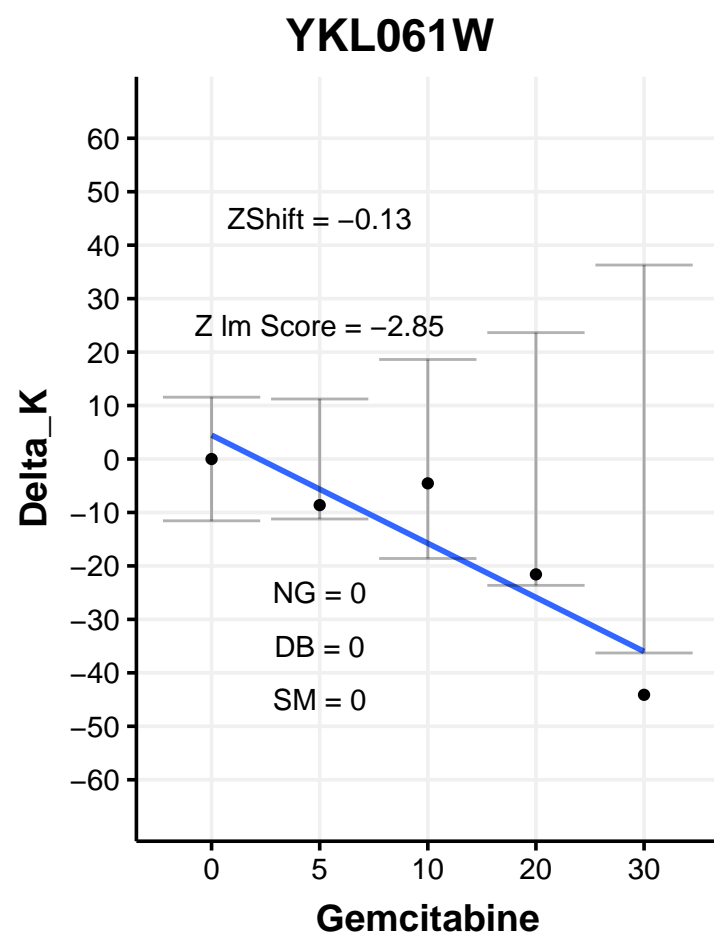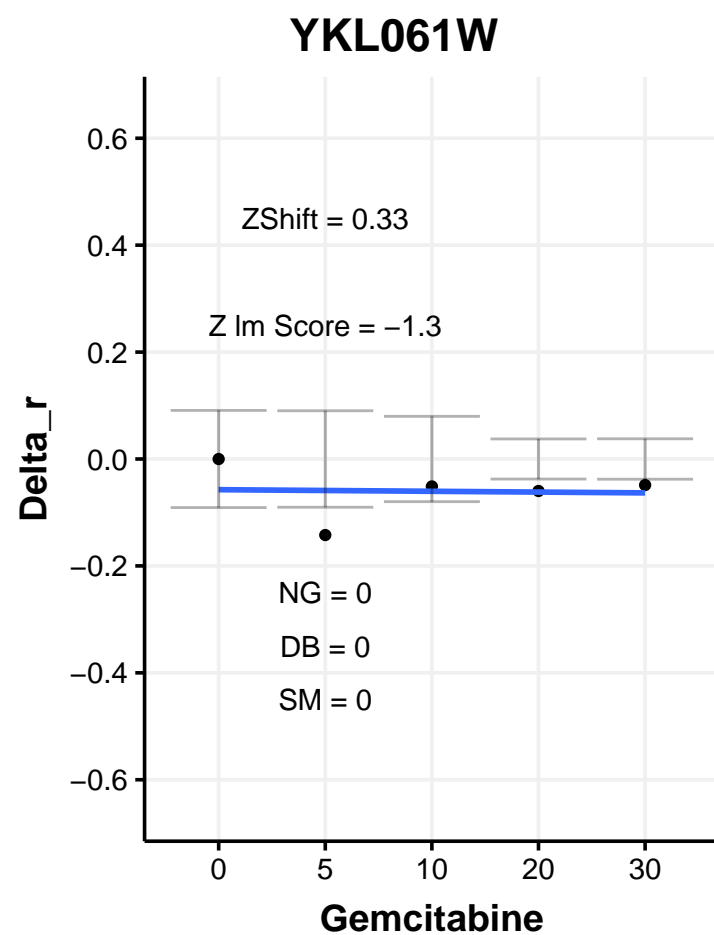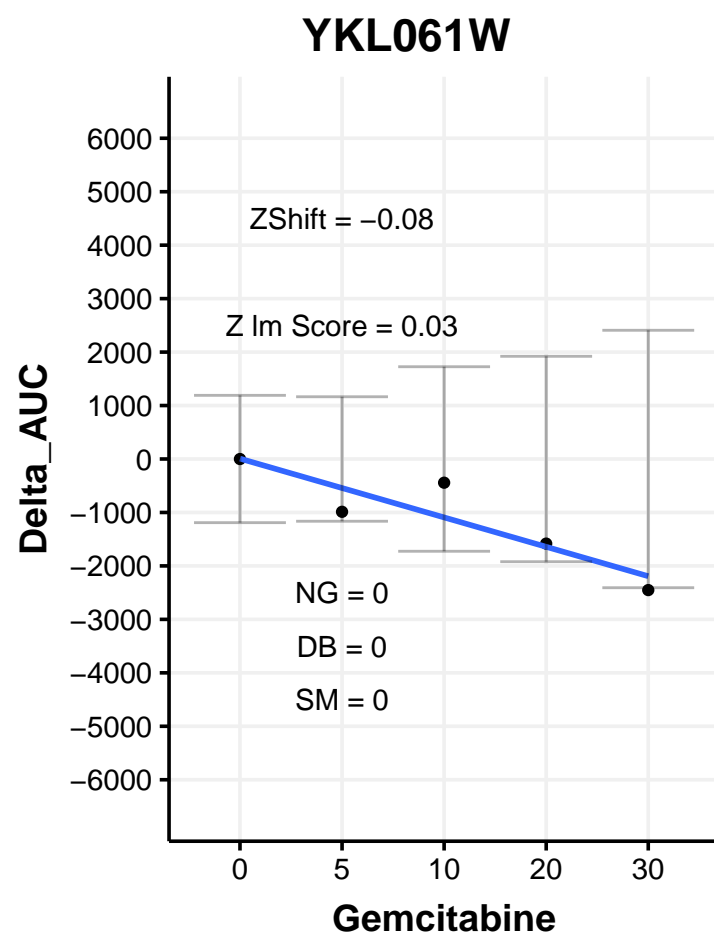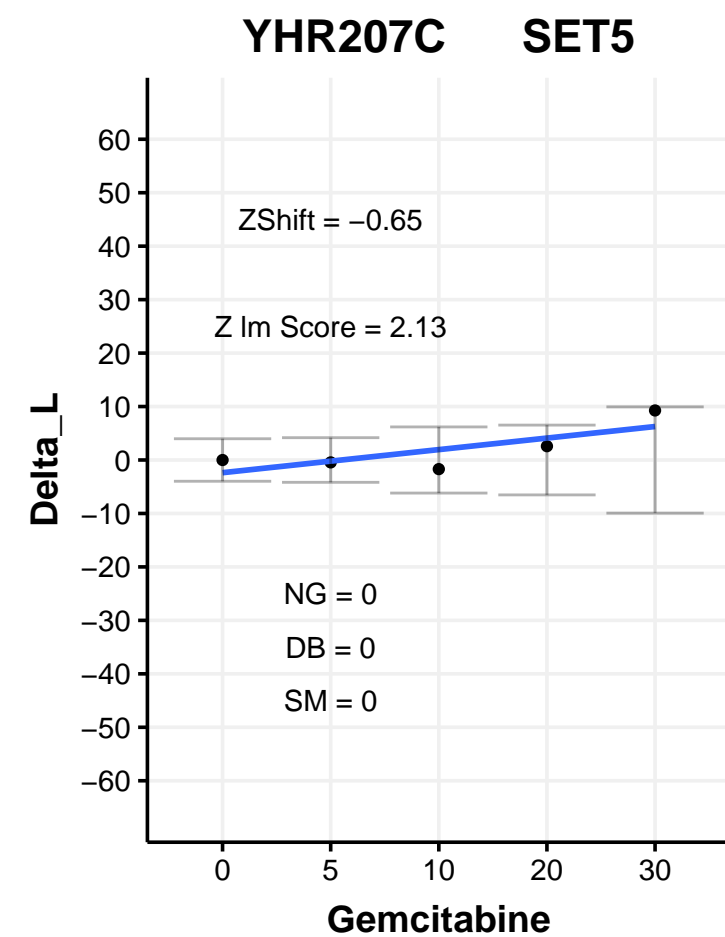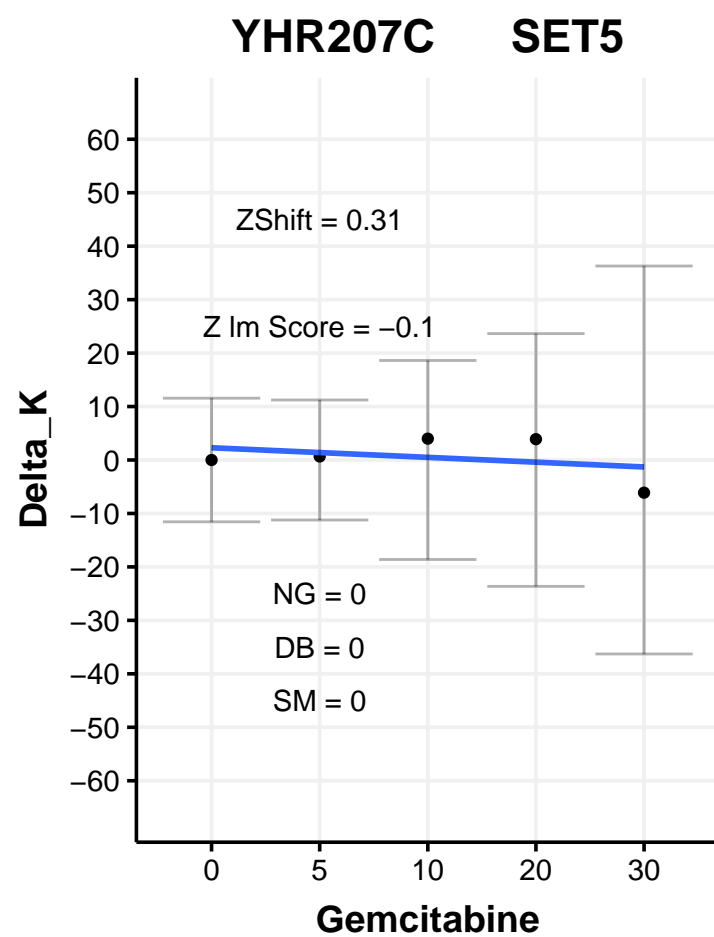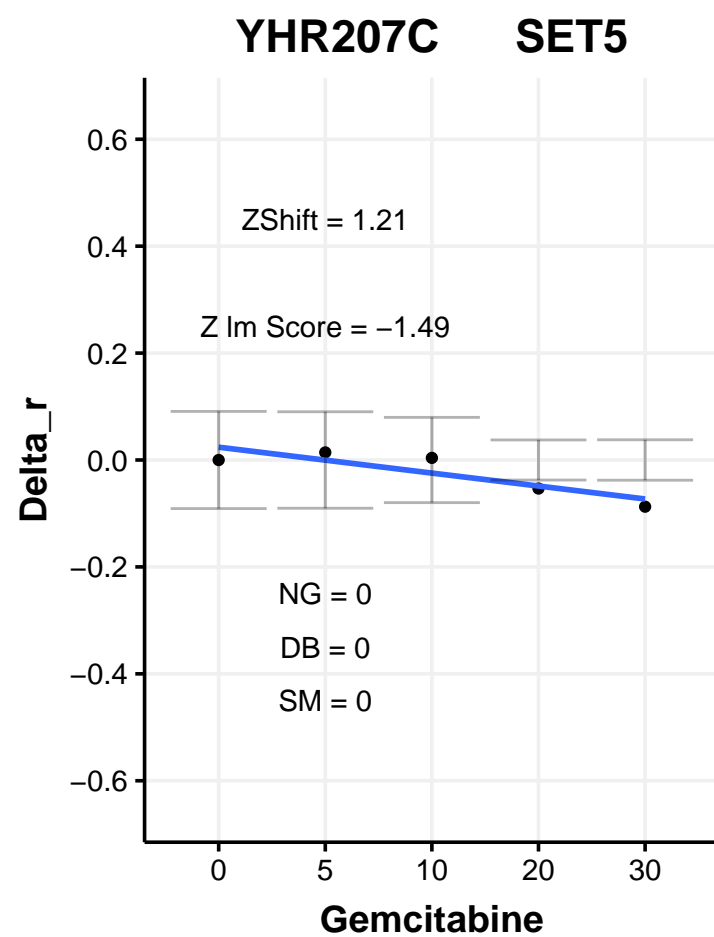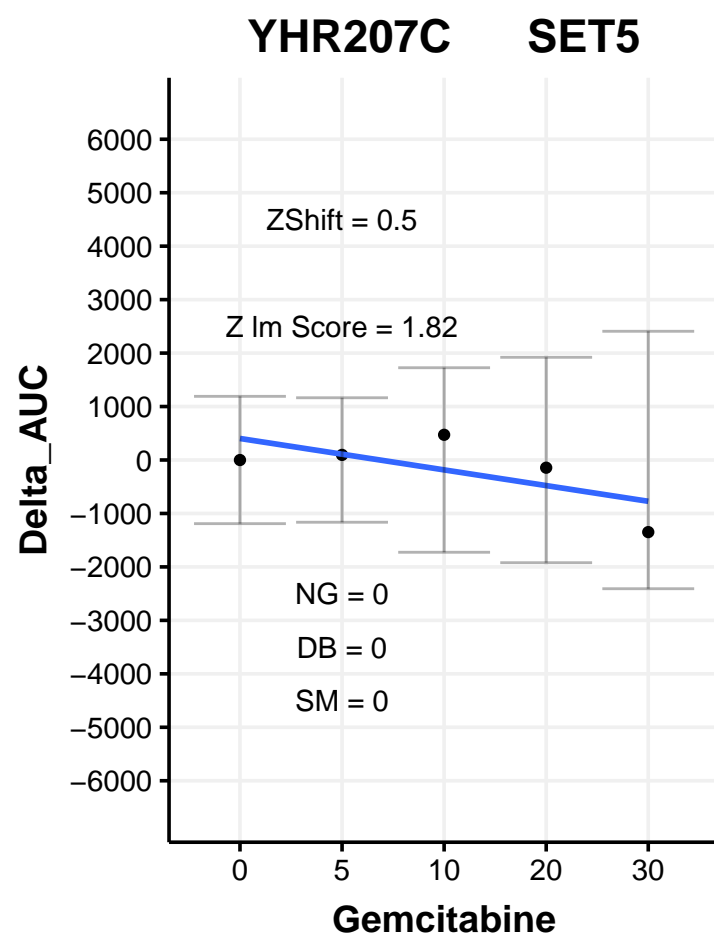

YAL058C-A

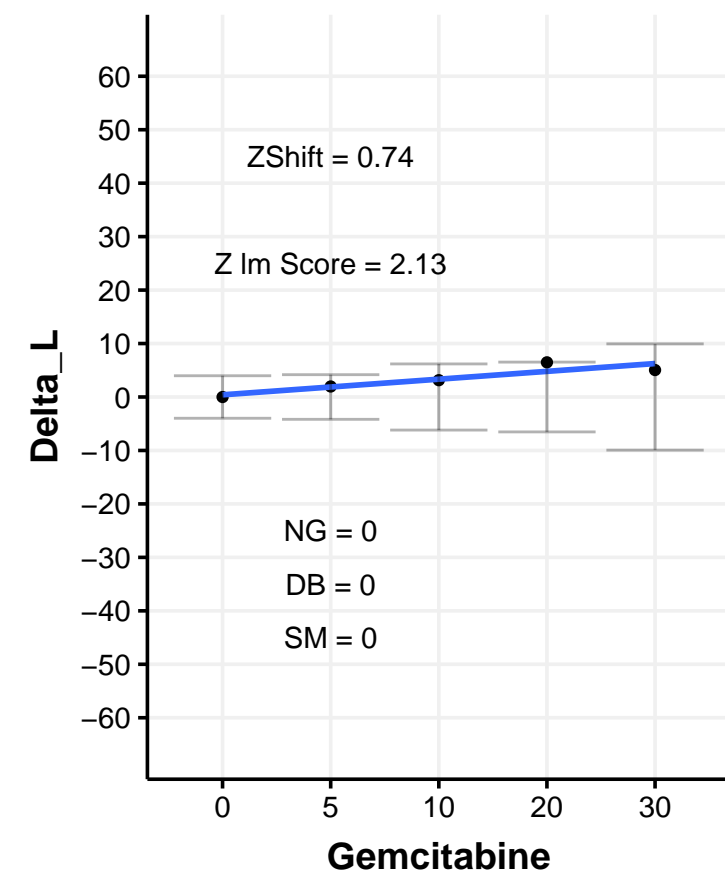

YAL058C-A

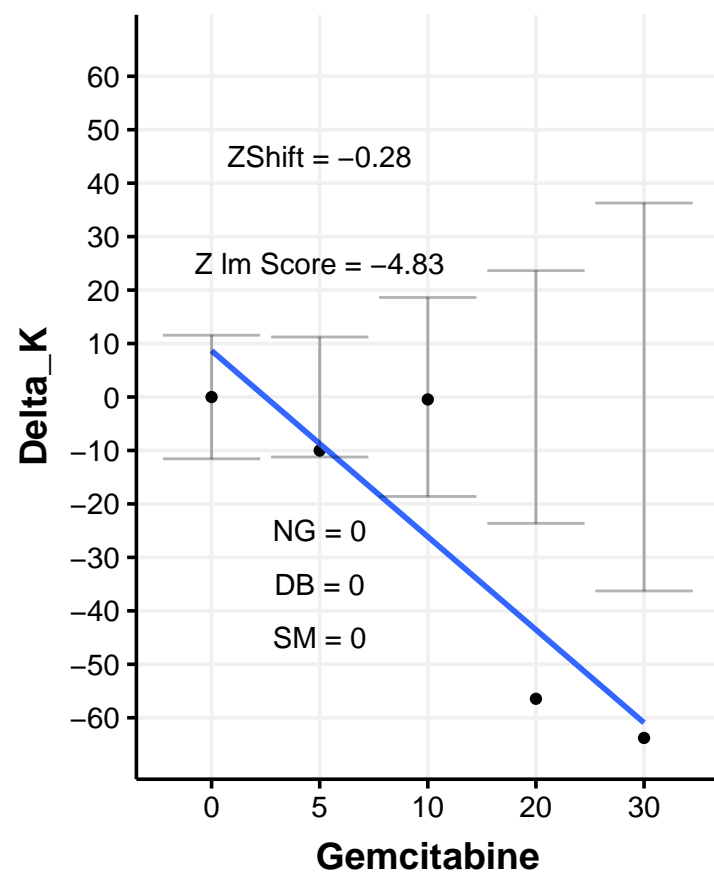

YAL058C-A

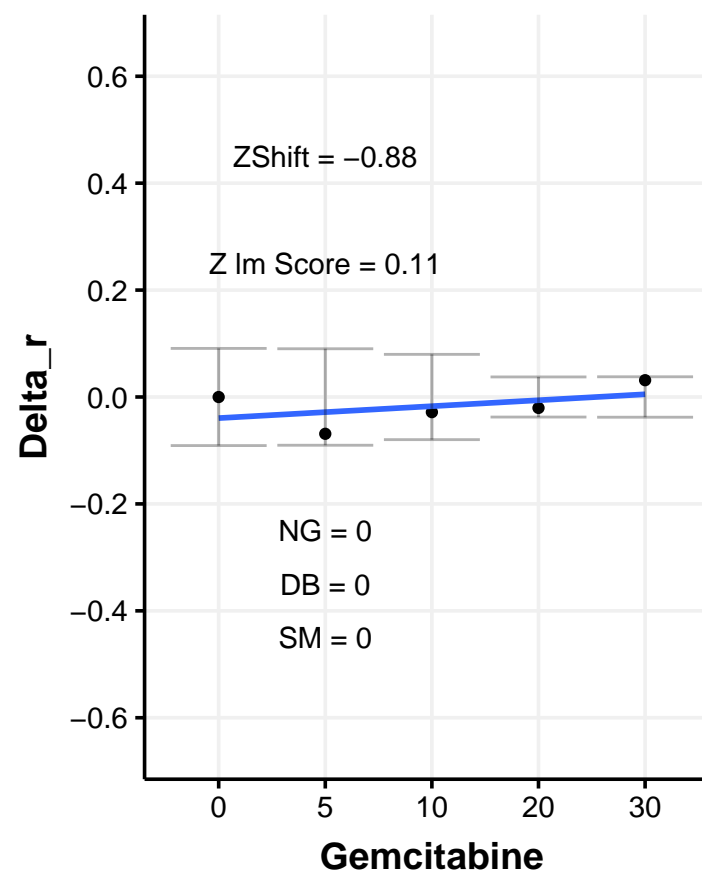

YAL058C-A

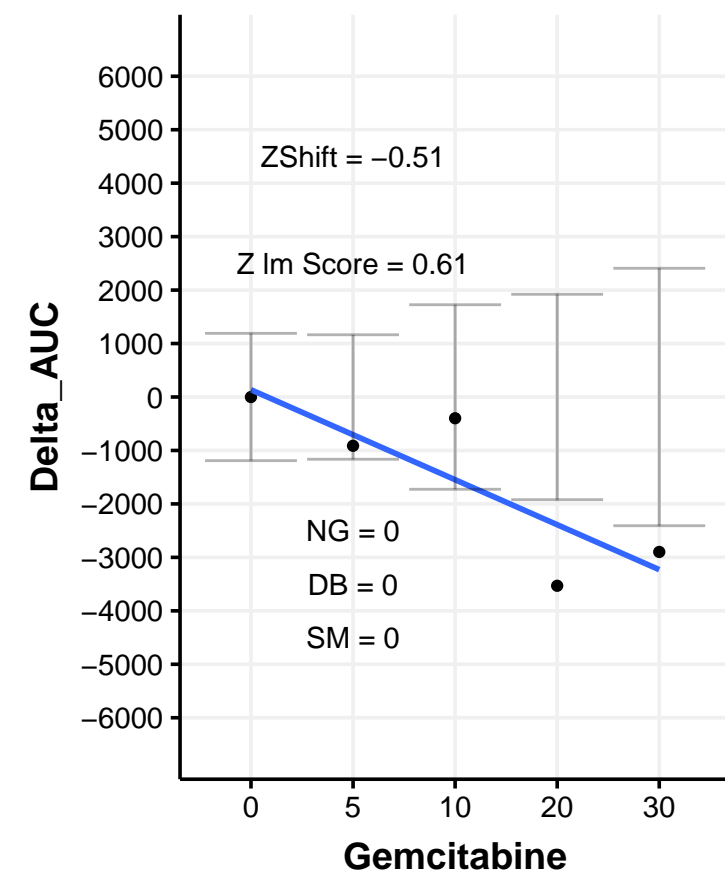

YOR331C

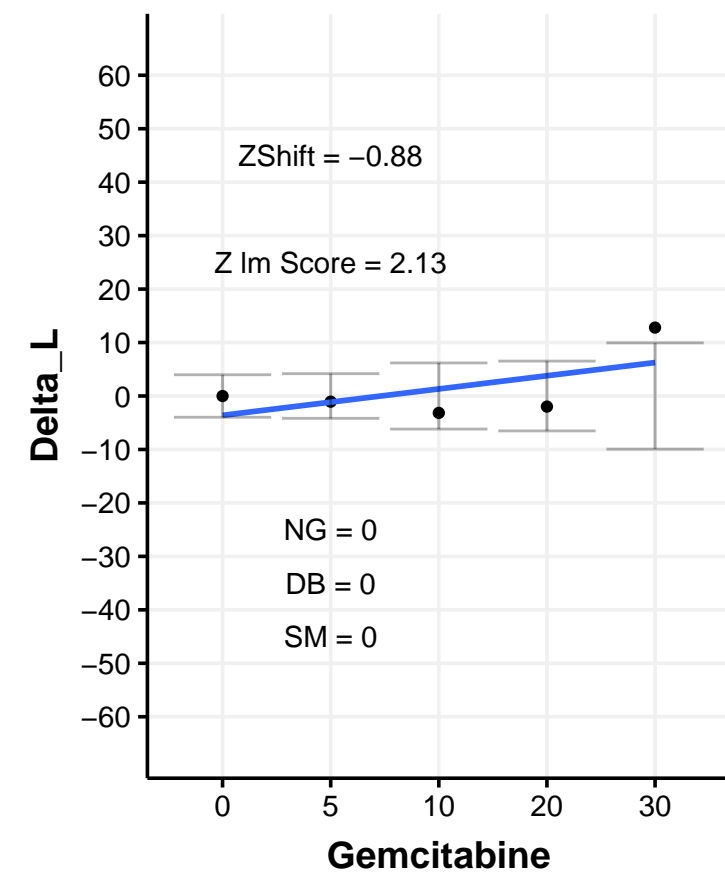

YOR331C

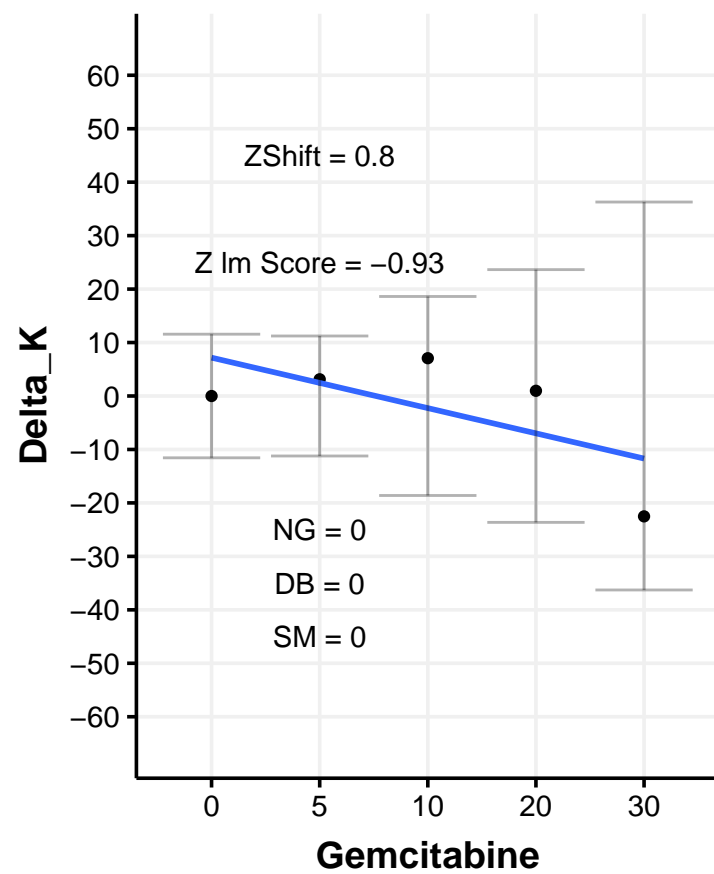

YOR331C

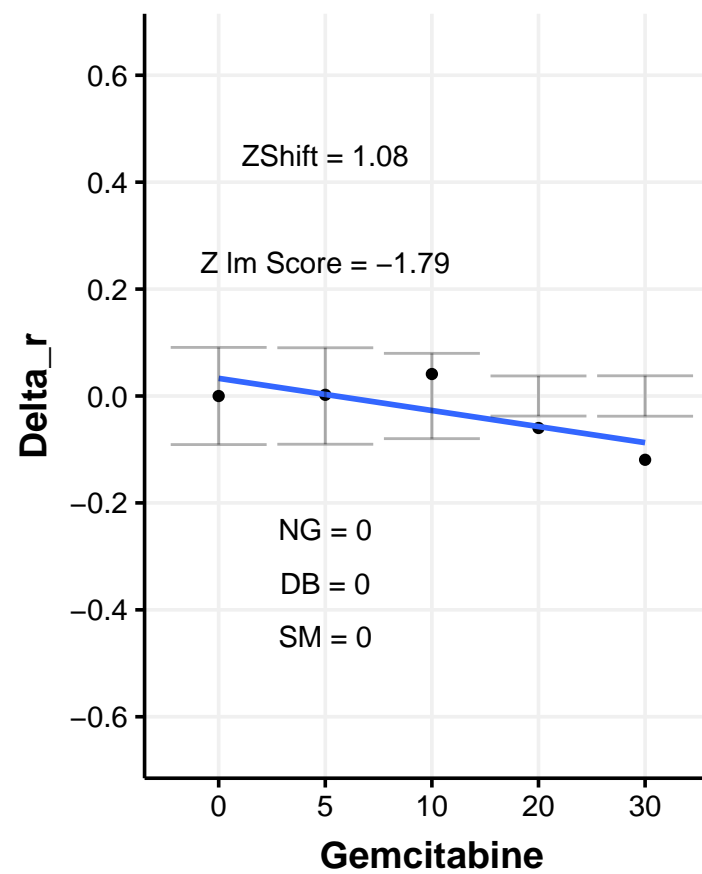

YOR331C

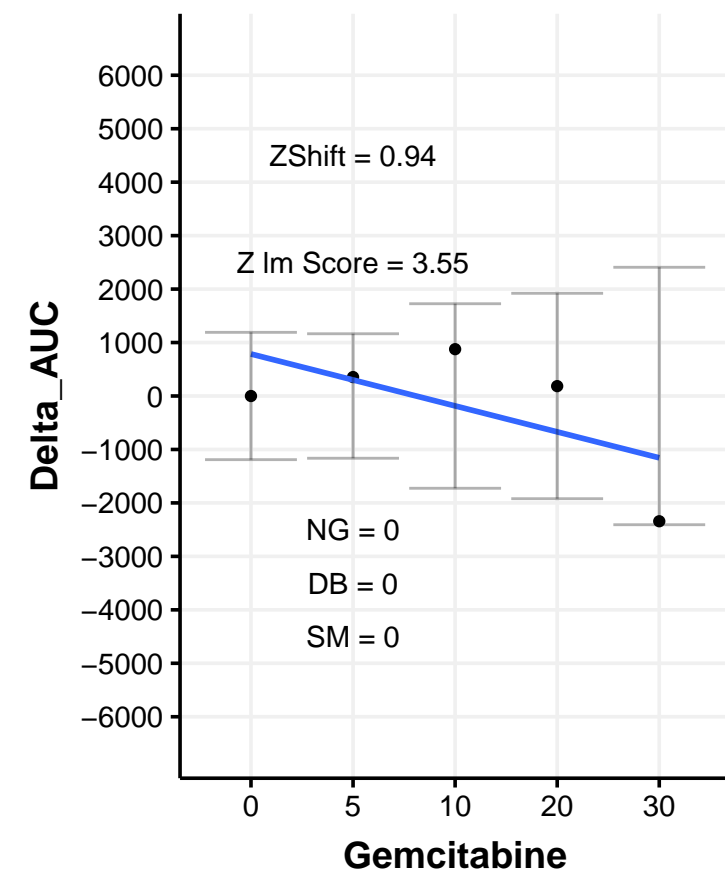

YPL086C ELP3

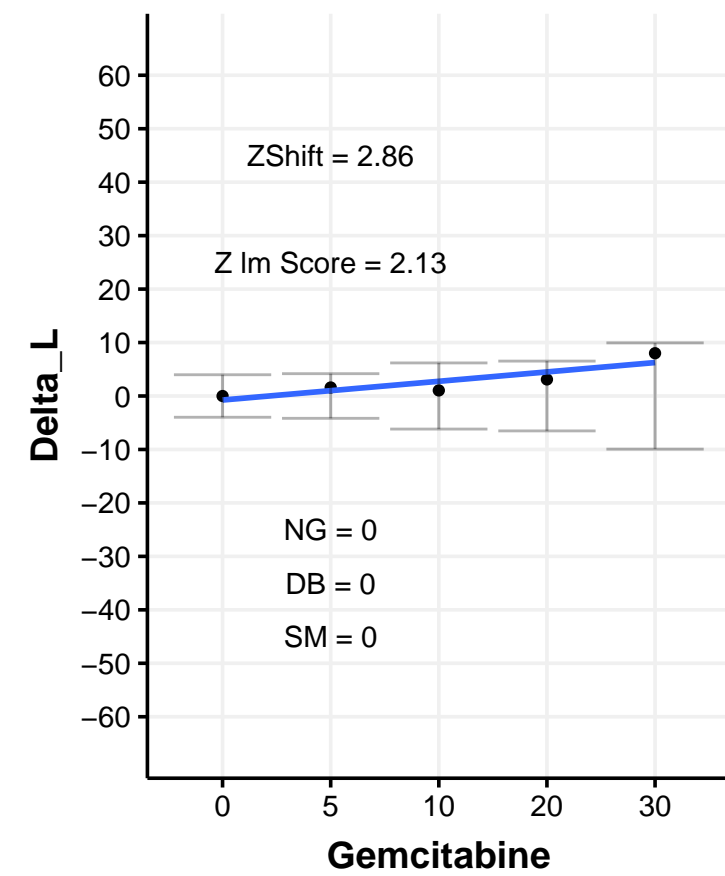

YPL086C ELP3

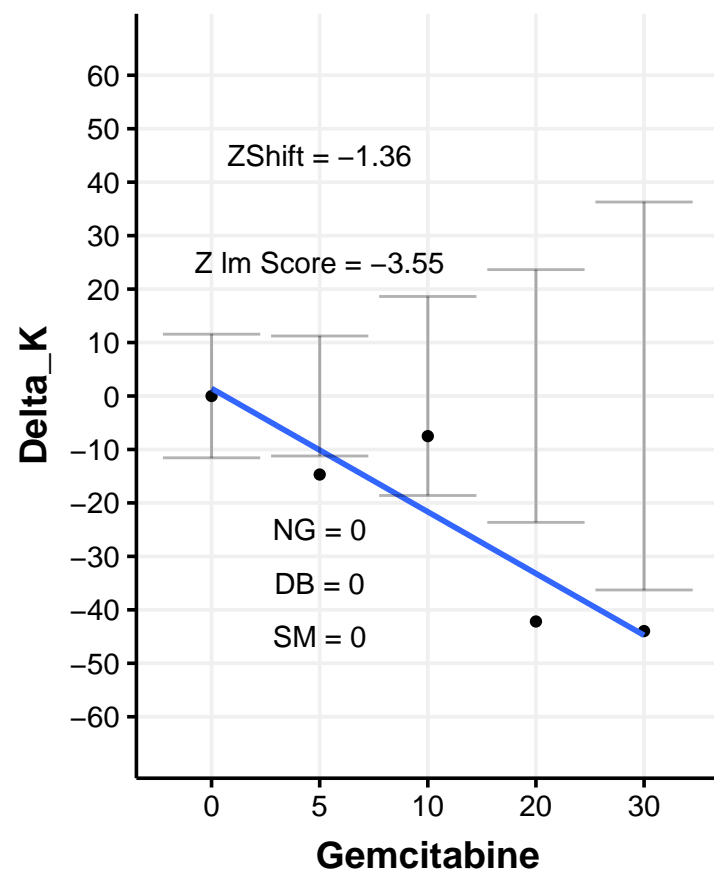

YPL086C ELP3

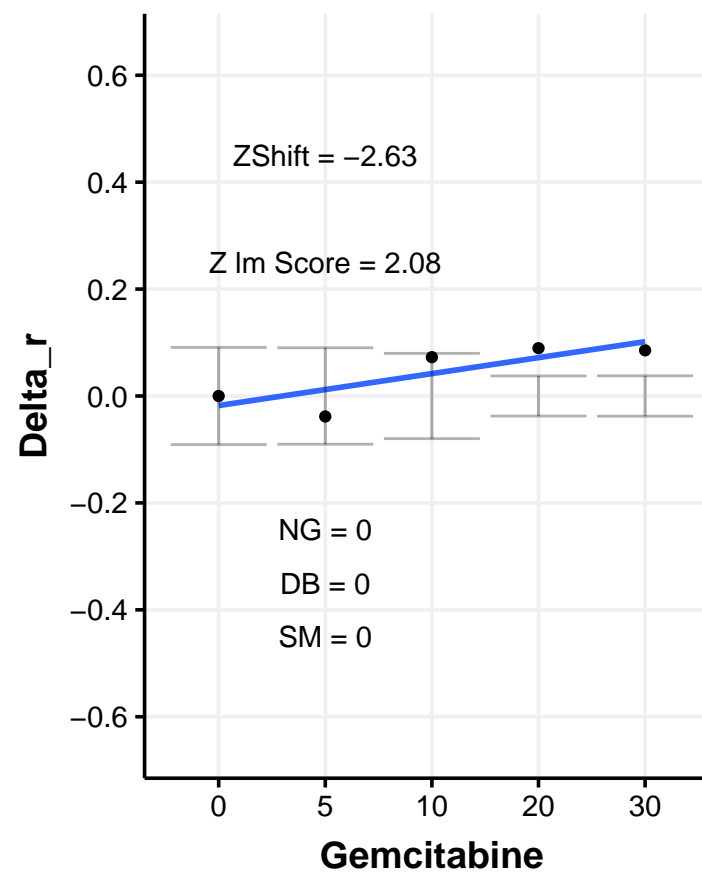

YPL086C ELP3

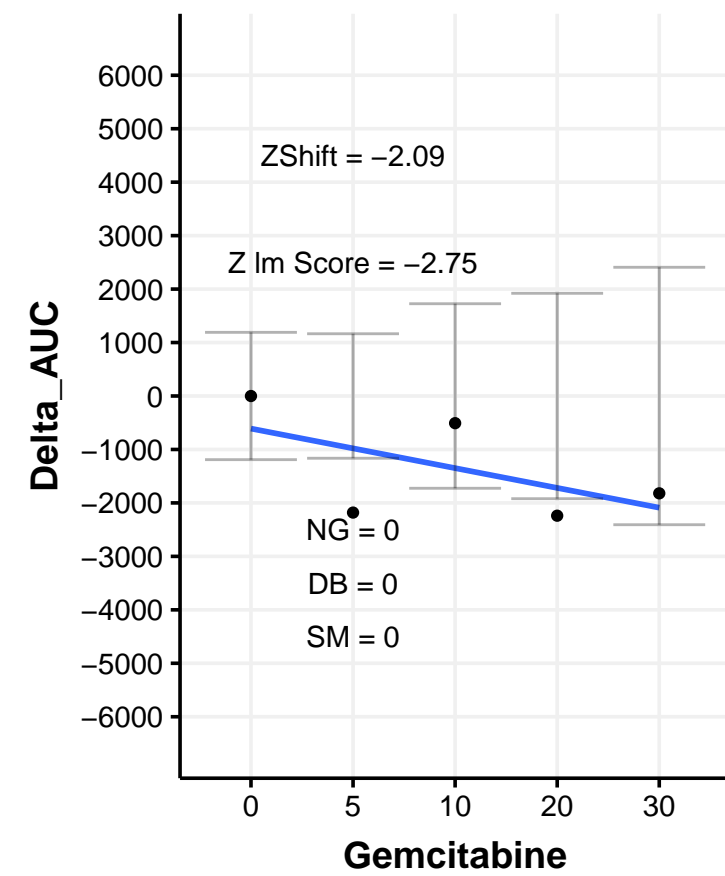

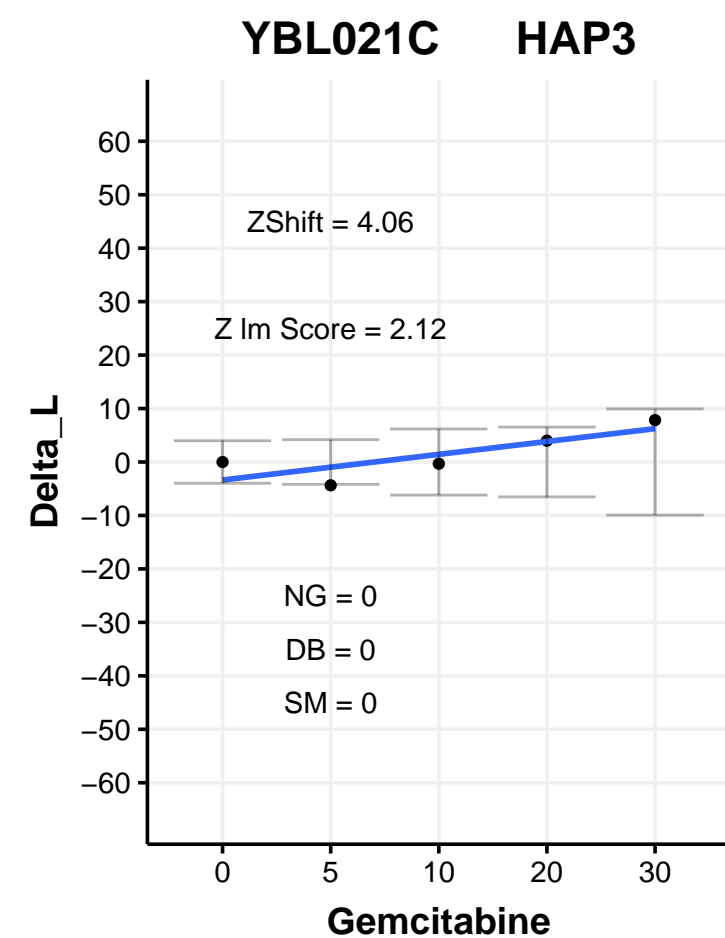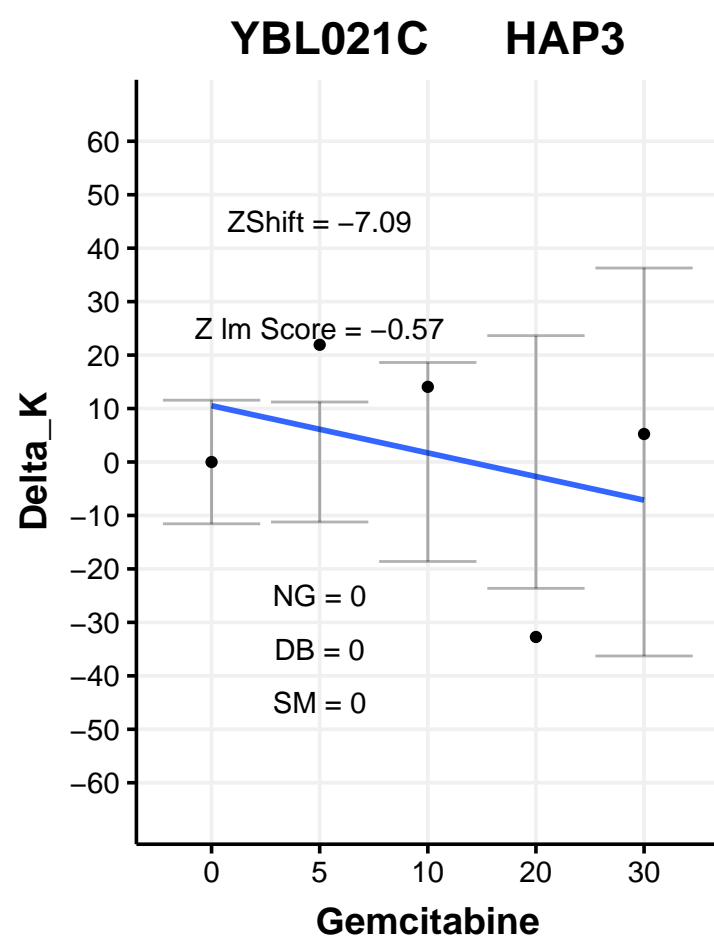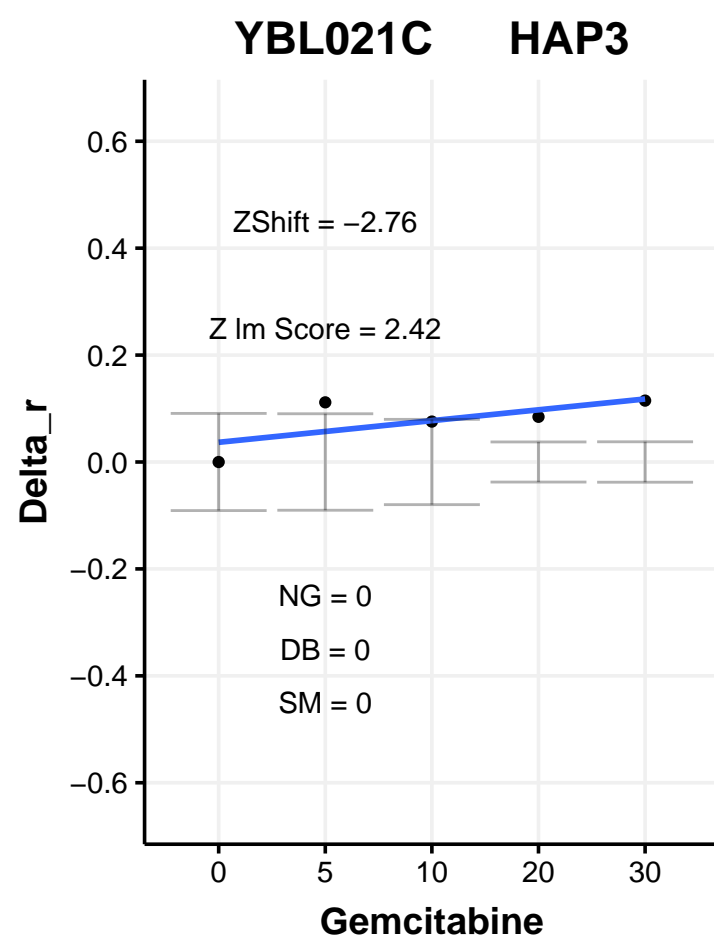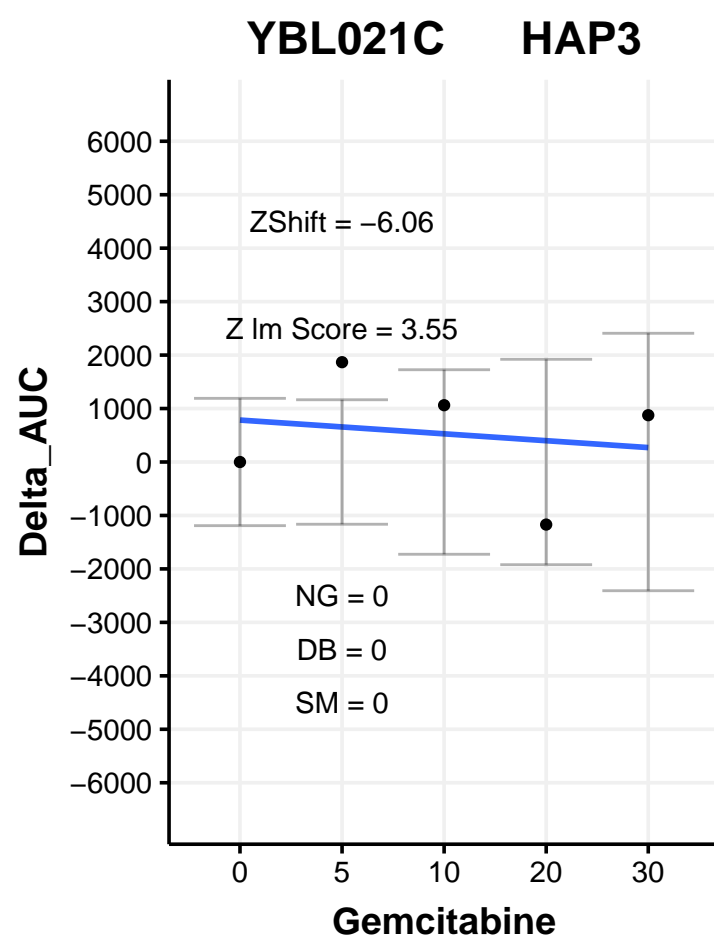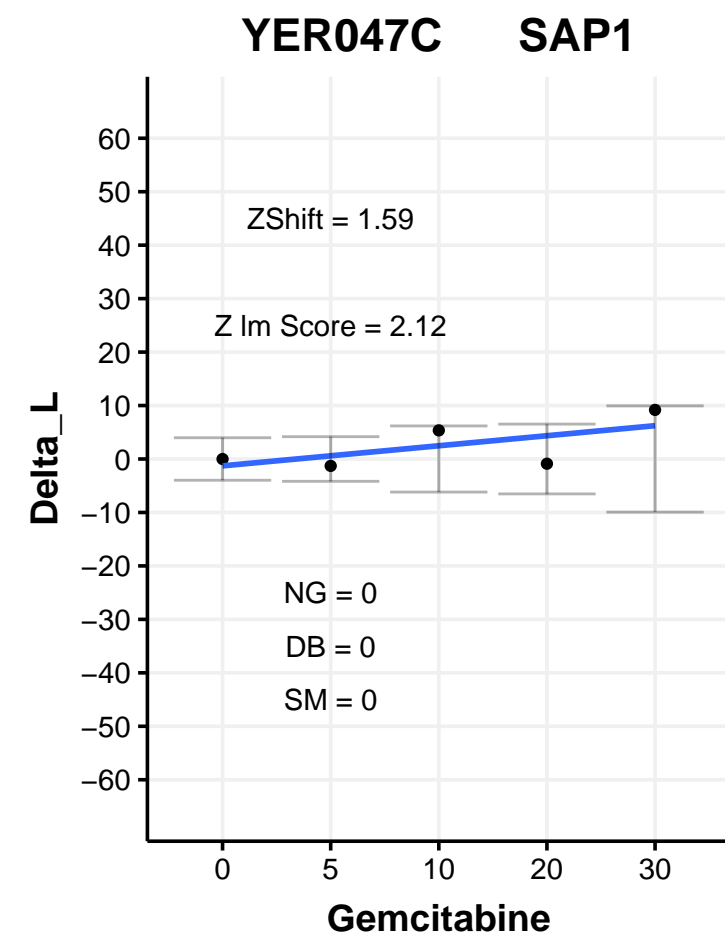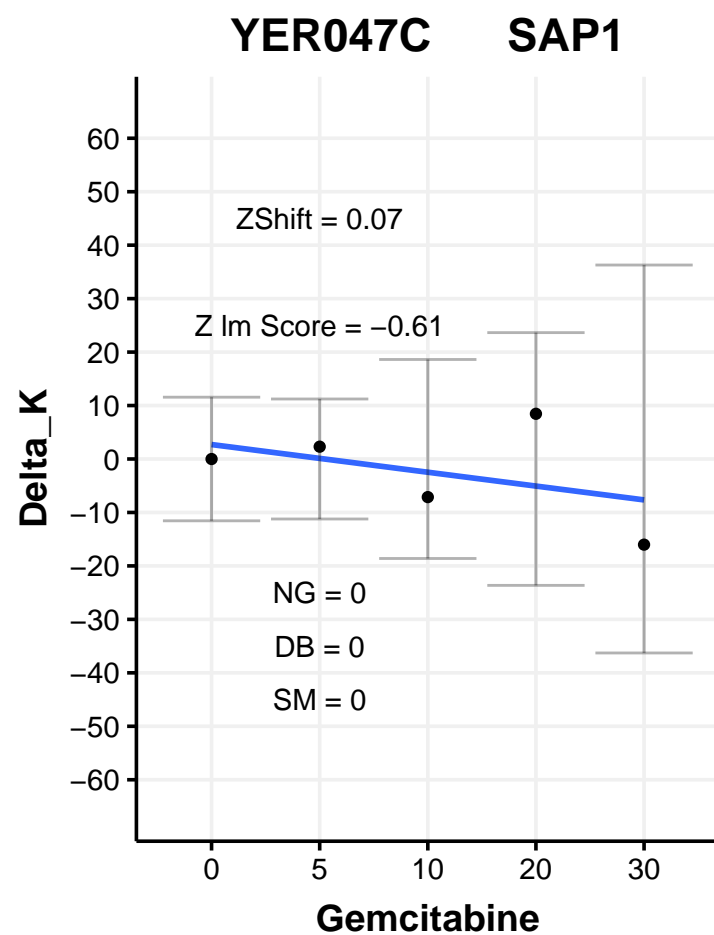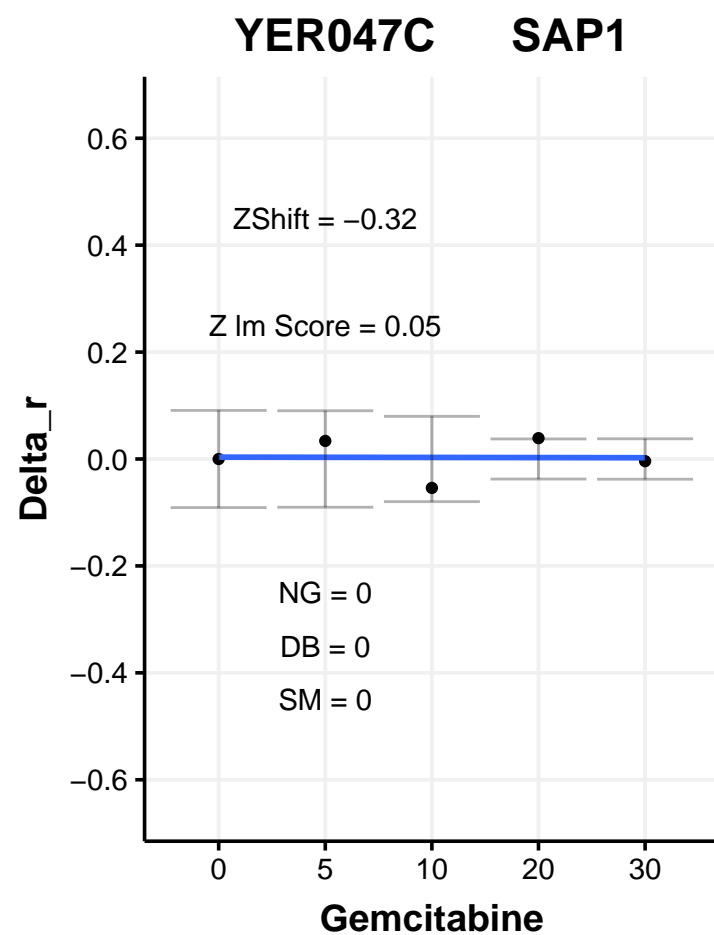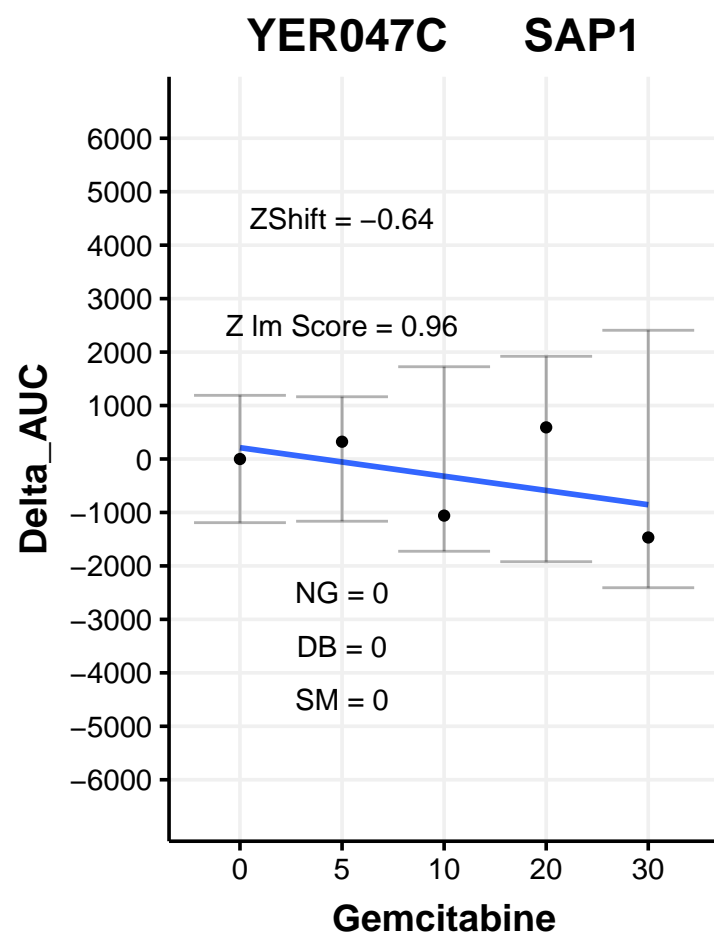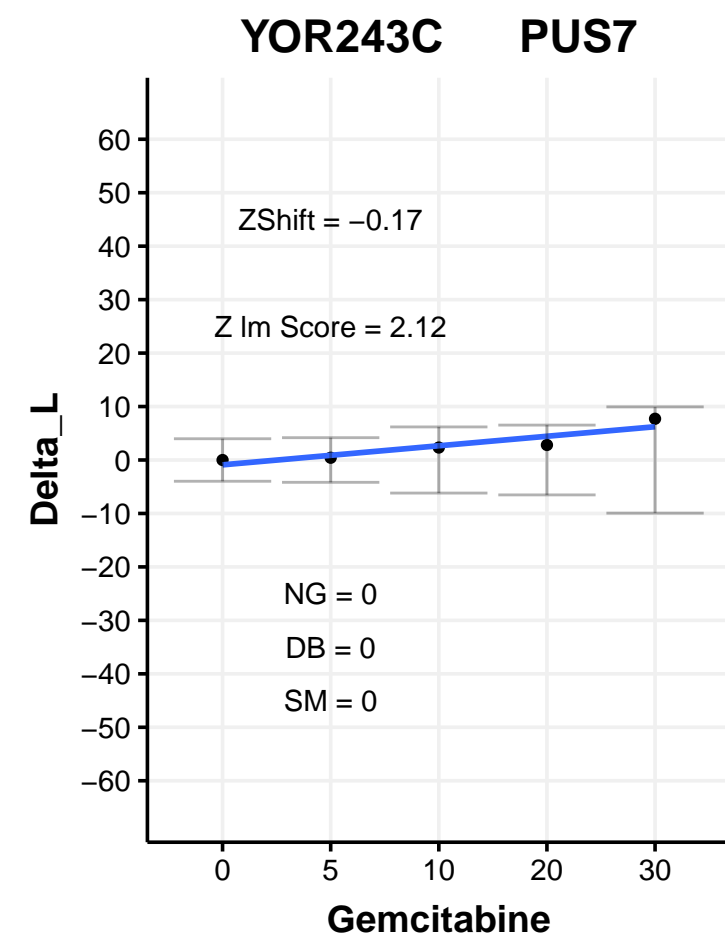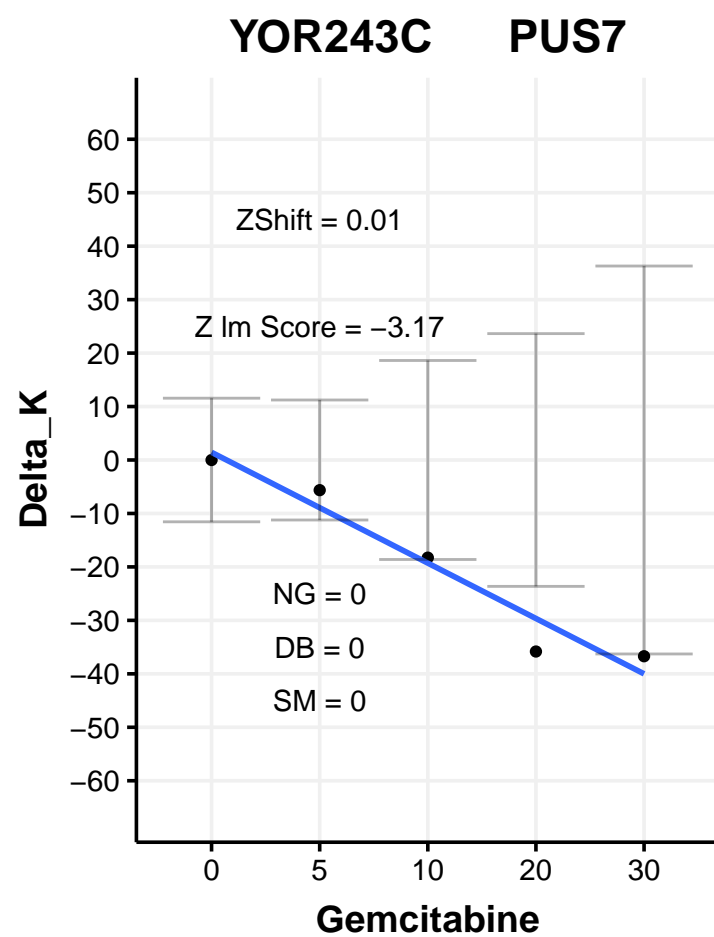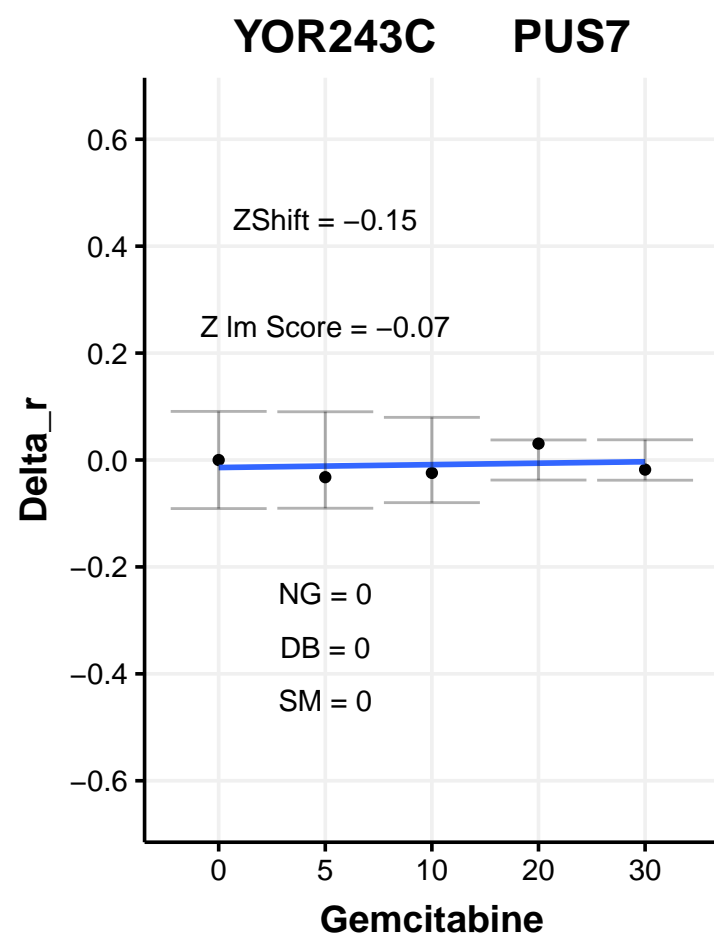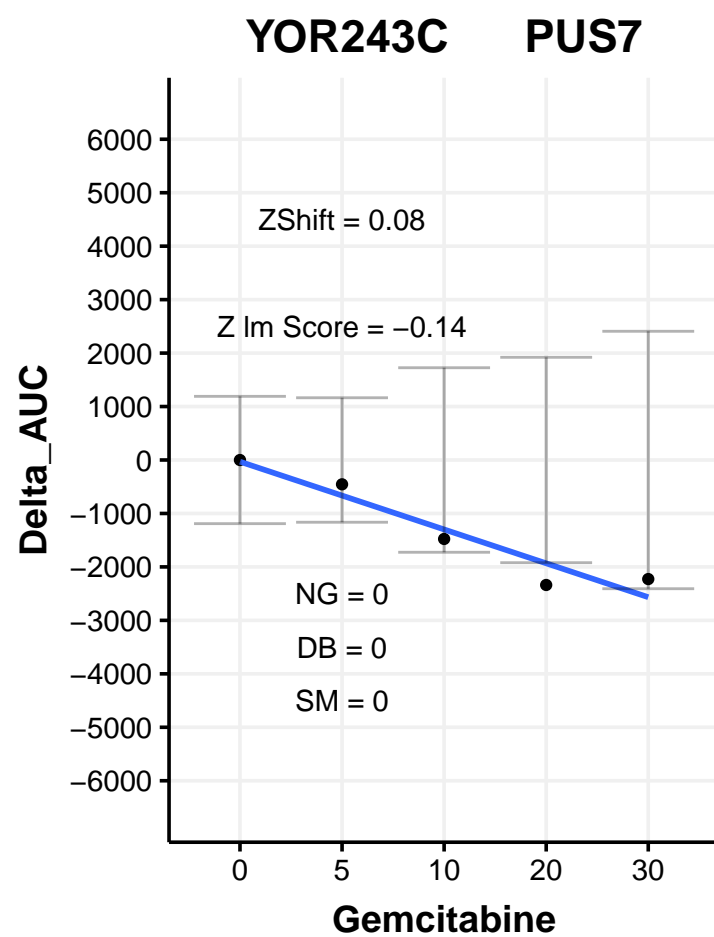

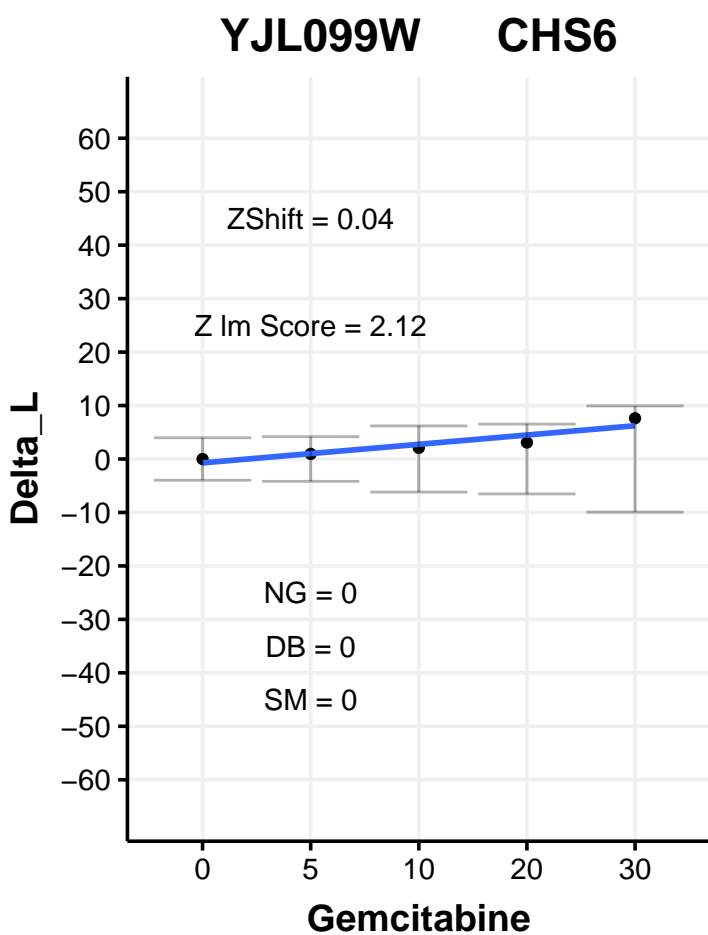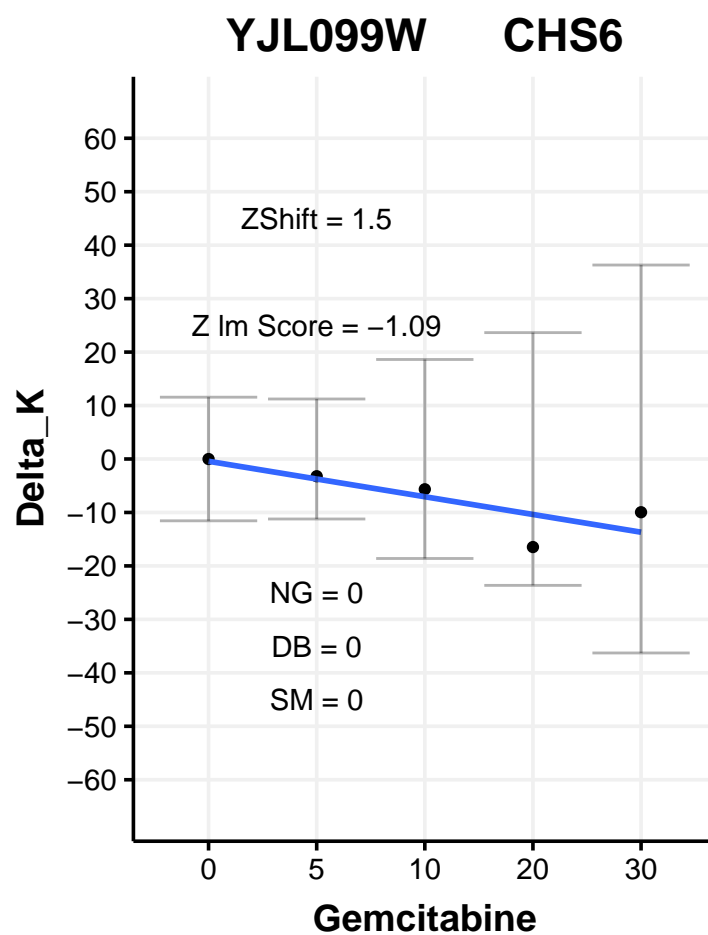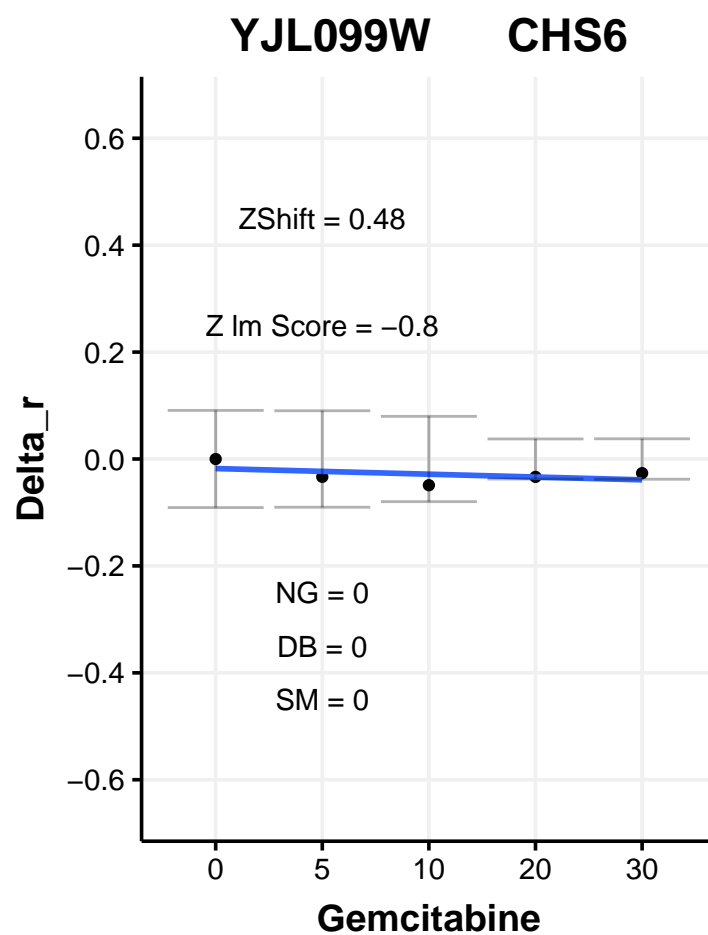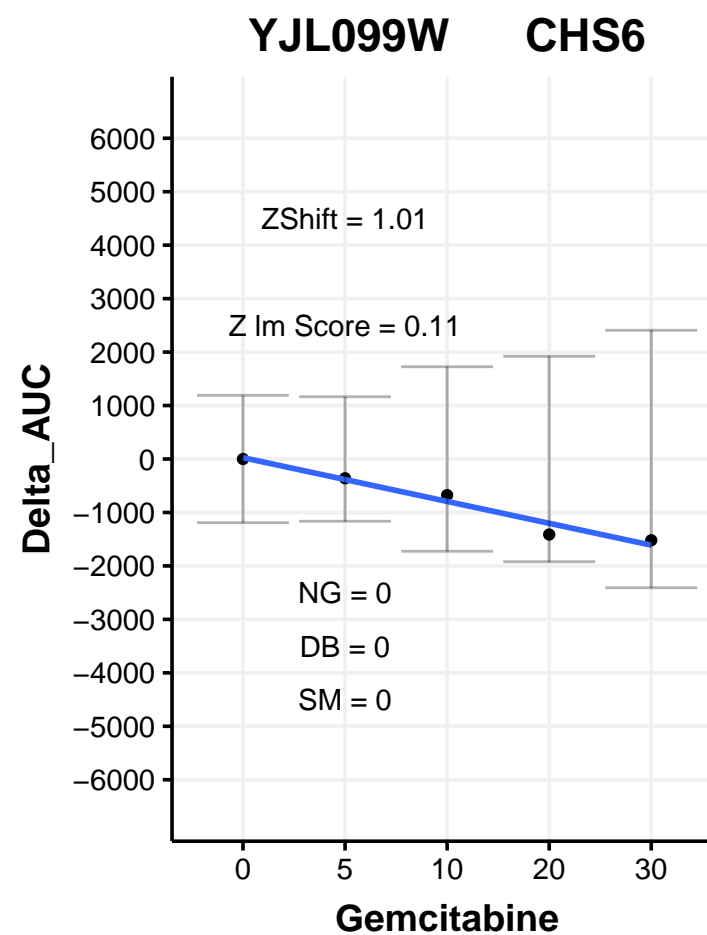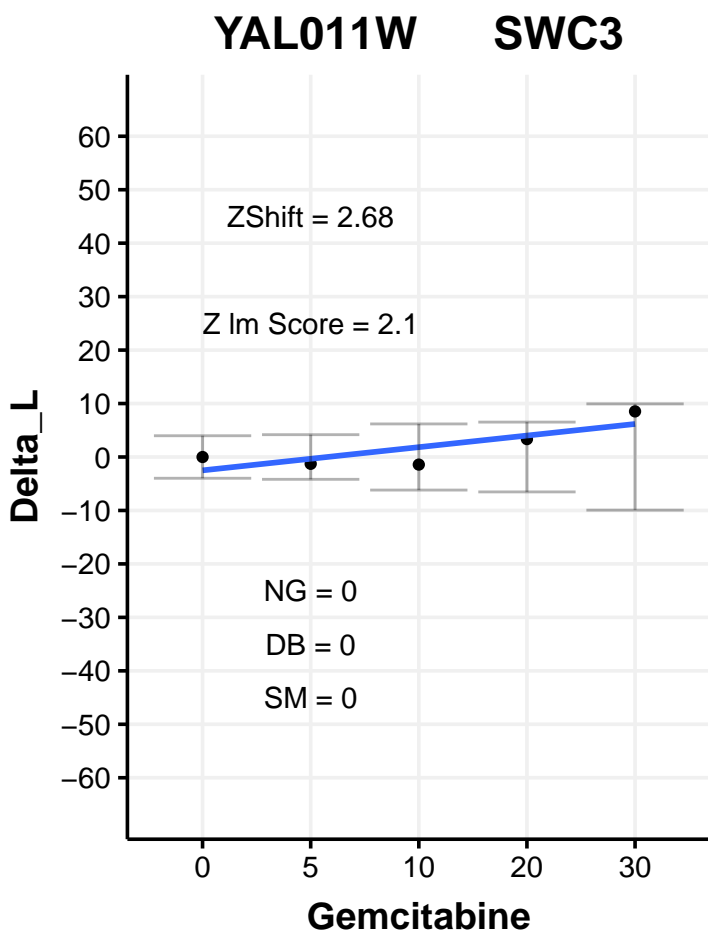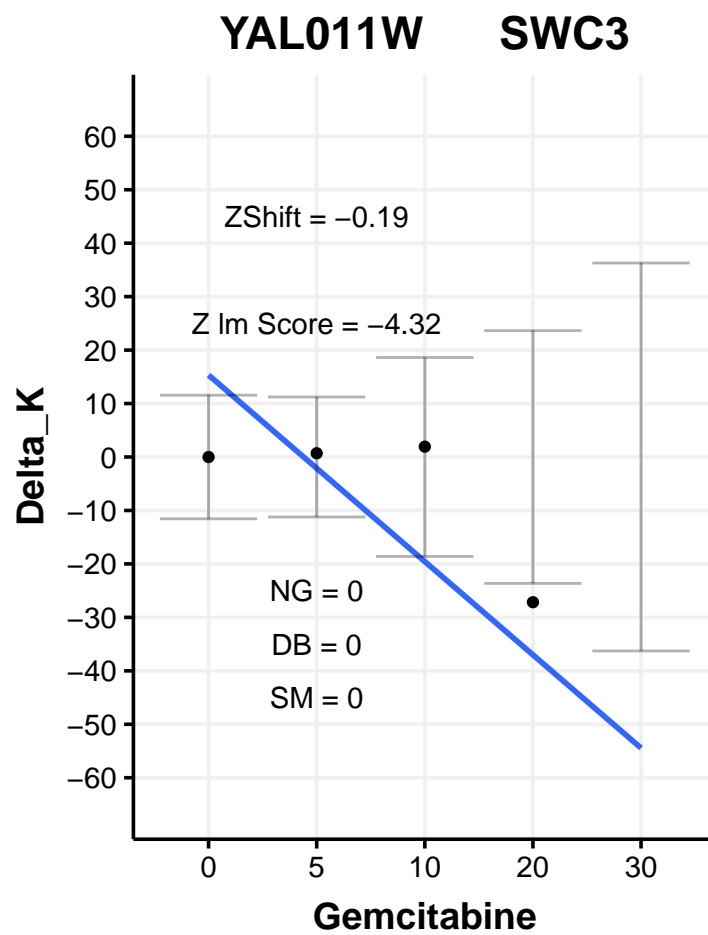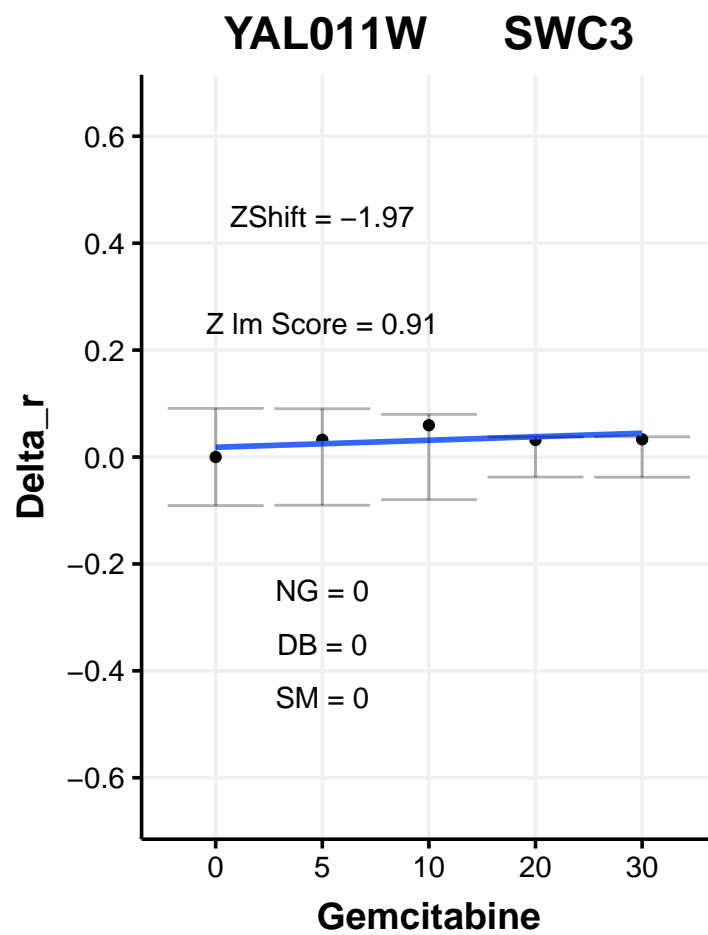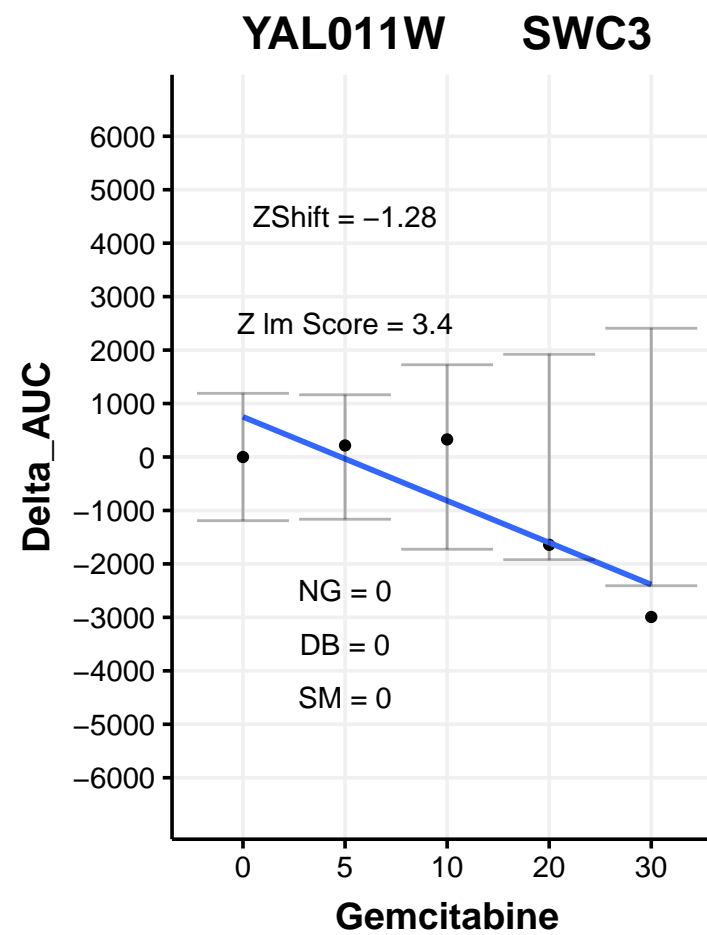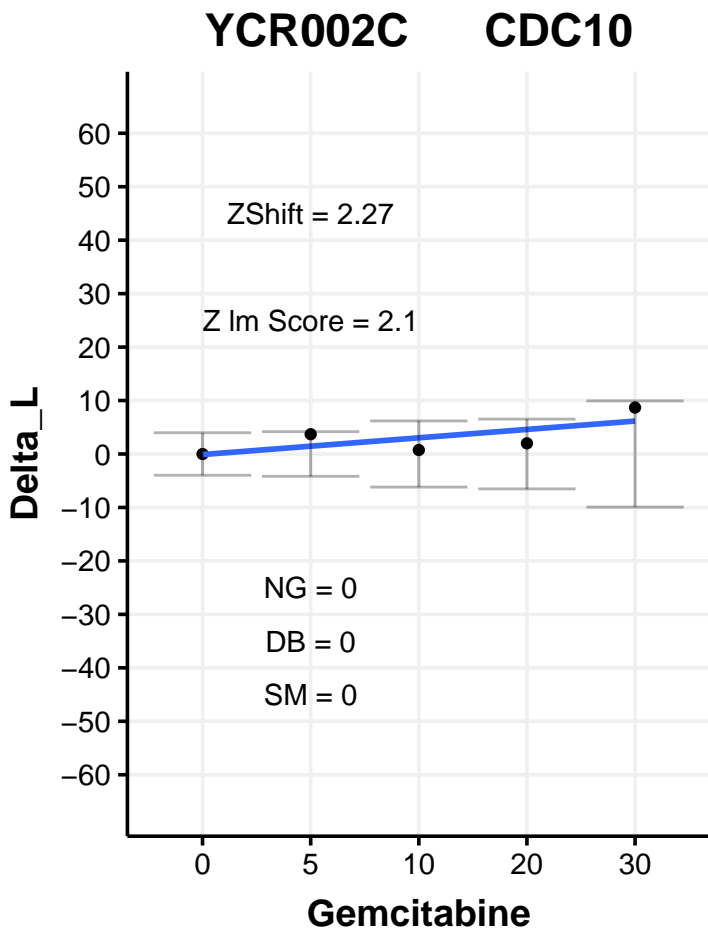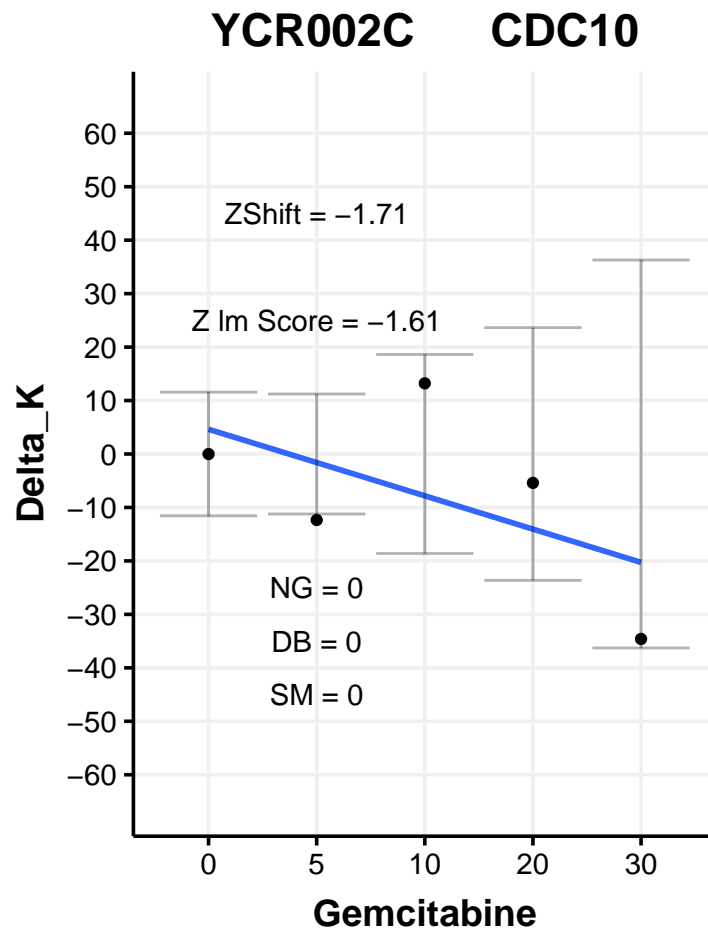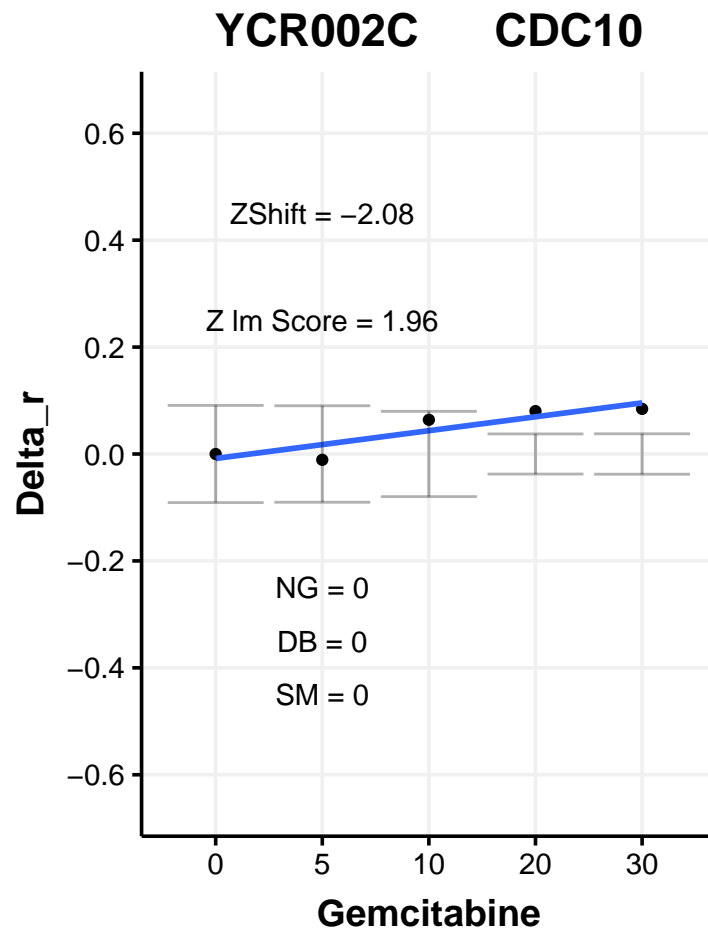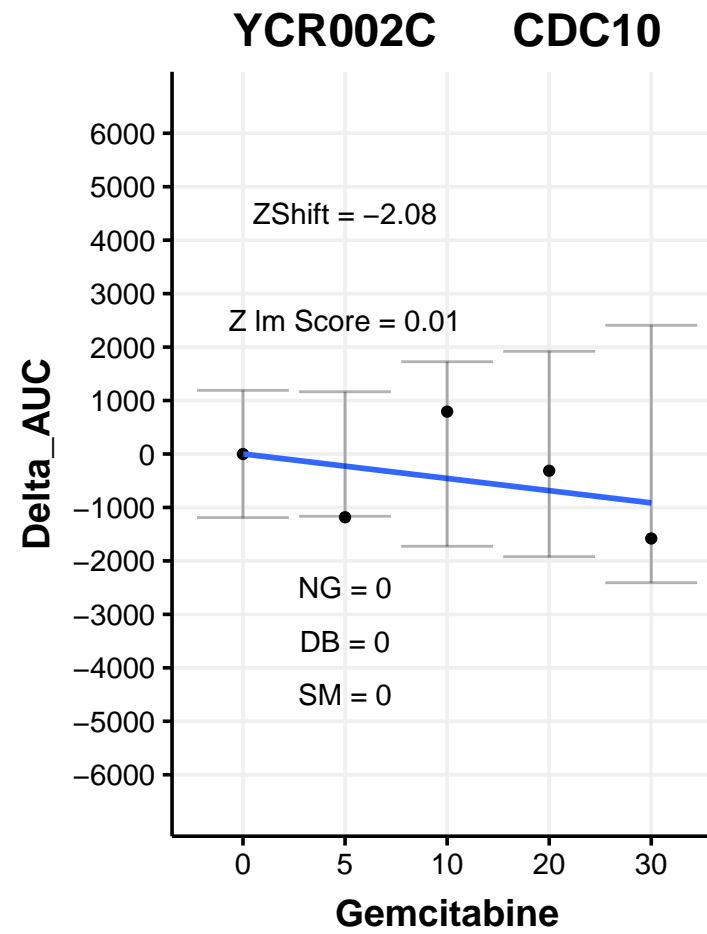

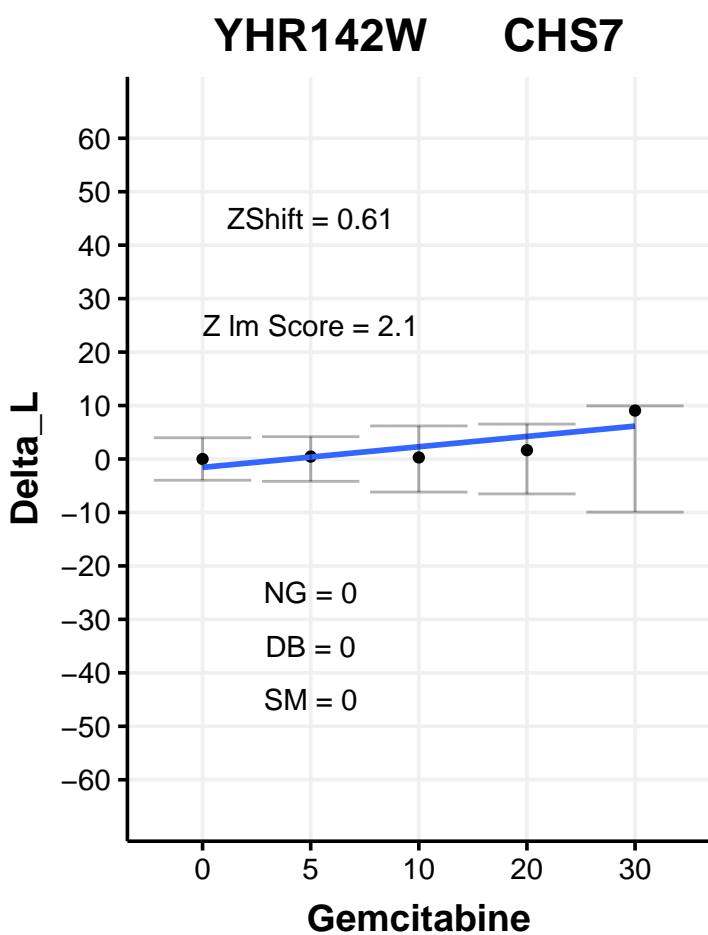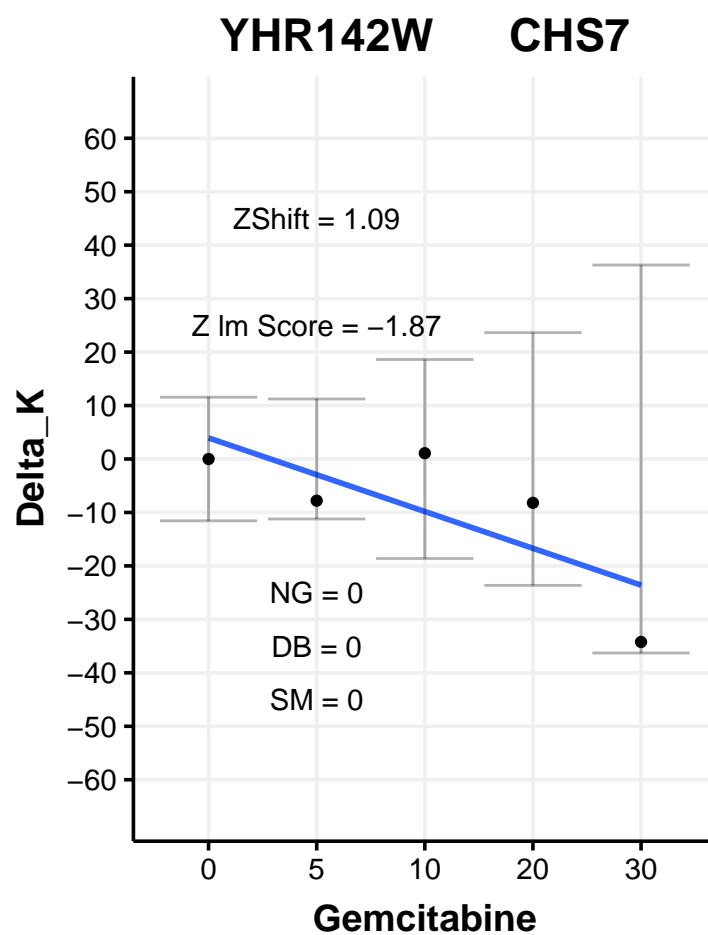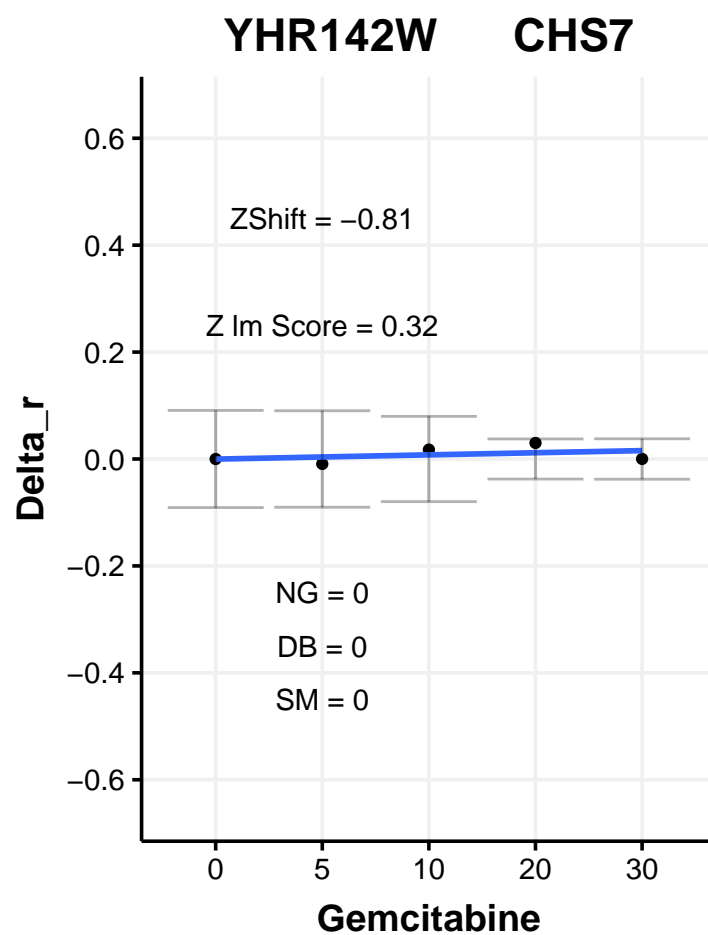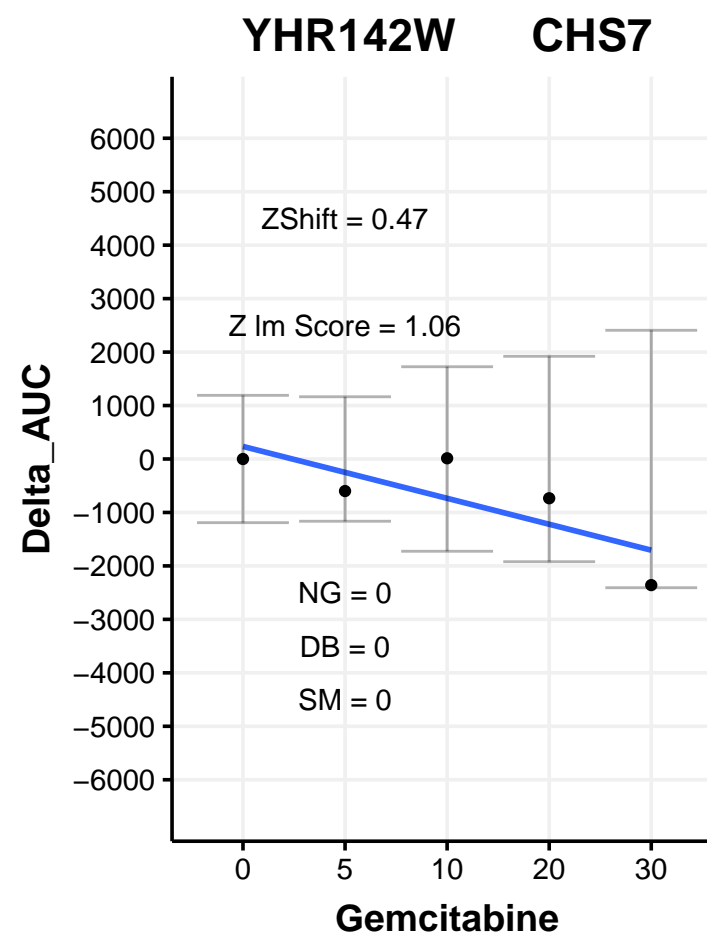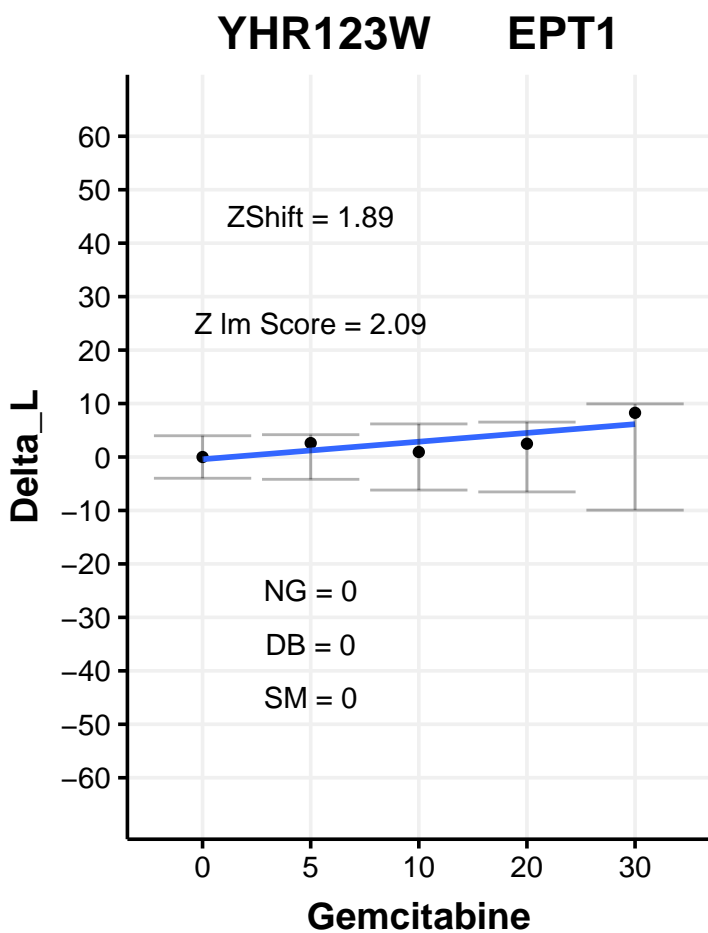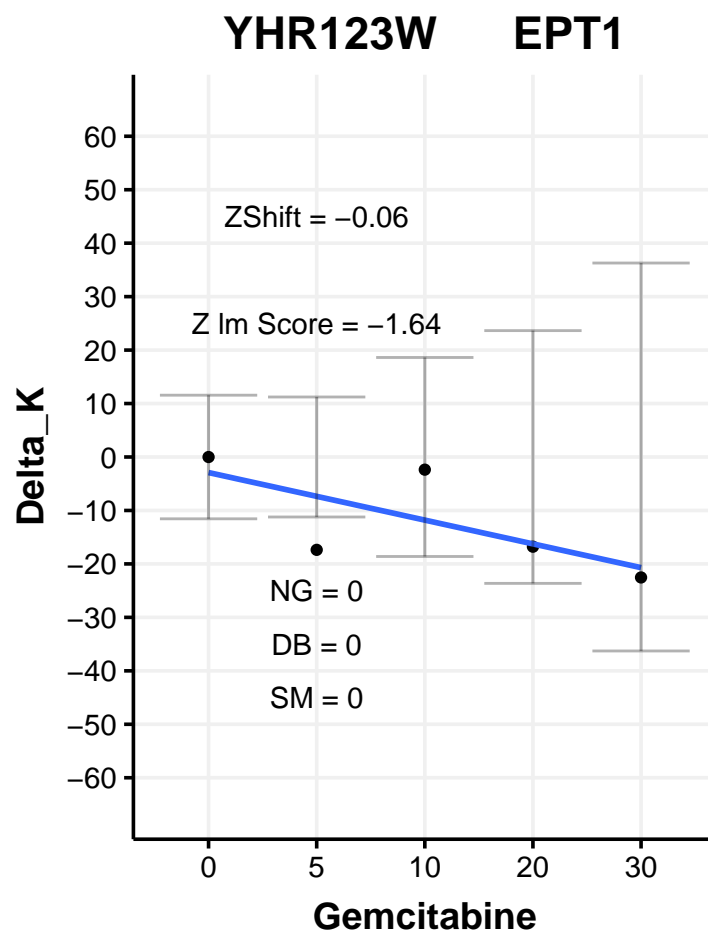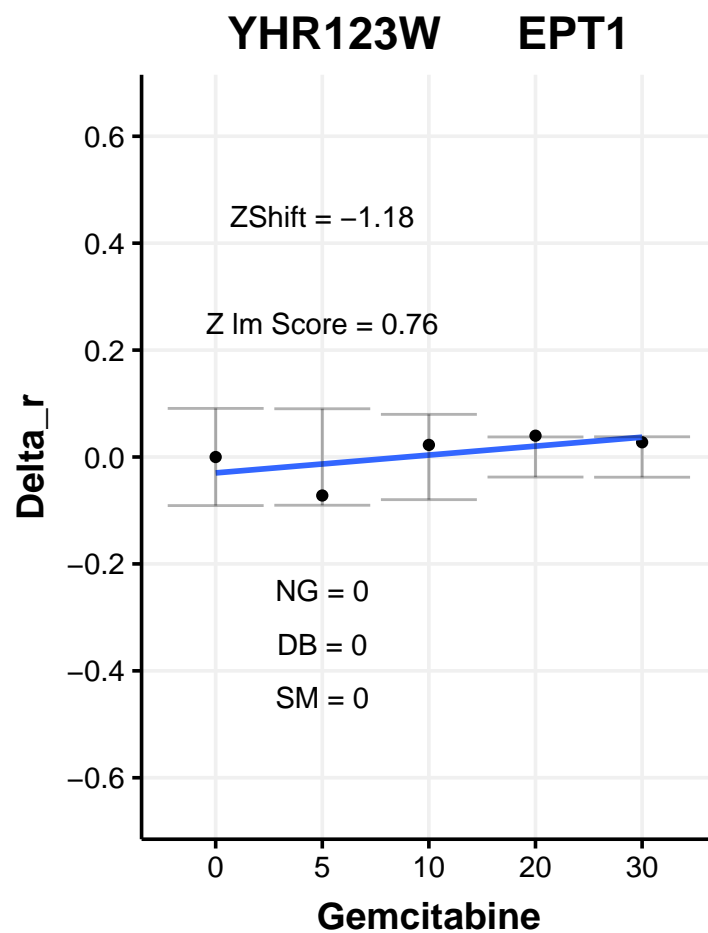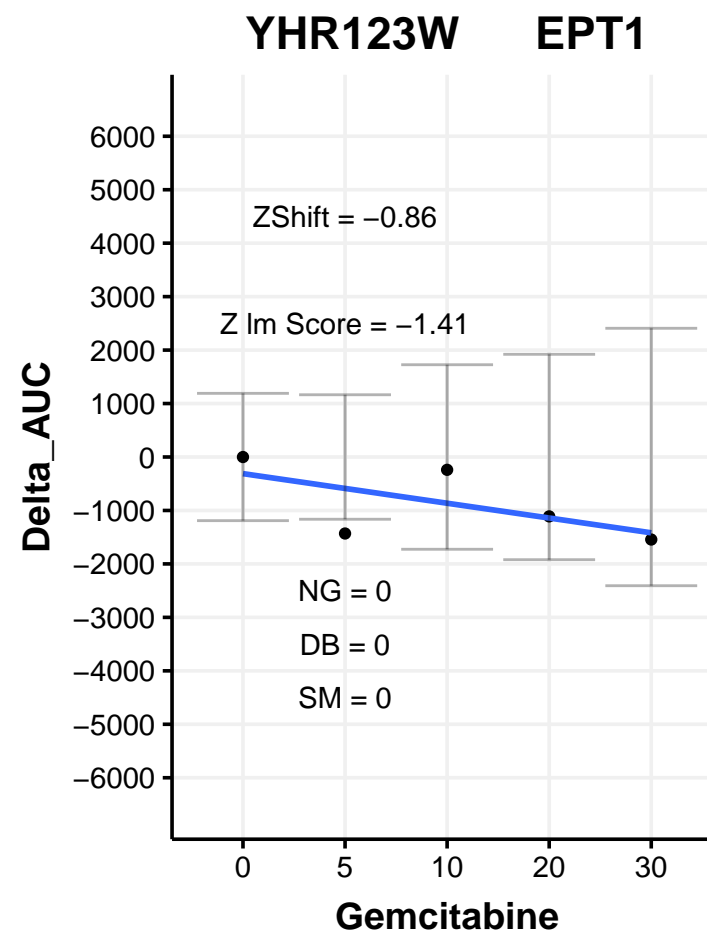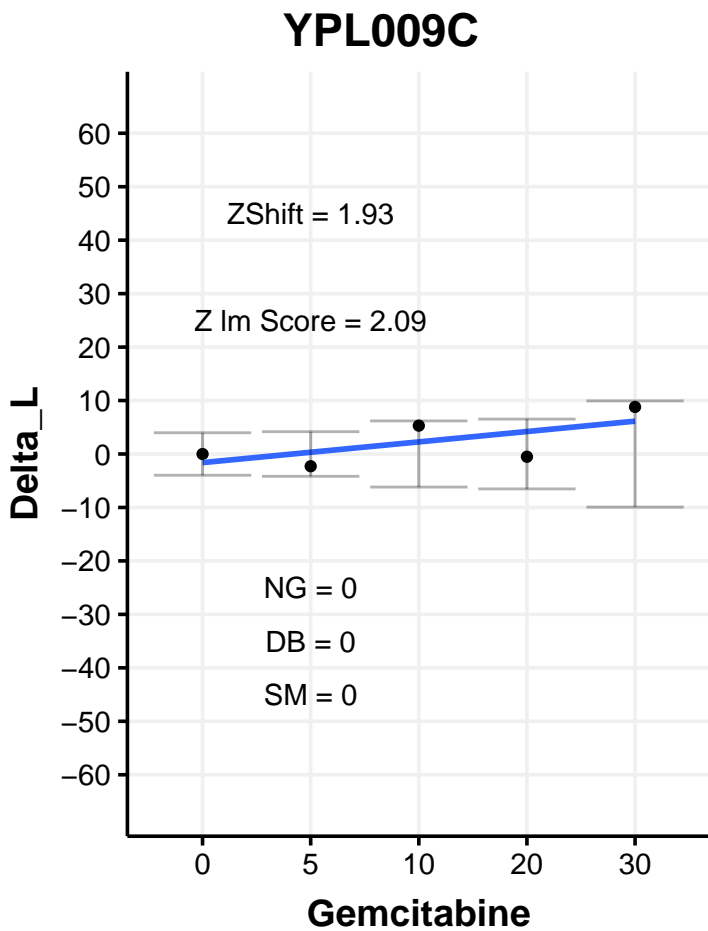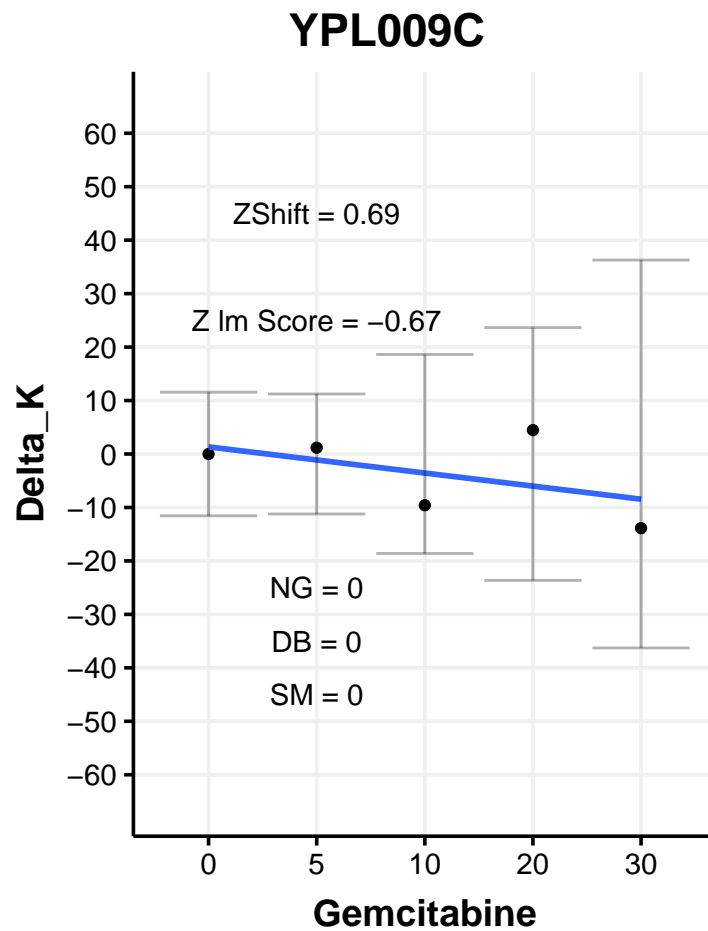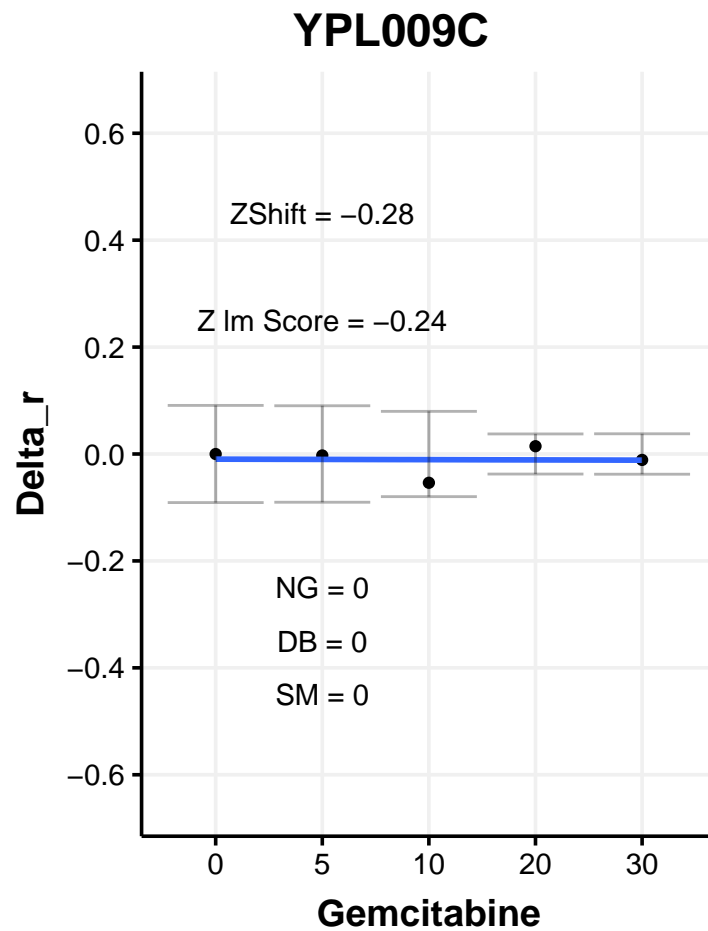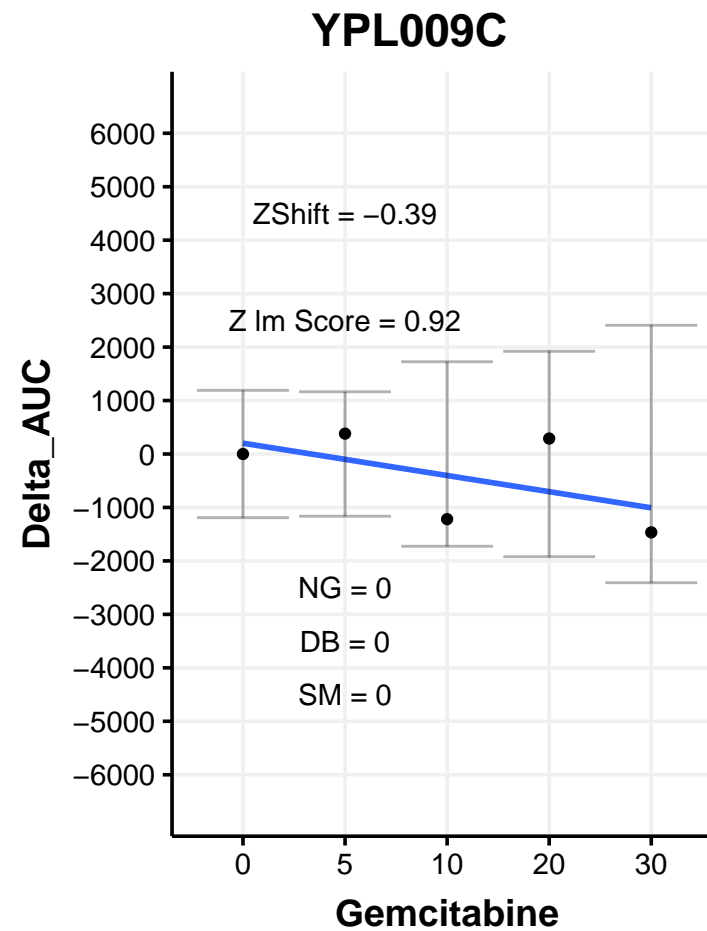



YHR050W-A\_2

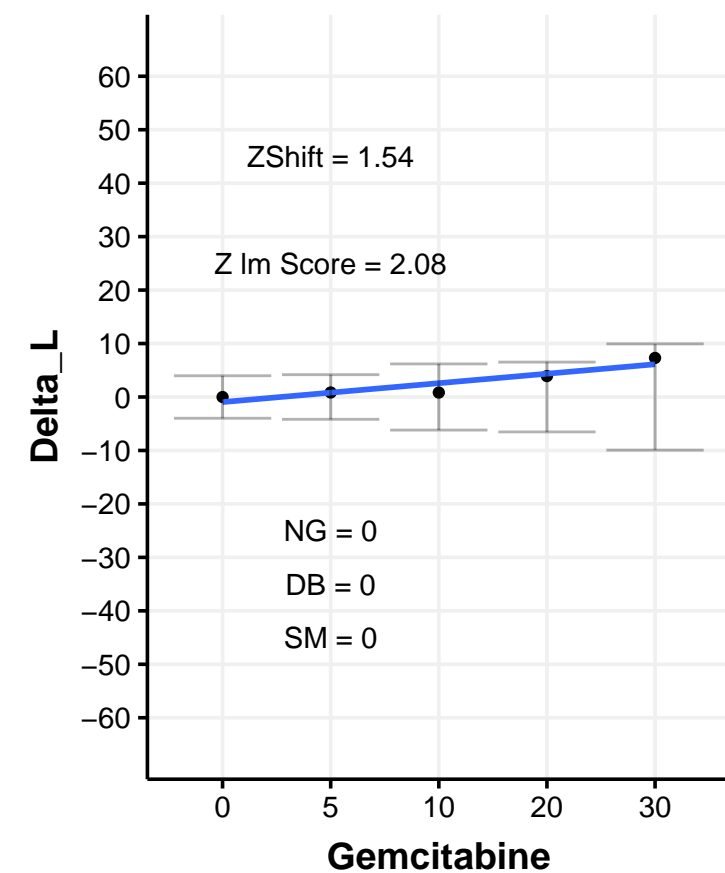

YHR050W-A\_2

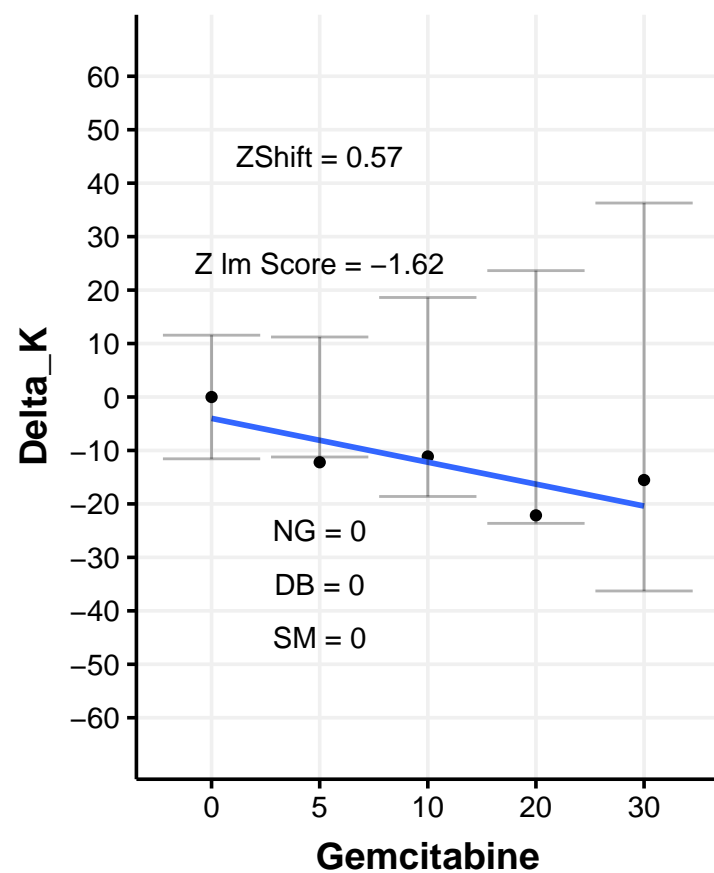

YHR050W-A\_2

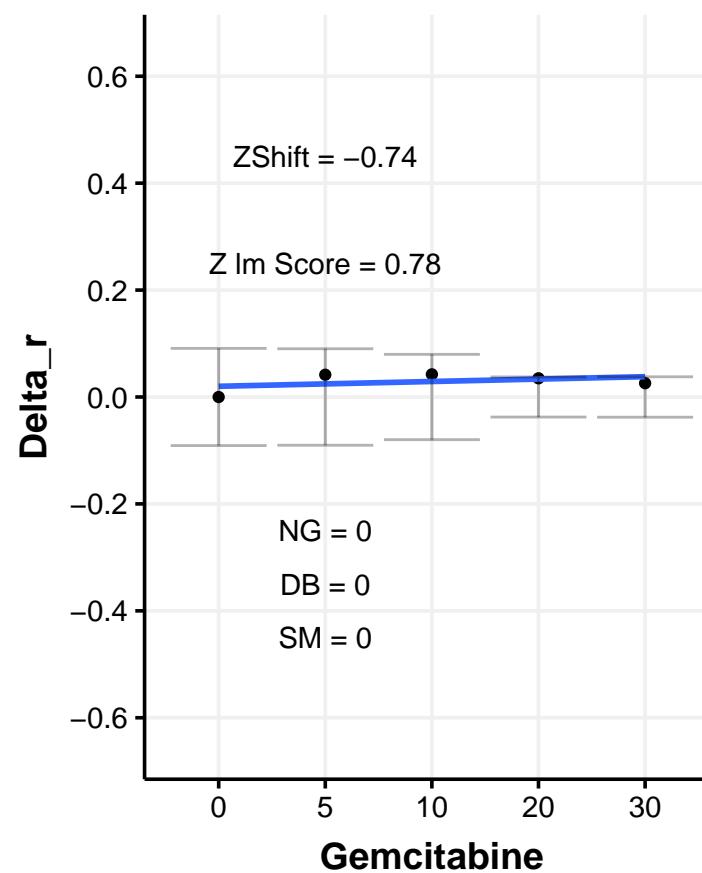

YHR050W-A\_2

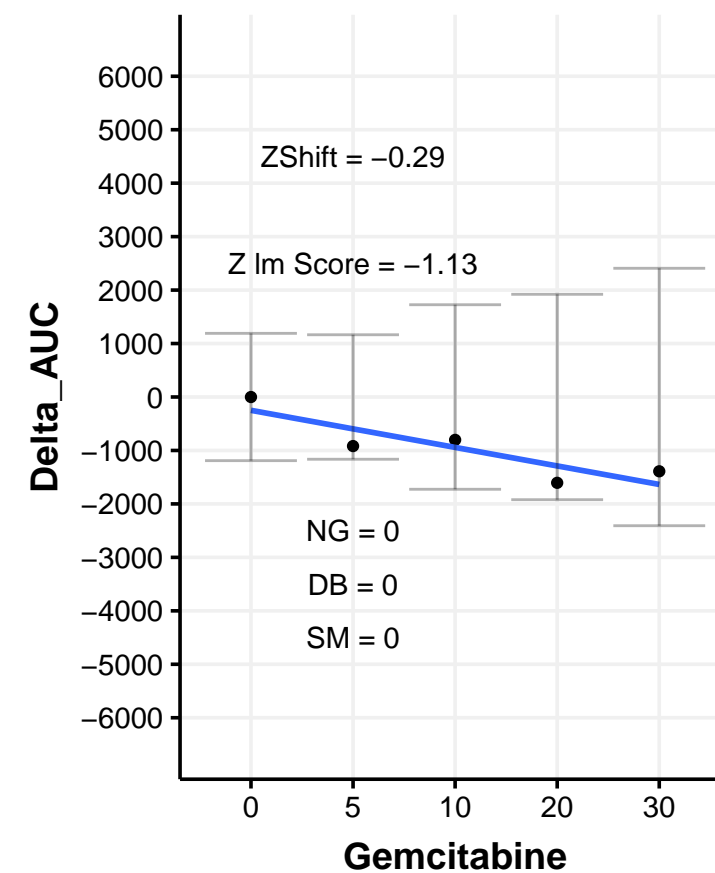

YPL102C

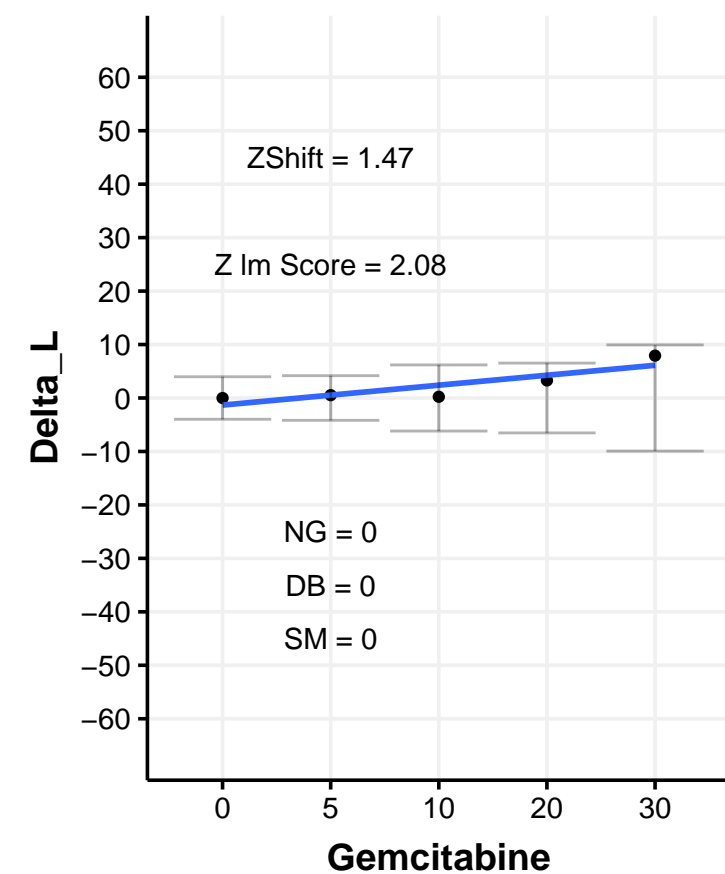

YPL102C

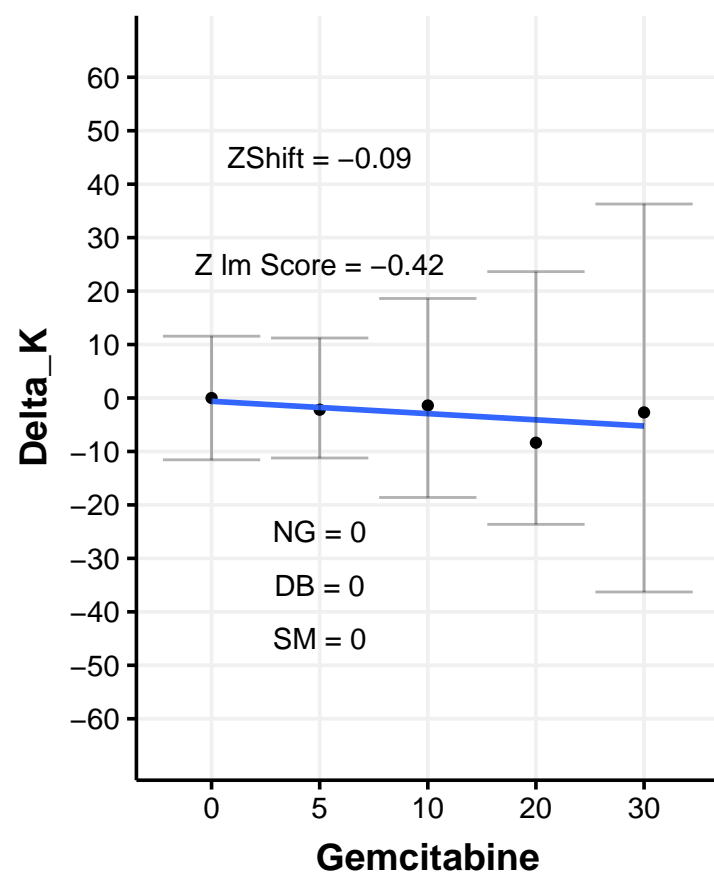

YPL102C

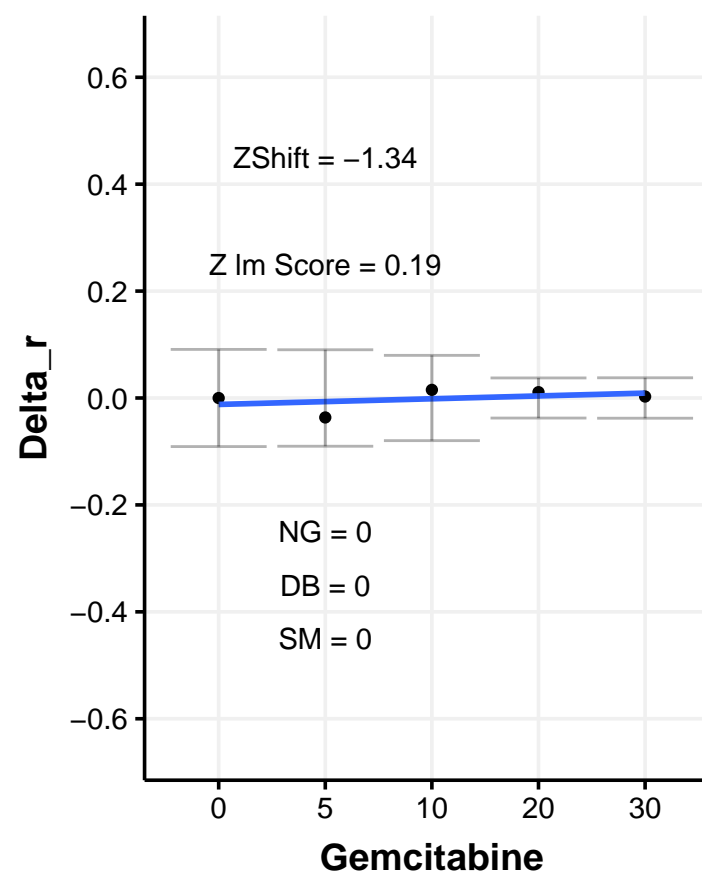

YPL102C

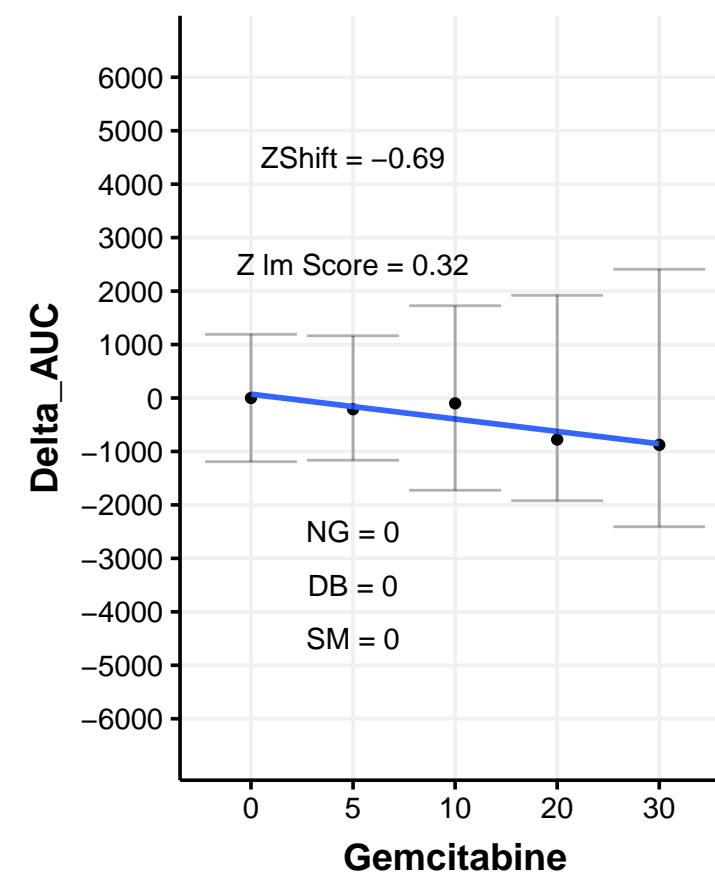

YOR024W

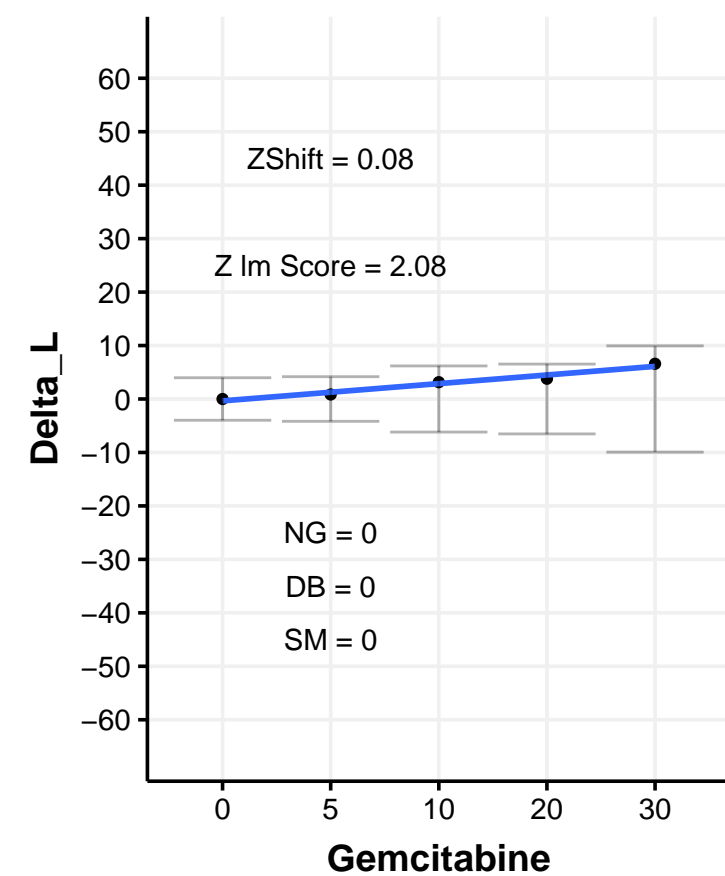

YOR024W

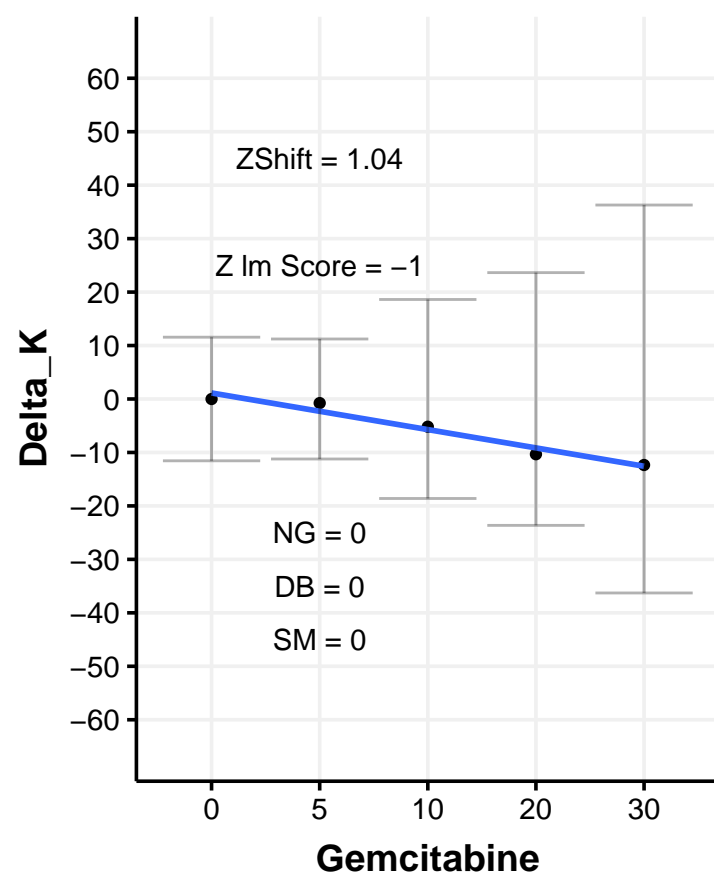

YOR024W

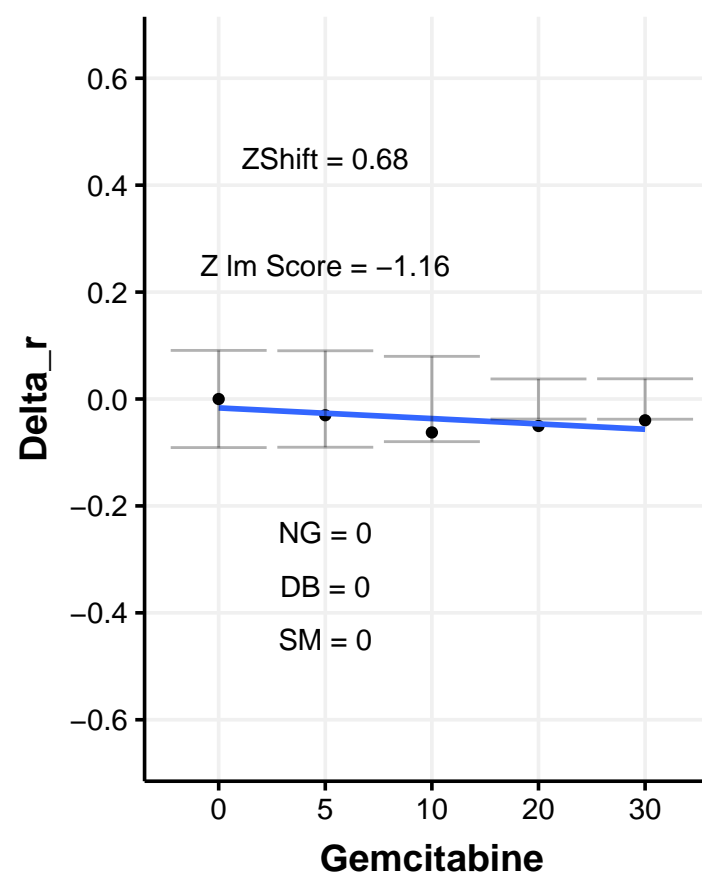

YOR024W

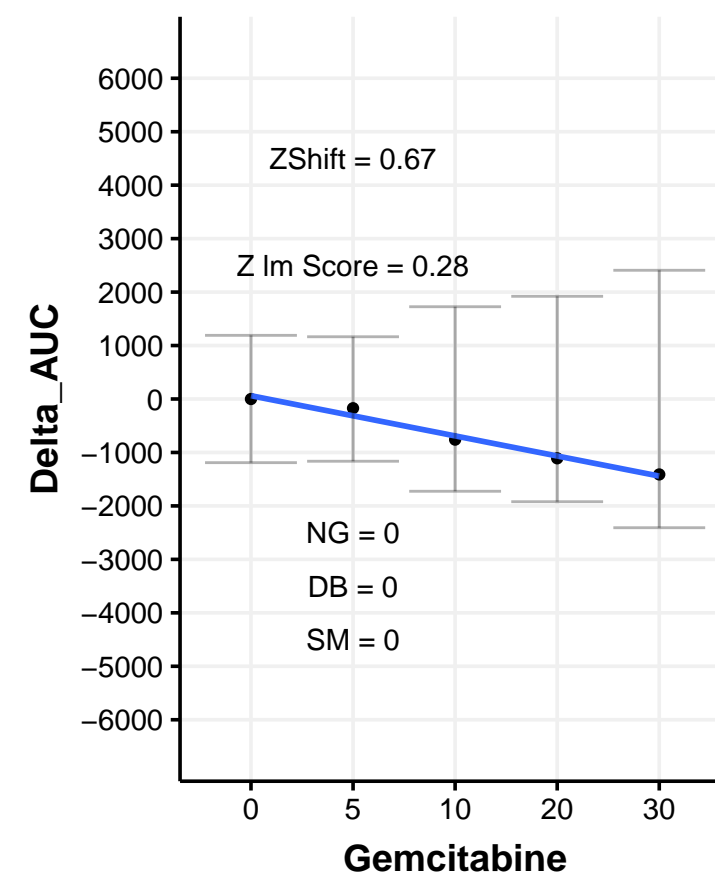

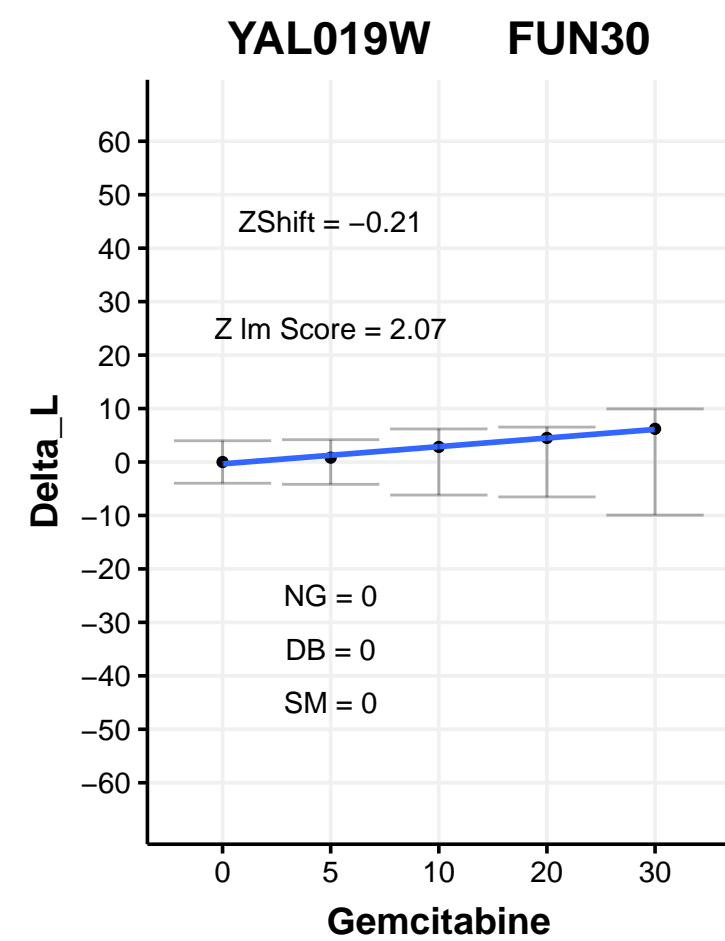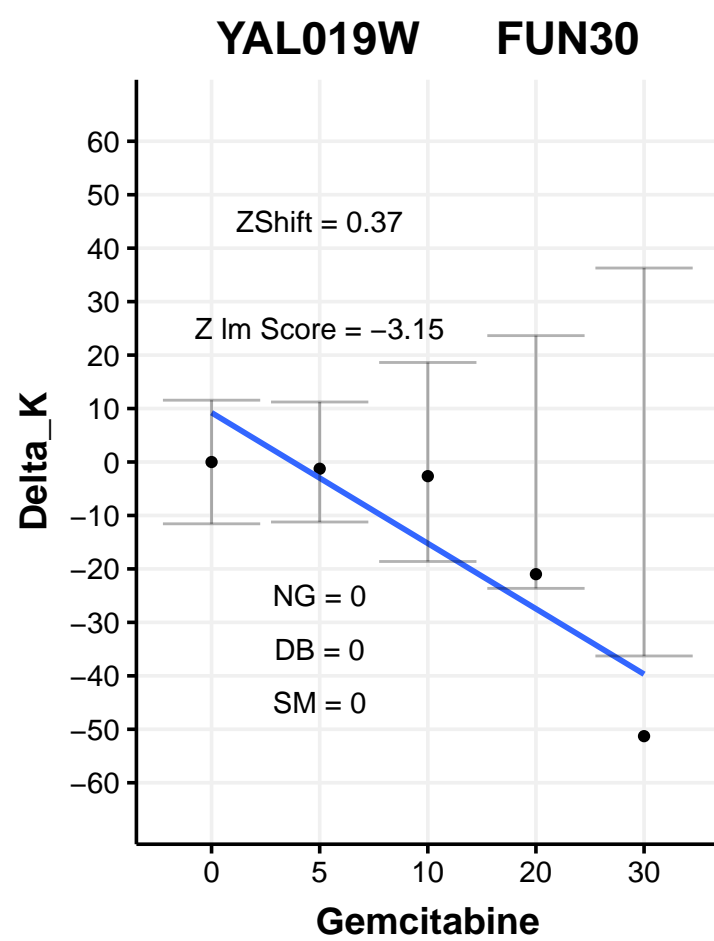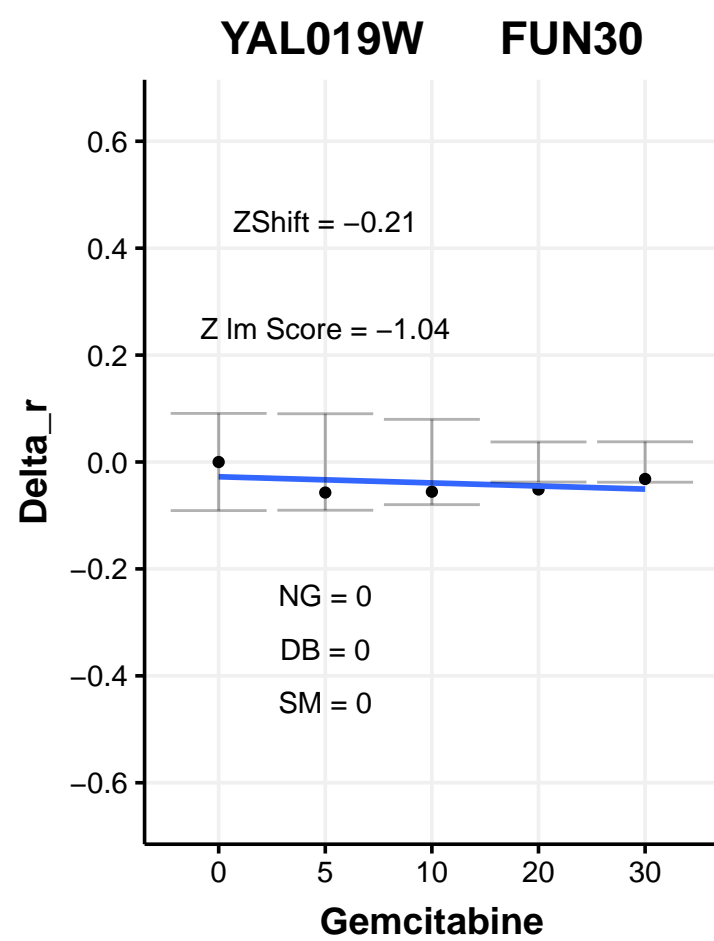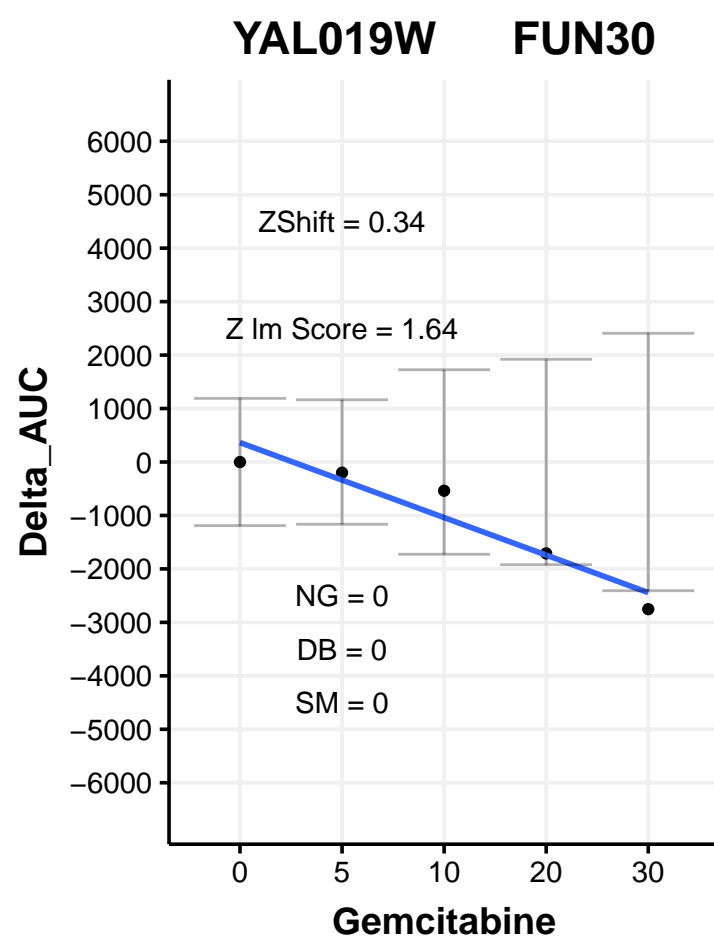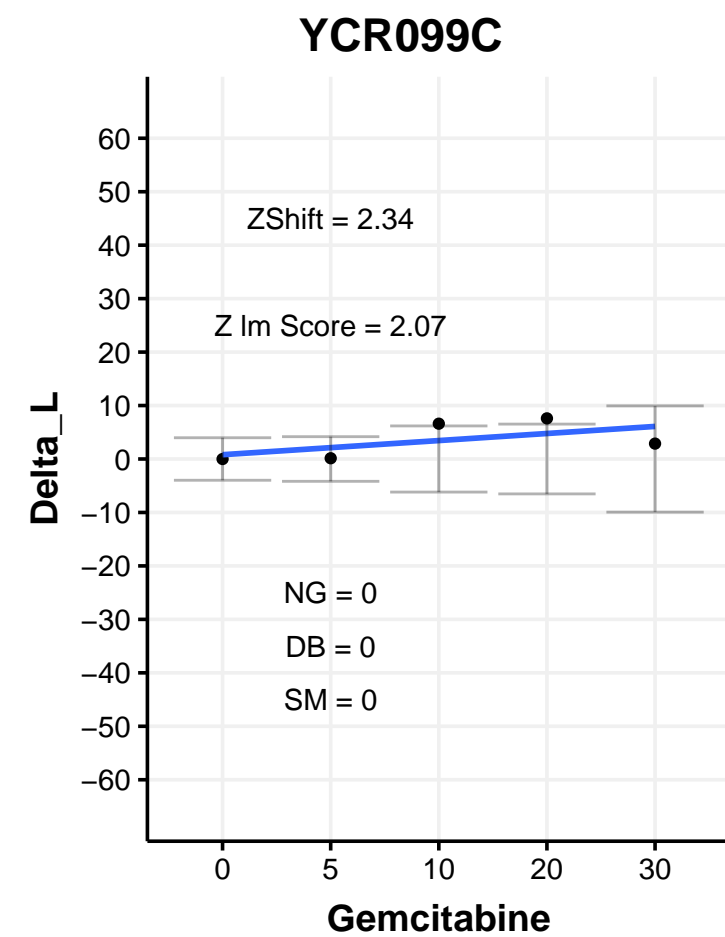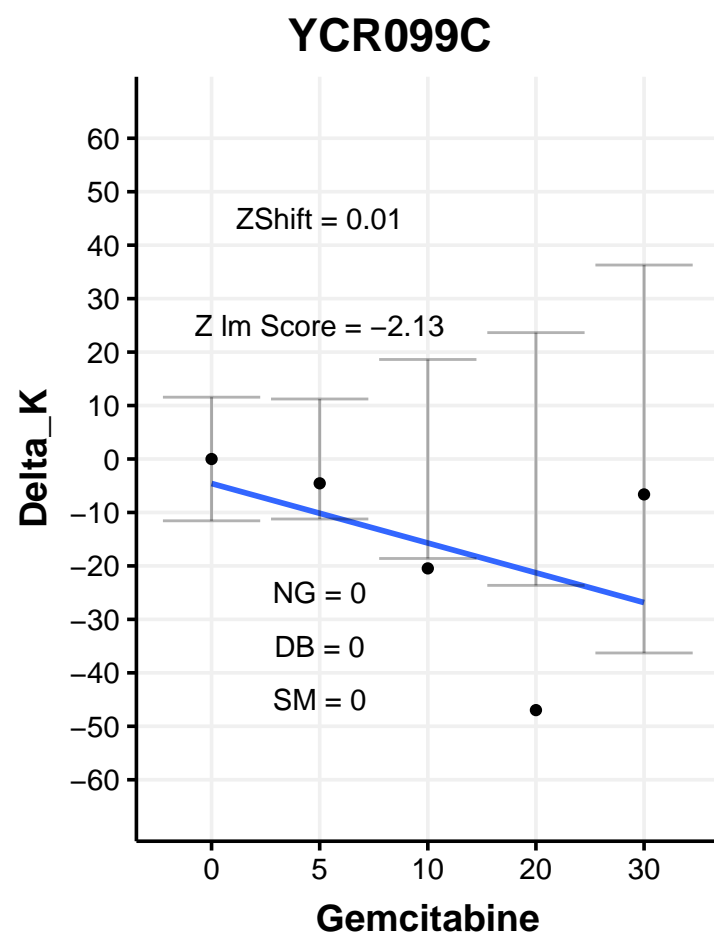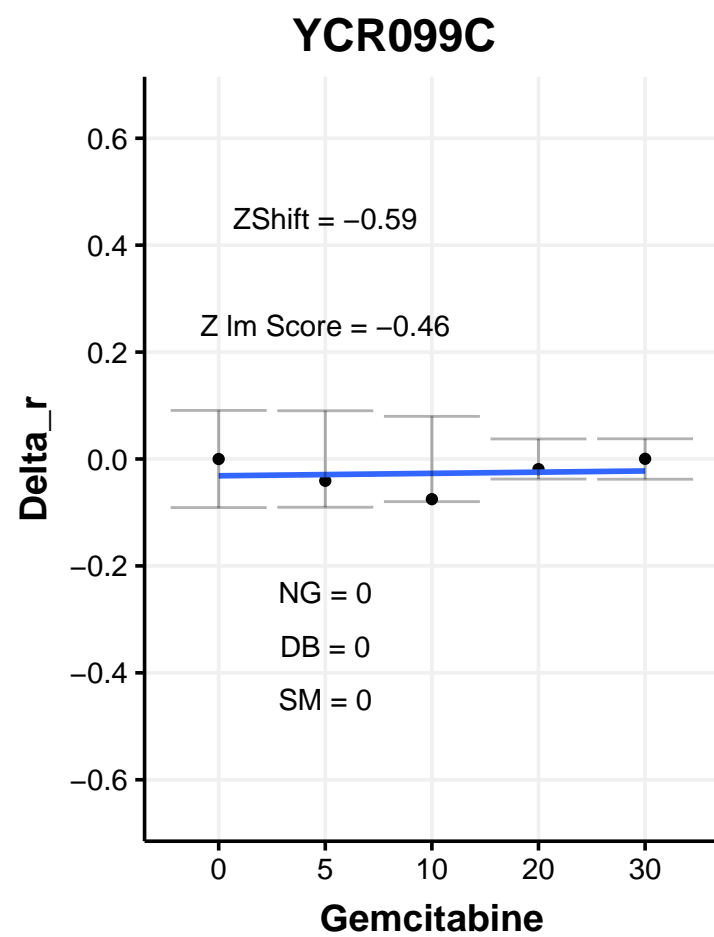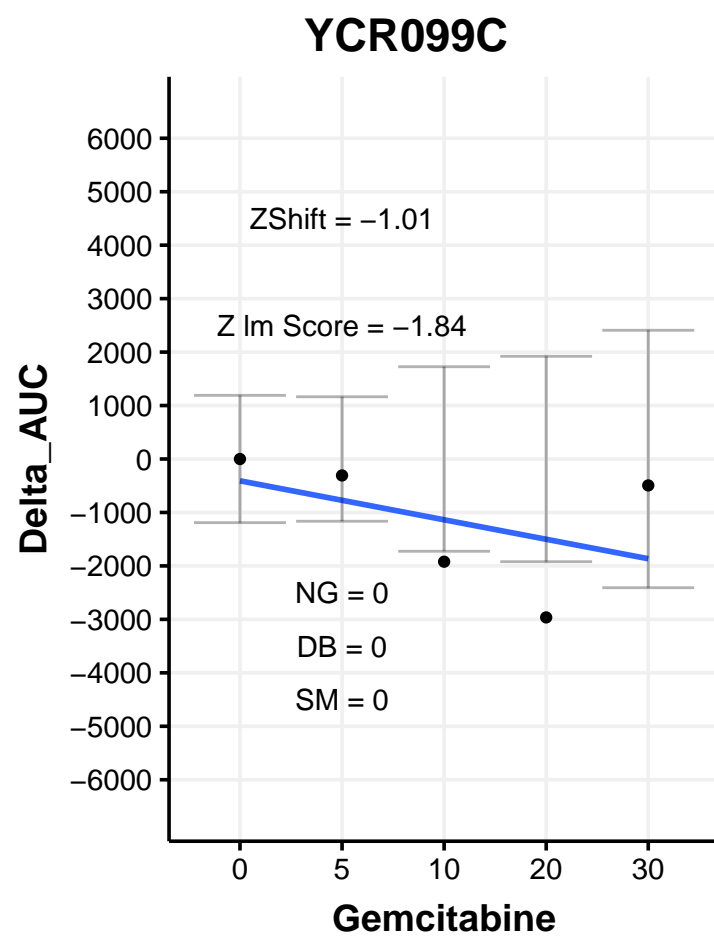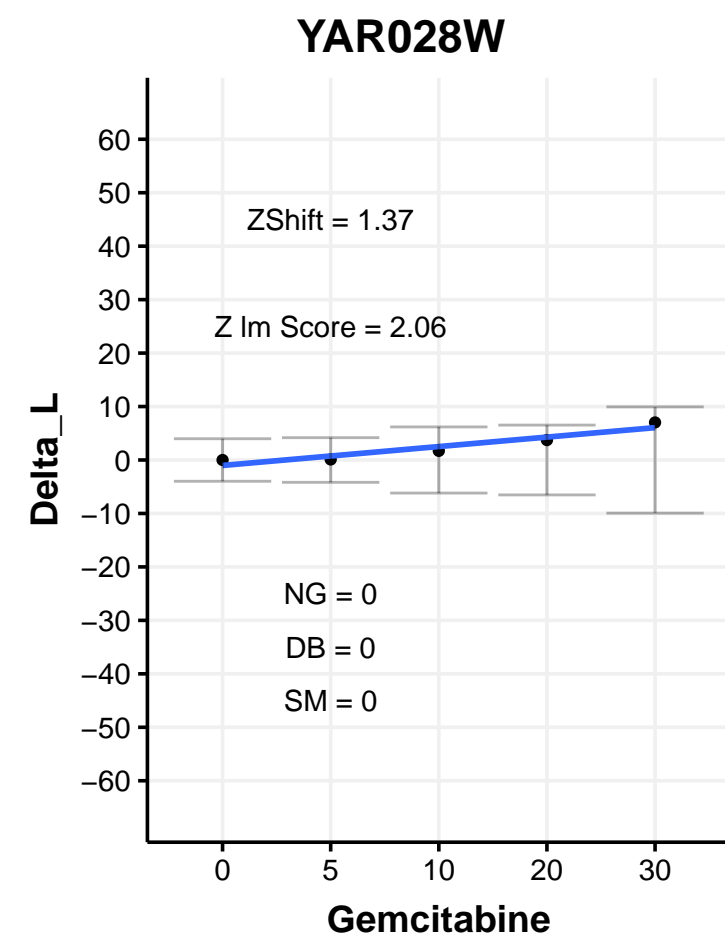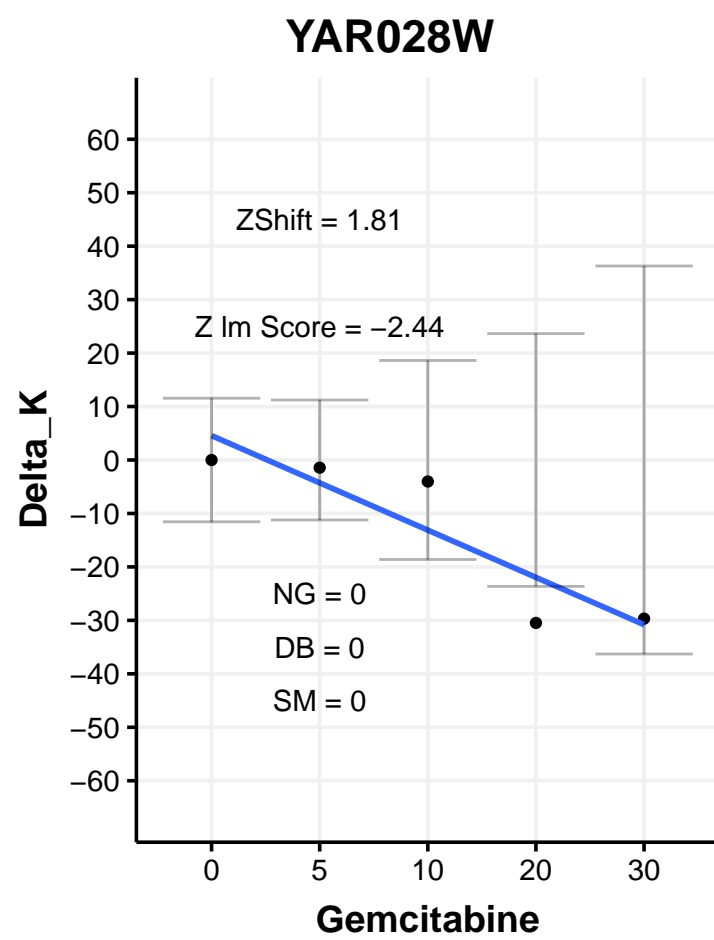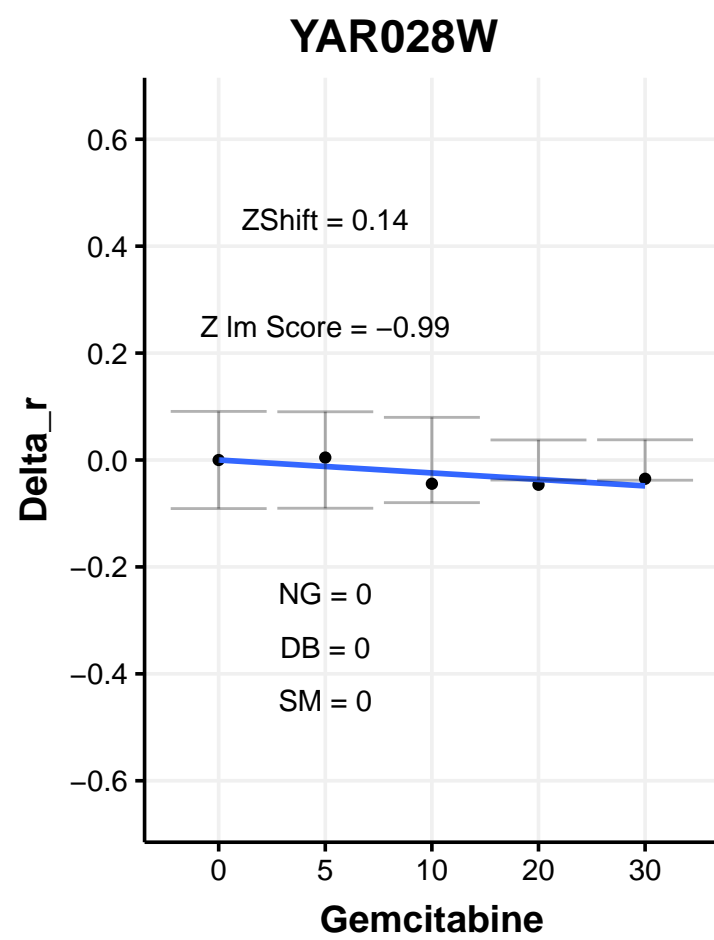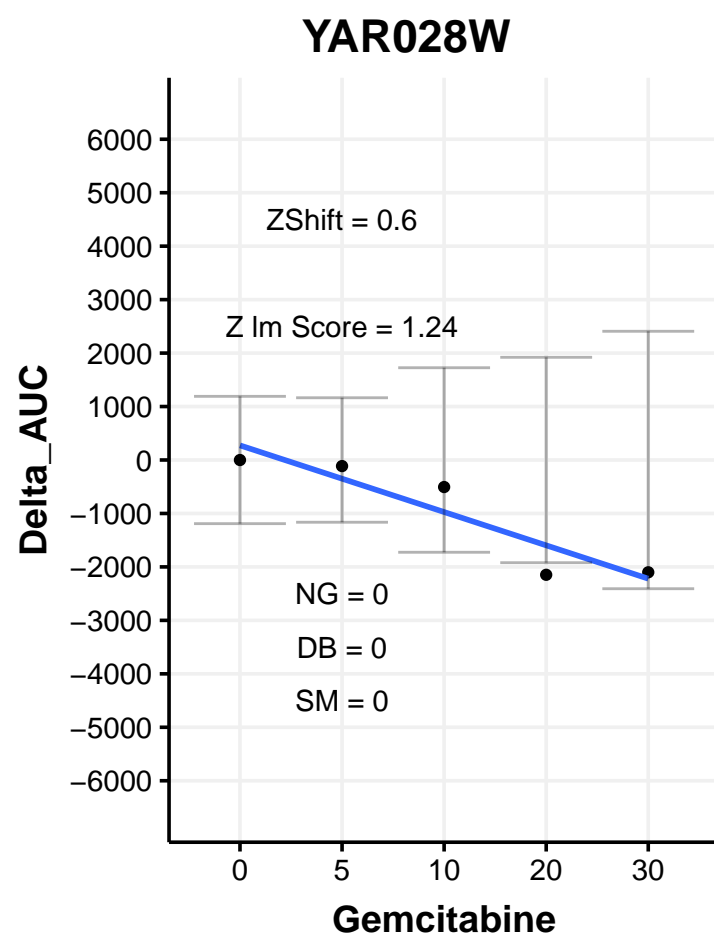

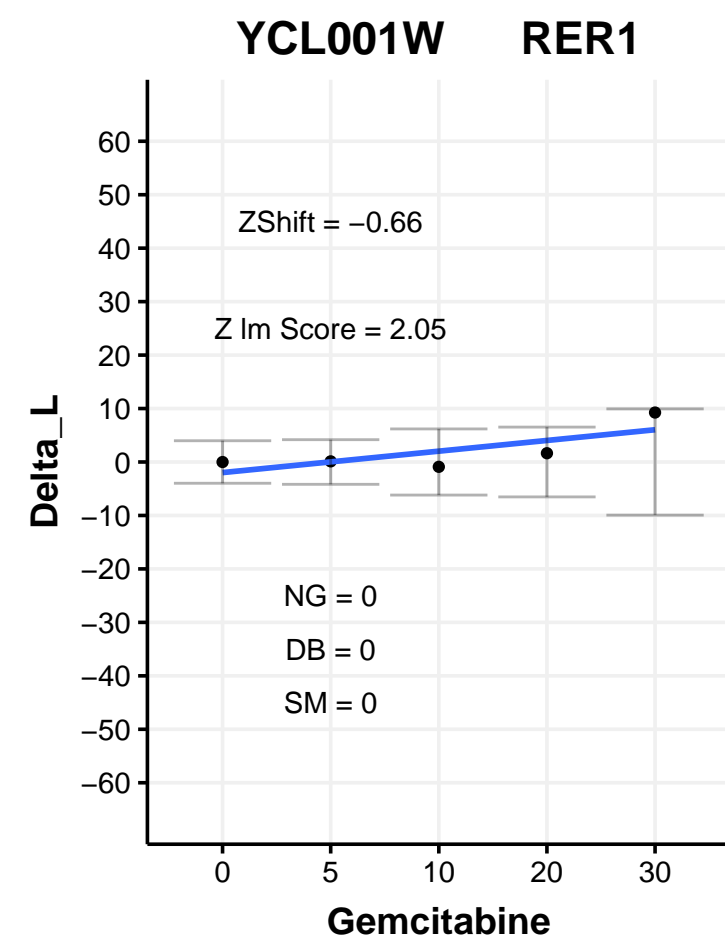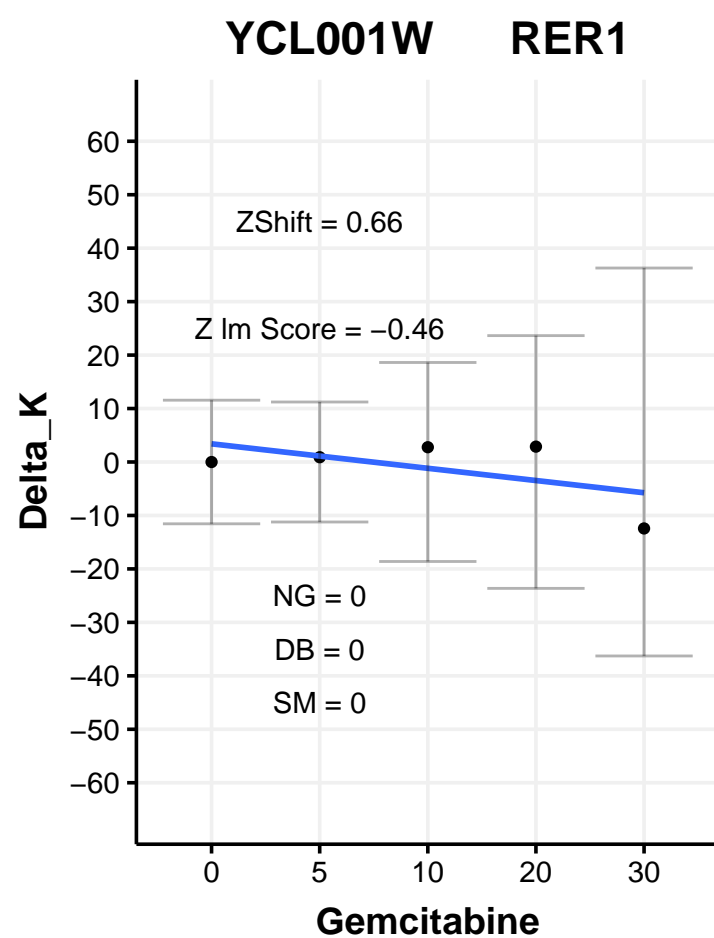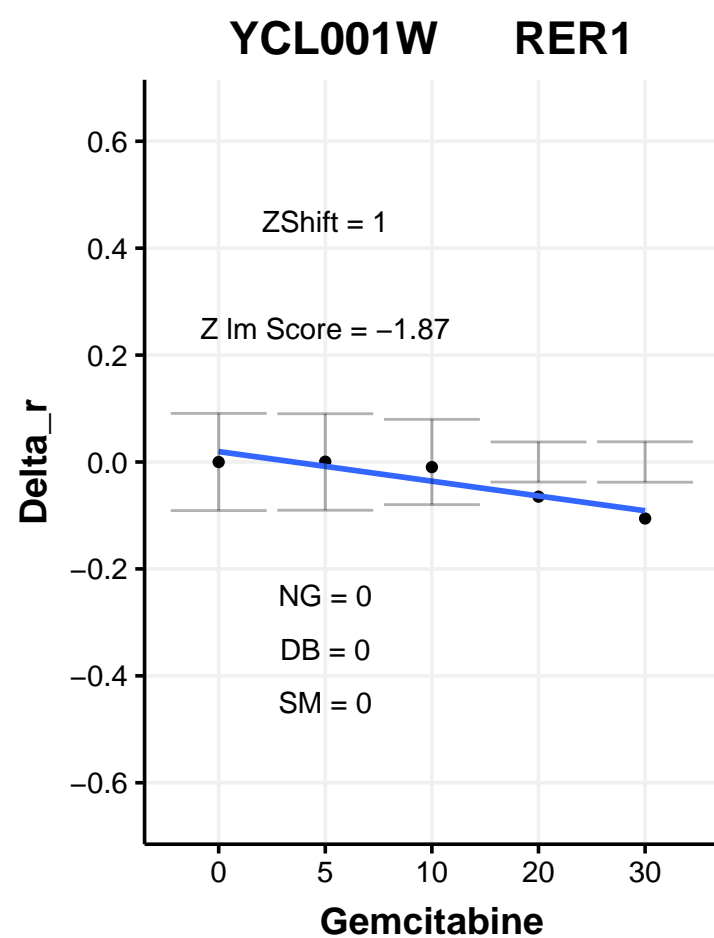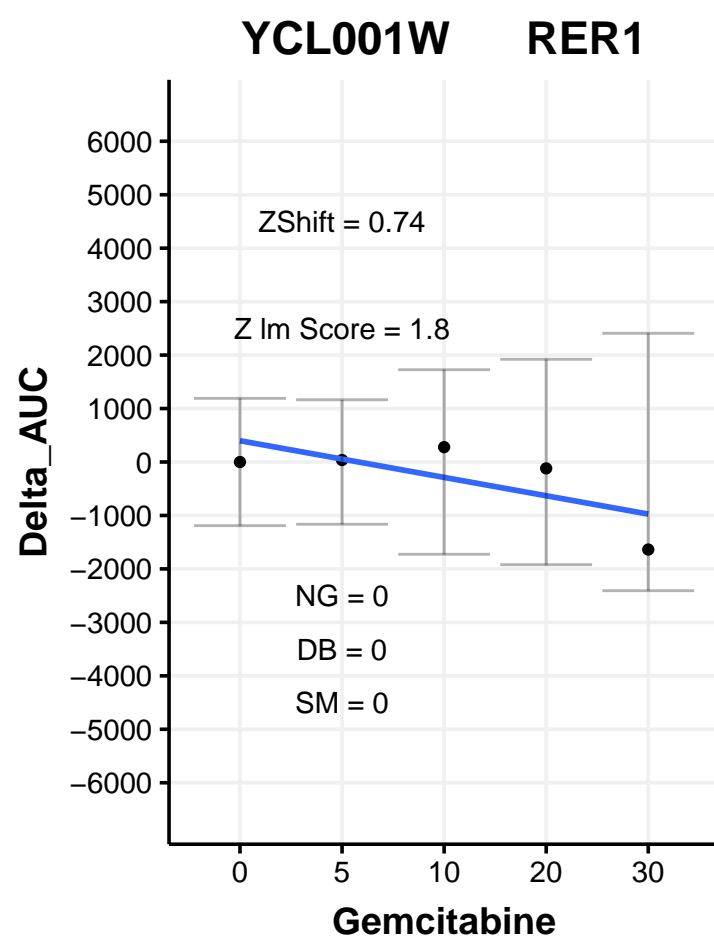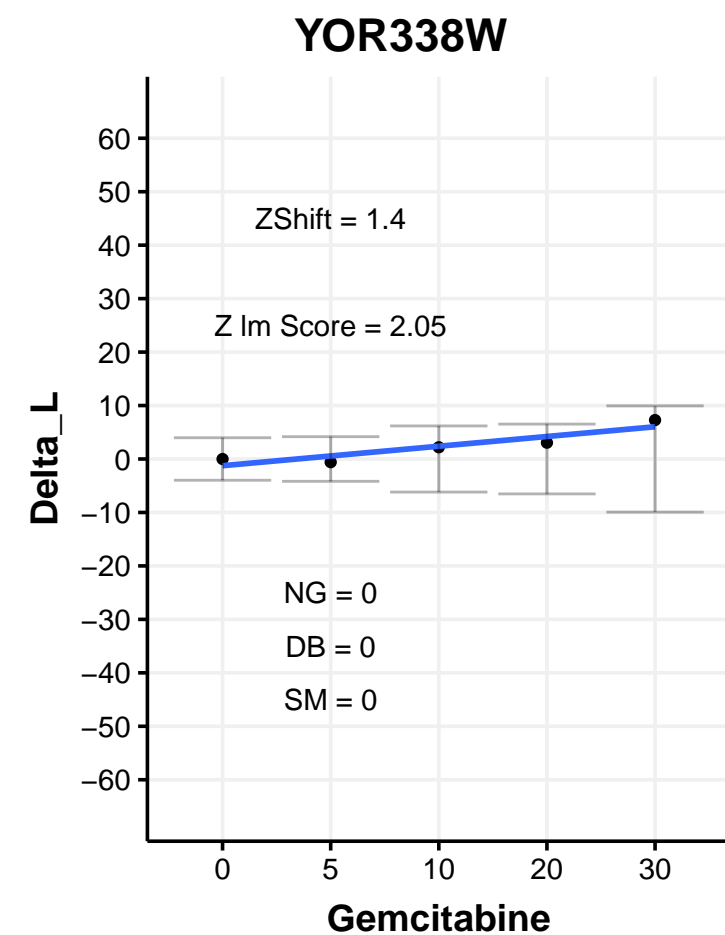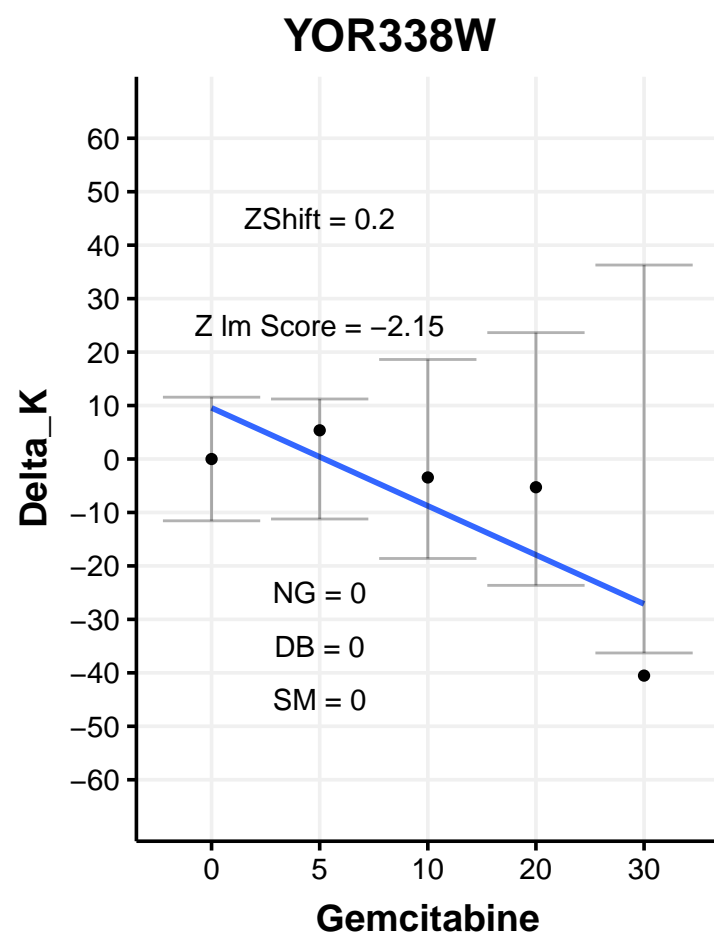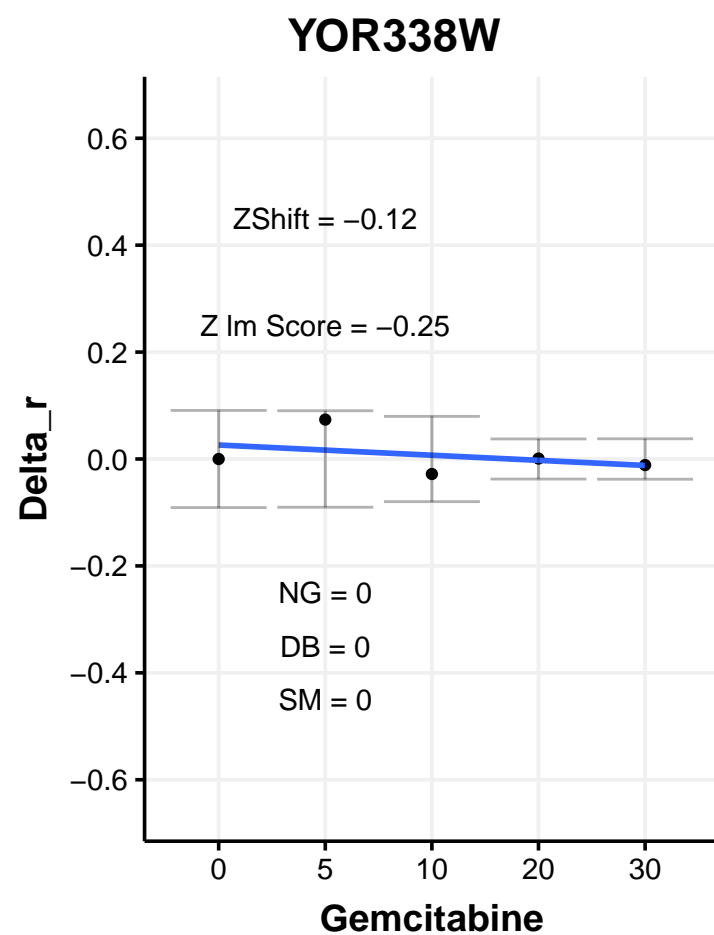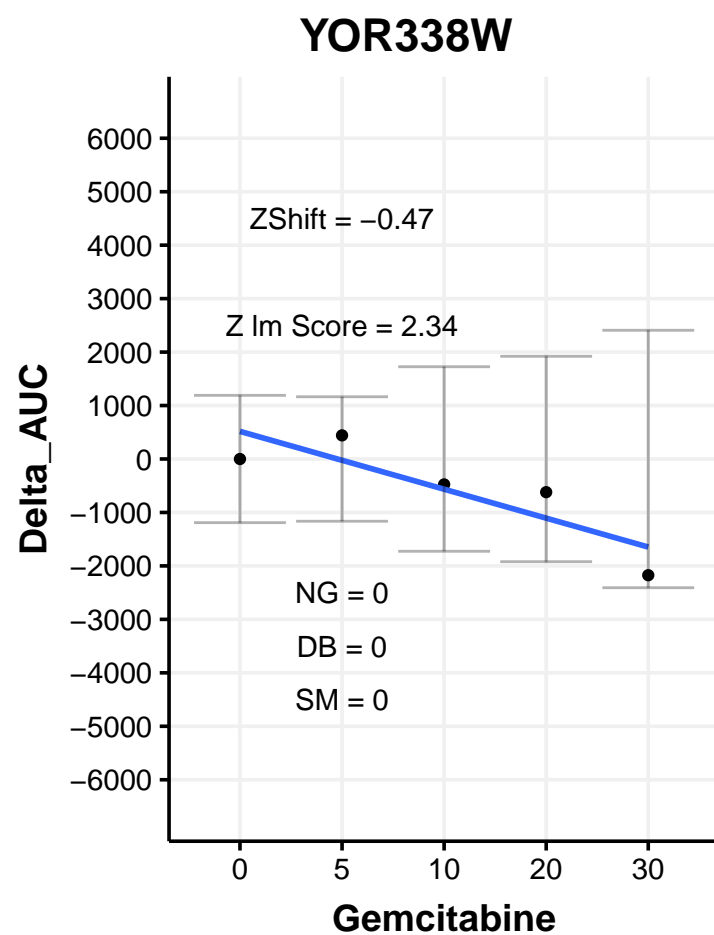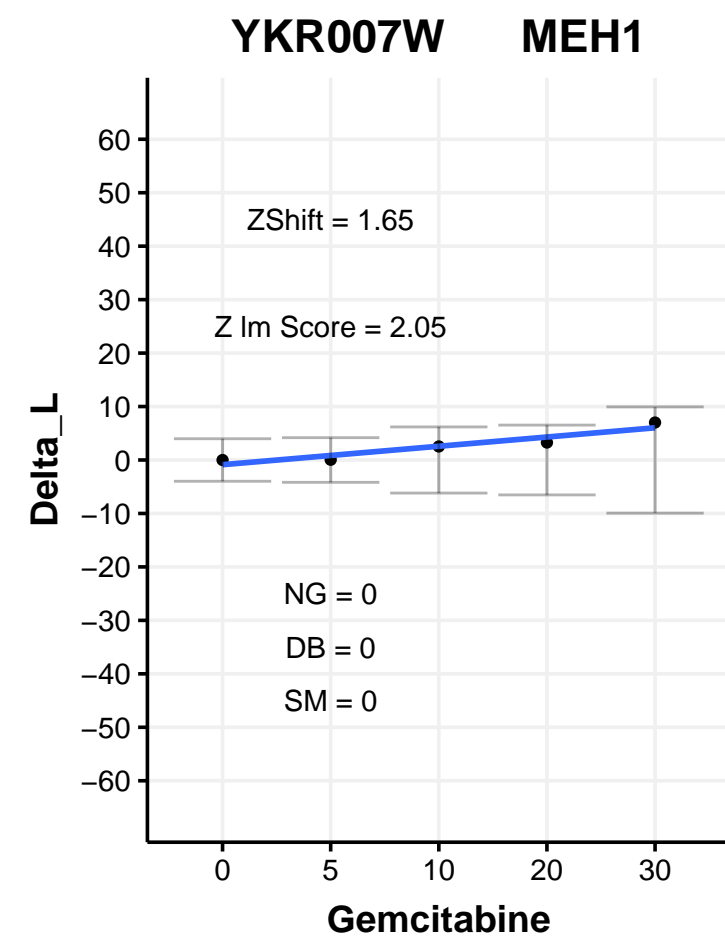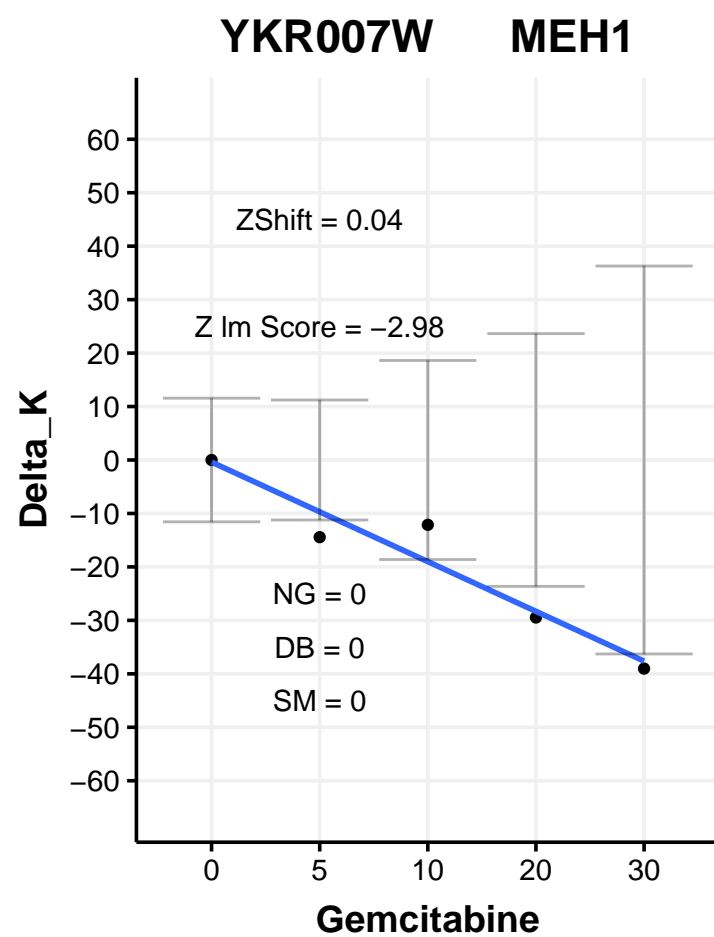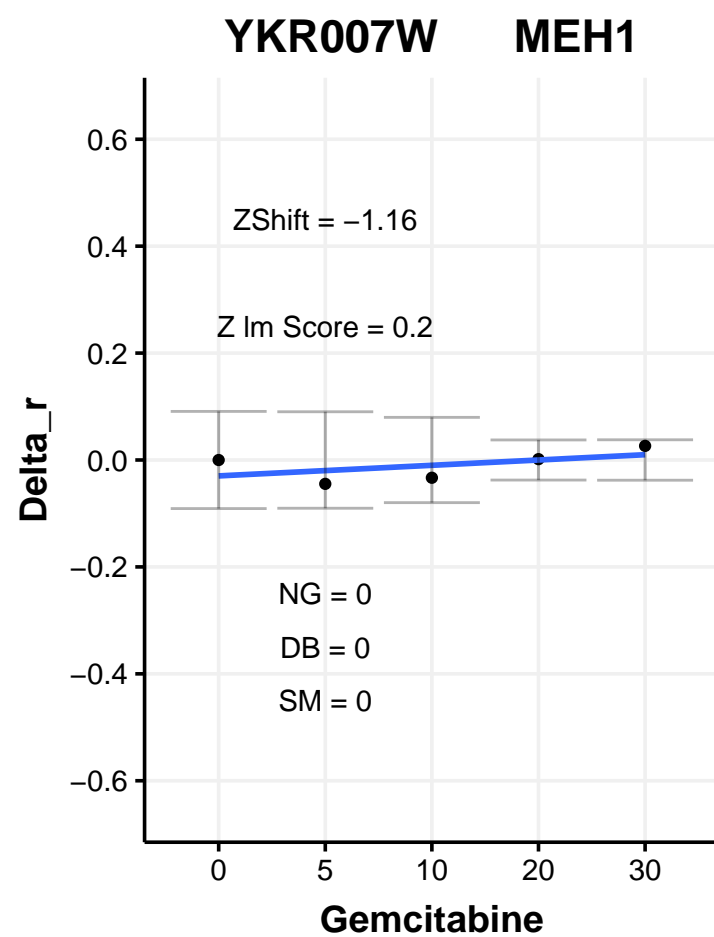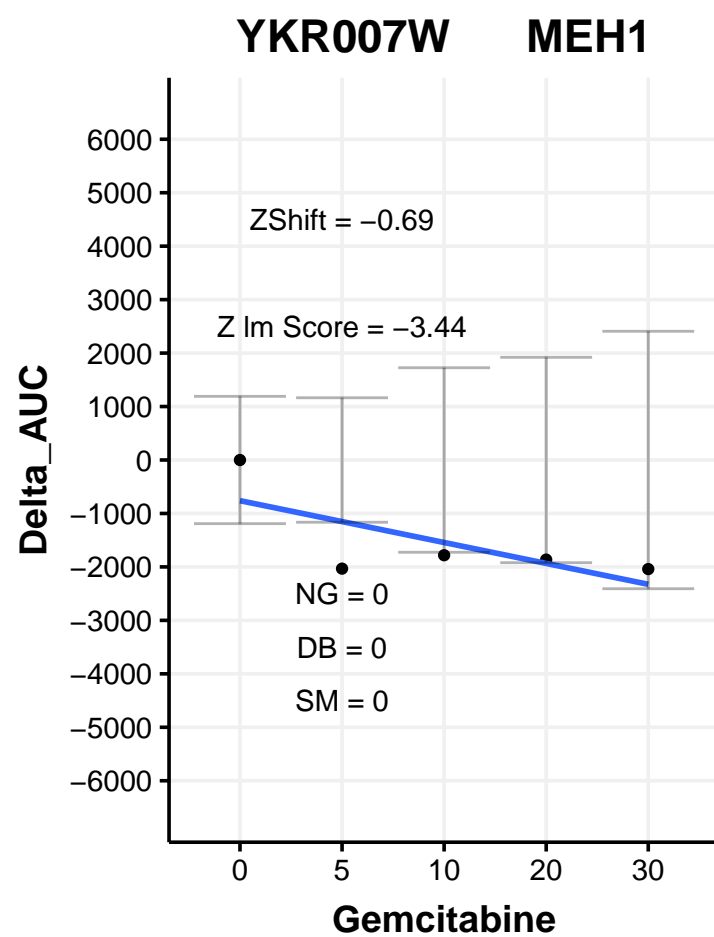

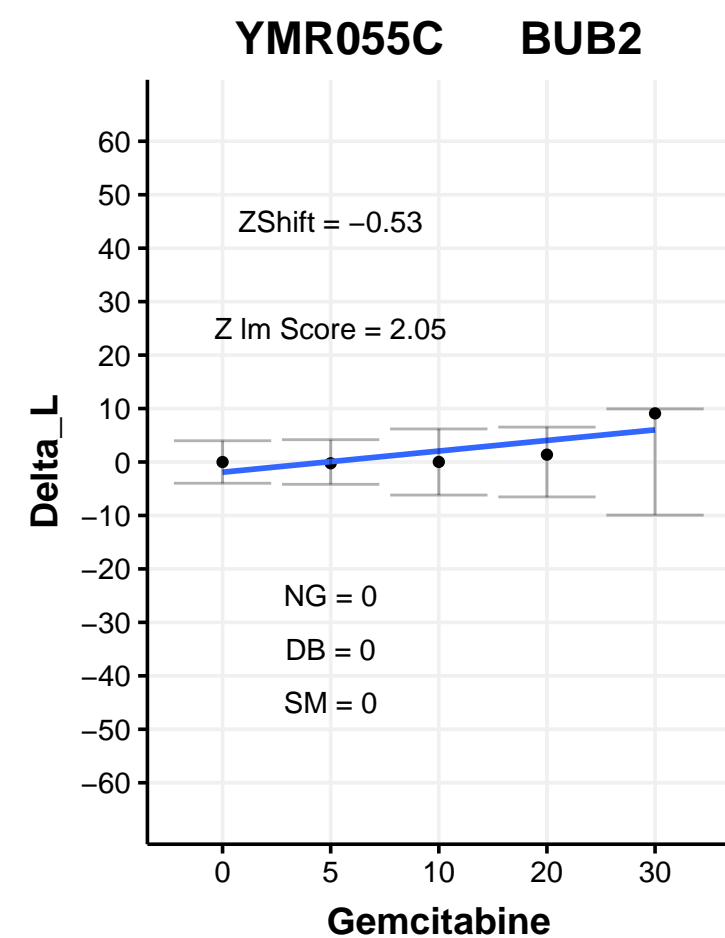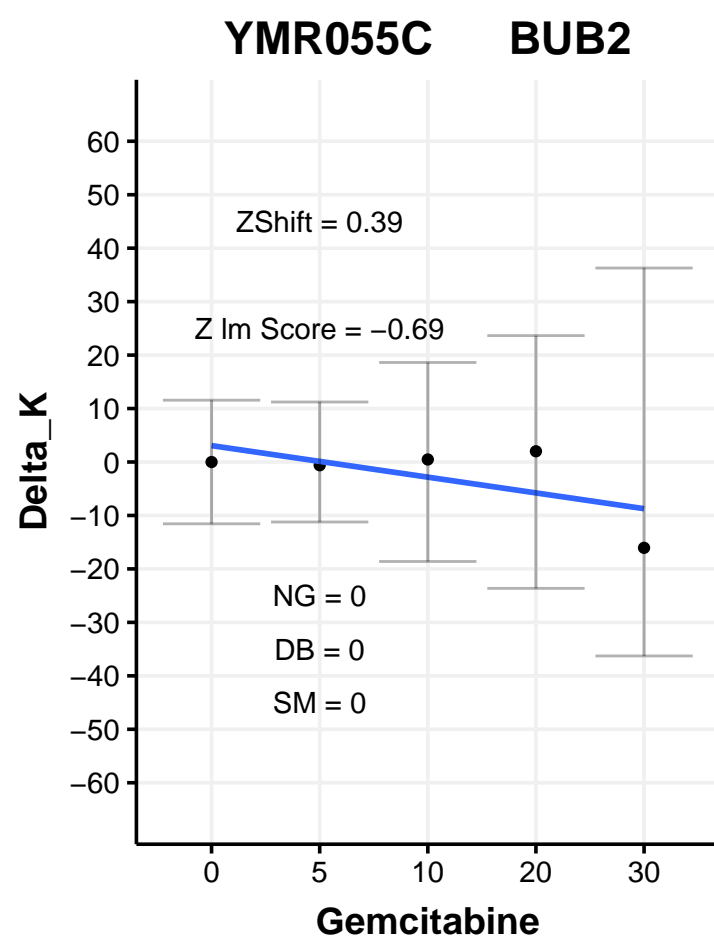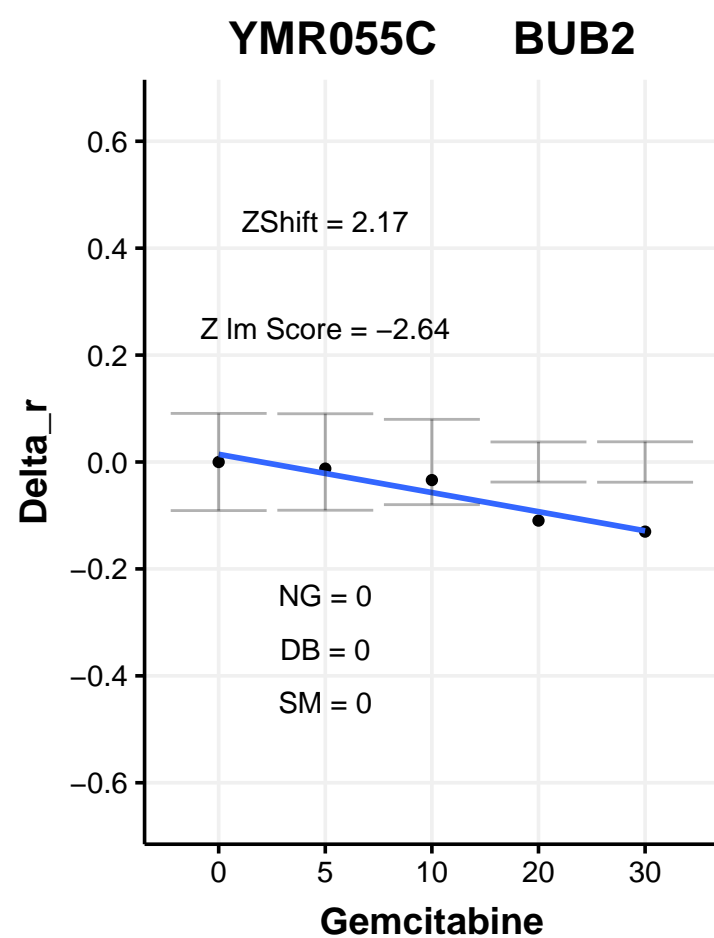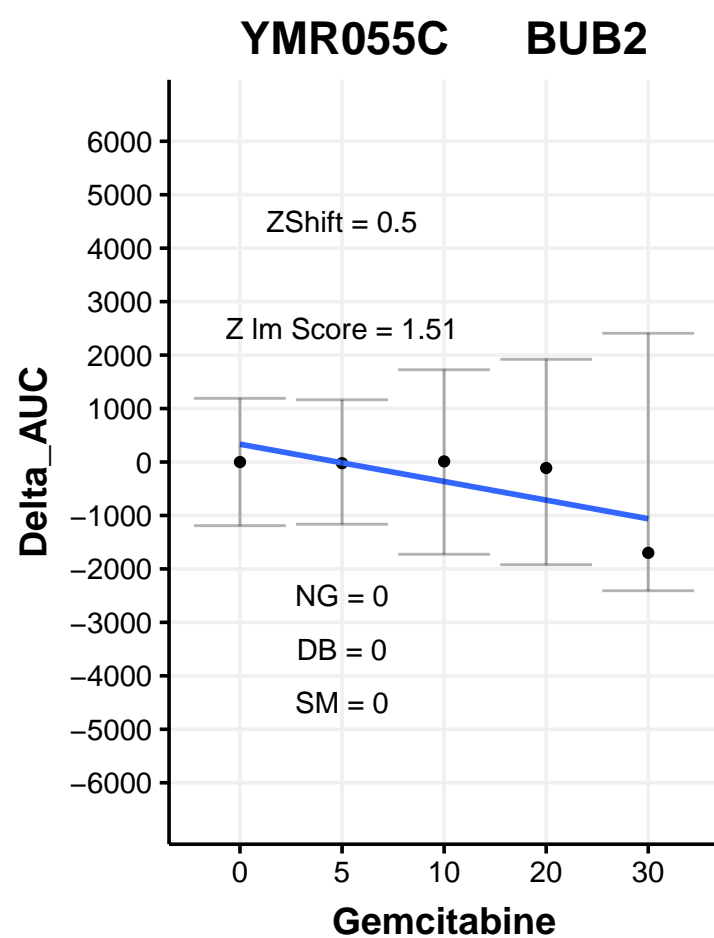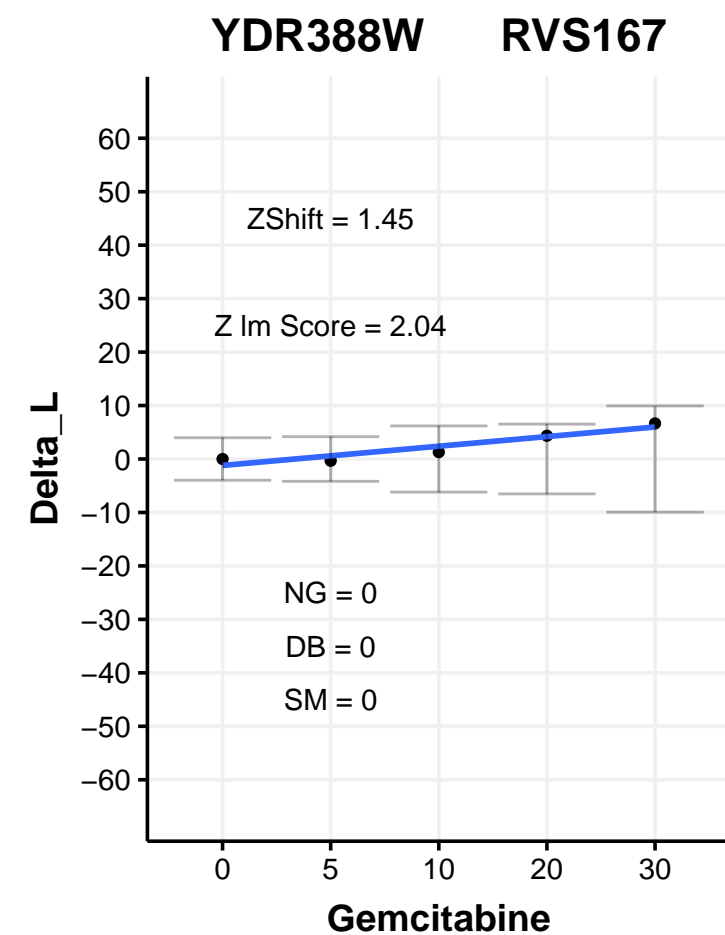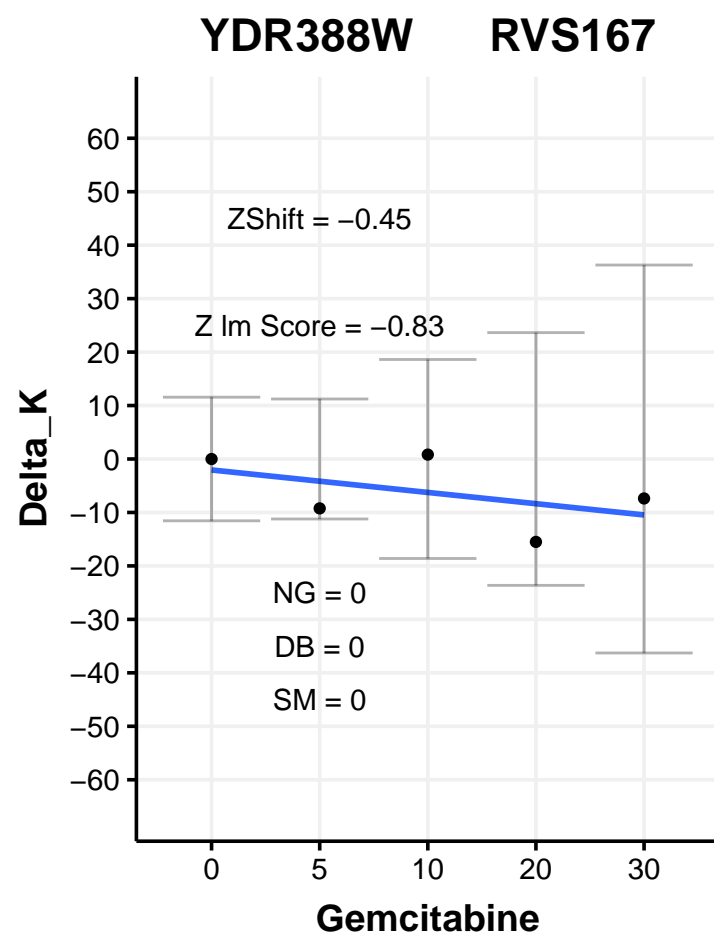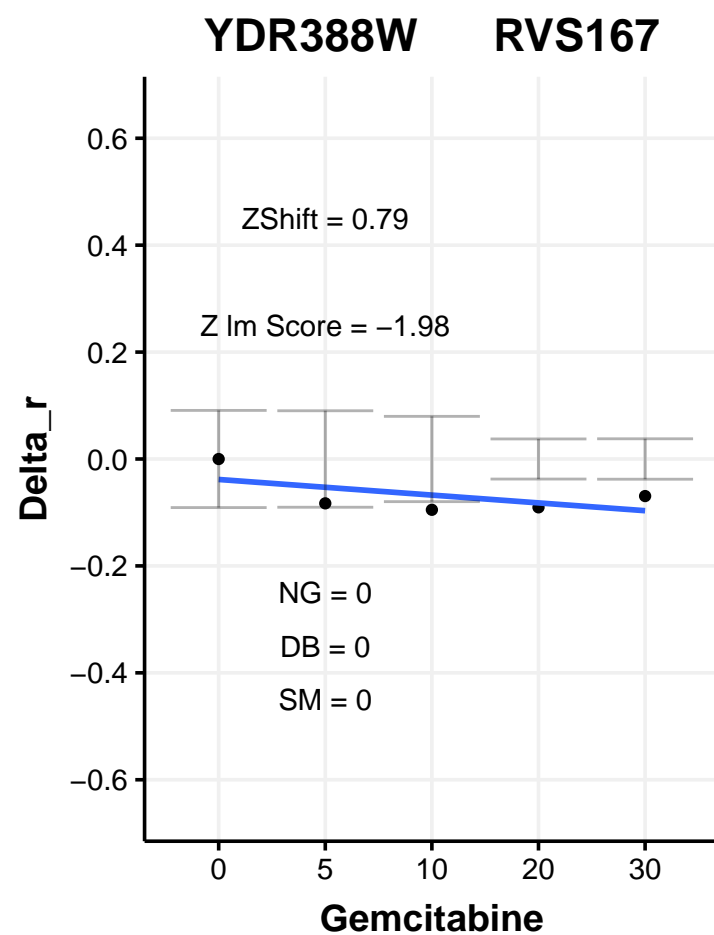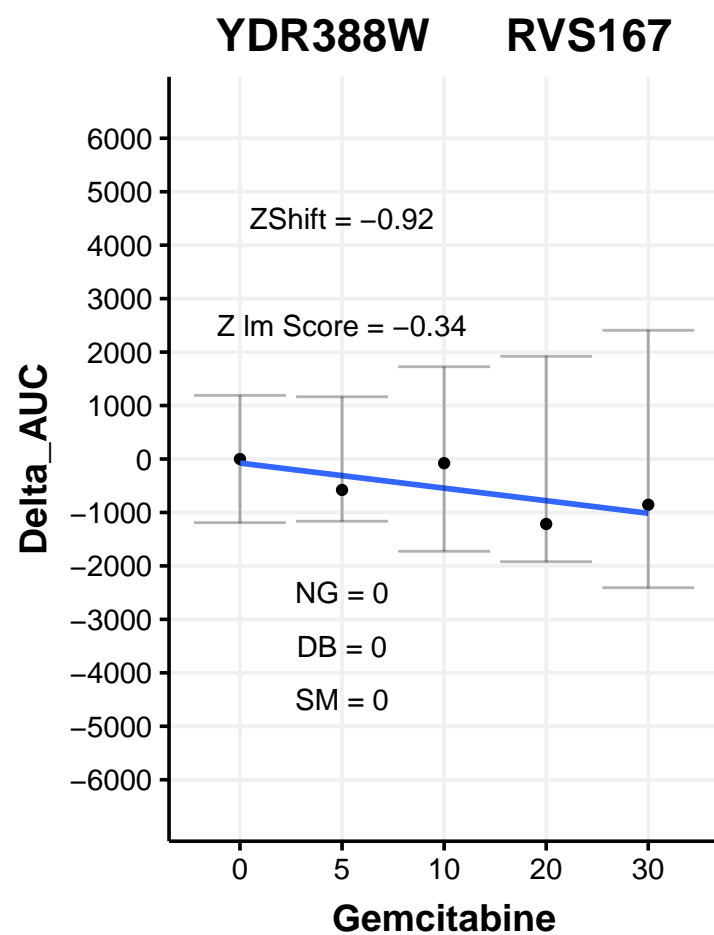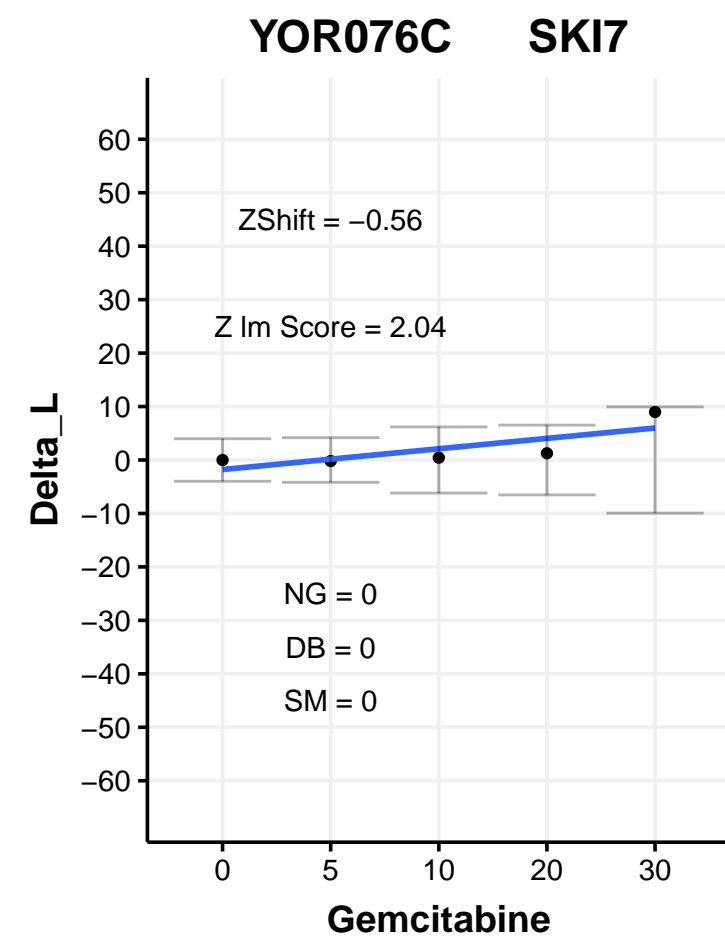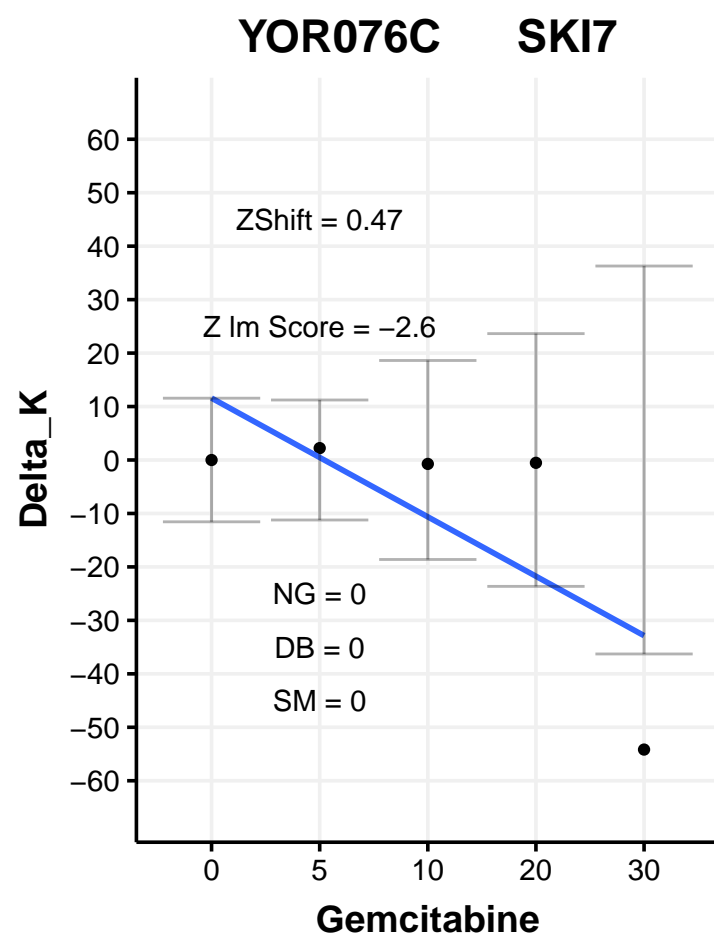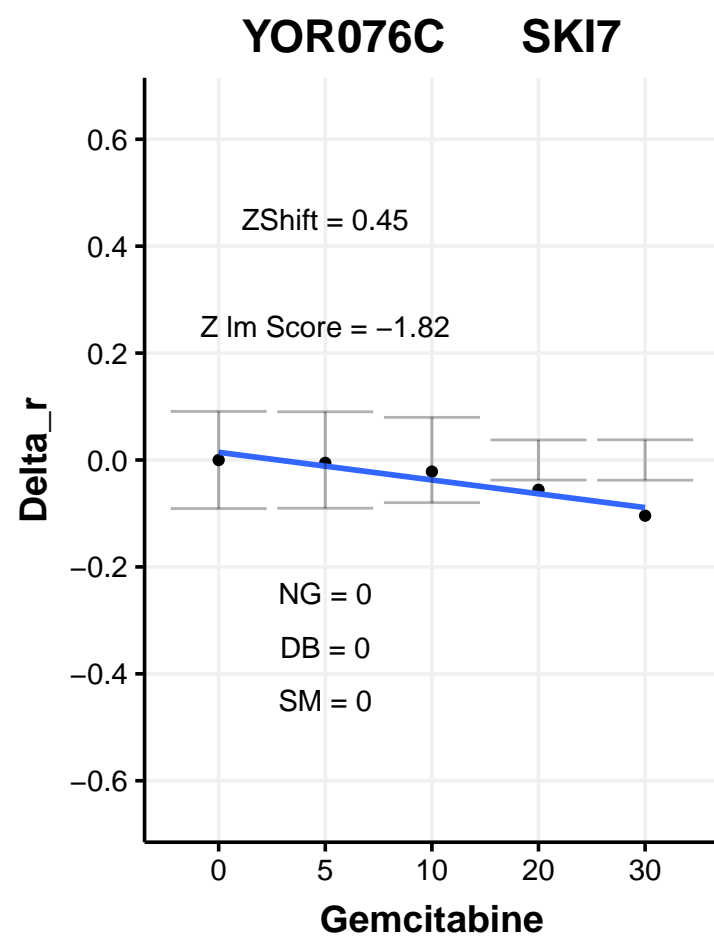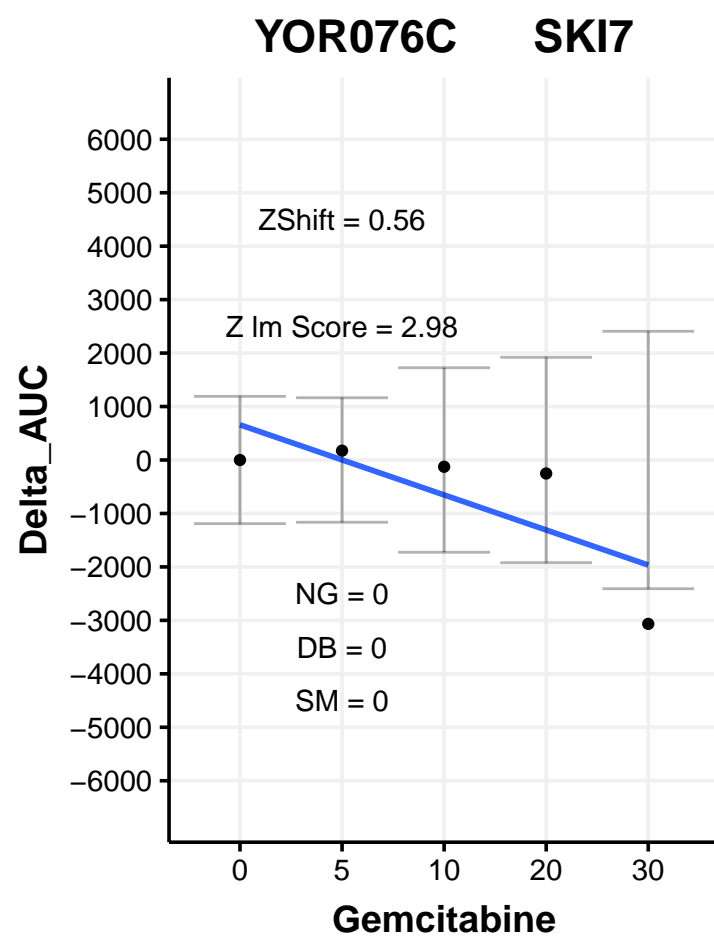

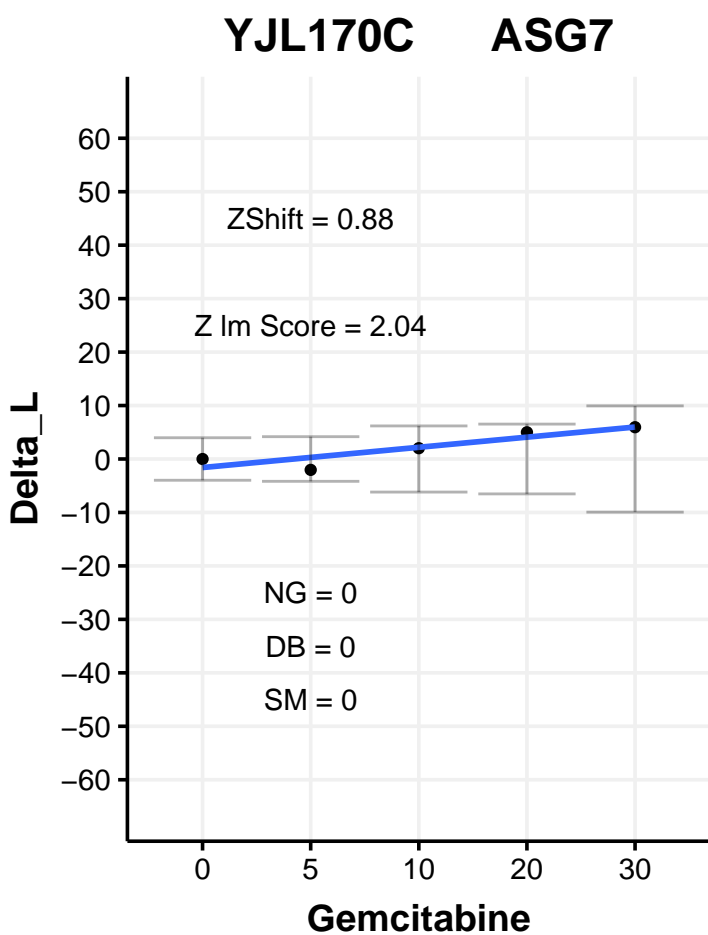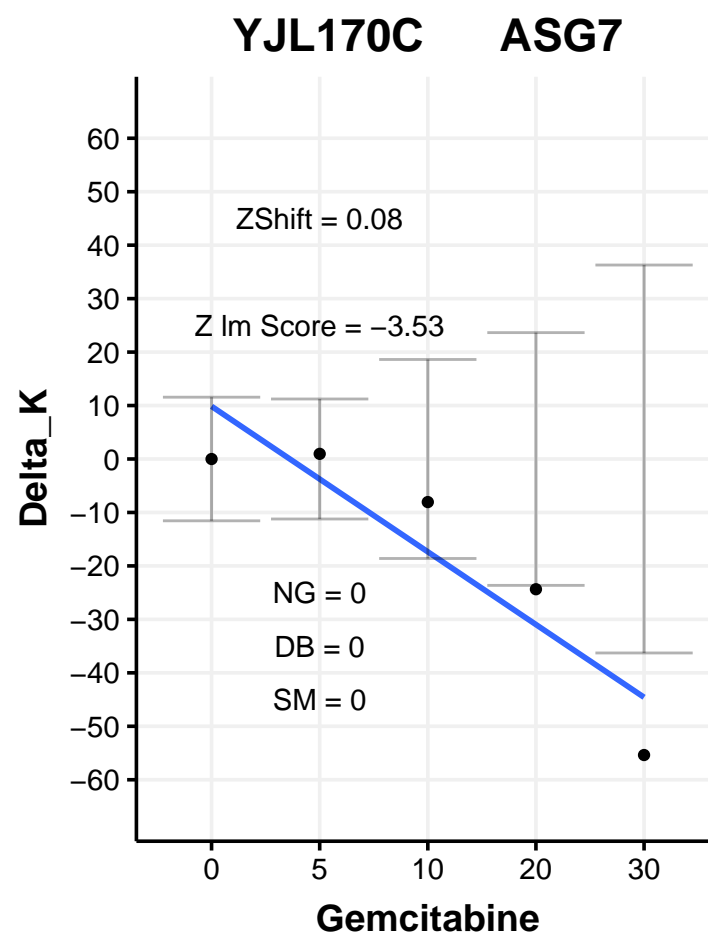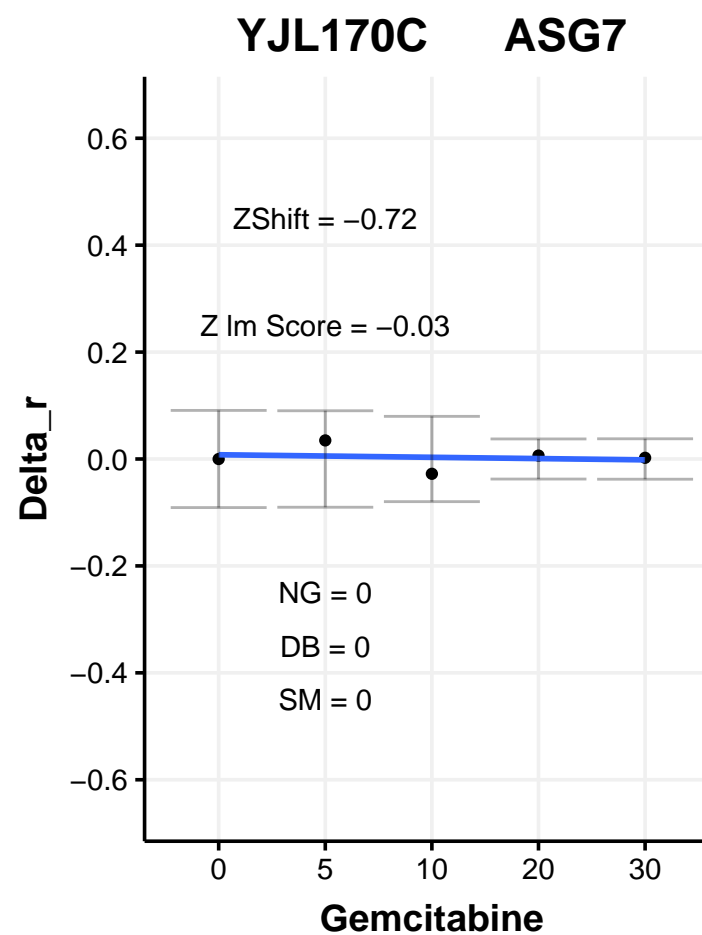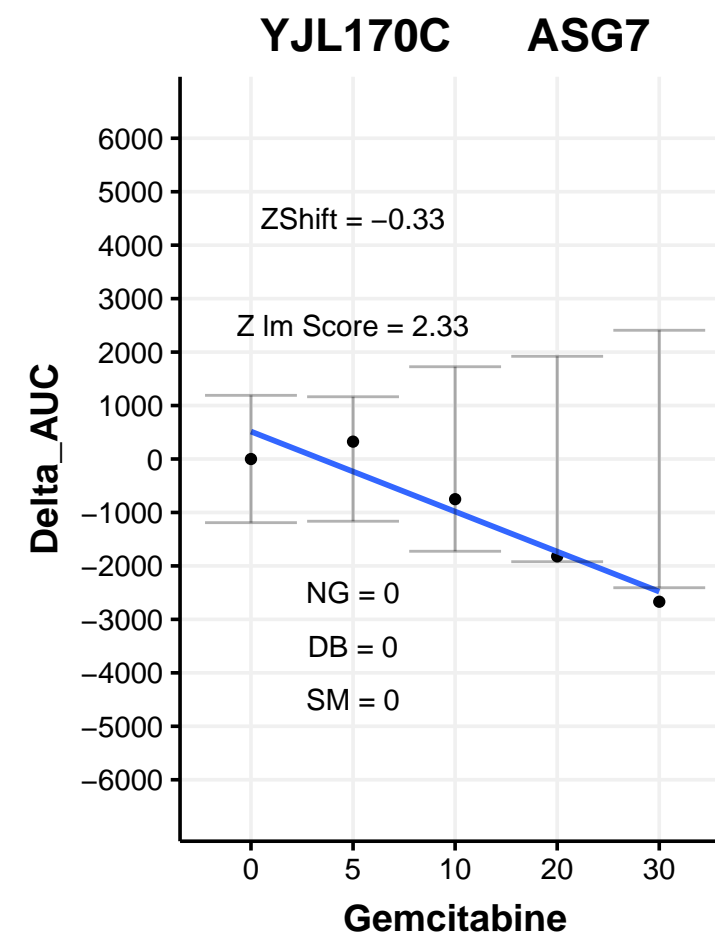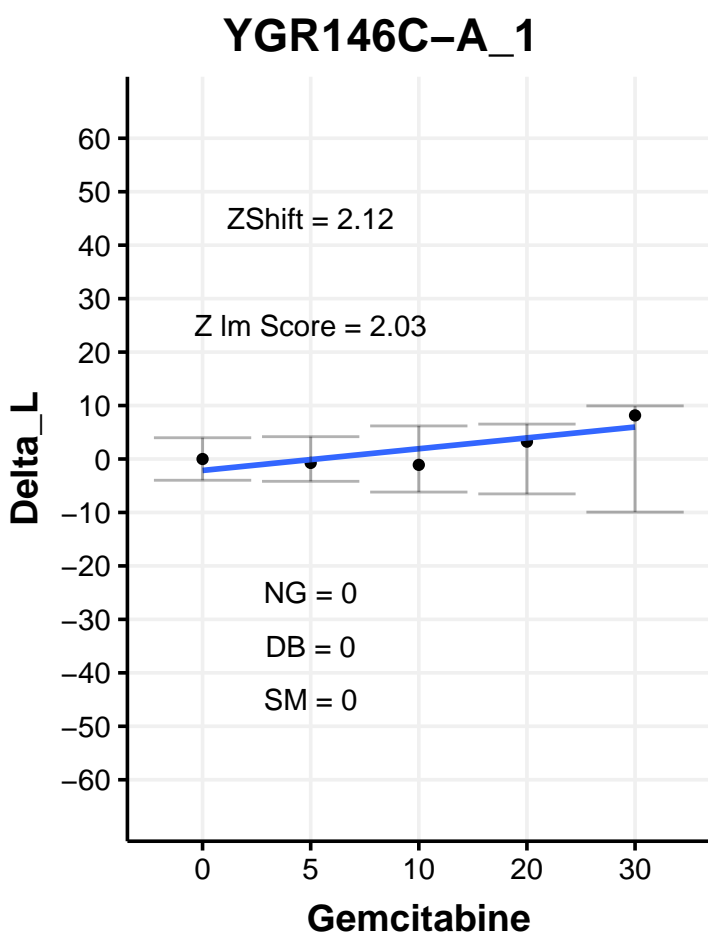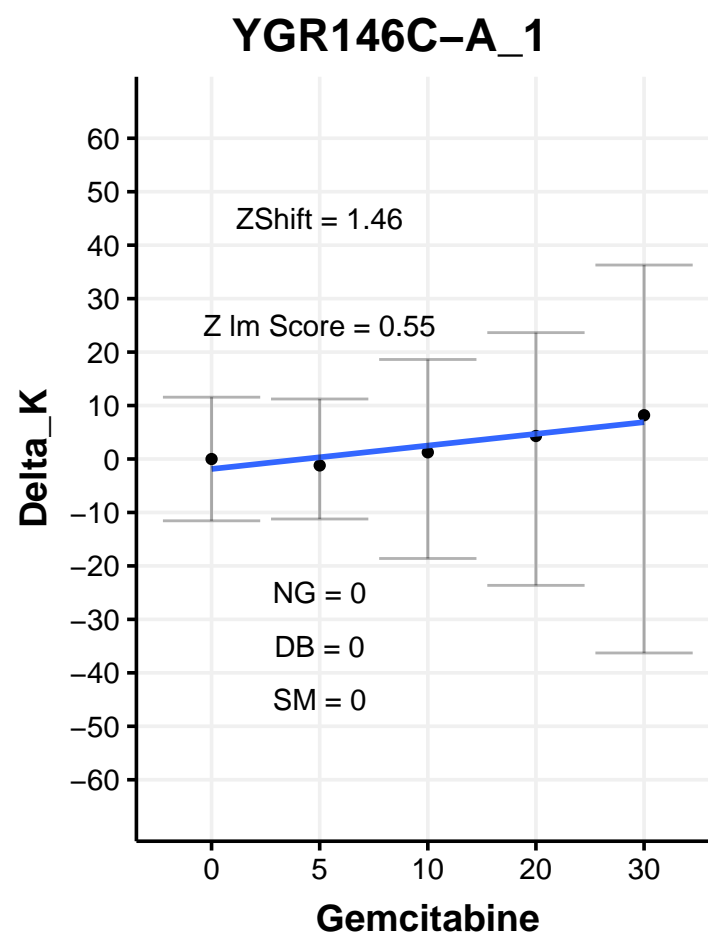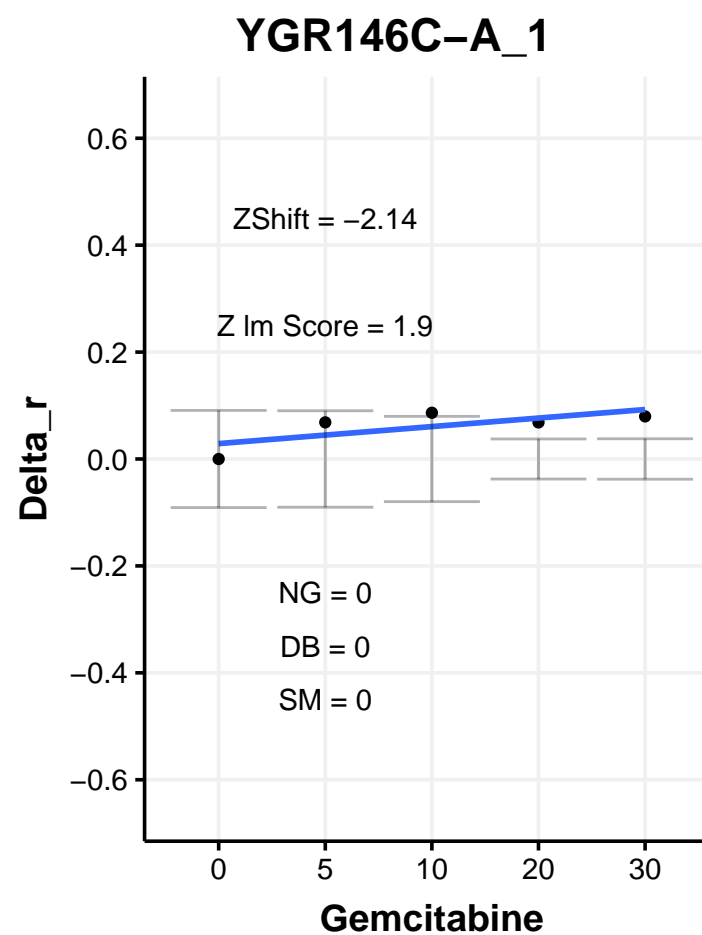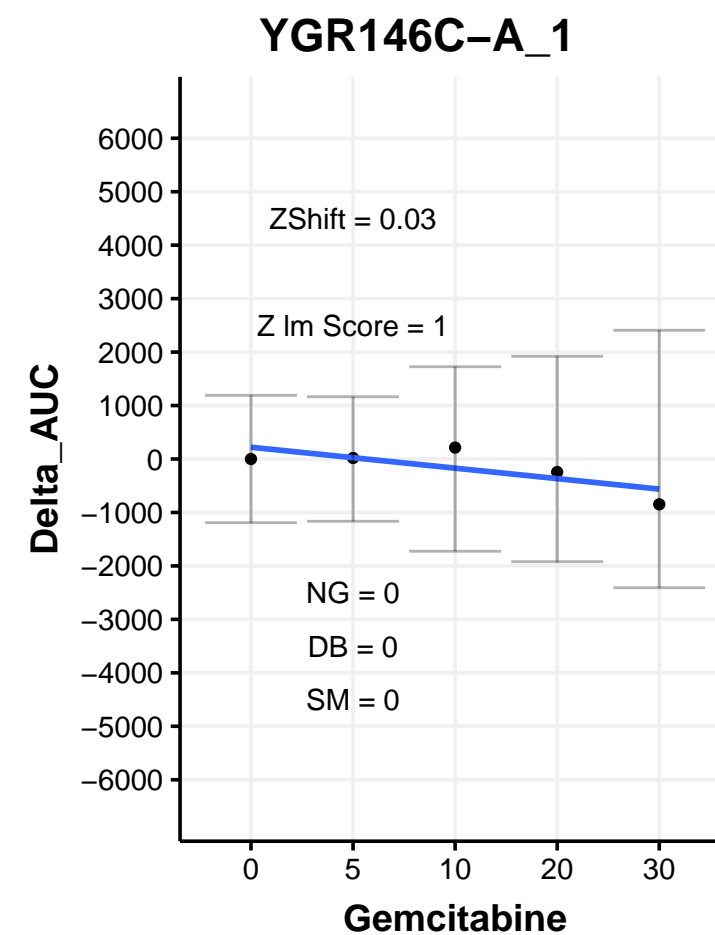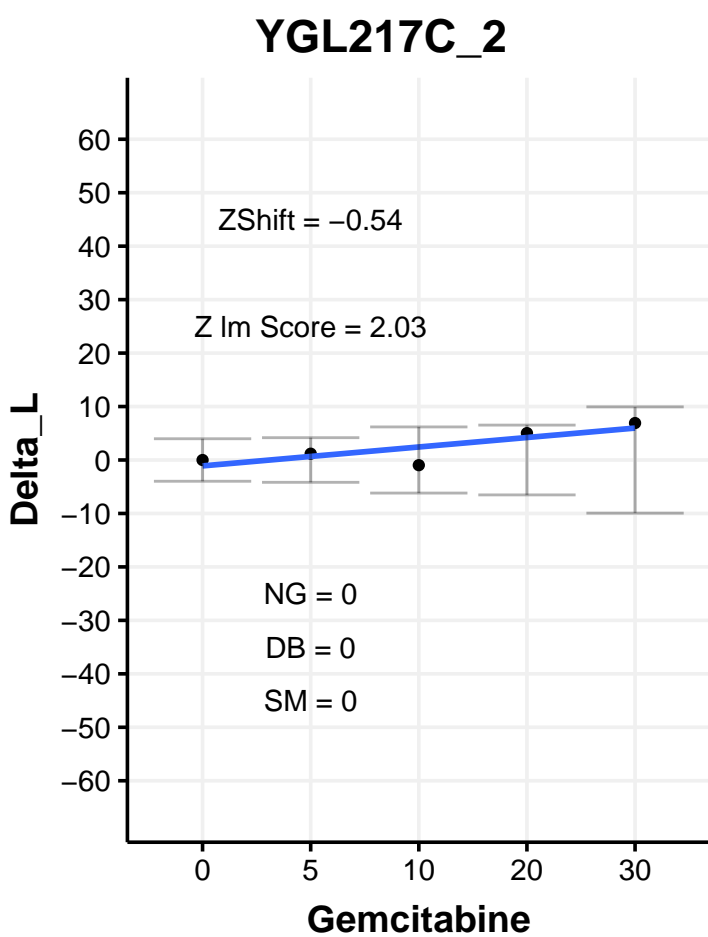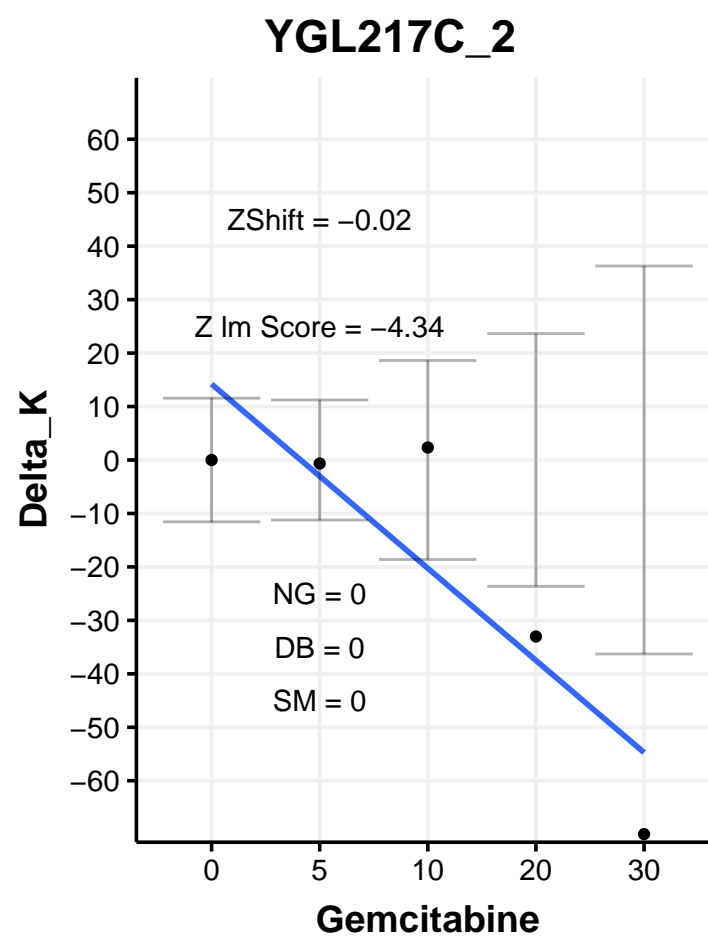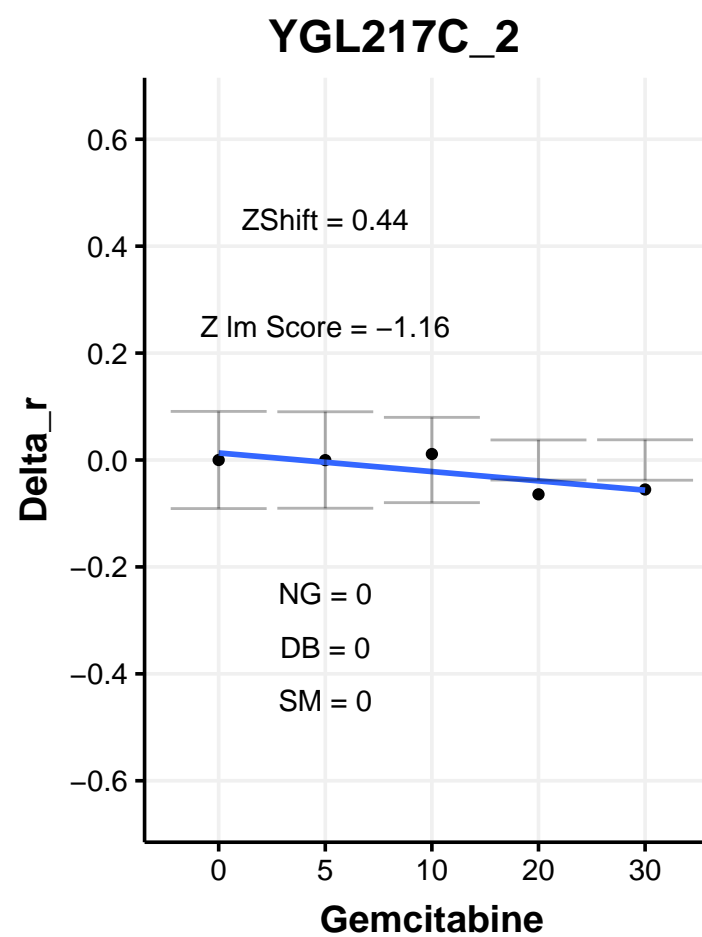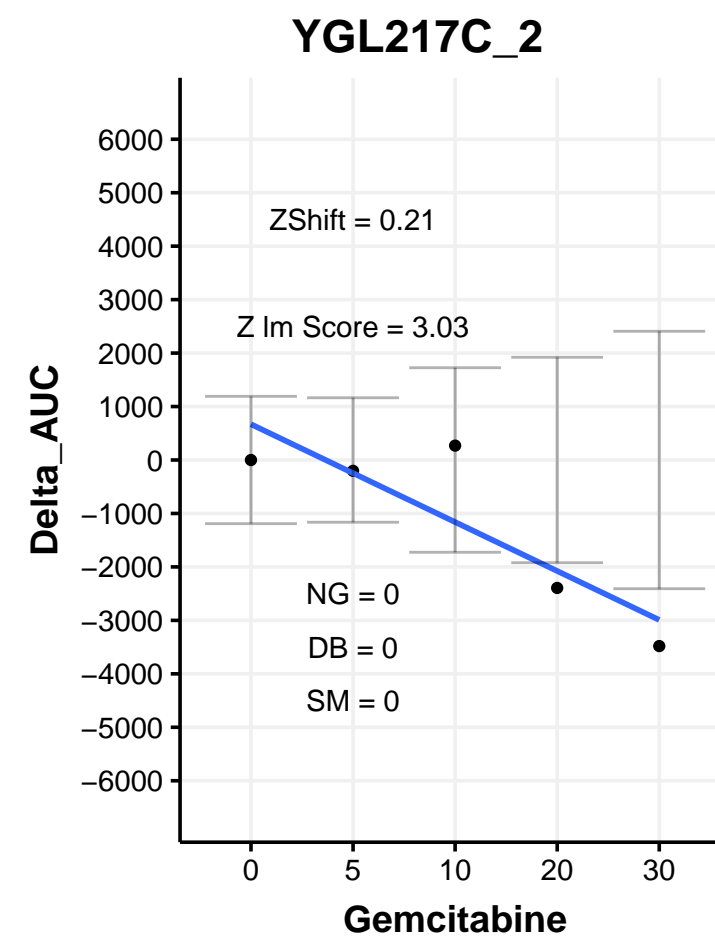

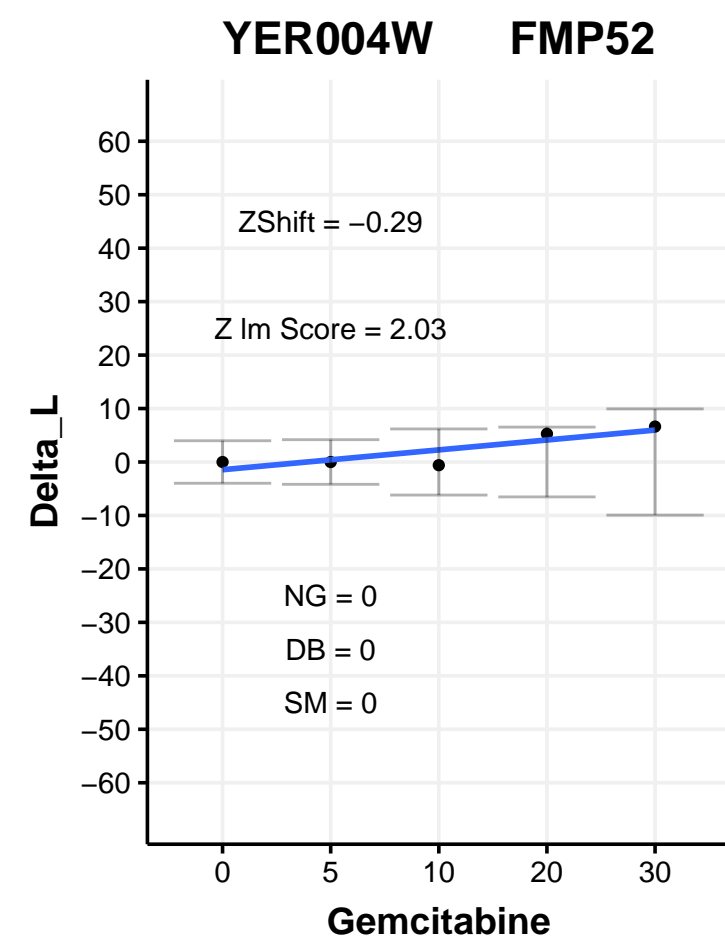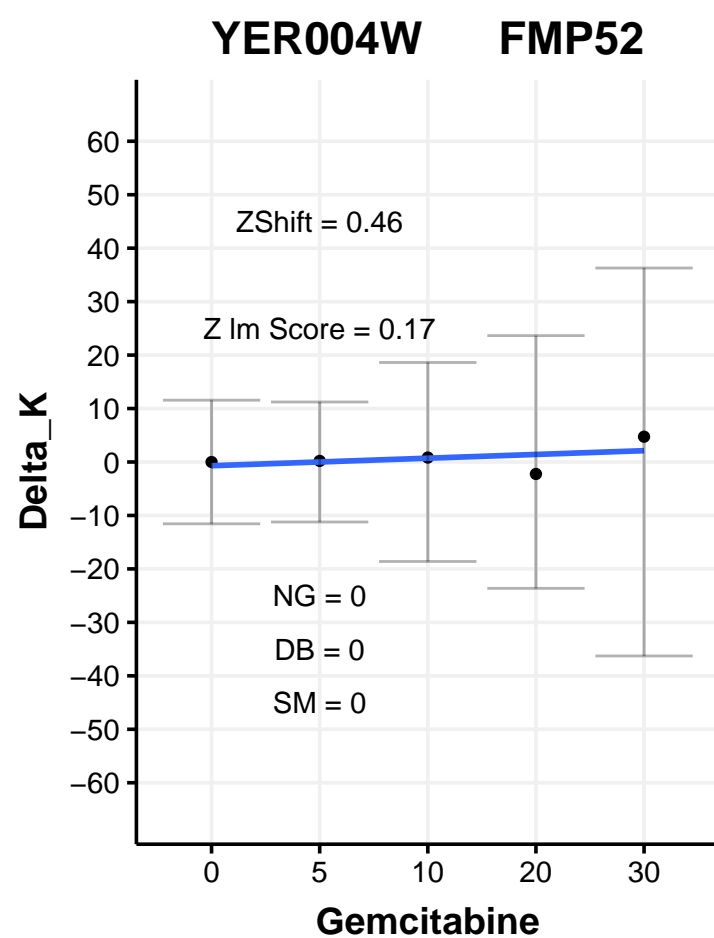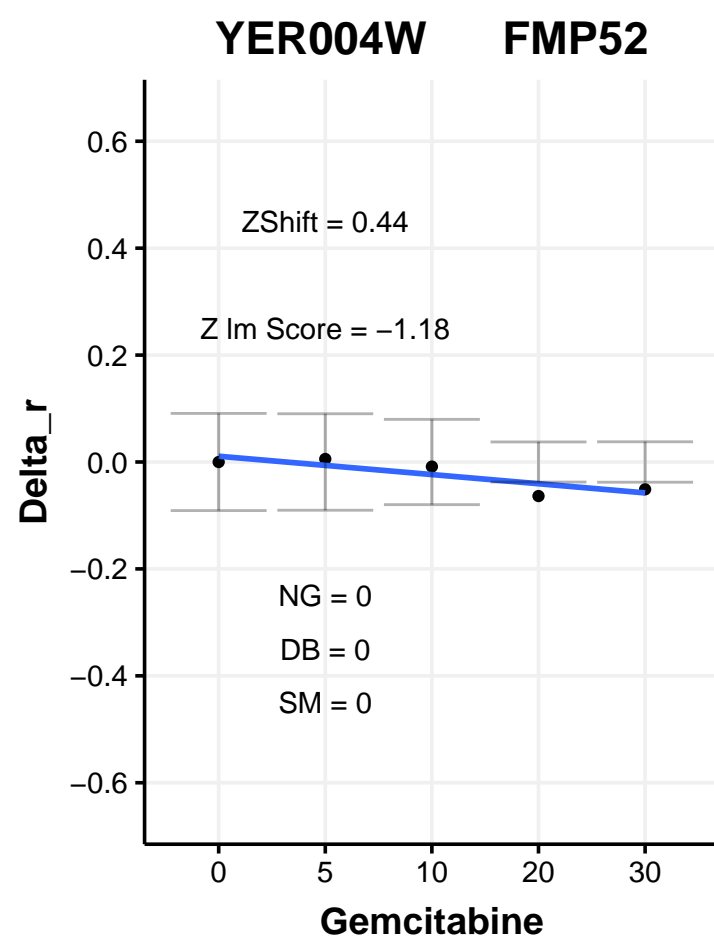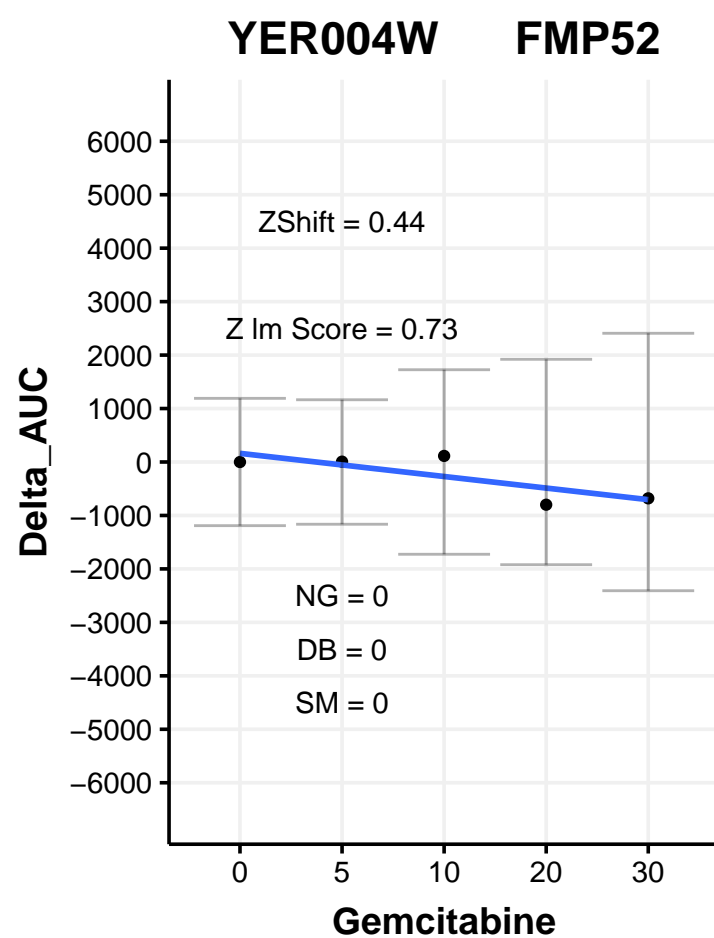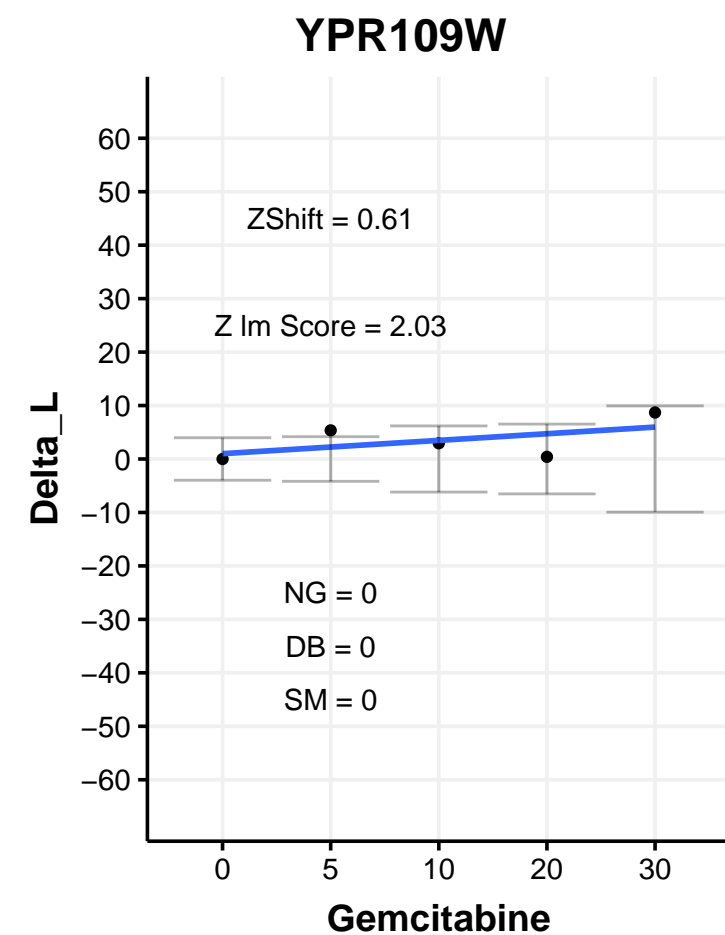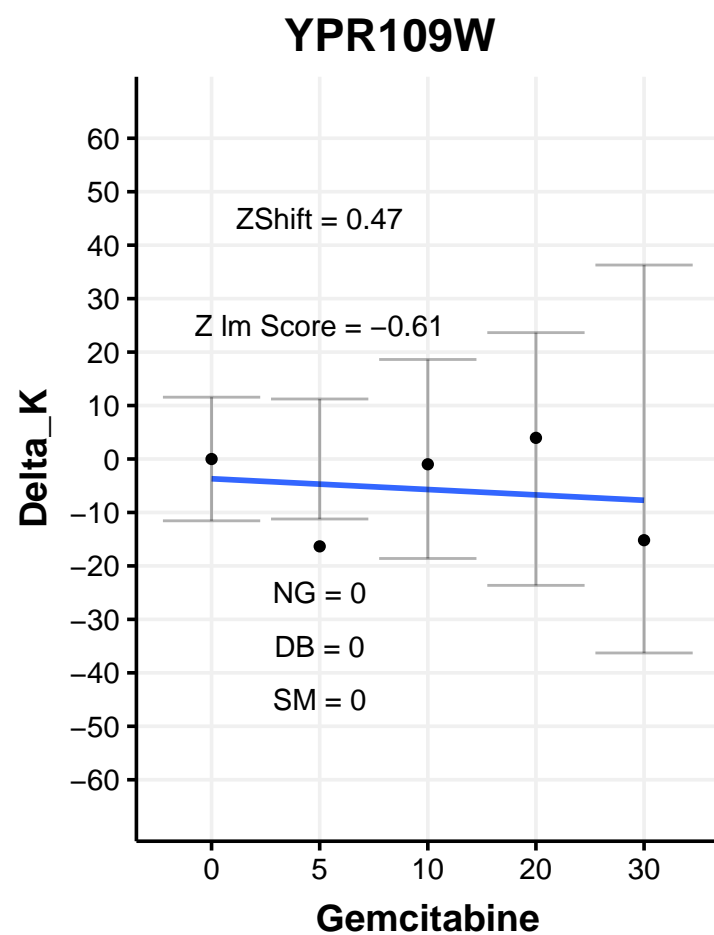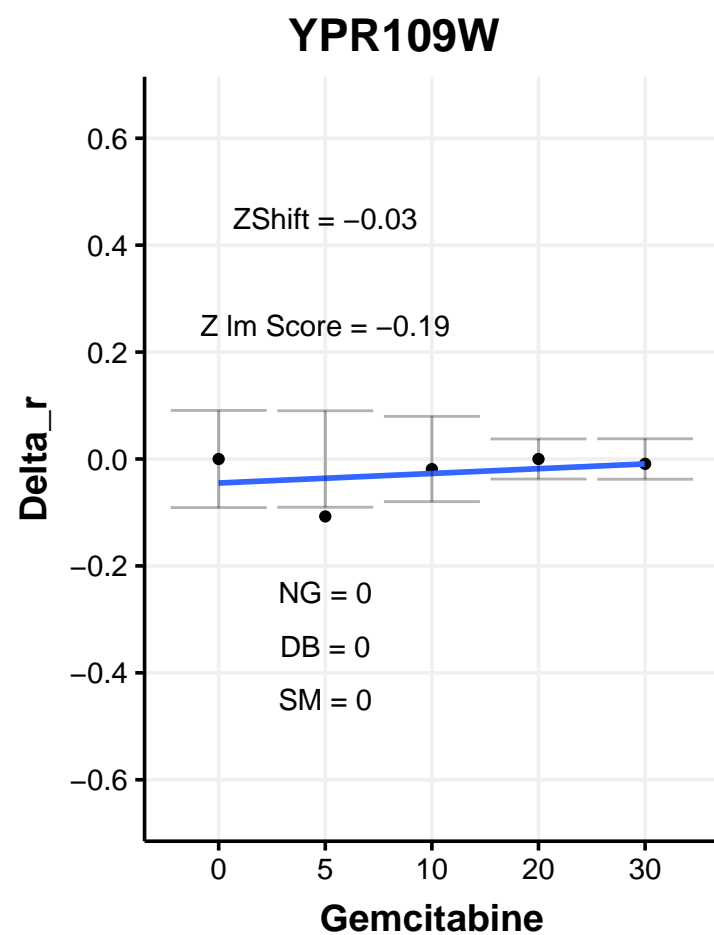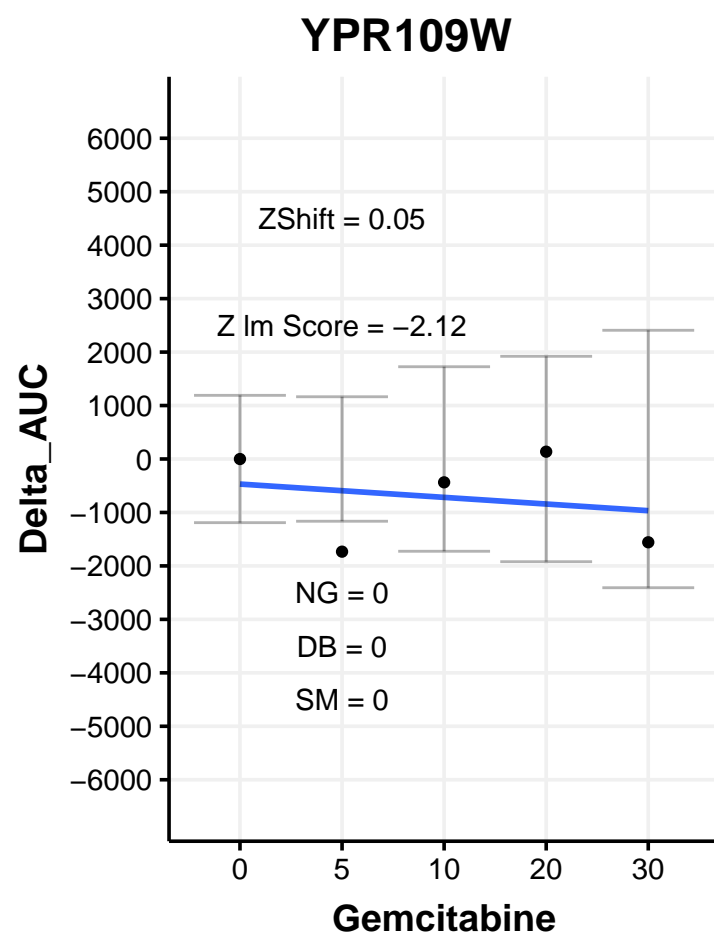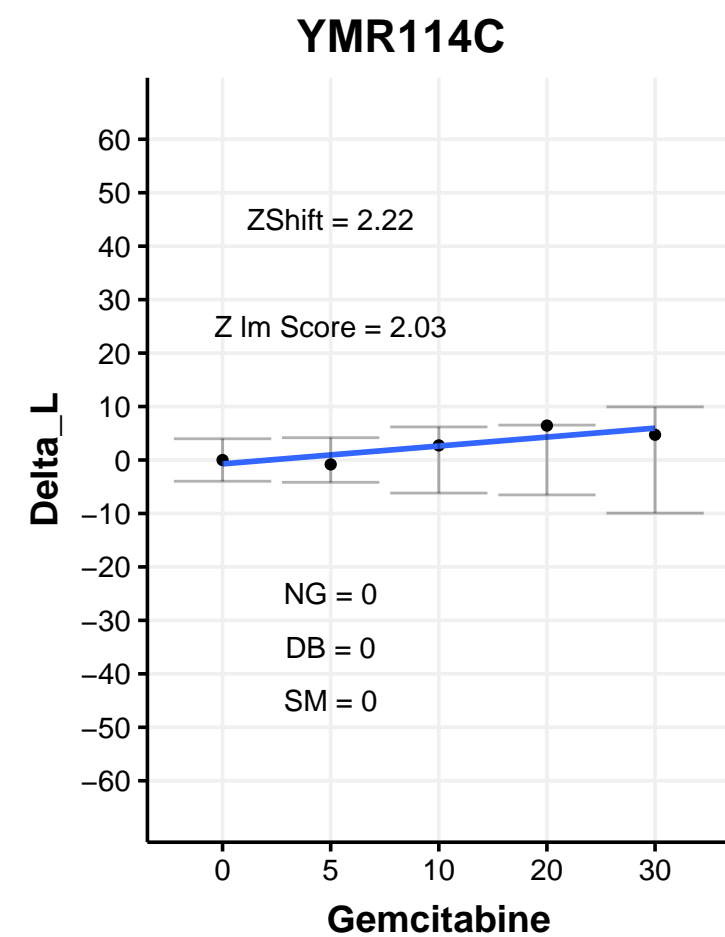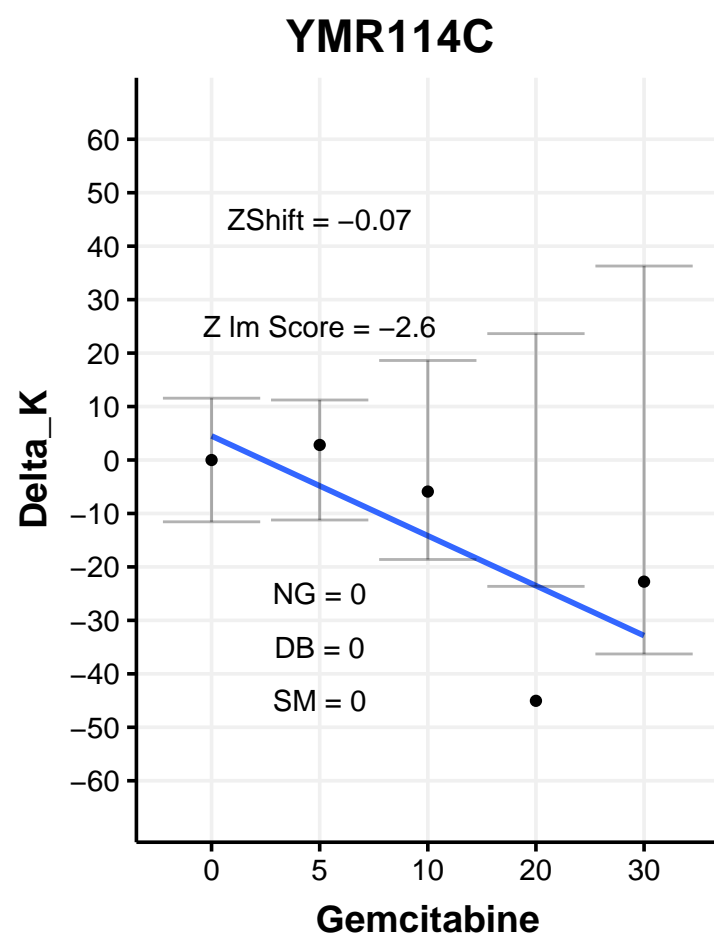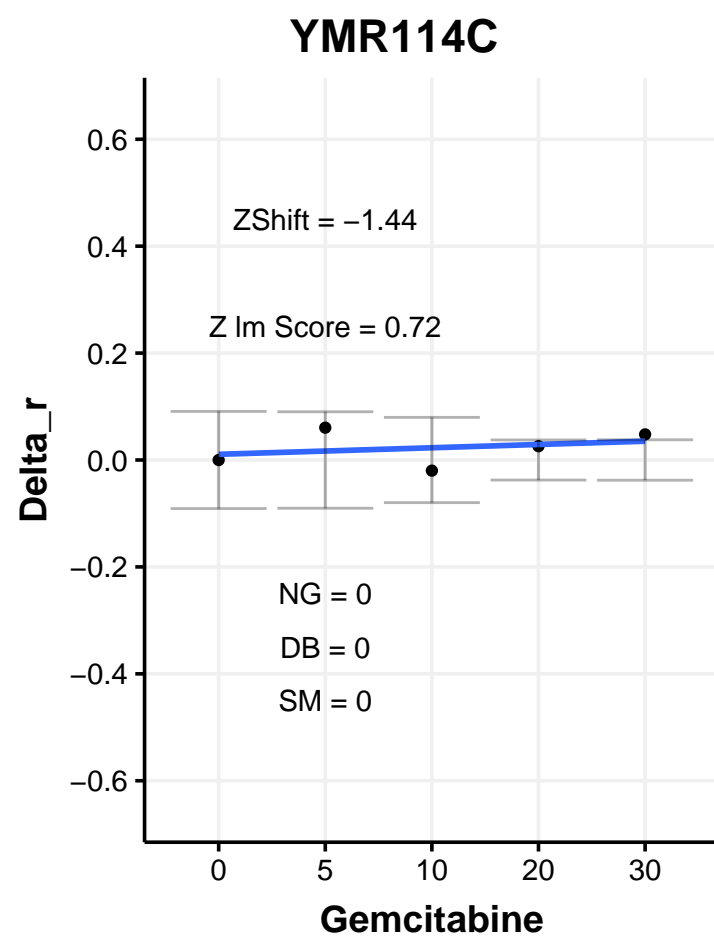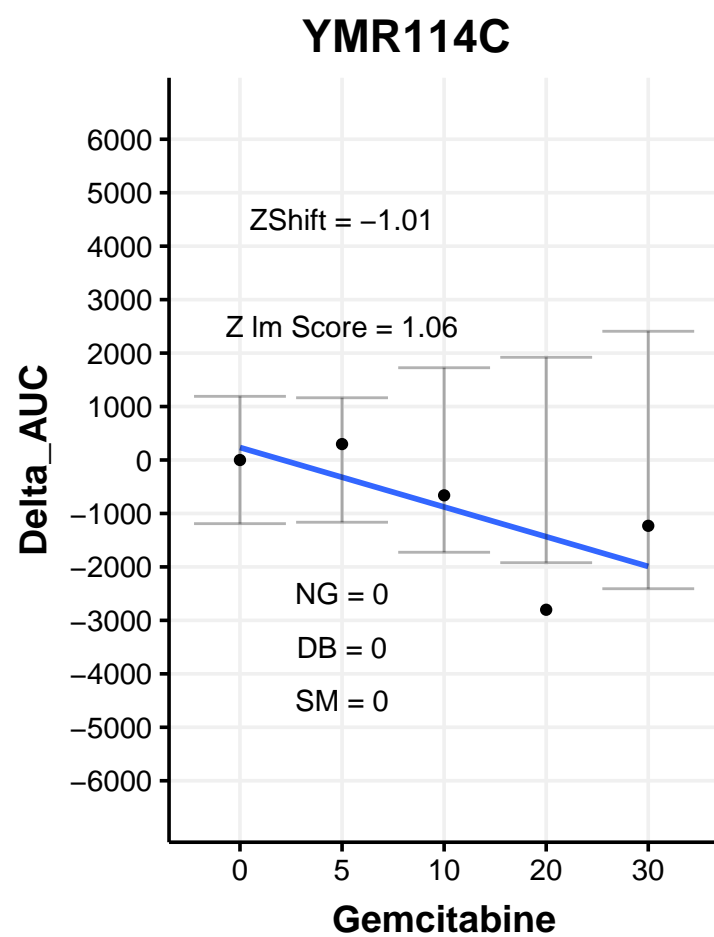

YML100W-A

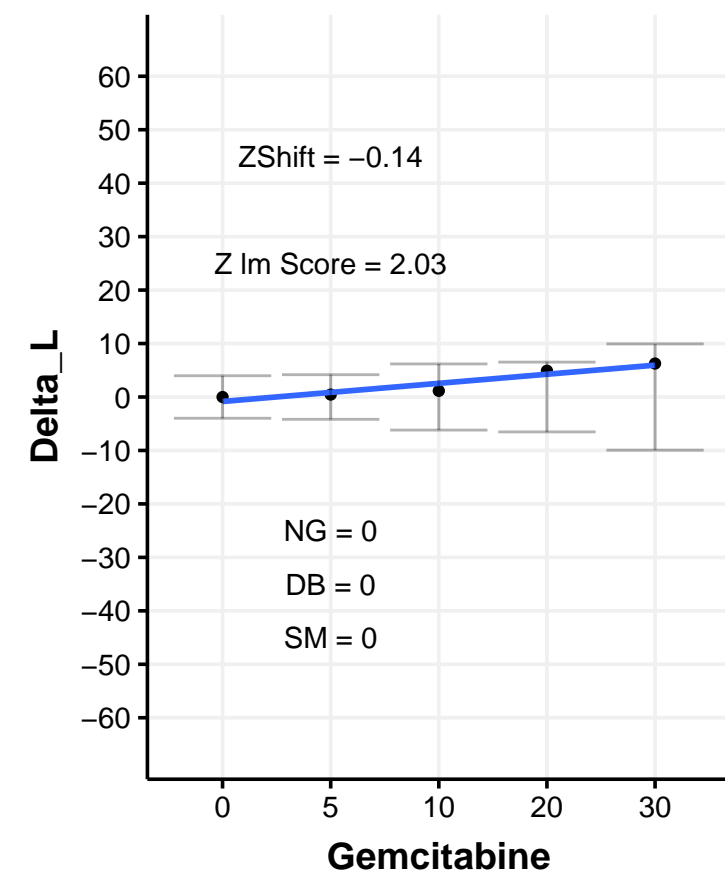

YML100W-A

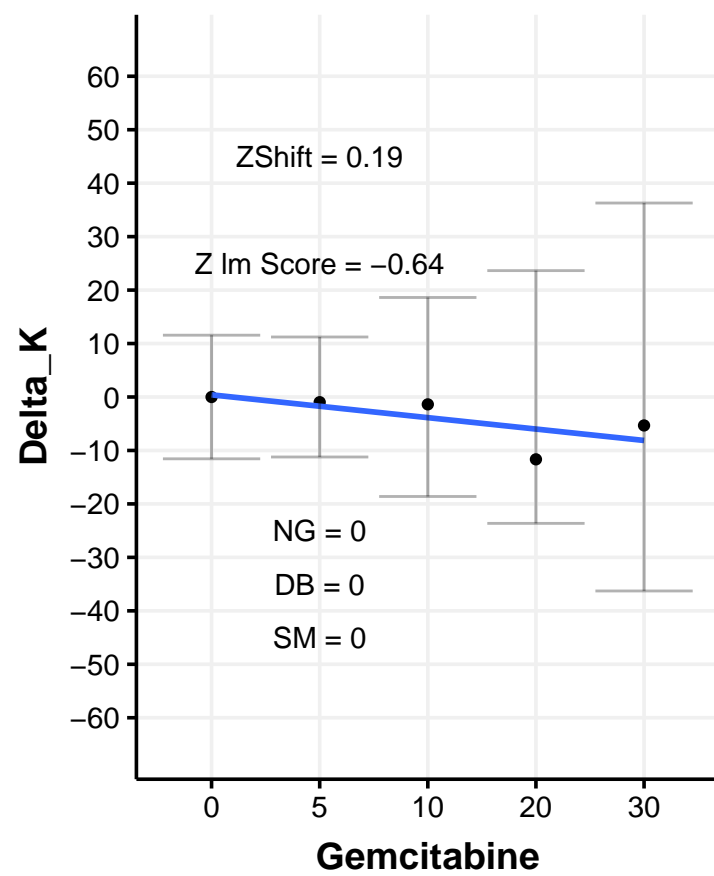

YML100W-A

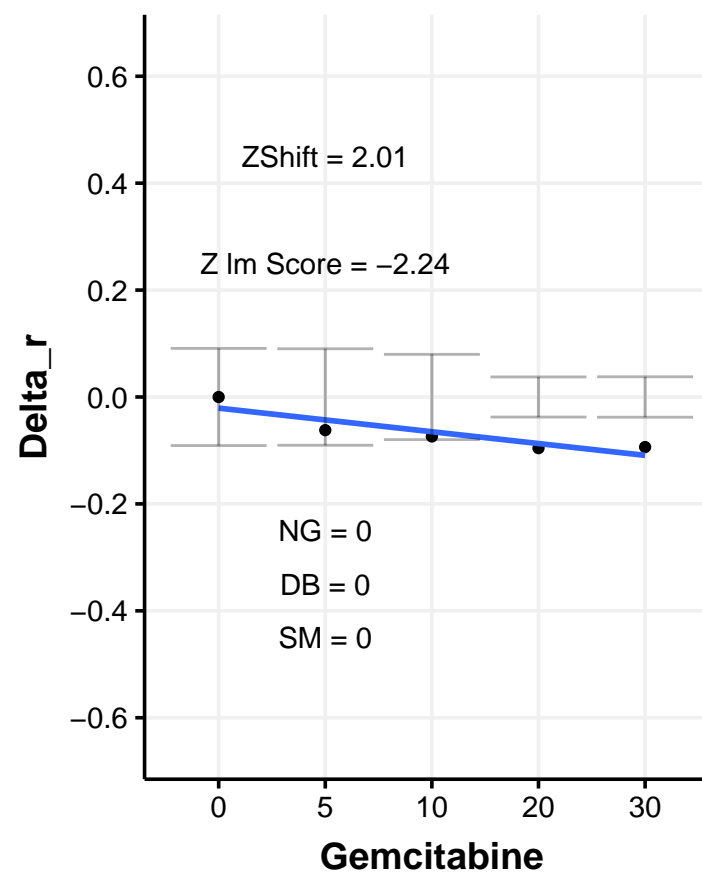

YML100W-A

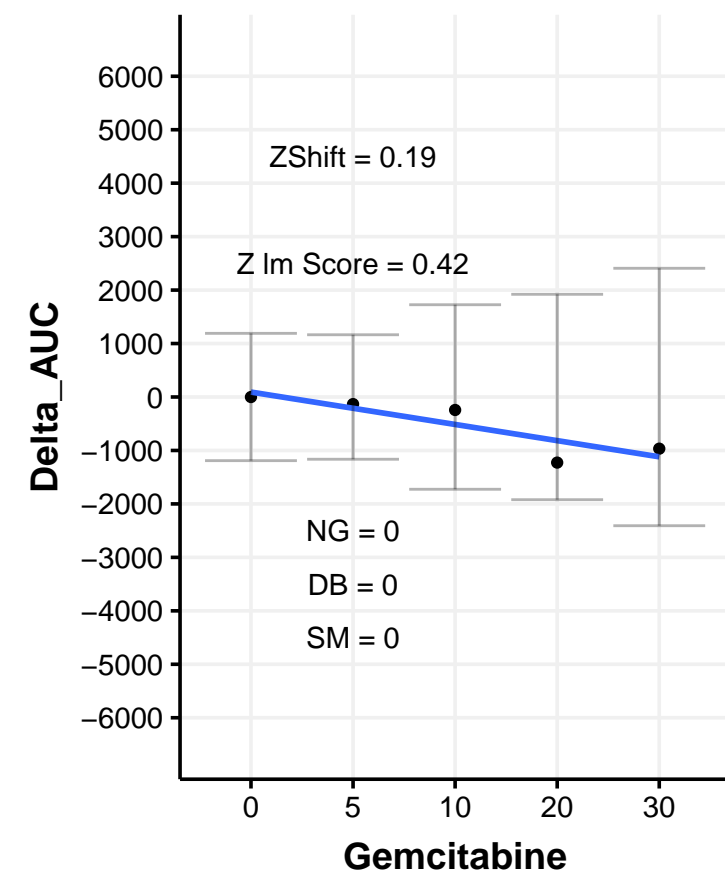

YLR335W NUP2

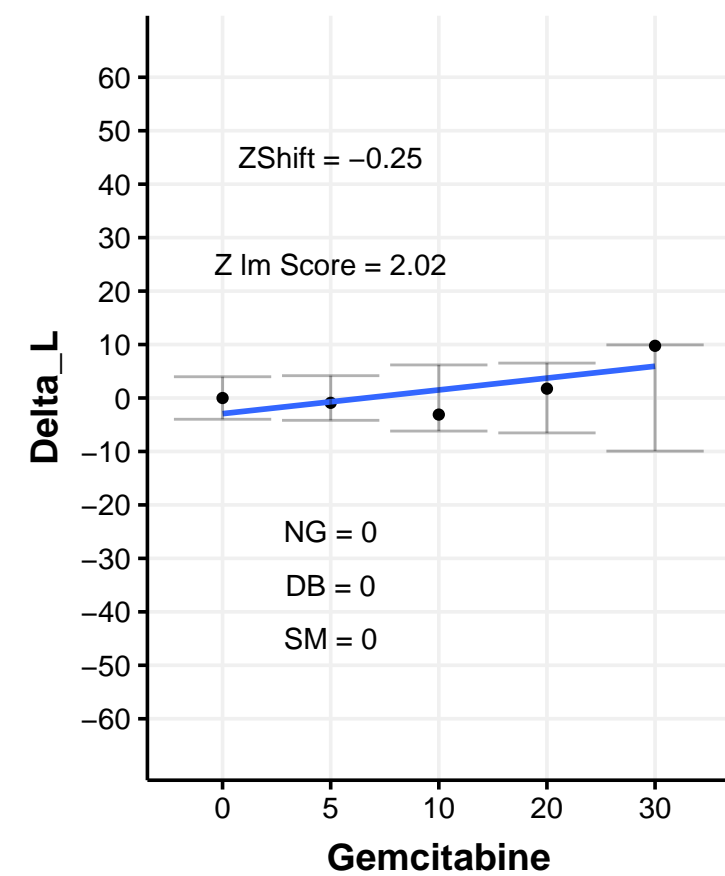

YLR335W NUP2

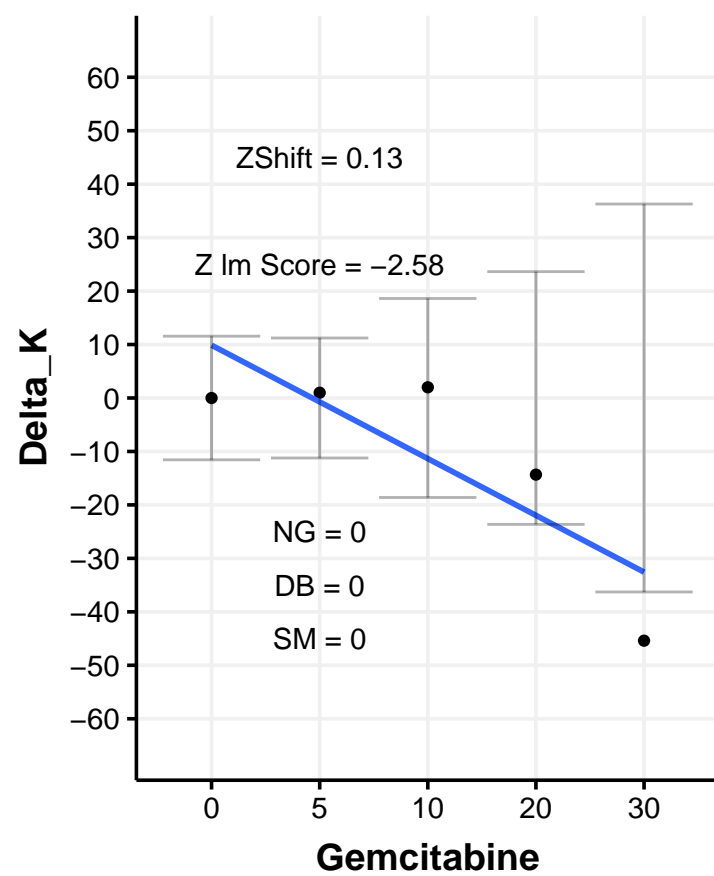

YLR335W NUP2

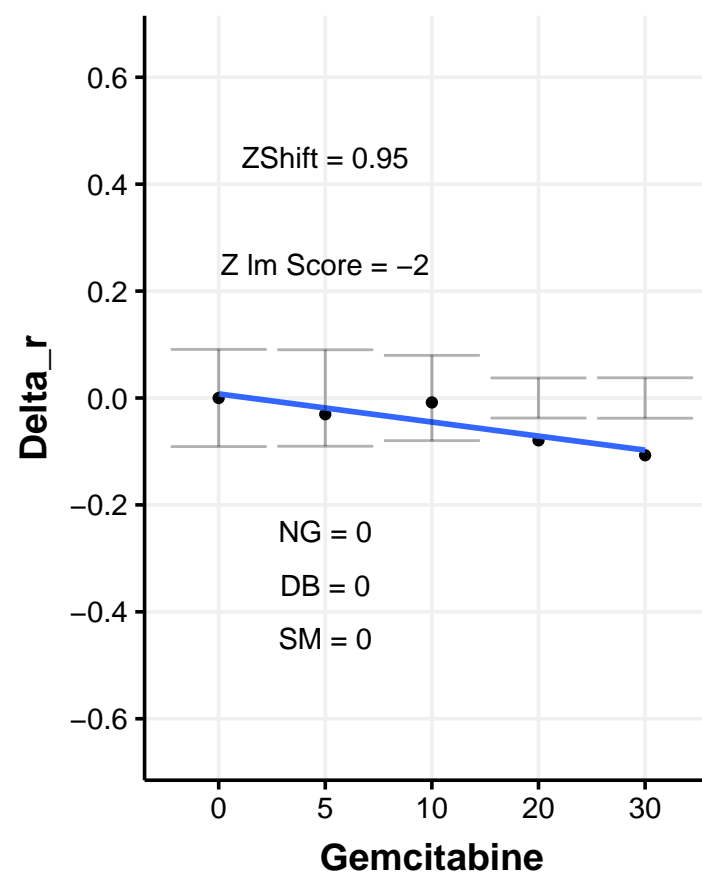

YLR335W NUP2

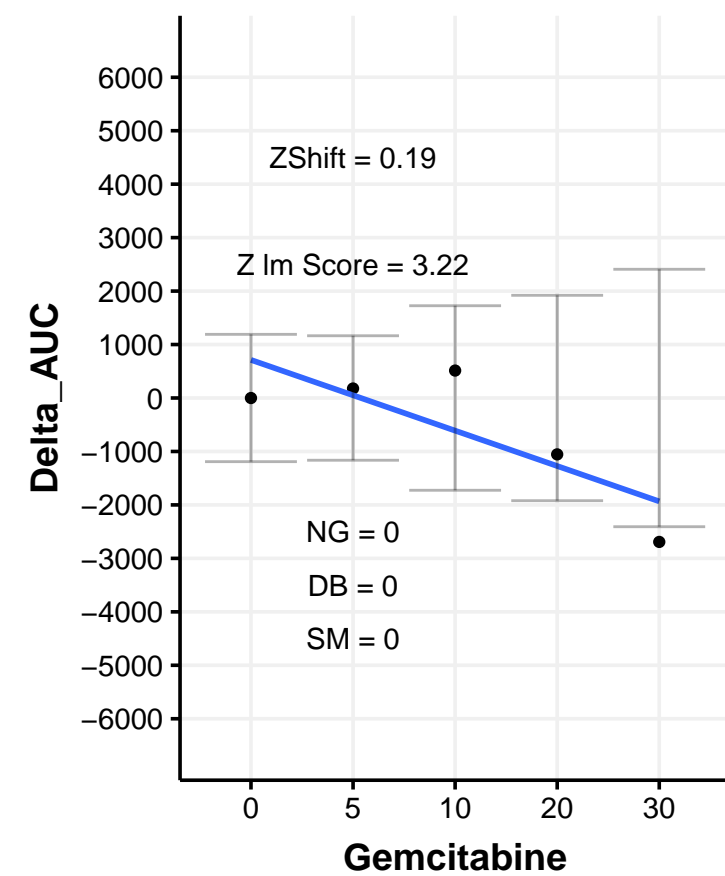

YLR389C STE23

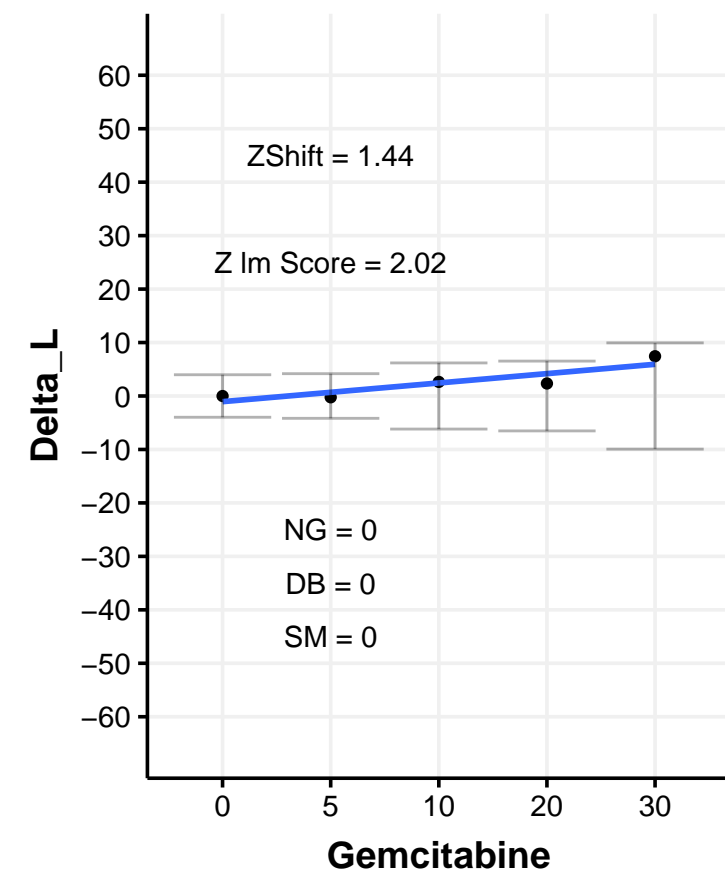

YLR389C STE23

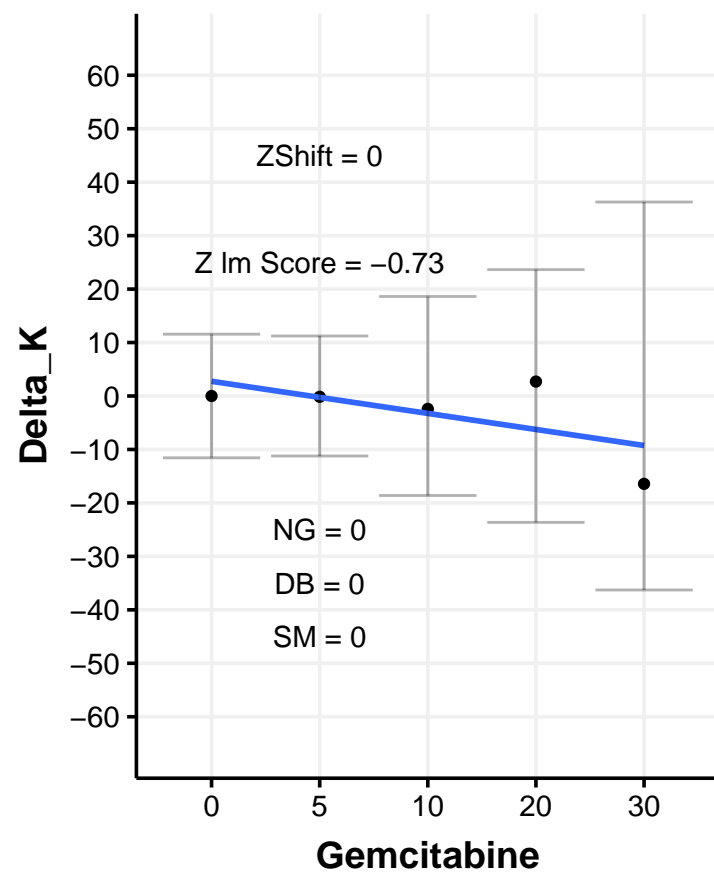

YLR389C STE23

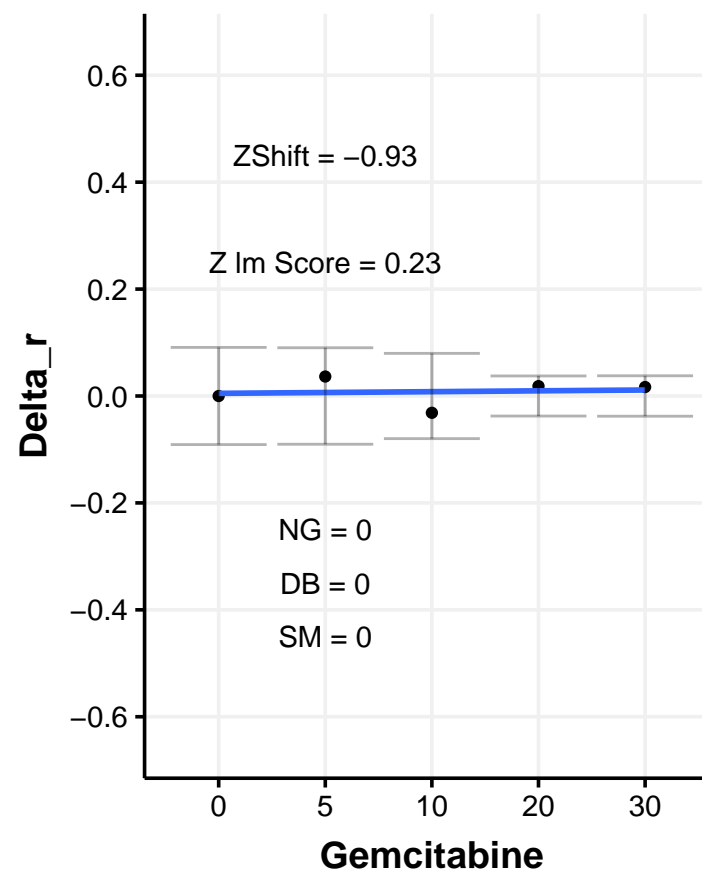

YLR389C STE23

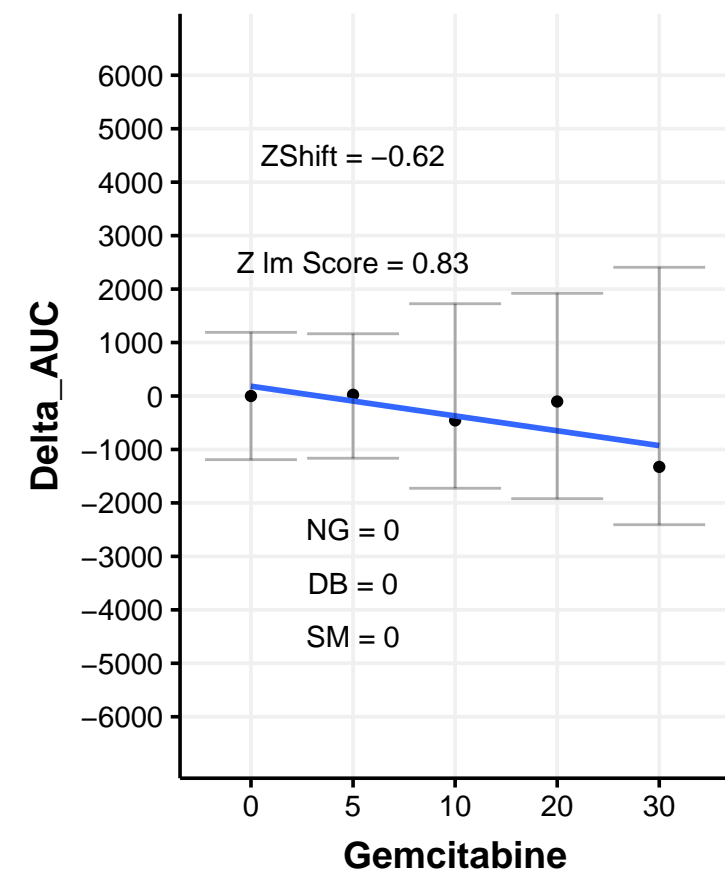



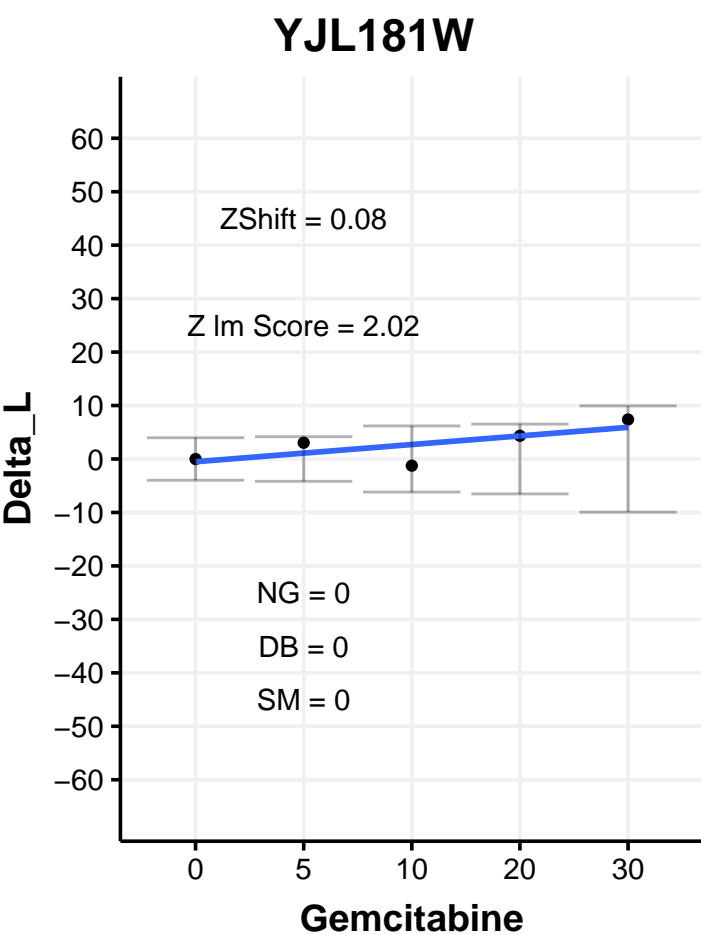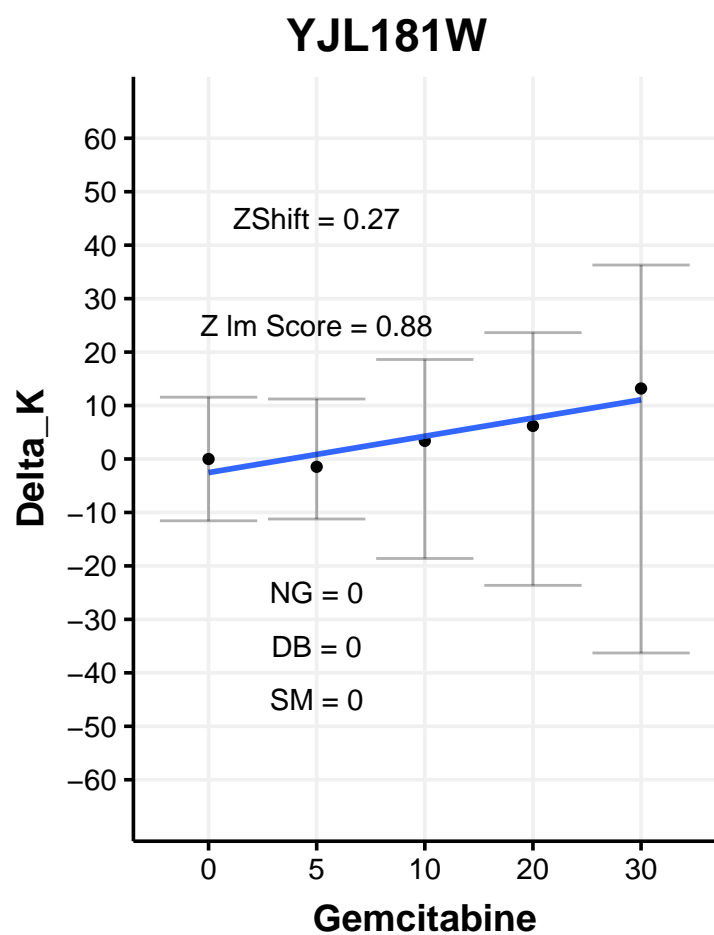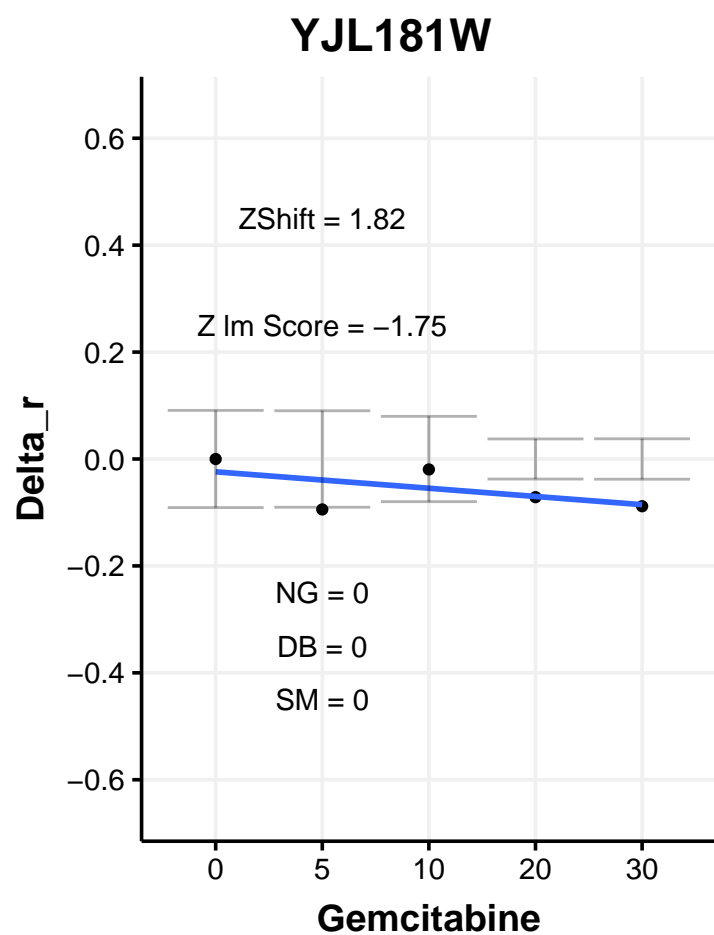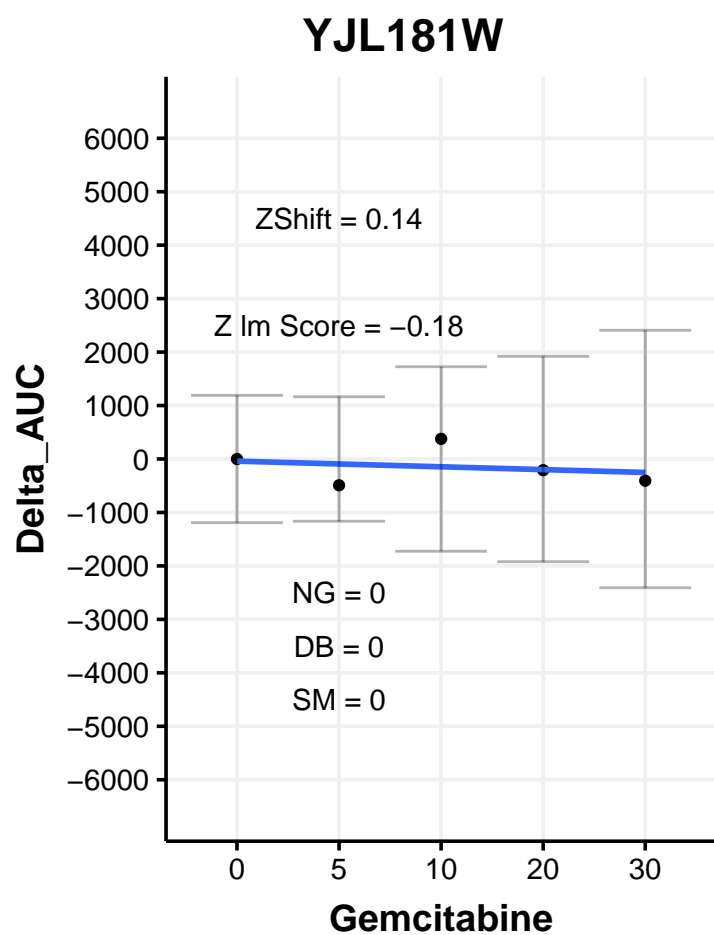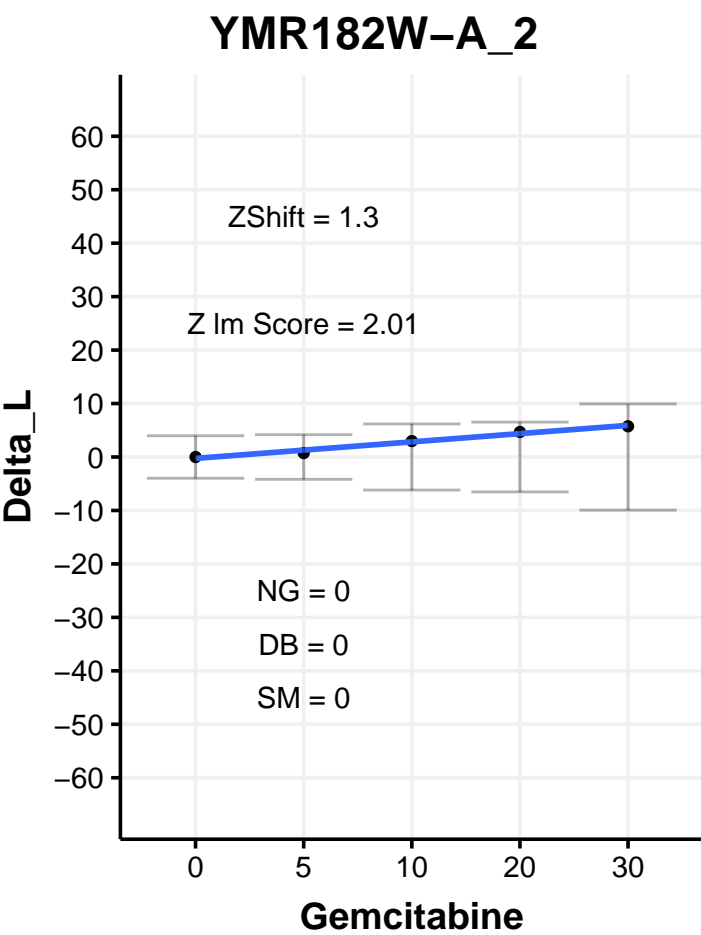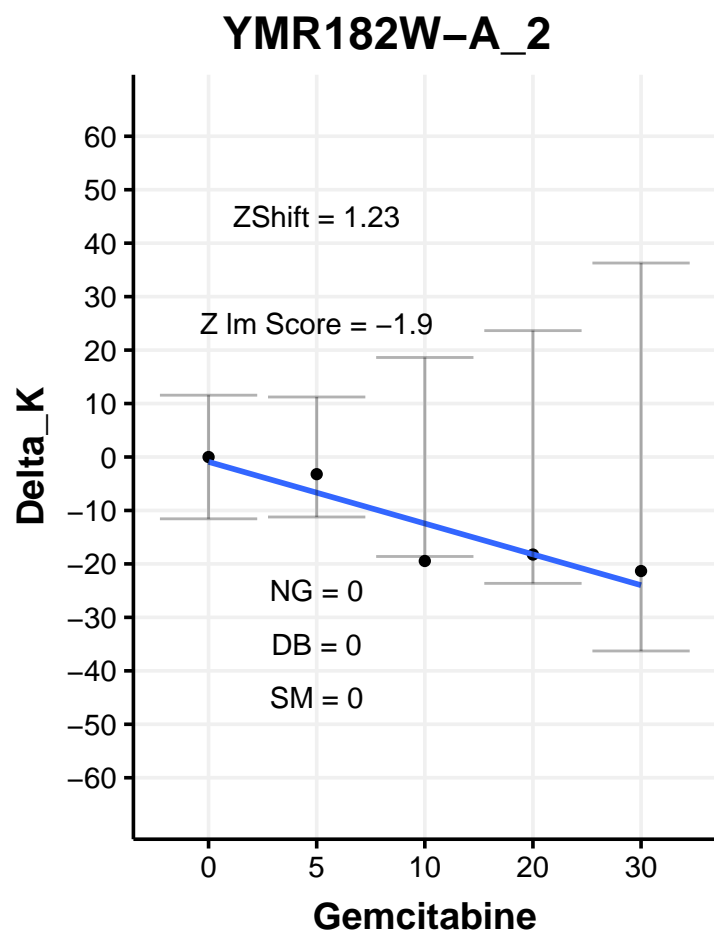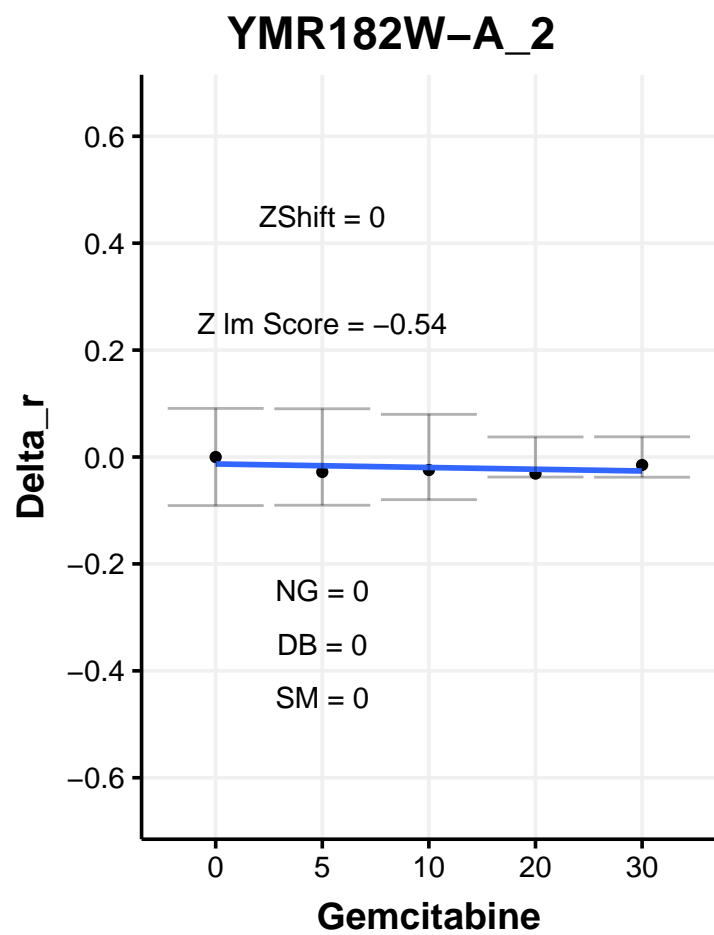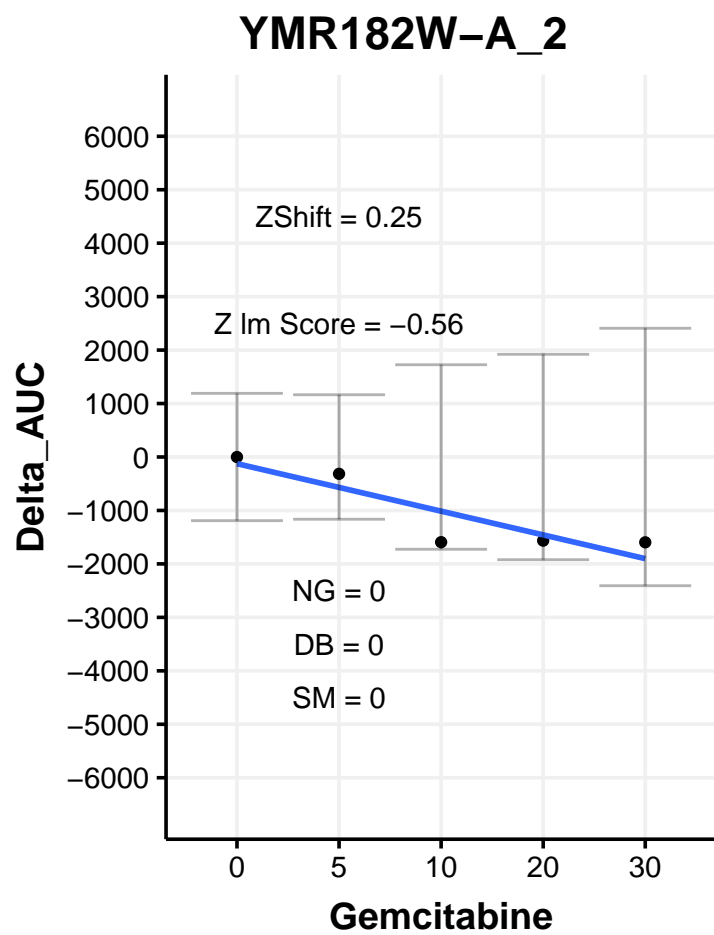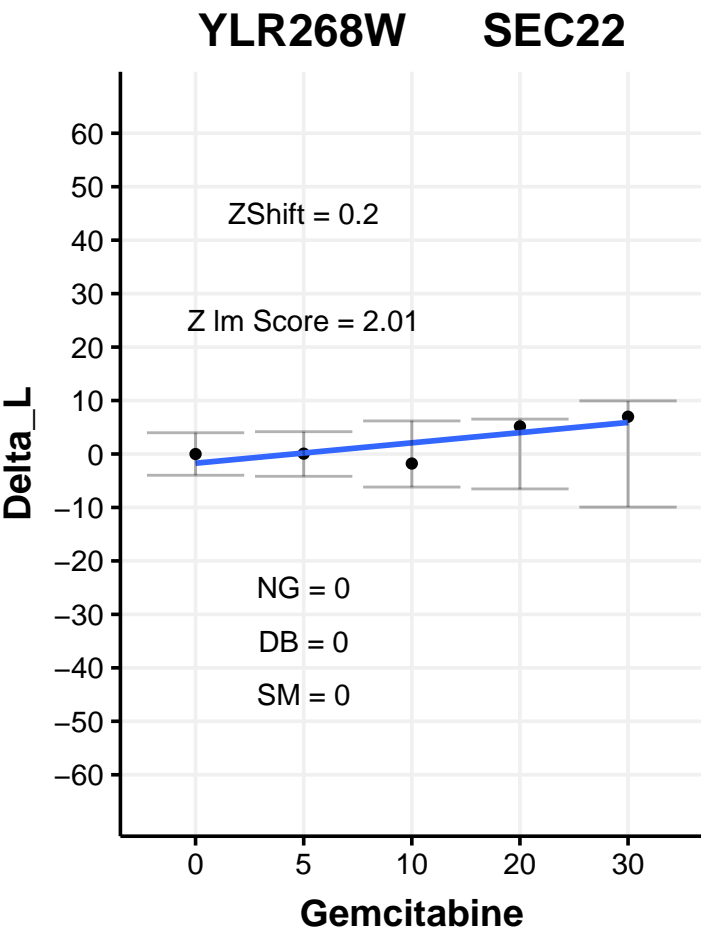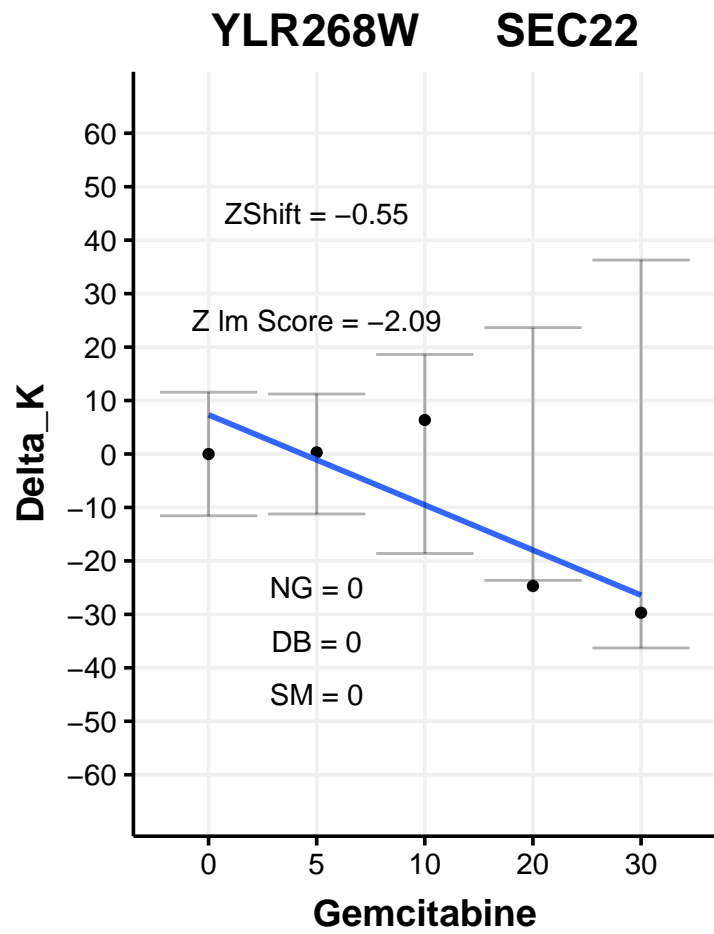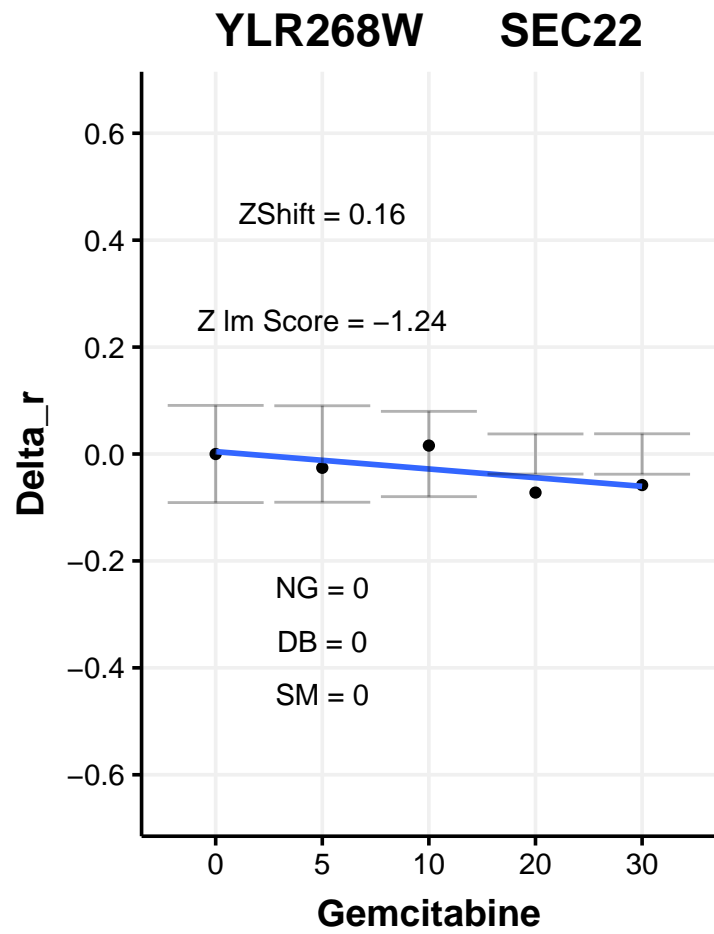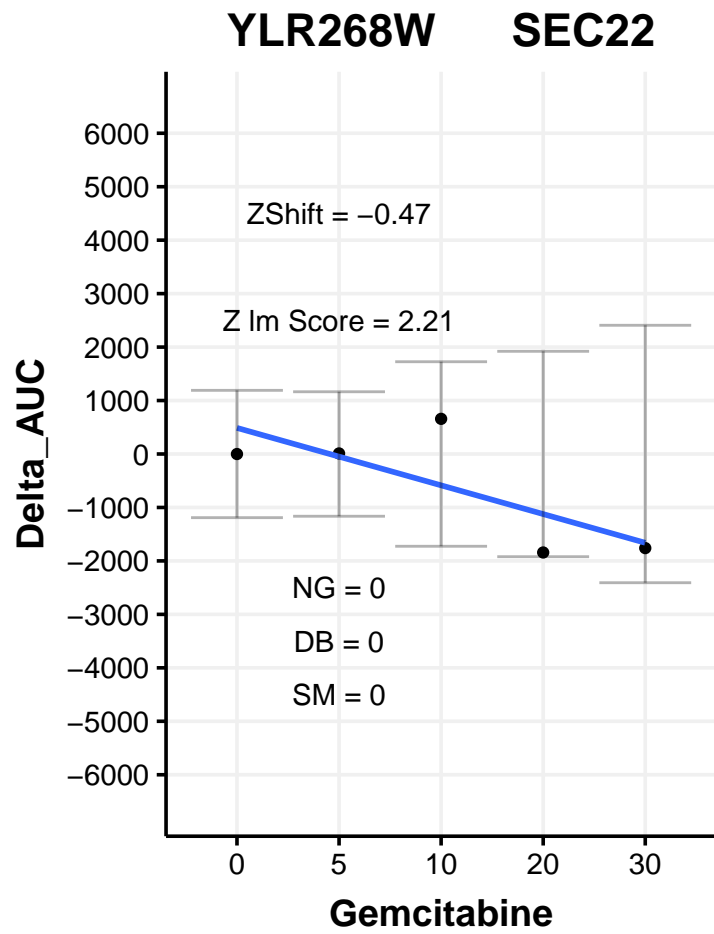

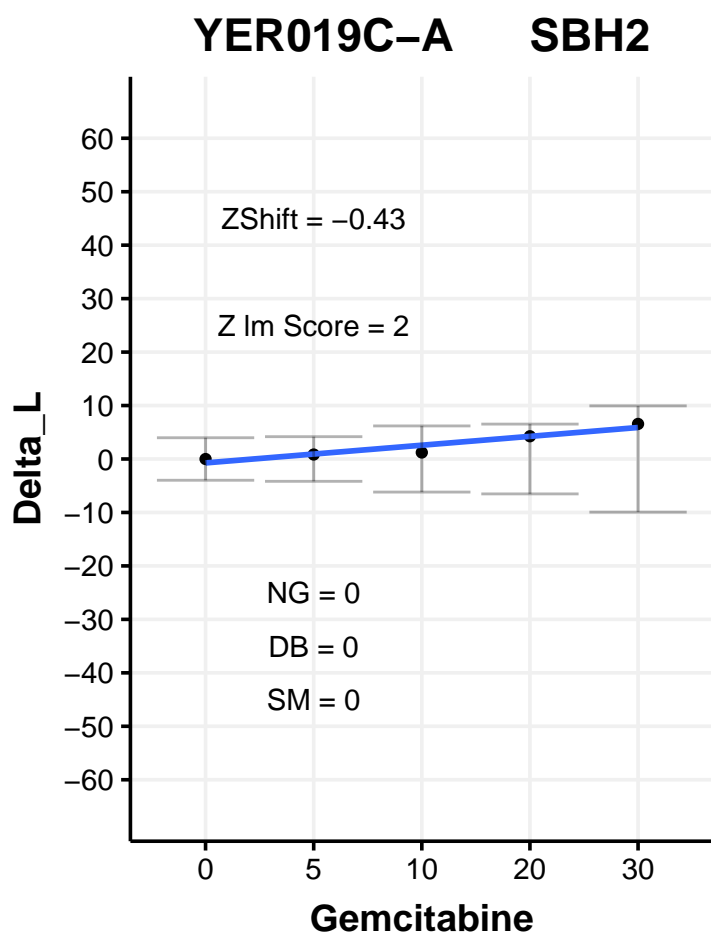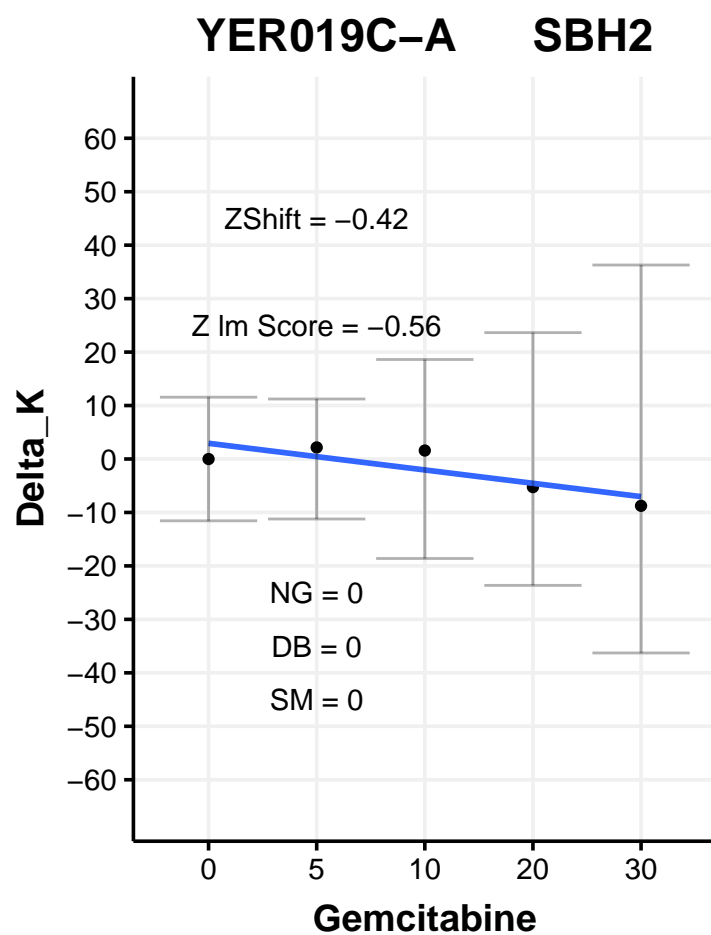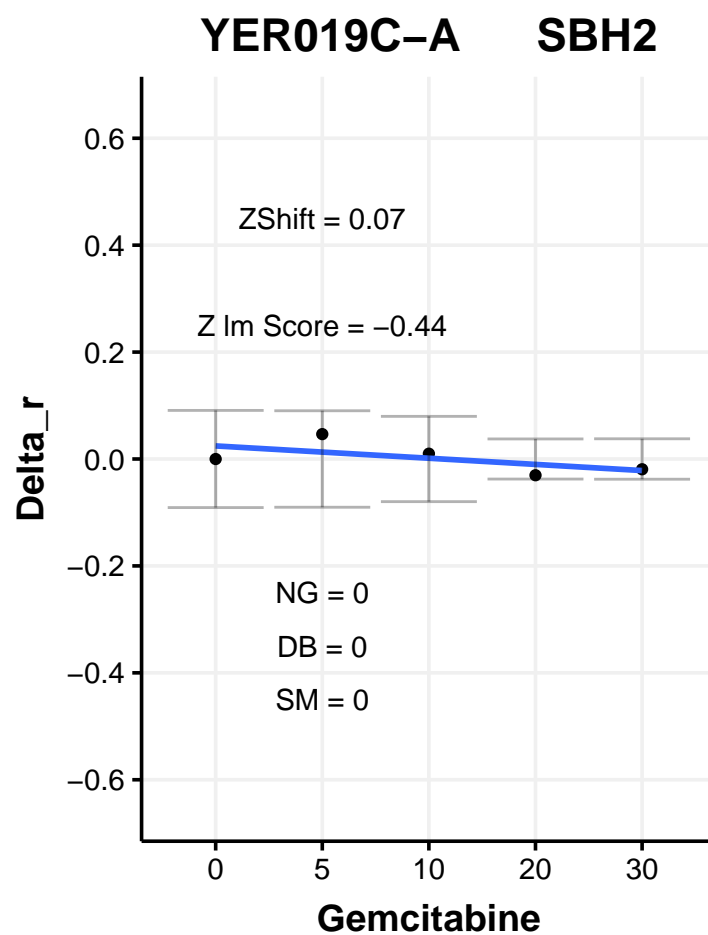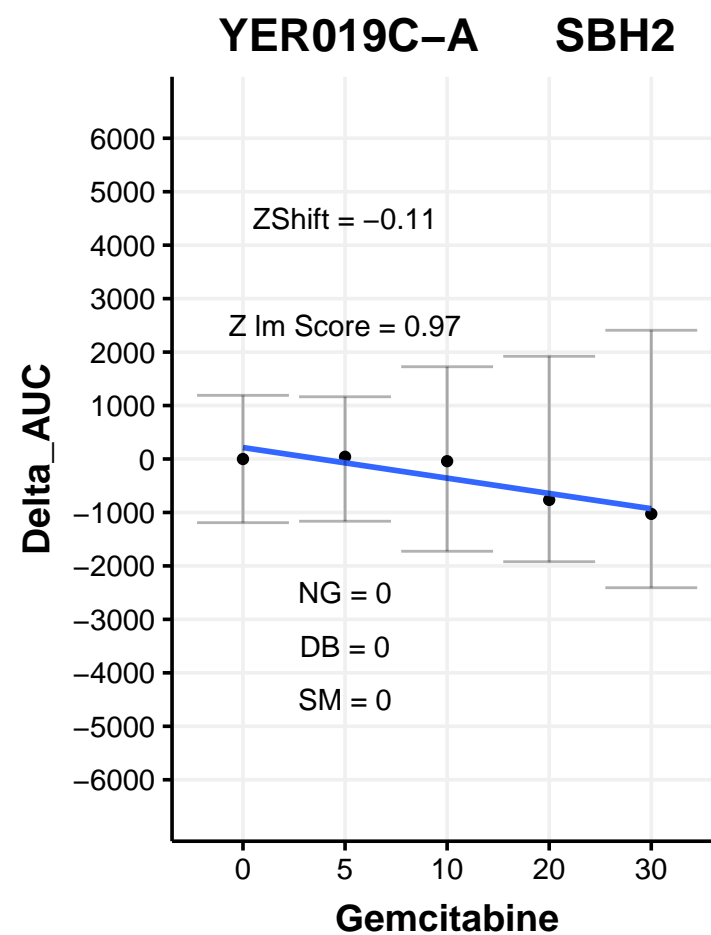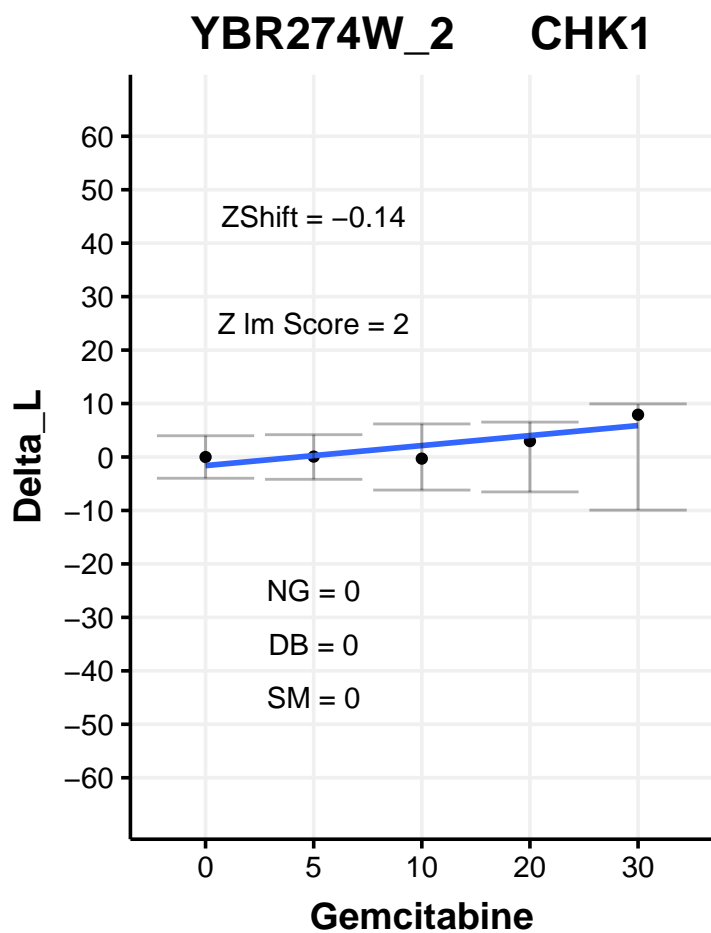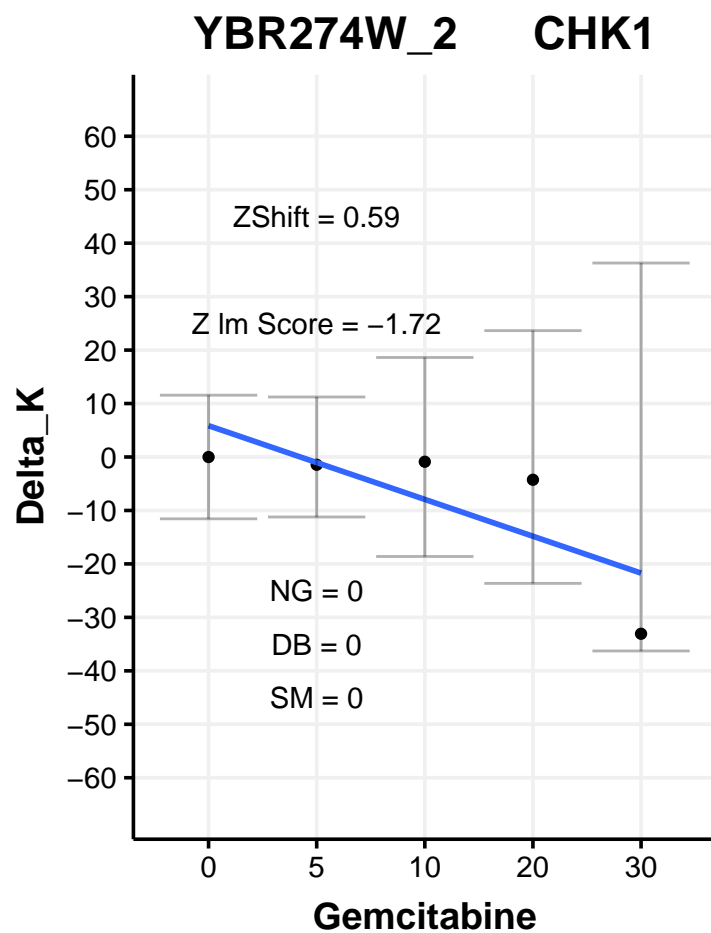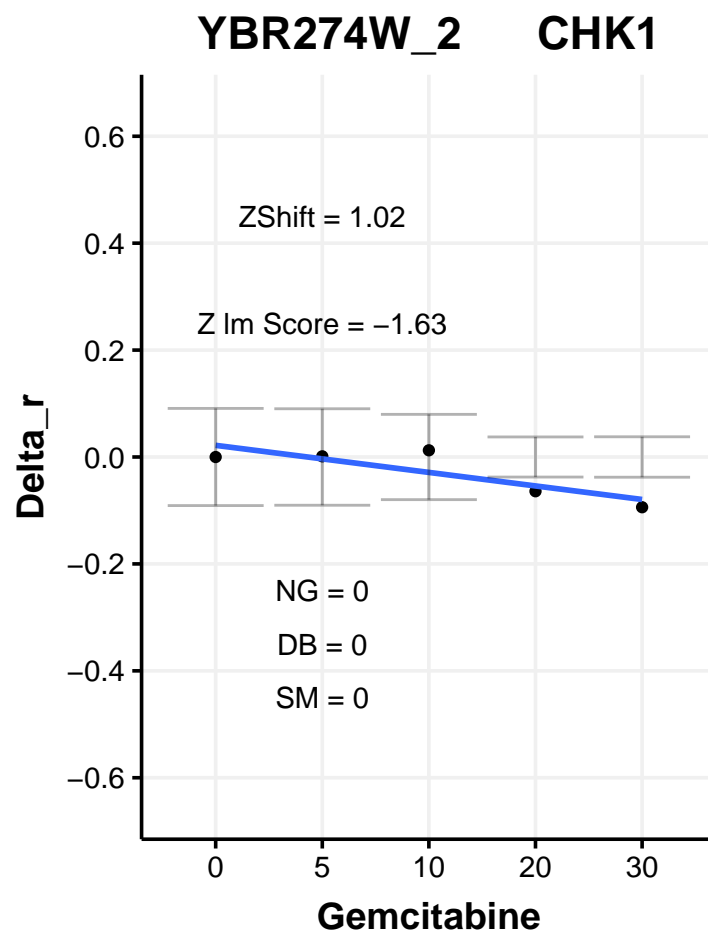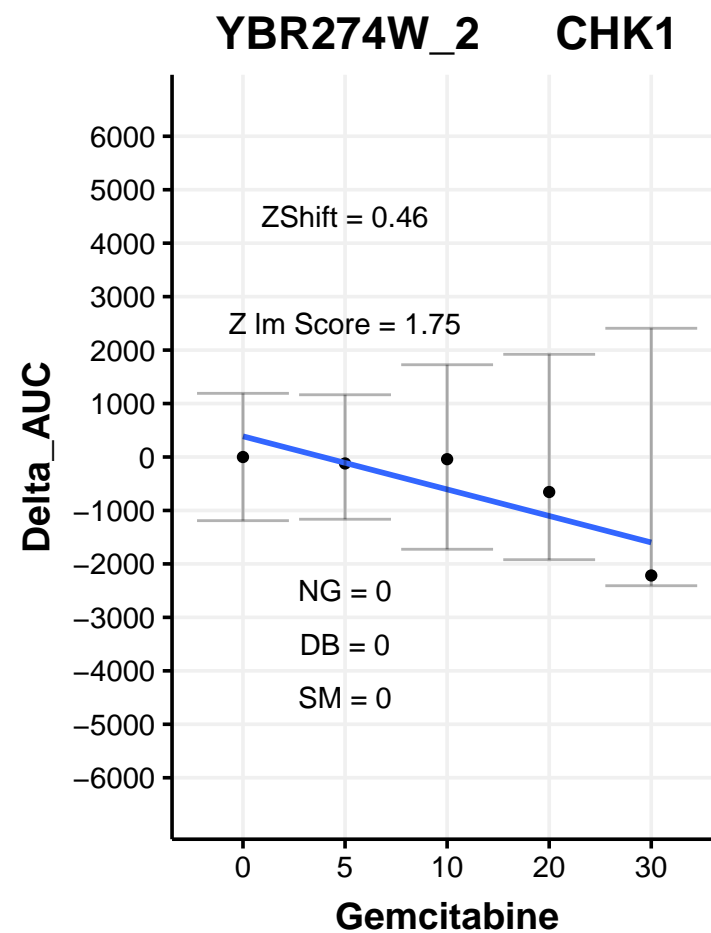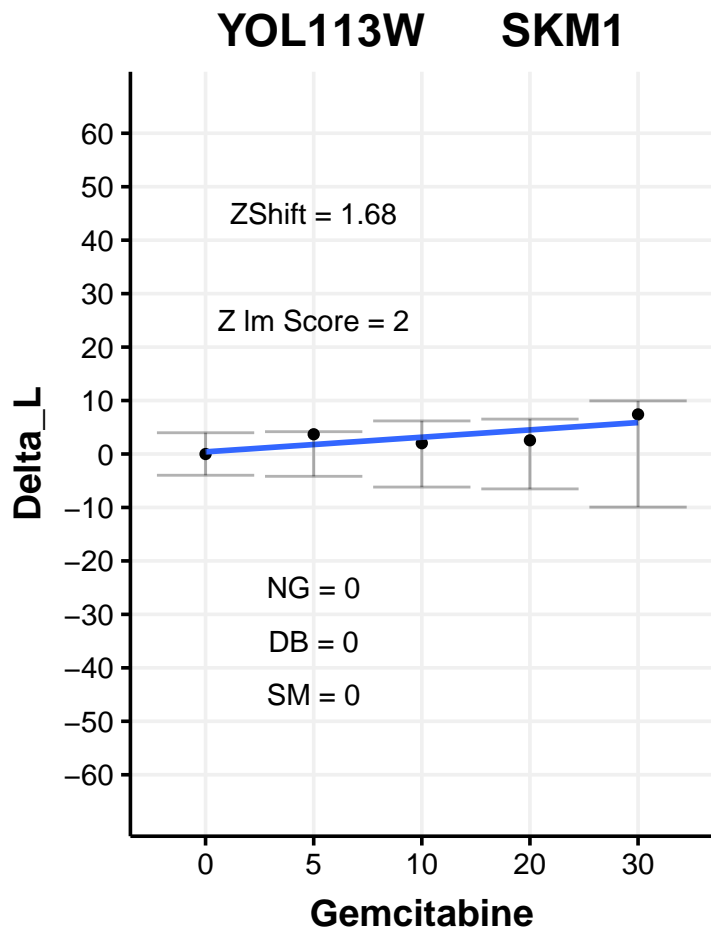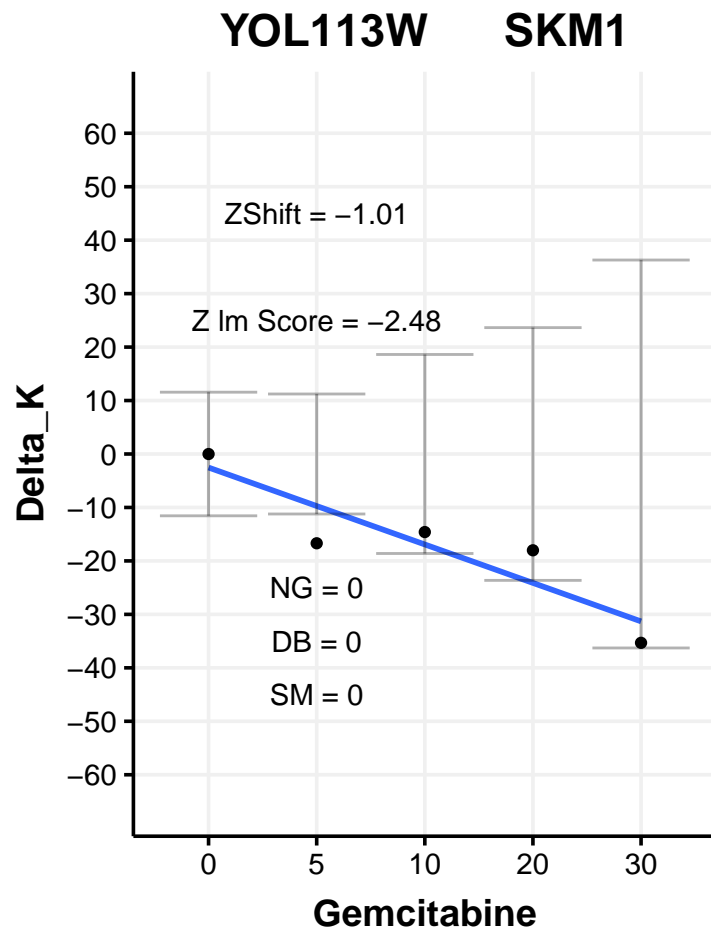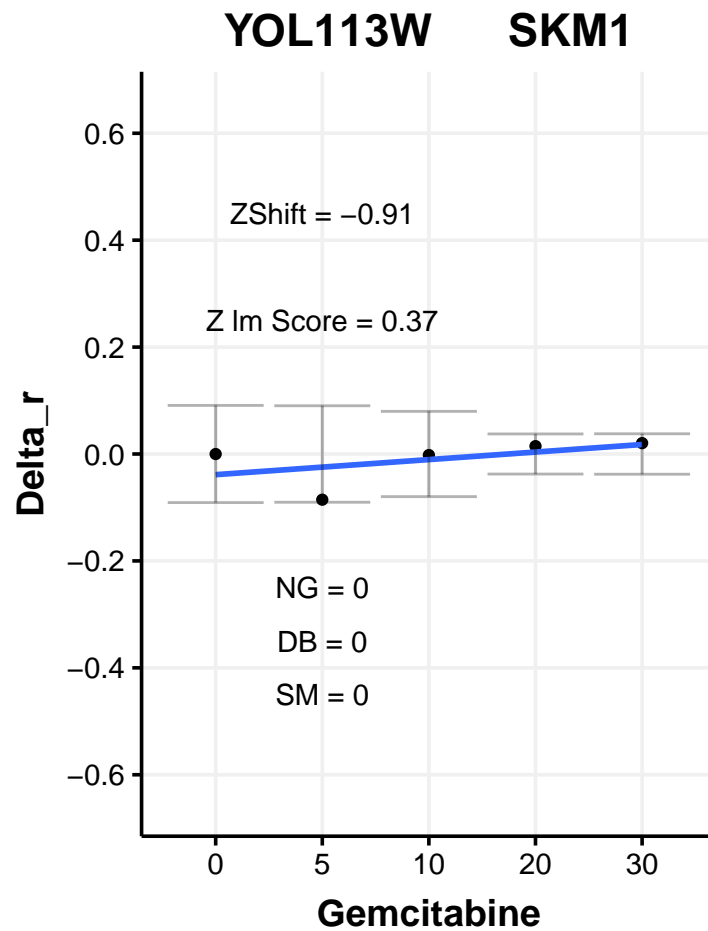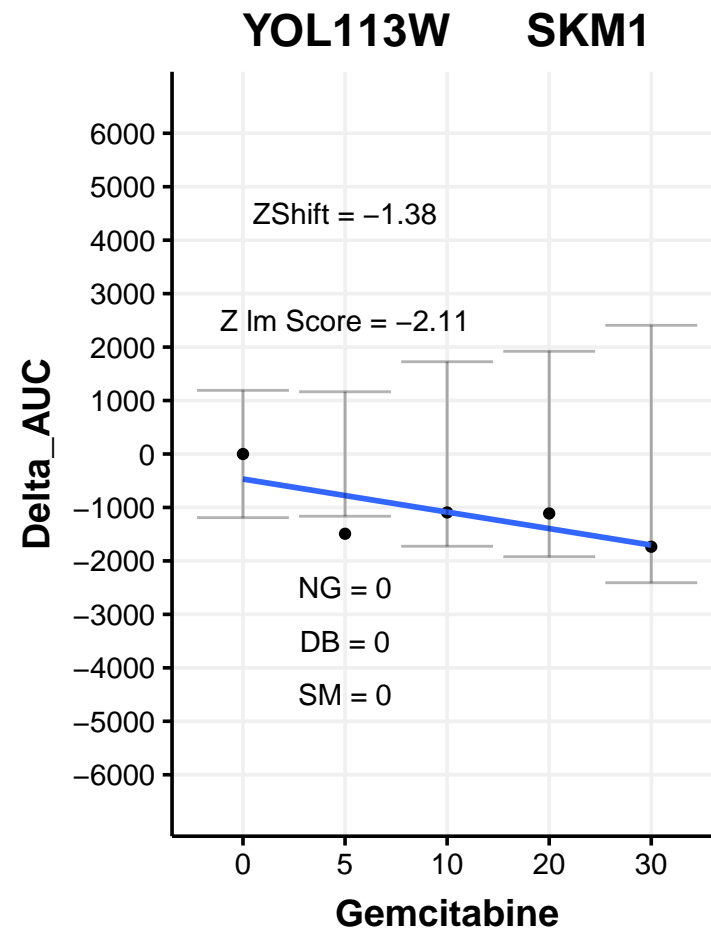

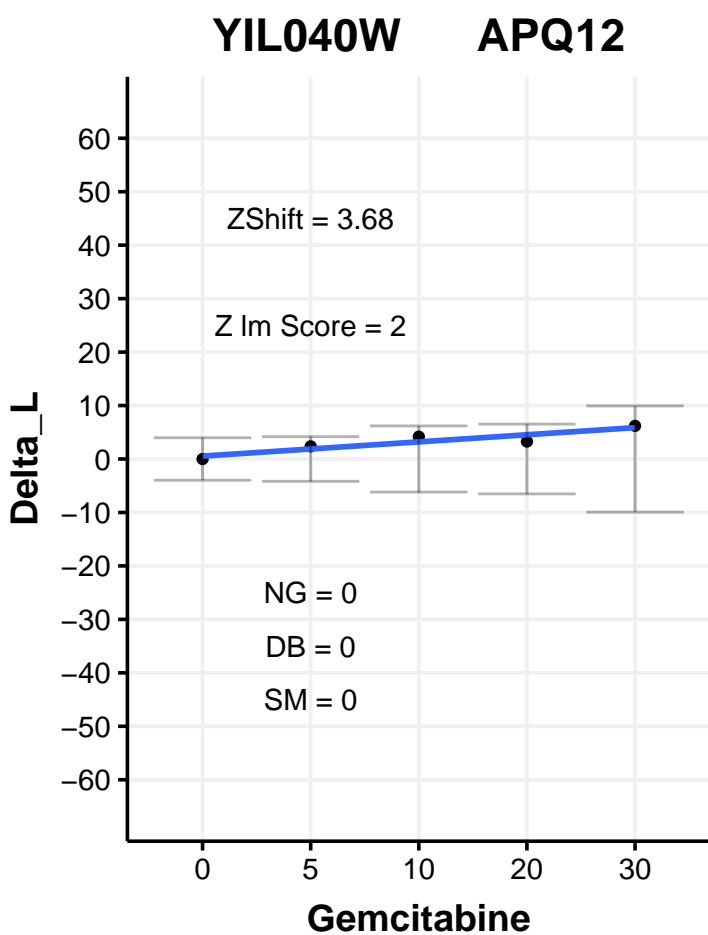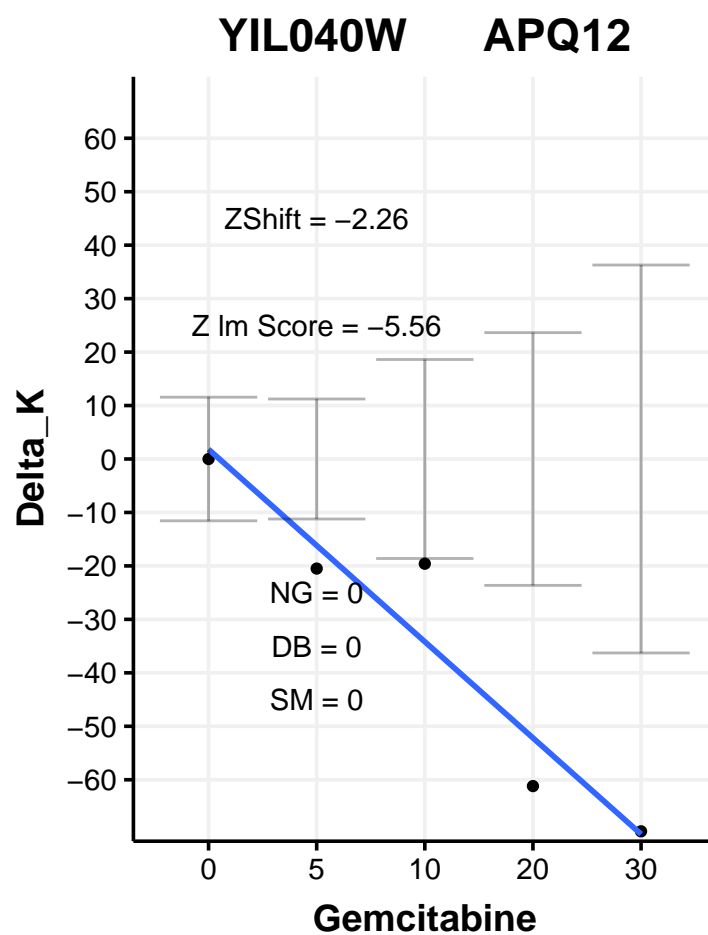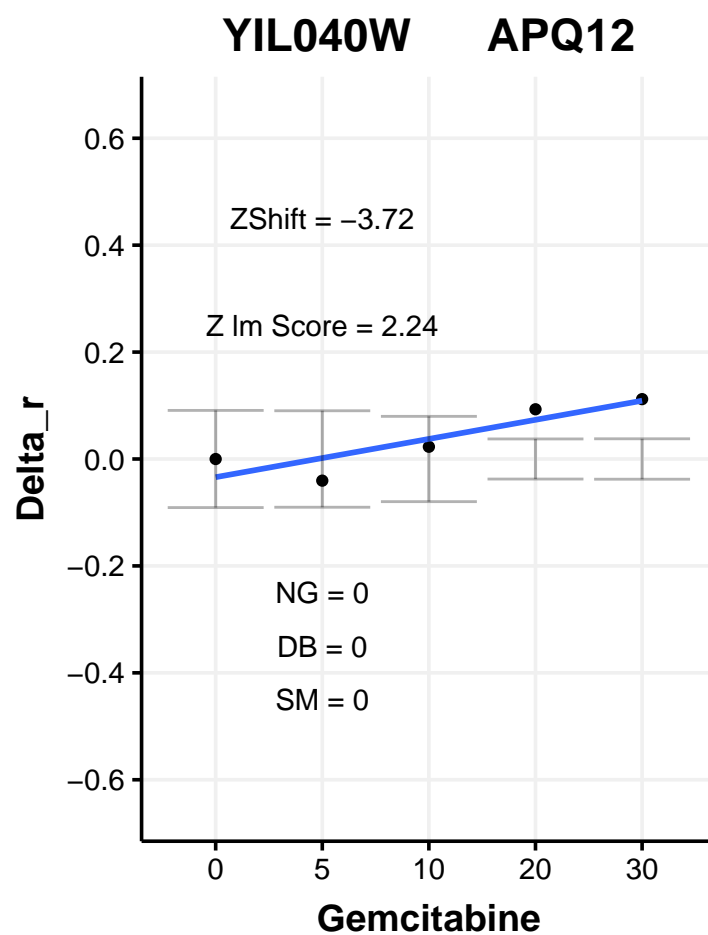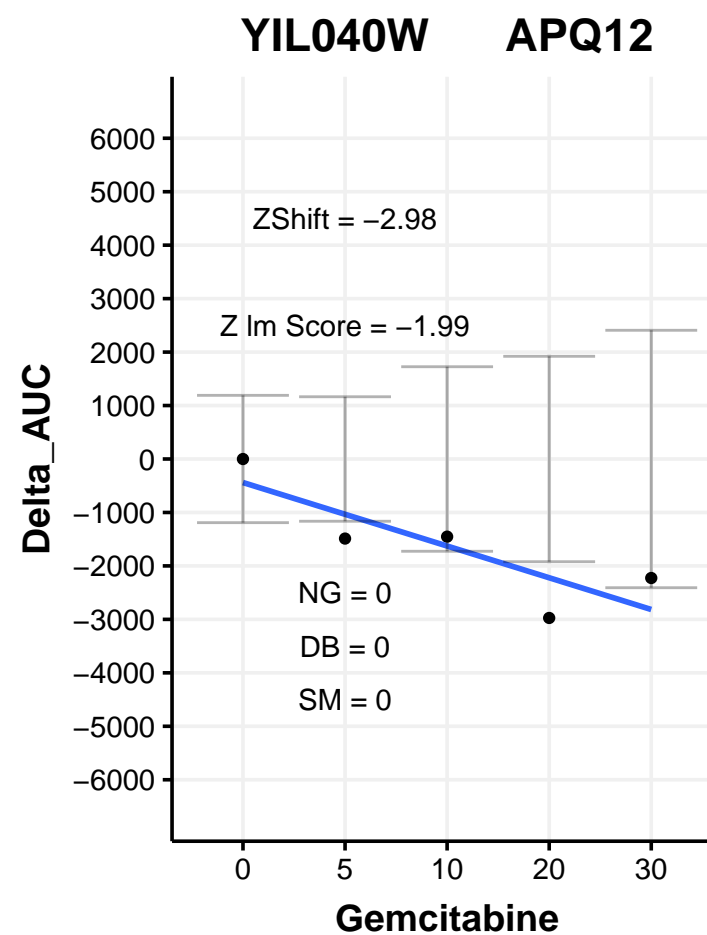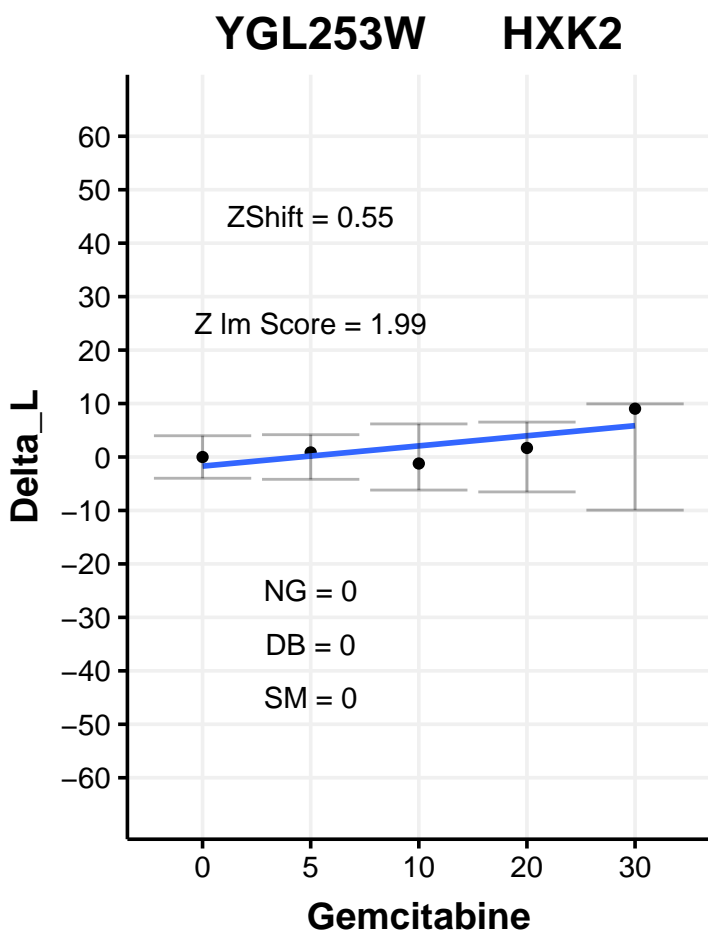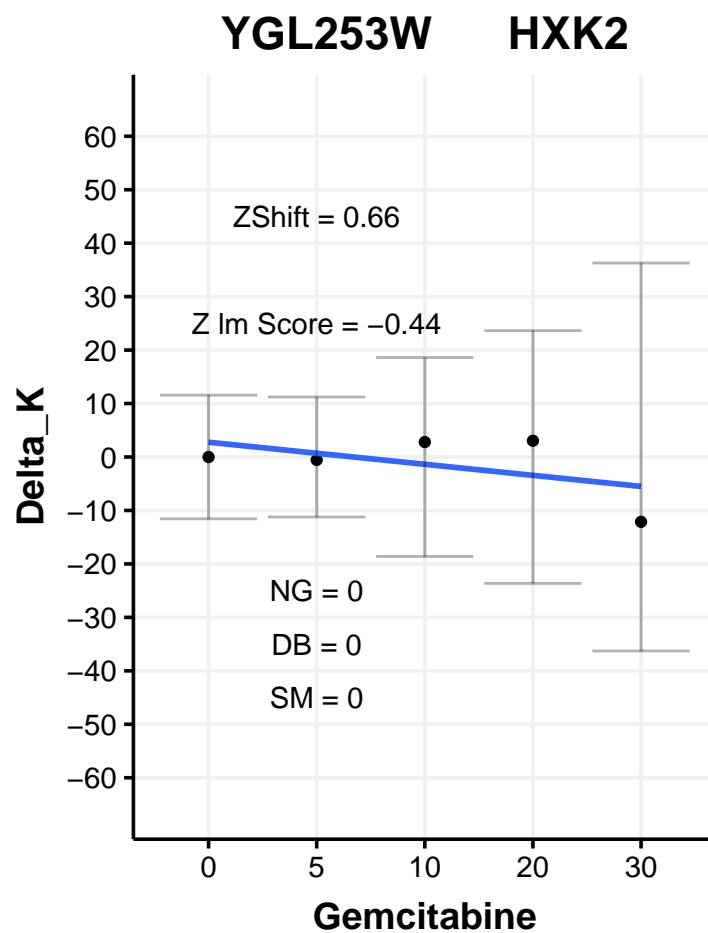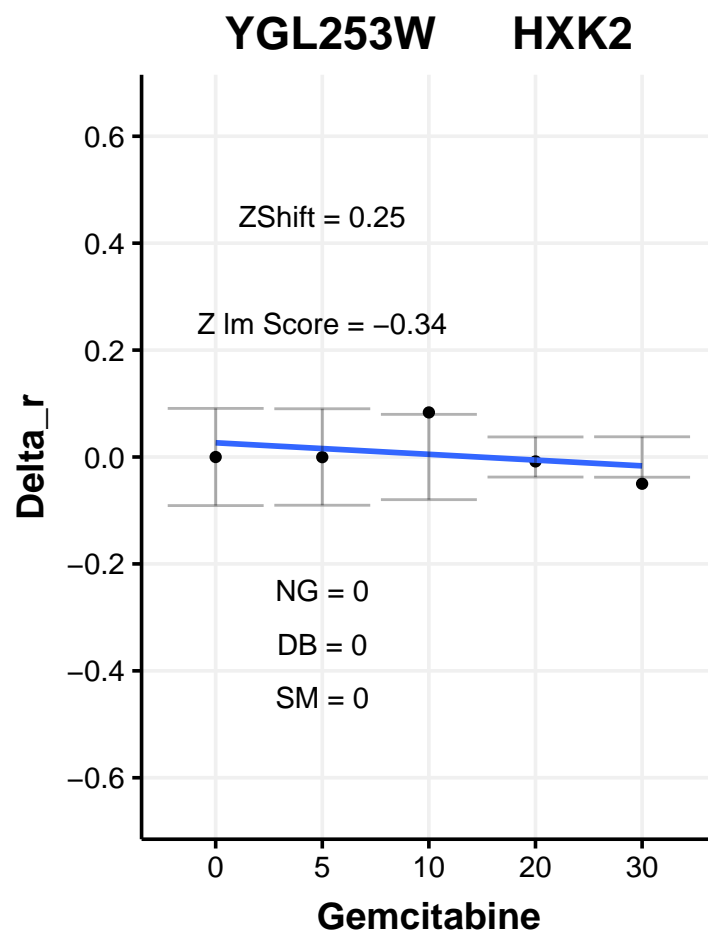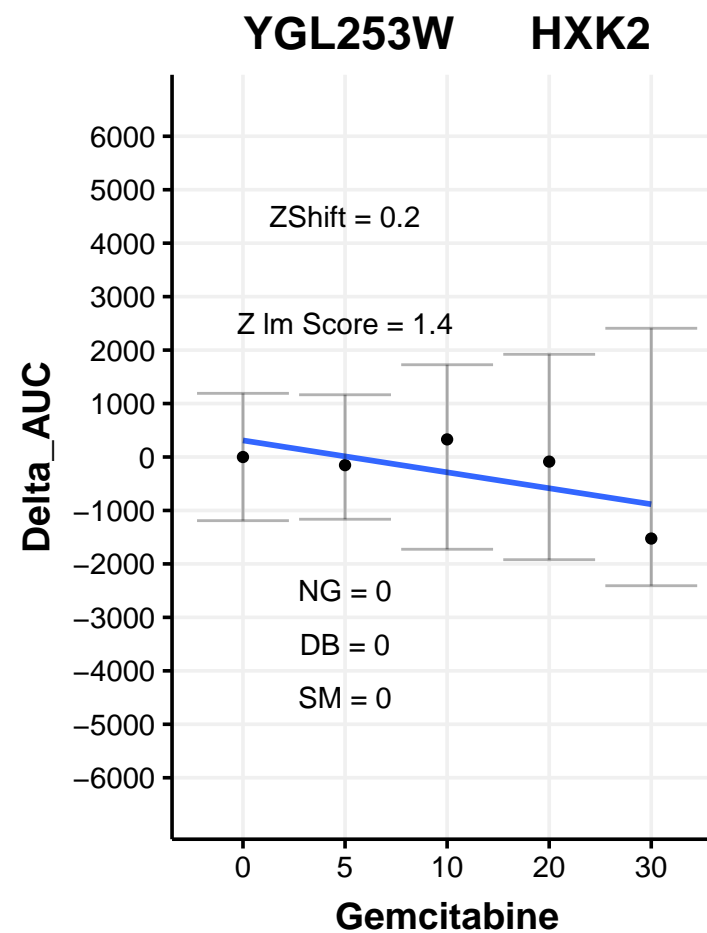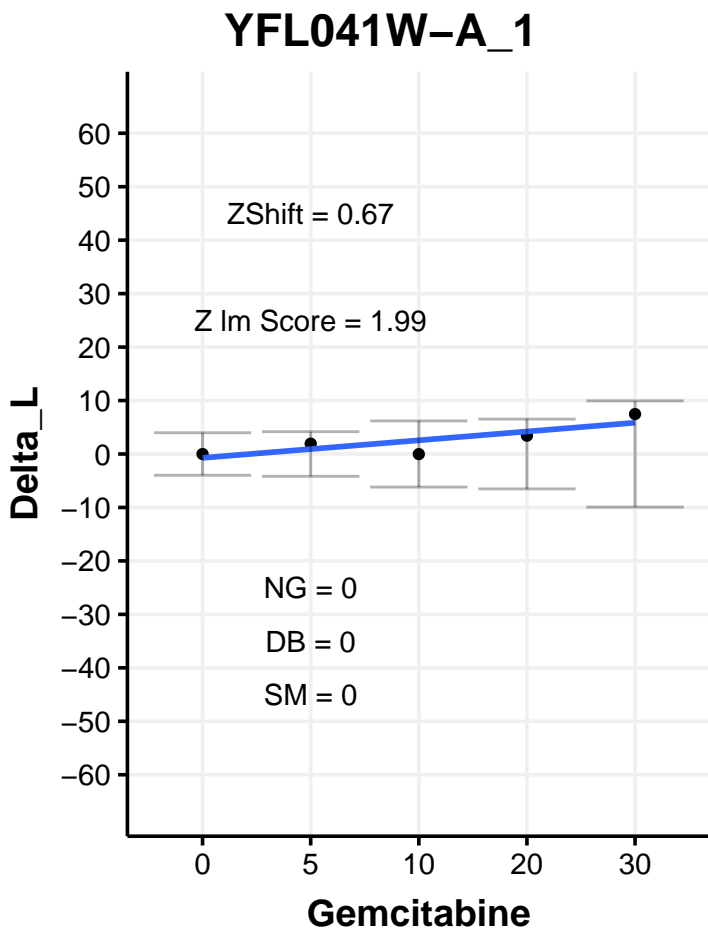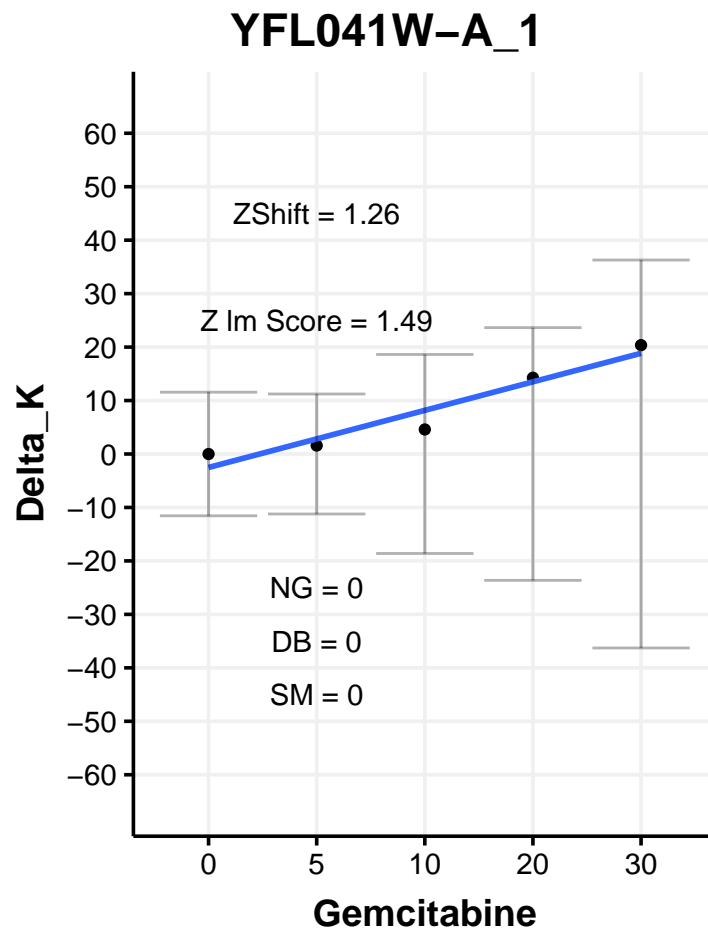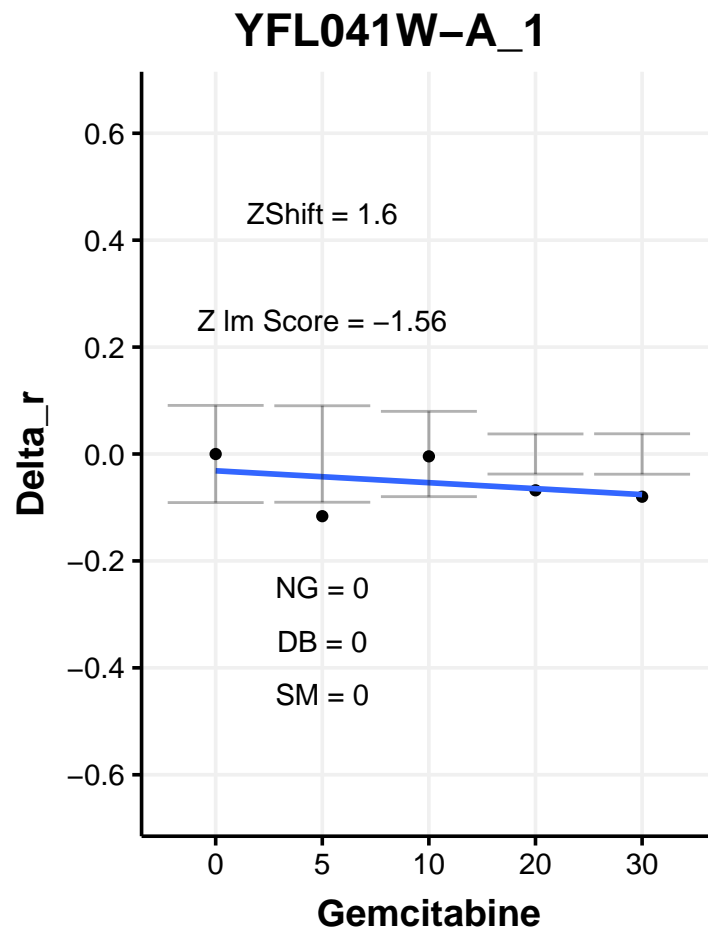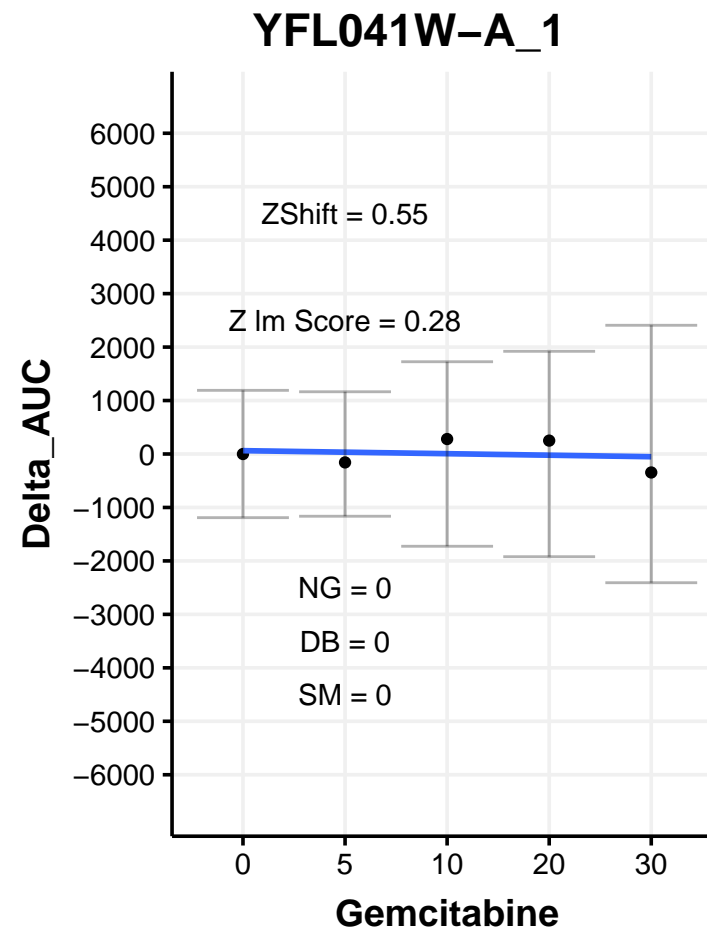

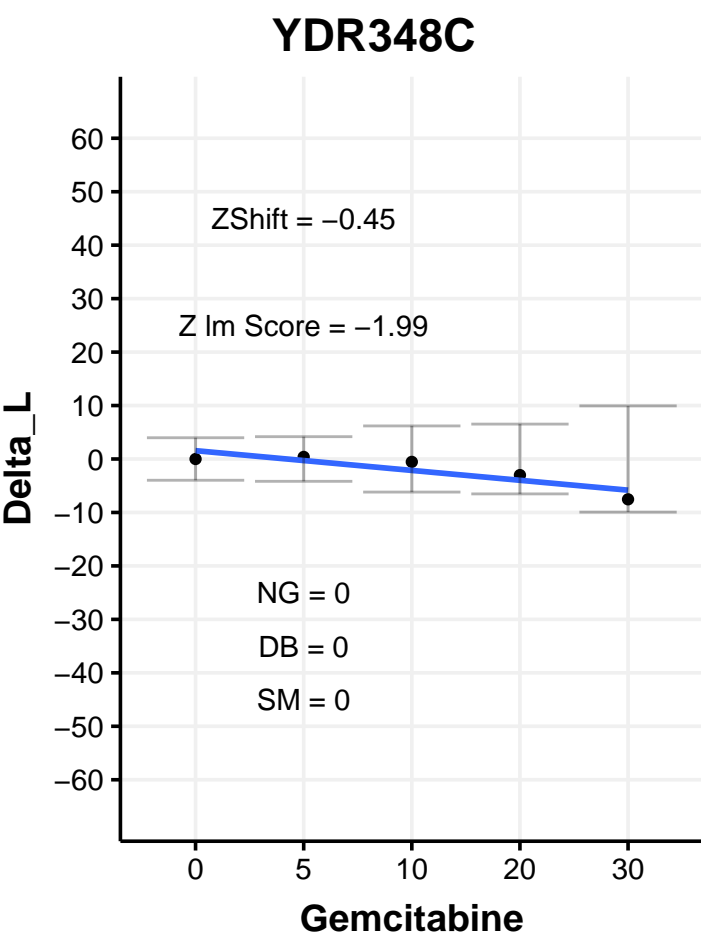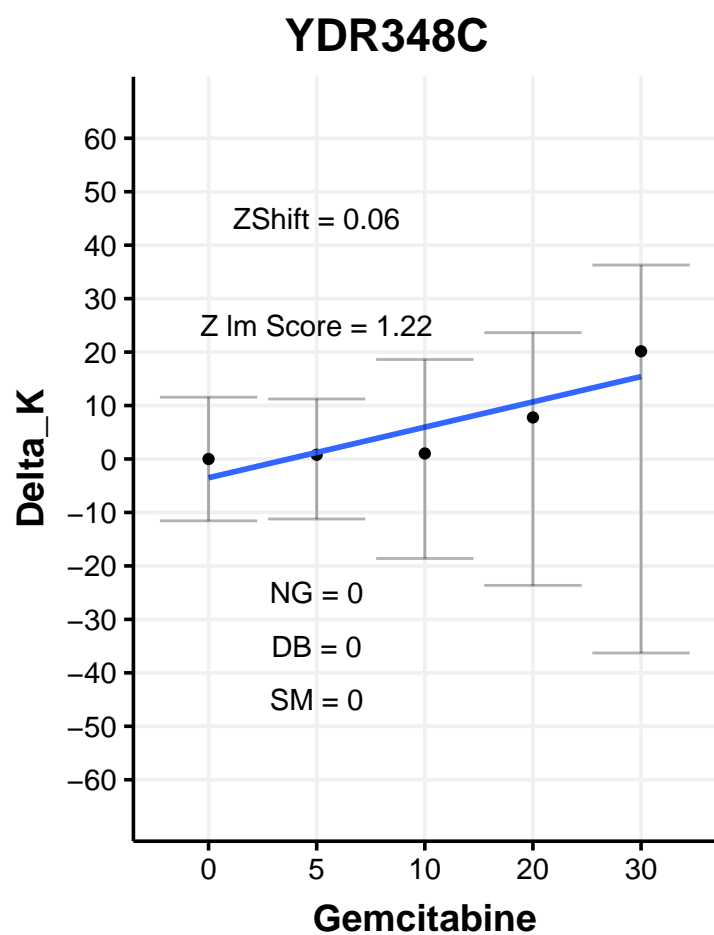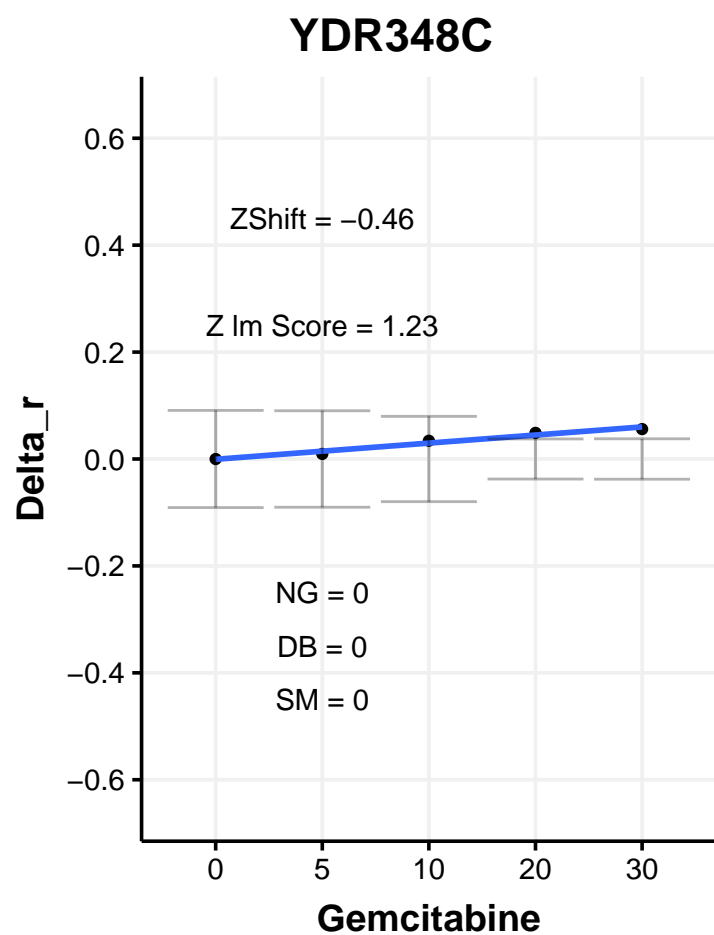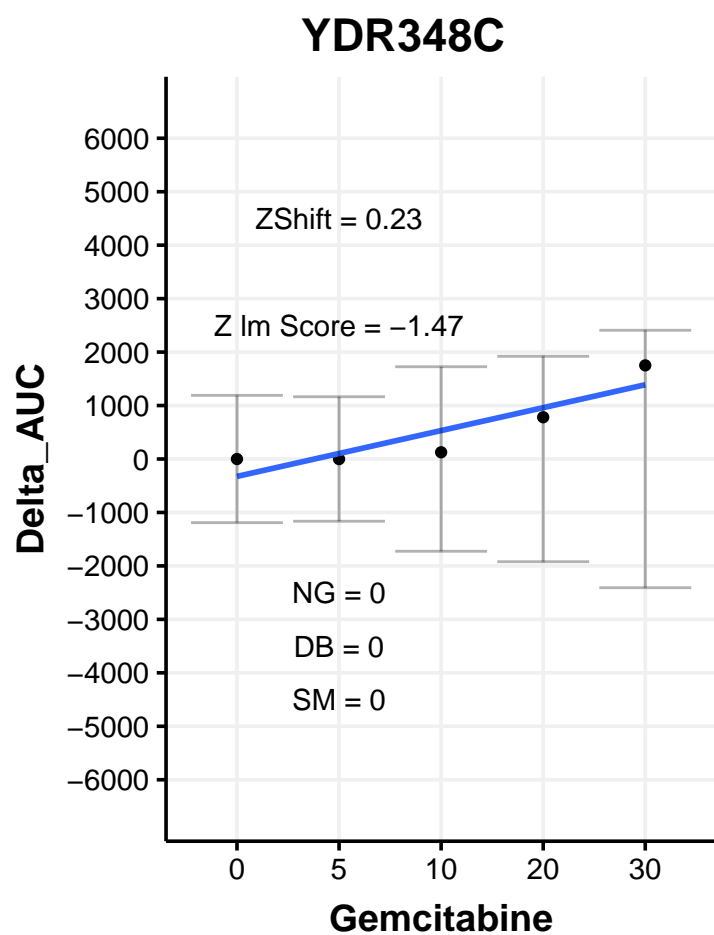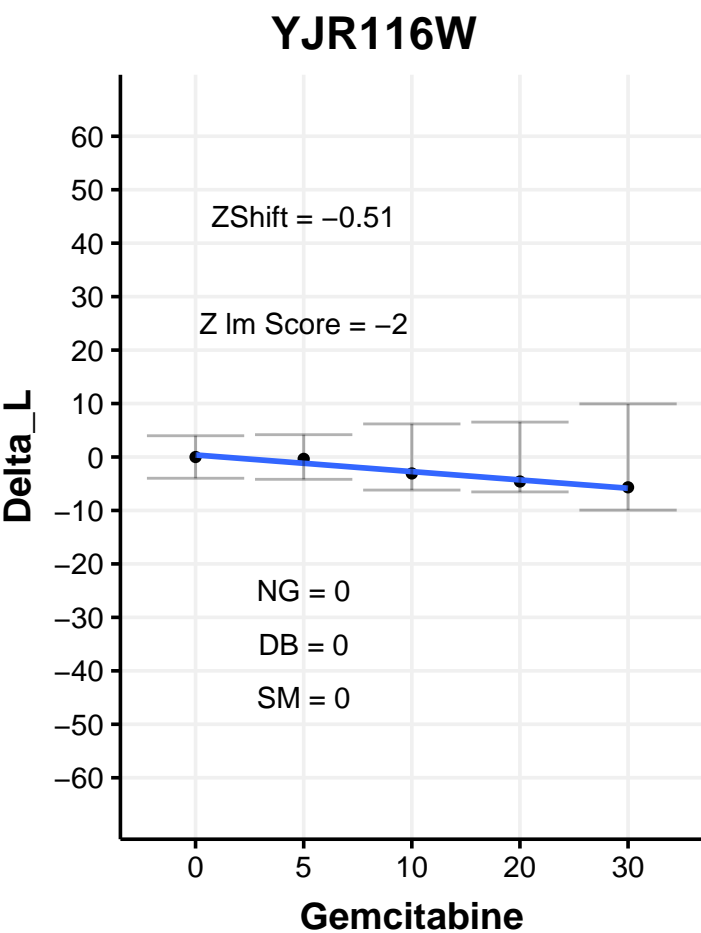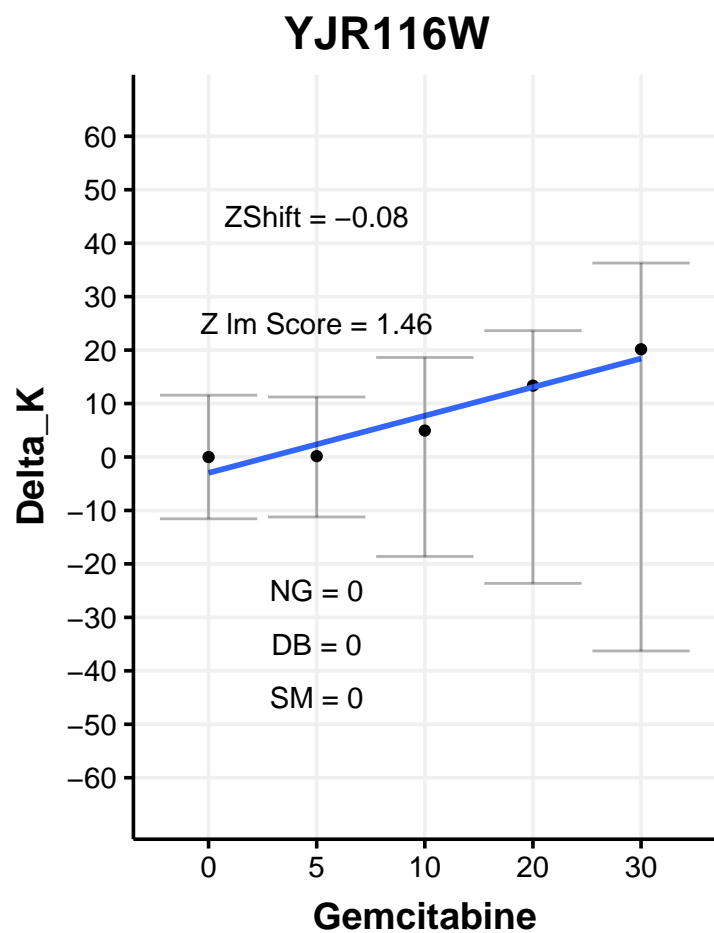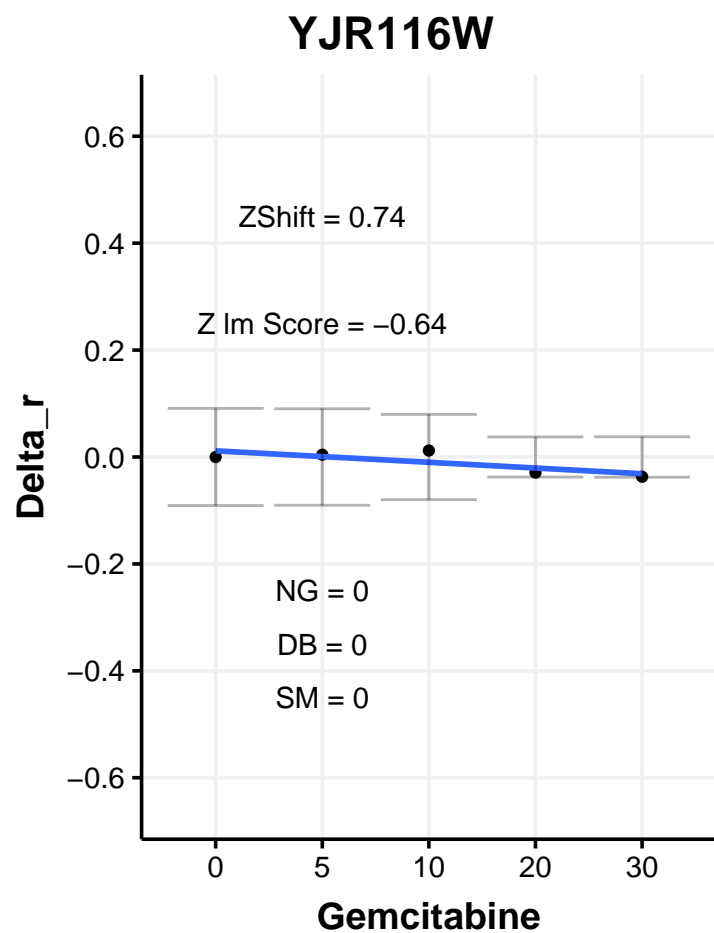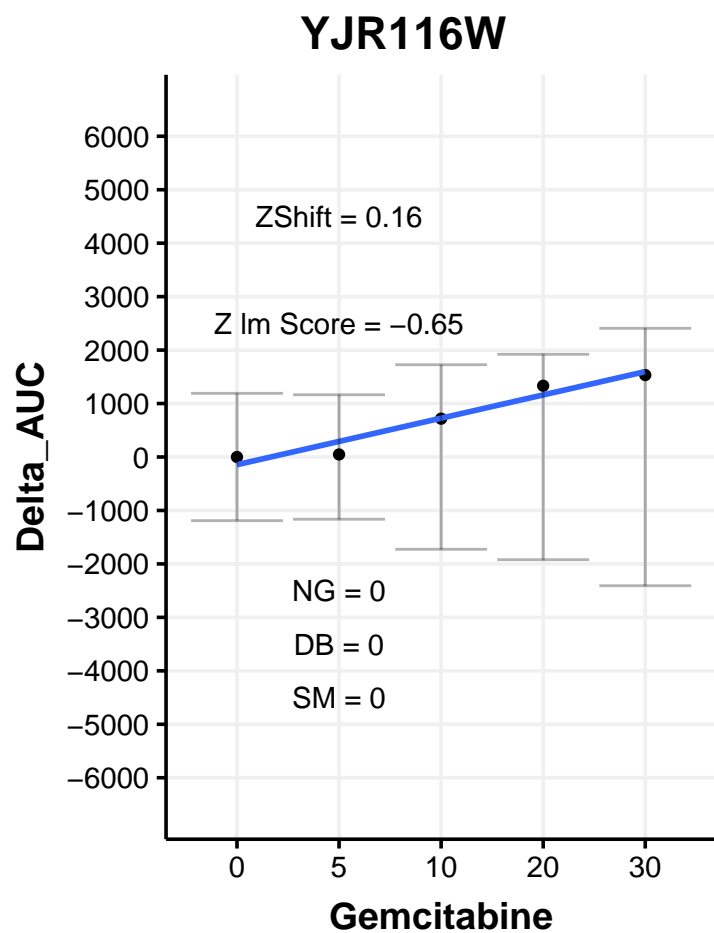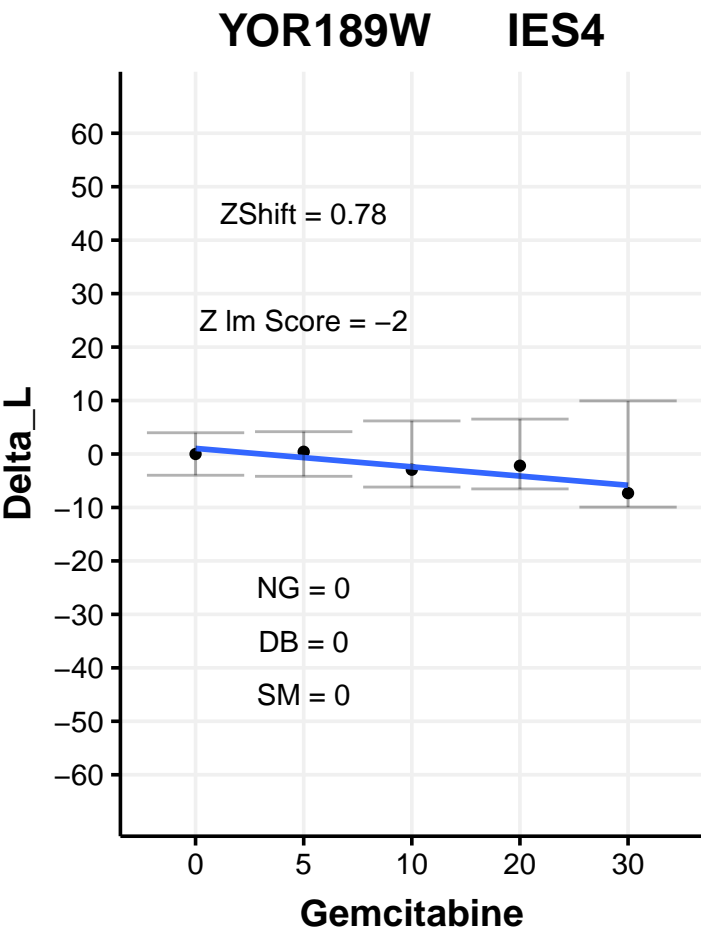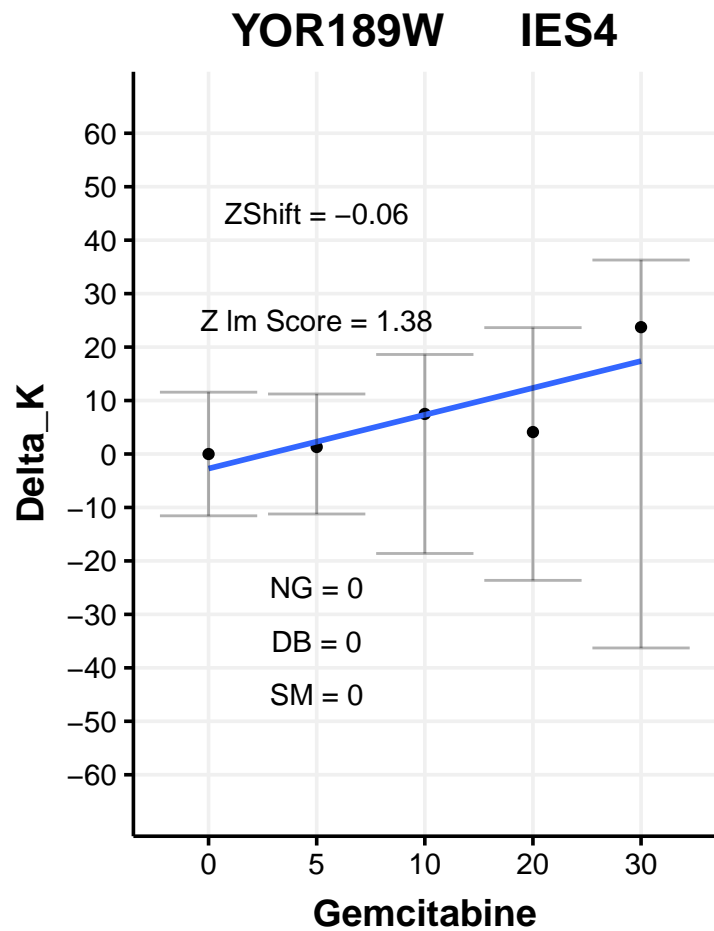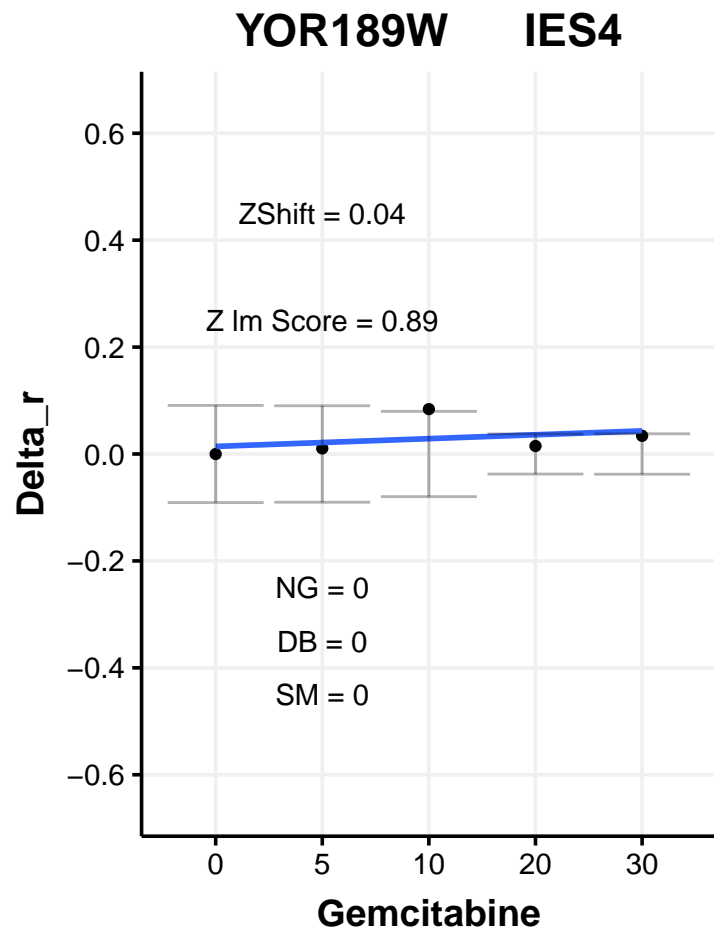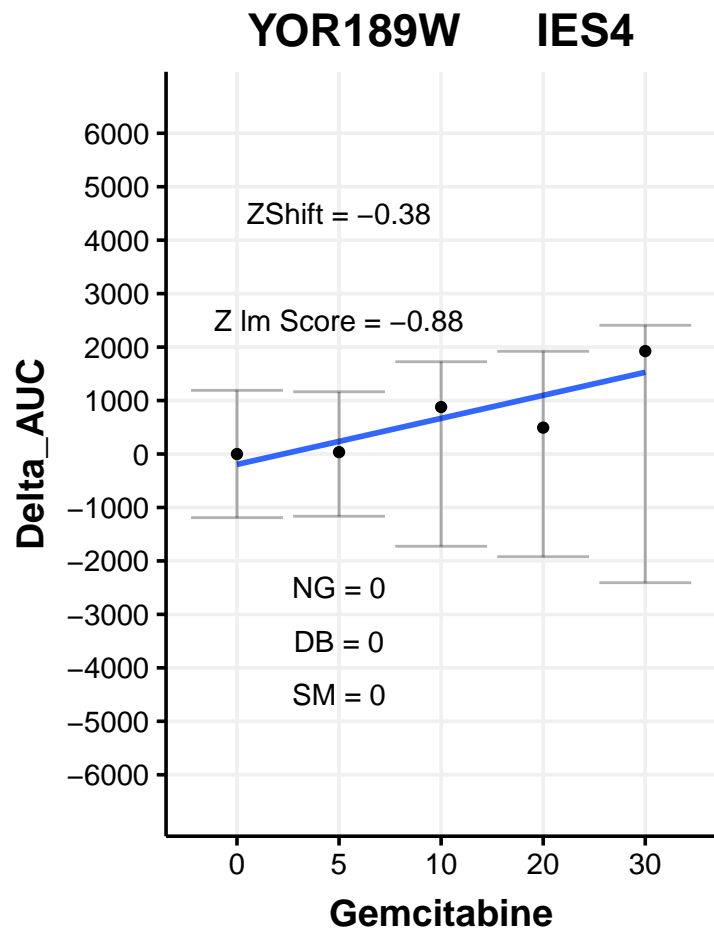

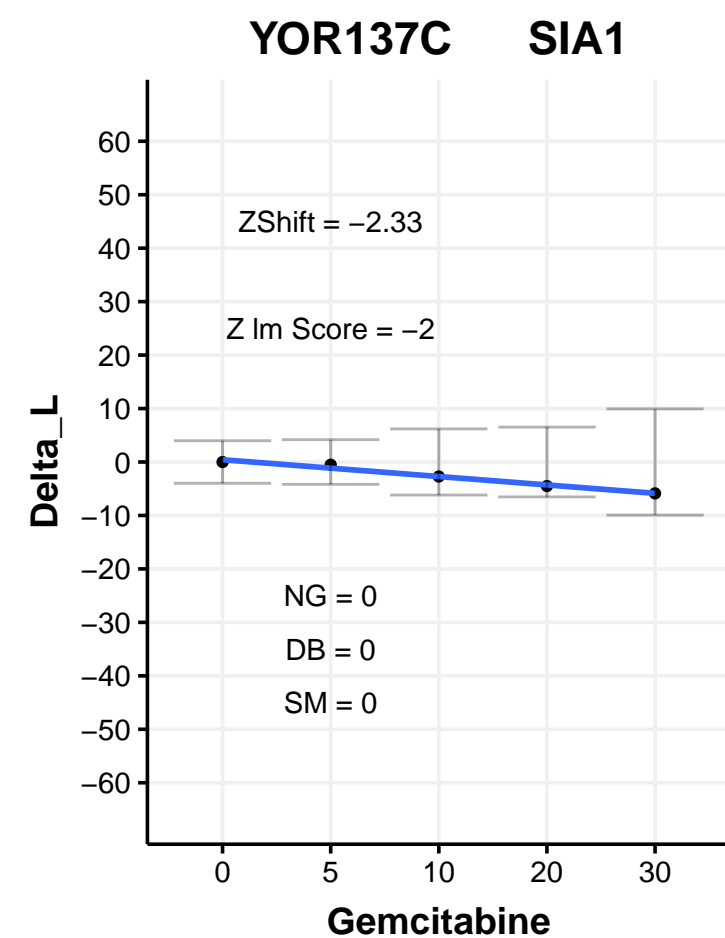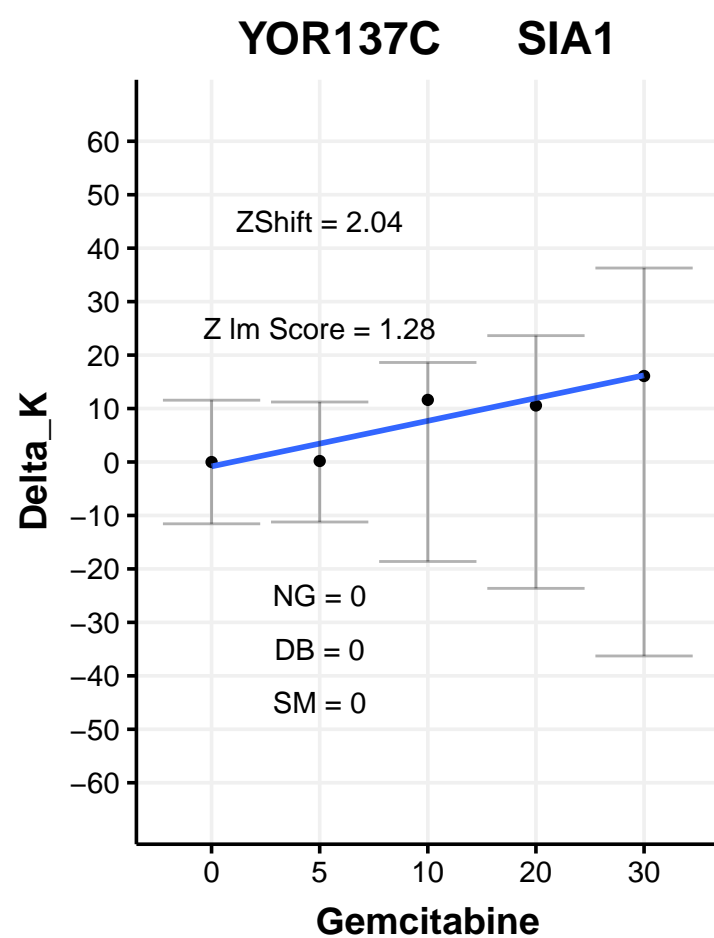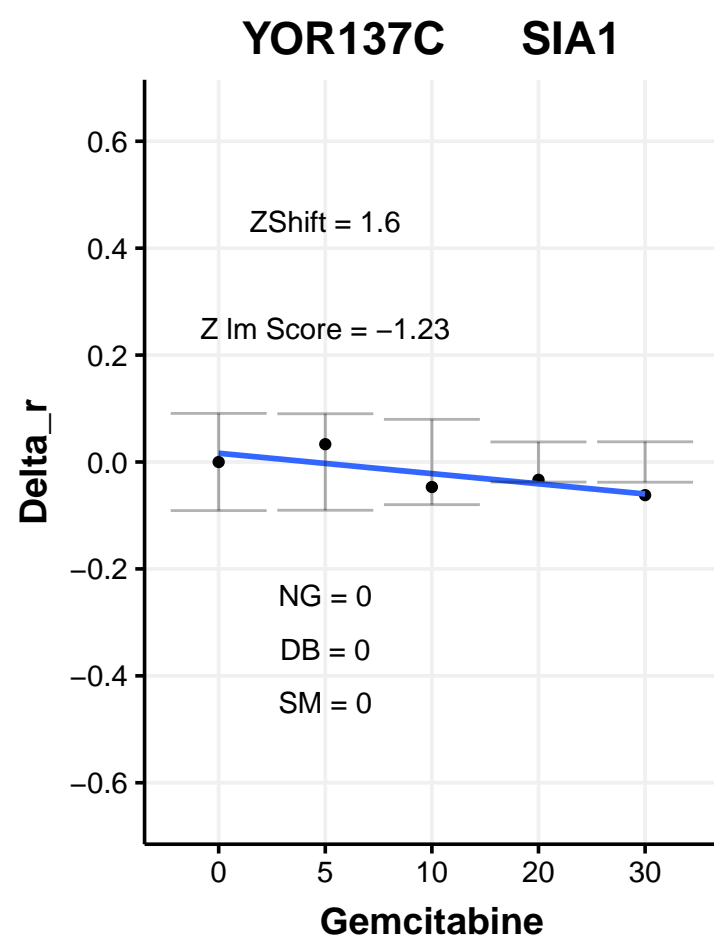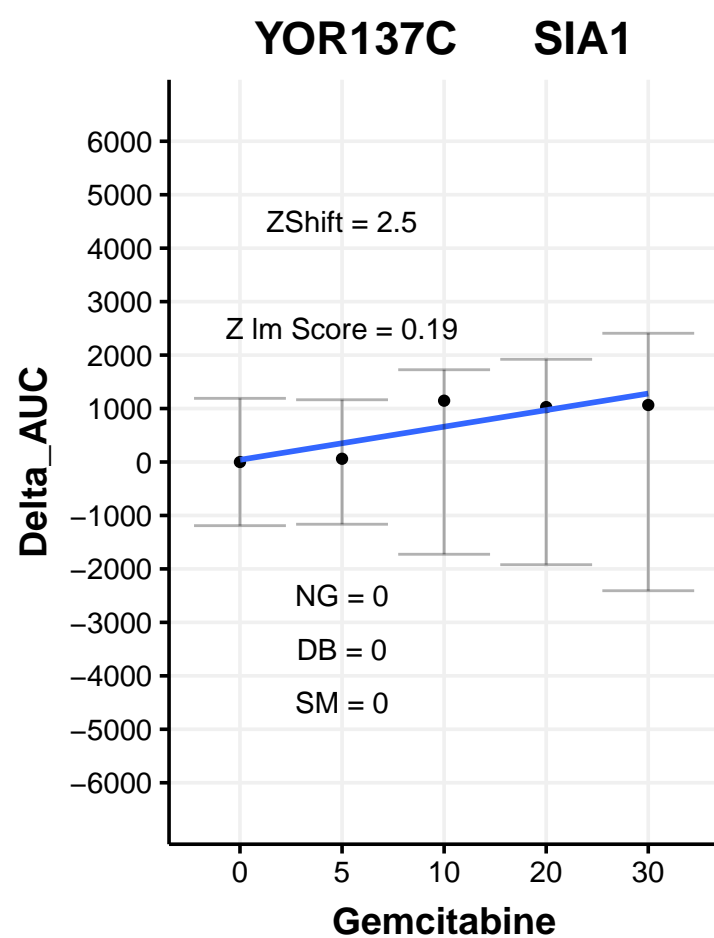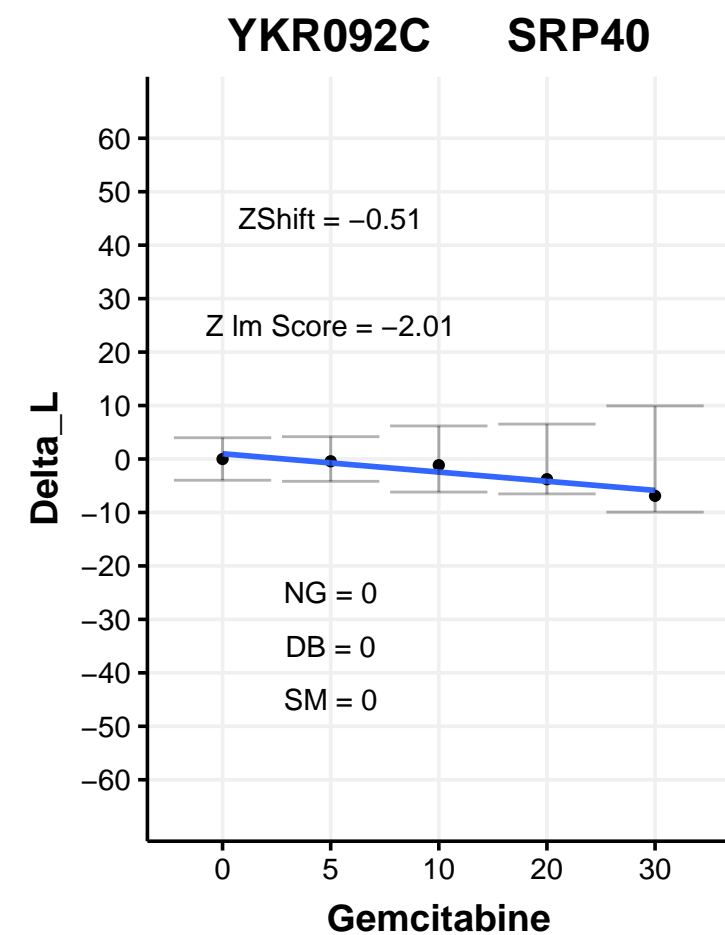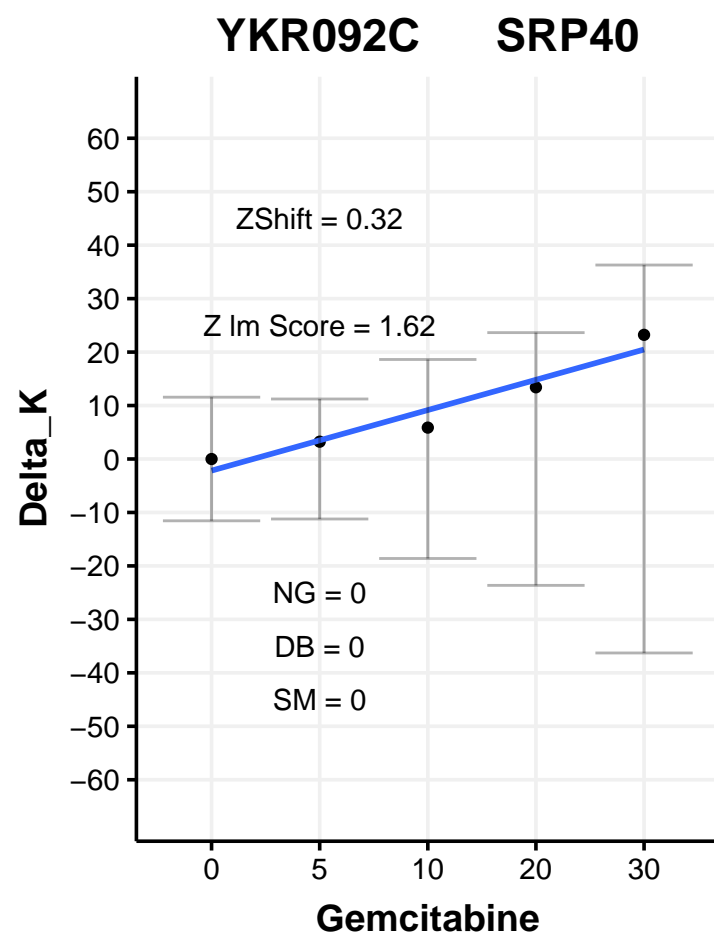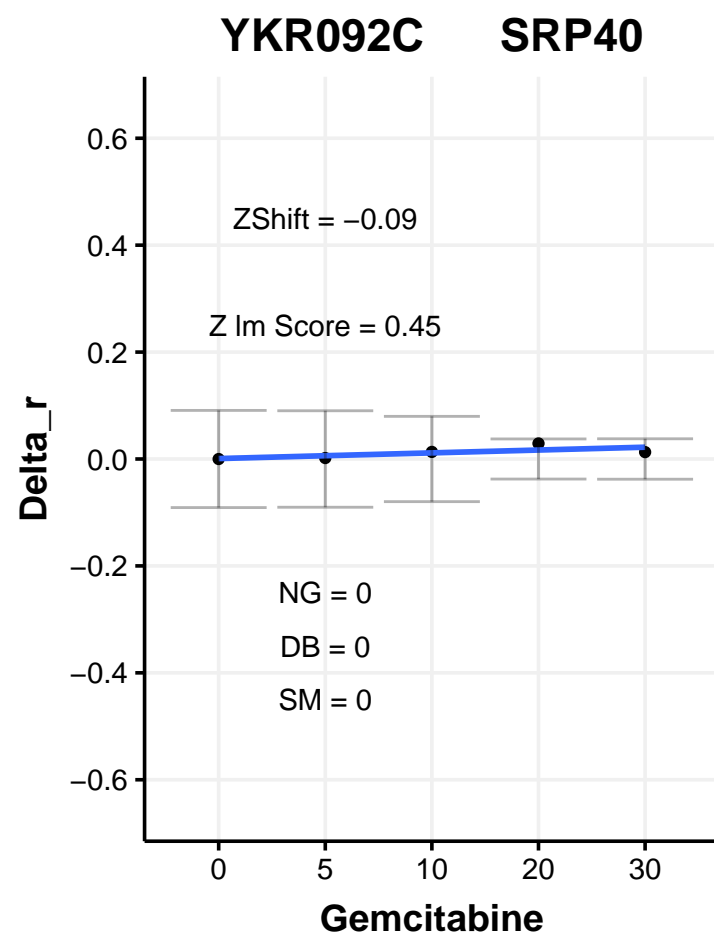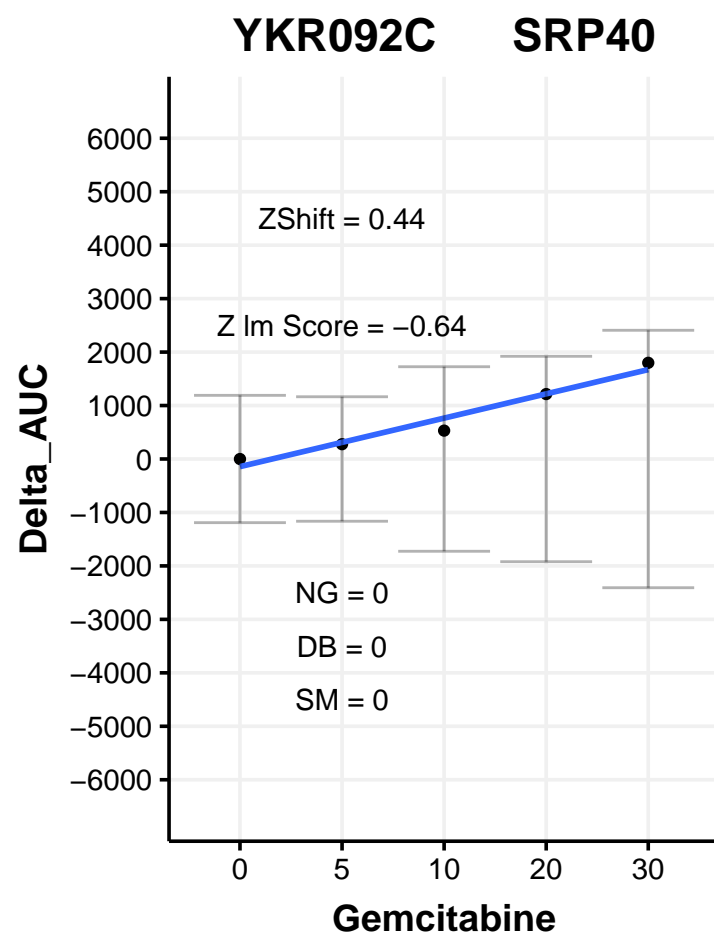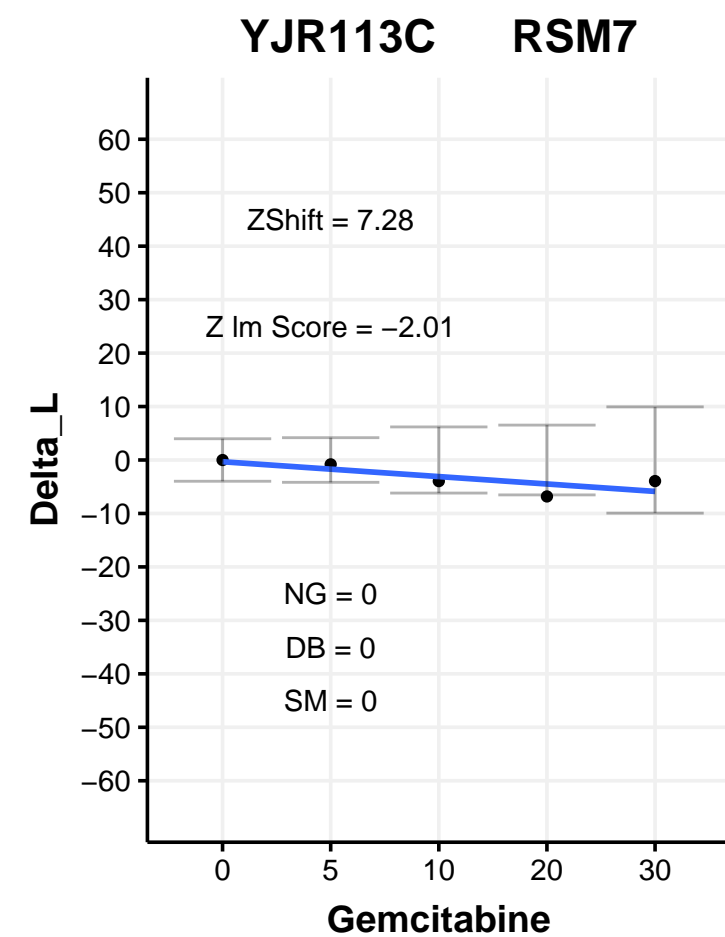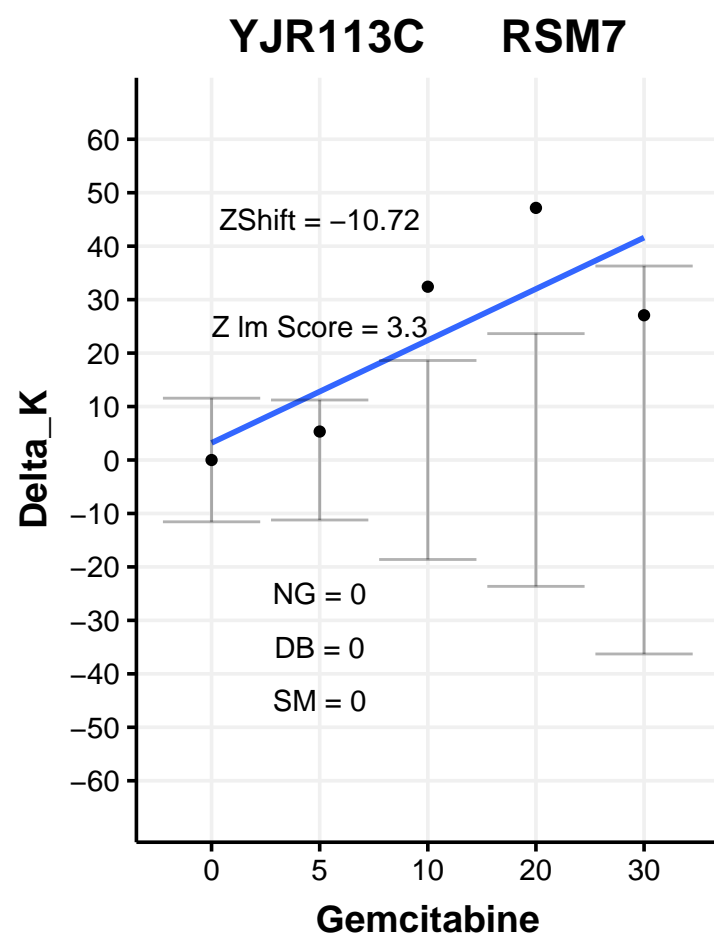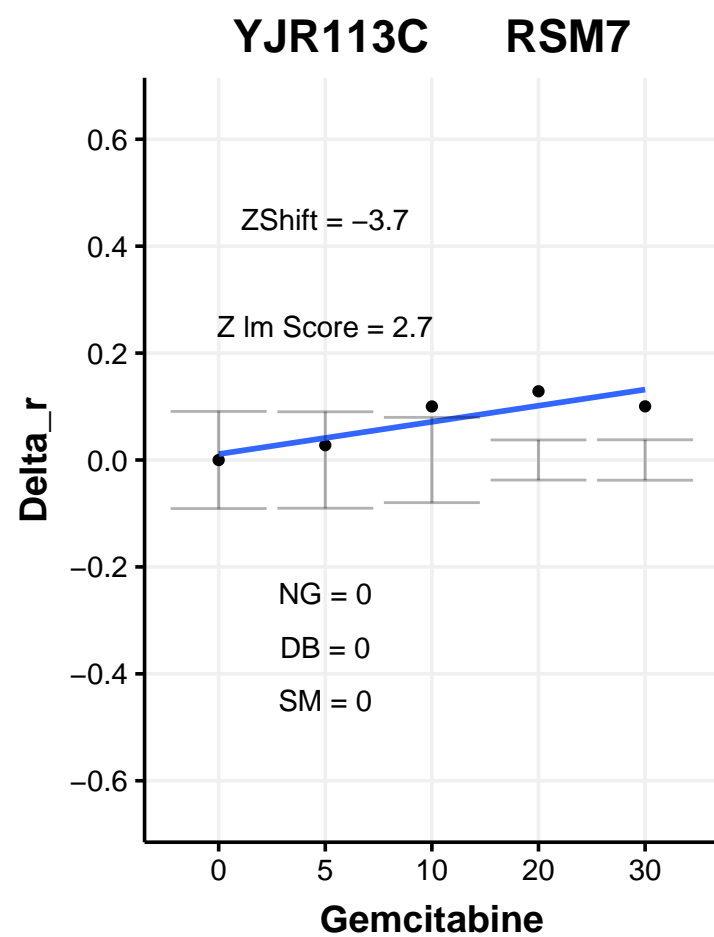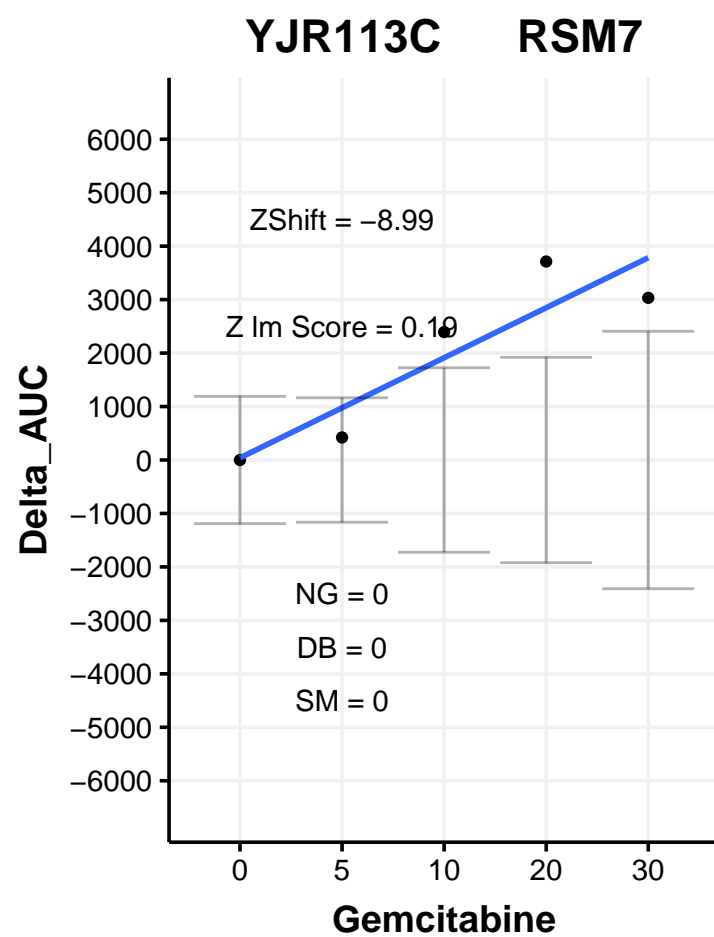

YMR262W

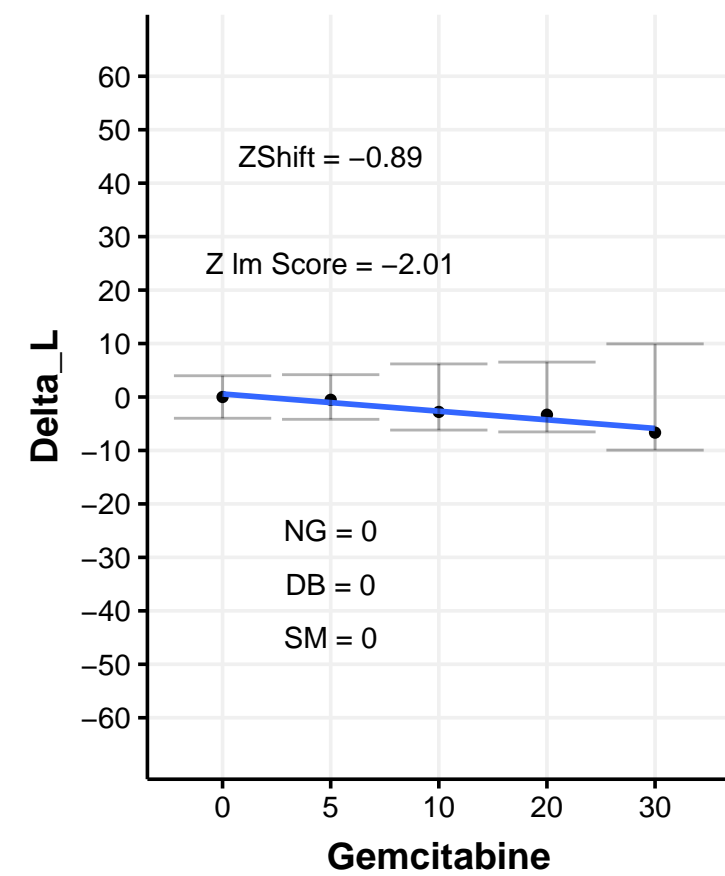

YMR262W

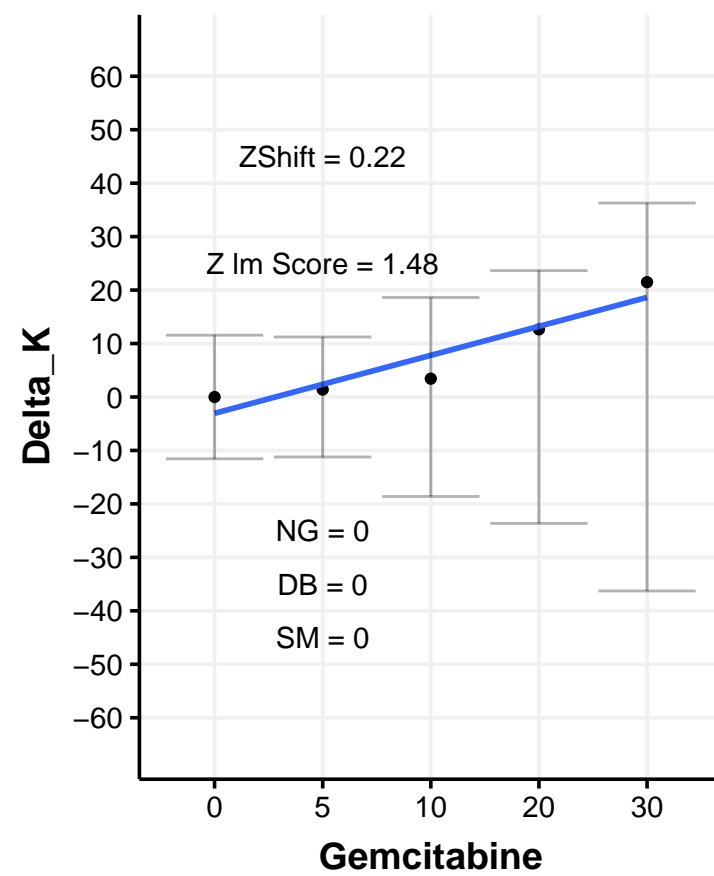

YMR262W

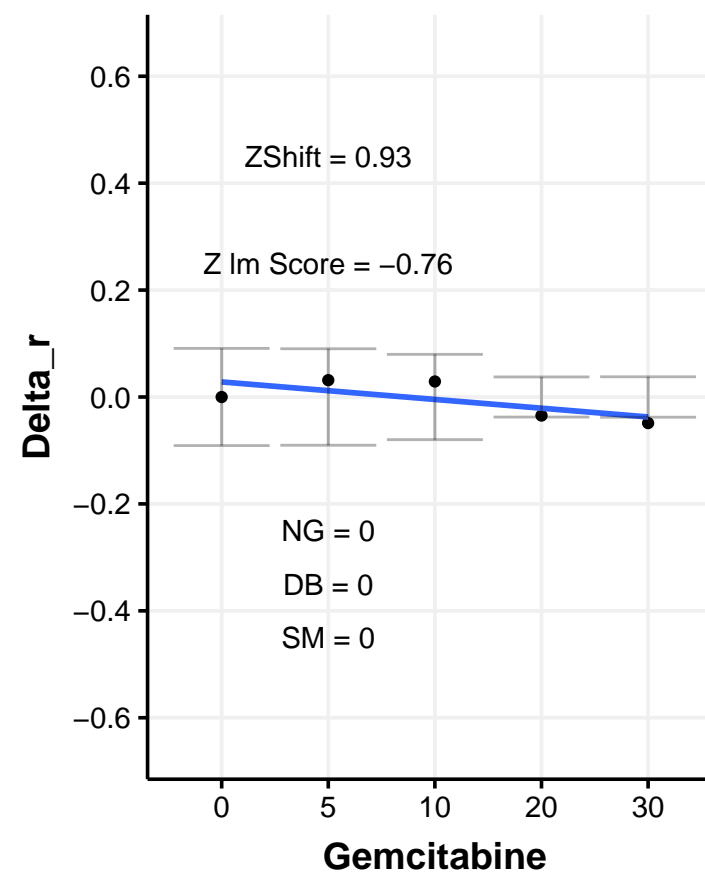

YMR262W

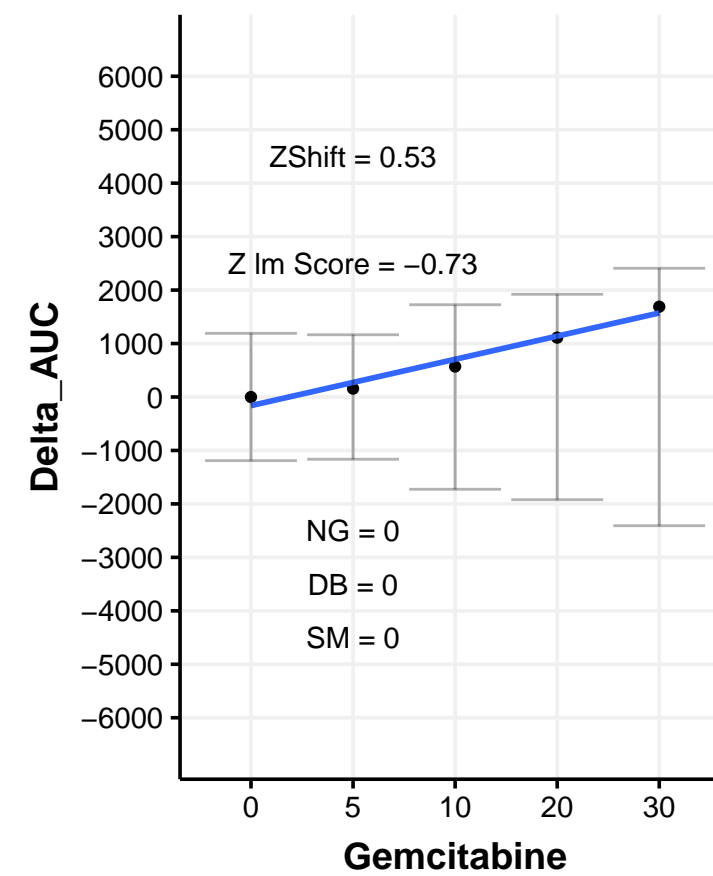

YOR187W TUF1

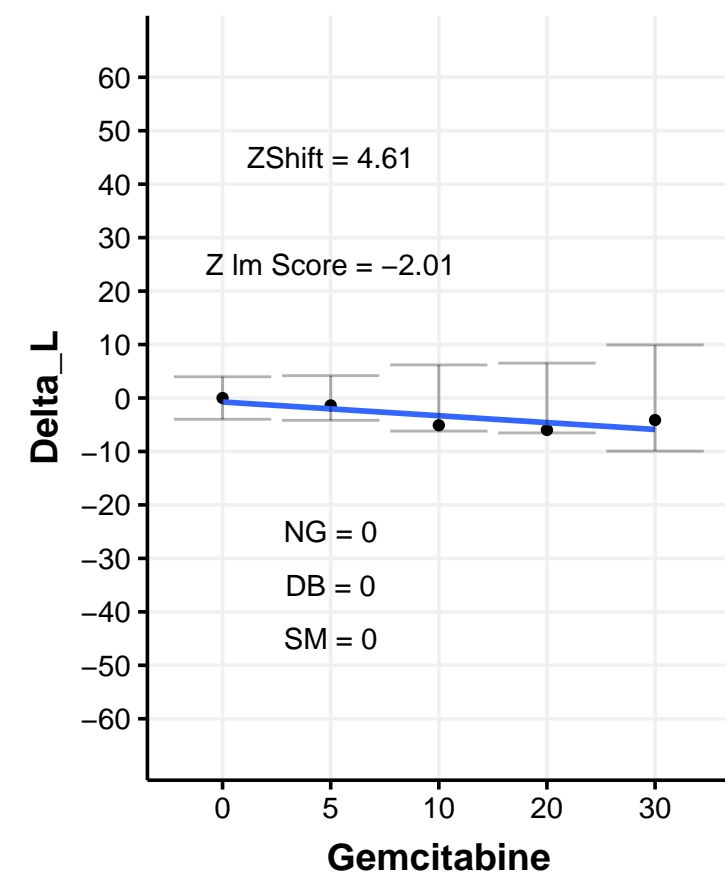

YOR187W TUF1

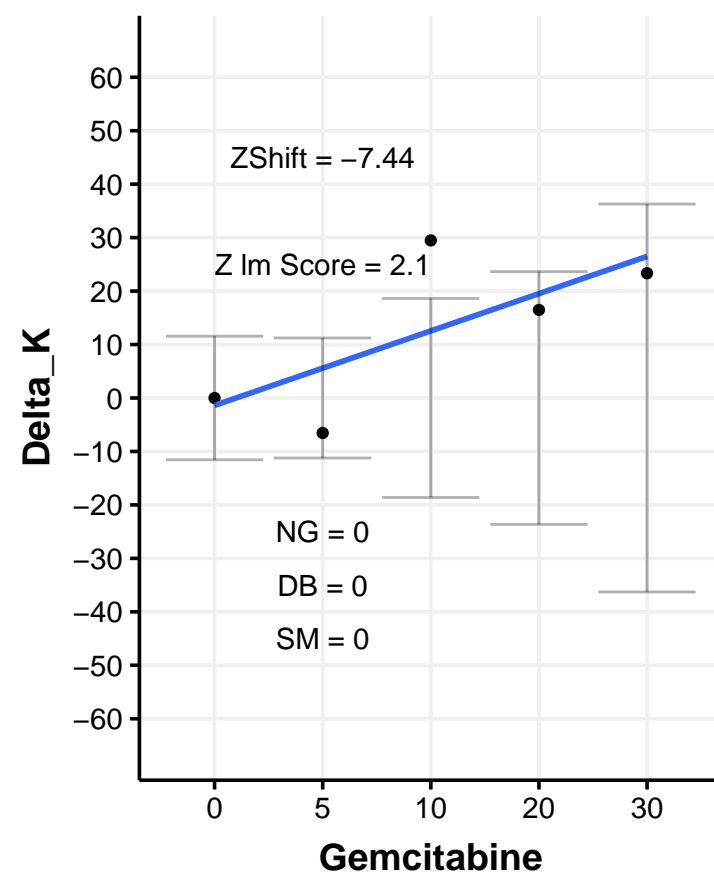

YOR187W TUF1

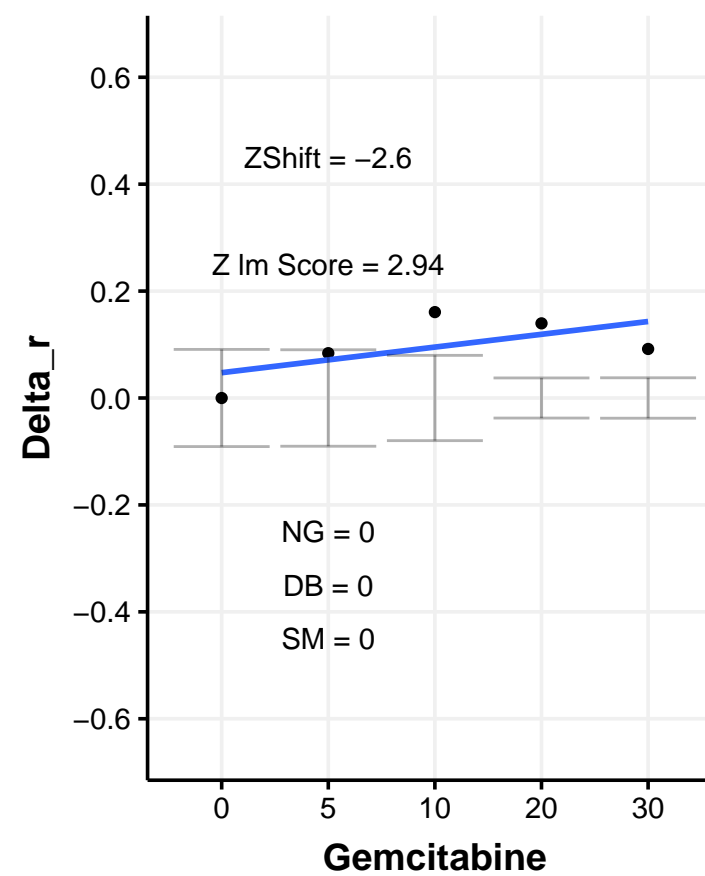

YOR187W TUF1

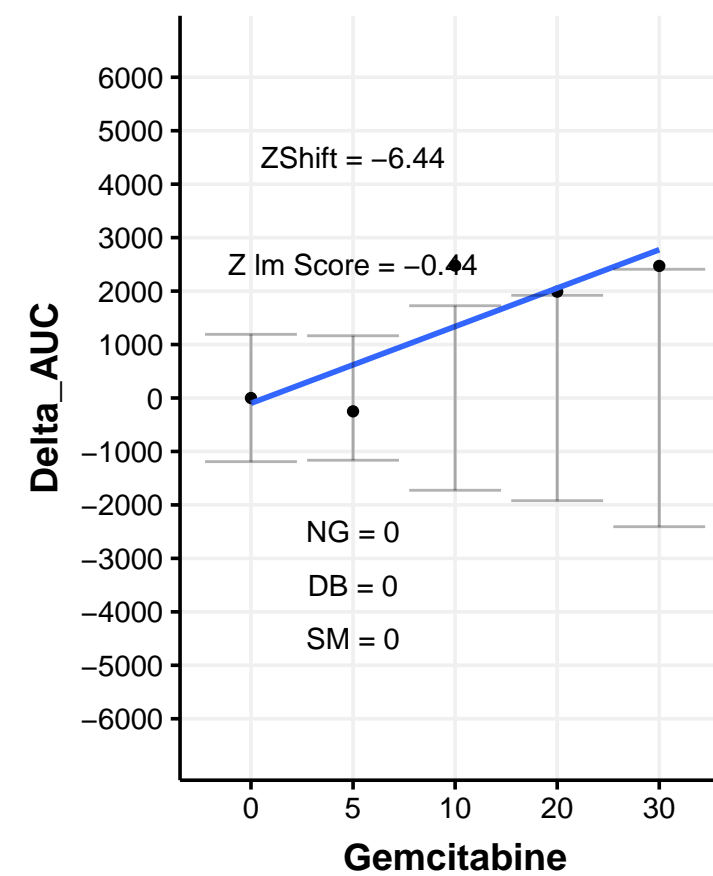

YGL043W DST1

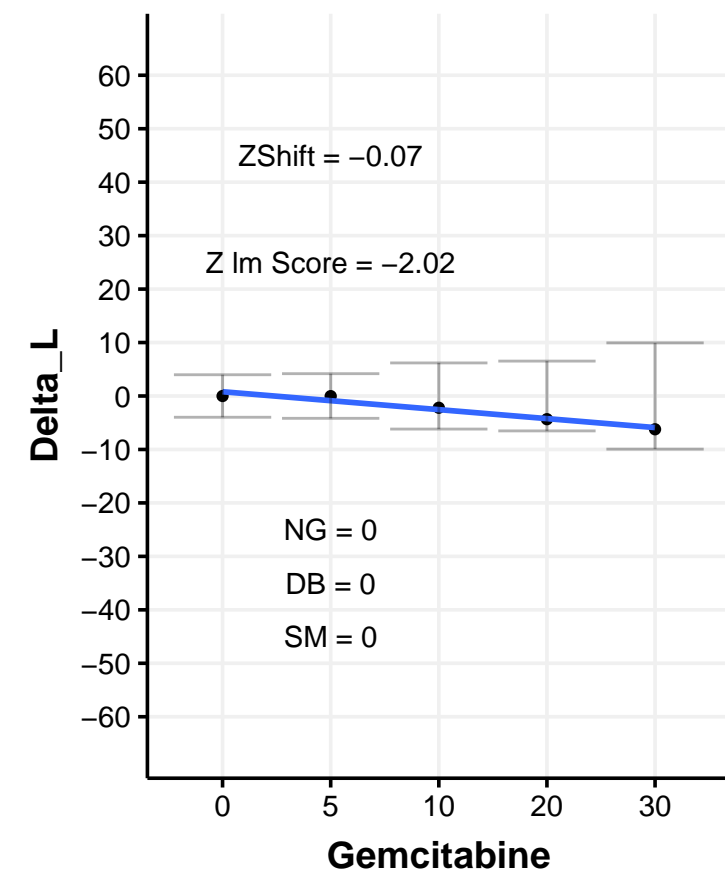

YGL043W DST1

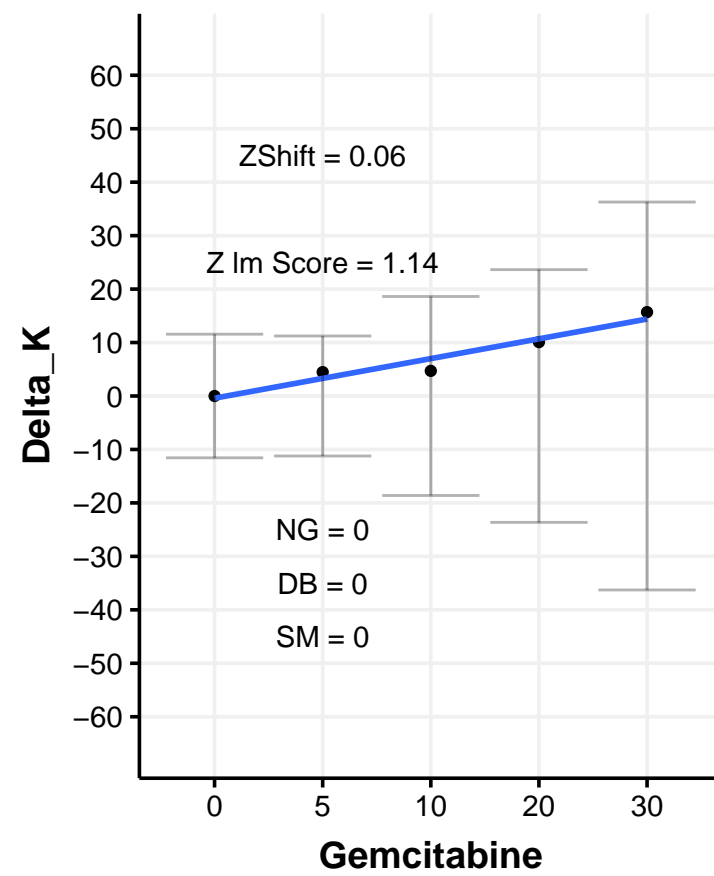

YGL043W DST1

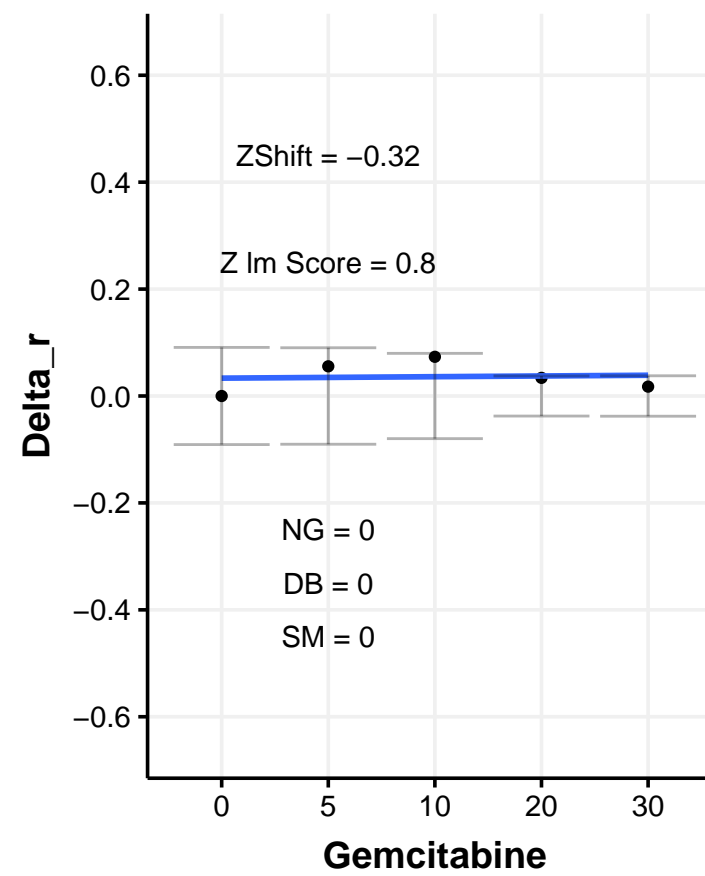

YGL043W DST1

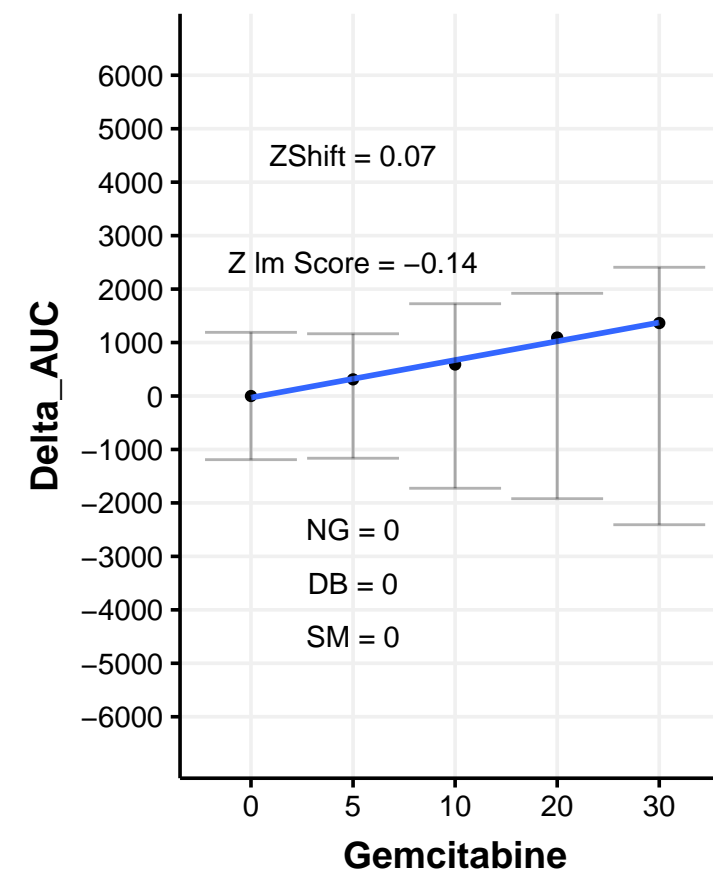

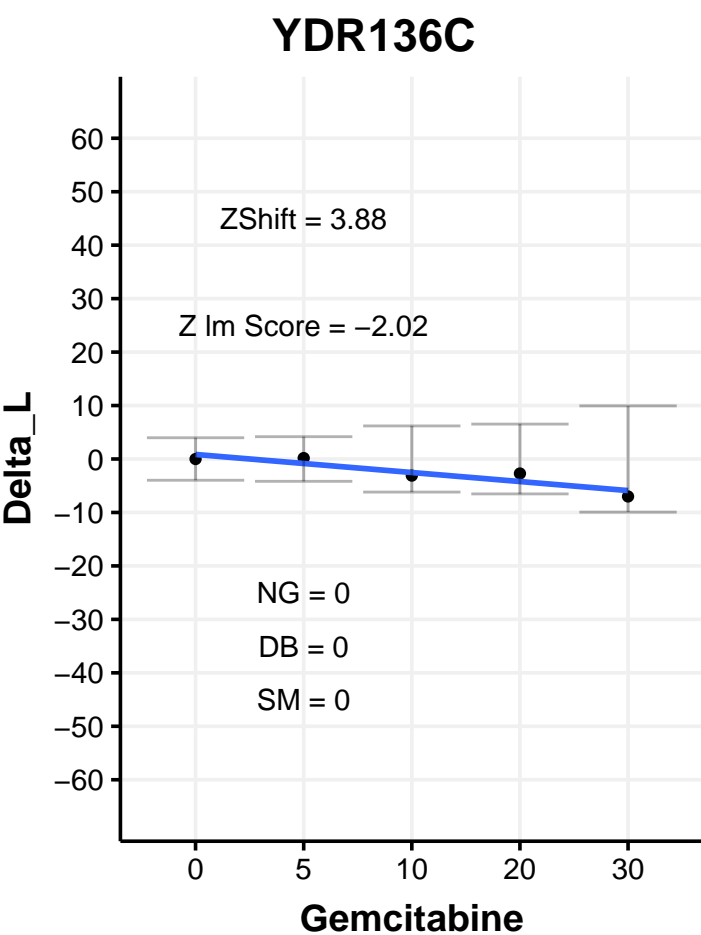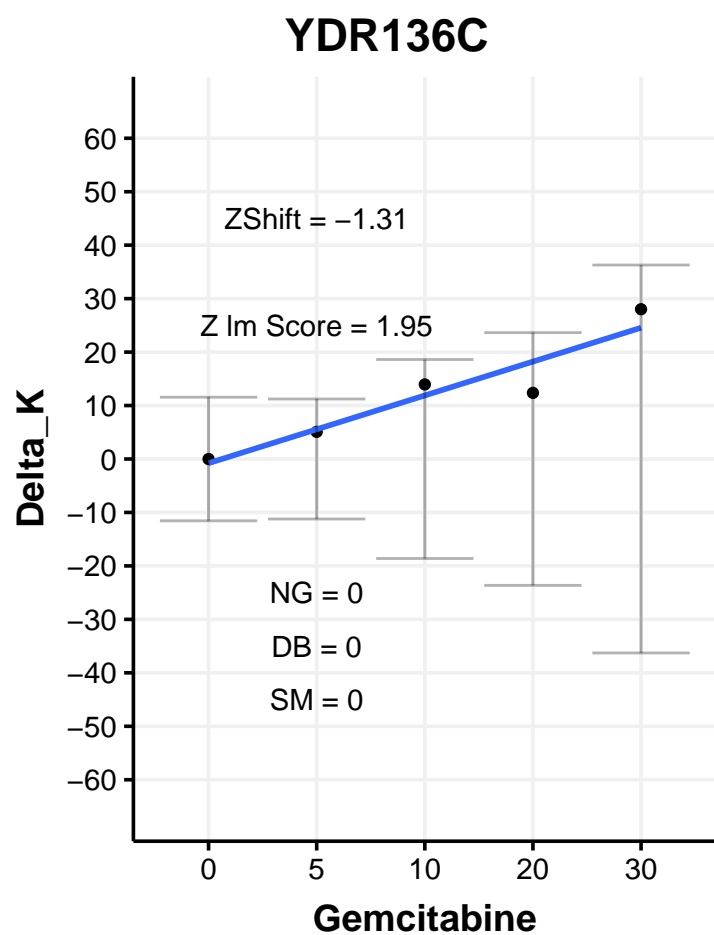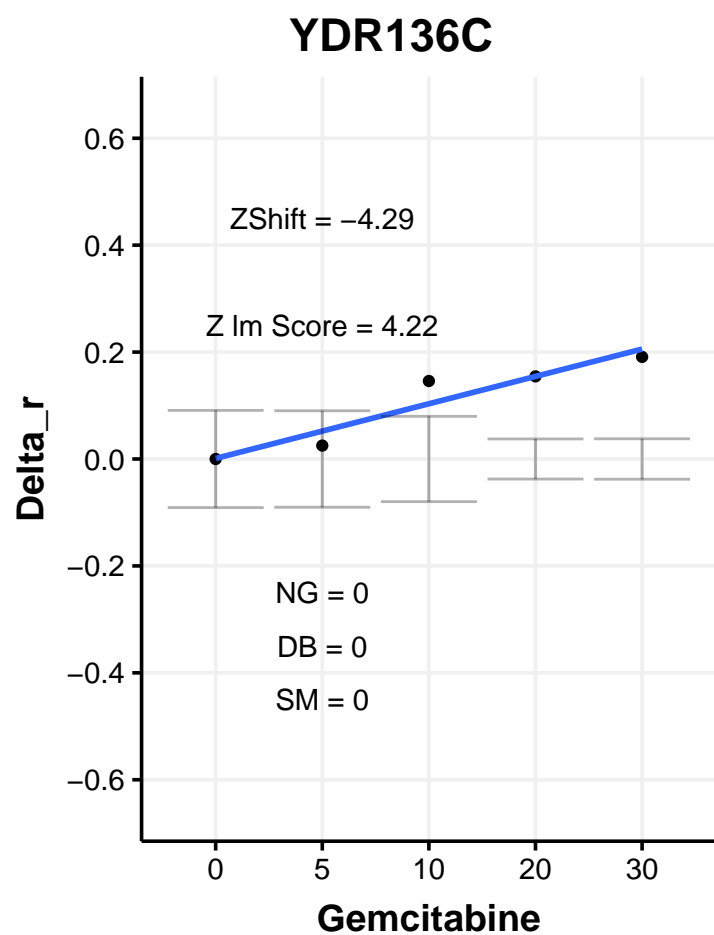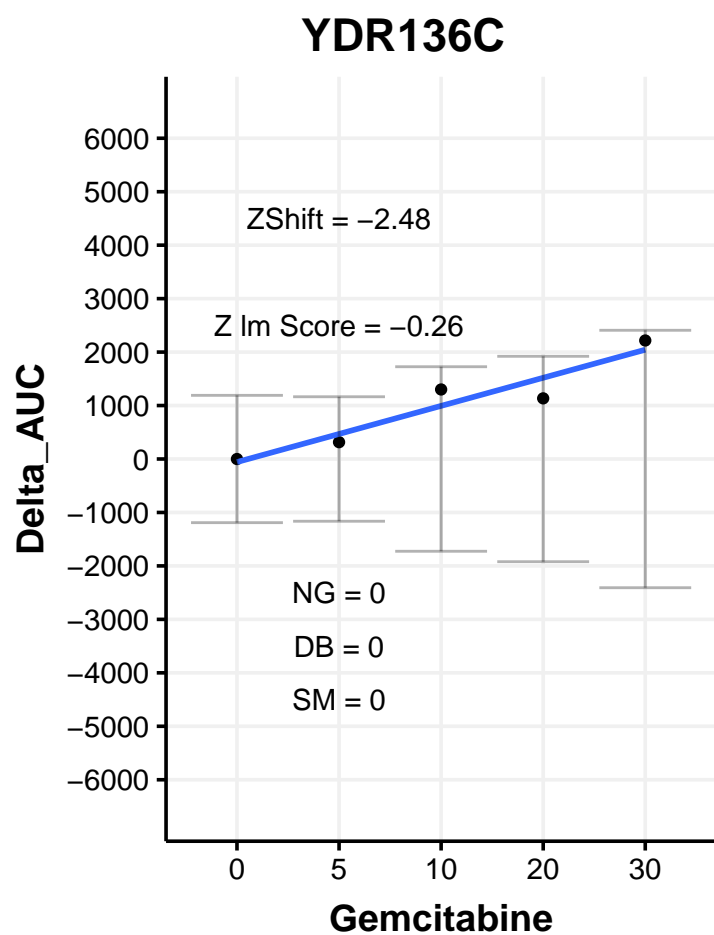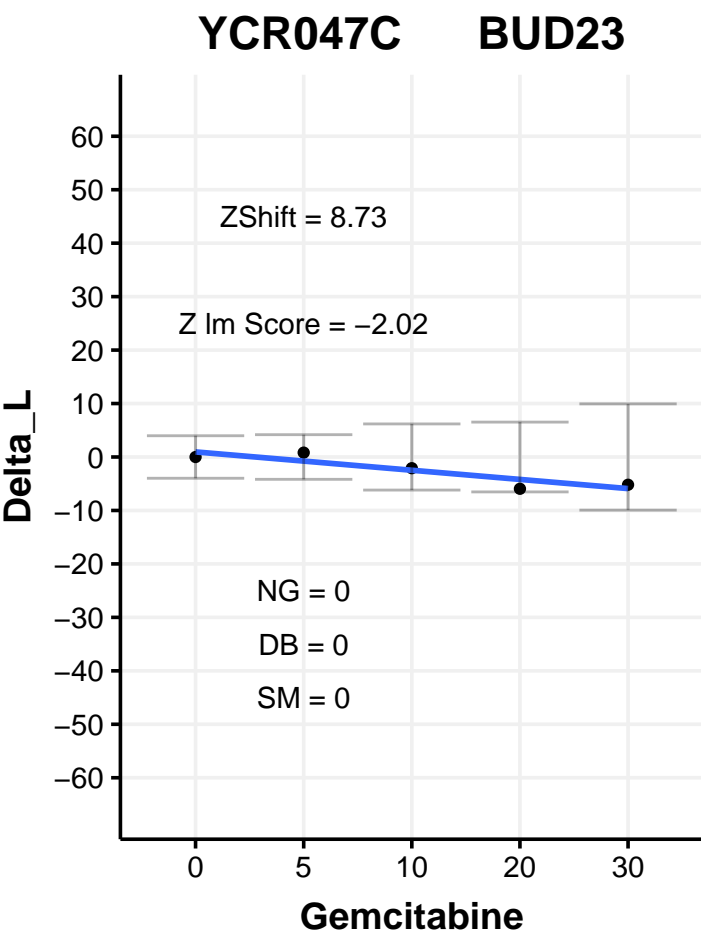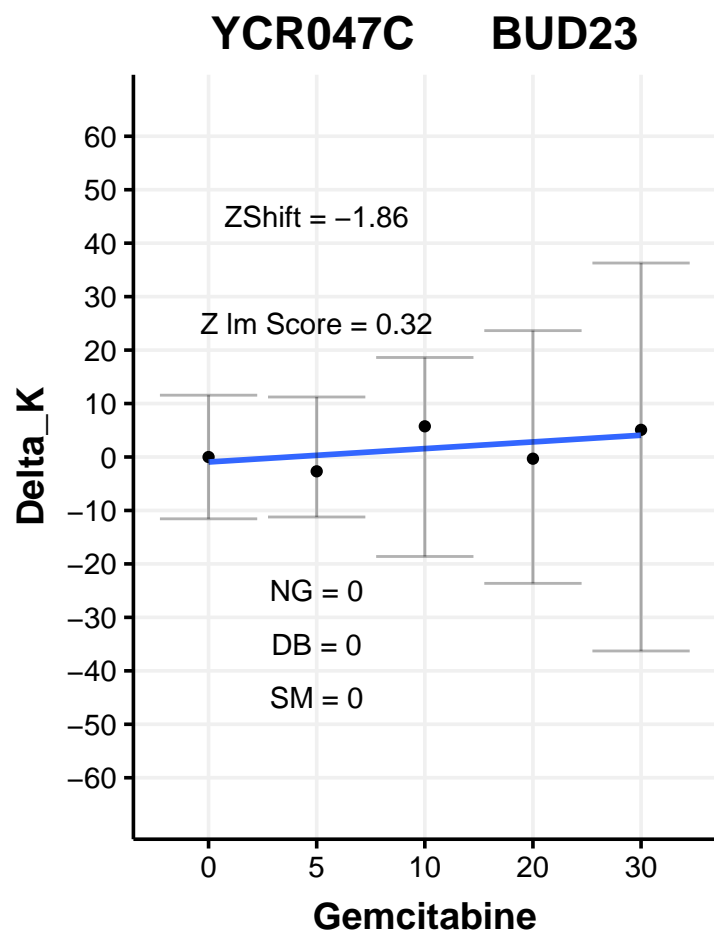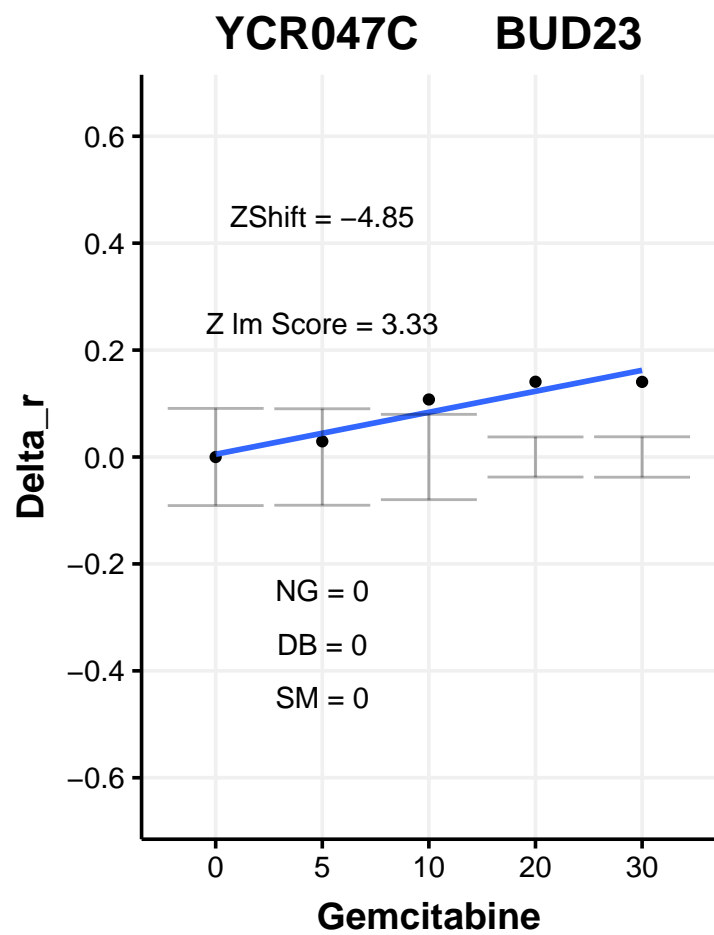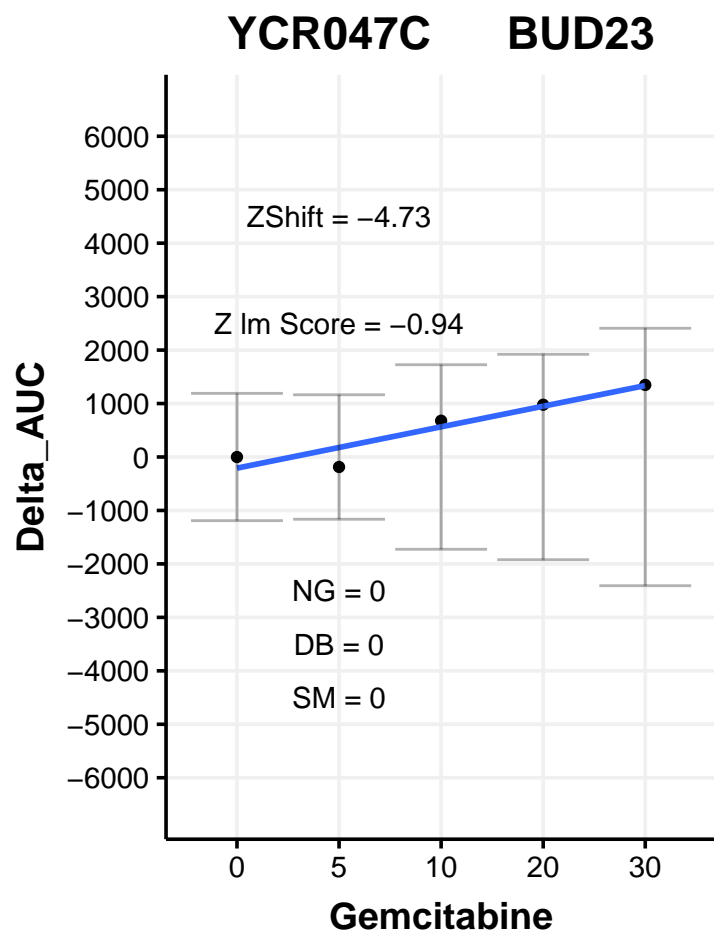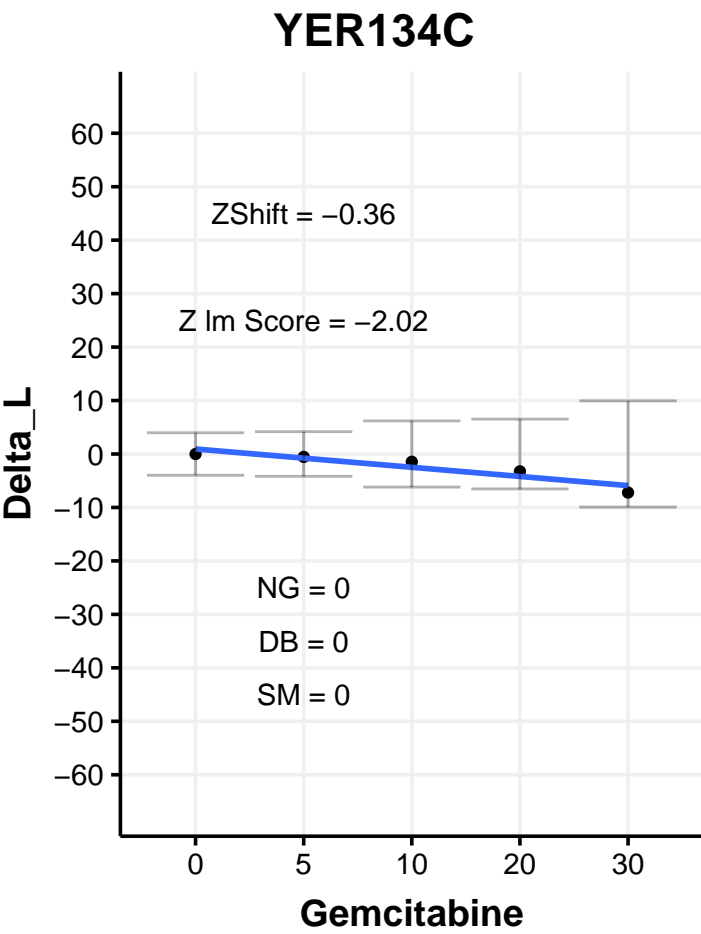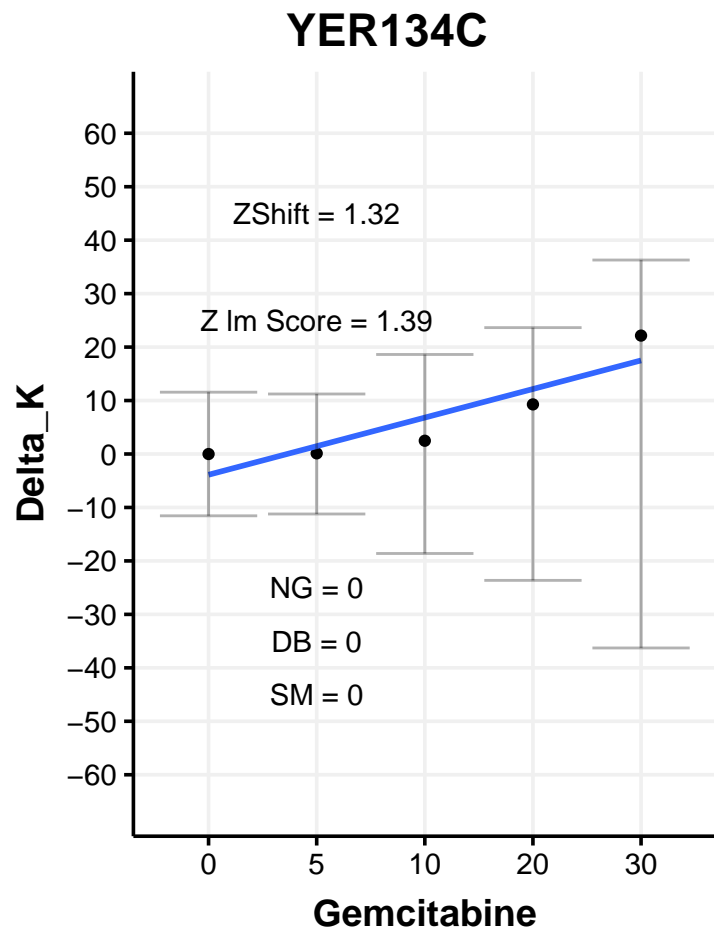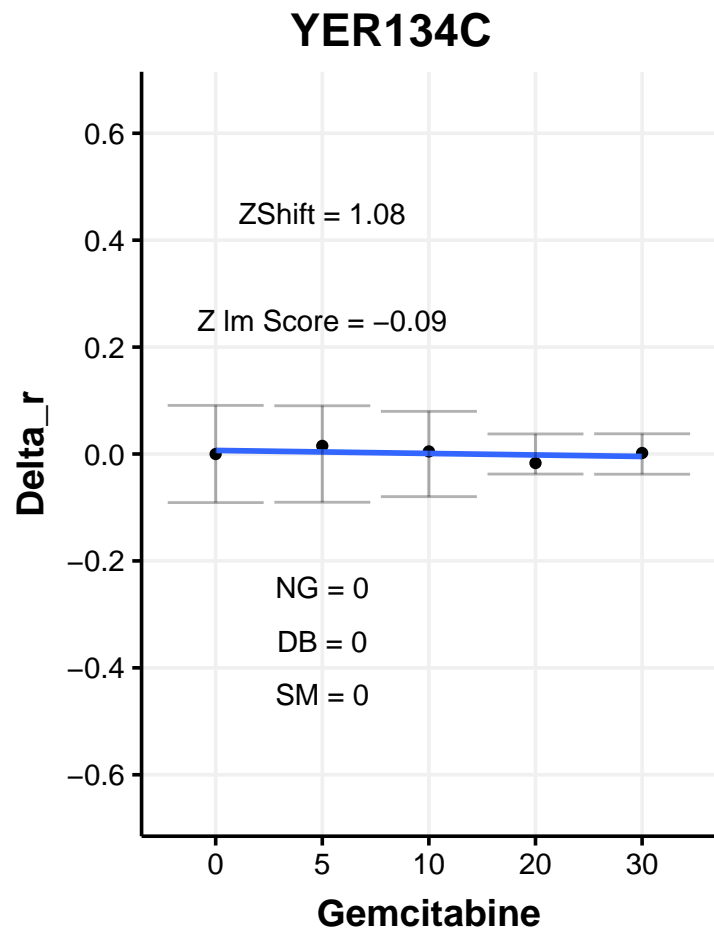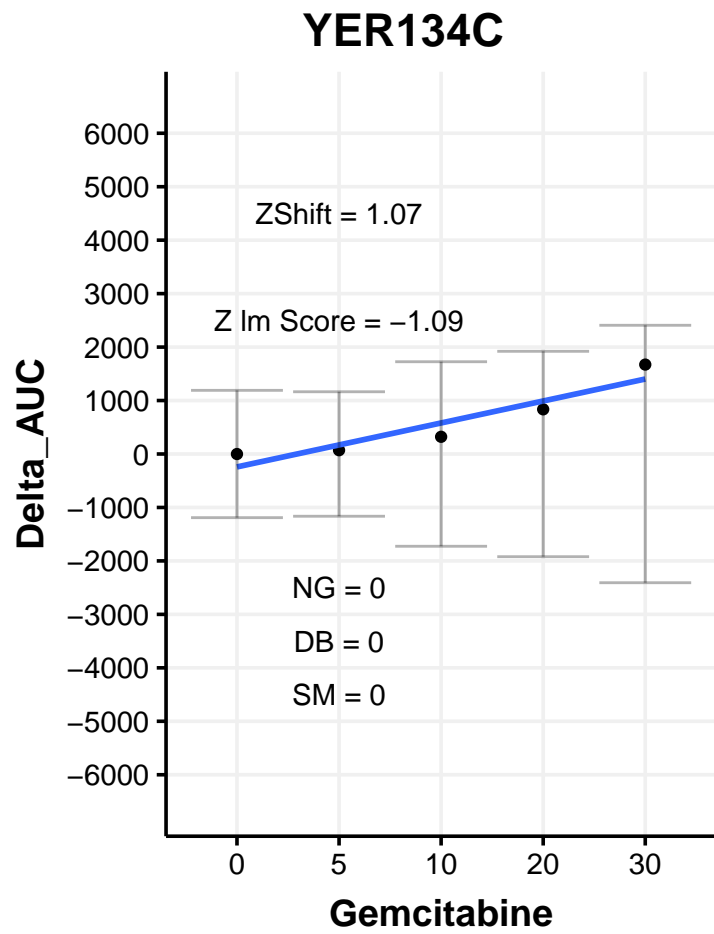



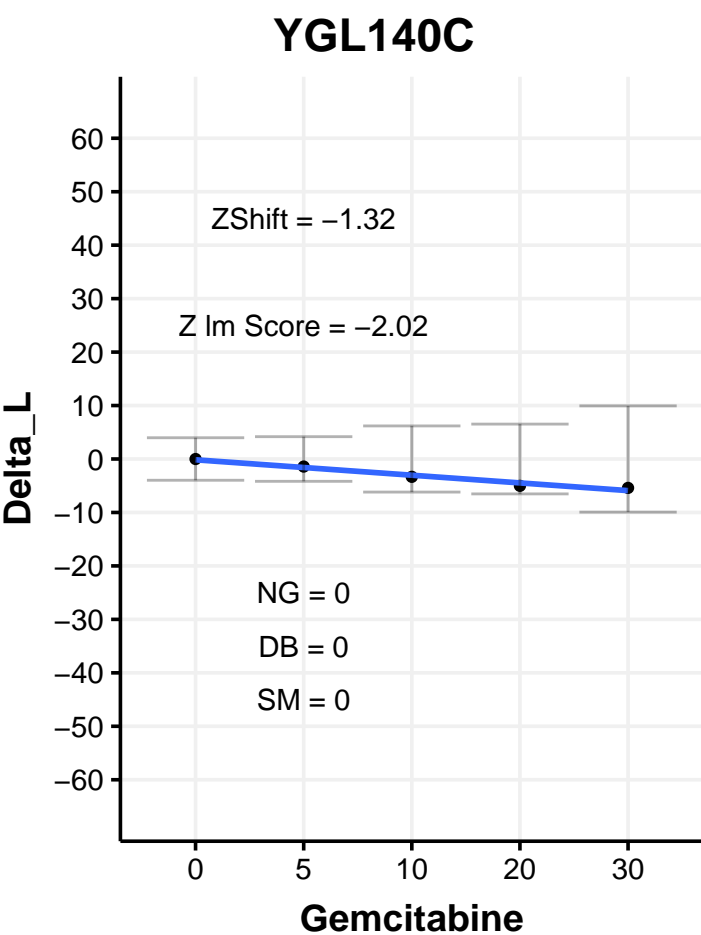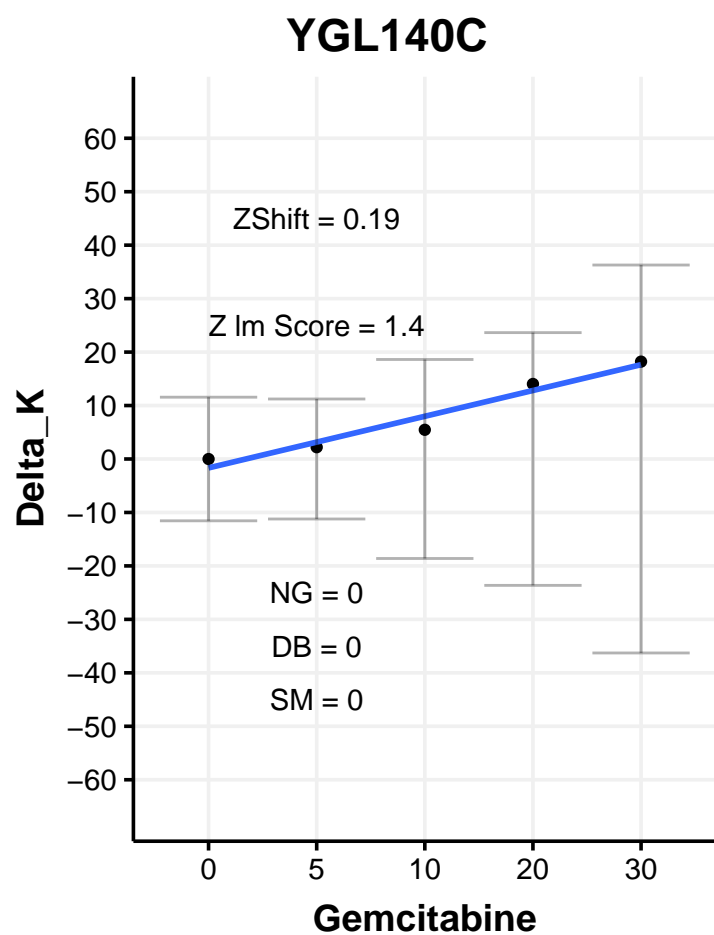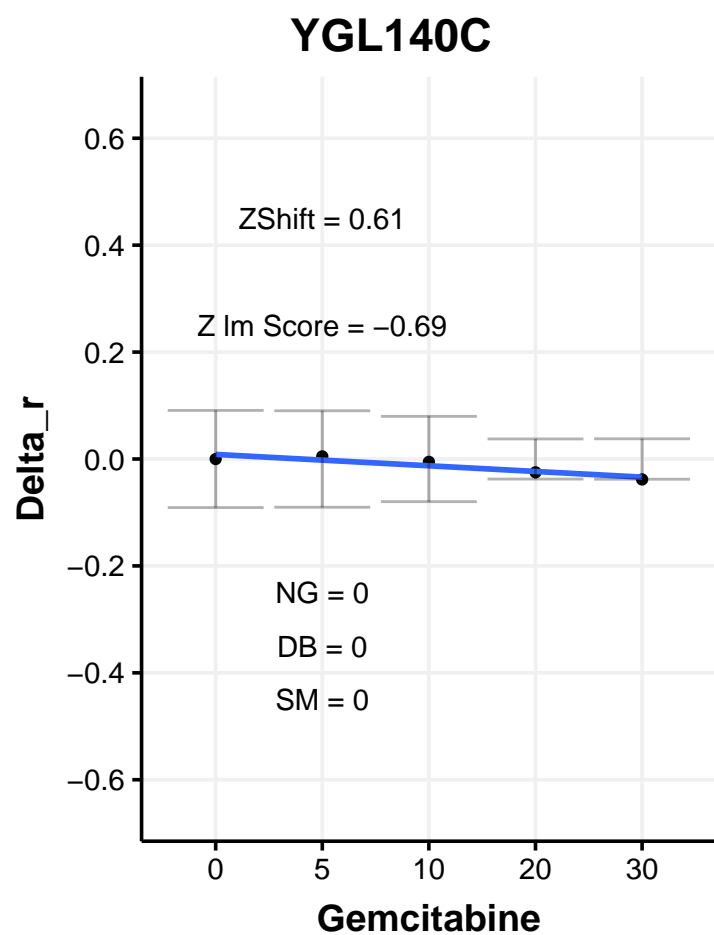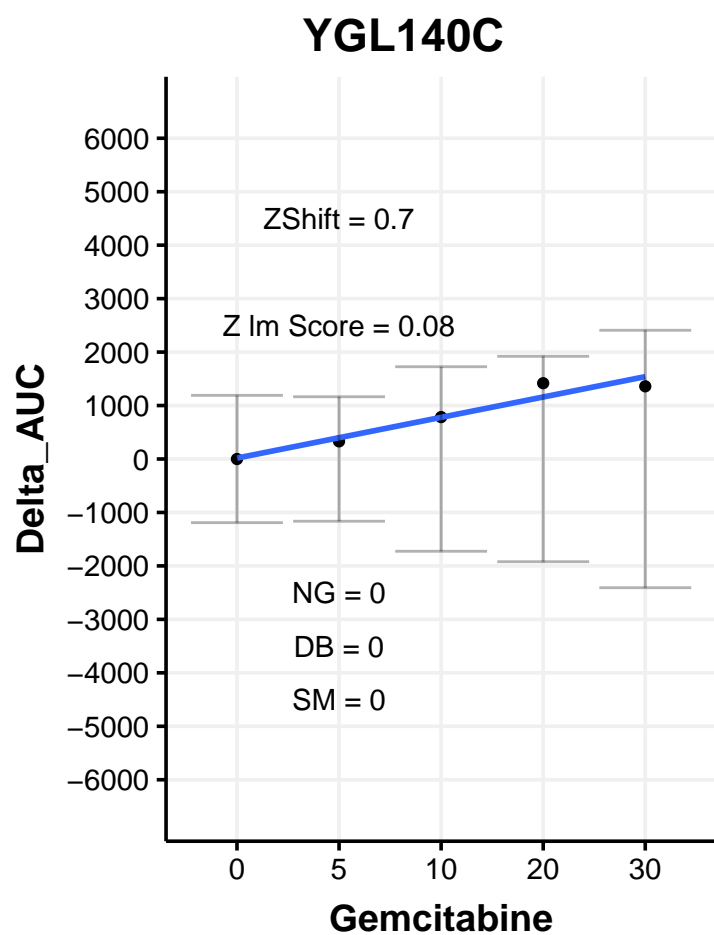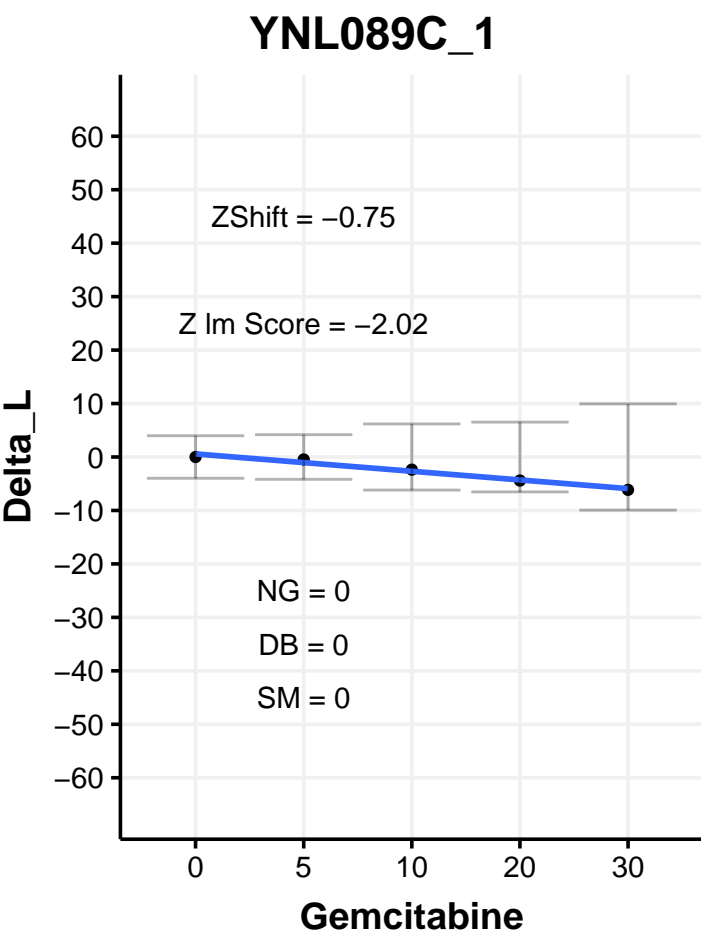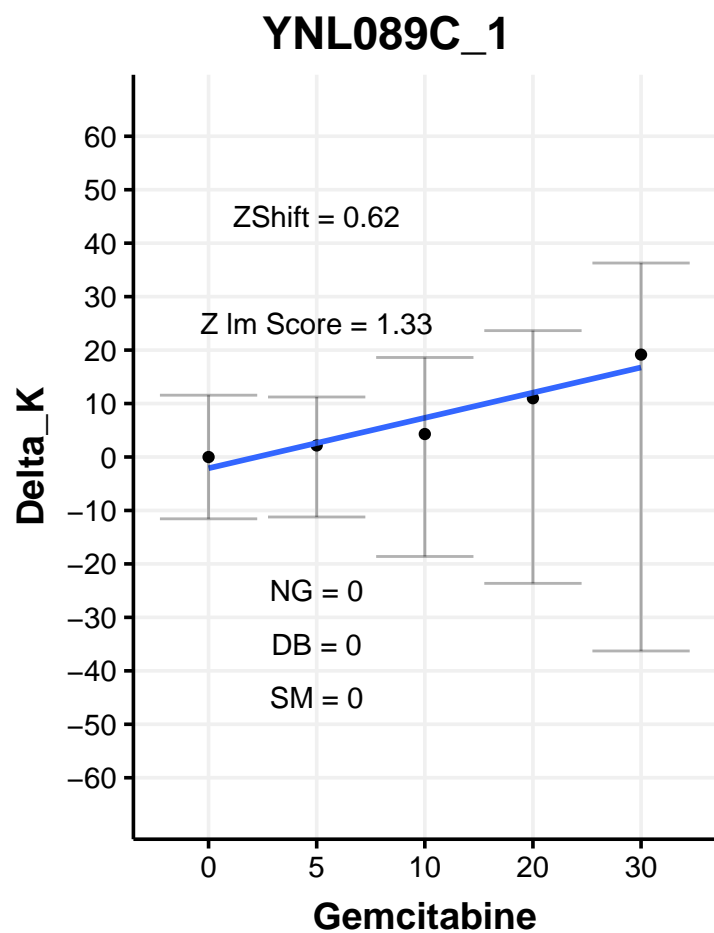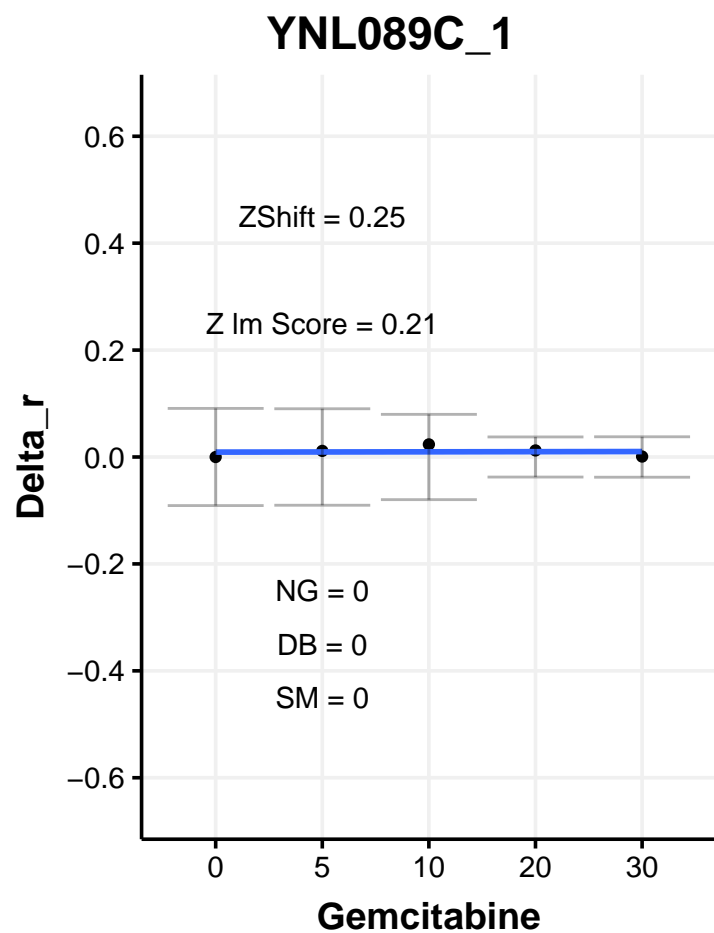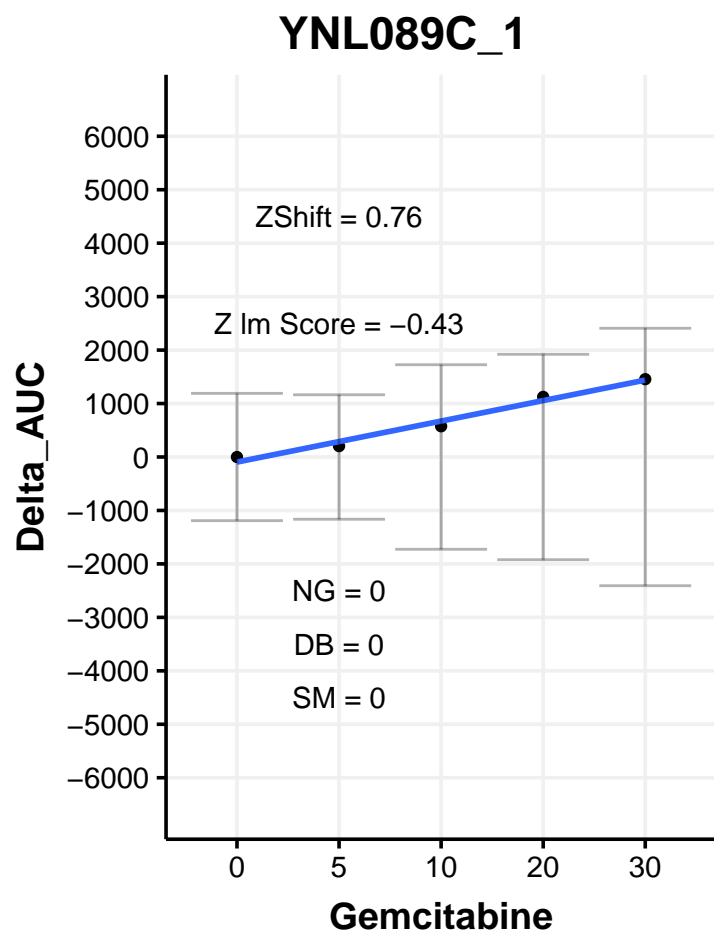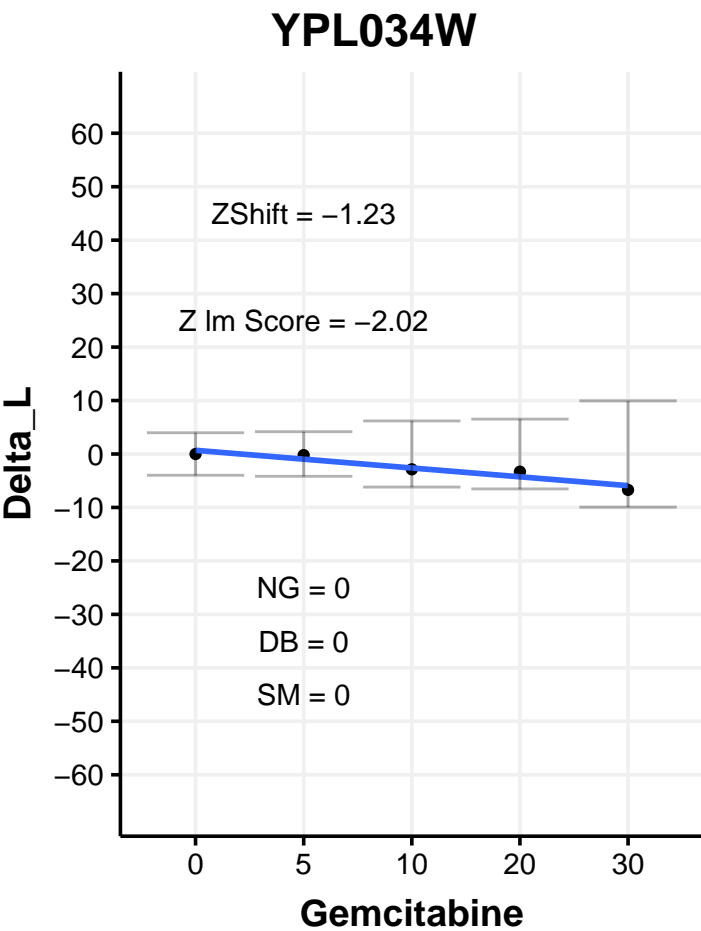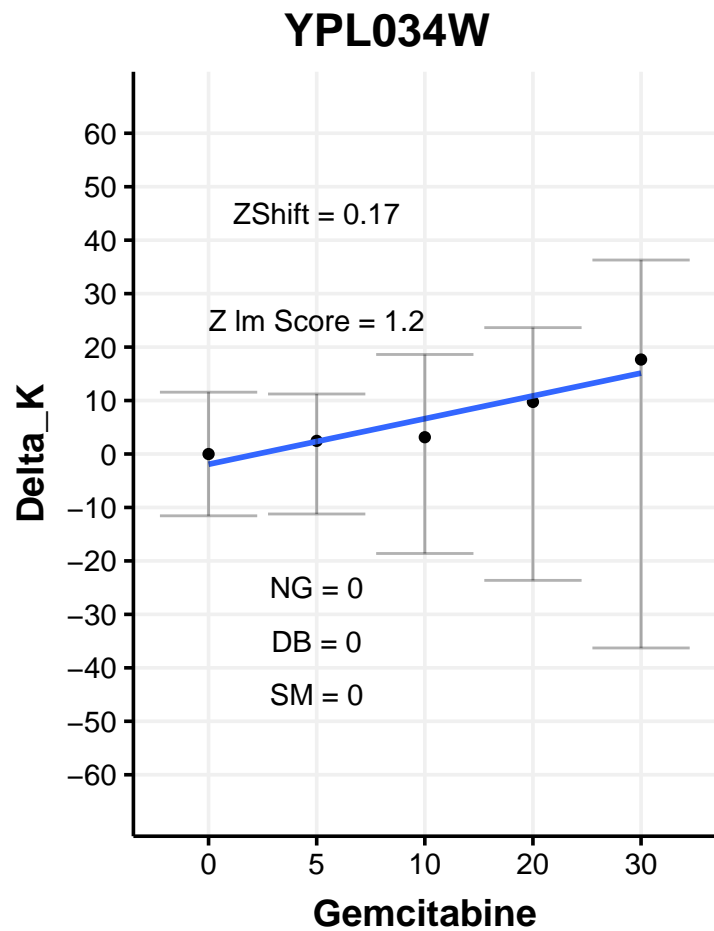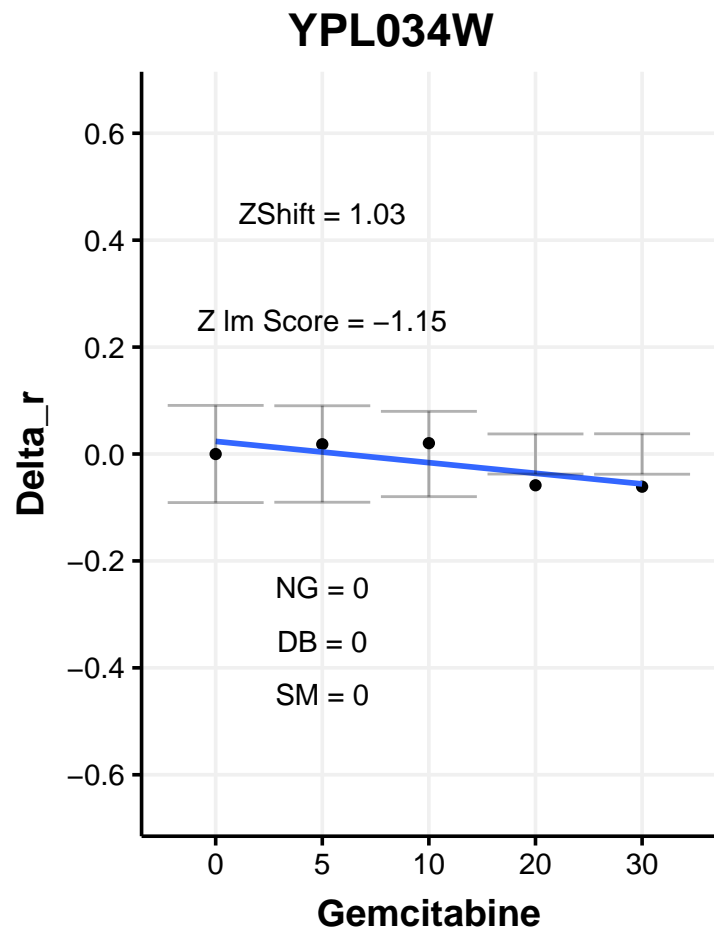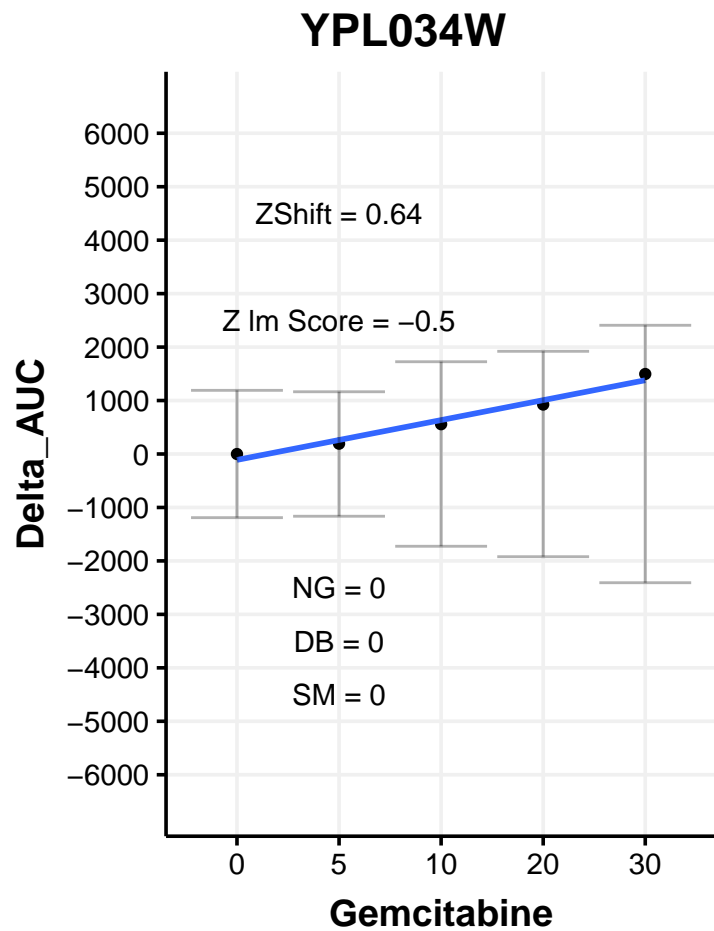

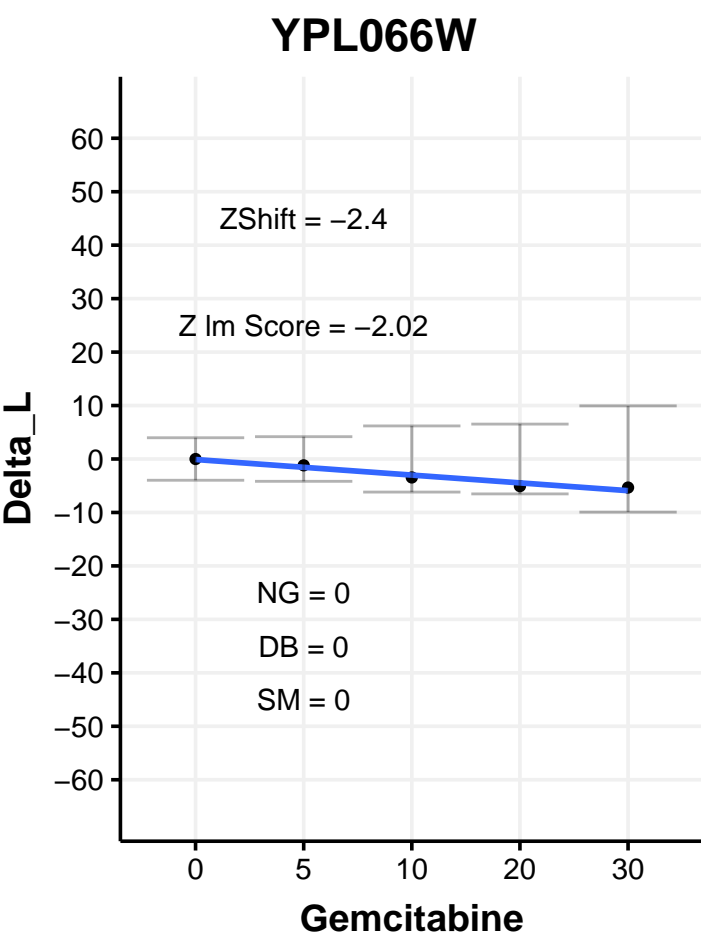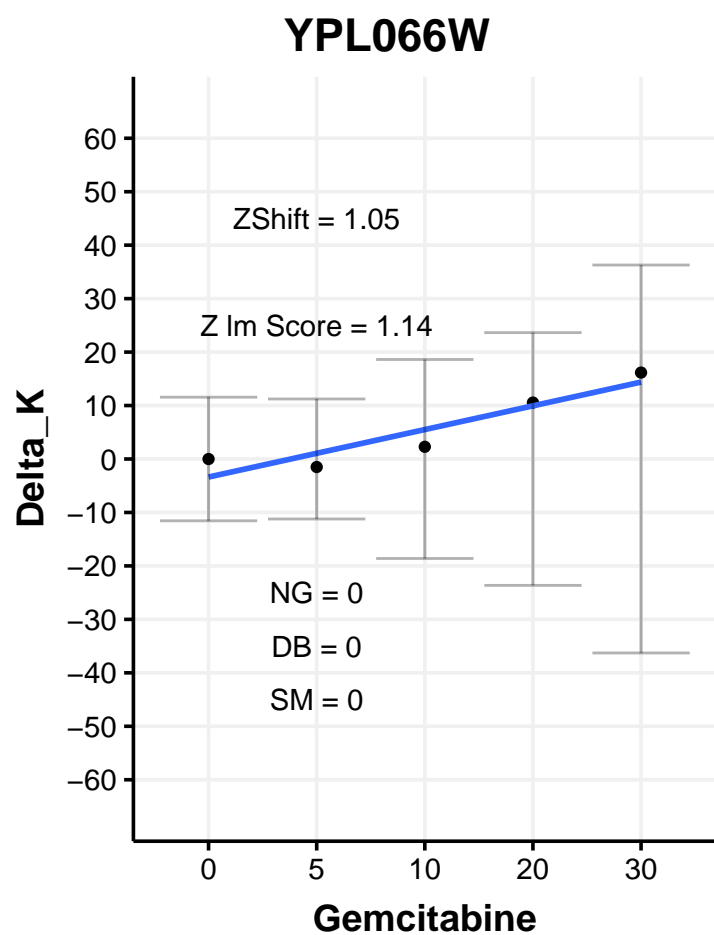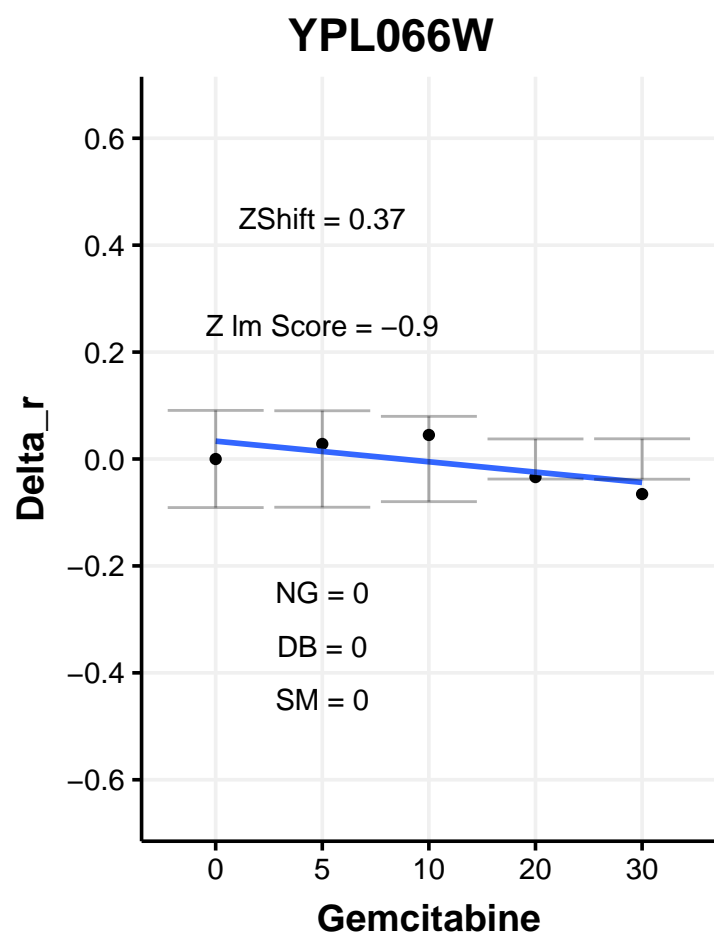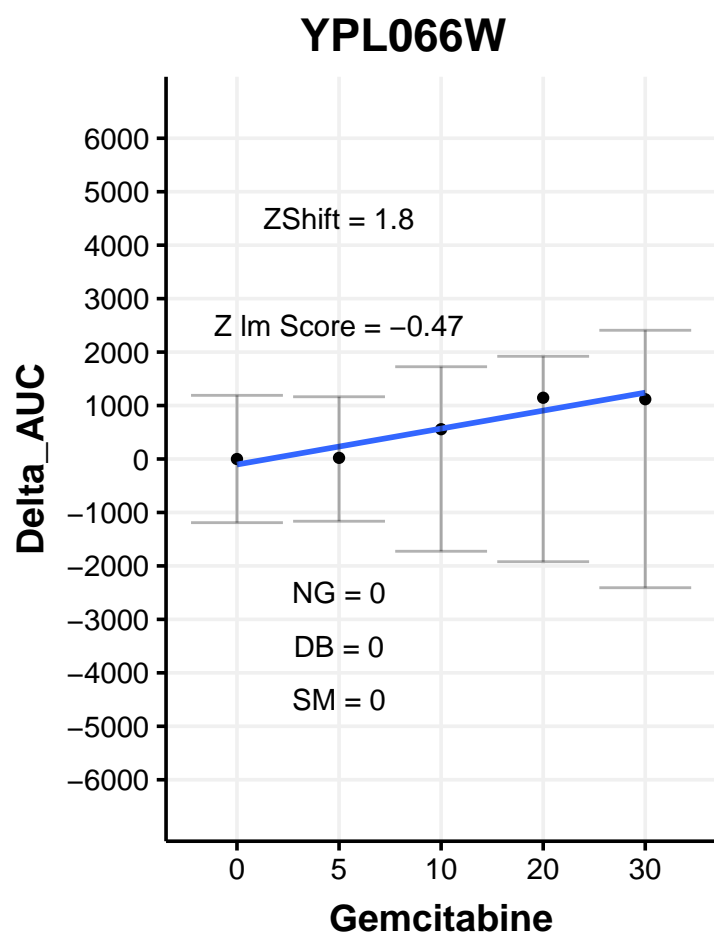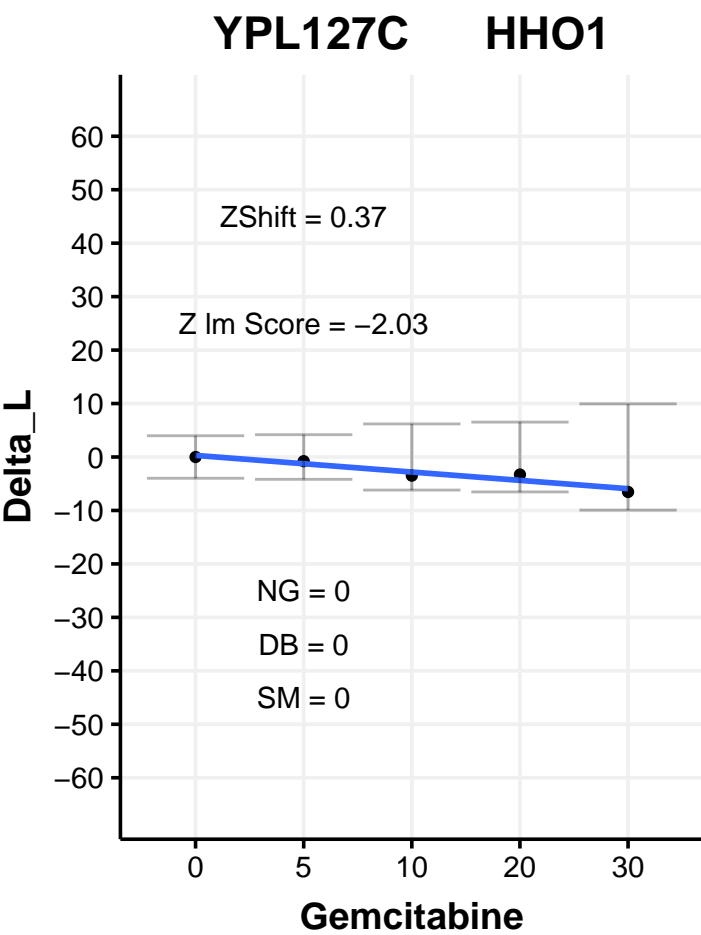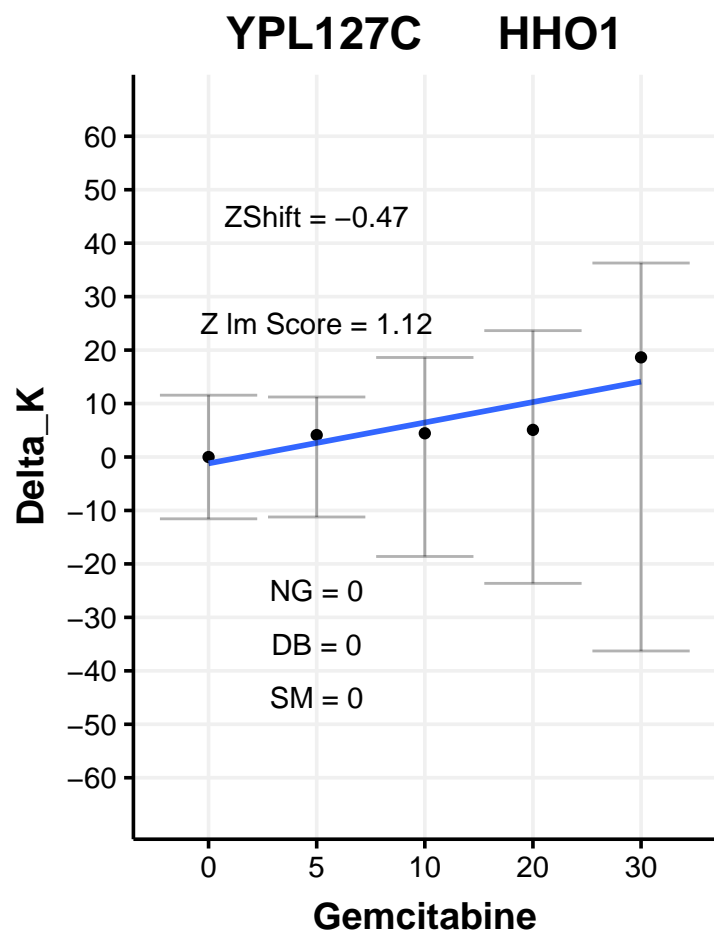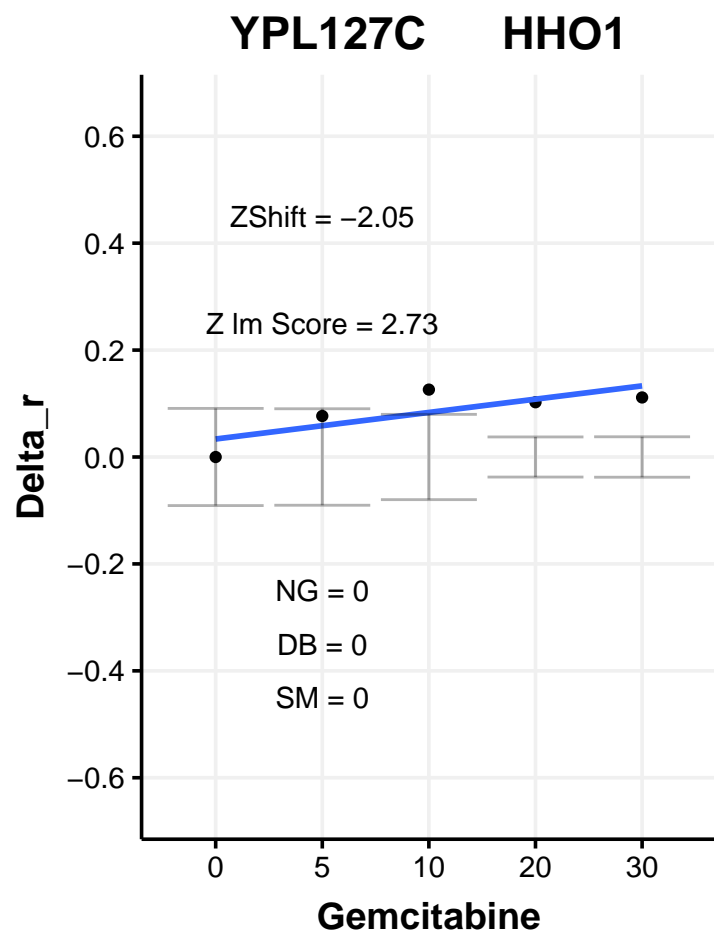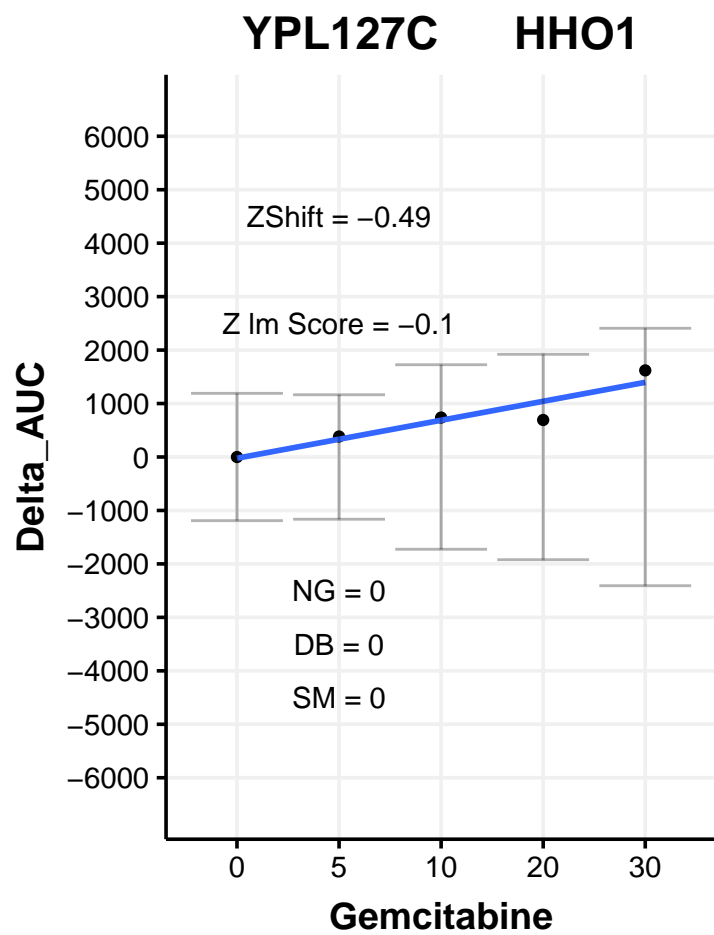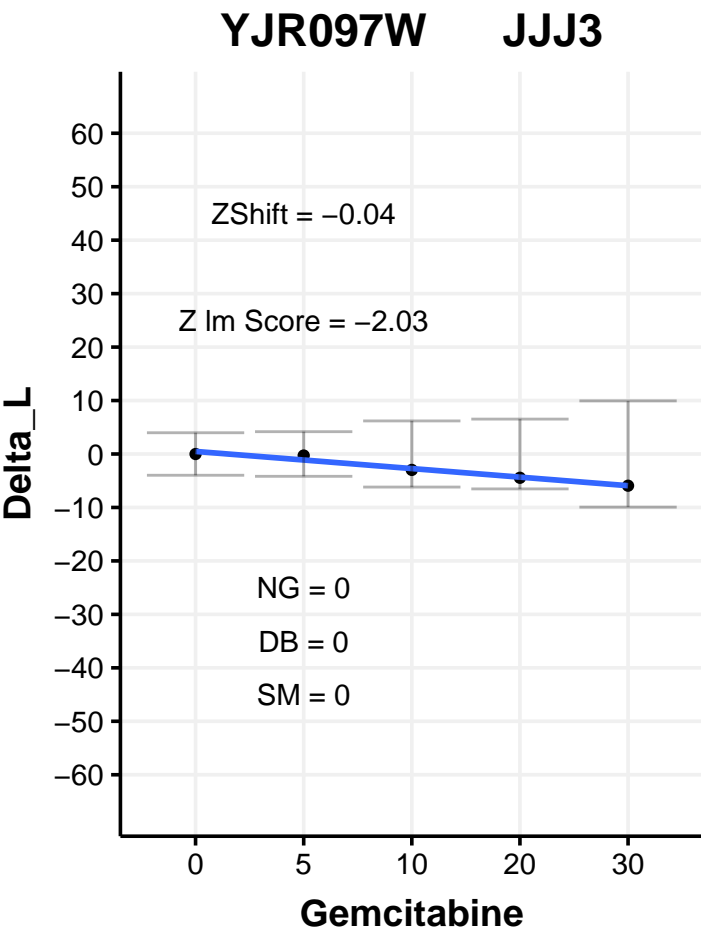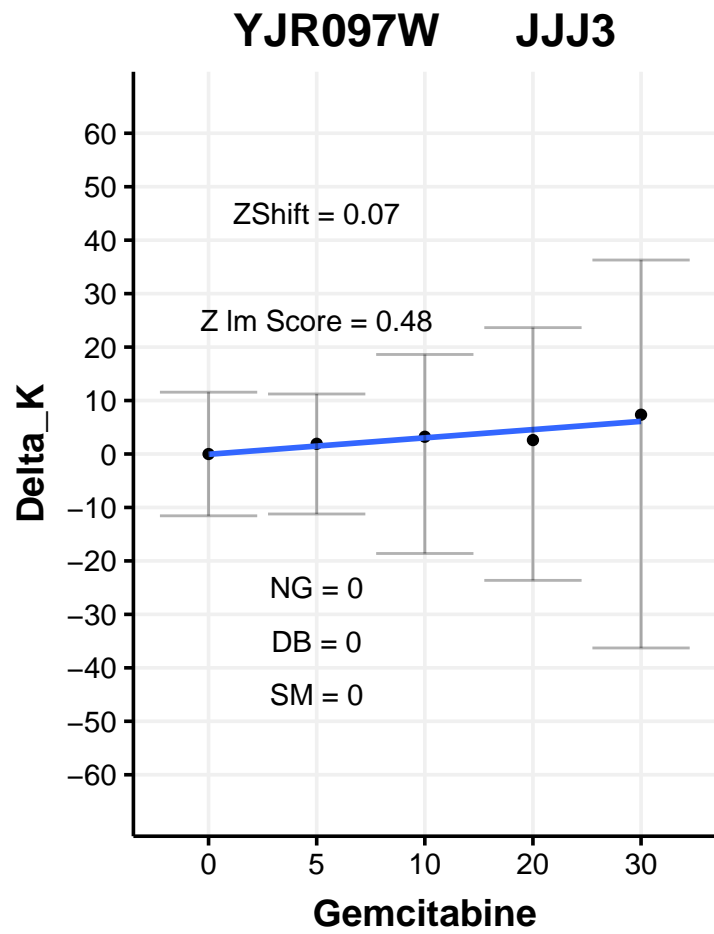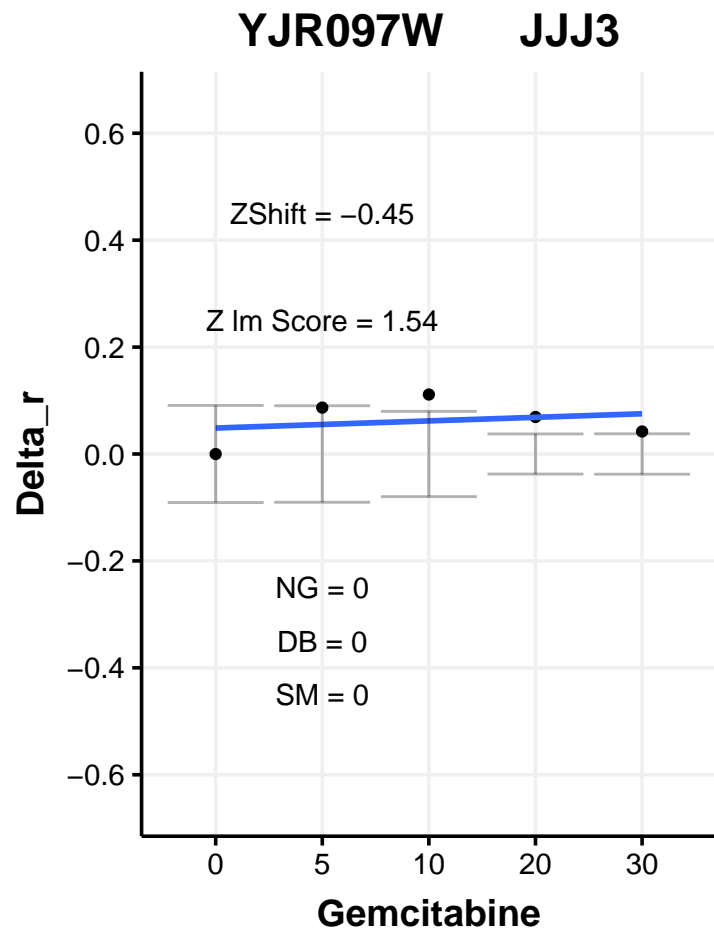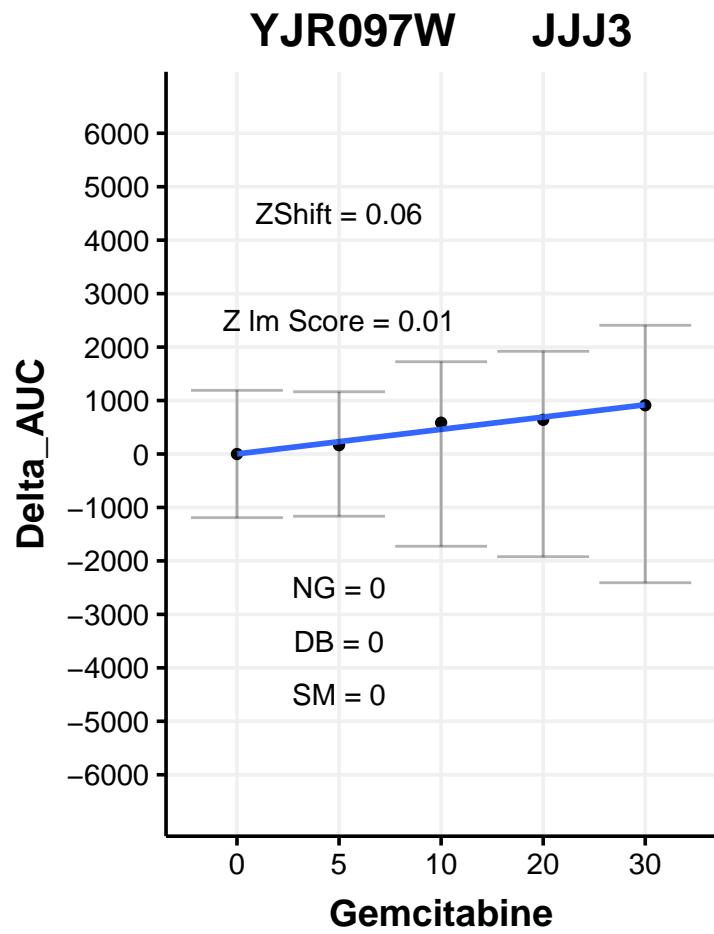

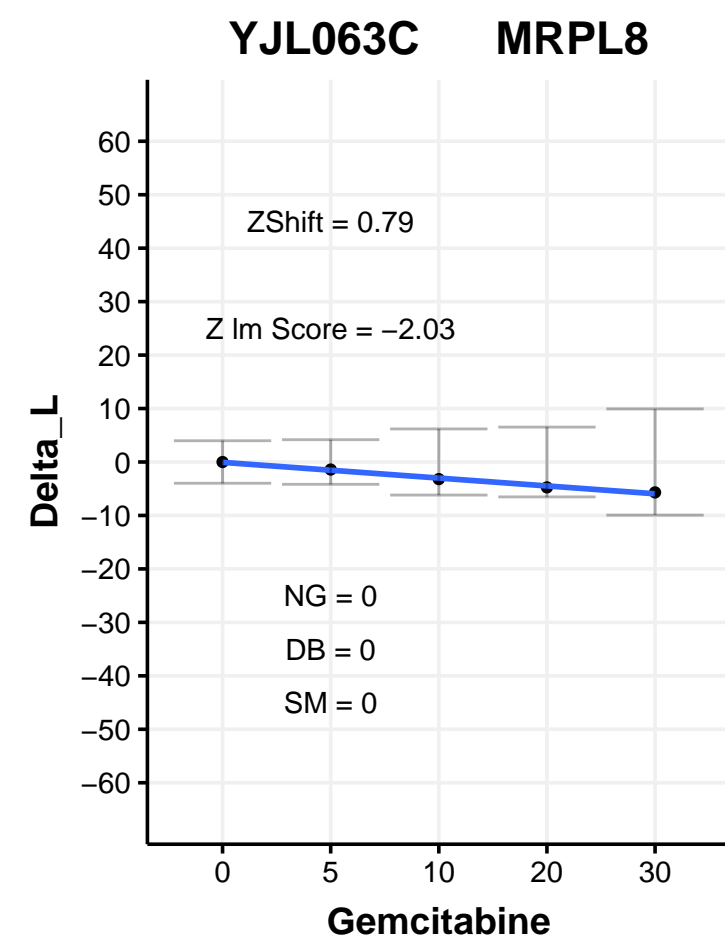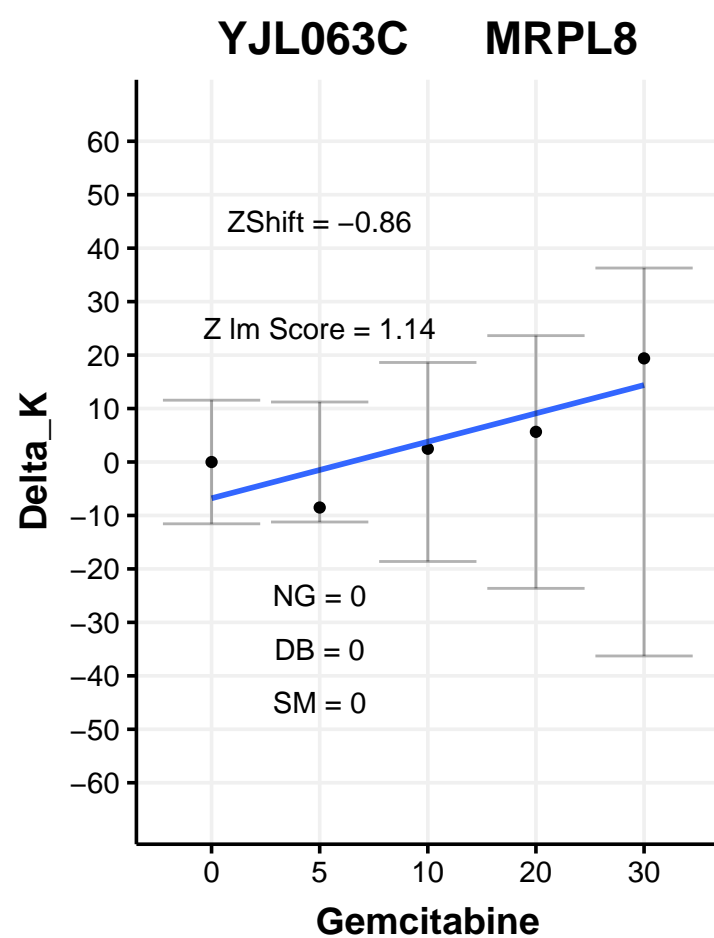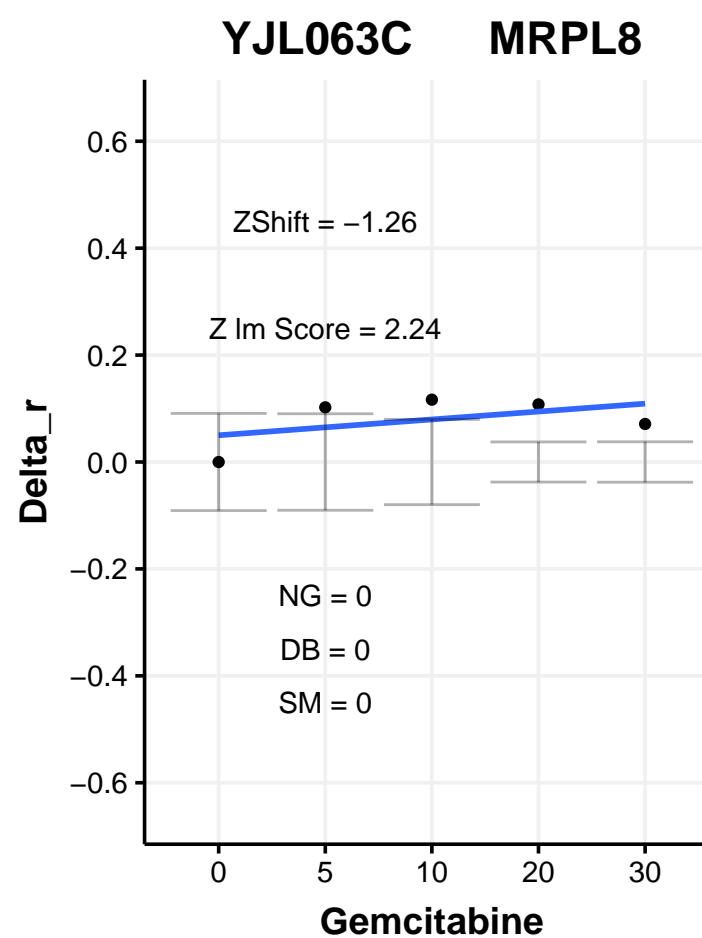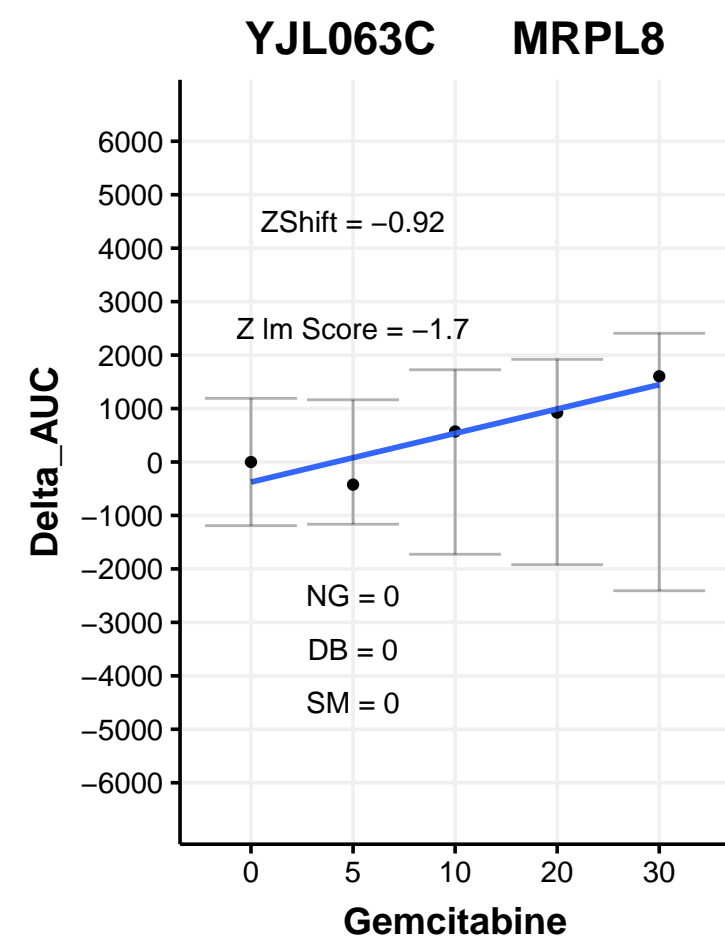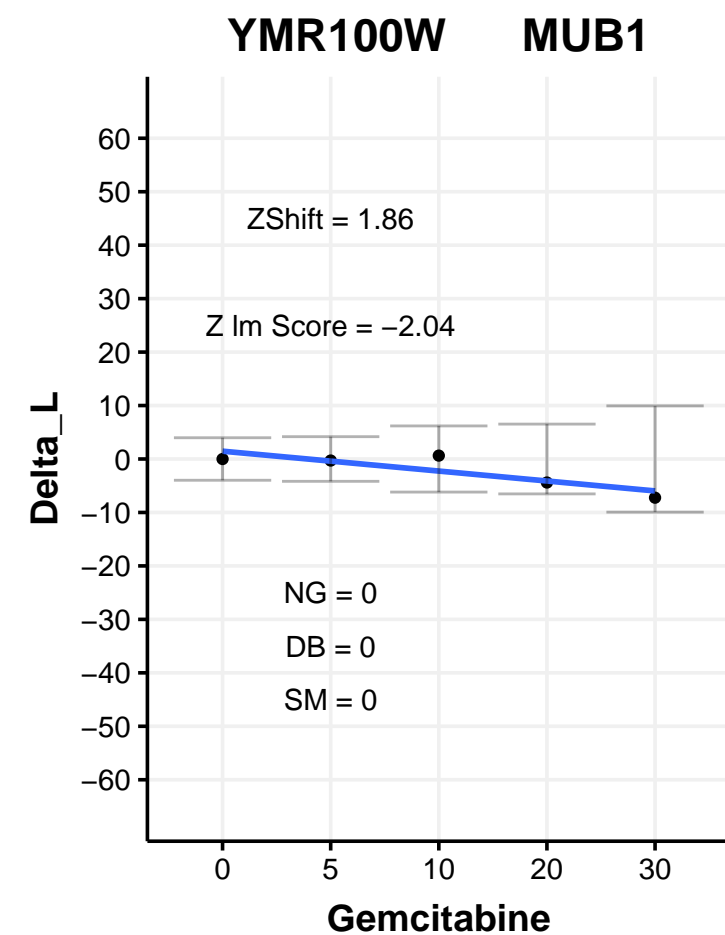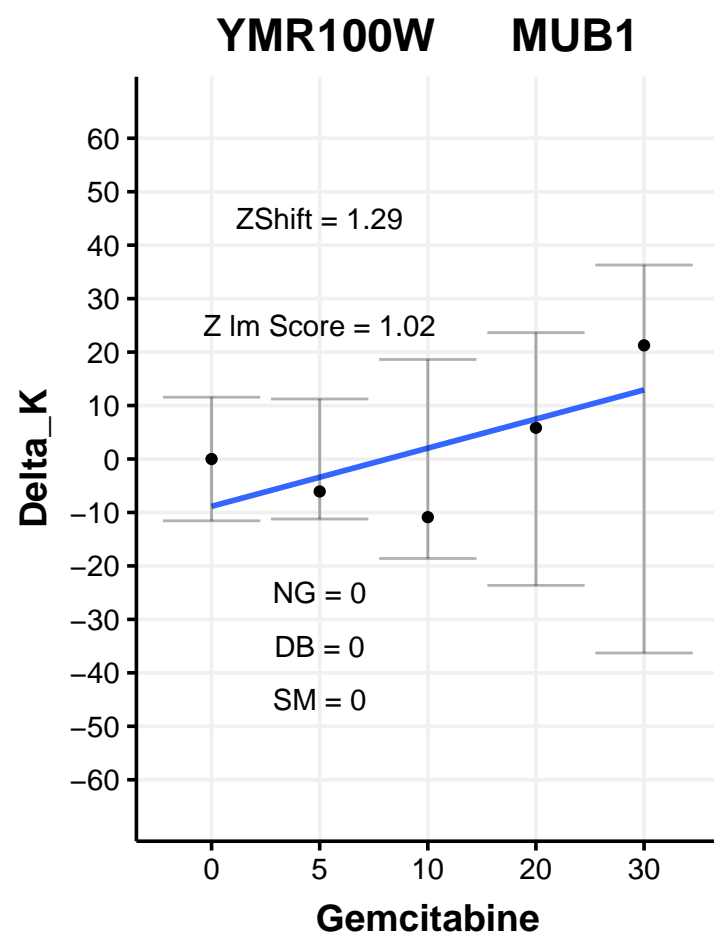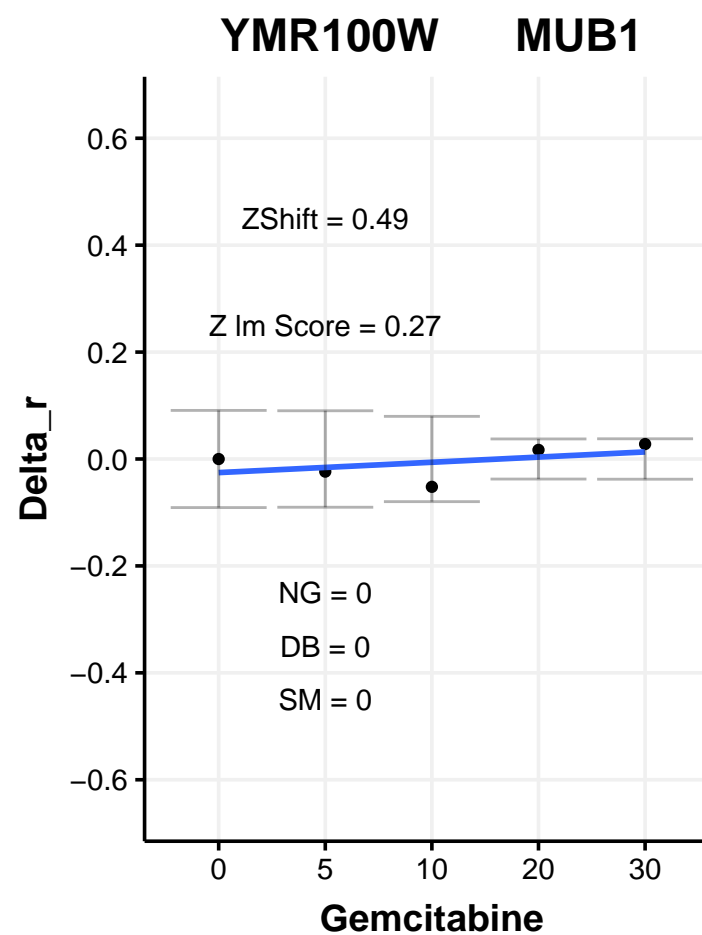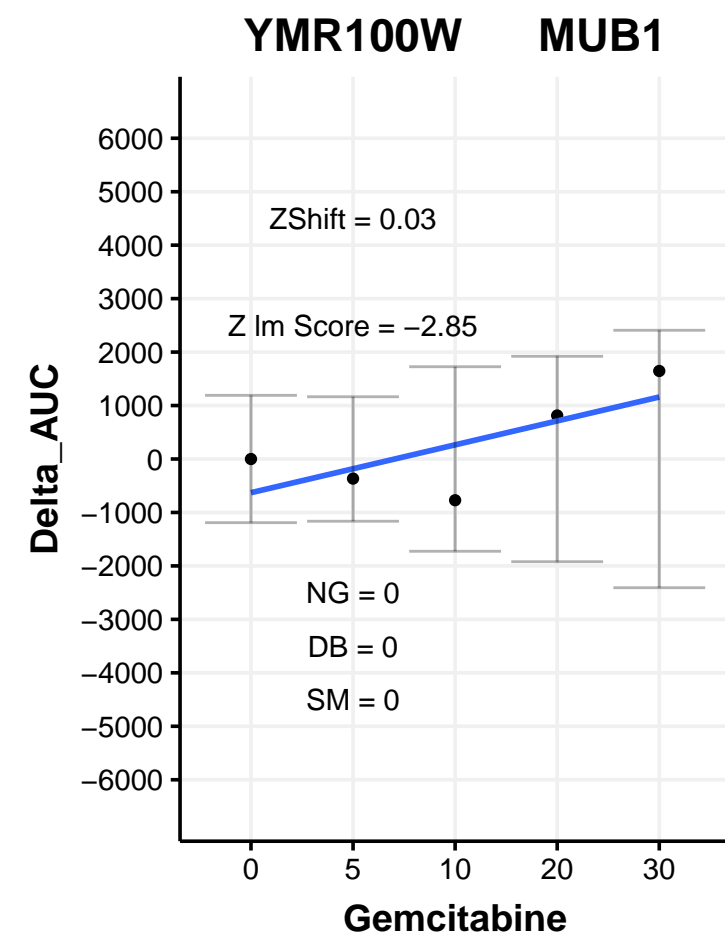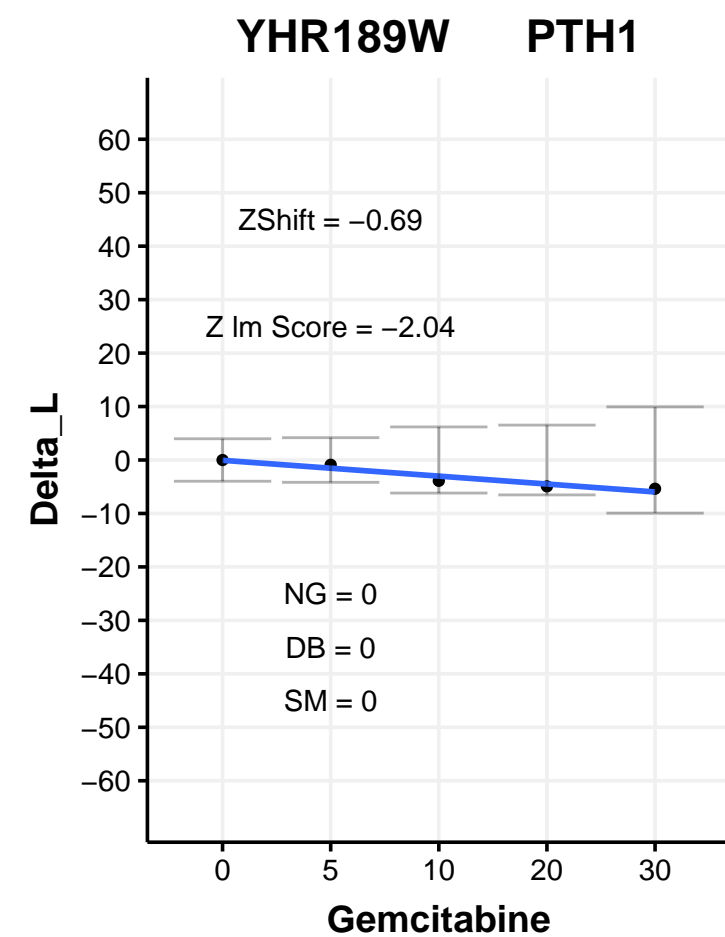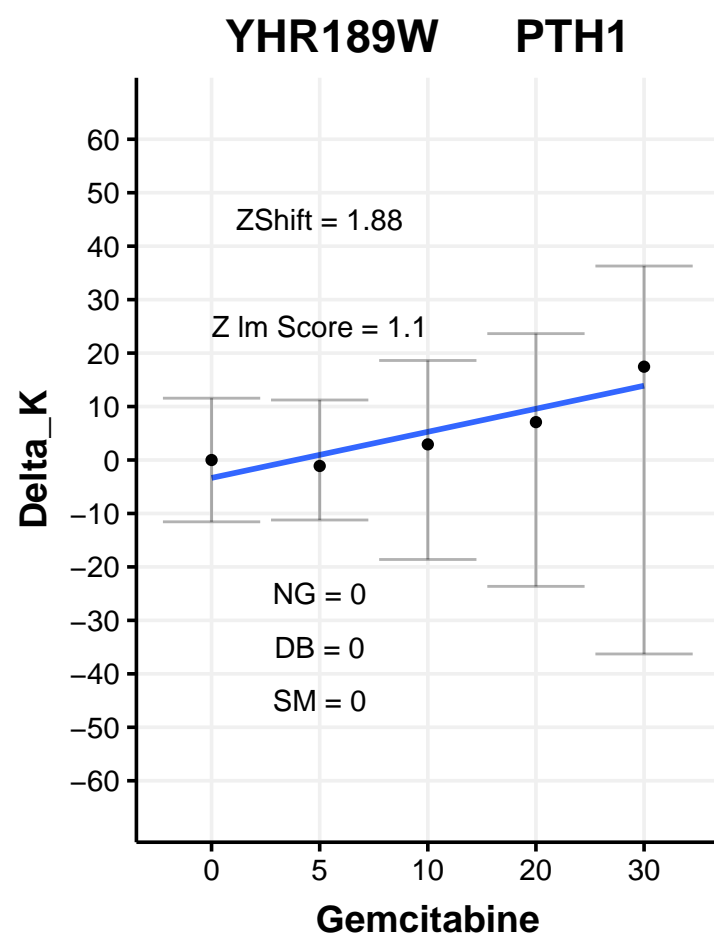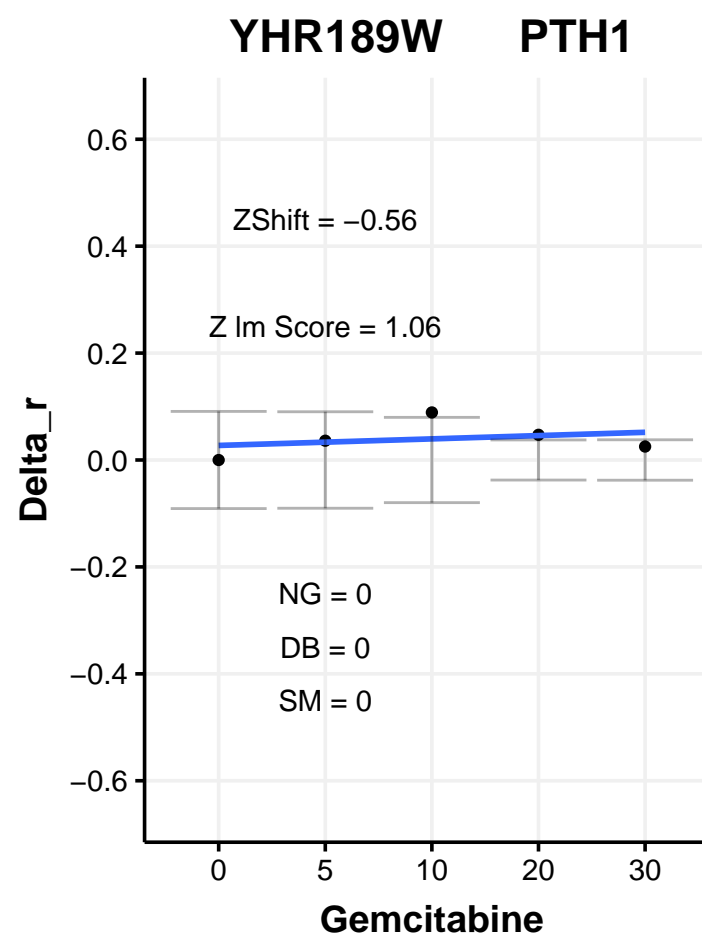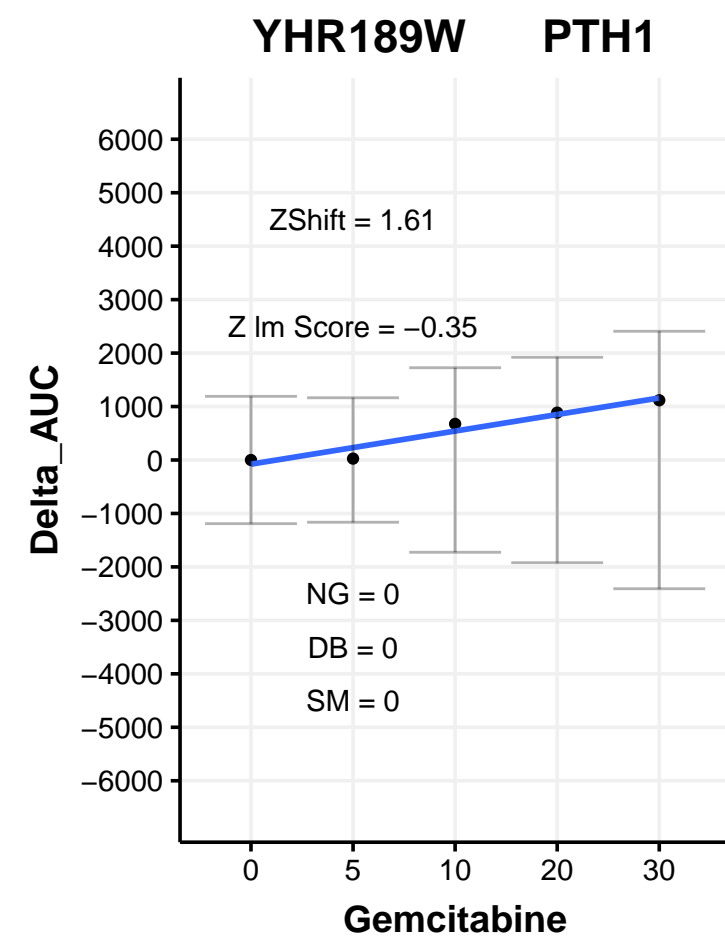

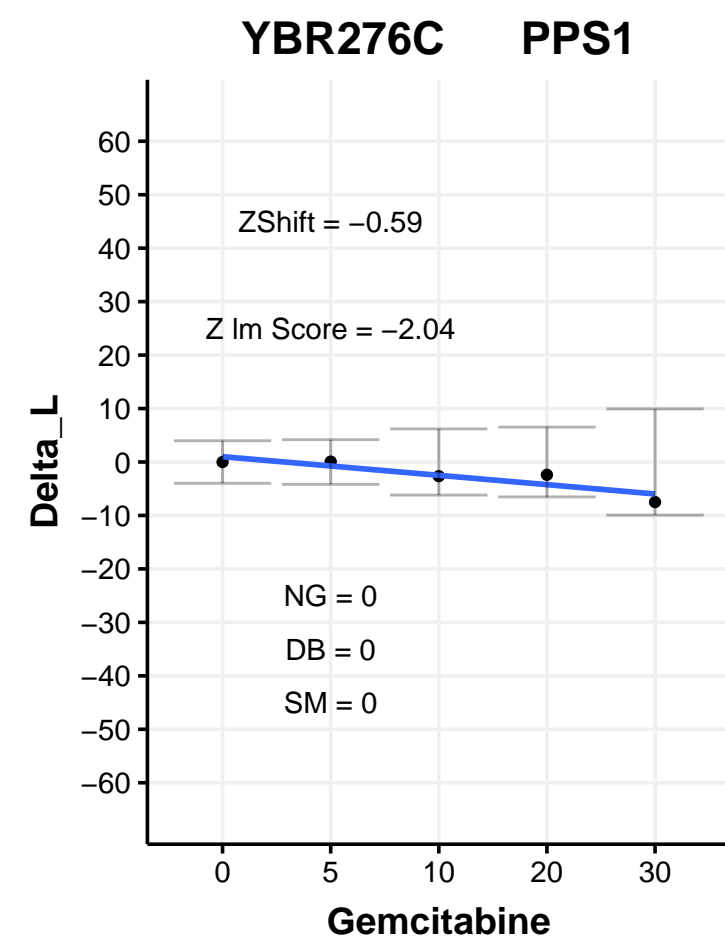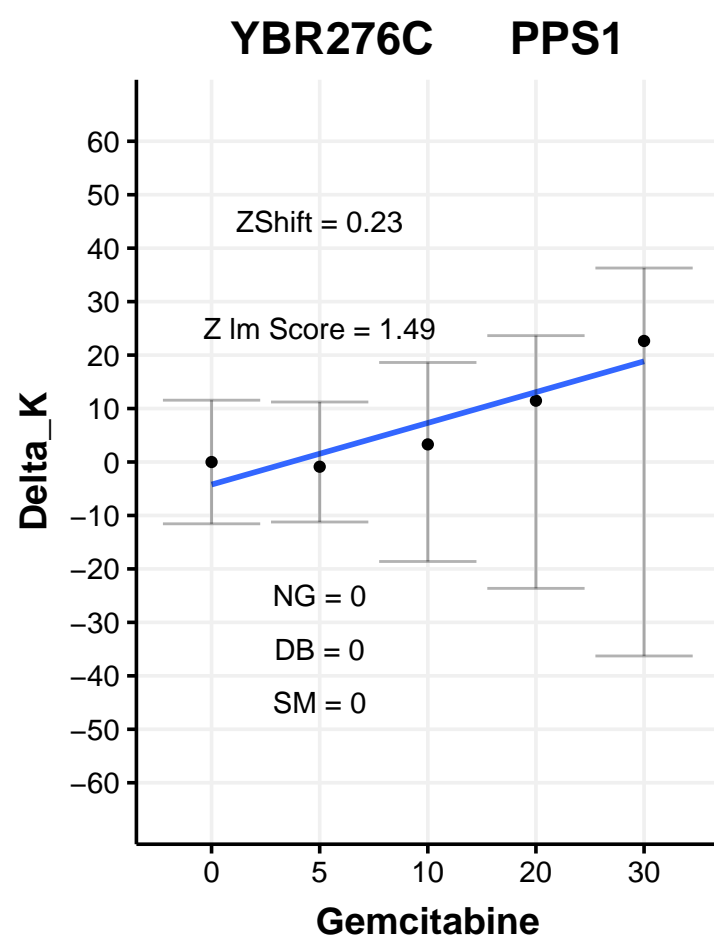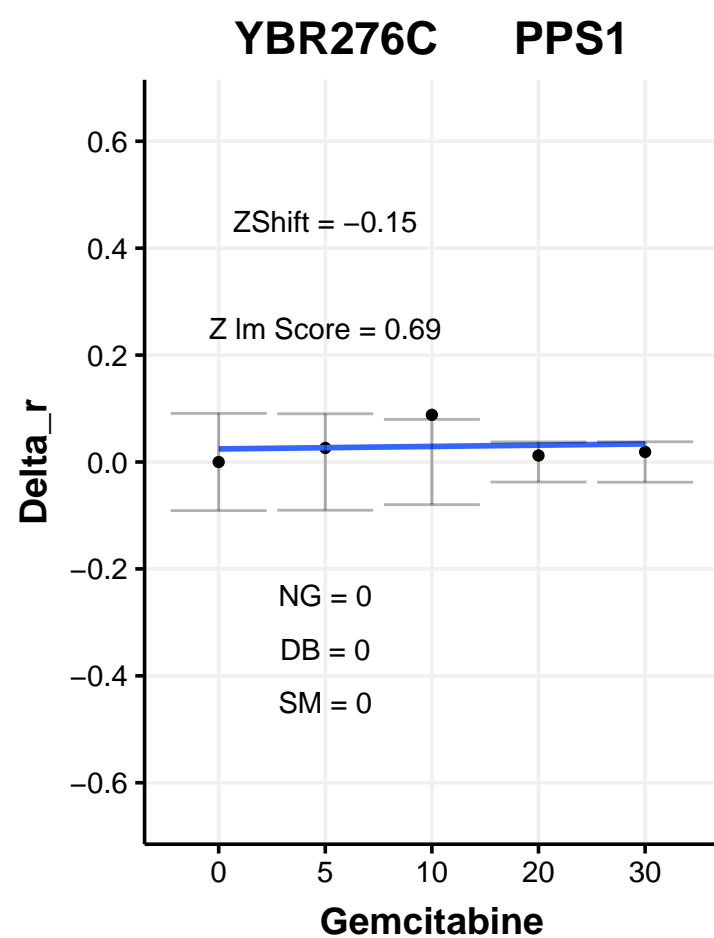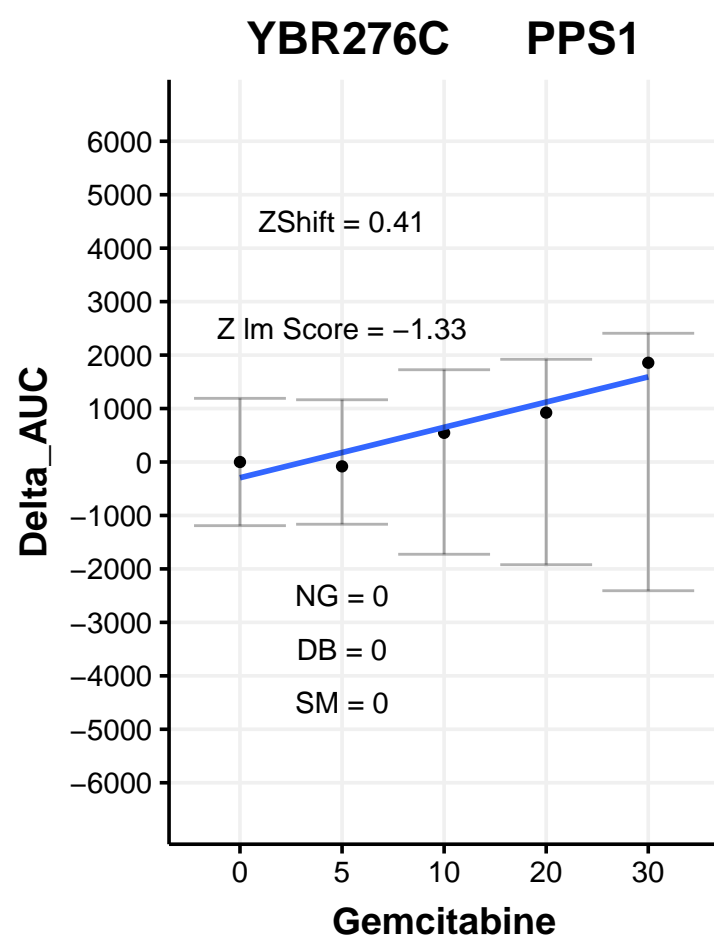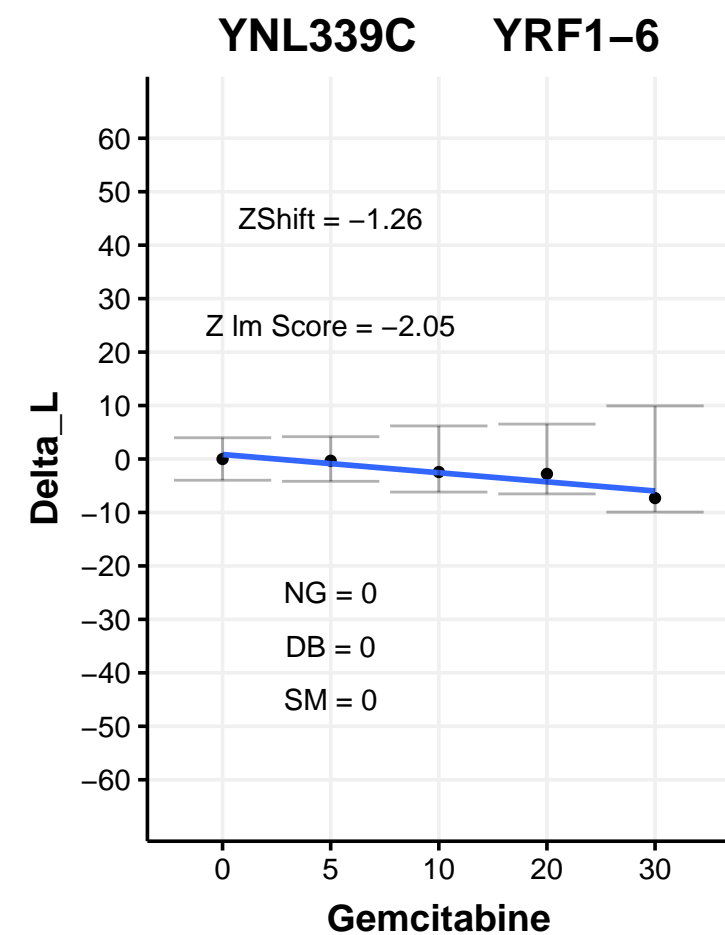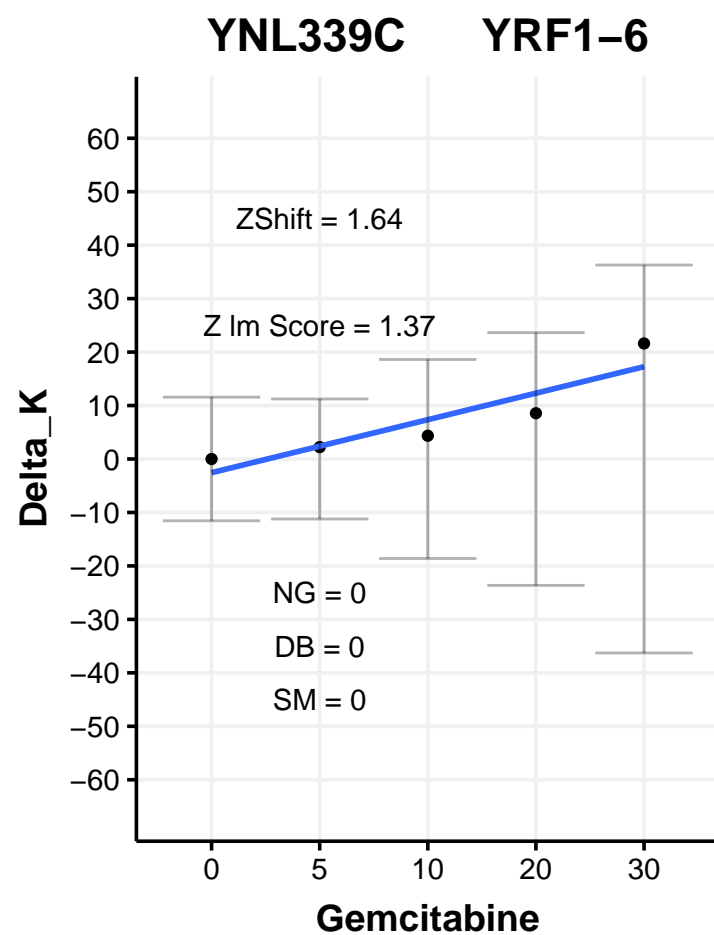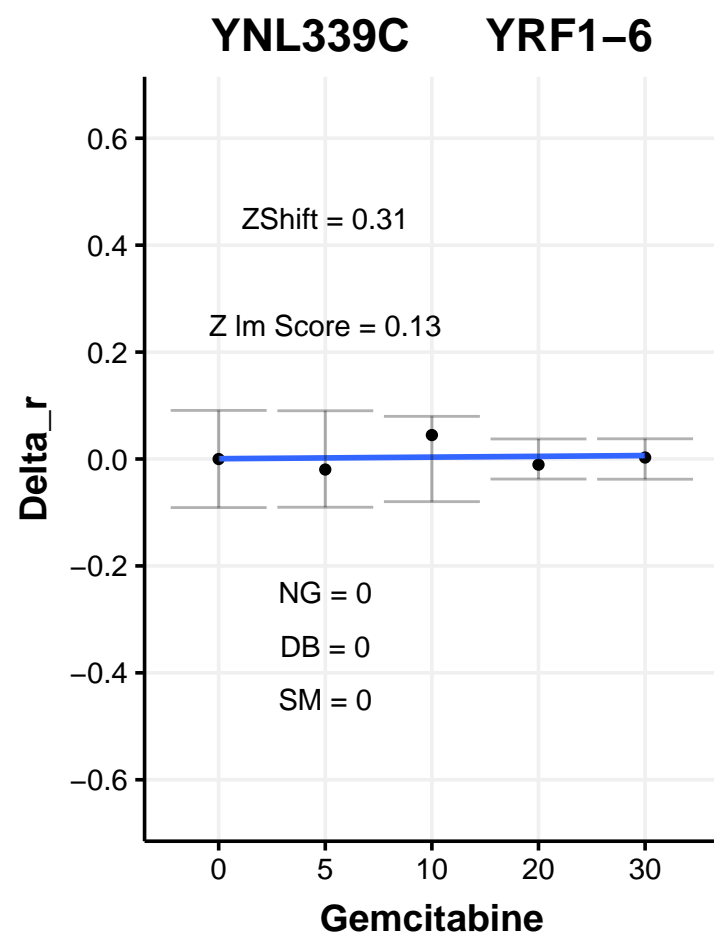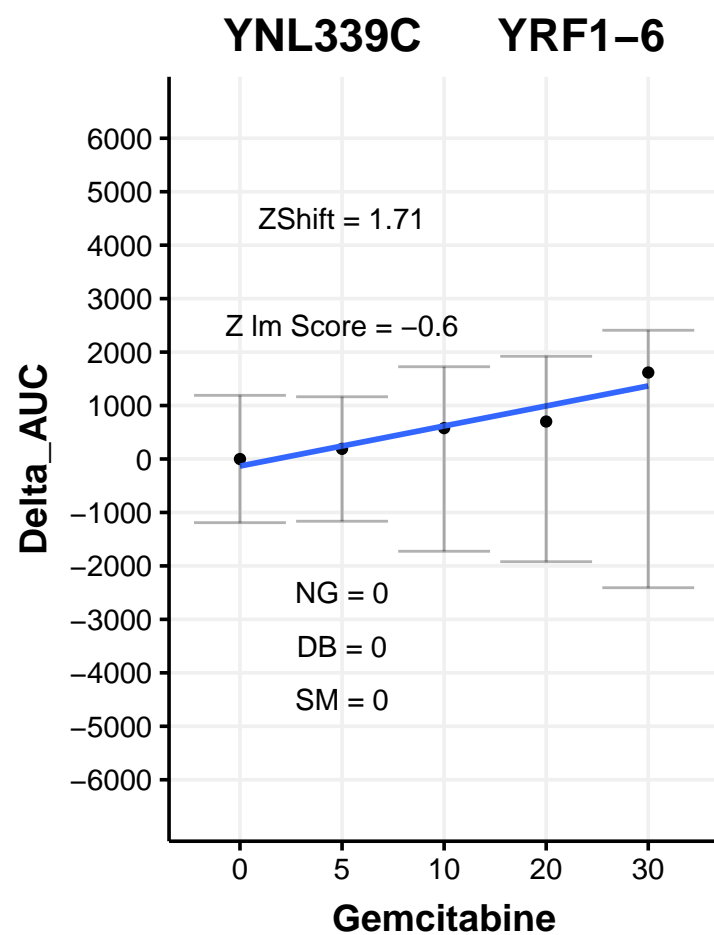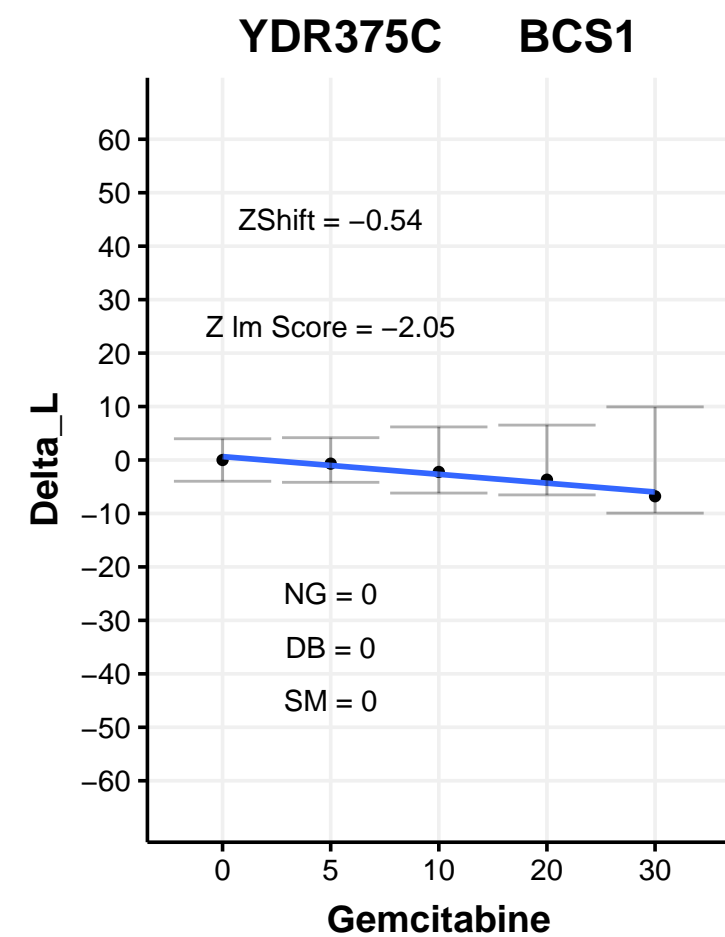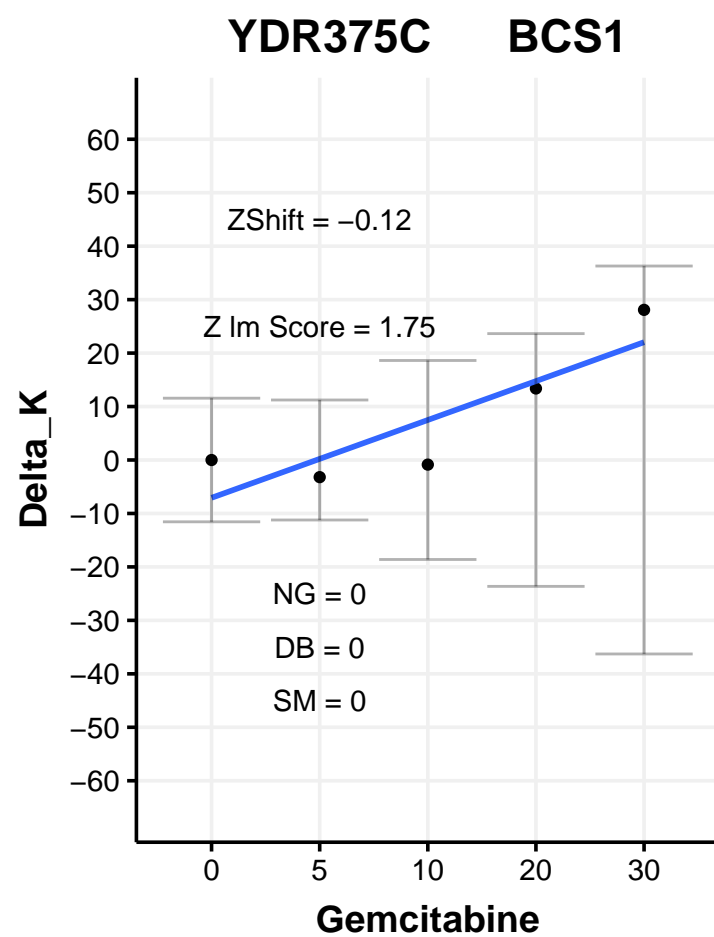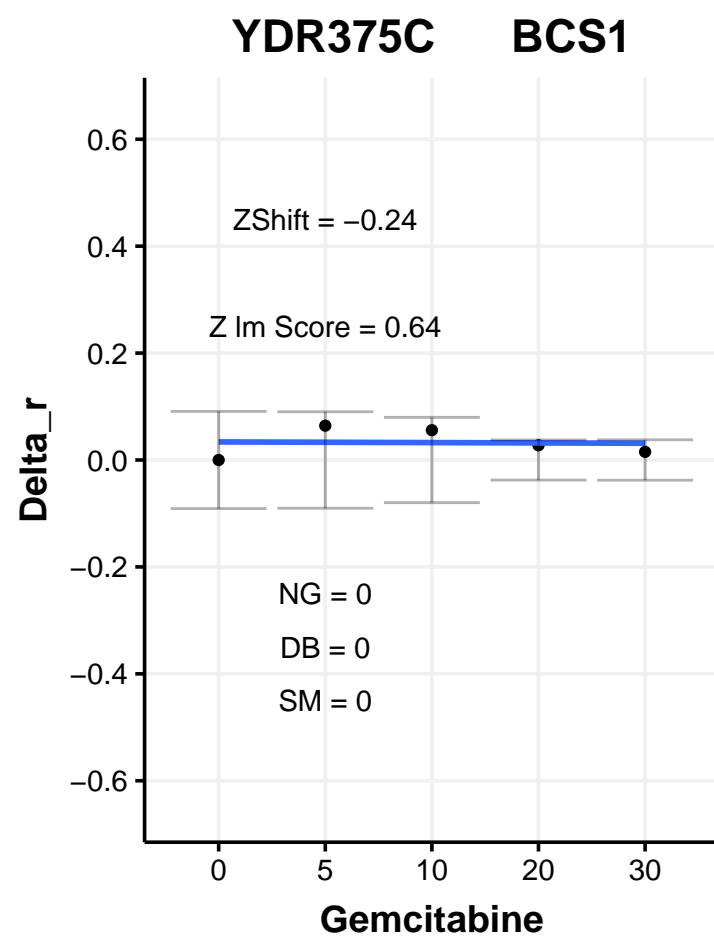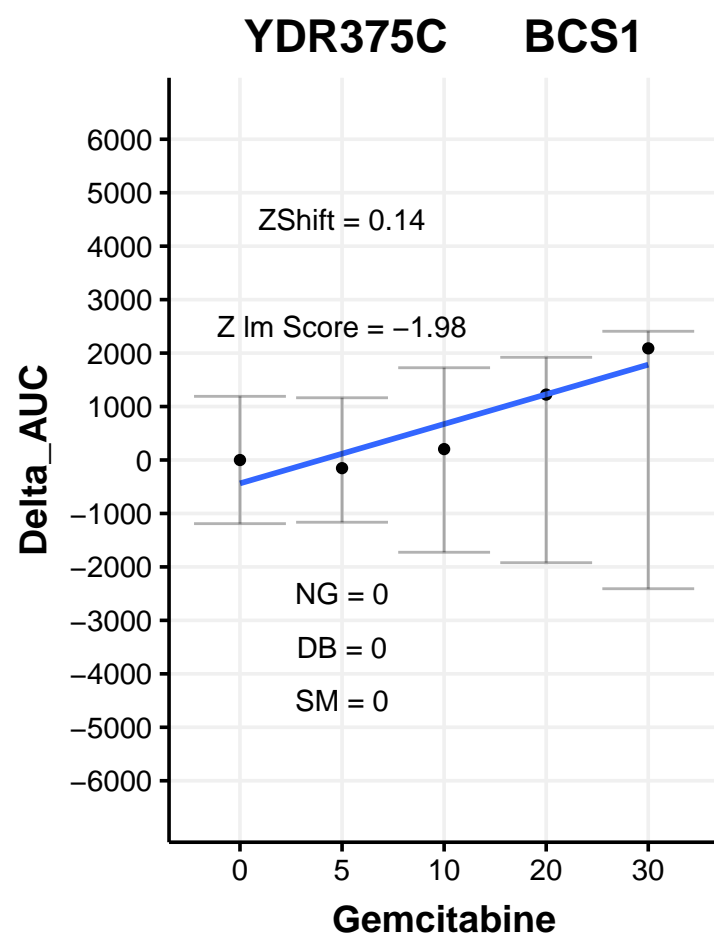

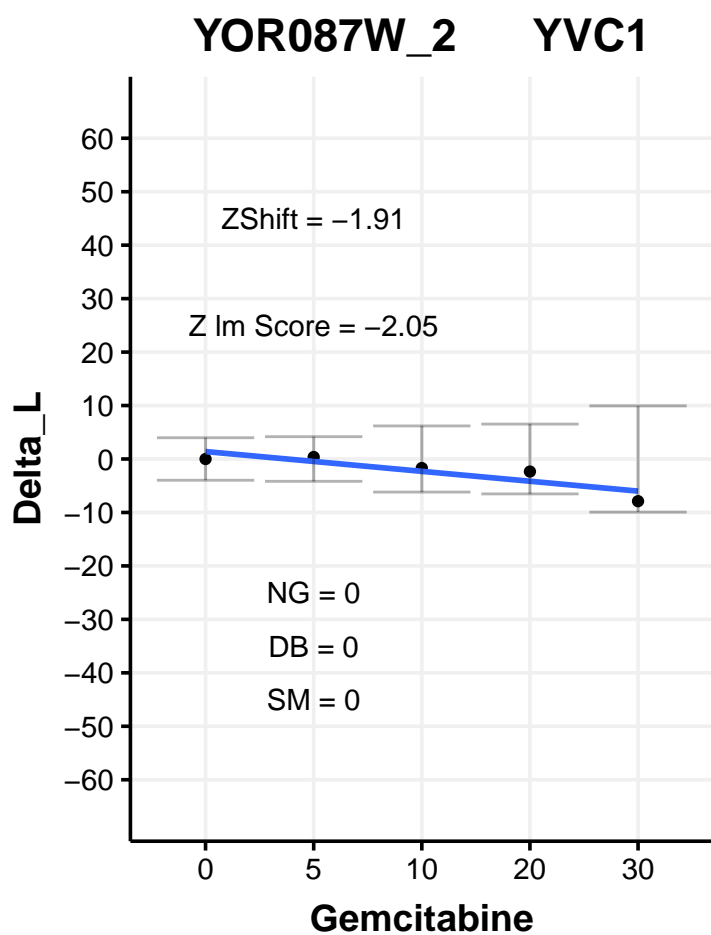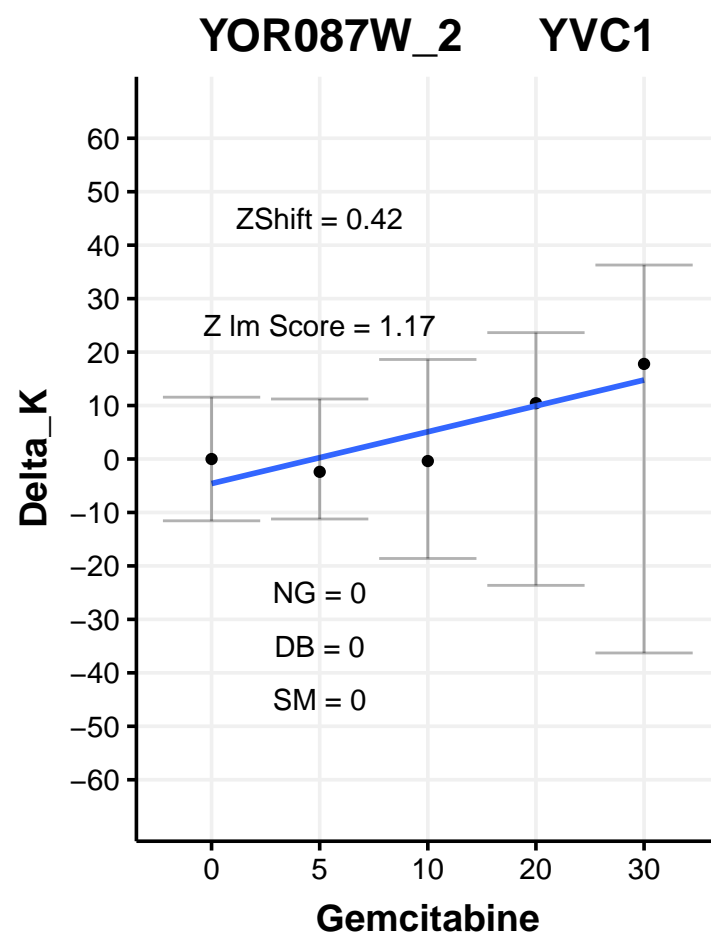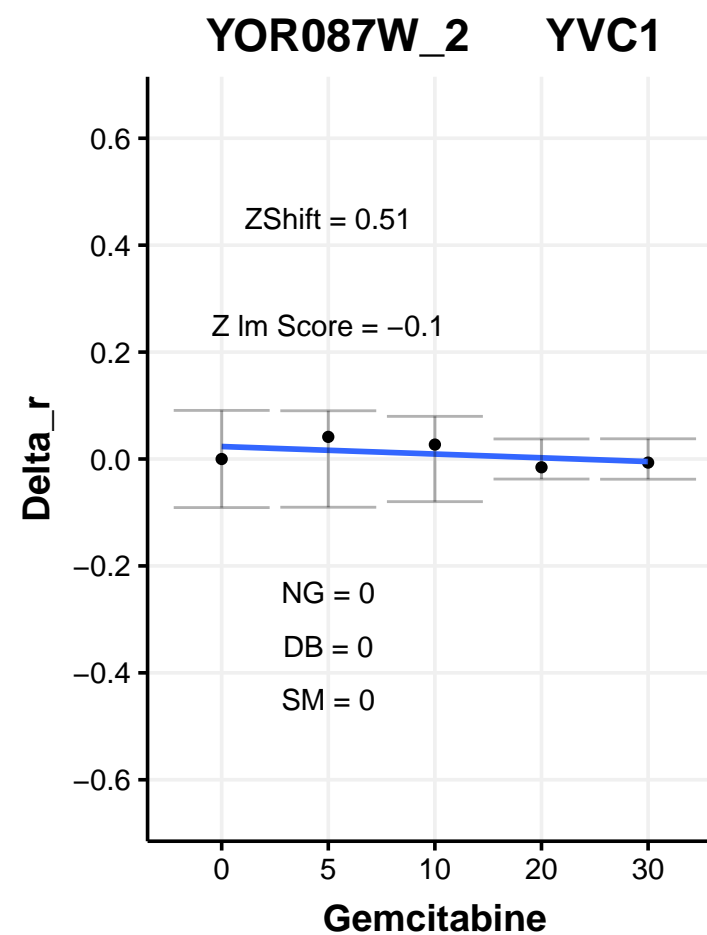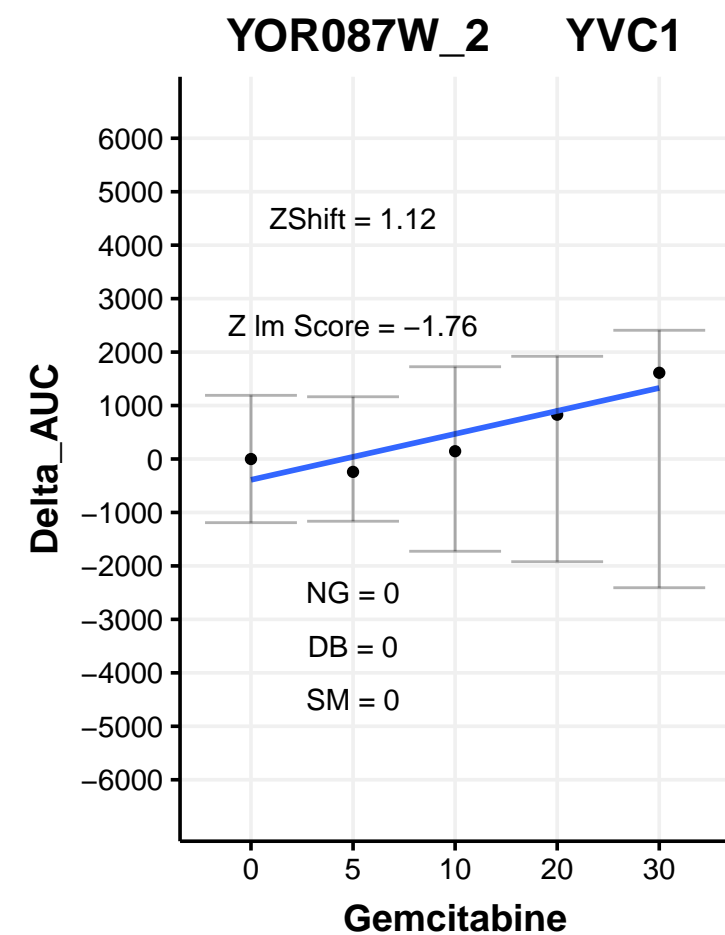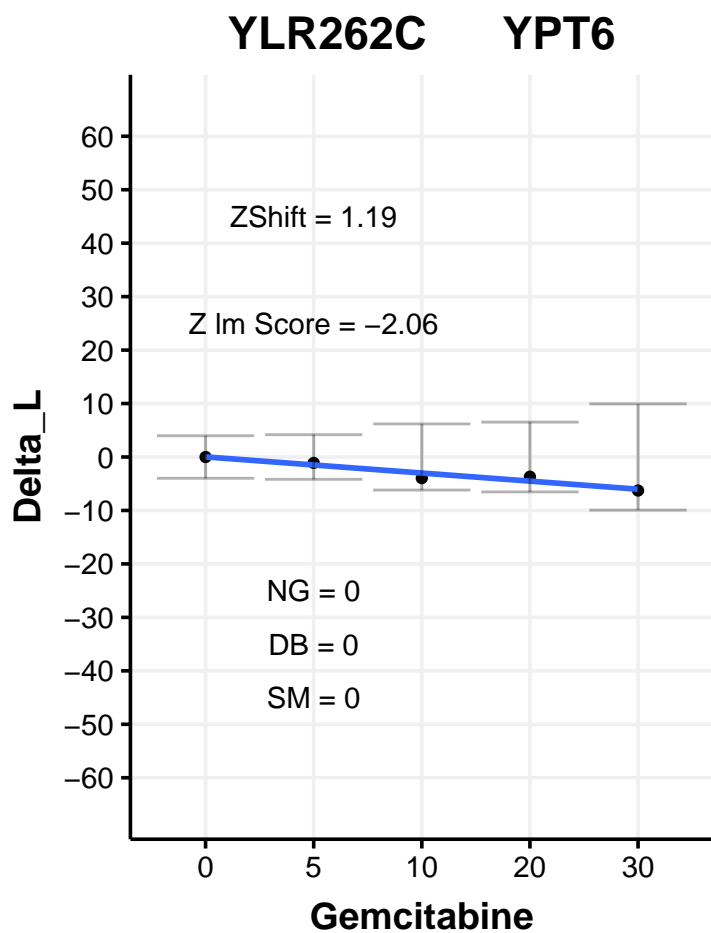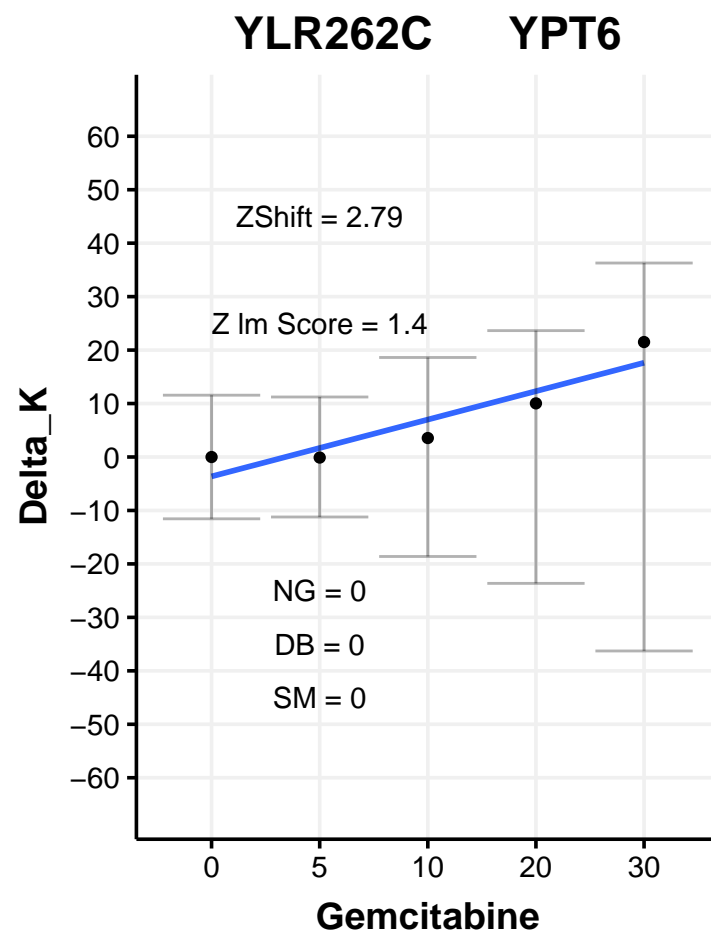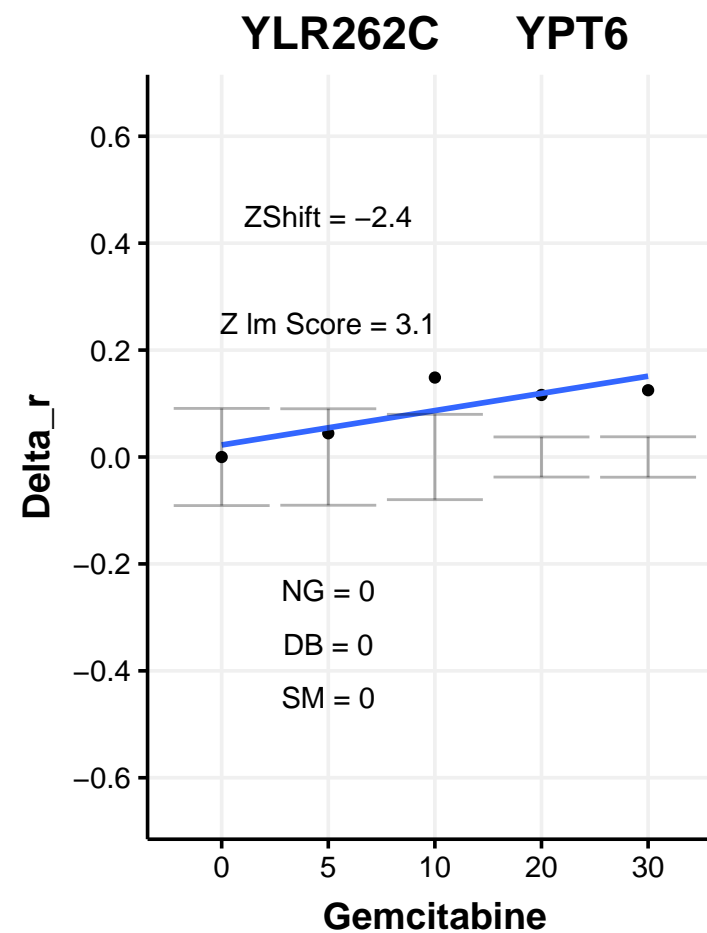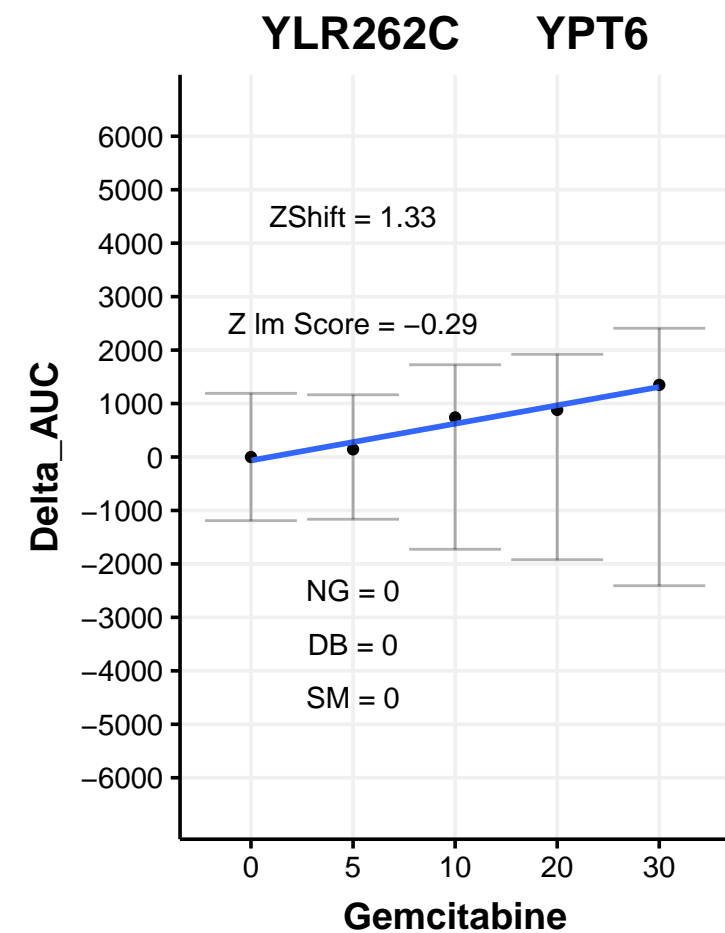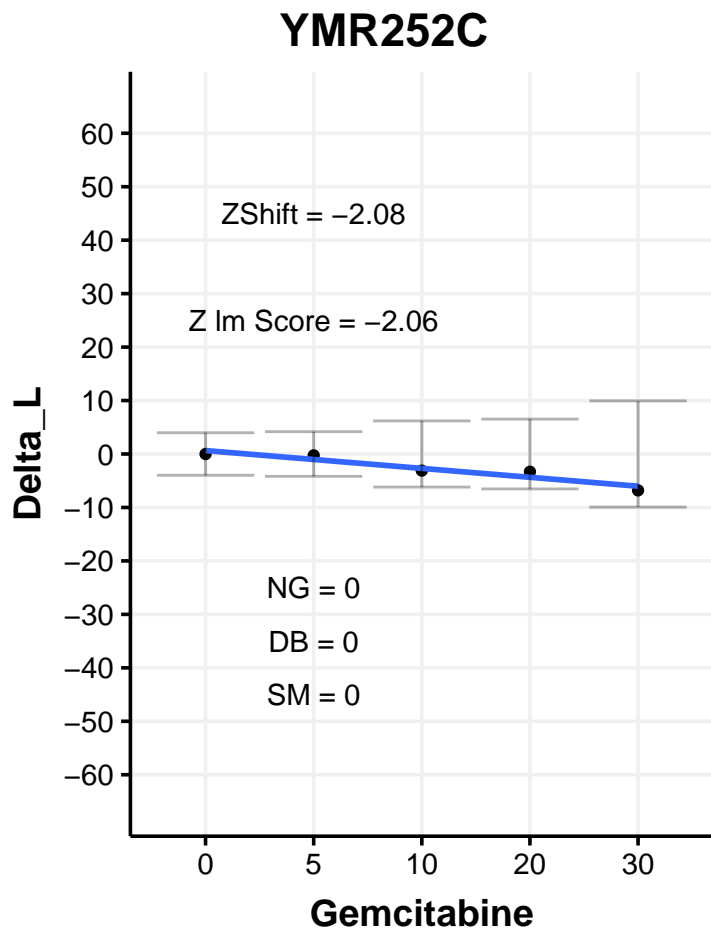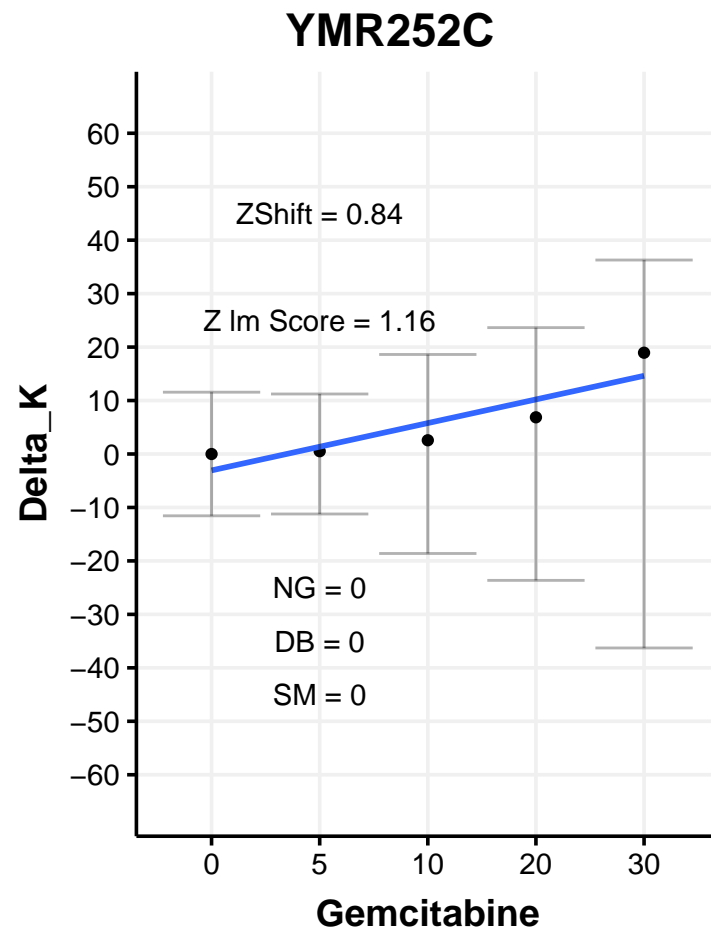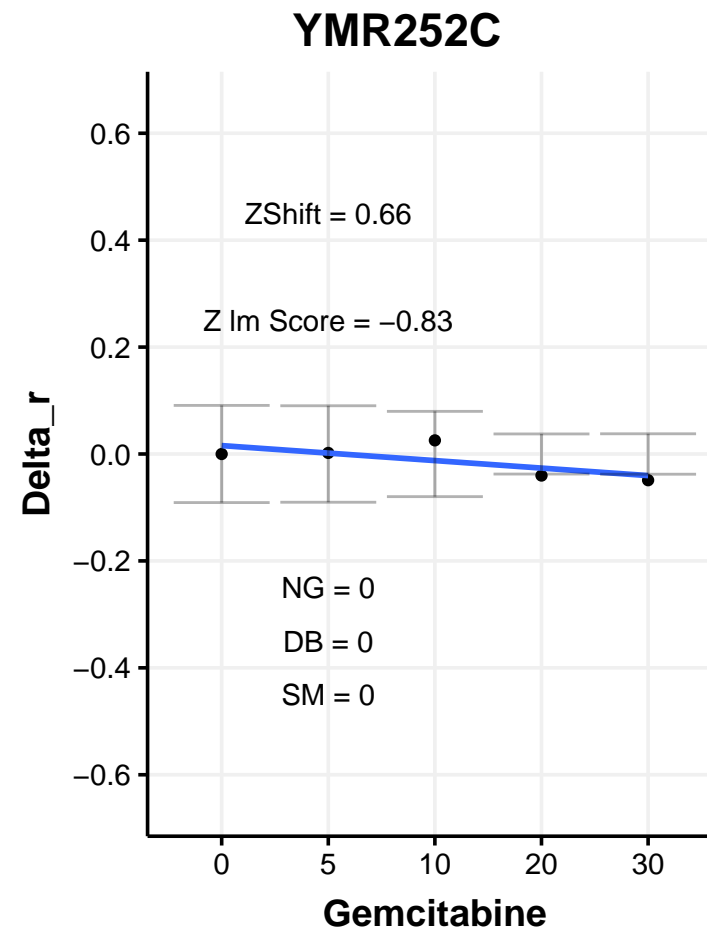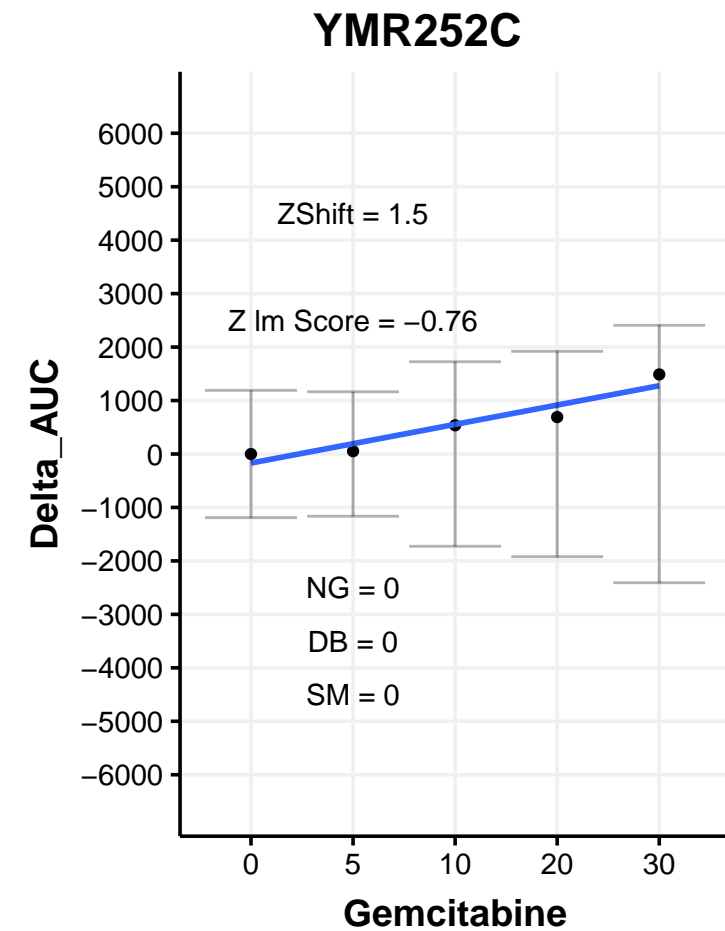

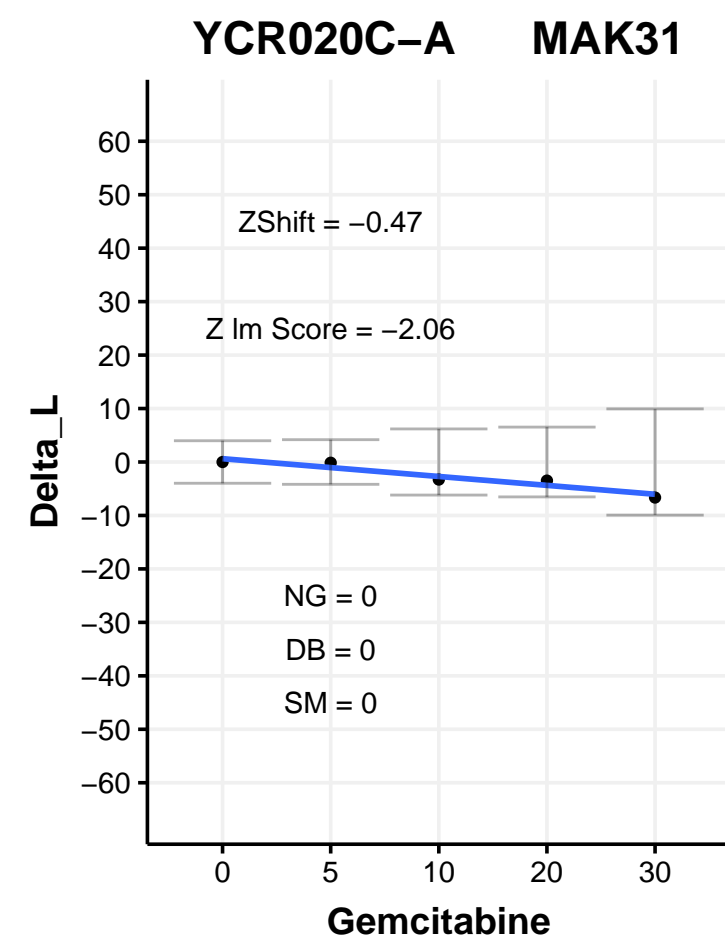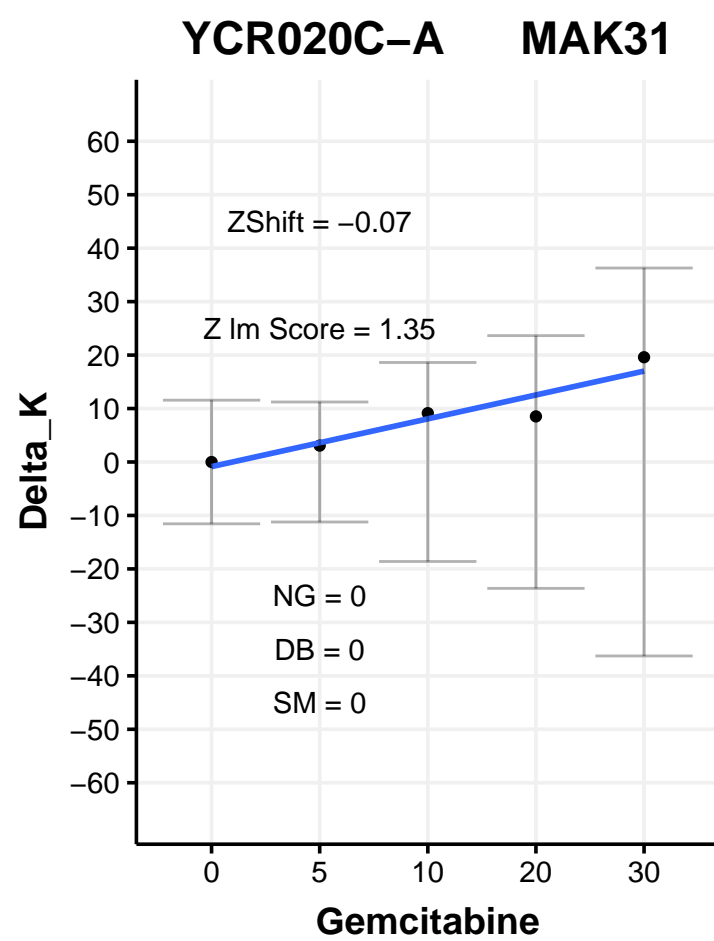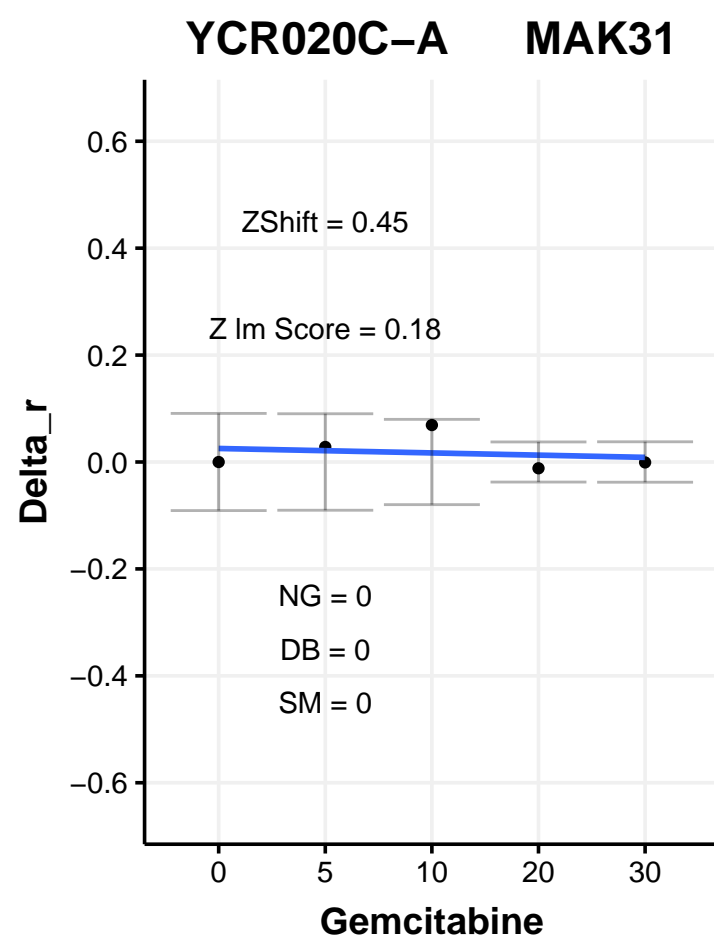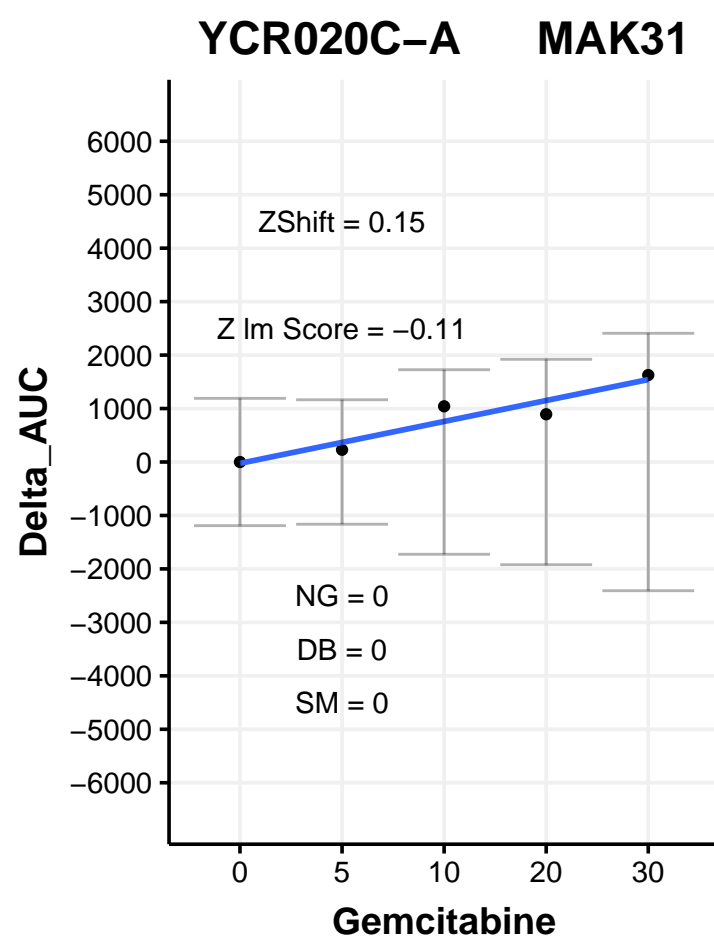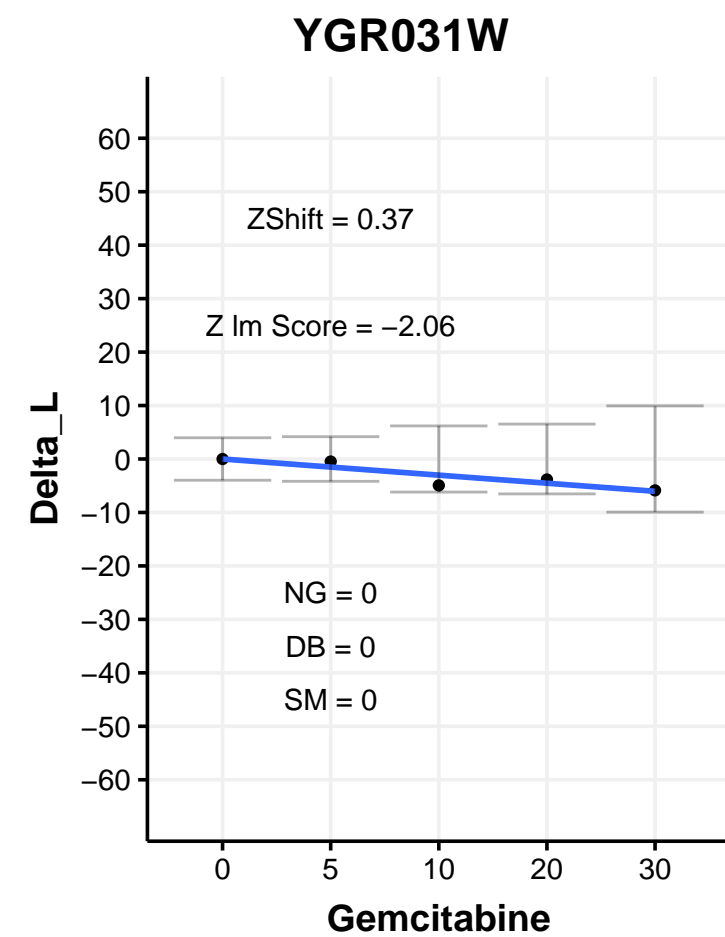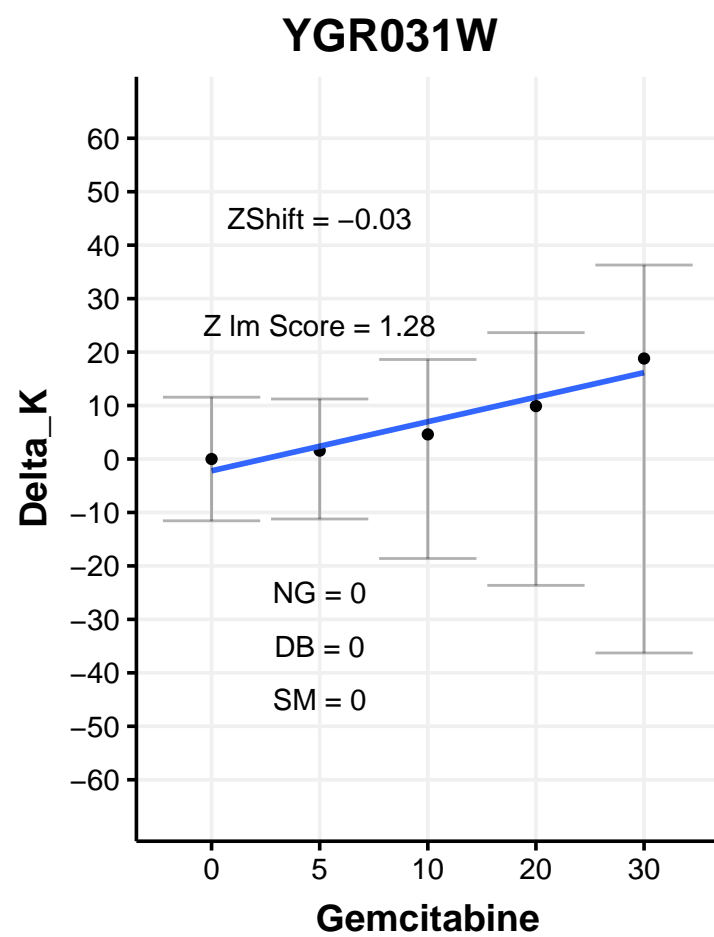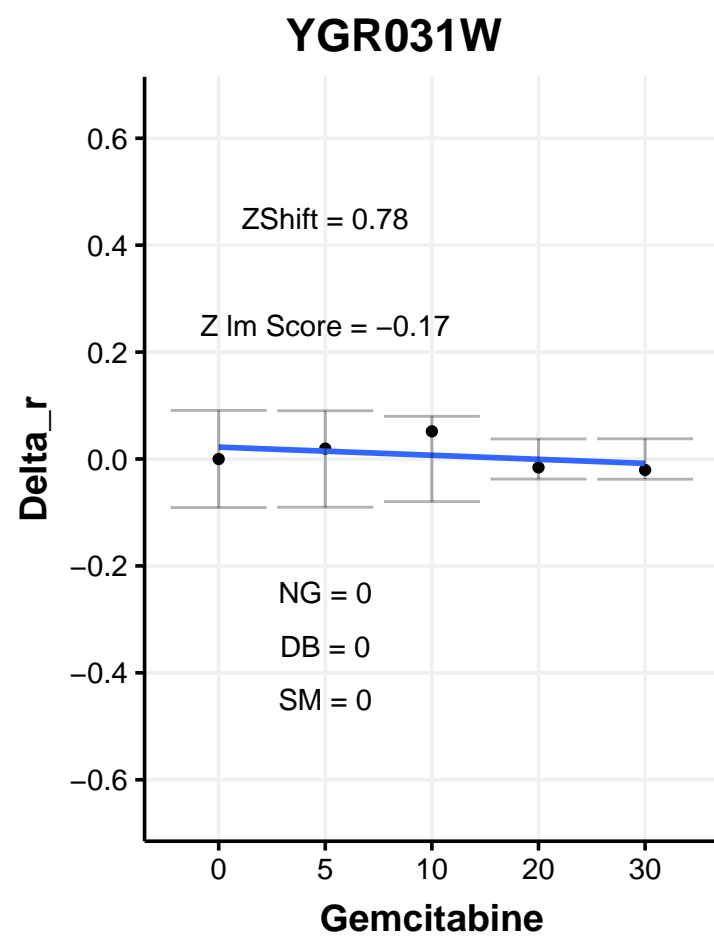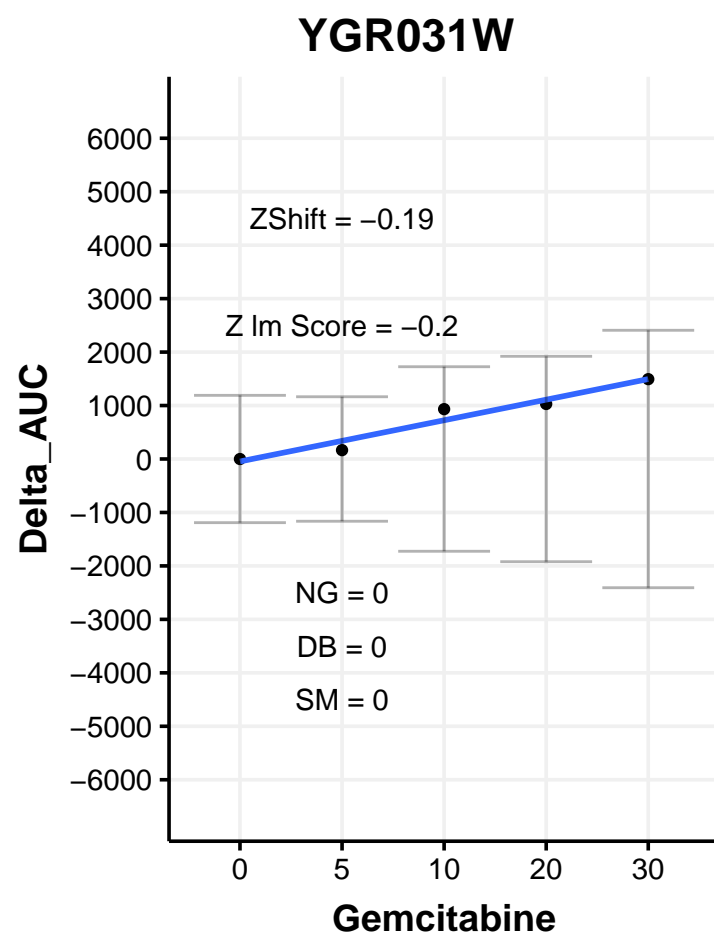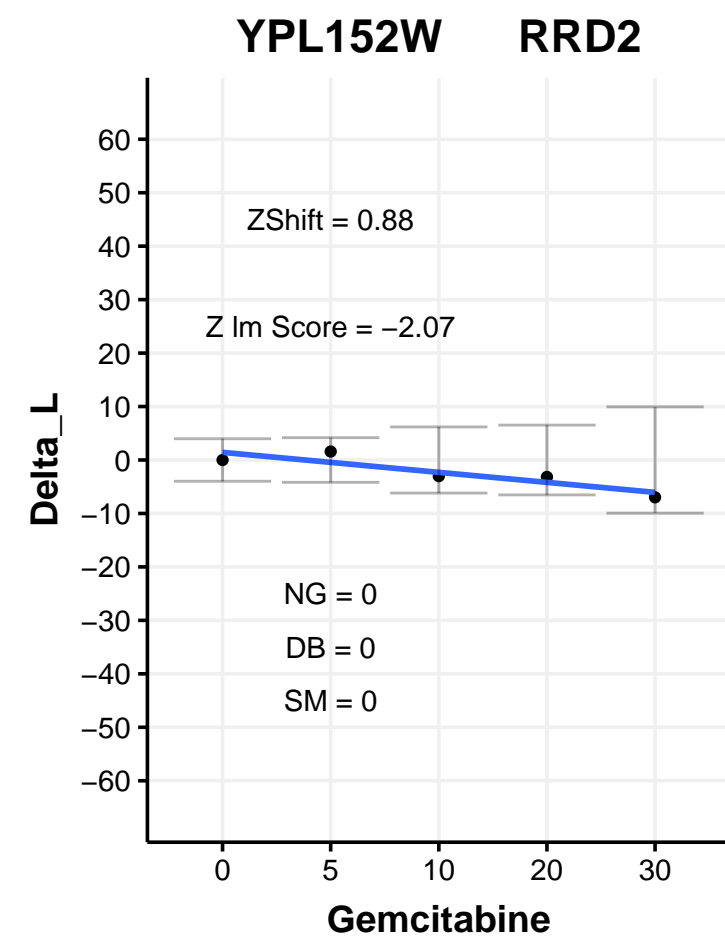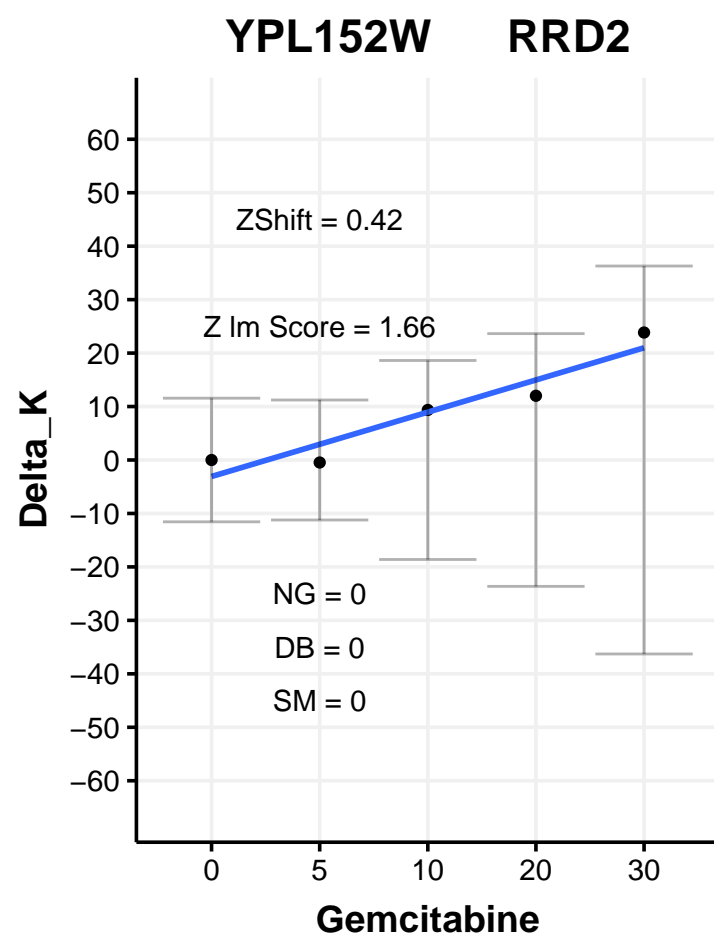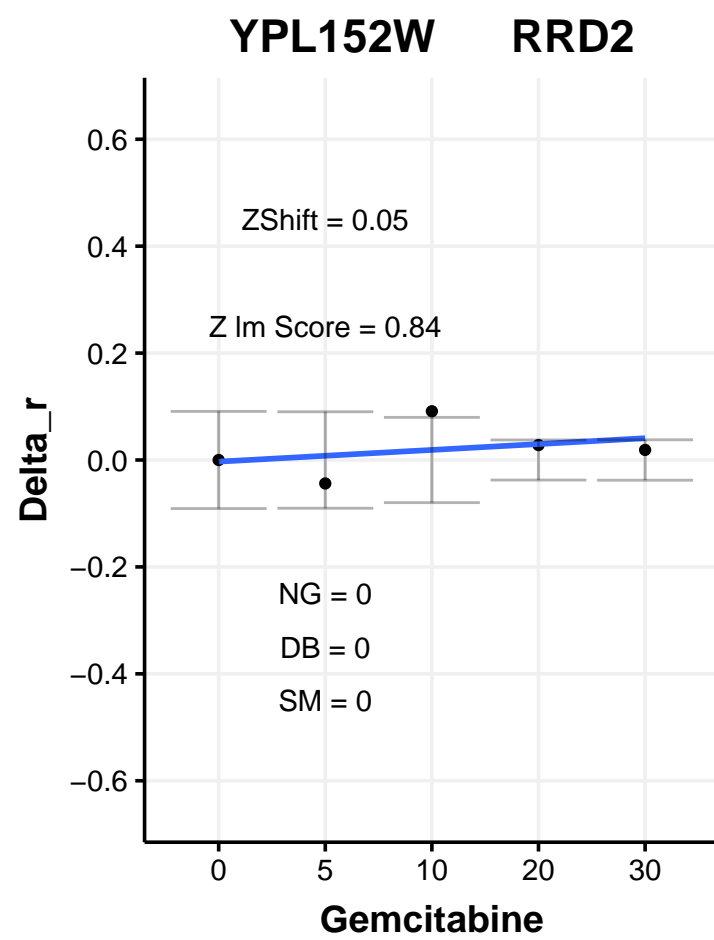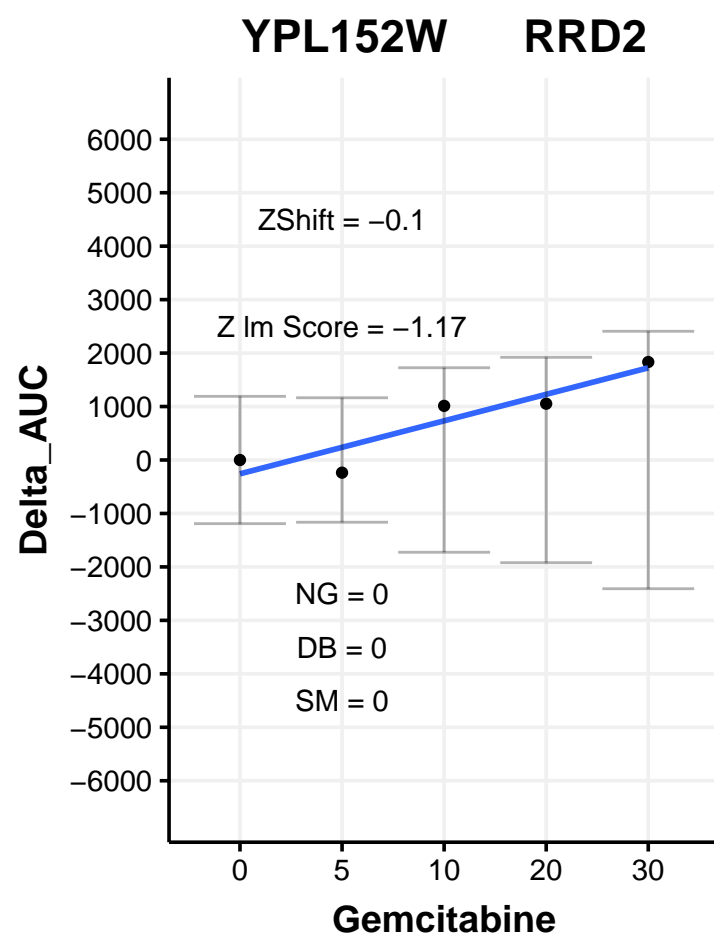

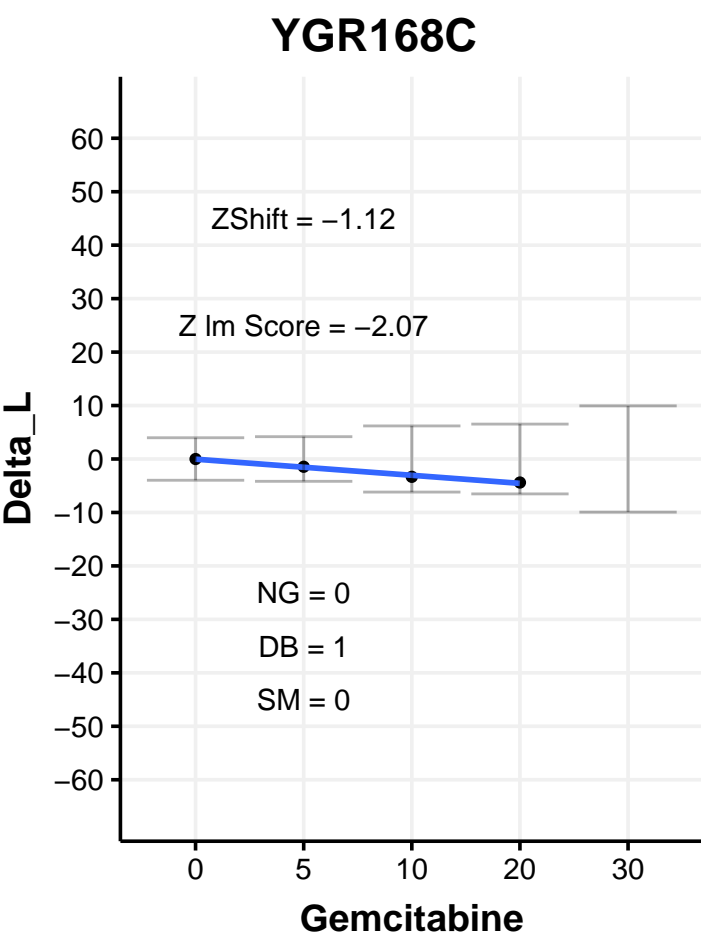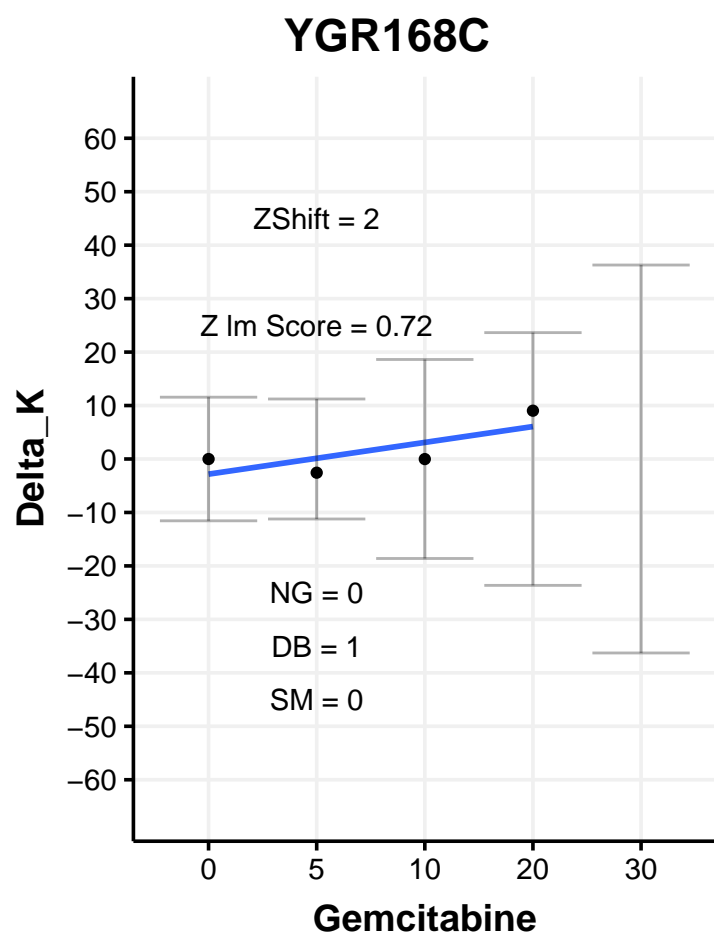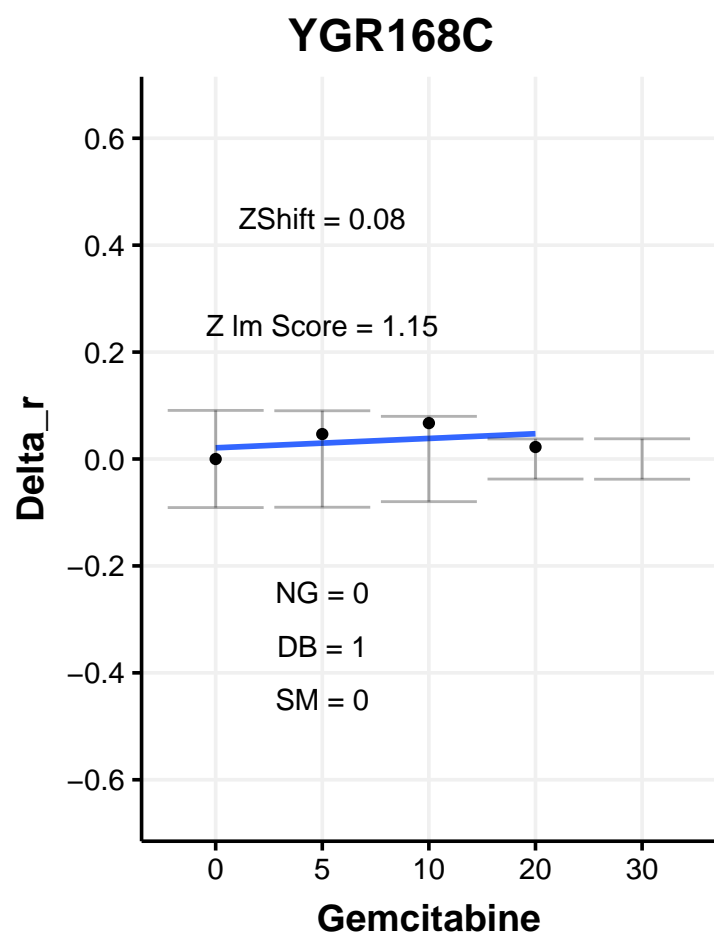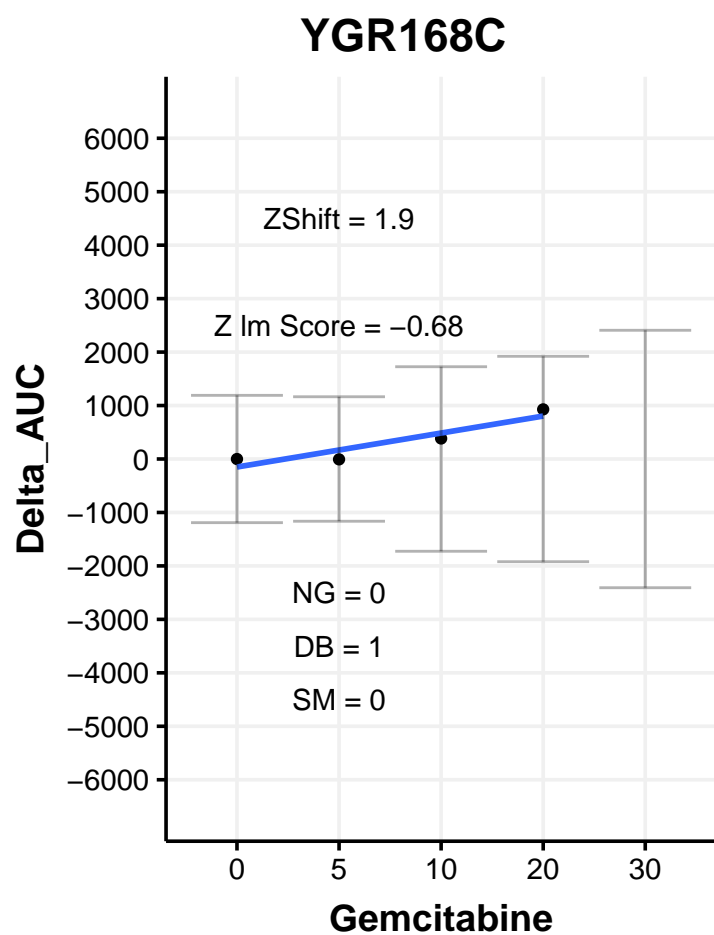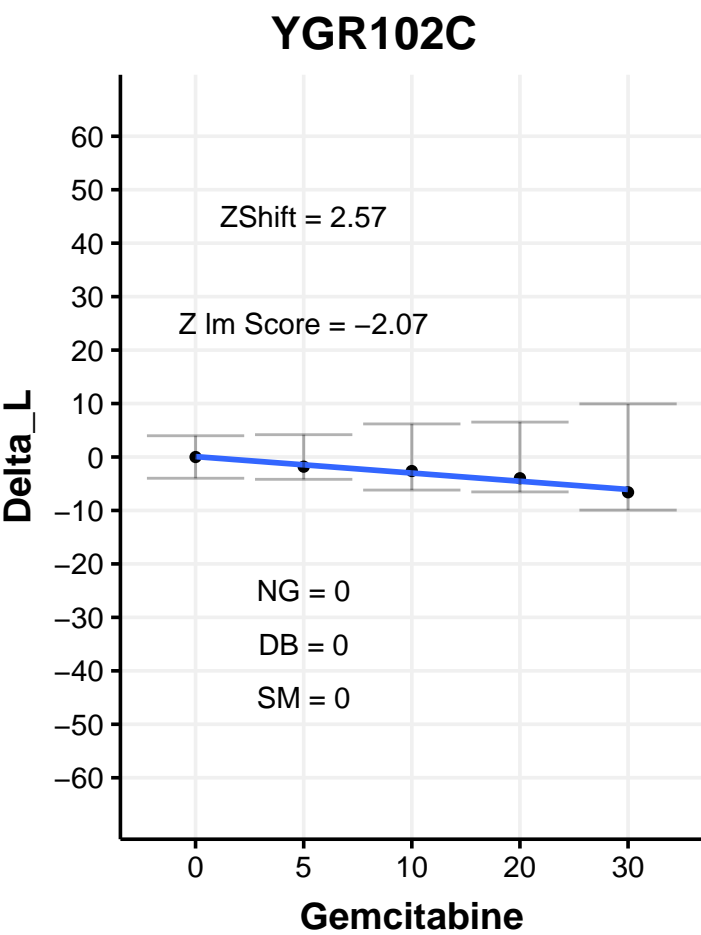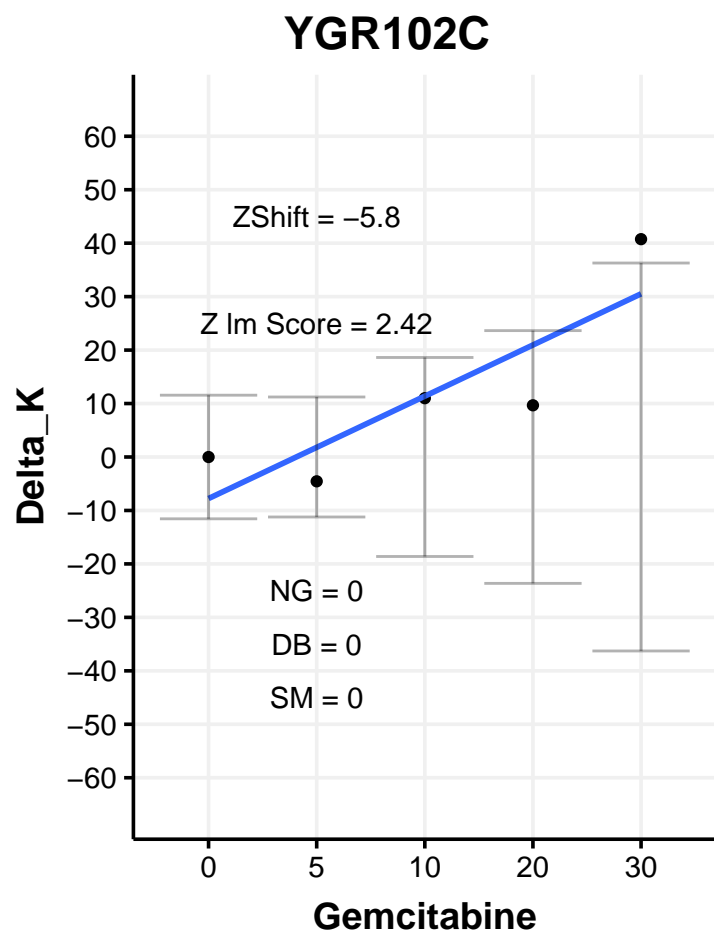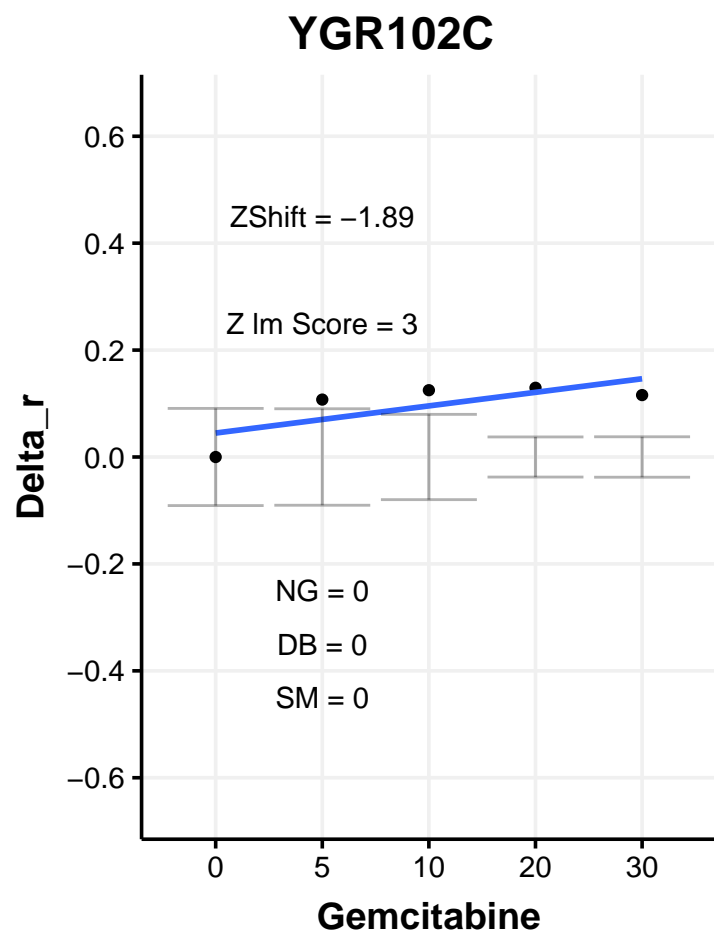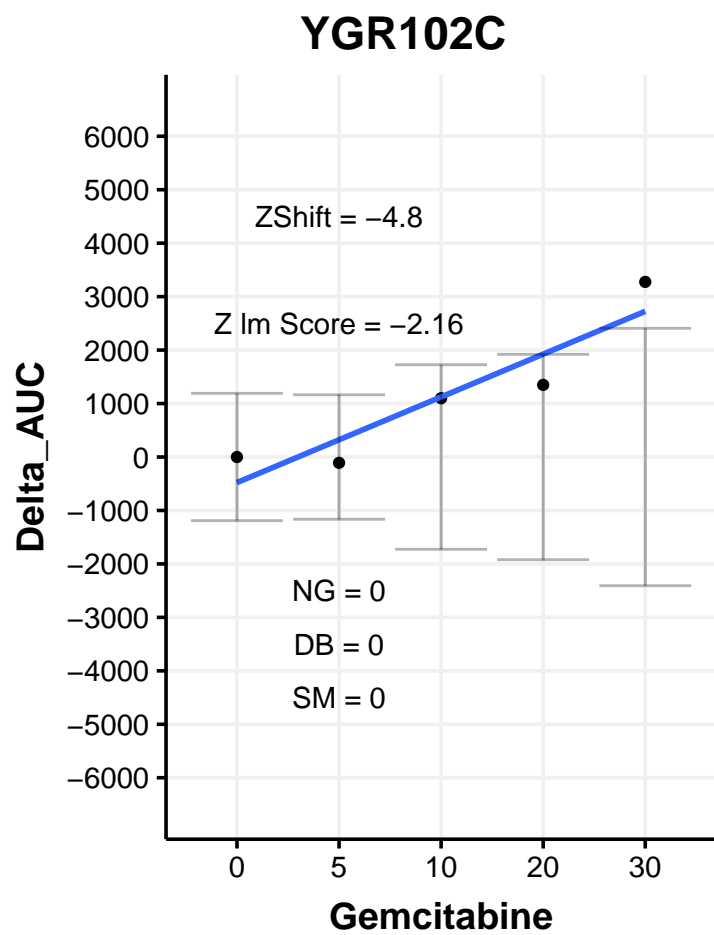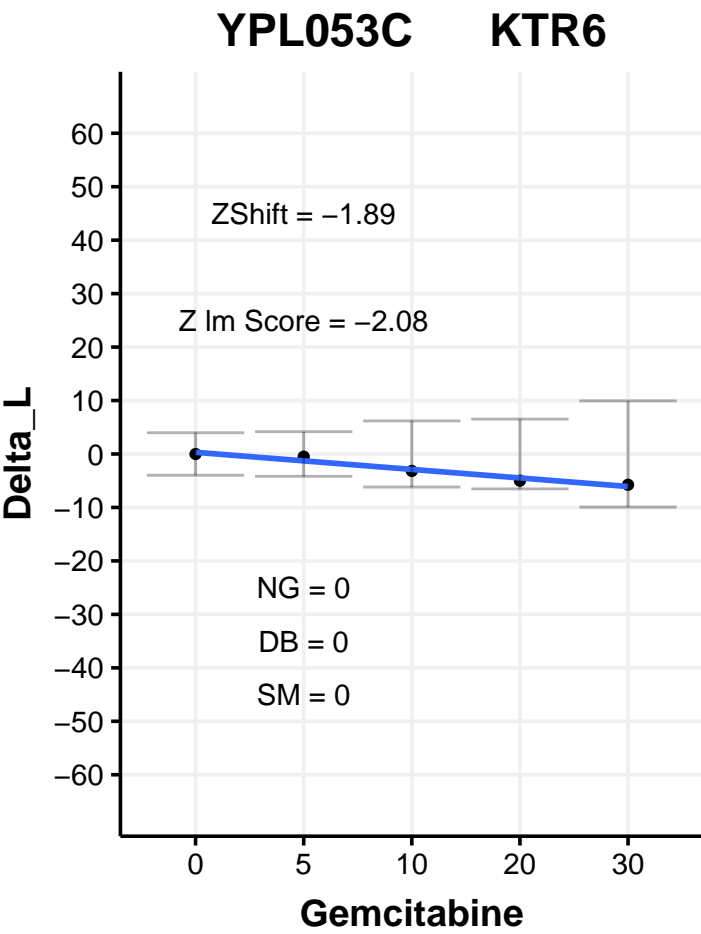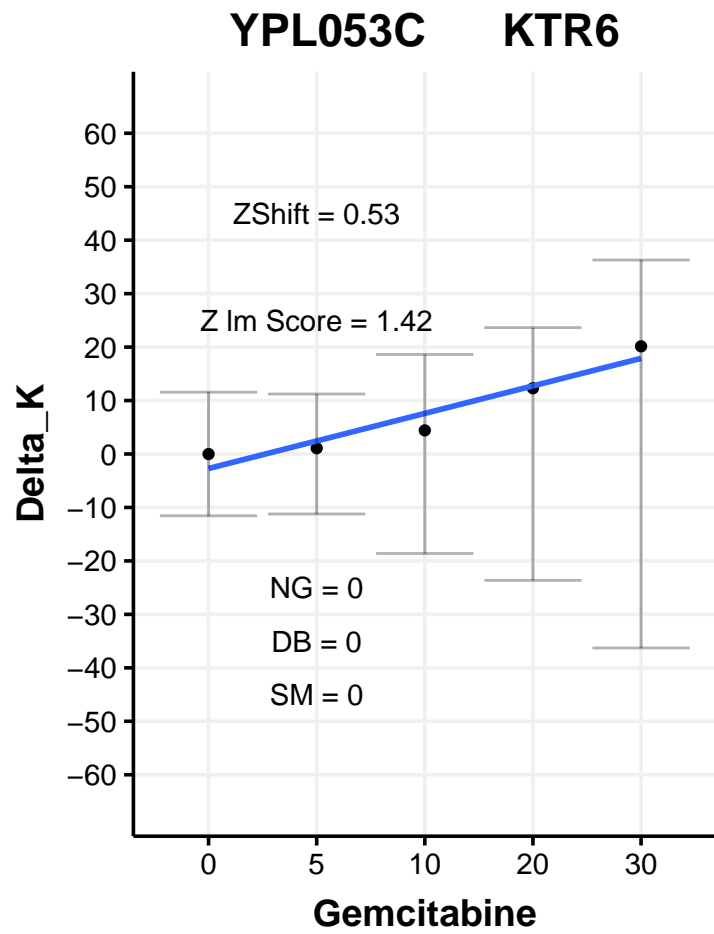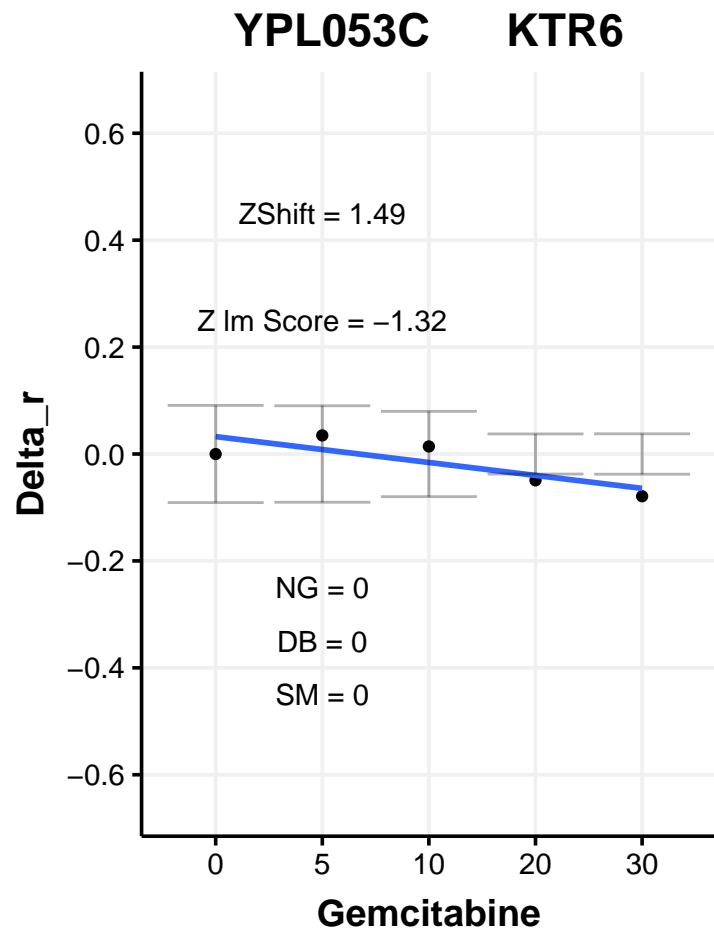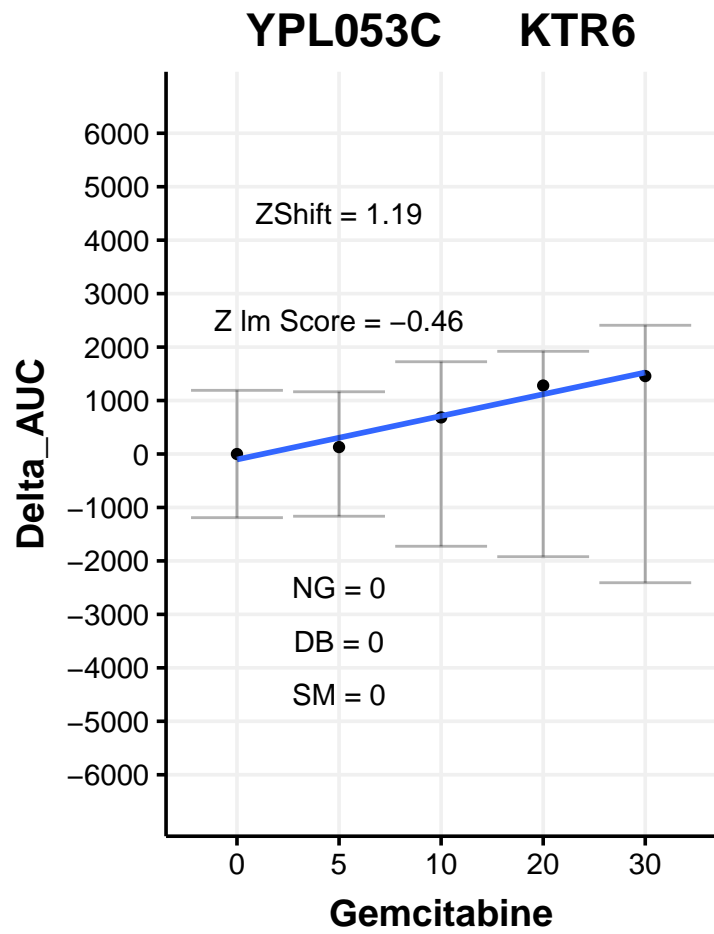



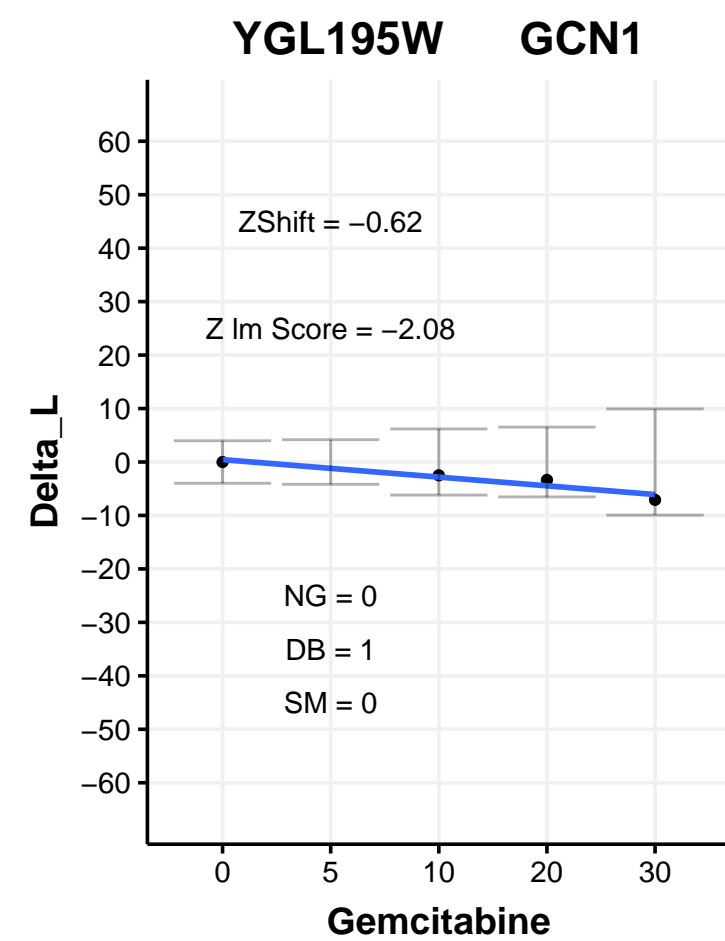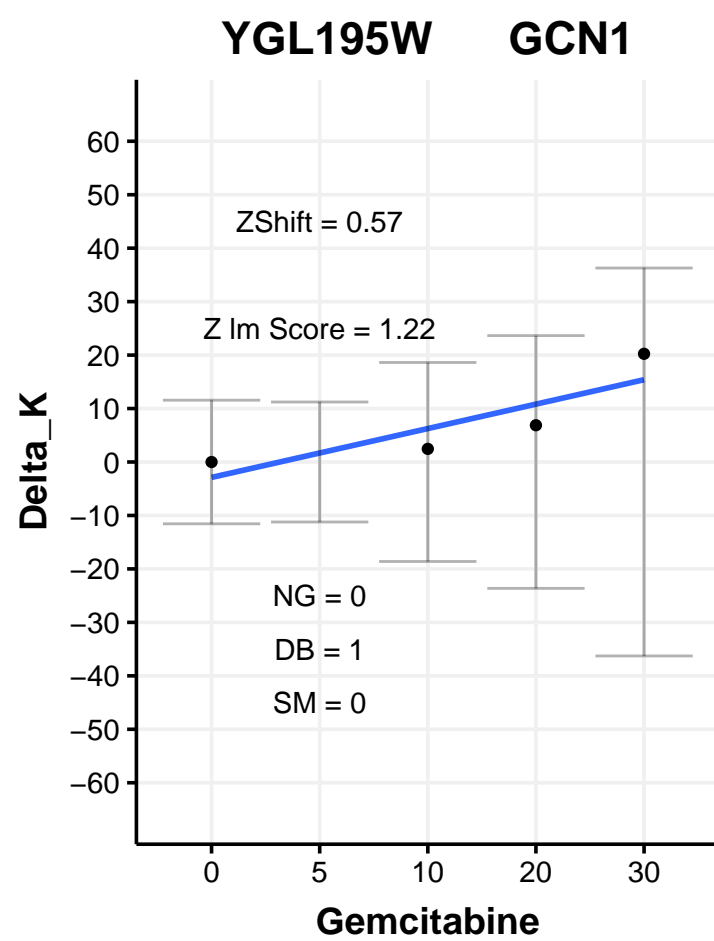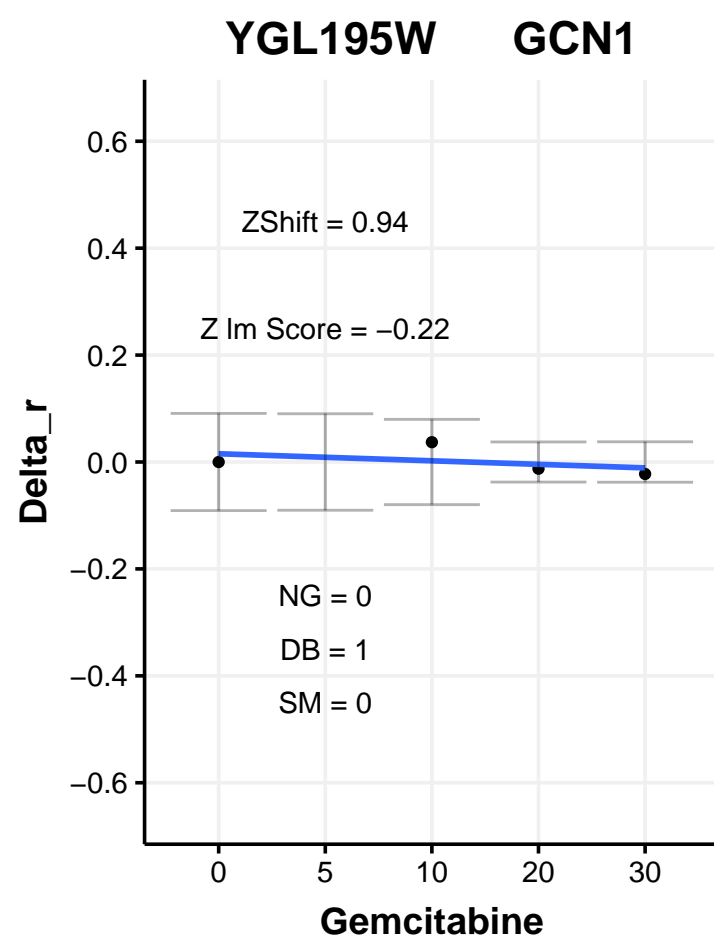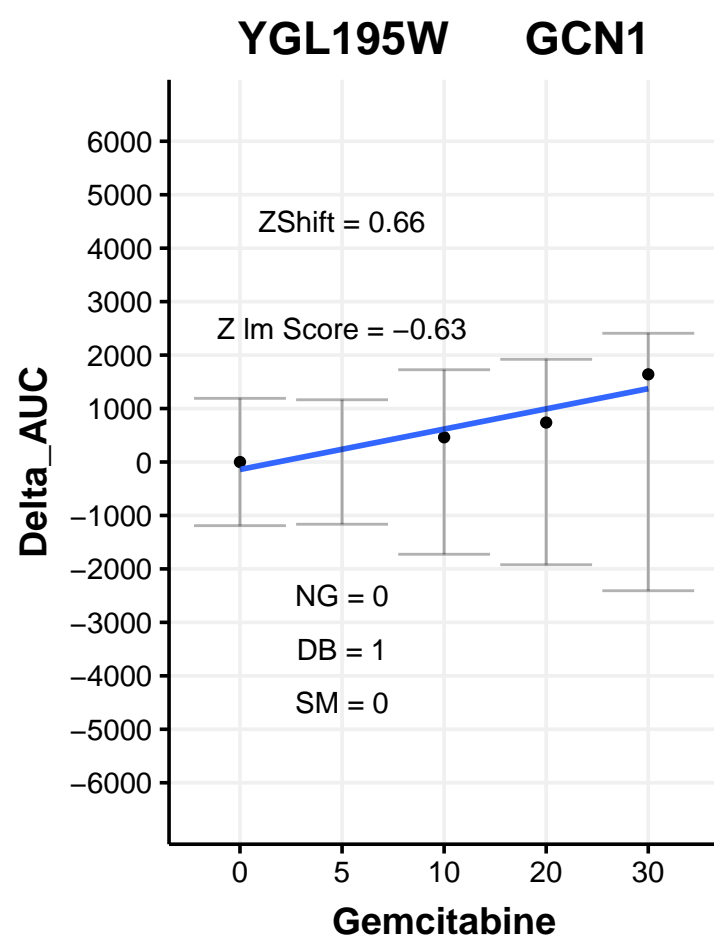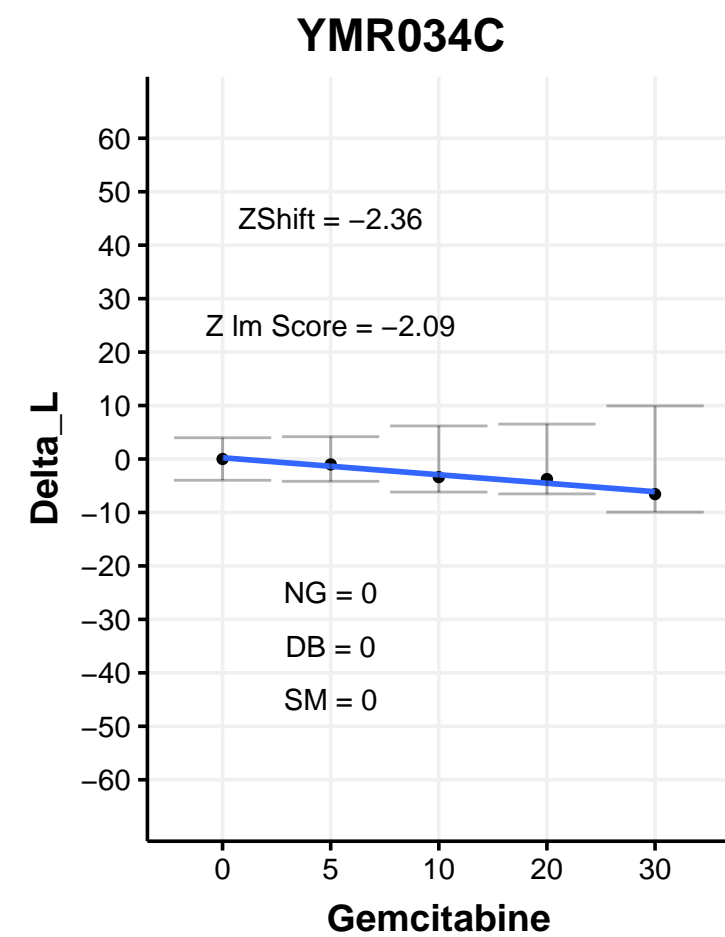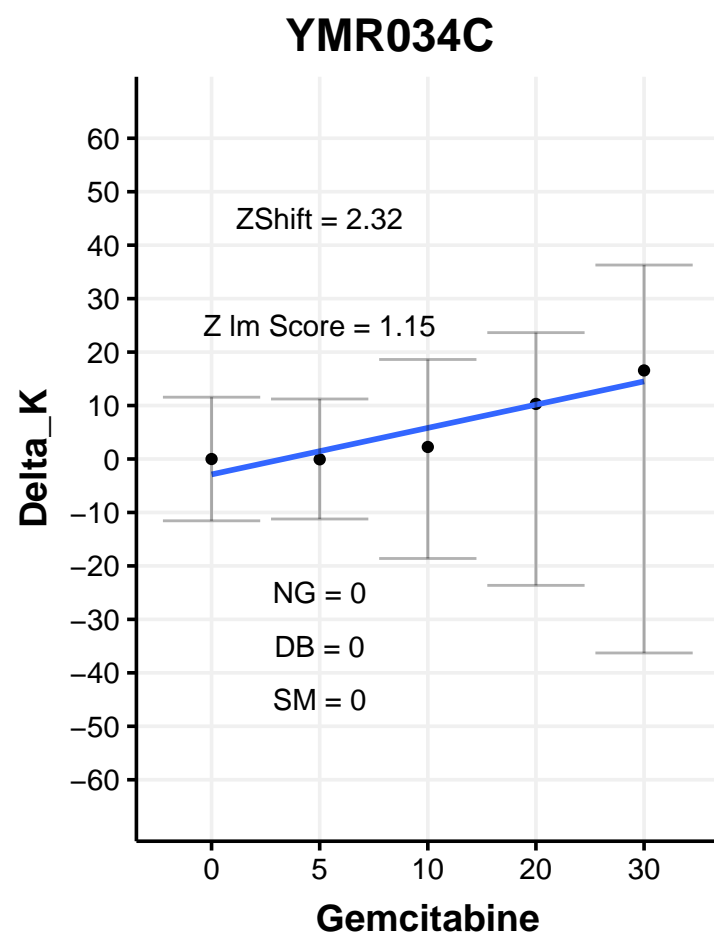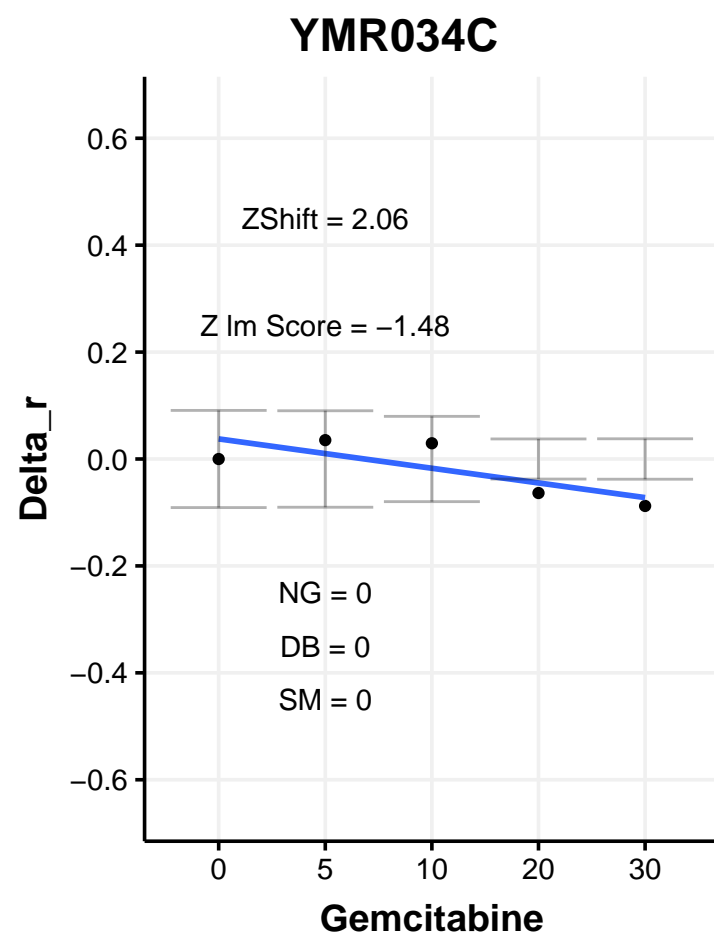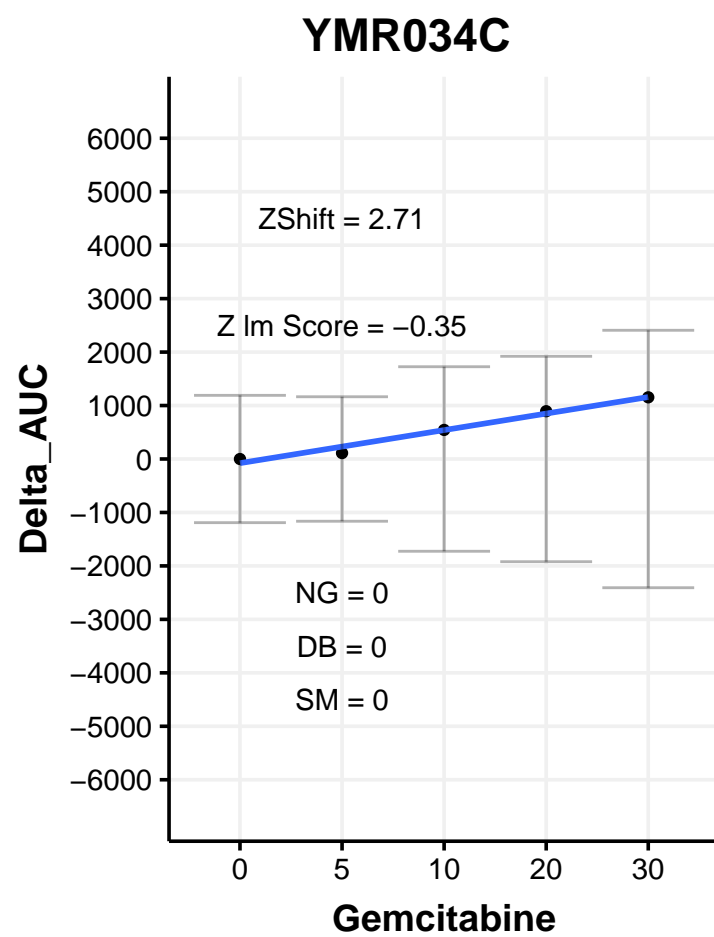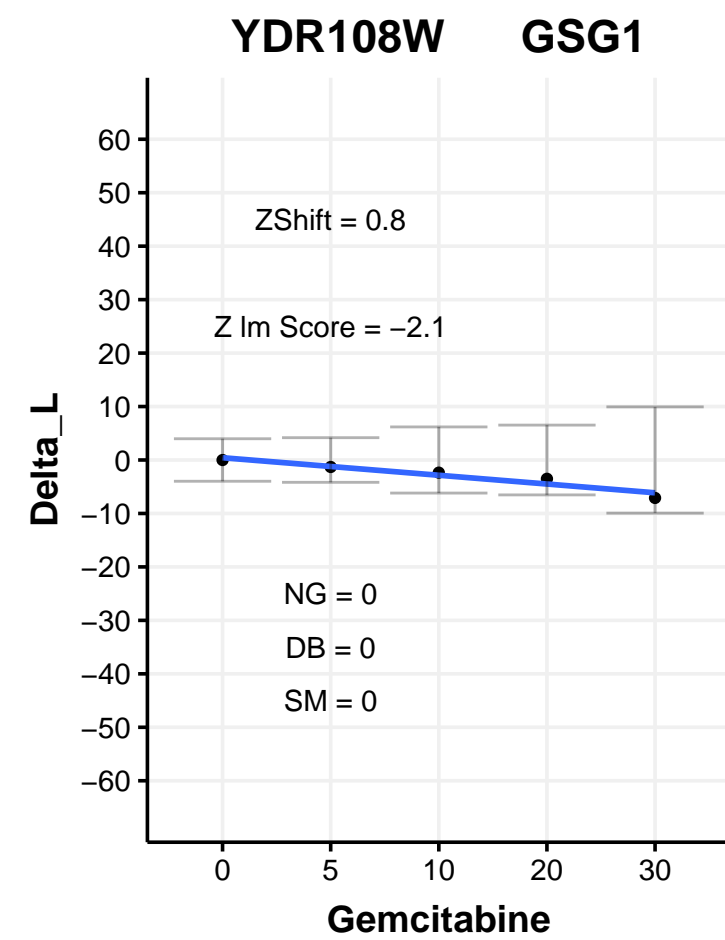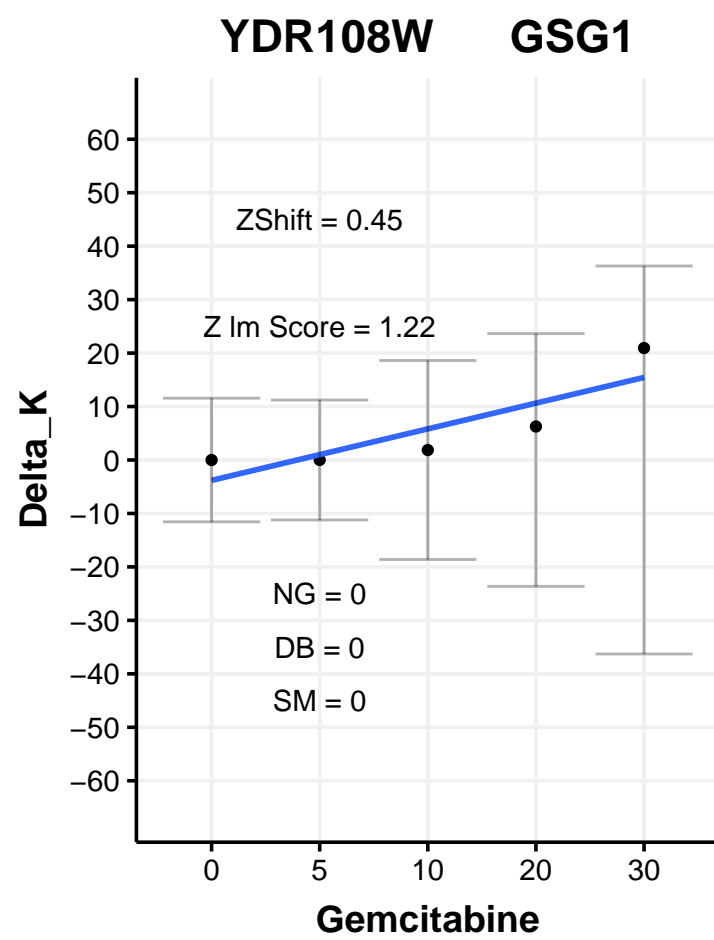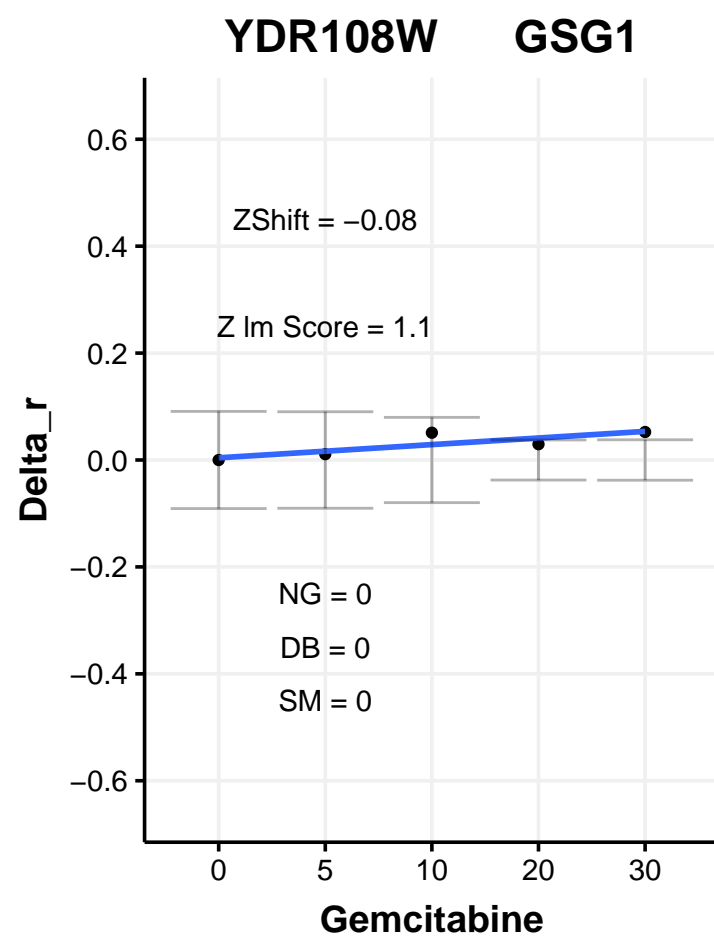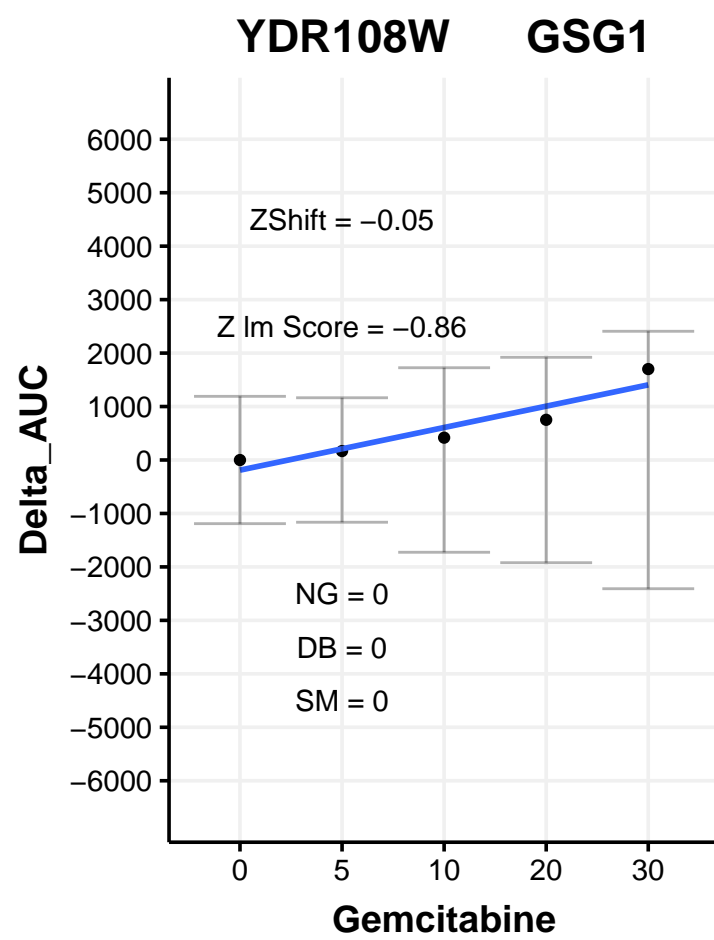

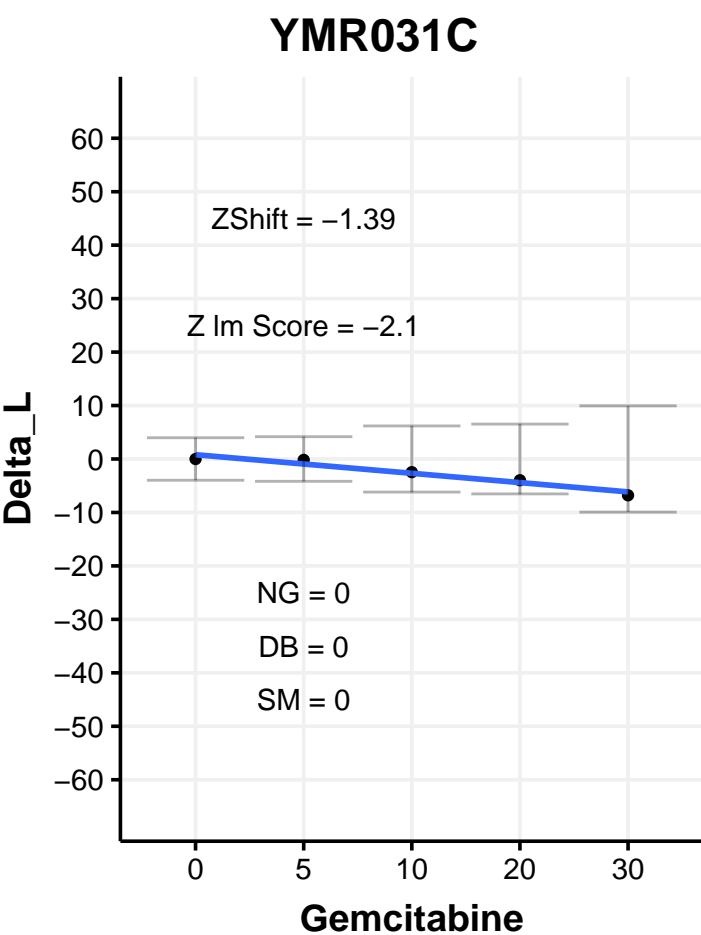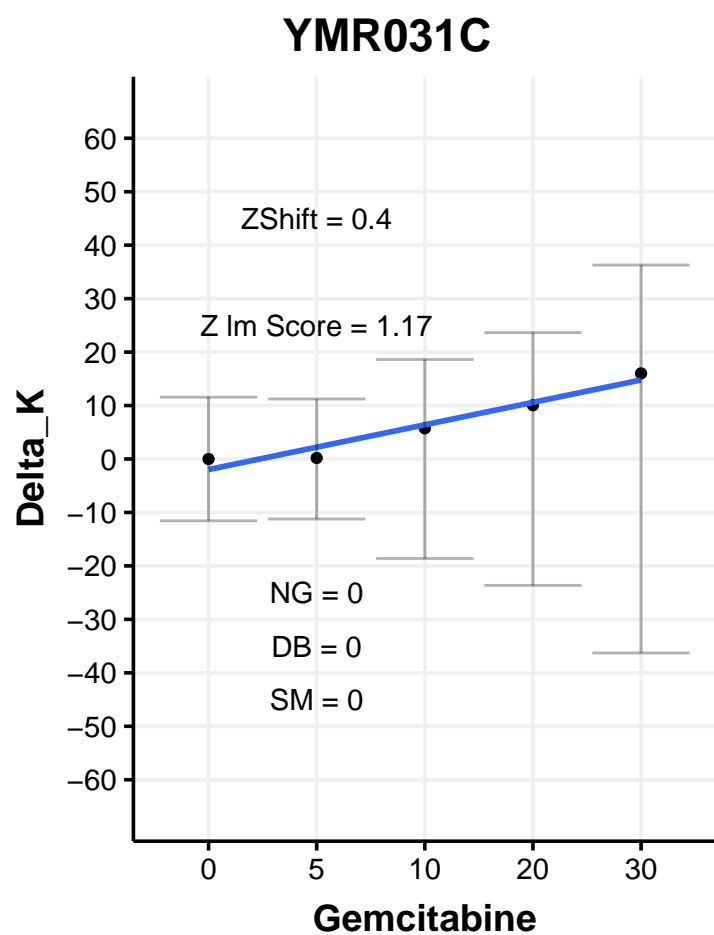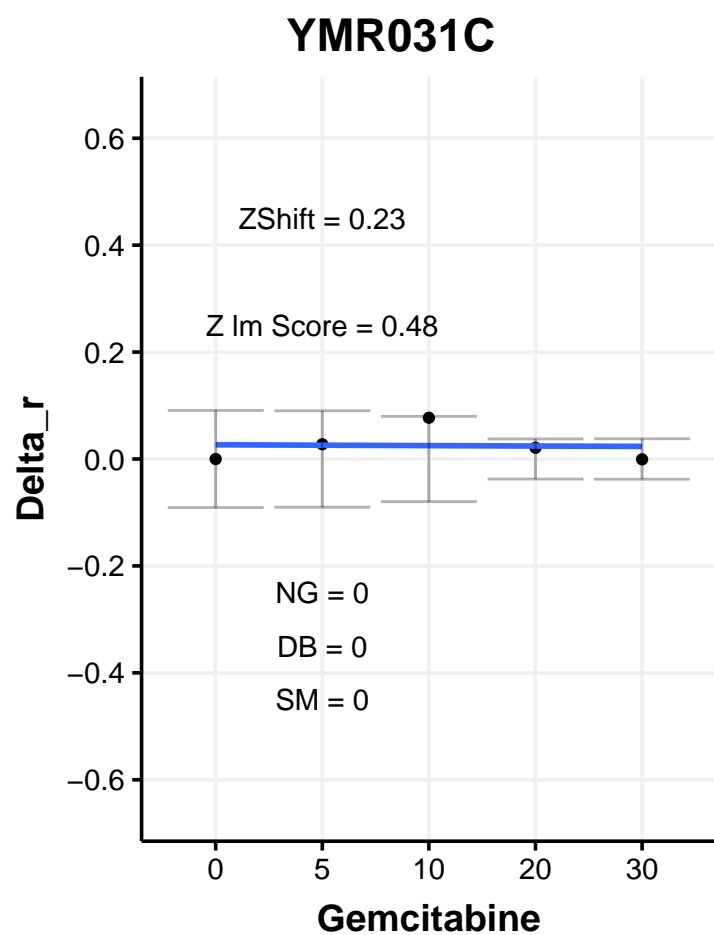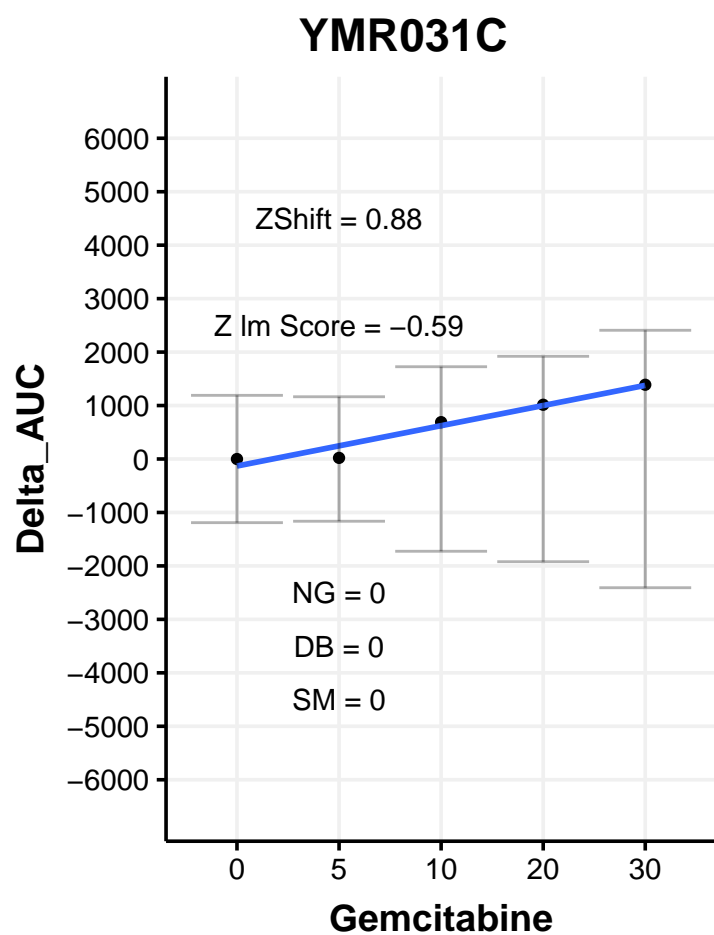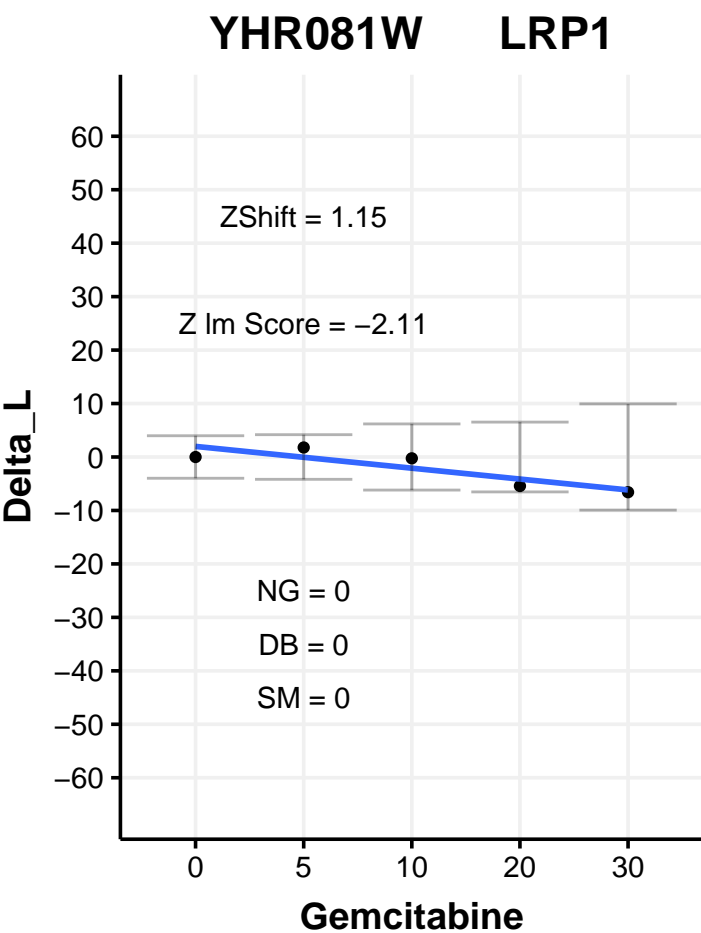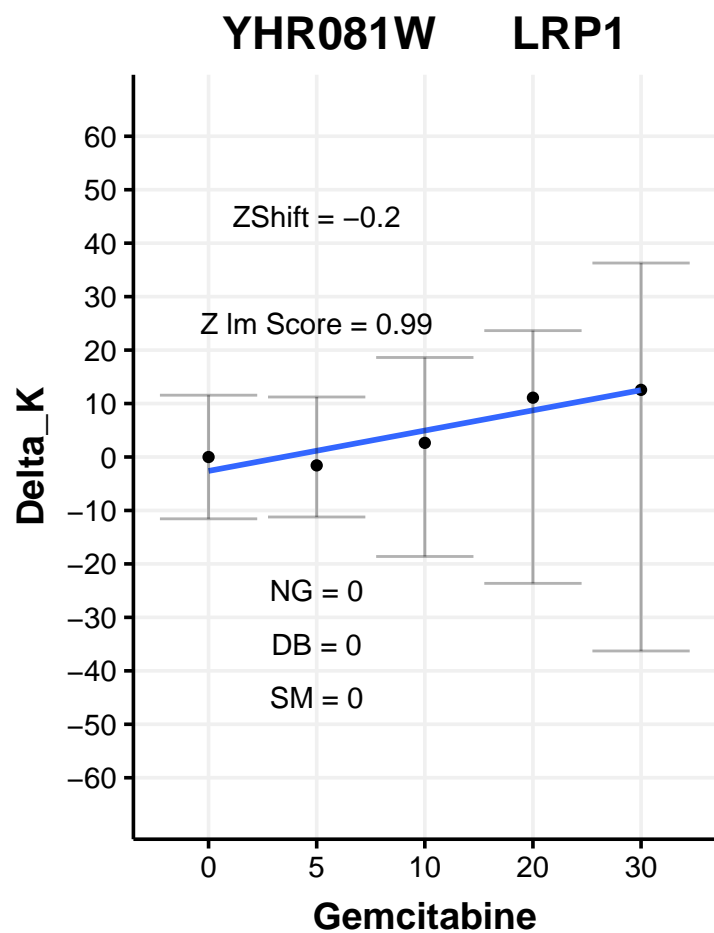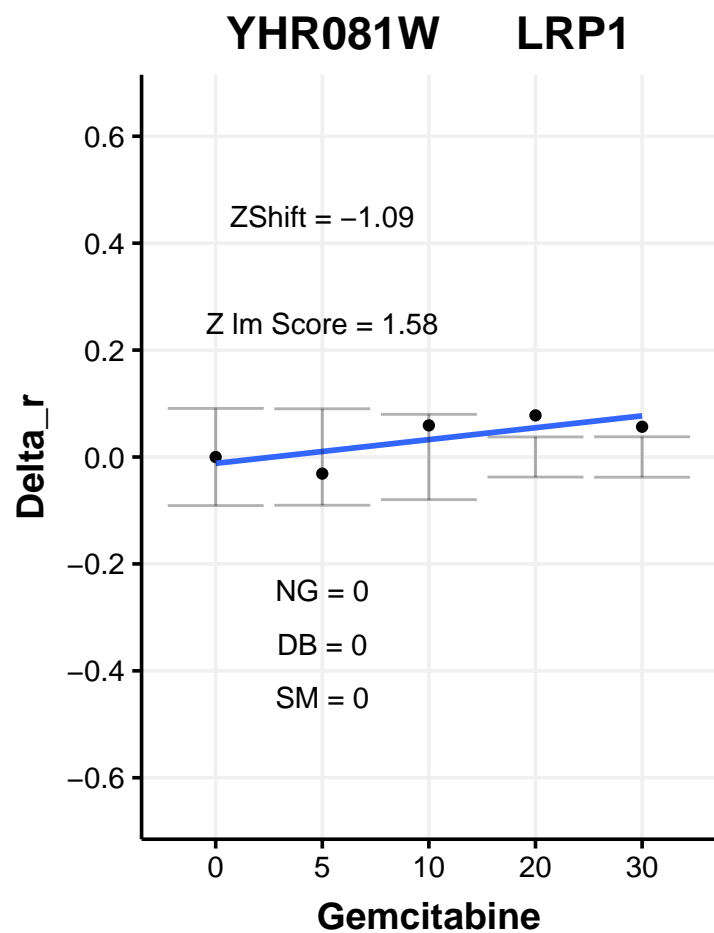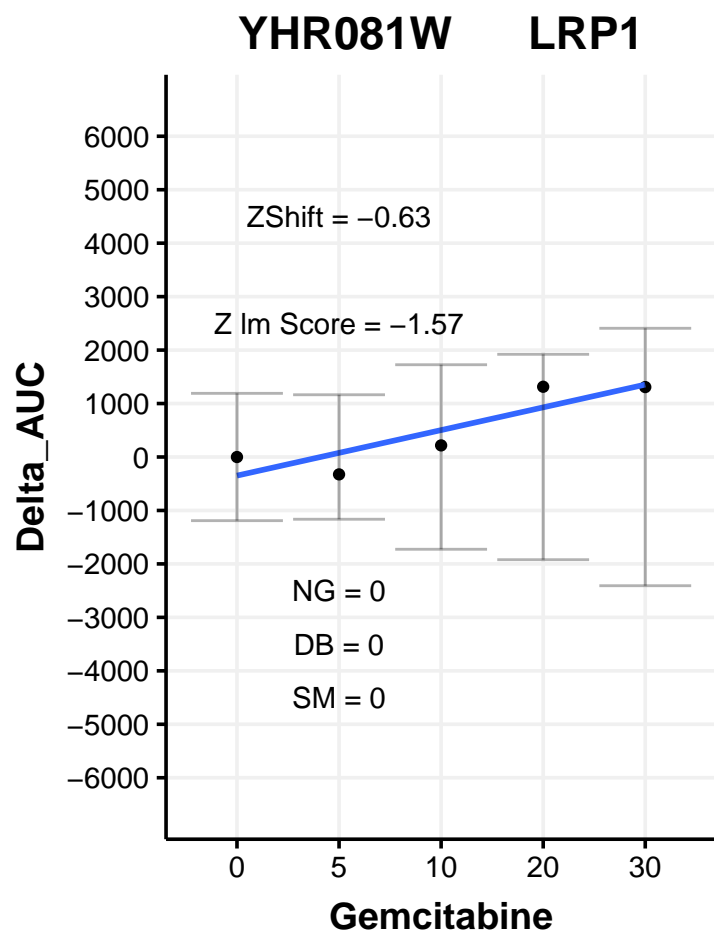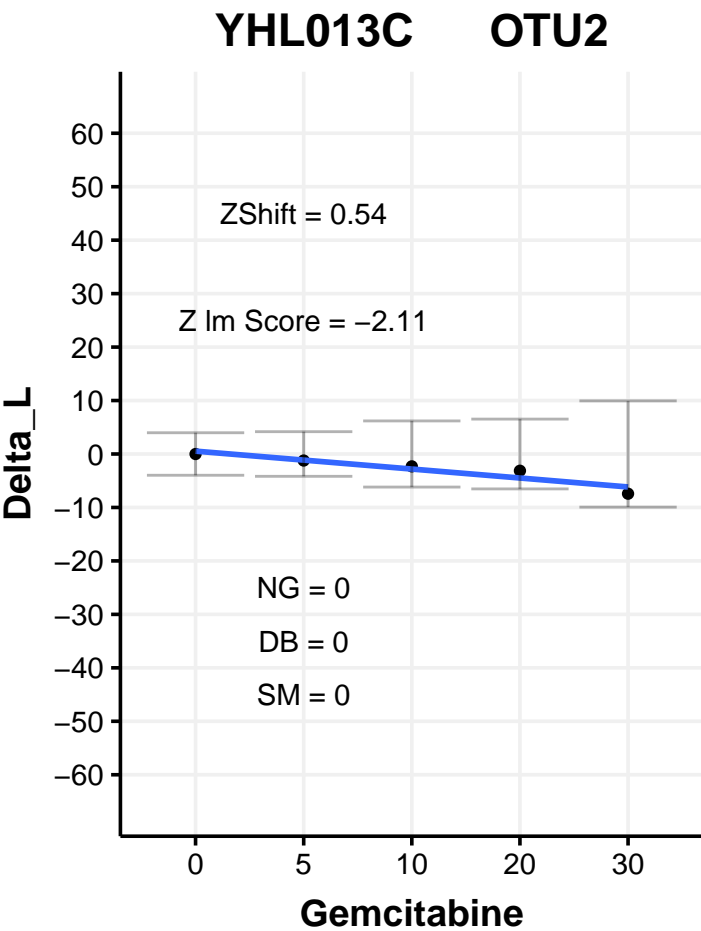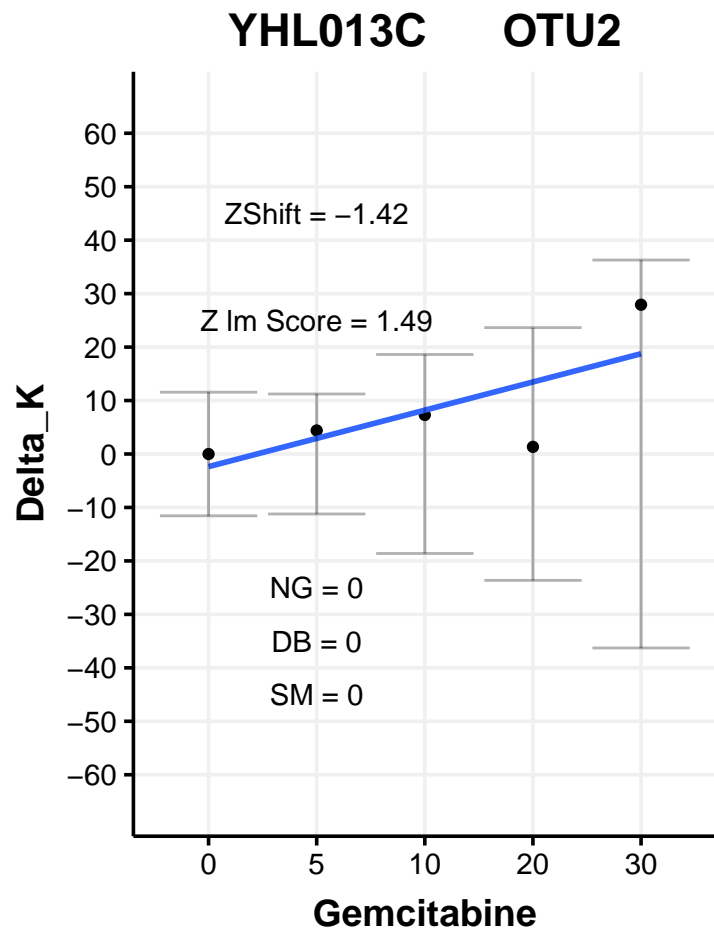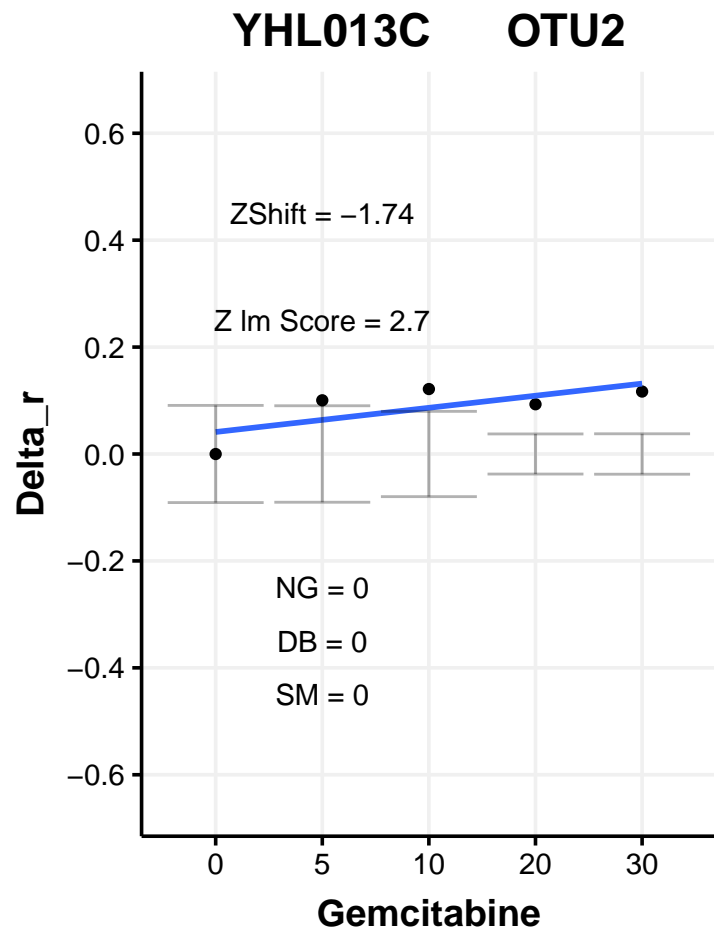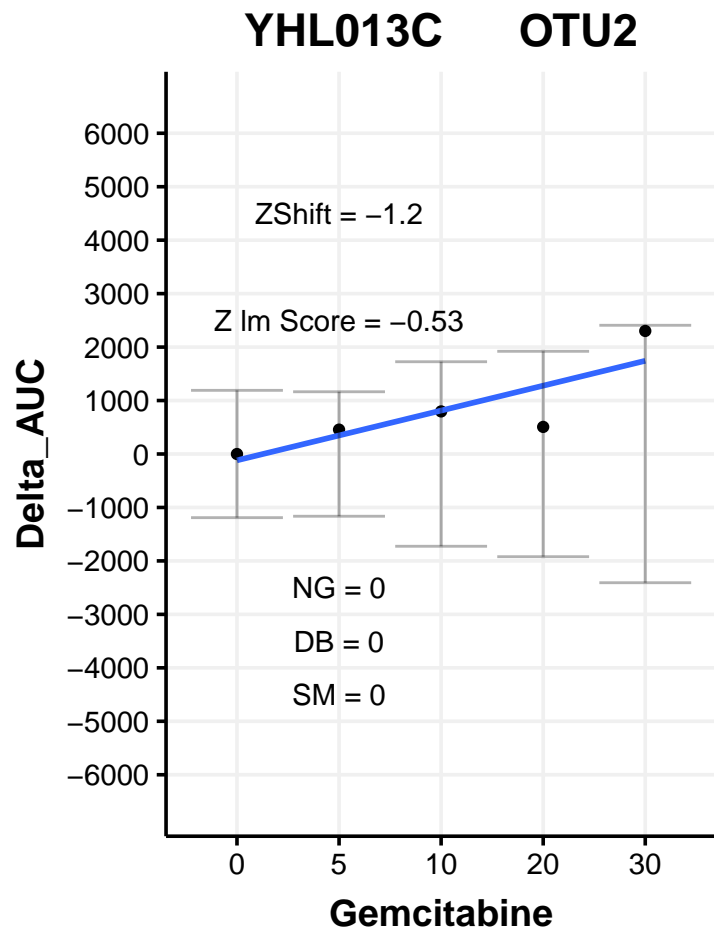

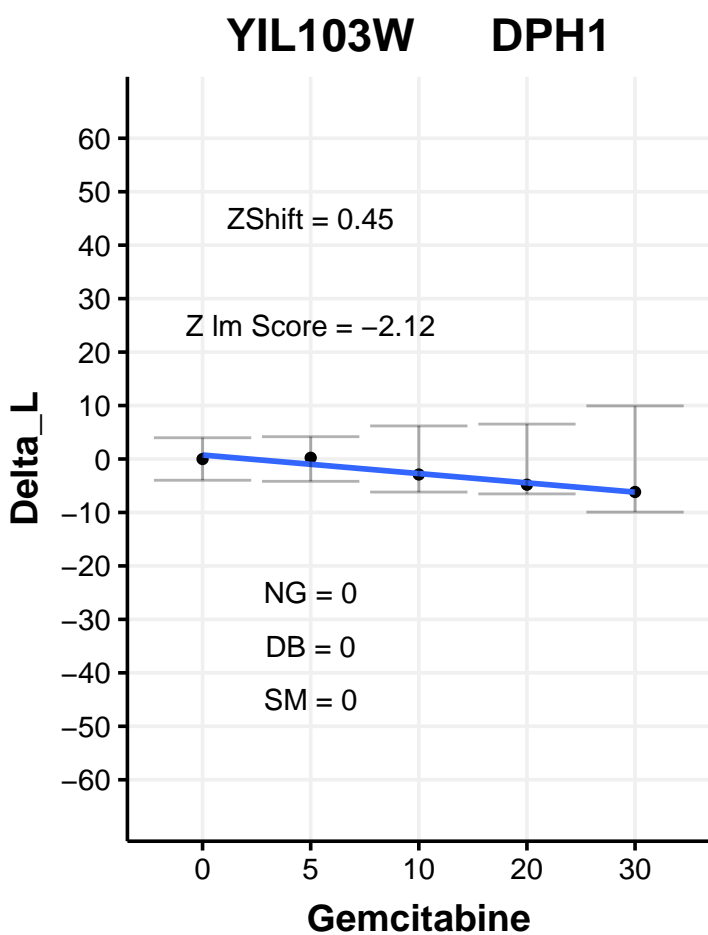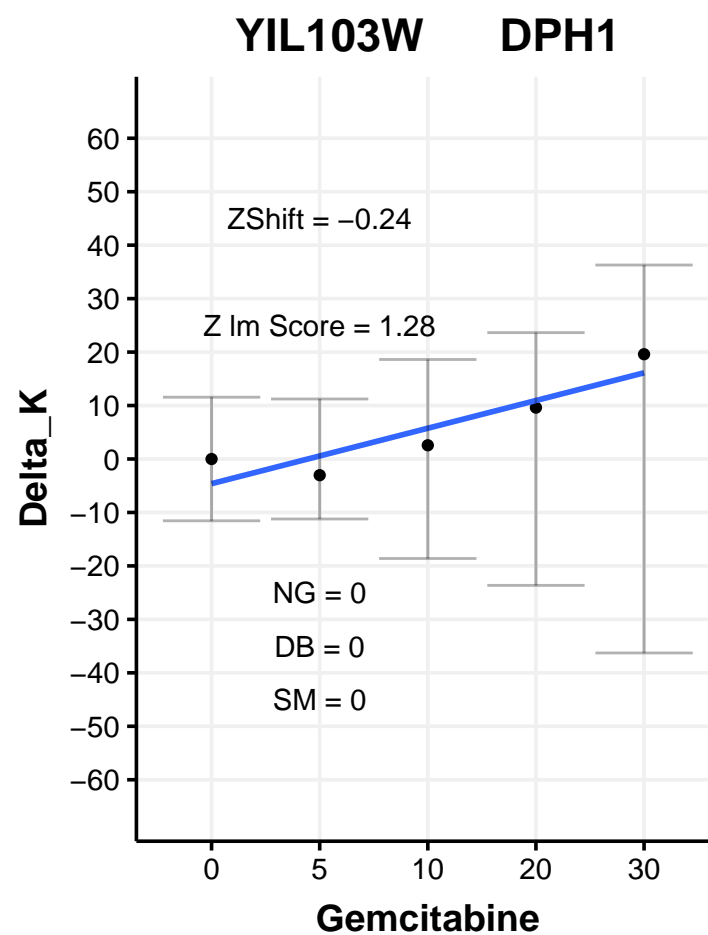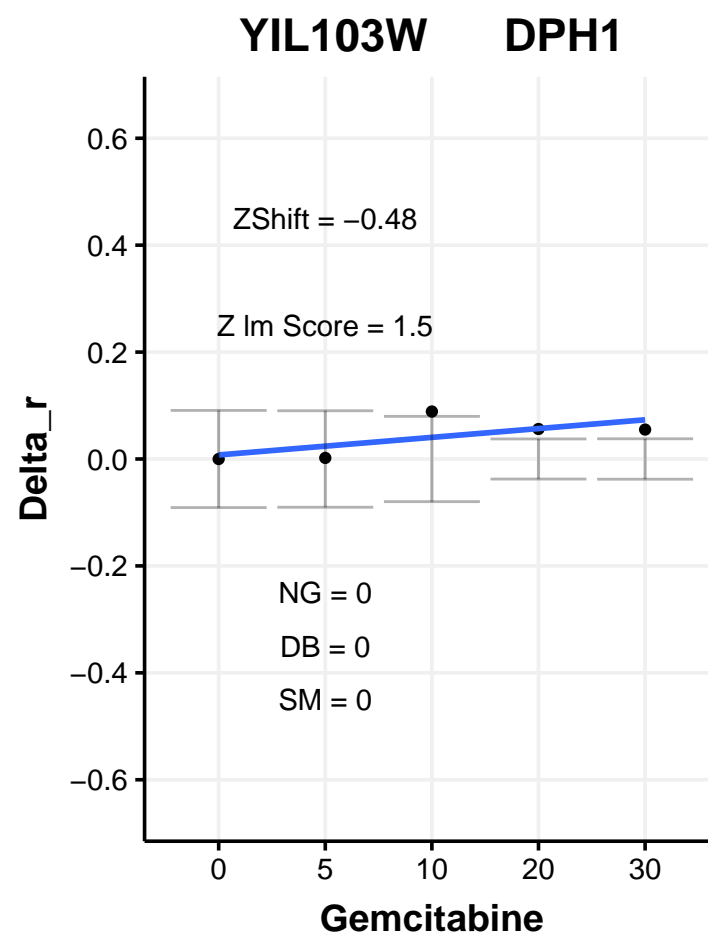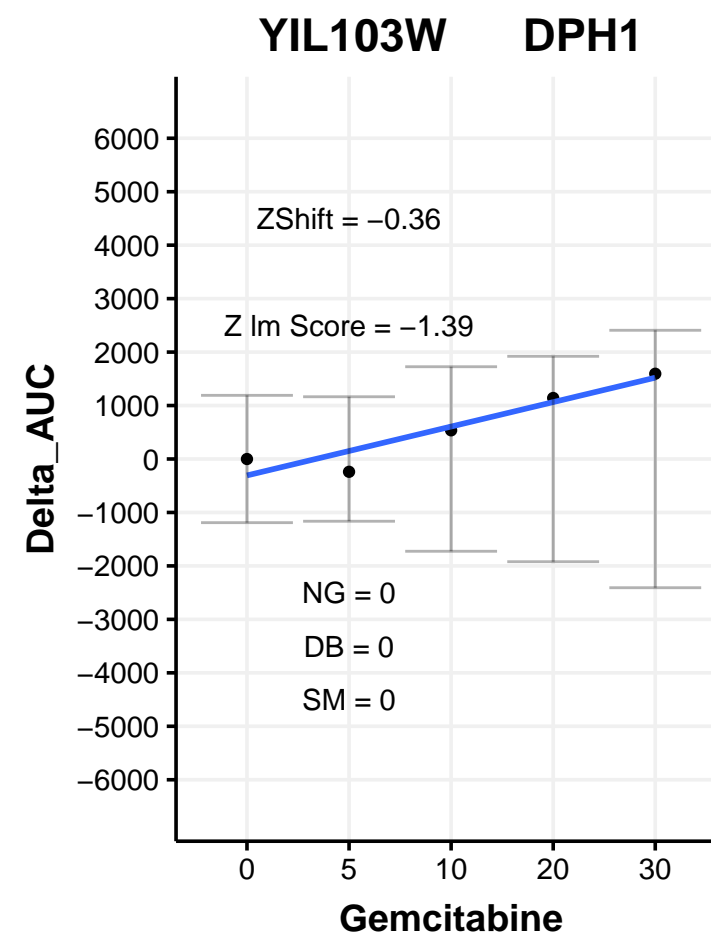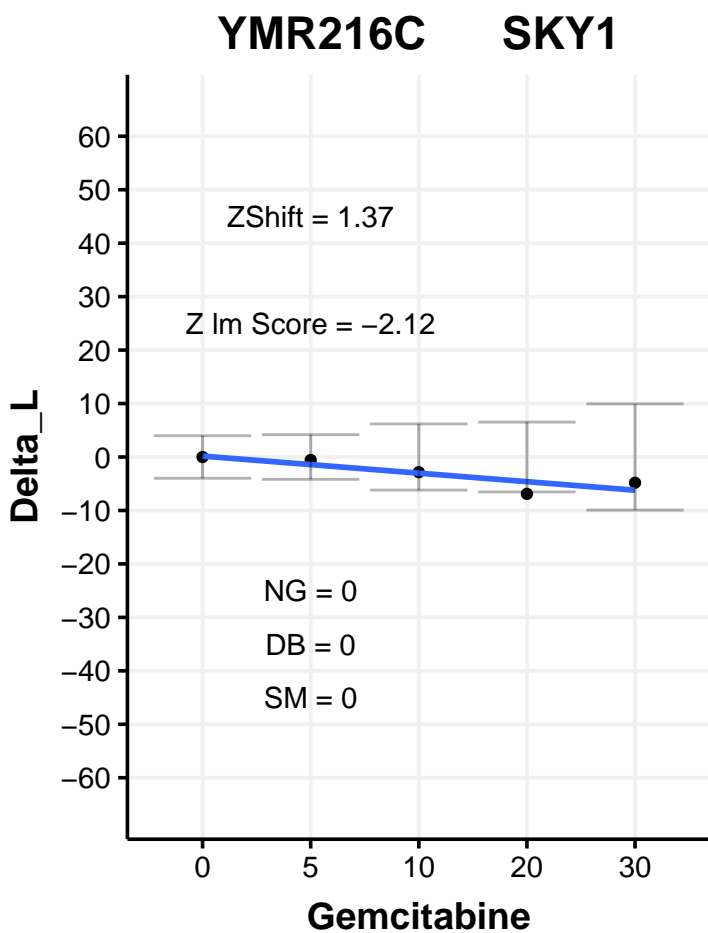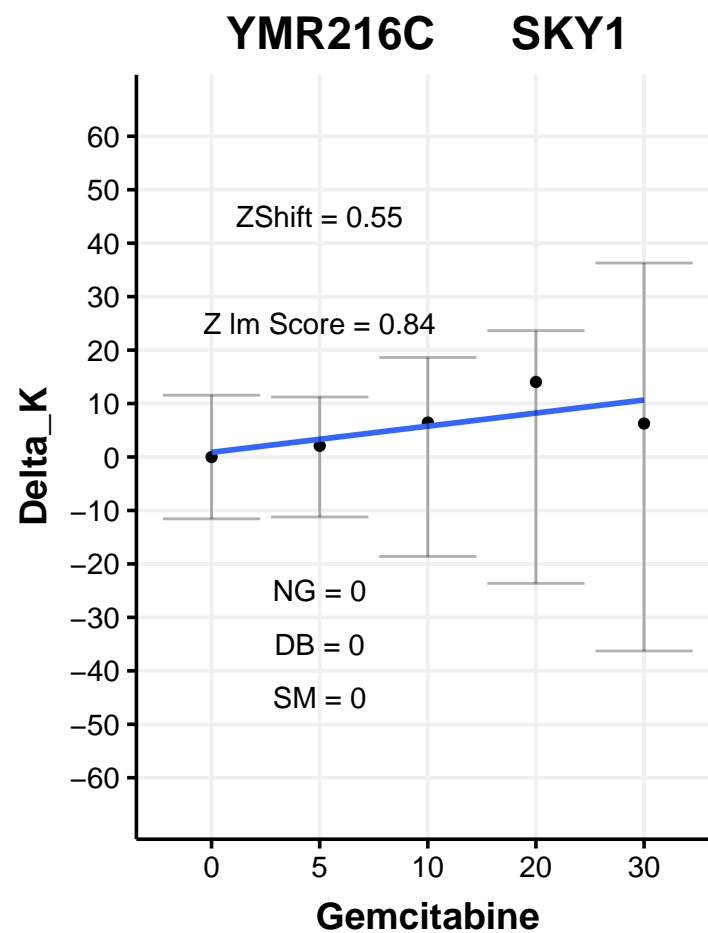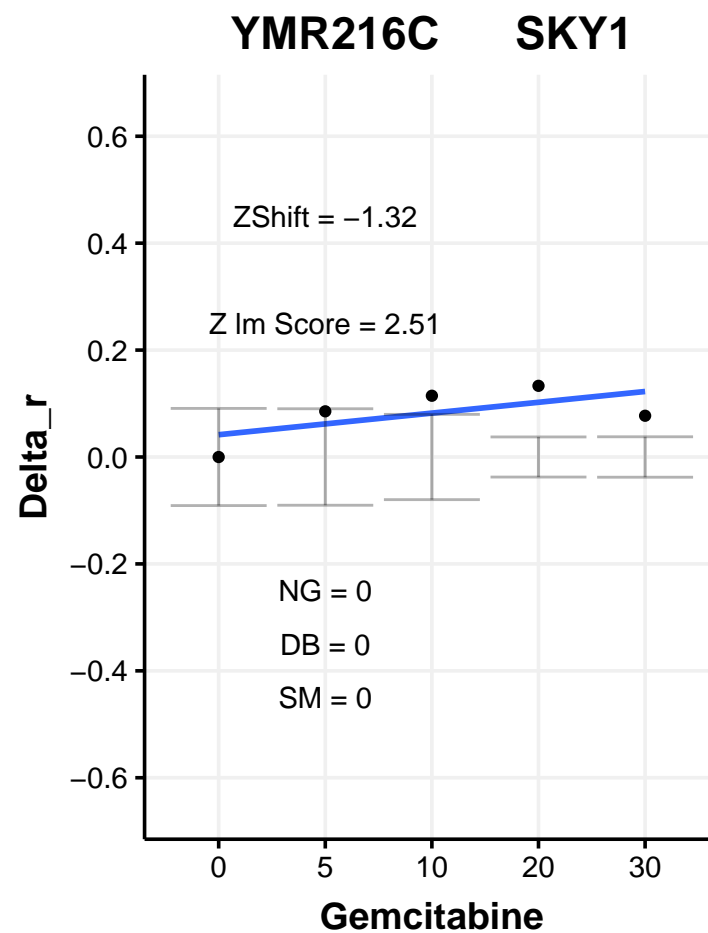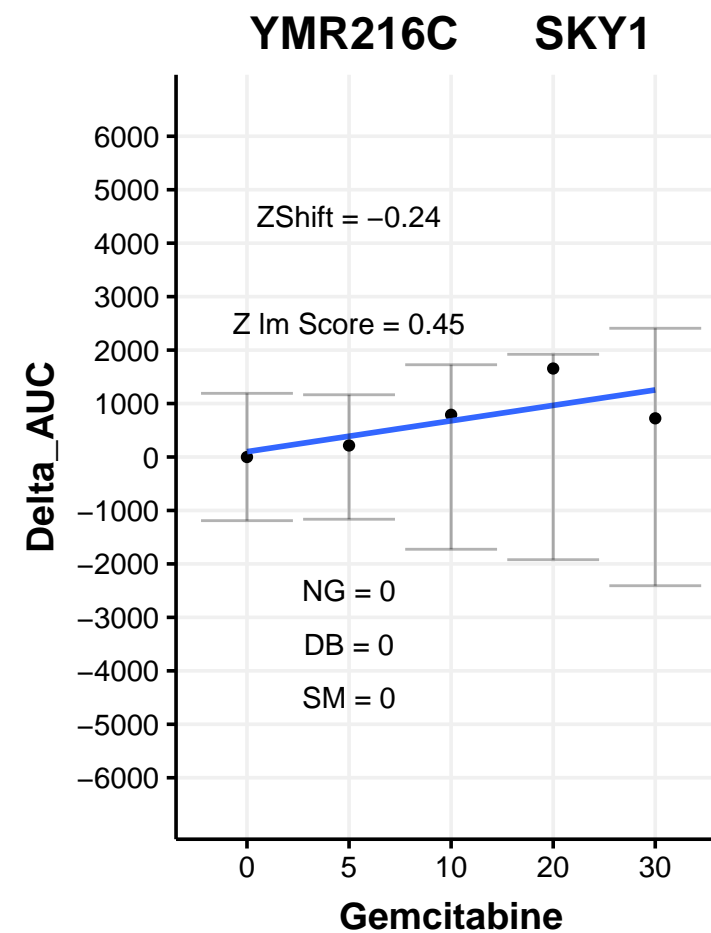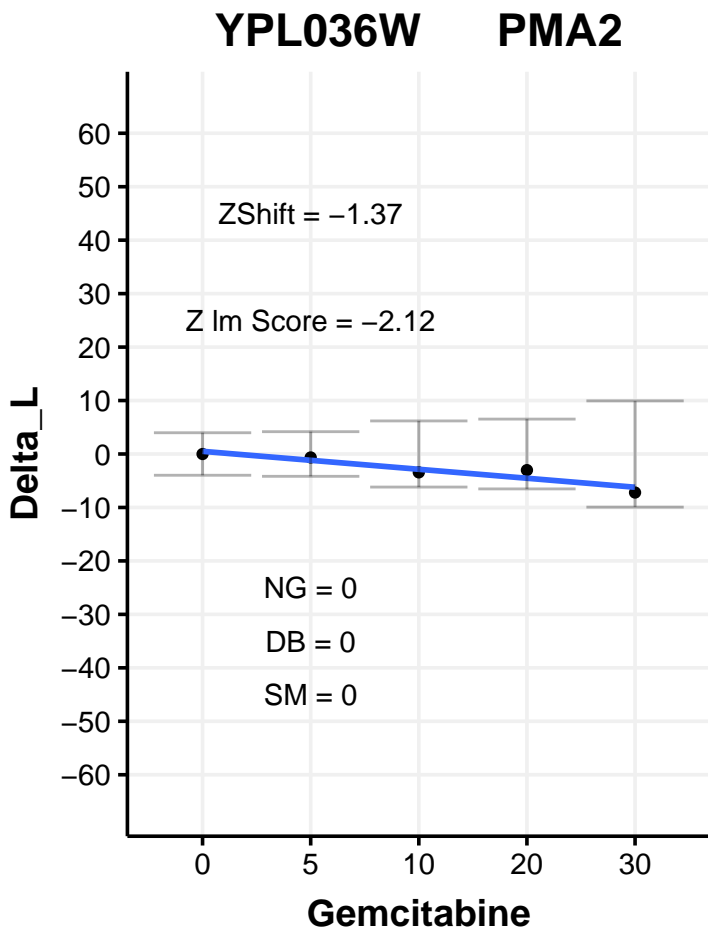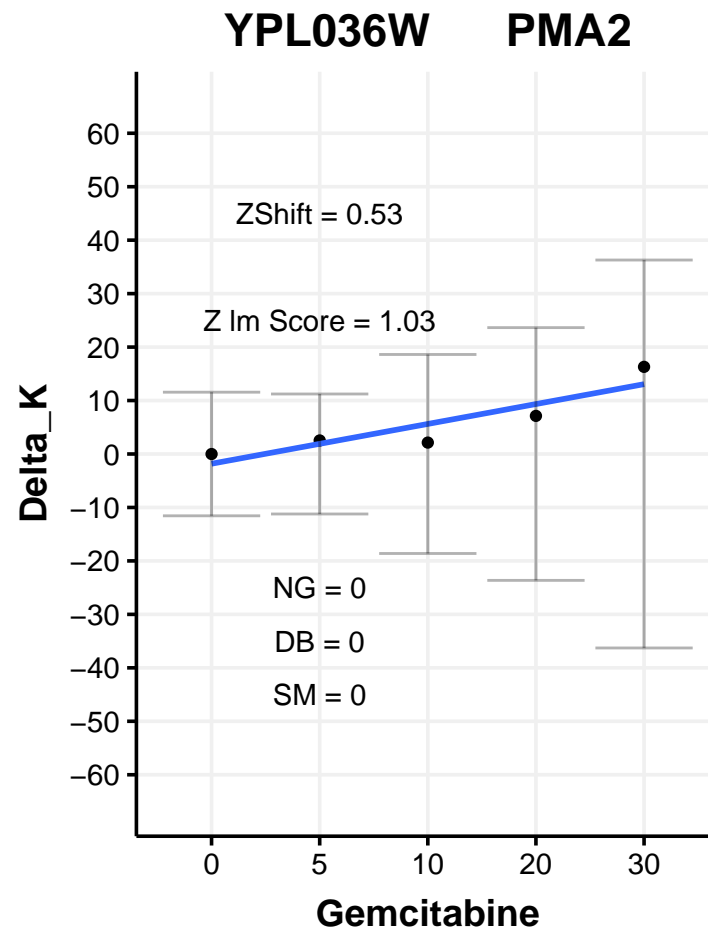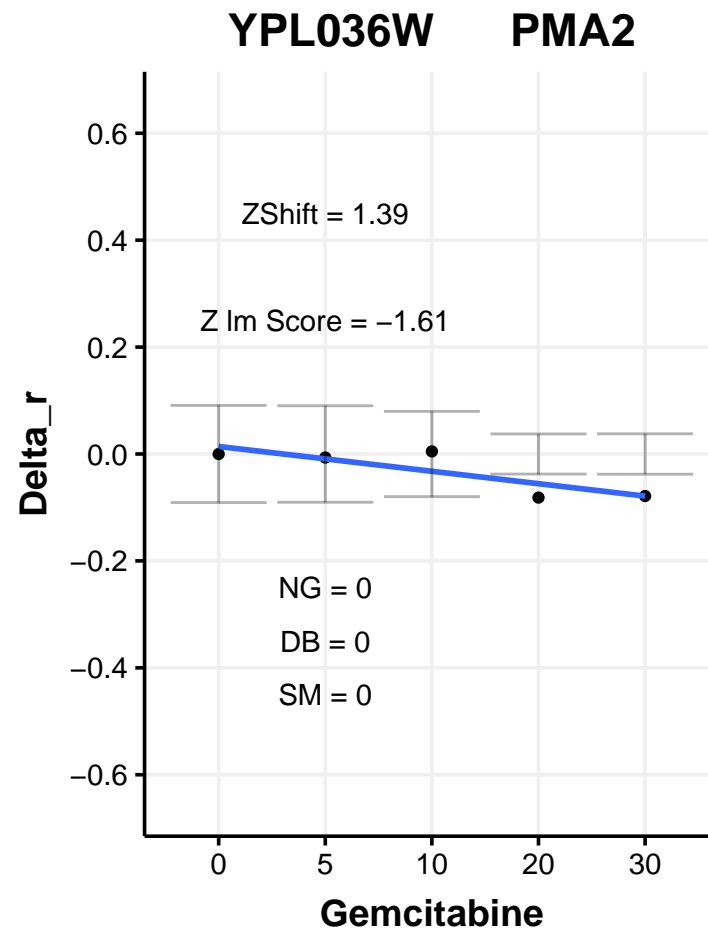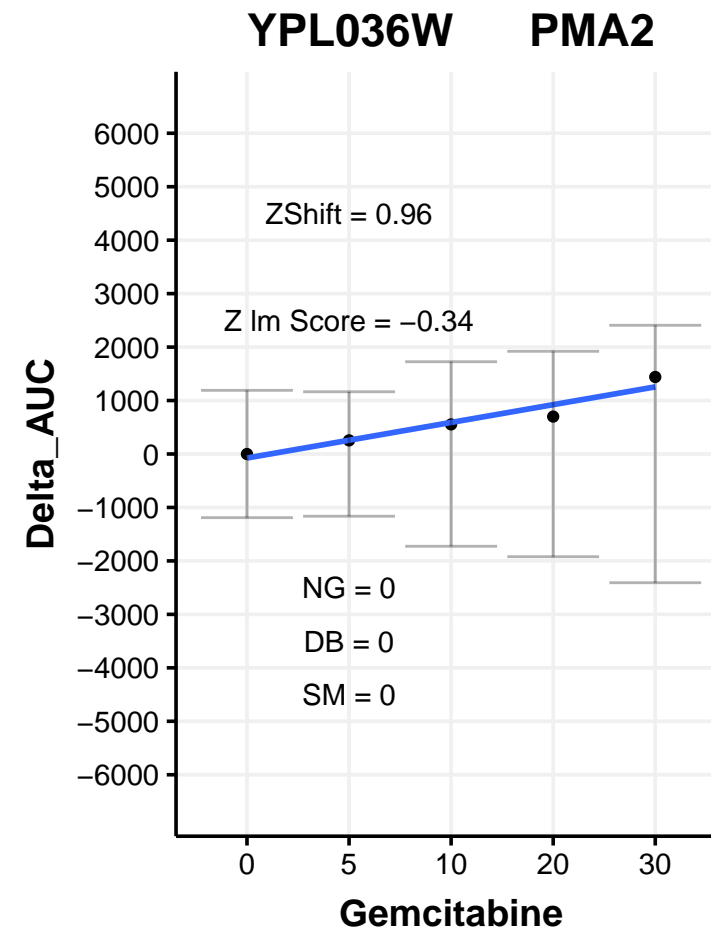

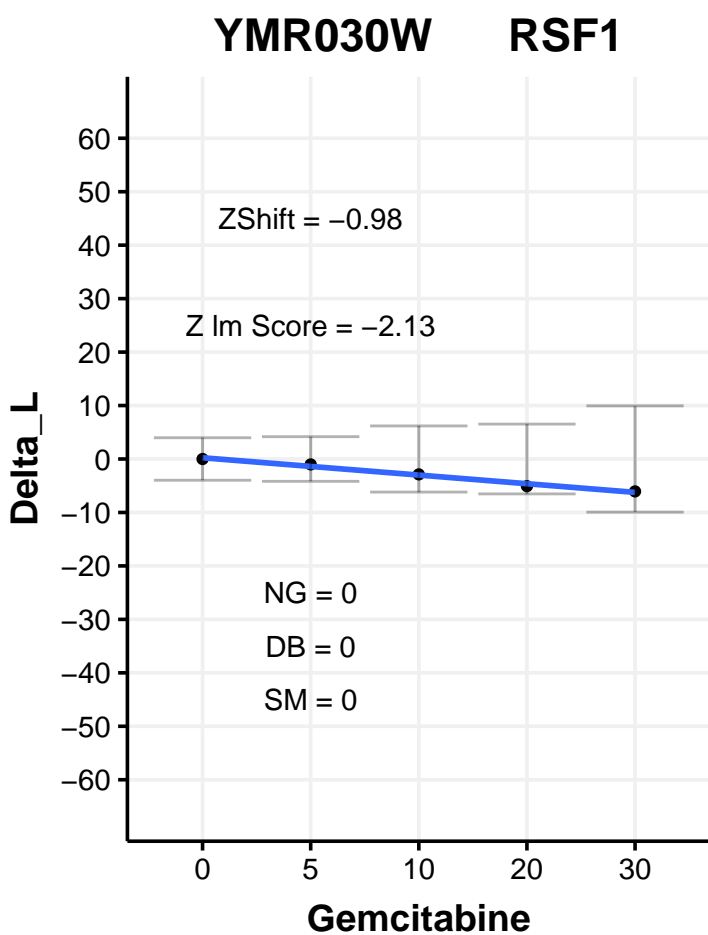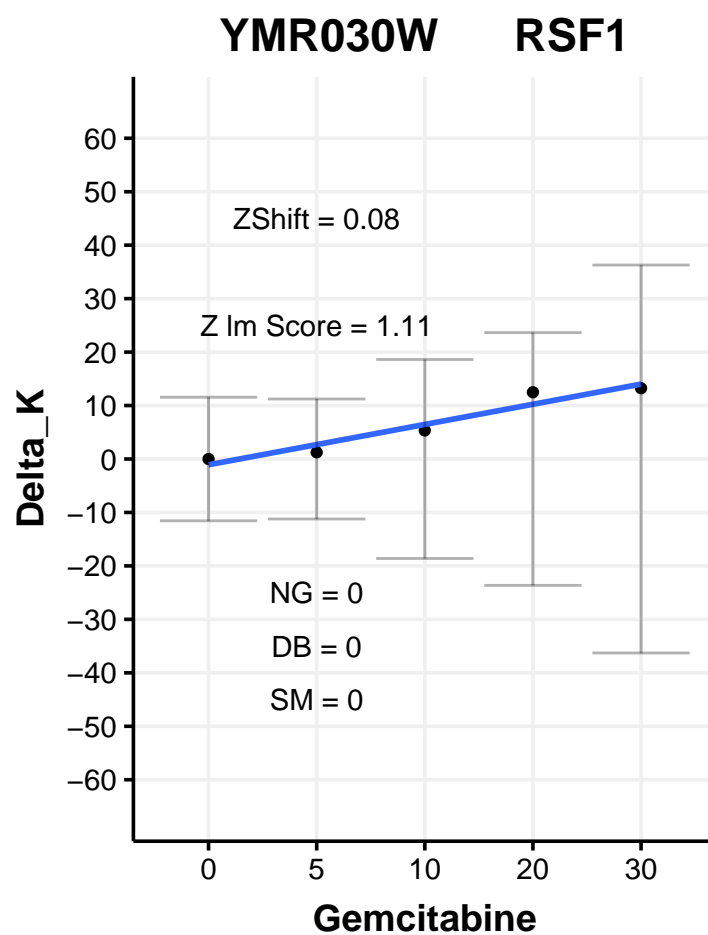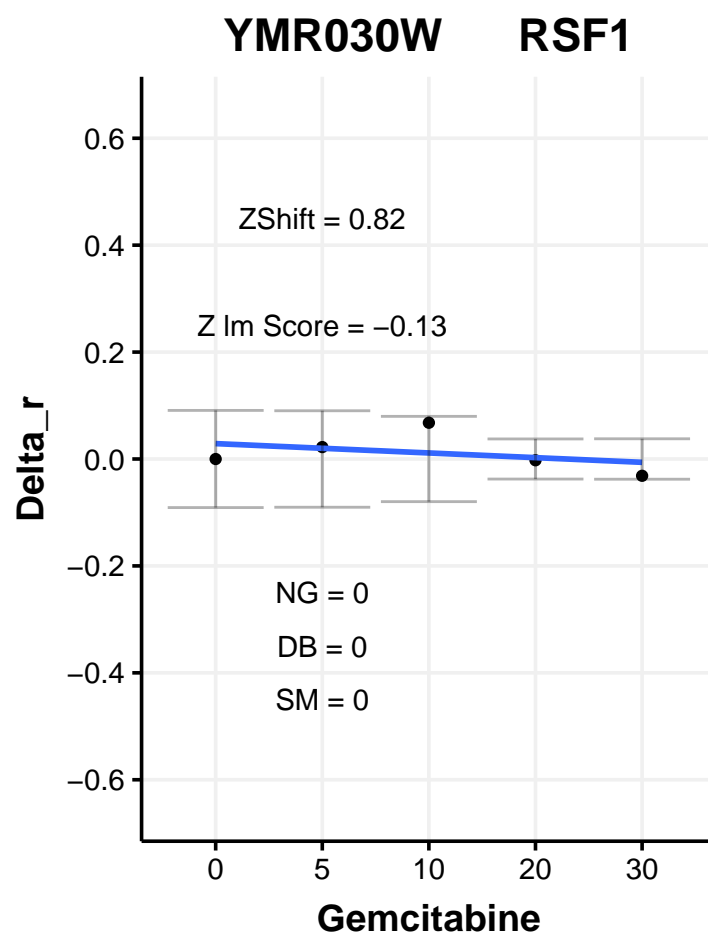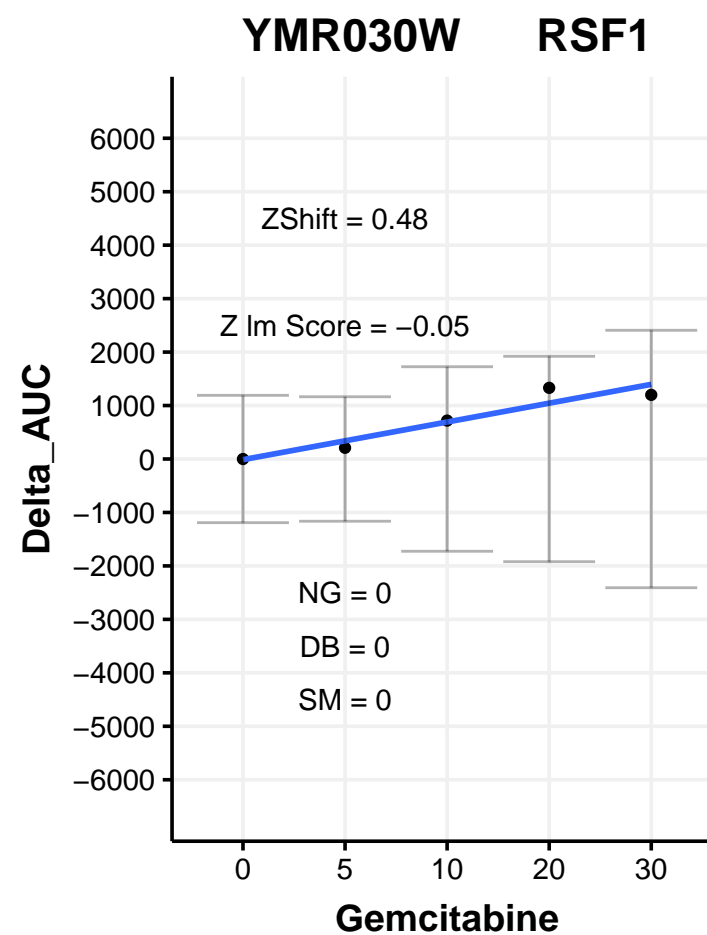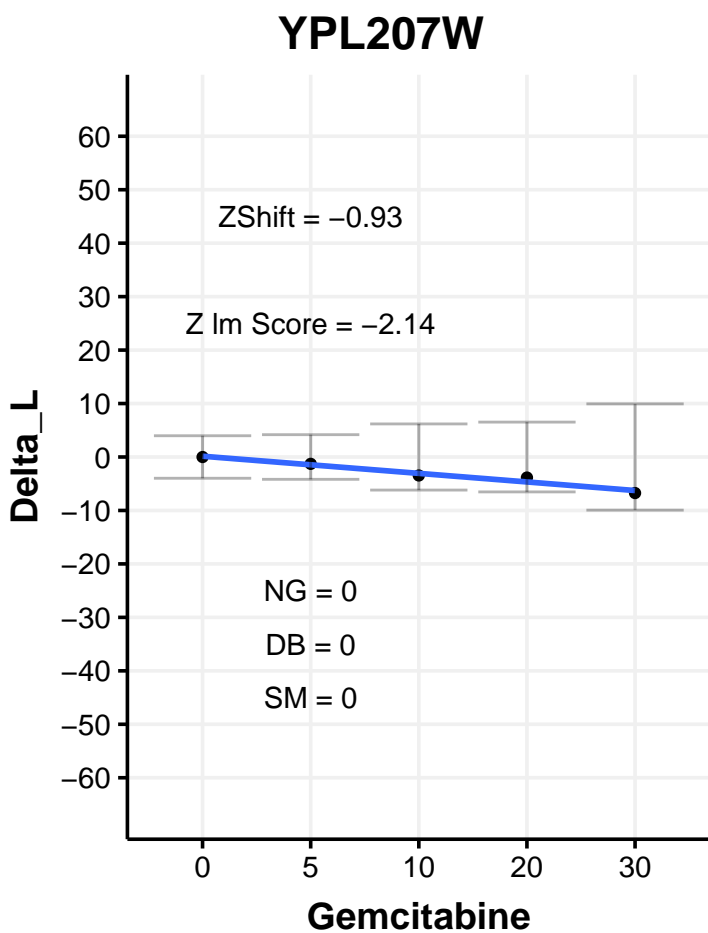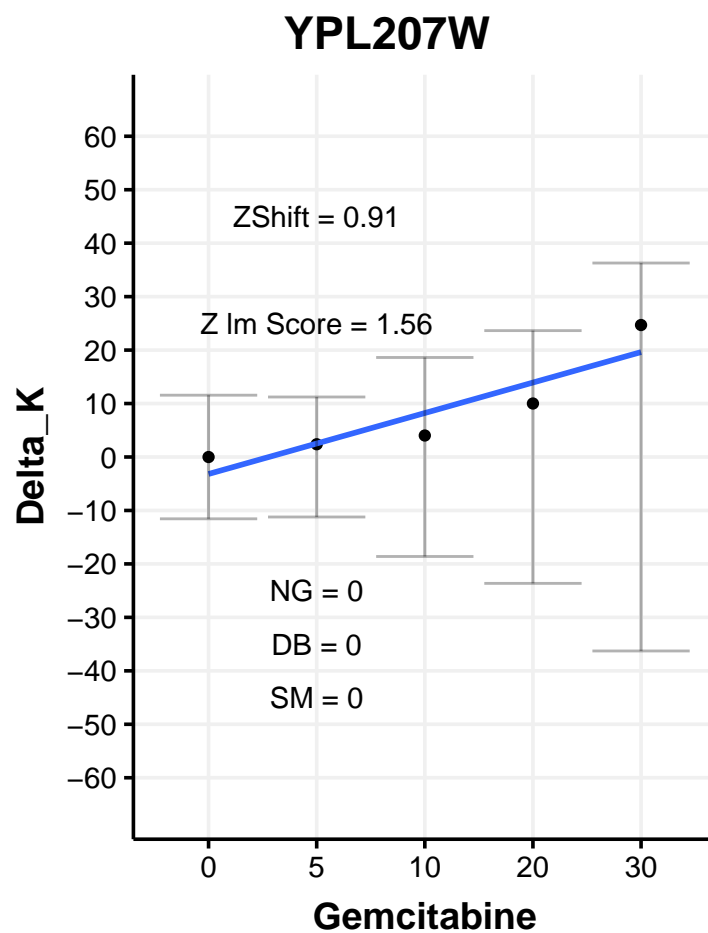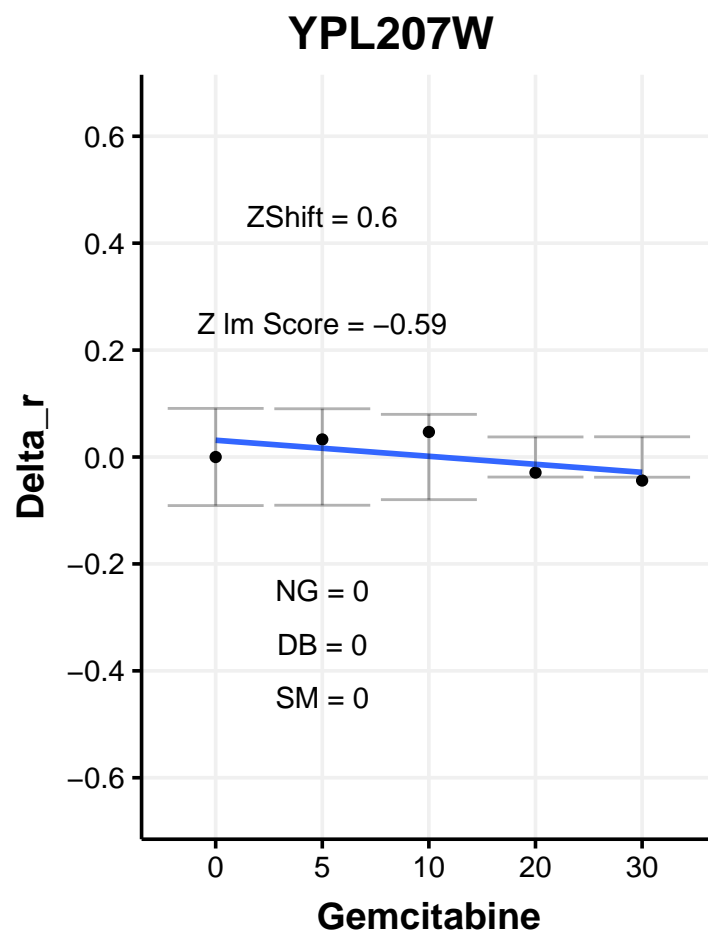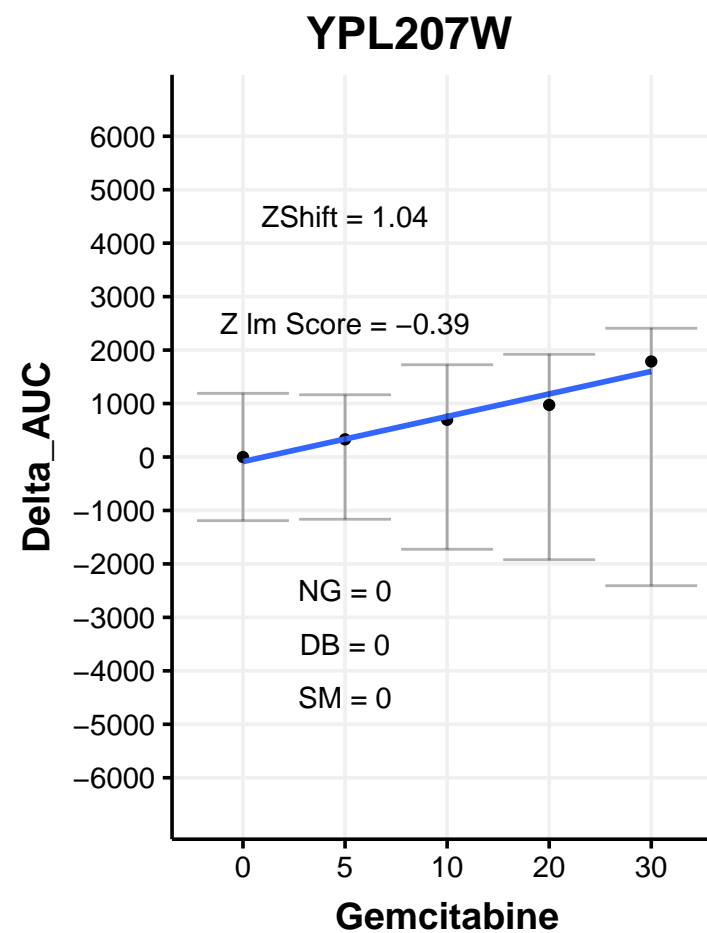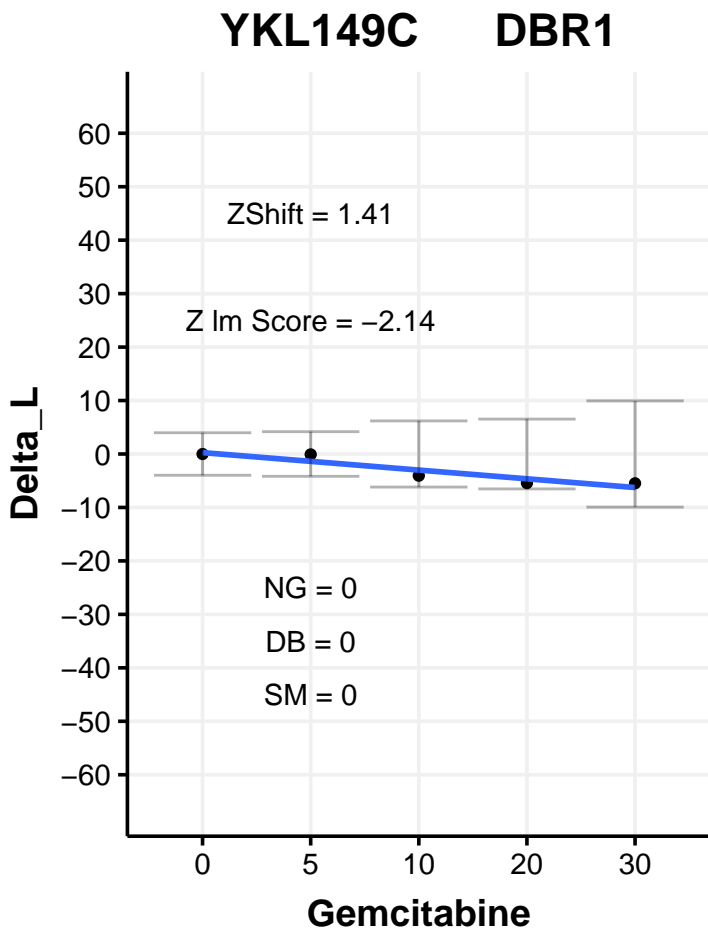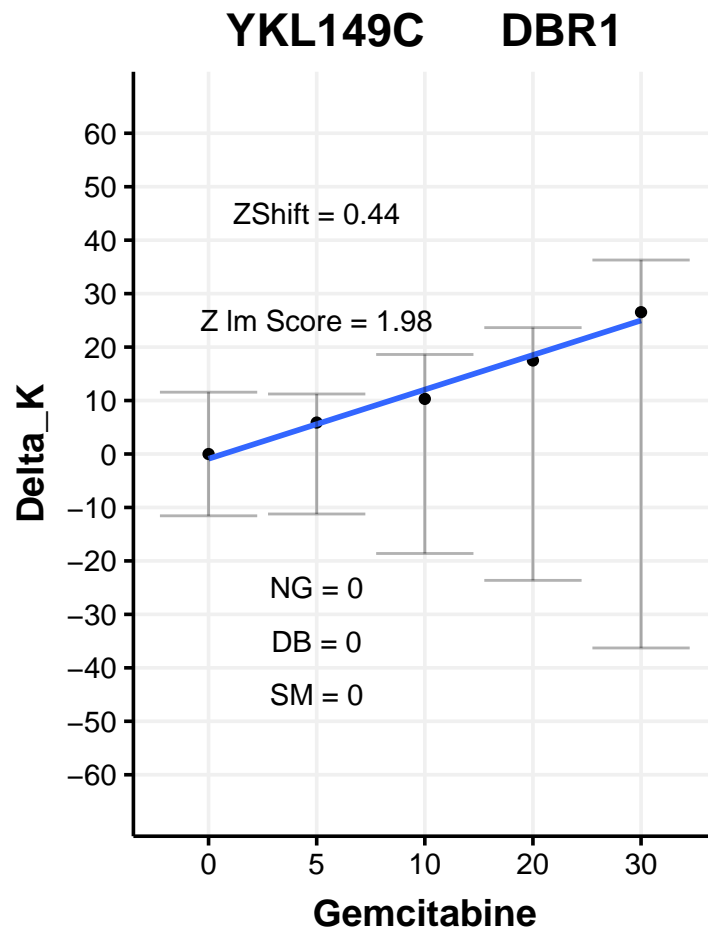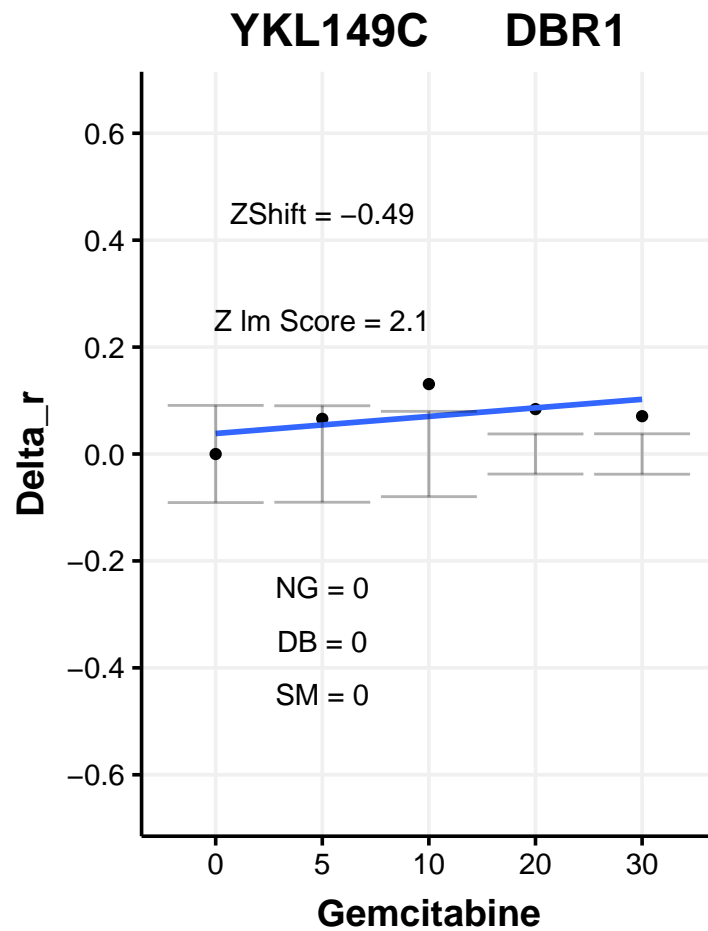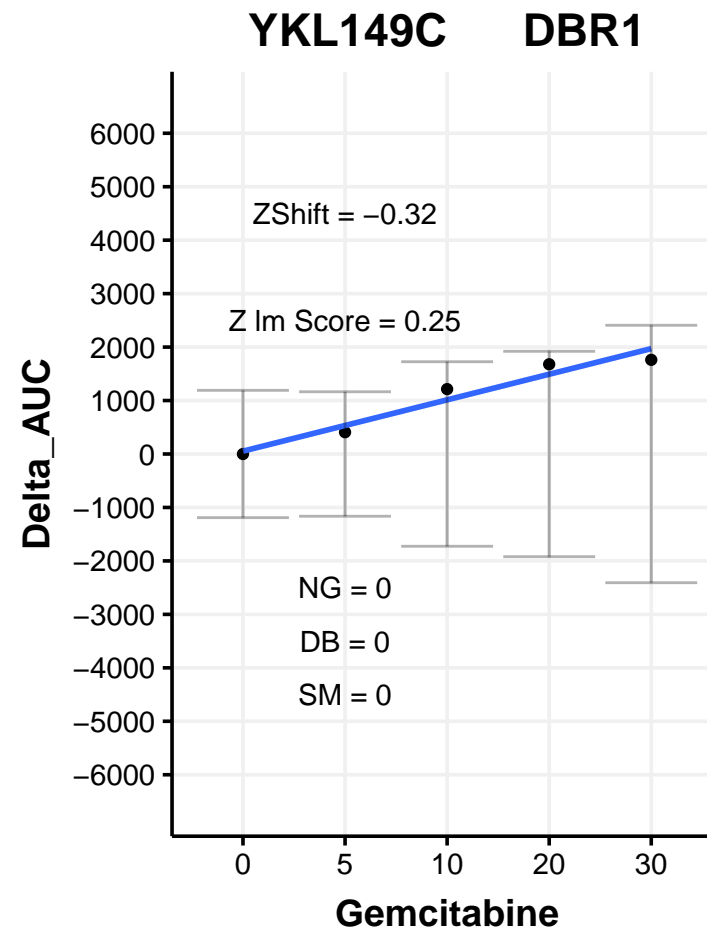

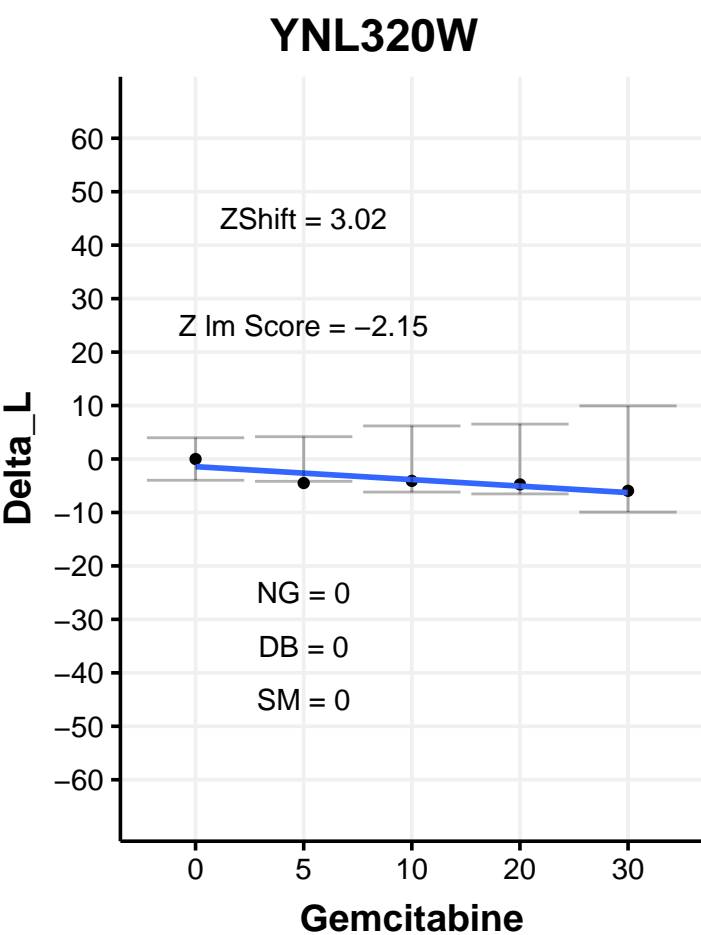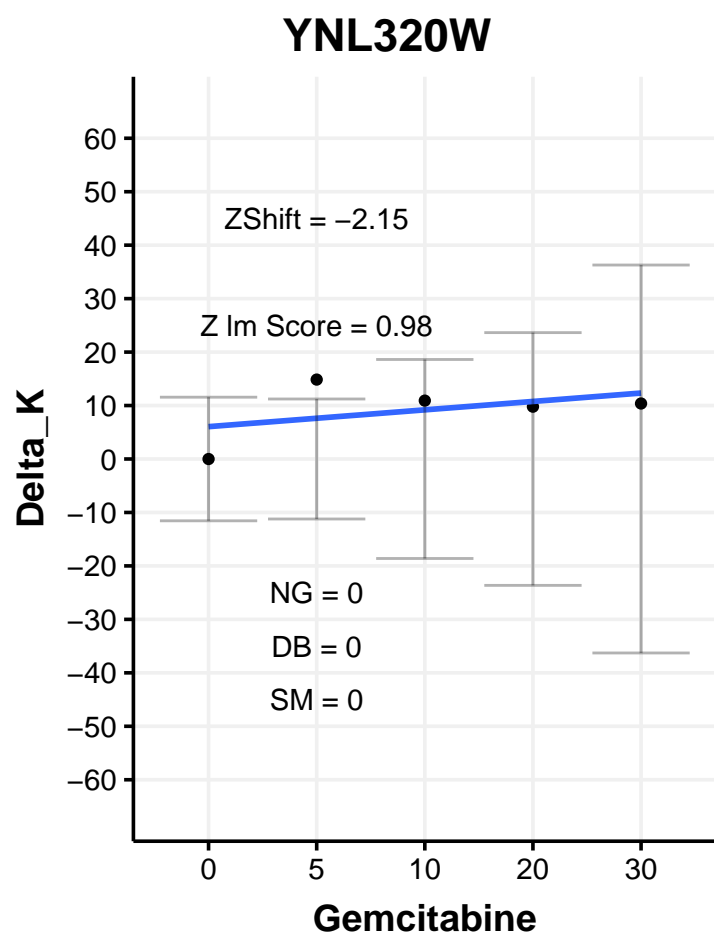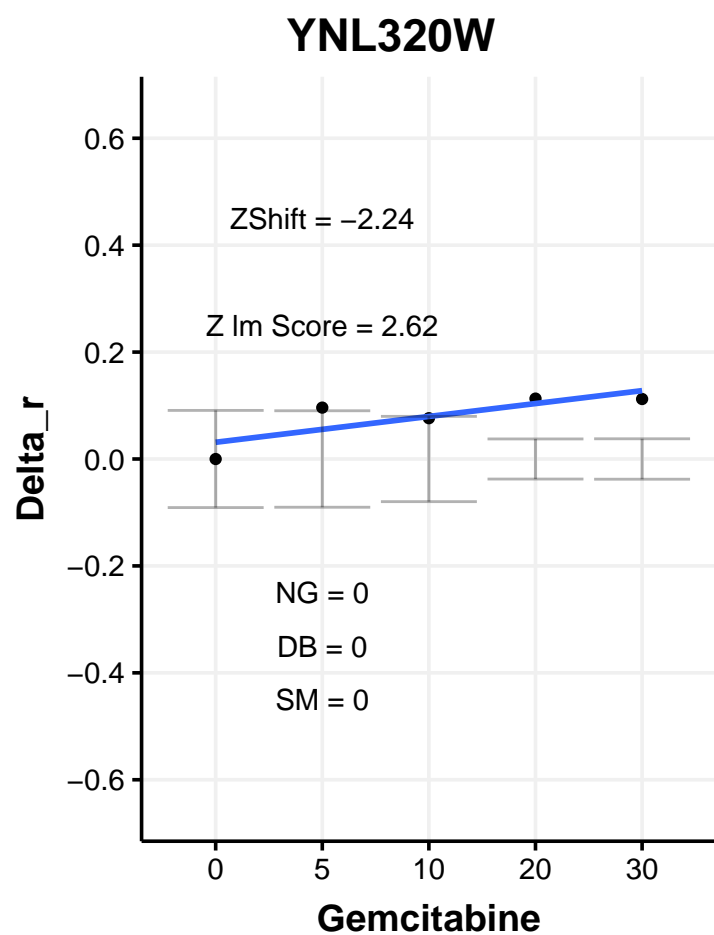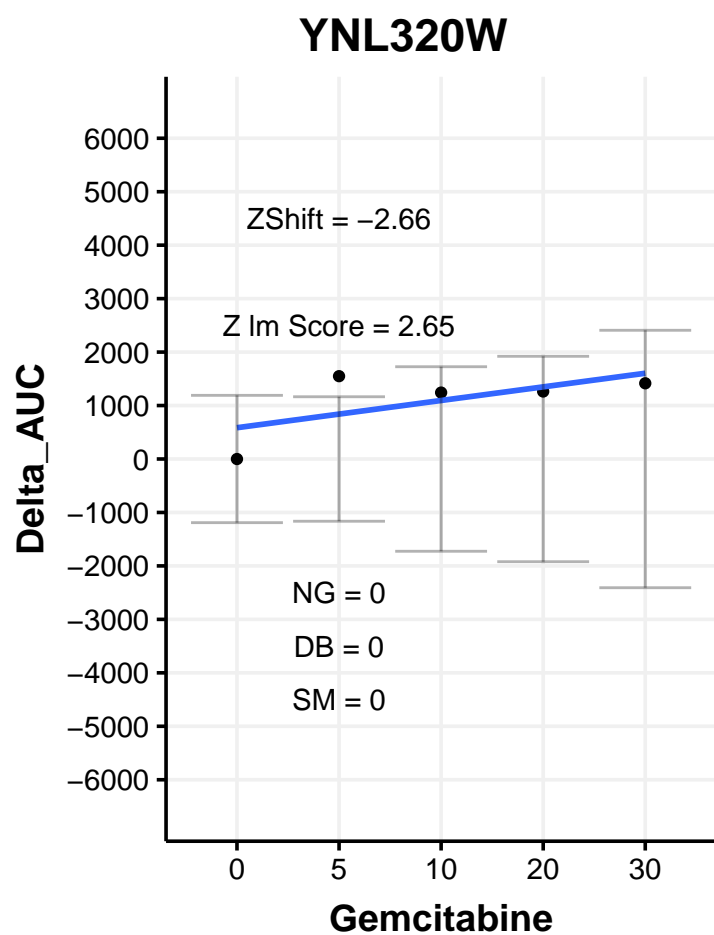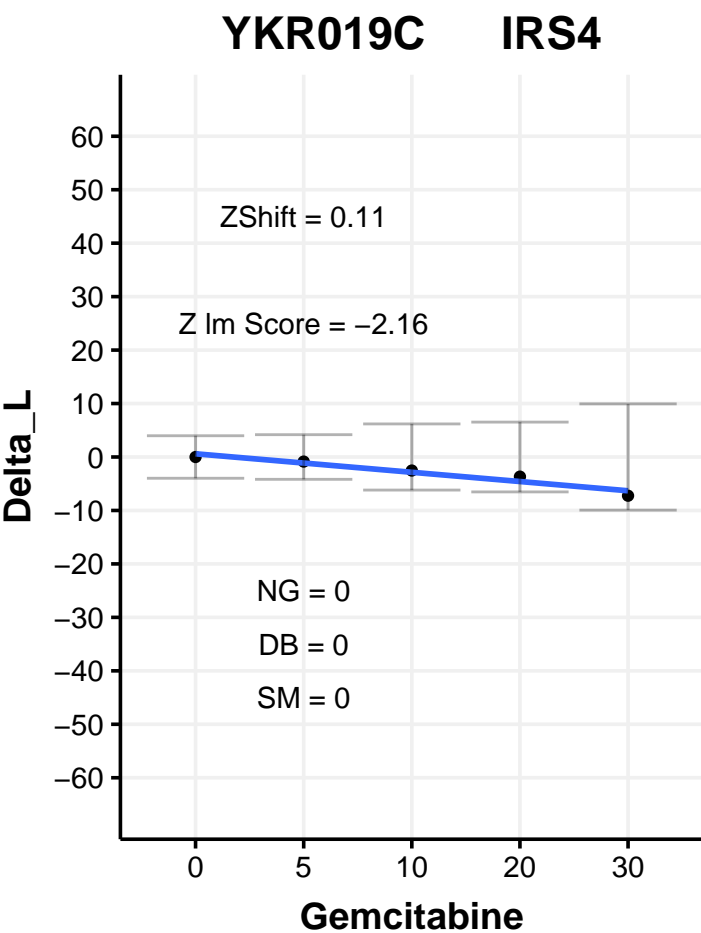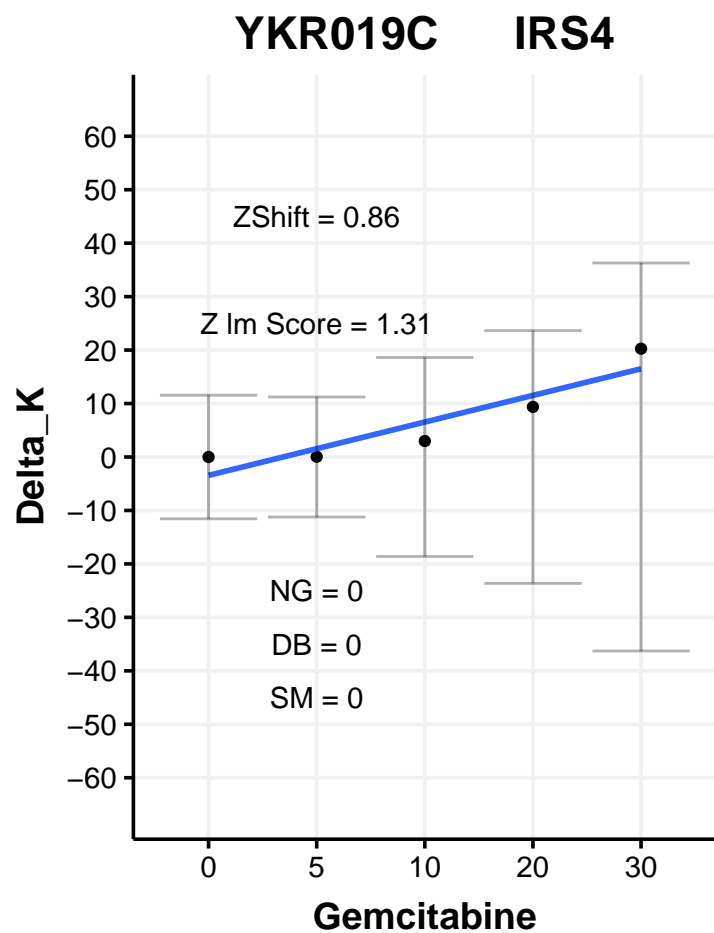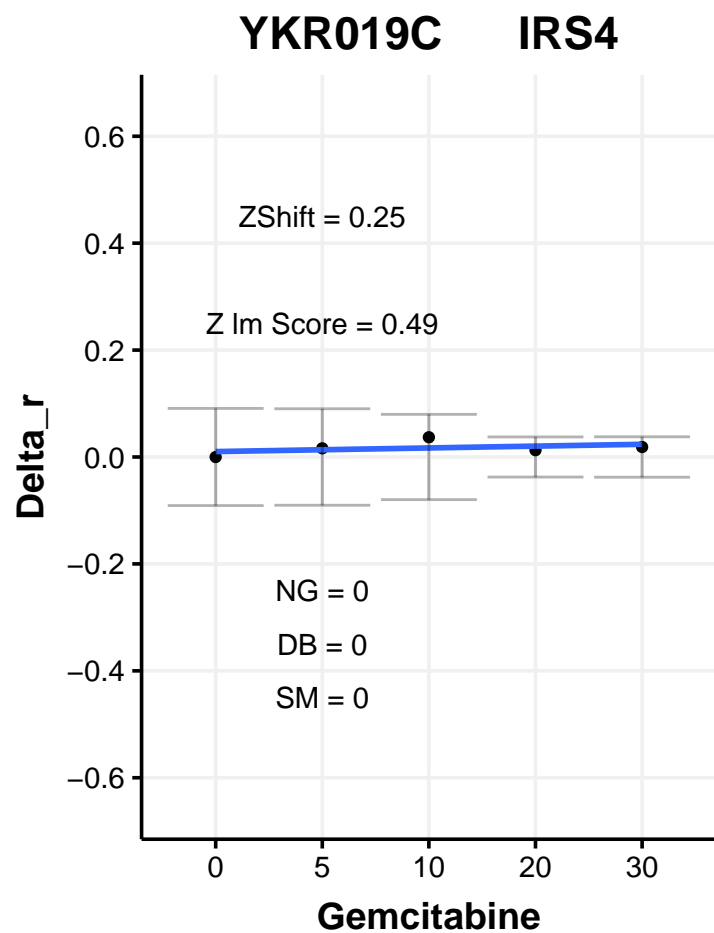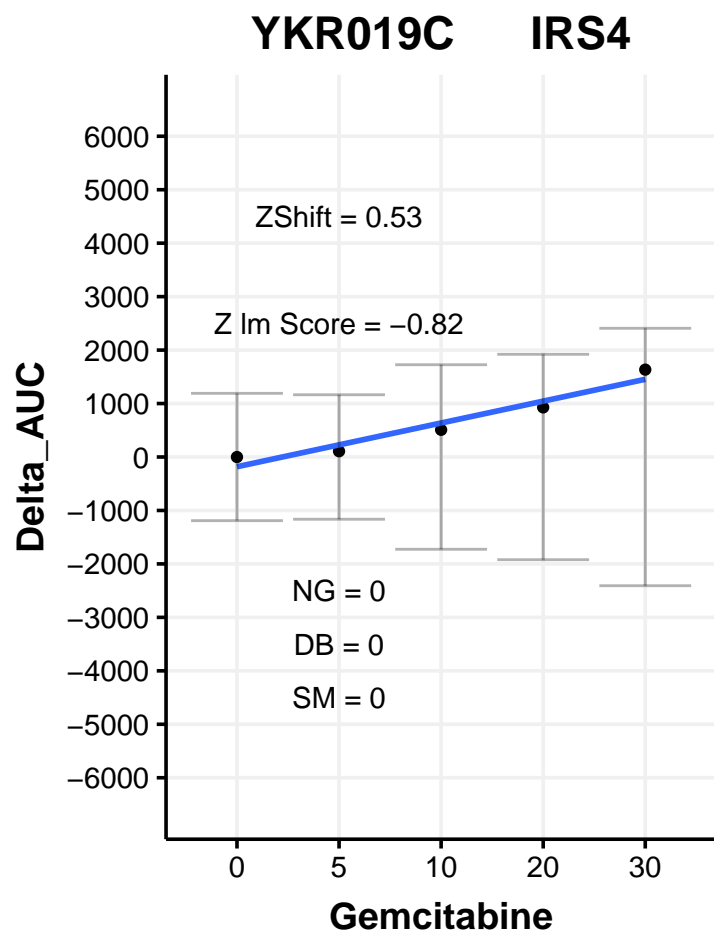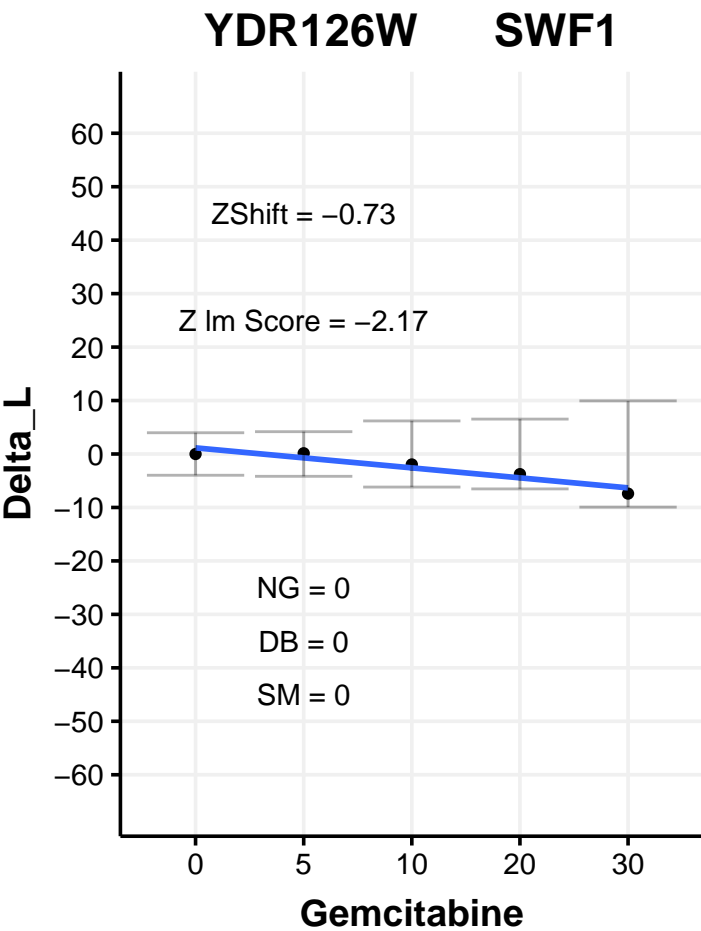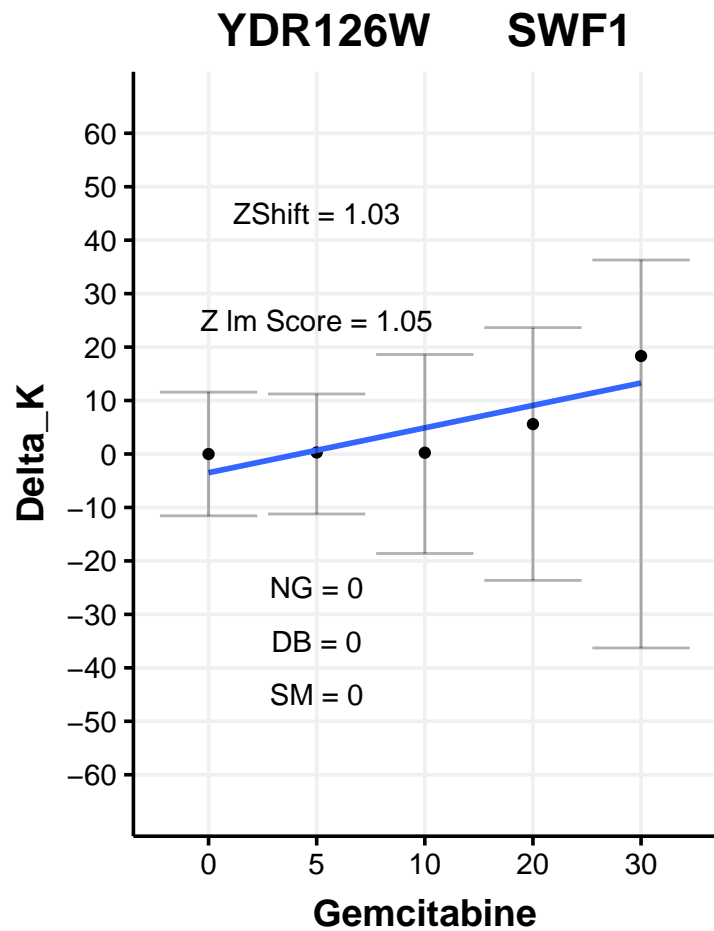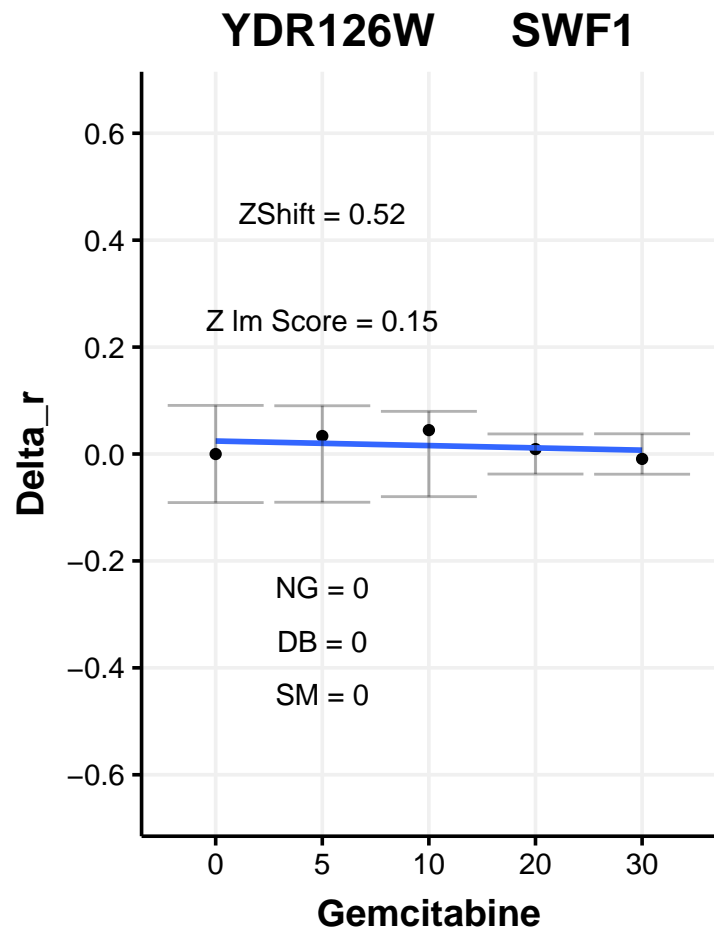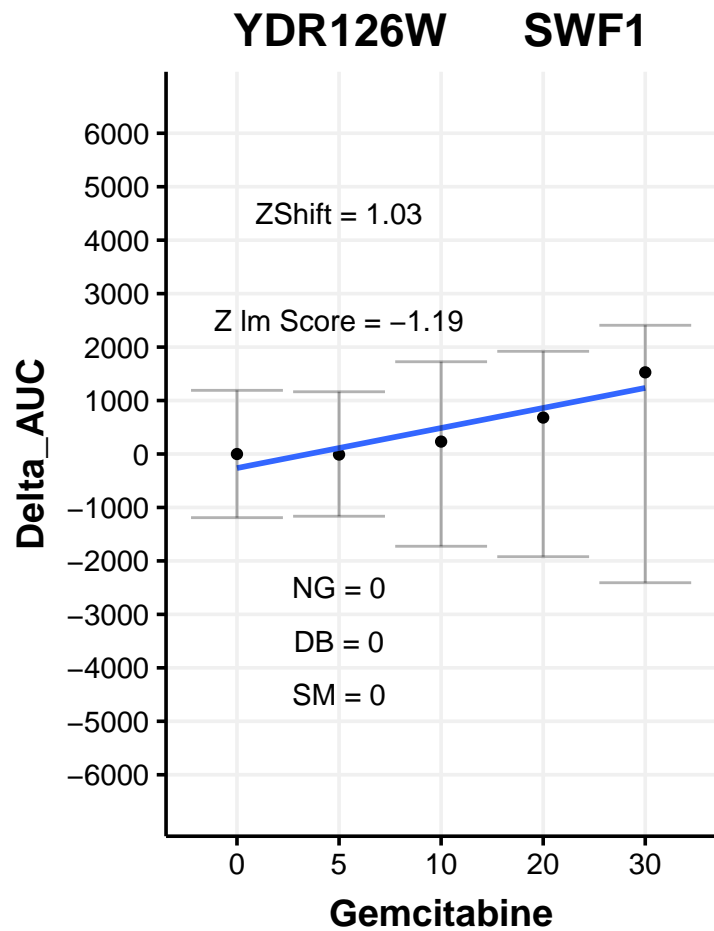

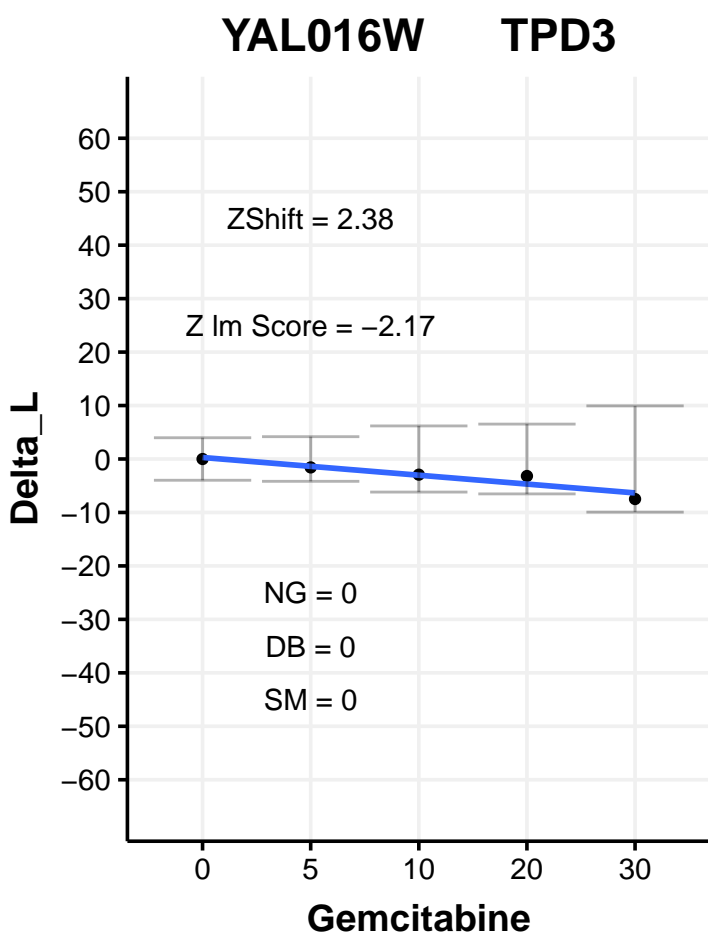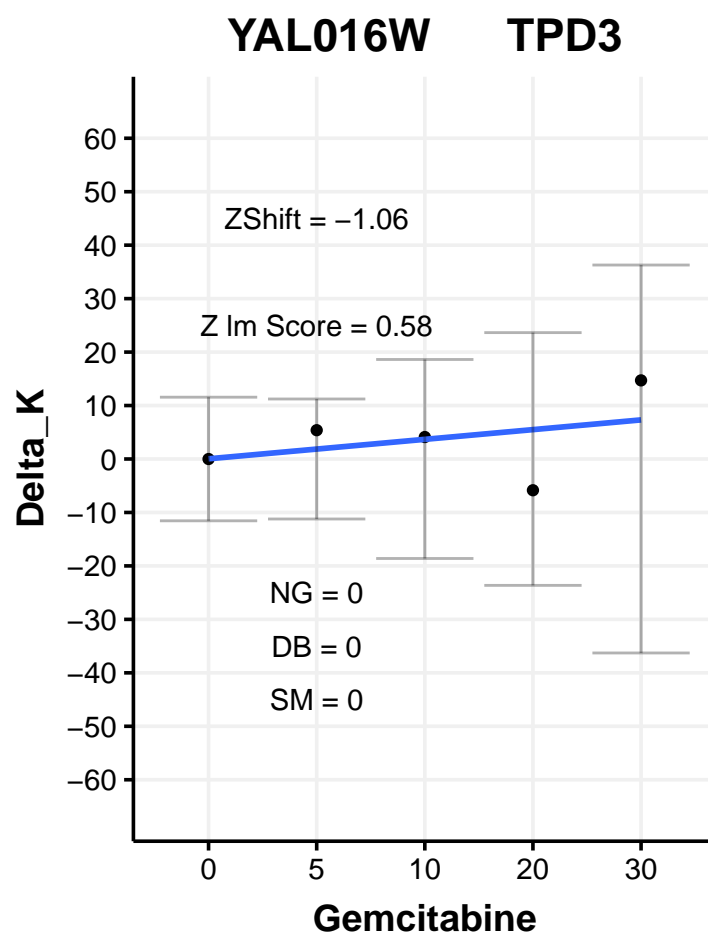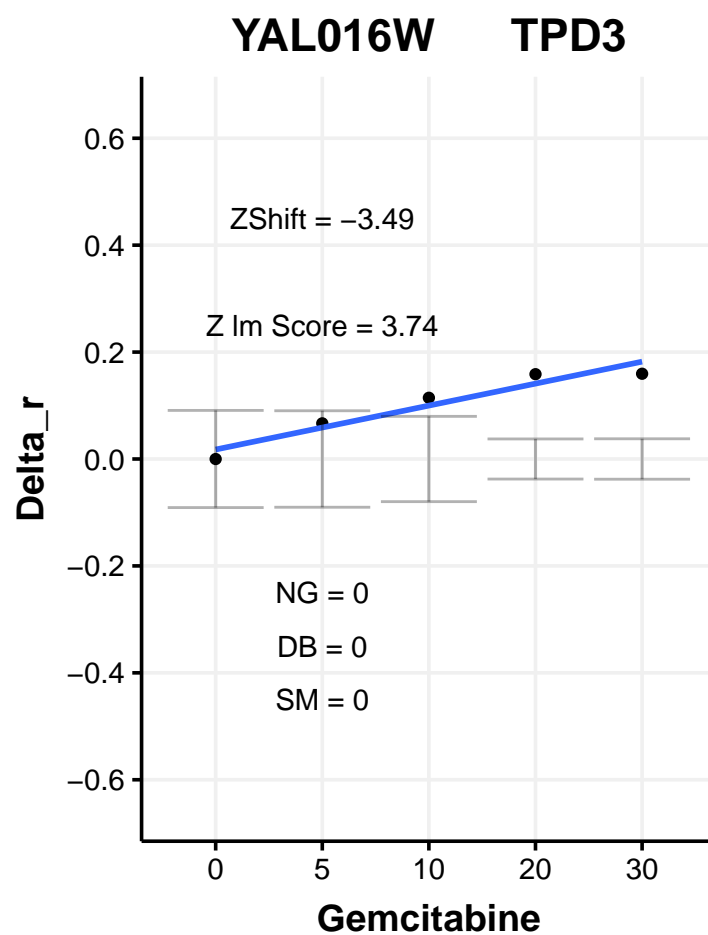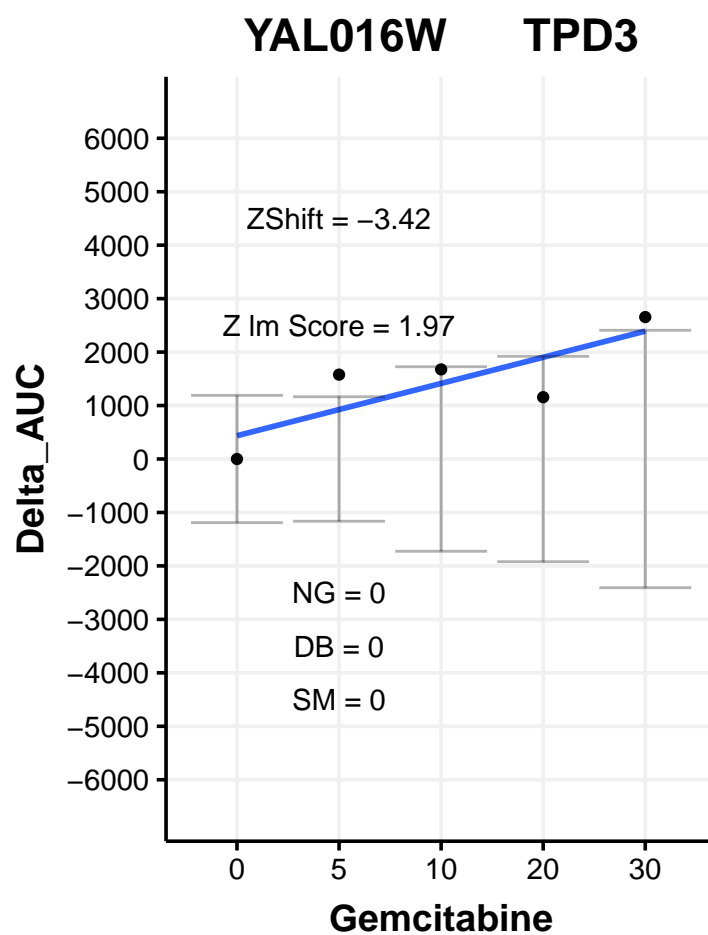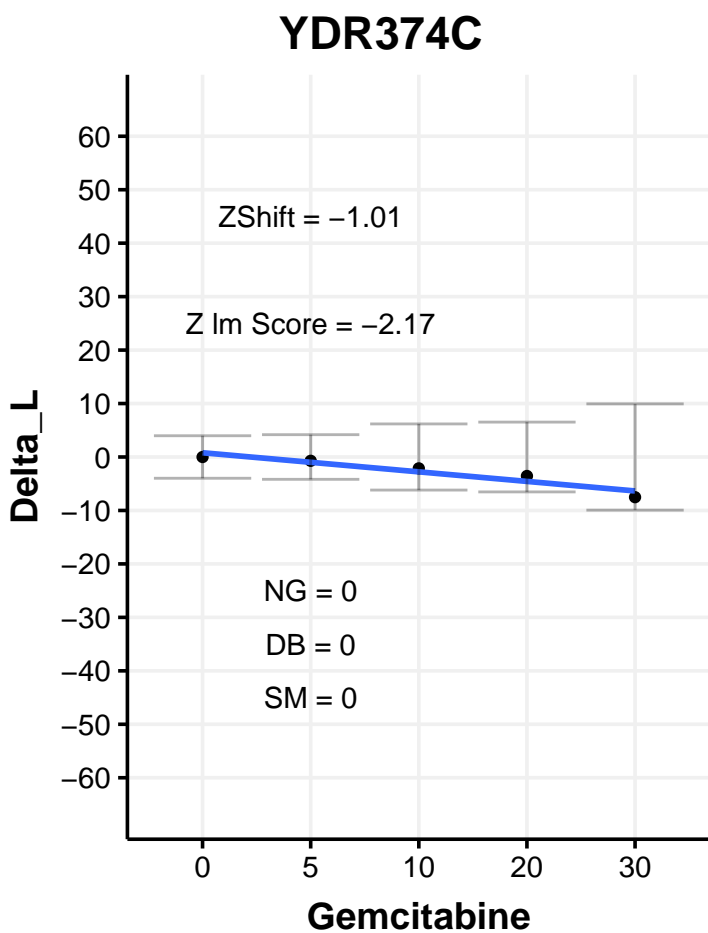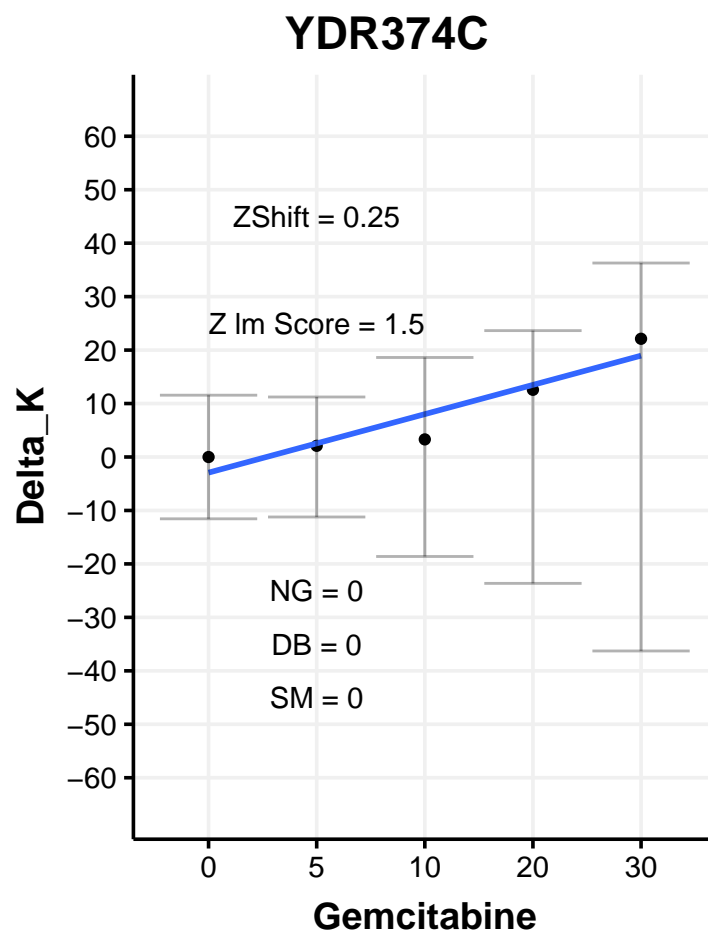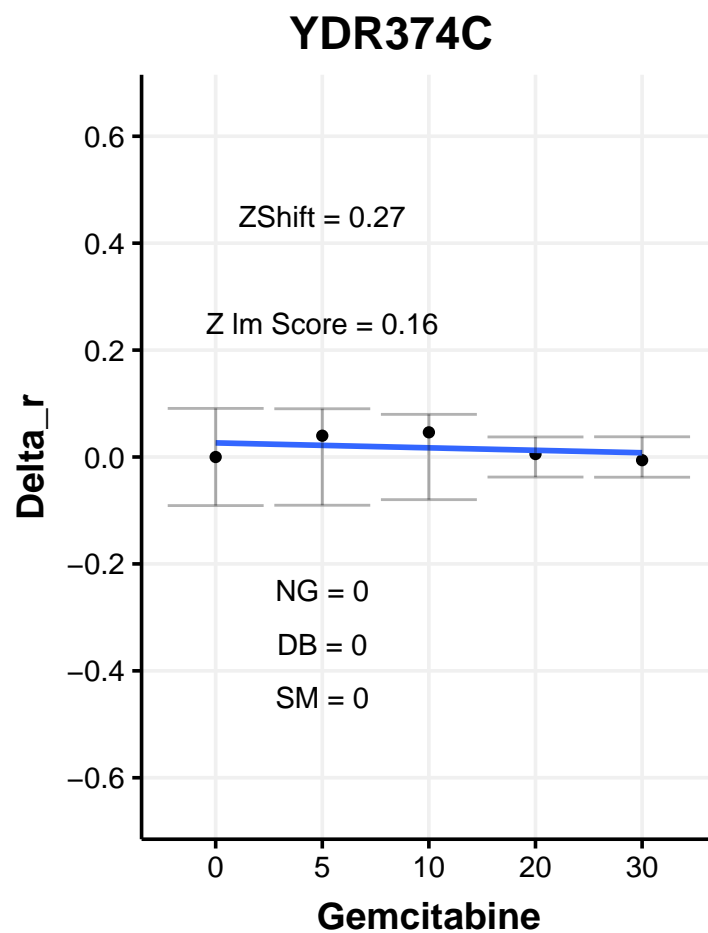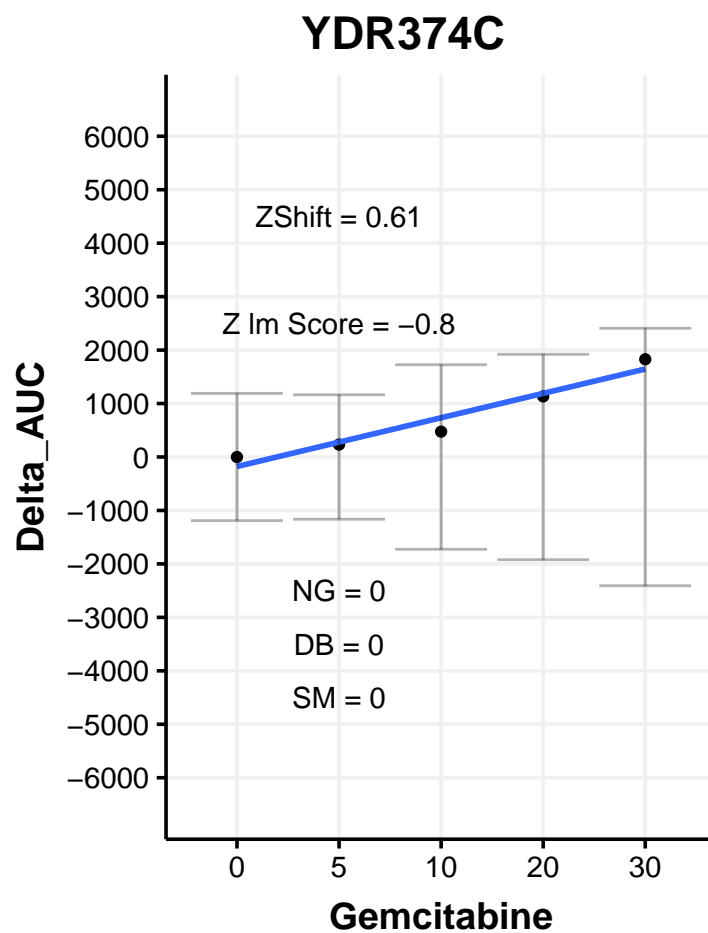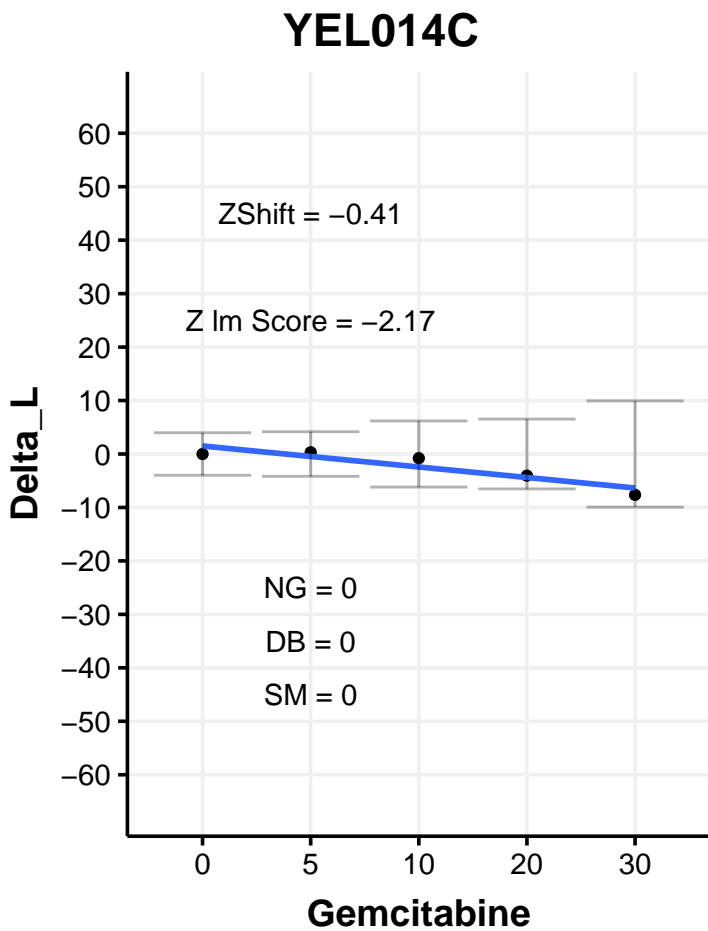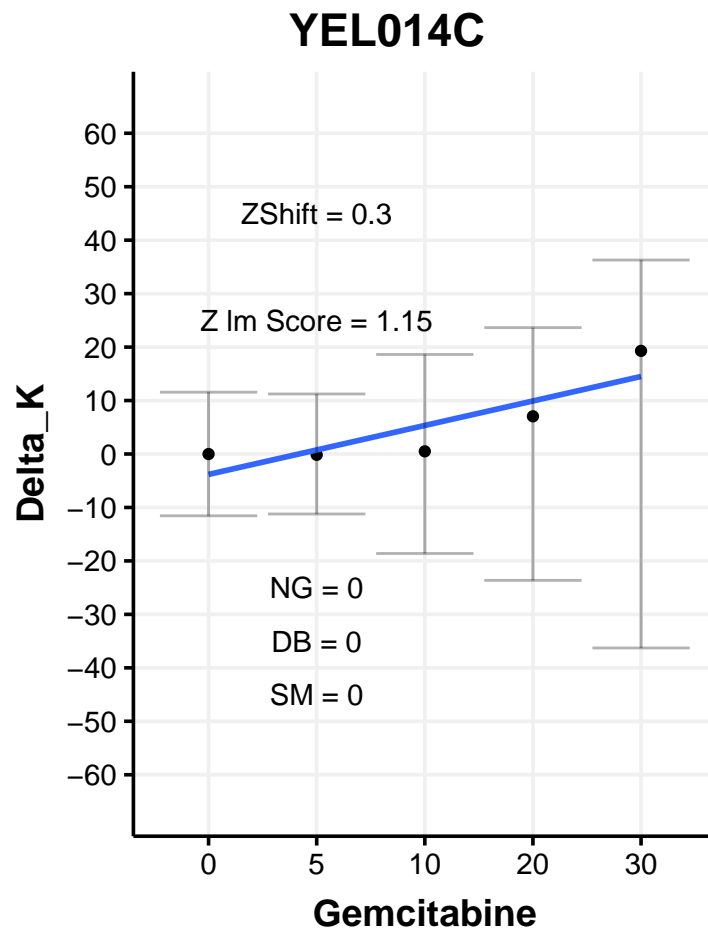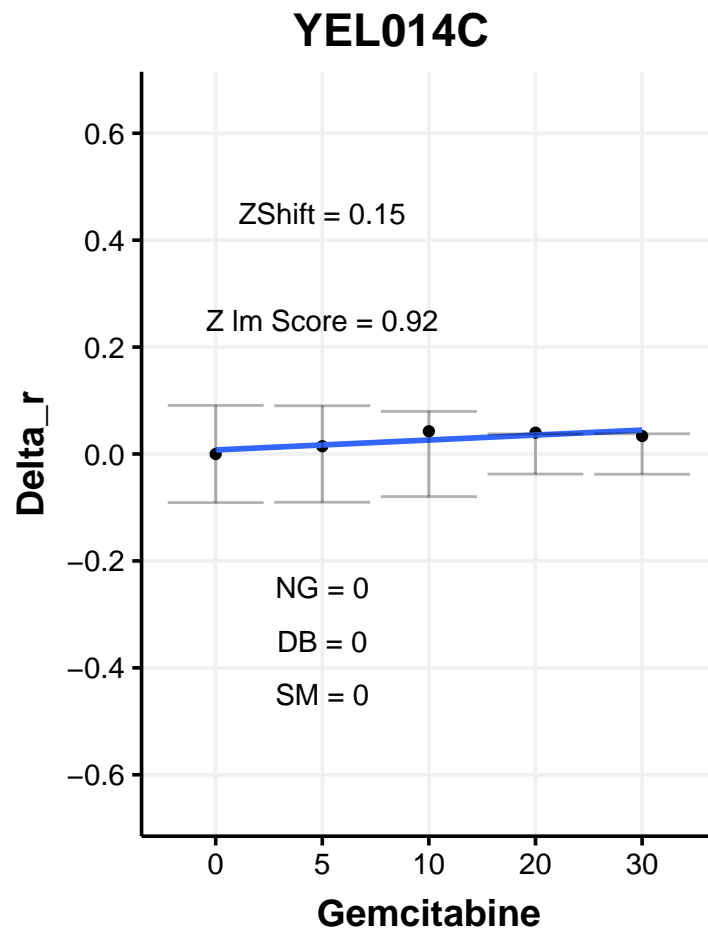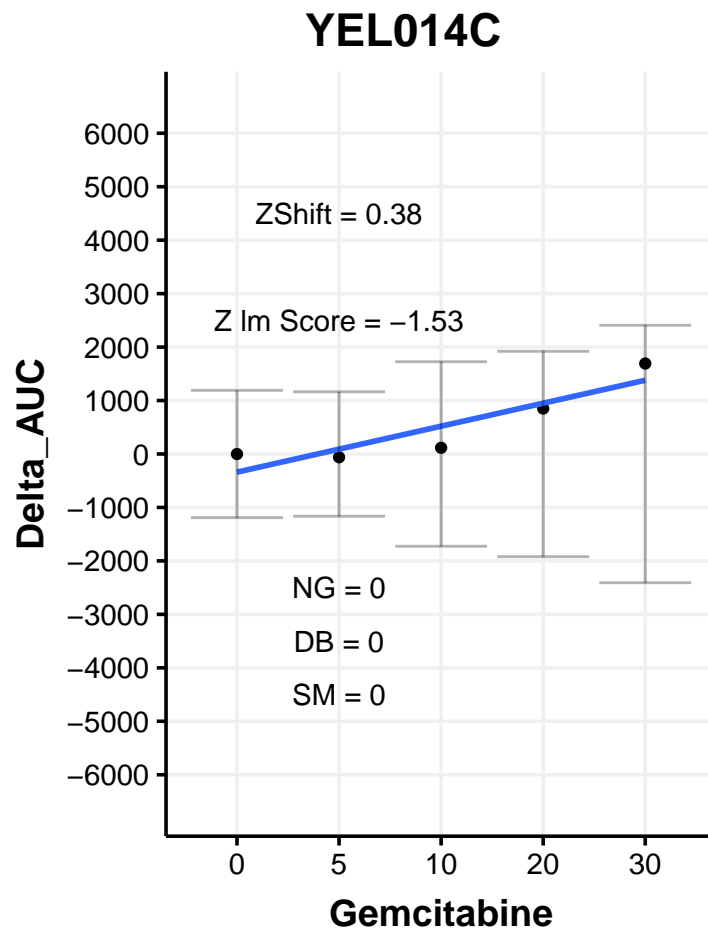

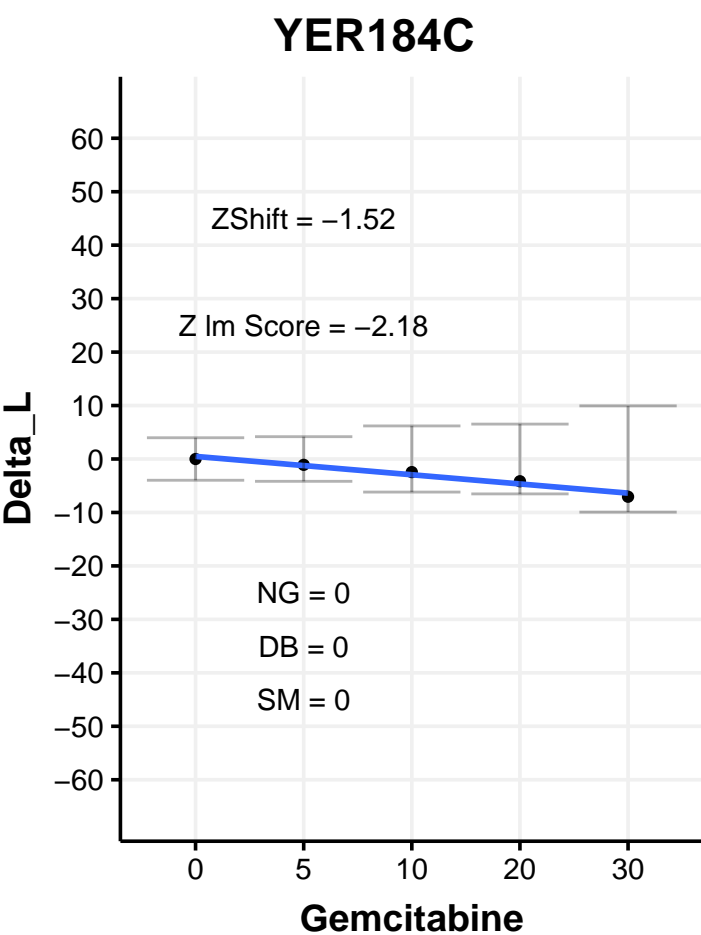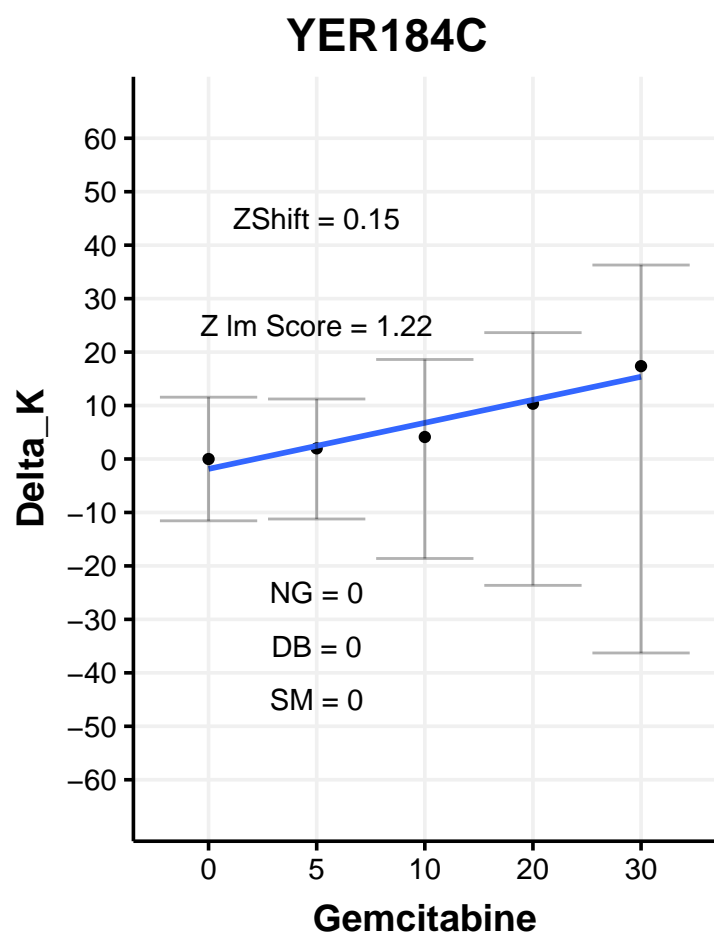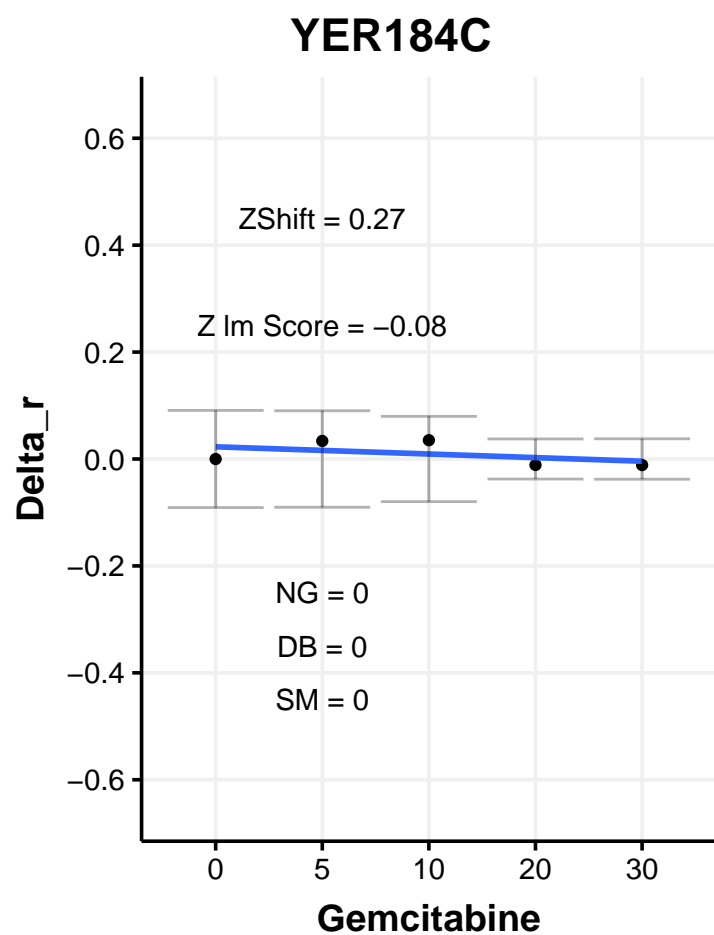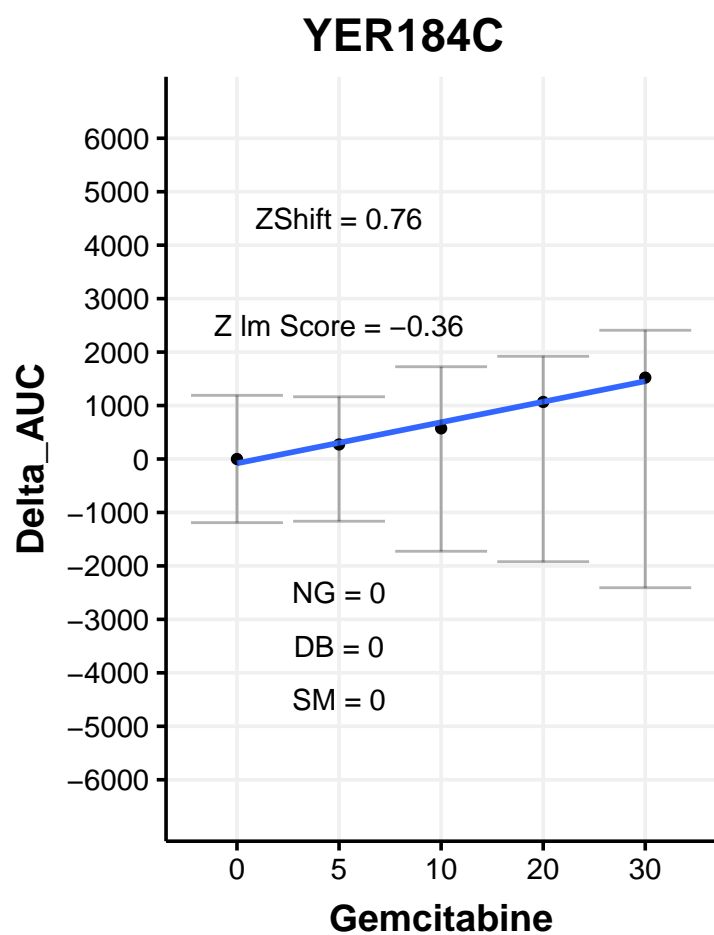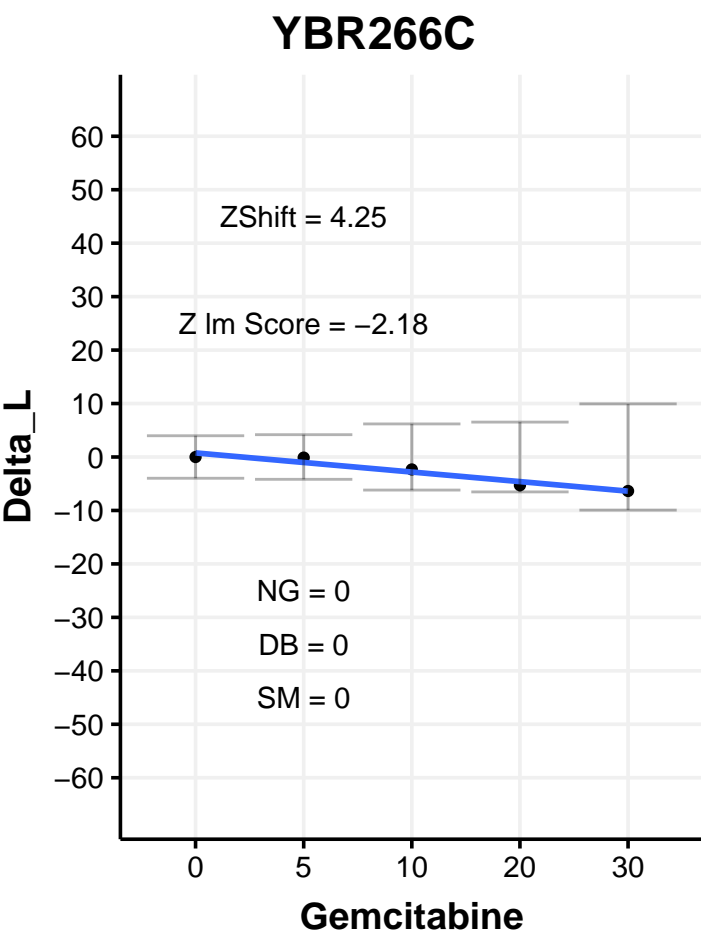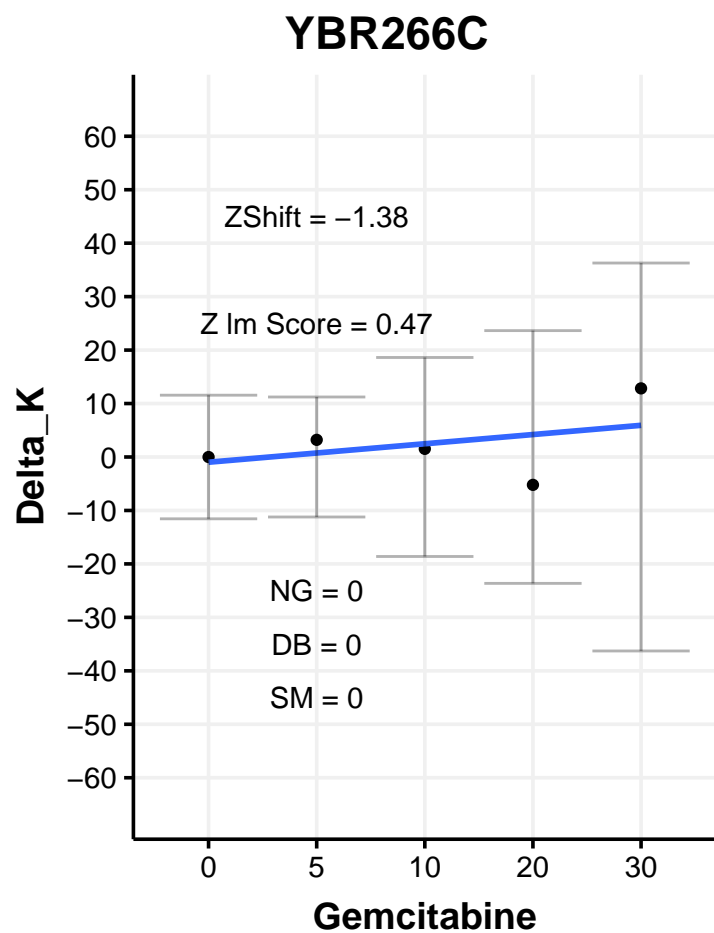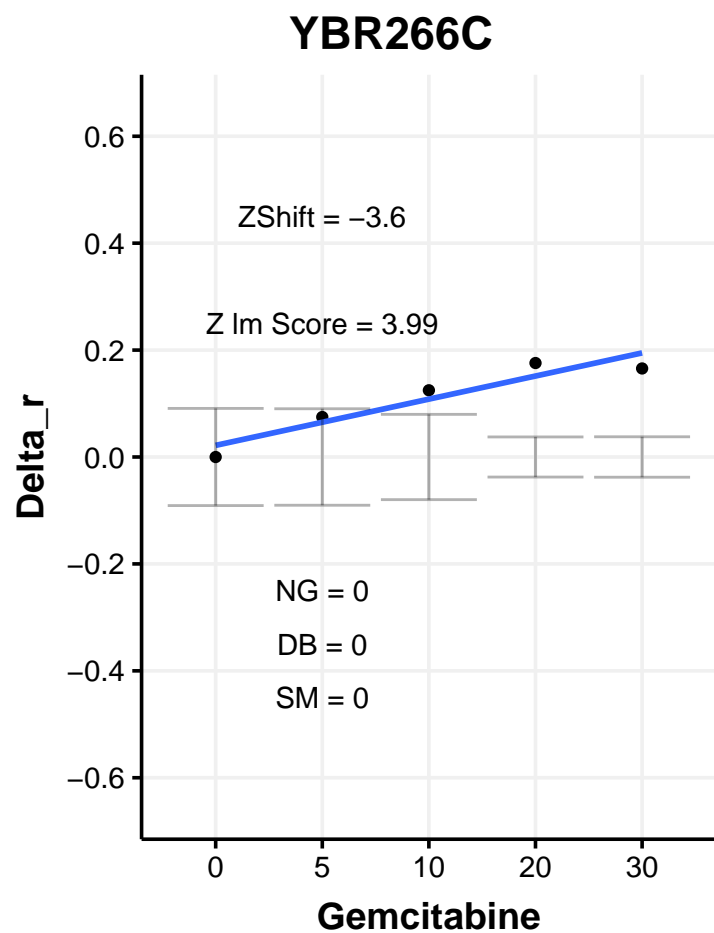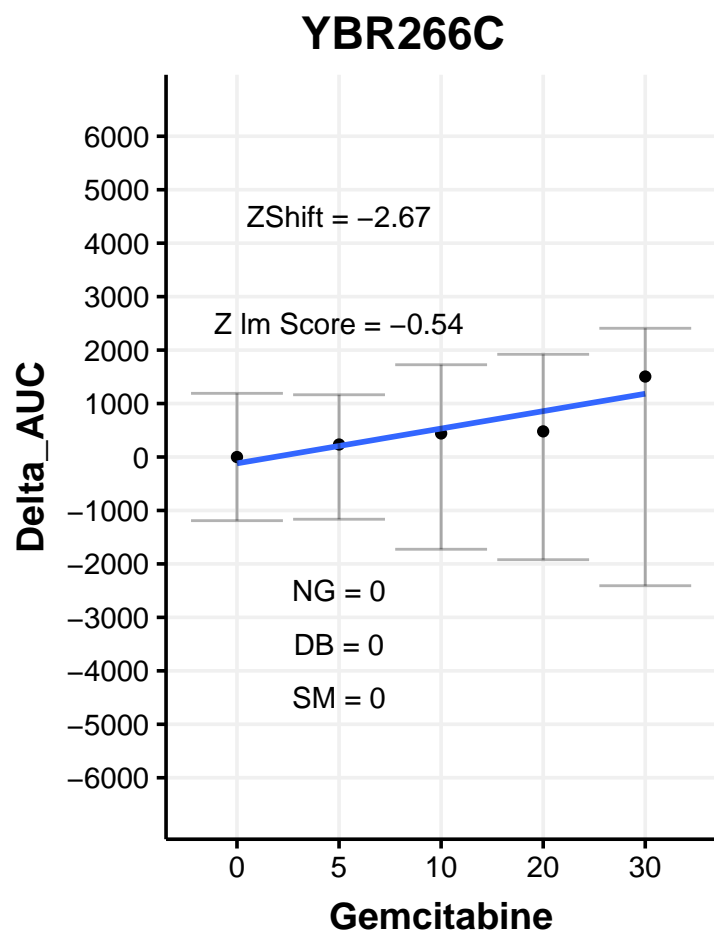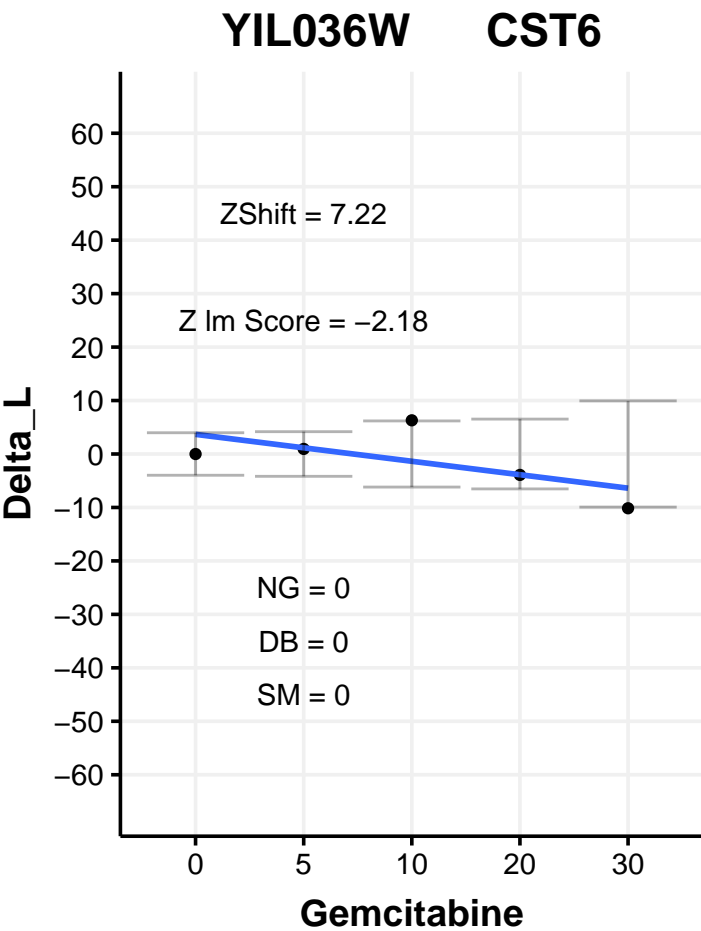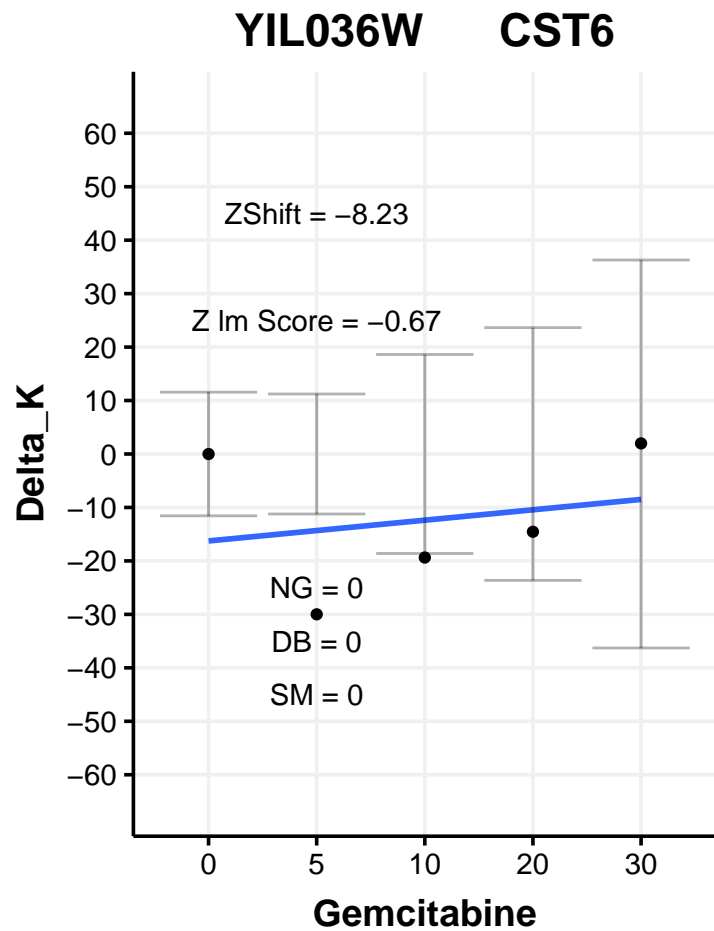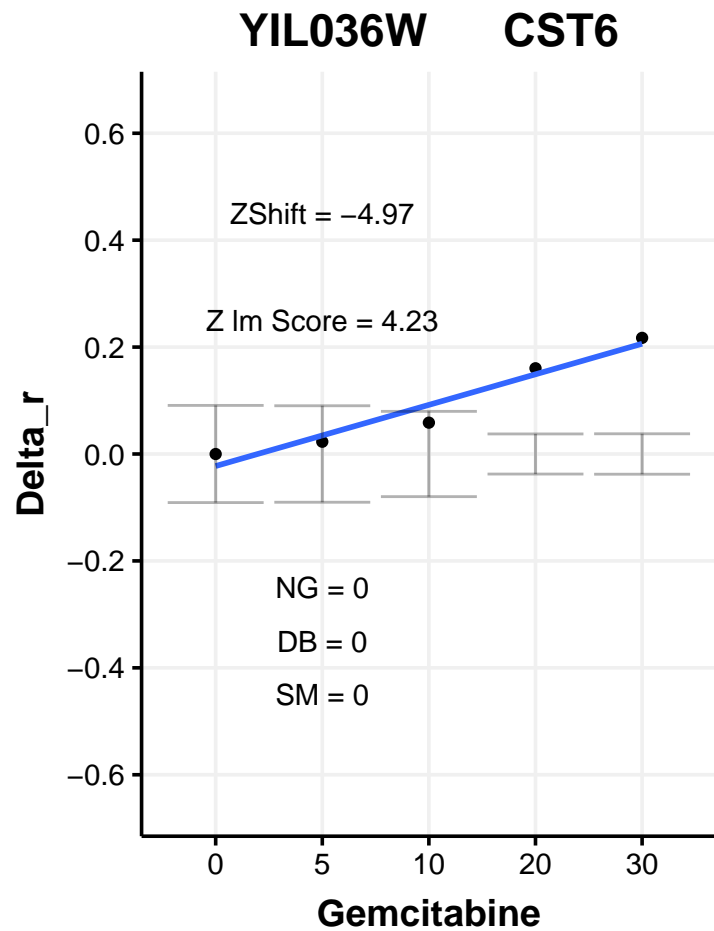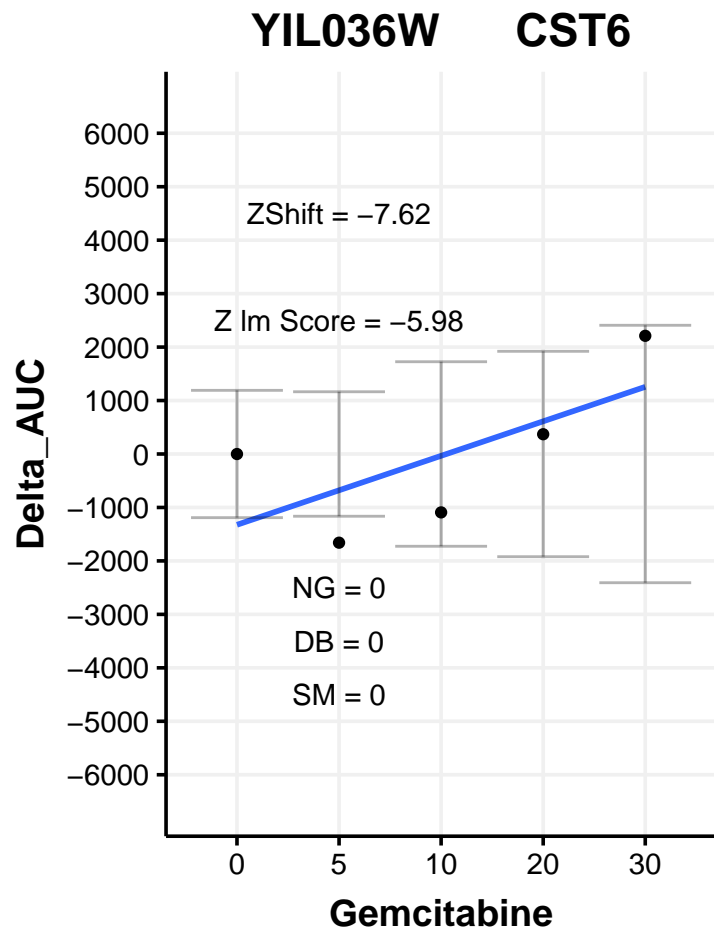



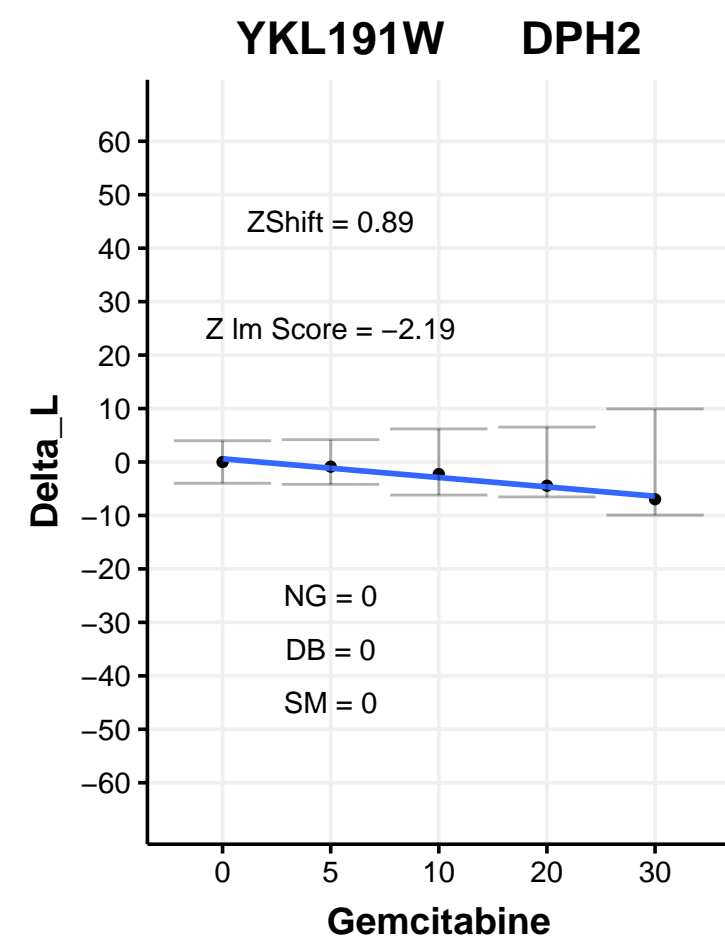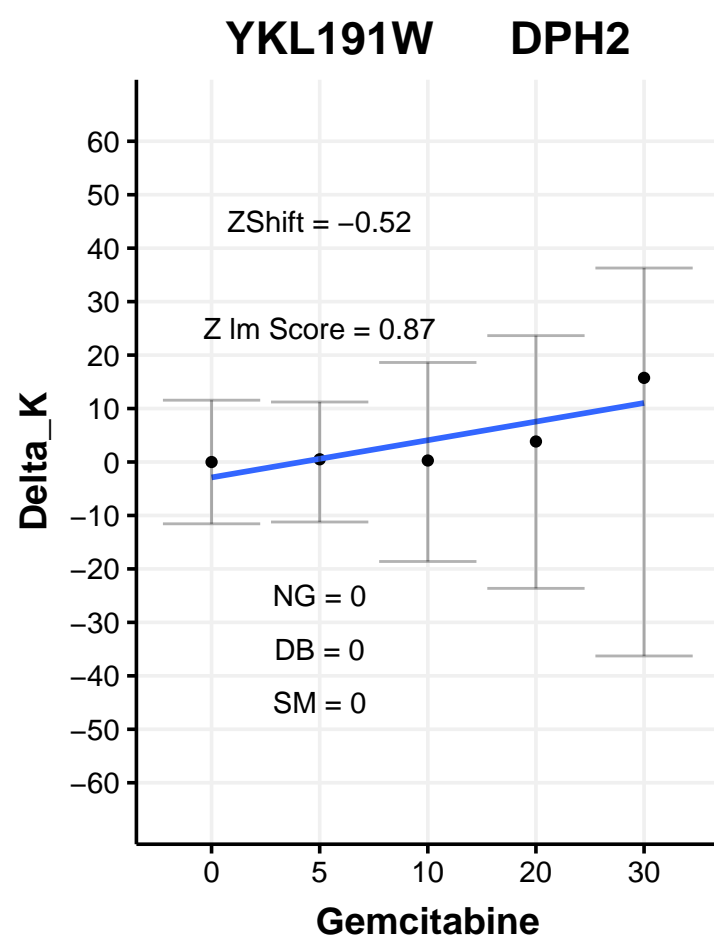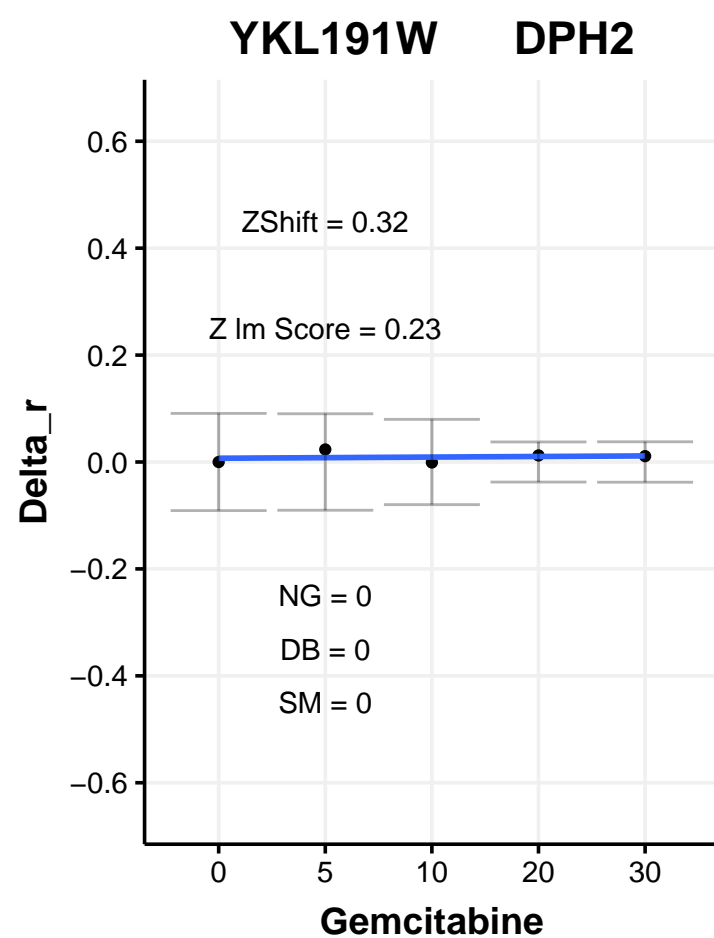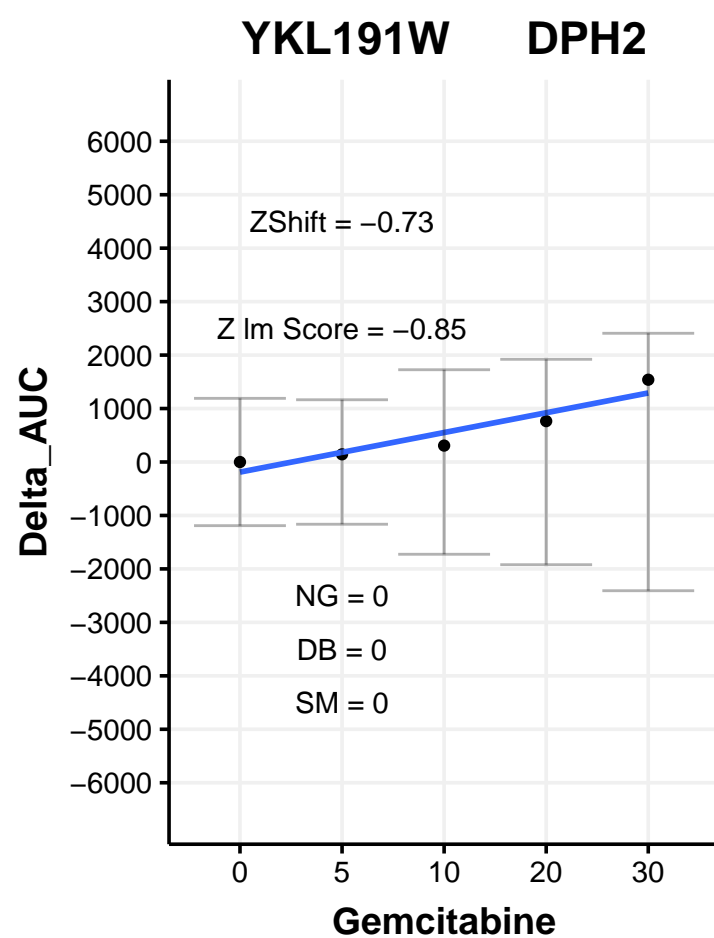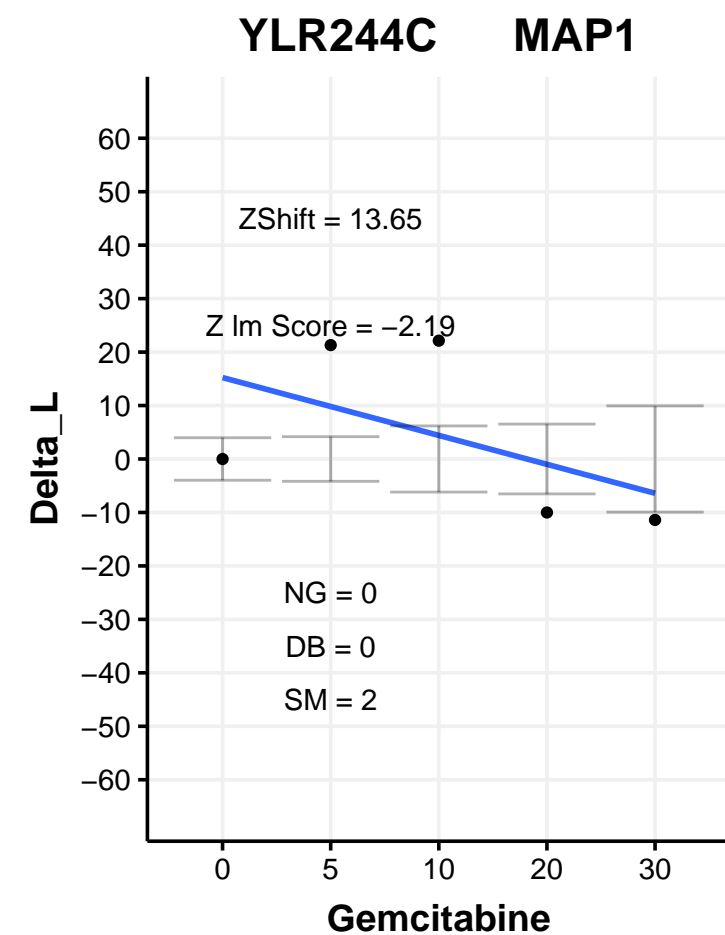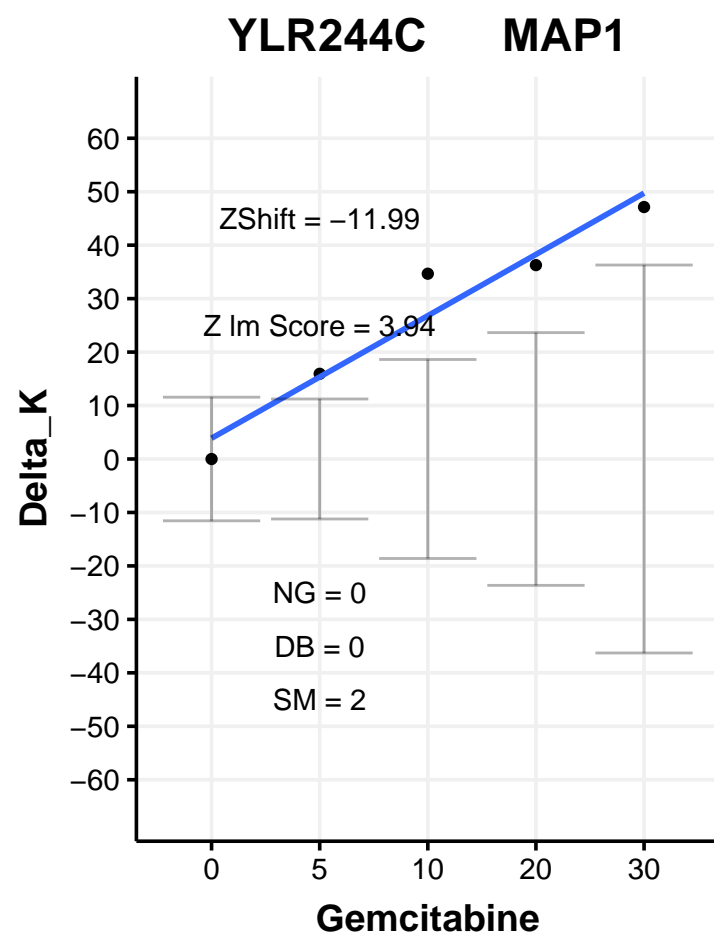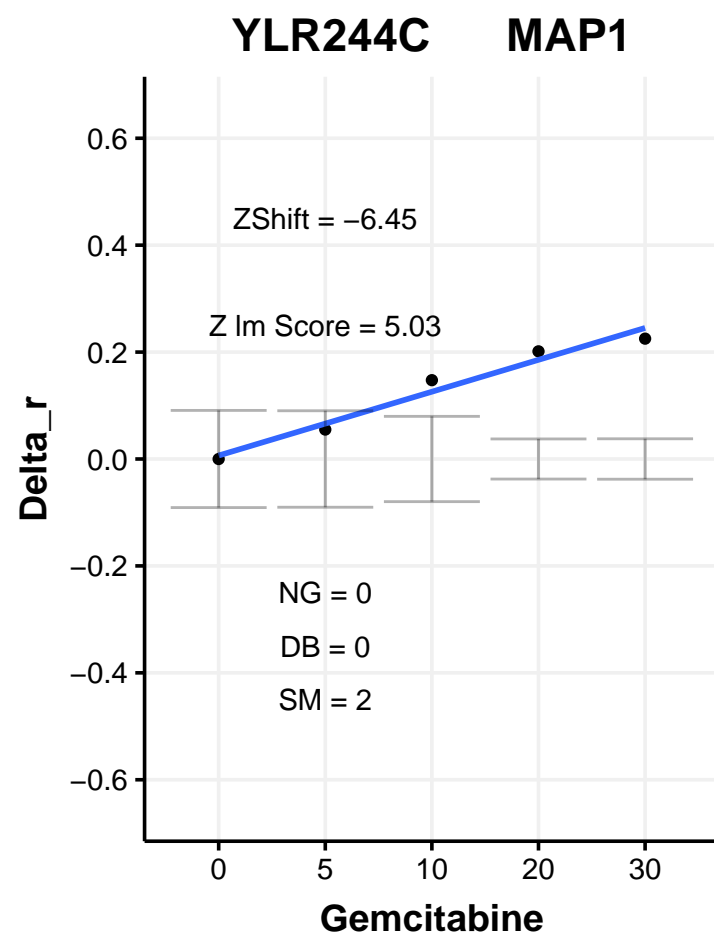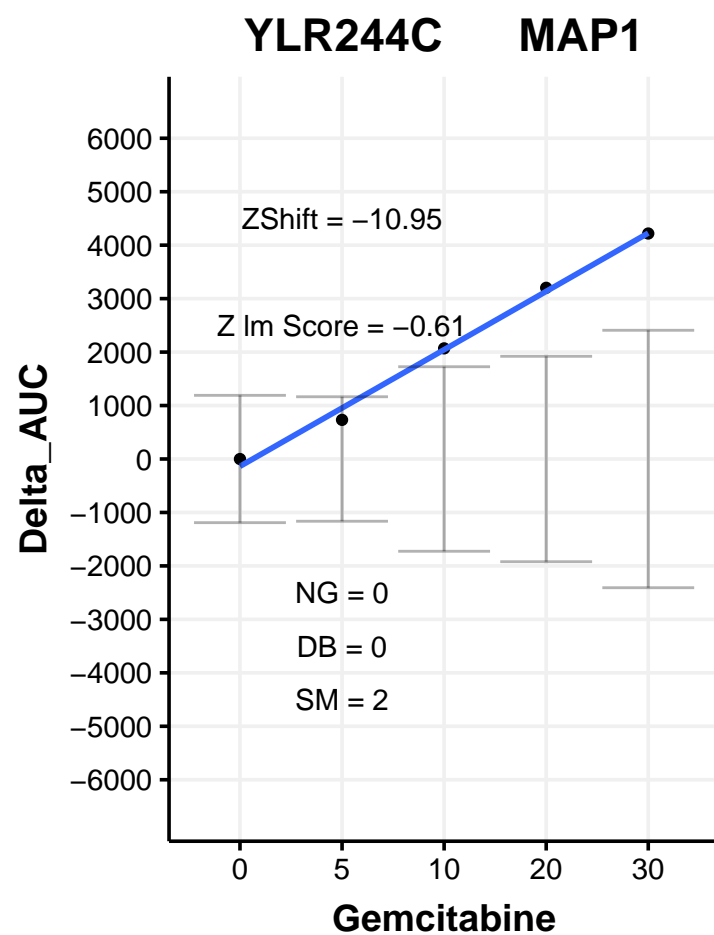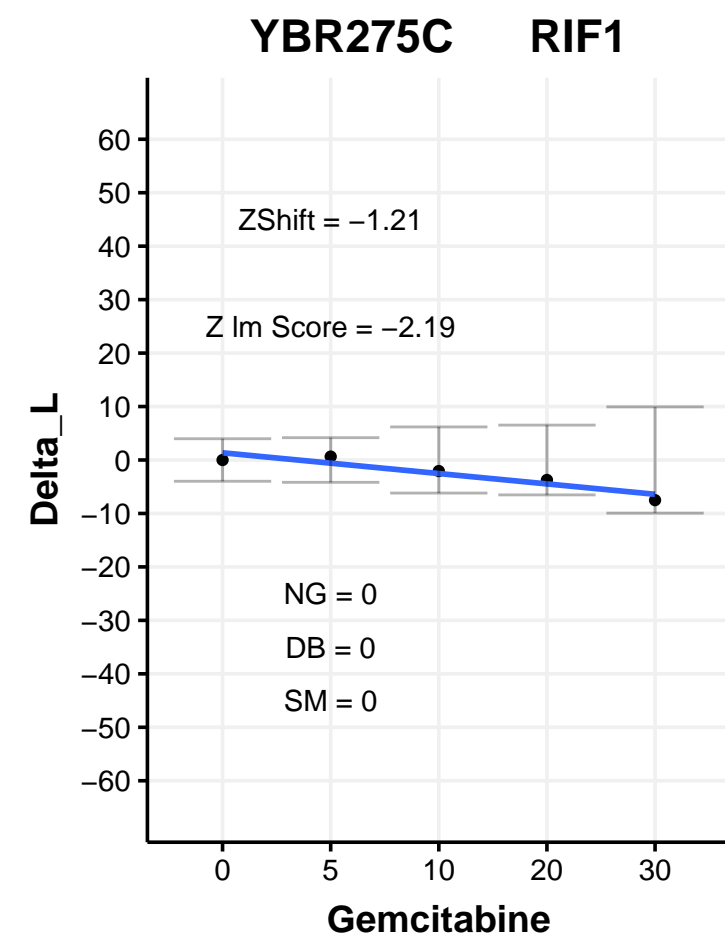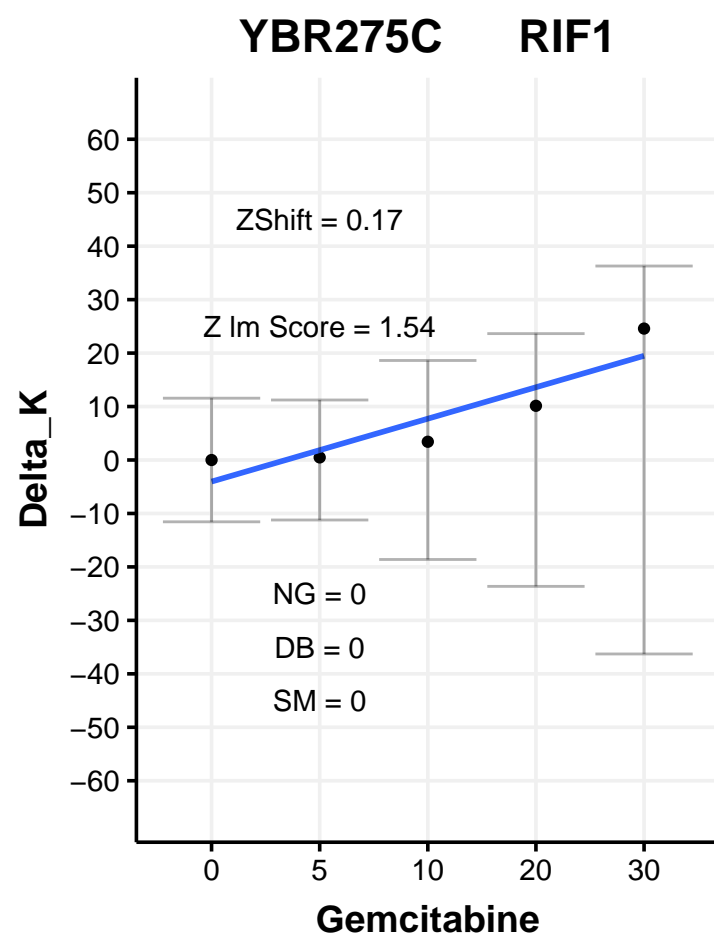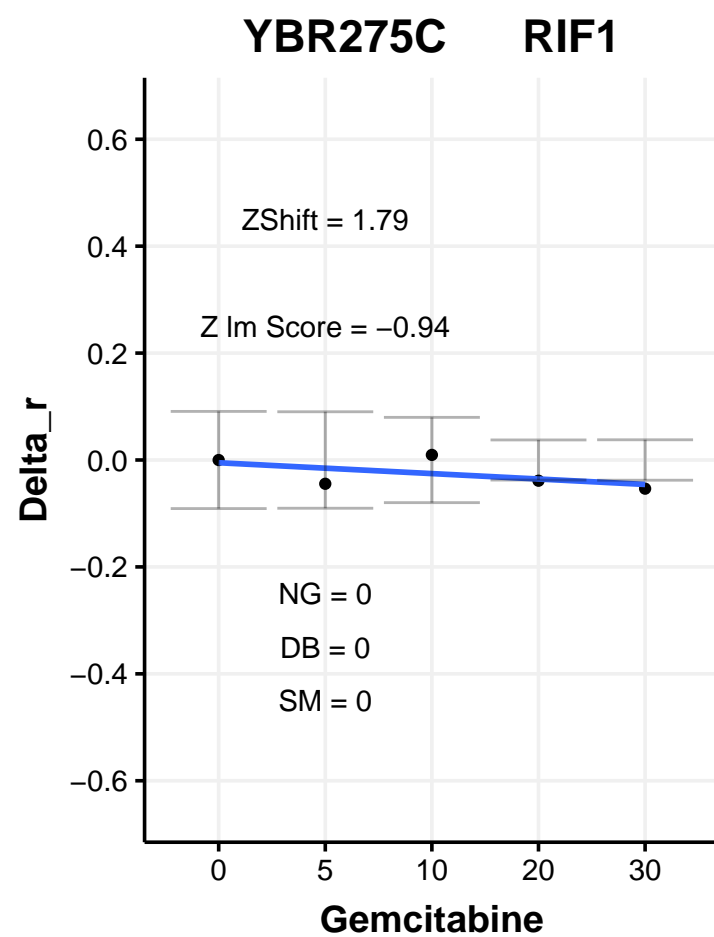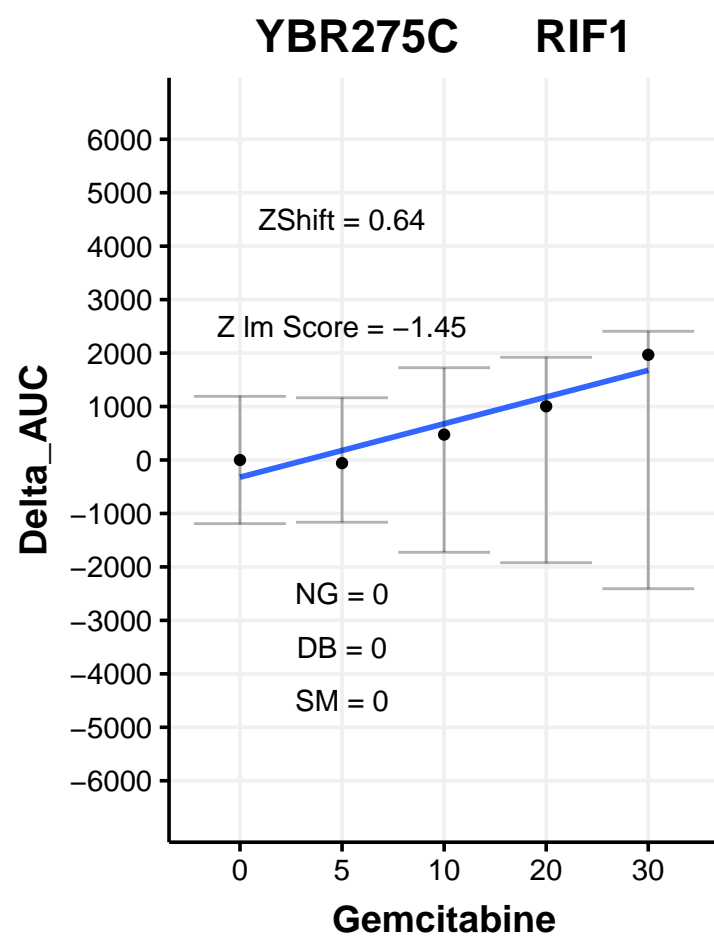

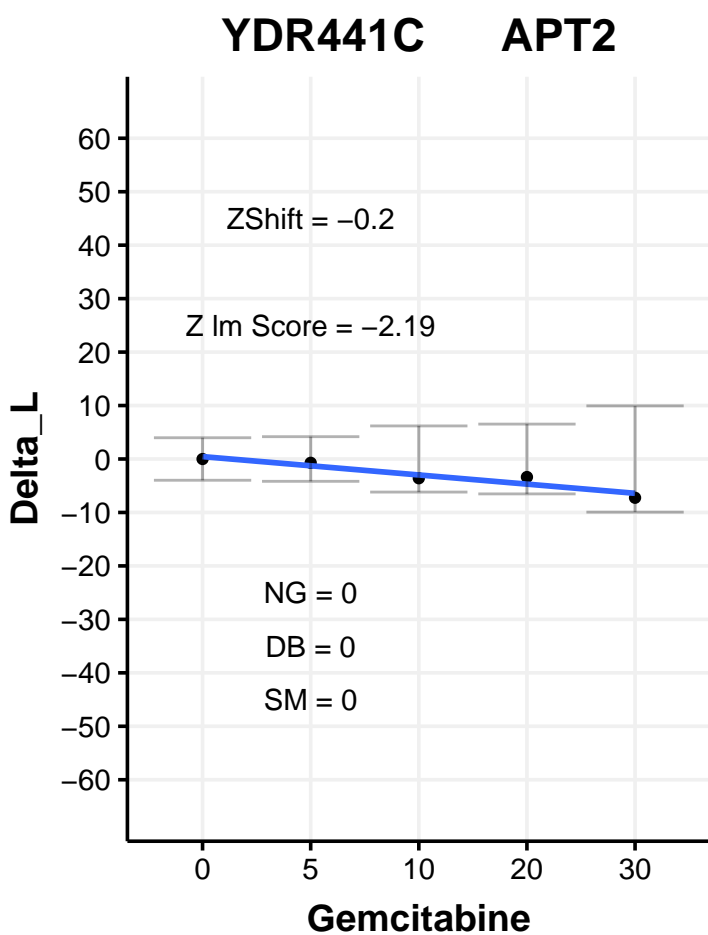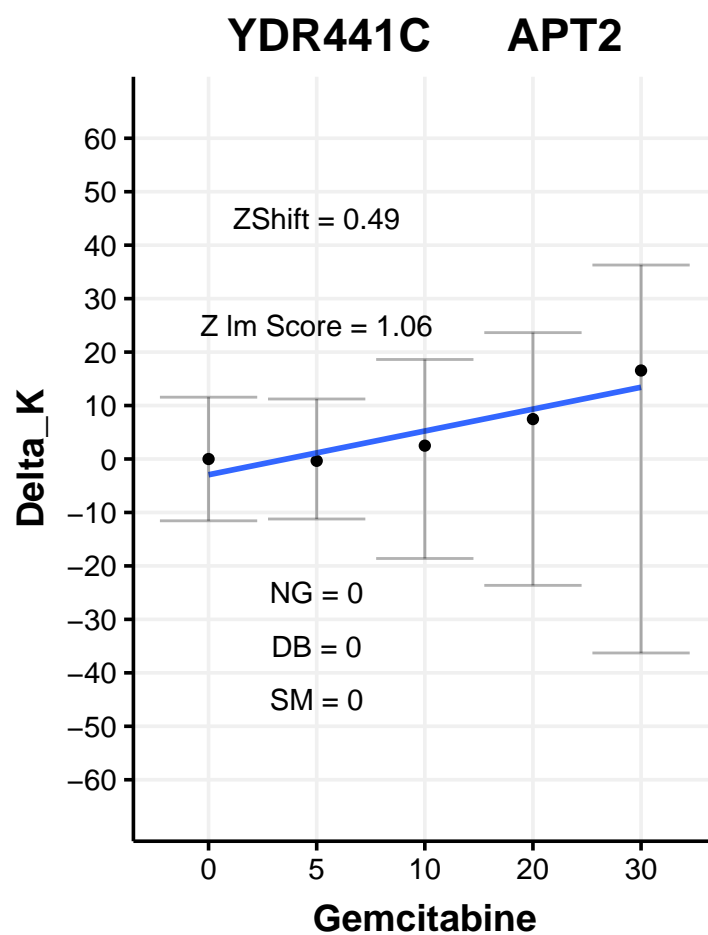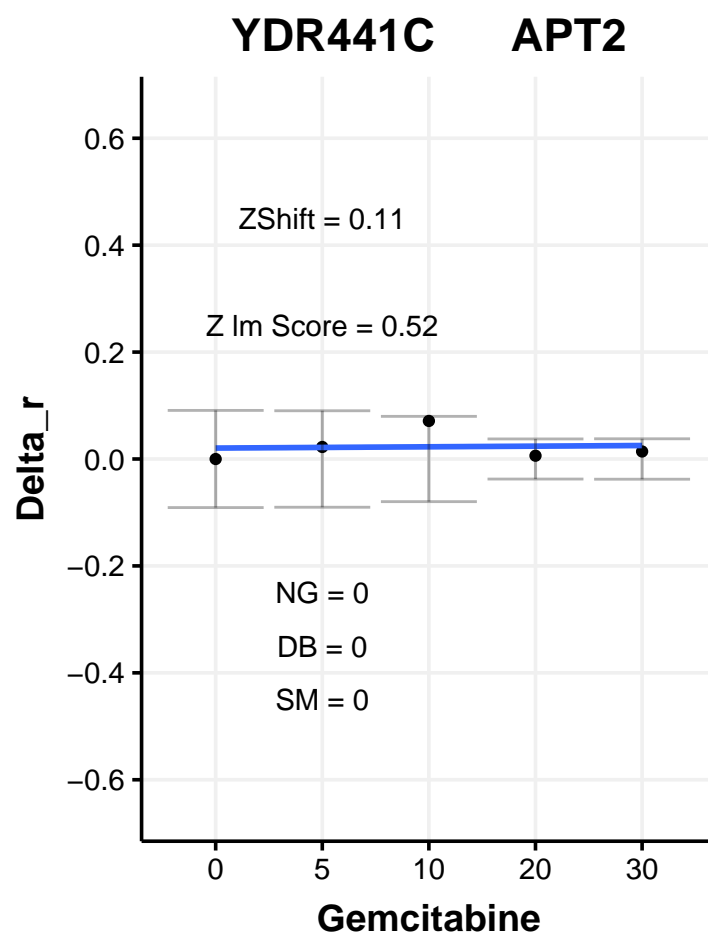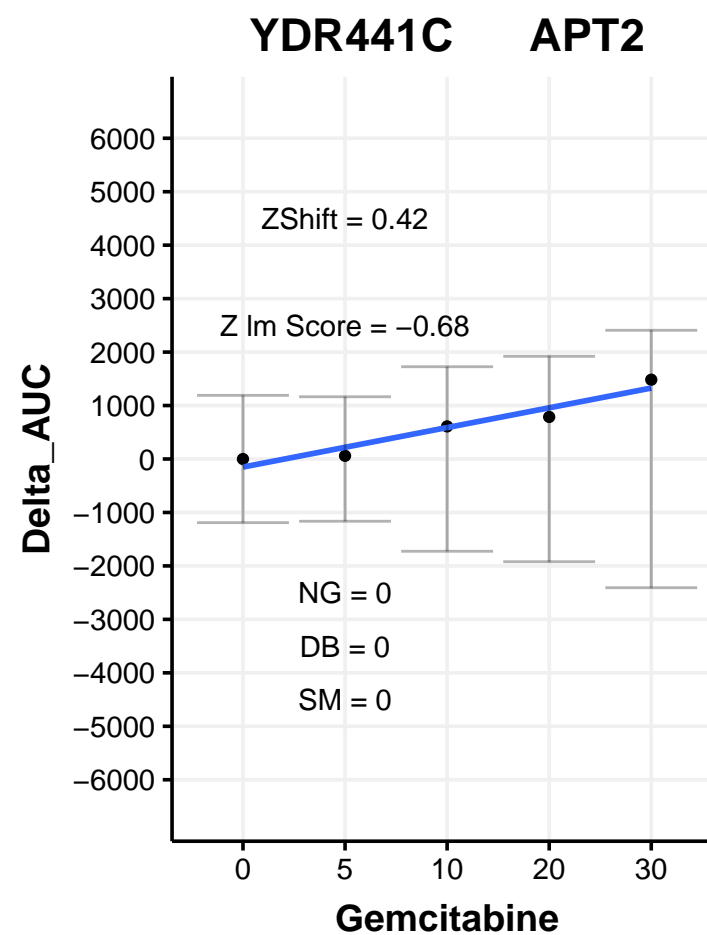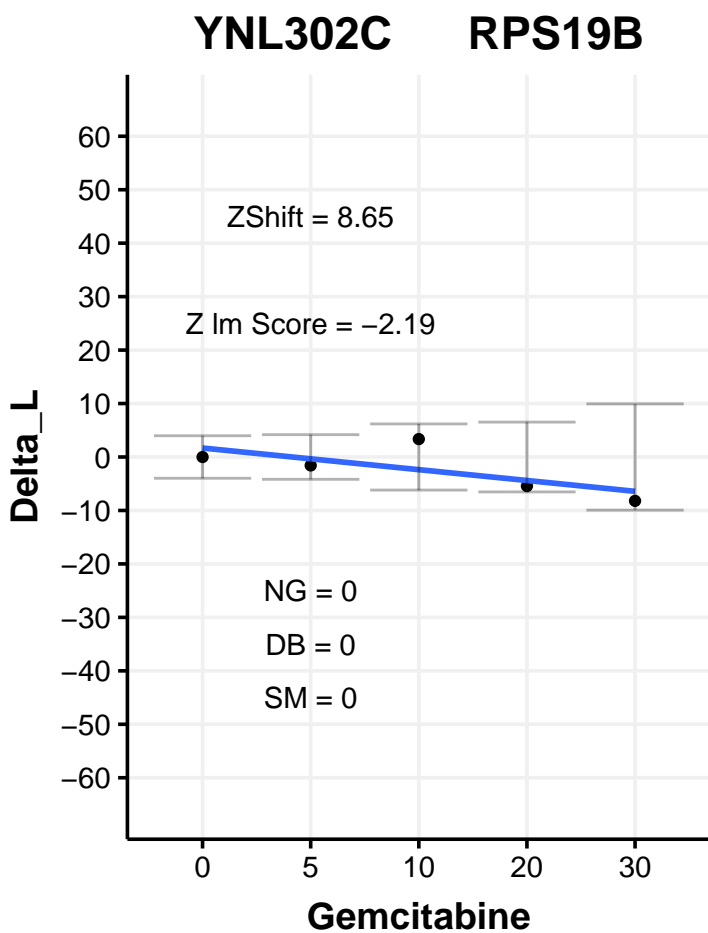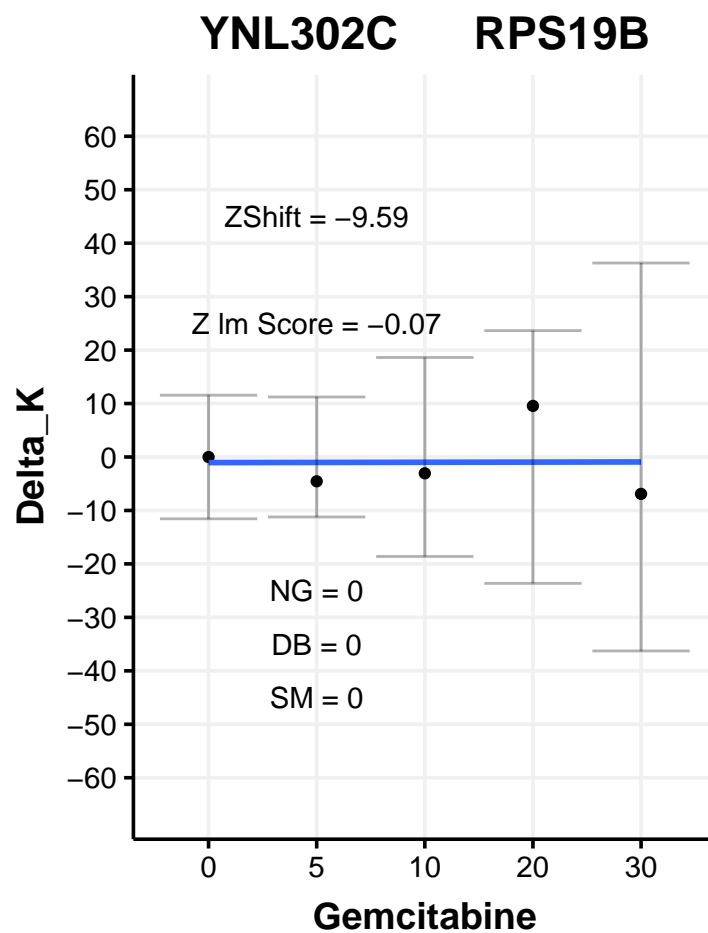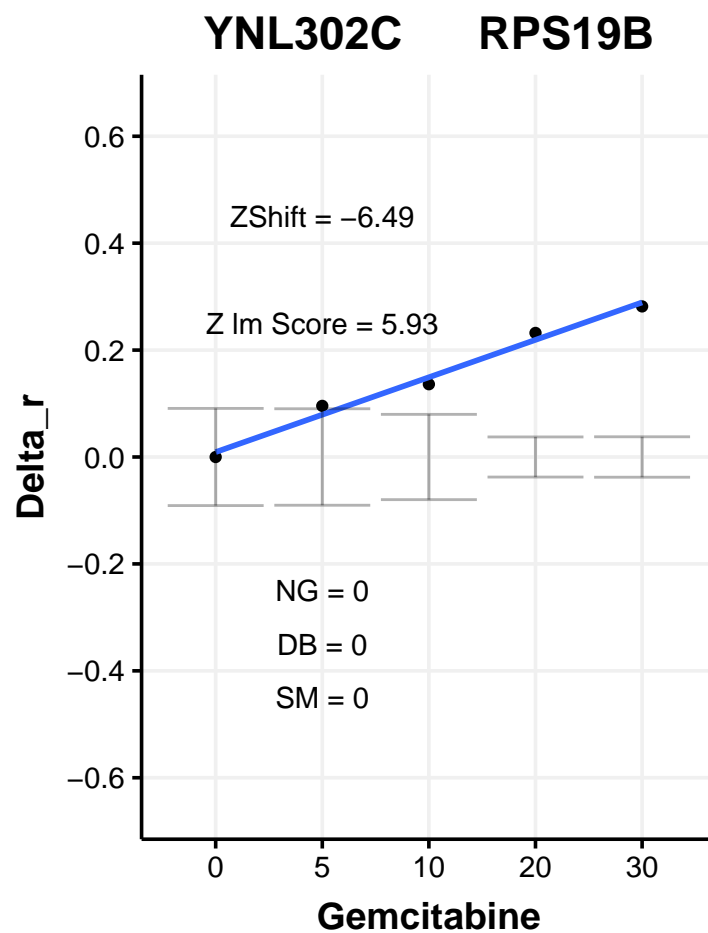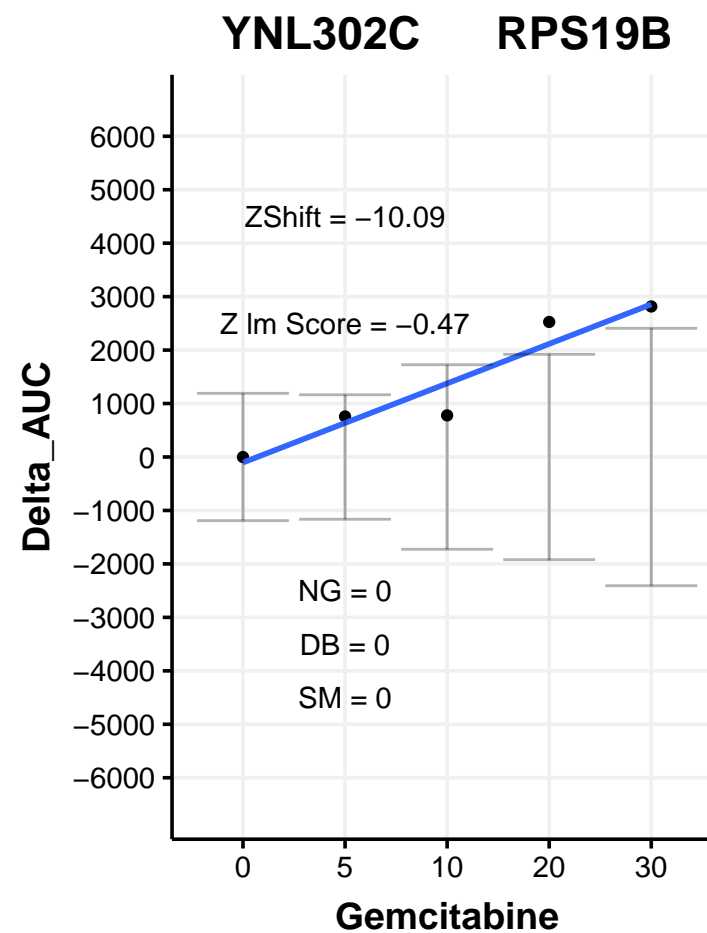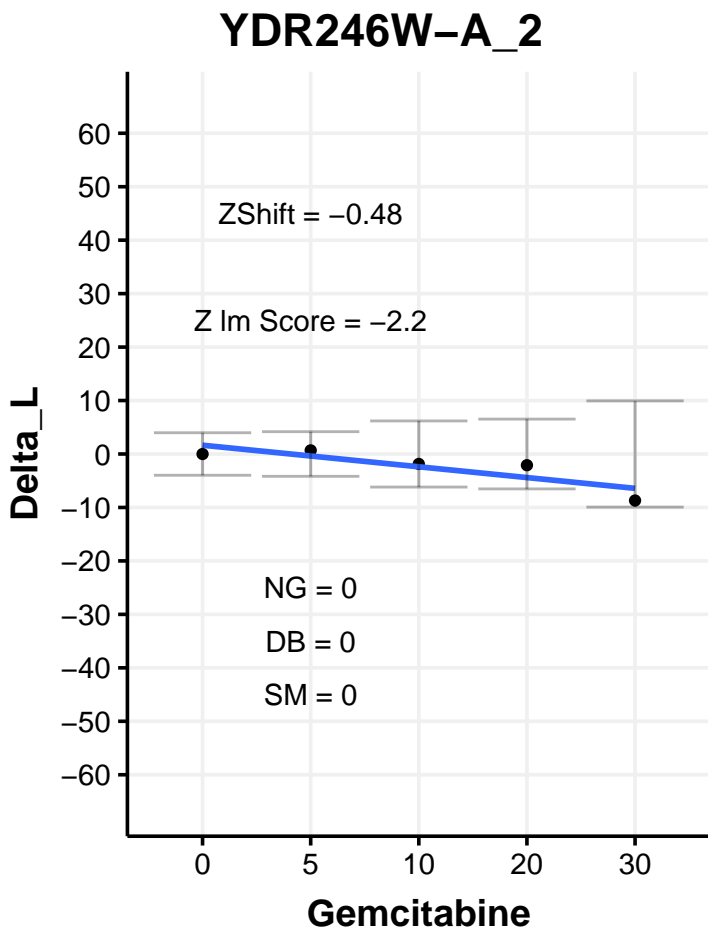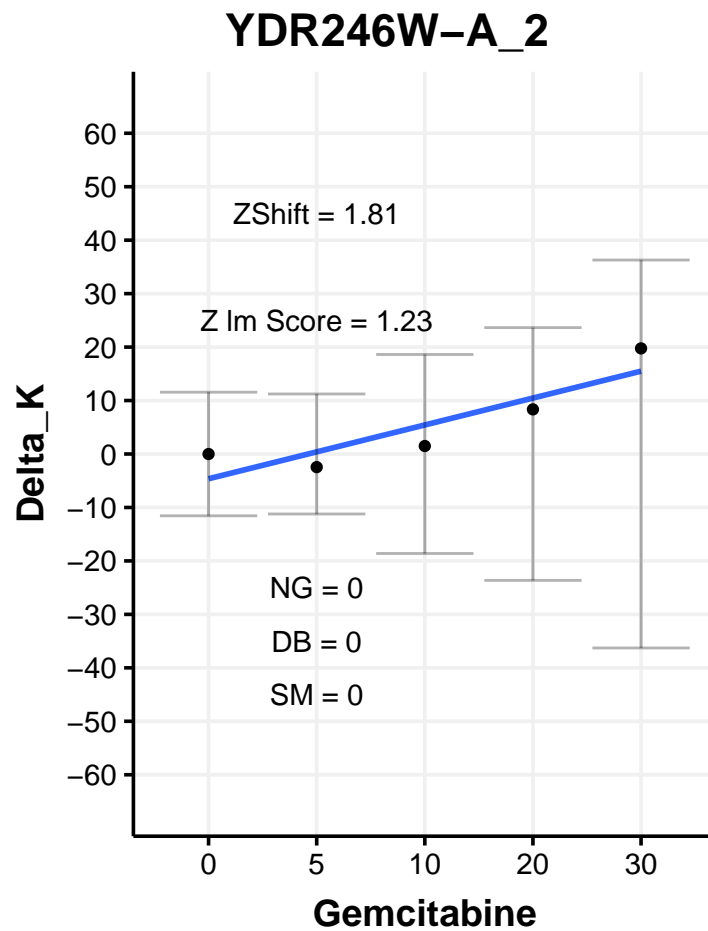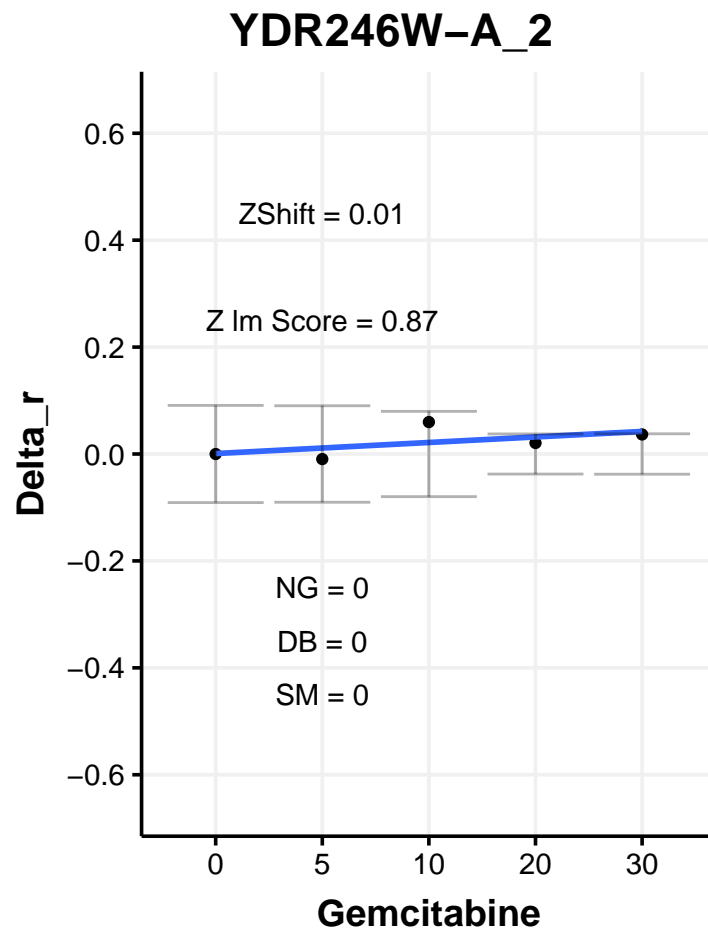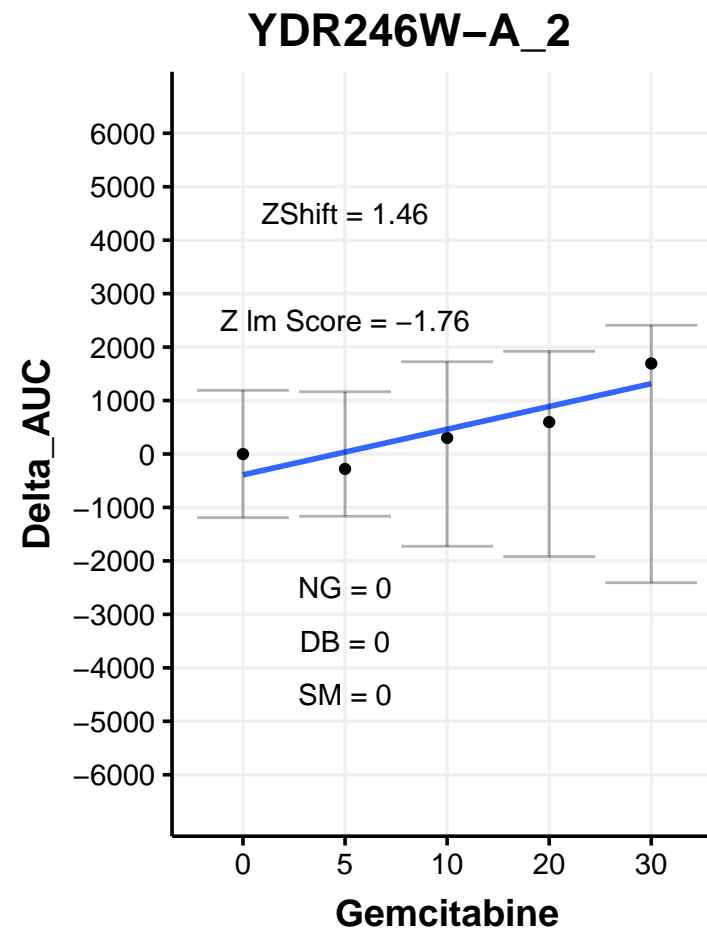

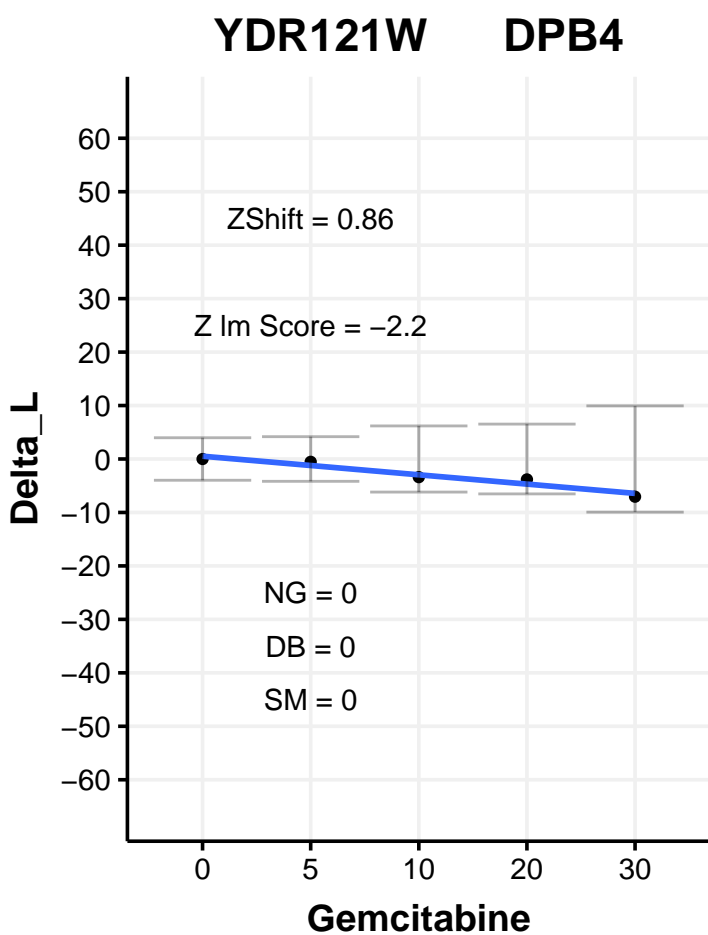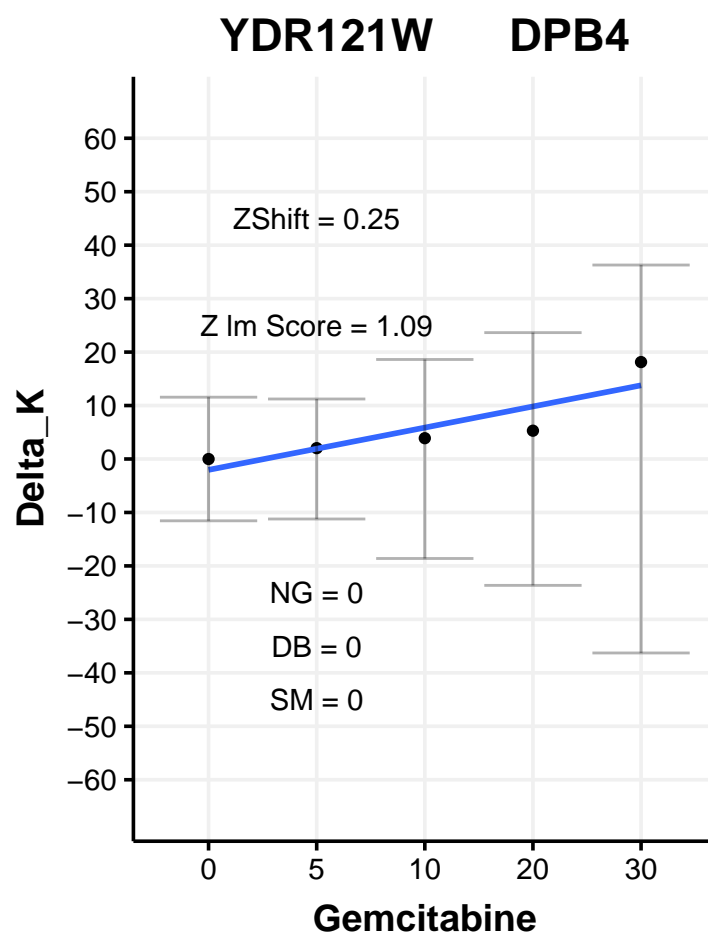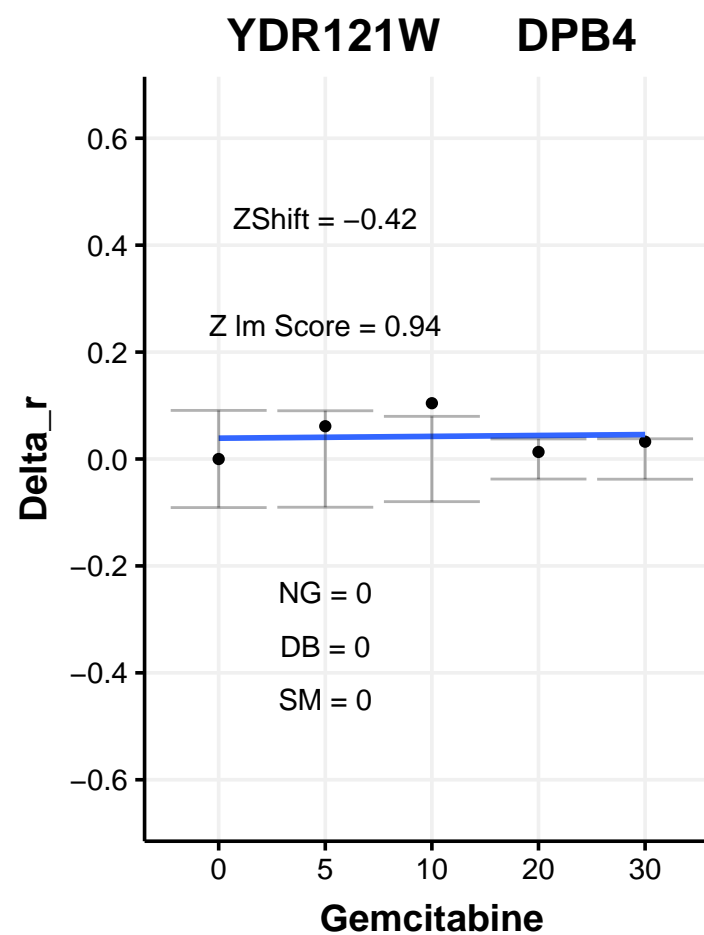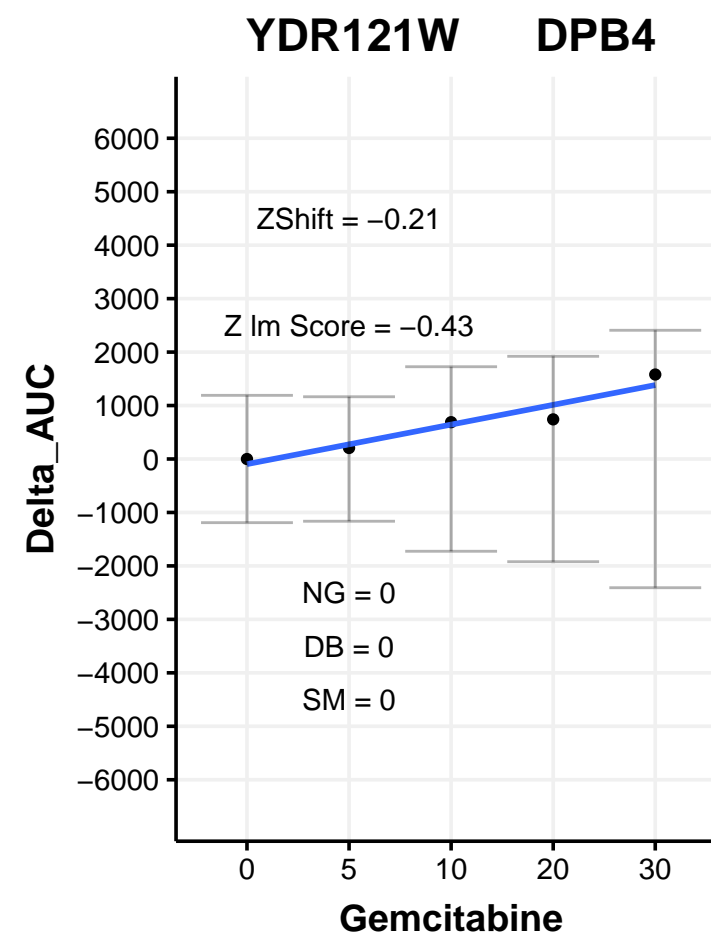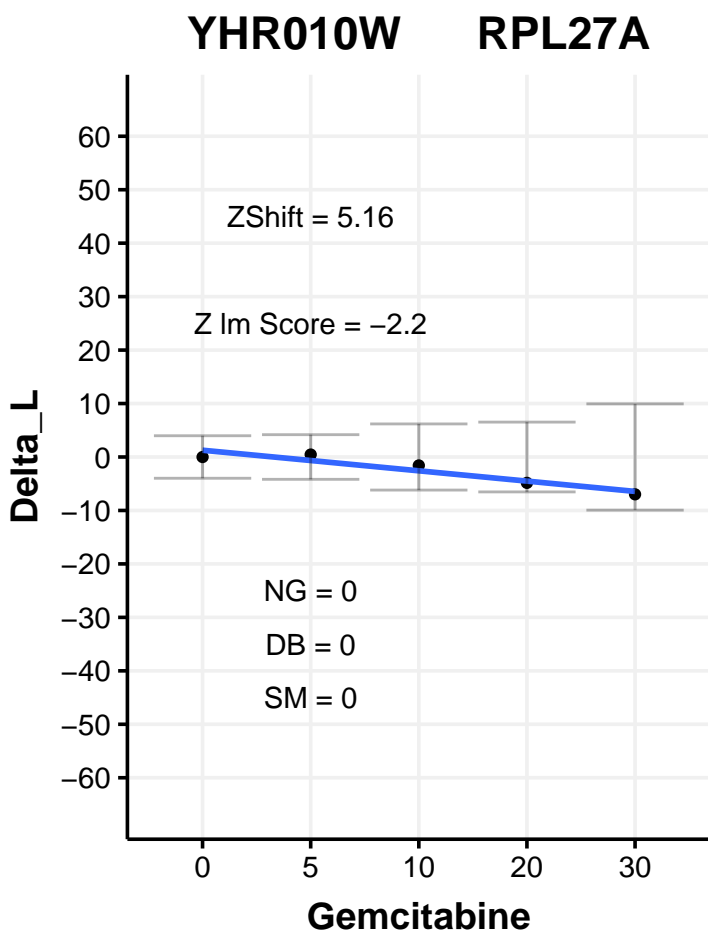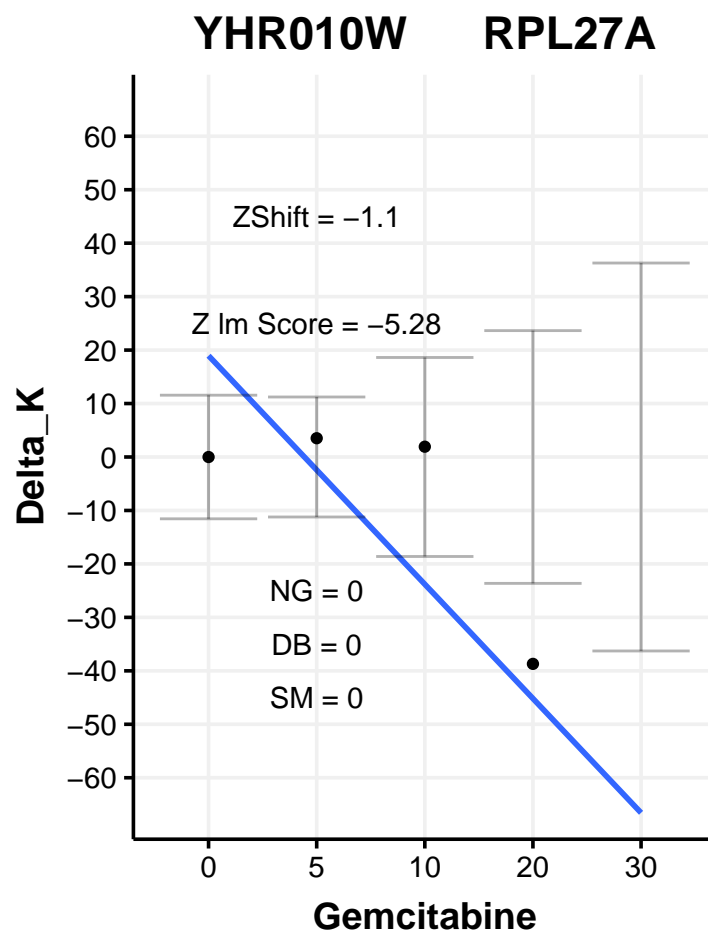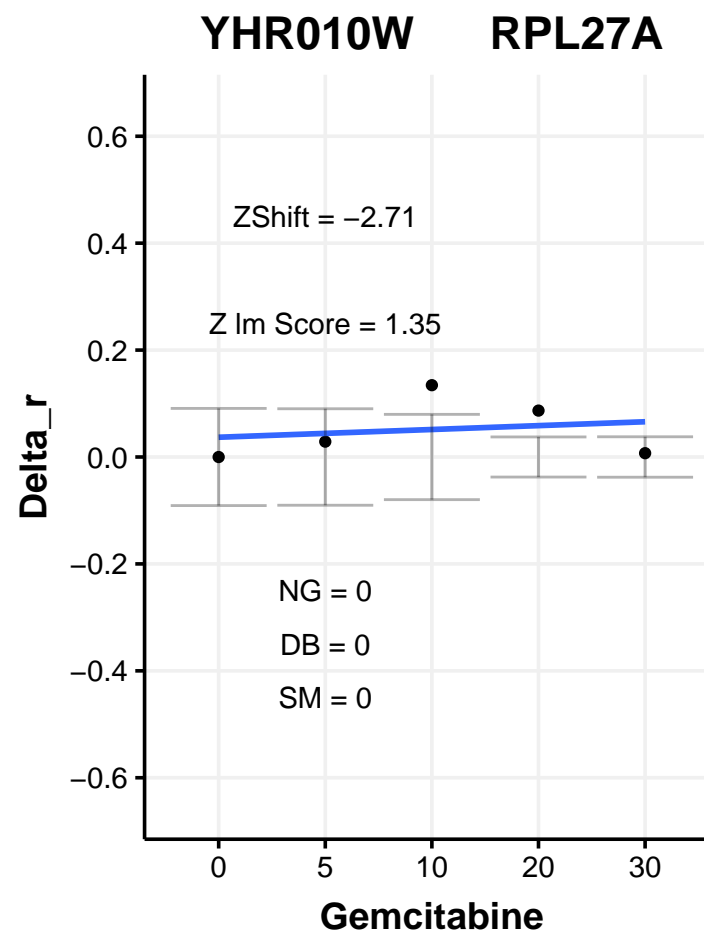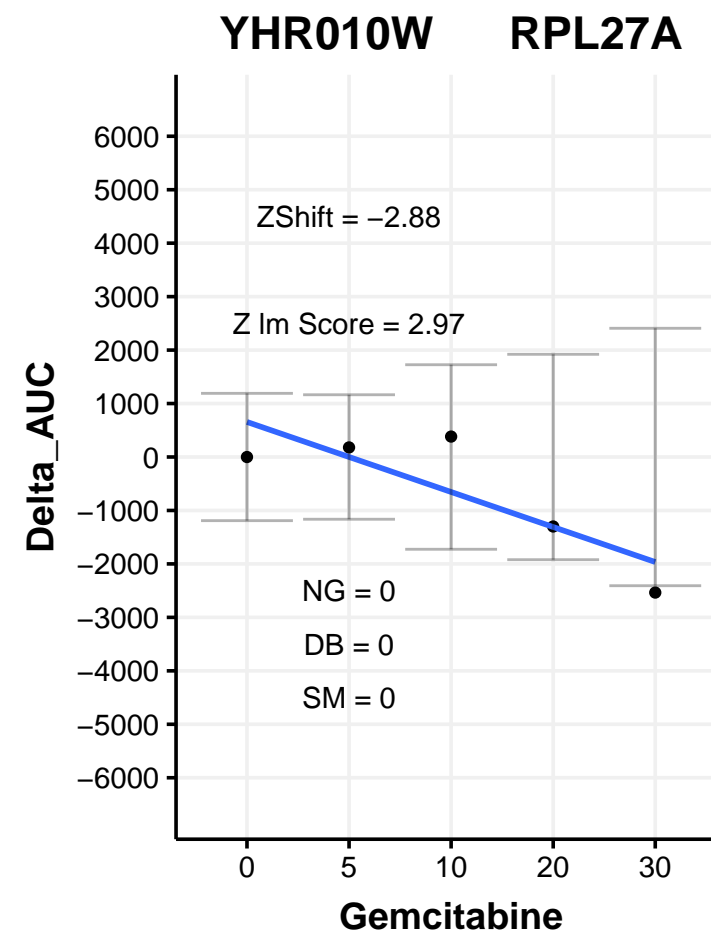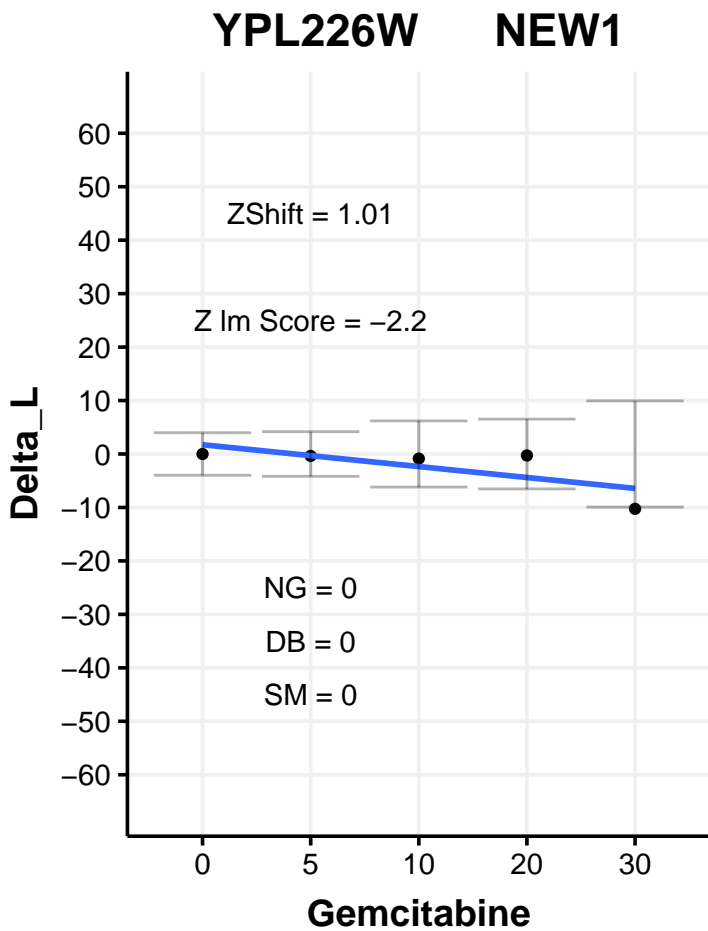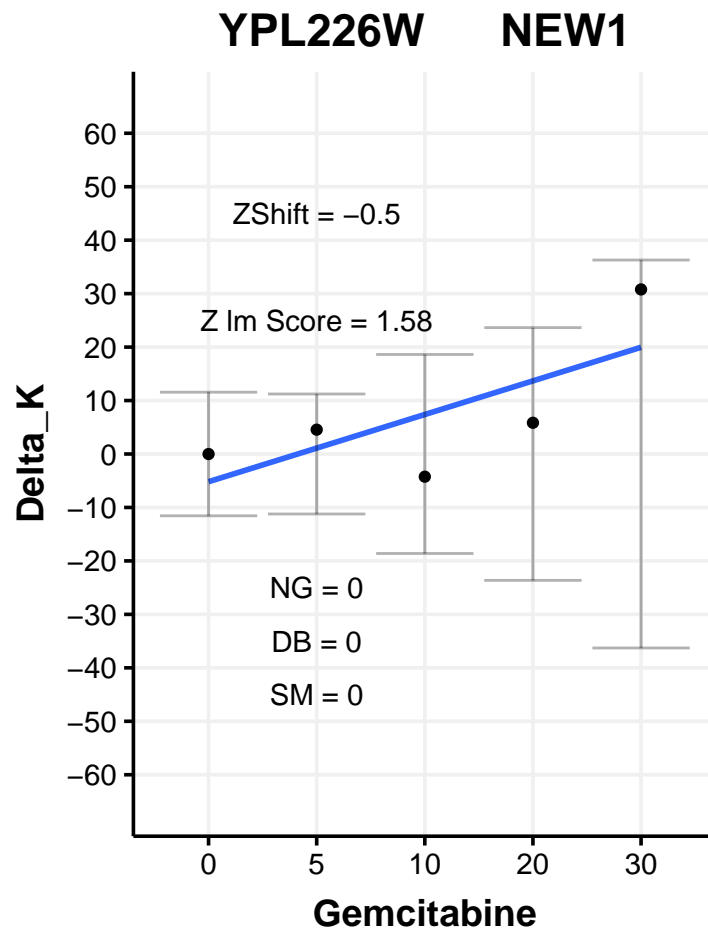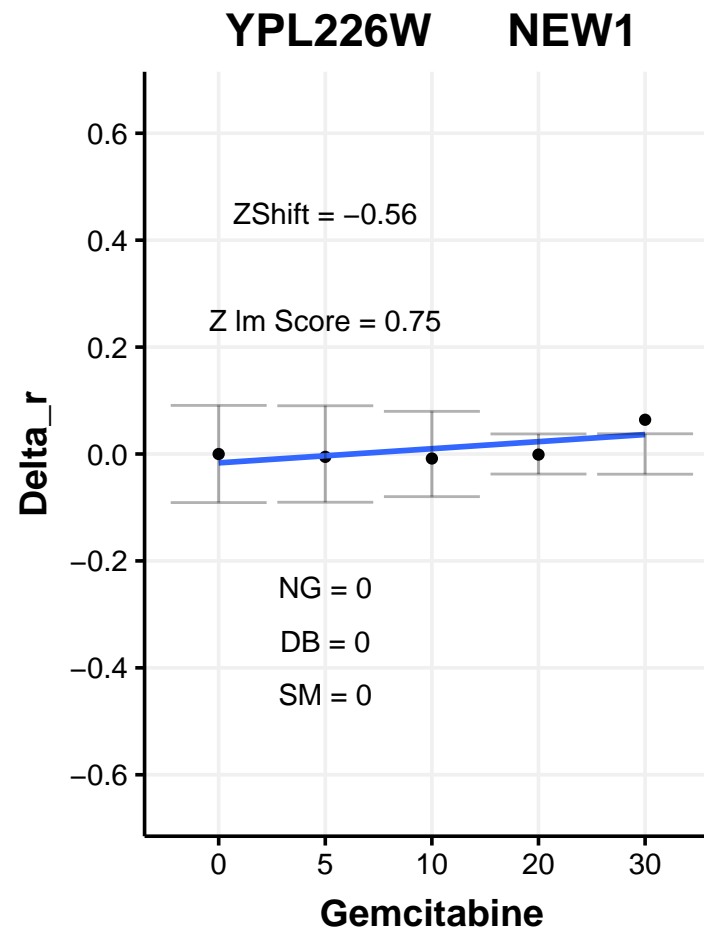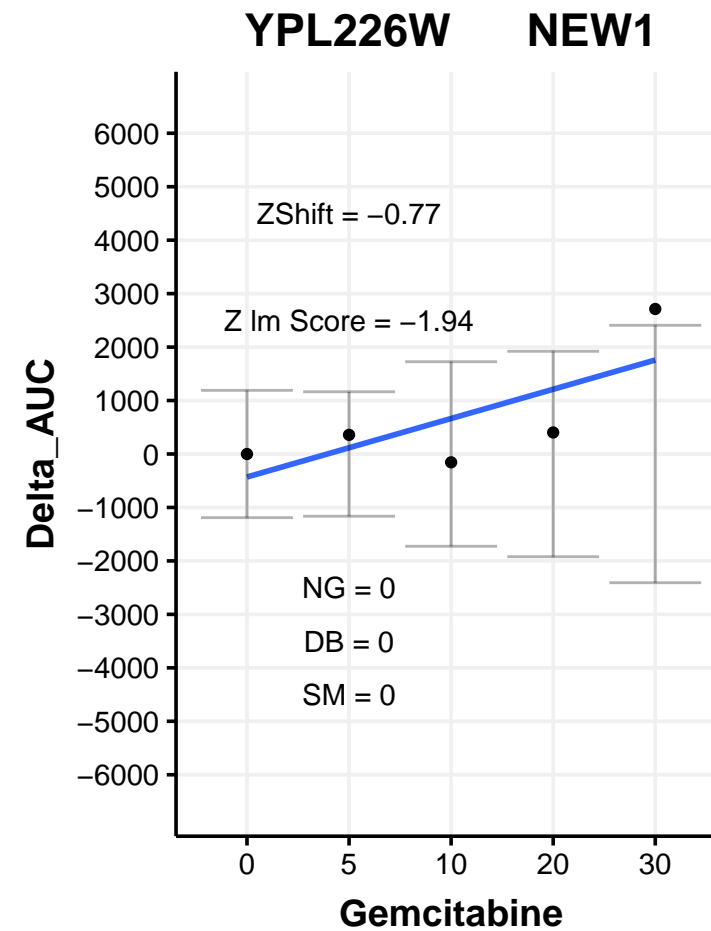

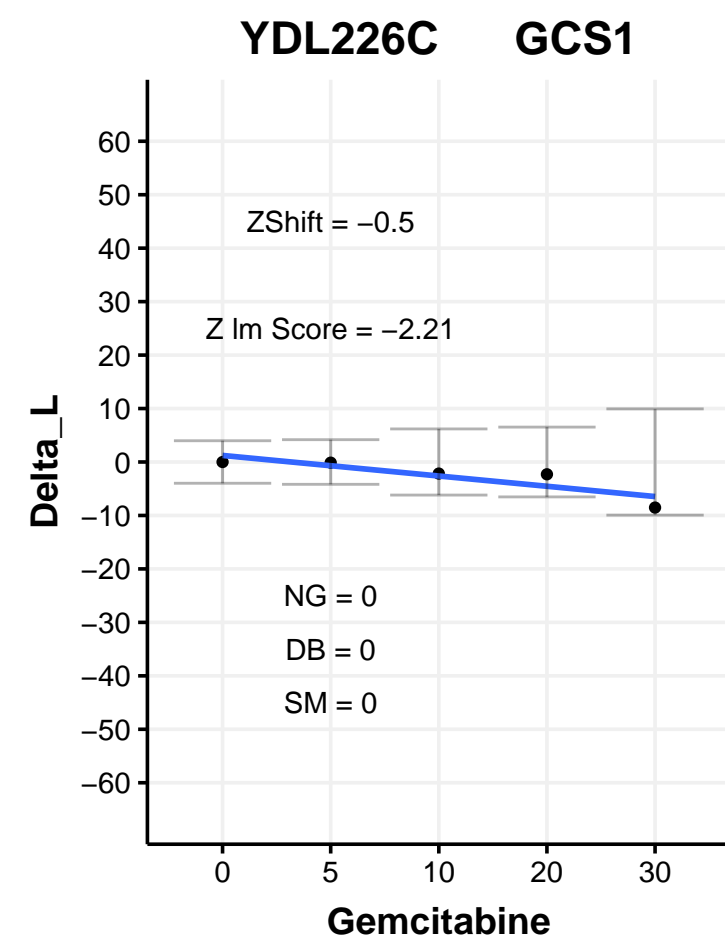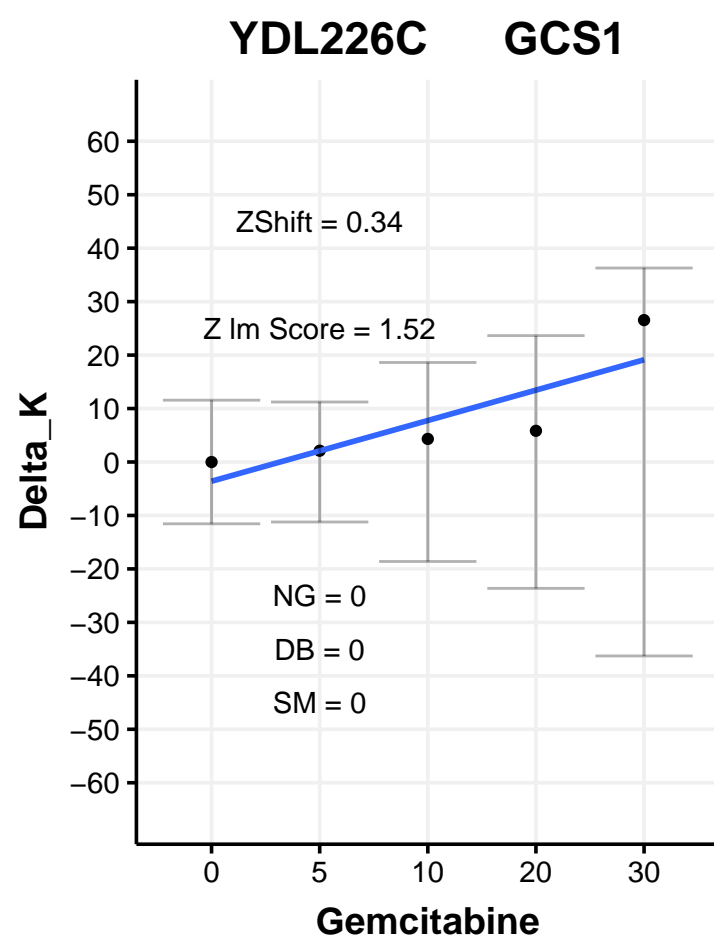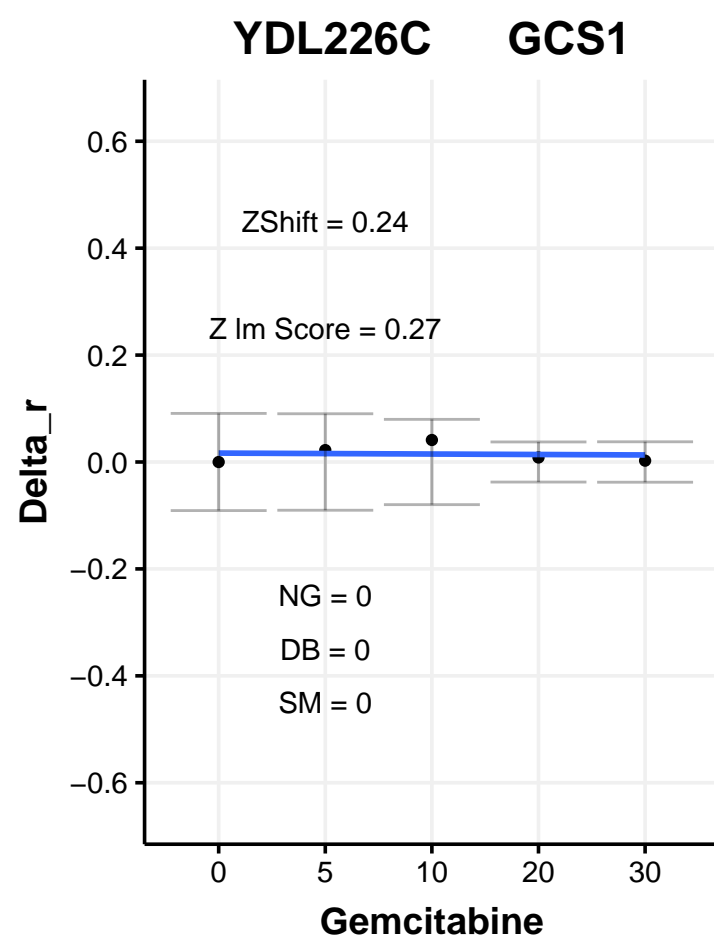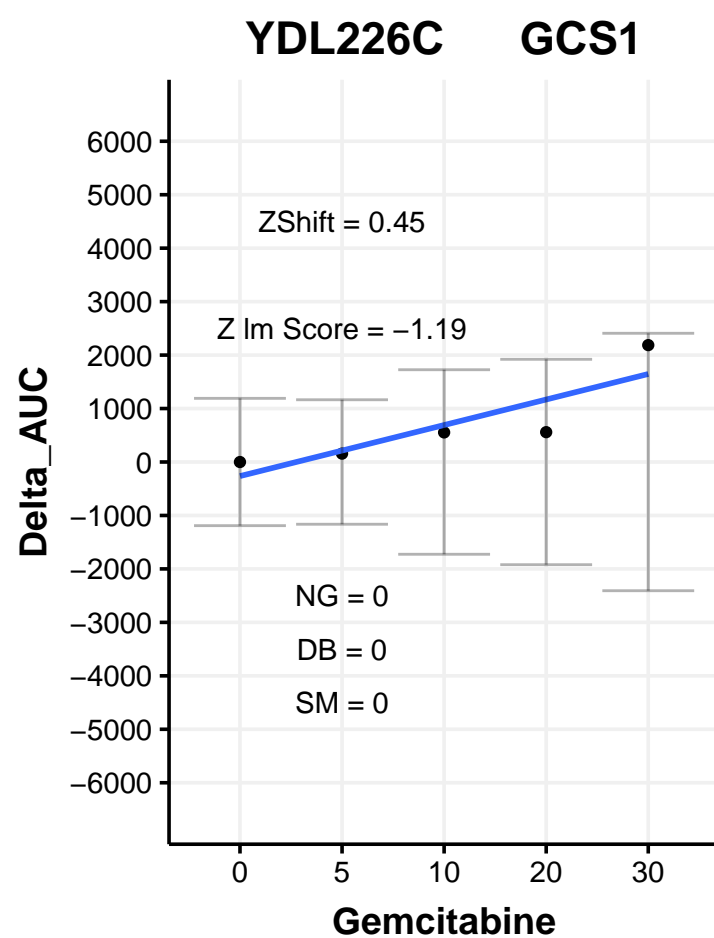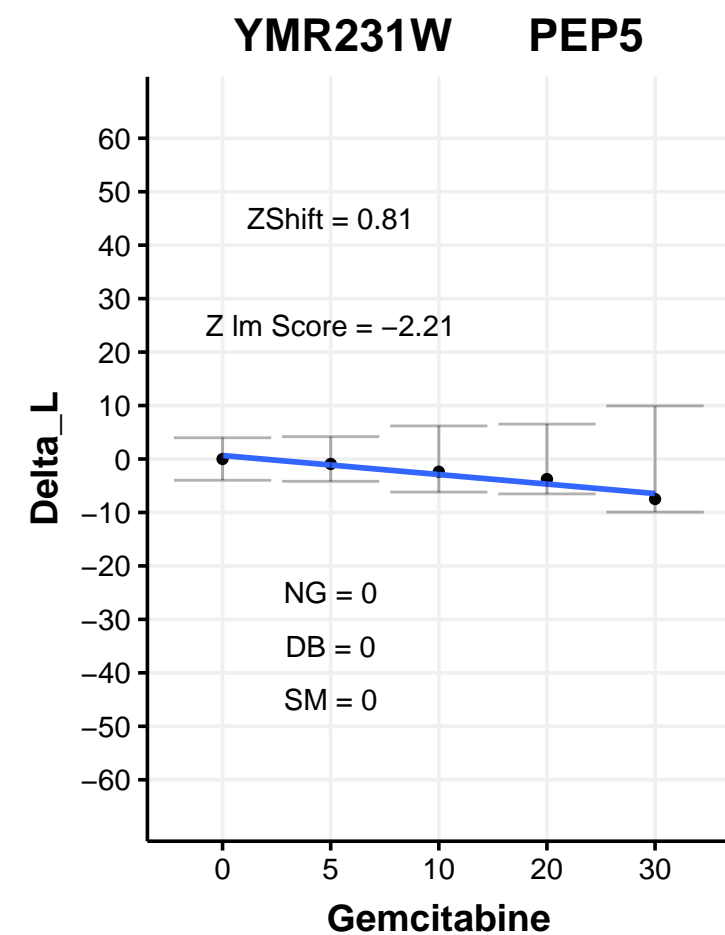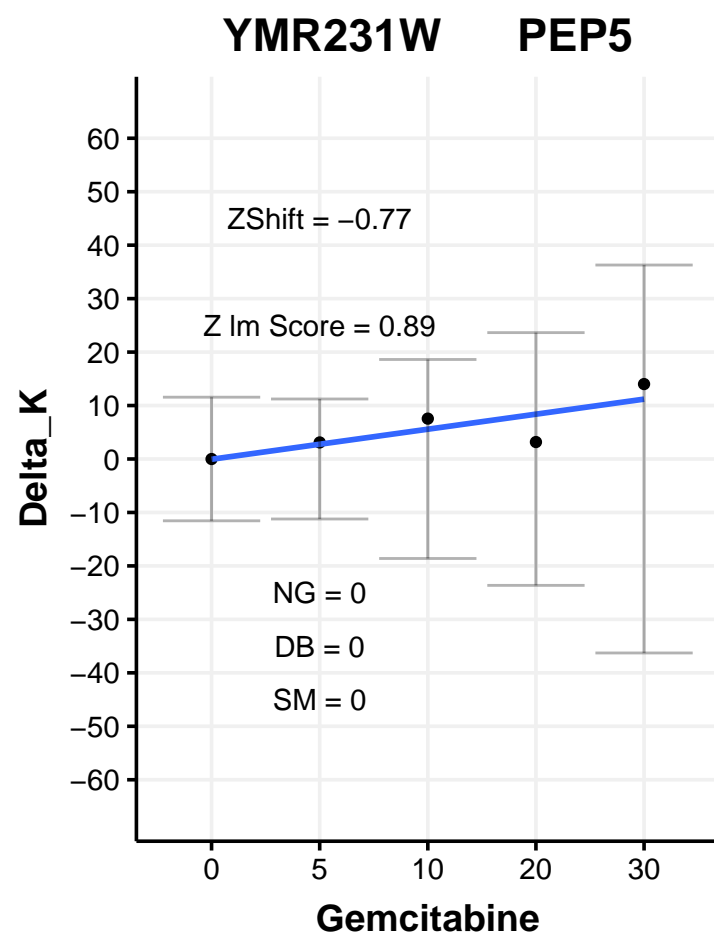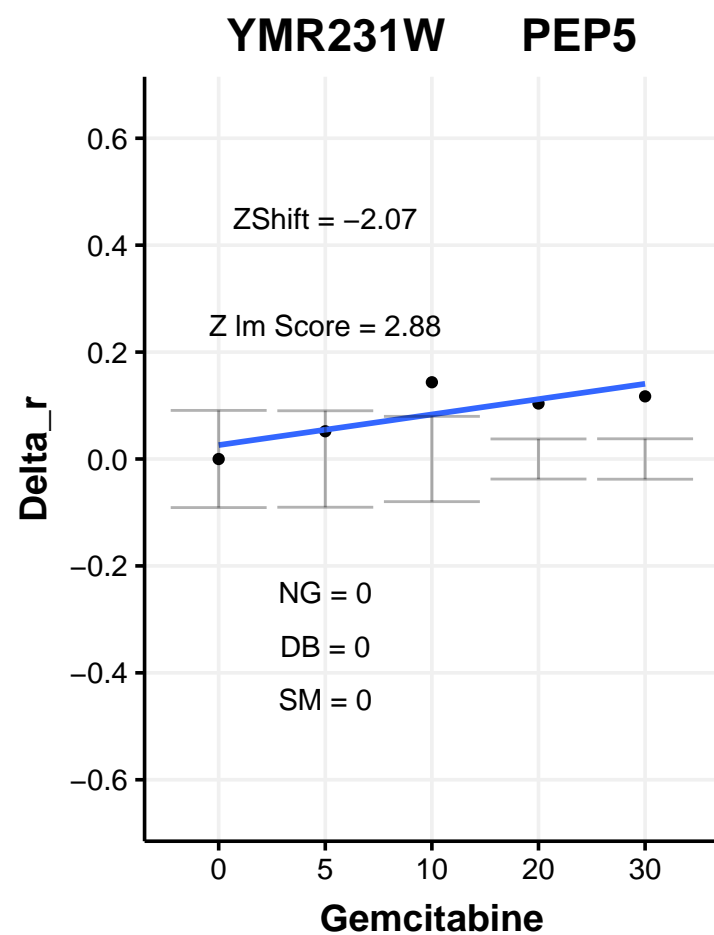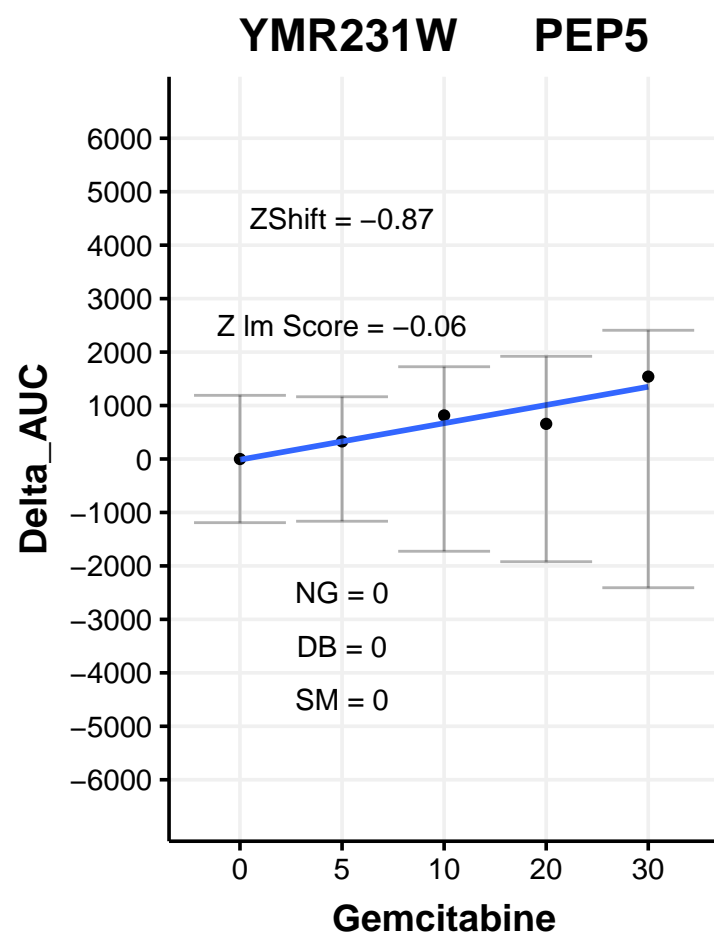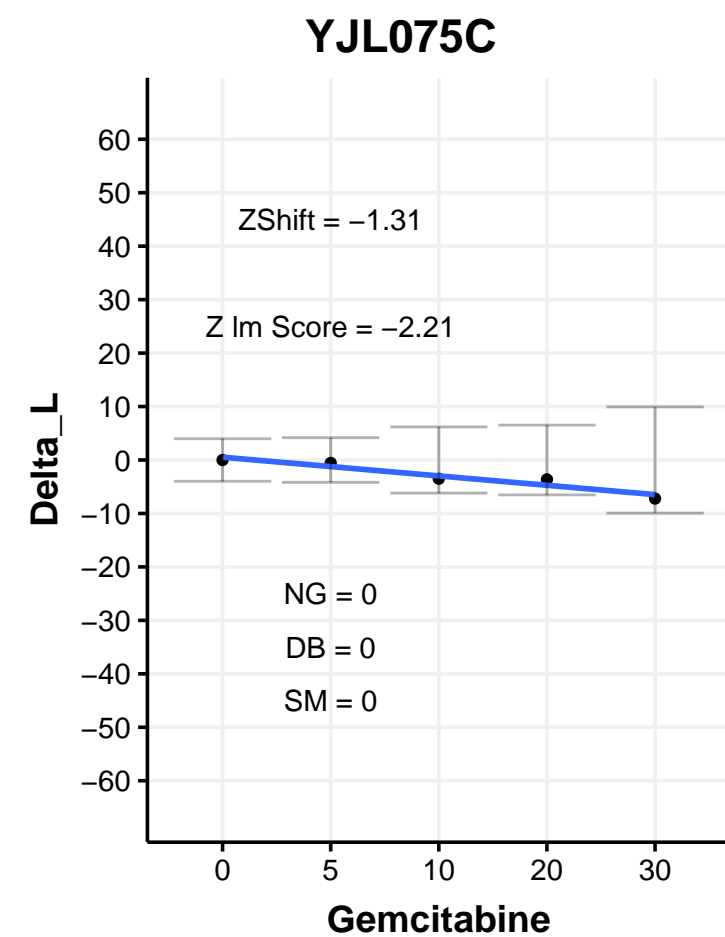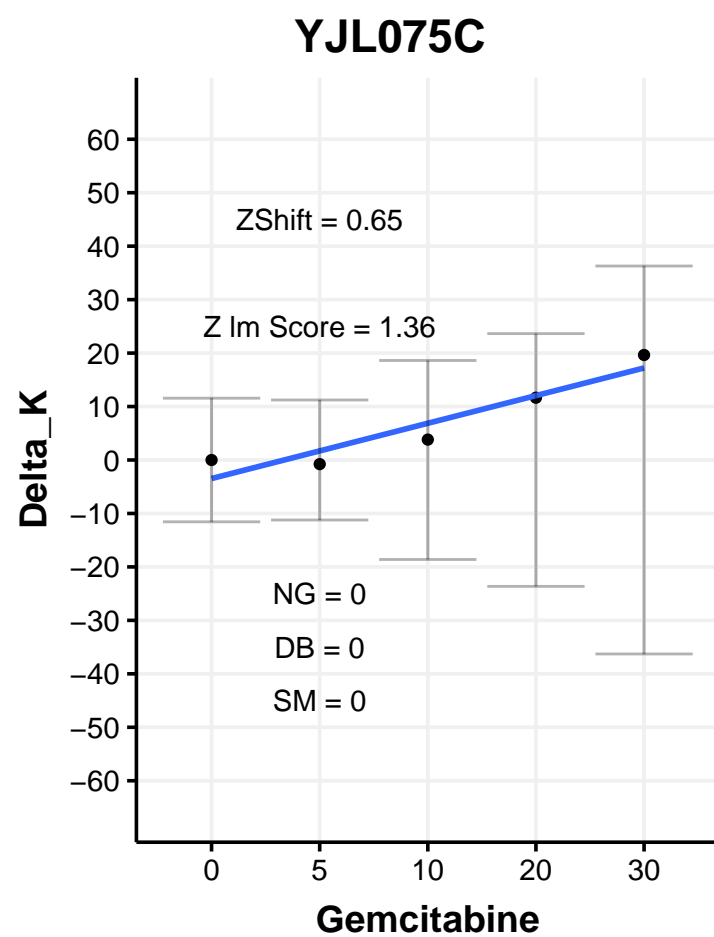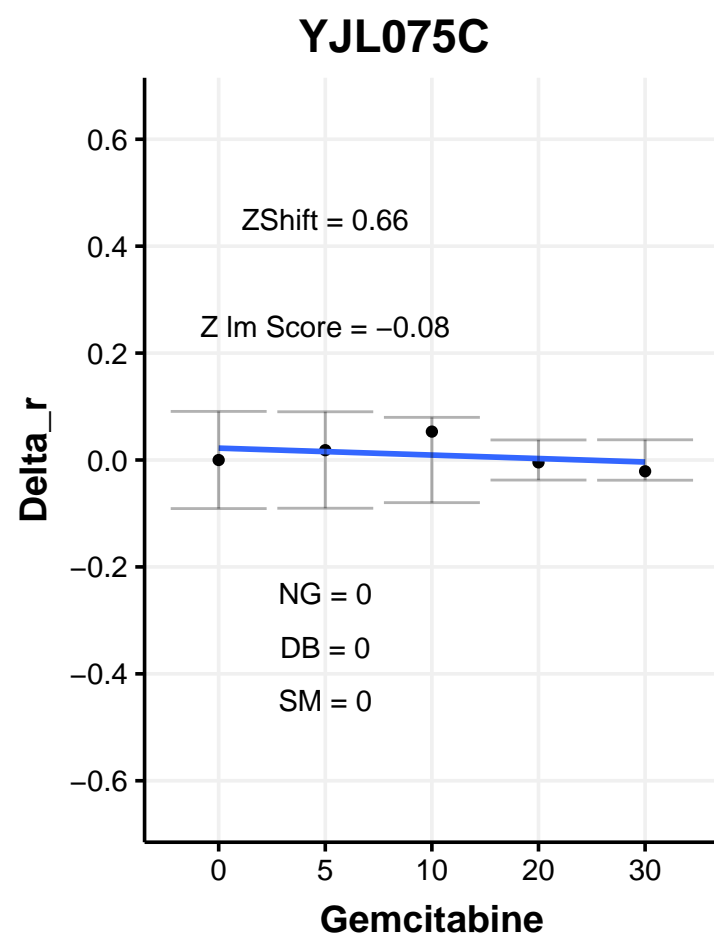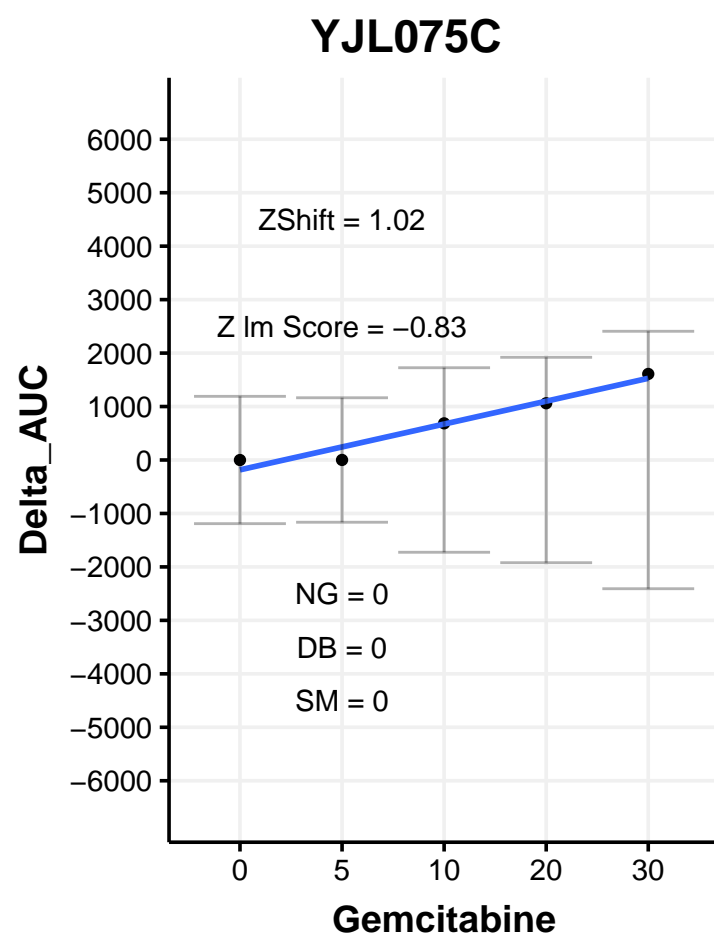

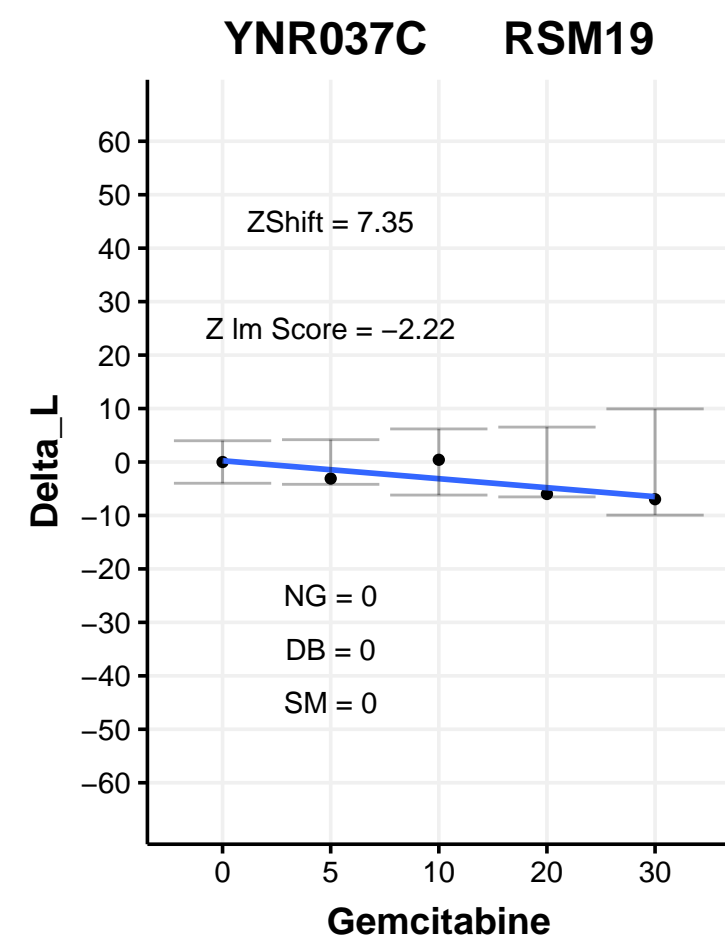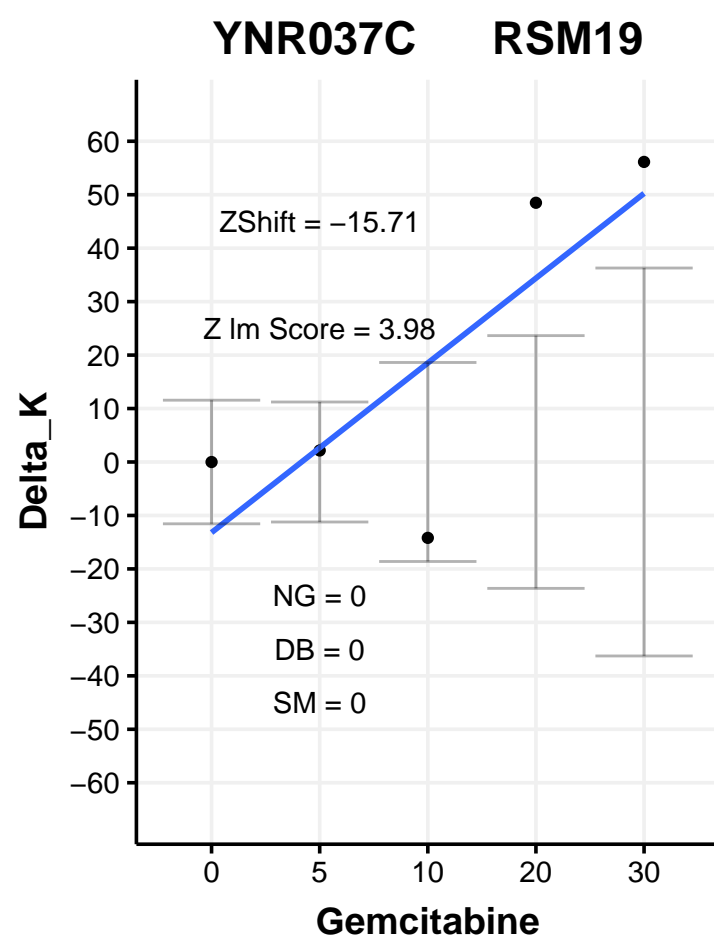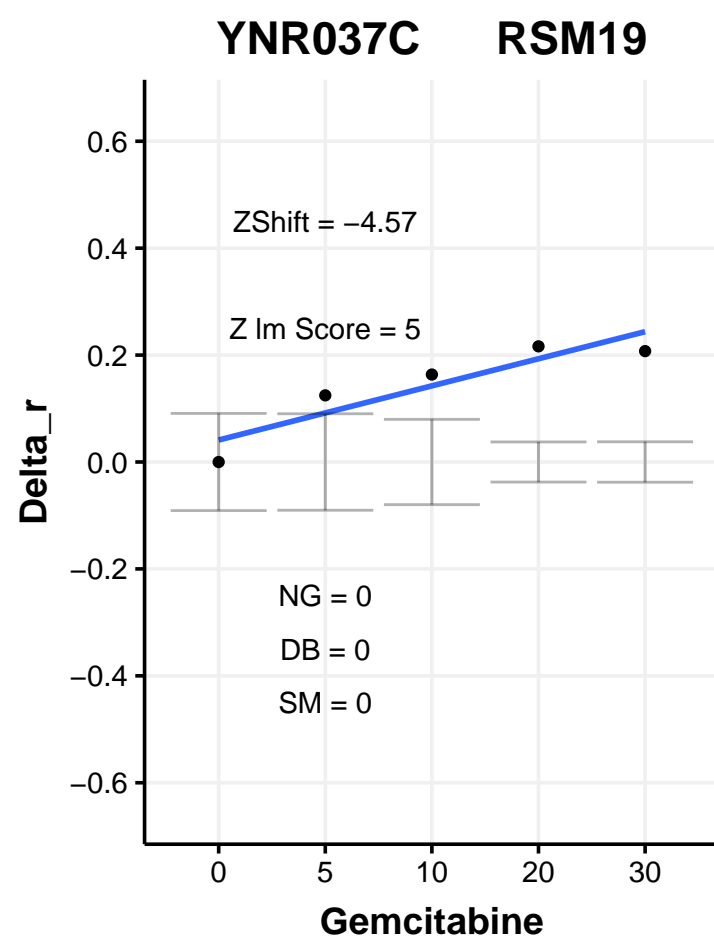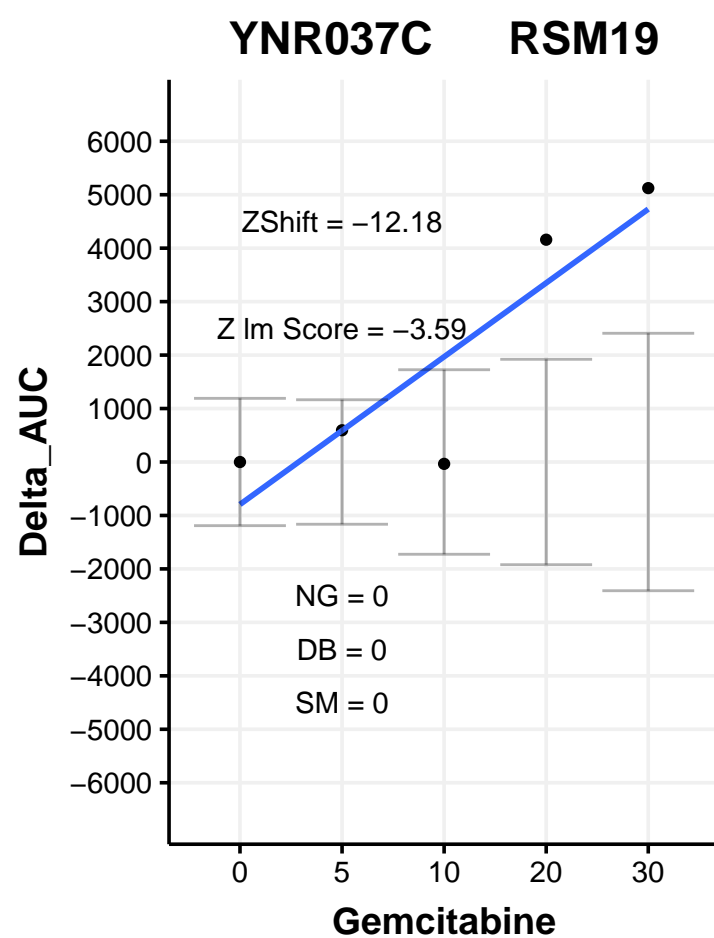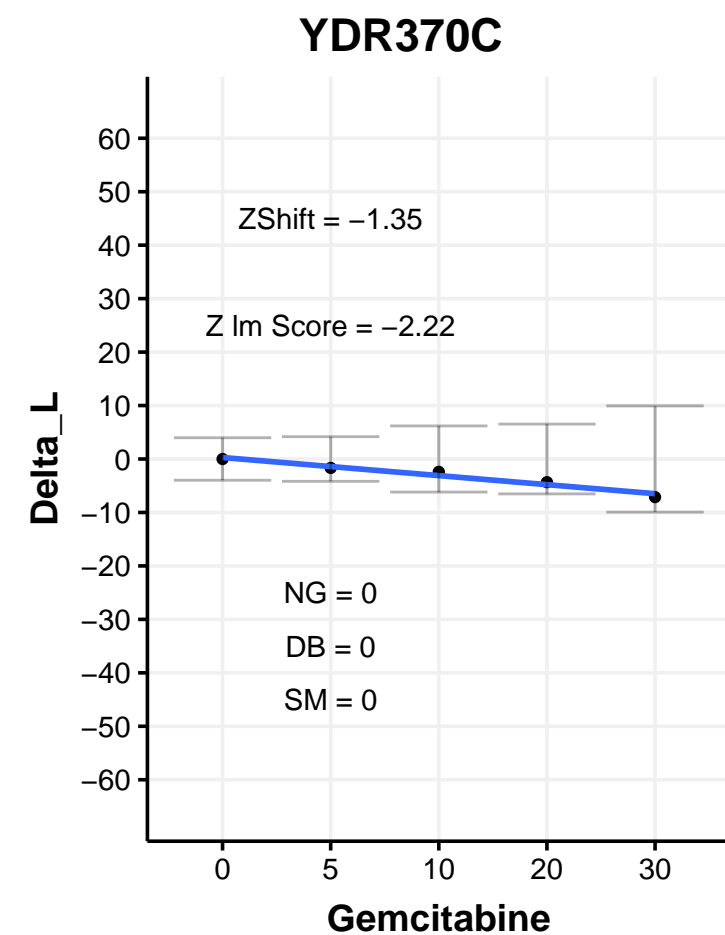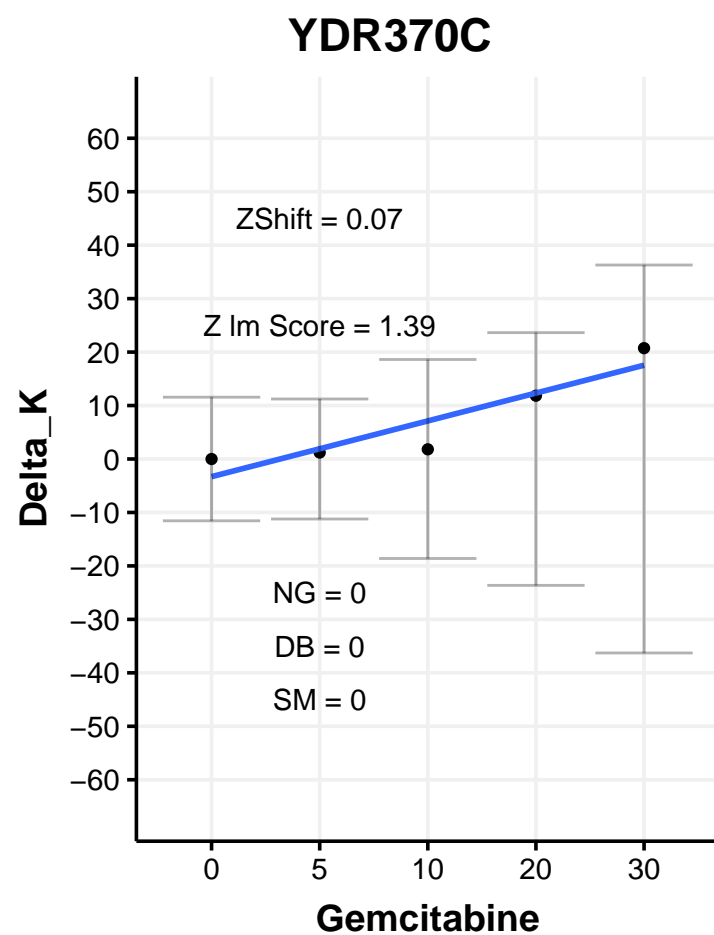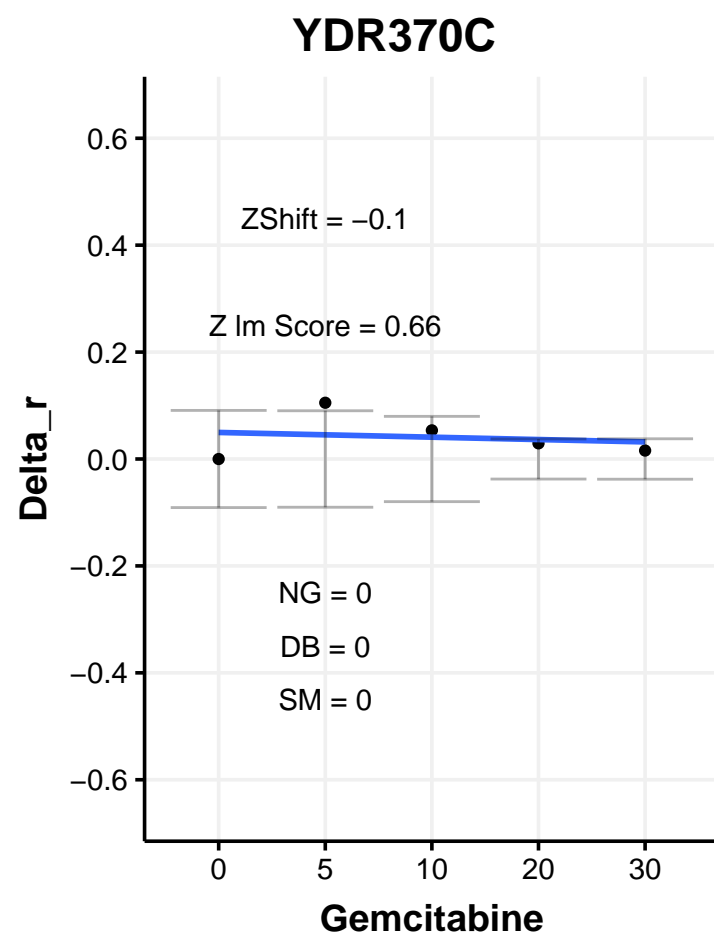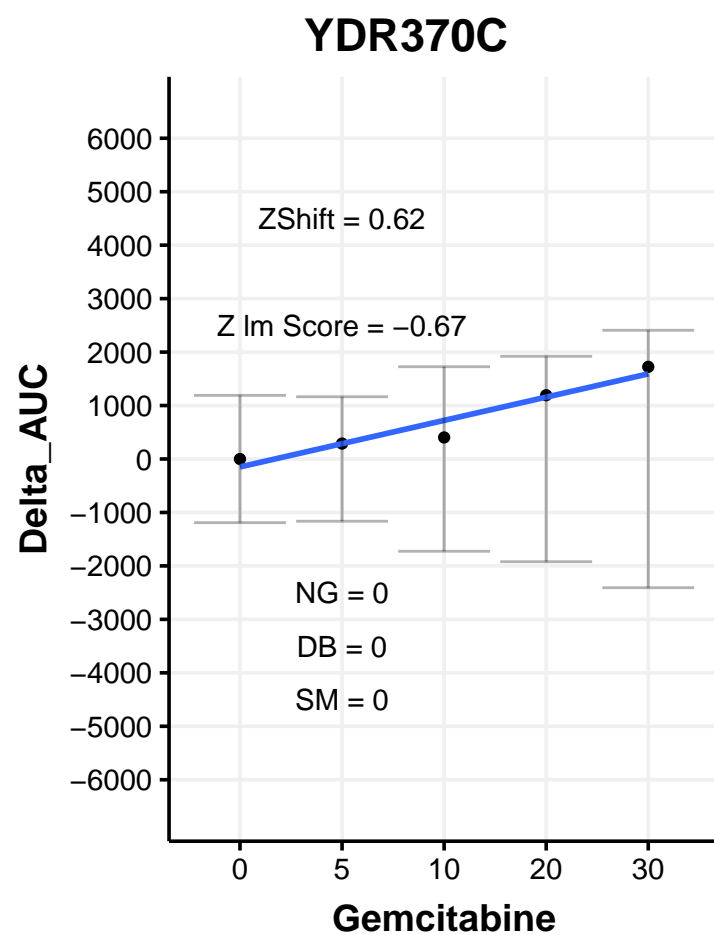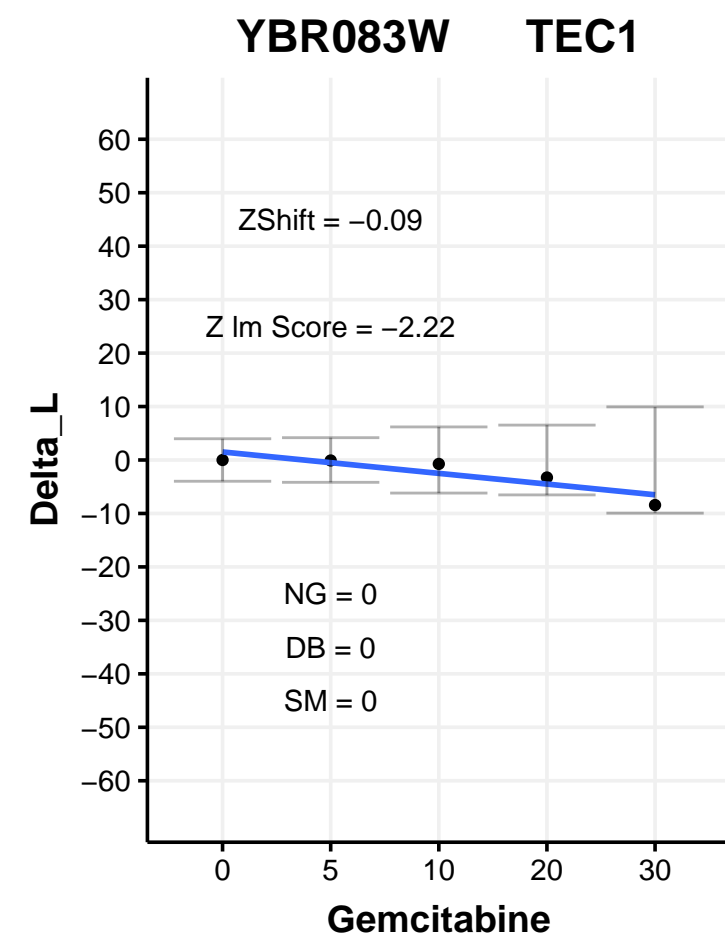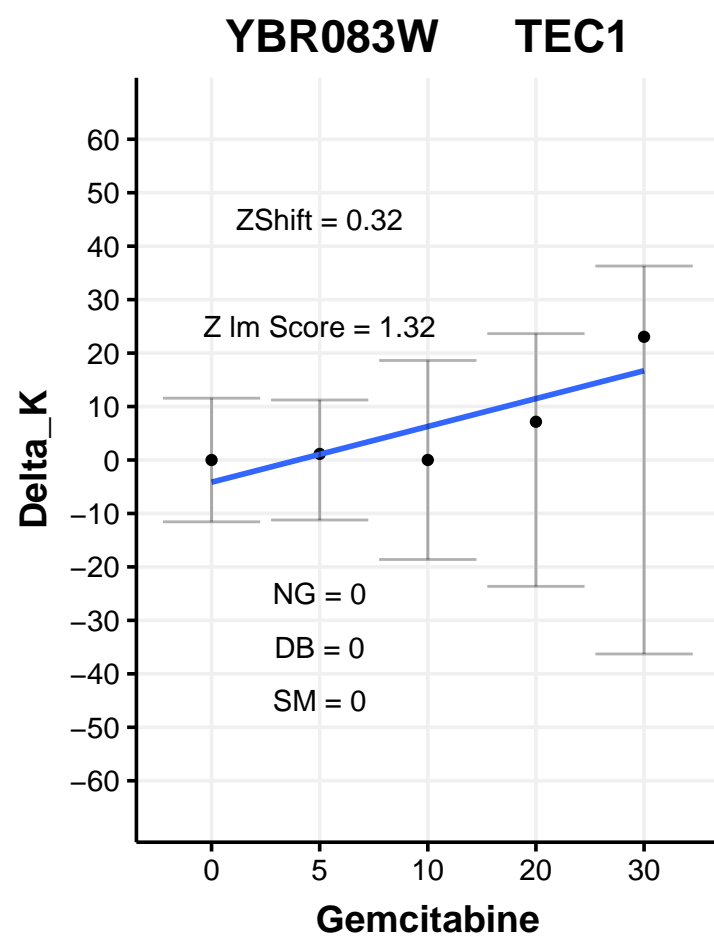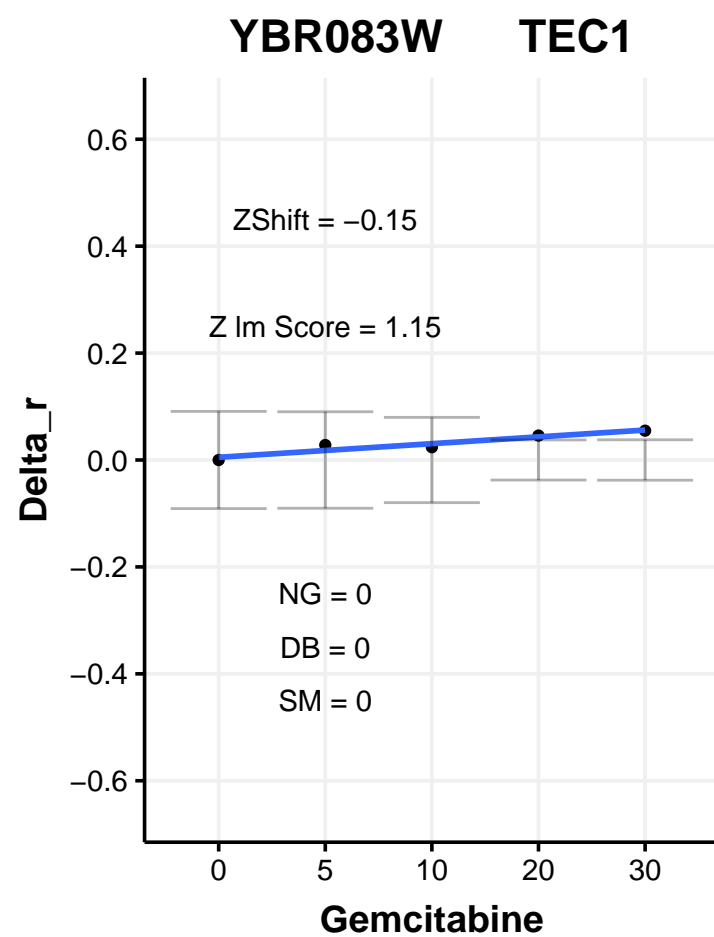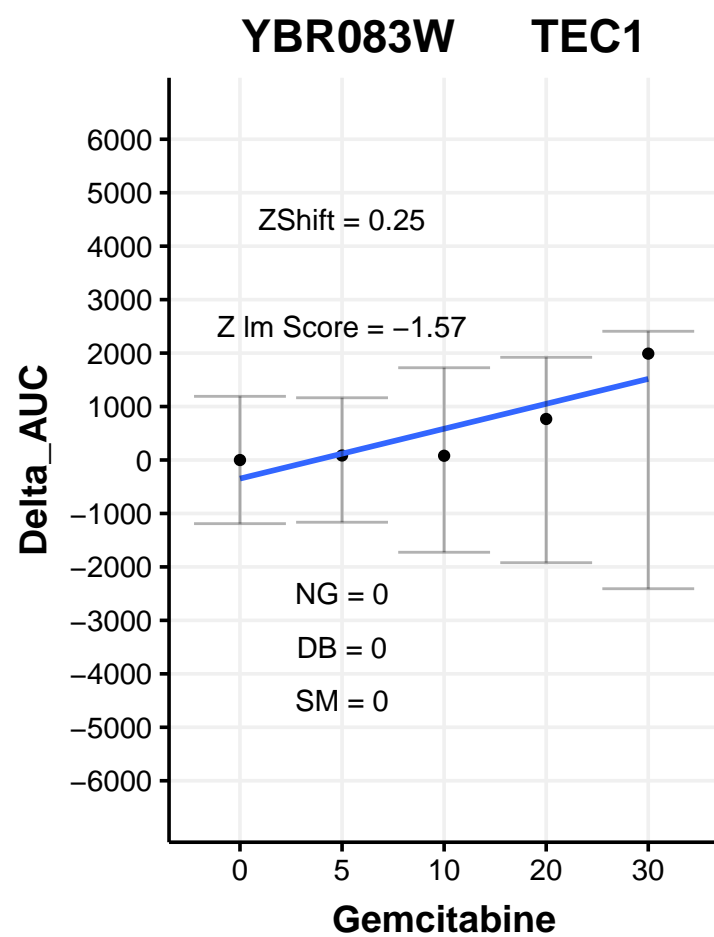

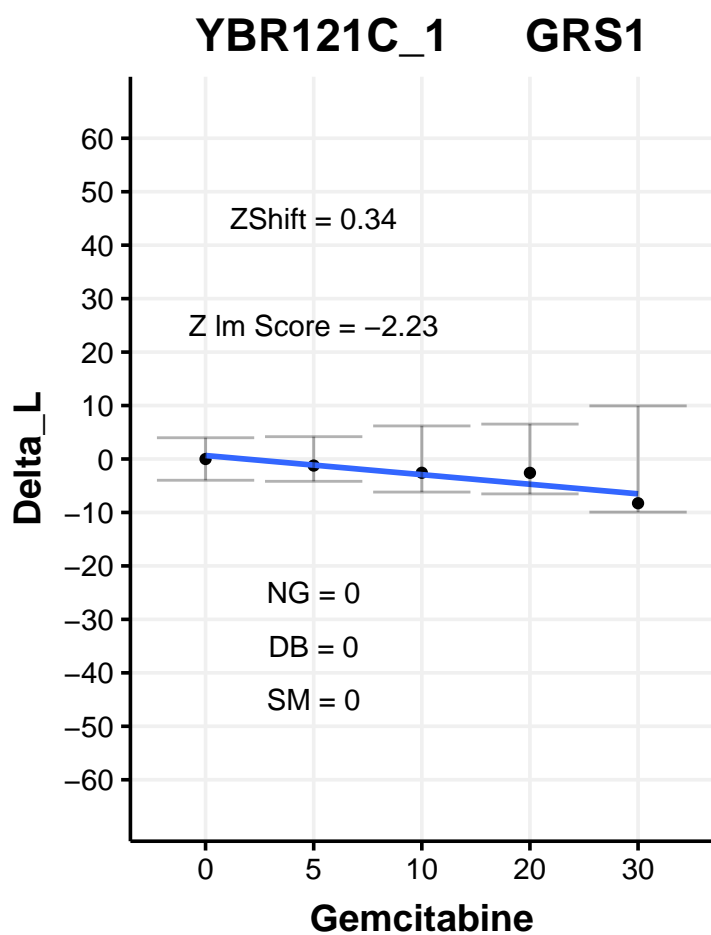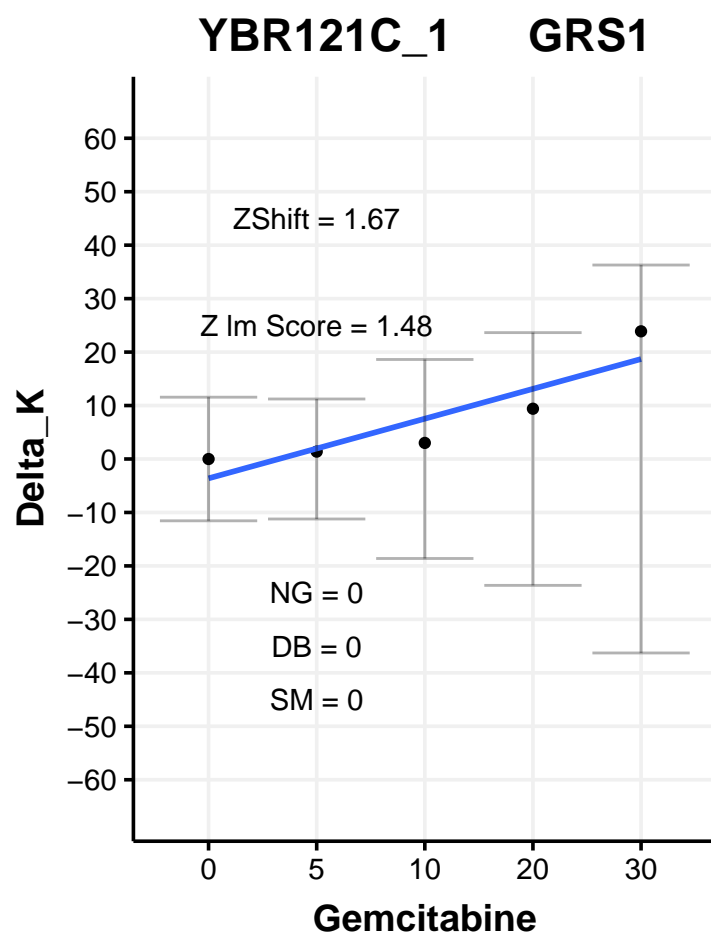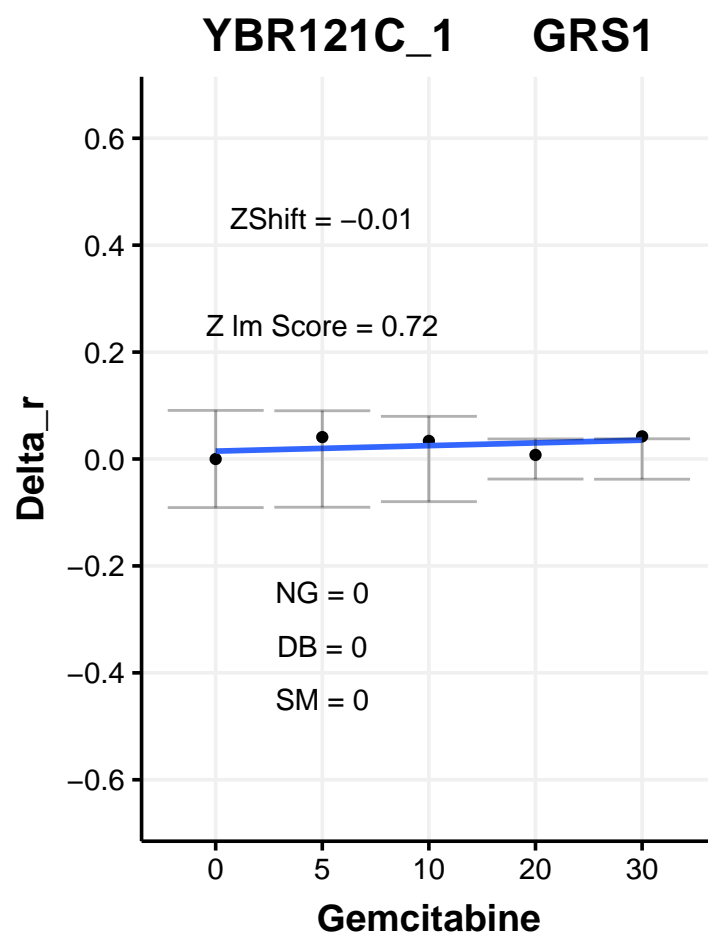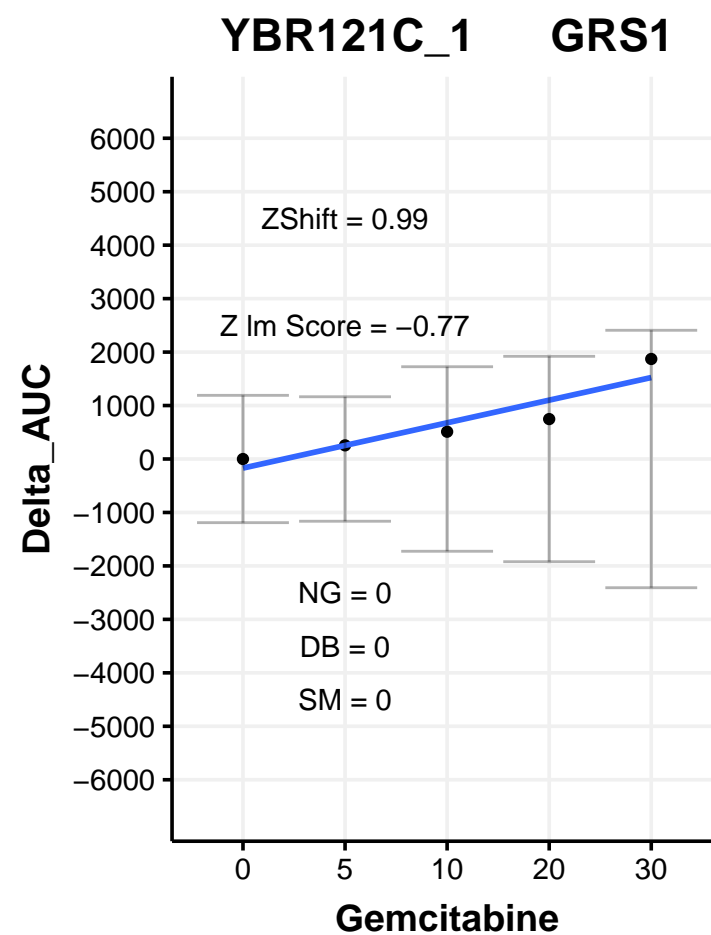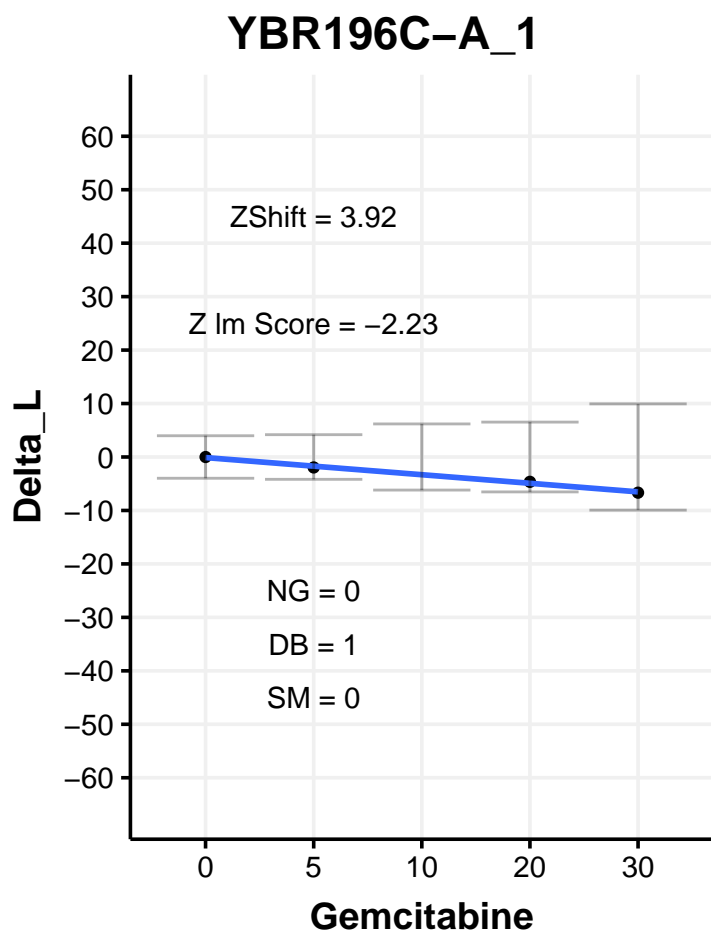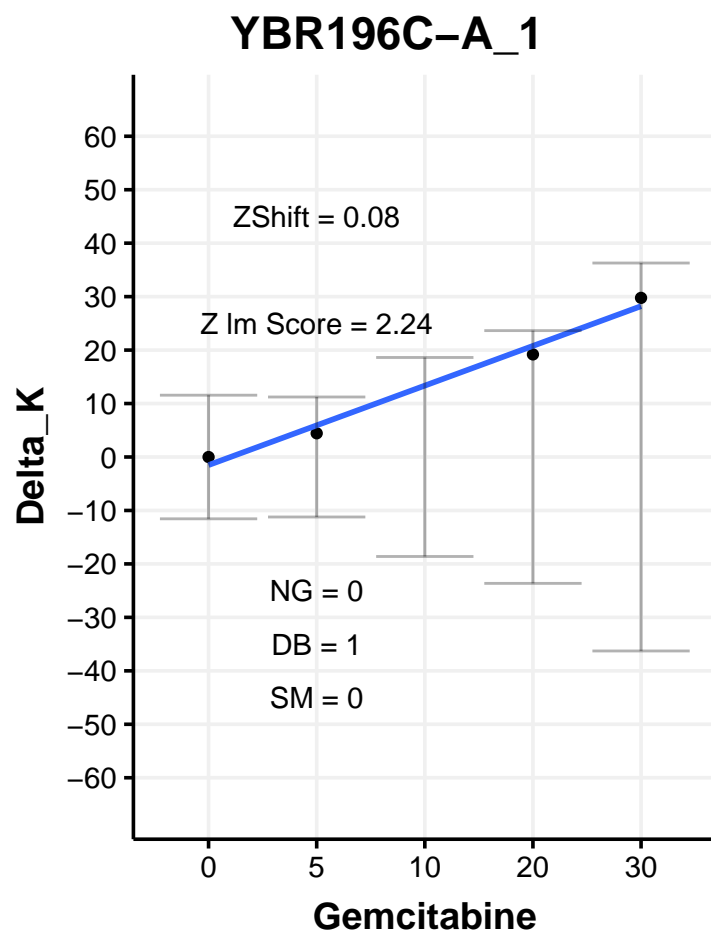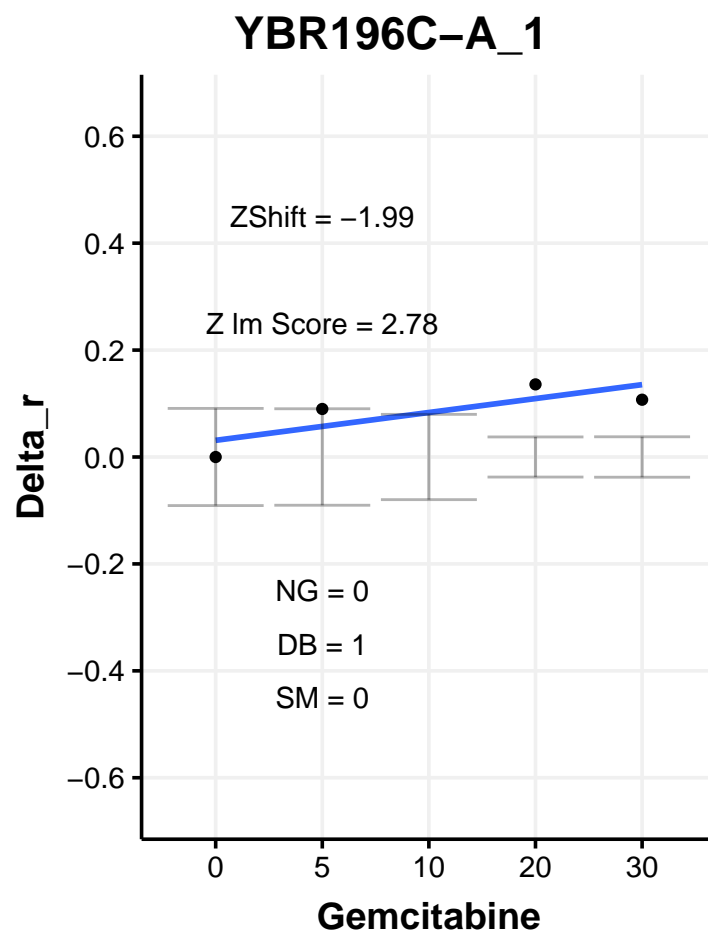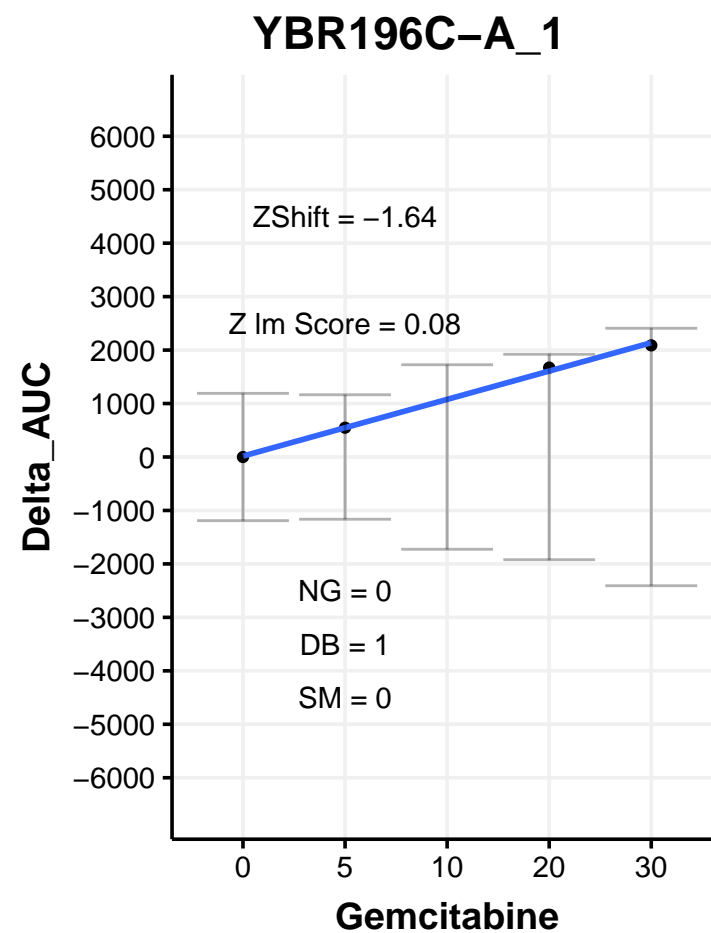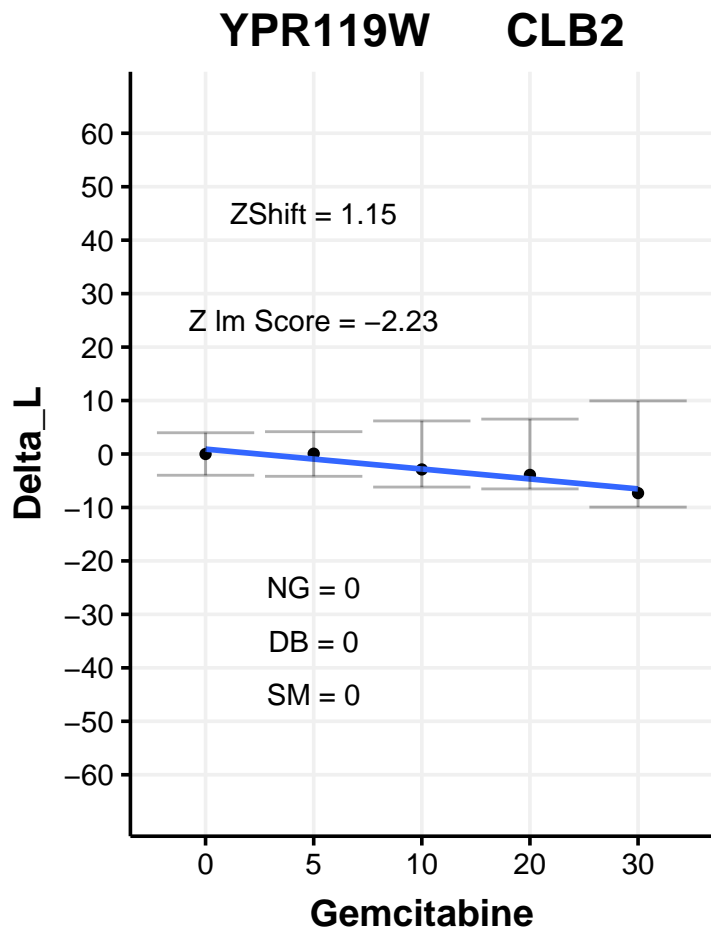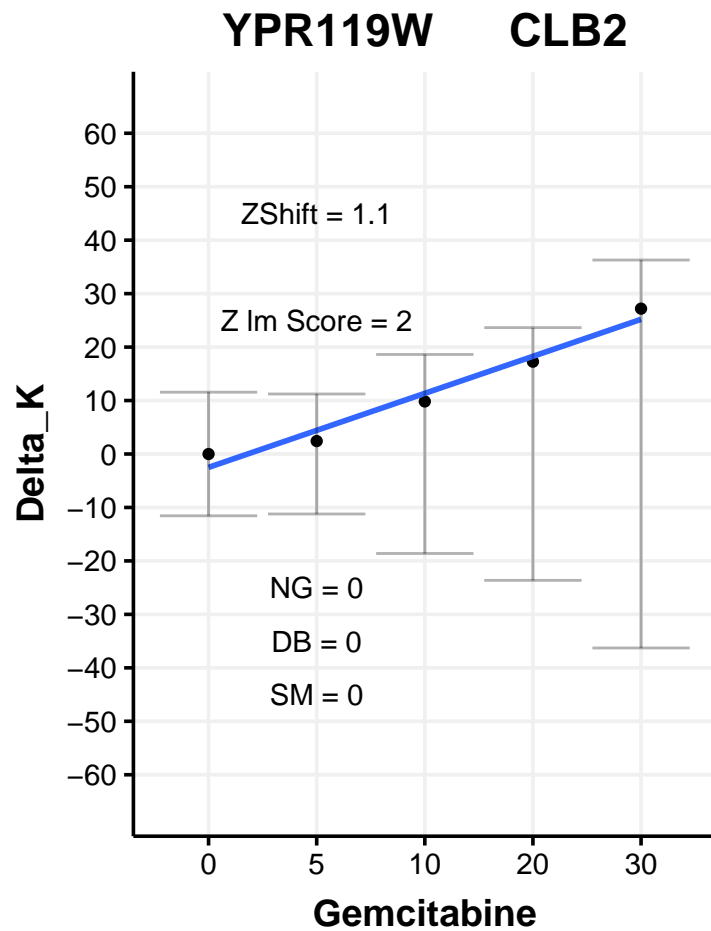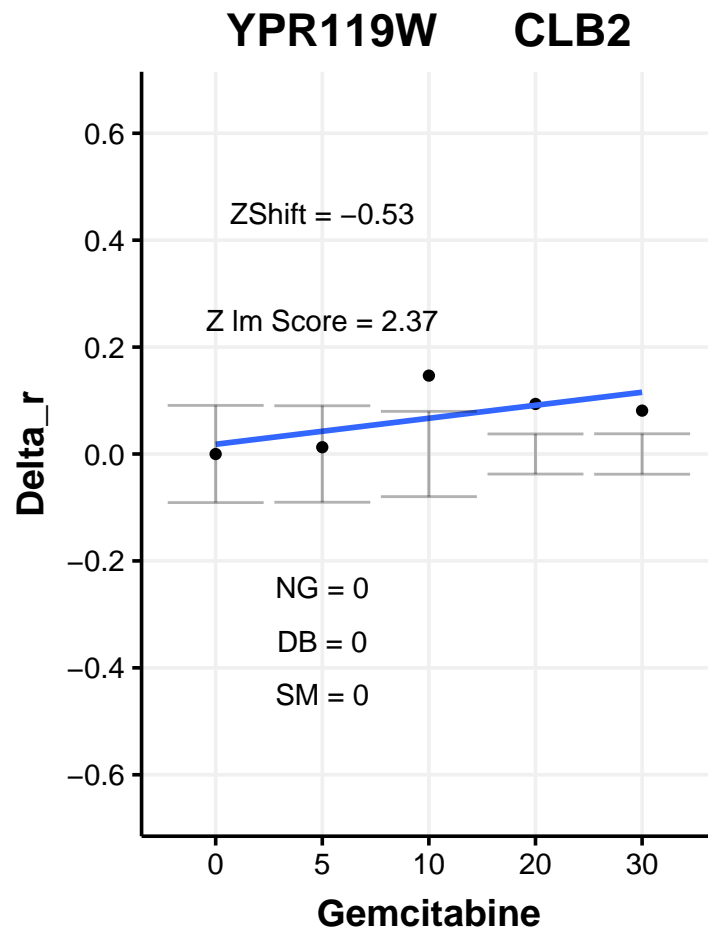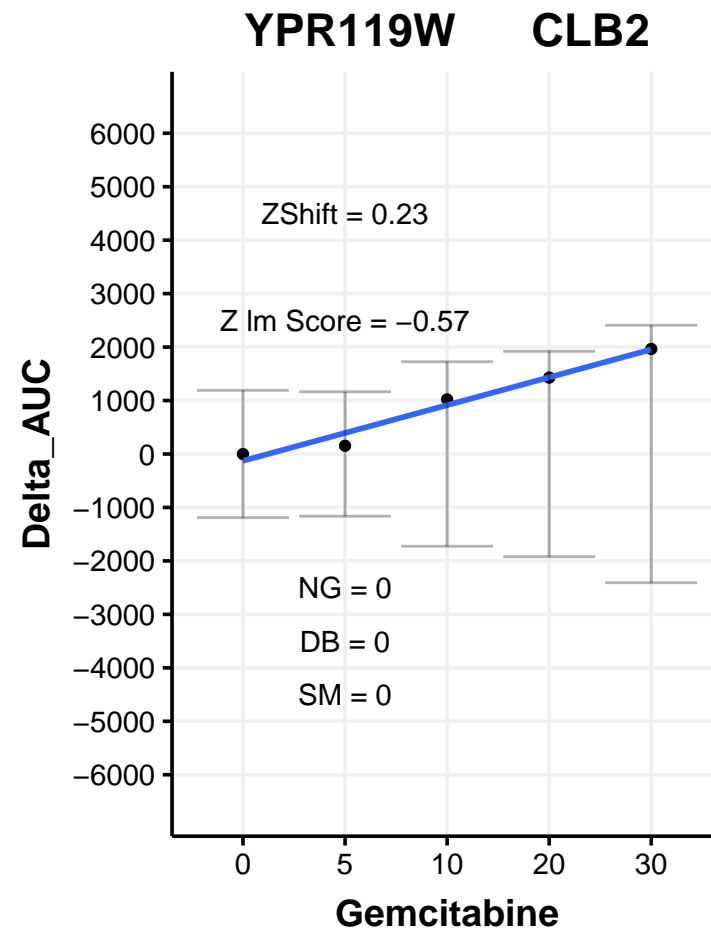

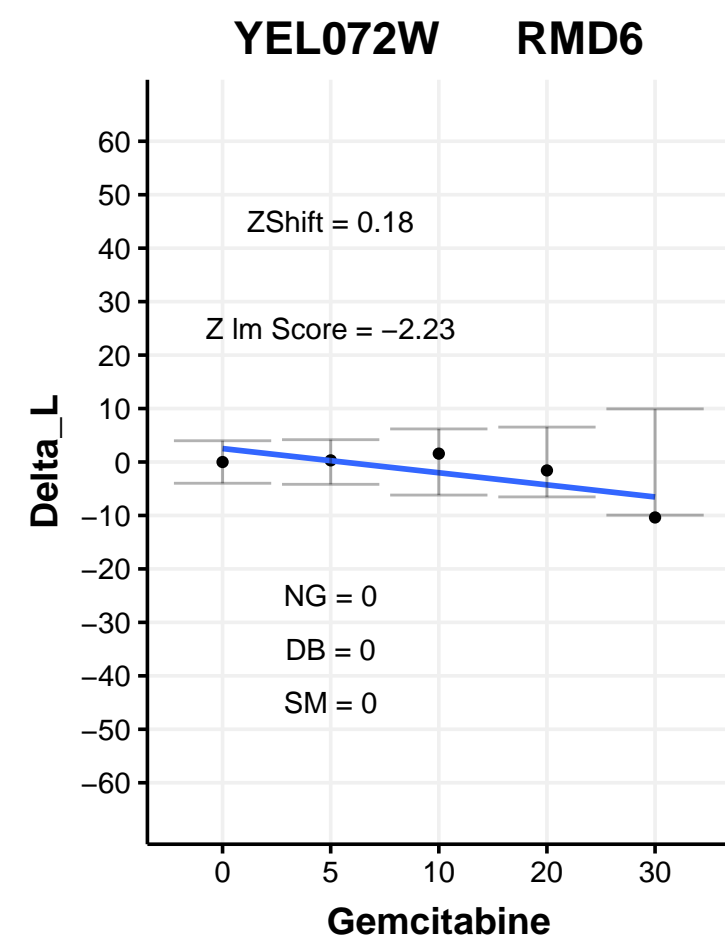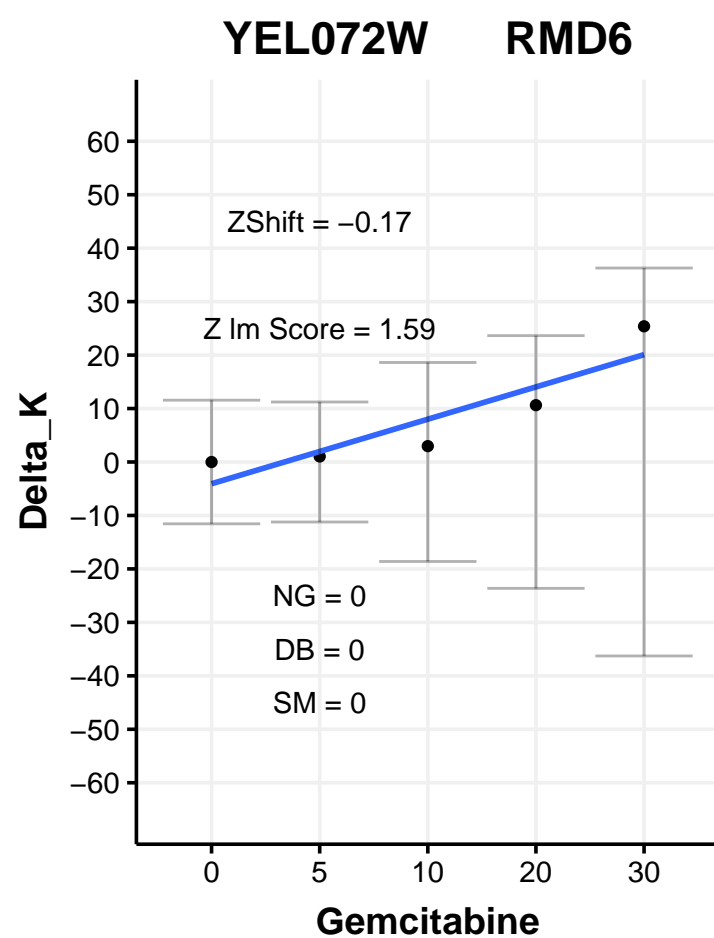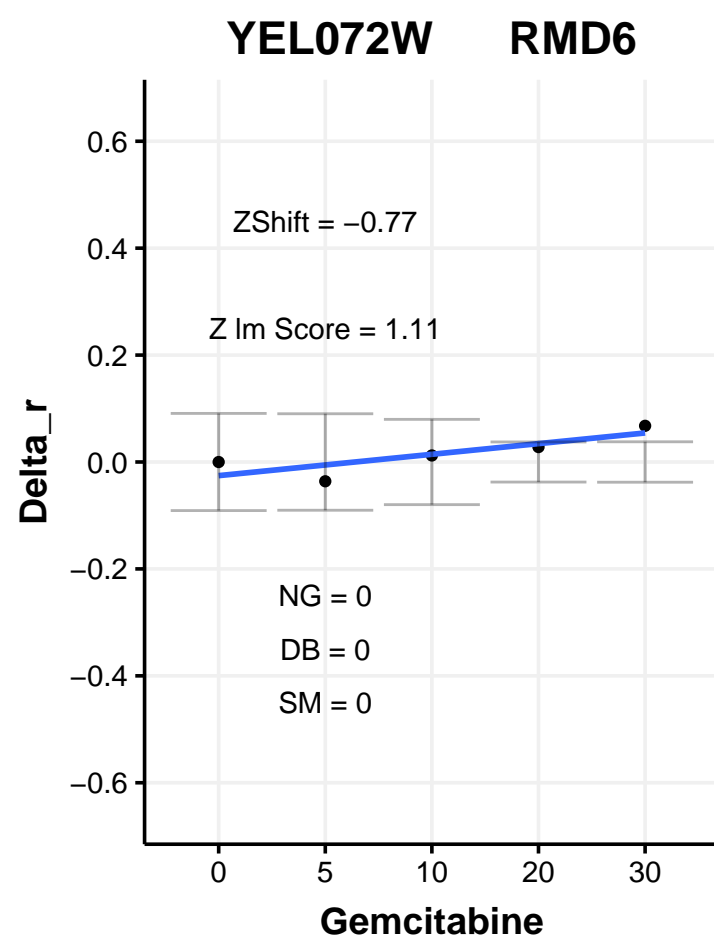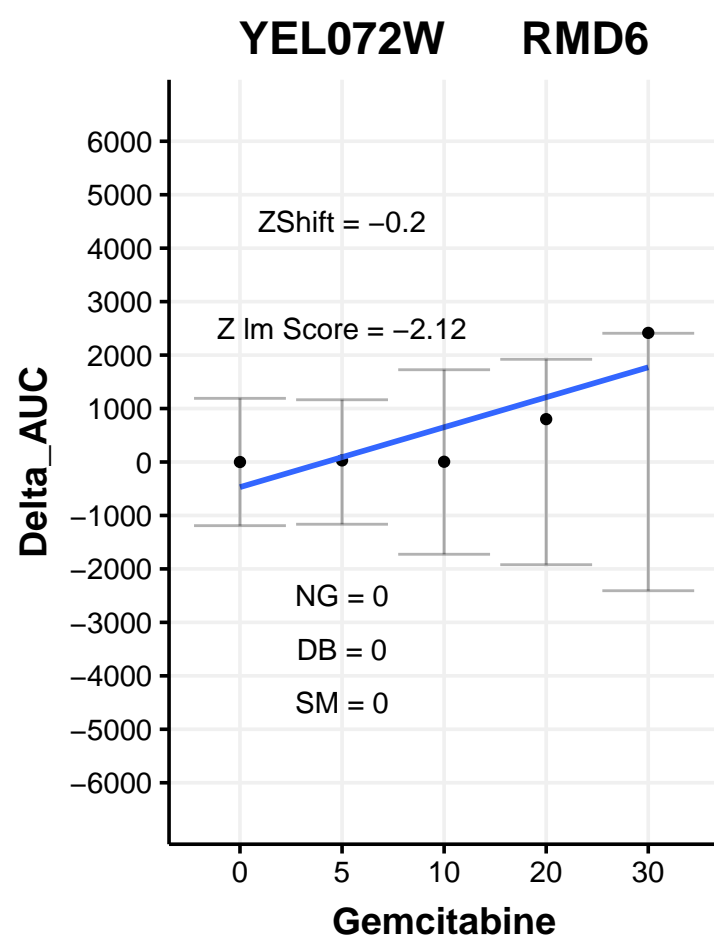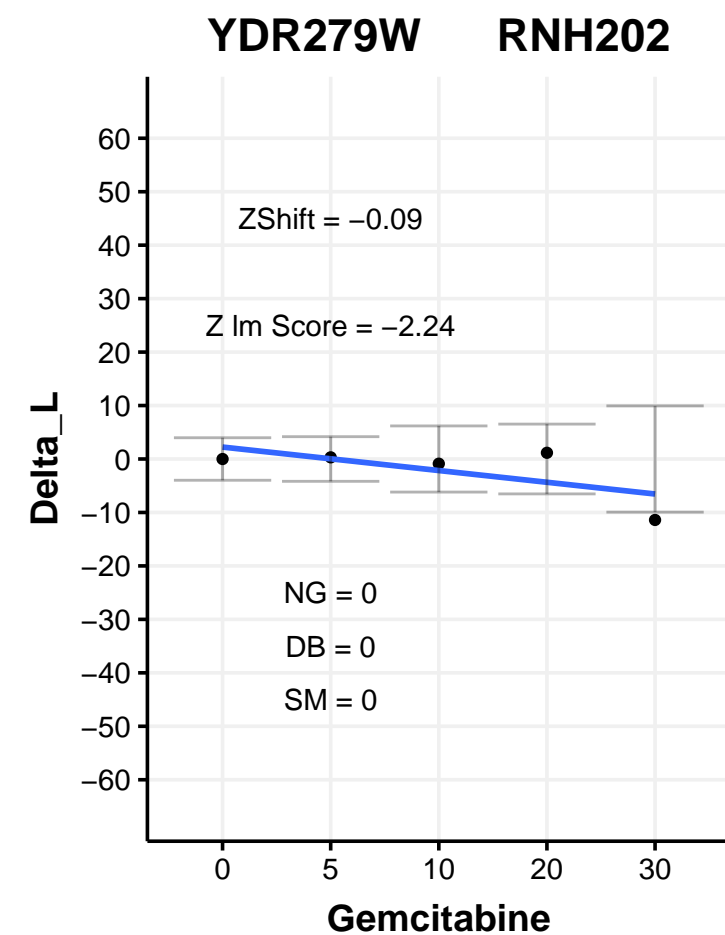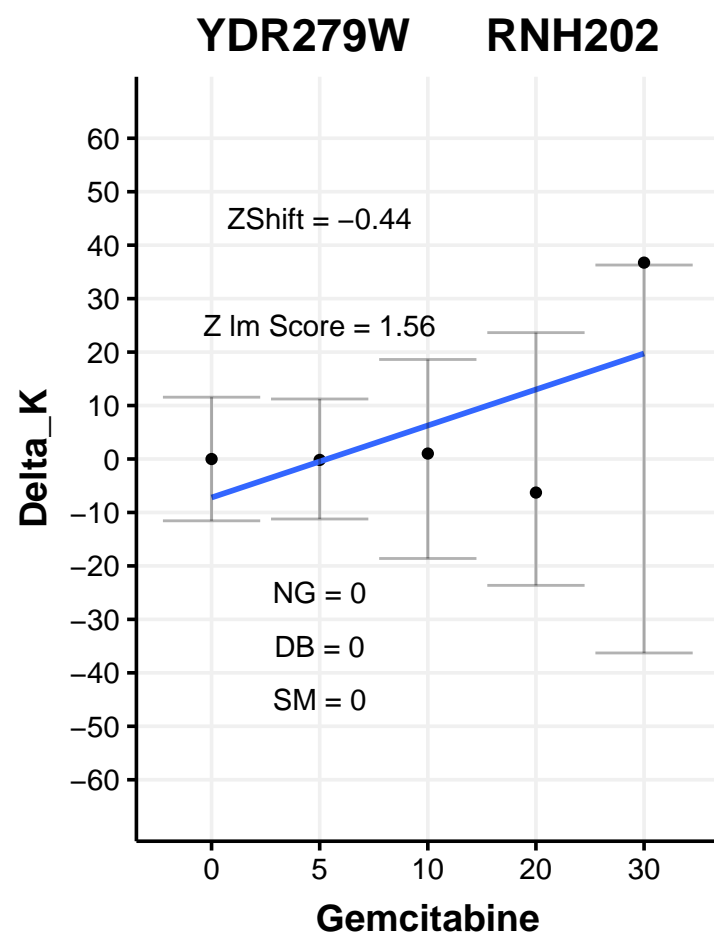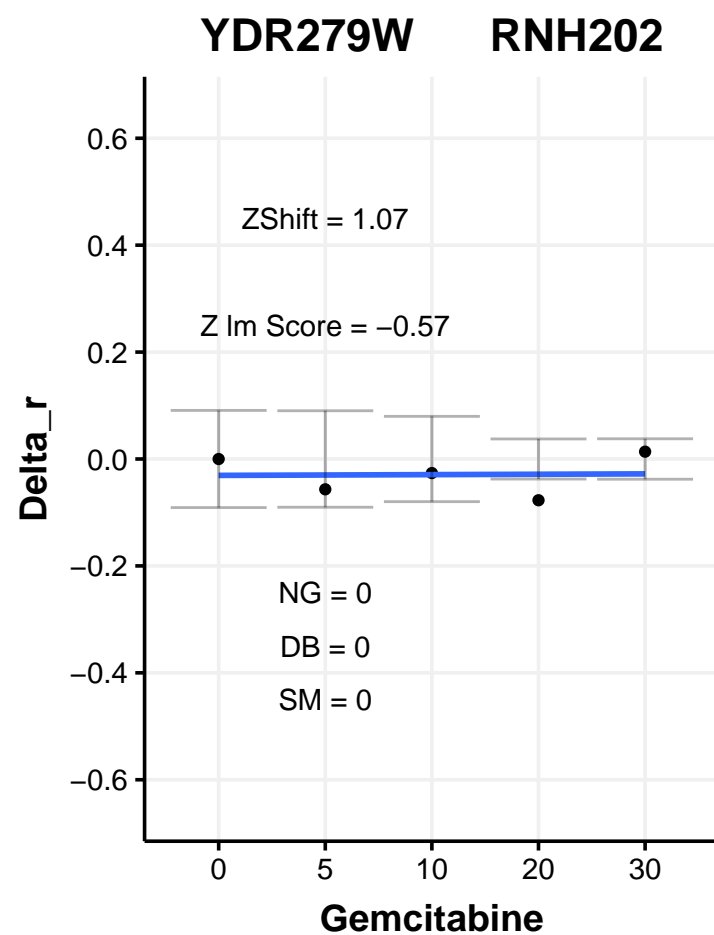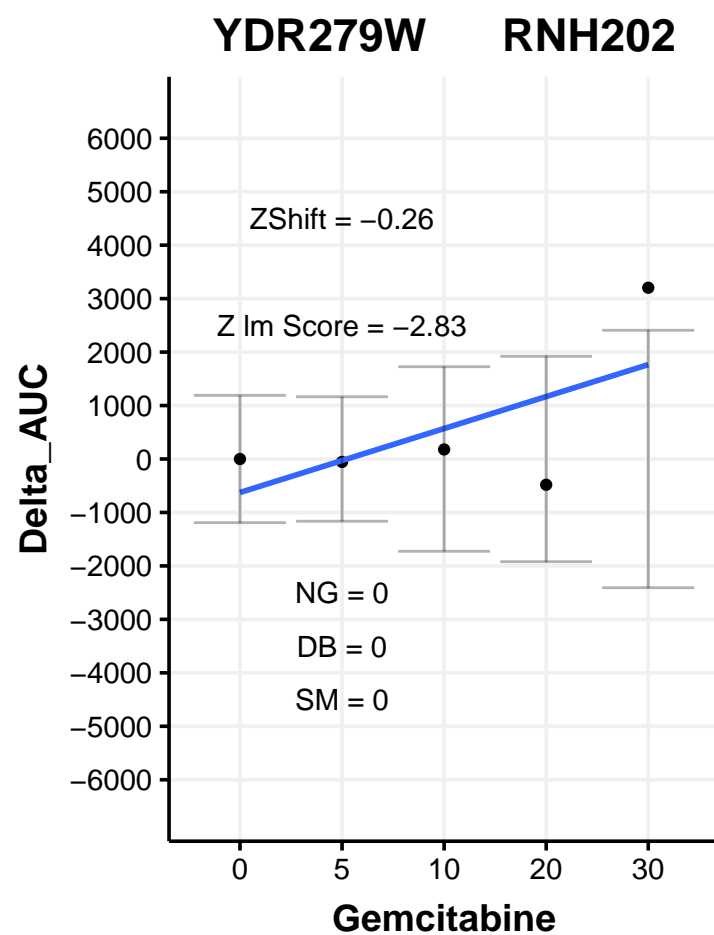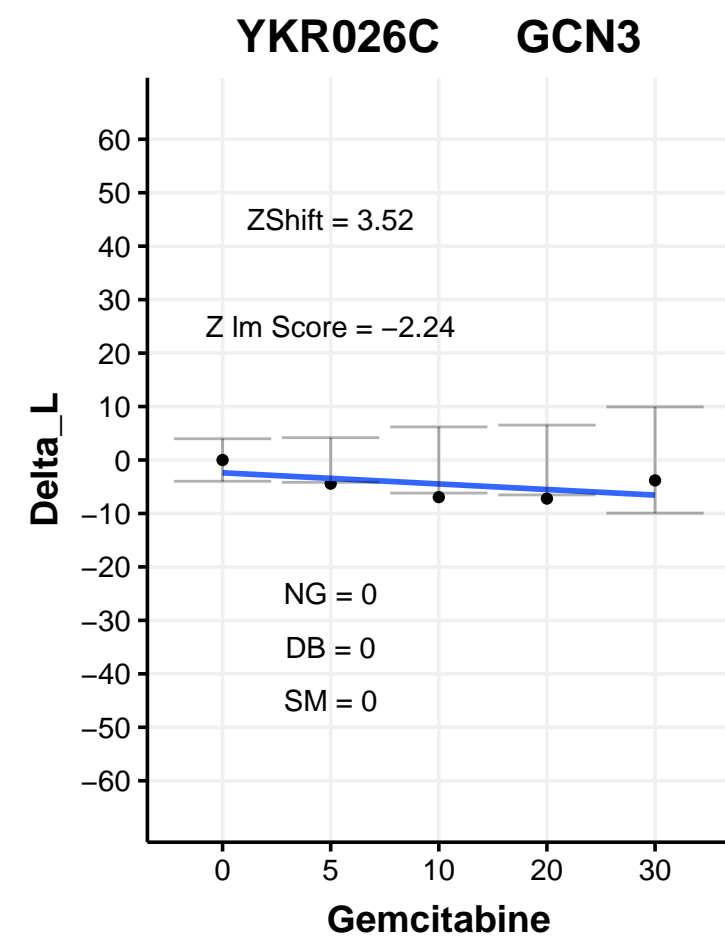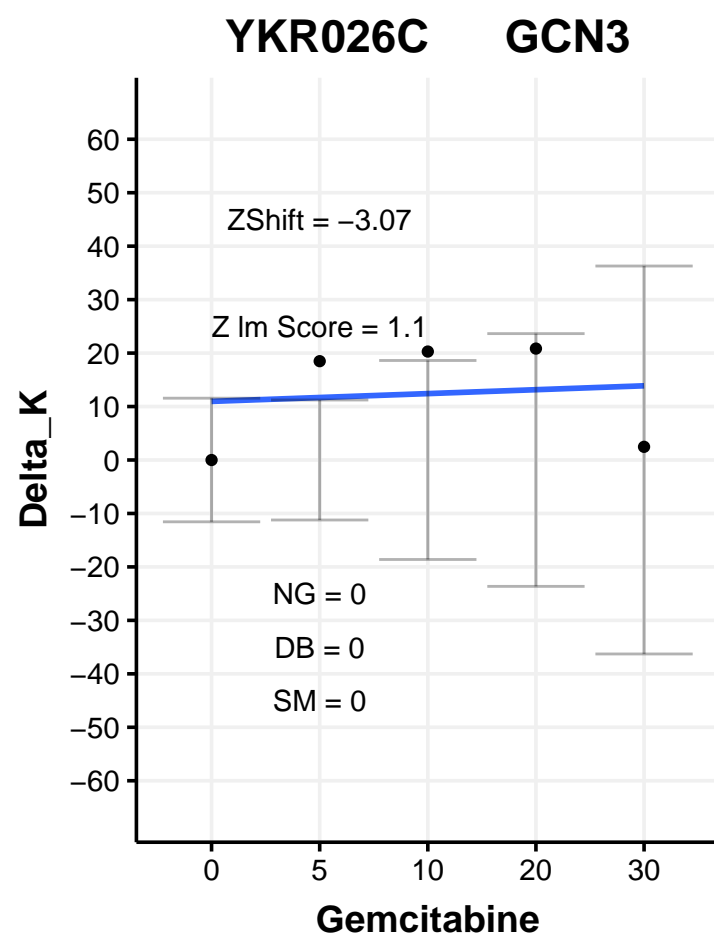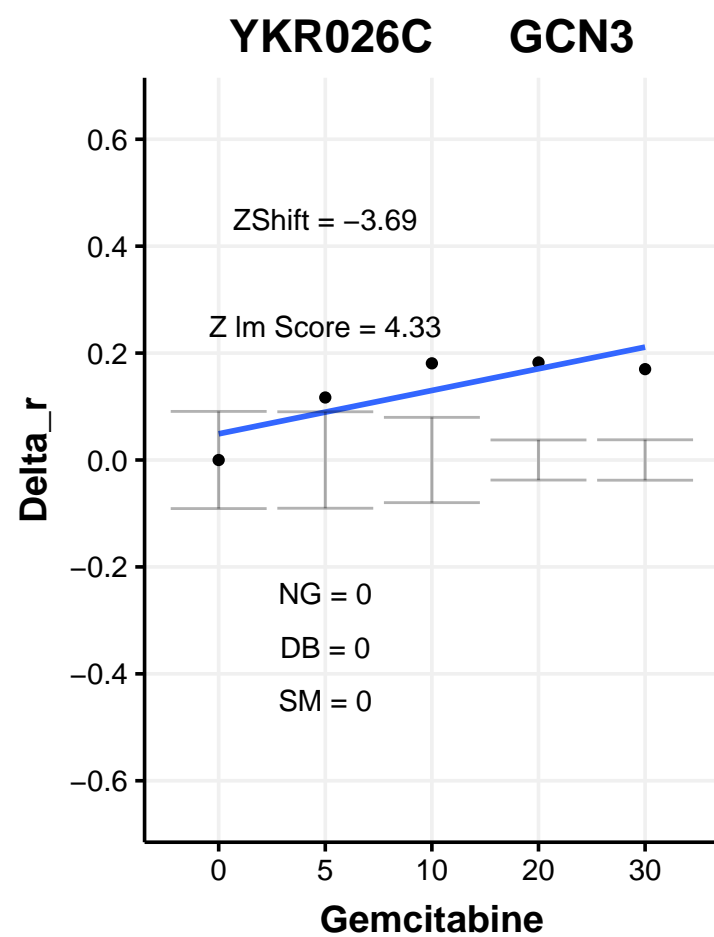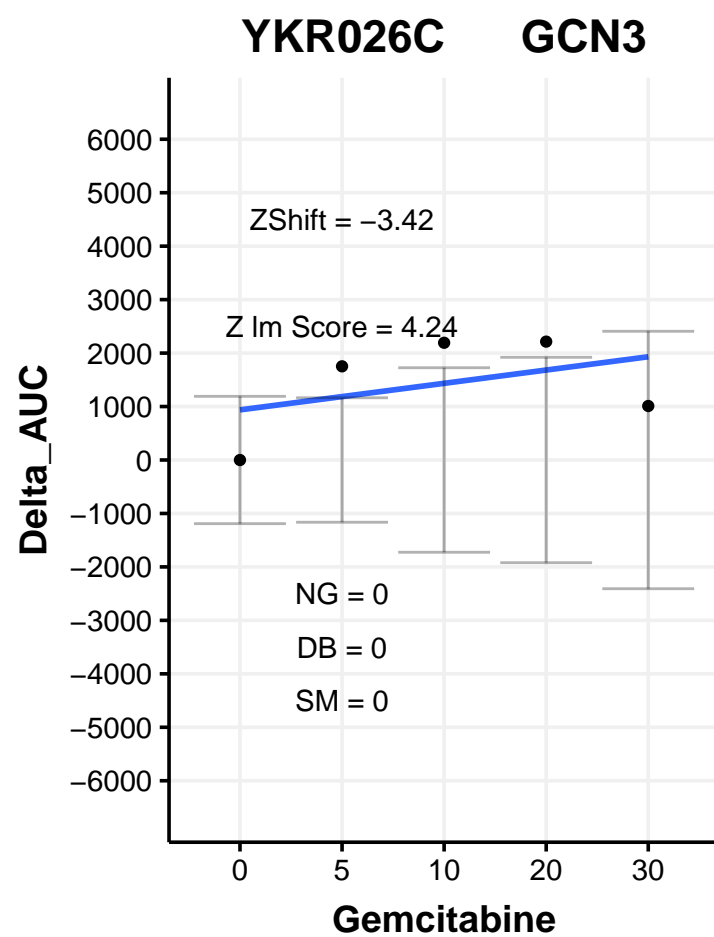



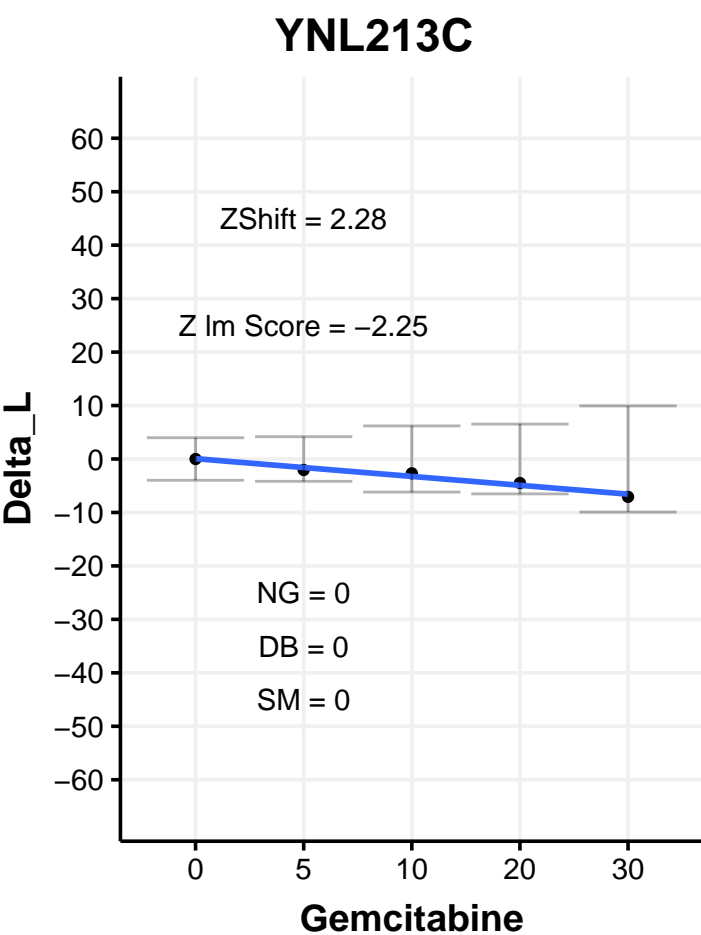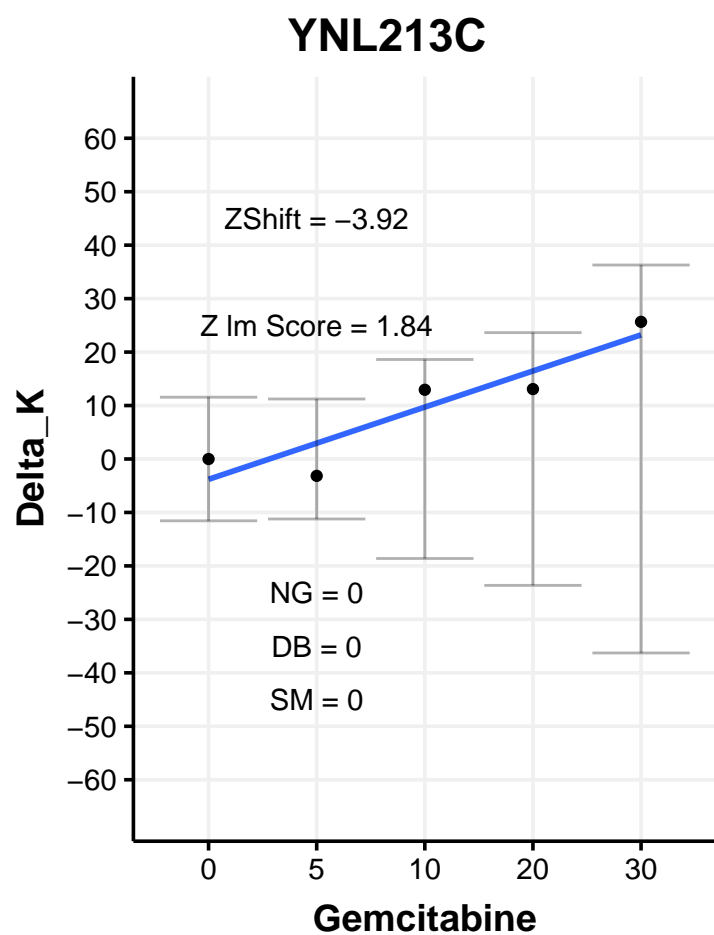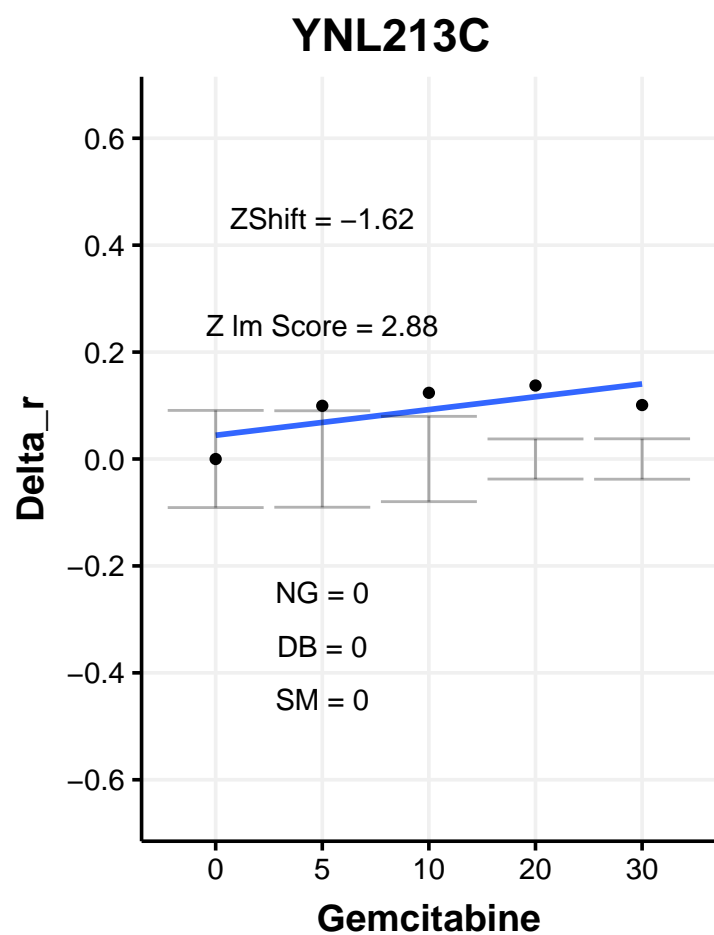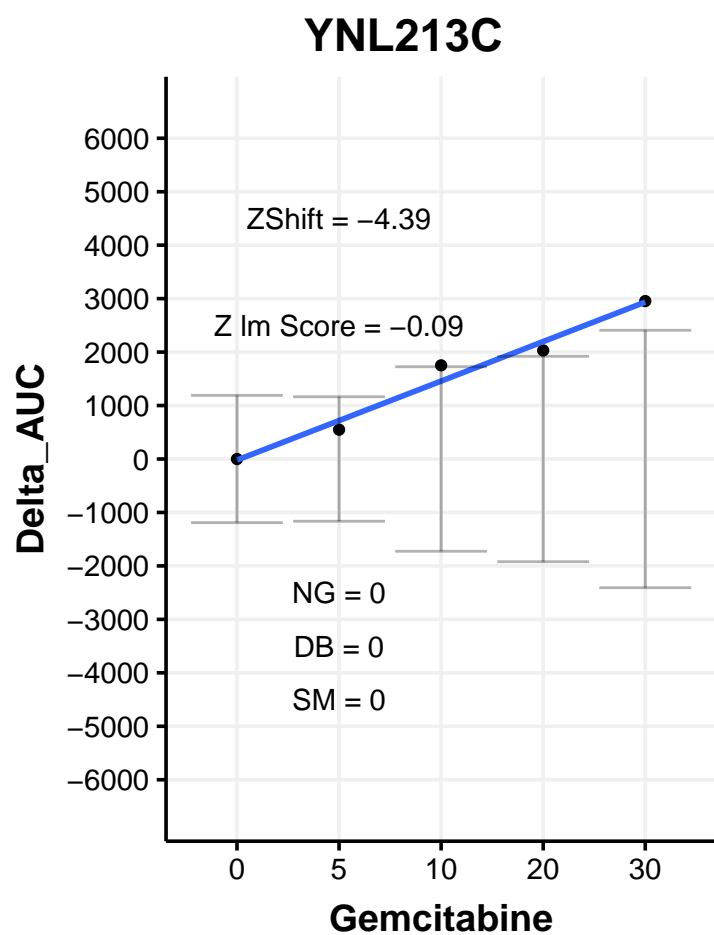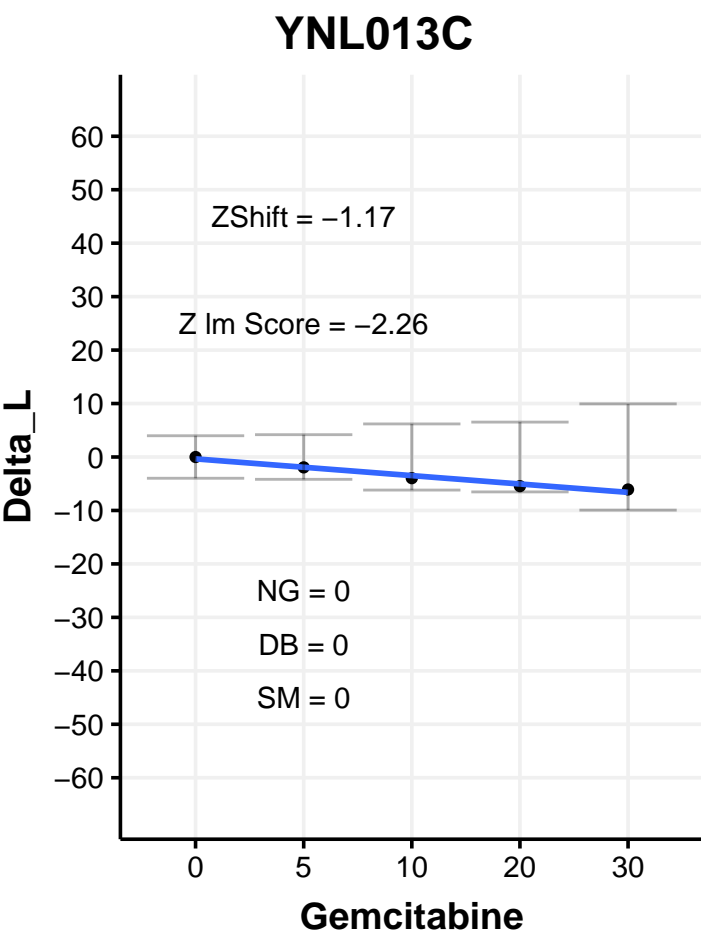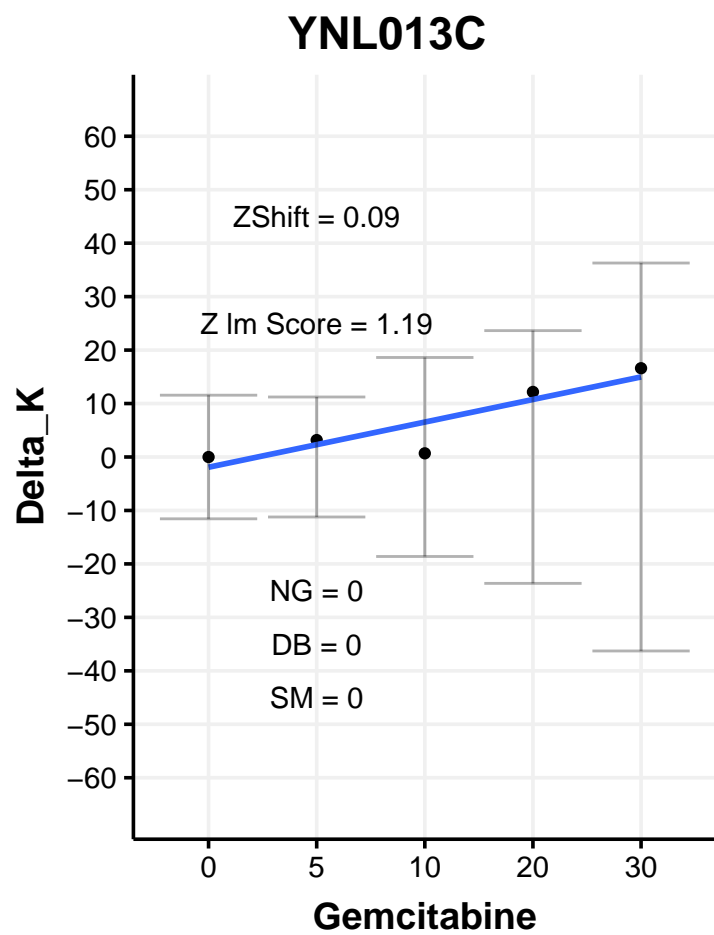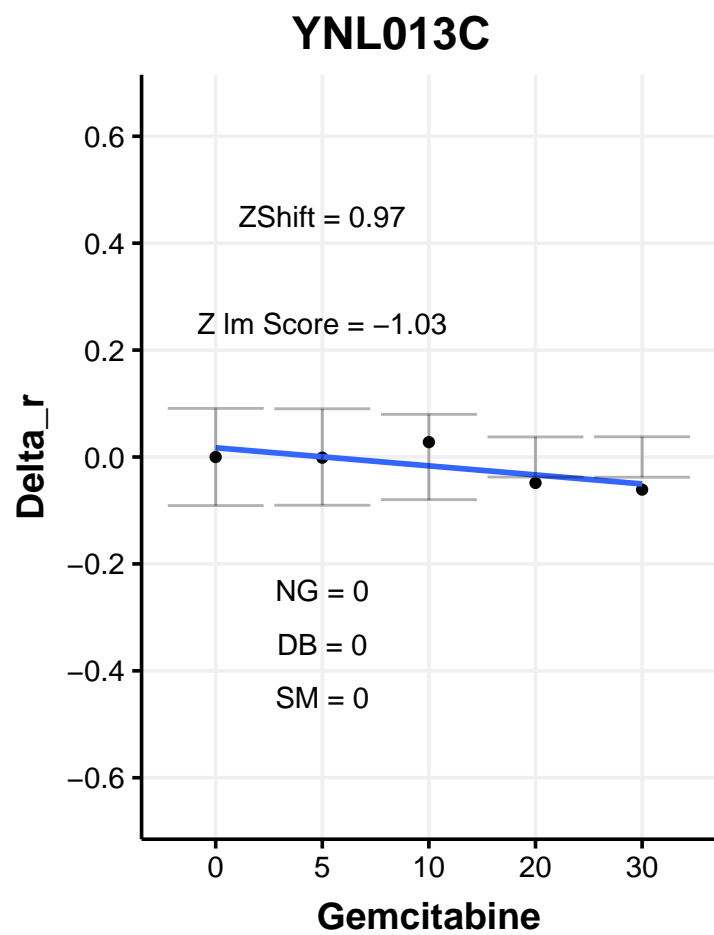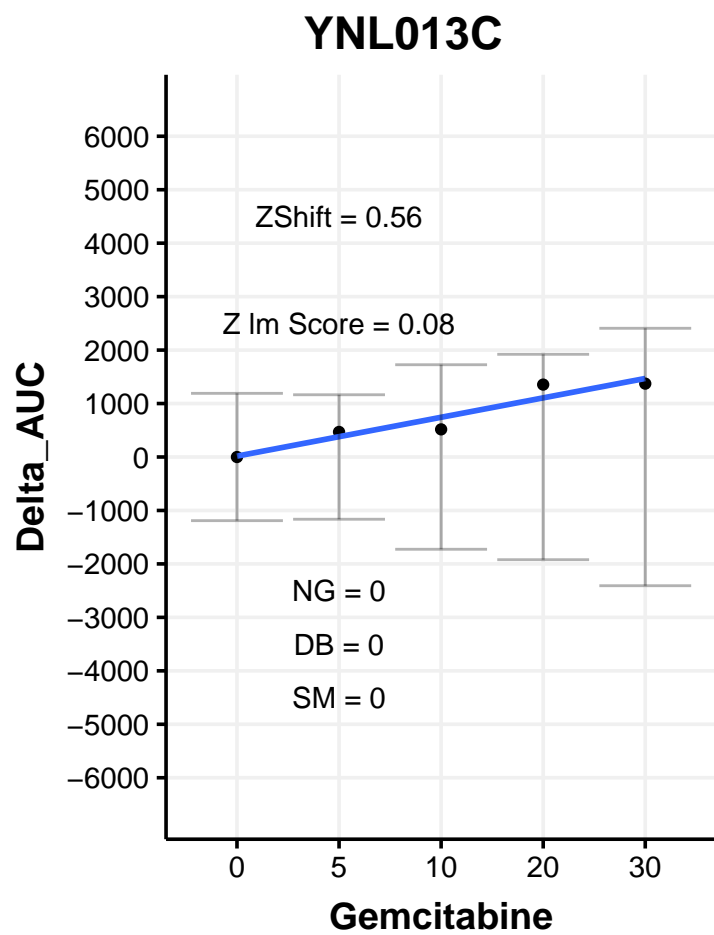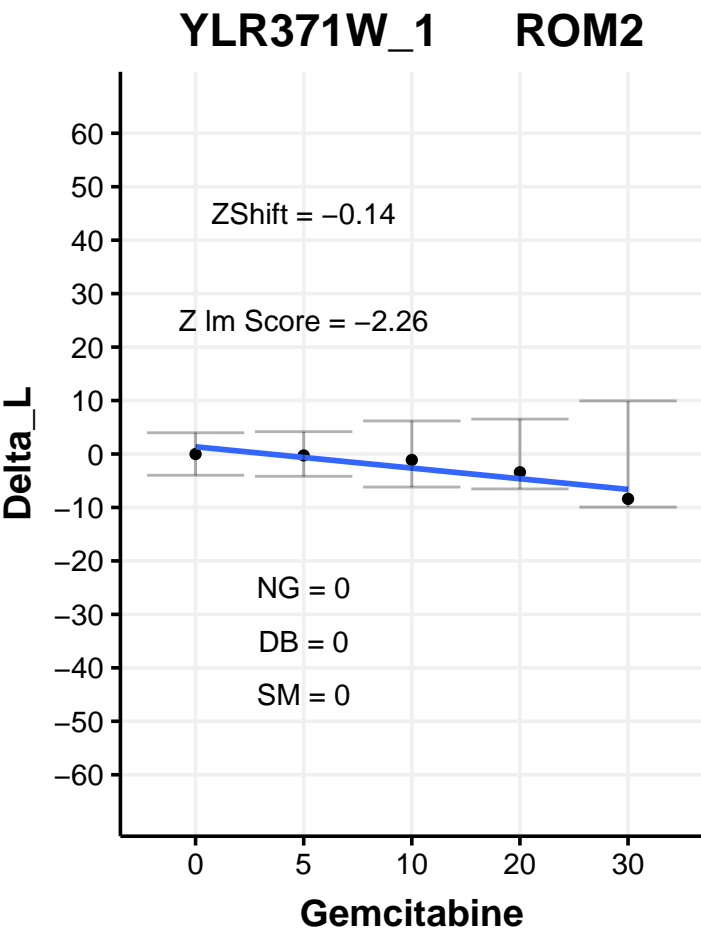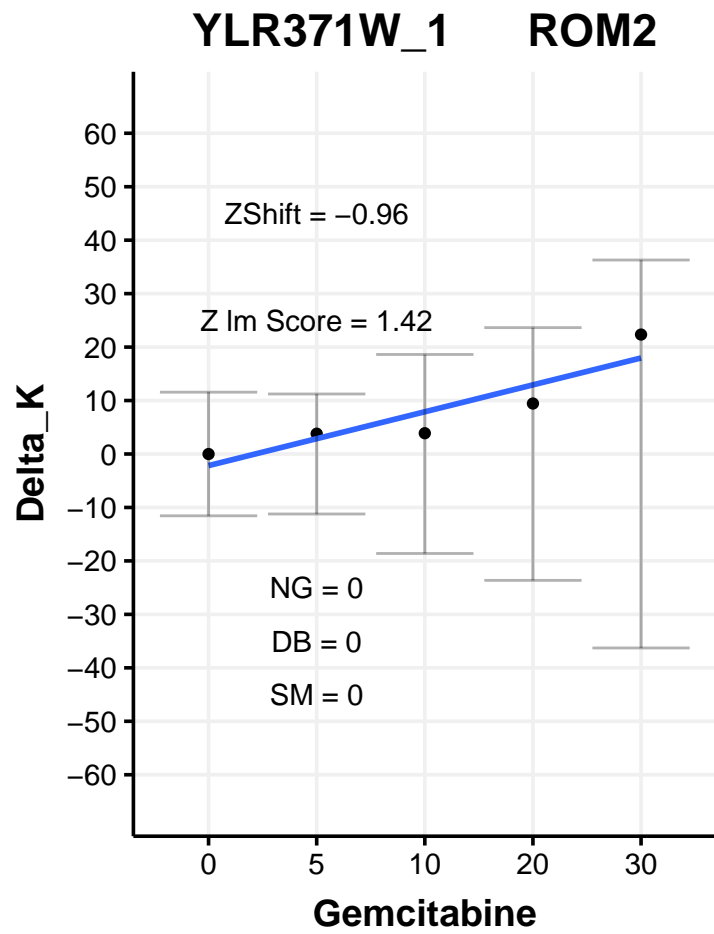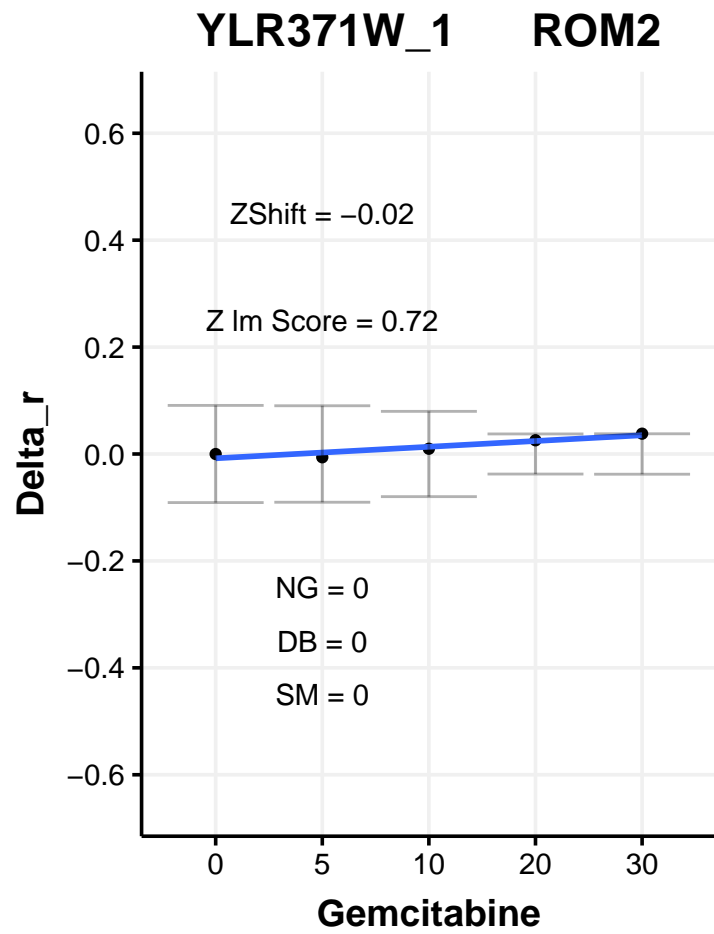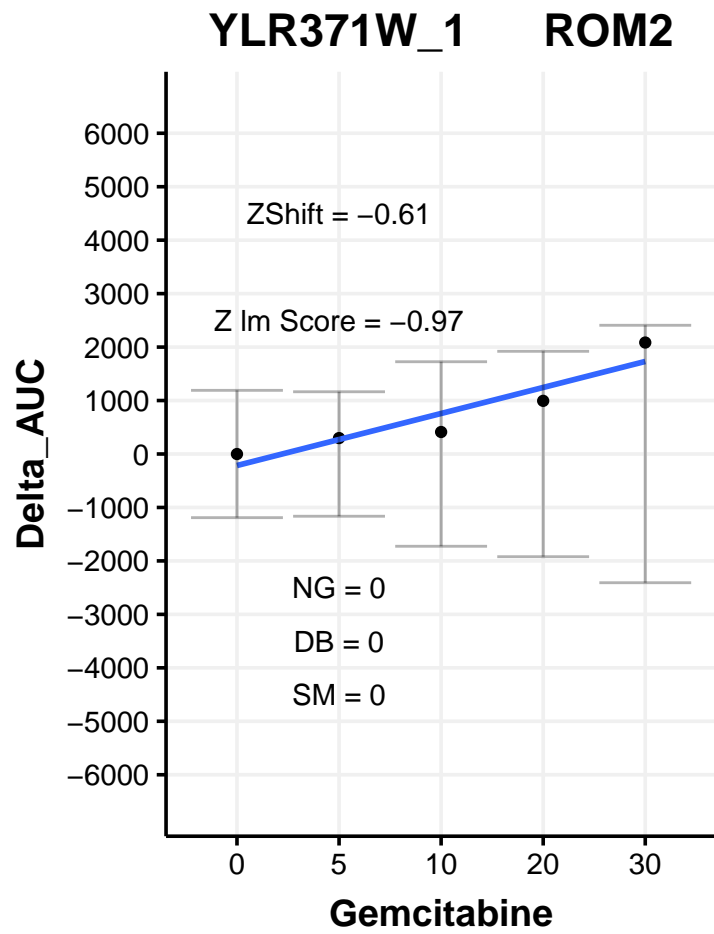

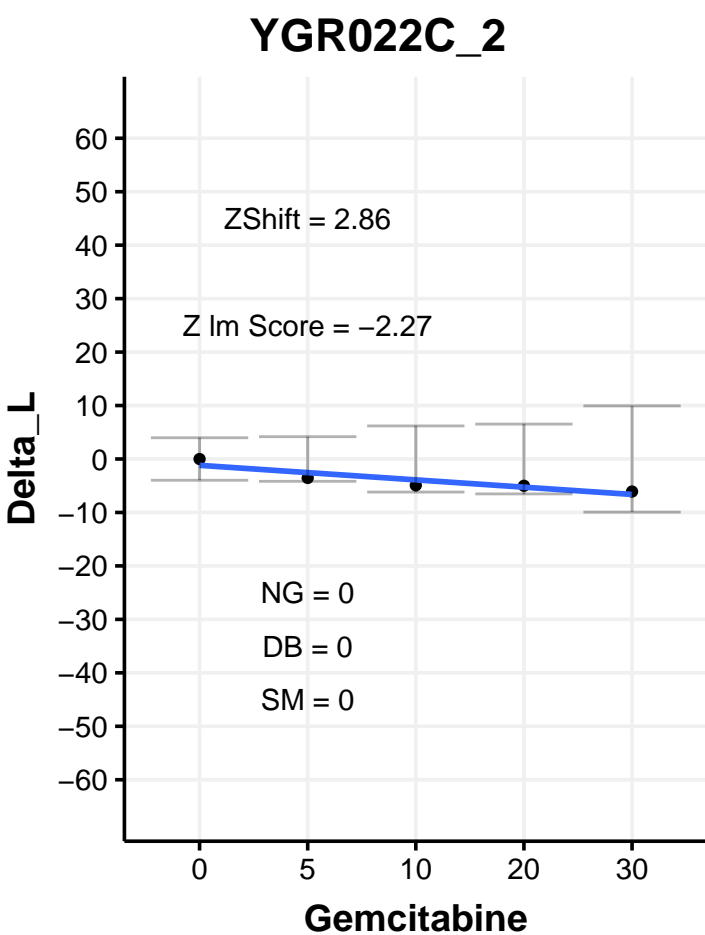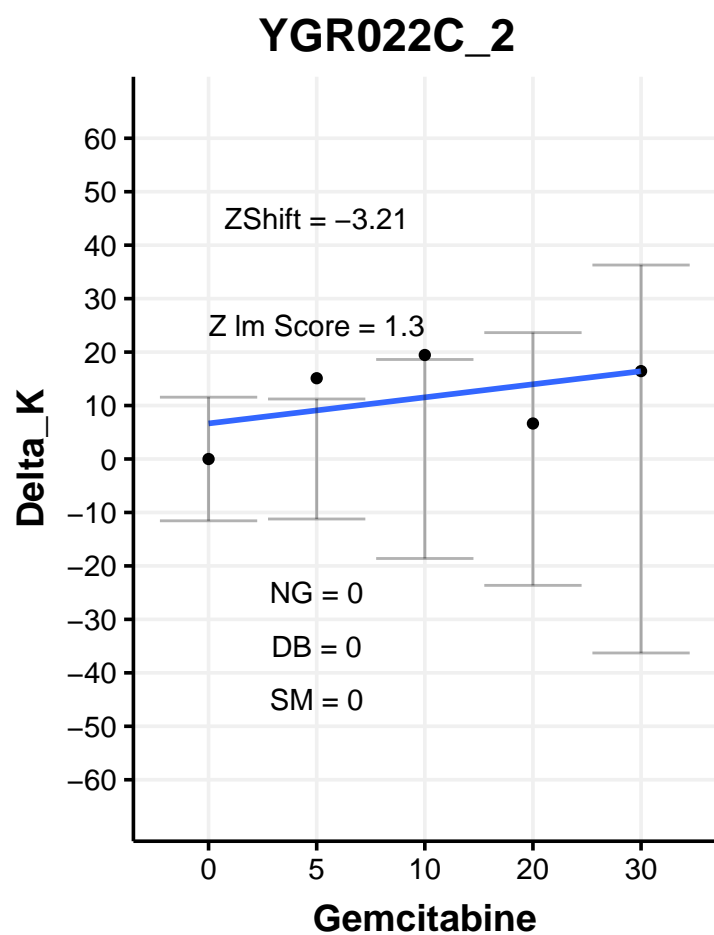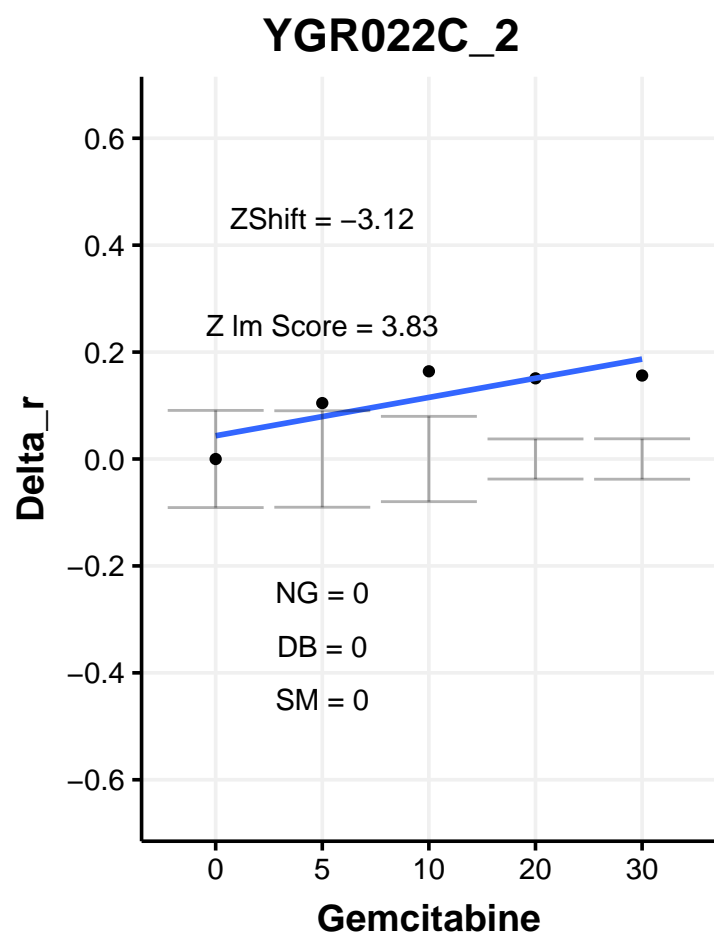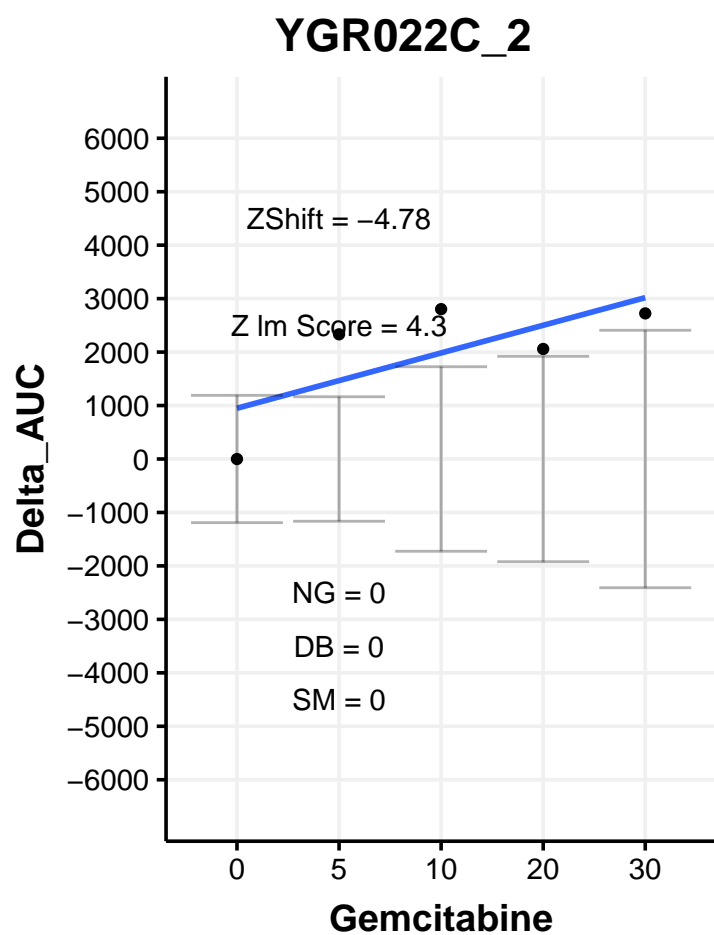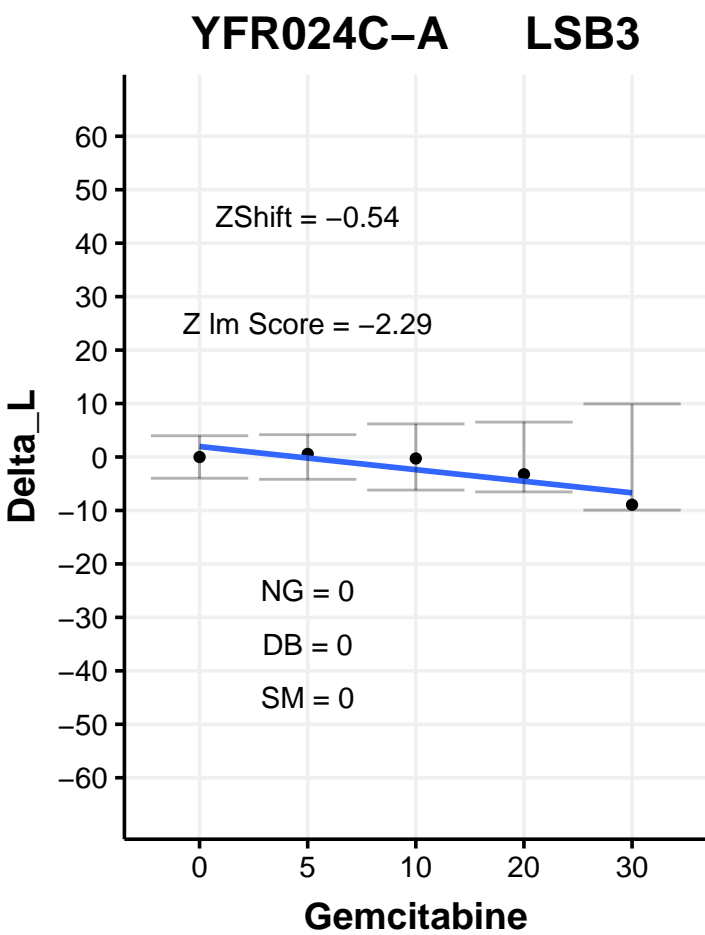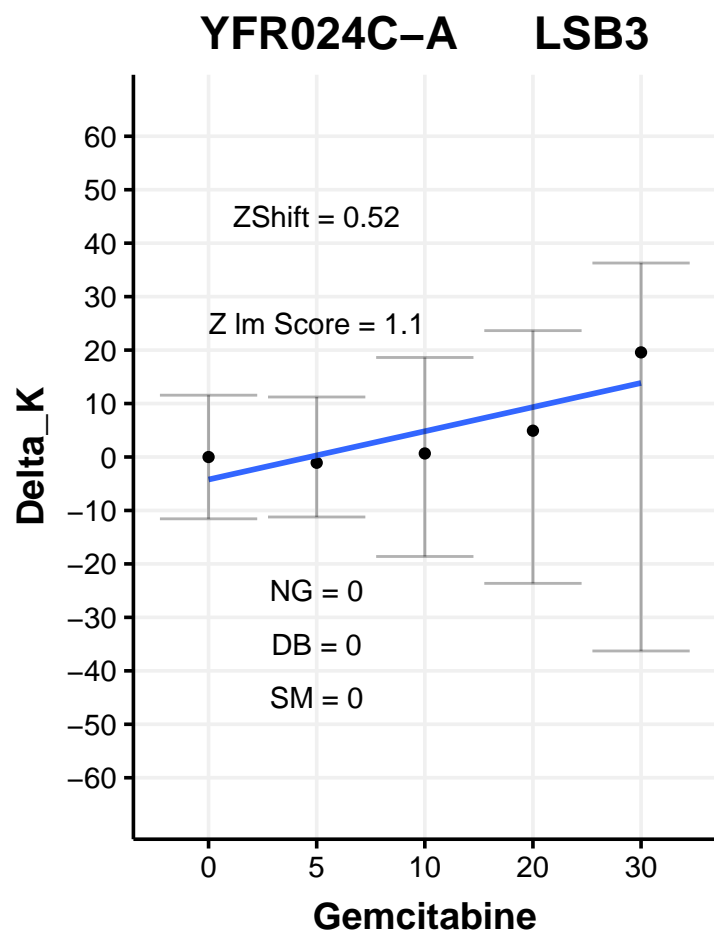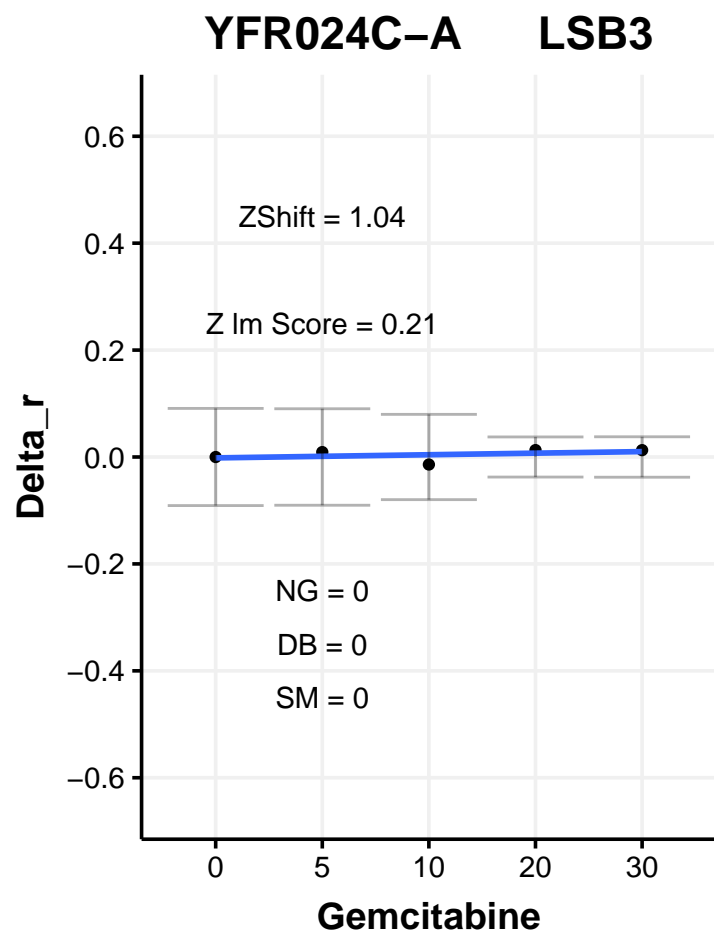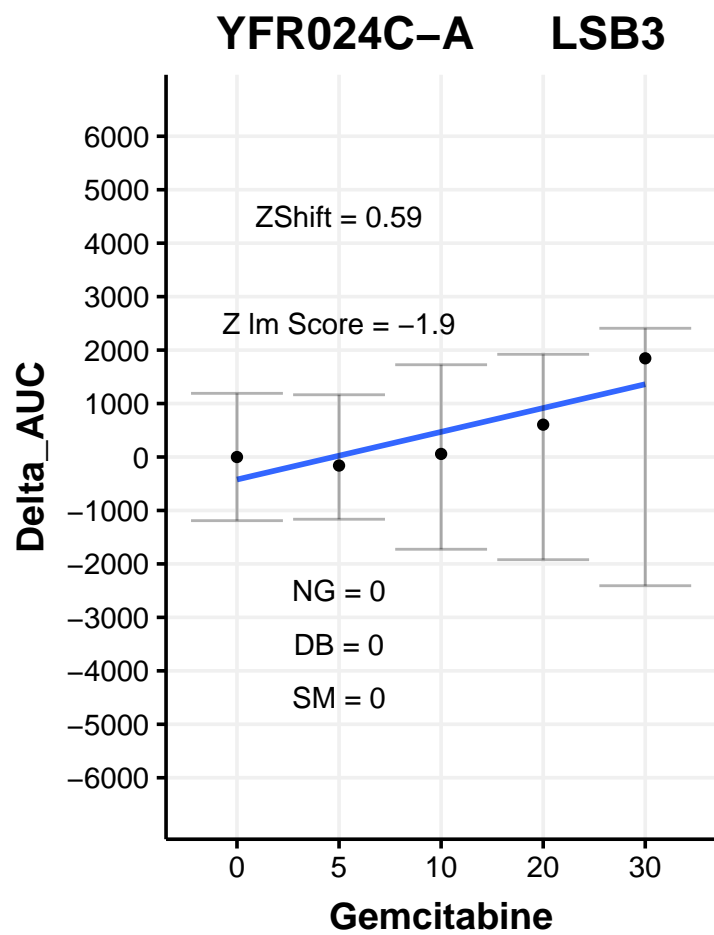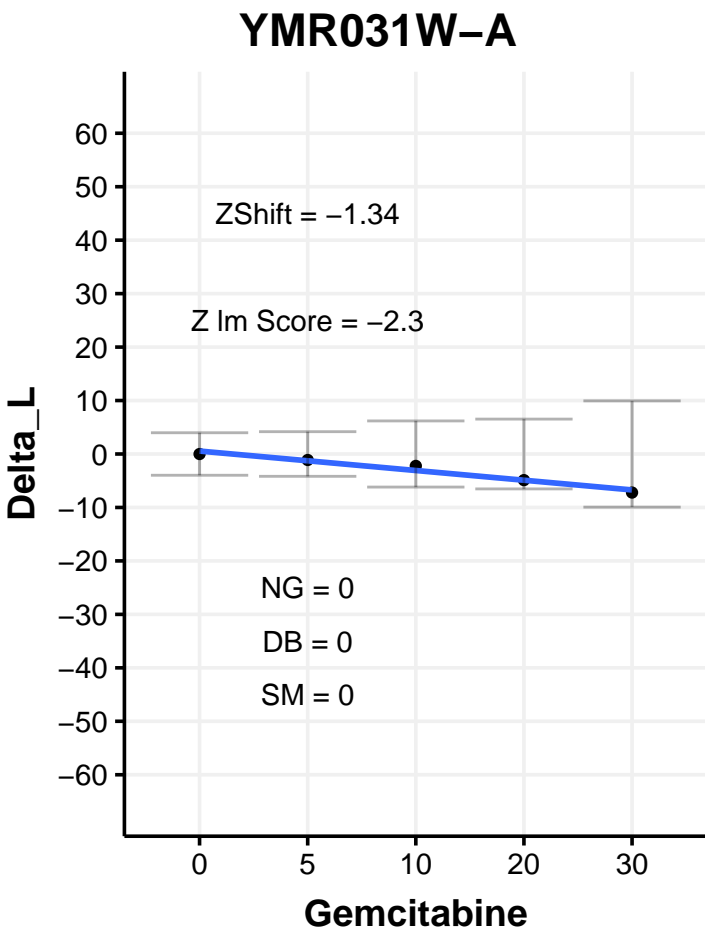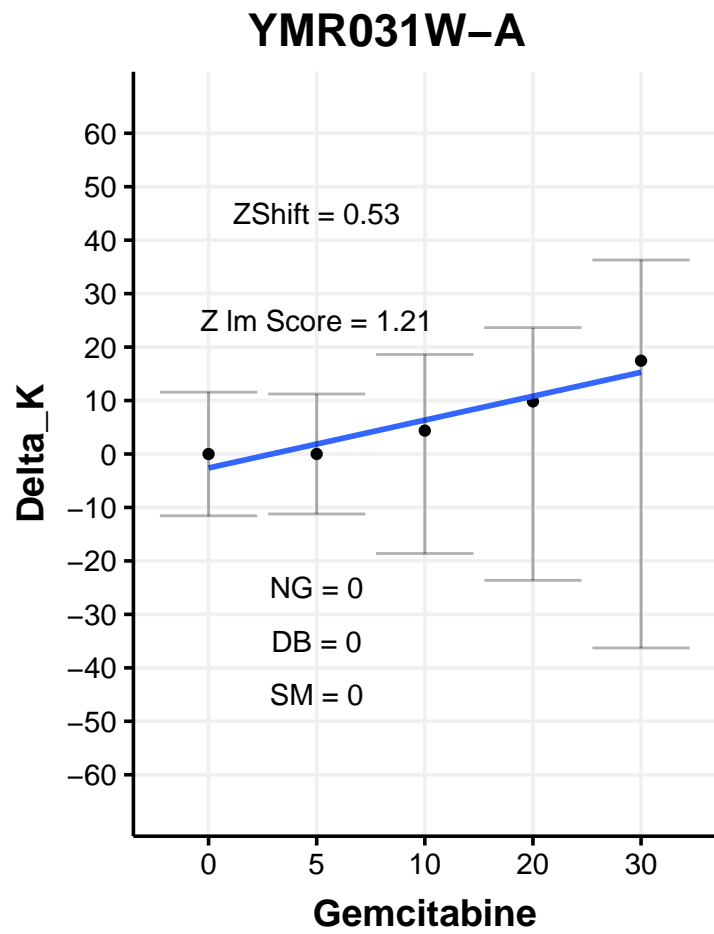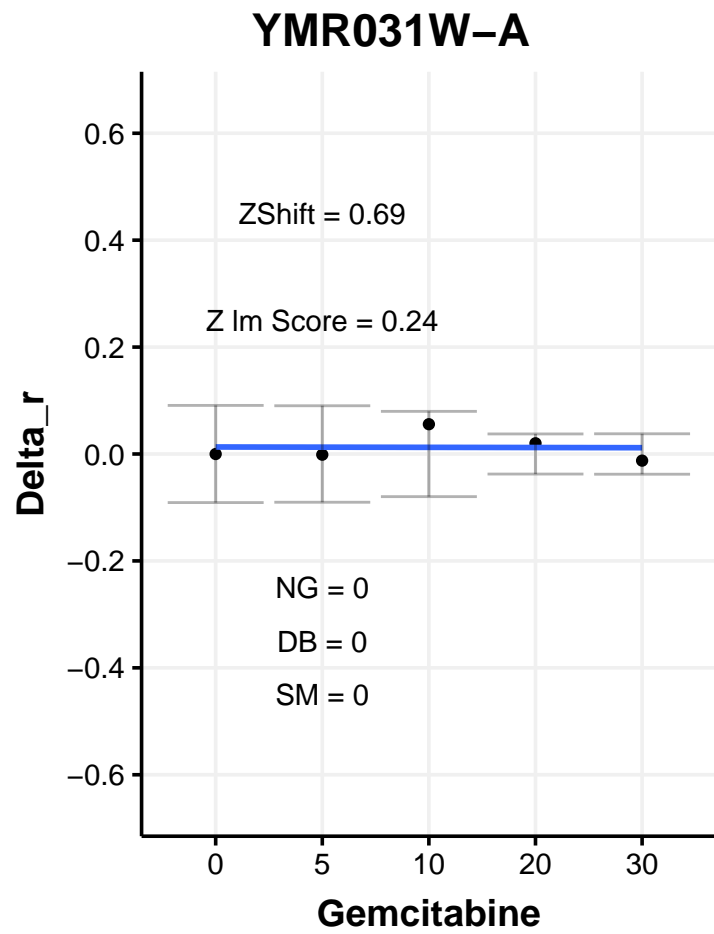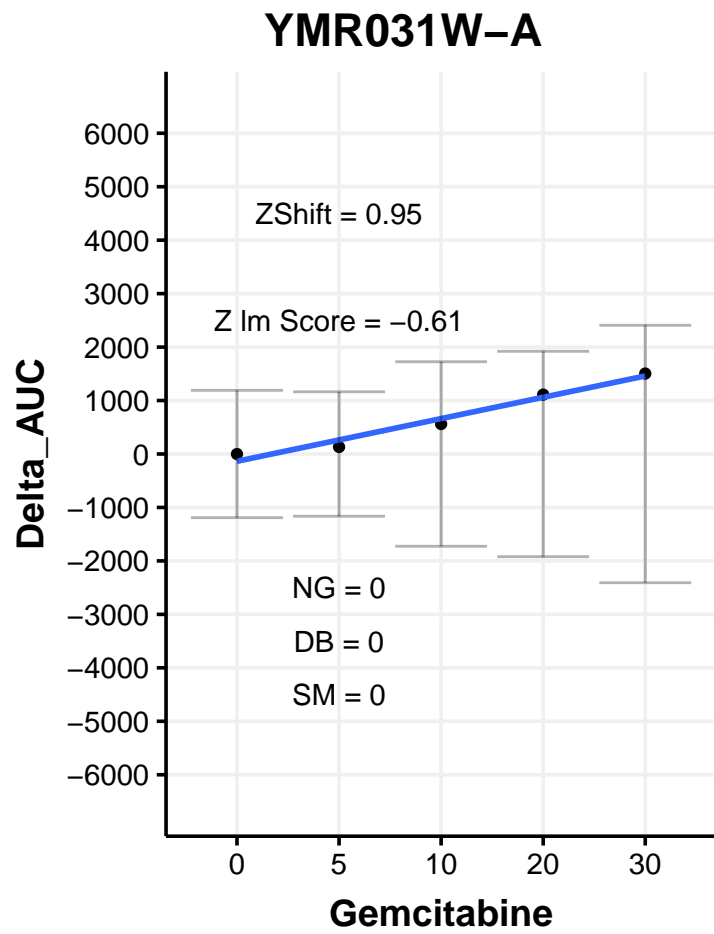

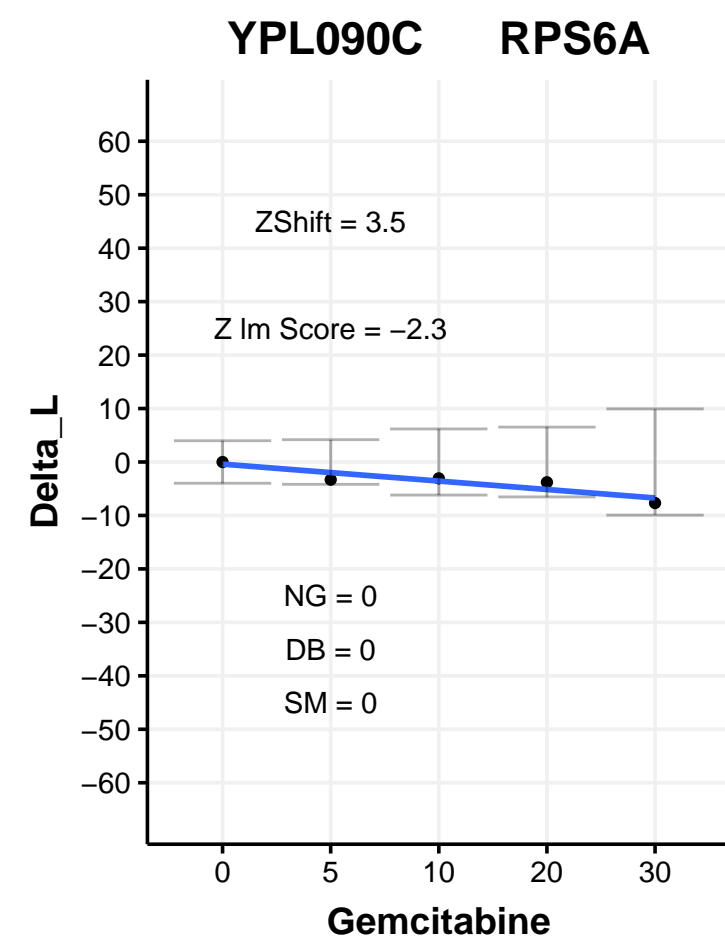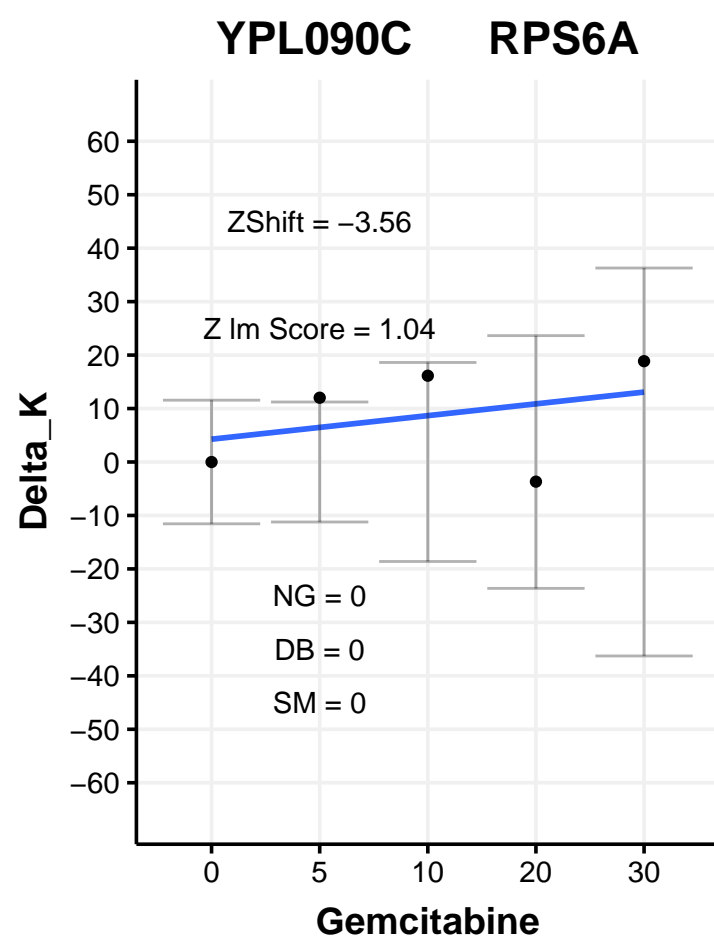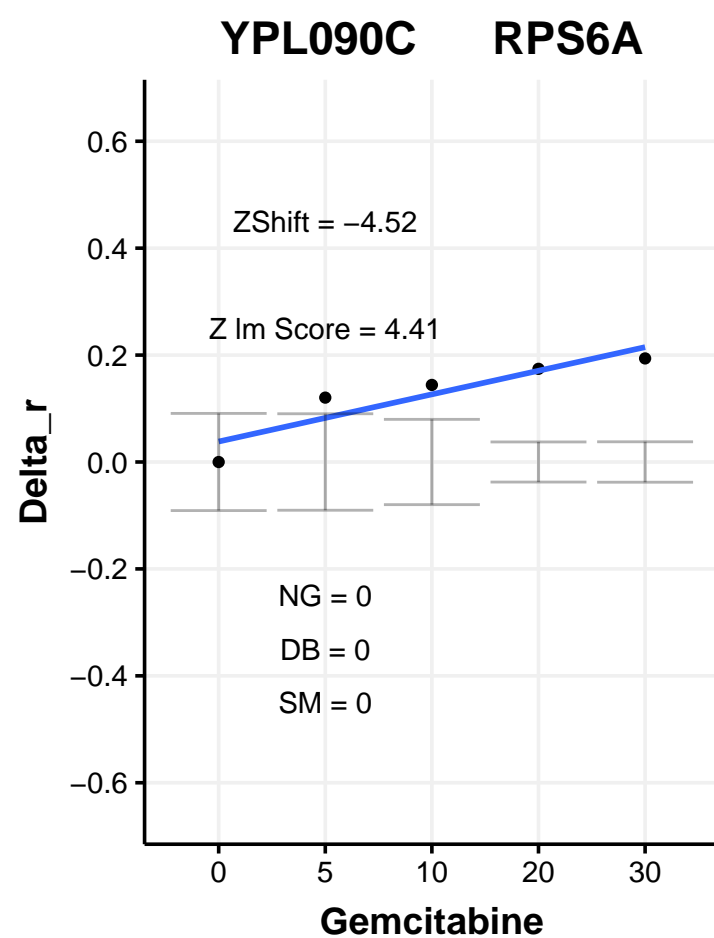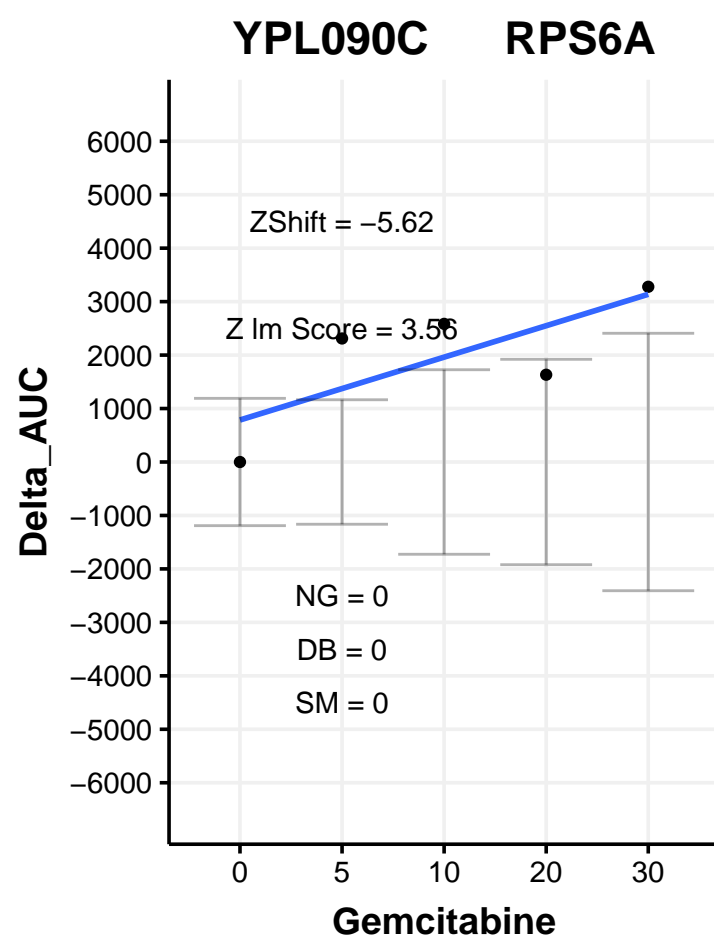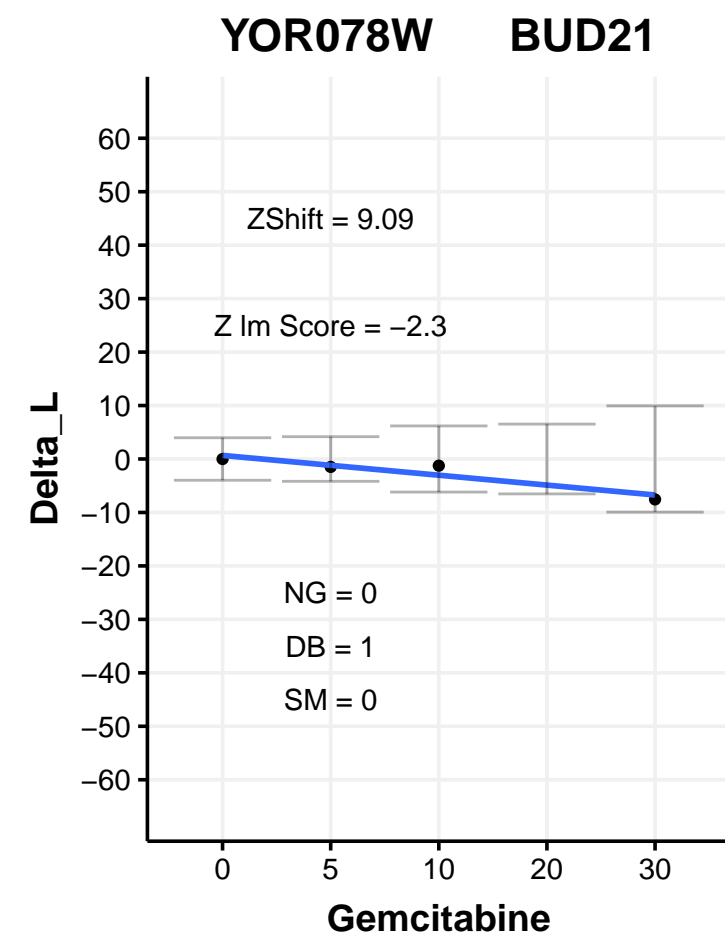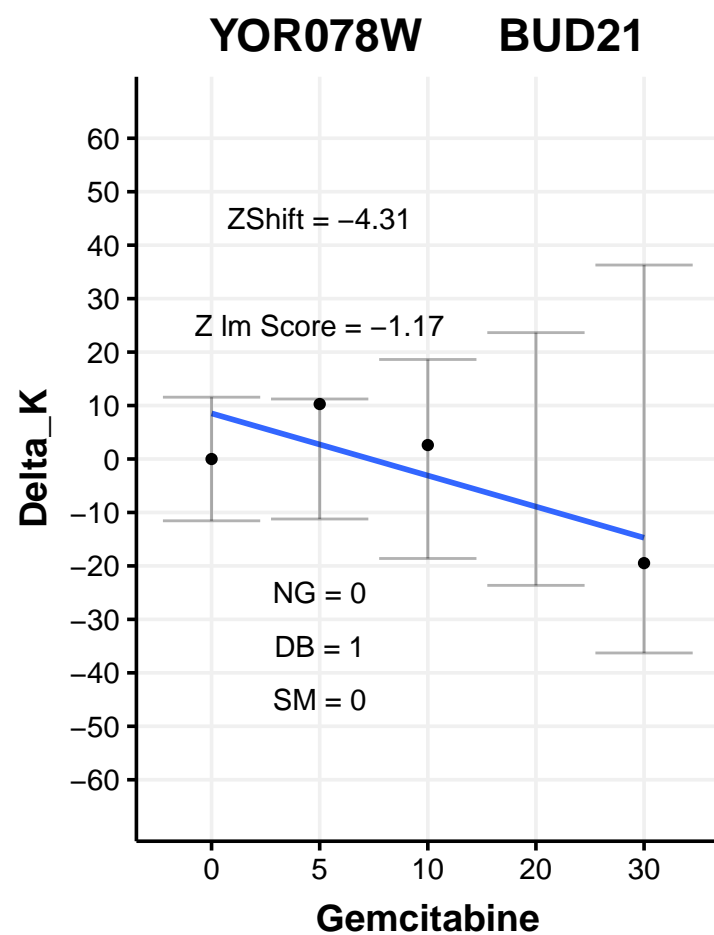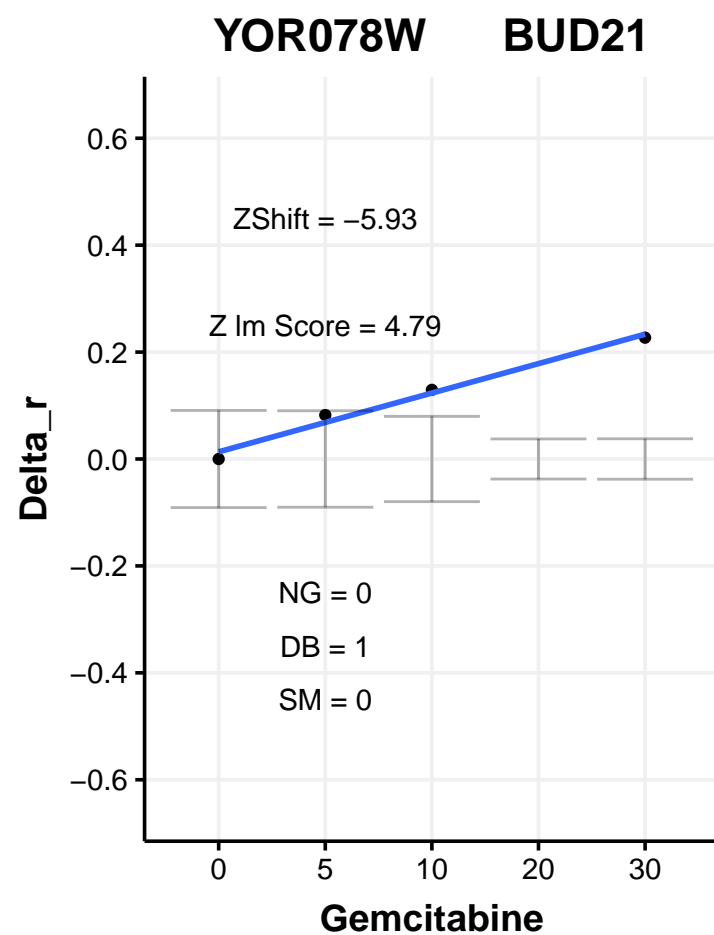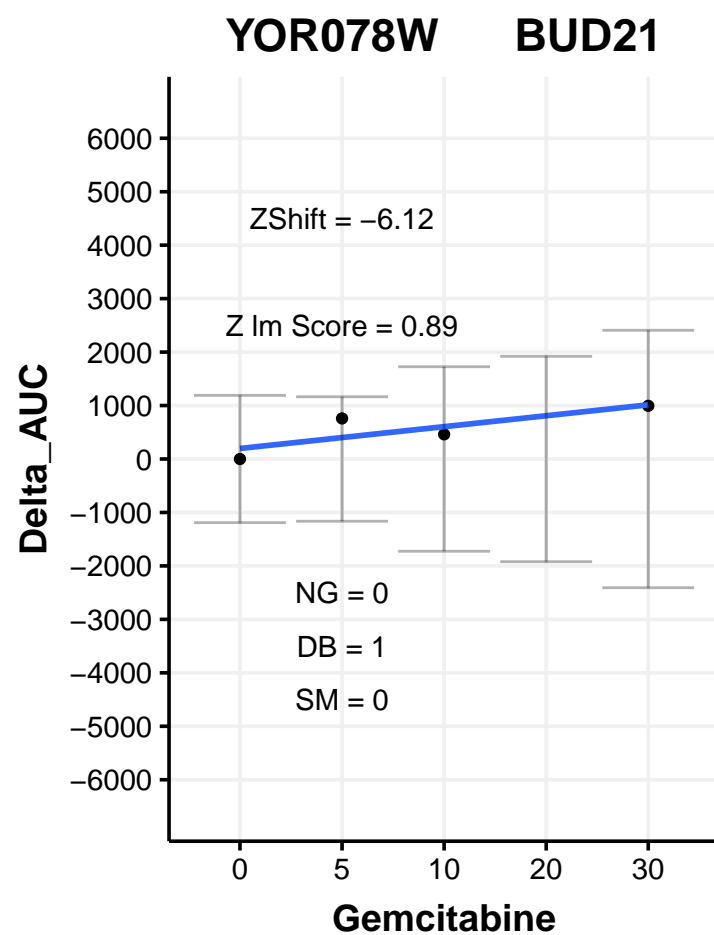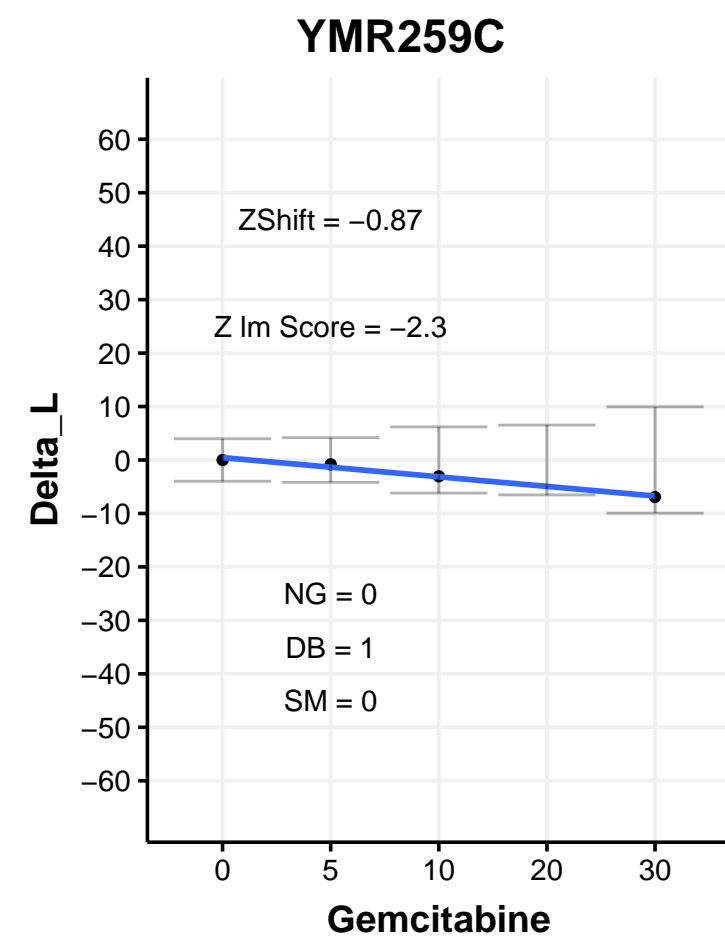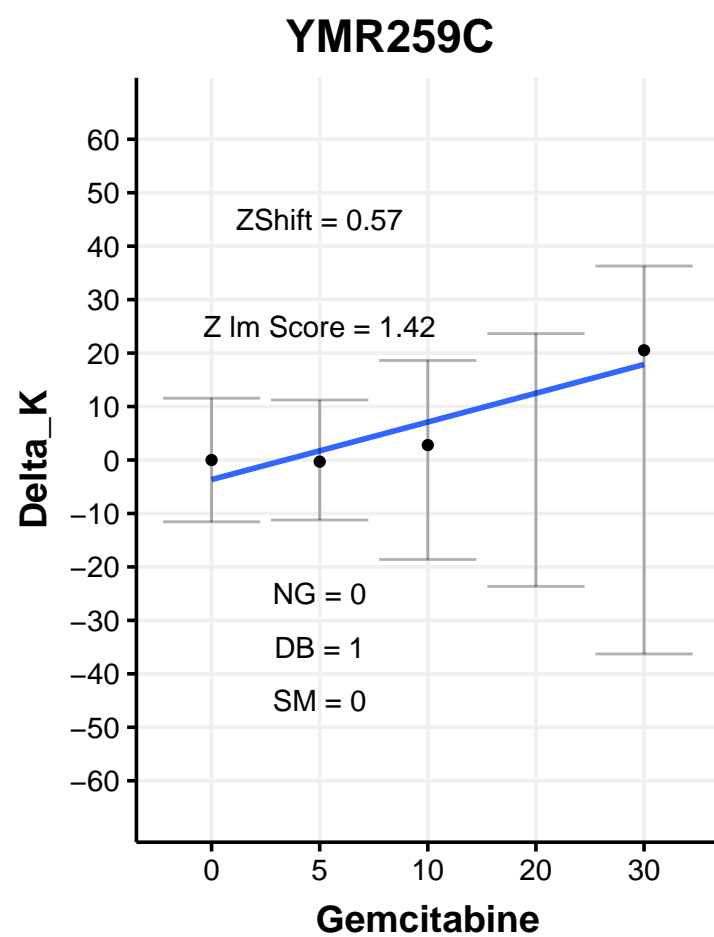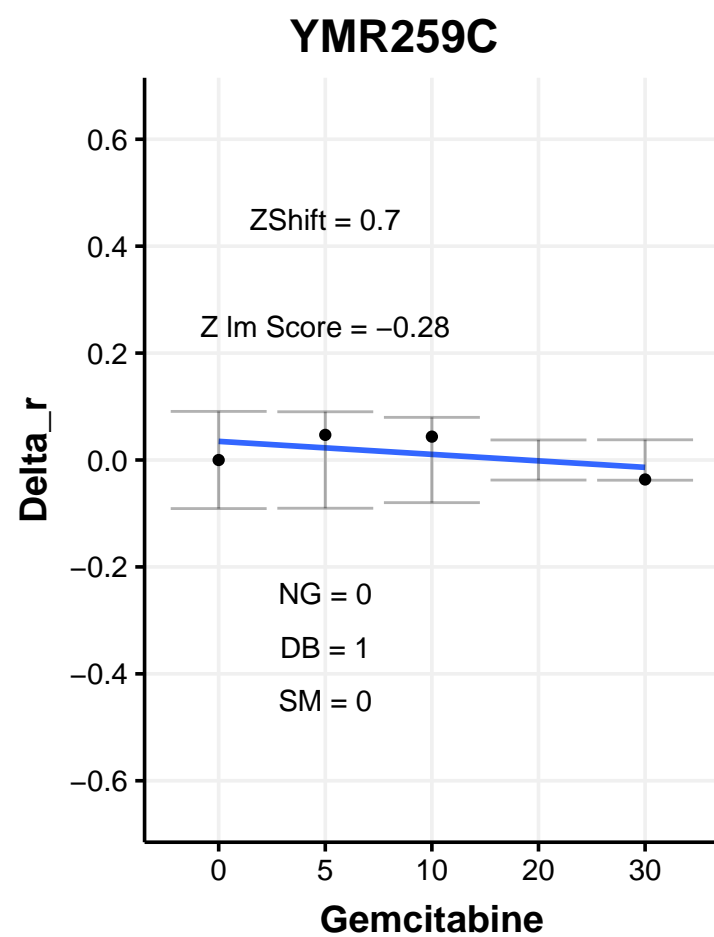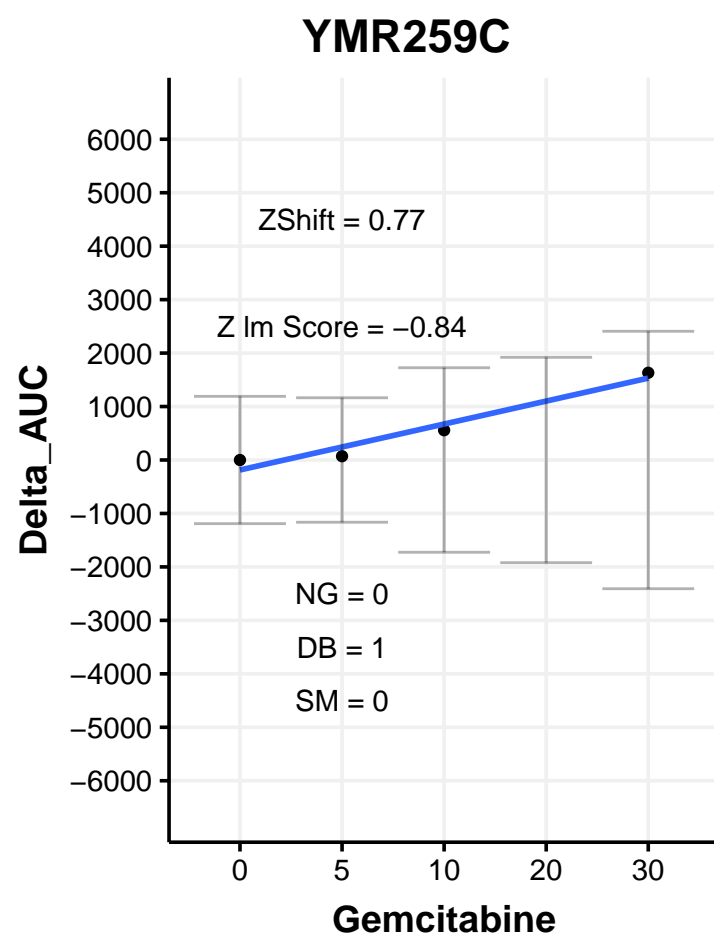

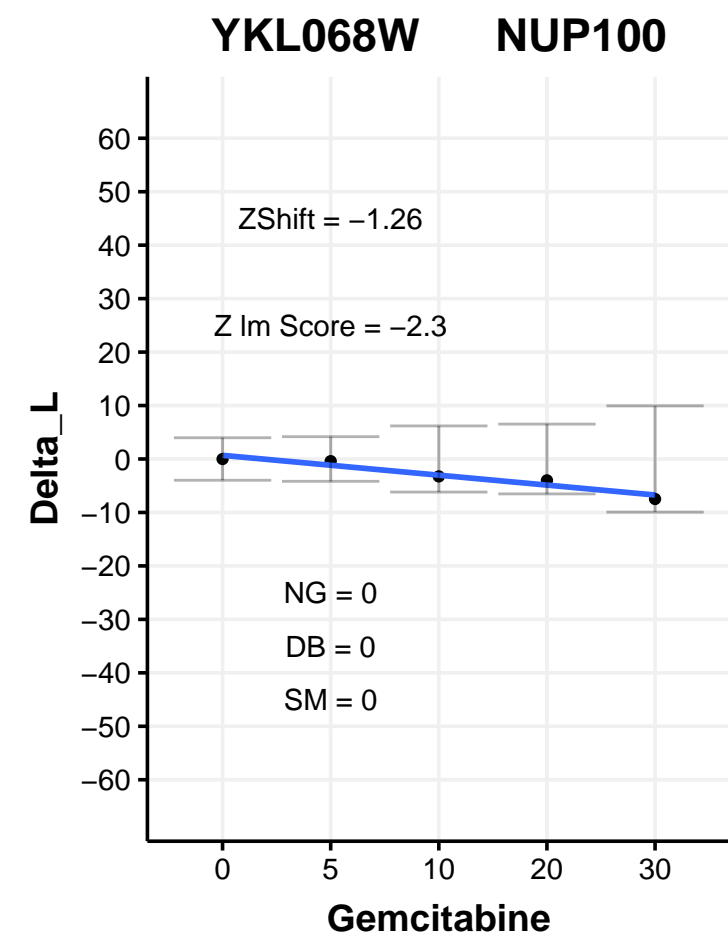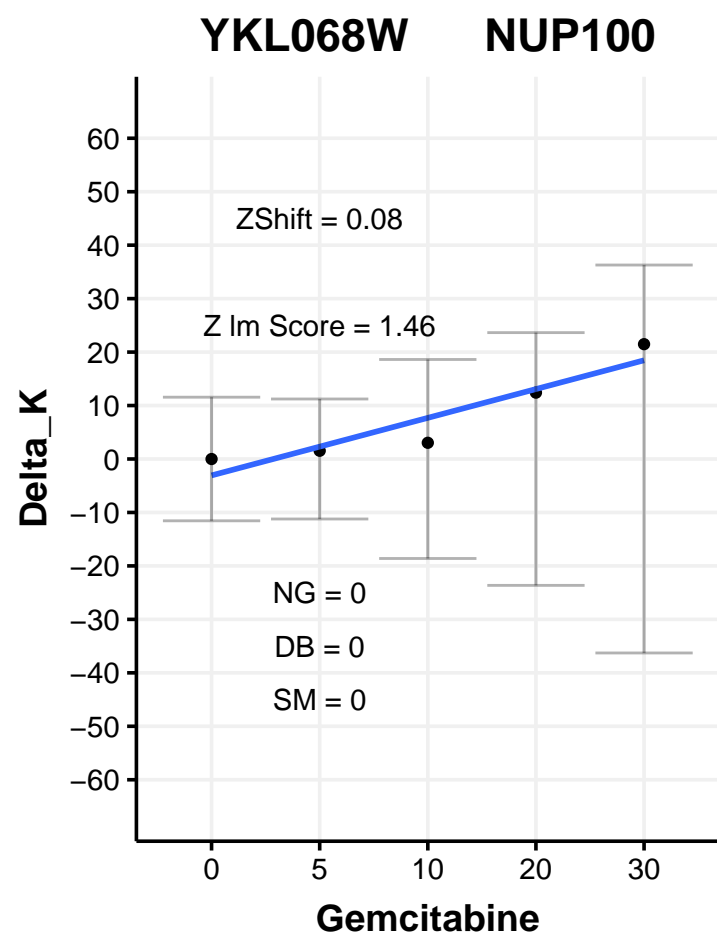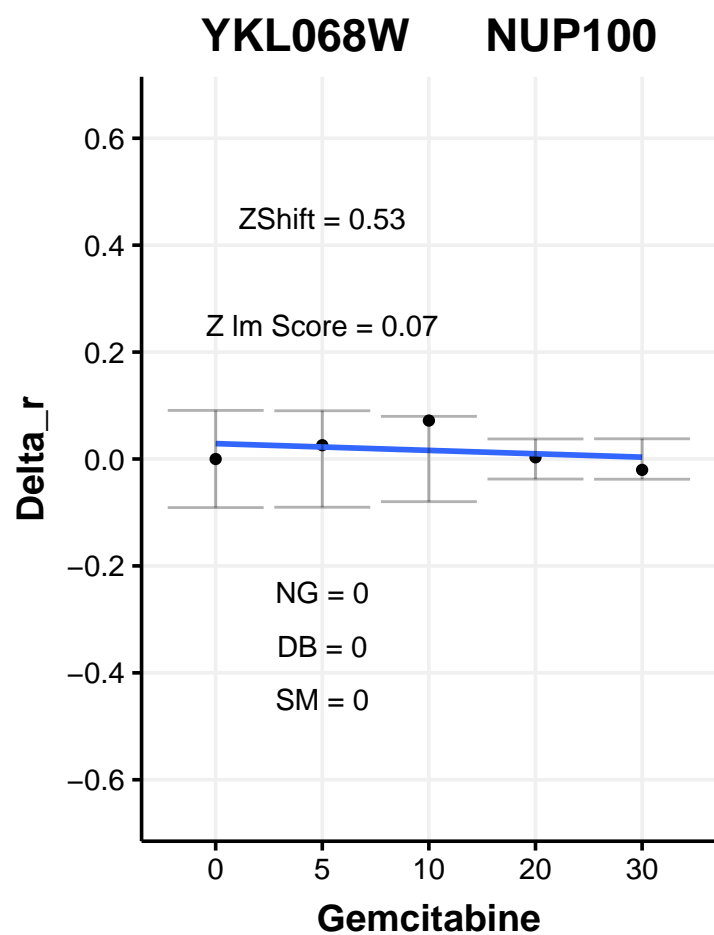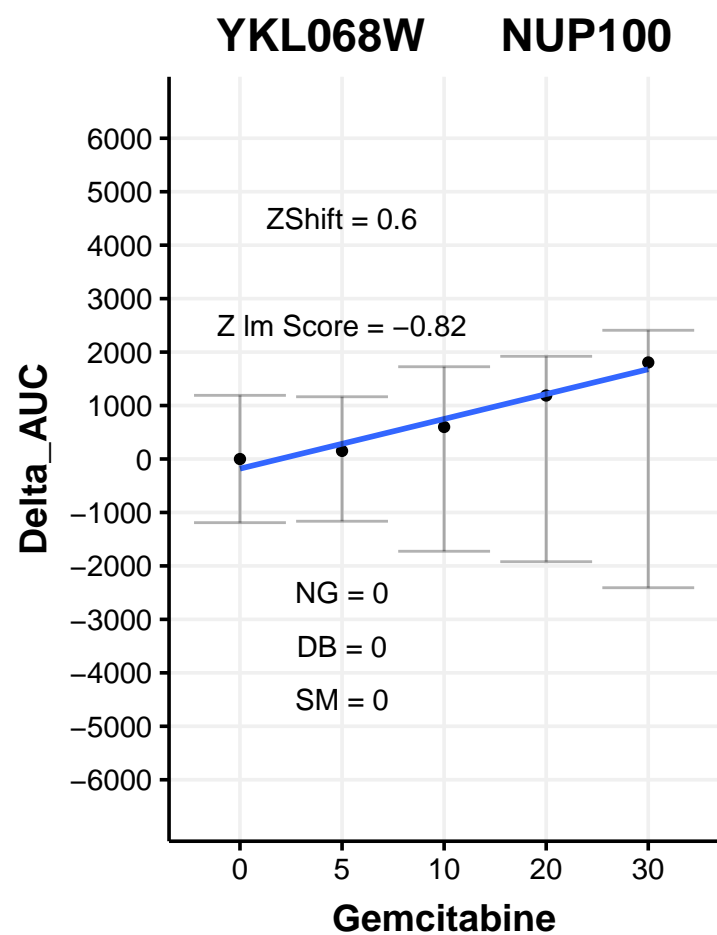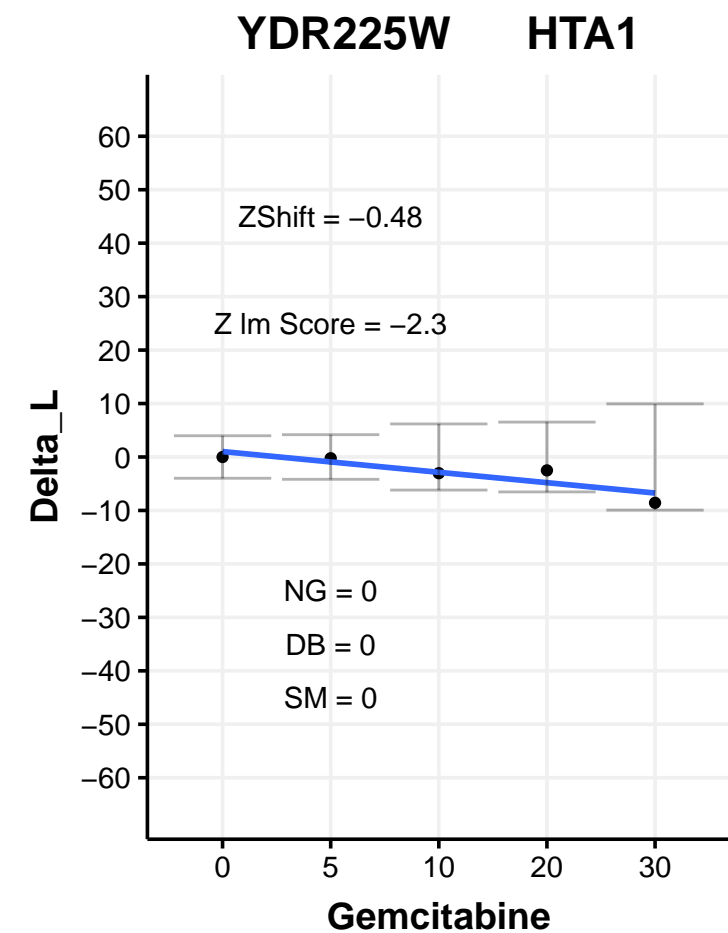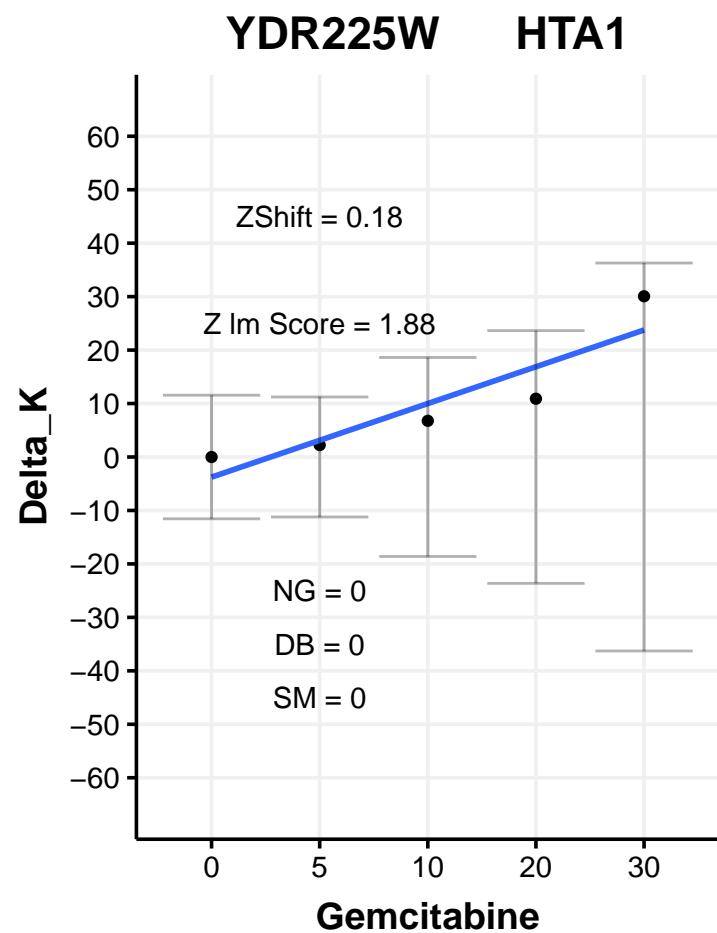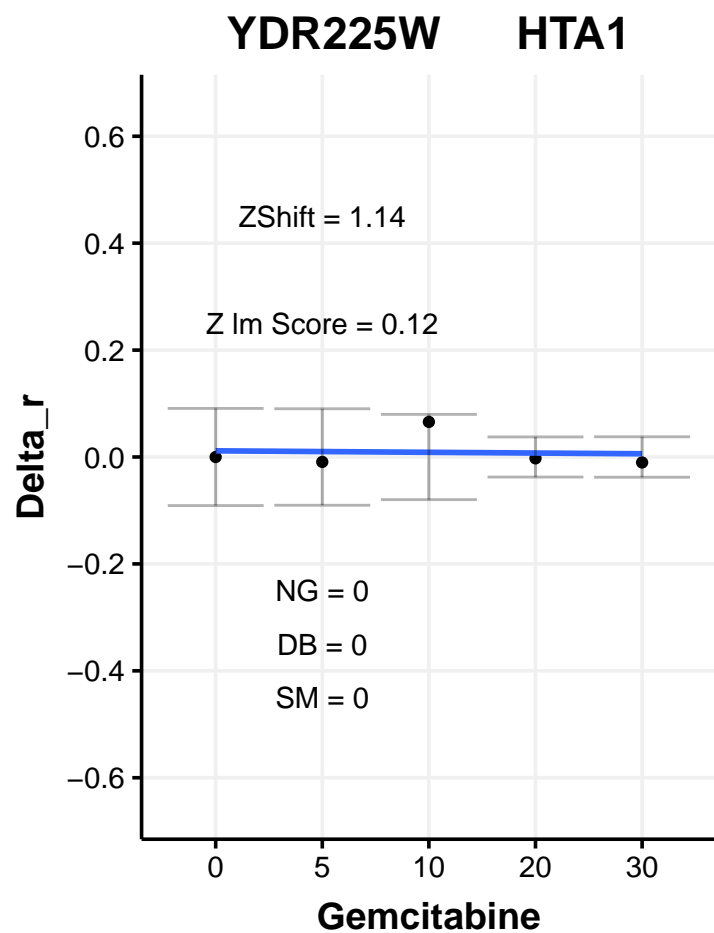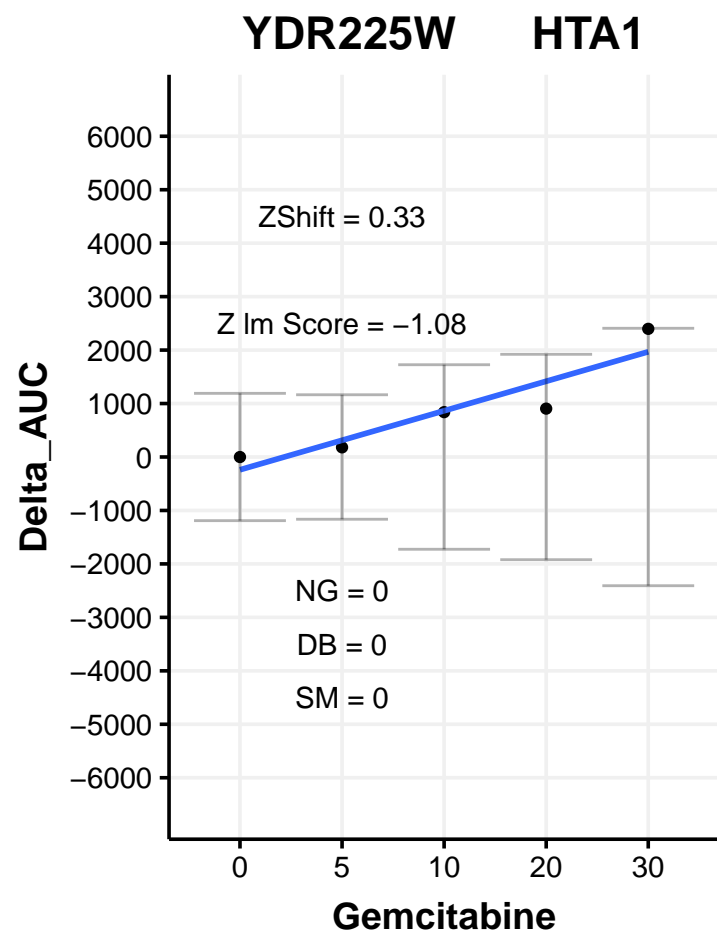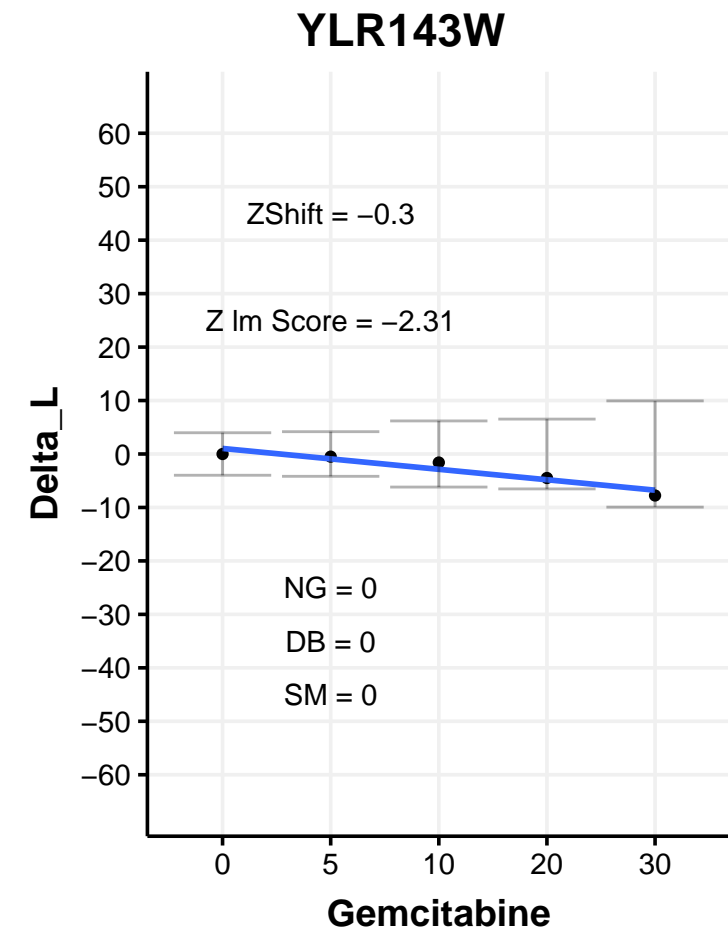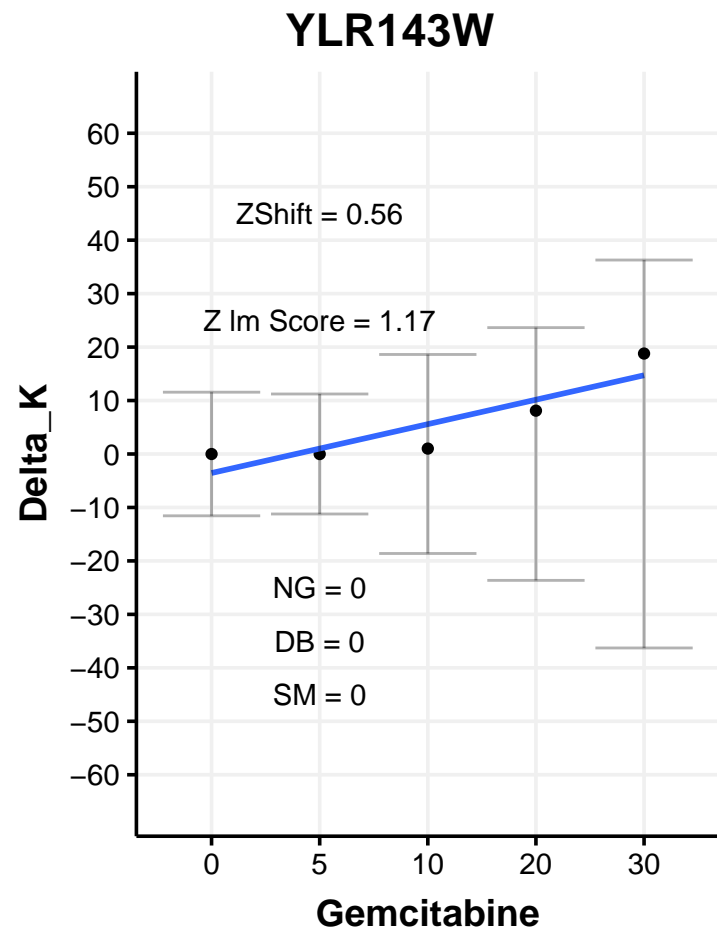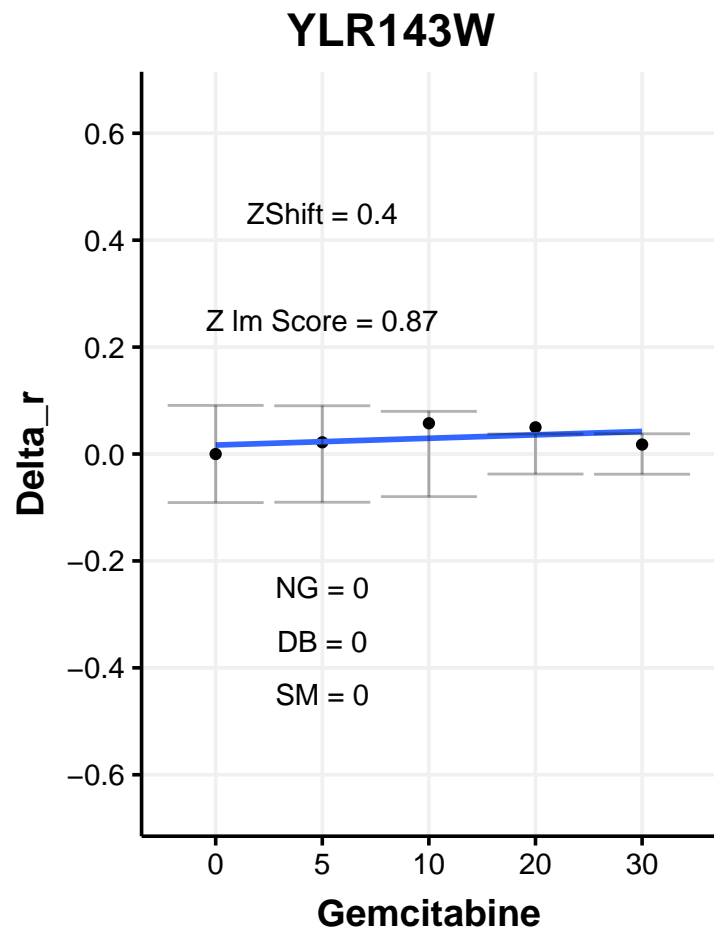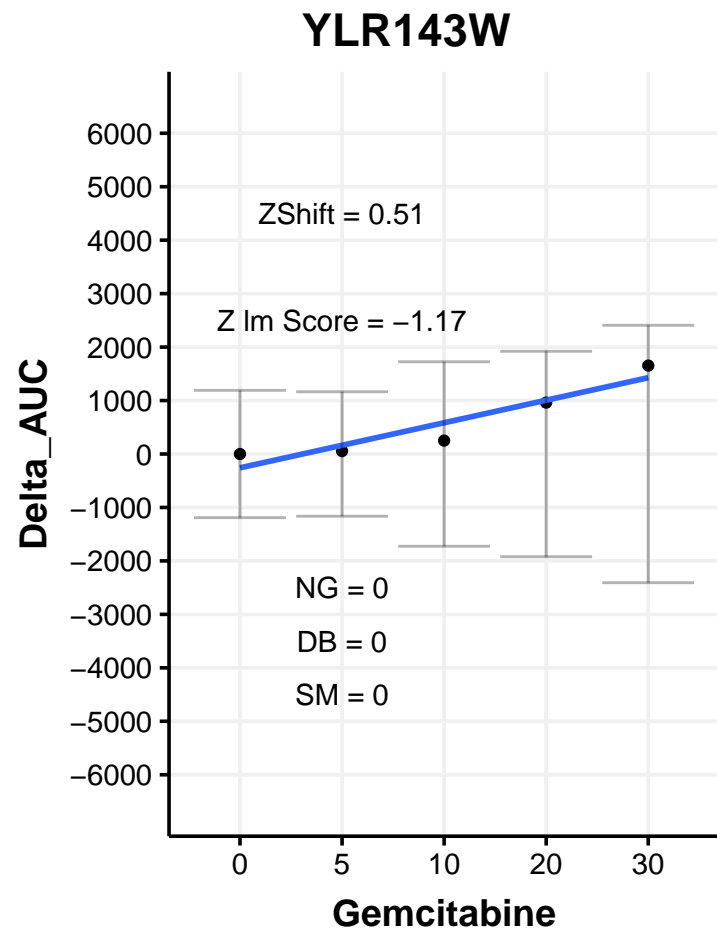

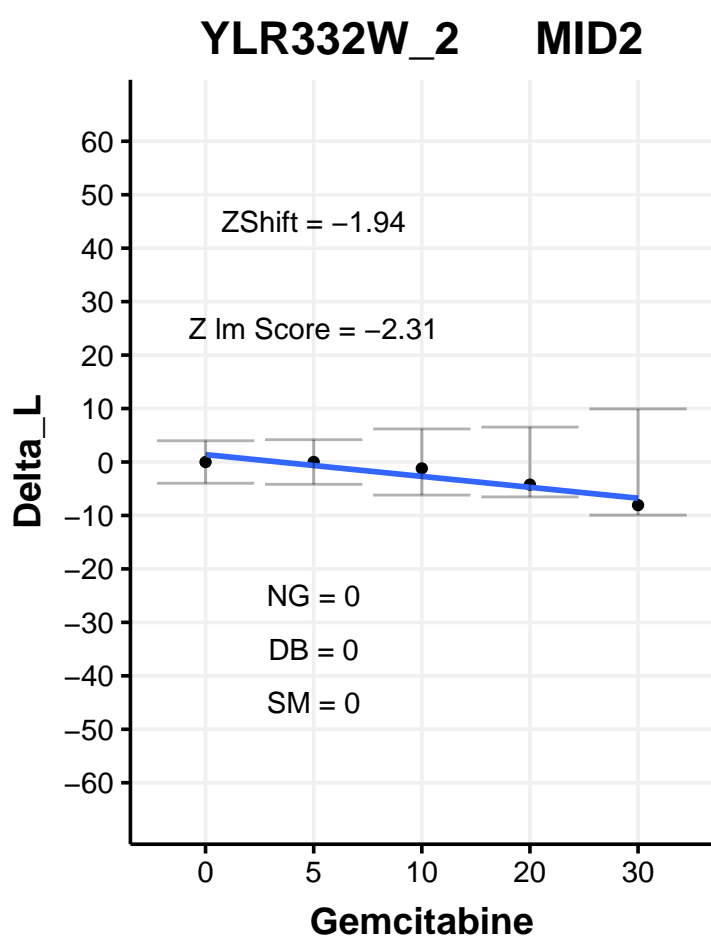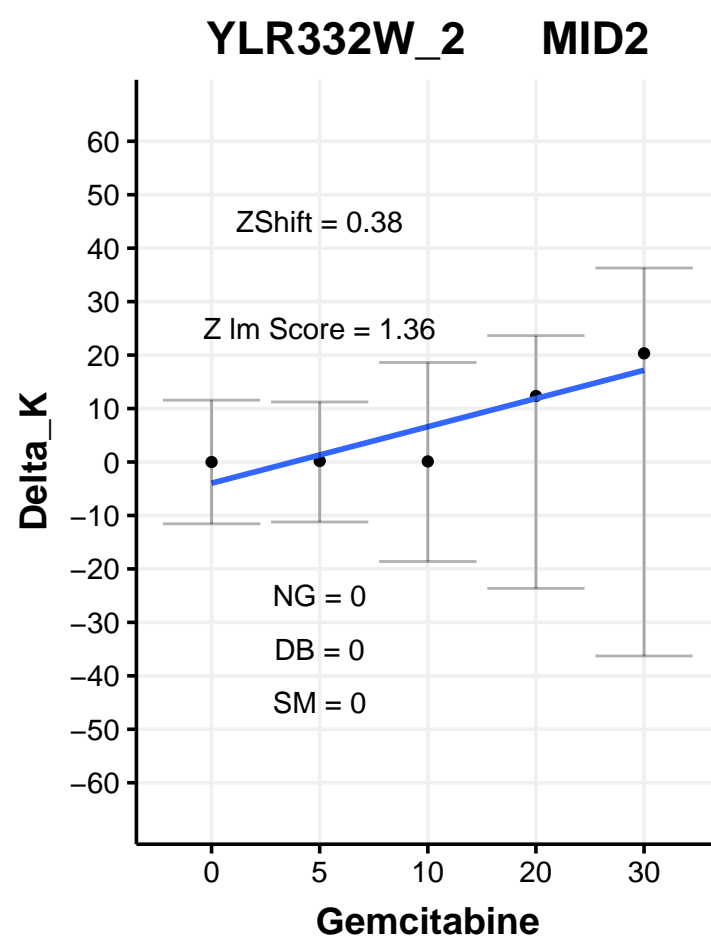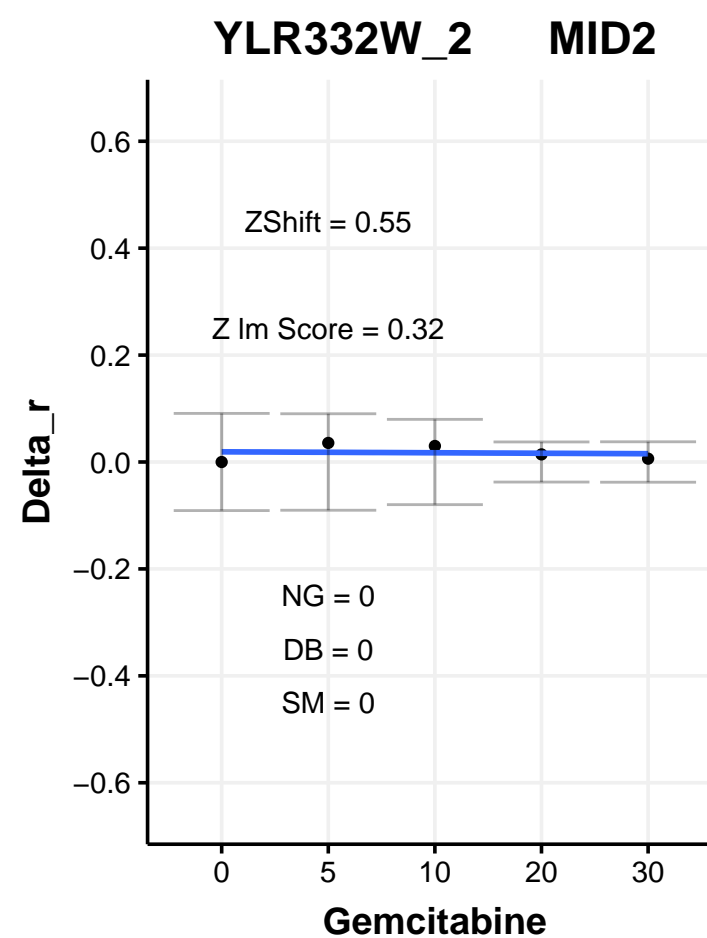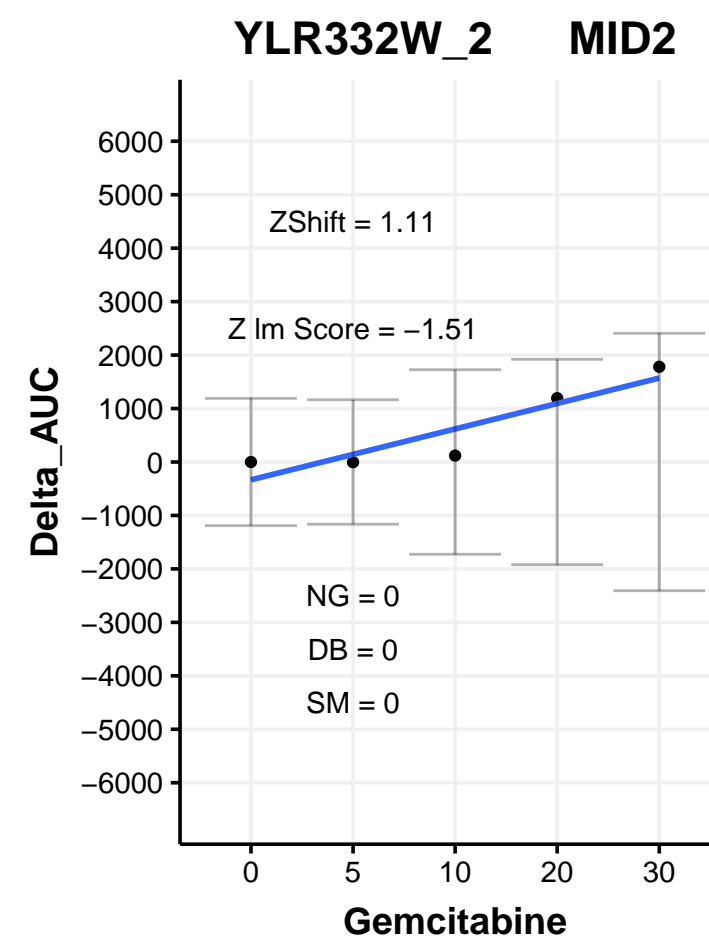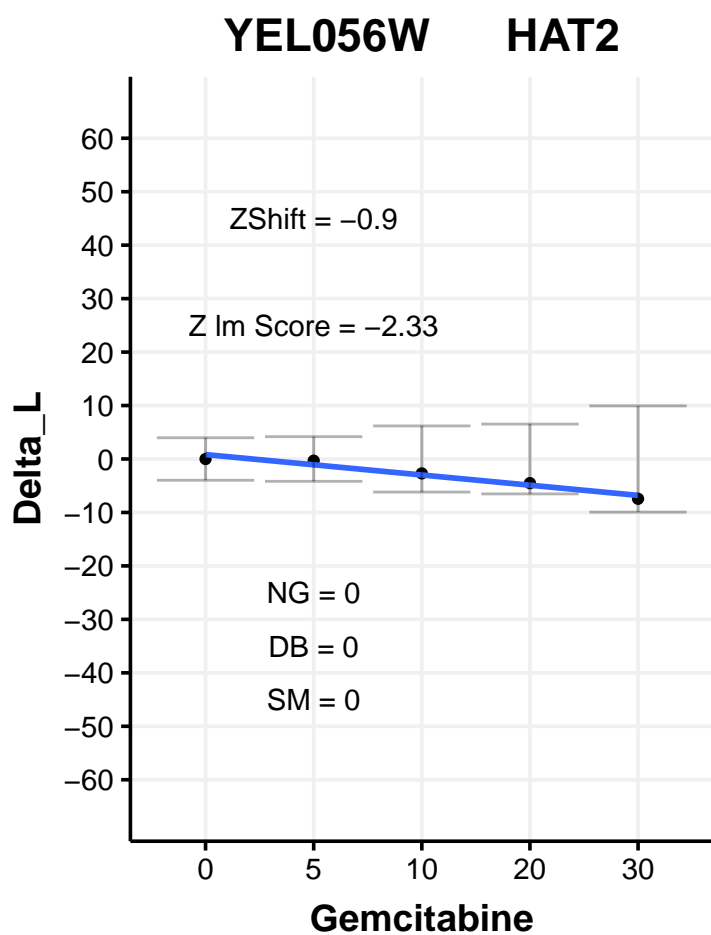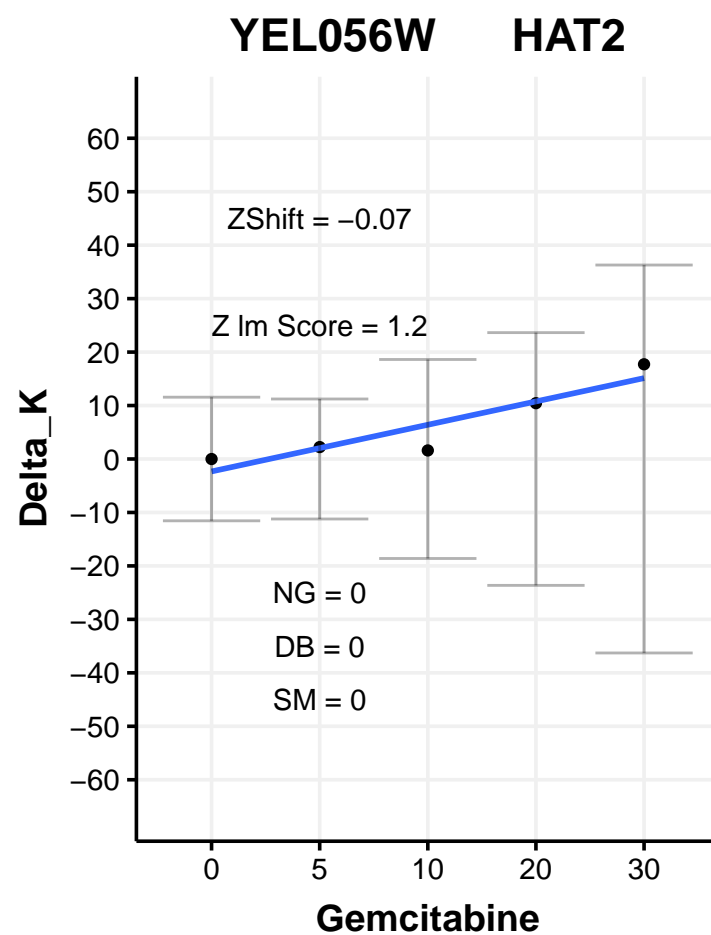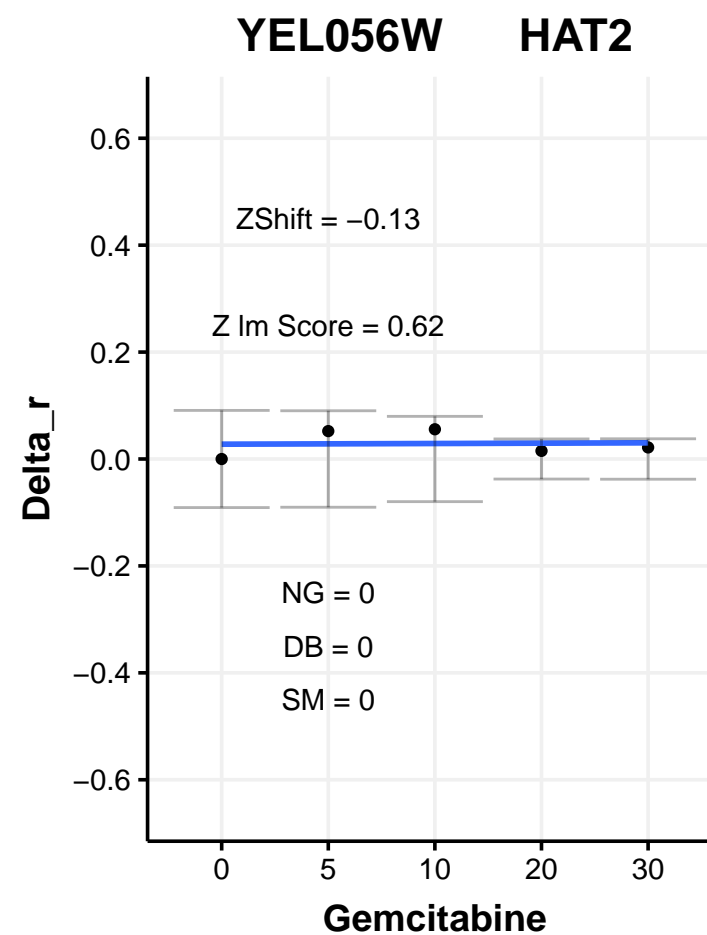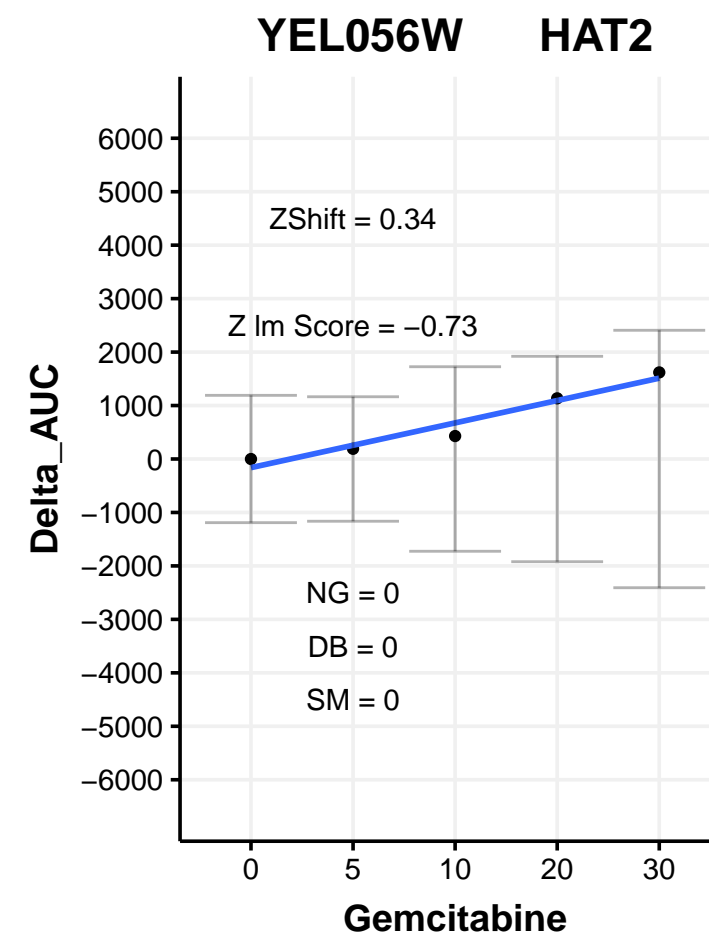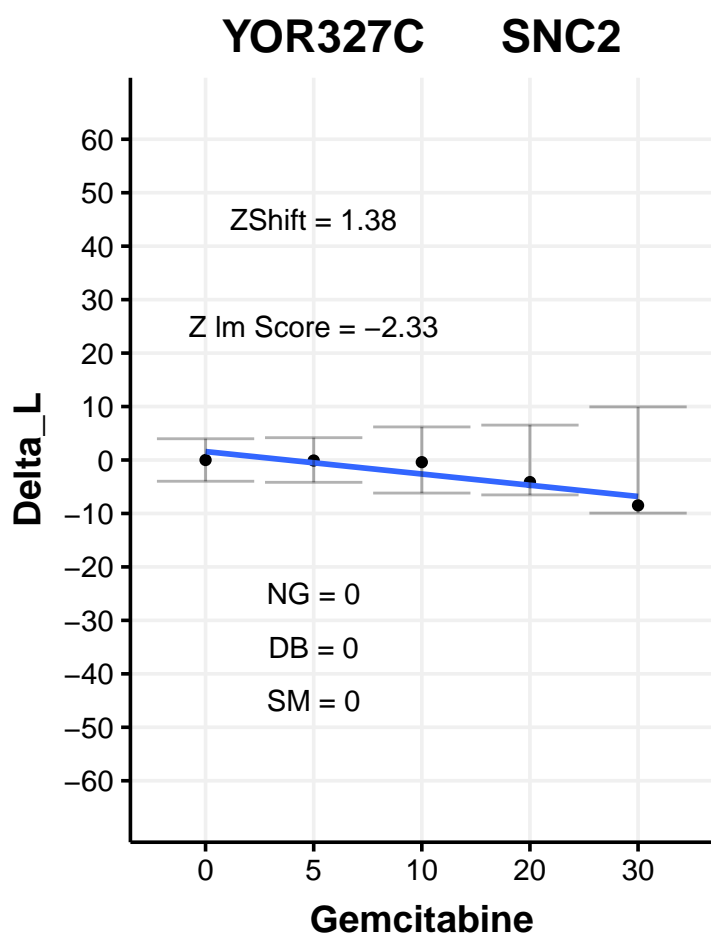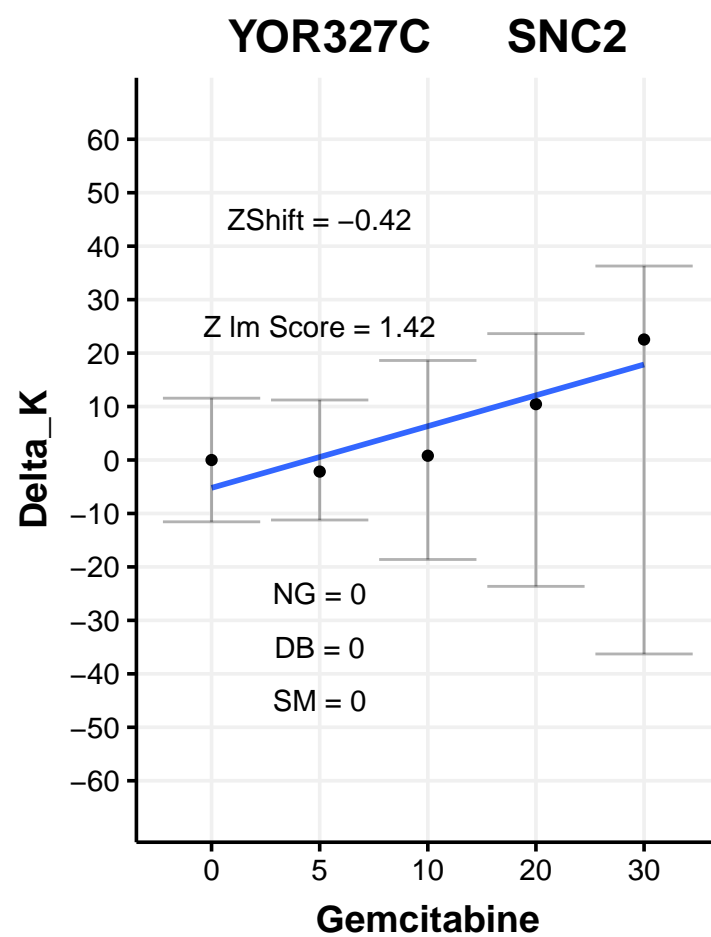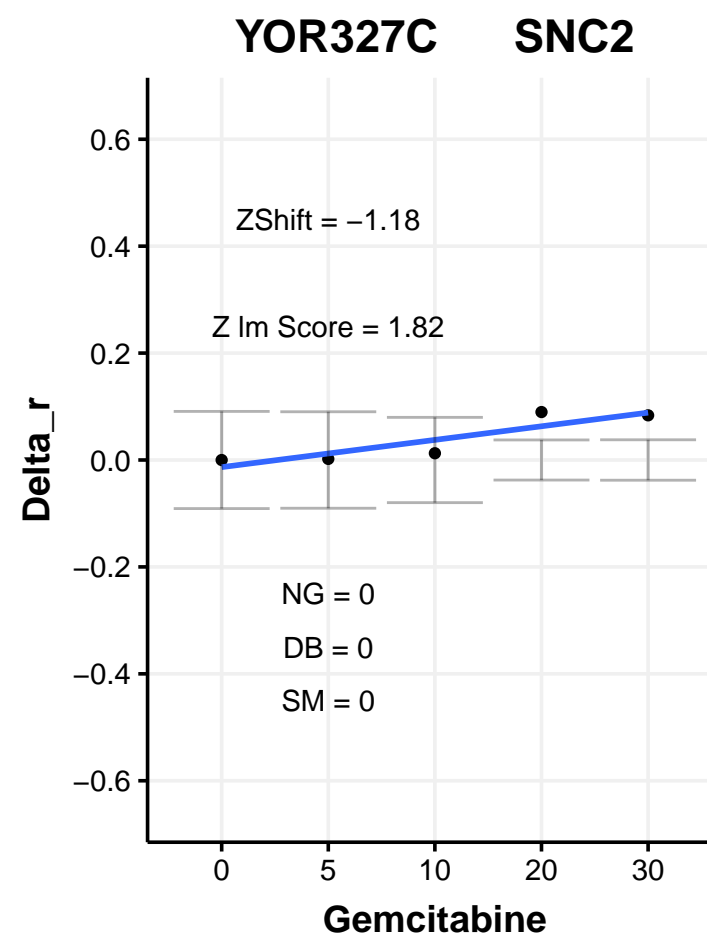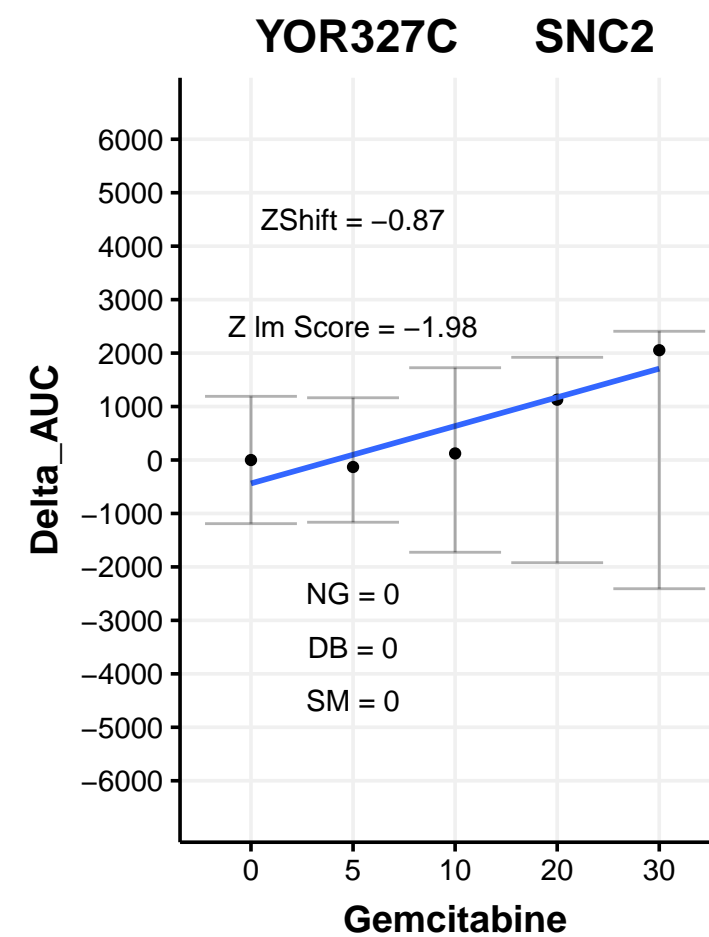

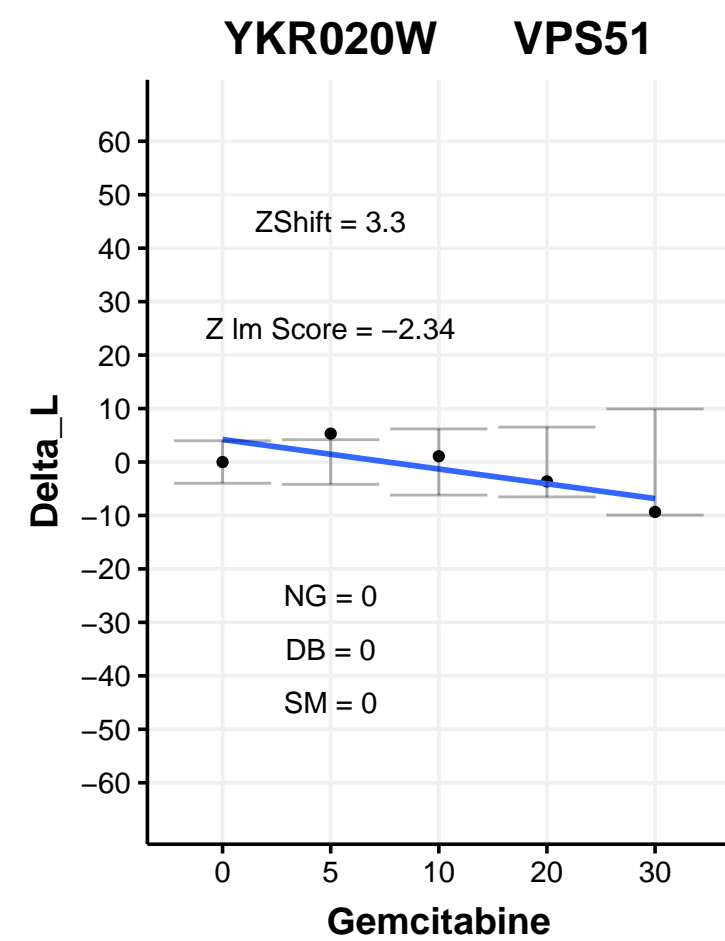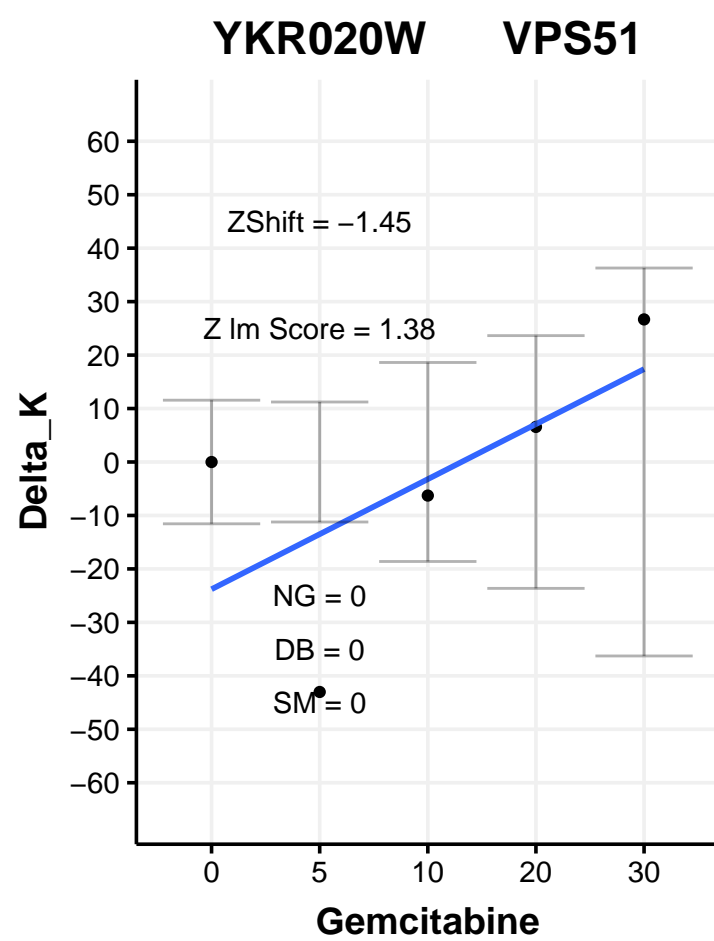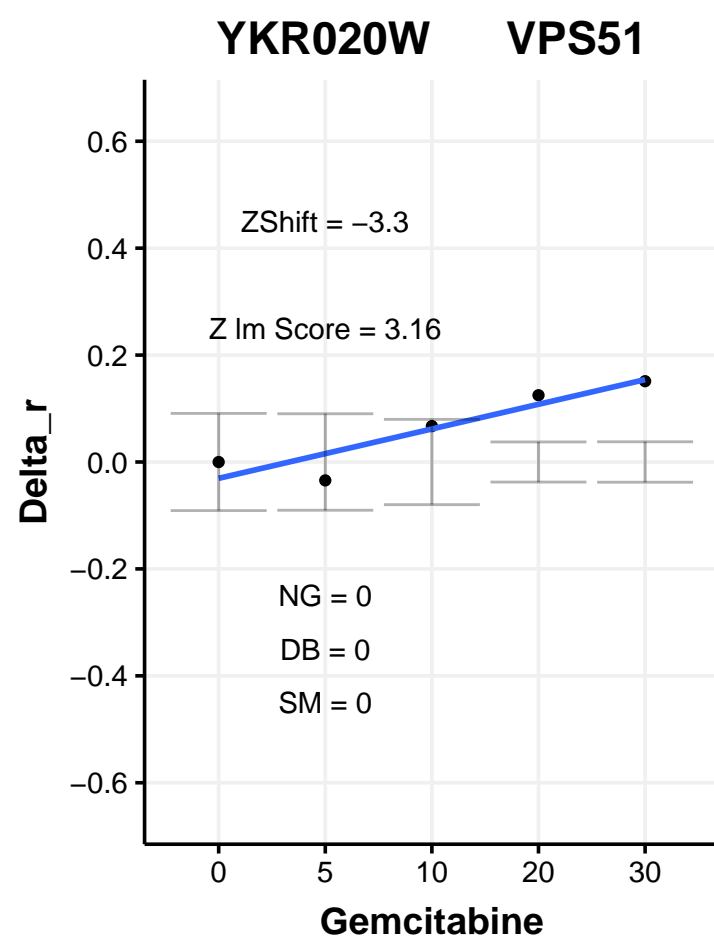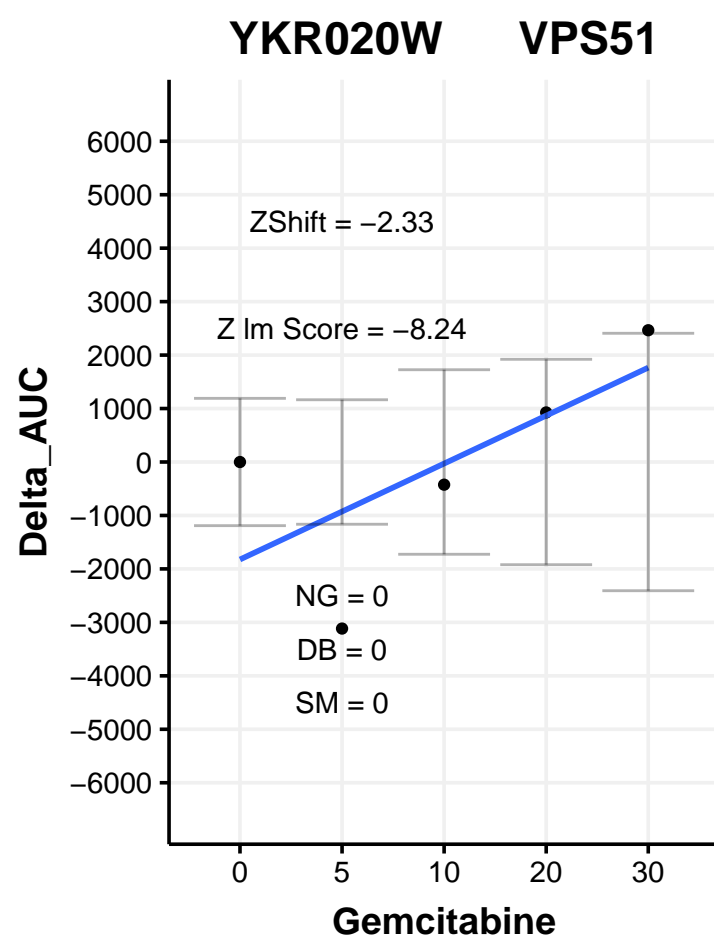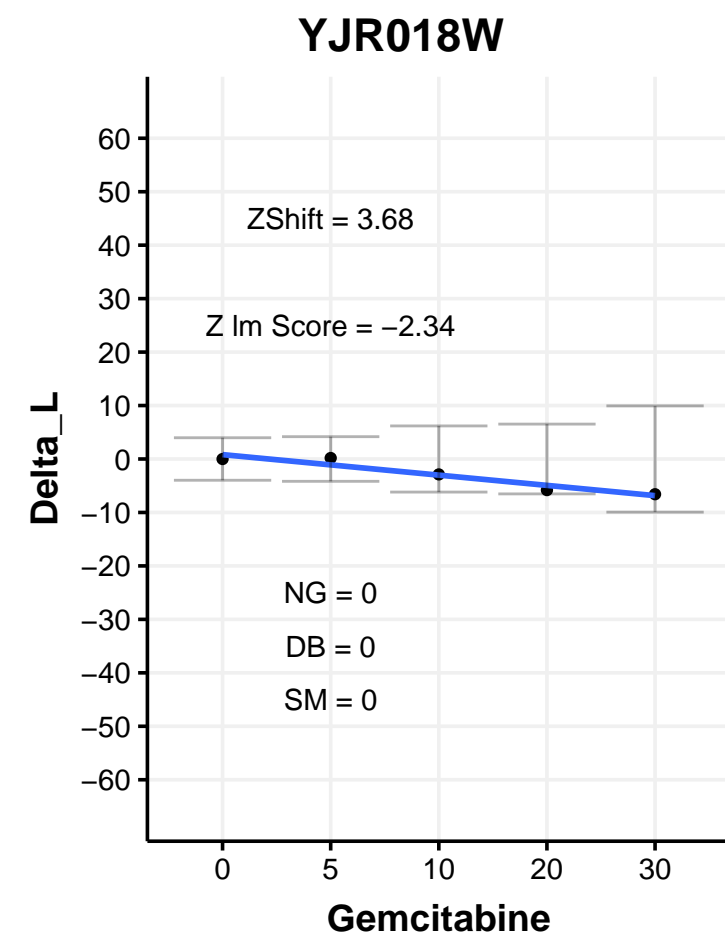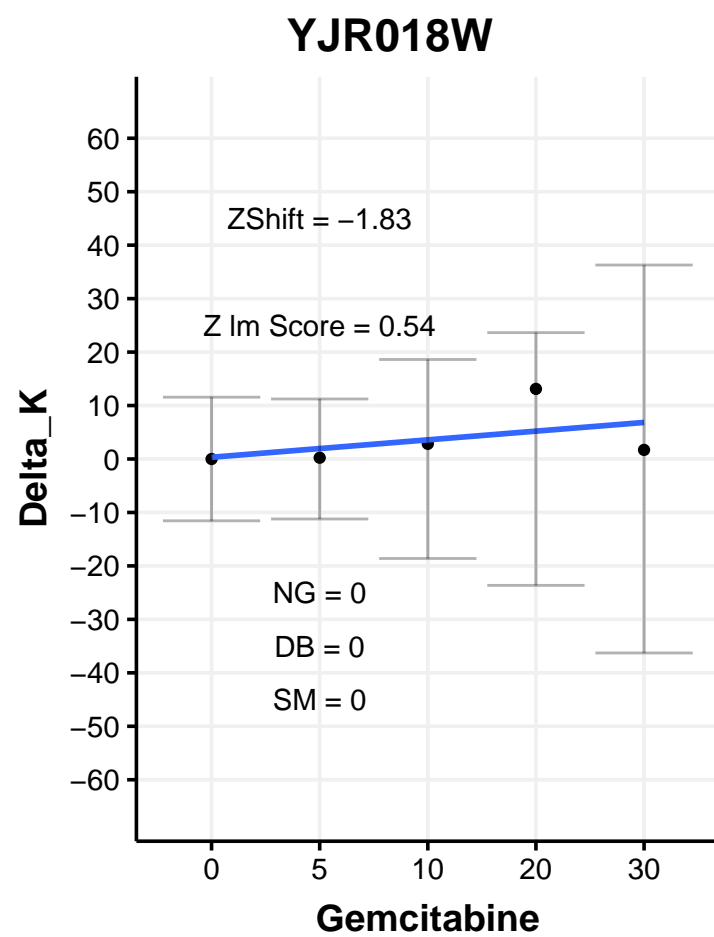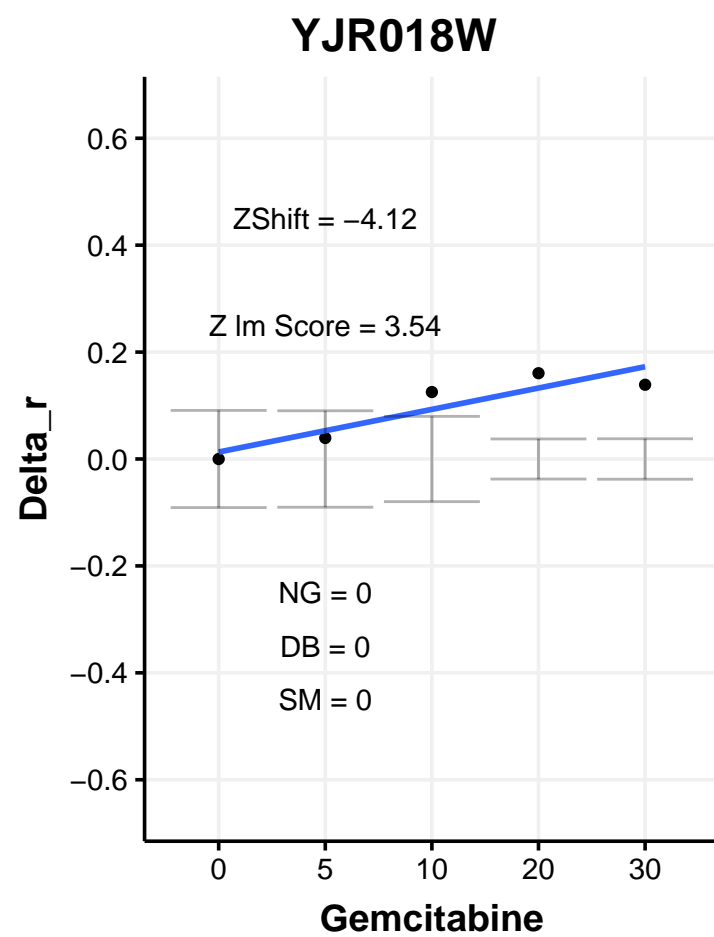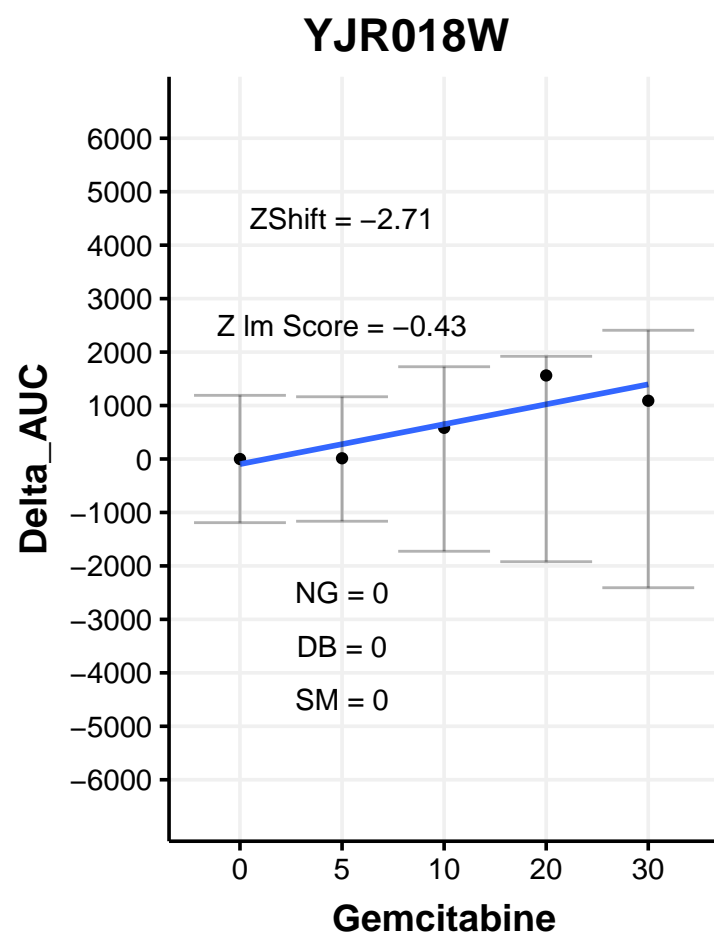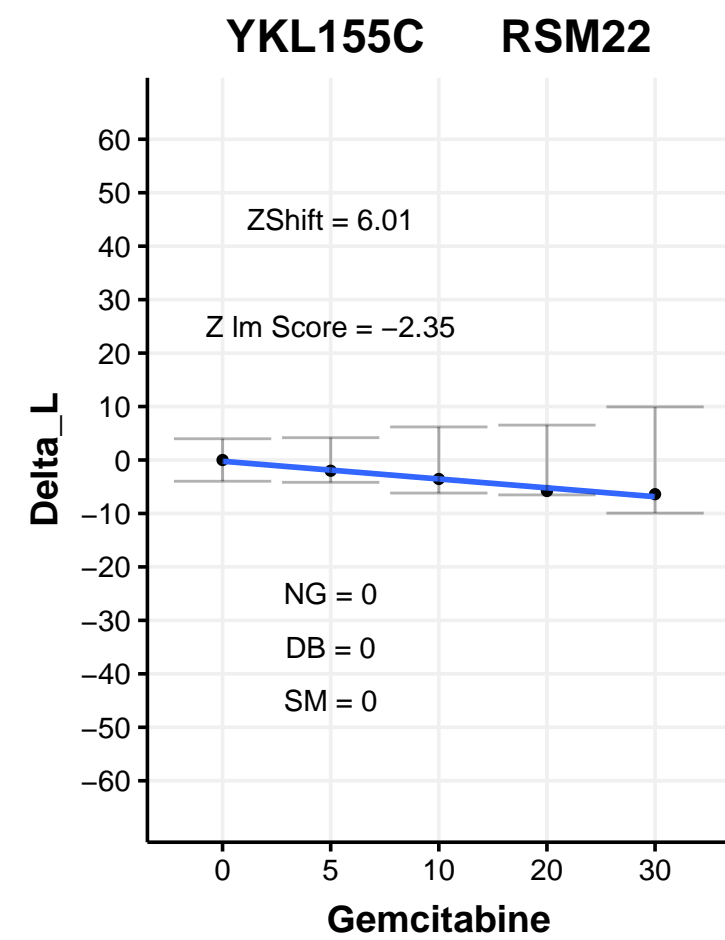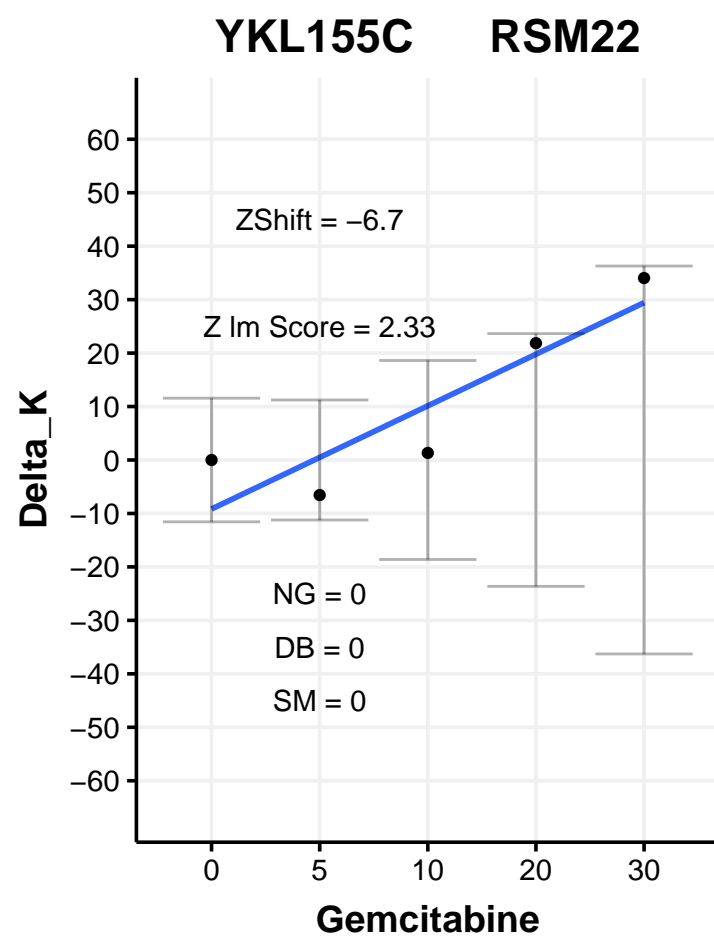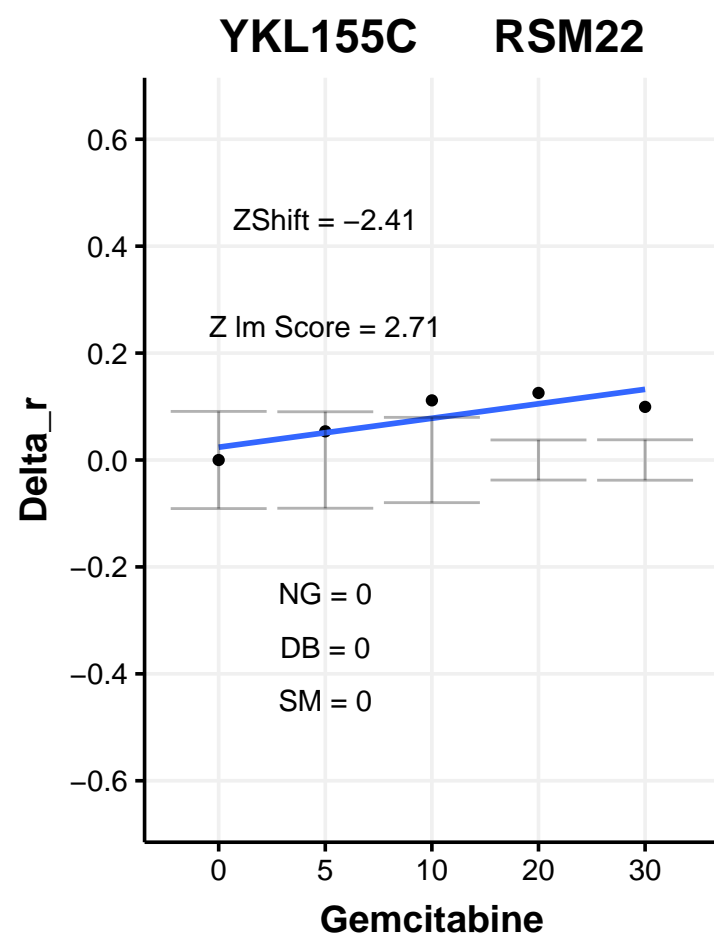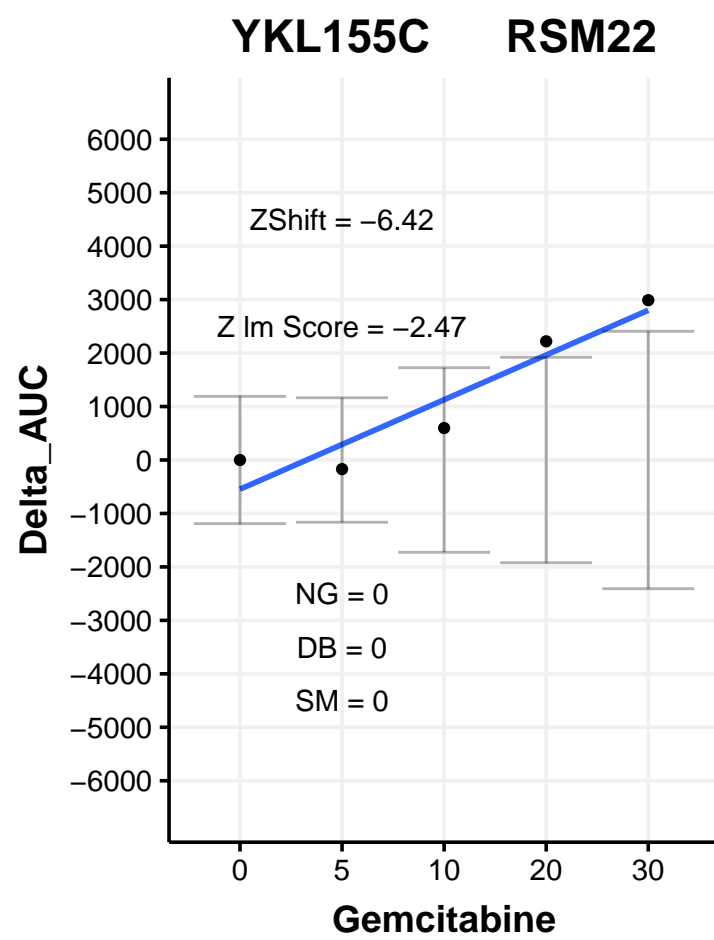

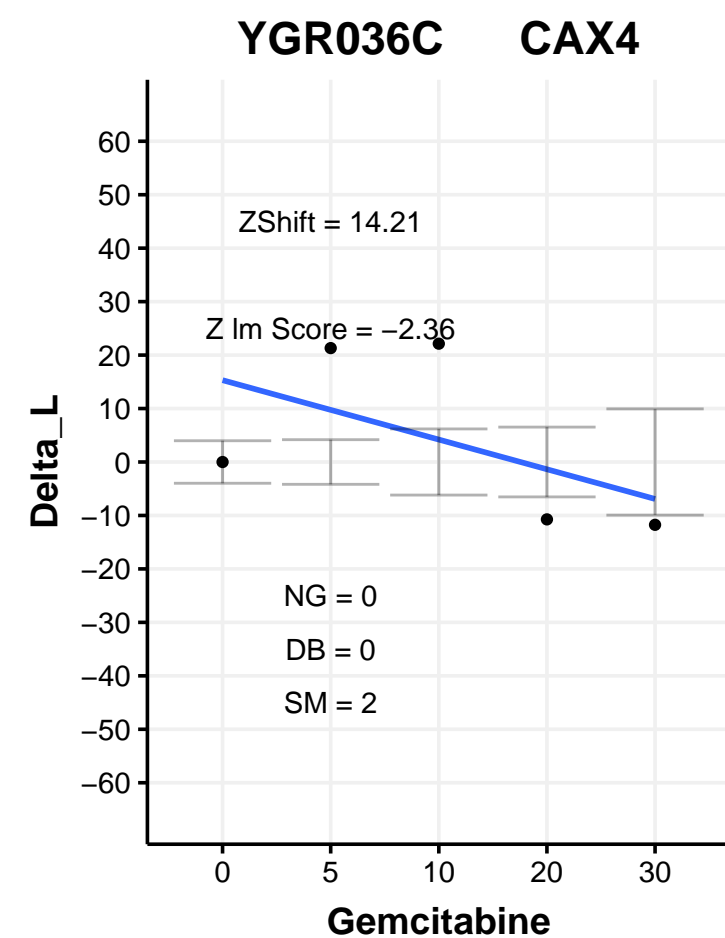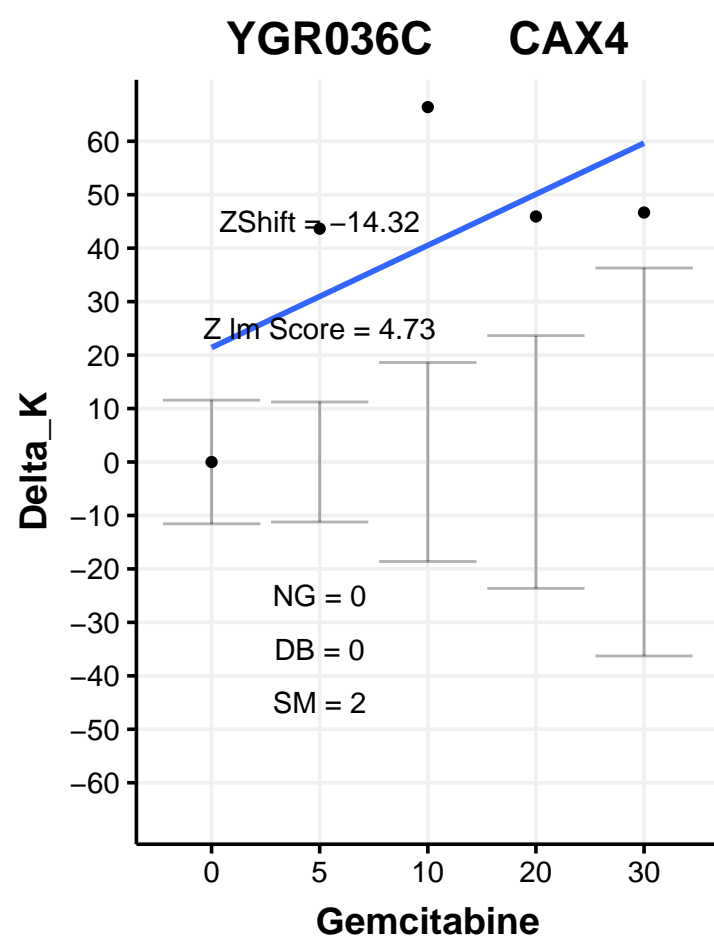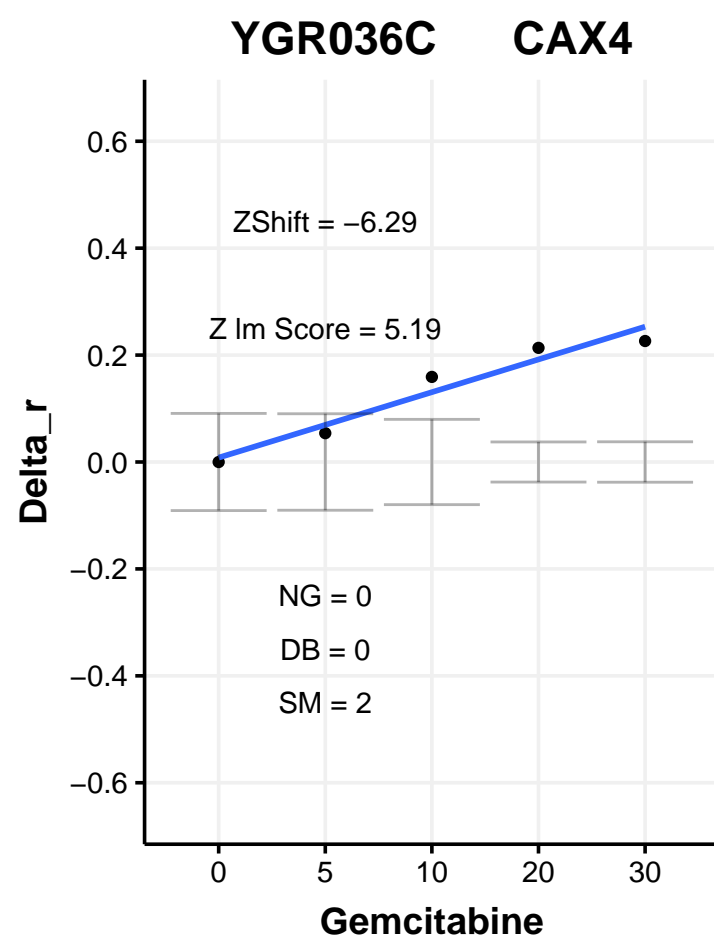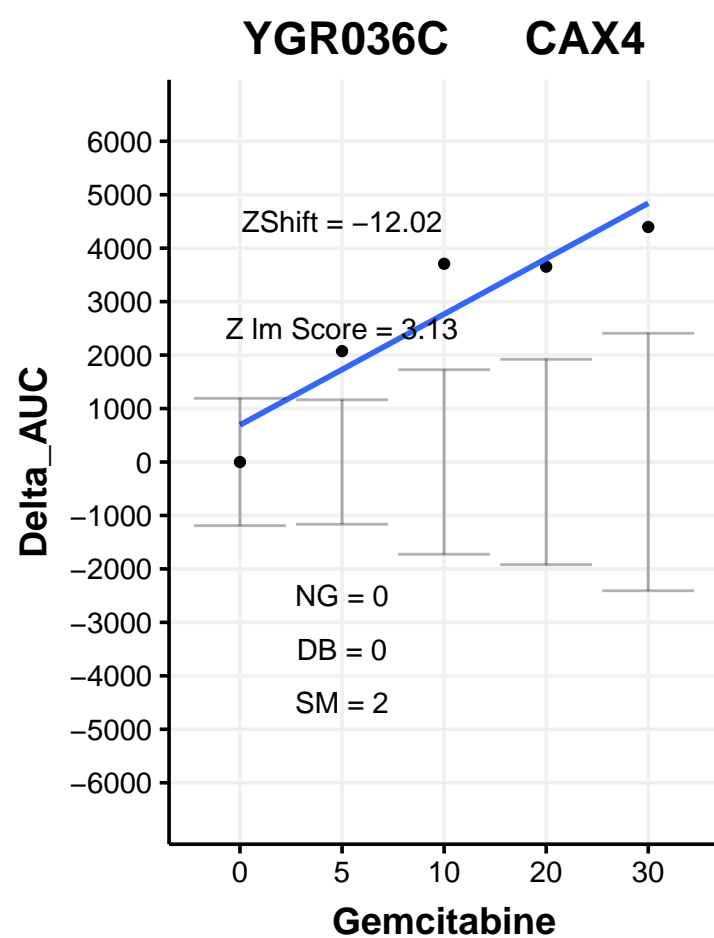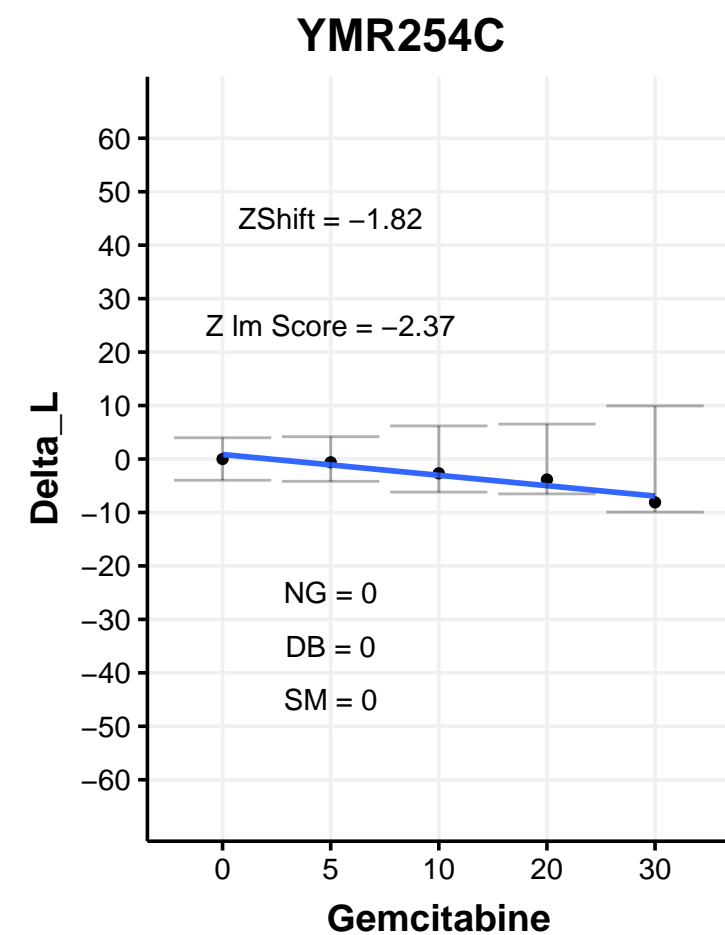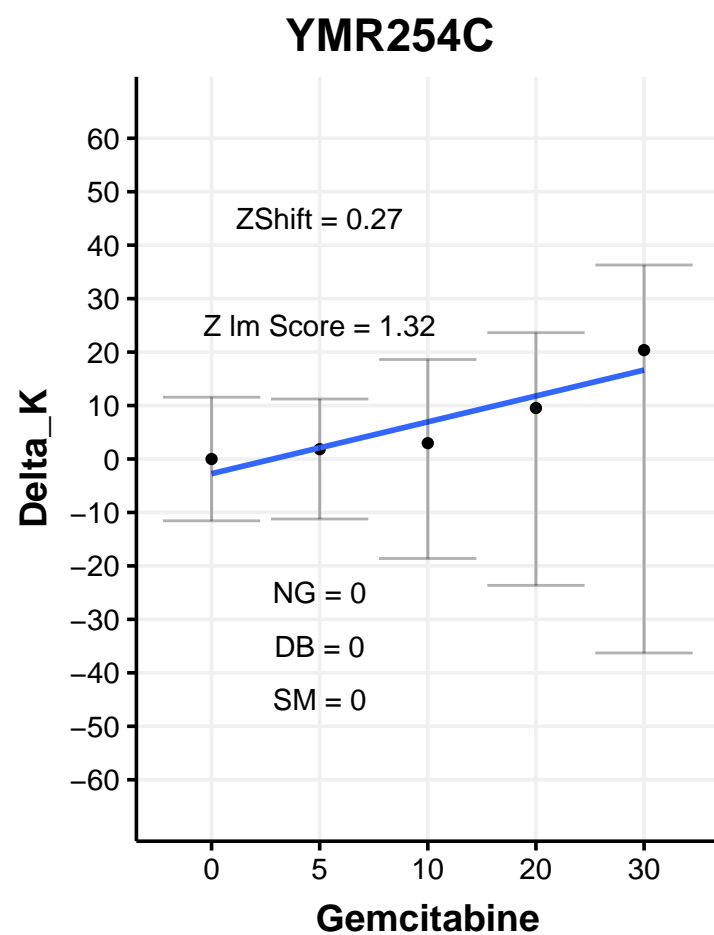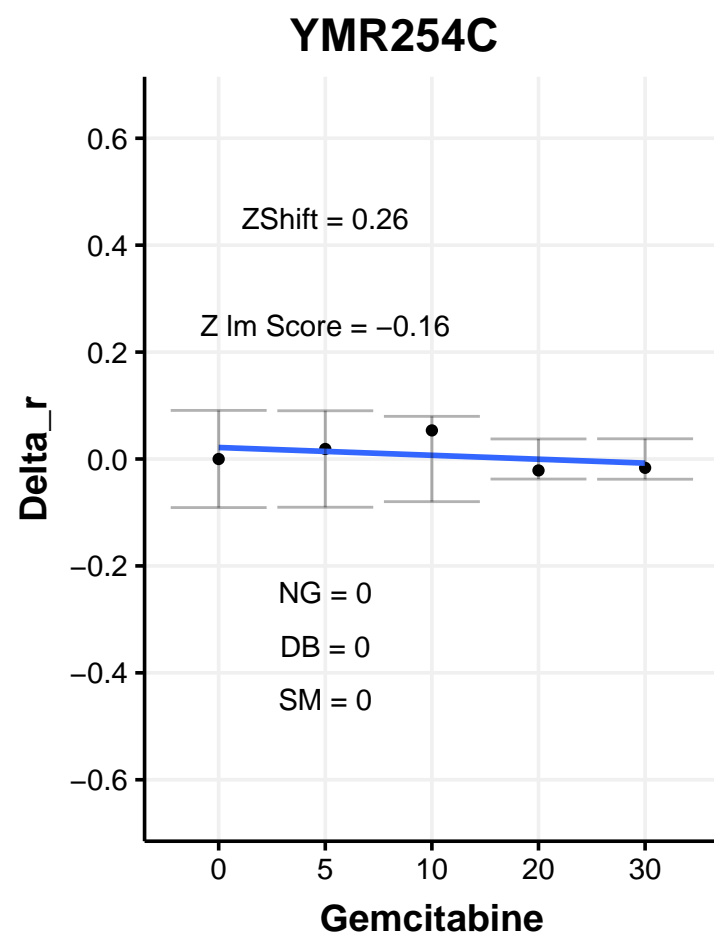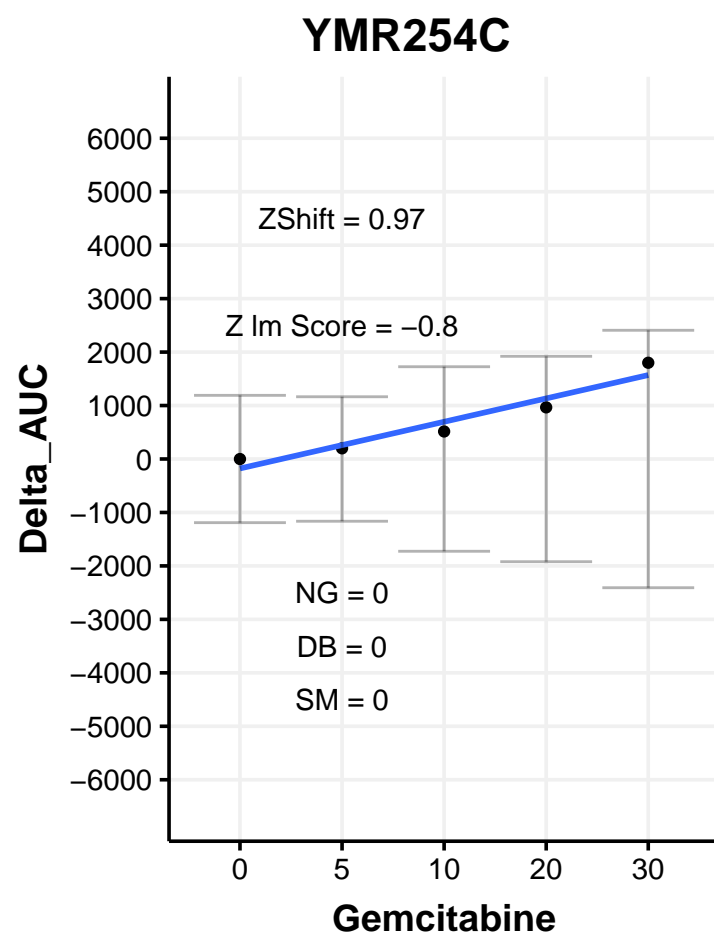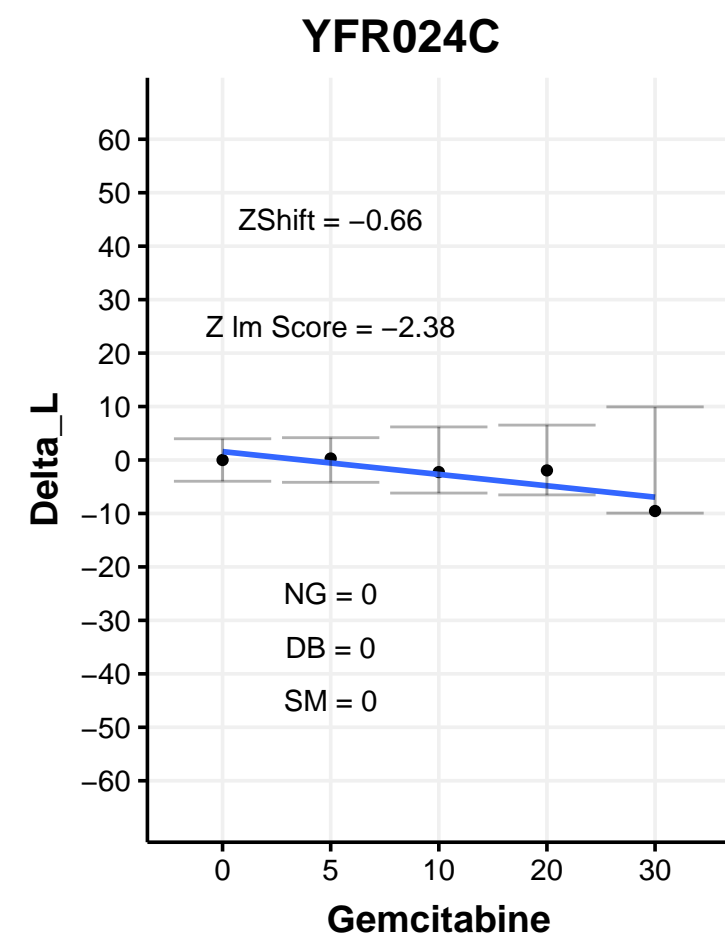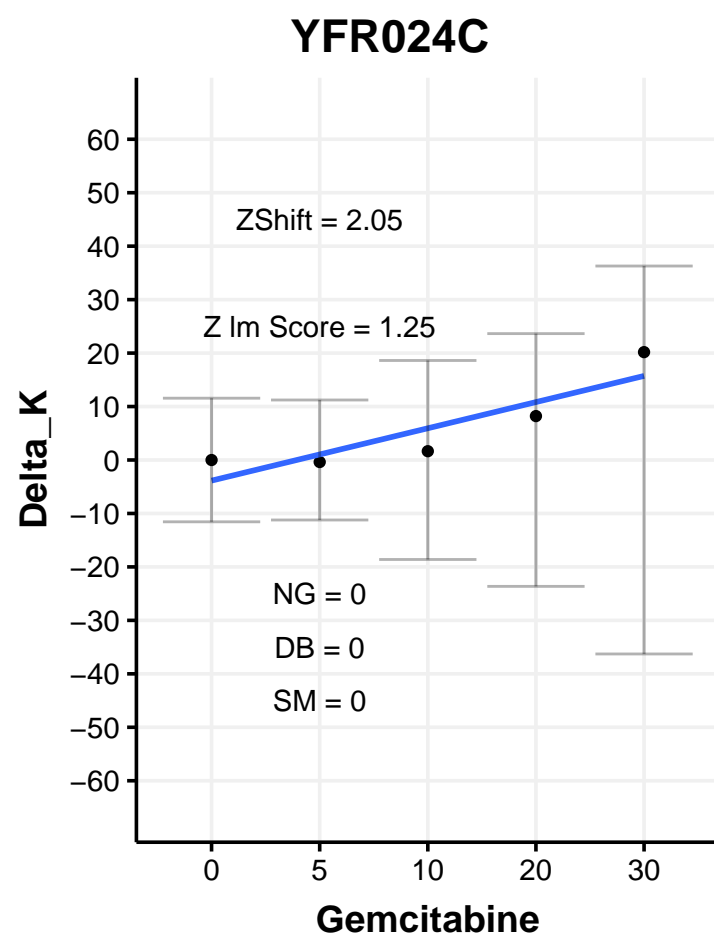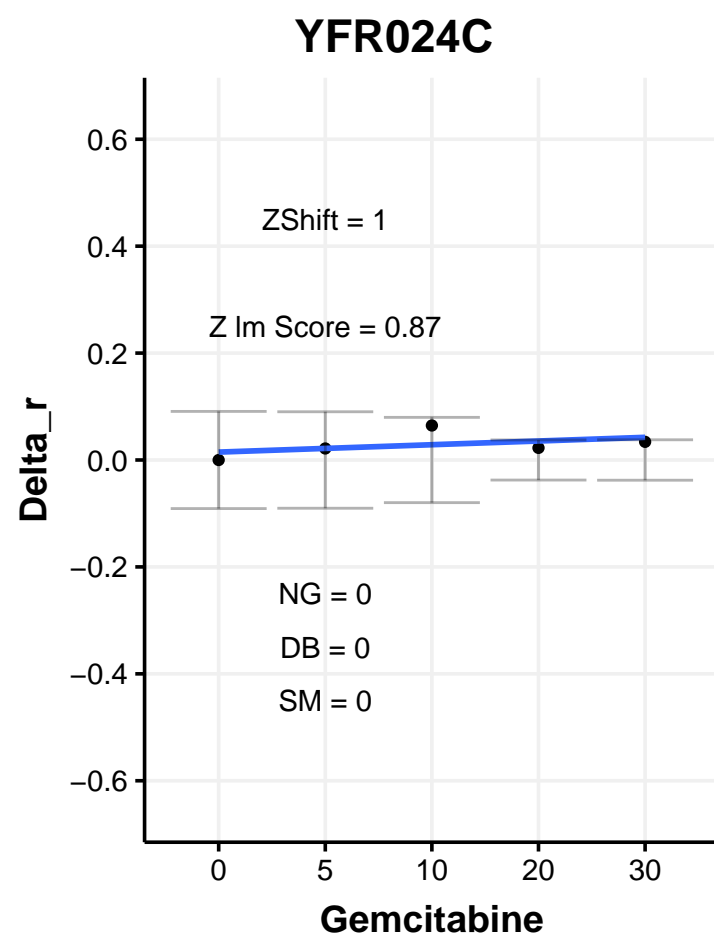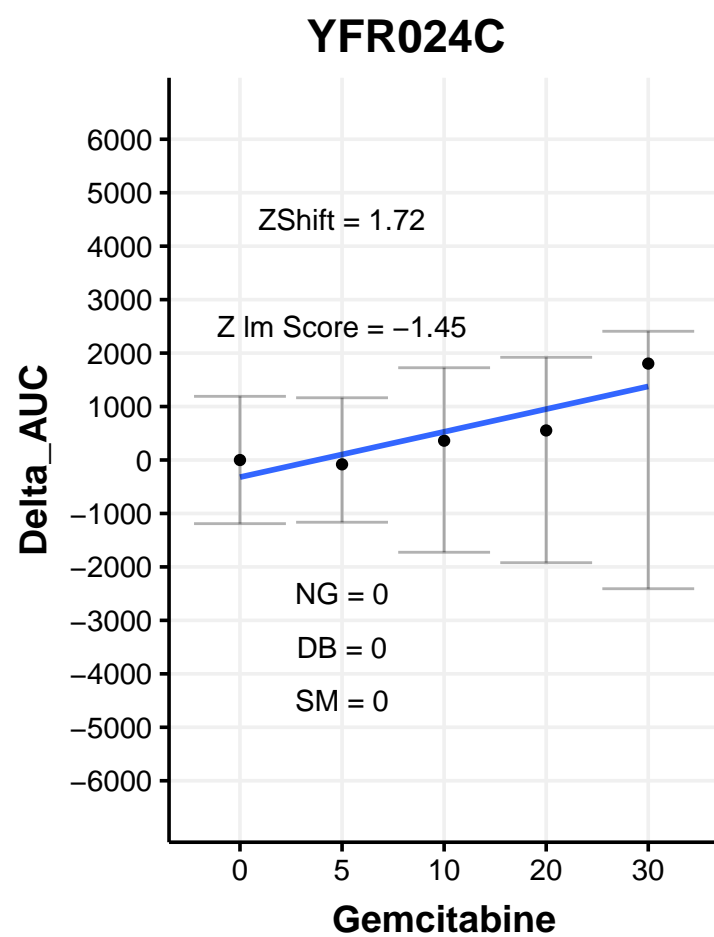



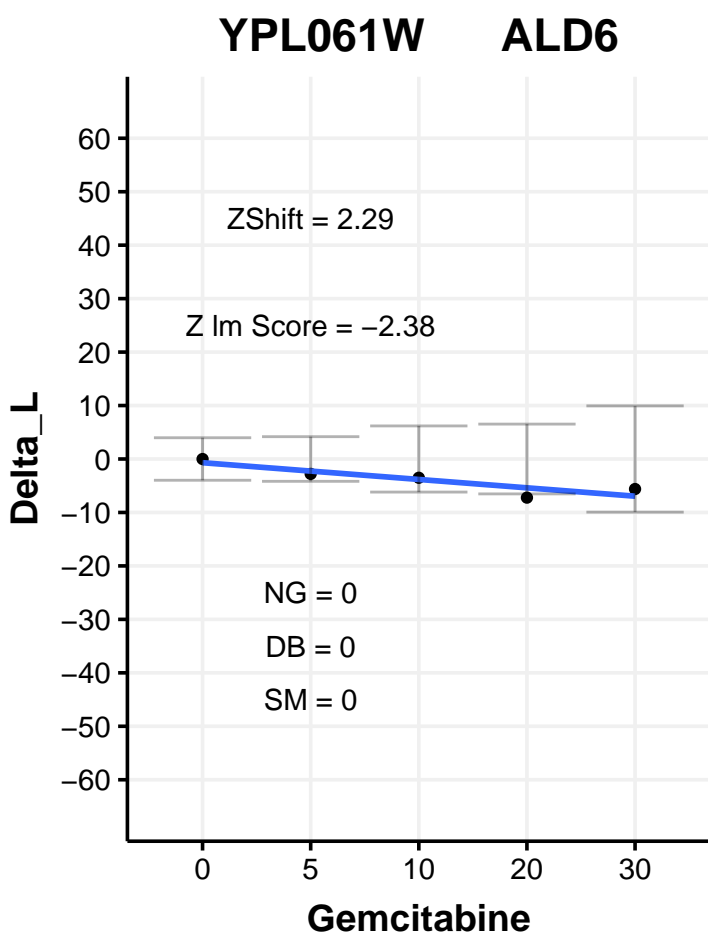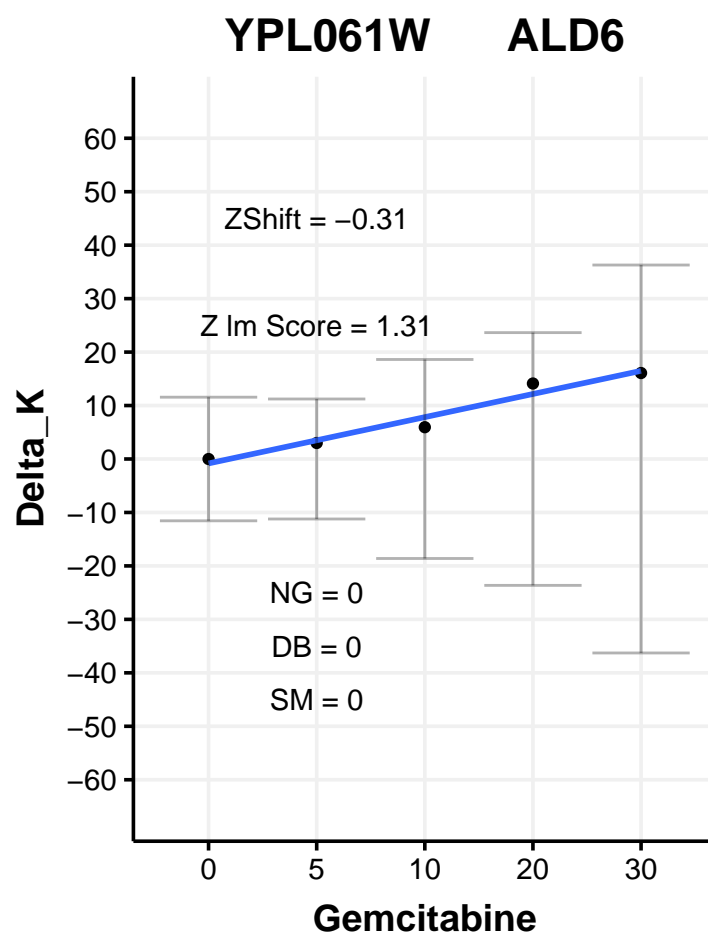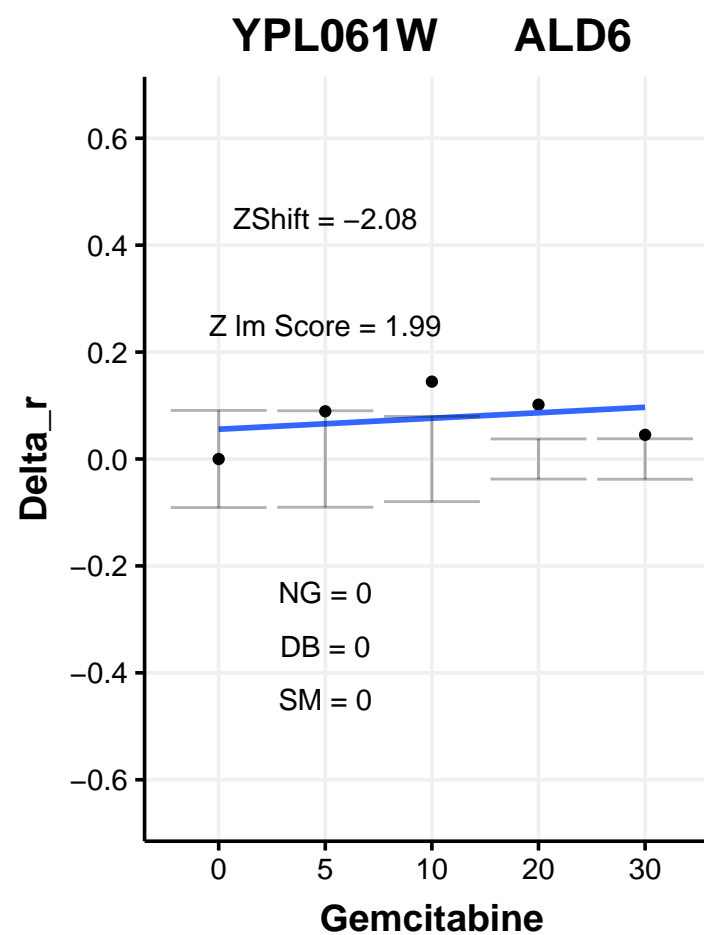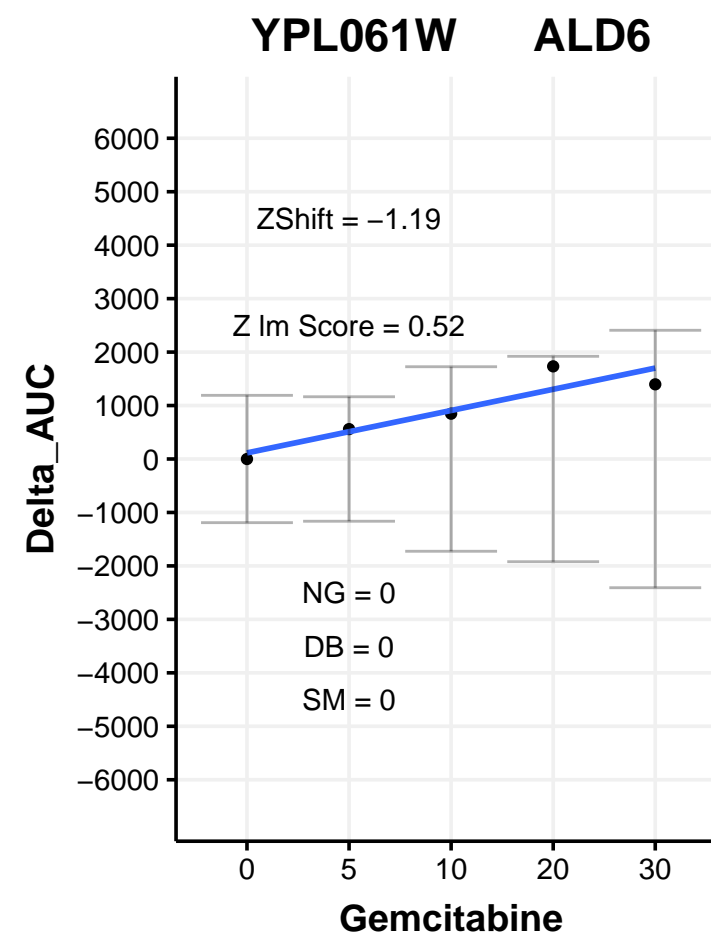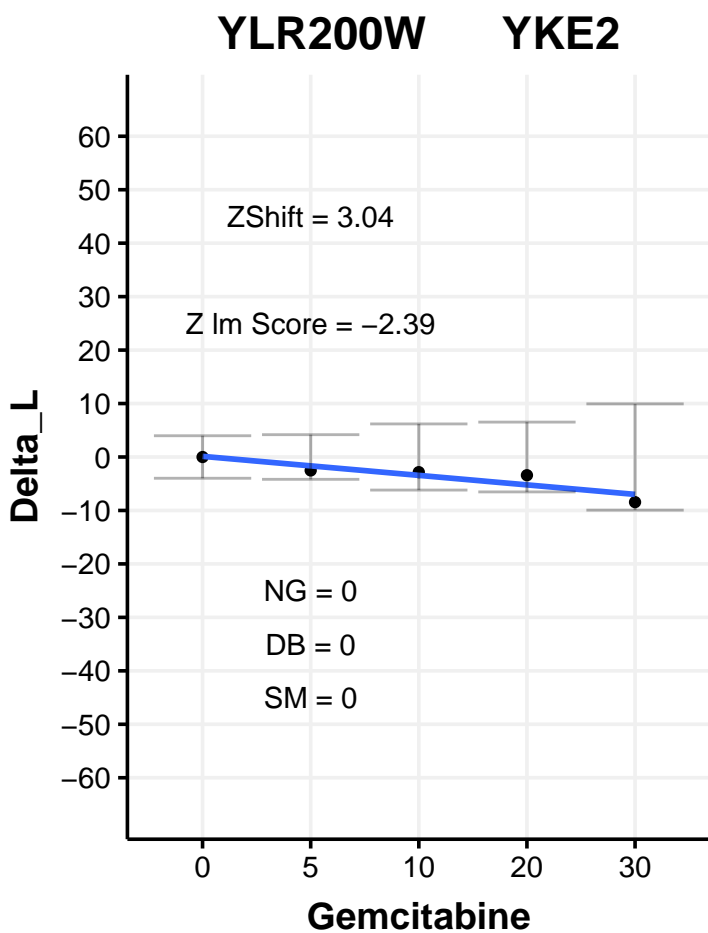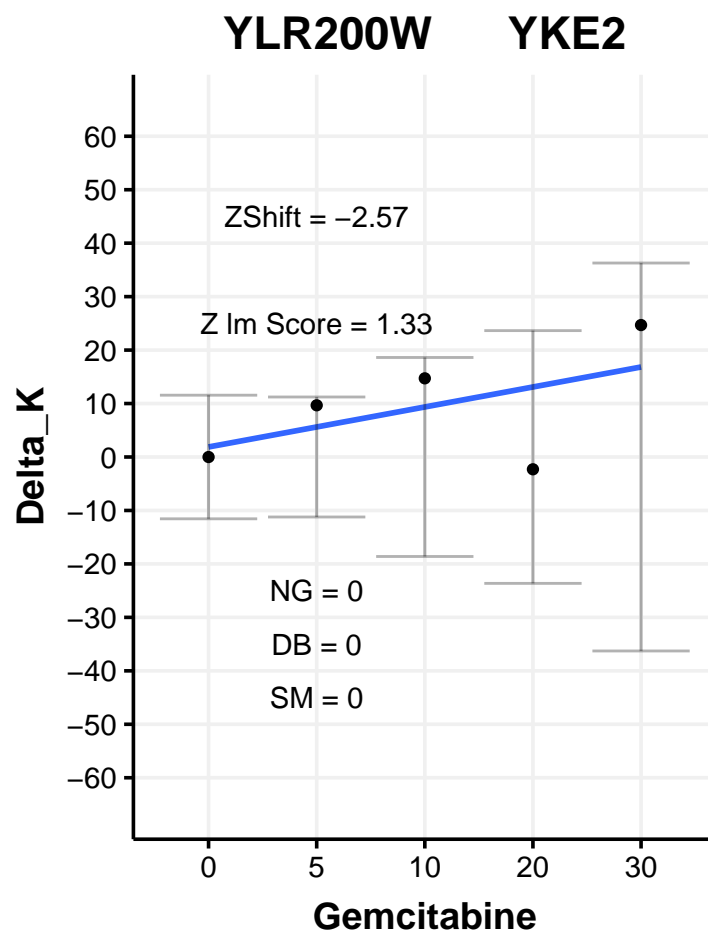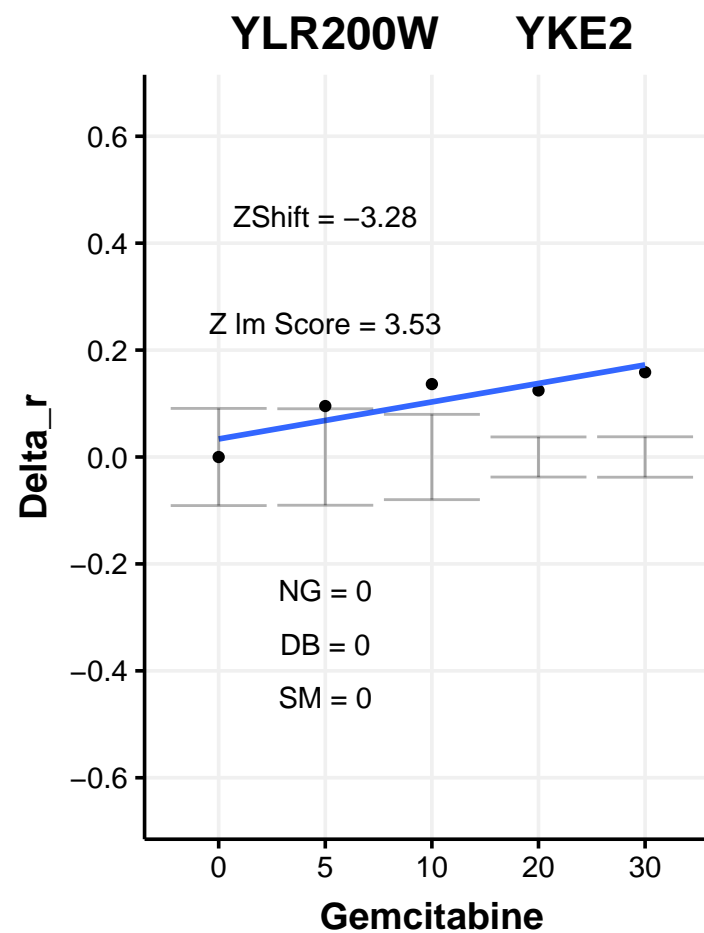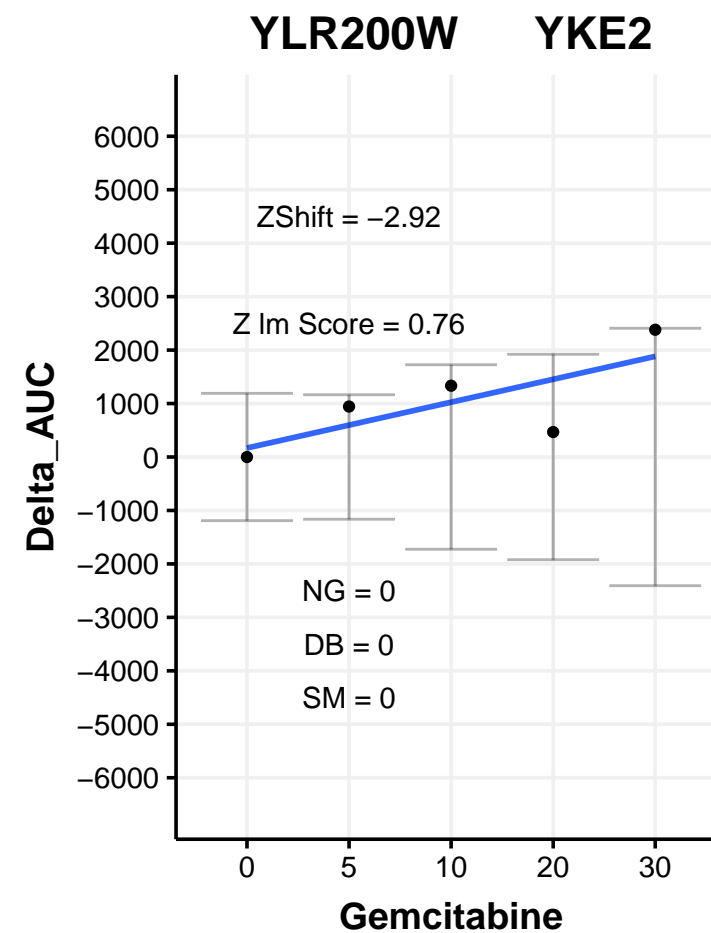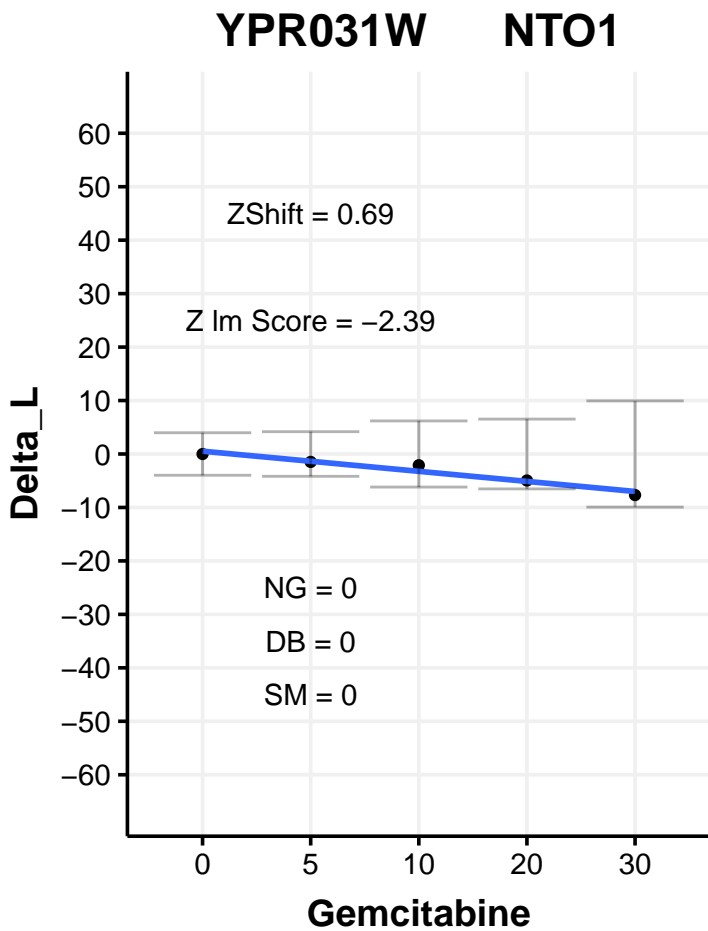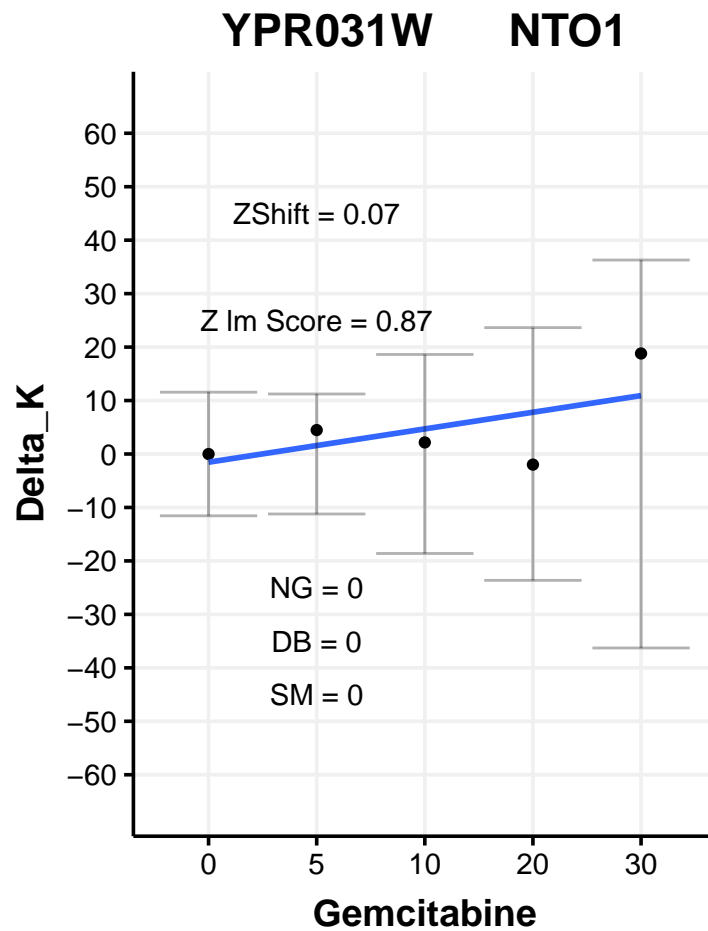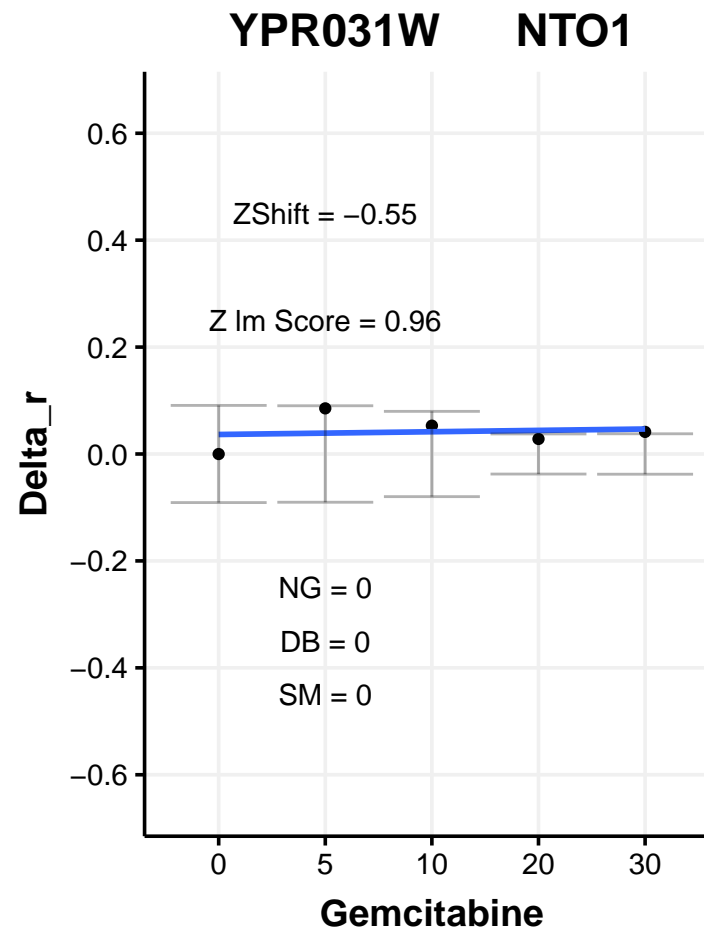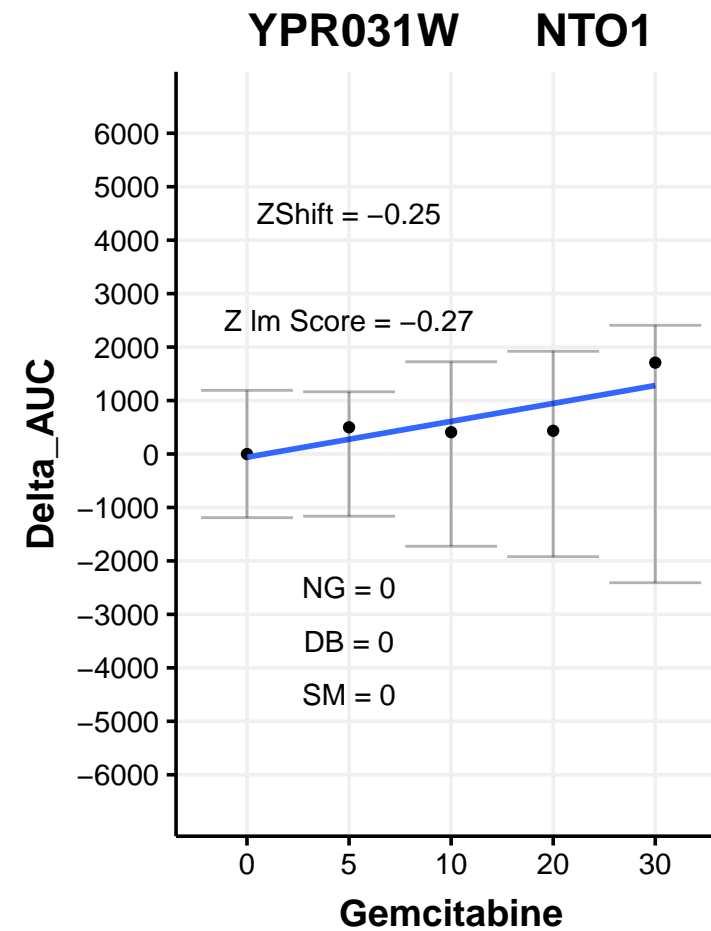

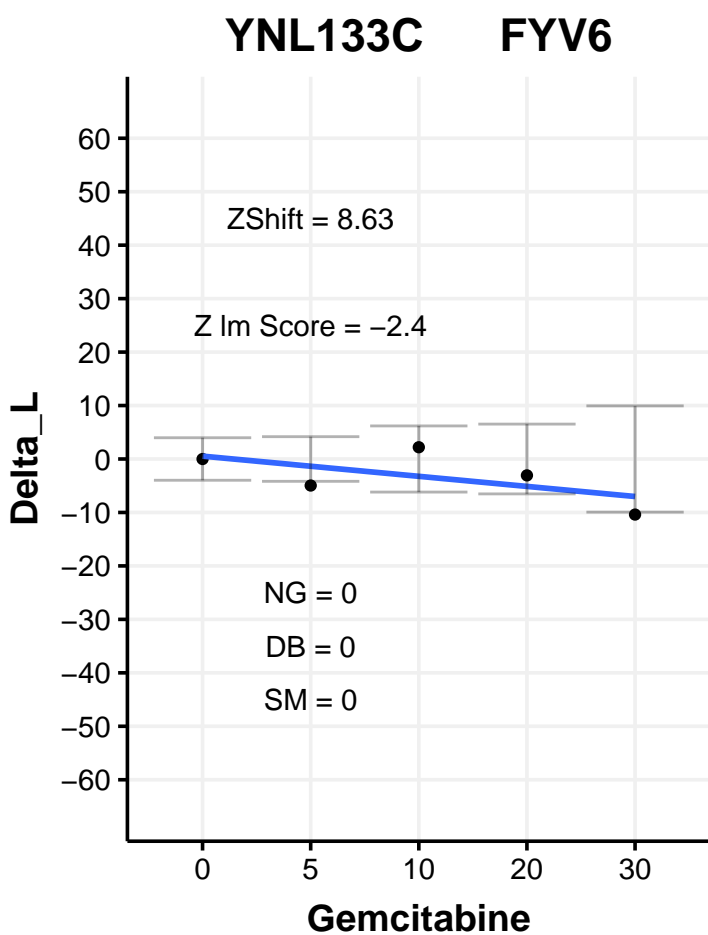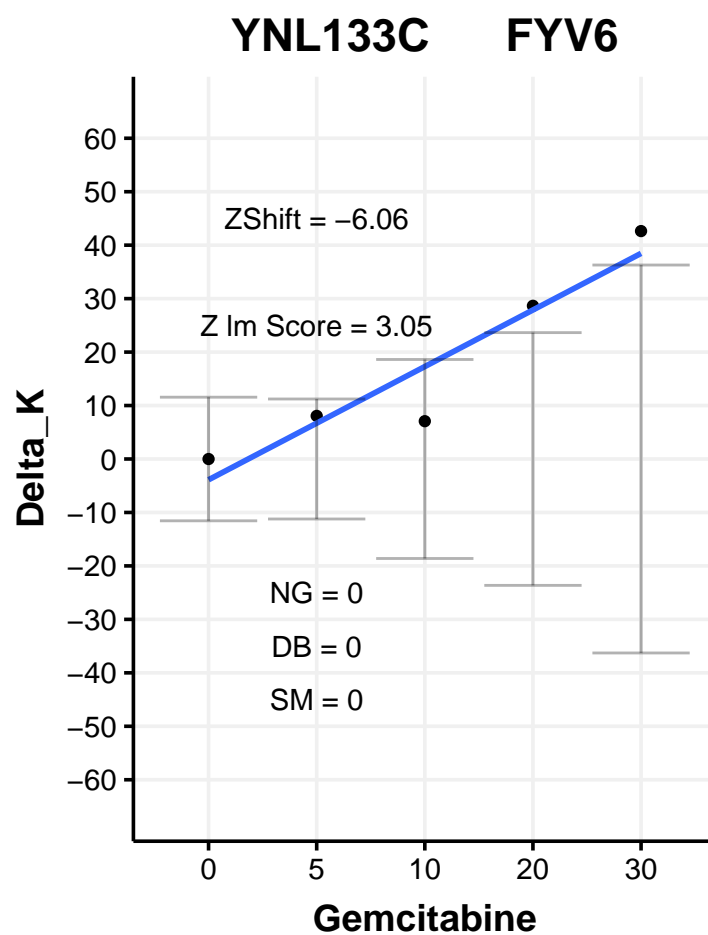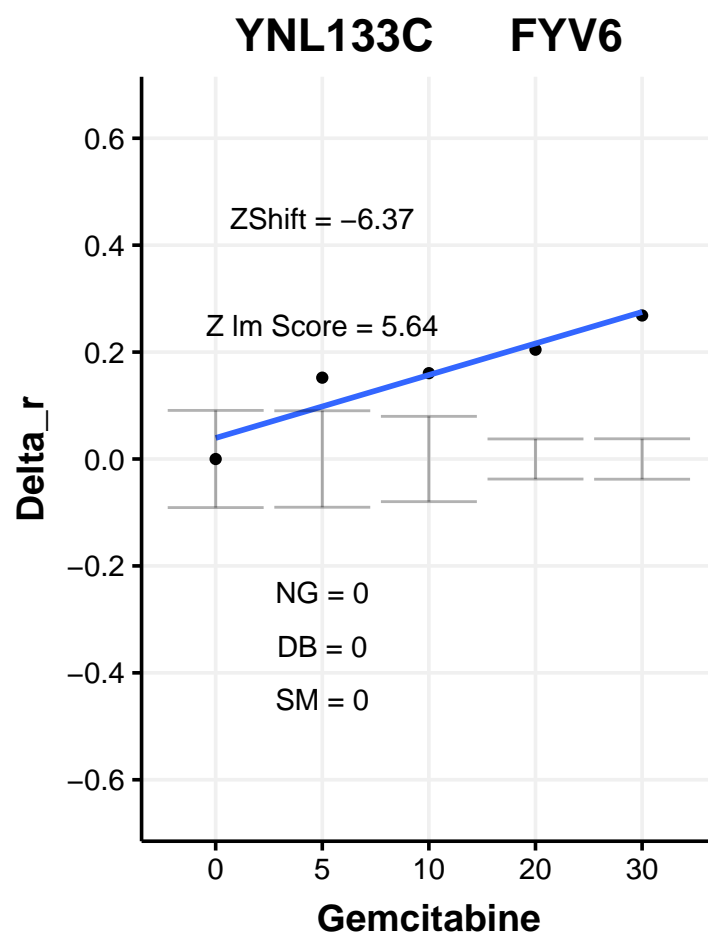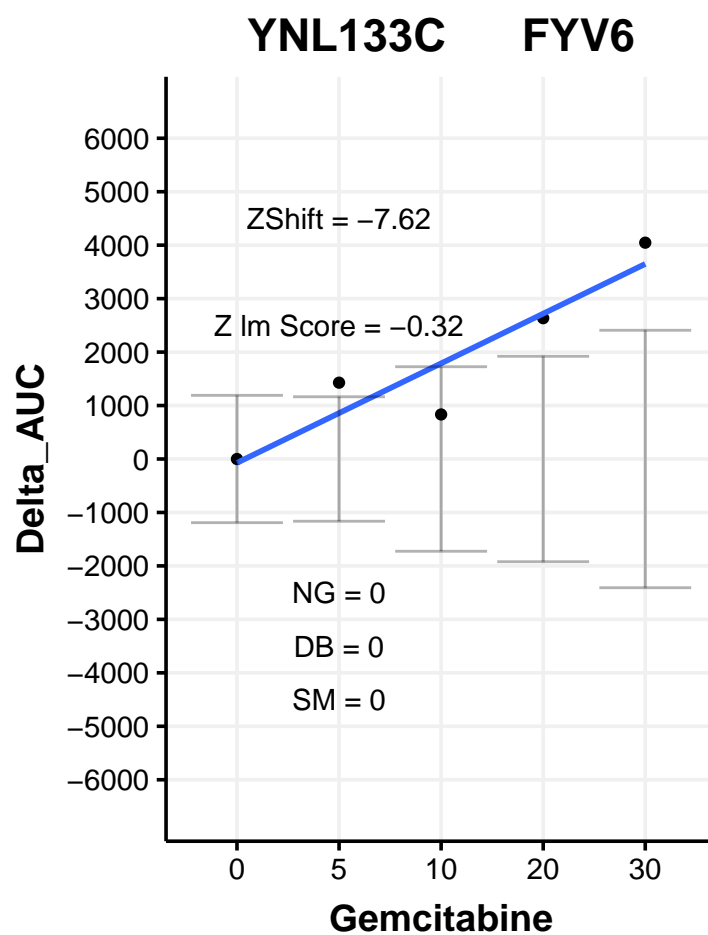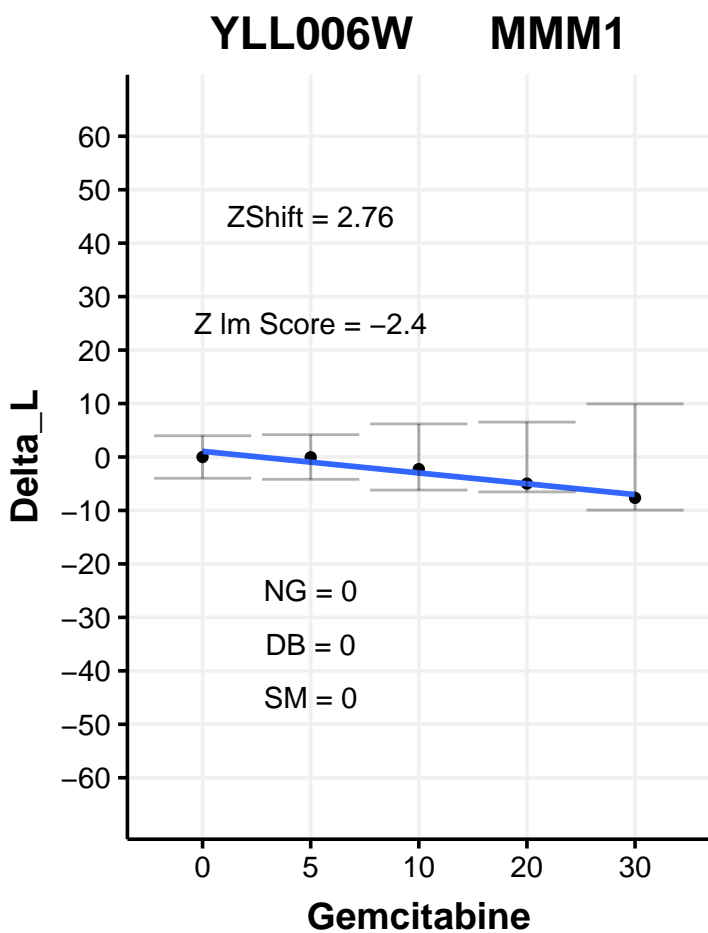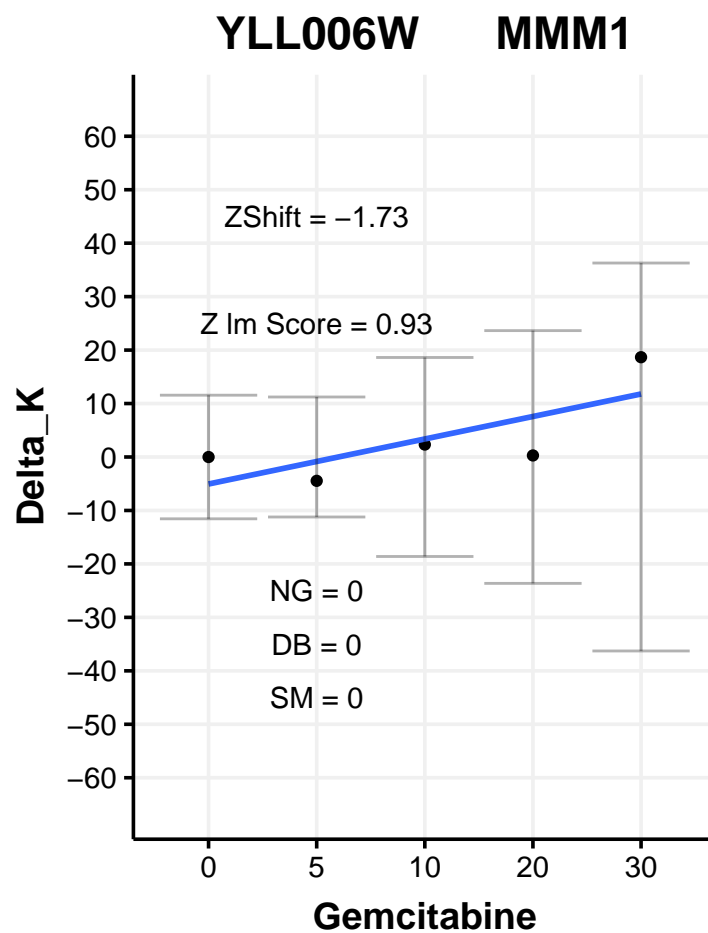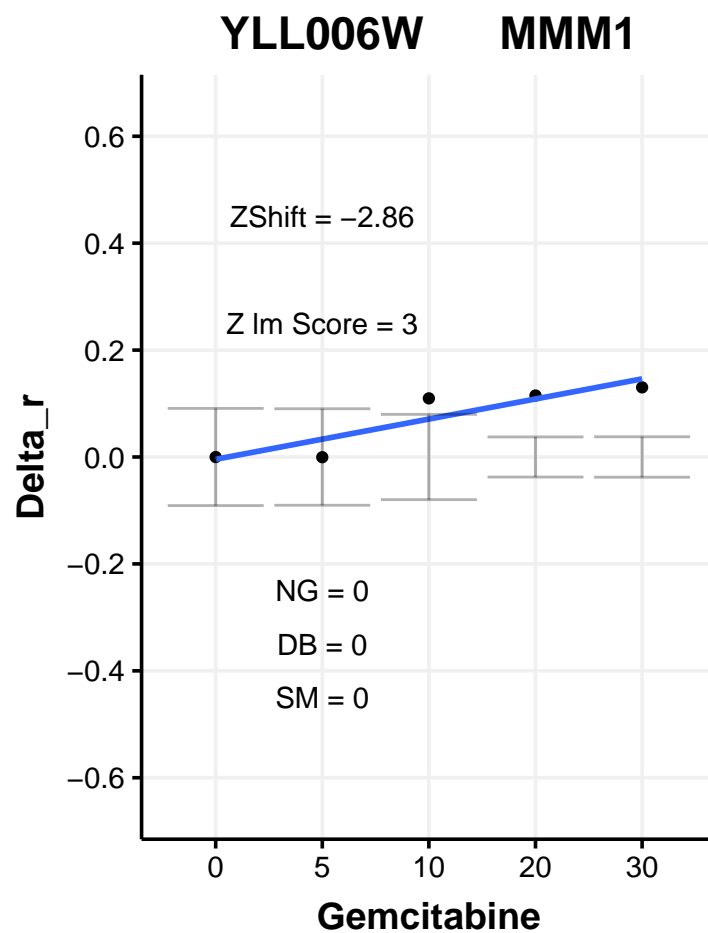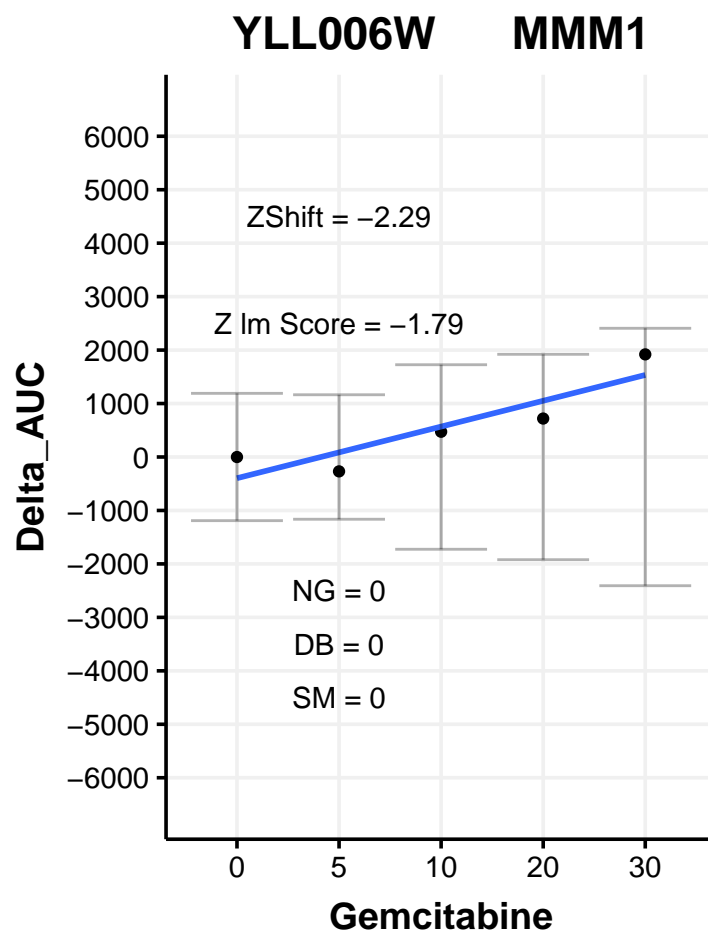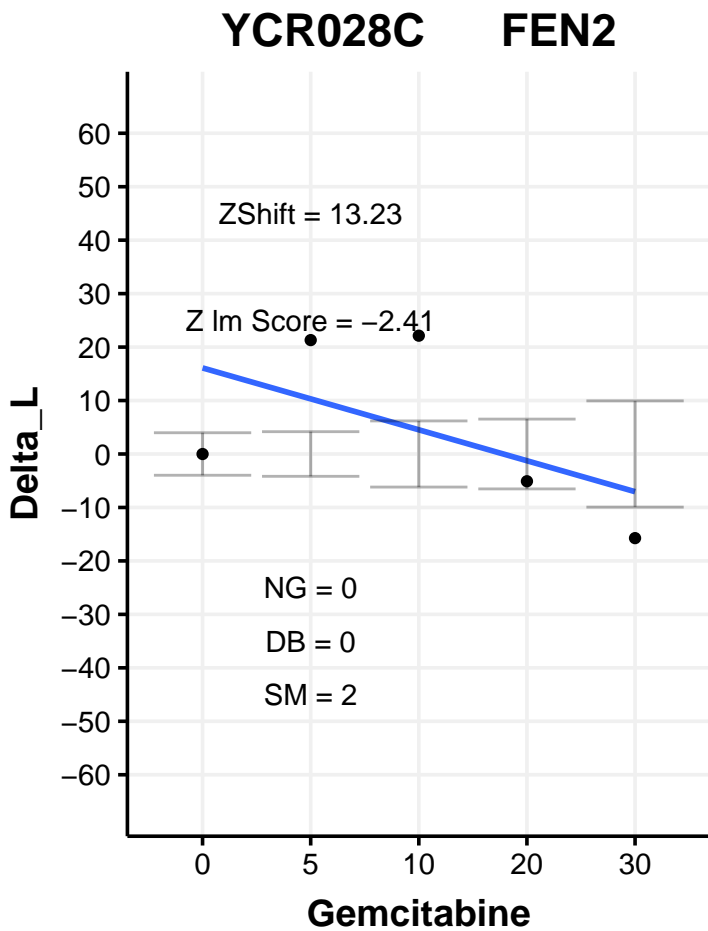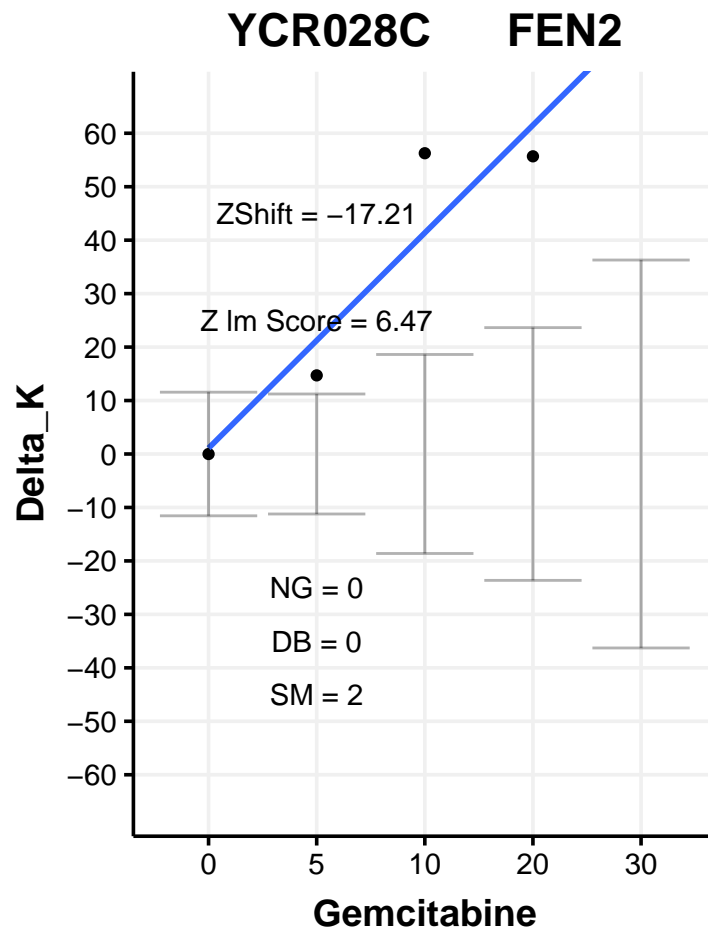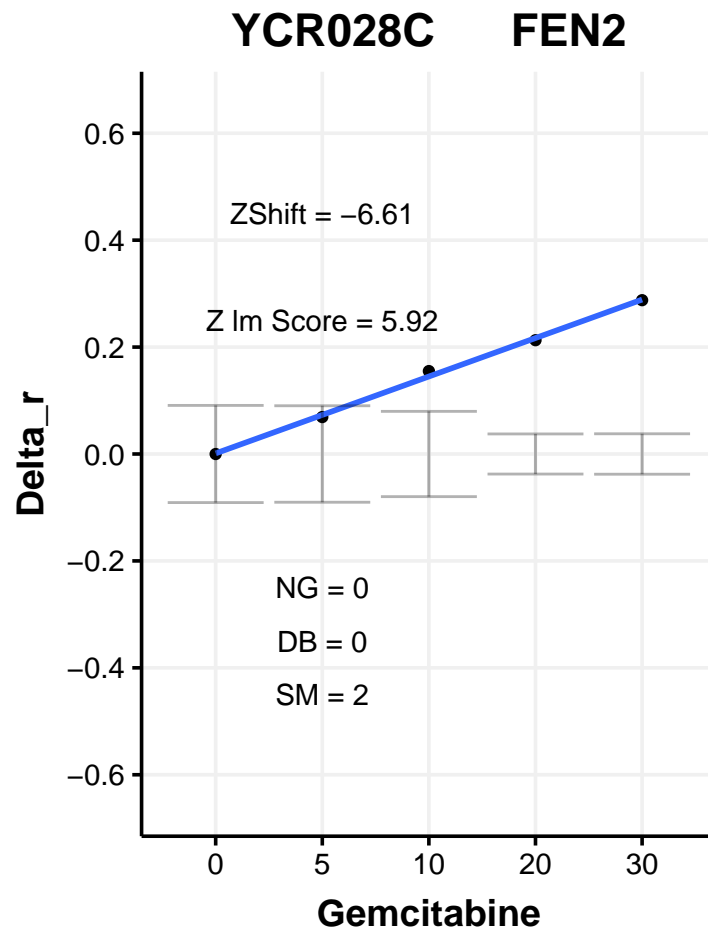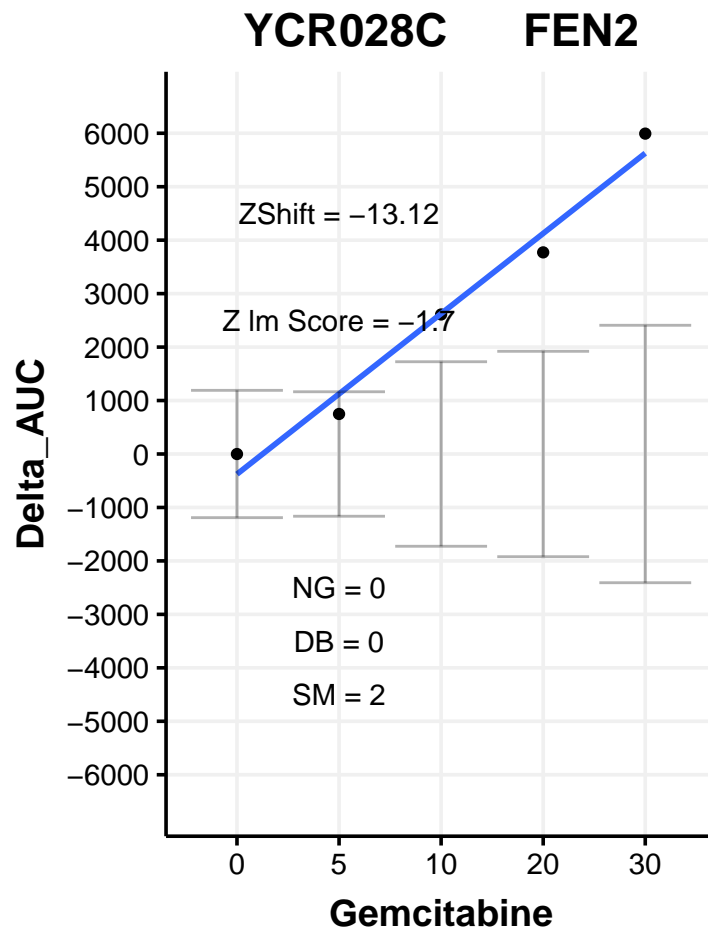

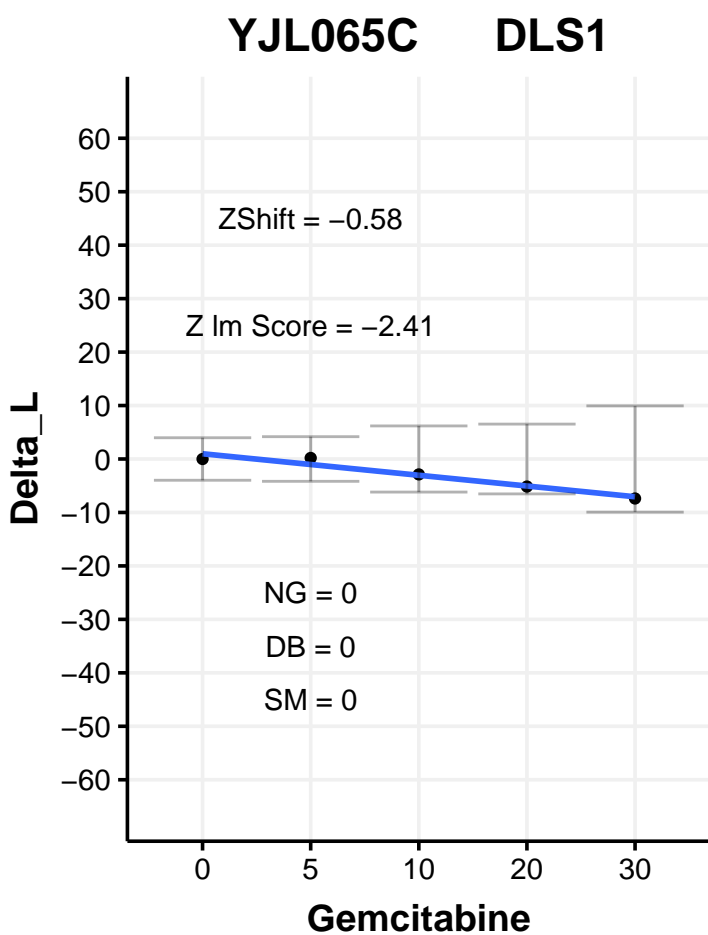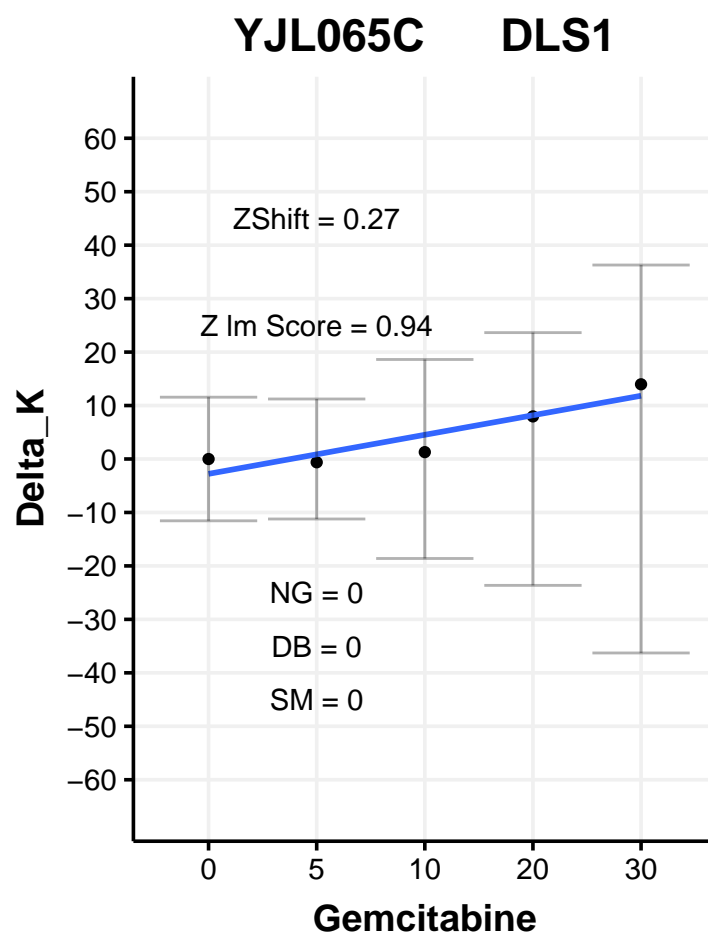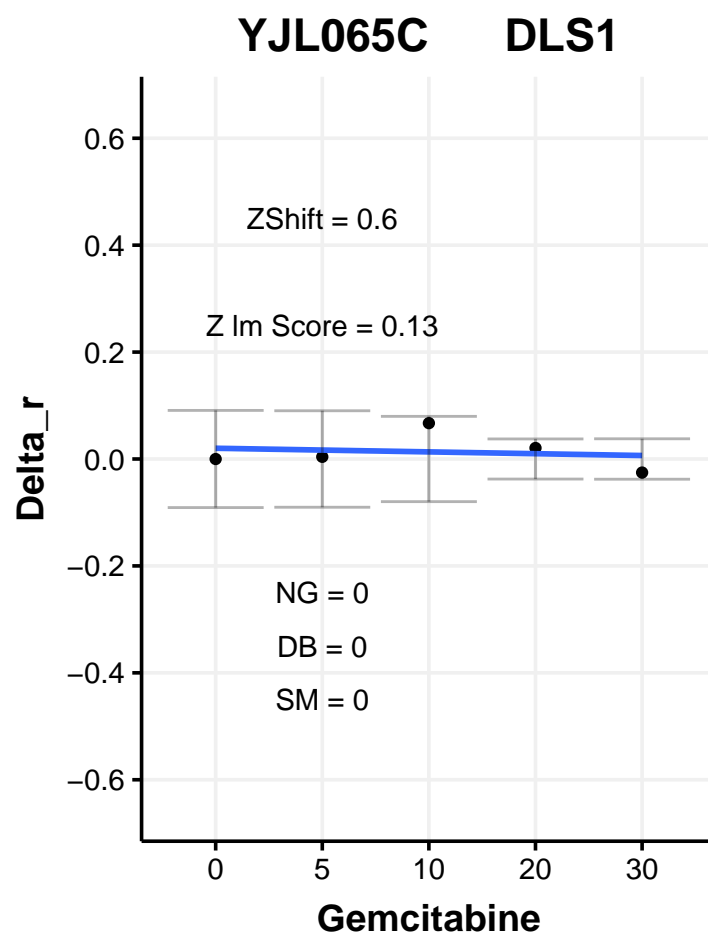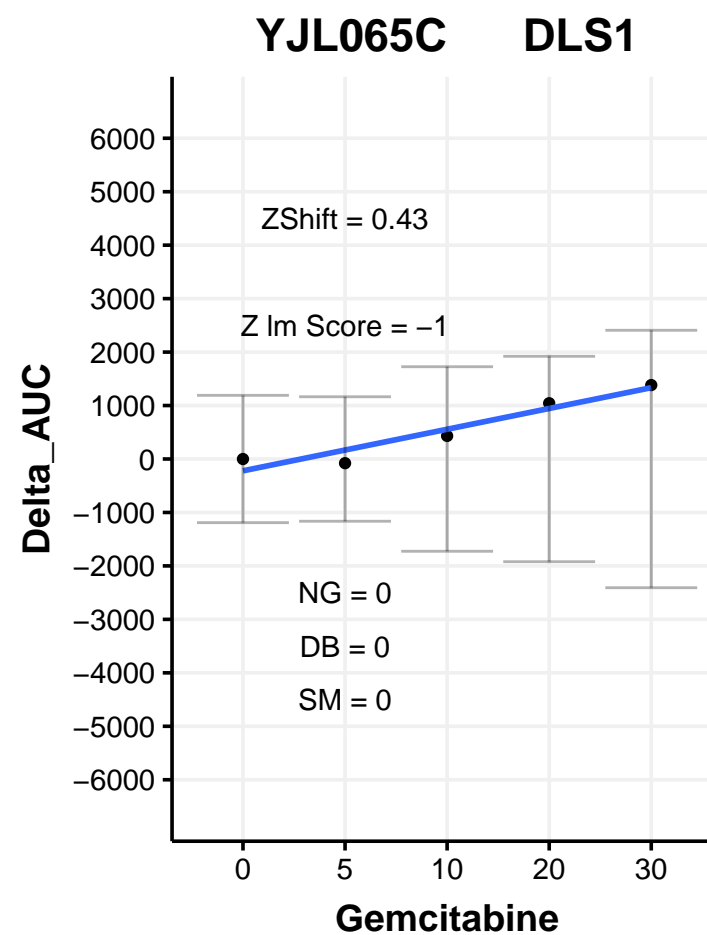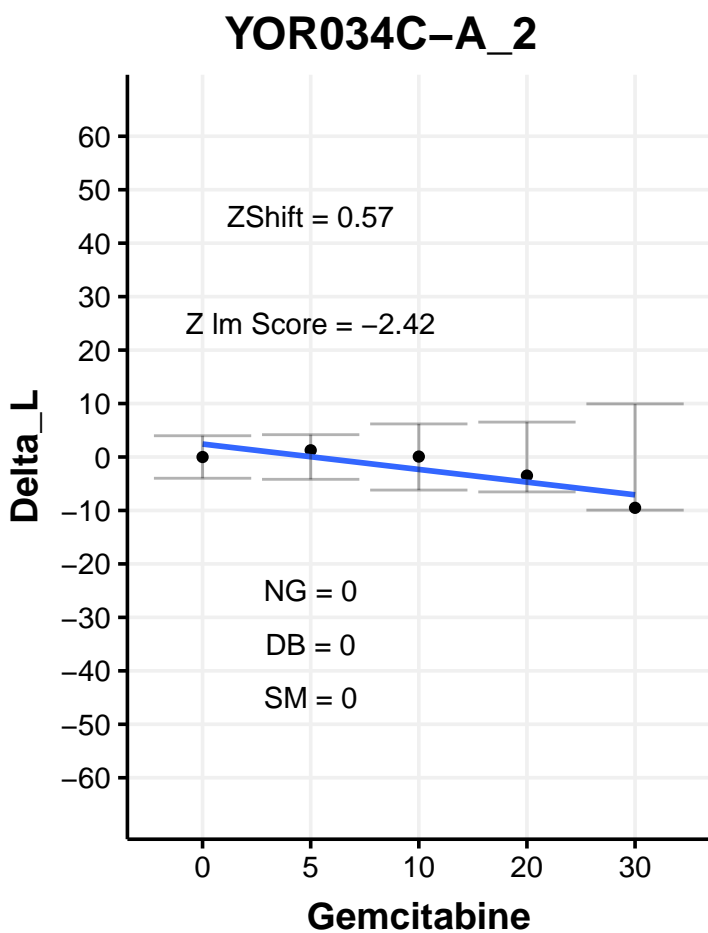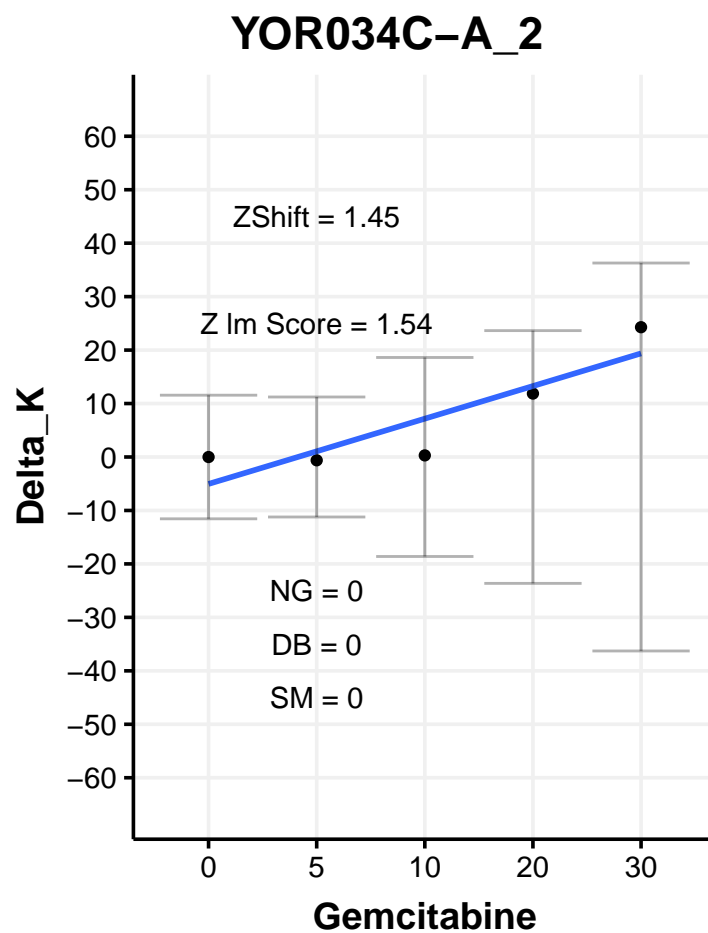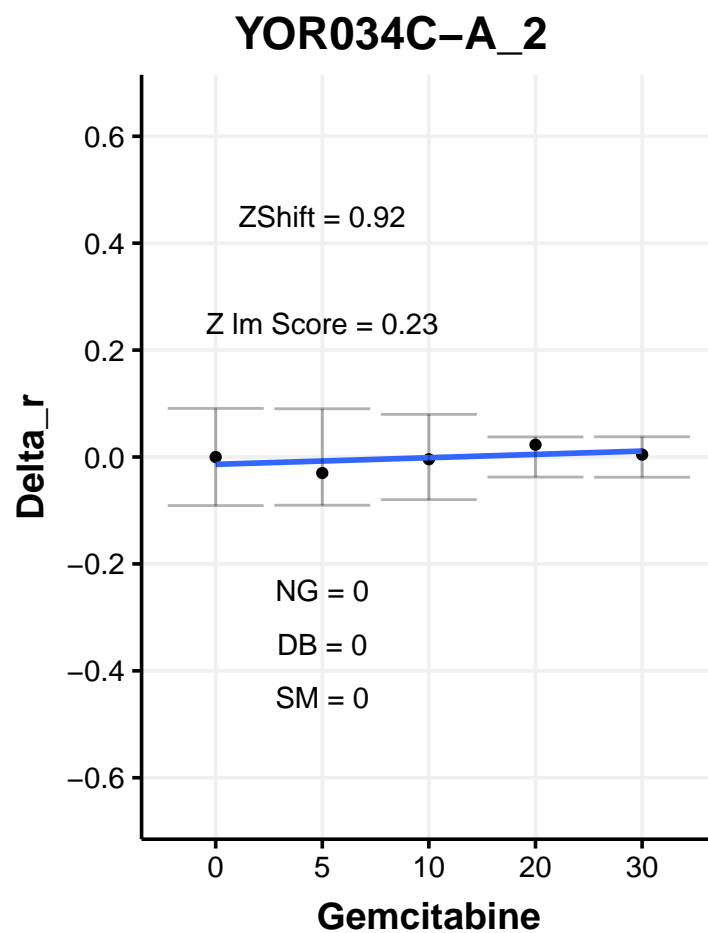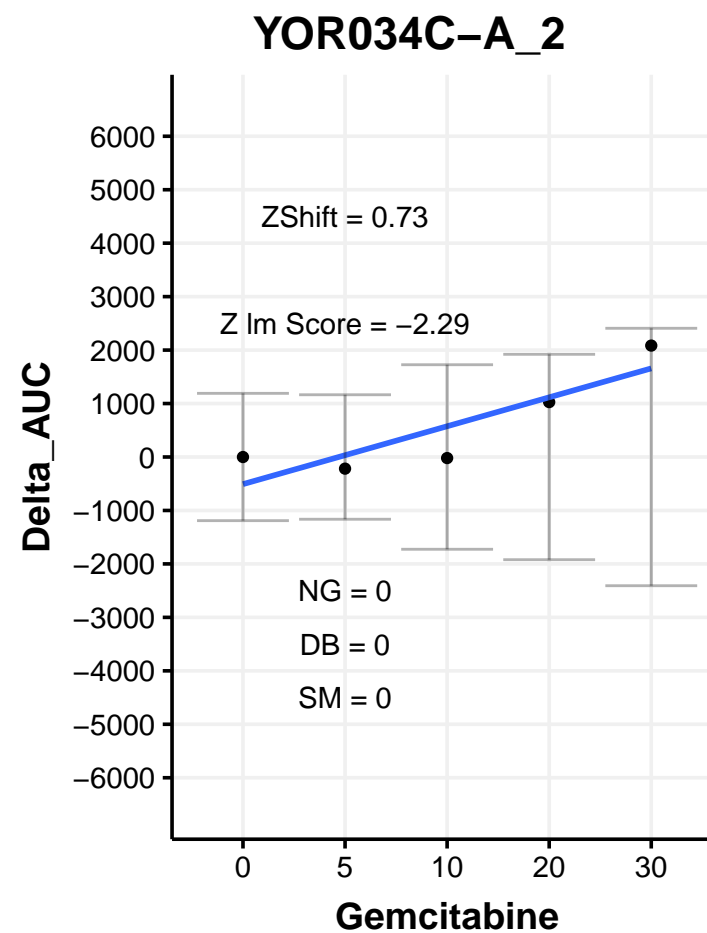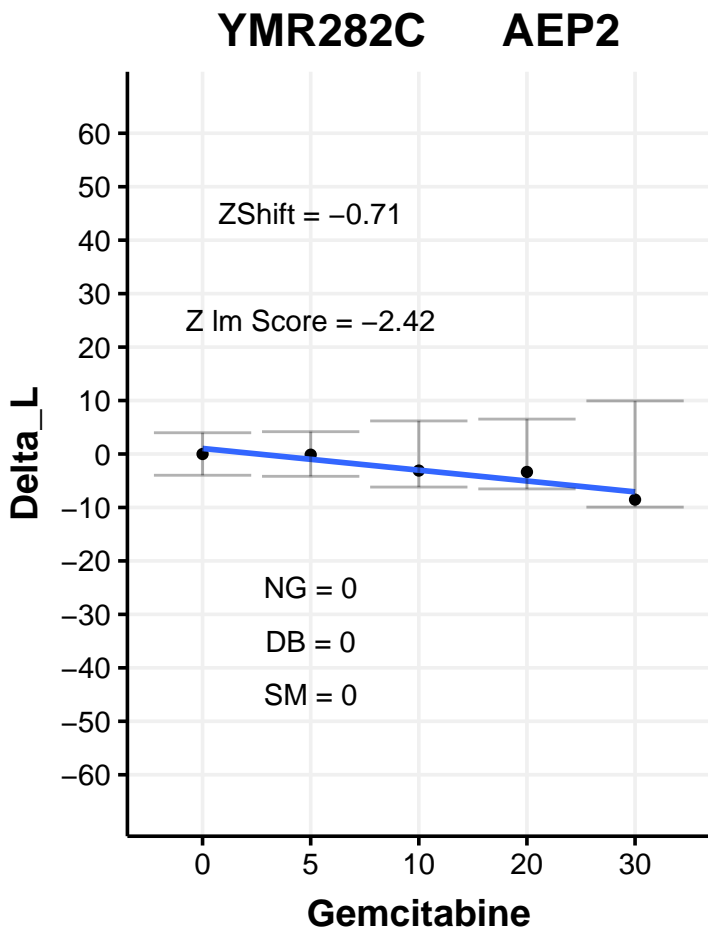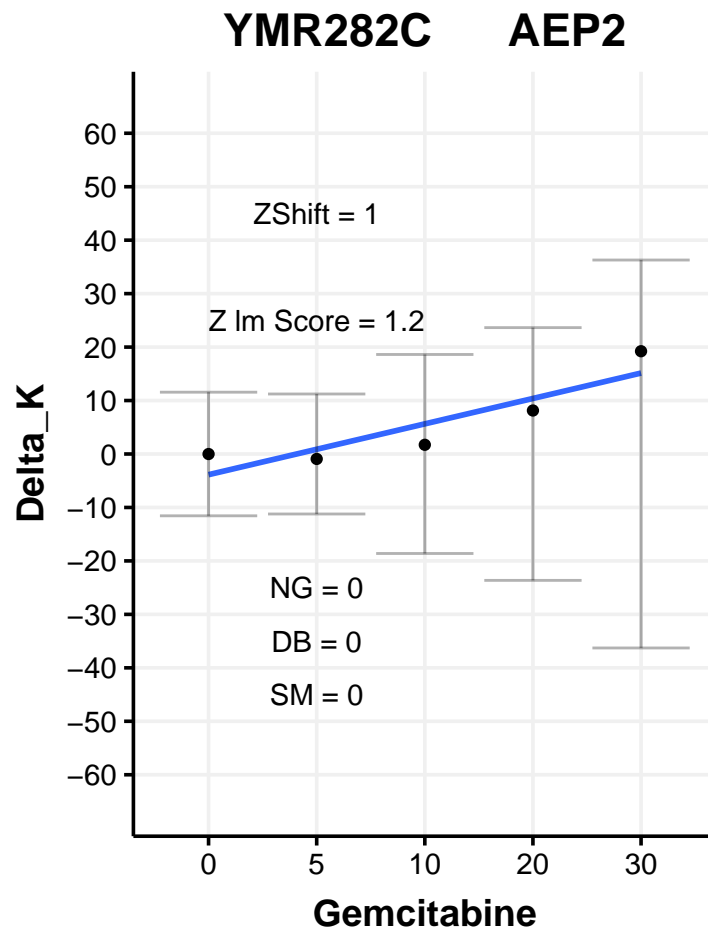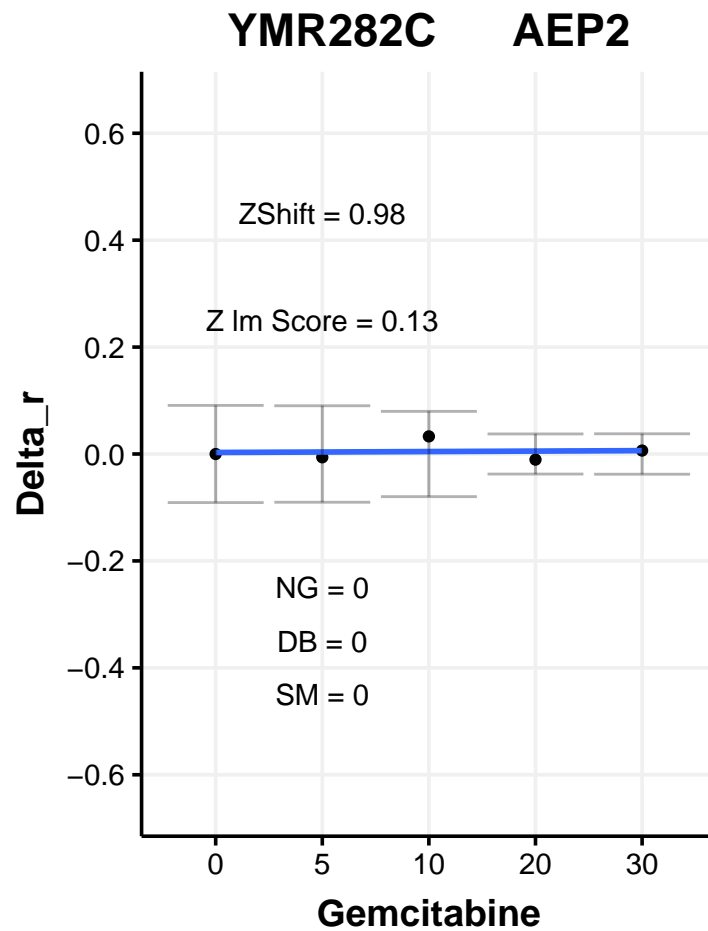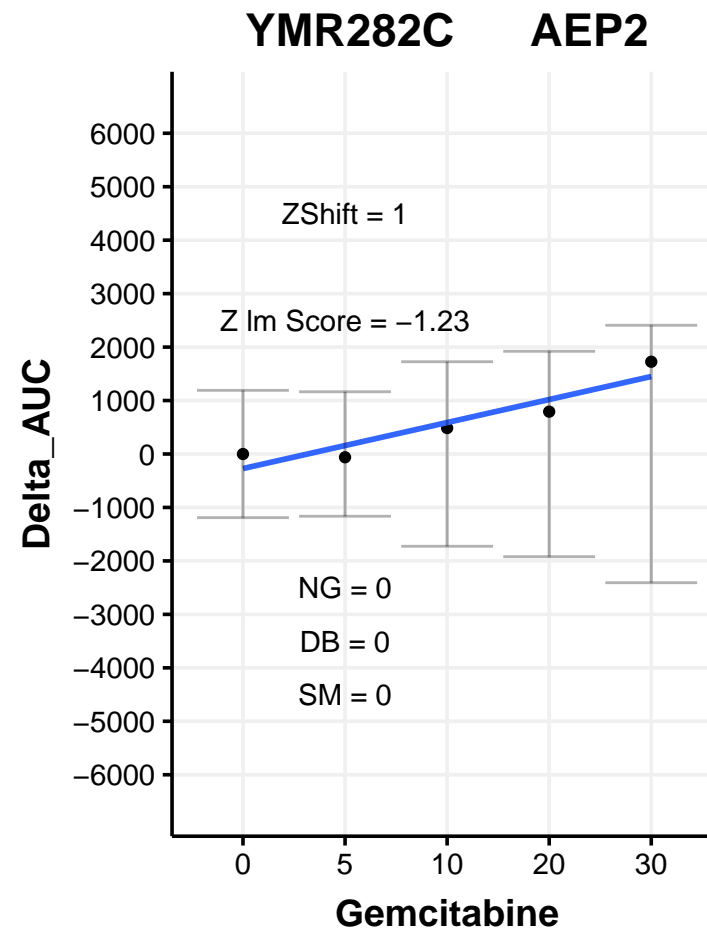

YOR309C\_2

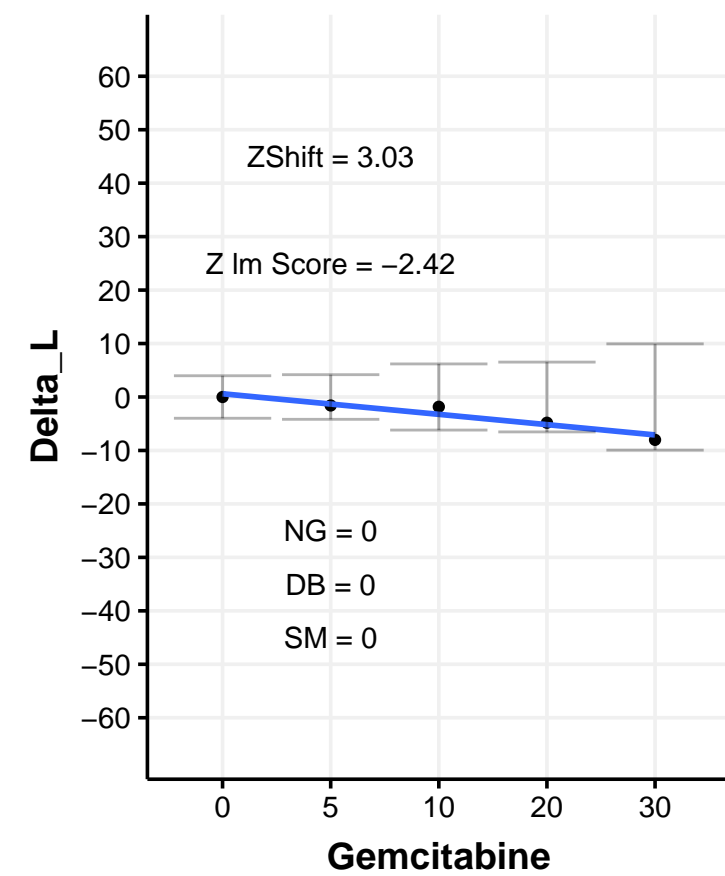

YOR309C\_2

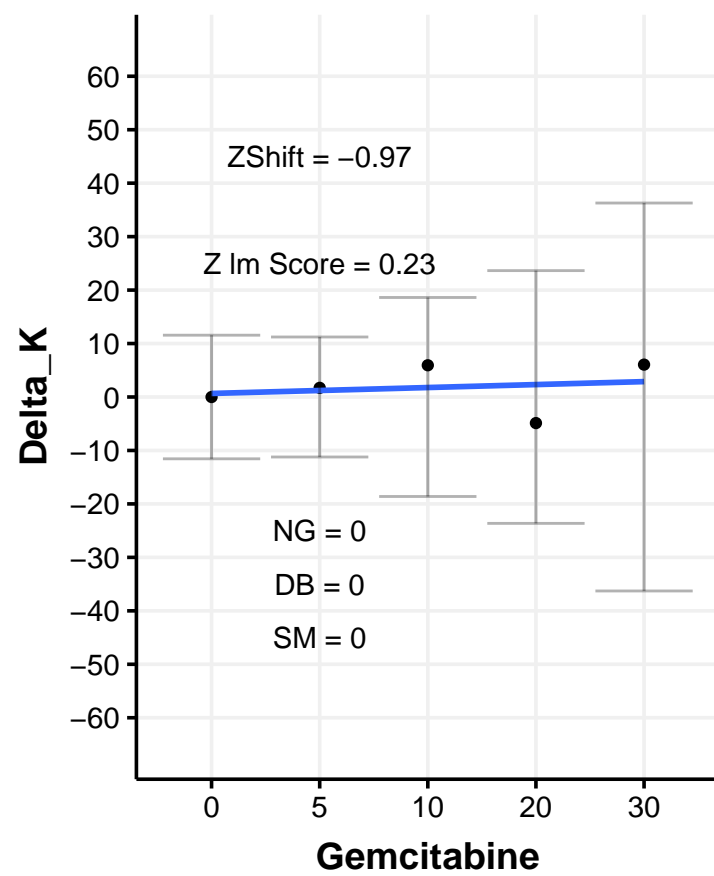

YOR309C\_2

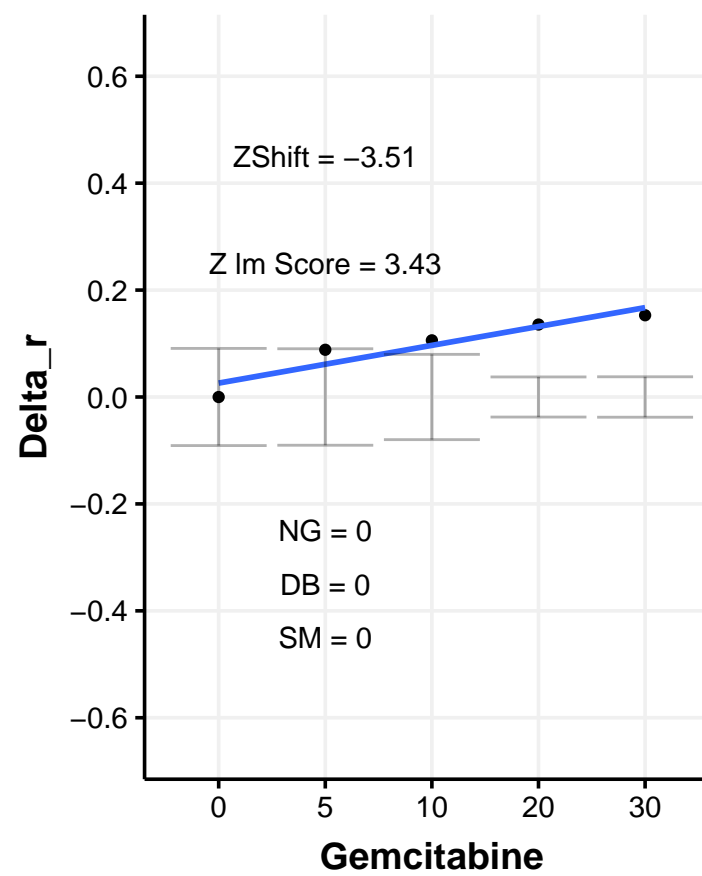

YOR309C\_2

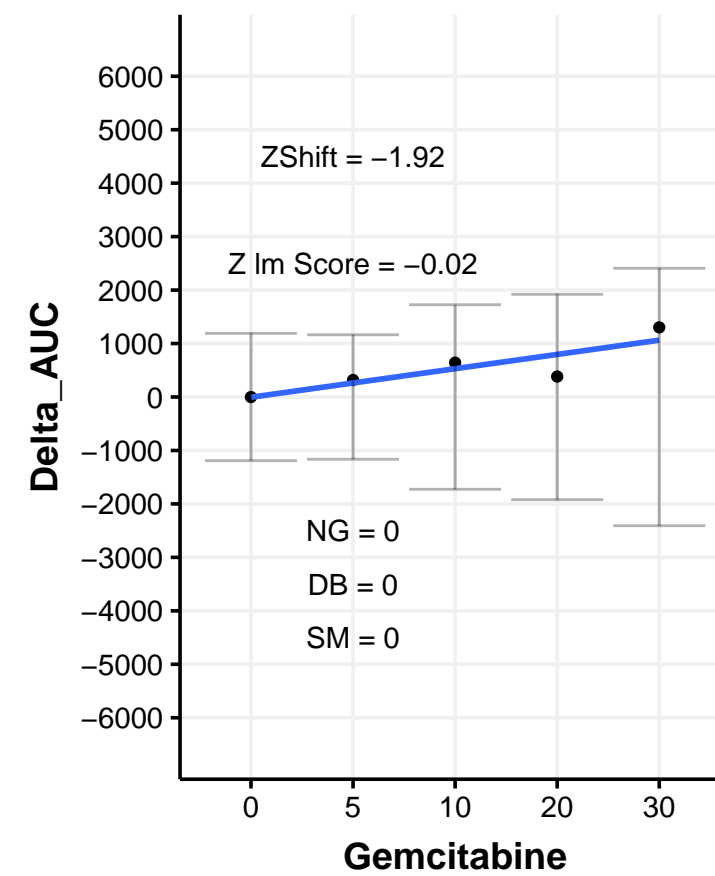

YDR385W EFT2

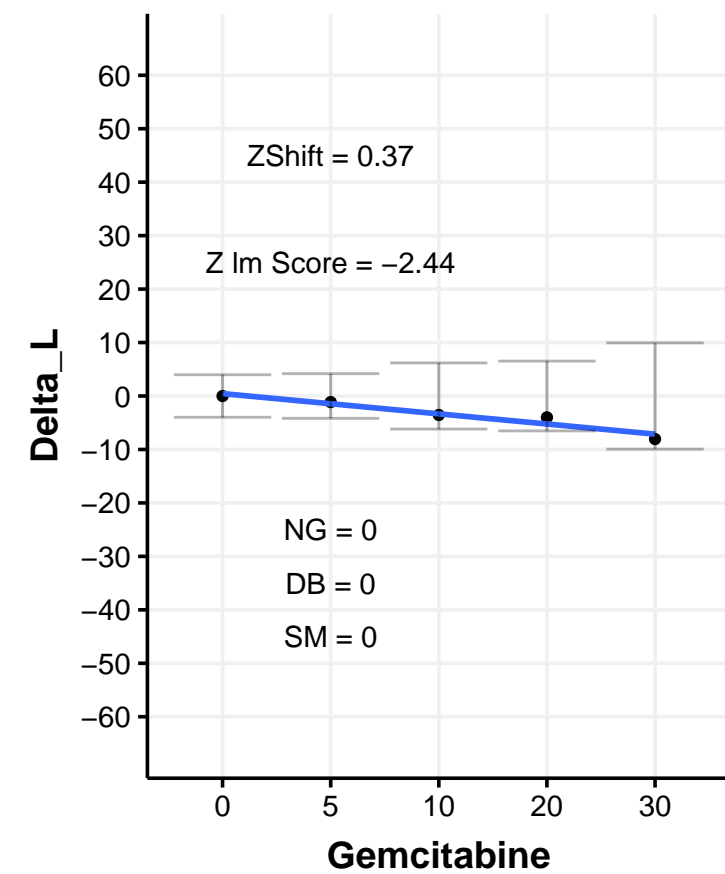

YDR385W EFT2

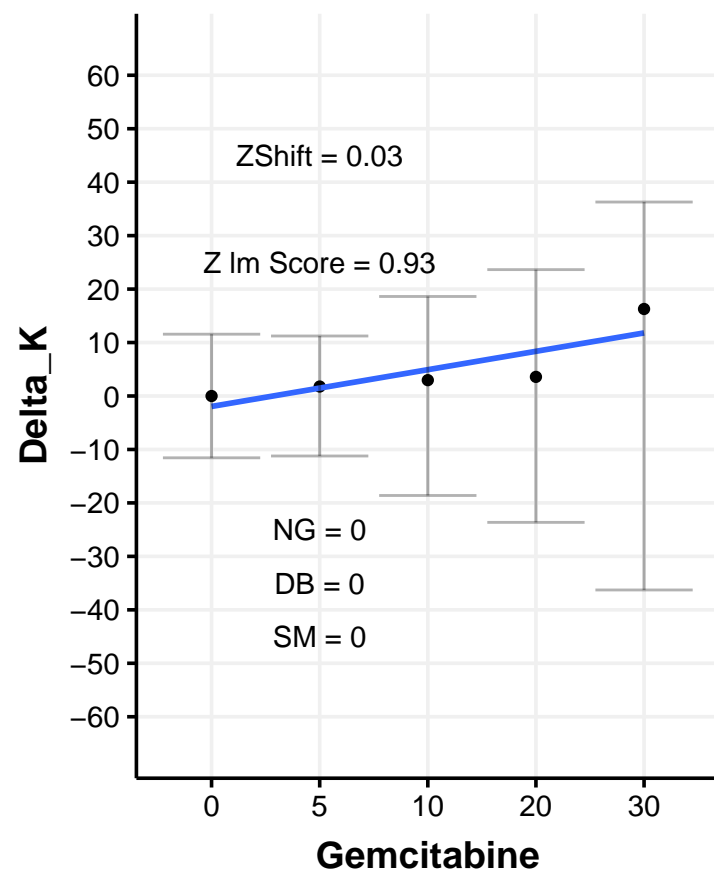

YDR385W EFT2

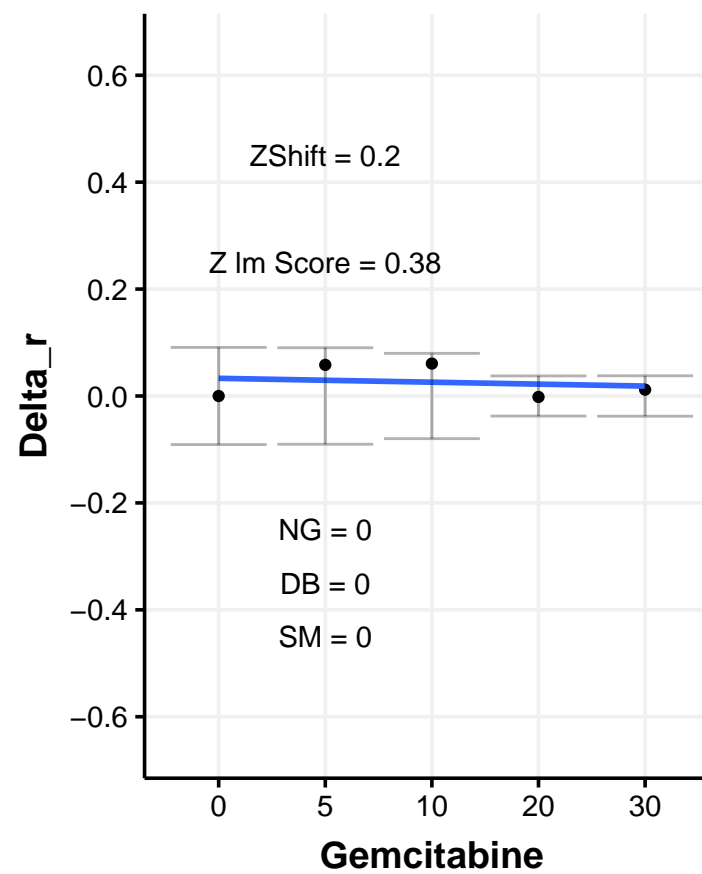

YDR385W EFT2

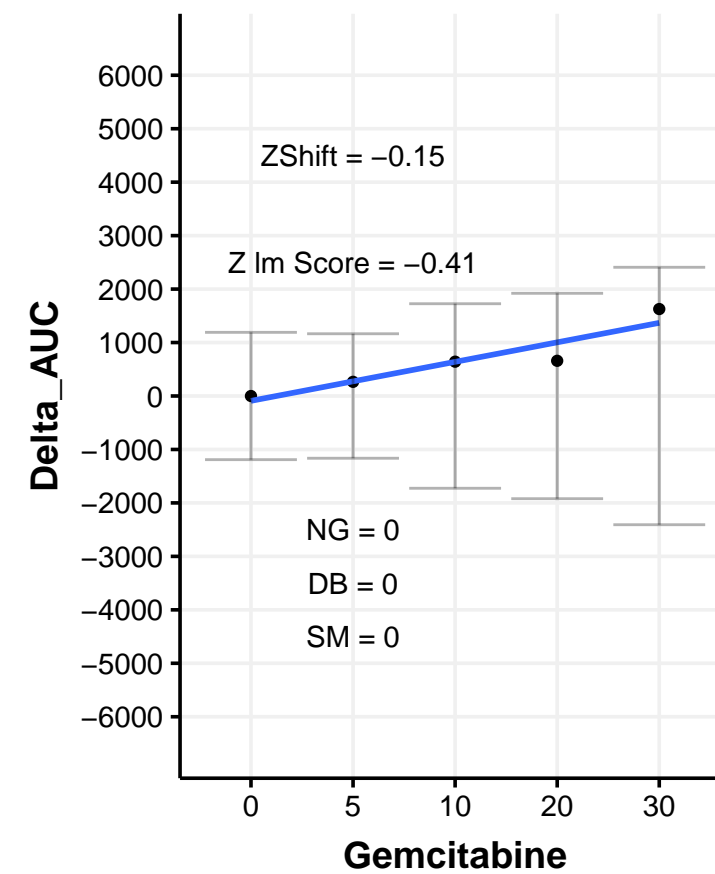

YNL005C MRP7

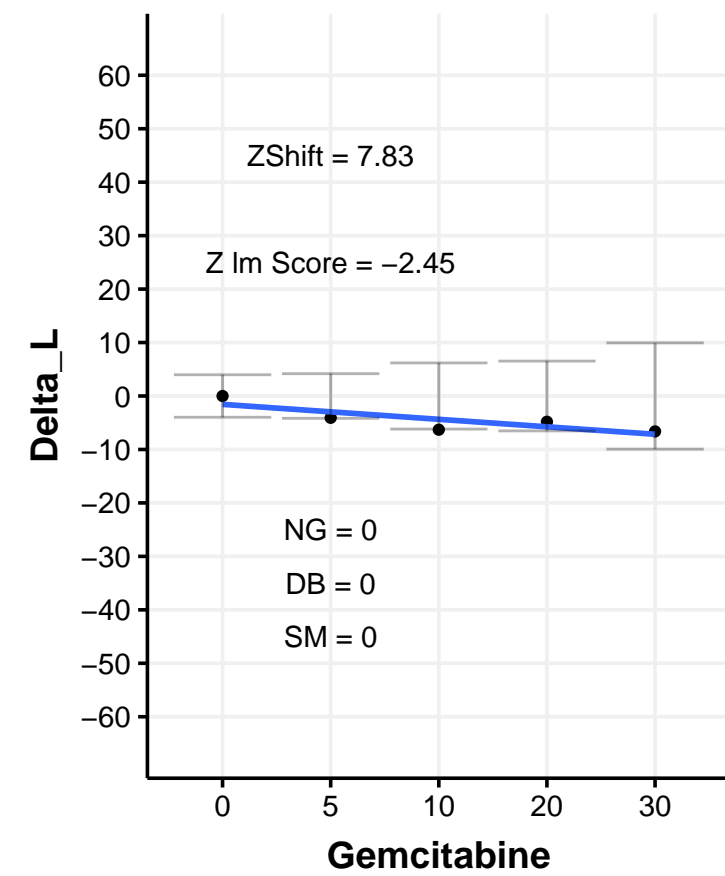

YNL005C MRP7

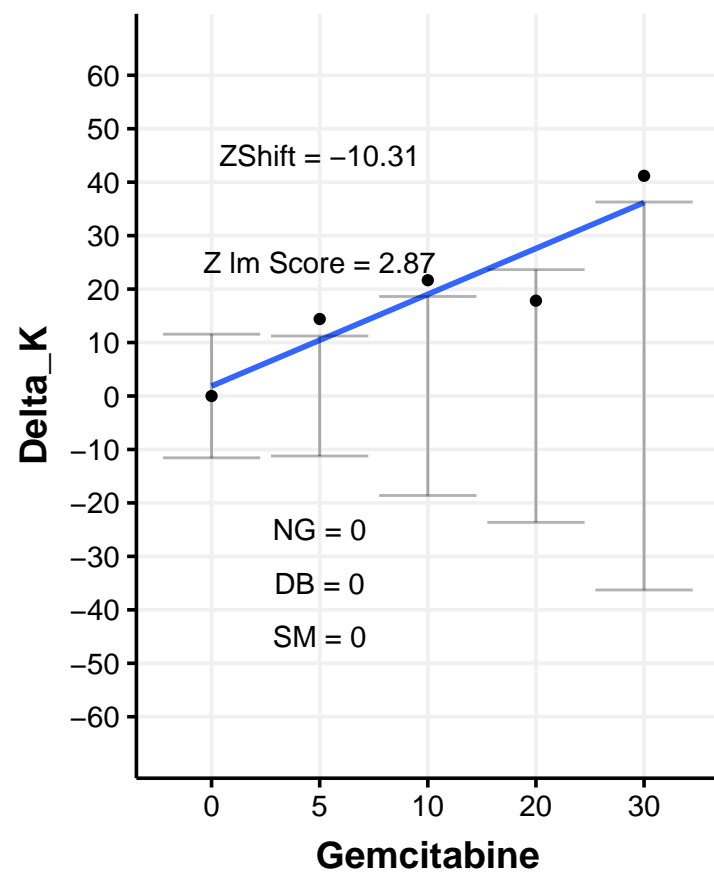

YNL005C MRP7

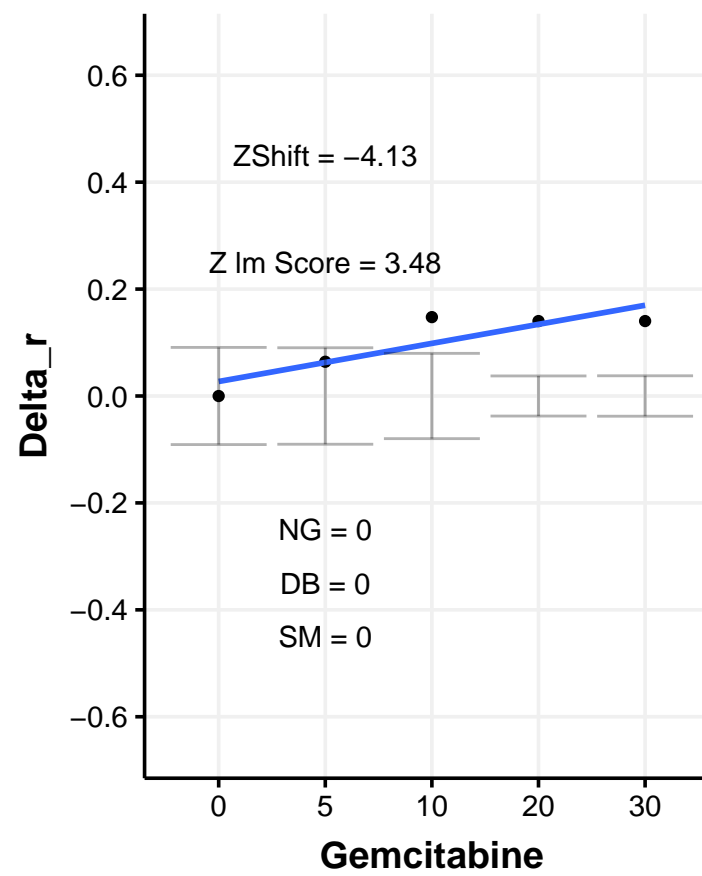

YNL005C MRP7

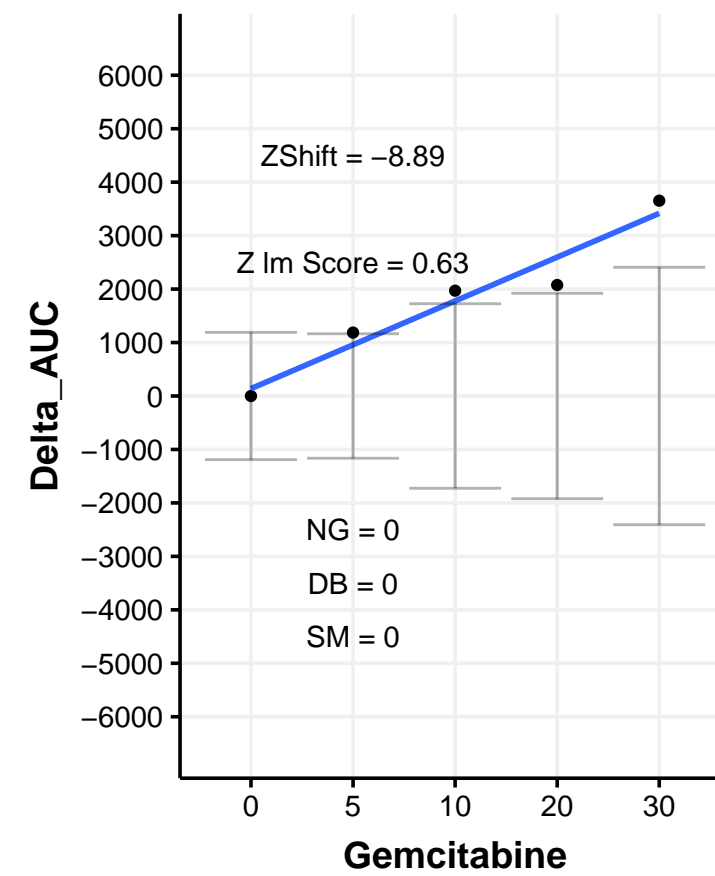

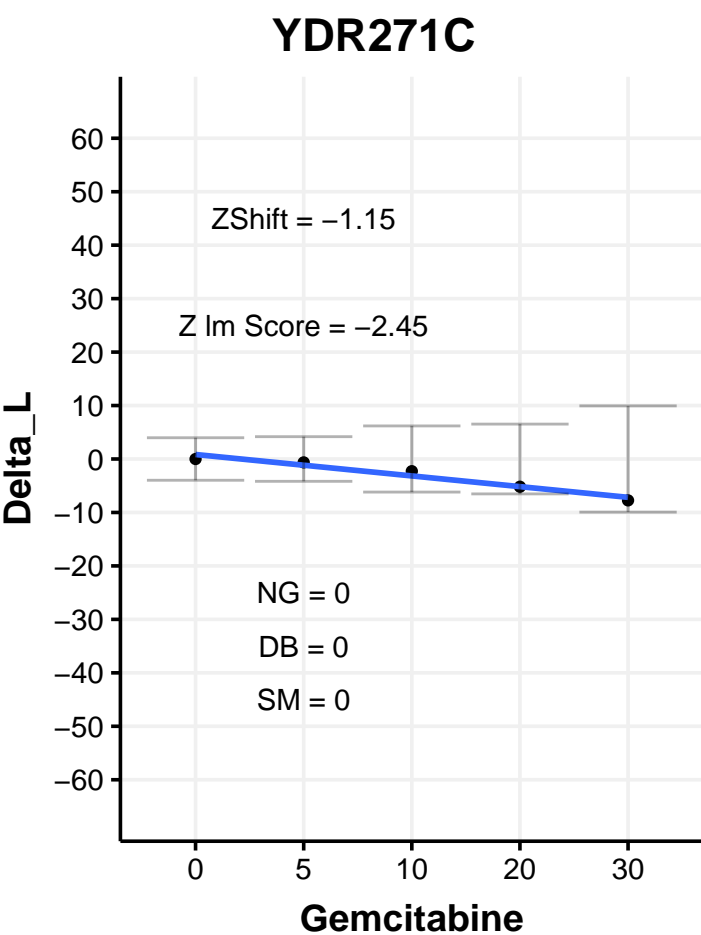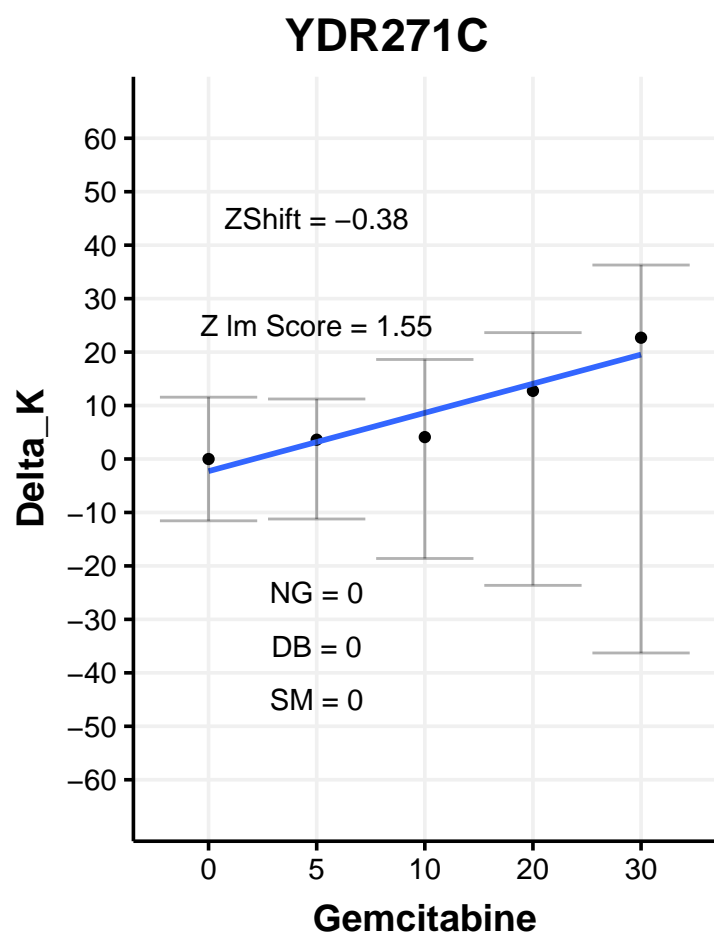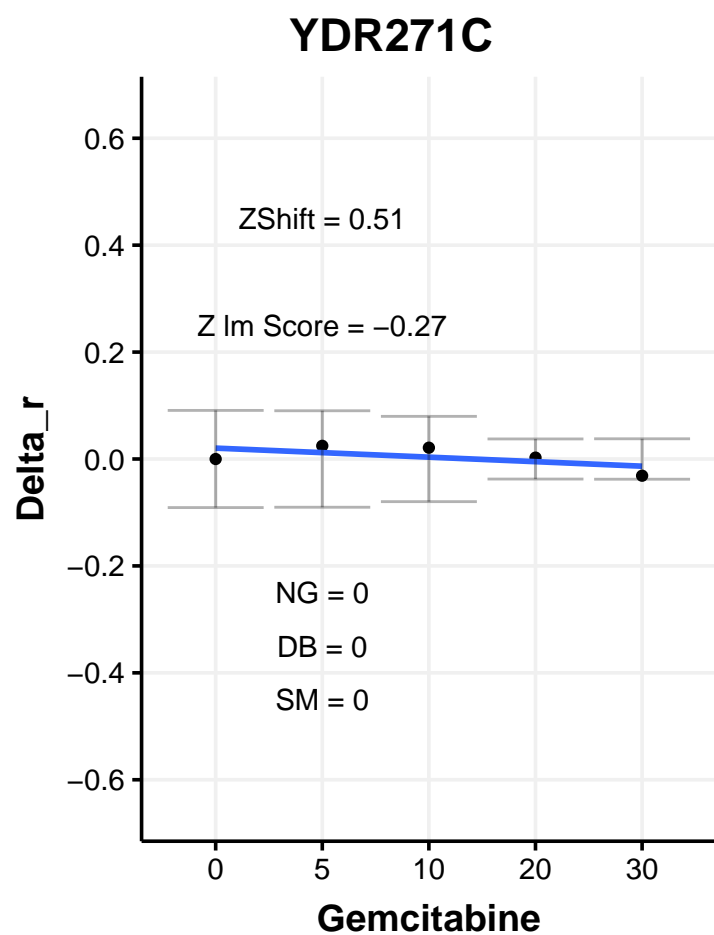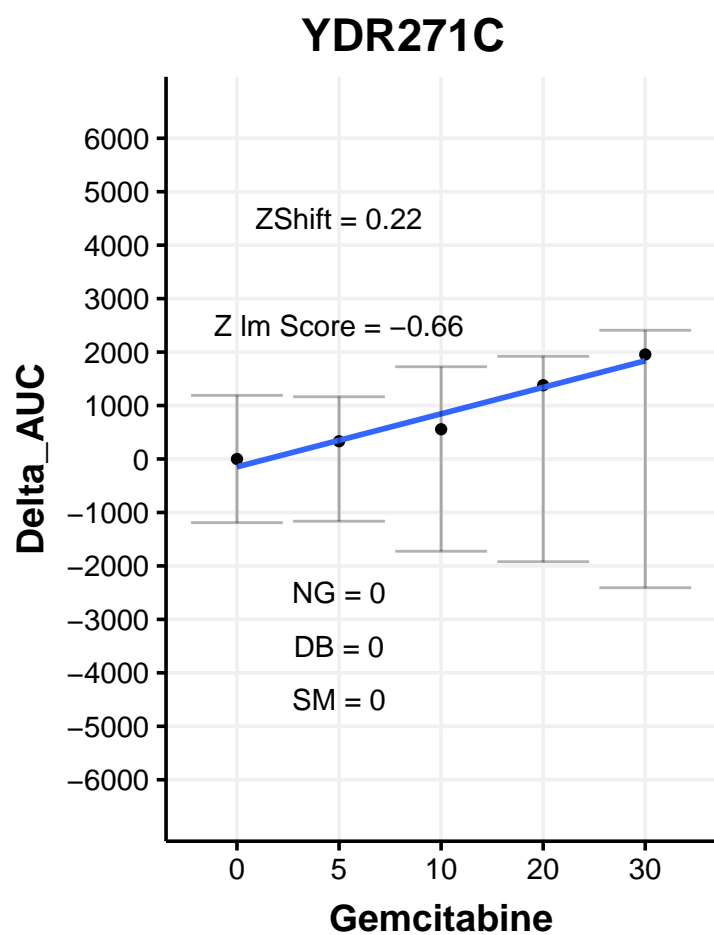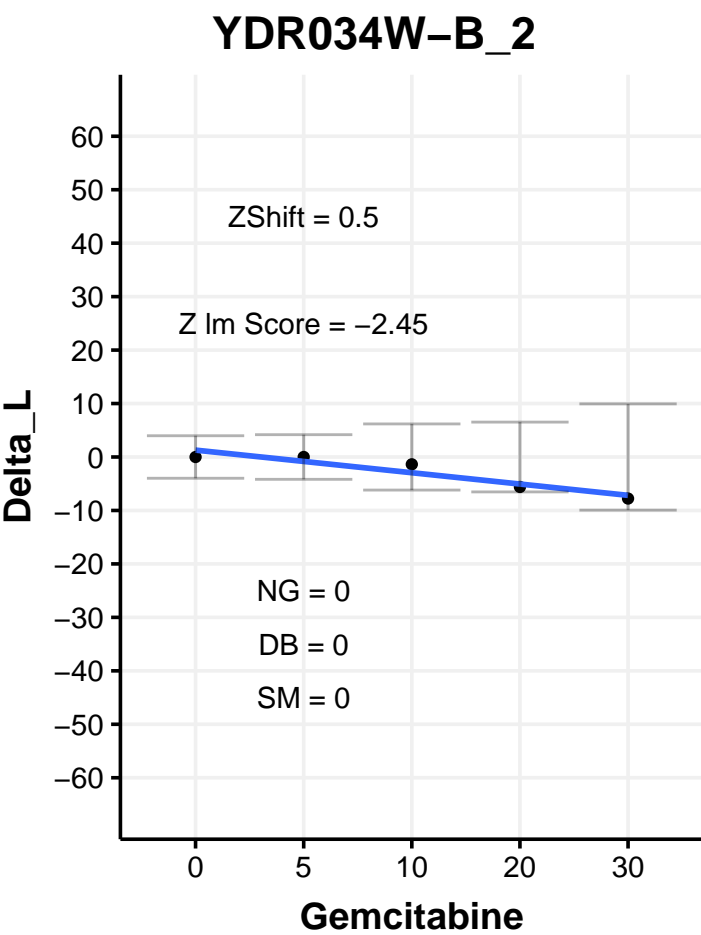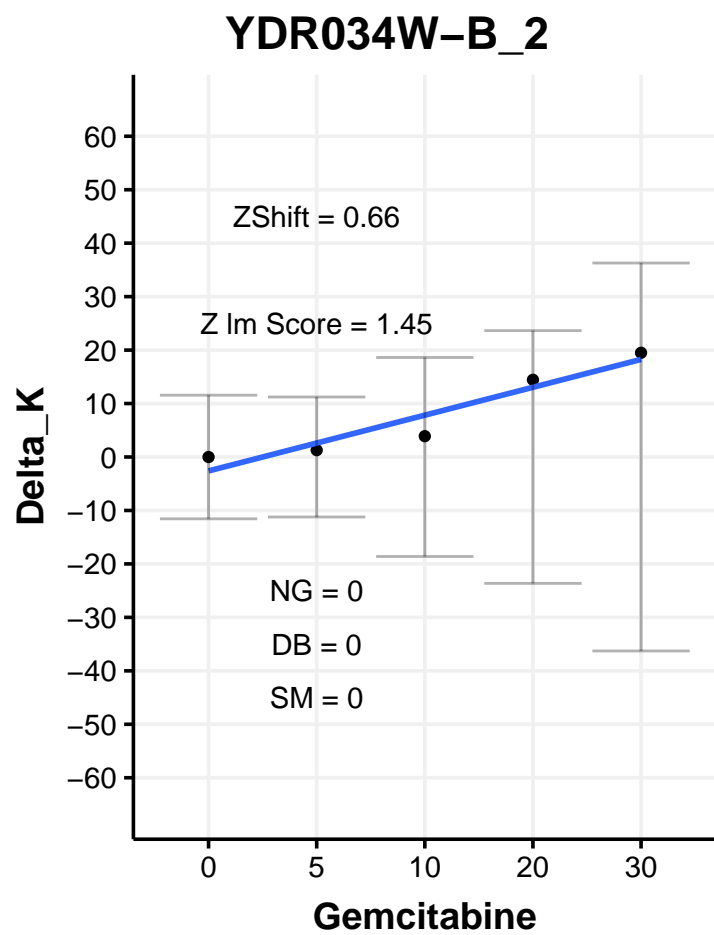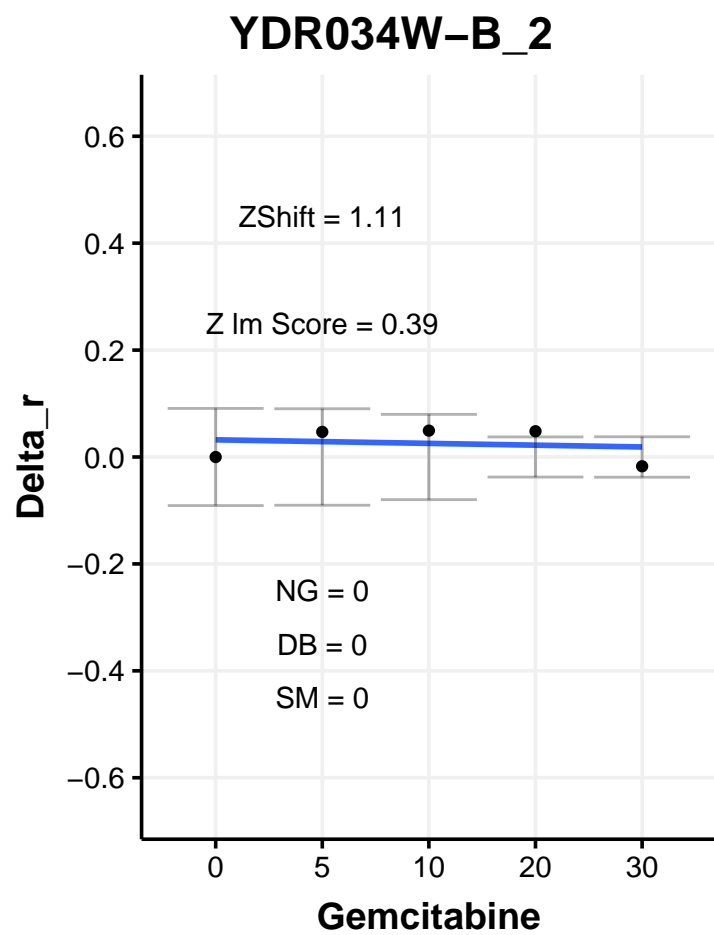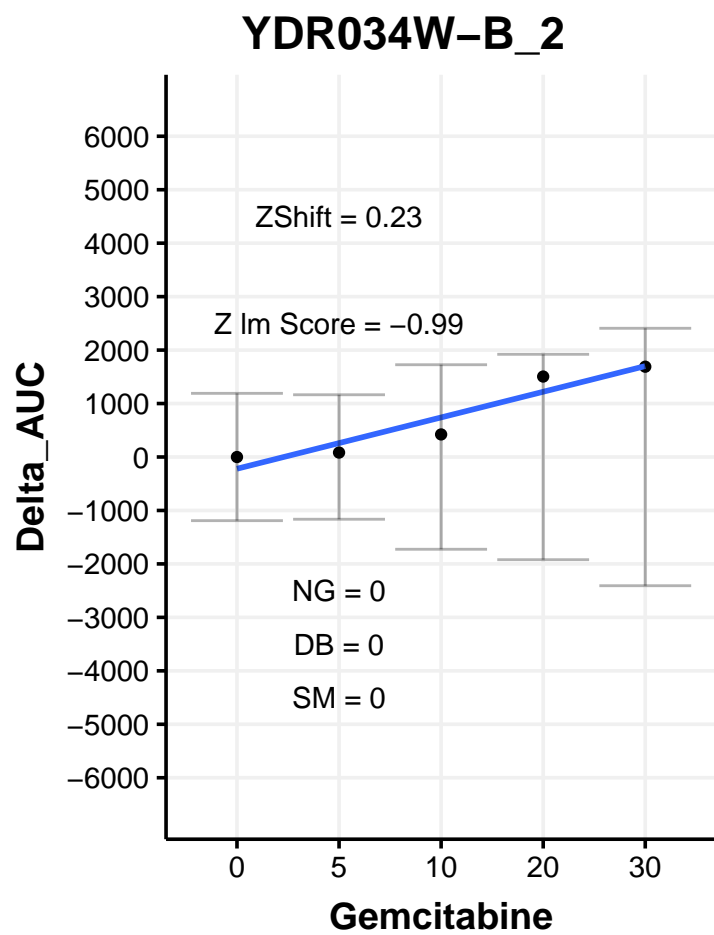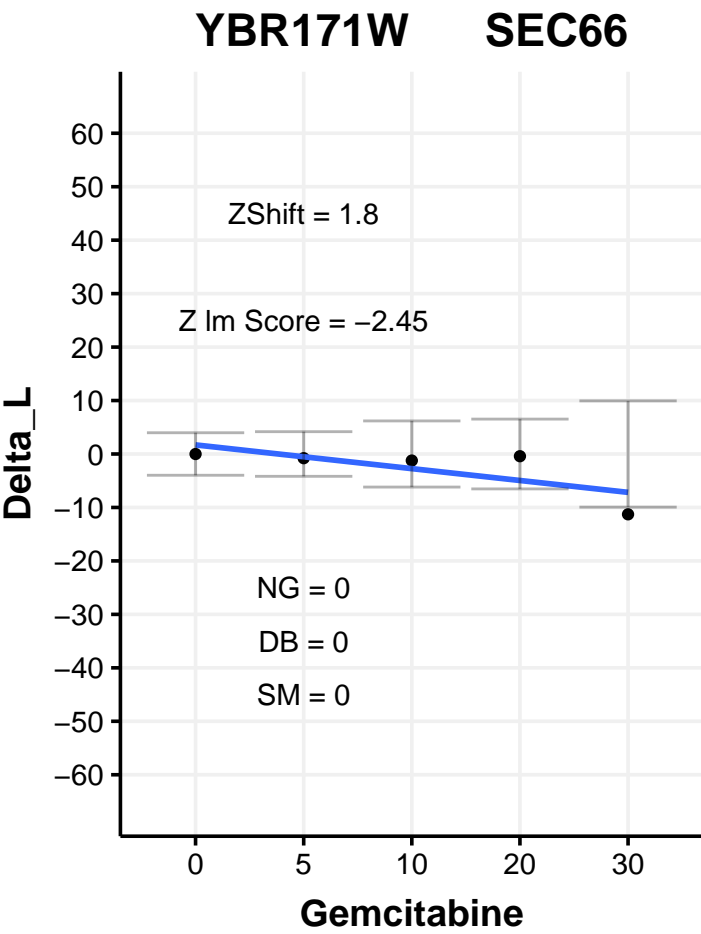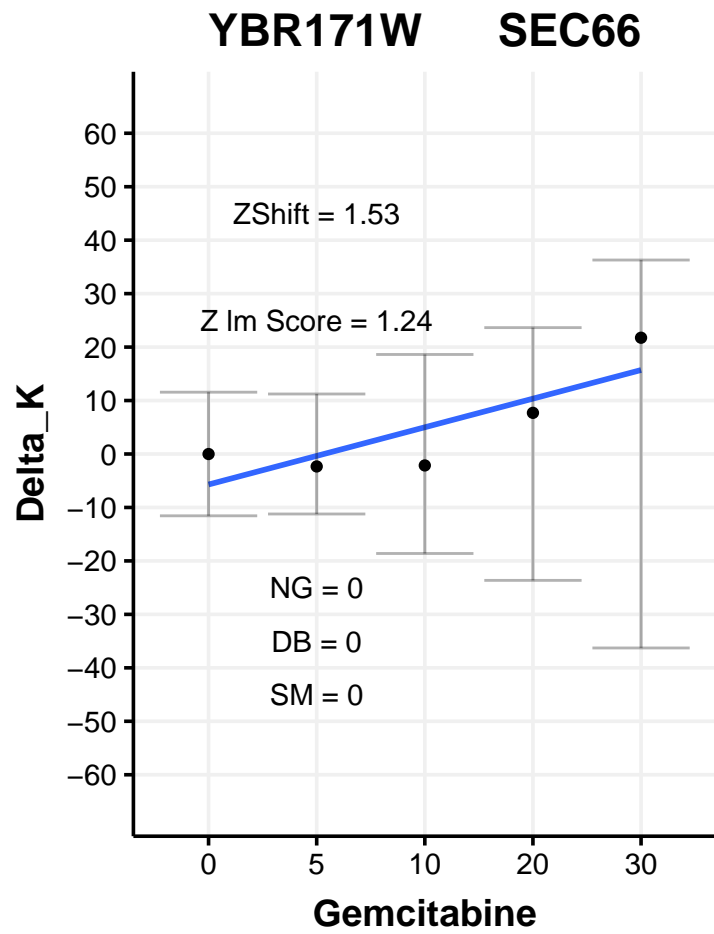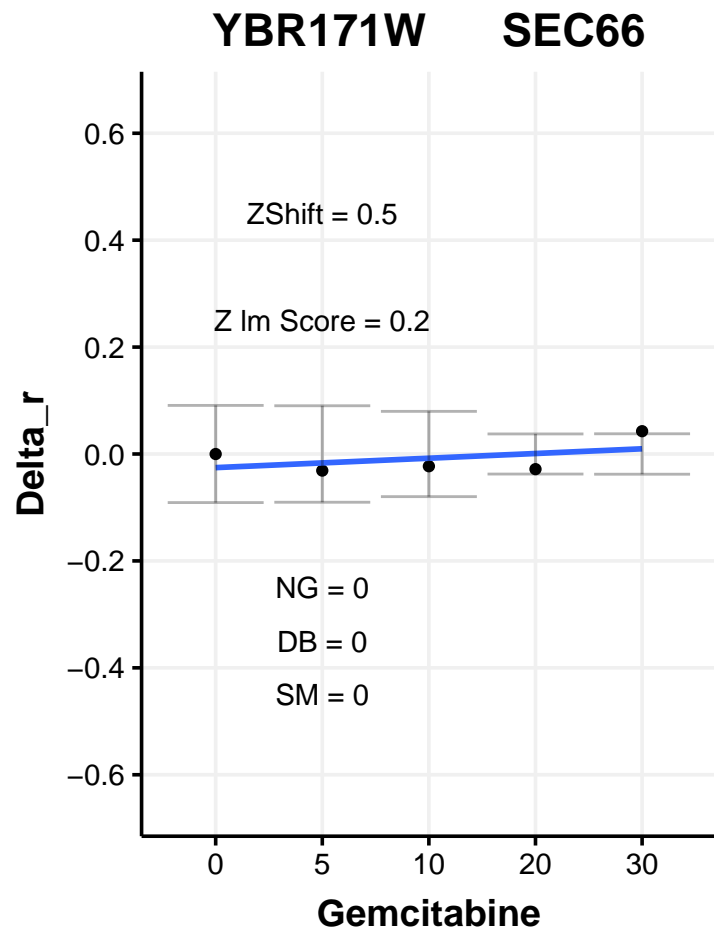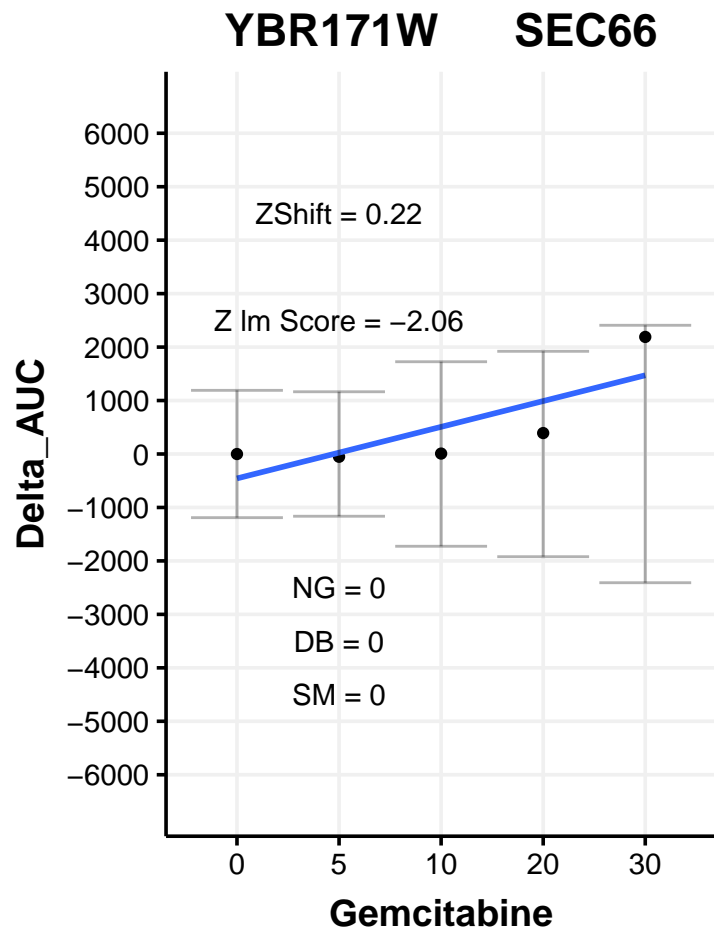

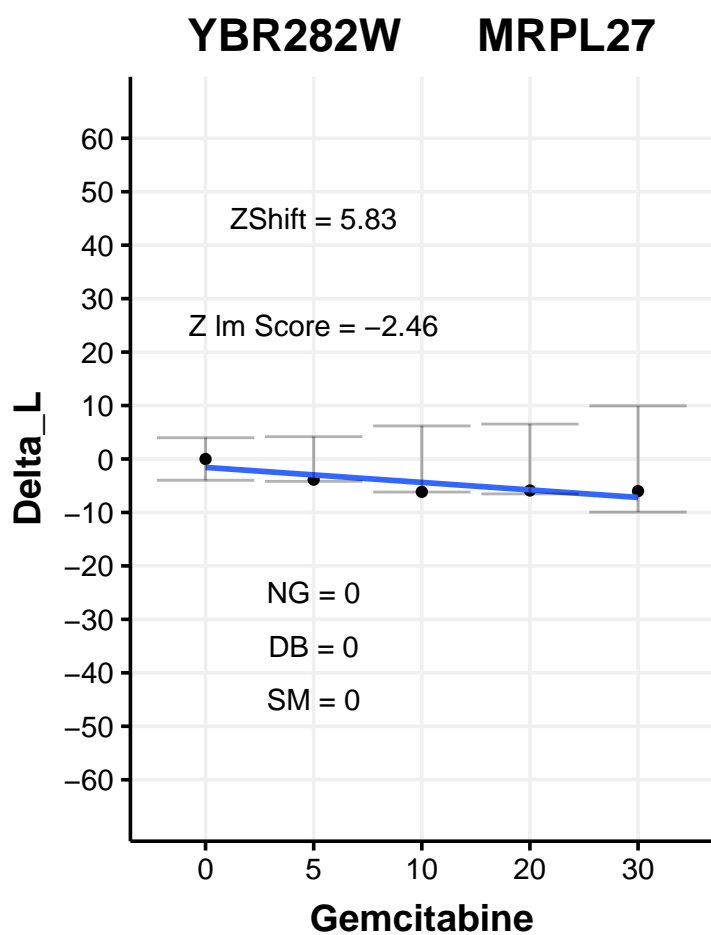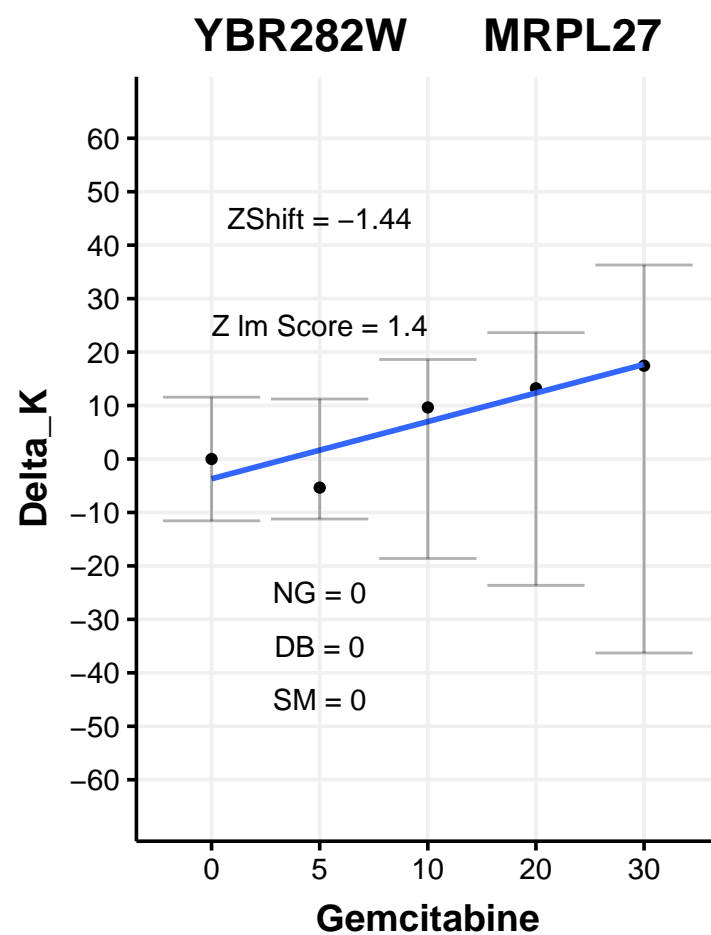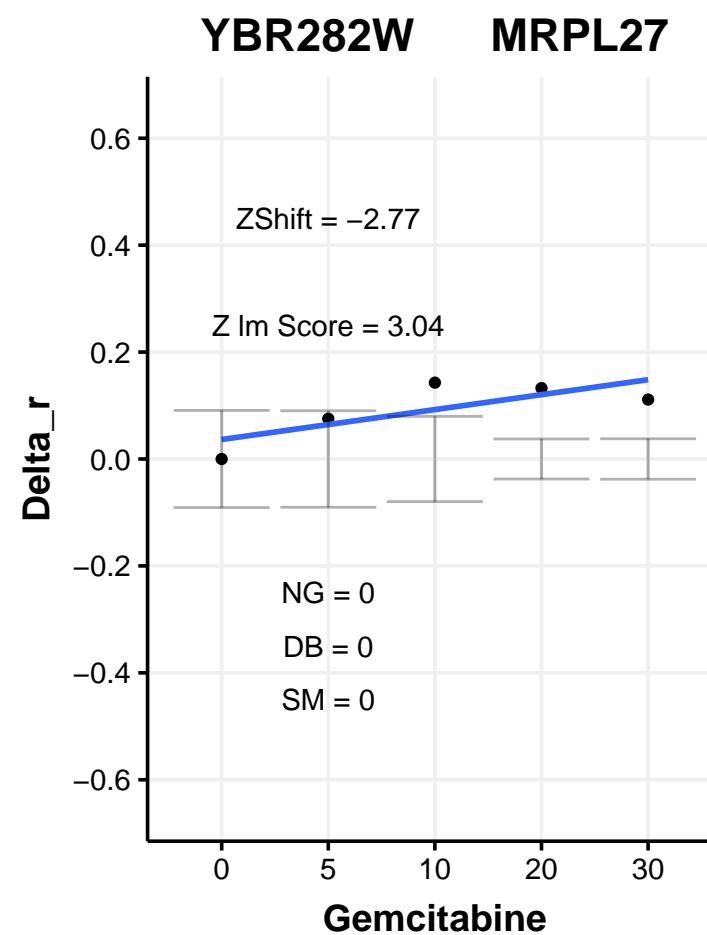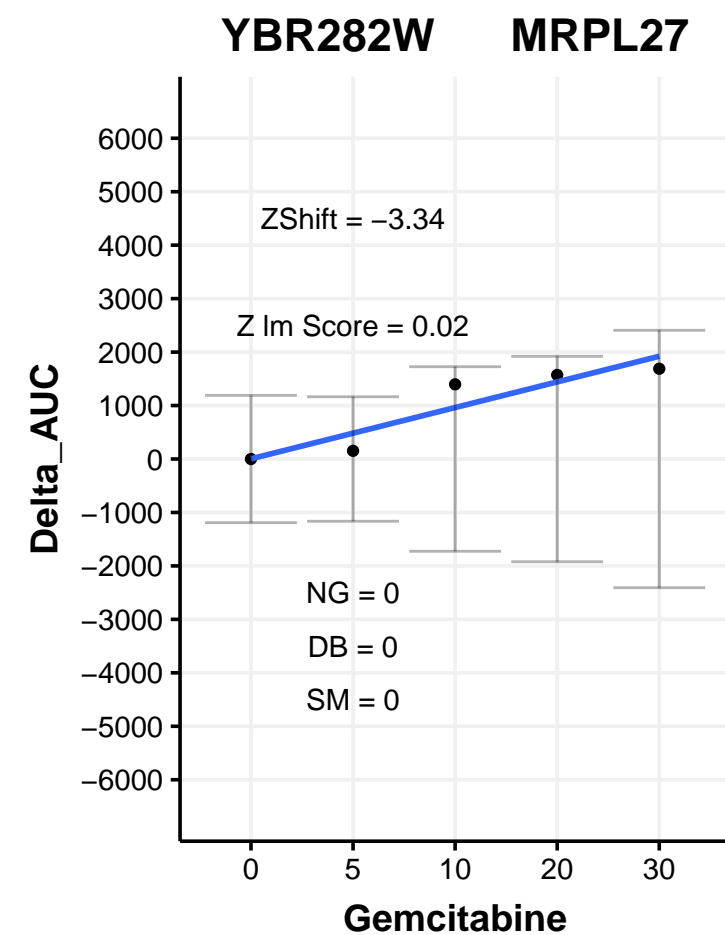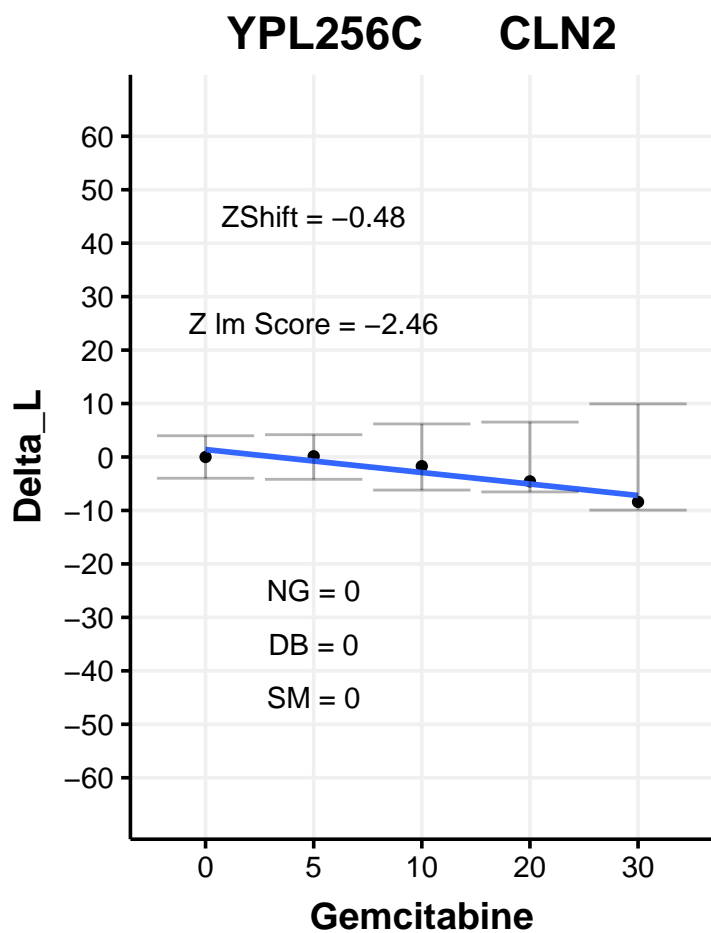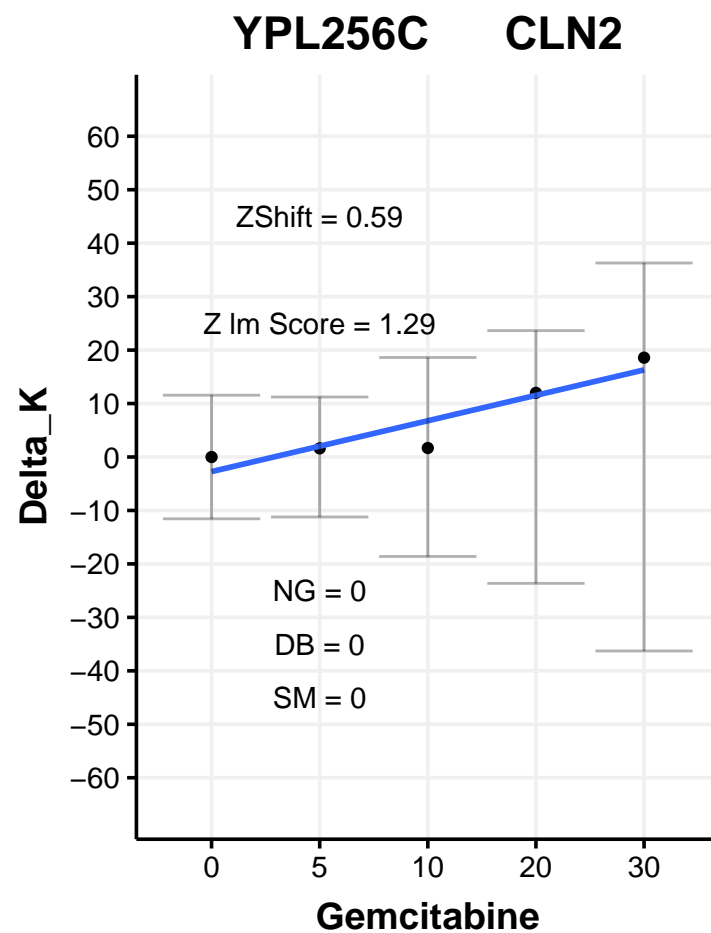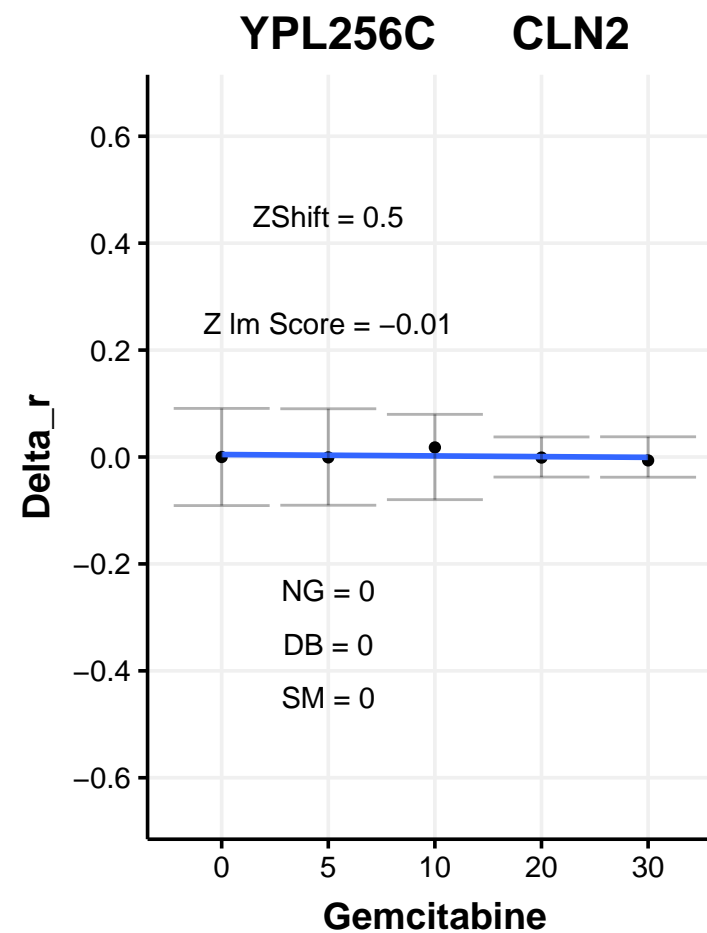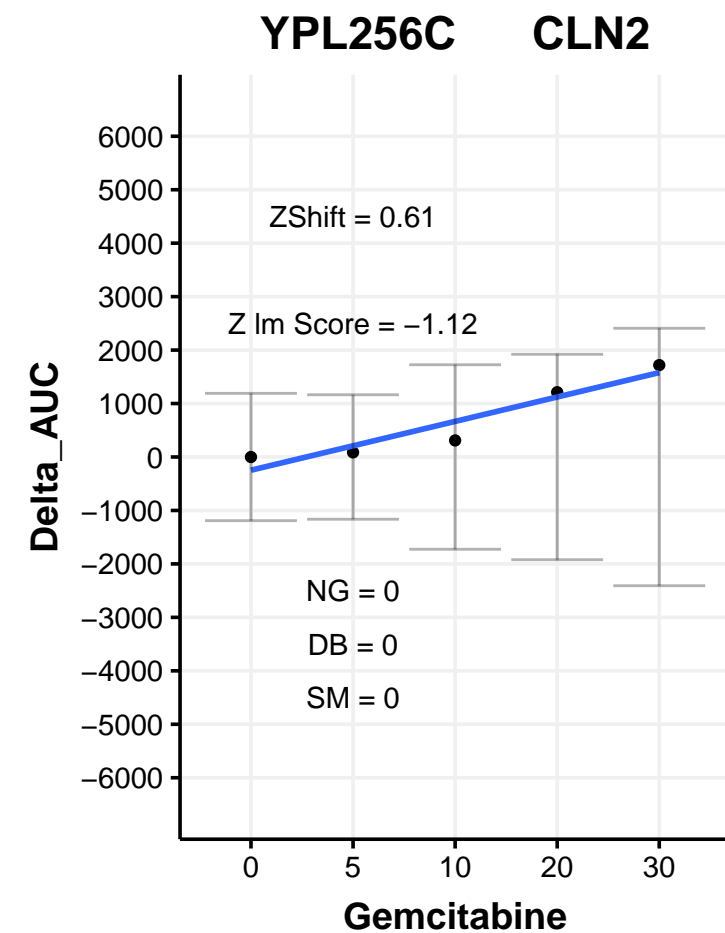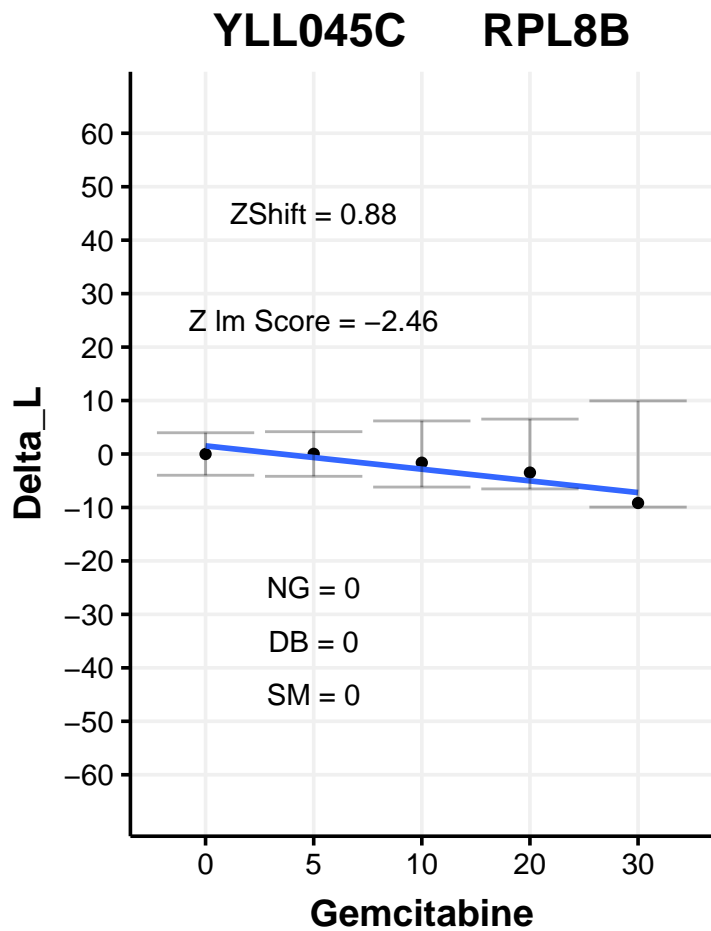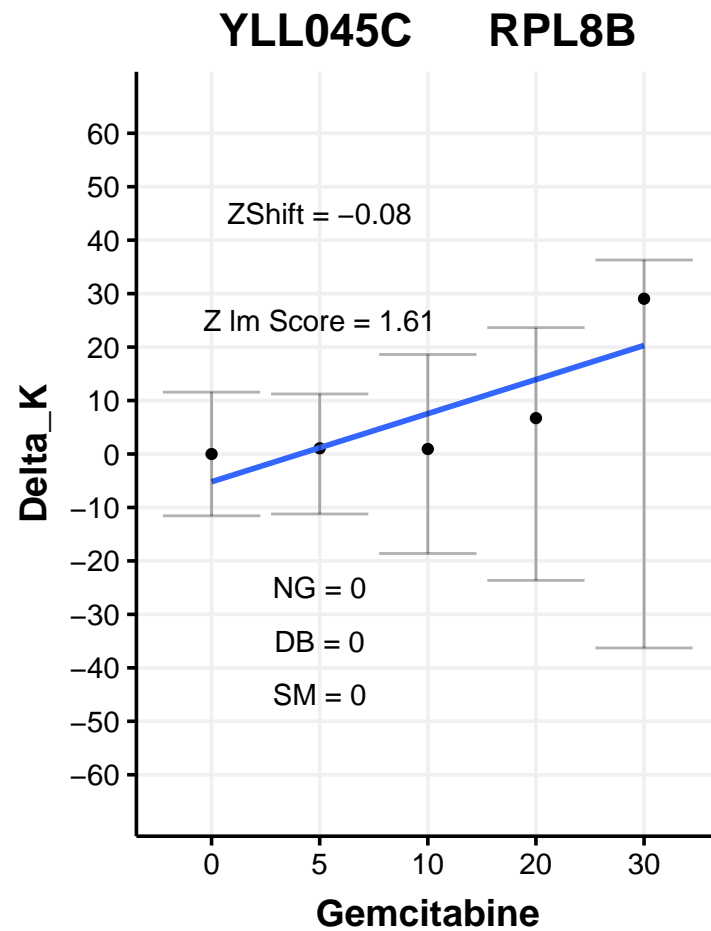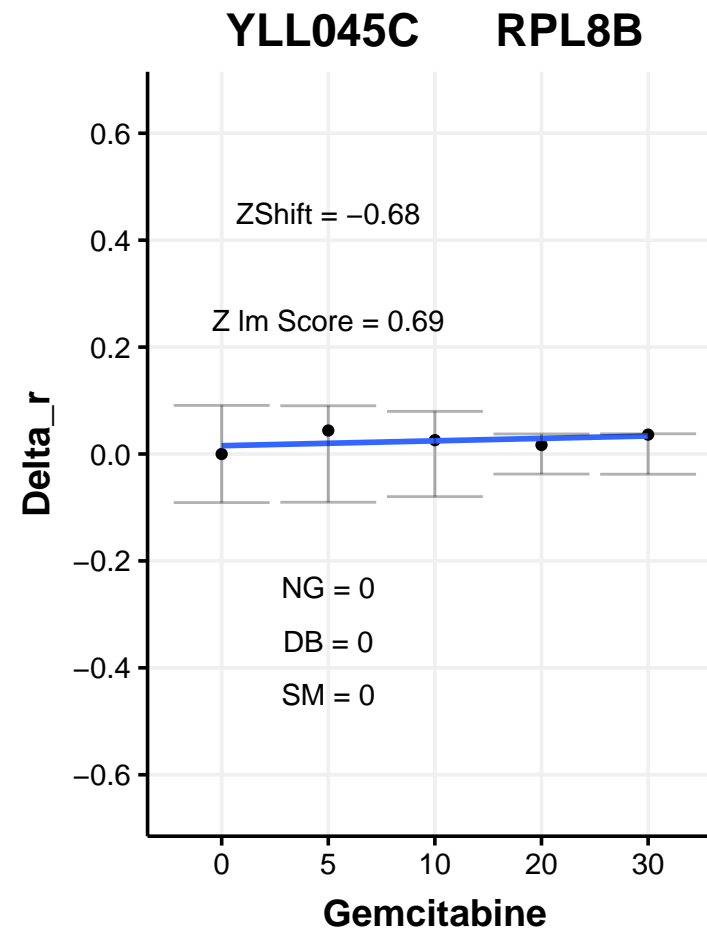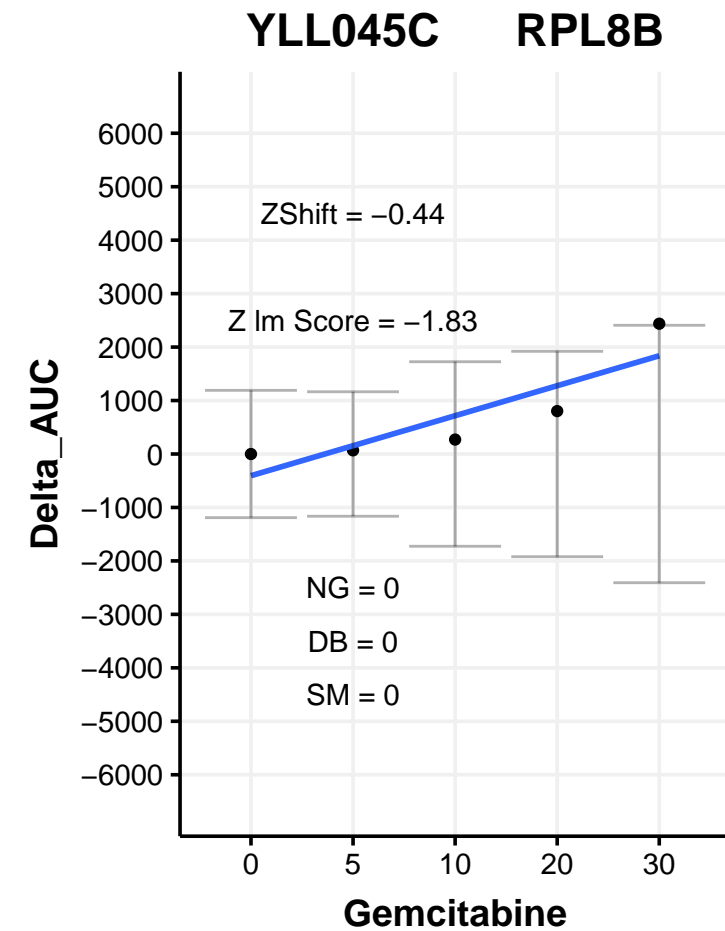

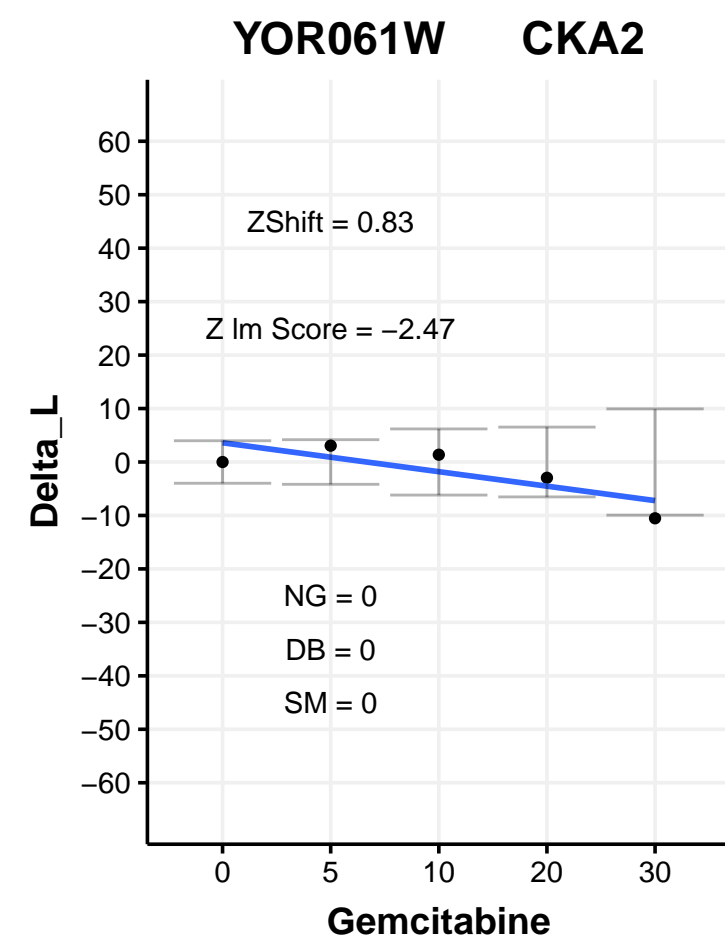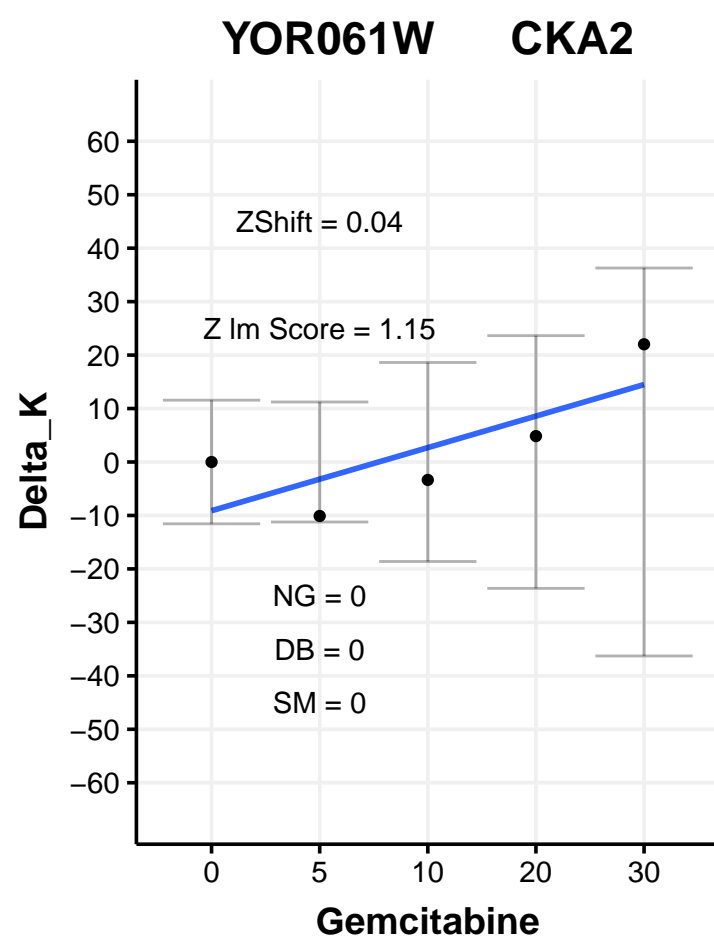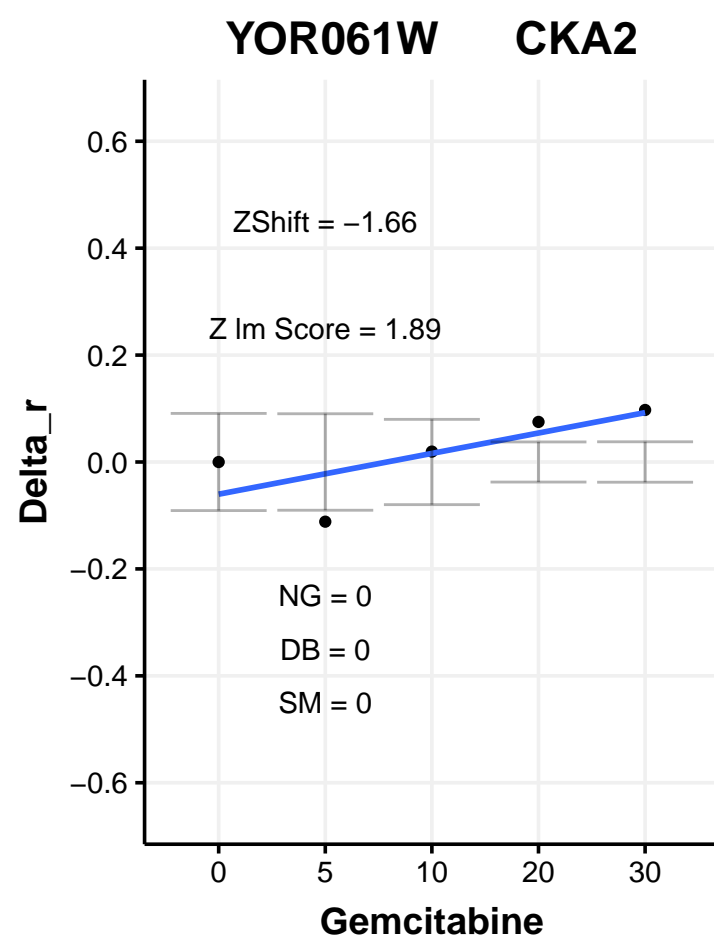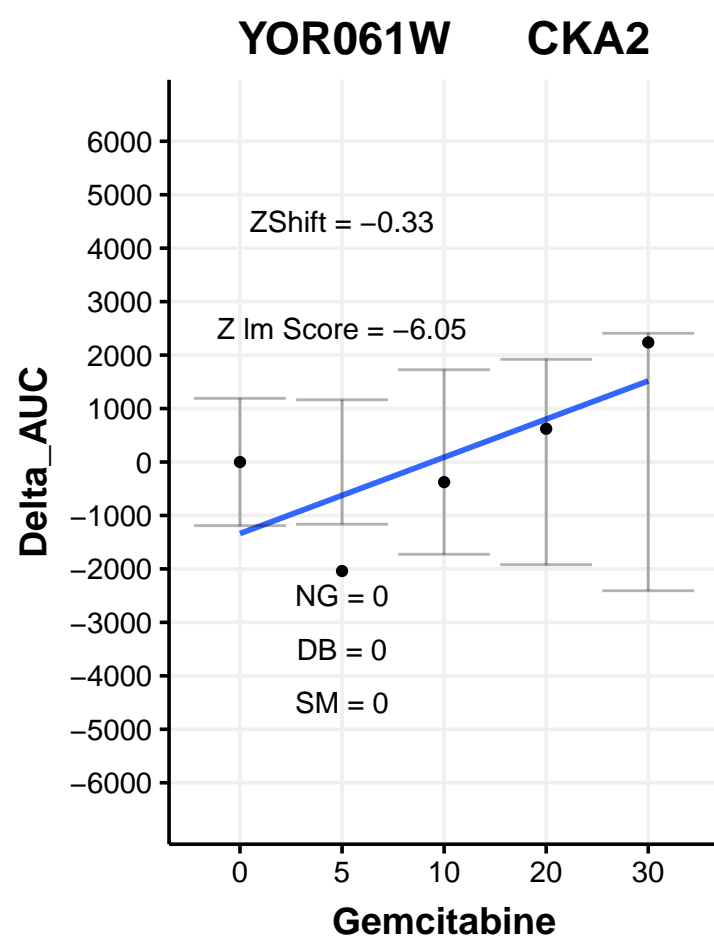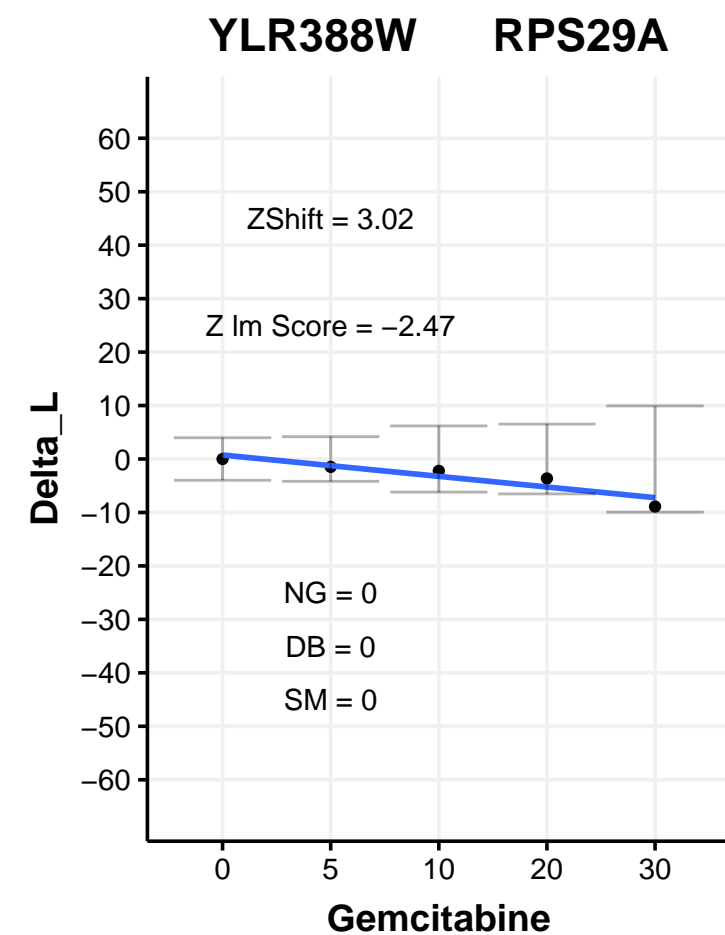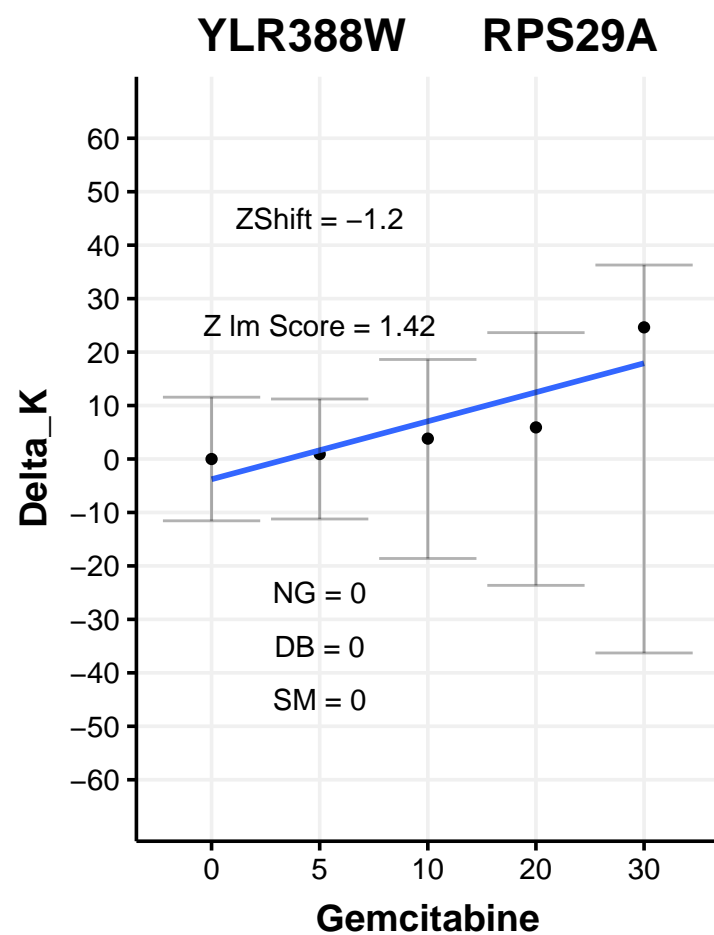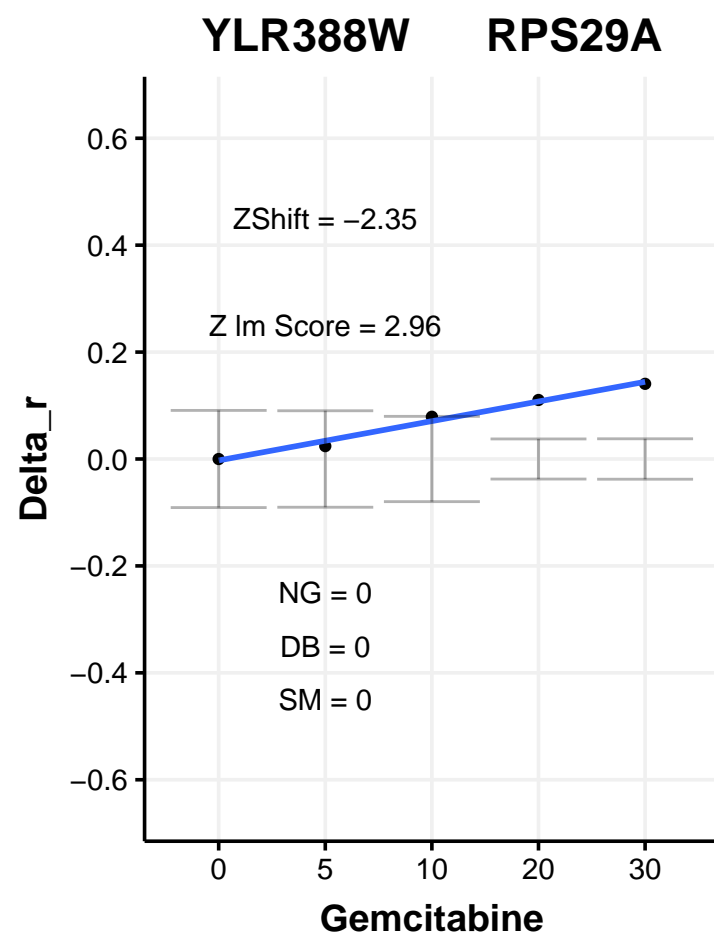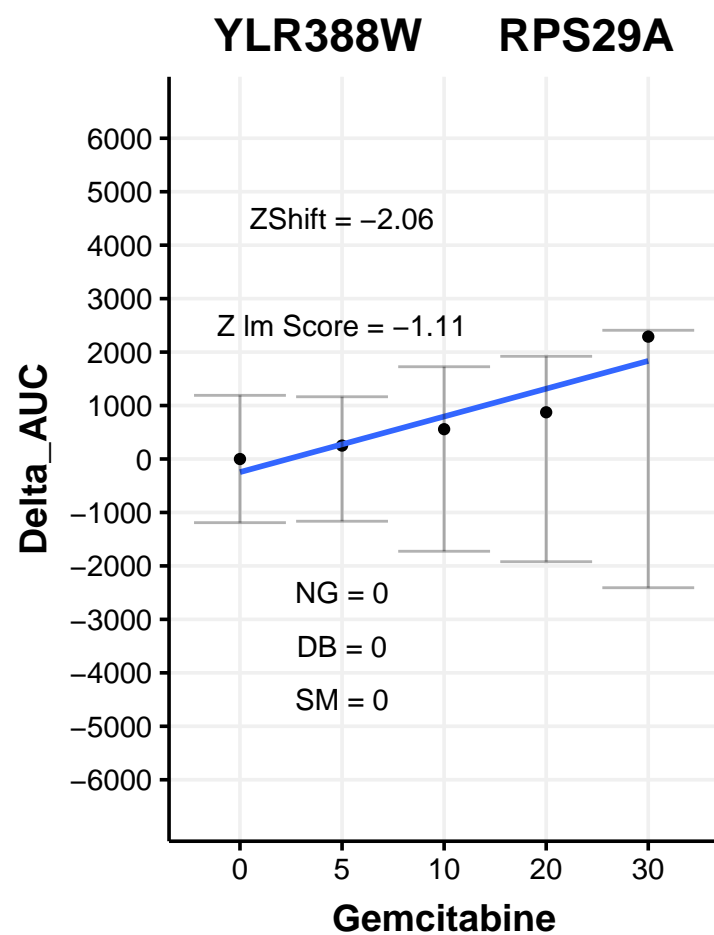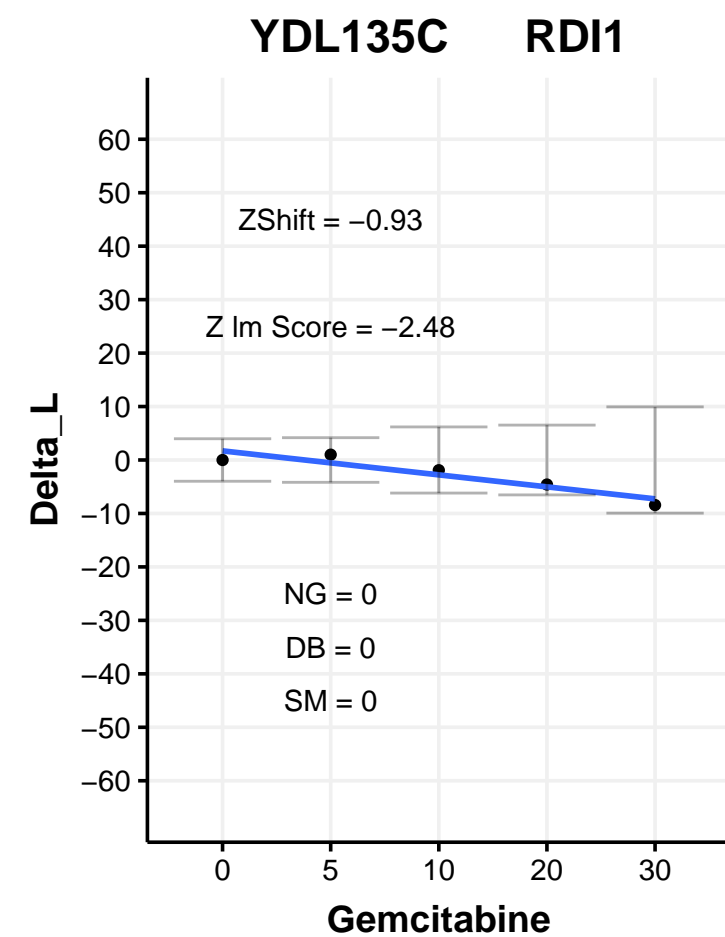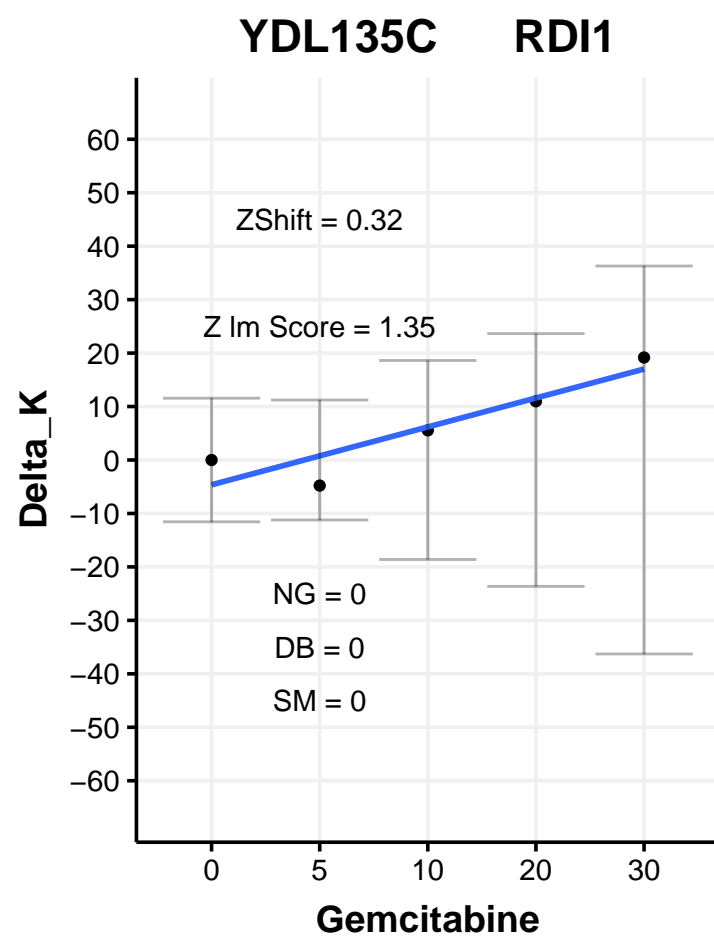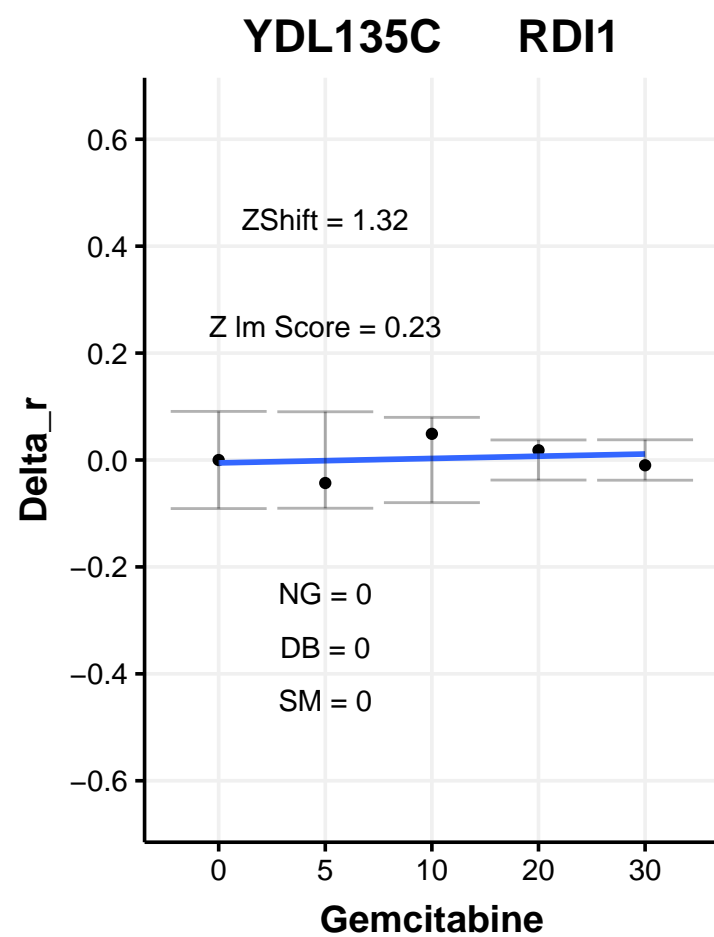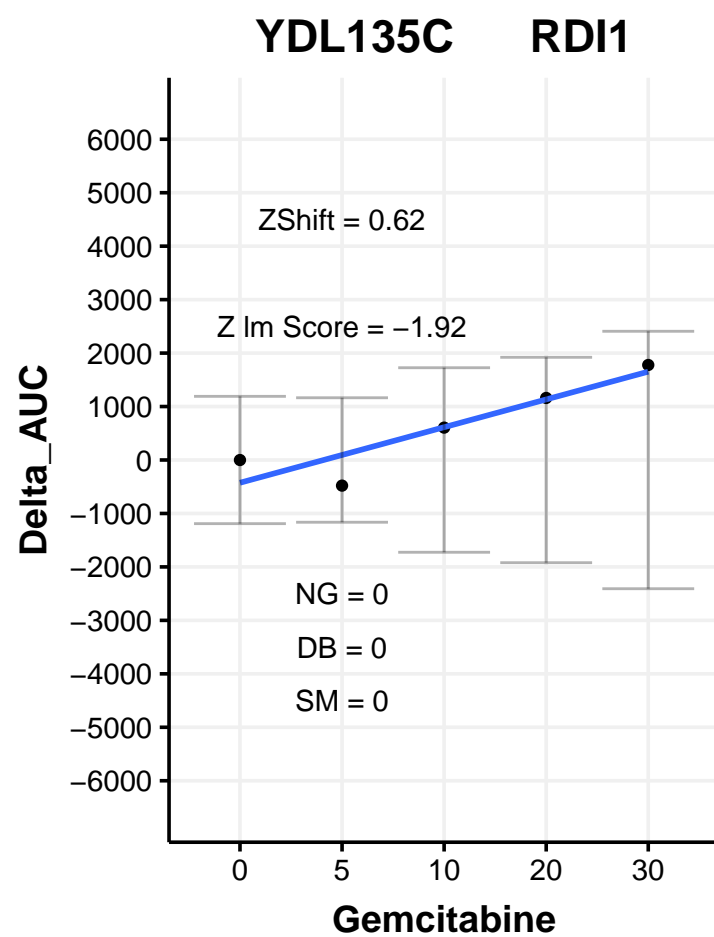



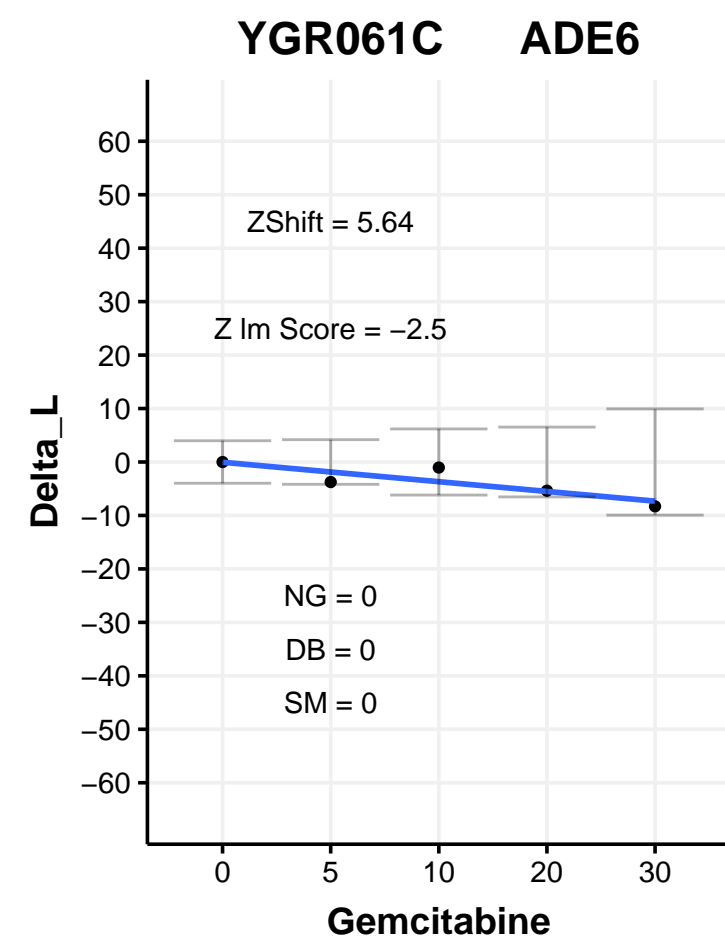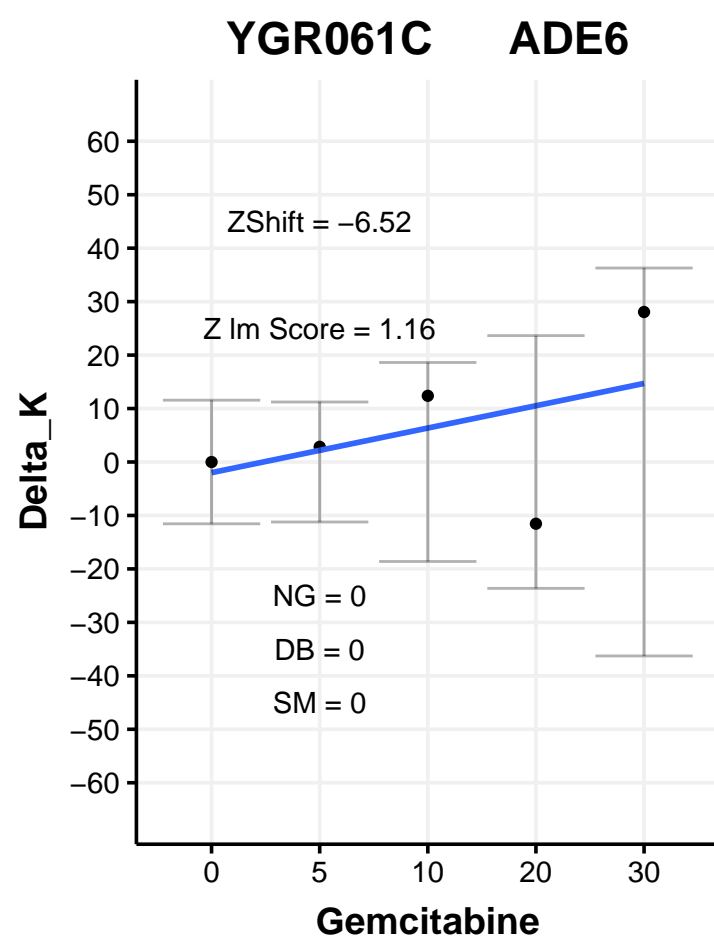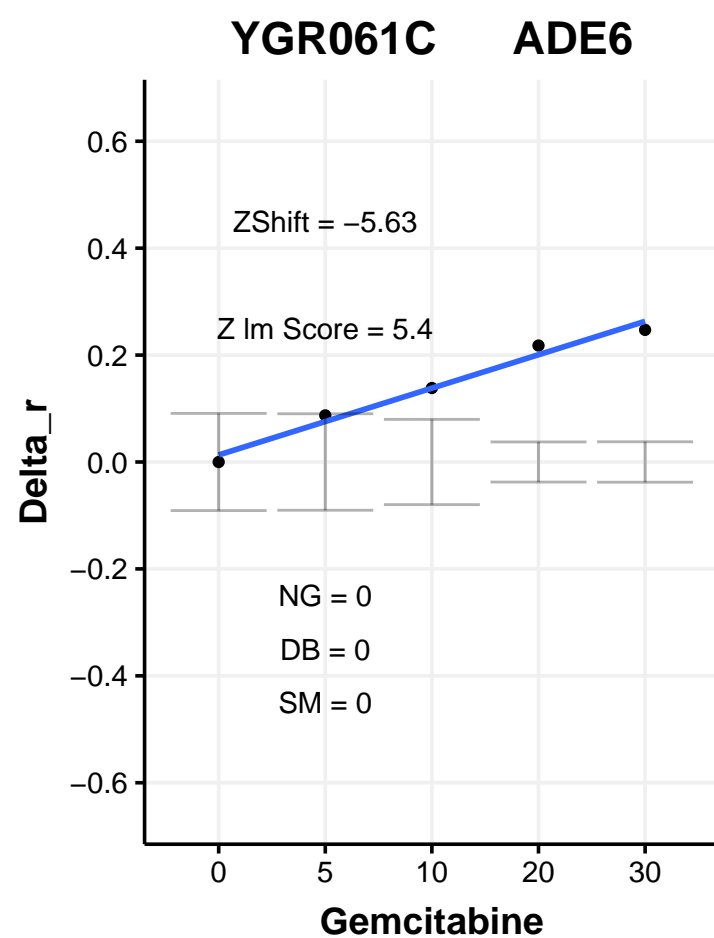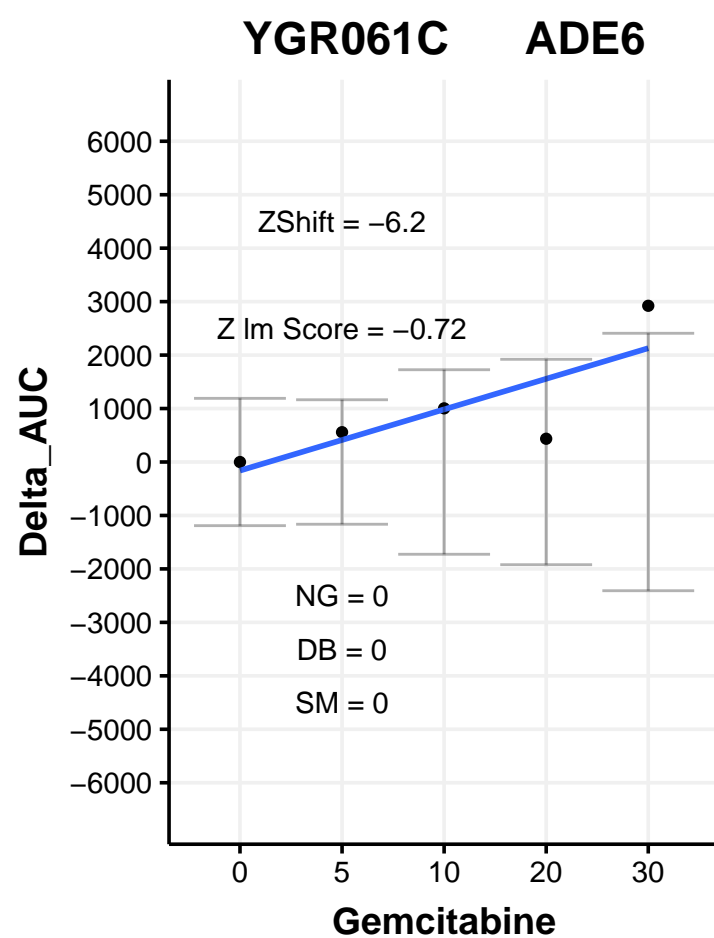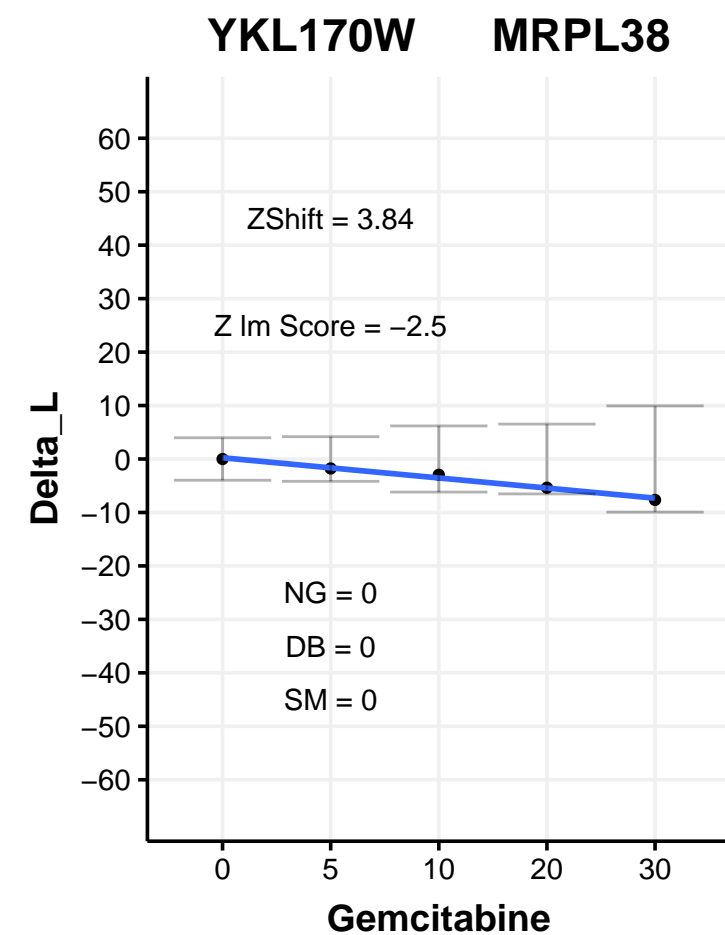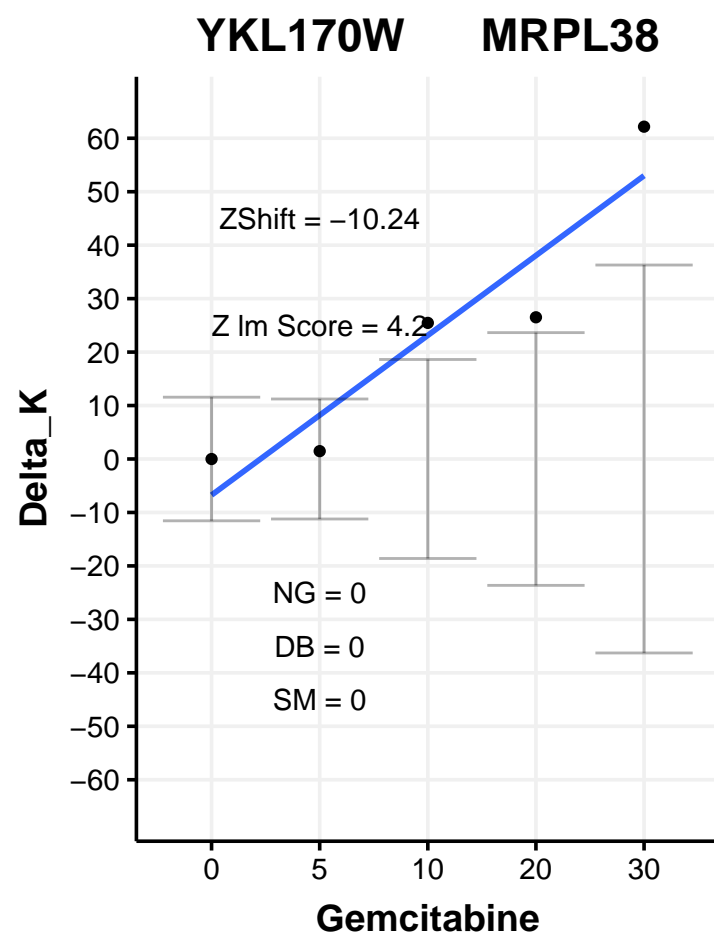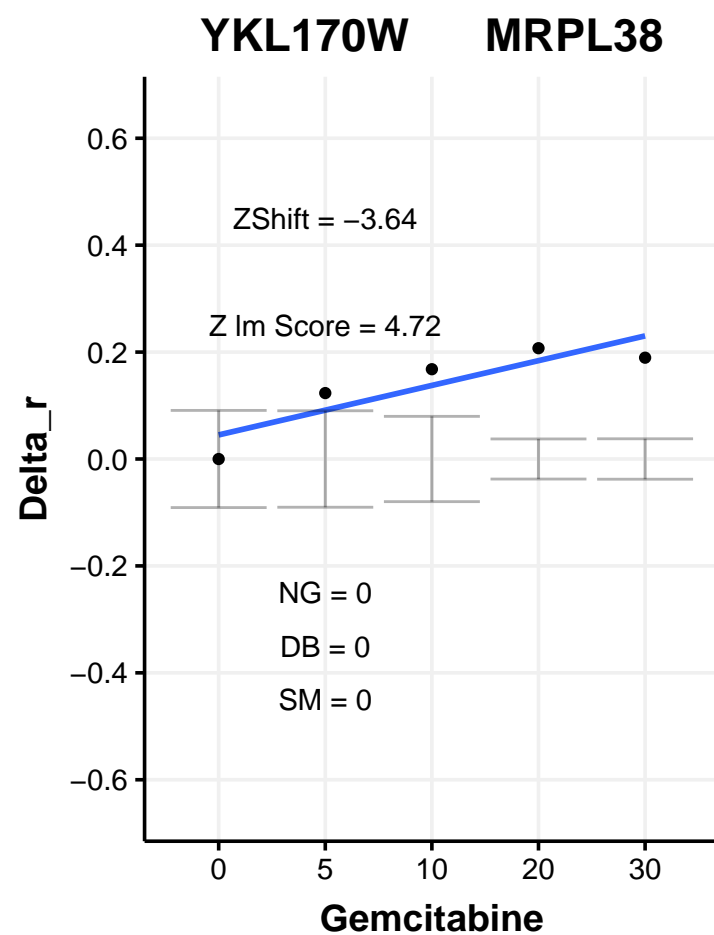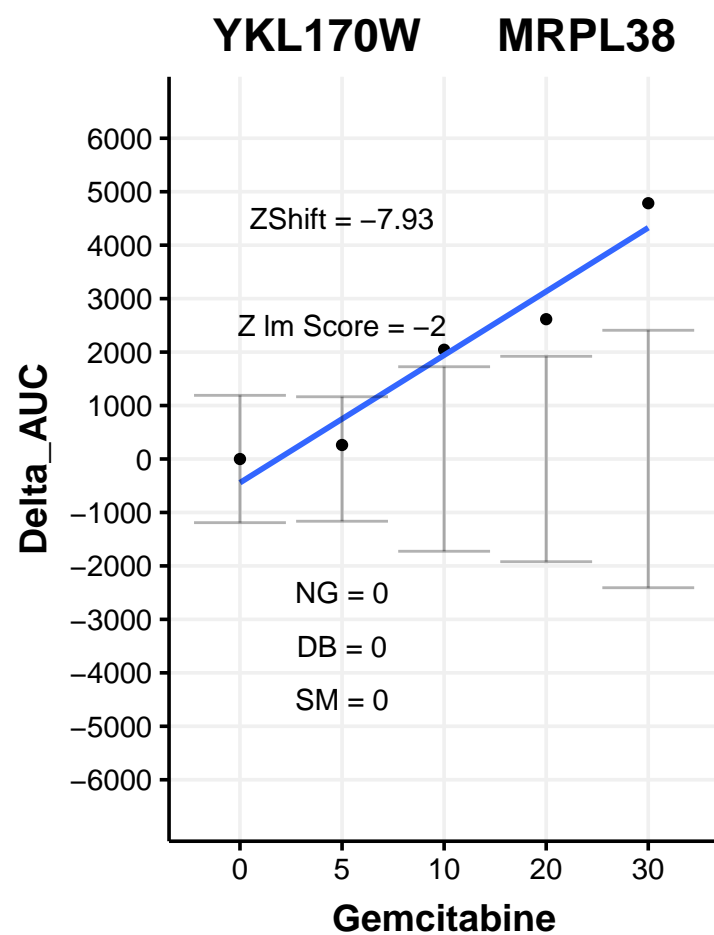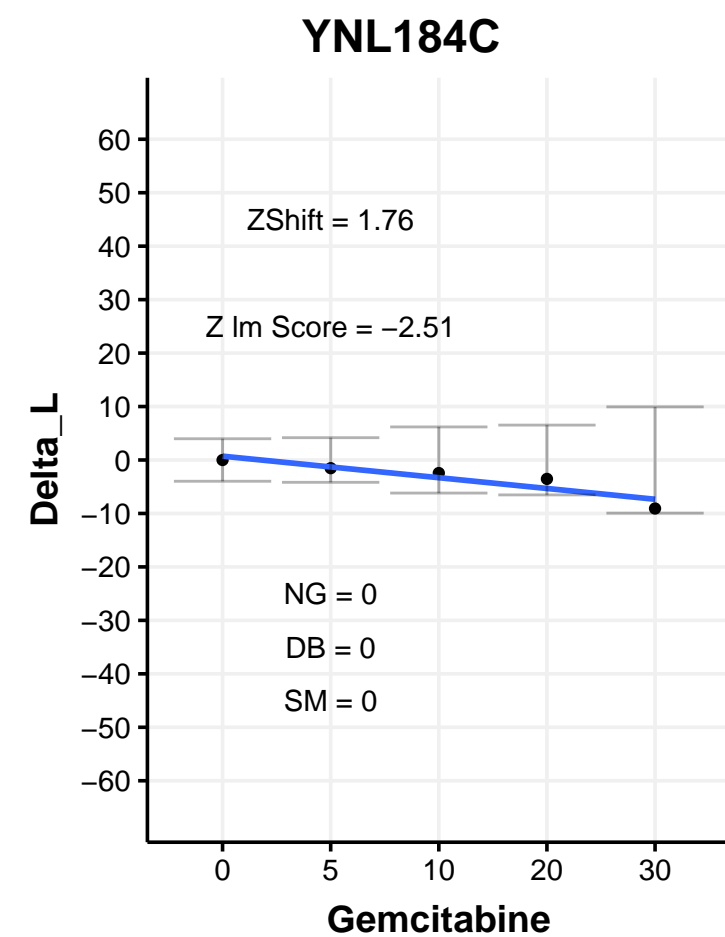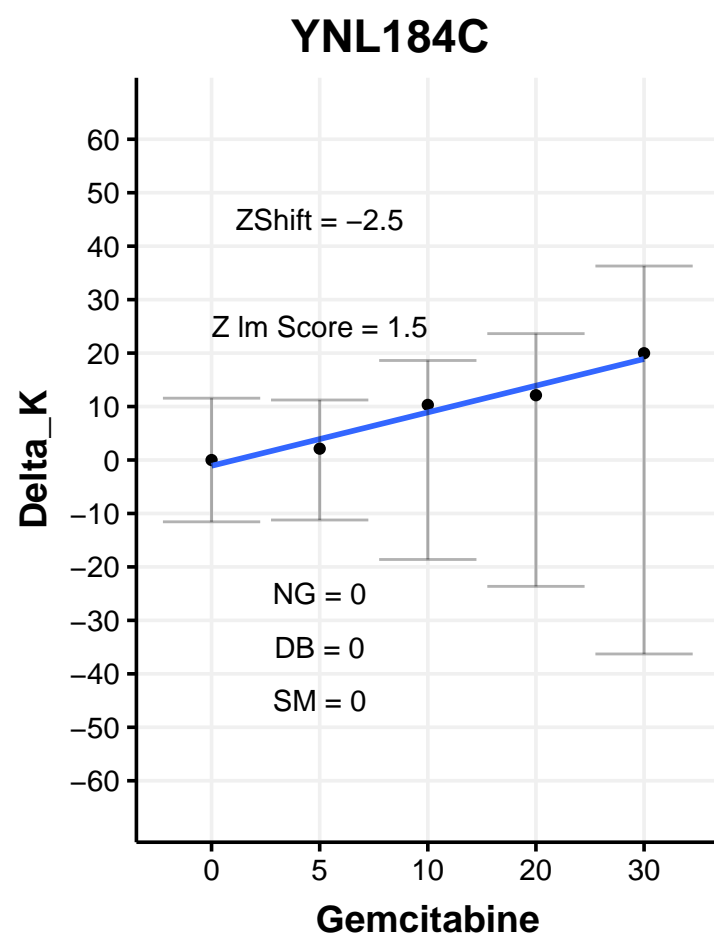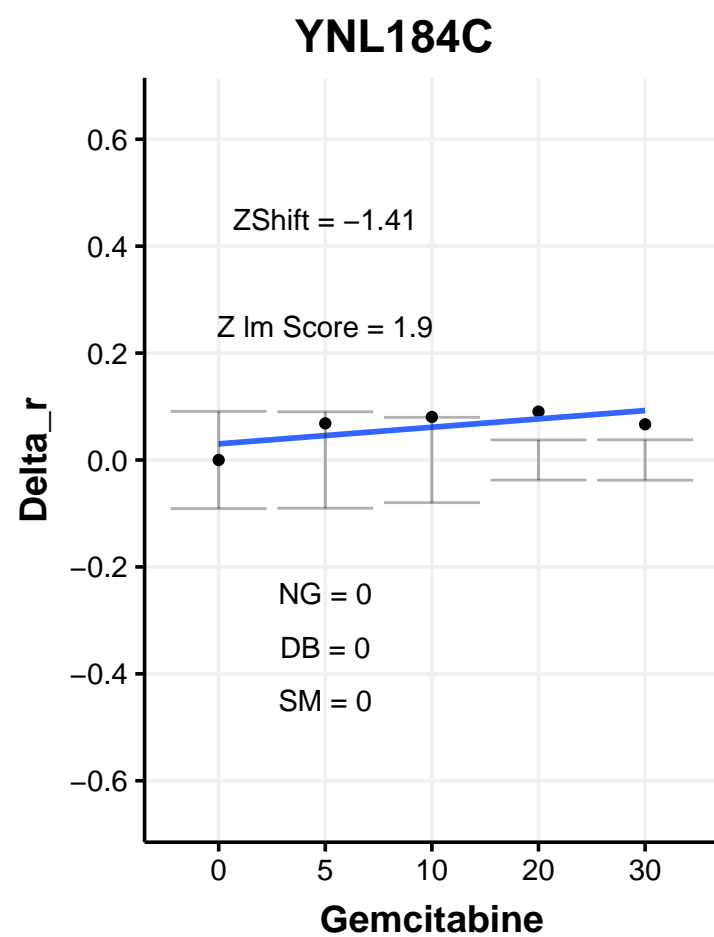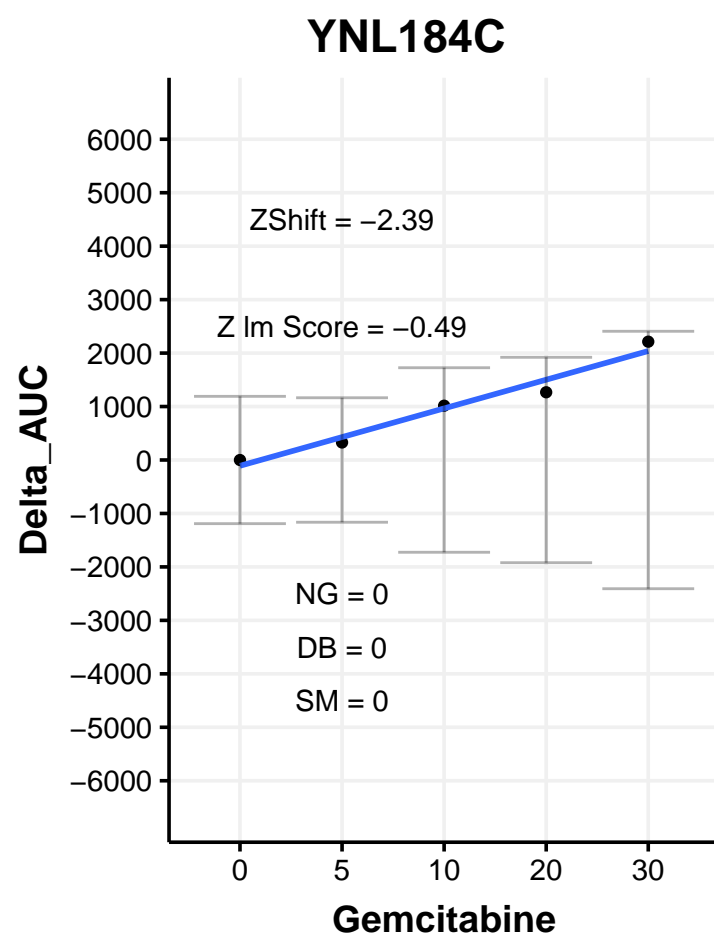

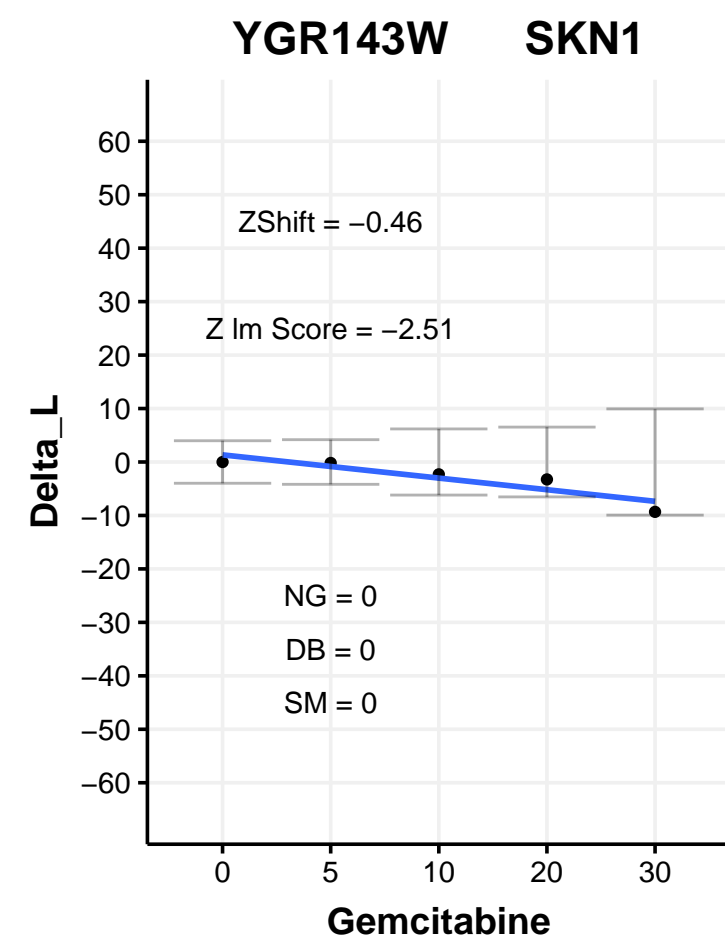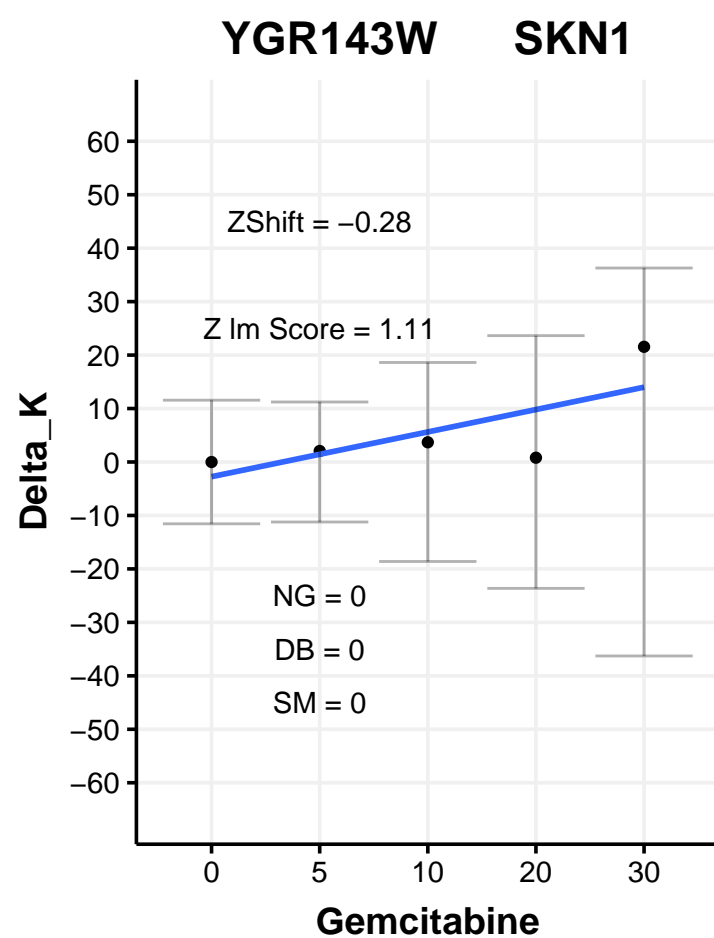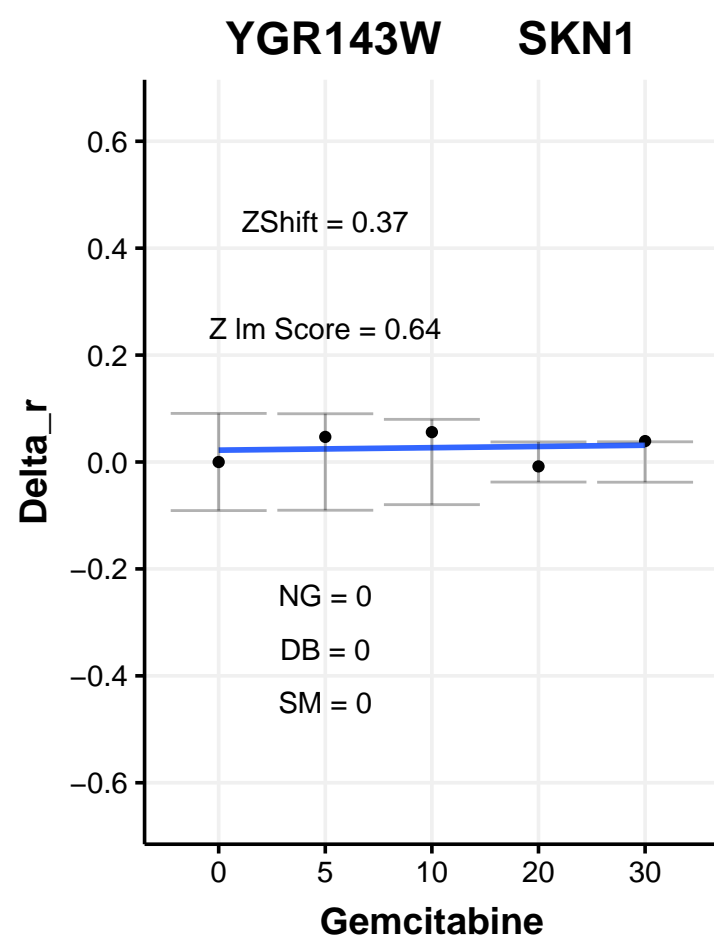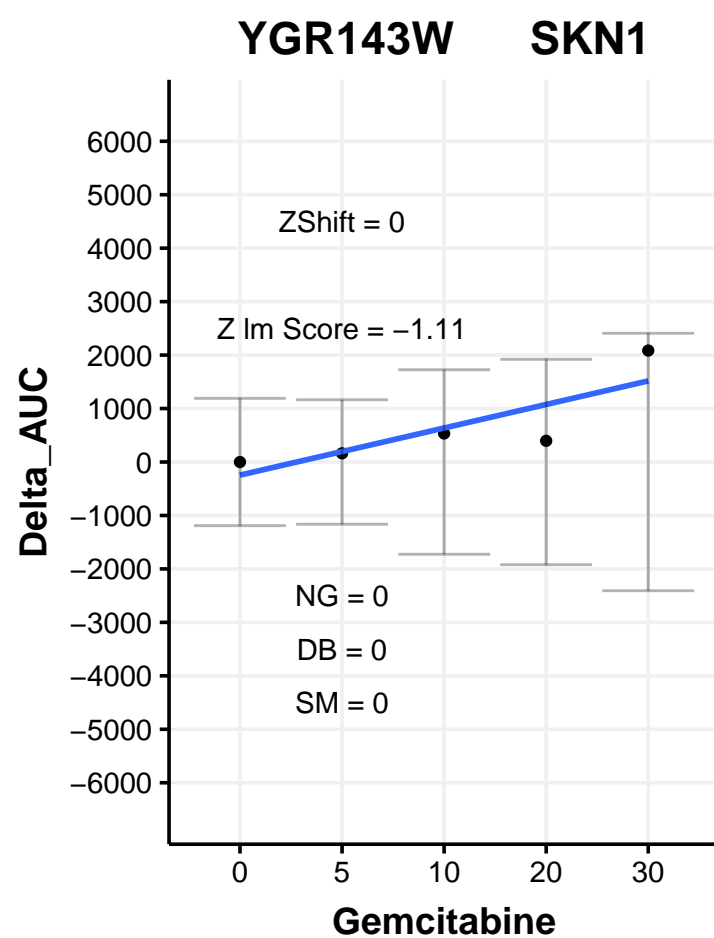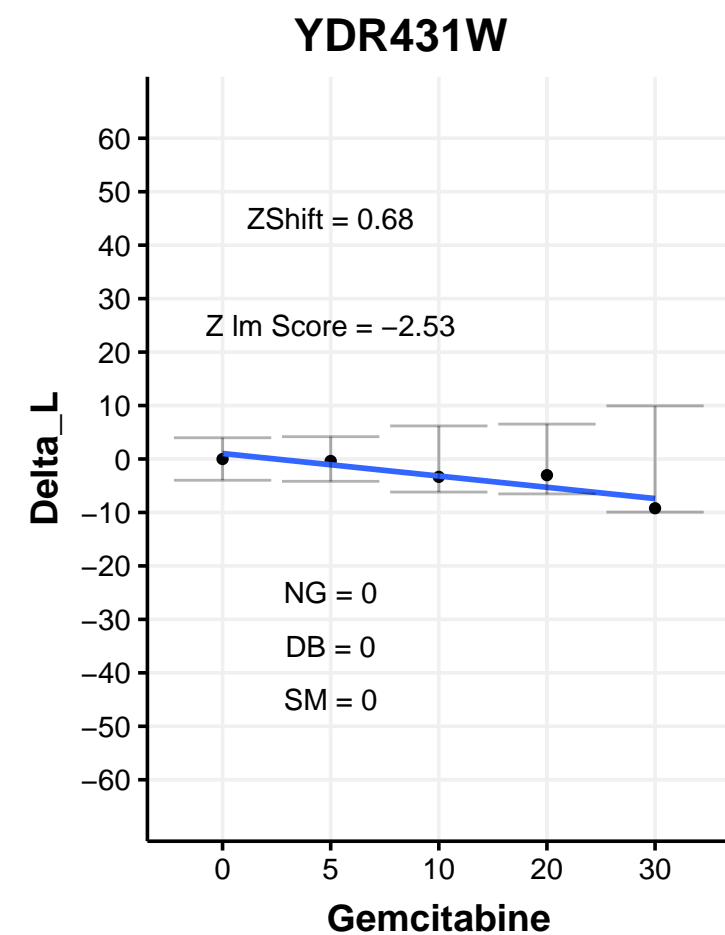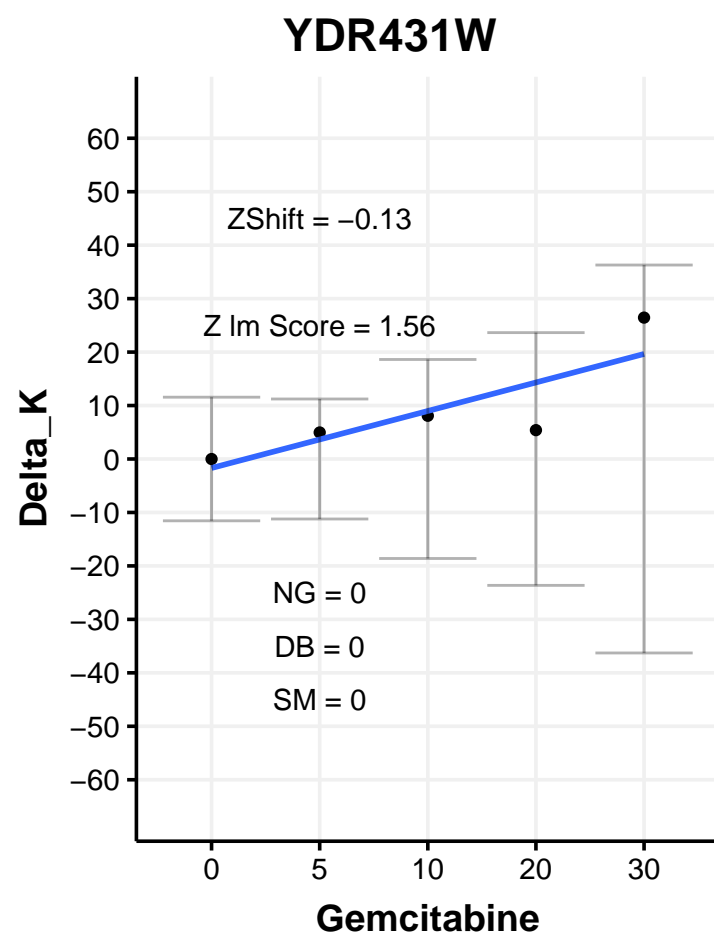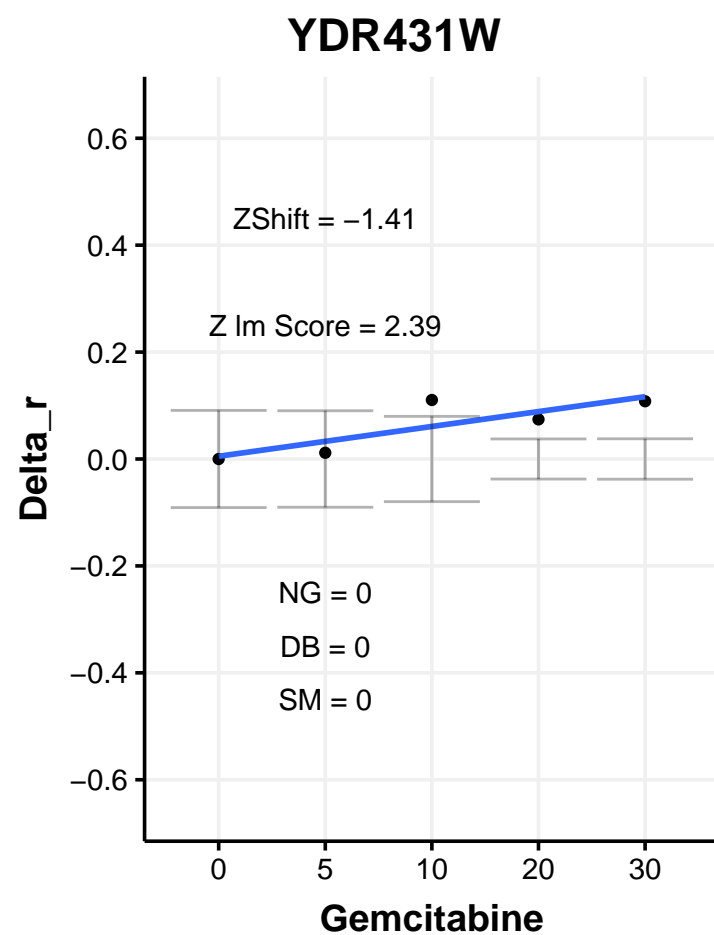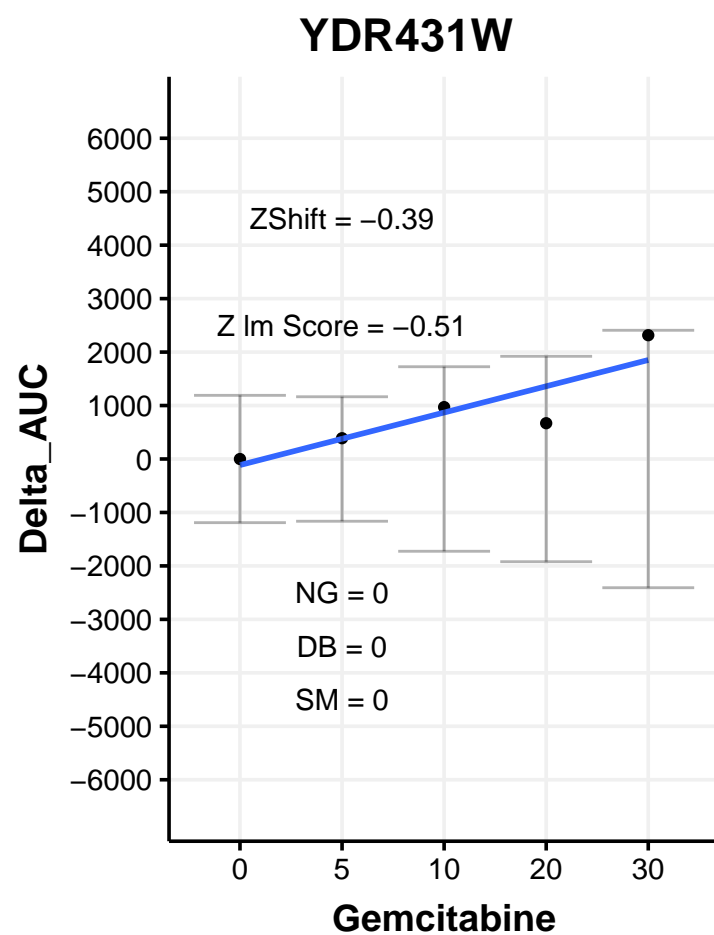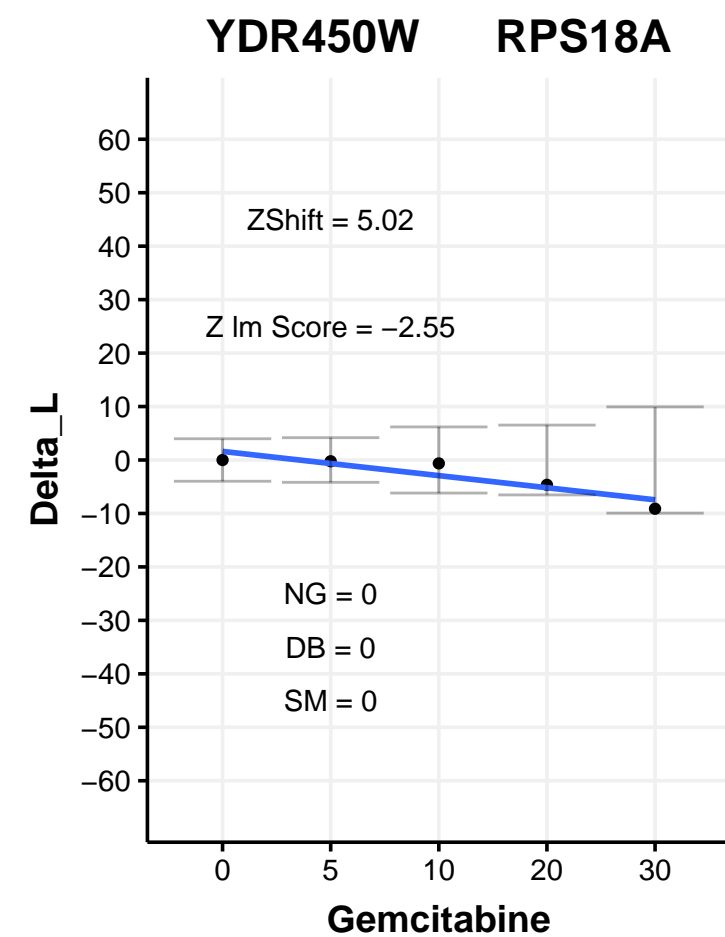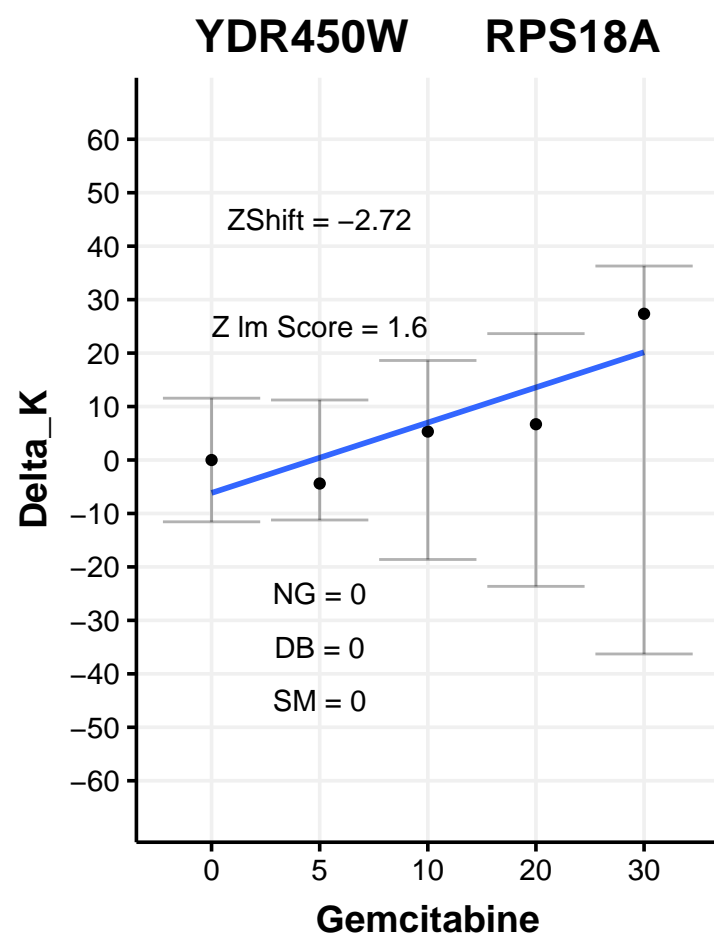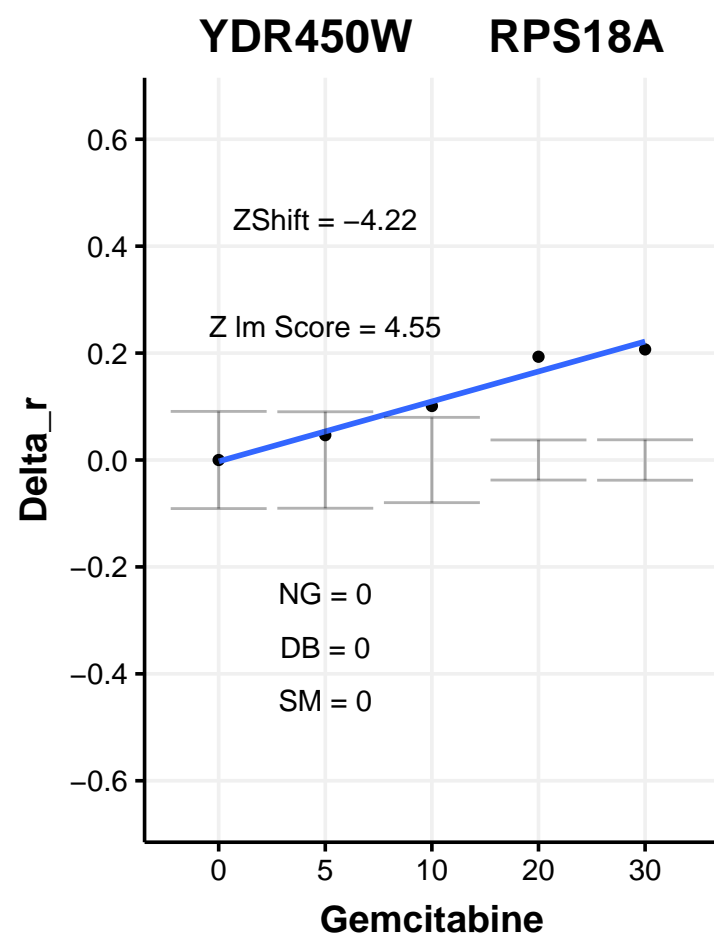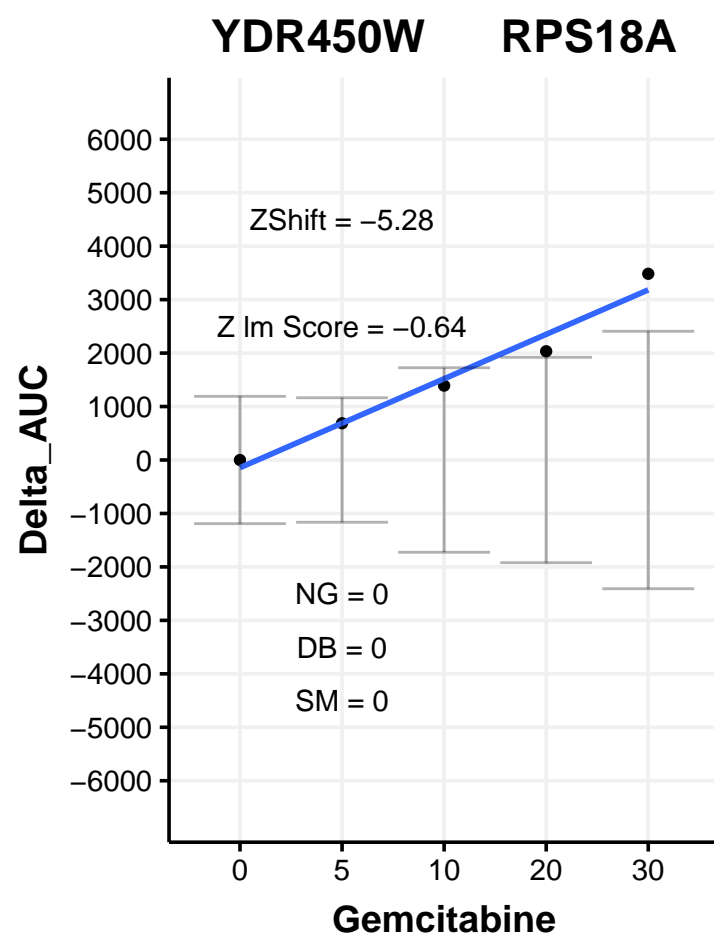

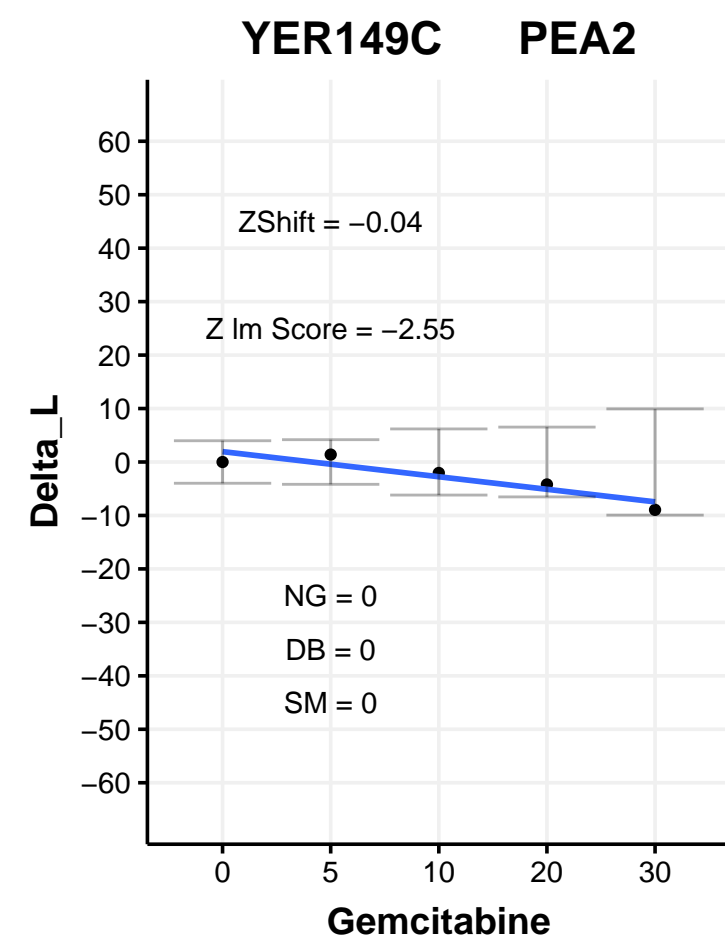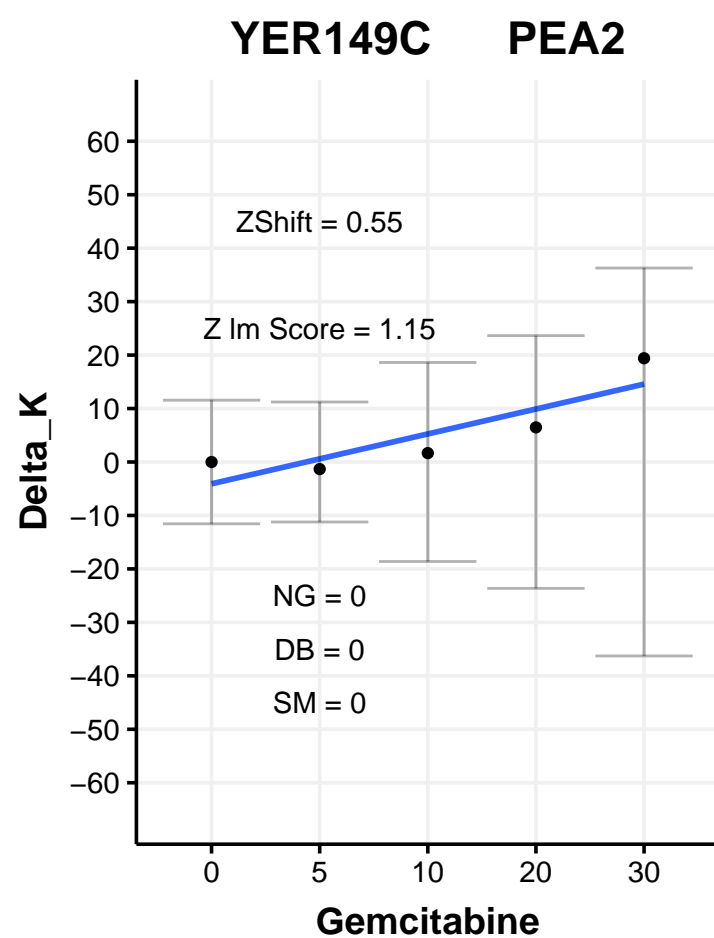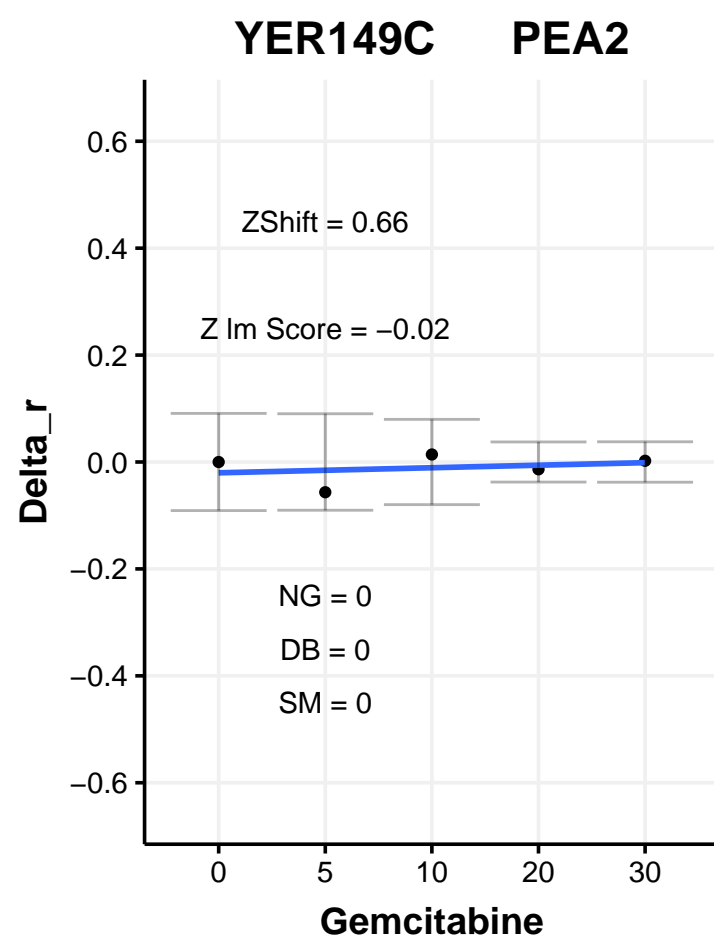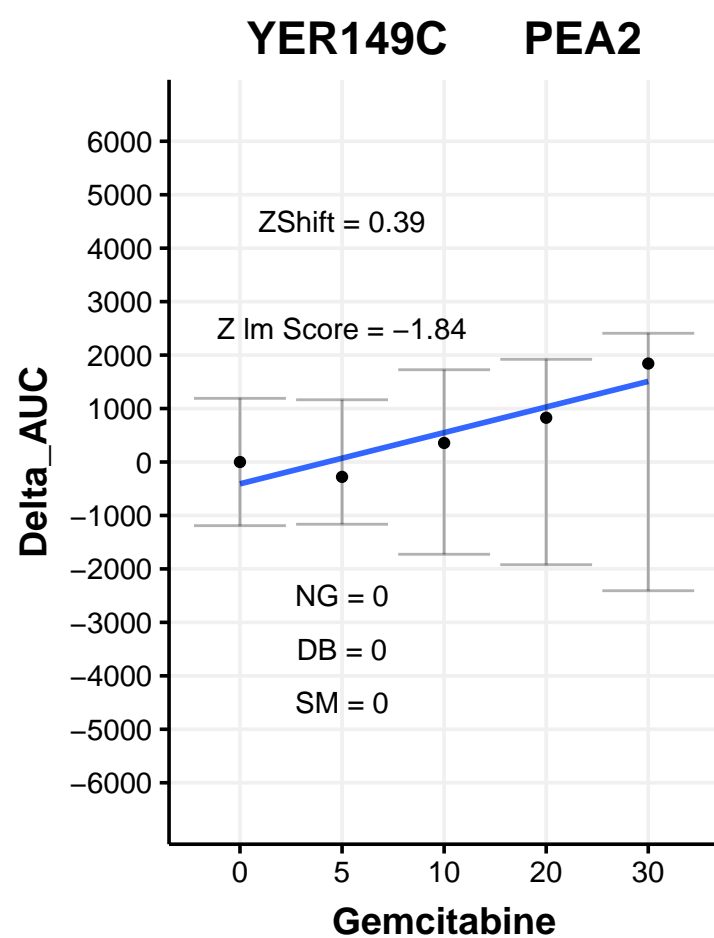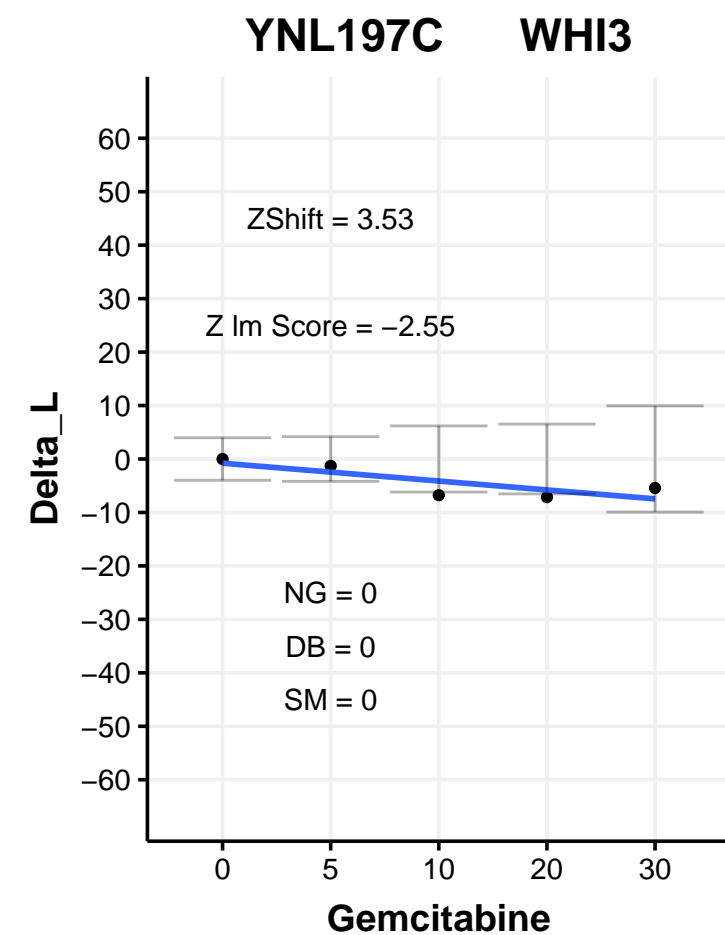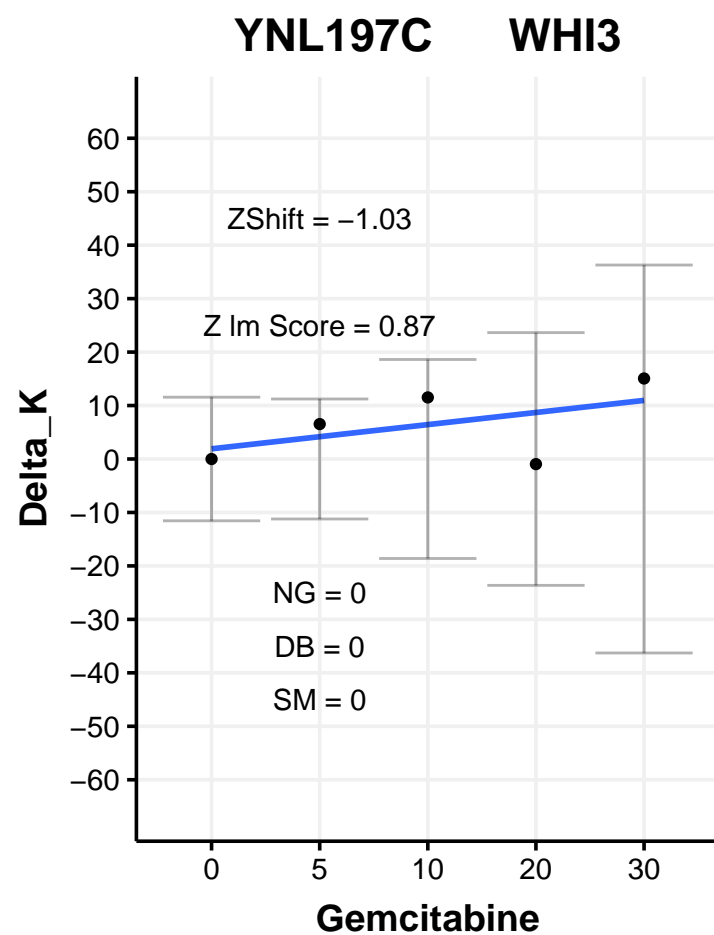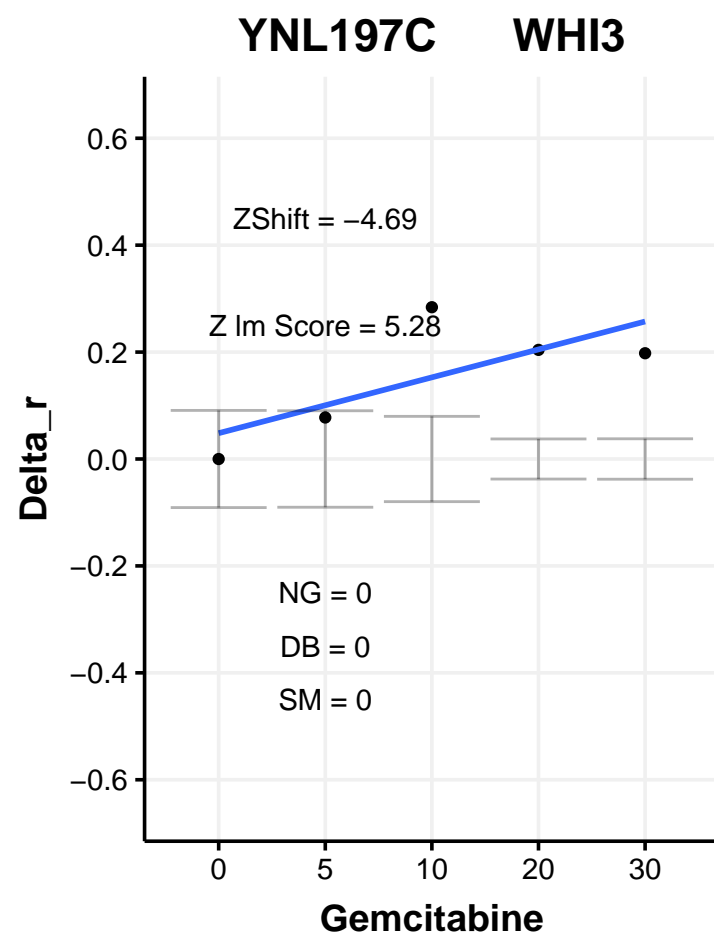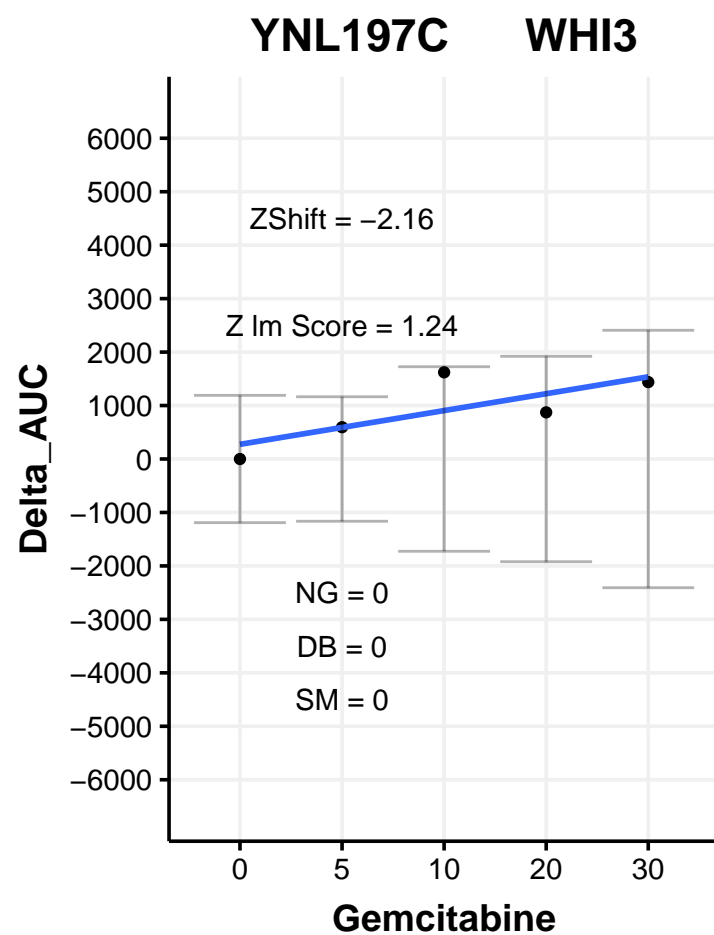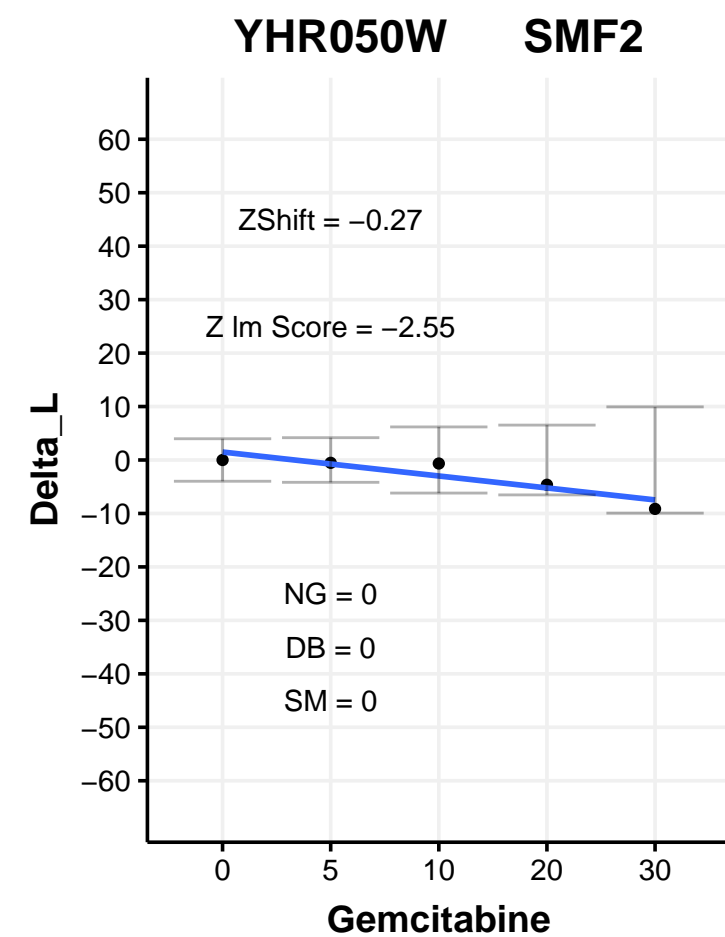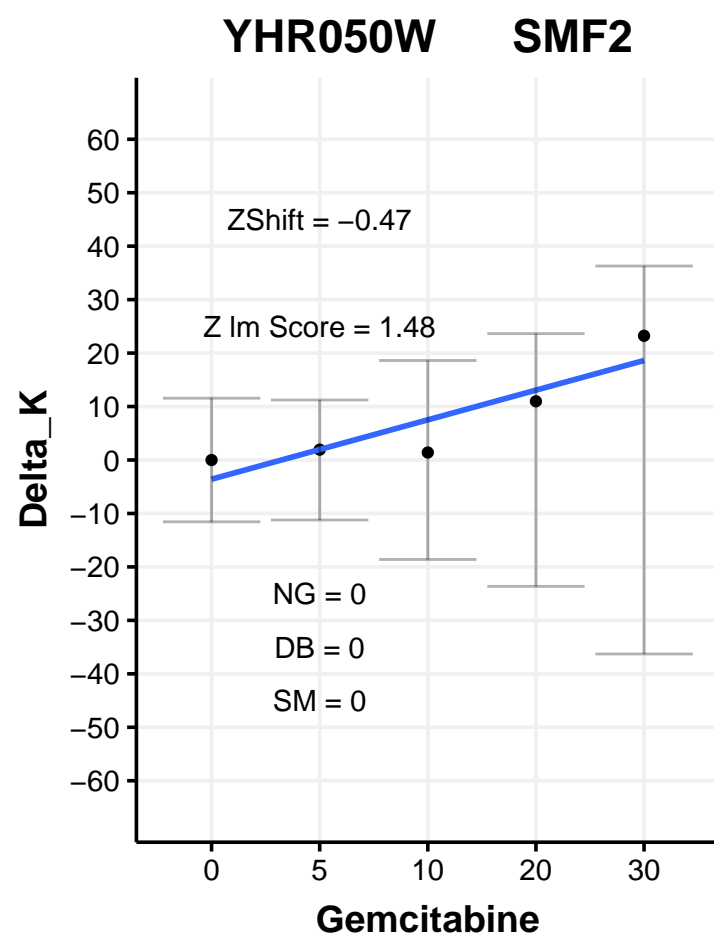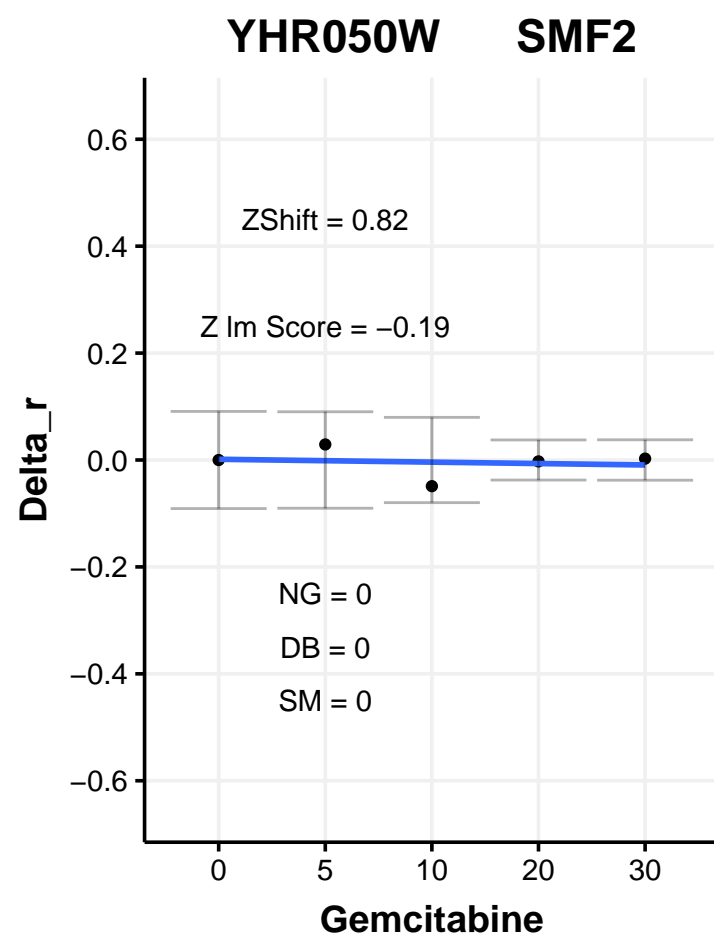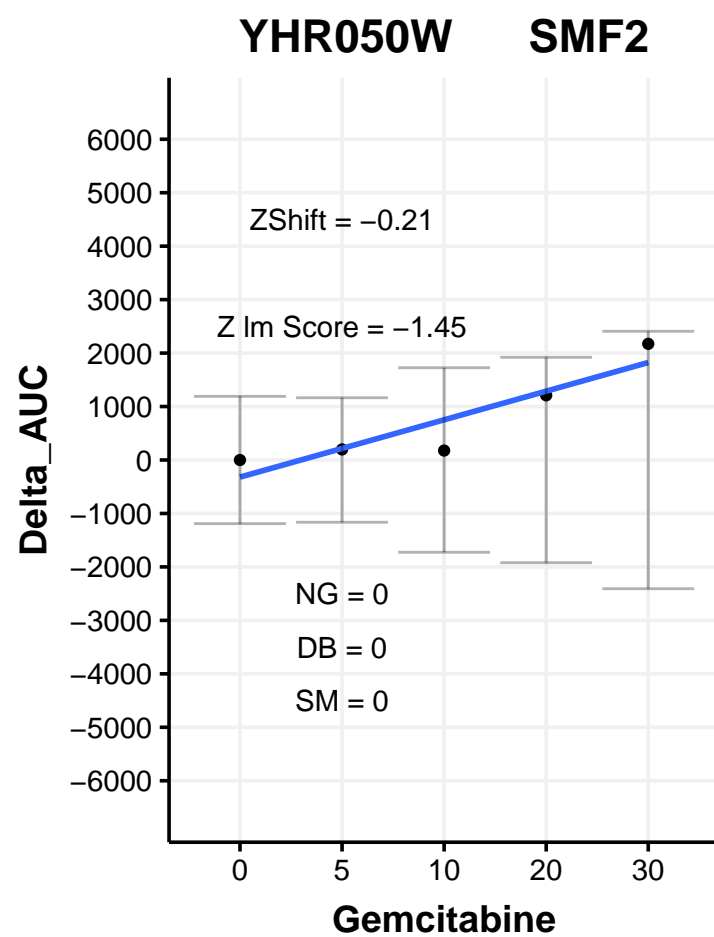

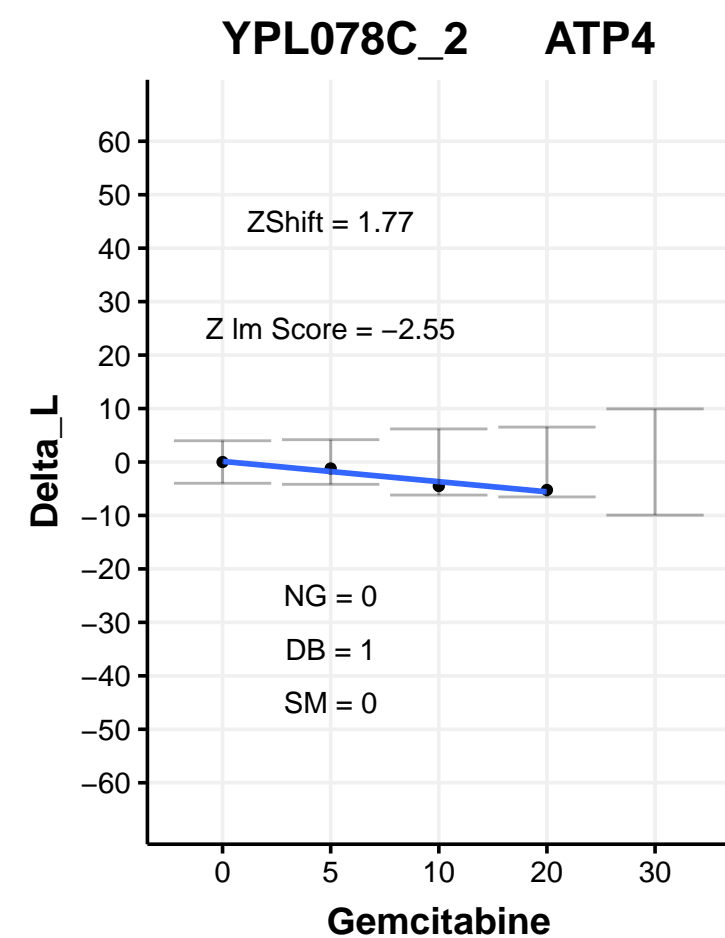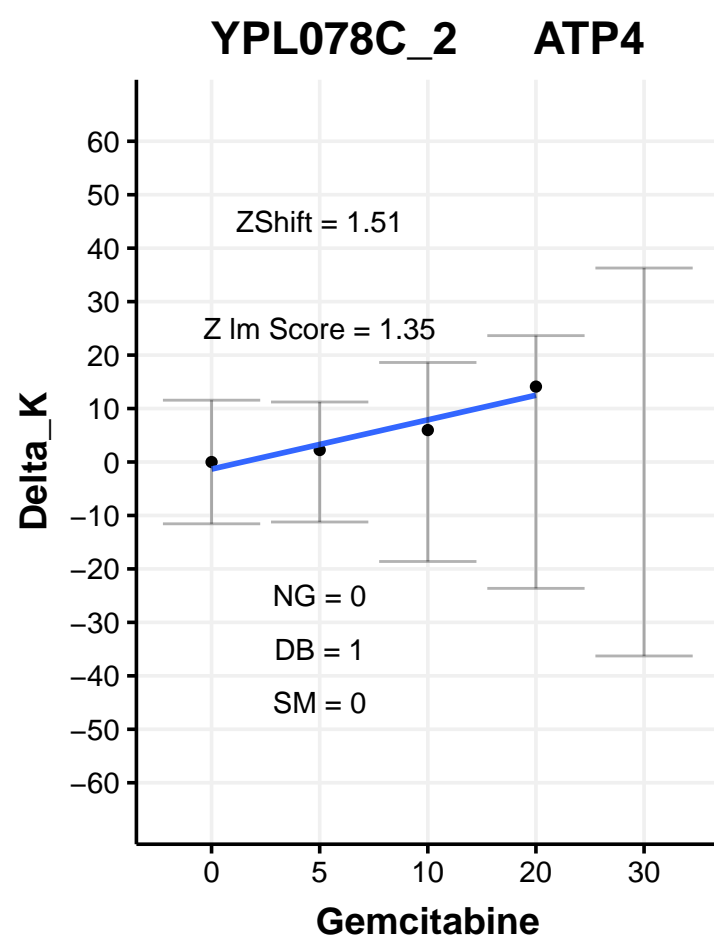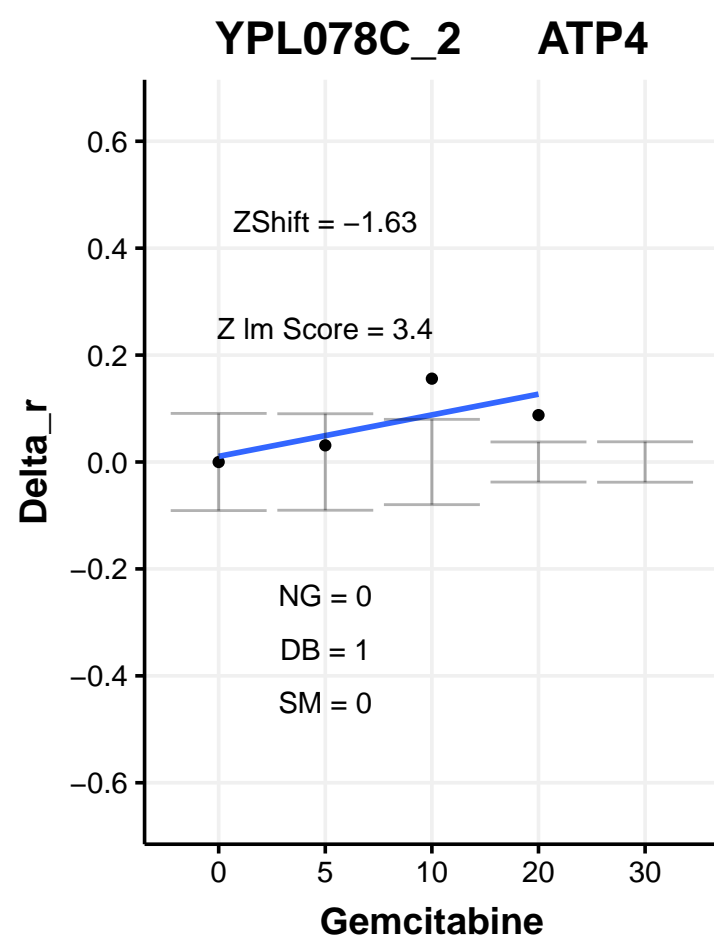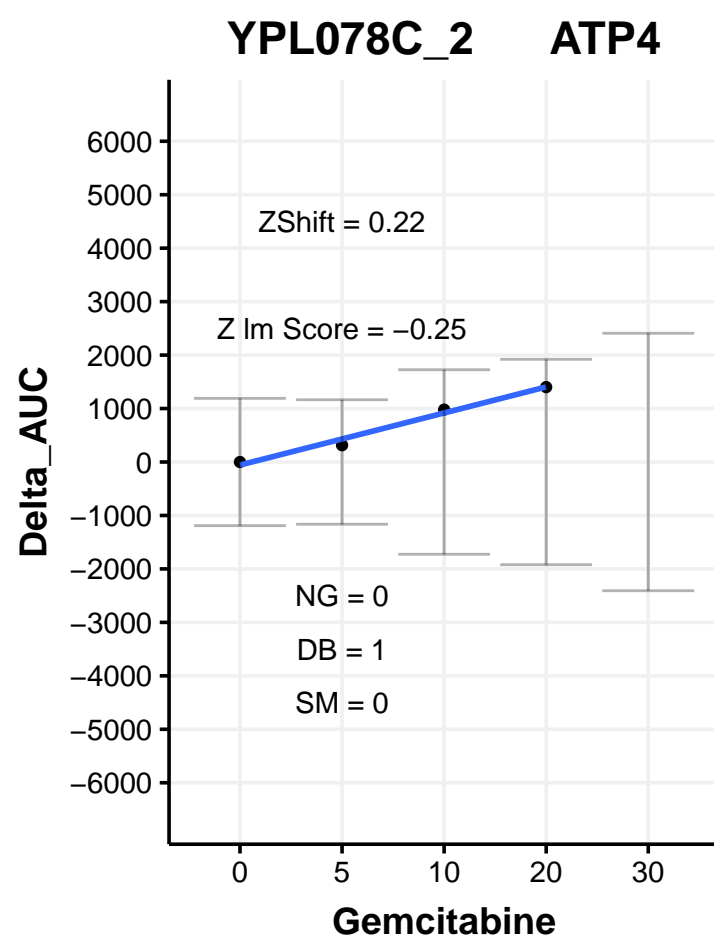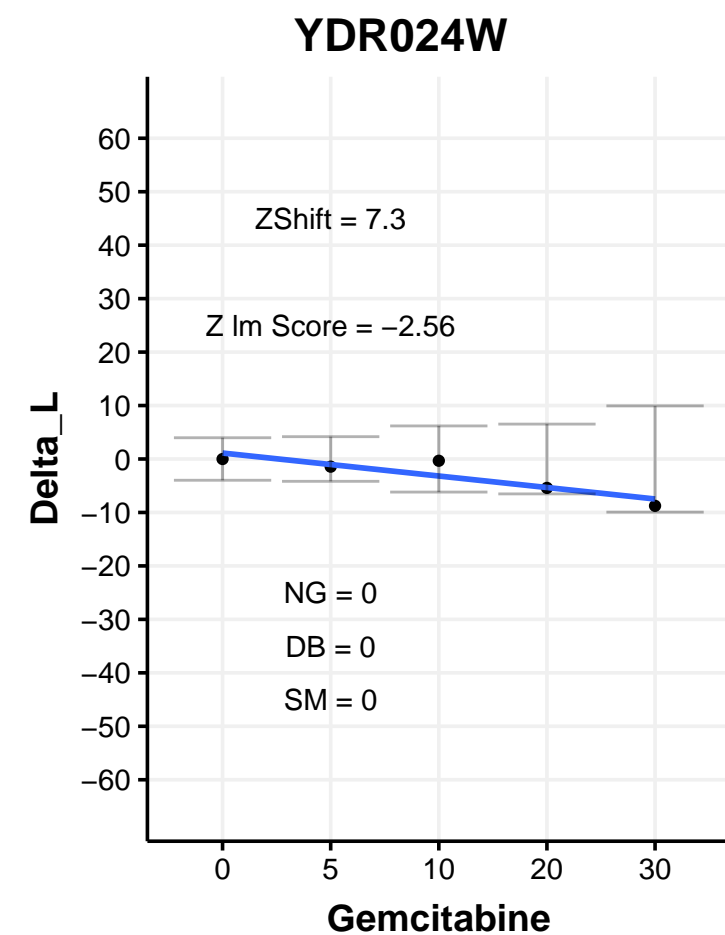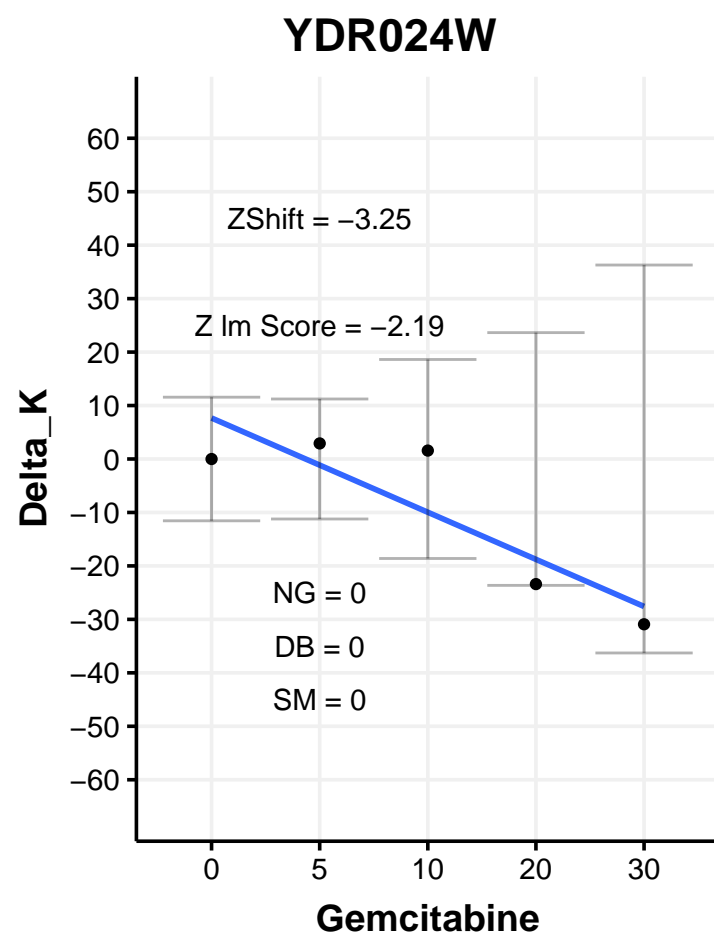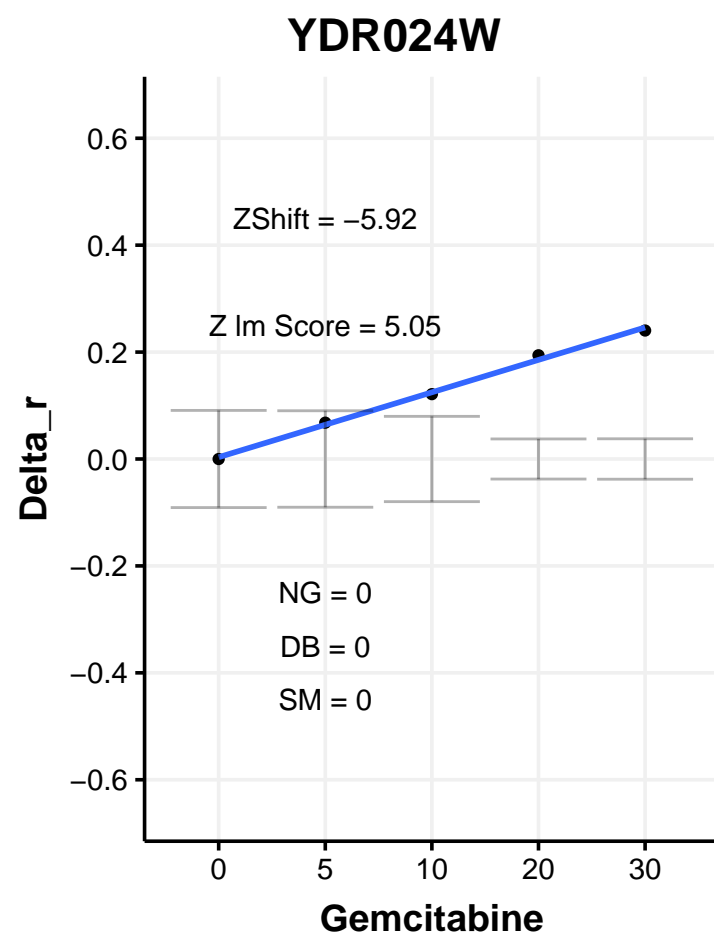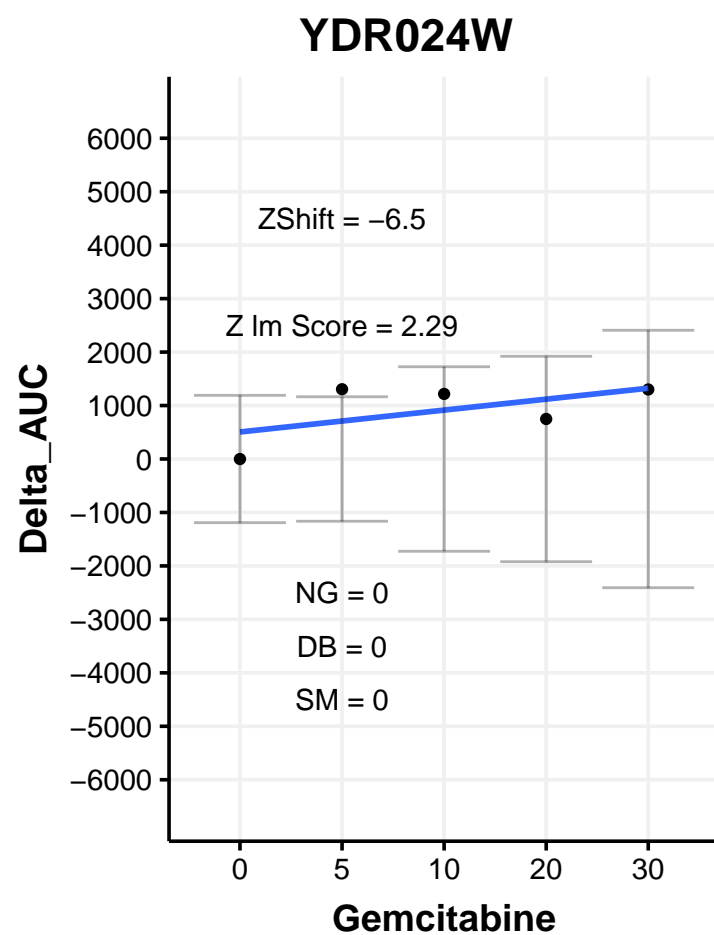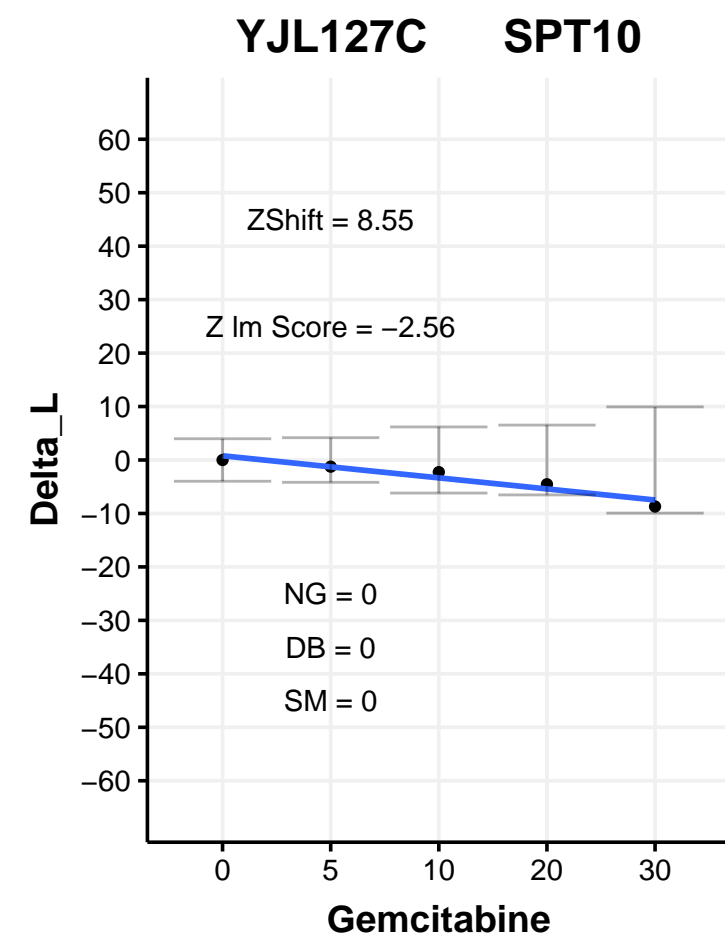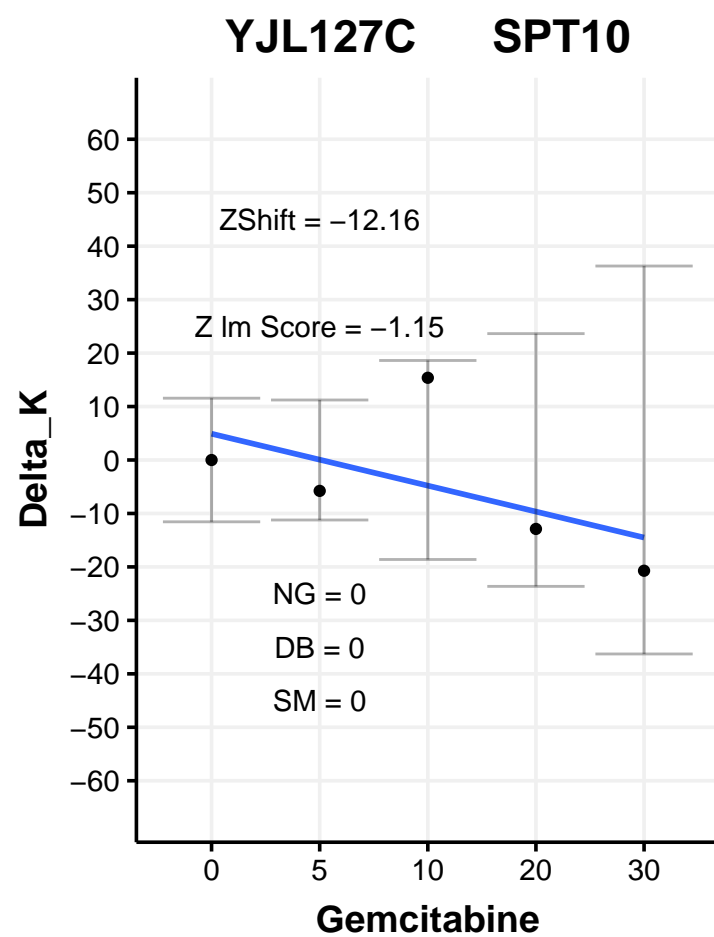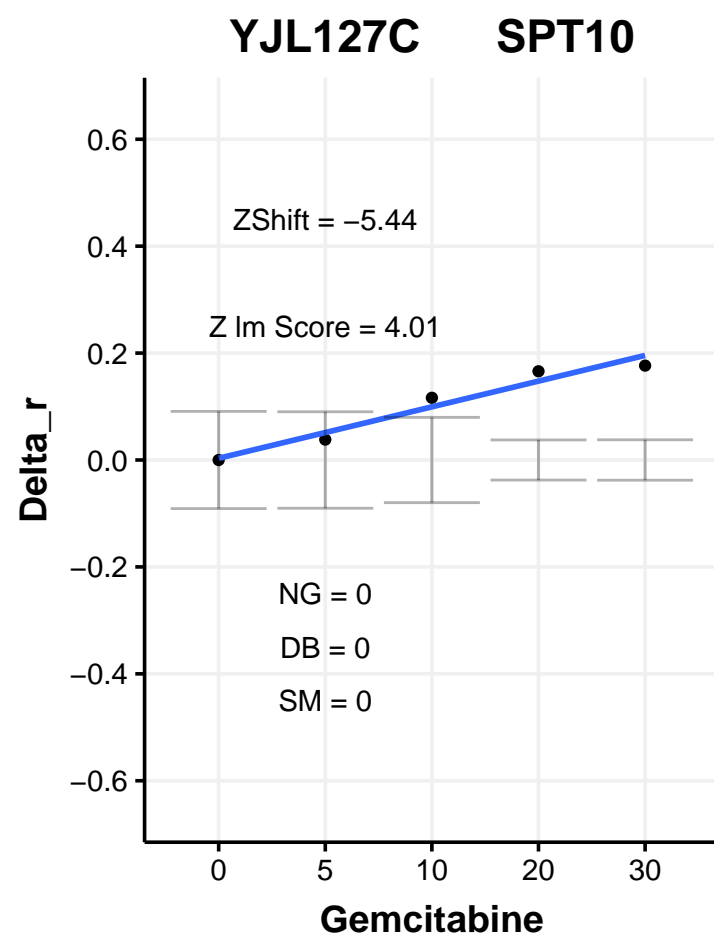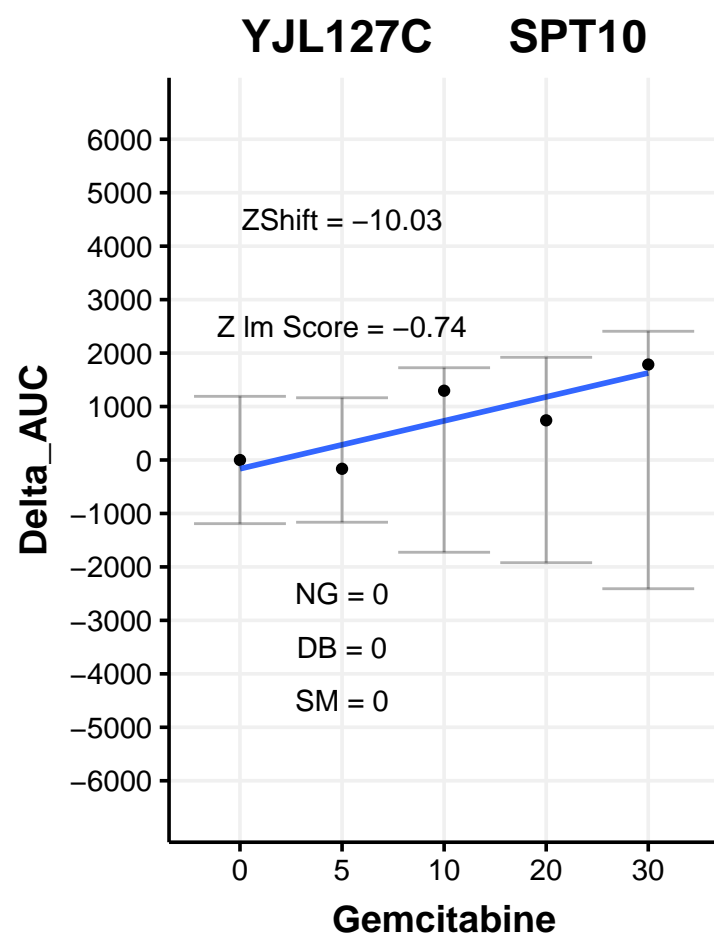

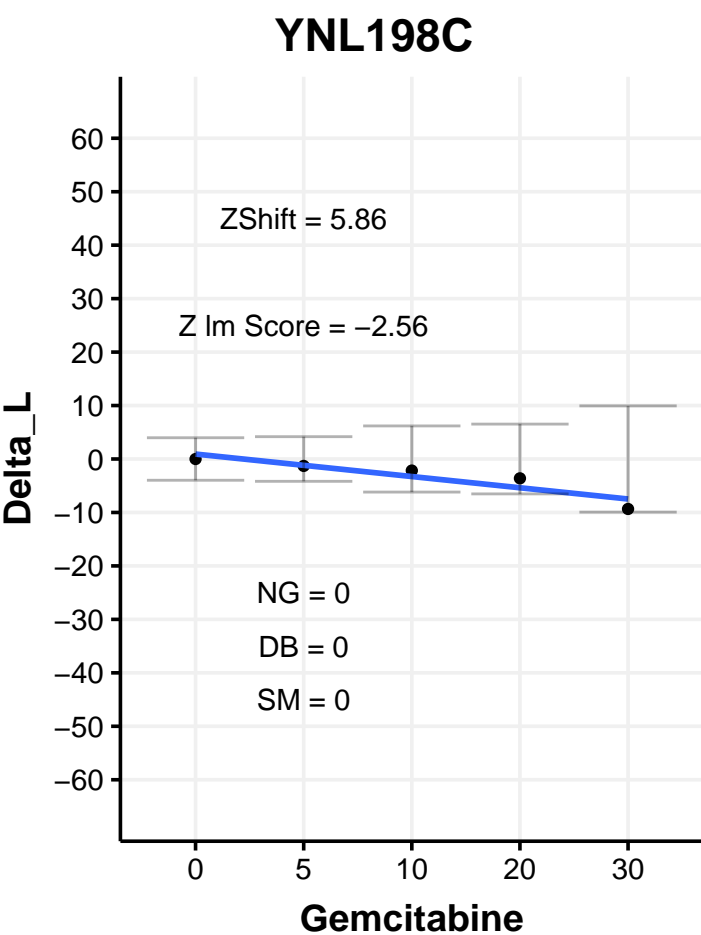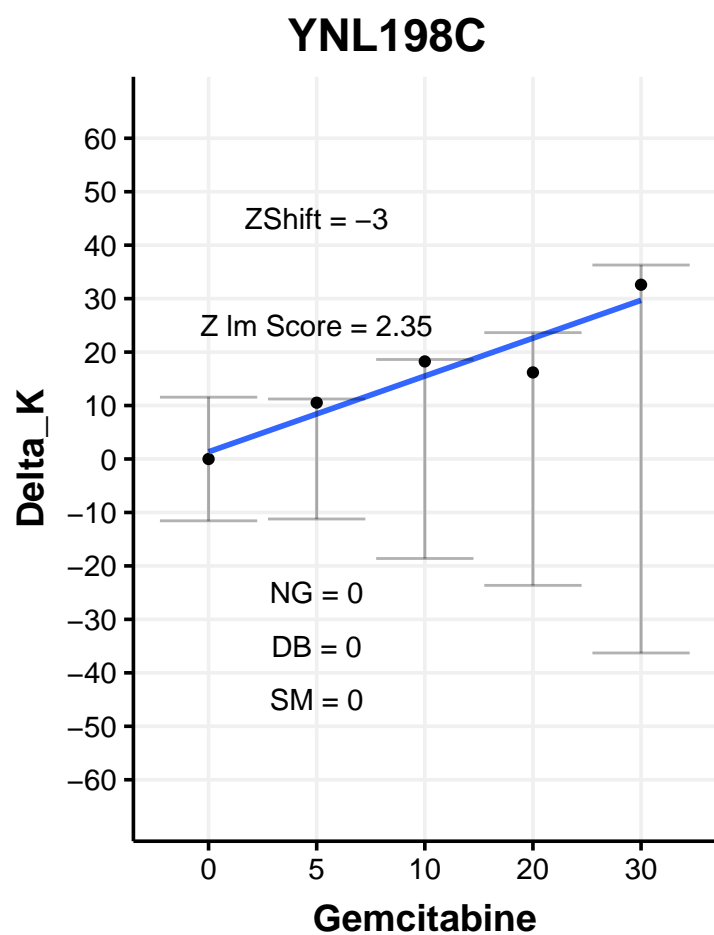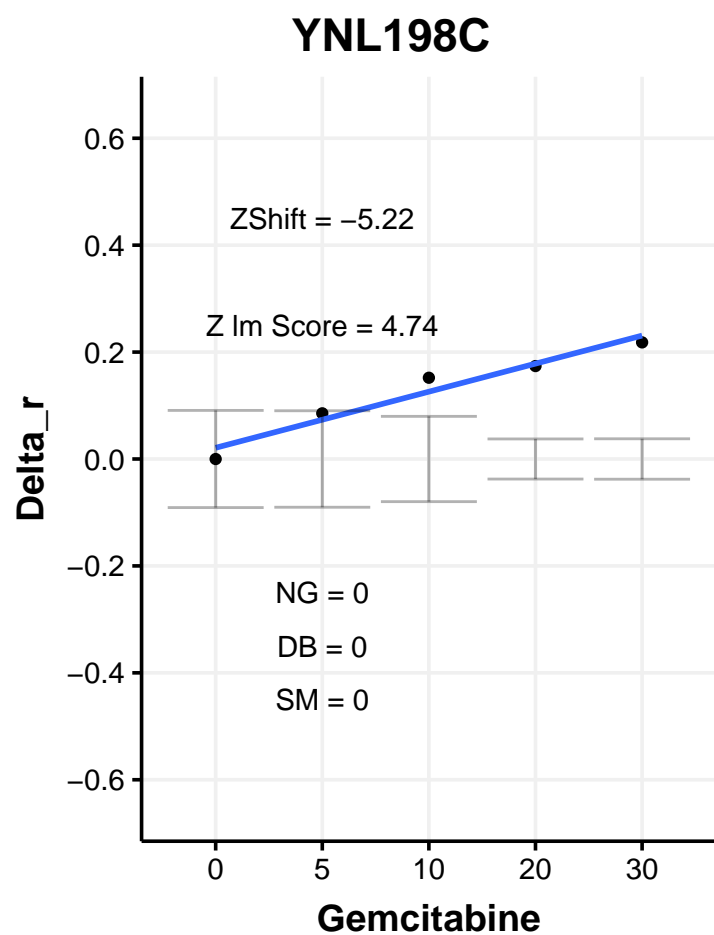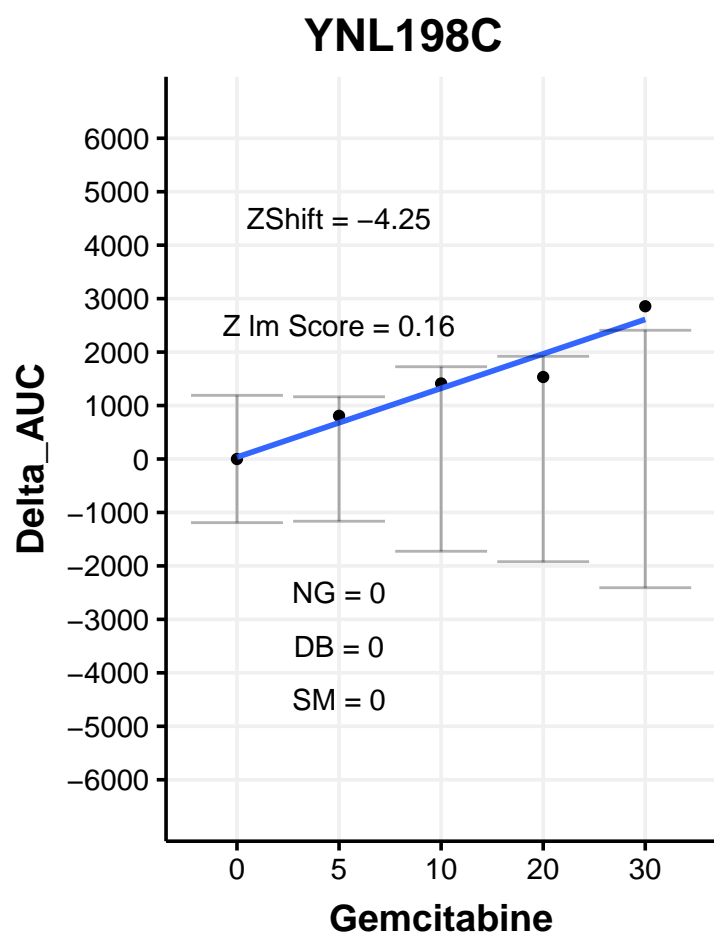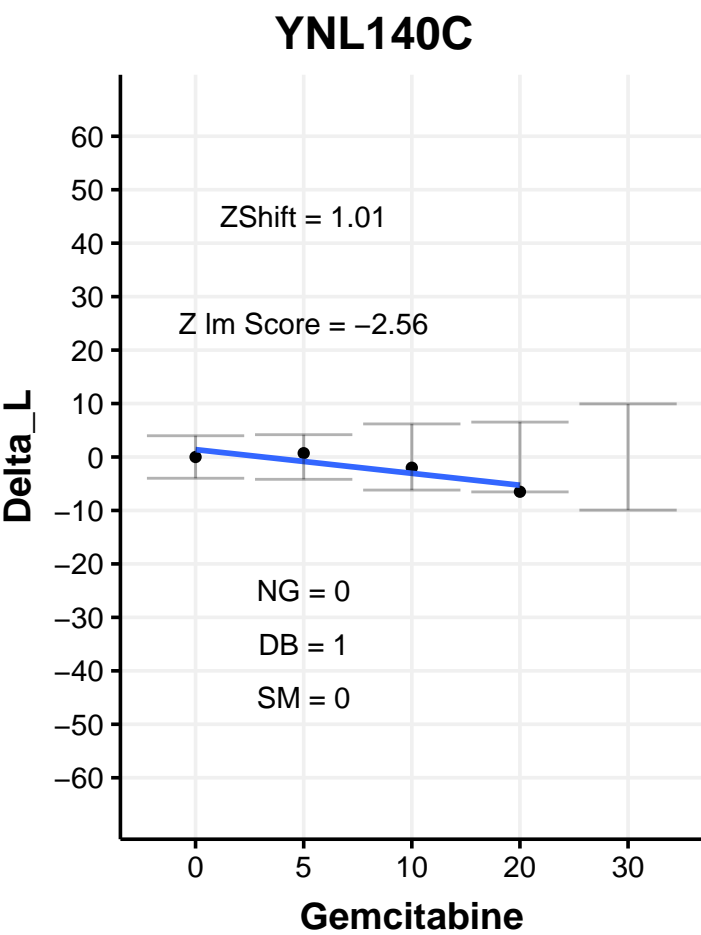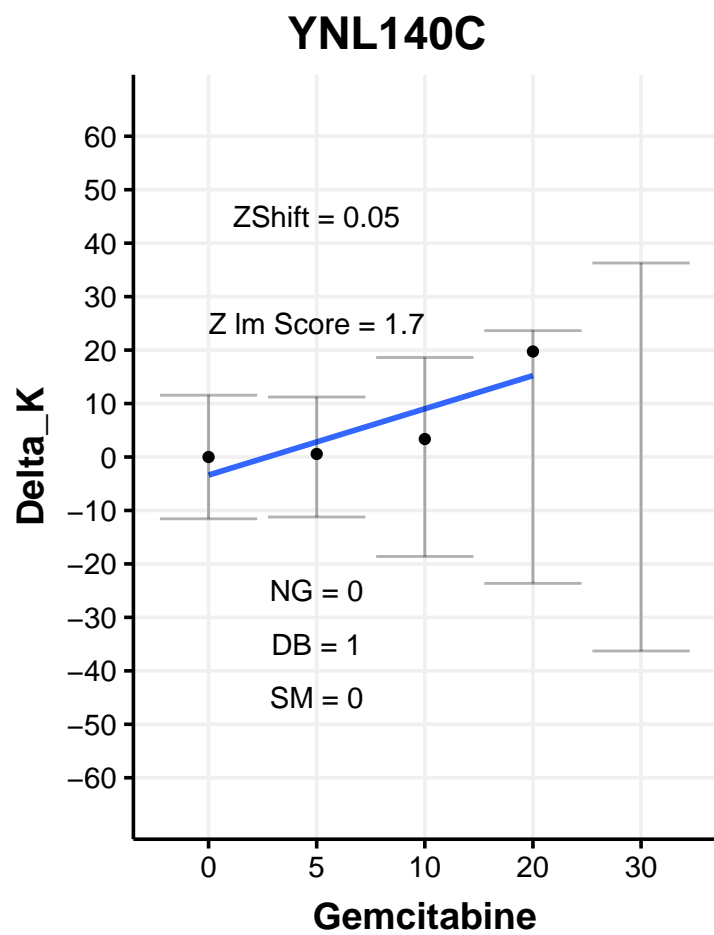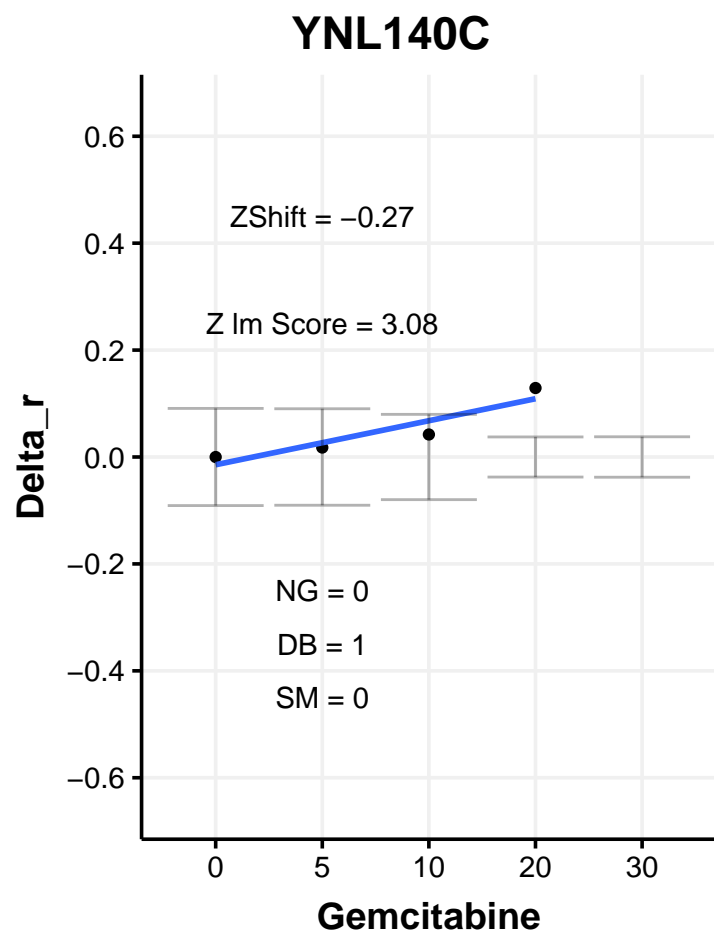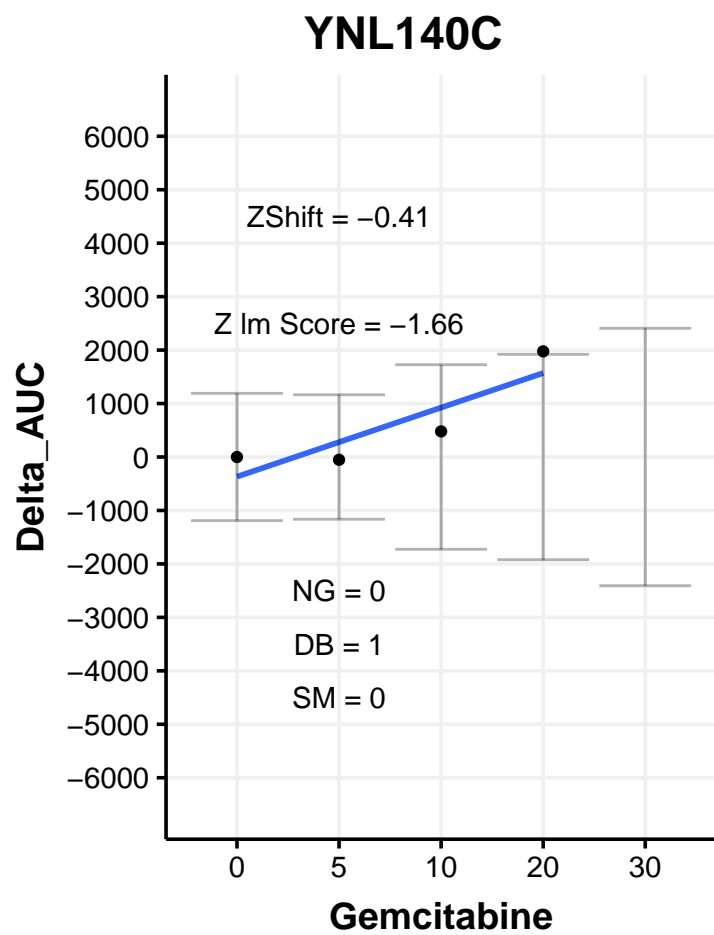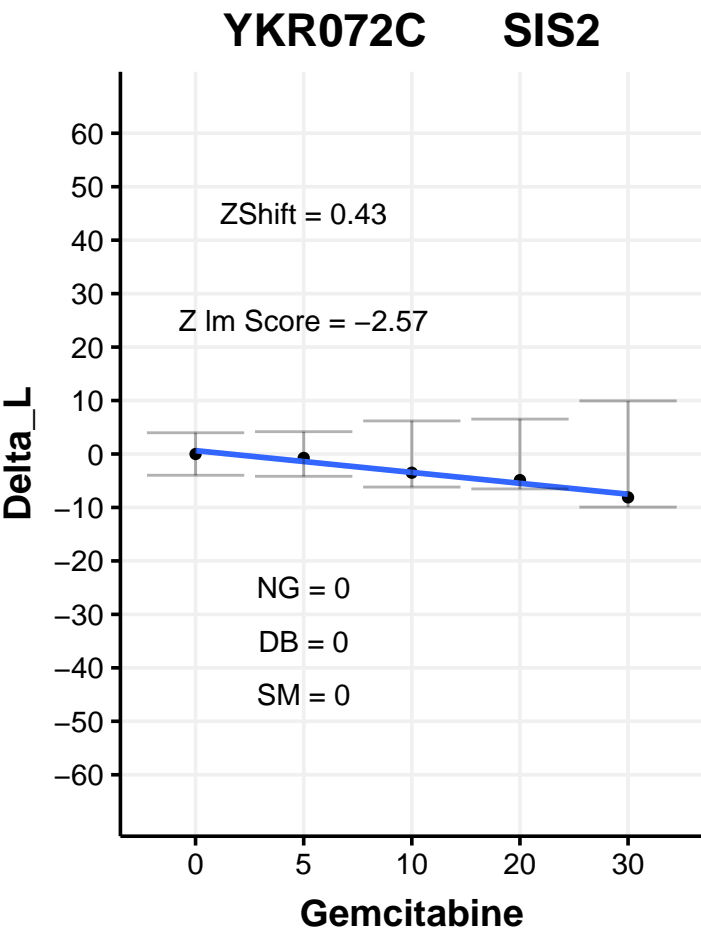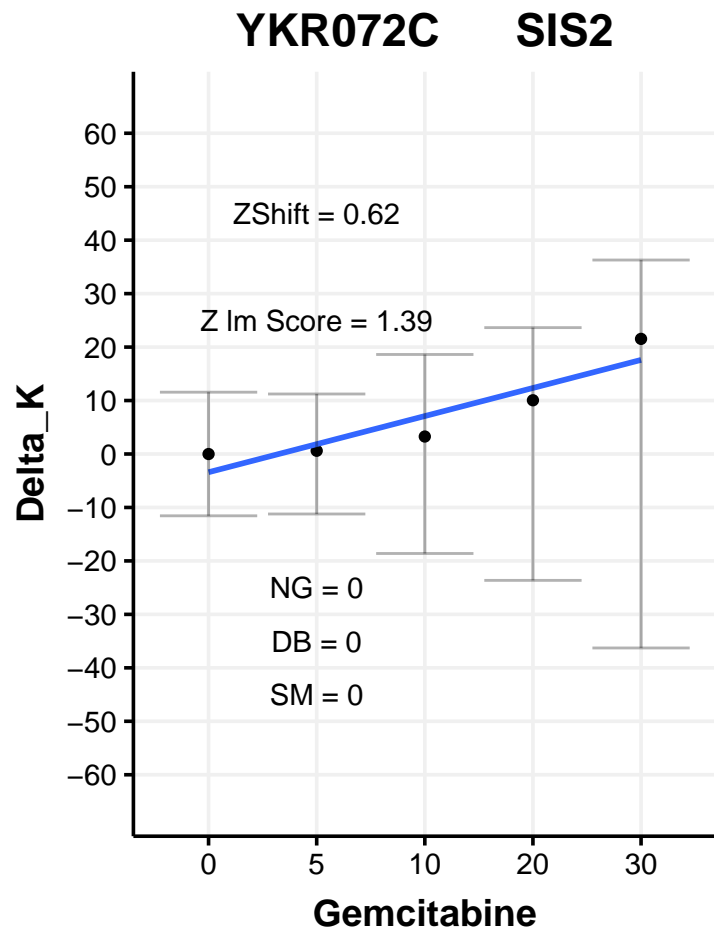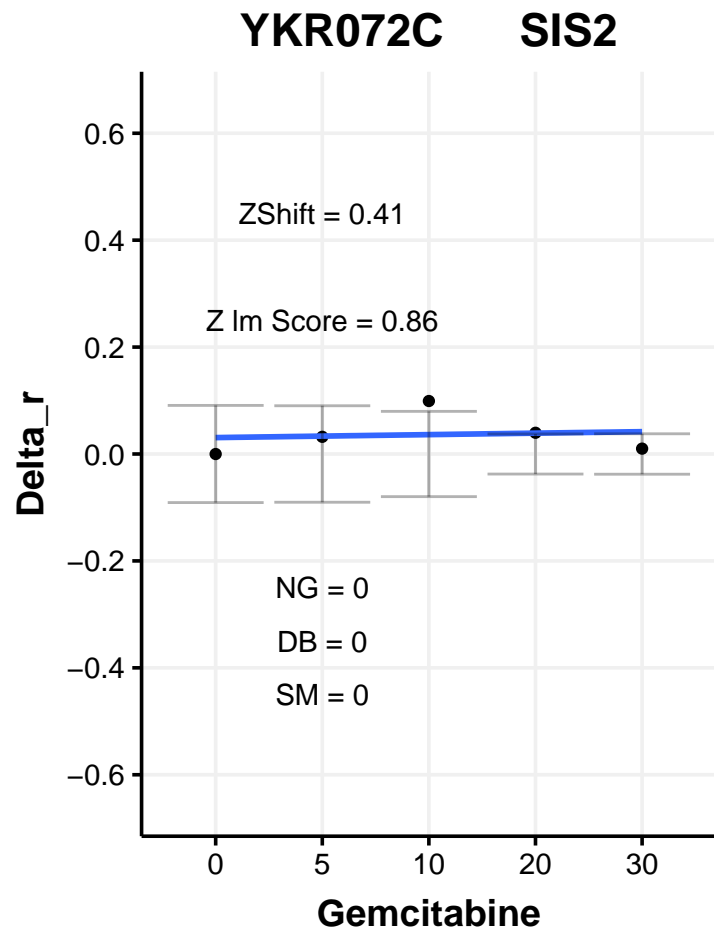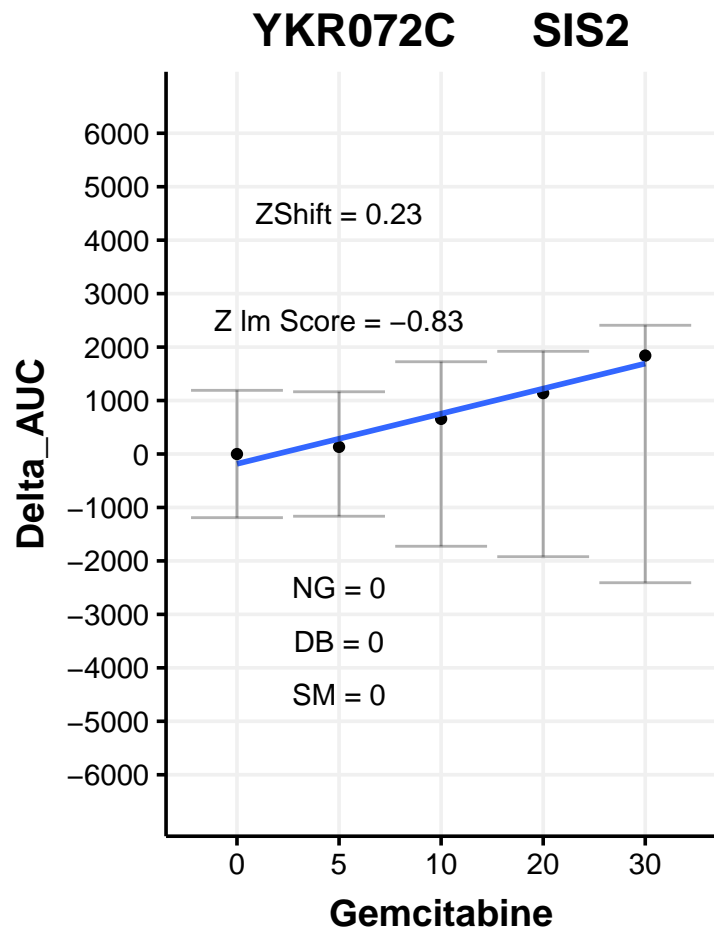

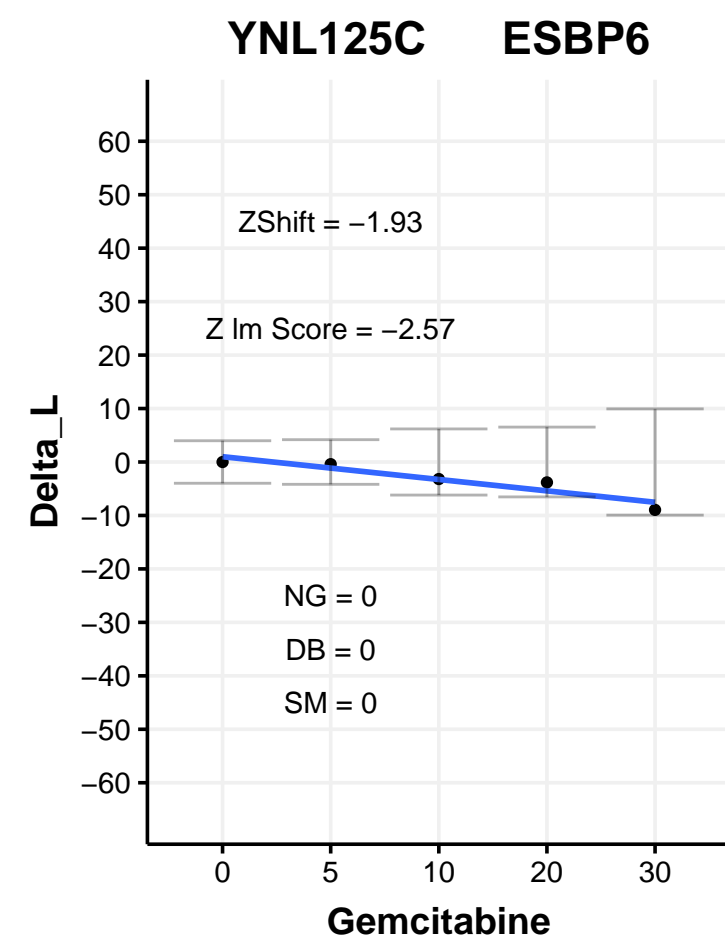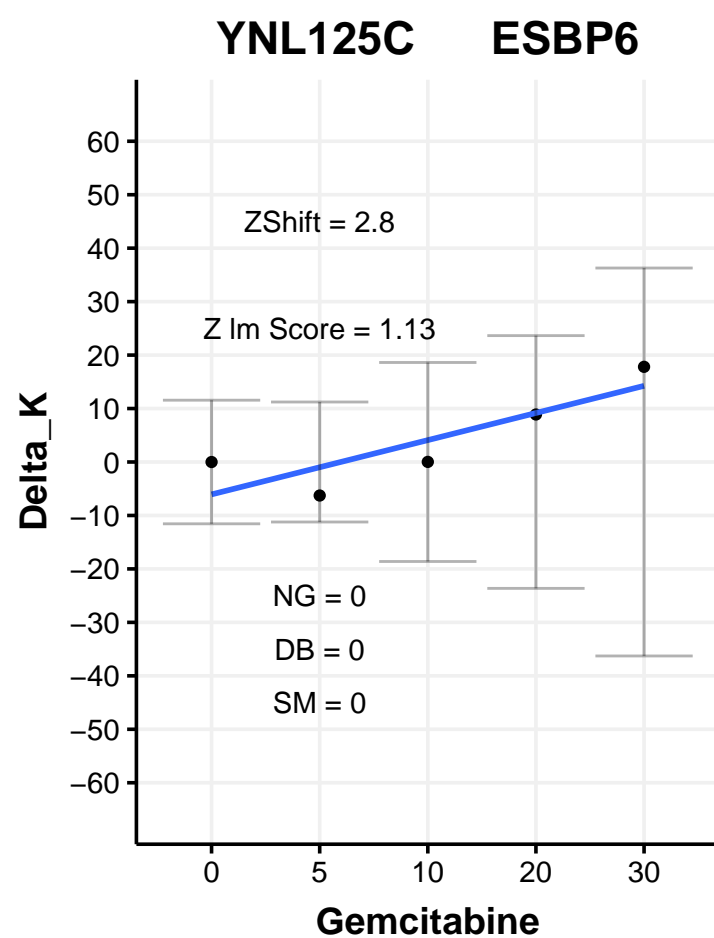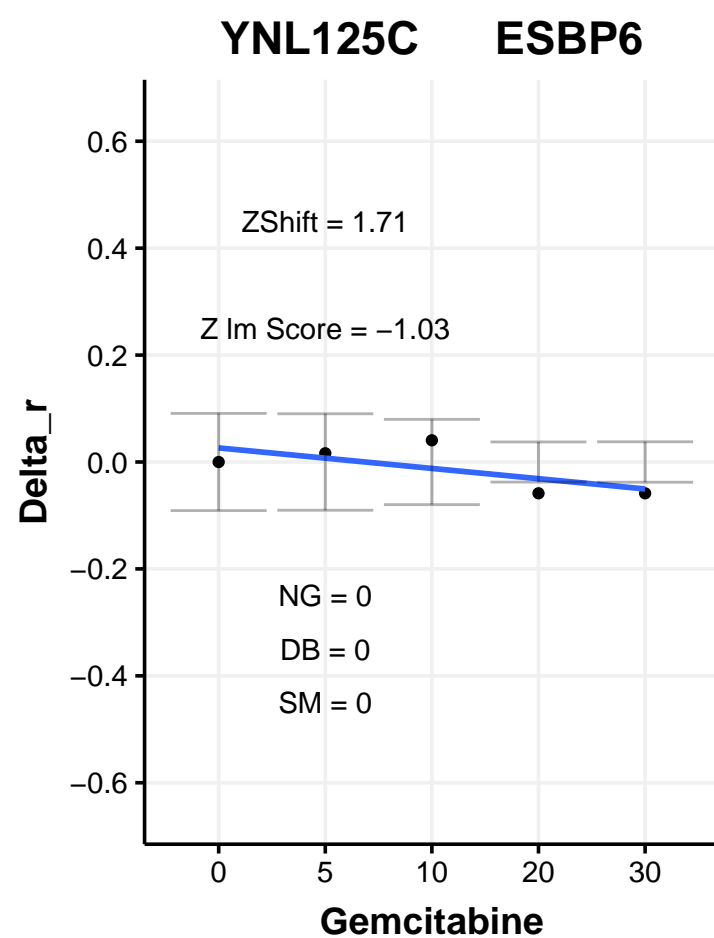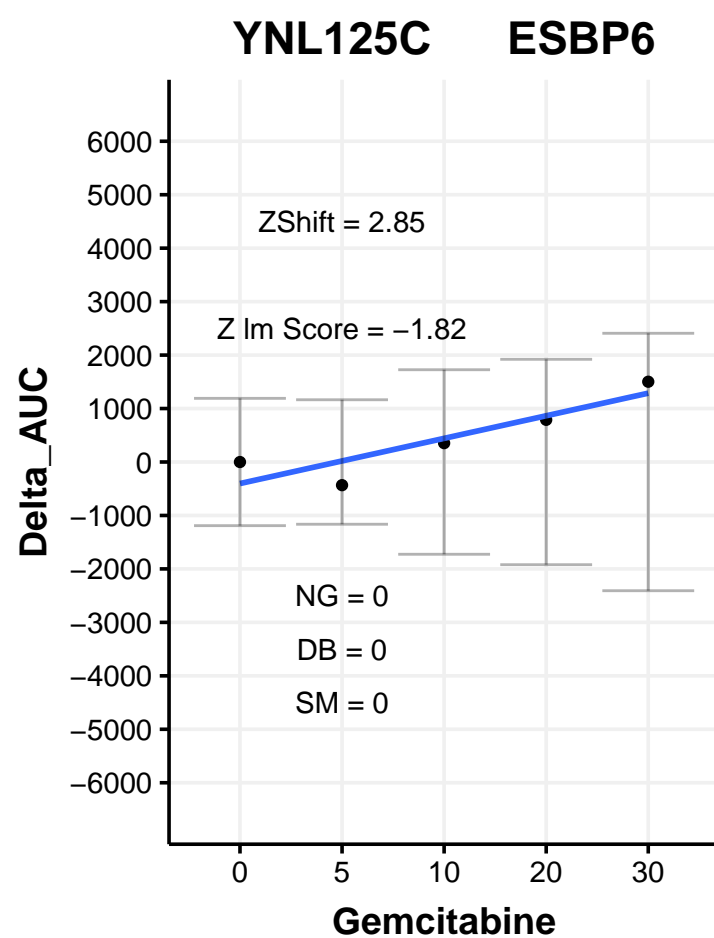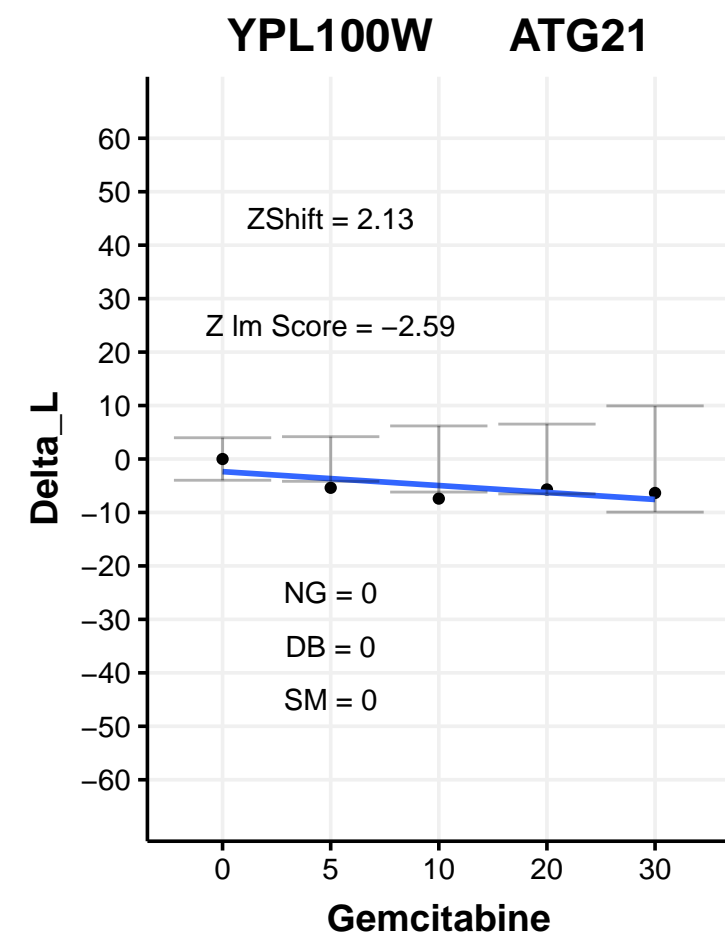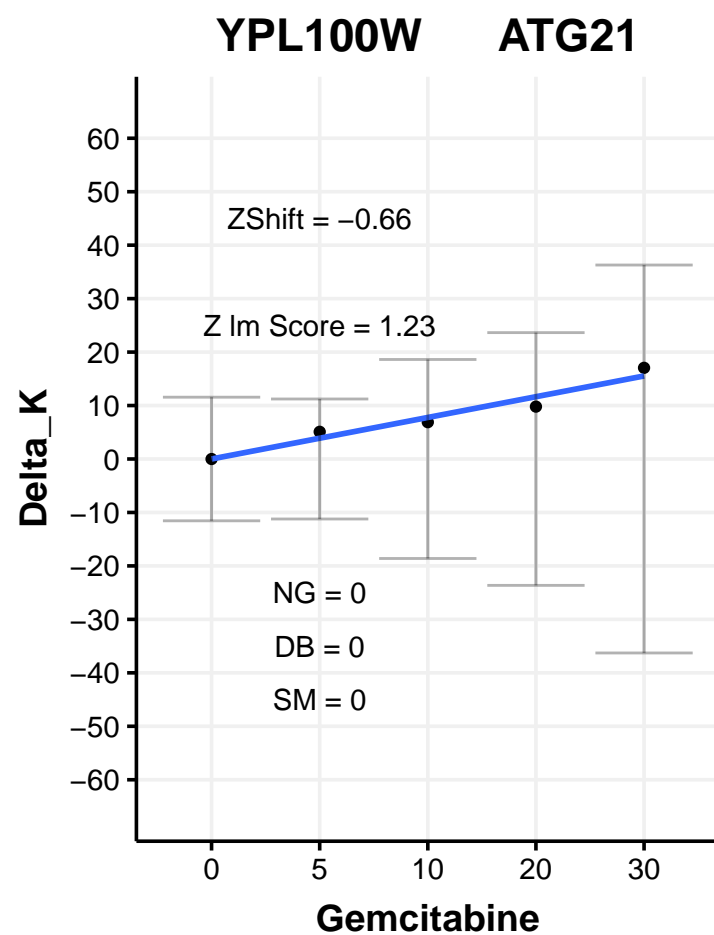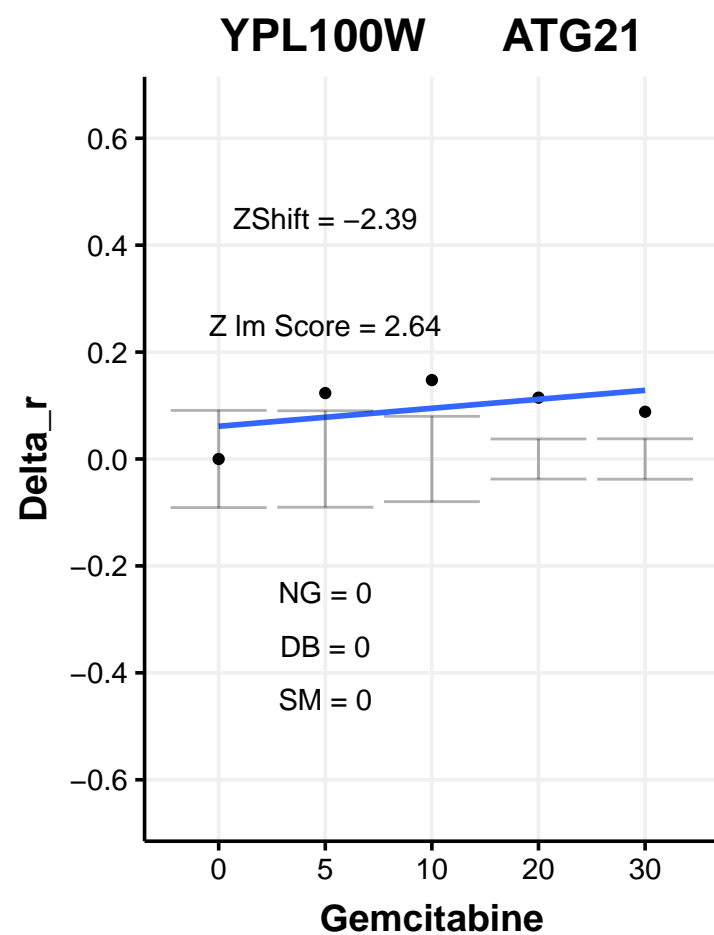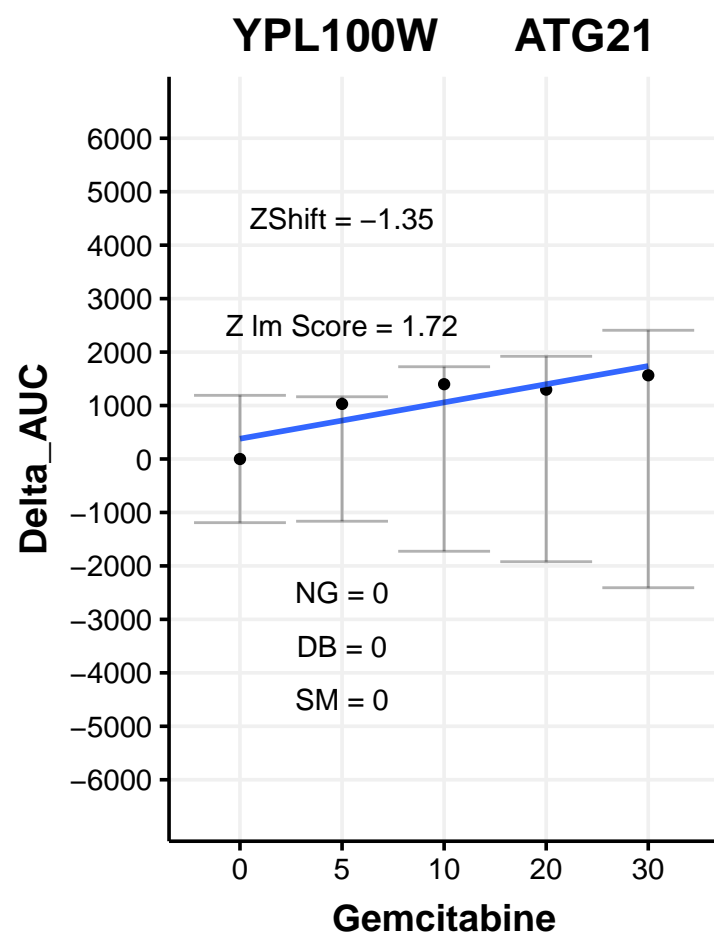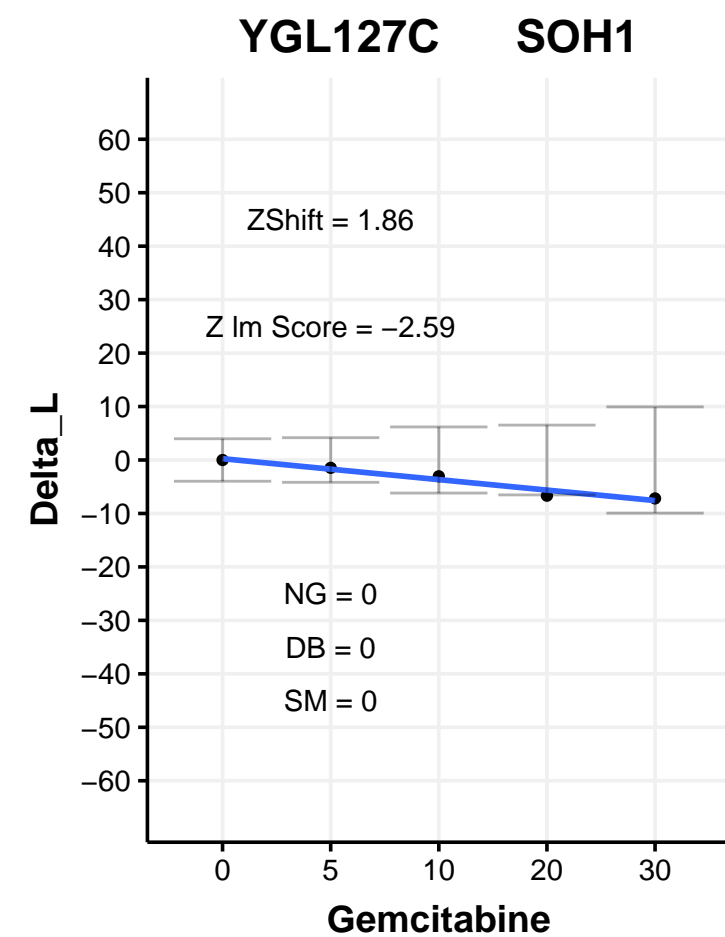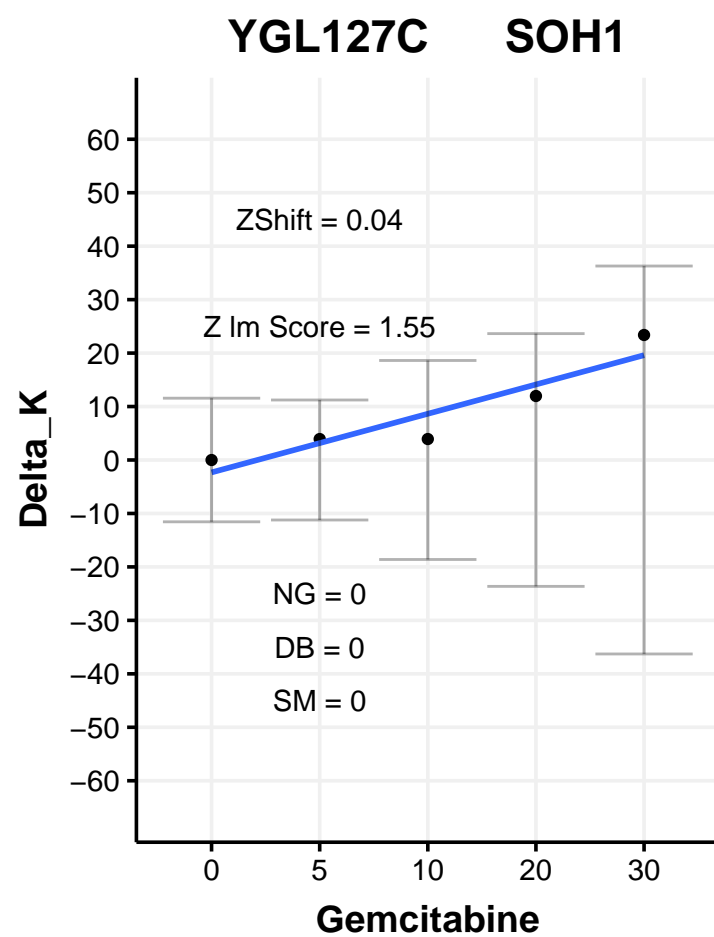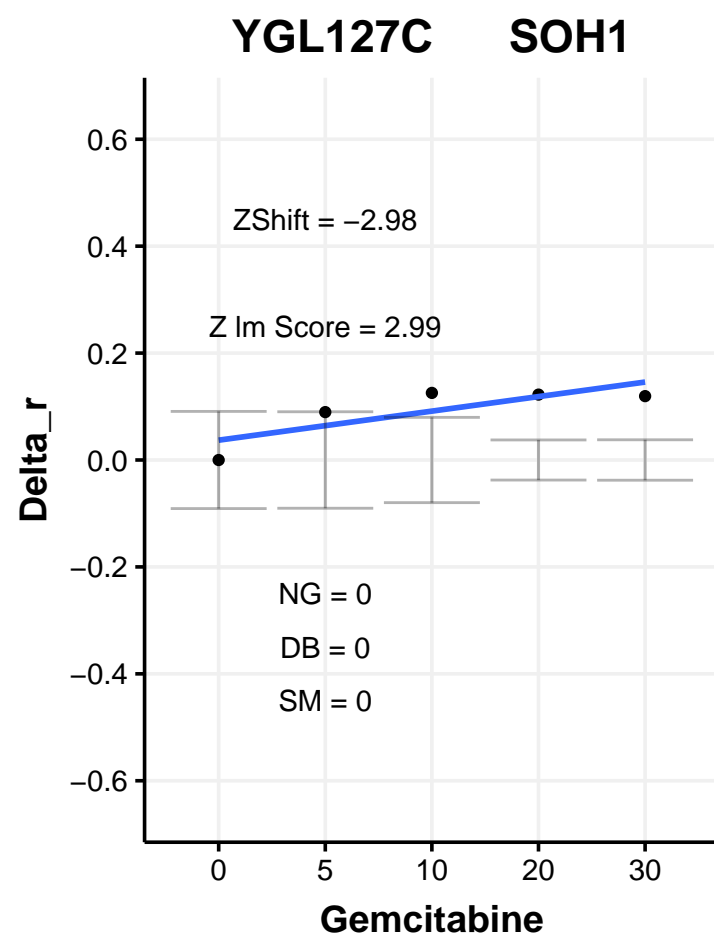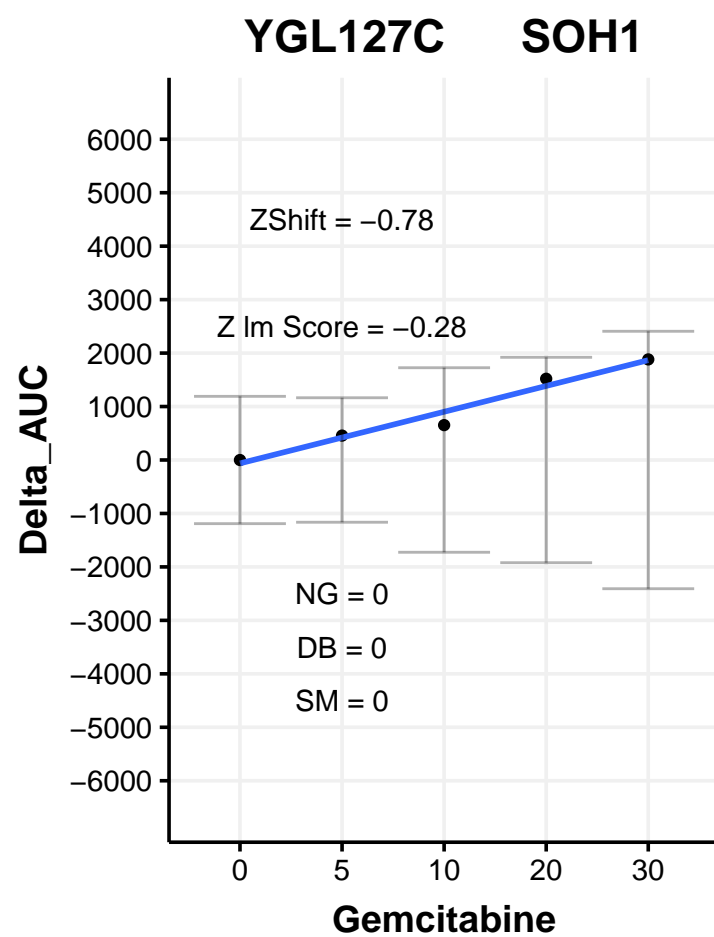

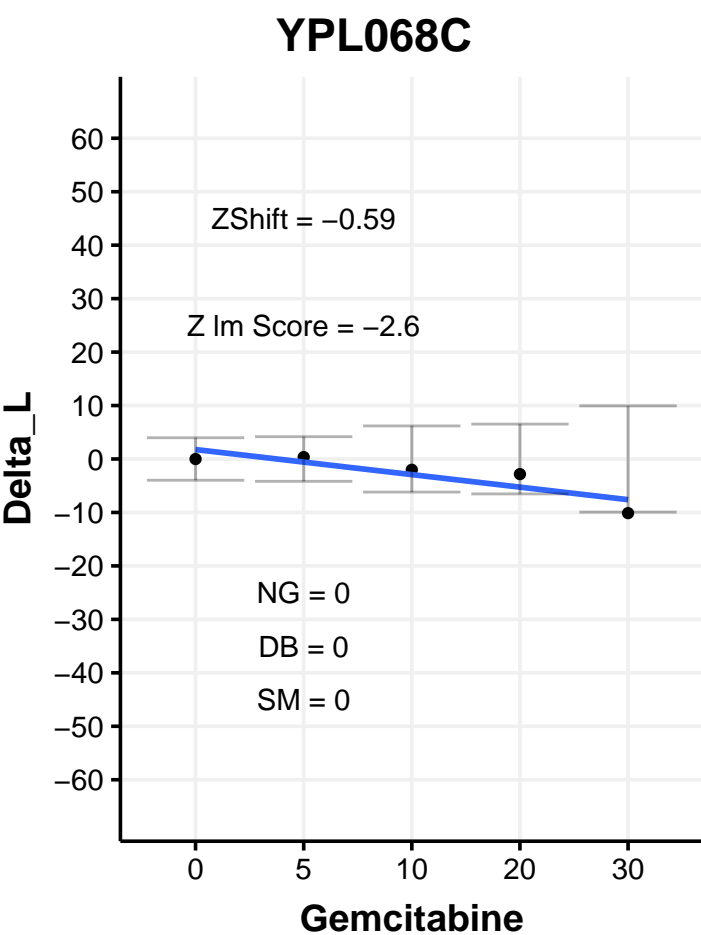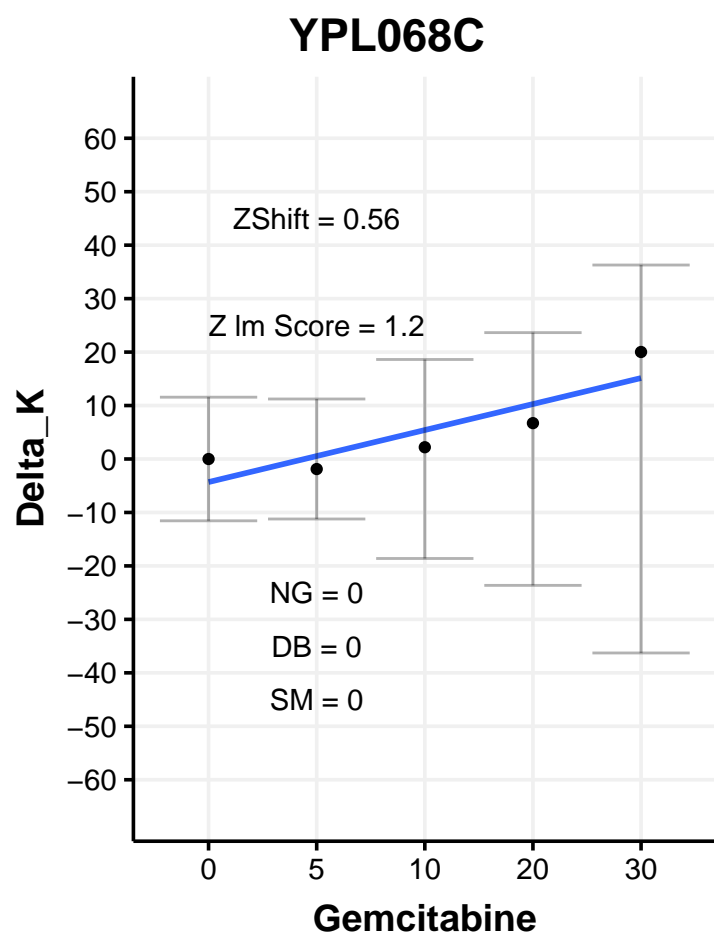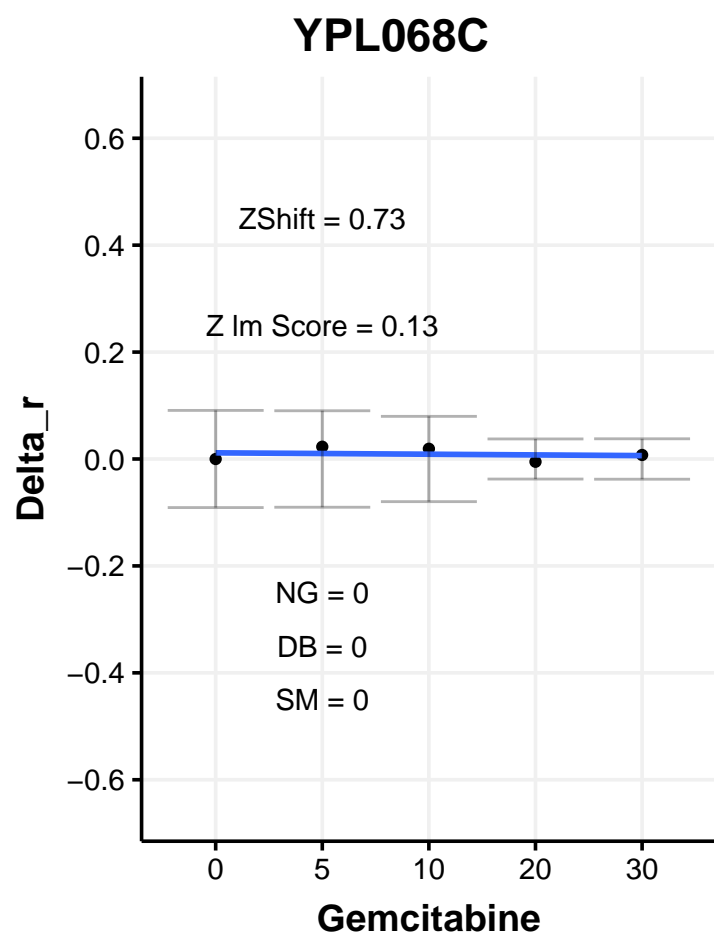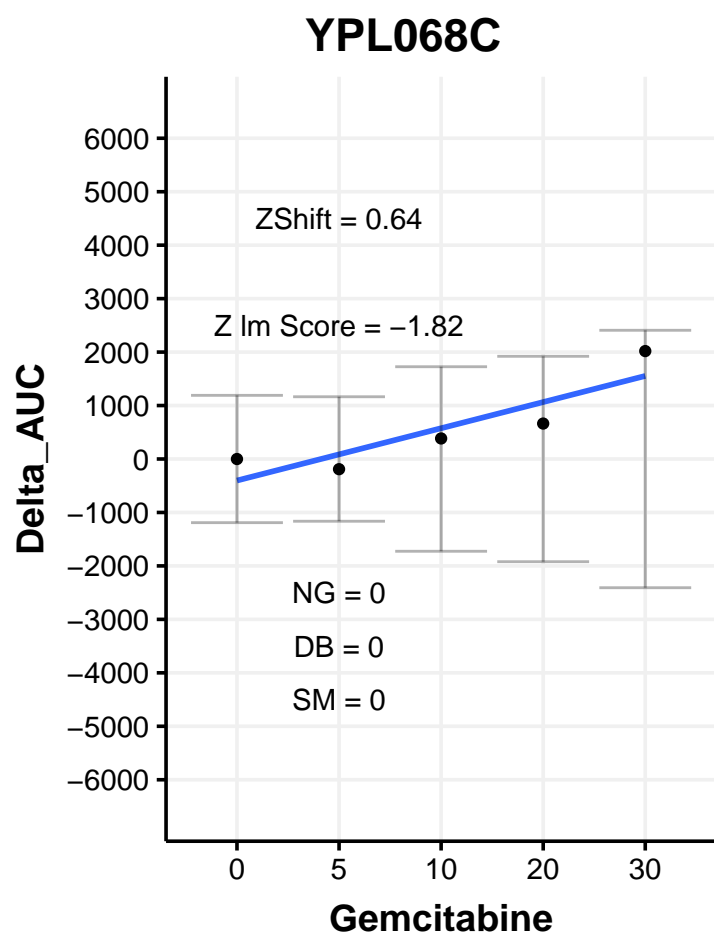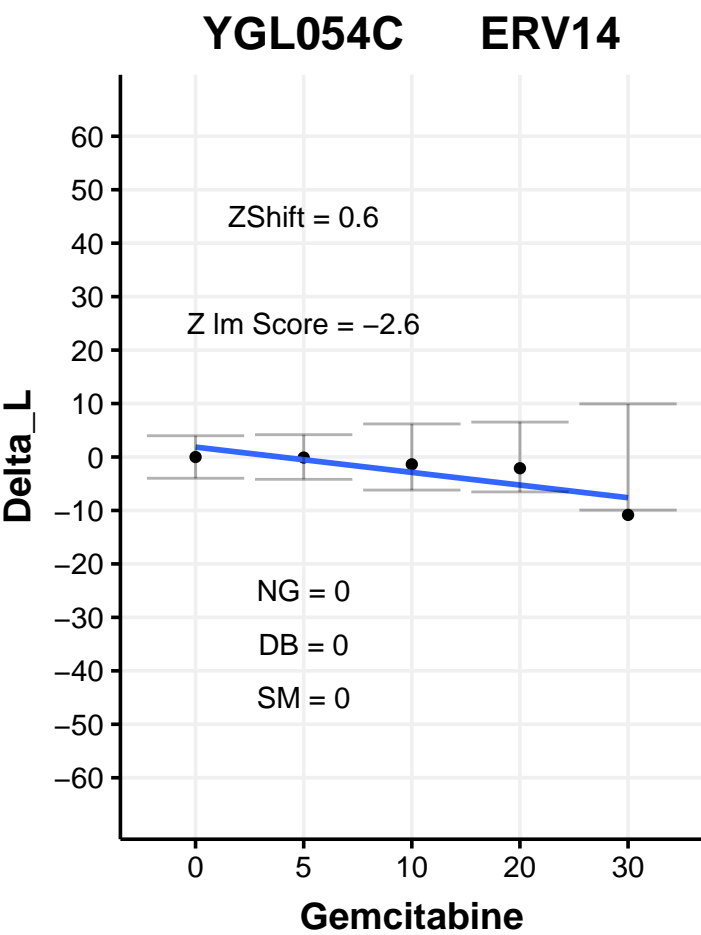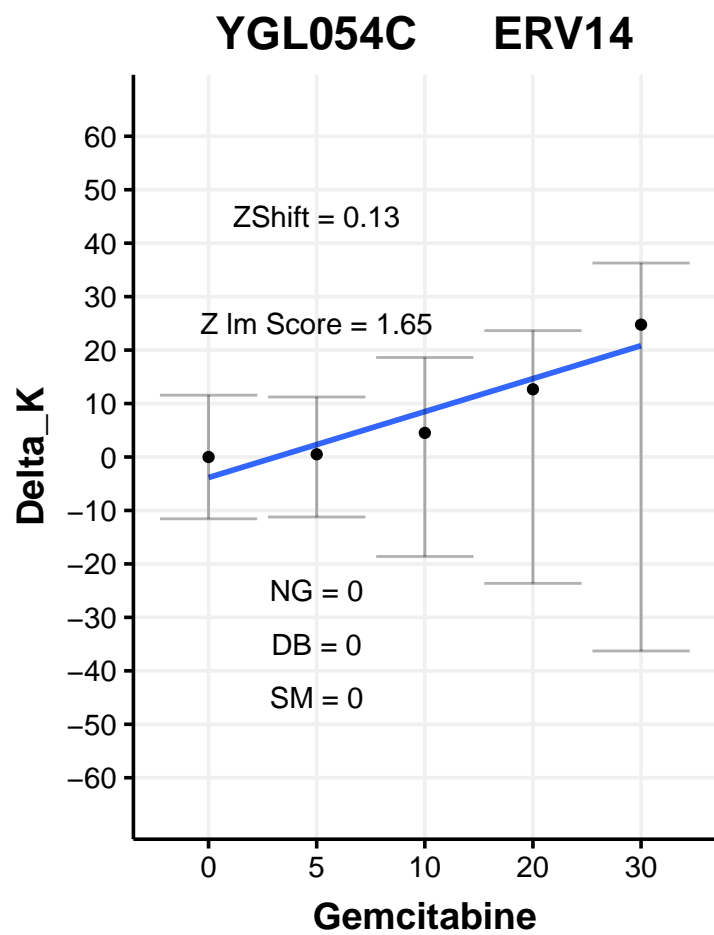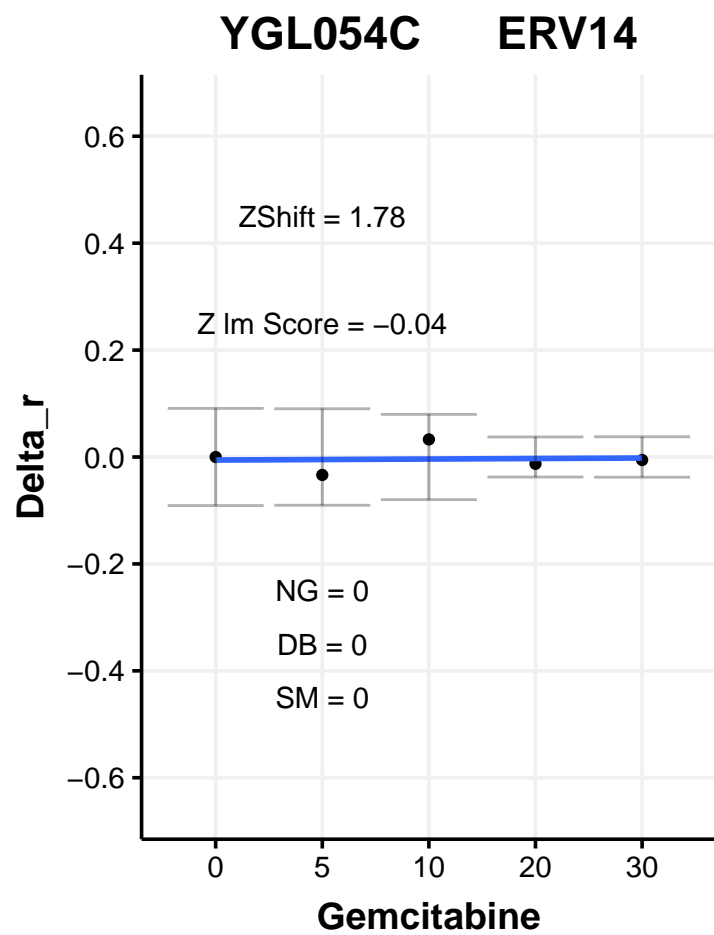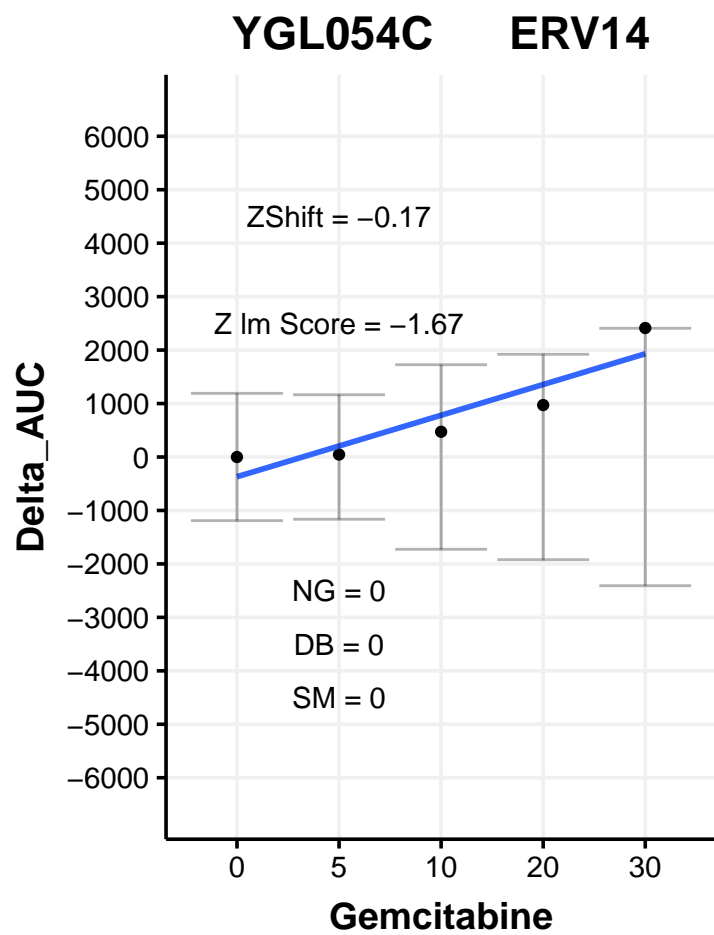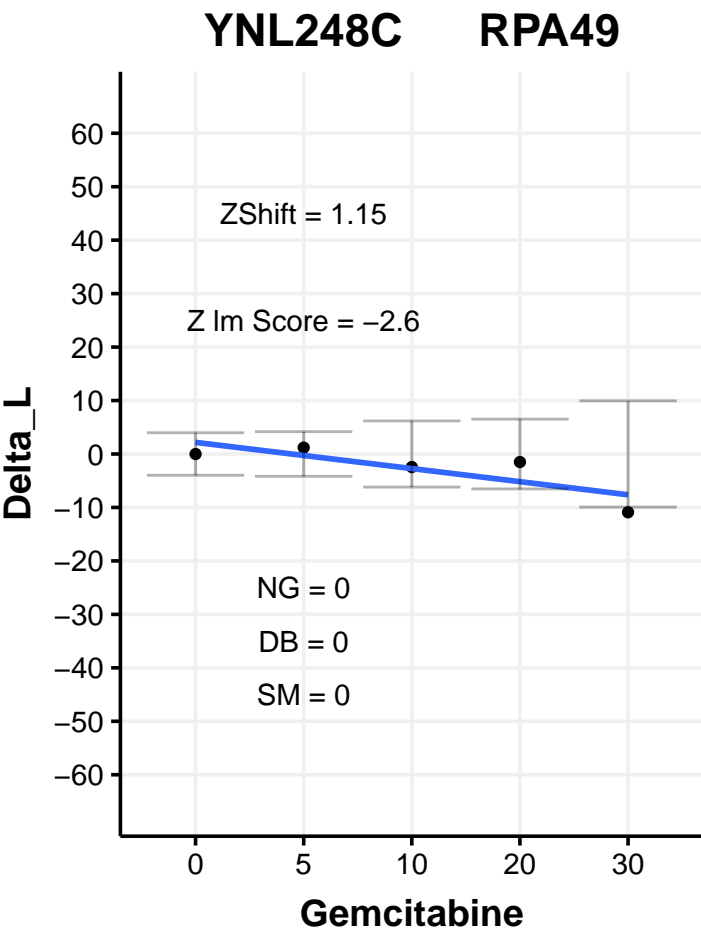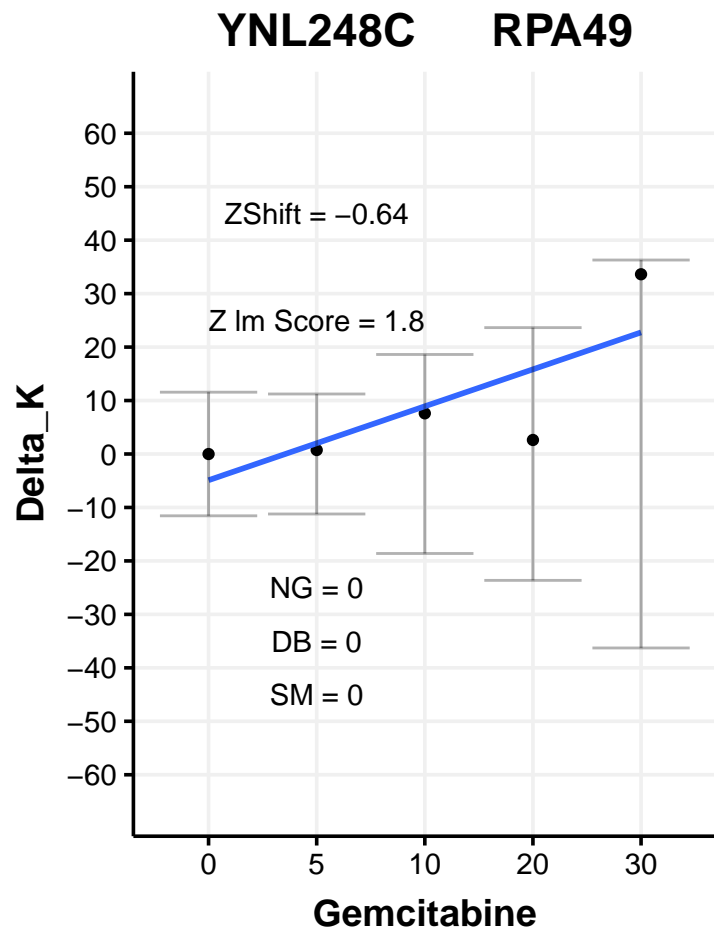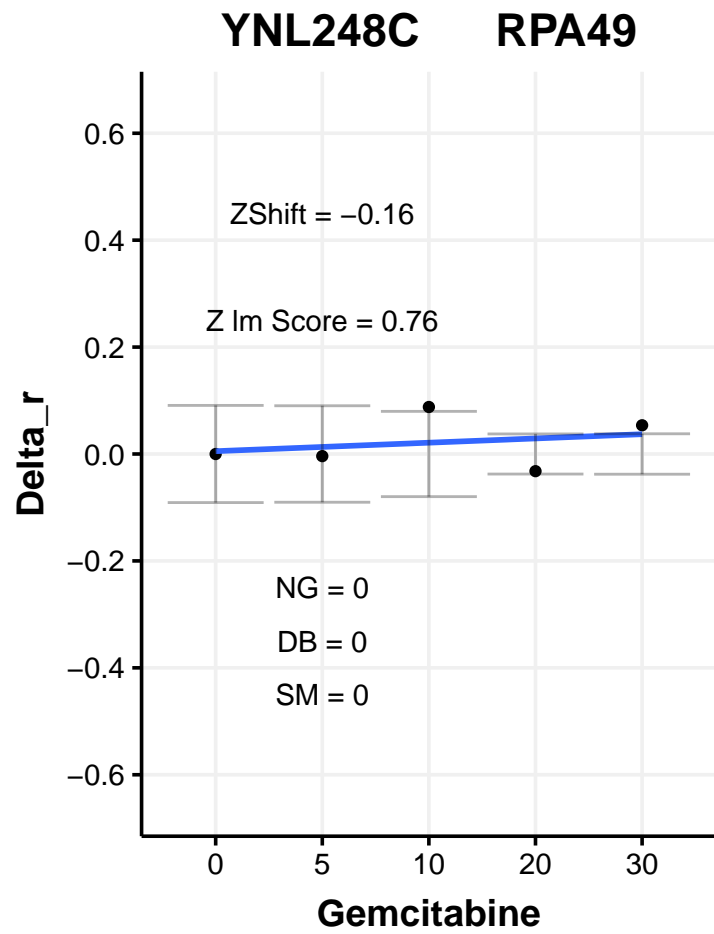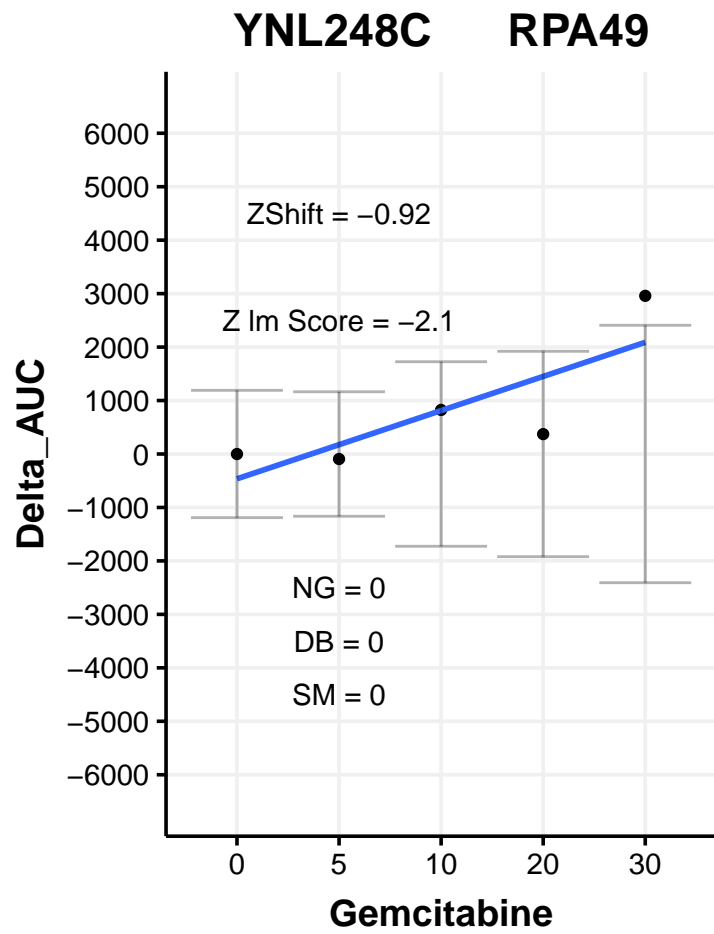



YGR290W

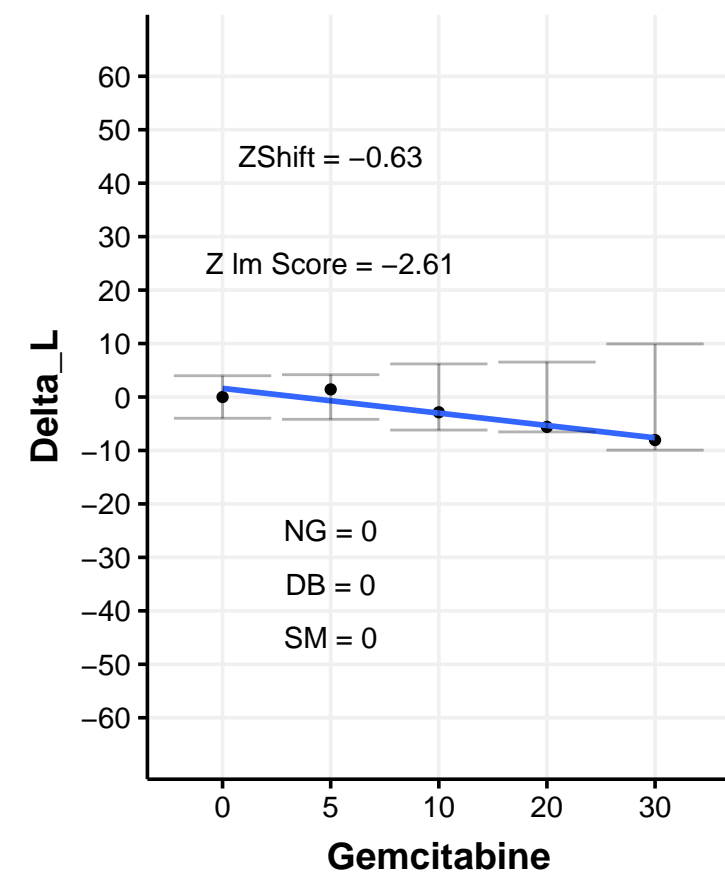

YGR290W

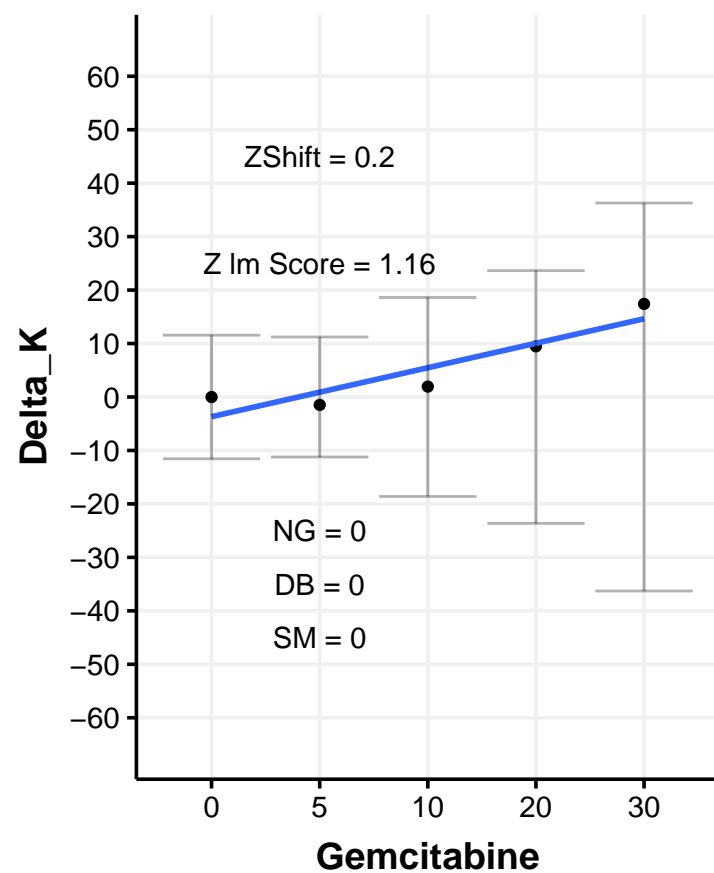

YGR290W

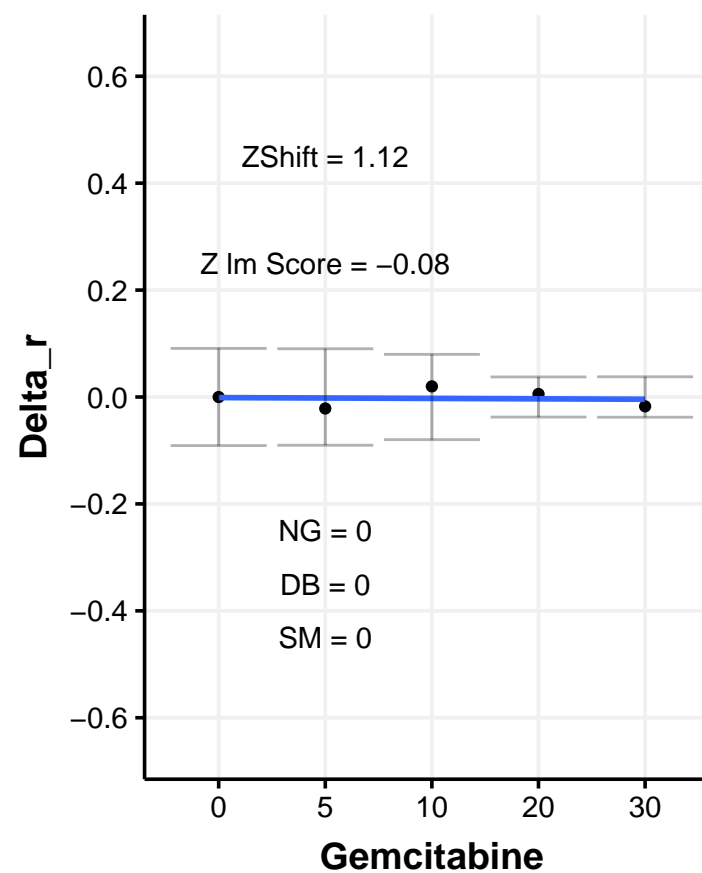

YGR290W

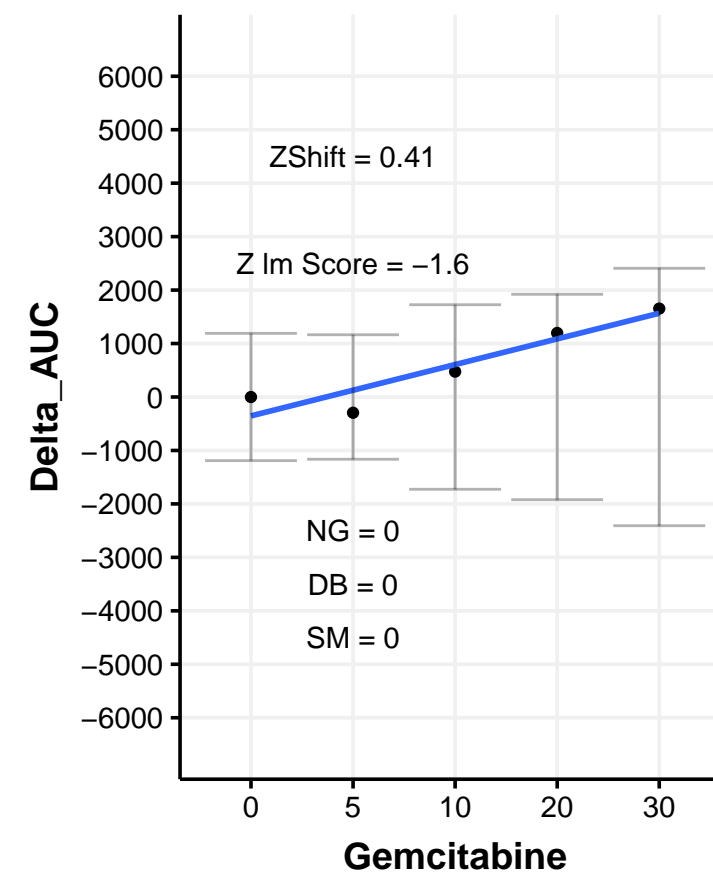

YNL107W YAF9

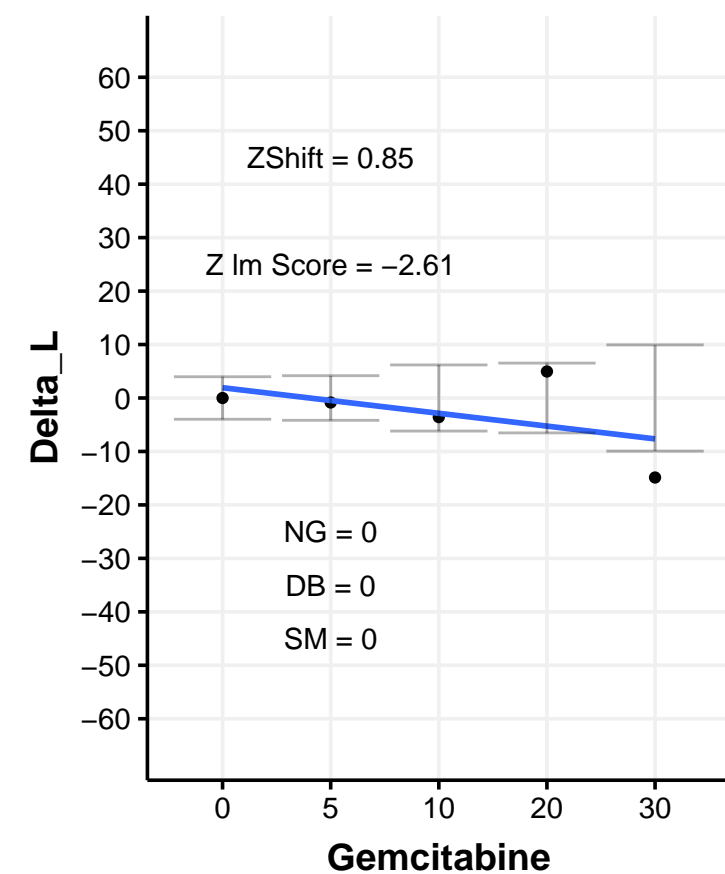

YNL107W YAF9

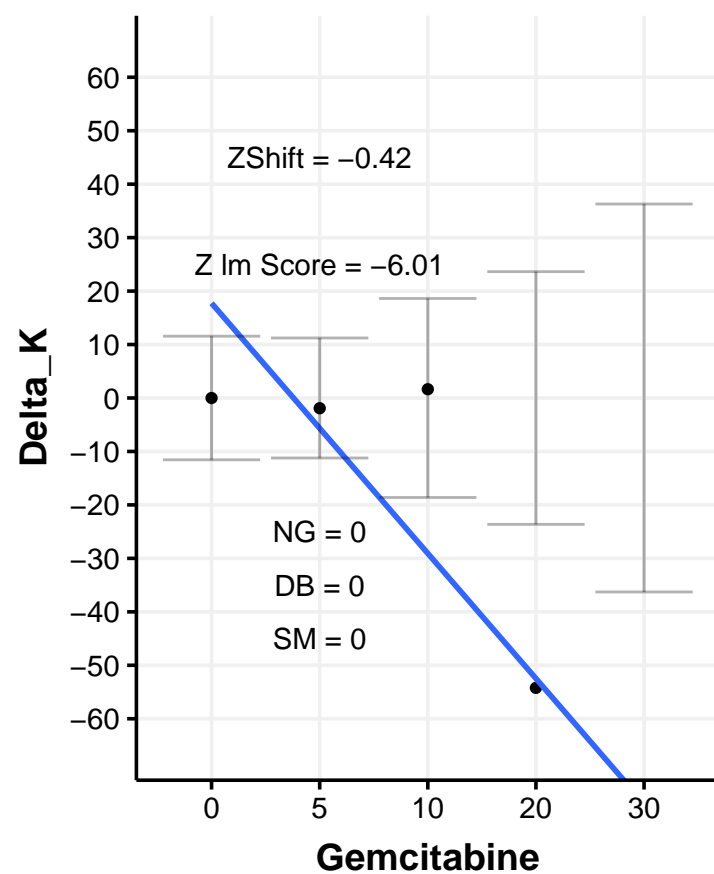

YNL107W YAF9

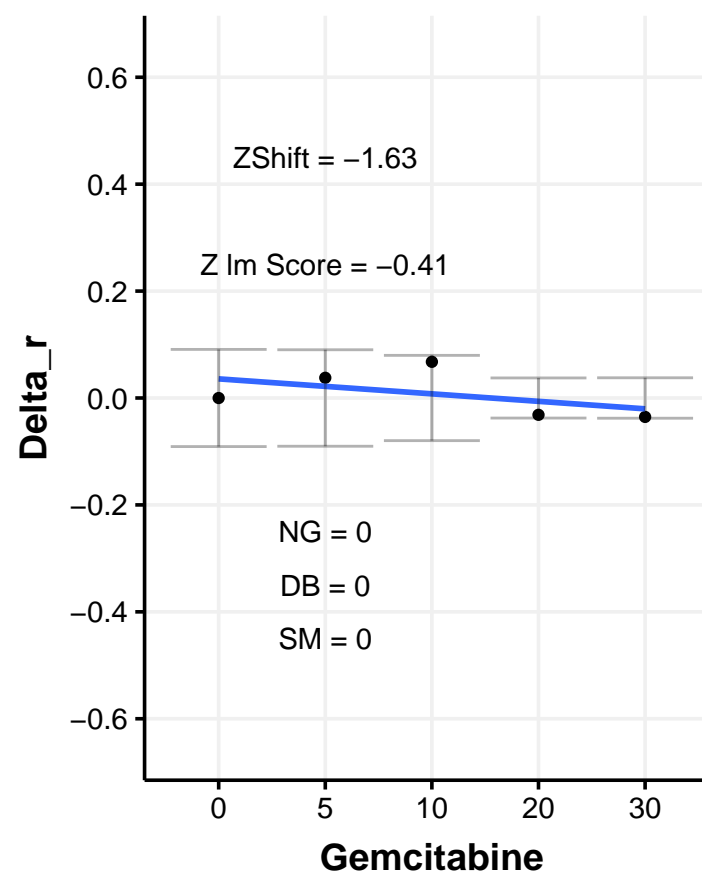

YNL107W YAF9

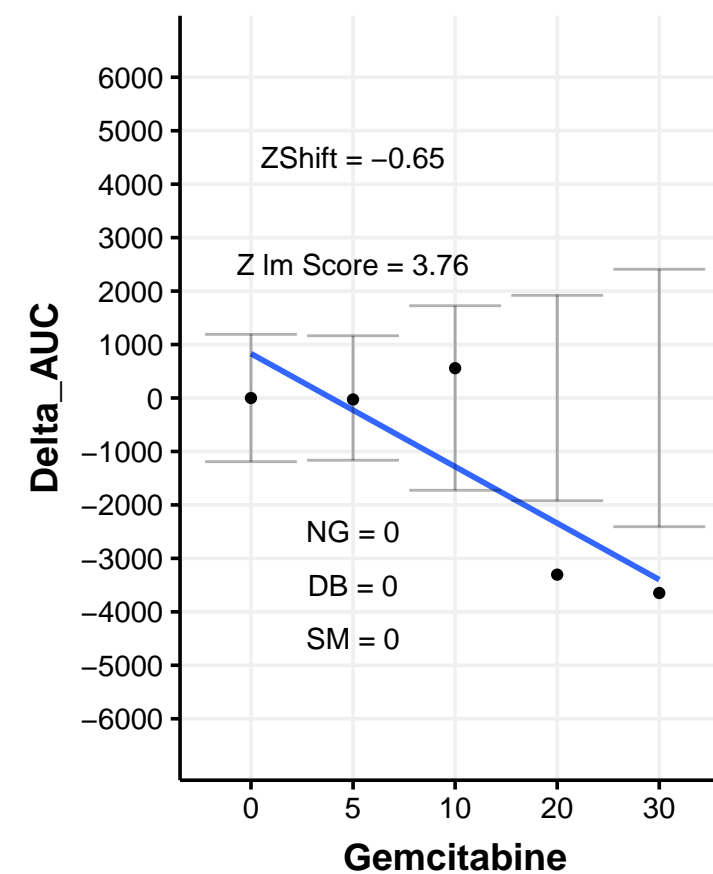

YNL227C JJJ1

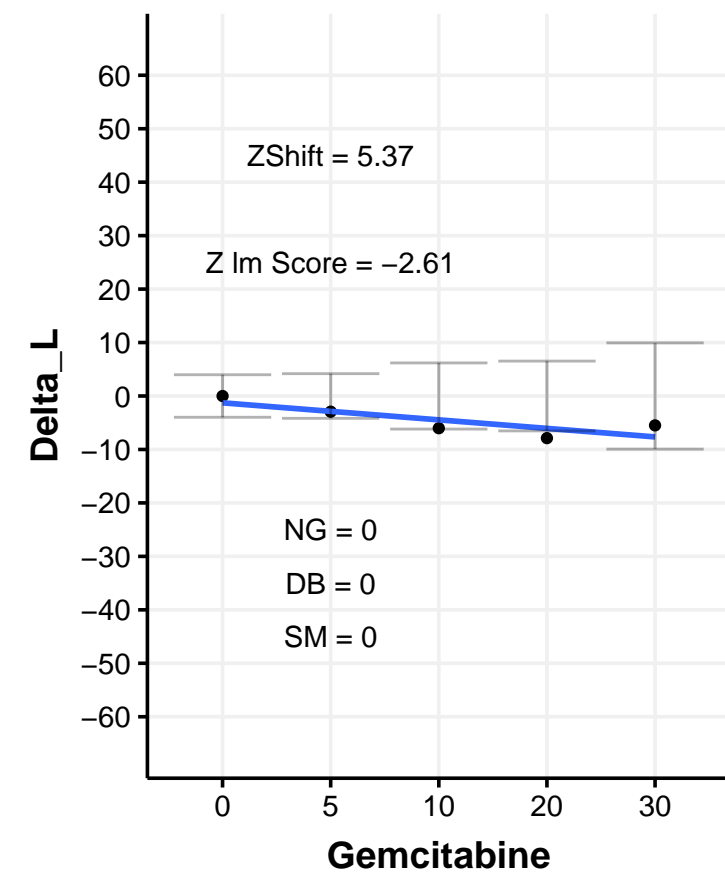

YNL227C JJJ1

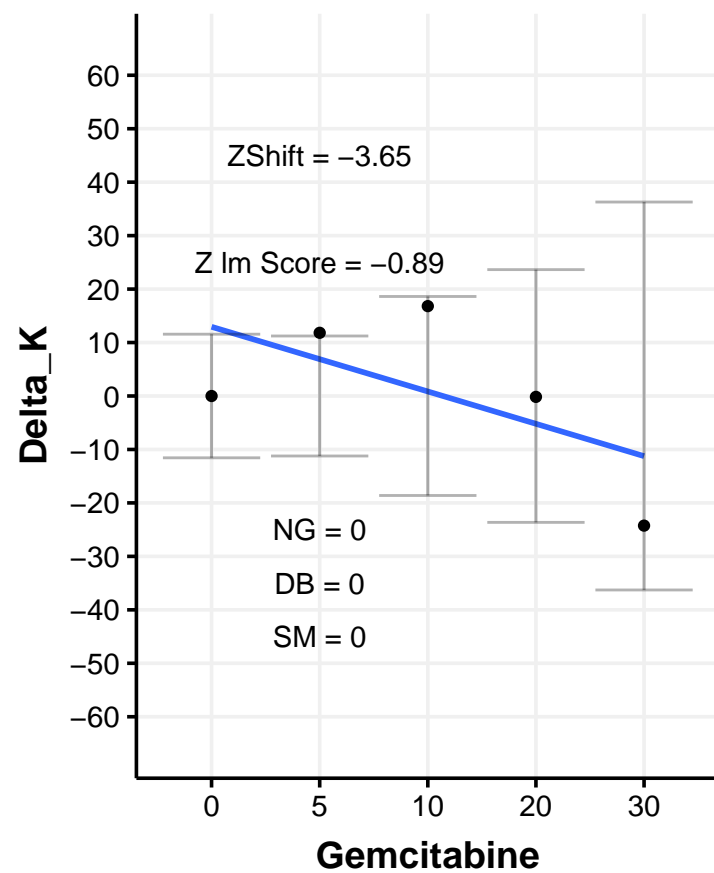

YNL227C JJJ1

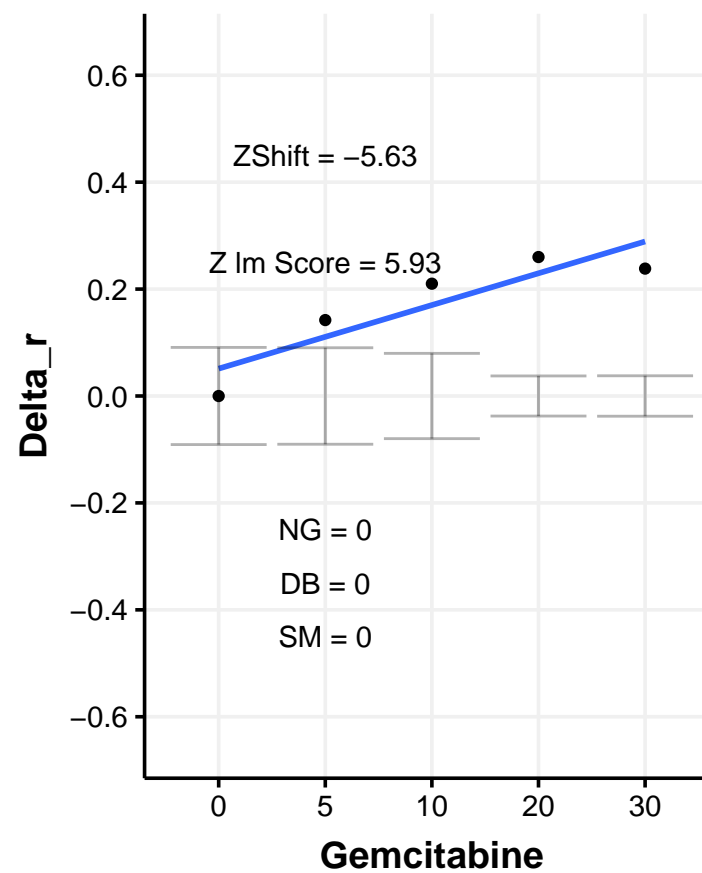

YNL227C JJJ1

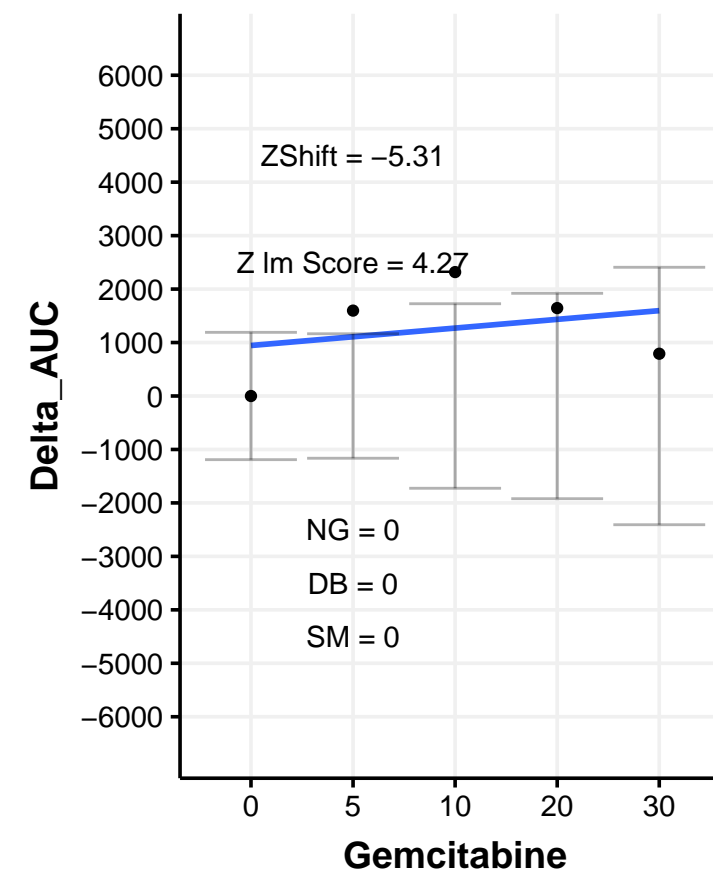

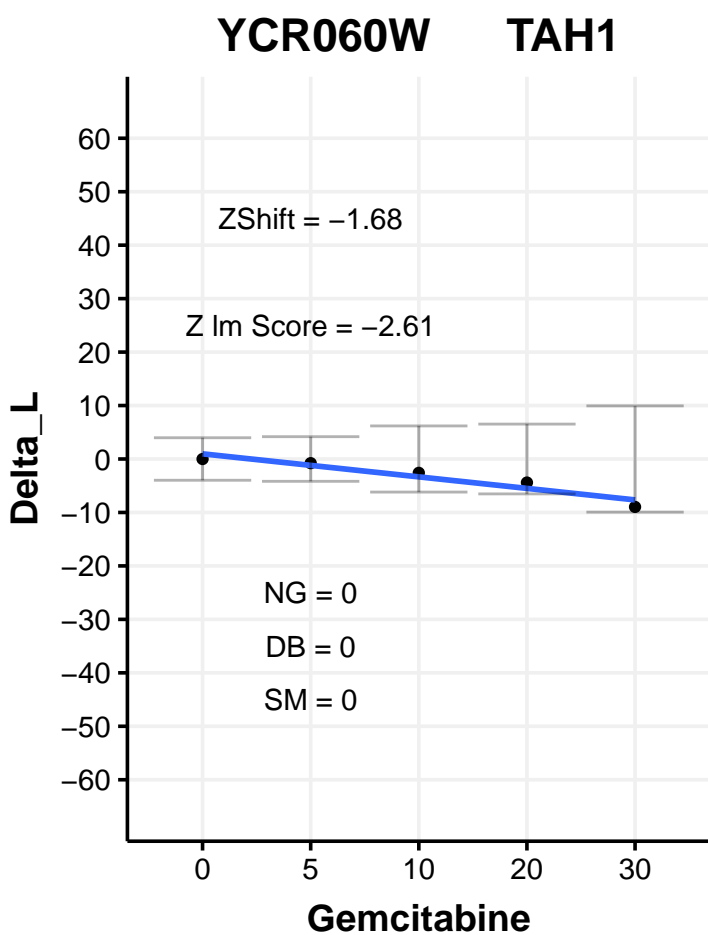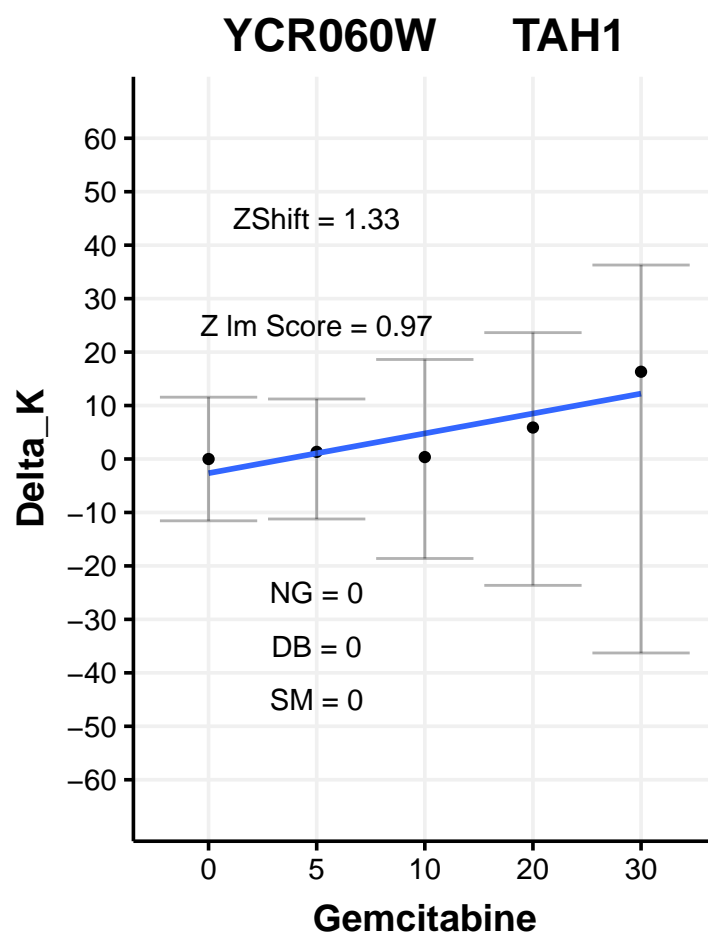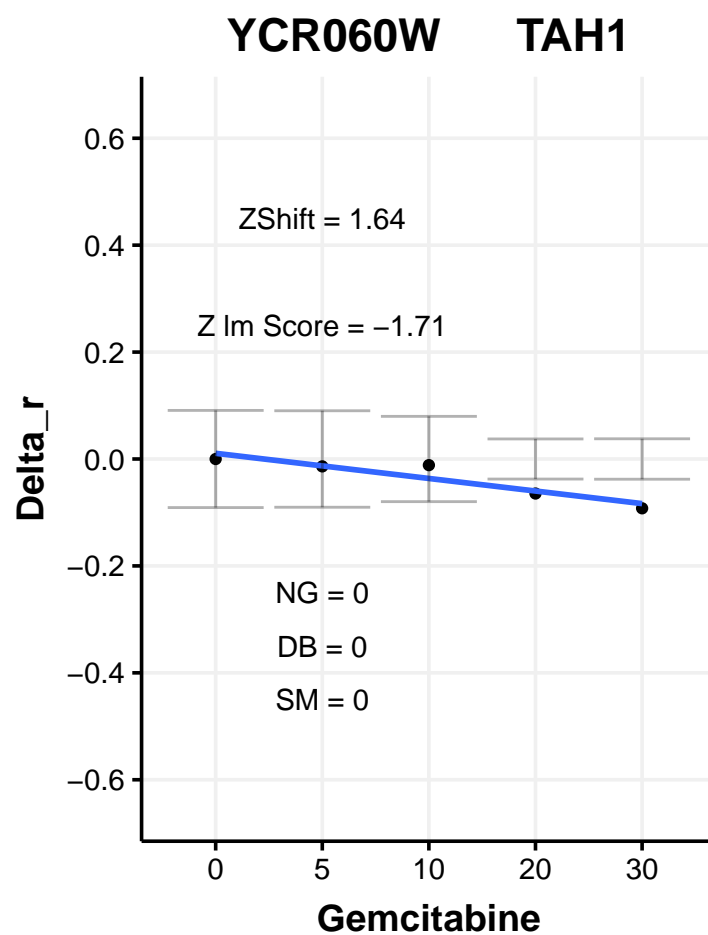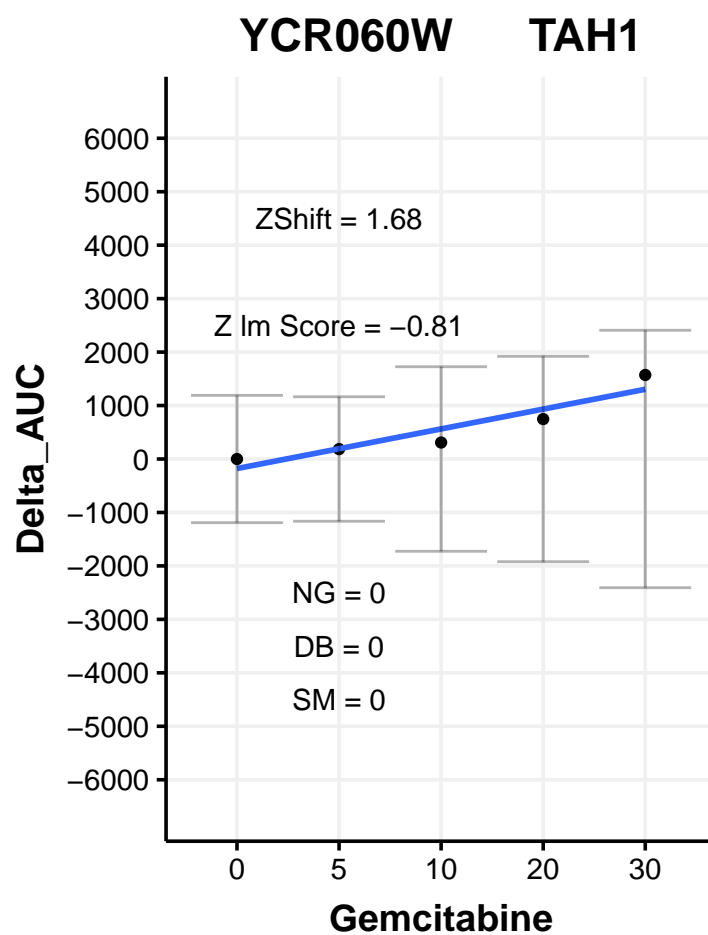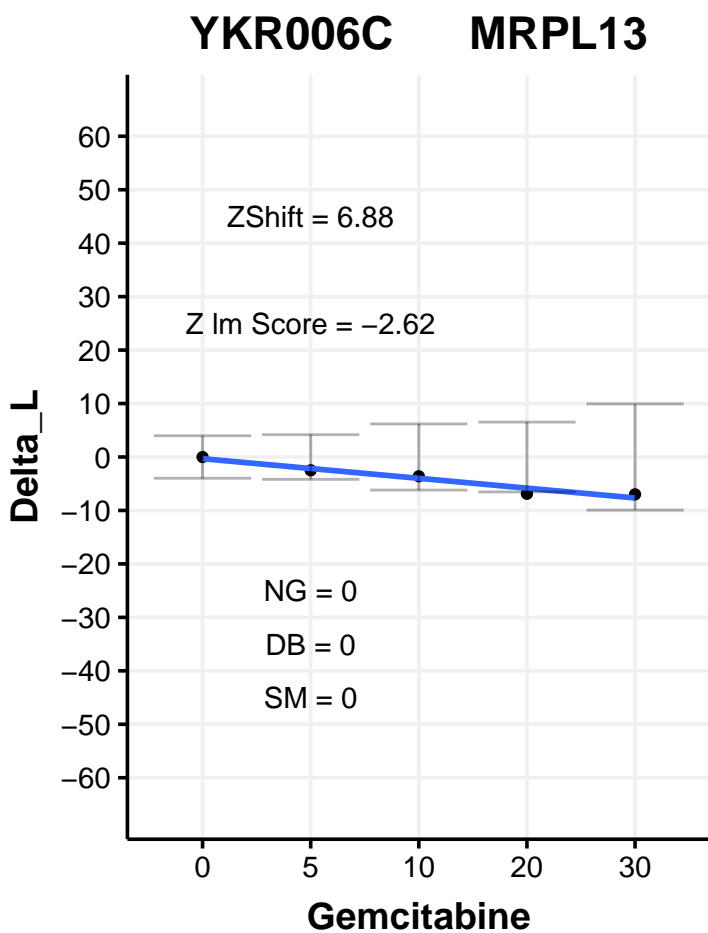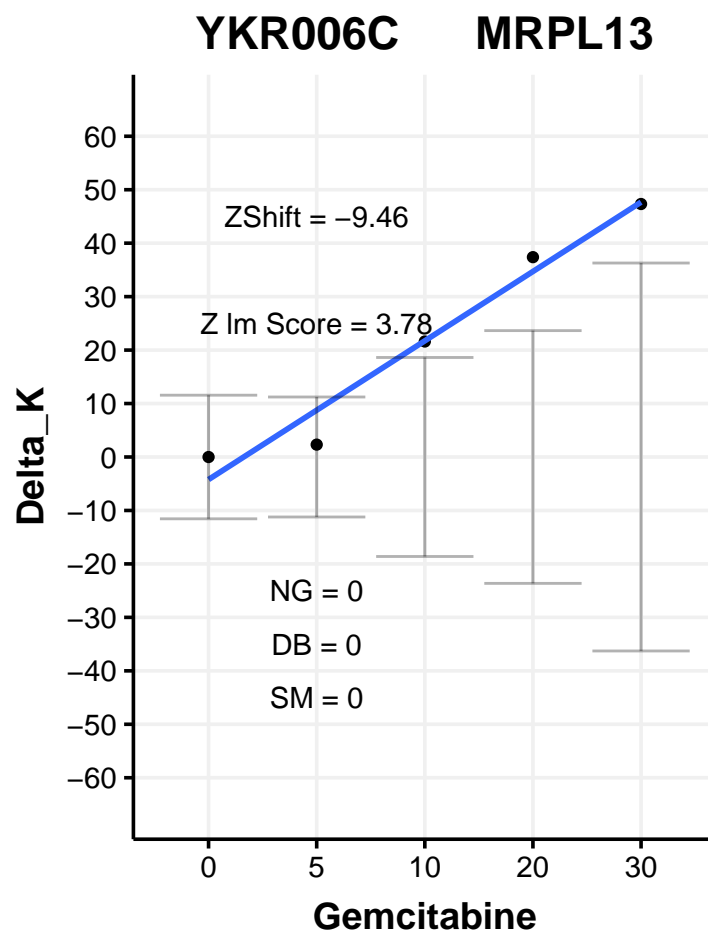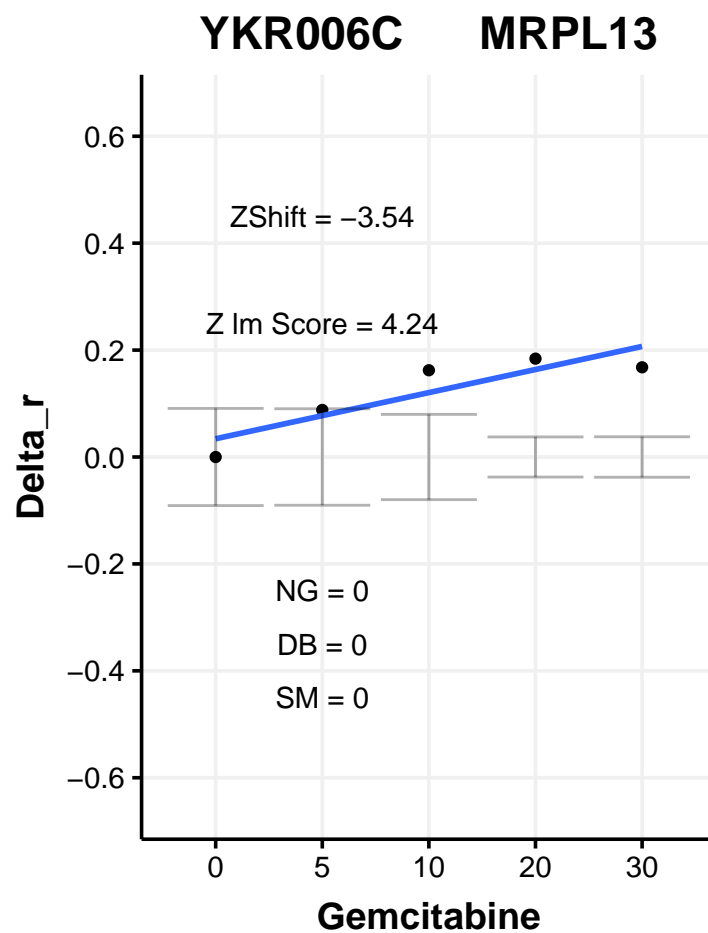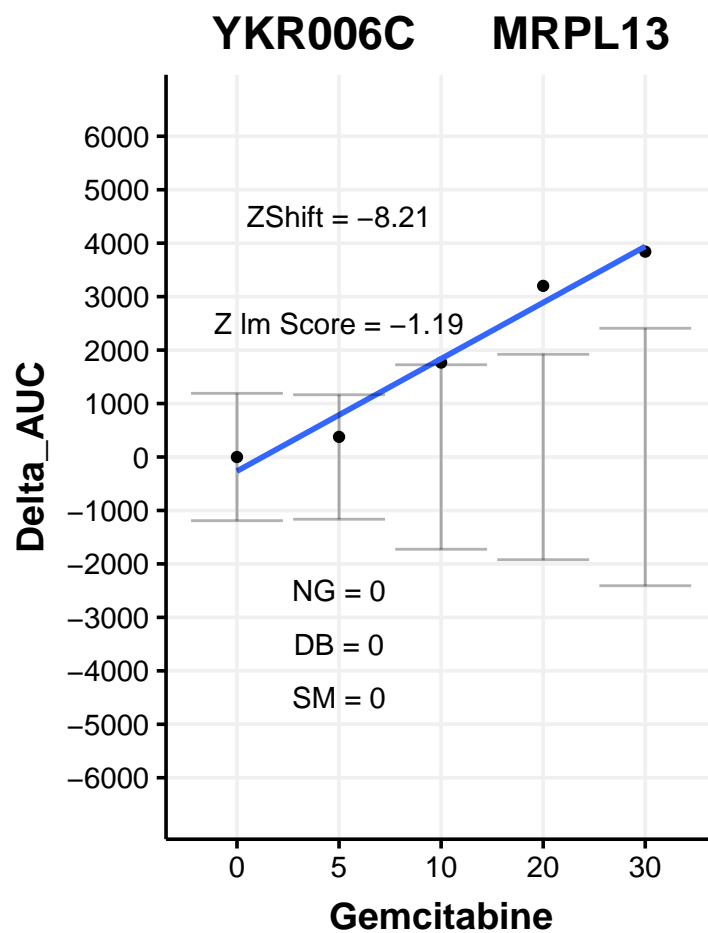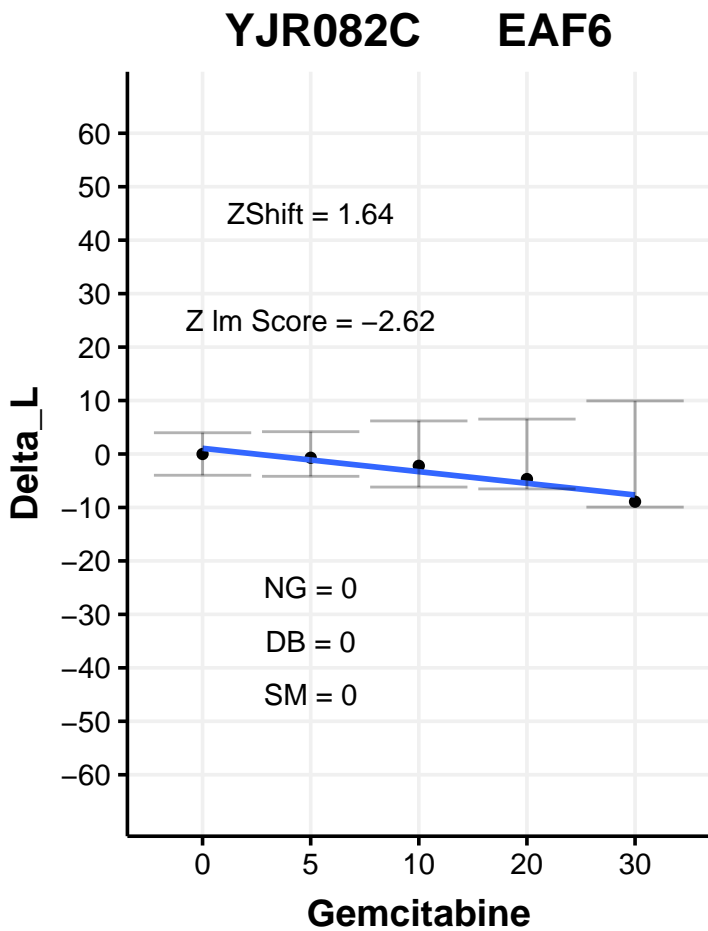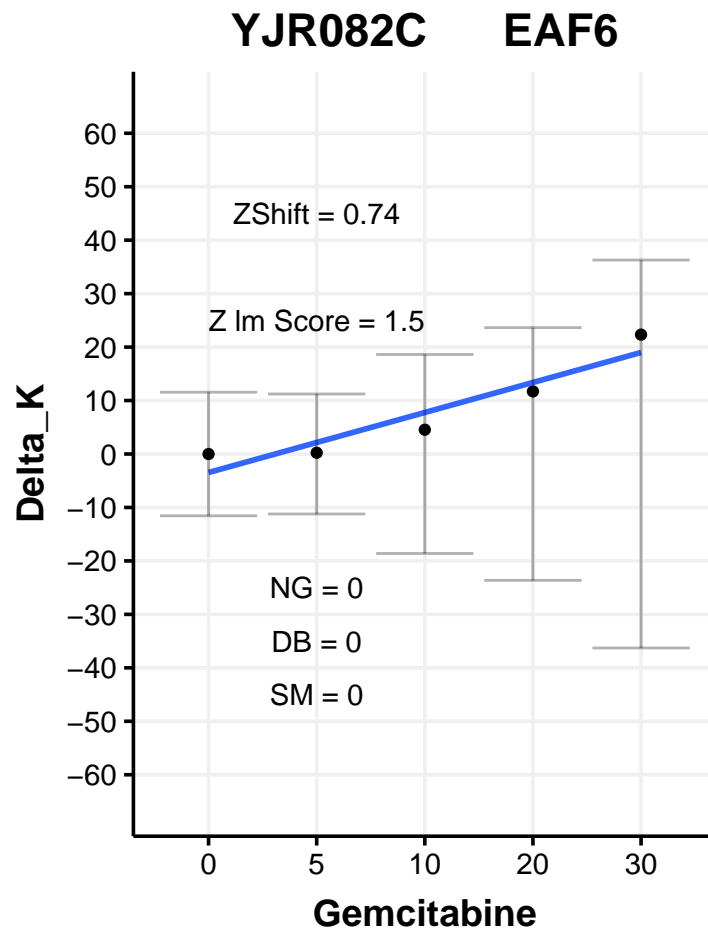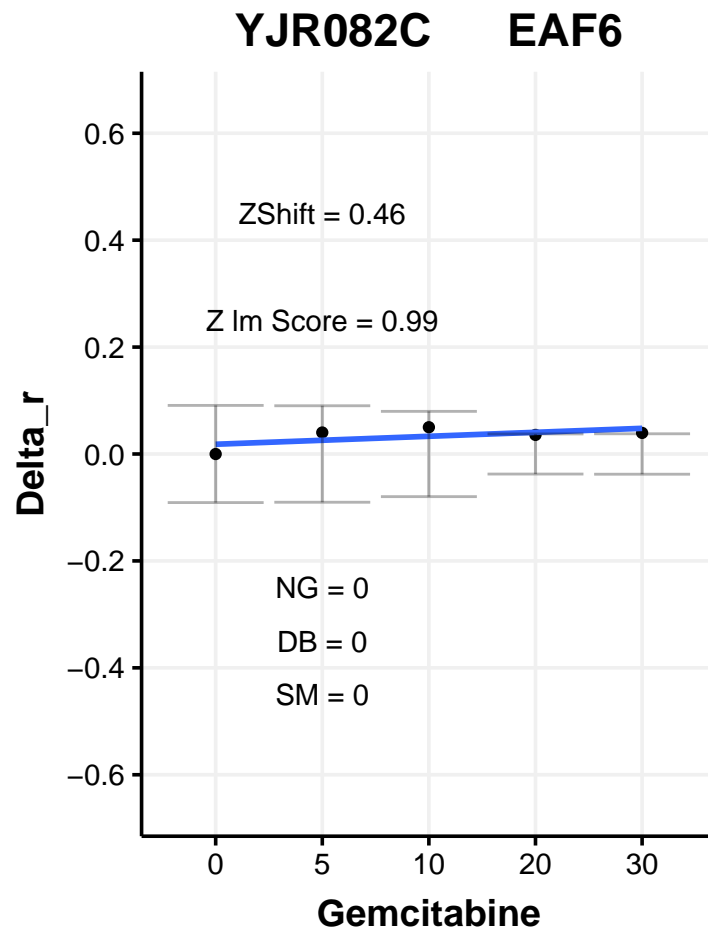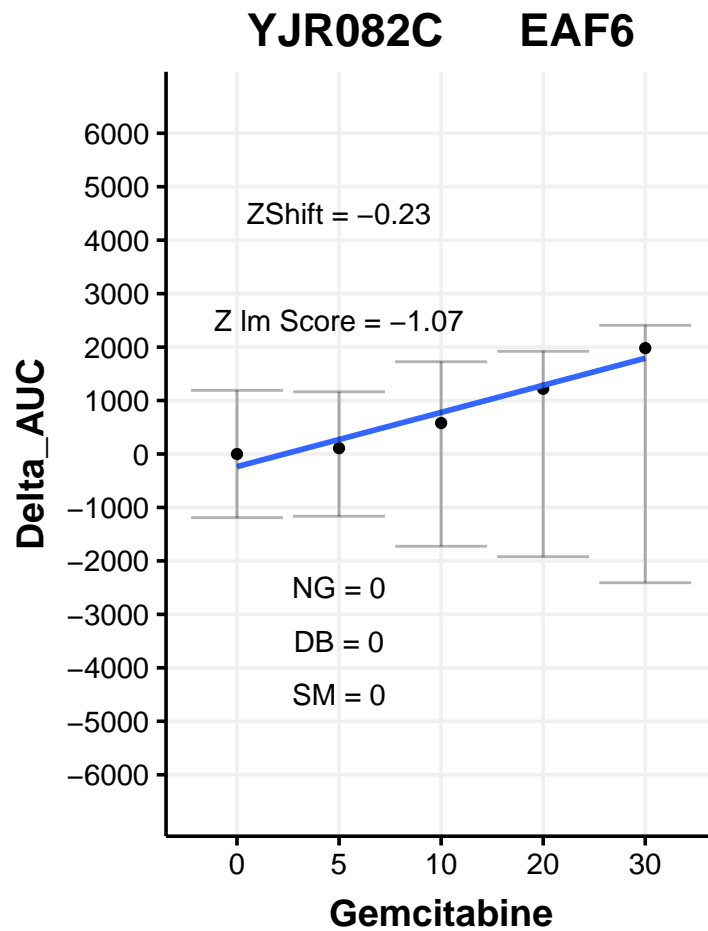

YBR196C-A\_2

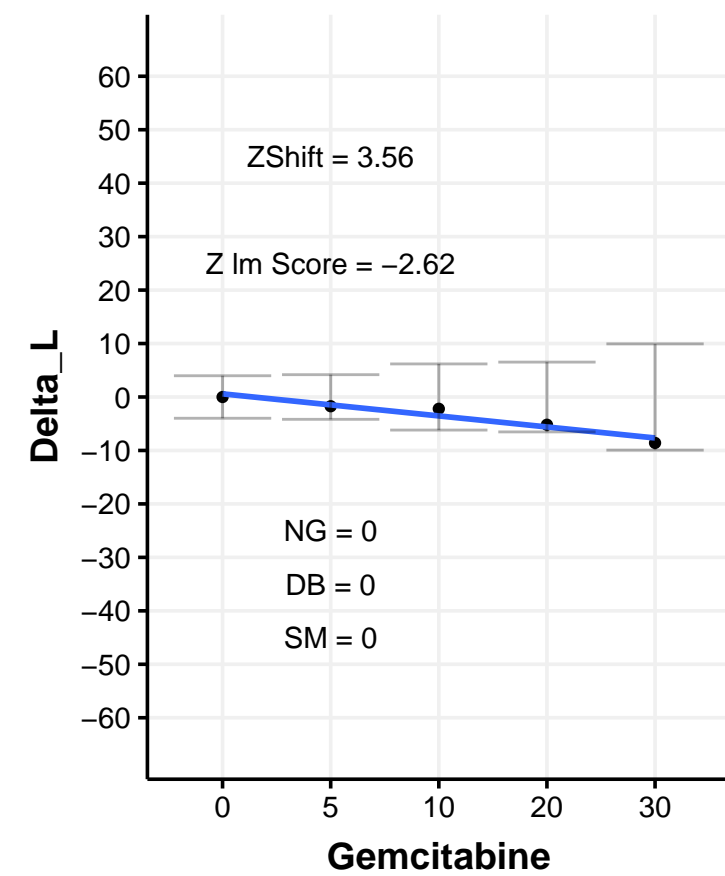

YBR196C-A\_2

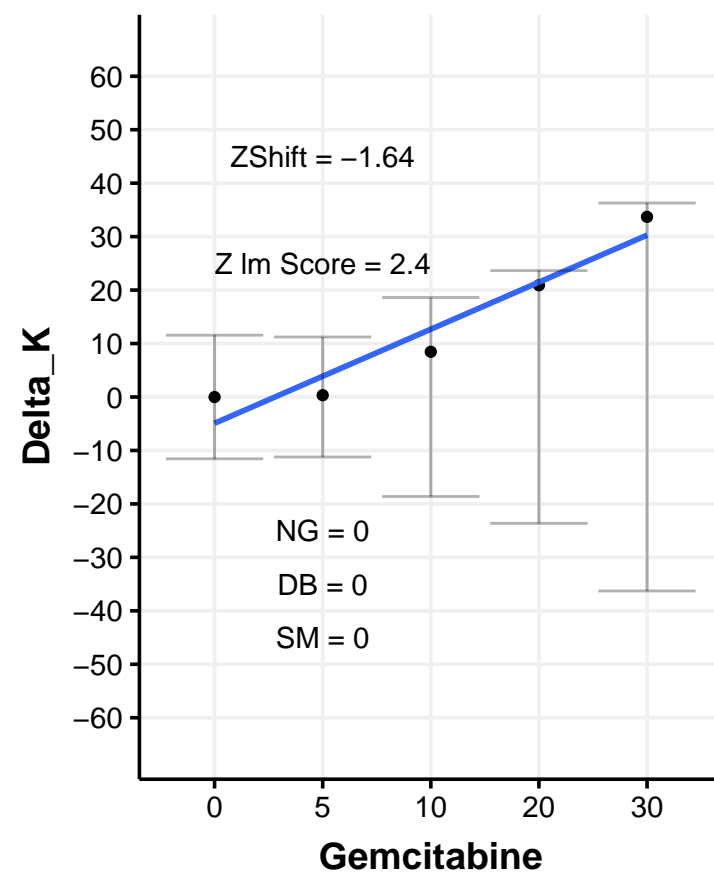

YBR196C-A\_2

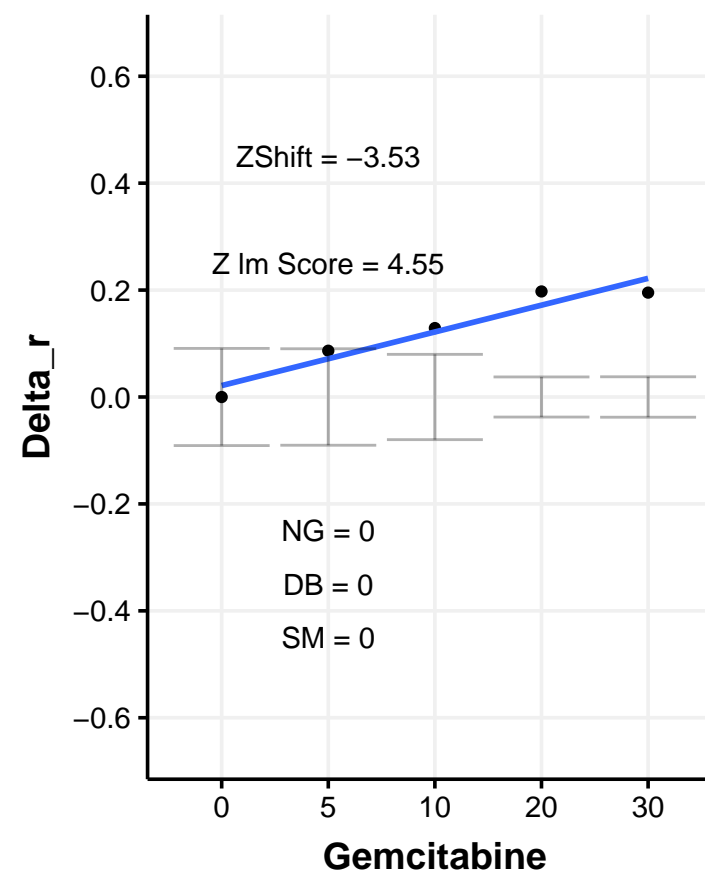

YBR196C-A\_2

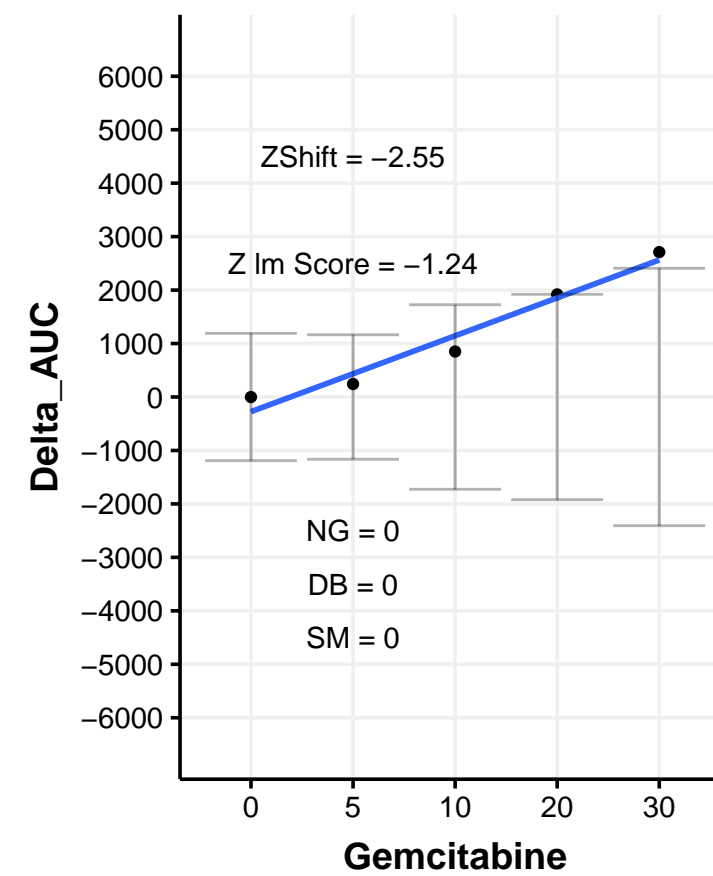

YBR025C

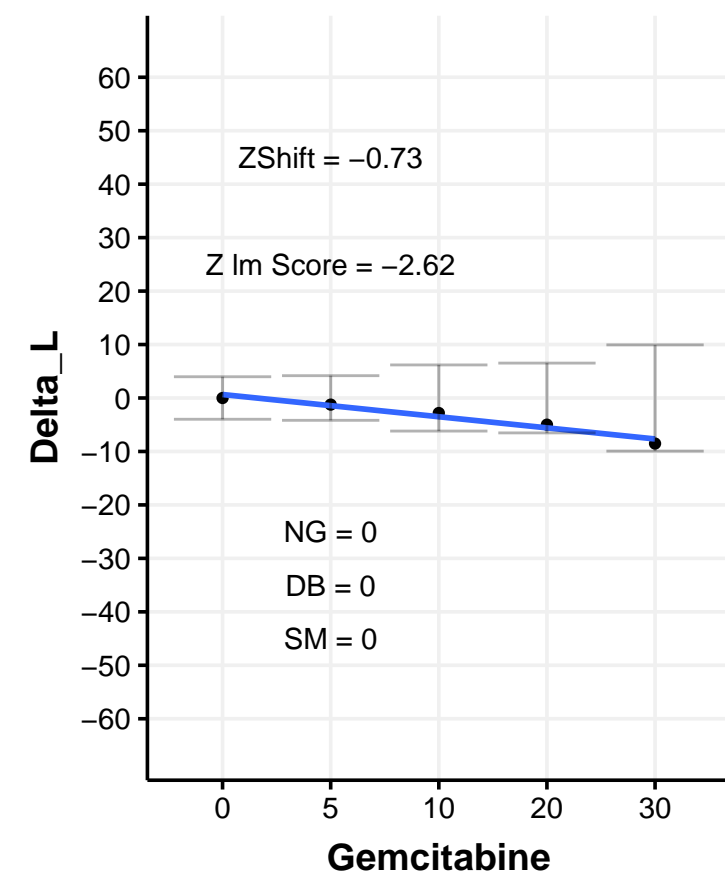

YBR025C

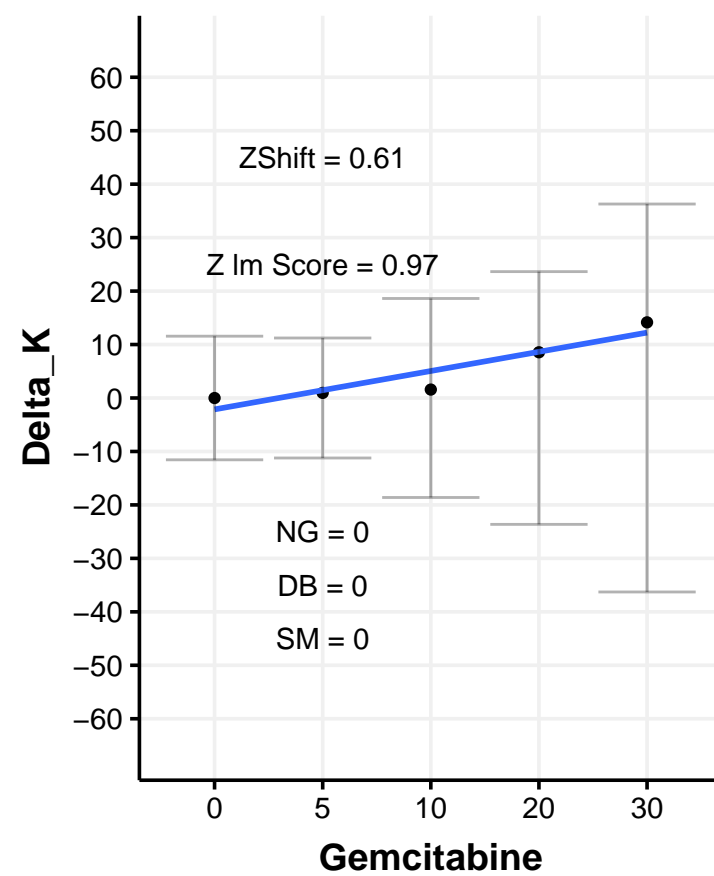

YBR025C

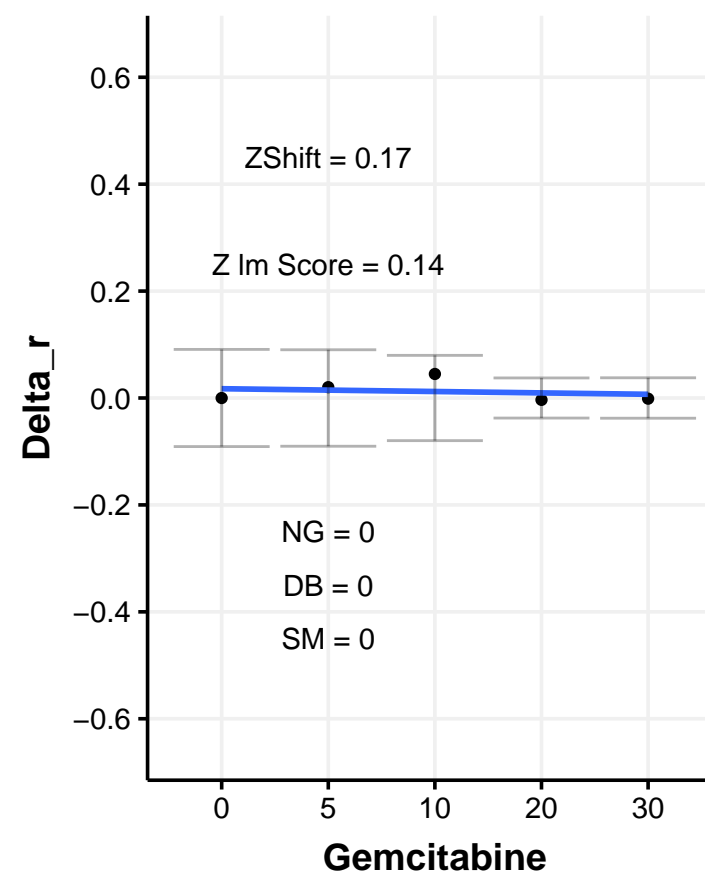

YBR025C

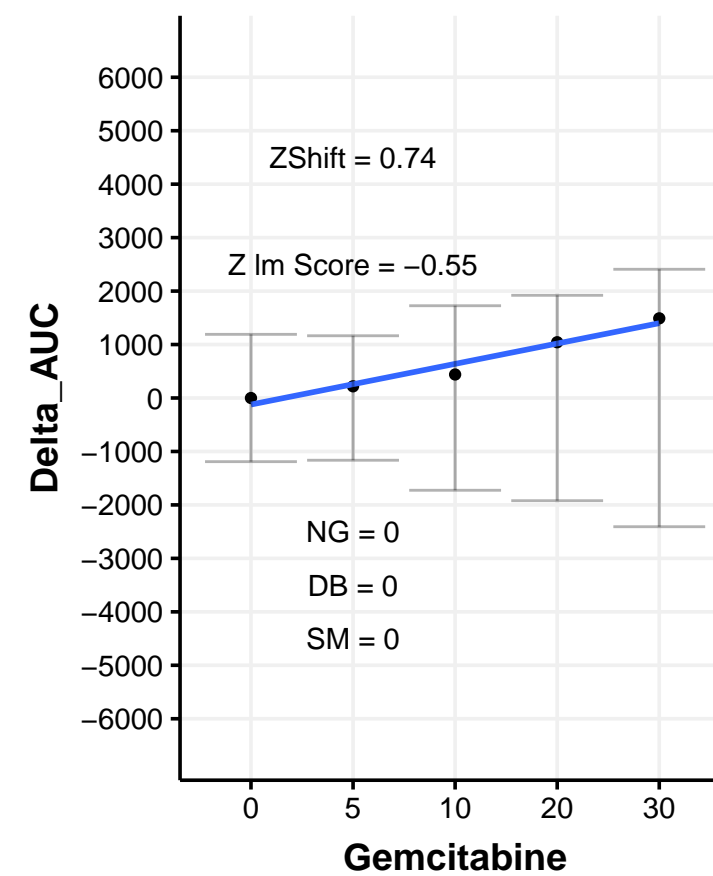

YGR219W

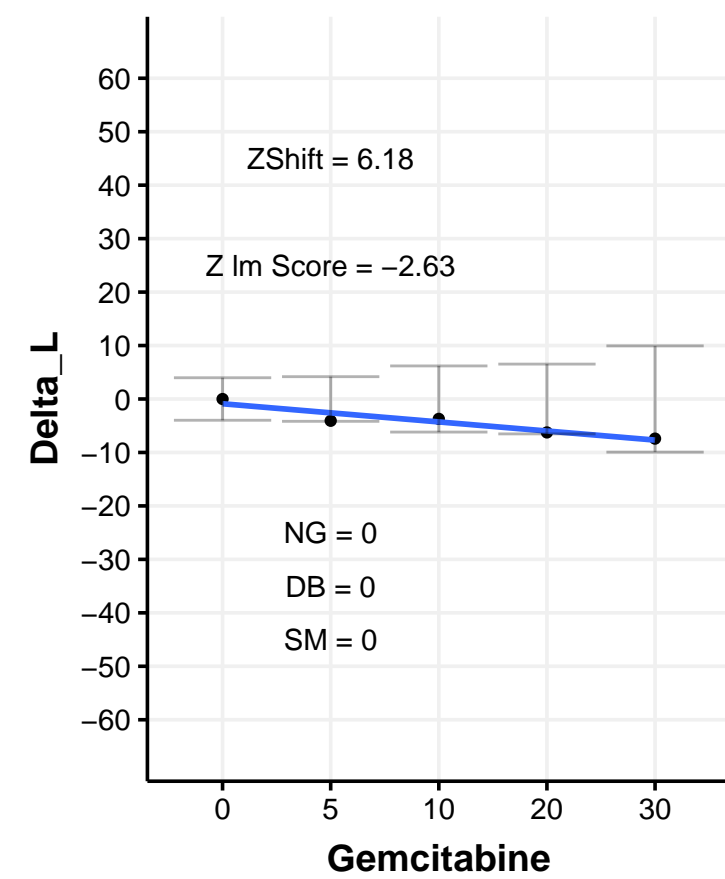

YGR219W

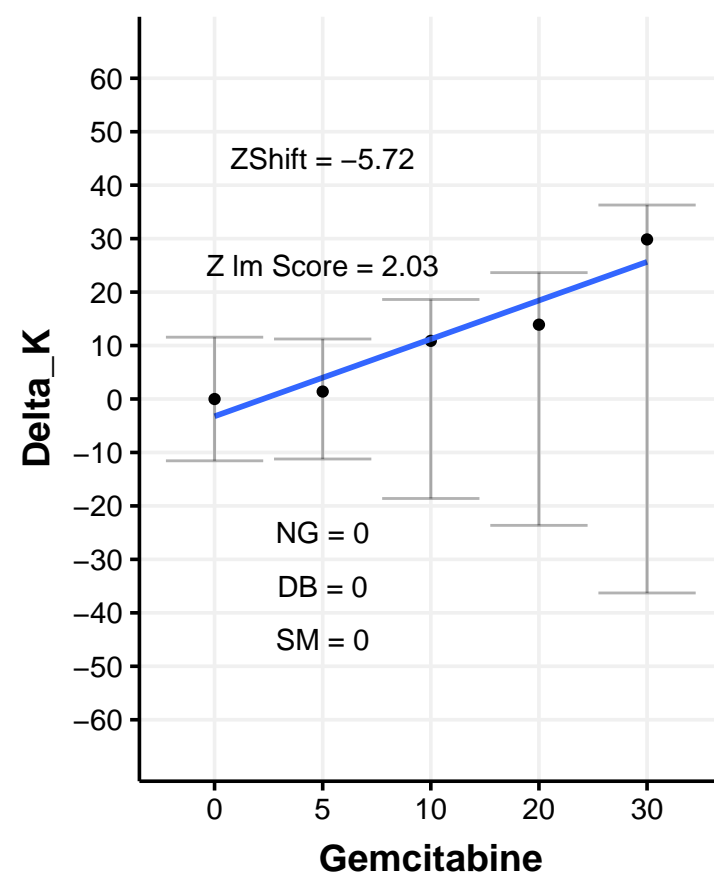

YGR219W

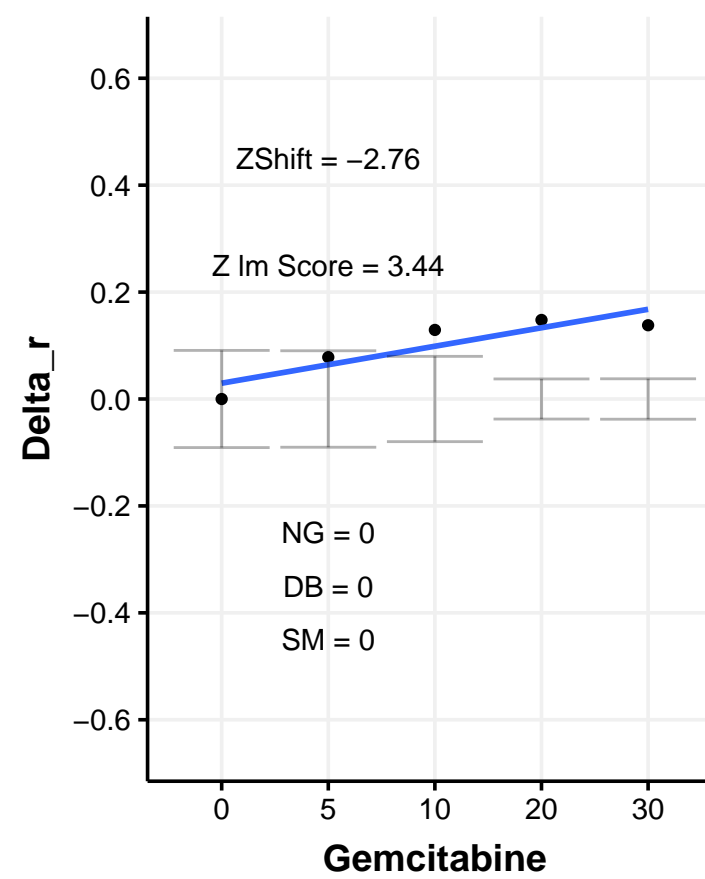

YGR219W

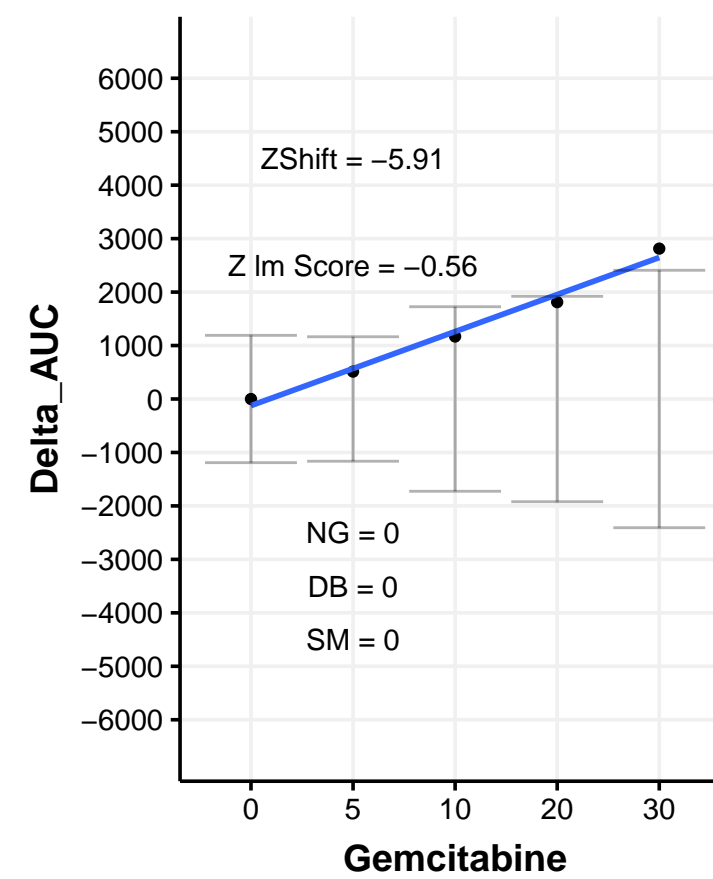

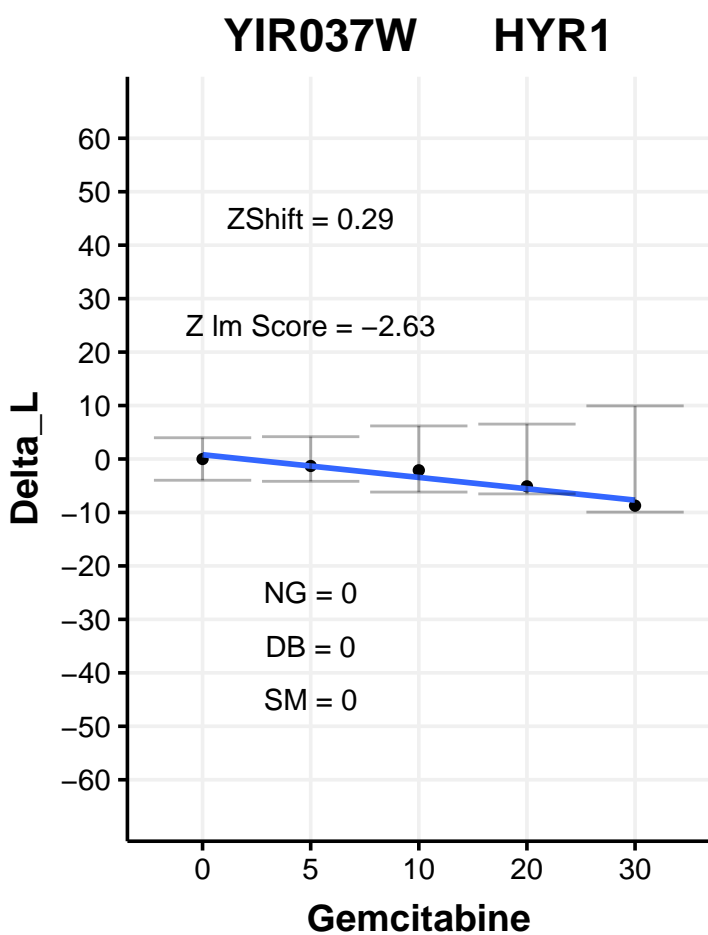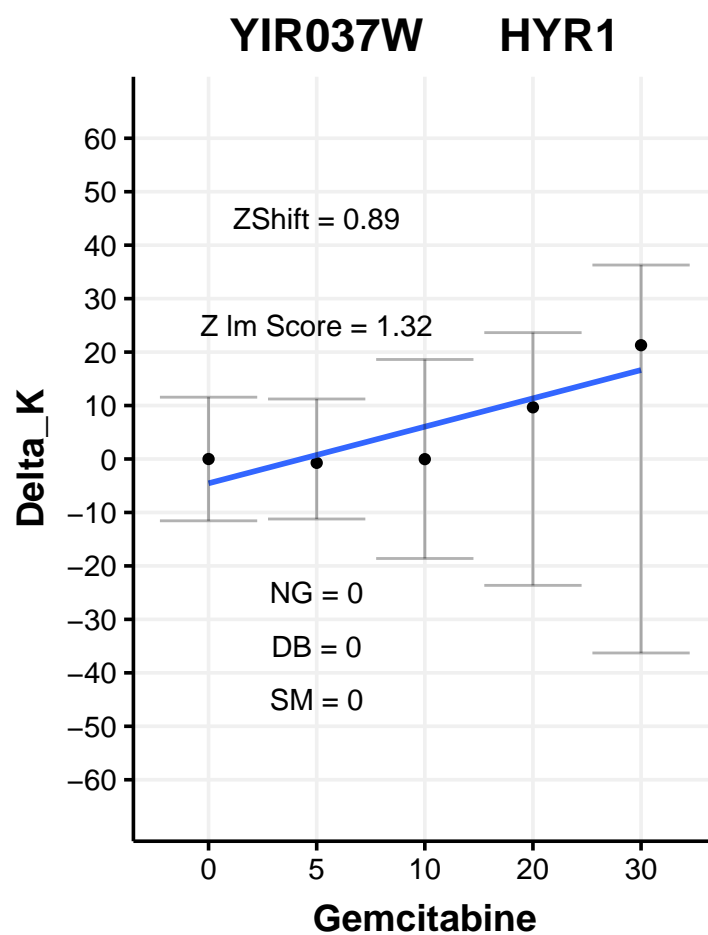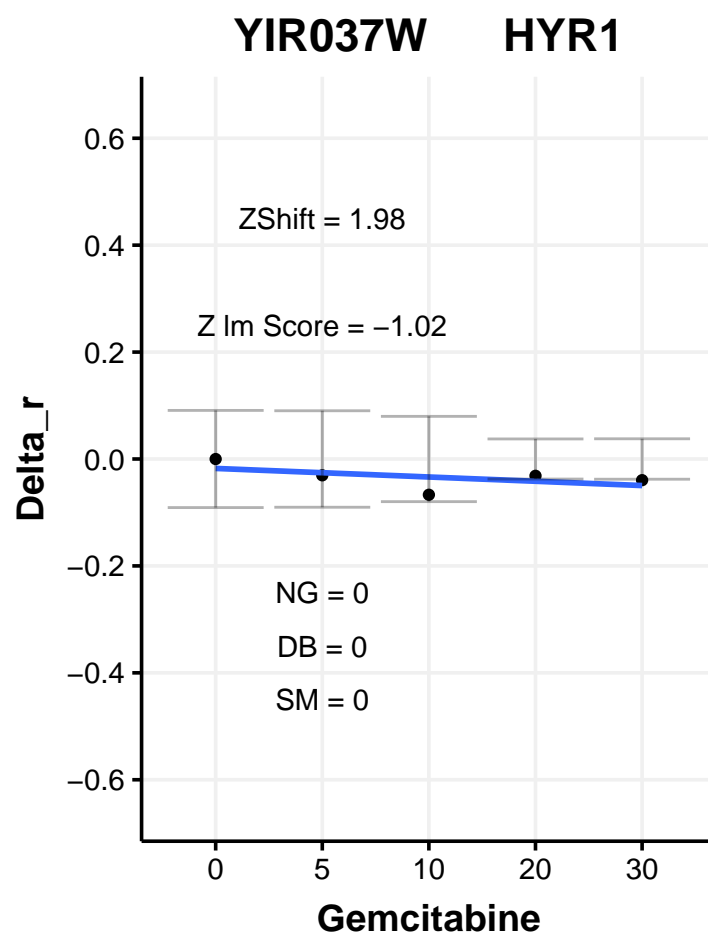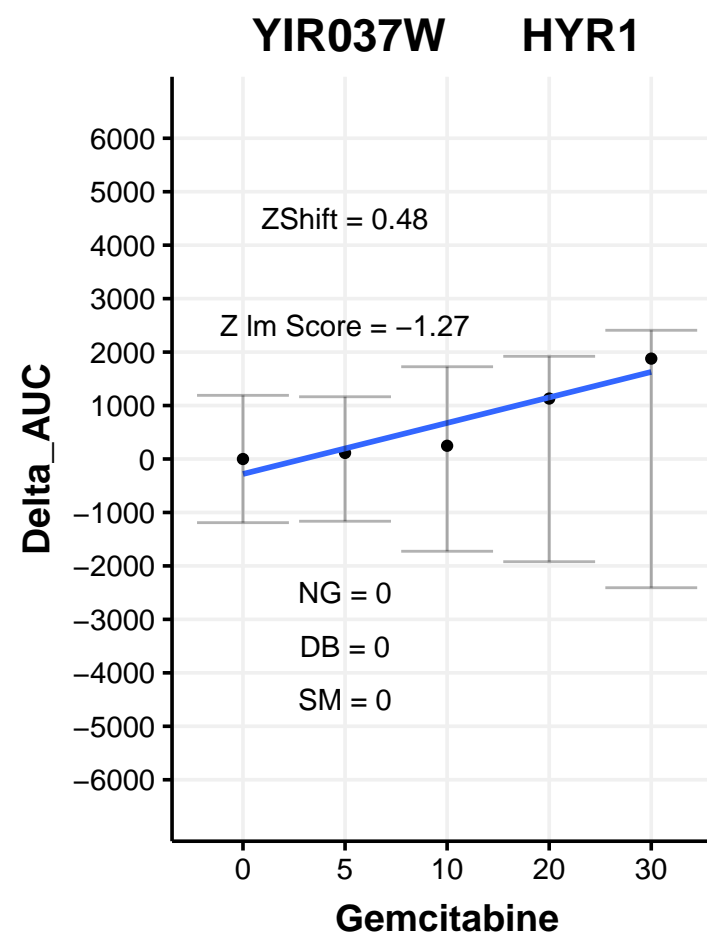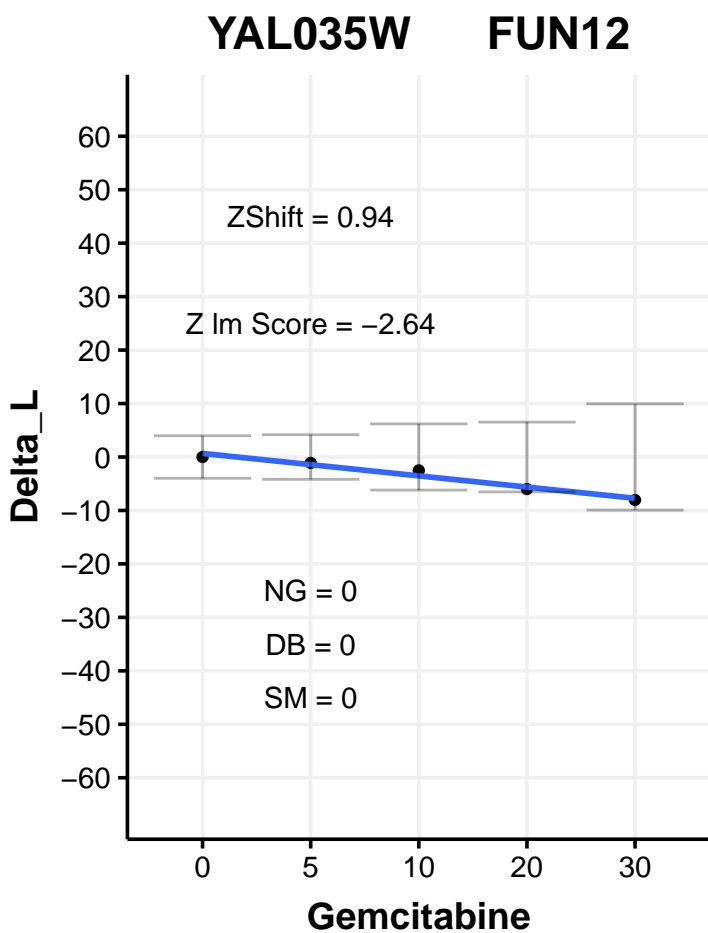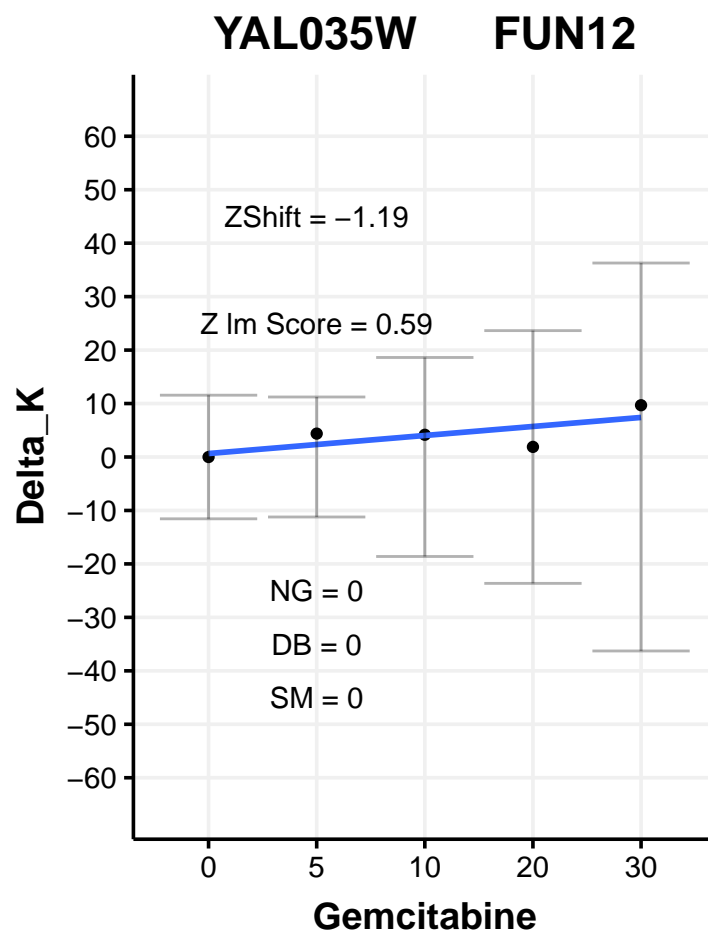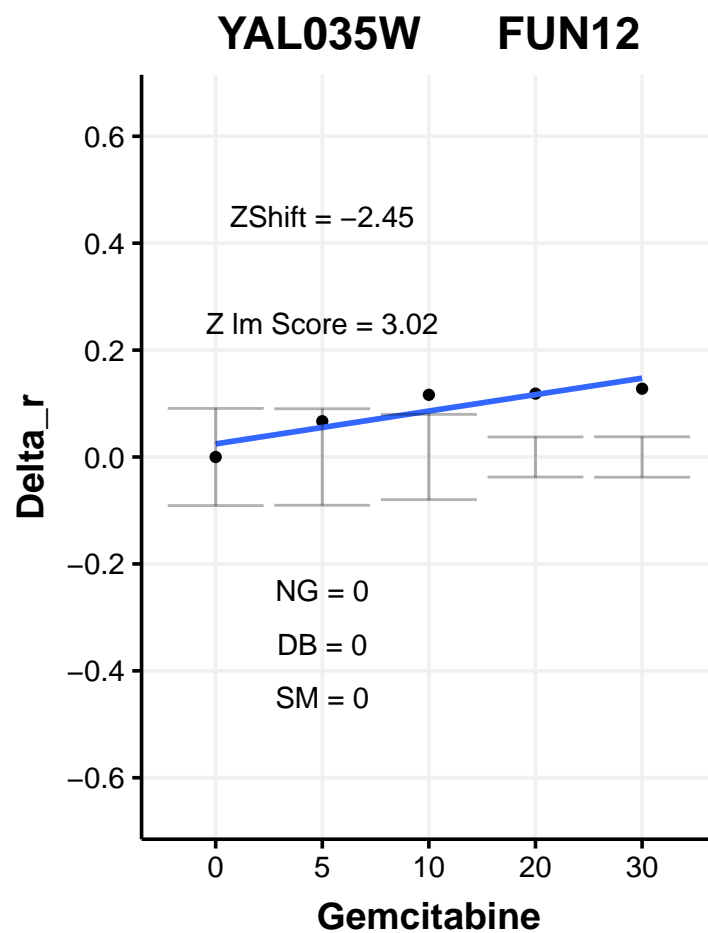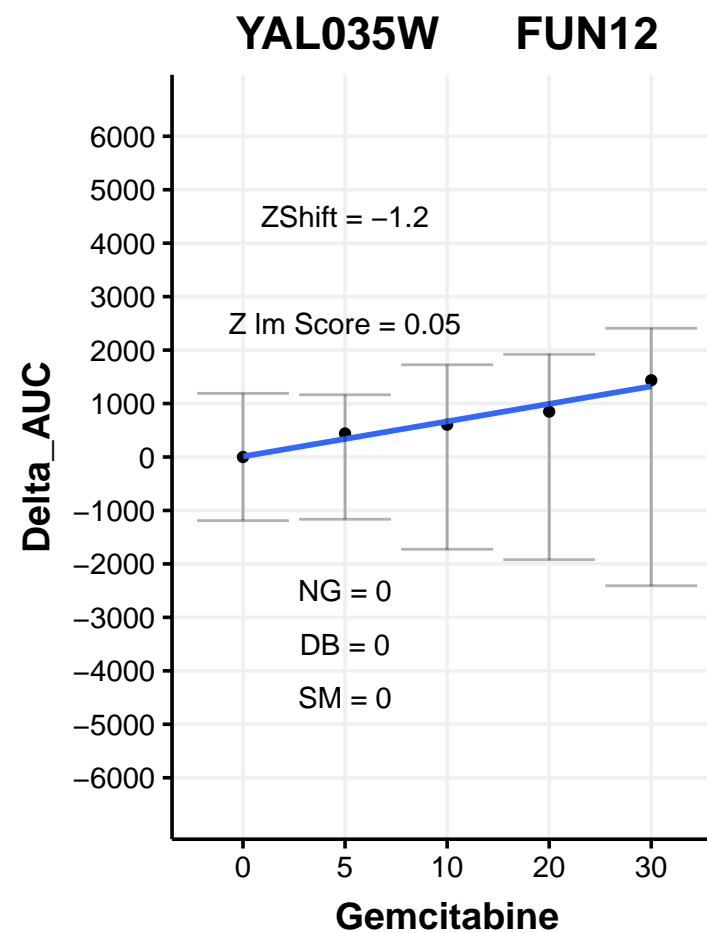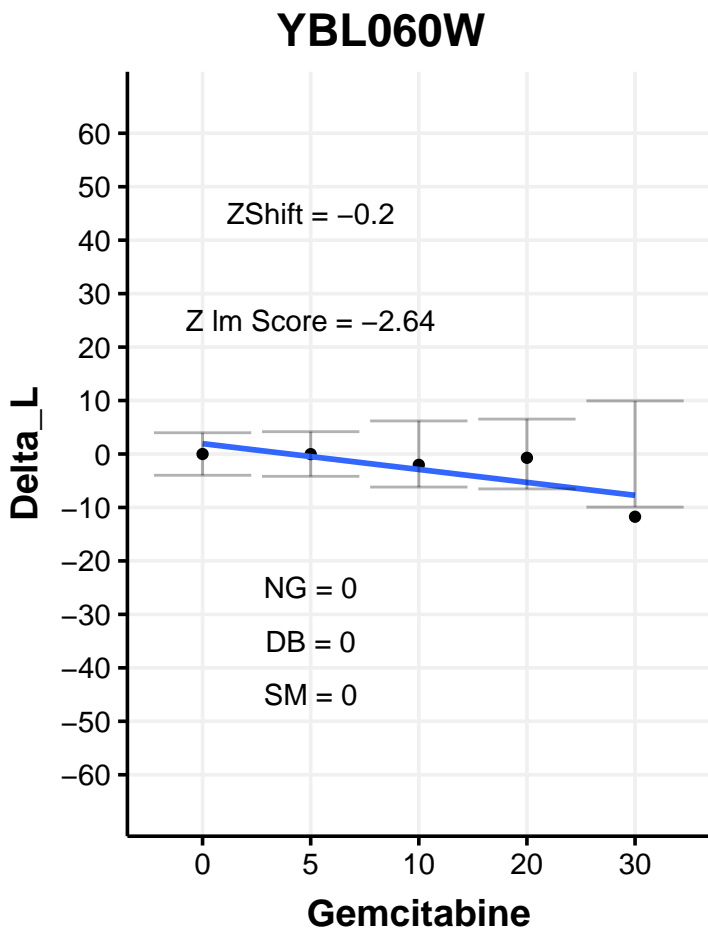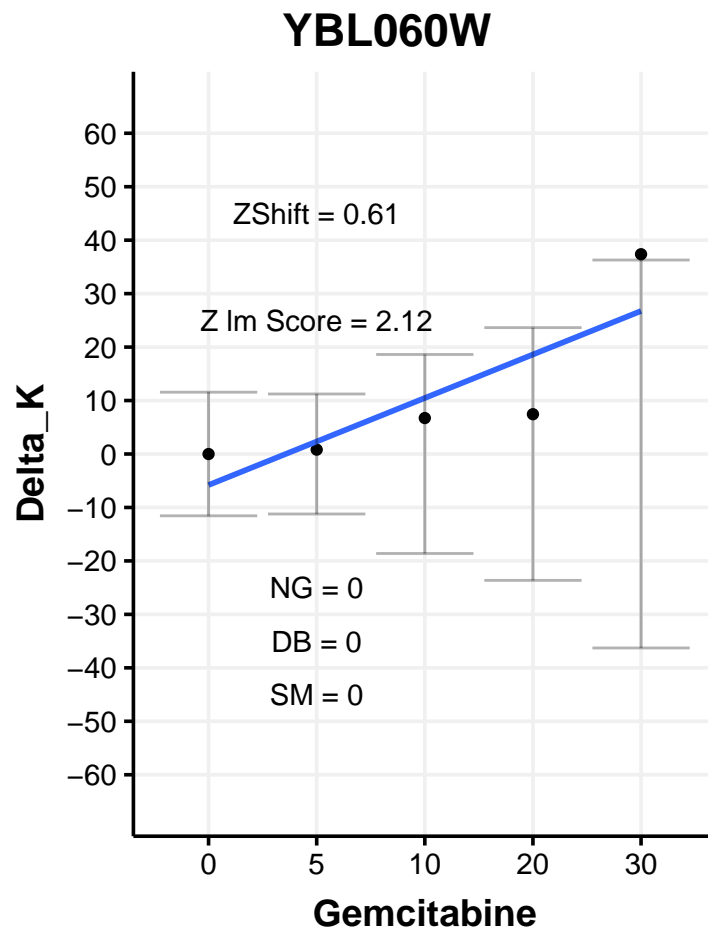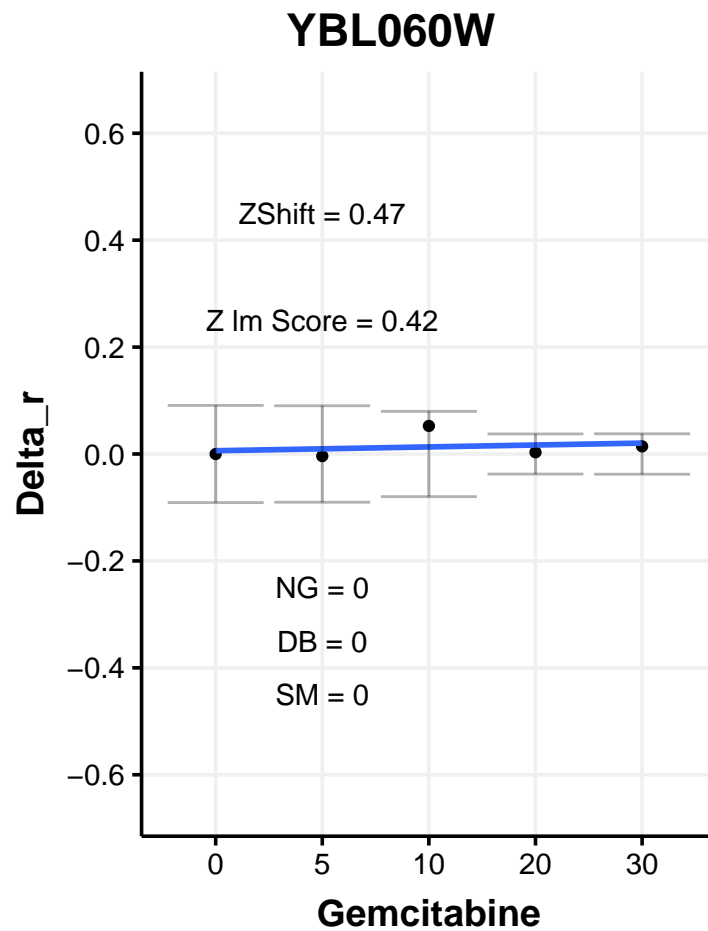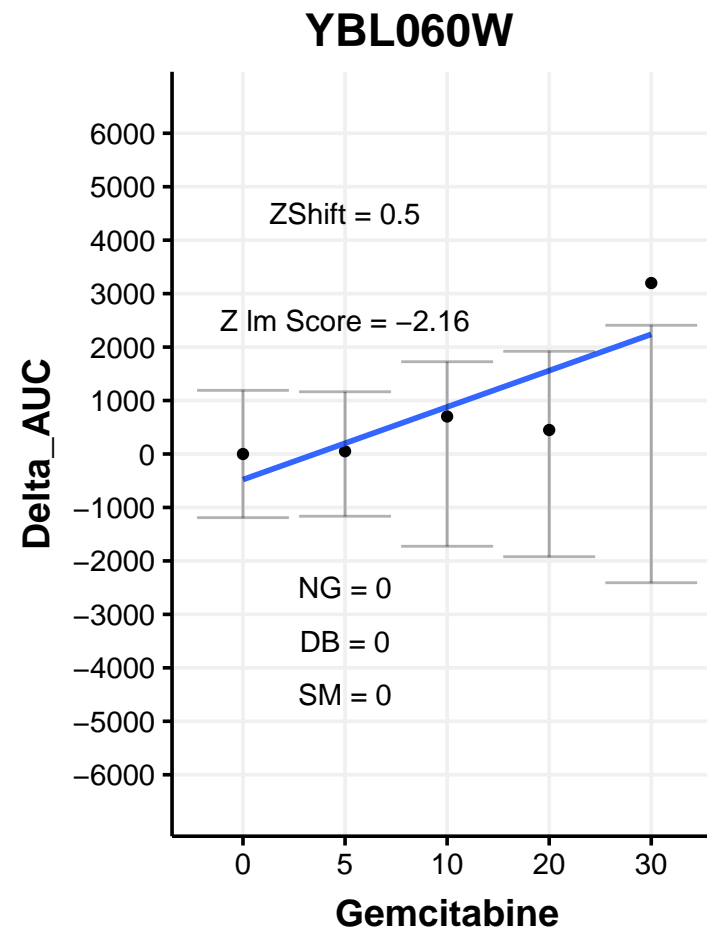

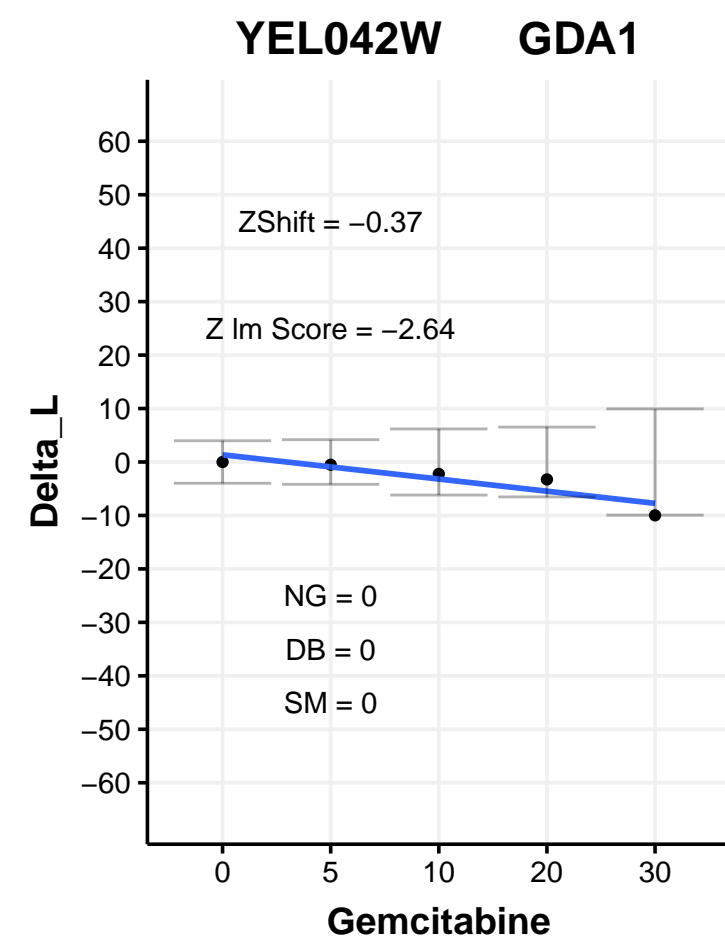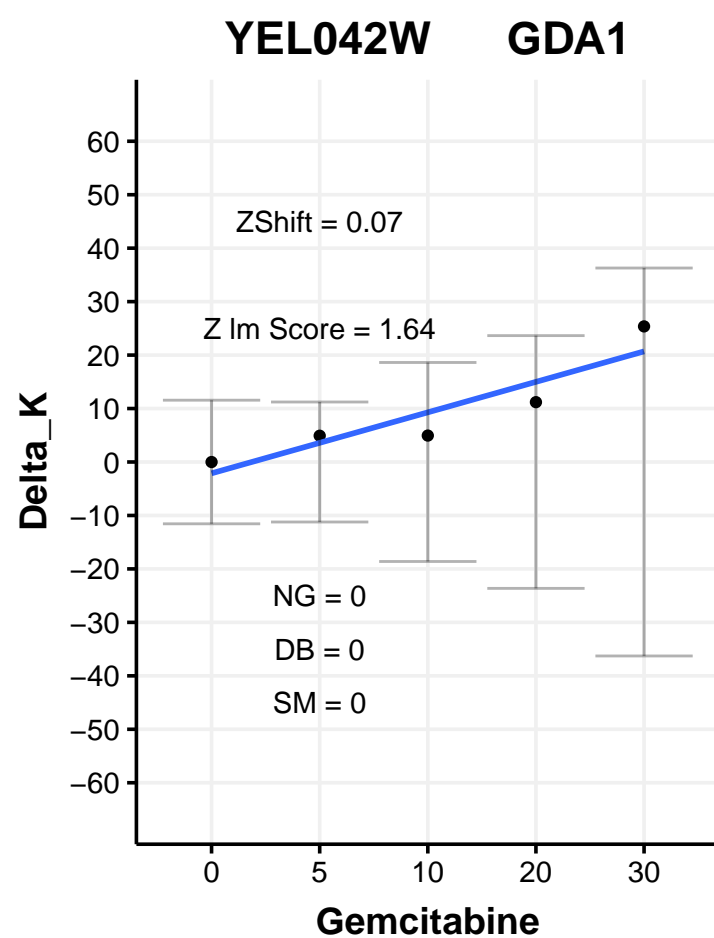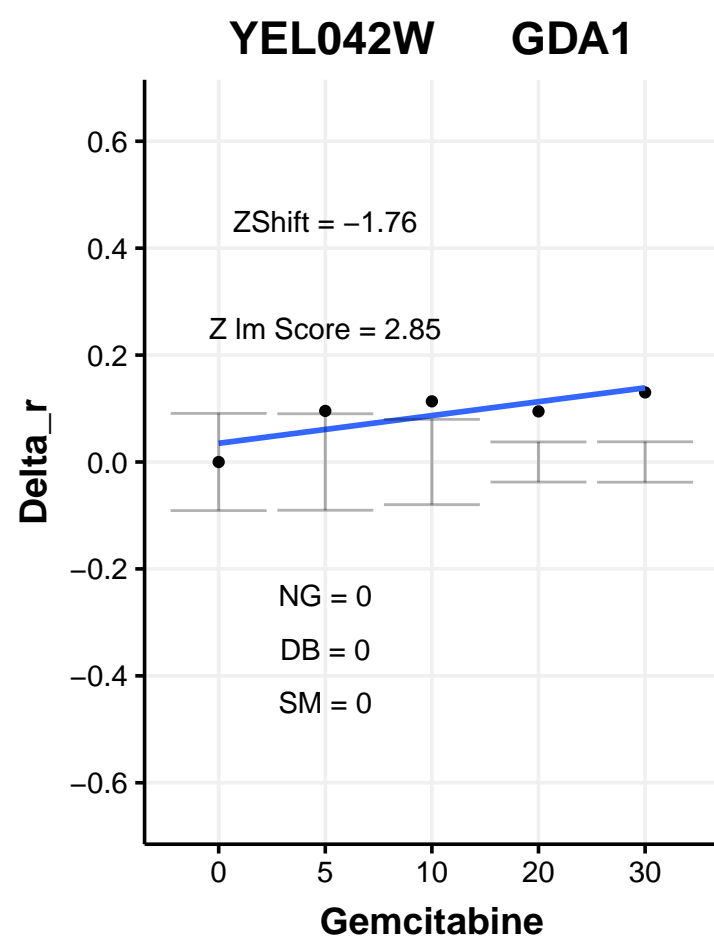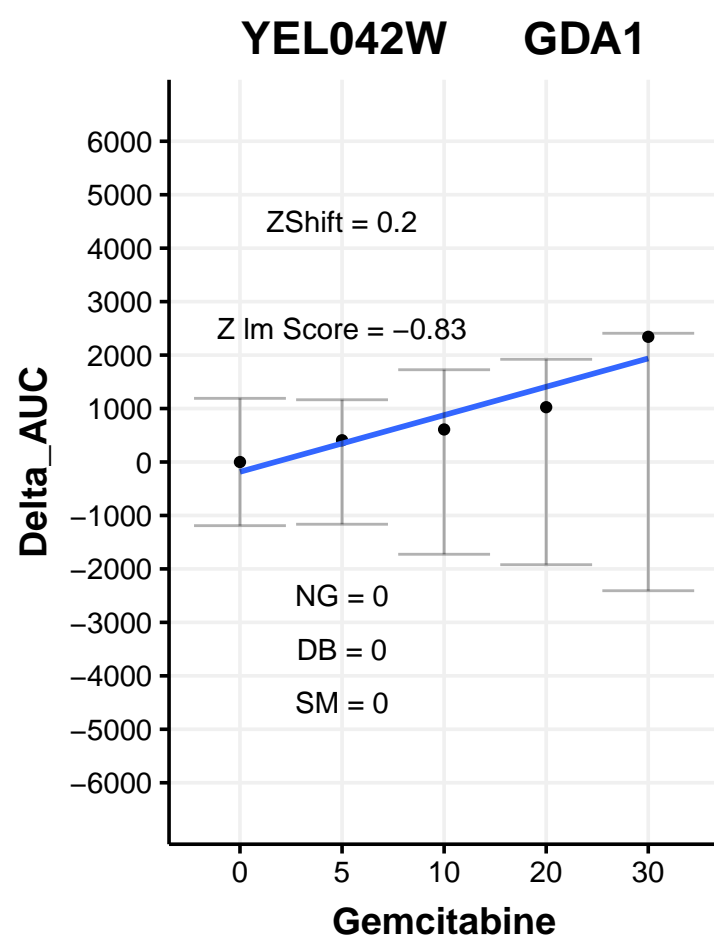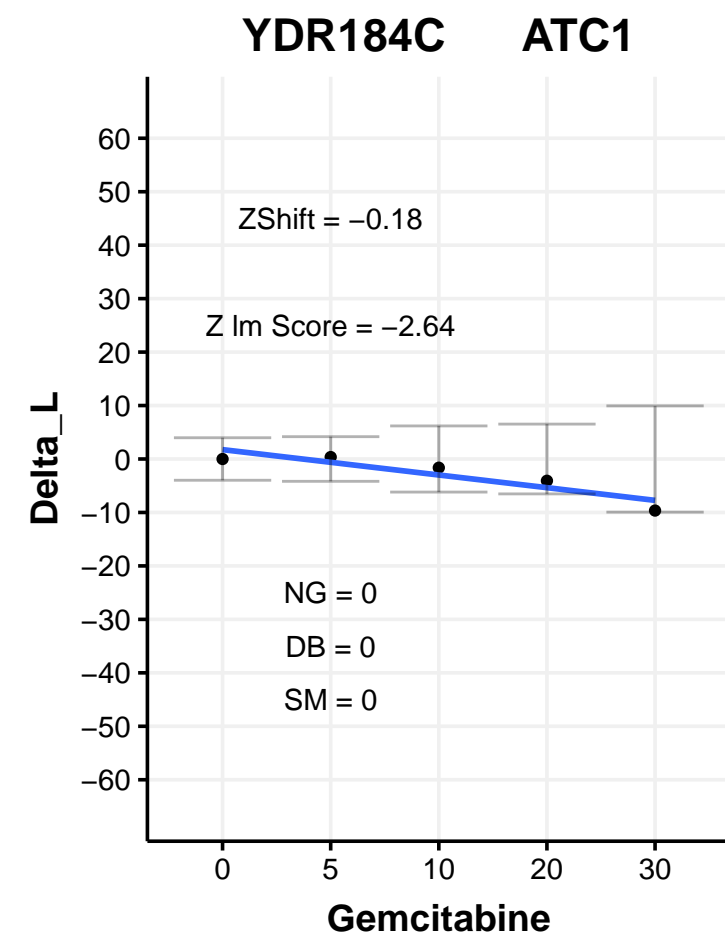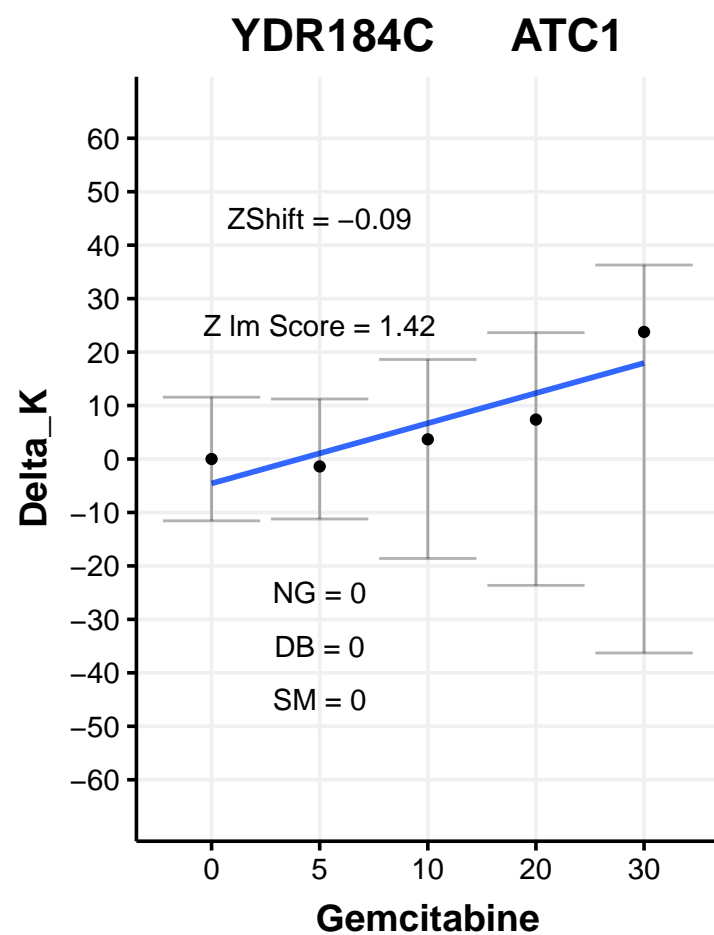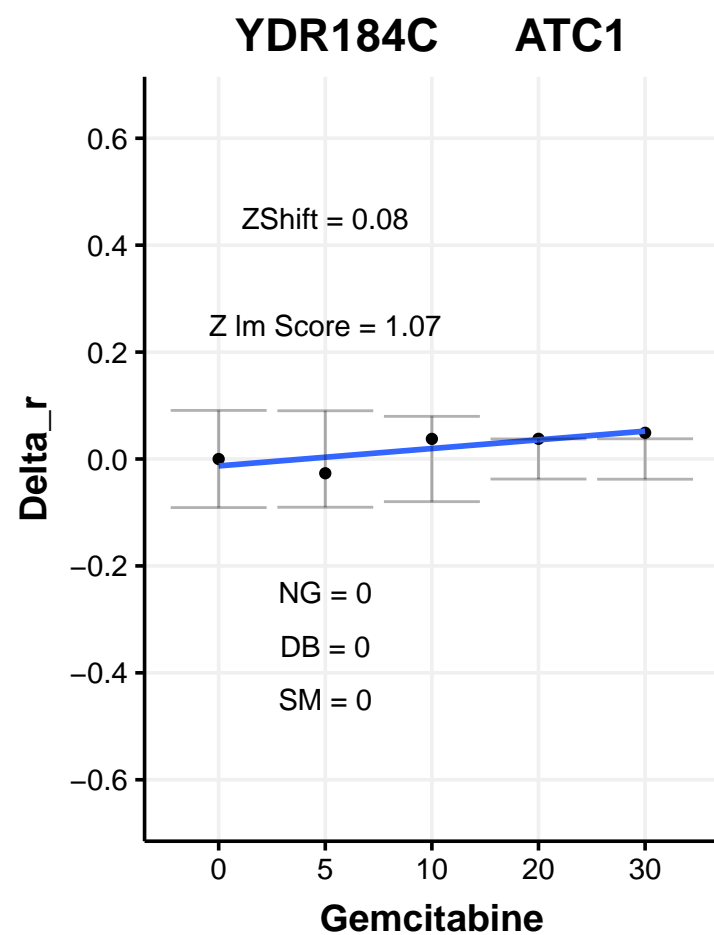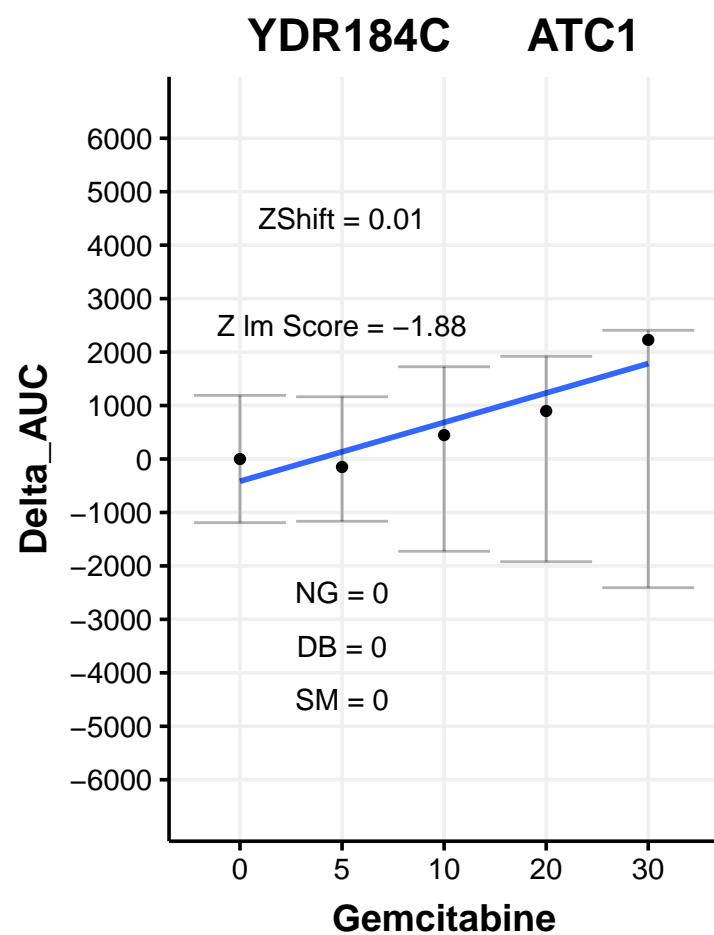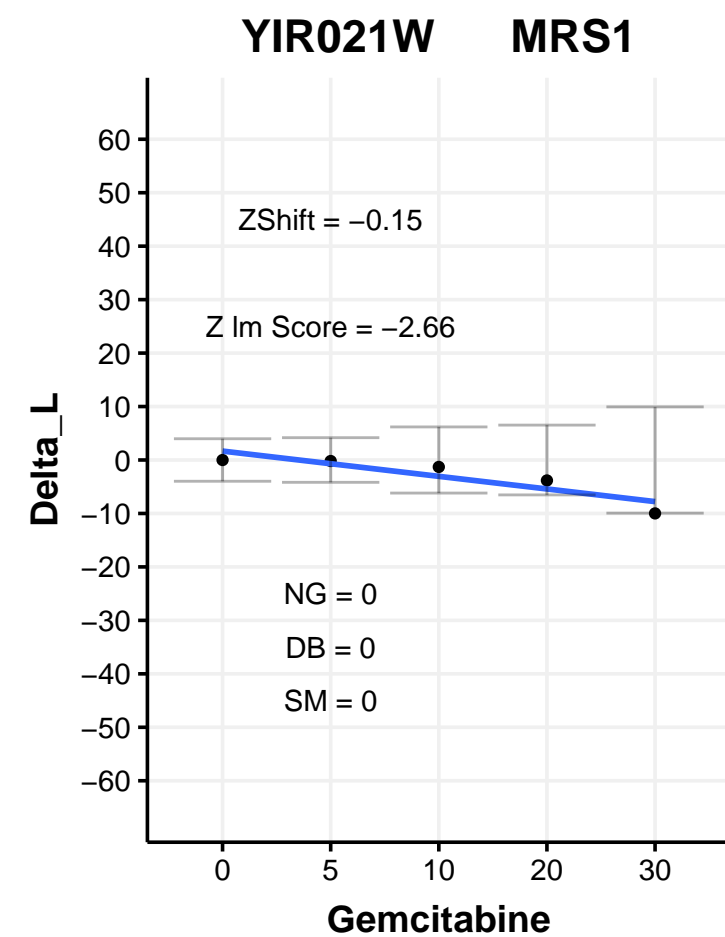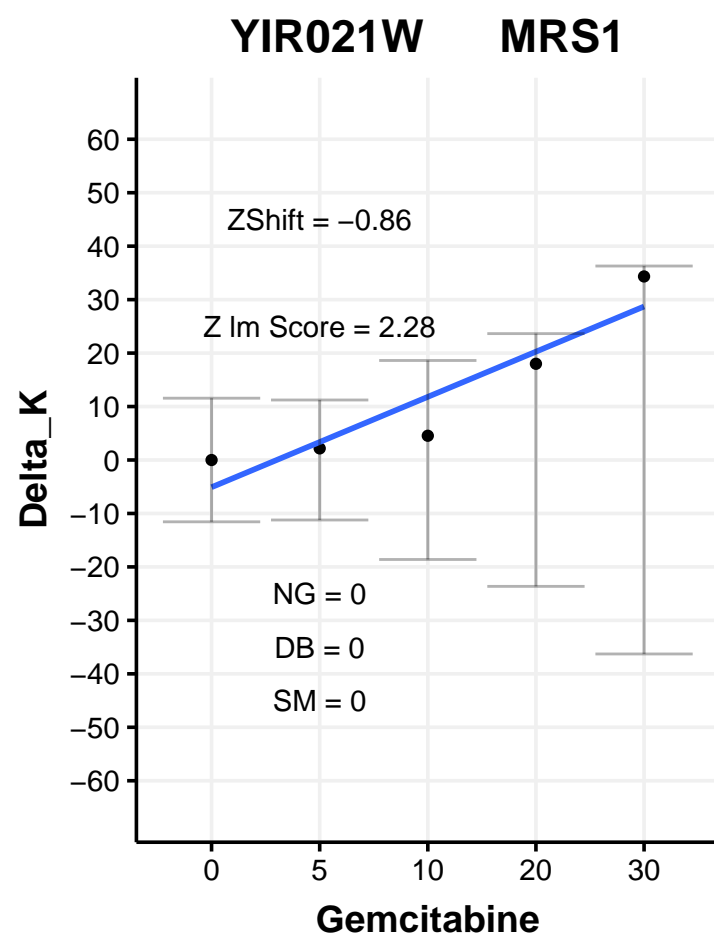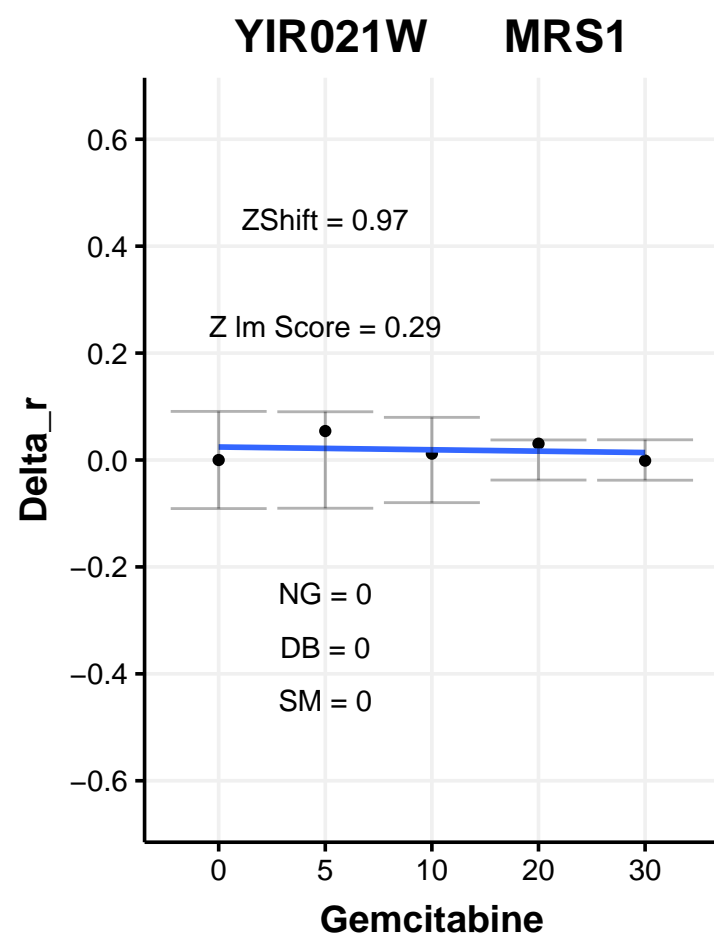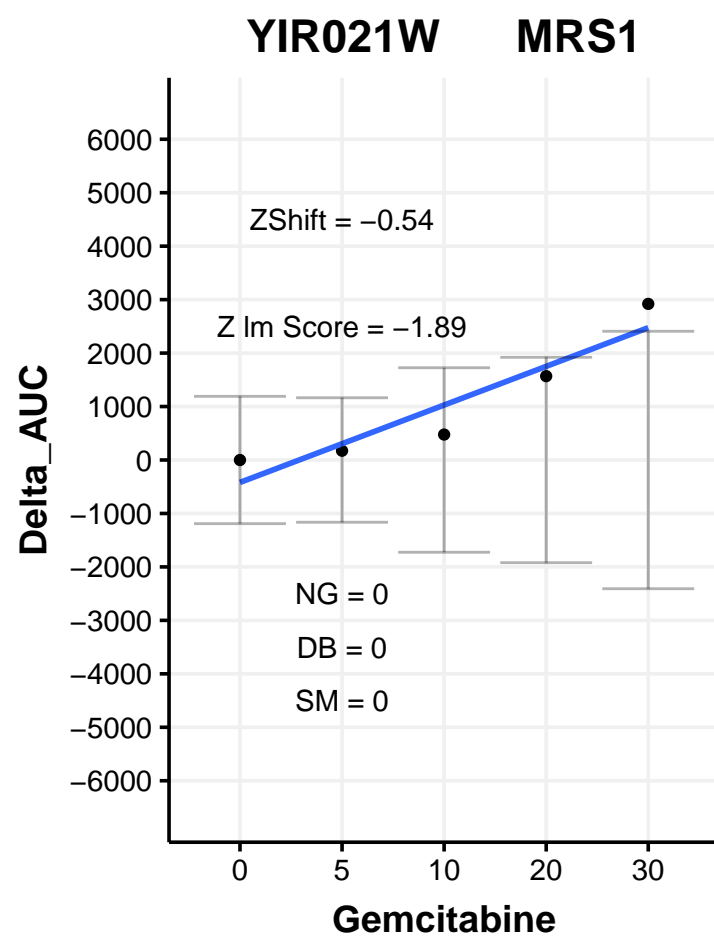

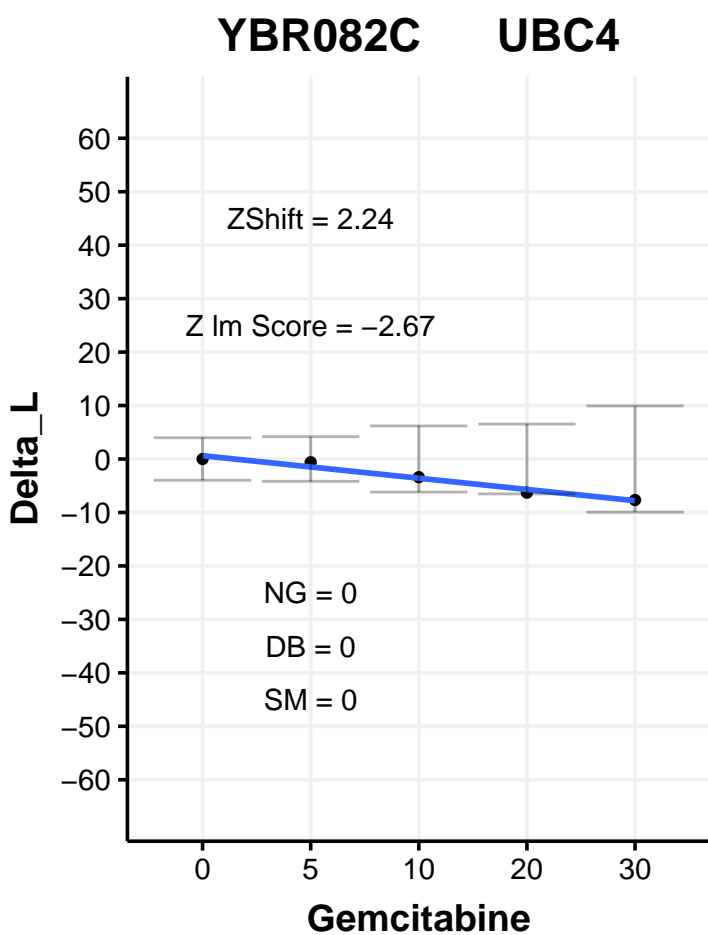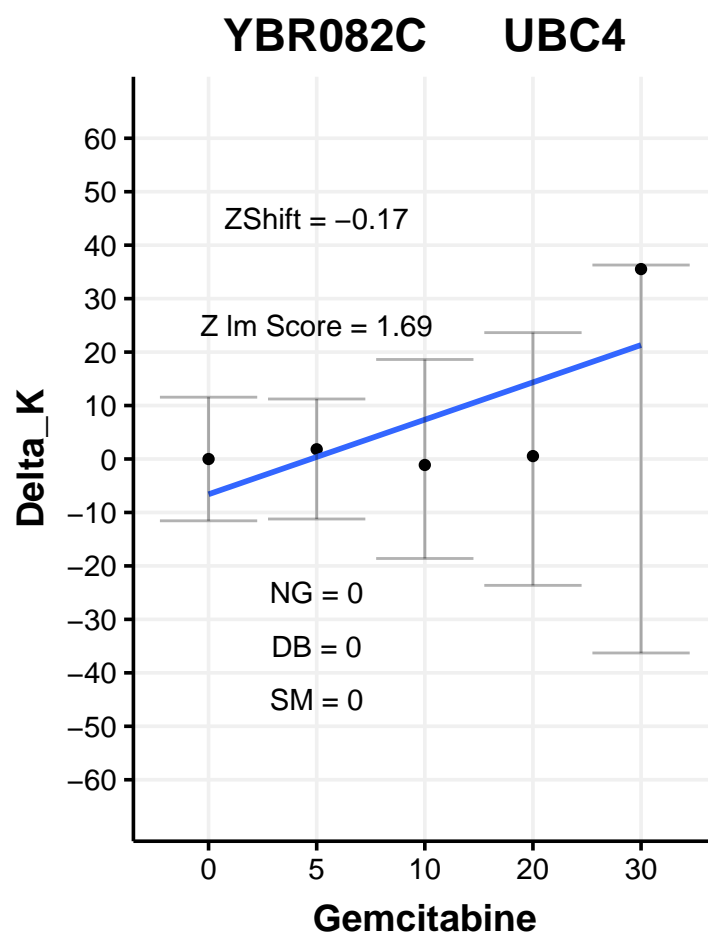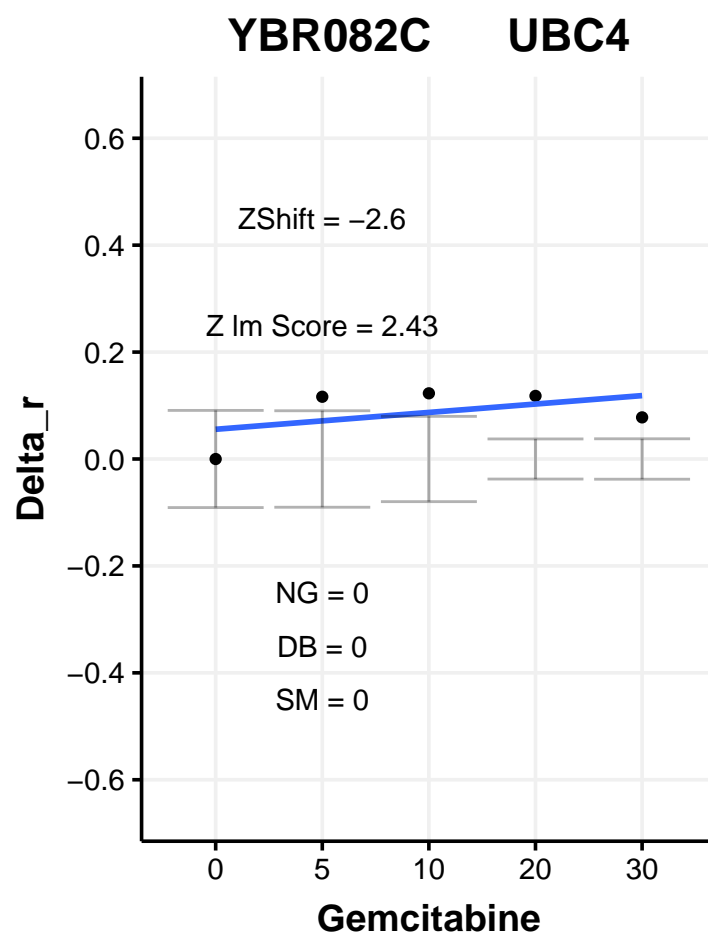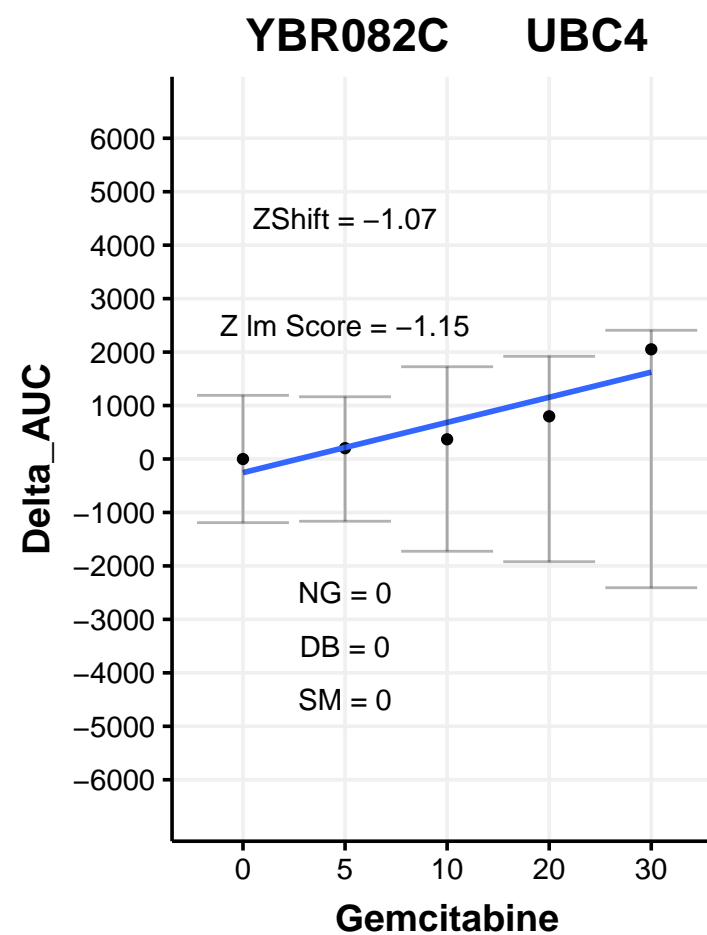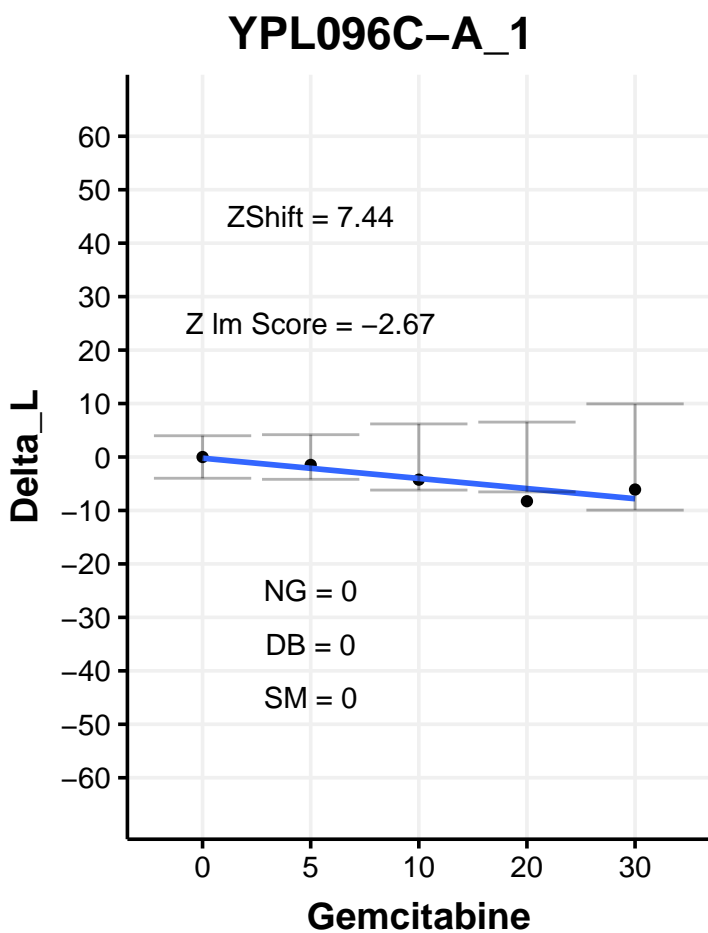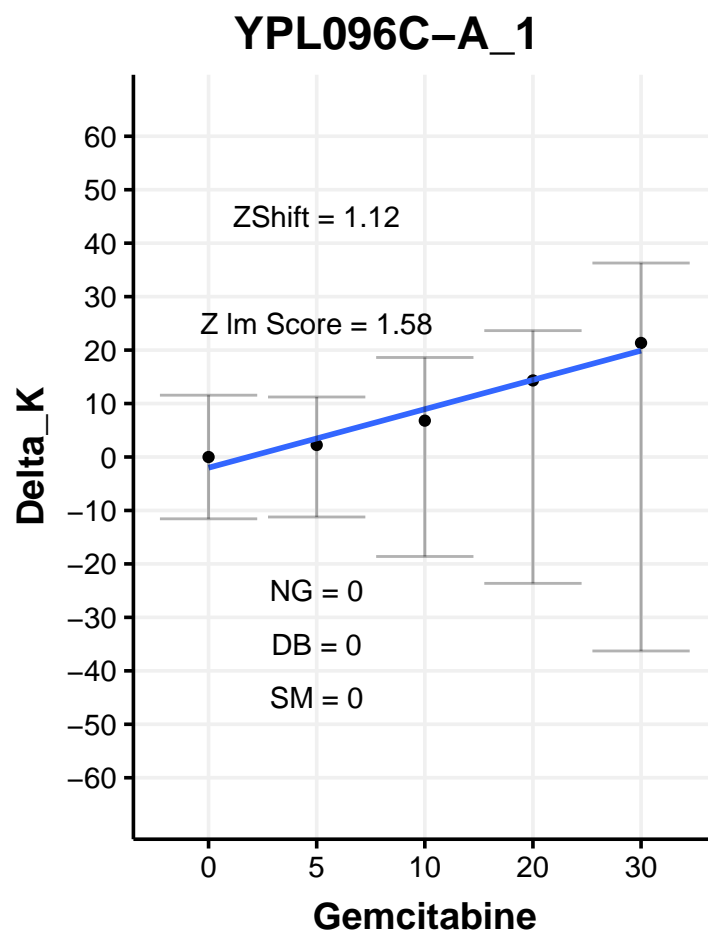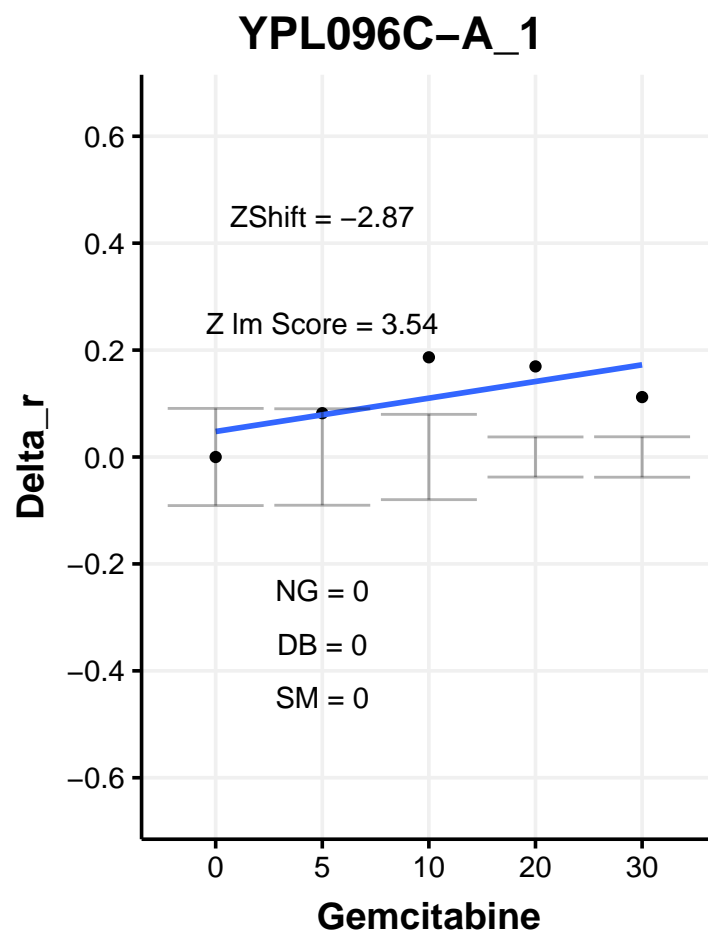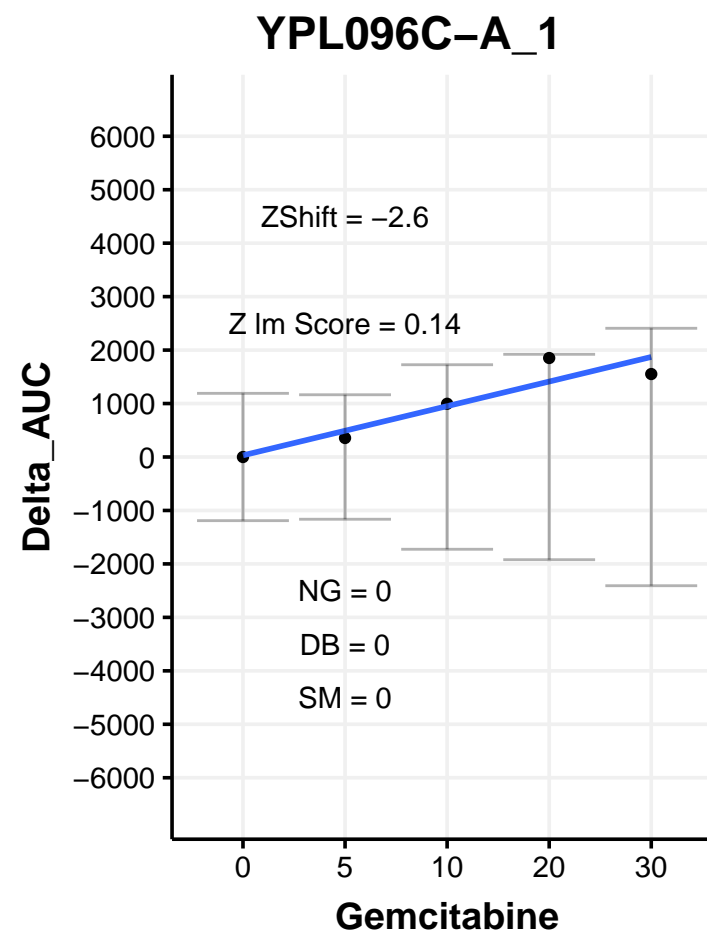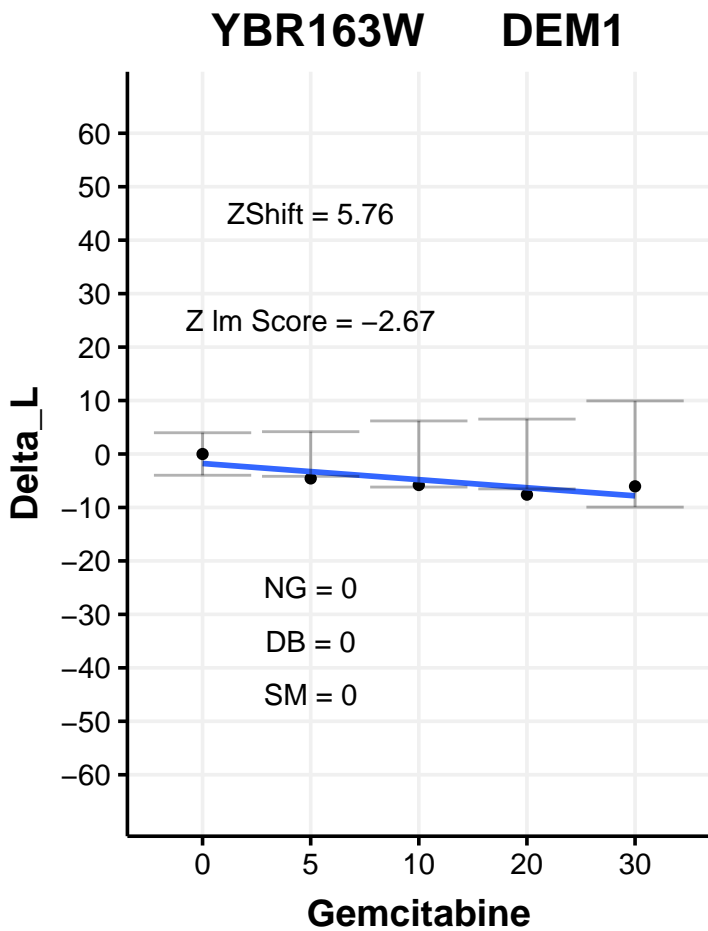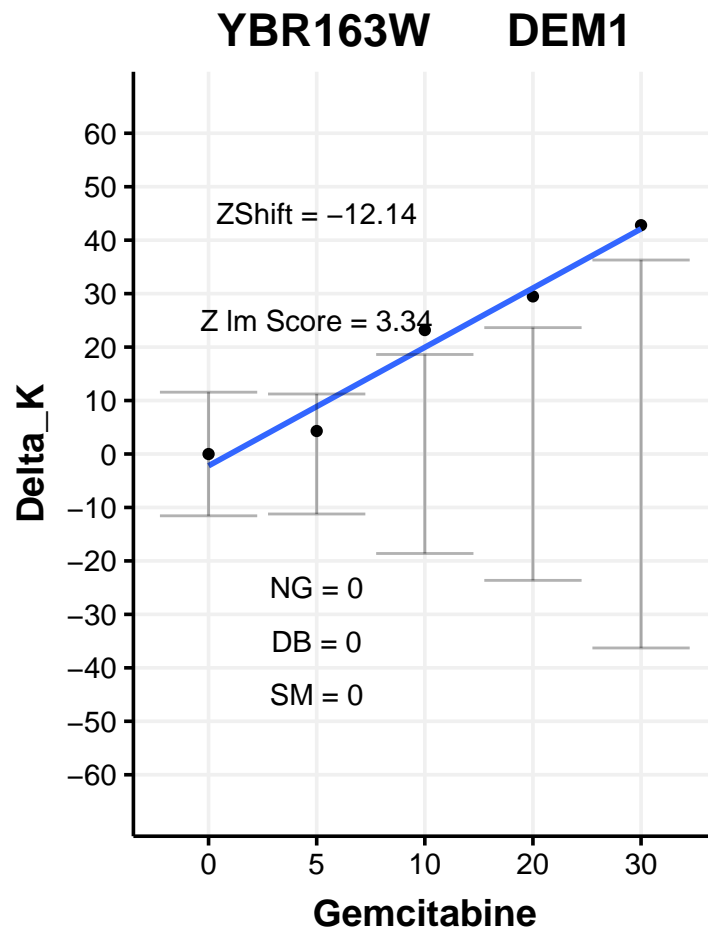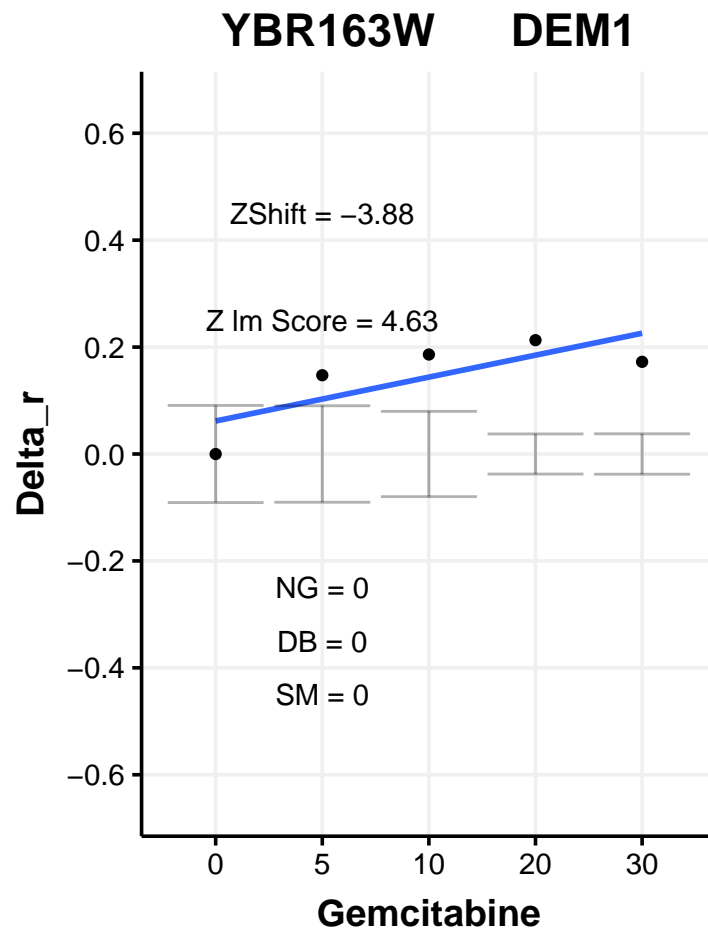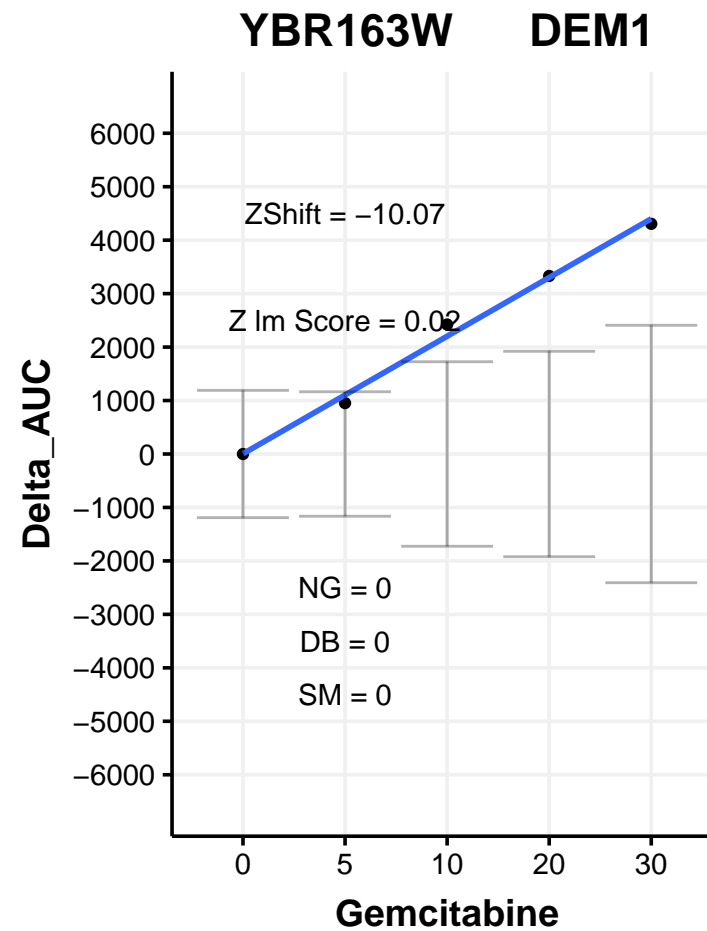

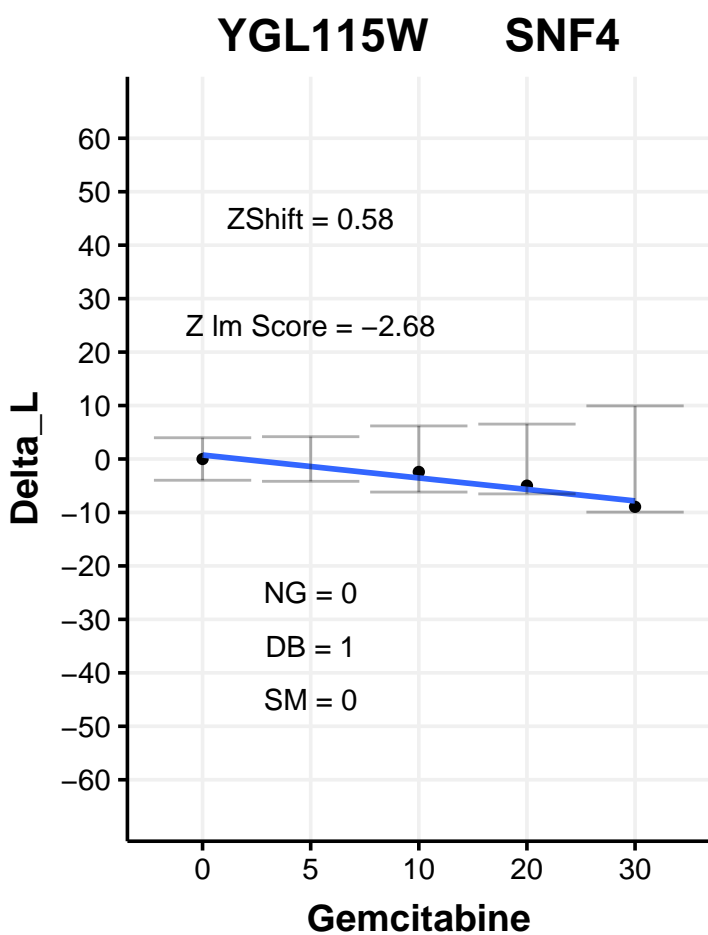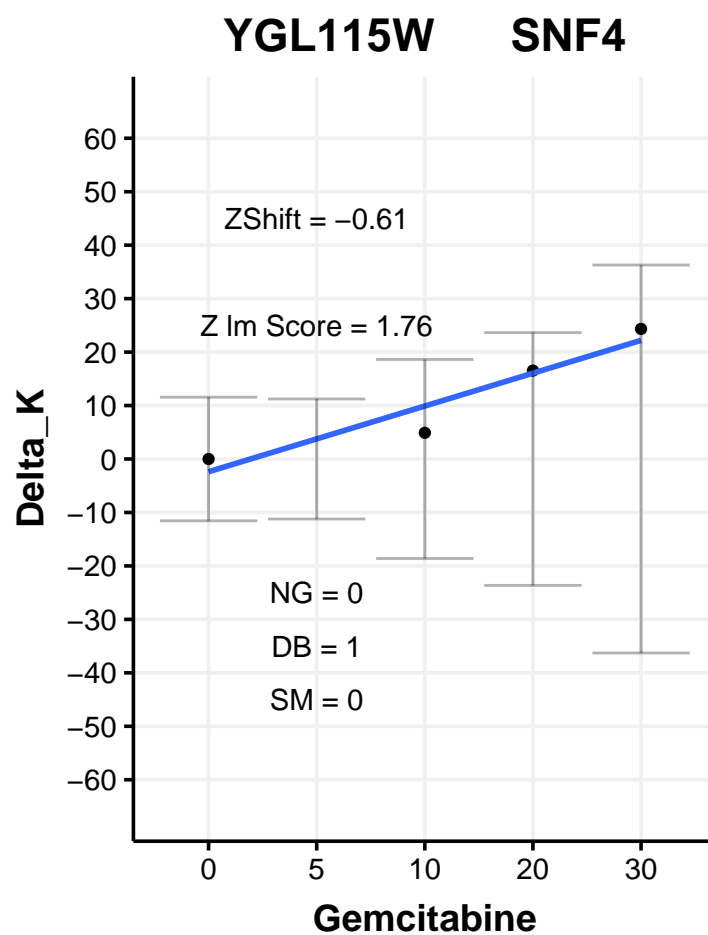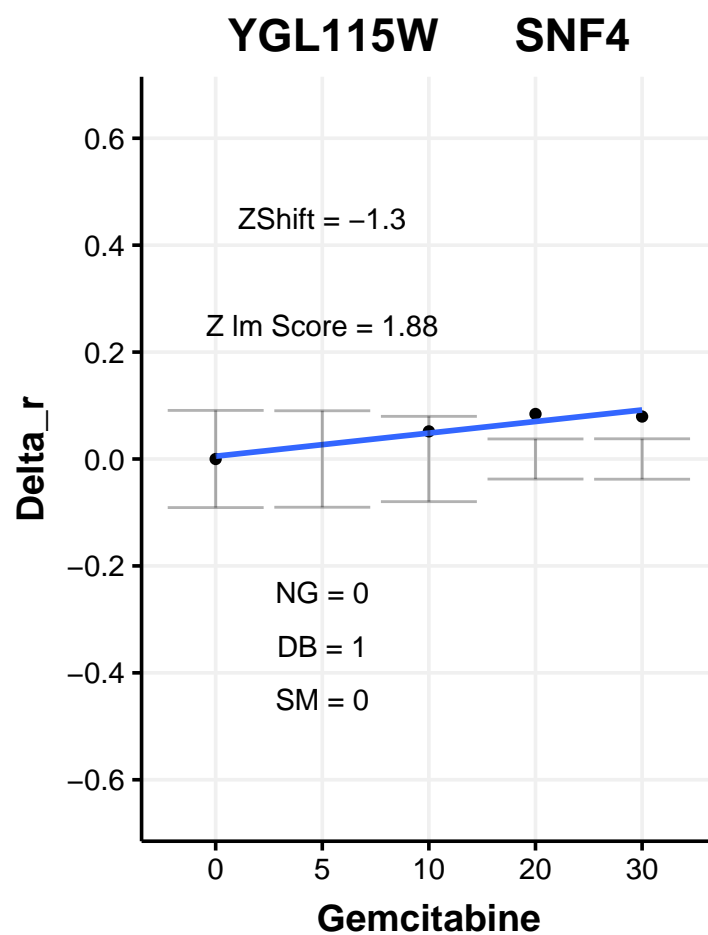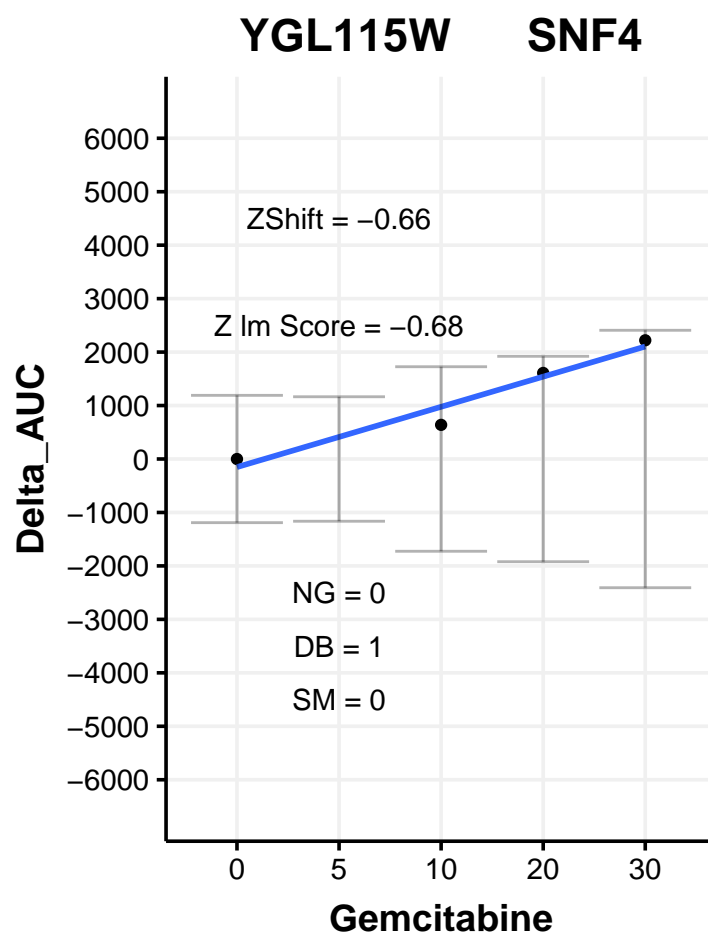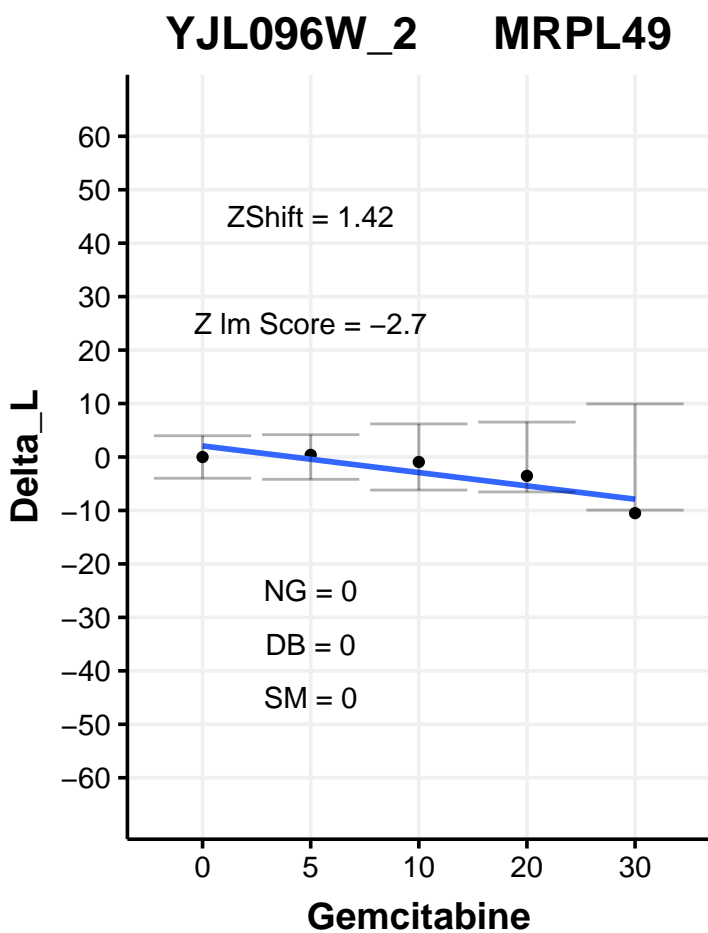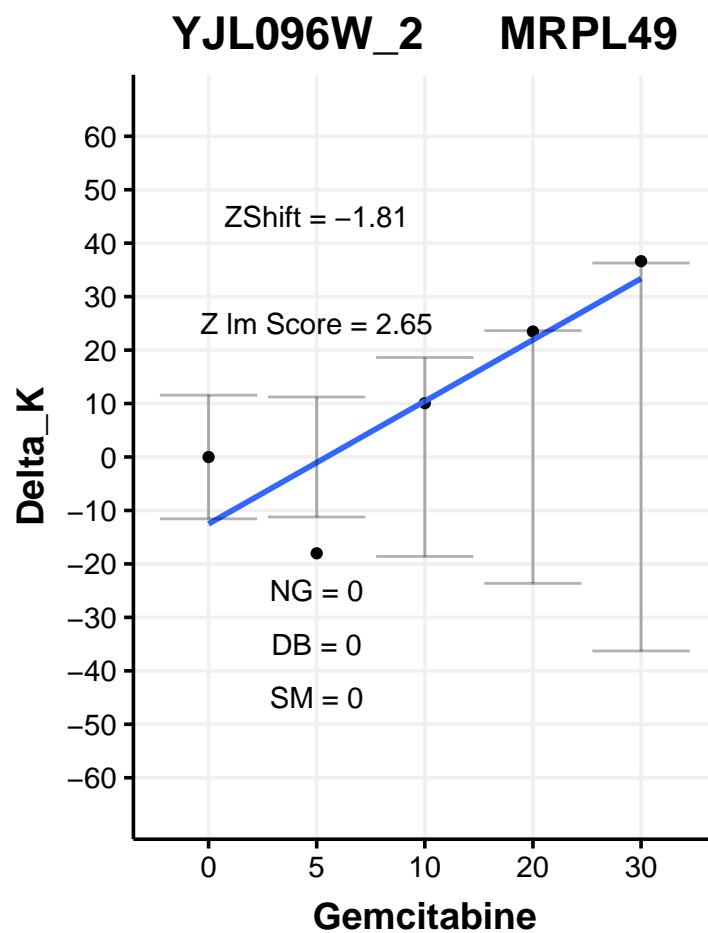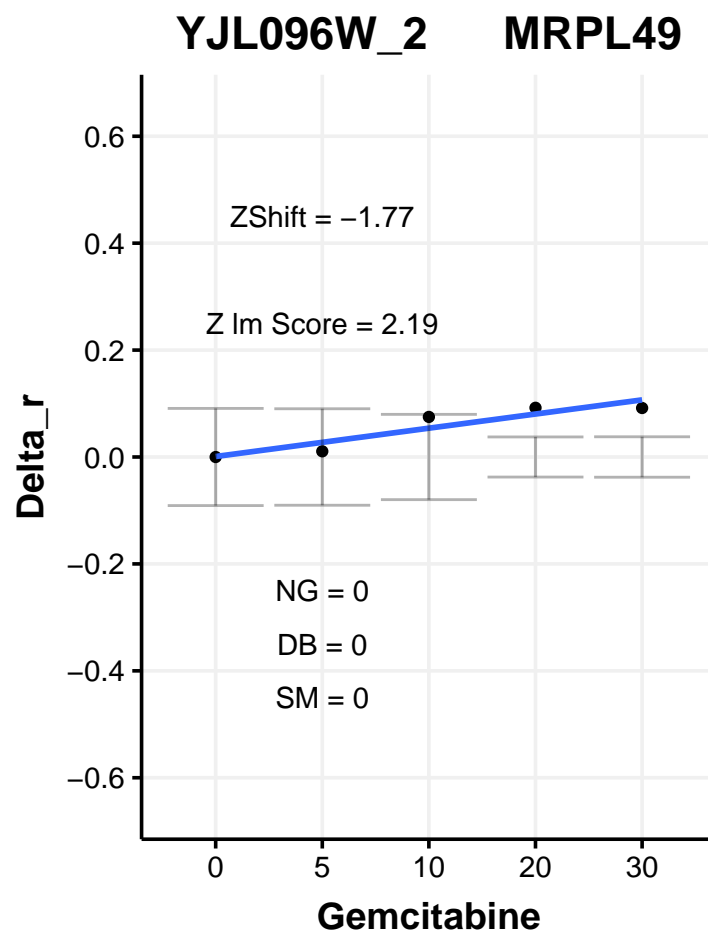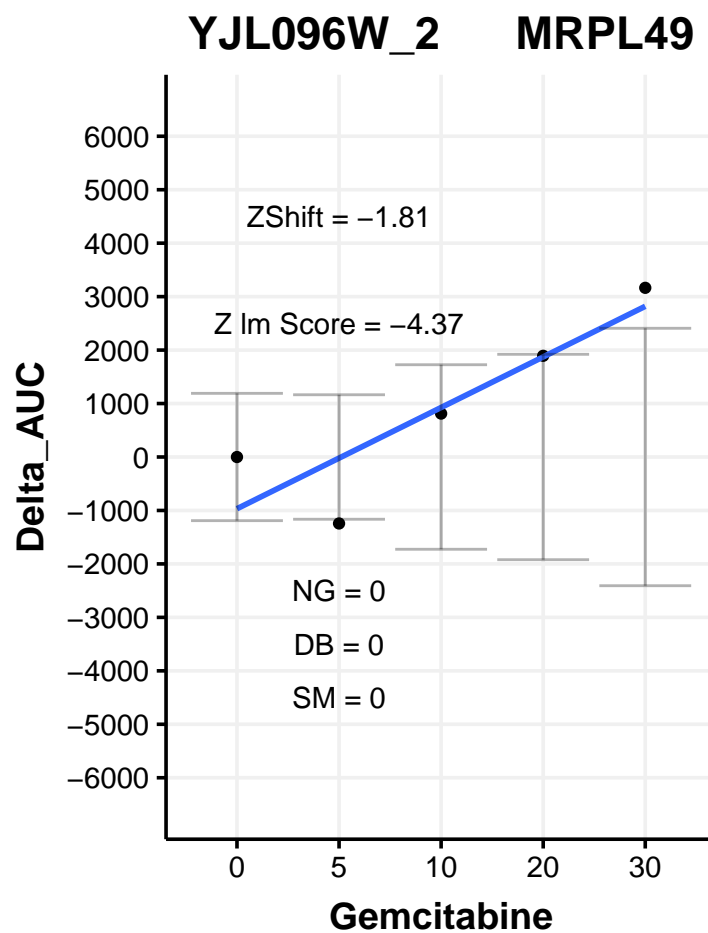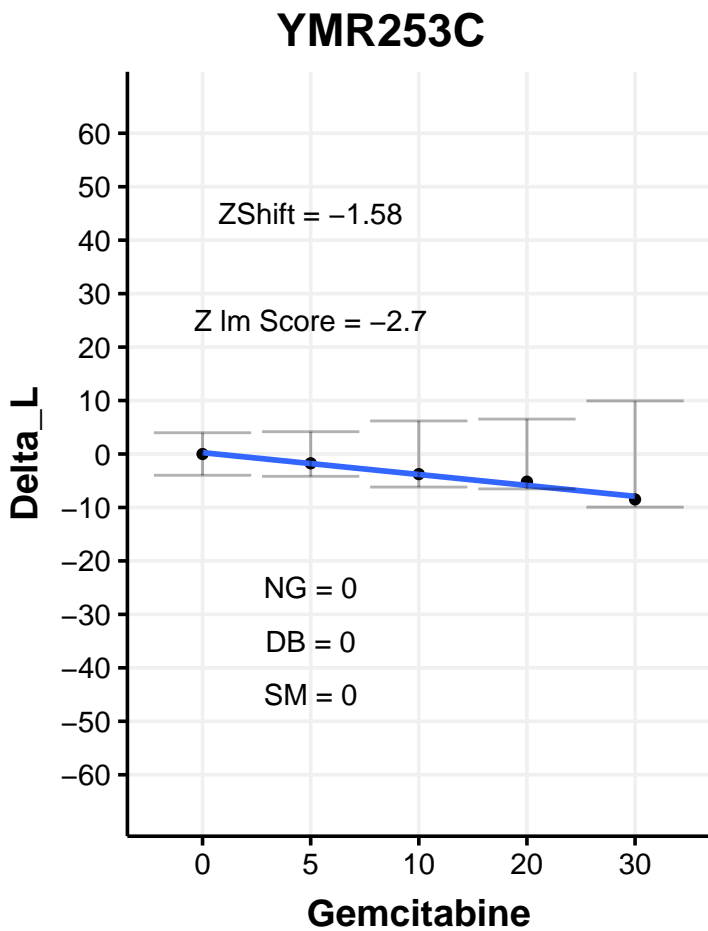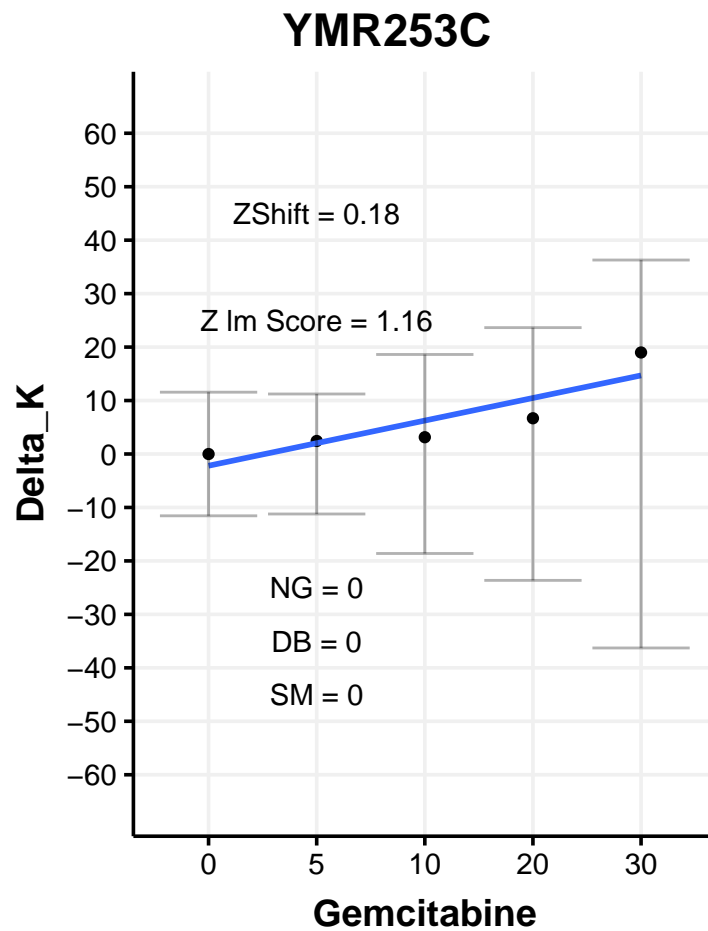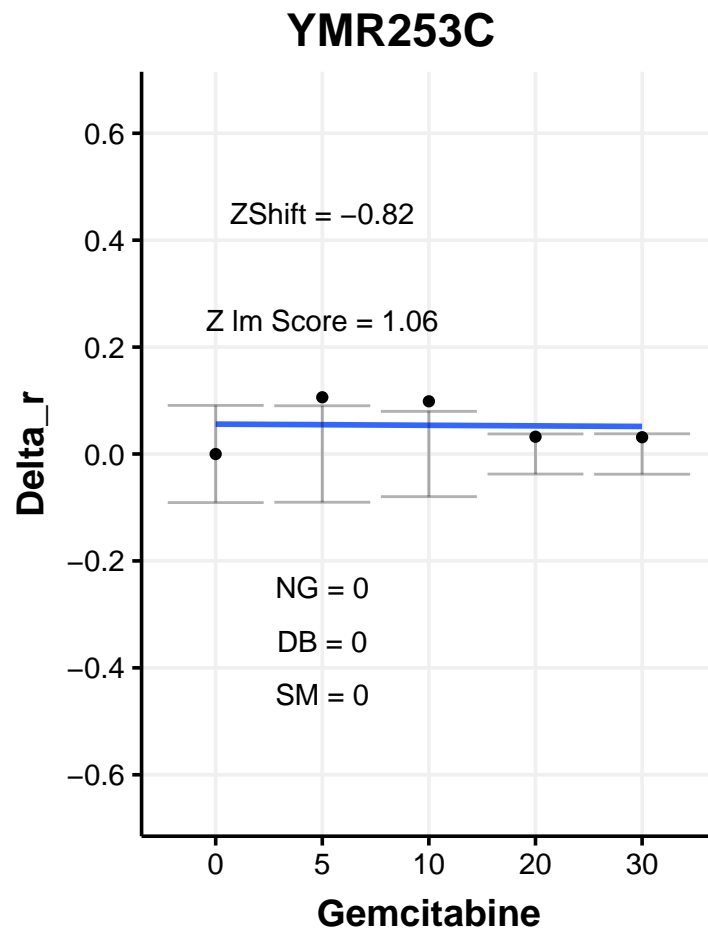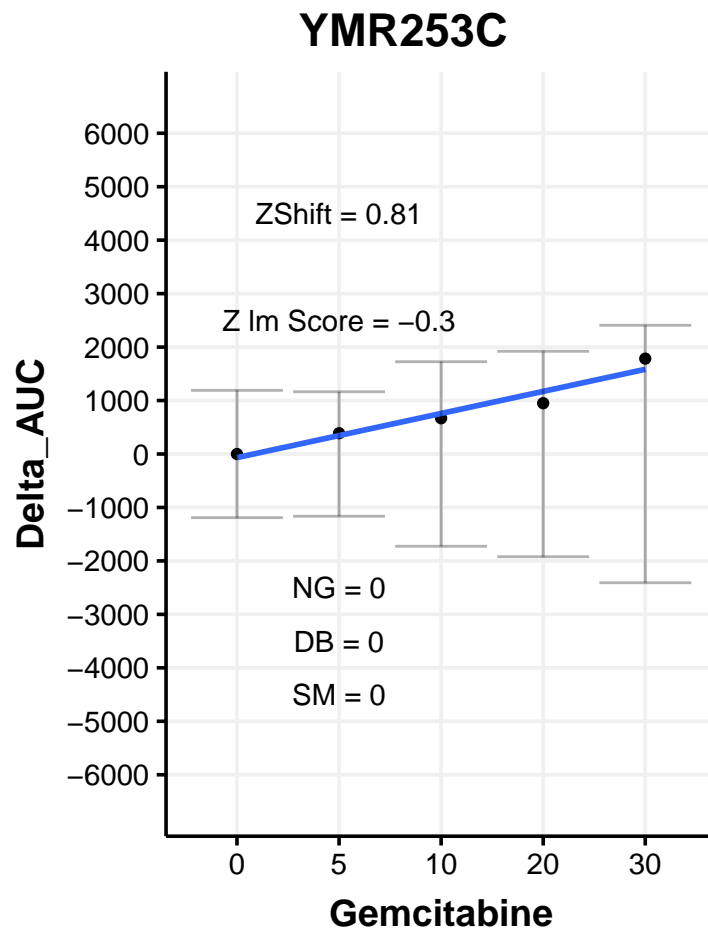



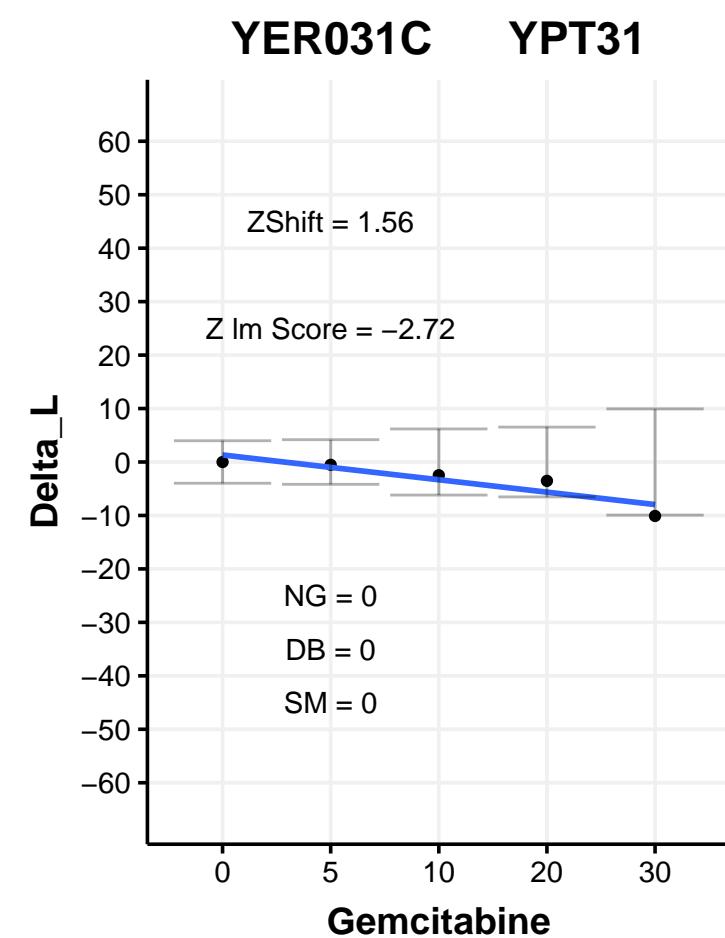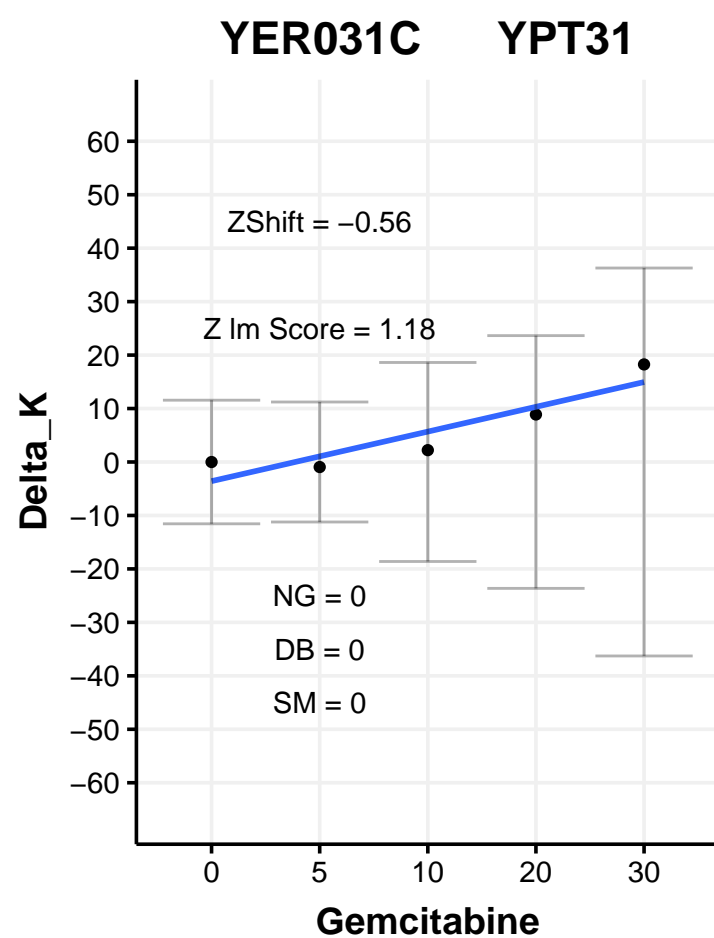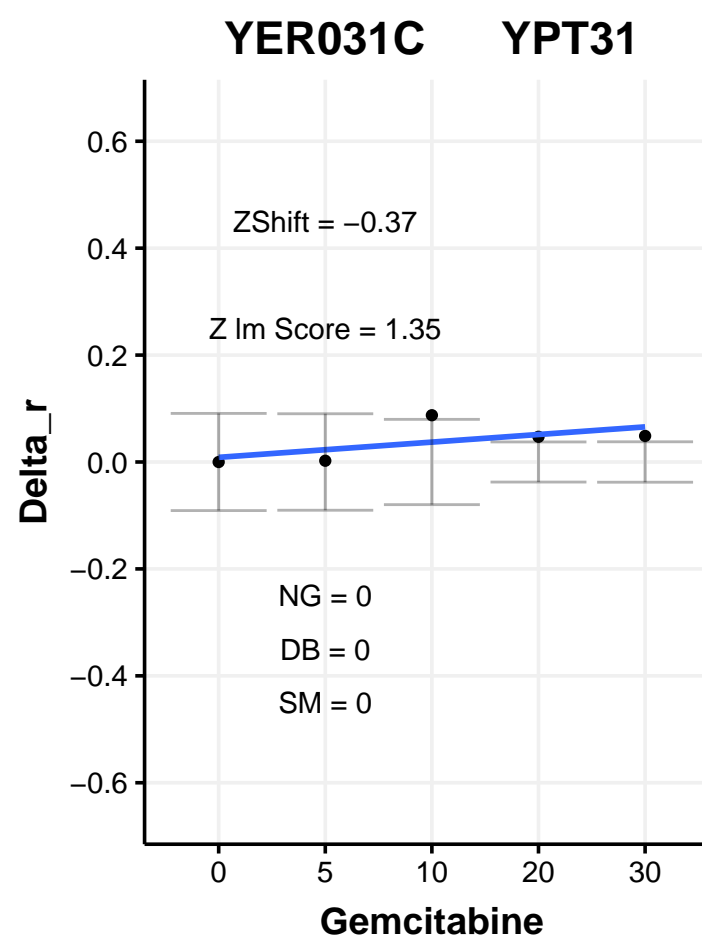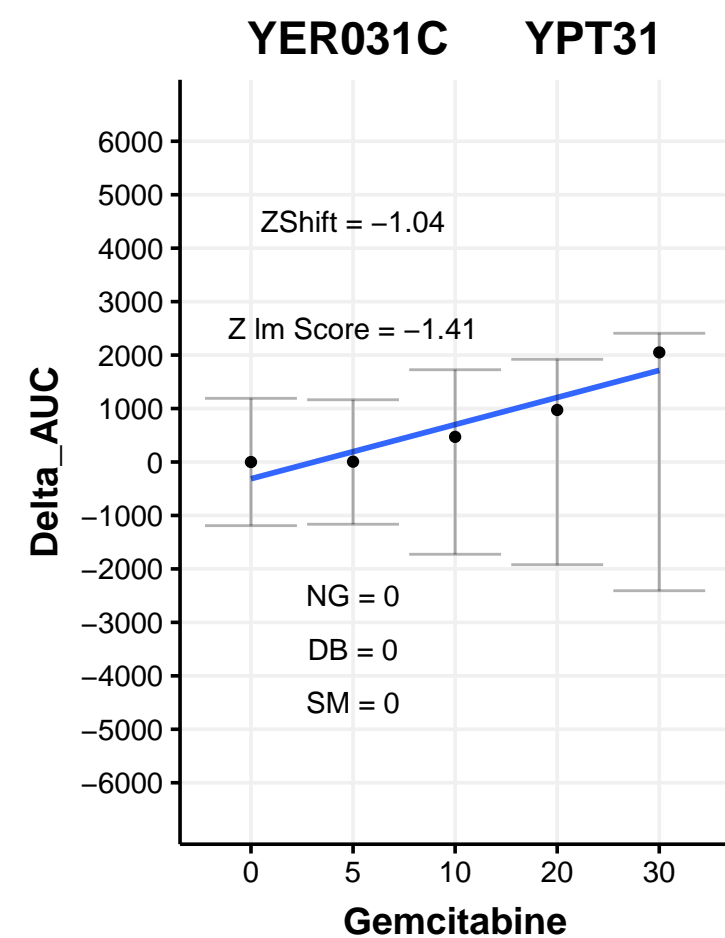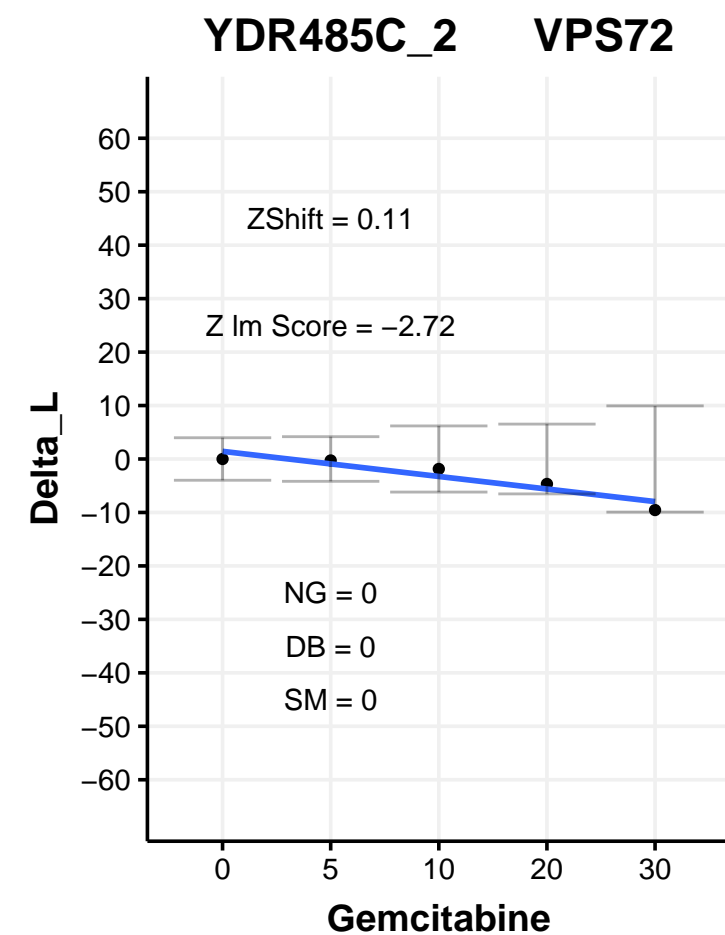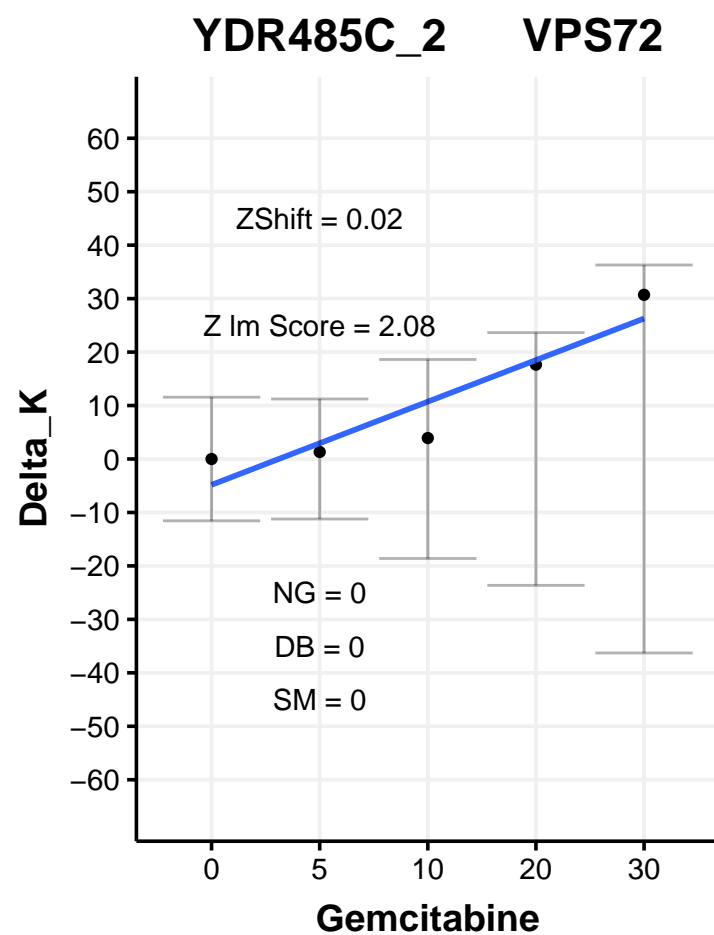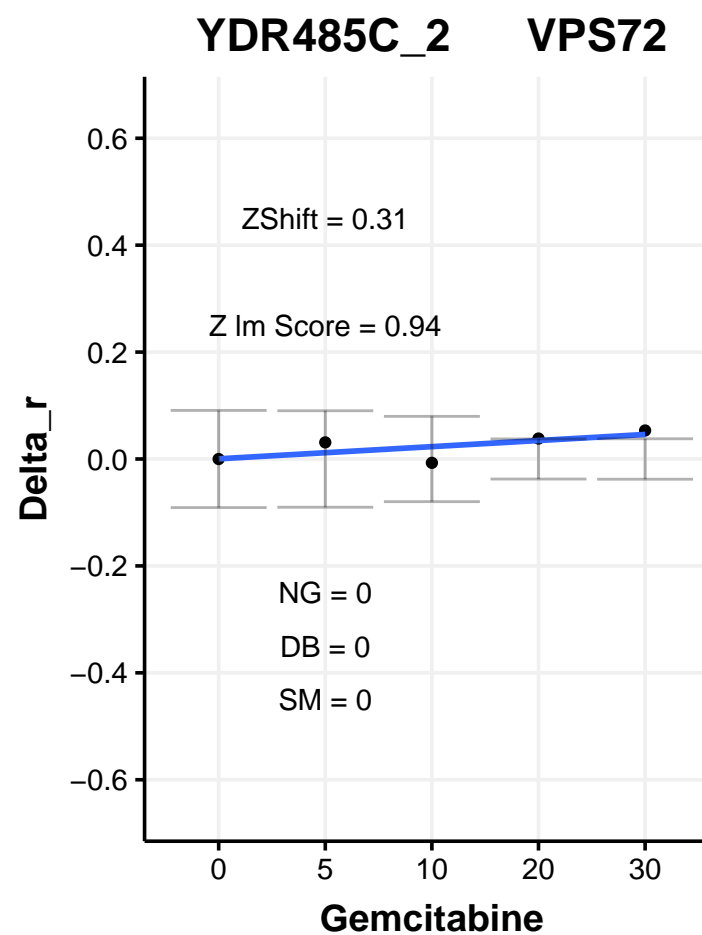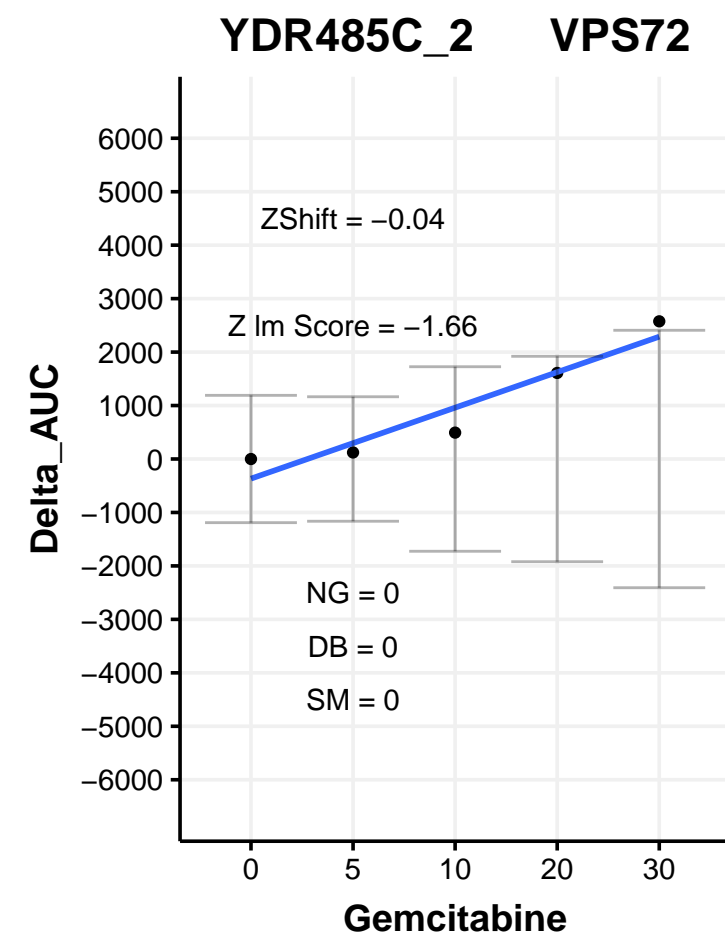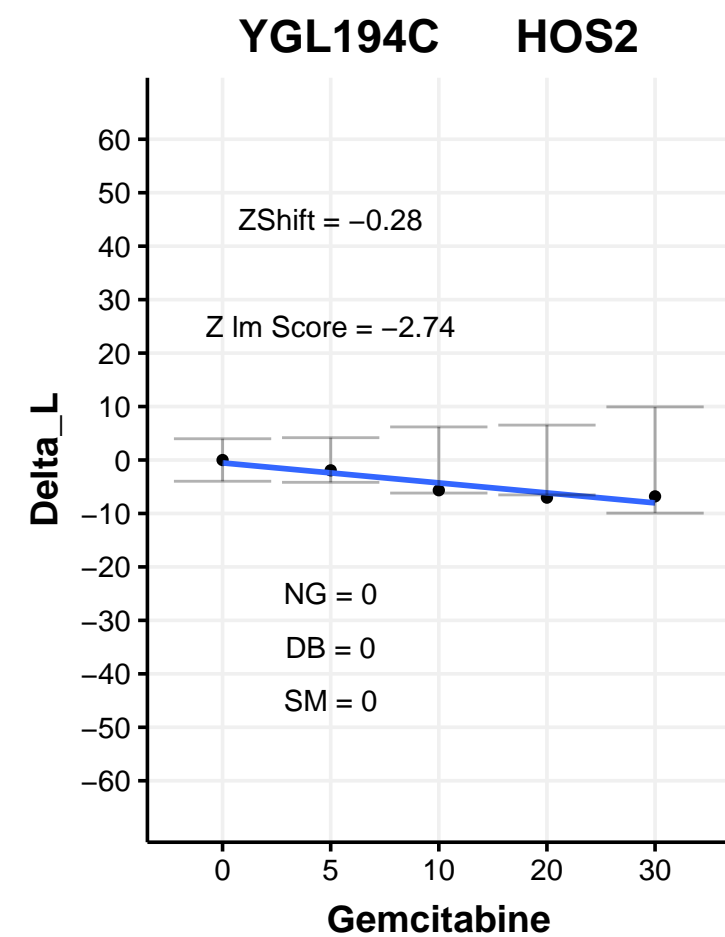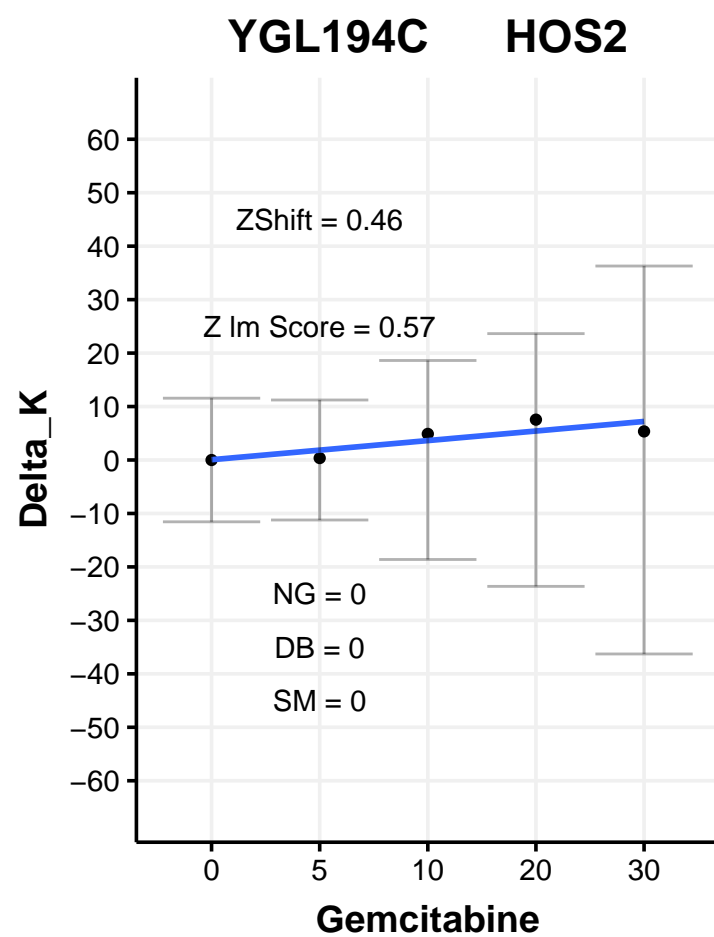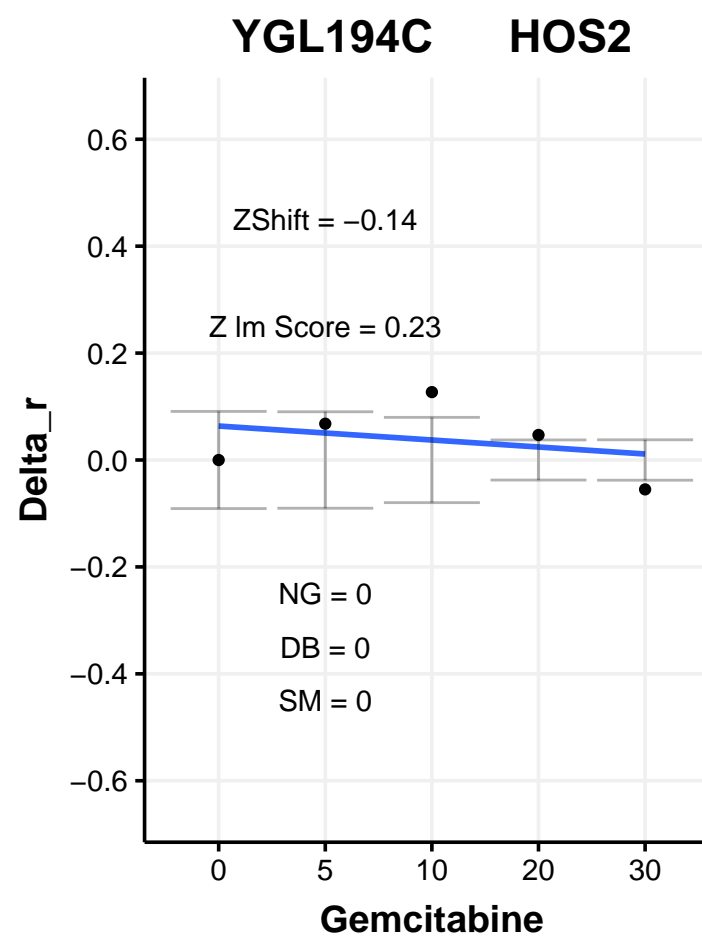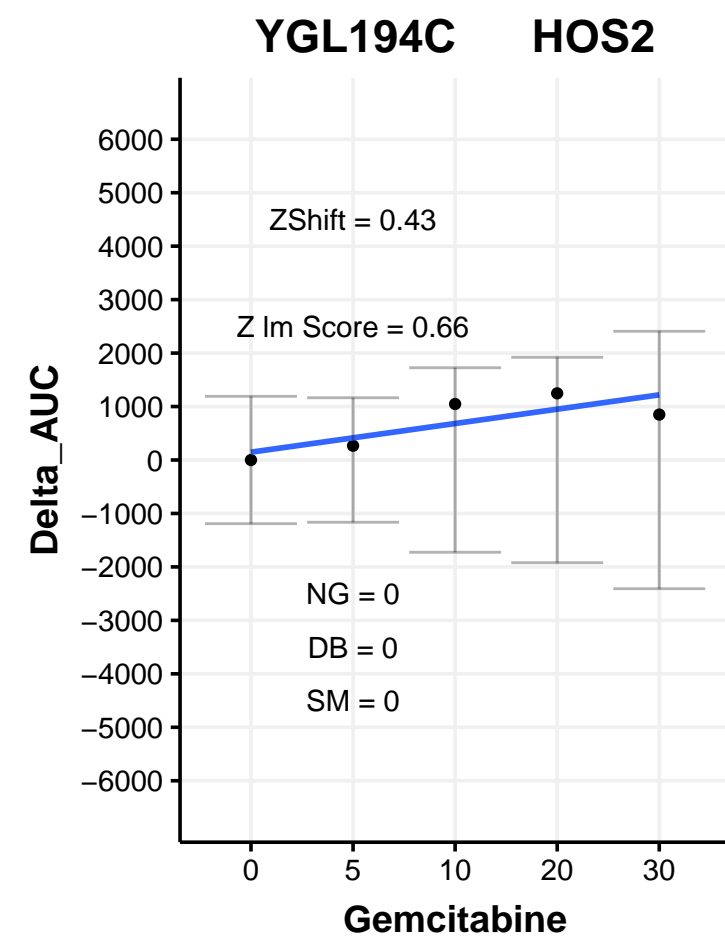

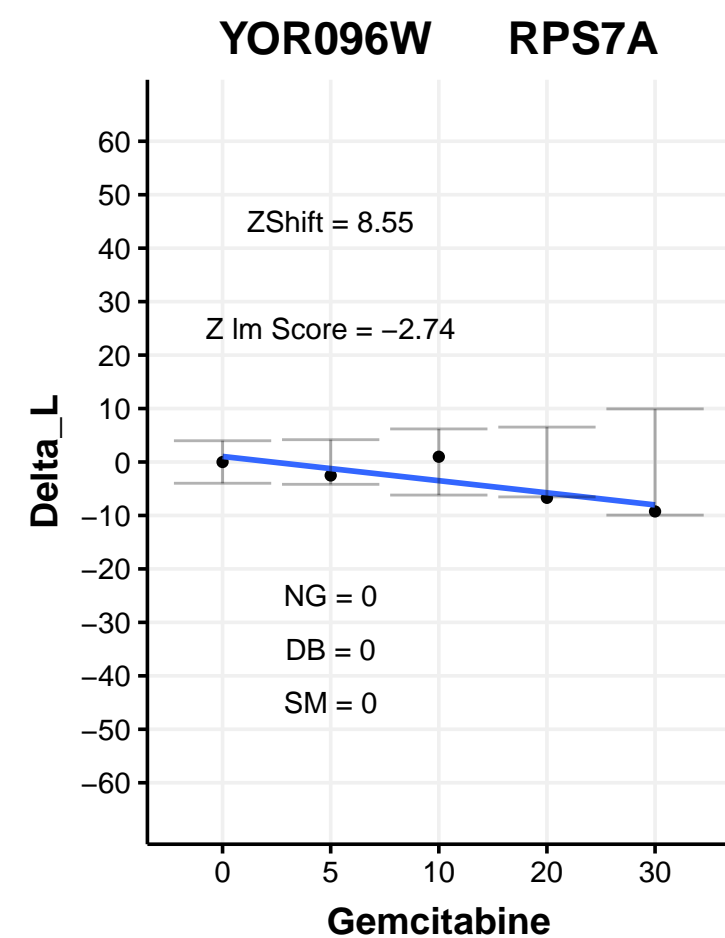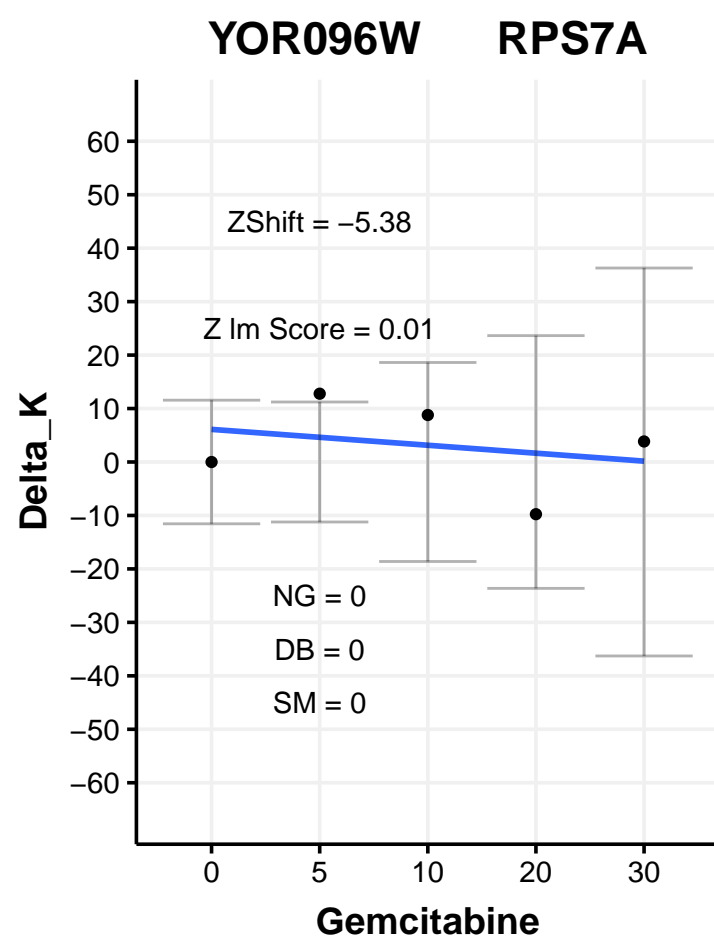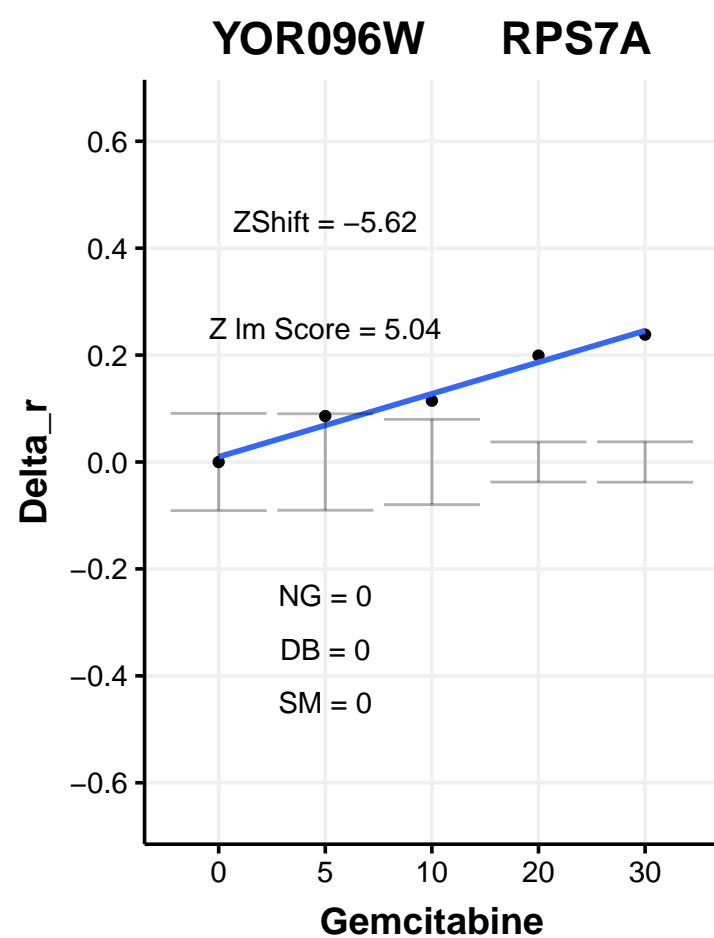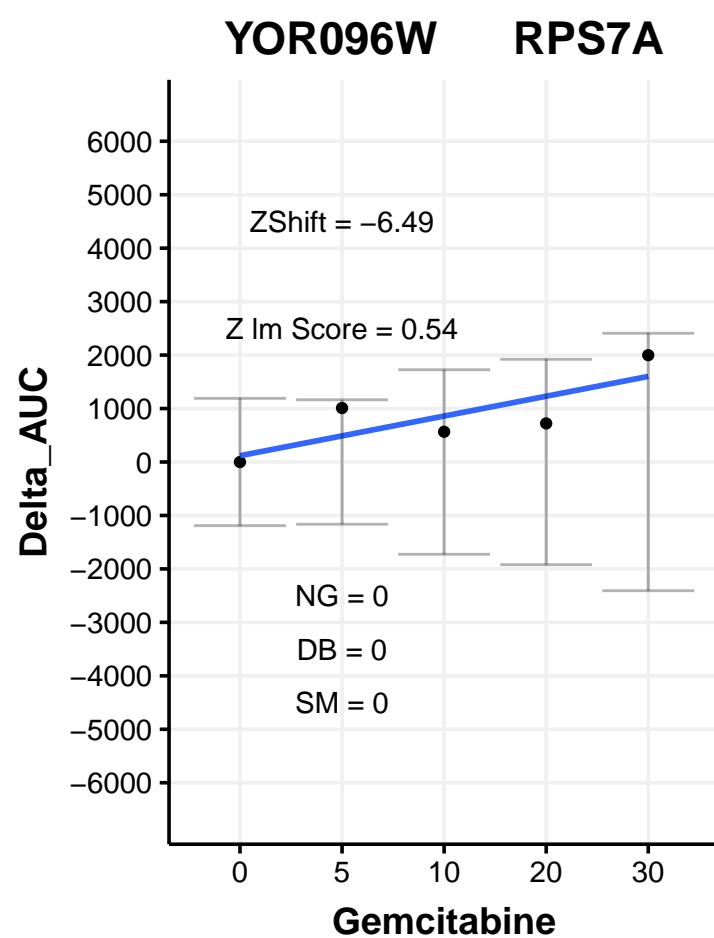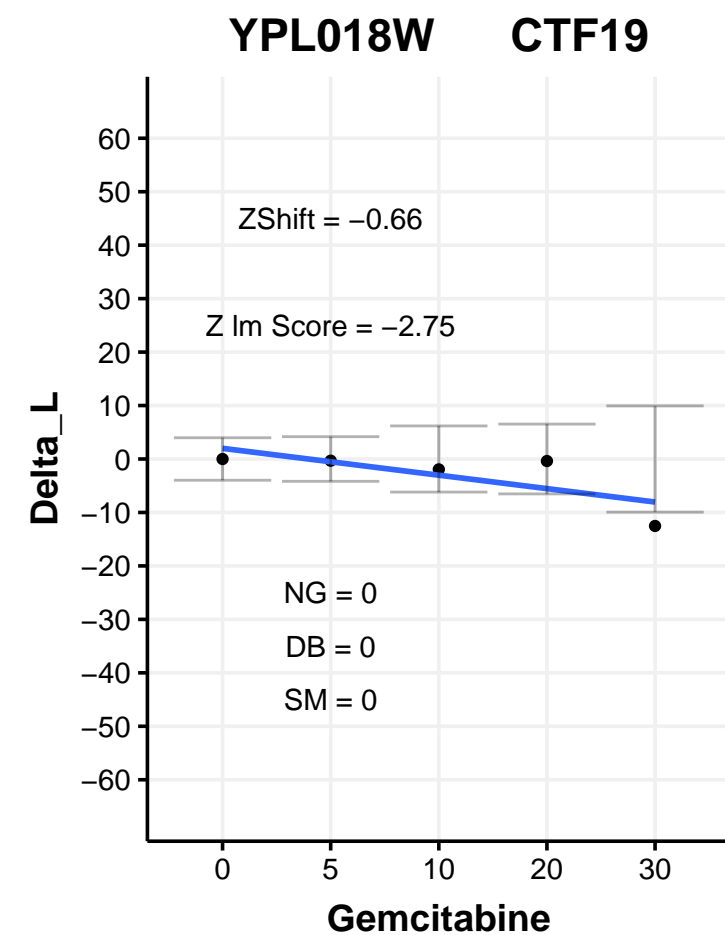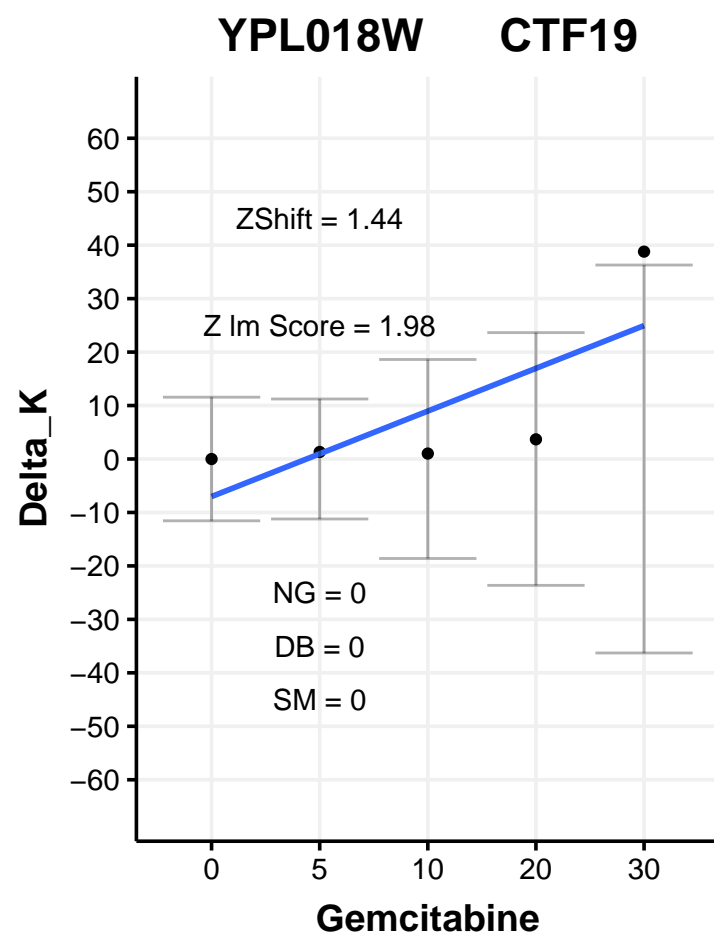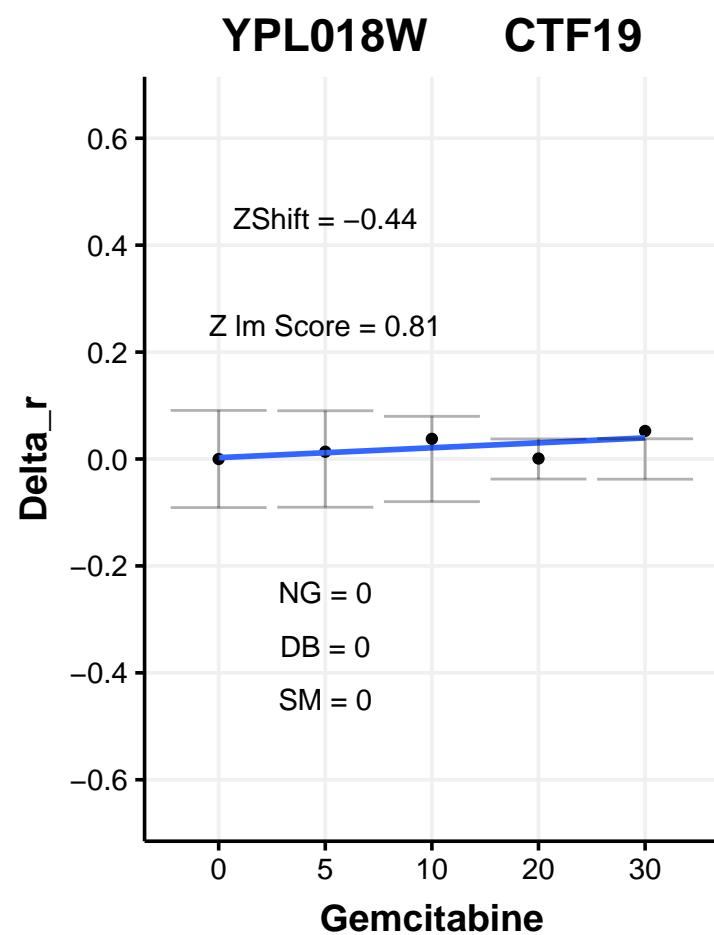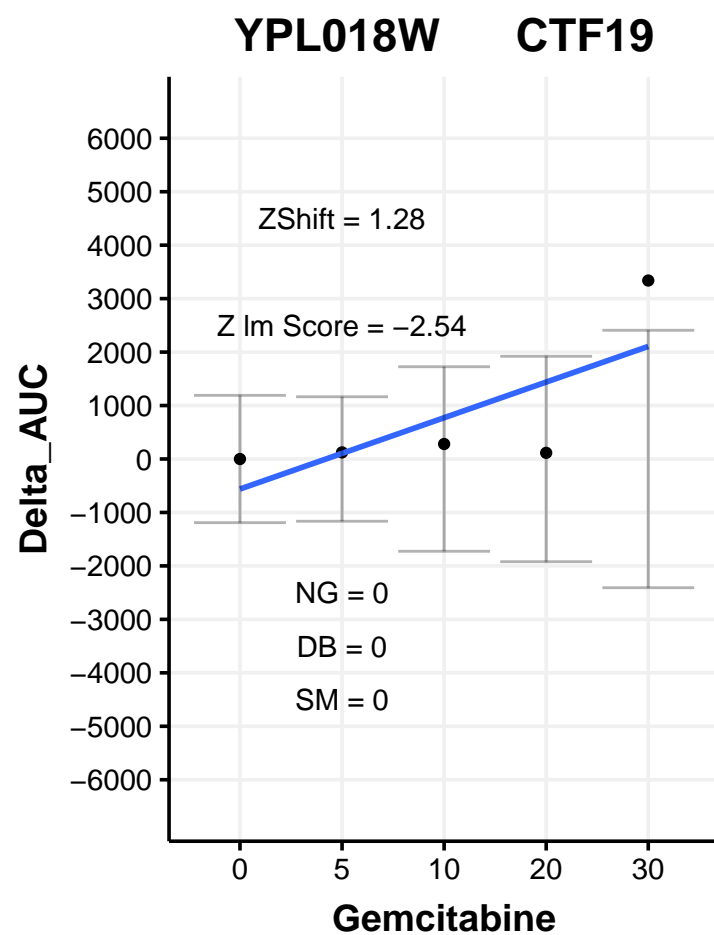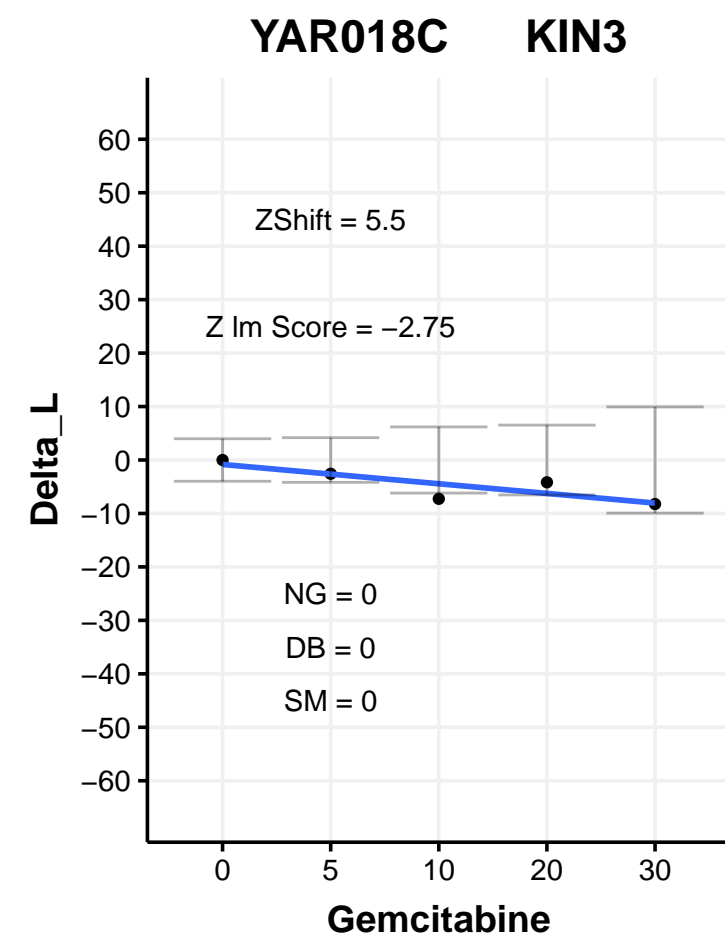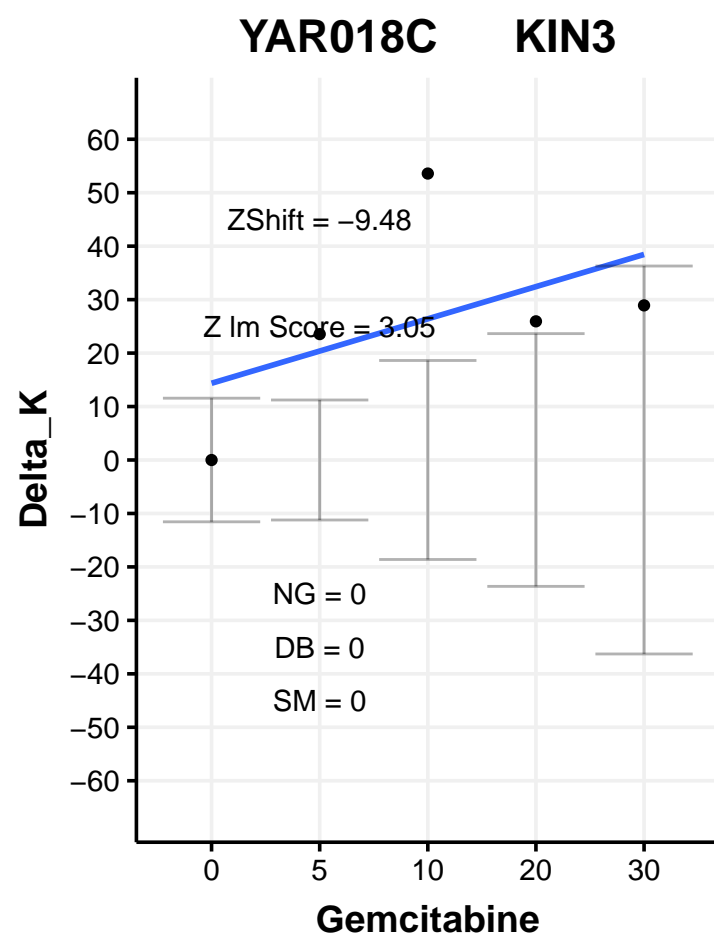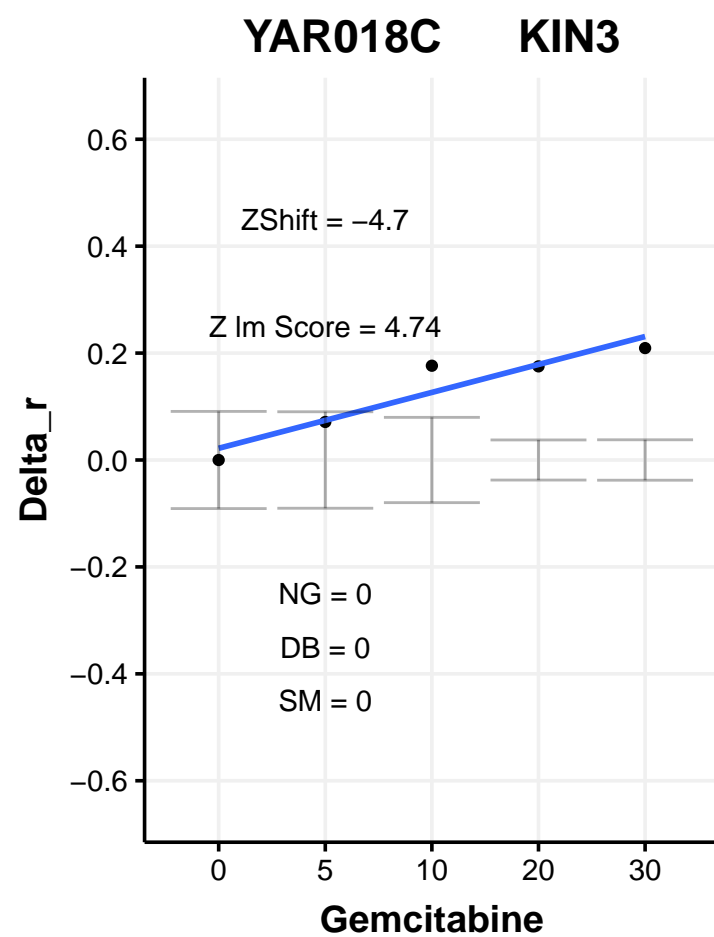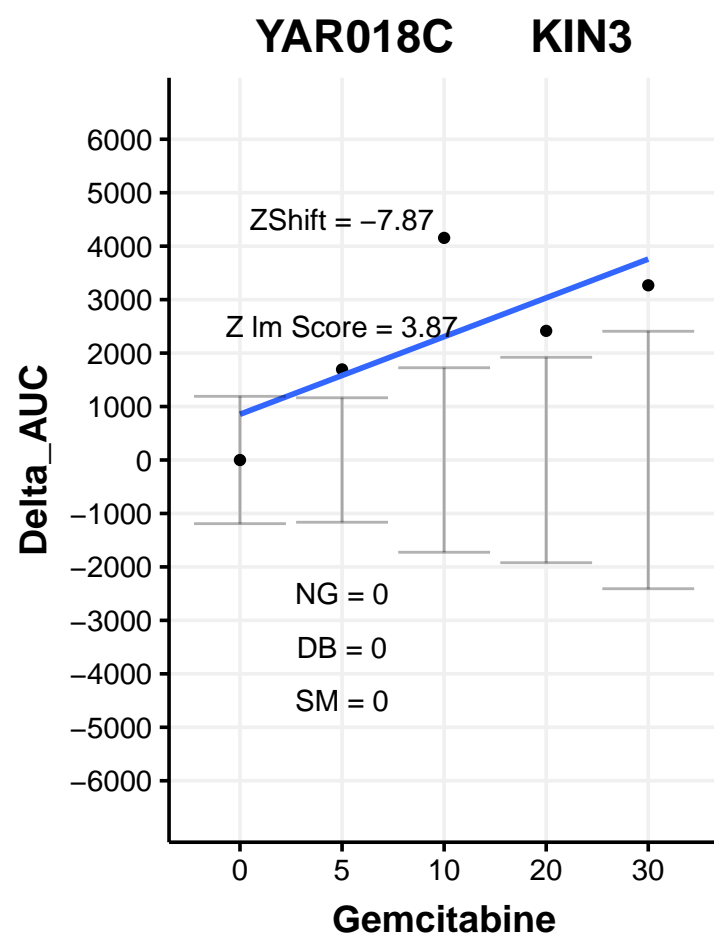

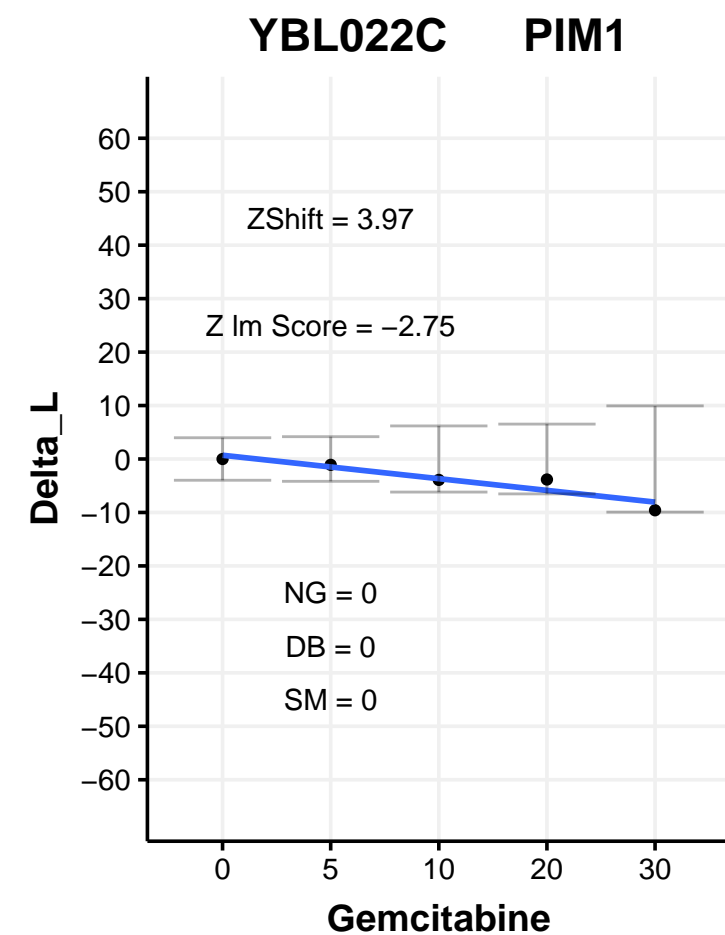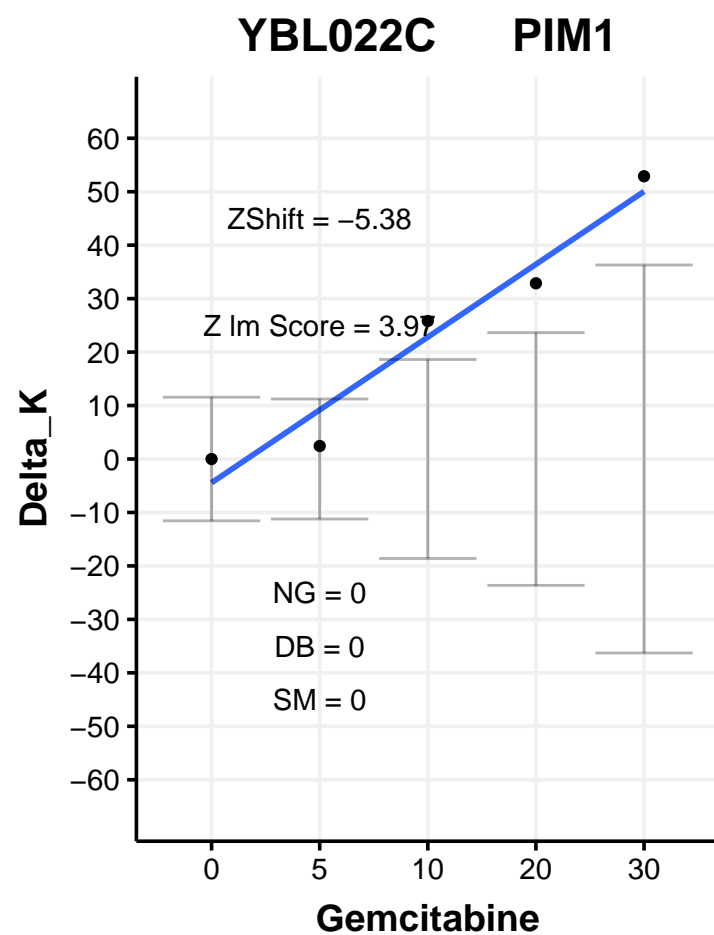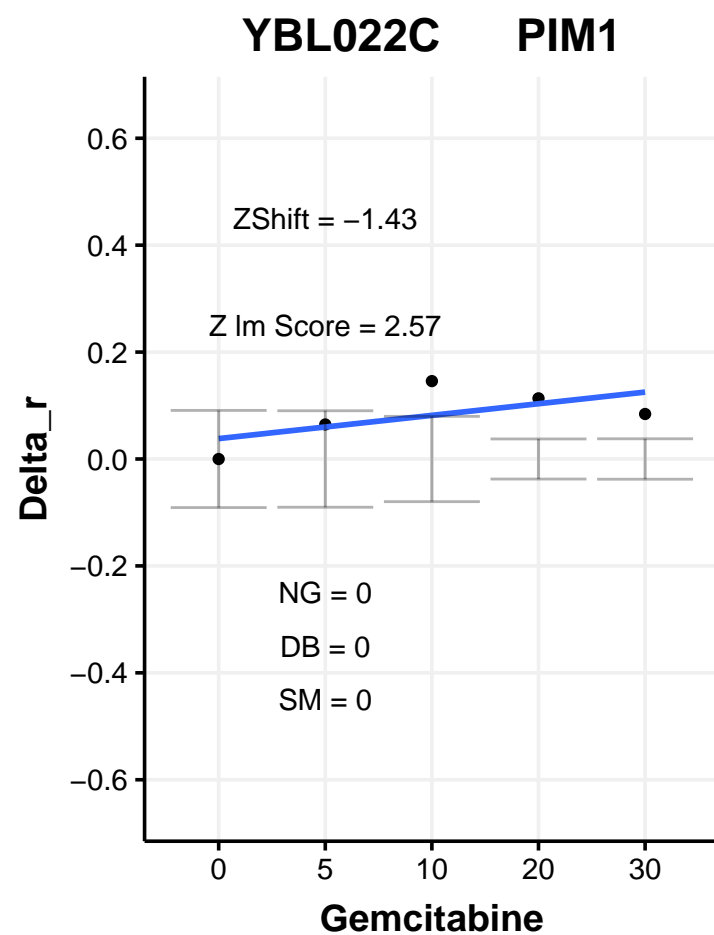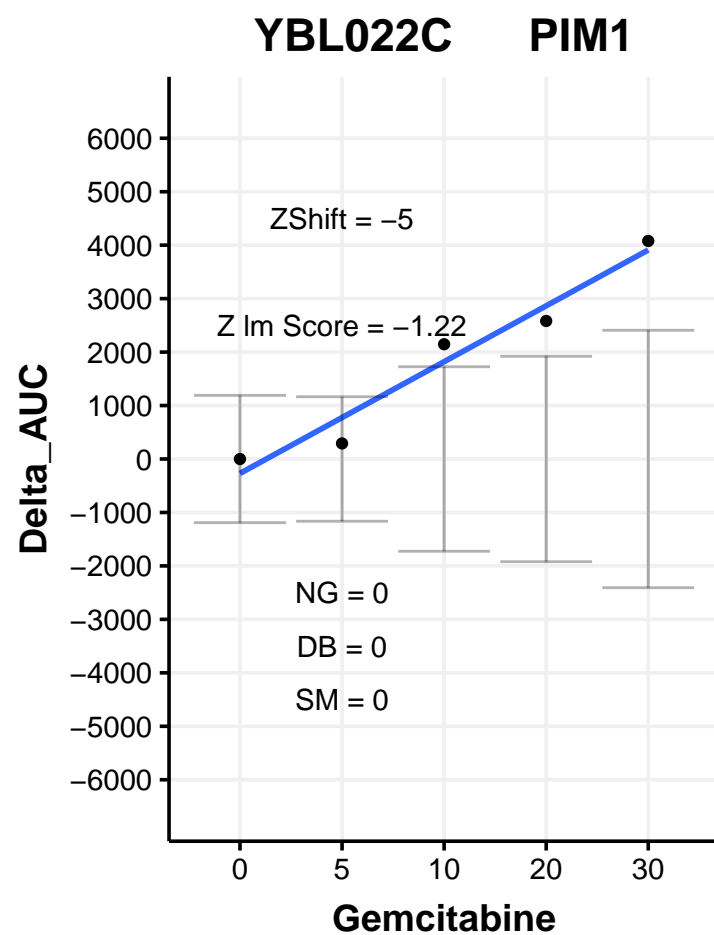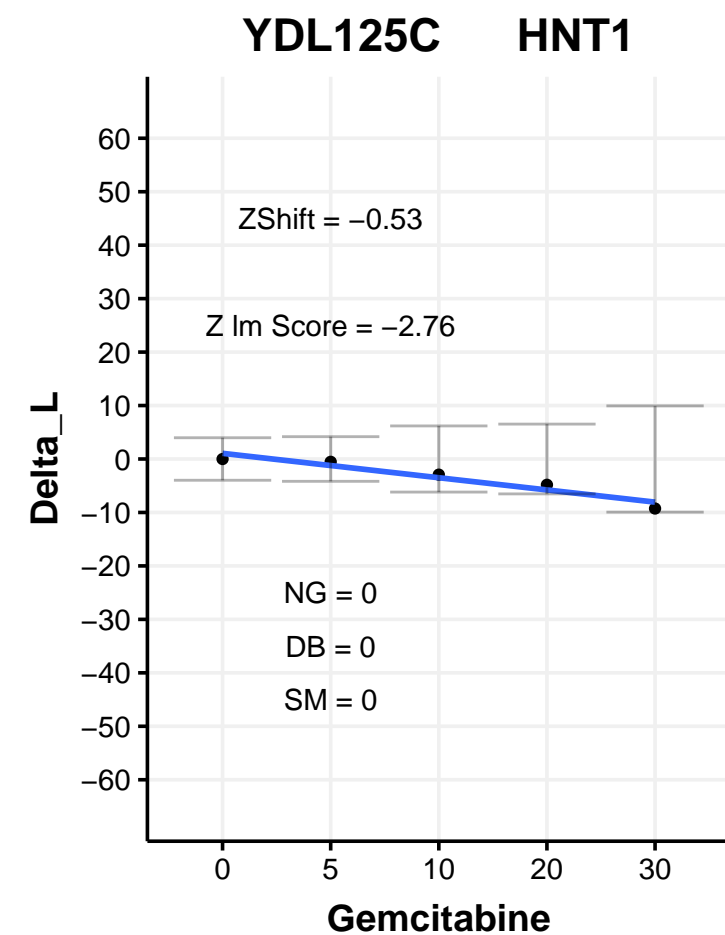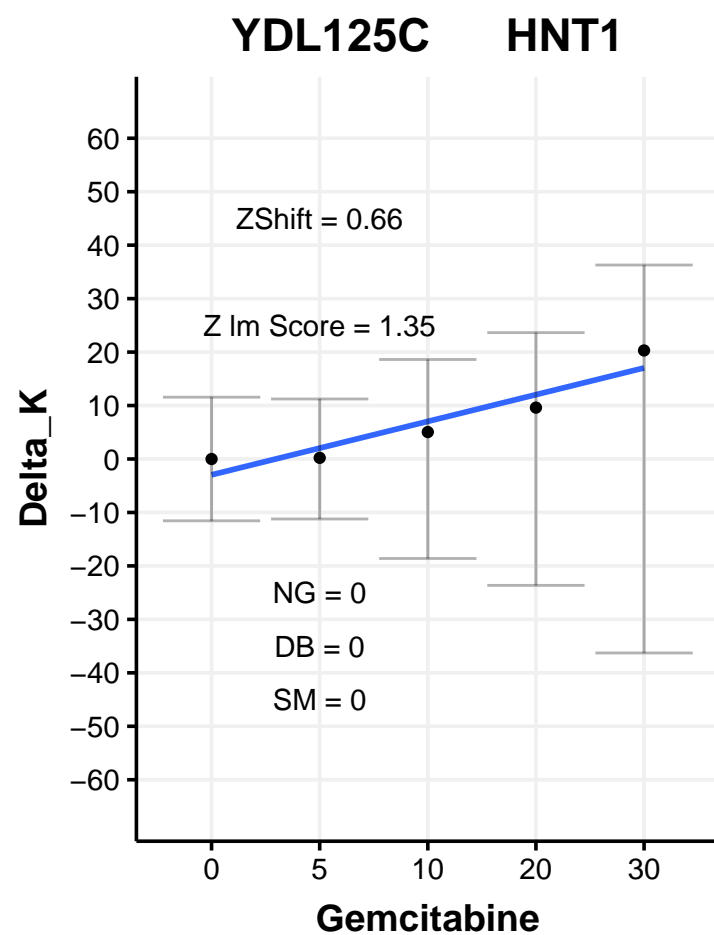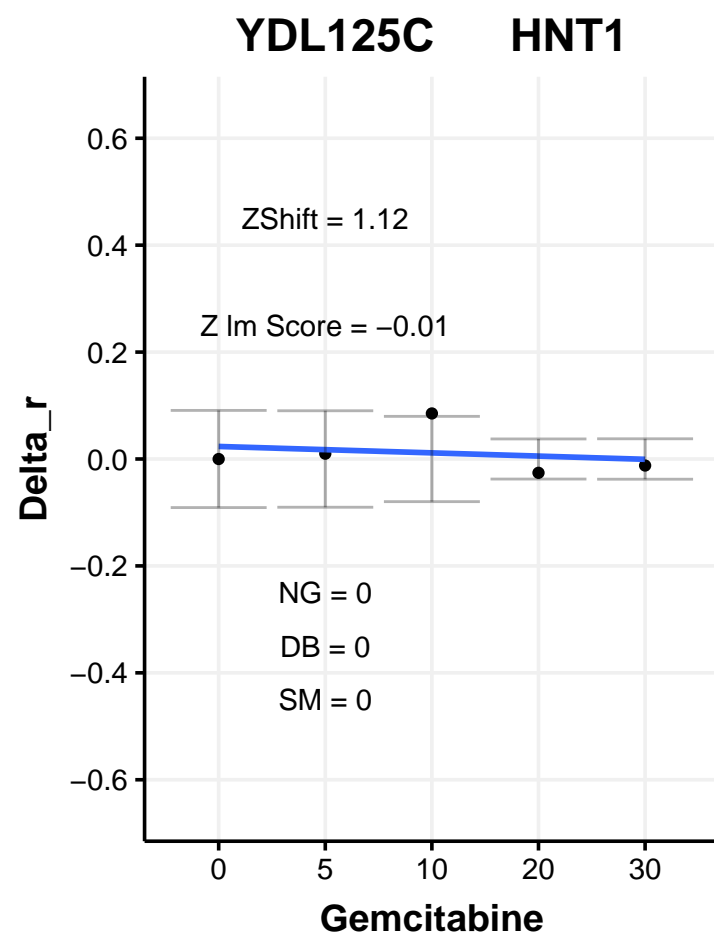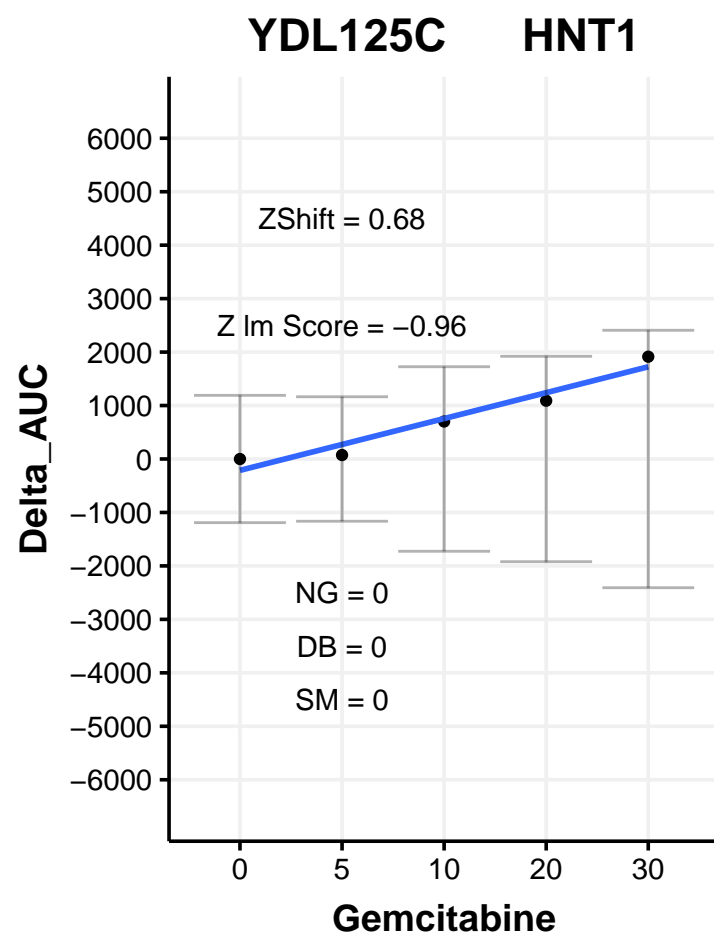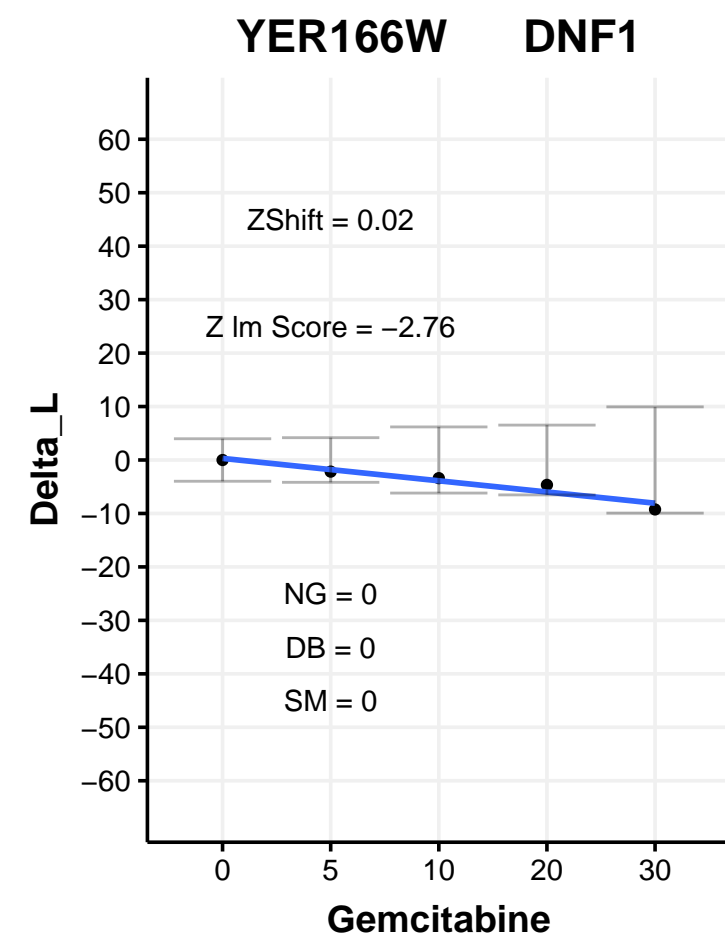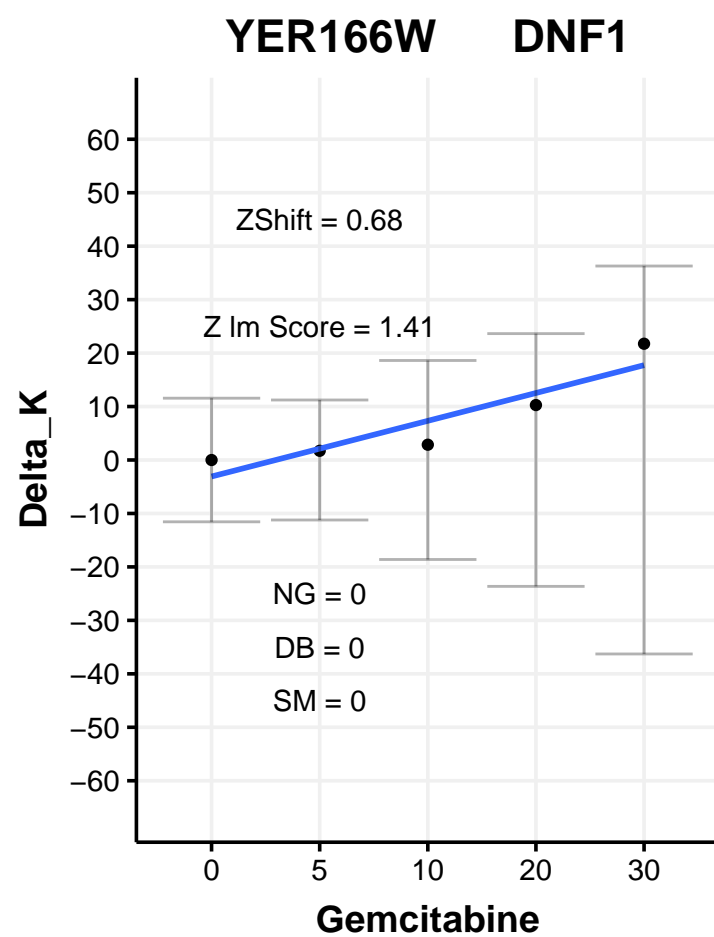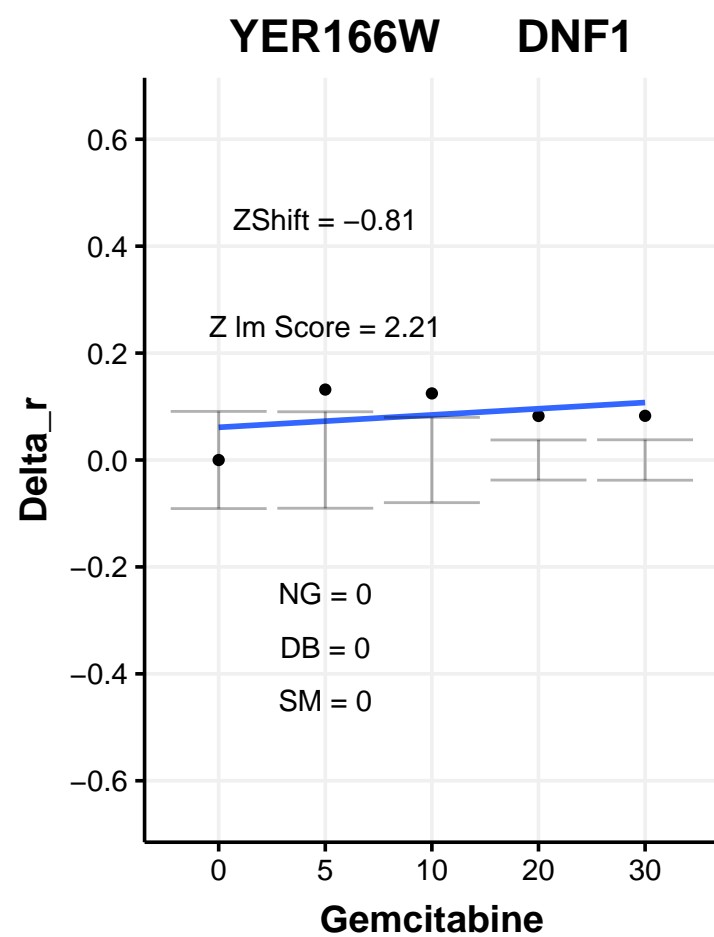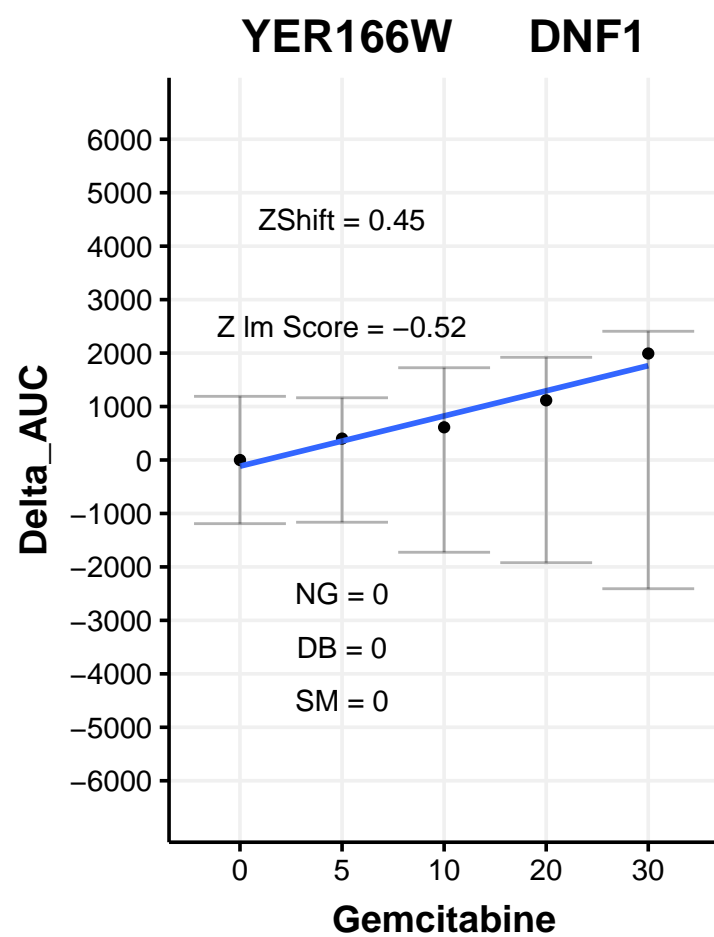

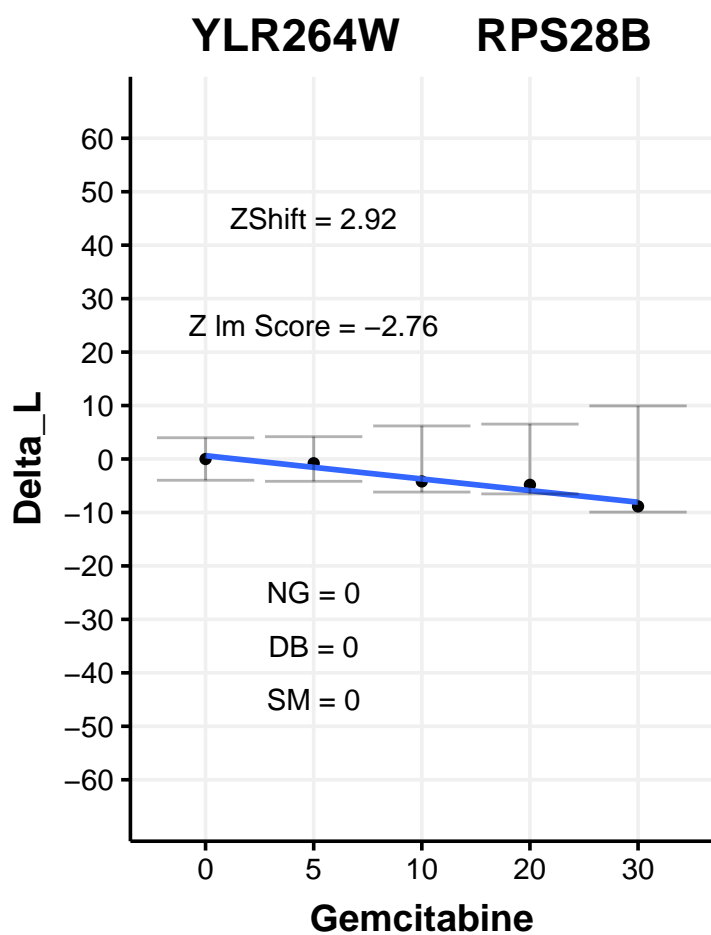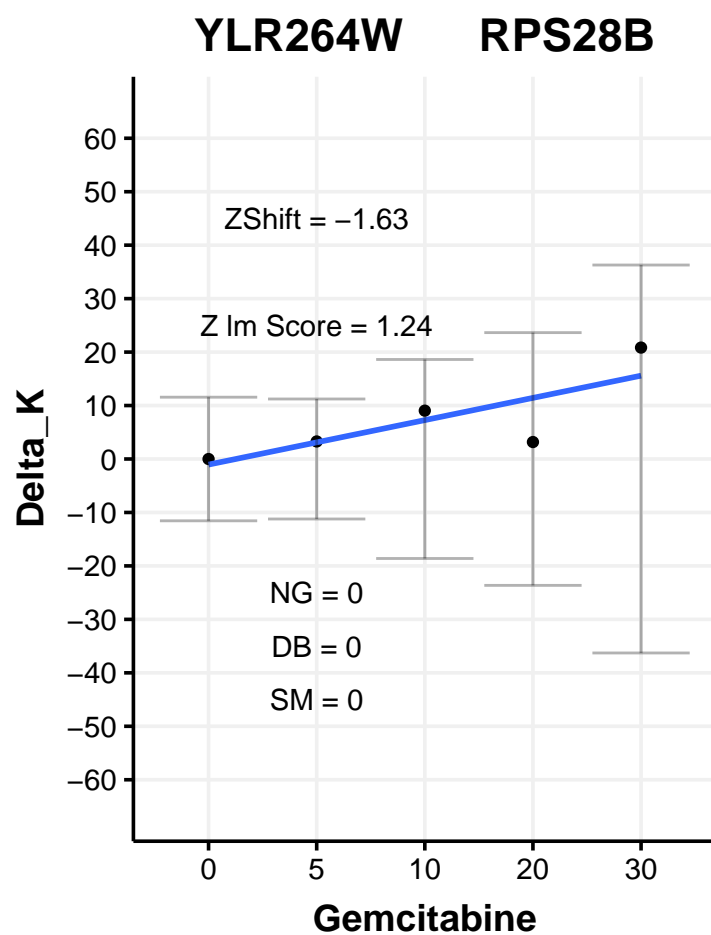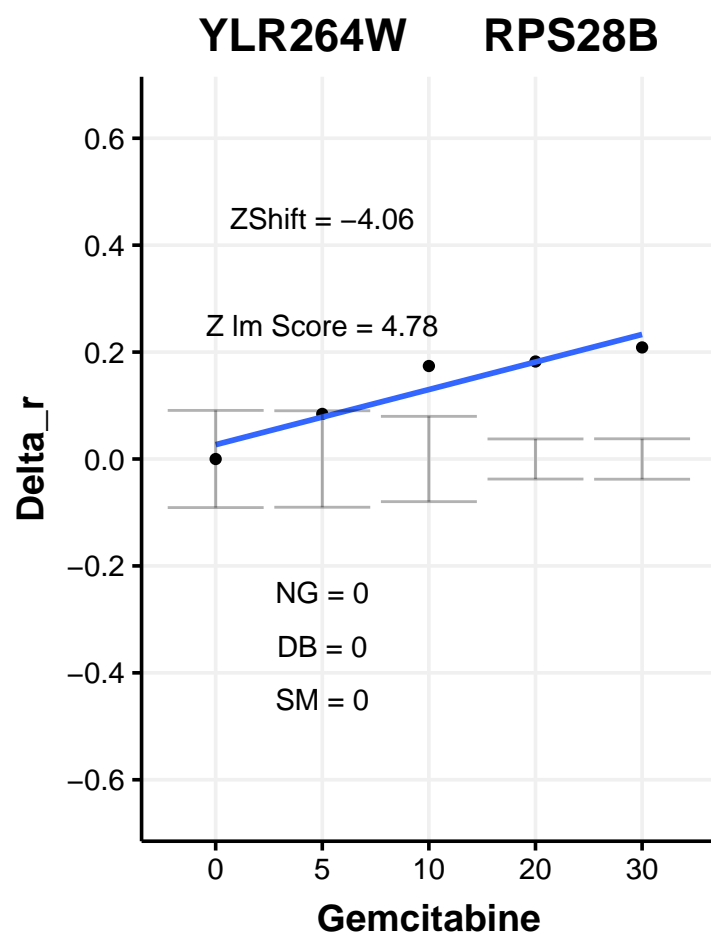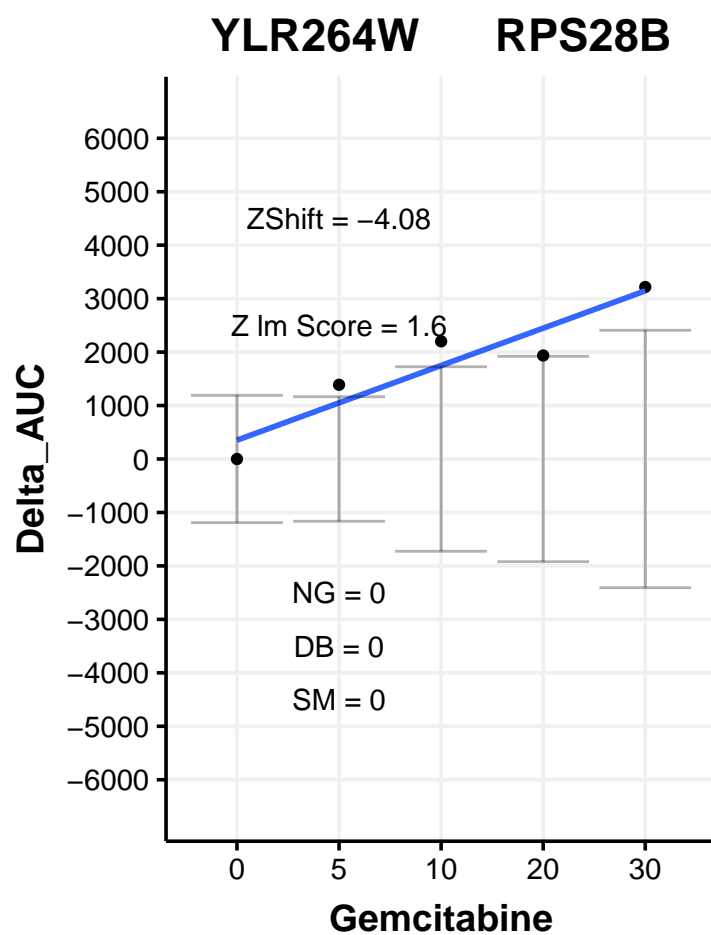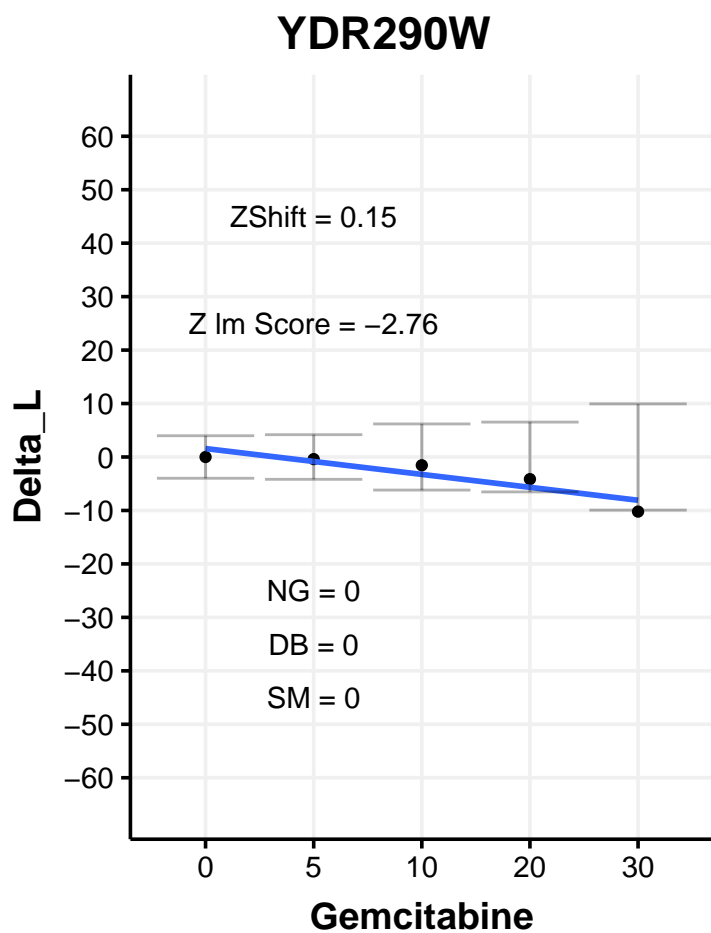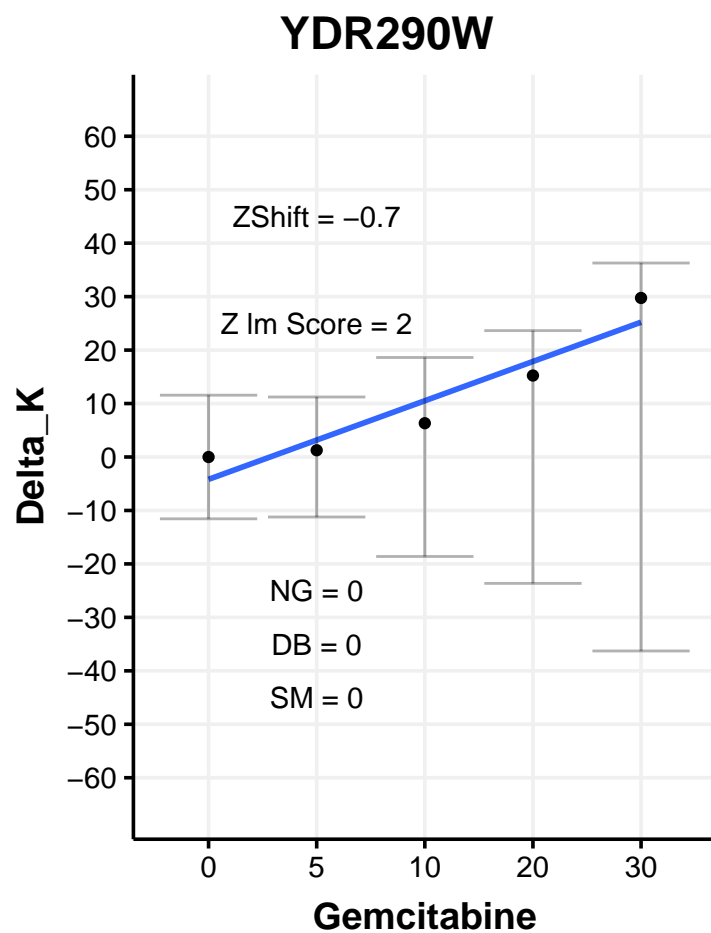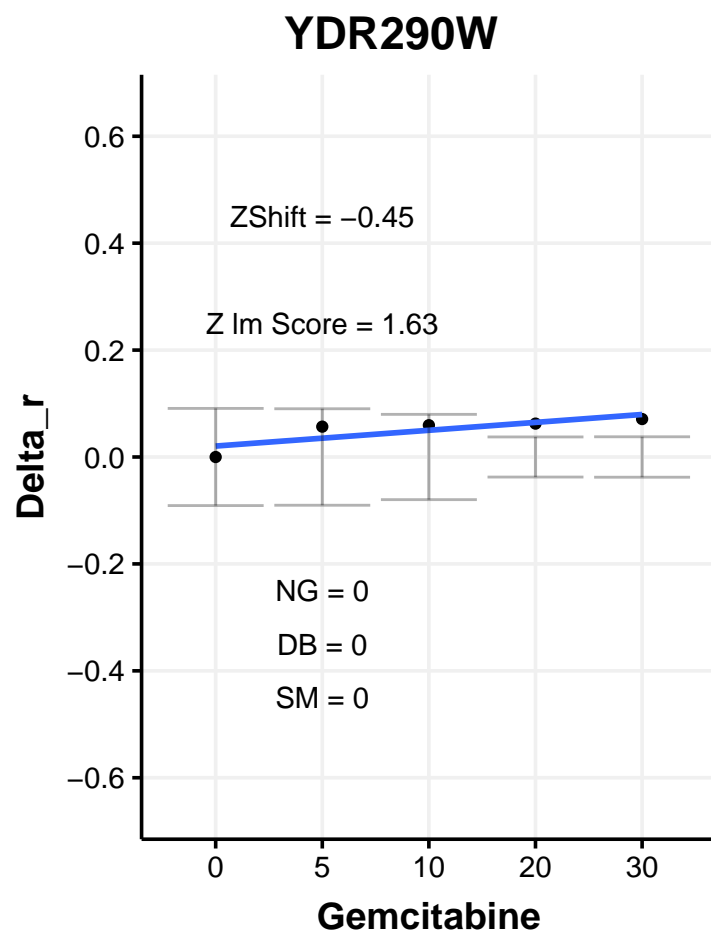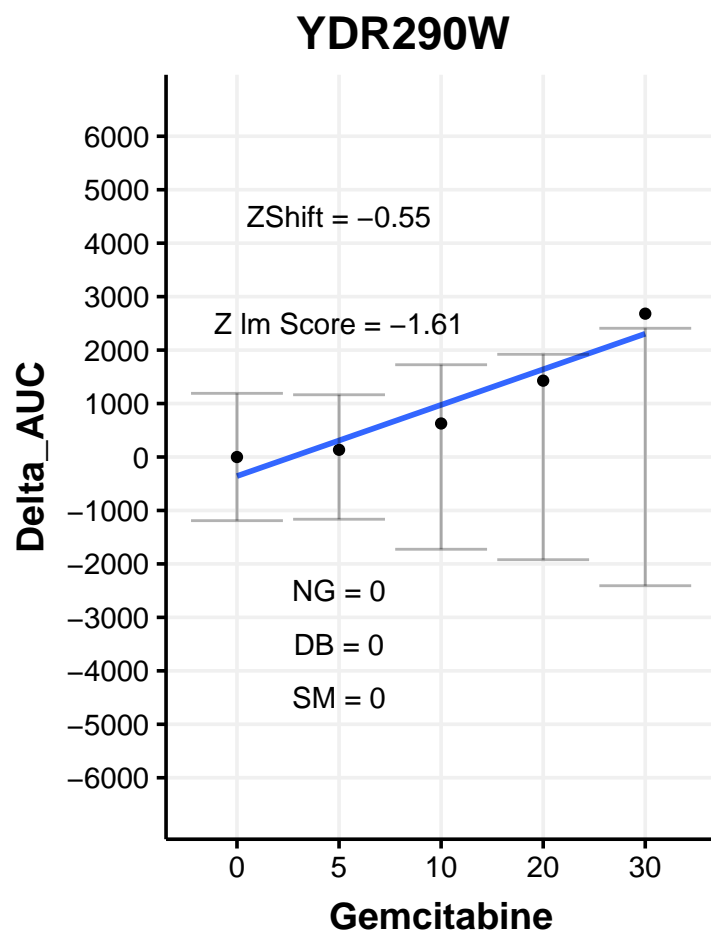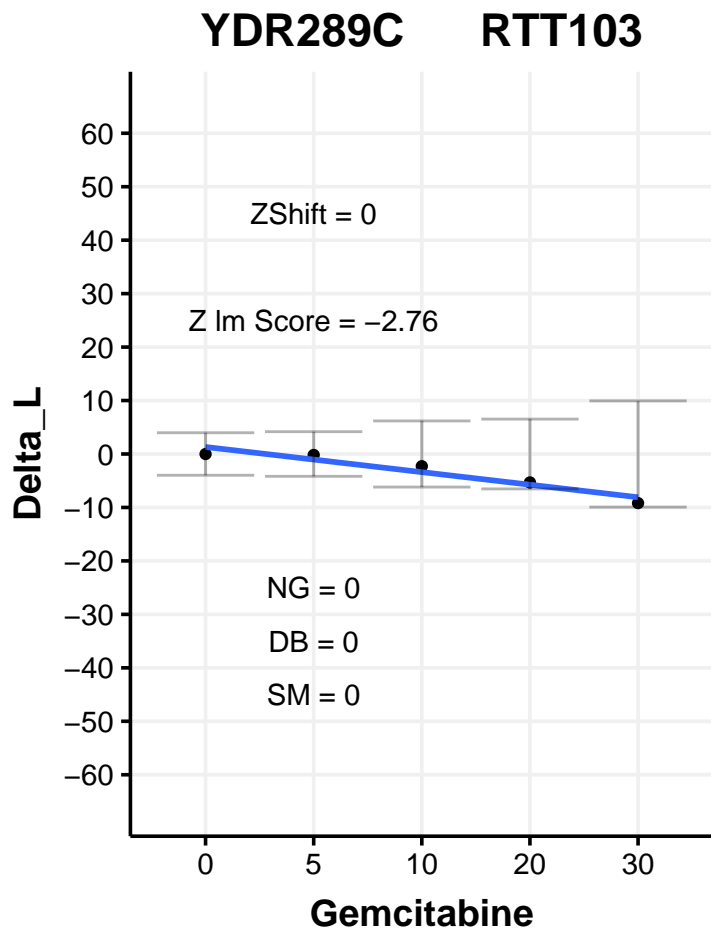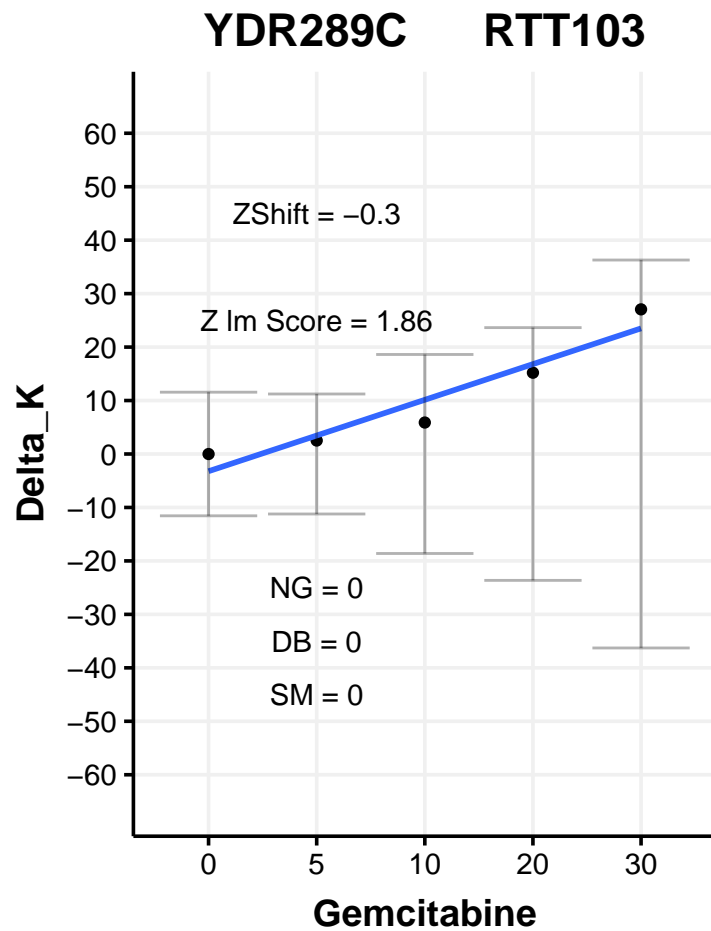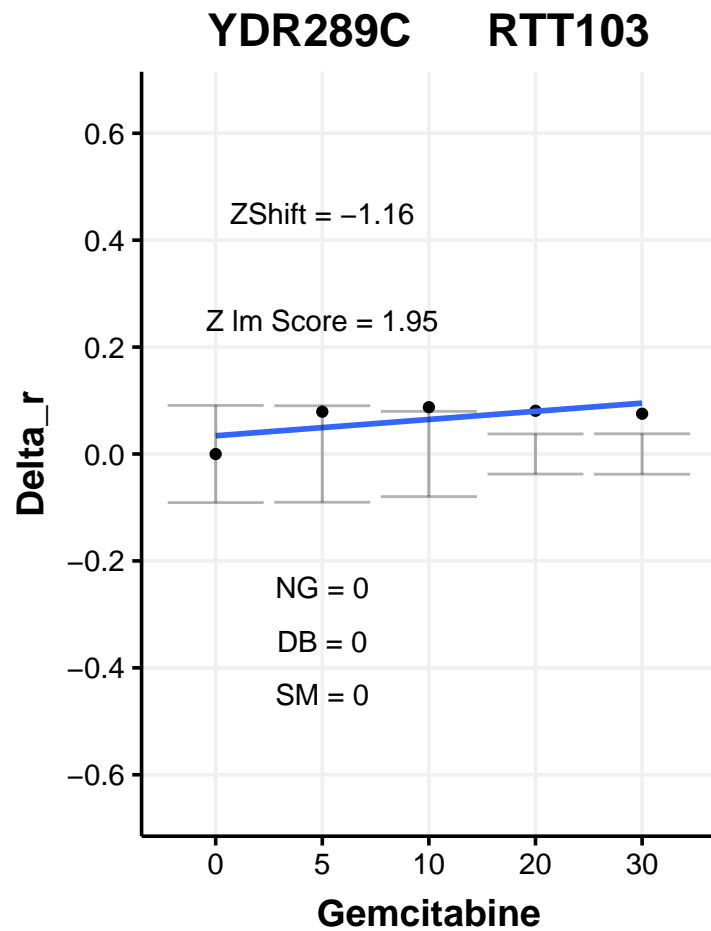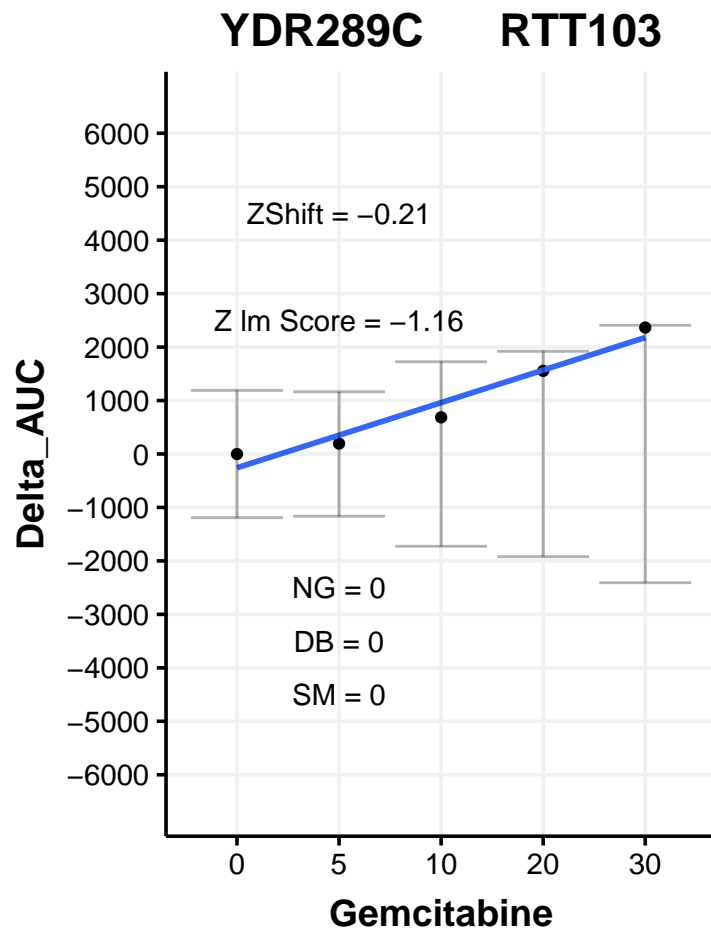

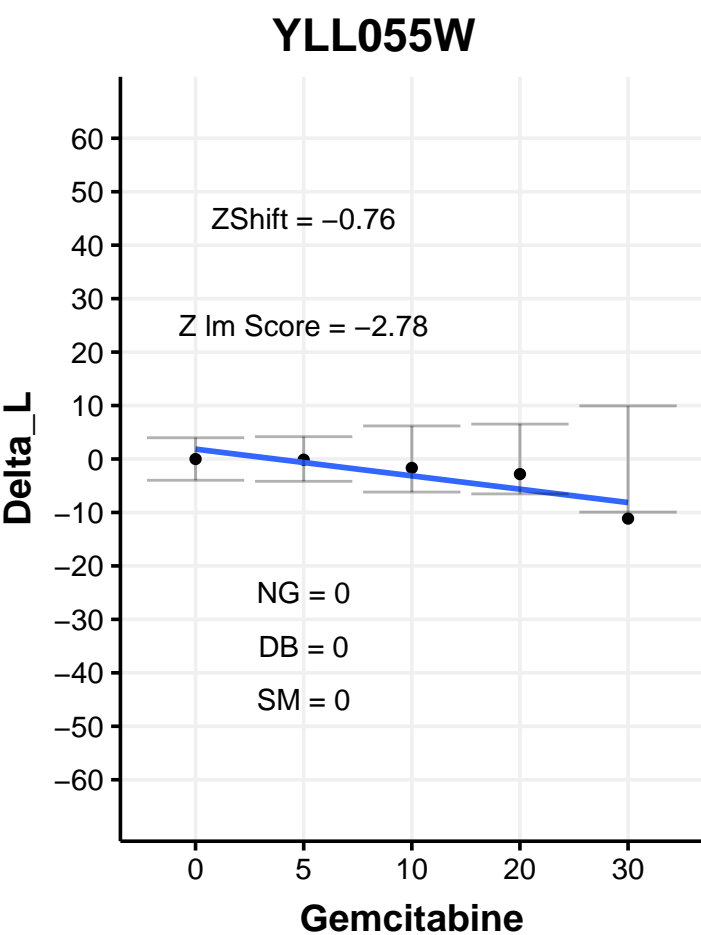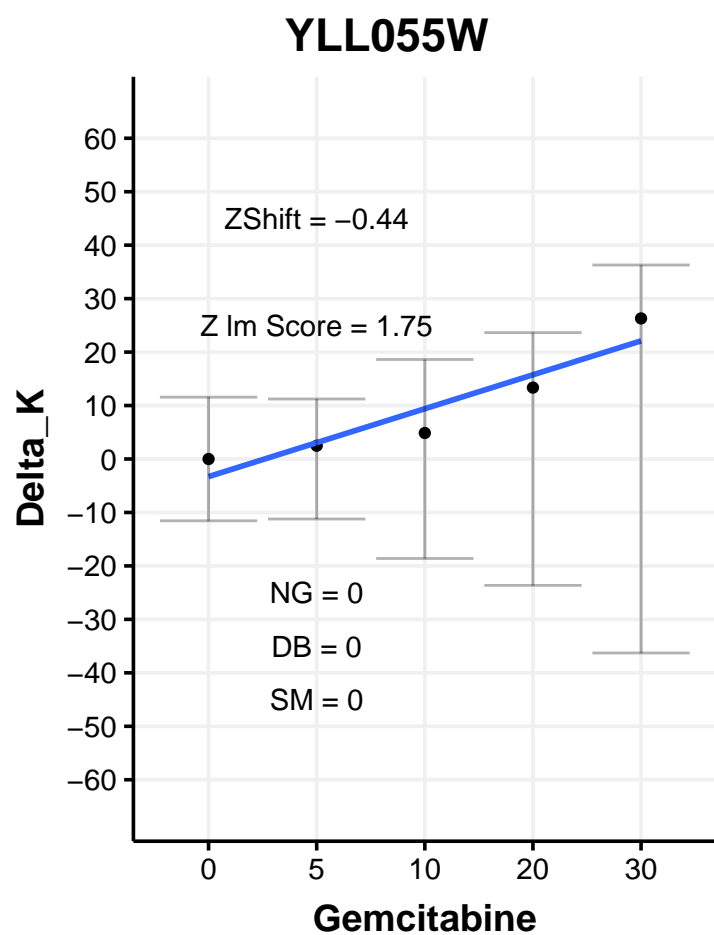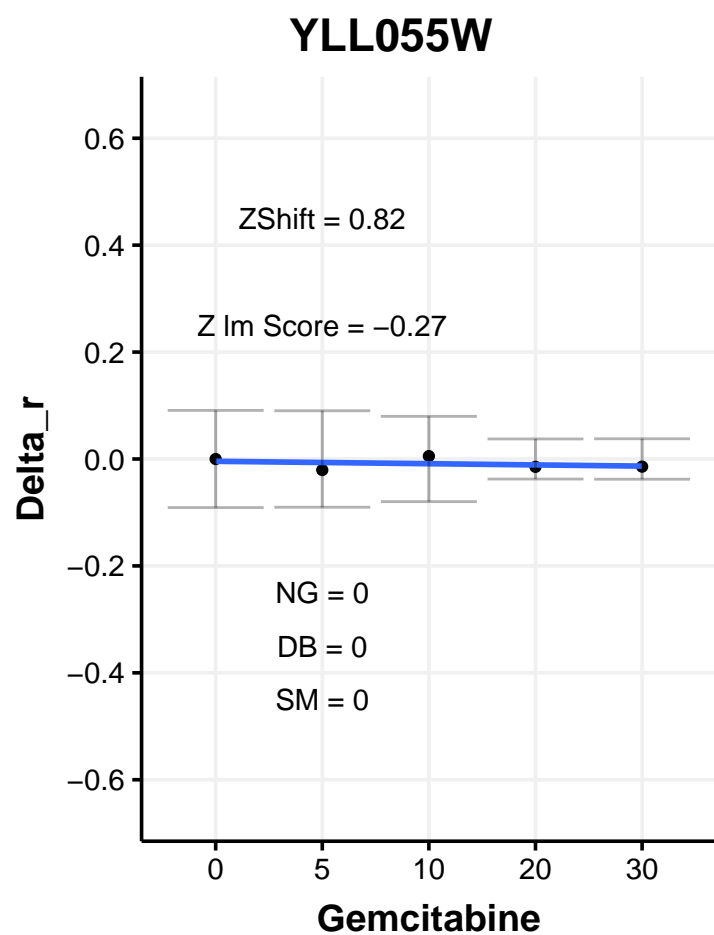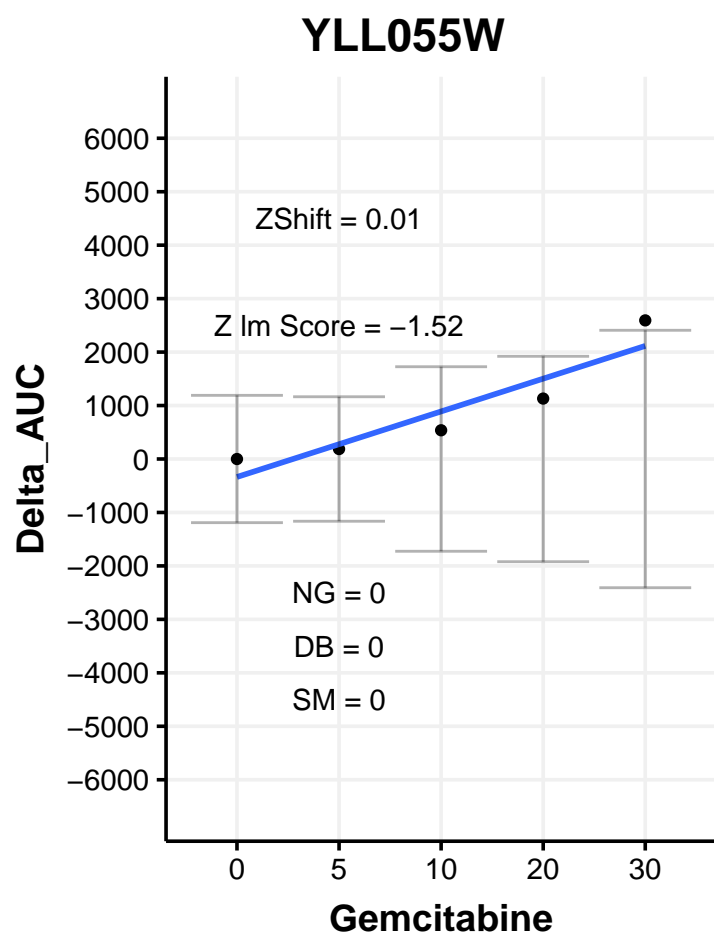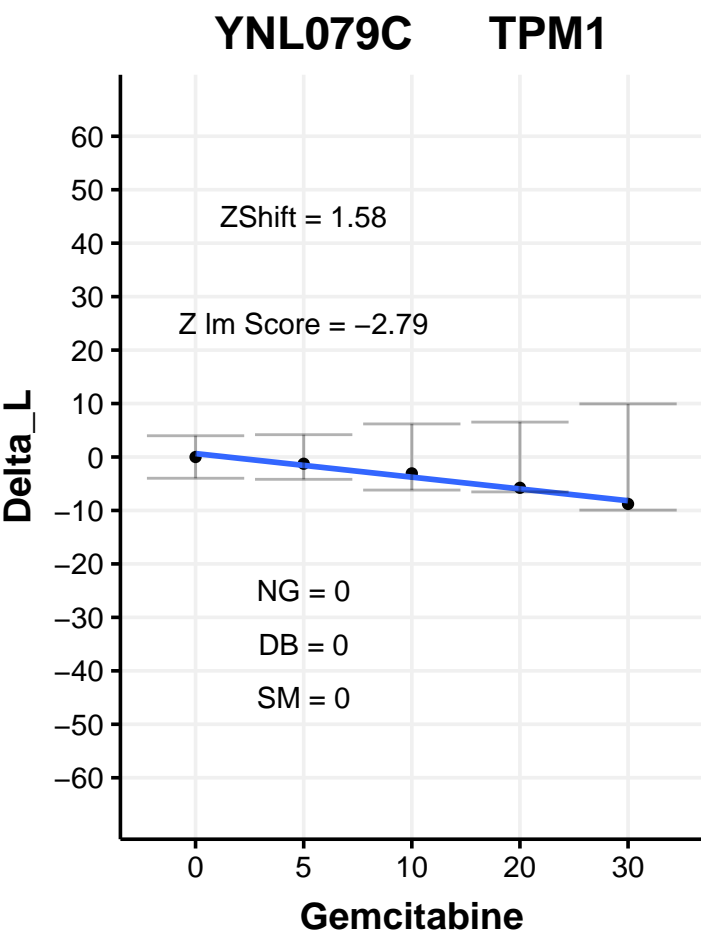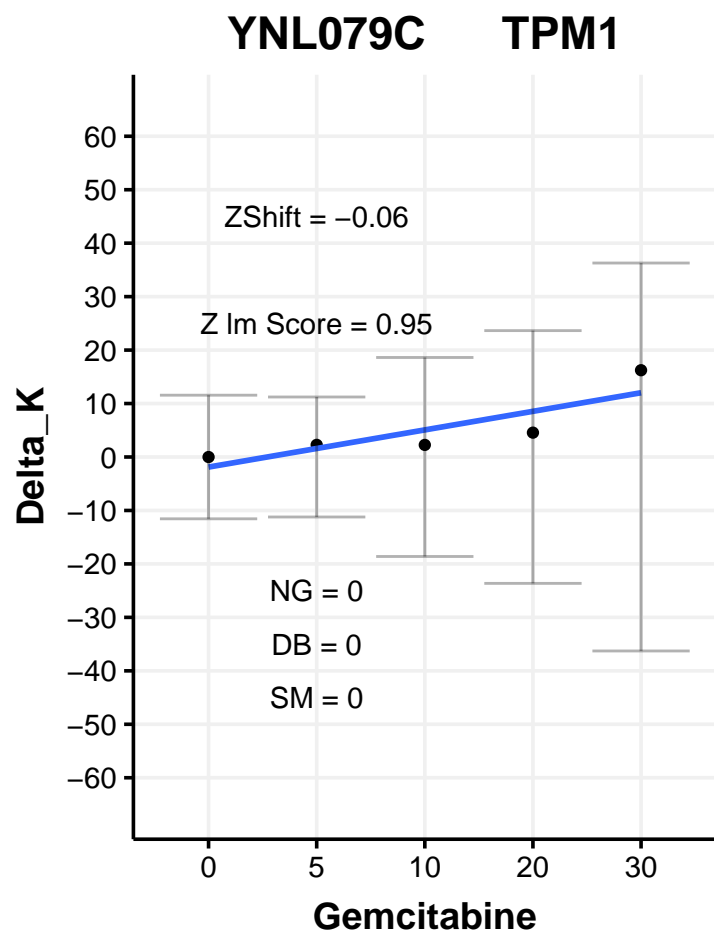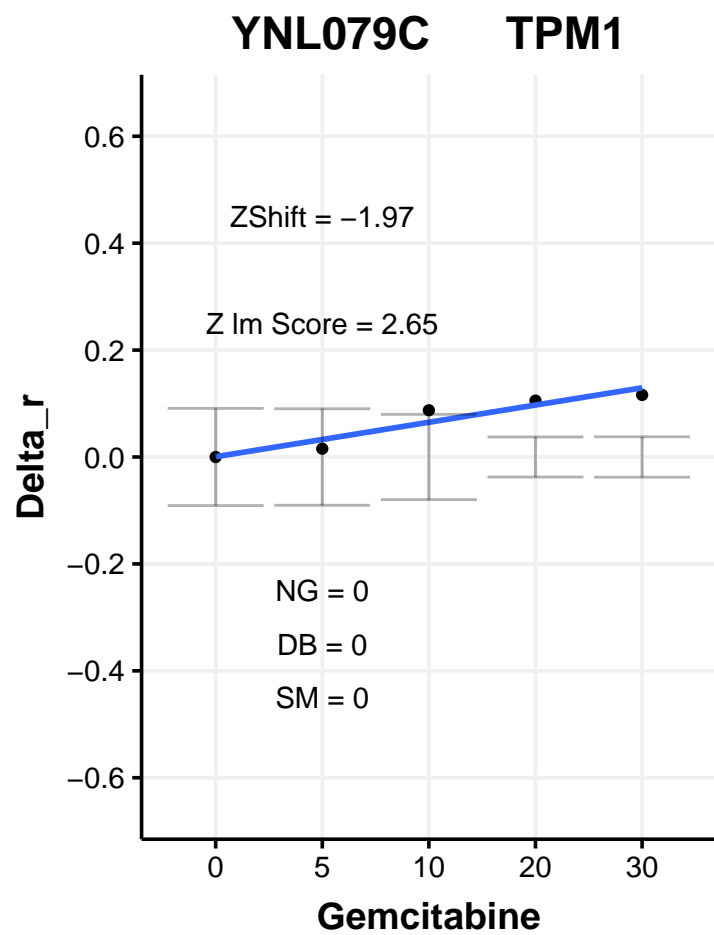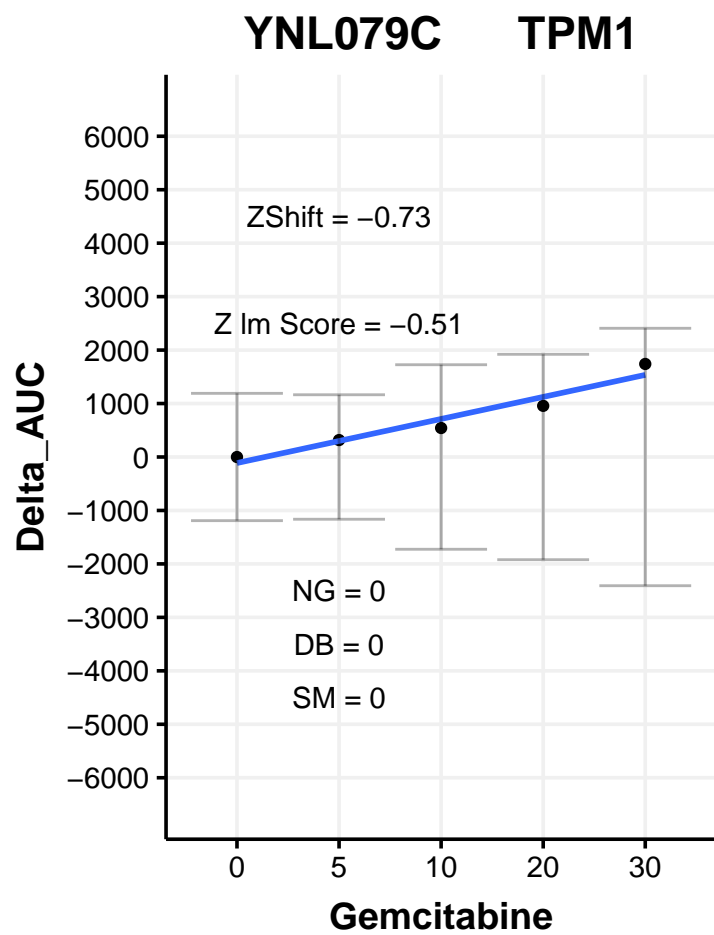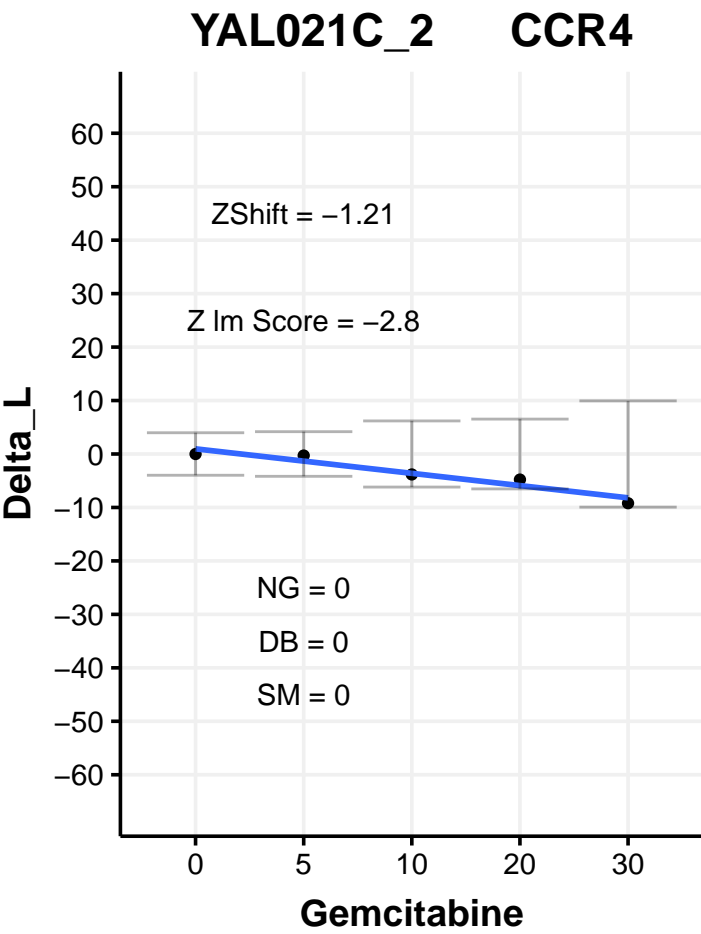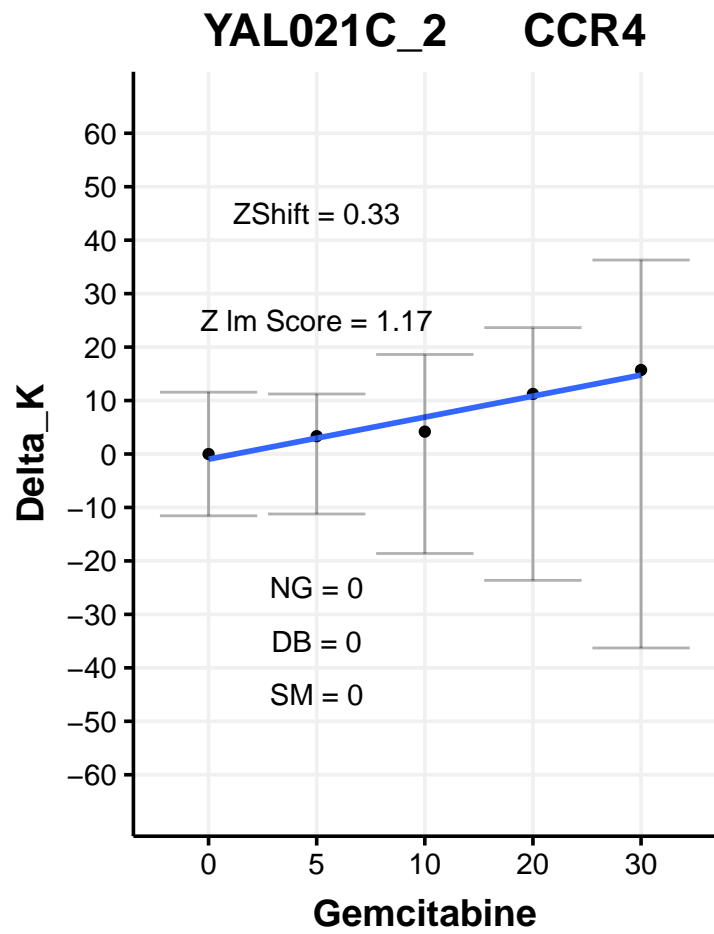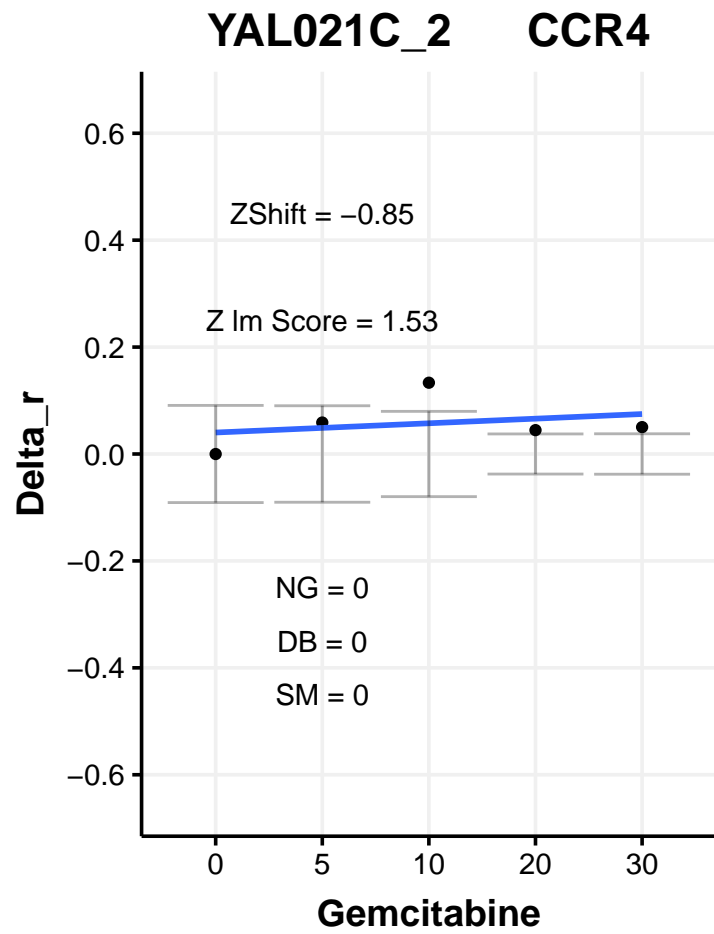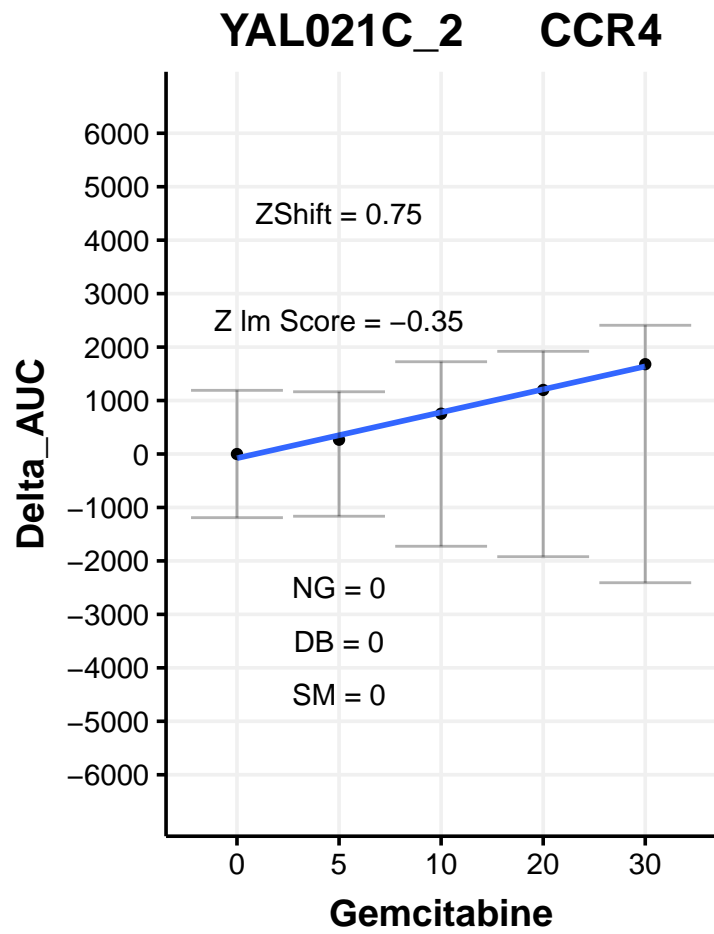

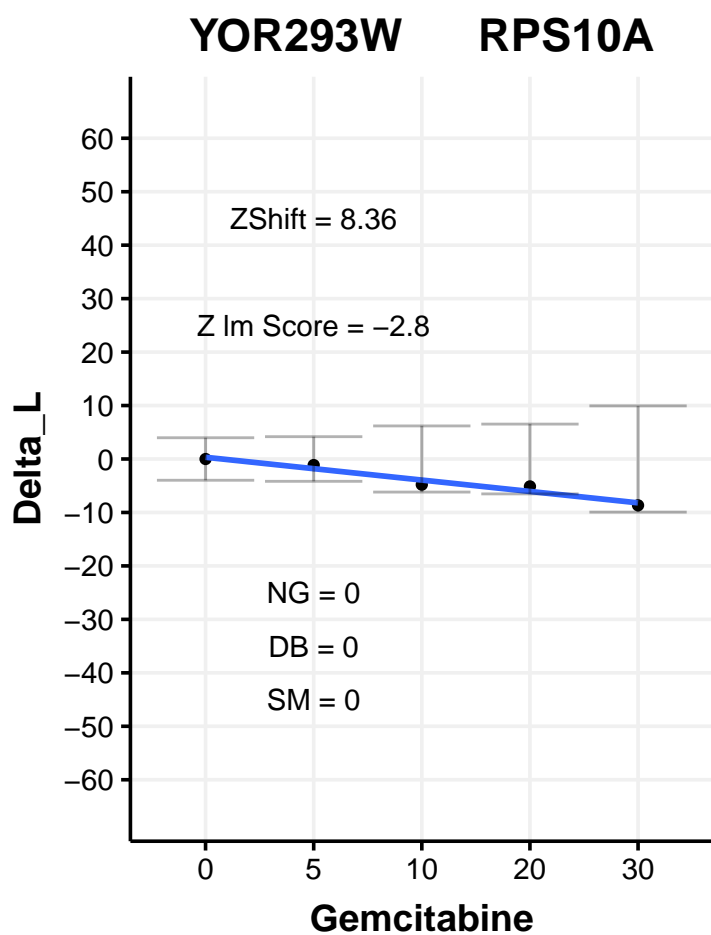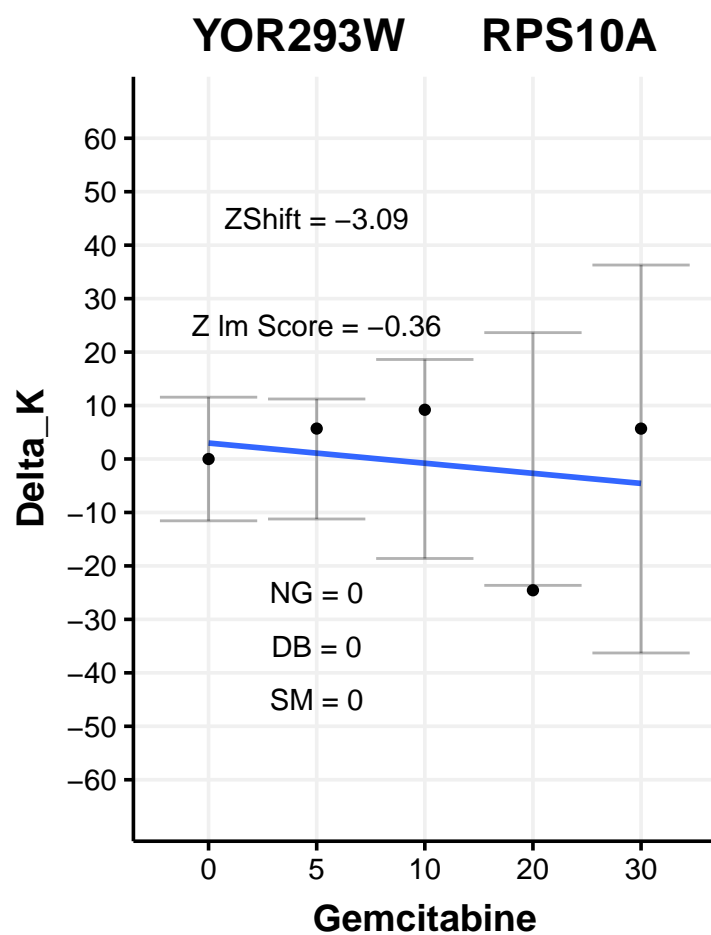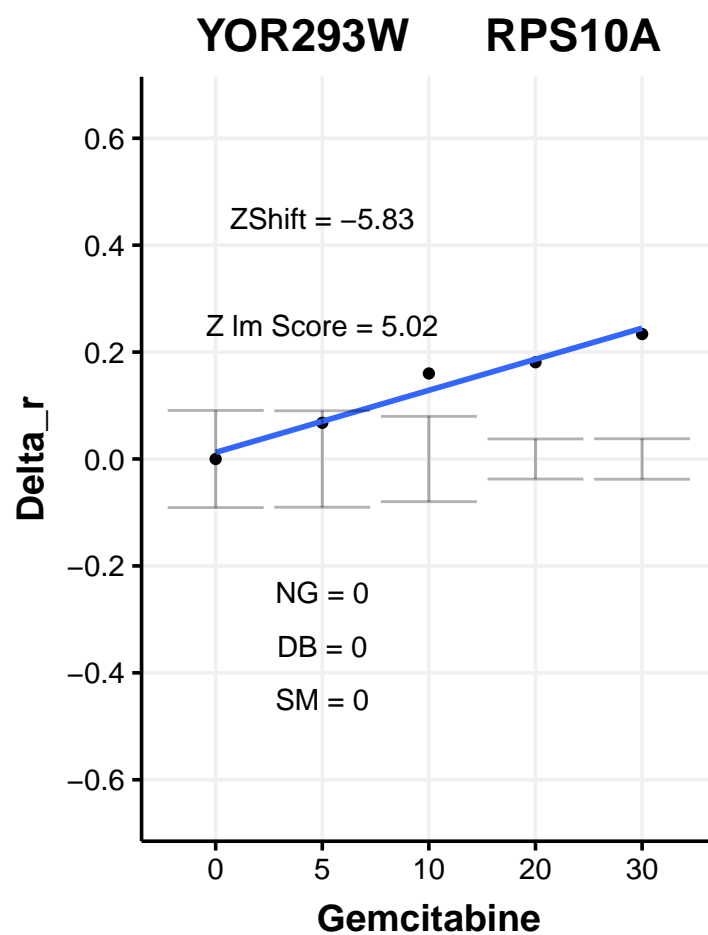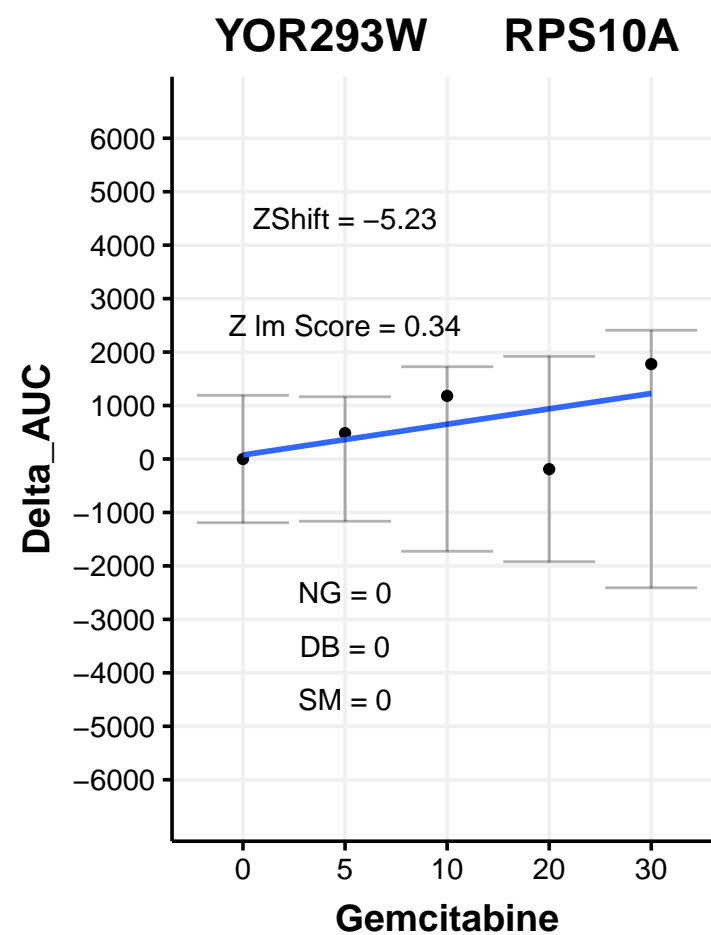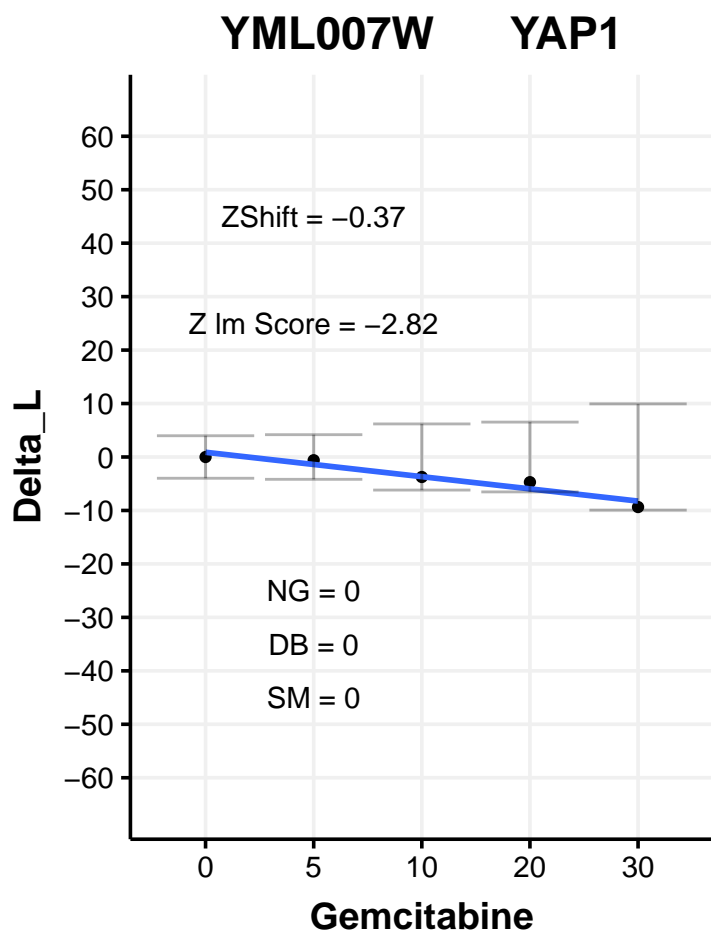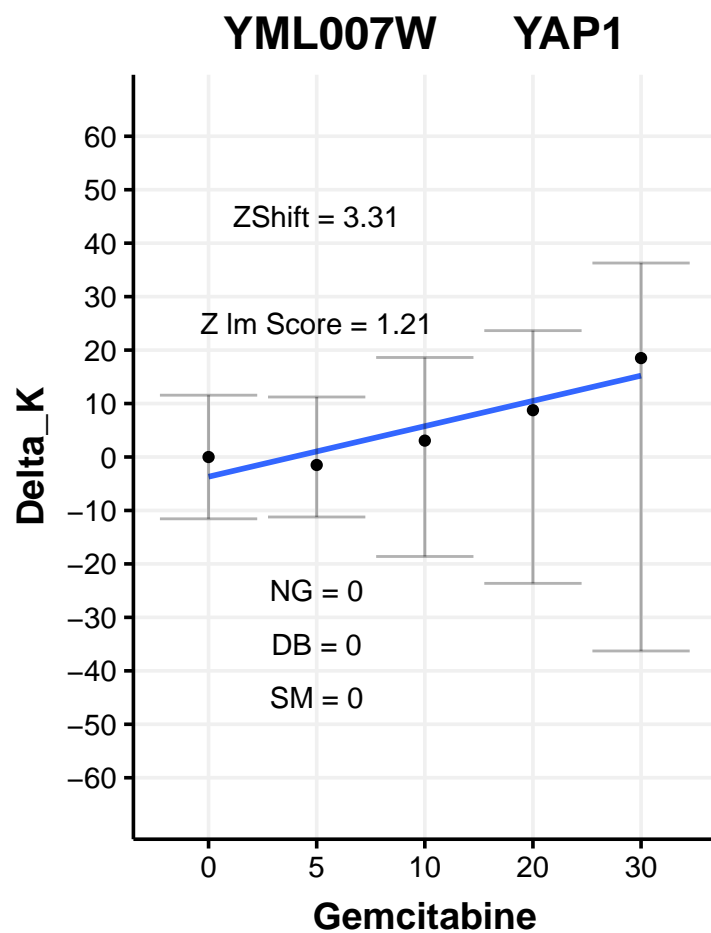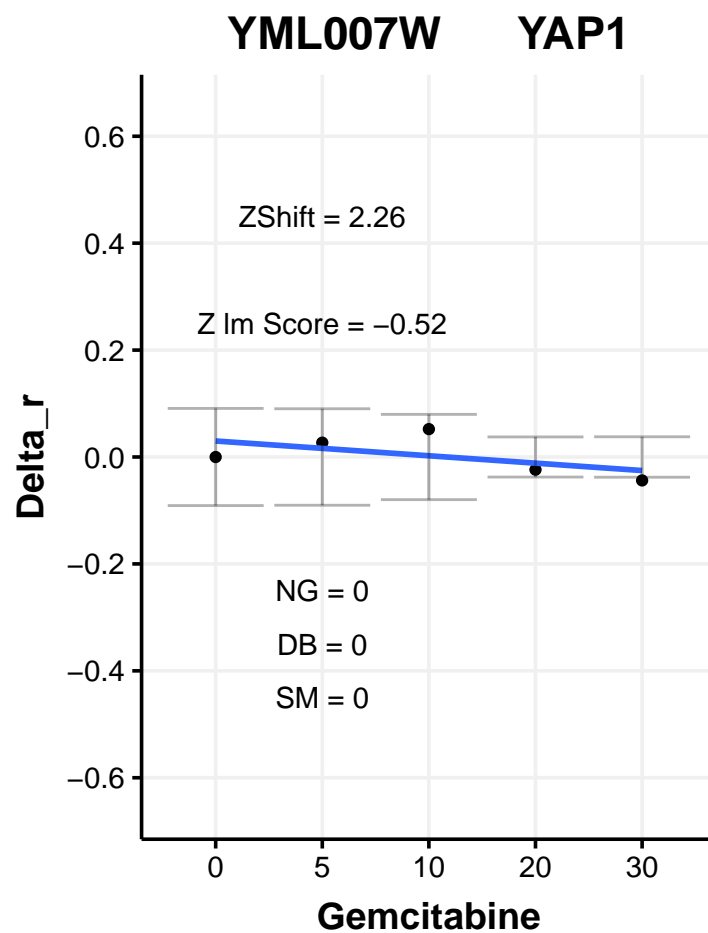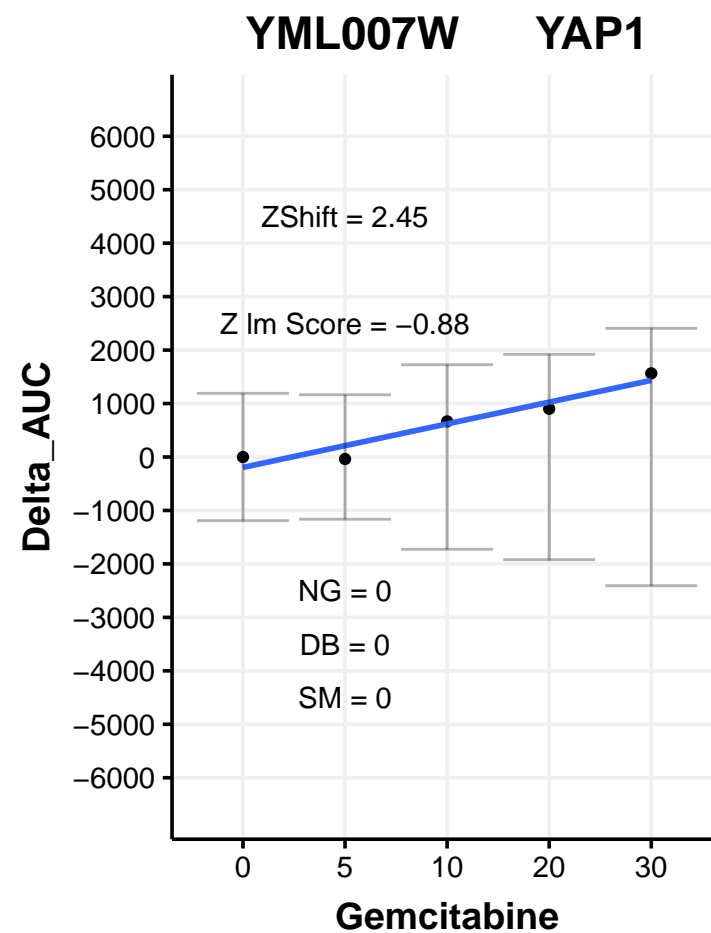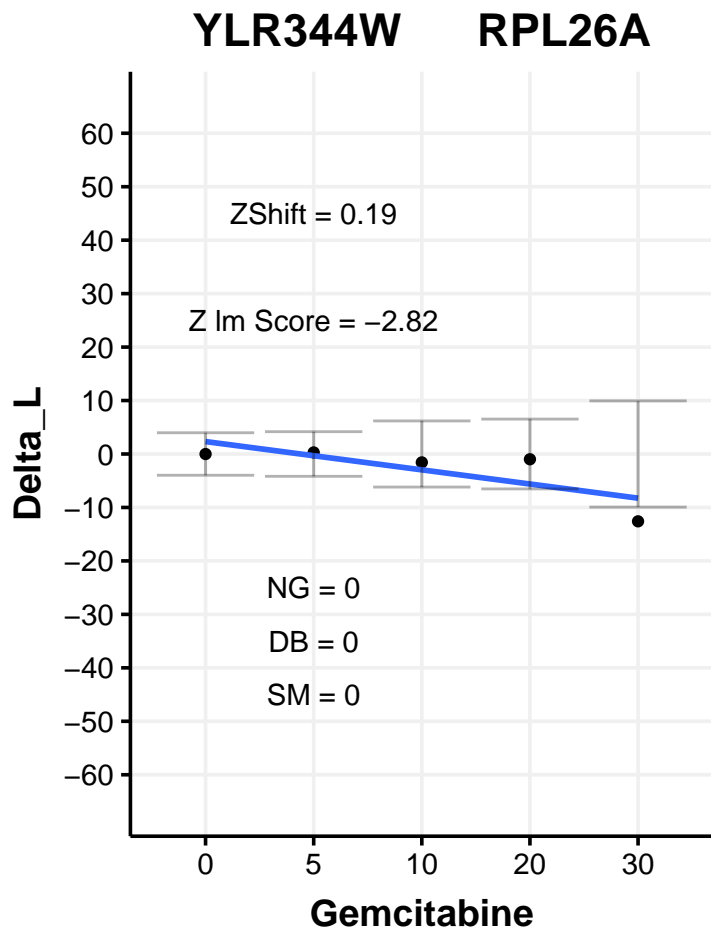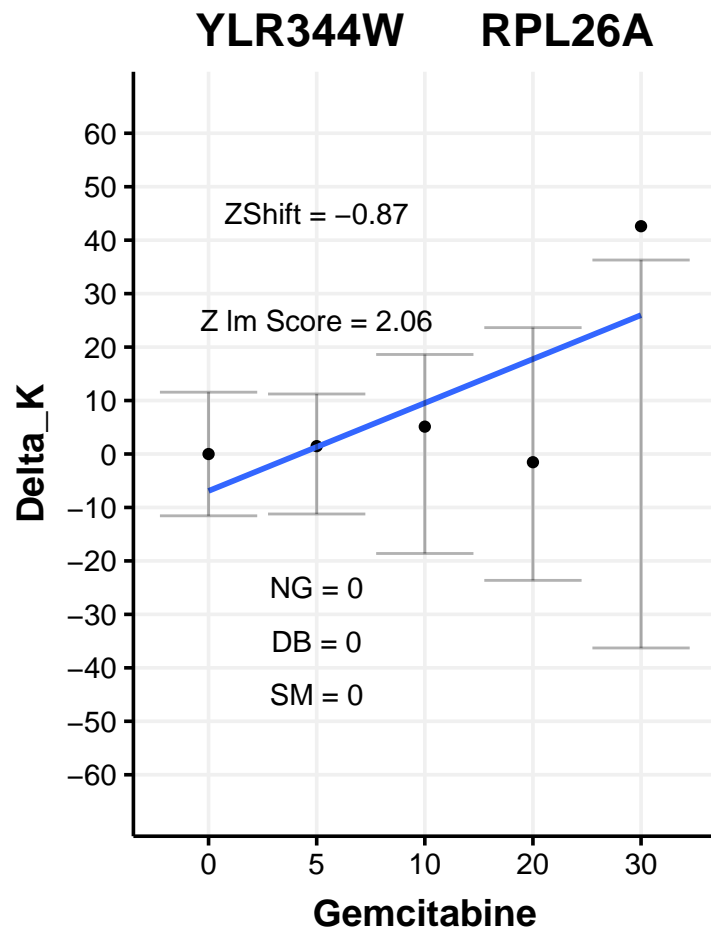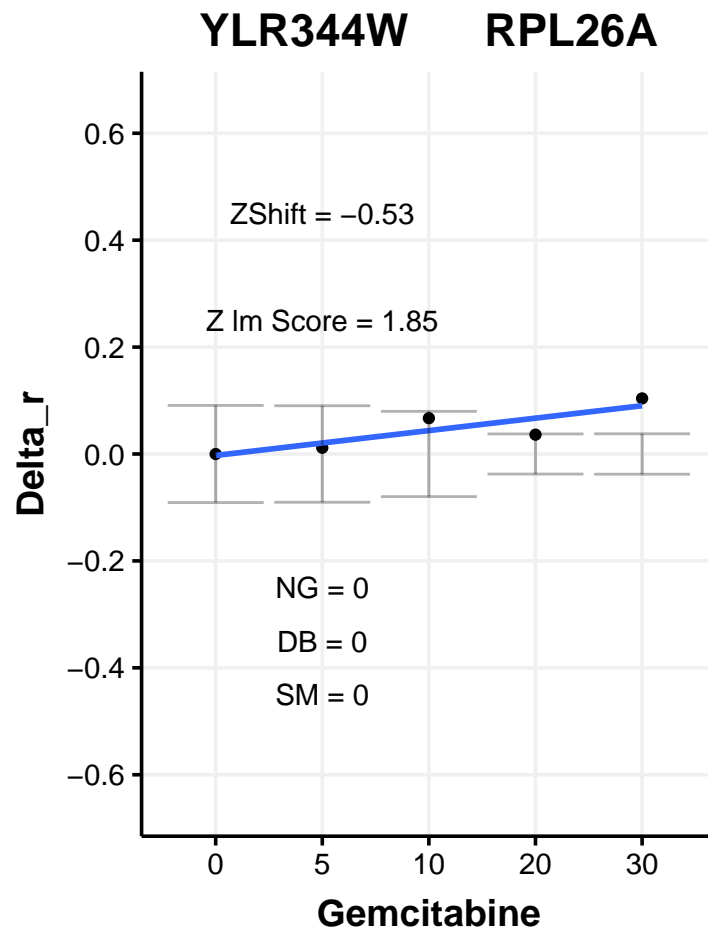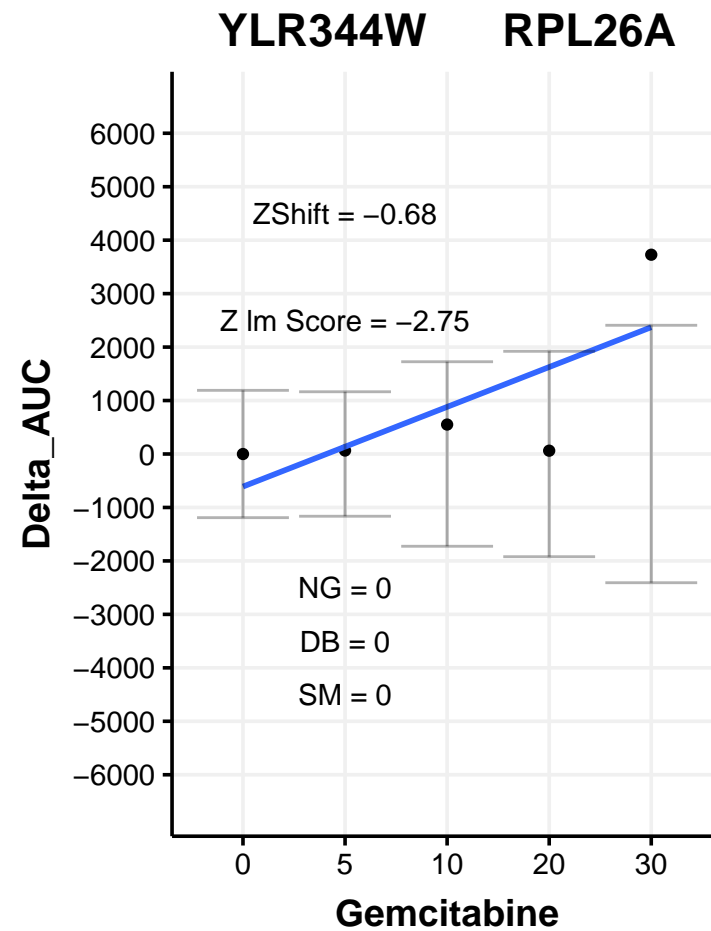

**YMR070W MOT3**

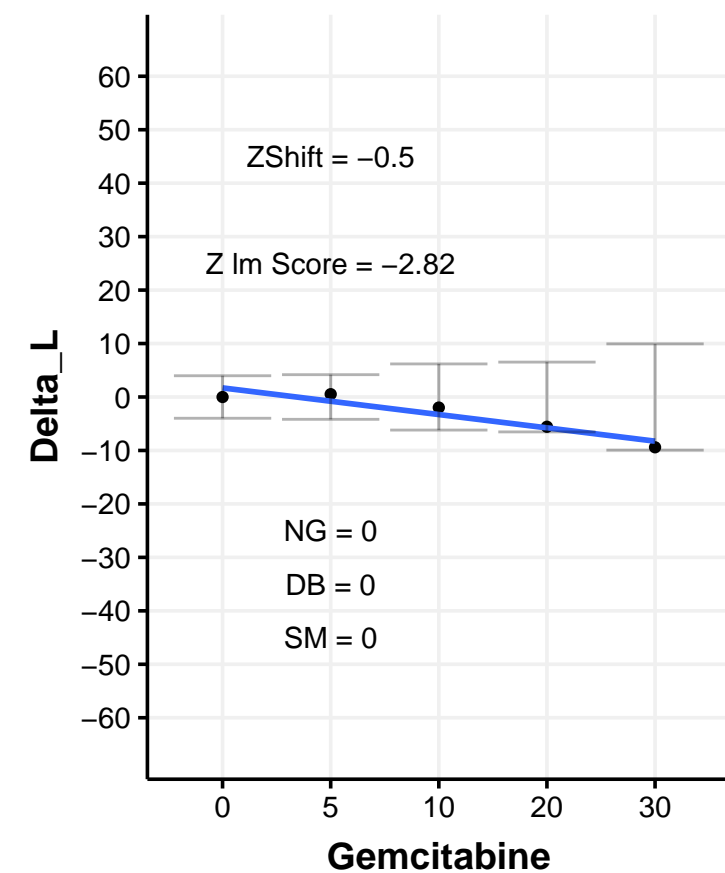

**YMR070W MOT3**

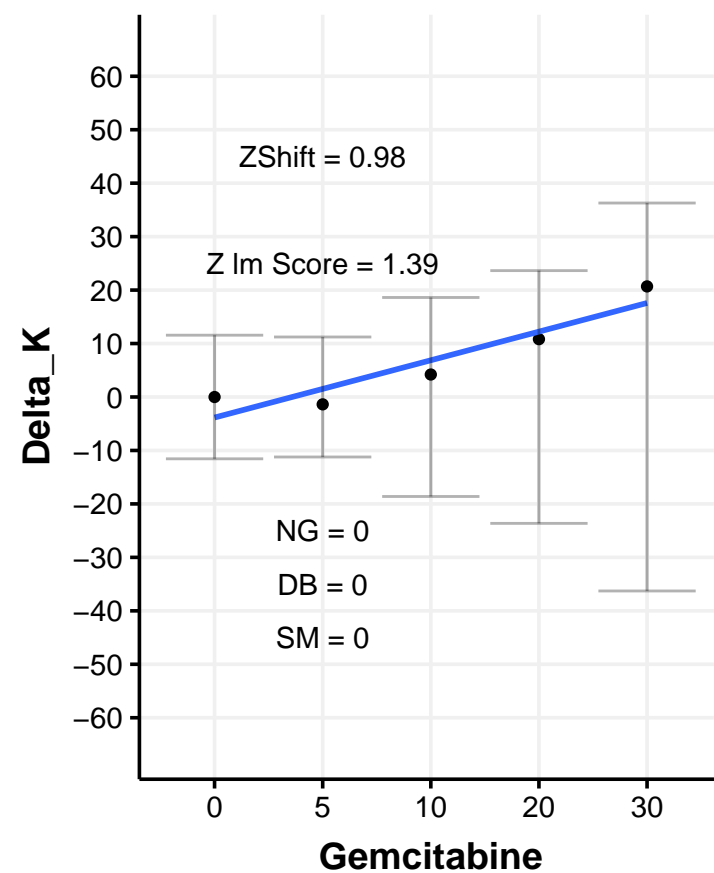

**YMR070W MOT3**

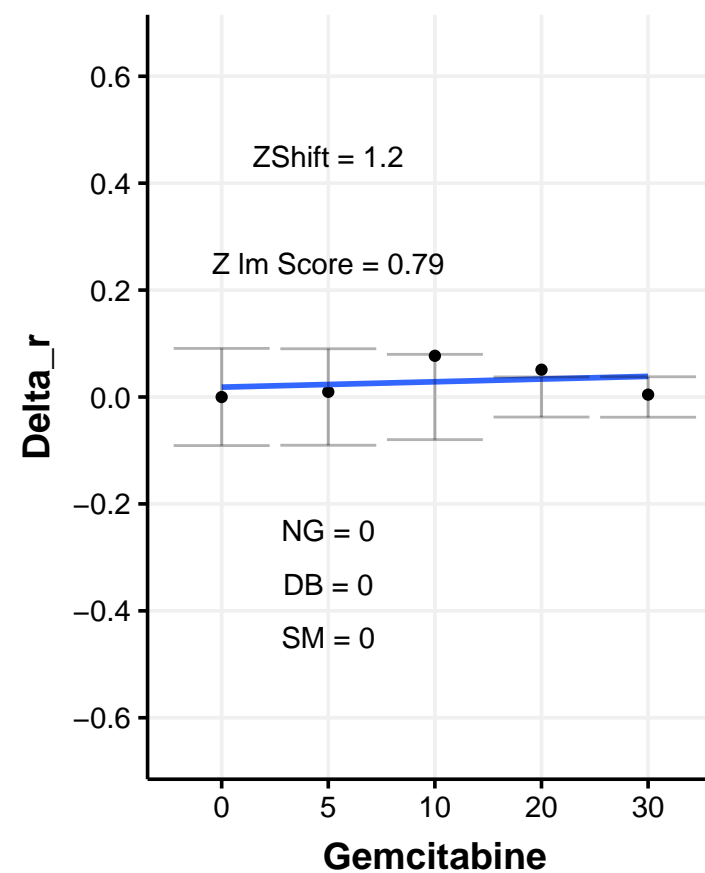

**YMR070W MOT3**

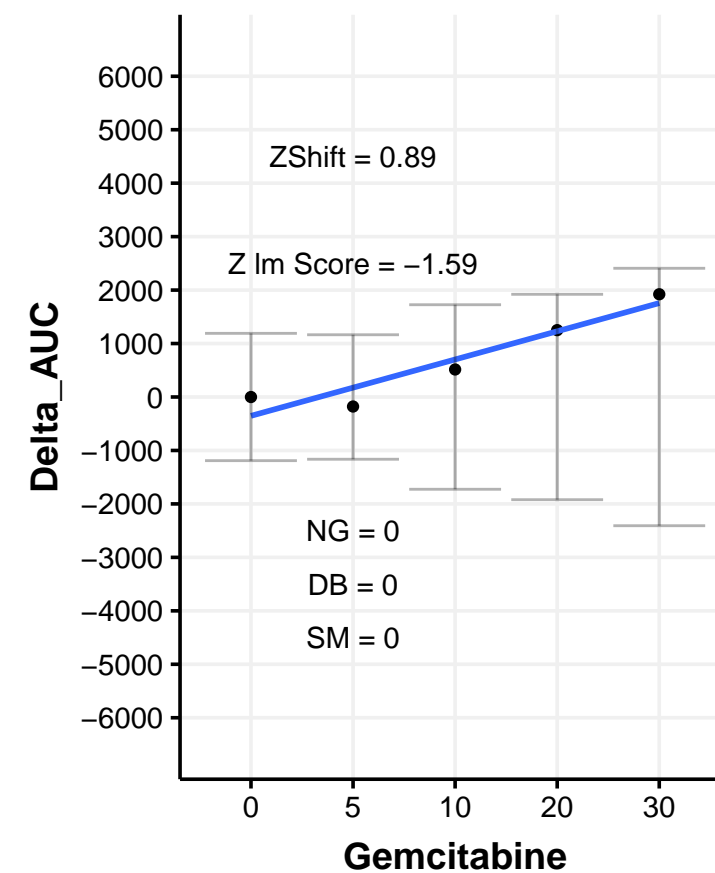

**YPR097W**

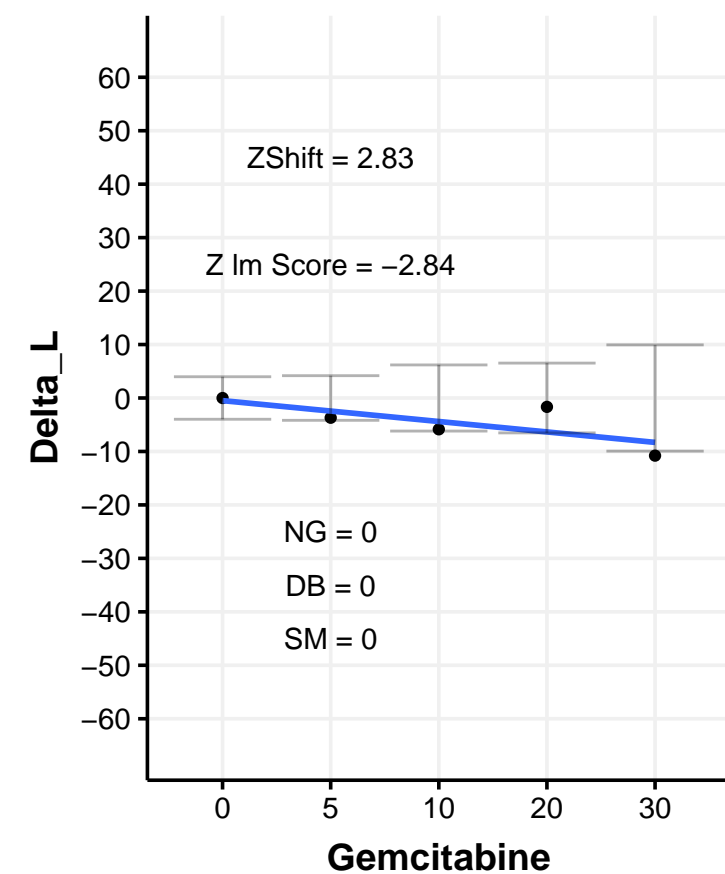

**YPR097W**

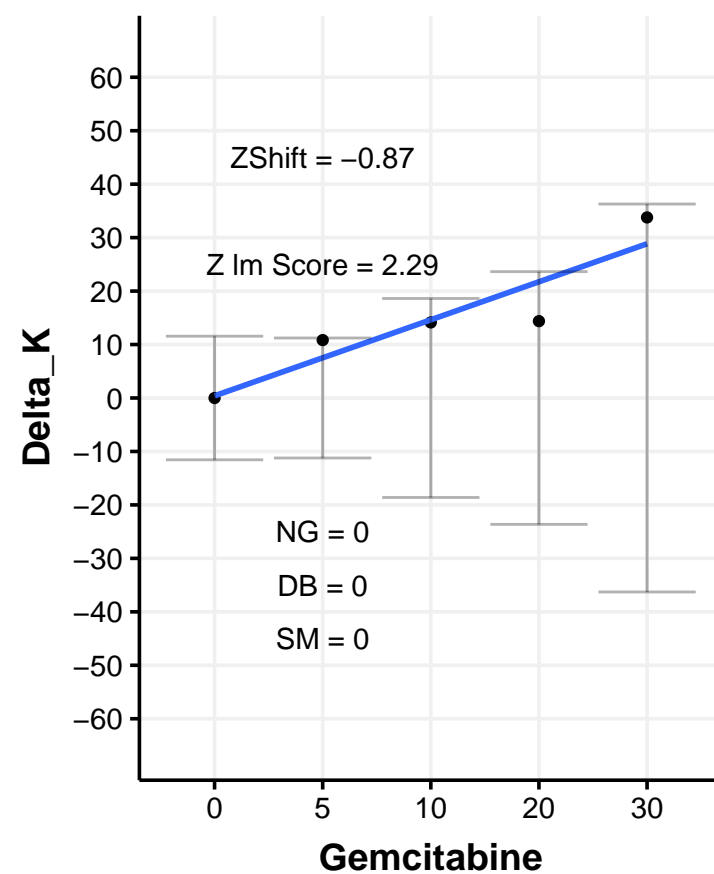

**YPR097W**

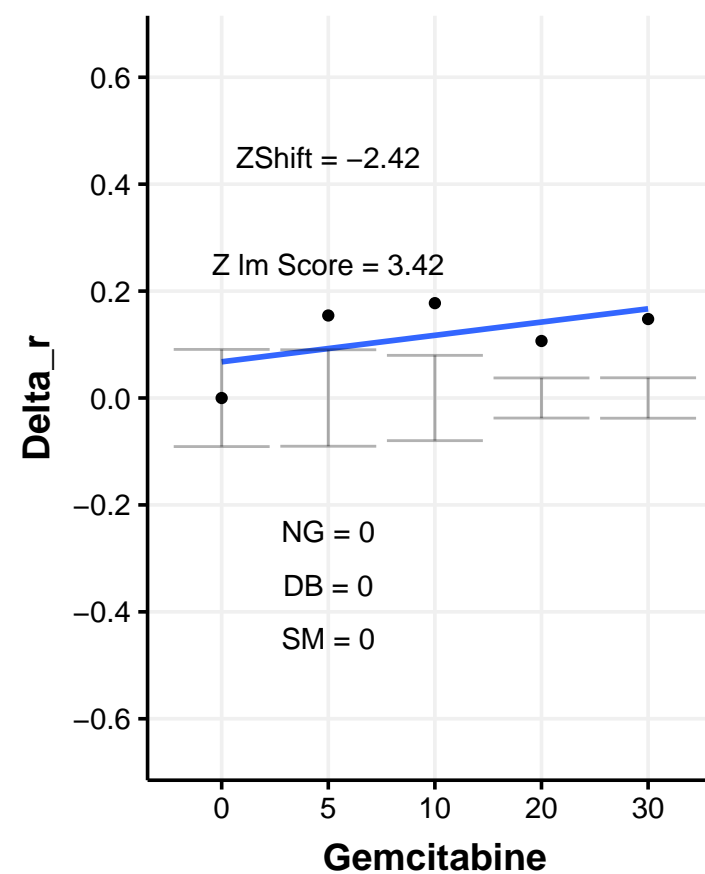

**YPR097W**

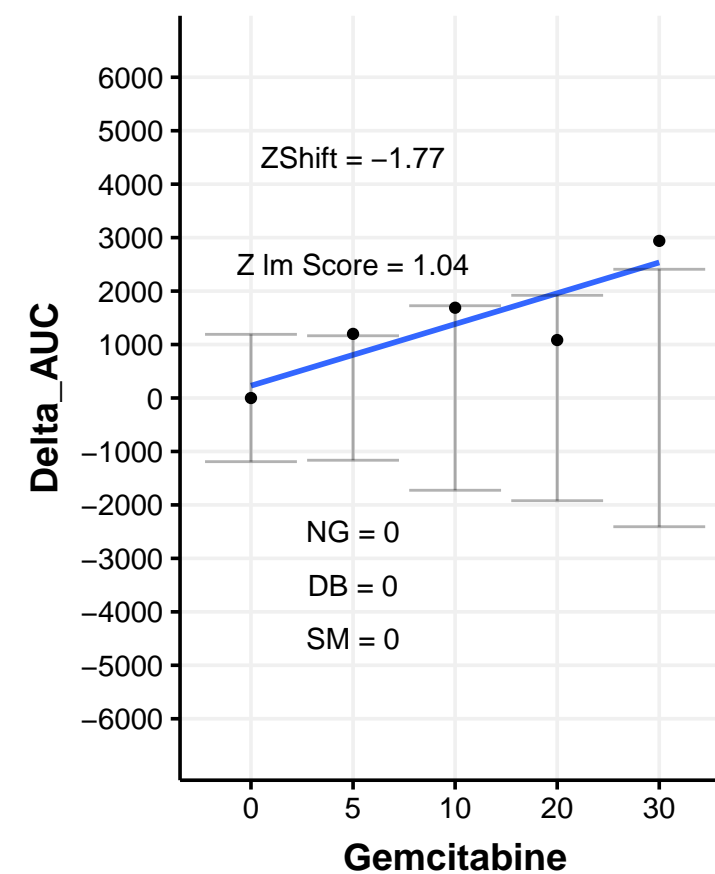

**YCR030C SYP1**

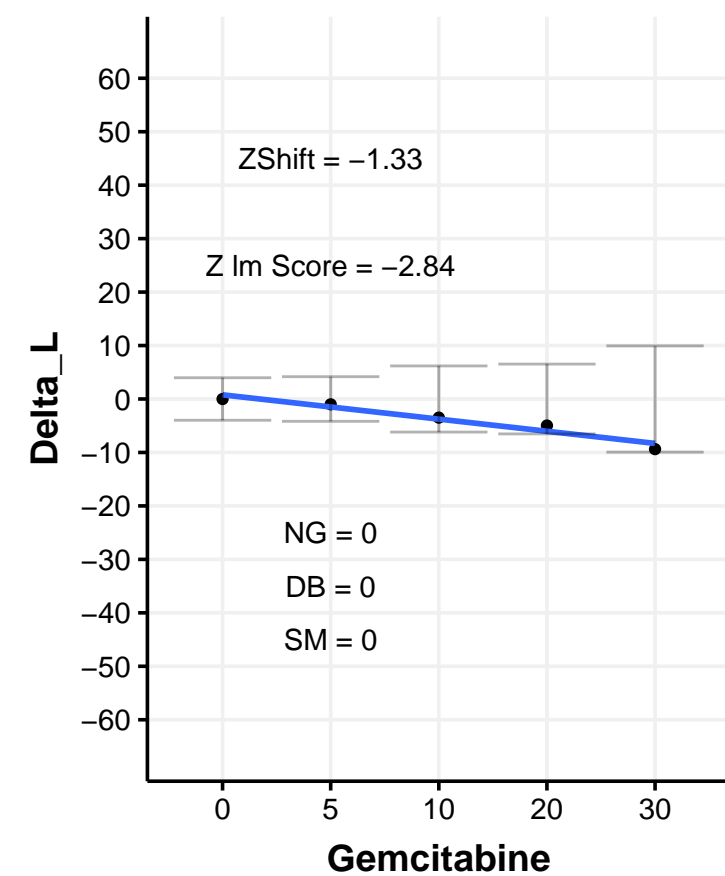

**YCR030C SYP1**

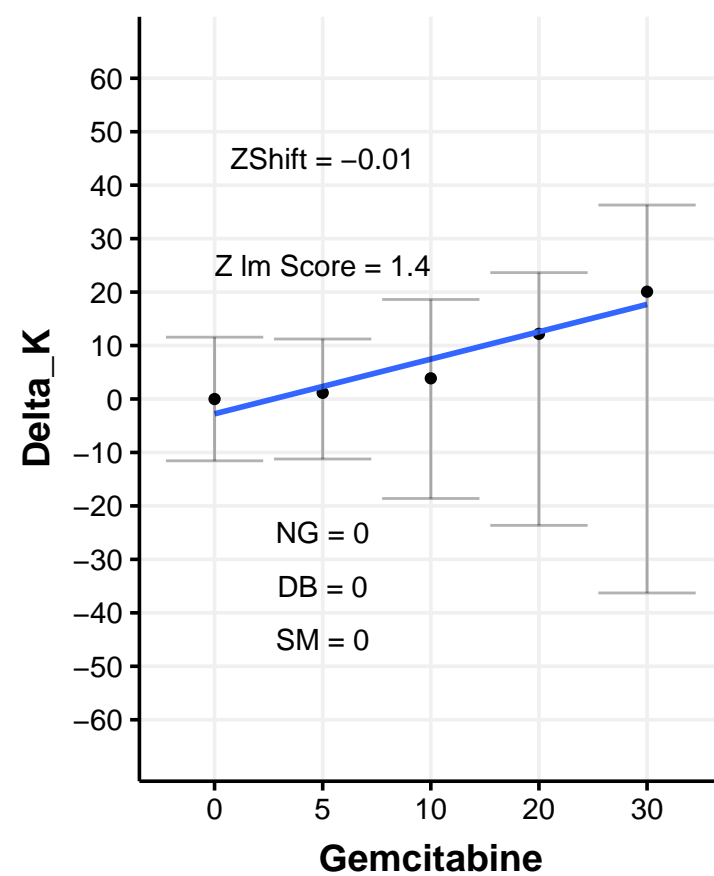

**YCR030C SYP1**

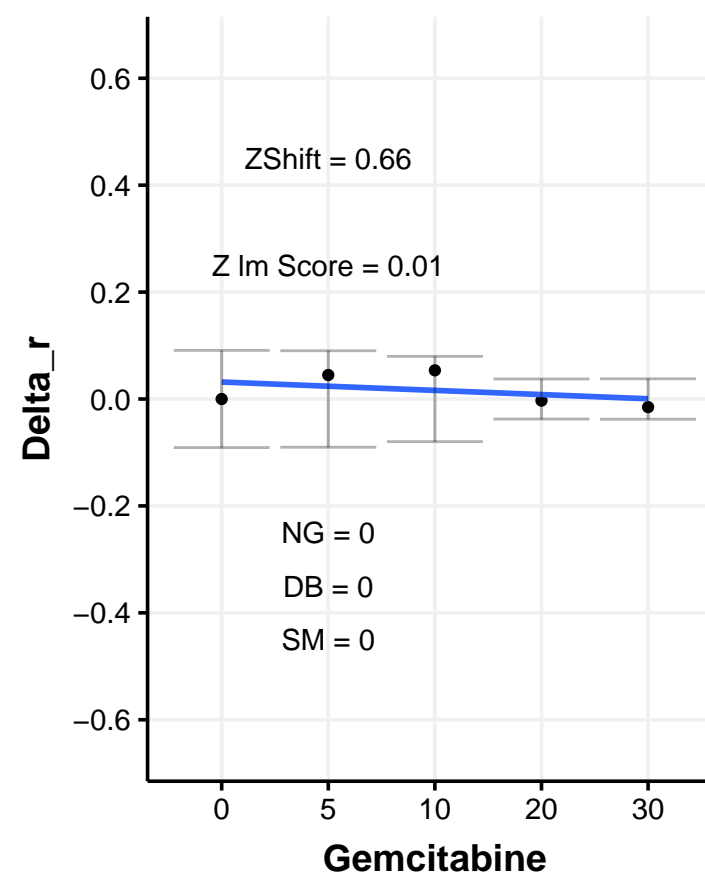

**YCR030C SYP1**

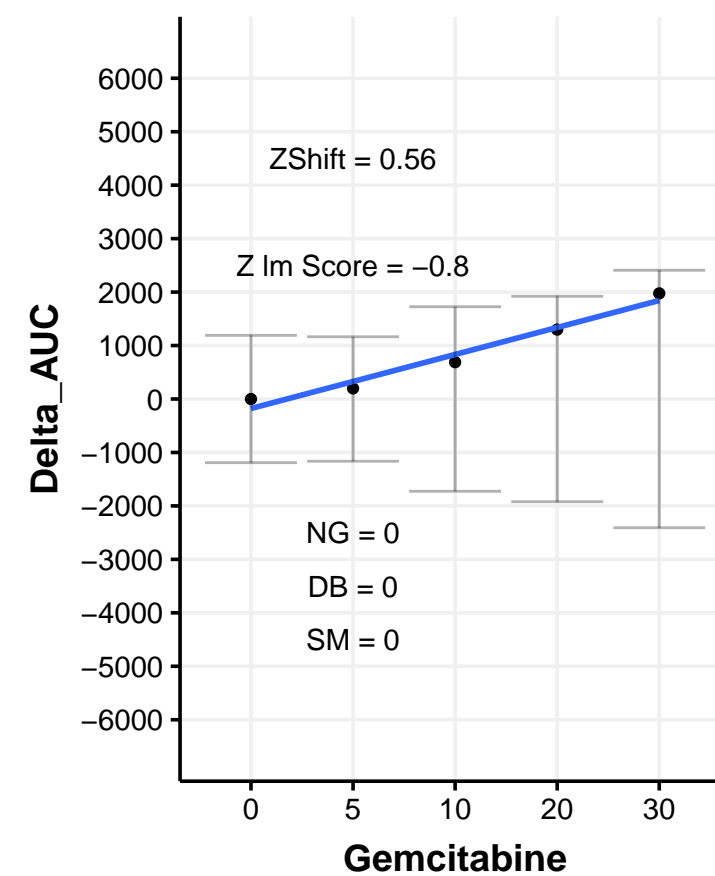



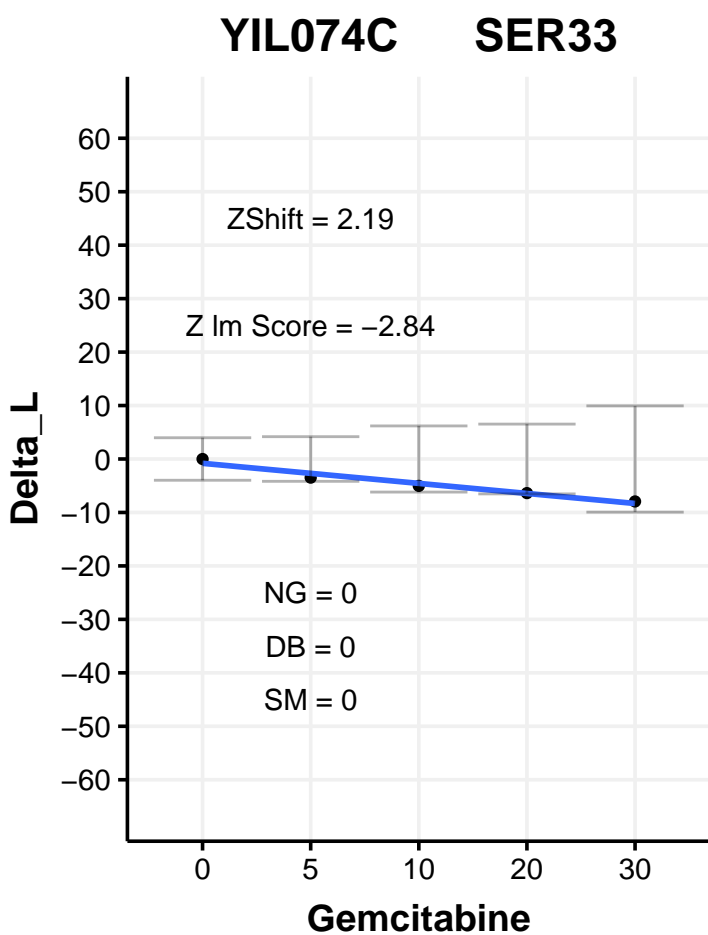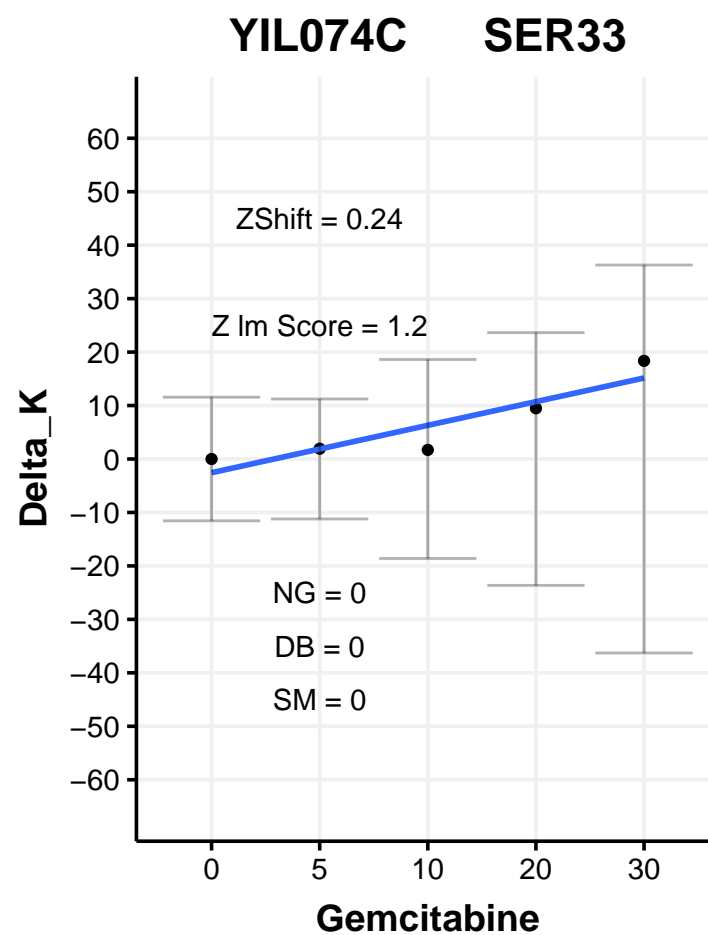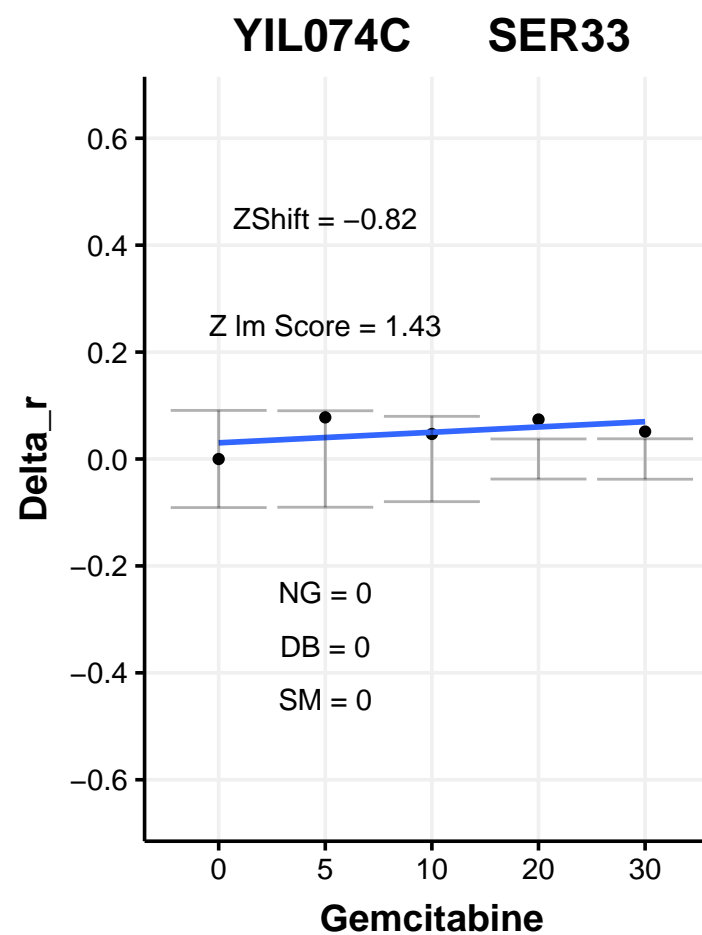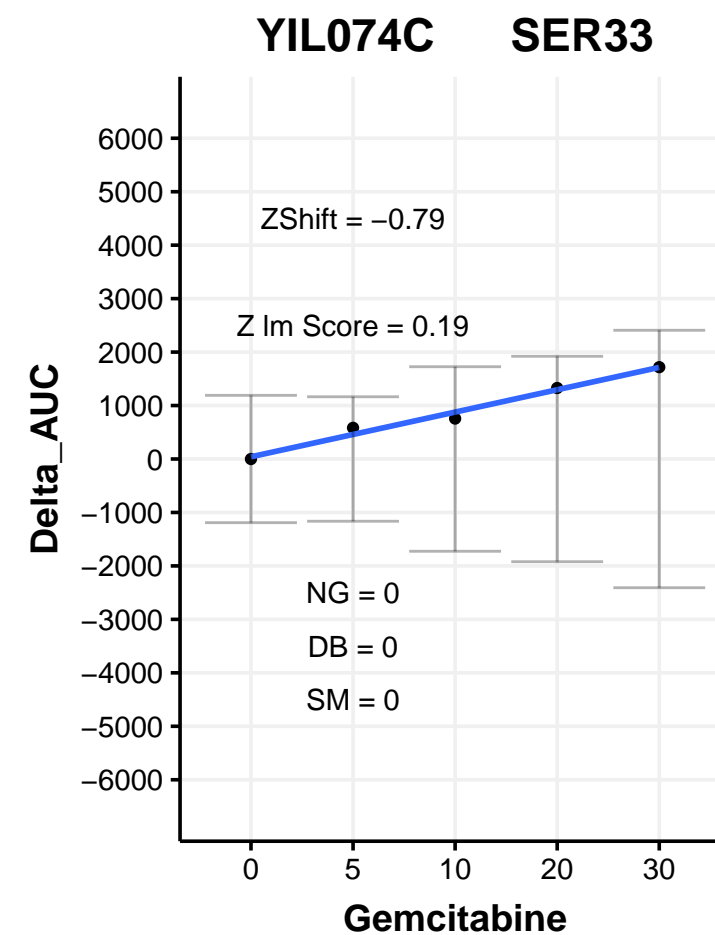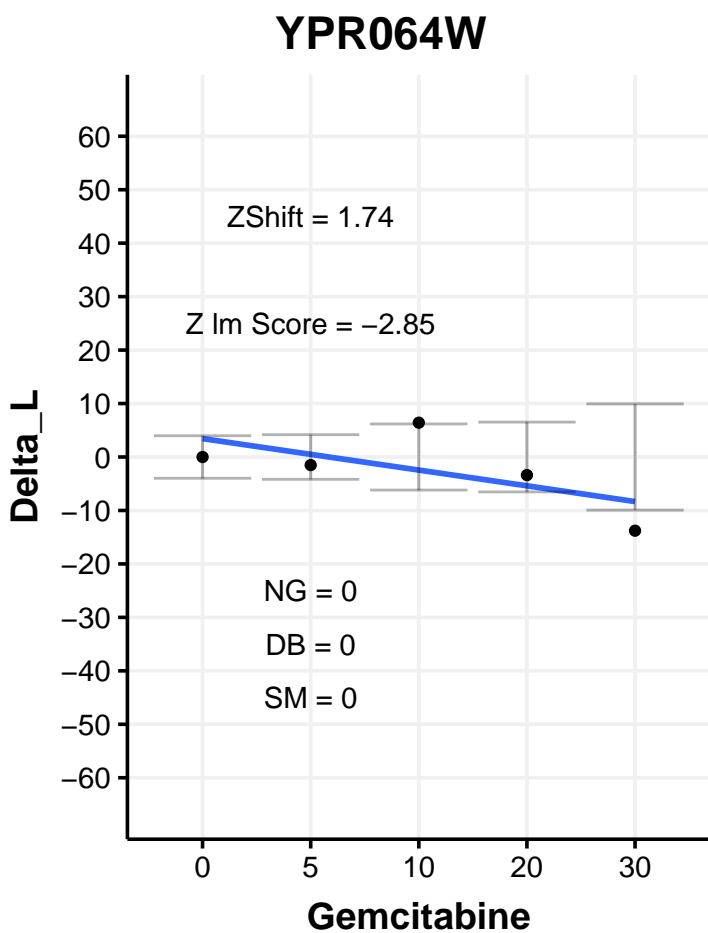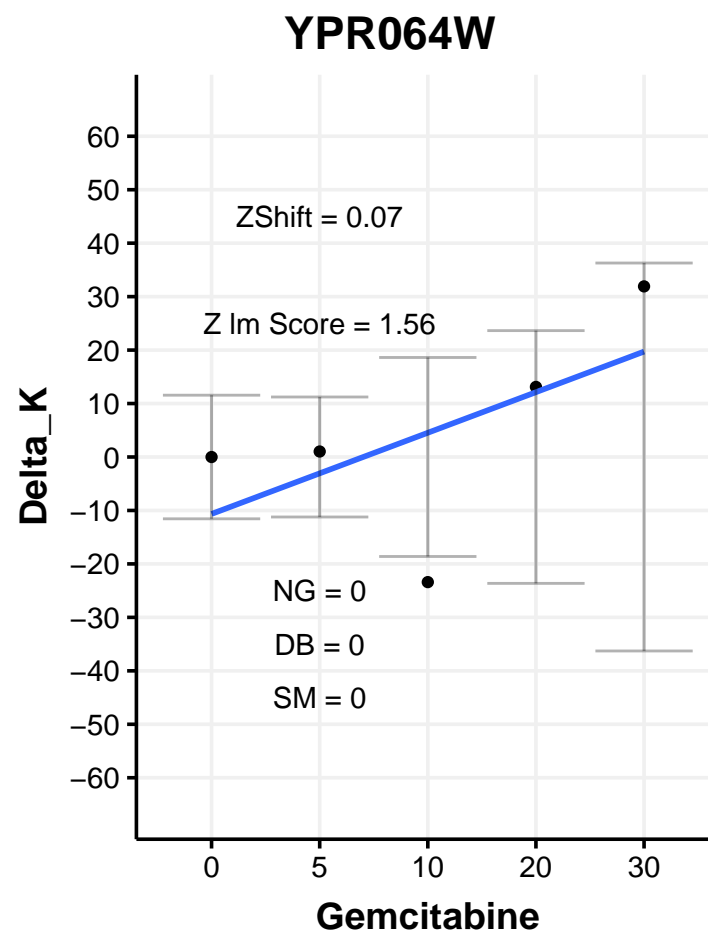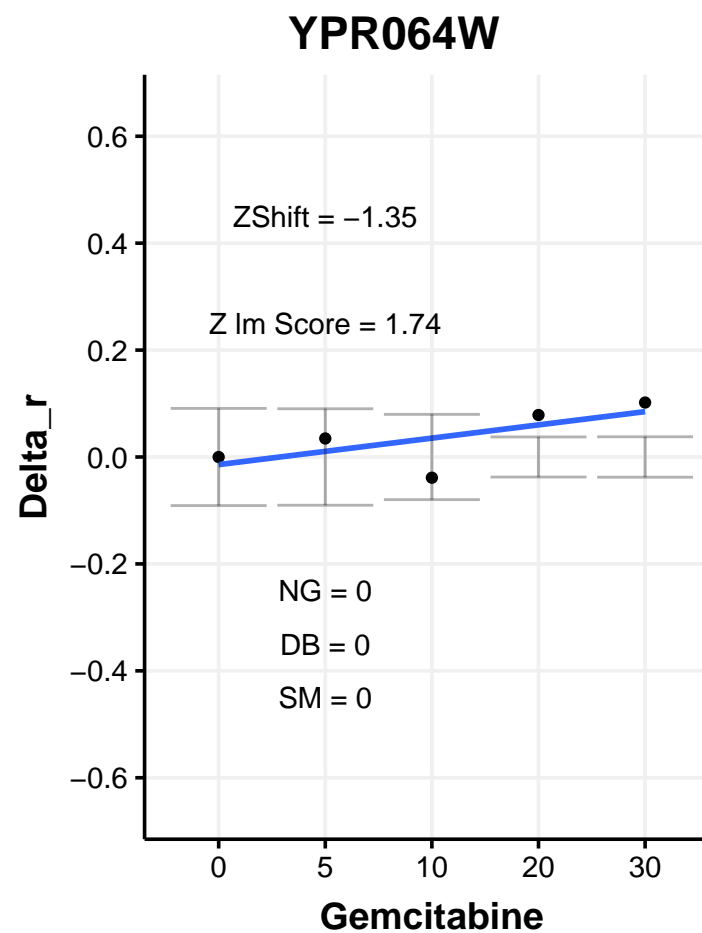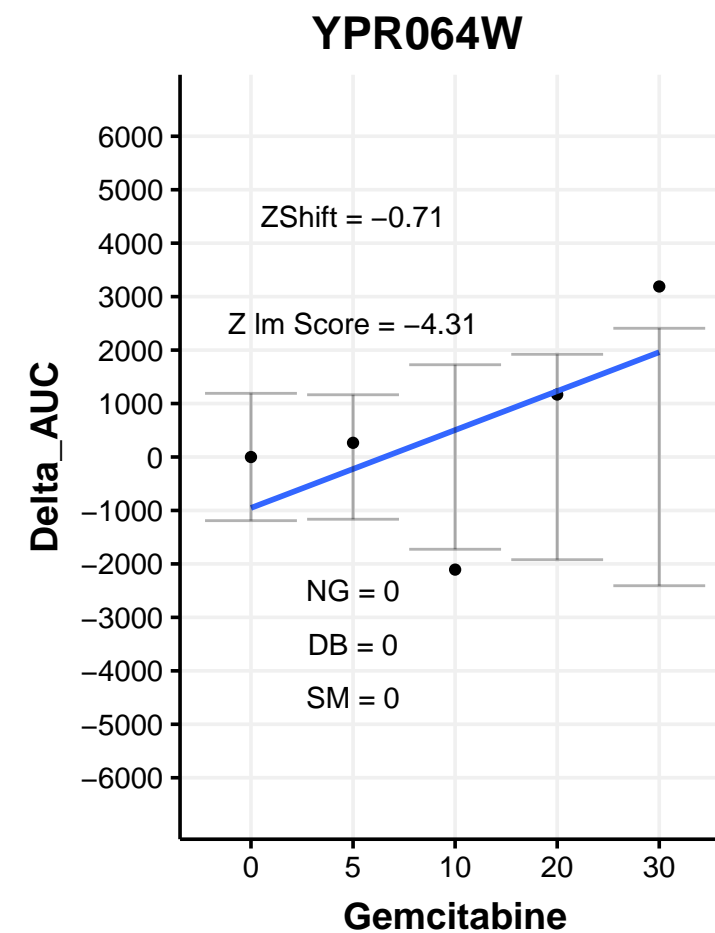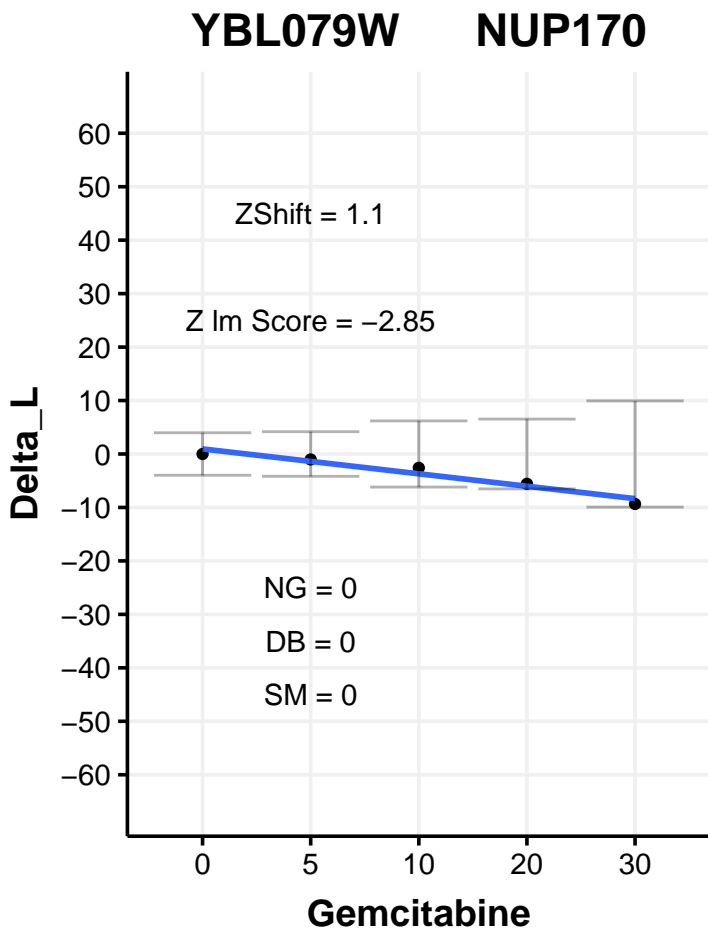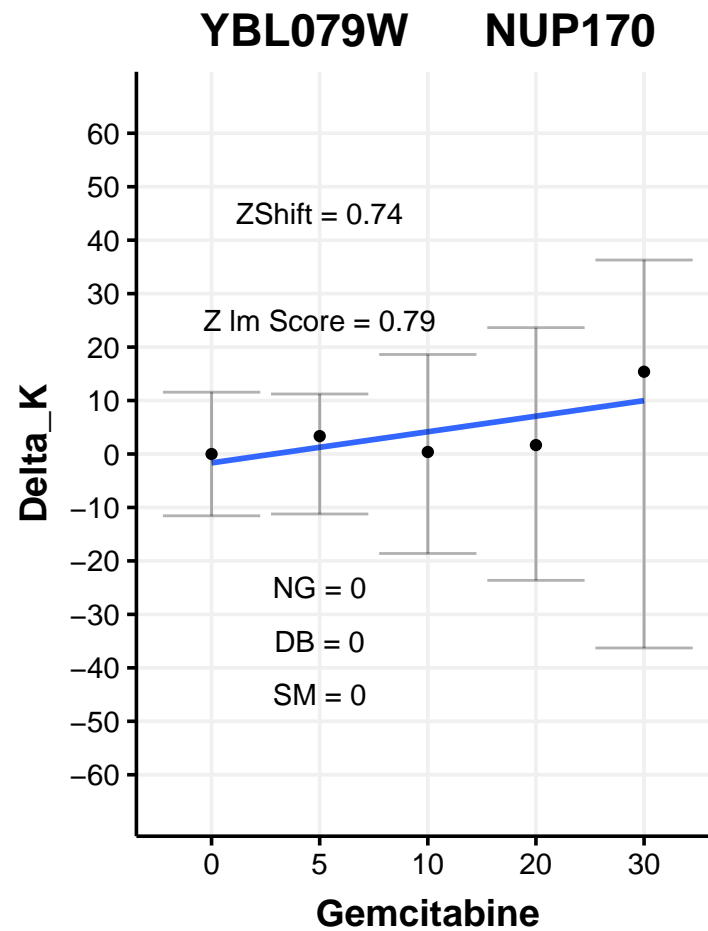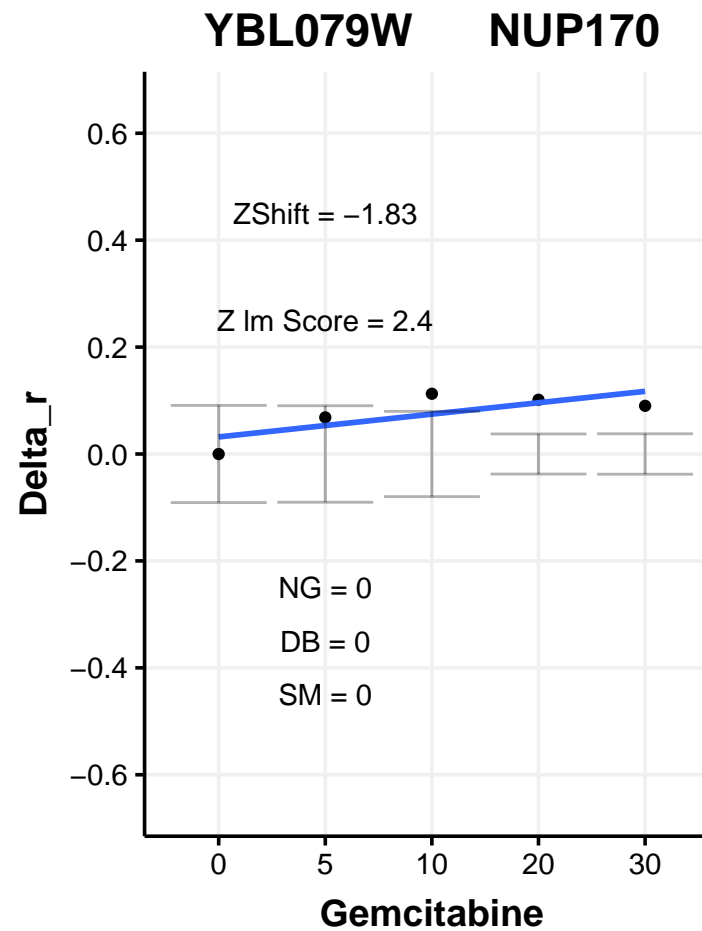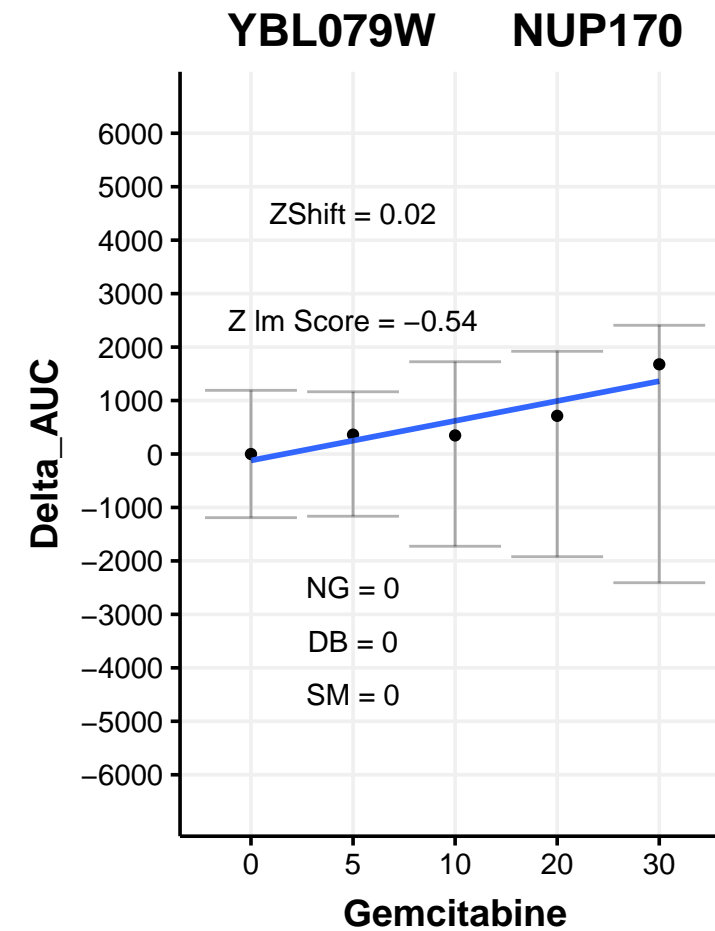

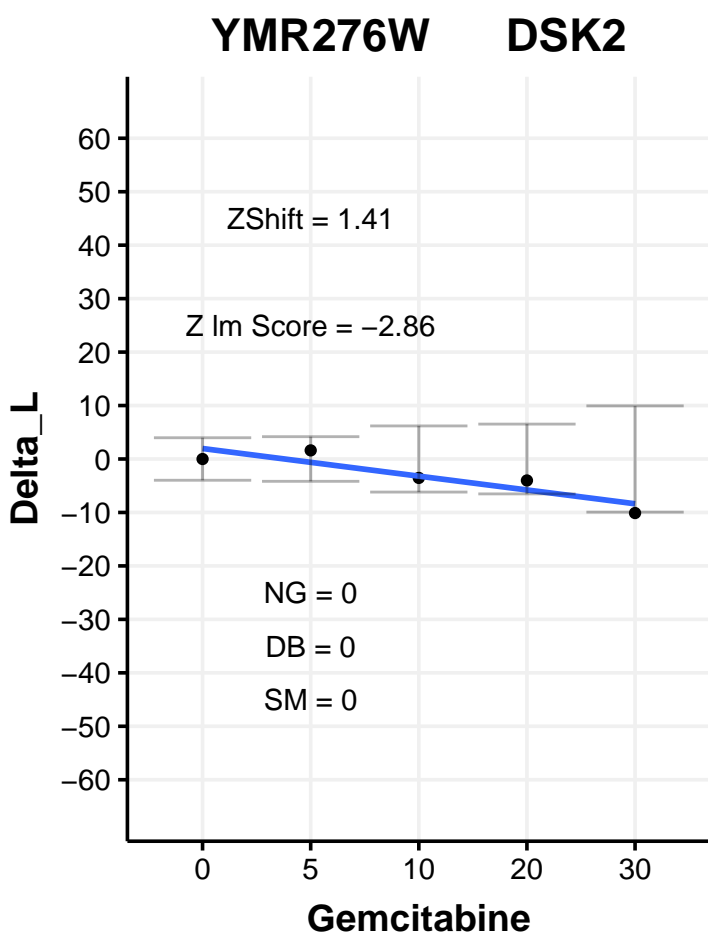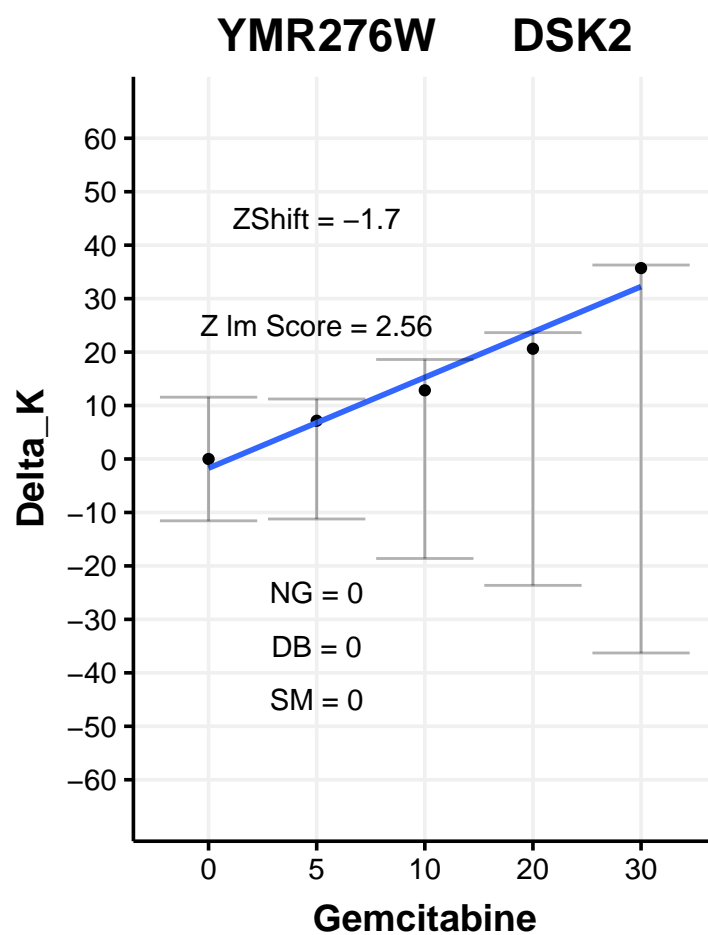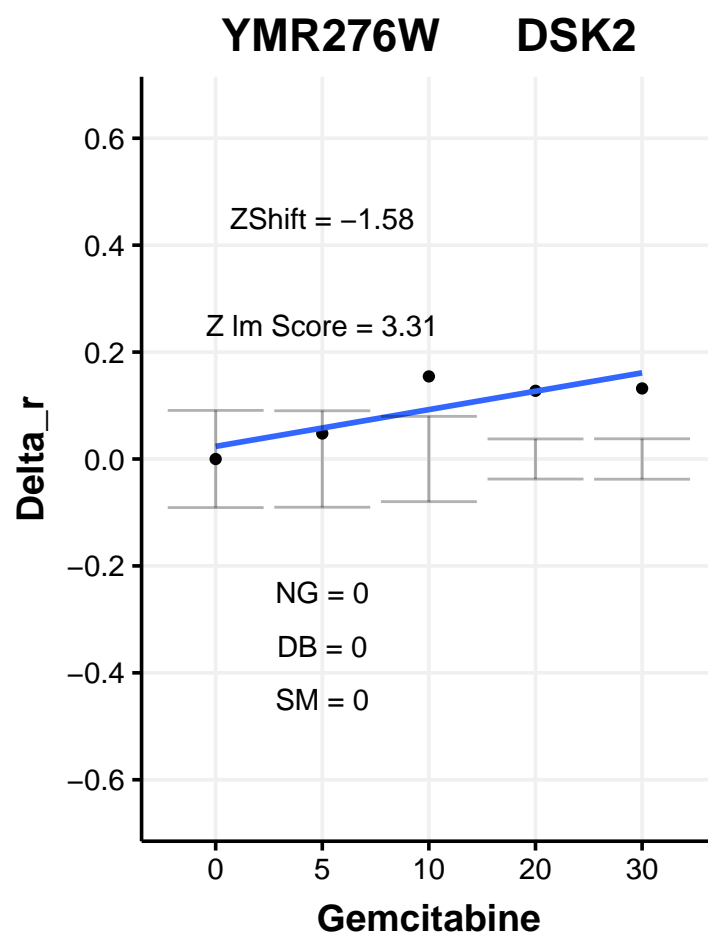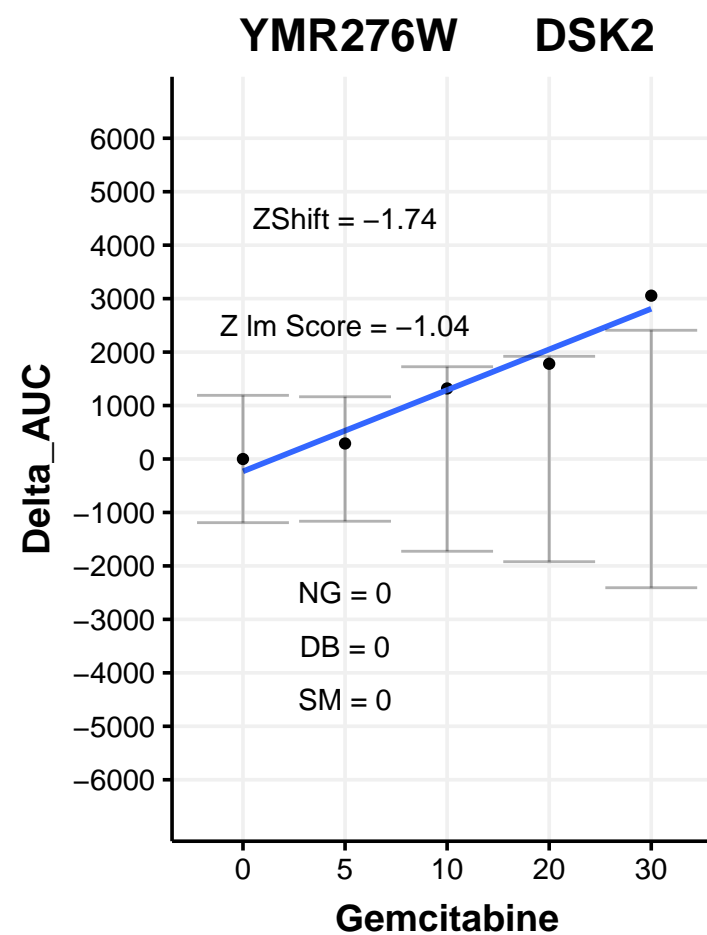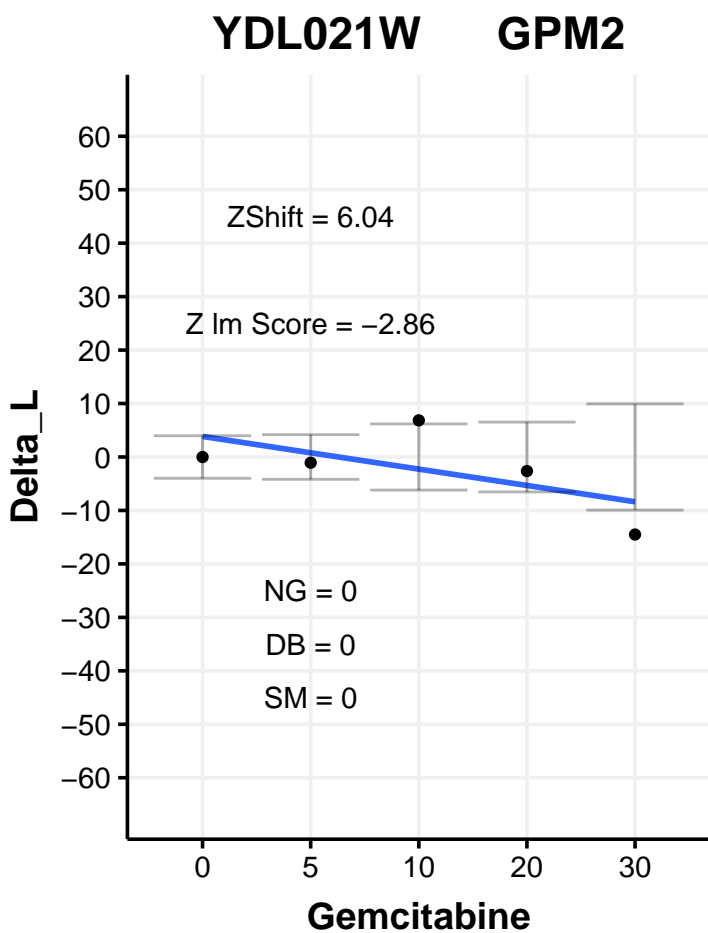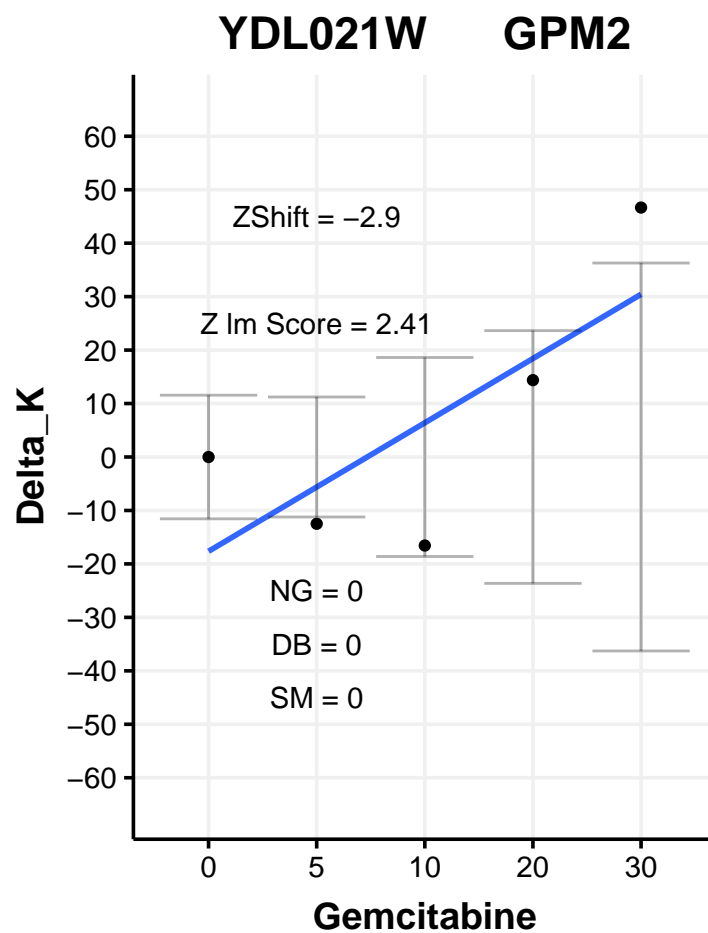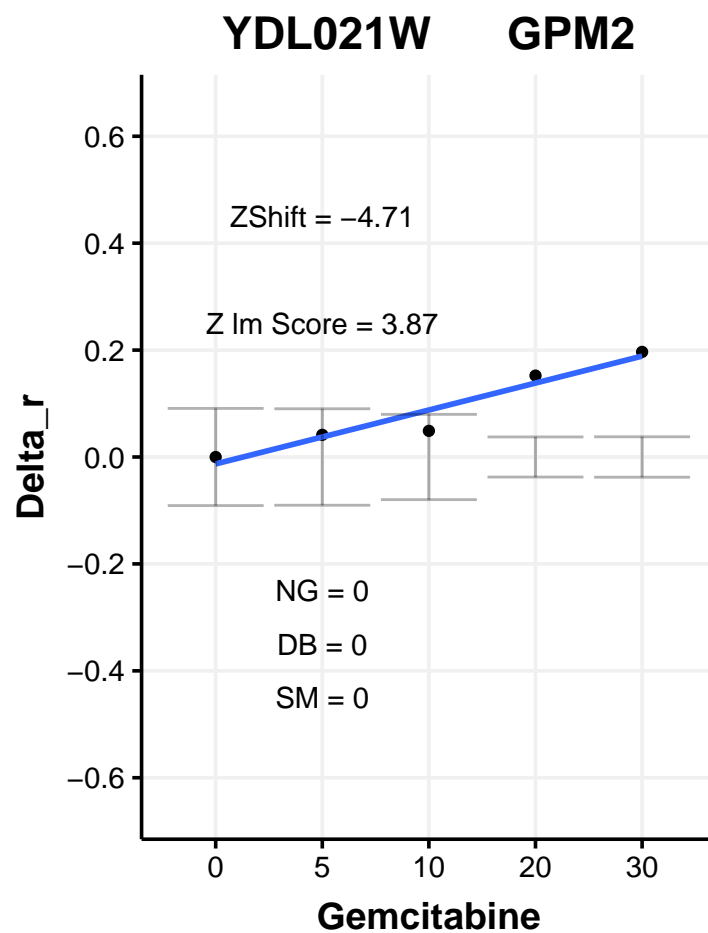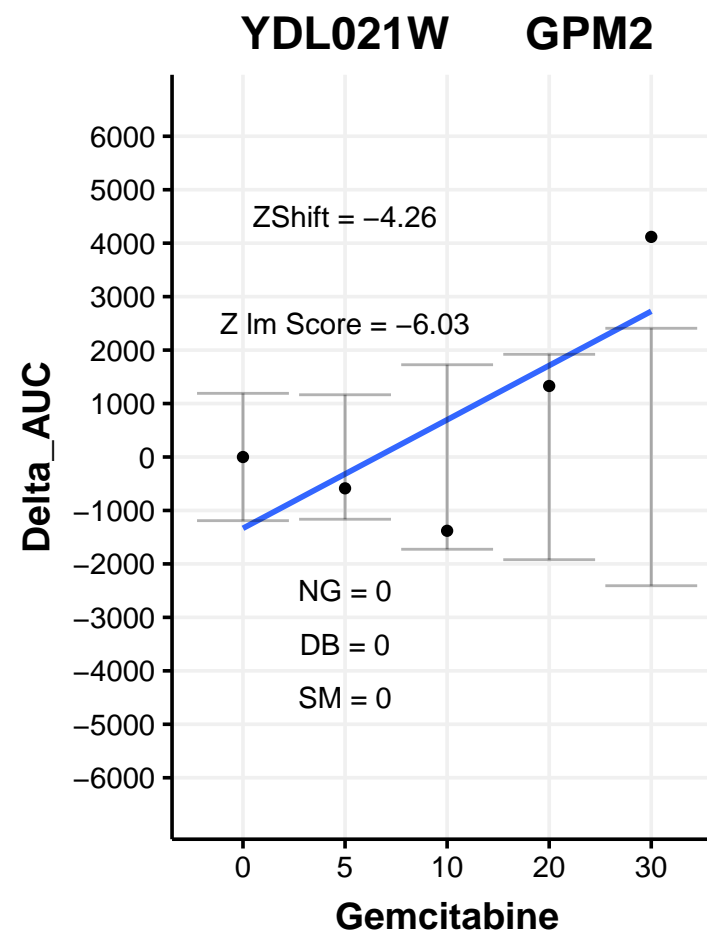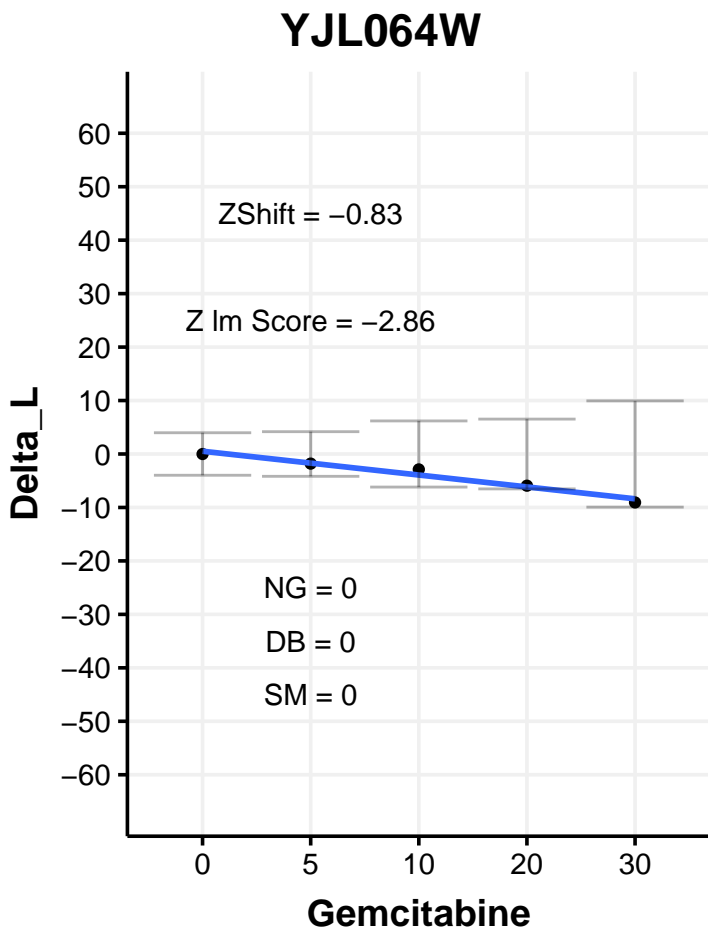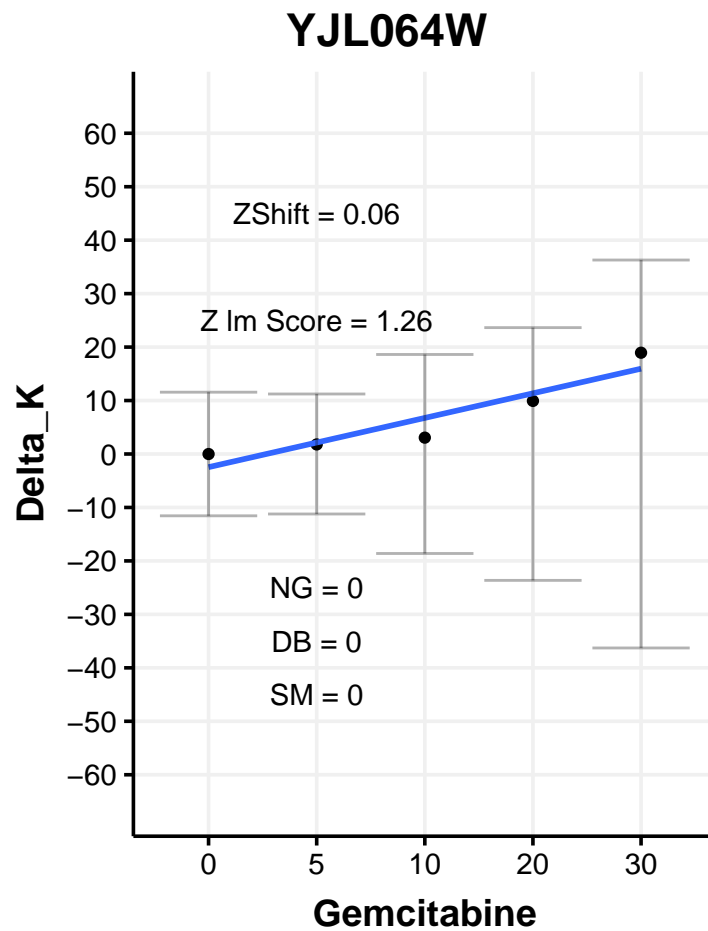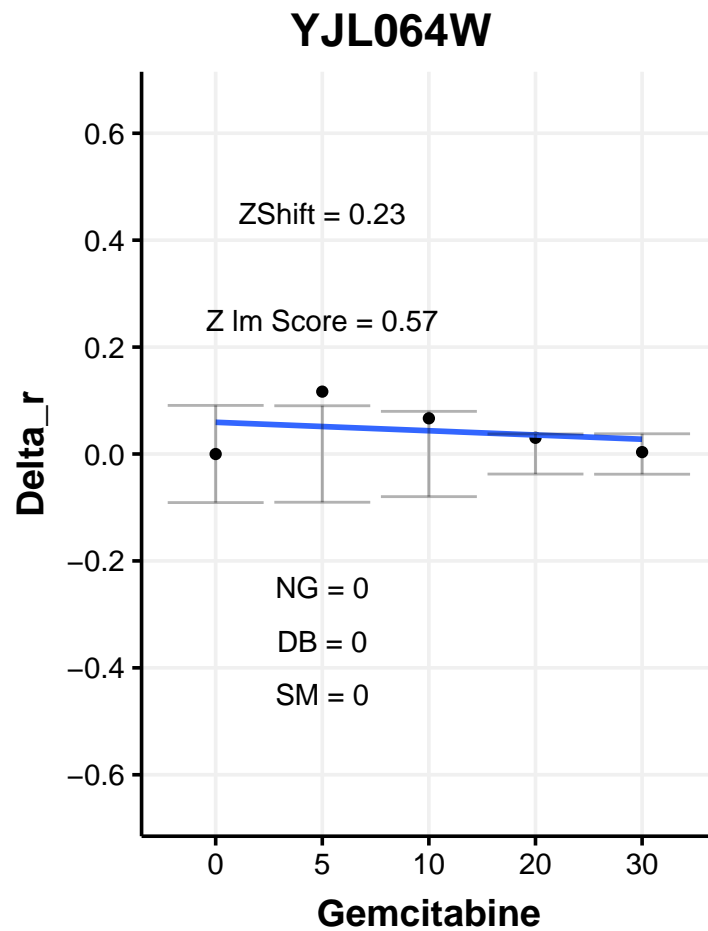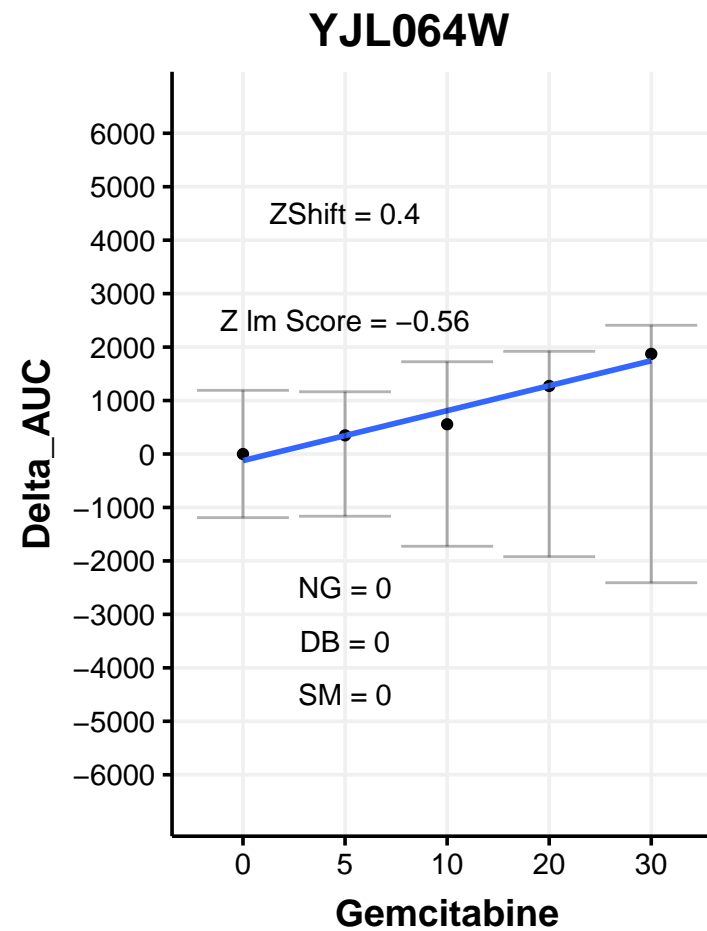

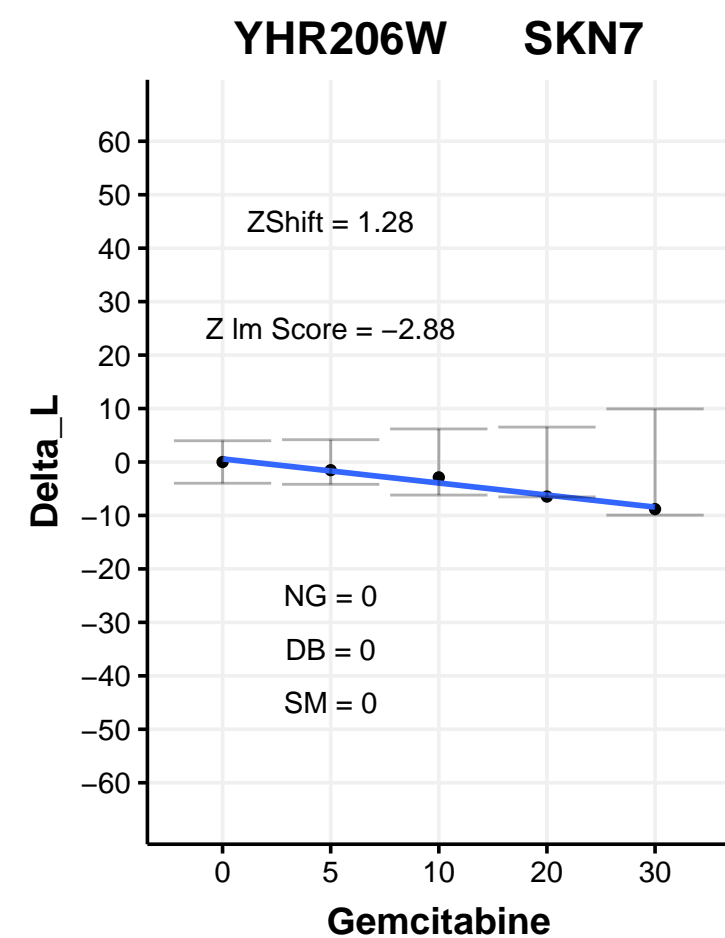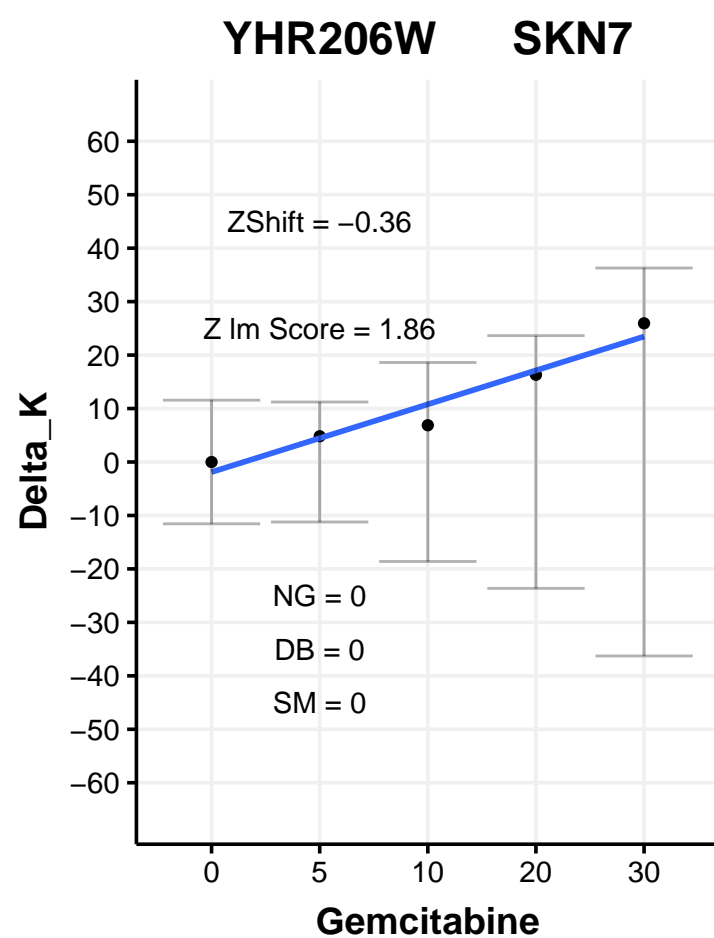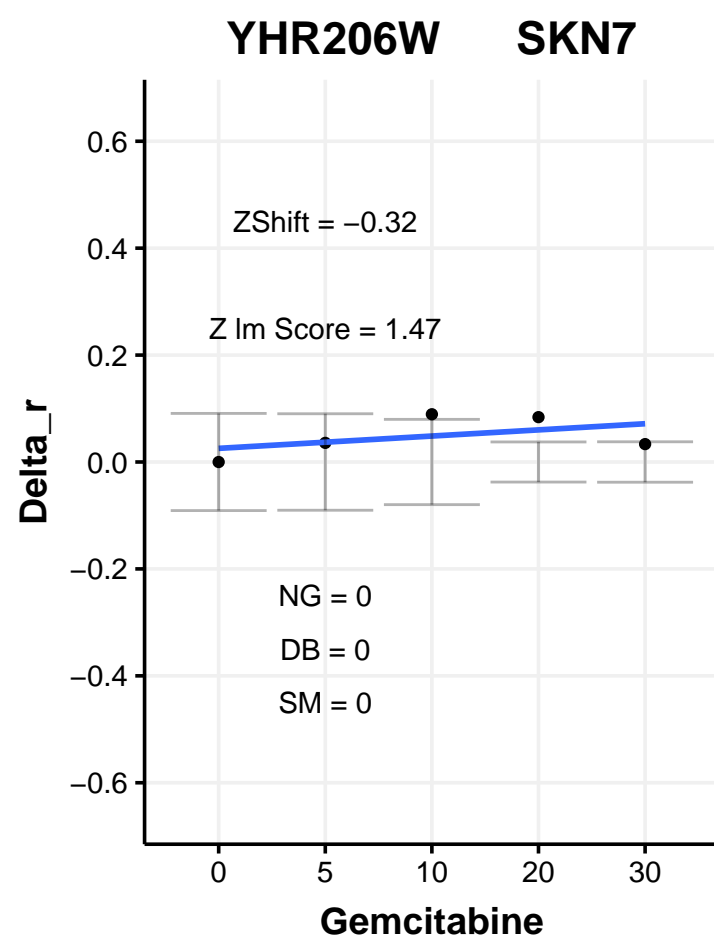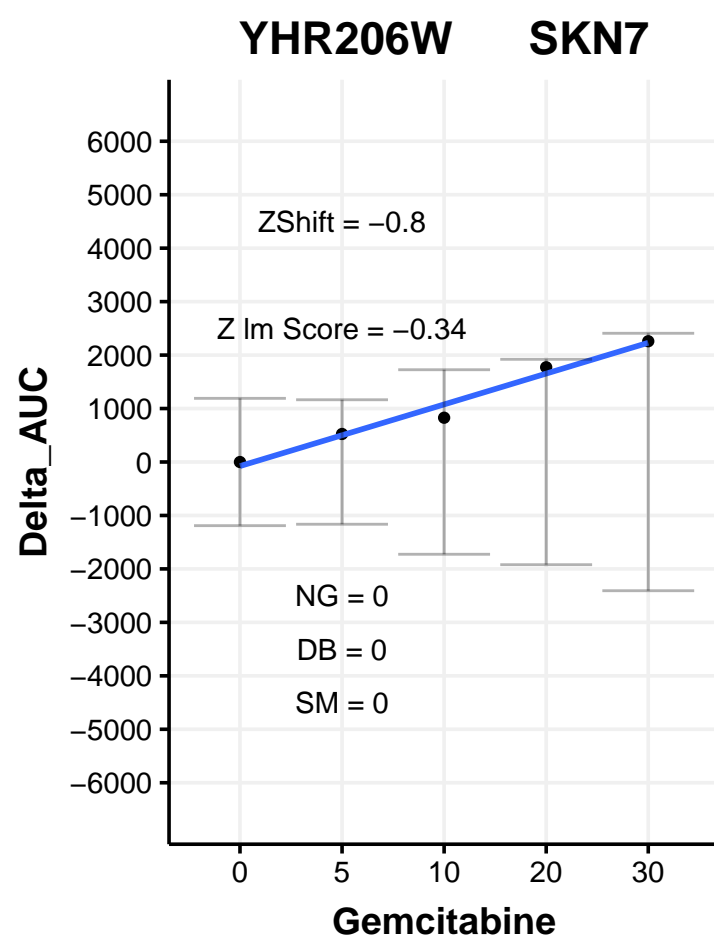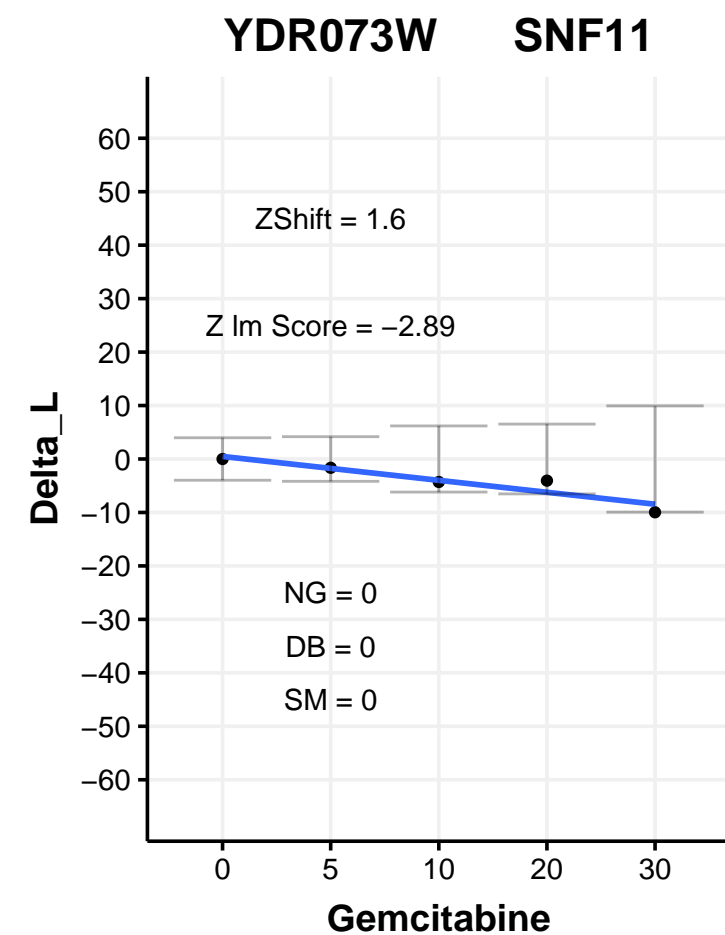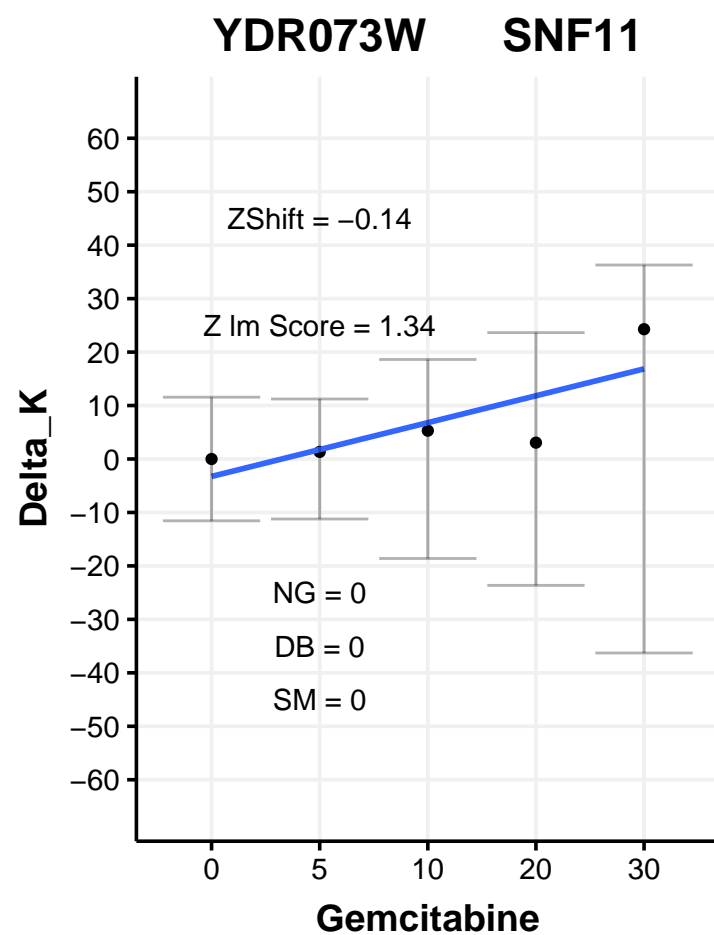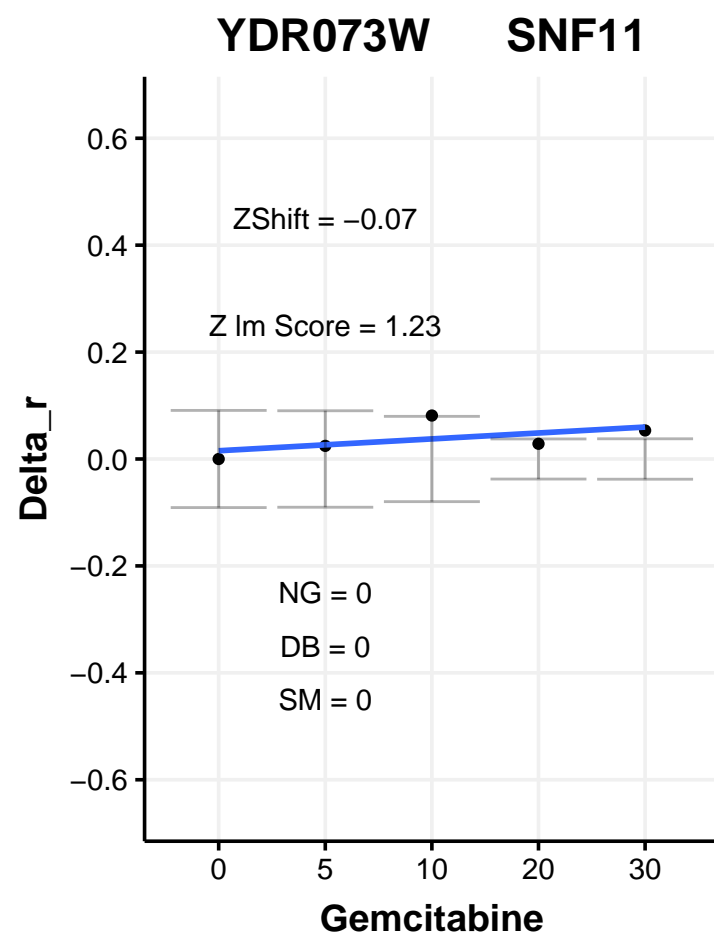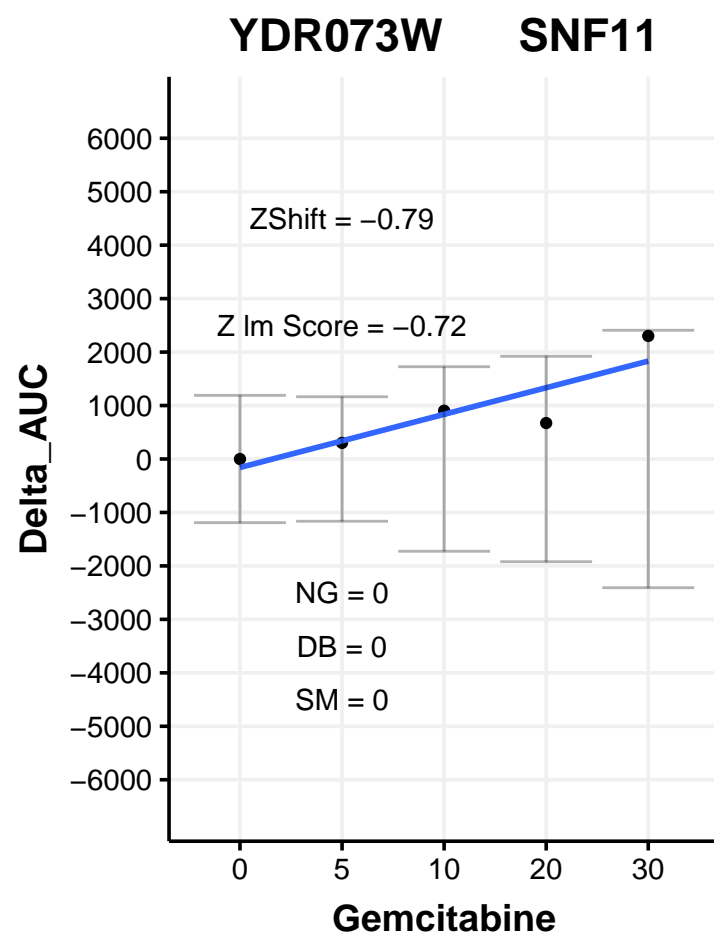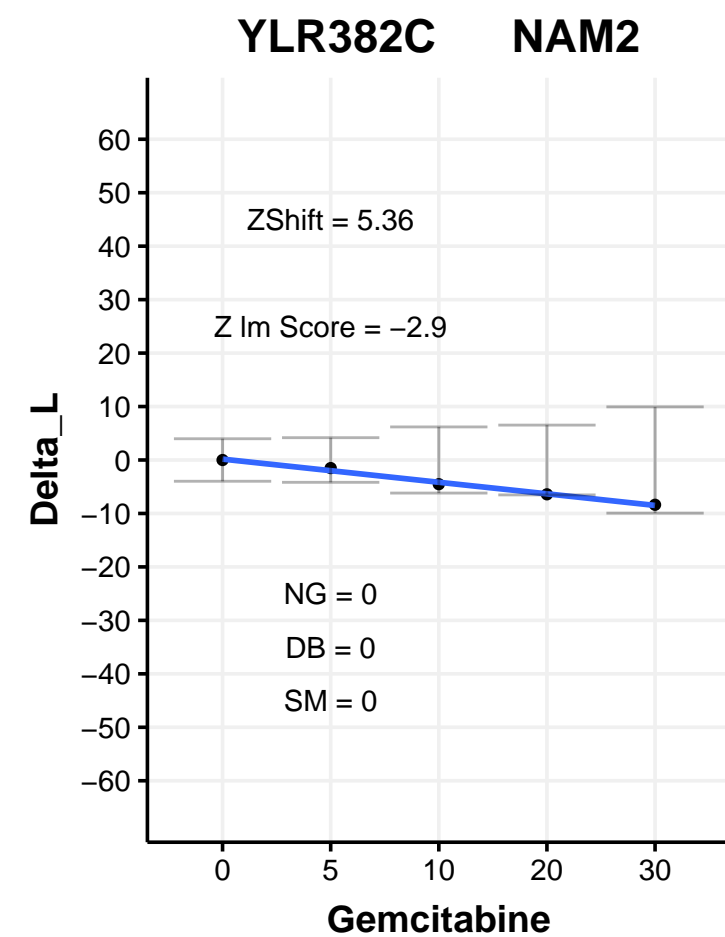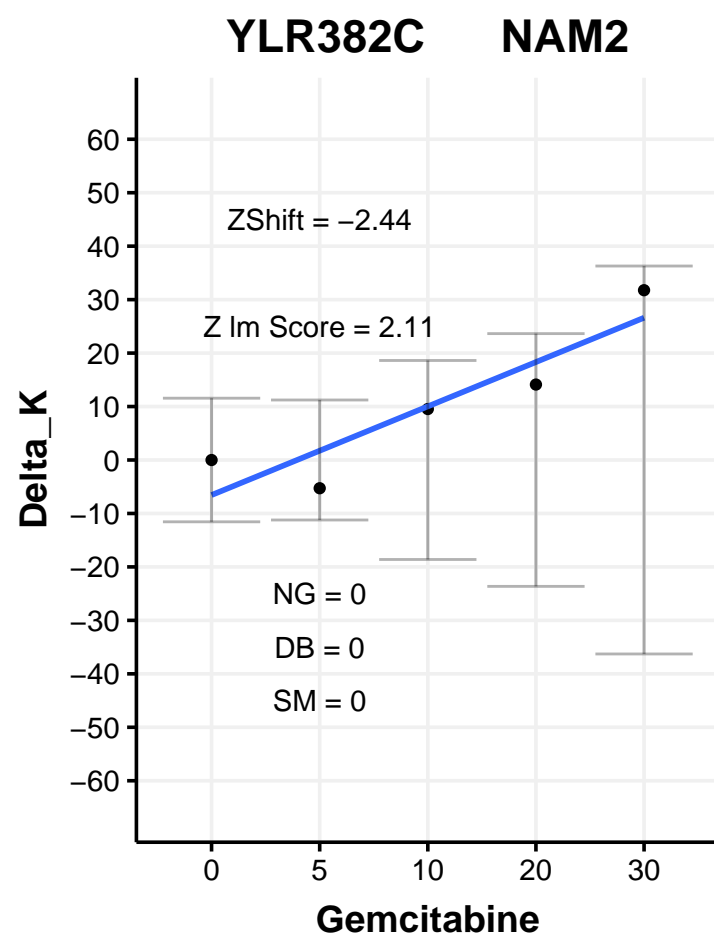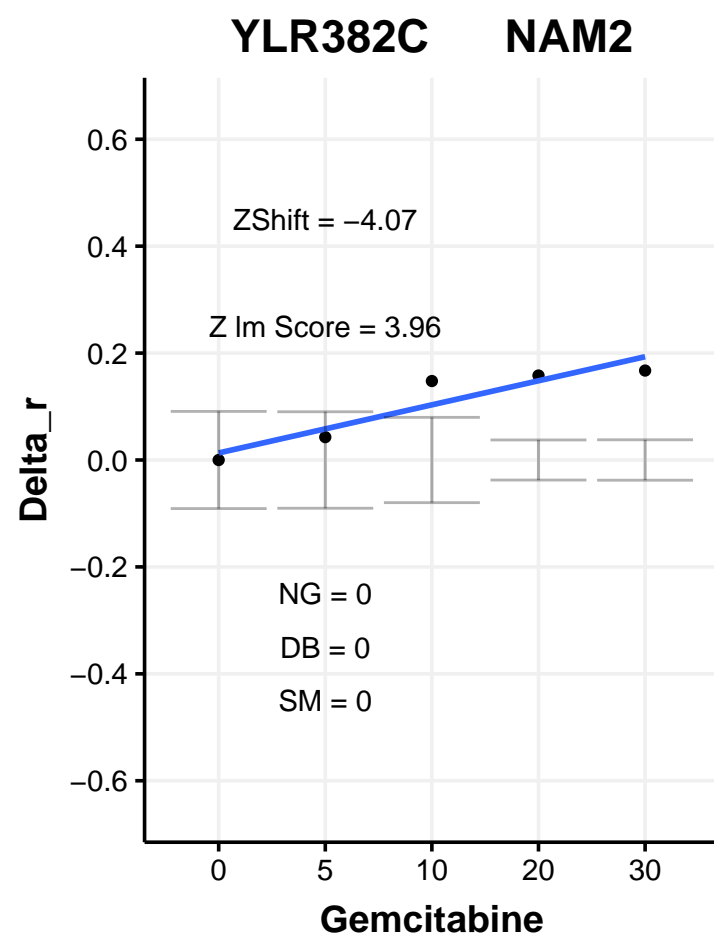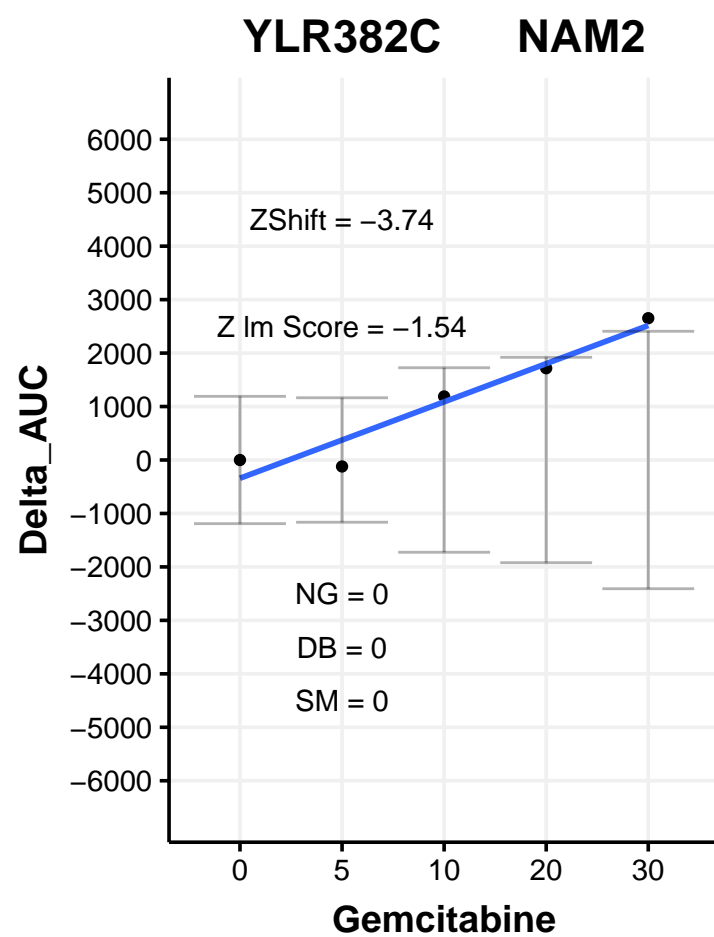

YGL007C-A\_2

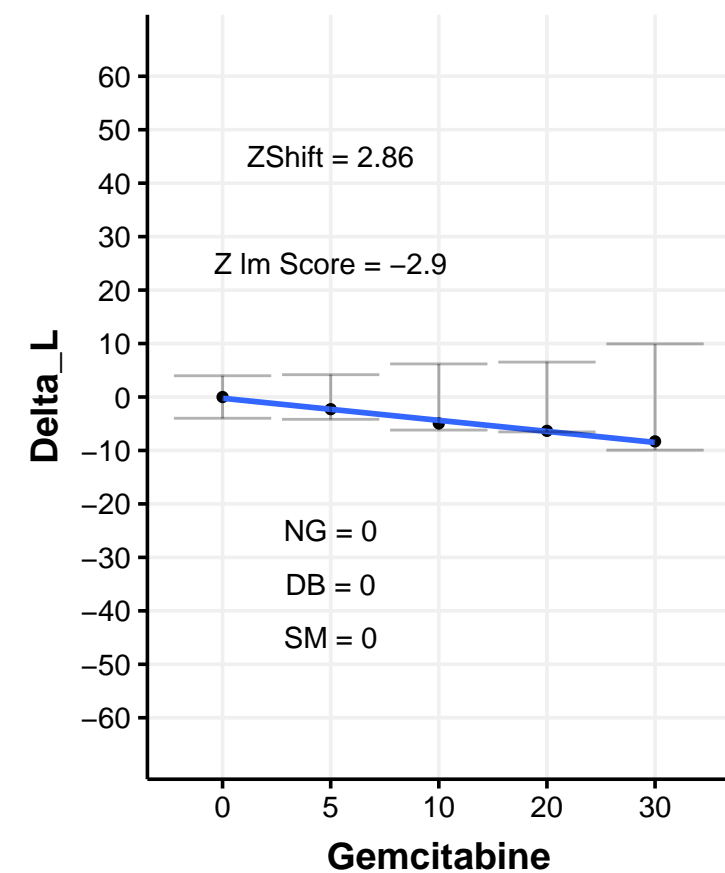

YGL007C-A\_2

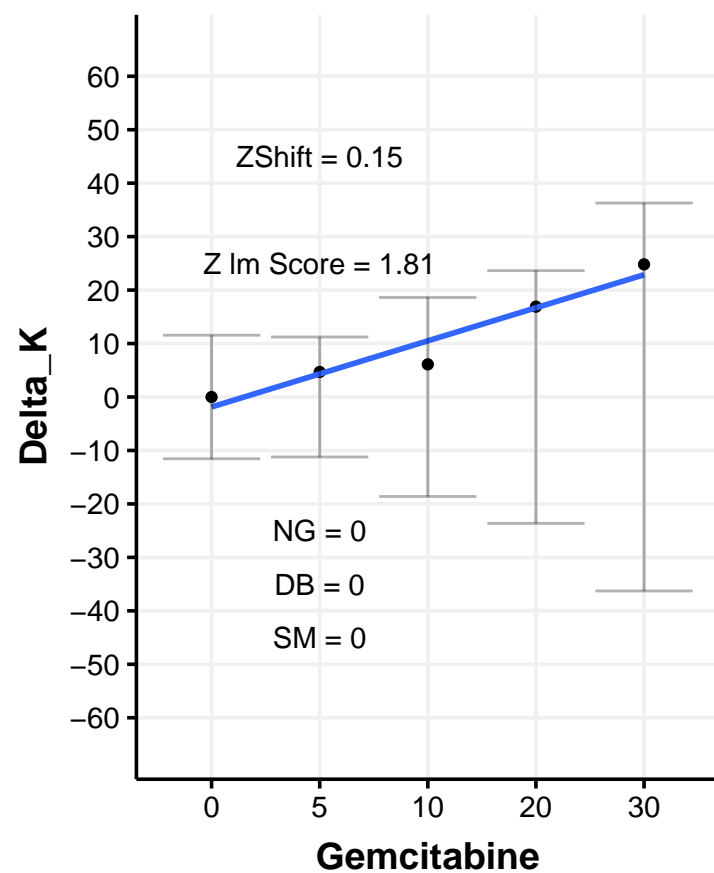

YGL007C-A\_2

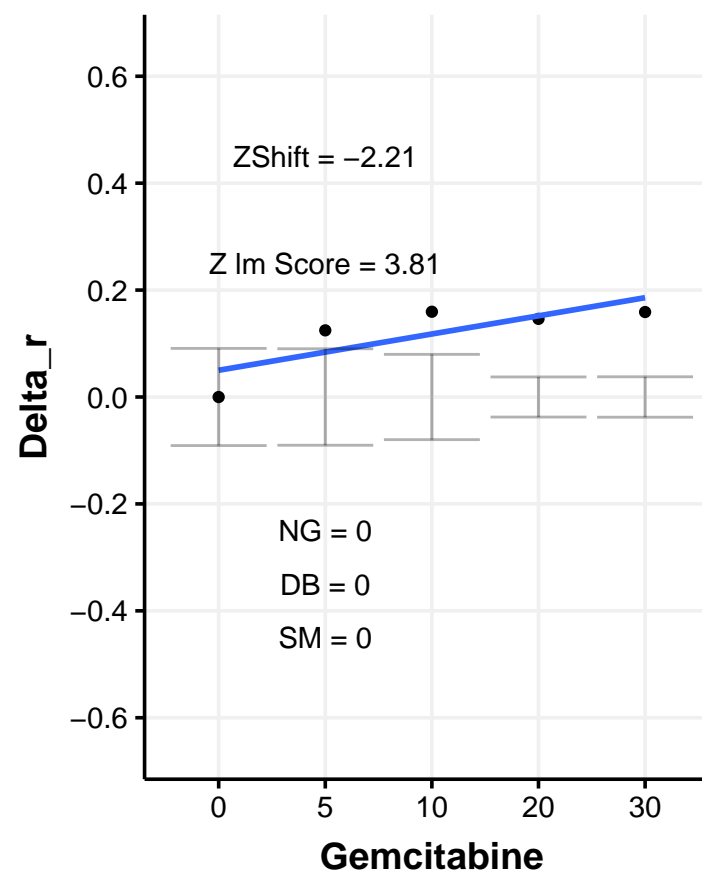

YGL007C-A\_2

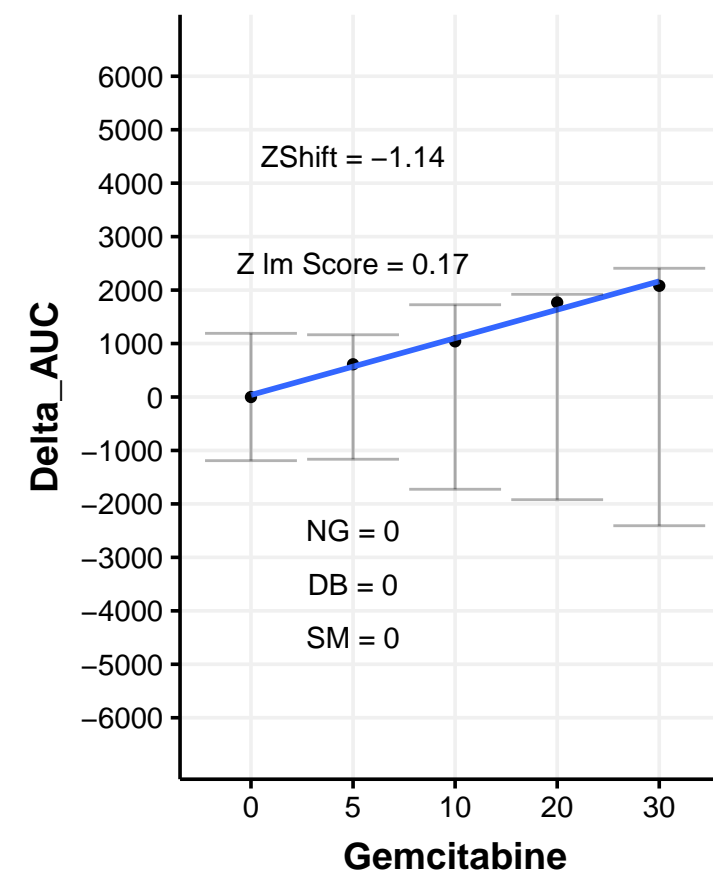

YDL099W BUG1

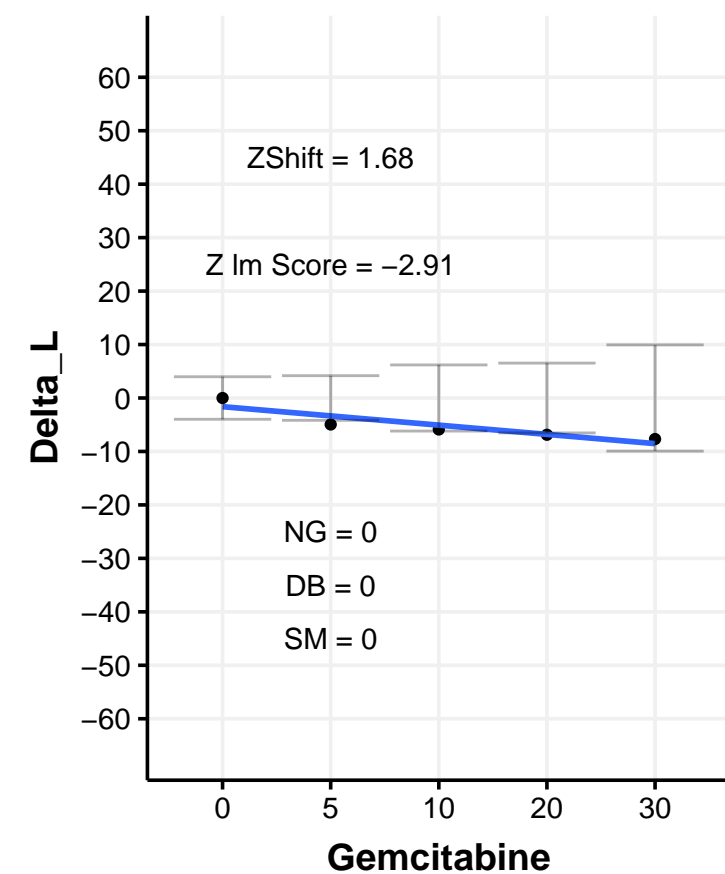

YDL099W BUG1

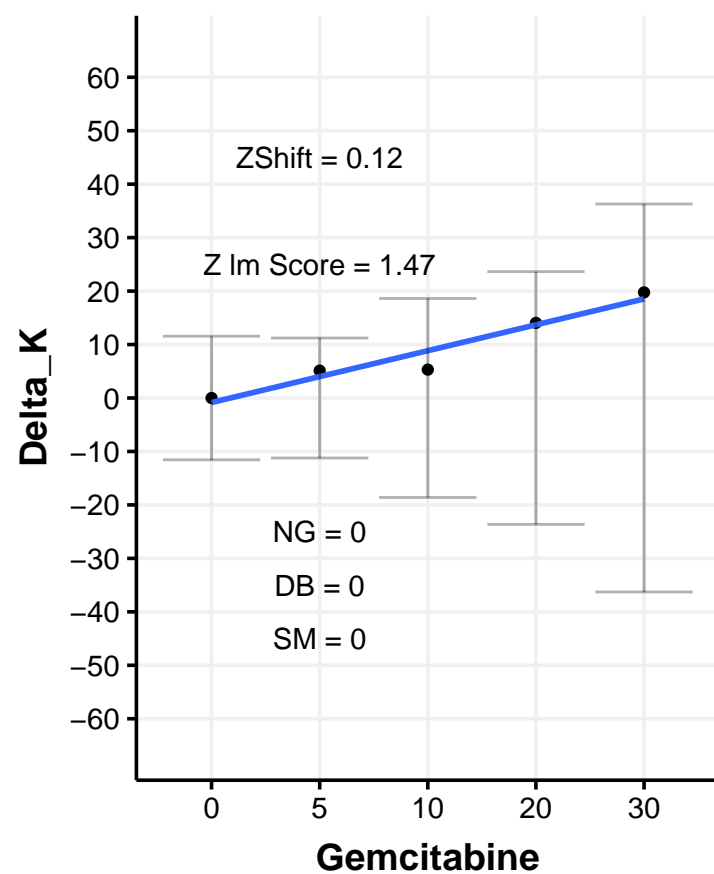

YDL099W BUG1

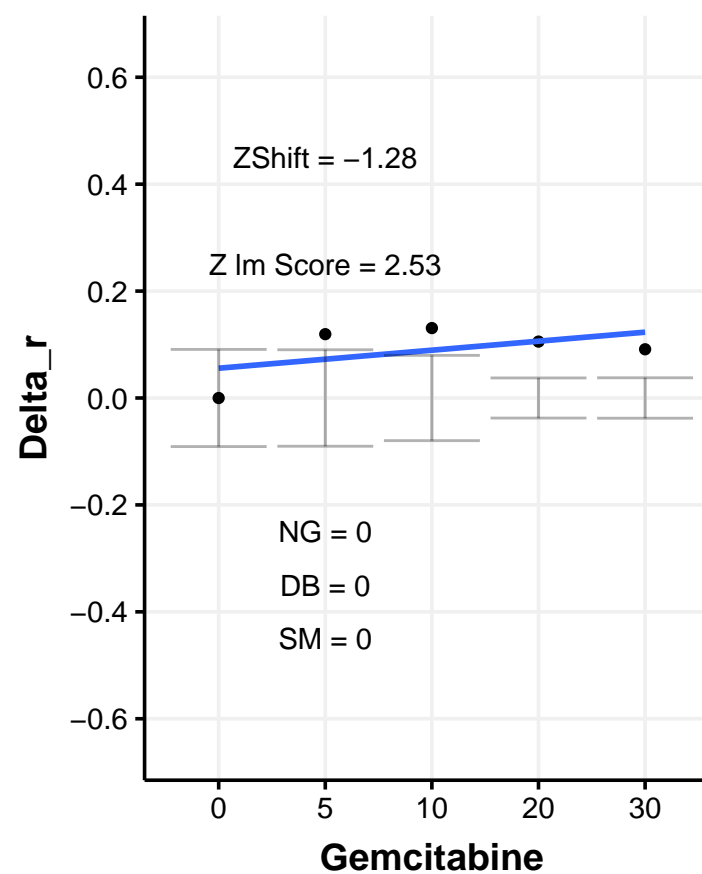

YDL099W BUG1

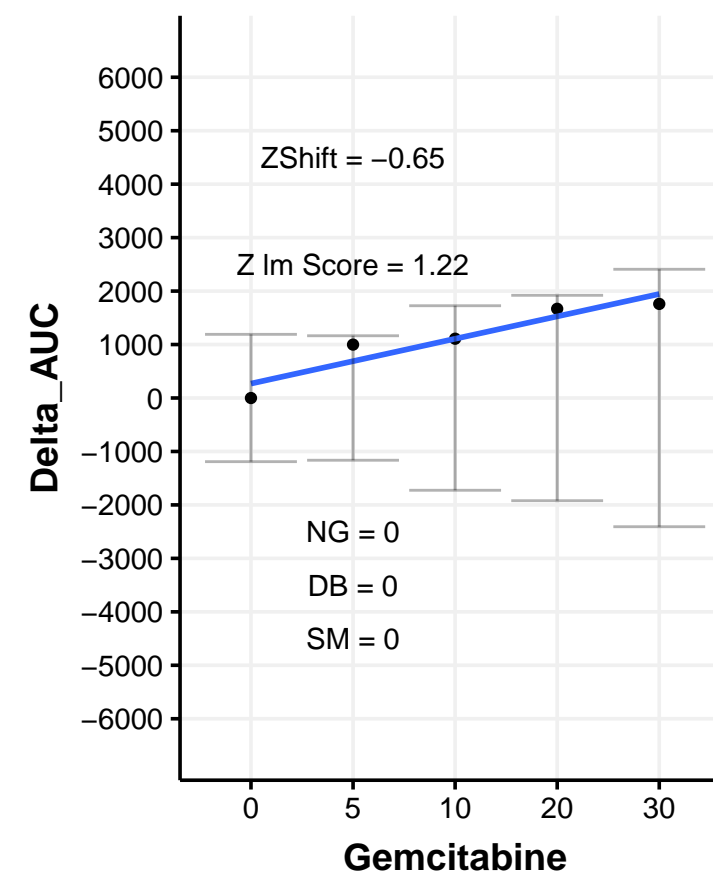

YML095C-A

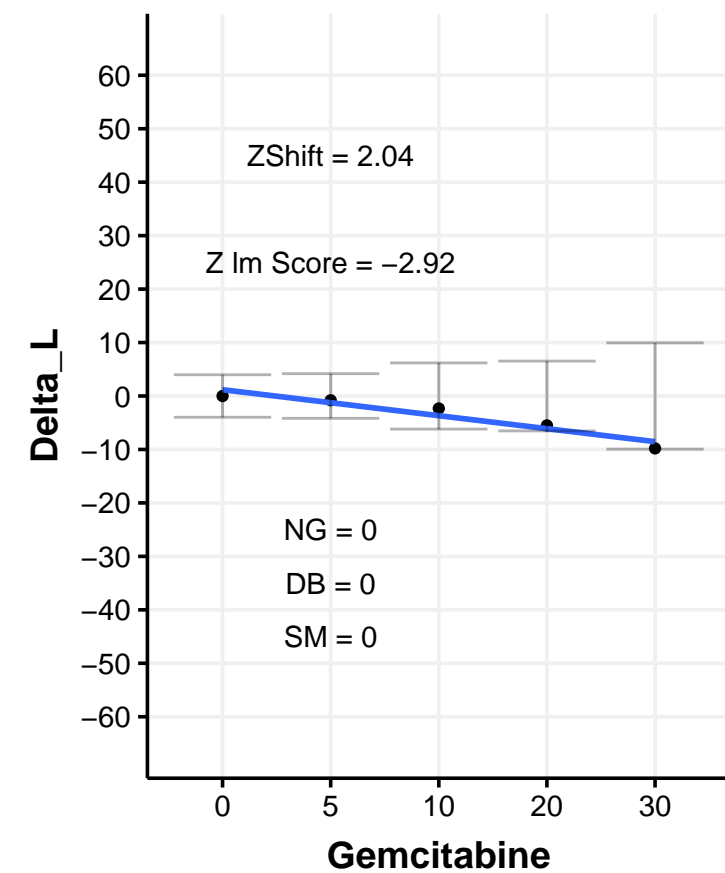

YML095C-A

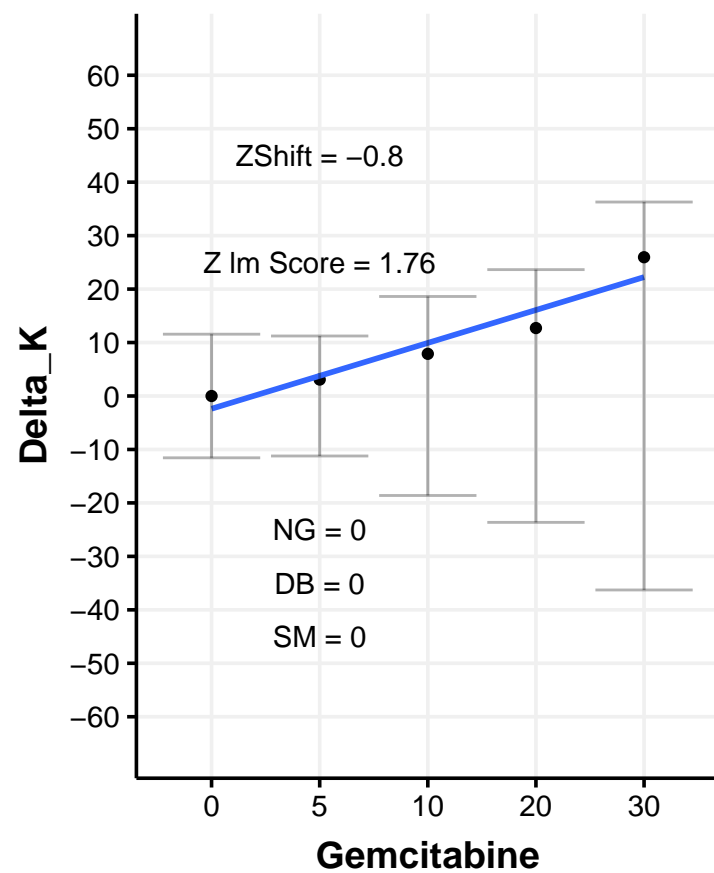

YML095C-A

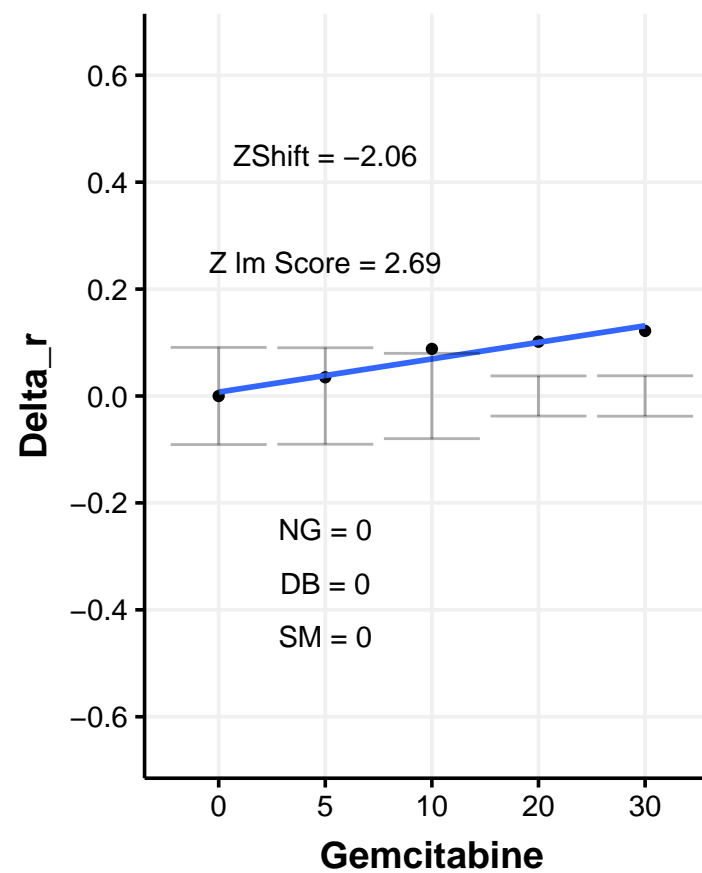

YML095C-A

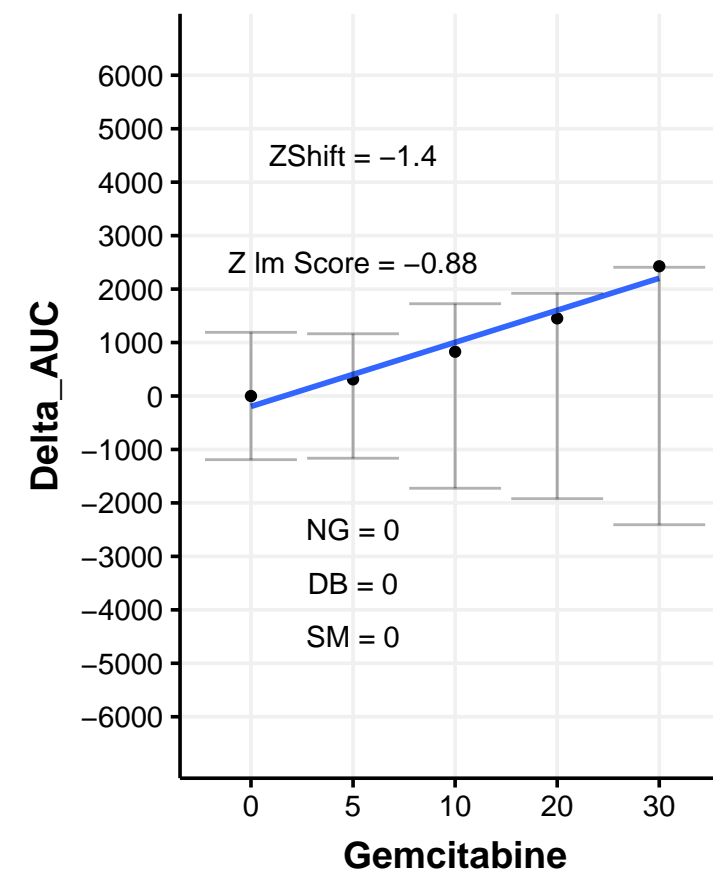

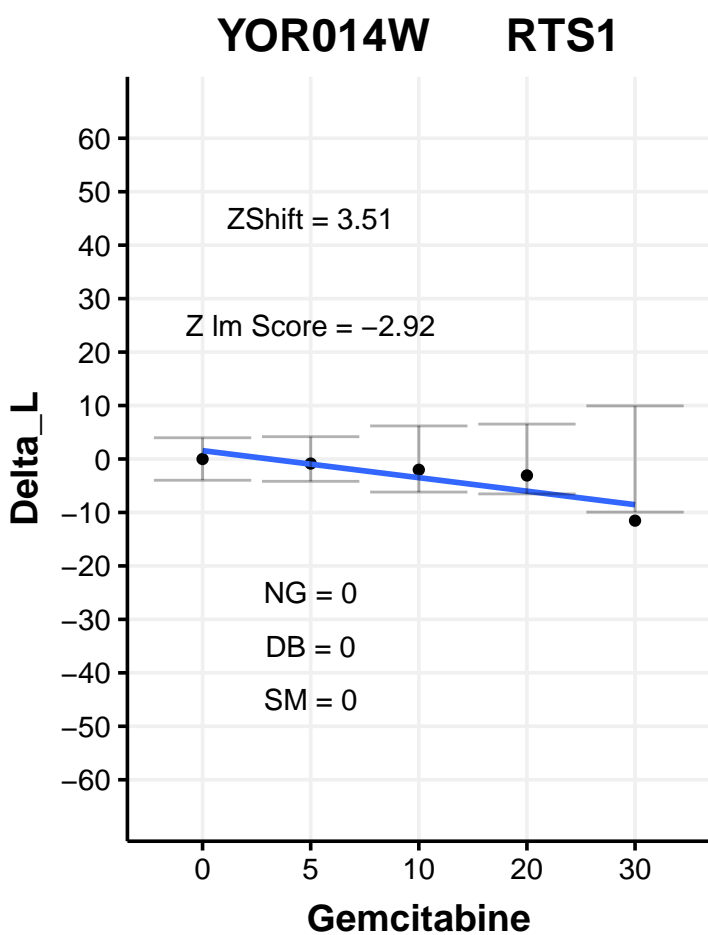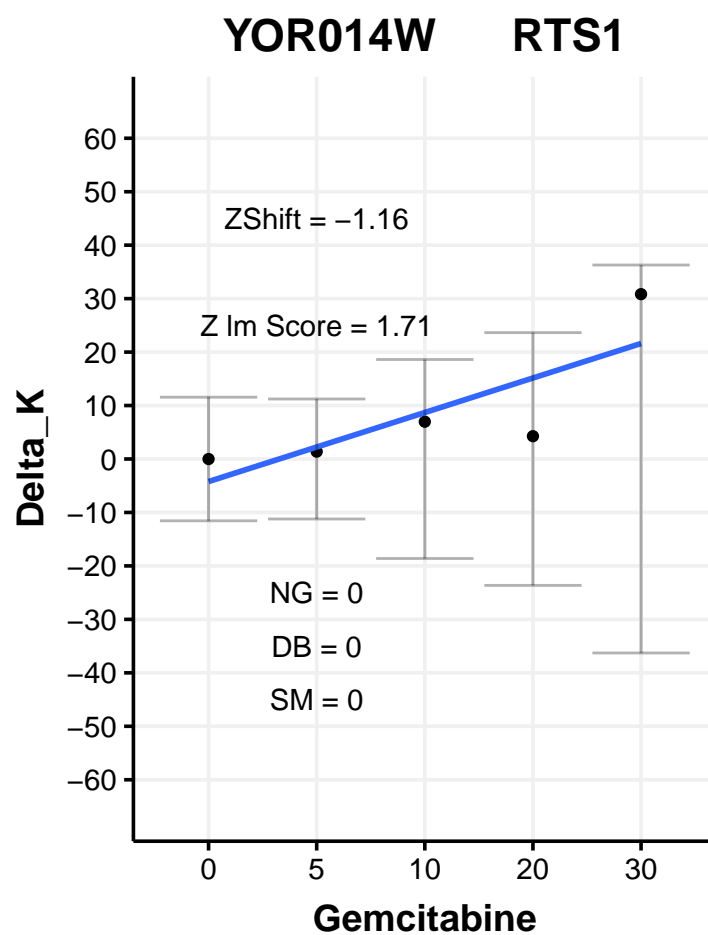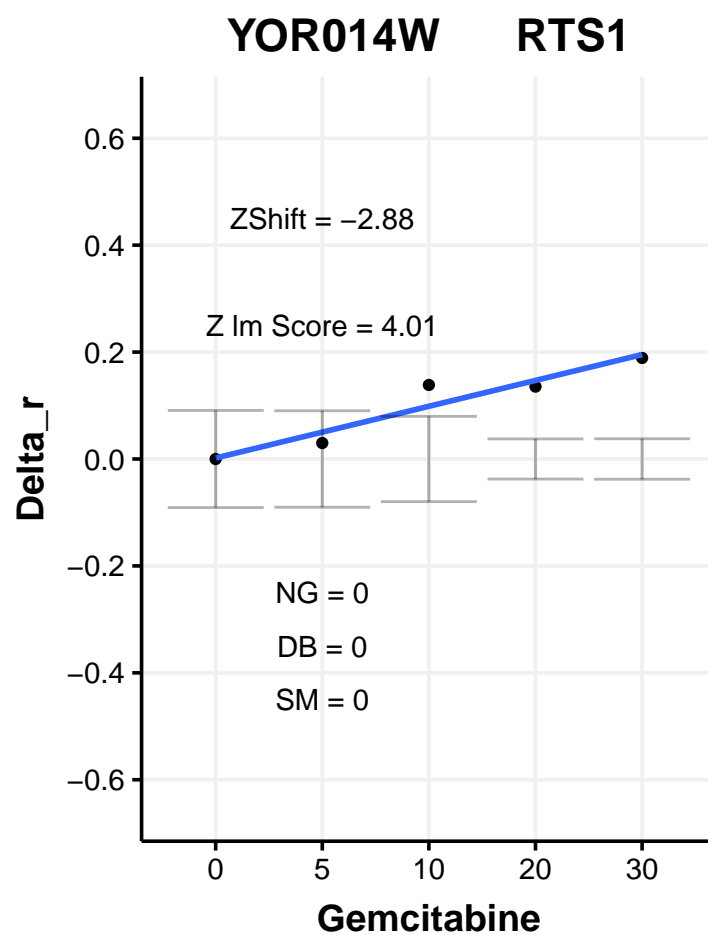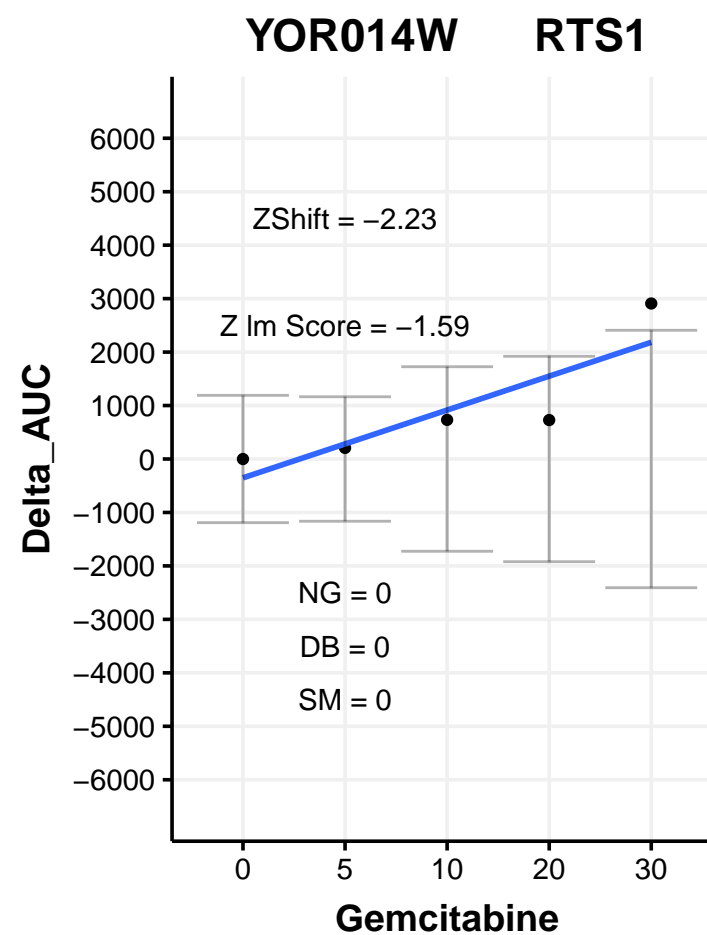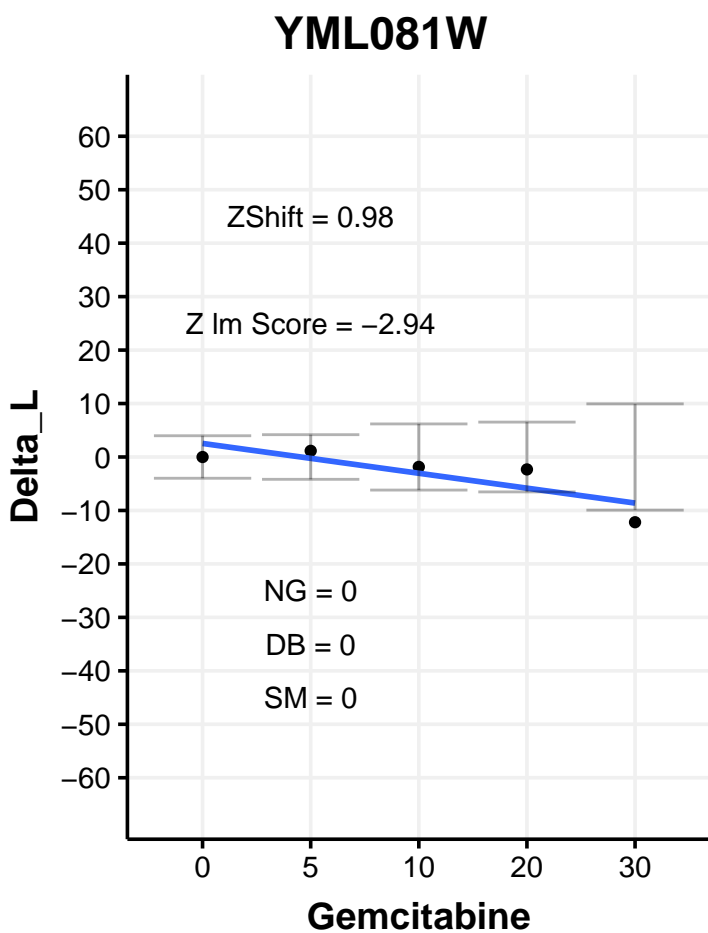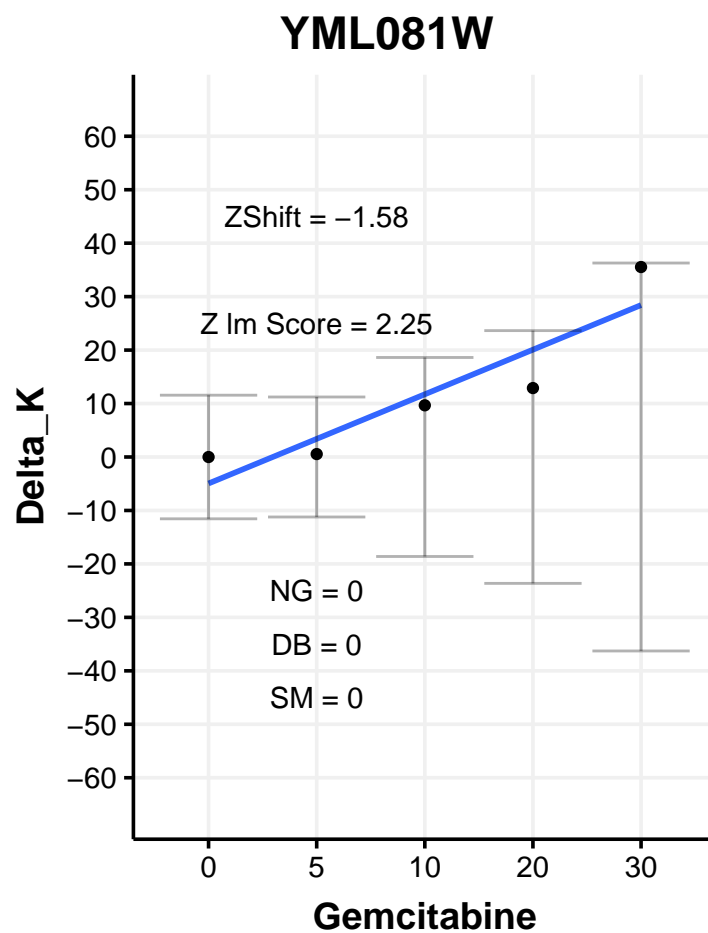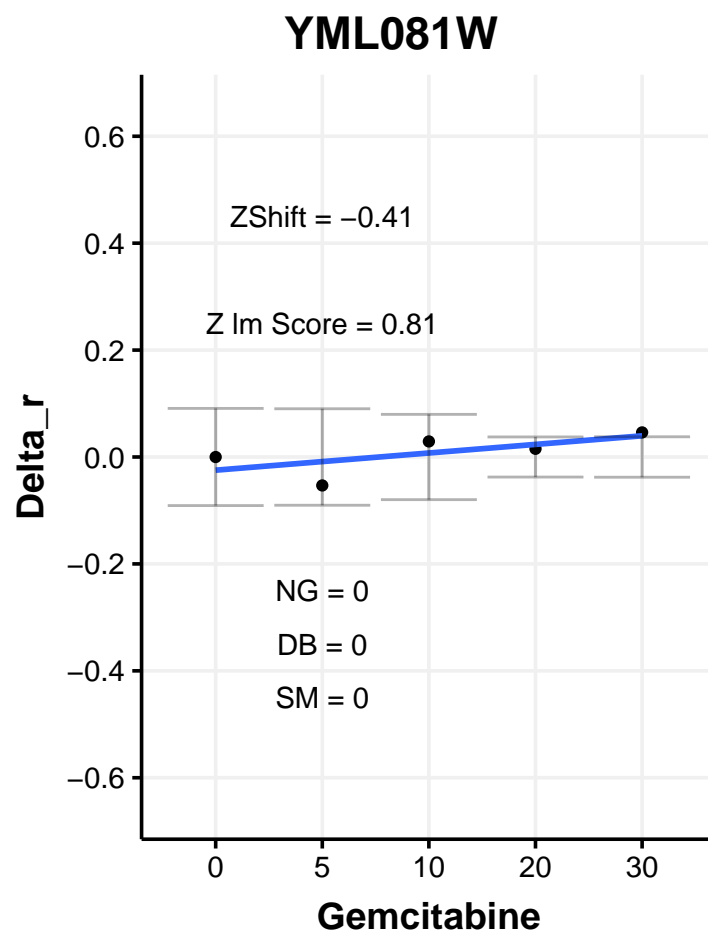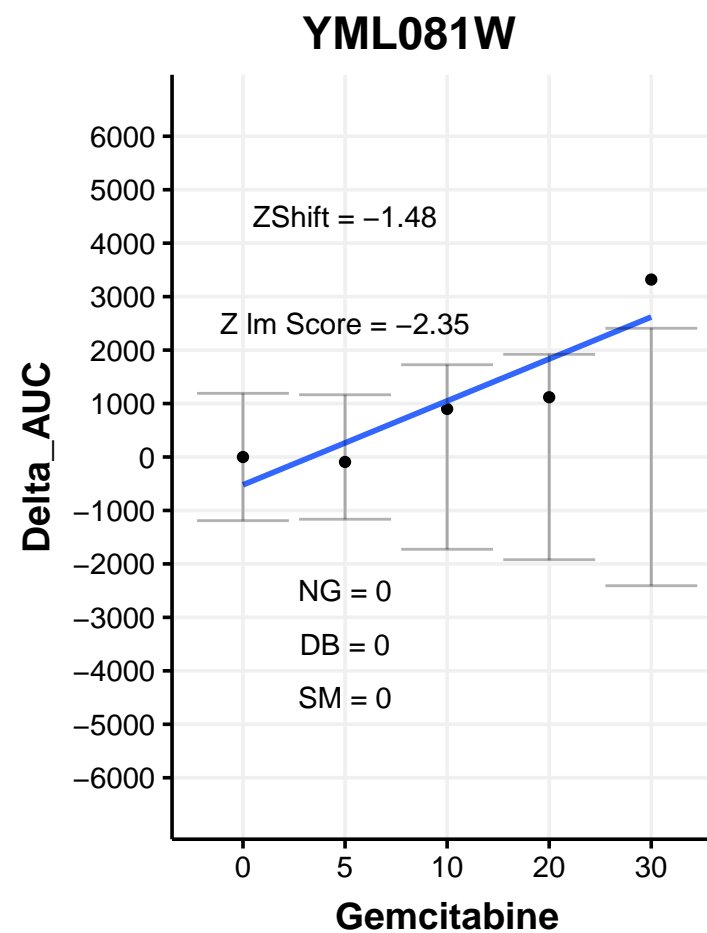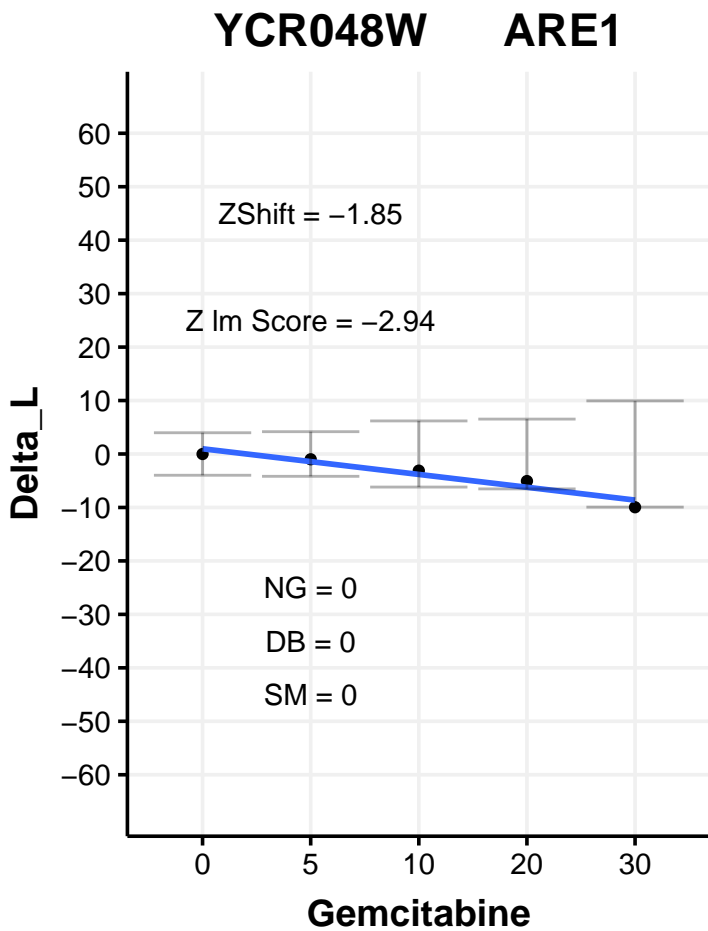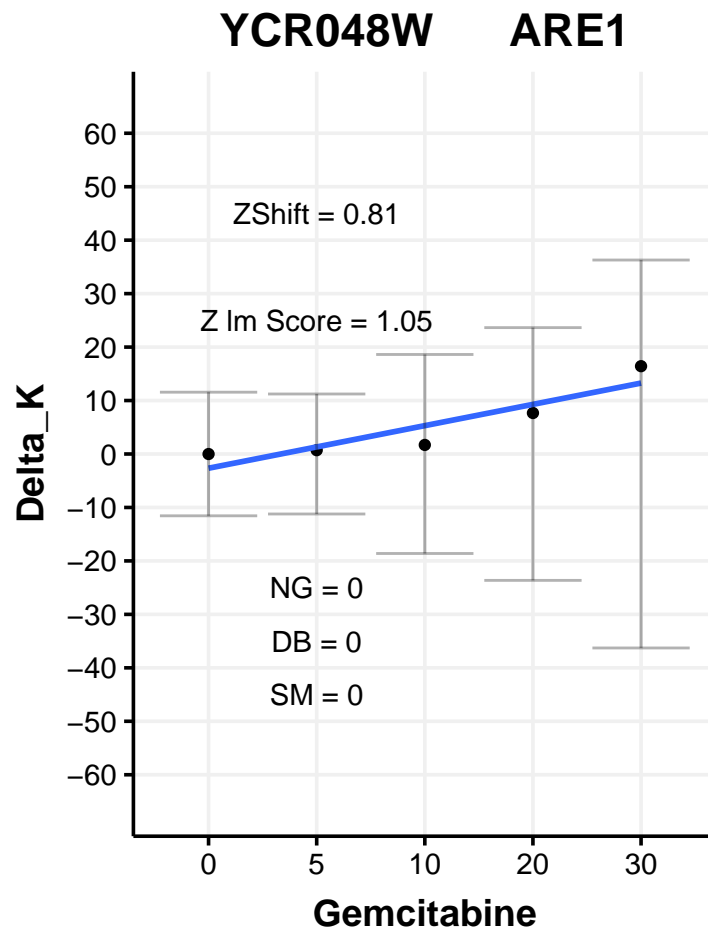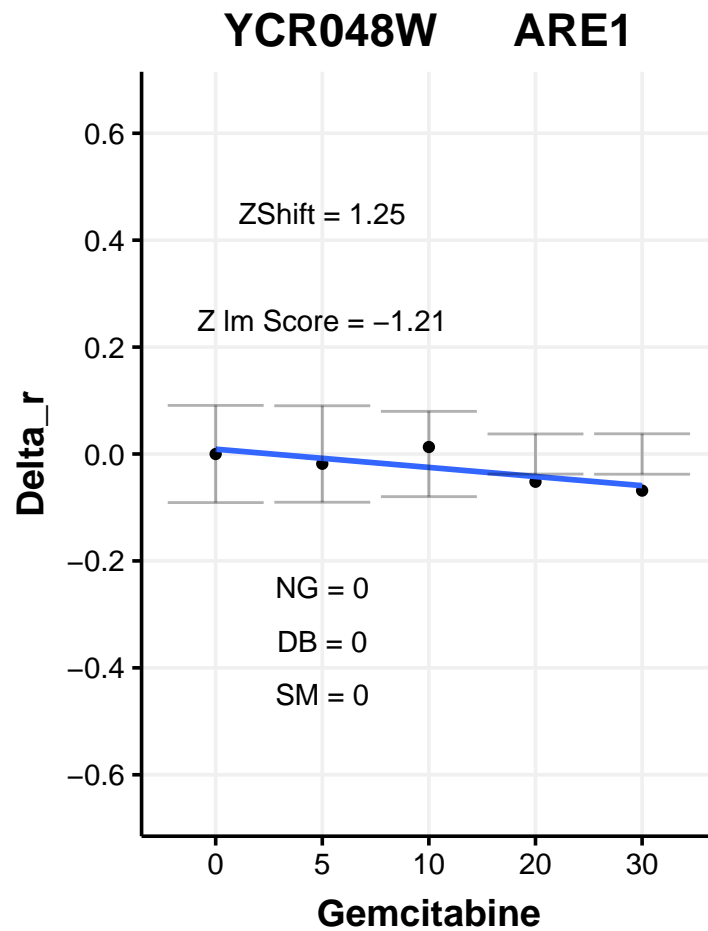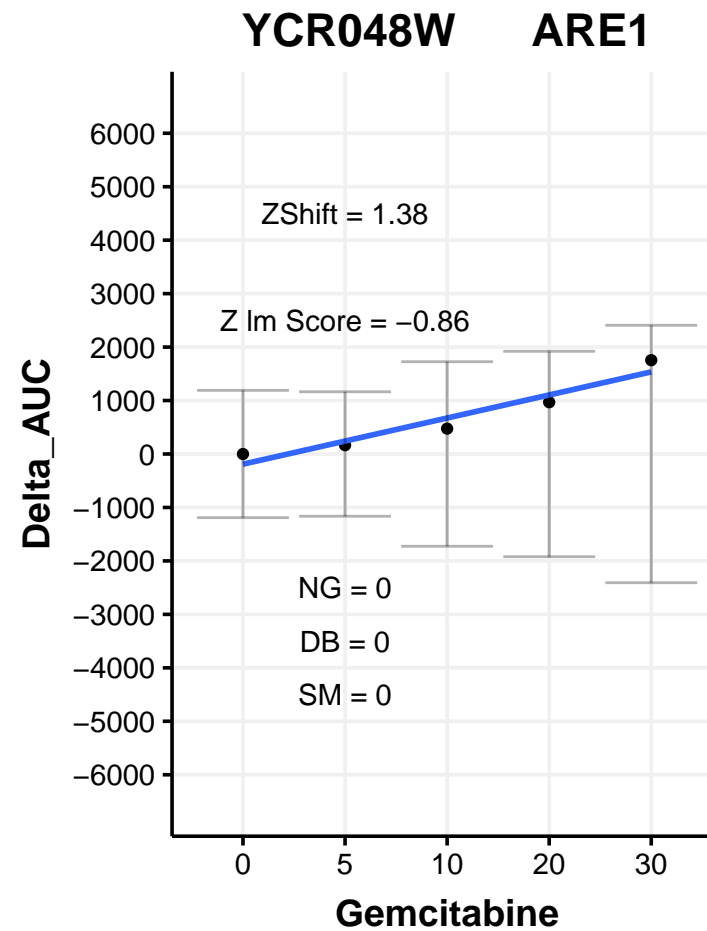

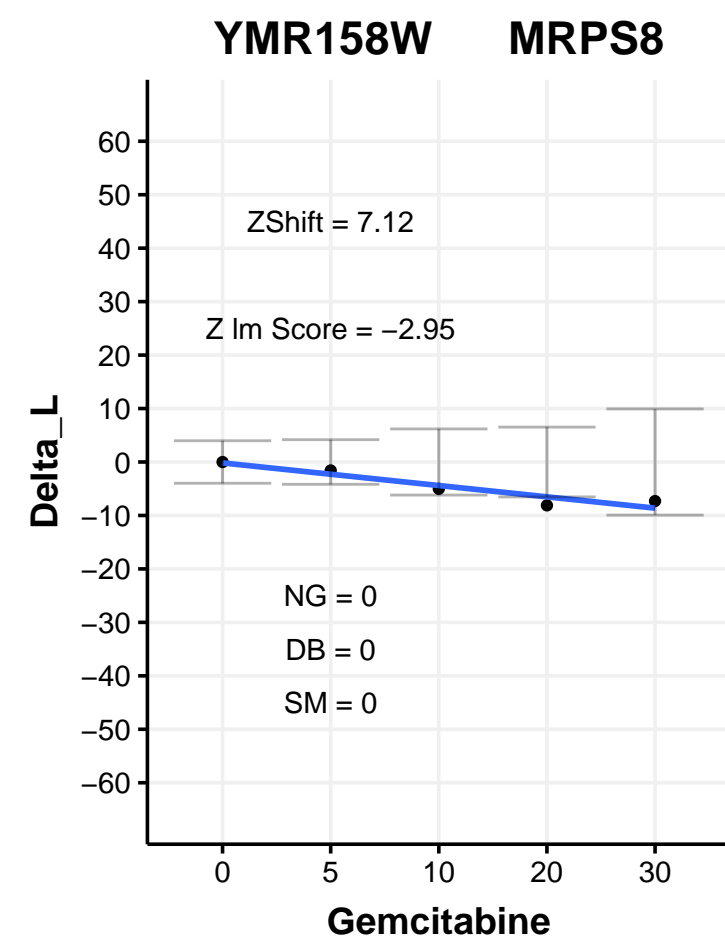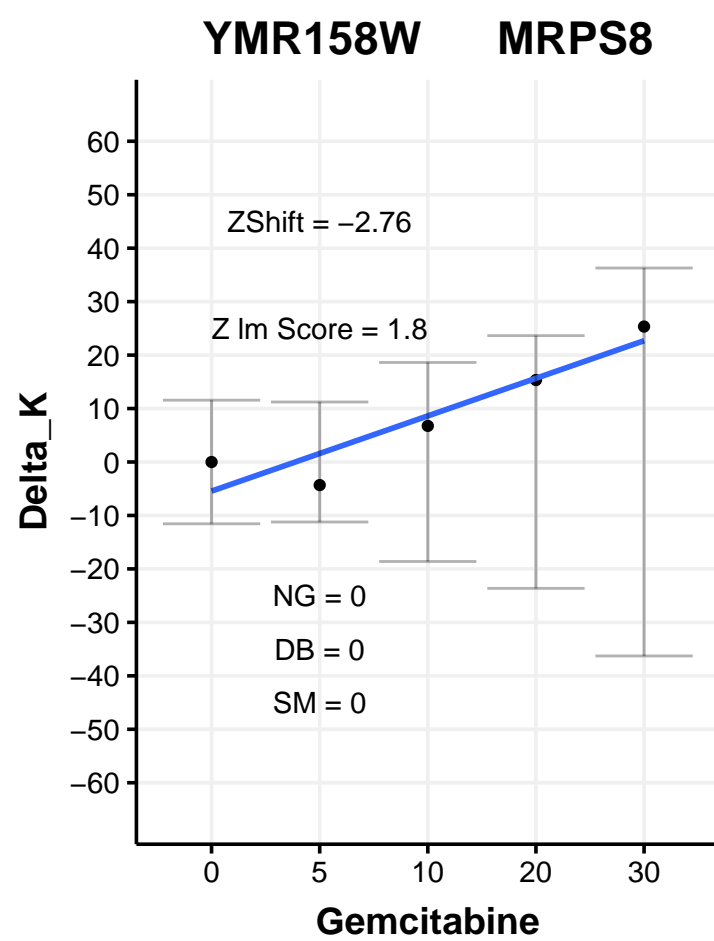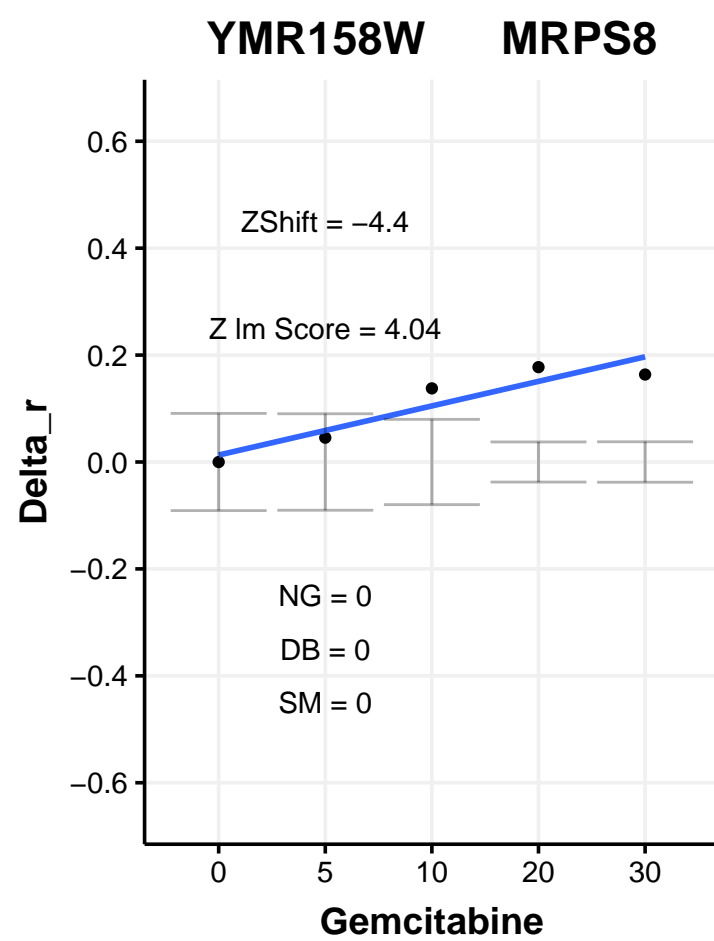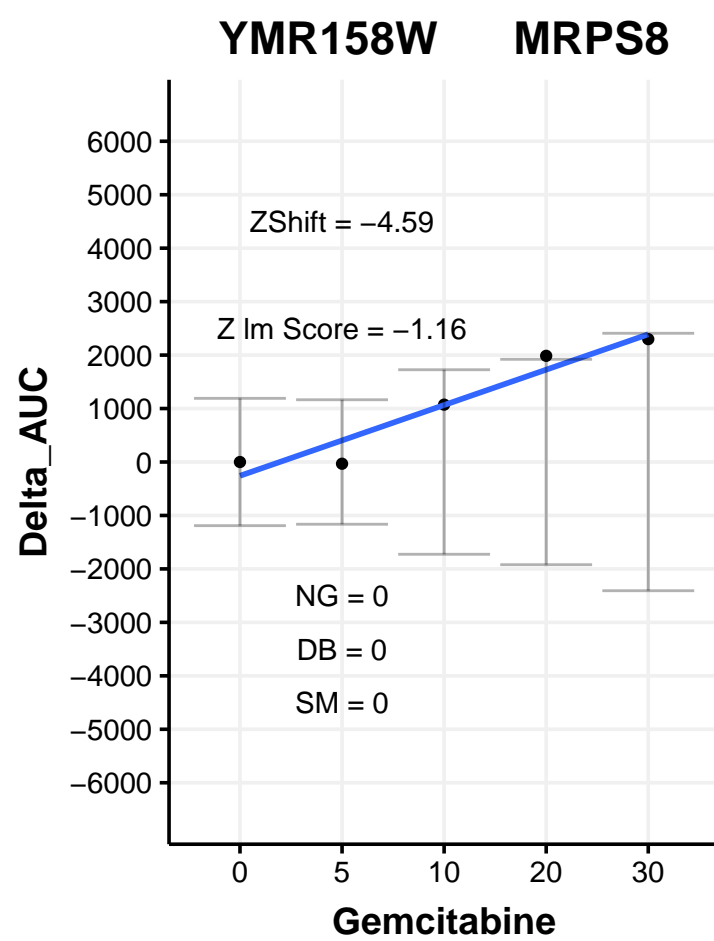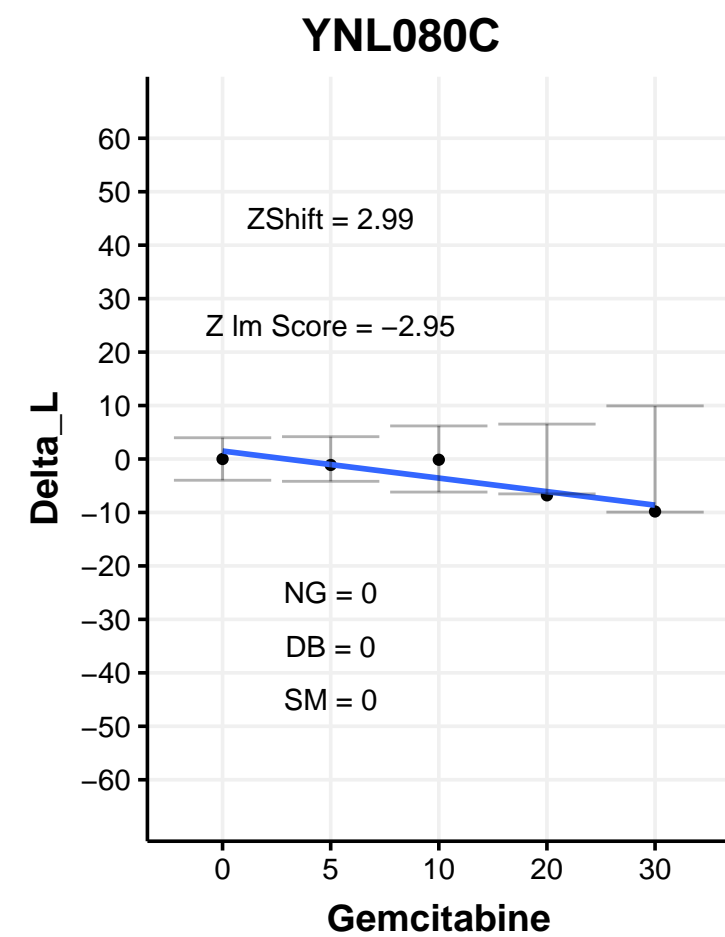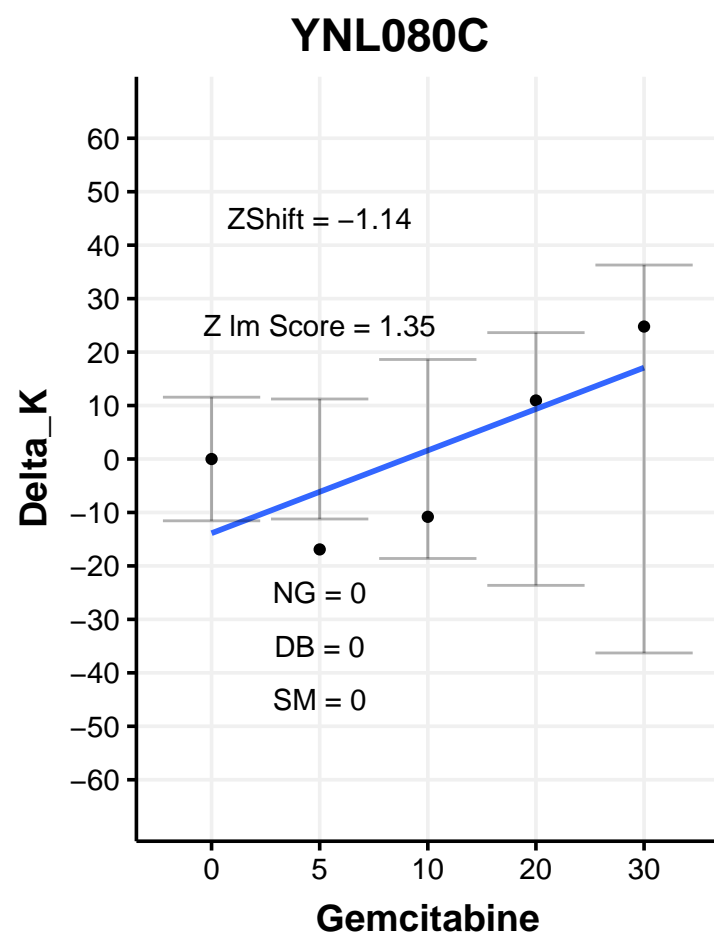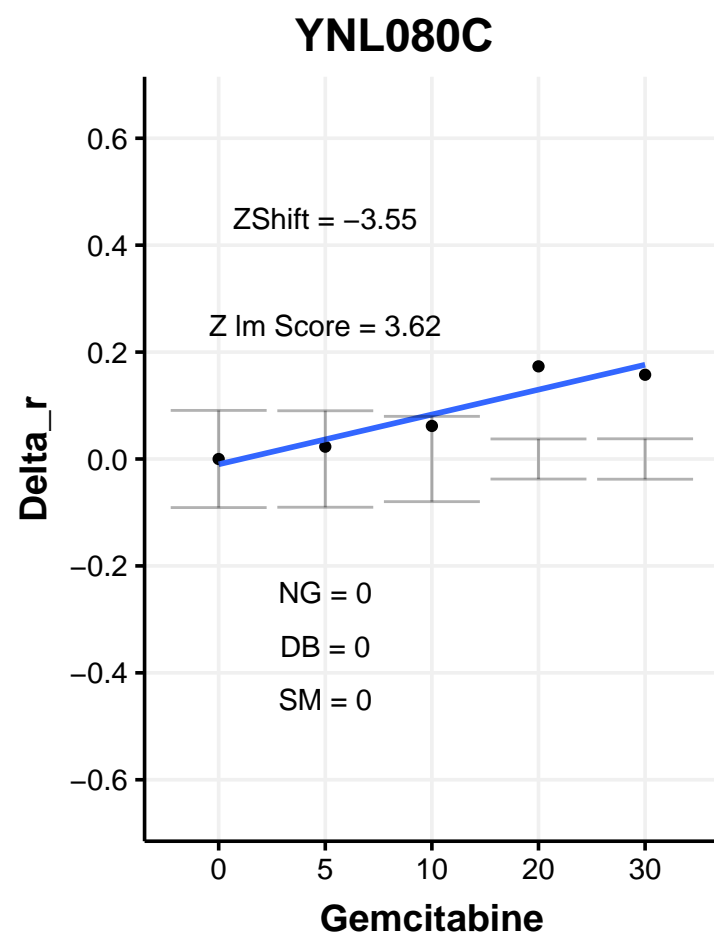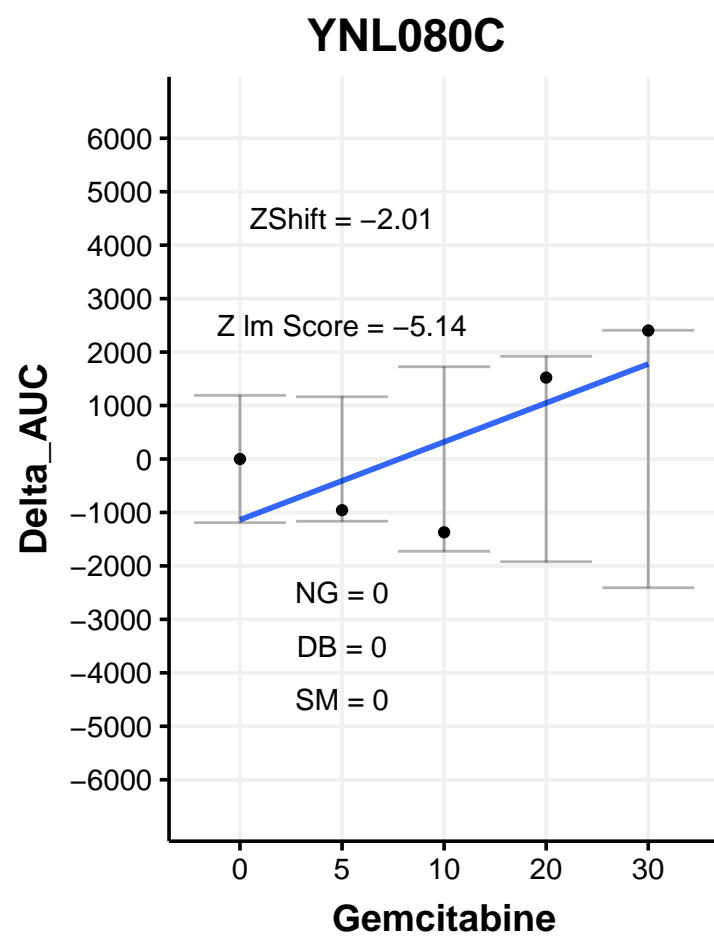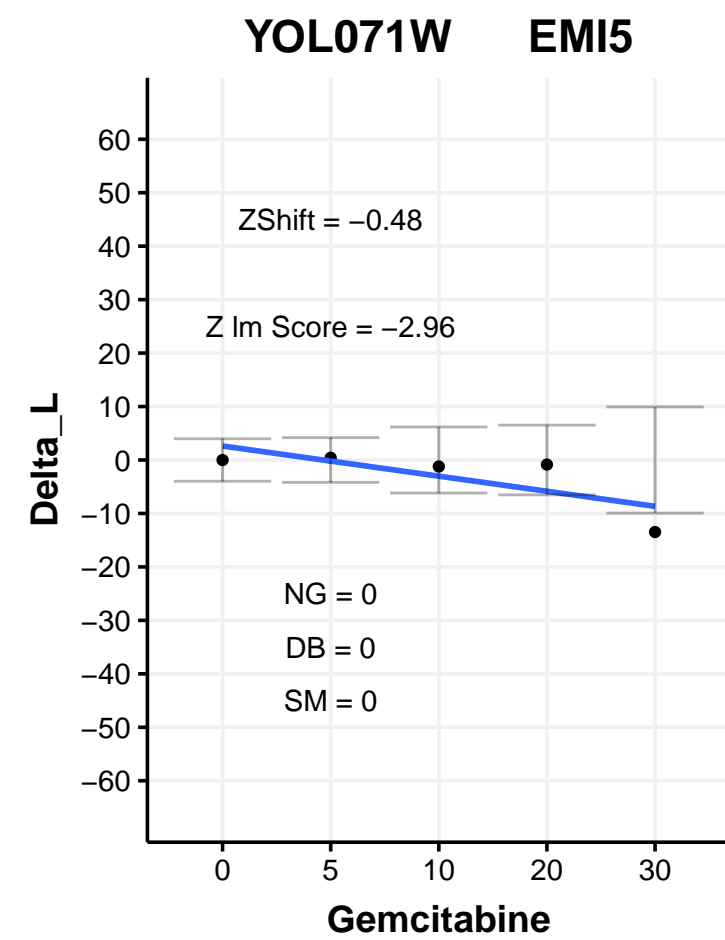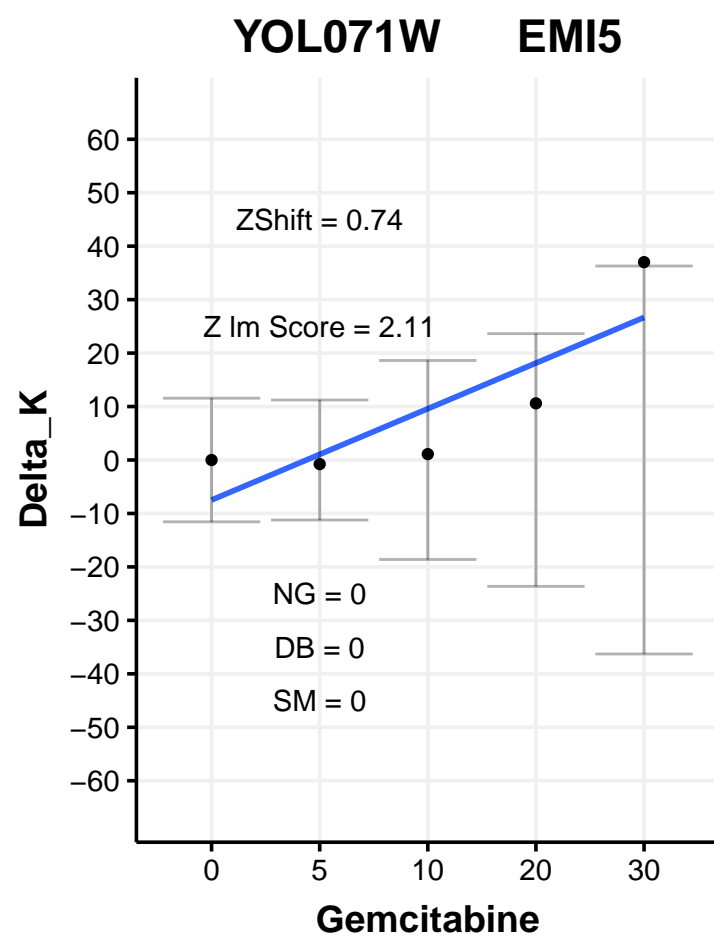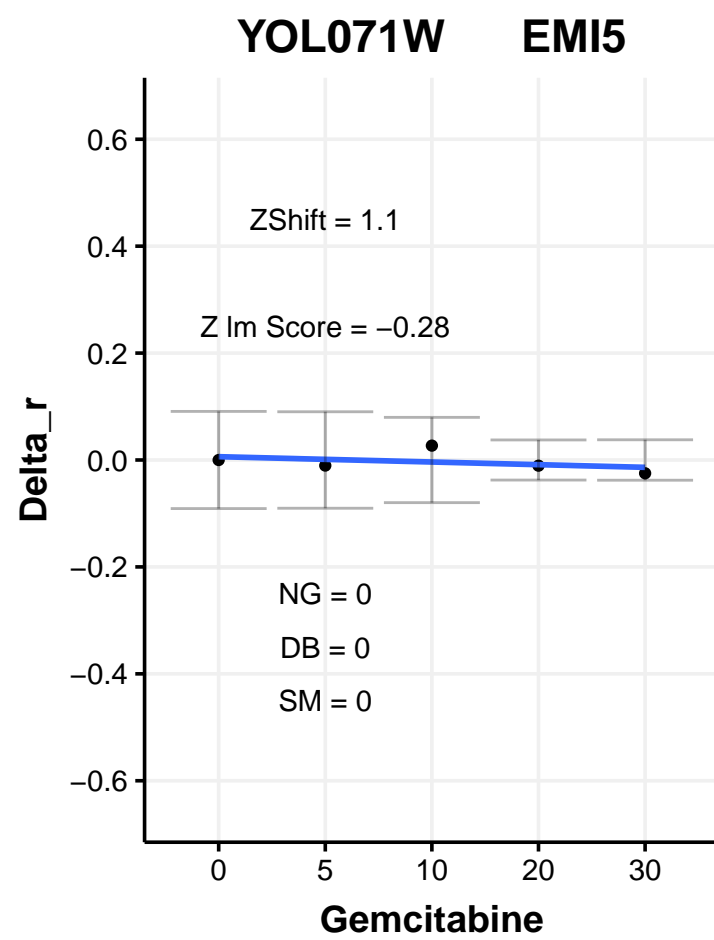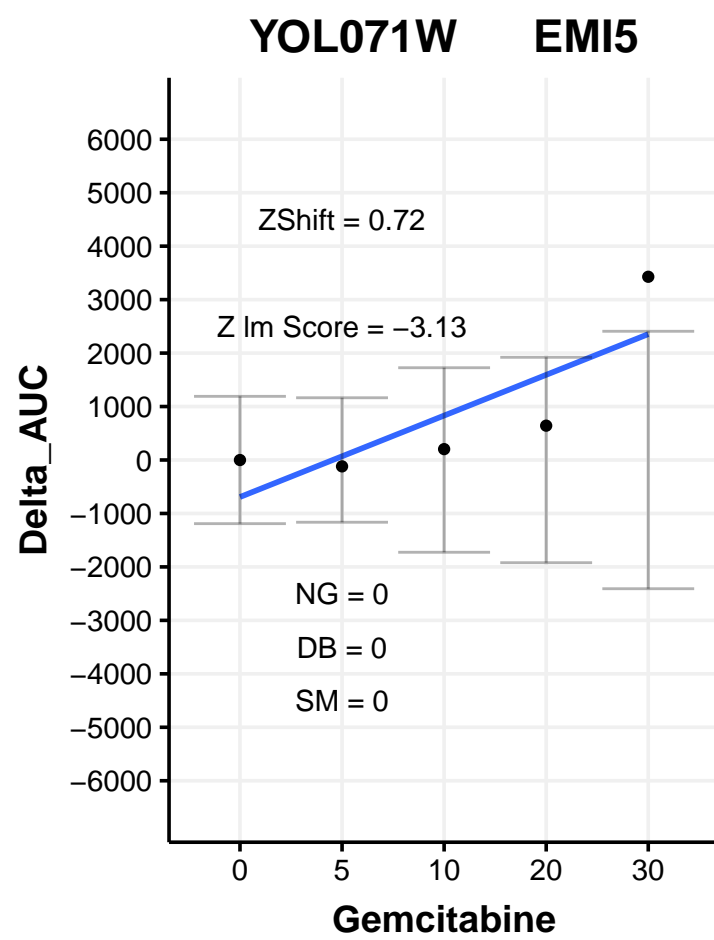

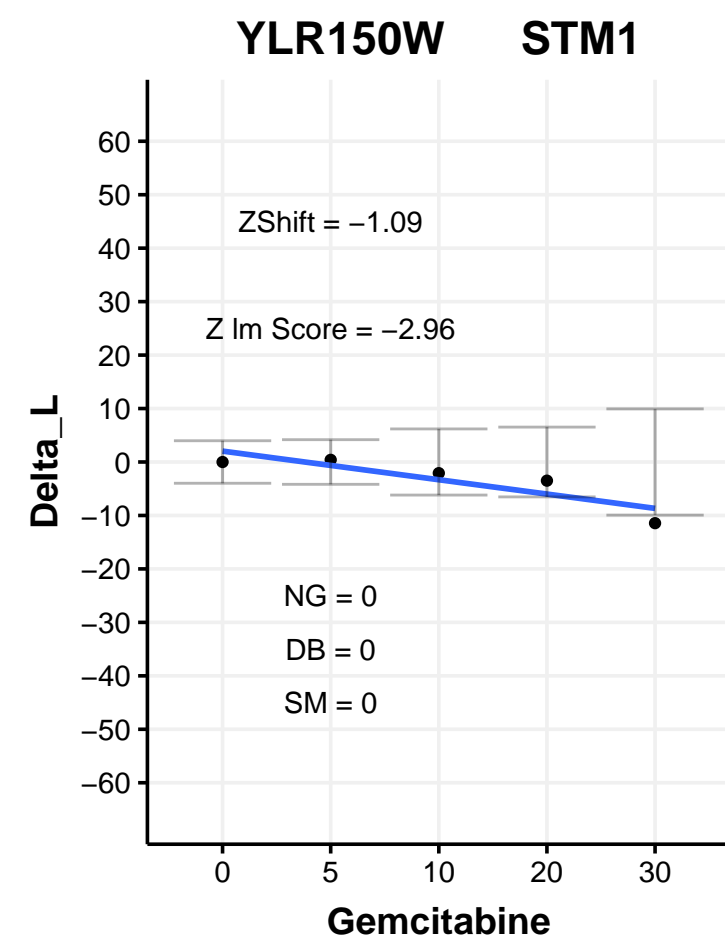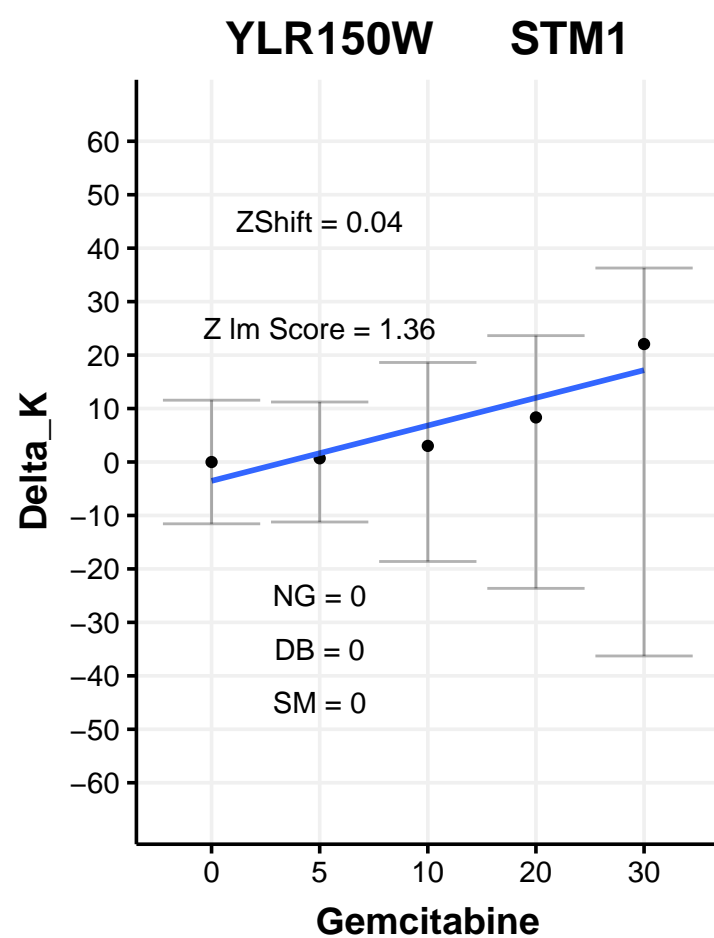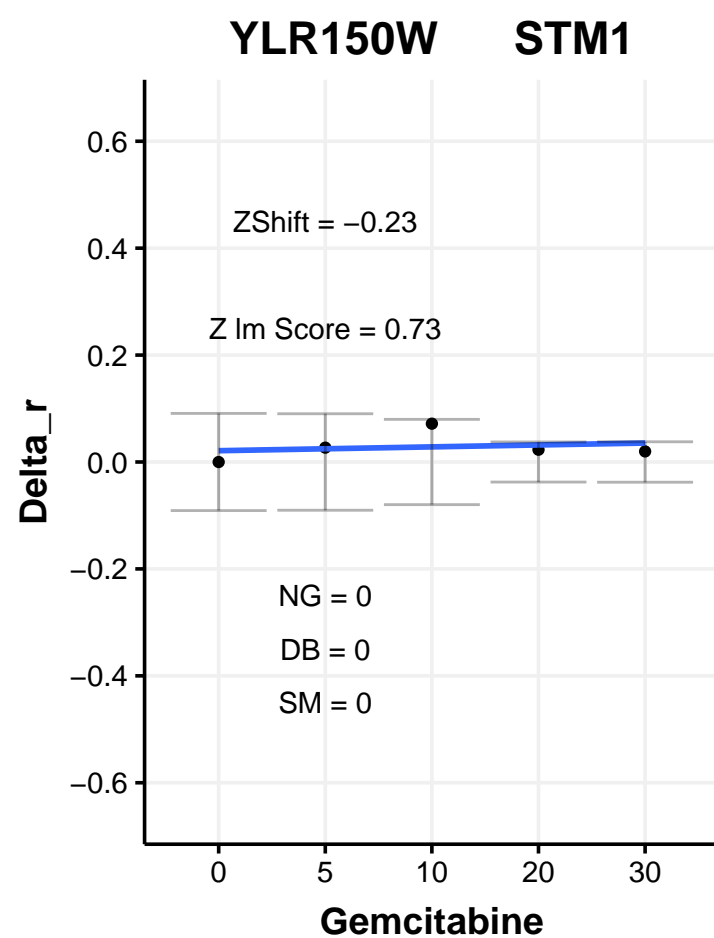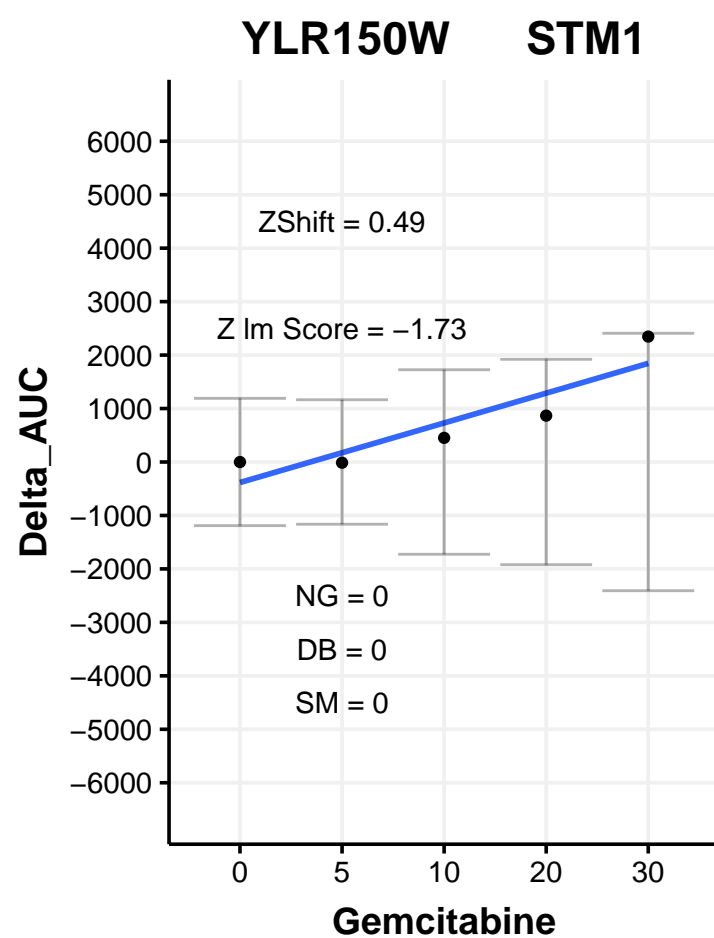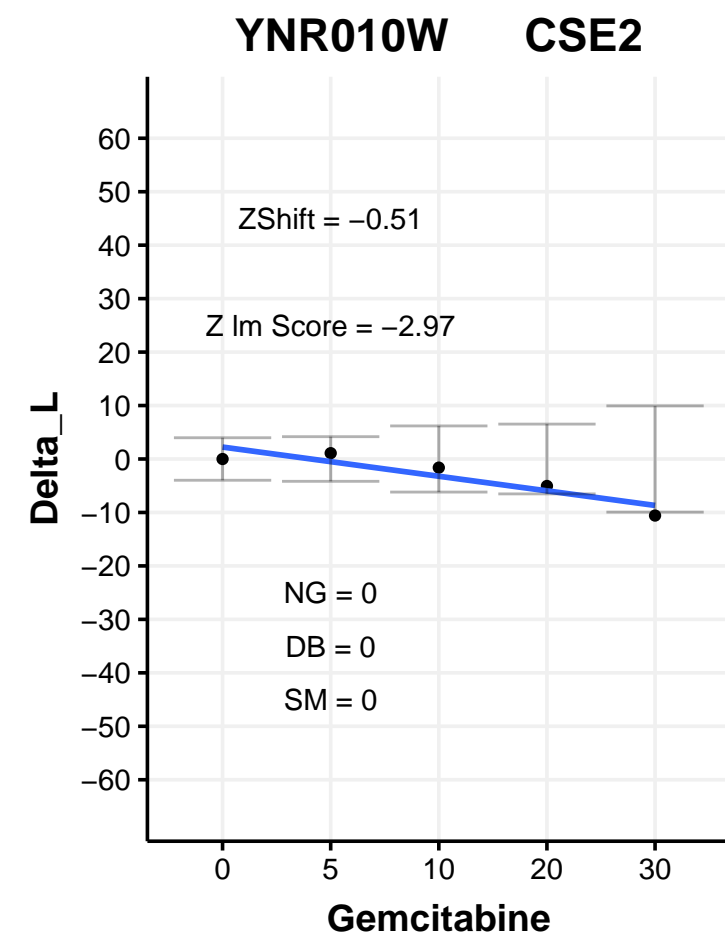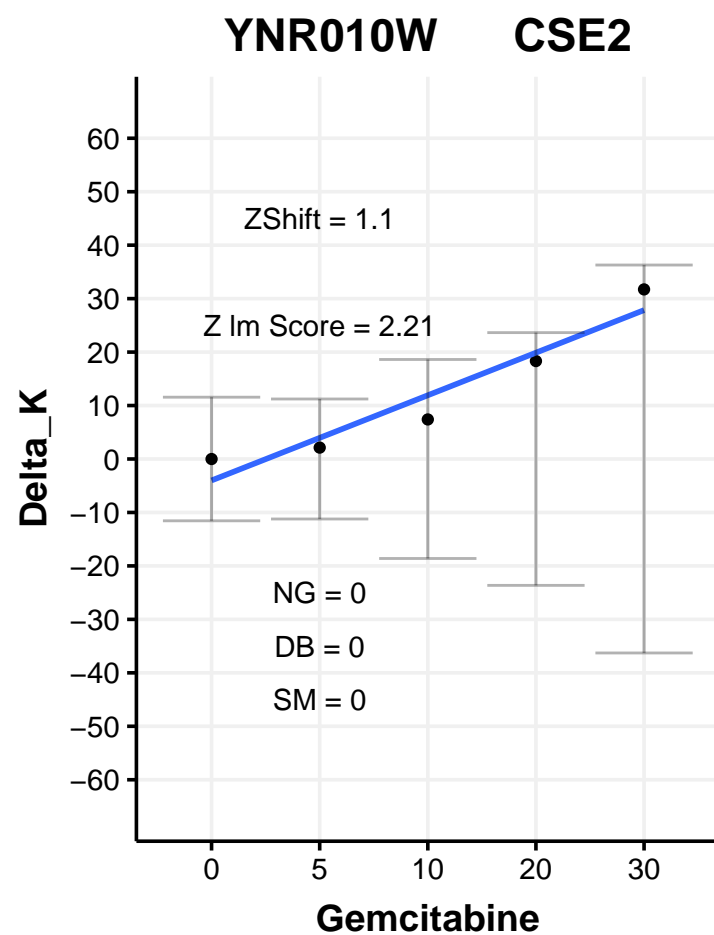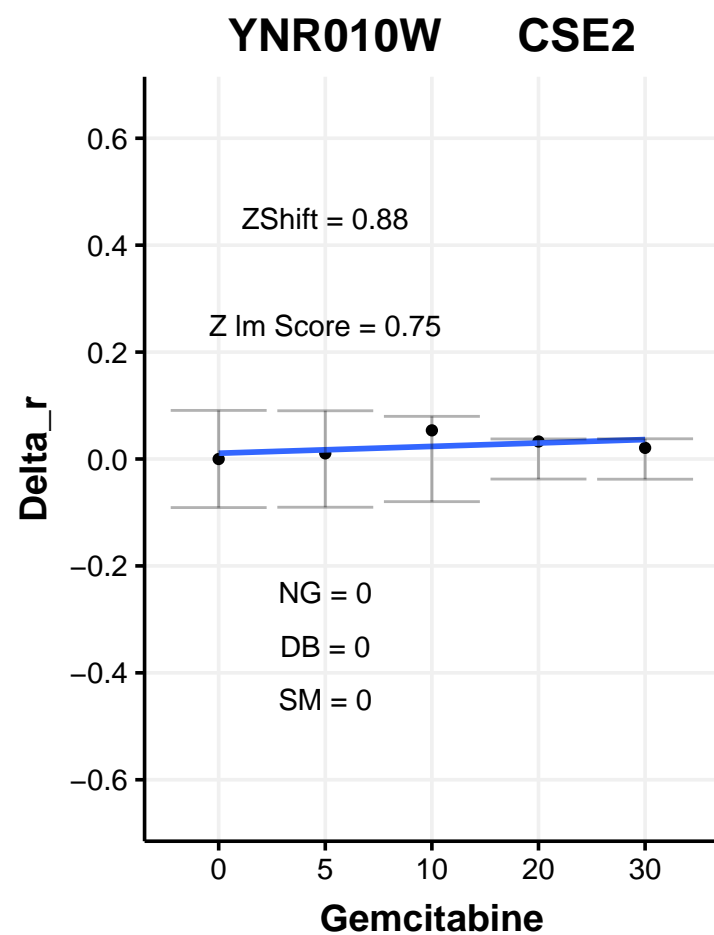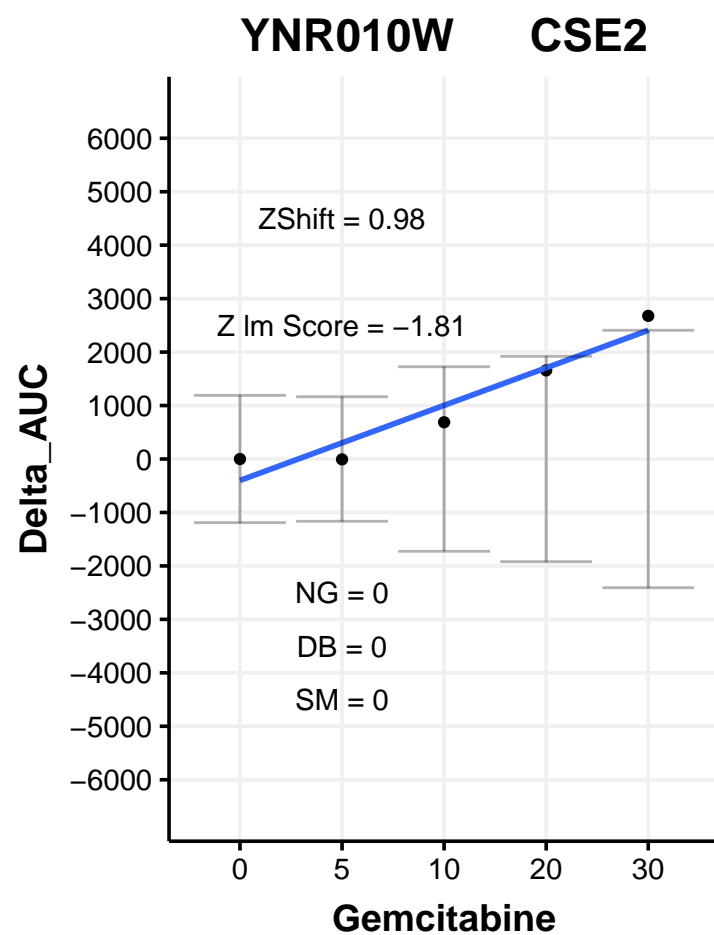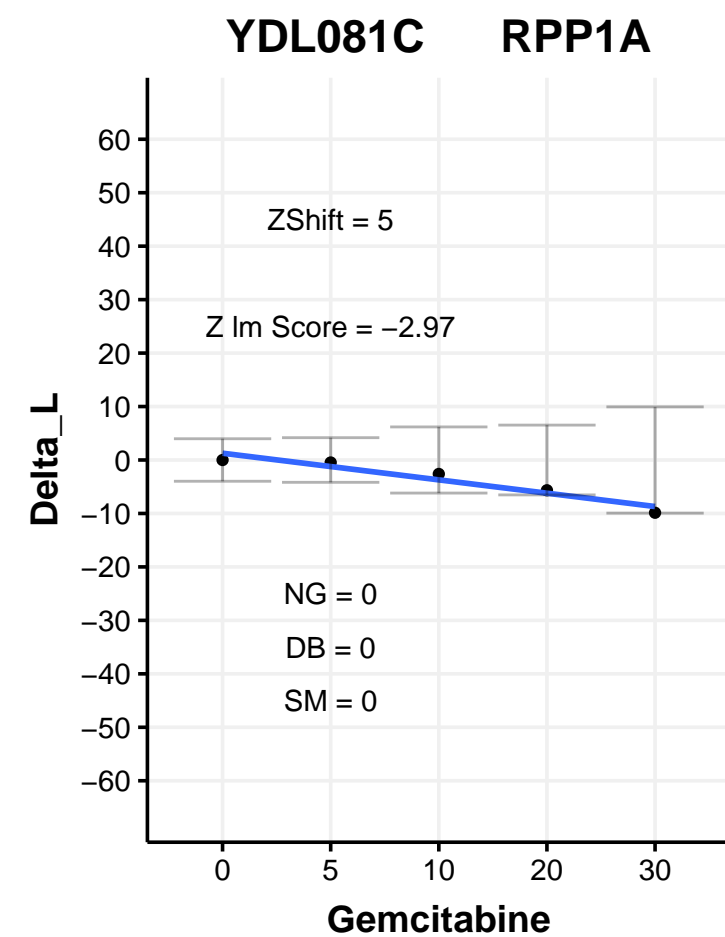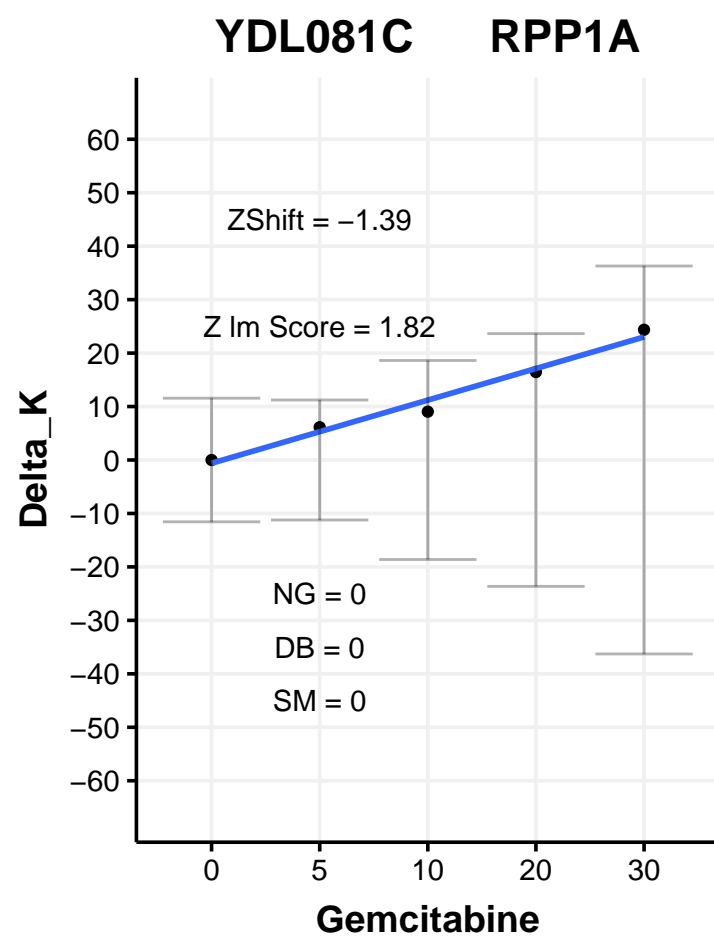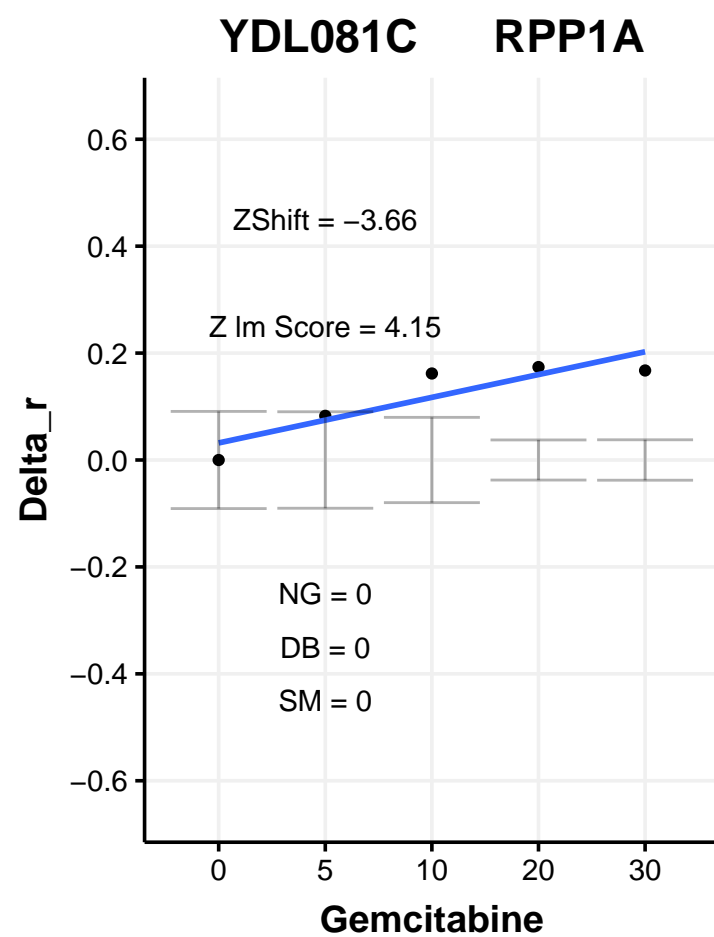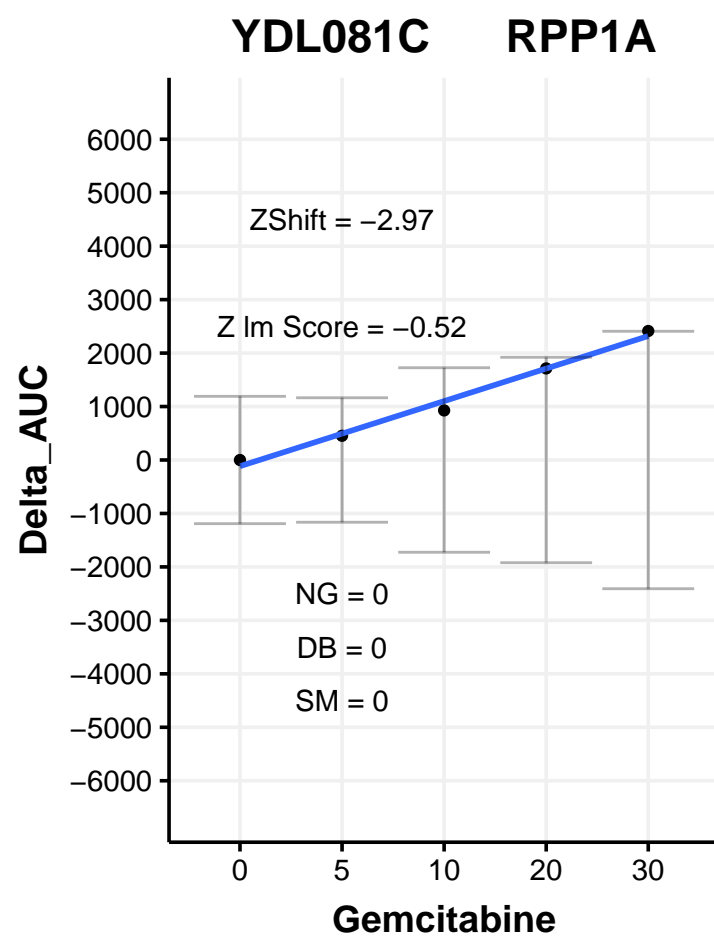



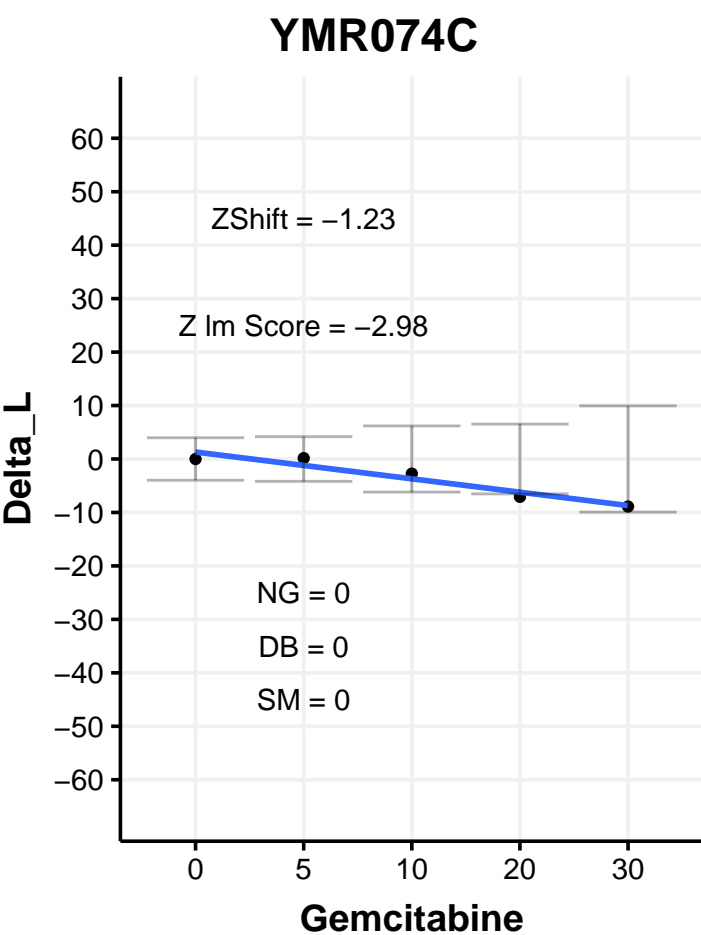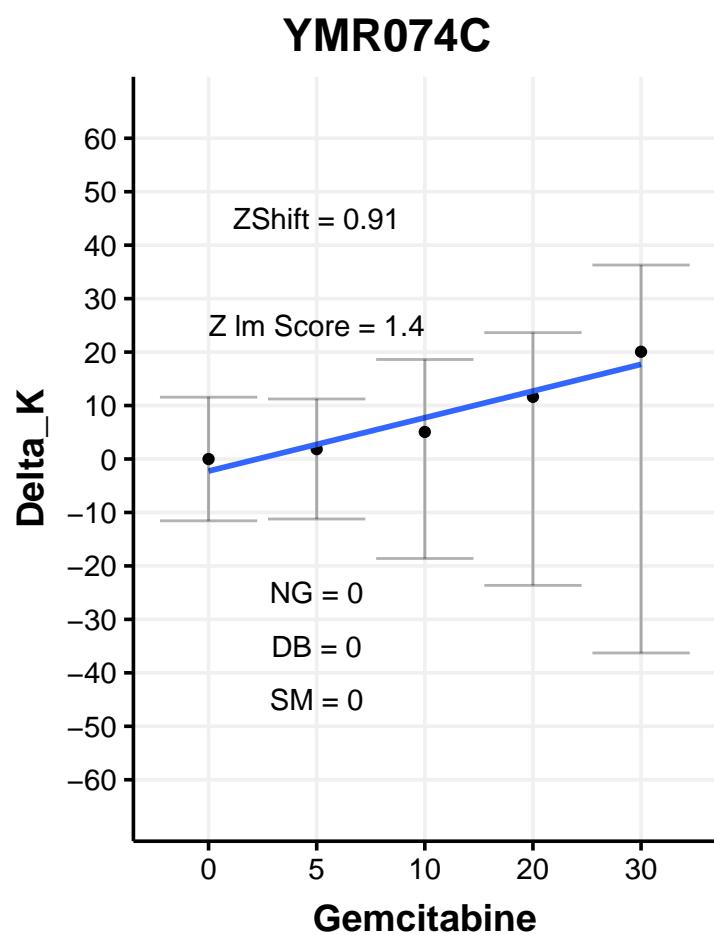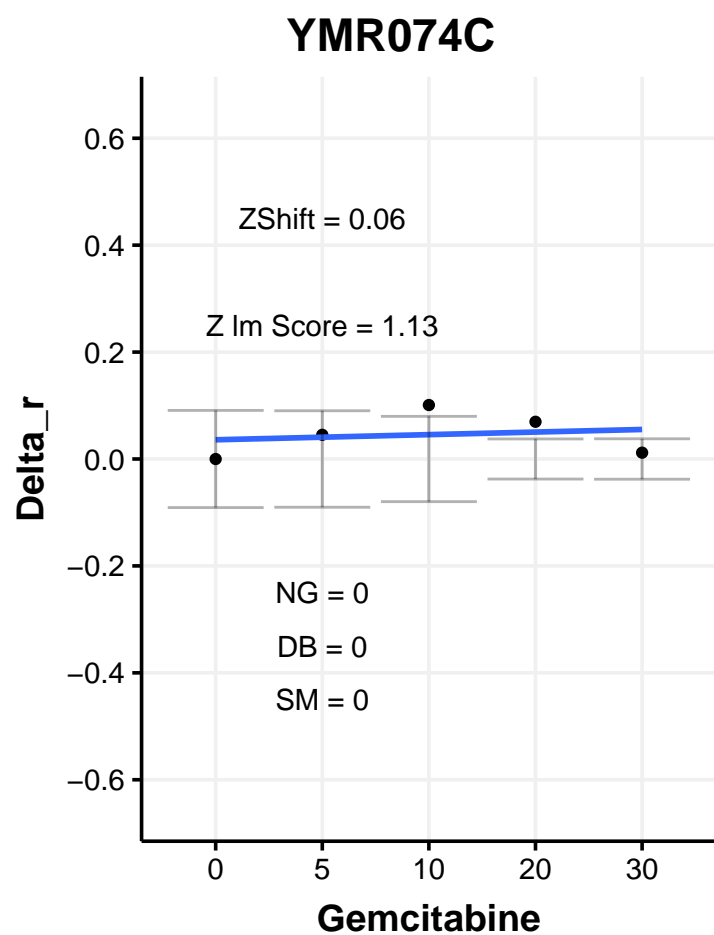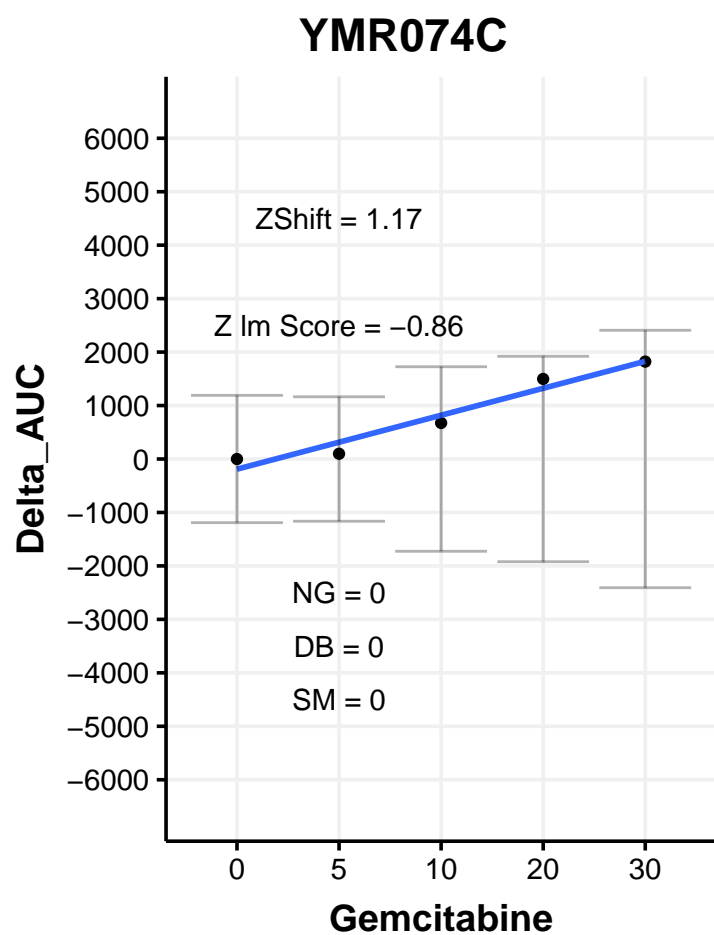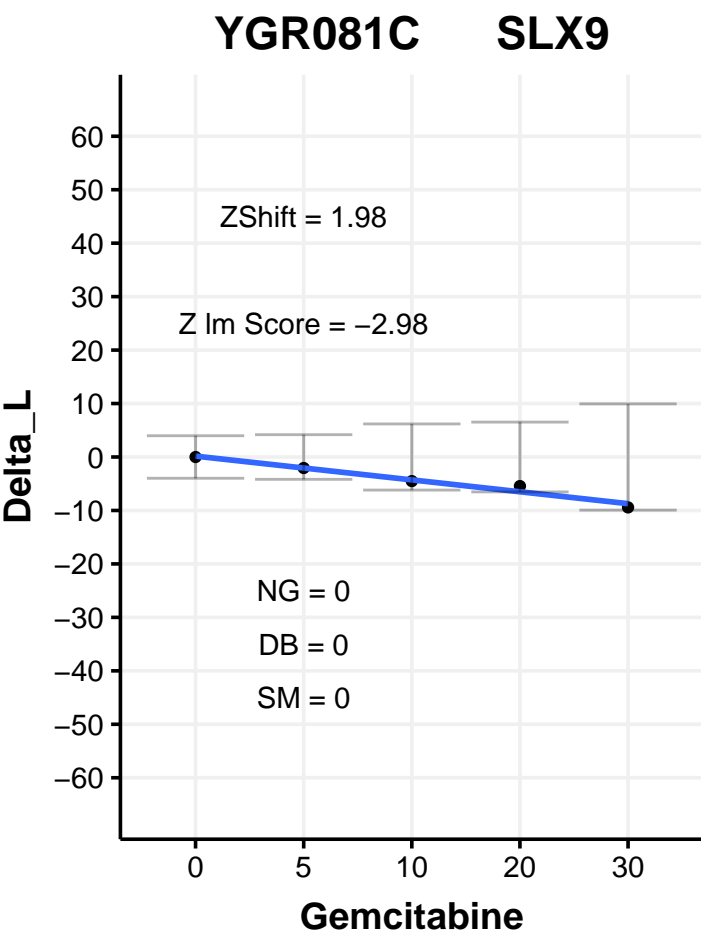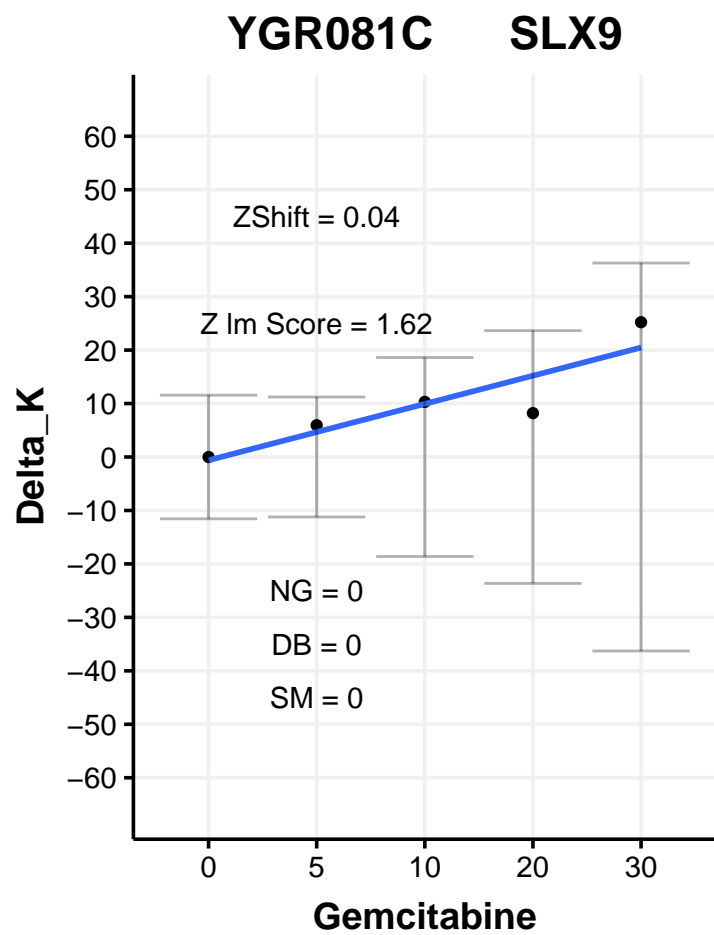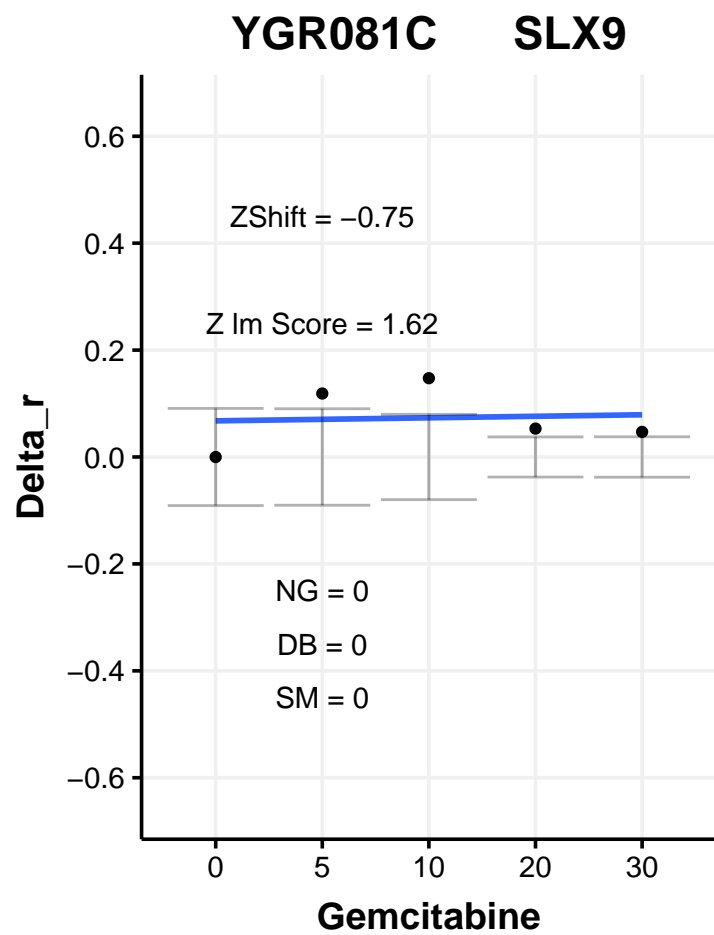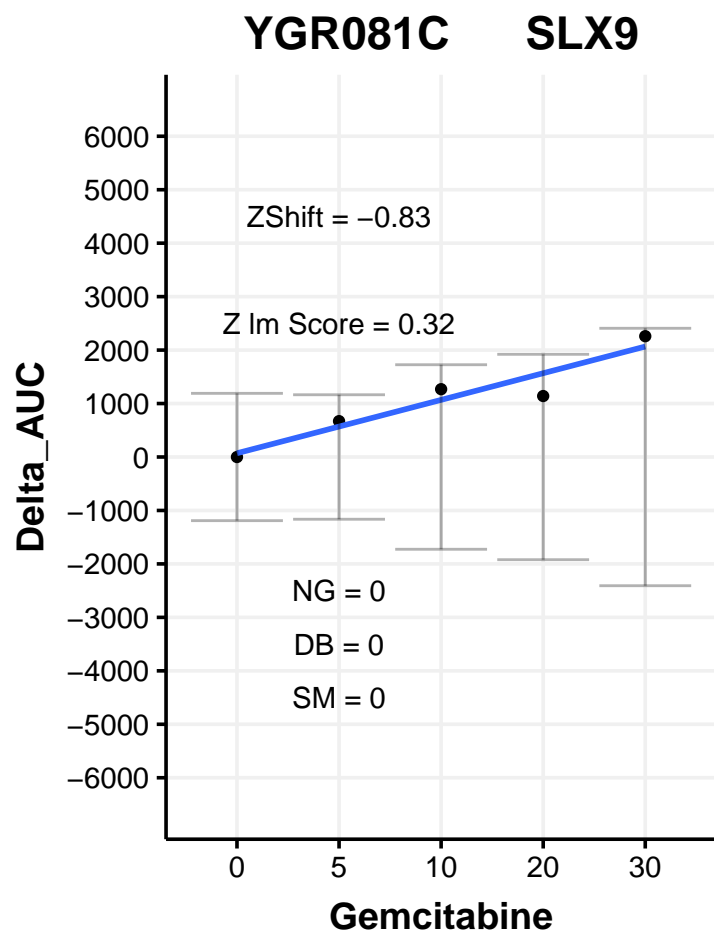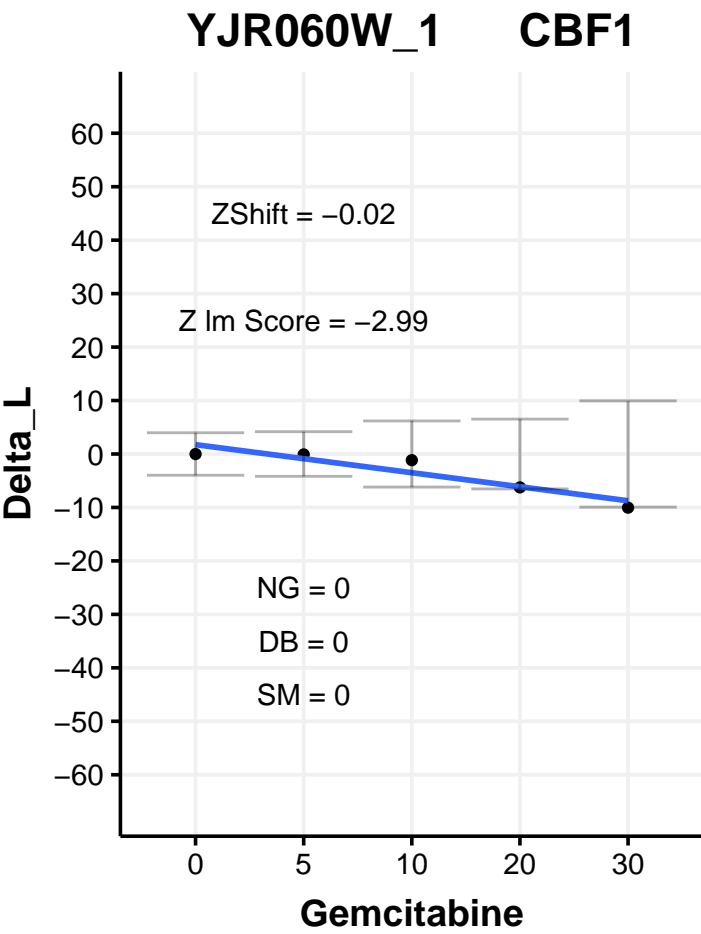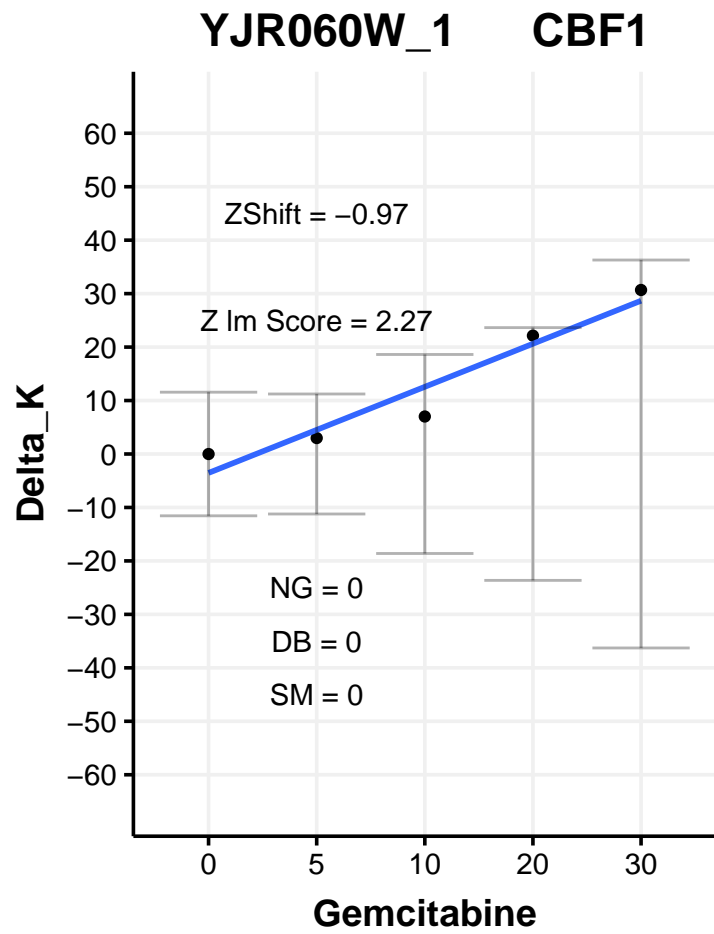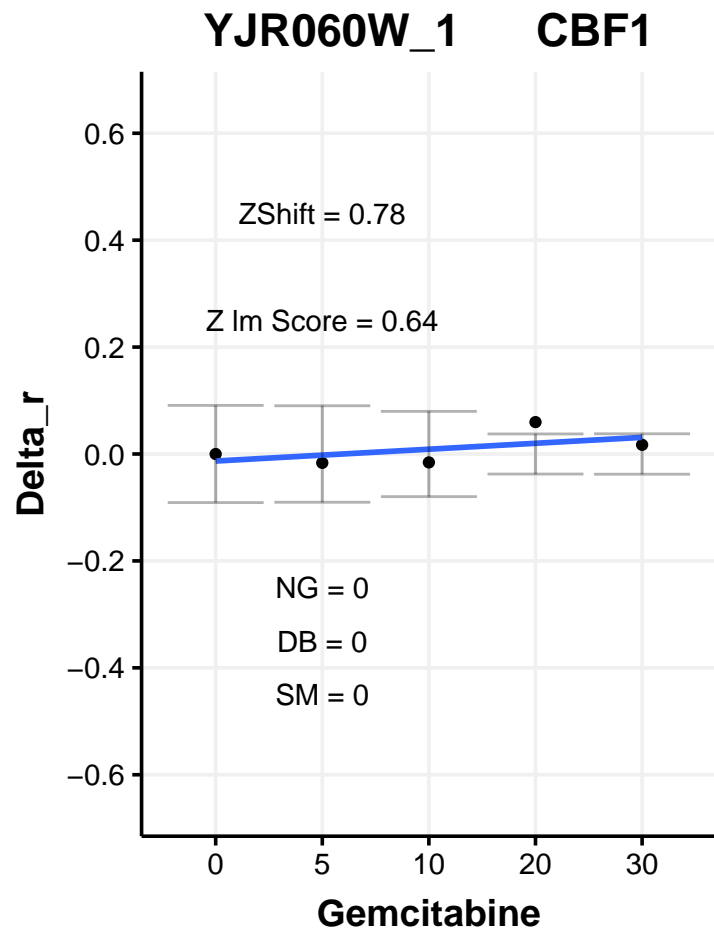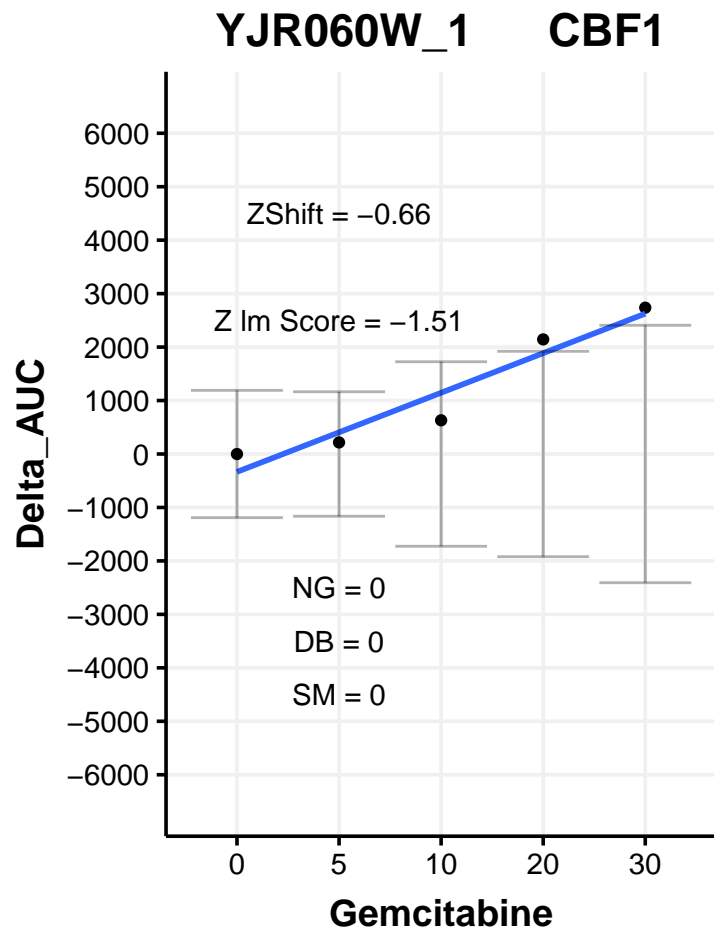

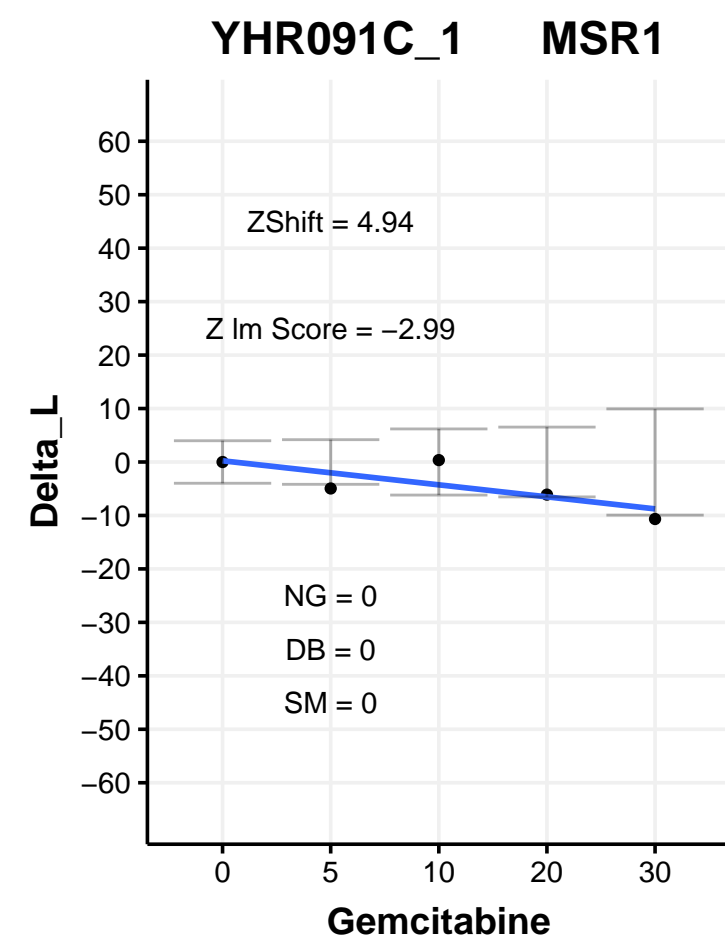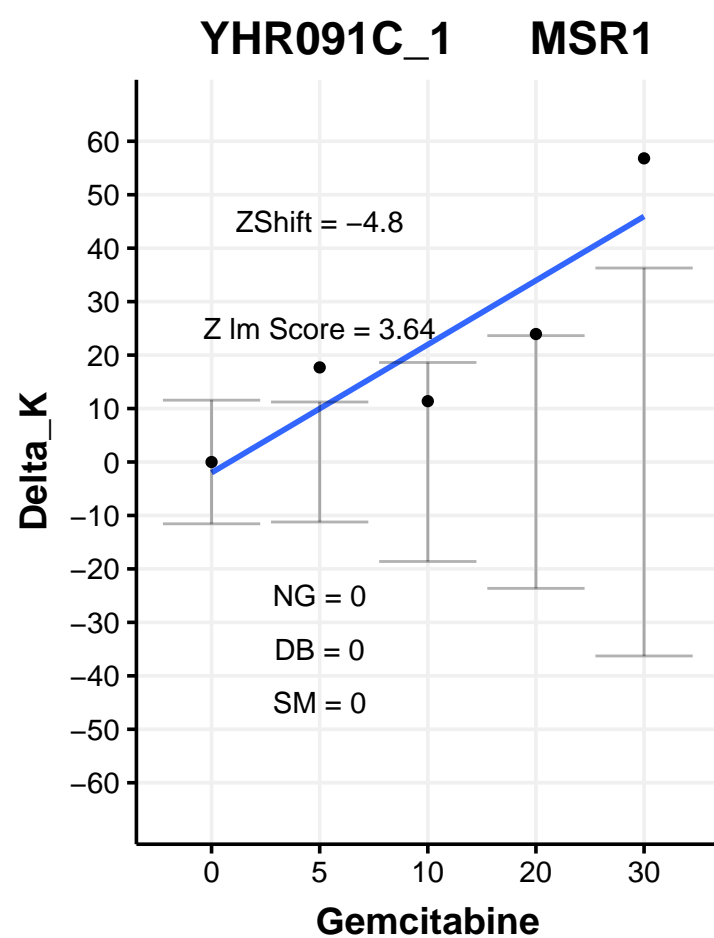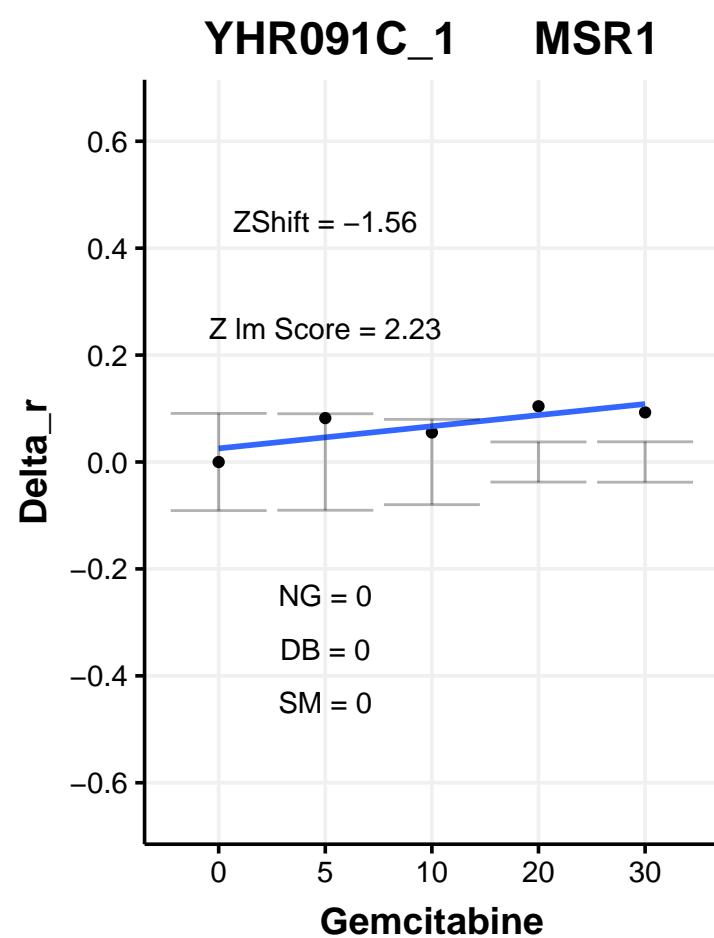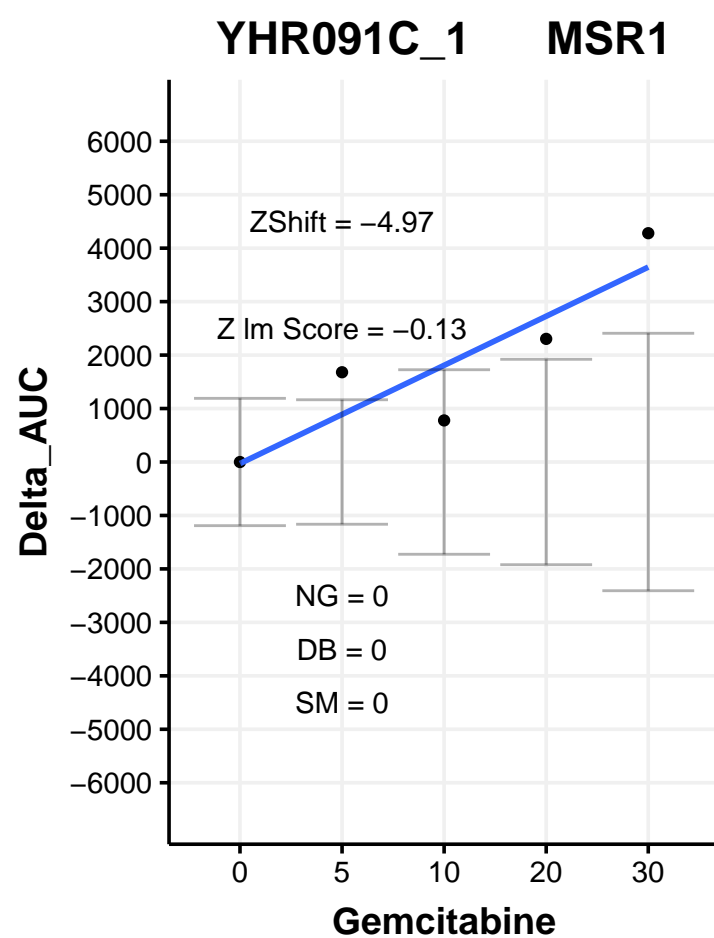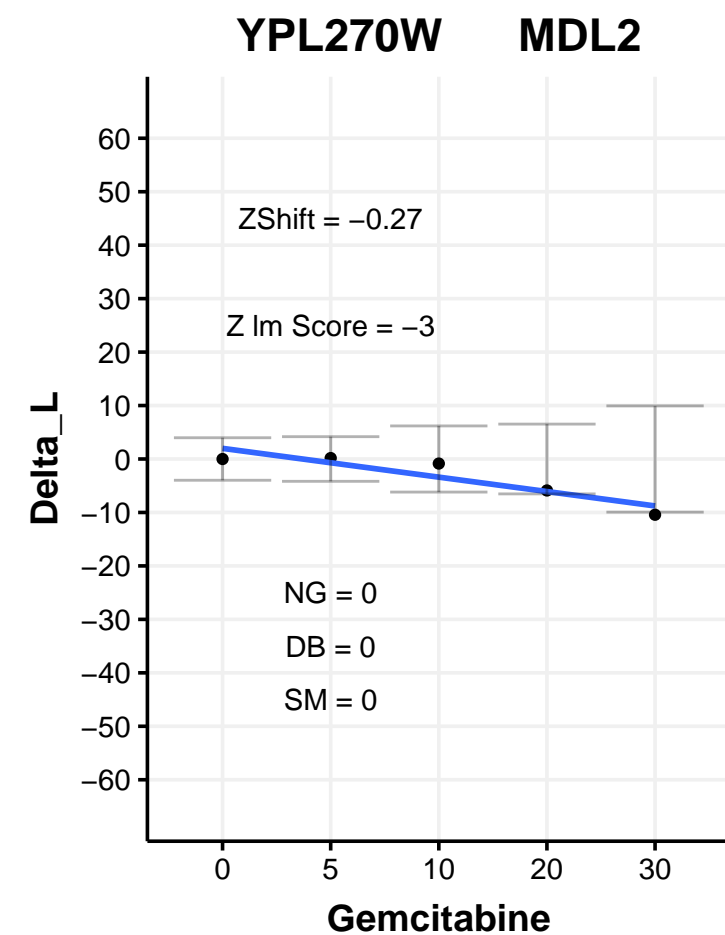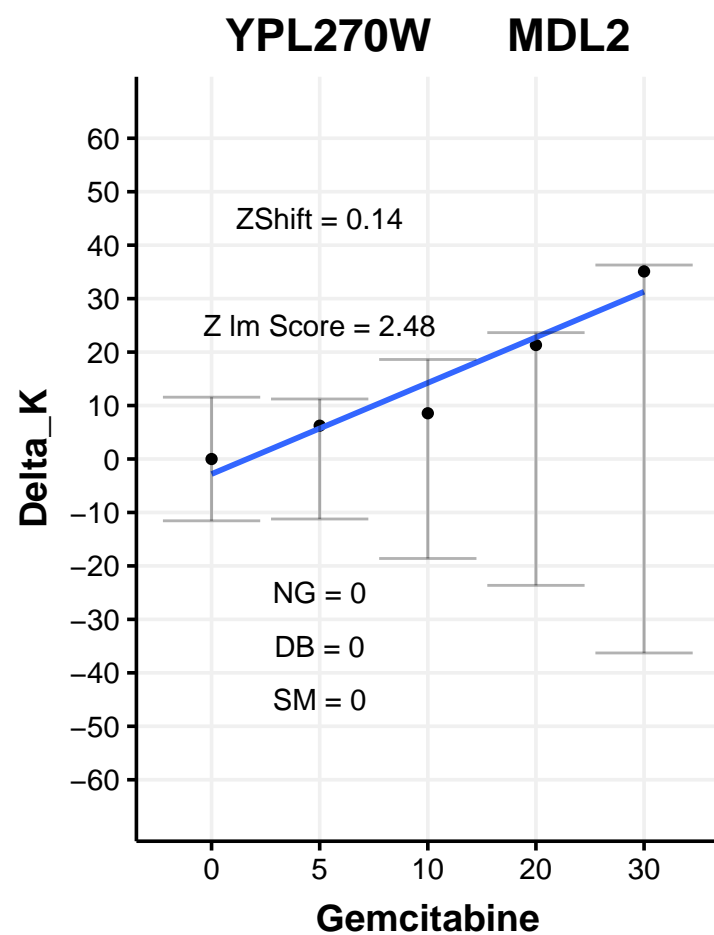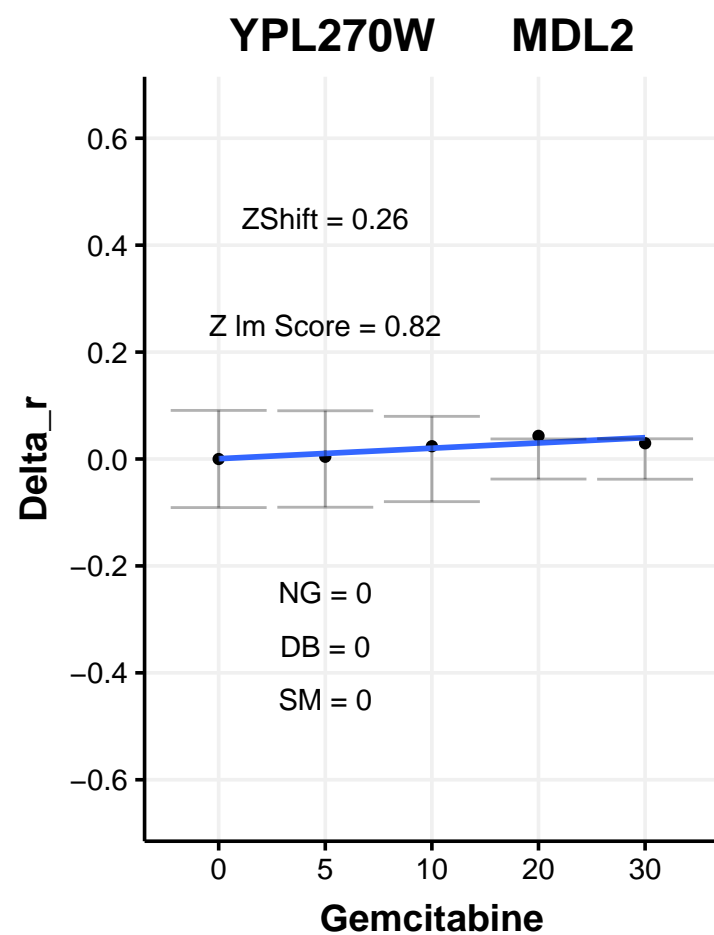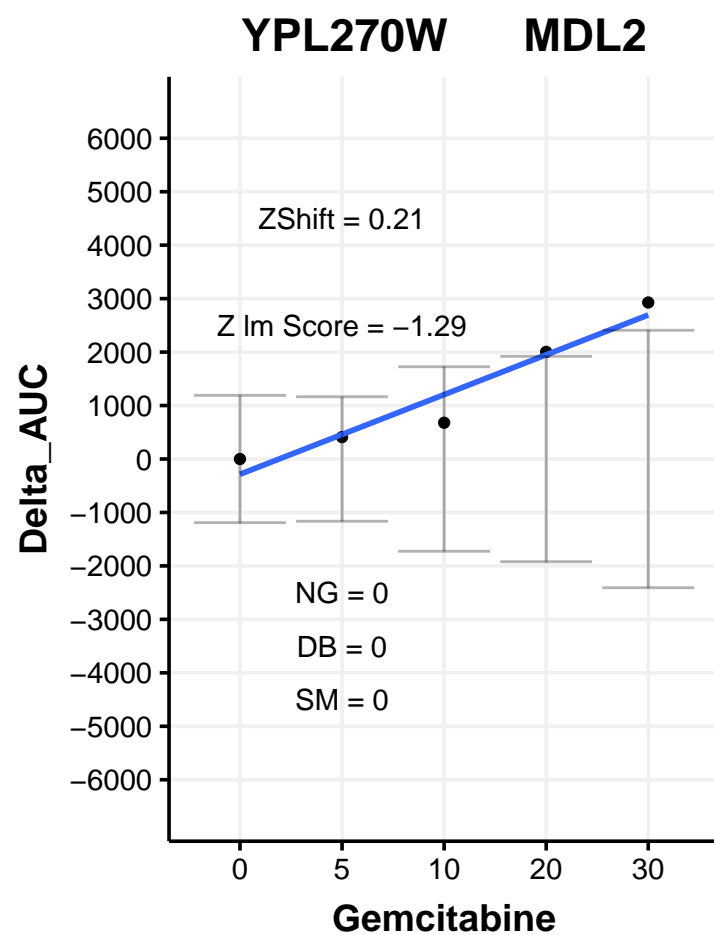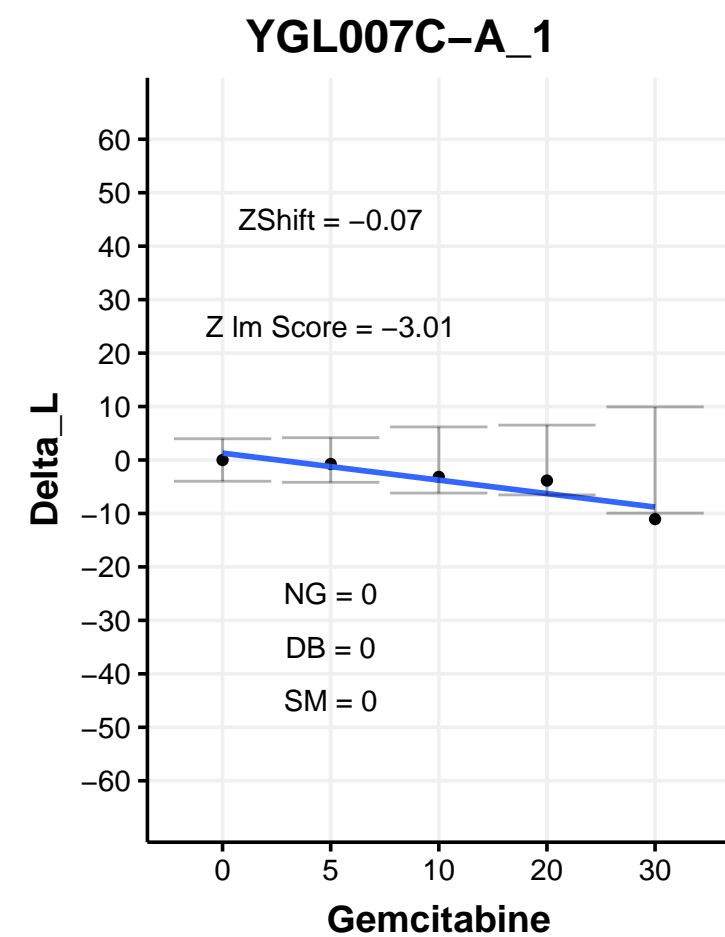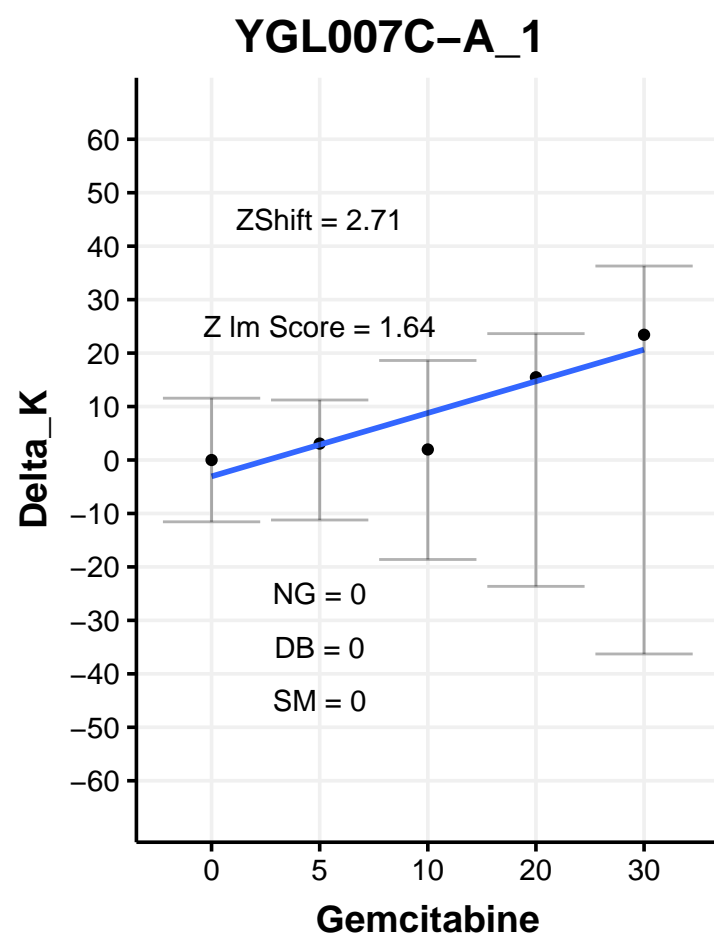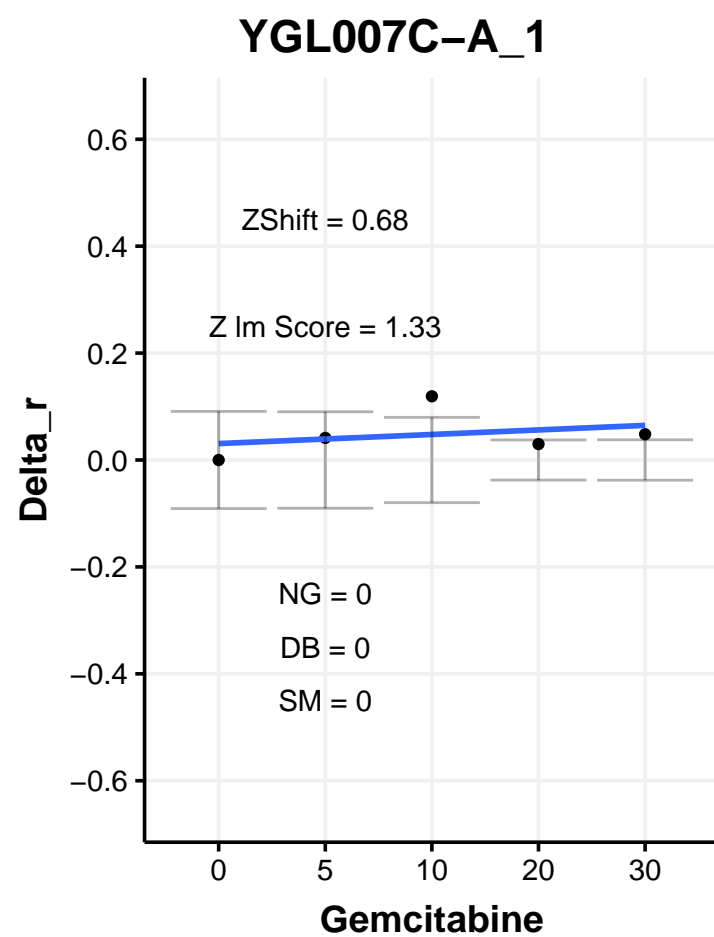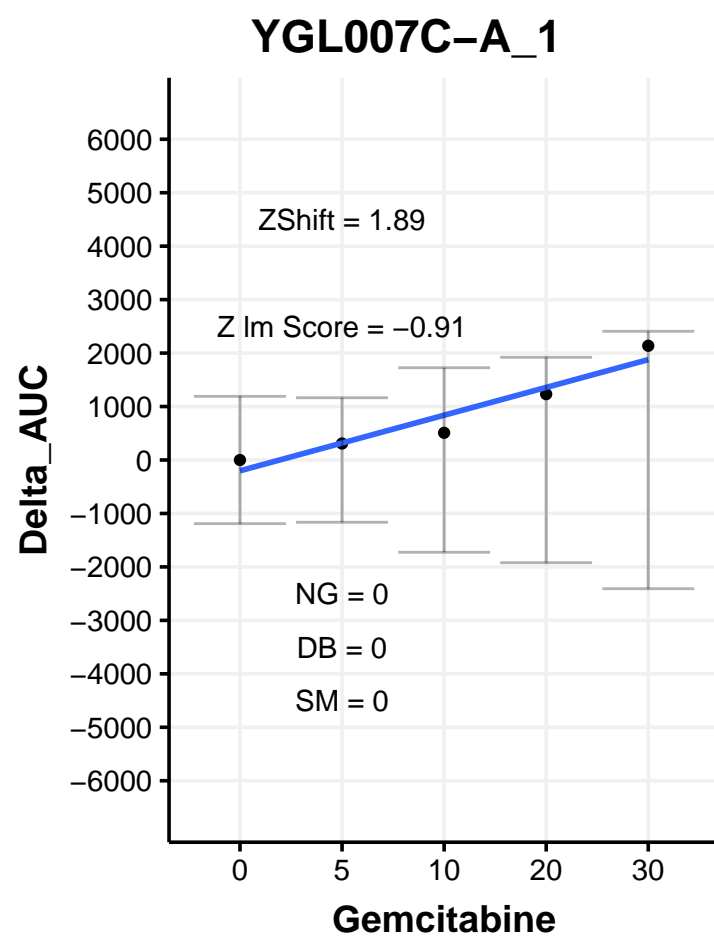

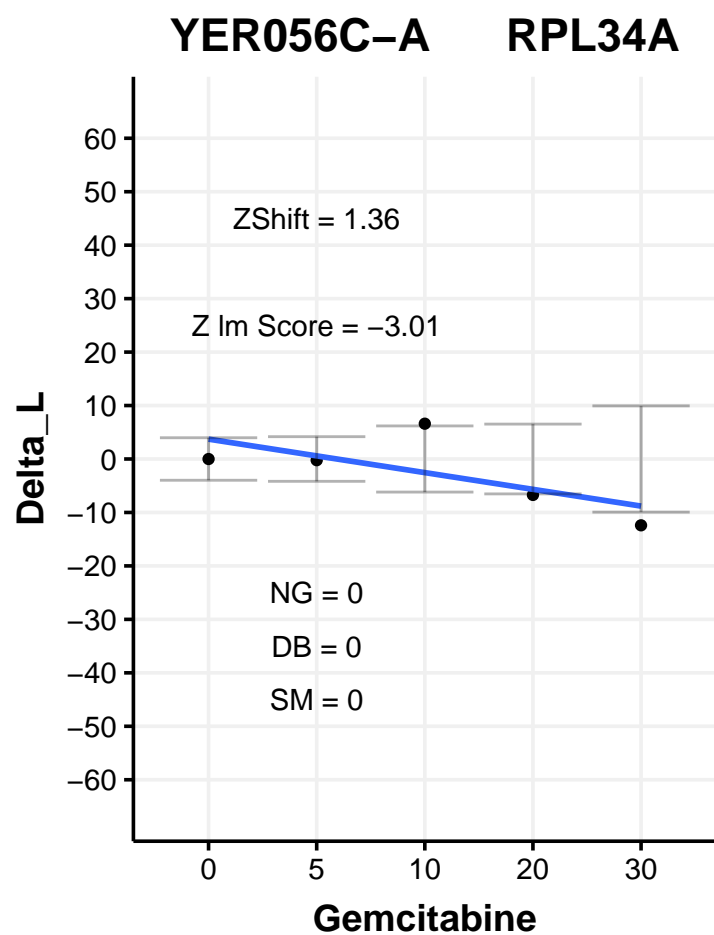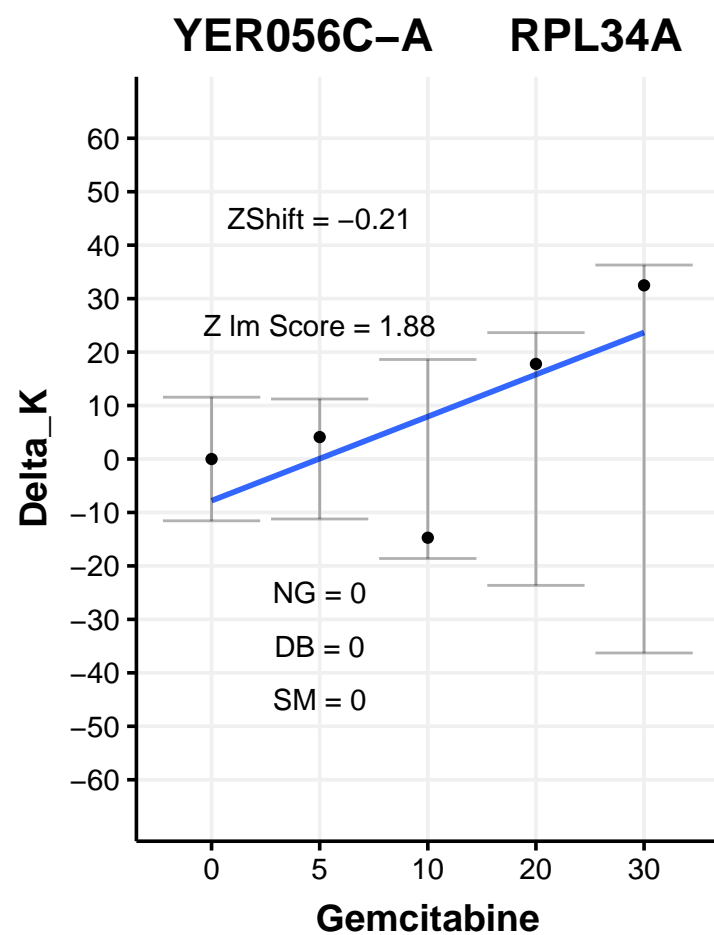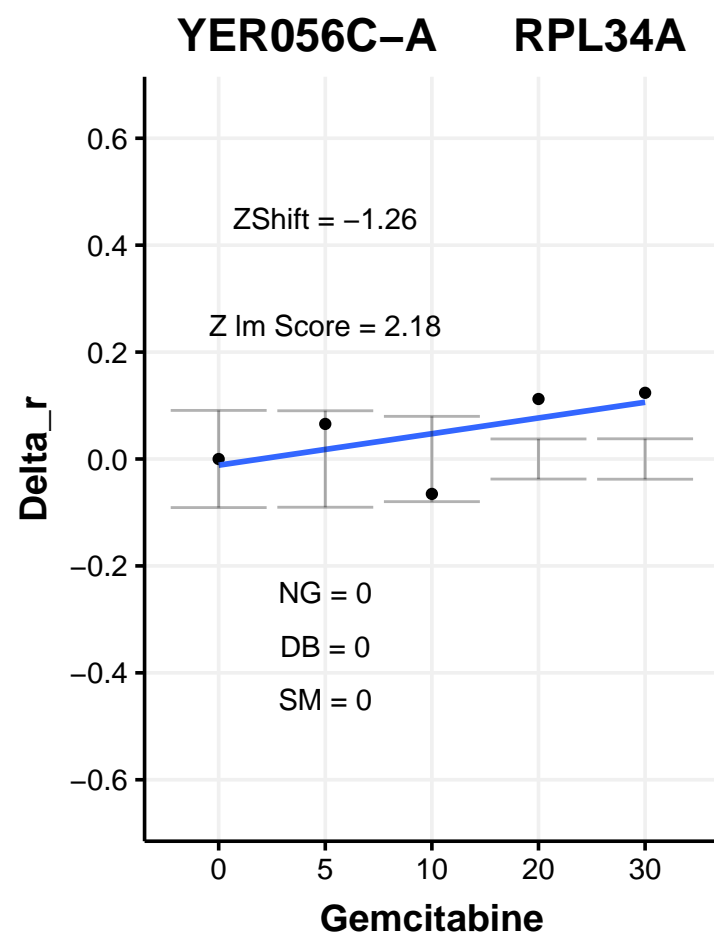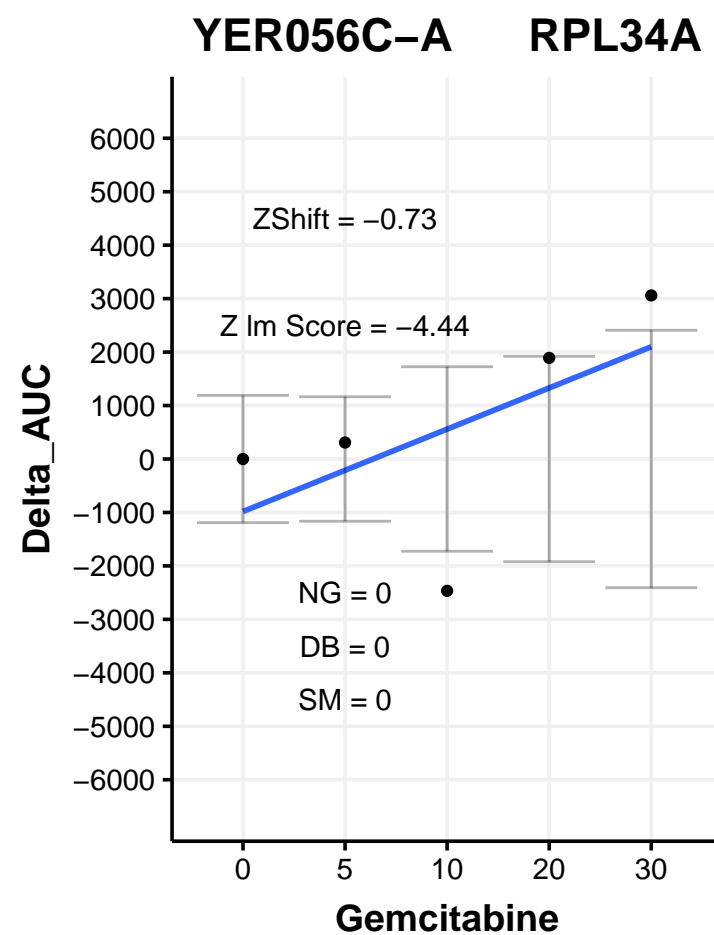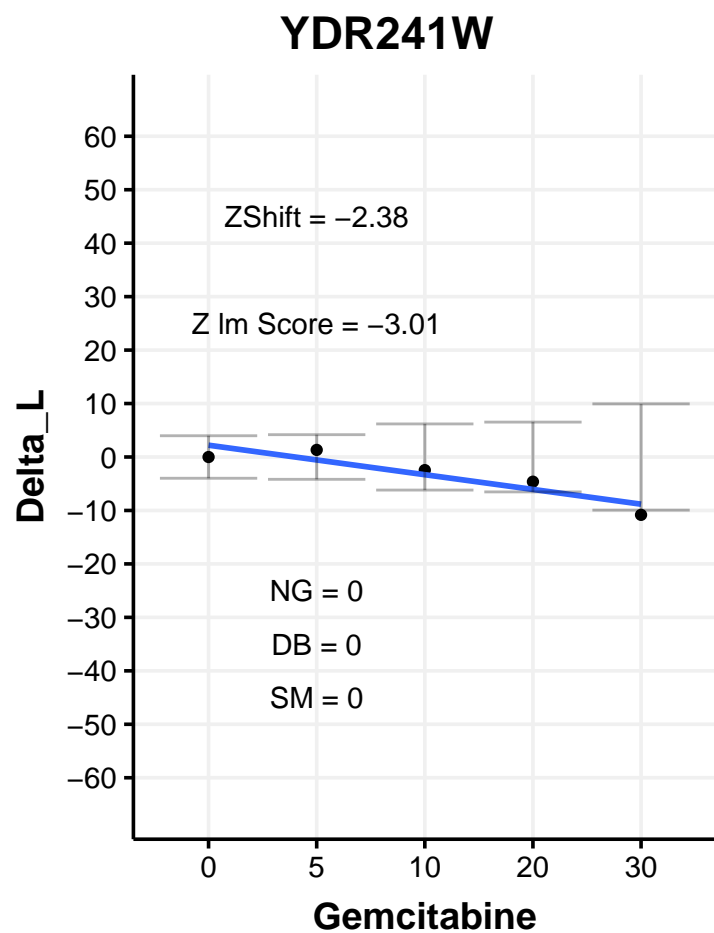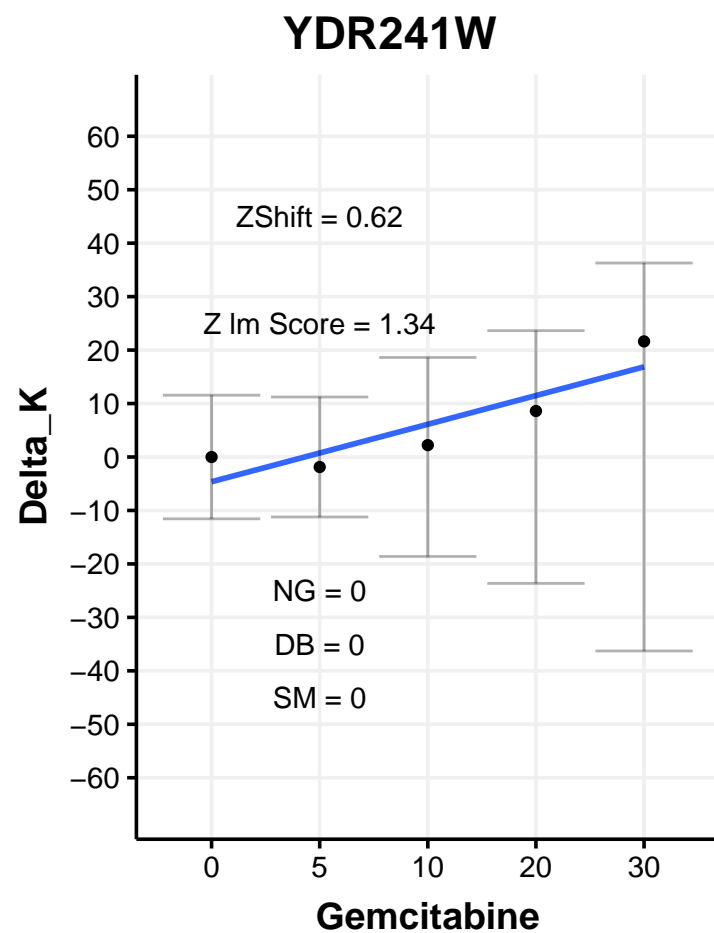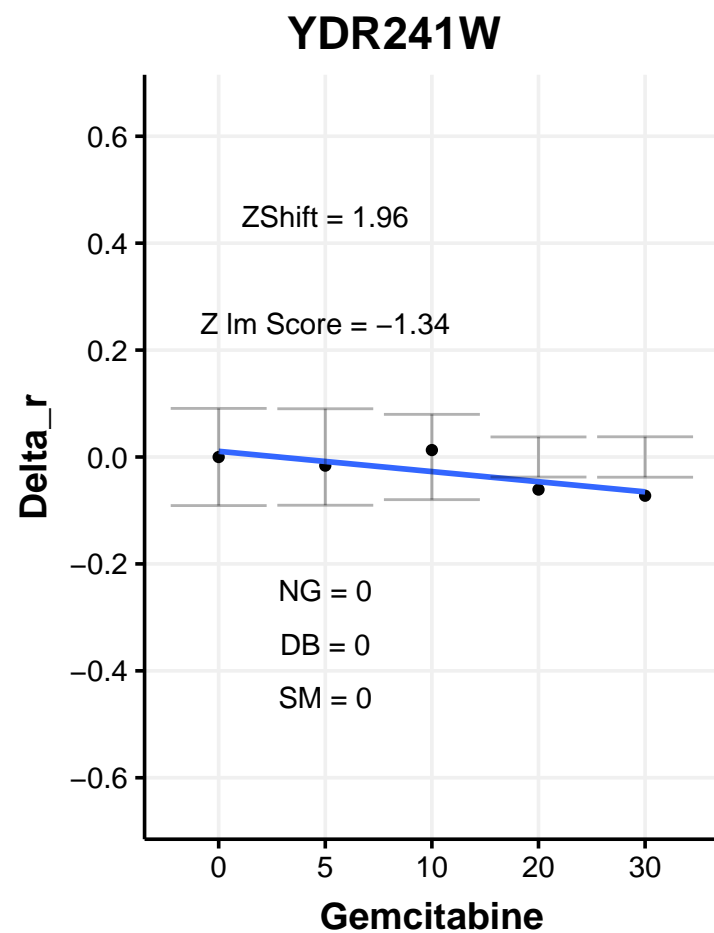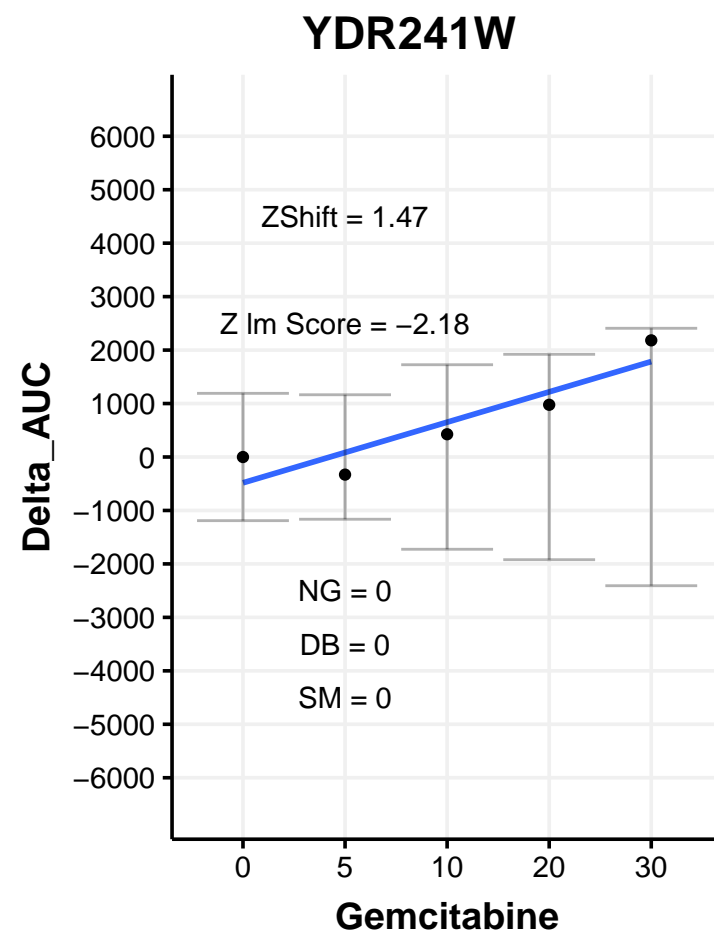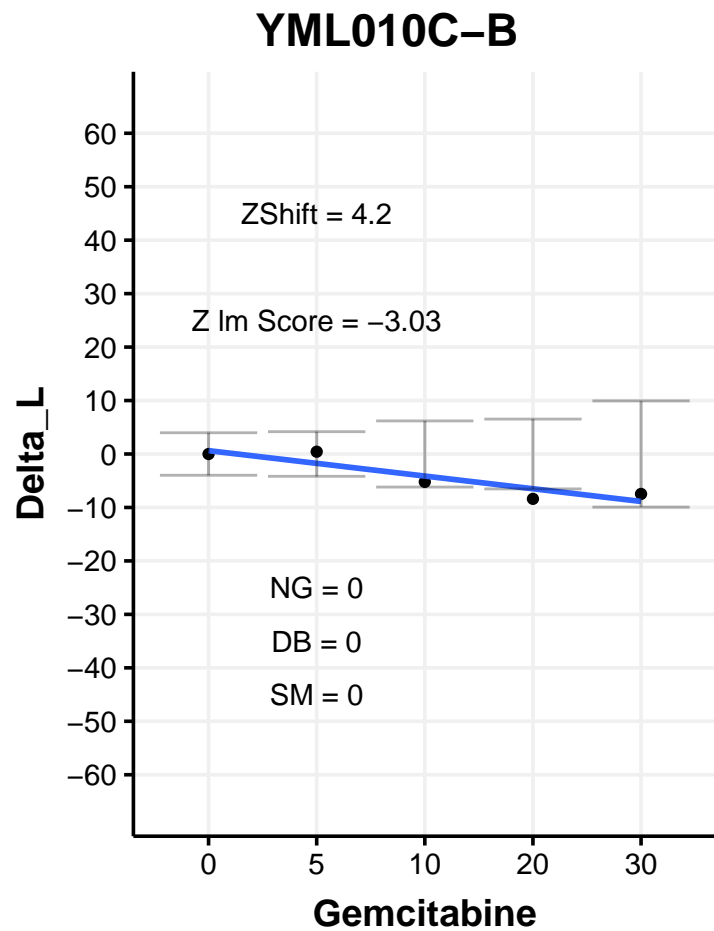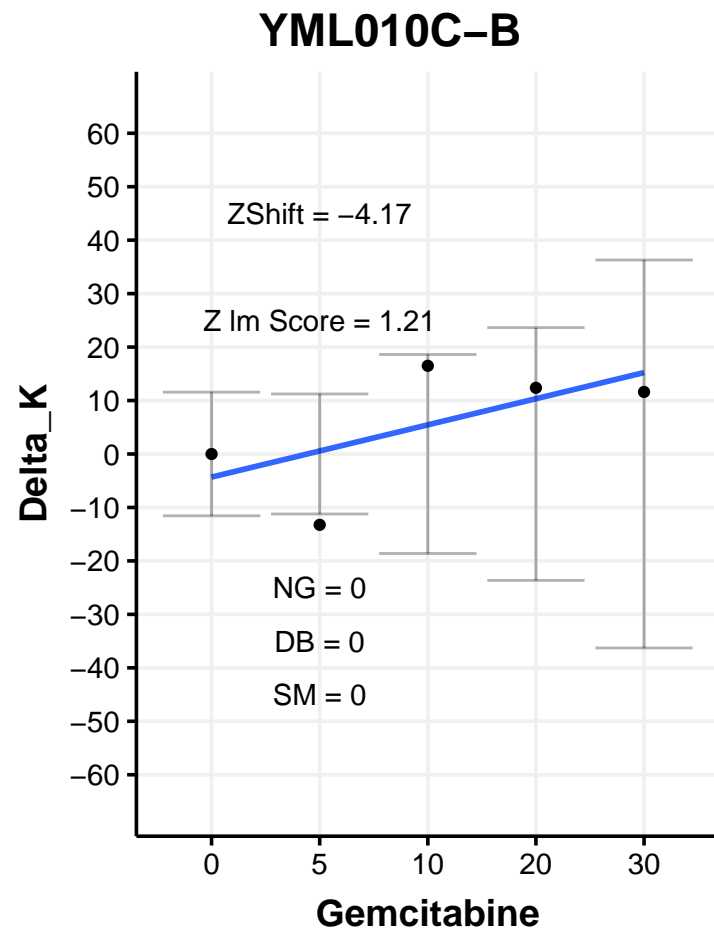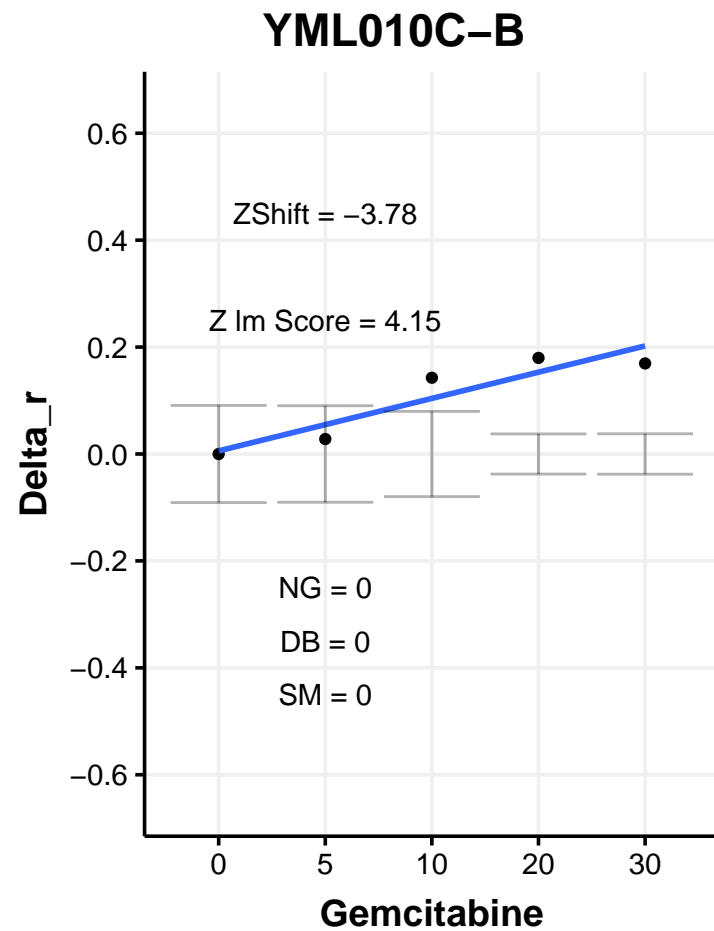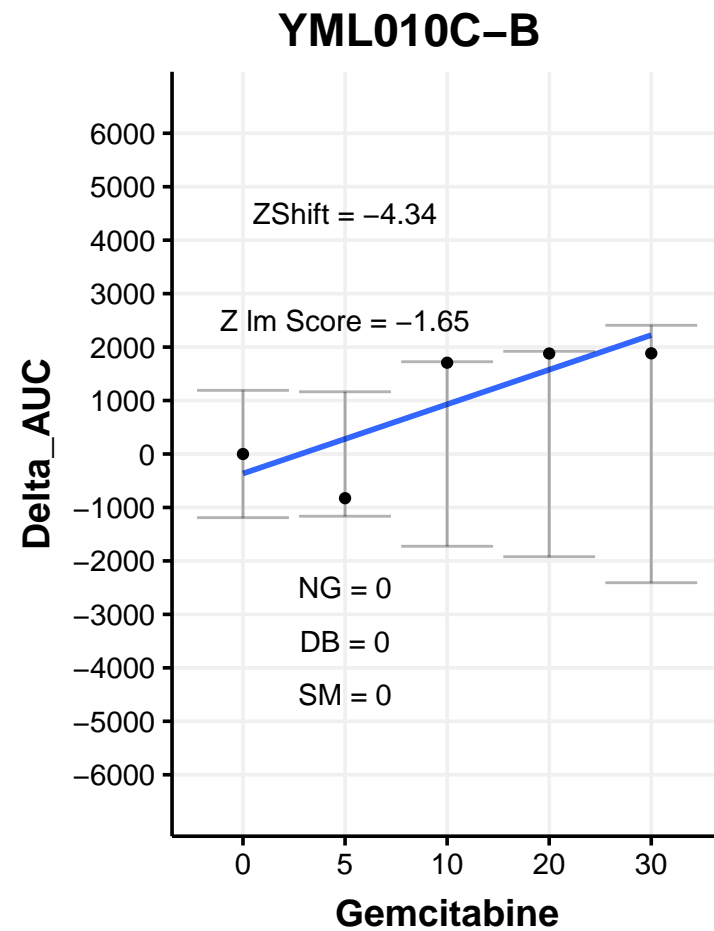

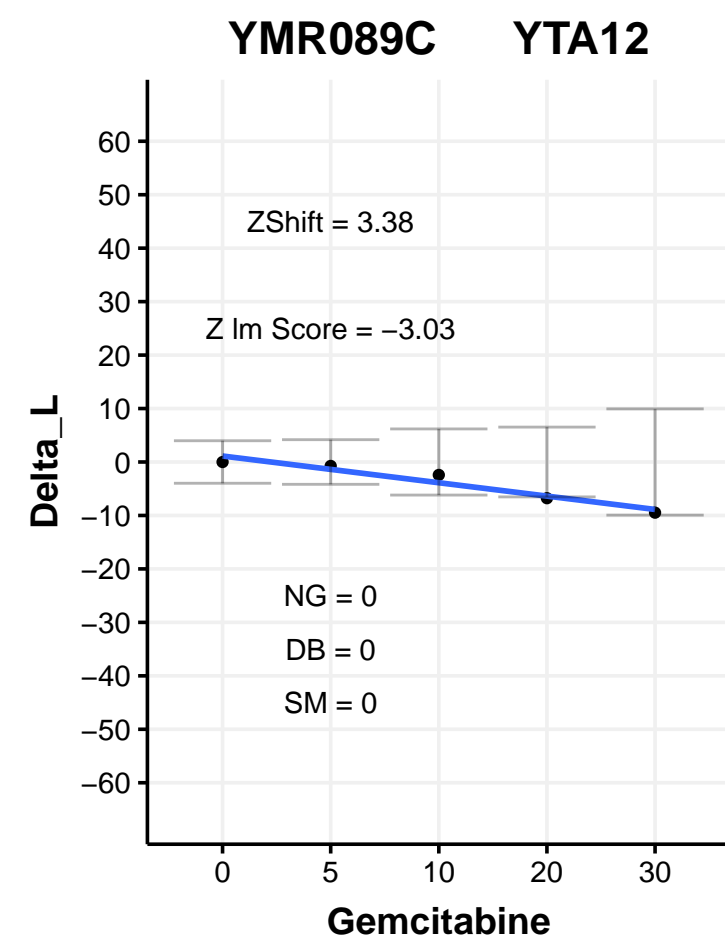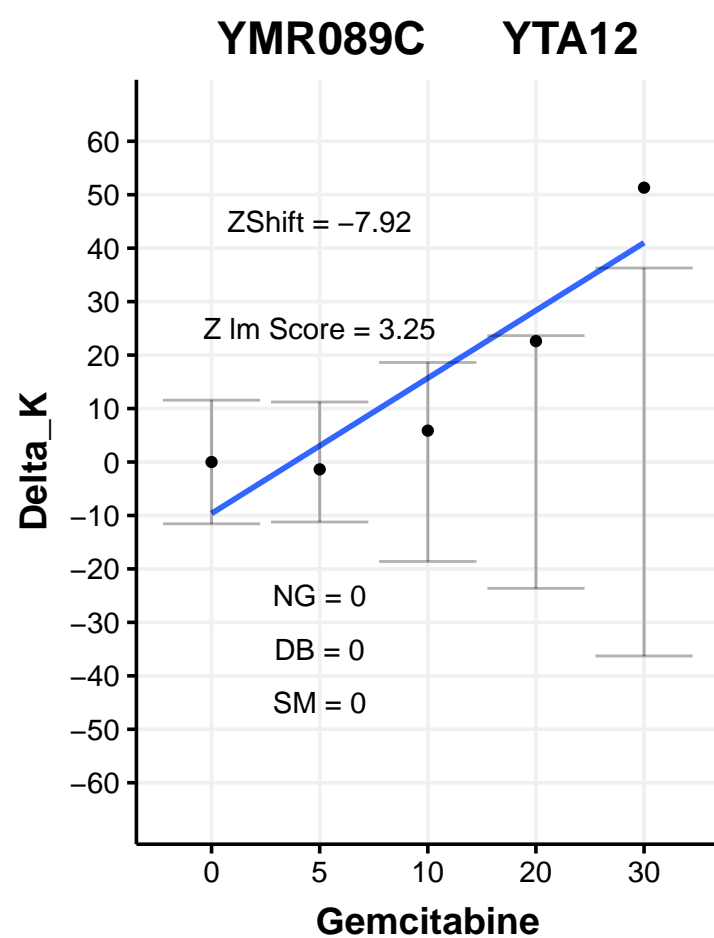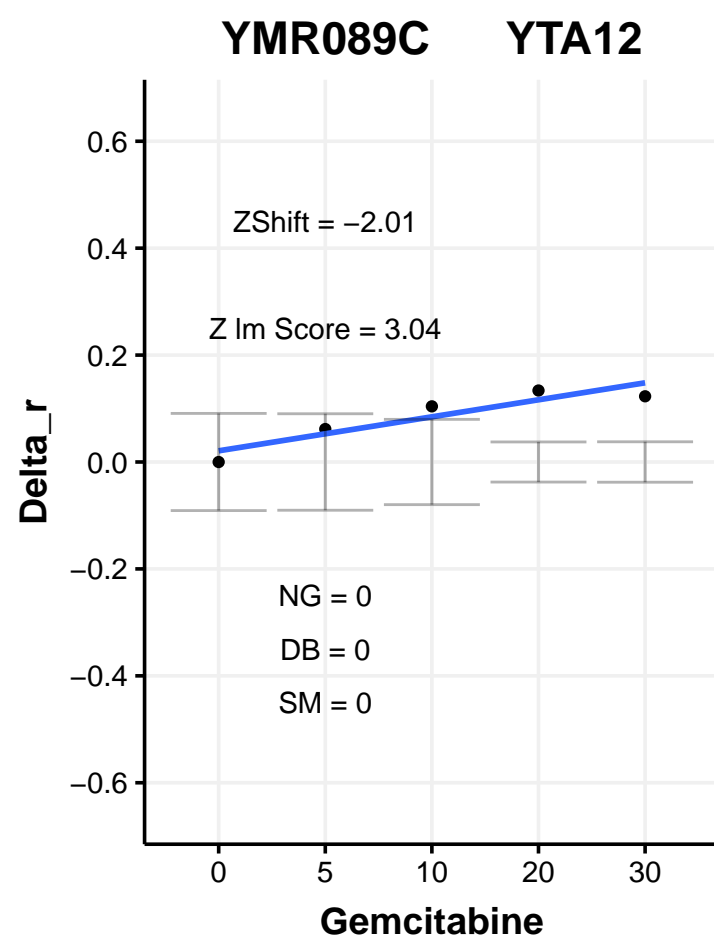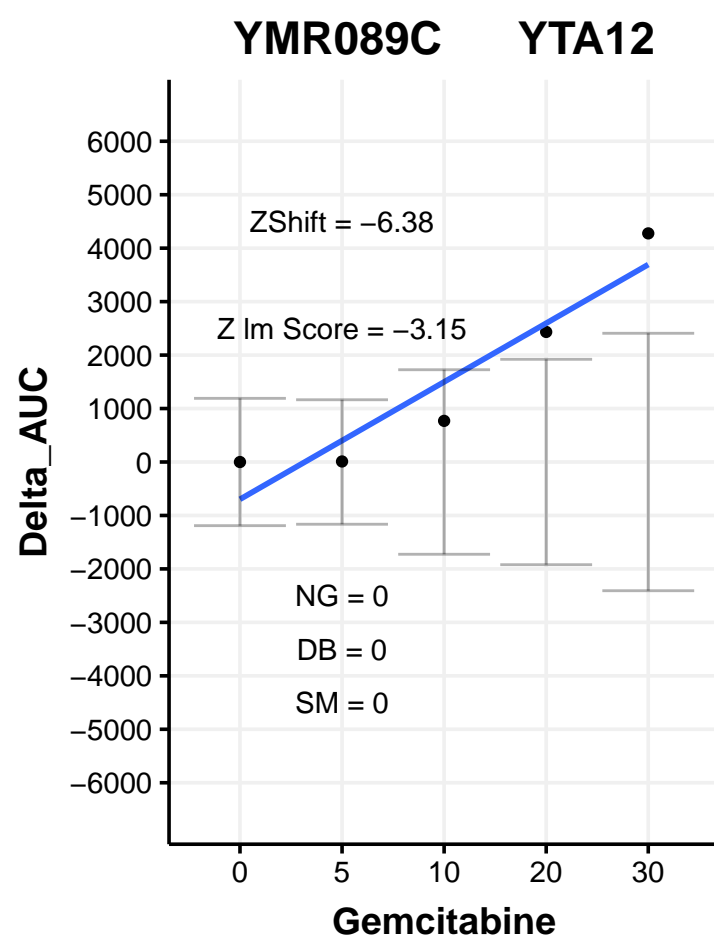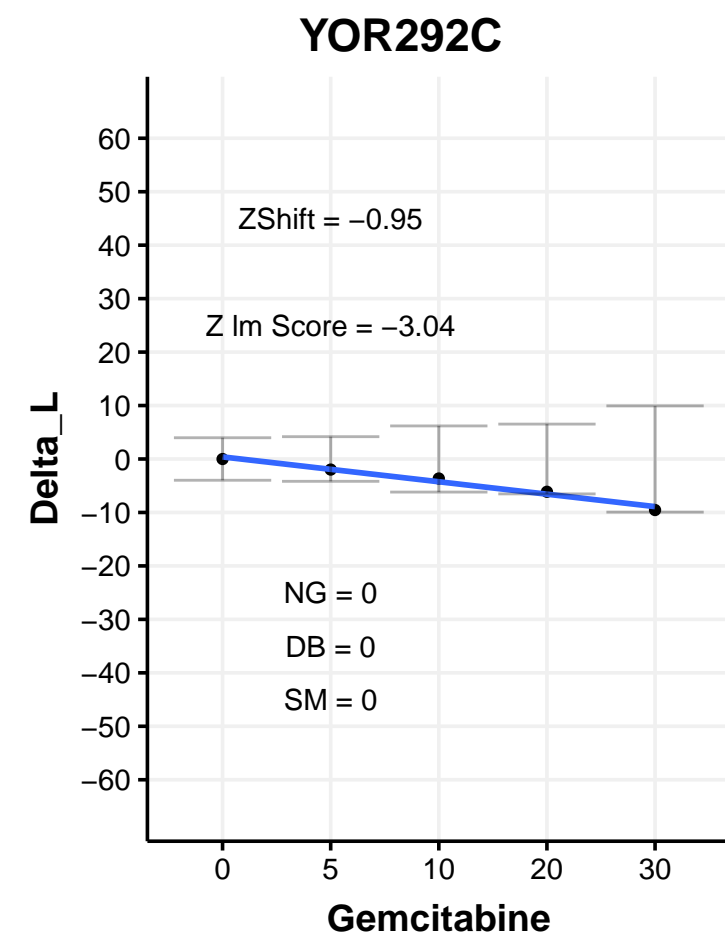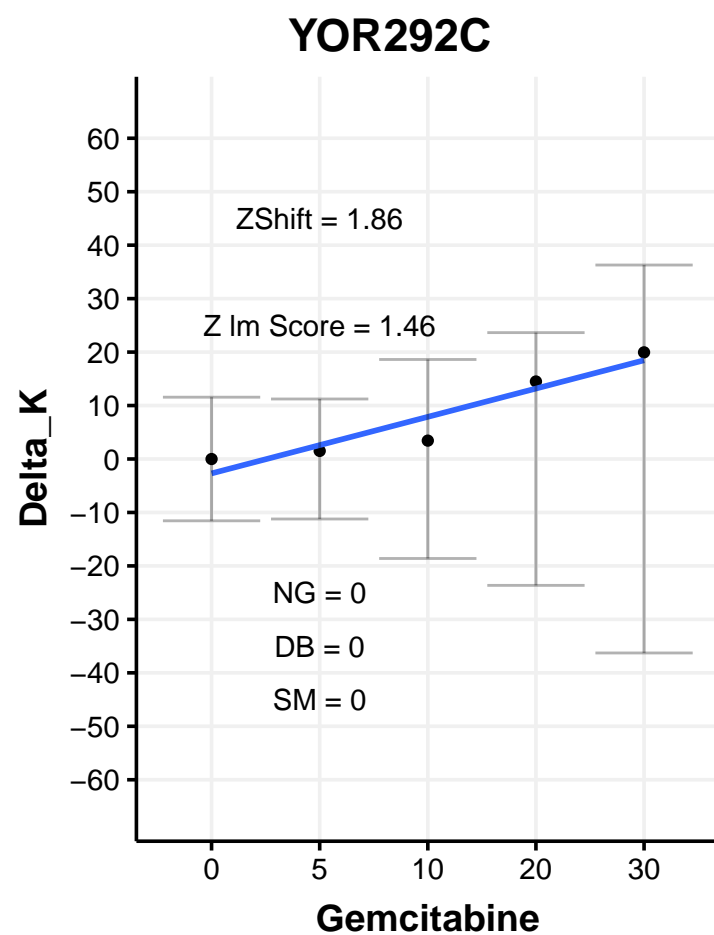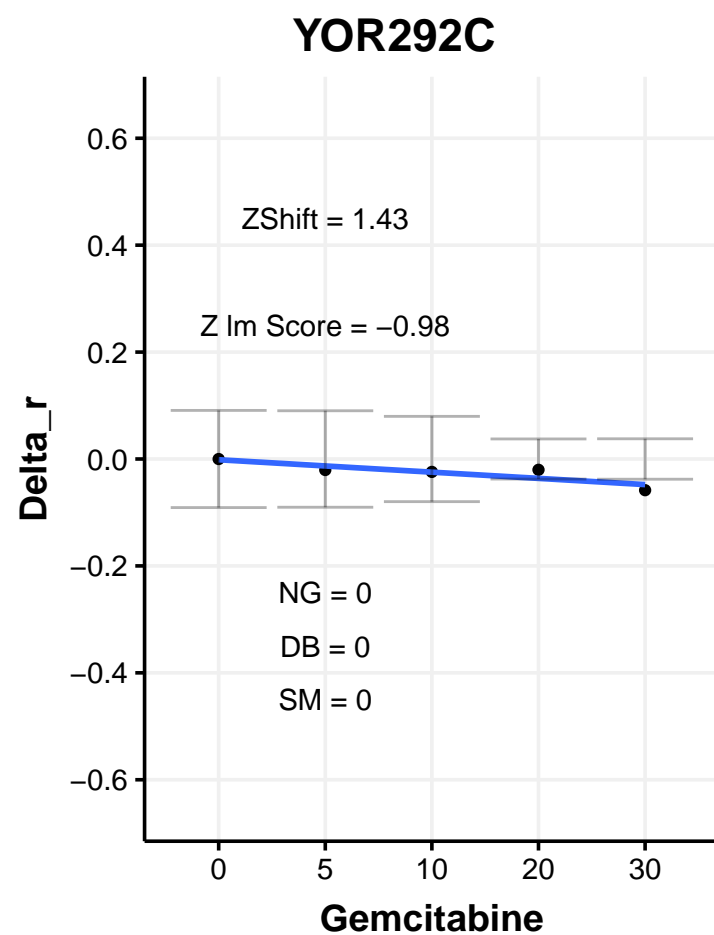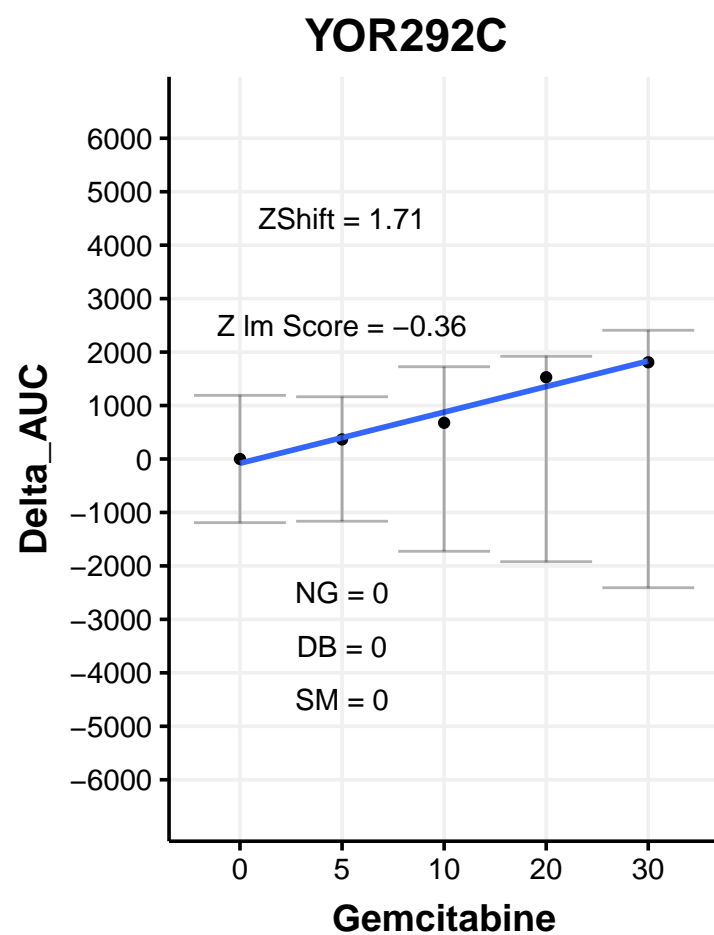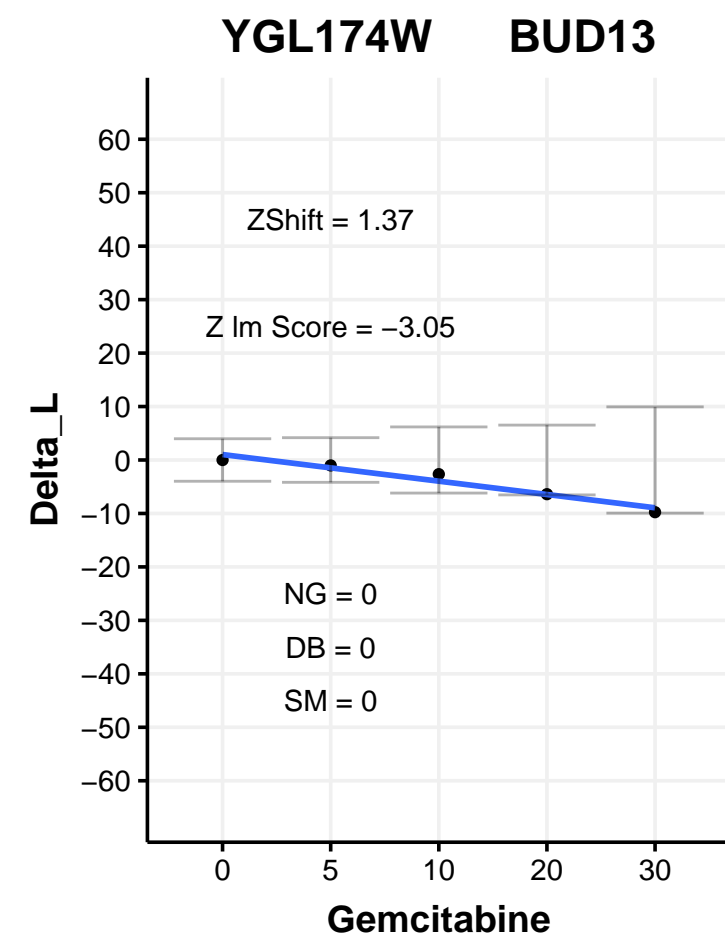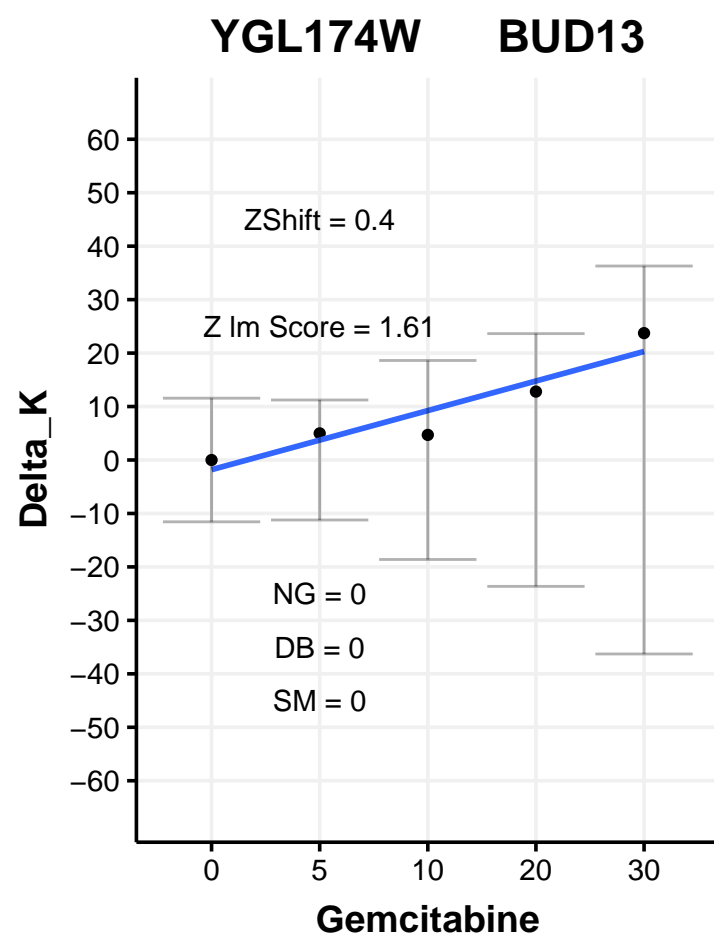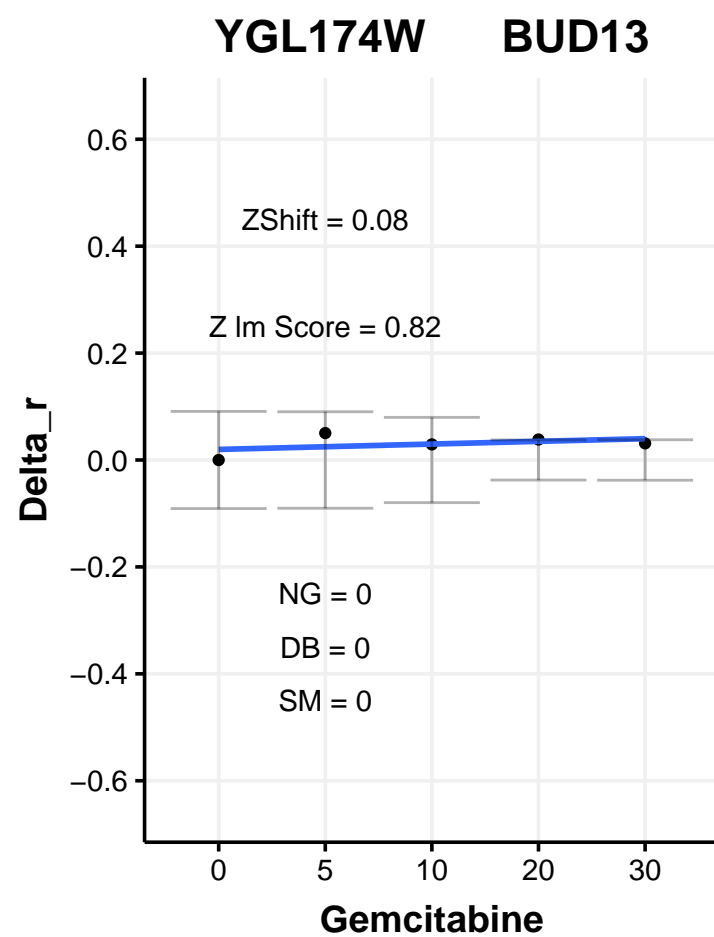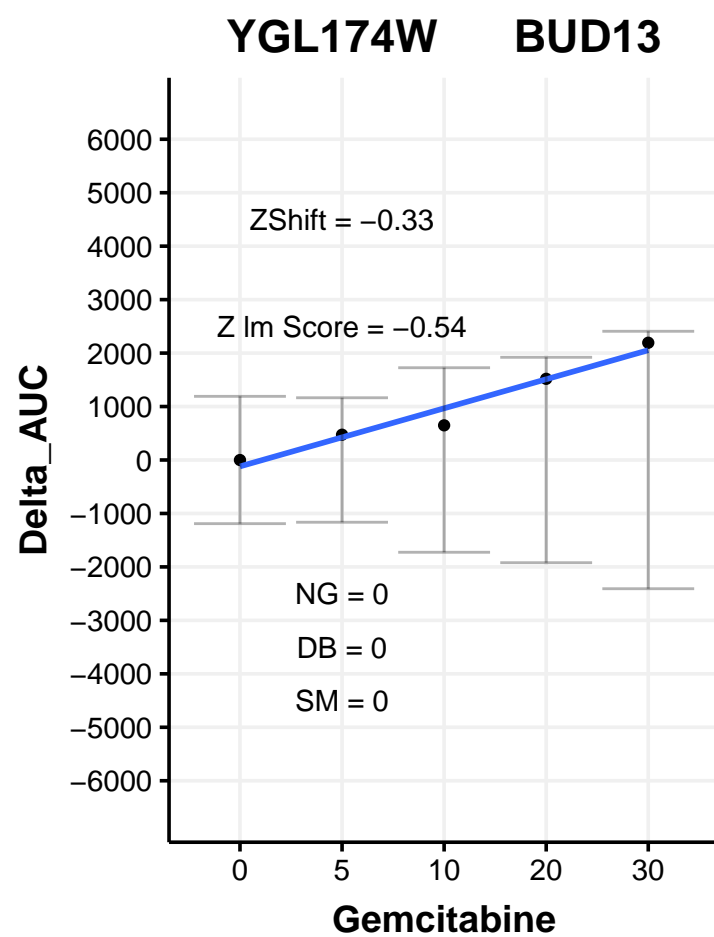

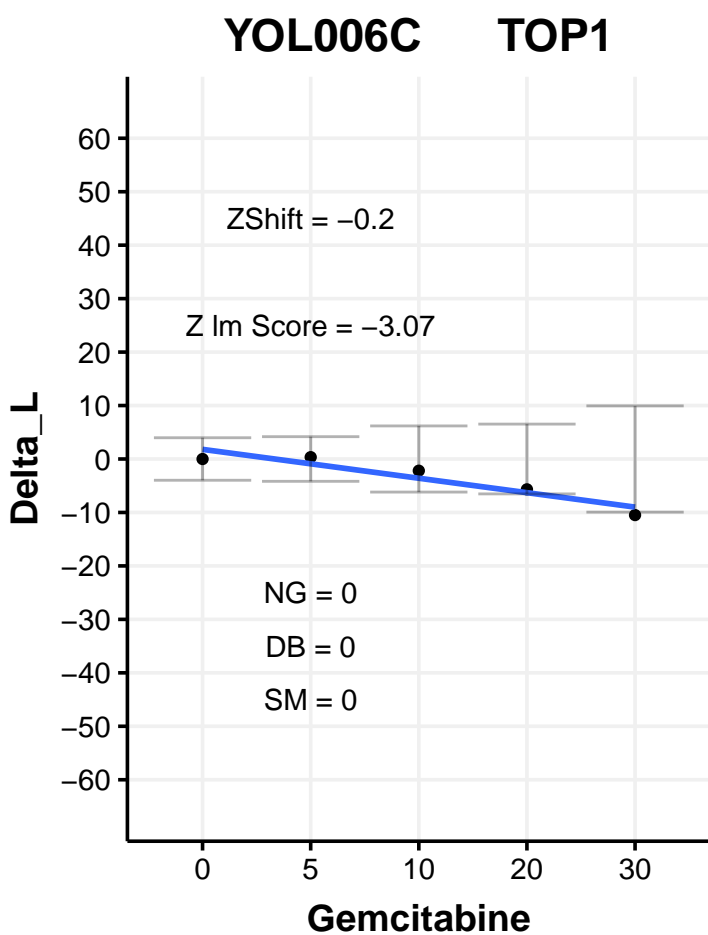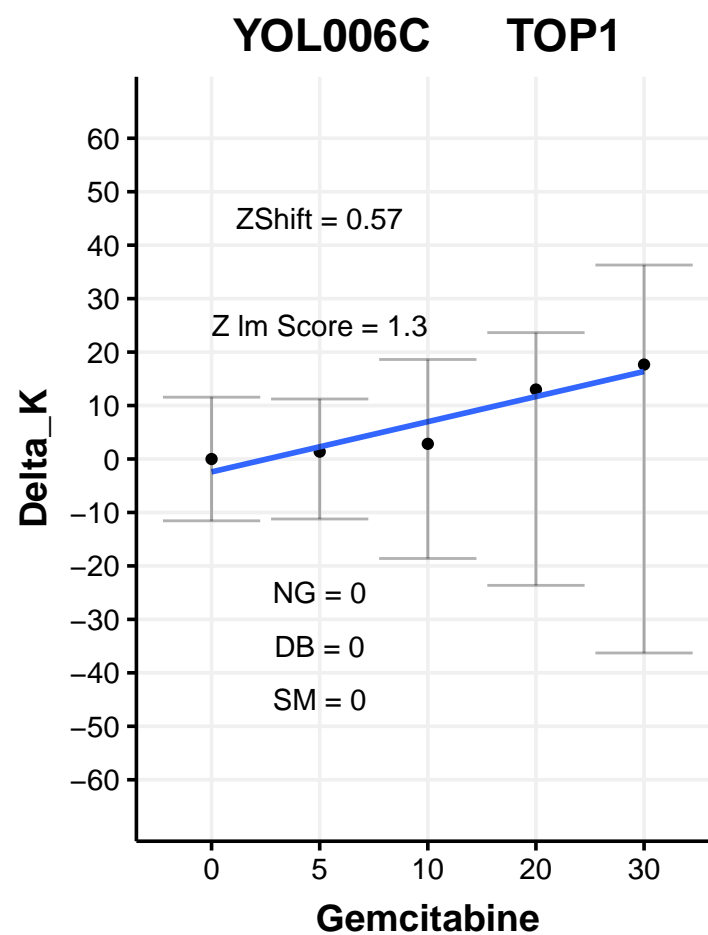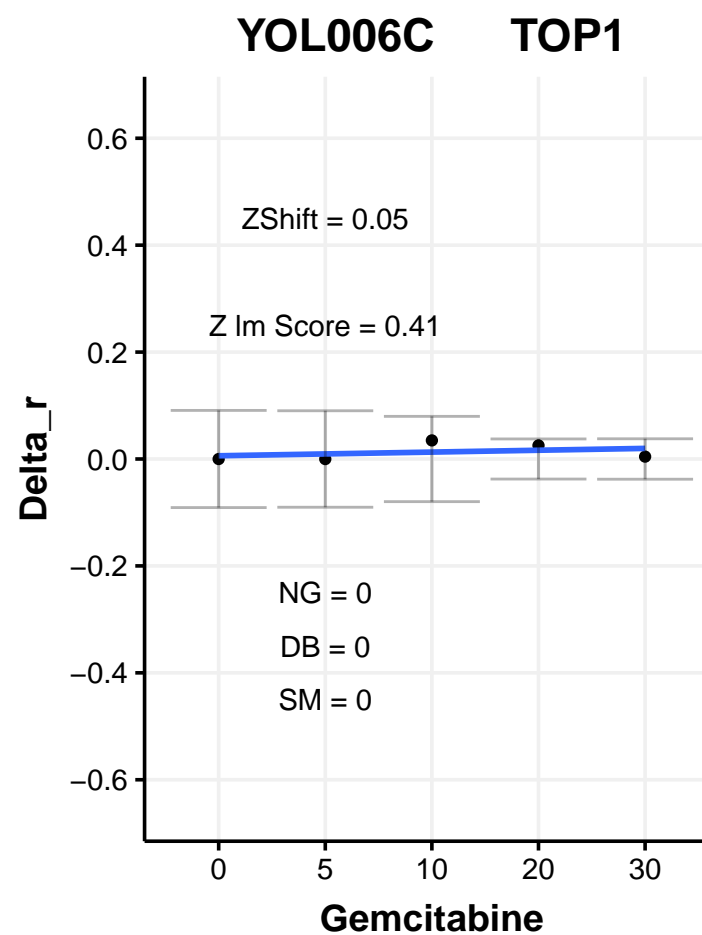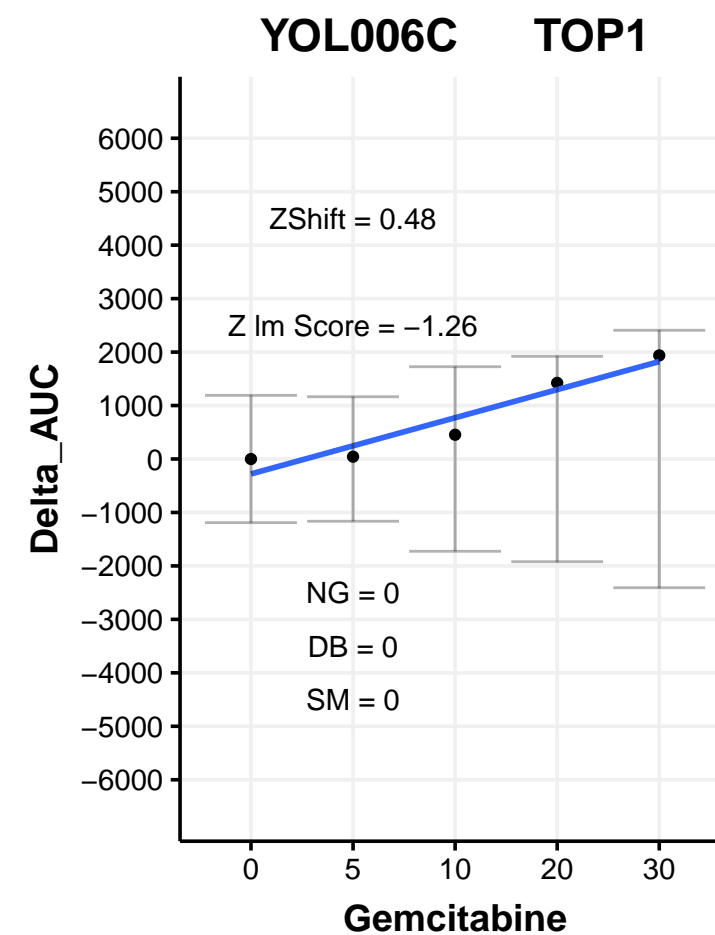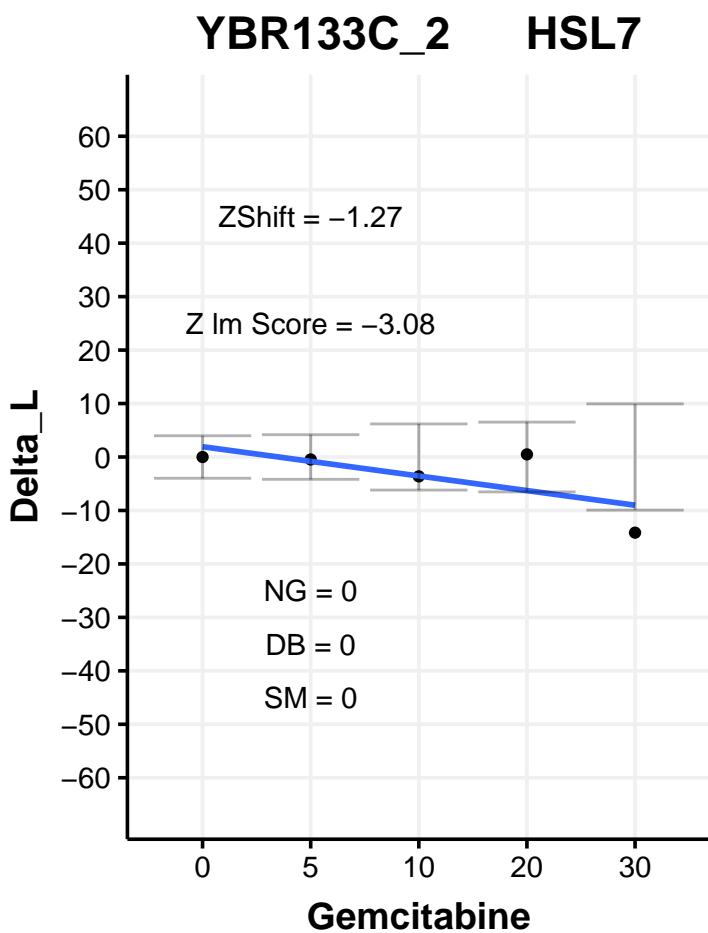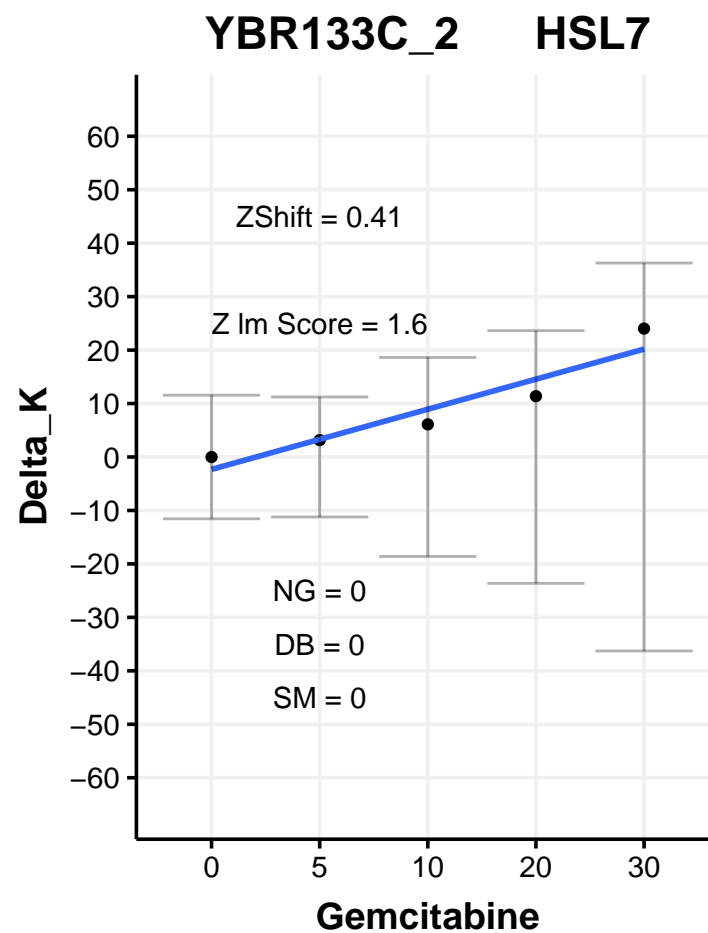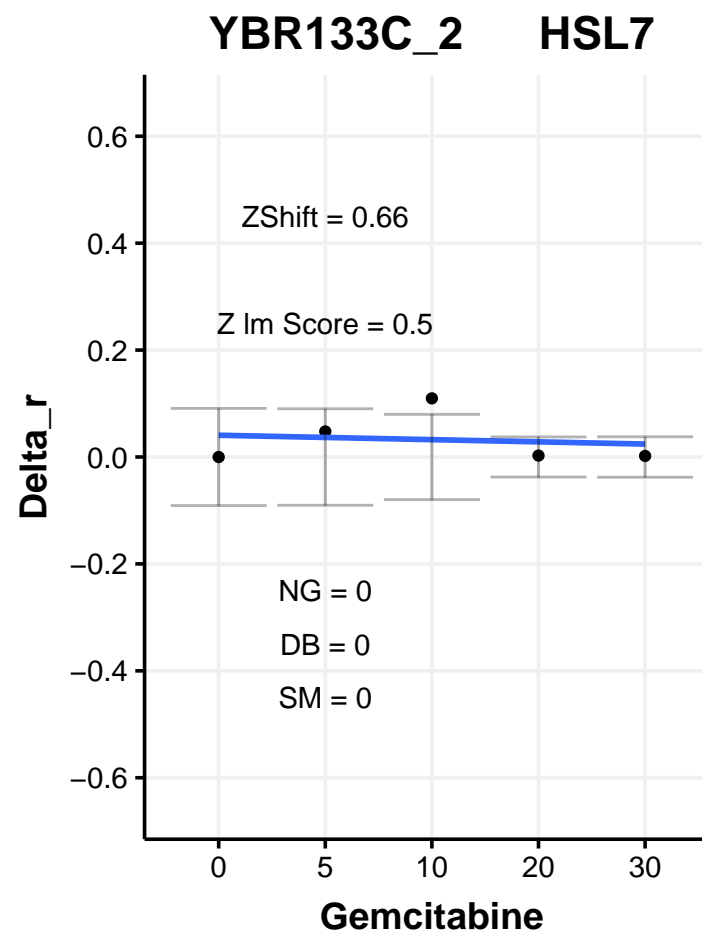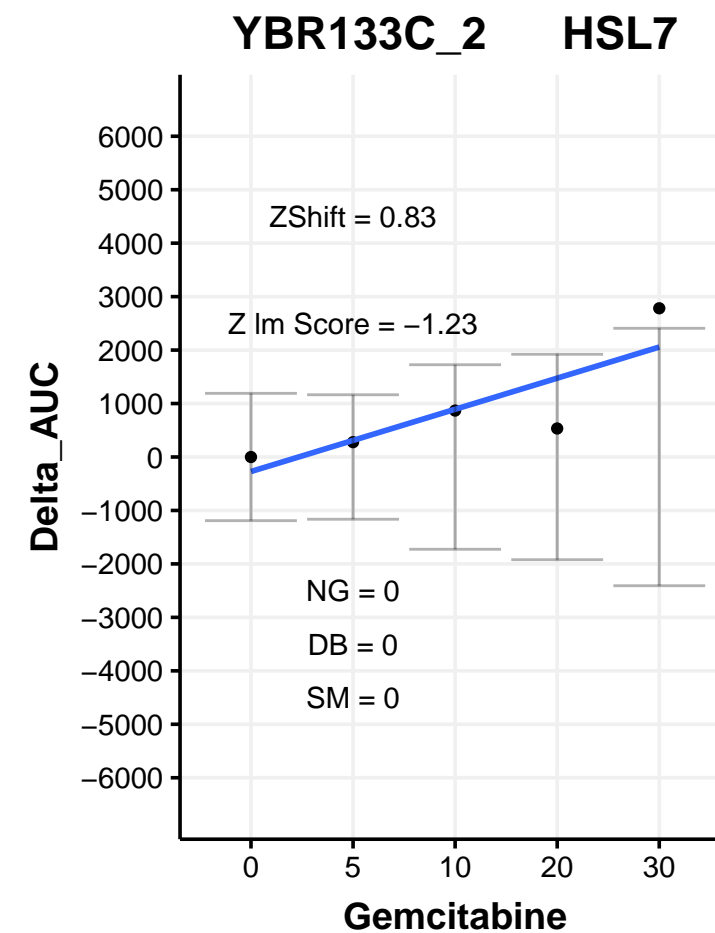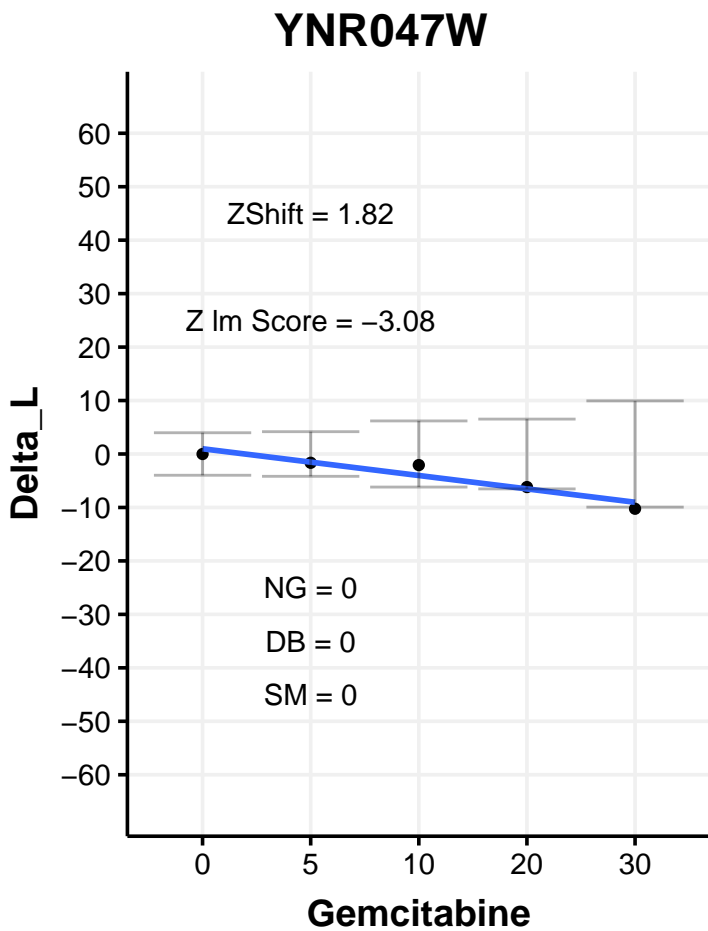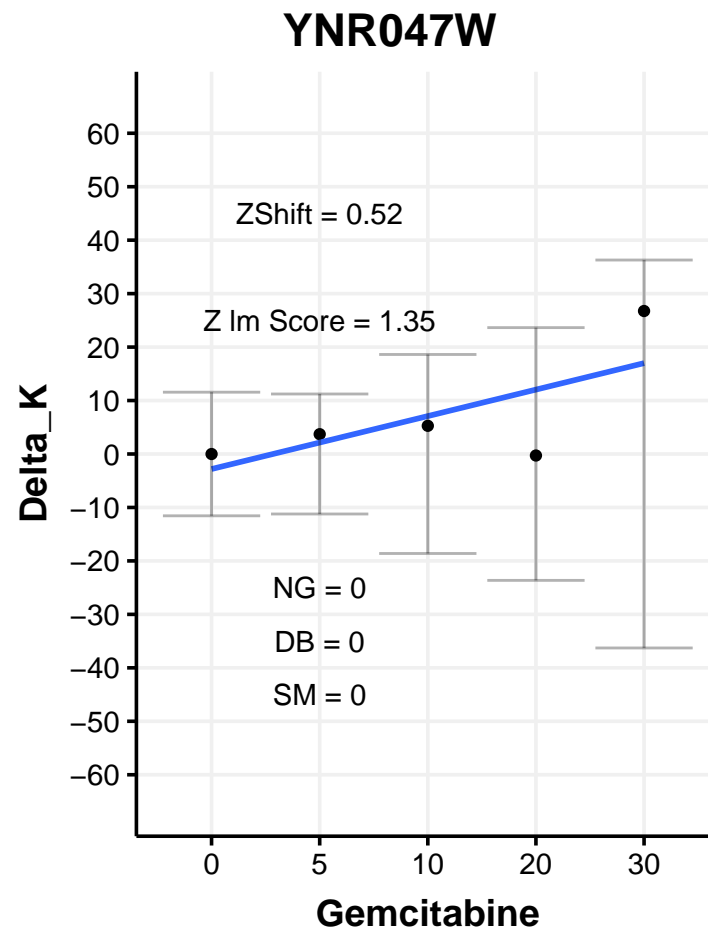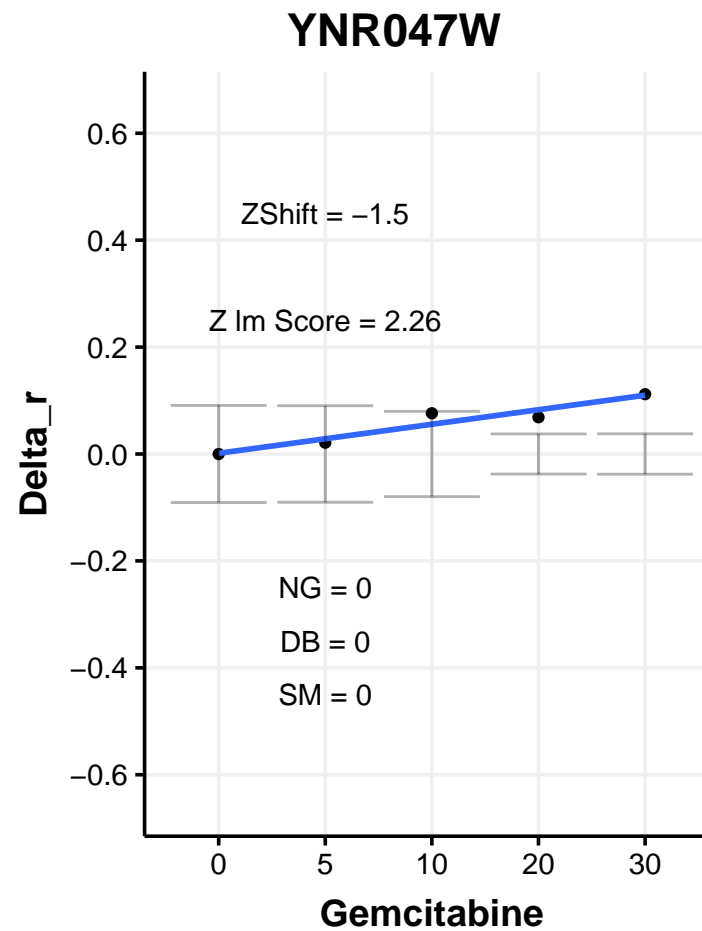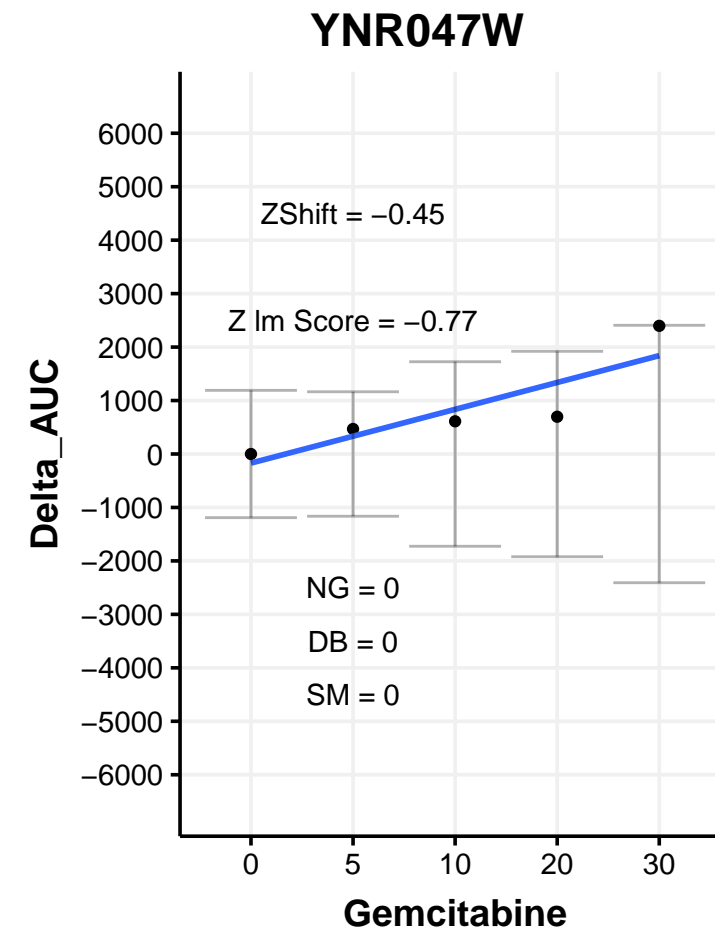

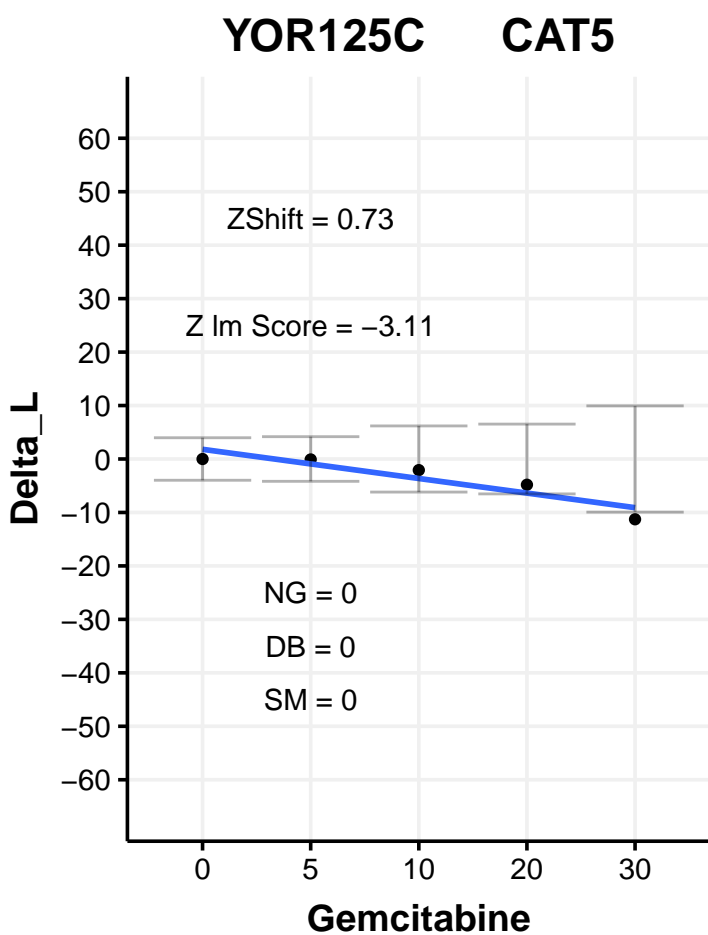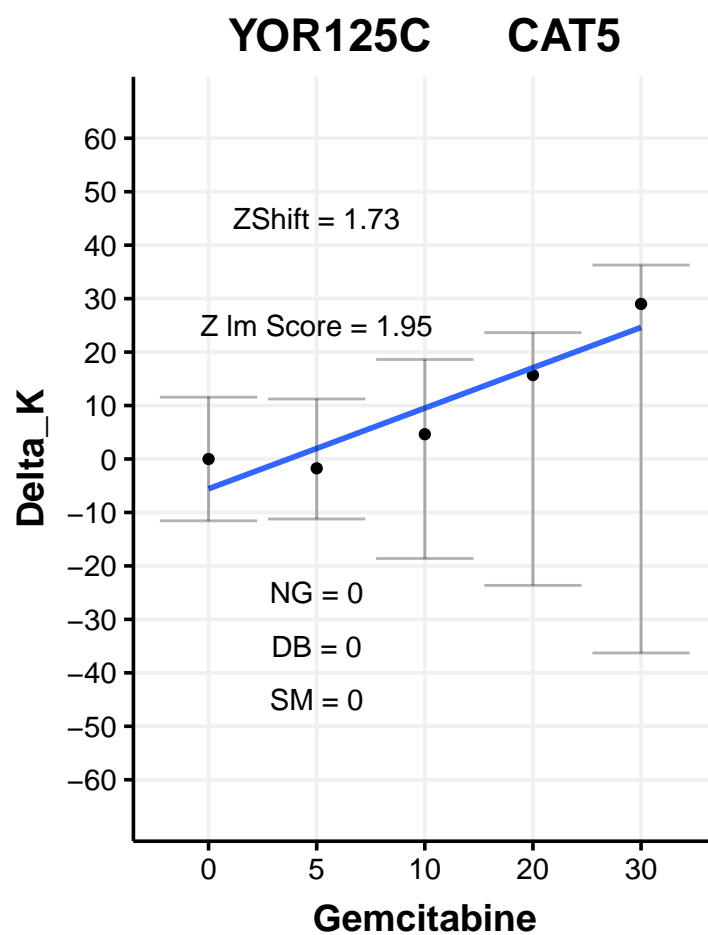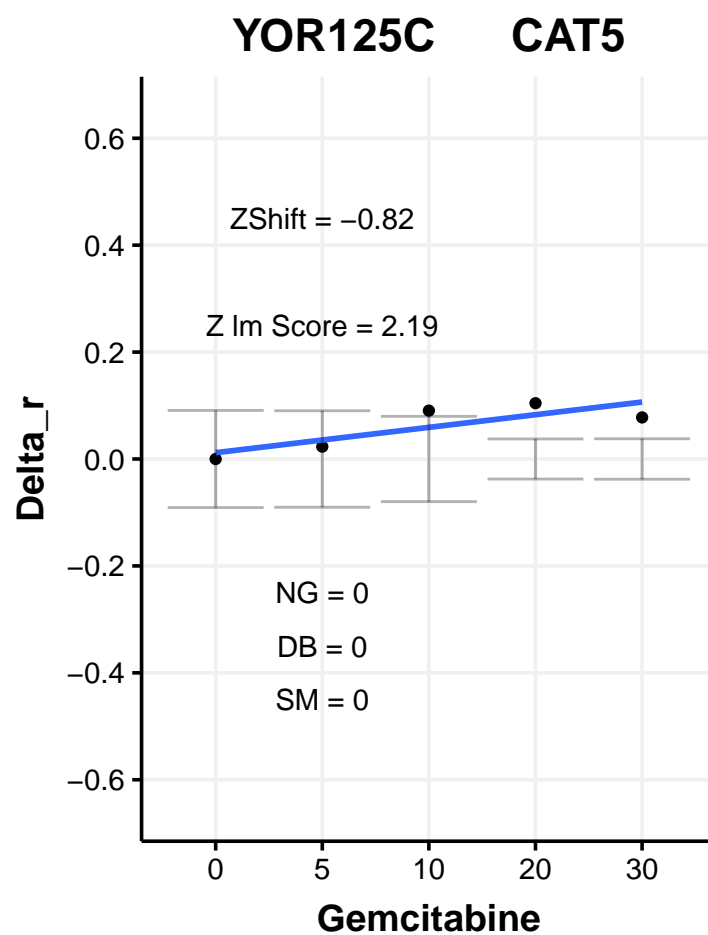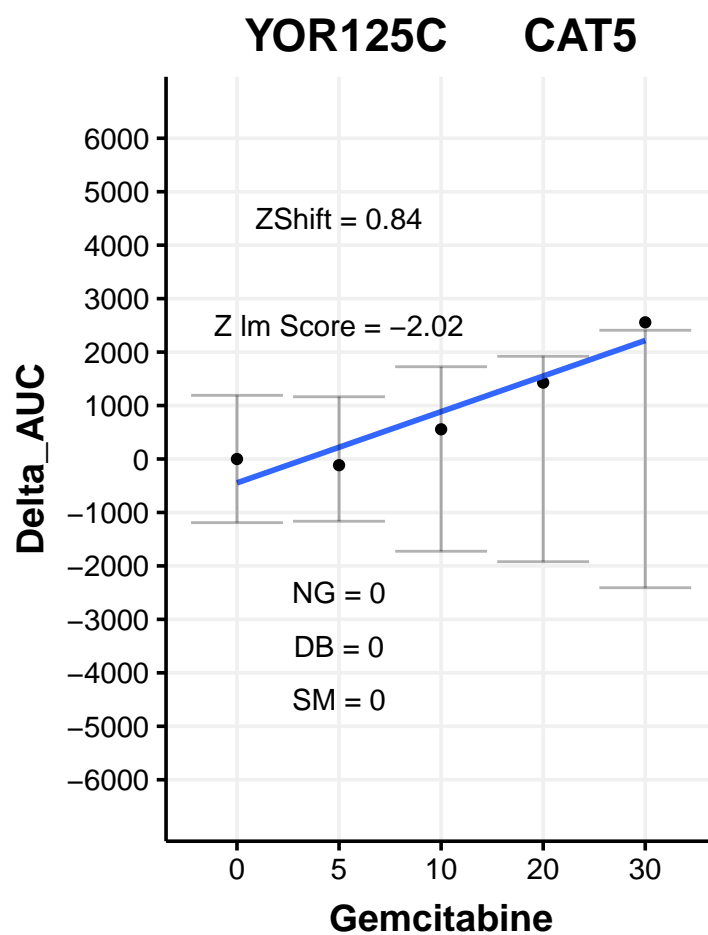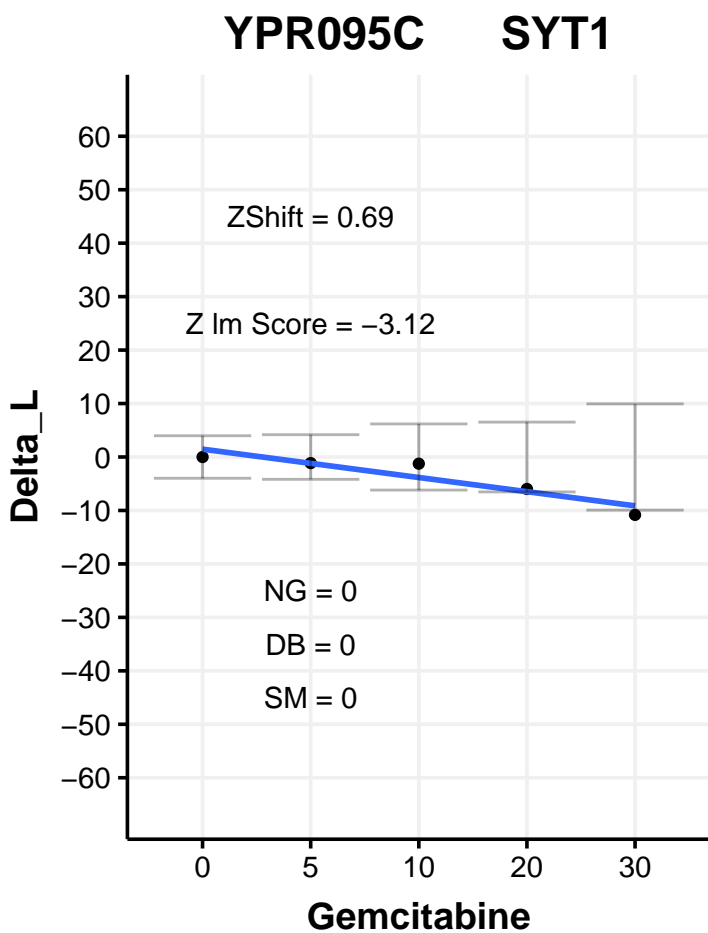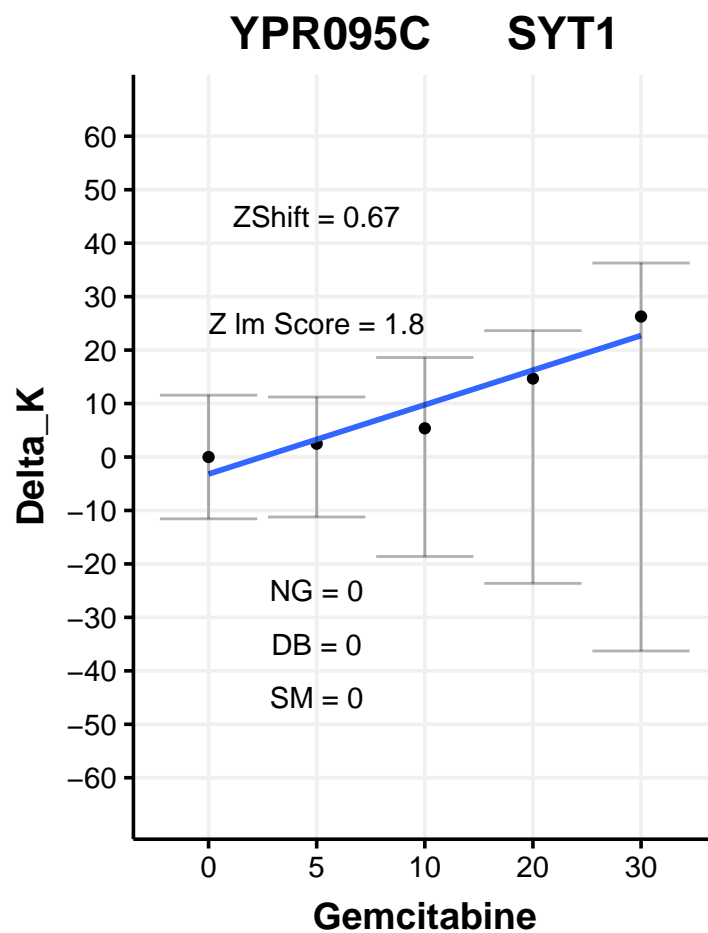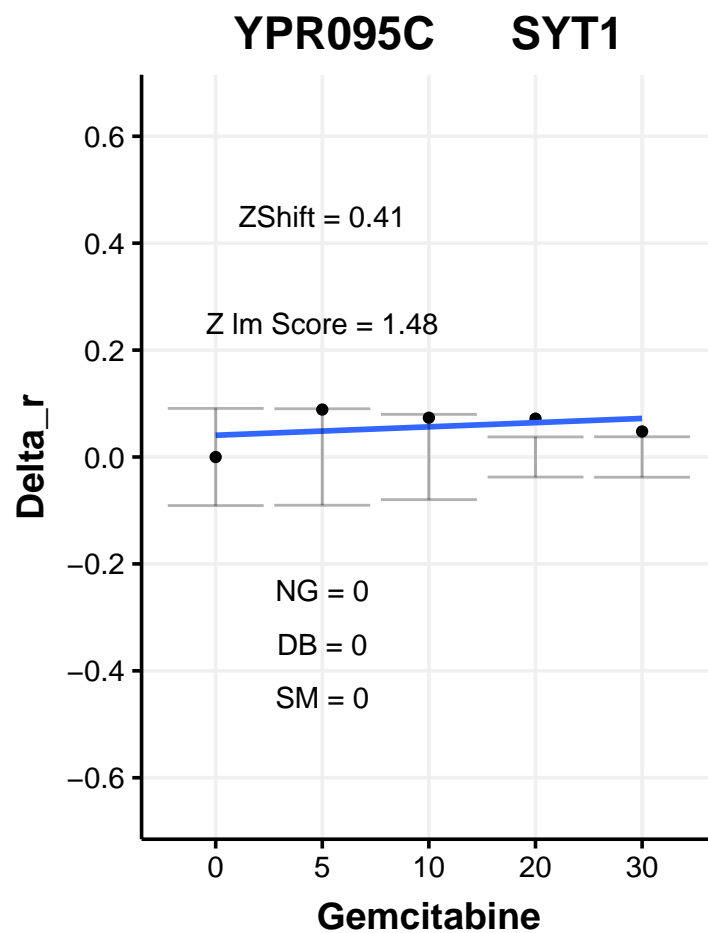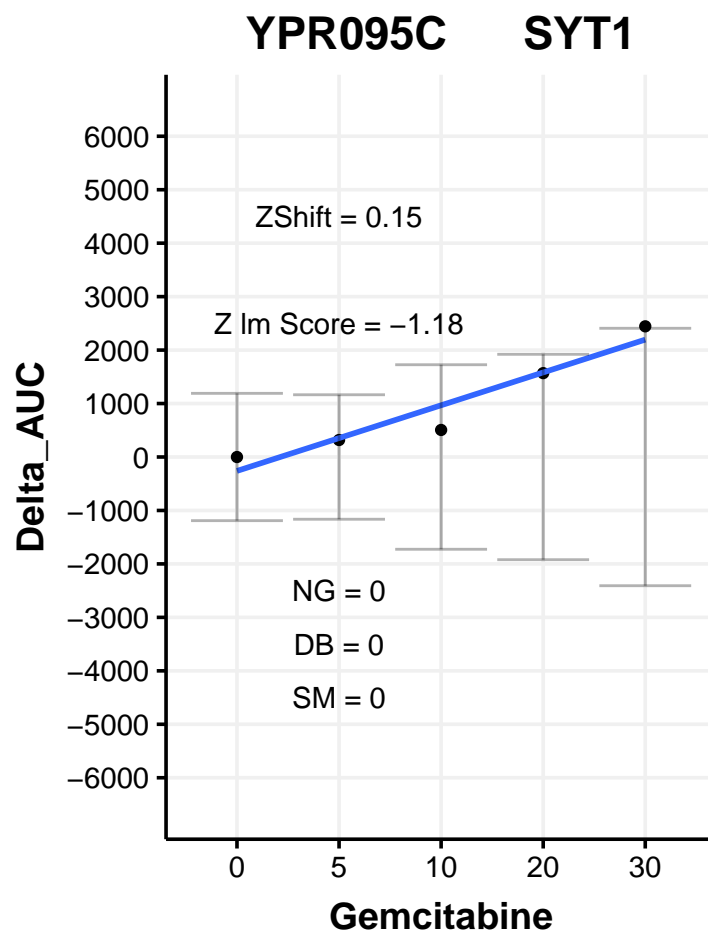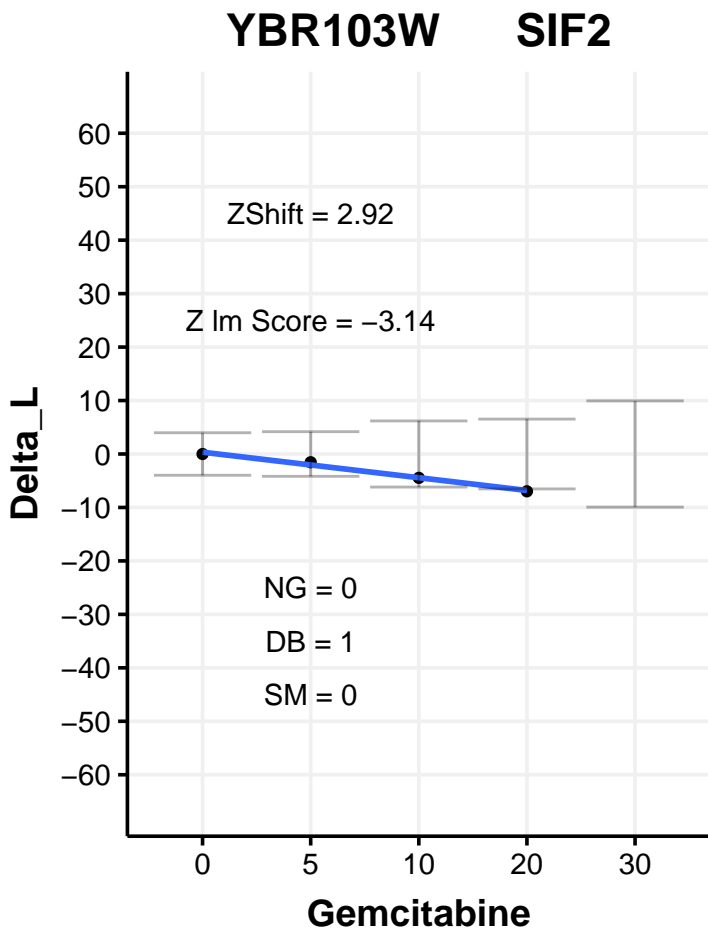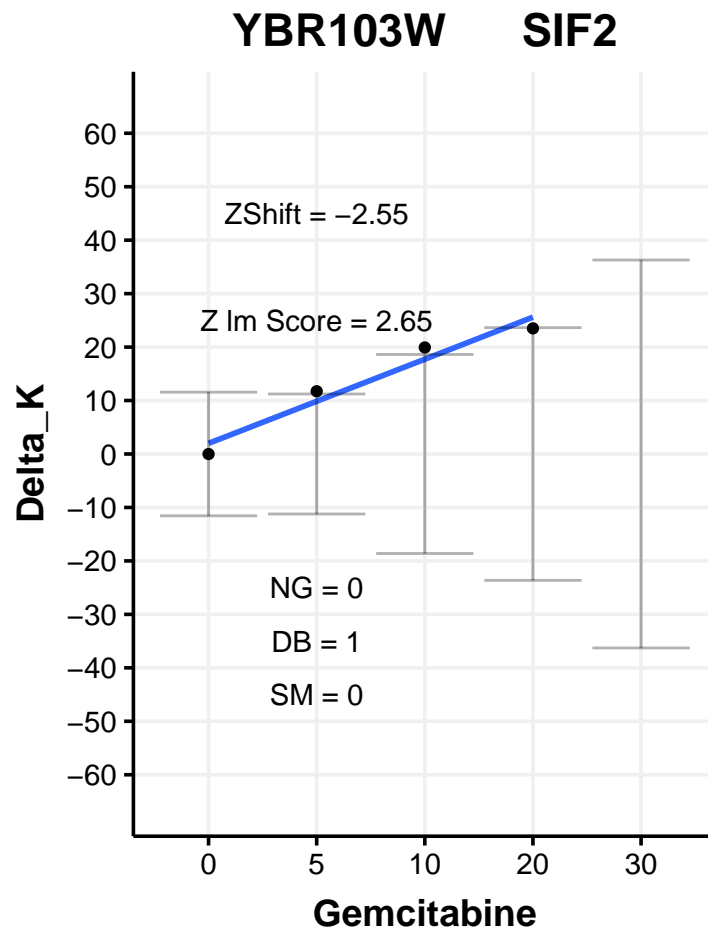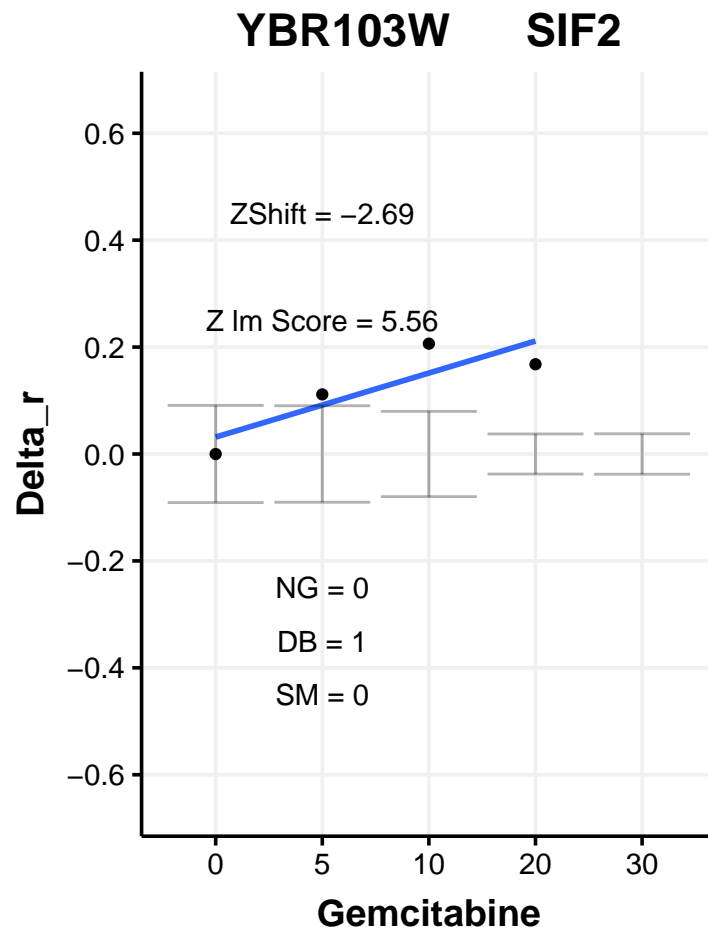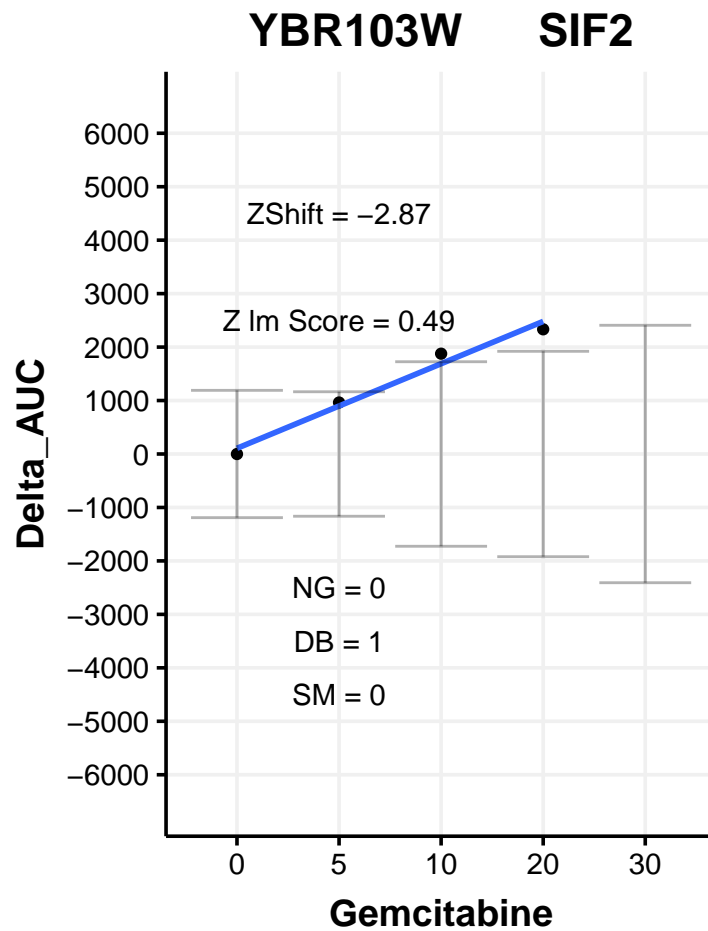

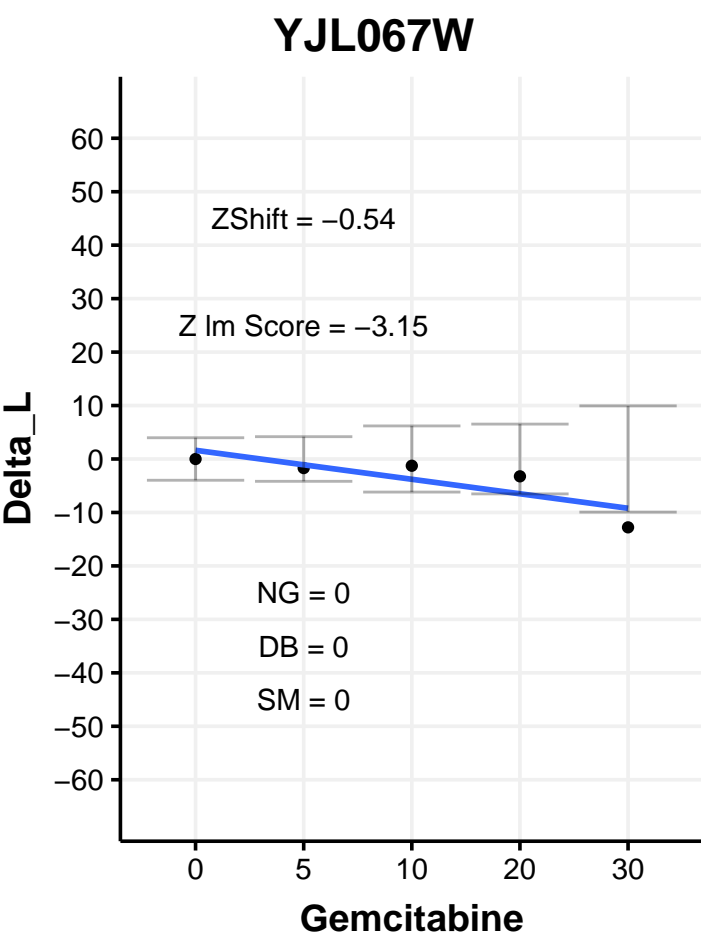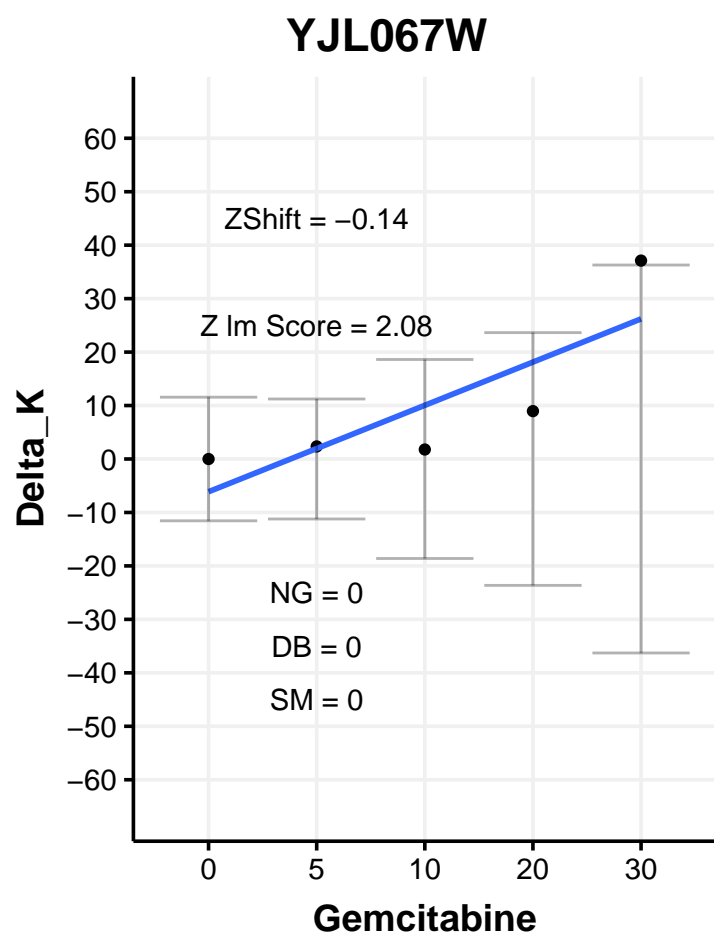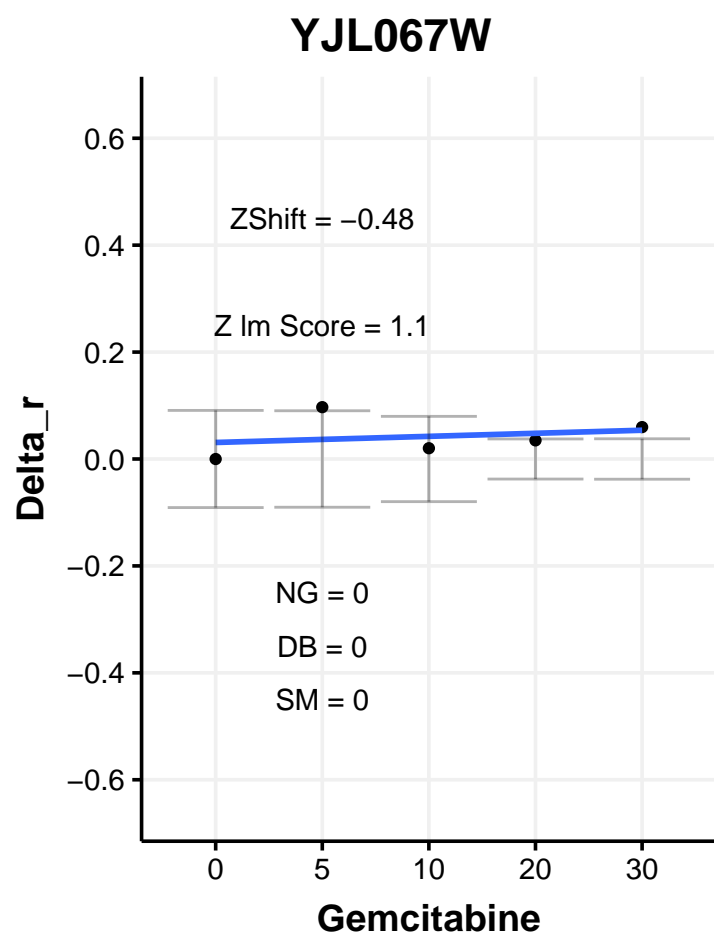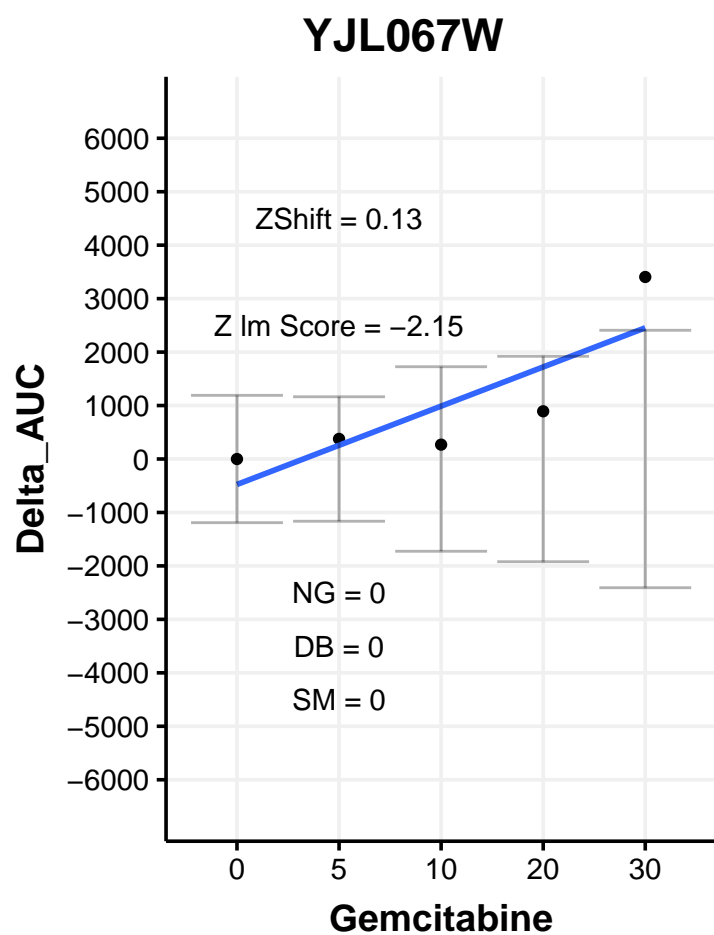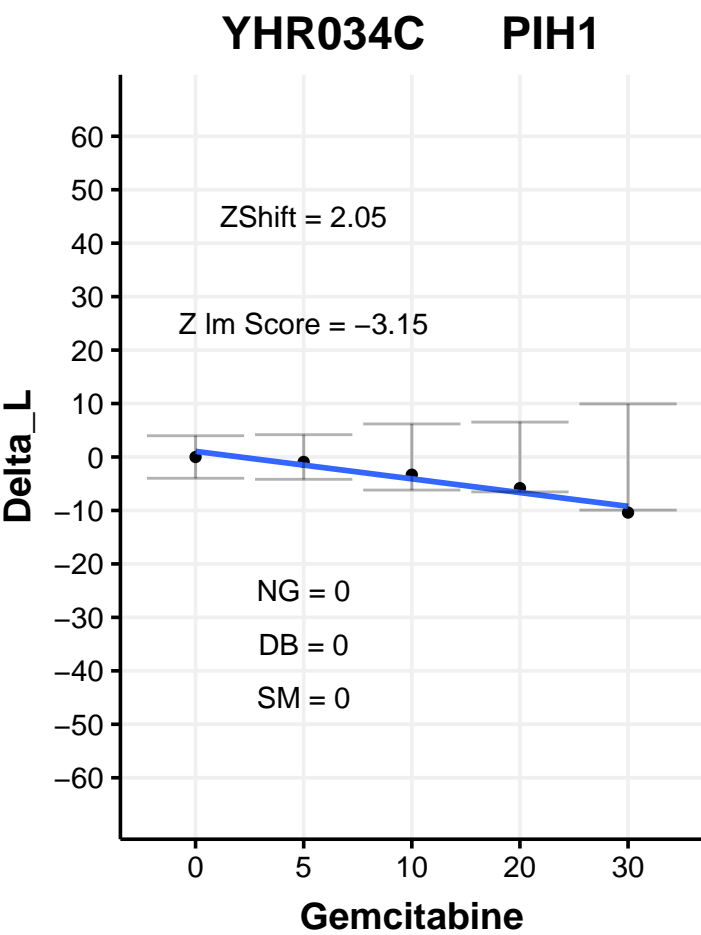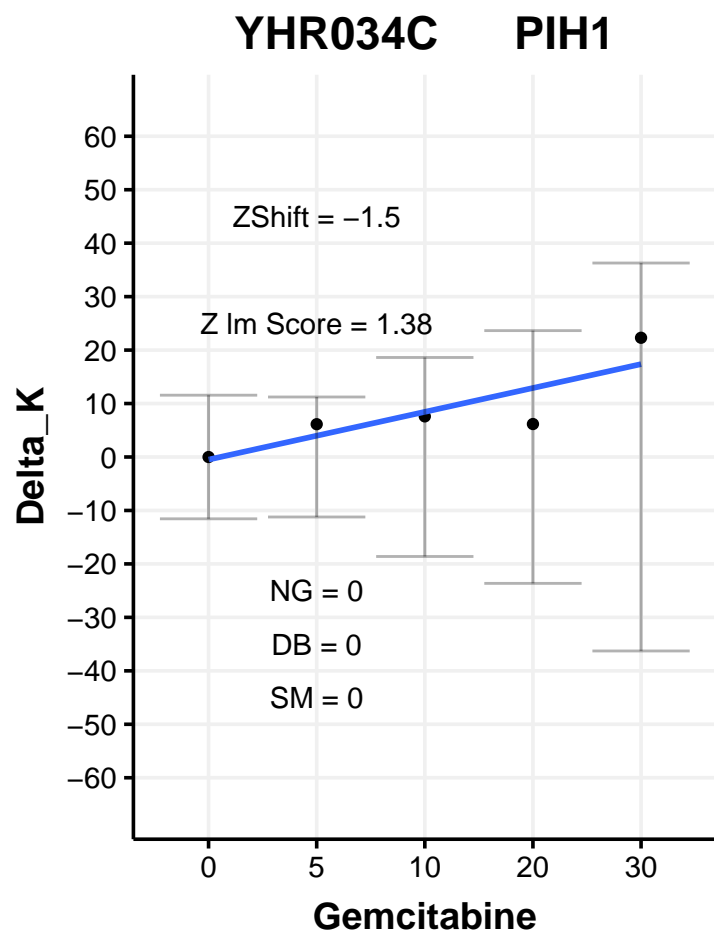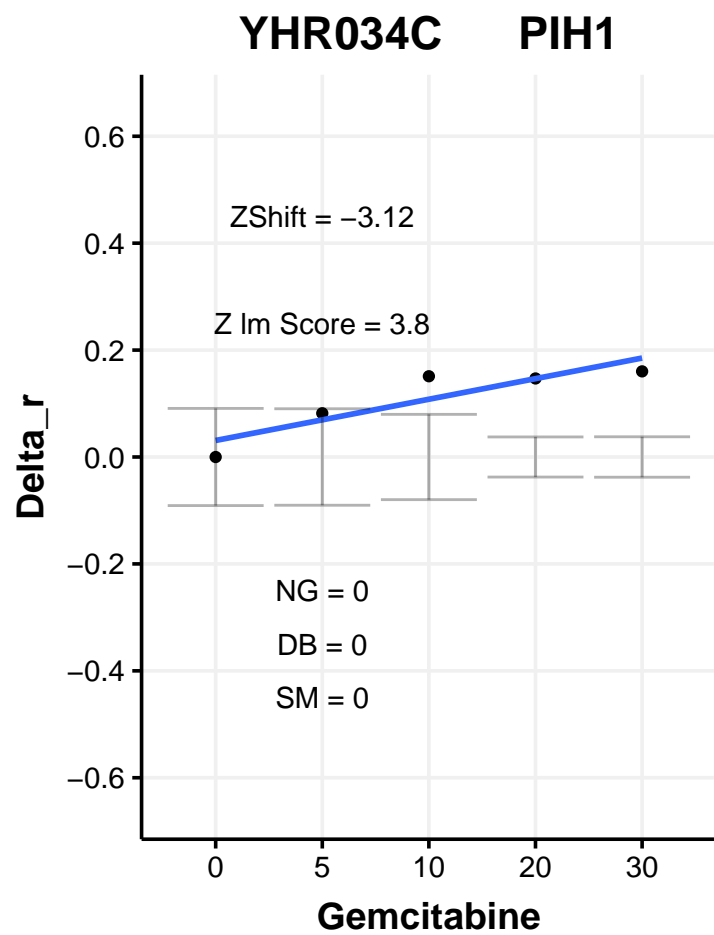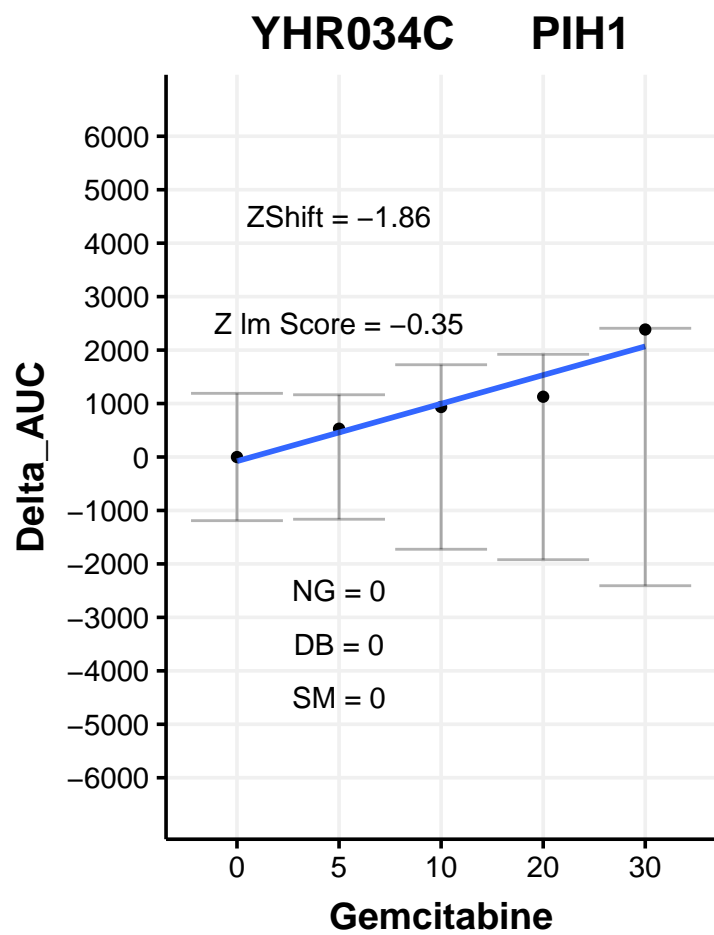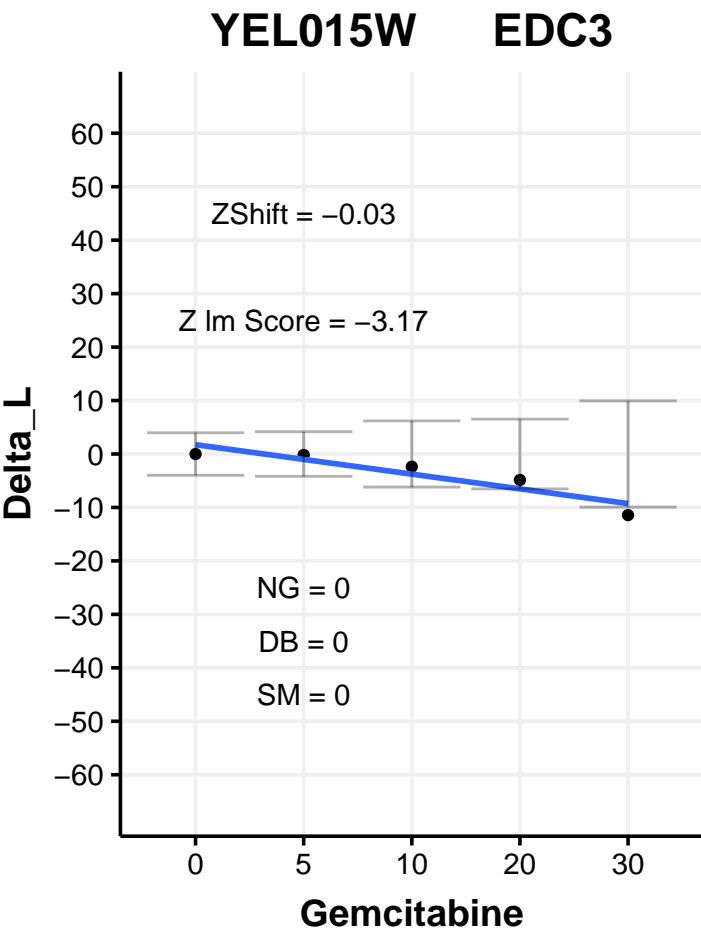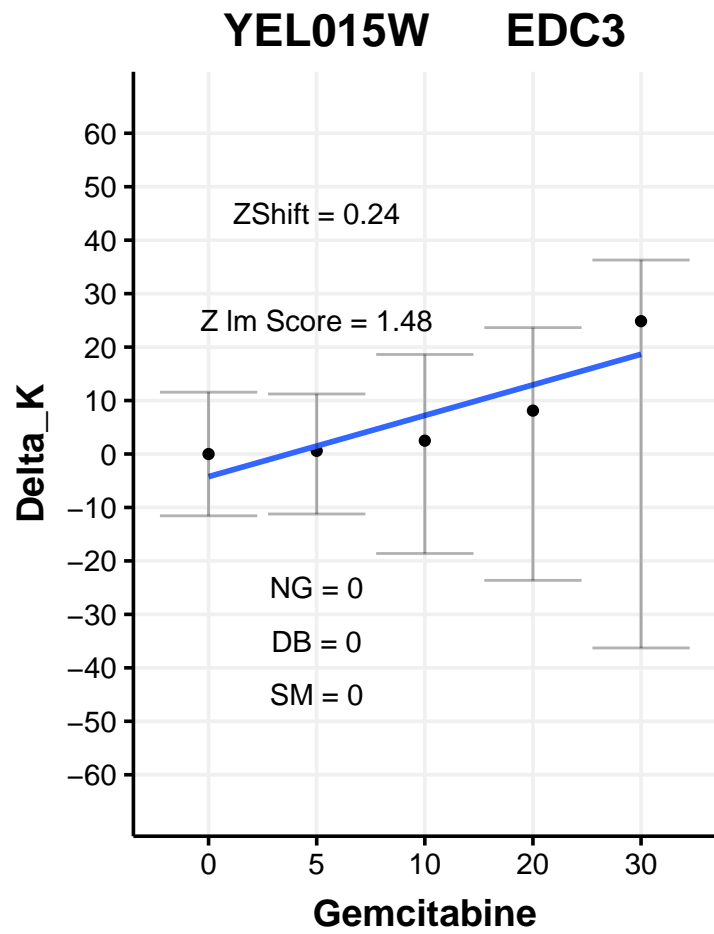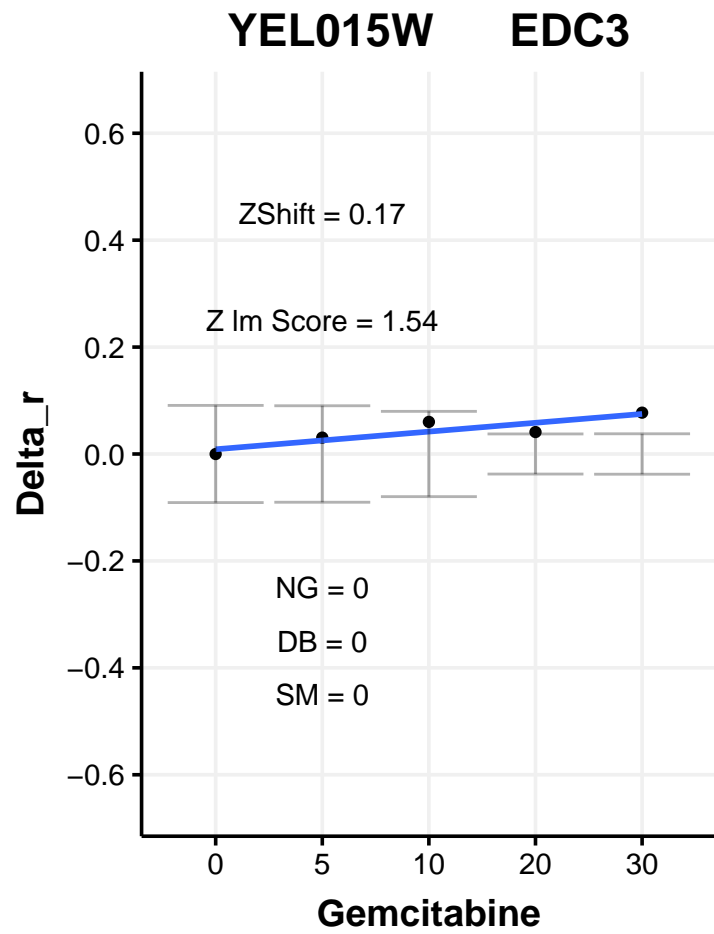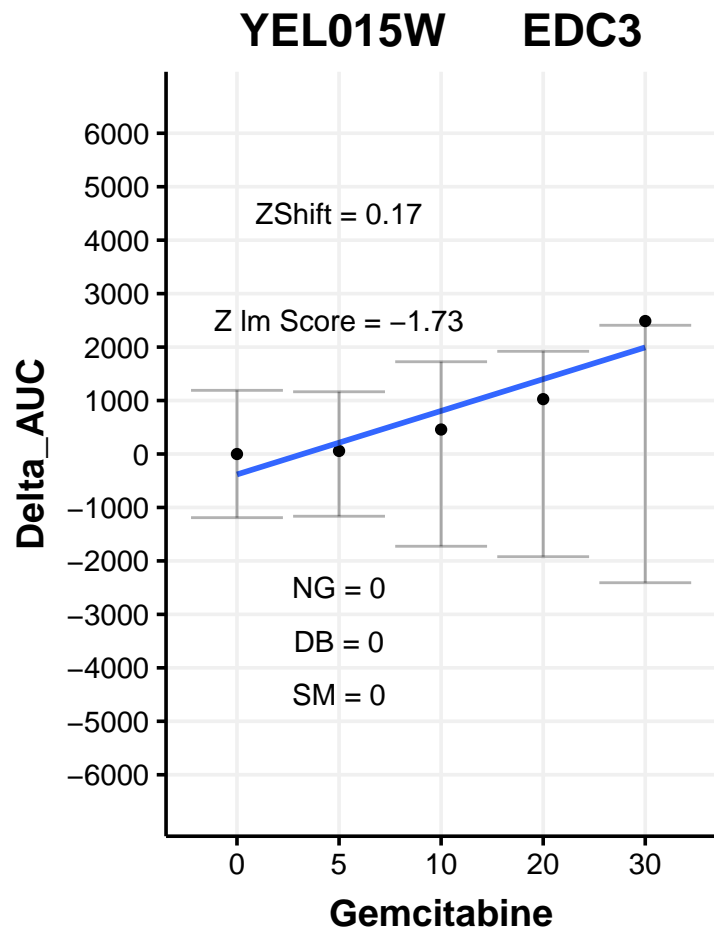



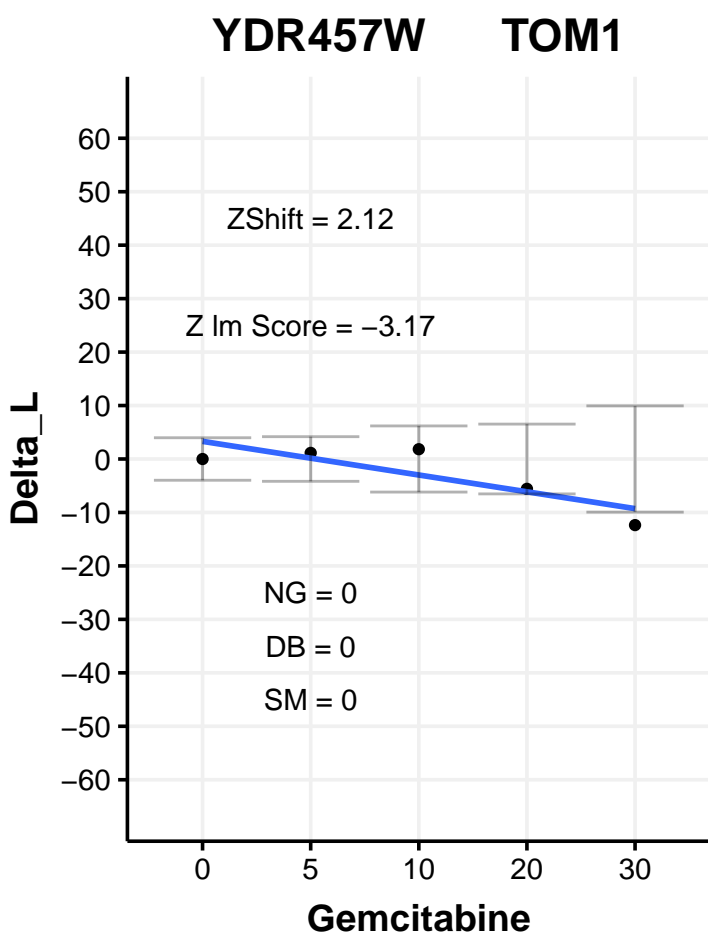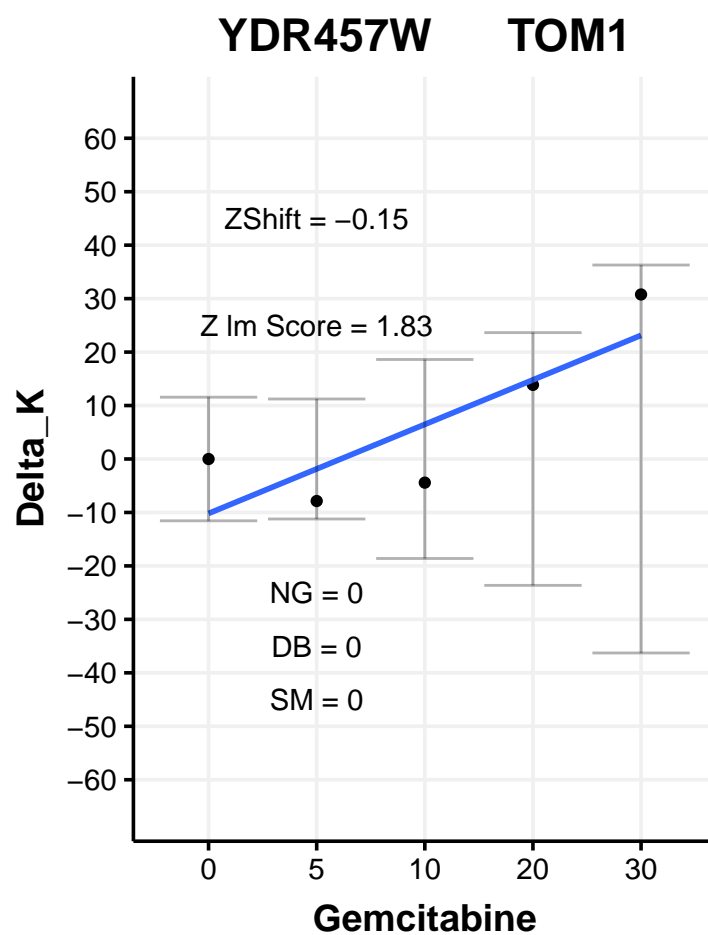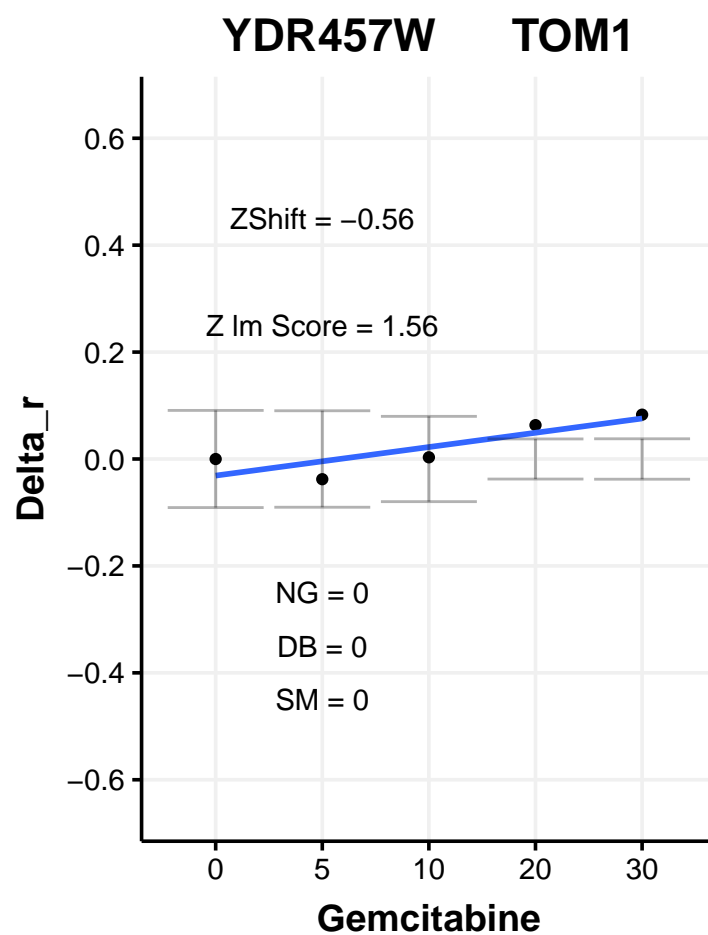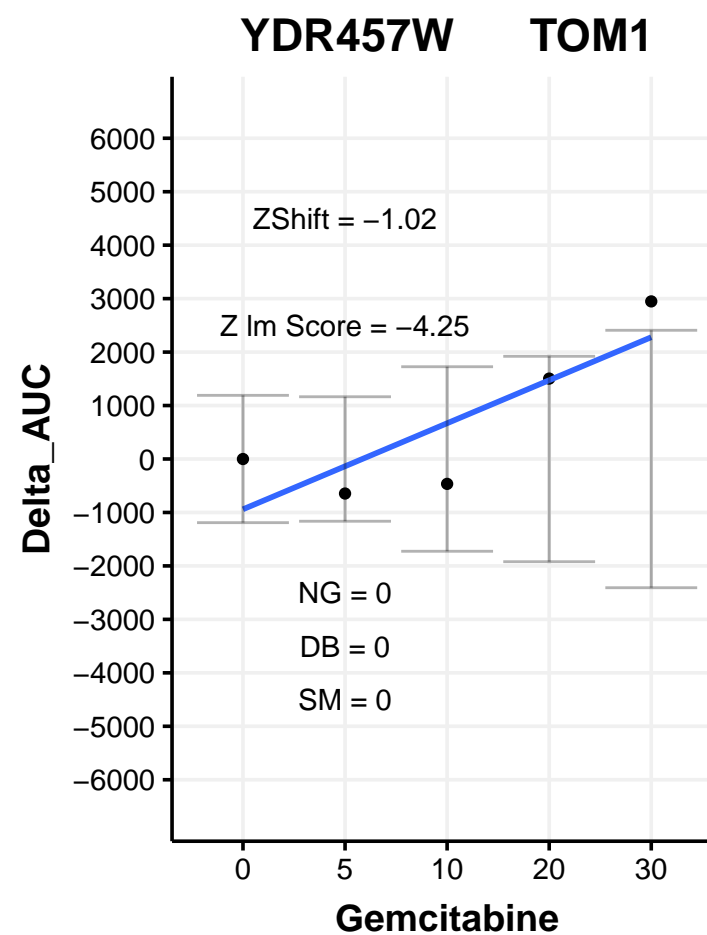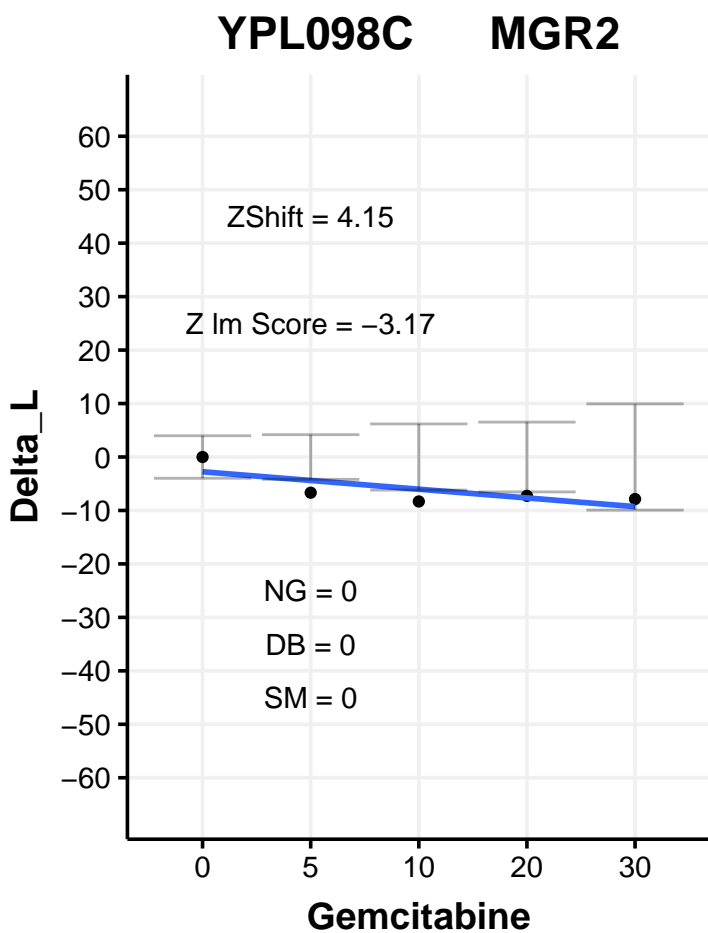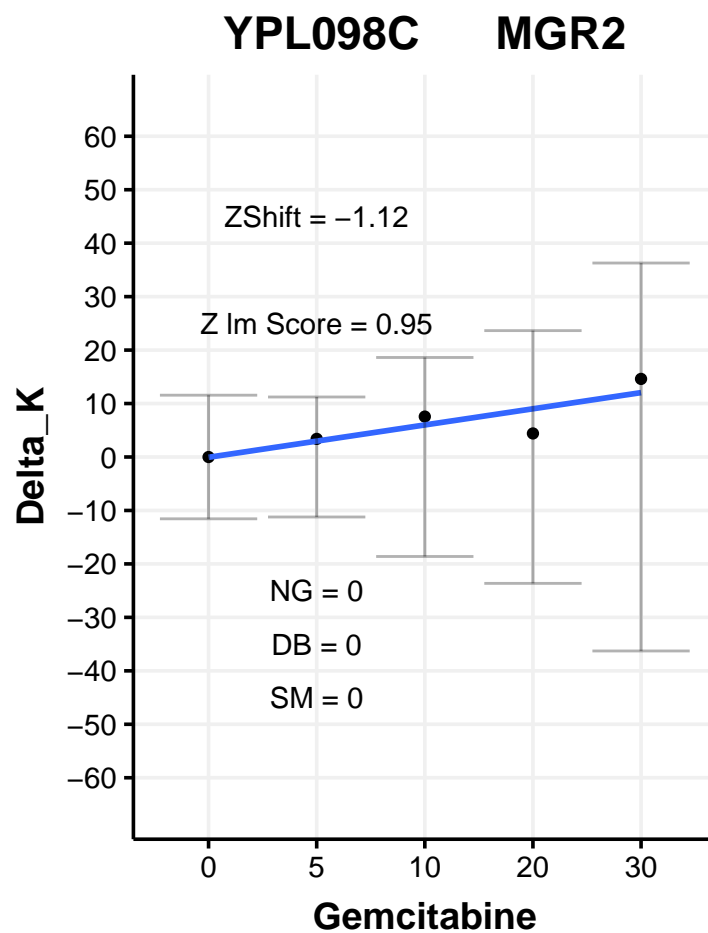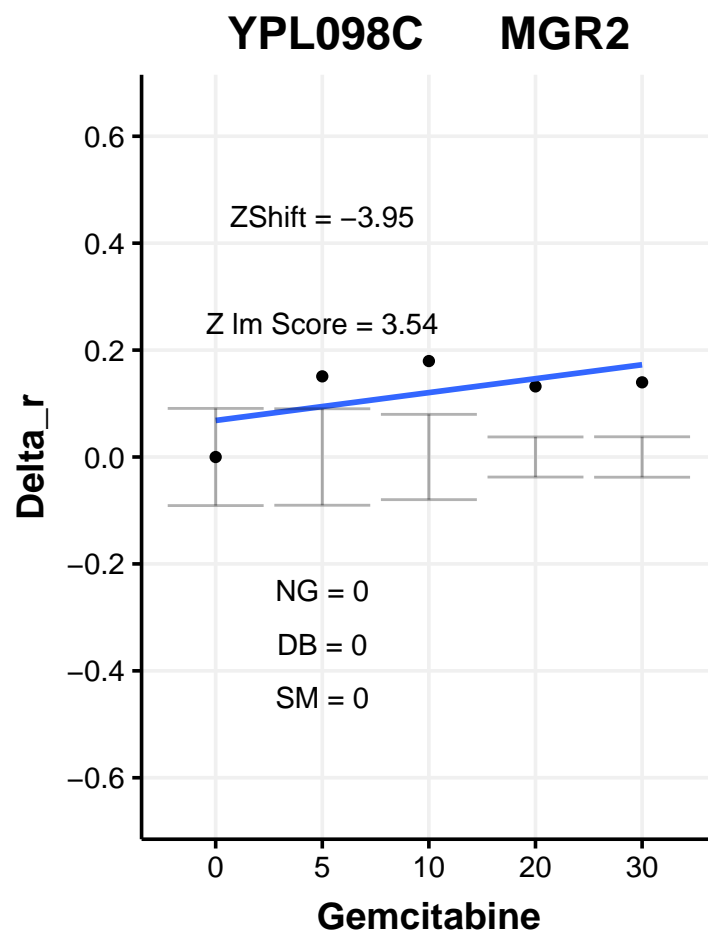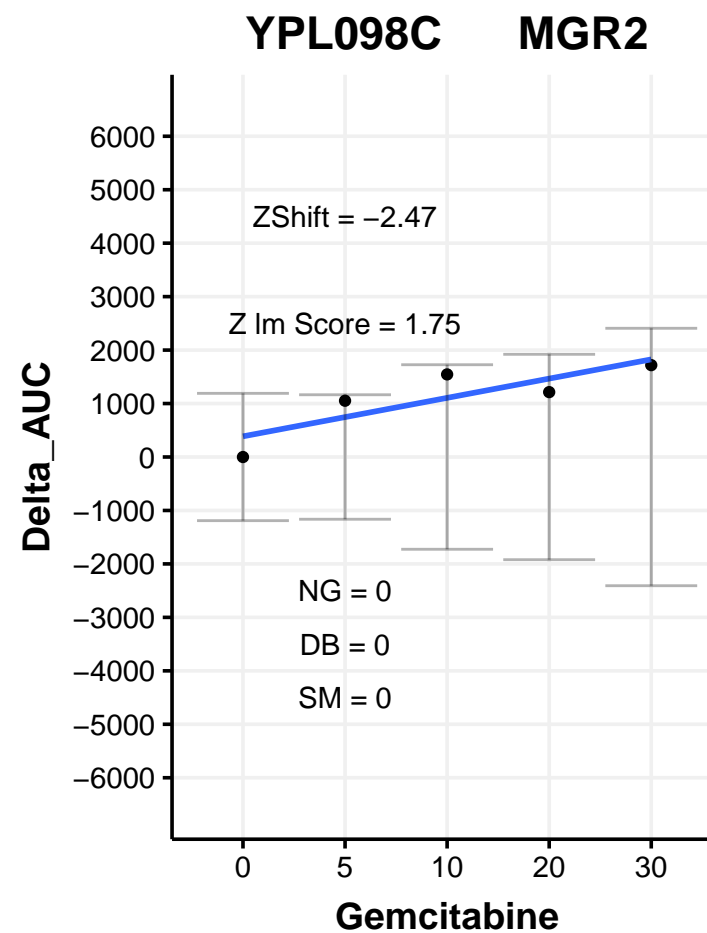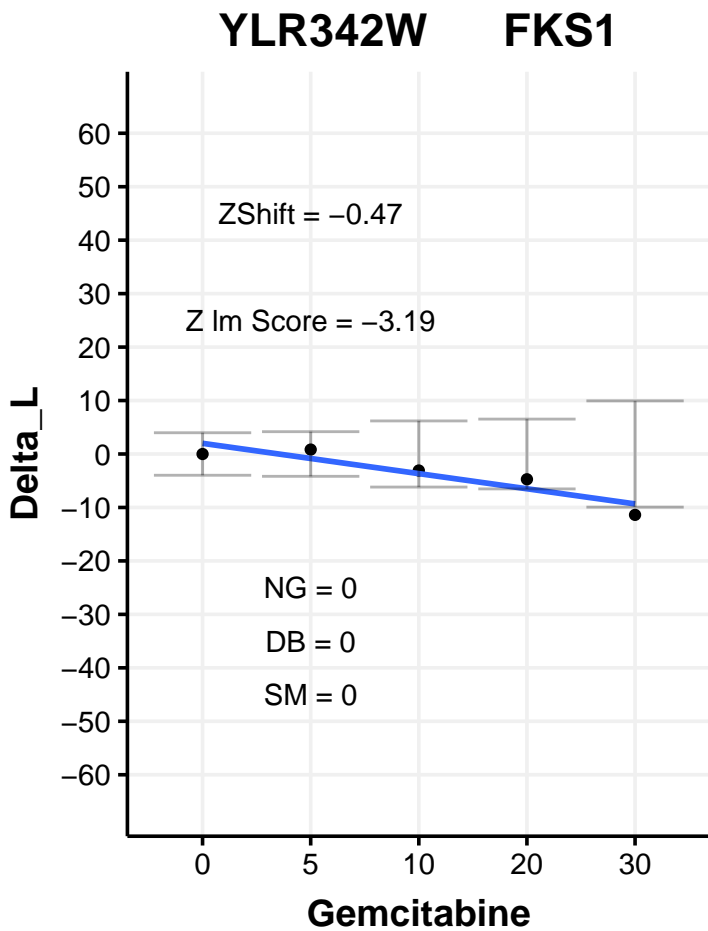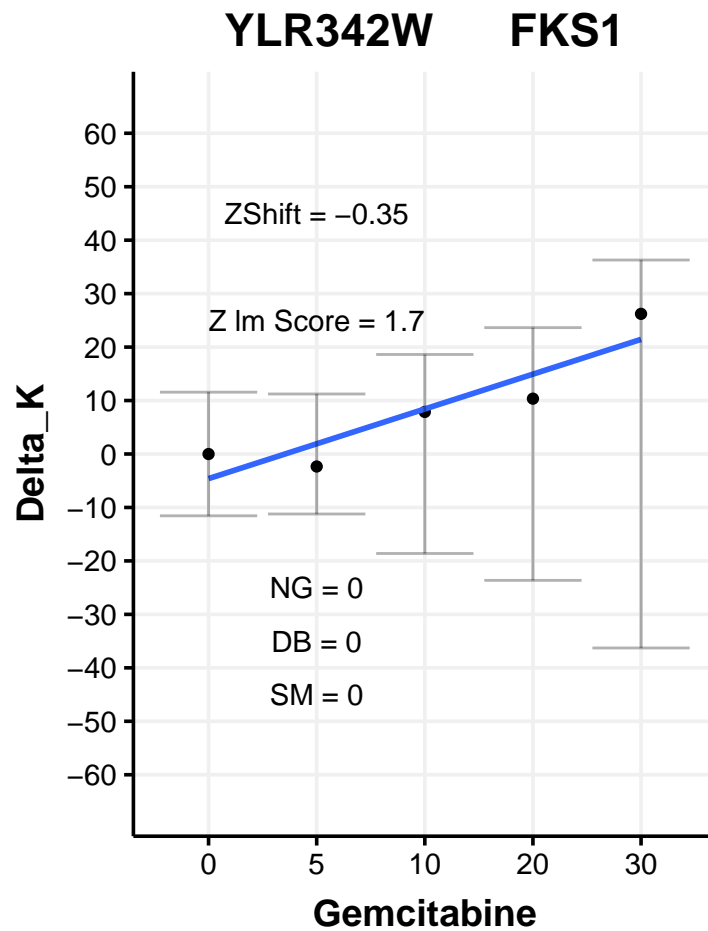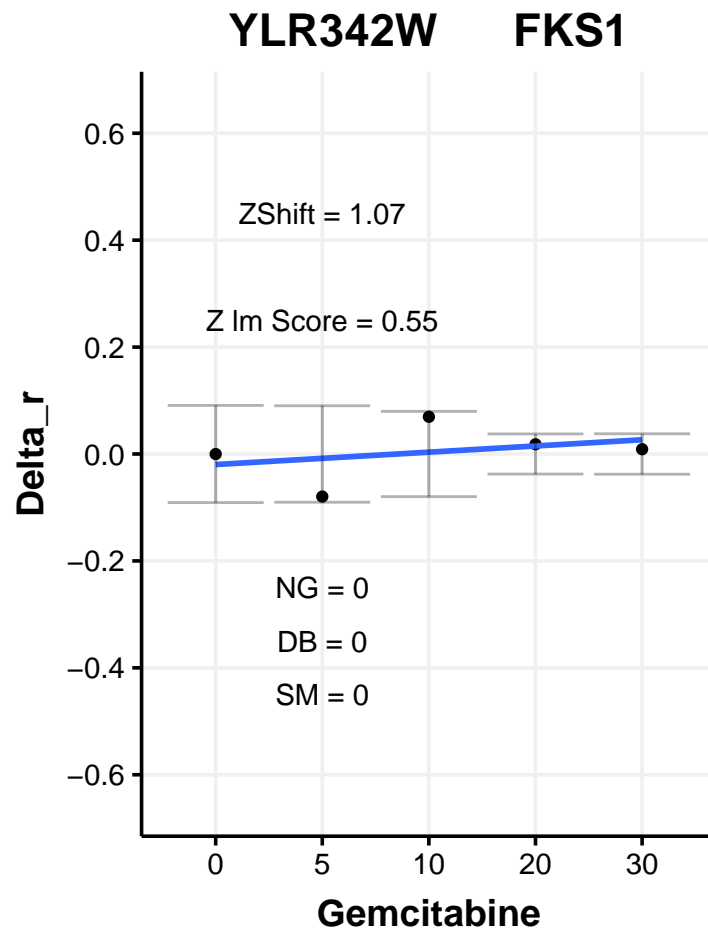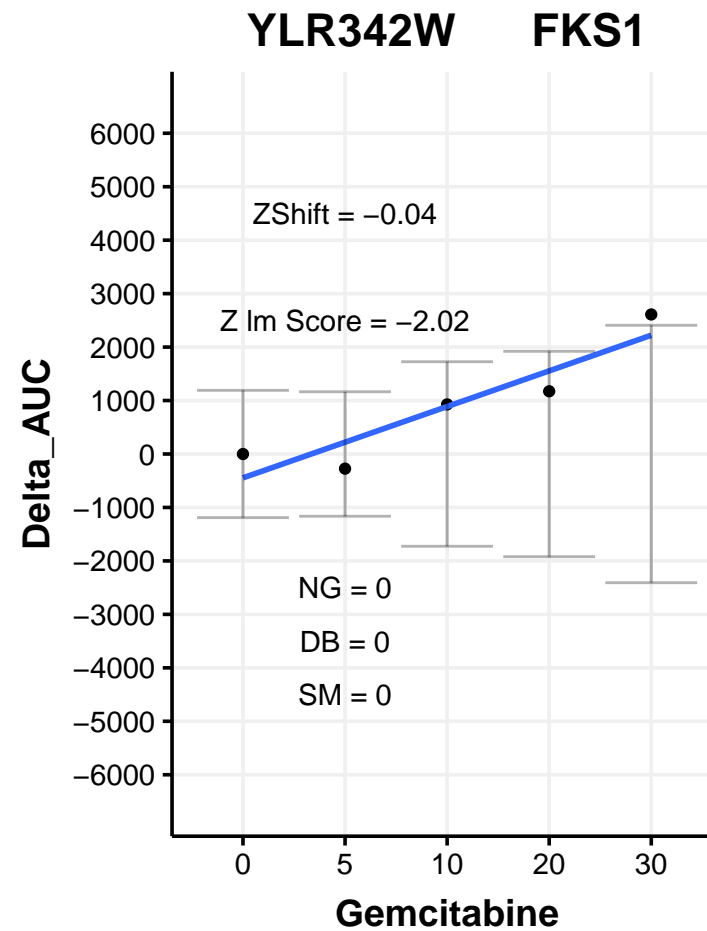

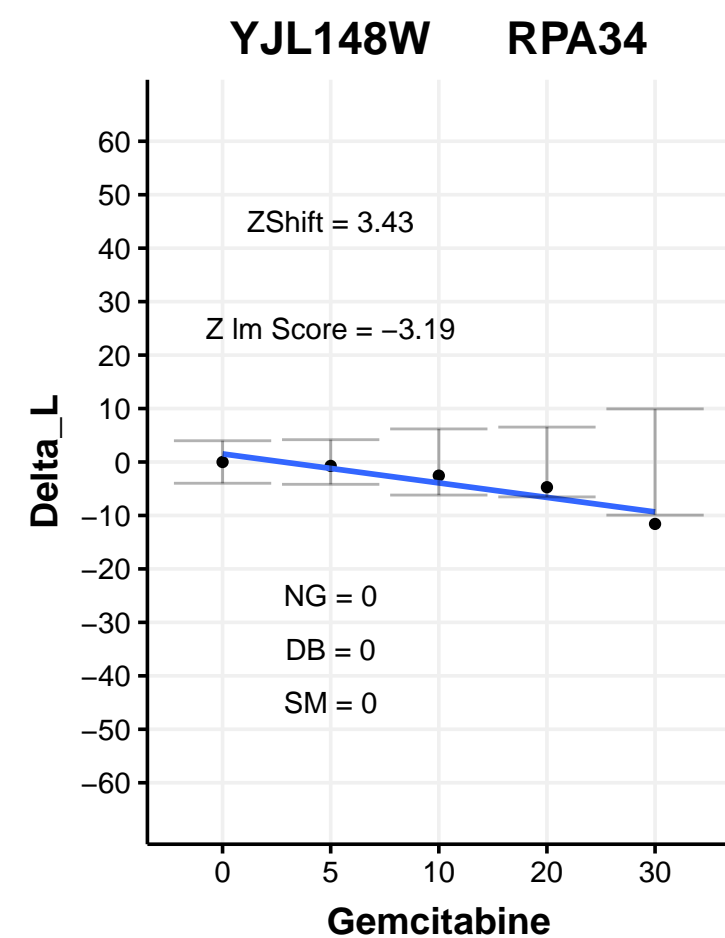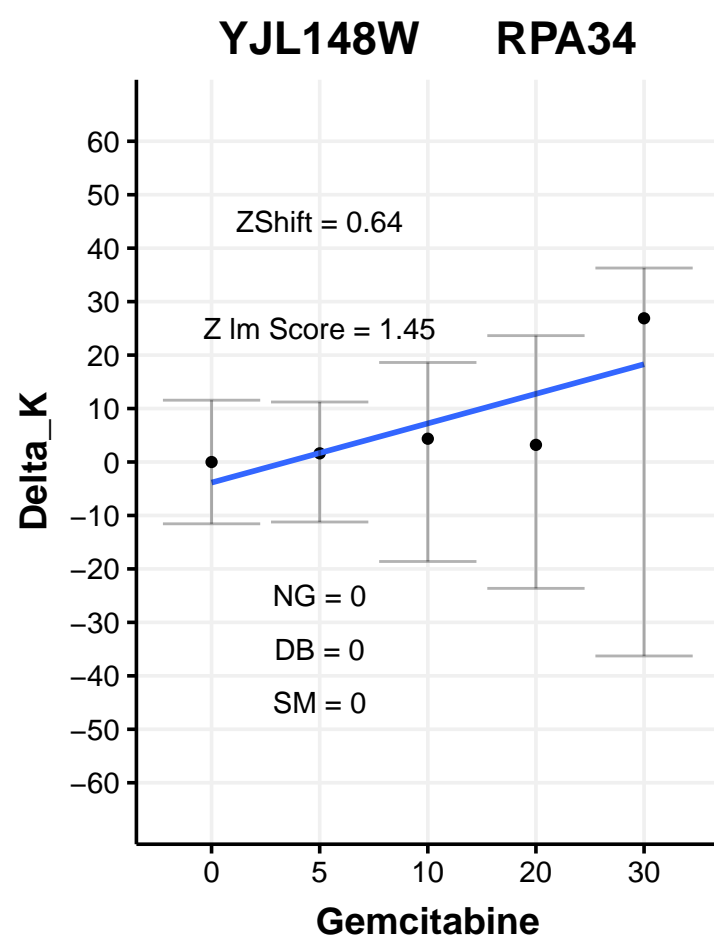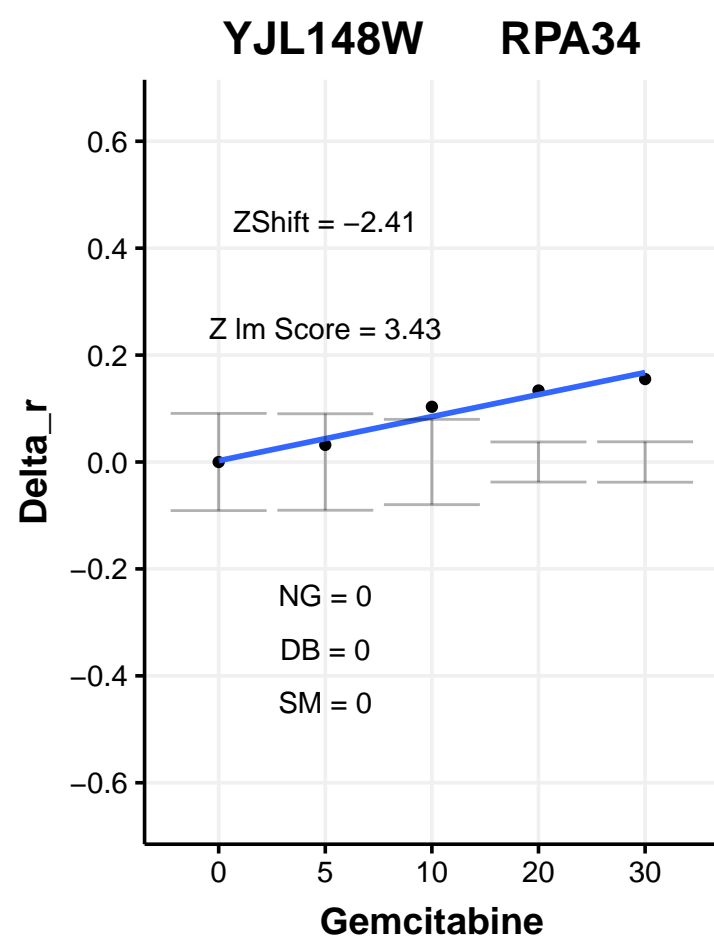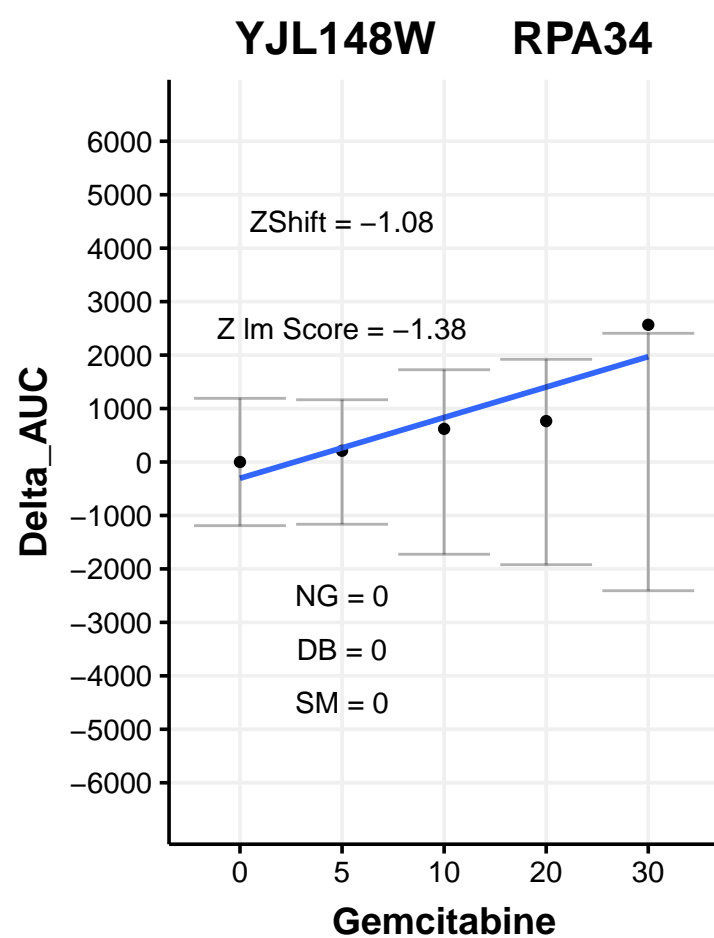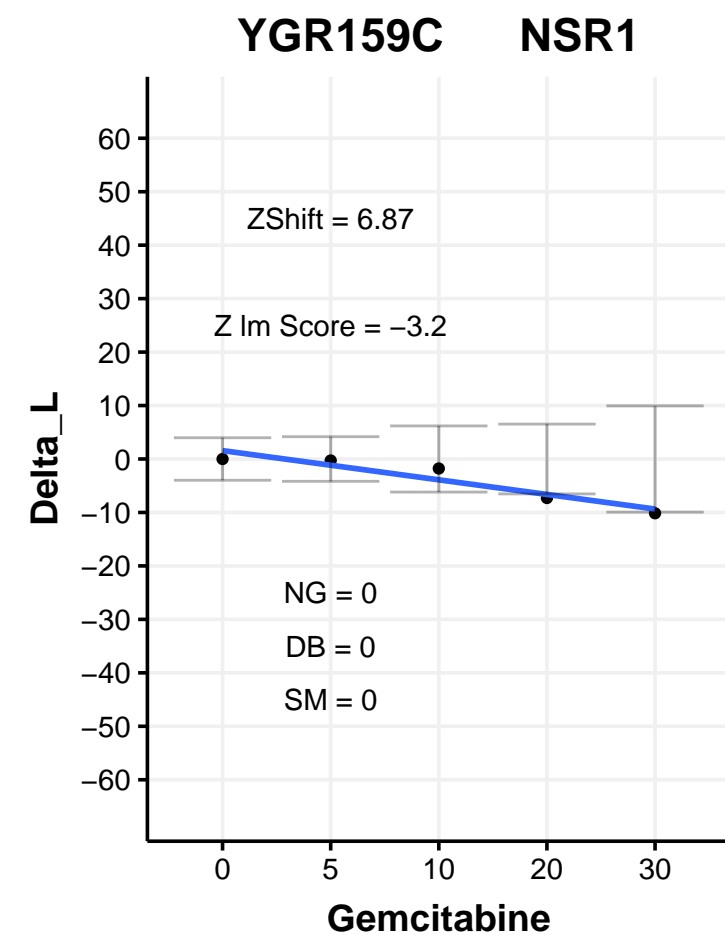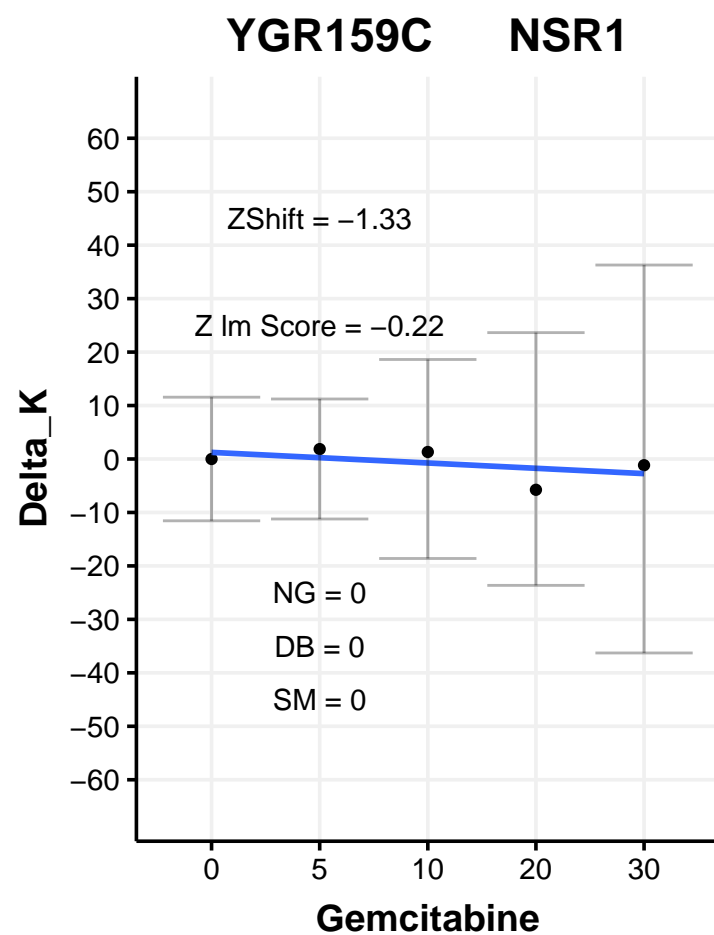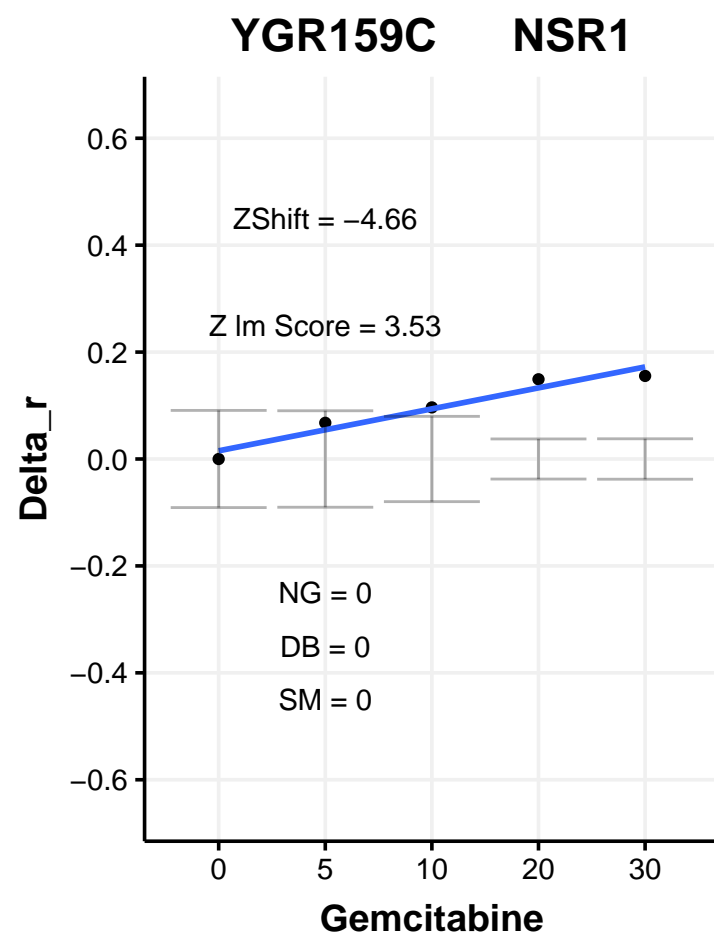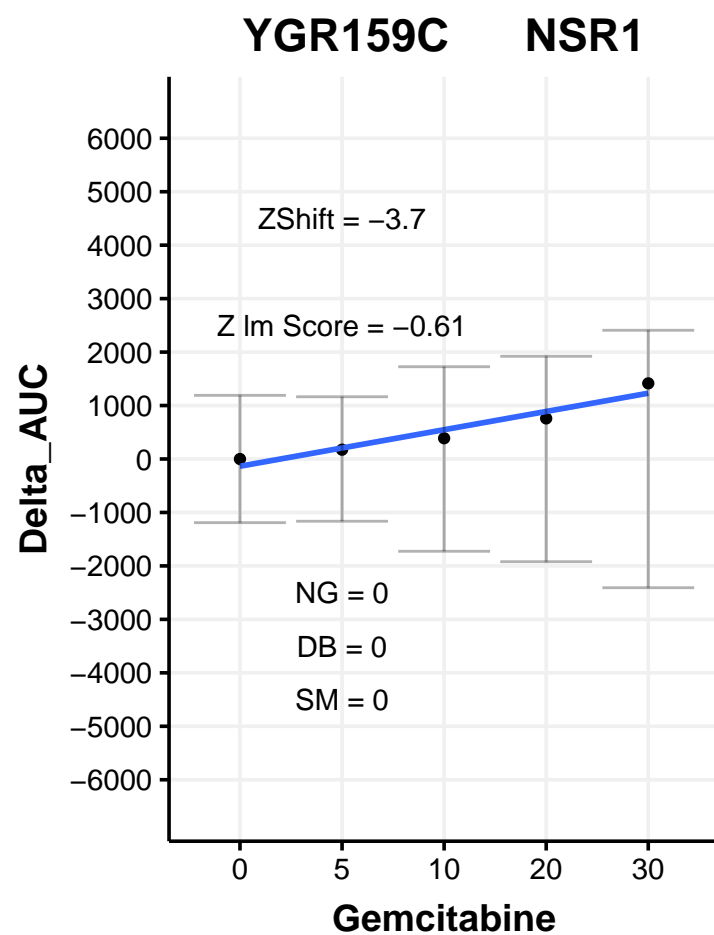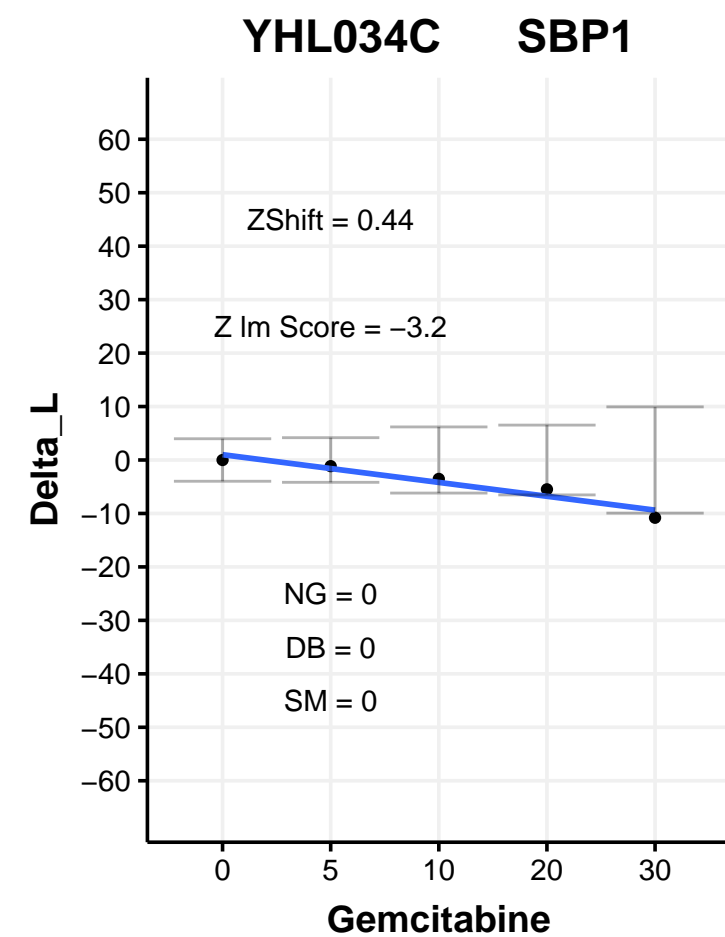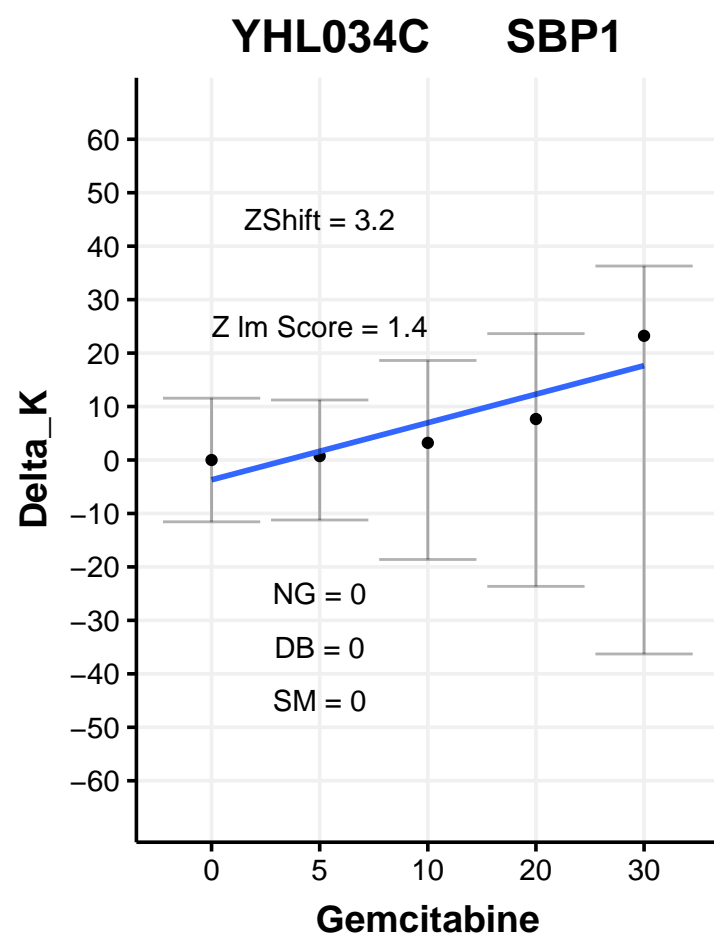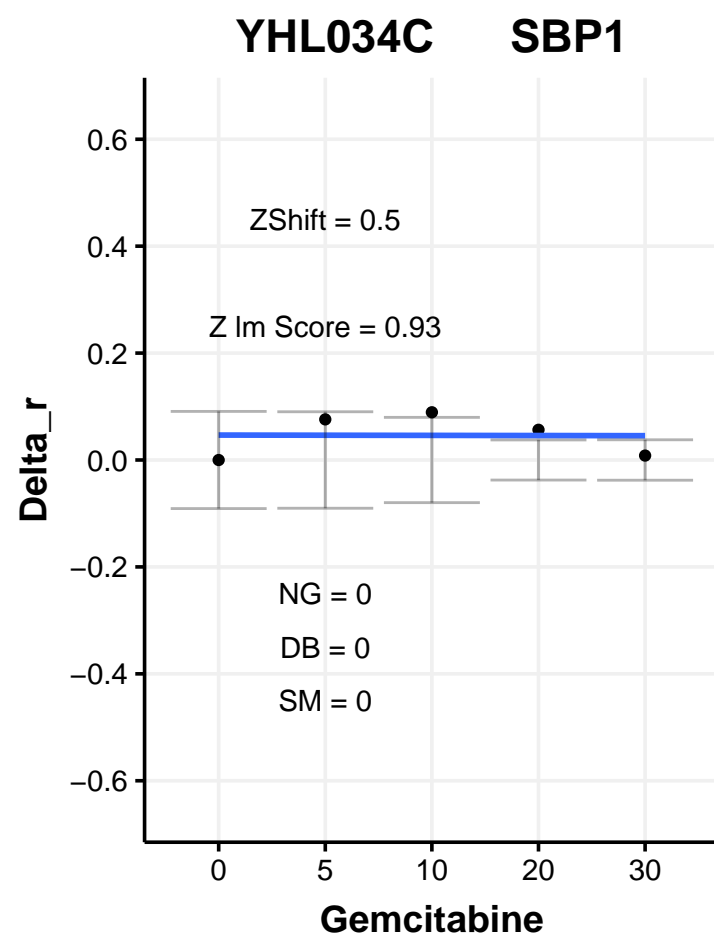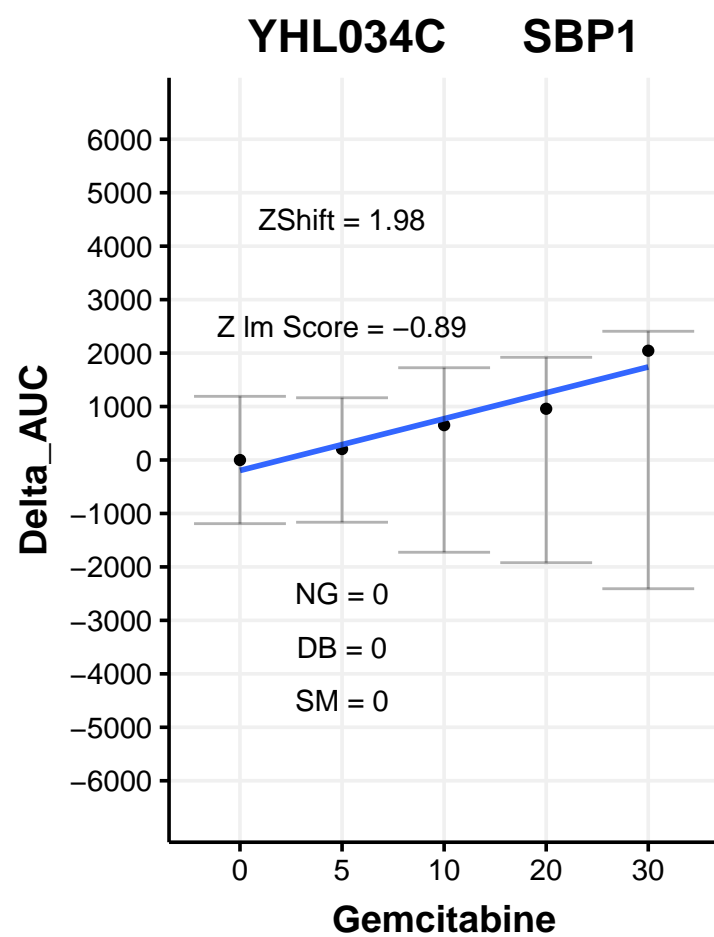

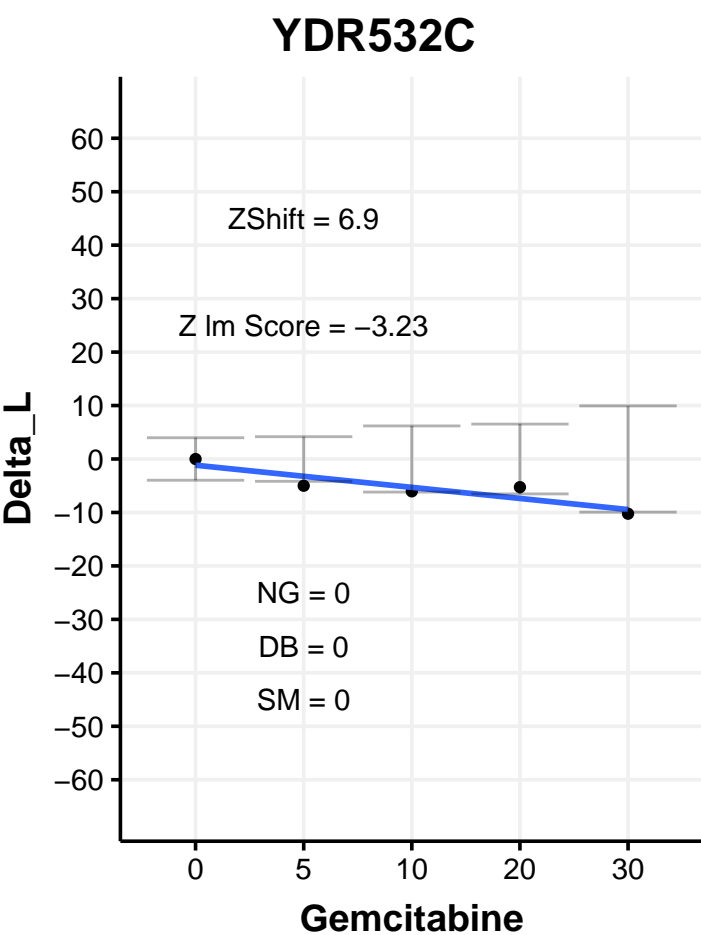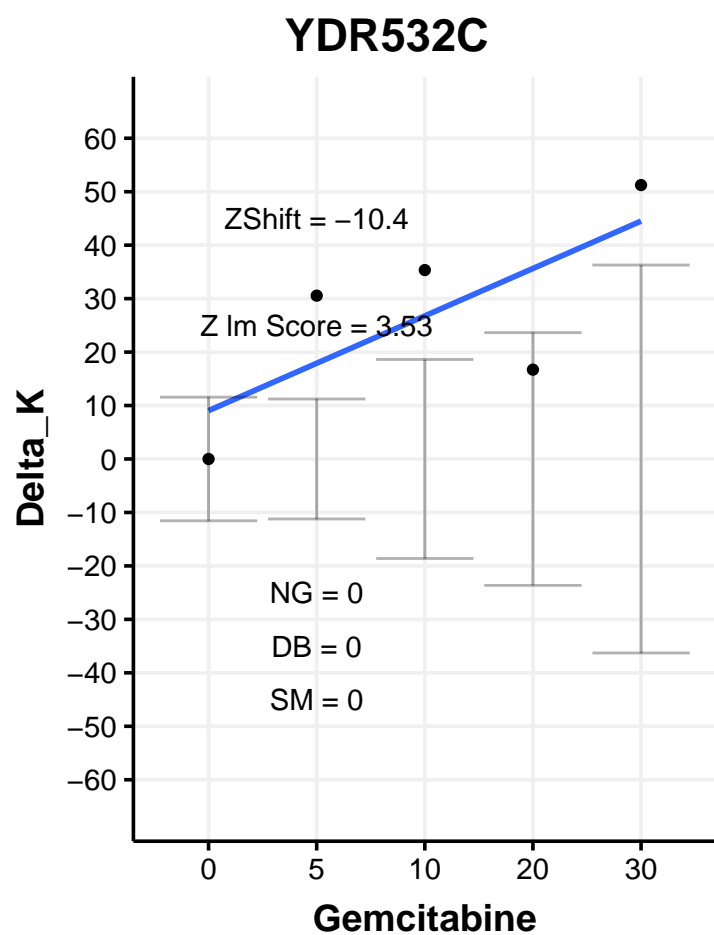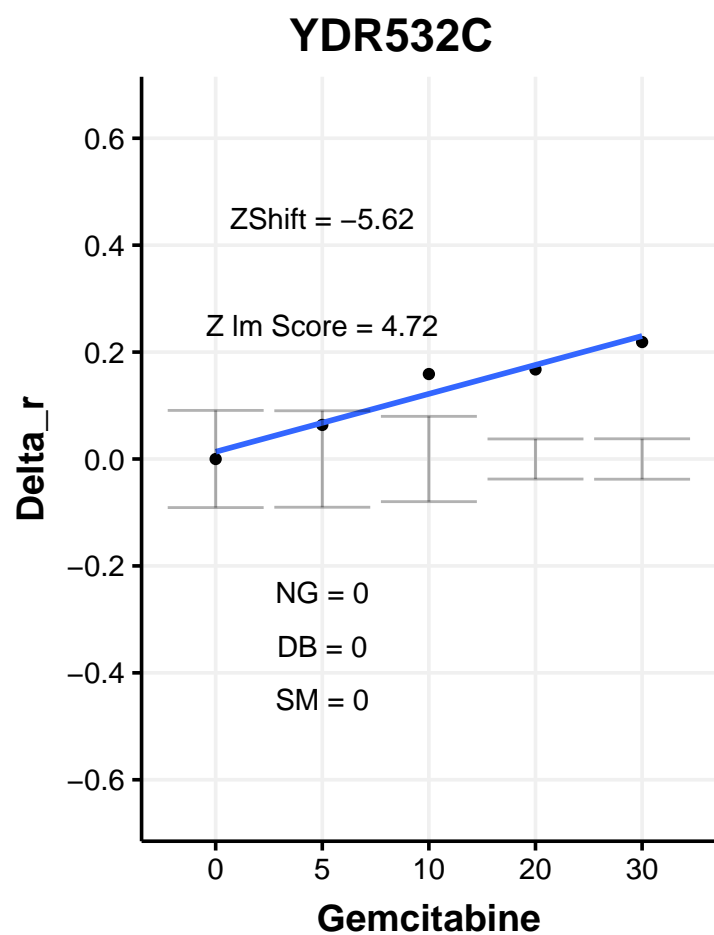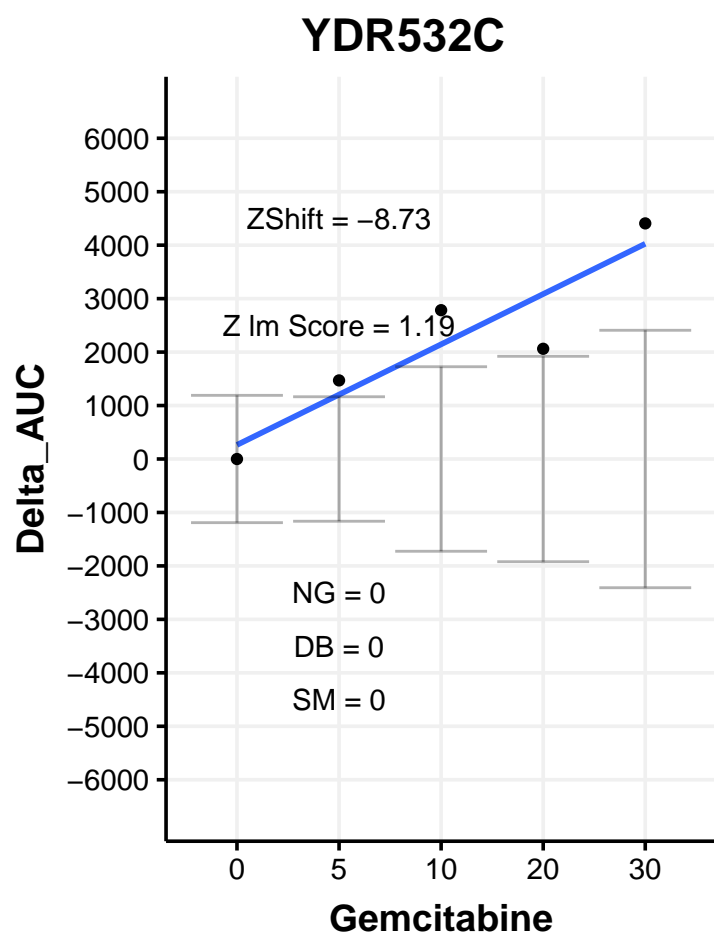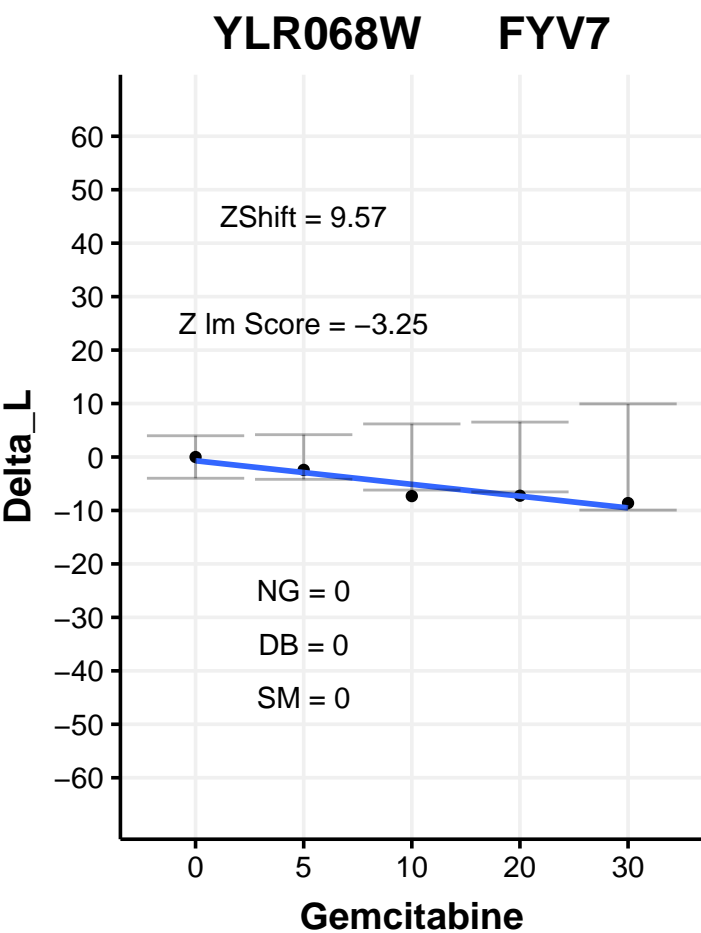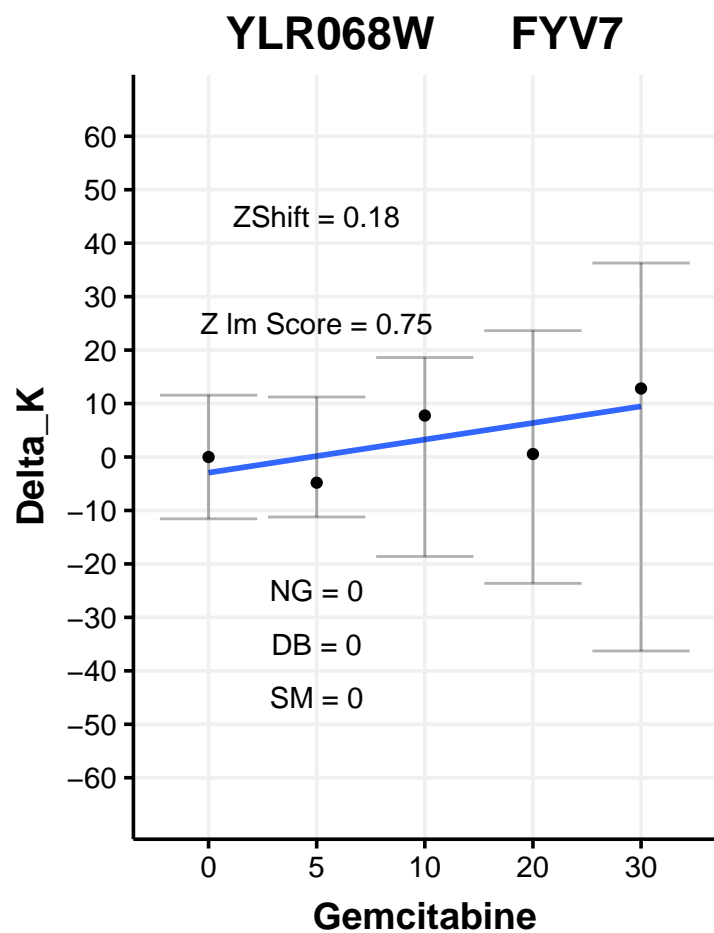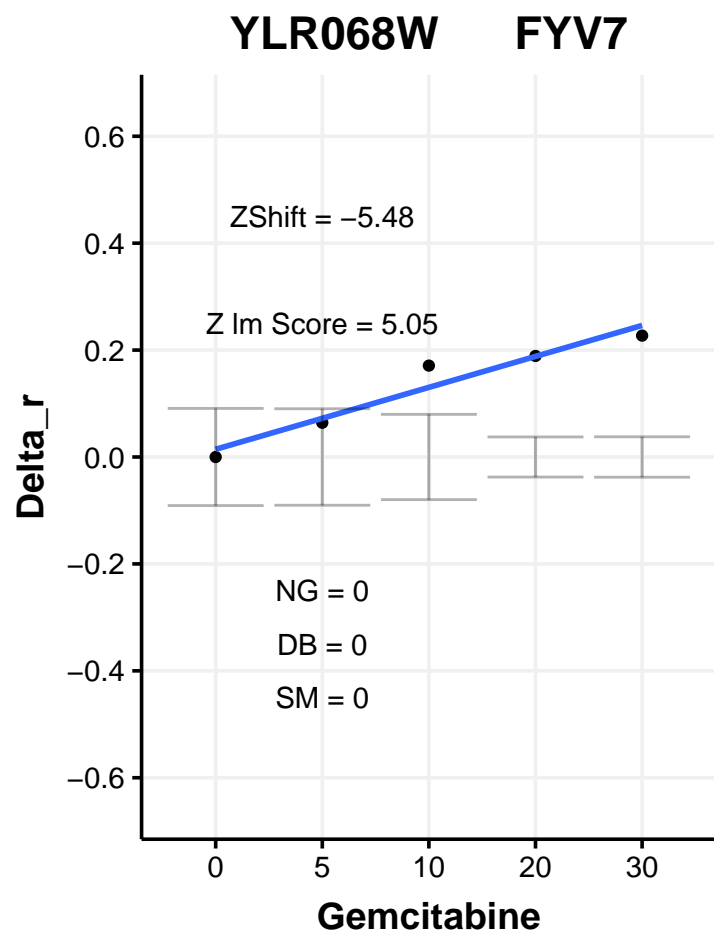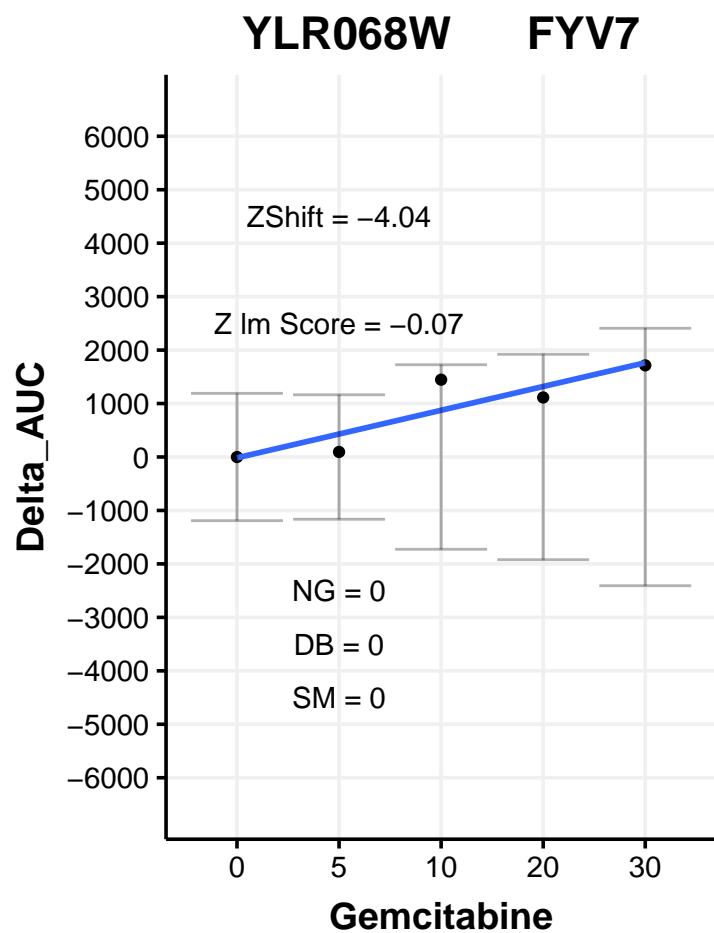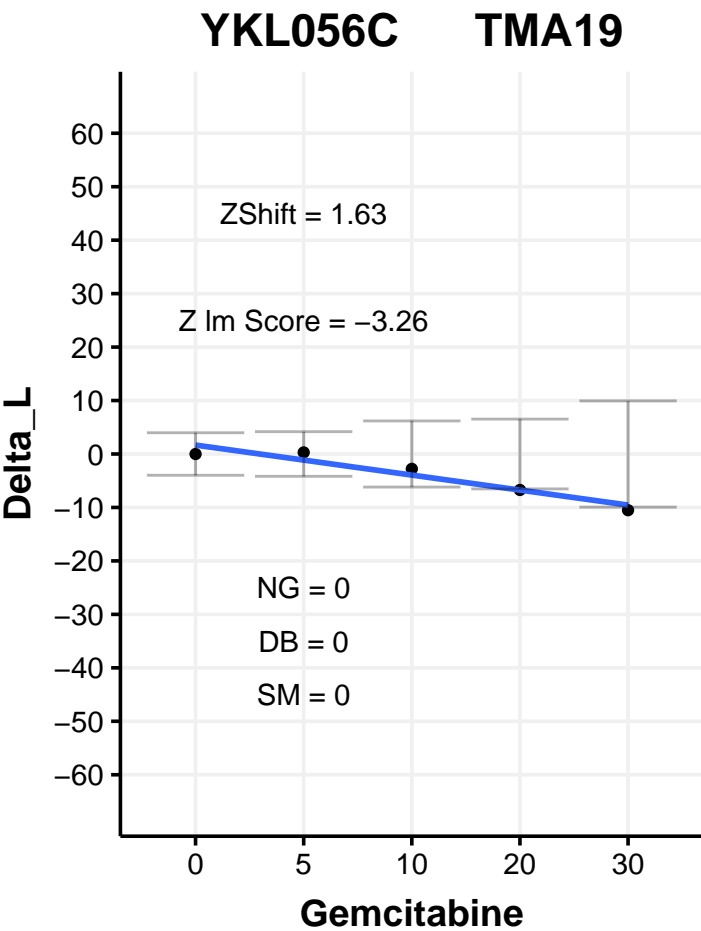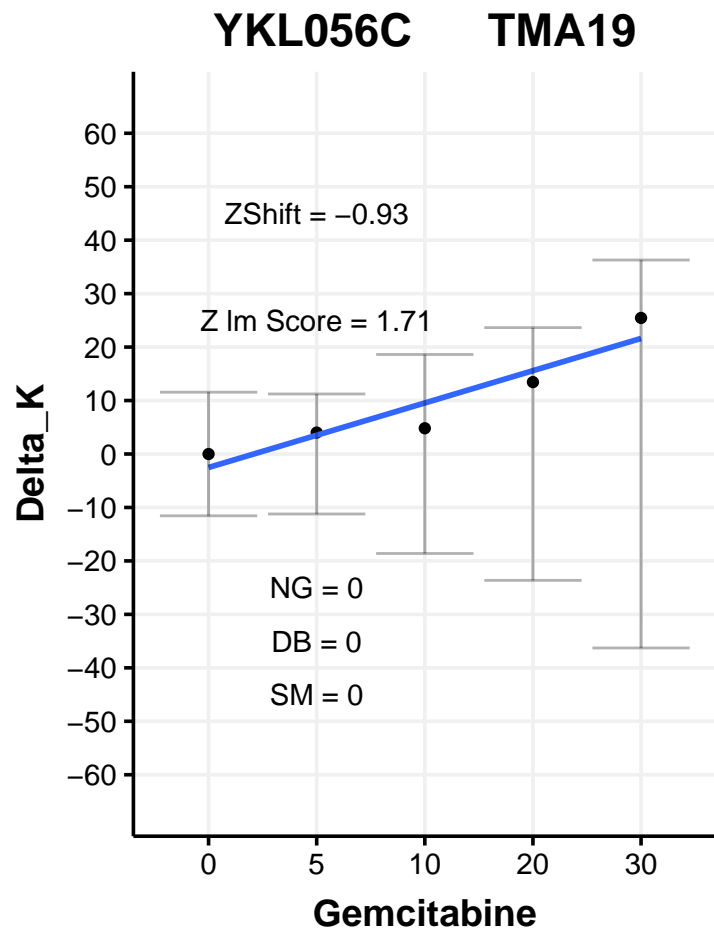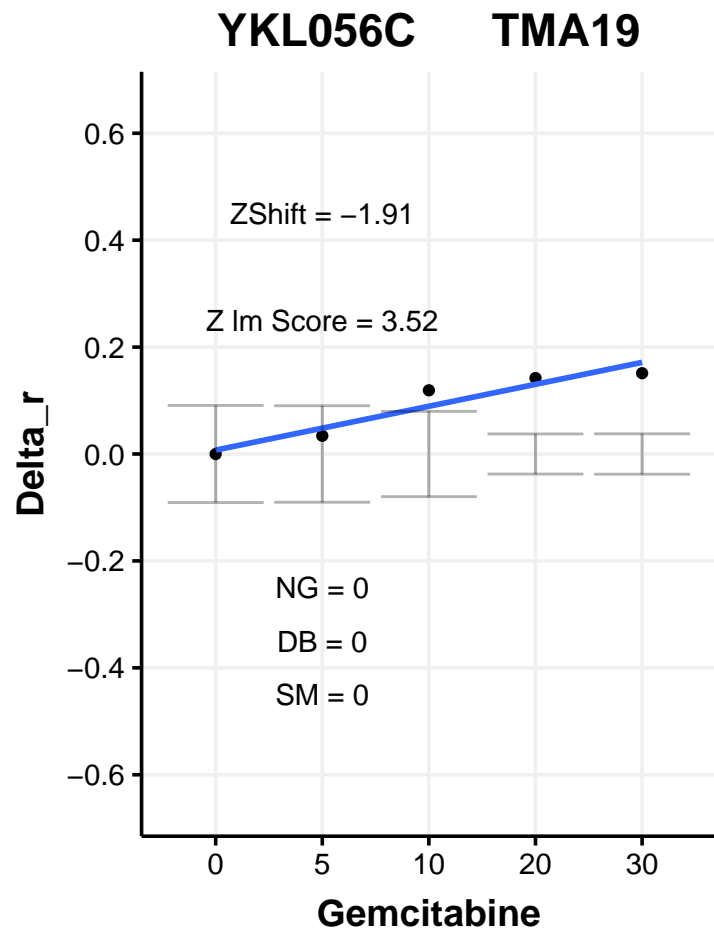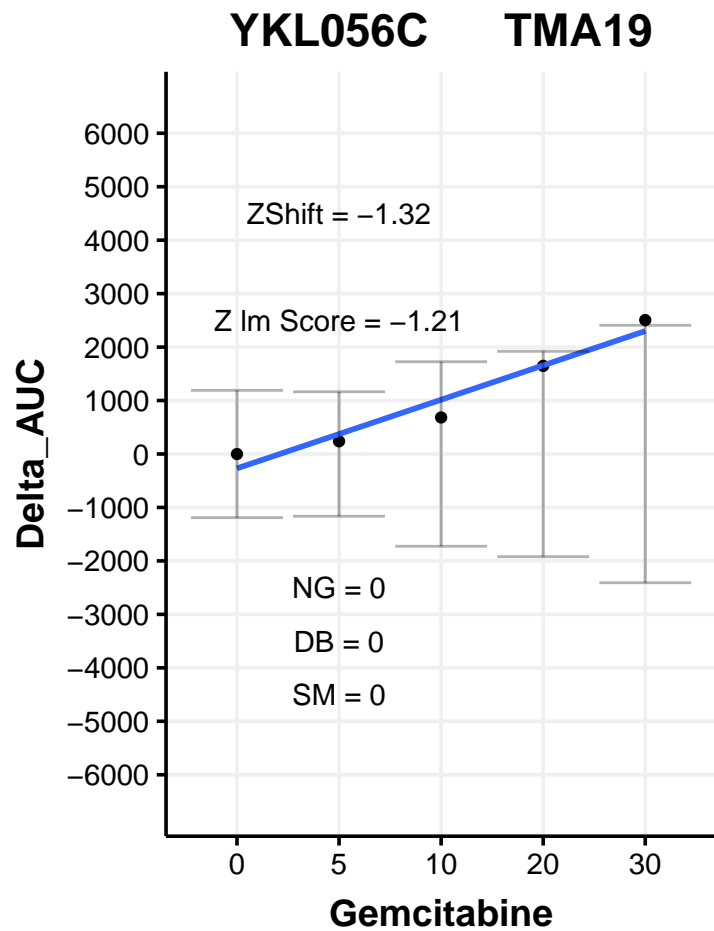

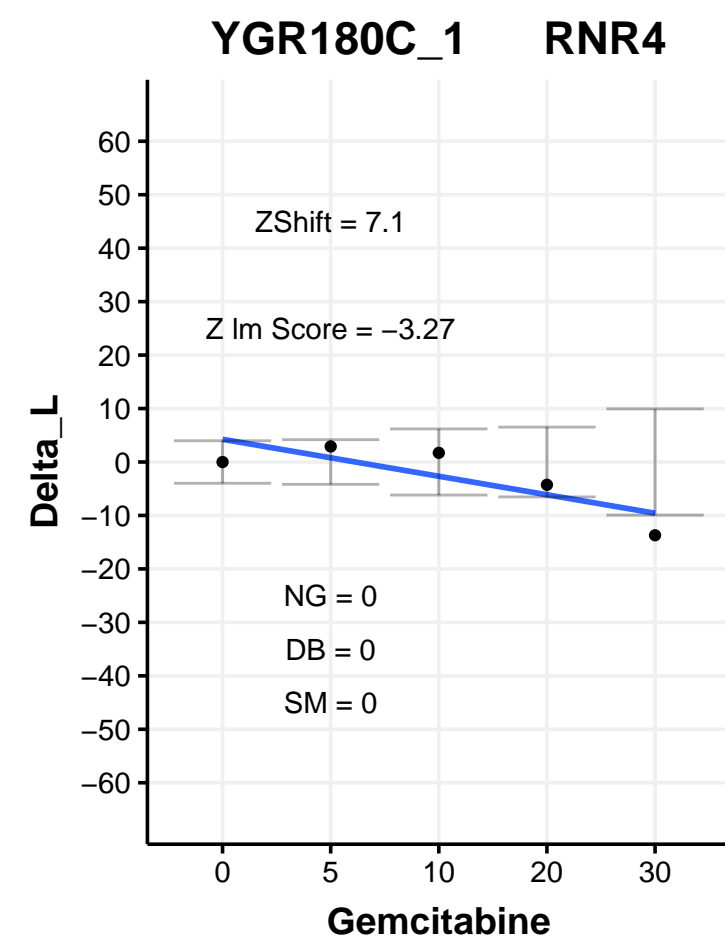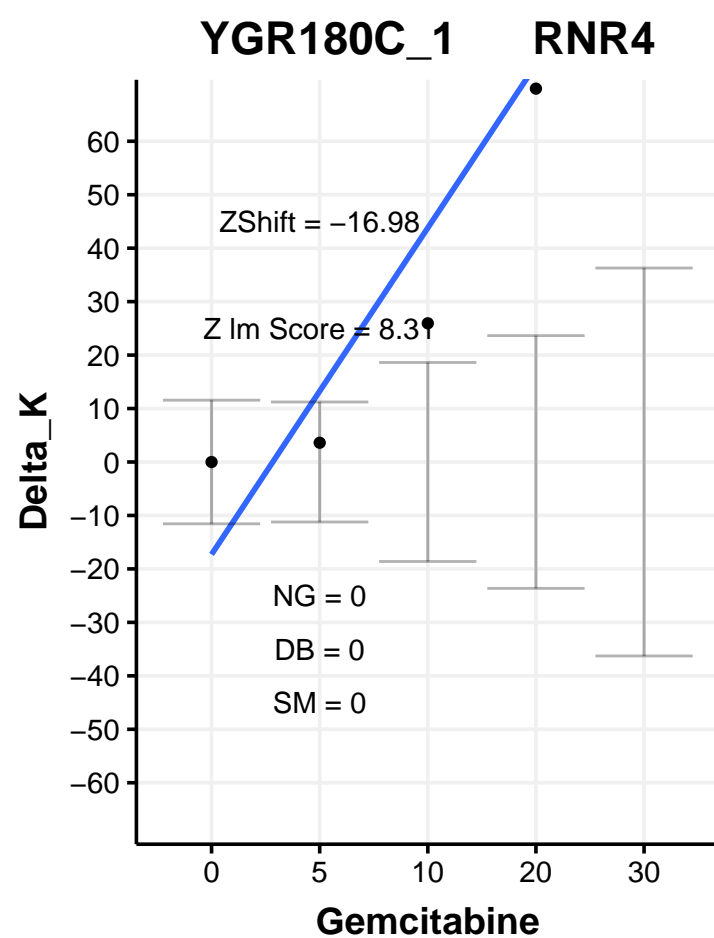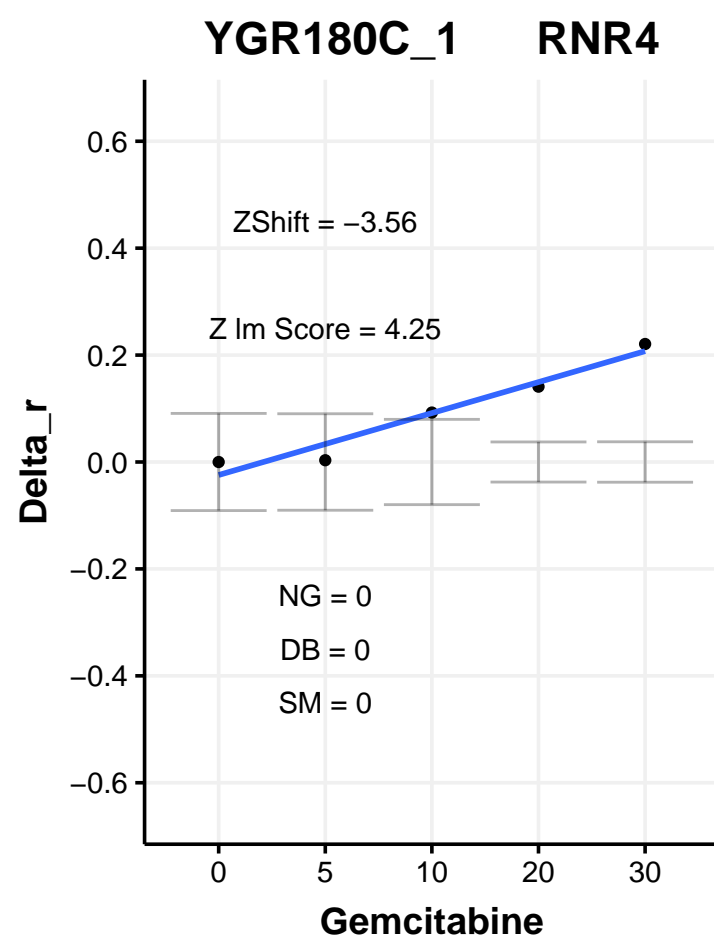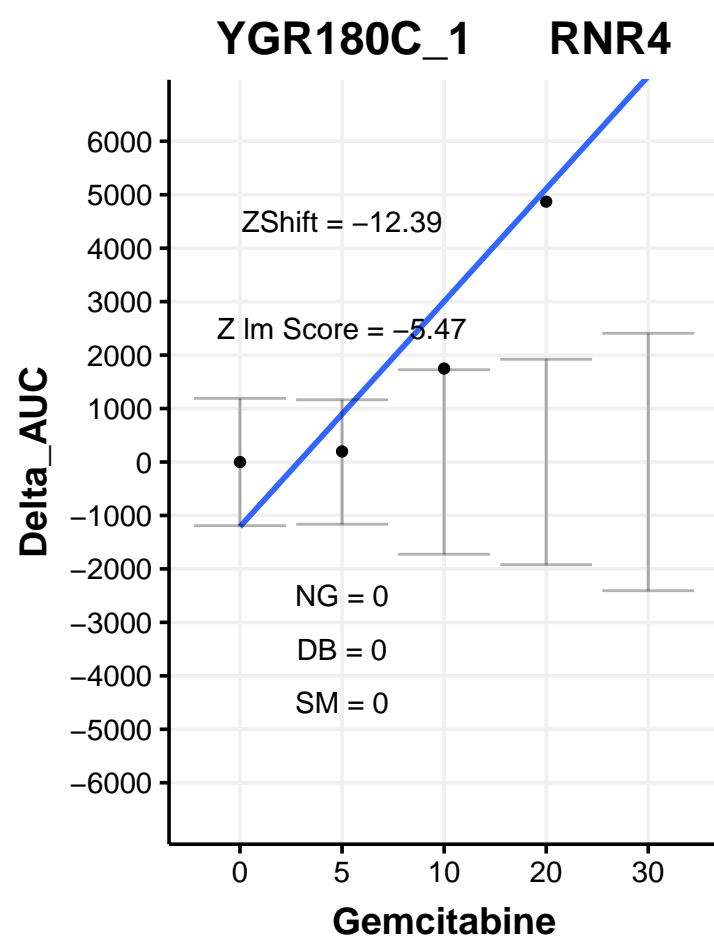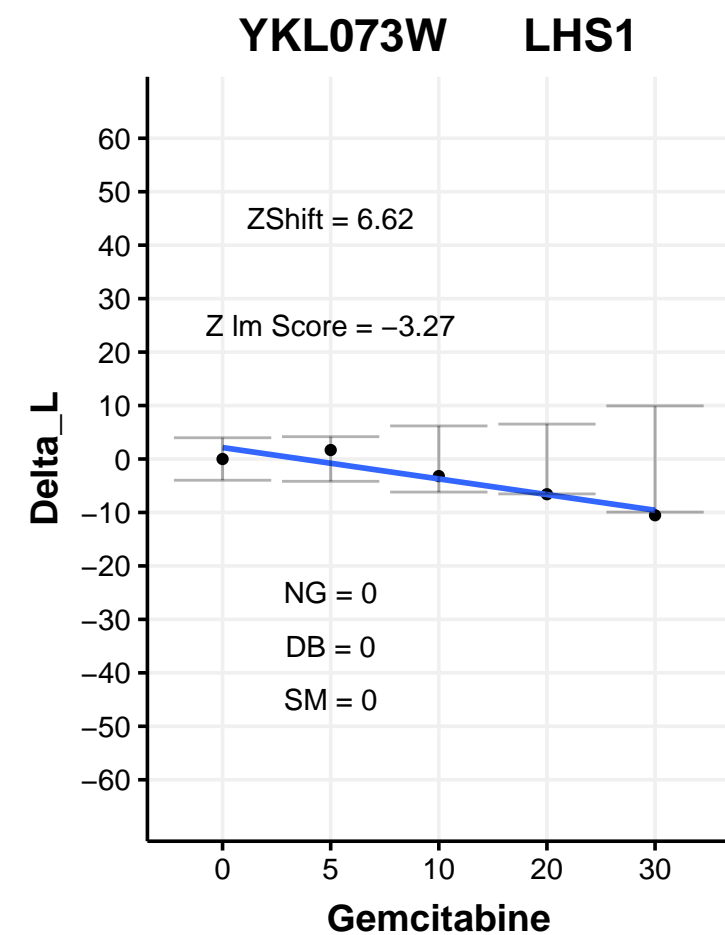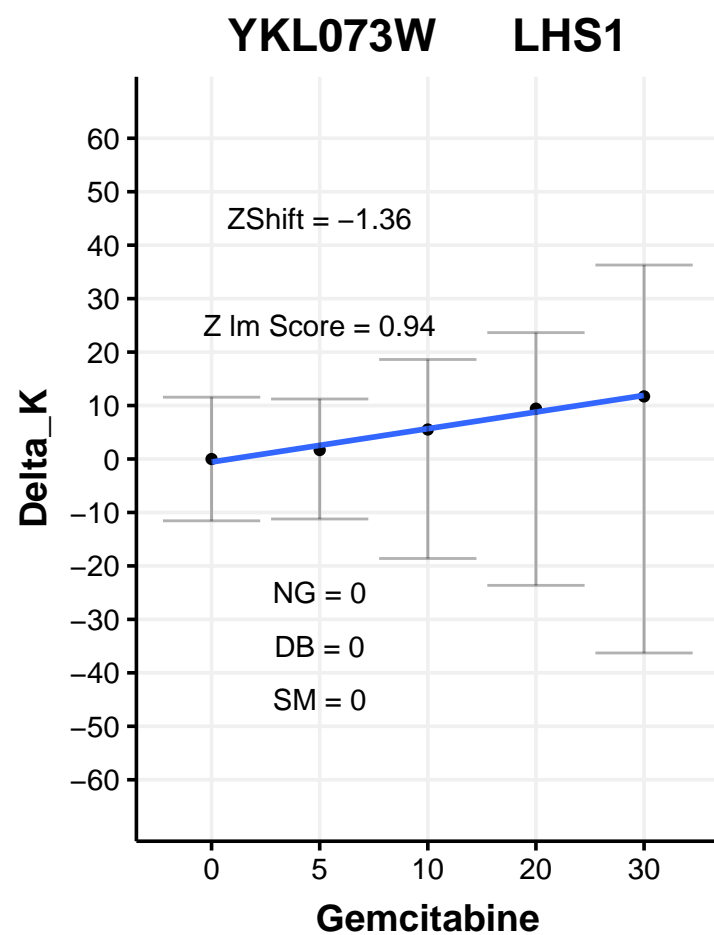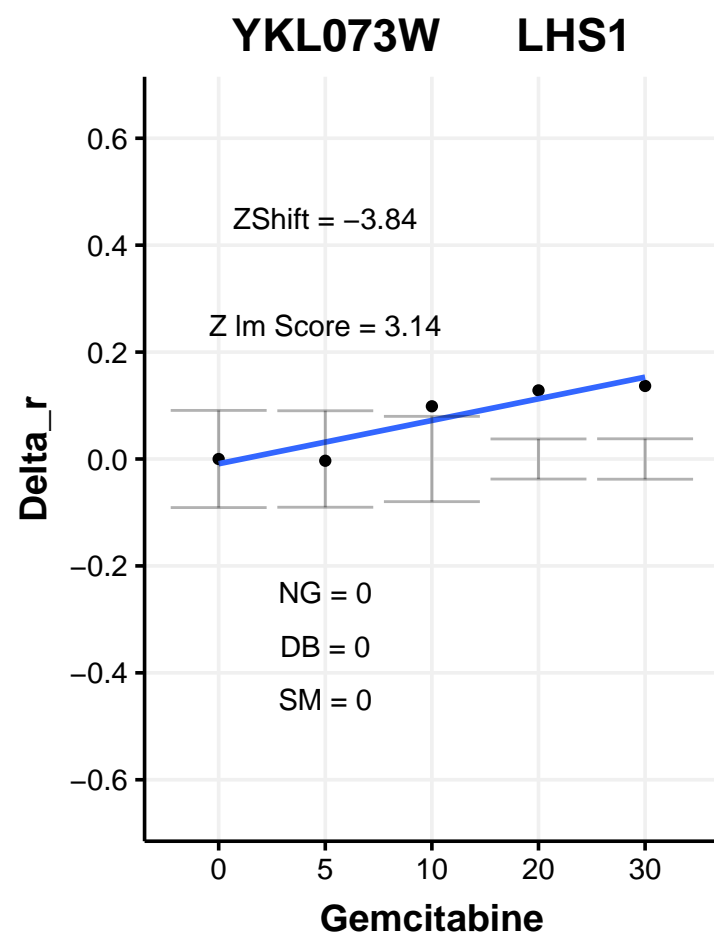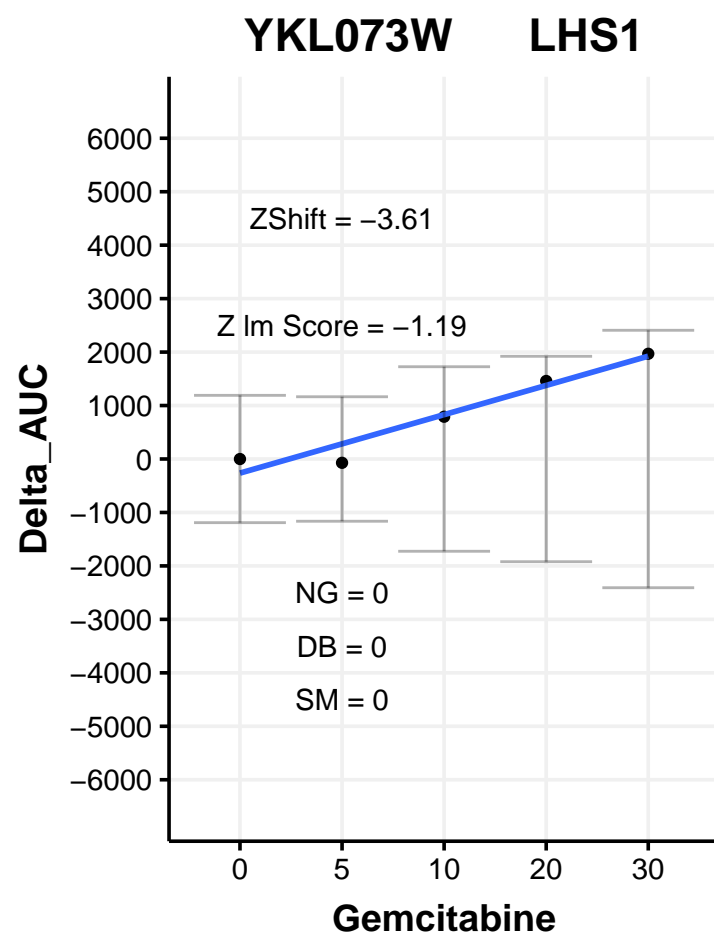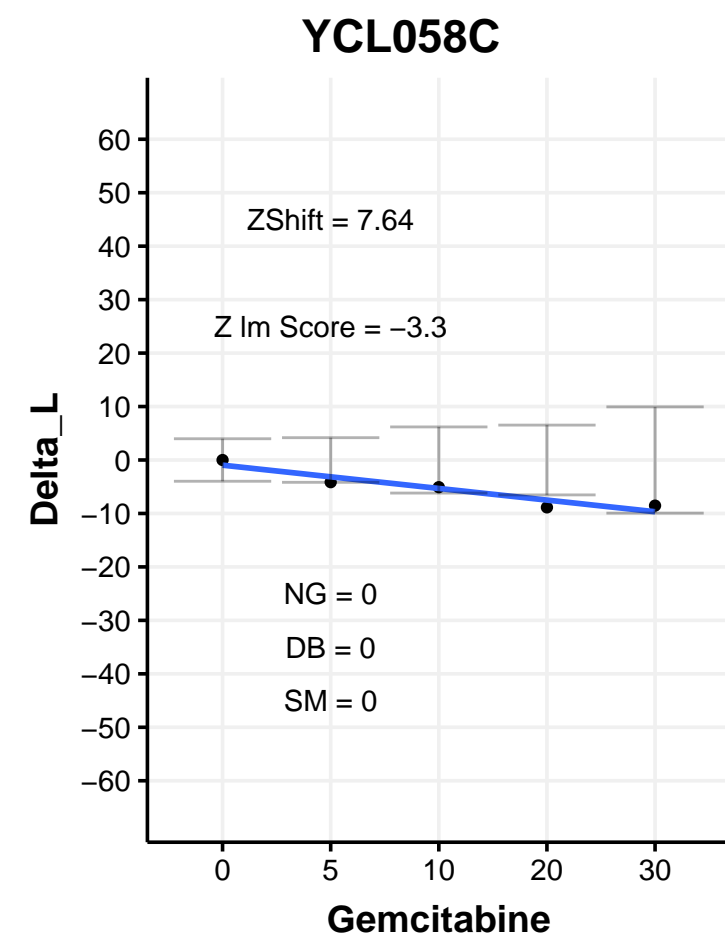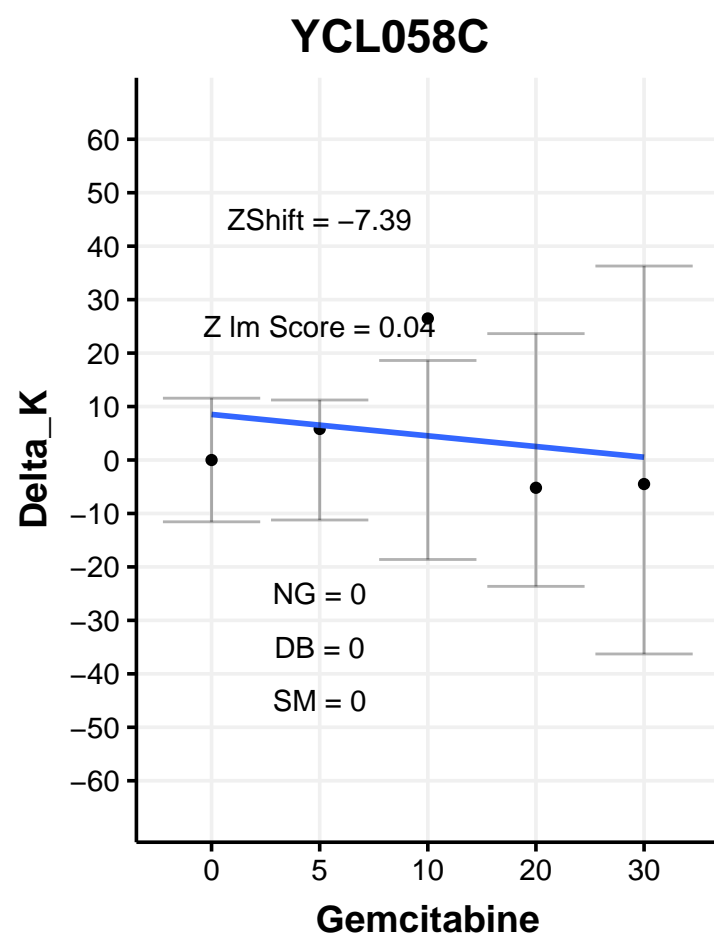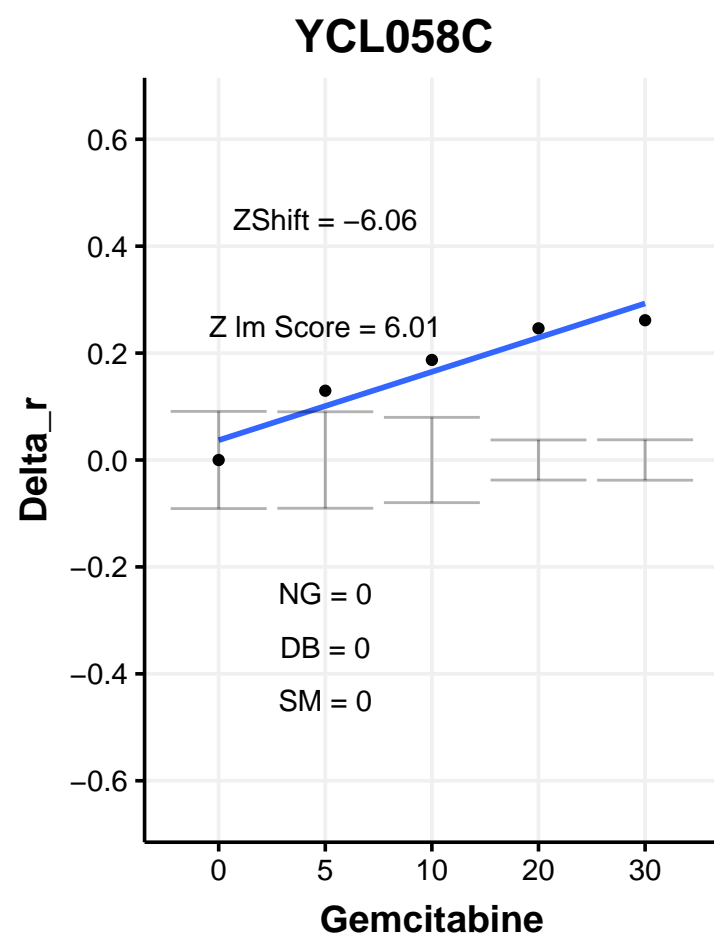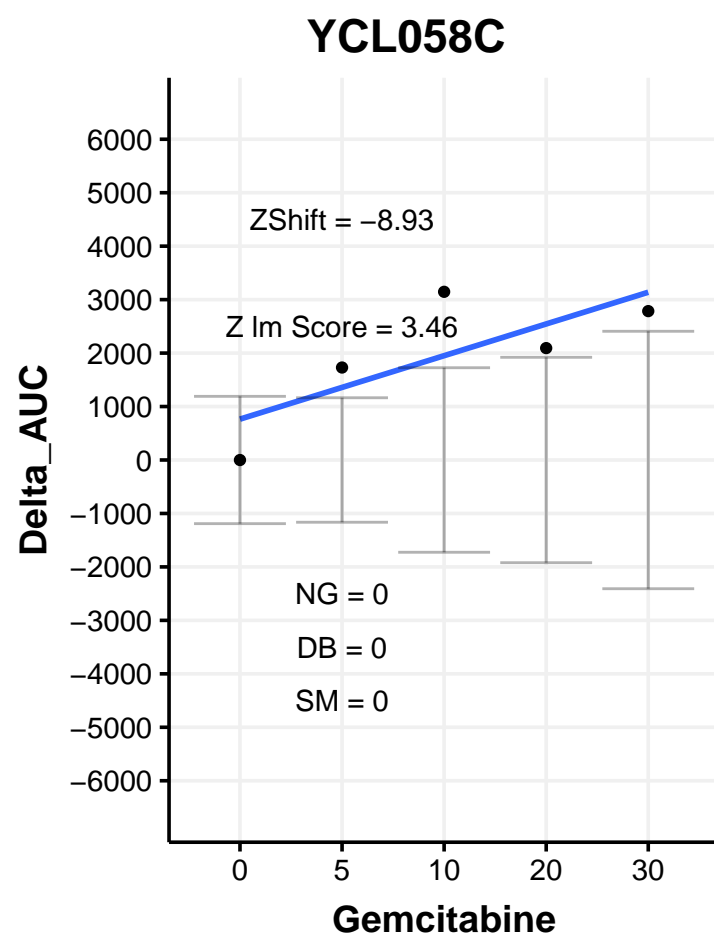

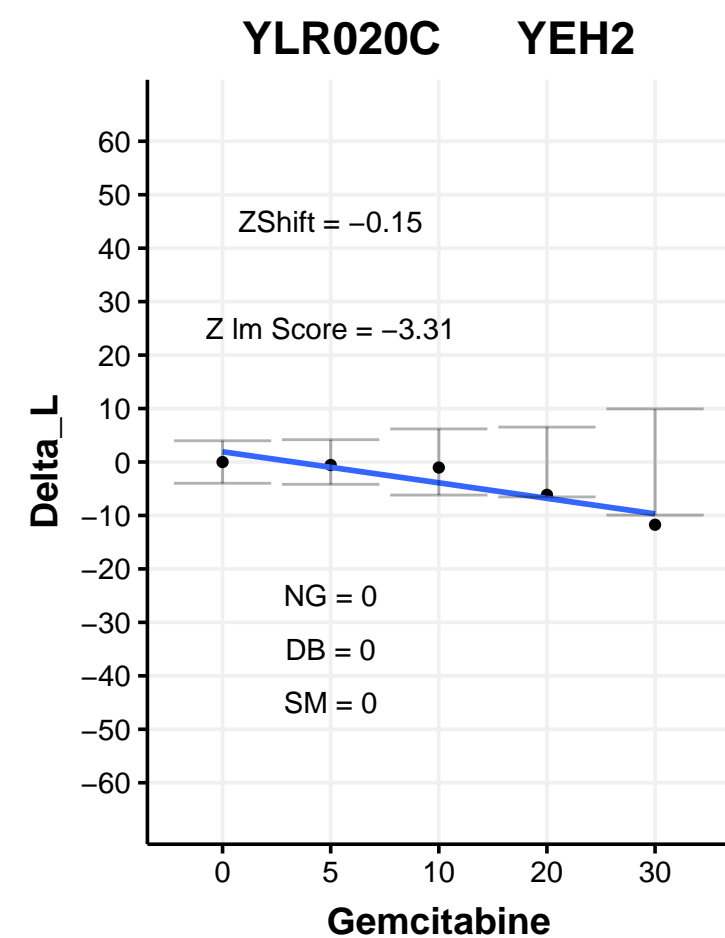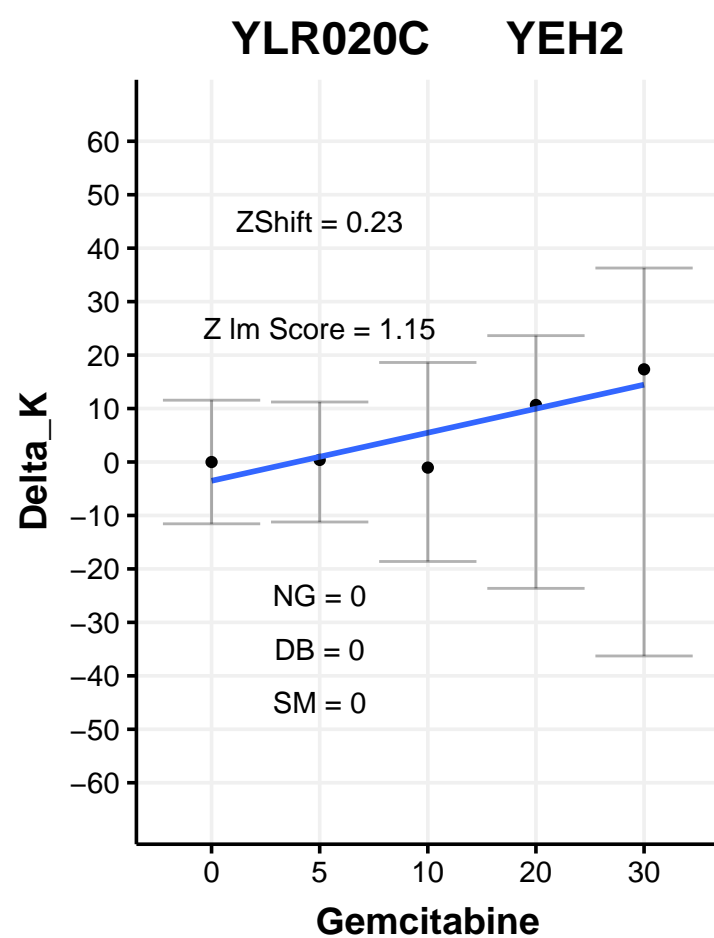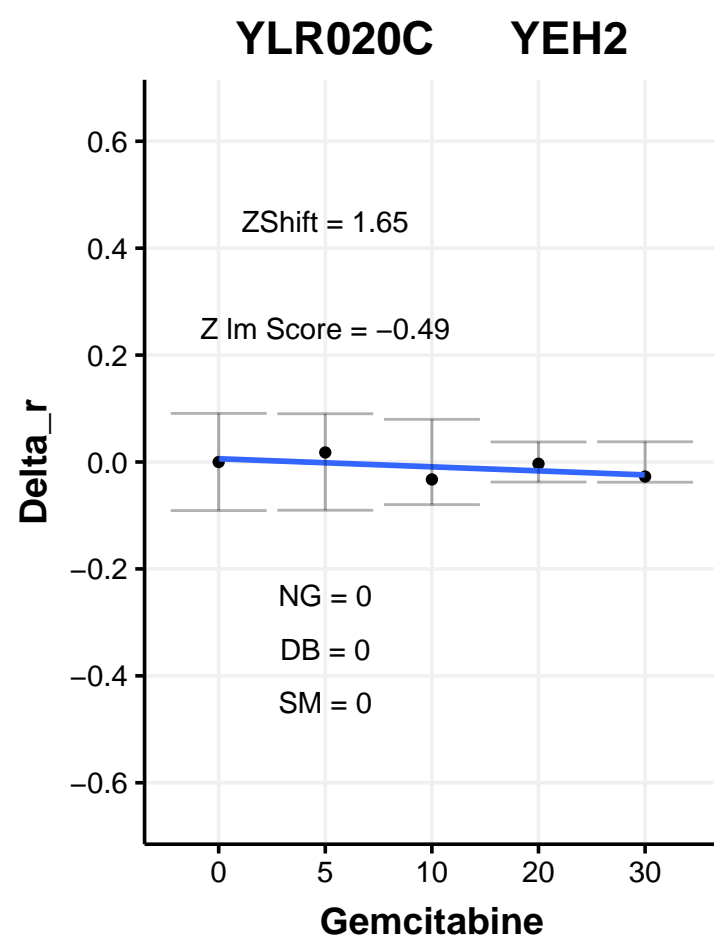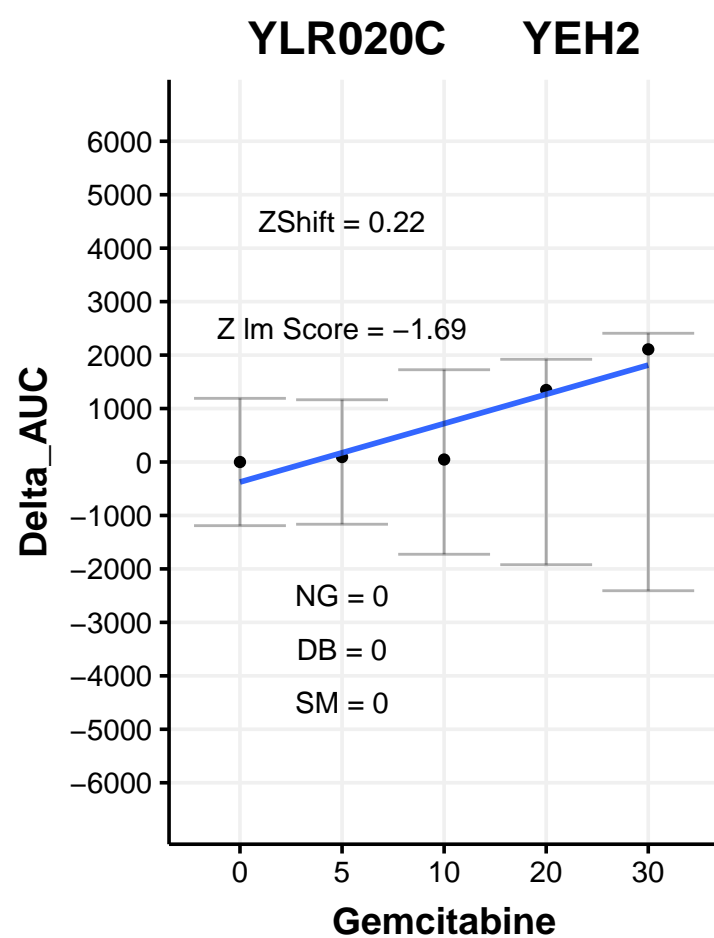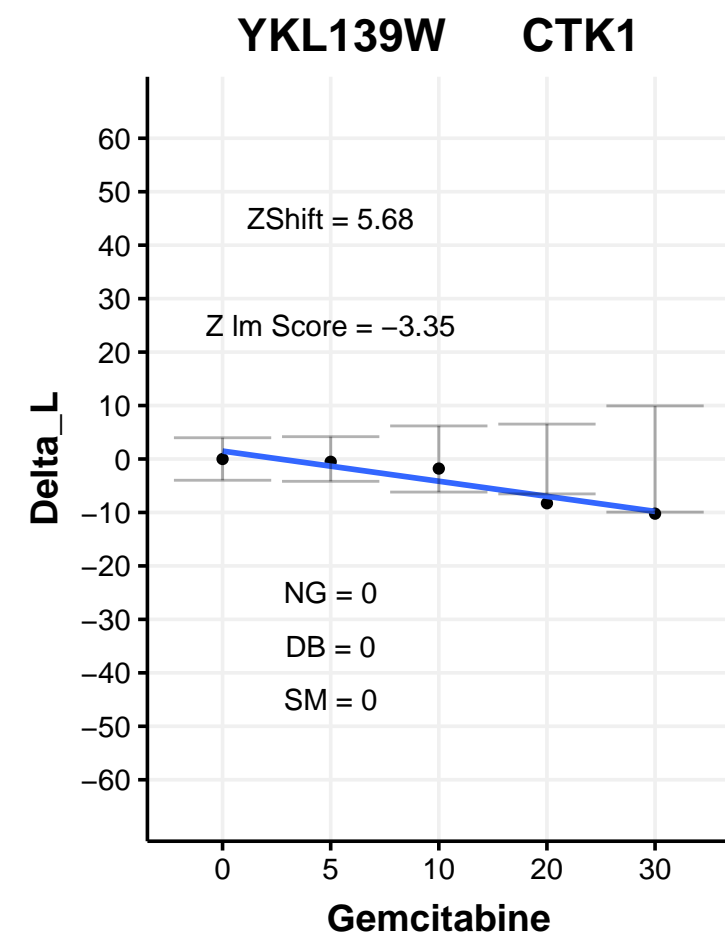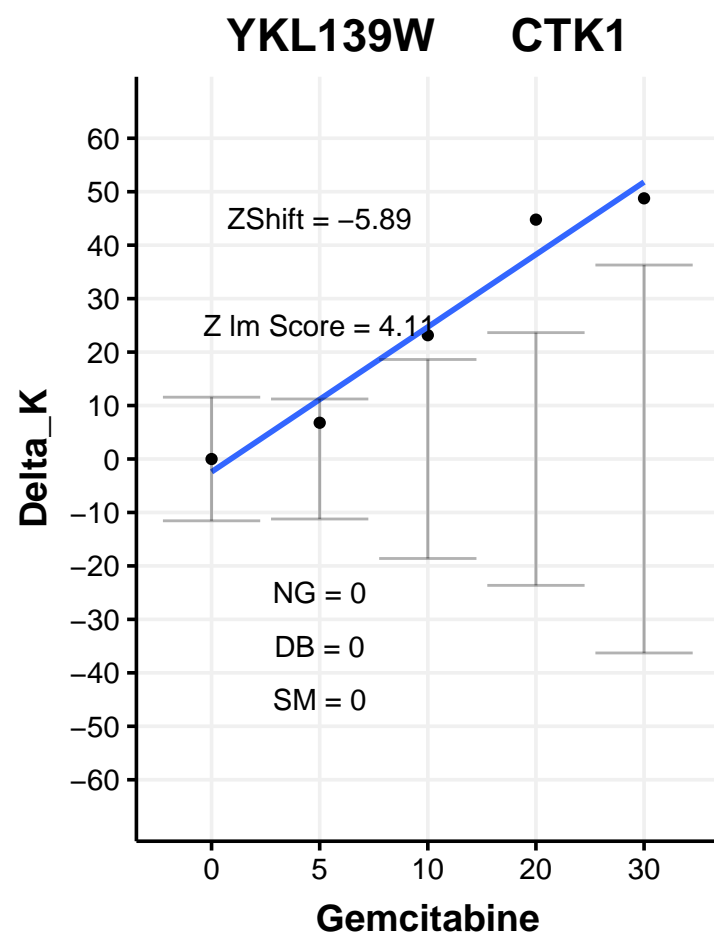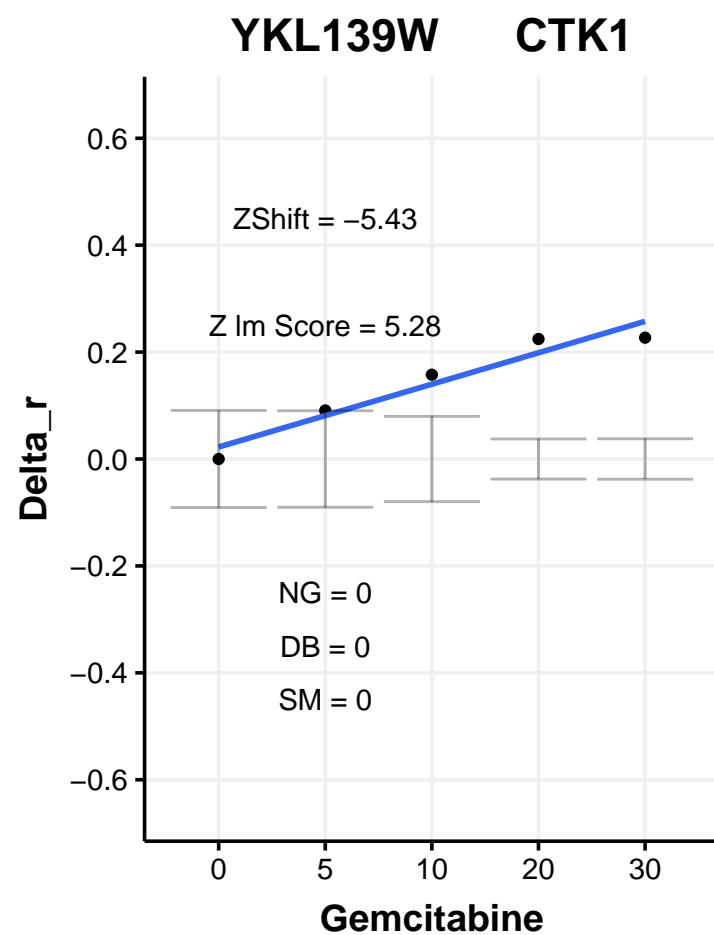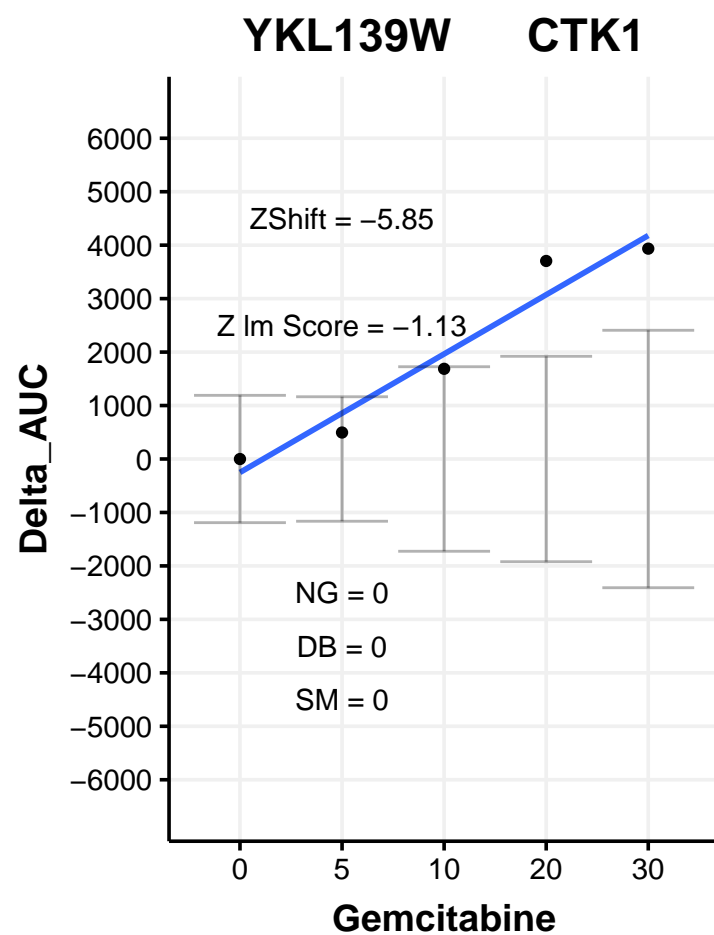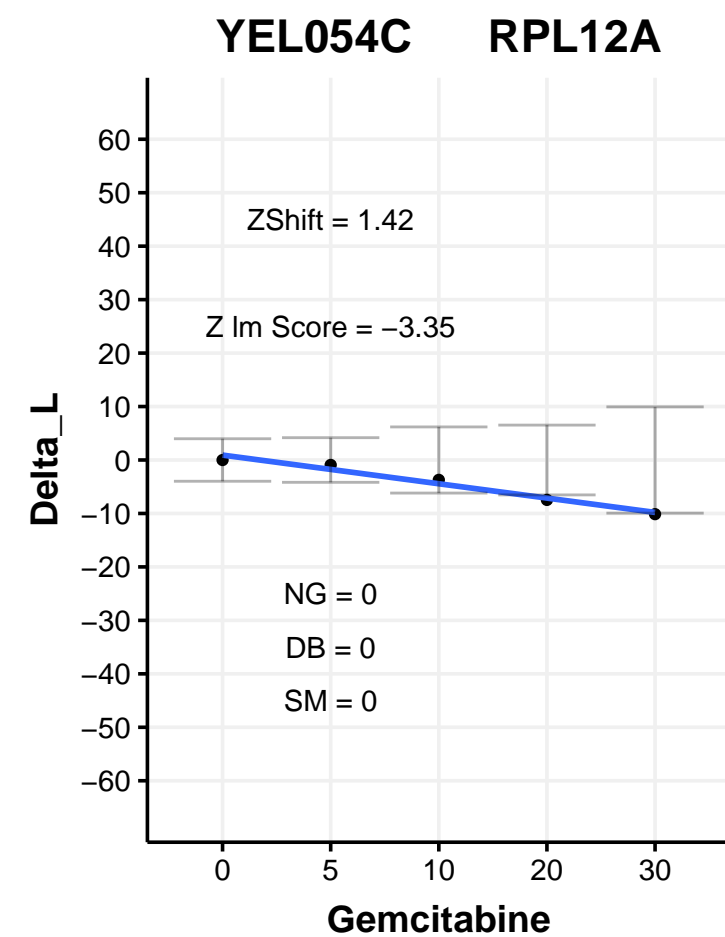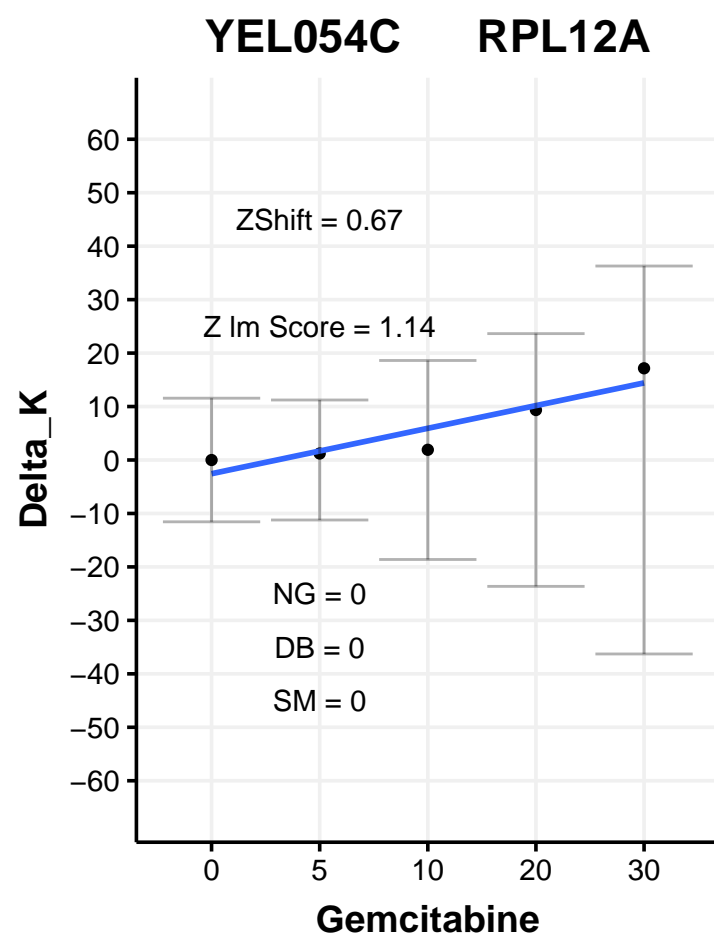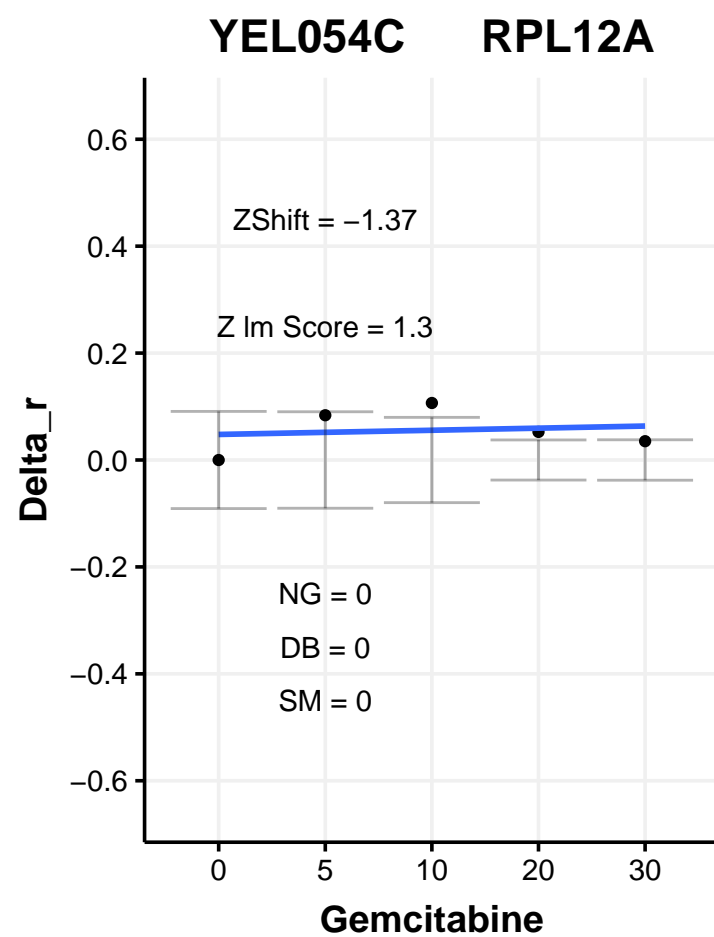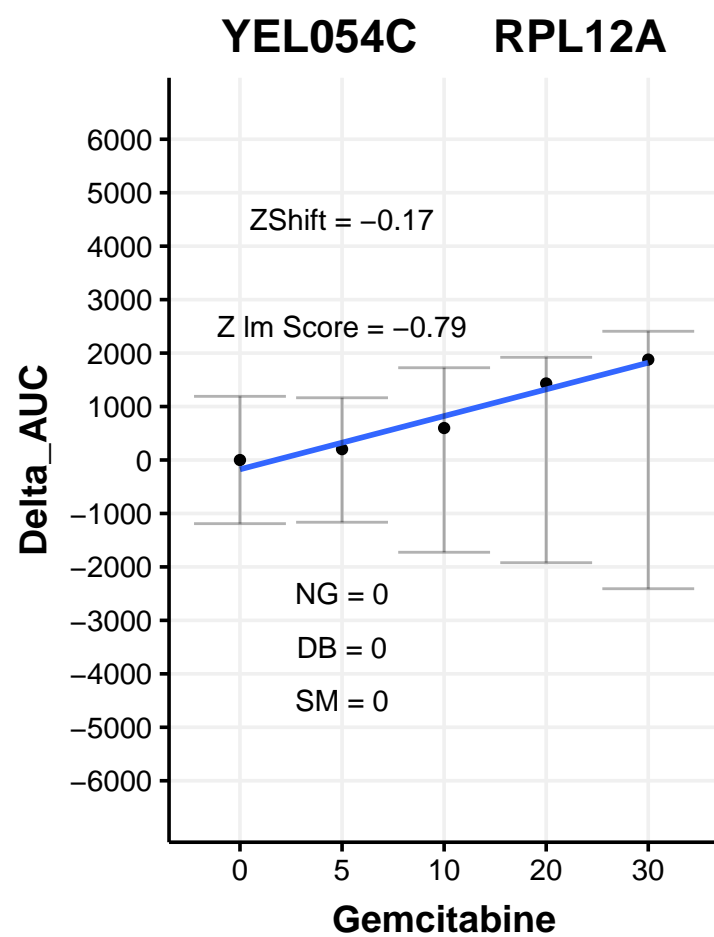

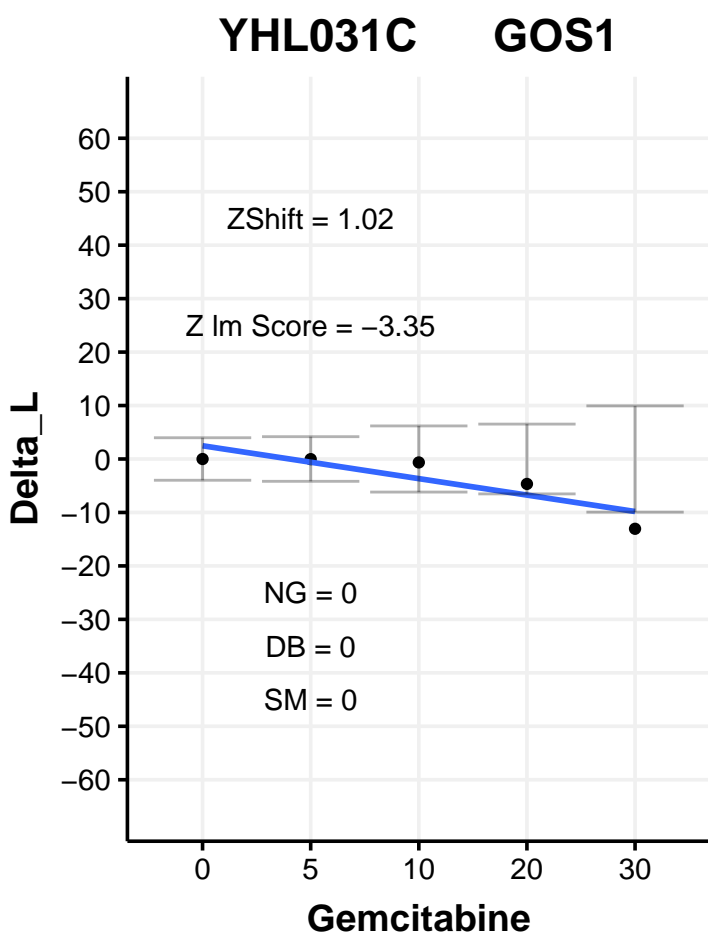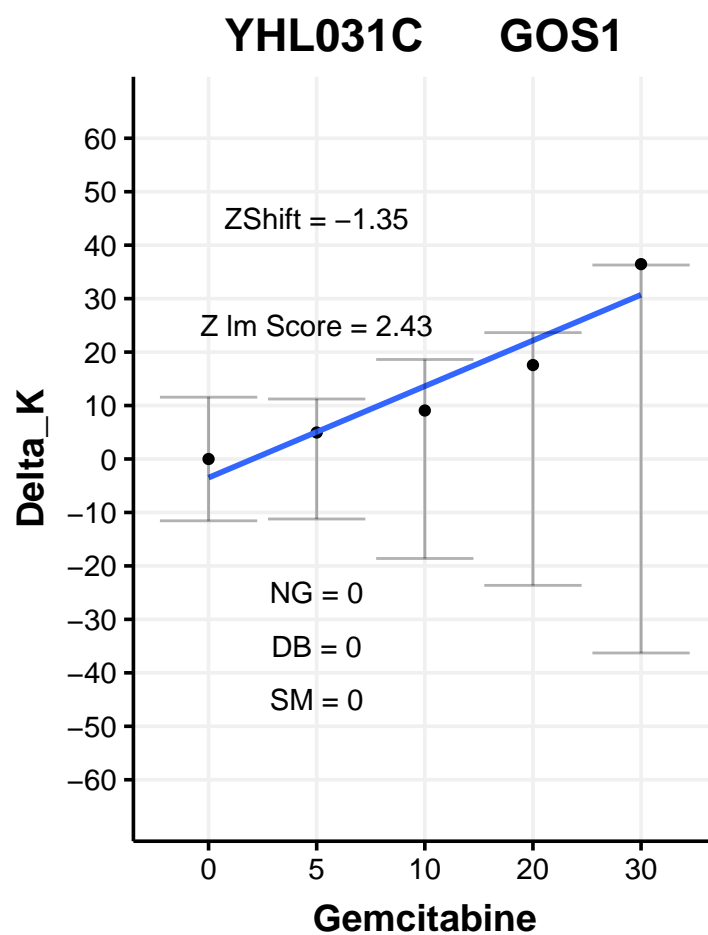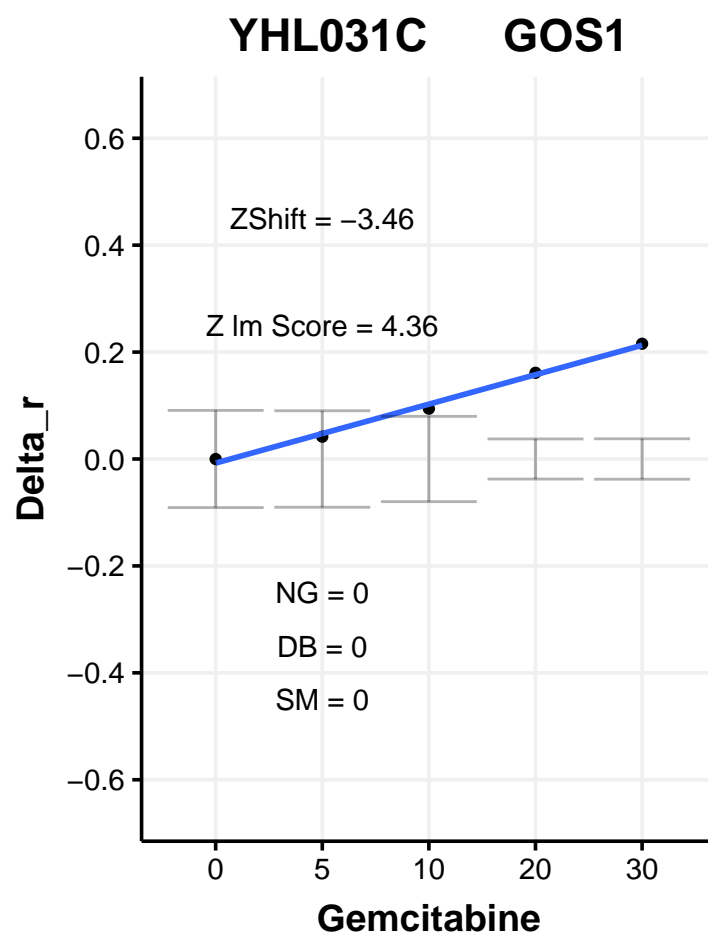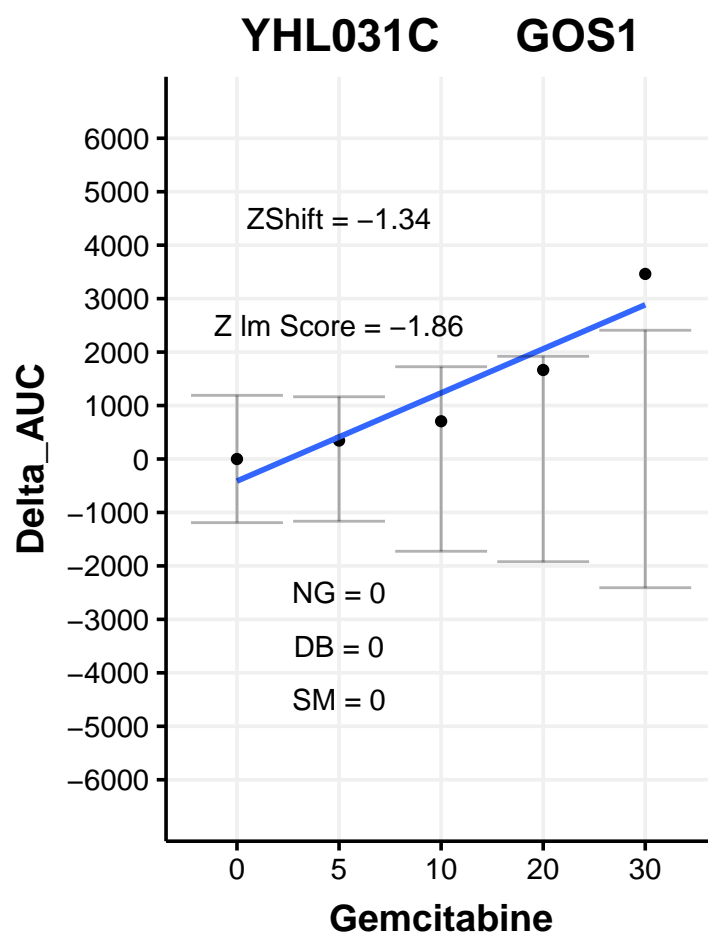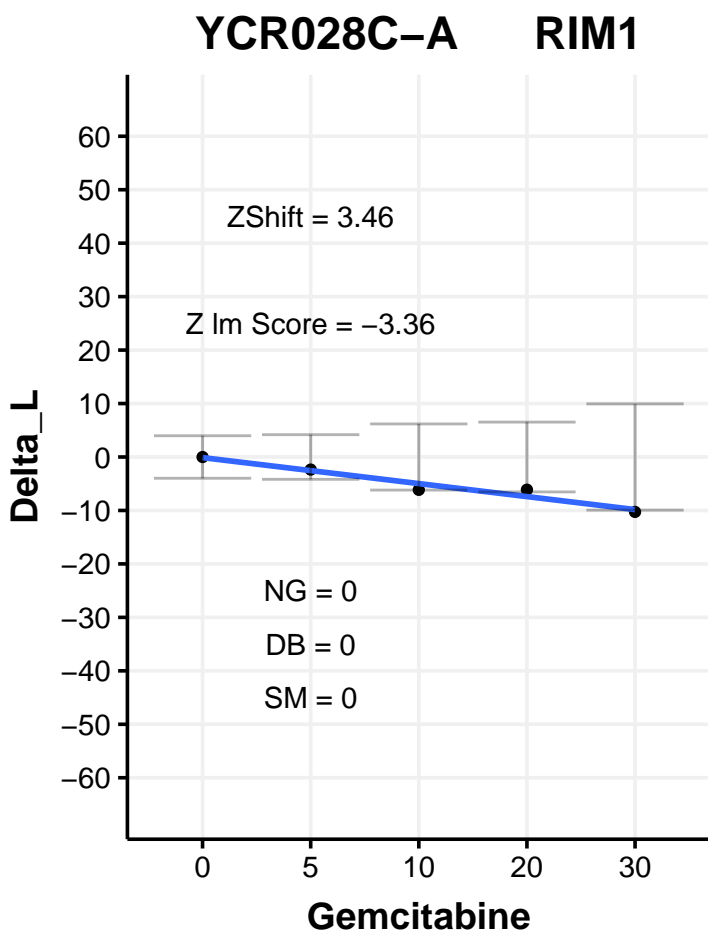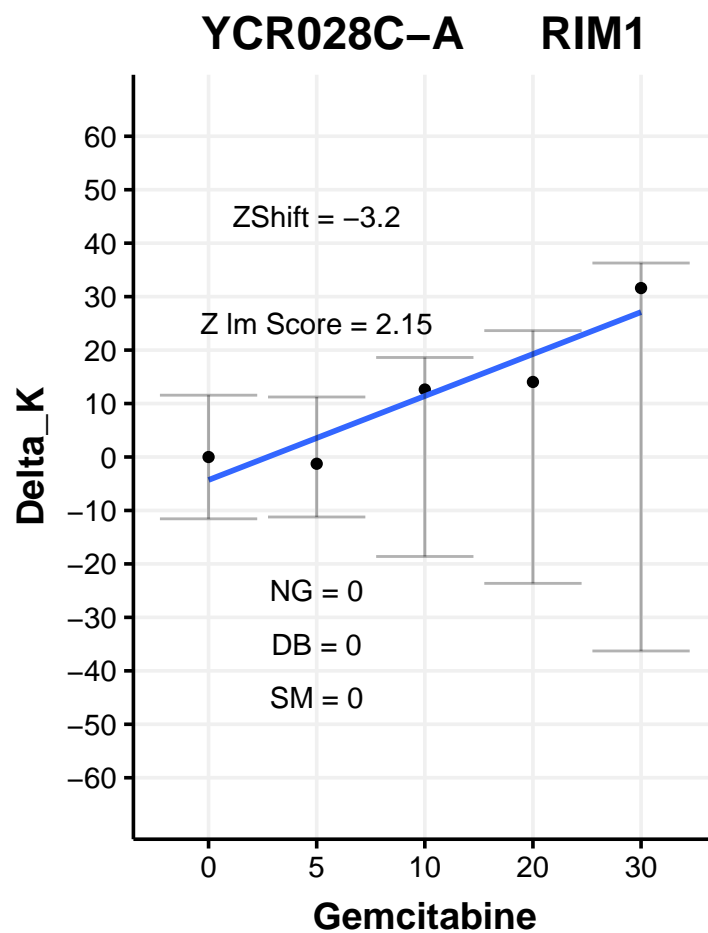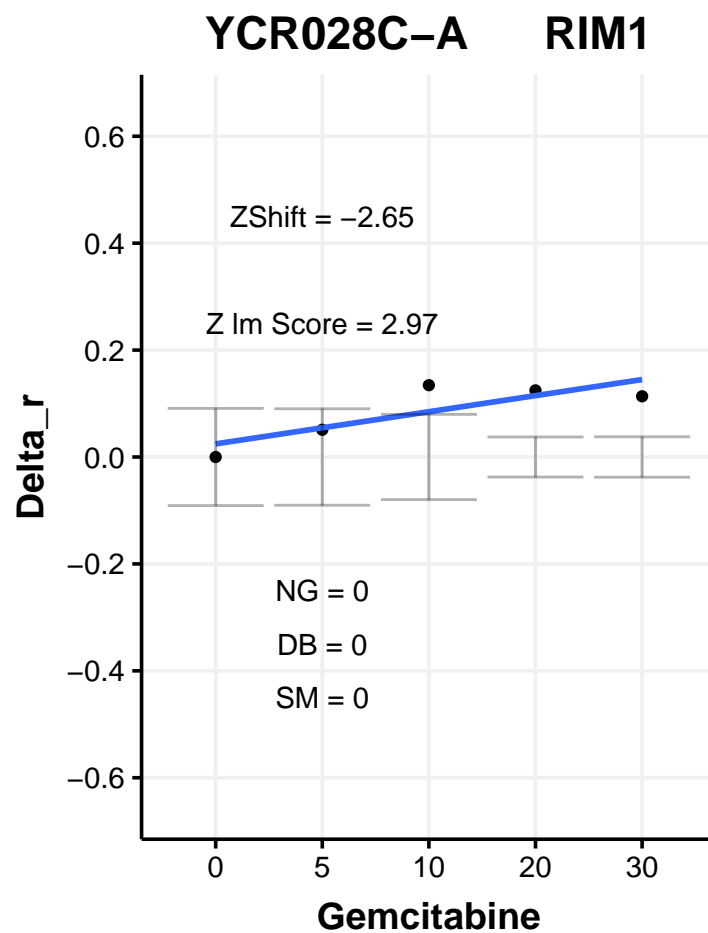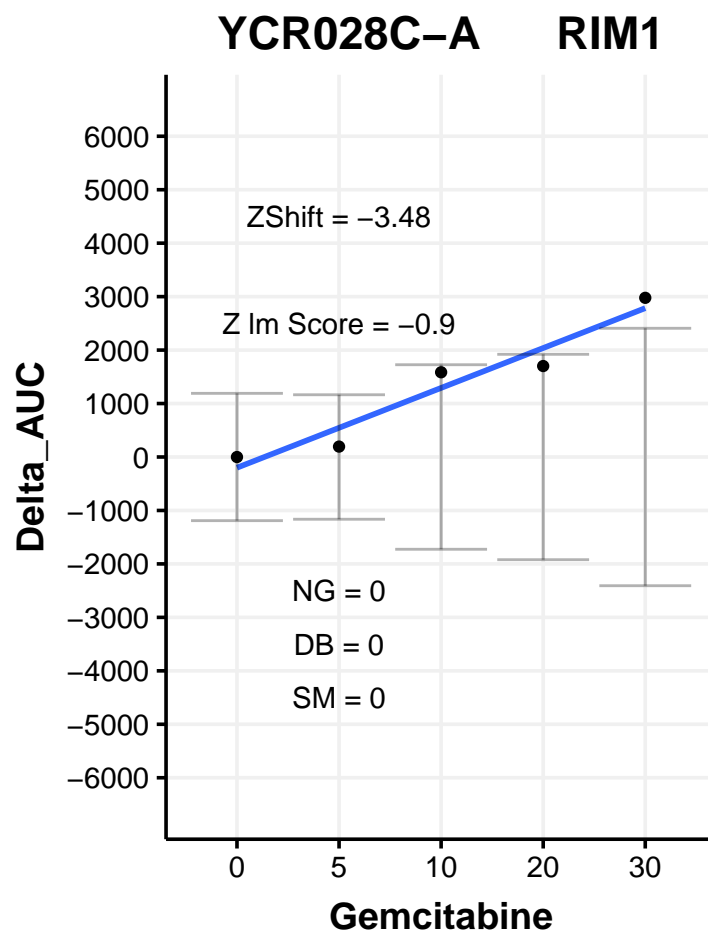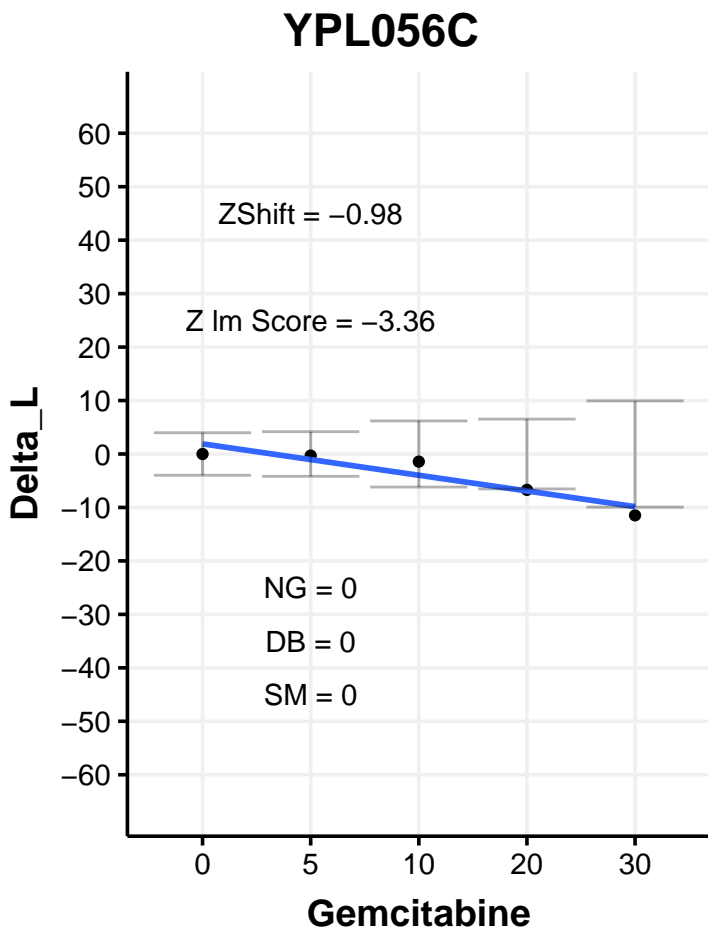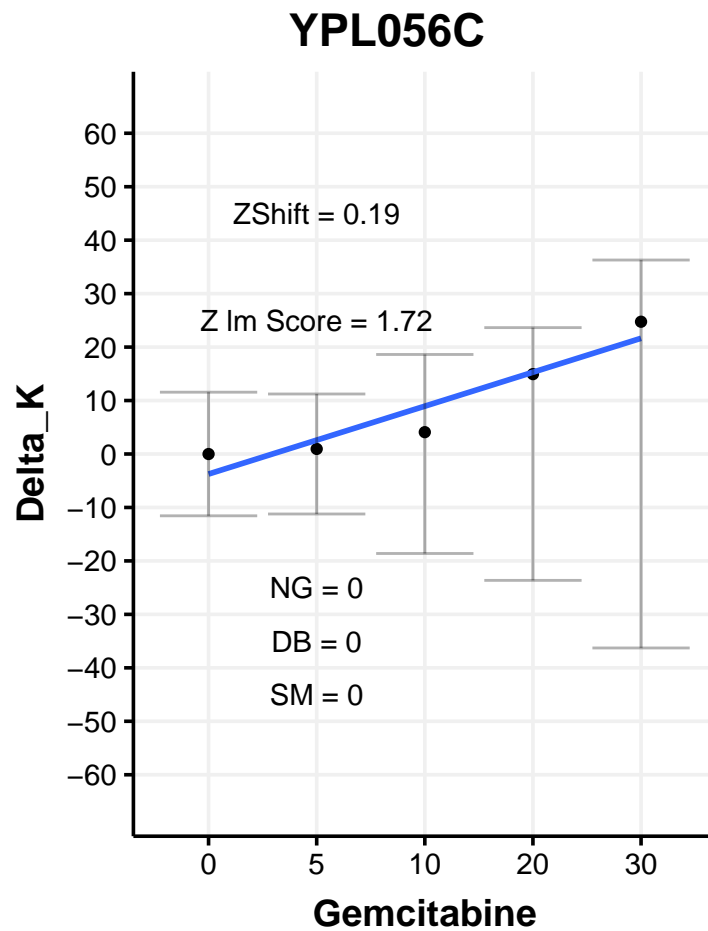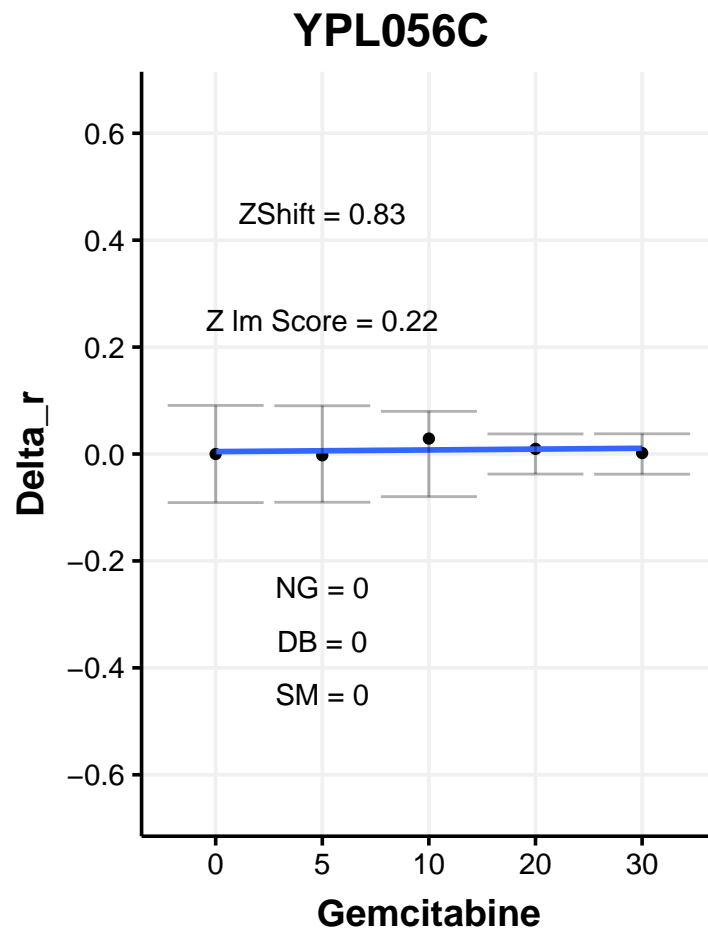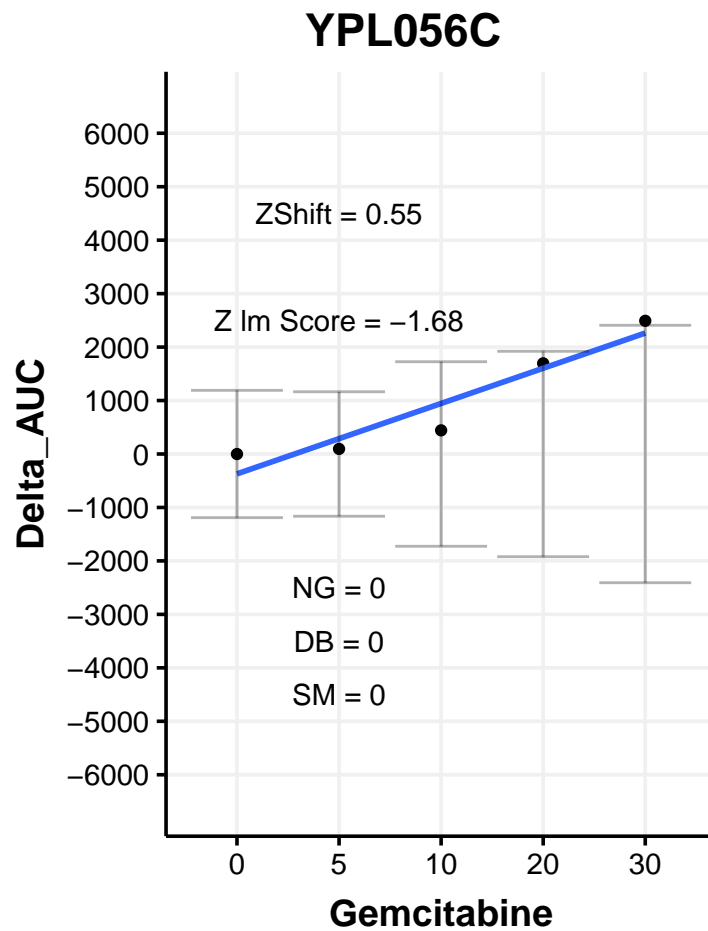

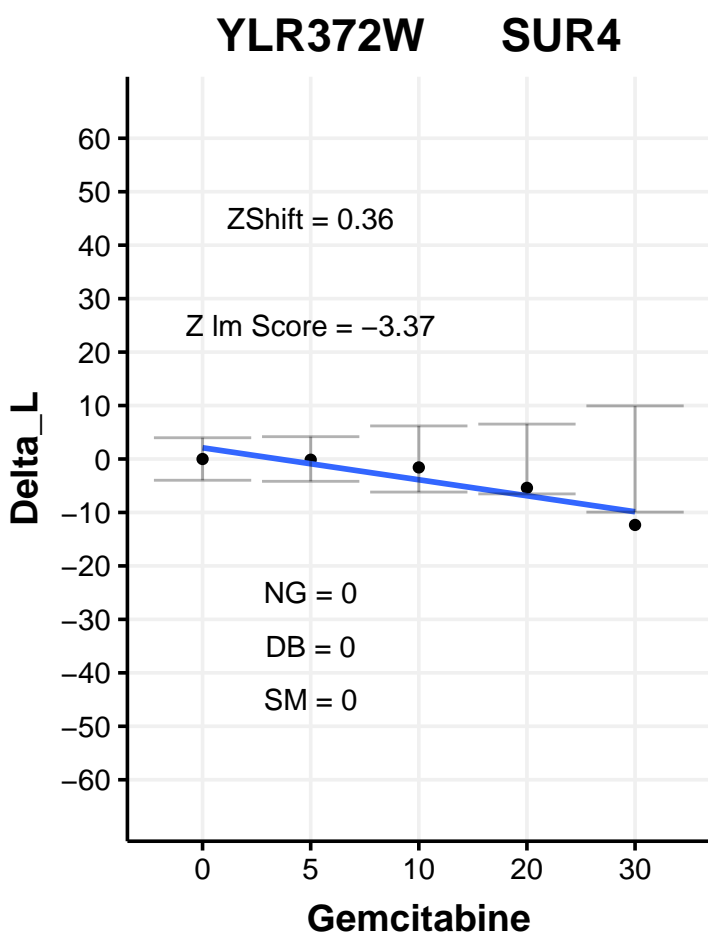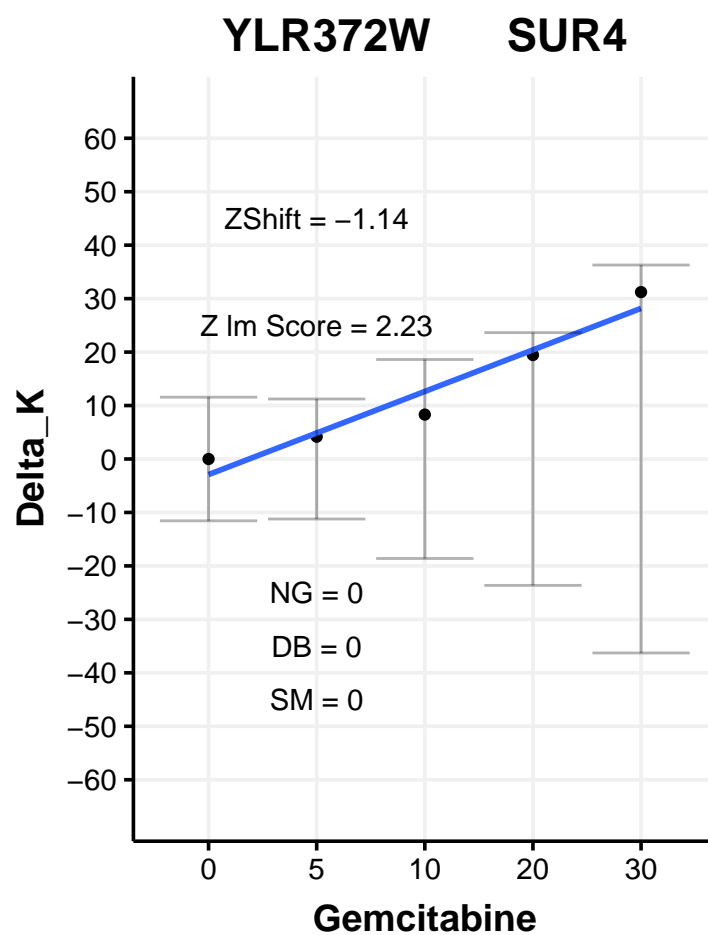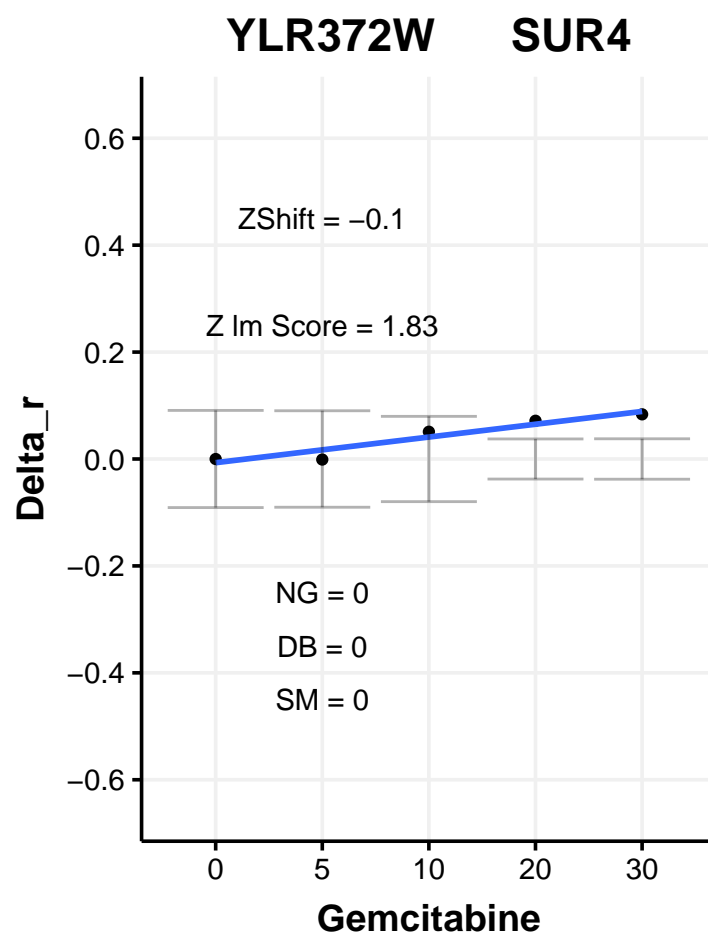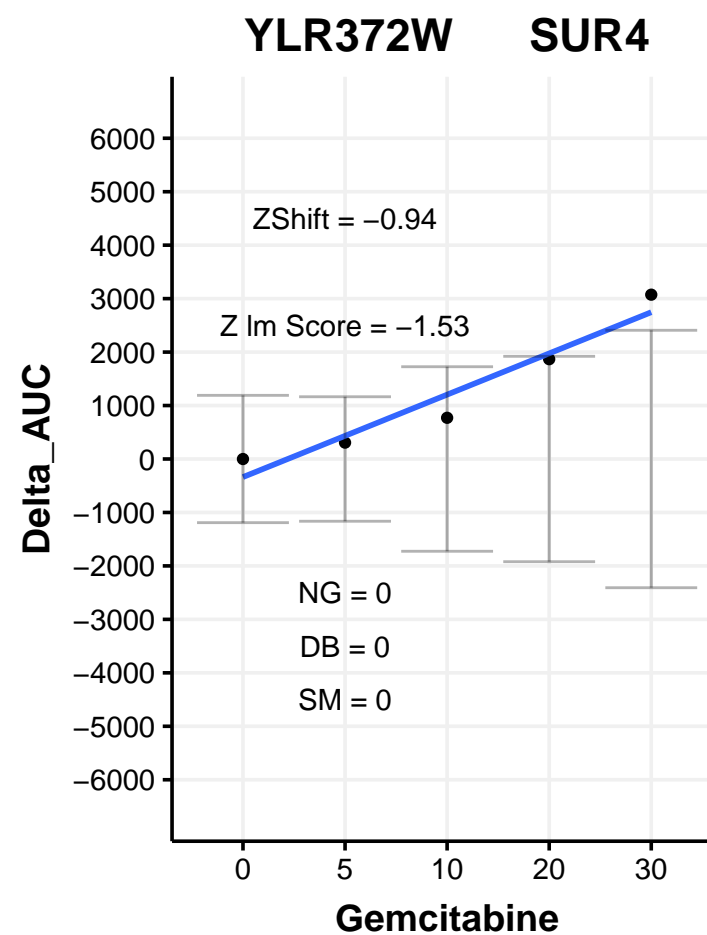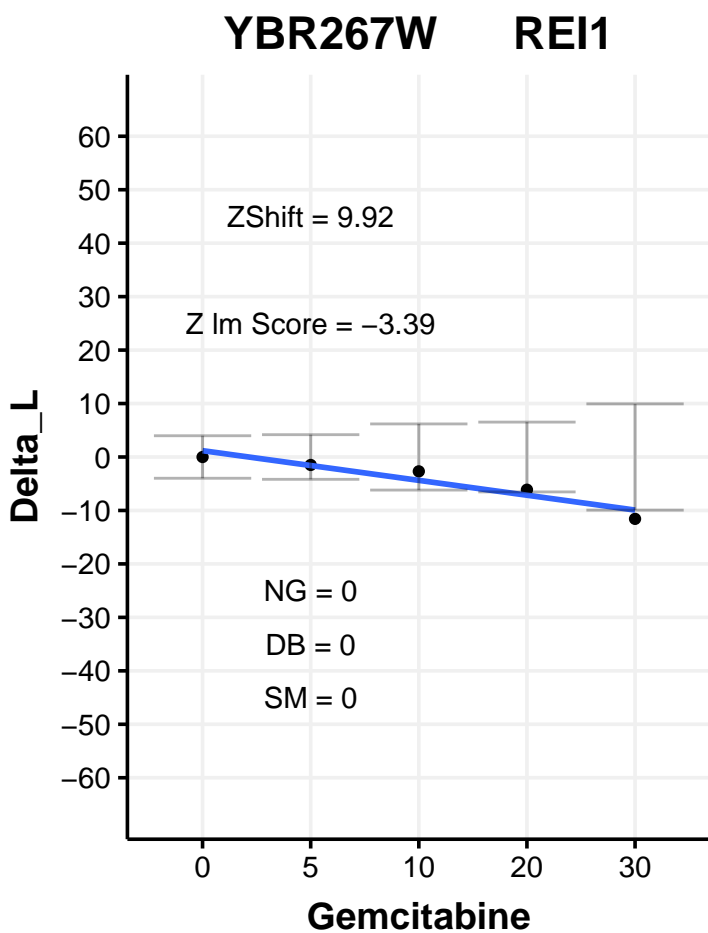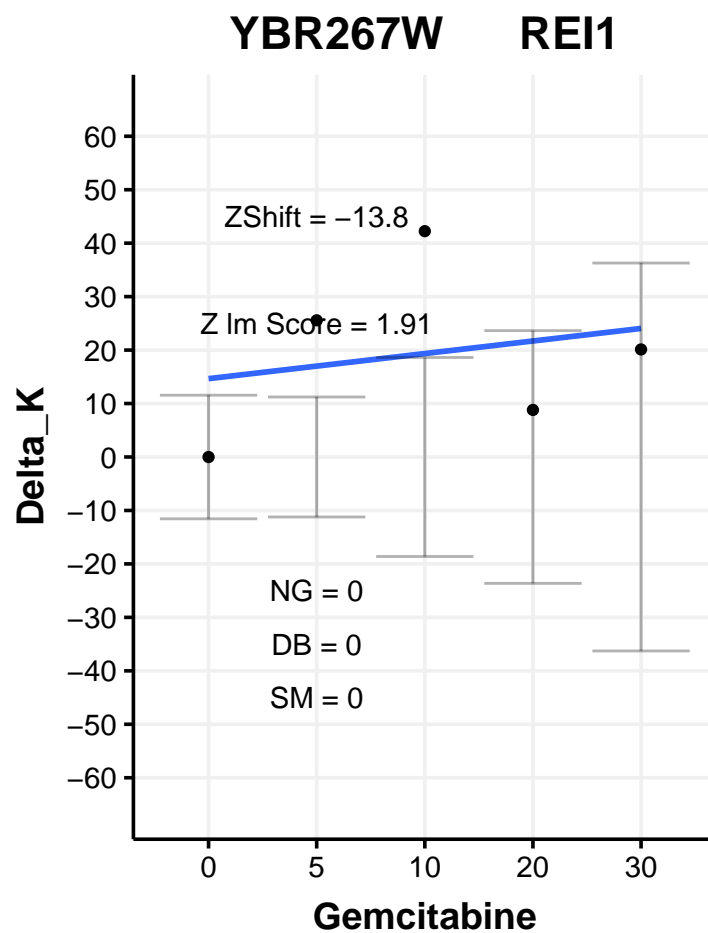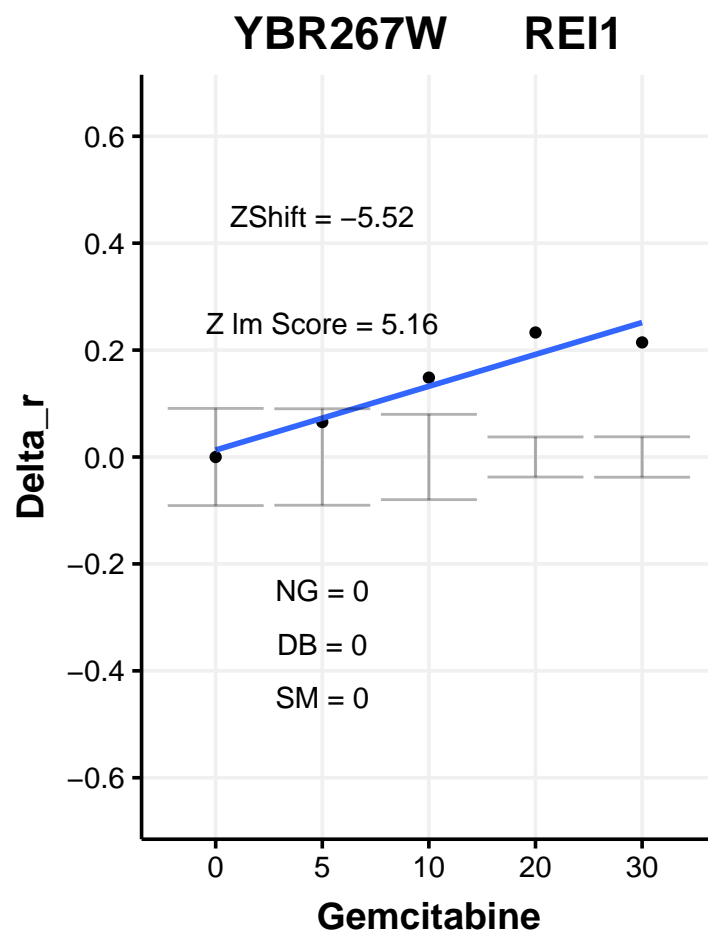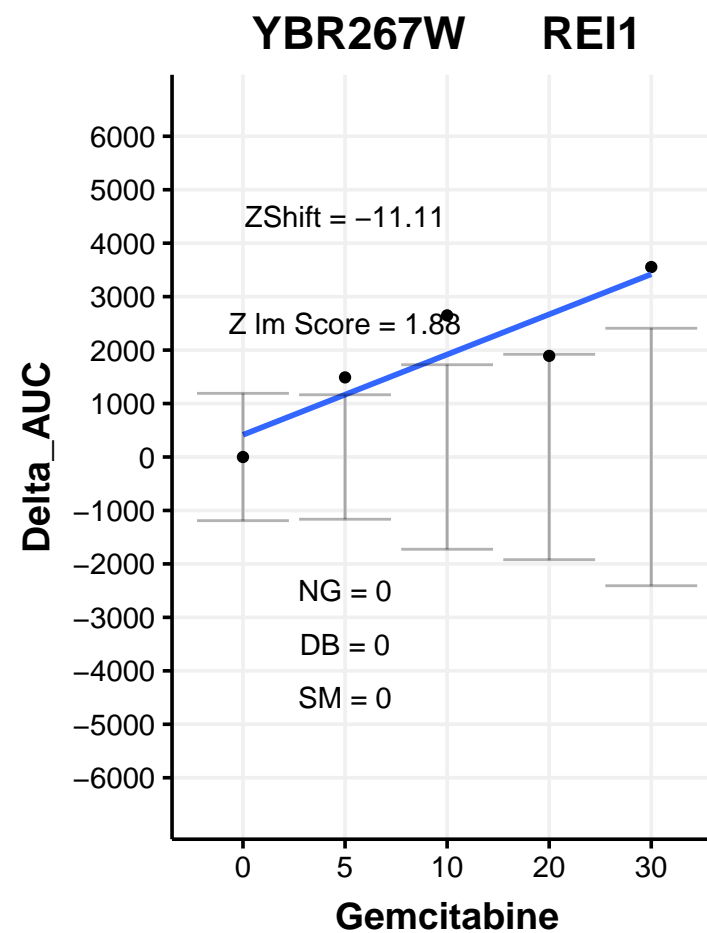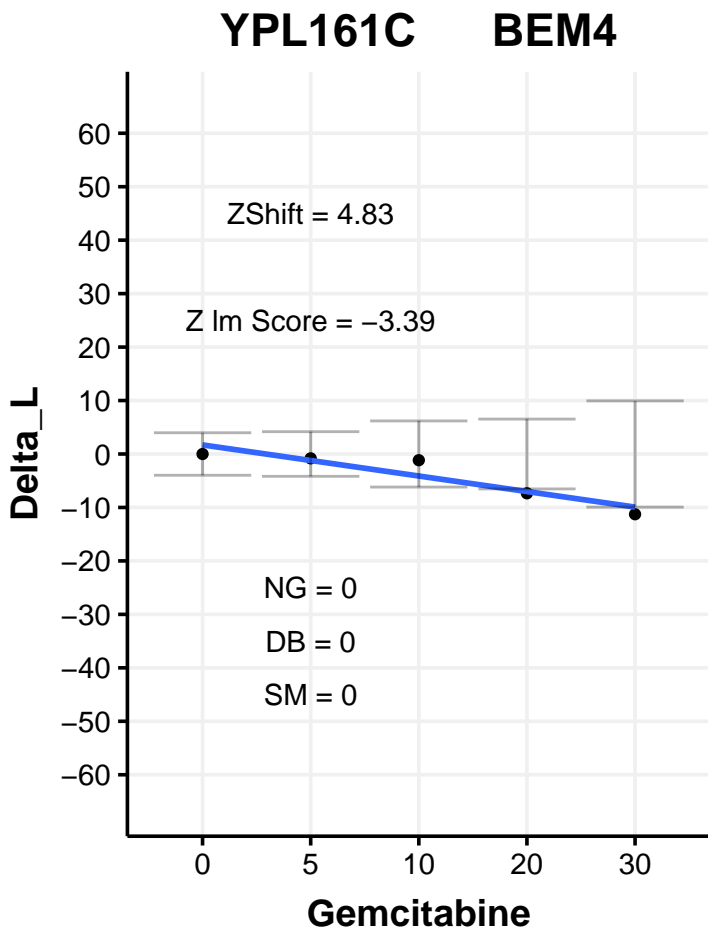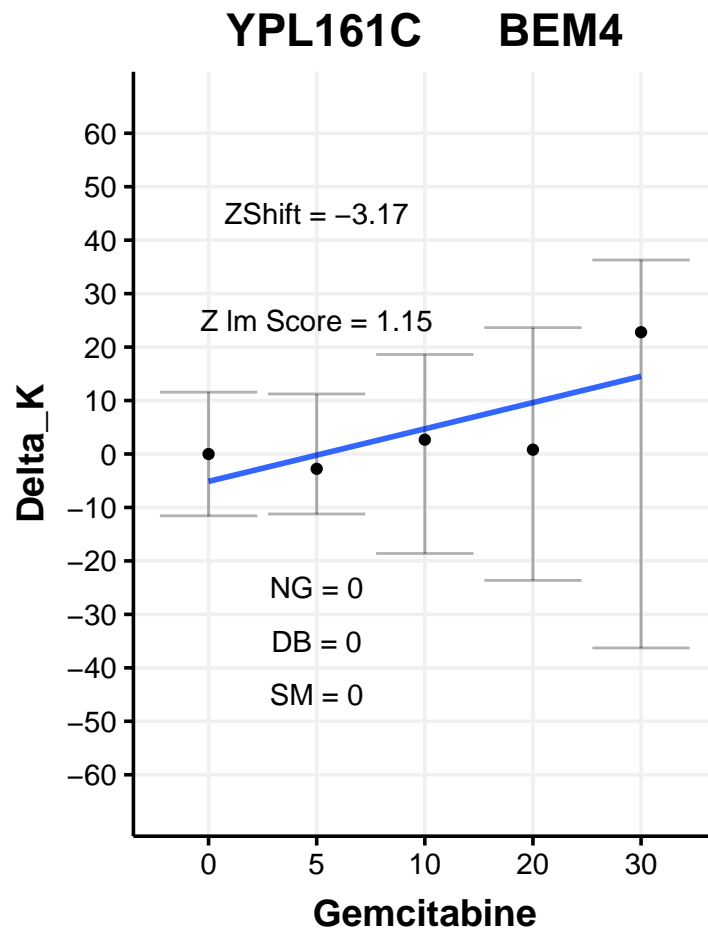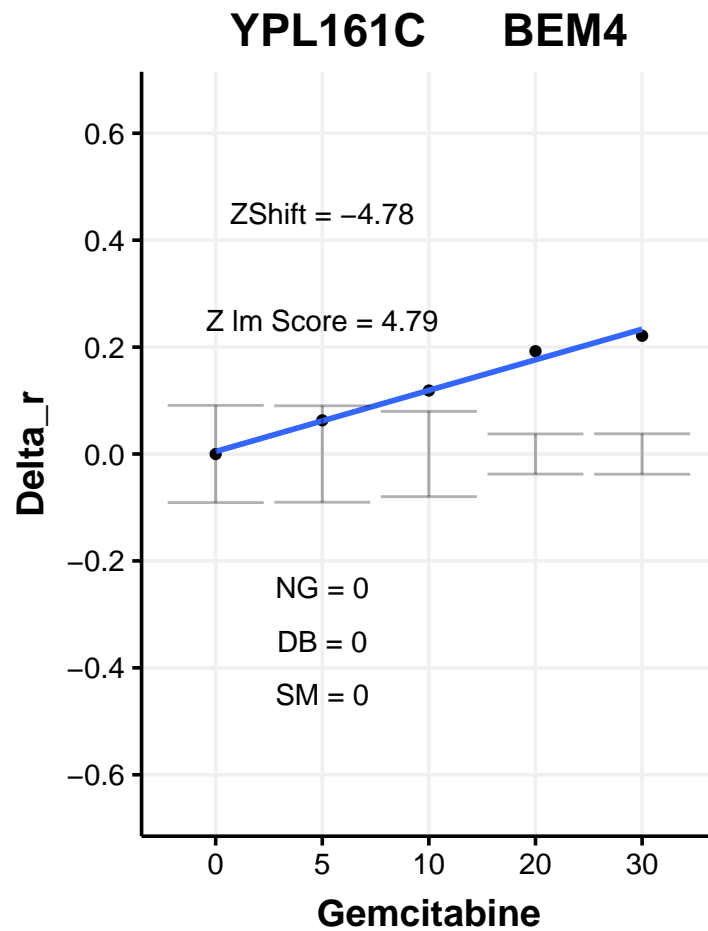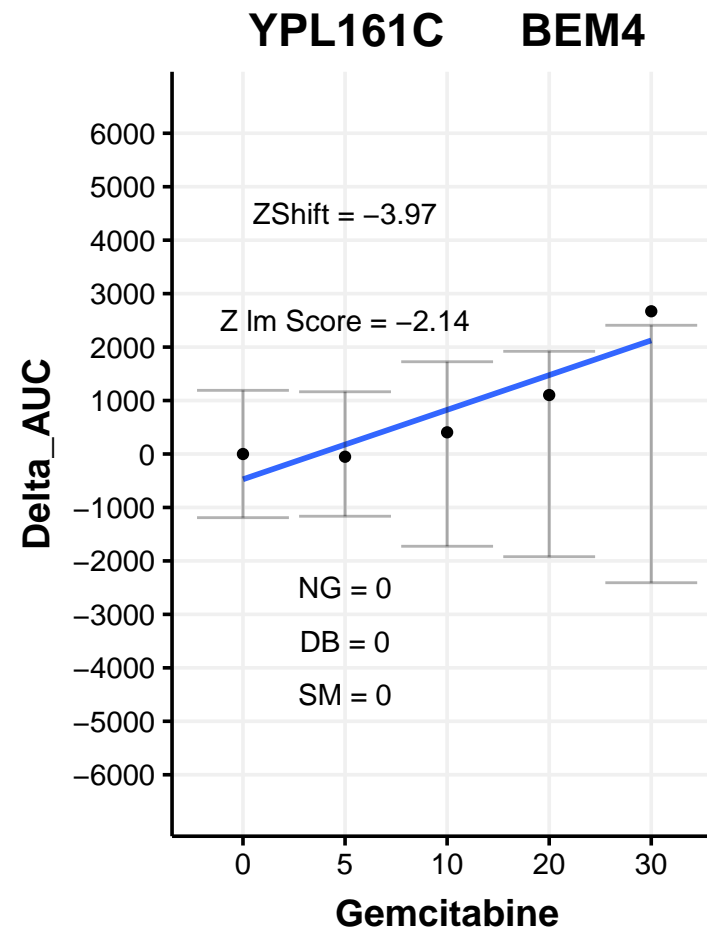



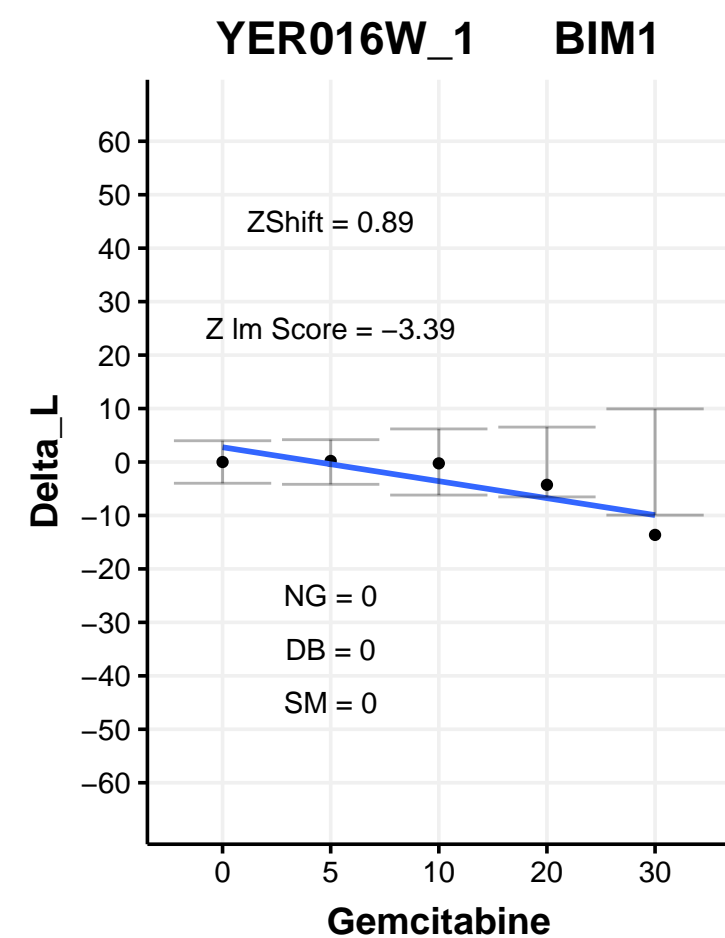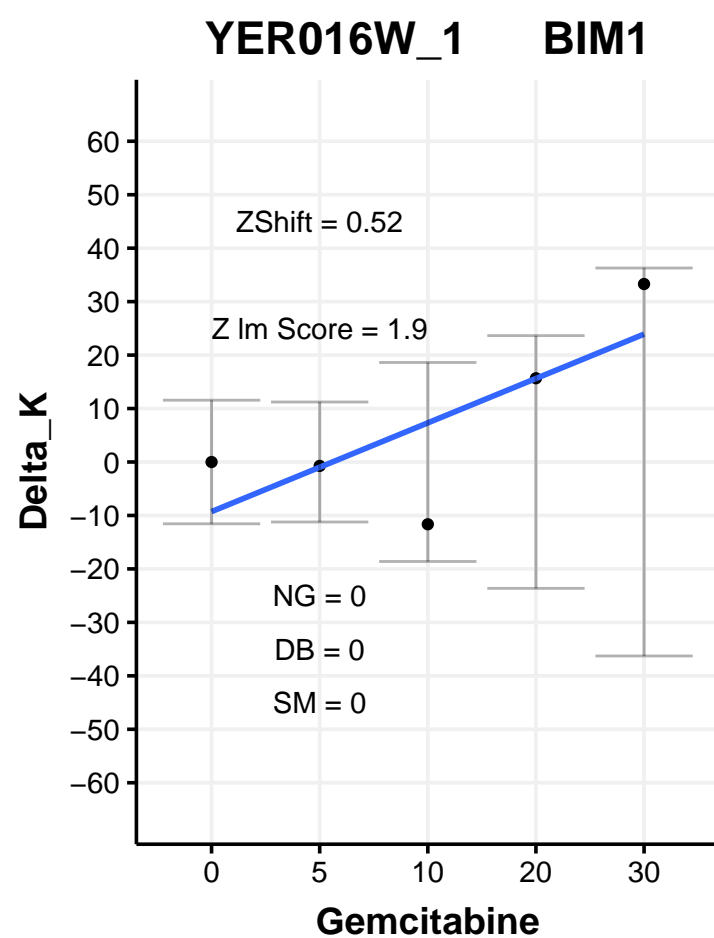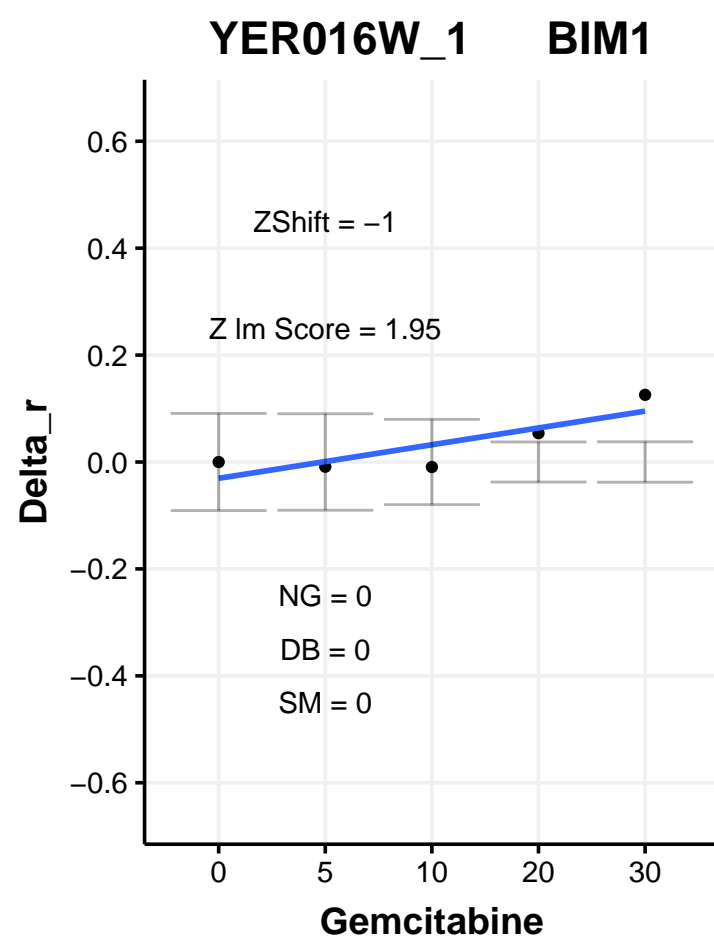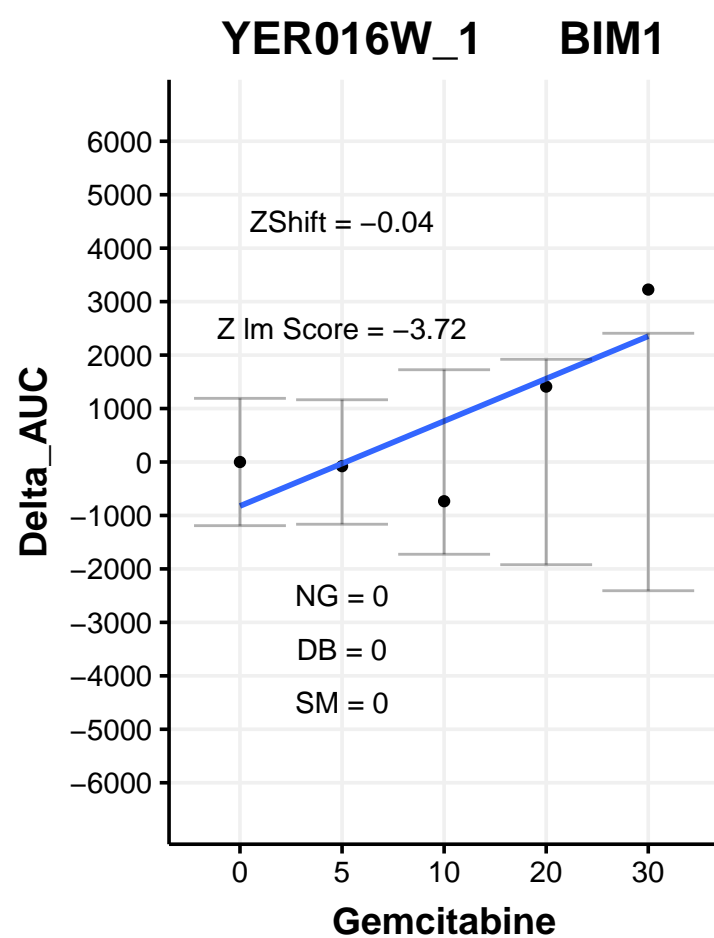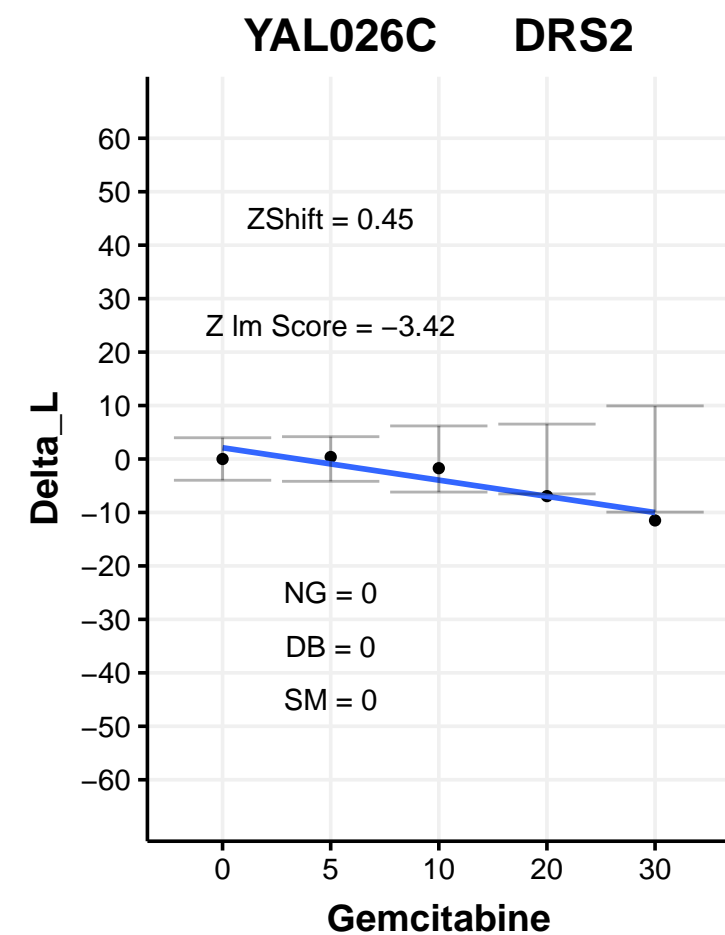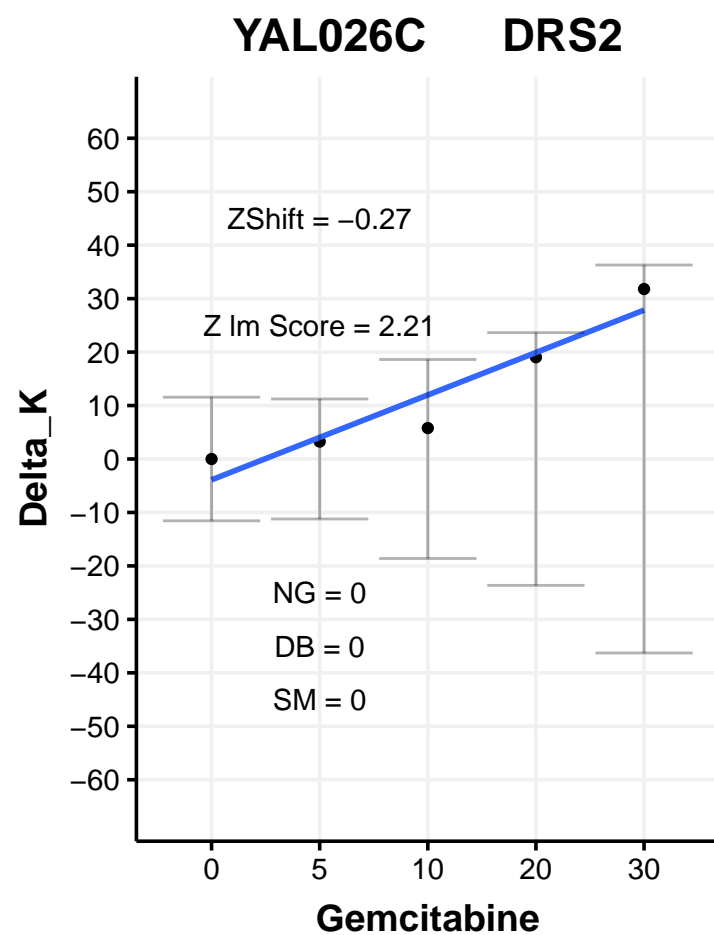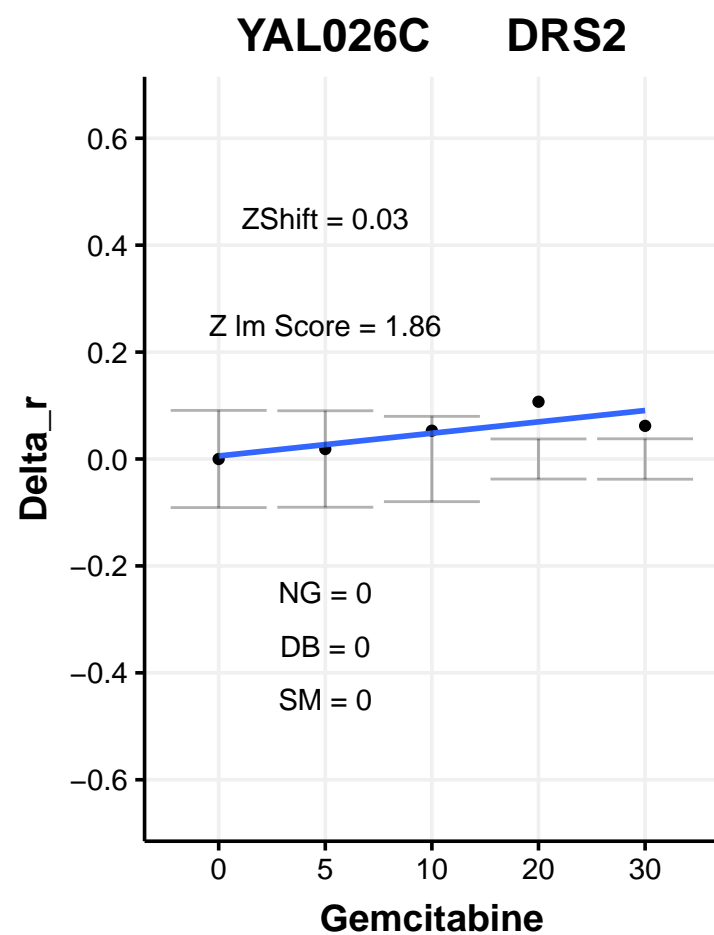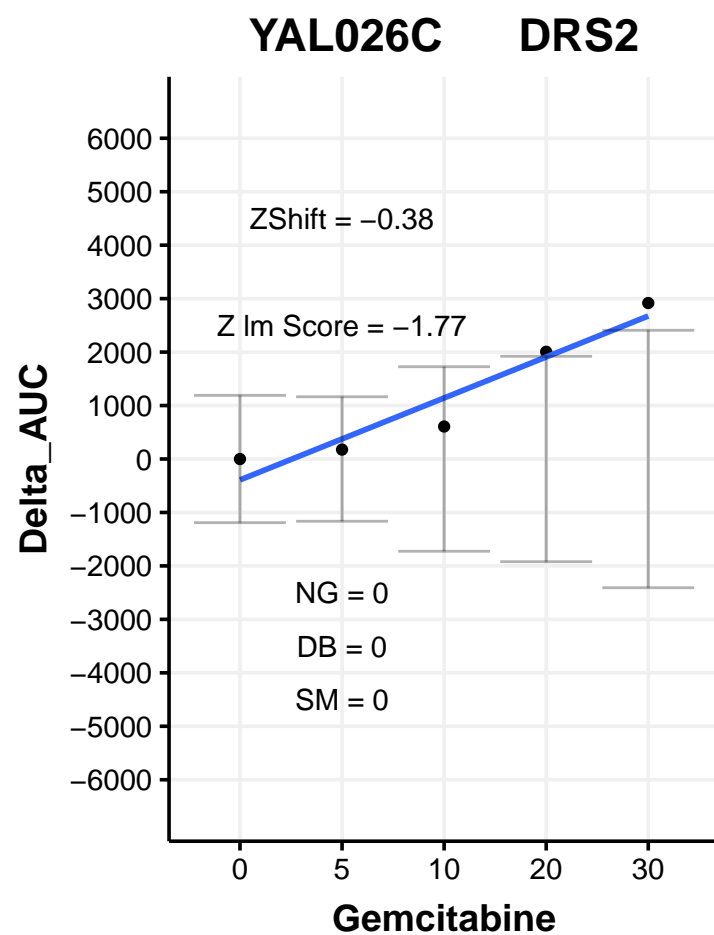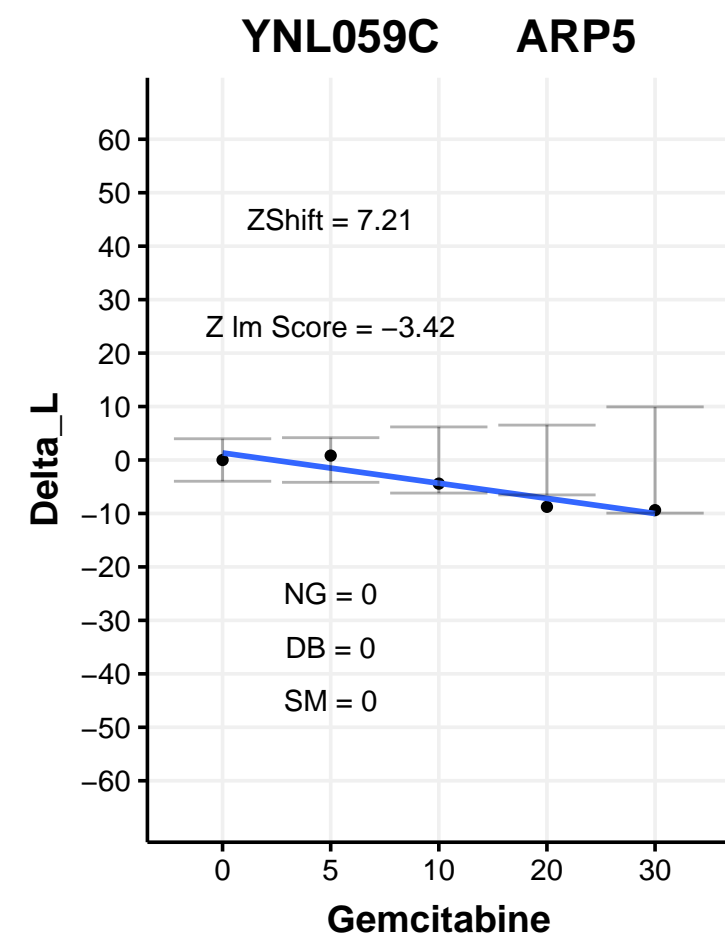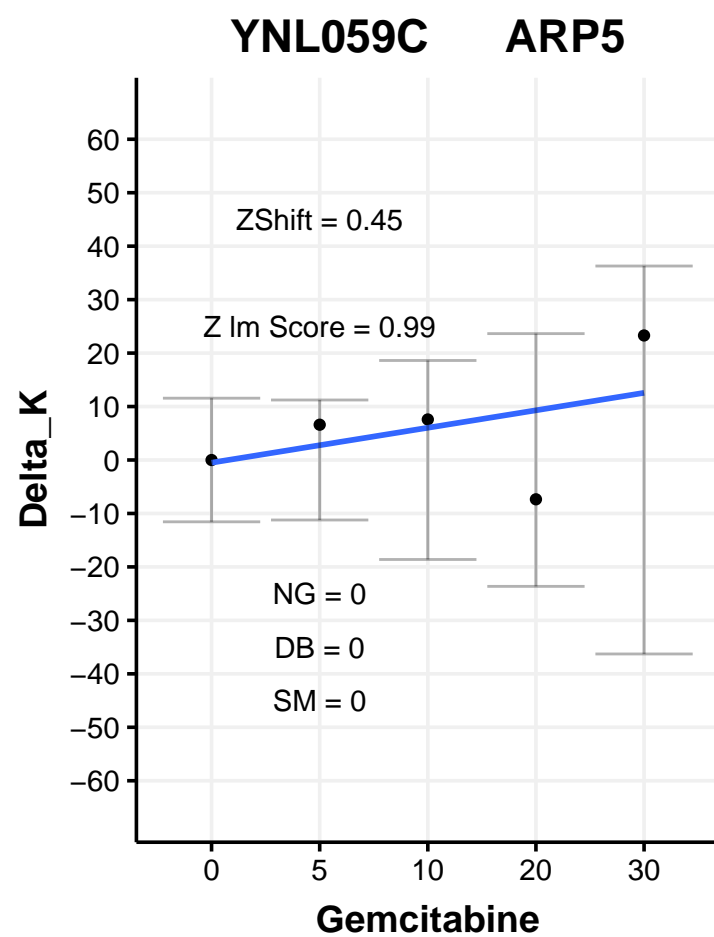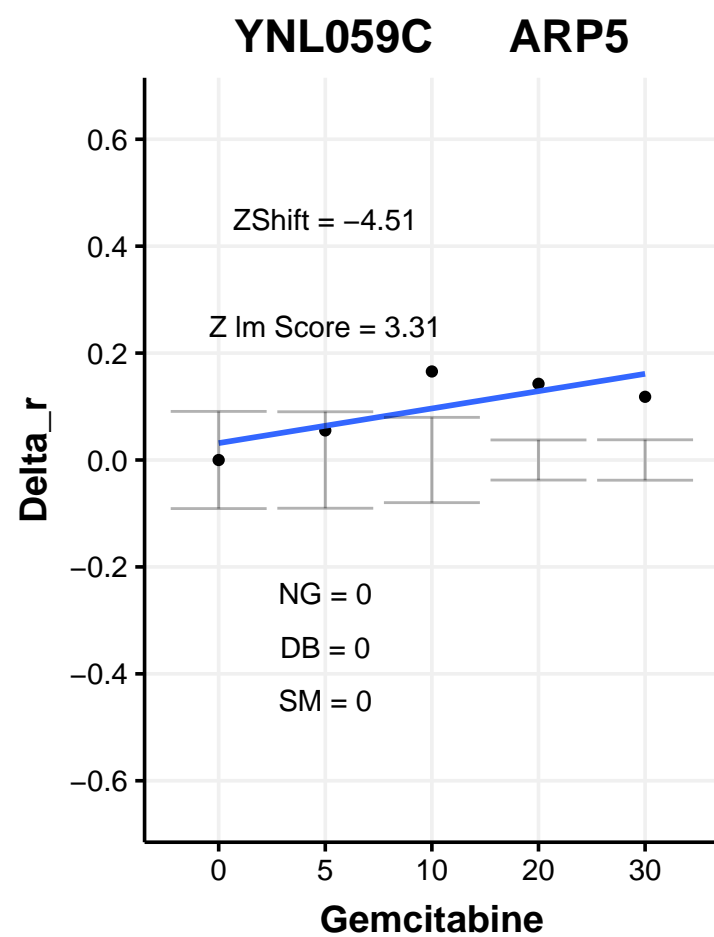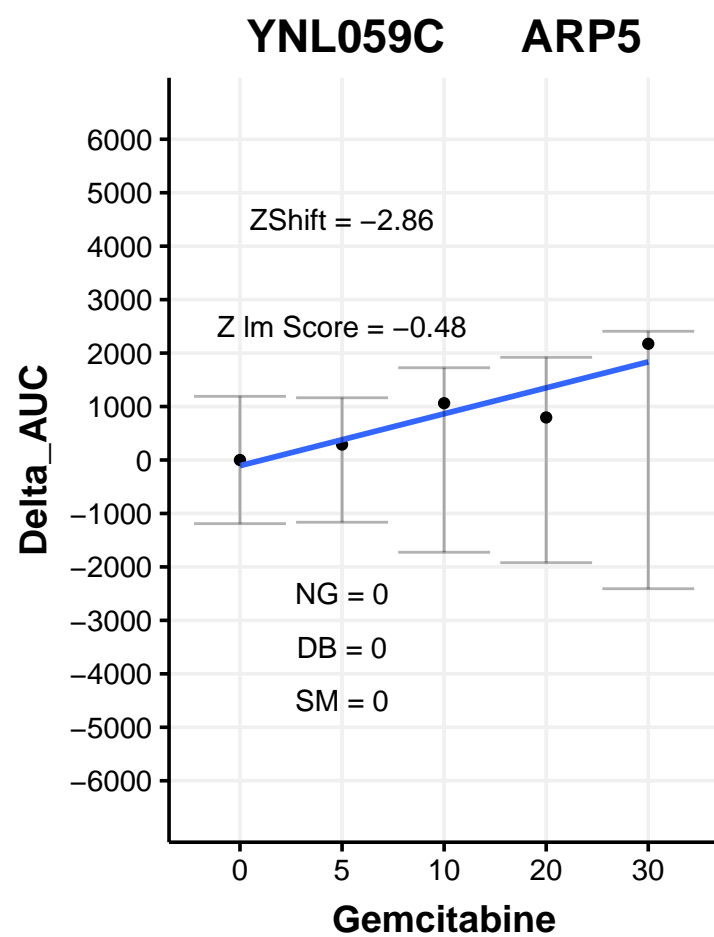

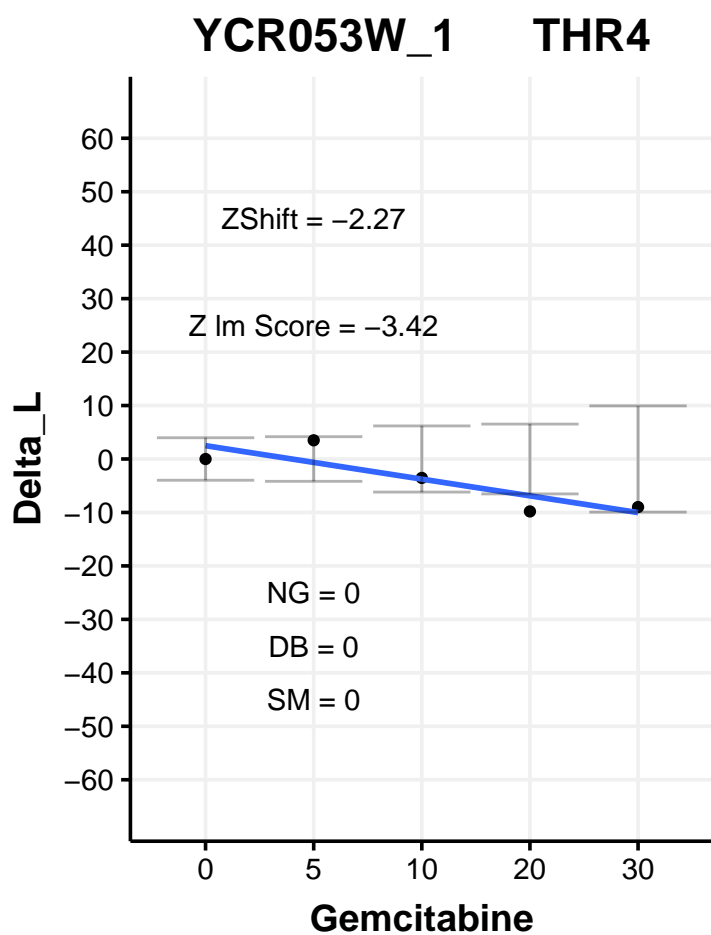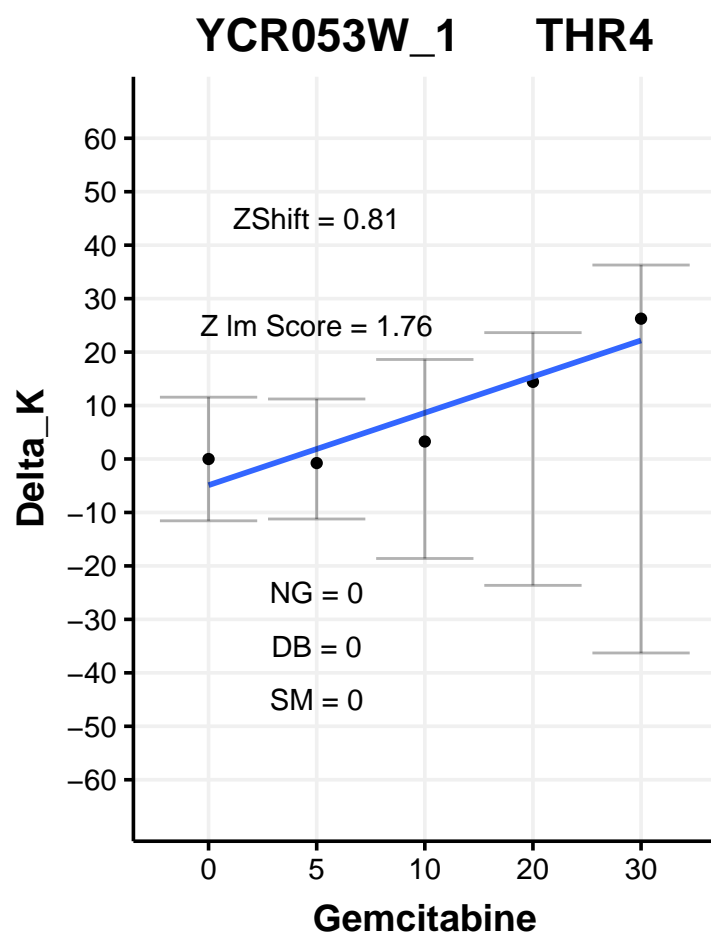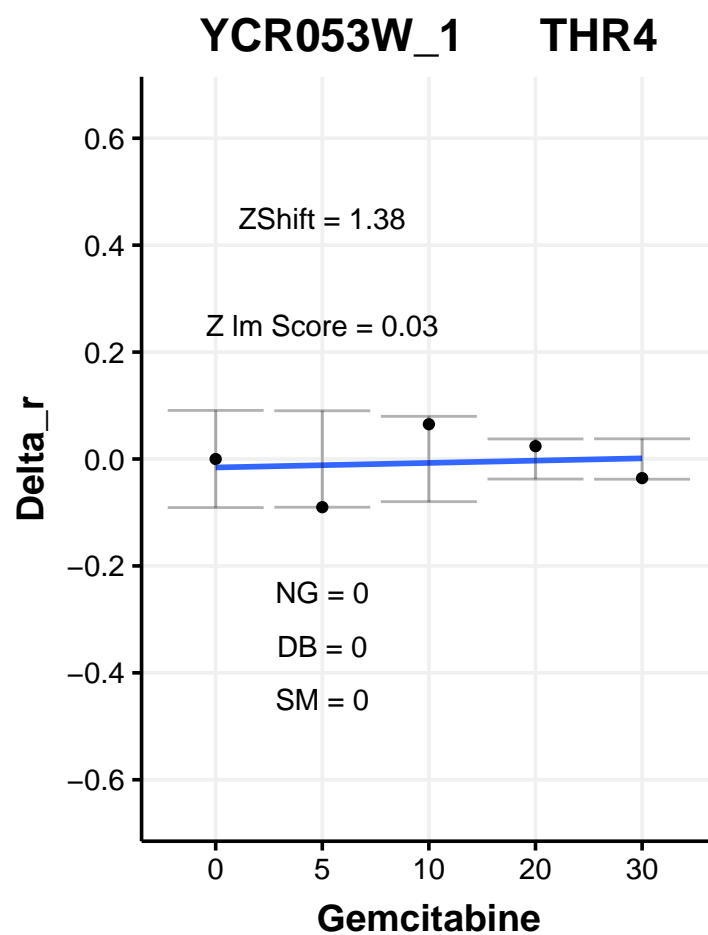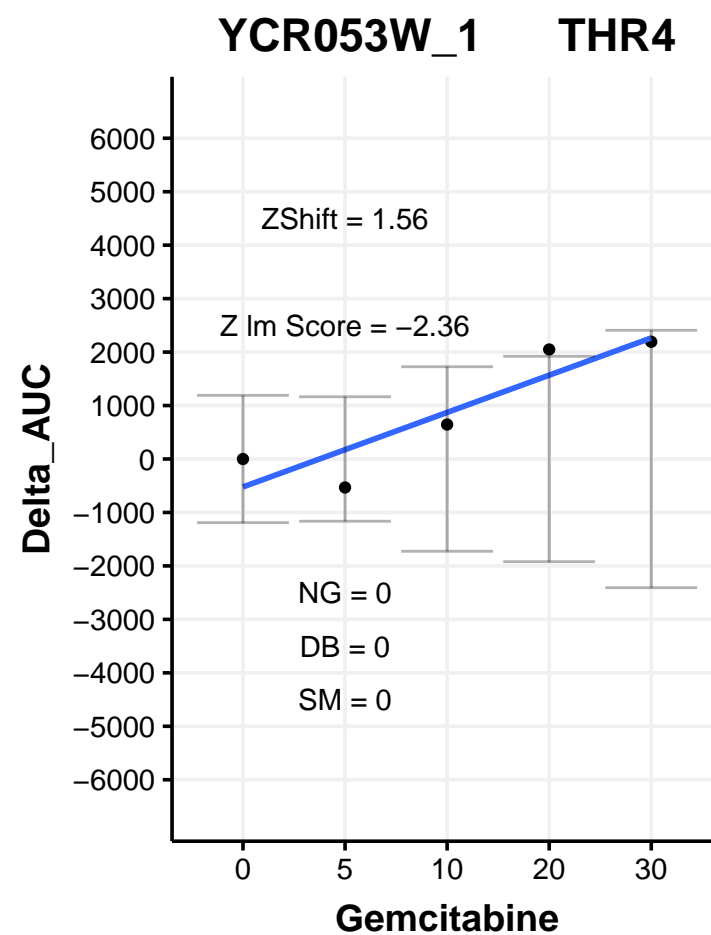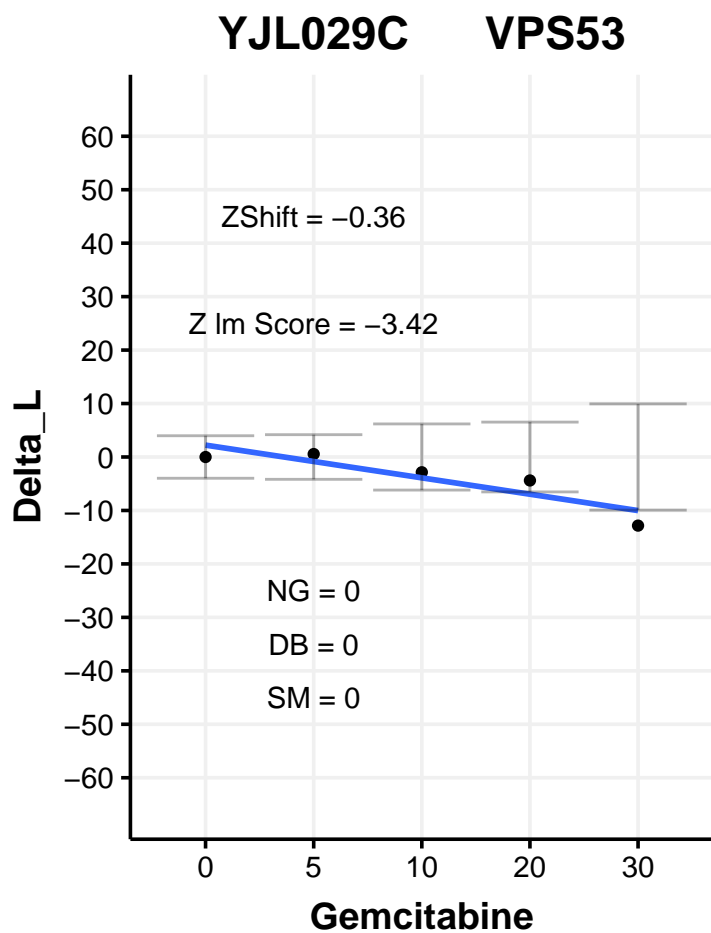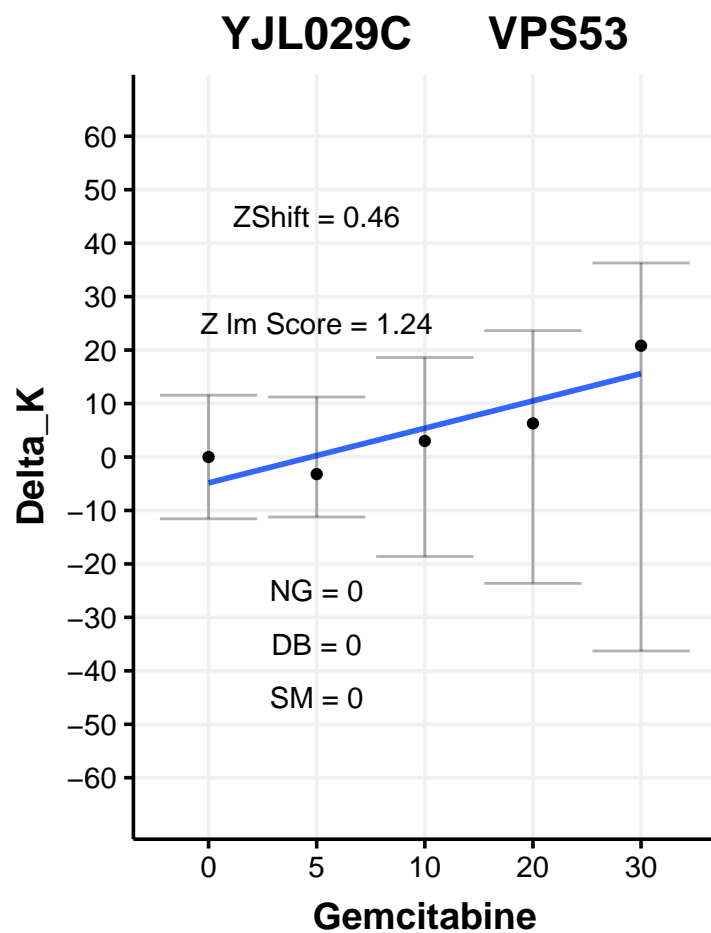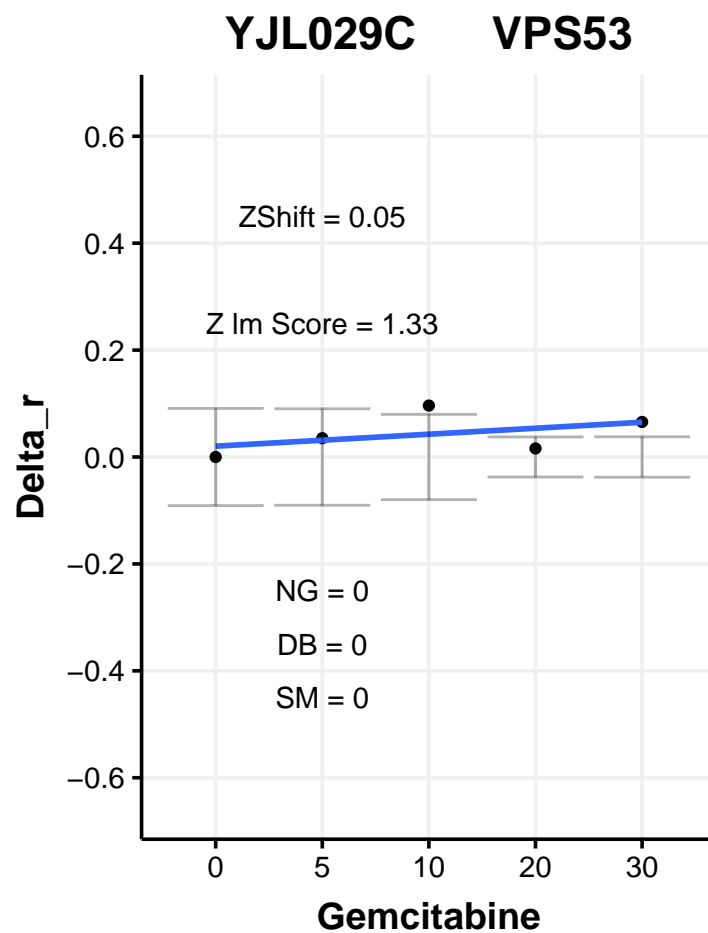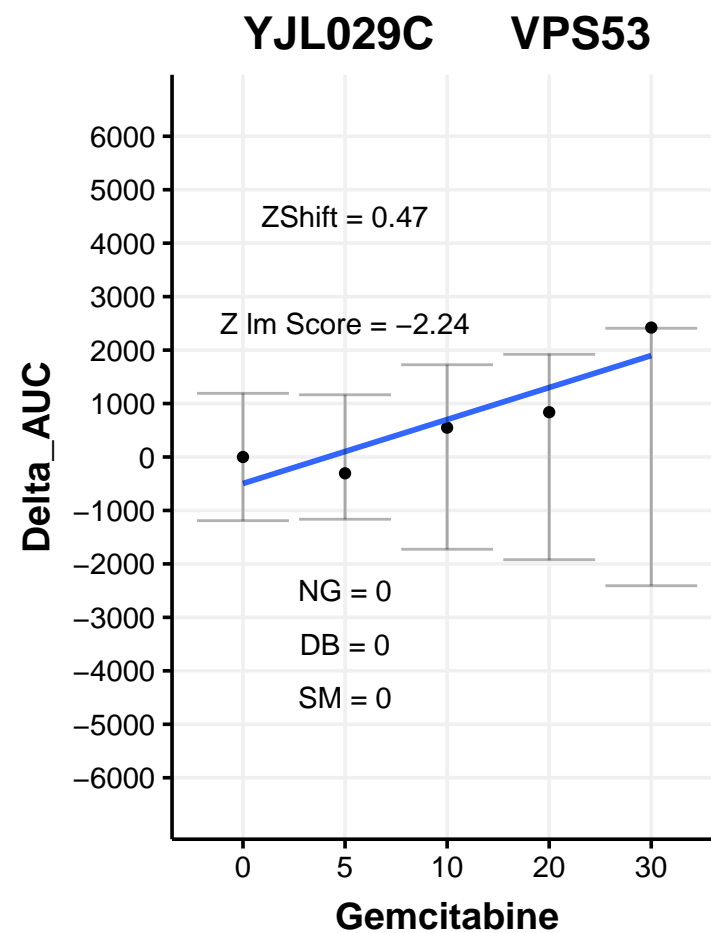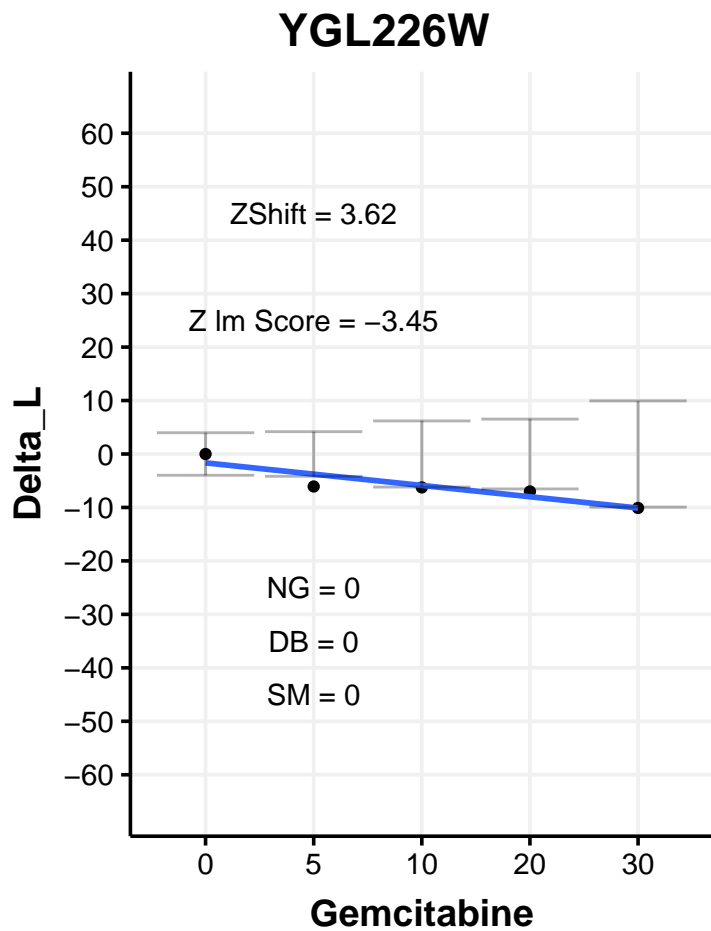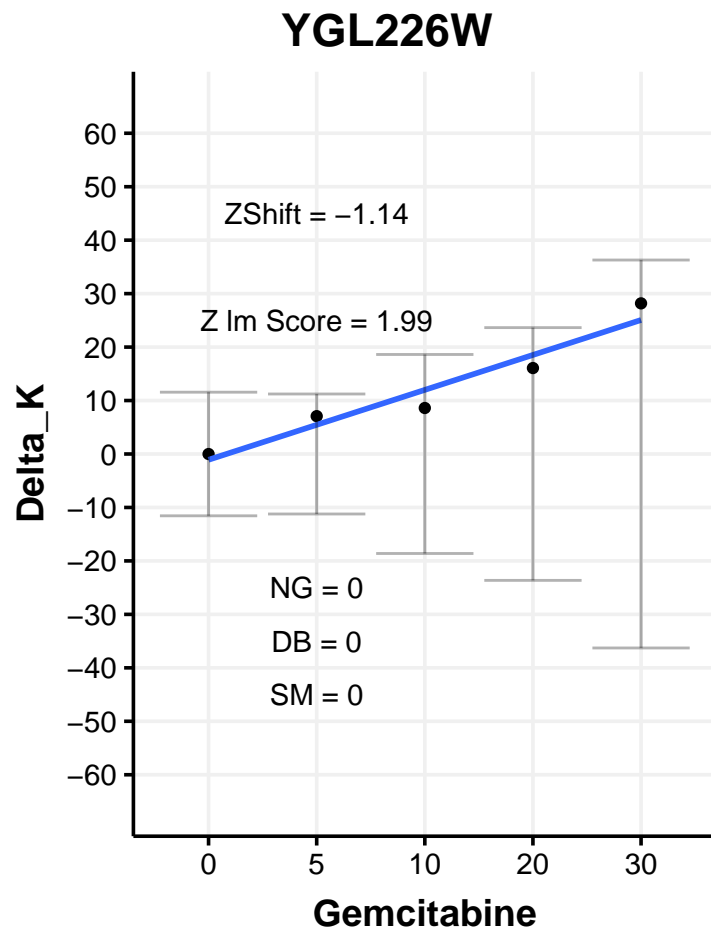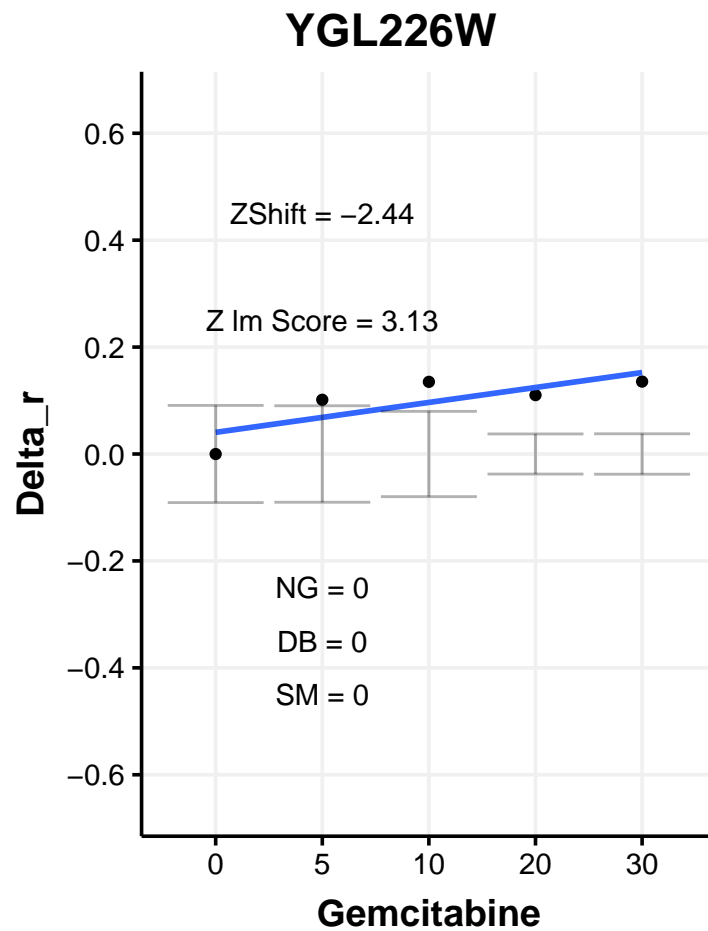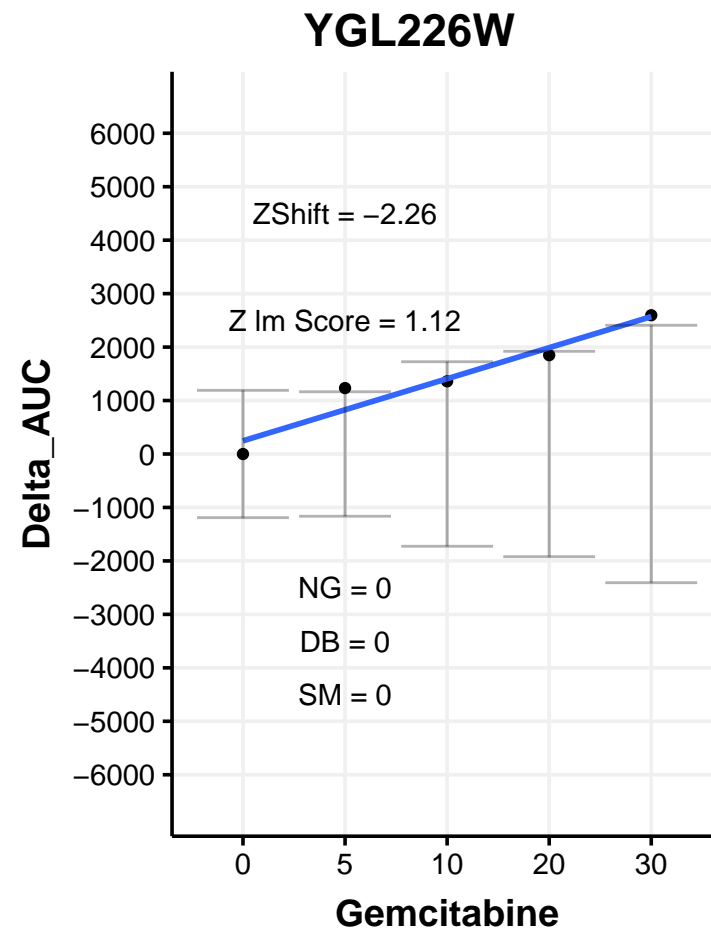

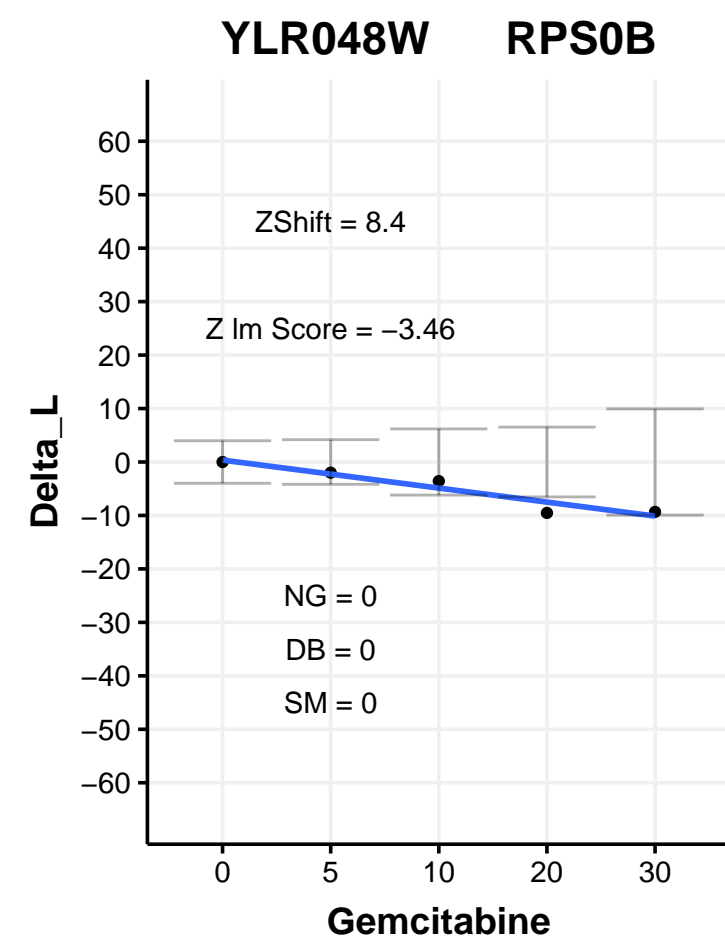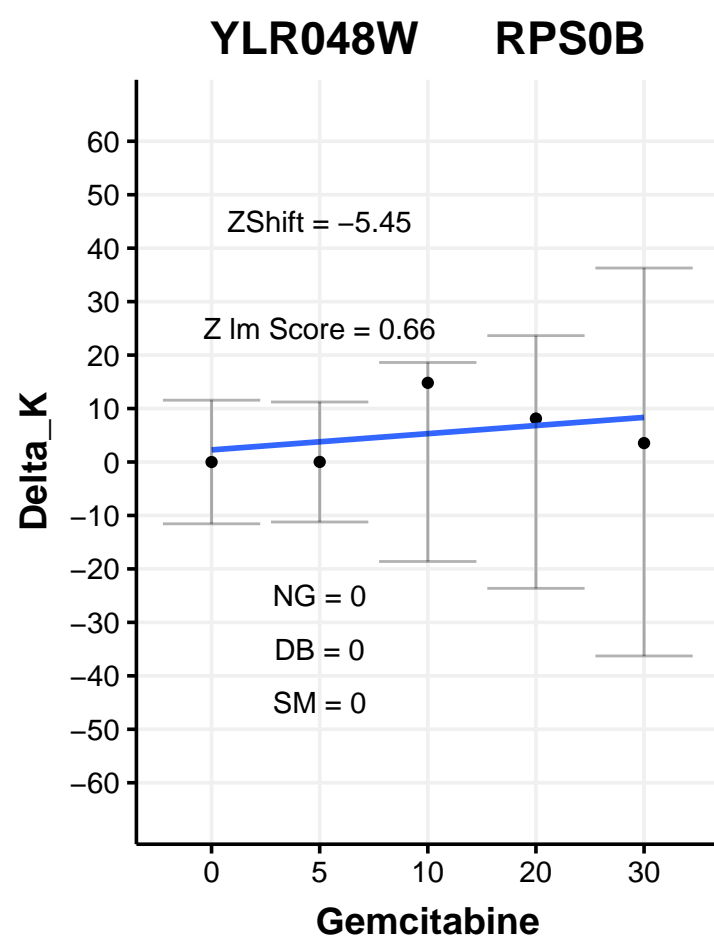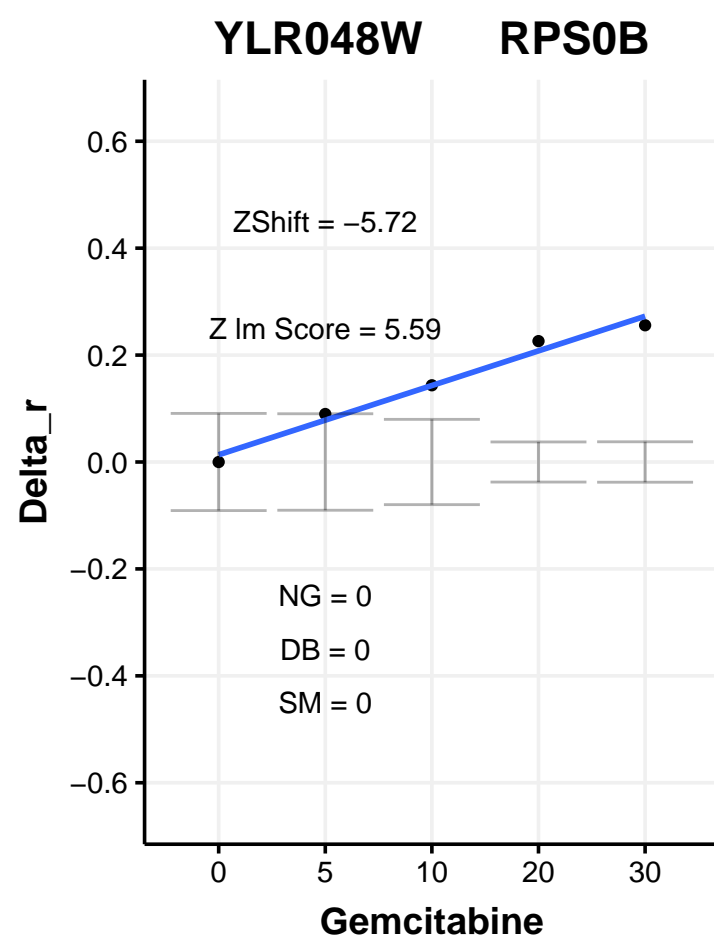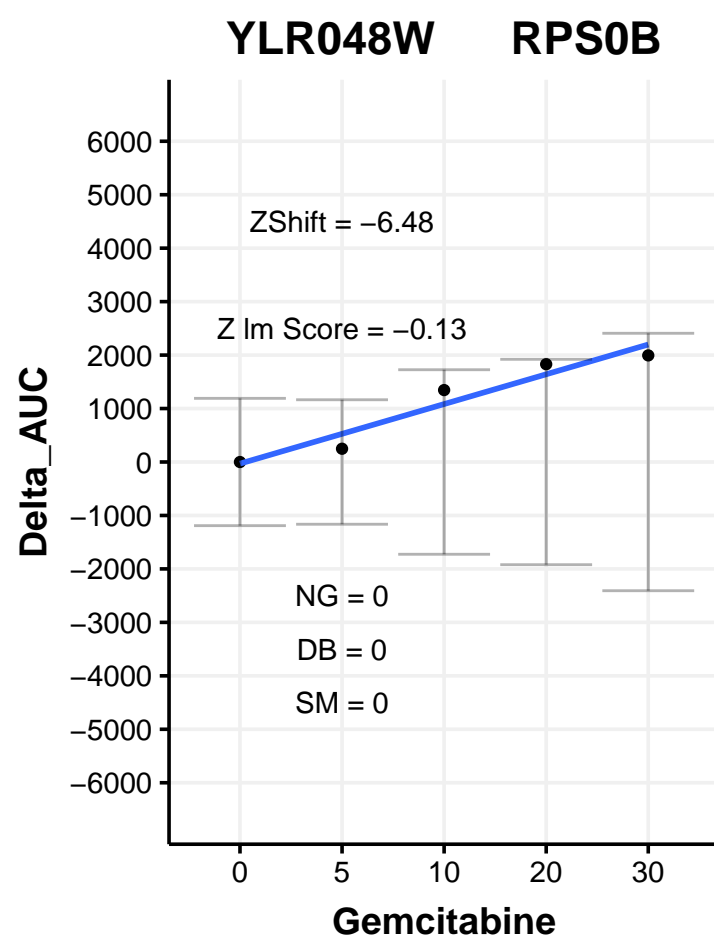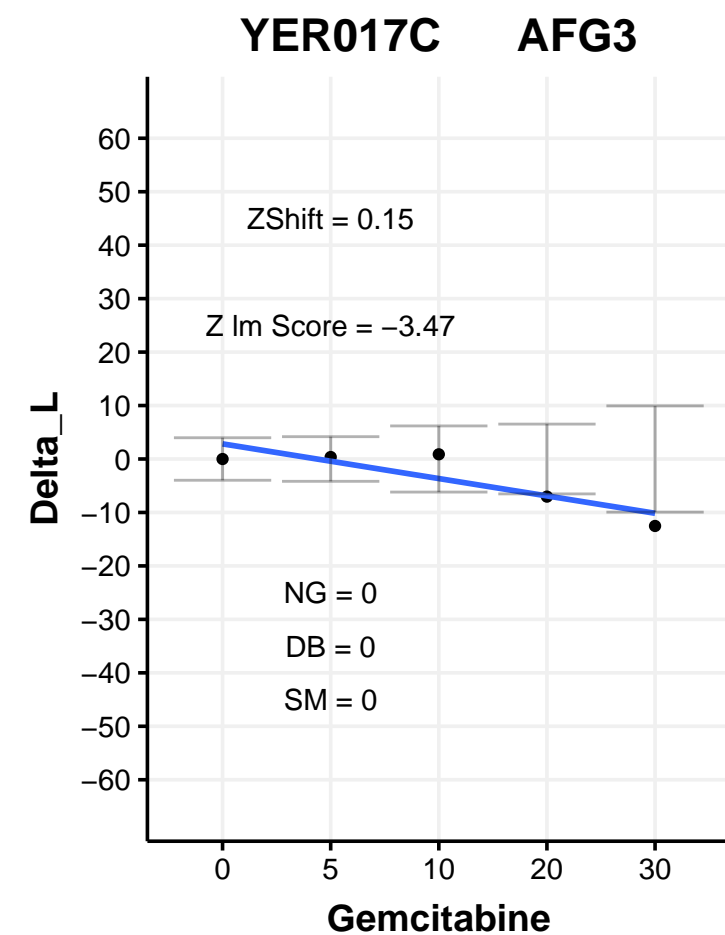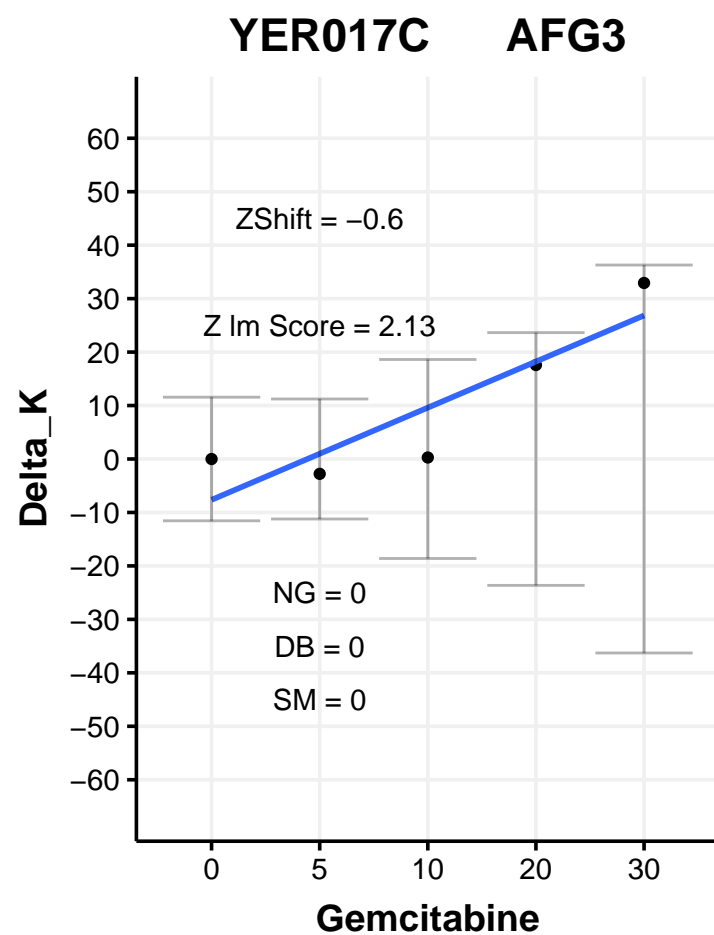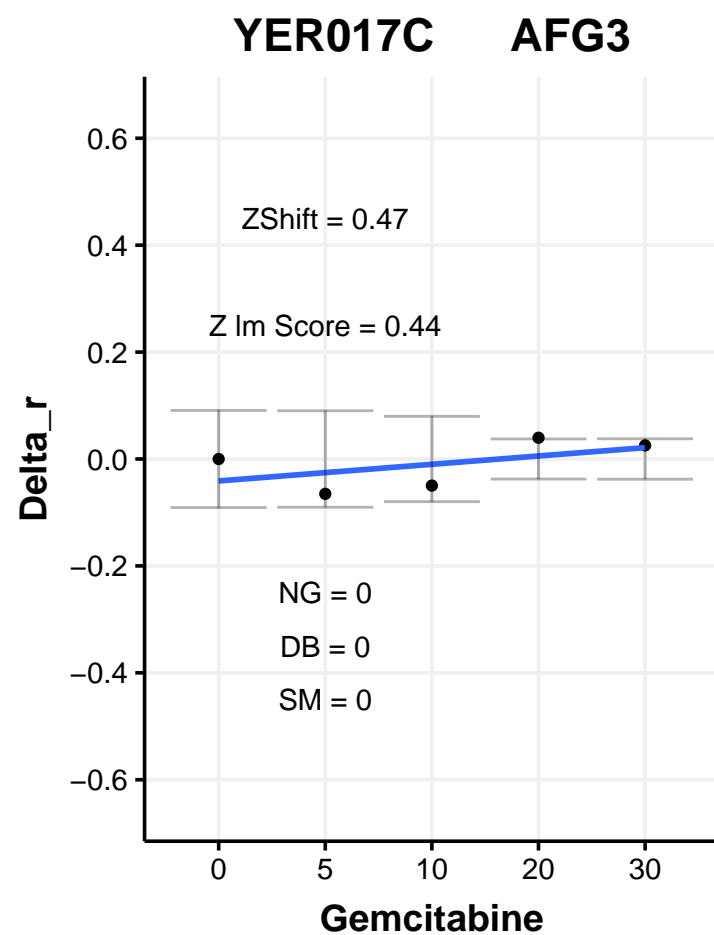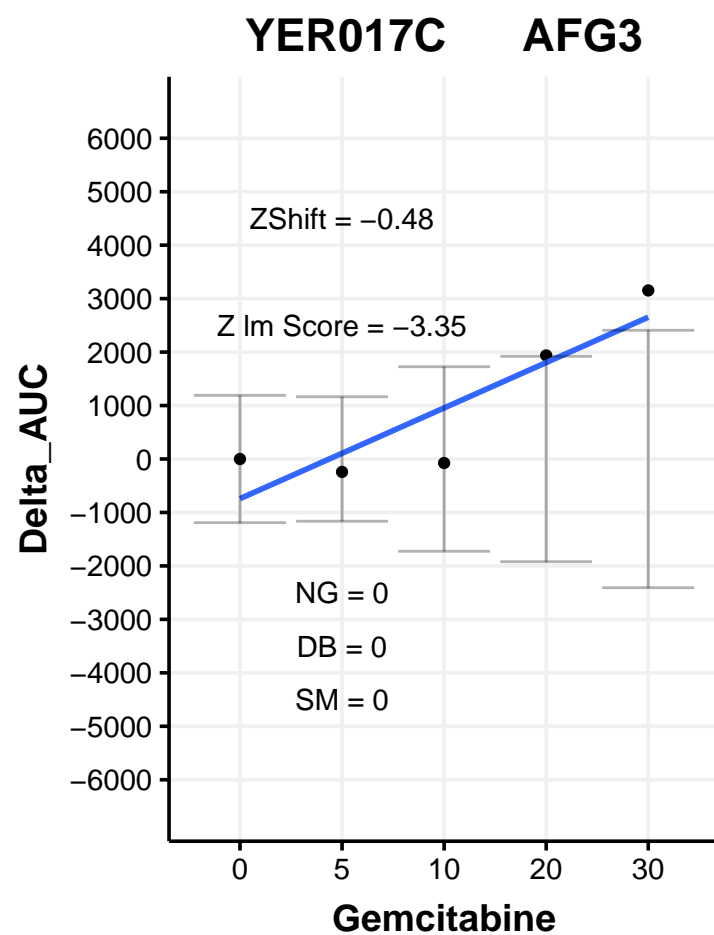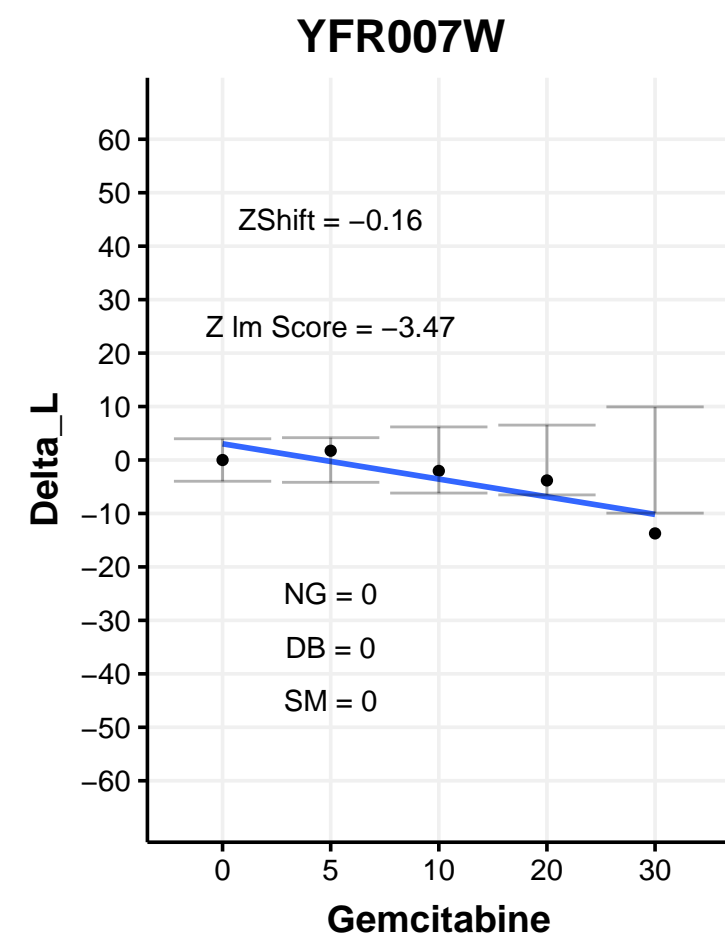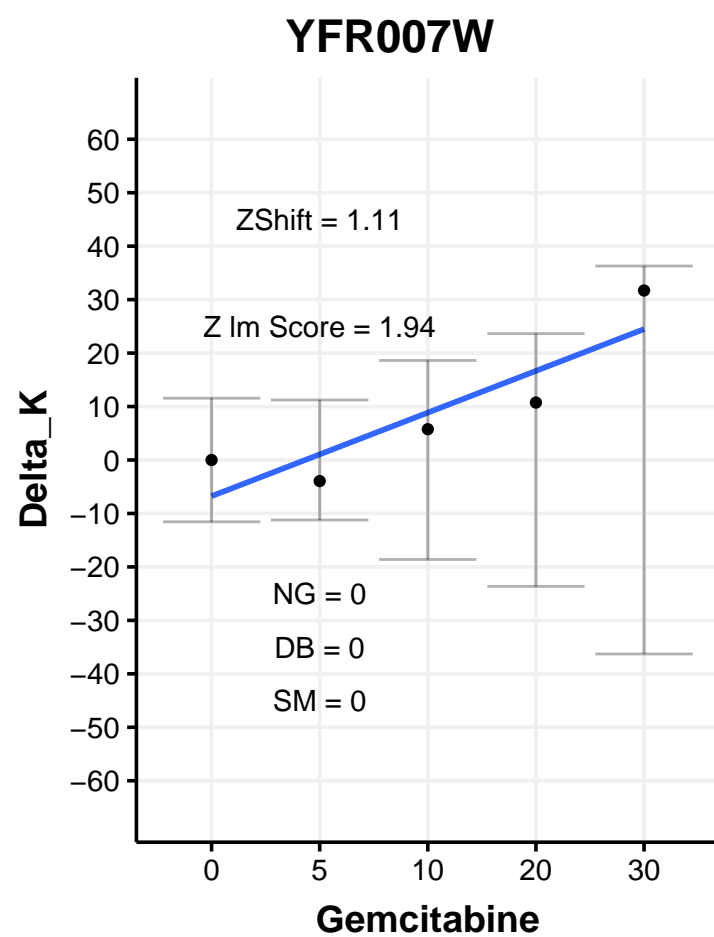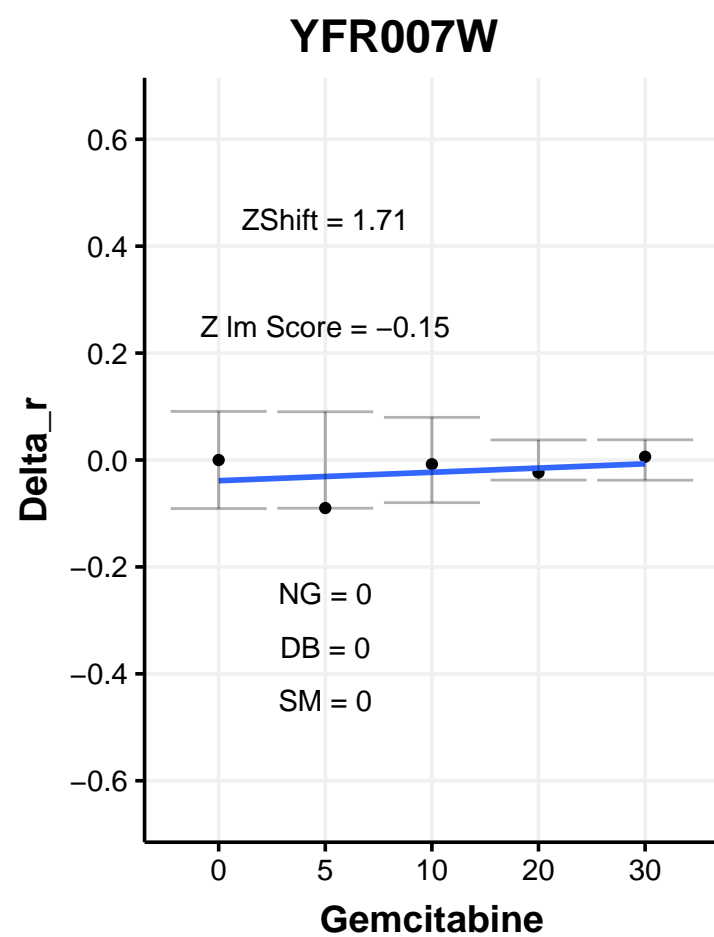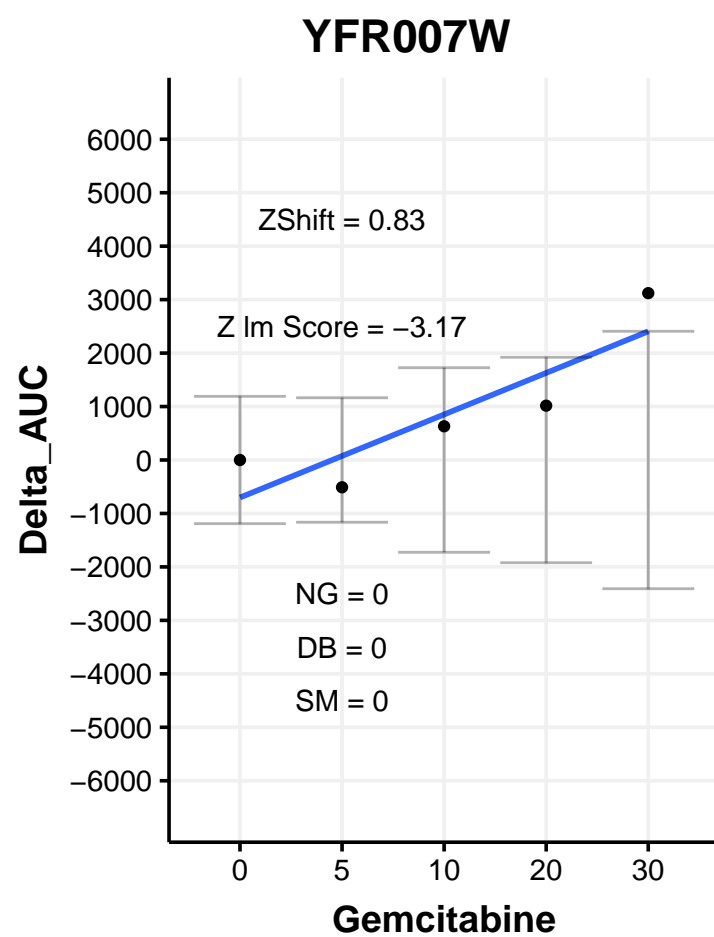

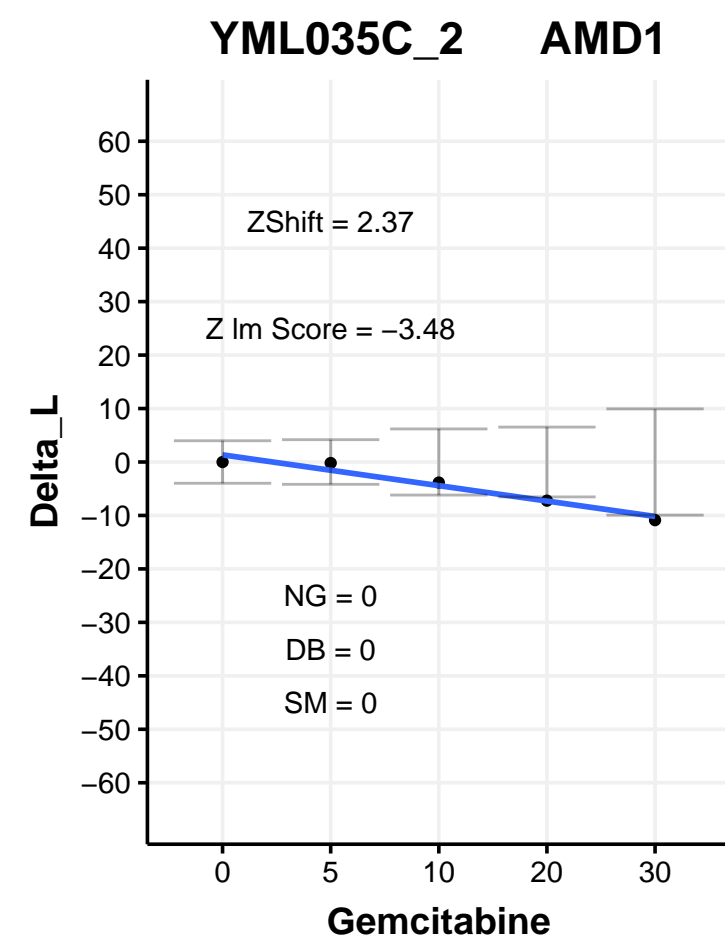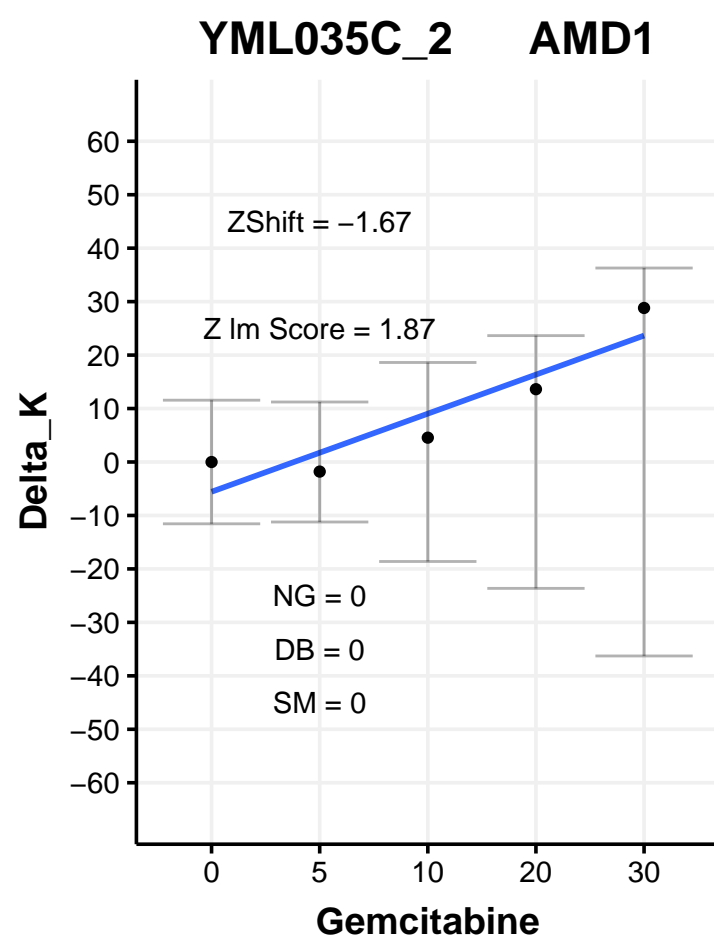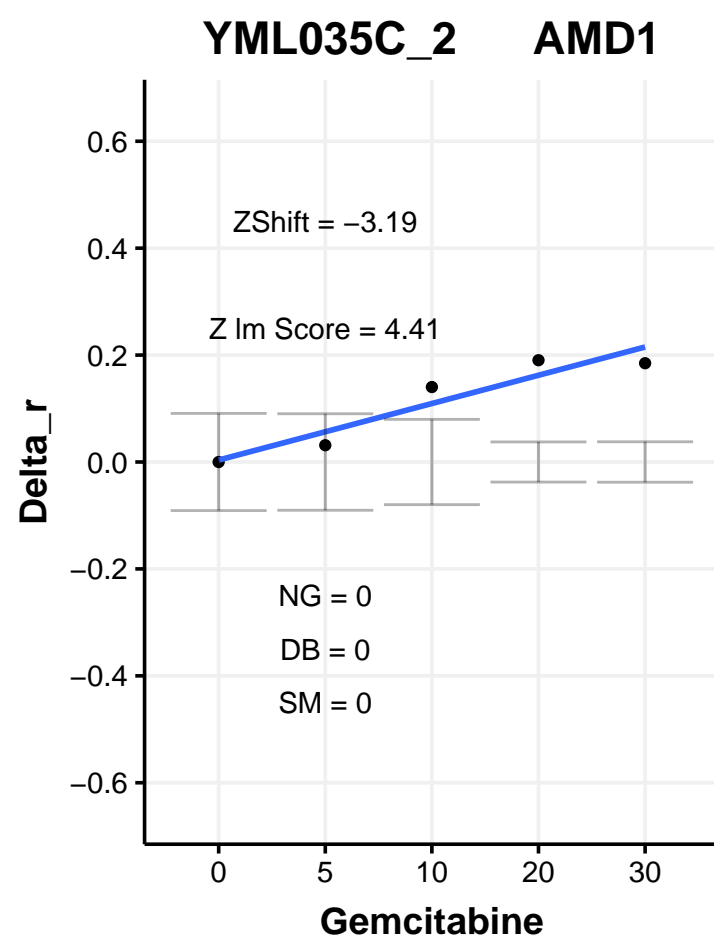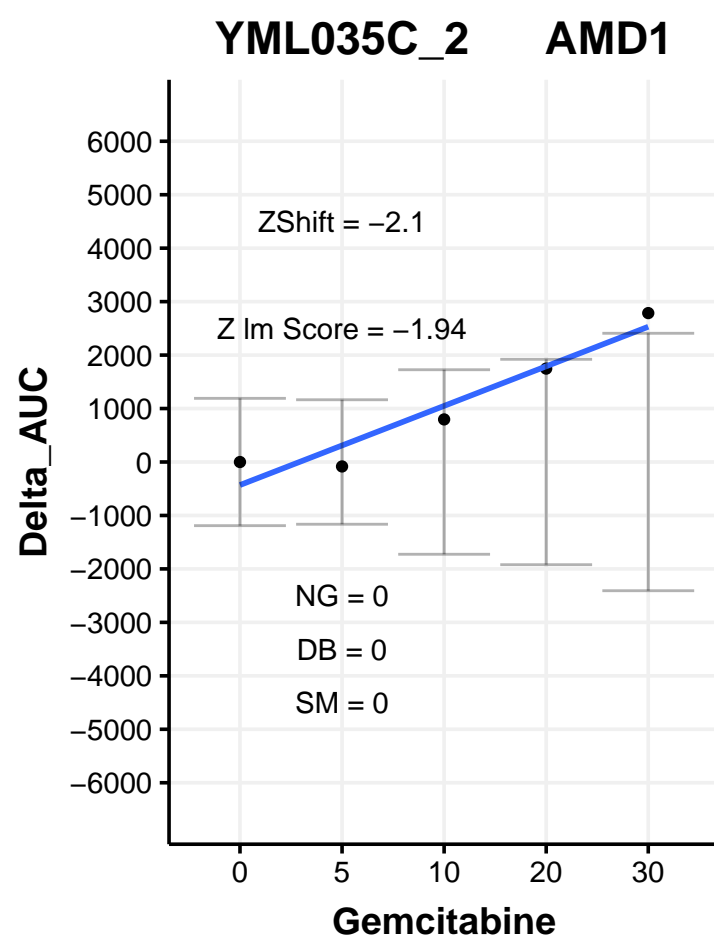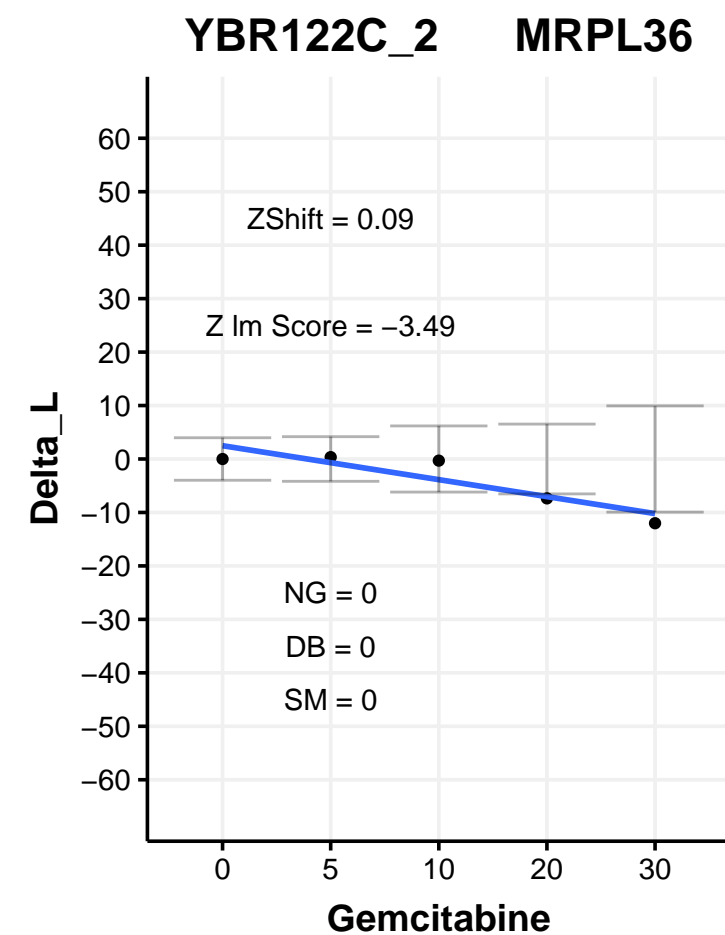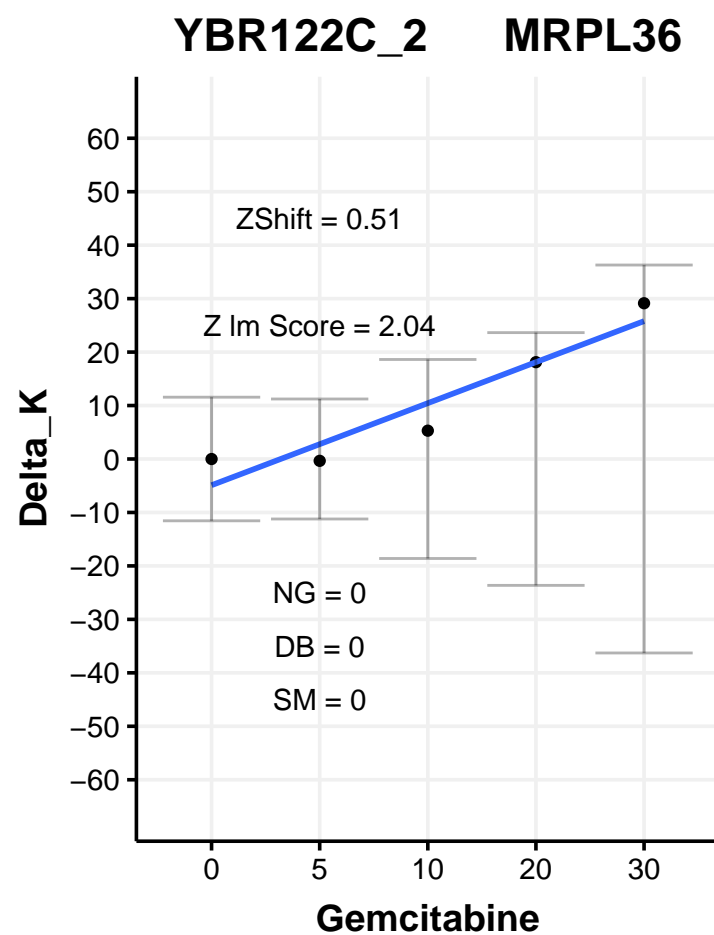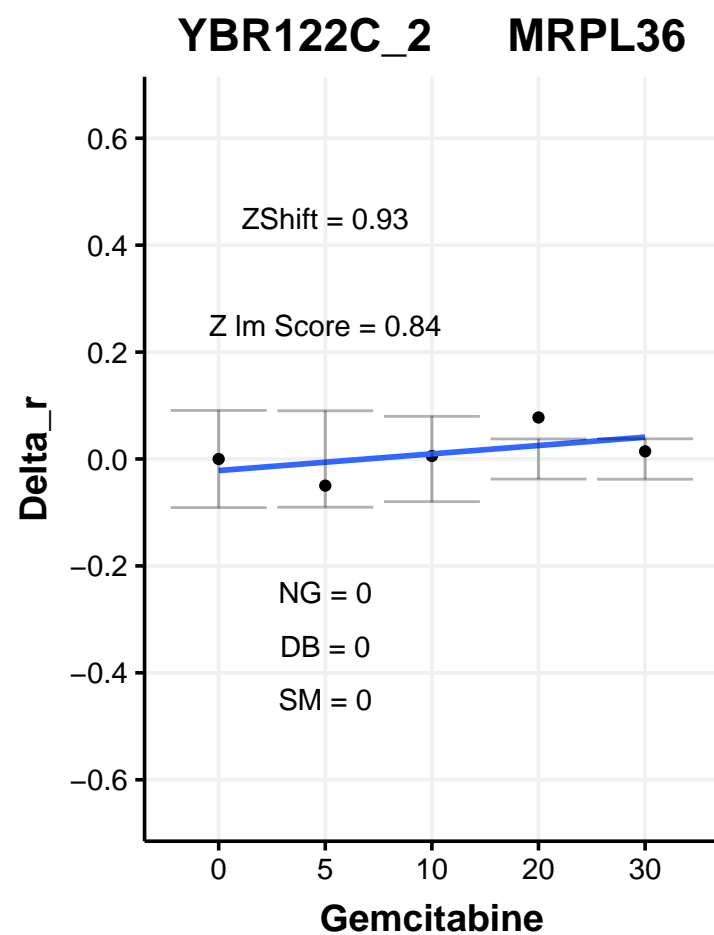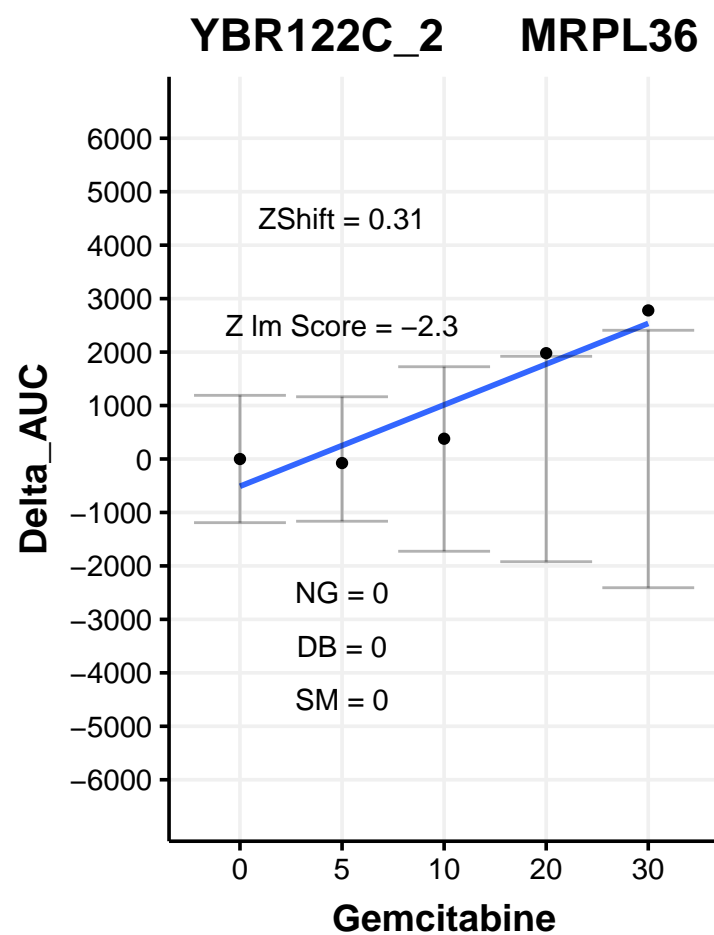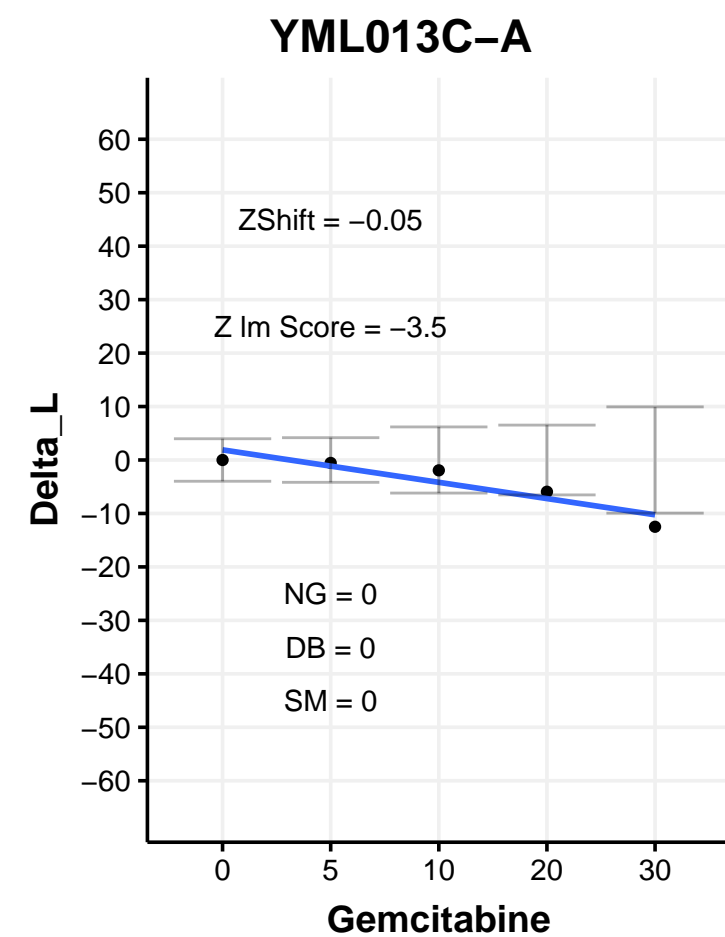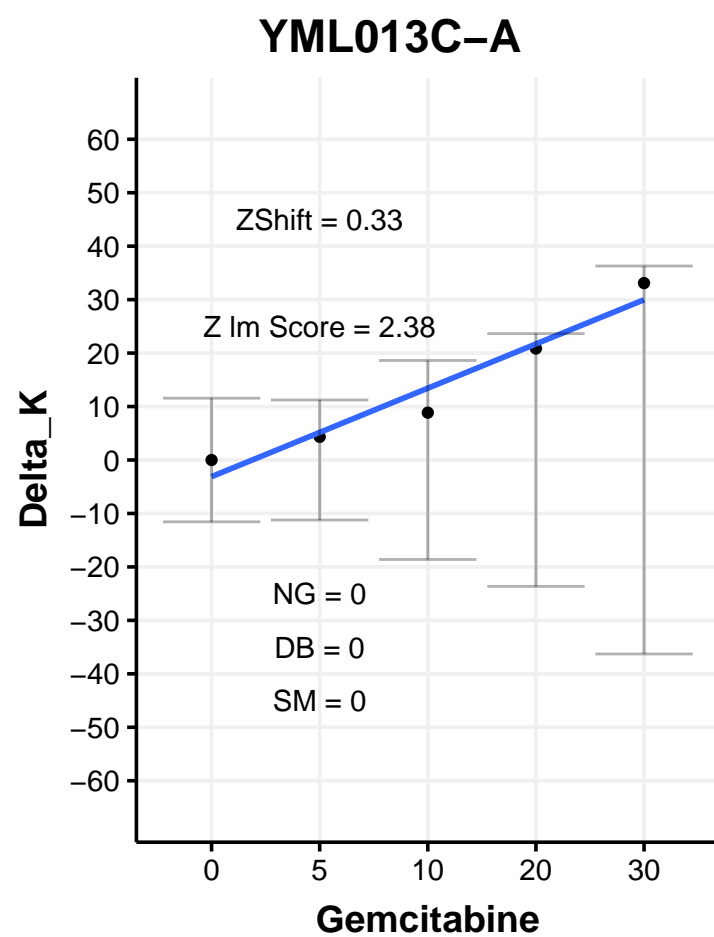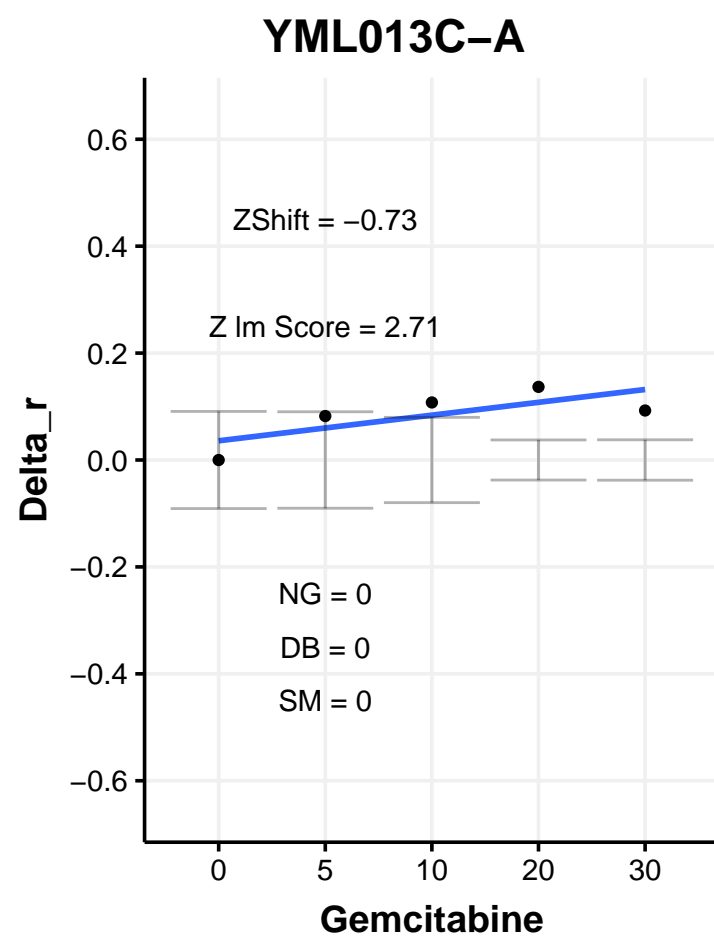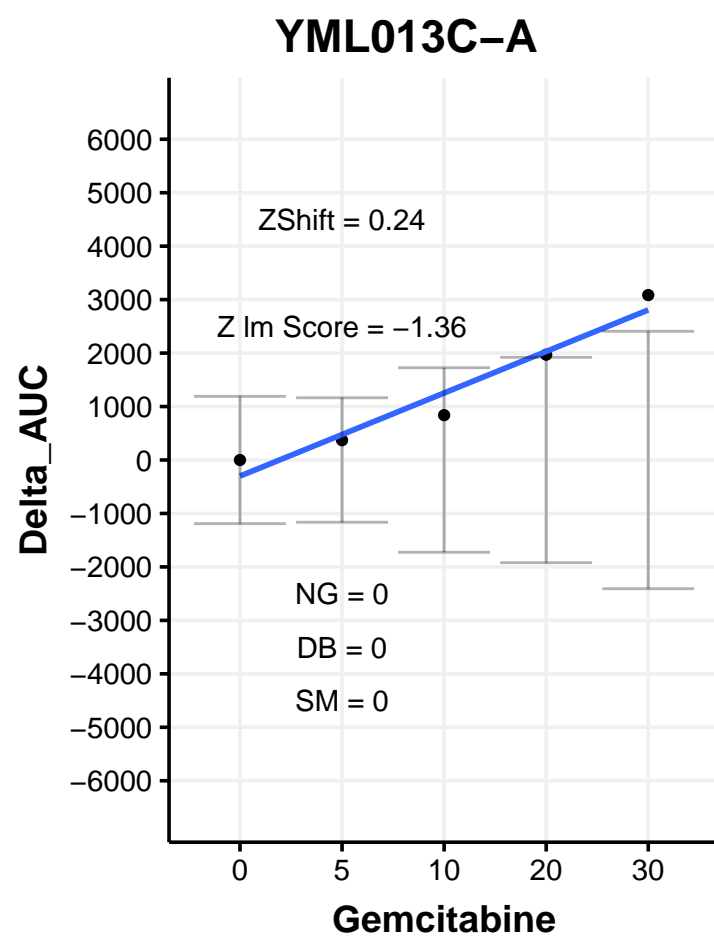

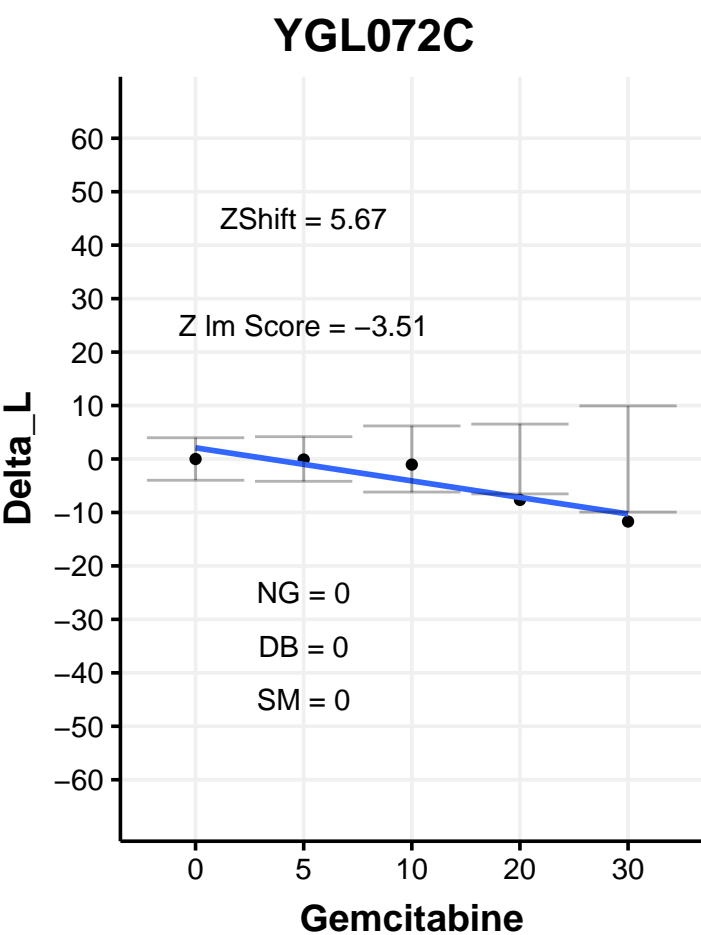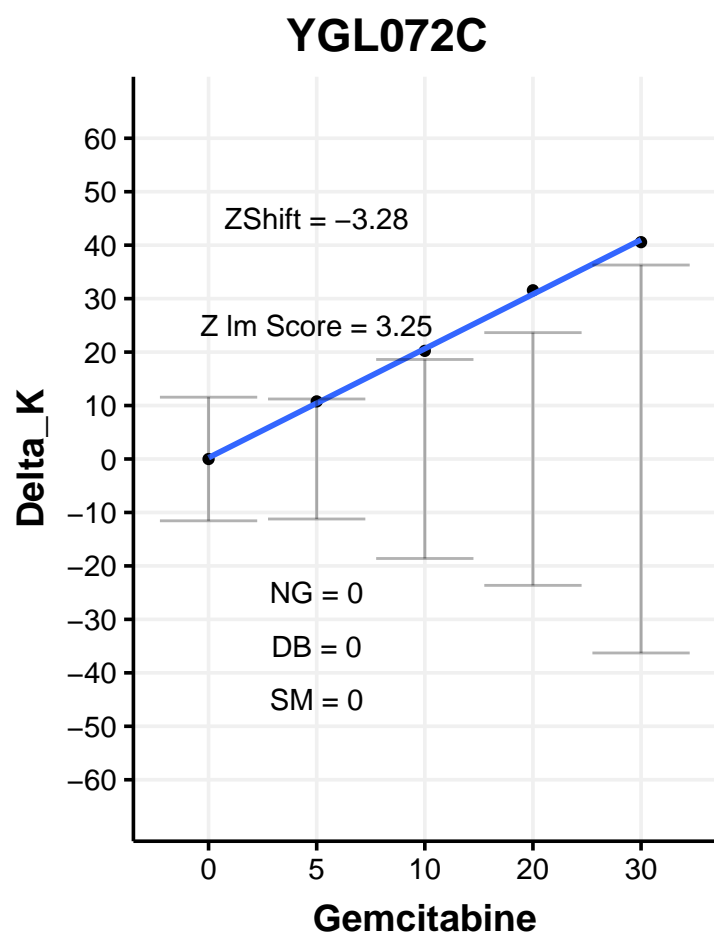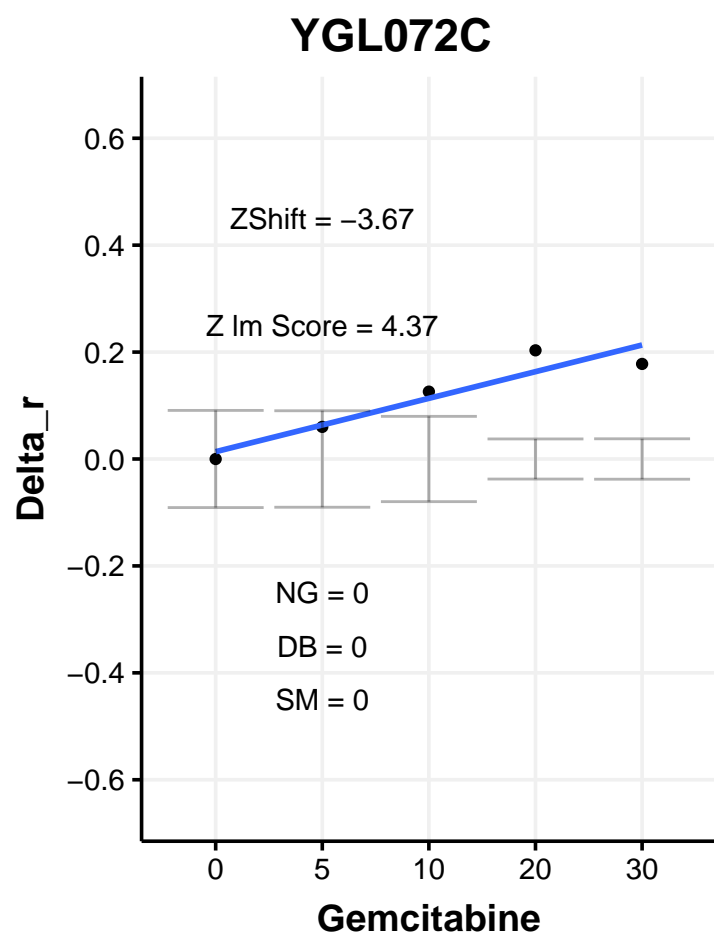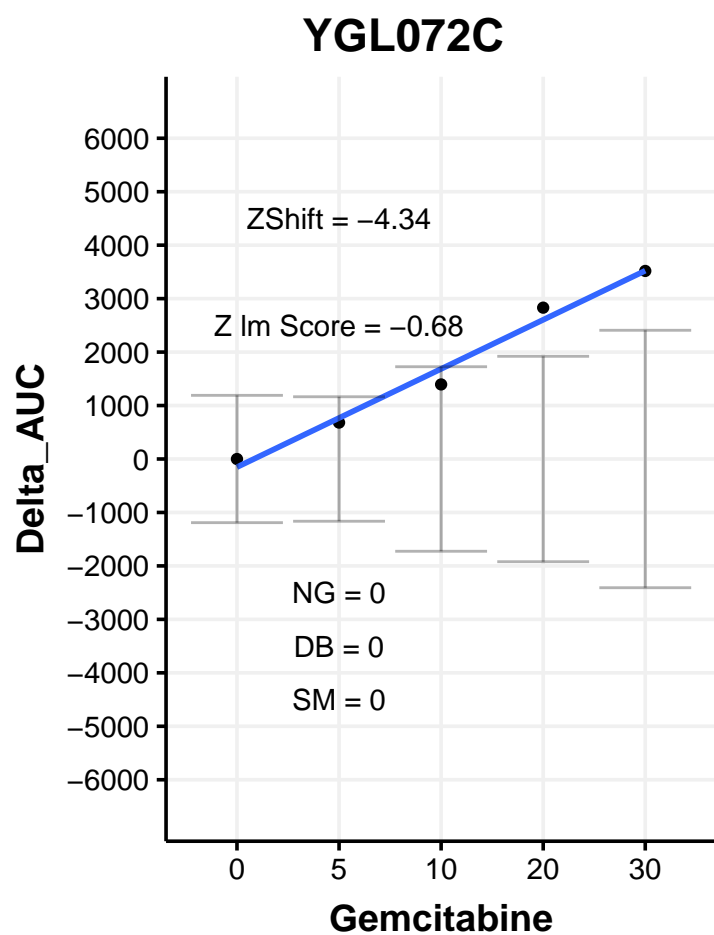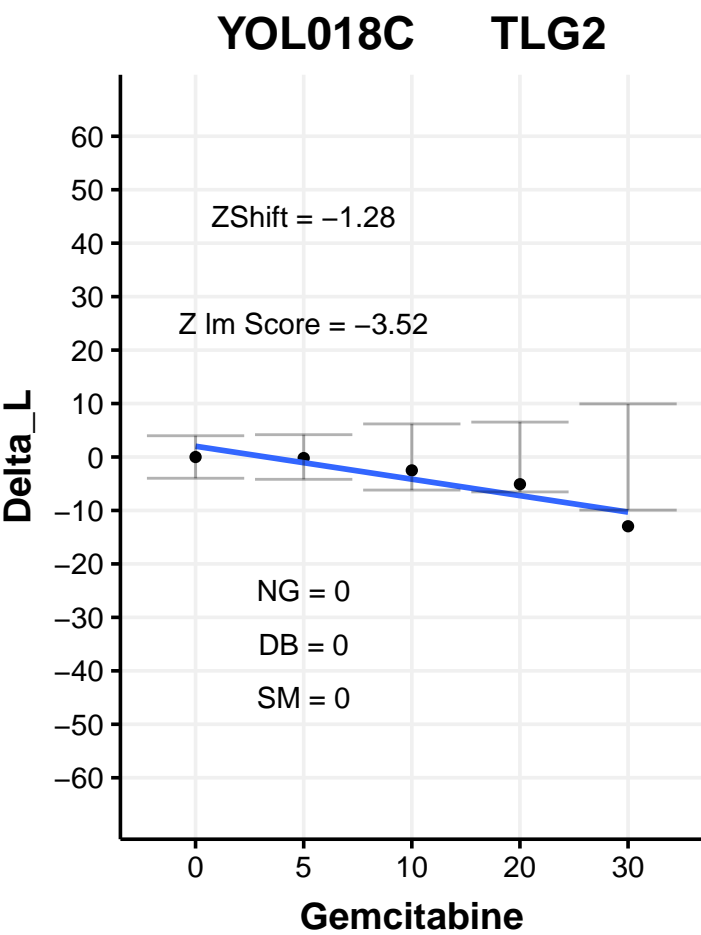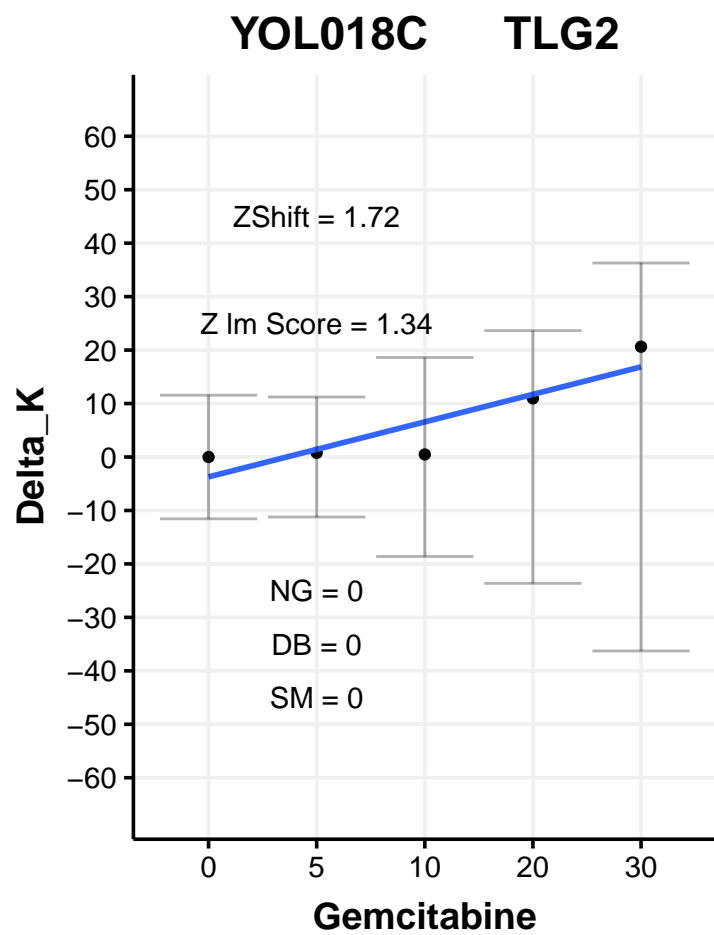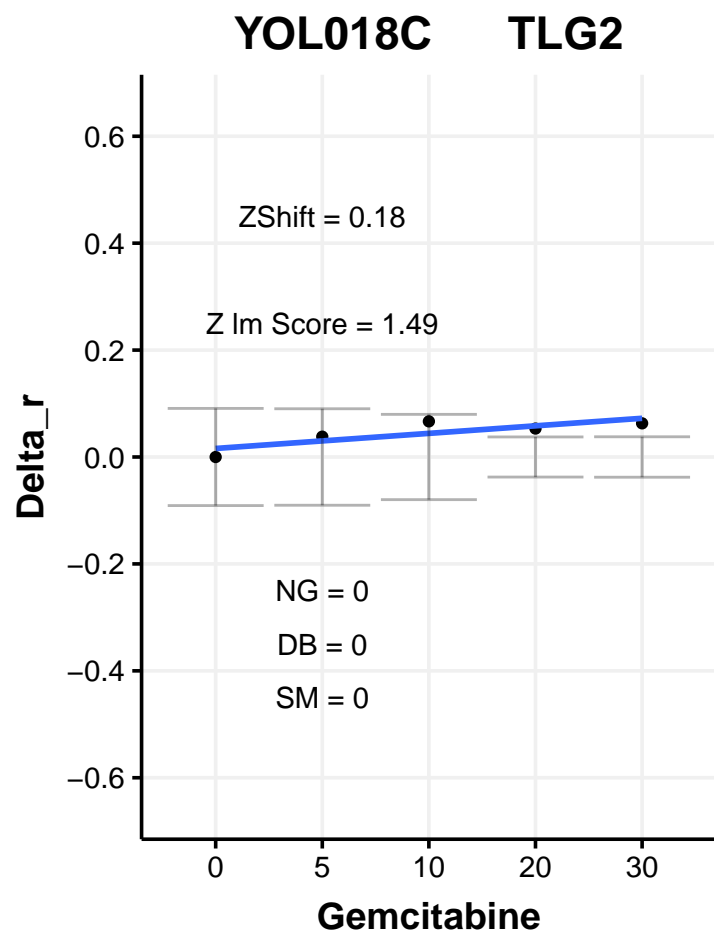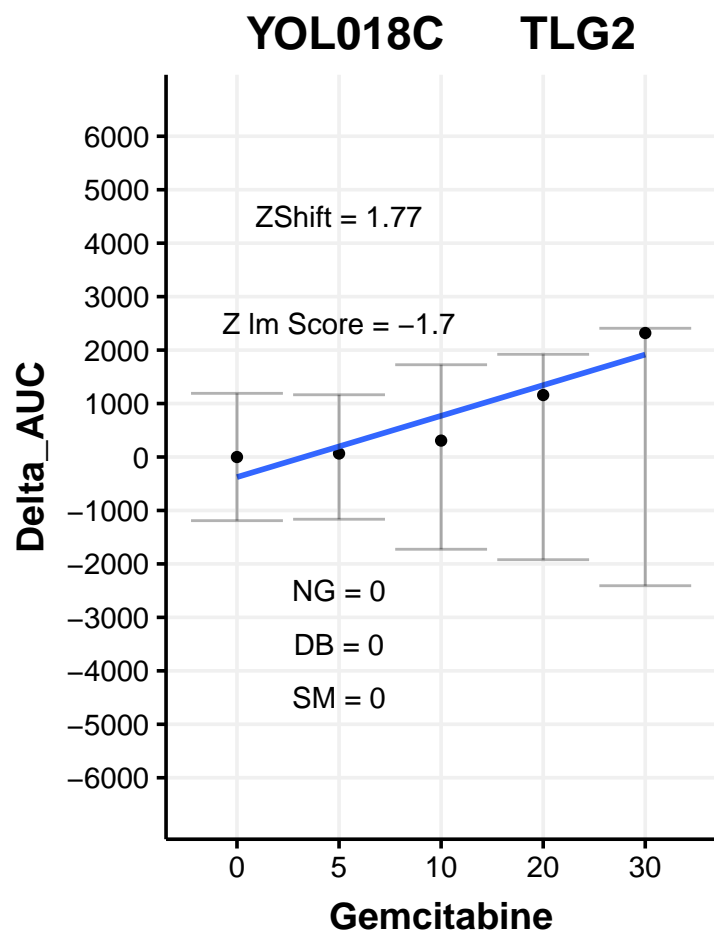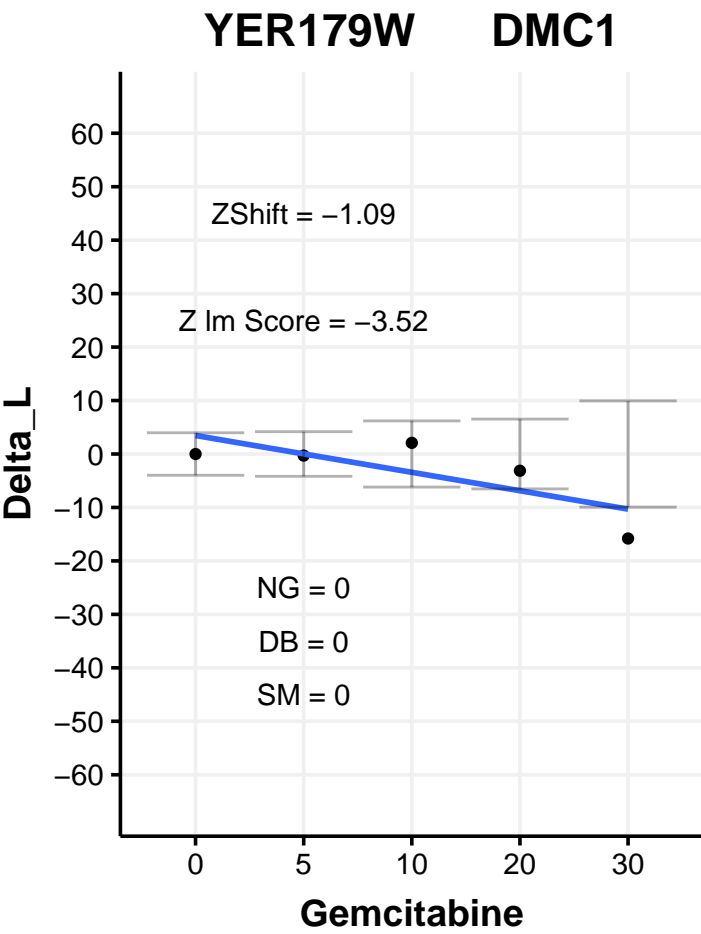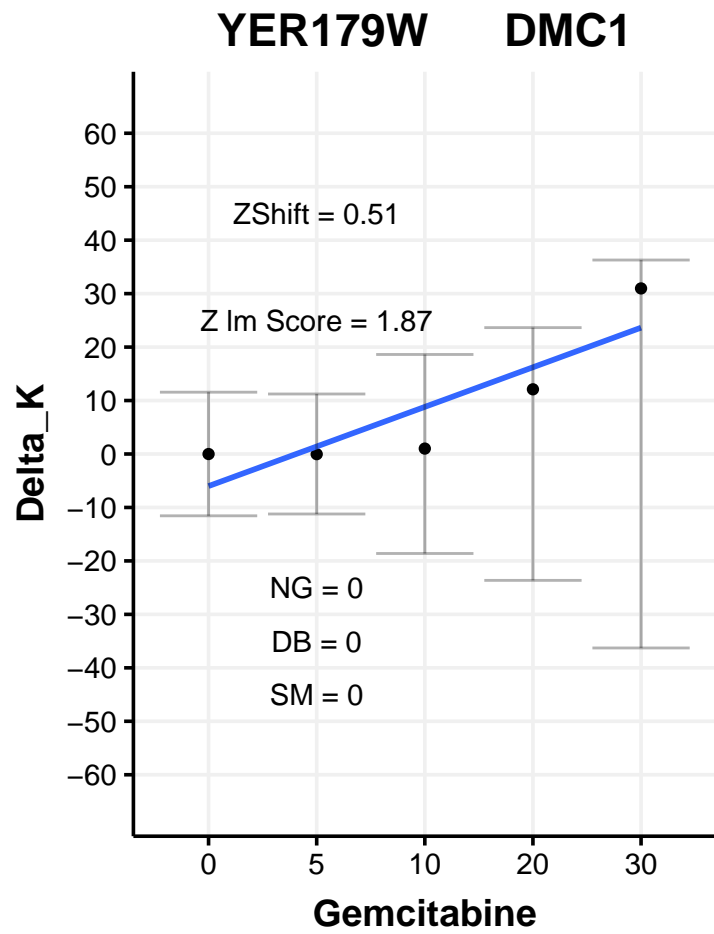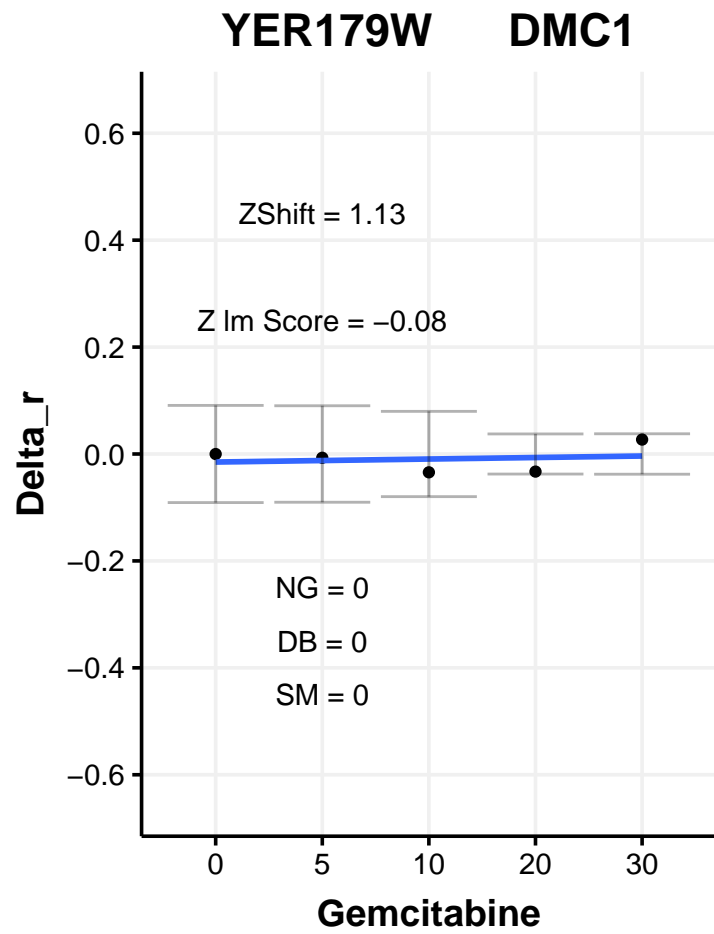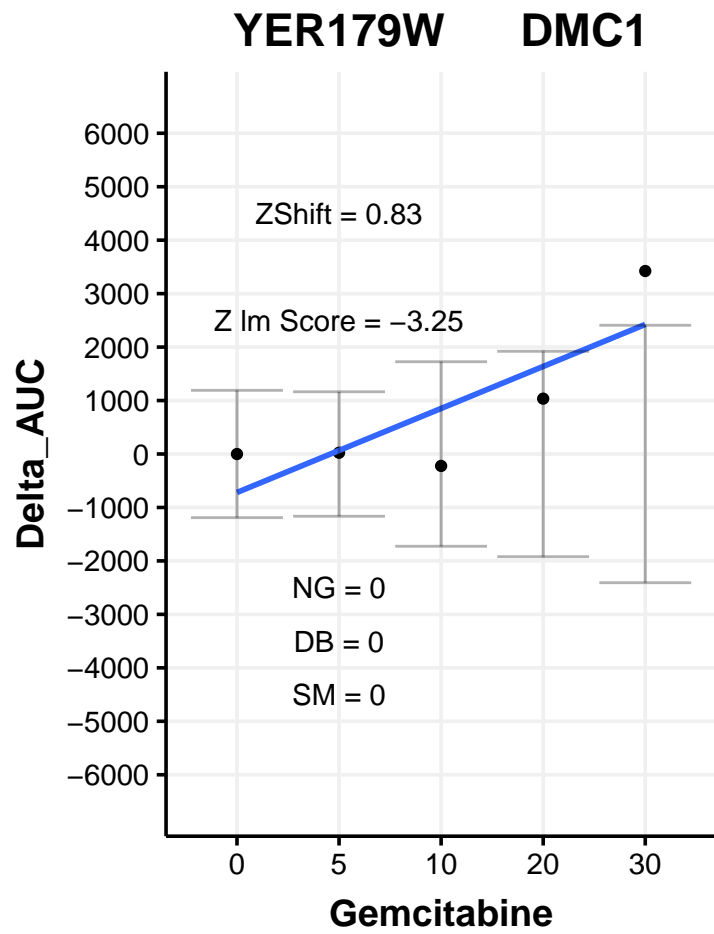

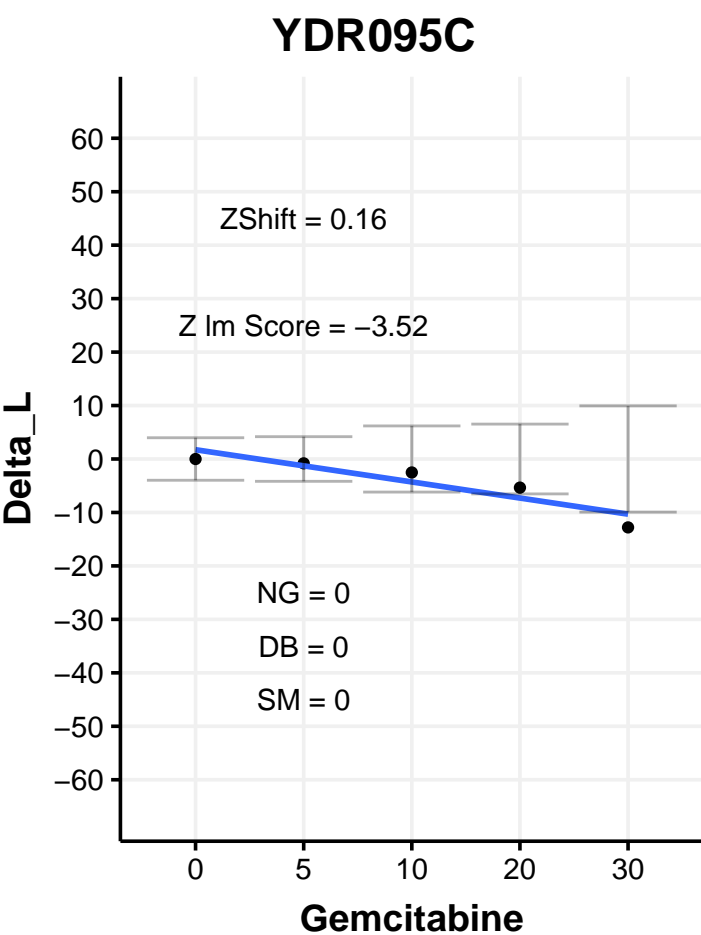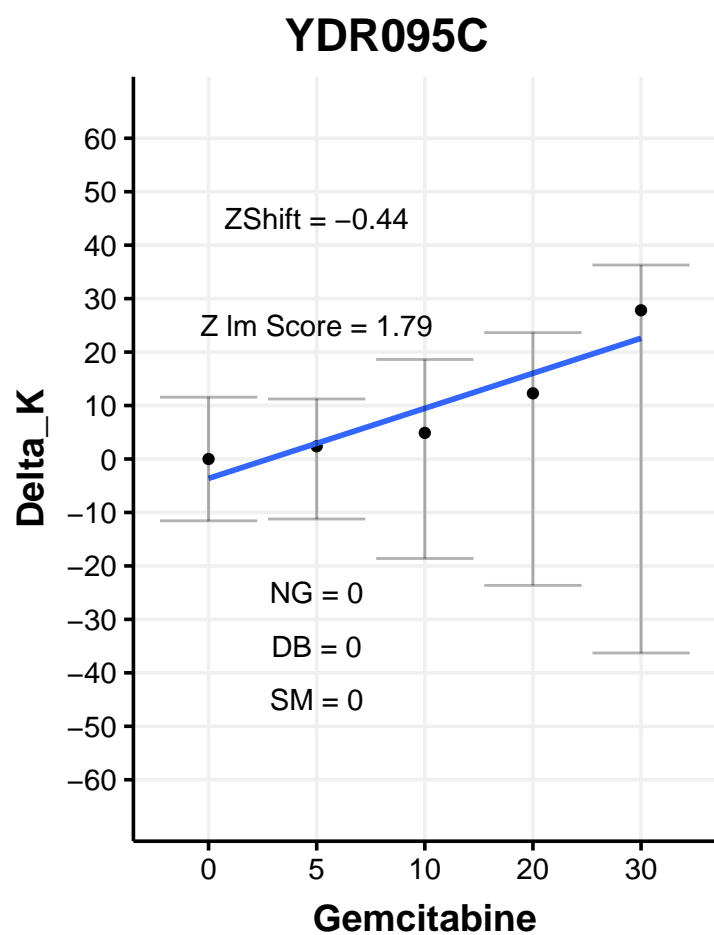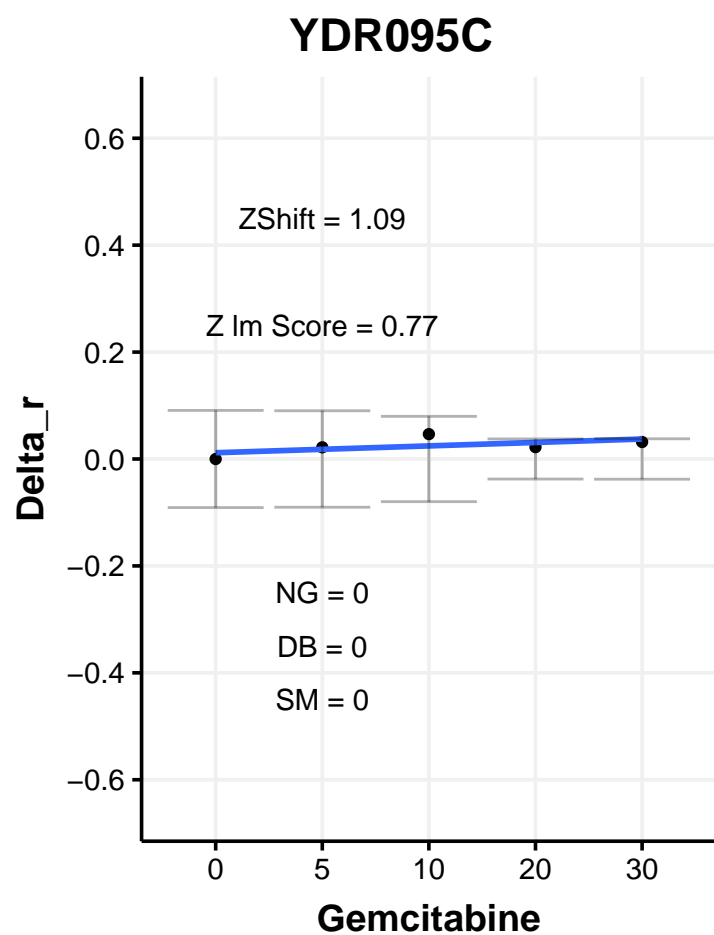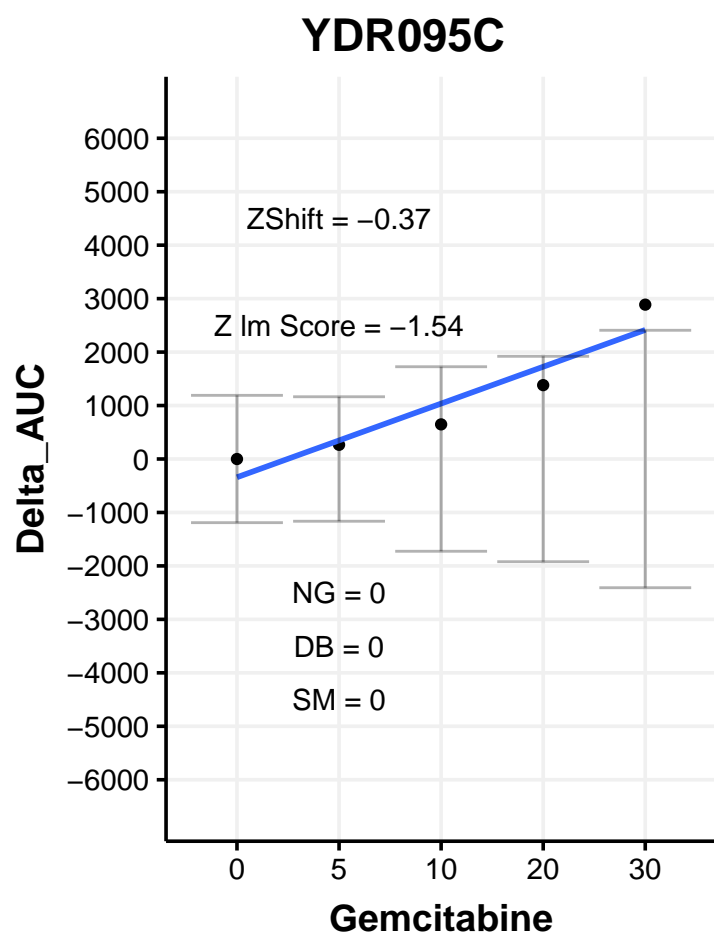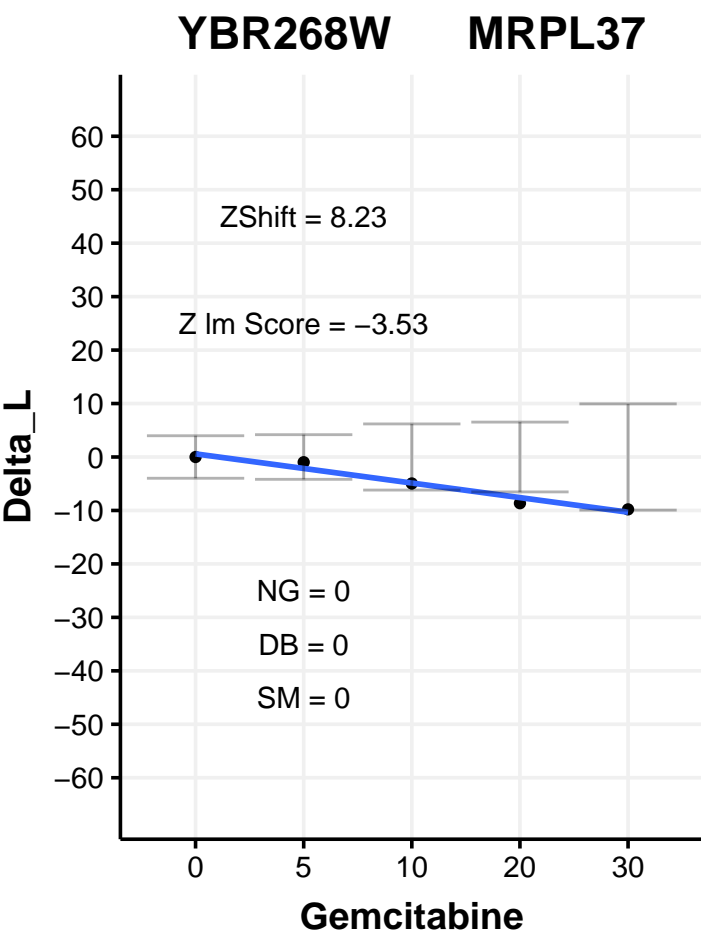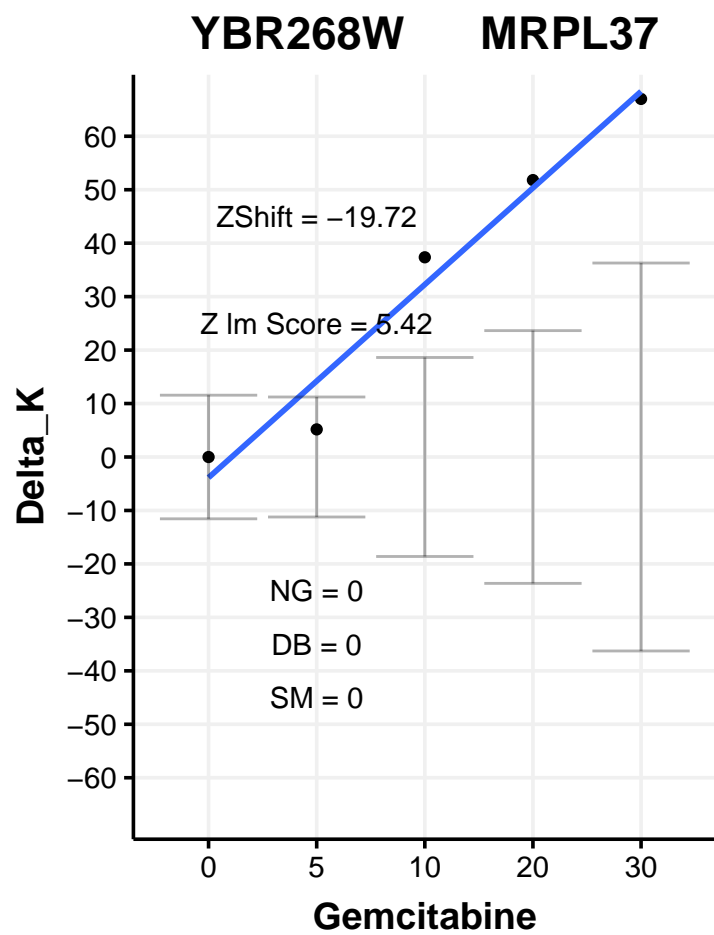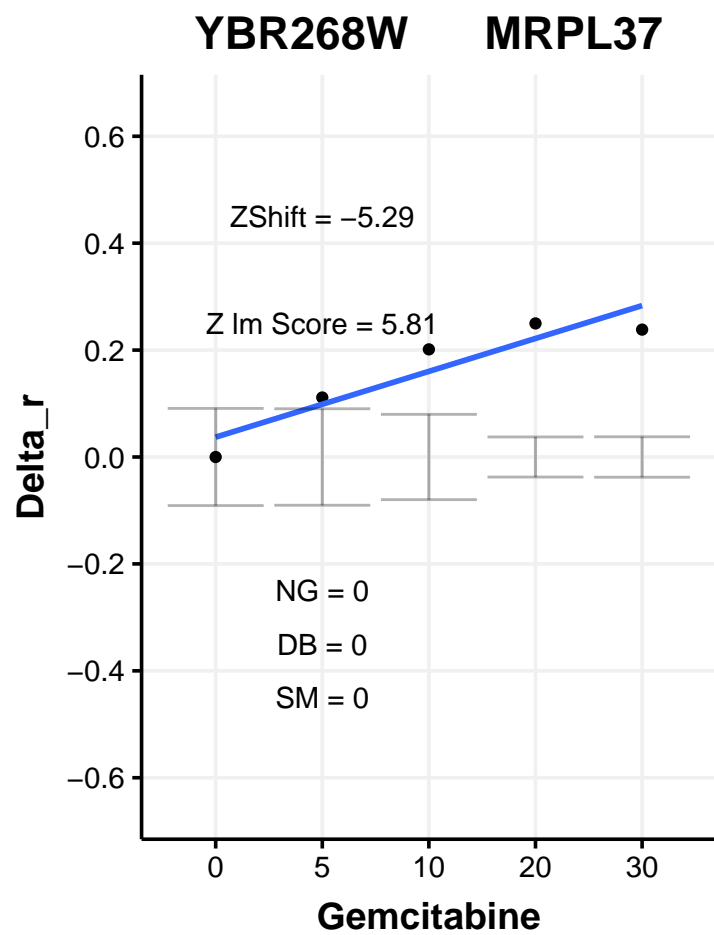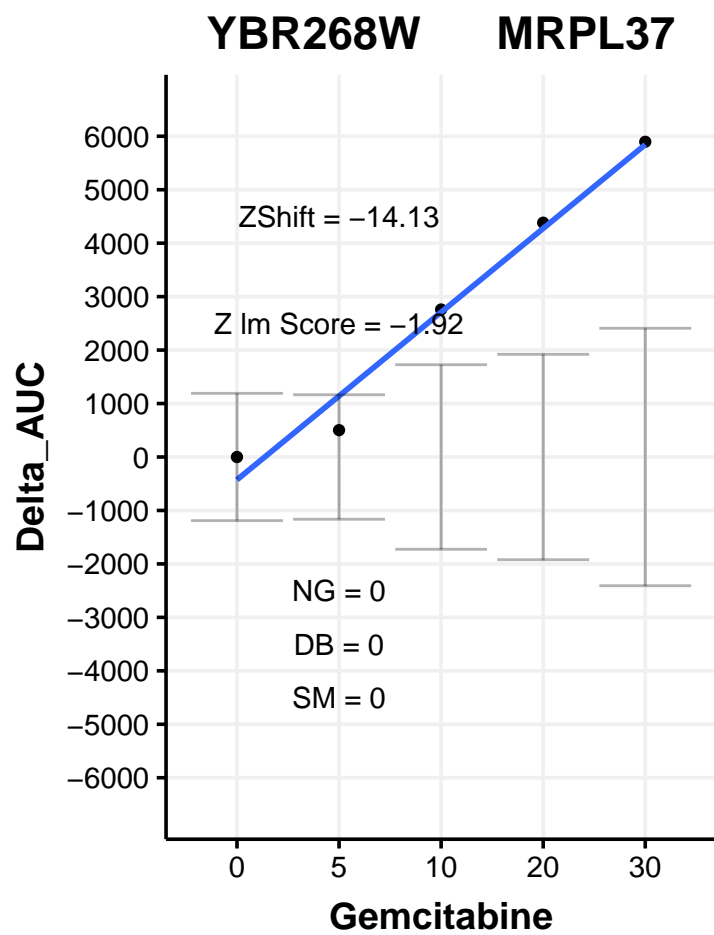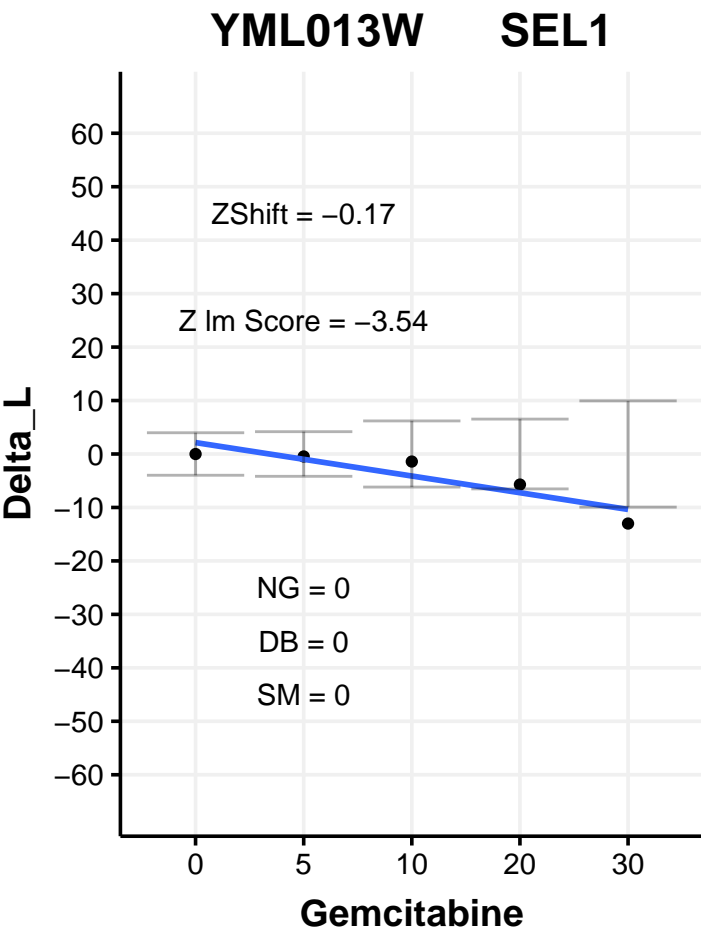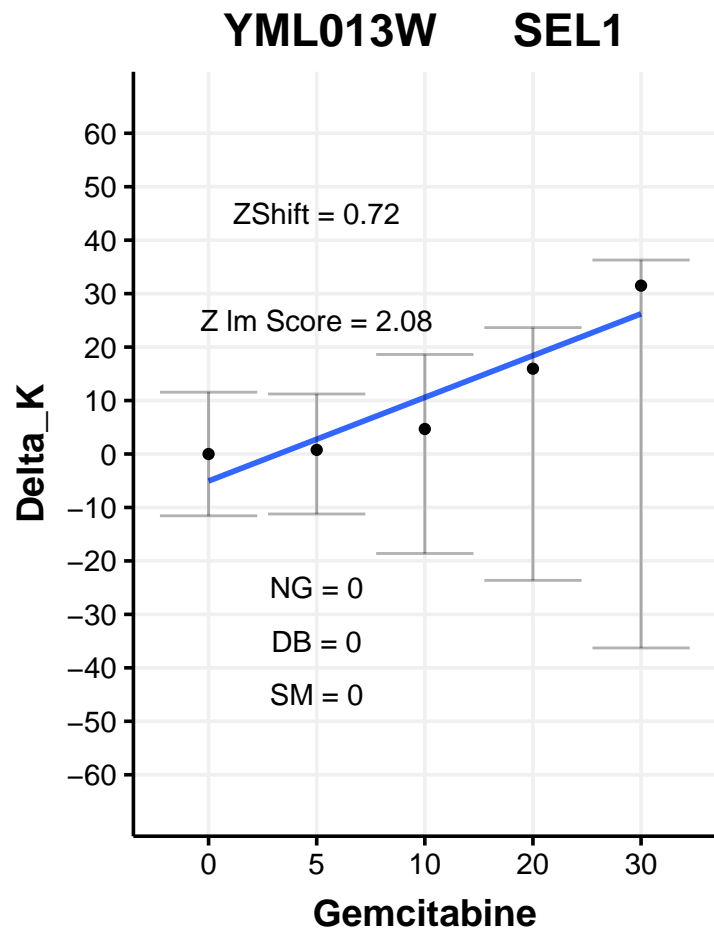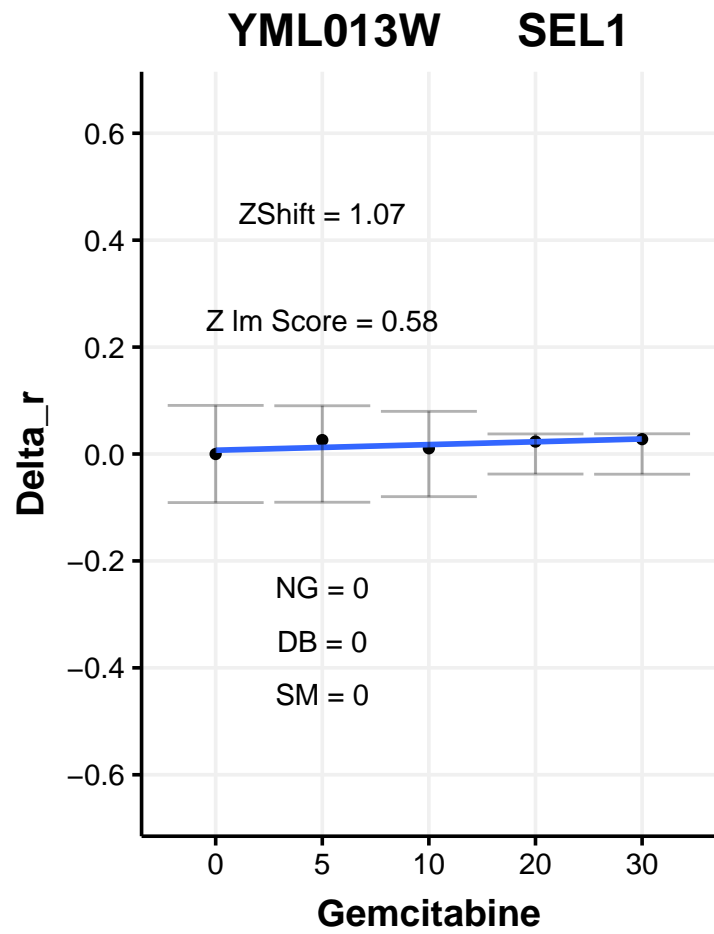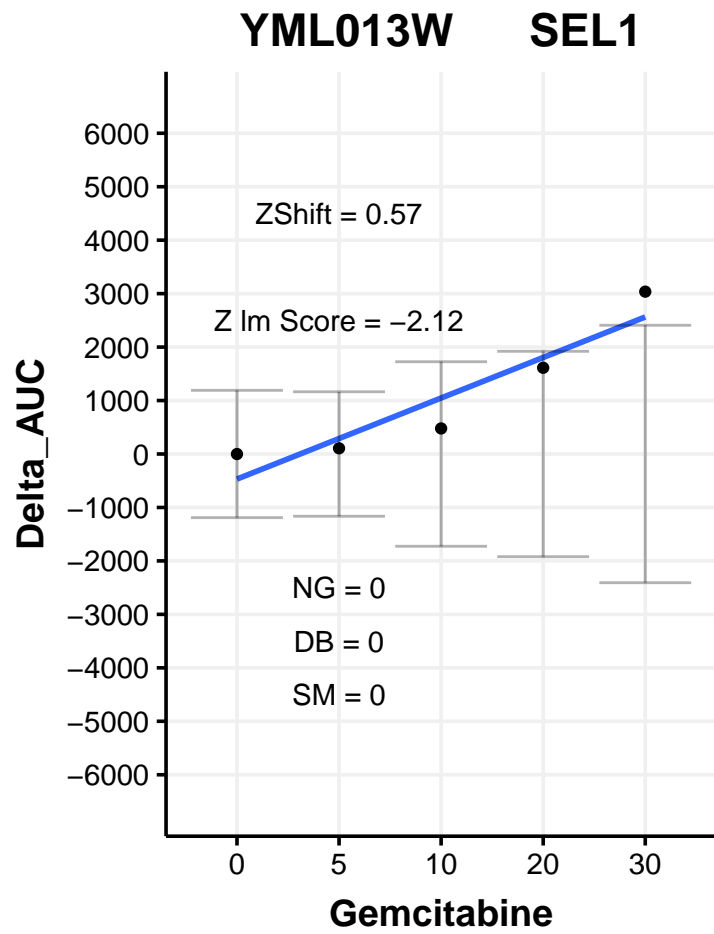

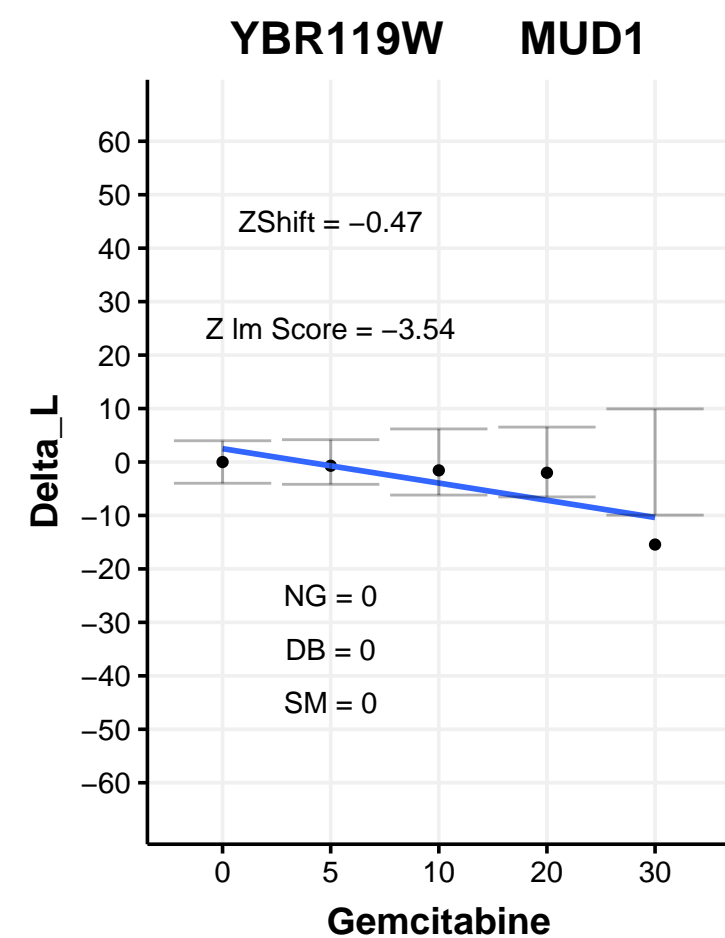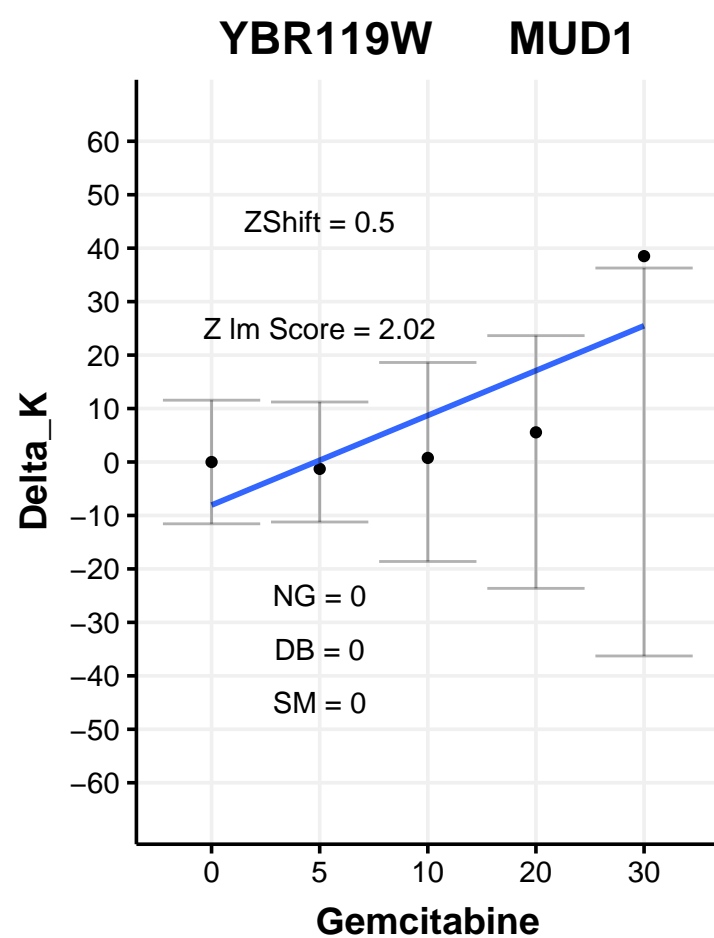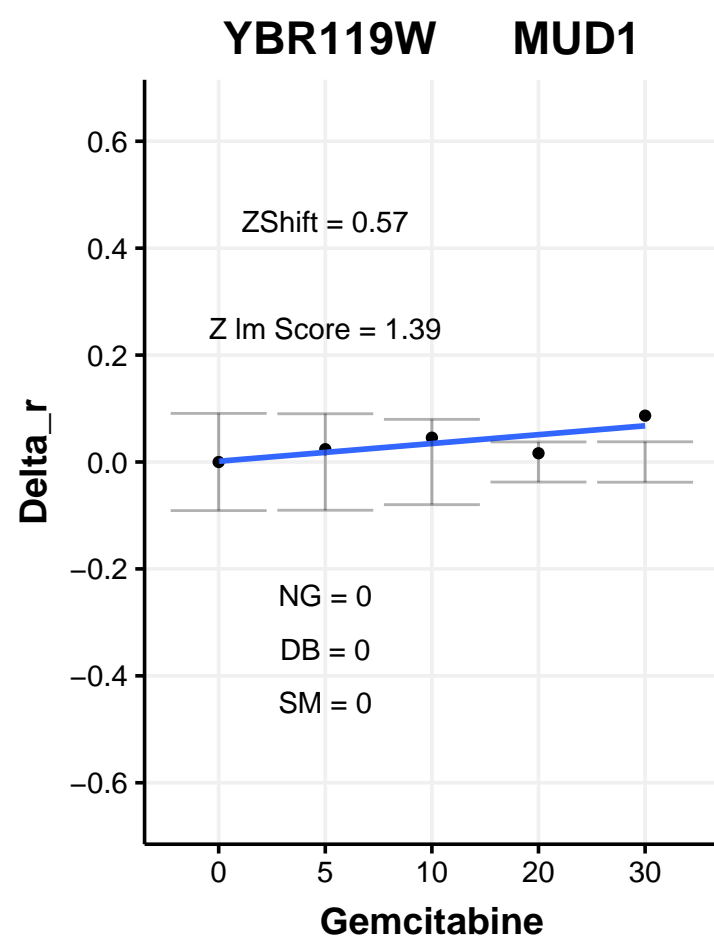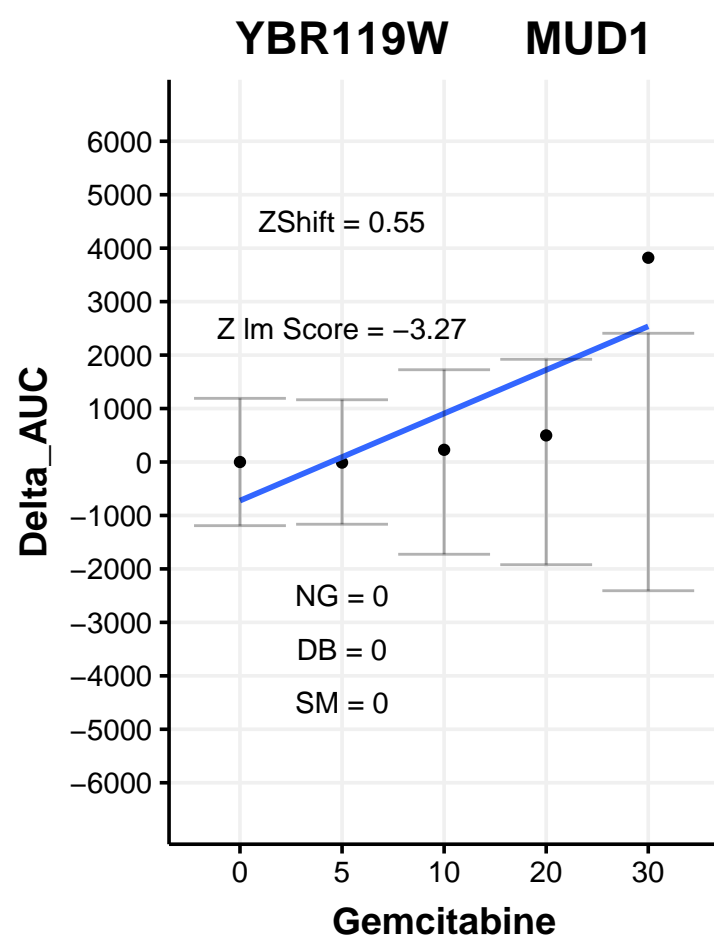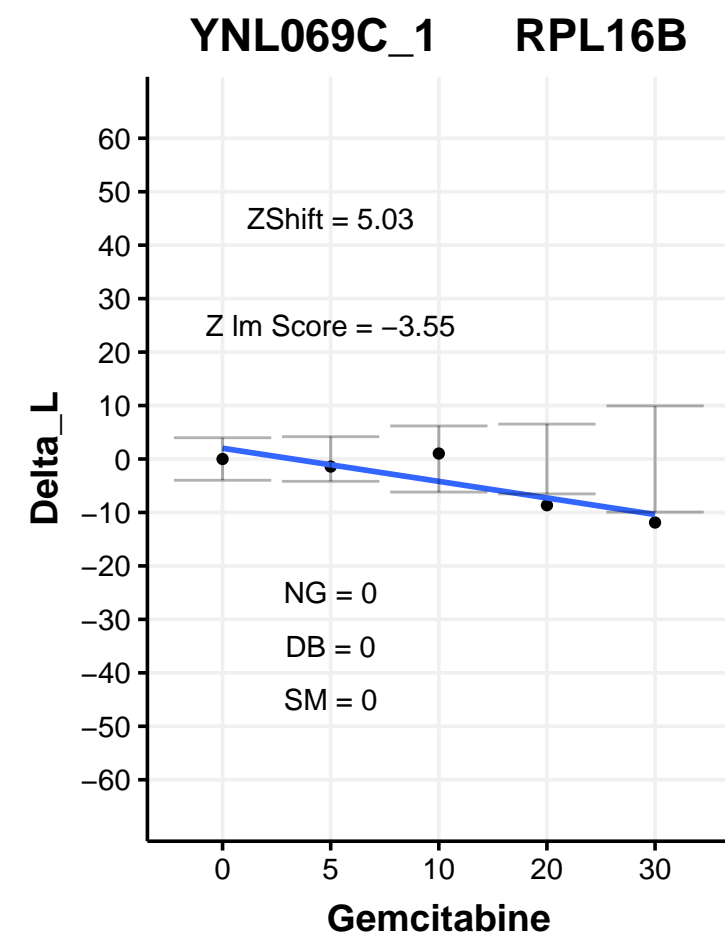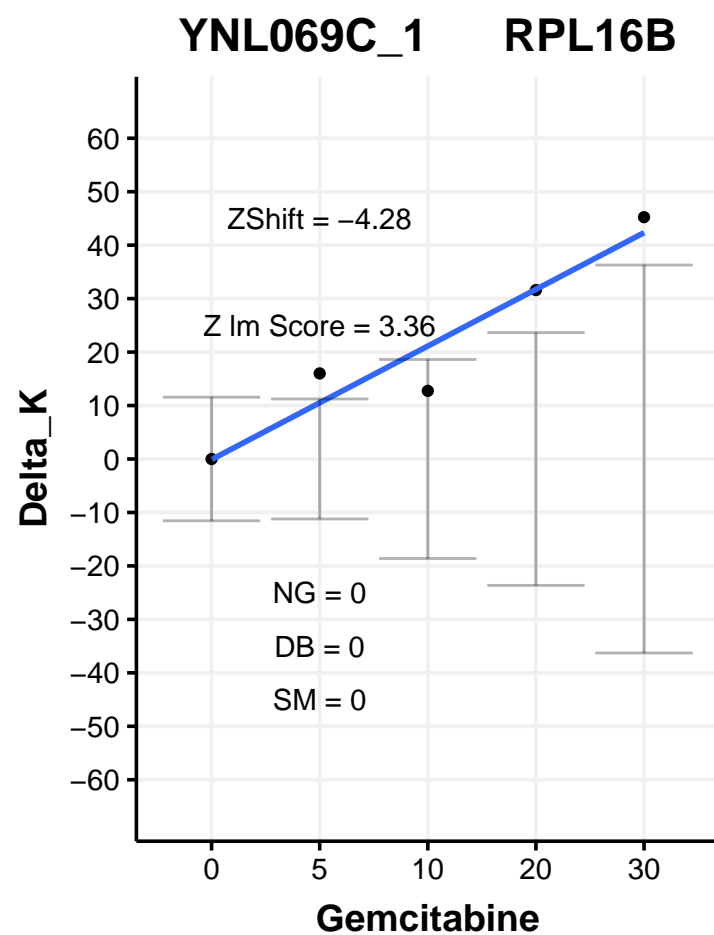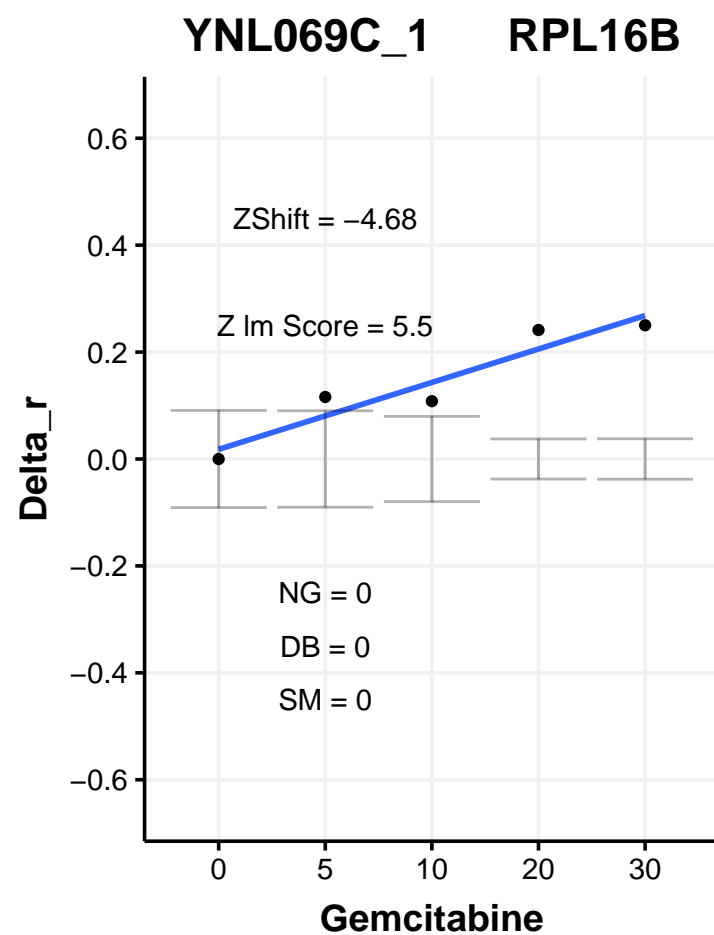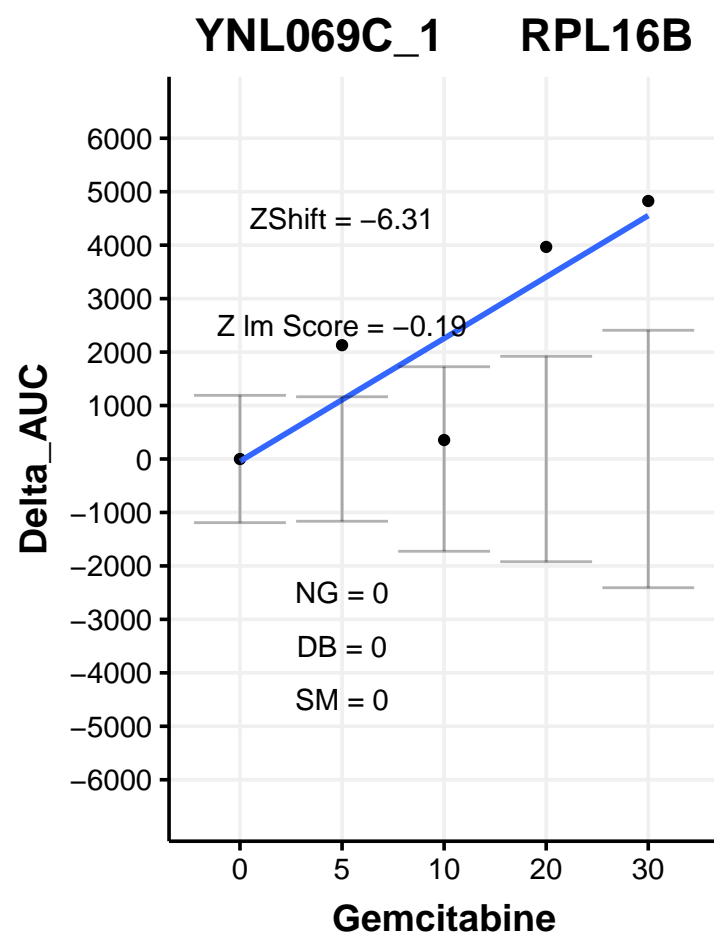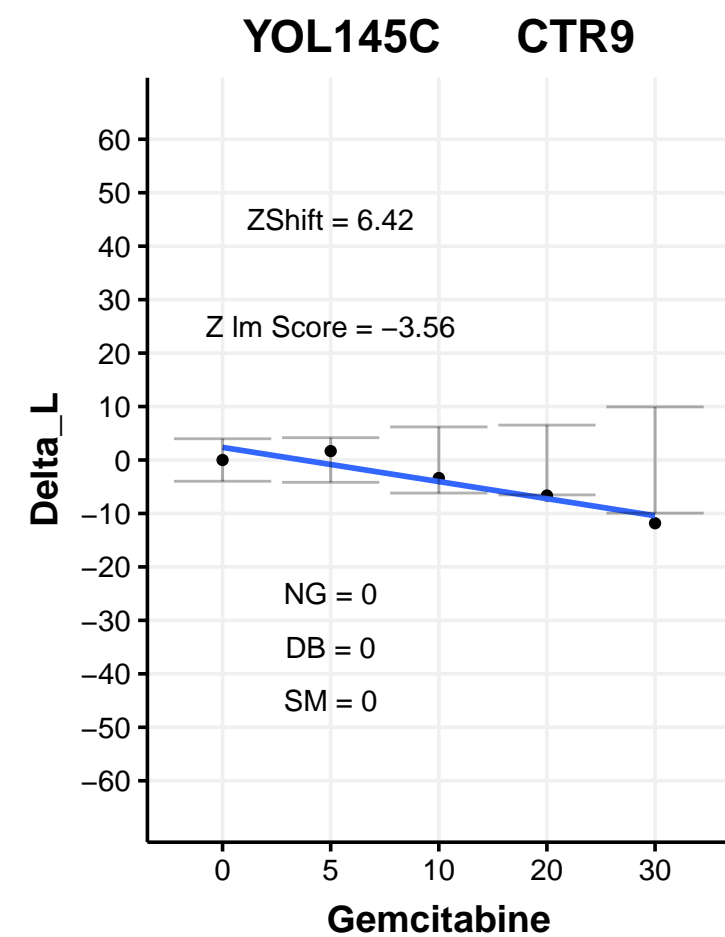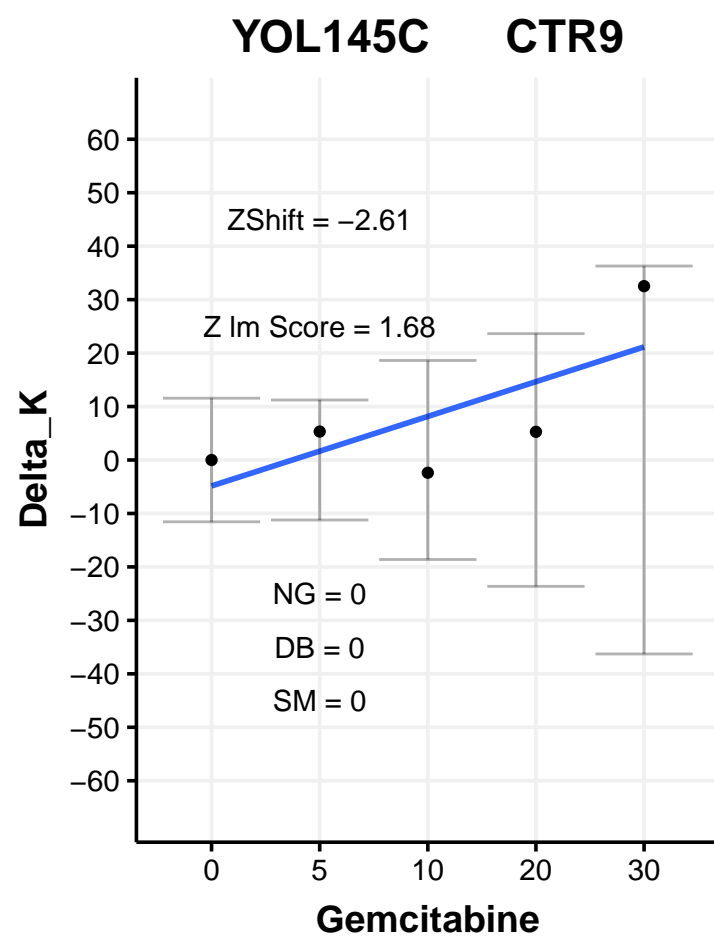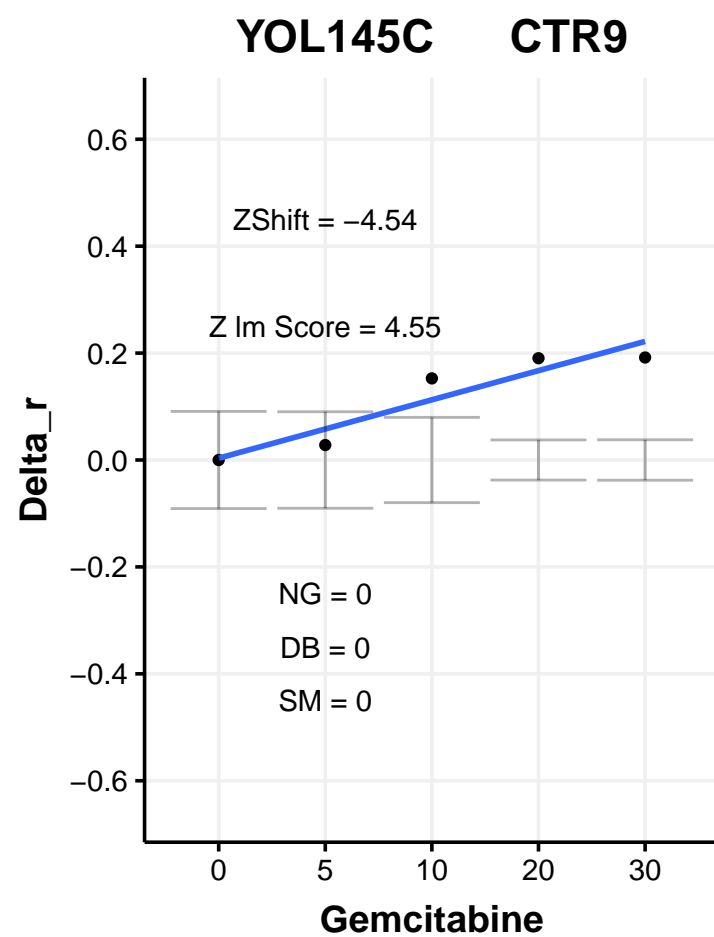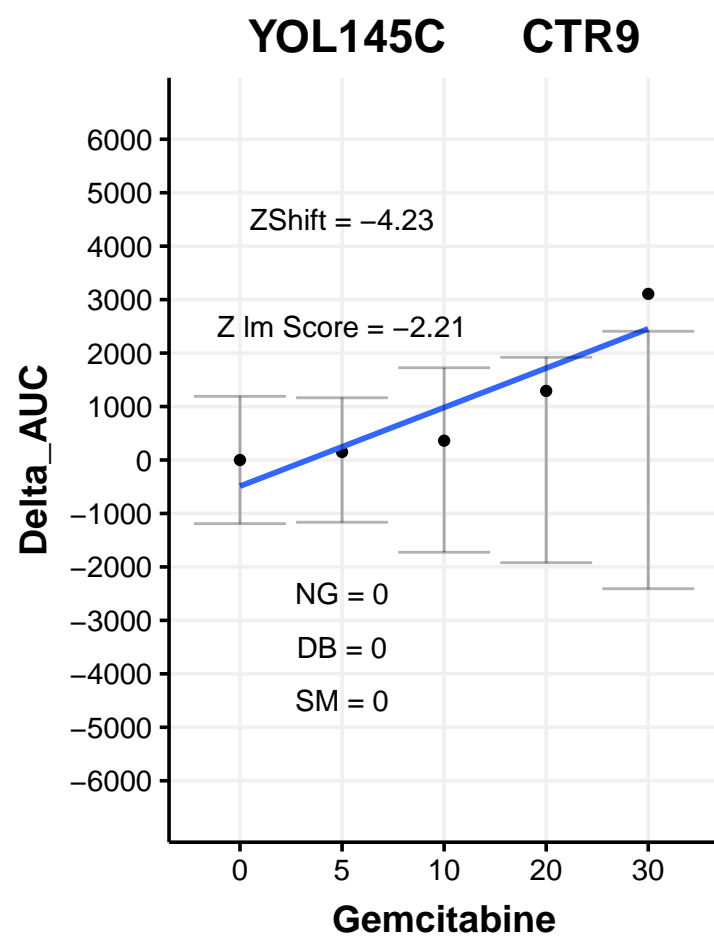



YDR174W HMO1

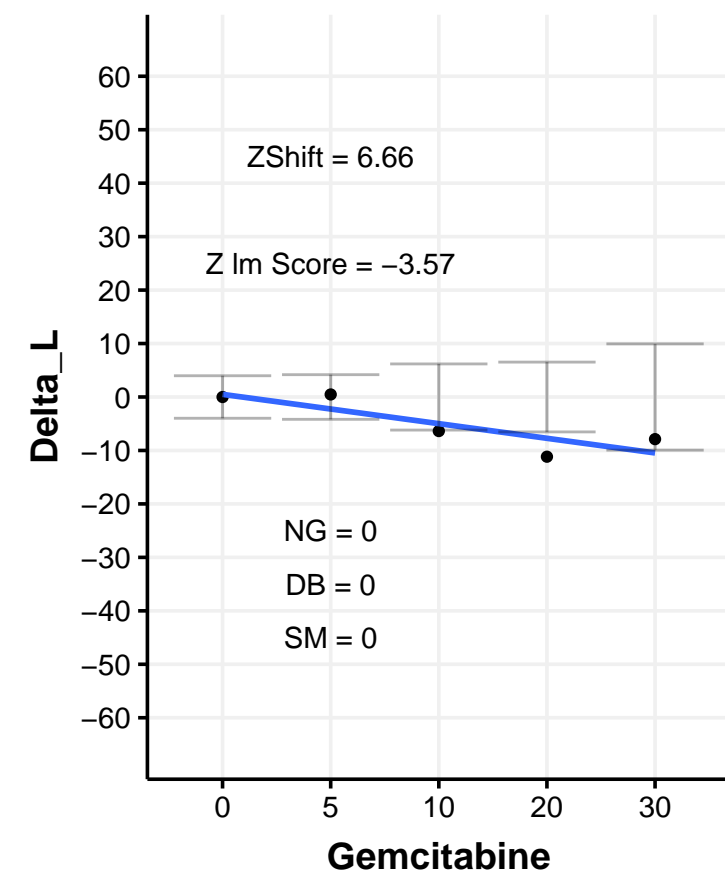

YDR174W HMO1

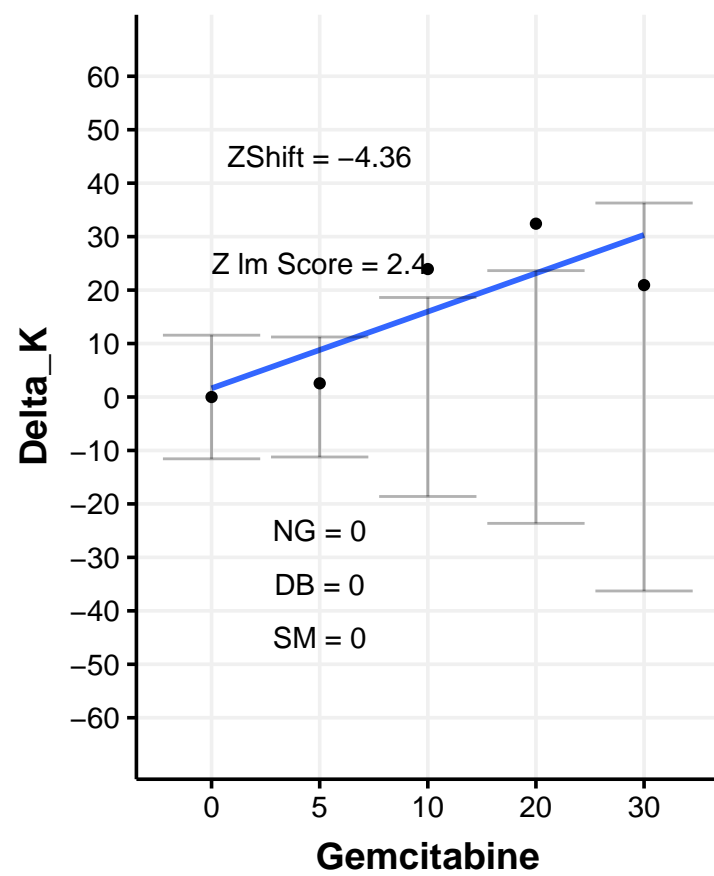

YDR174W HMO1

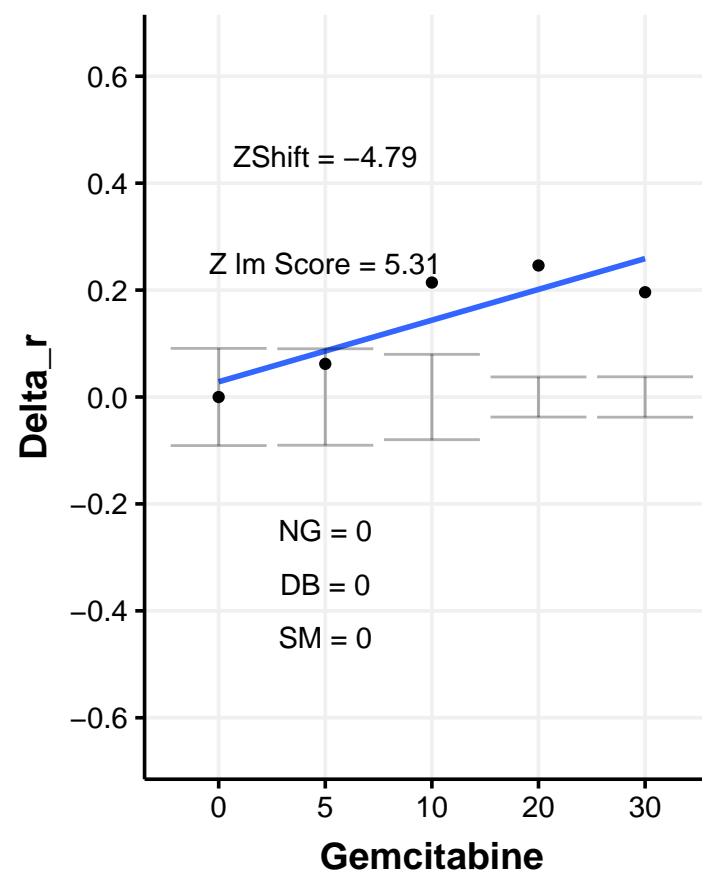

YDR174W HMO1

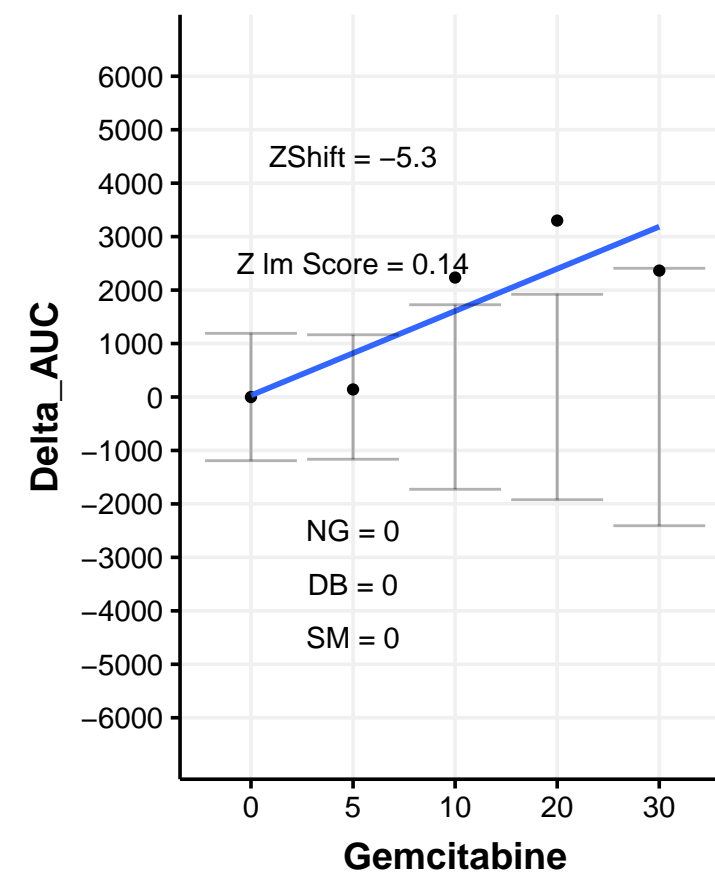

YGL042C

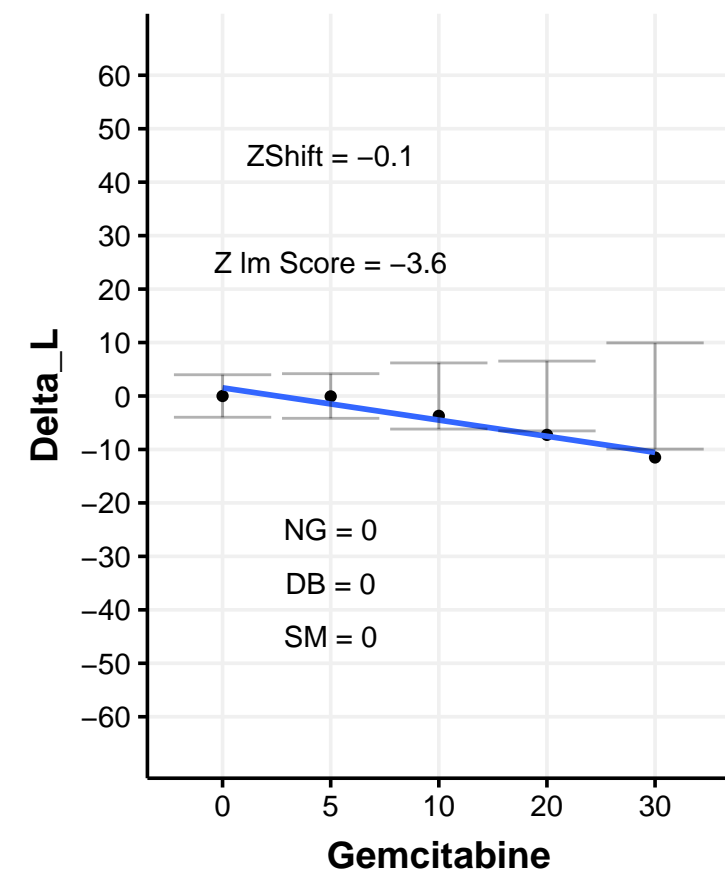

YGL042C

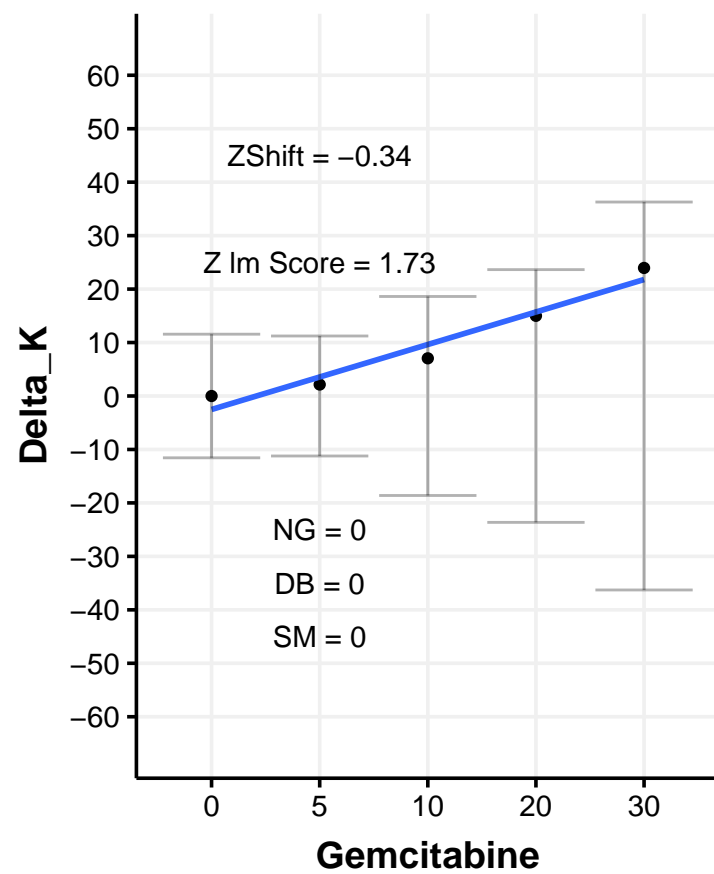

YGL042C

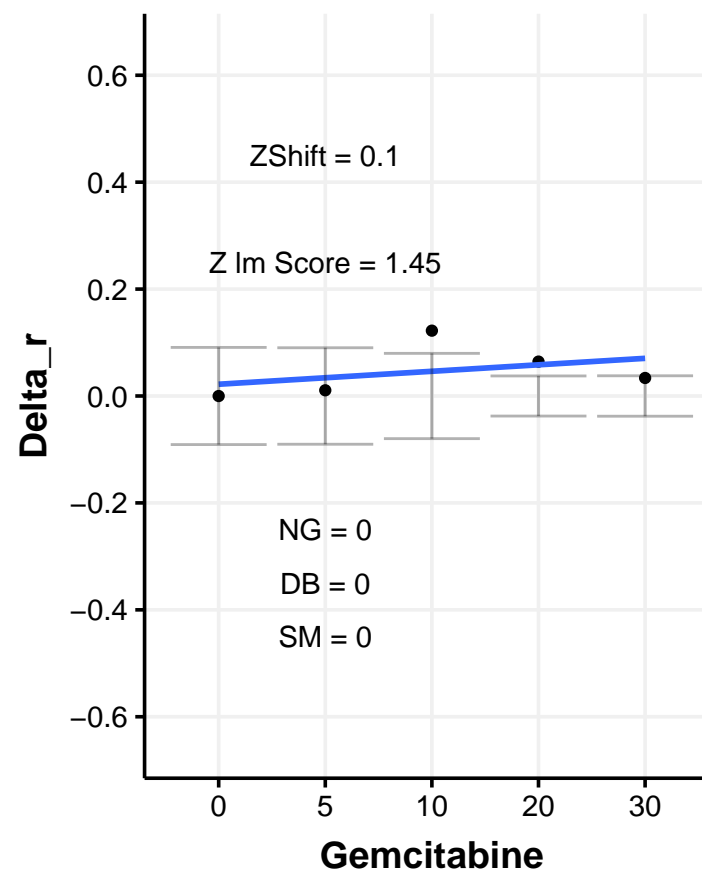

YGL042C

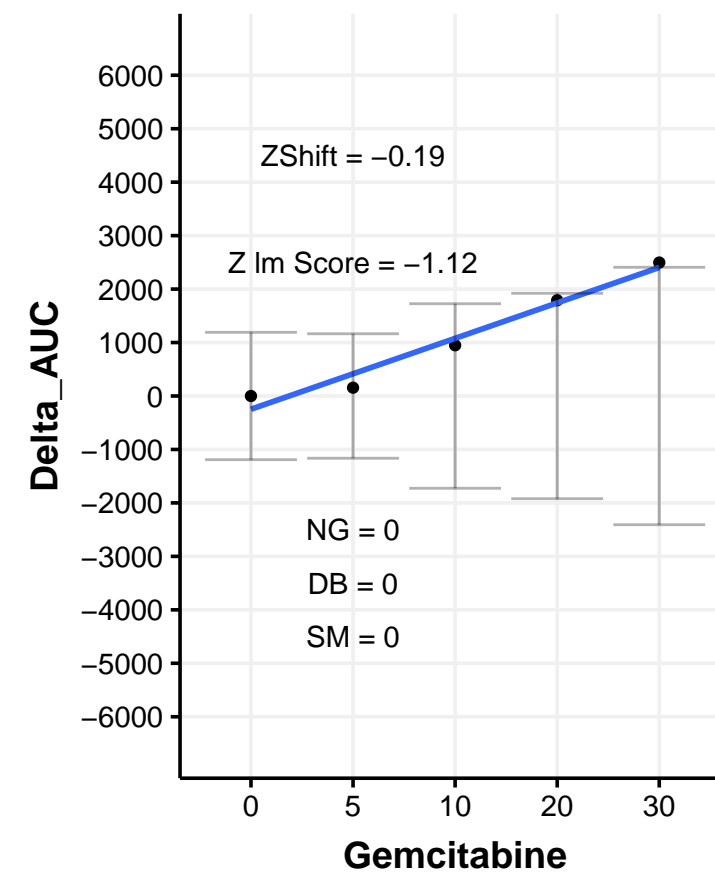

YDR027C VPS54

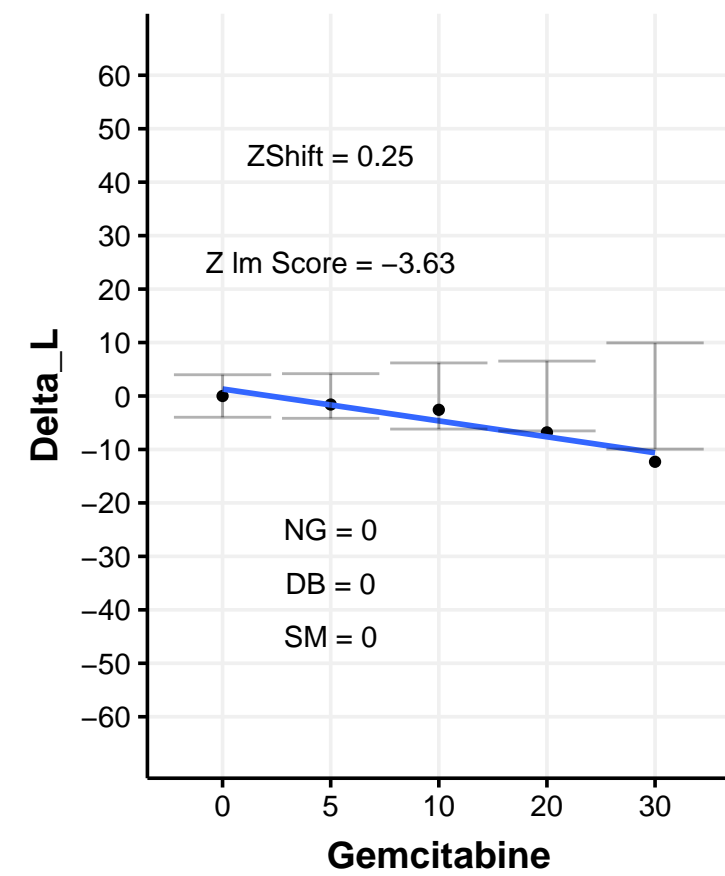

YDR027C VPS54

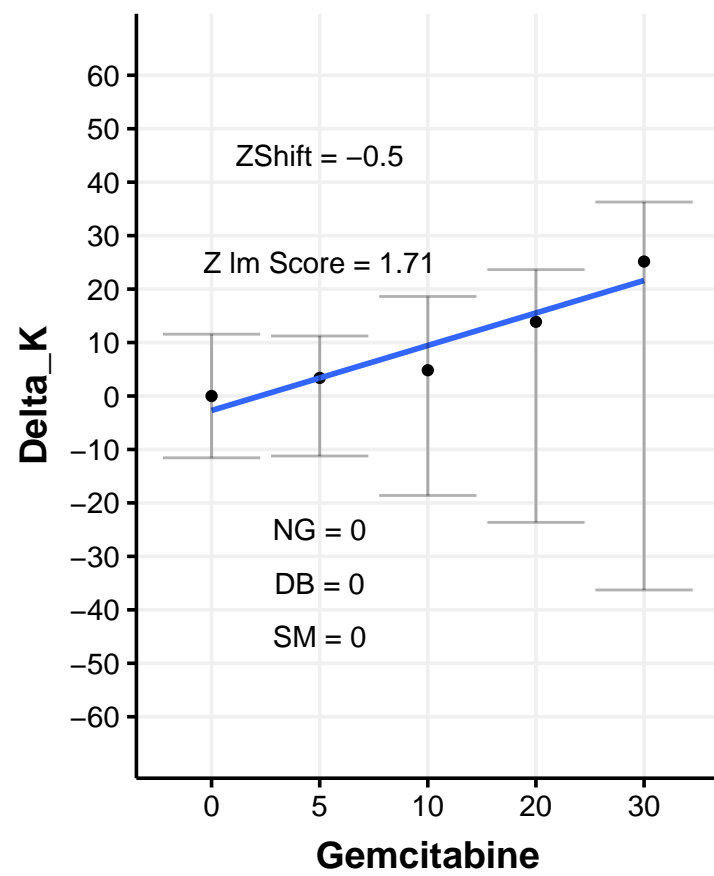

YDR027C VPS54

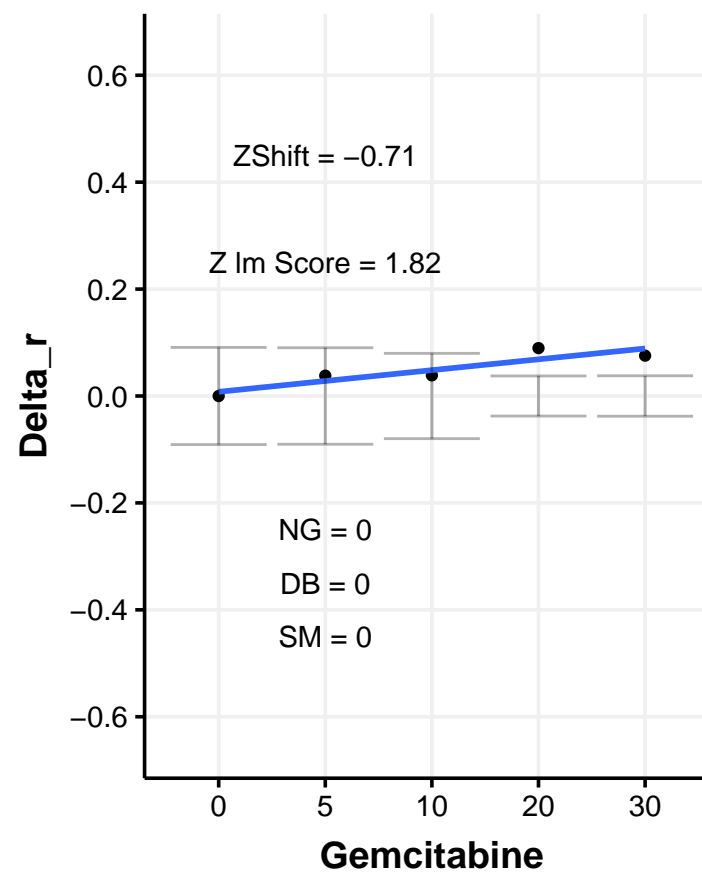

YDR027C VPS54

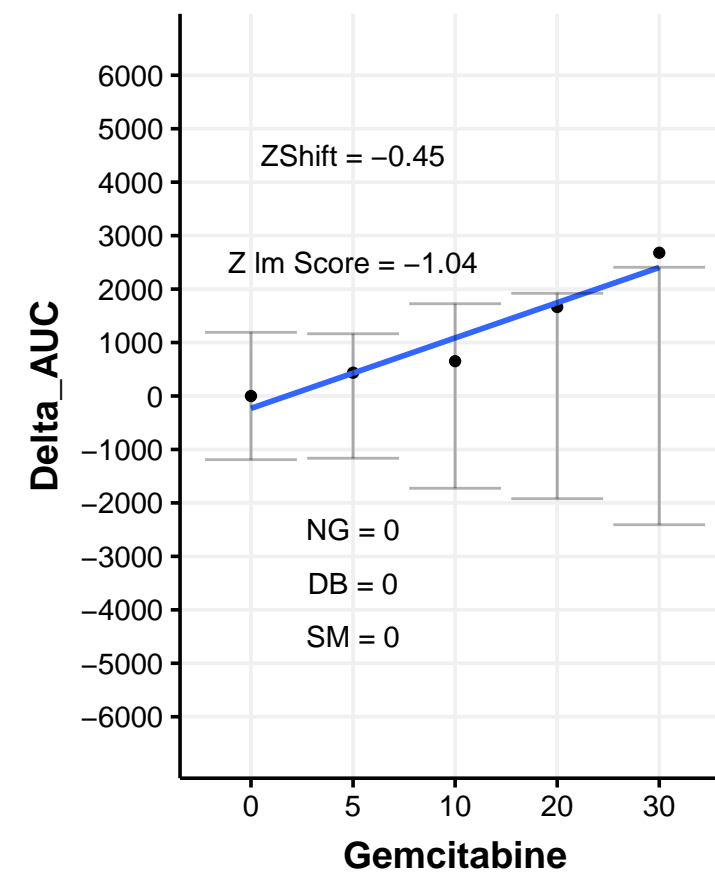

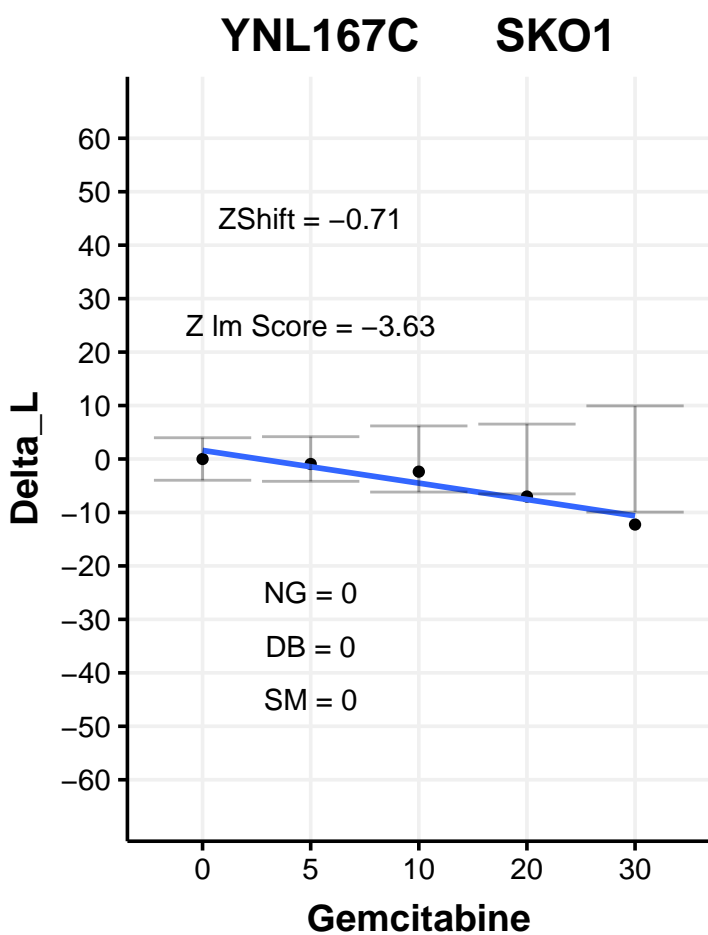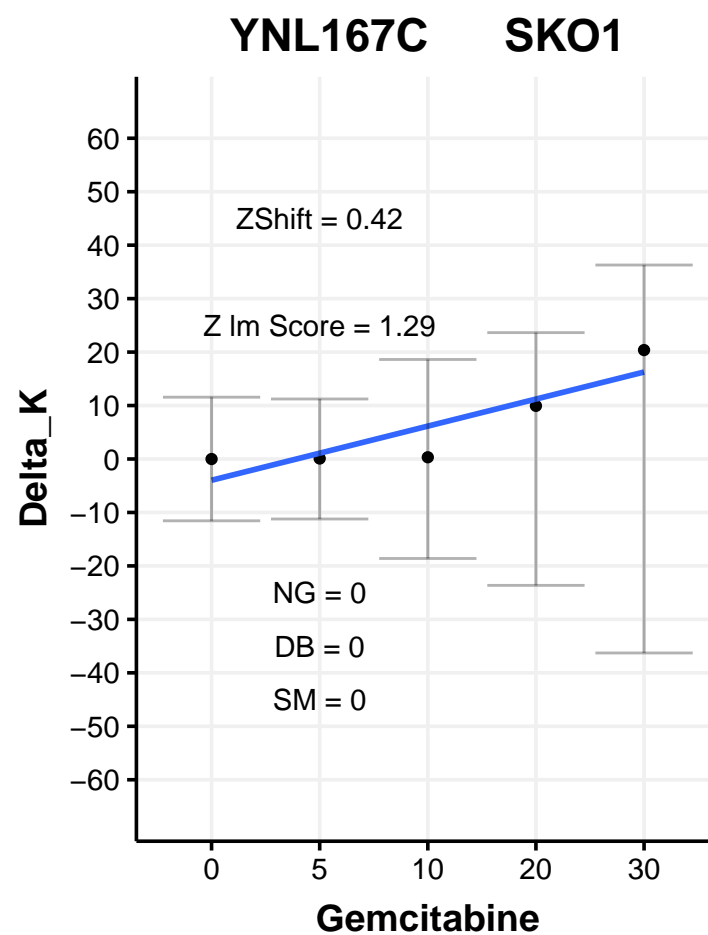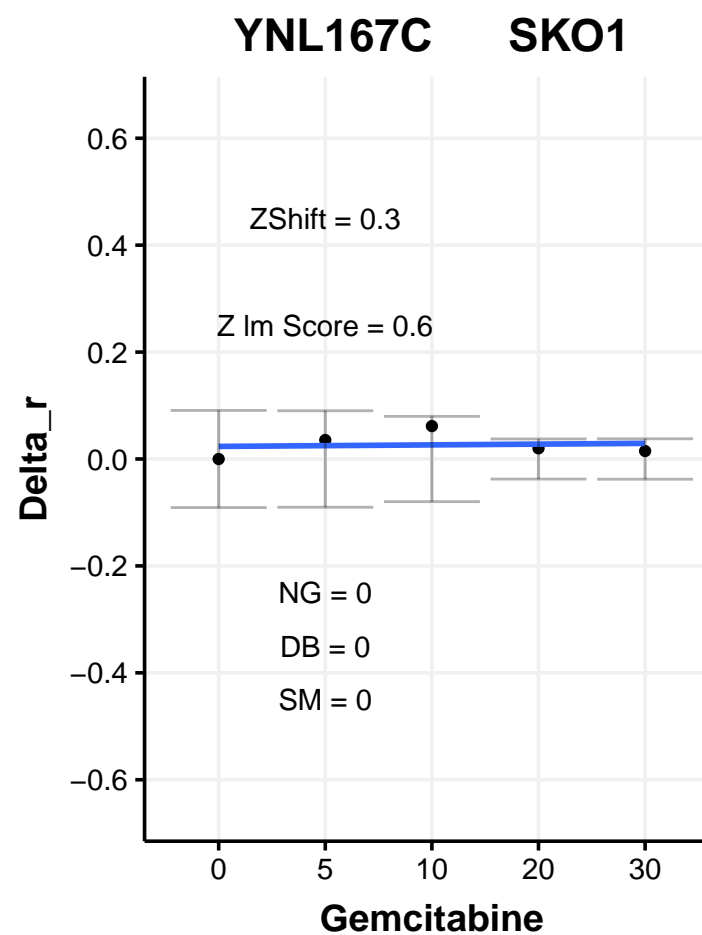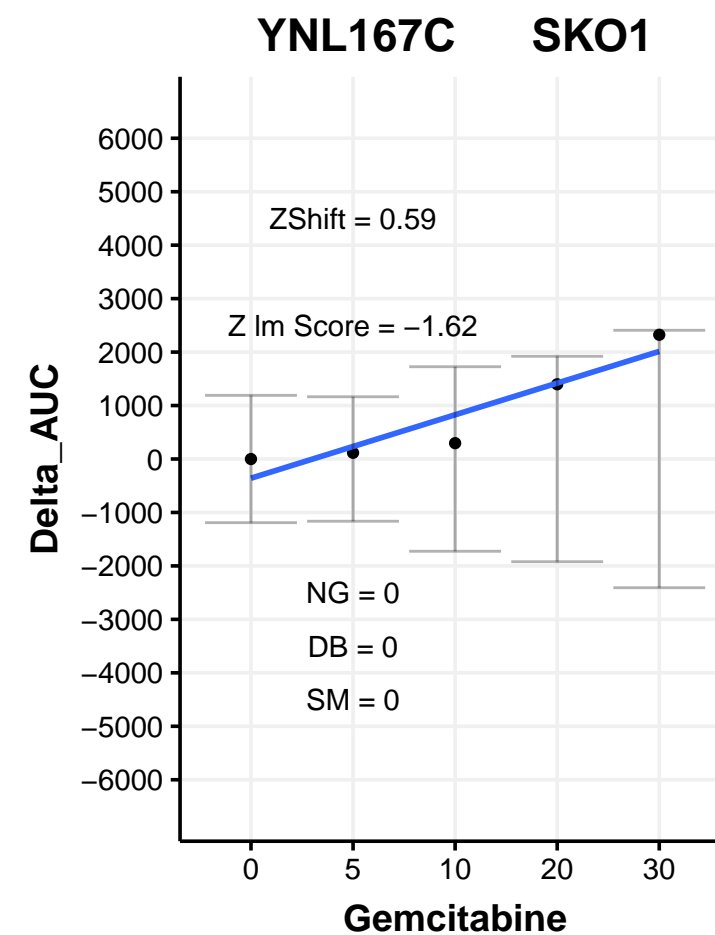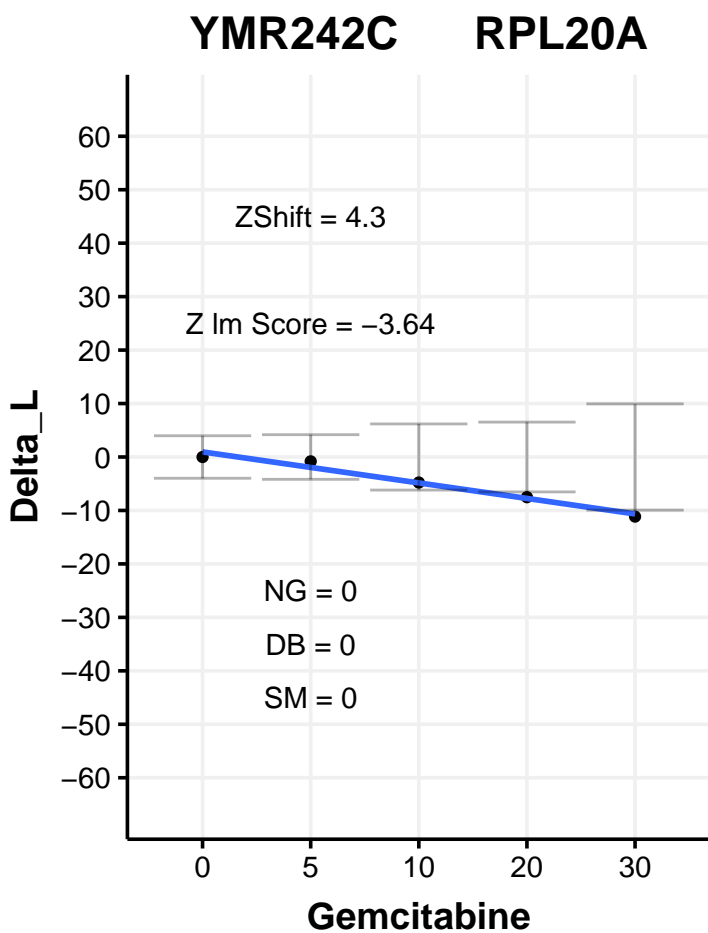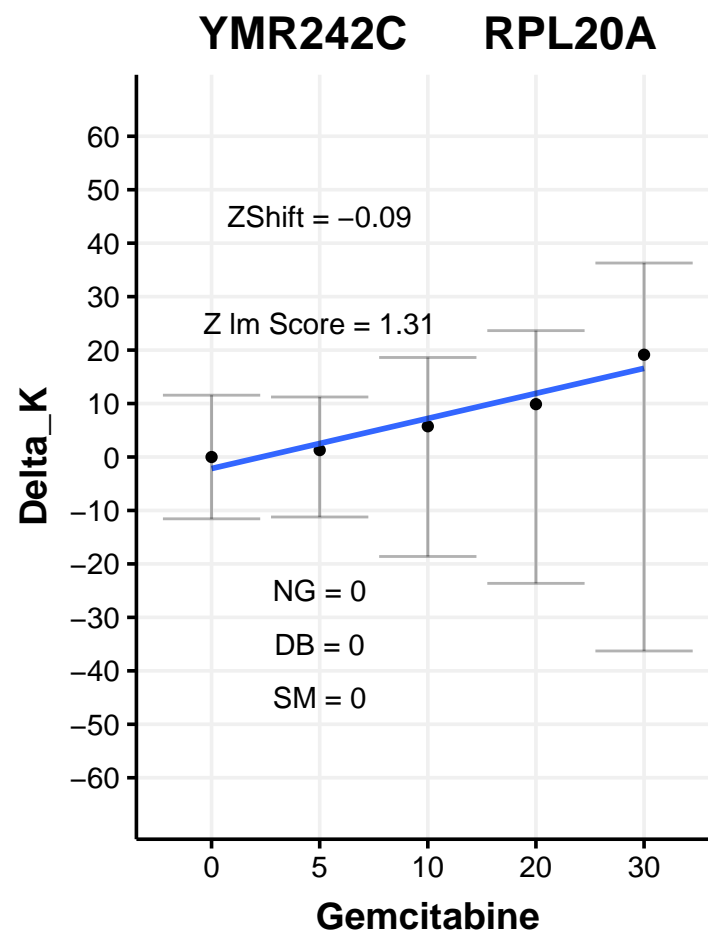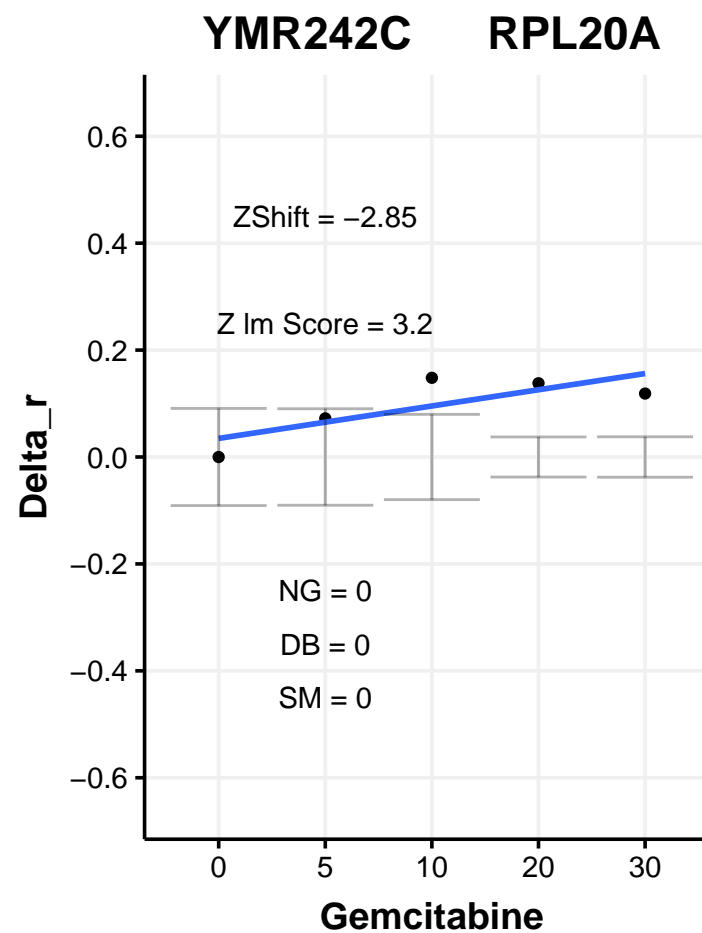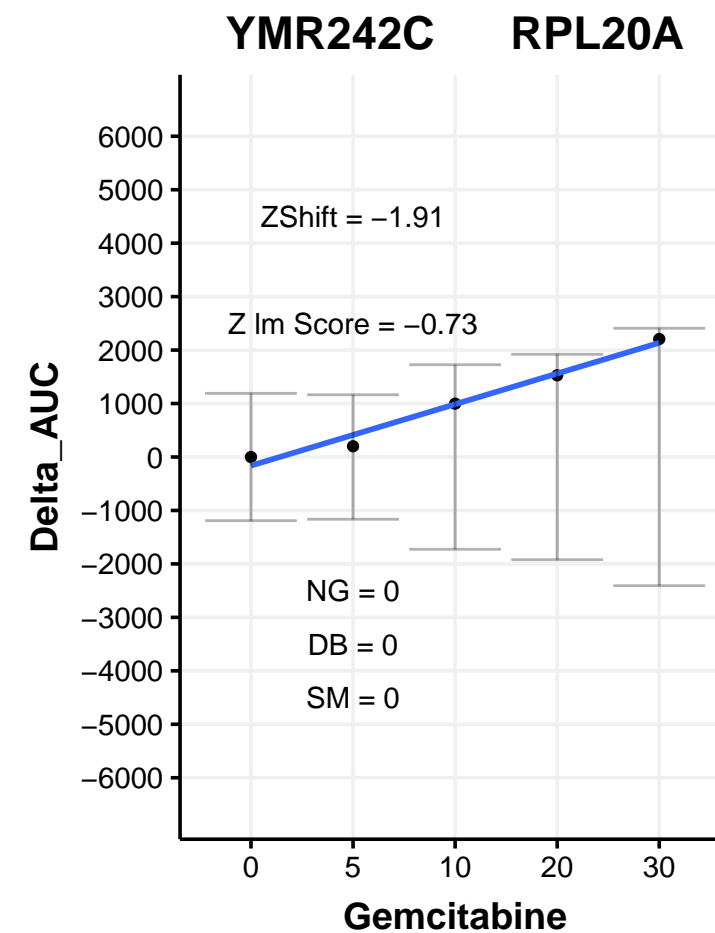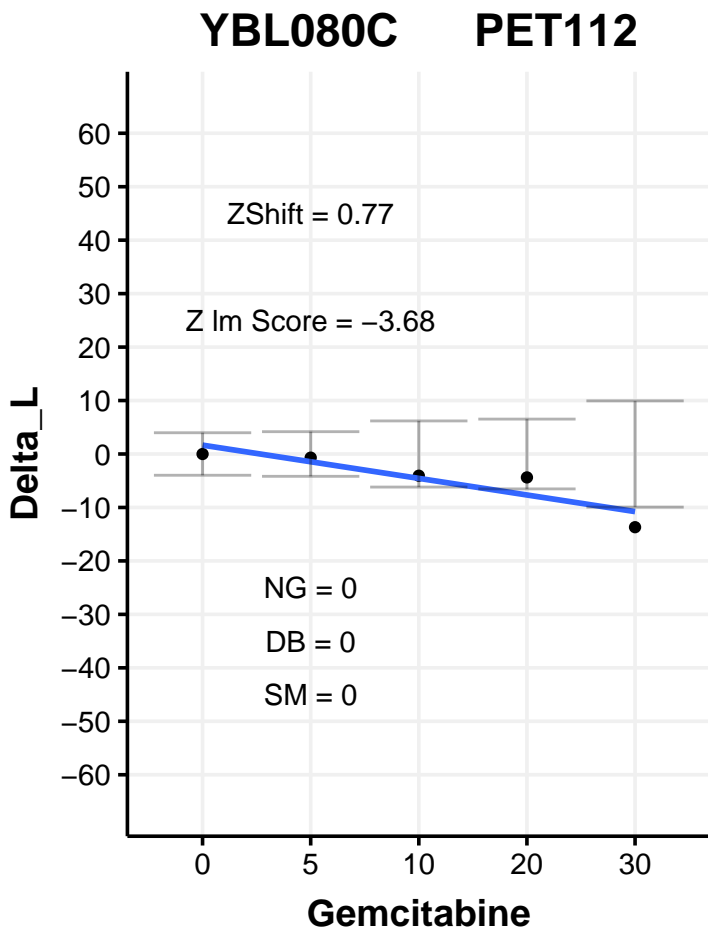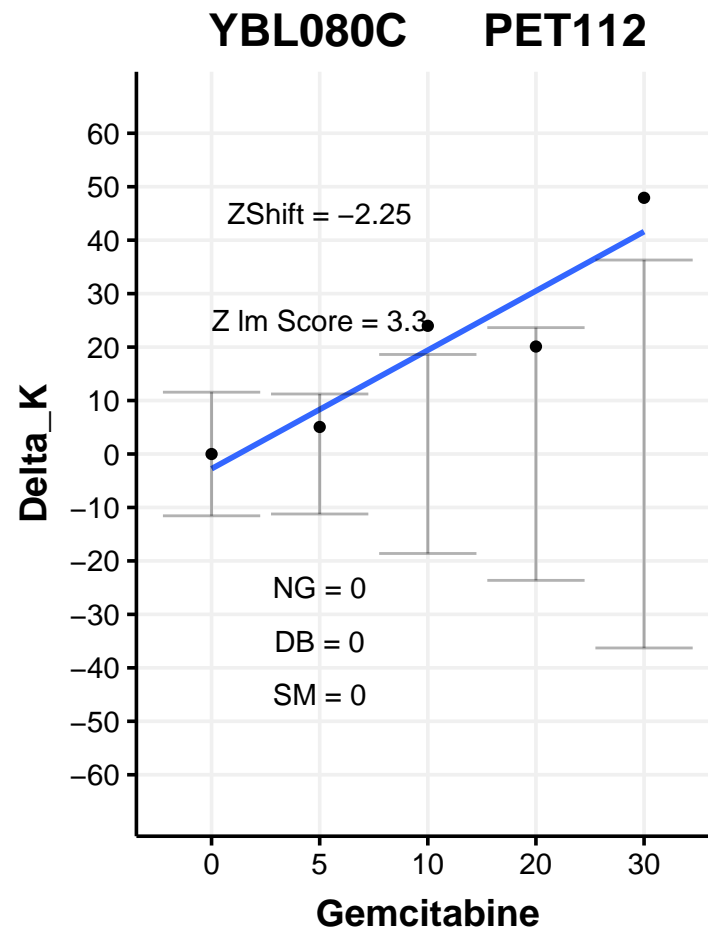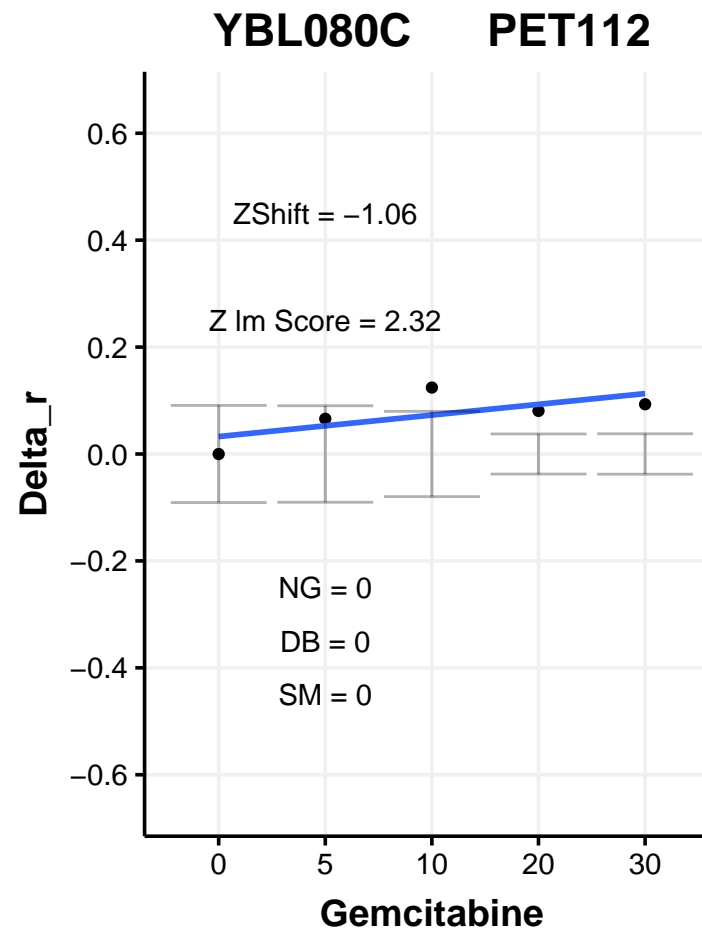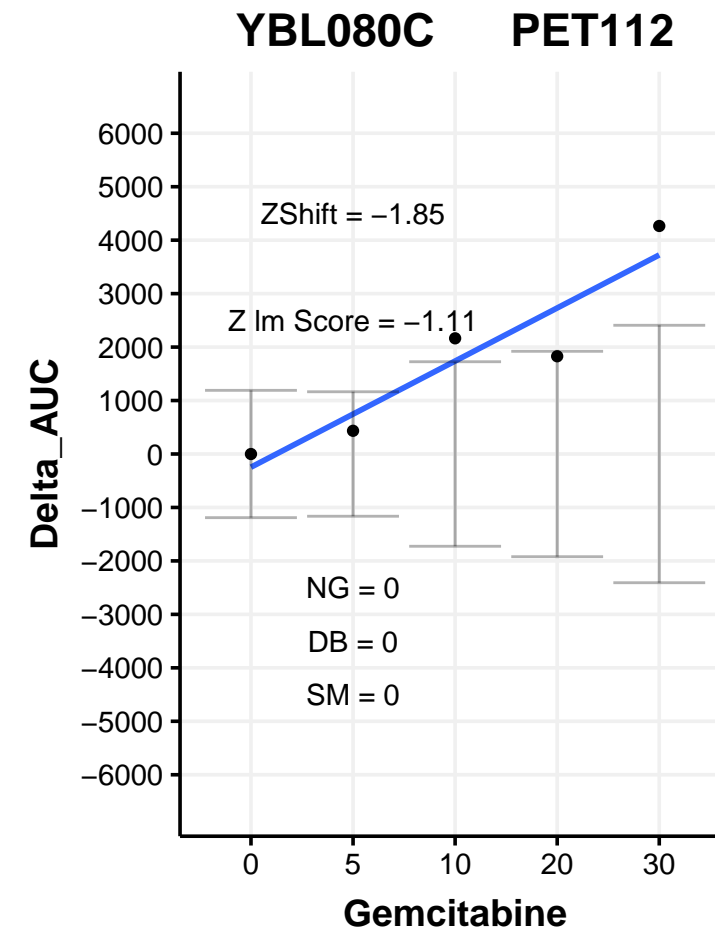

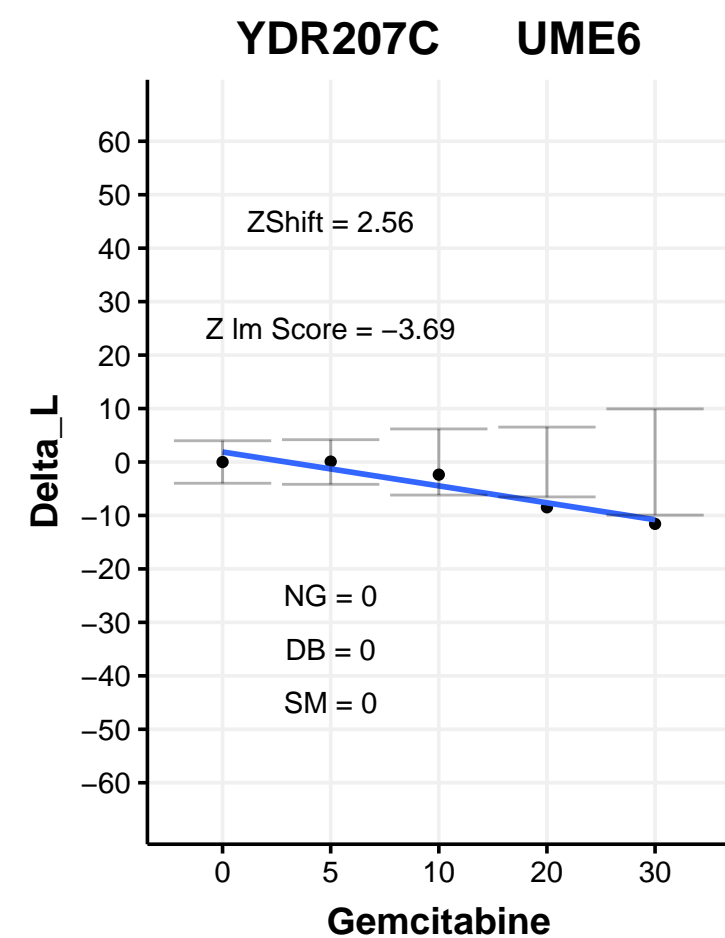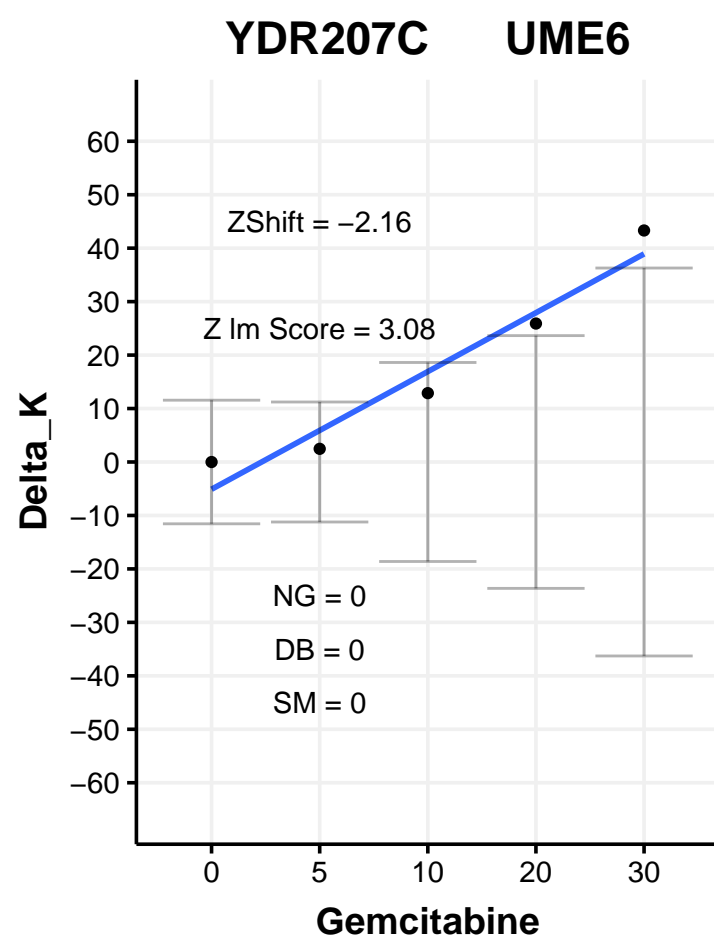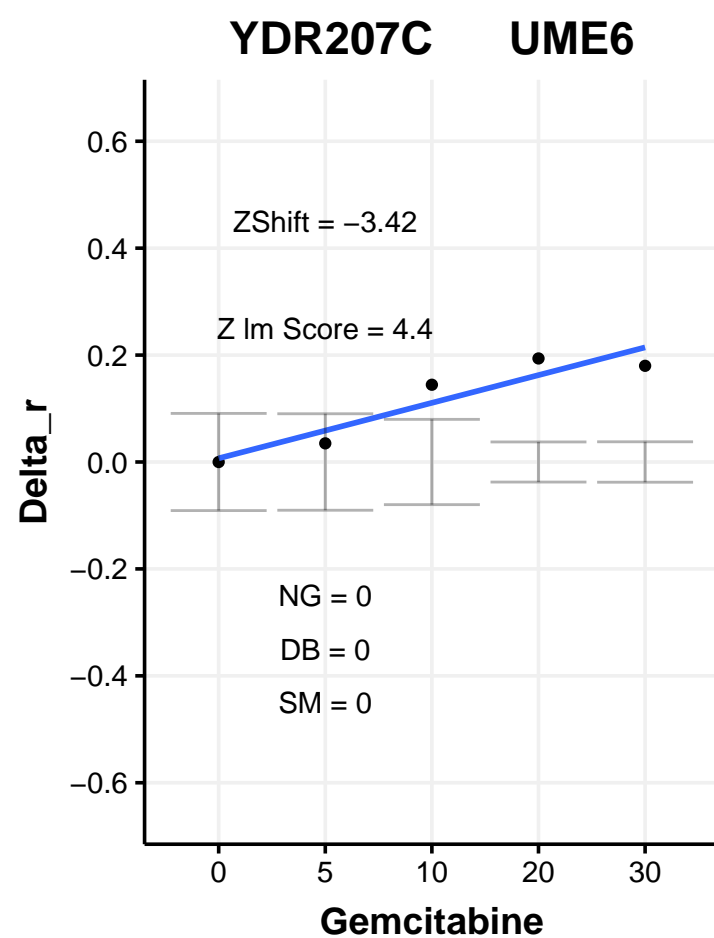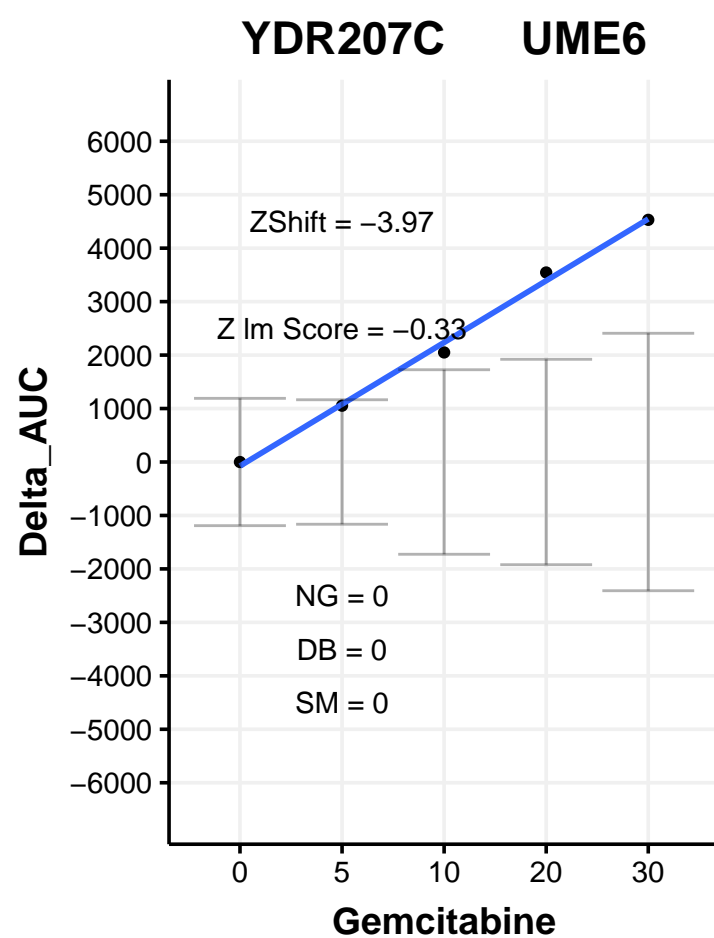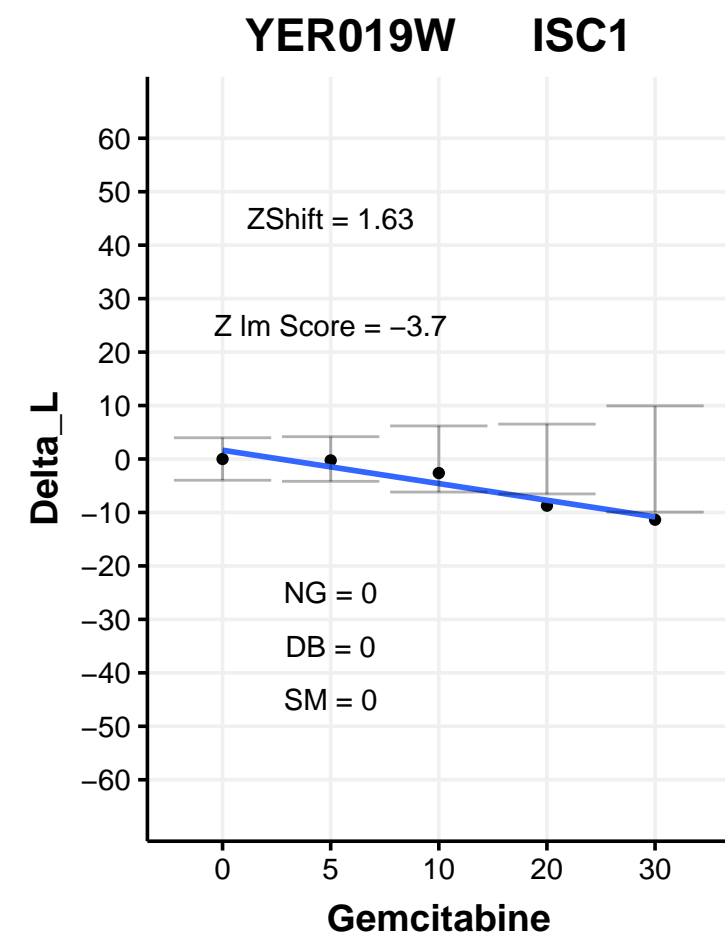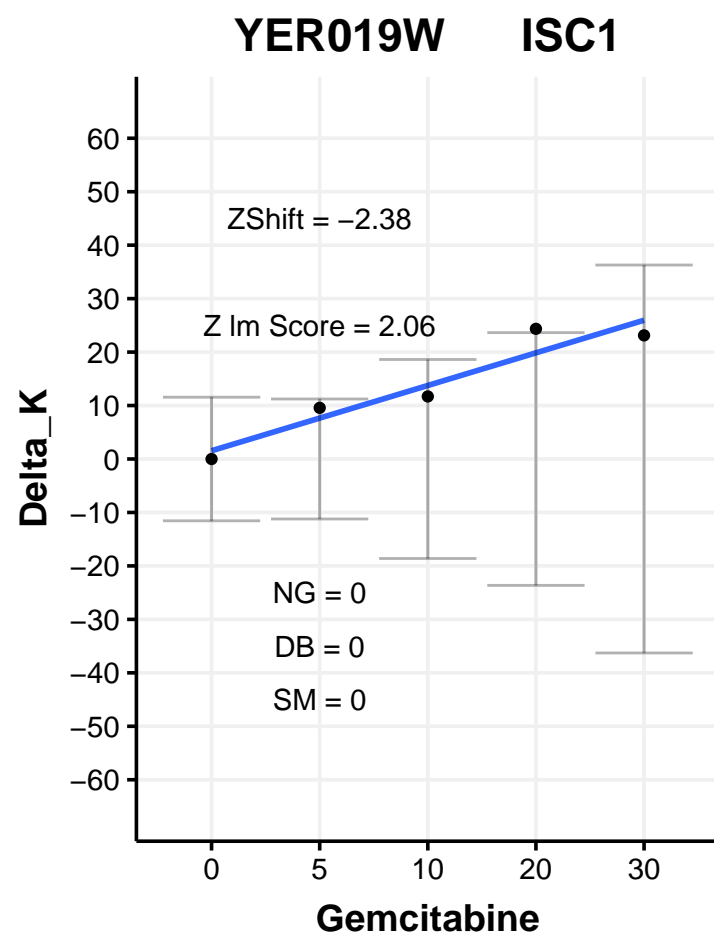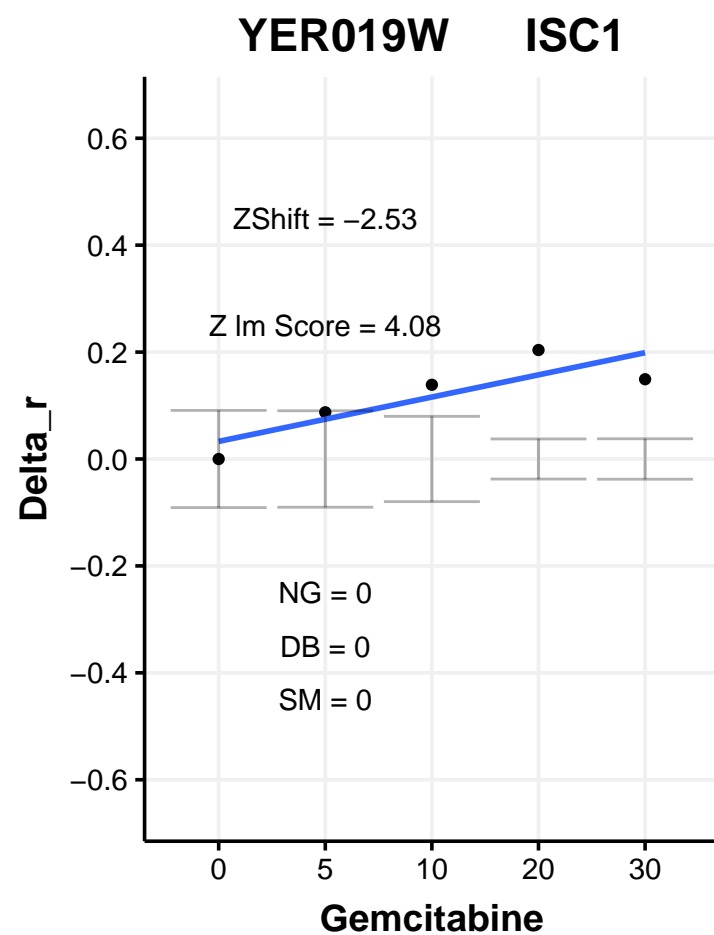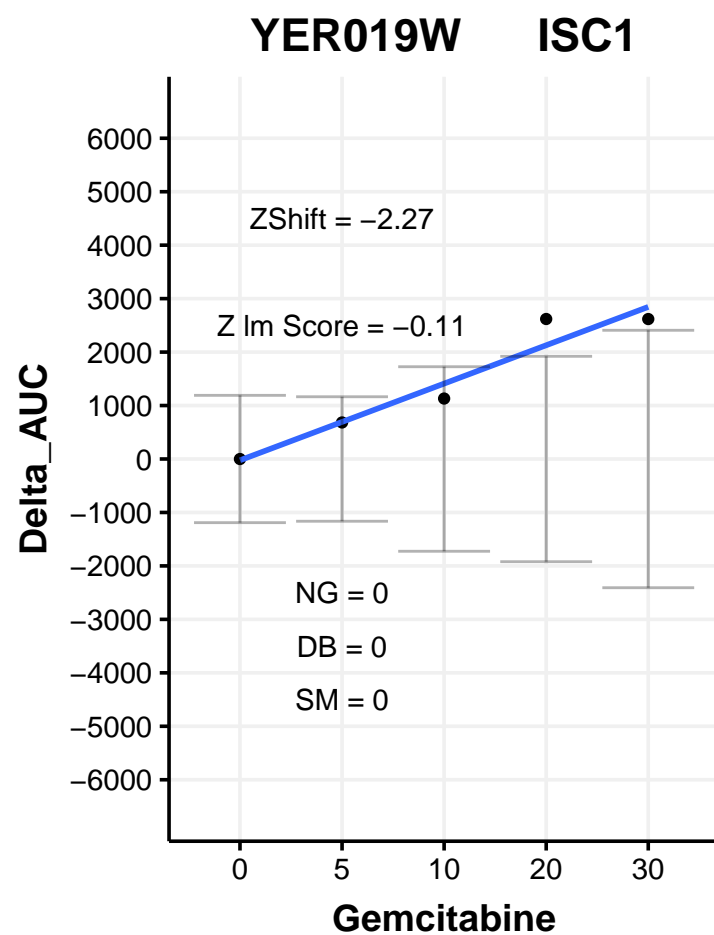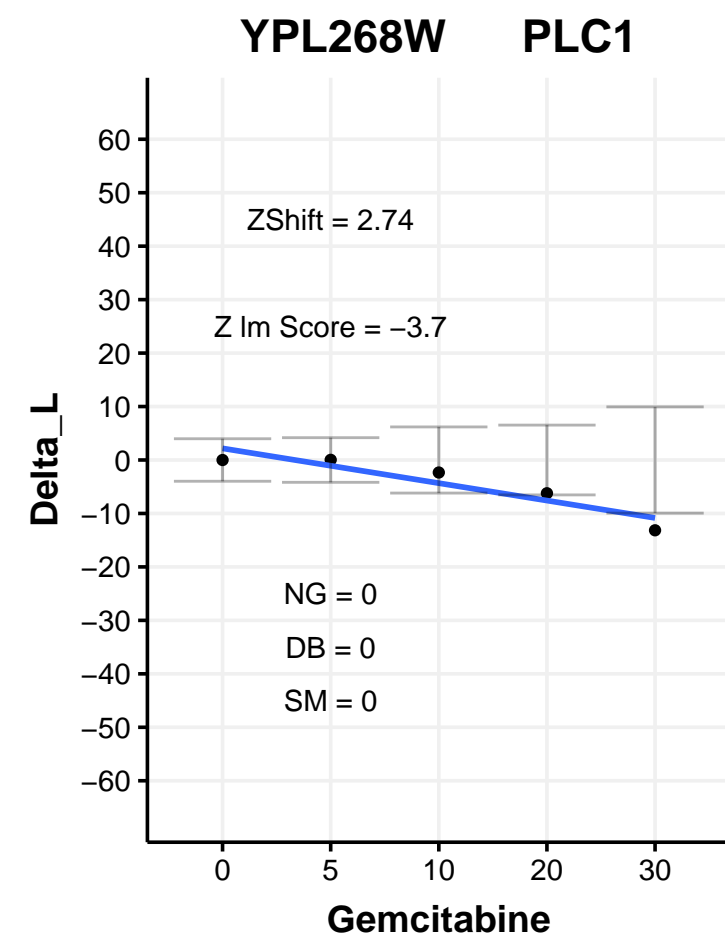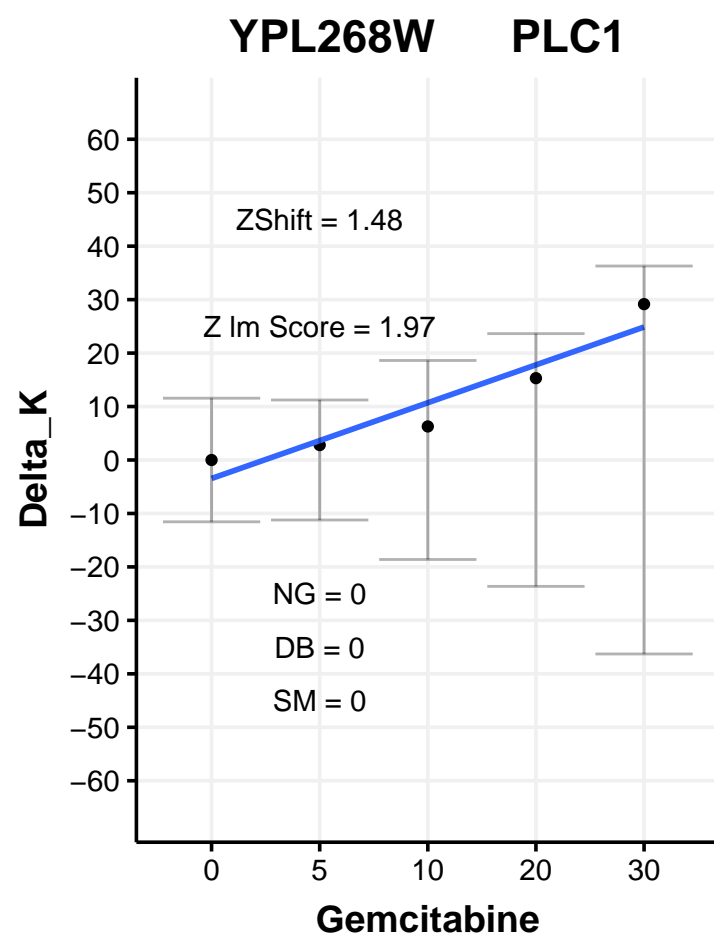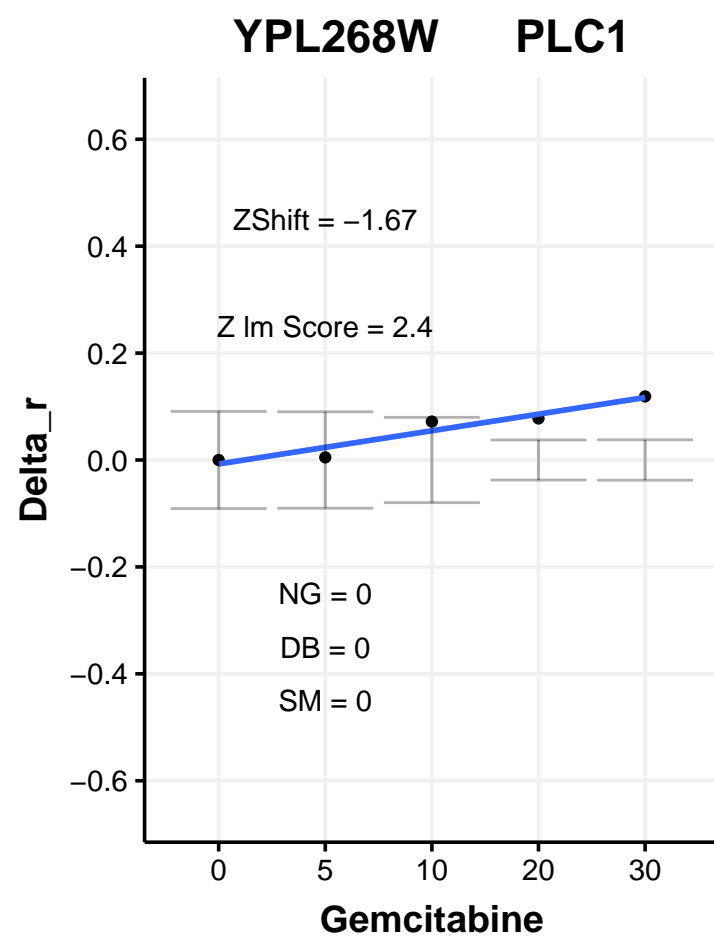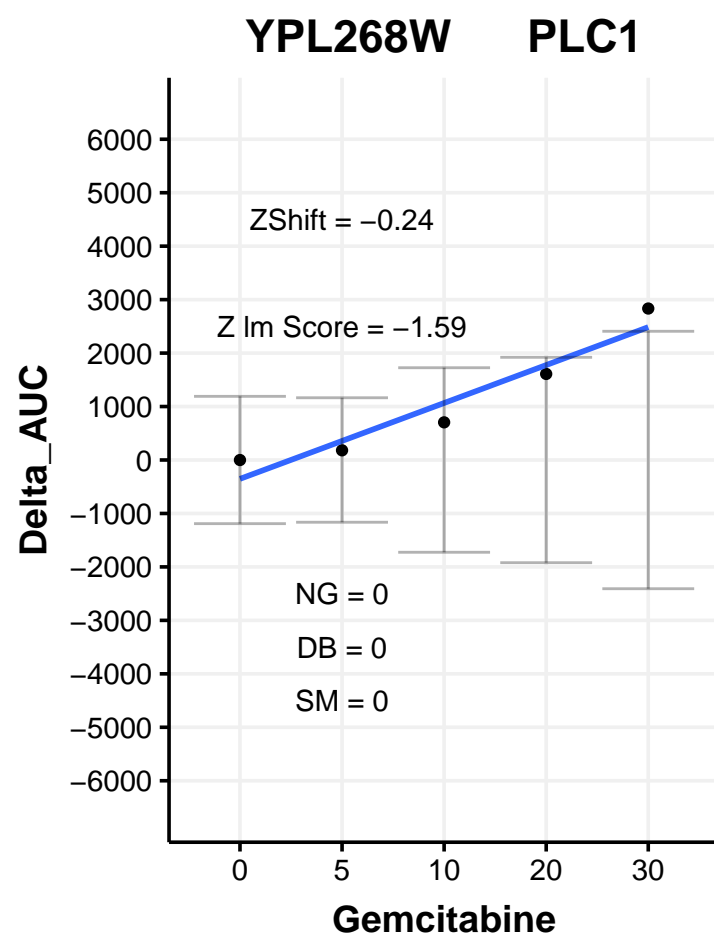

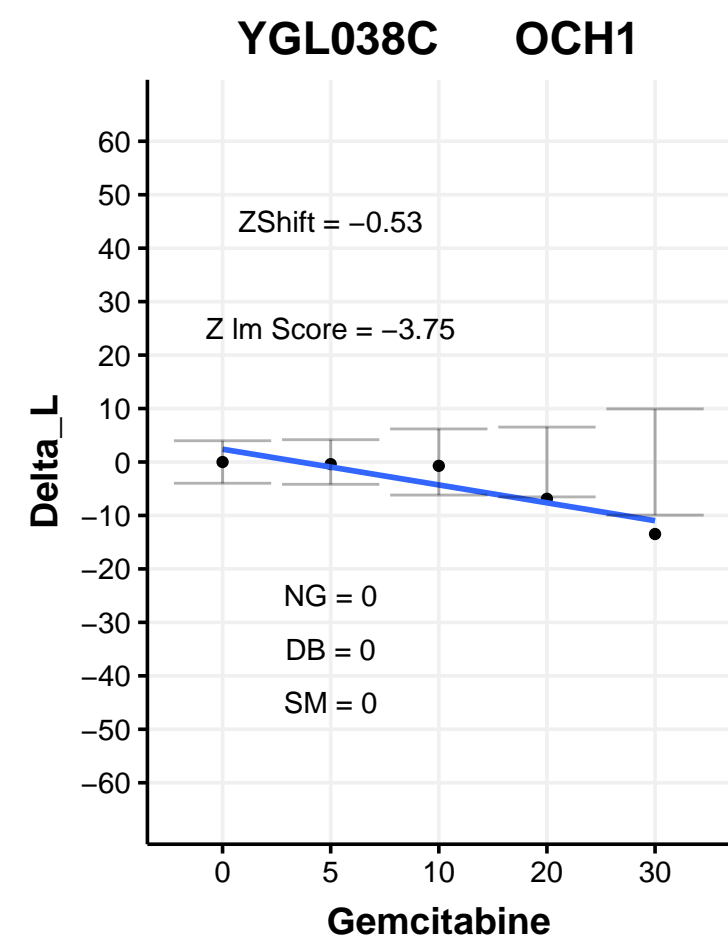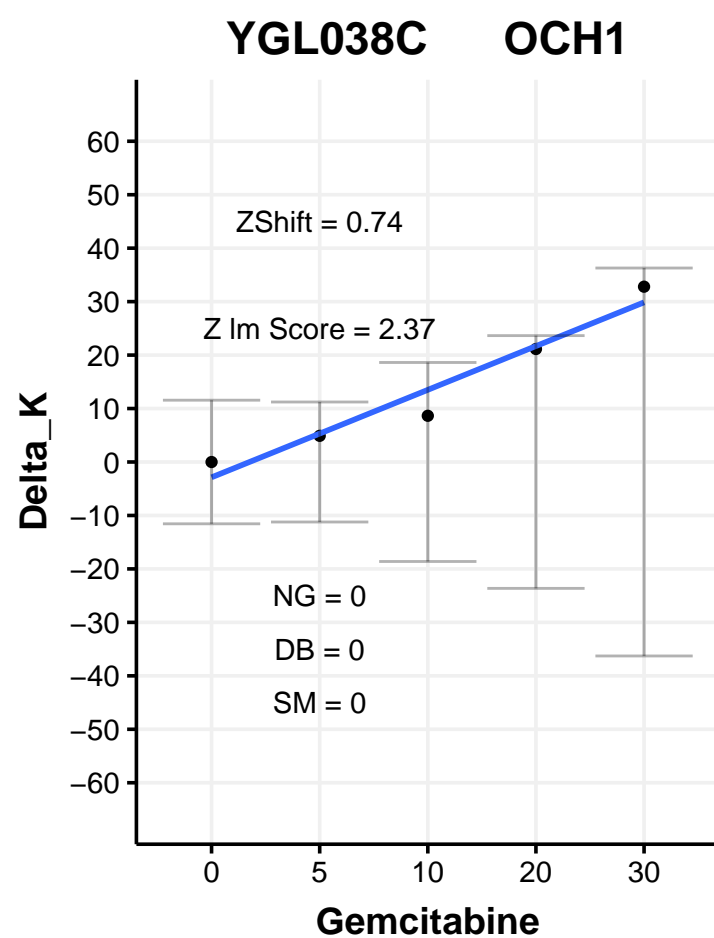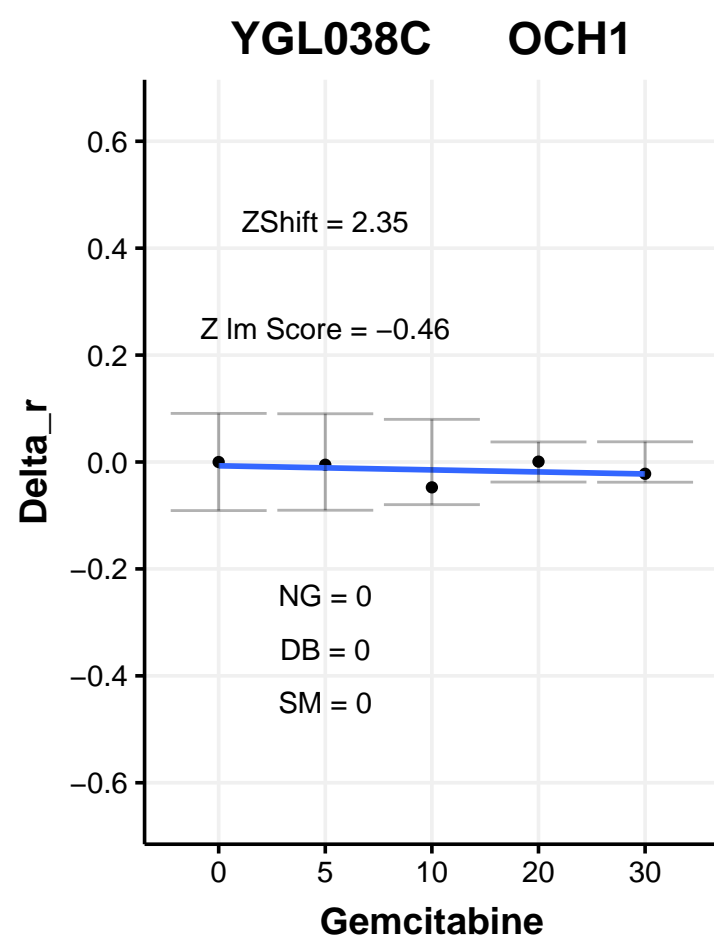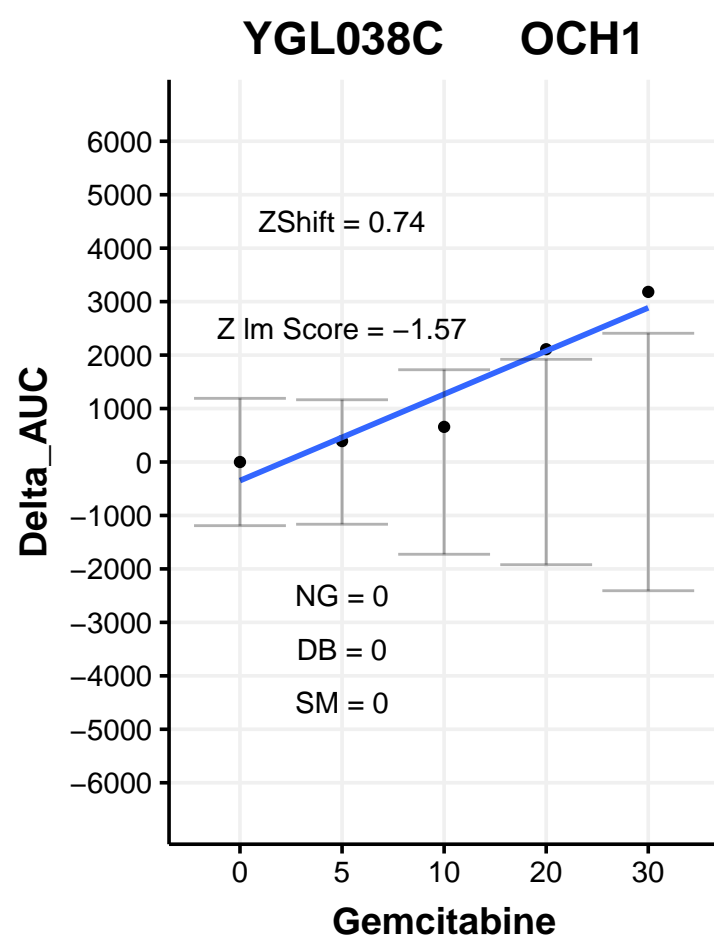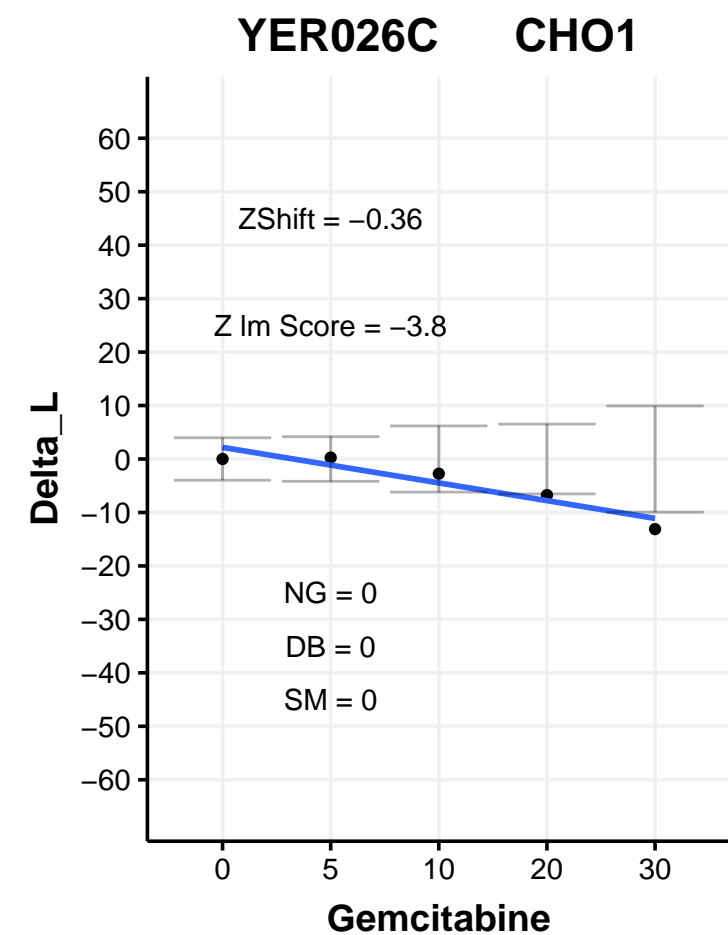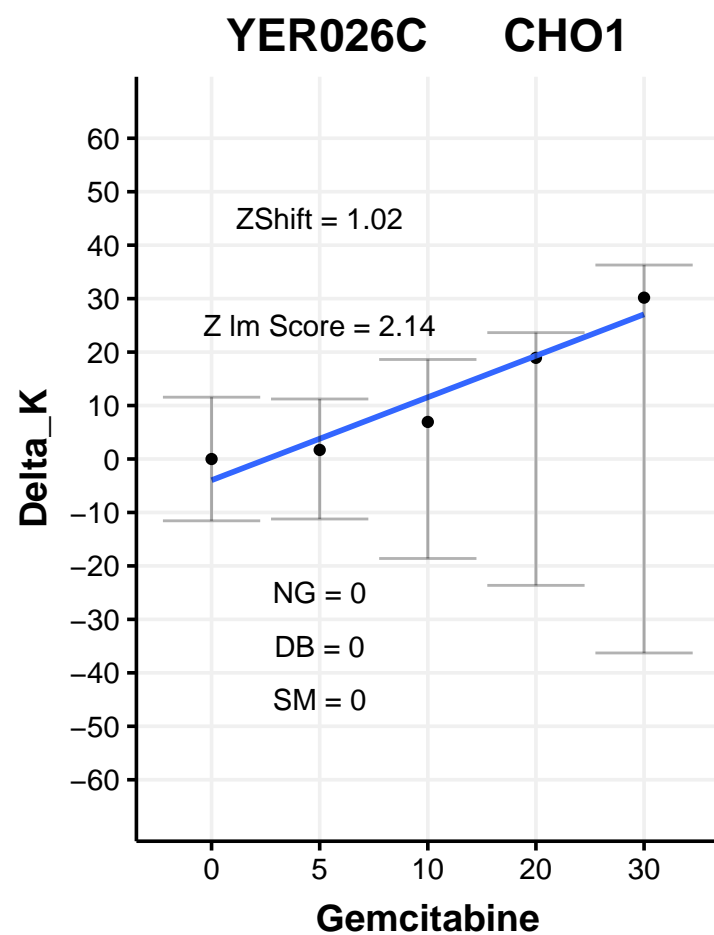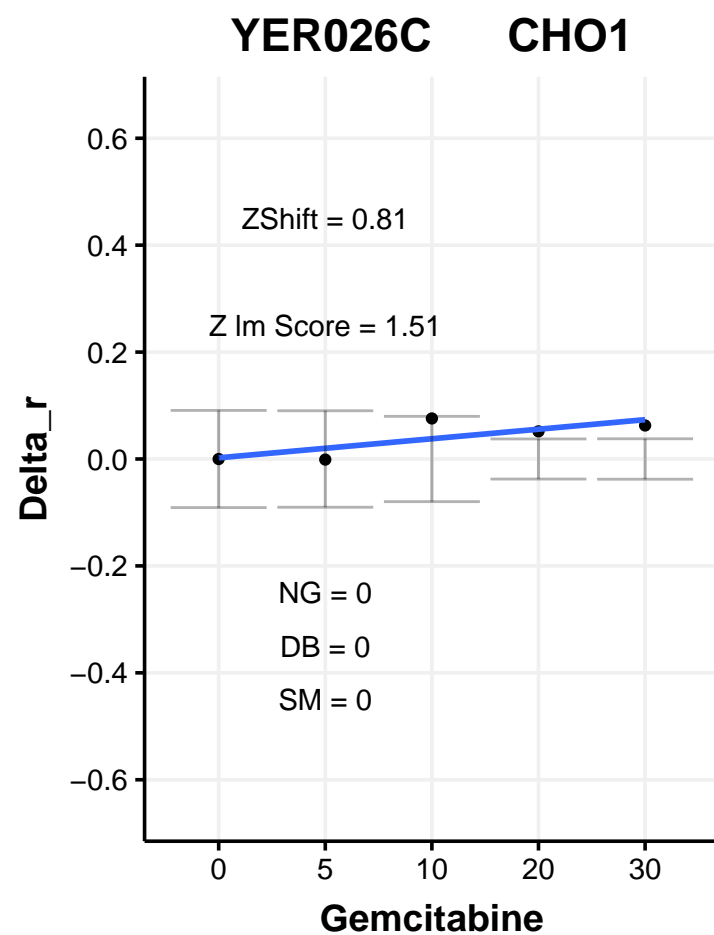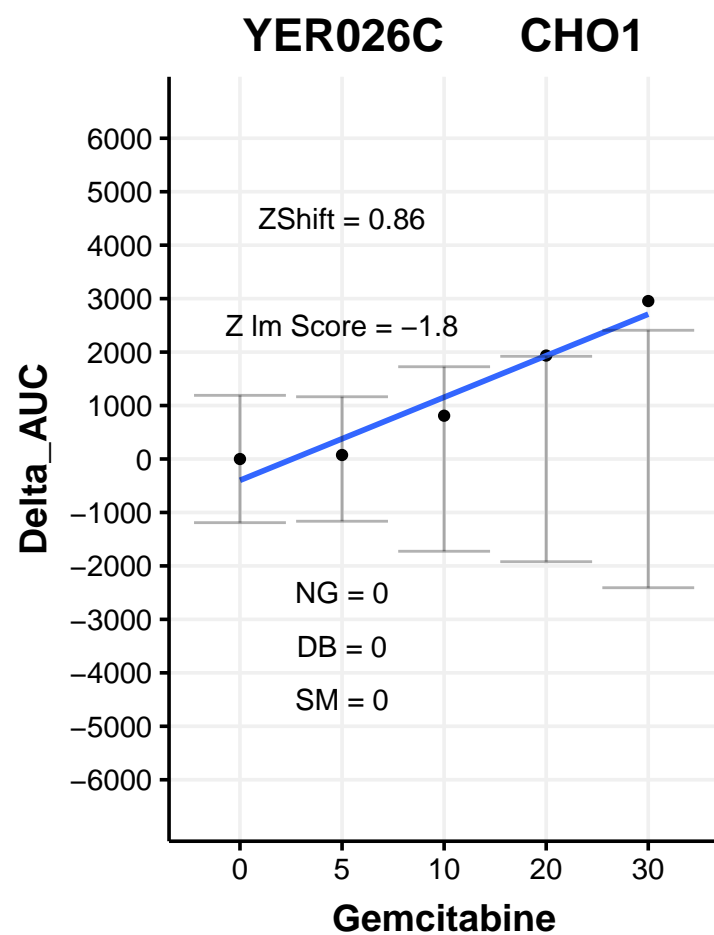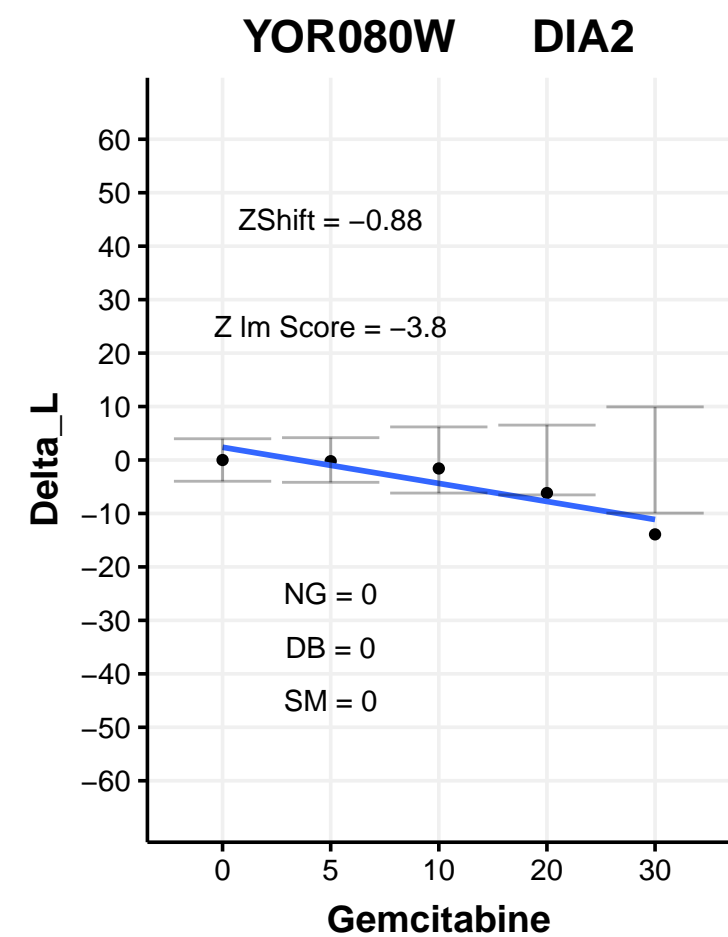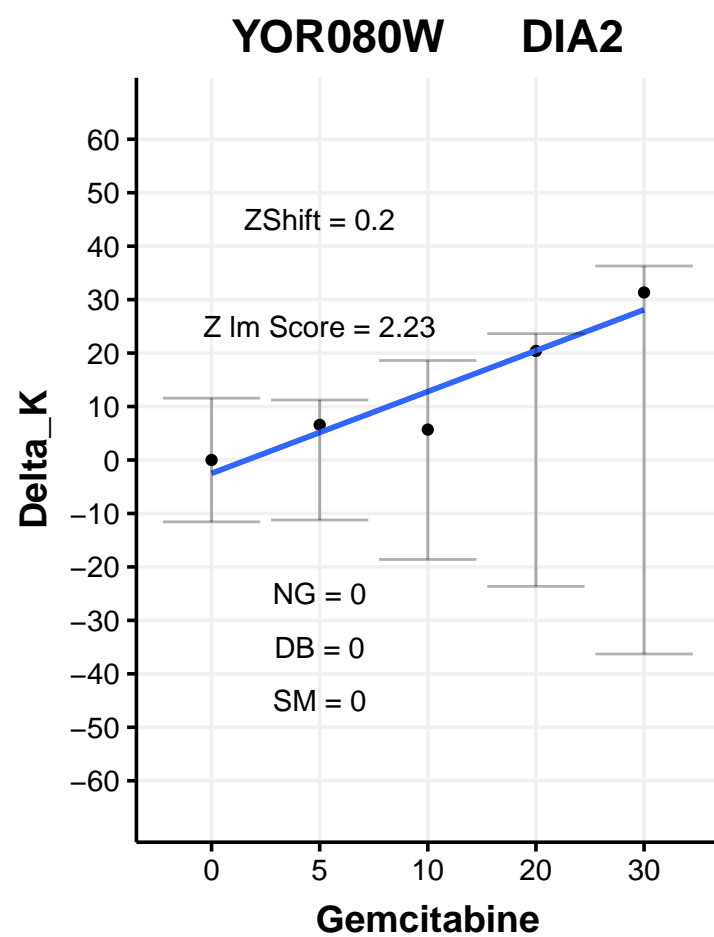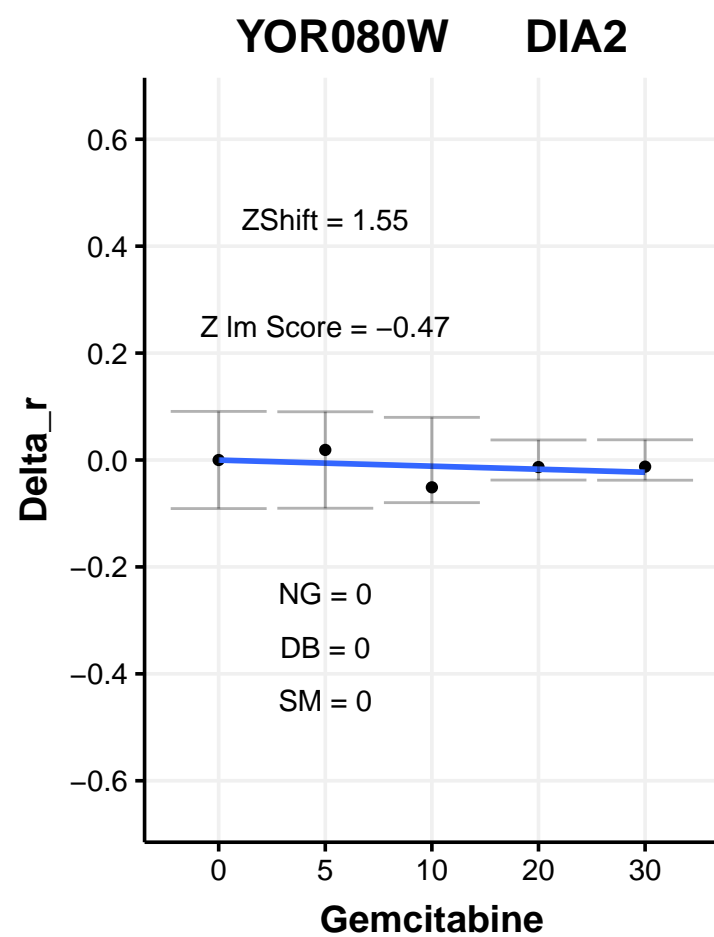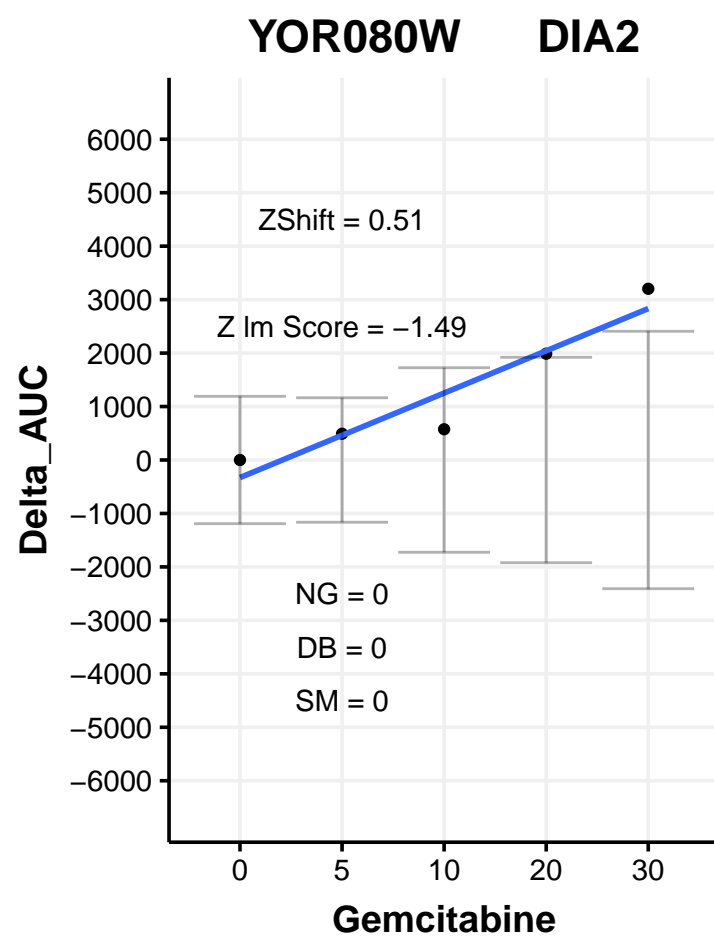

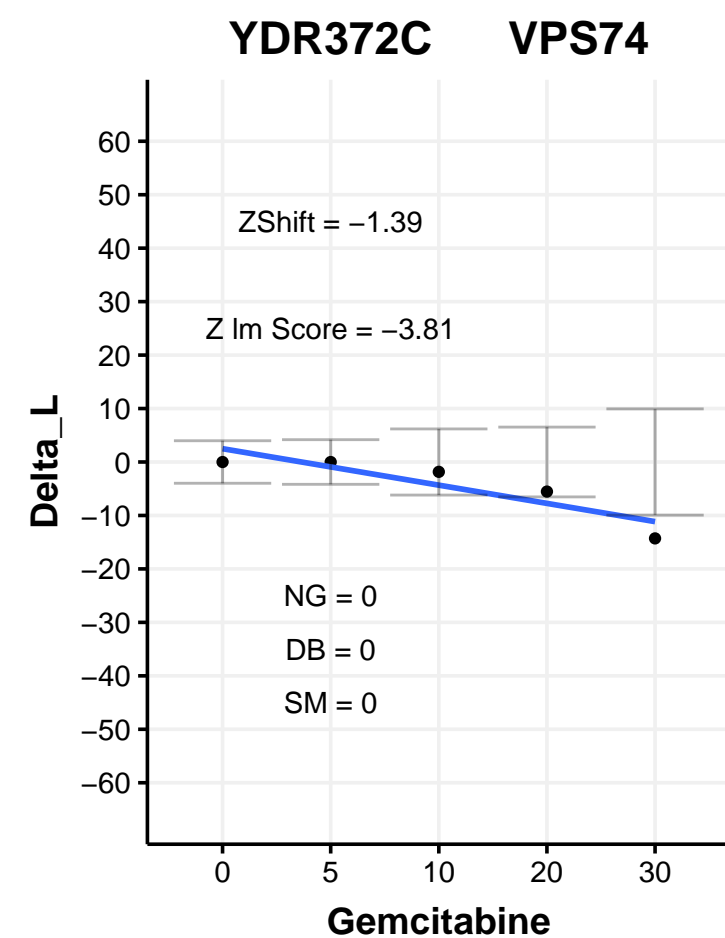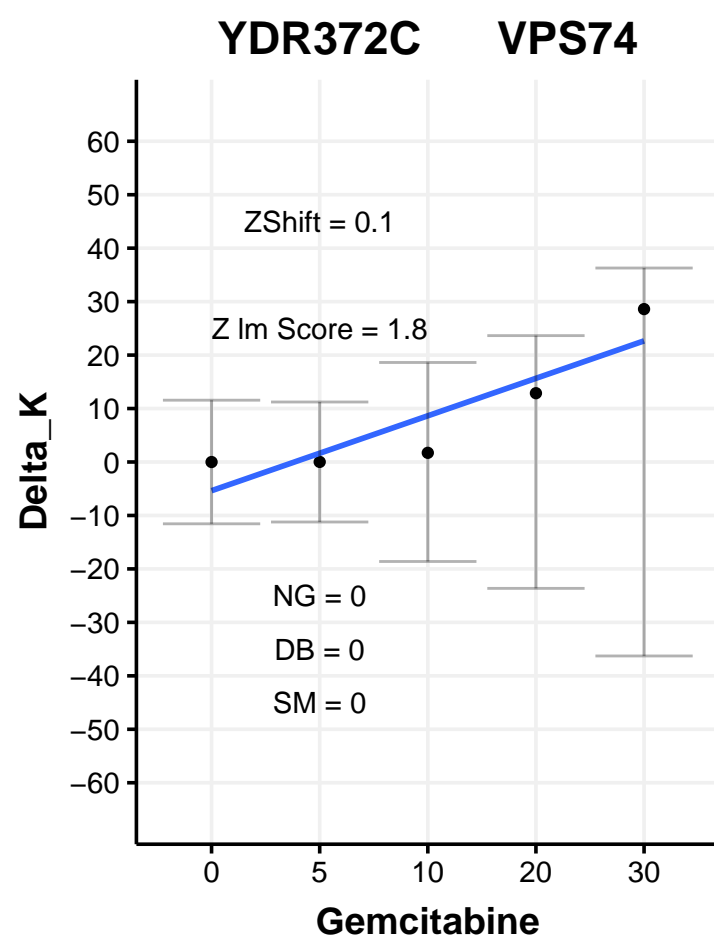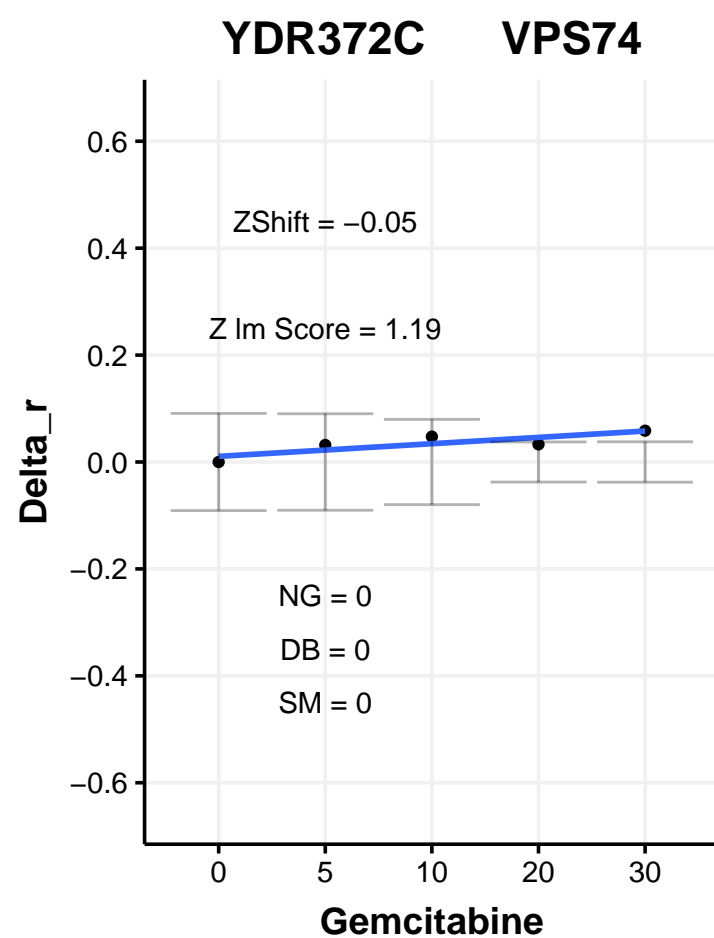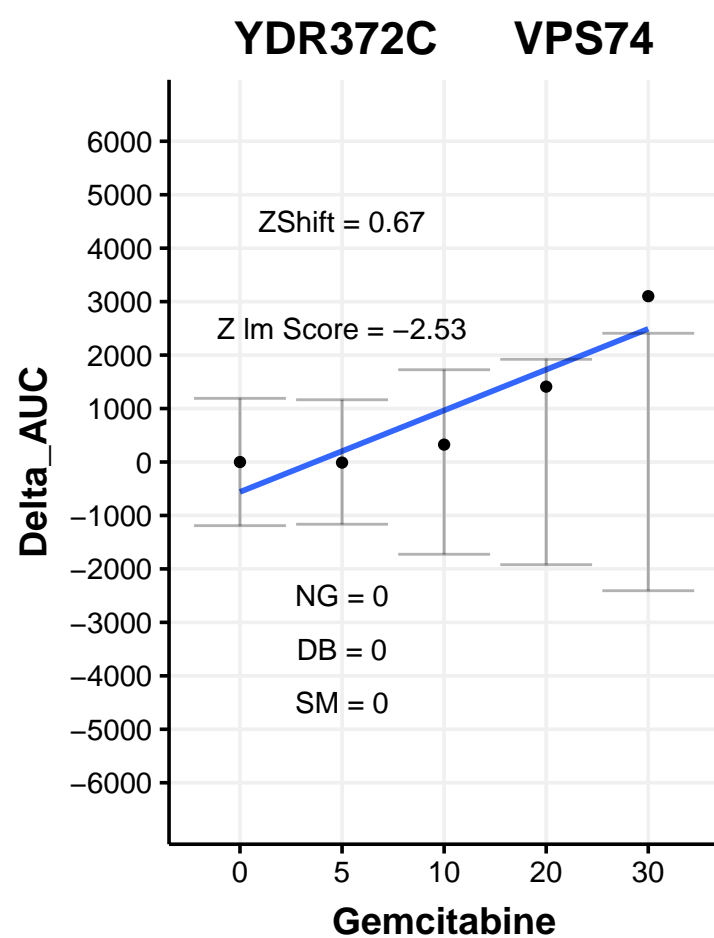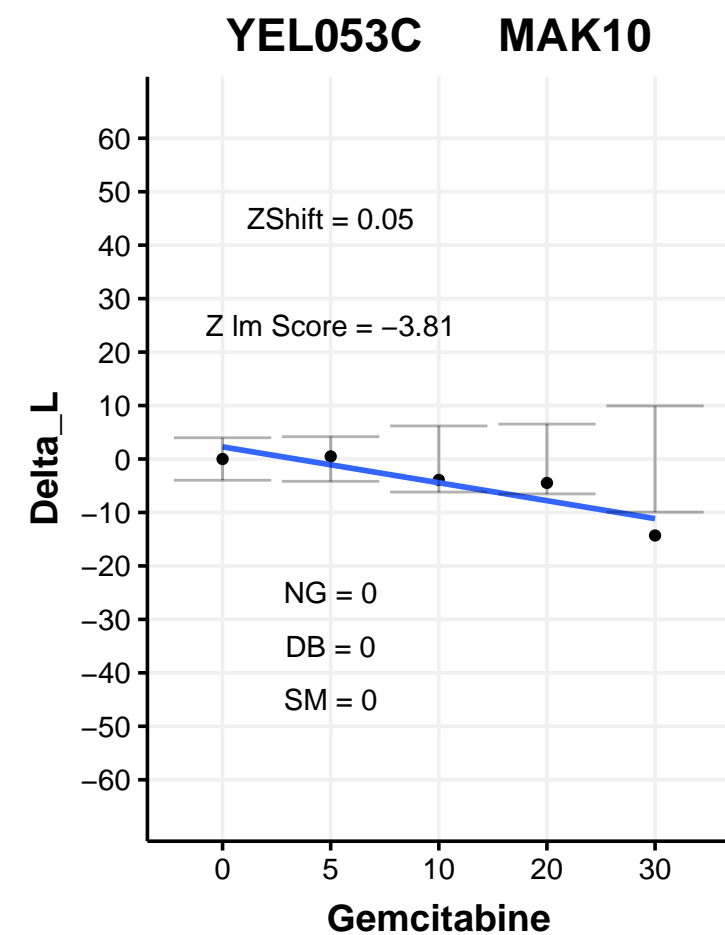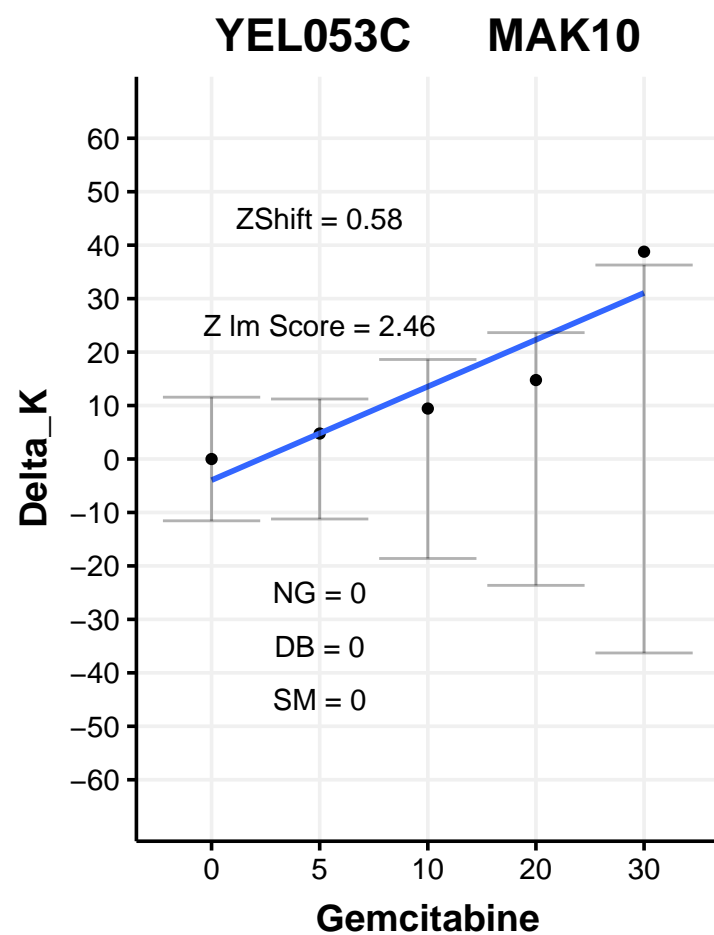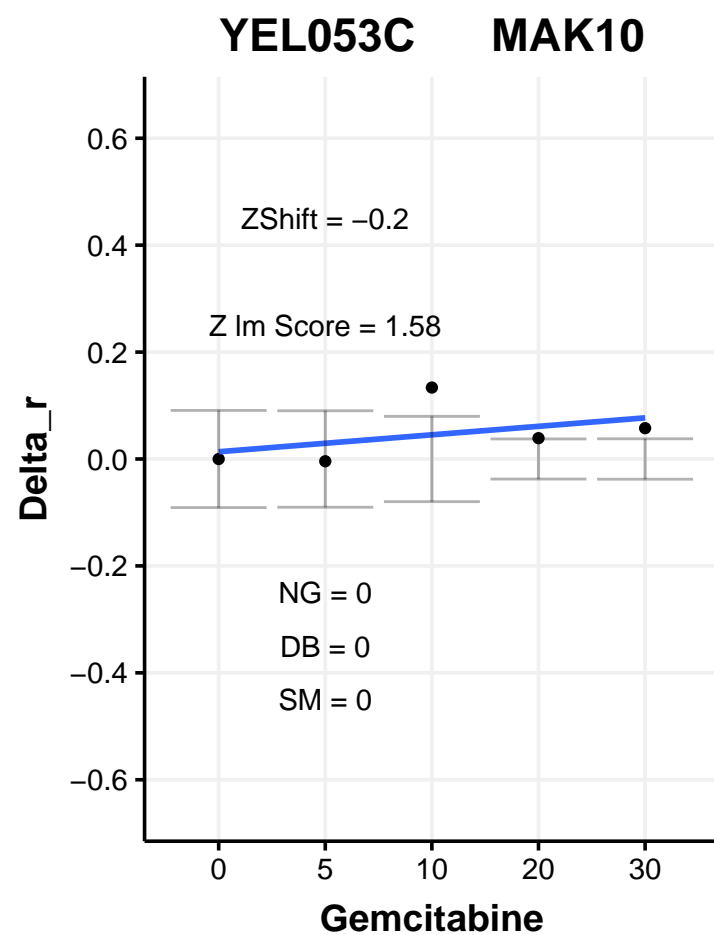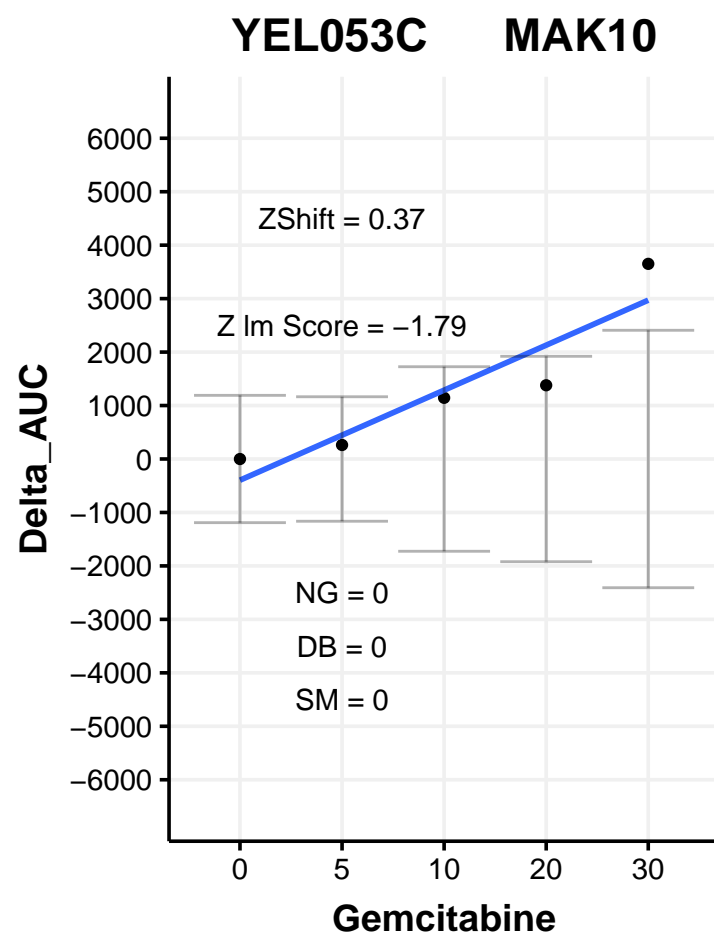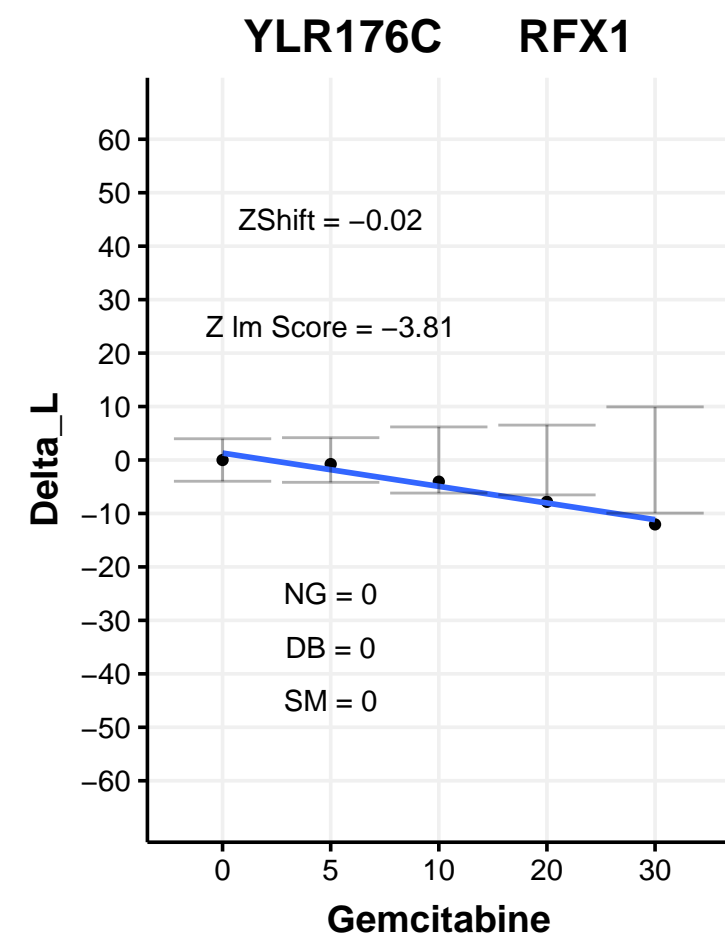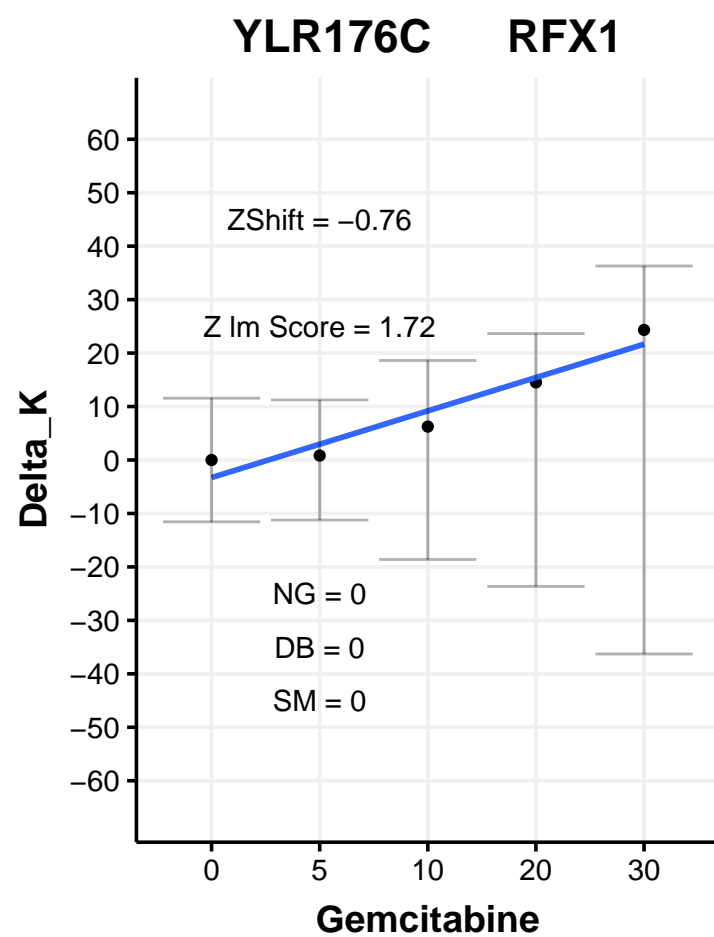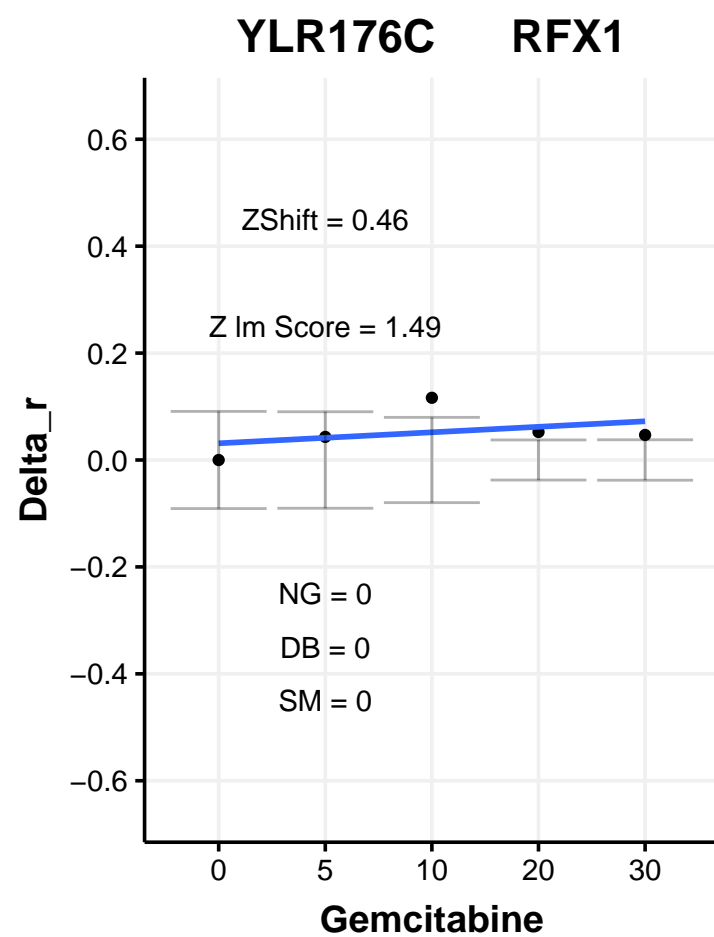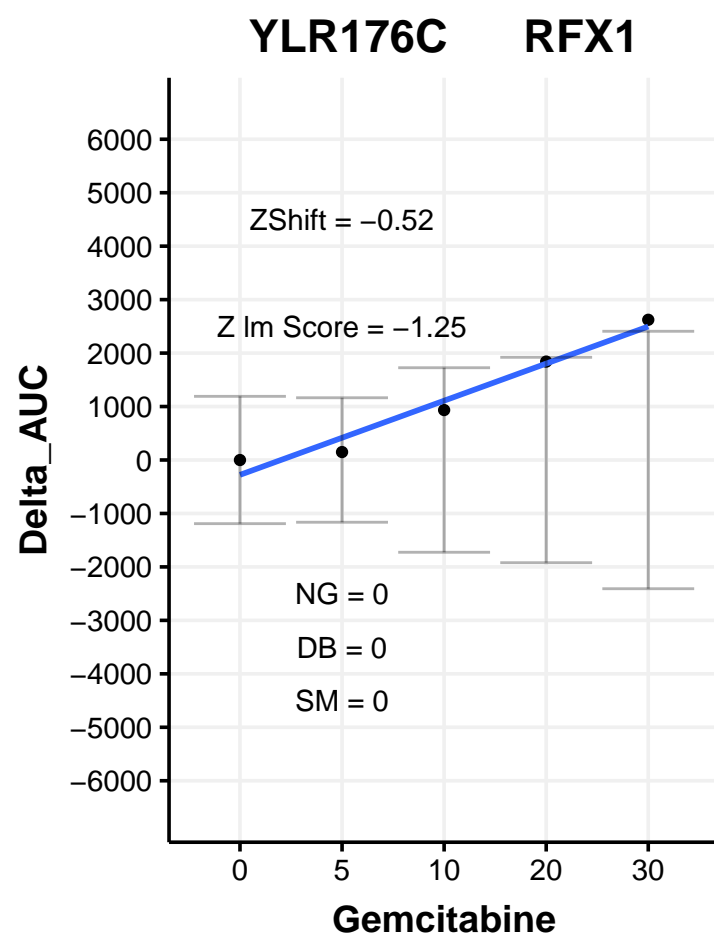

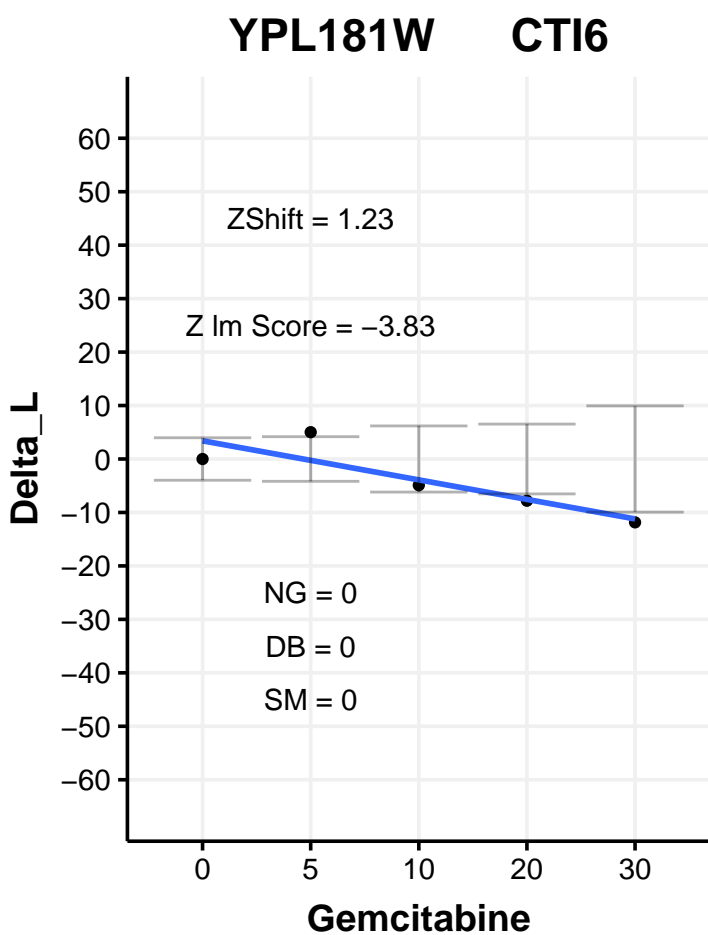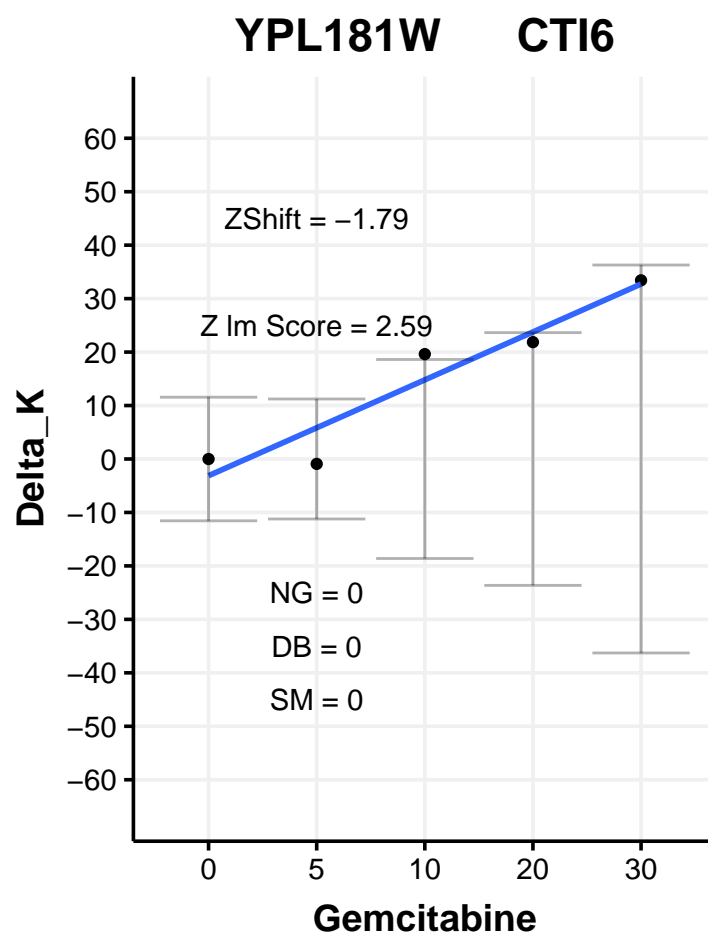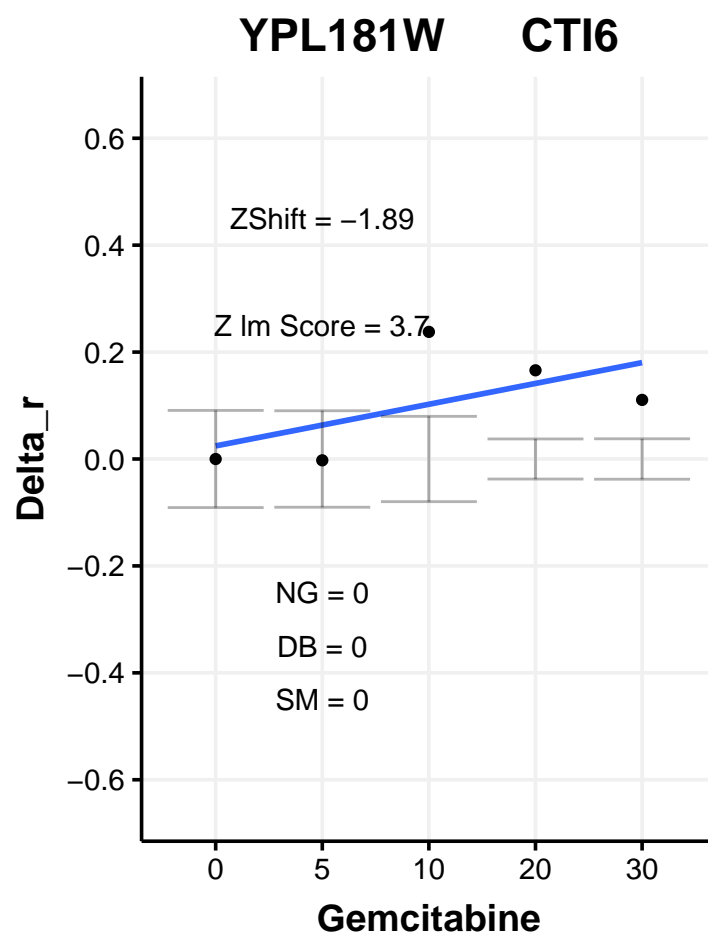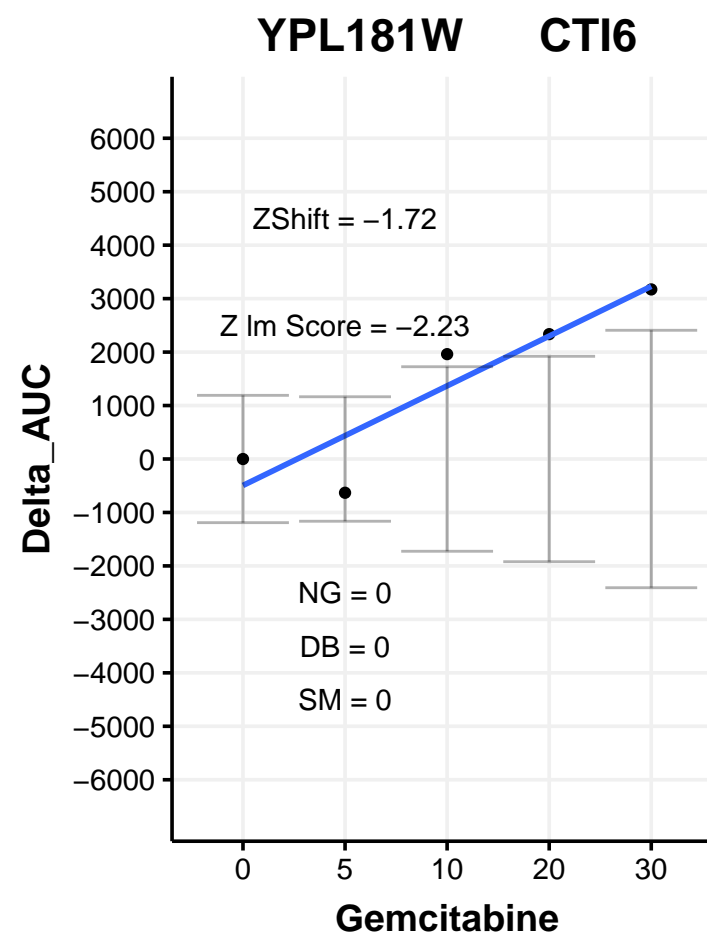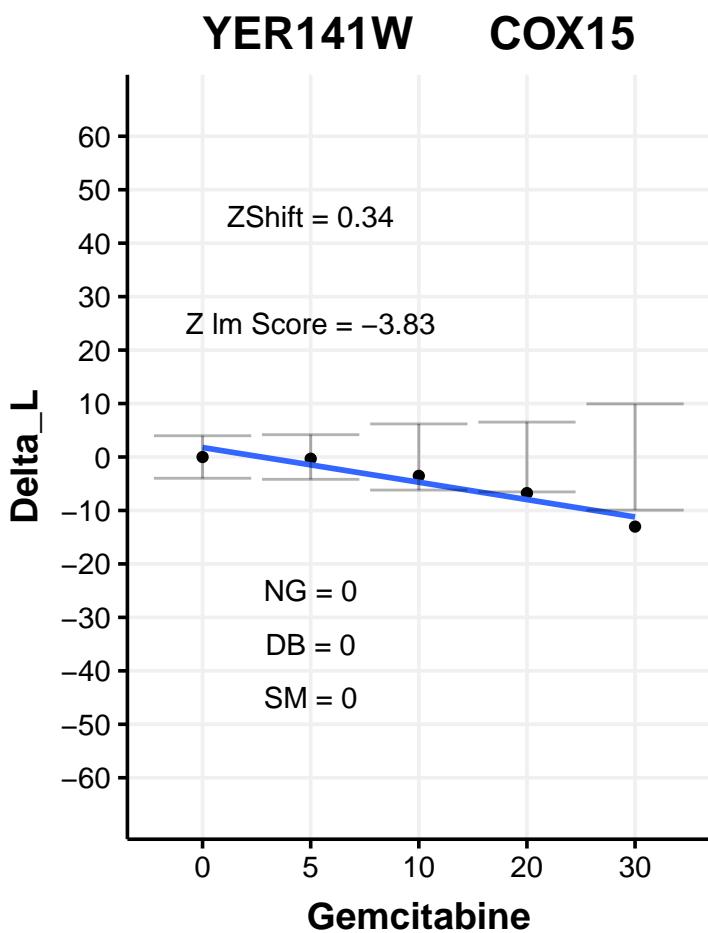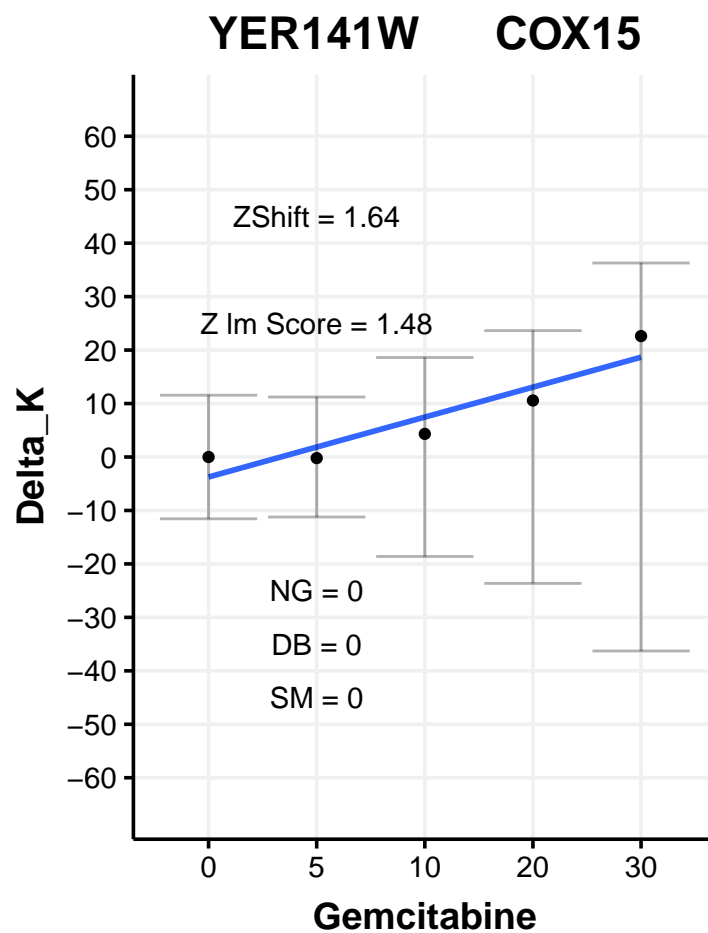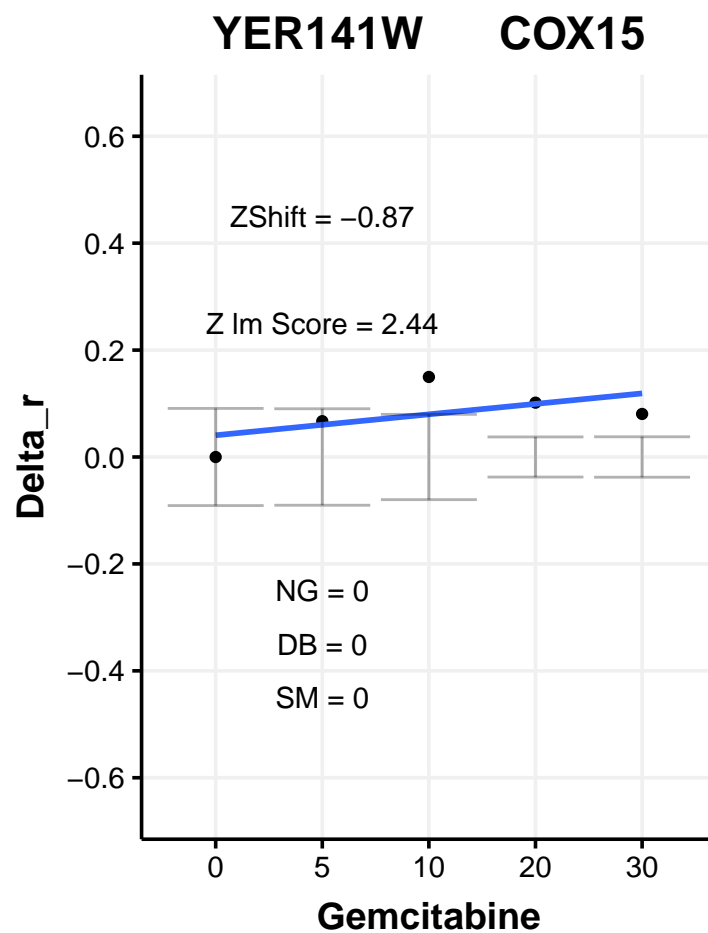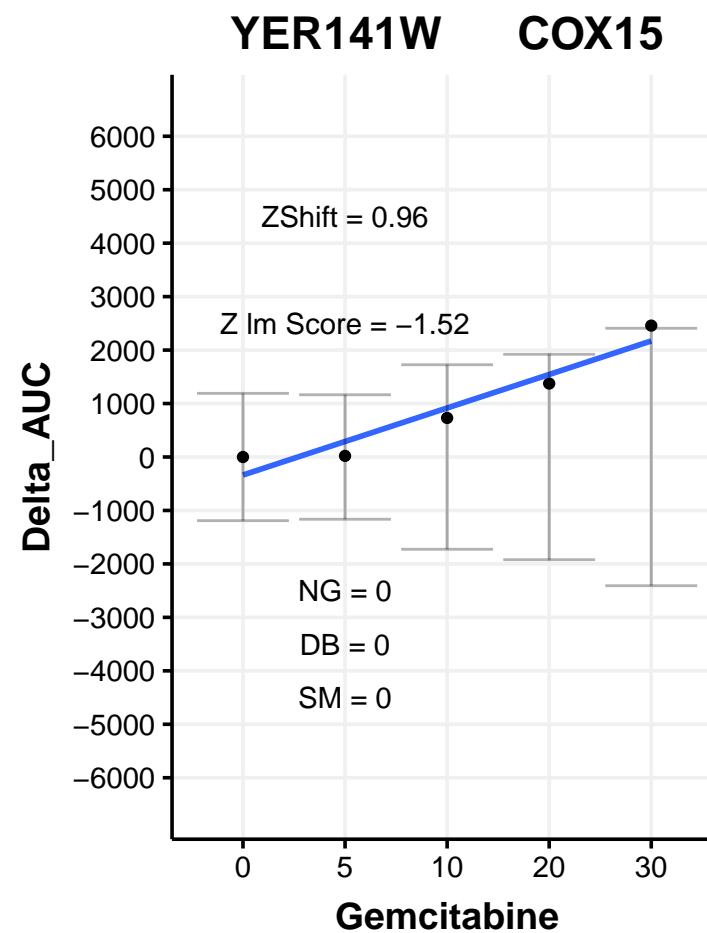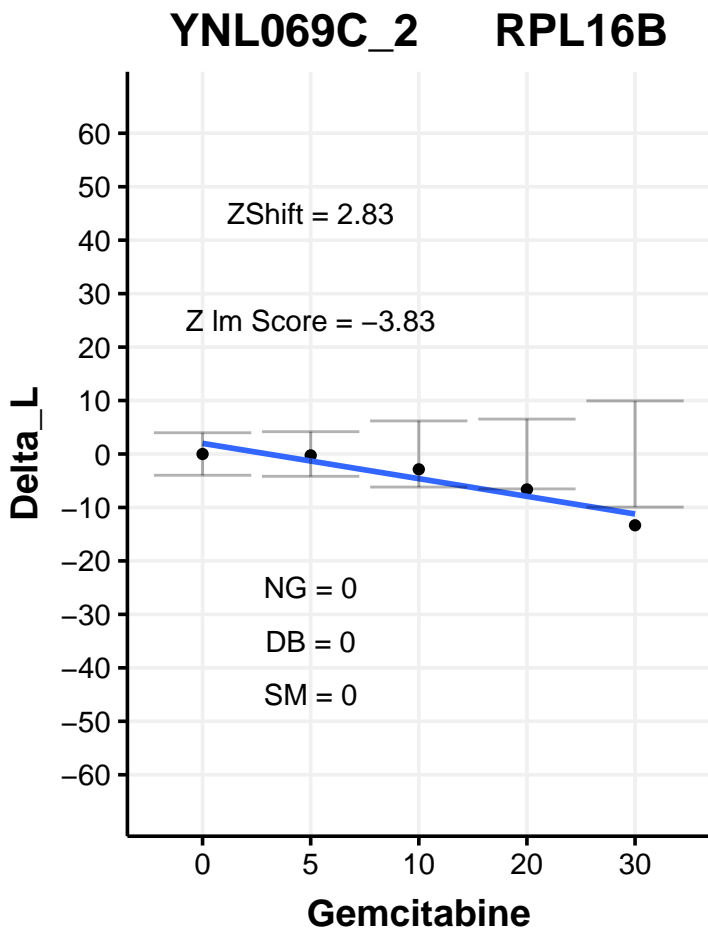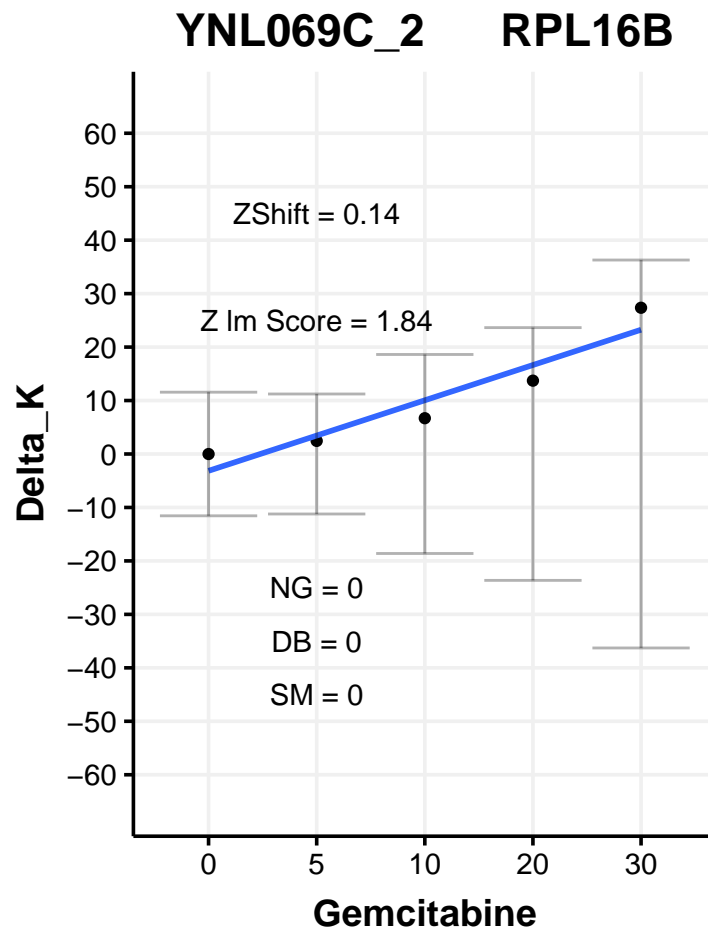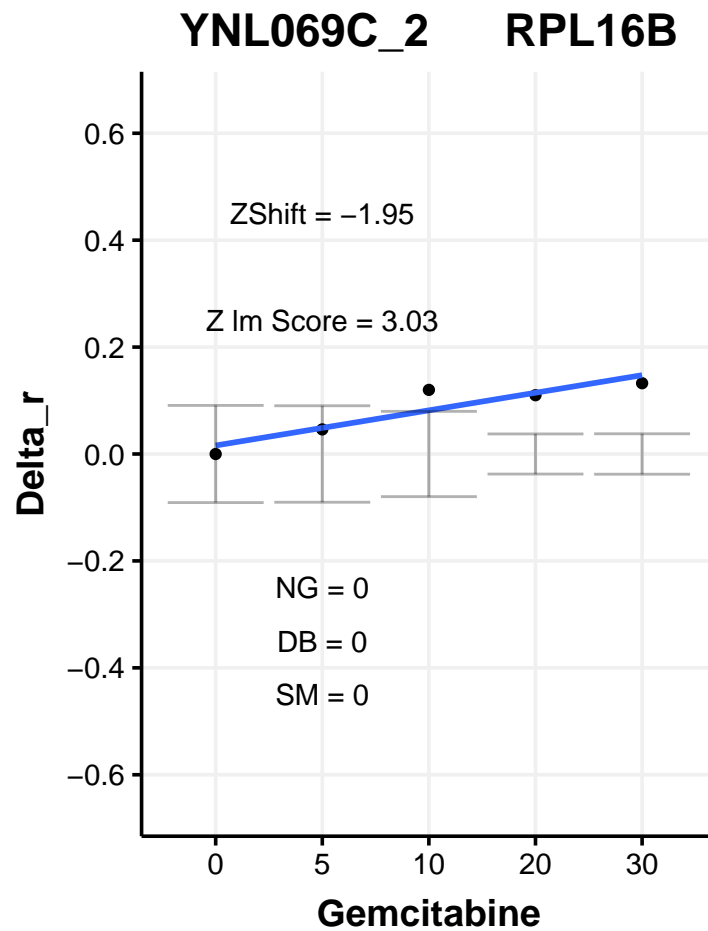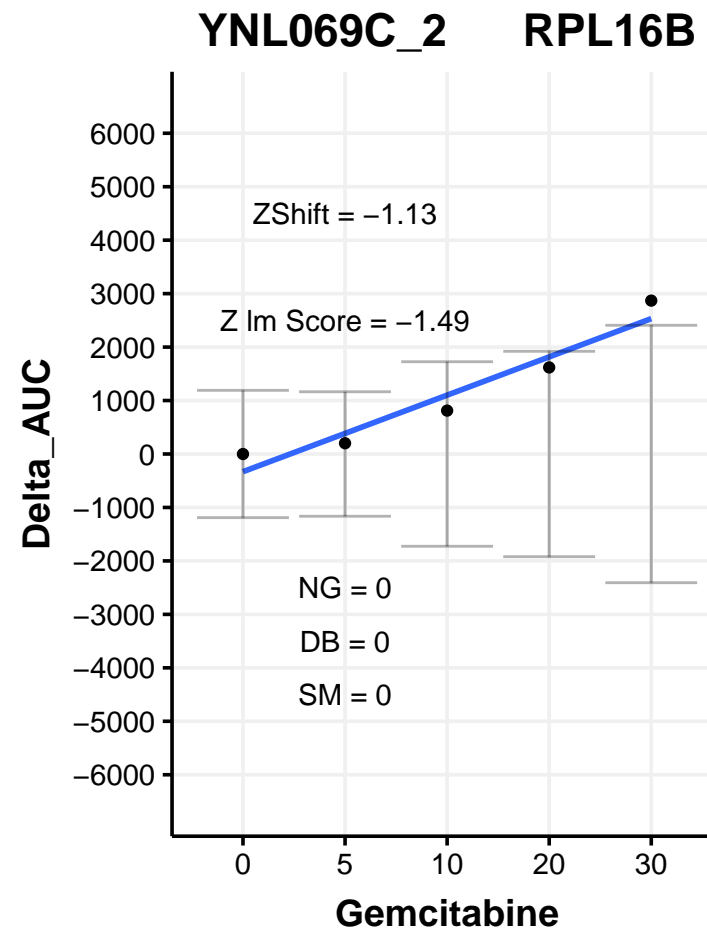

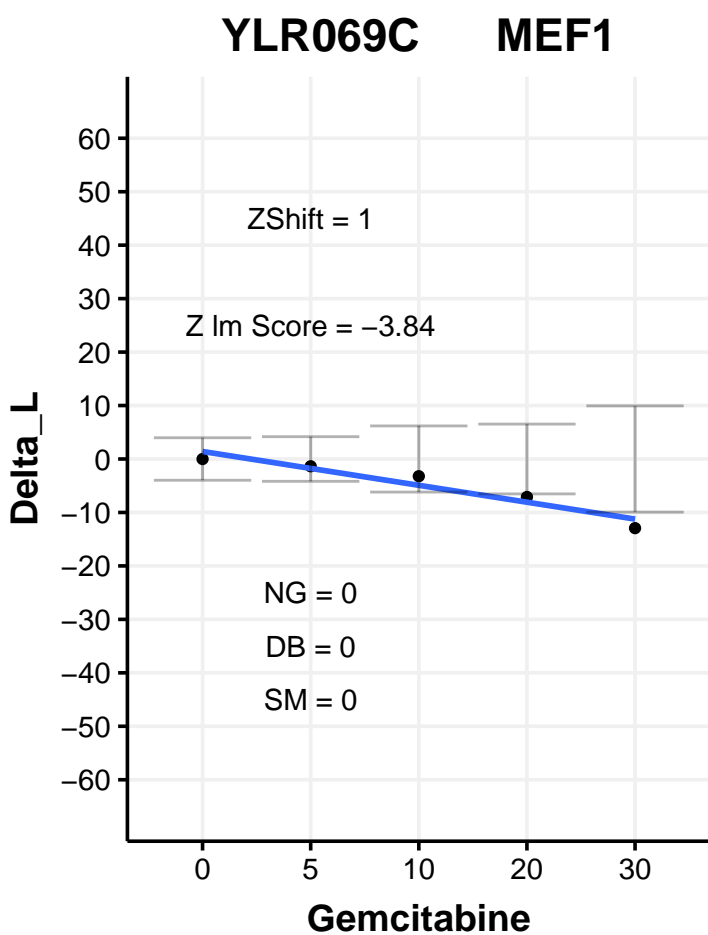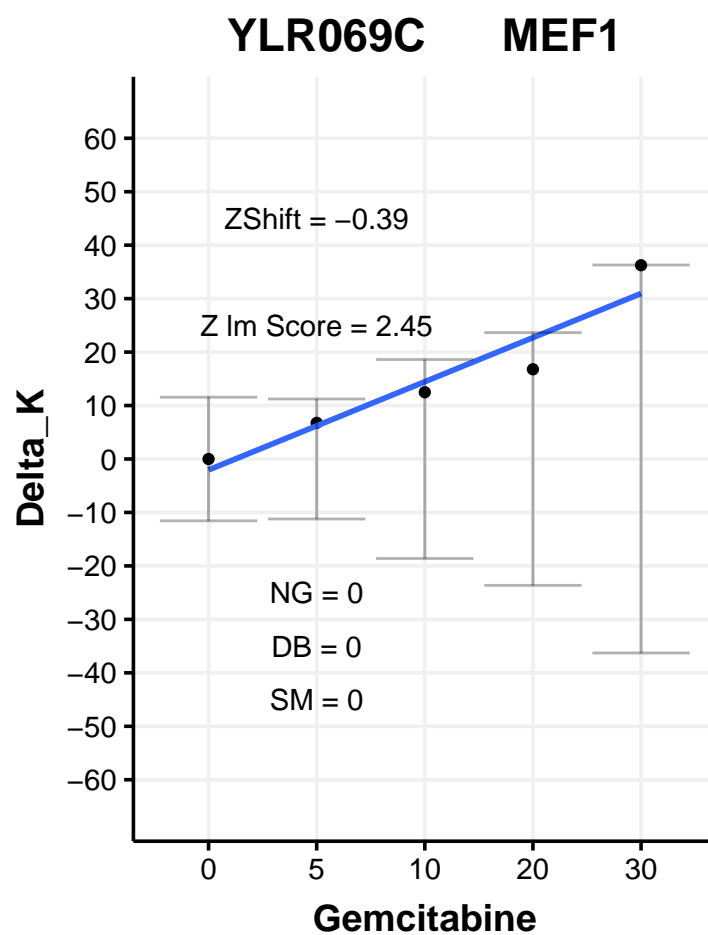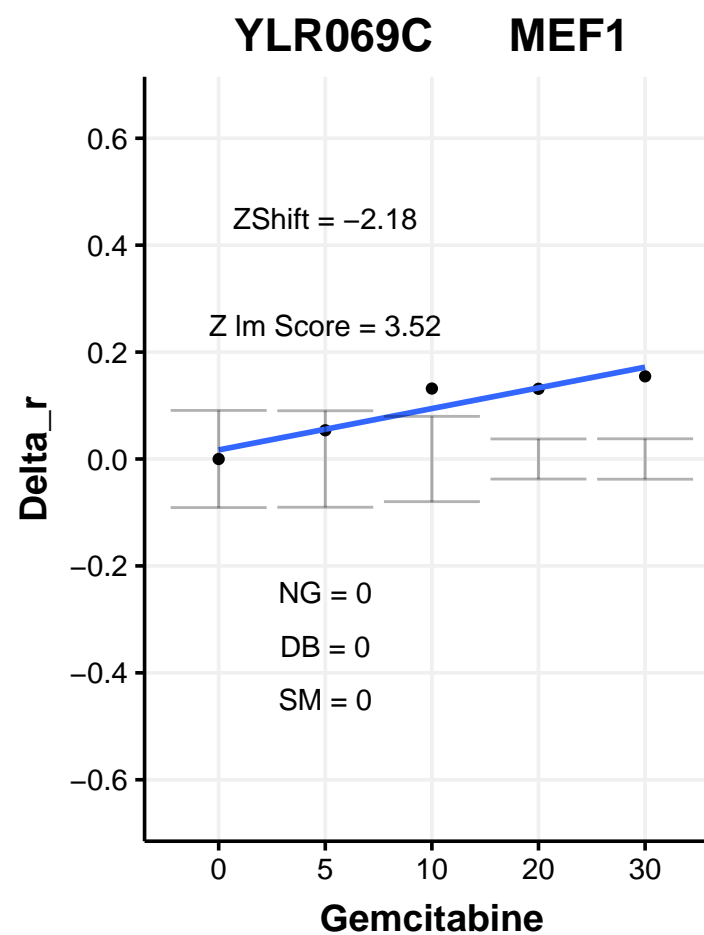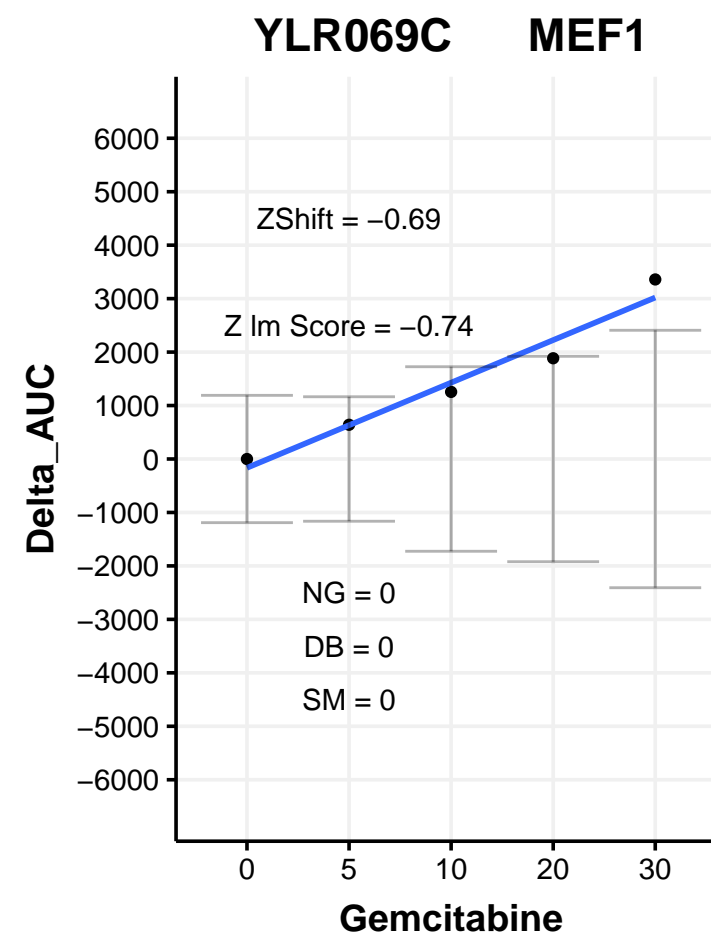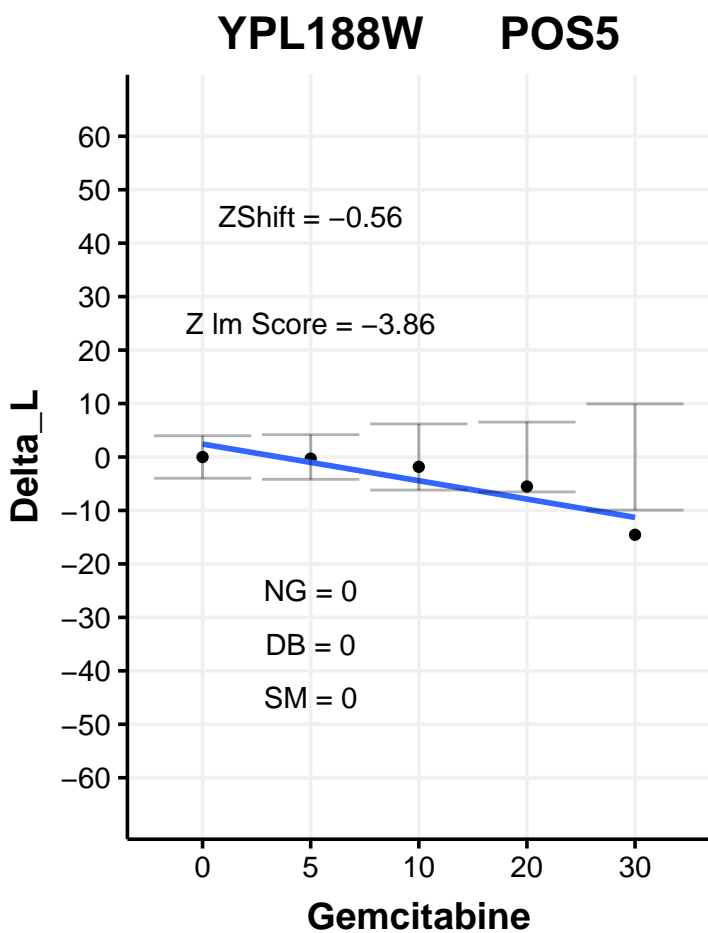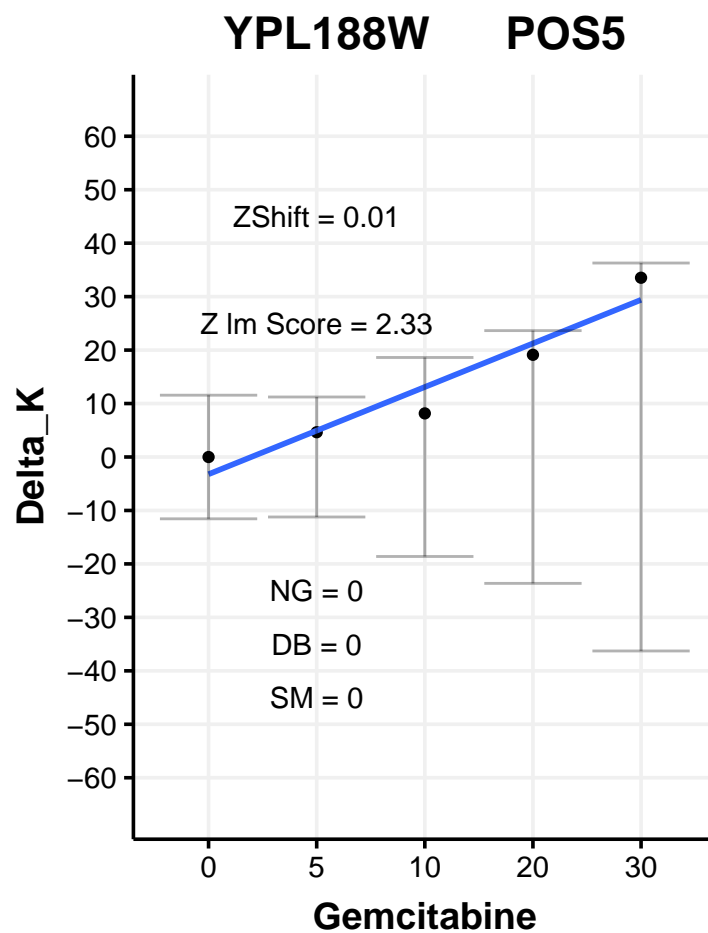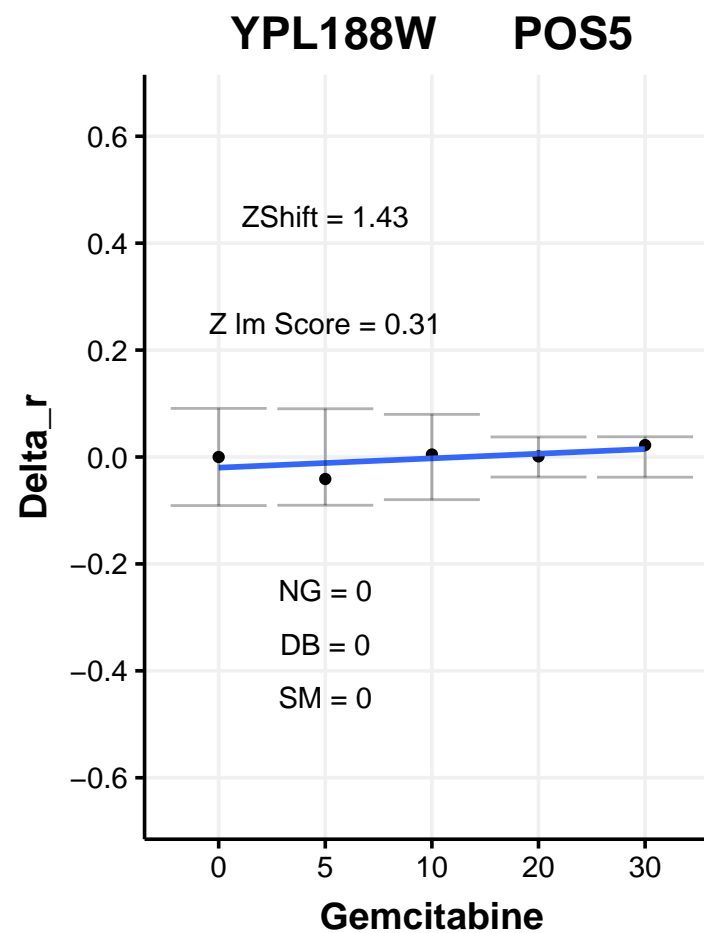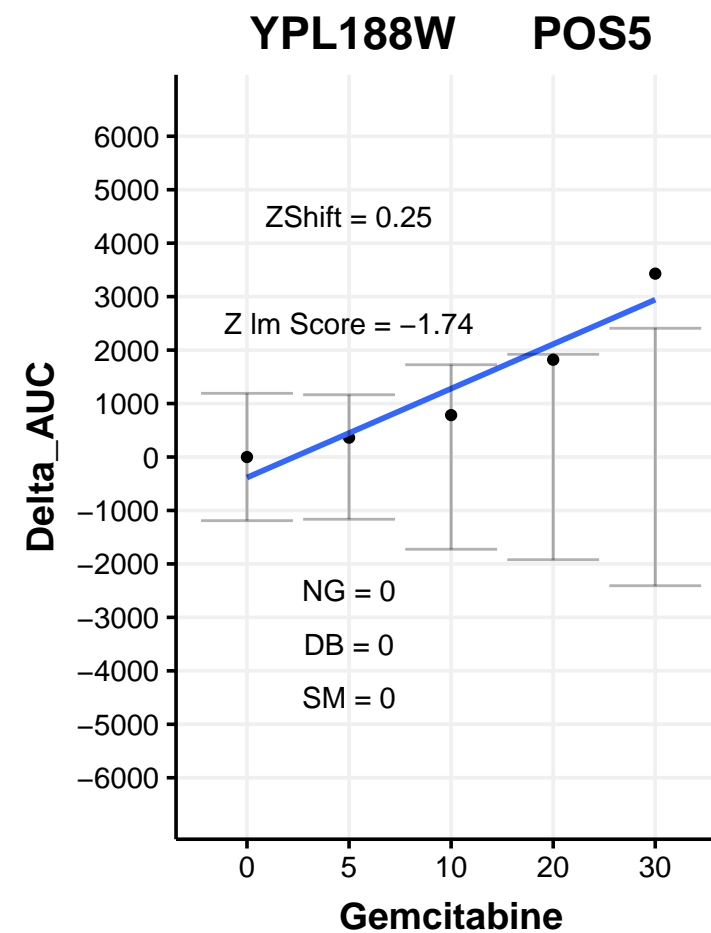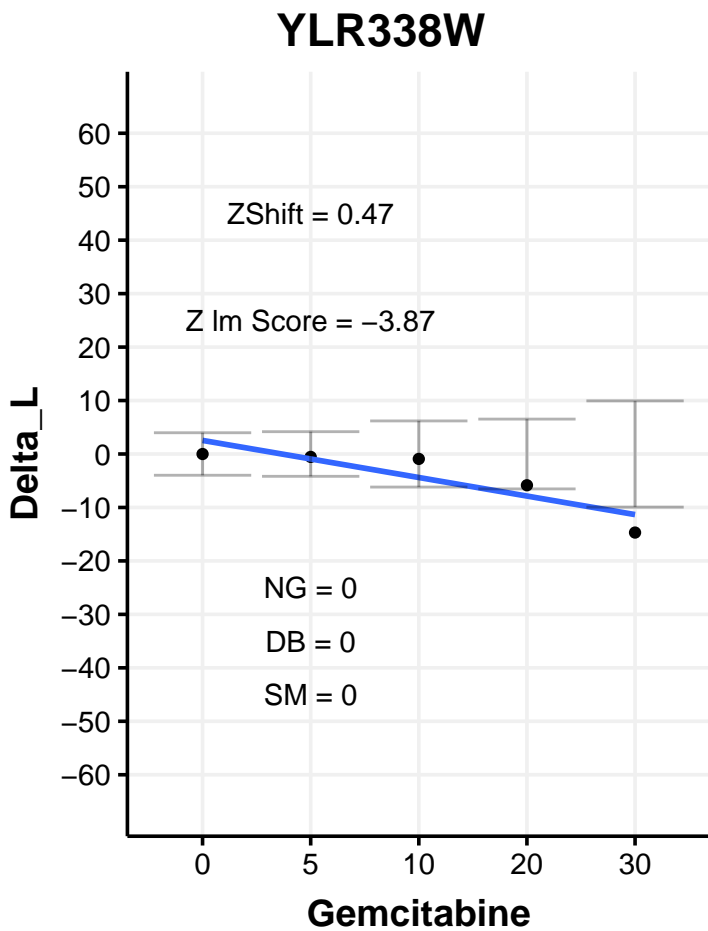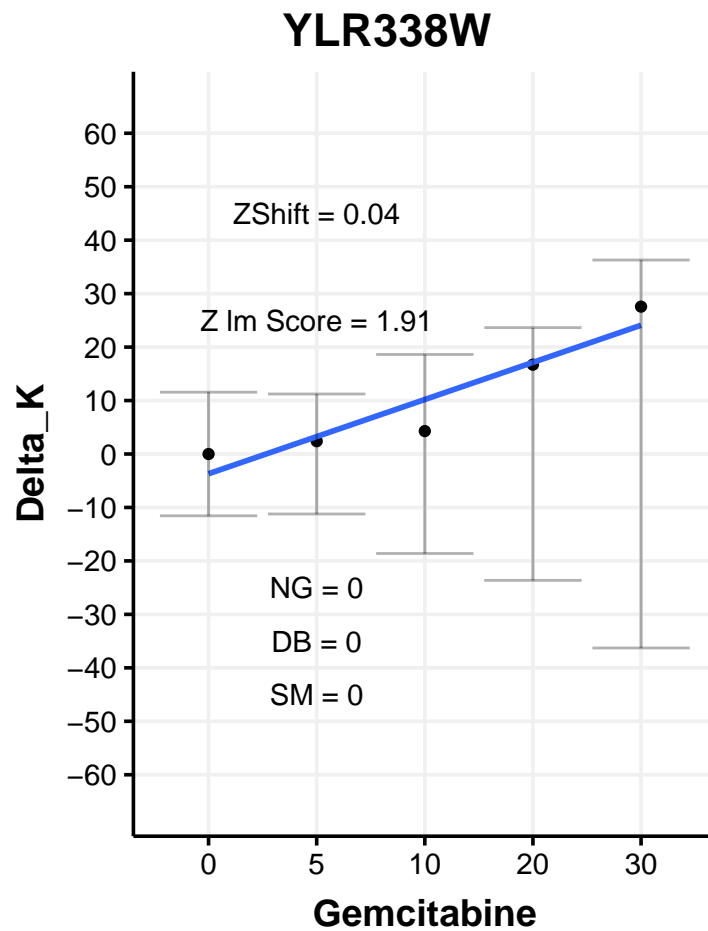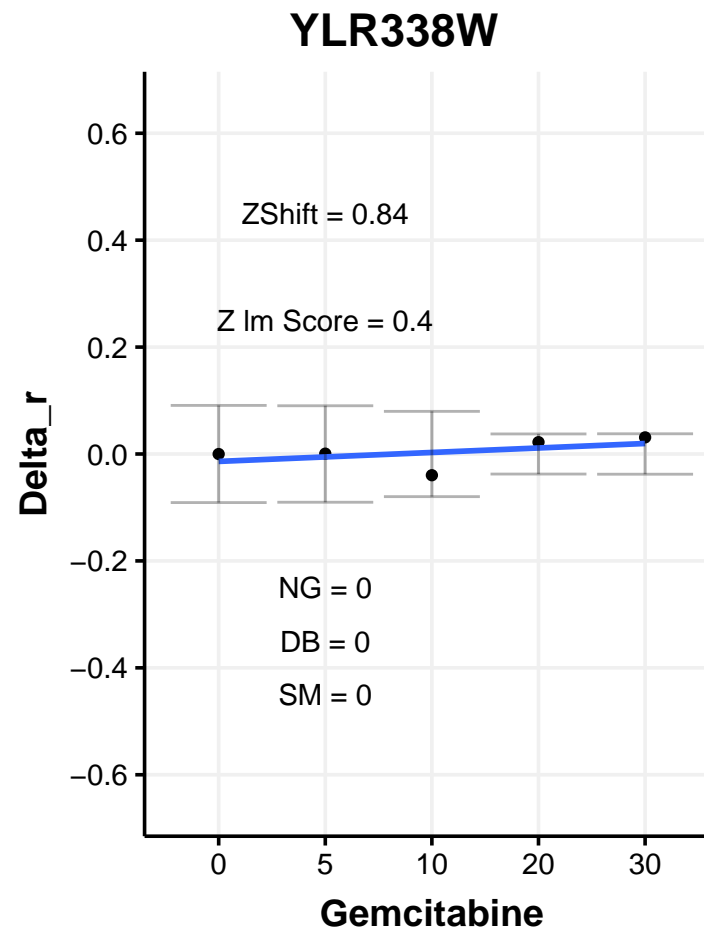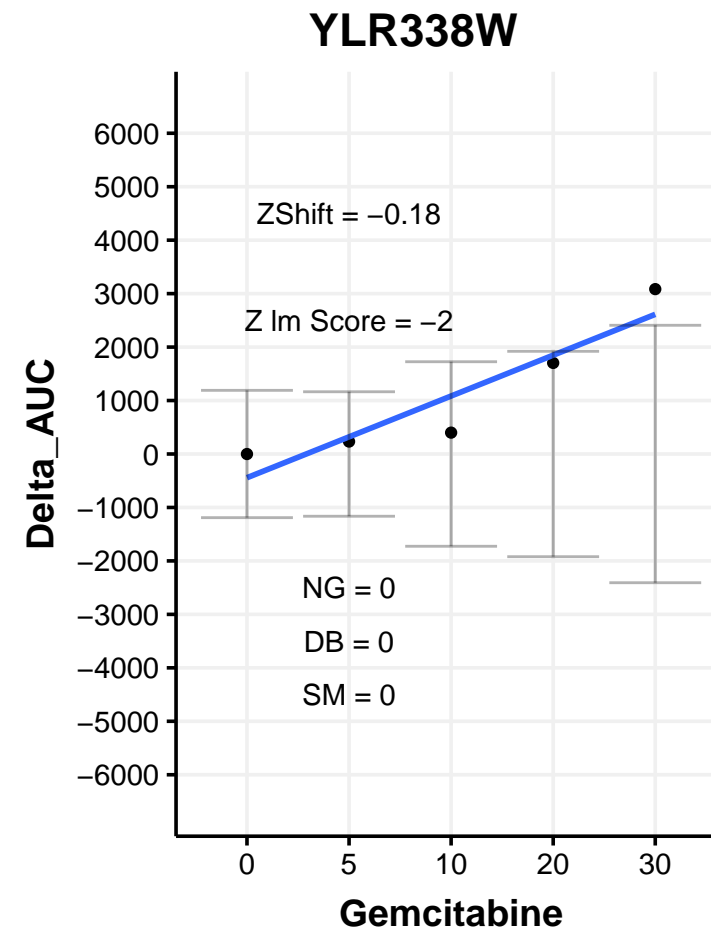



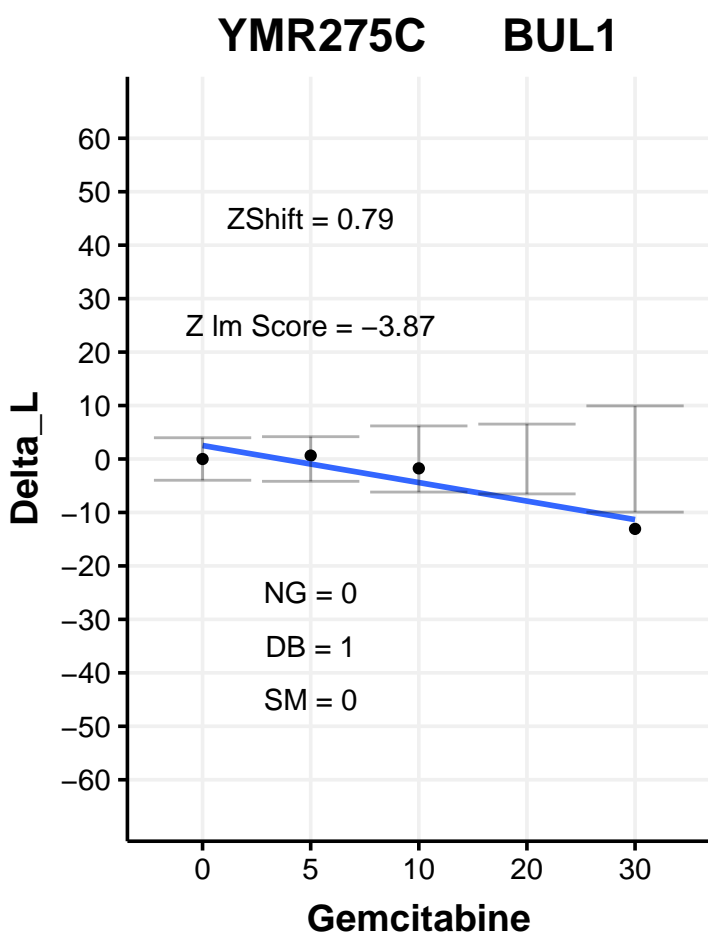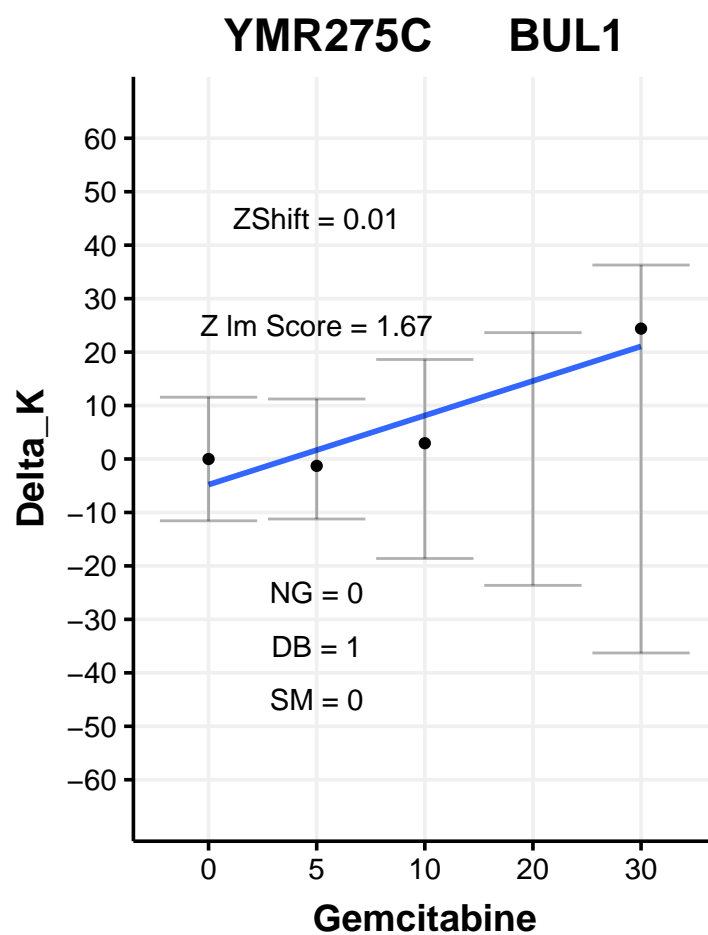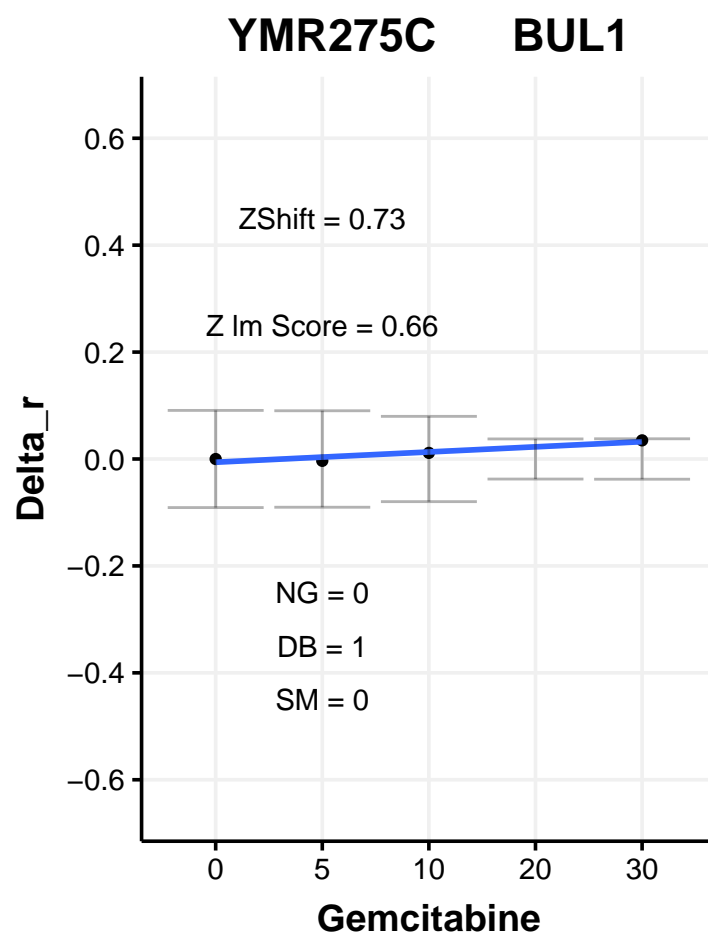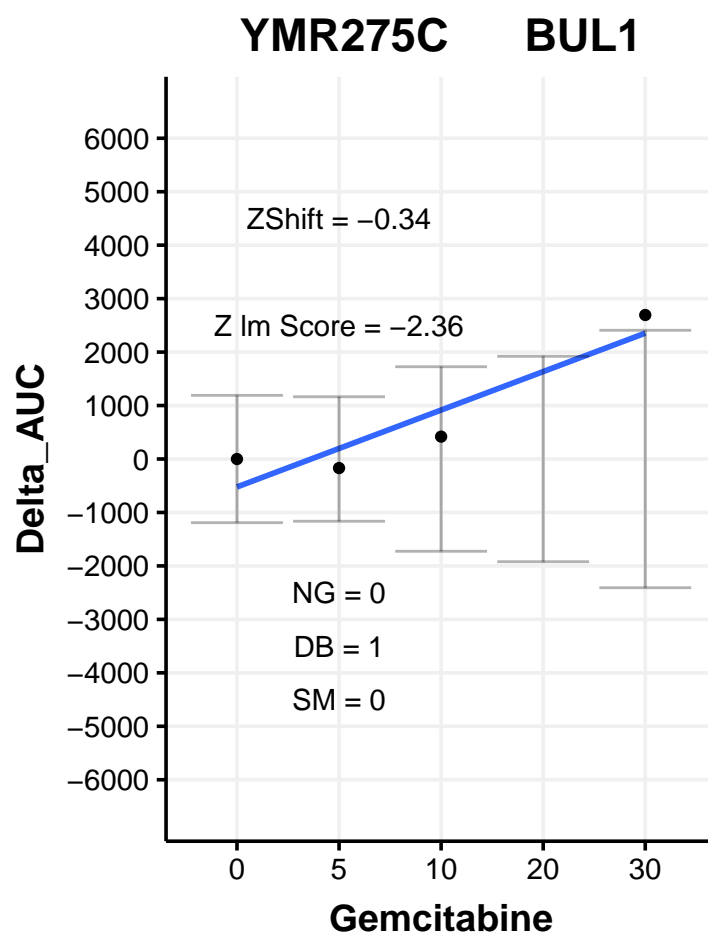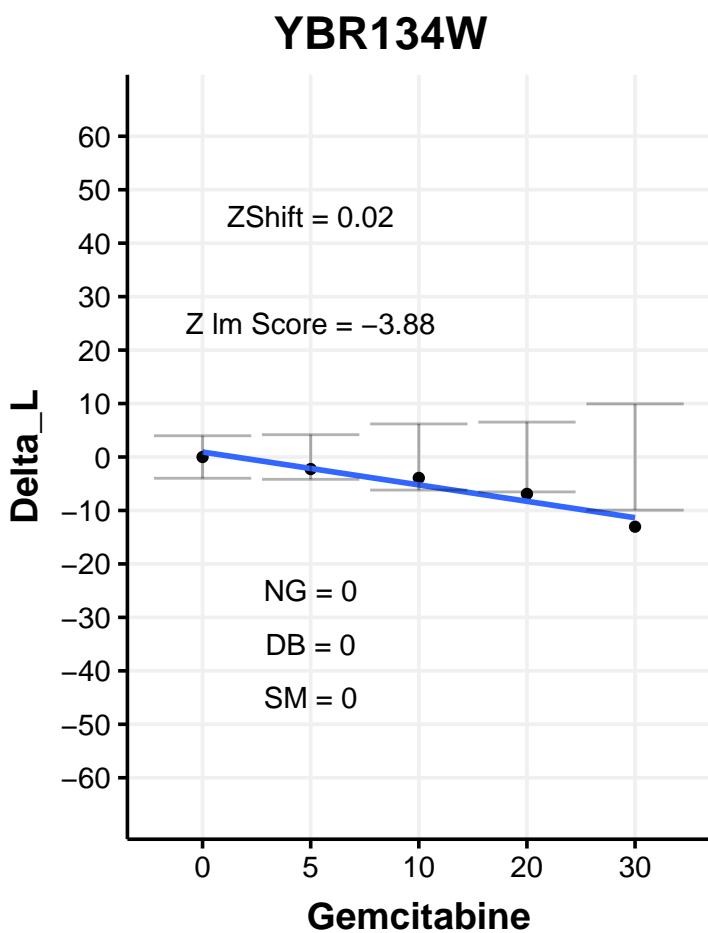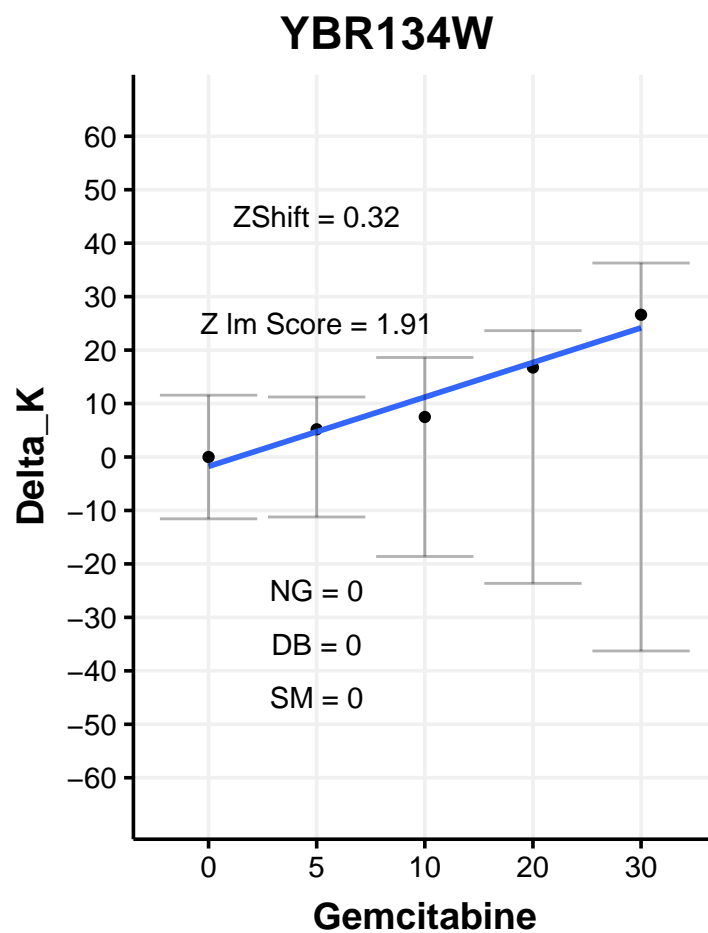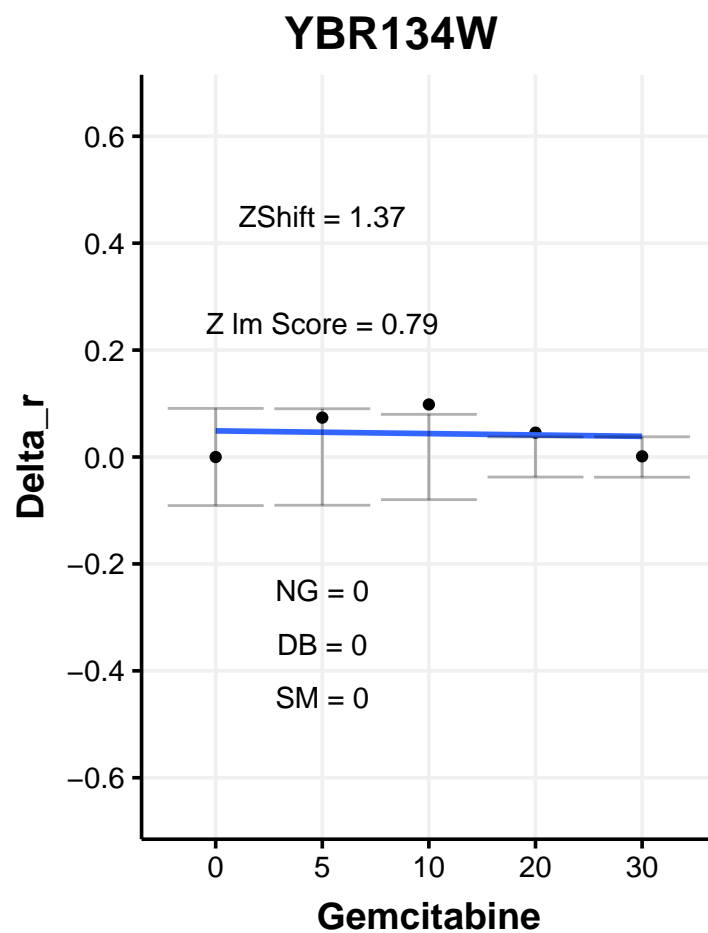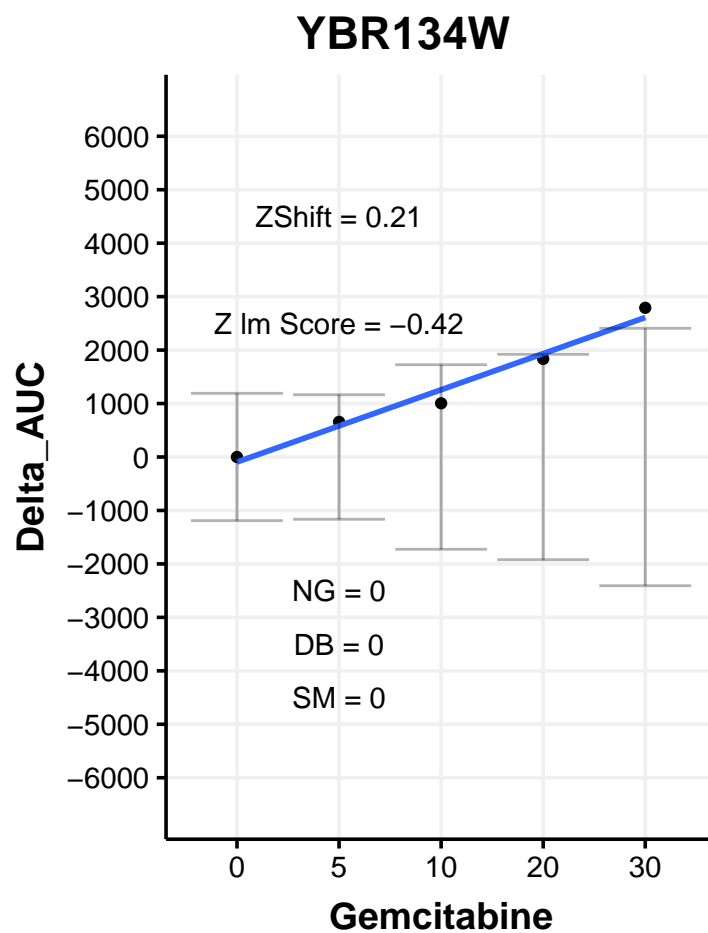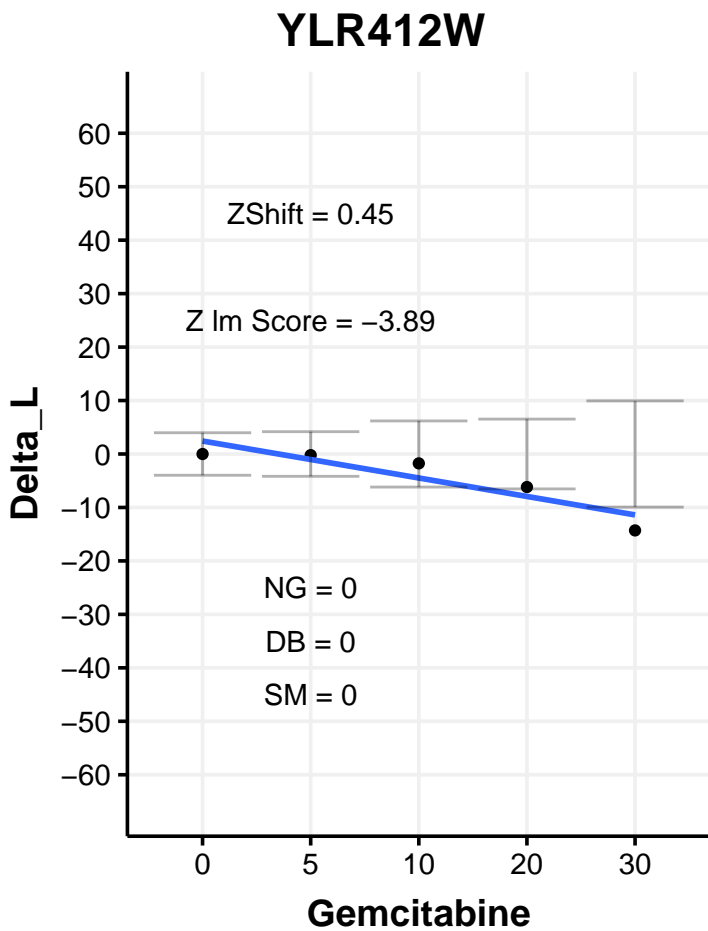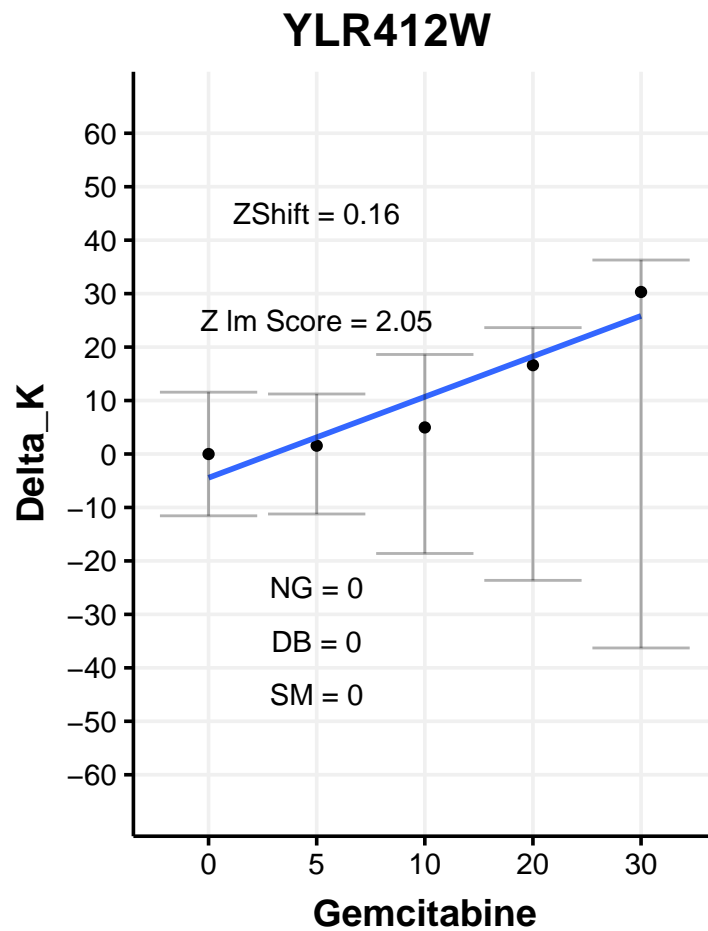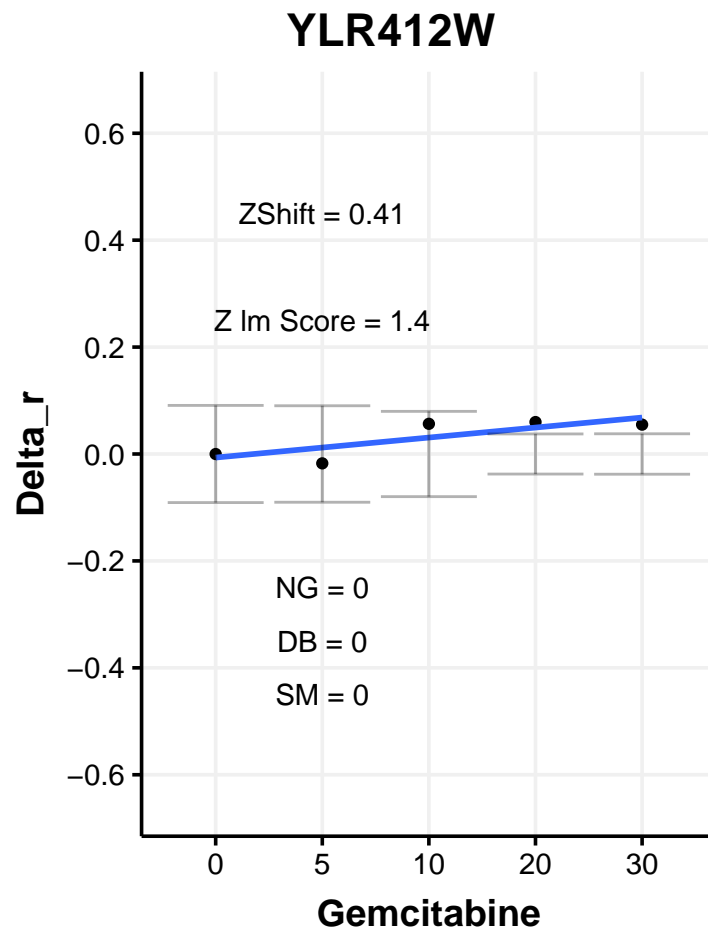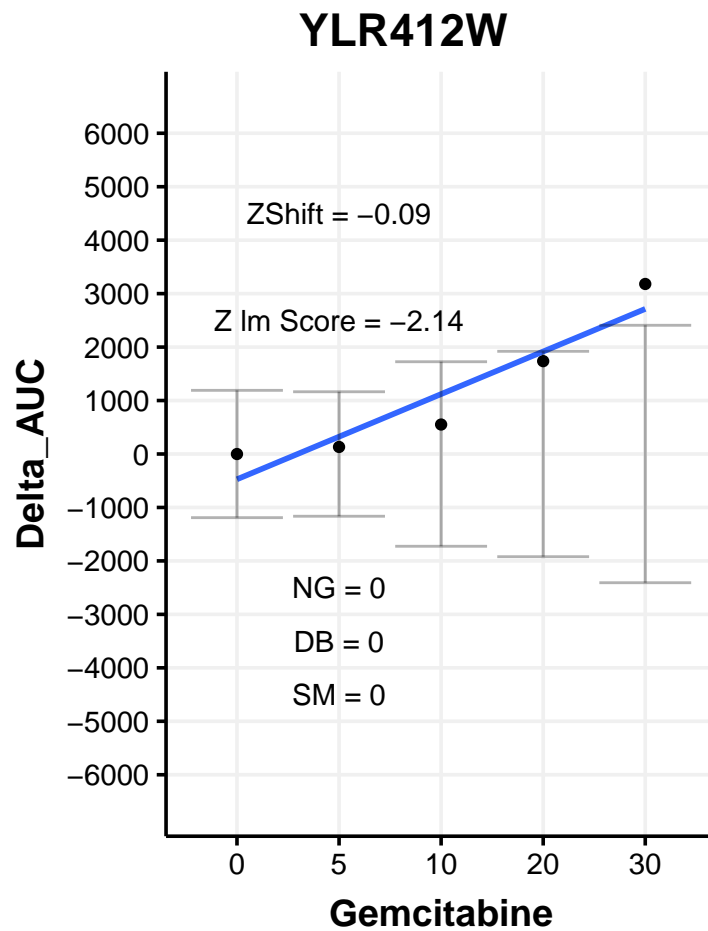

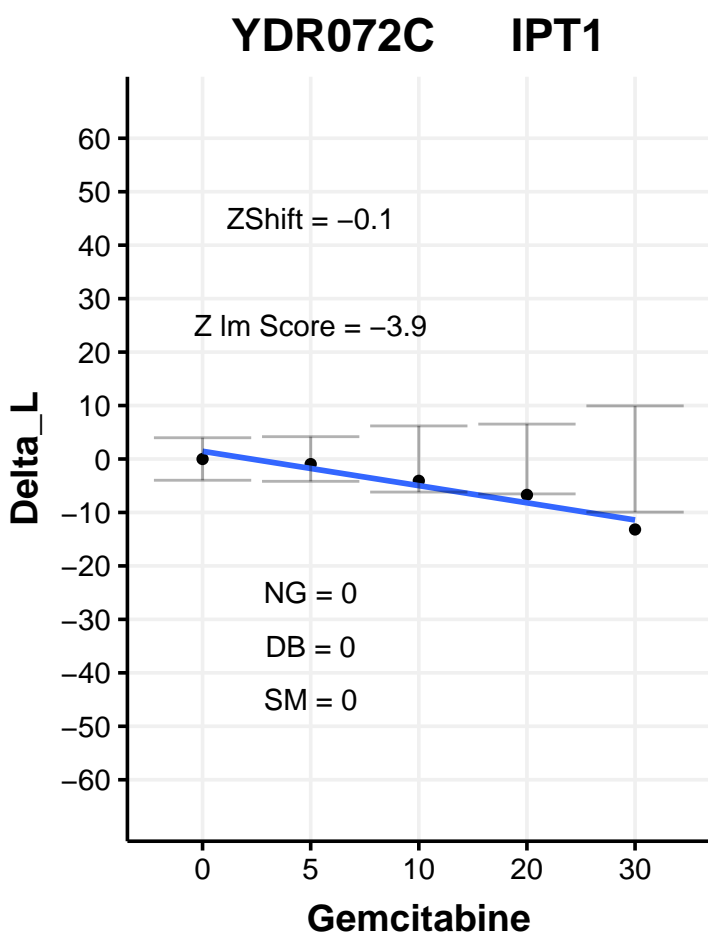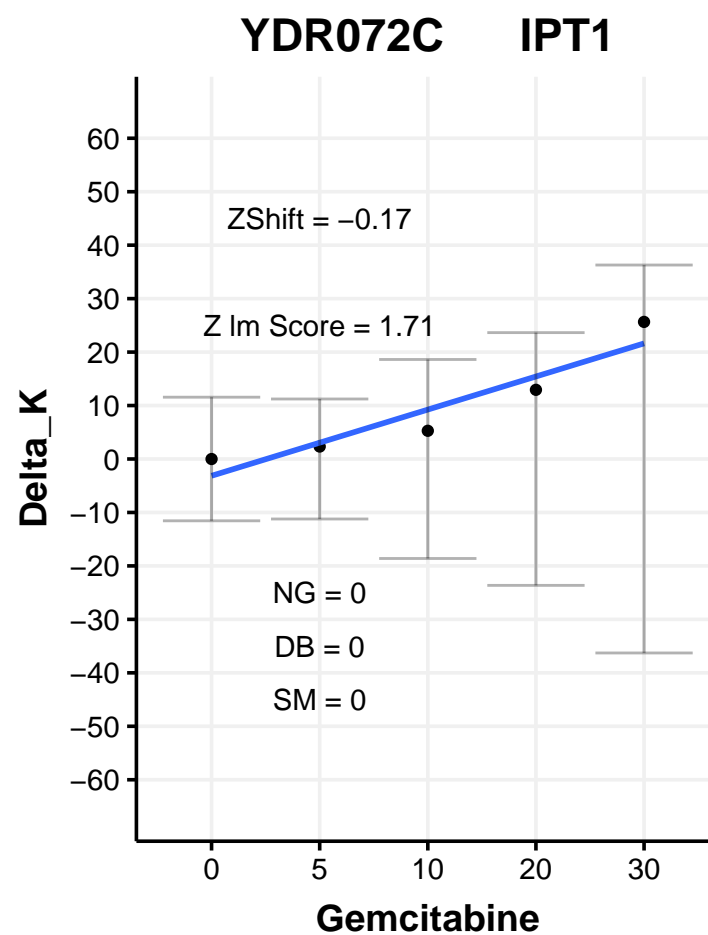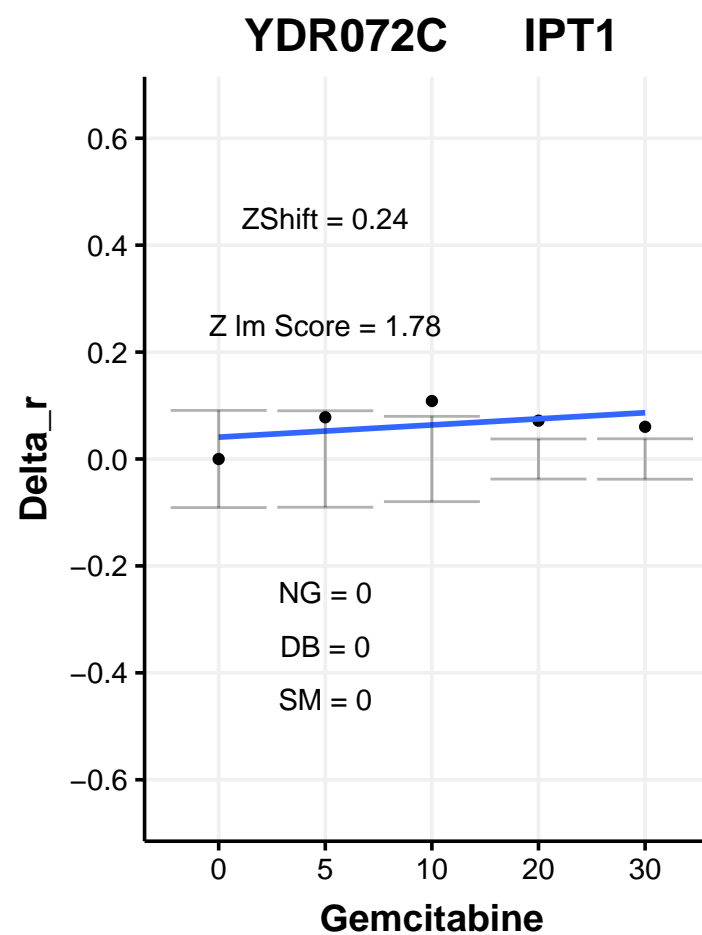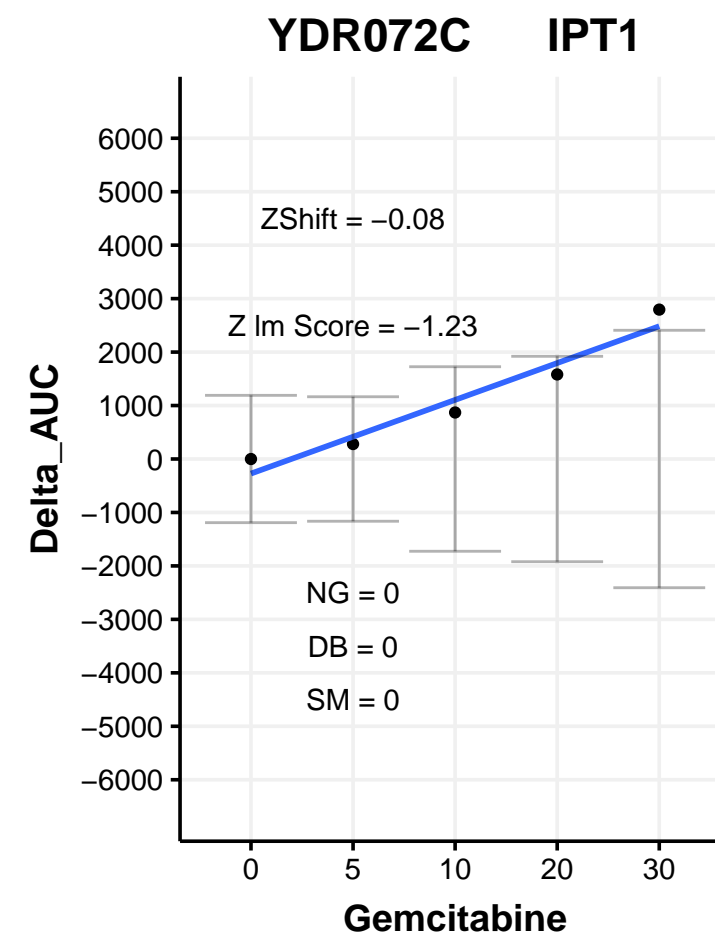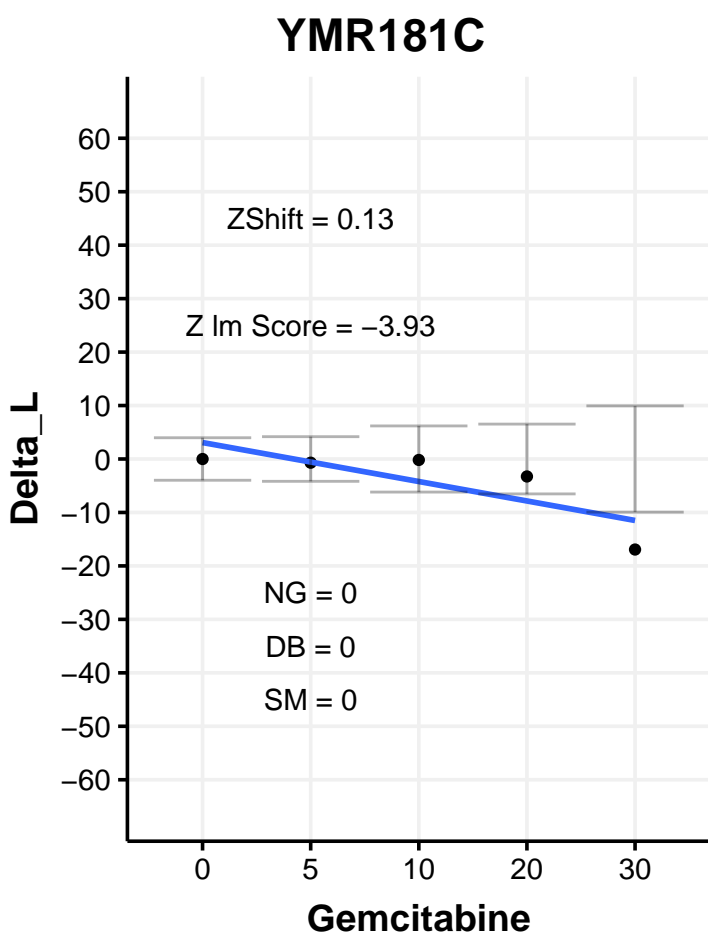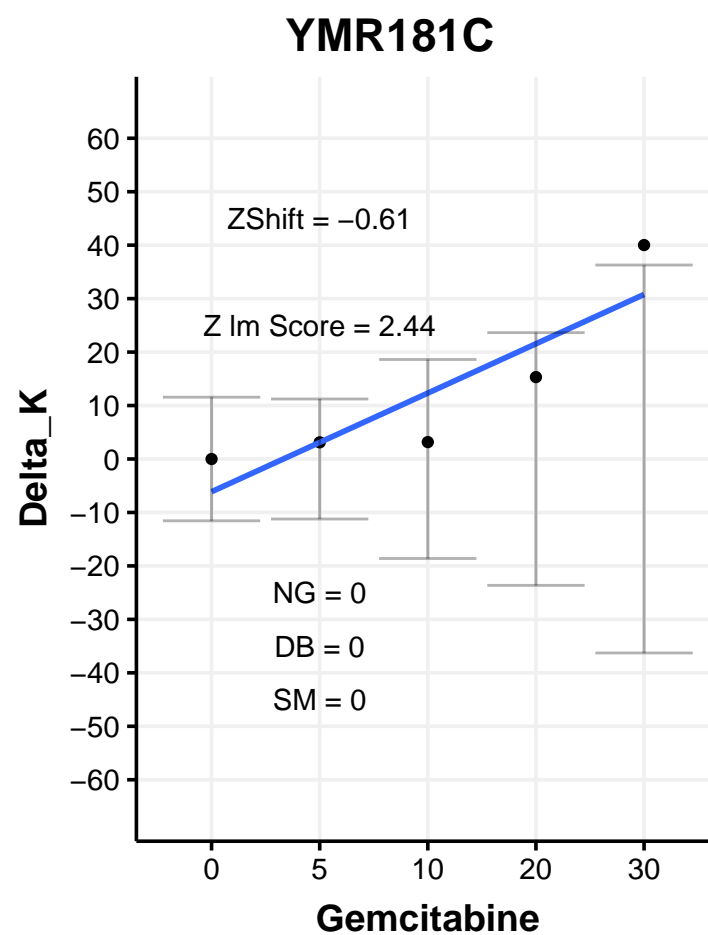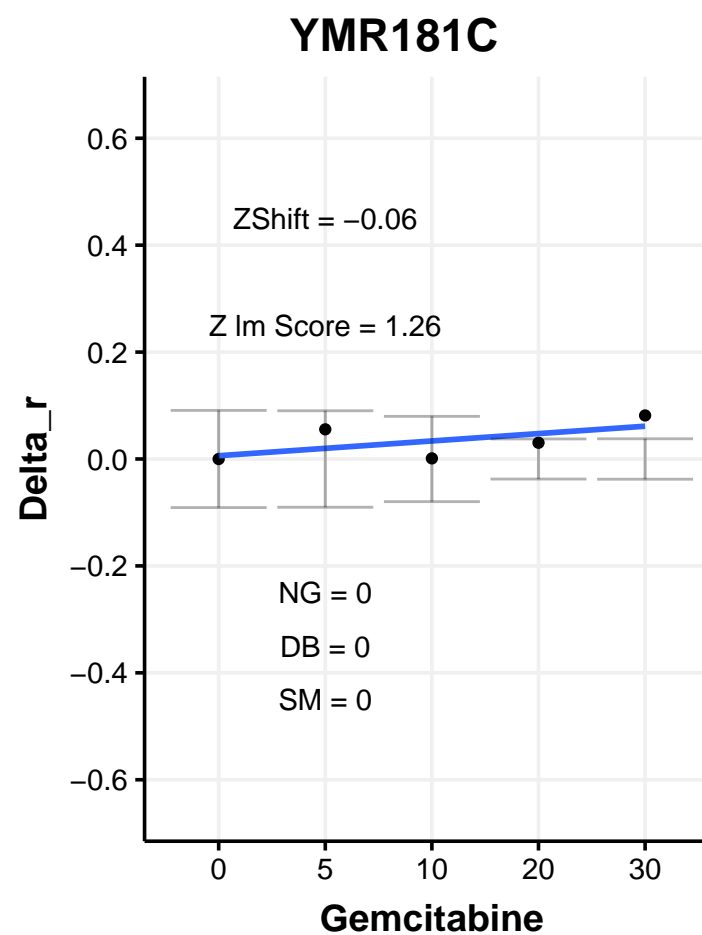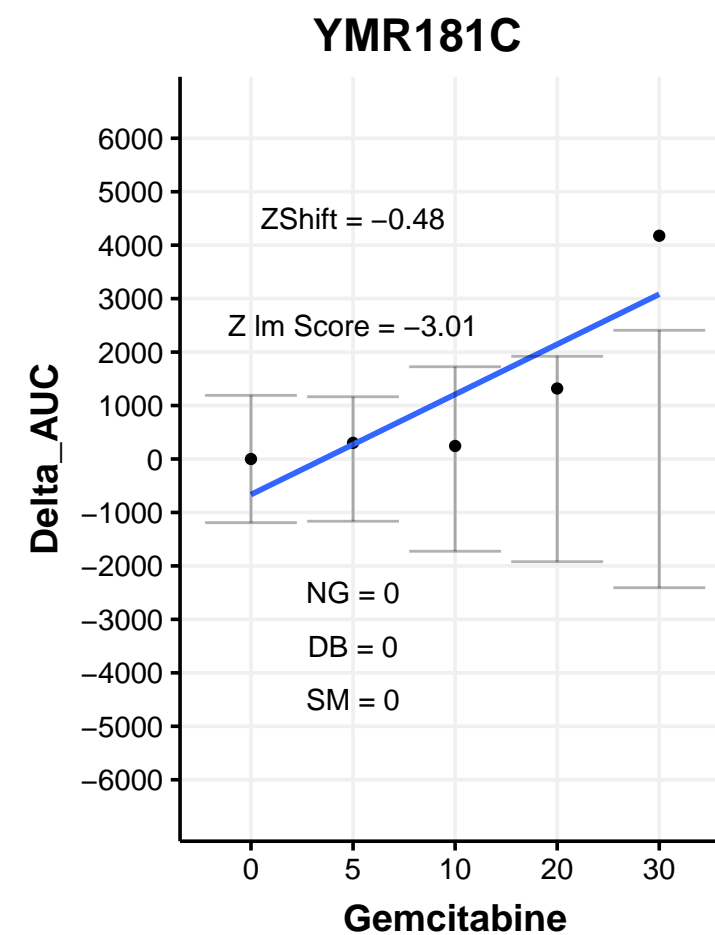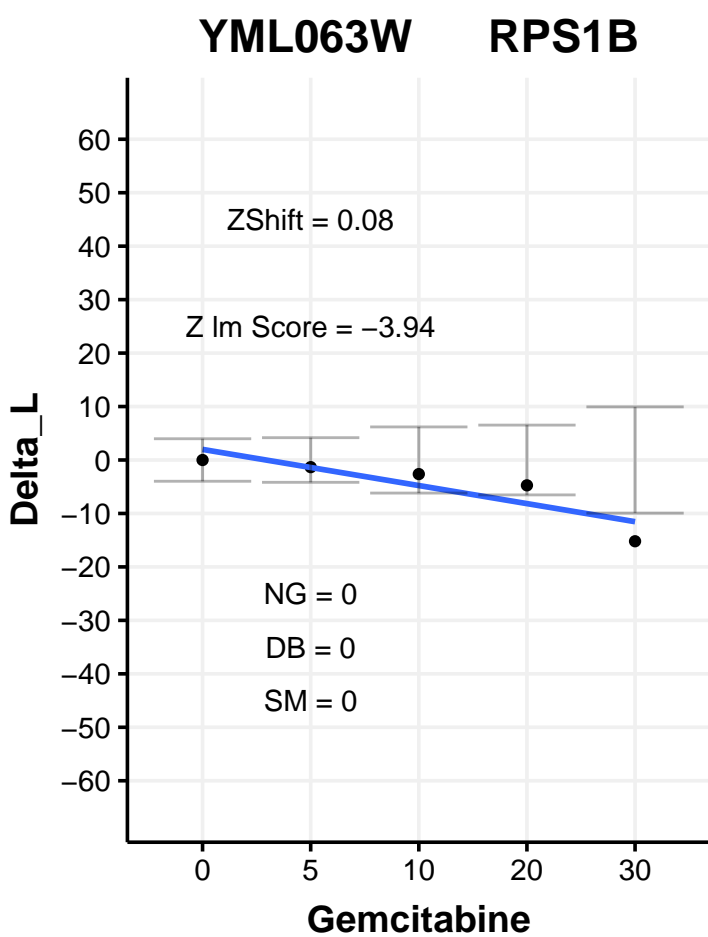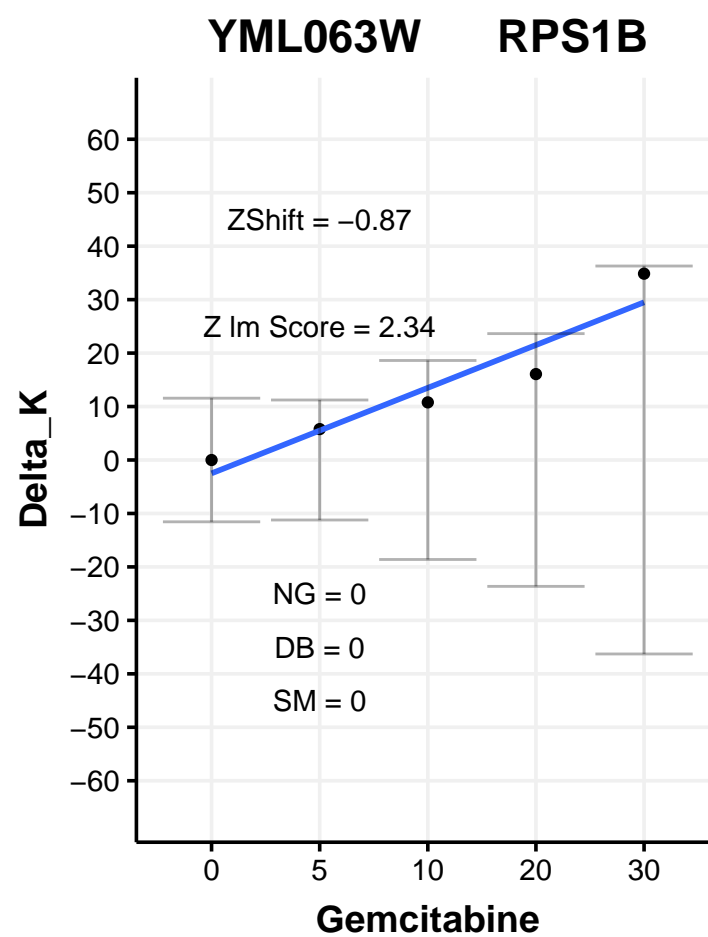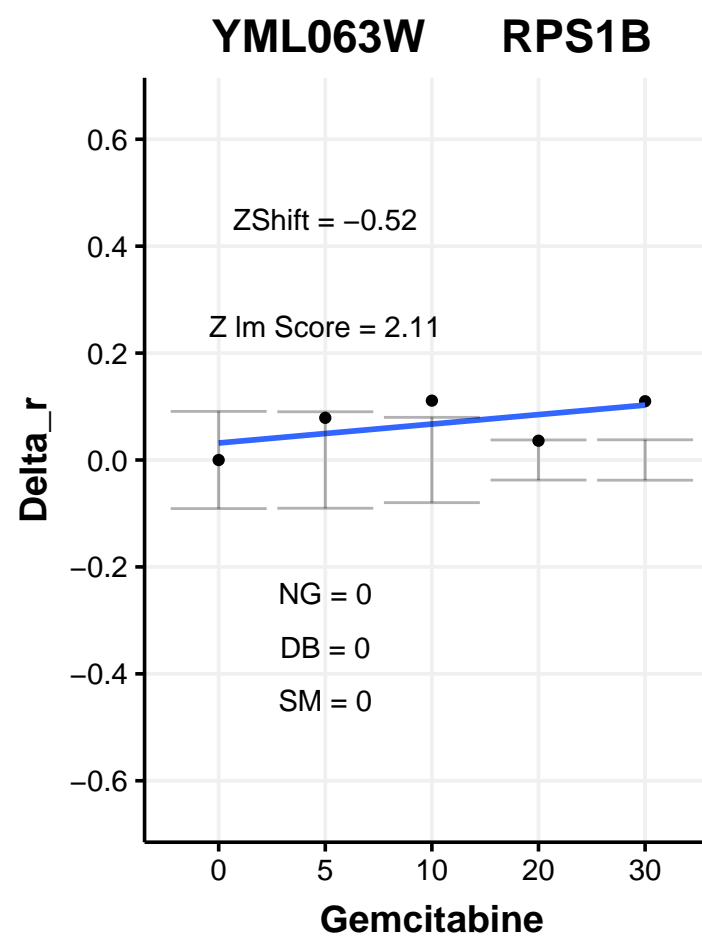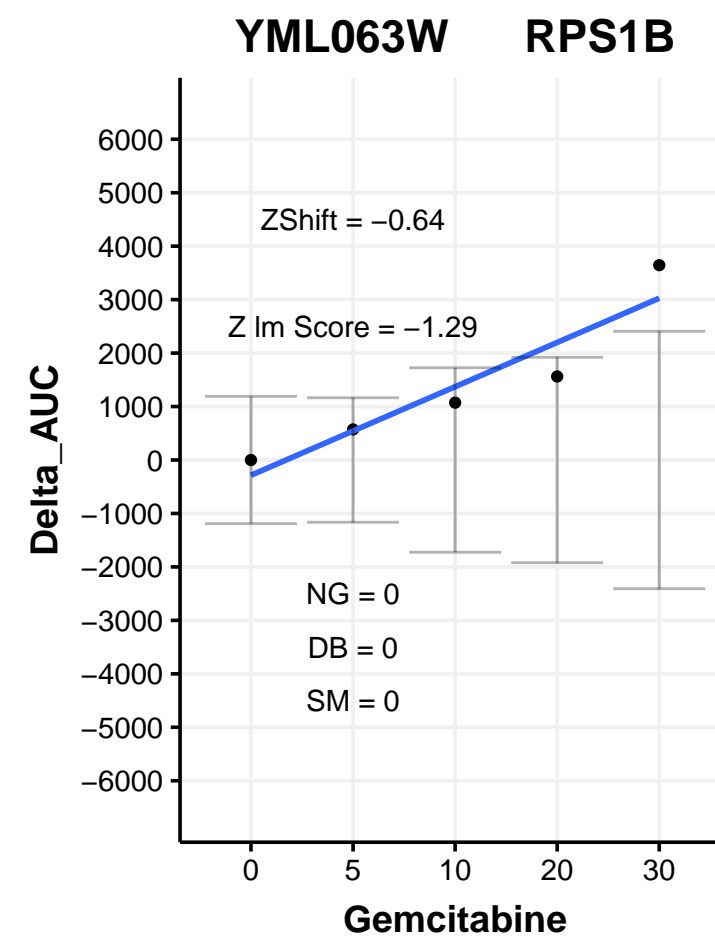

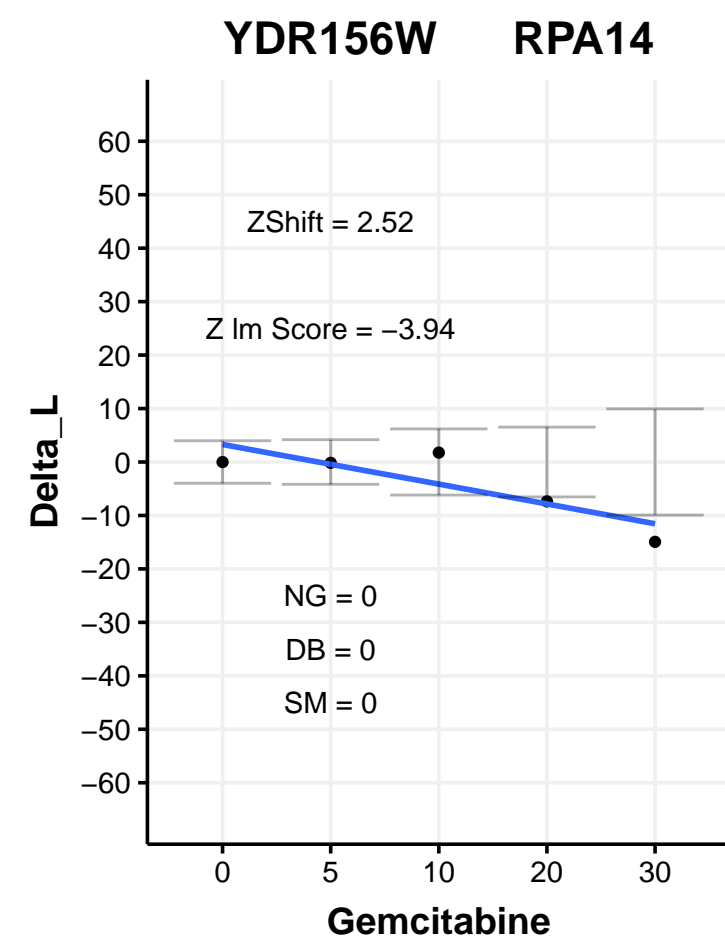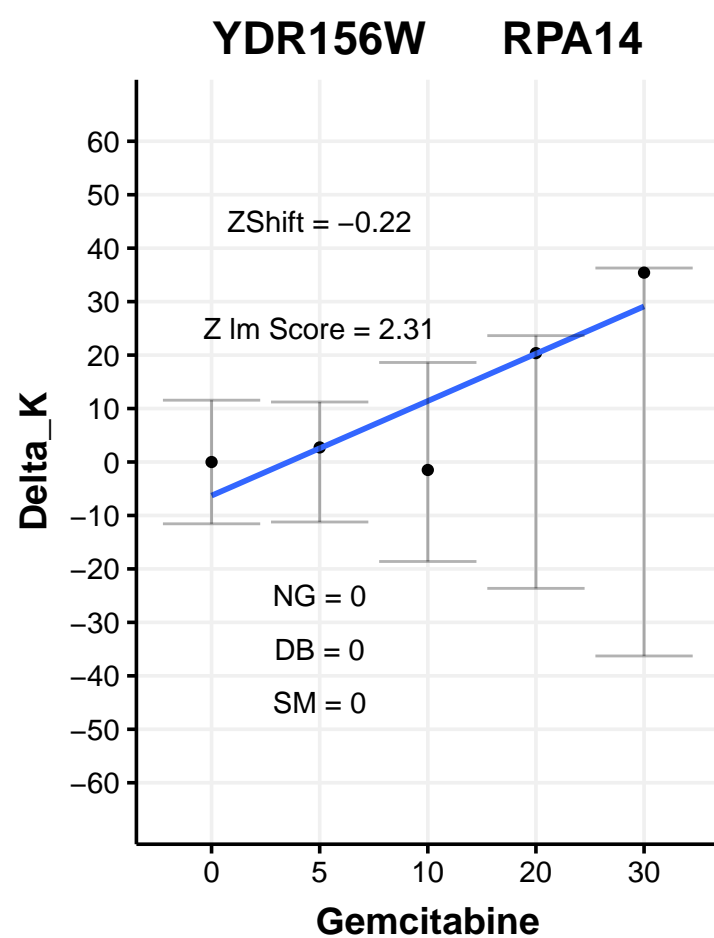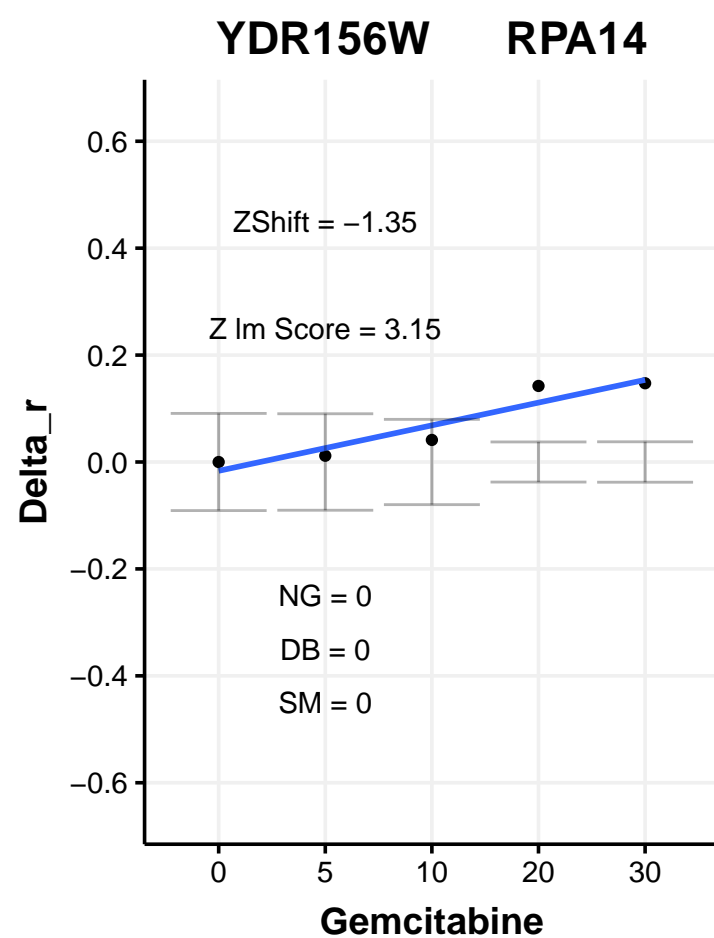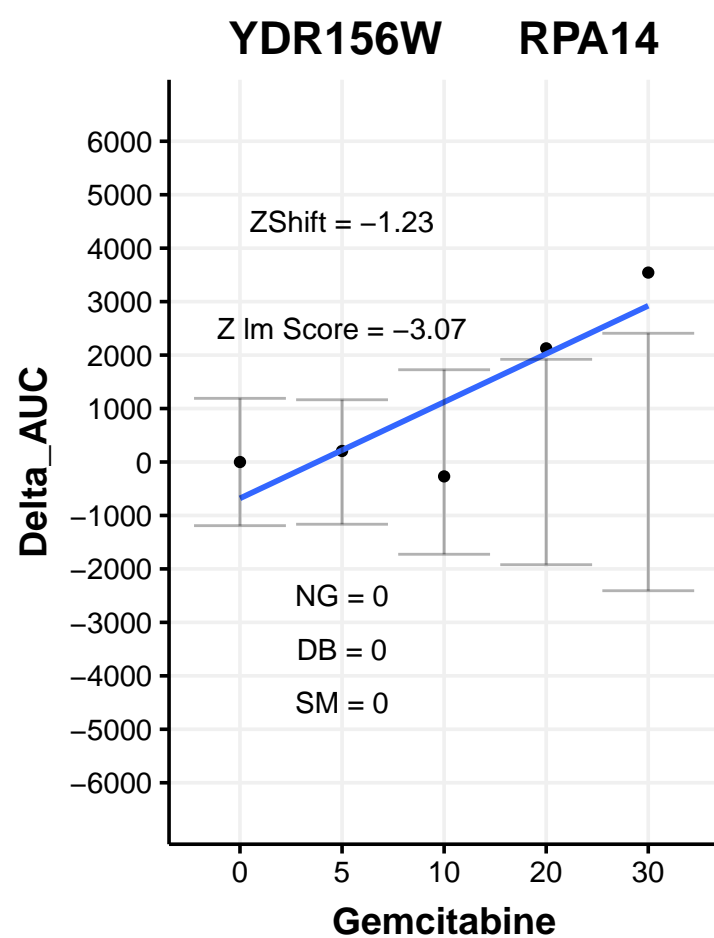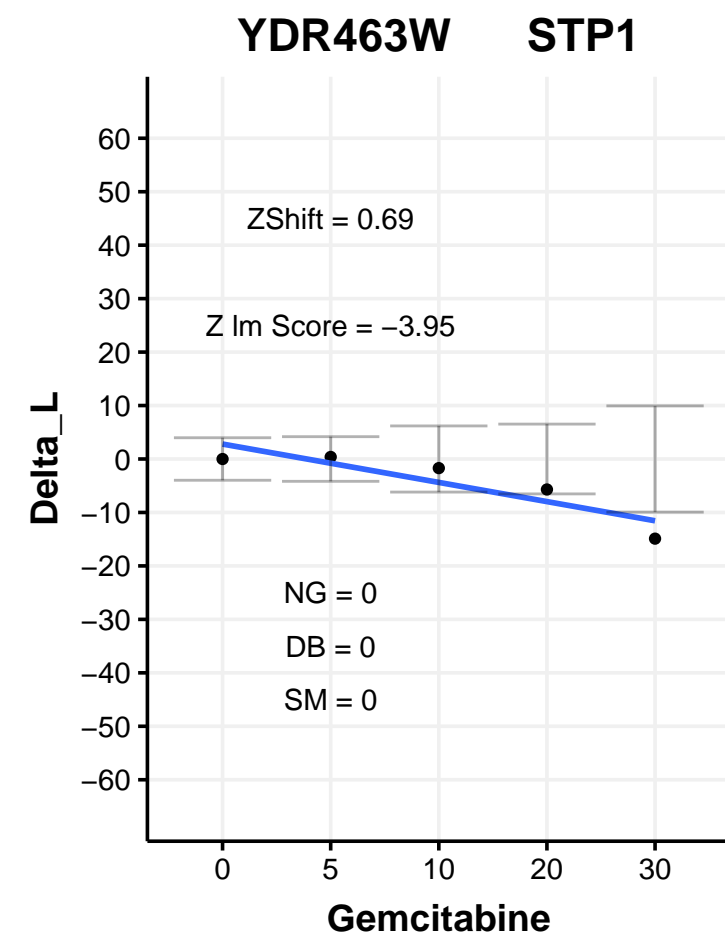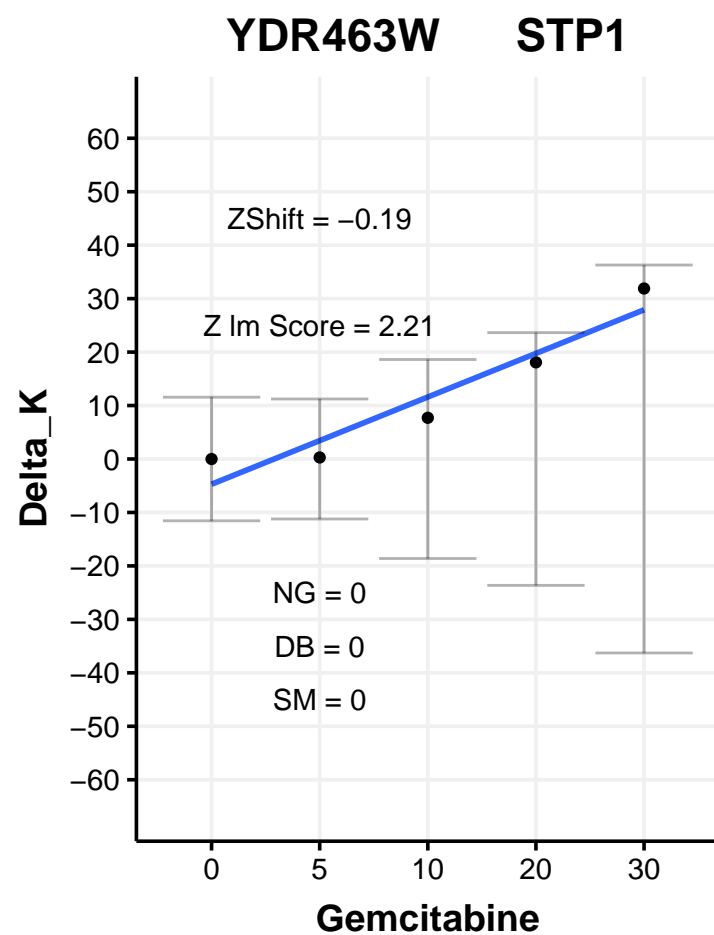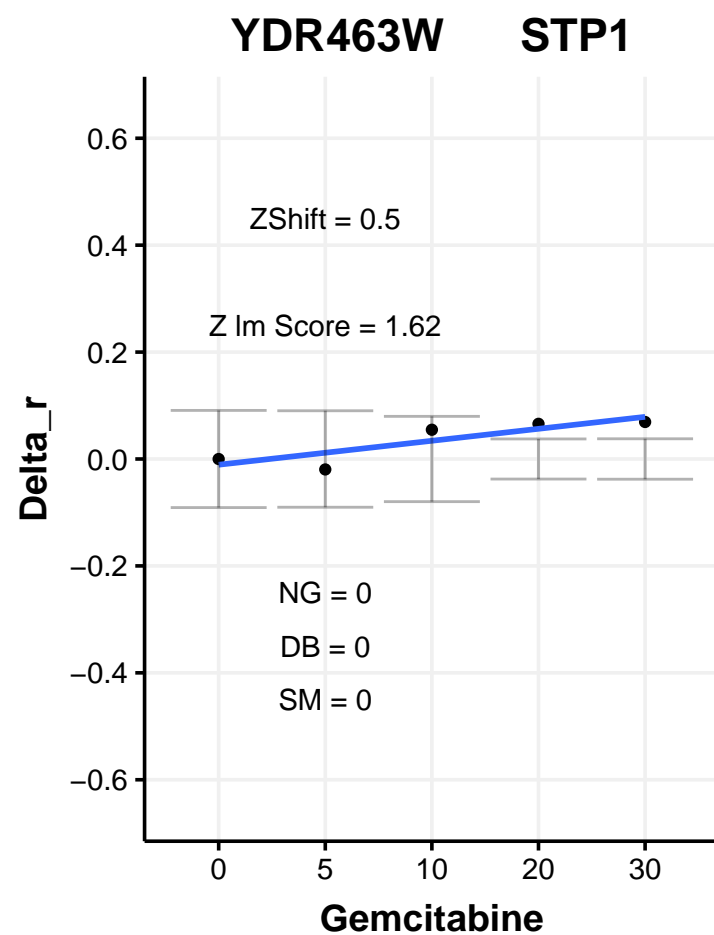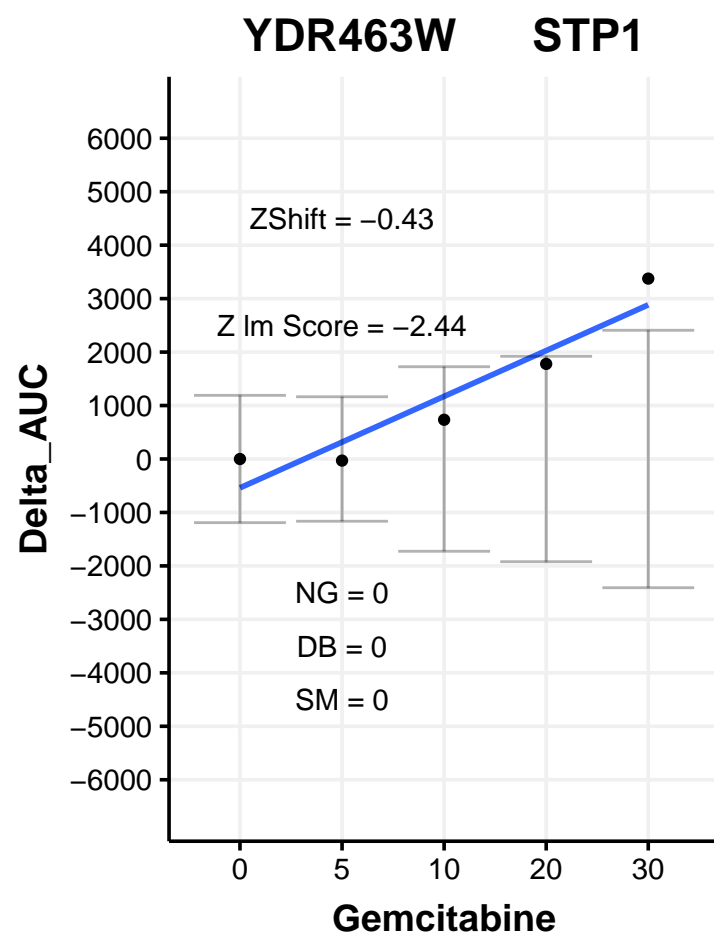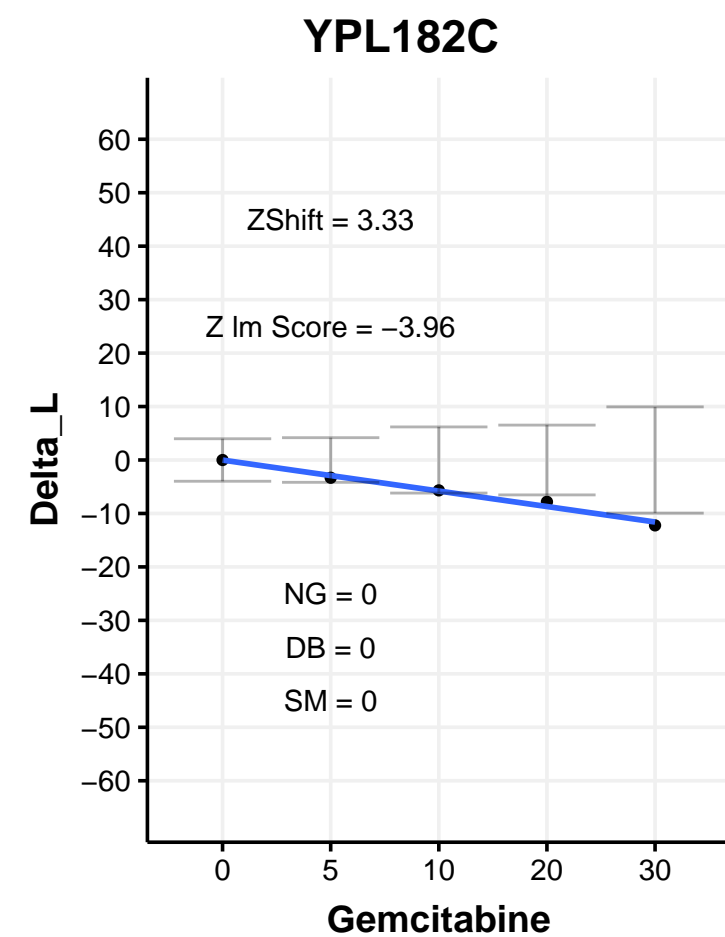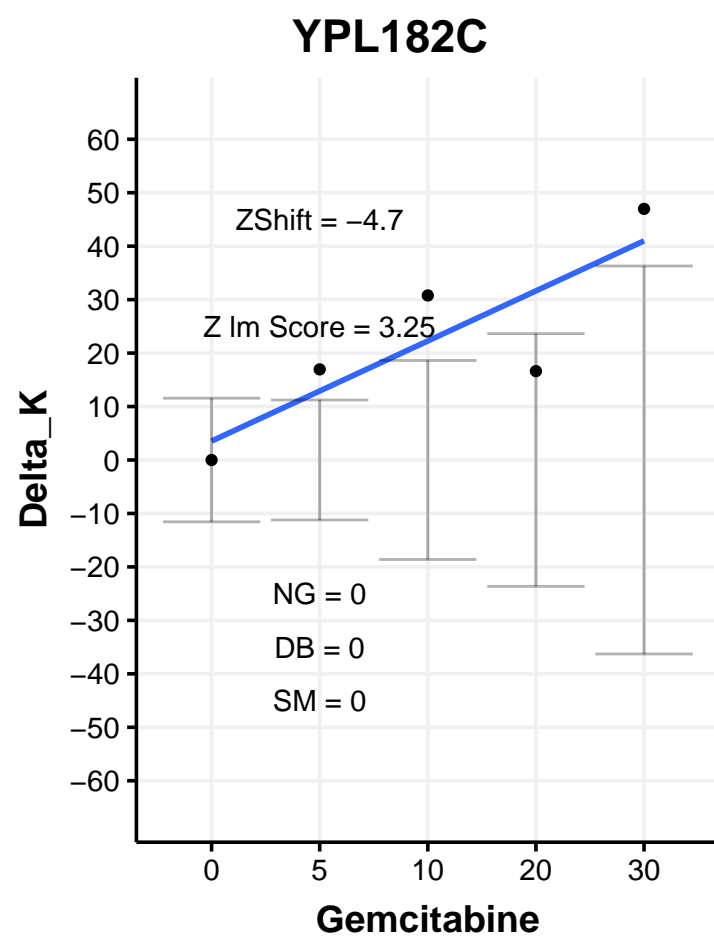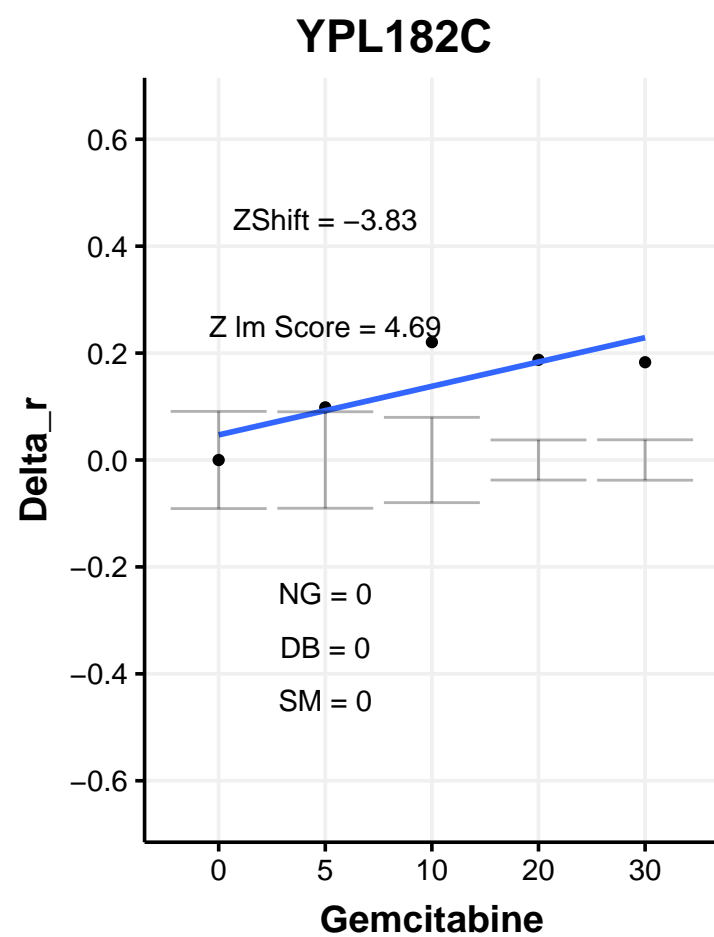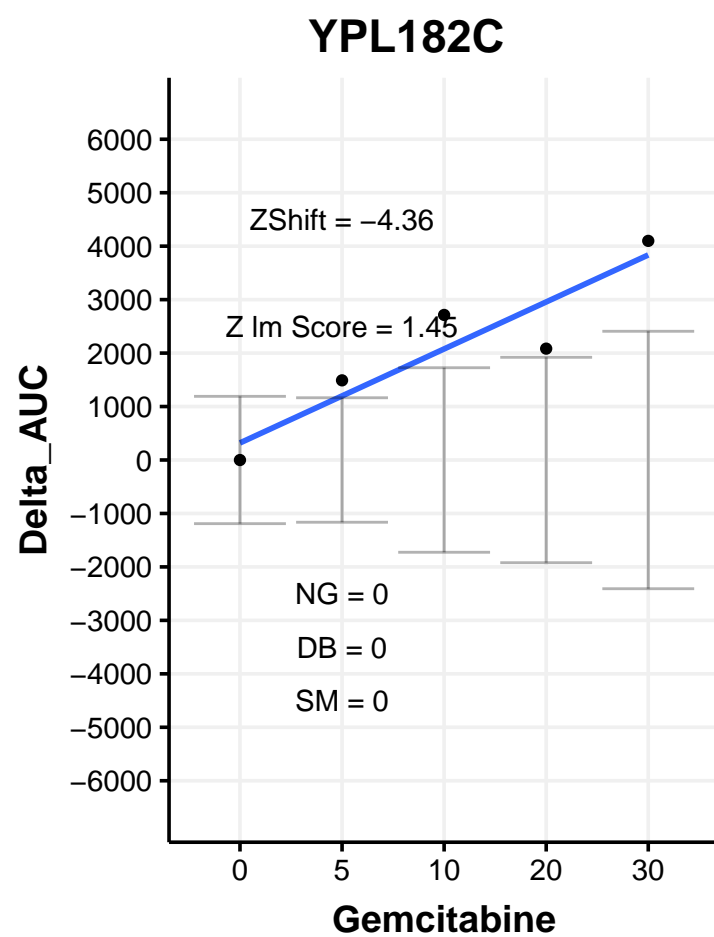

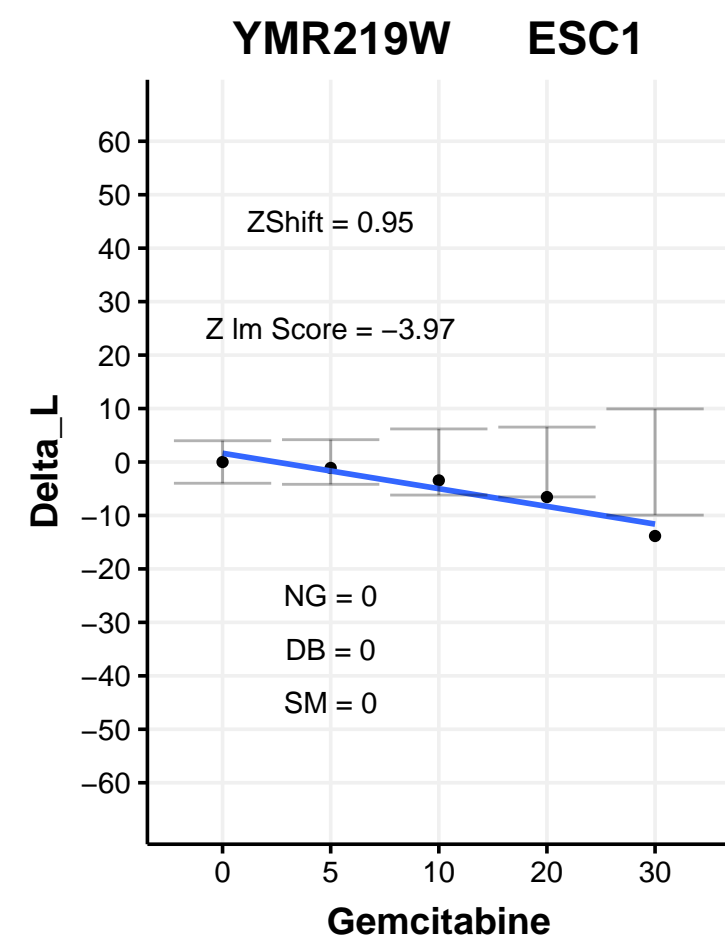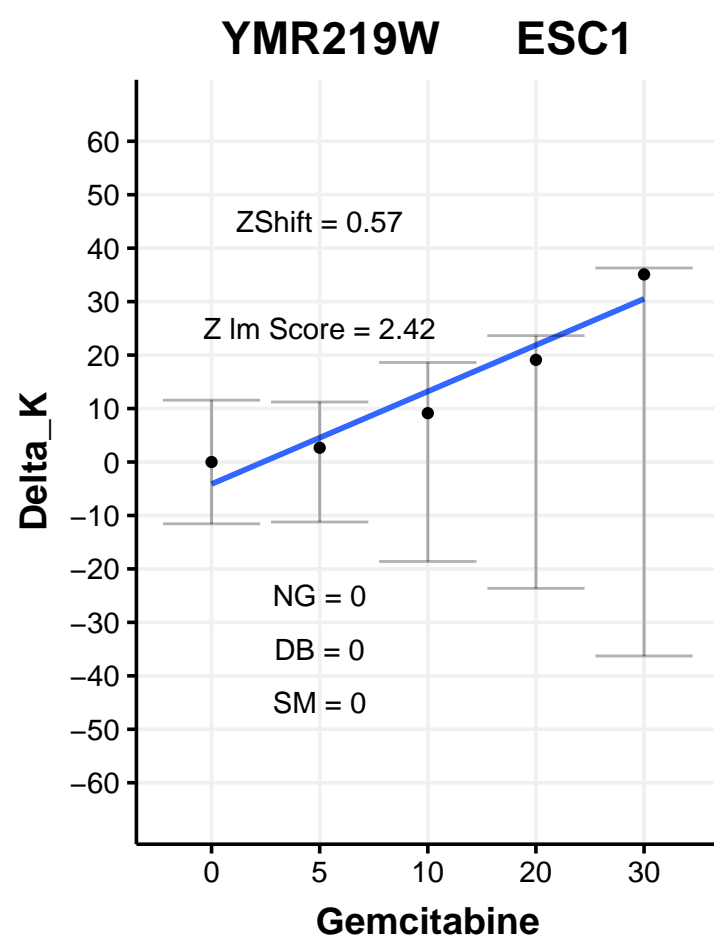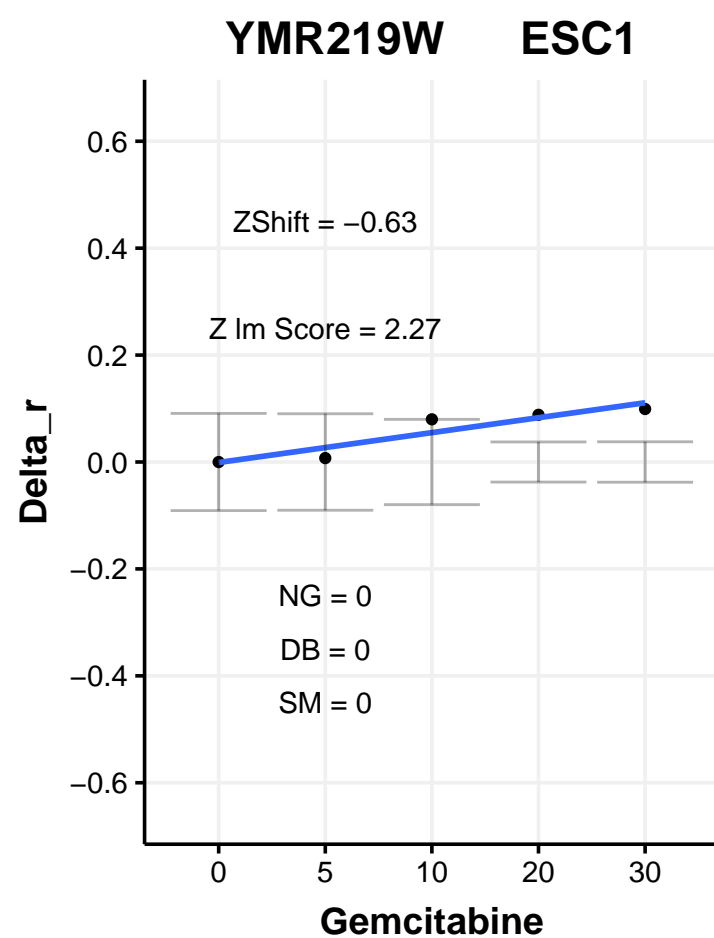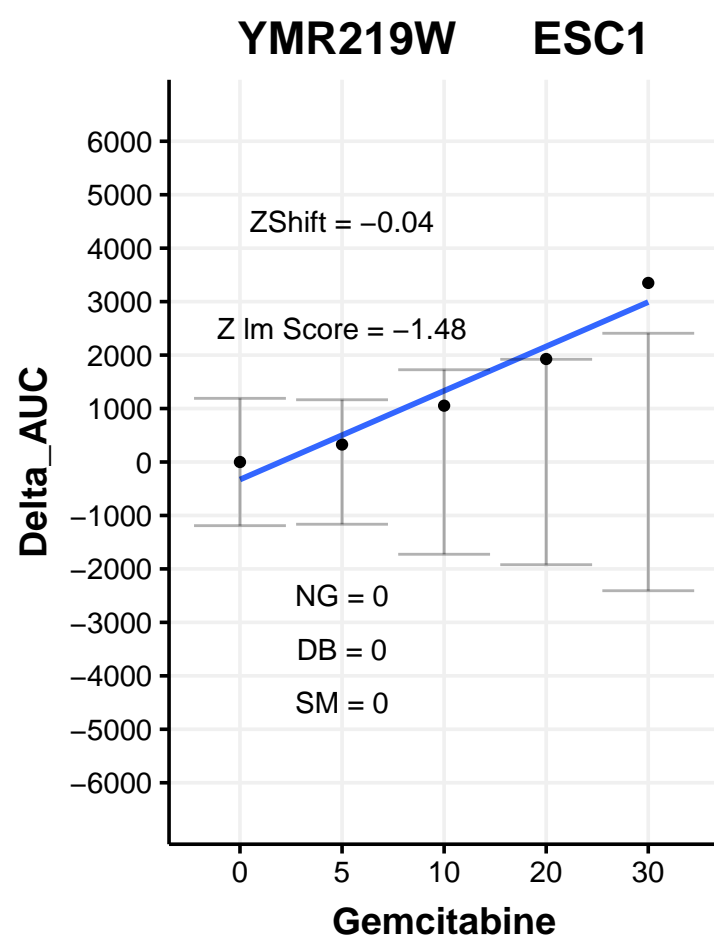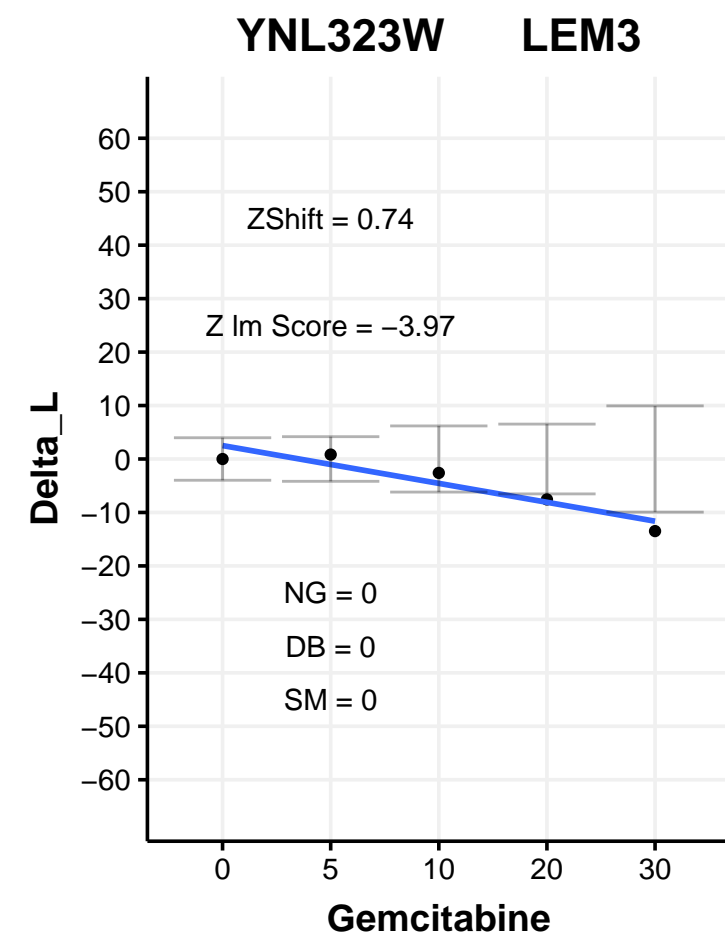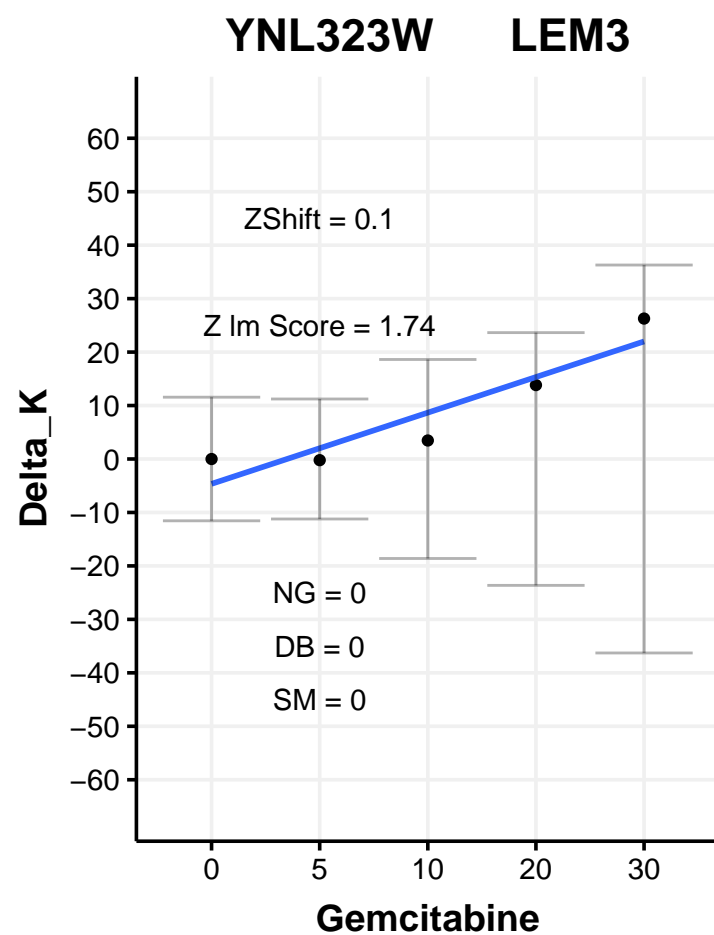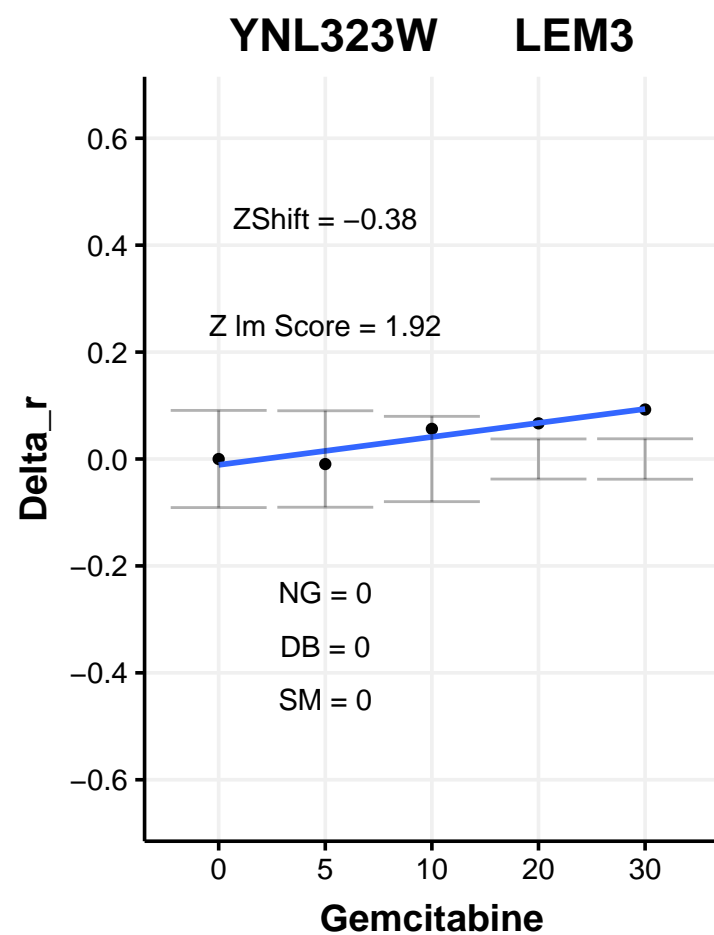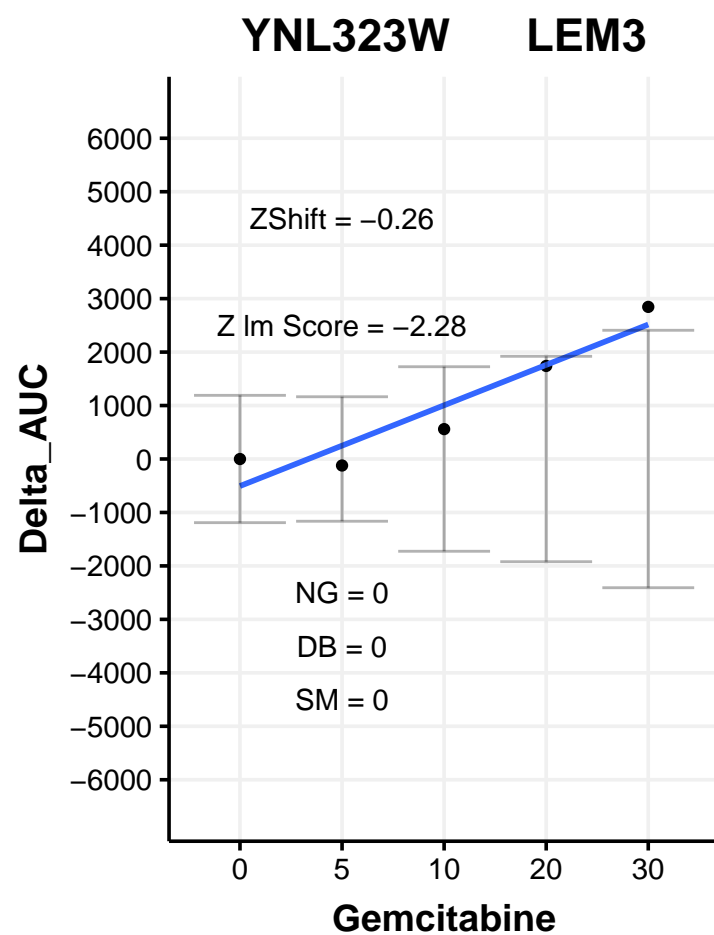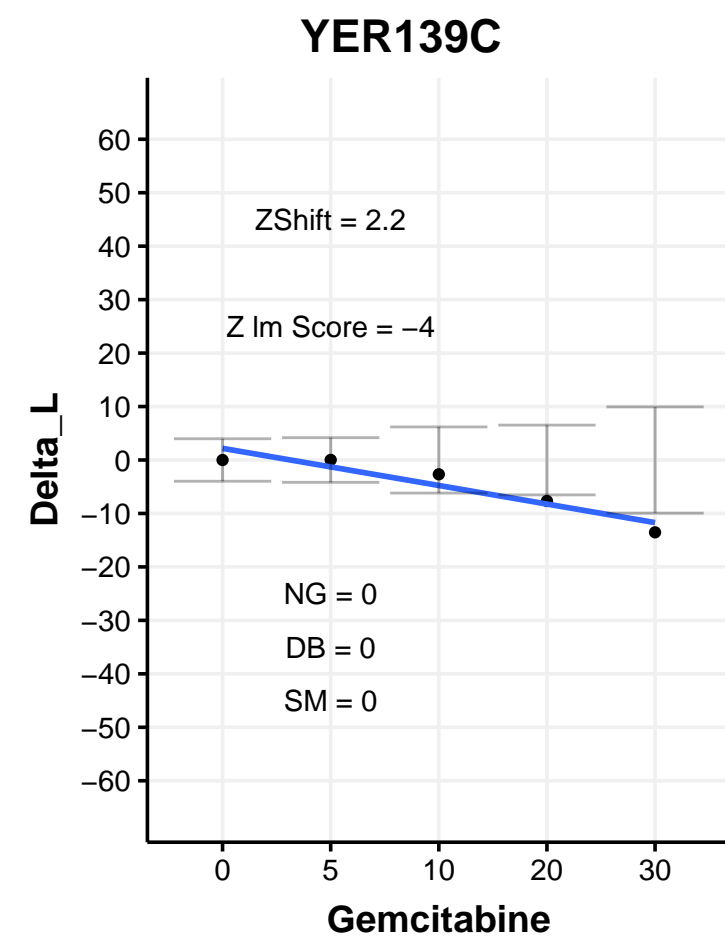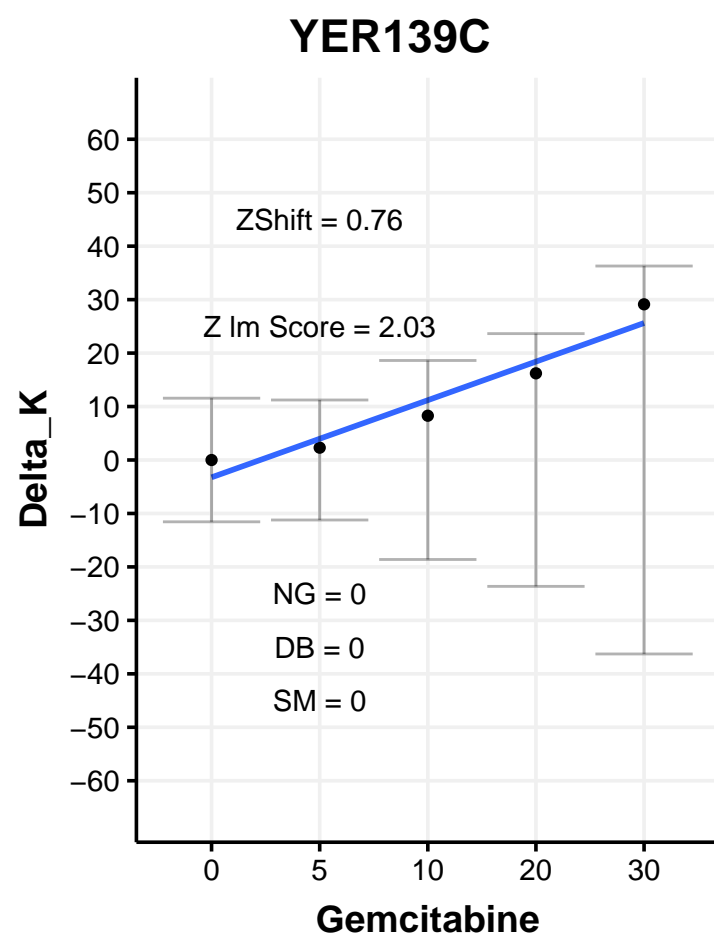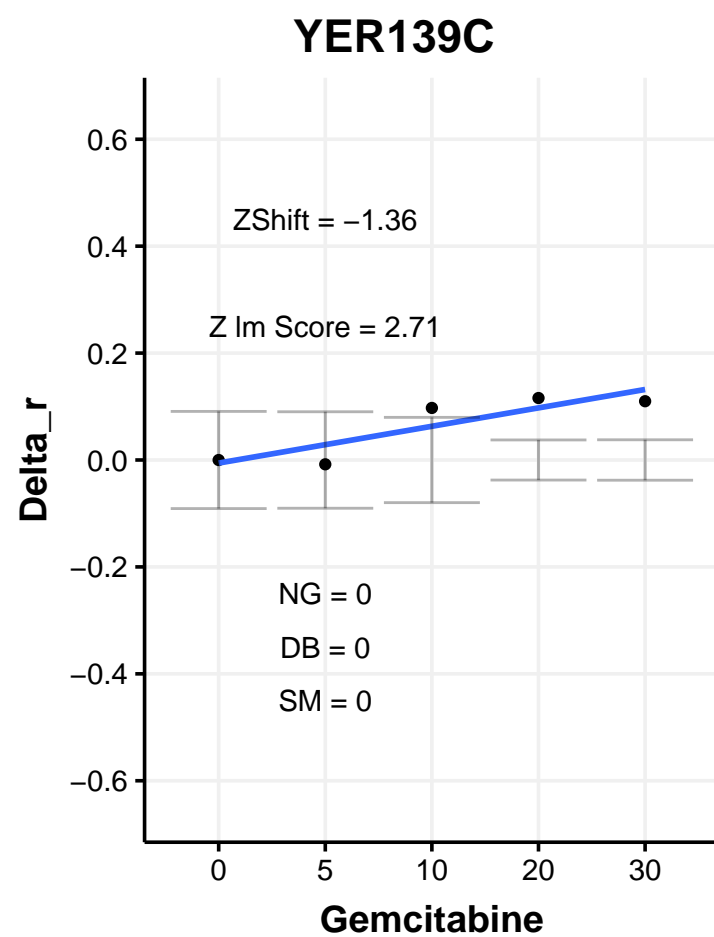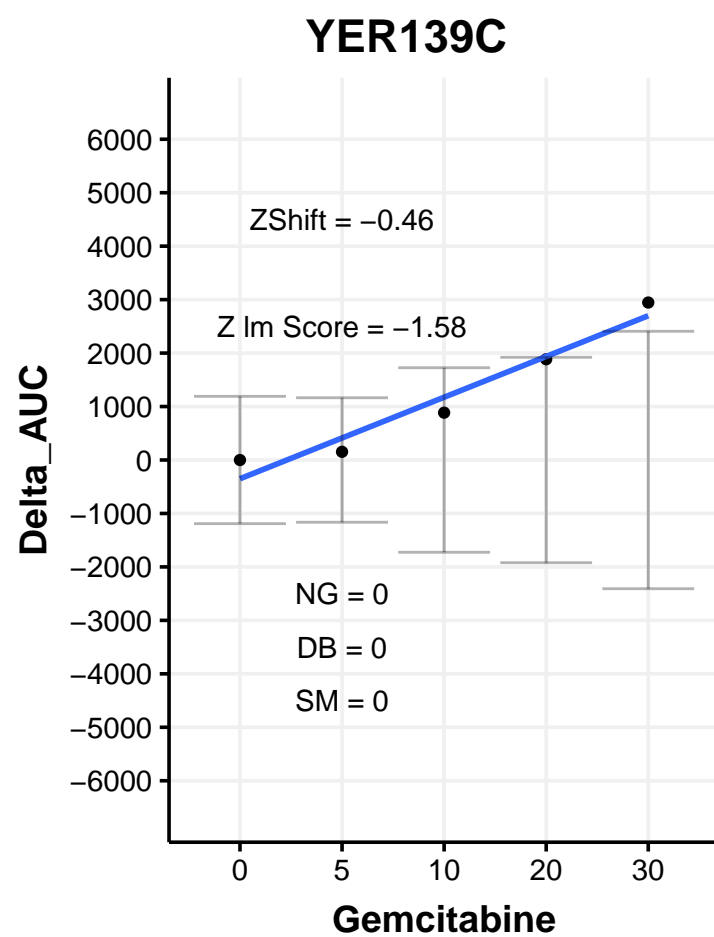

**YIL020C HIS6**

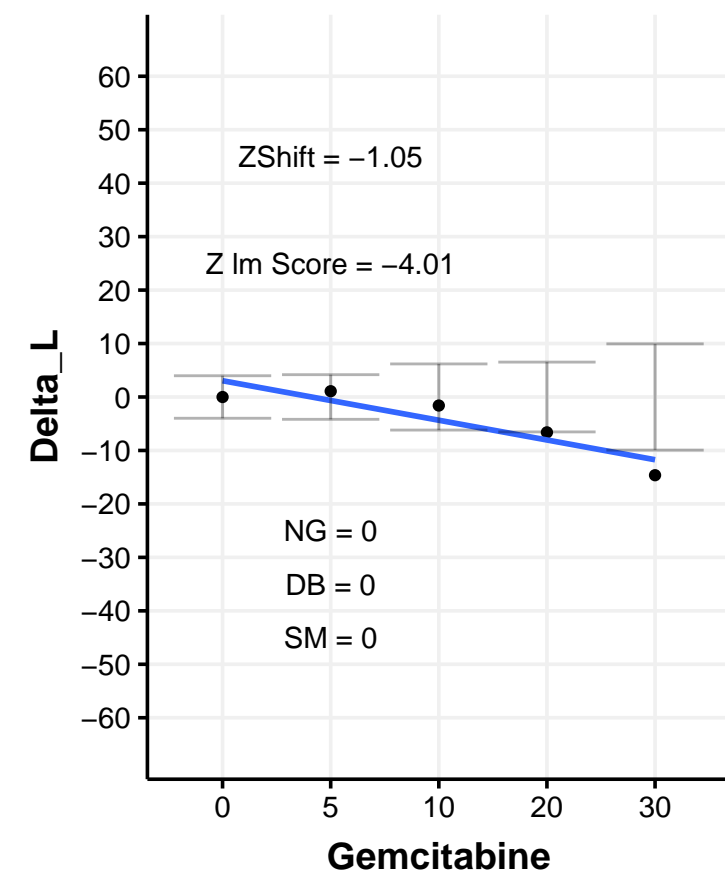

**YIL020C HIS6**

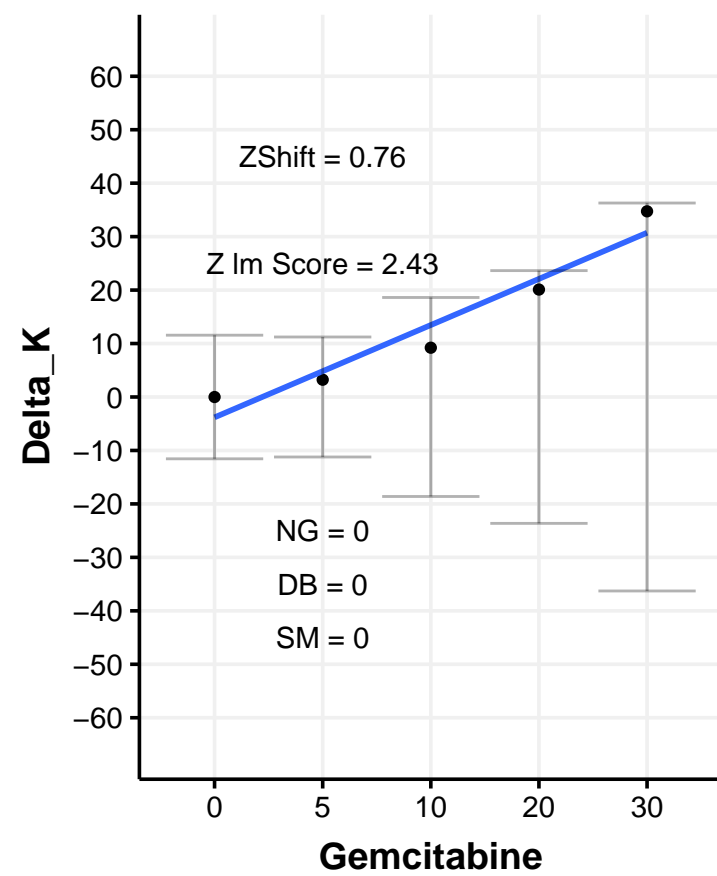

**YIL020C HIS6**

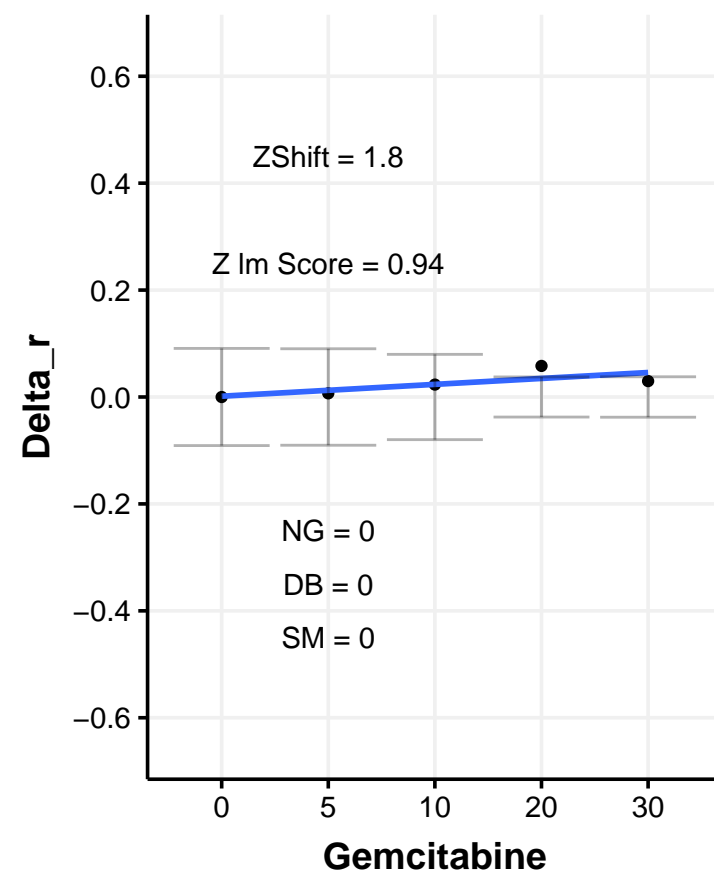

**YIL020C HIS6**

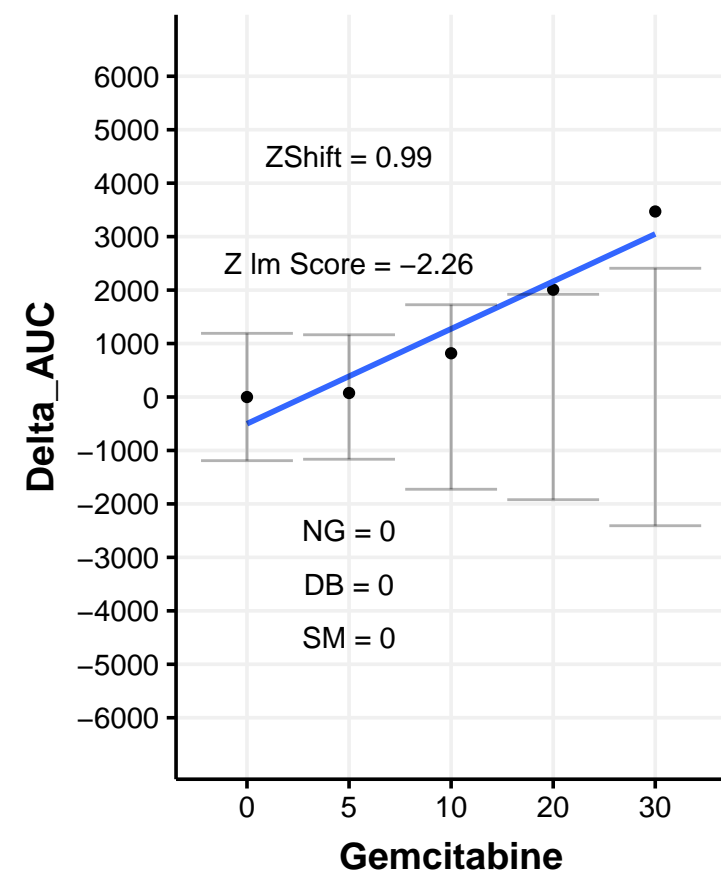

**YMR242W-A\_2**

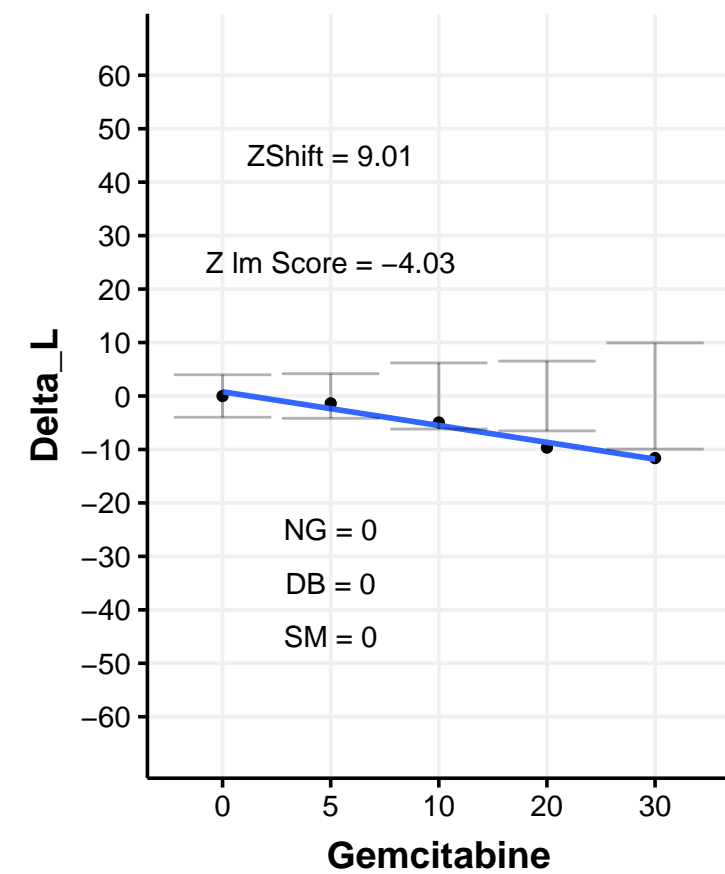

**YMR242W-A\_2**

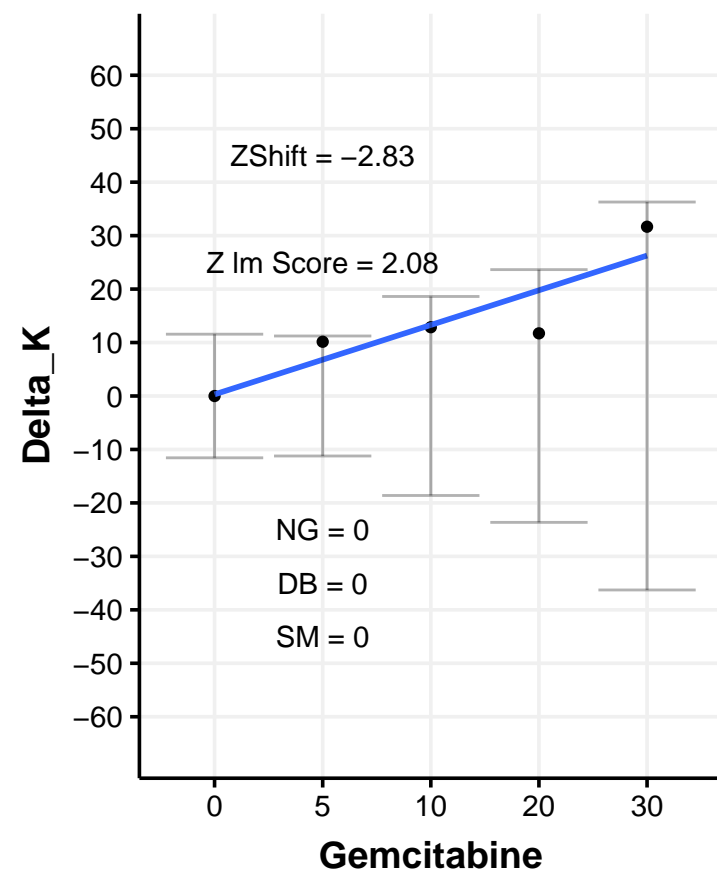

**YMR242W-A\_2**

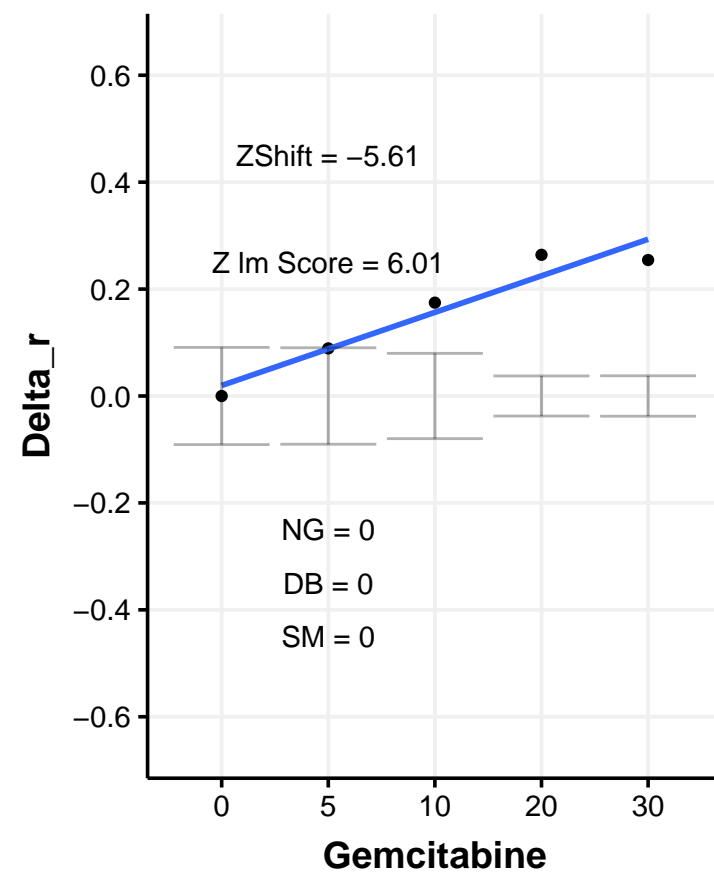

**YMR242W-A\_2**

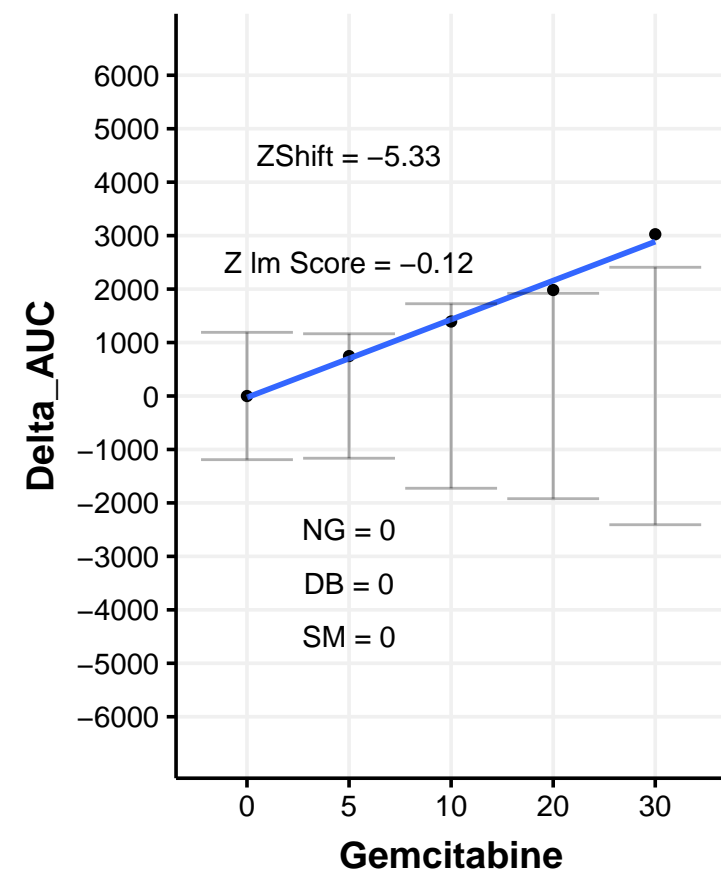

**YLR193C**

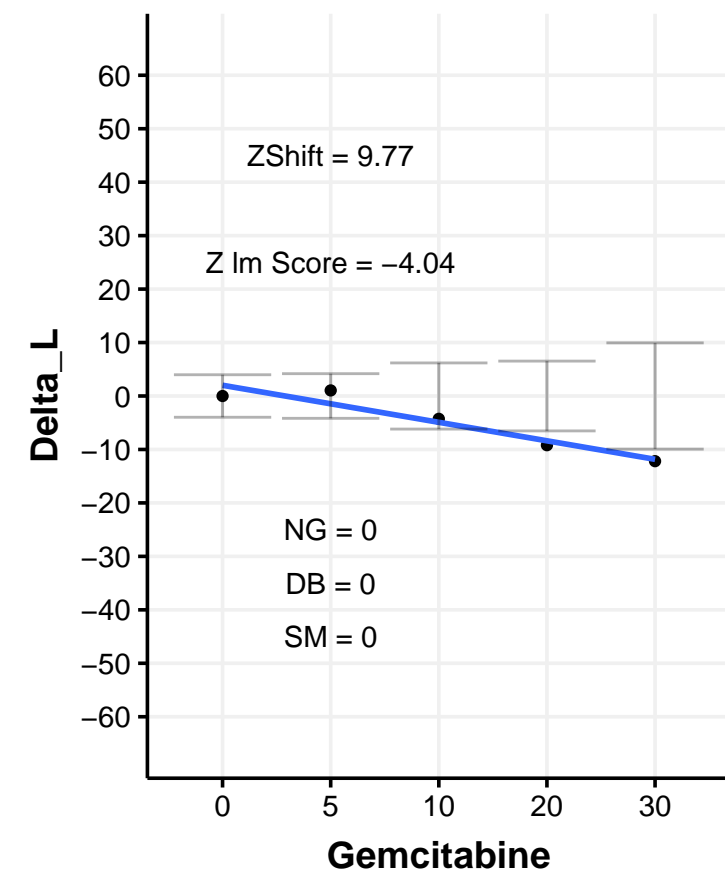

**YLR193C**

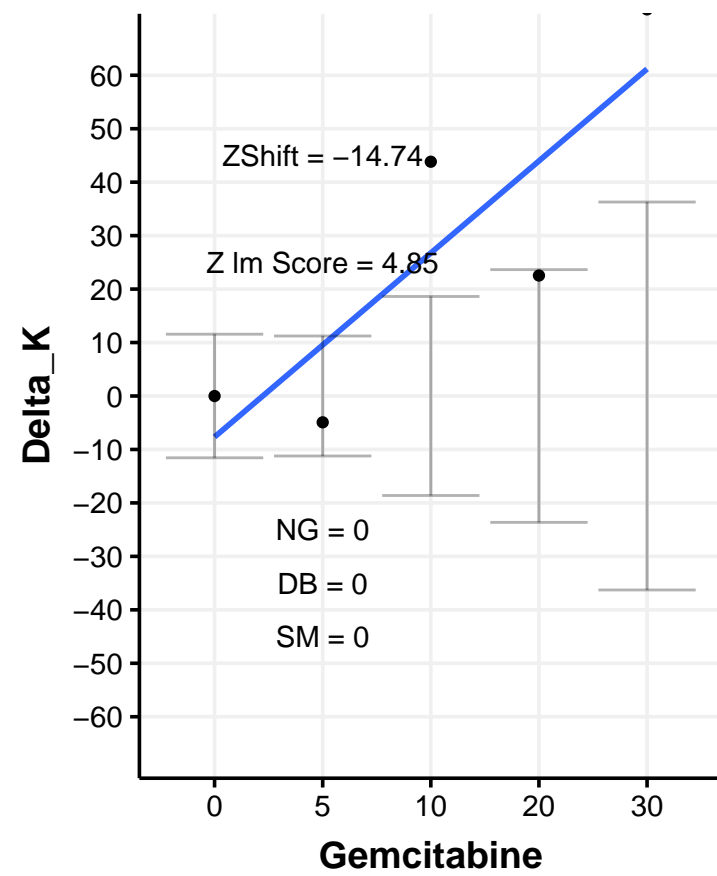

**YLR193C**

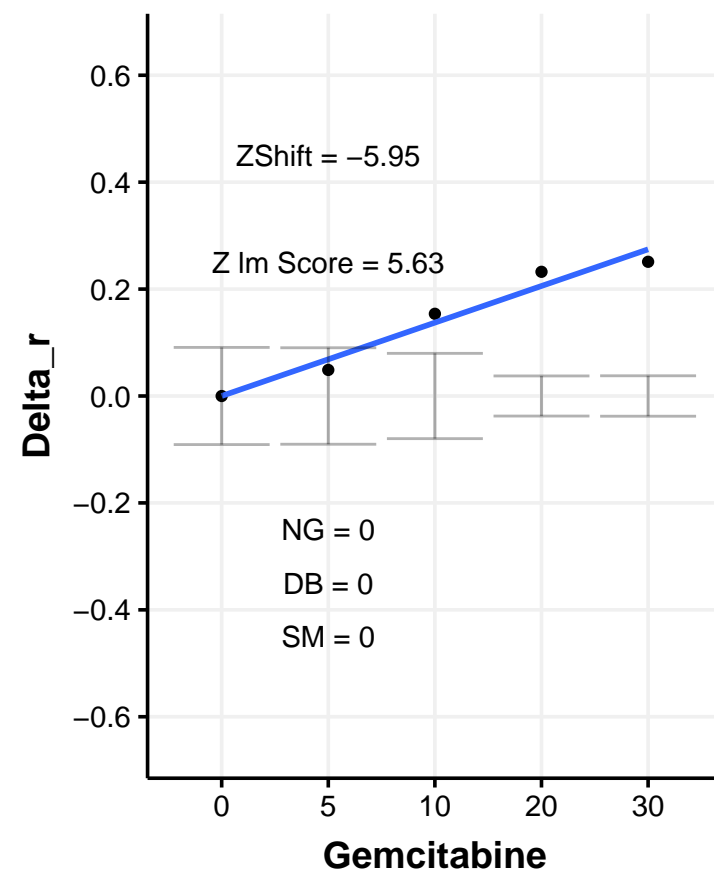

**YLR193C**

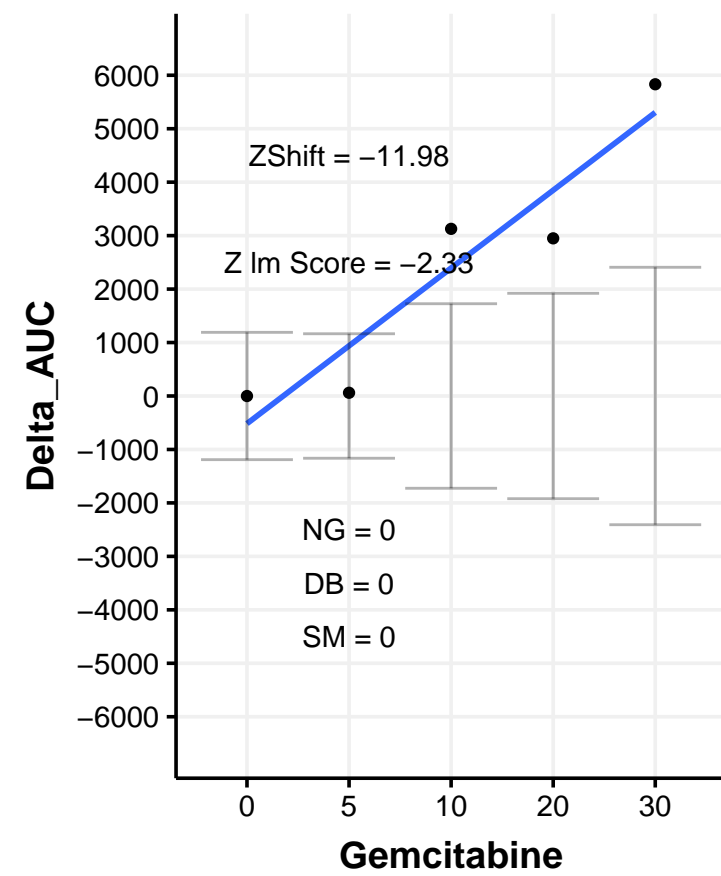

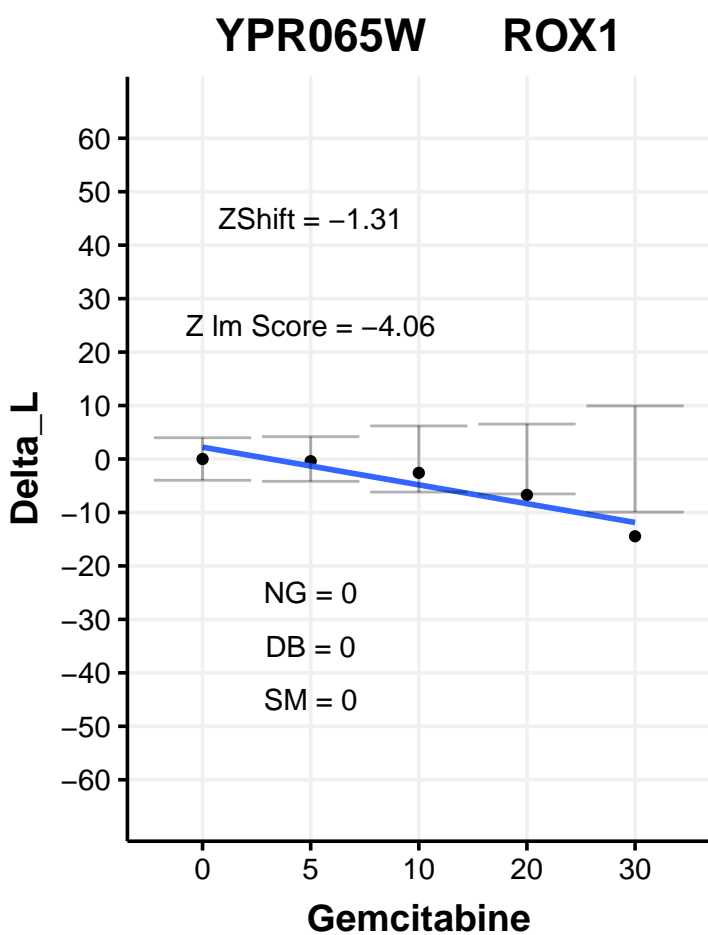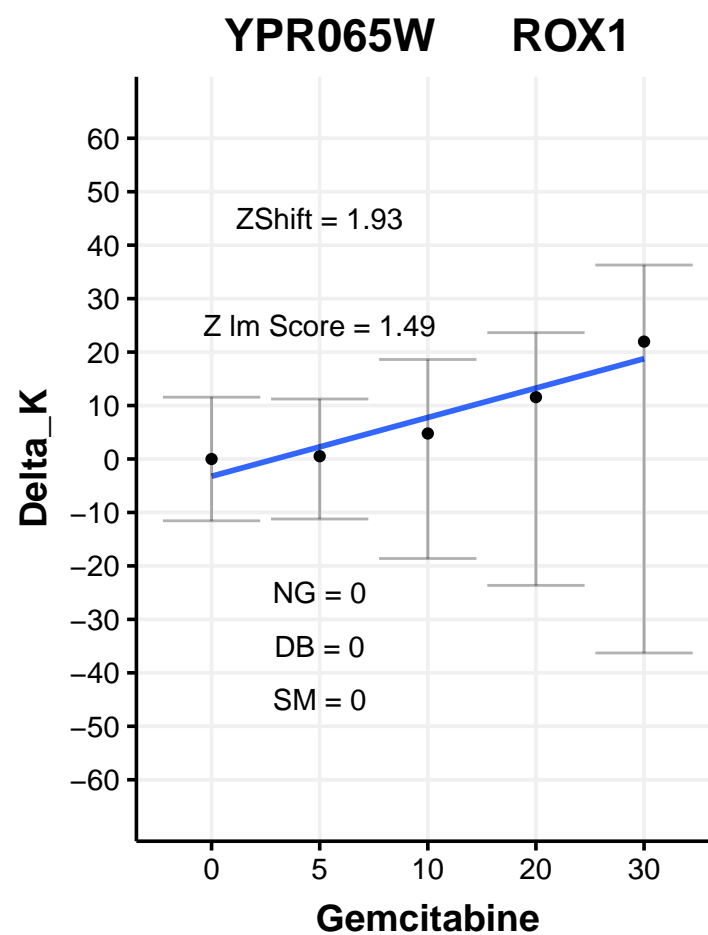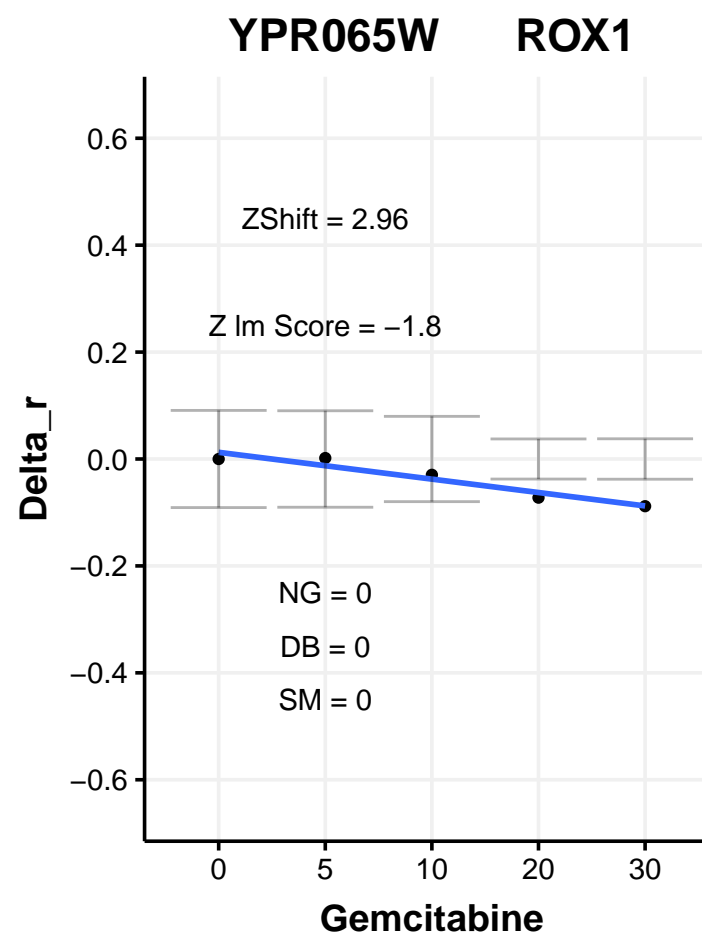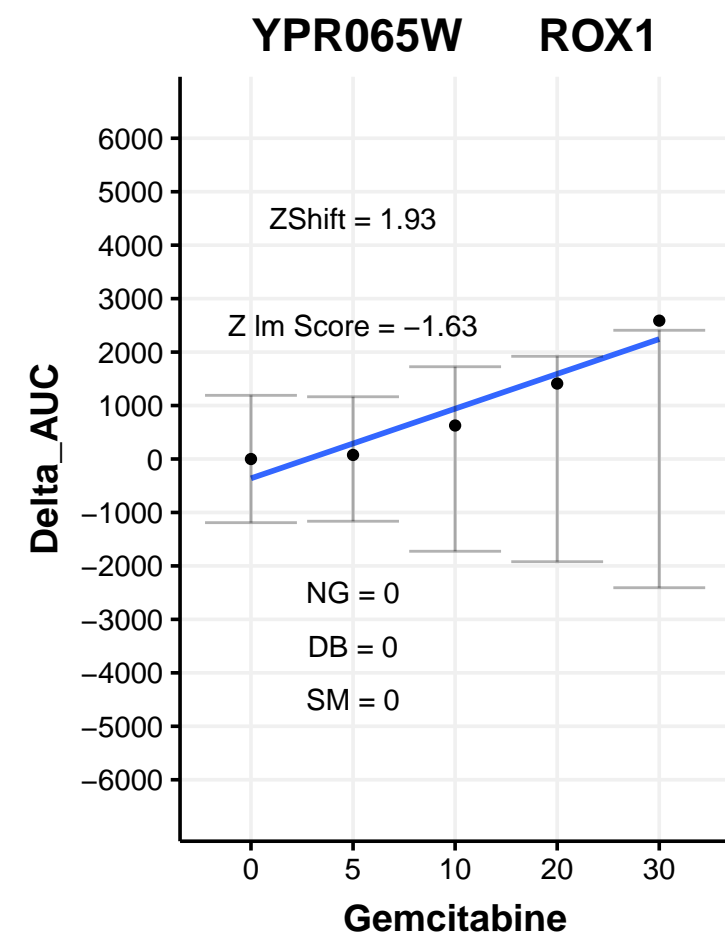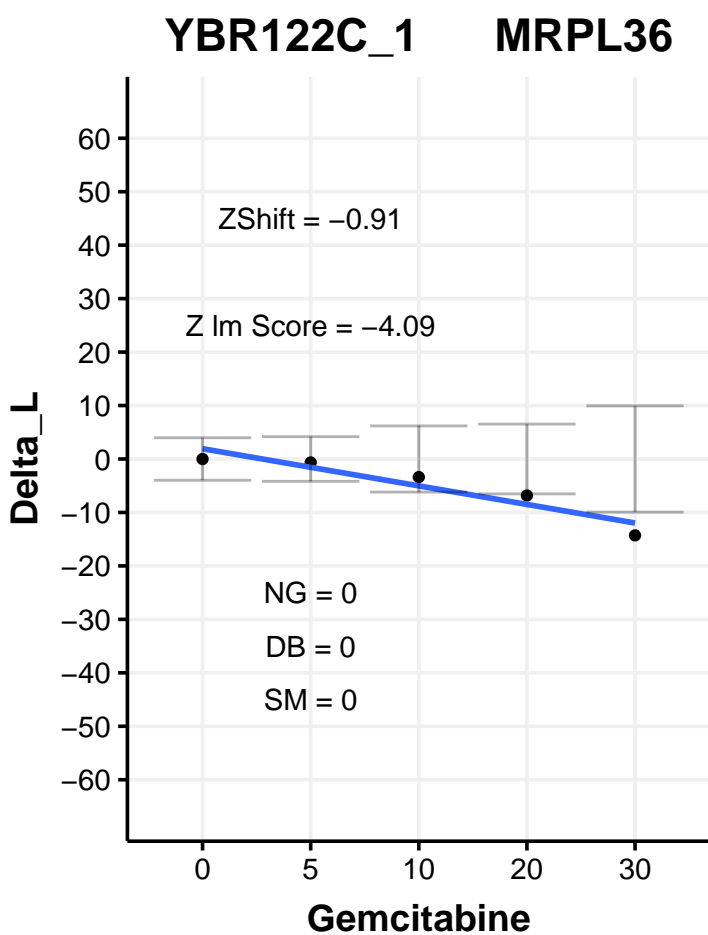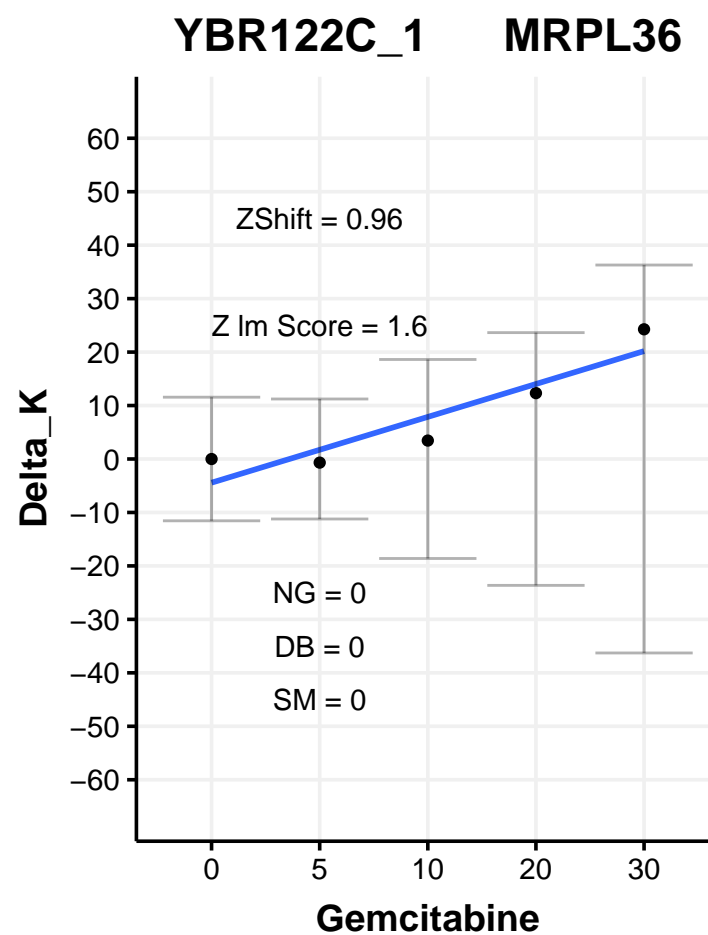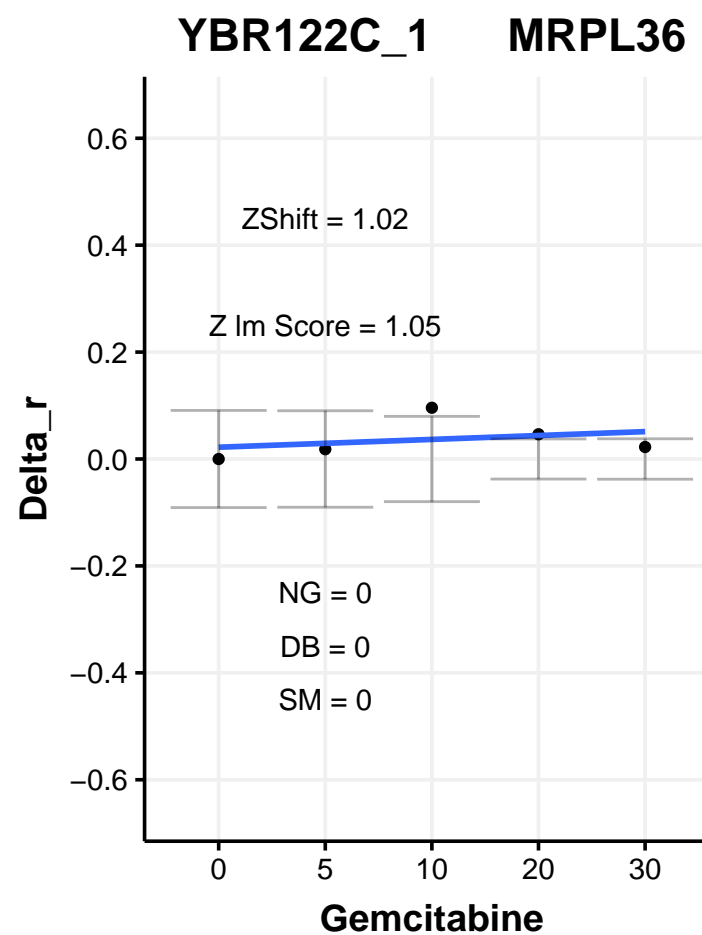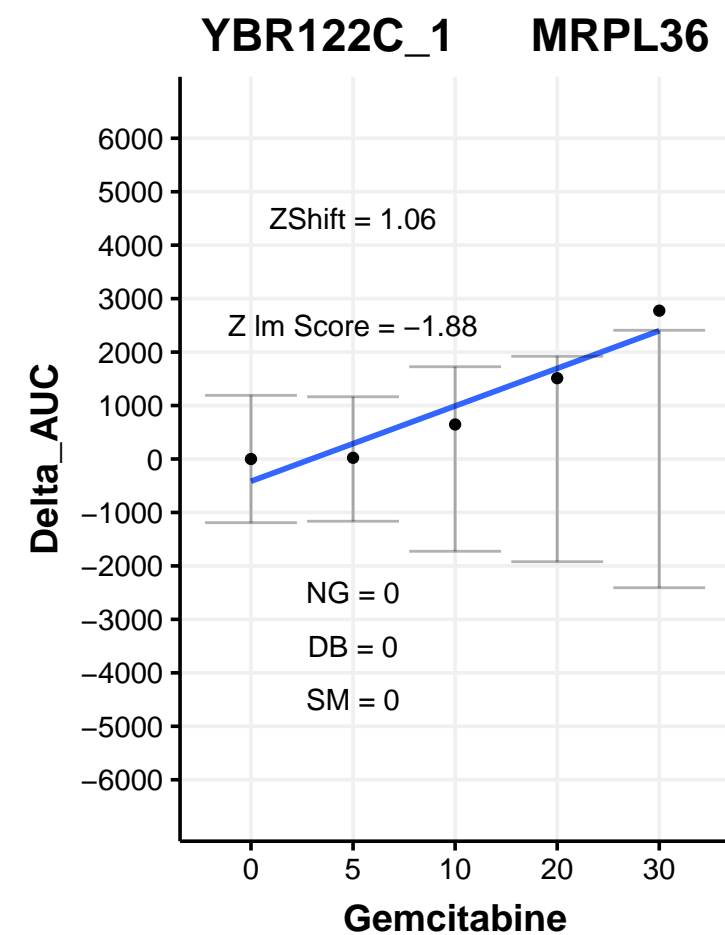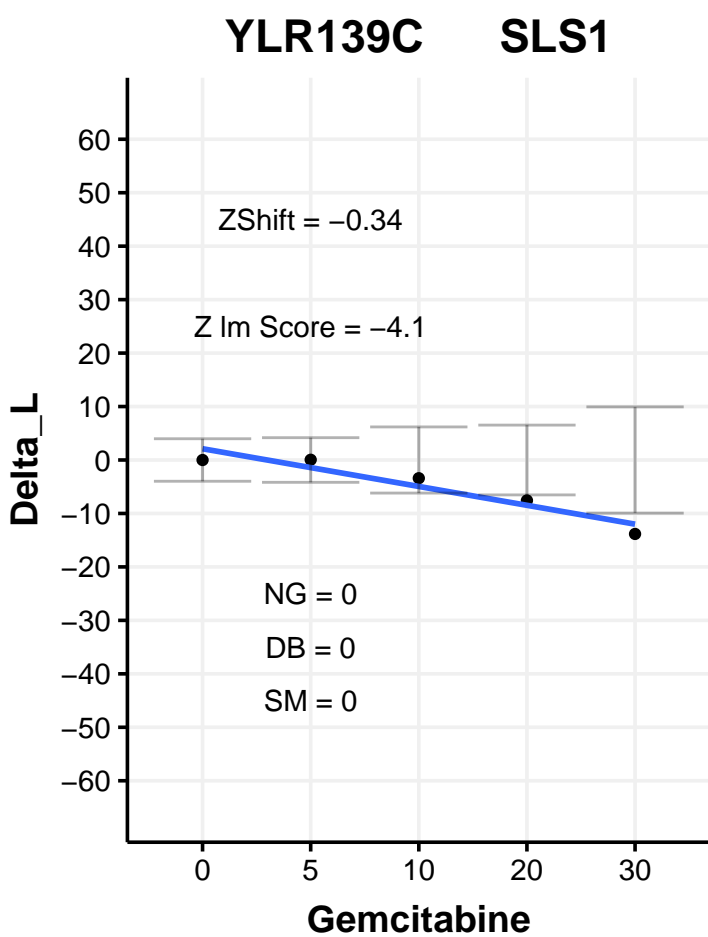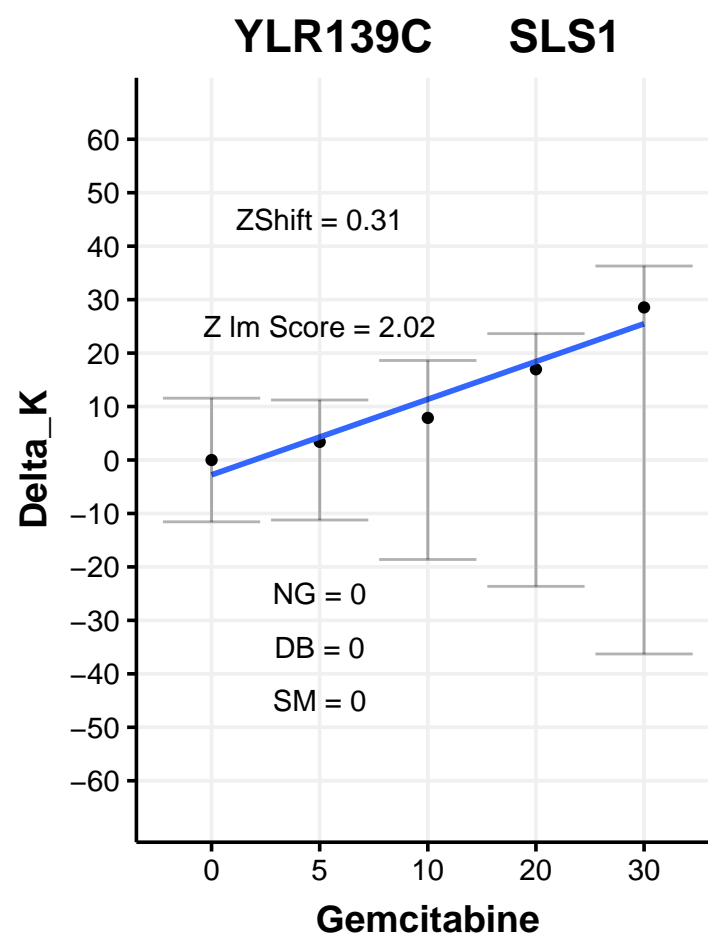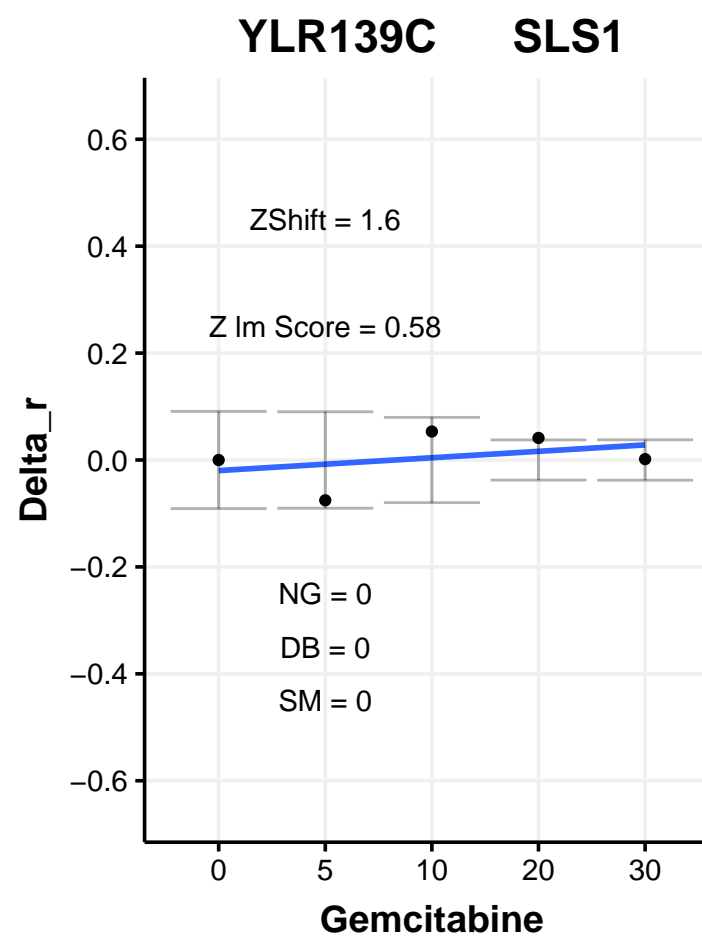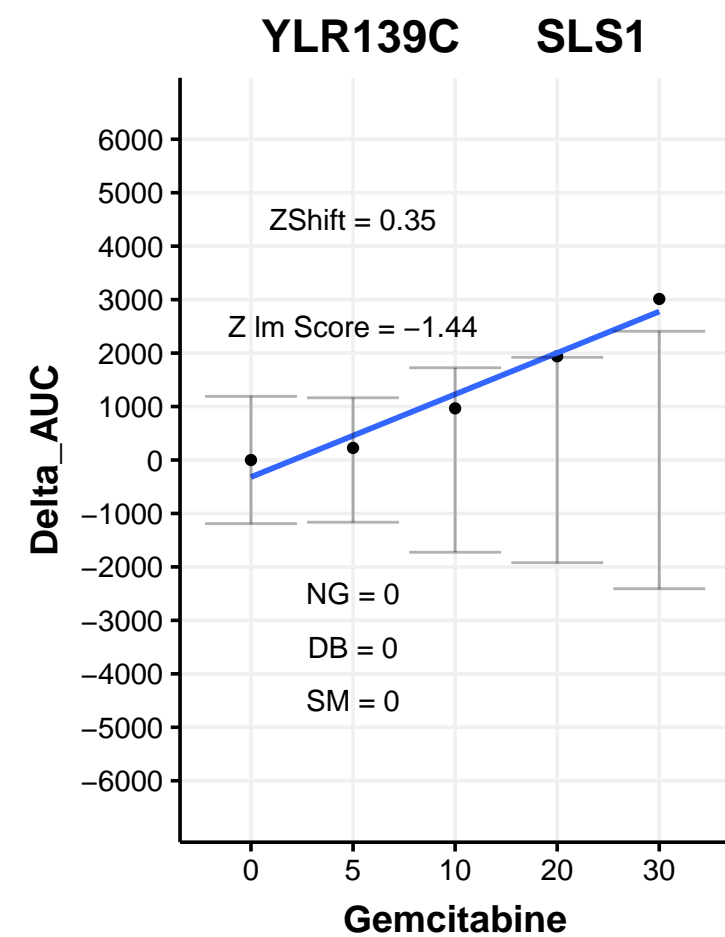

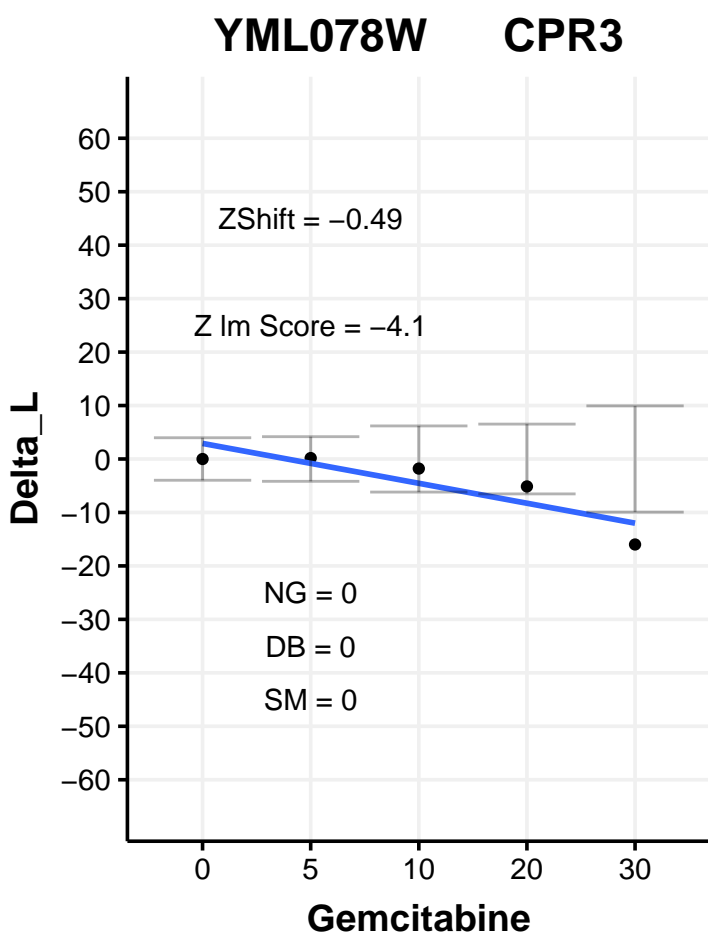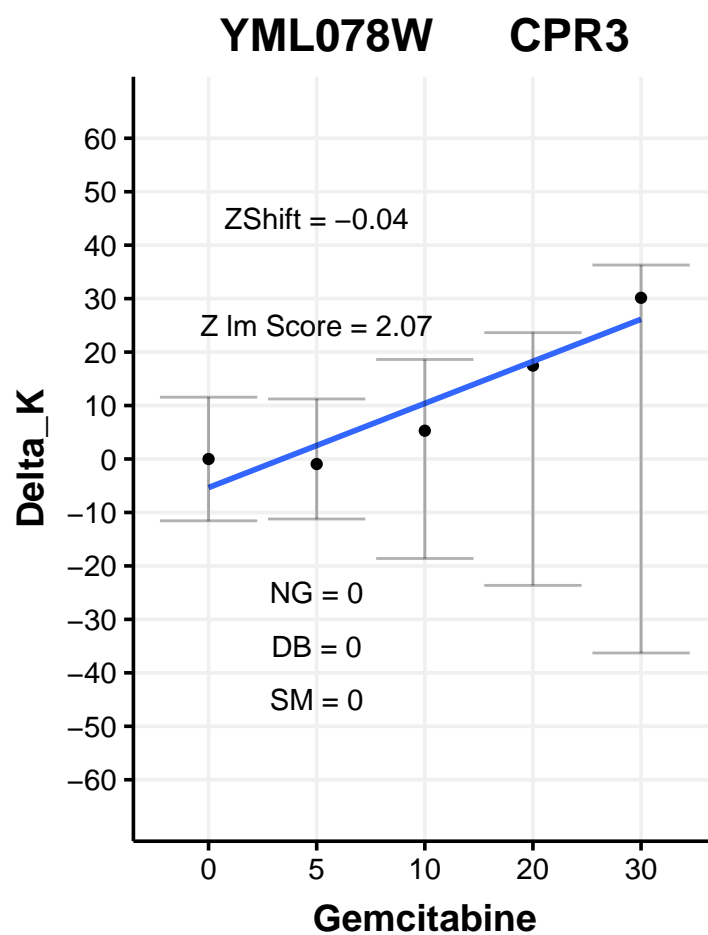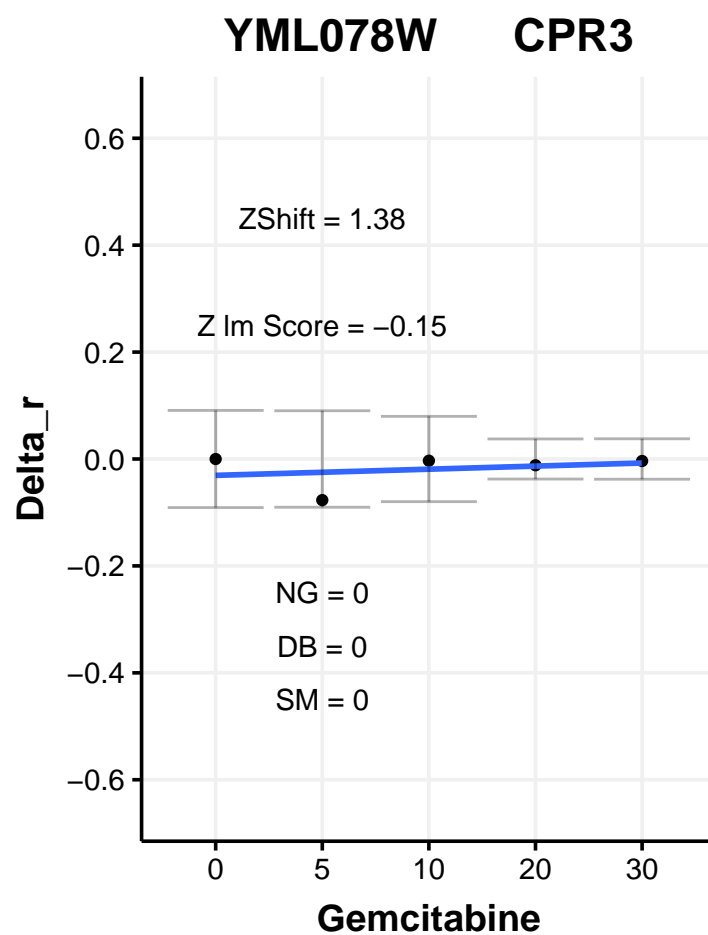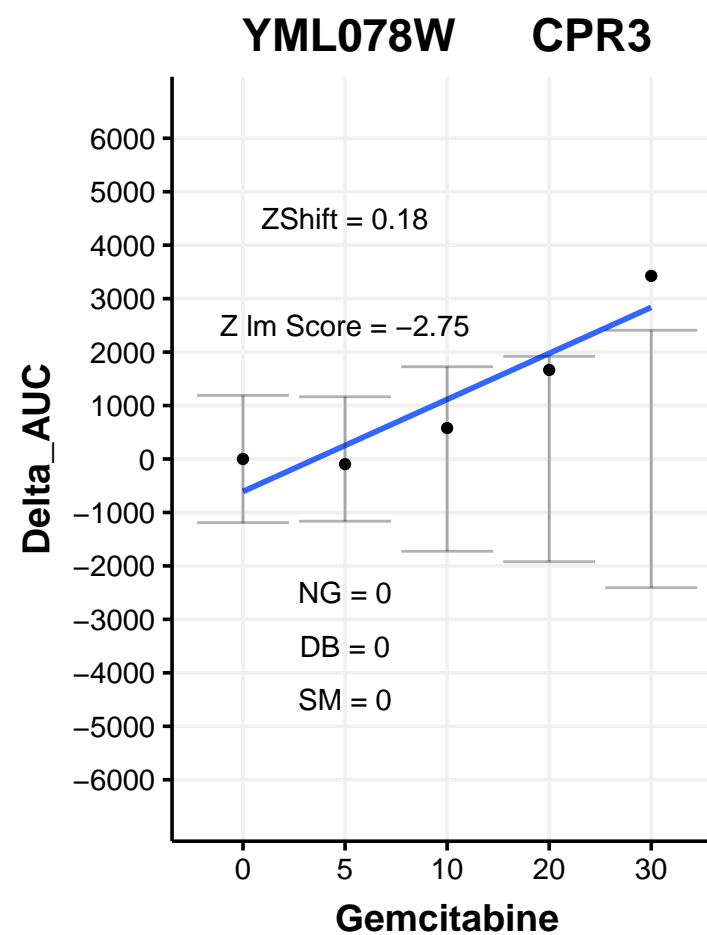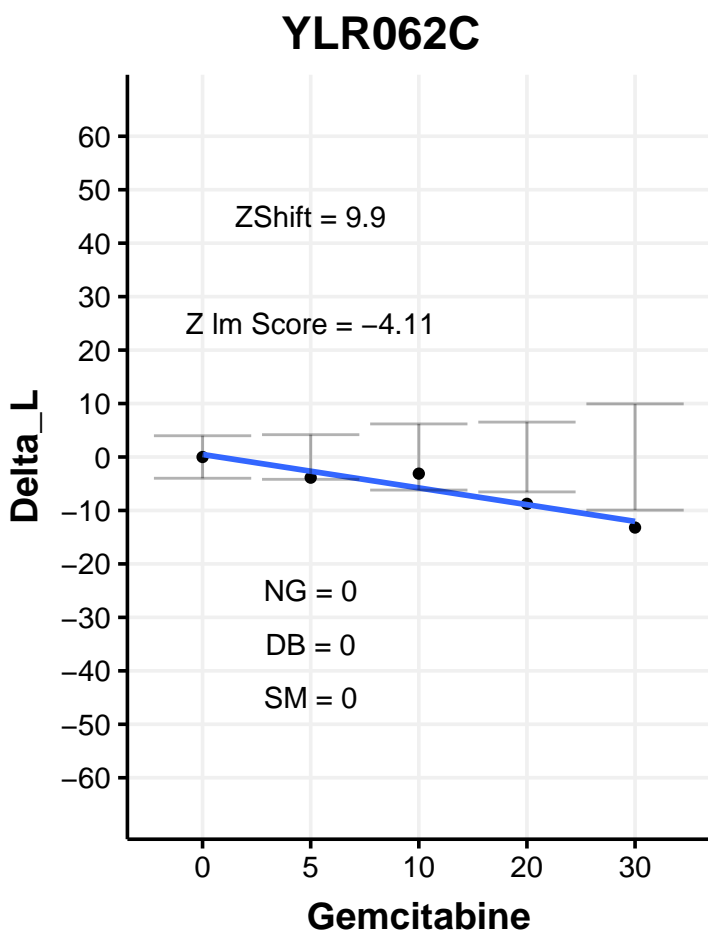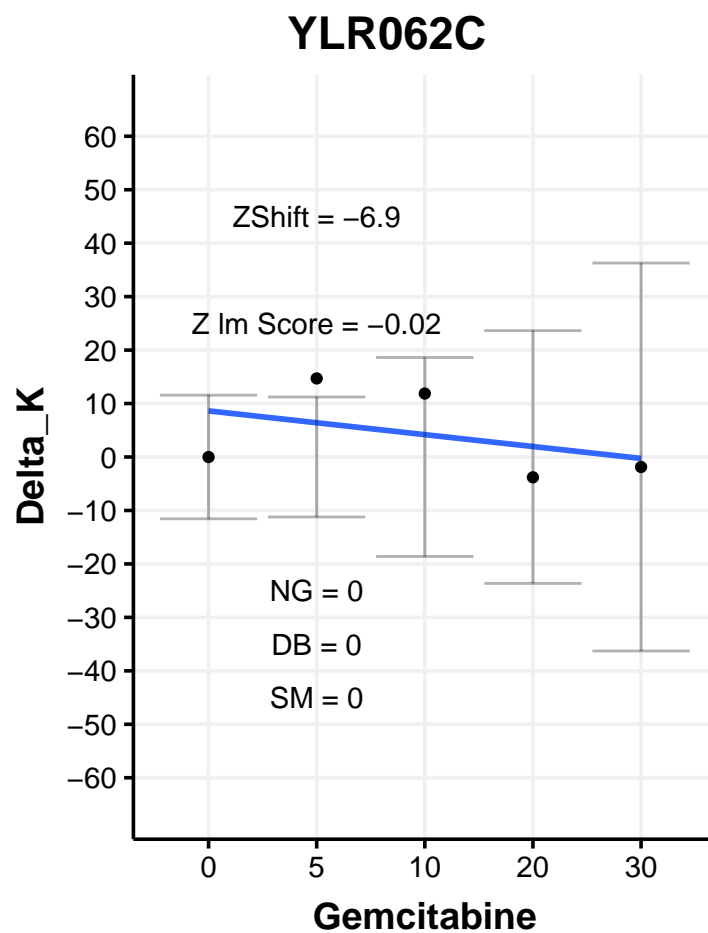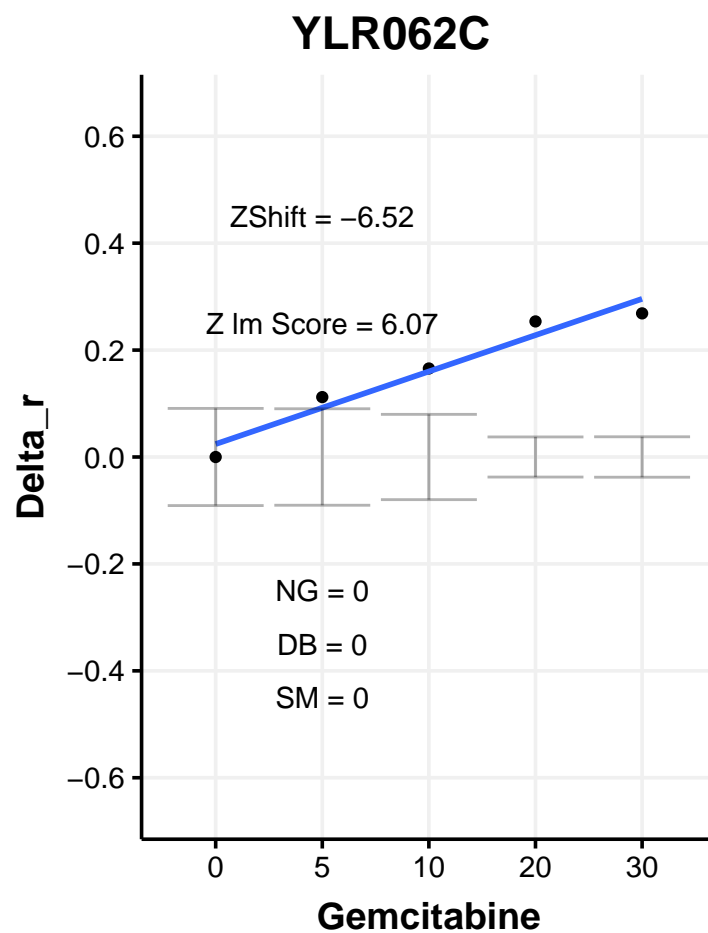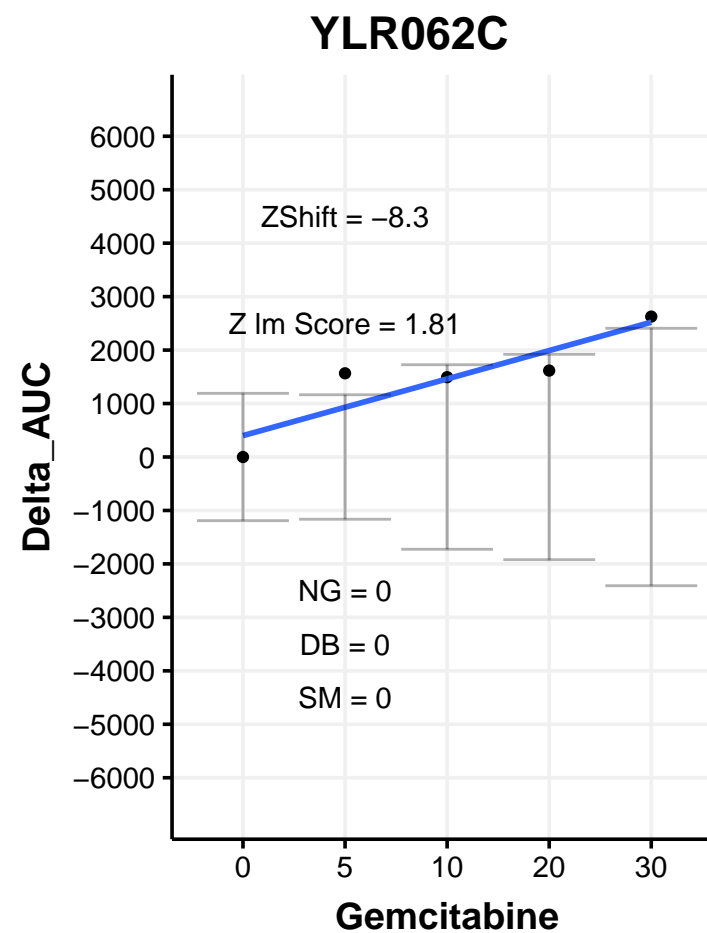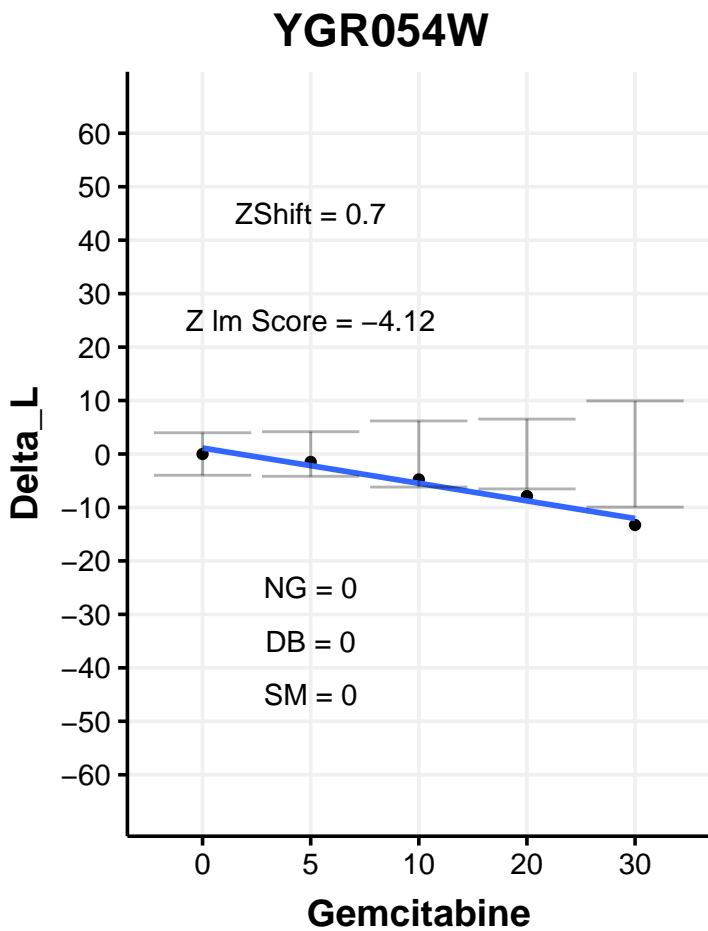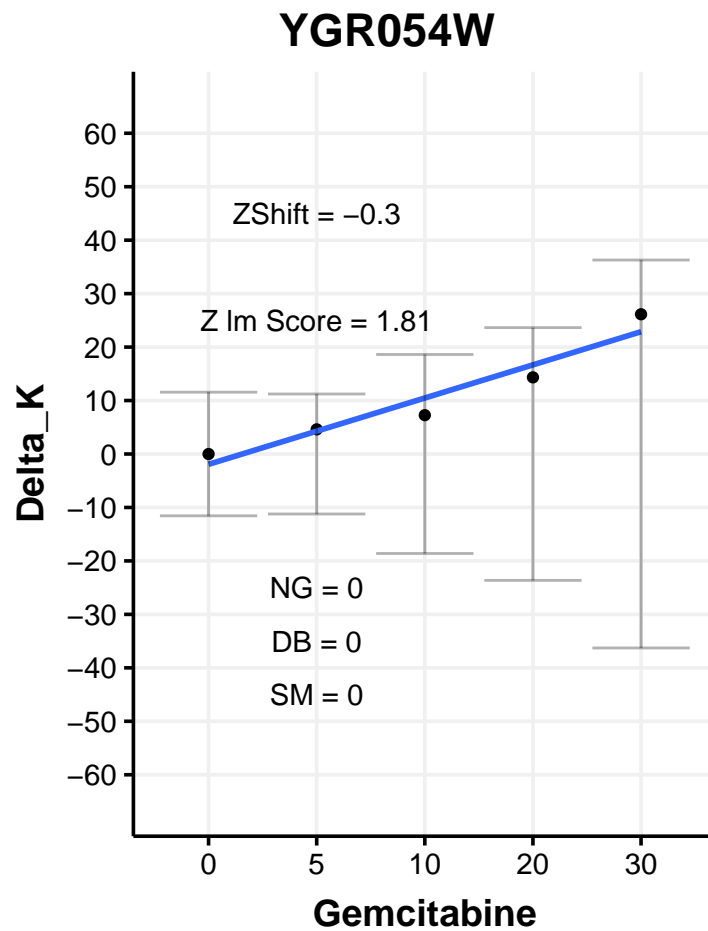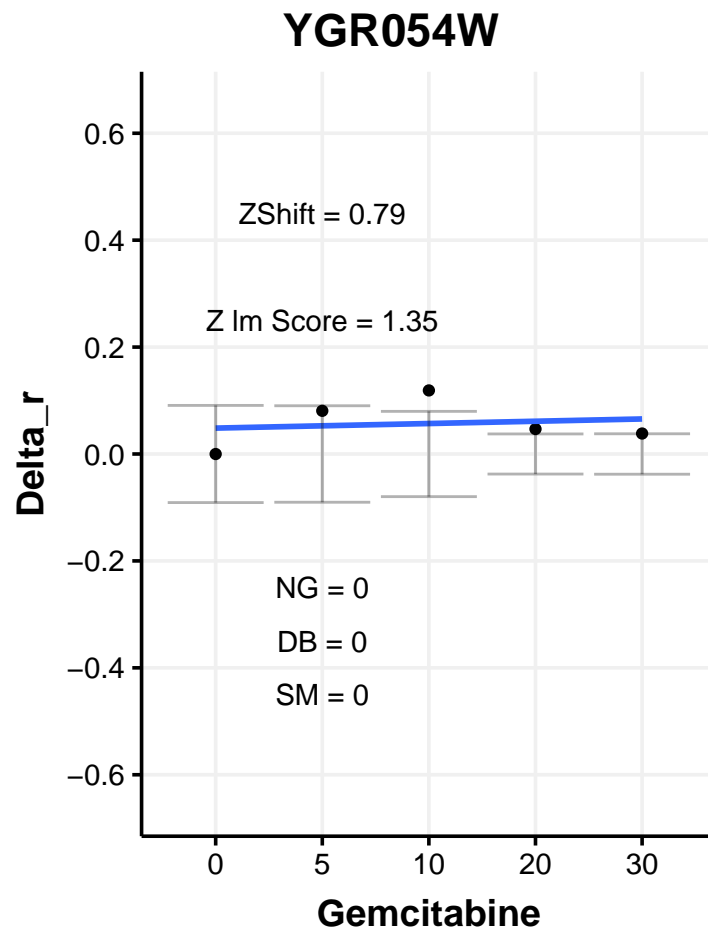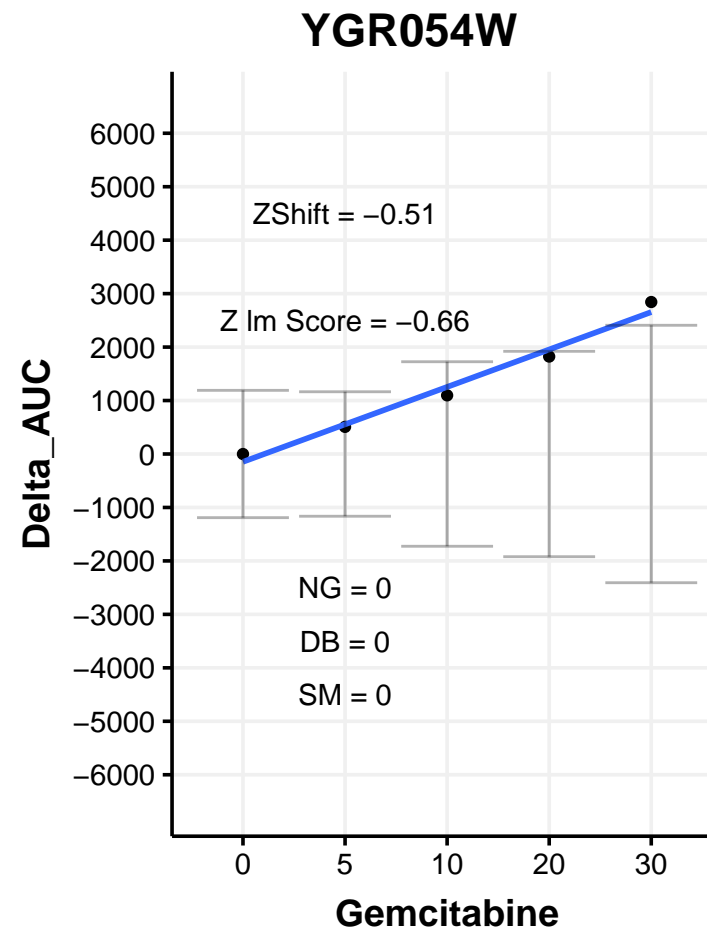



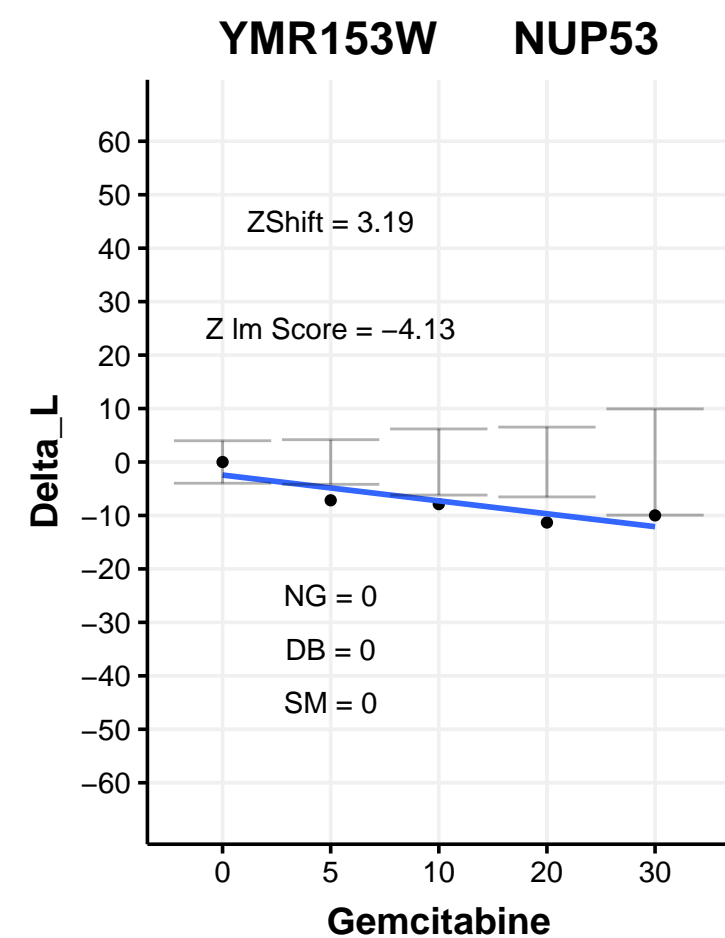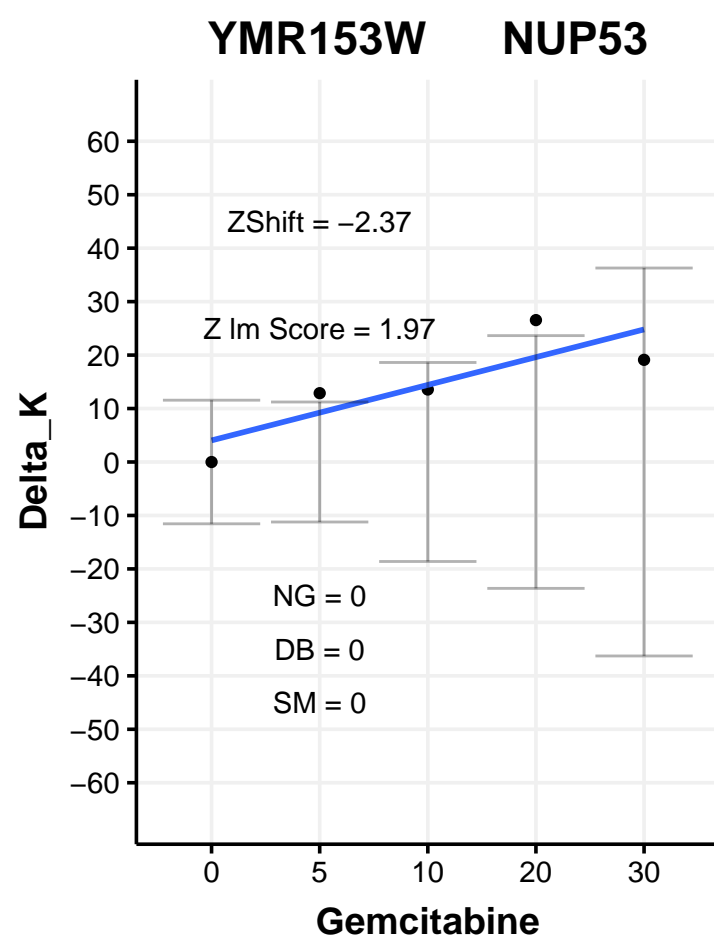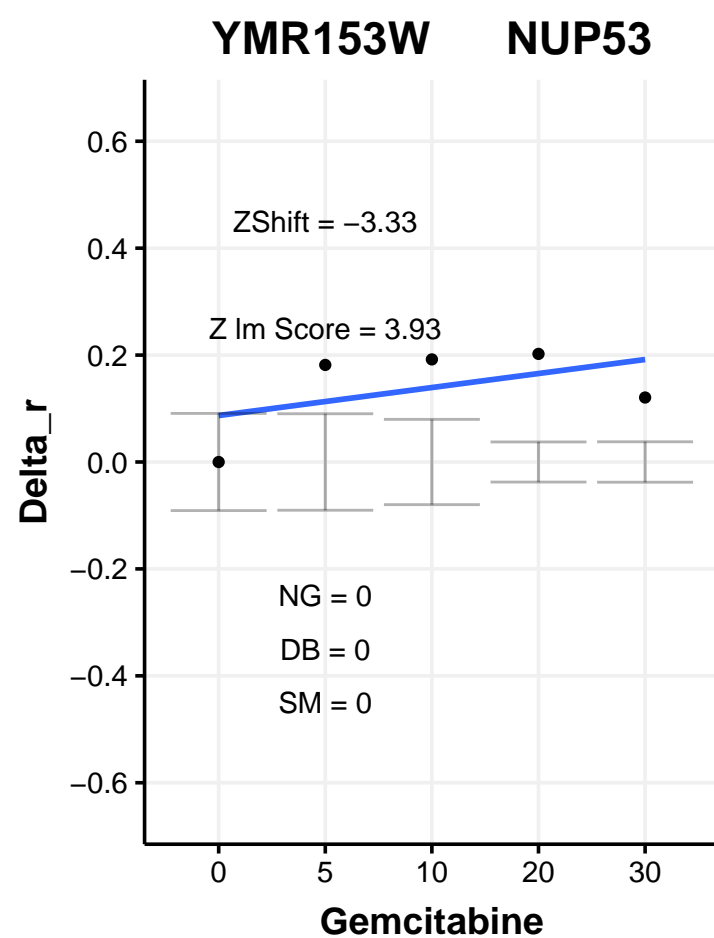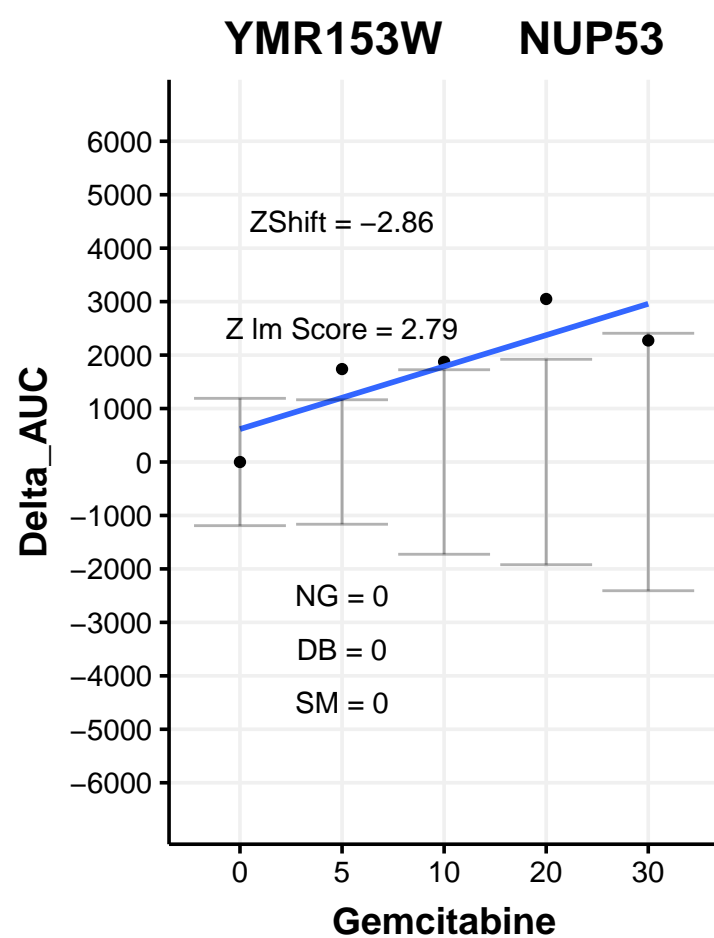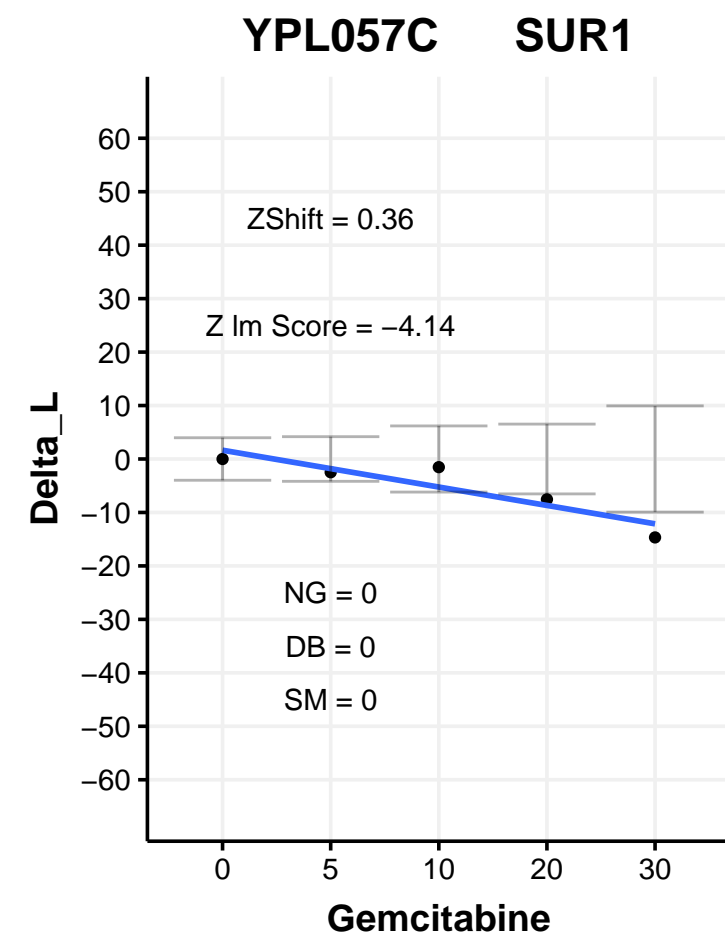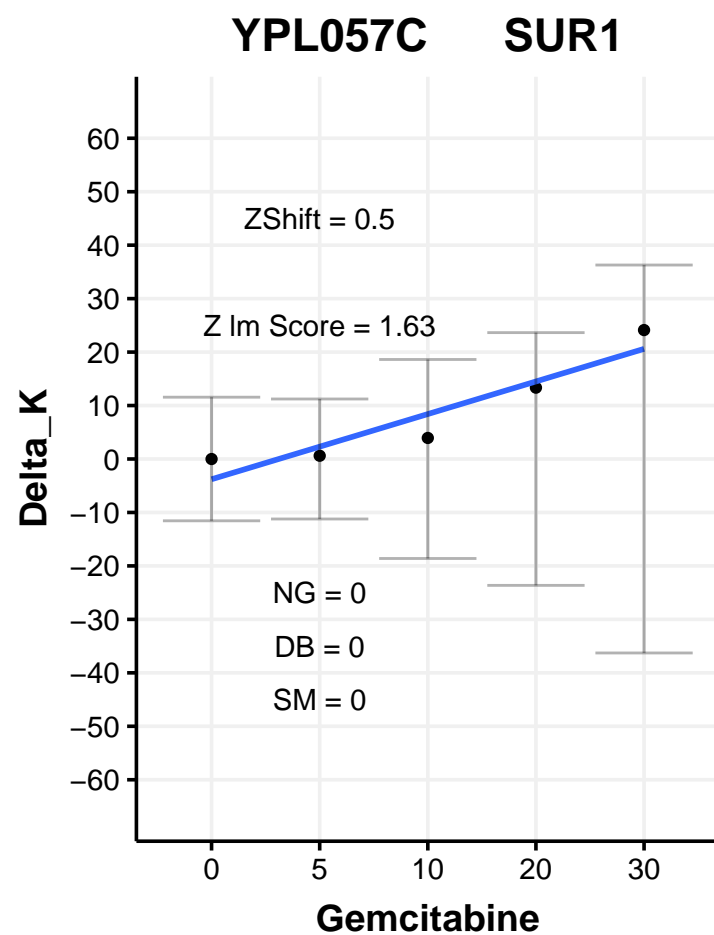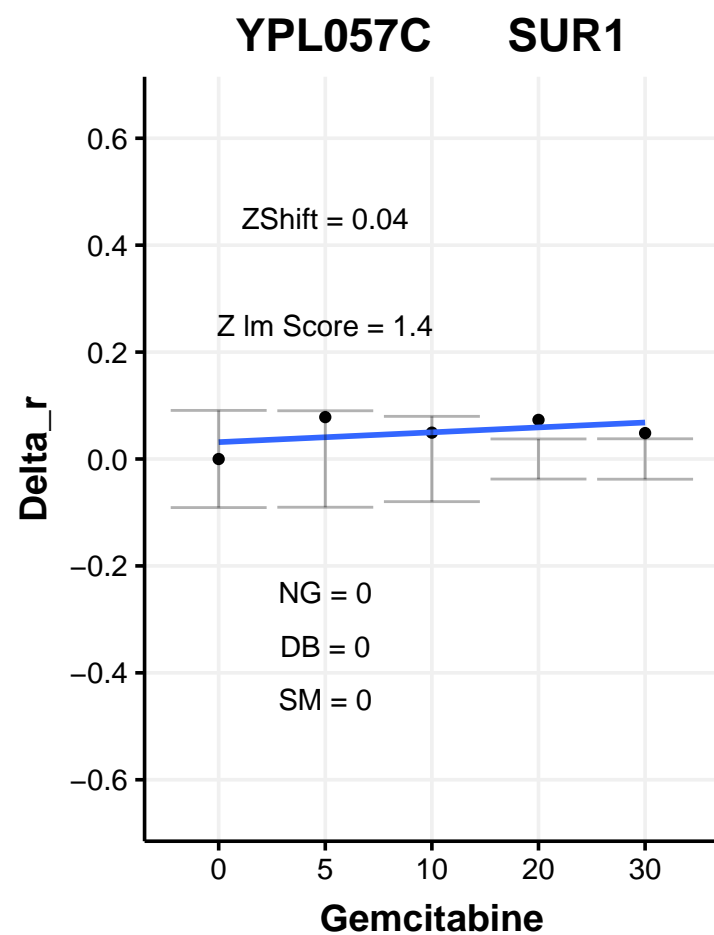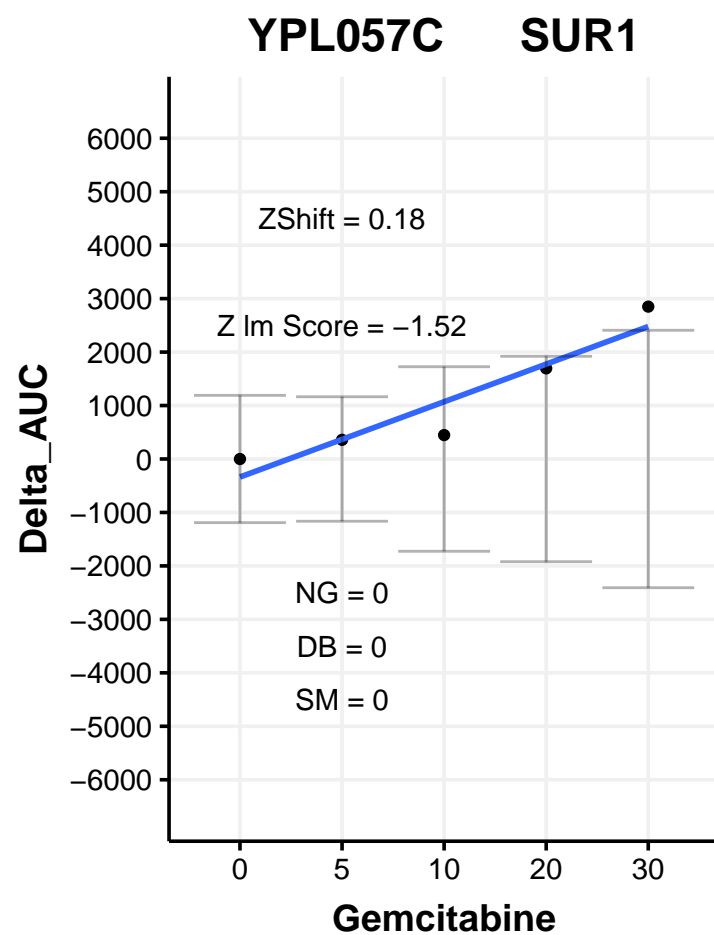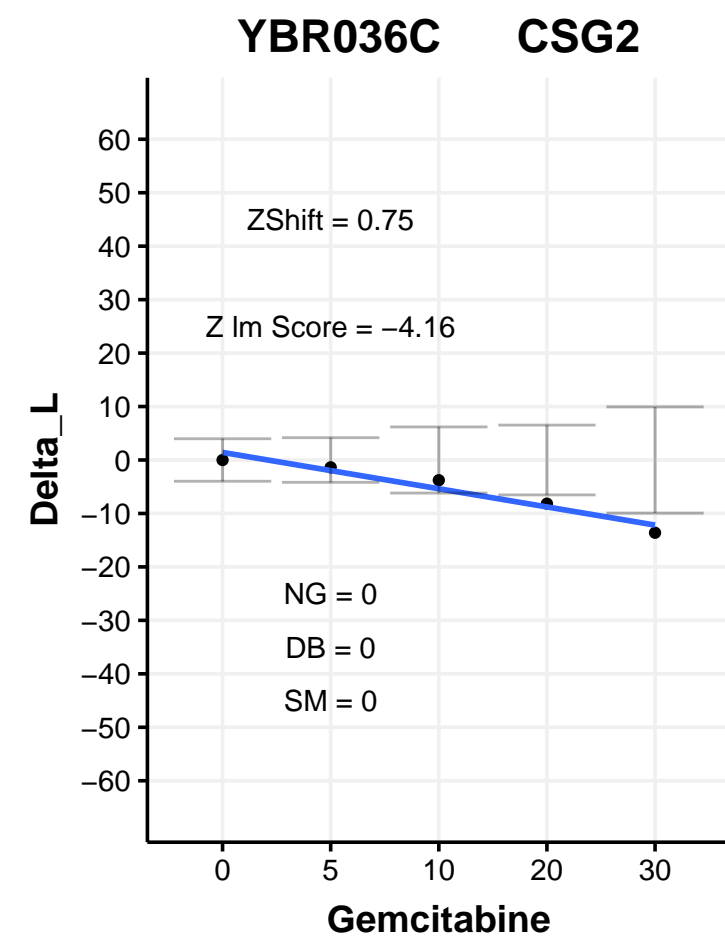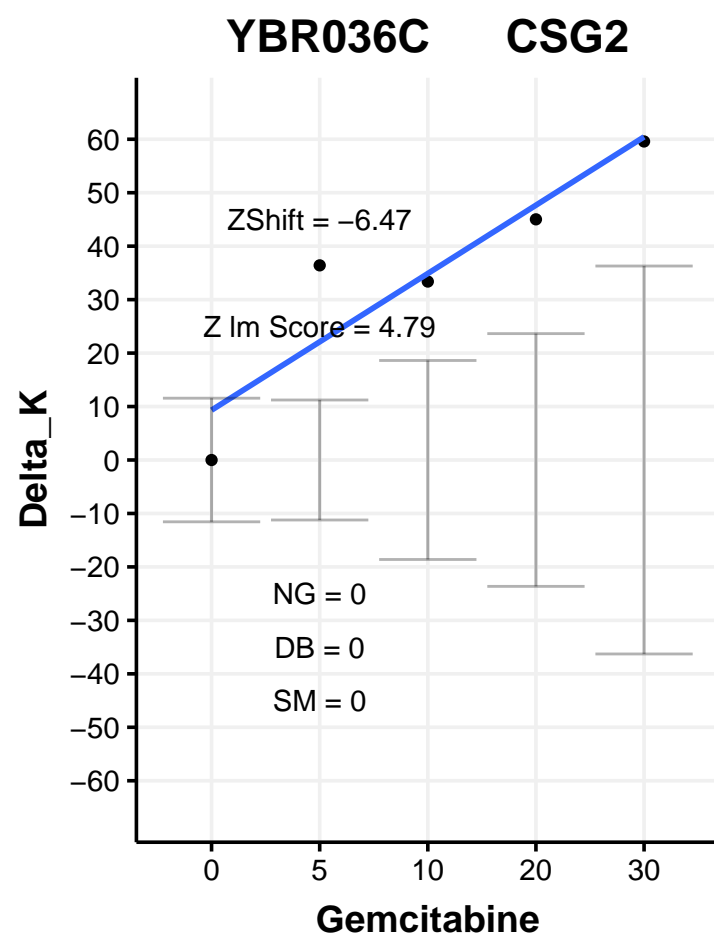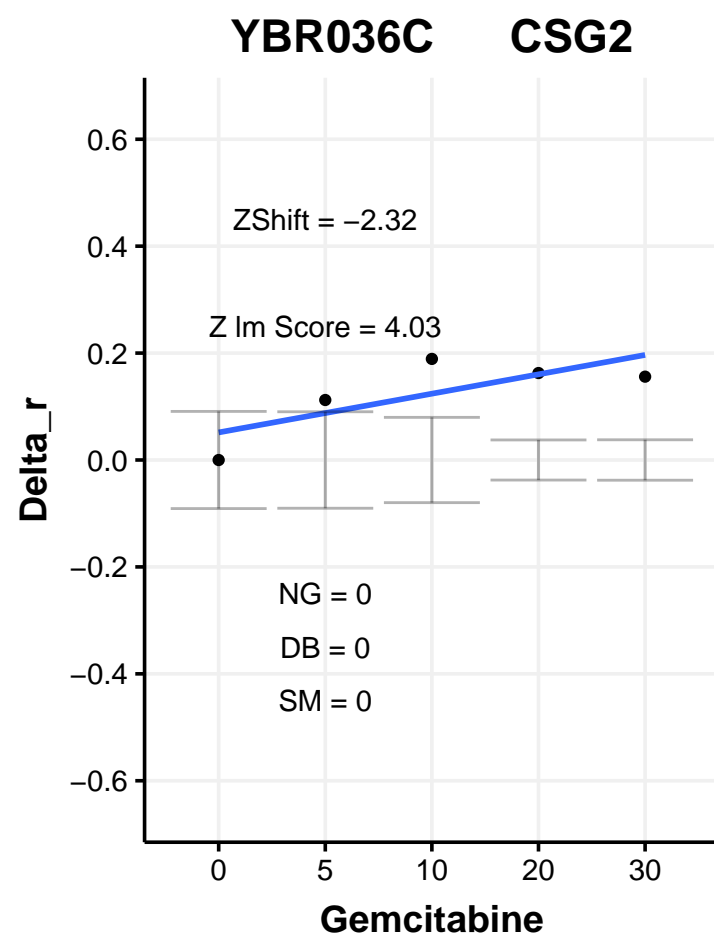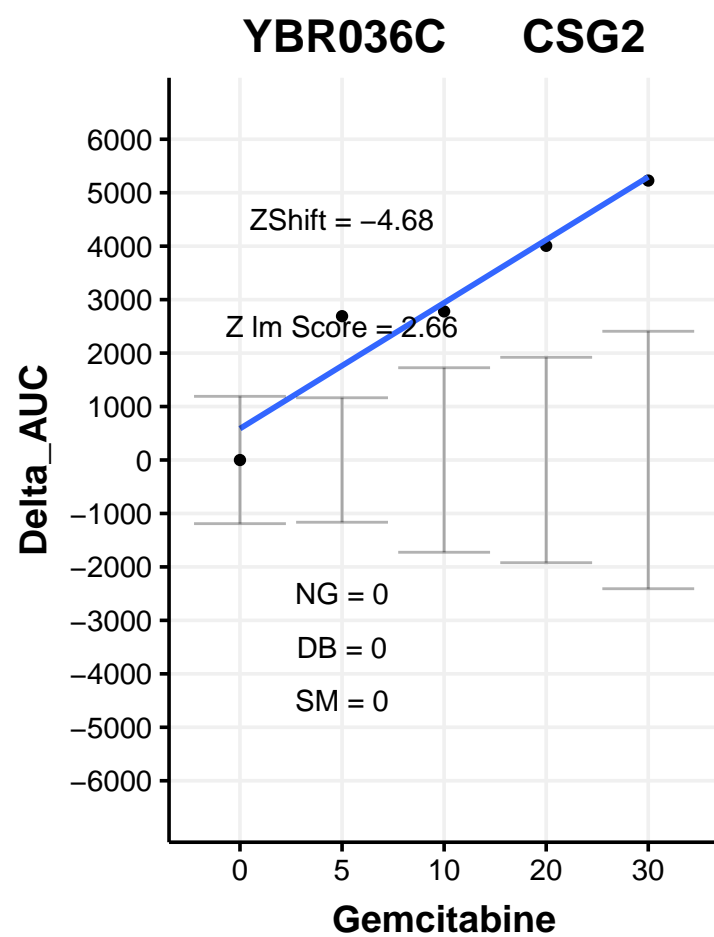

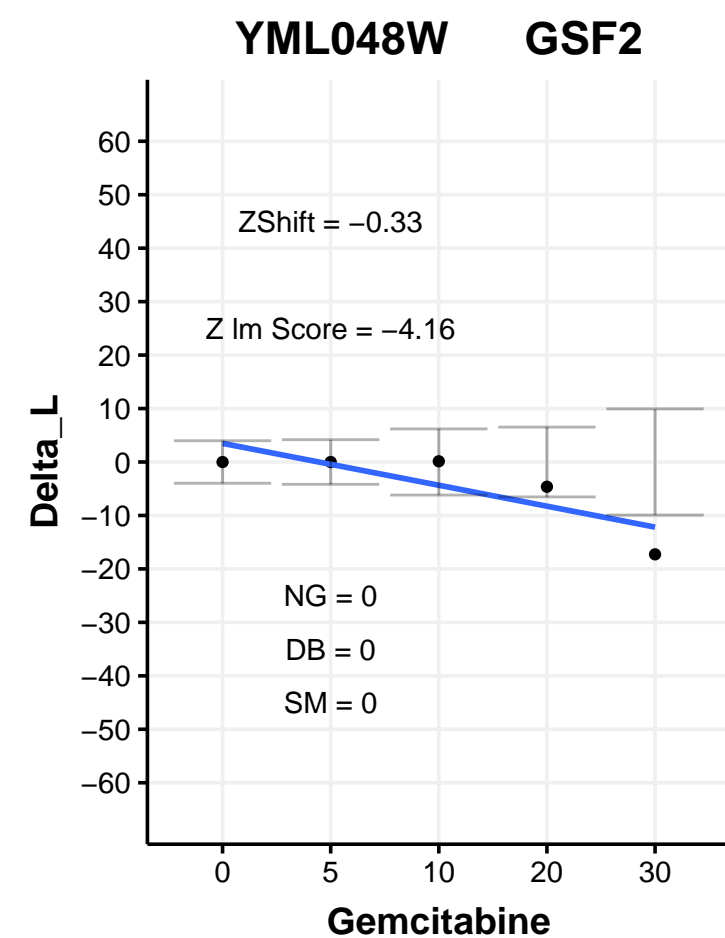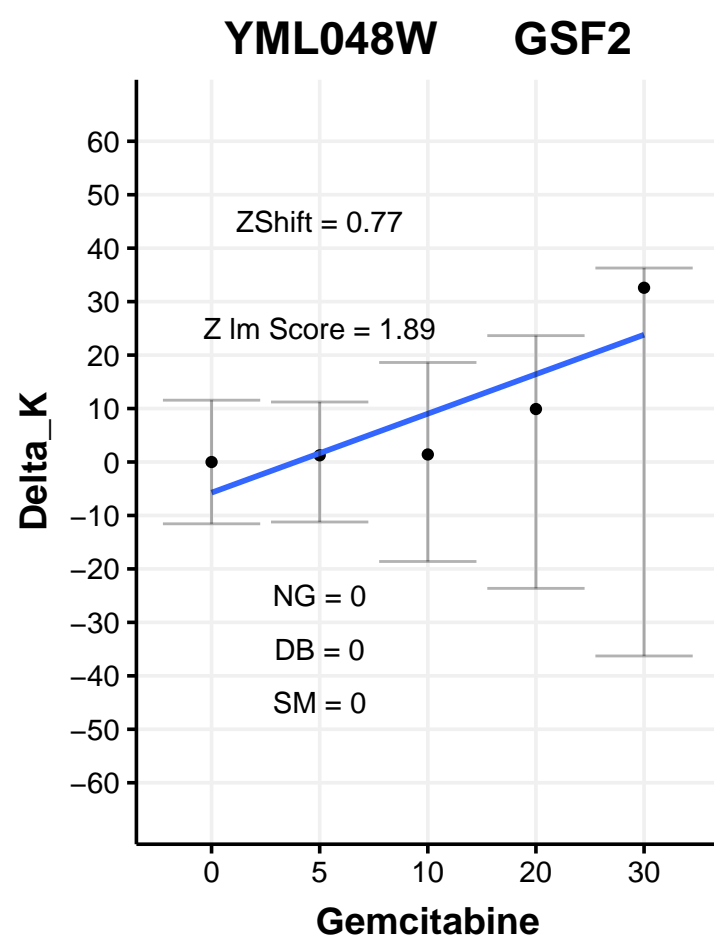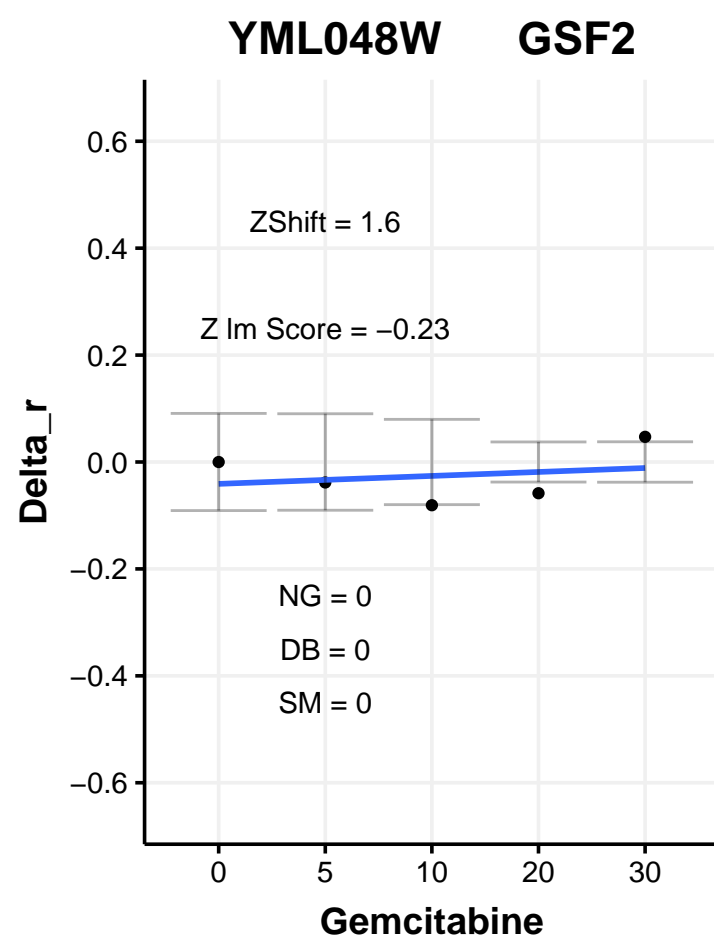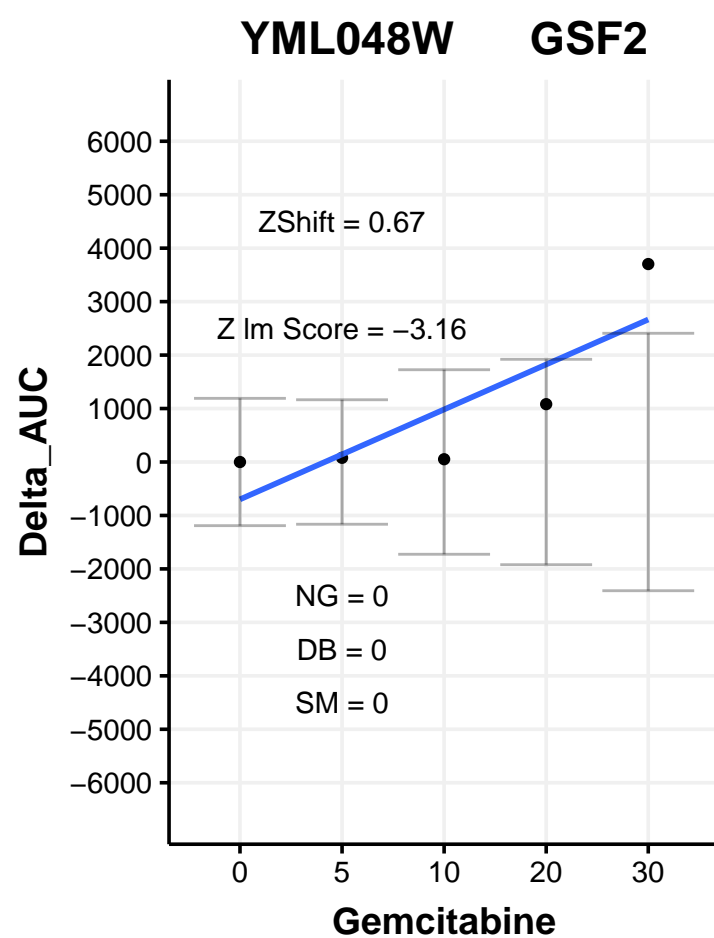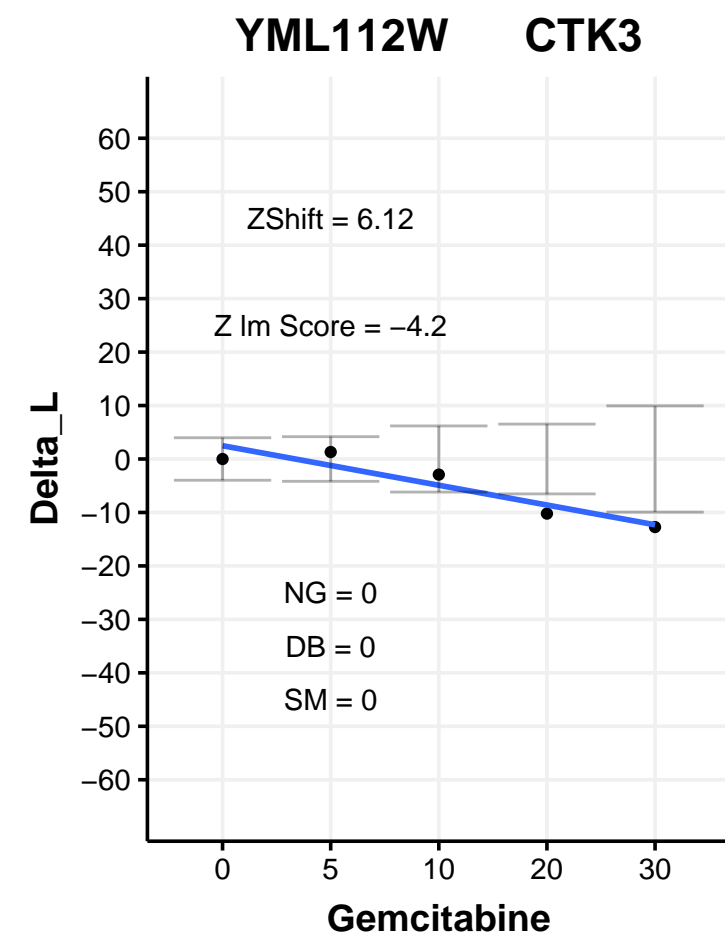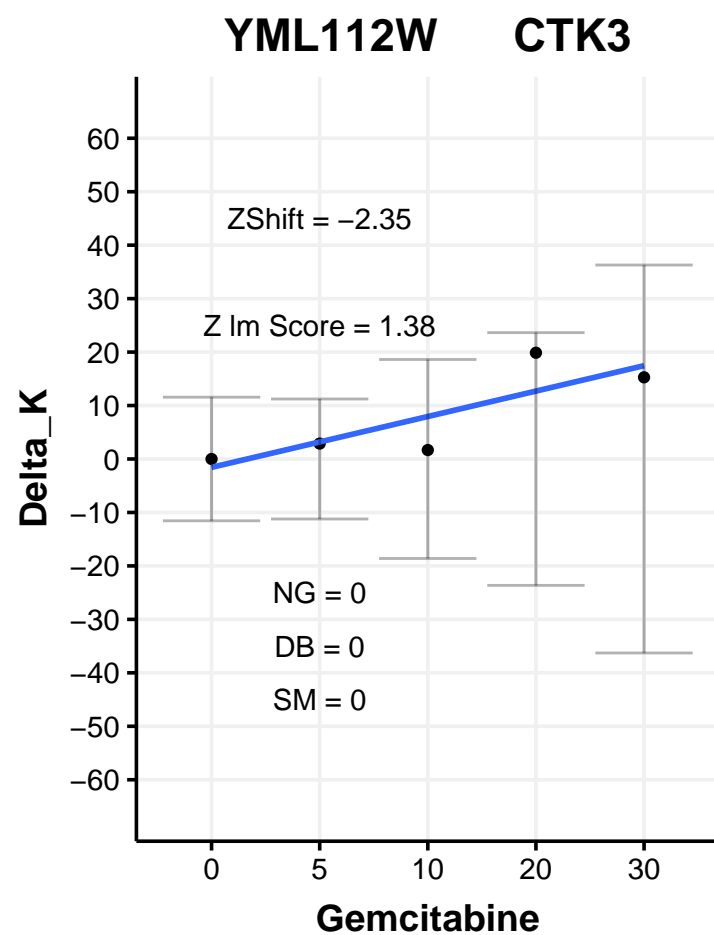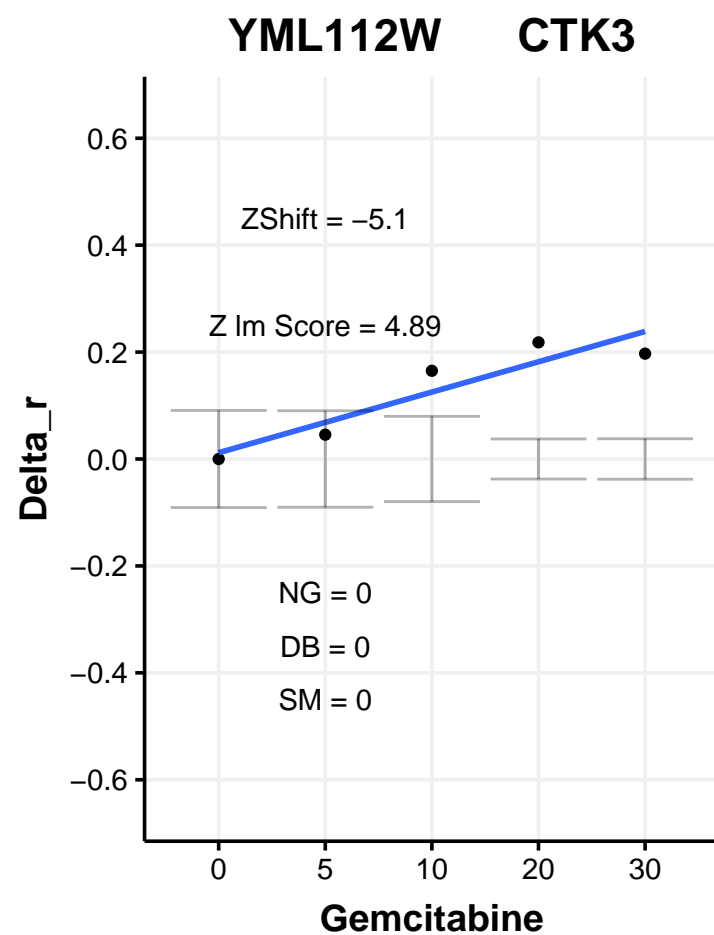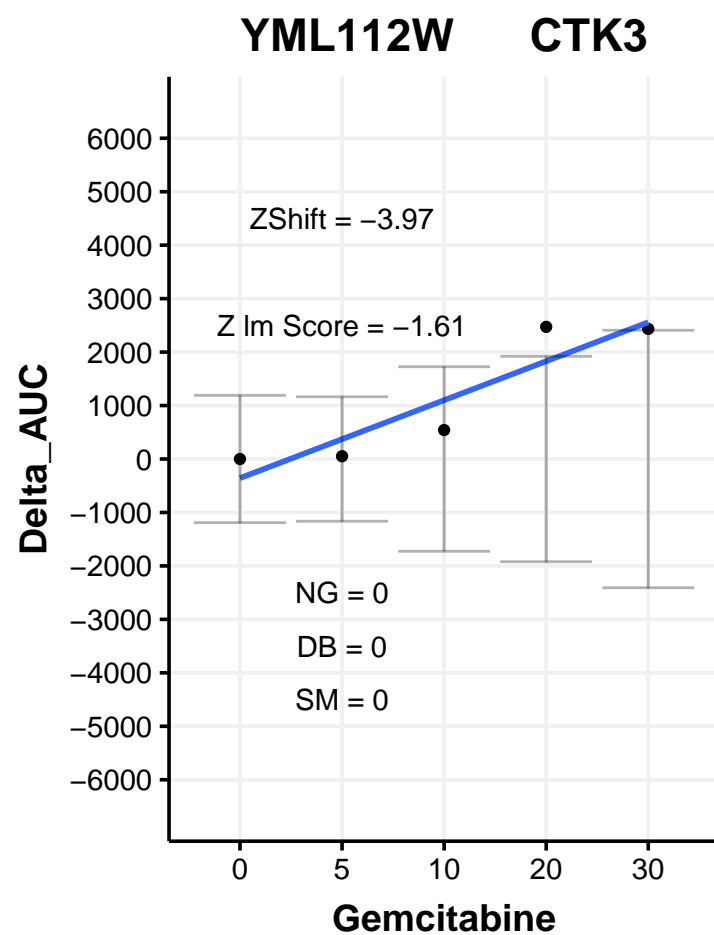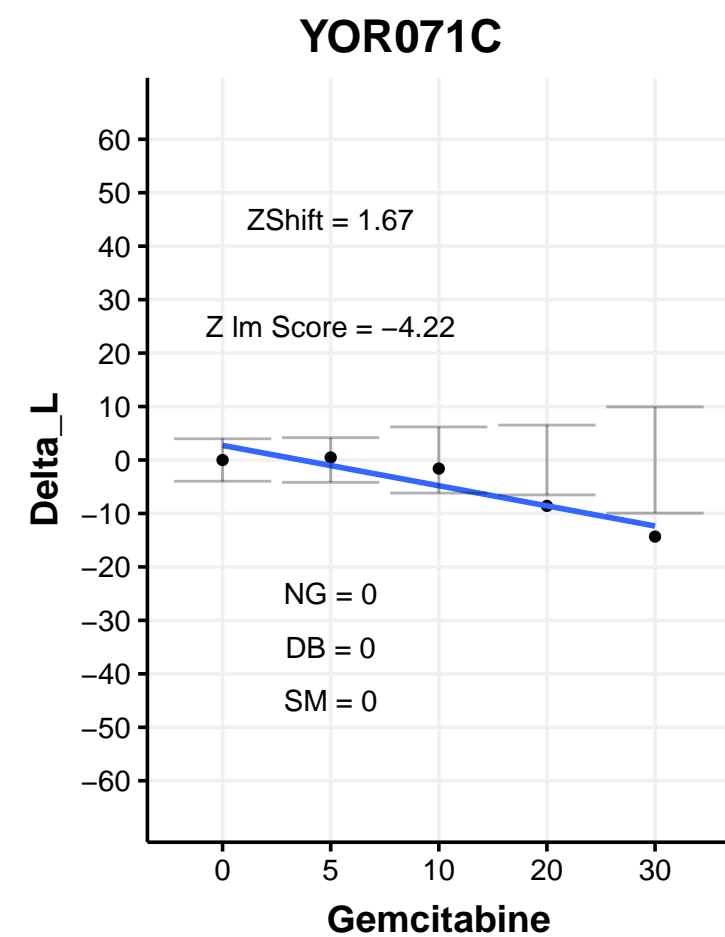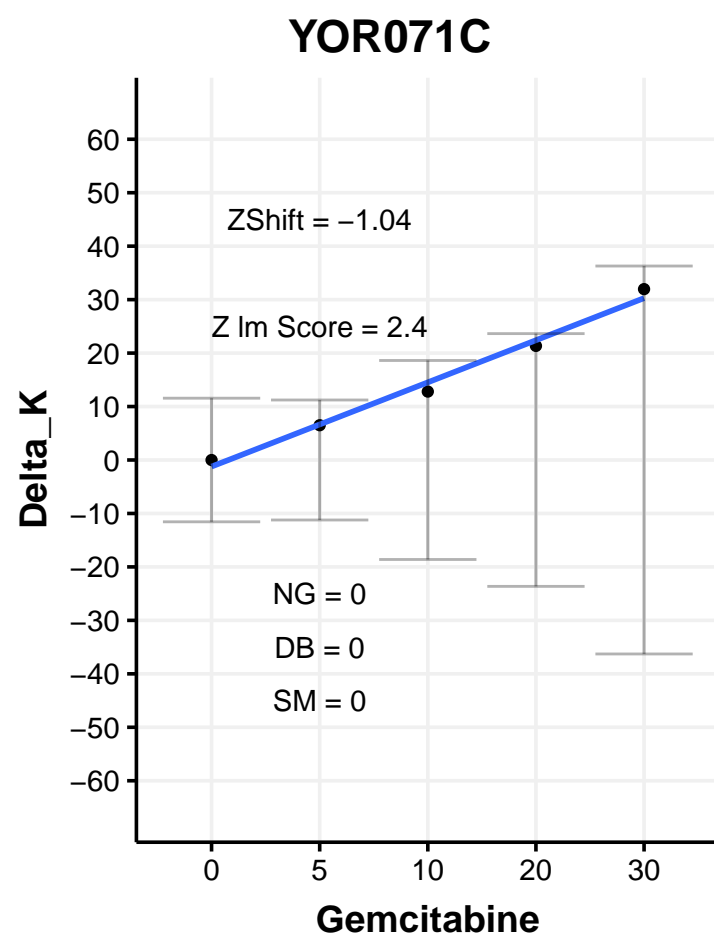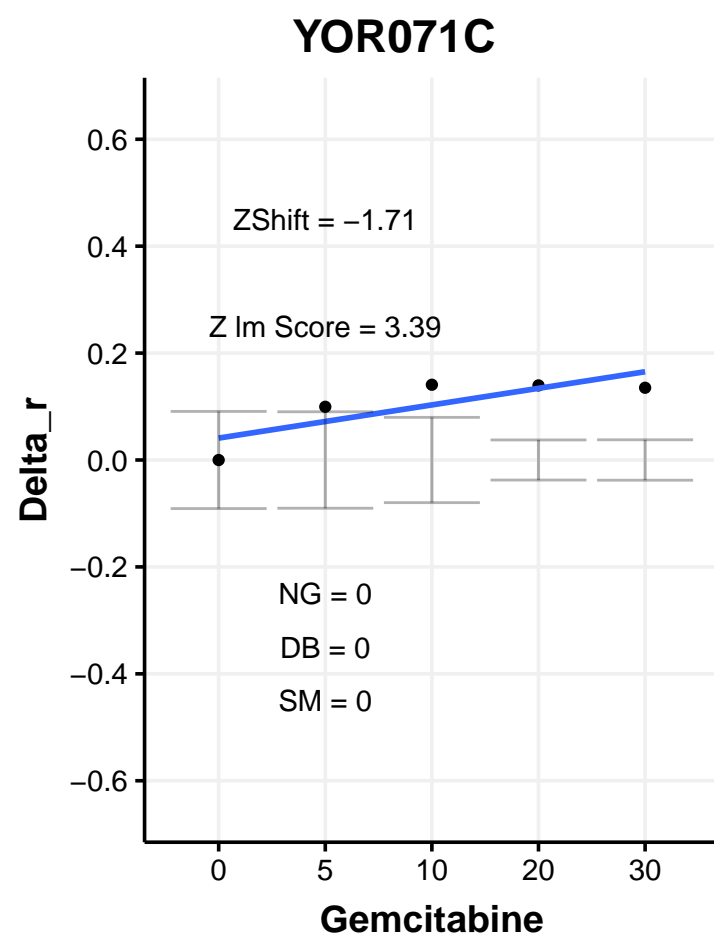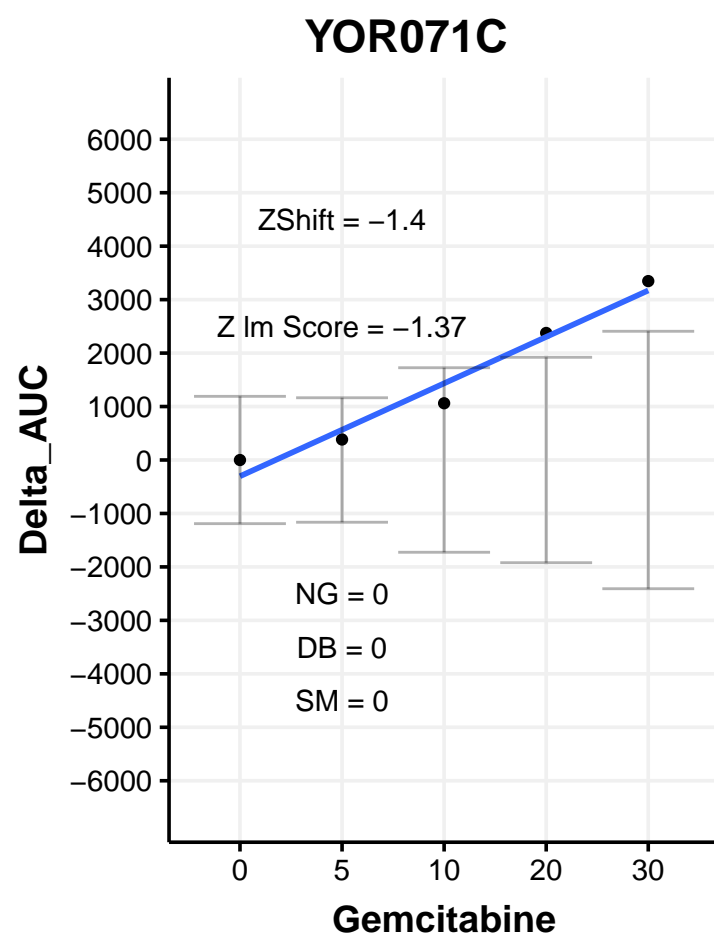

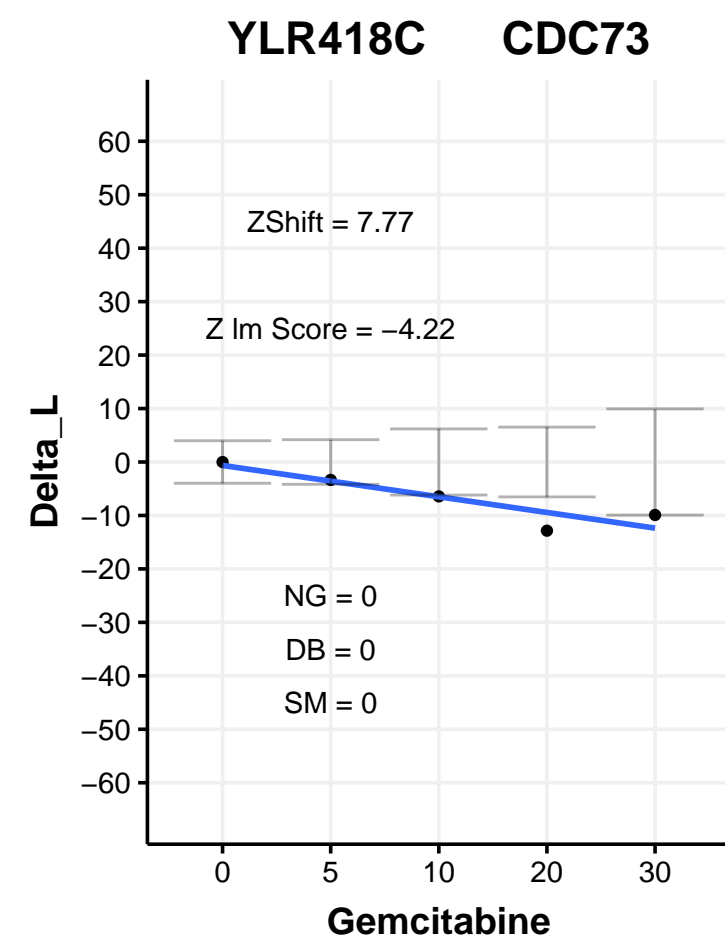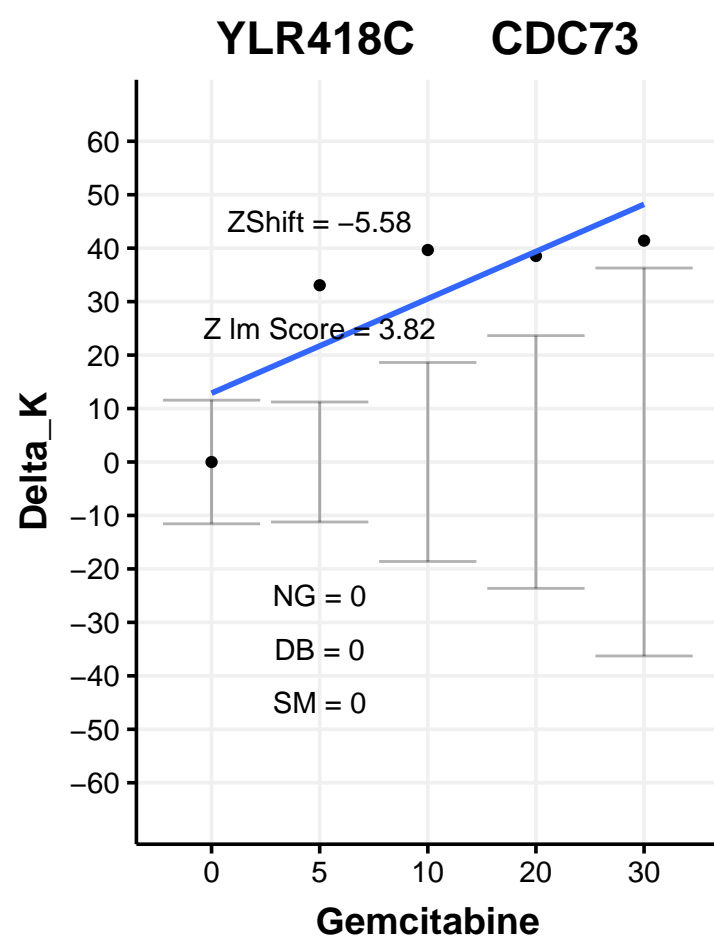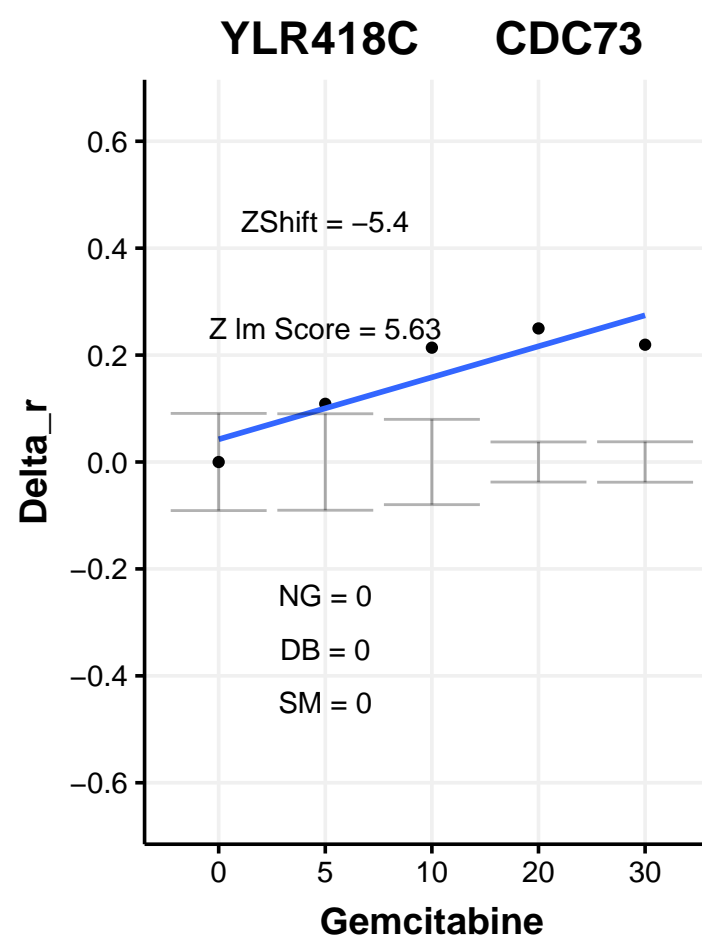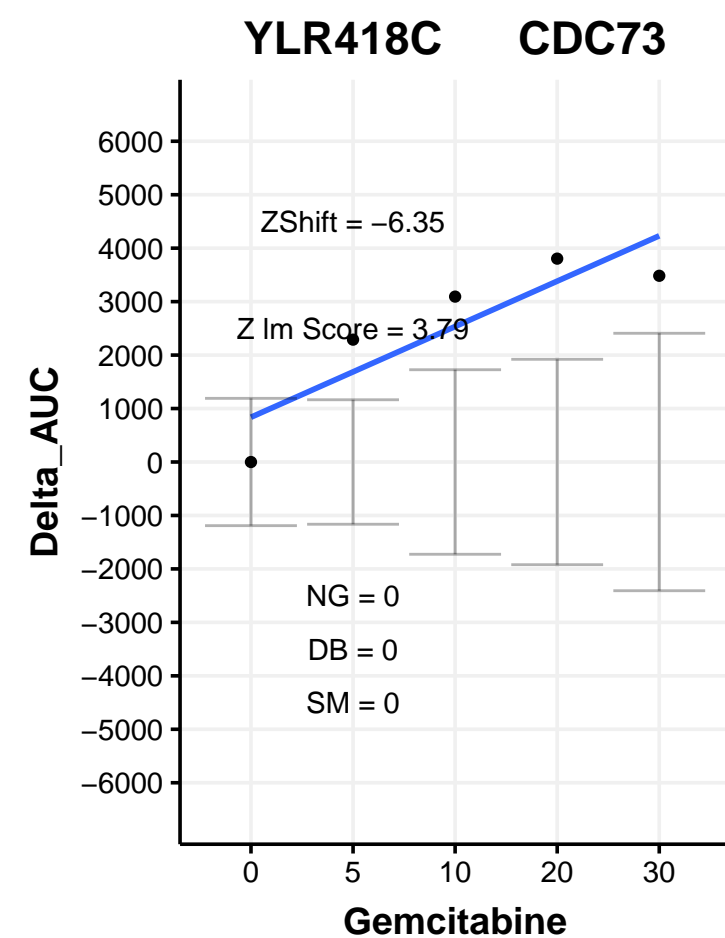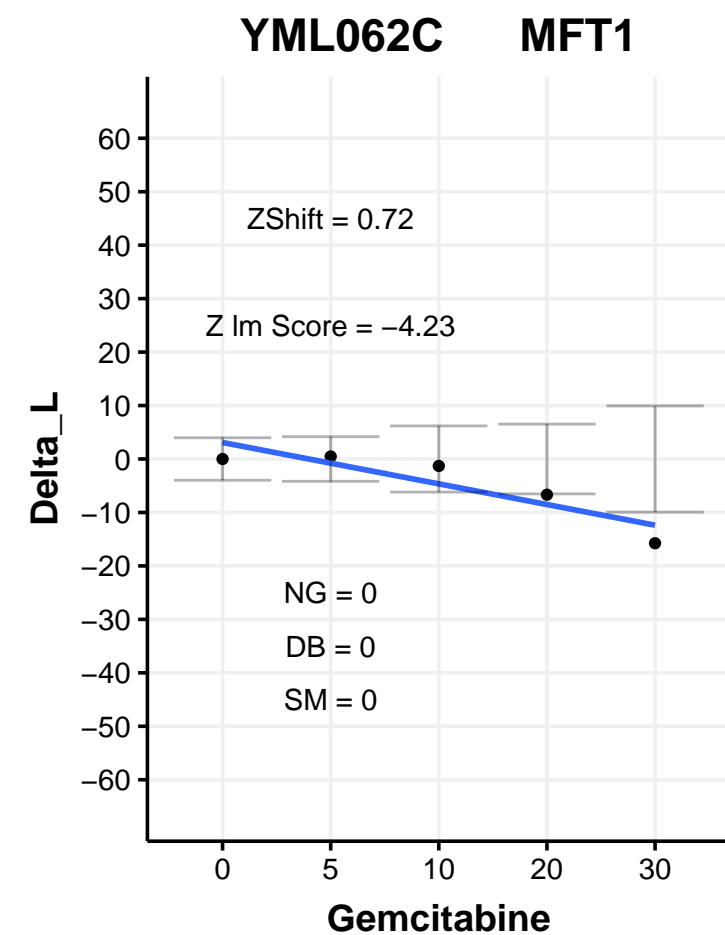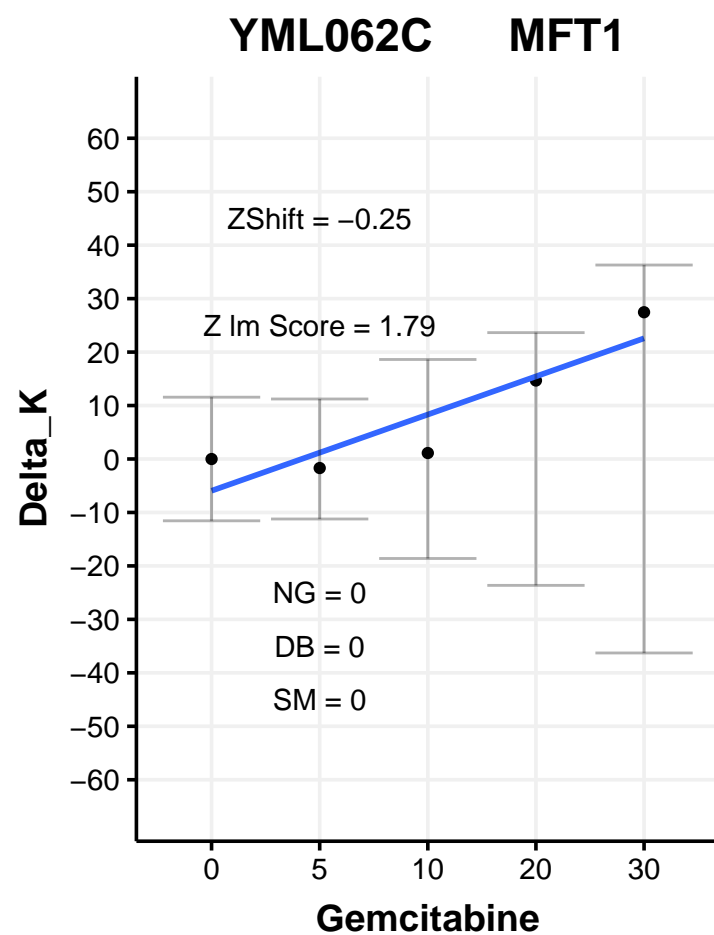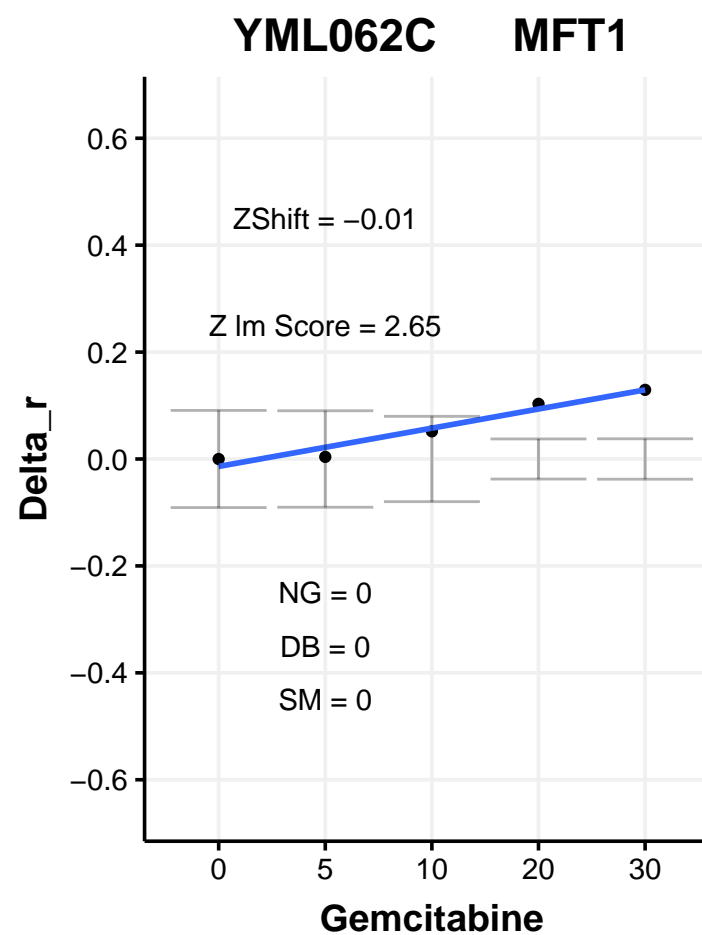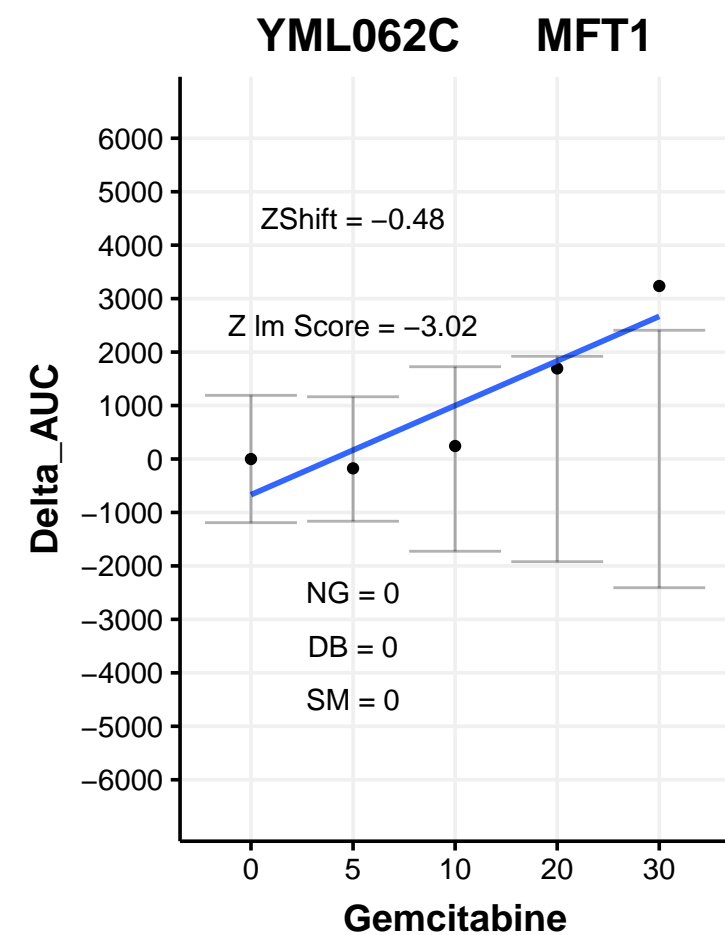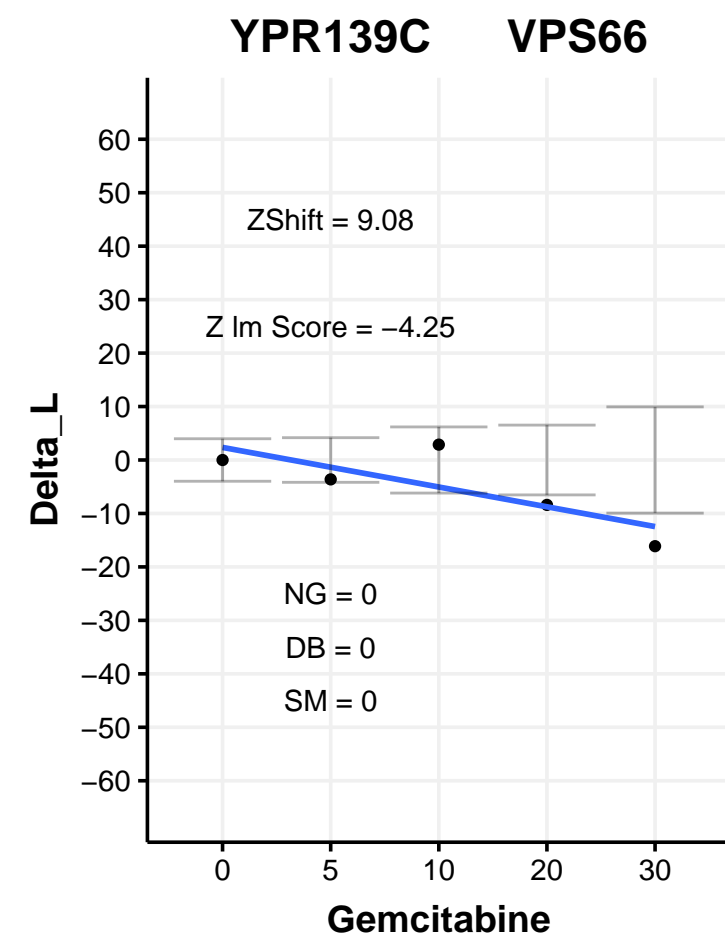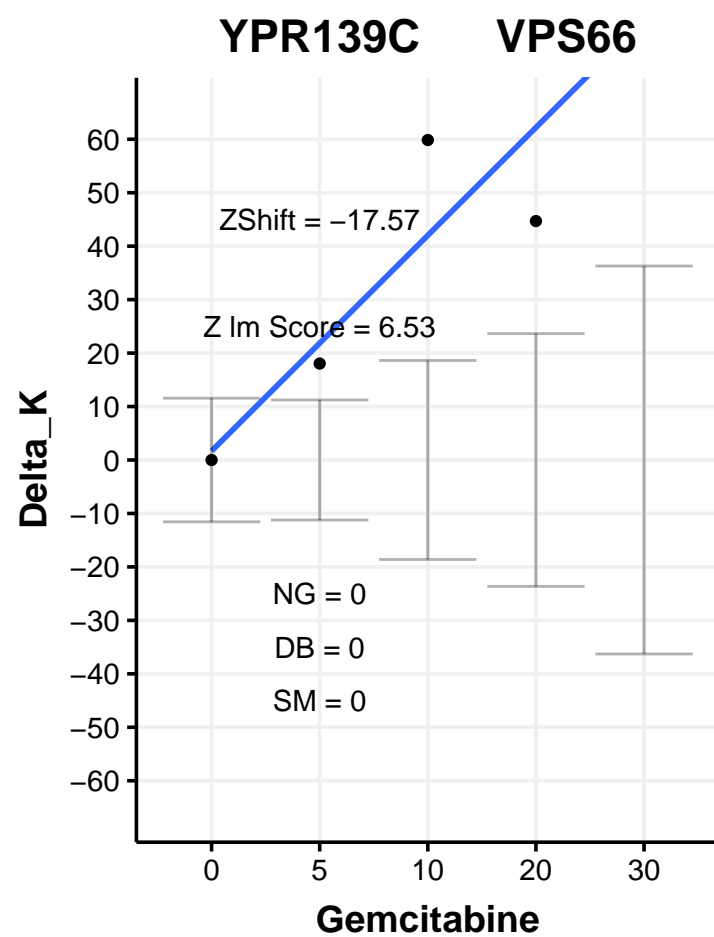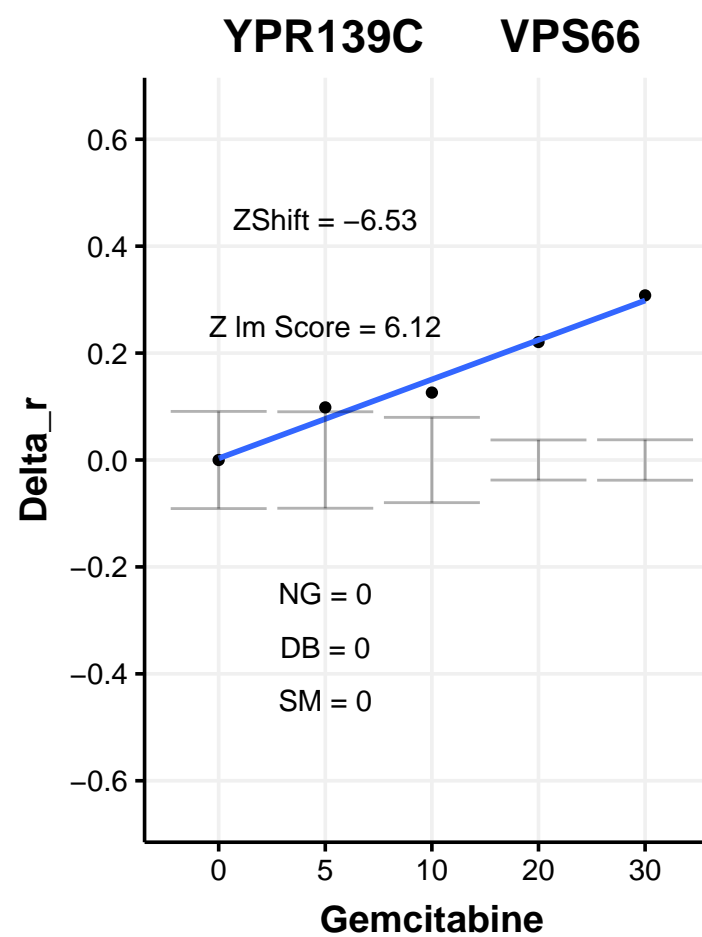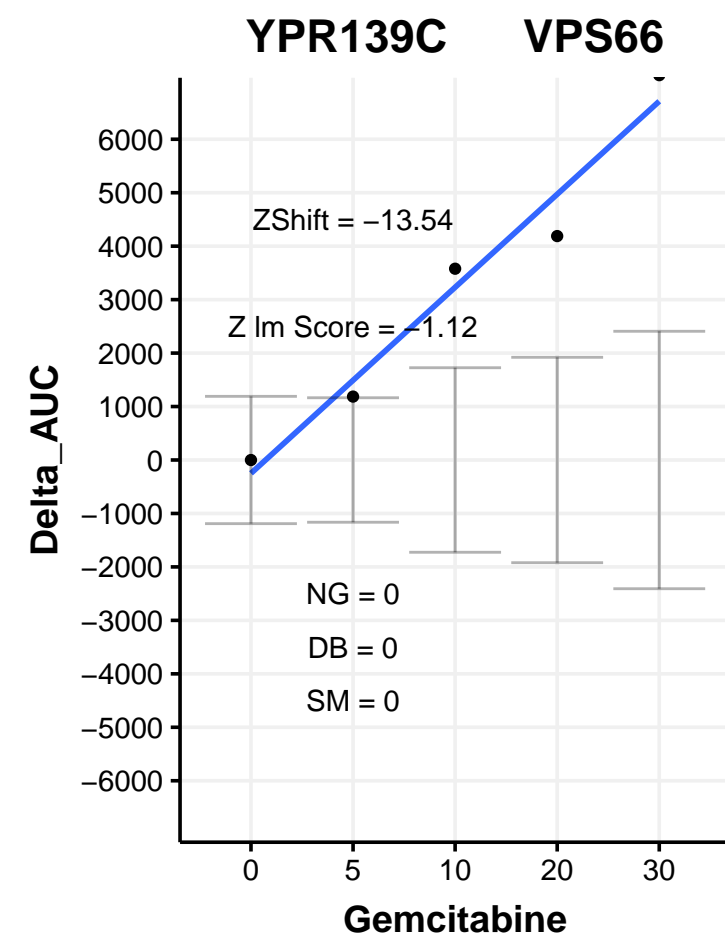

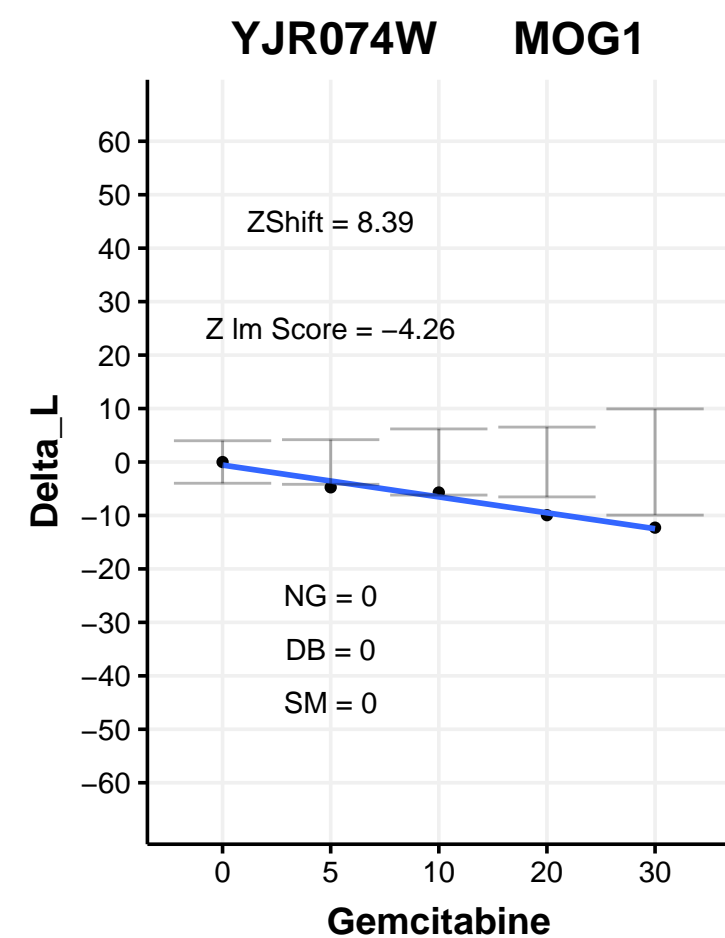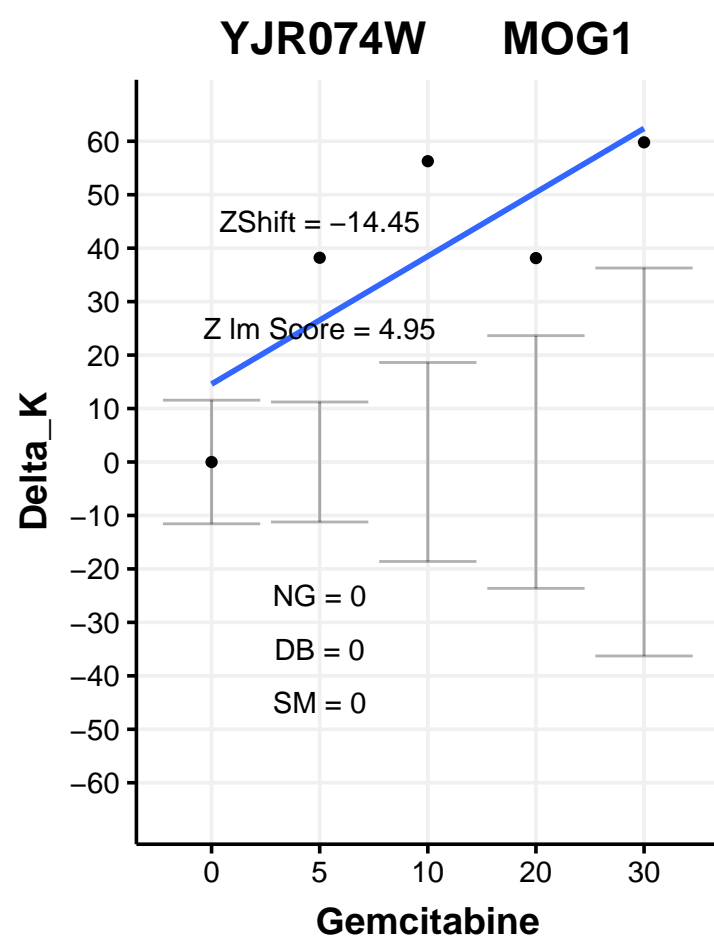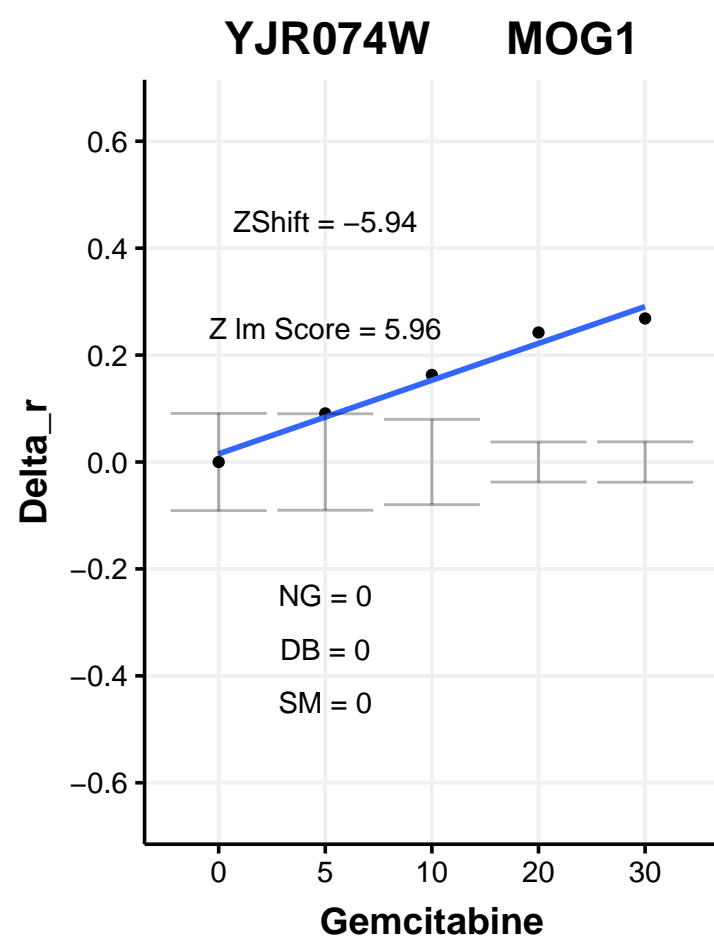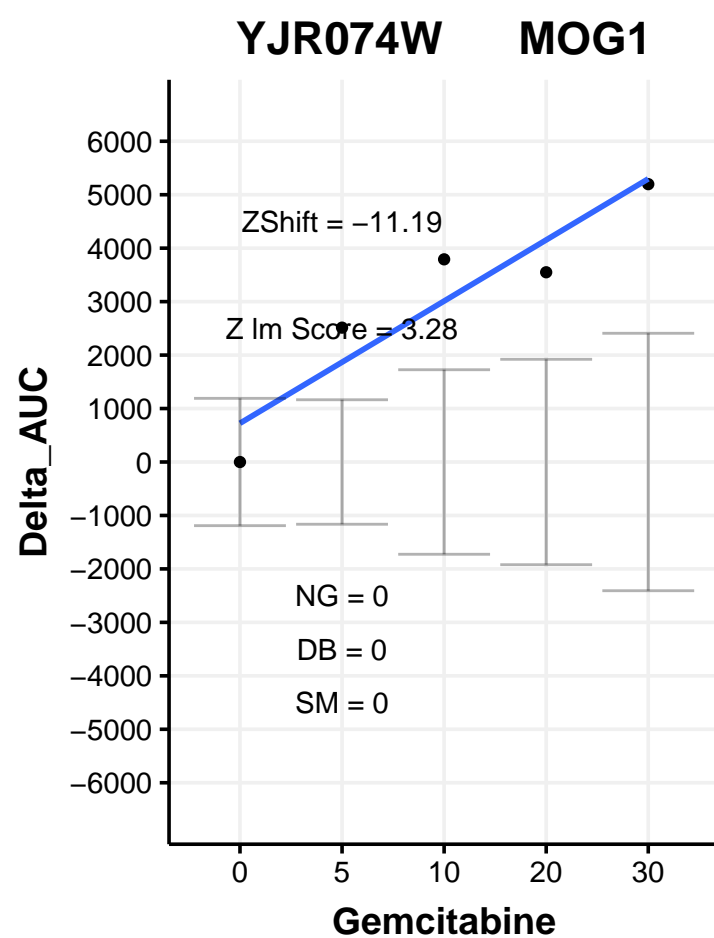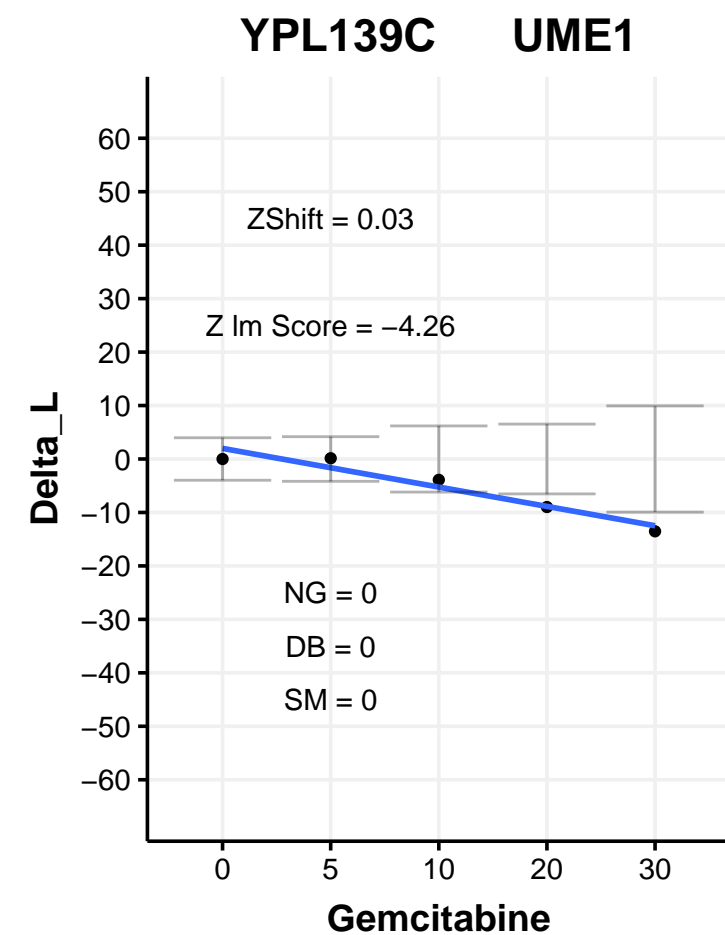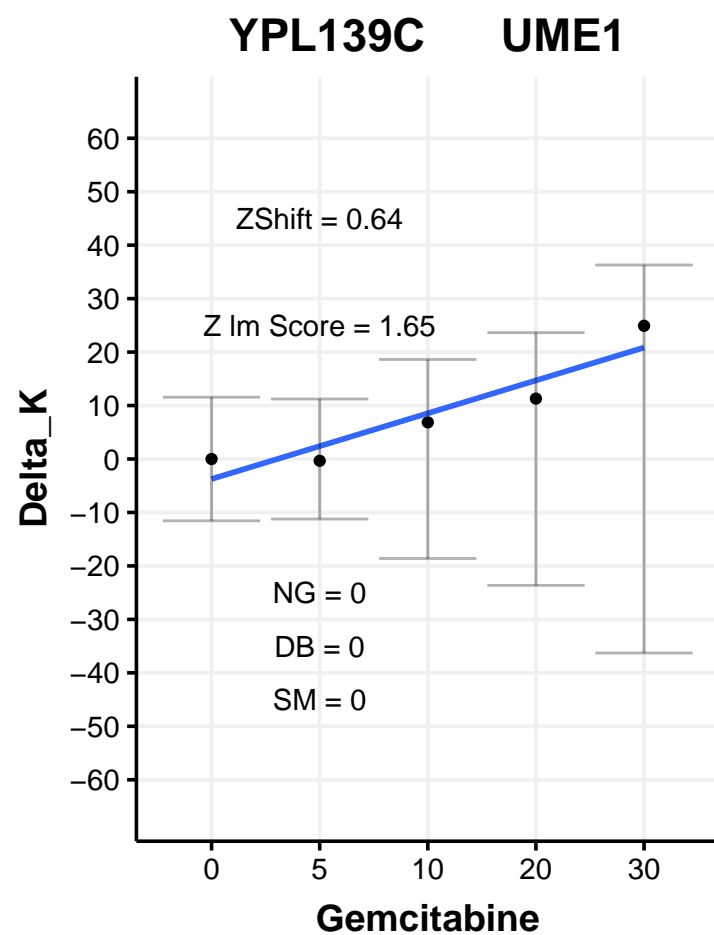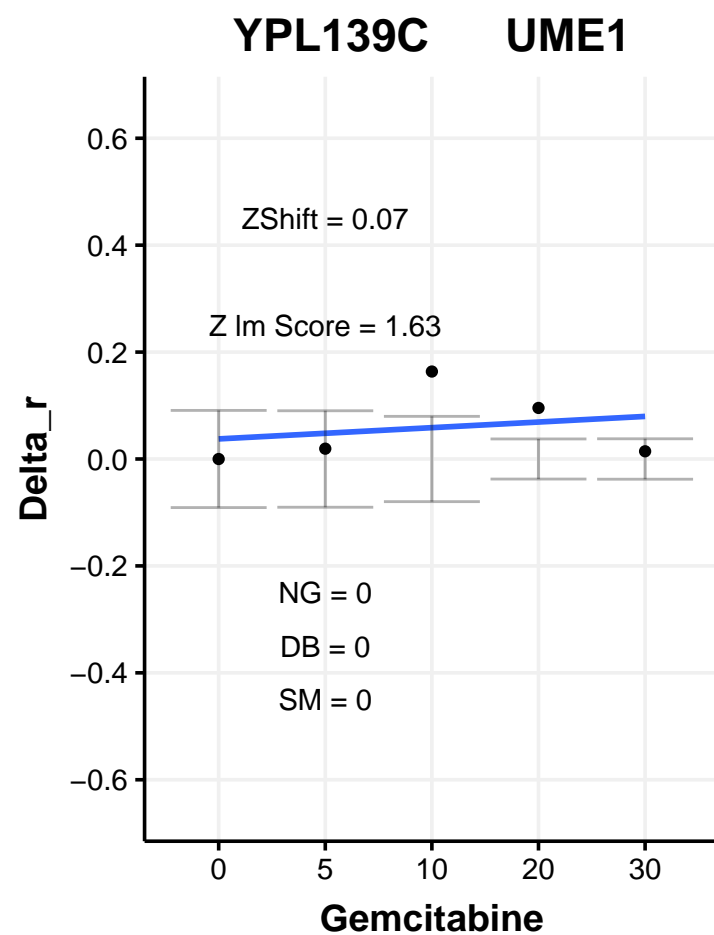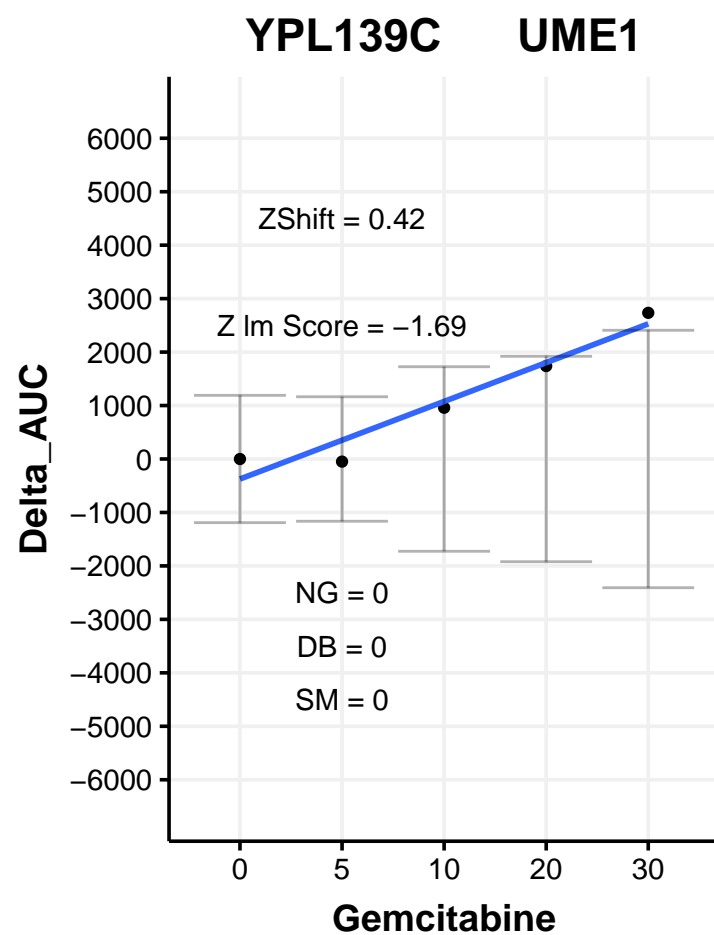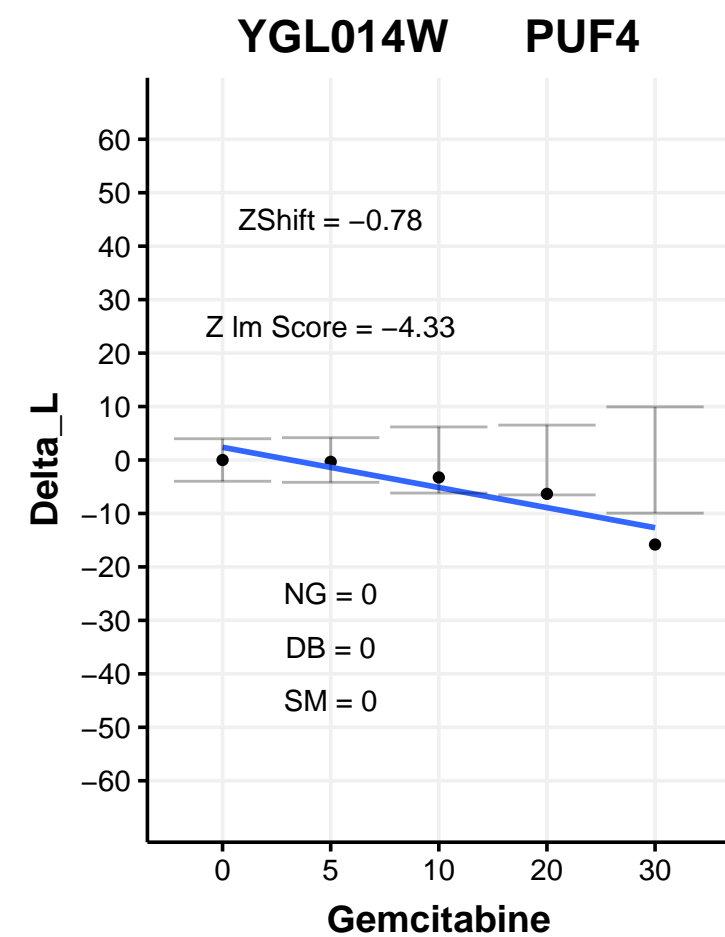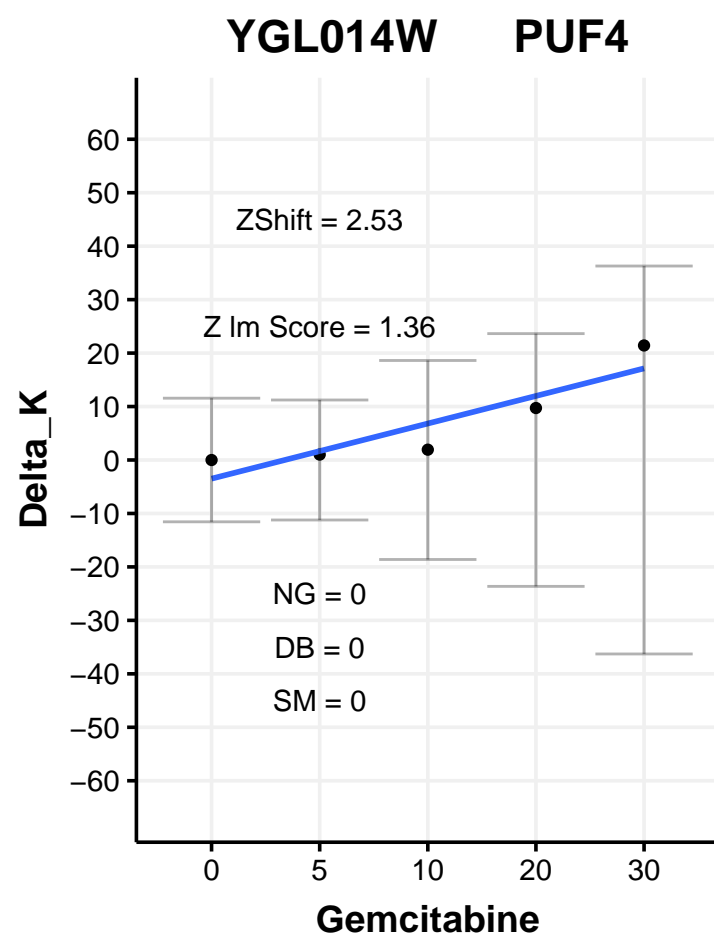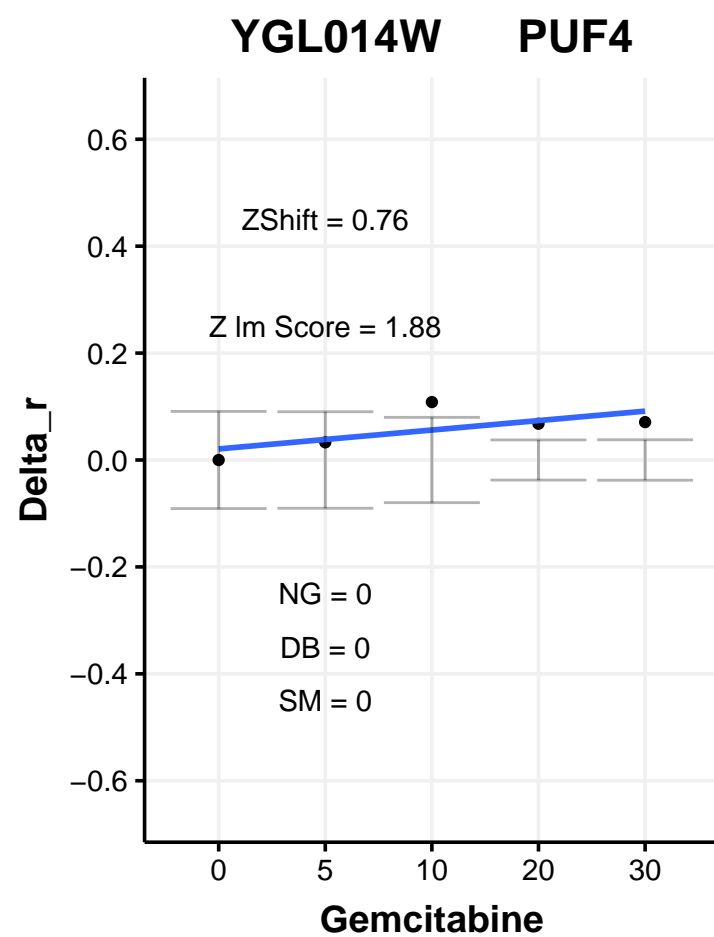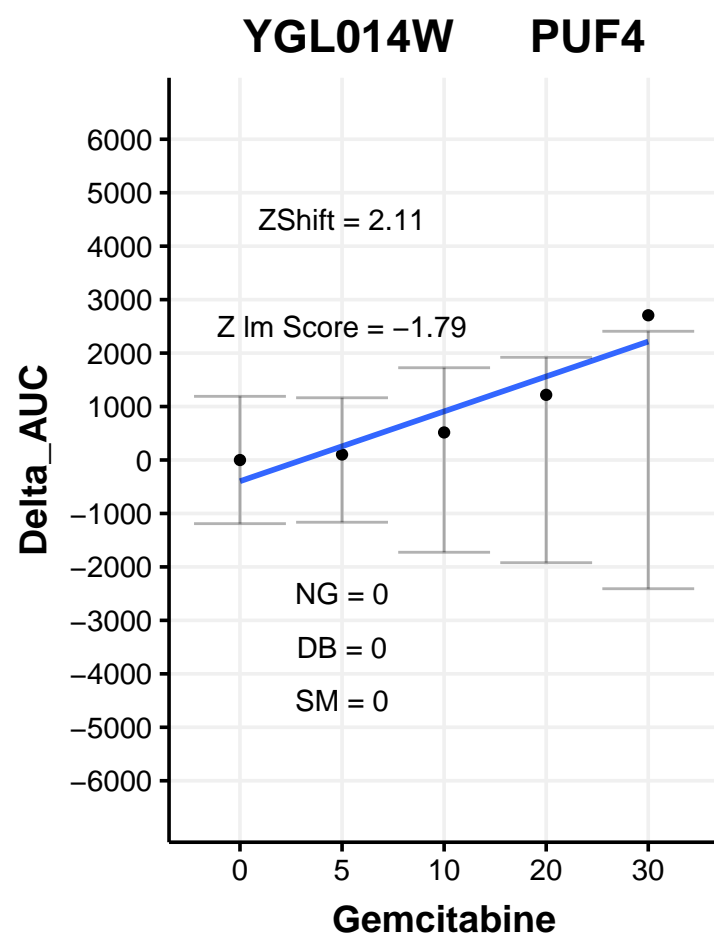

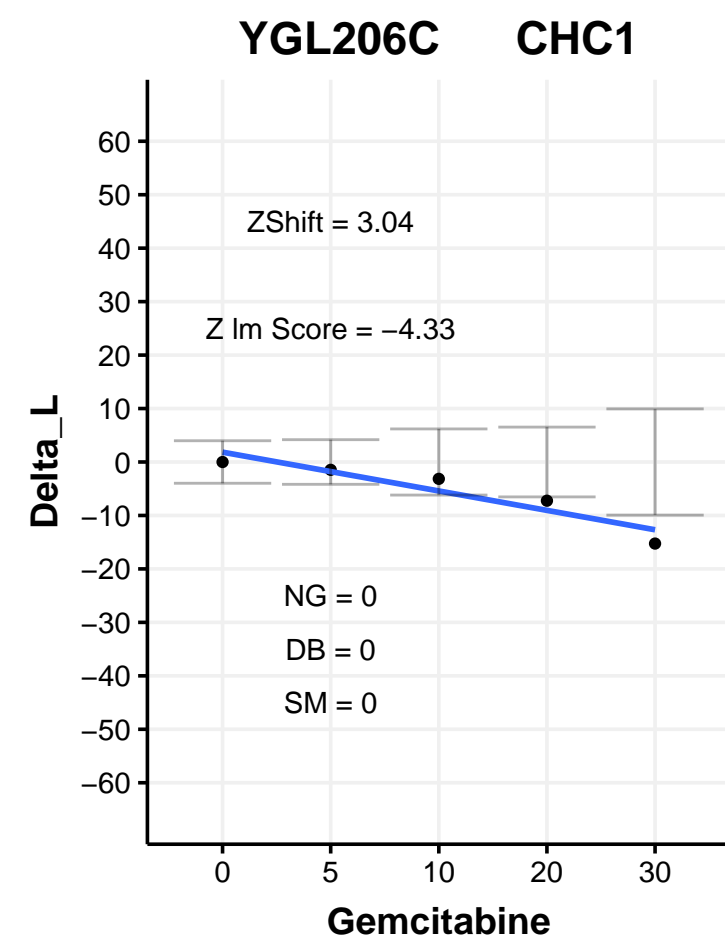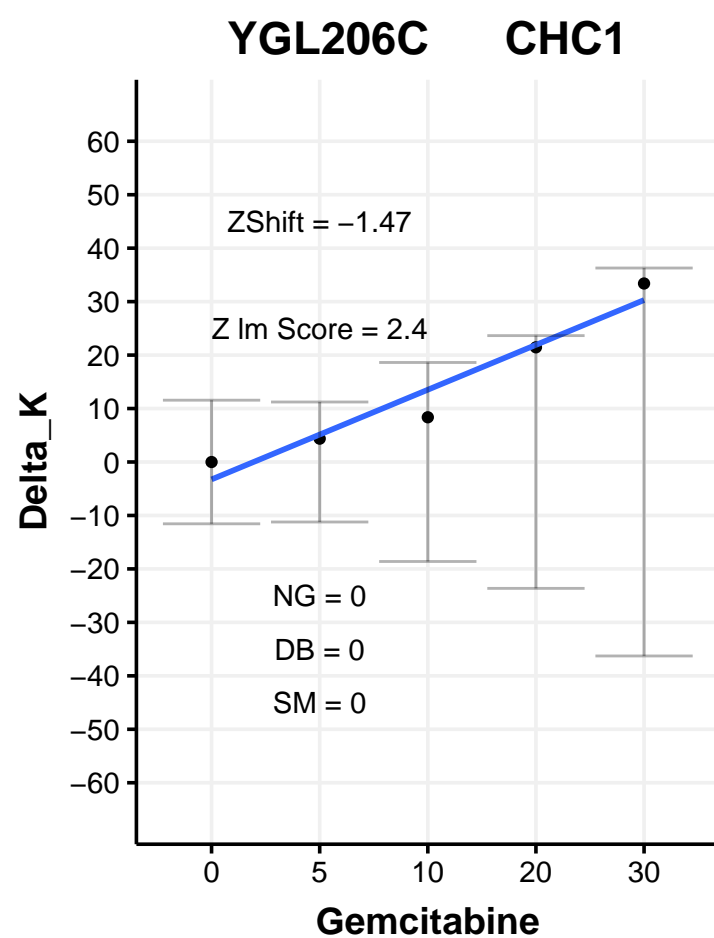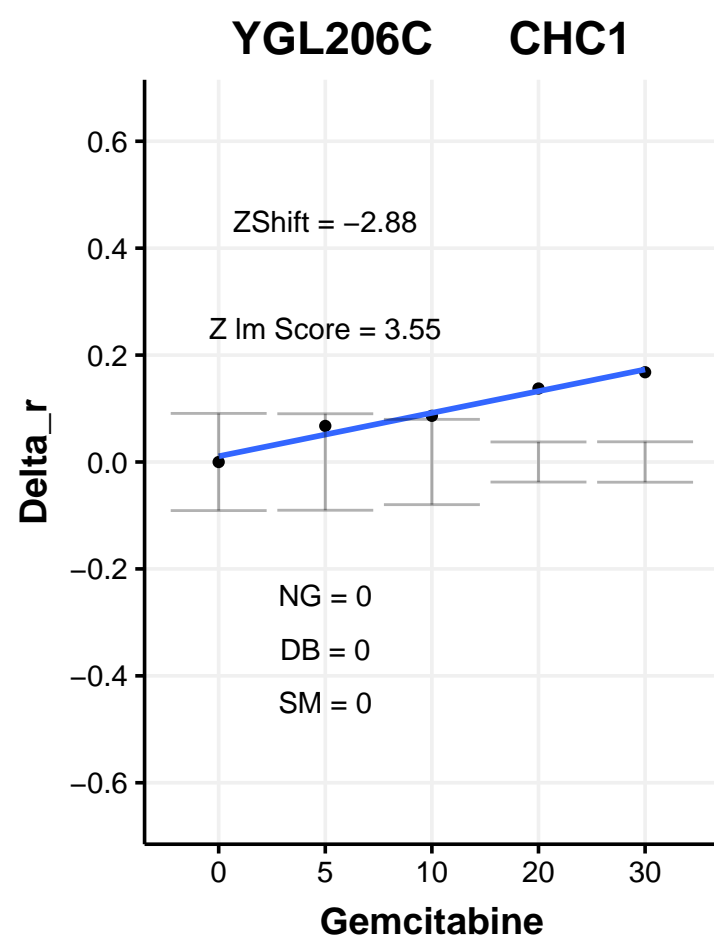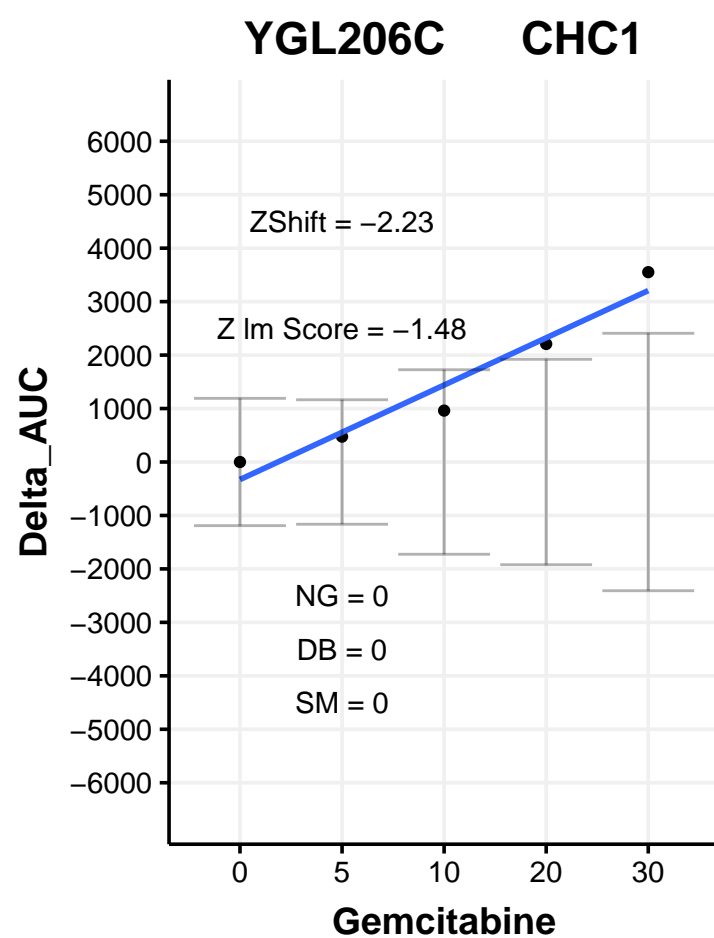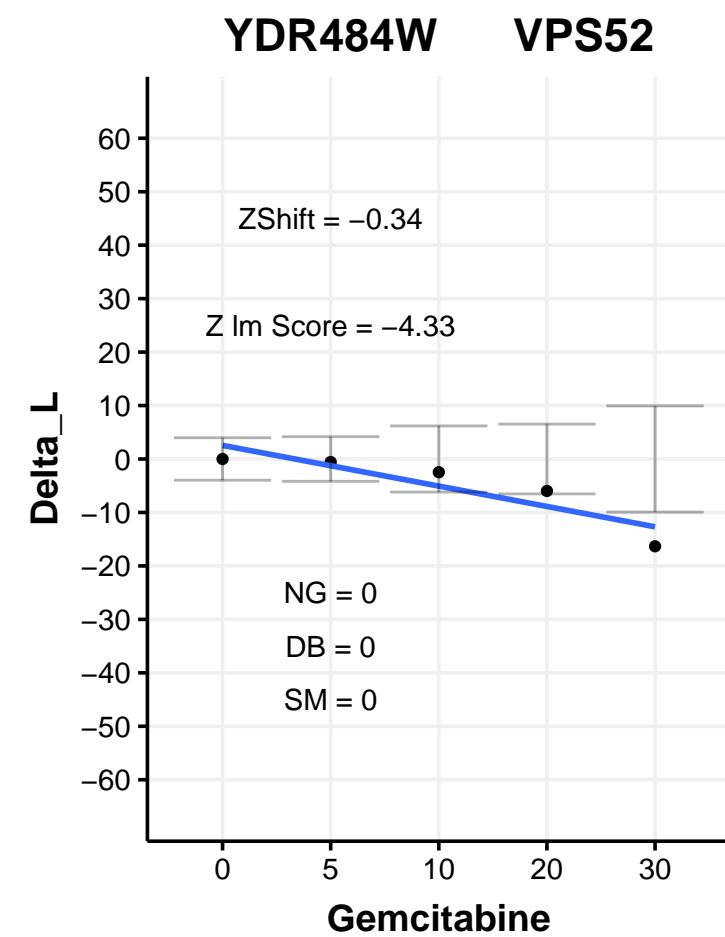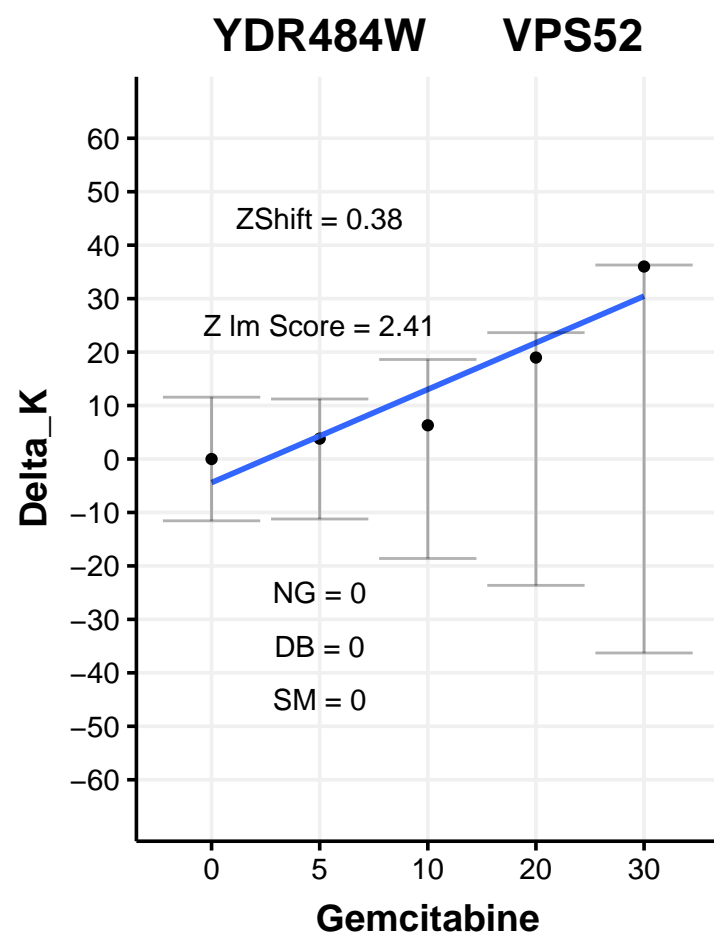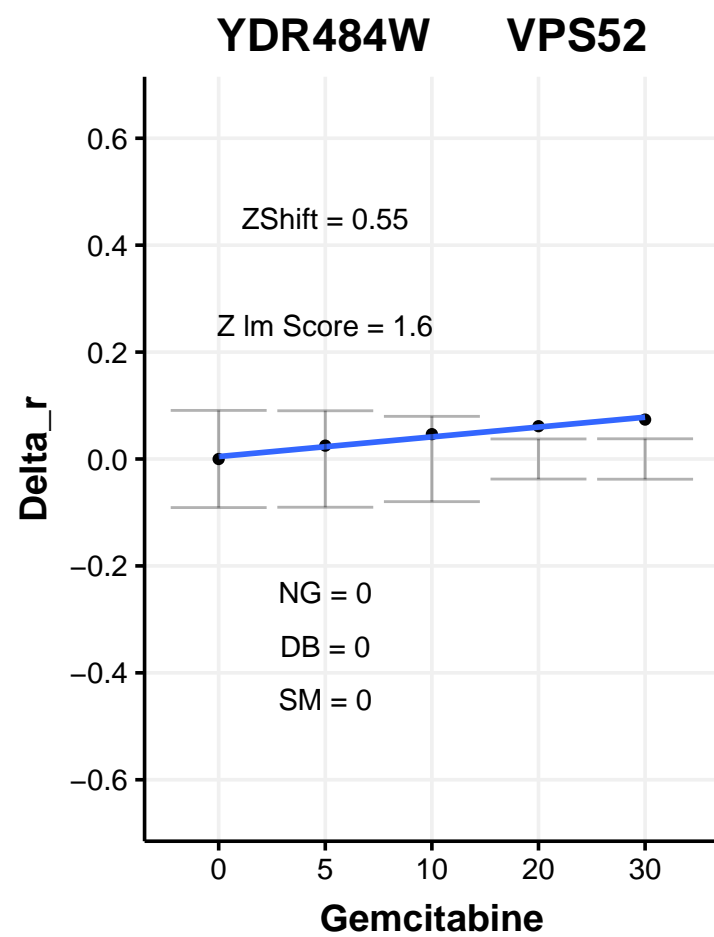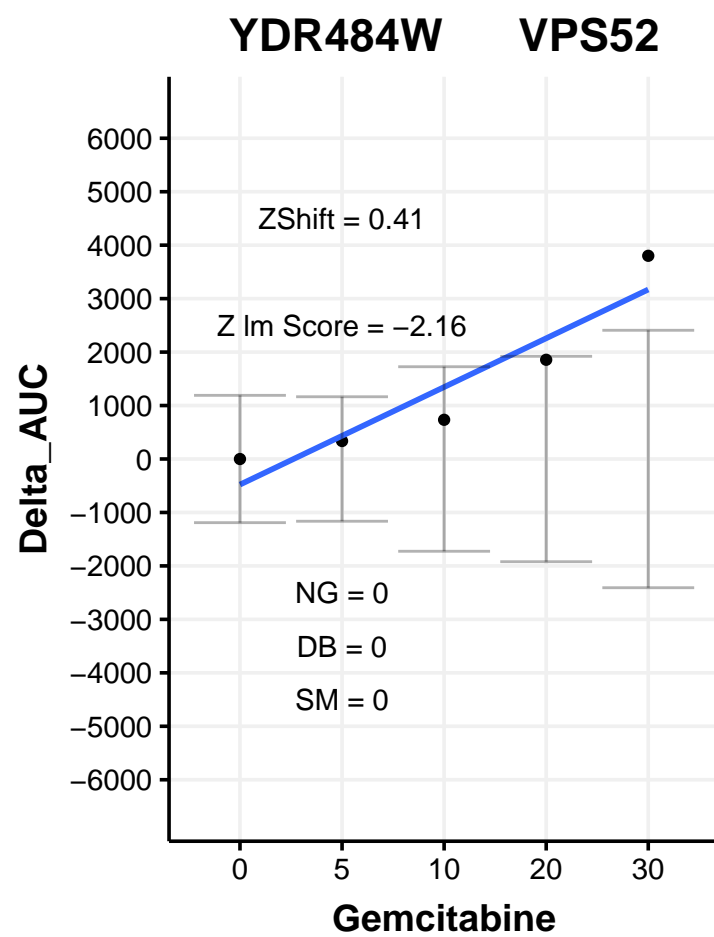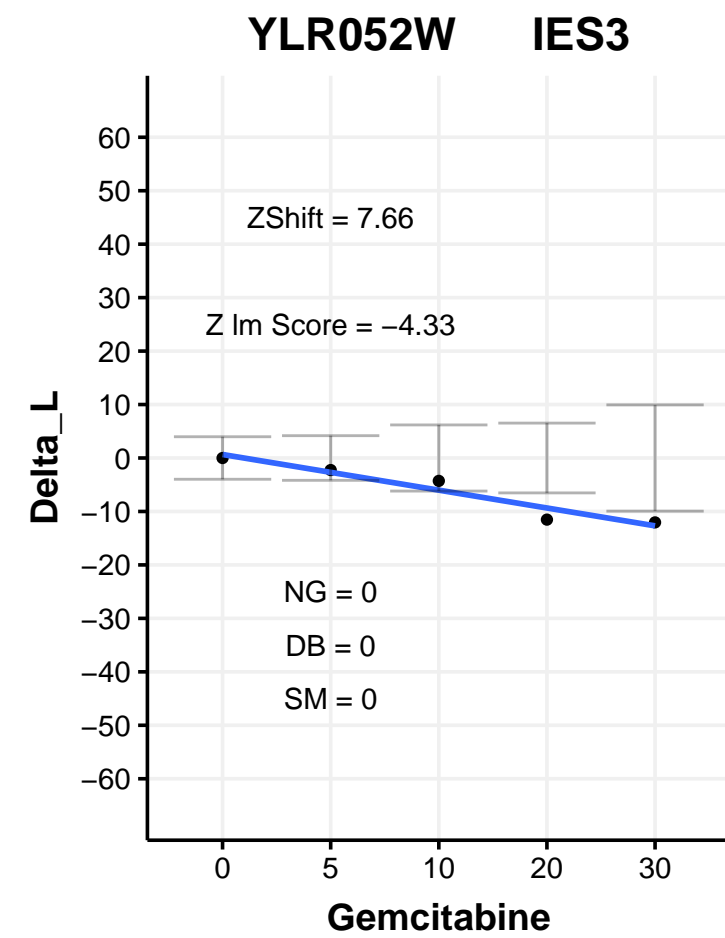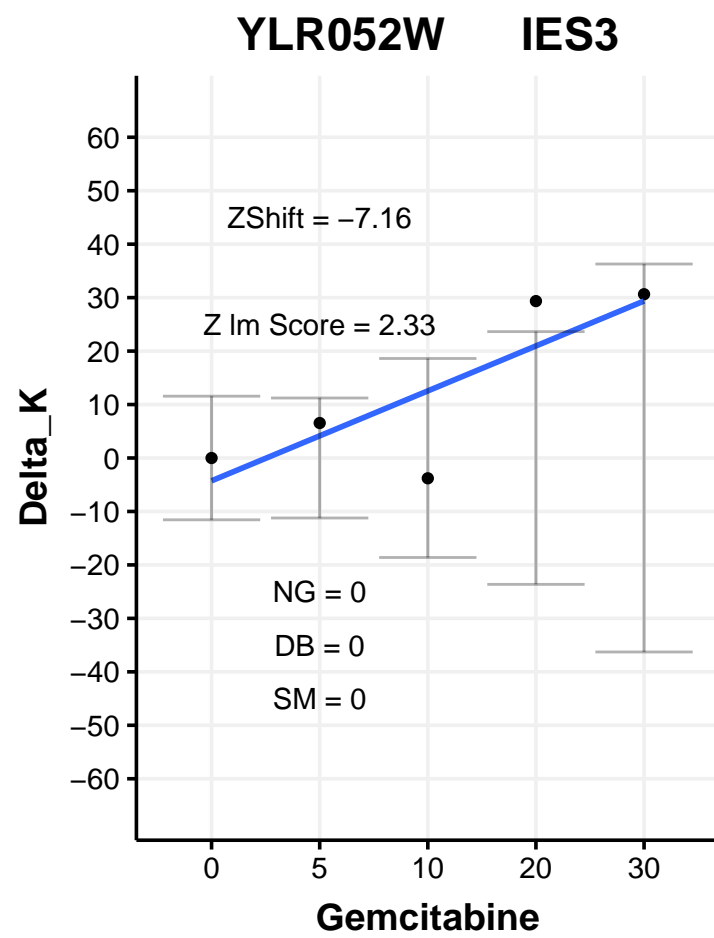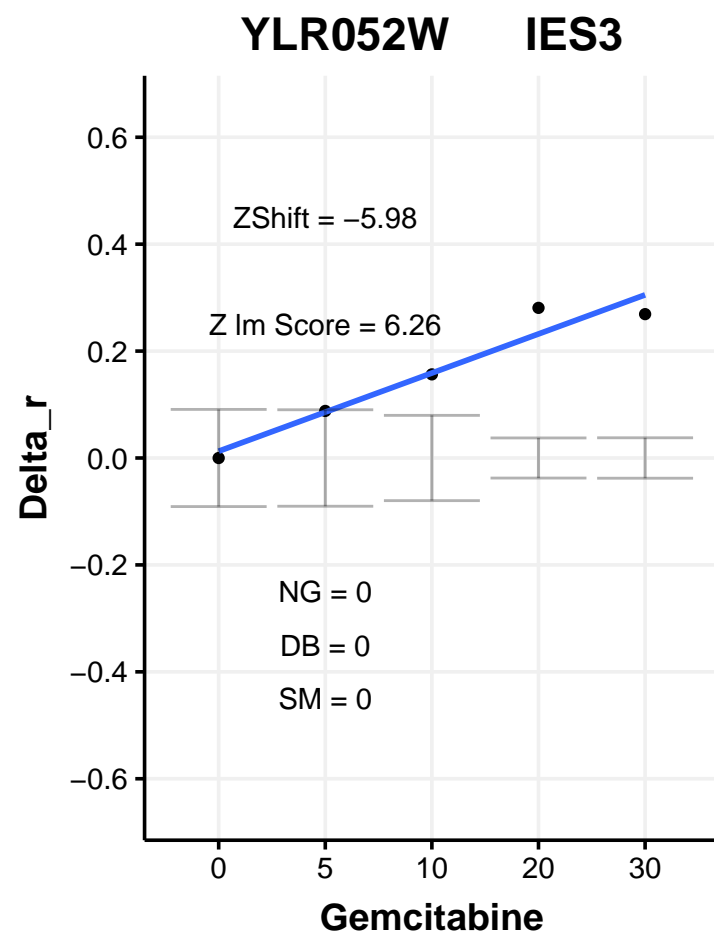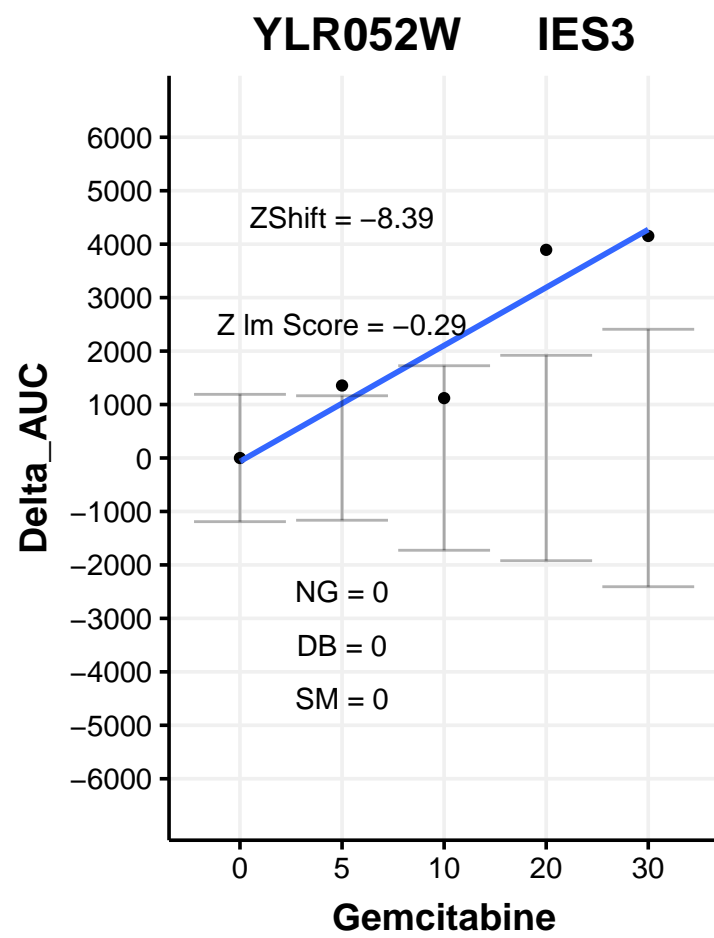

YHR033W

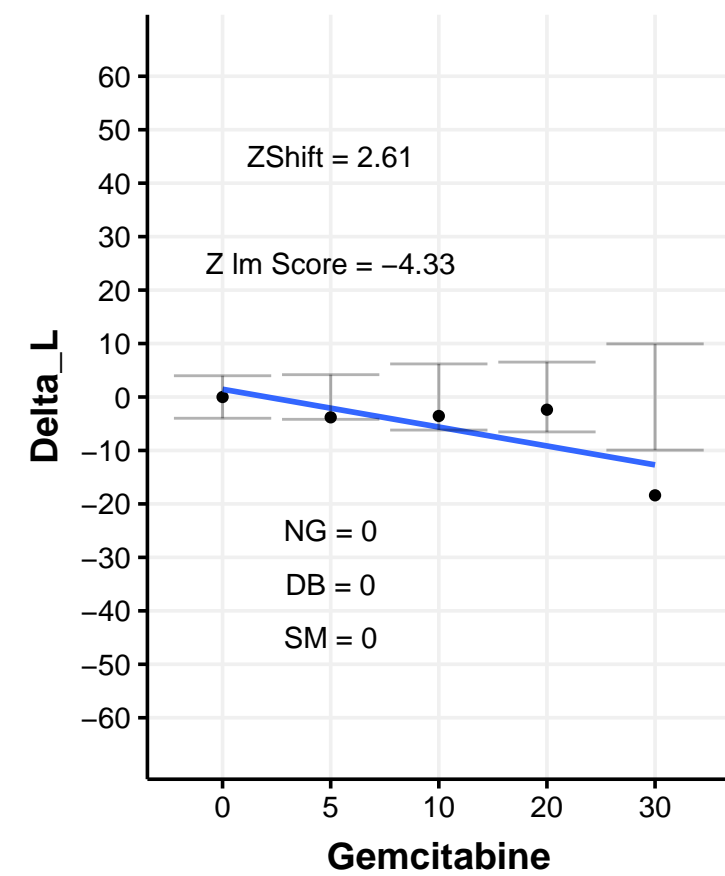

YHR033W

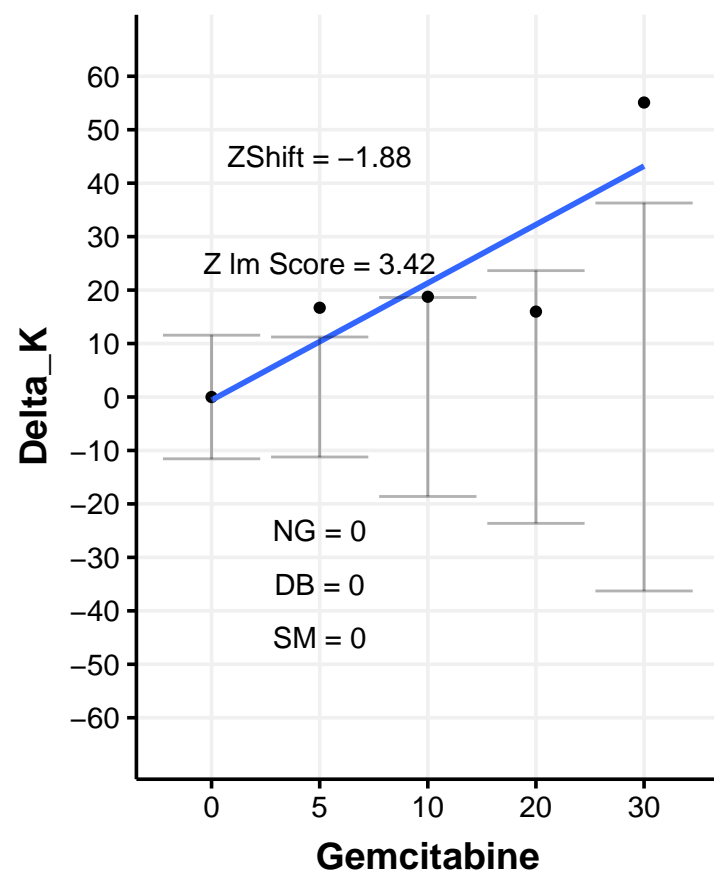

YHR033W

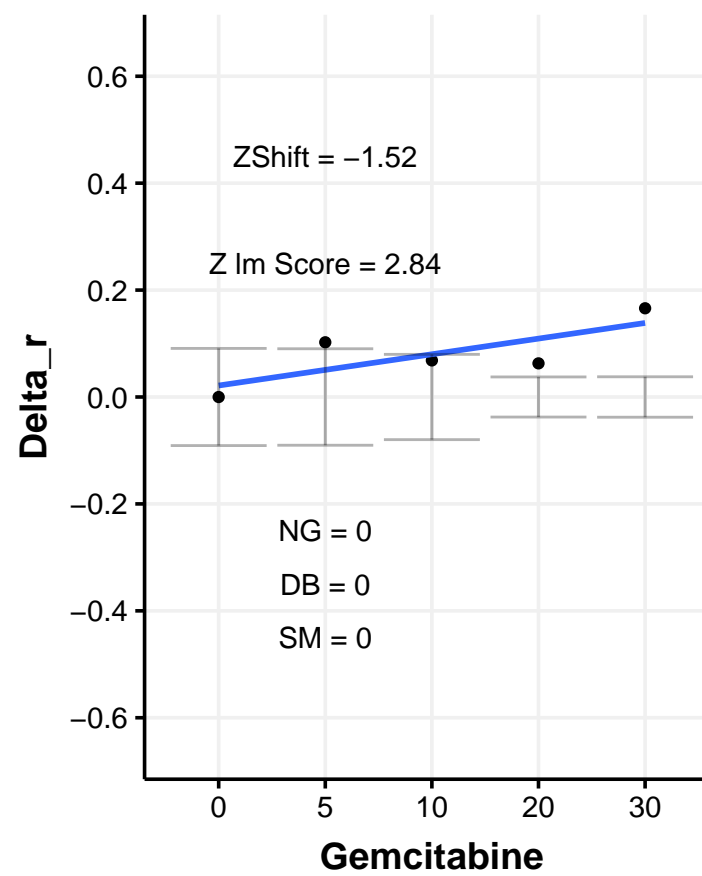

YHR033W

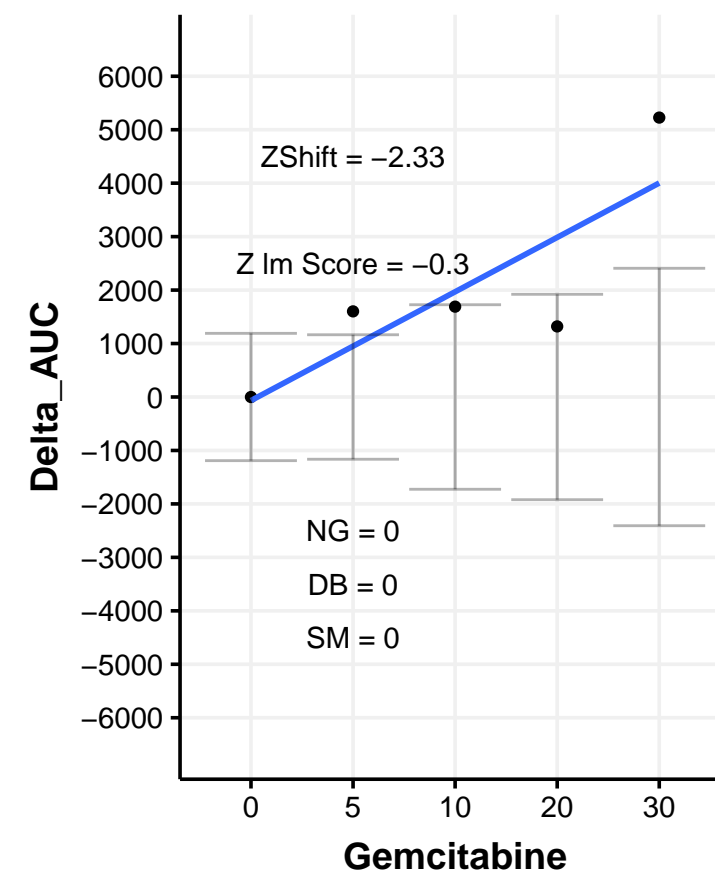

YML083C

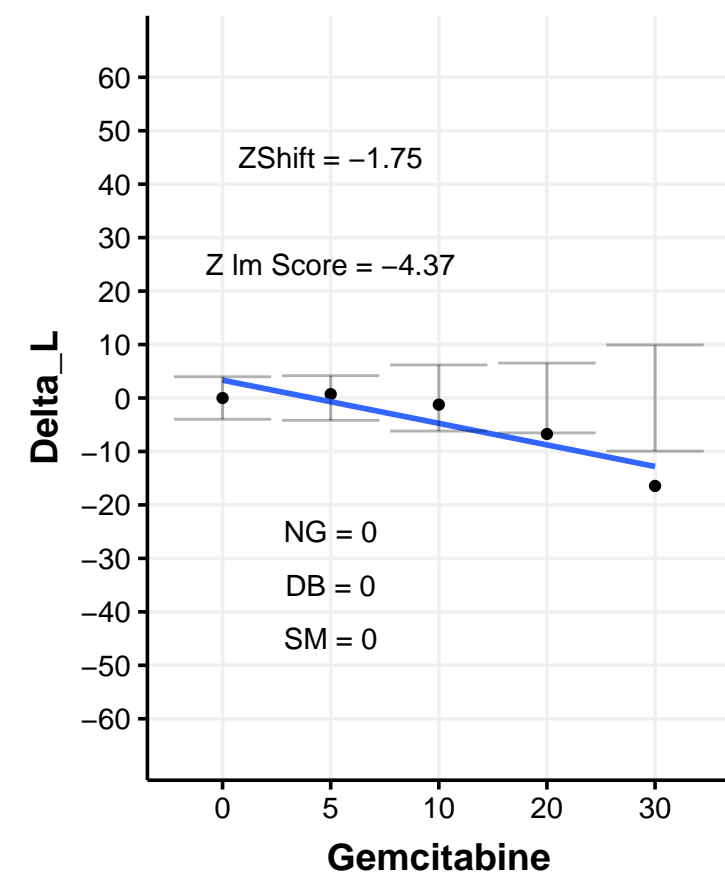

YML083C

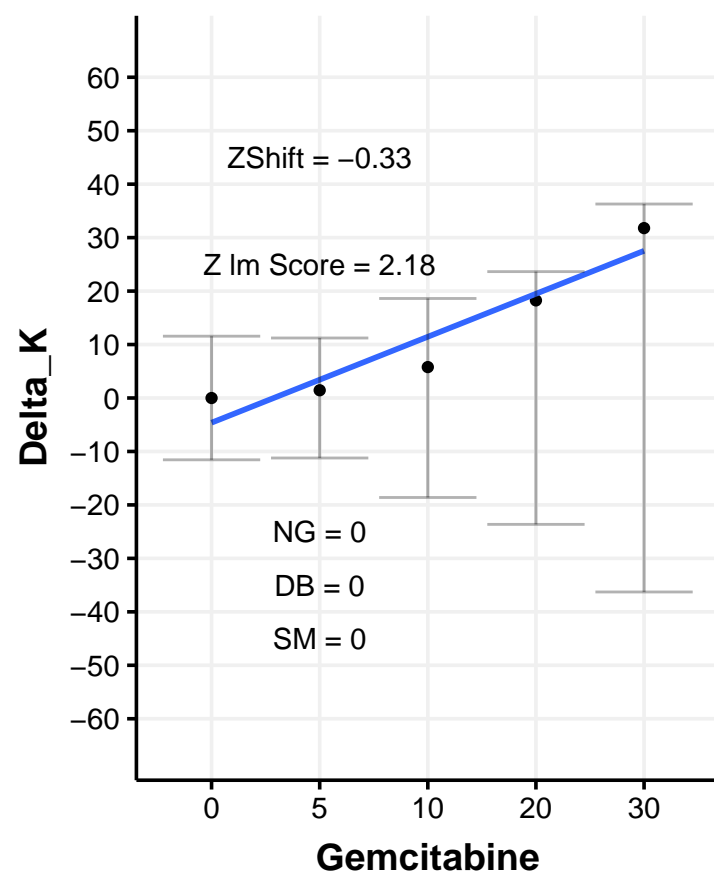

YML083C

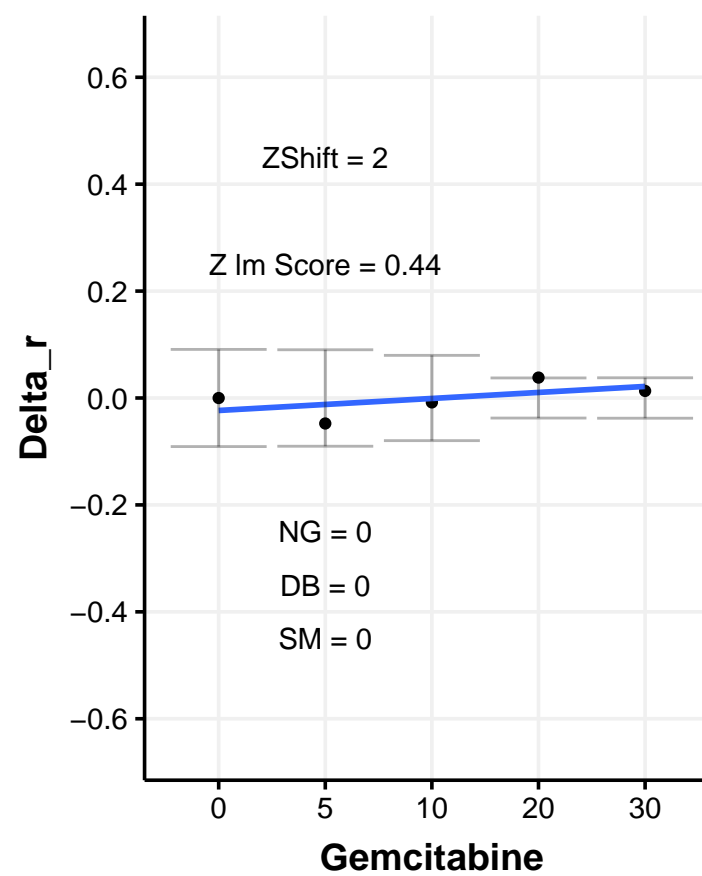

YML083C

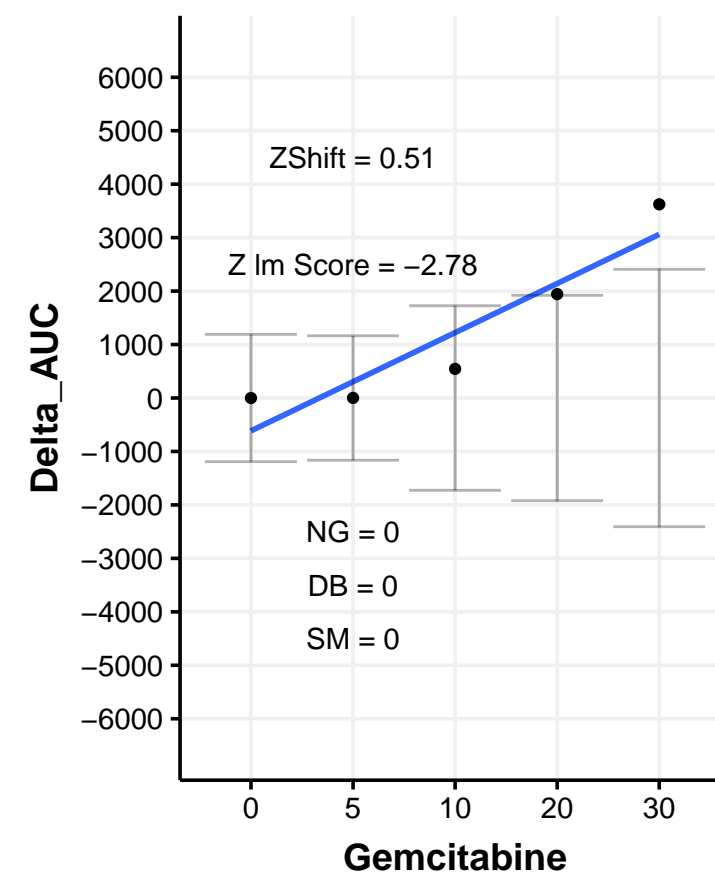

YML082W

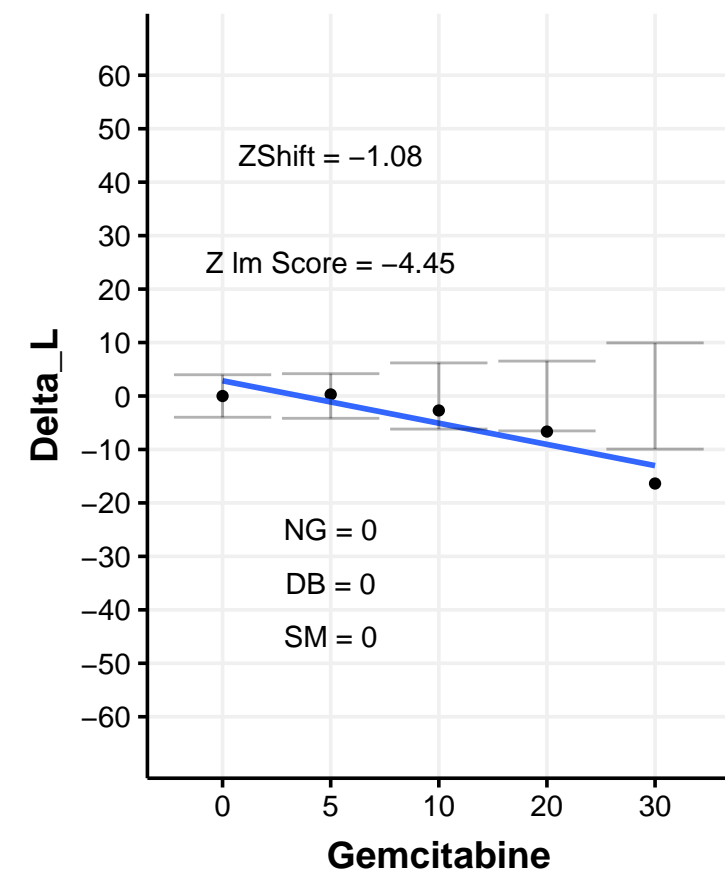

YML082W

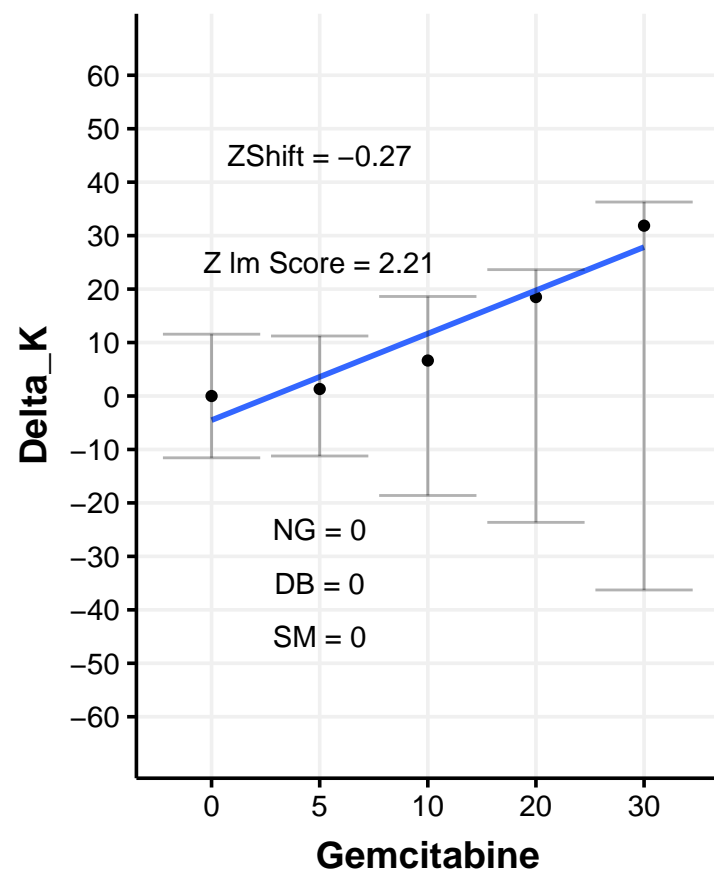

YML082W

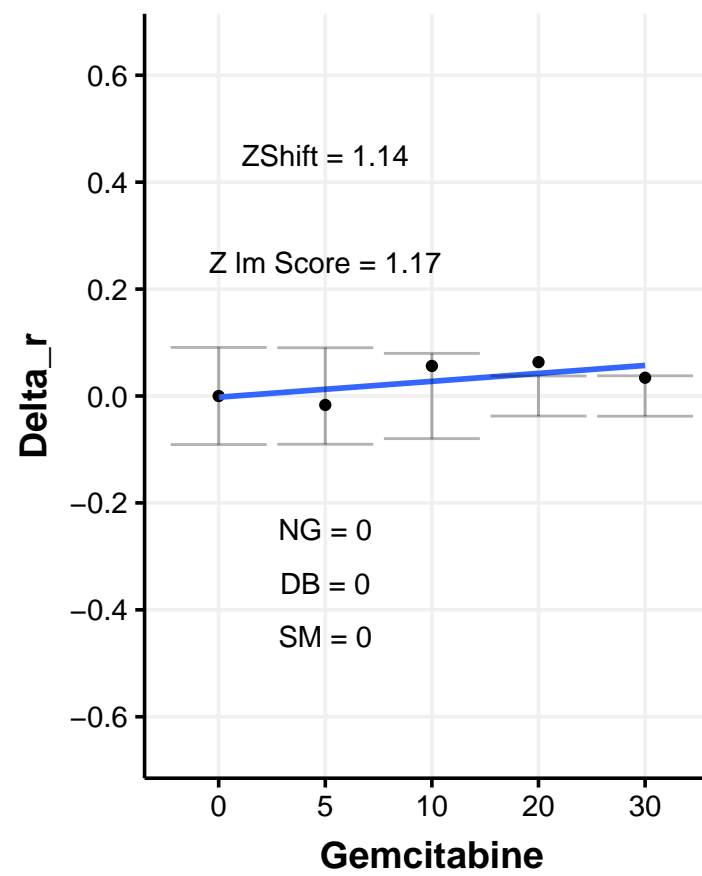

YML082W

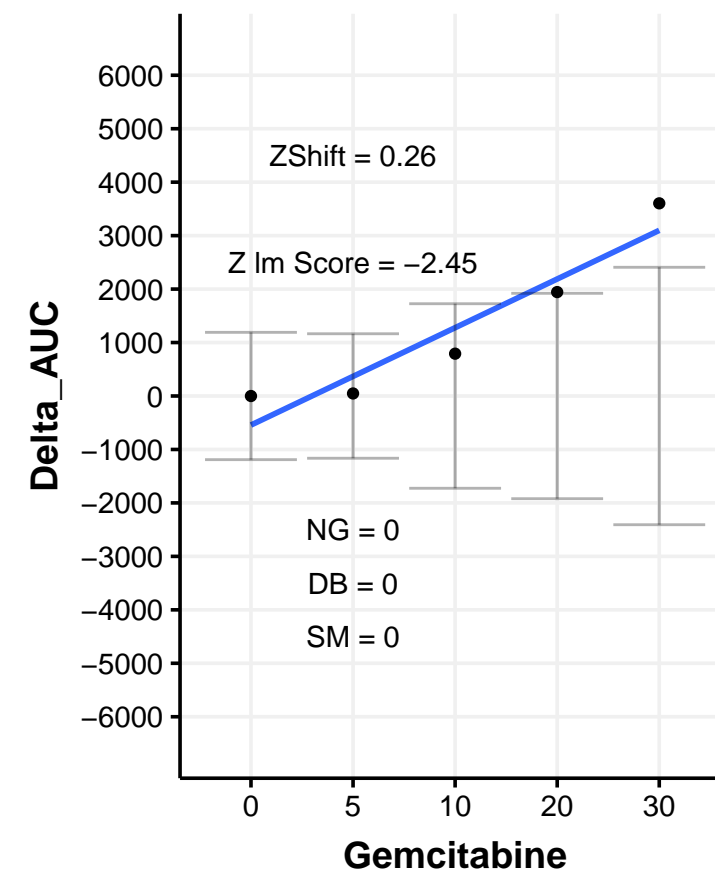

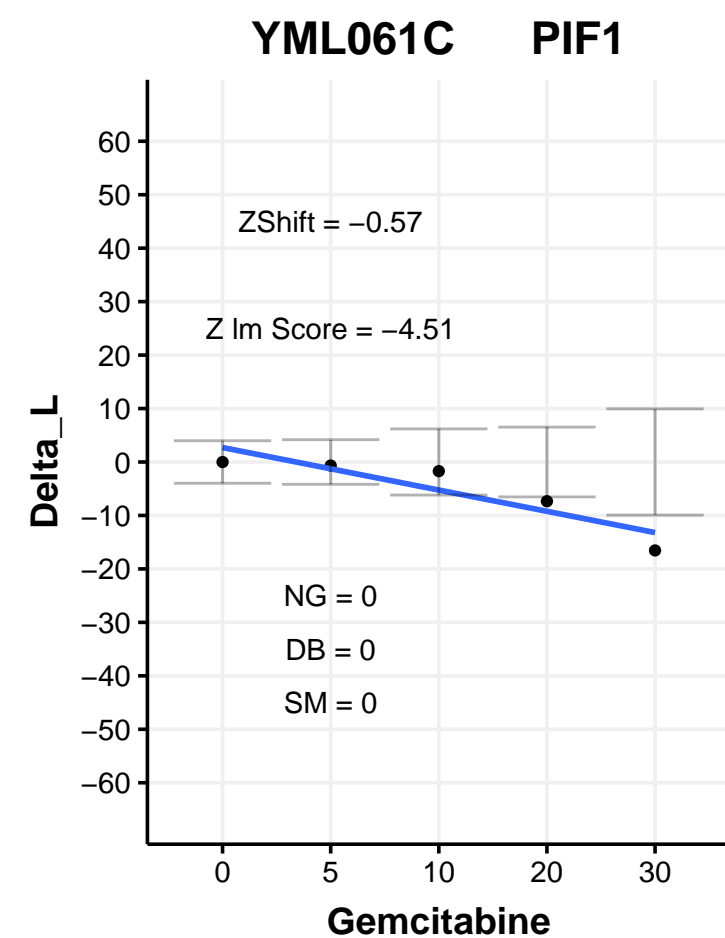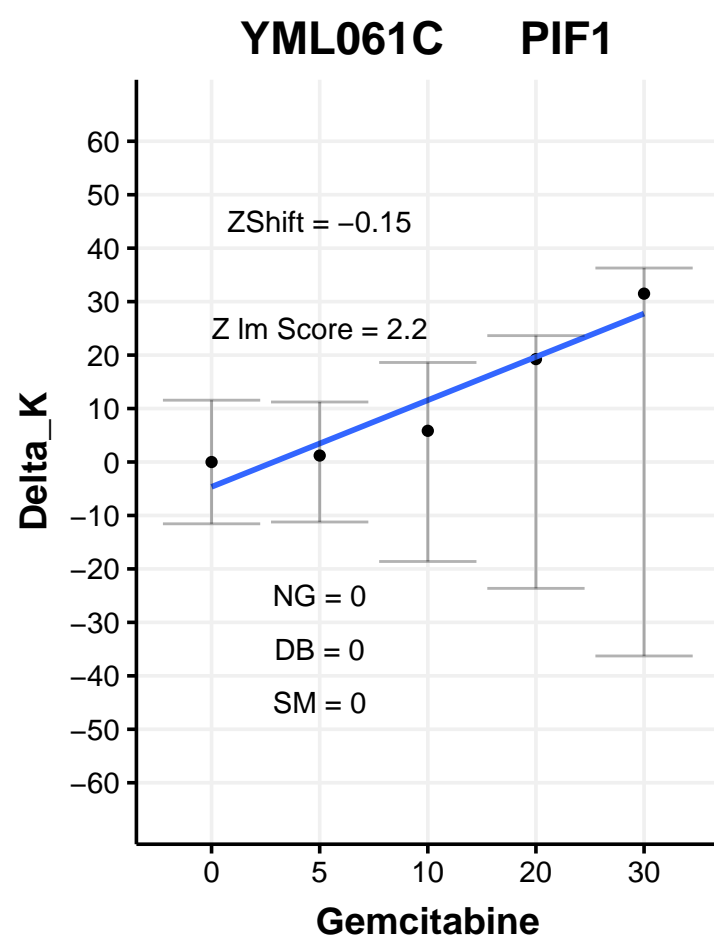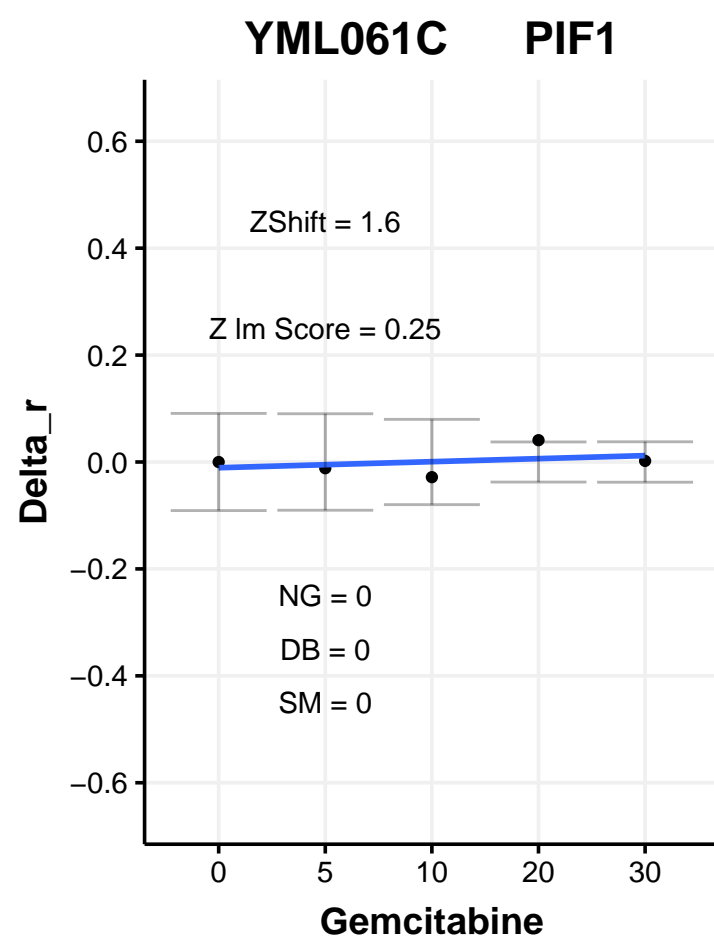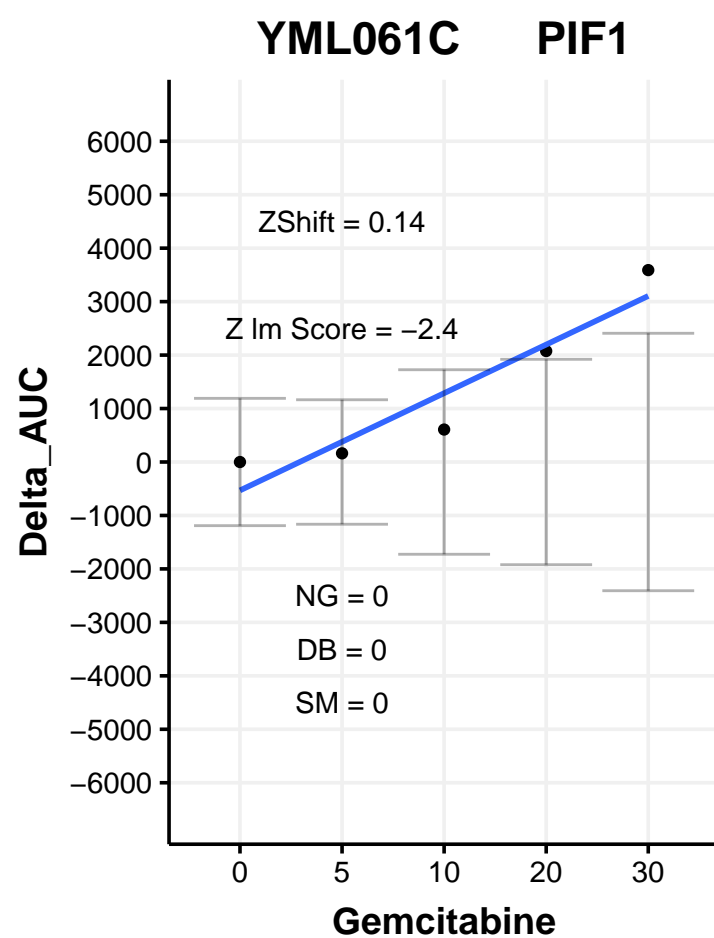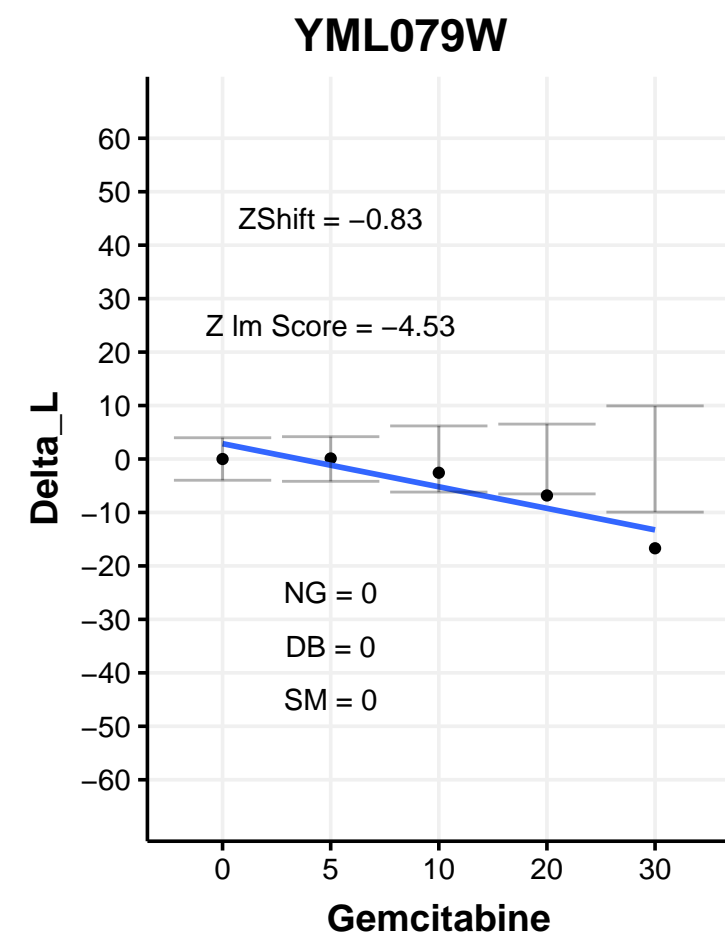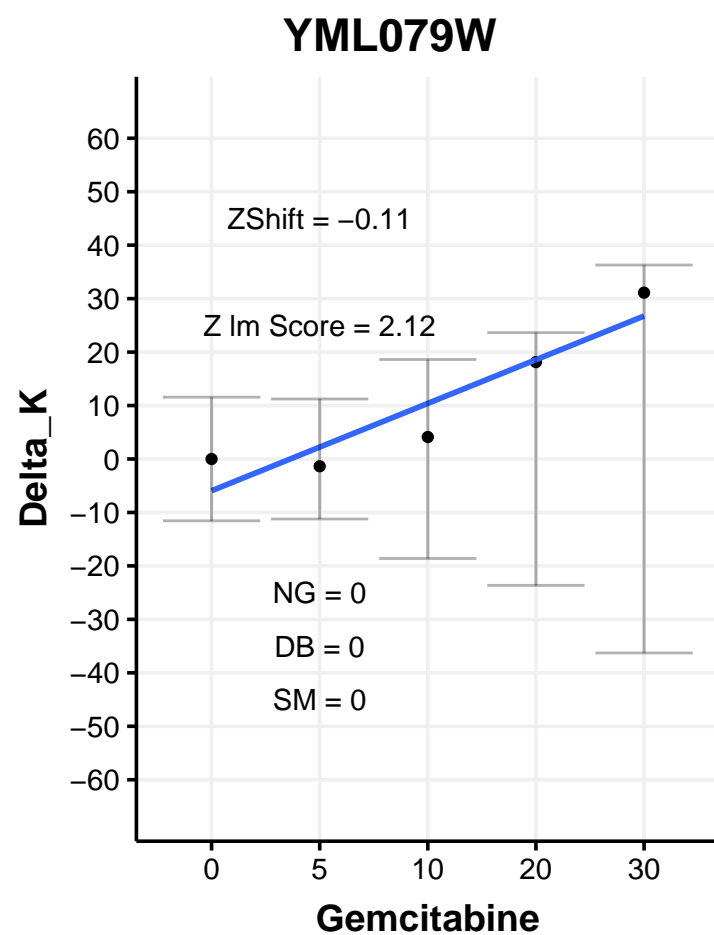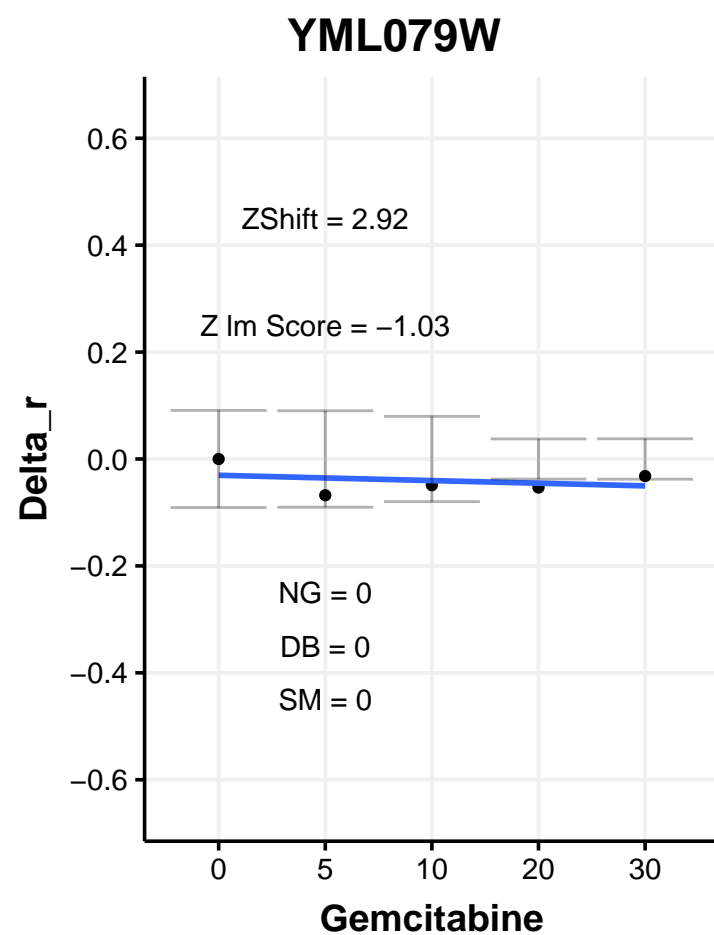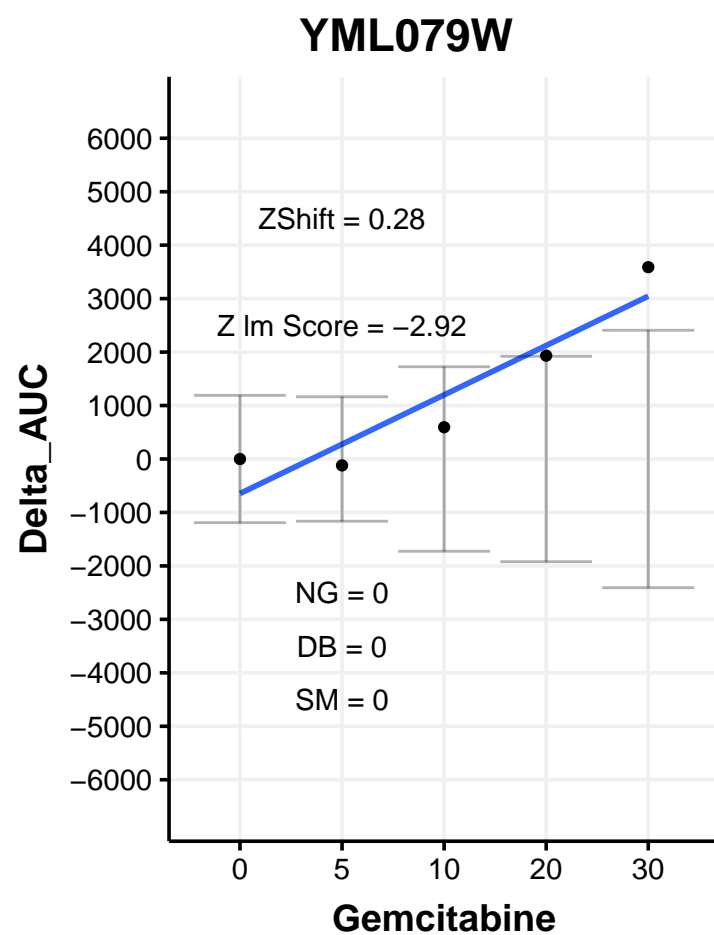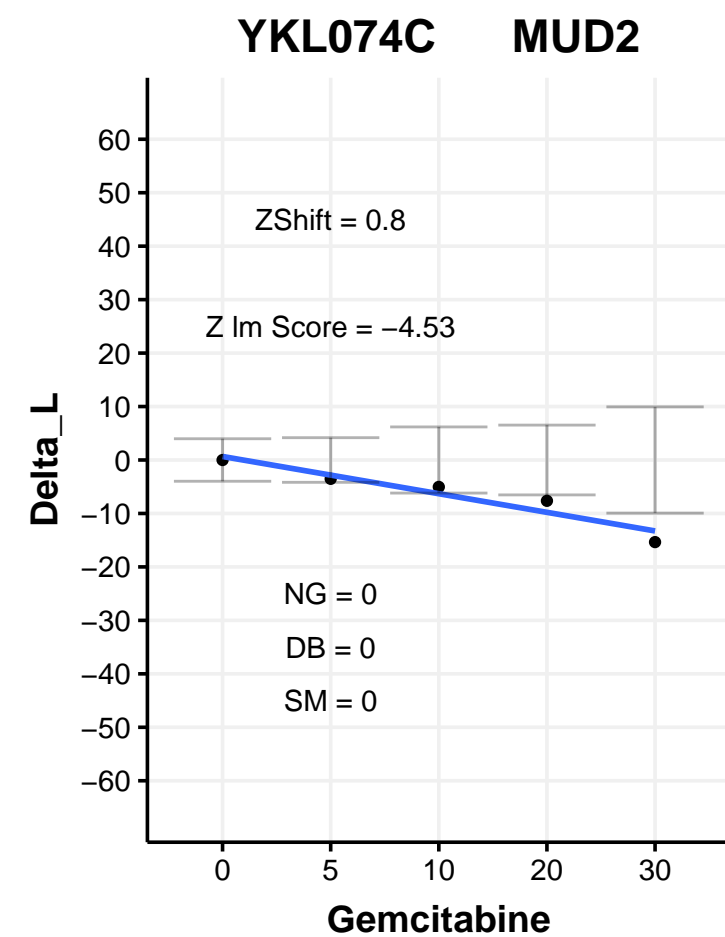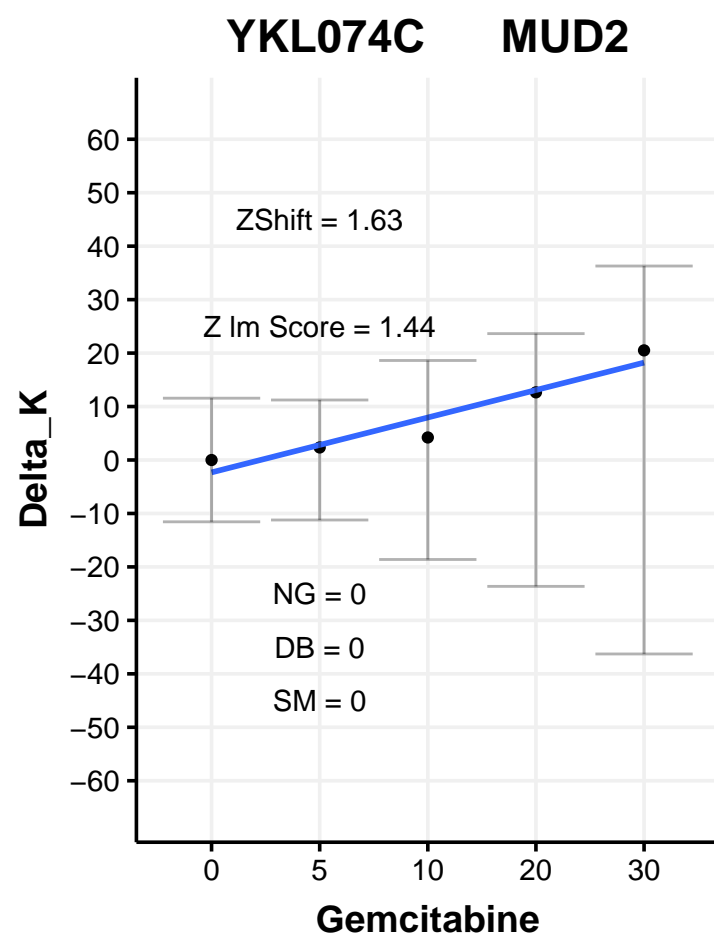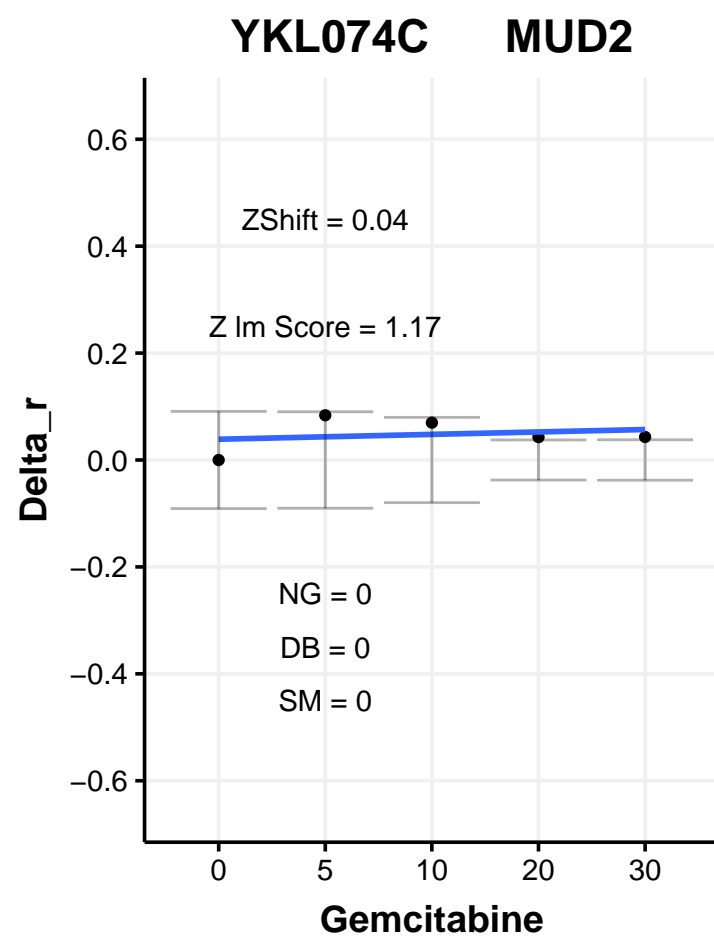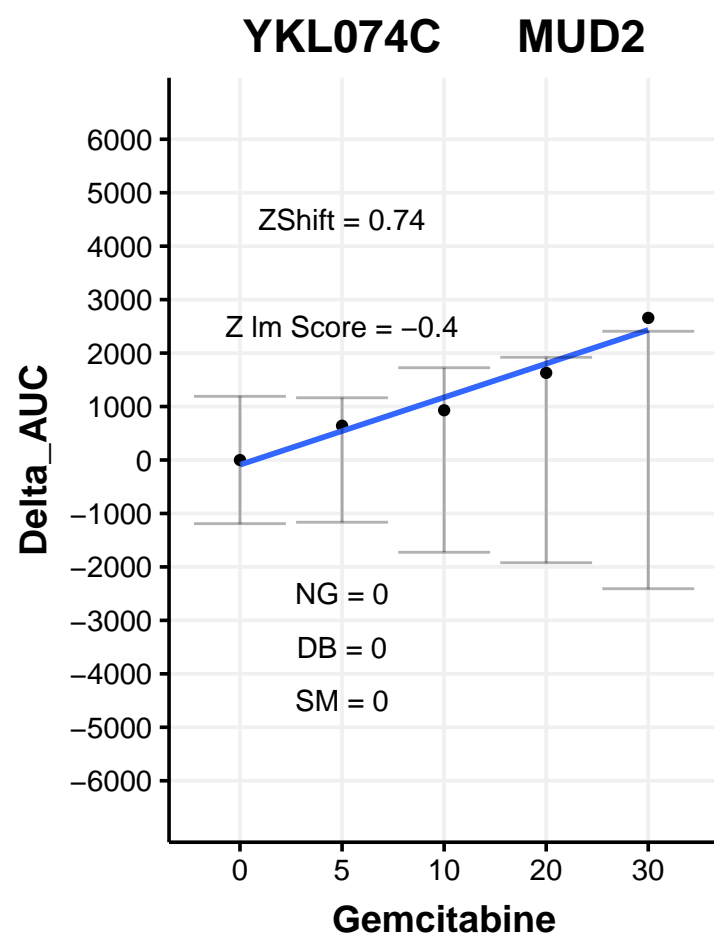



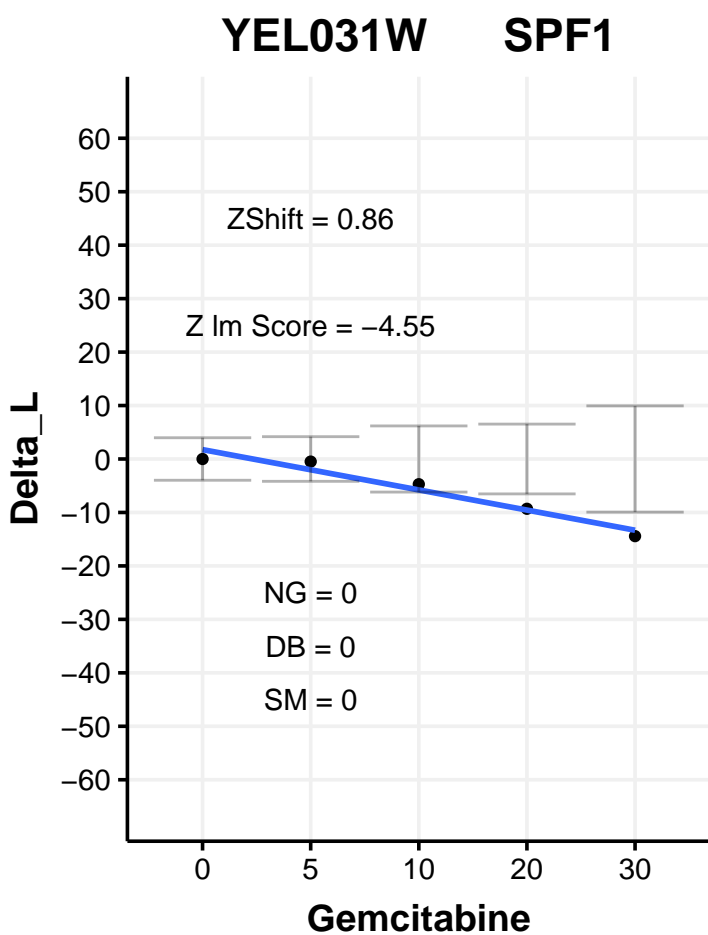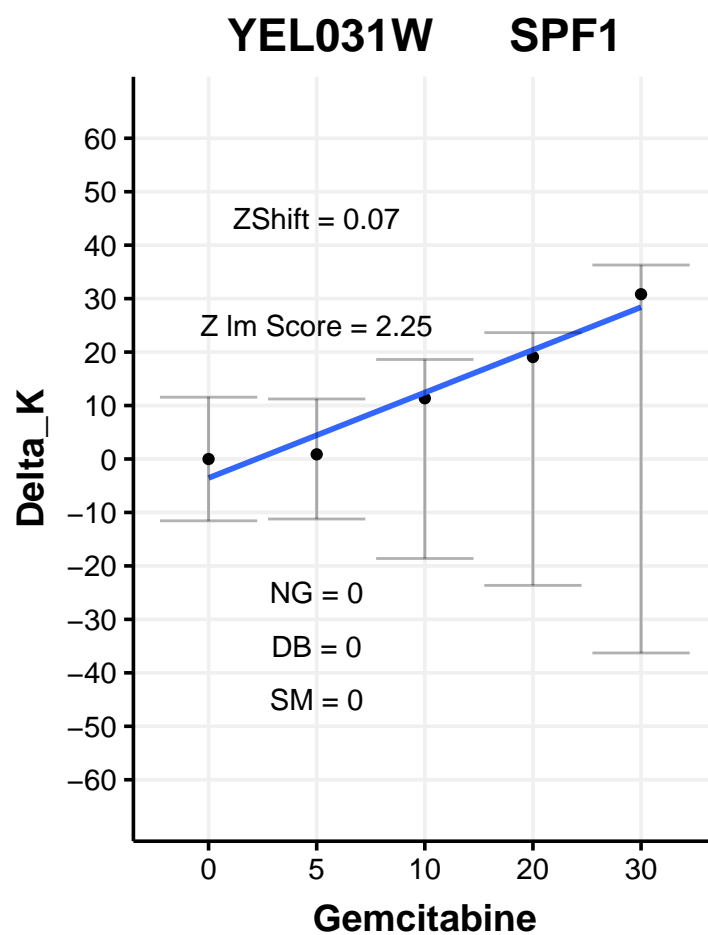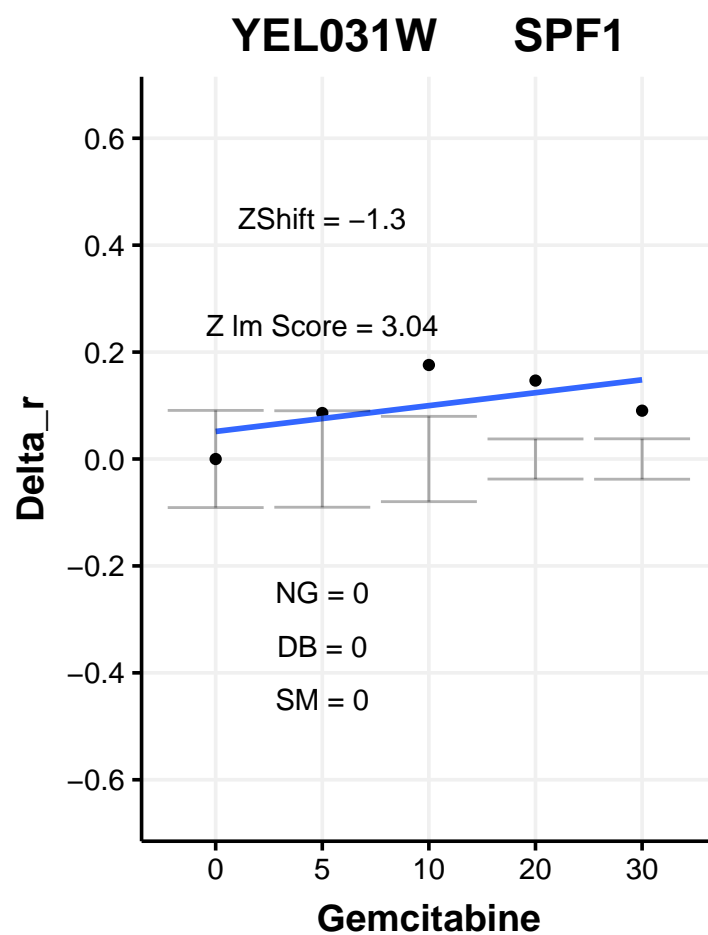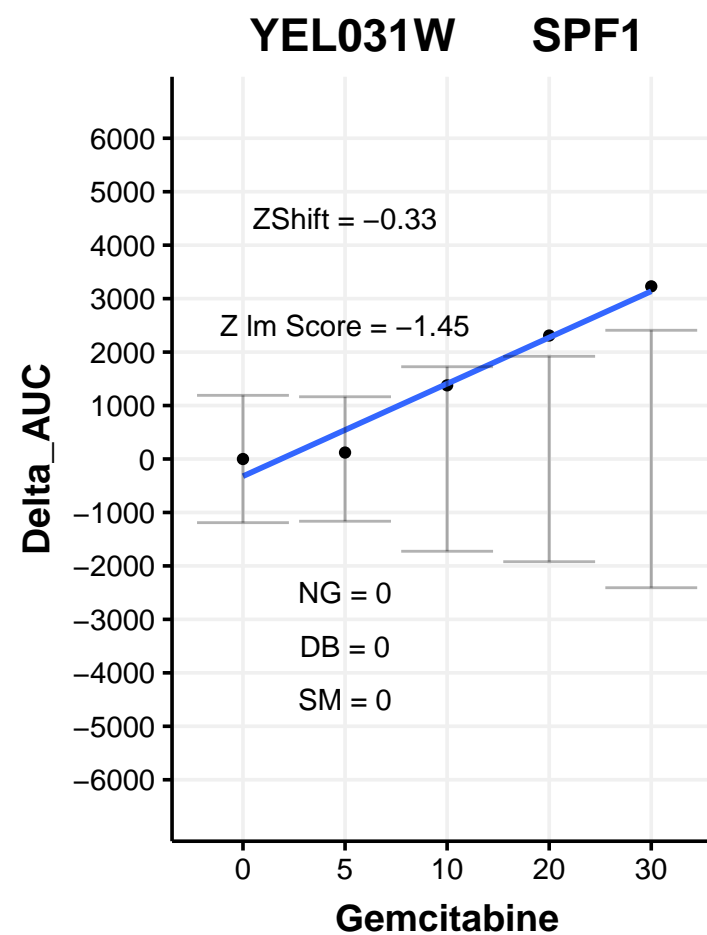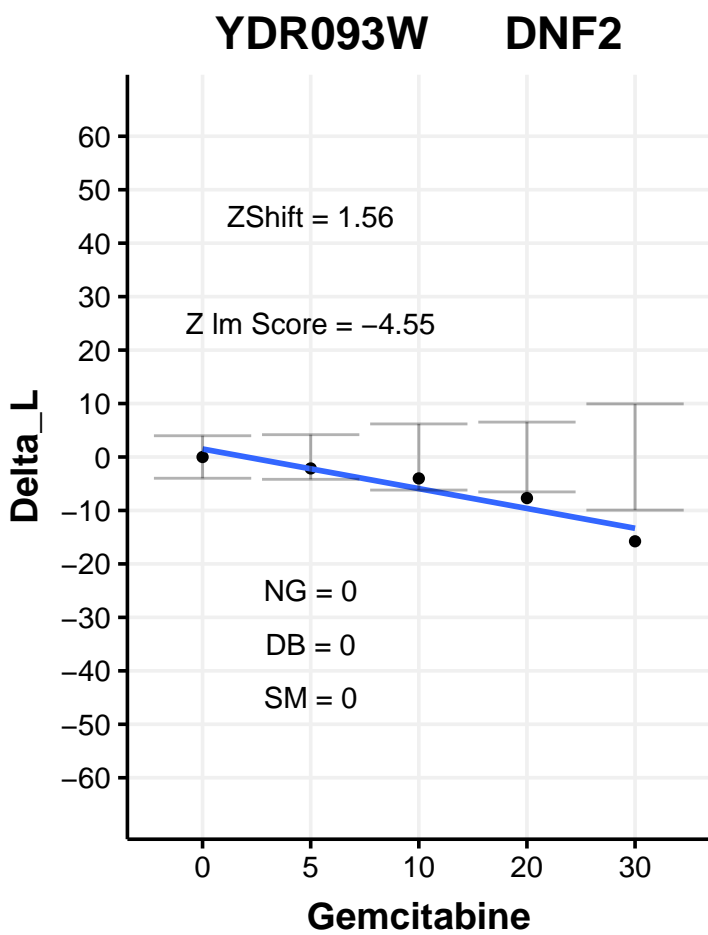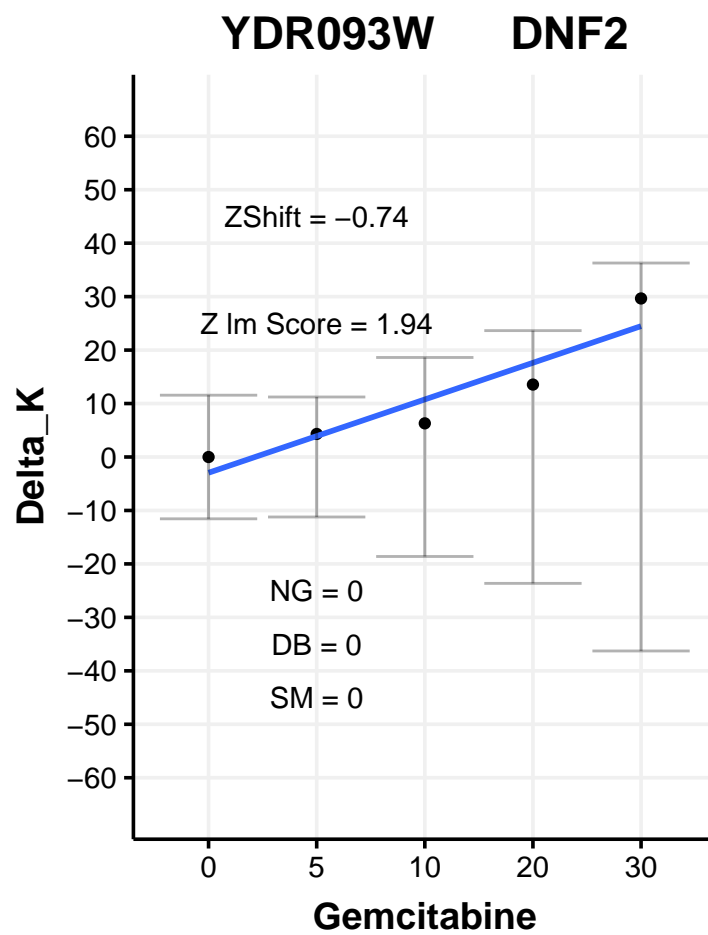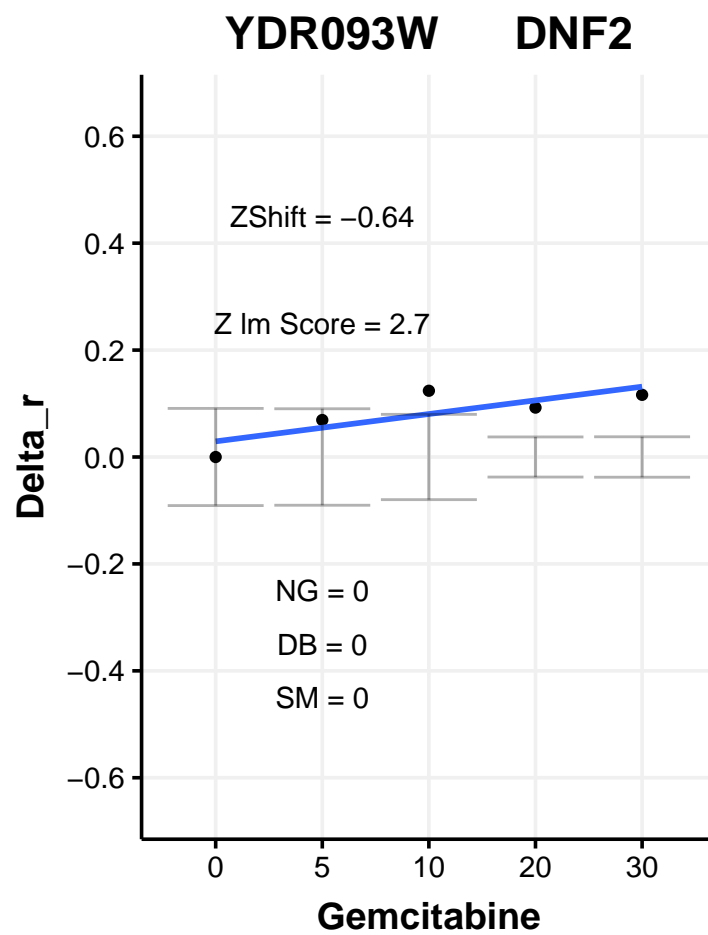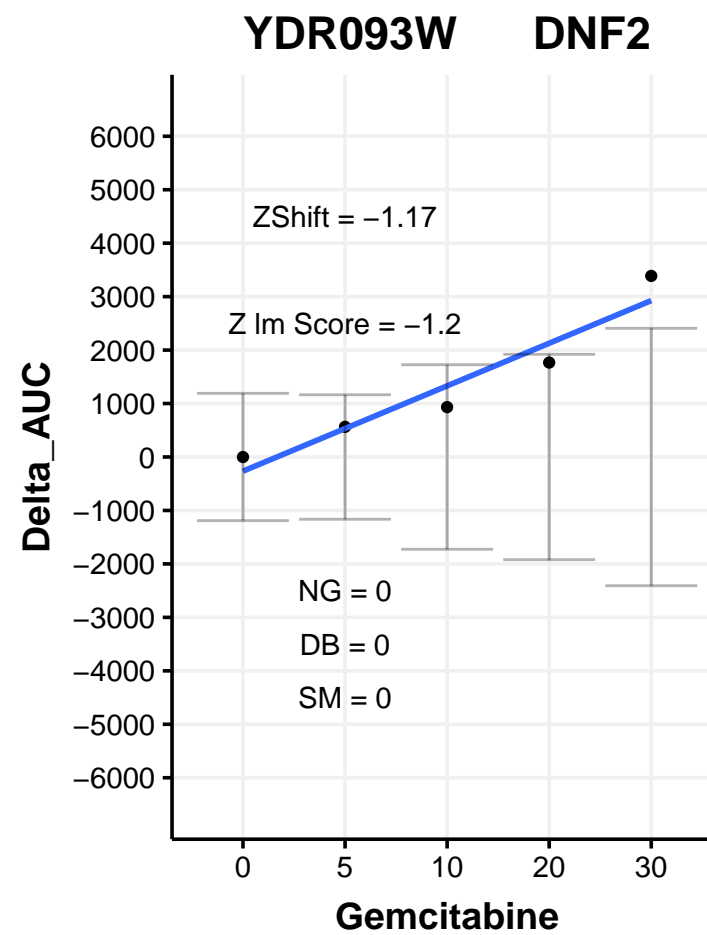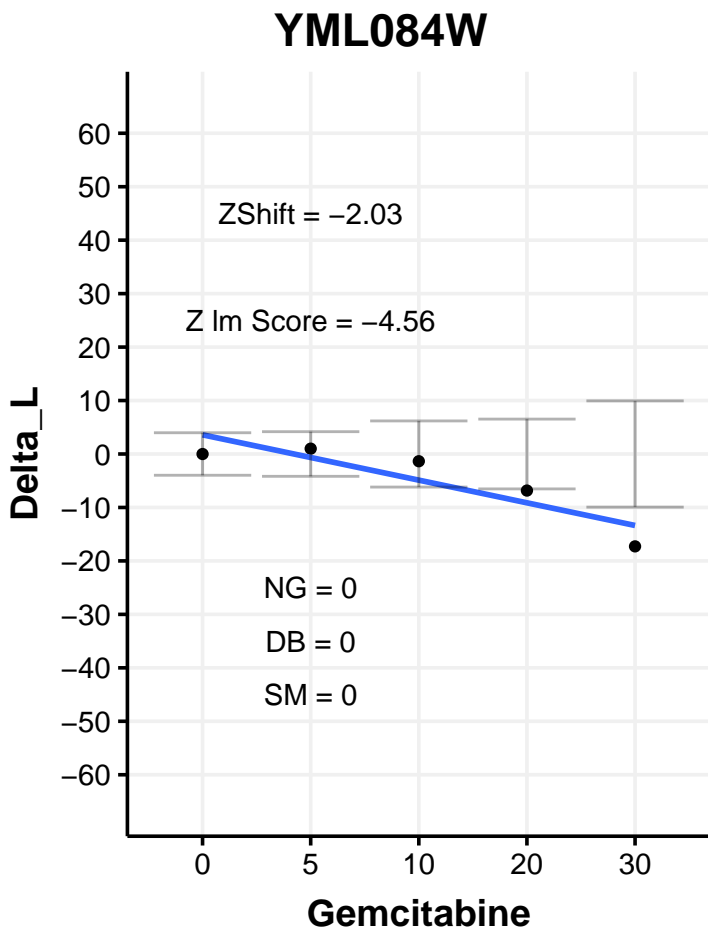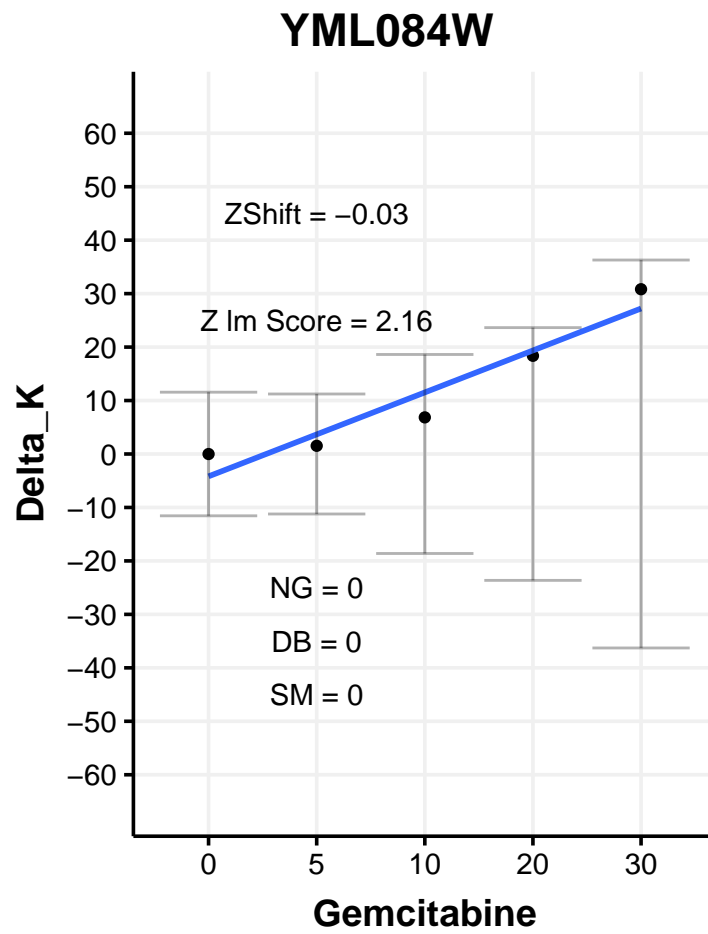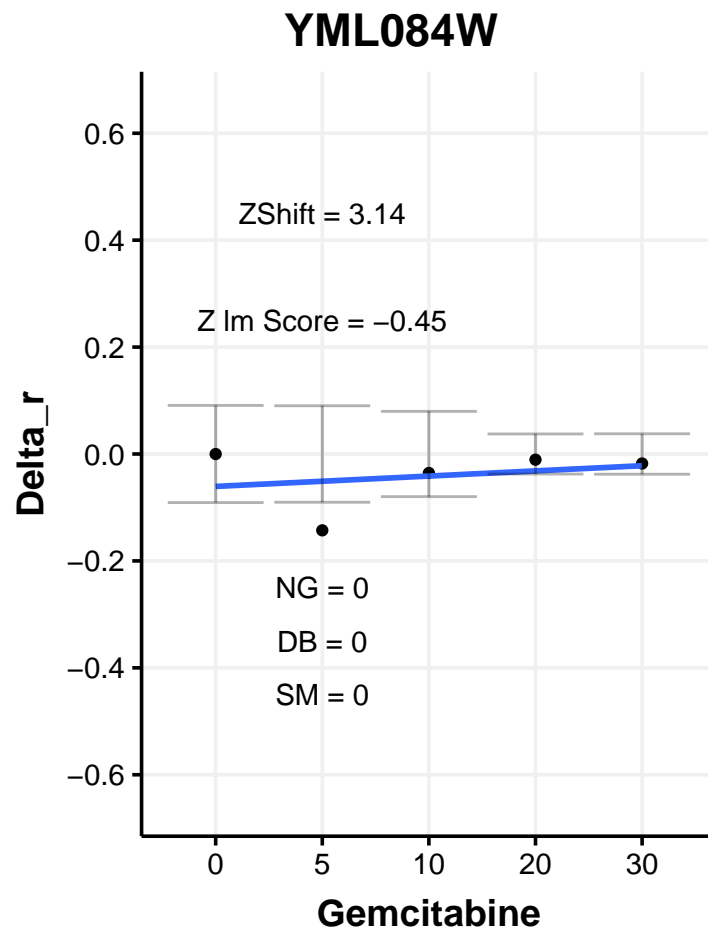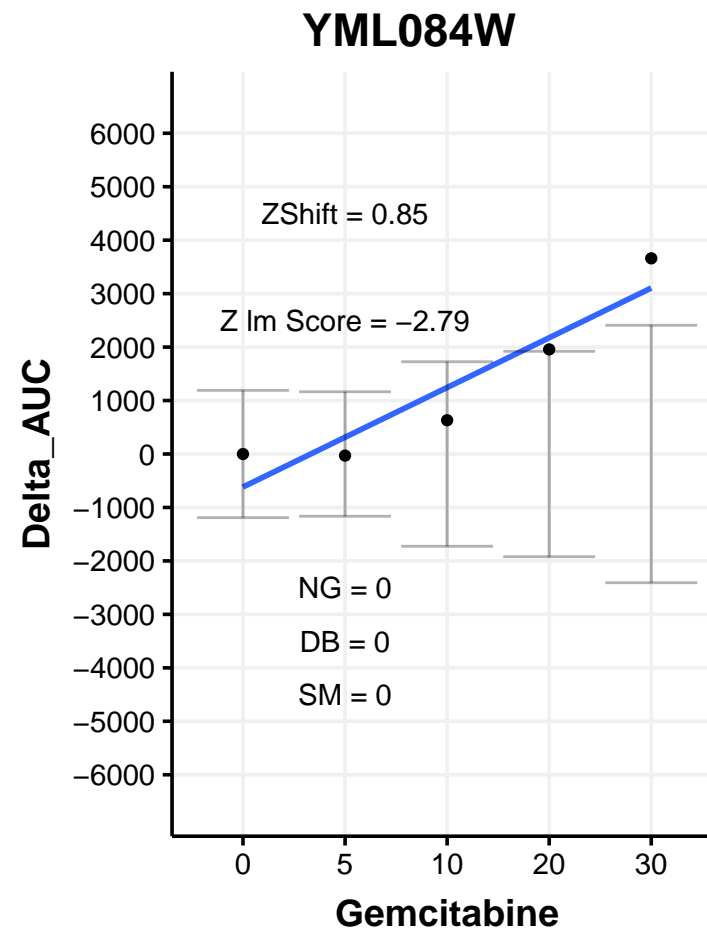

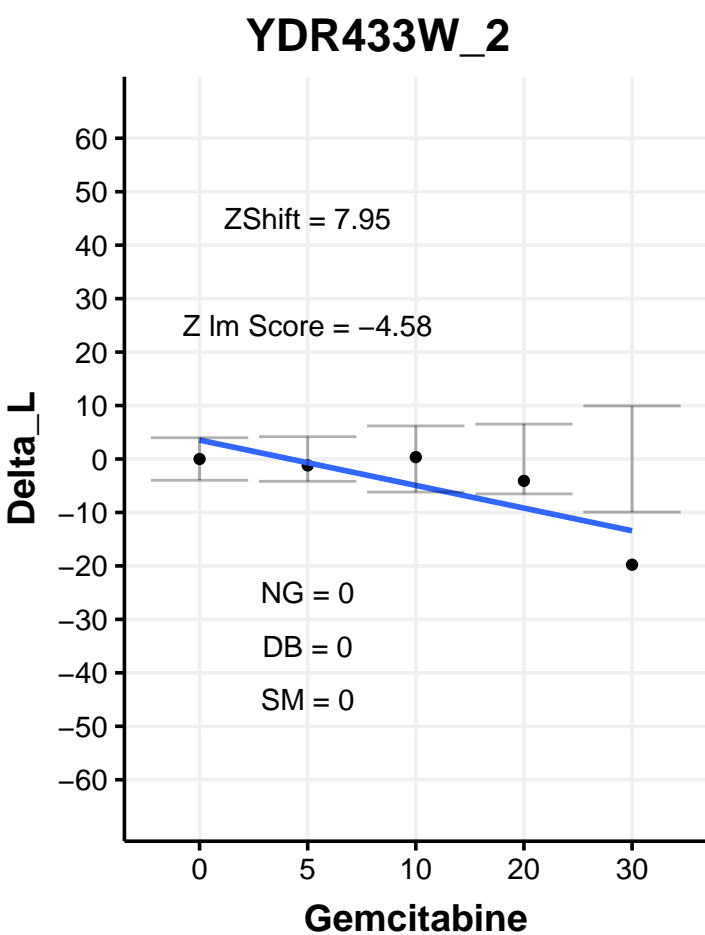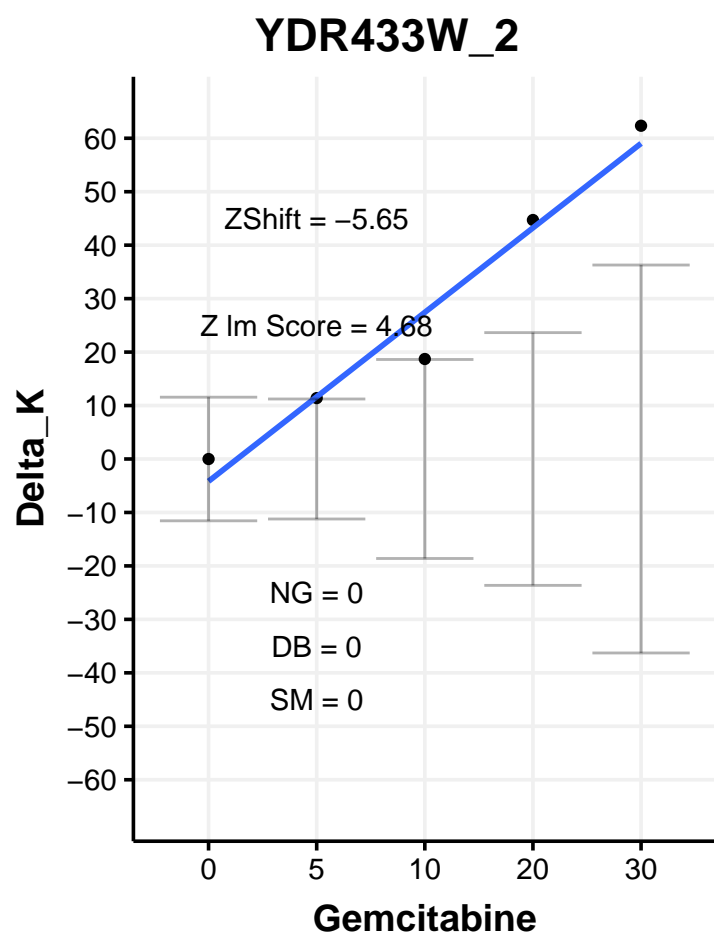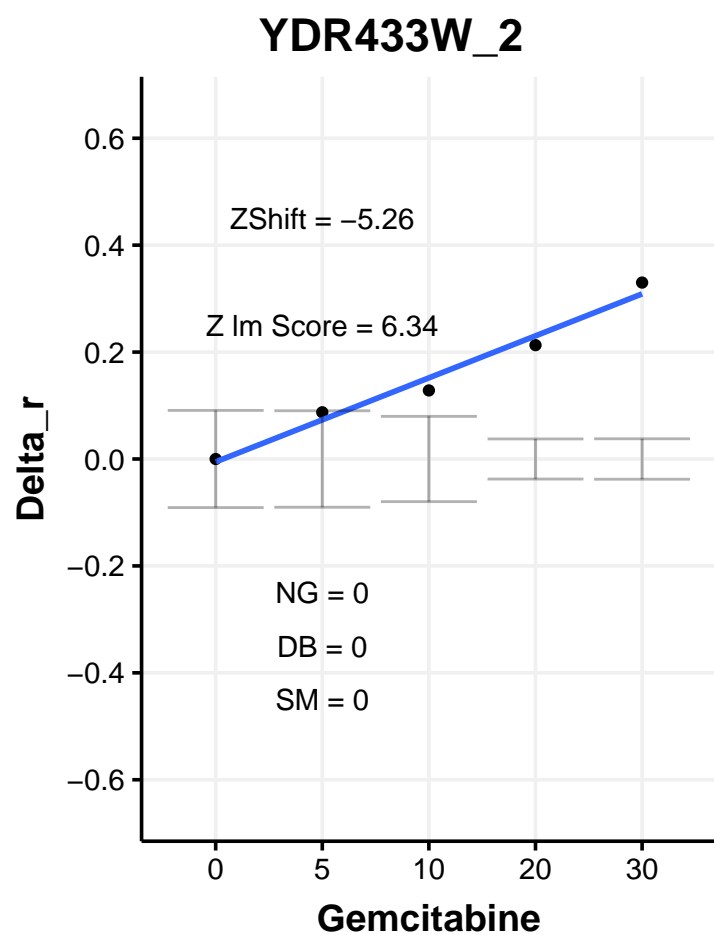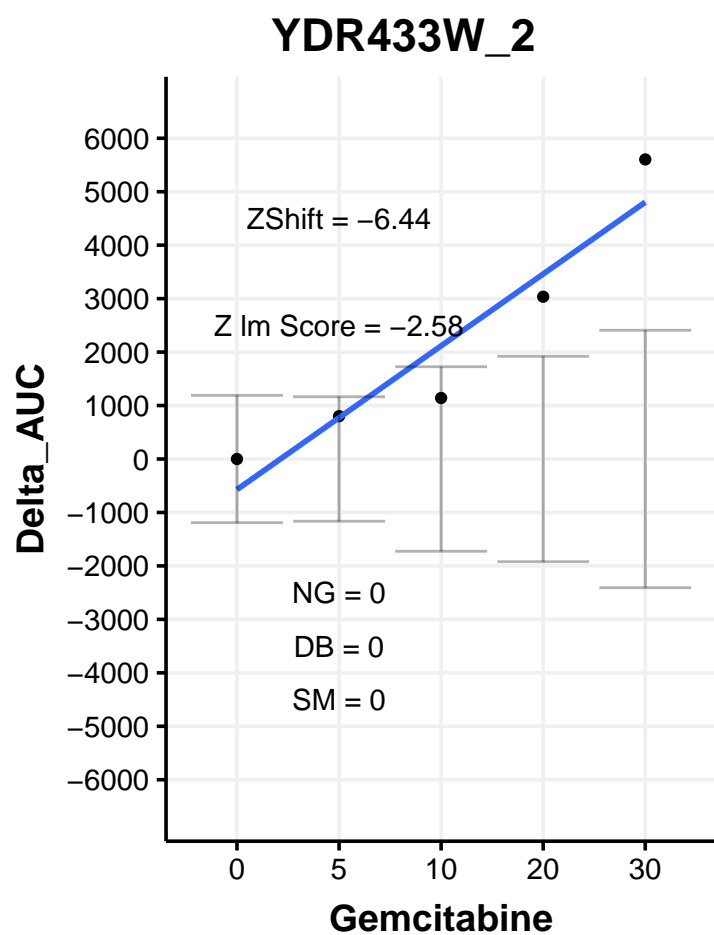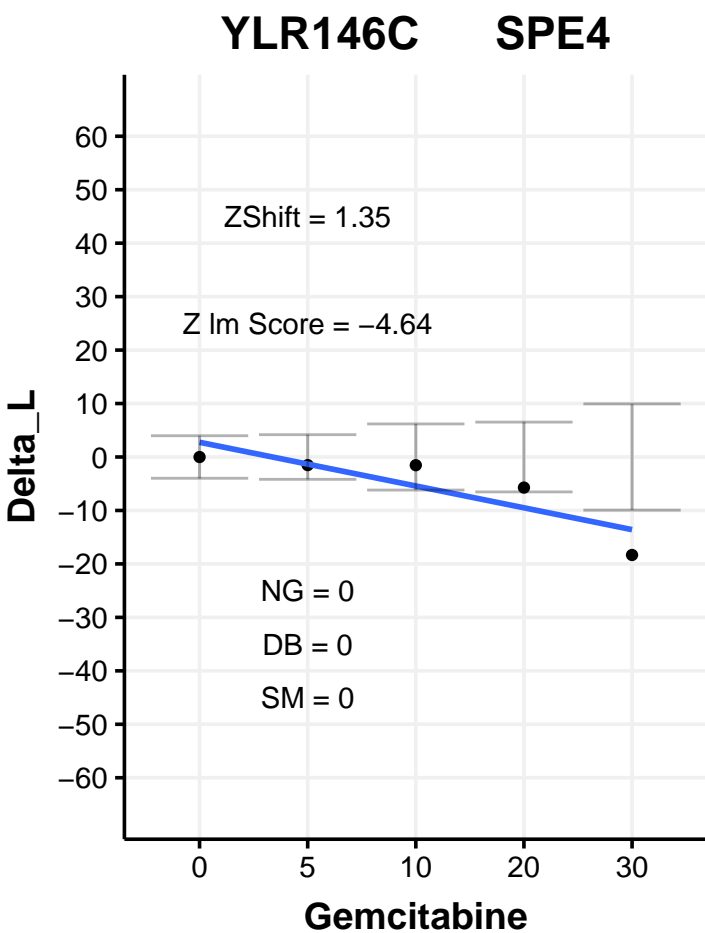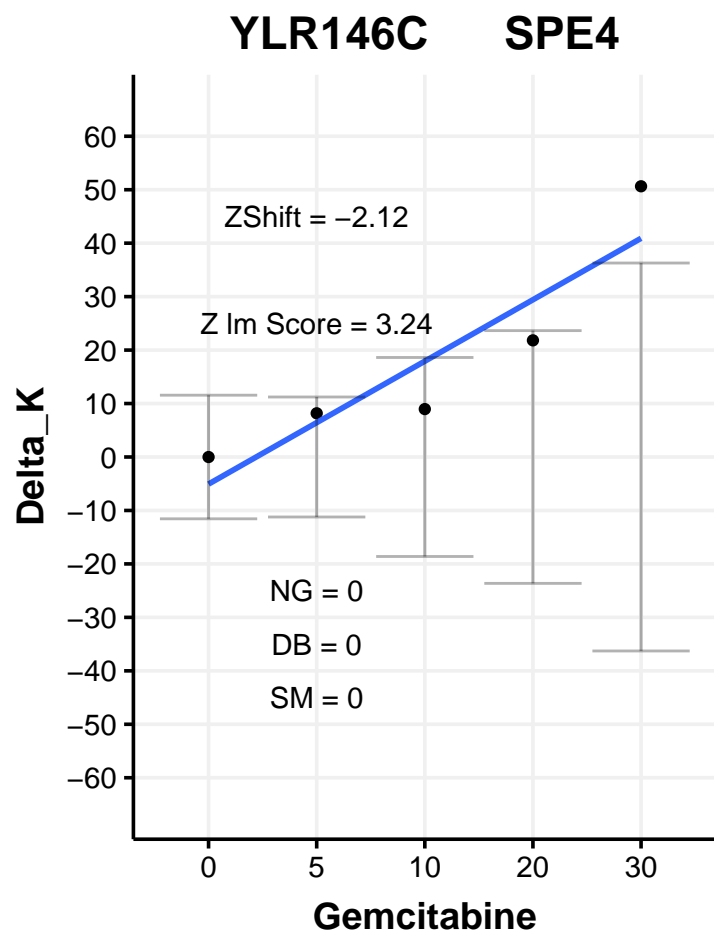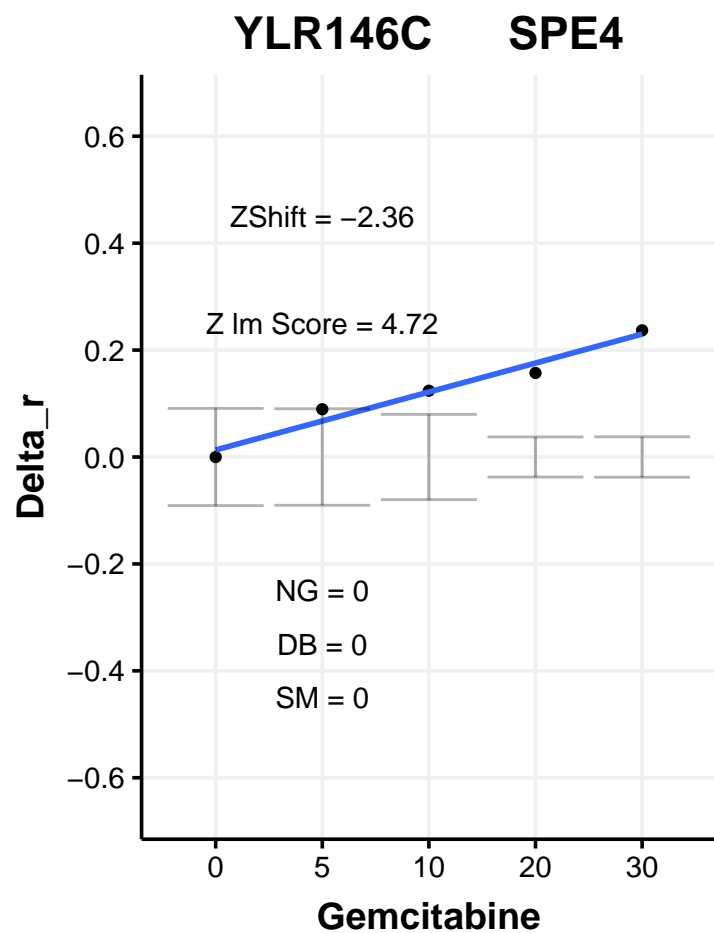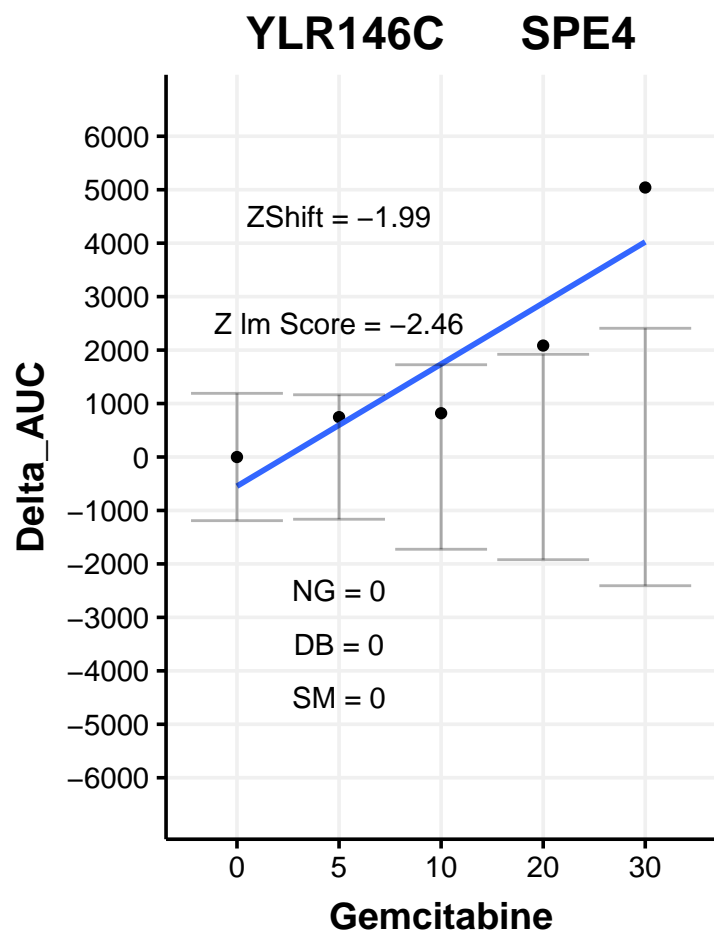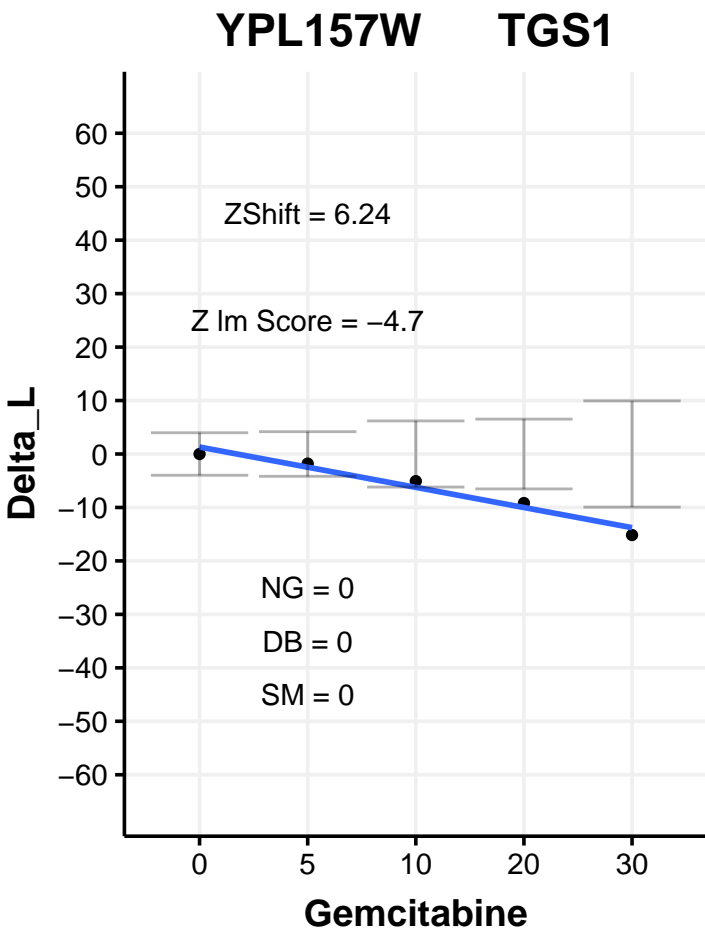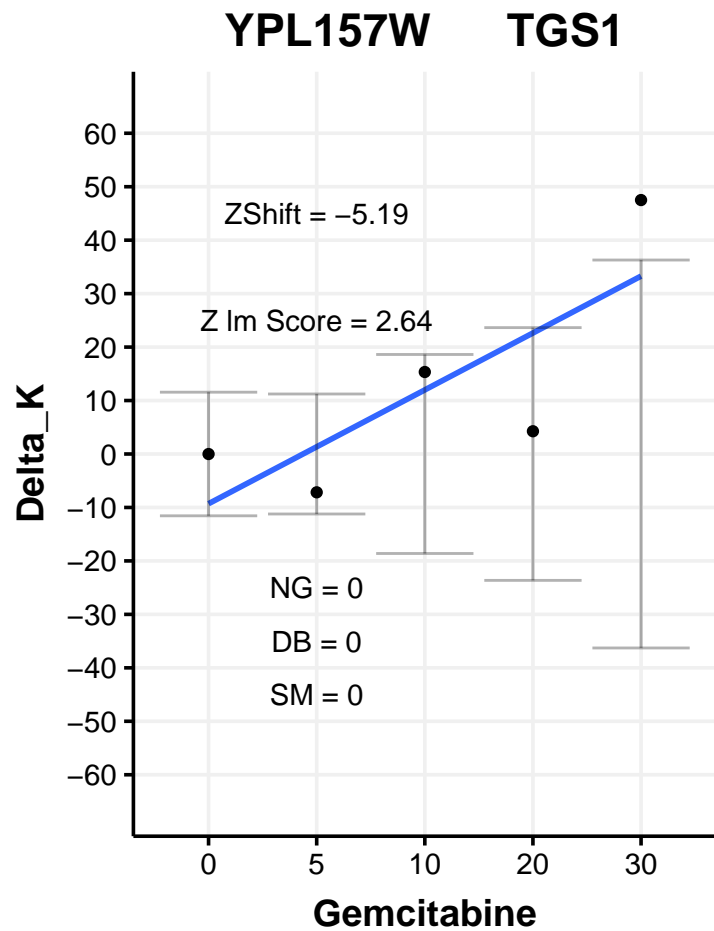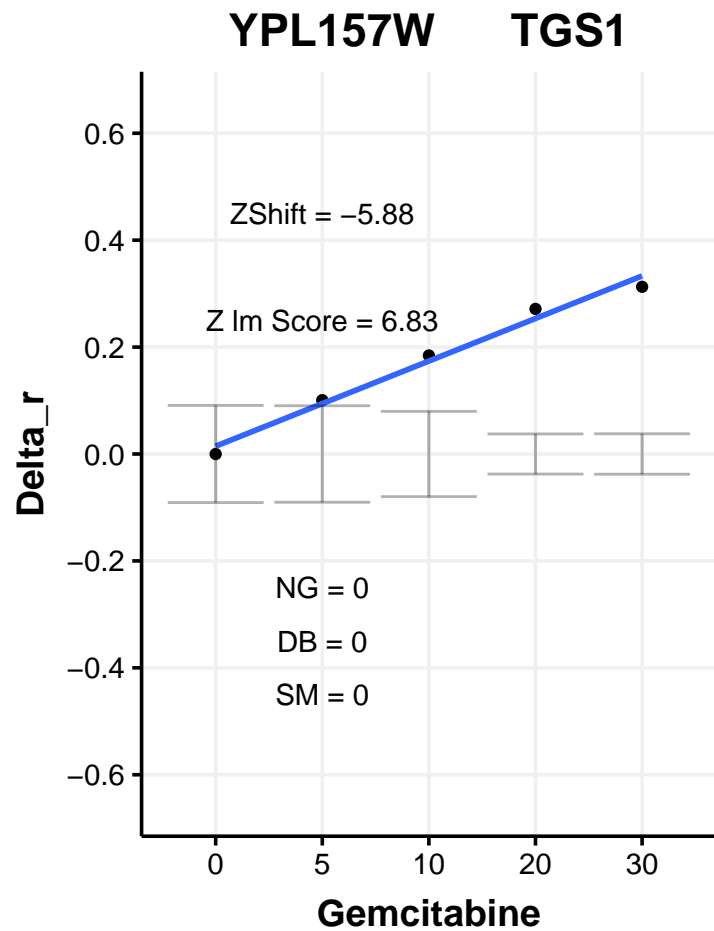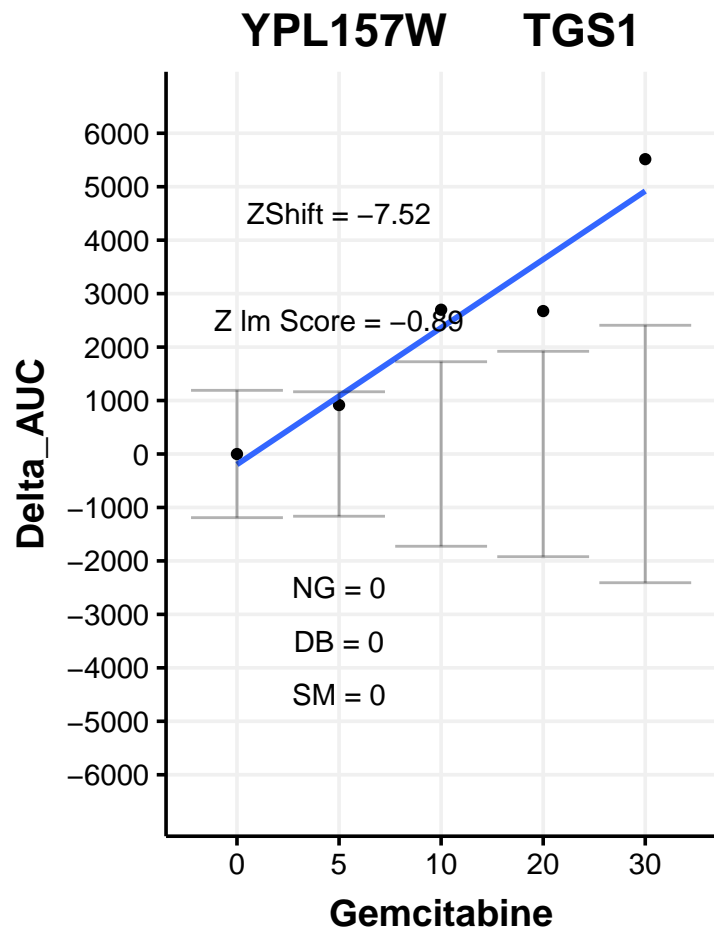

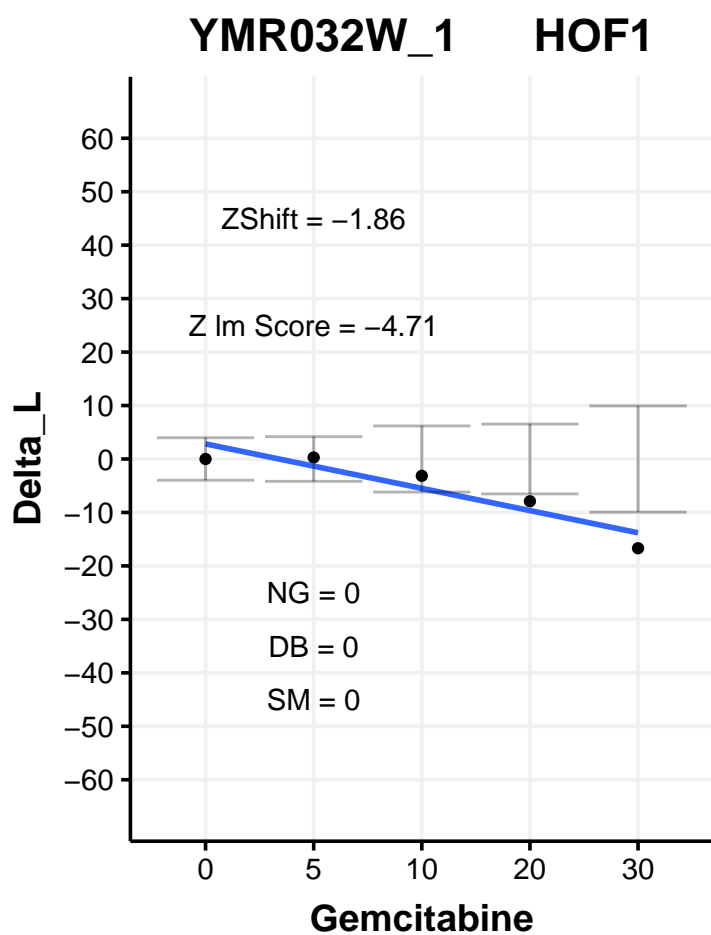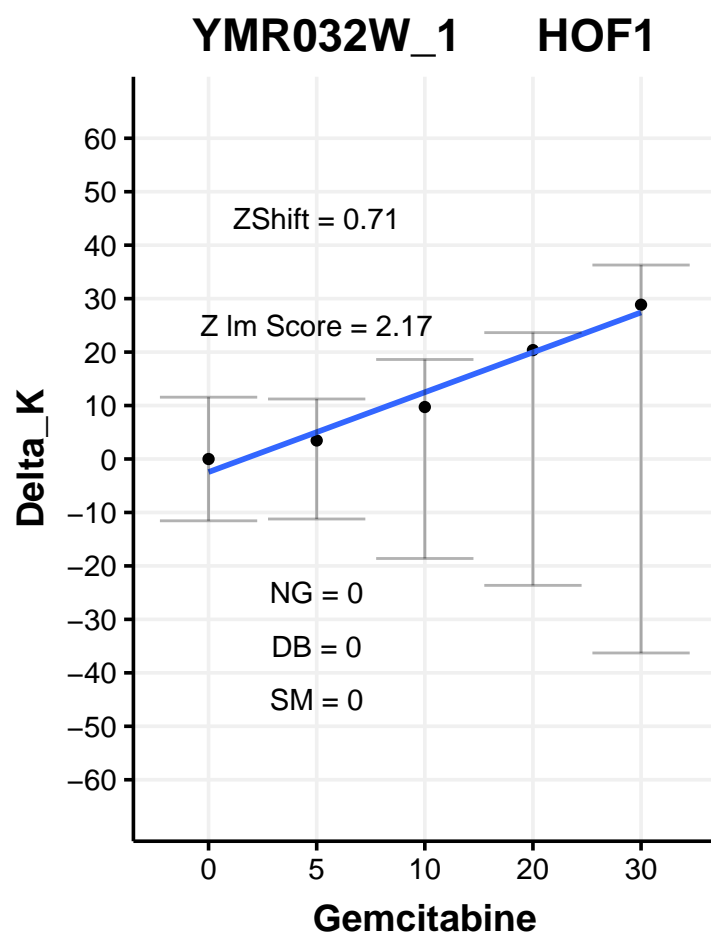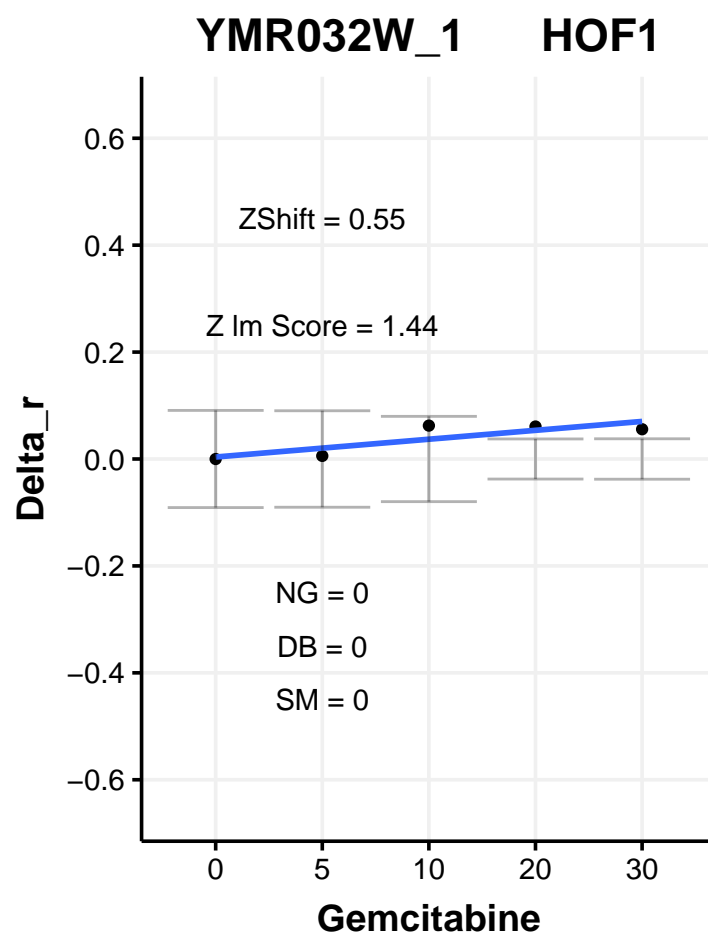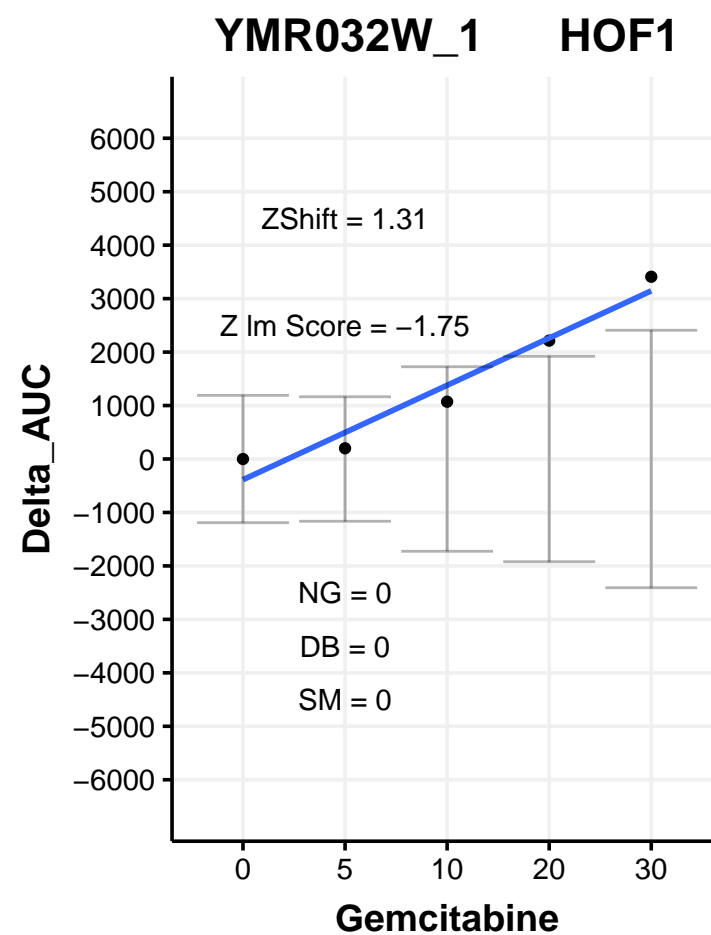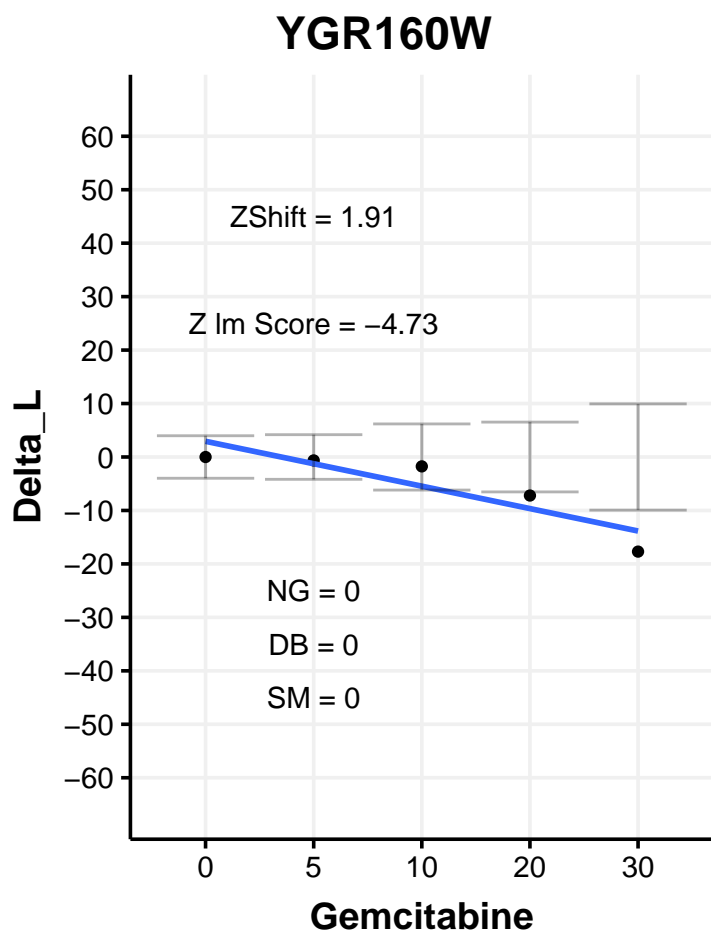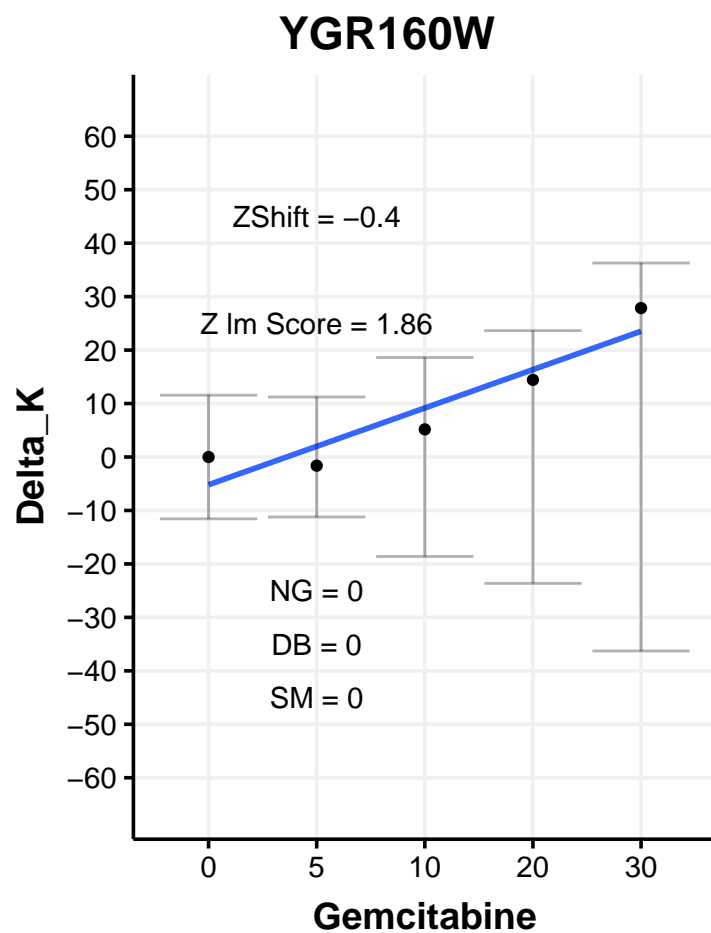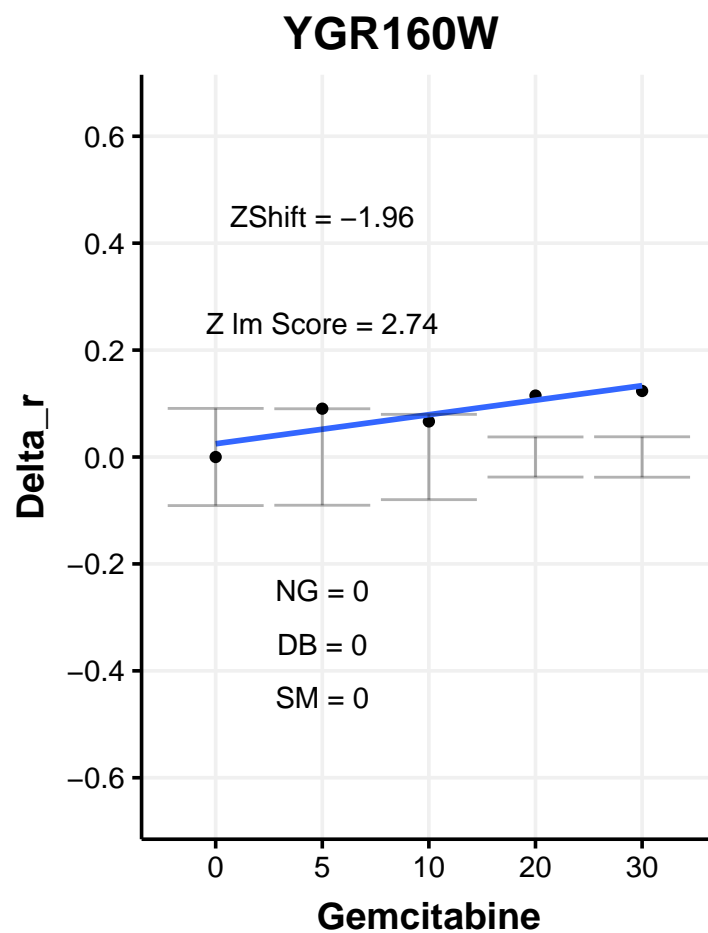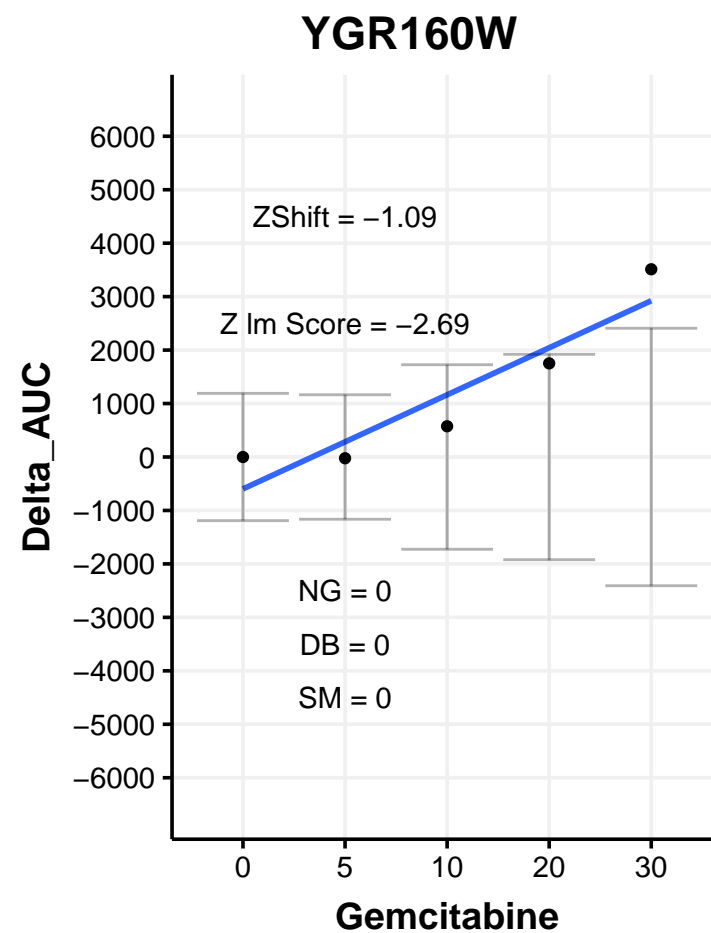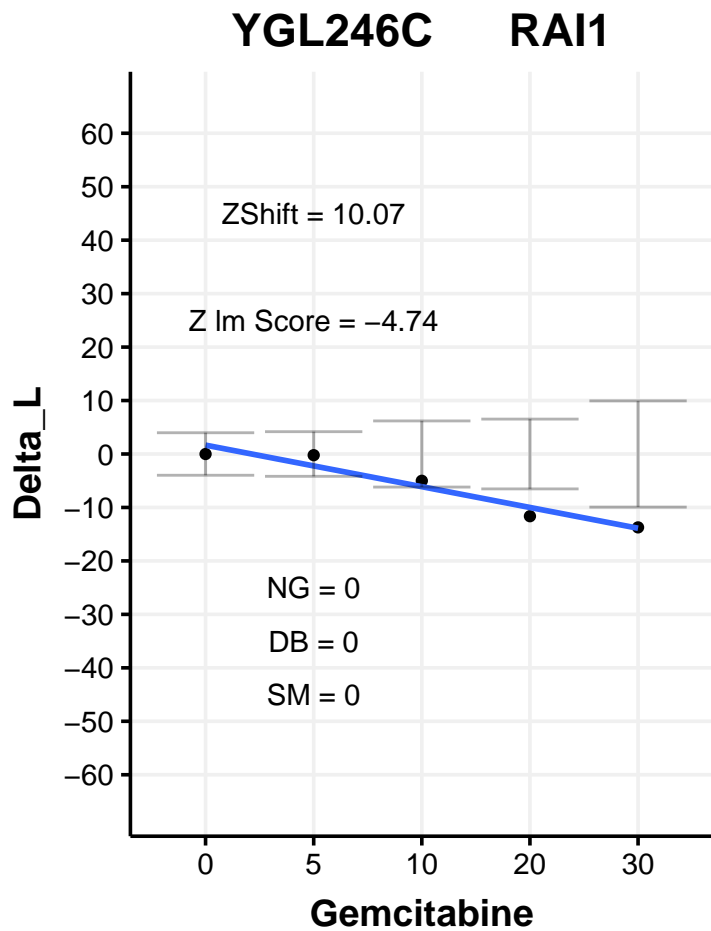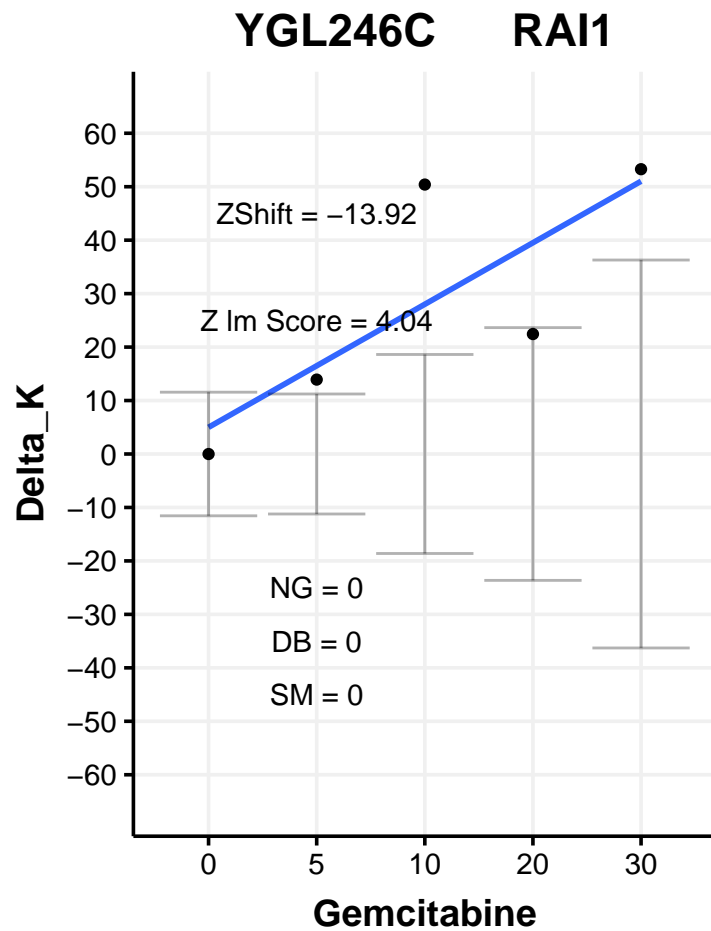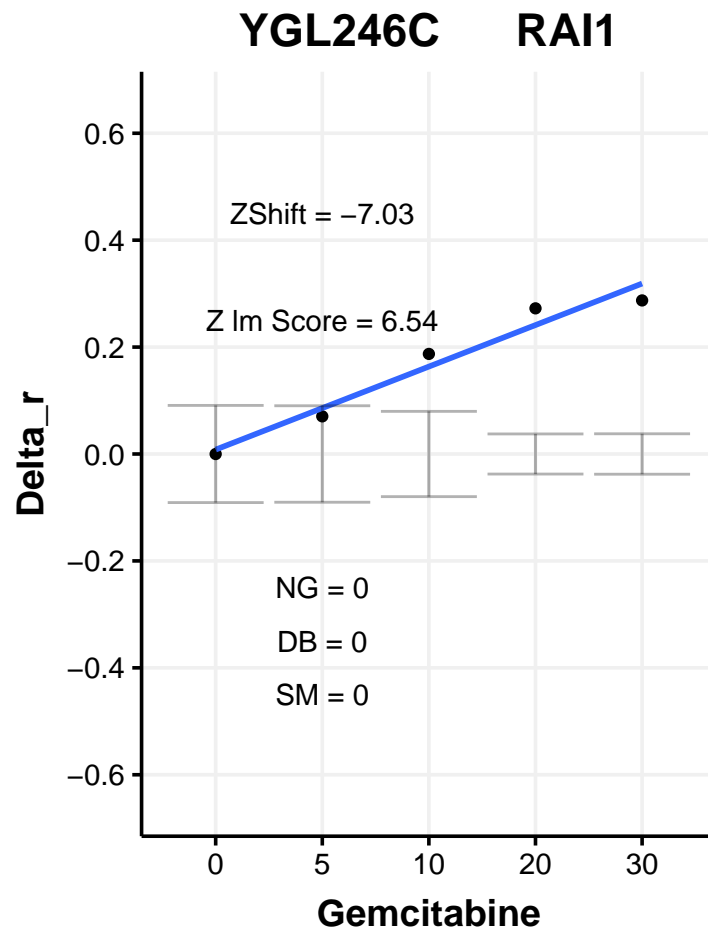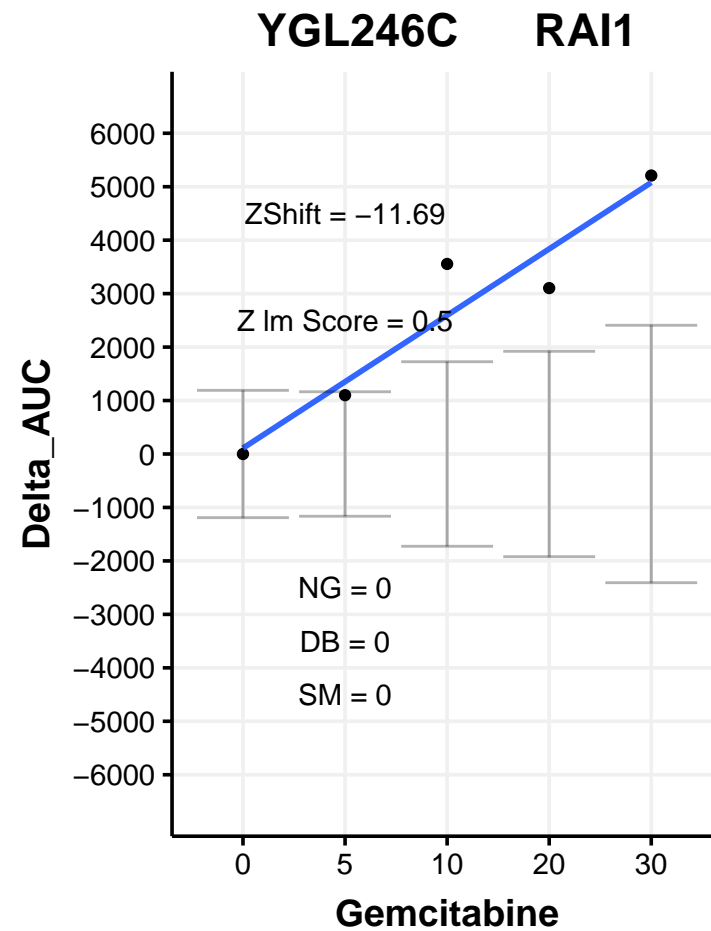

YBL071C-B\_1

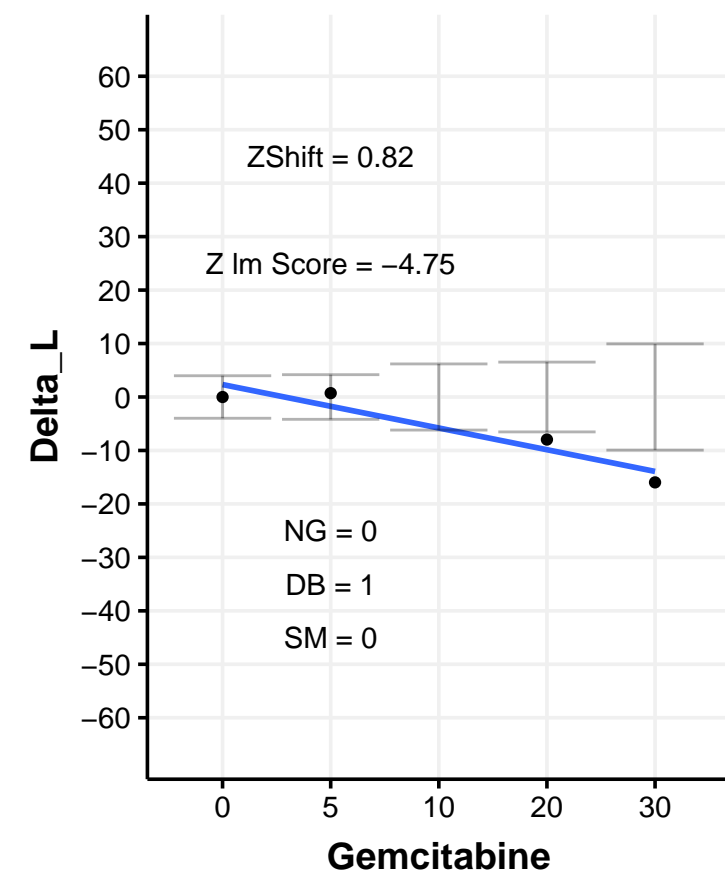

YBL071C-B\_1

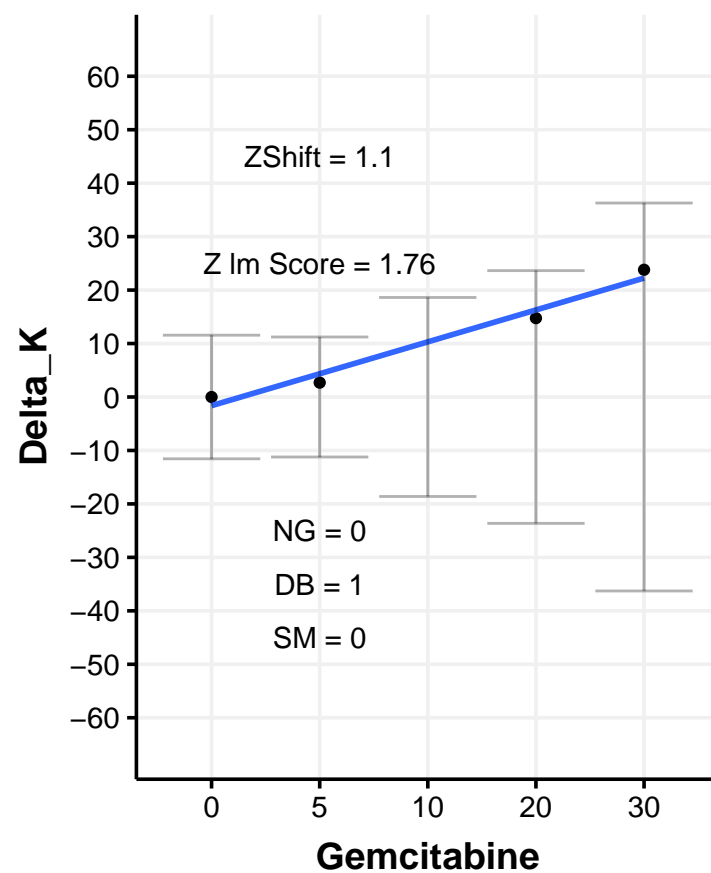

YBL071C-B\_1

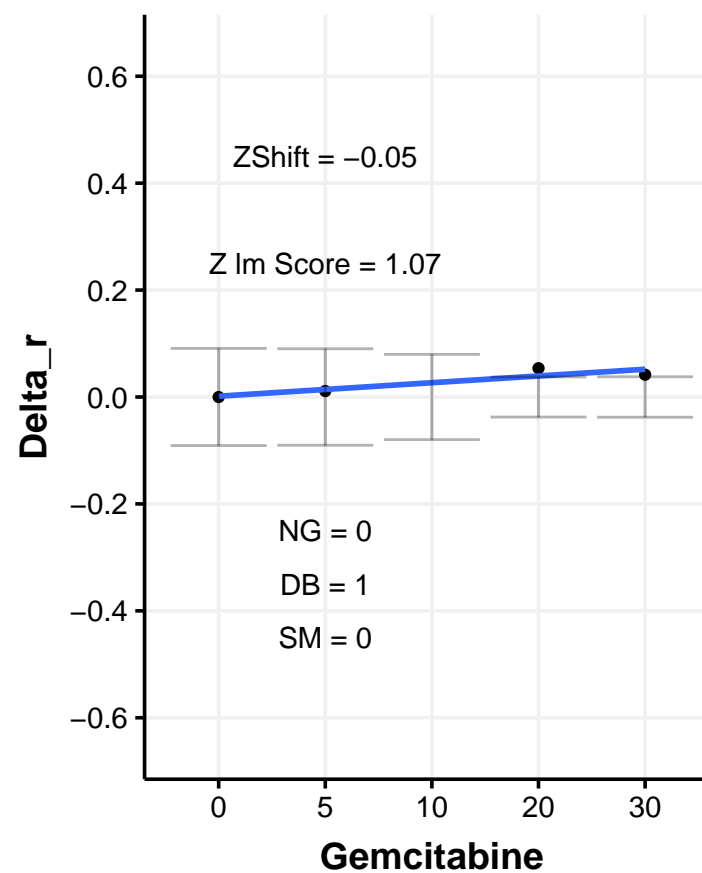

YBL071C-B\_1

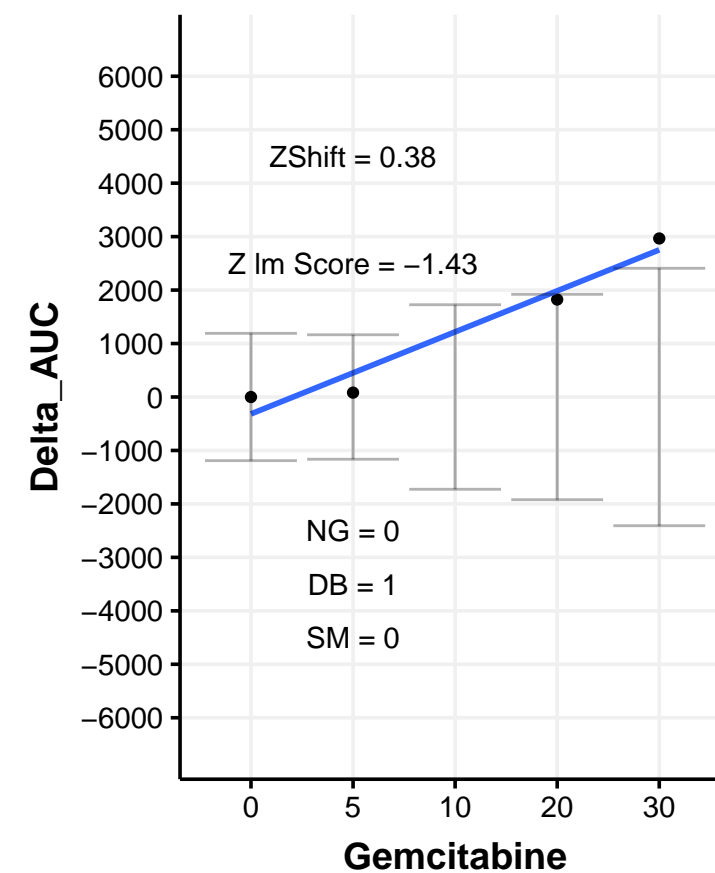

YML086C\_1 ALO1

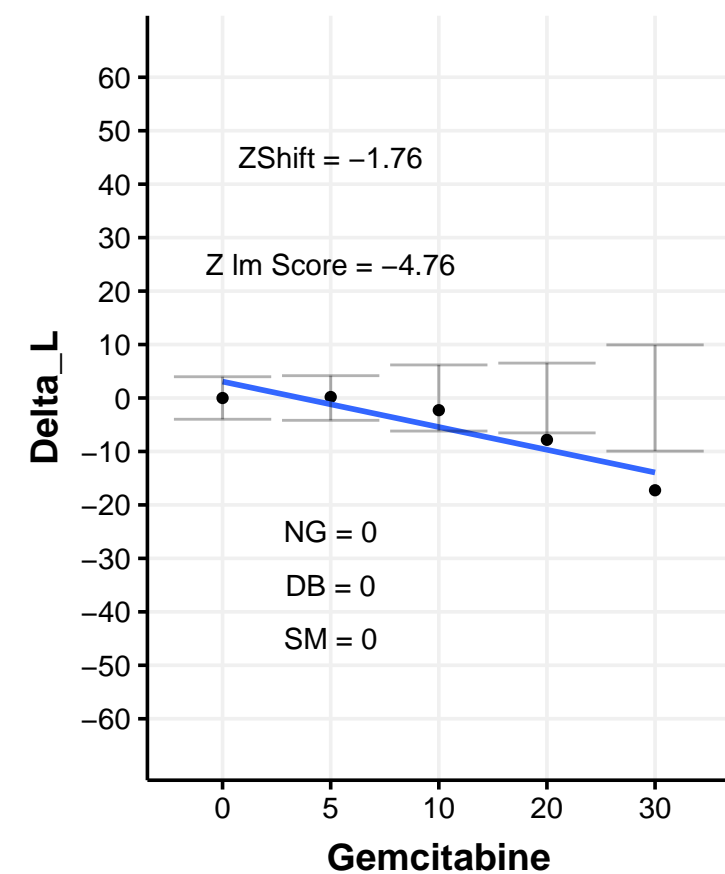

YML086C\_1 ALO1

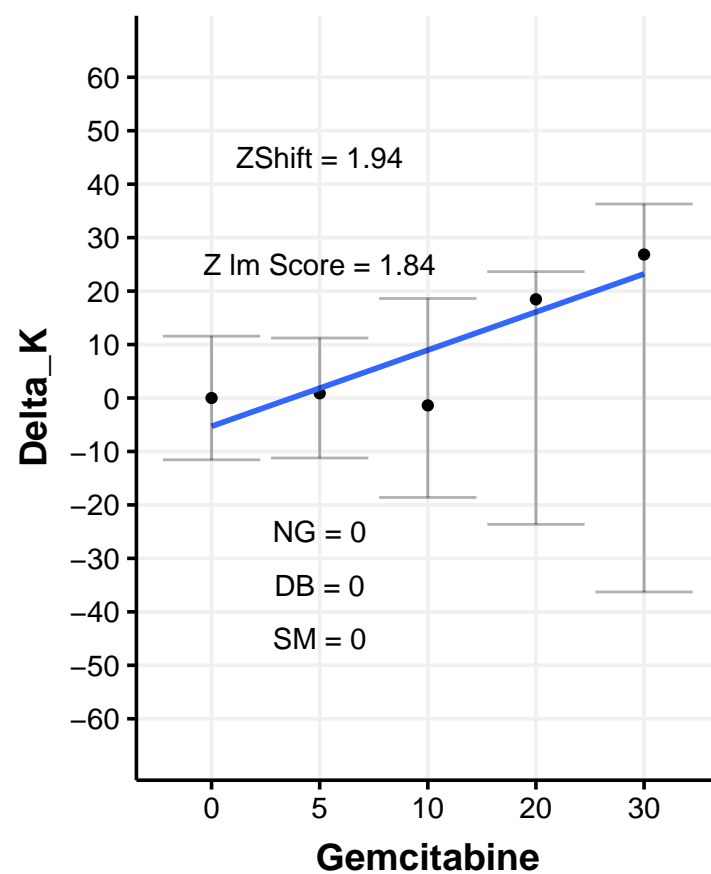

YML086C\_1 ALO1

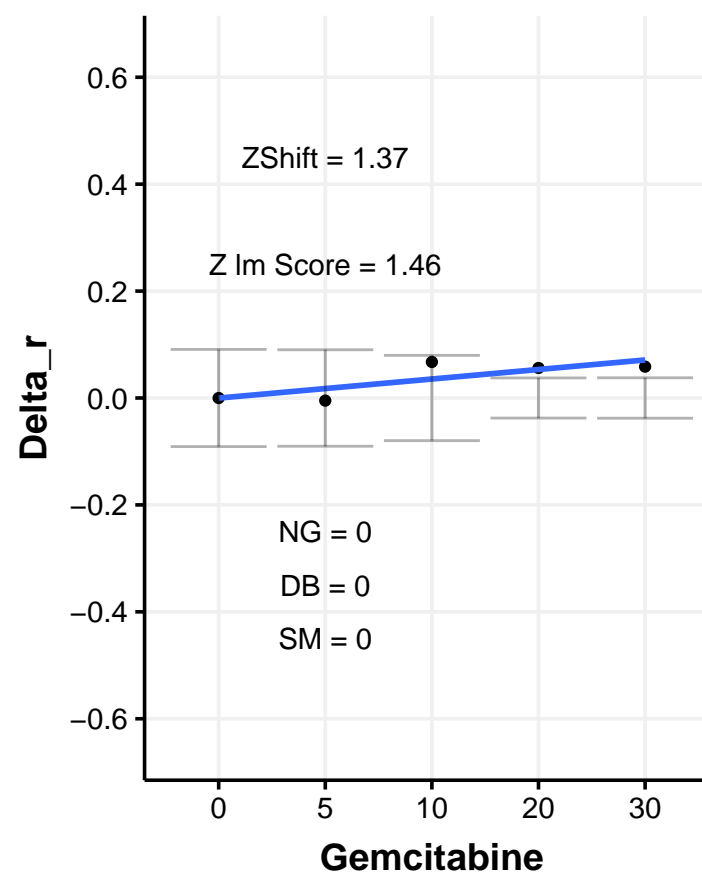

YML086C\_1 ALO1

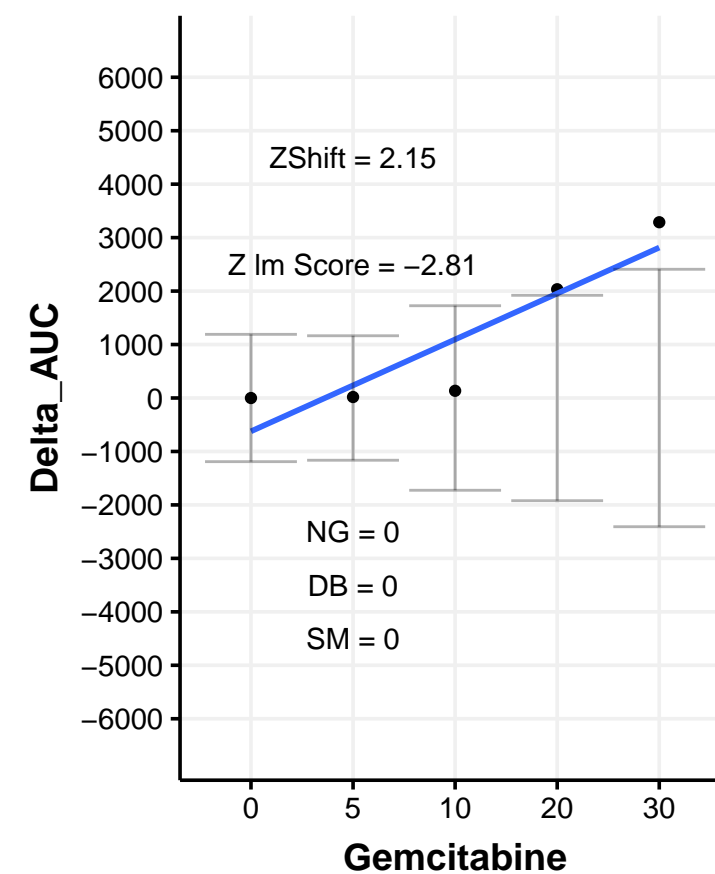

YNL296W

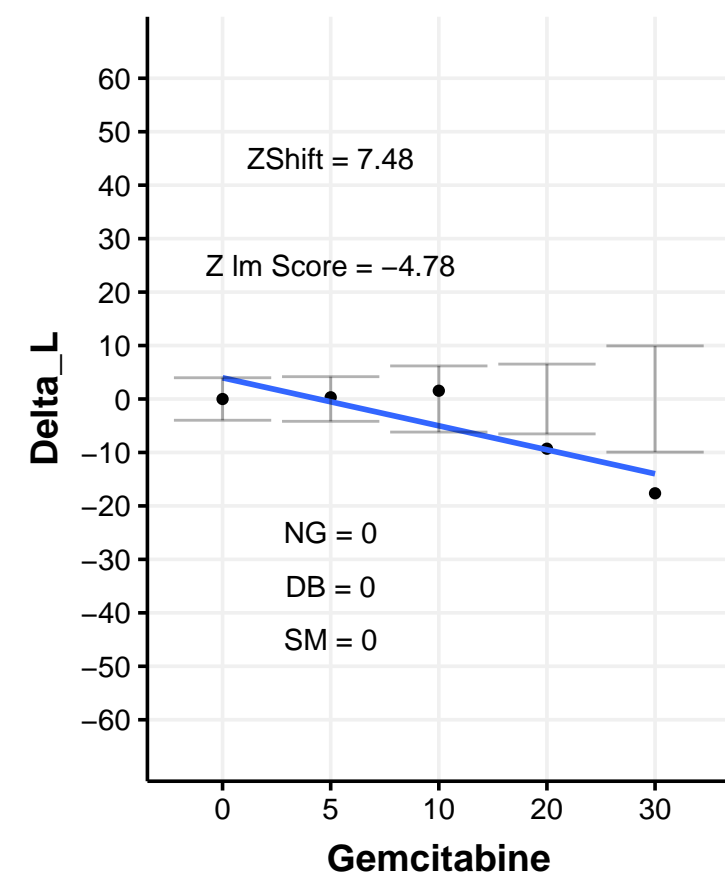

YNL296W

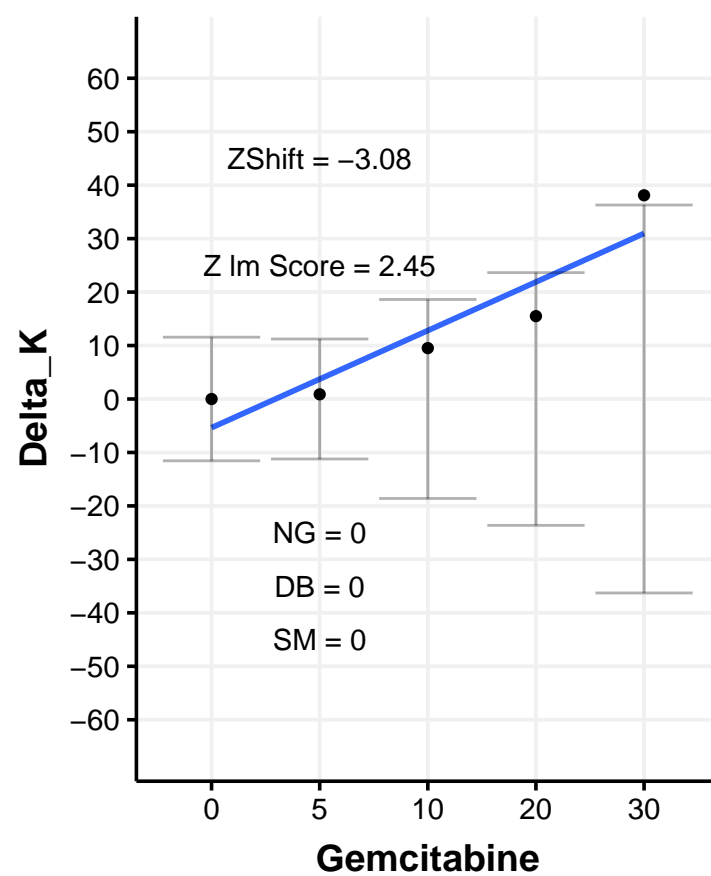

YNL296W

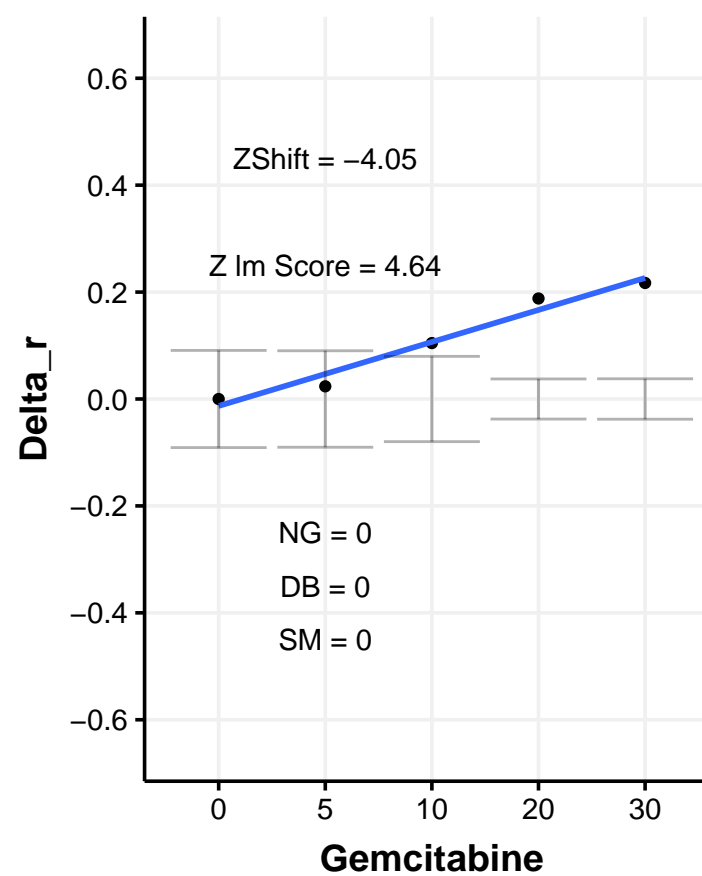

YNL296W

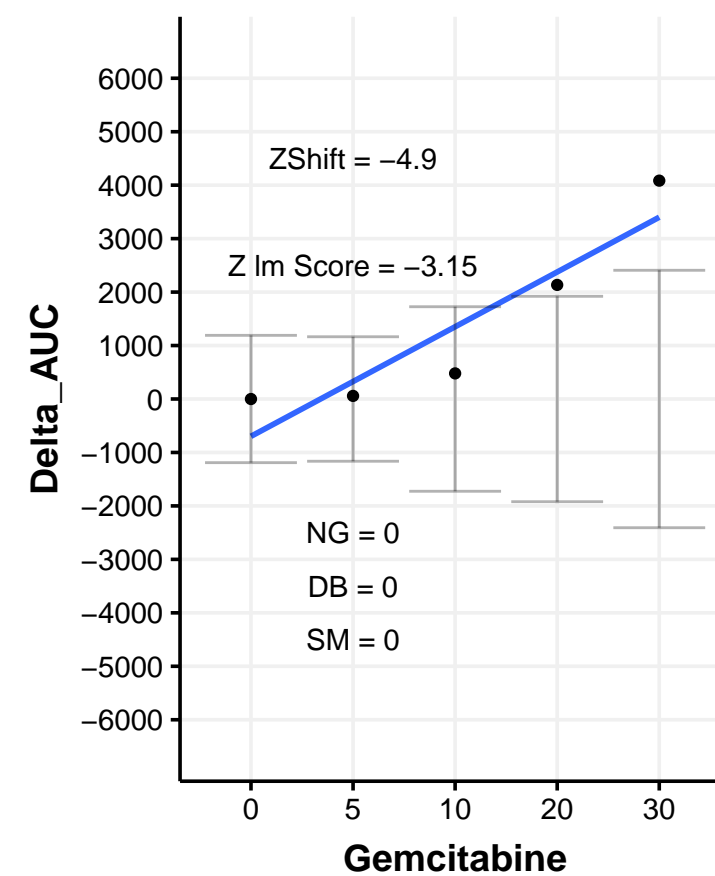

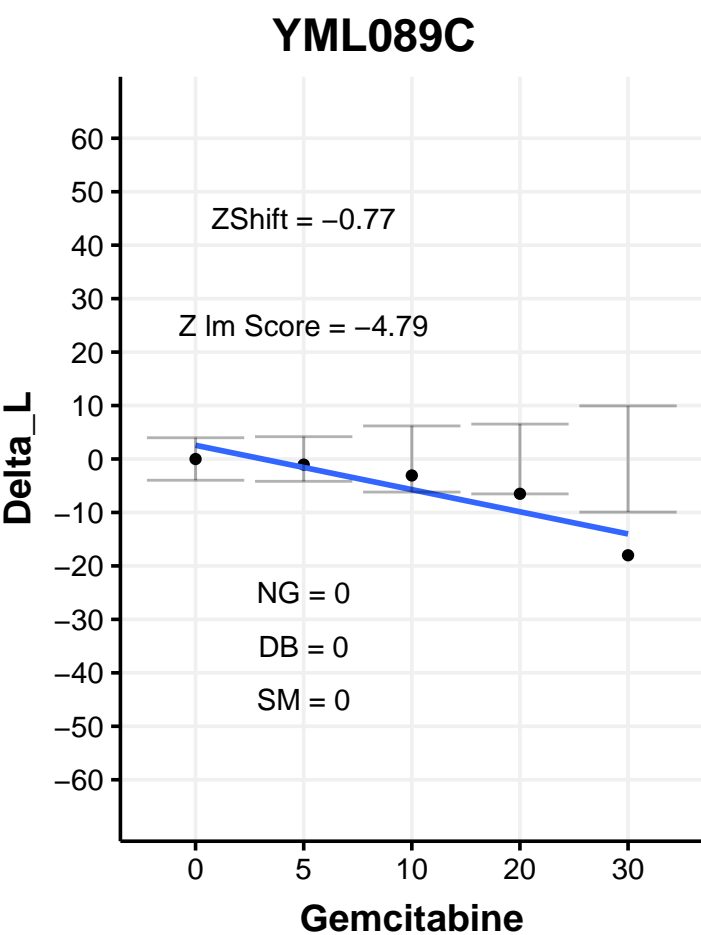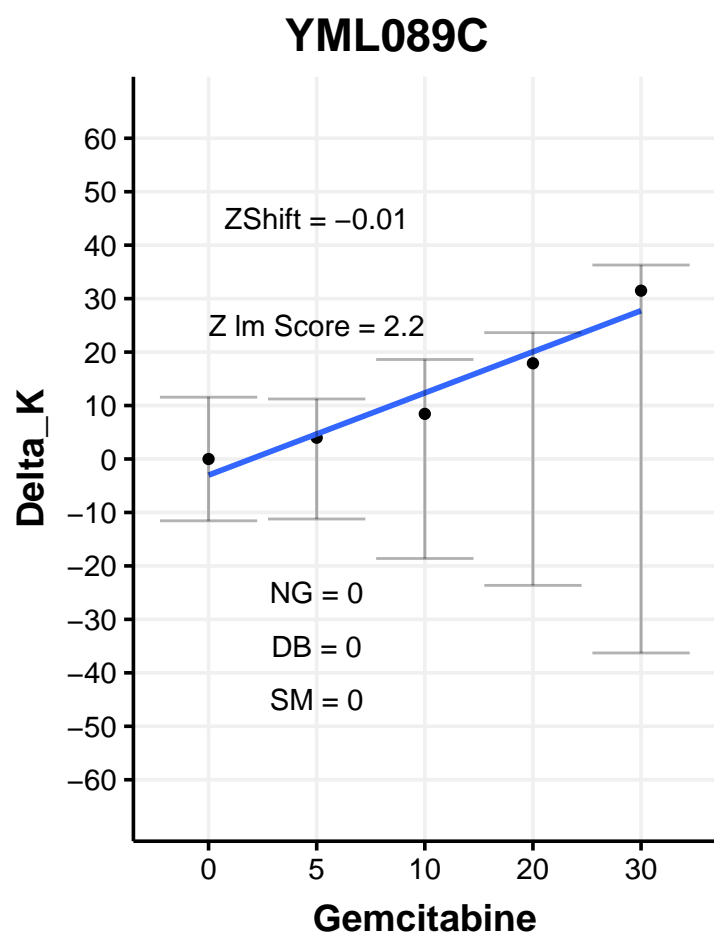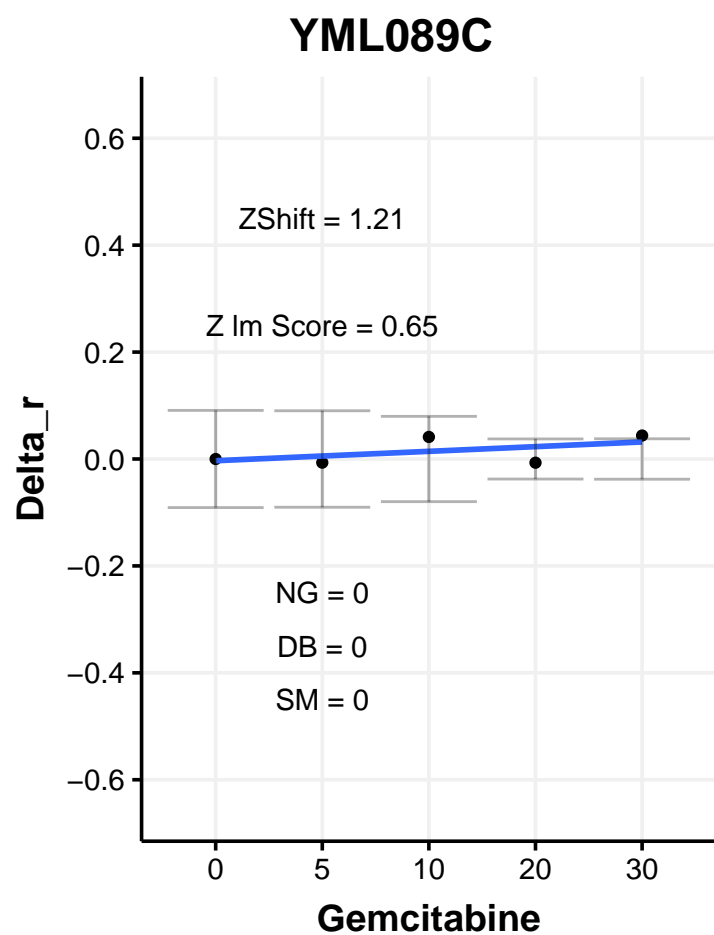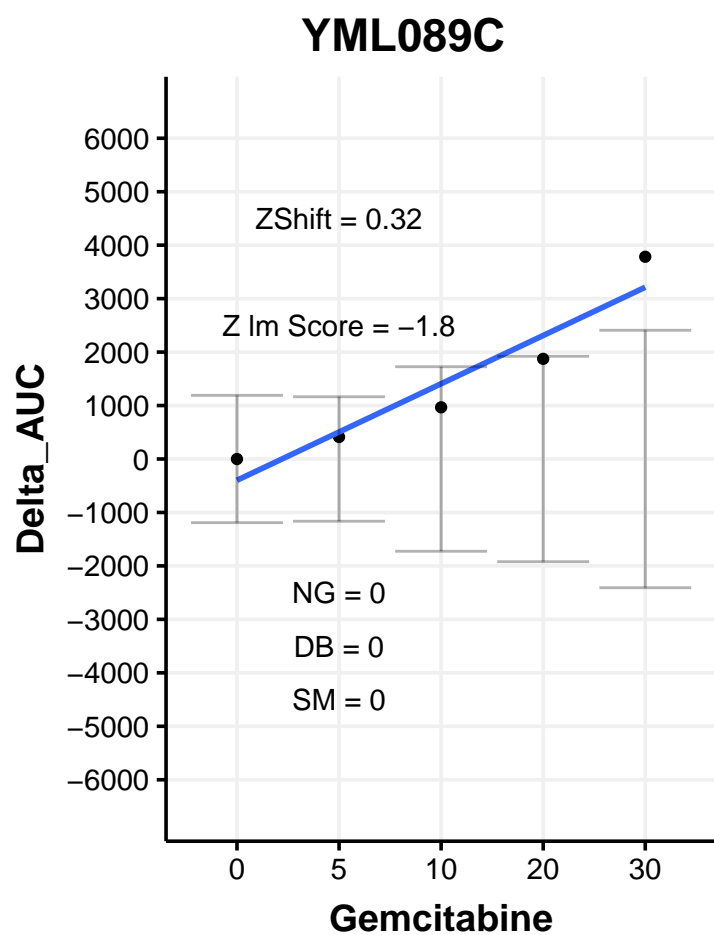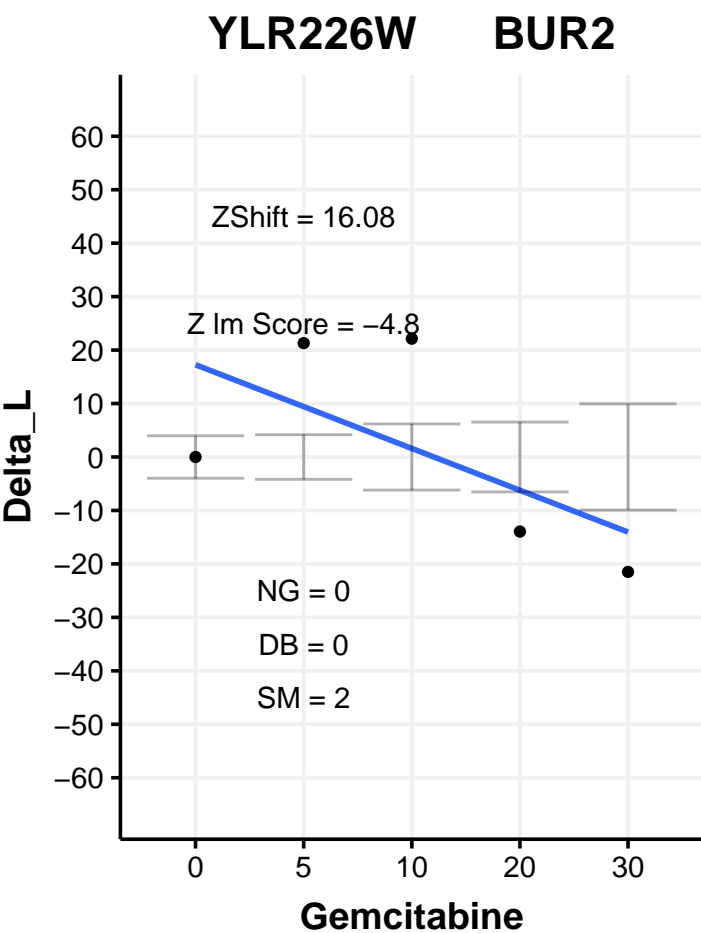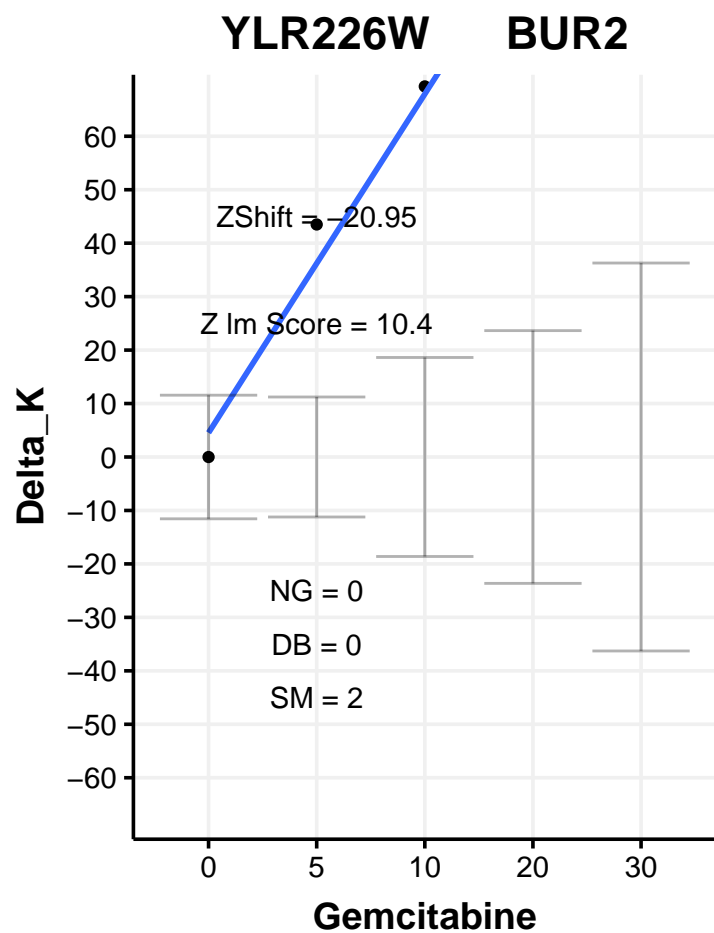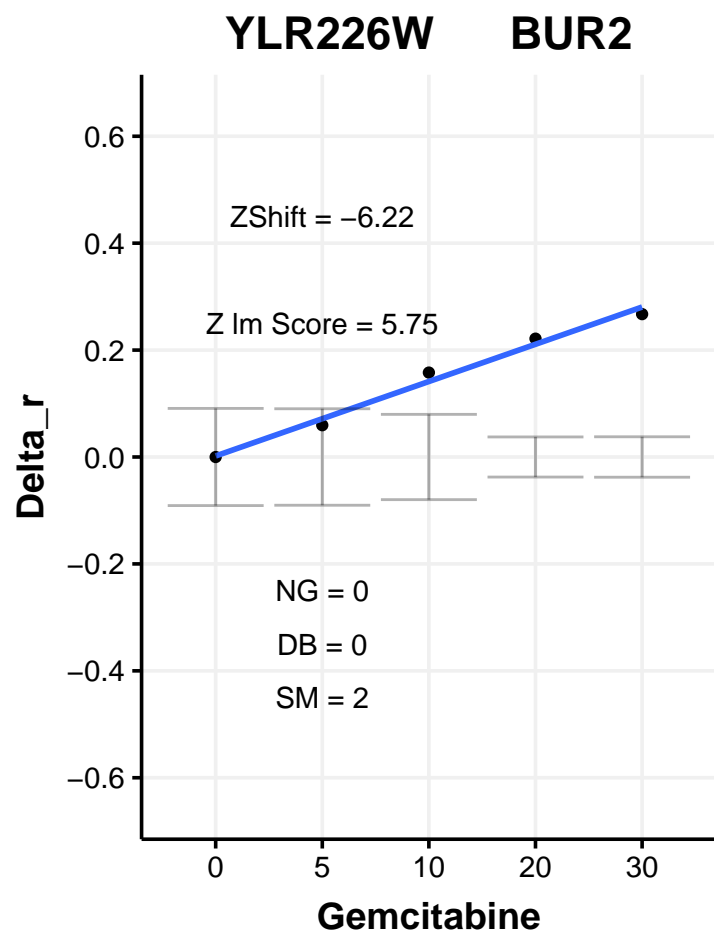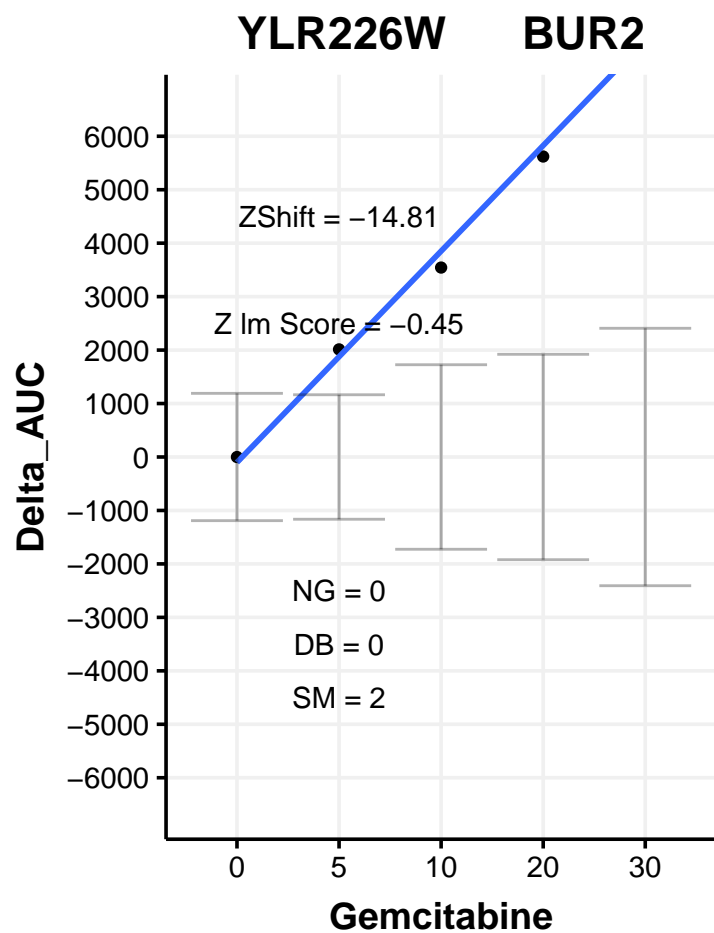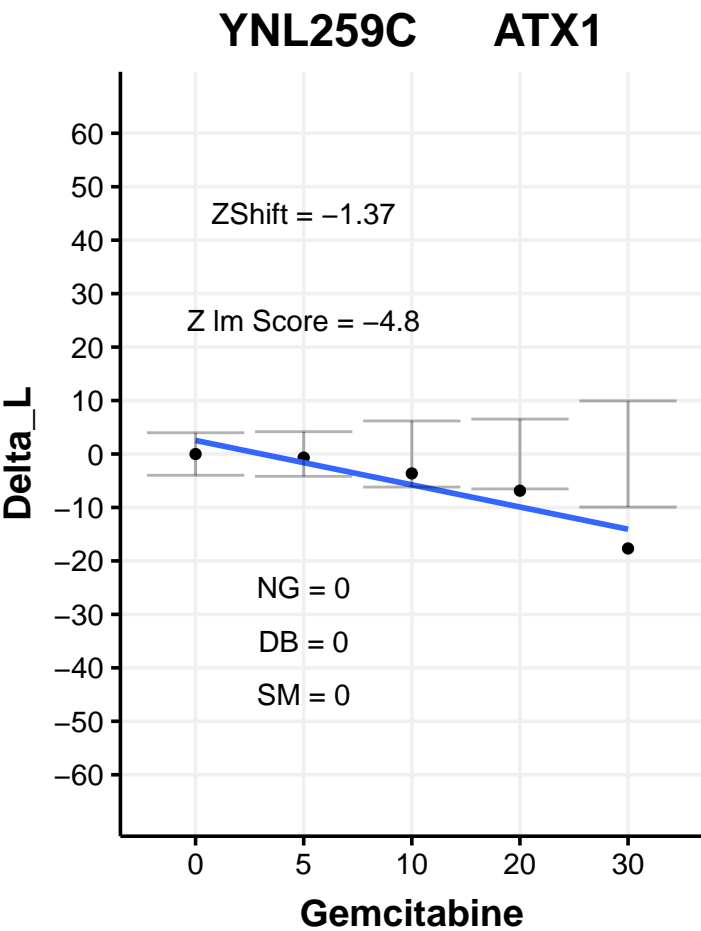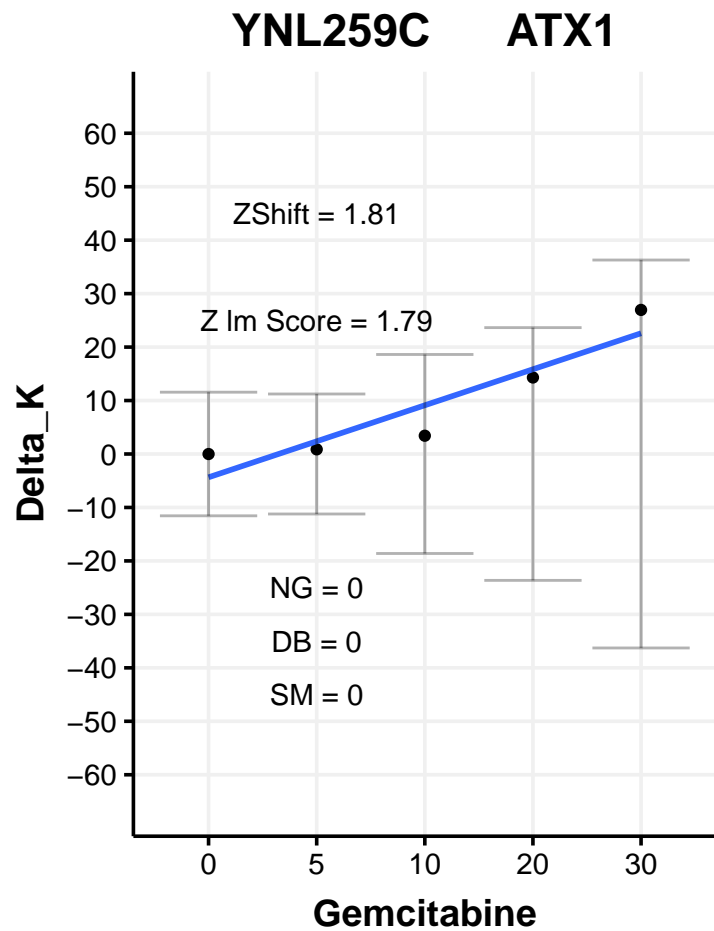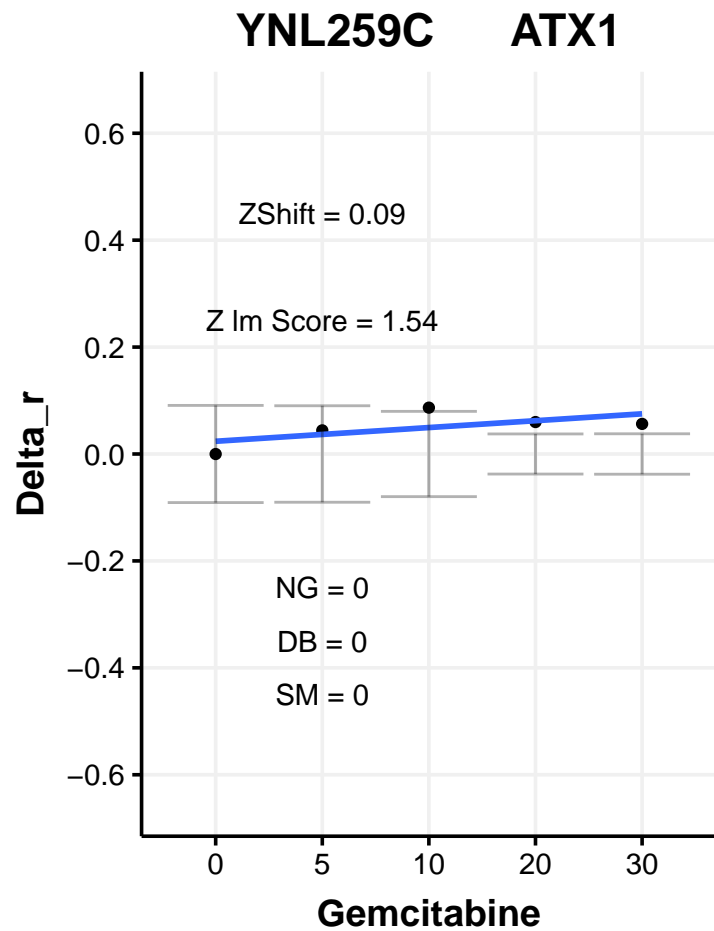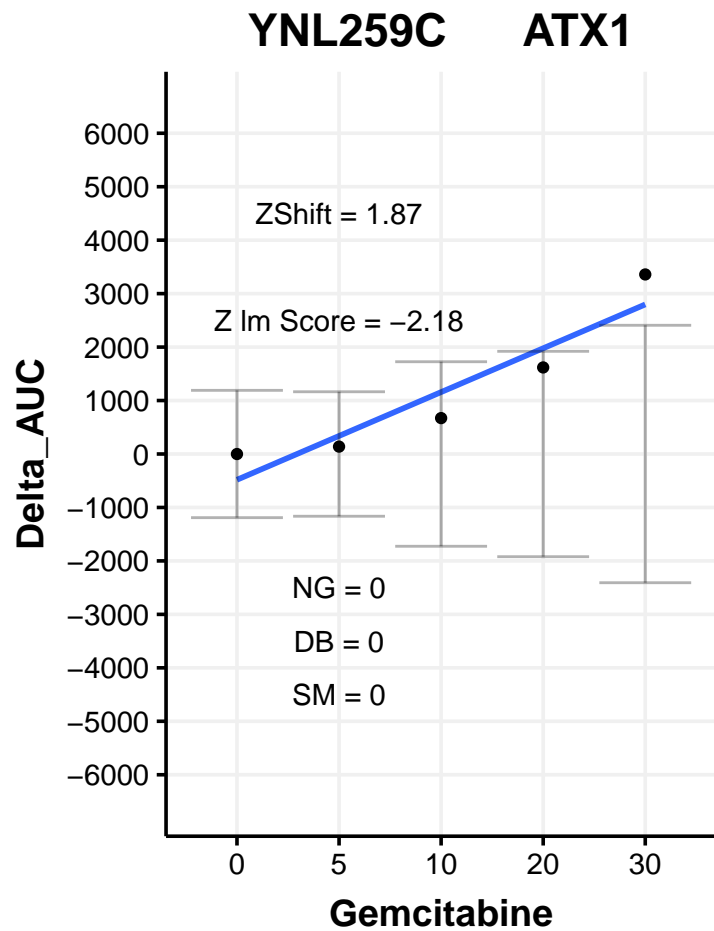

YCR079W

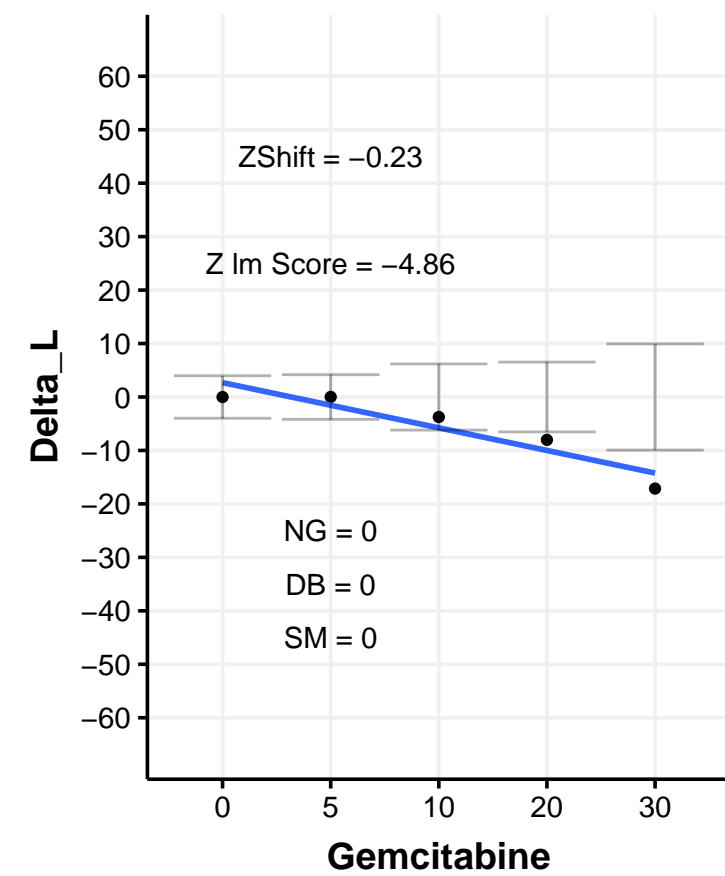

YCR079W

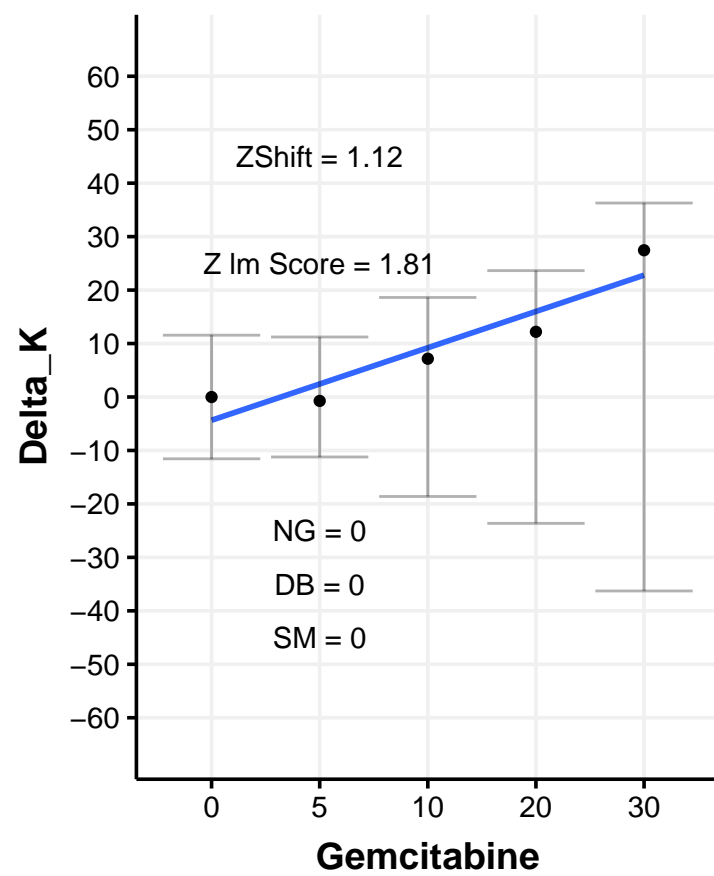

YCR079W

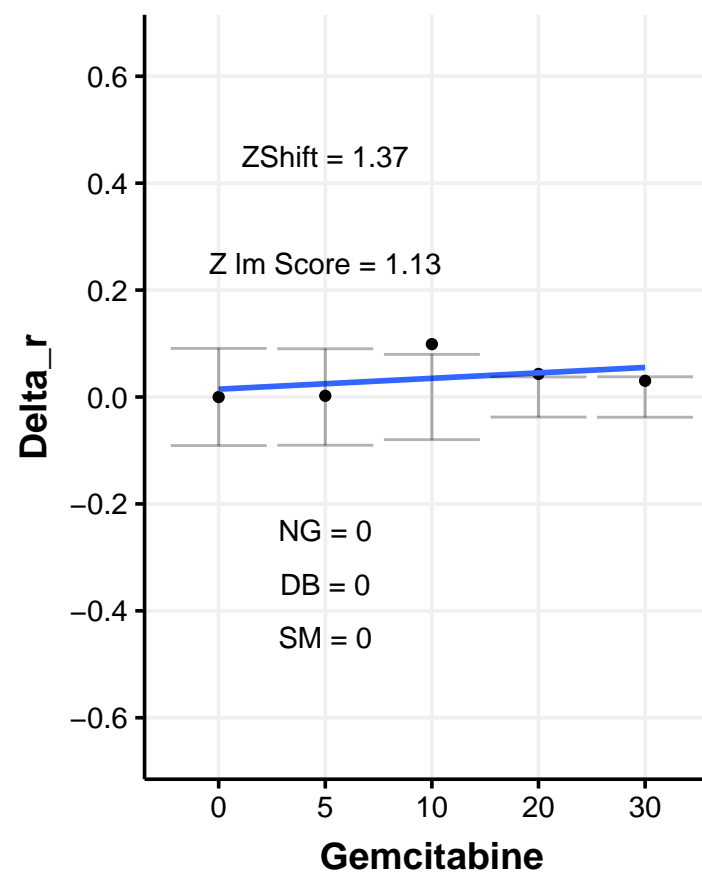

YCR079W

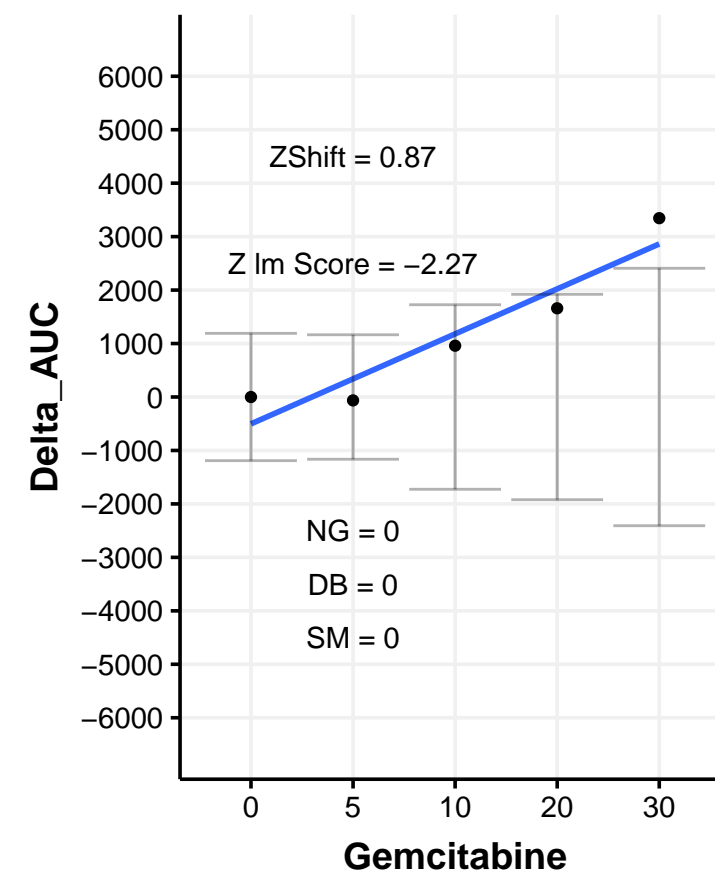

YKR094C RPL40B

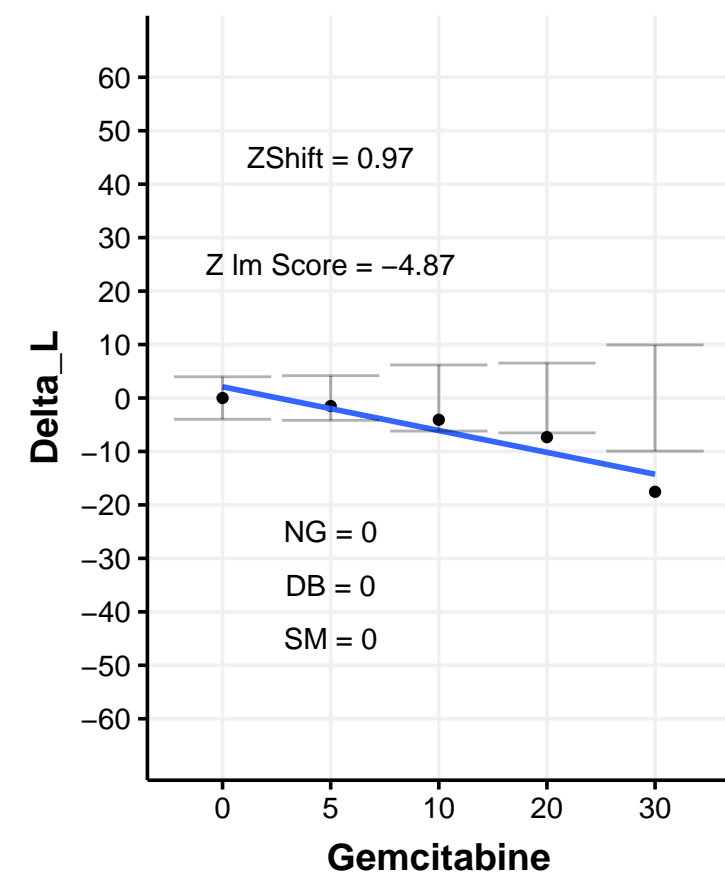

YKR094C RPL40B

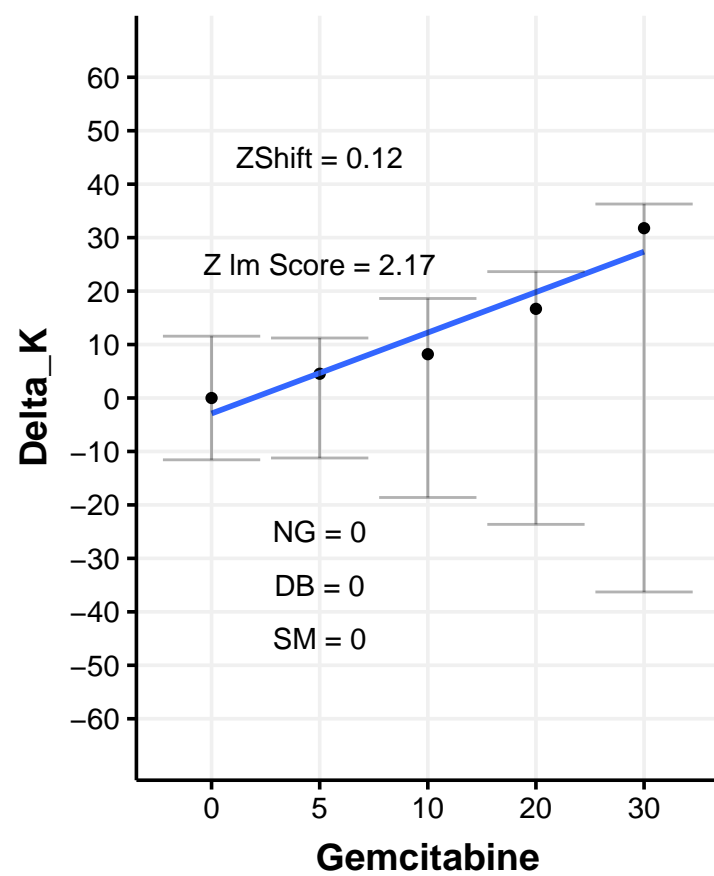

YKR094C RPL40B

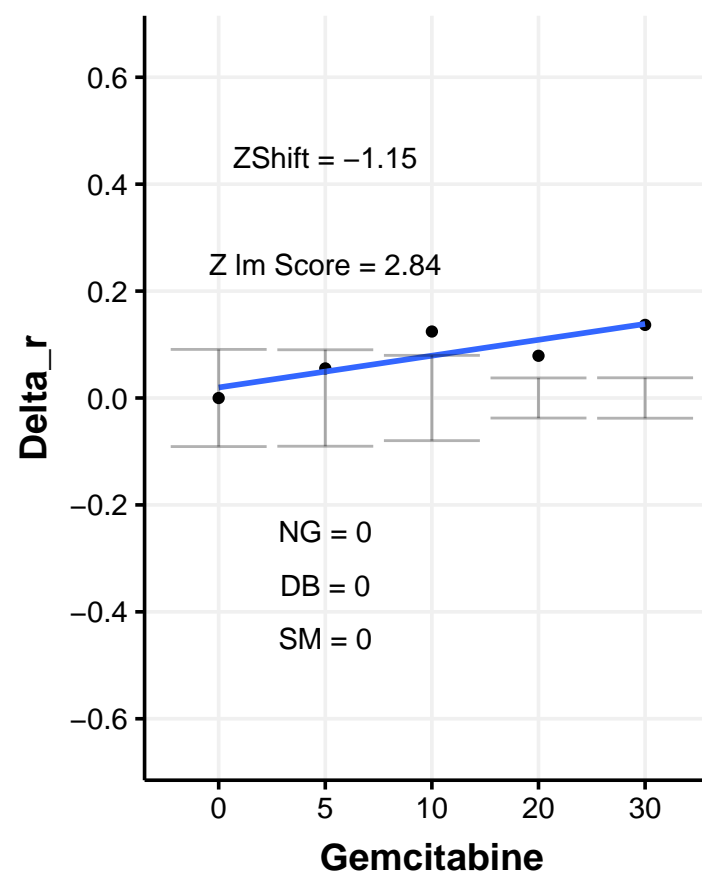

YKR094C RPL40B

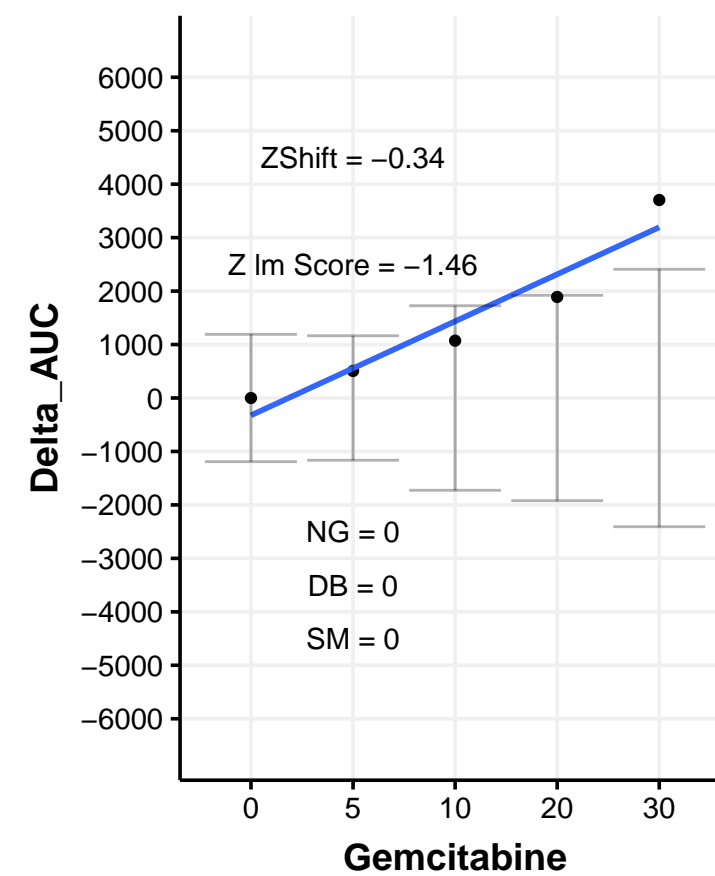

YIR005W IST3

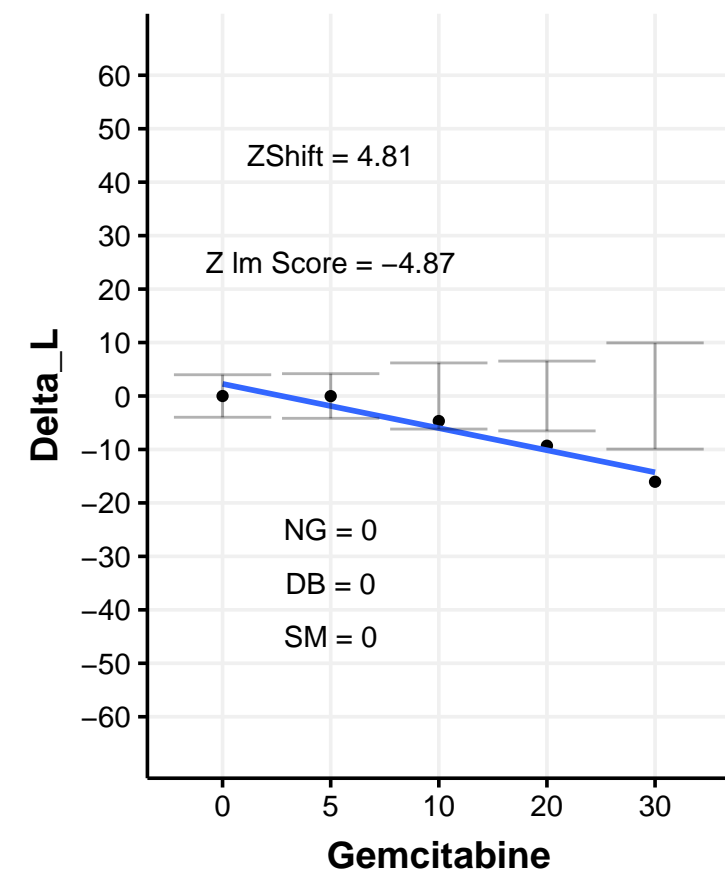

YIR005W IST3

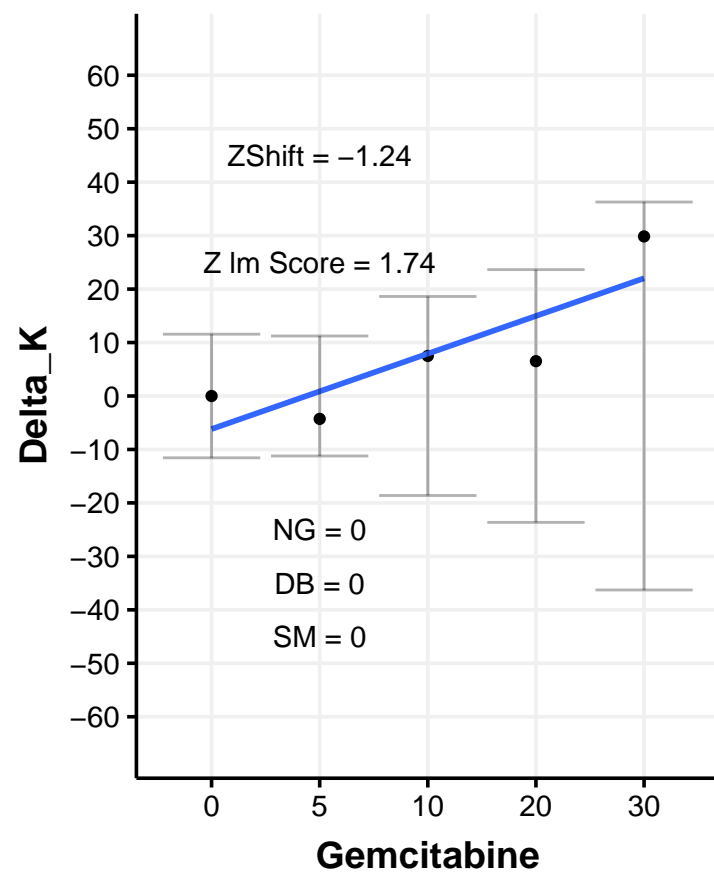

YIR005W IST3

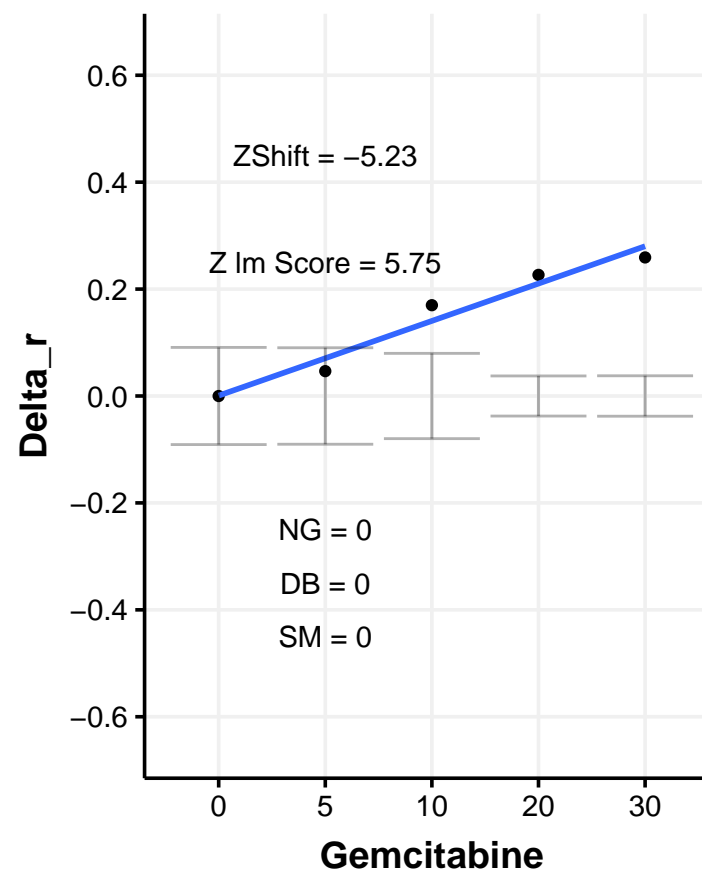

YIR005W IST3

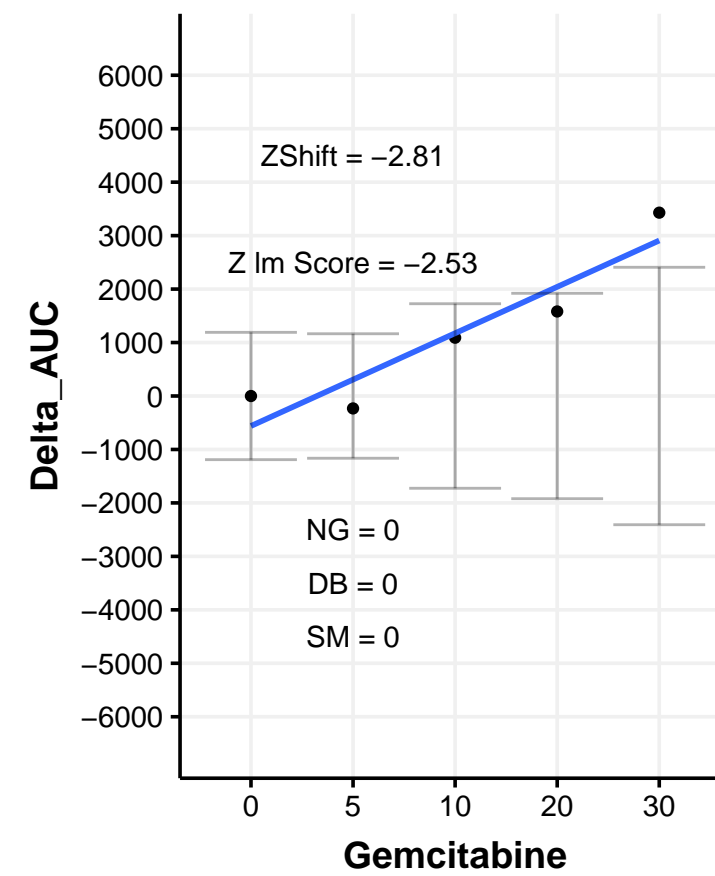

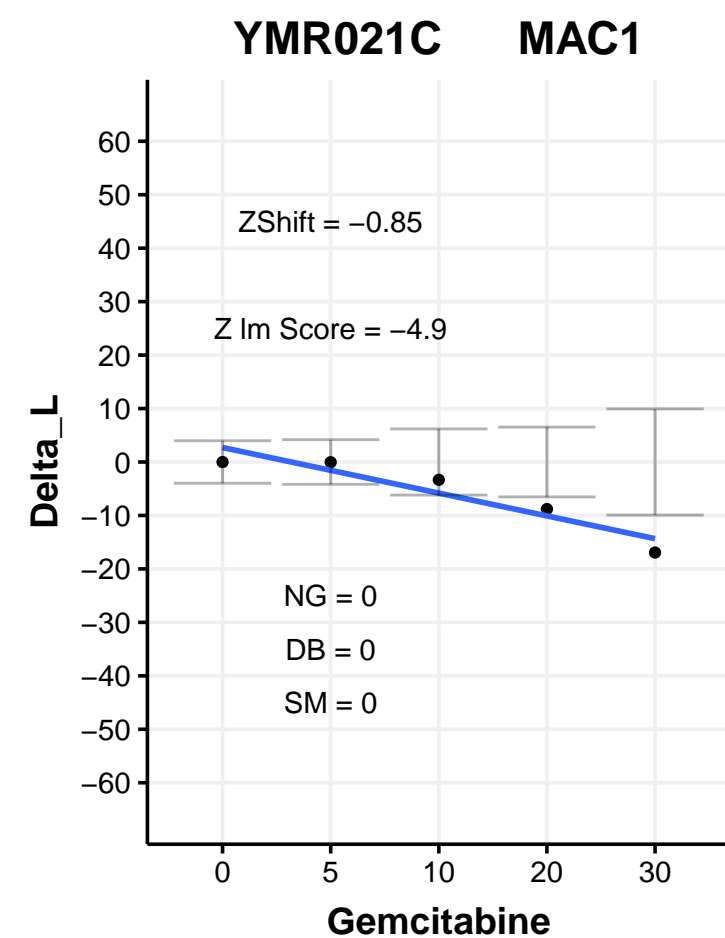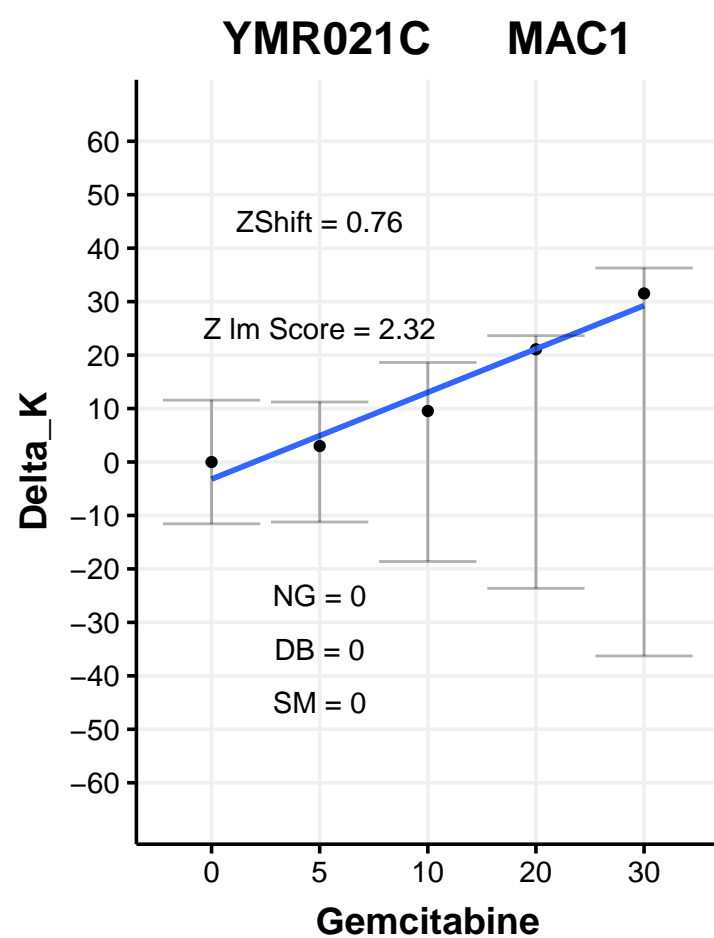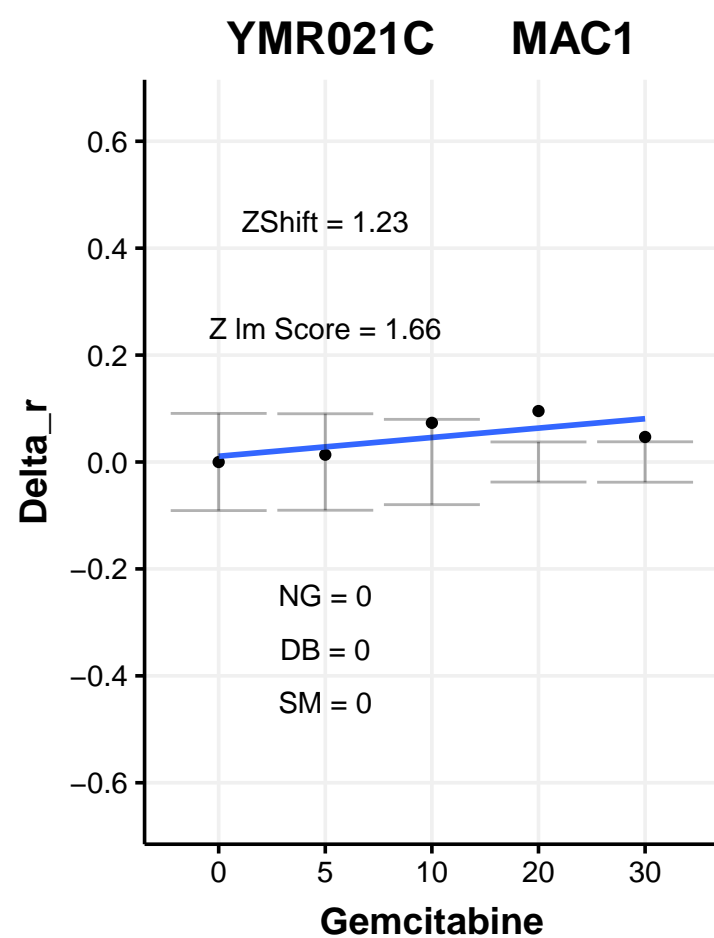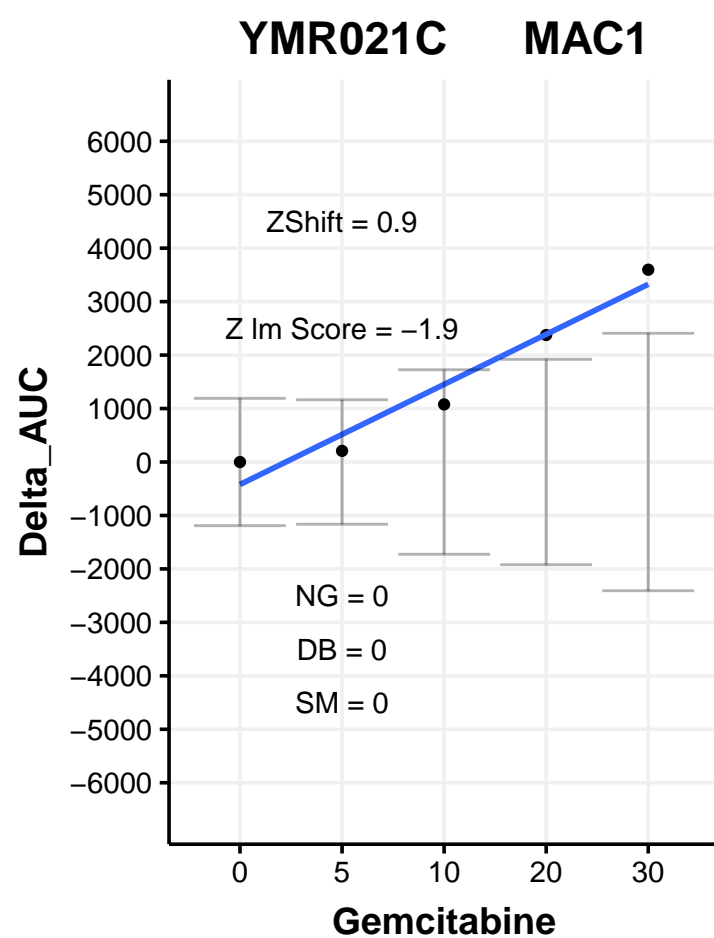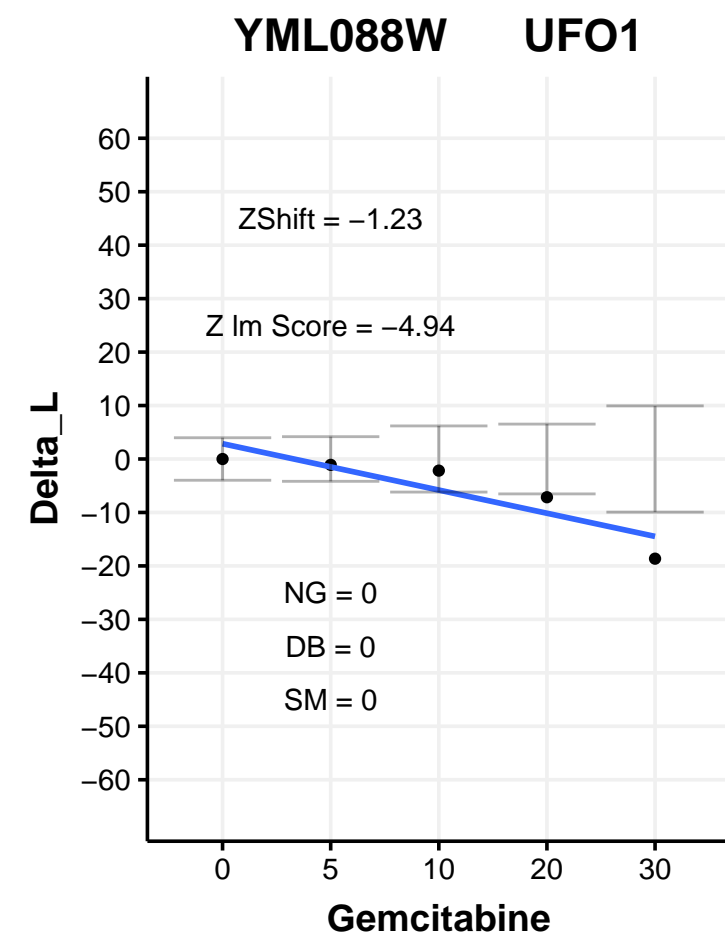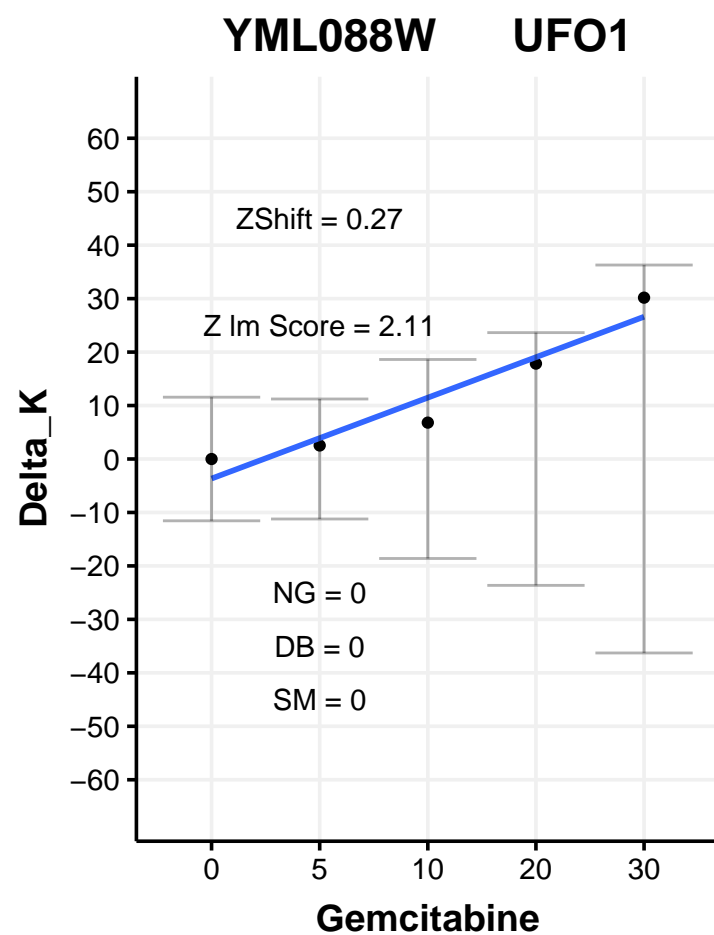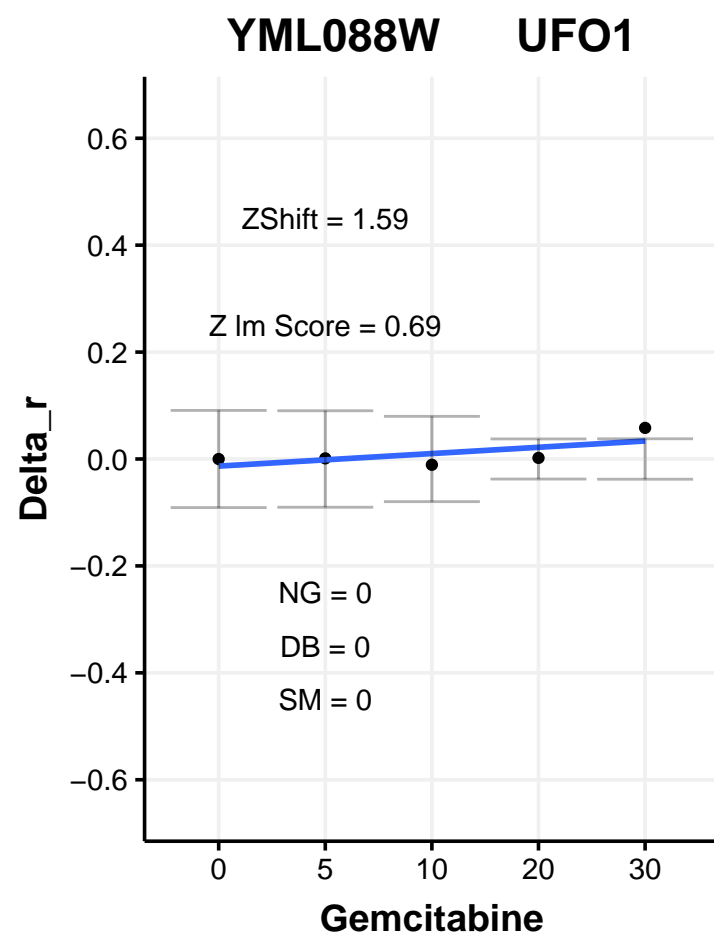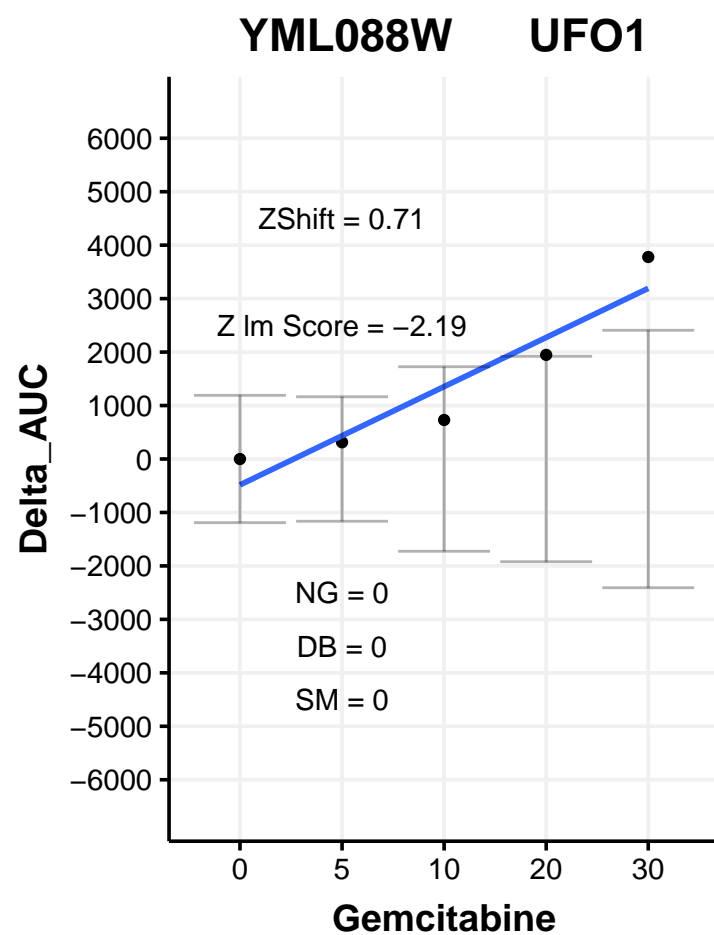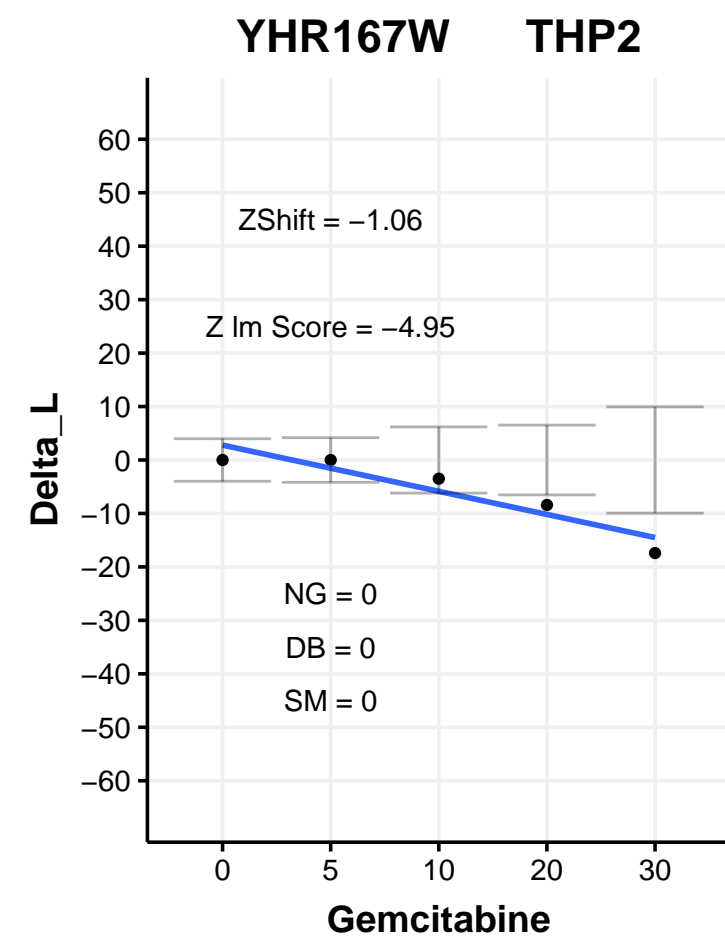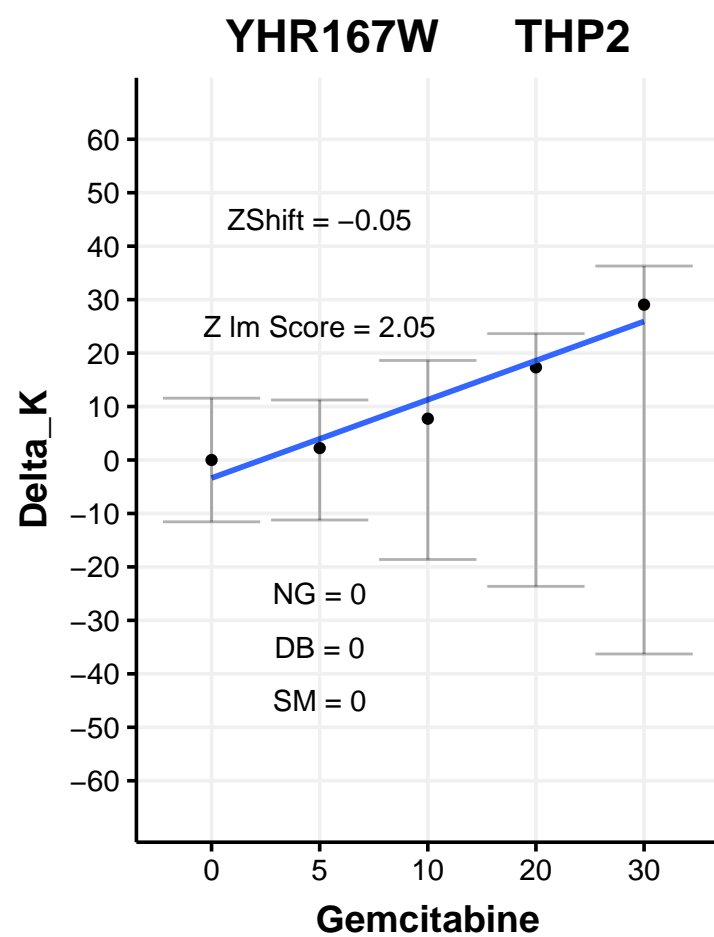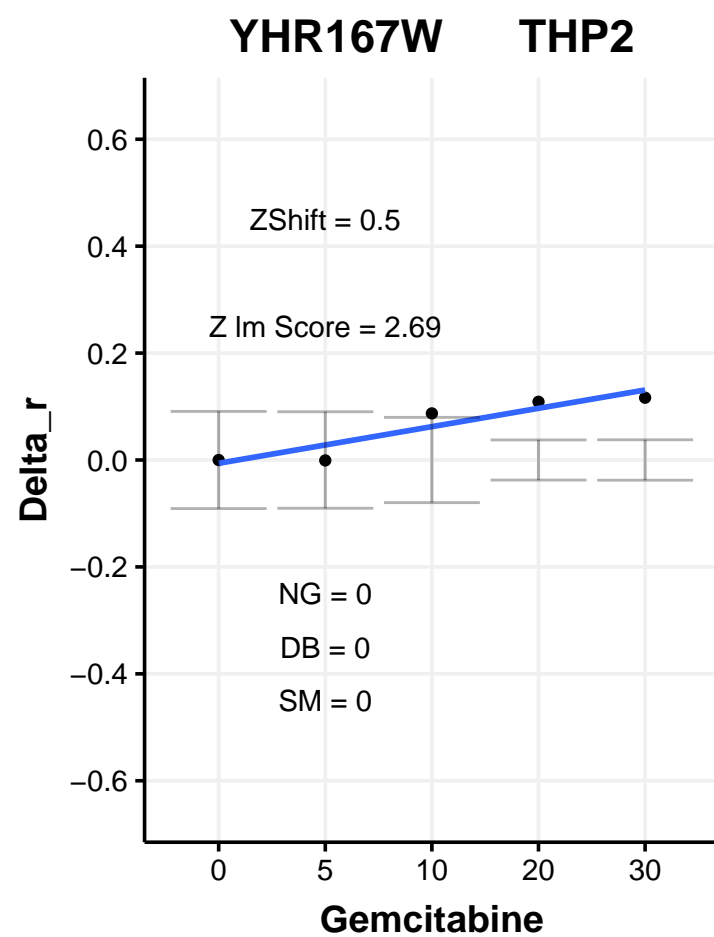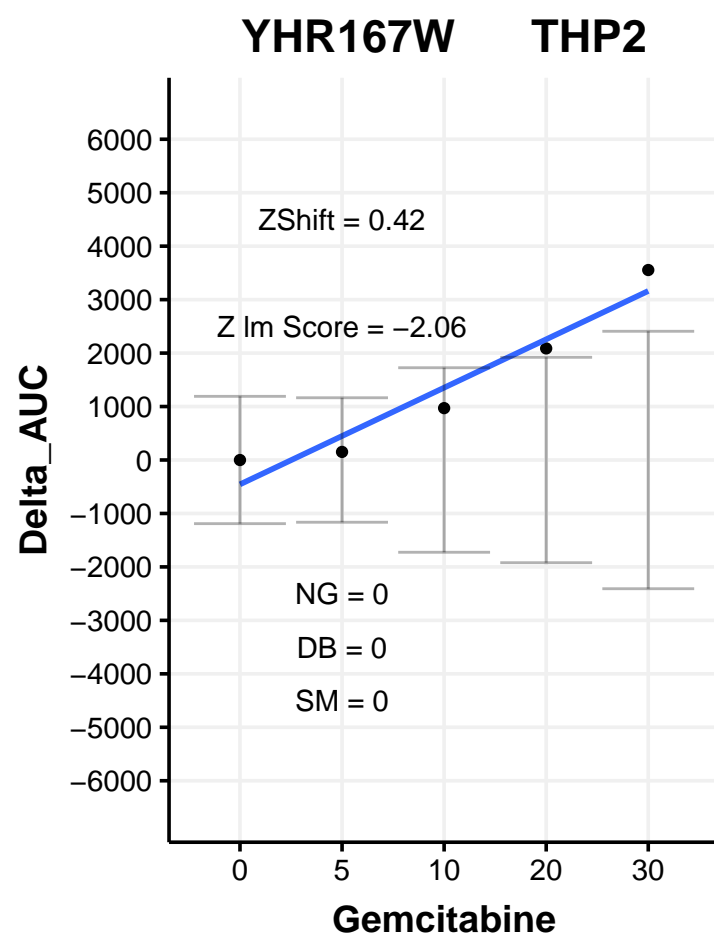



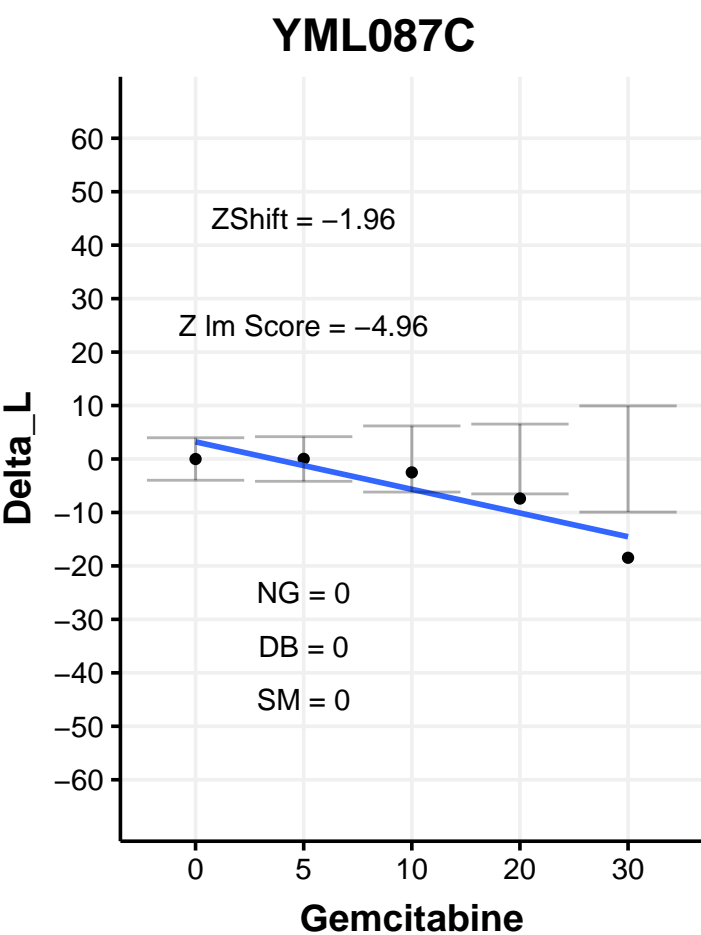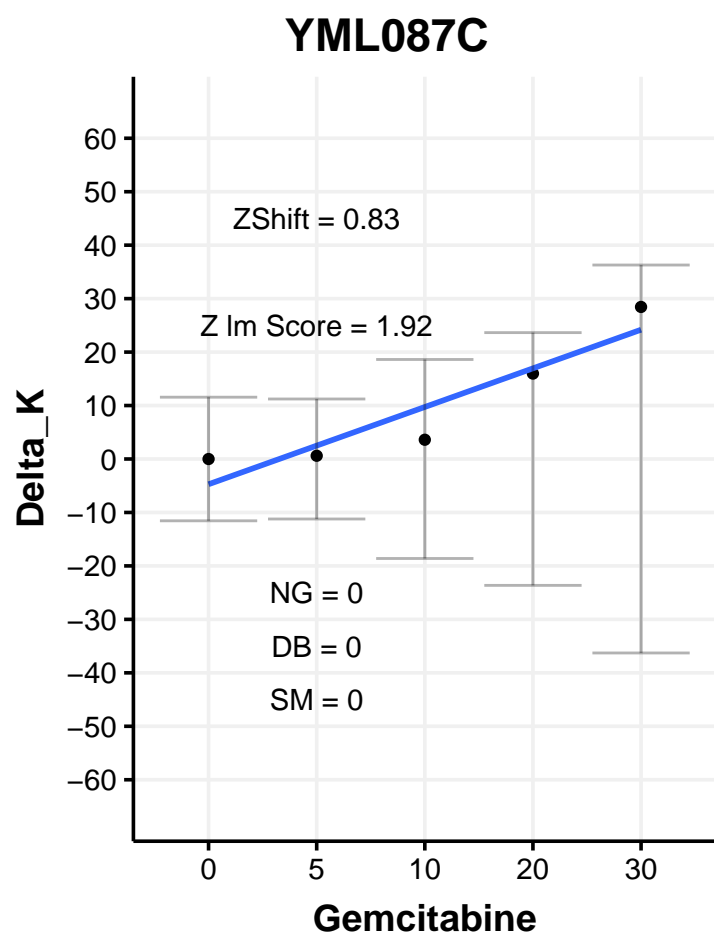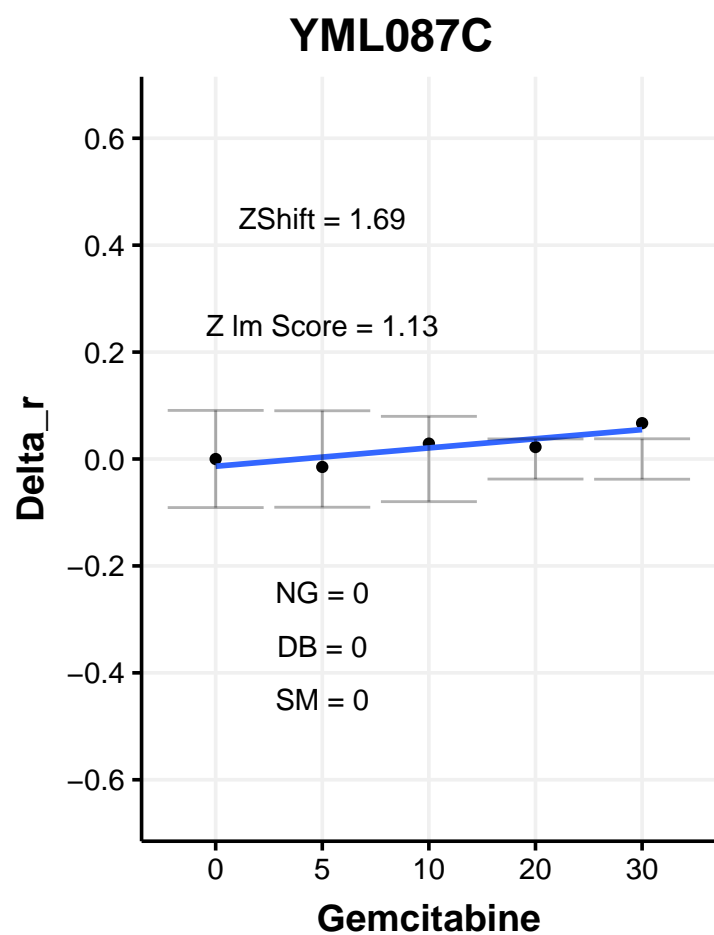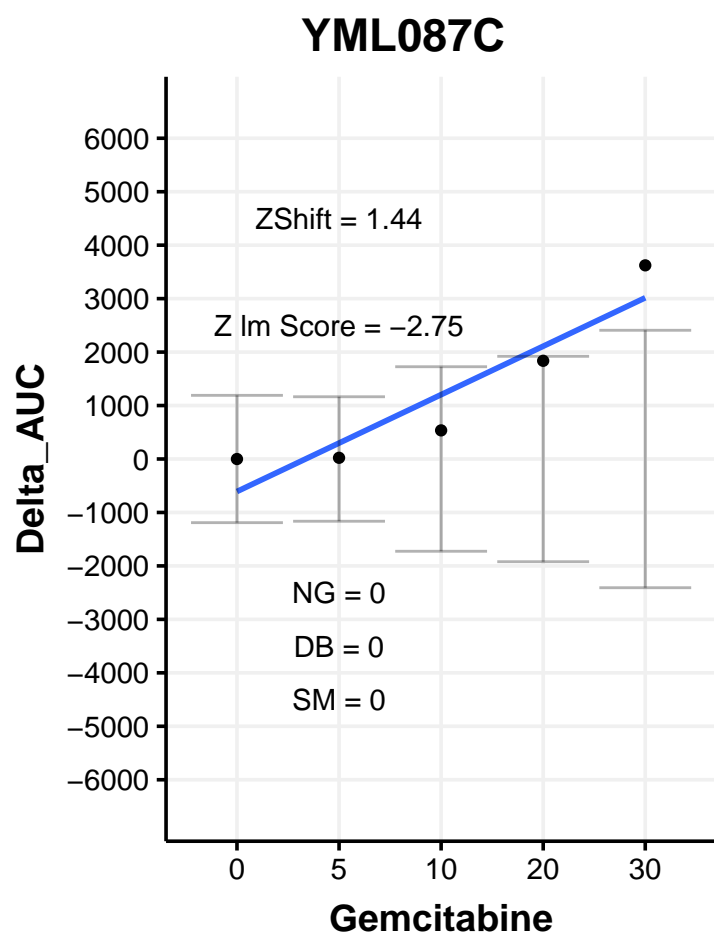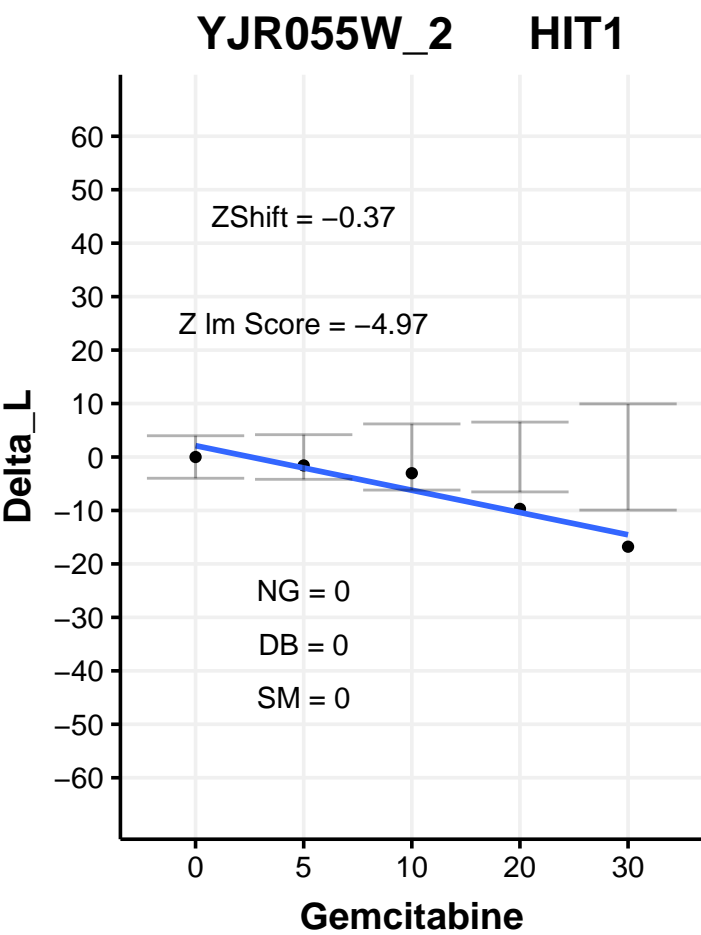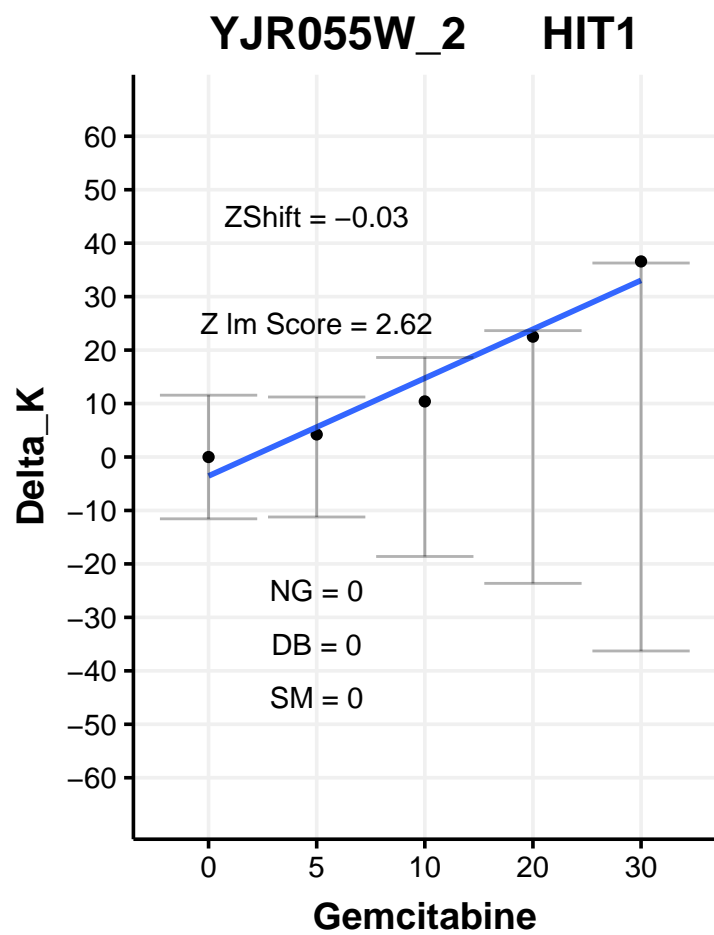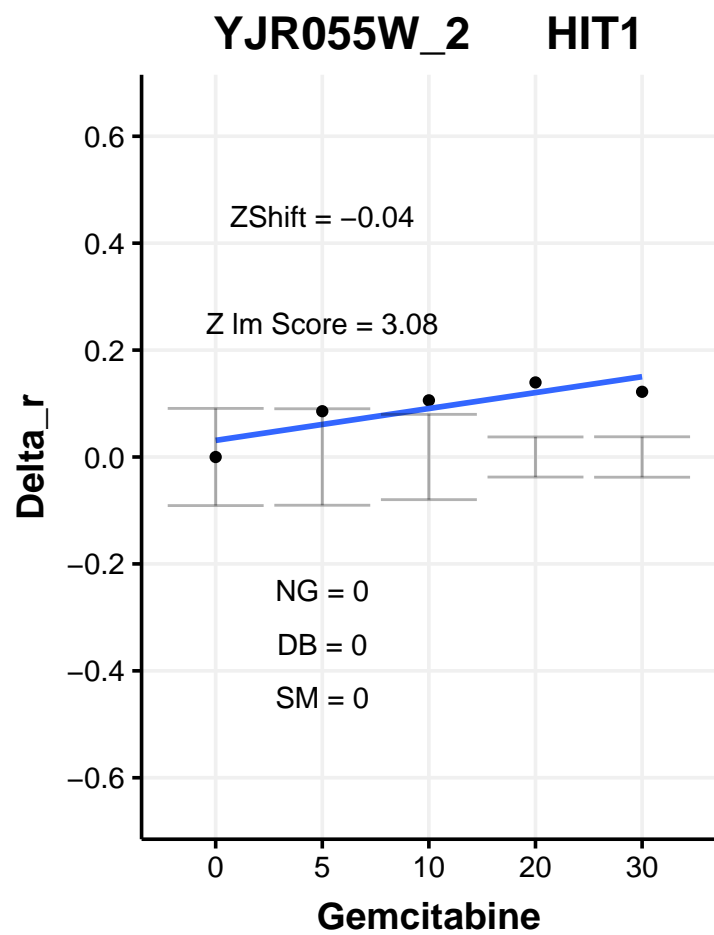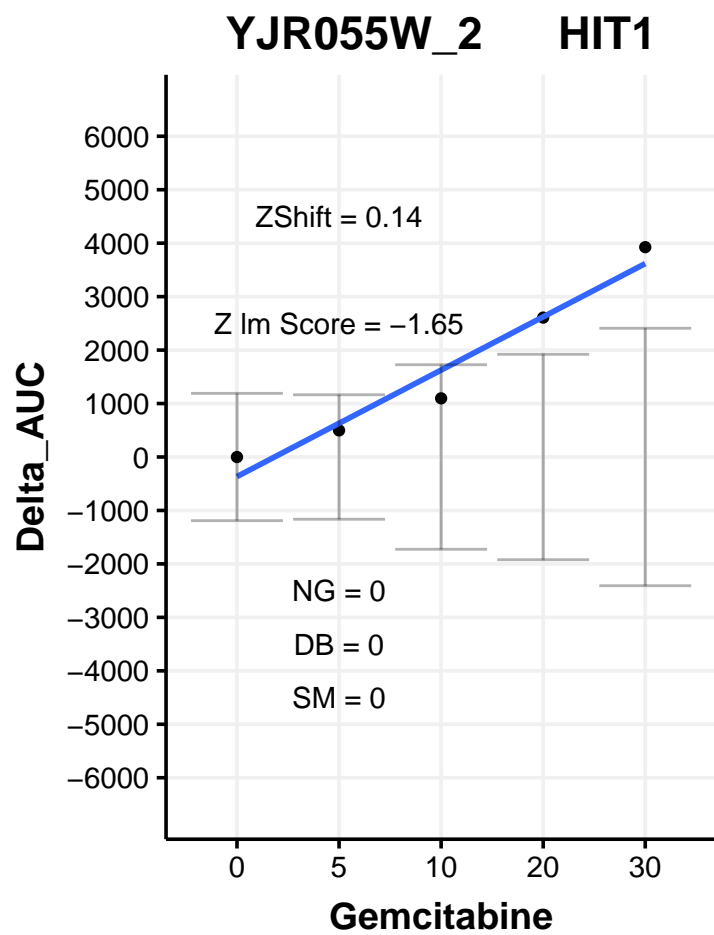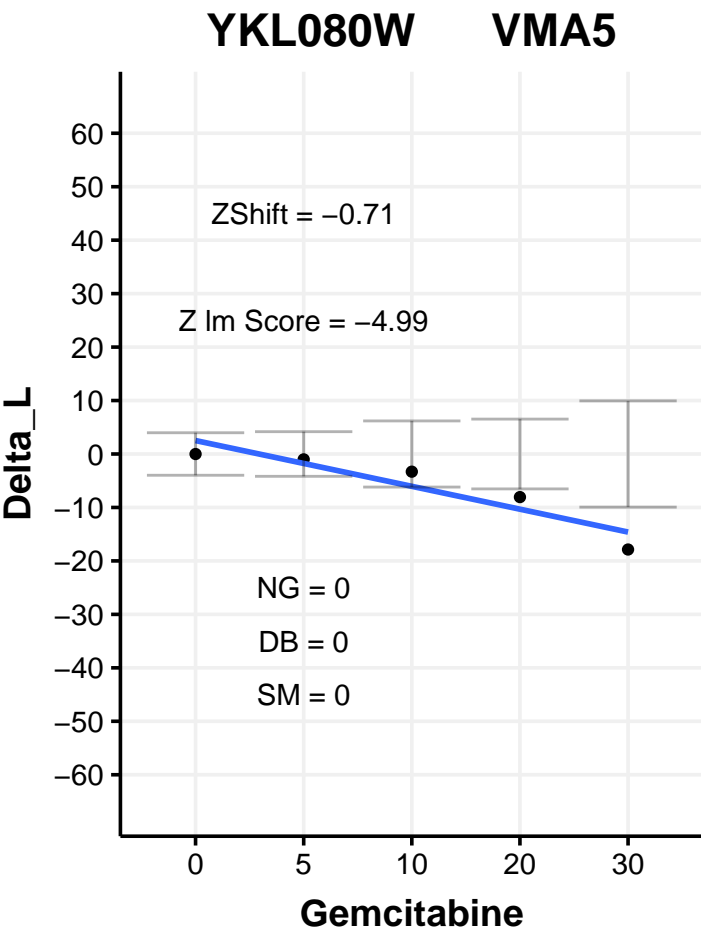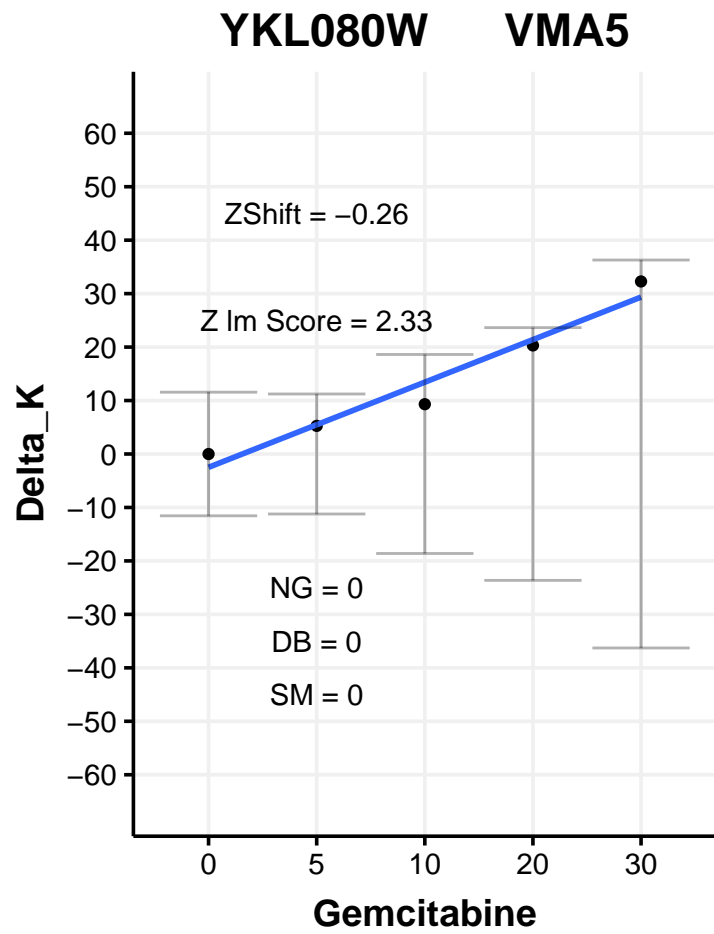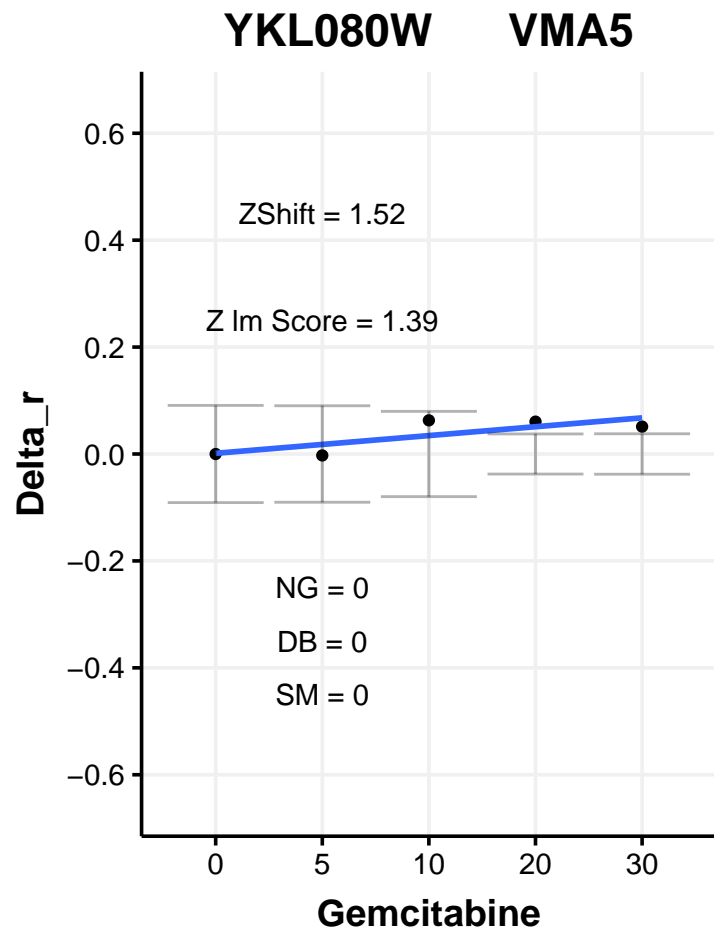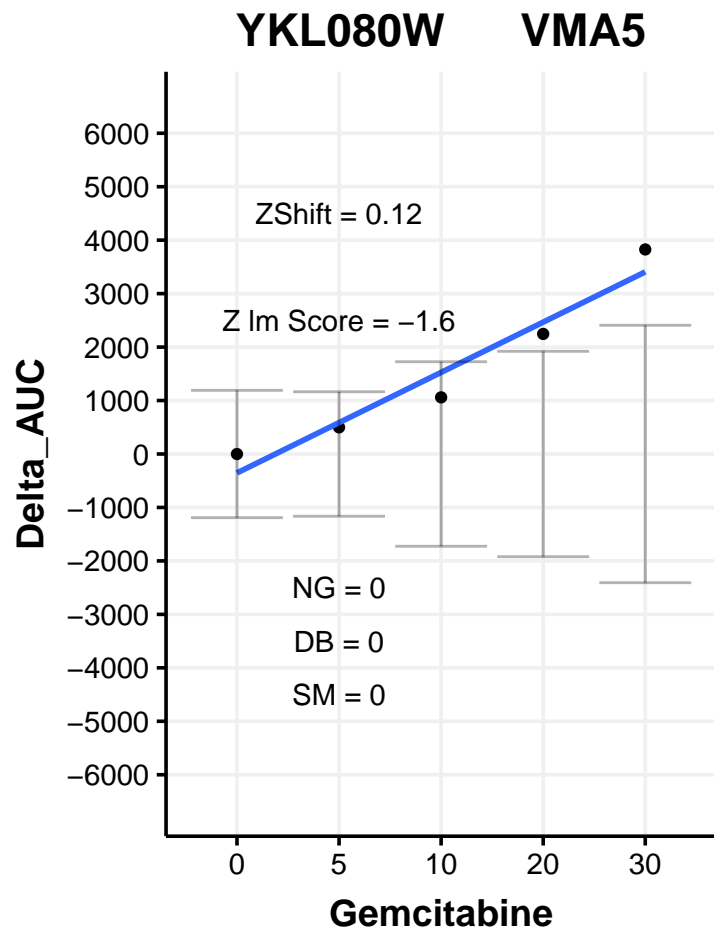

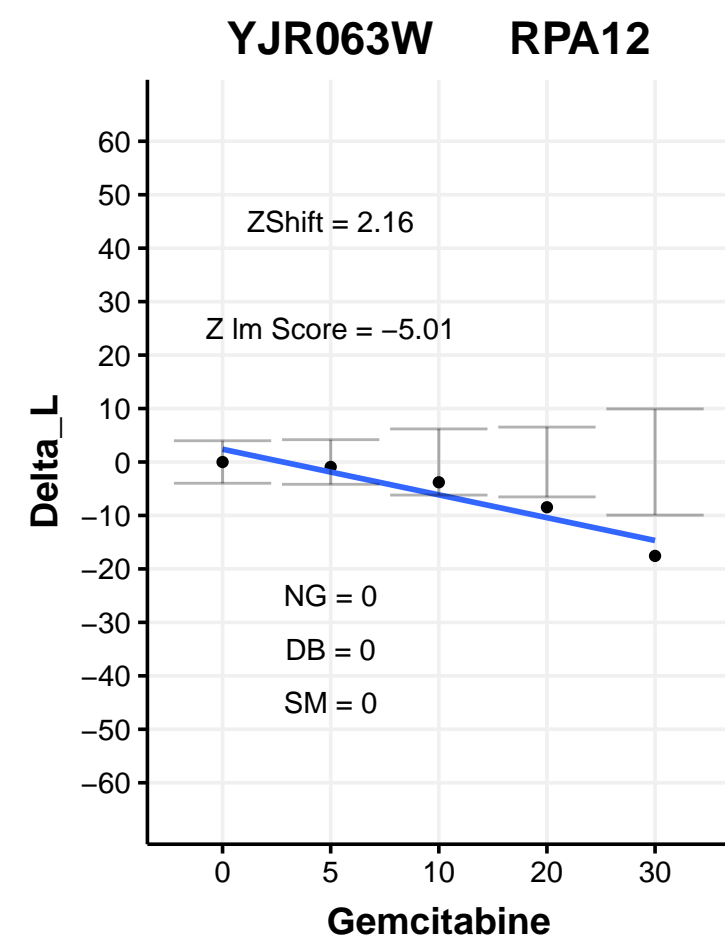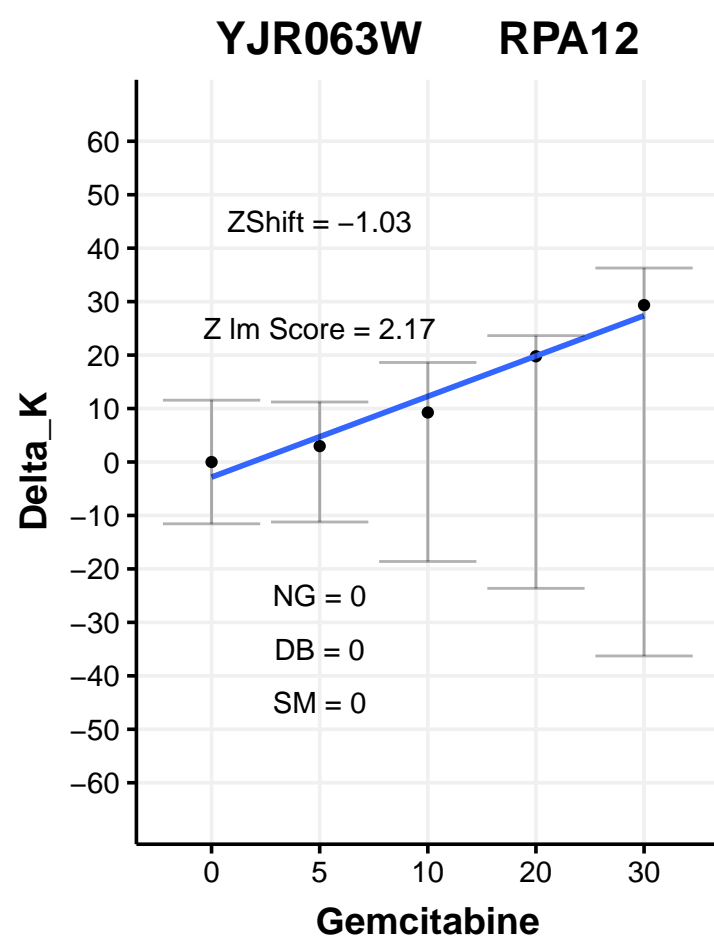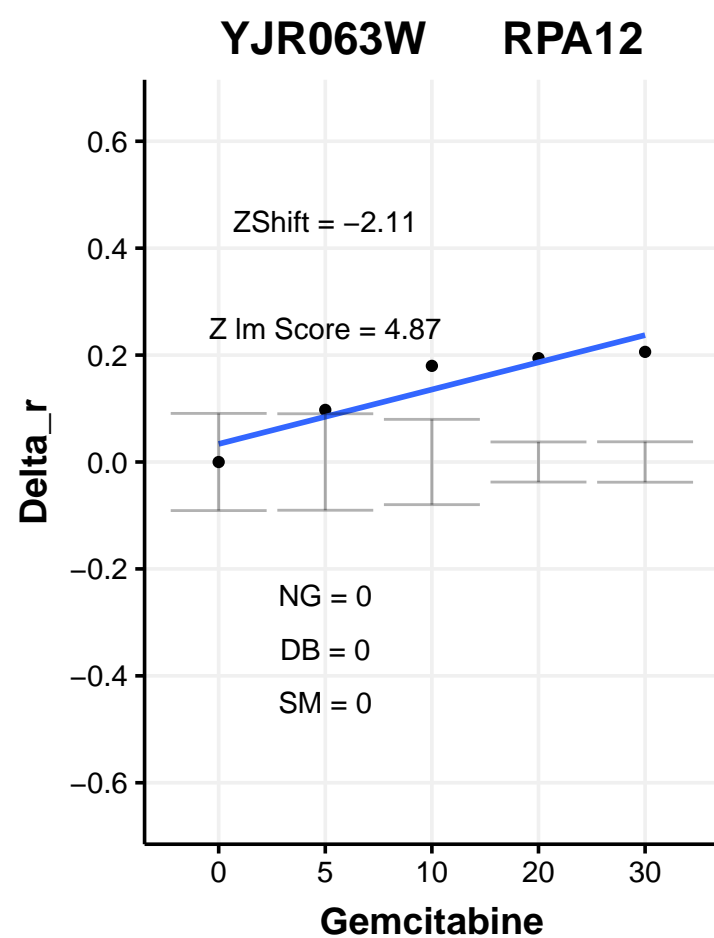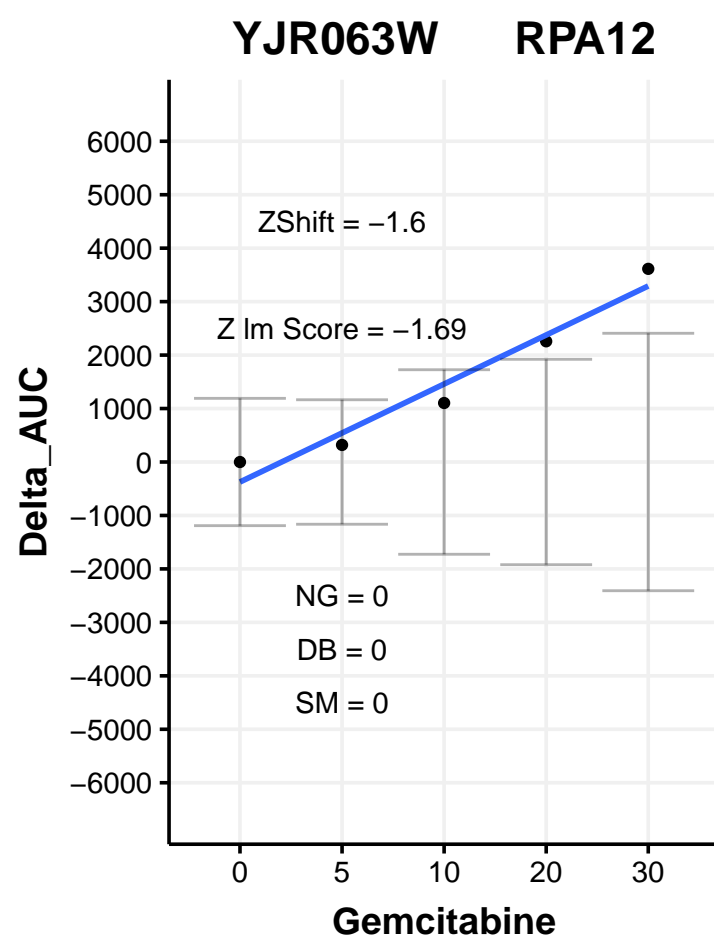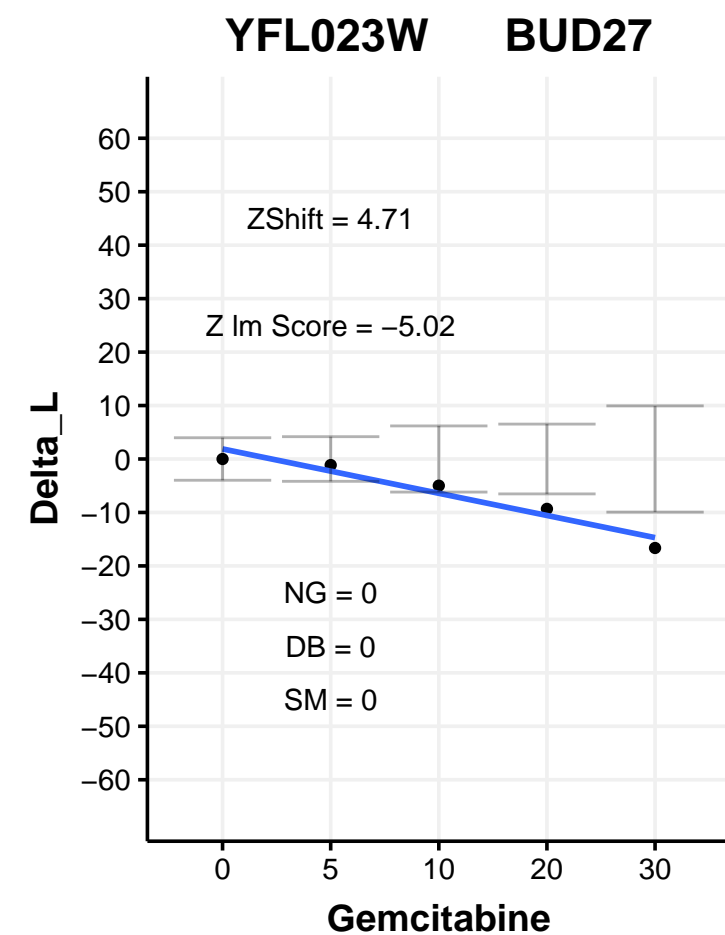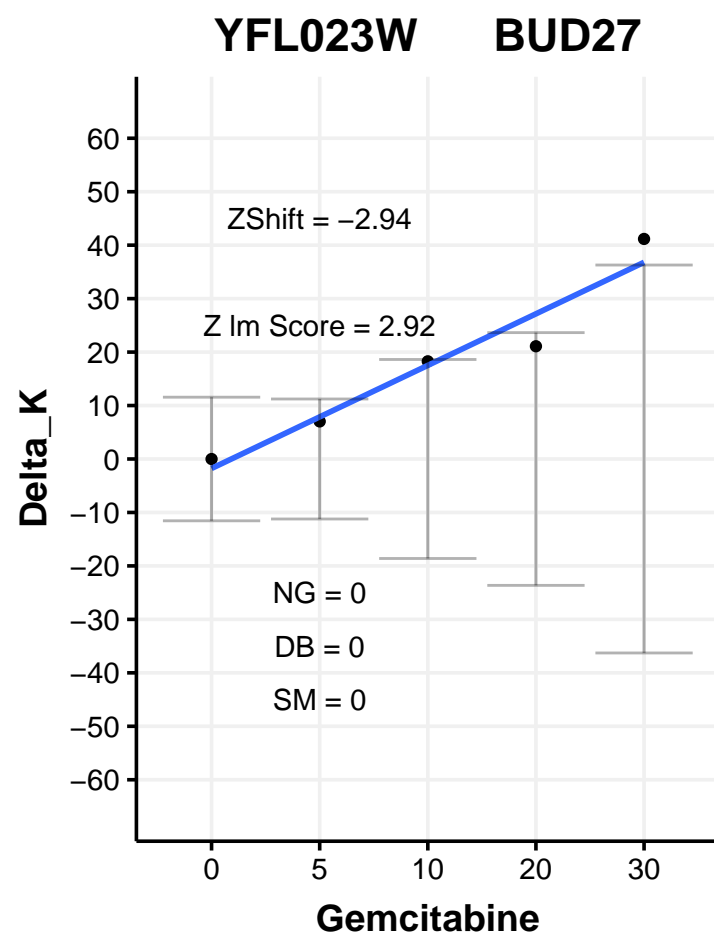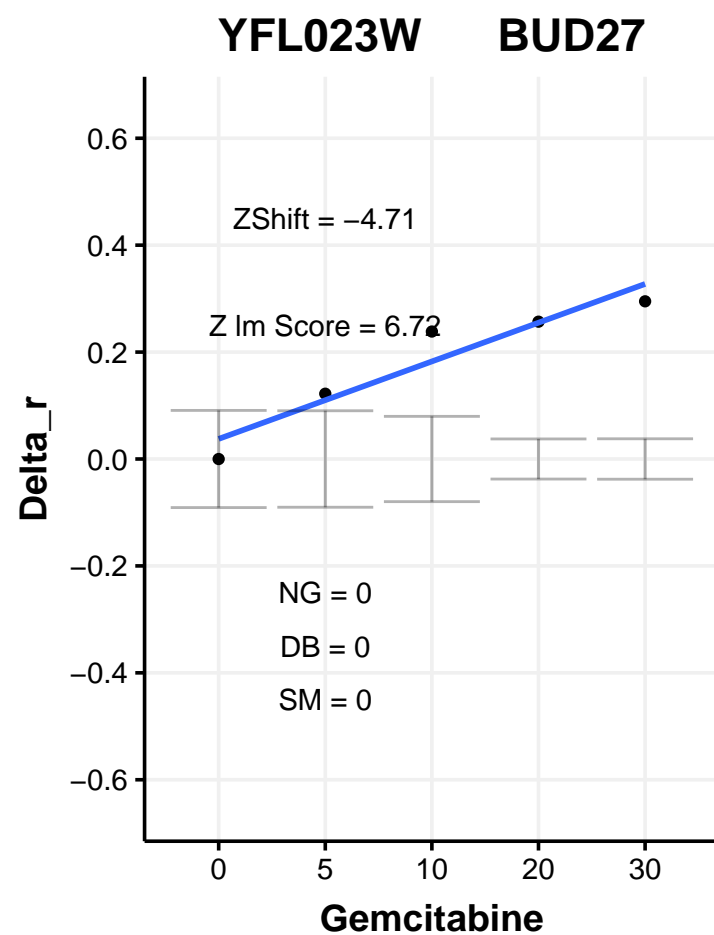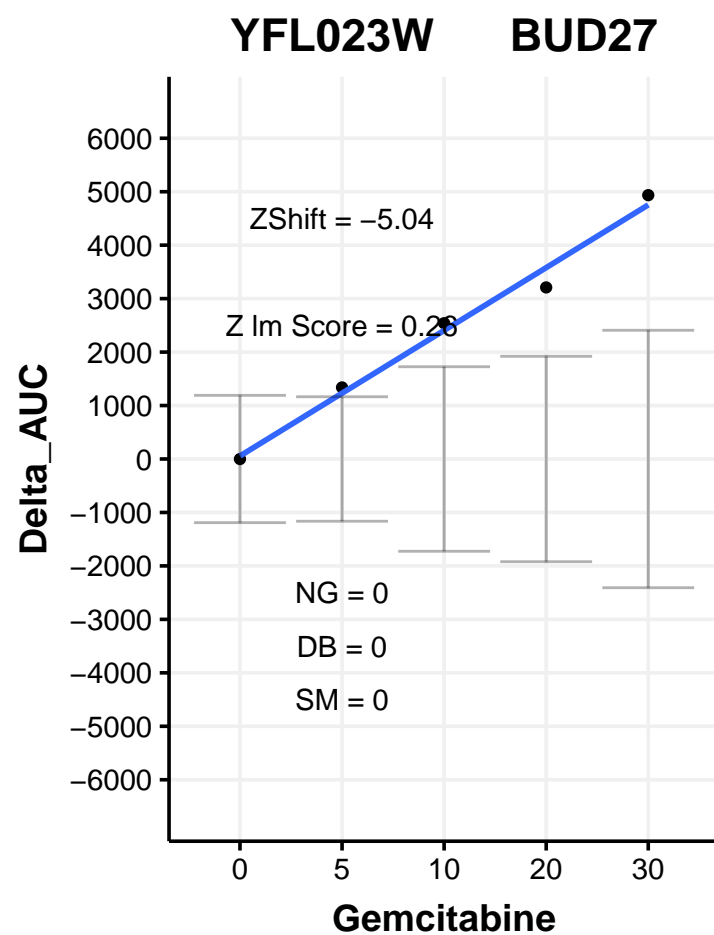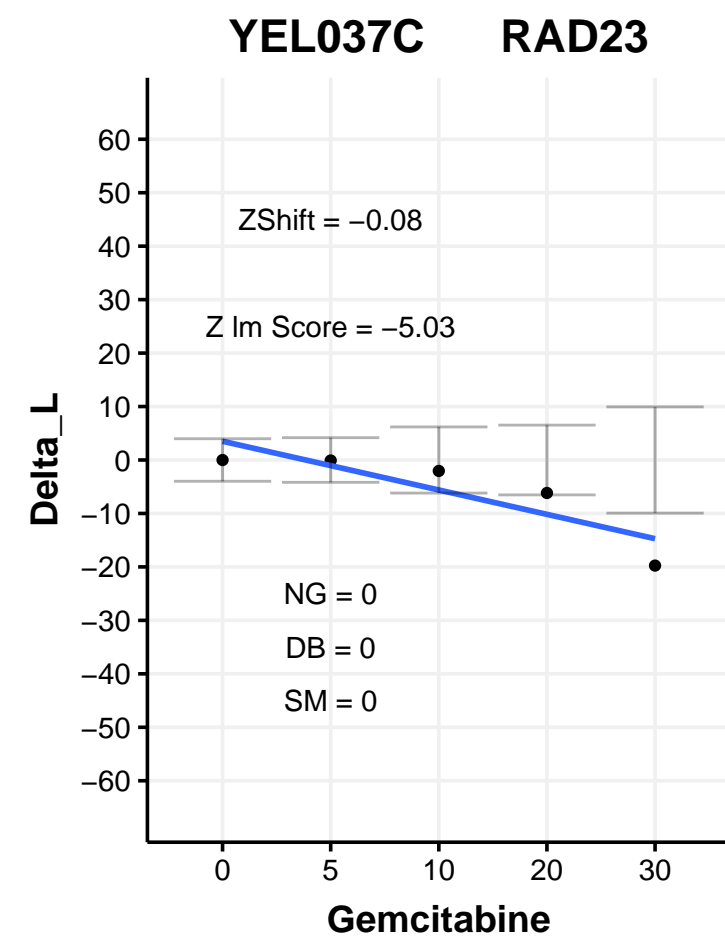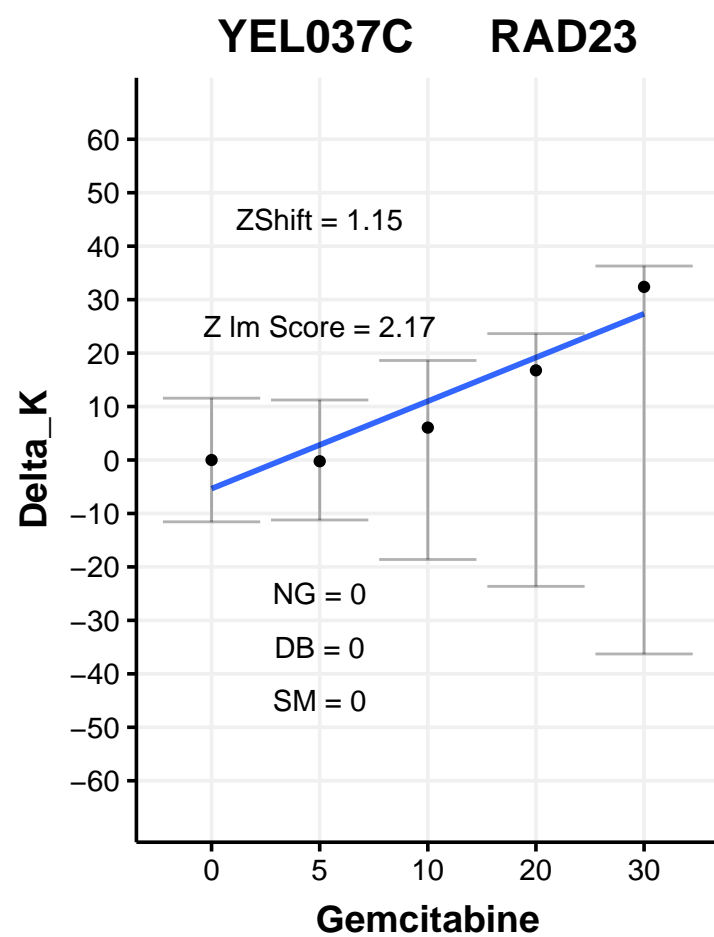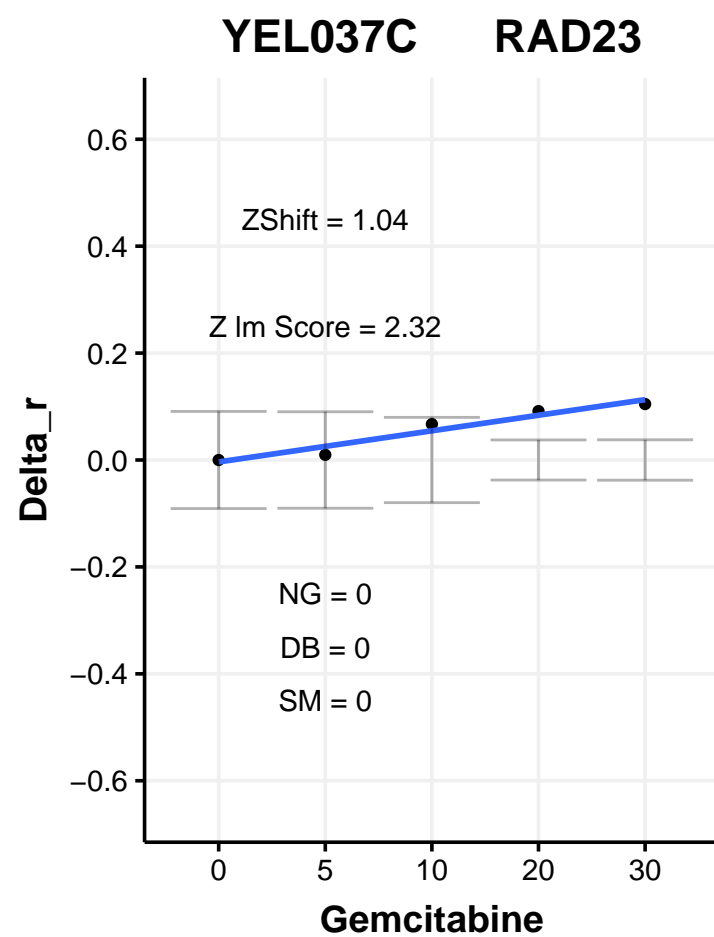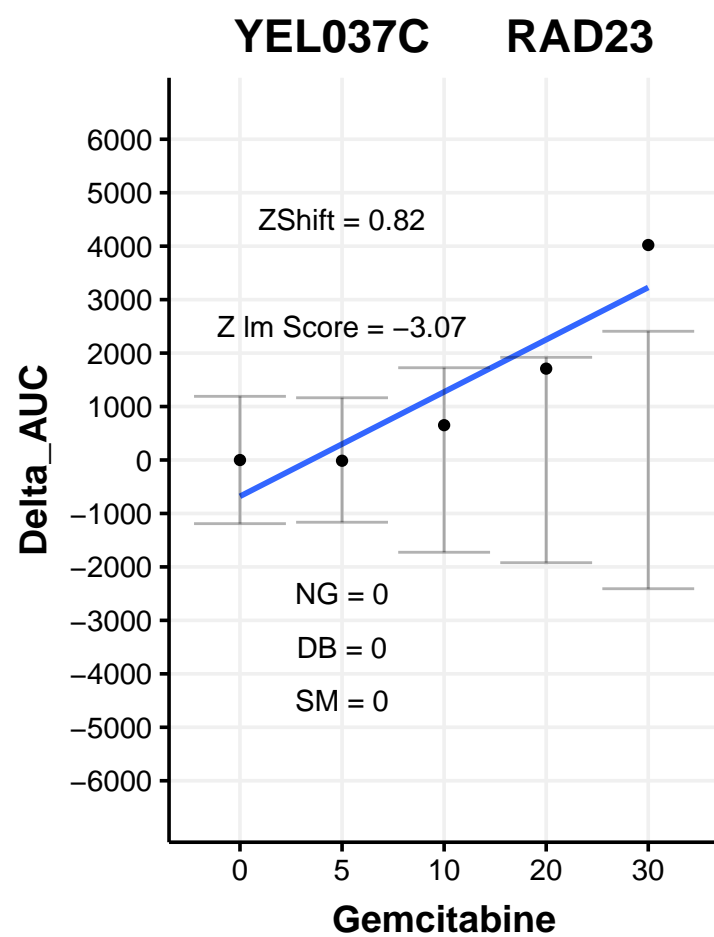

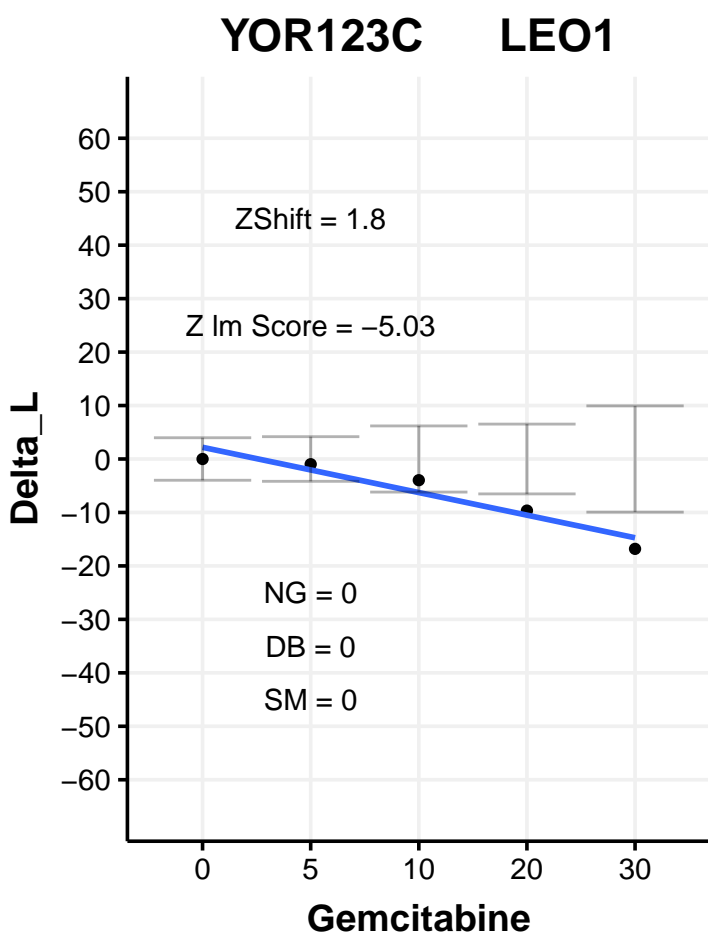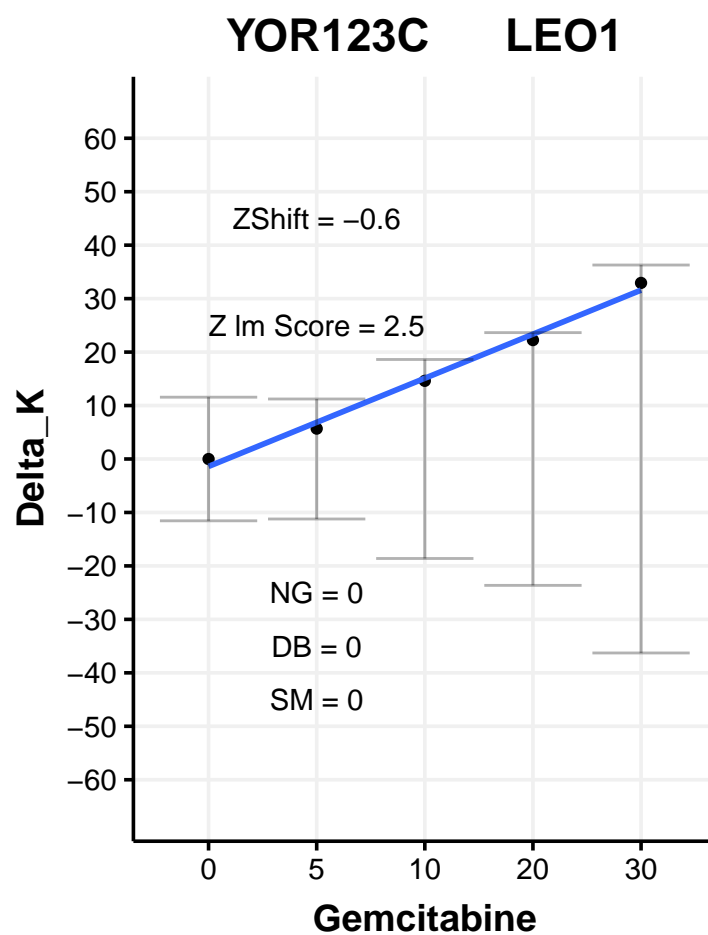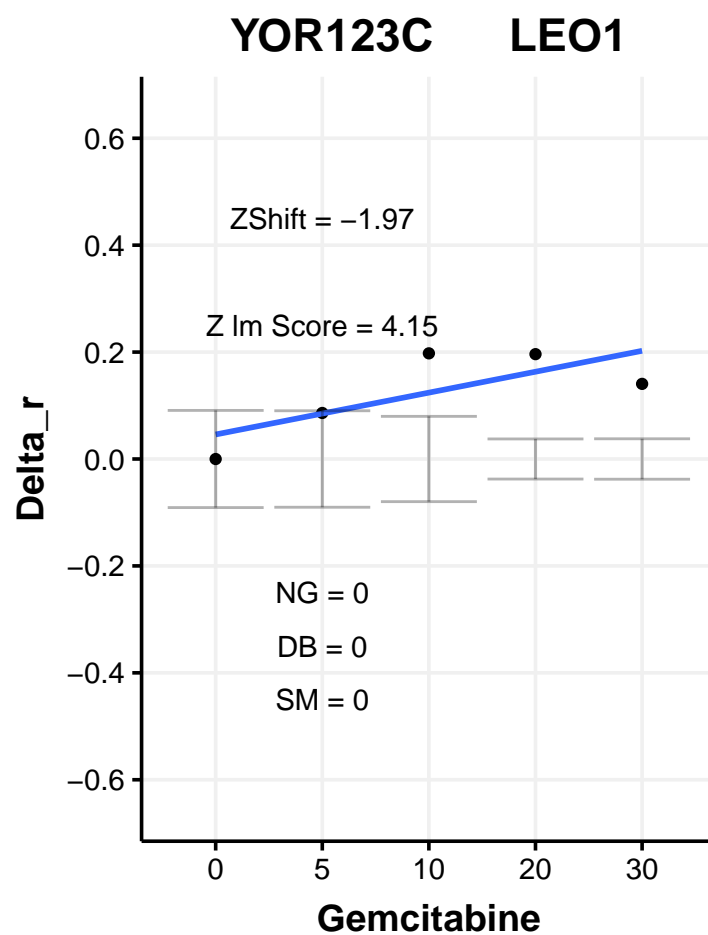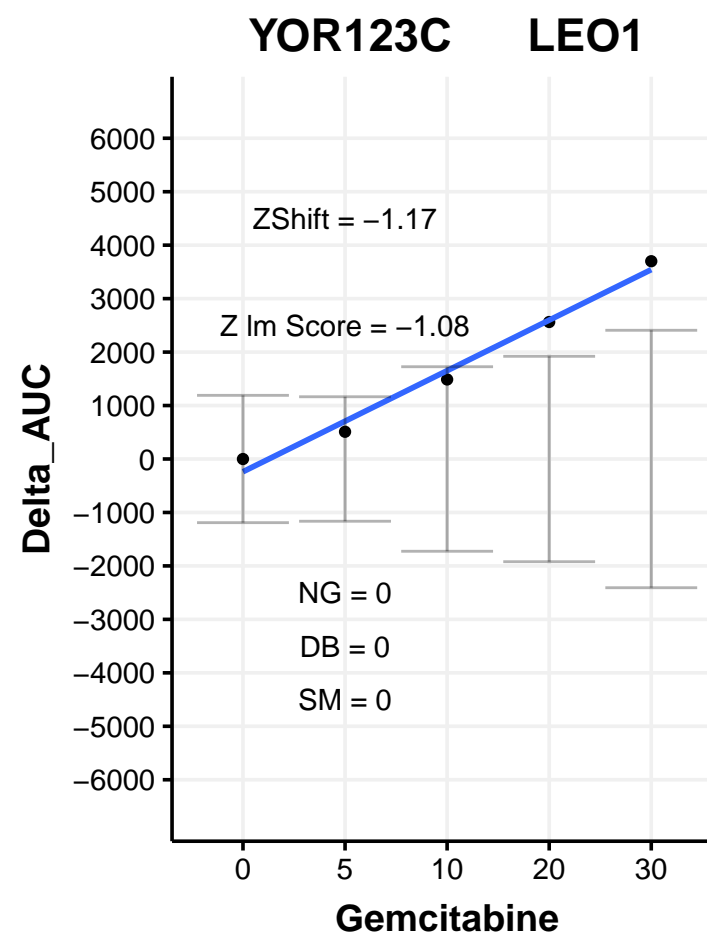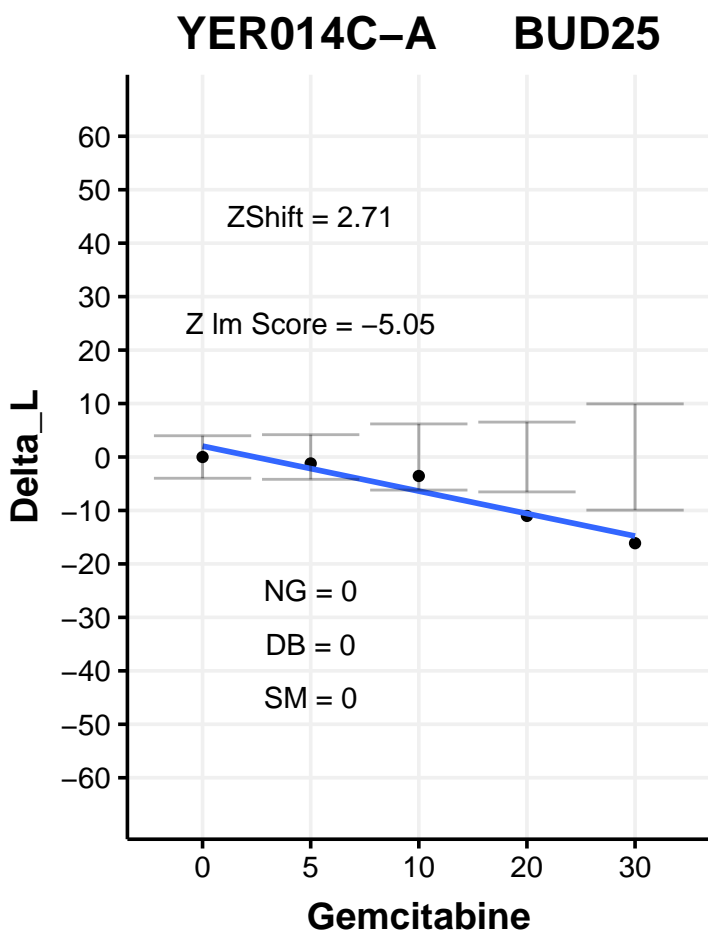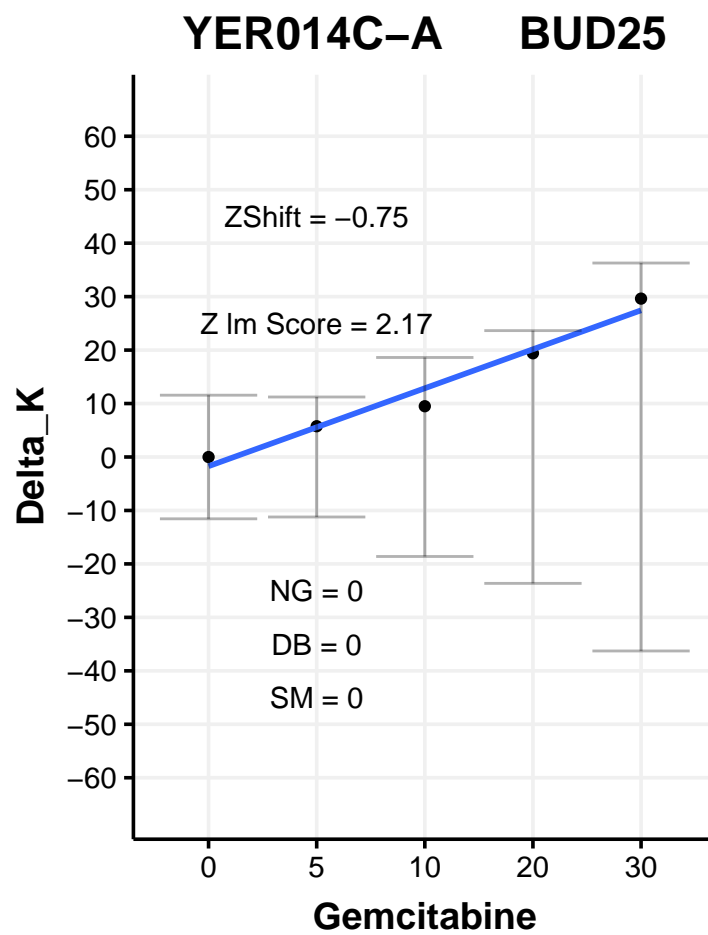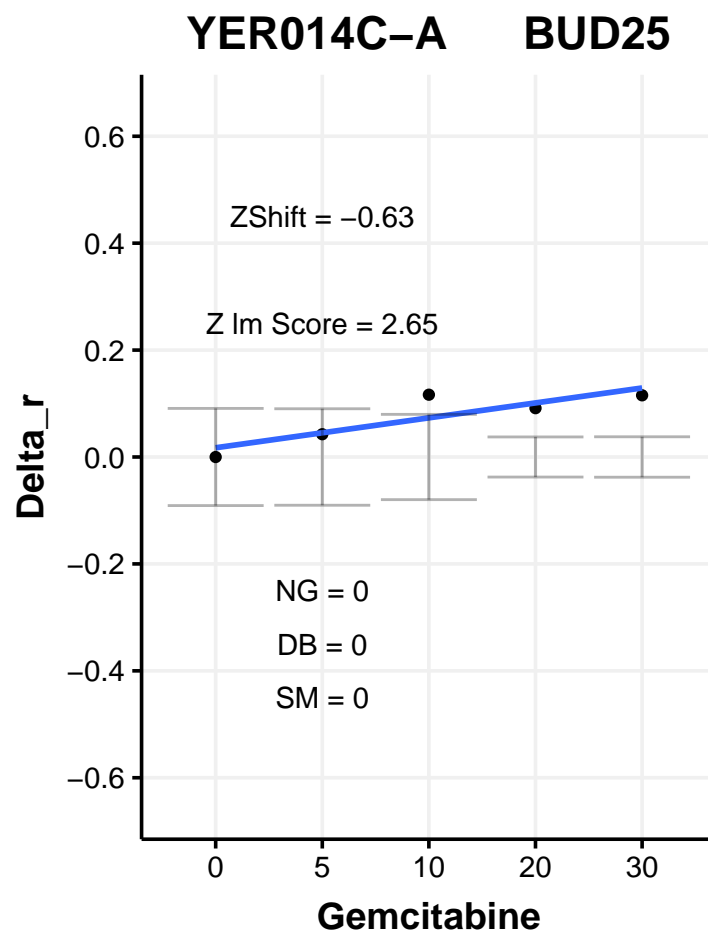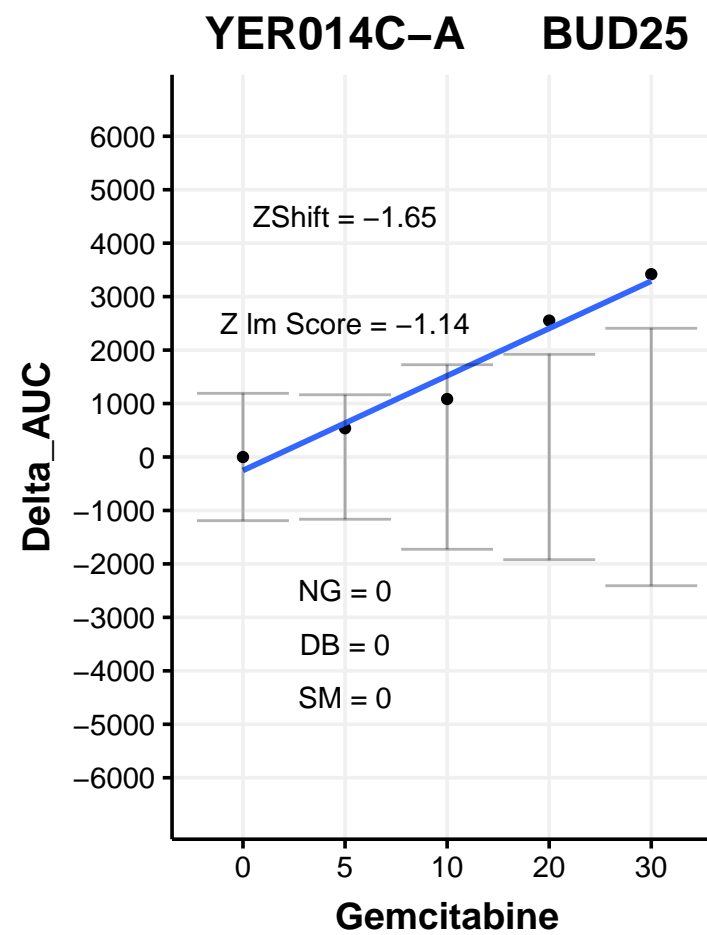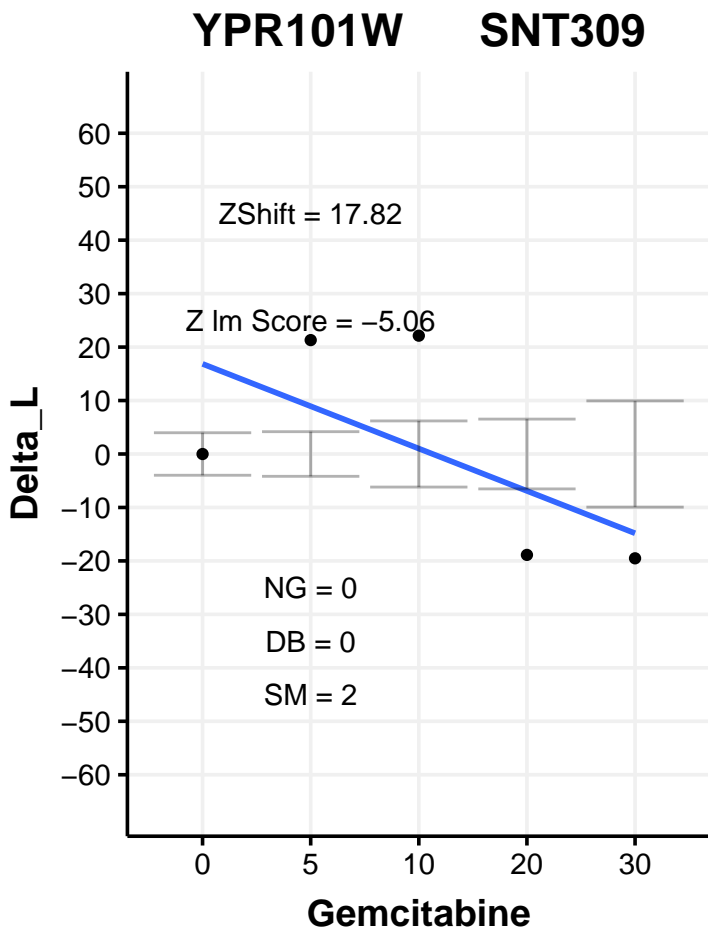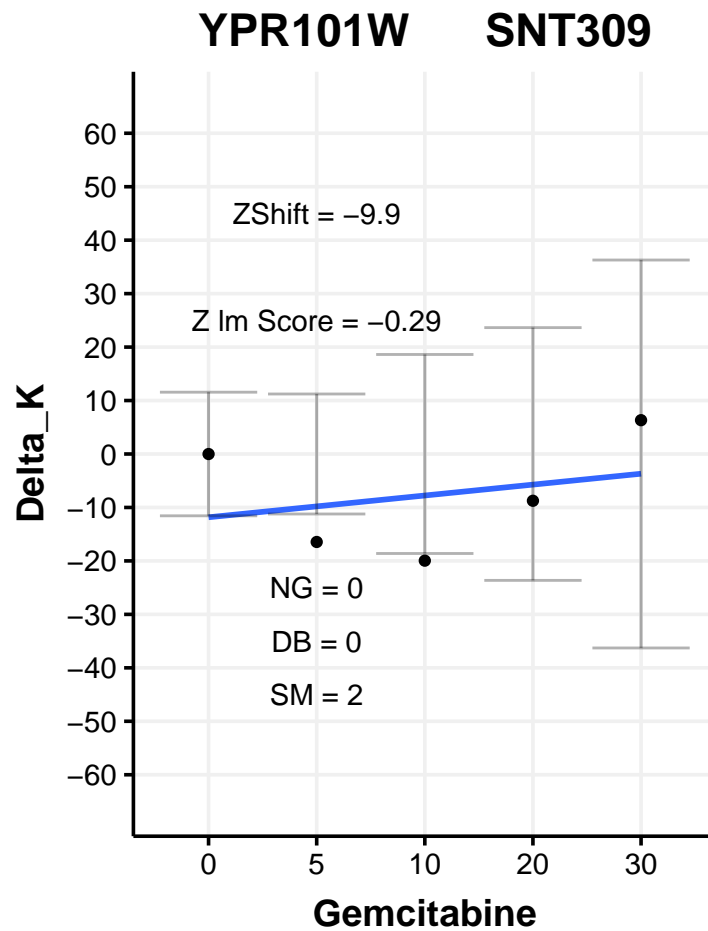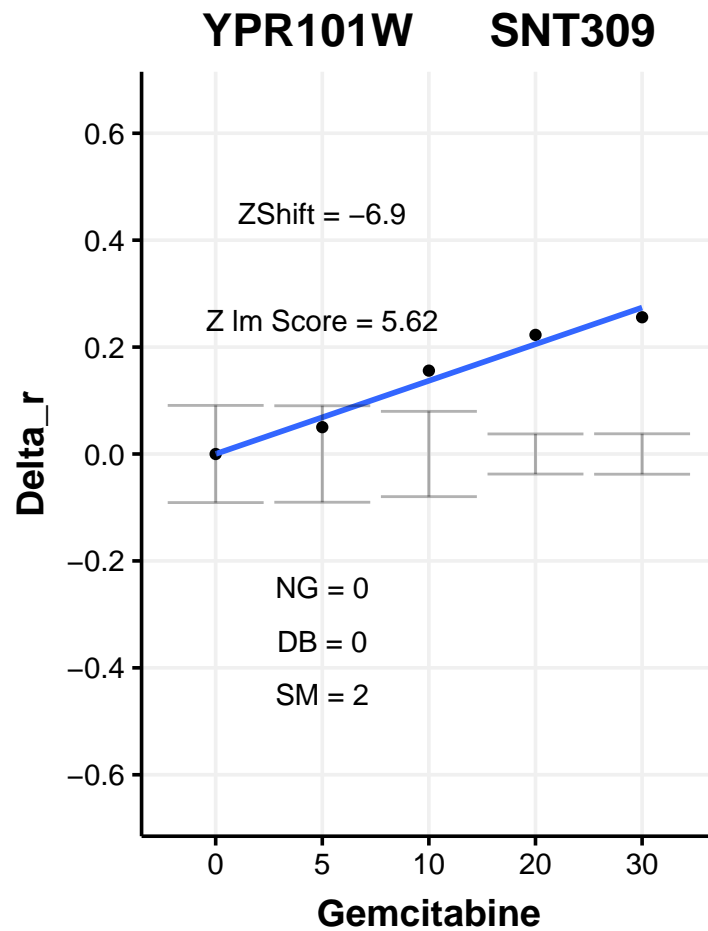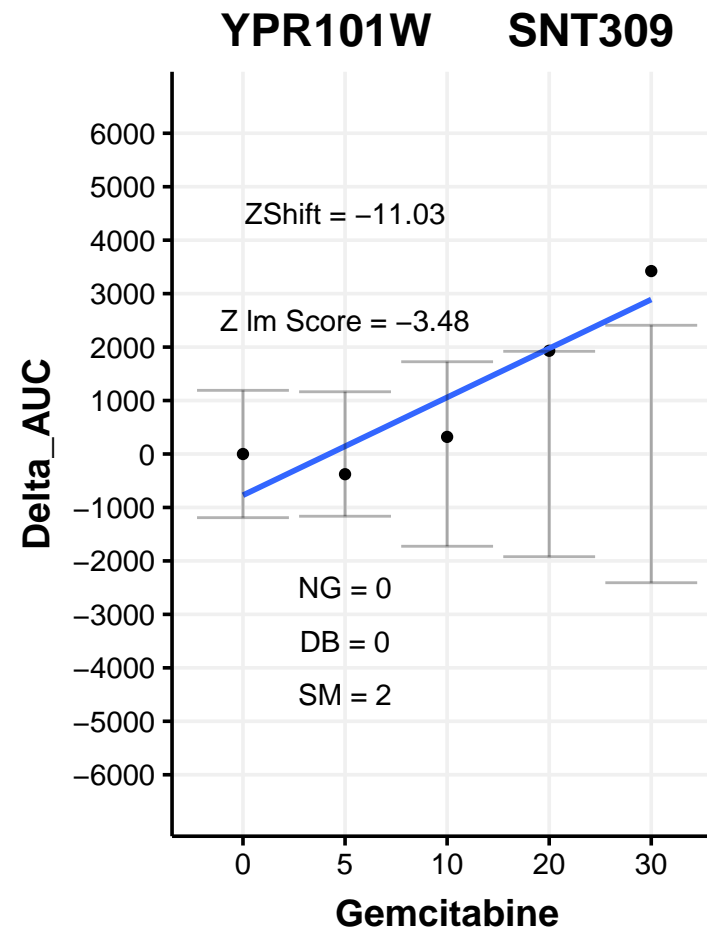

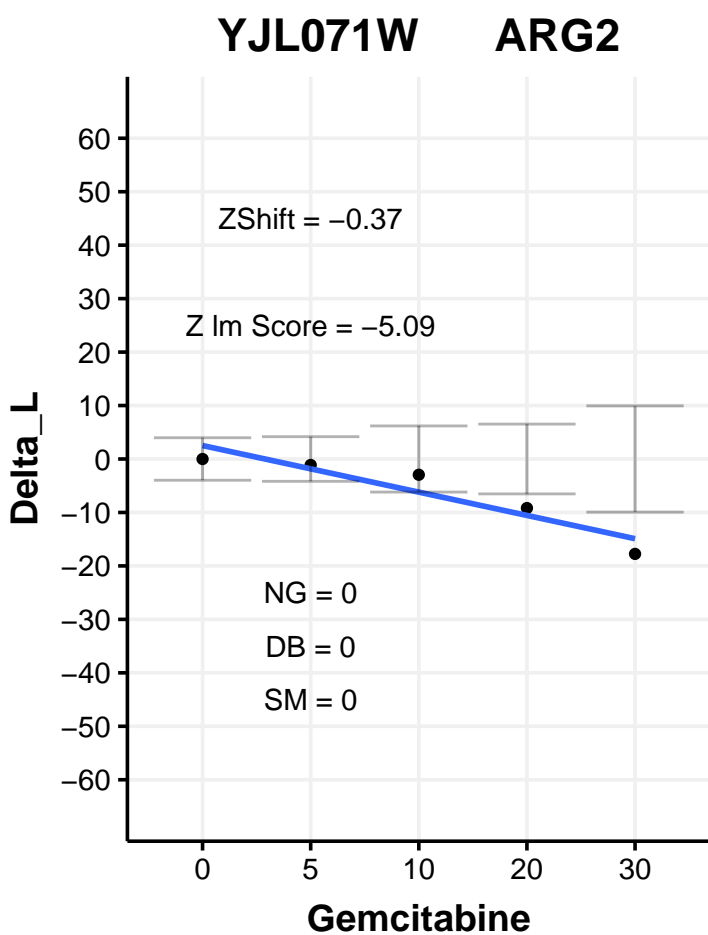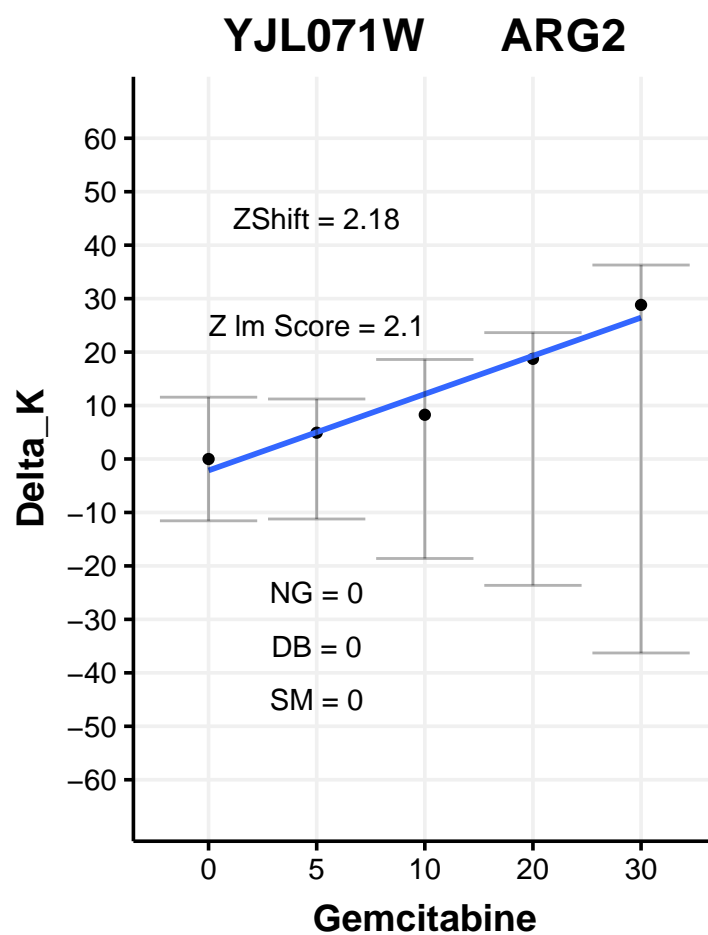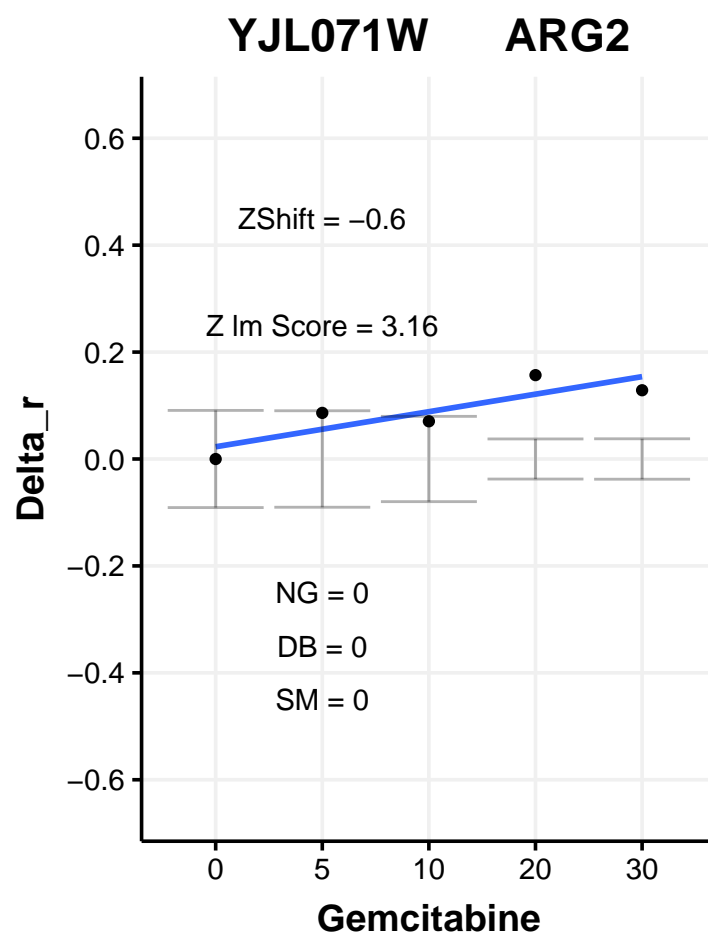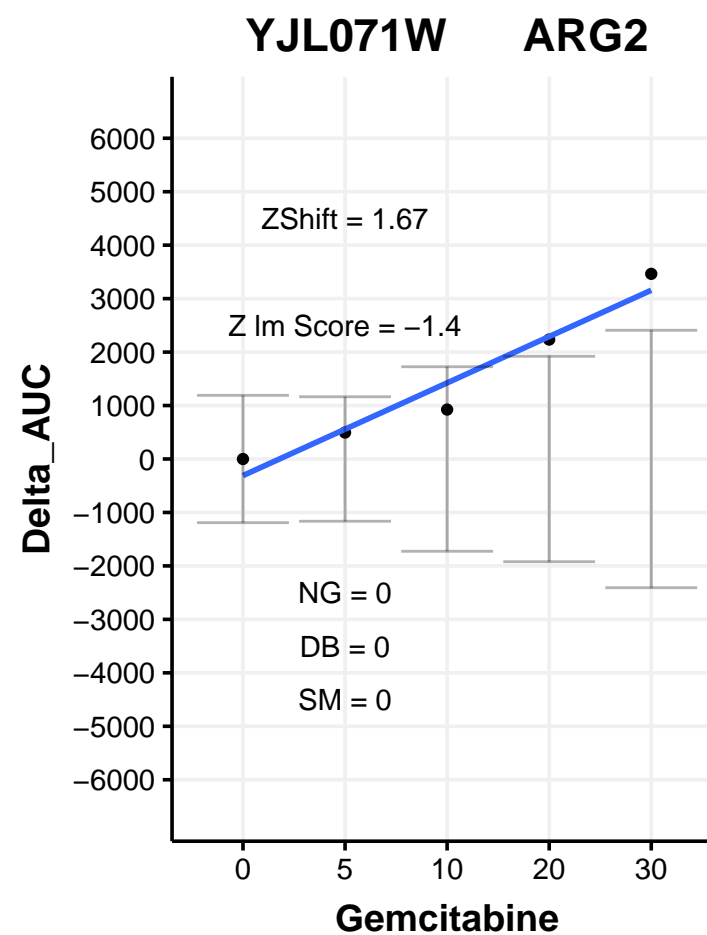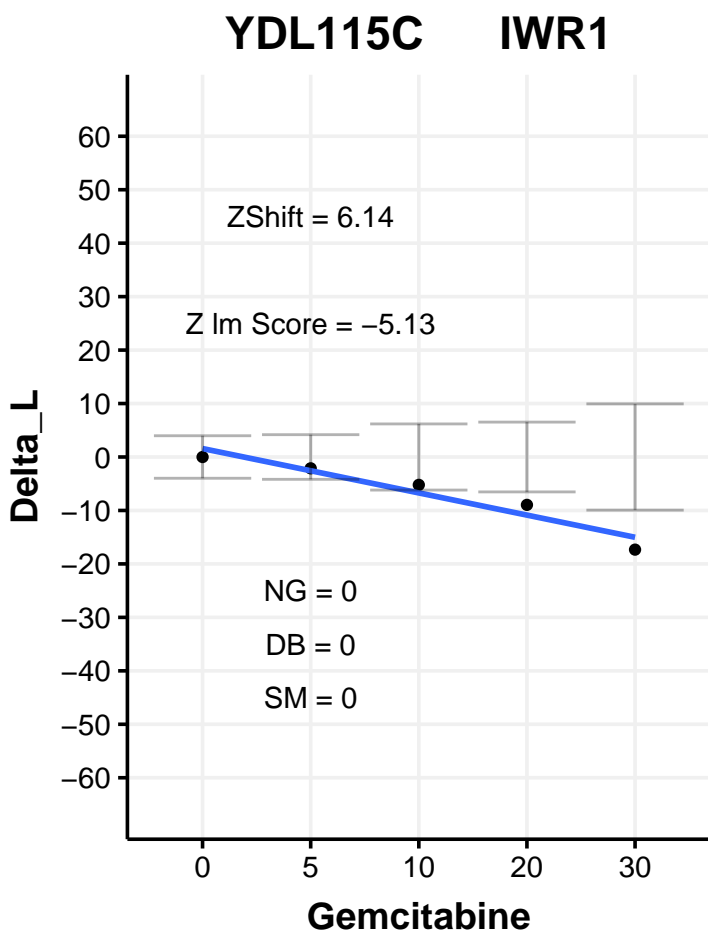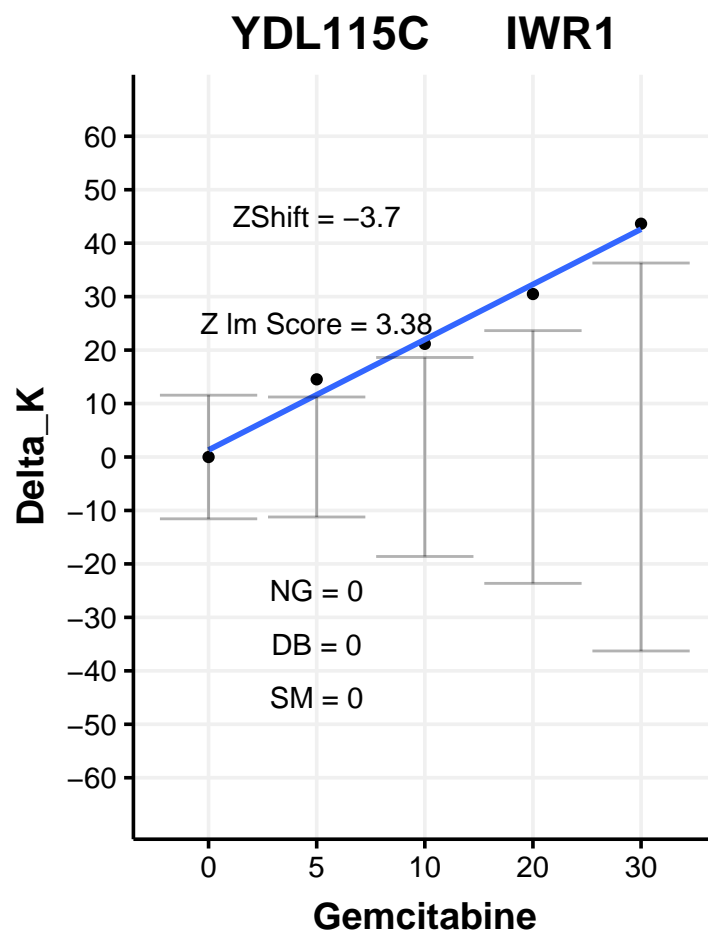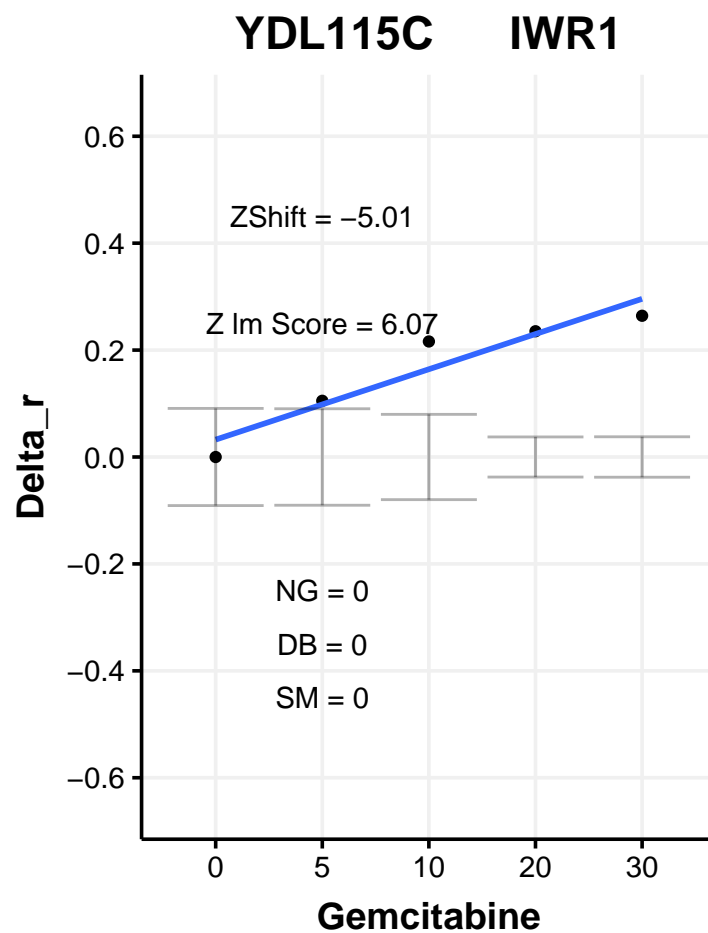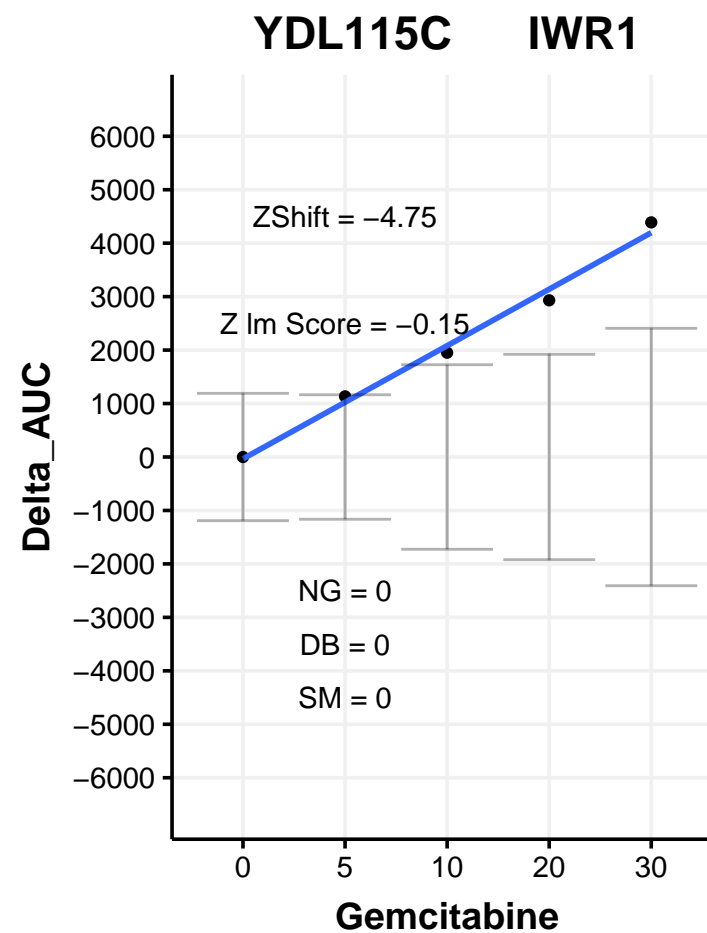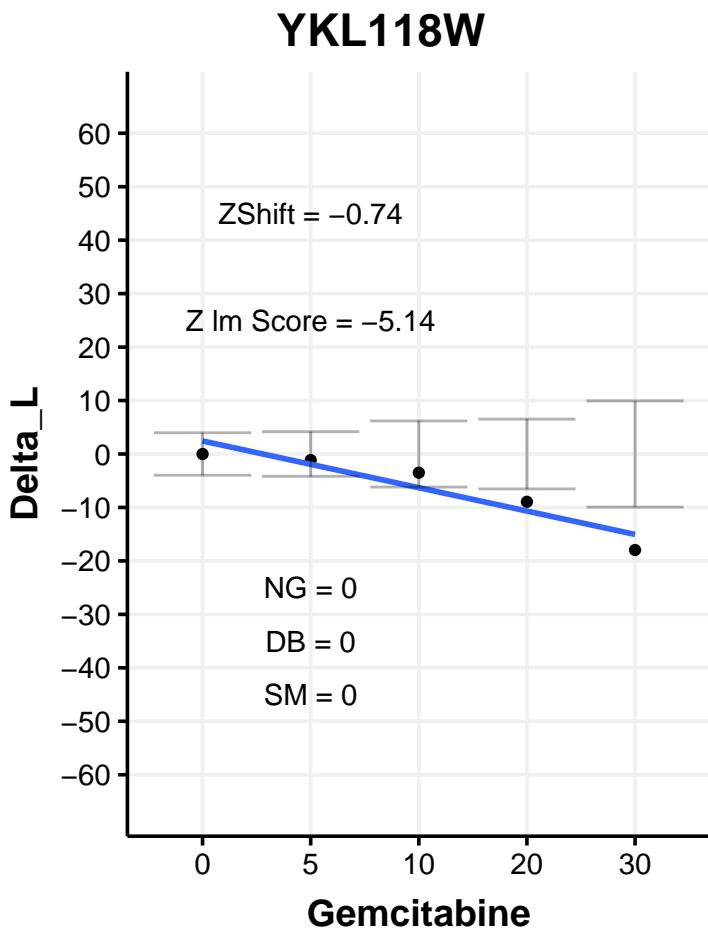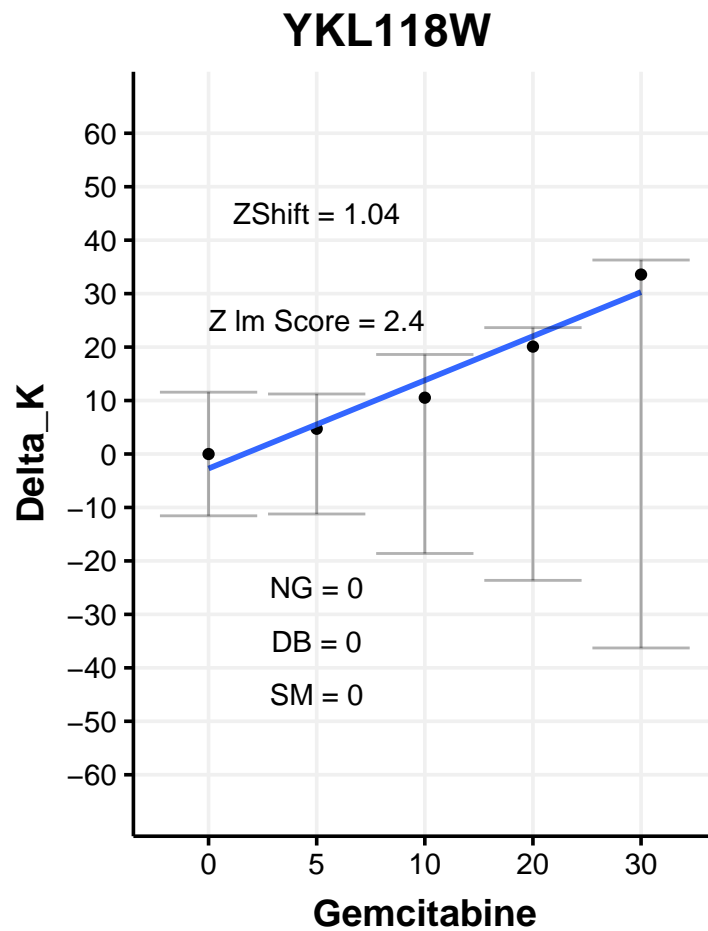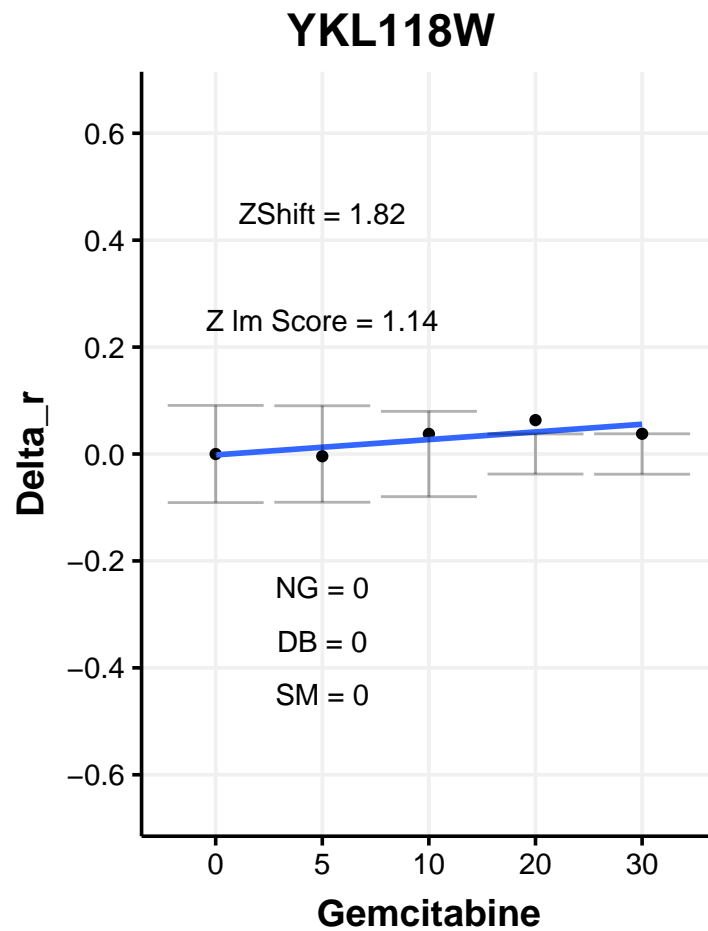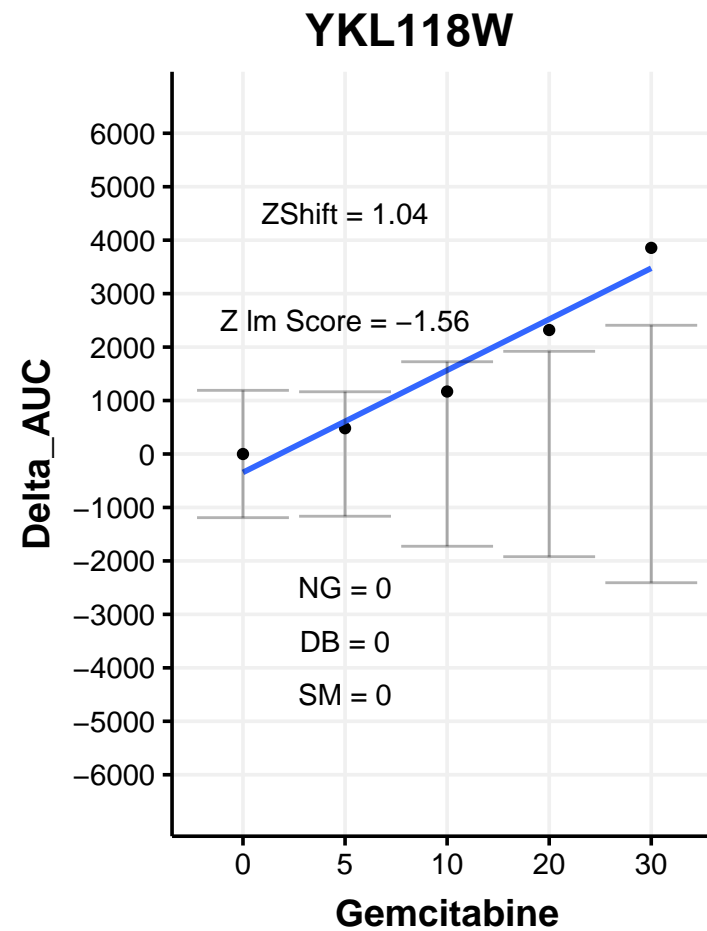

YBL071C-B\_2

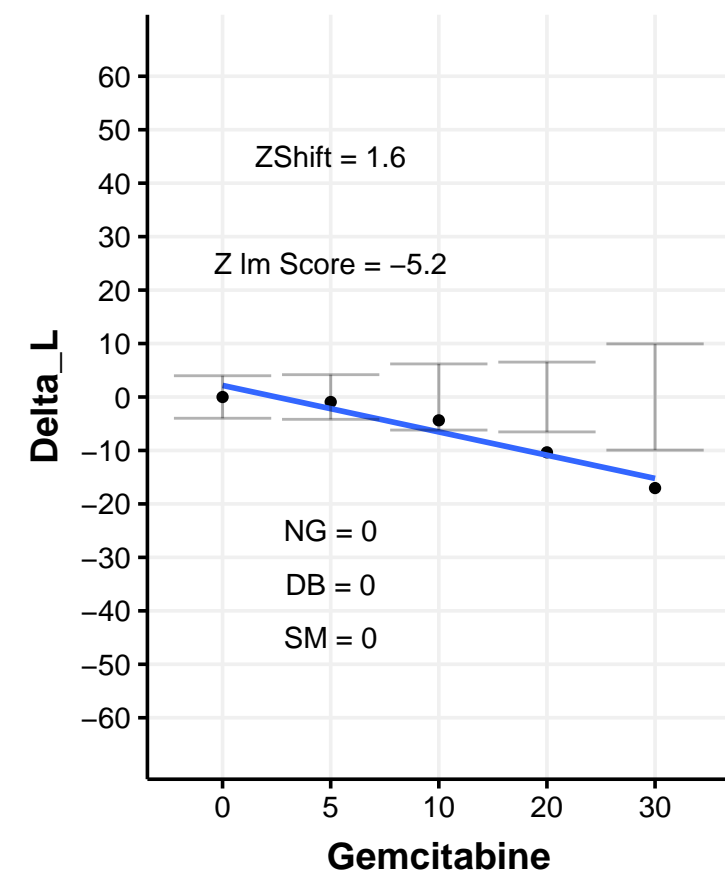

YBL071C-B\_2

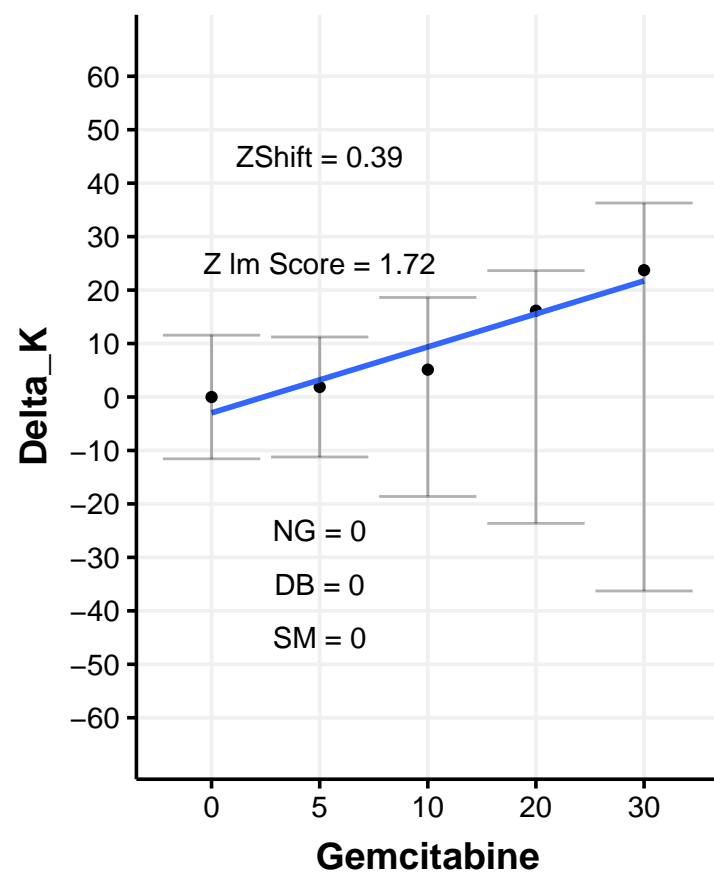

YBL071C-B\_2

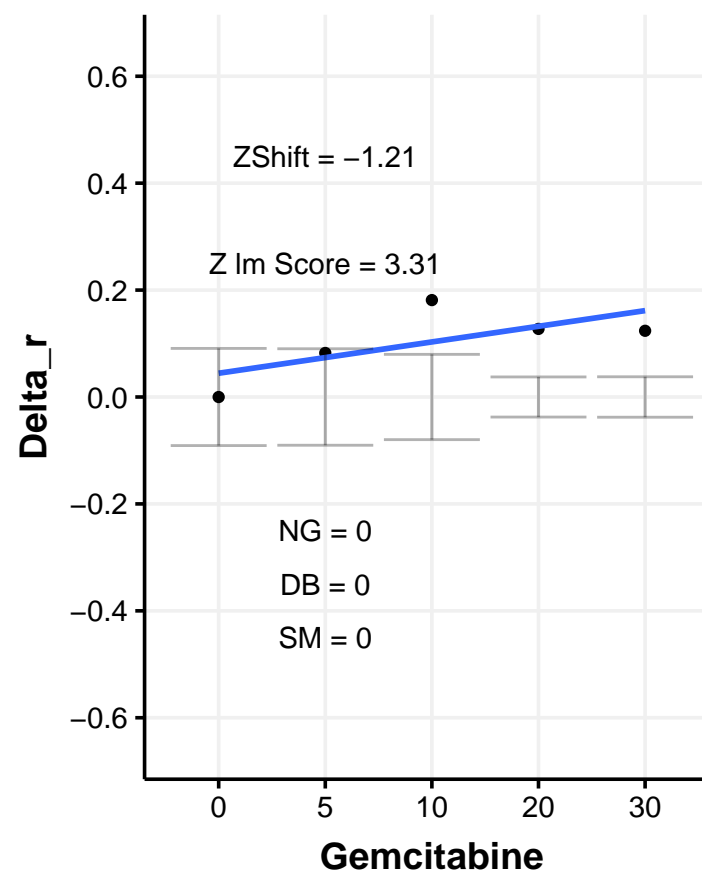

YBL071C-B\_2

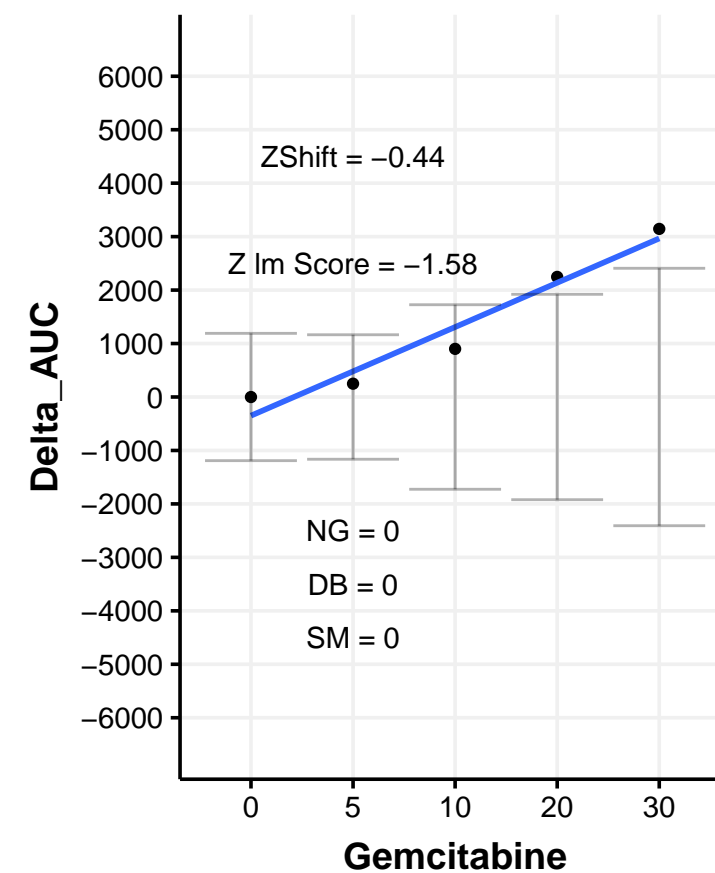

YDR159W SAC3

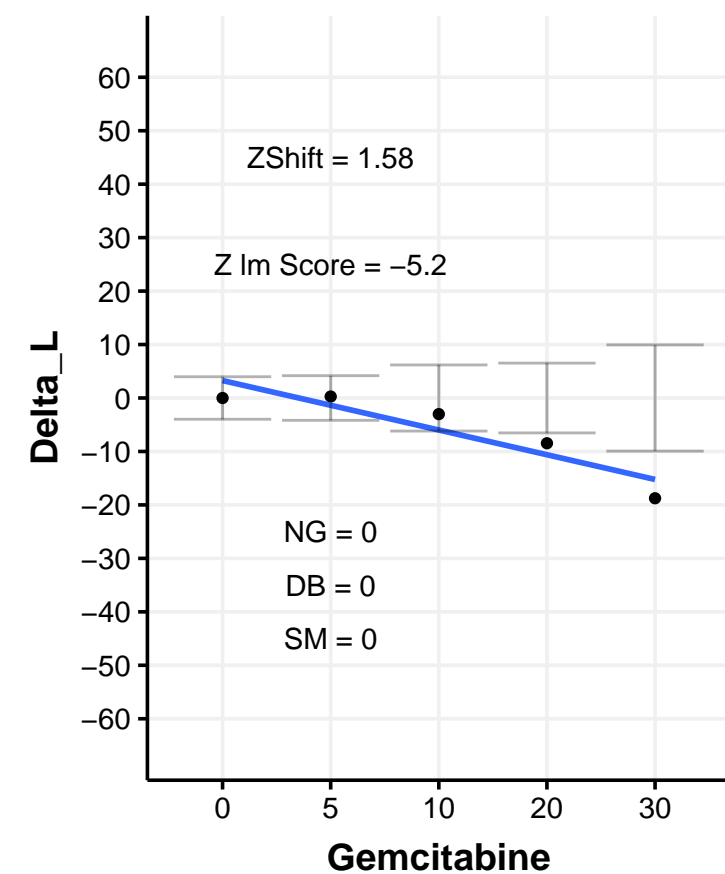

YDR159W SAC3

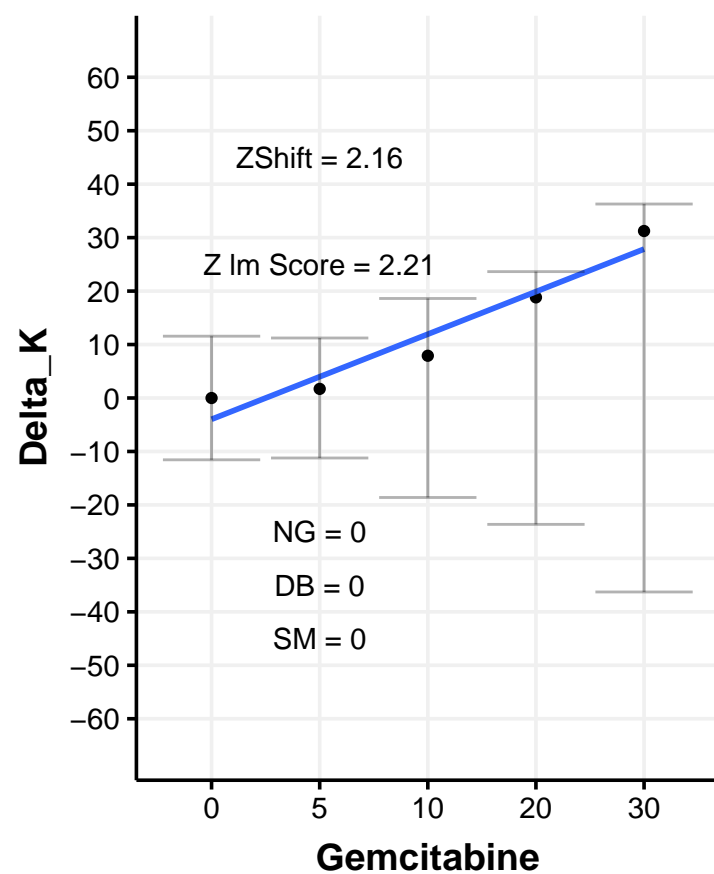

YDR159W SAC3

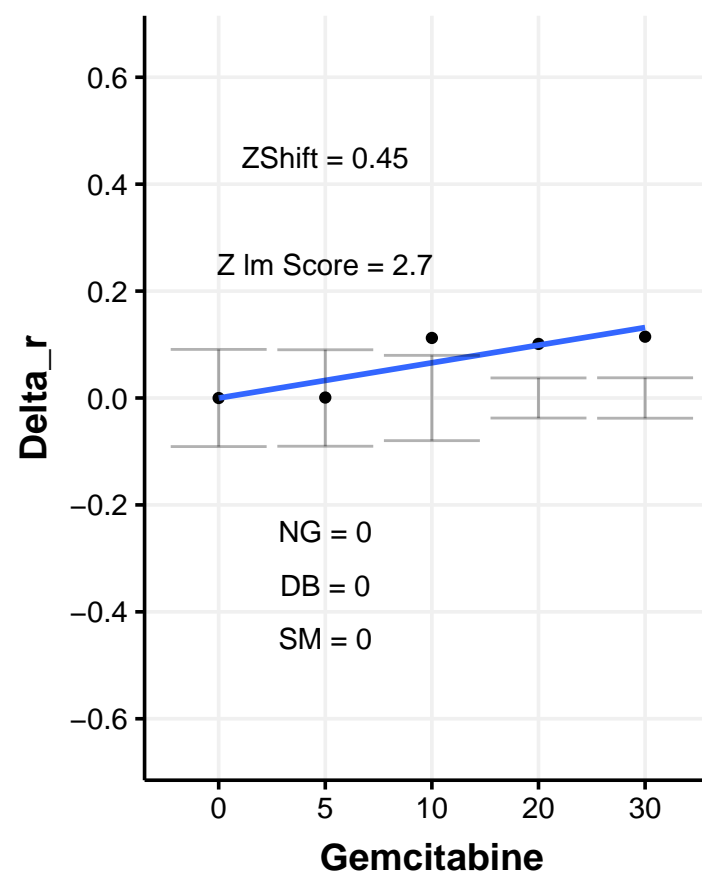

YDR159W SAC3

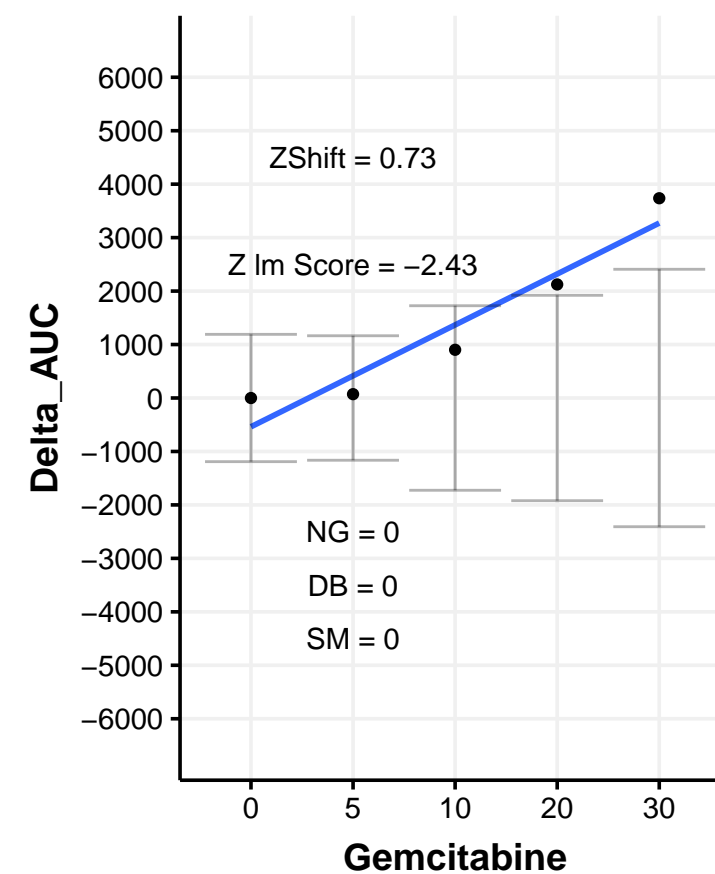

YGL135W RPL1B

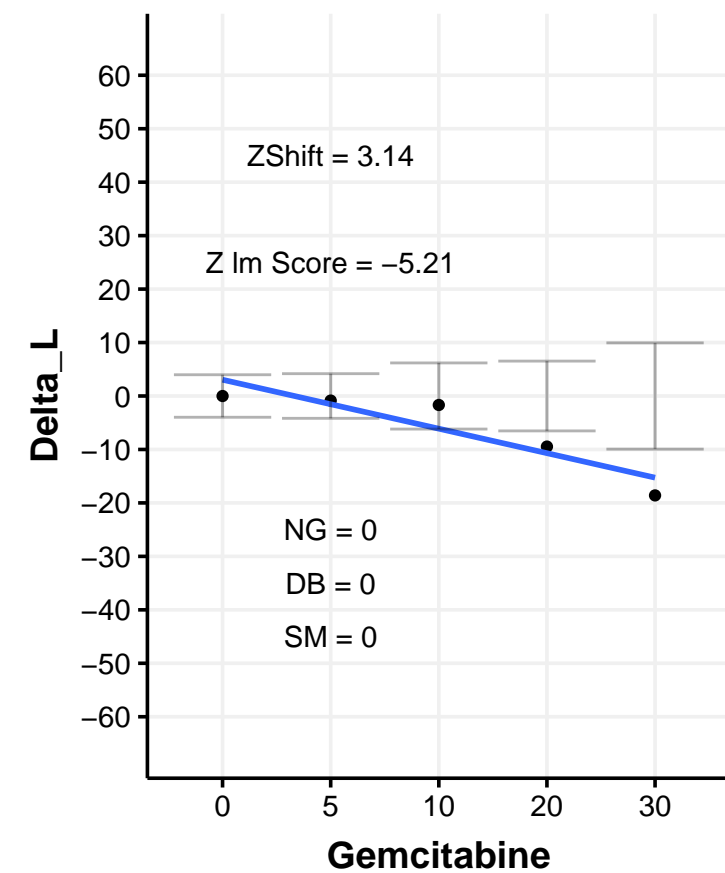

YGL135W RPL1B

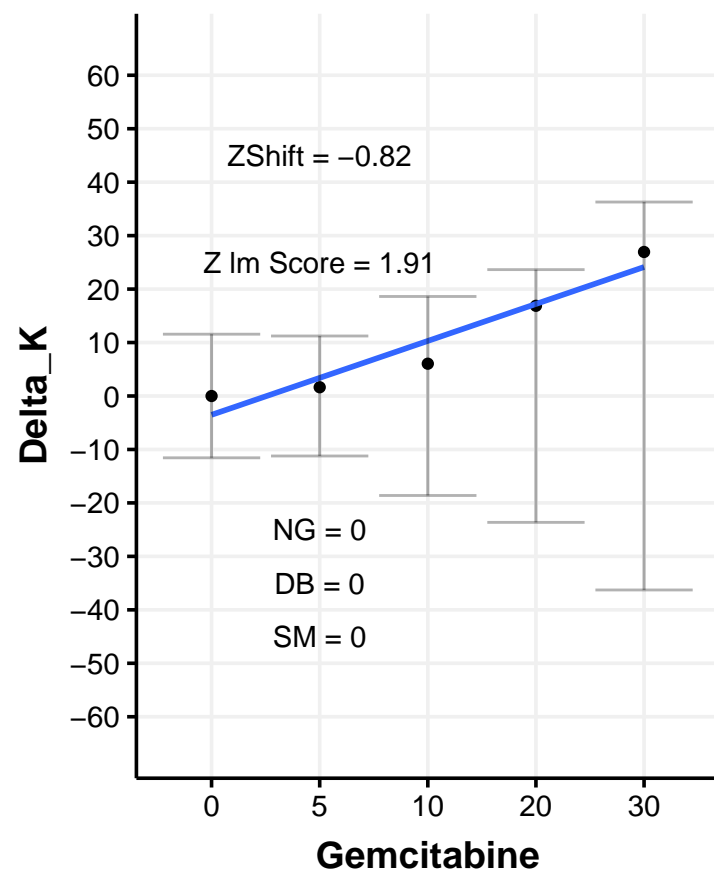

YGL135W RPL1B

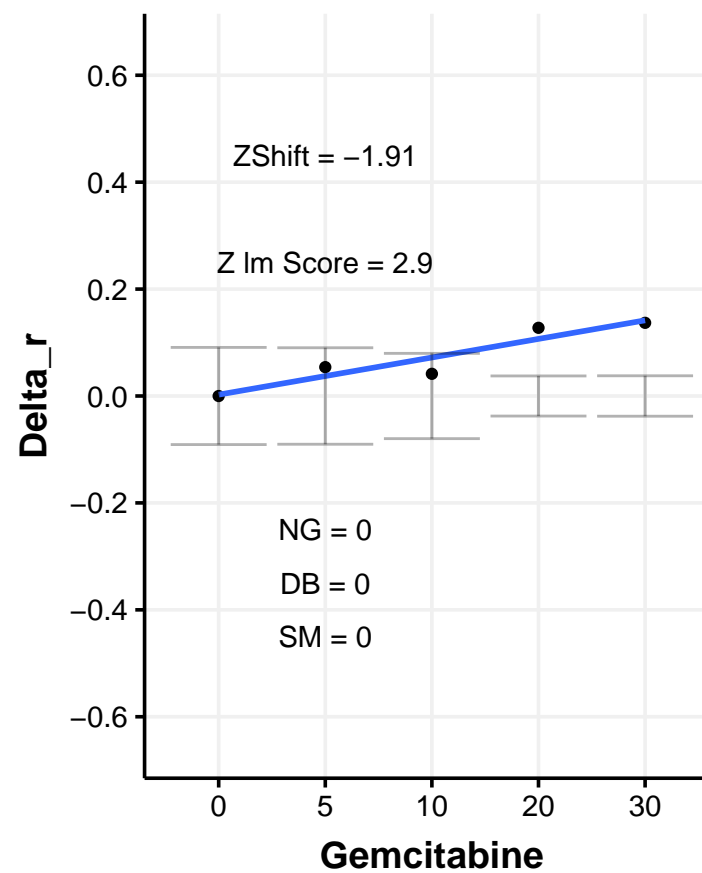

YGL135W RPL1B

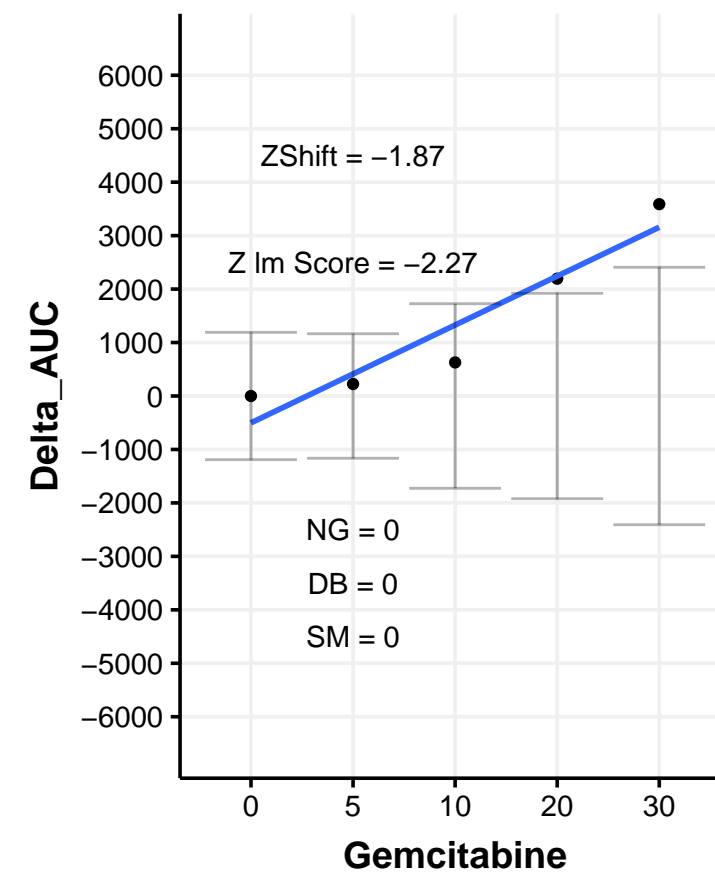

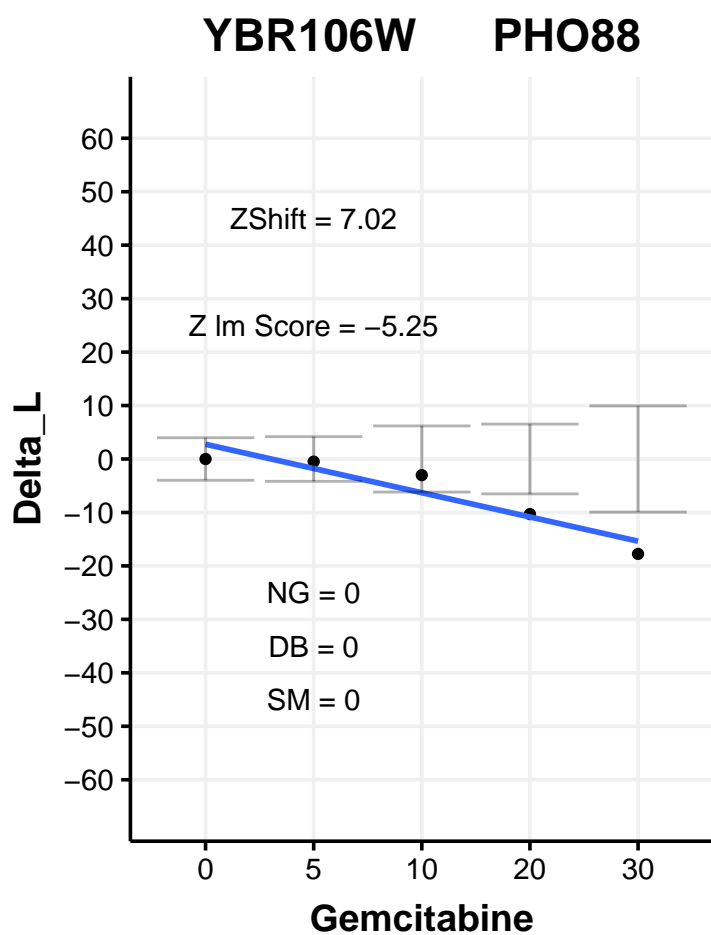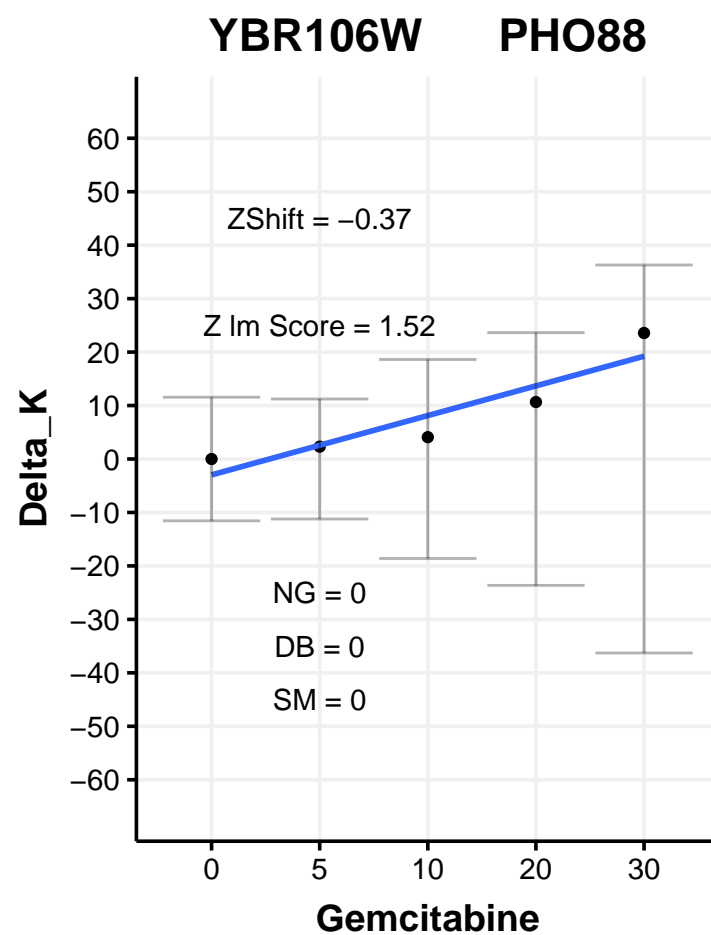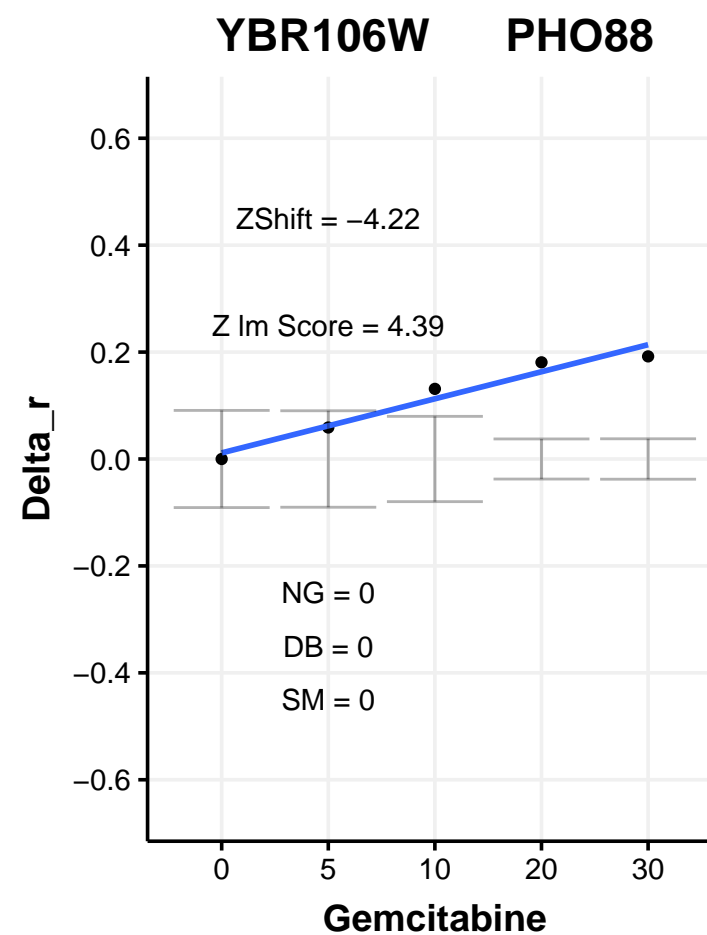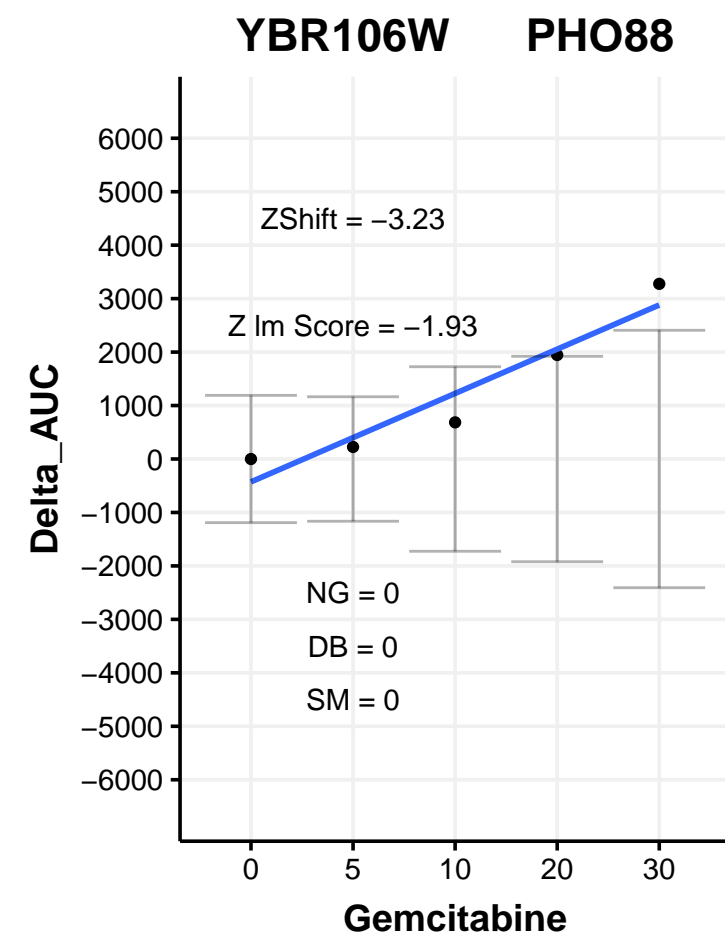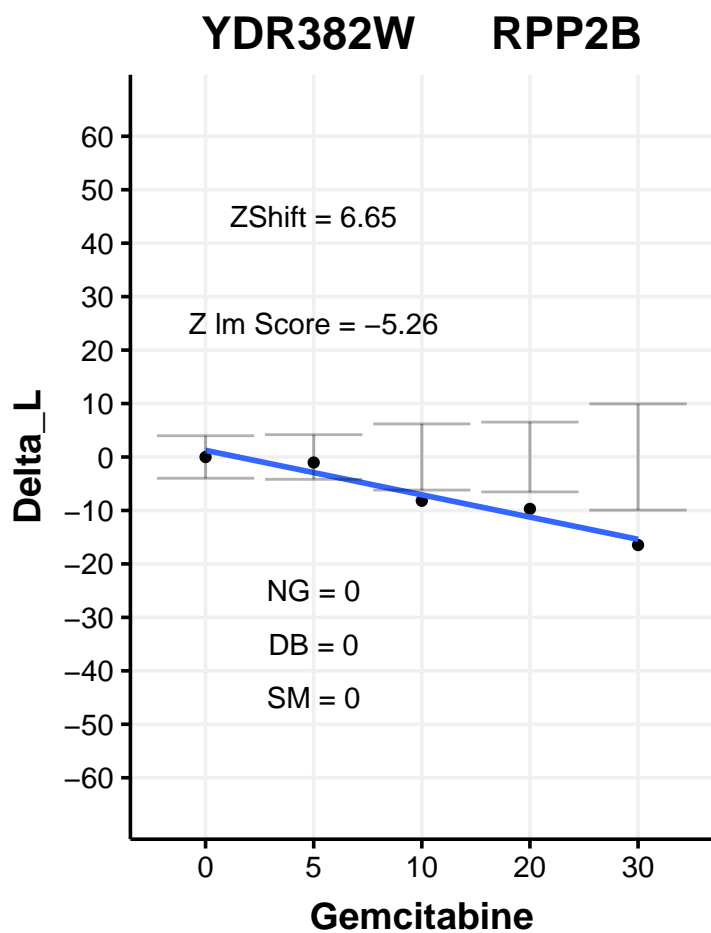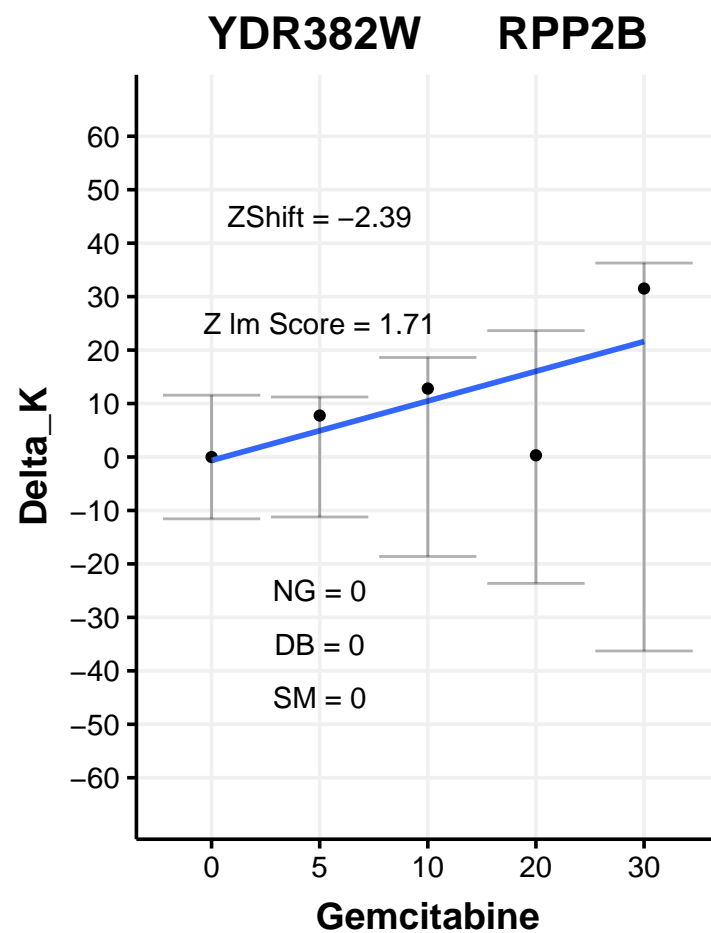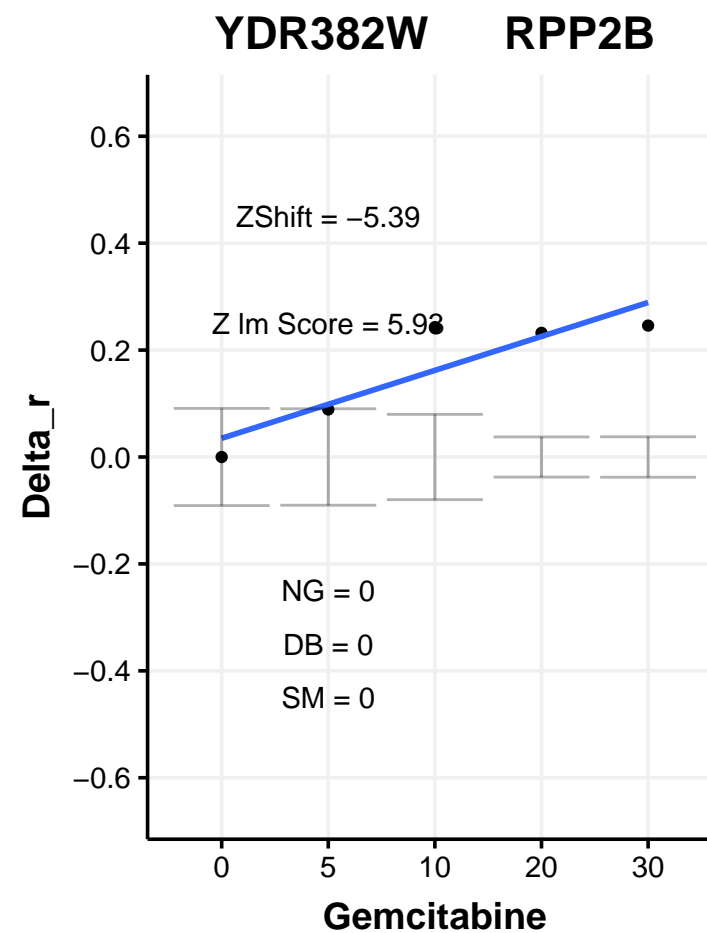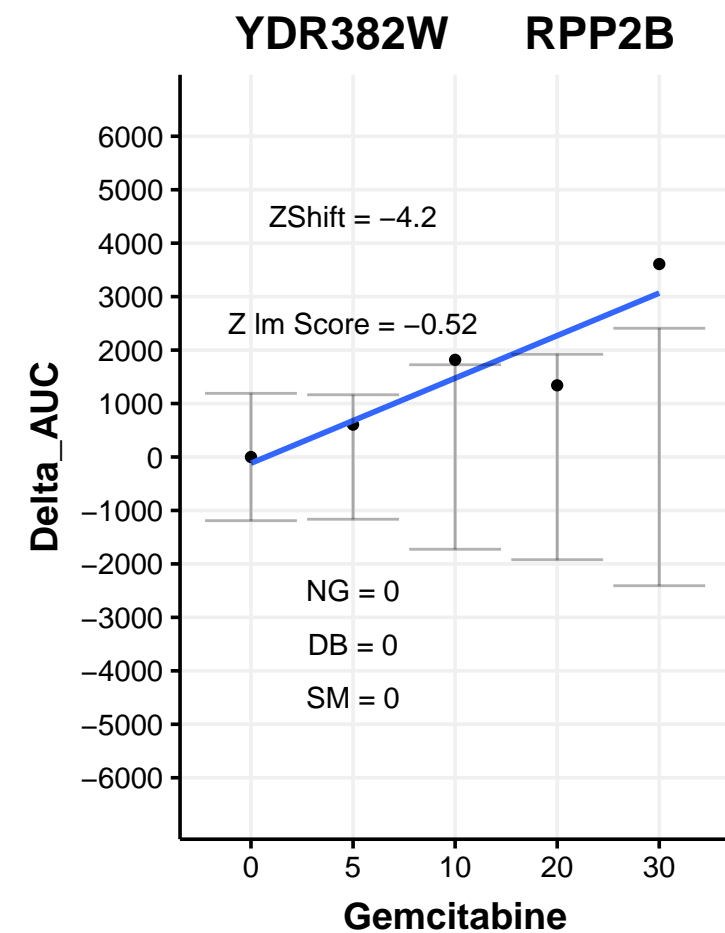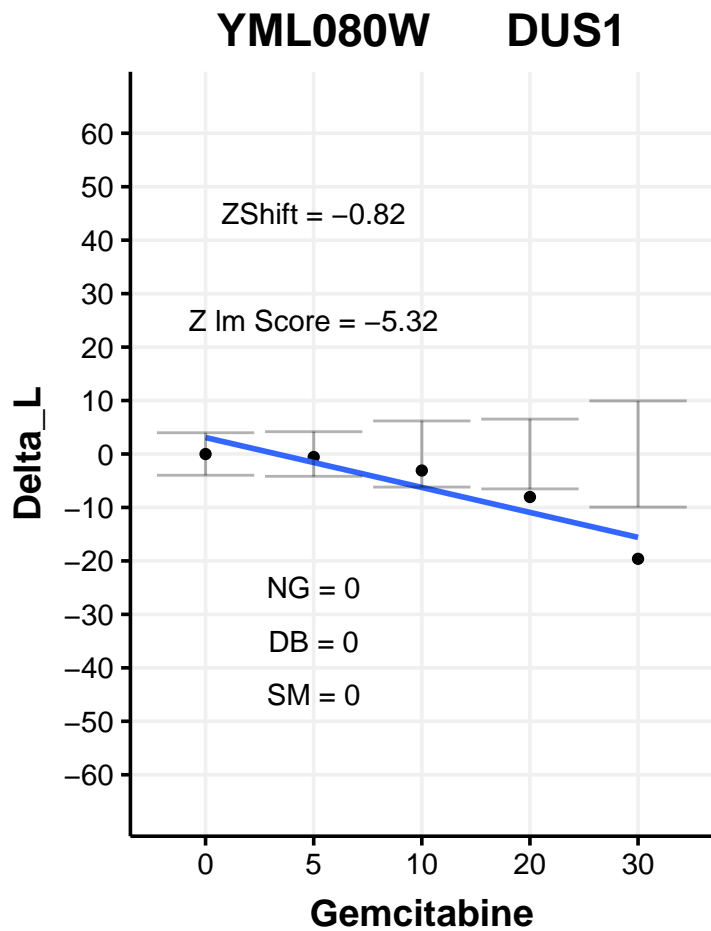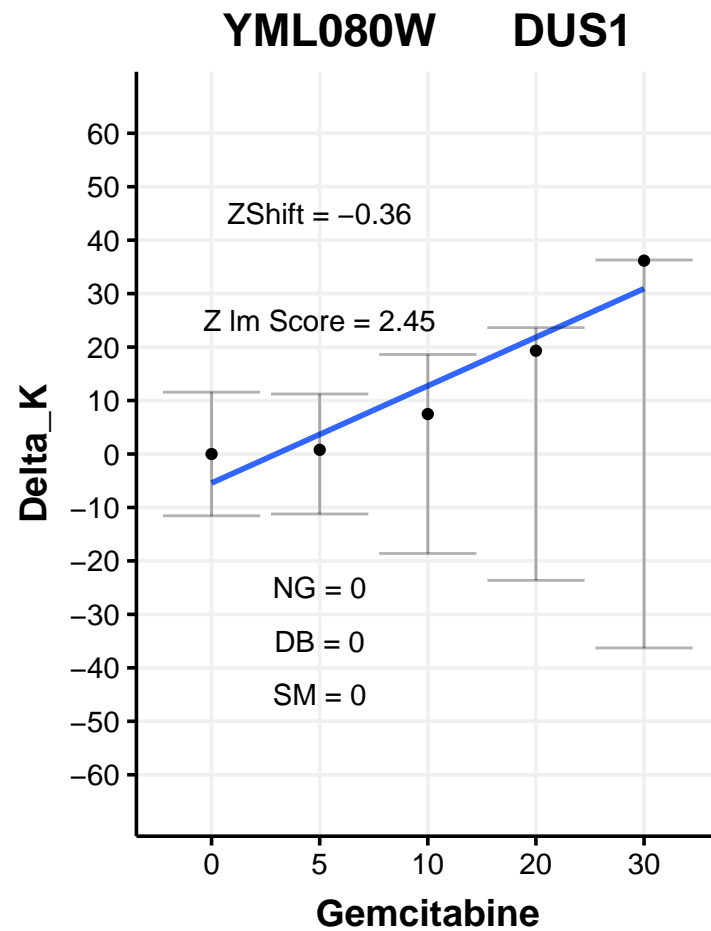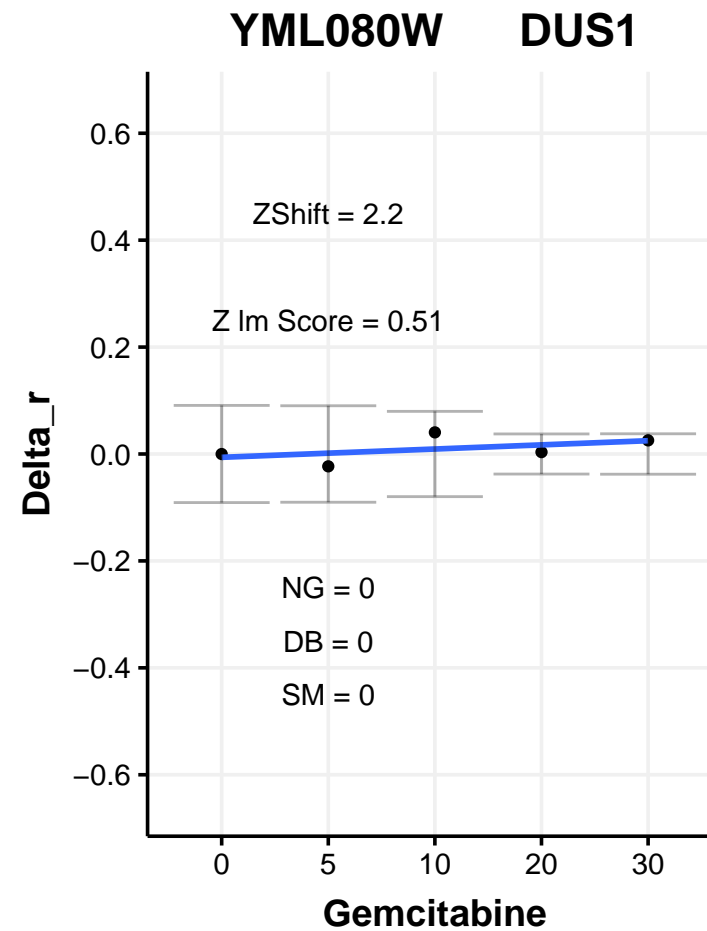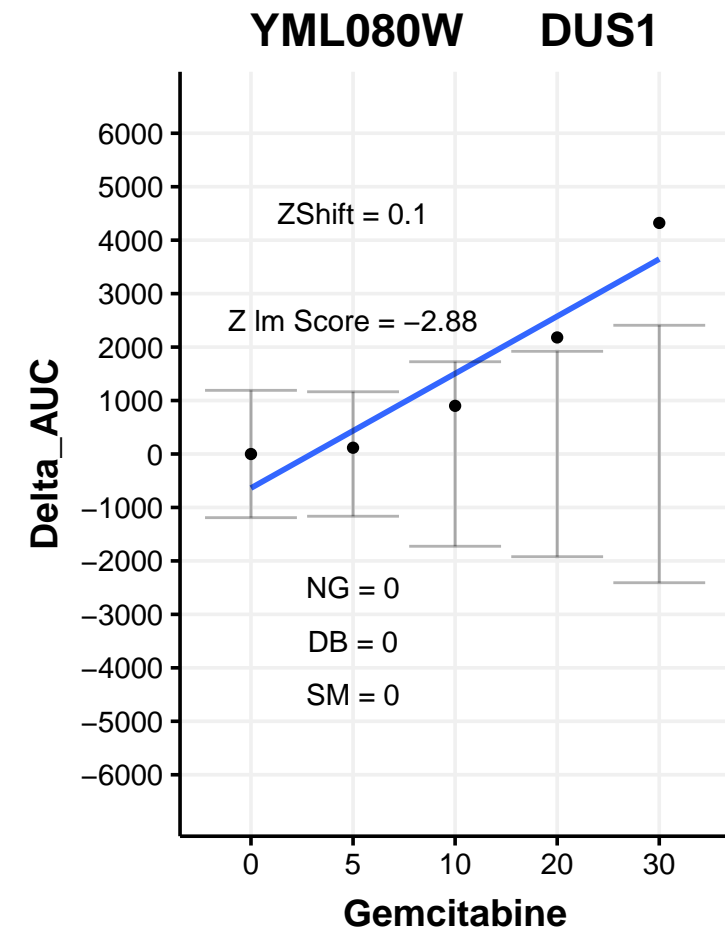

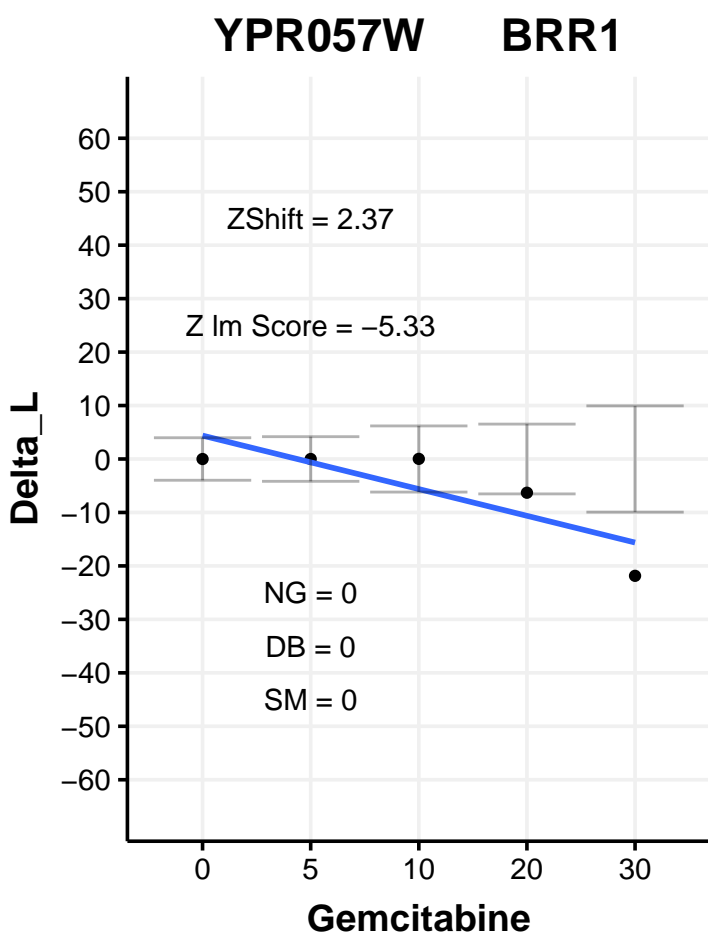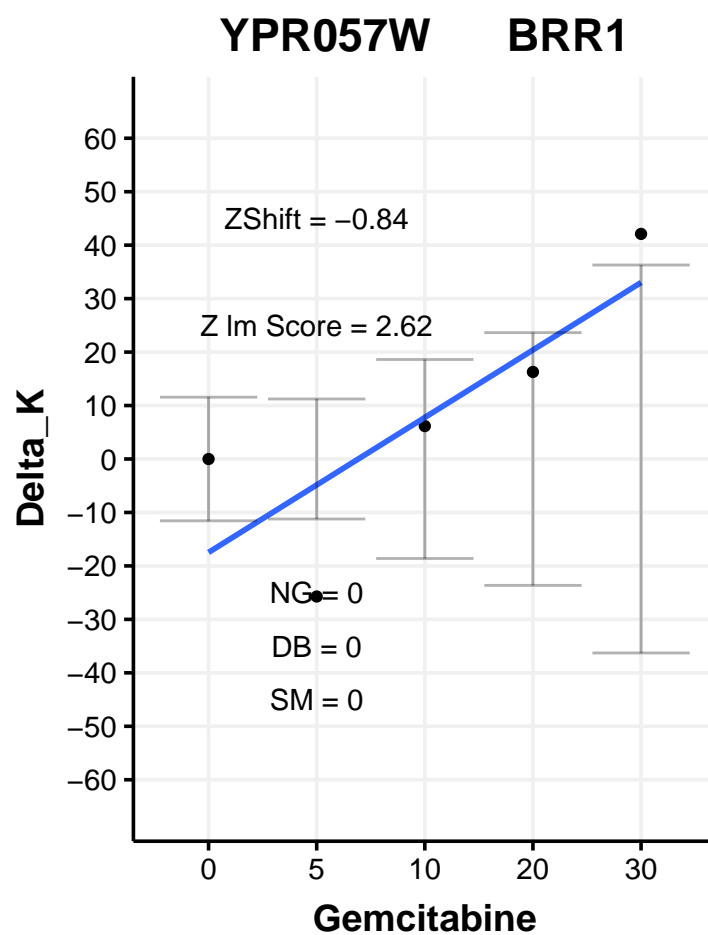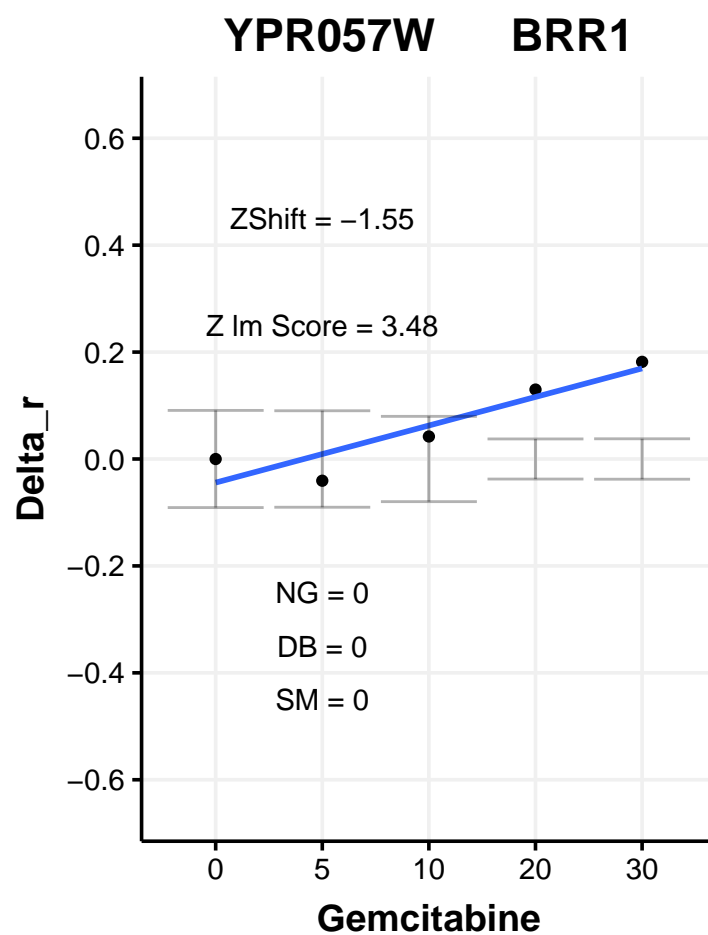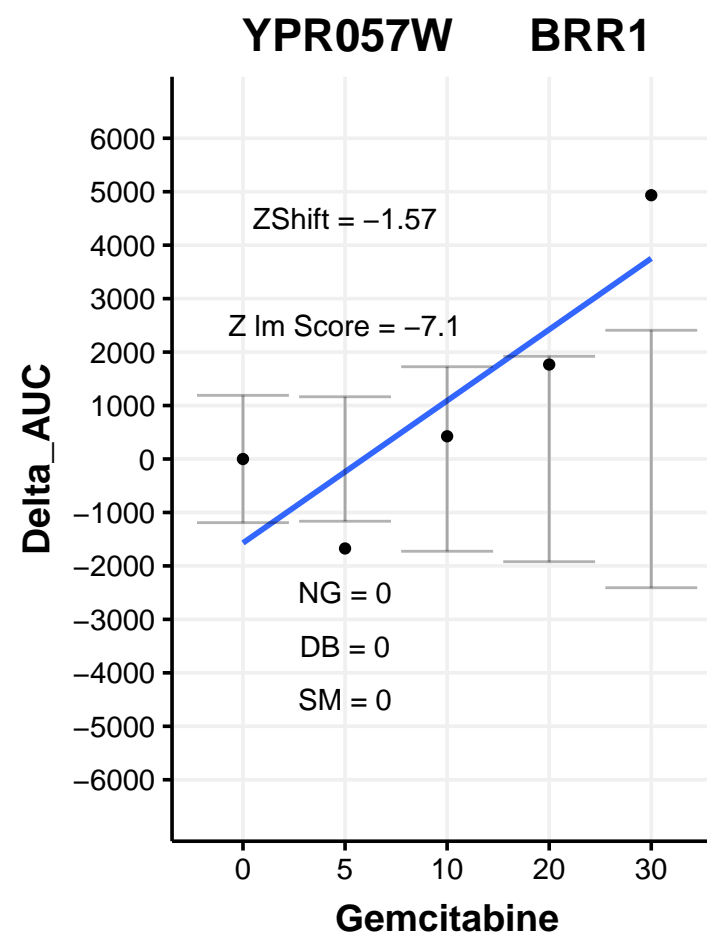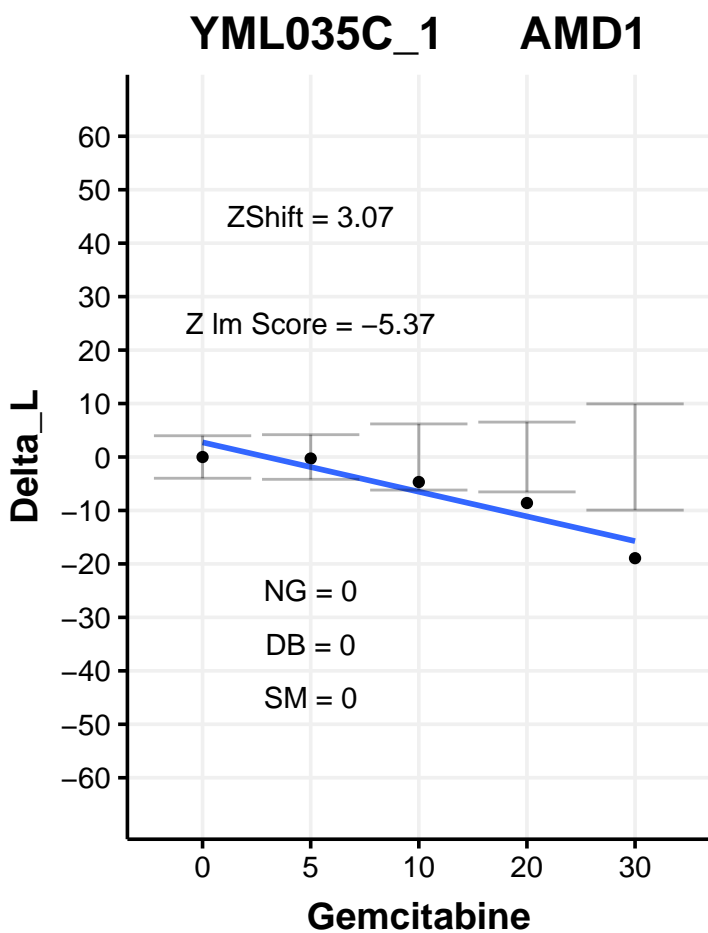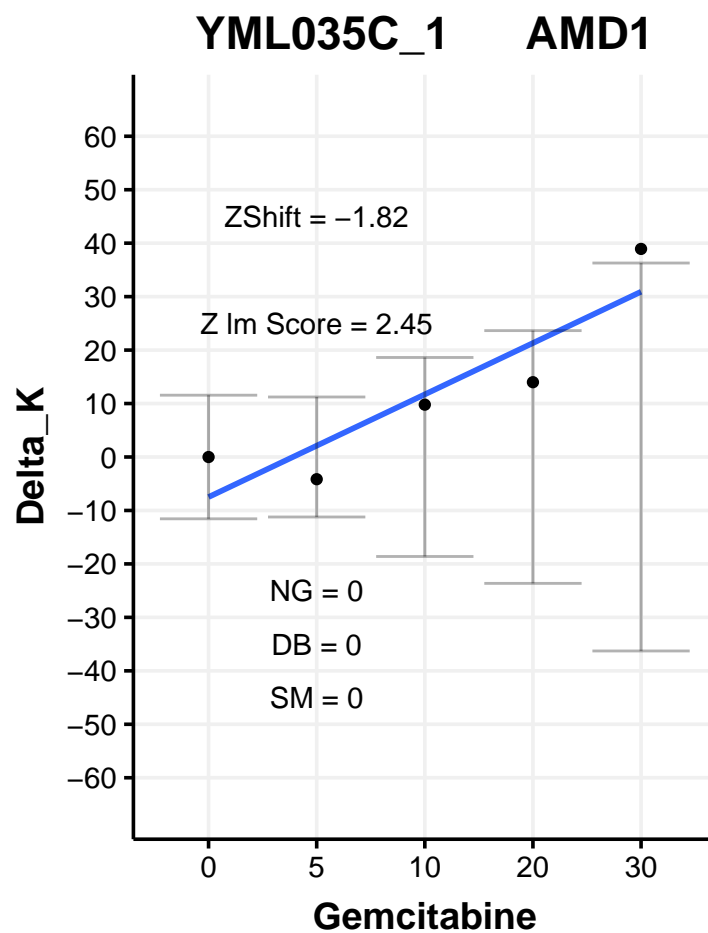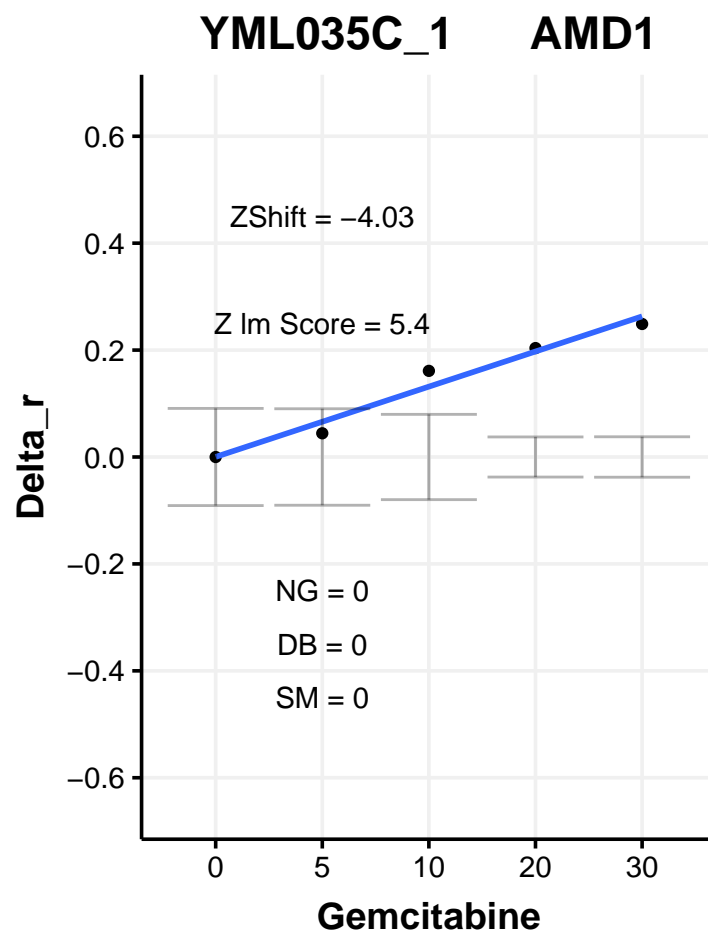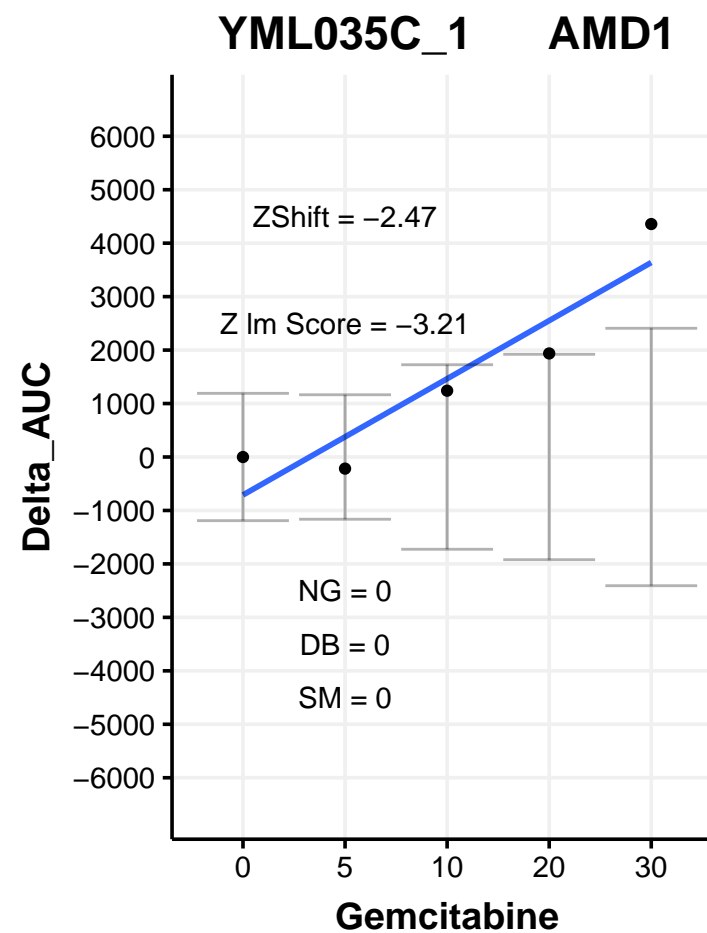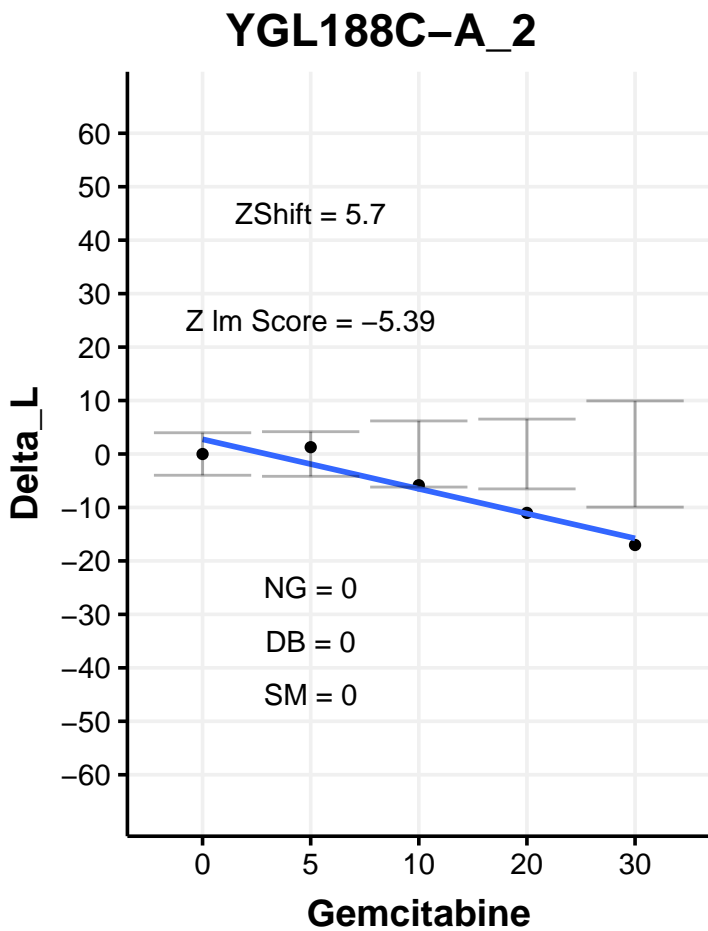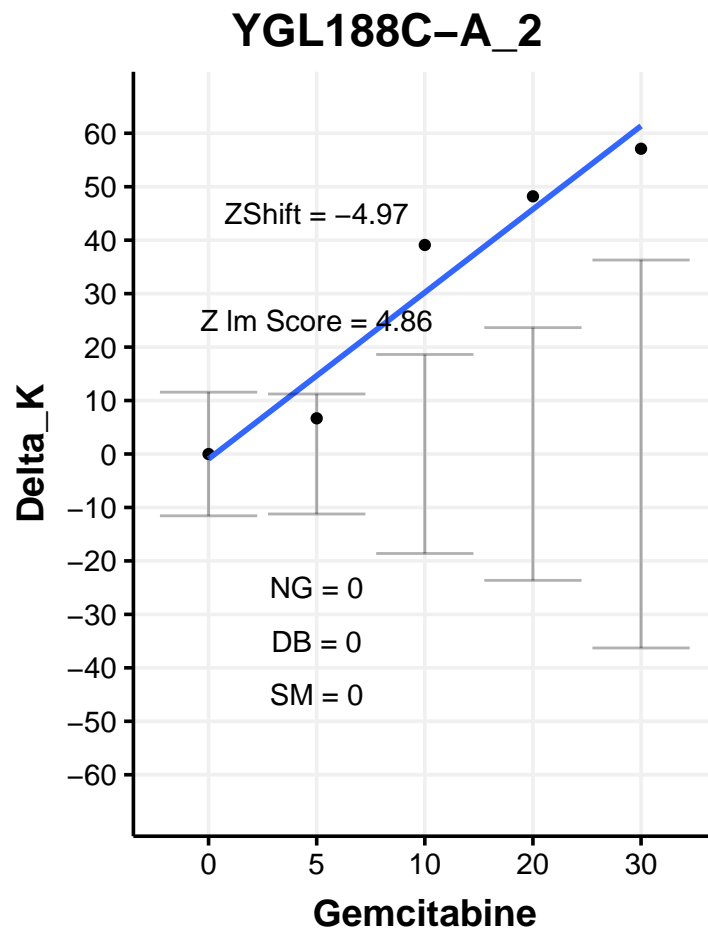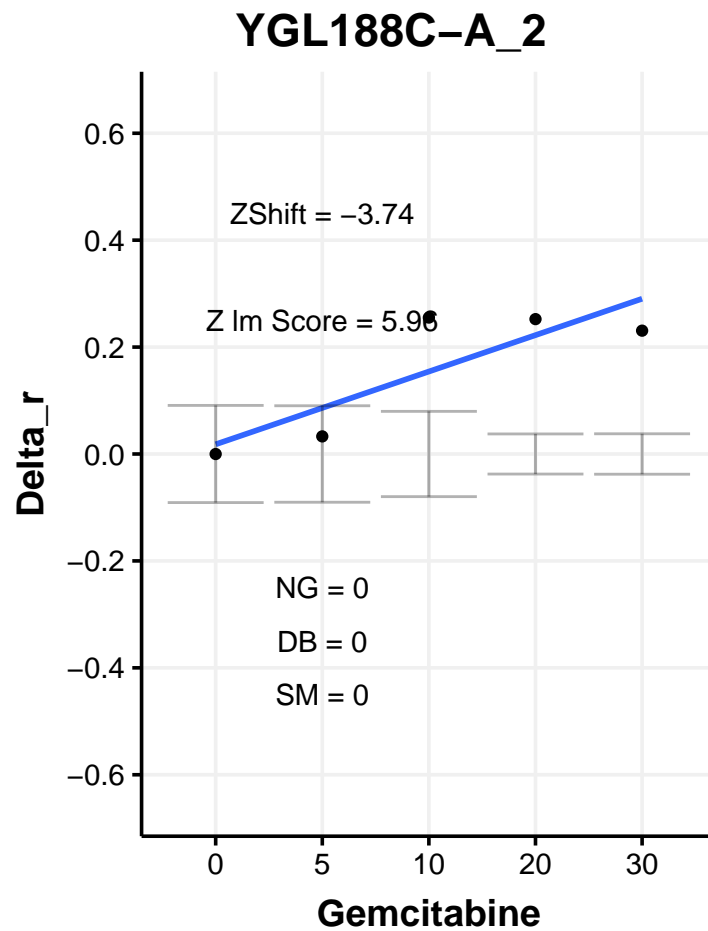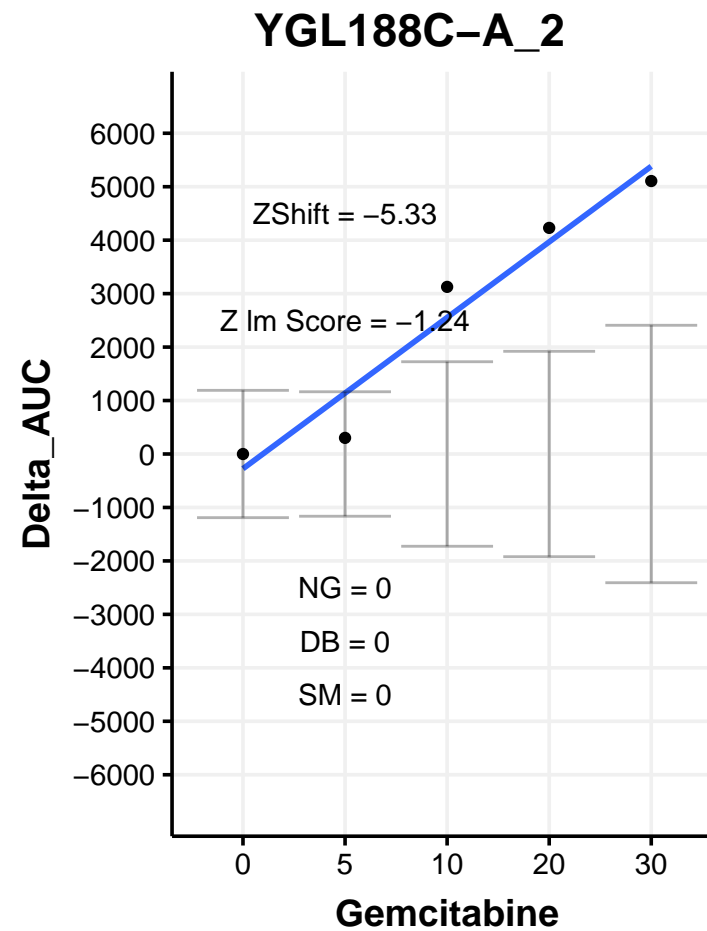



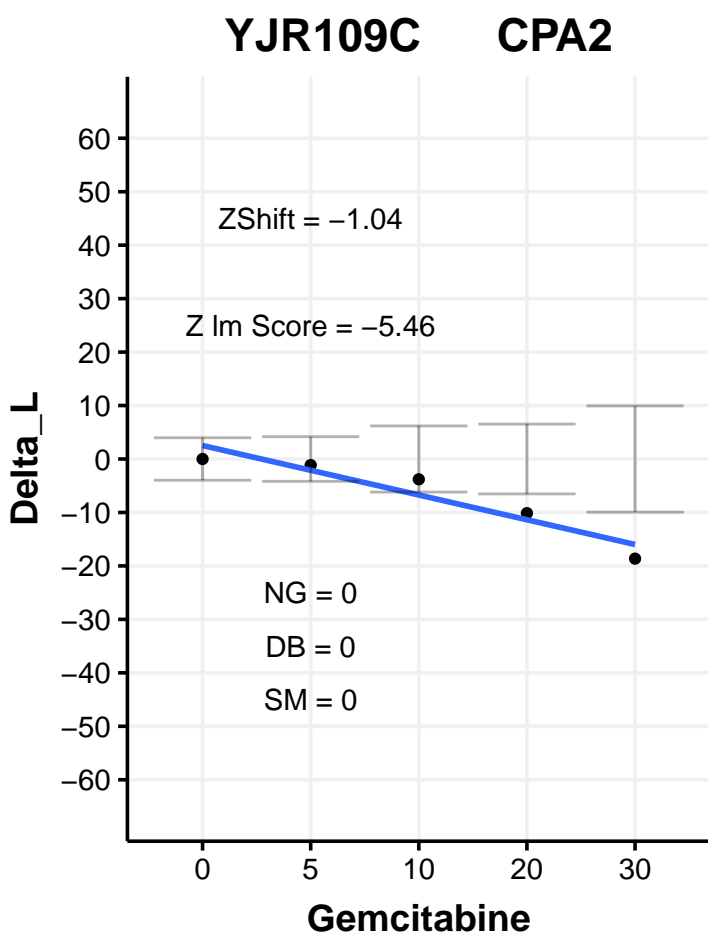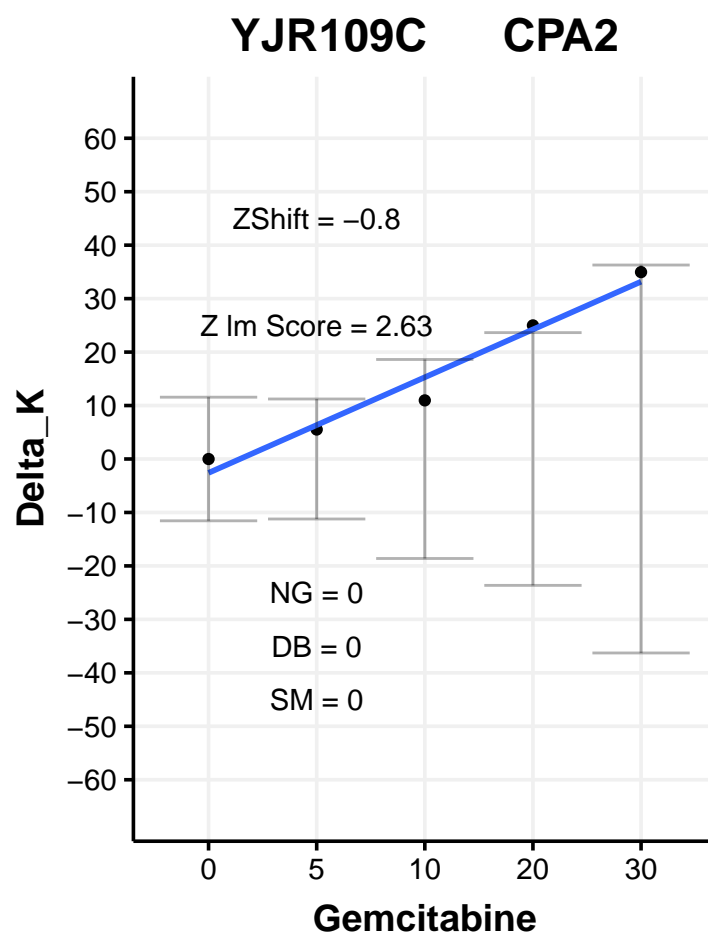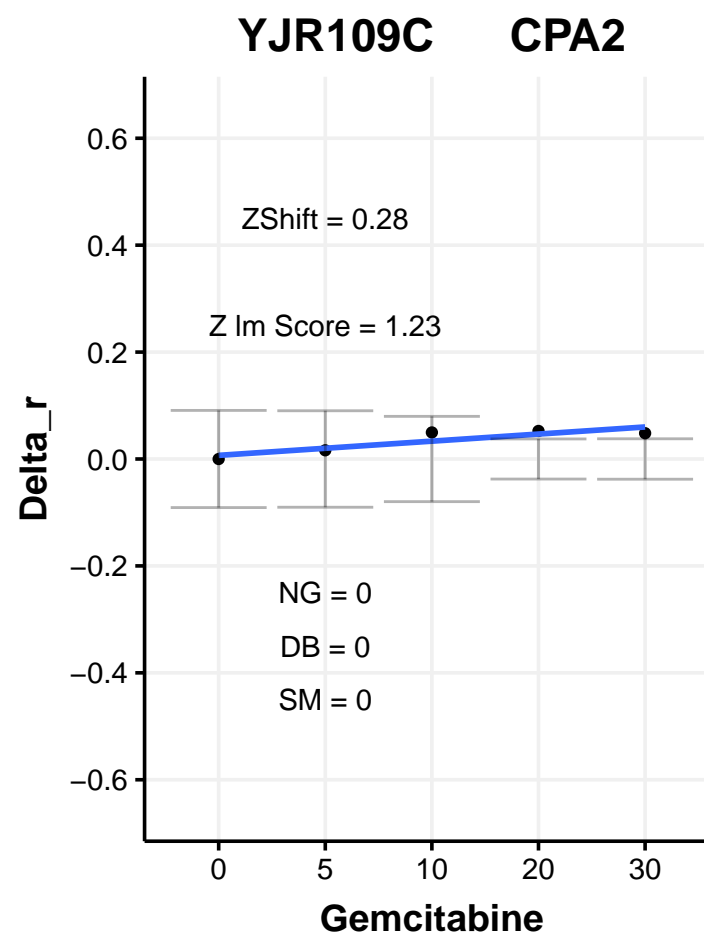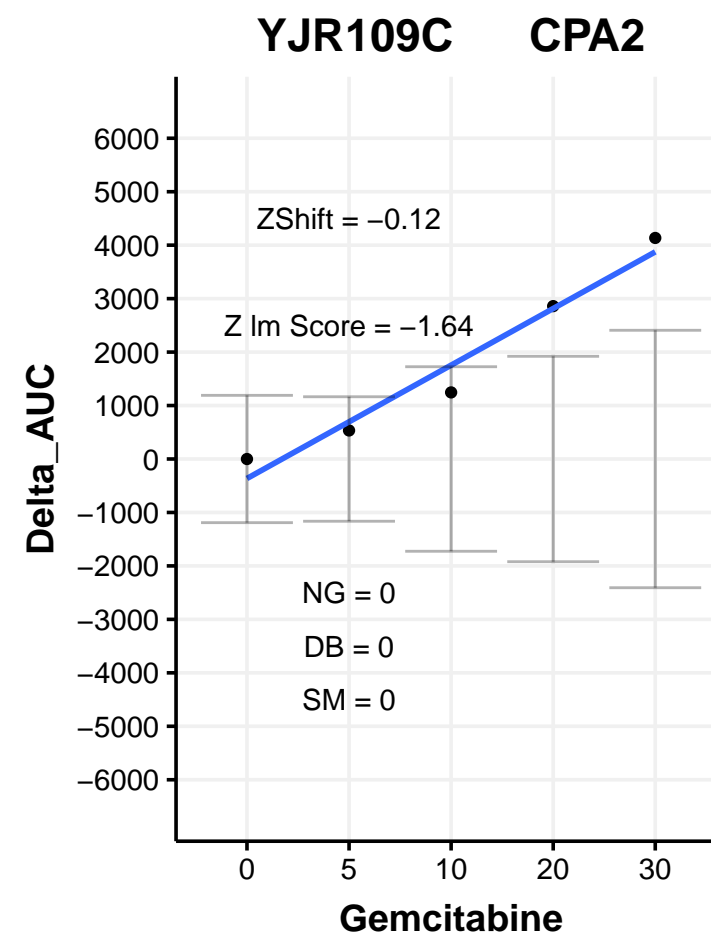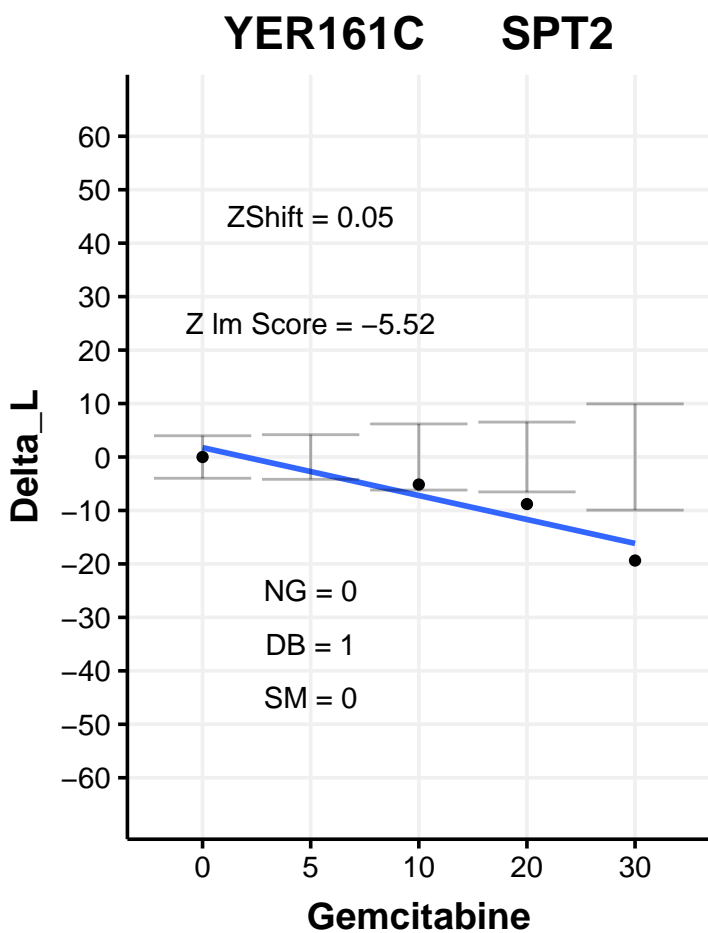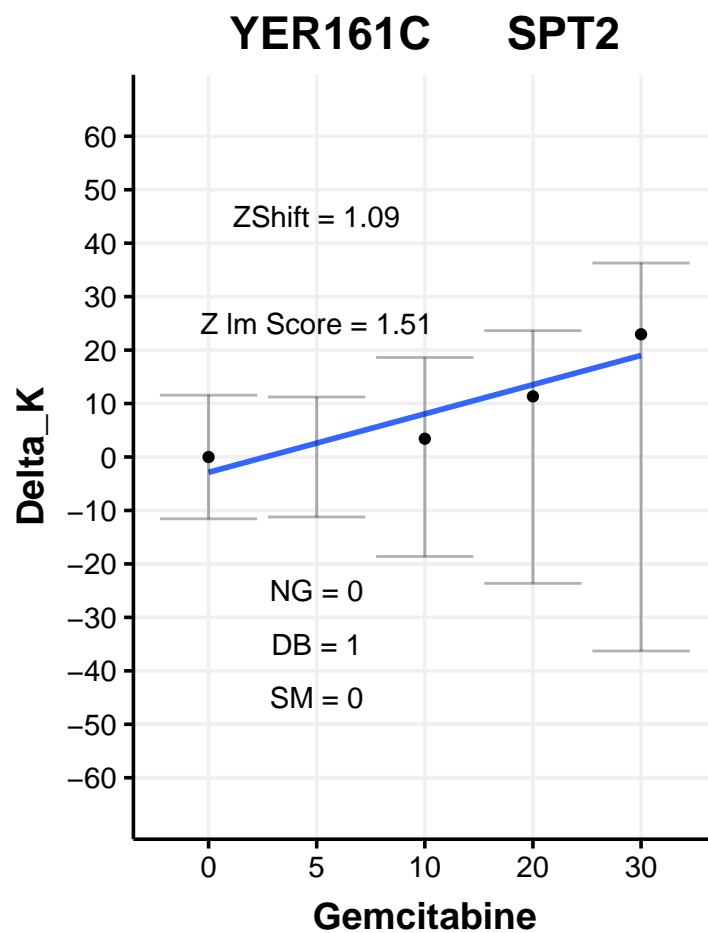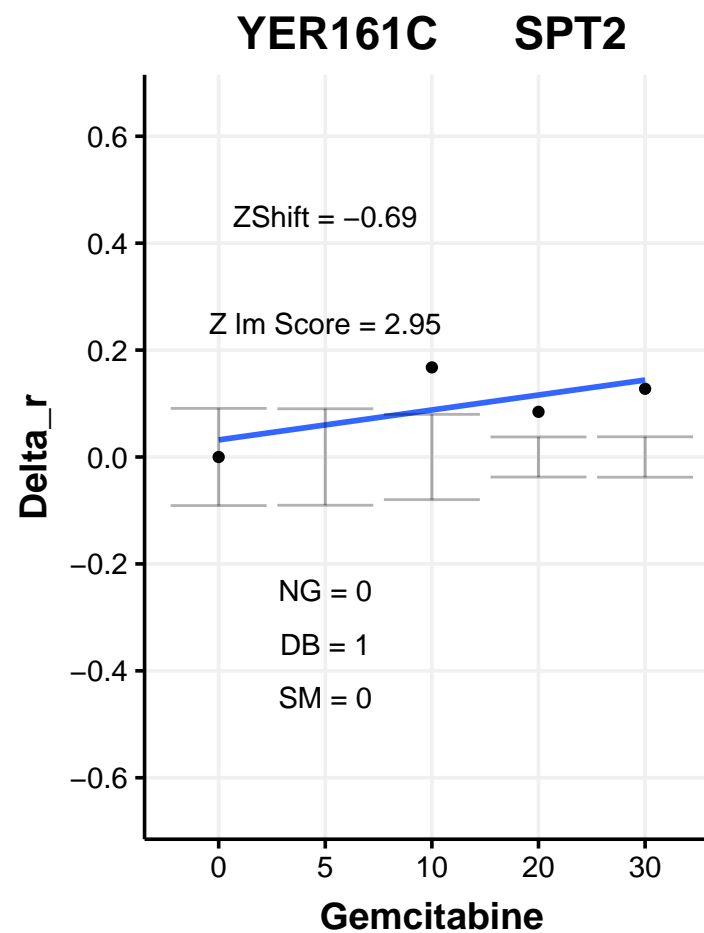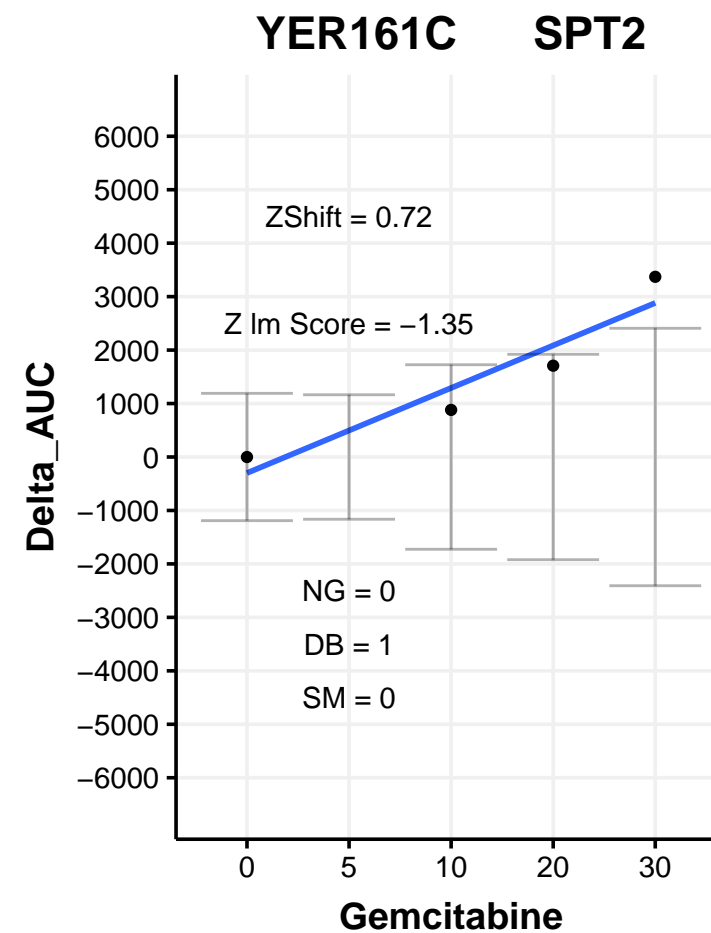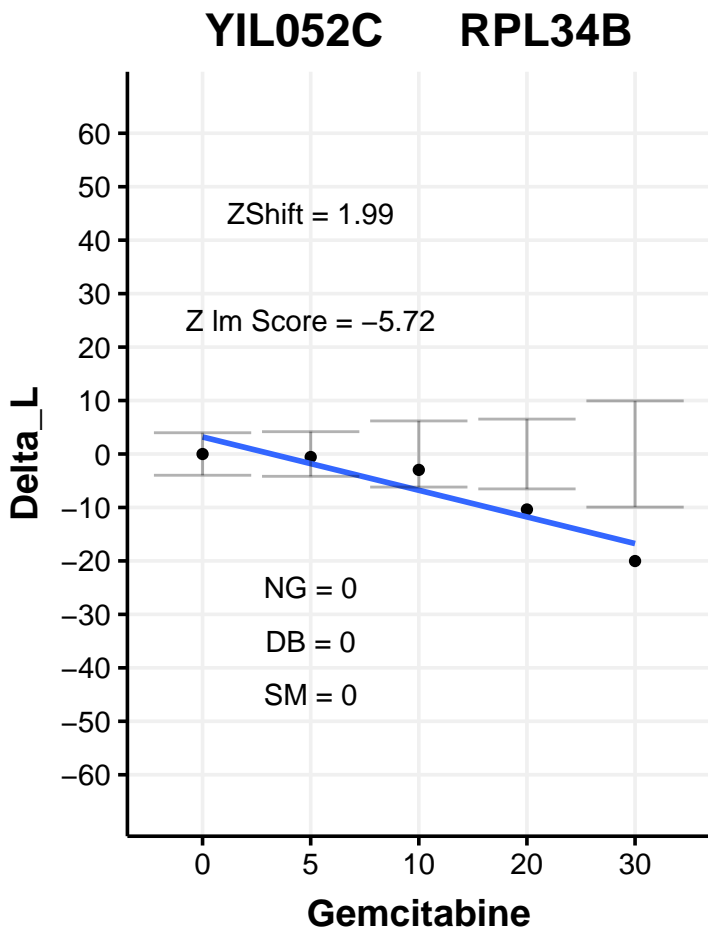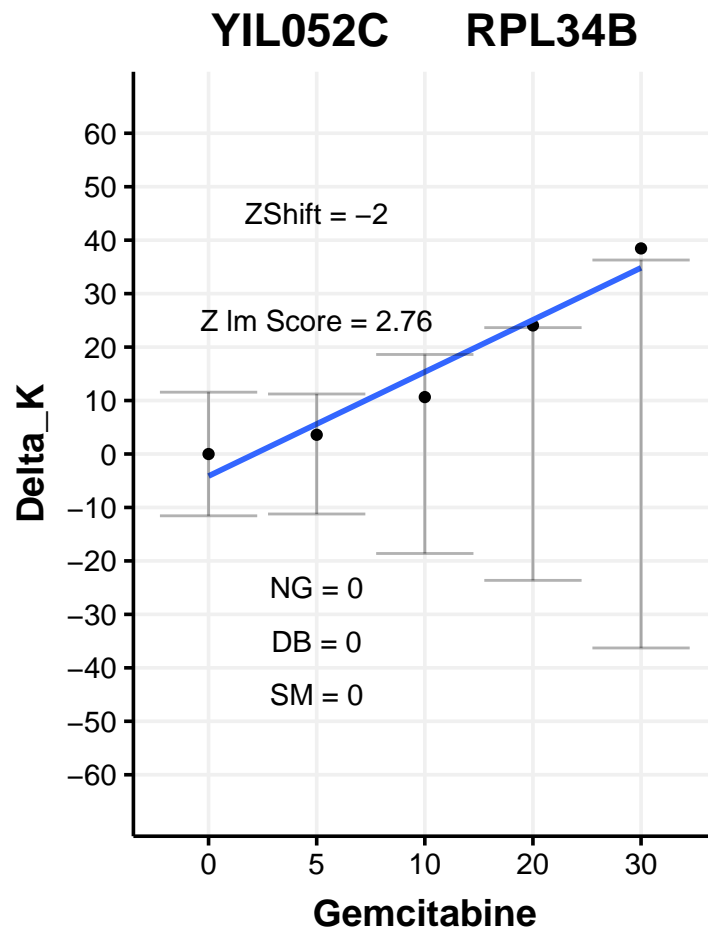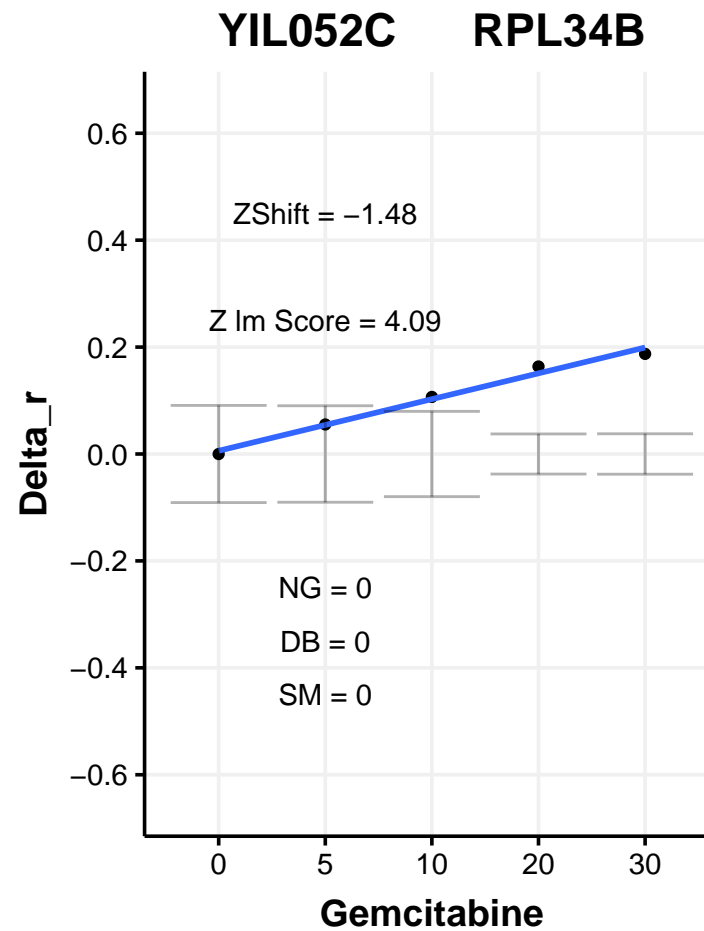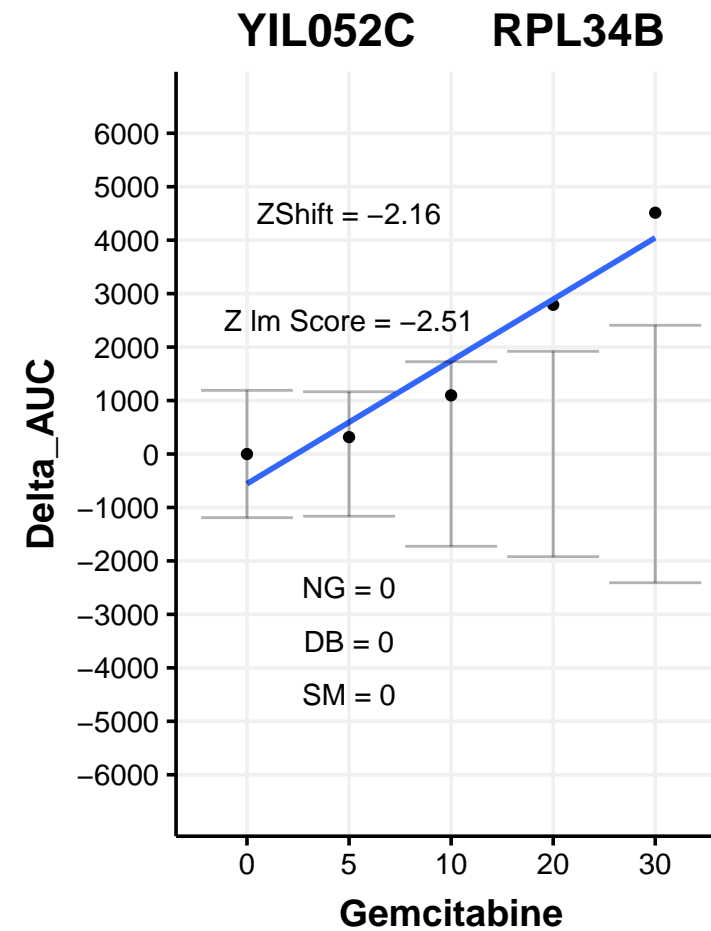

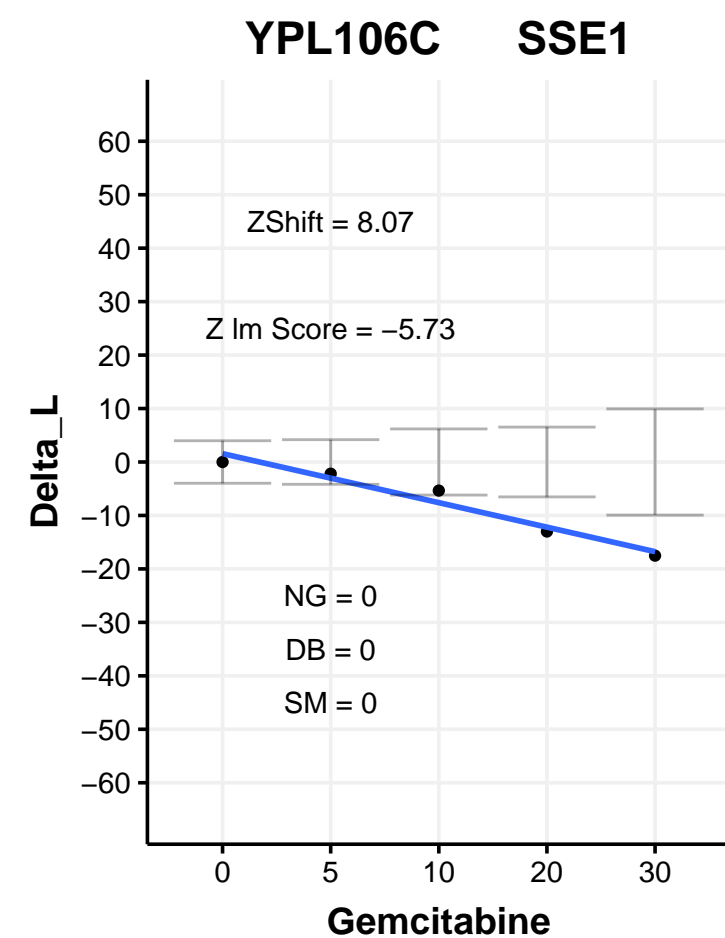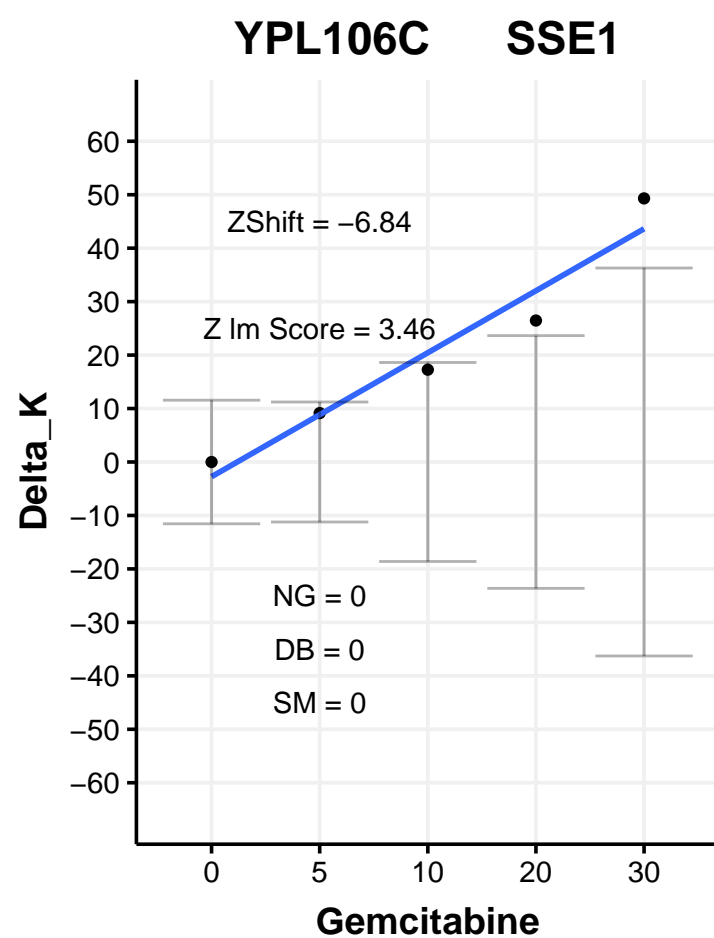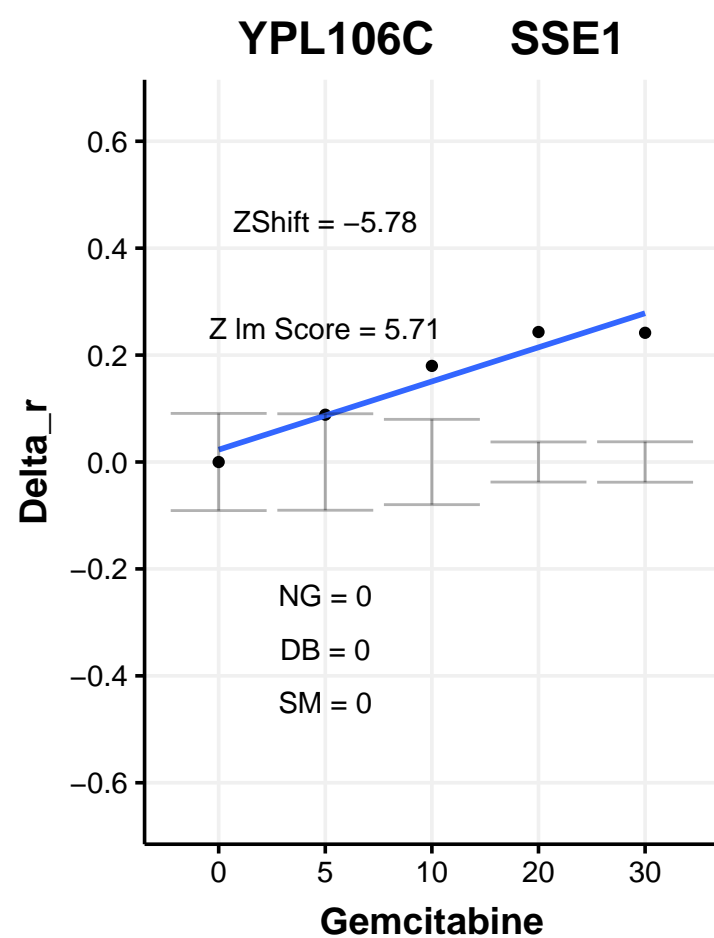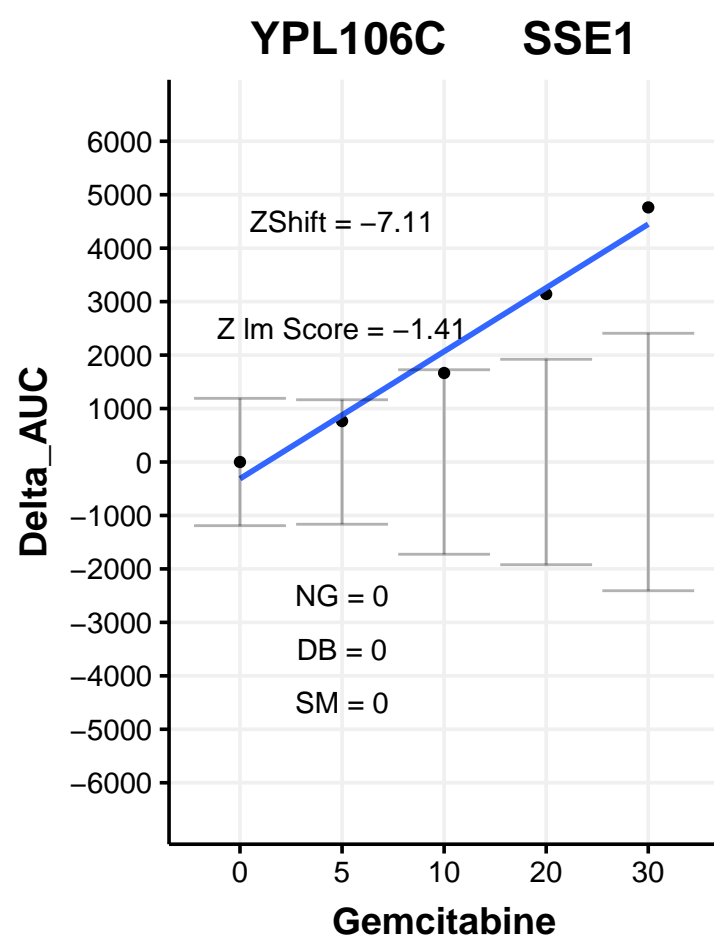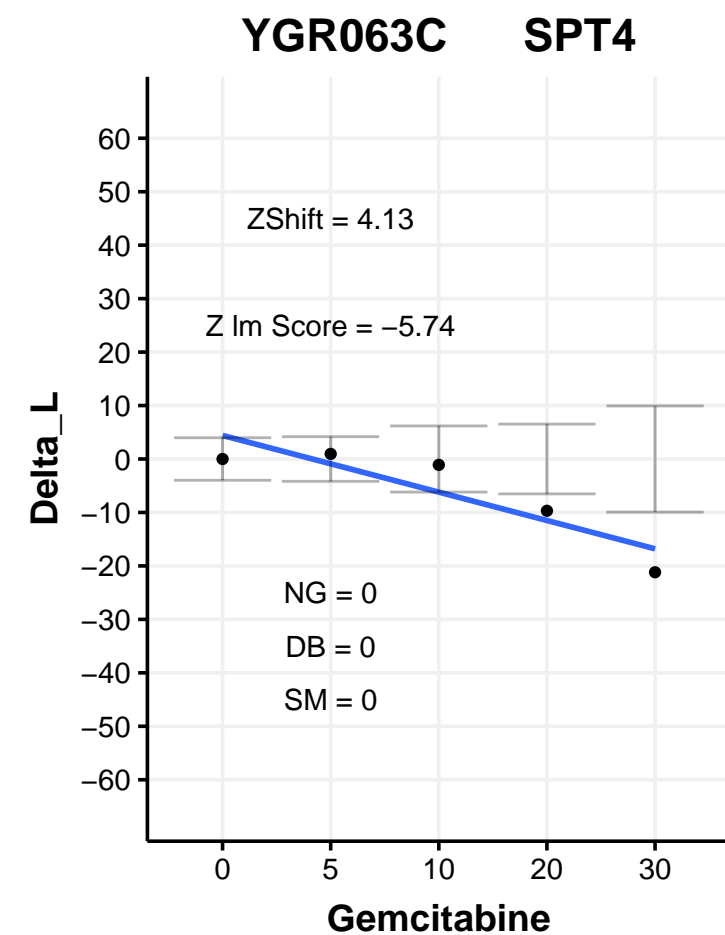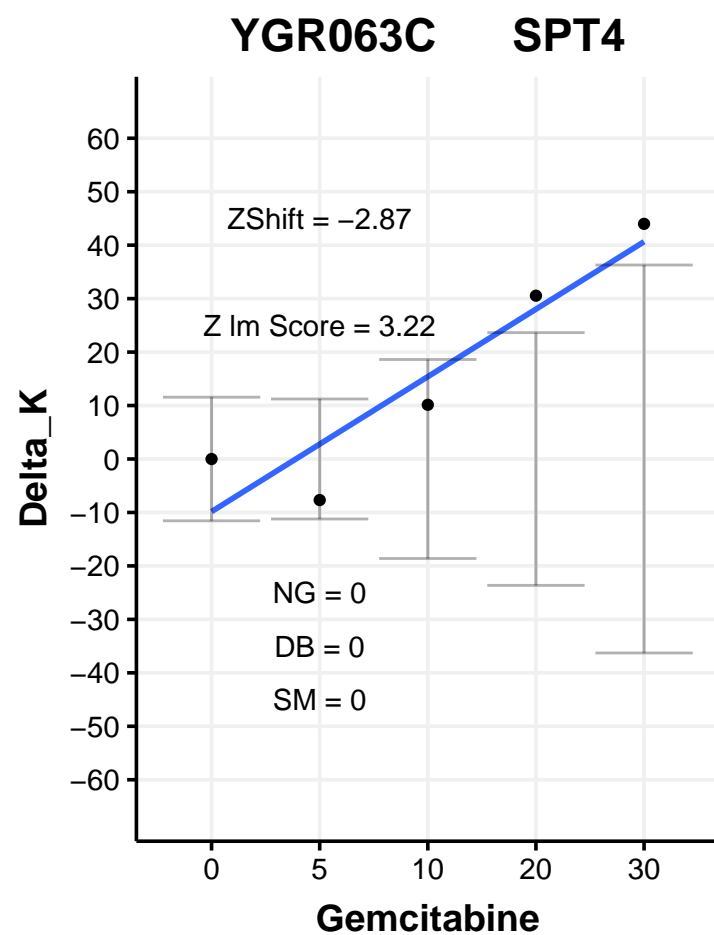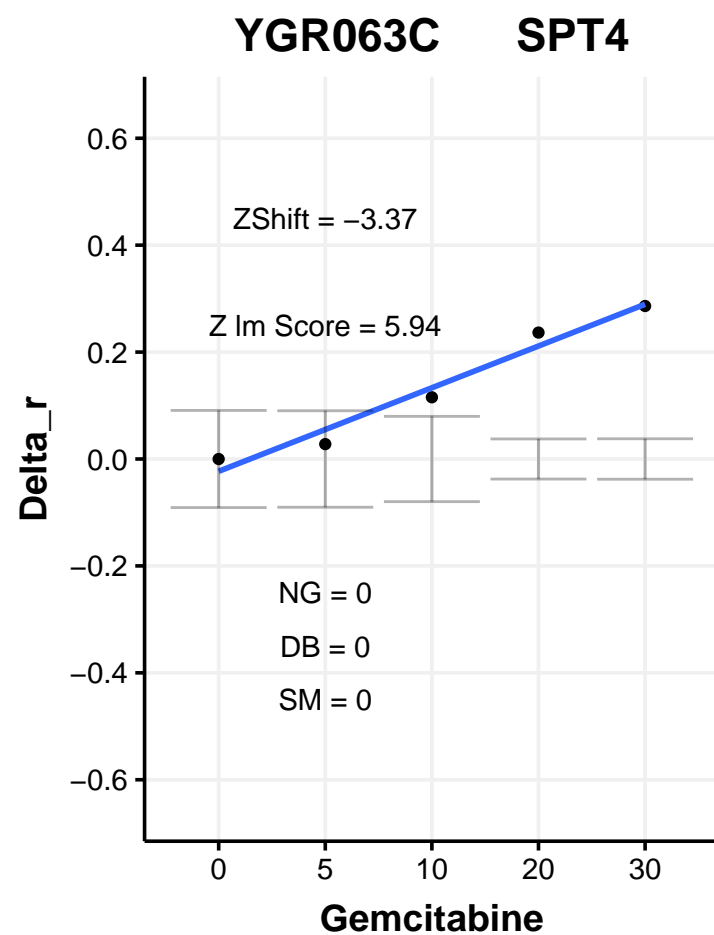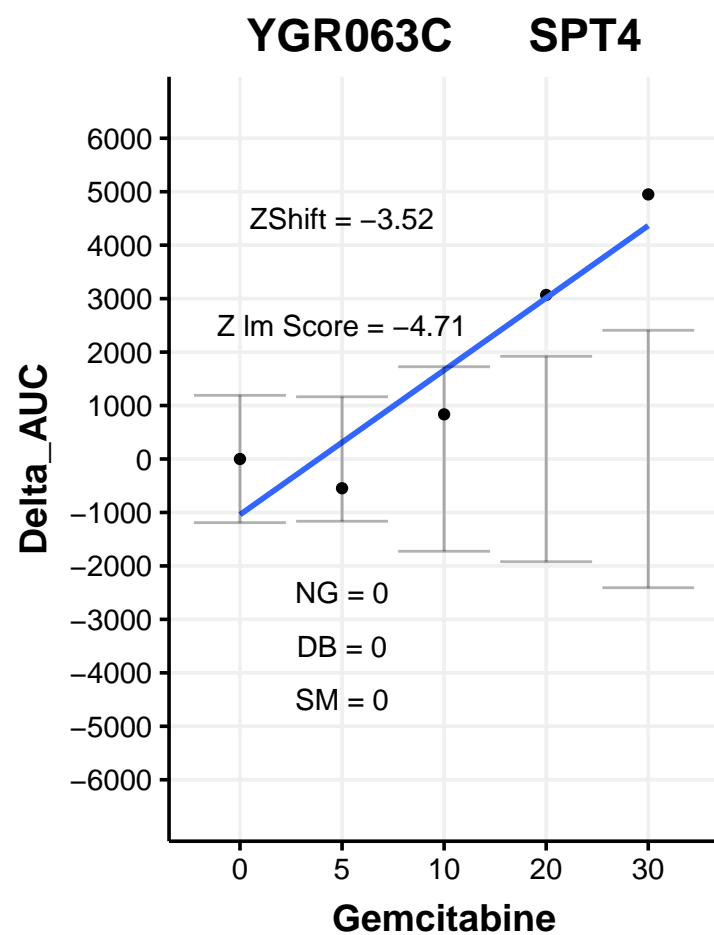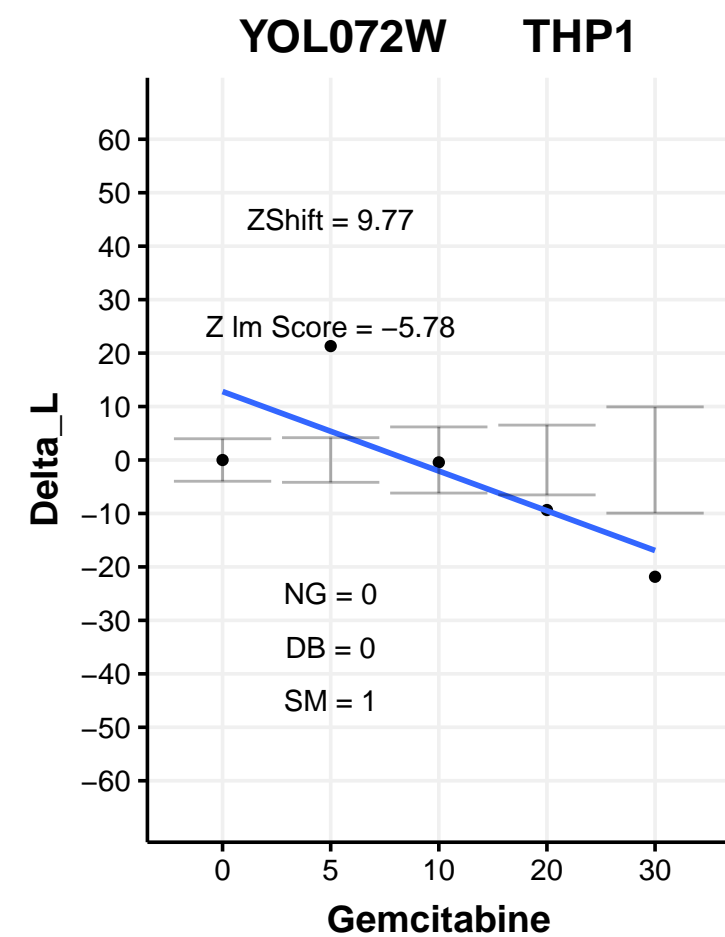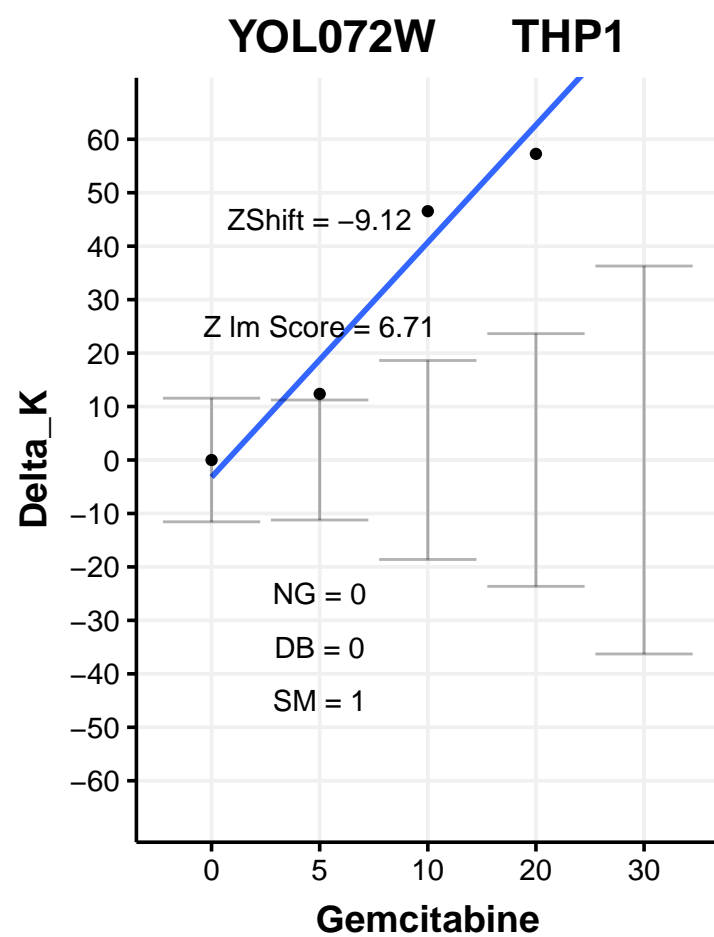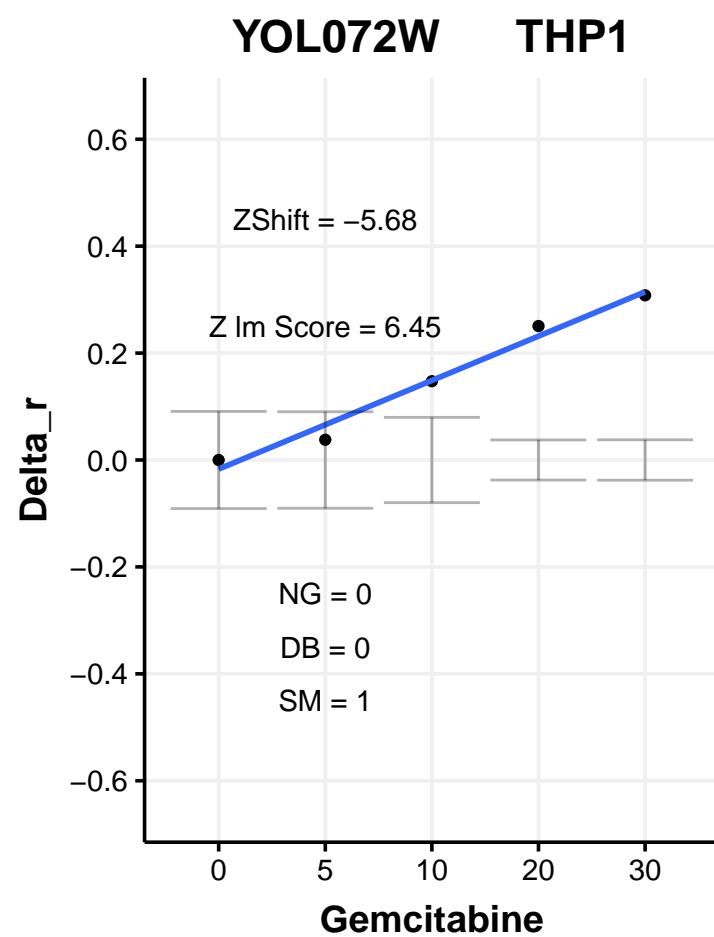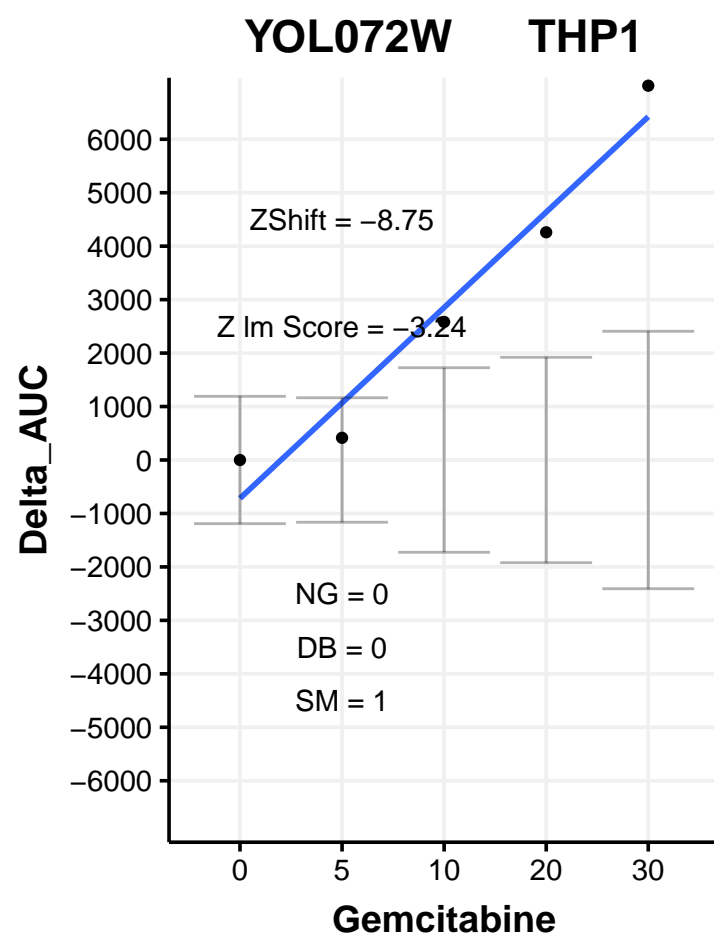

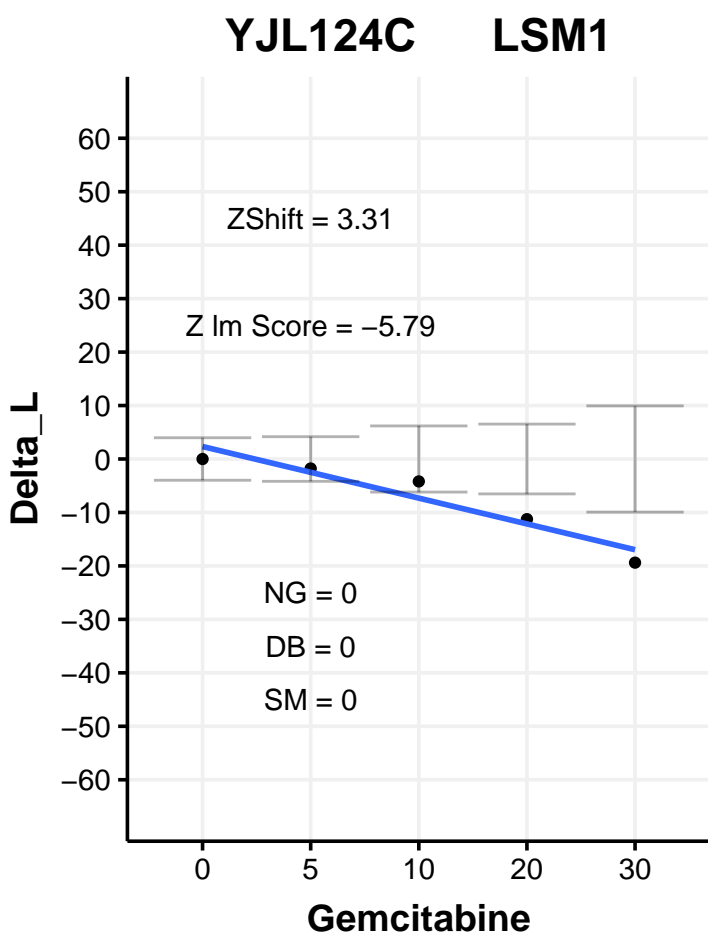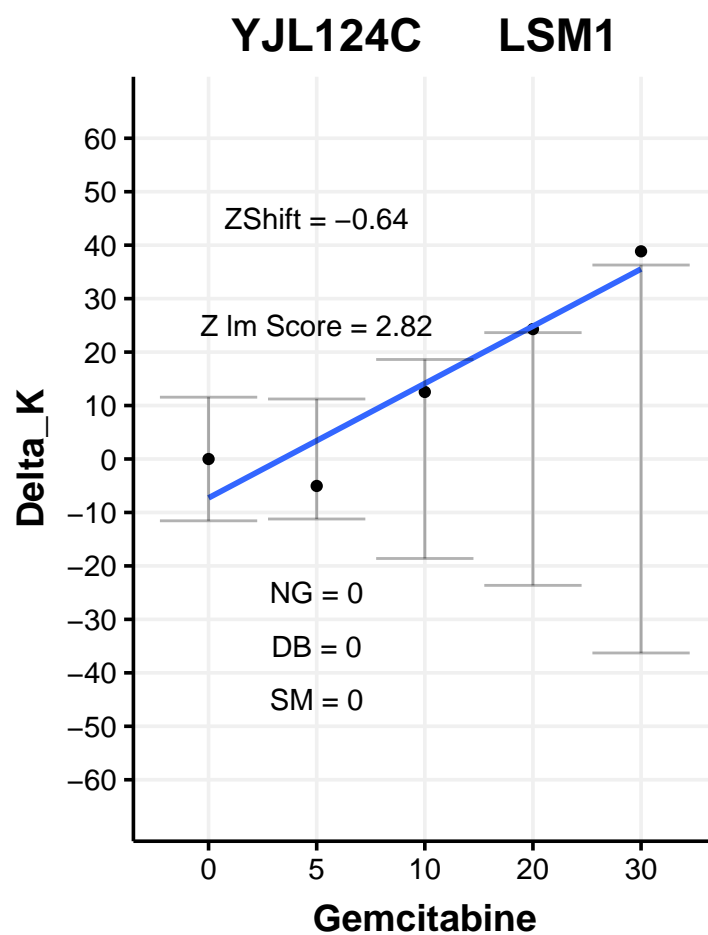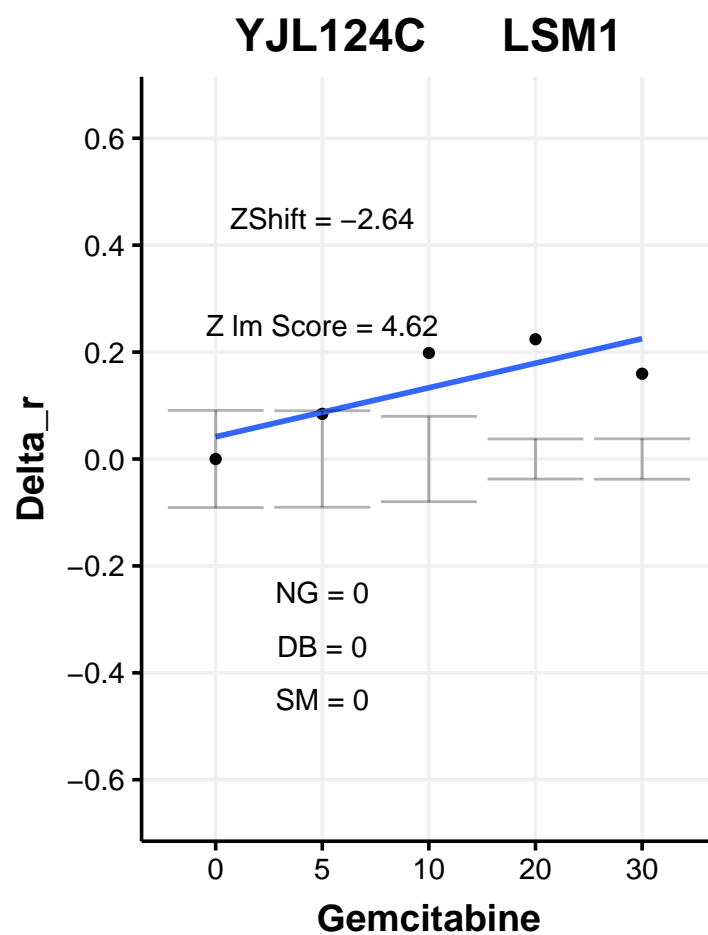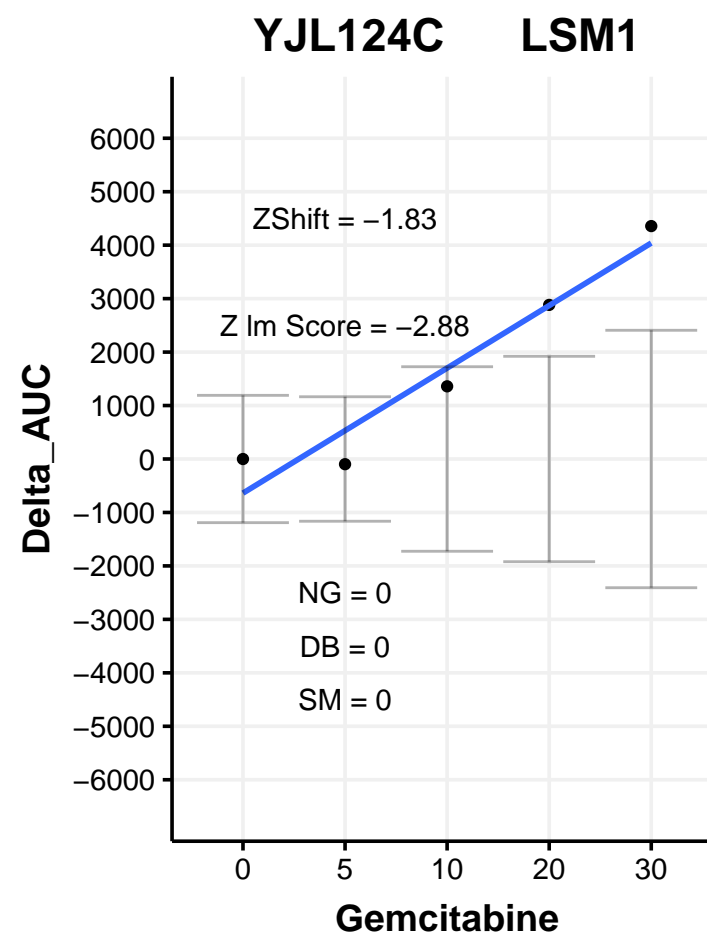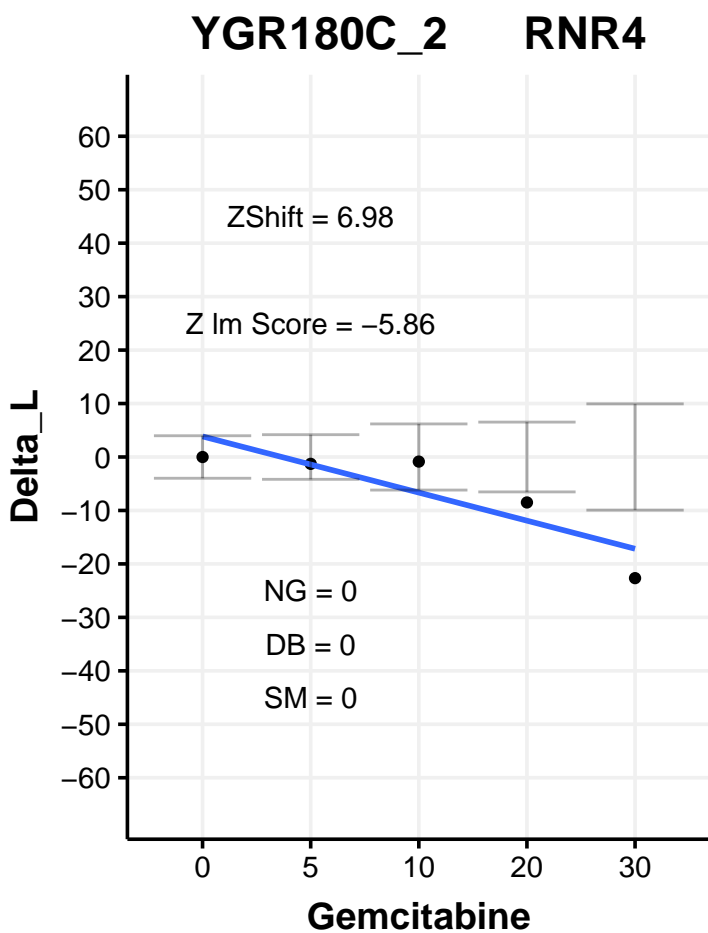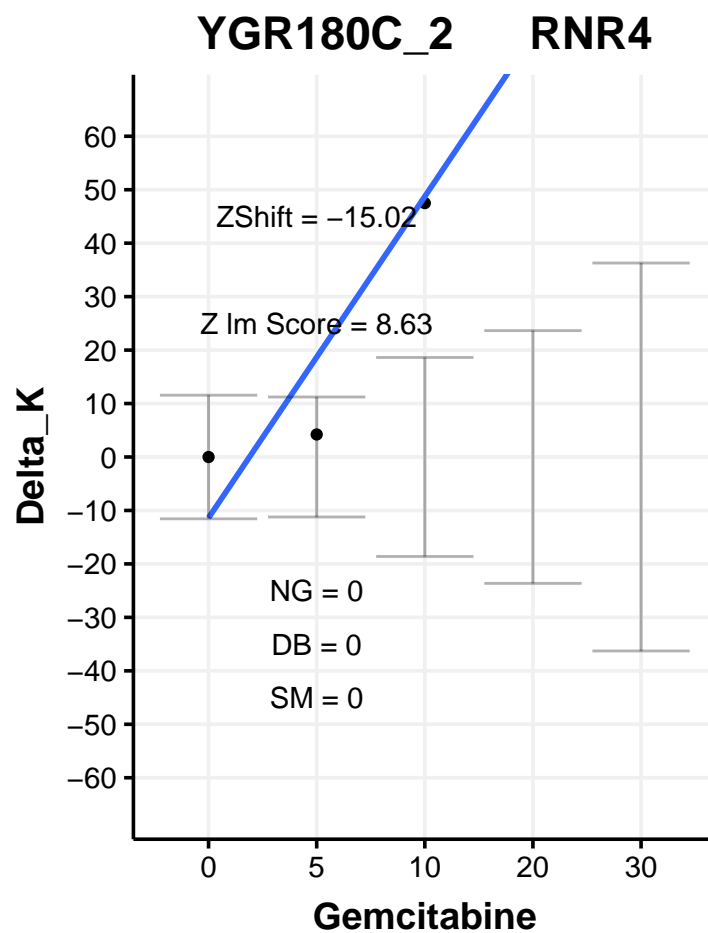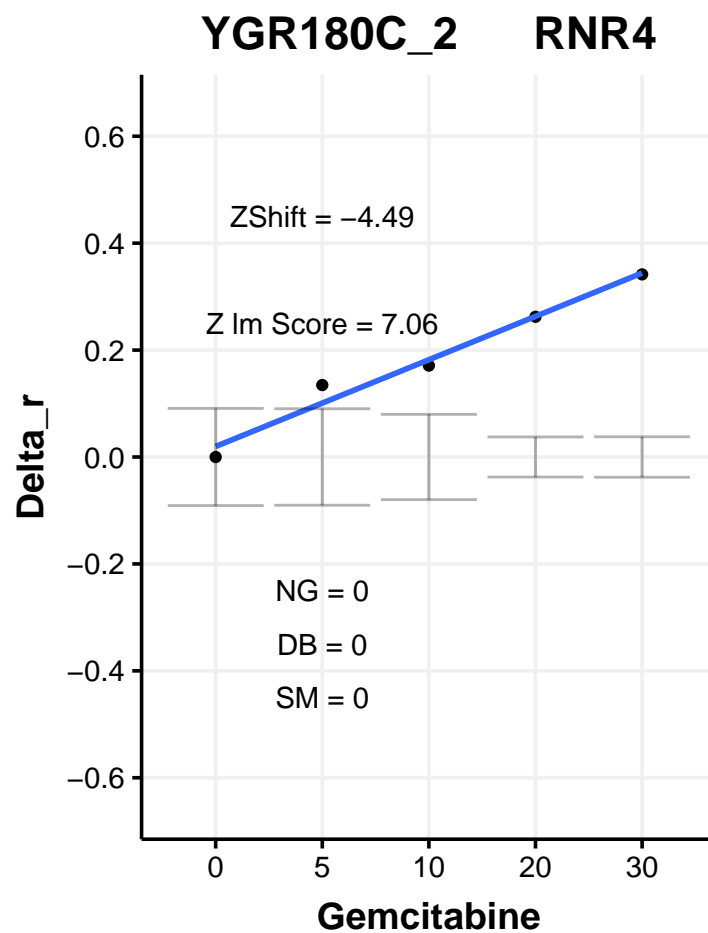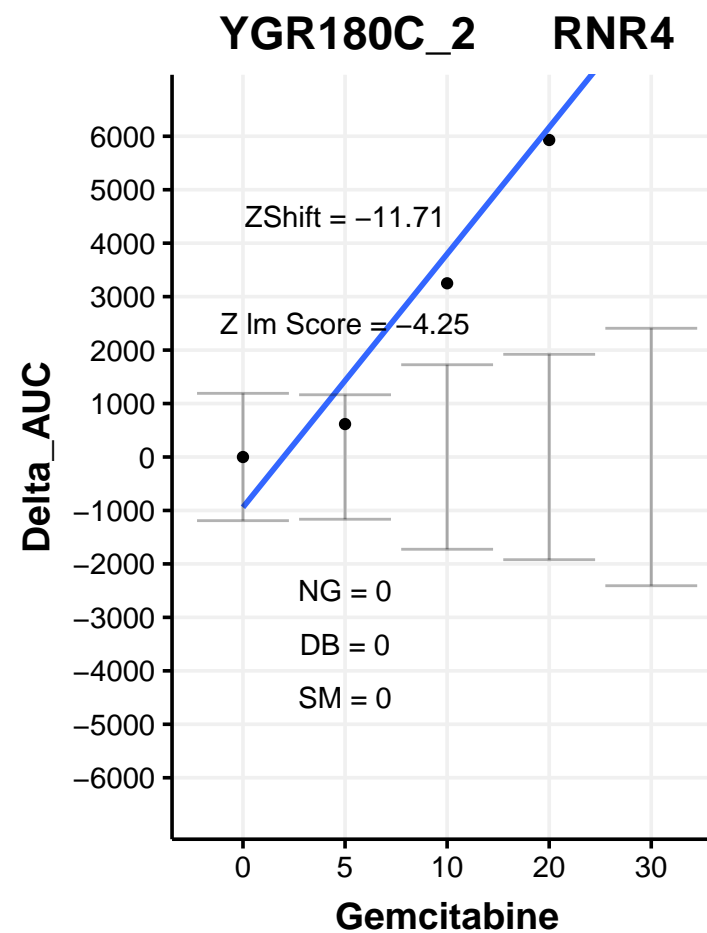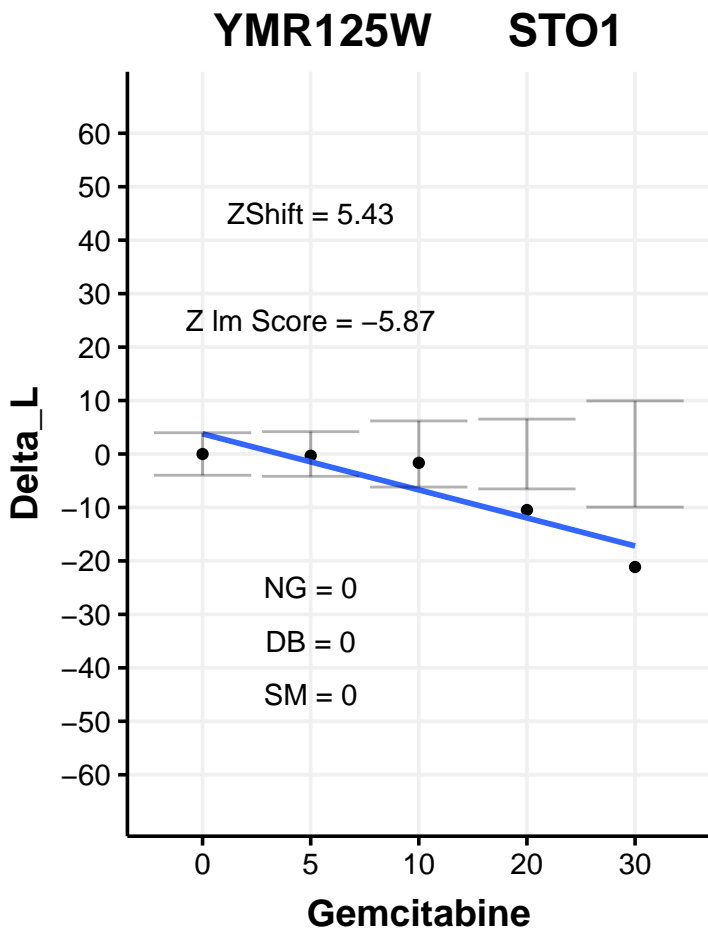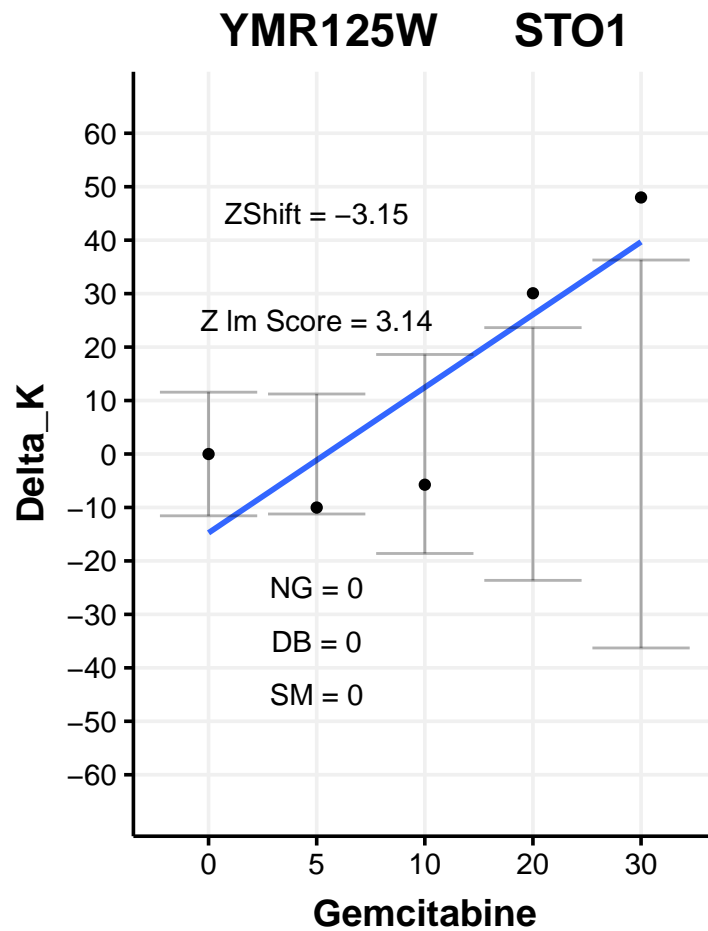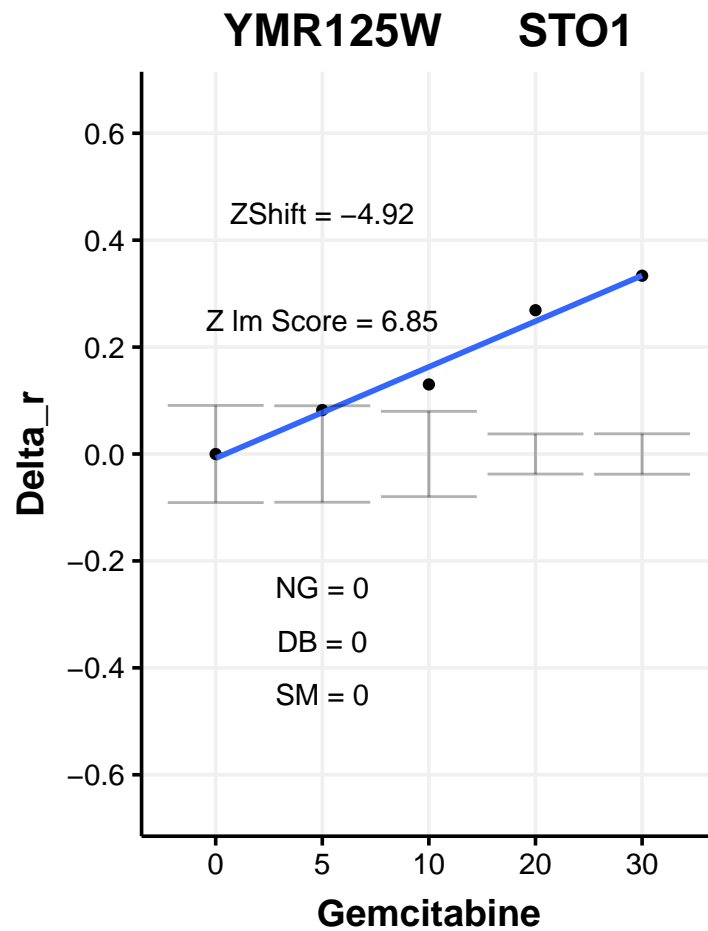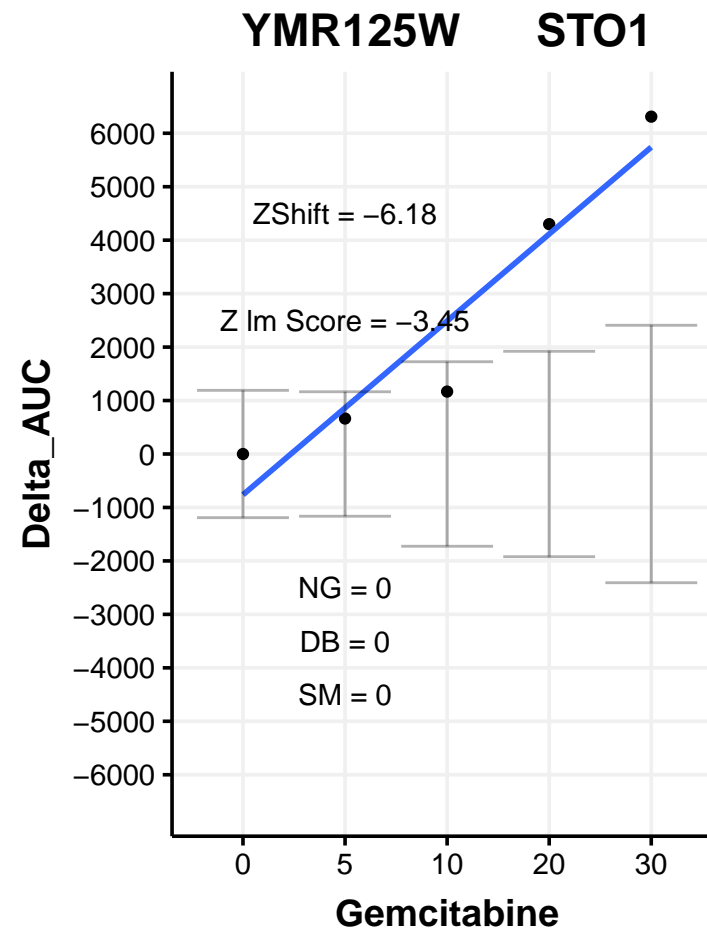

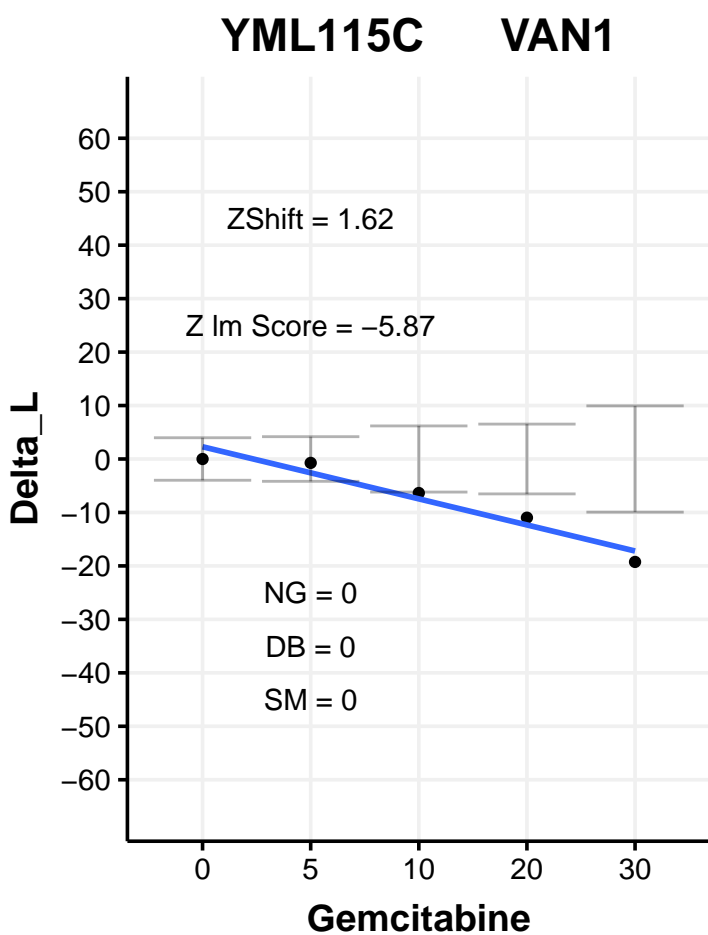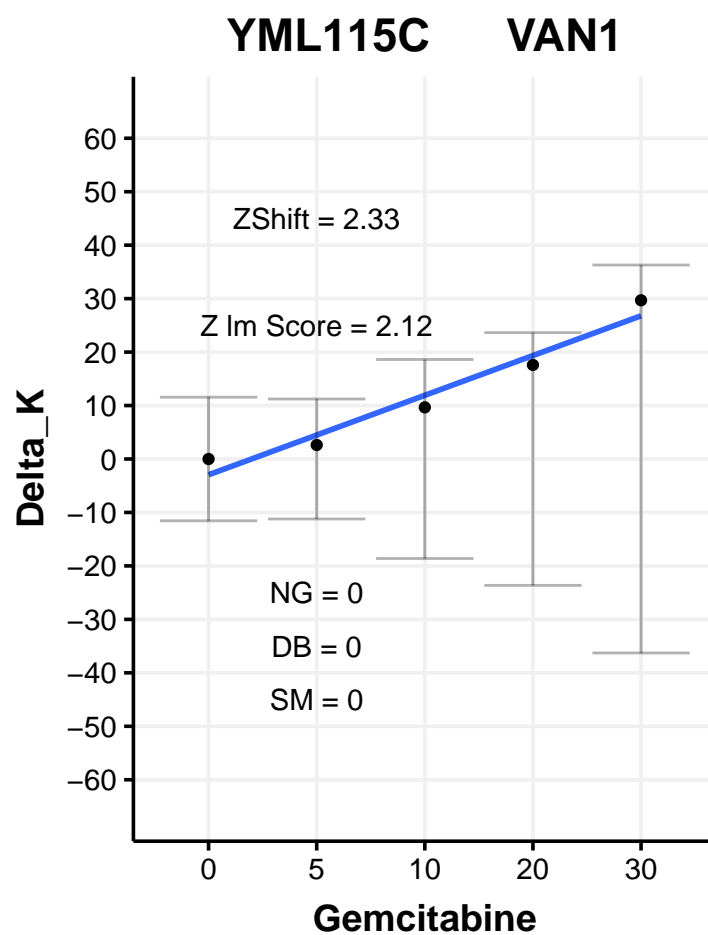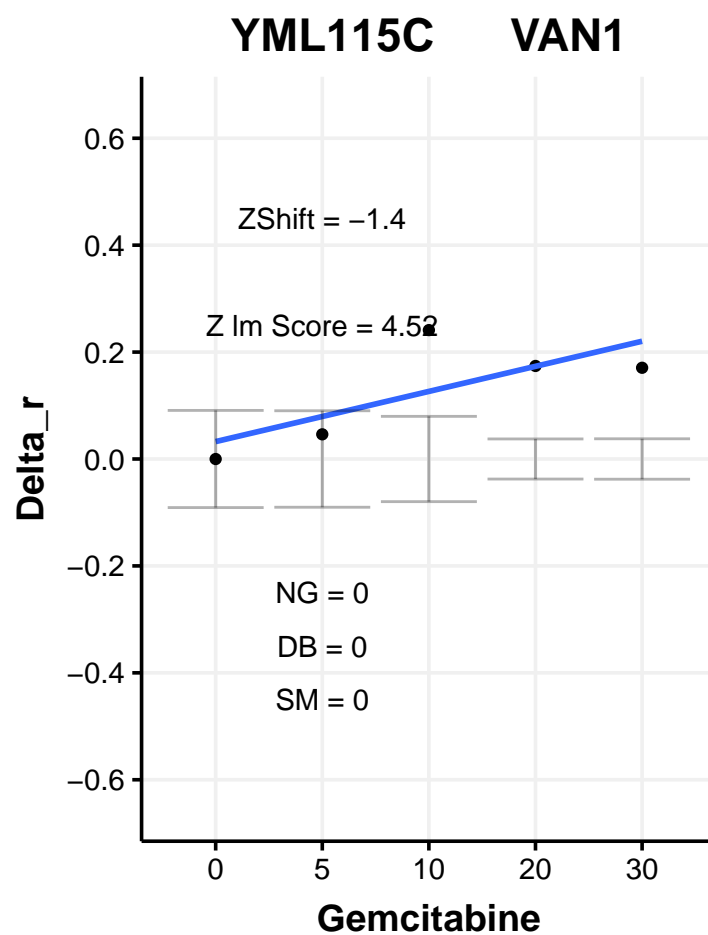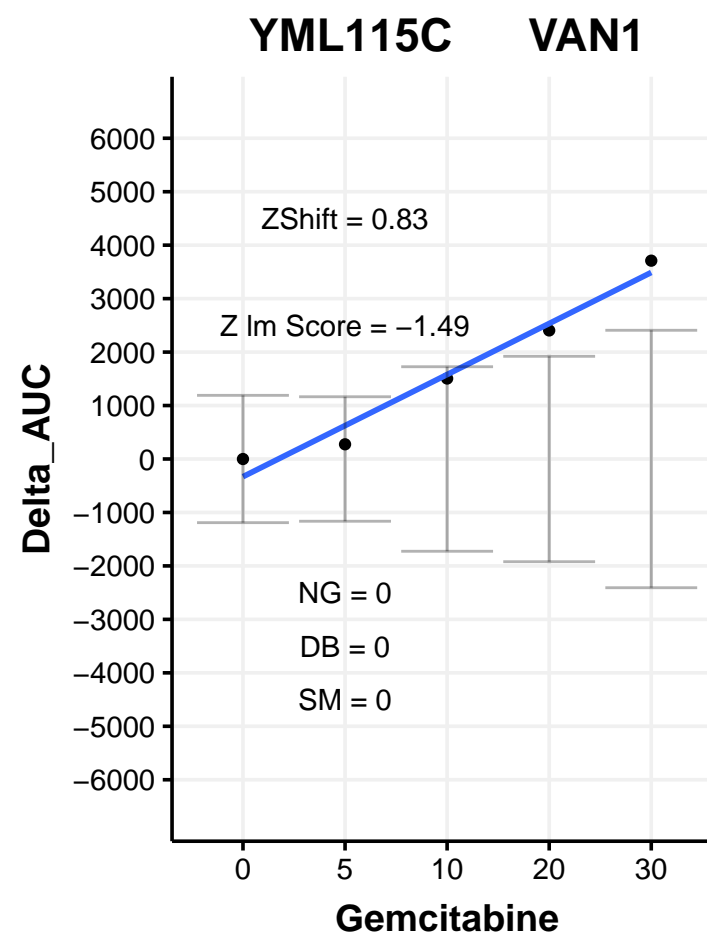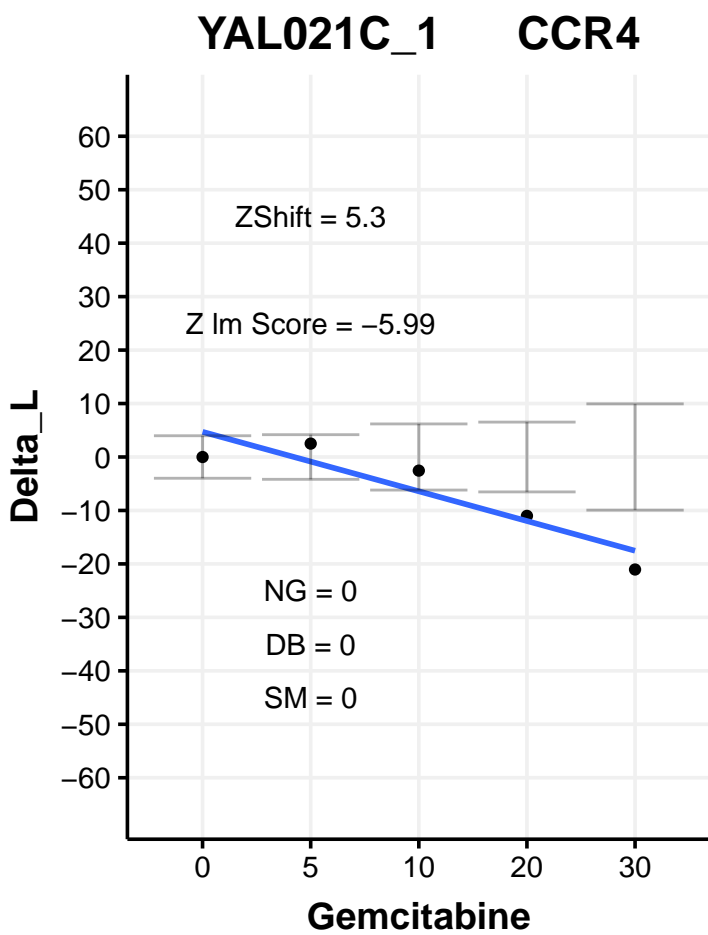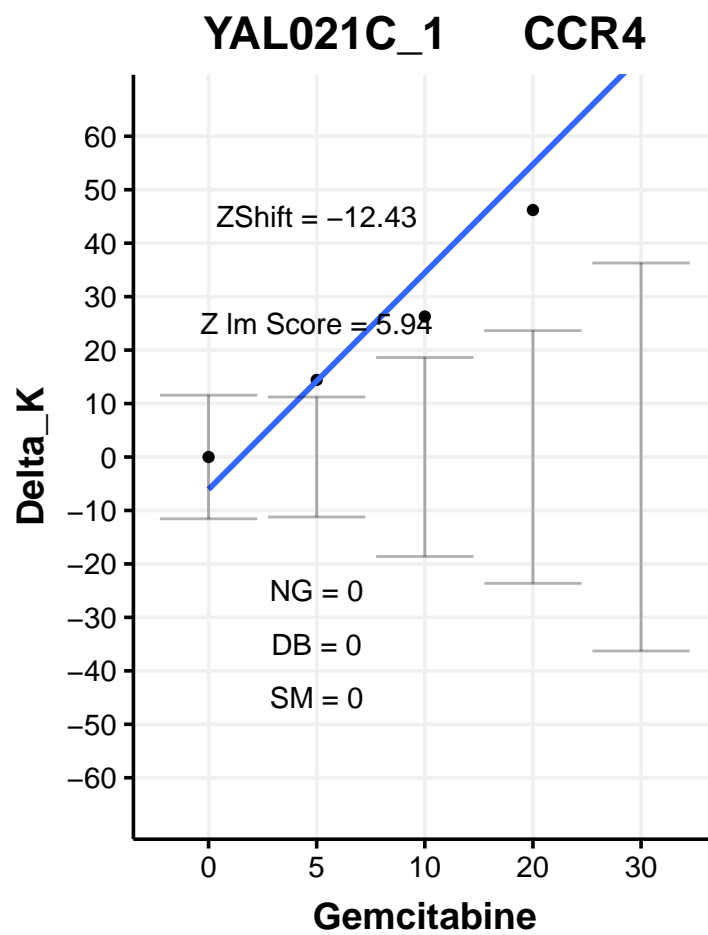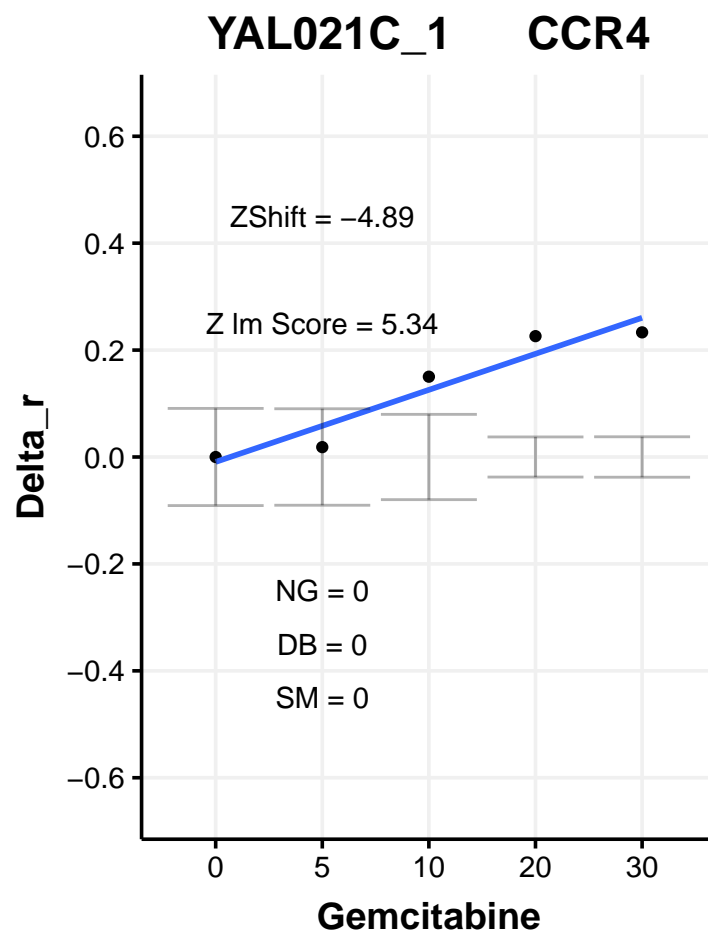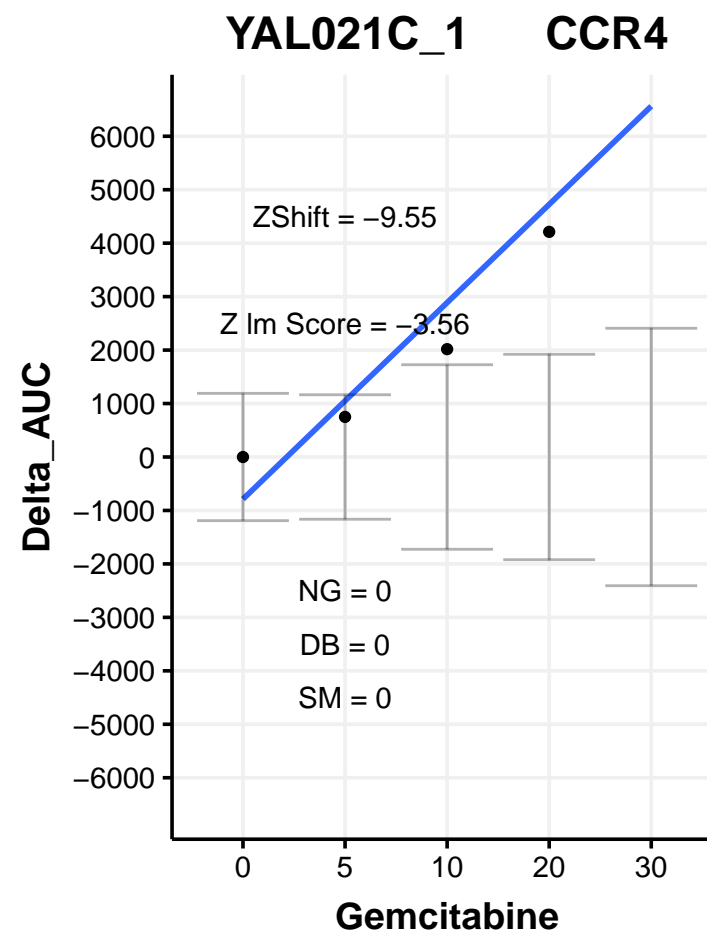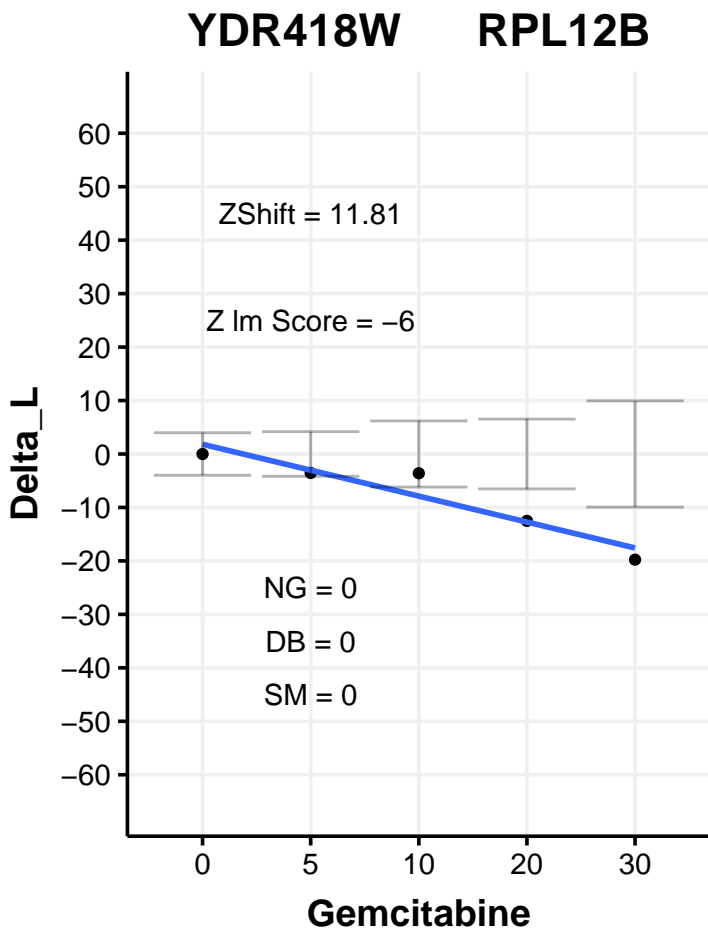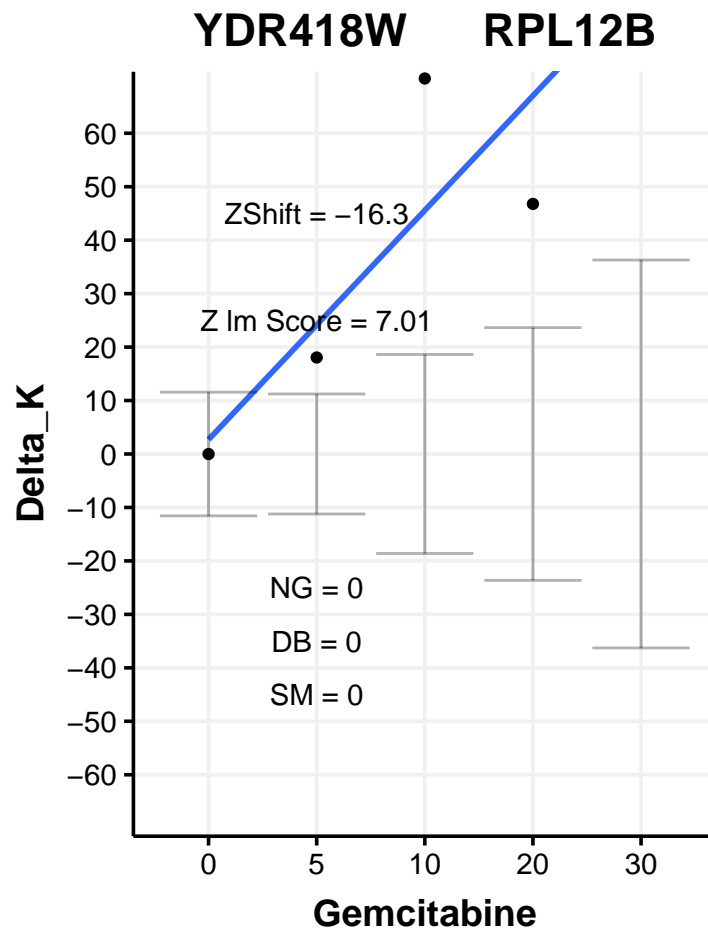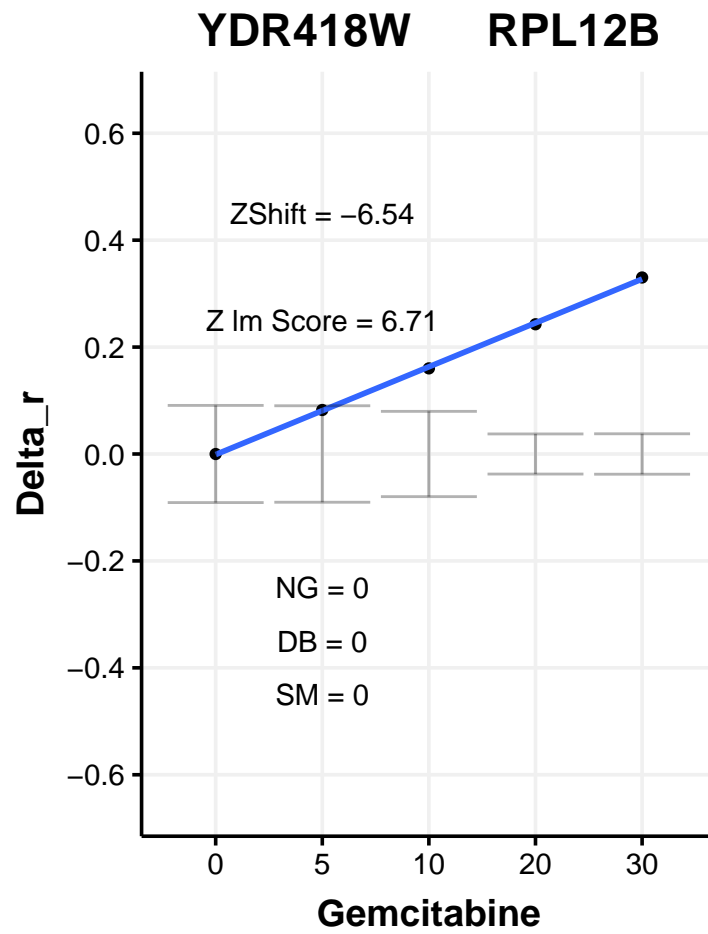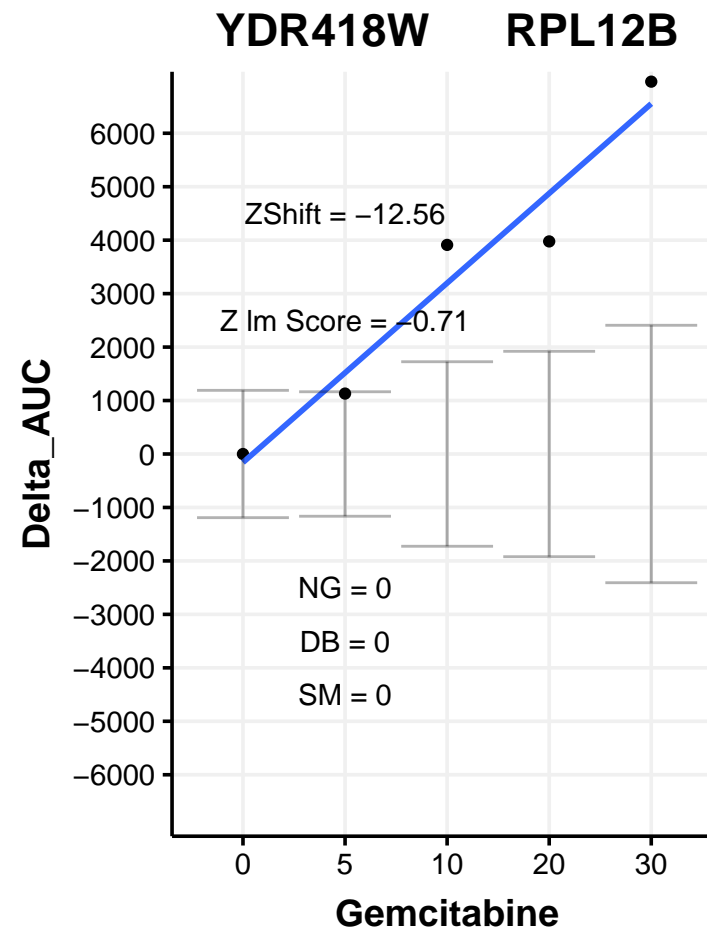

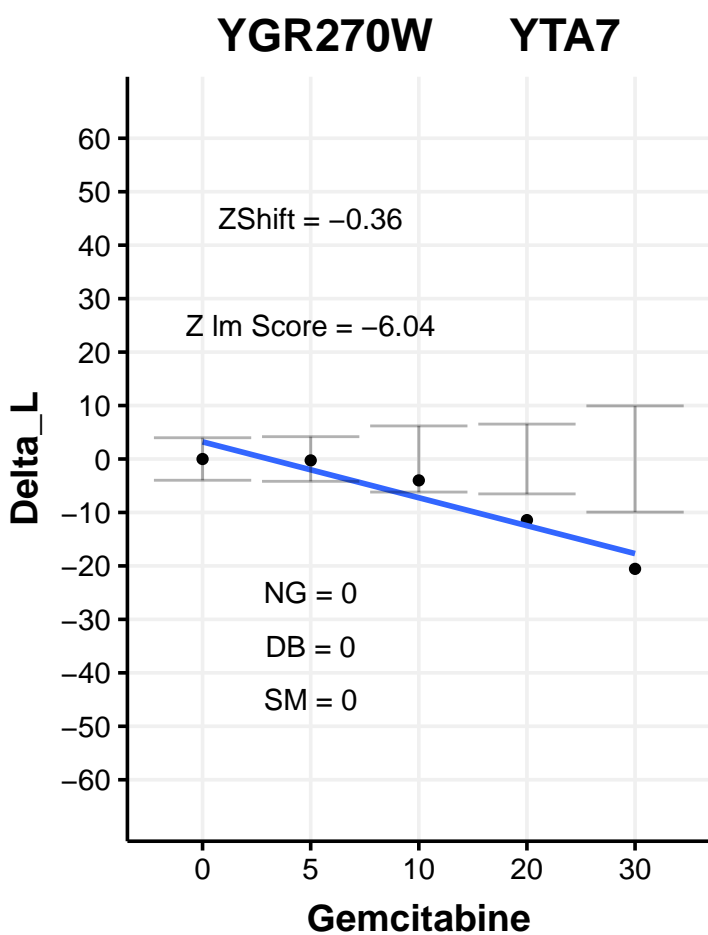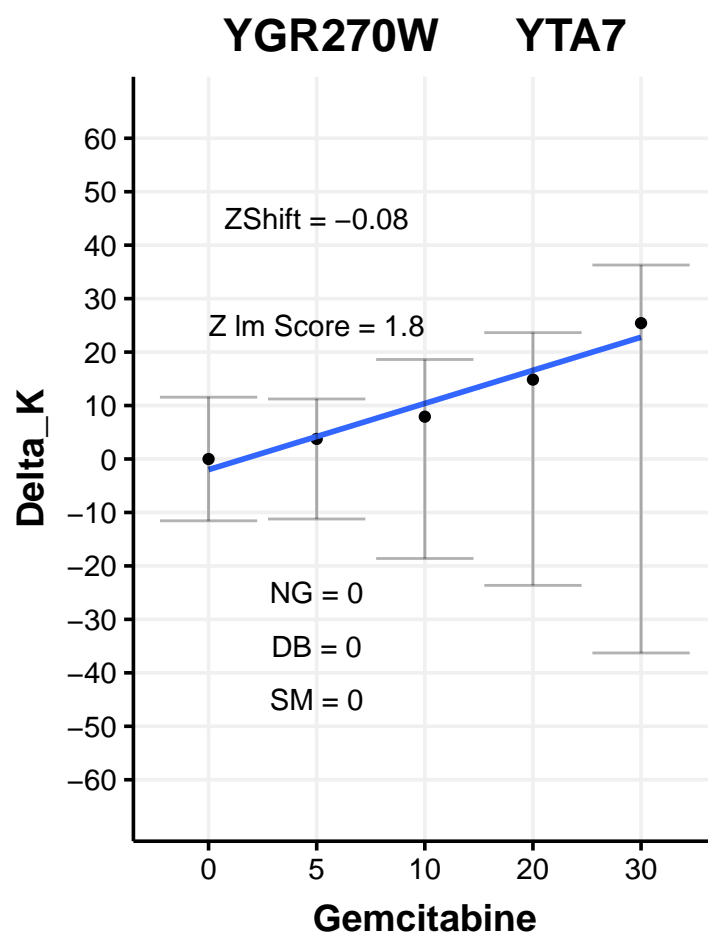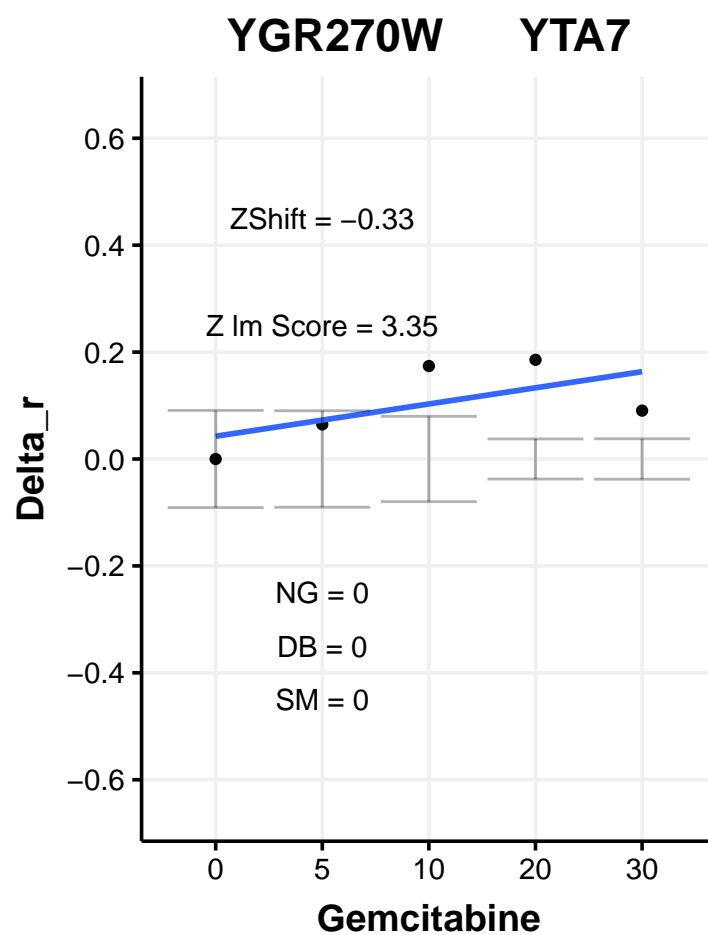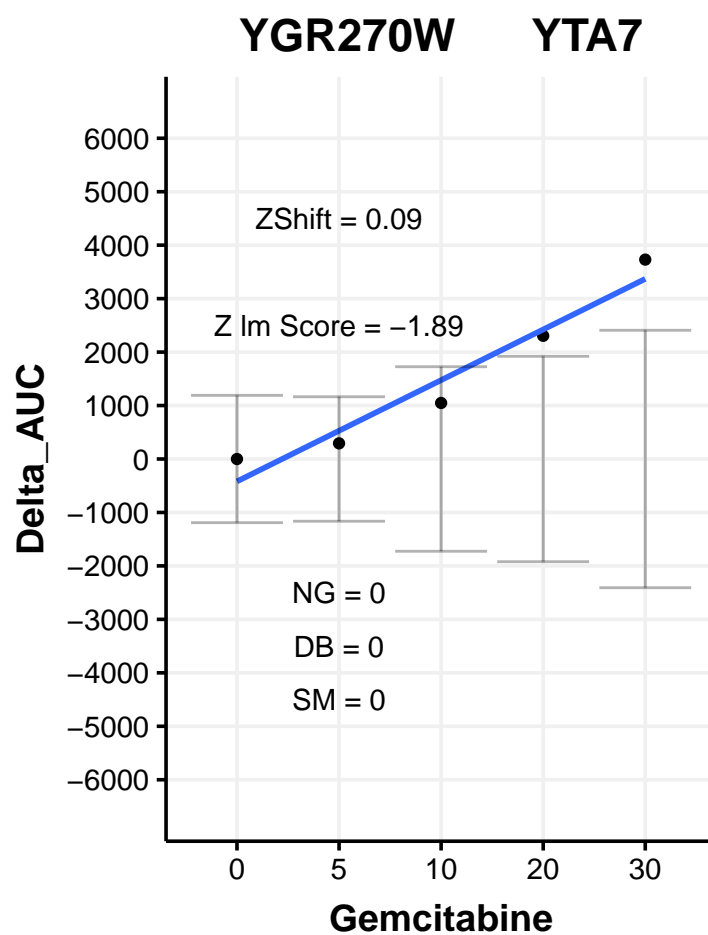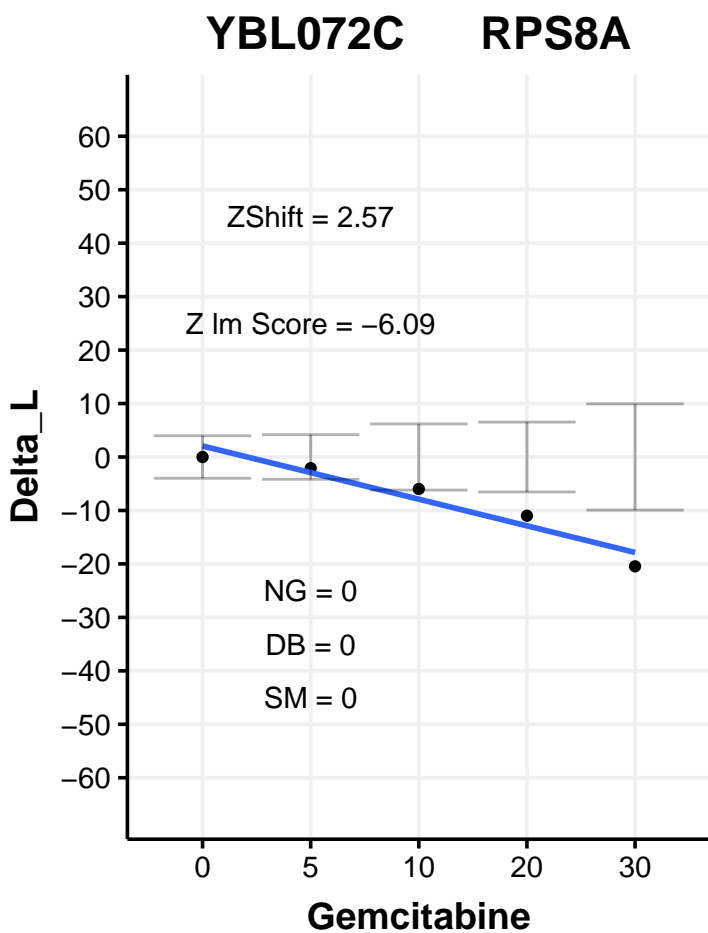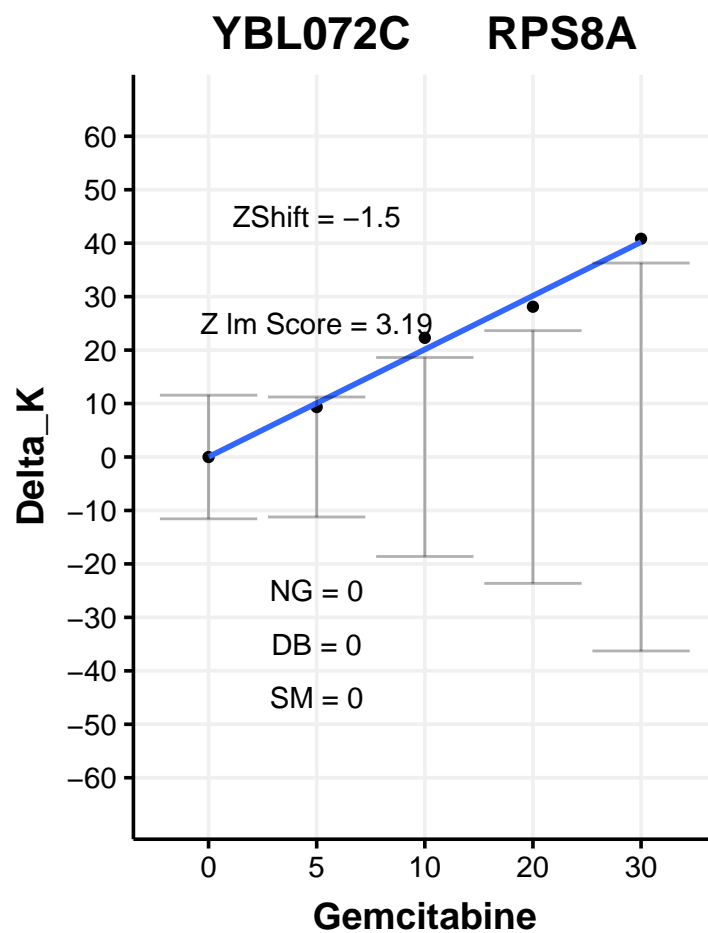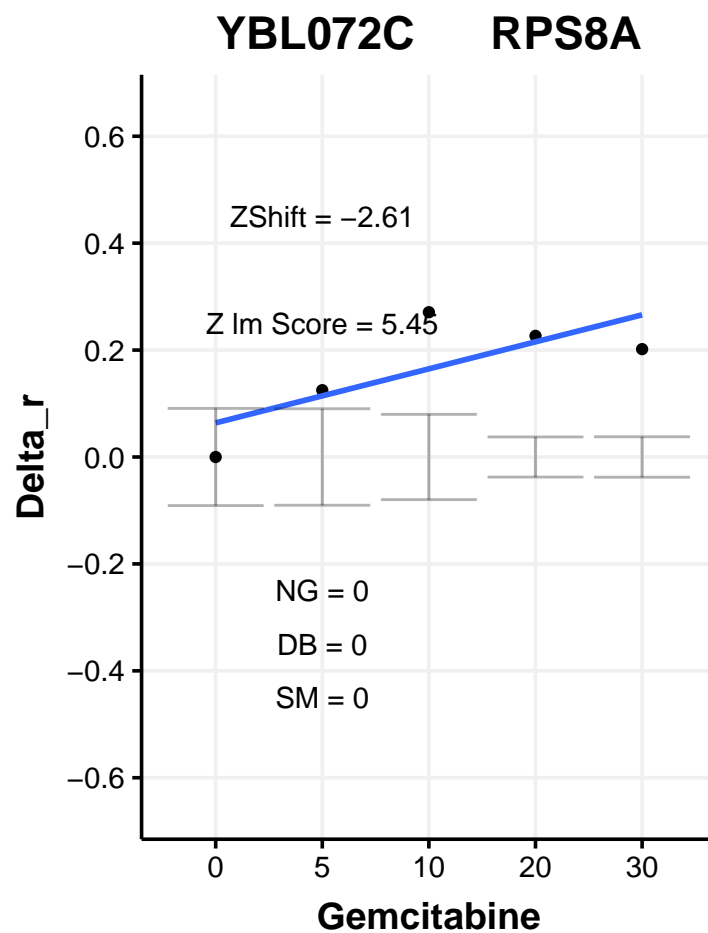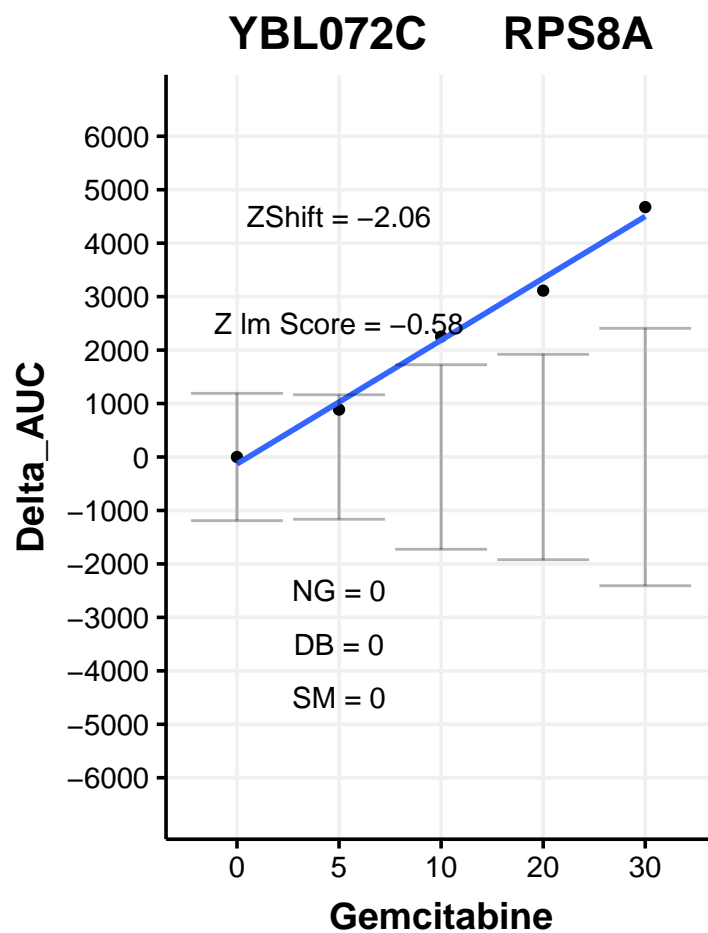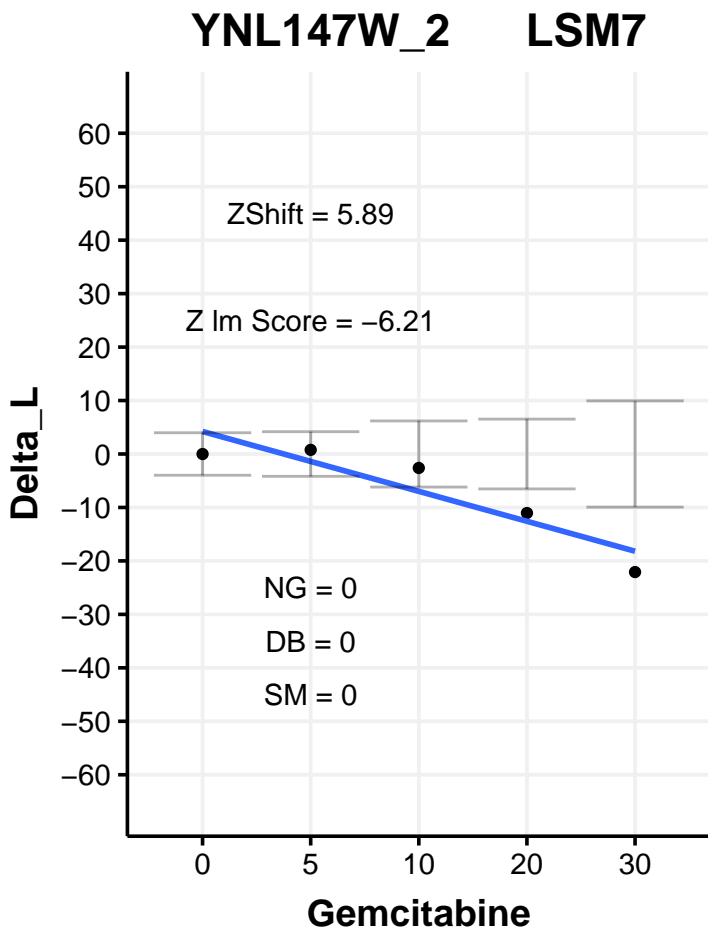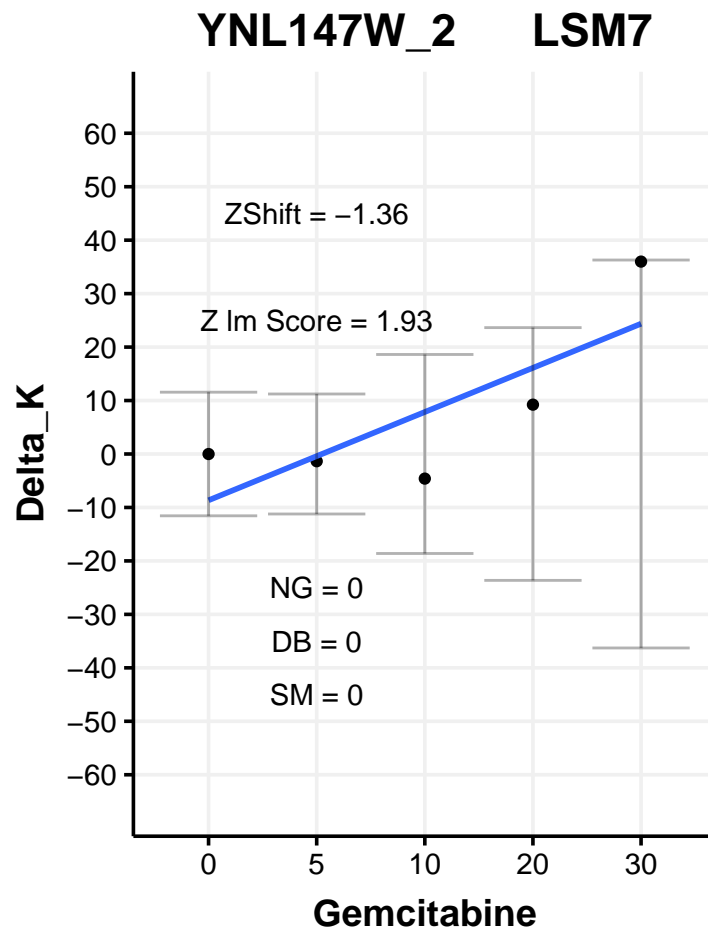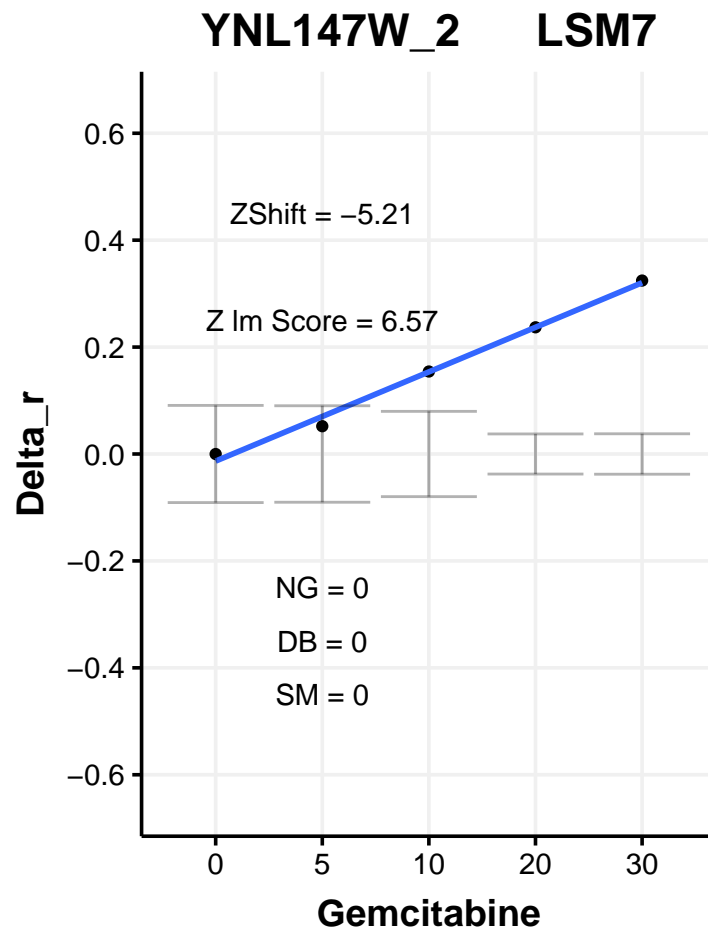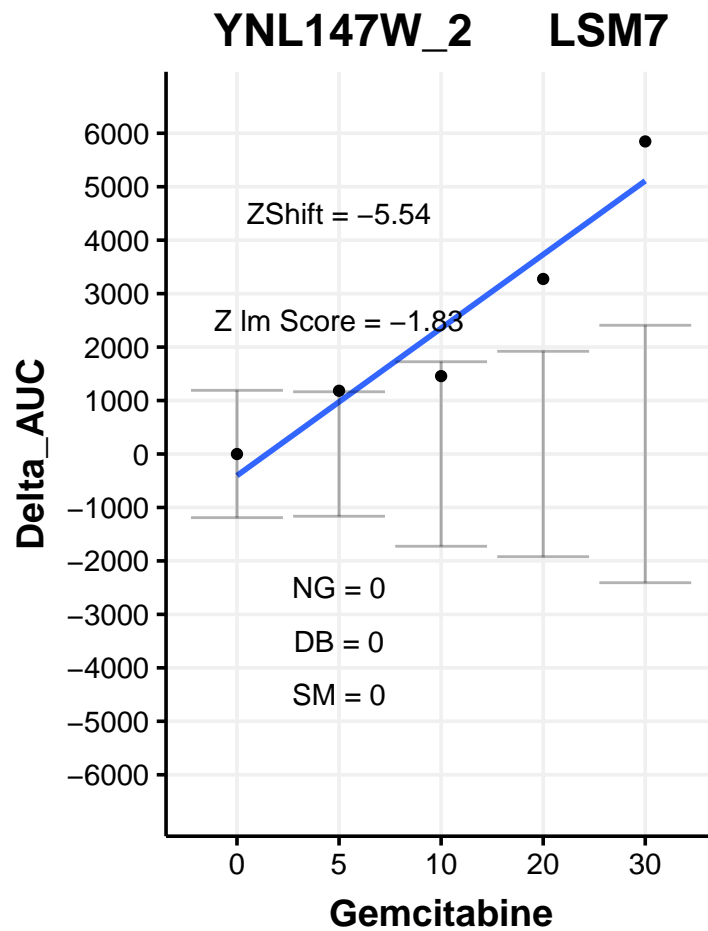

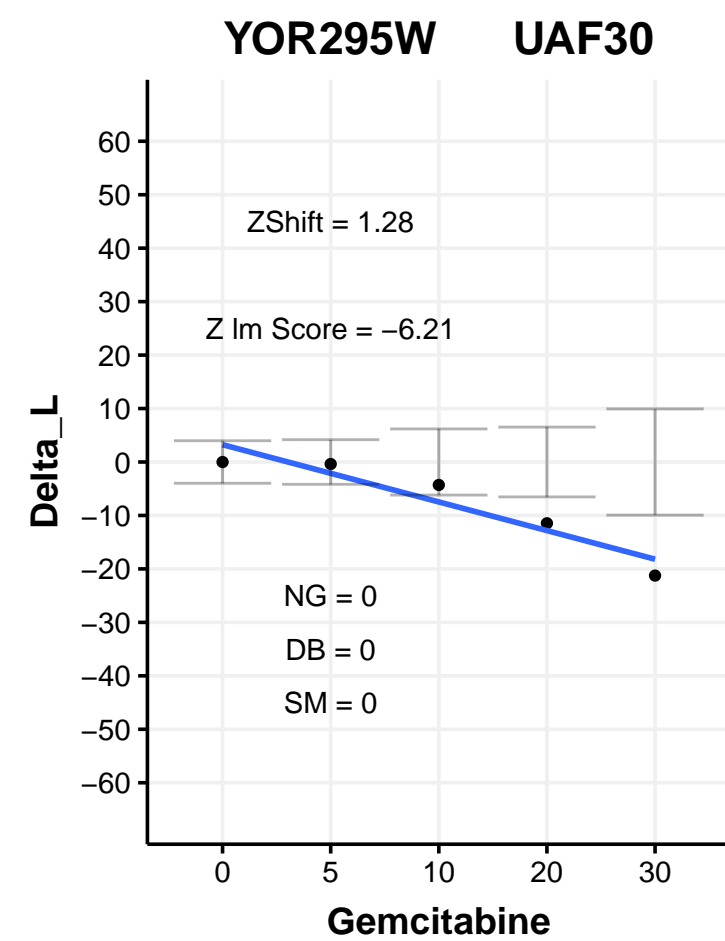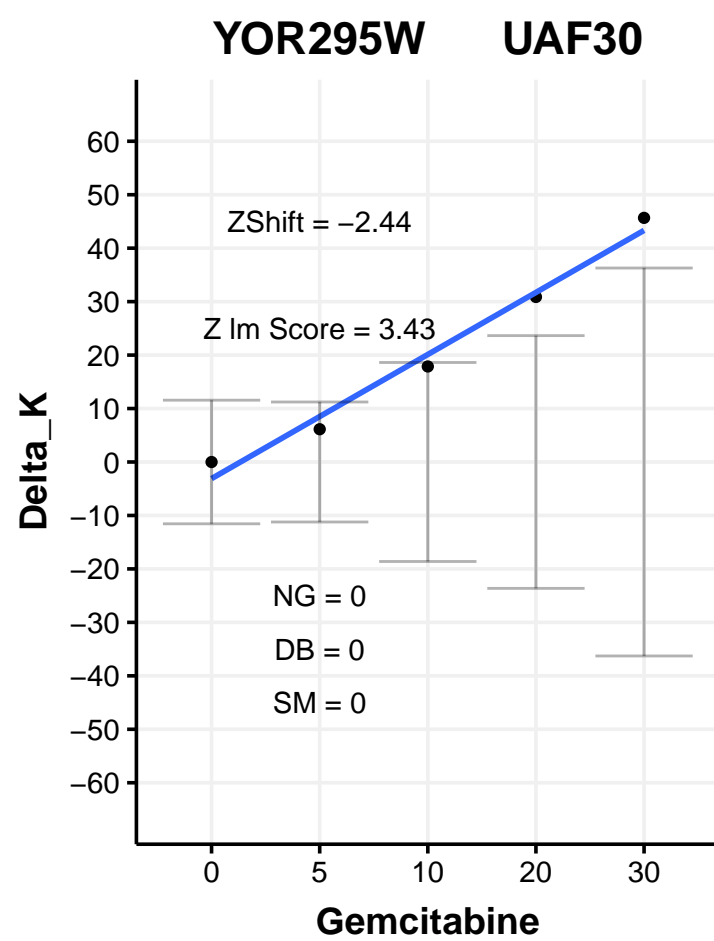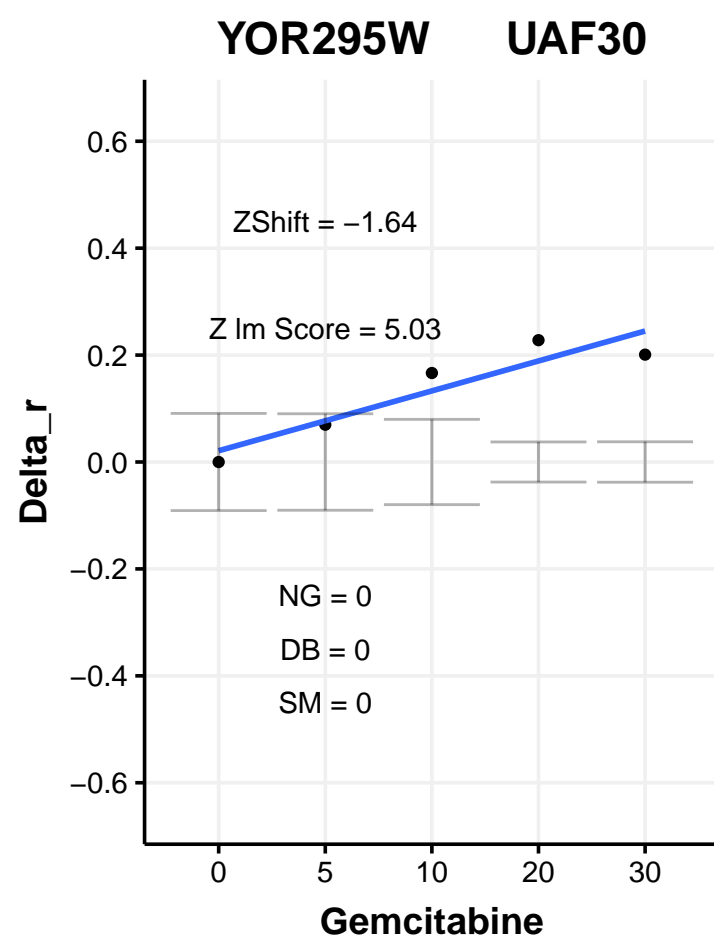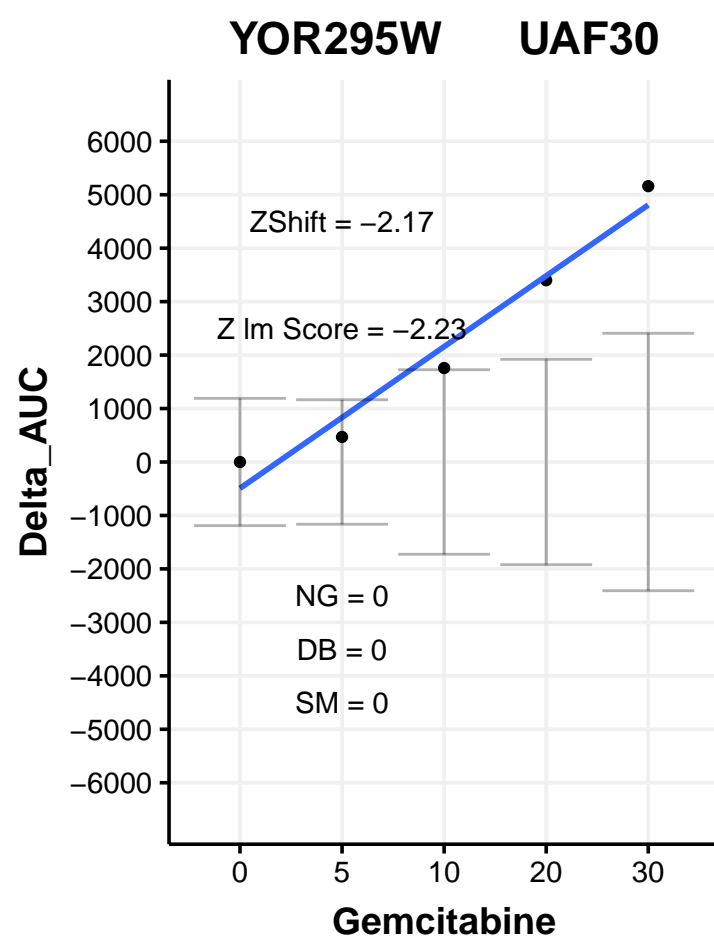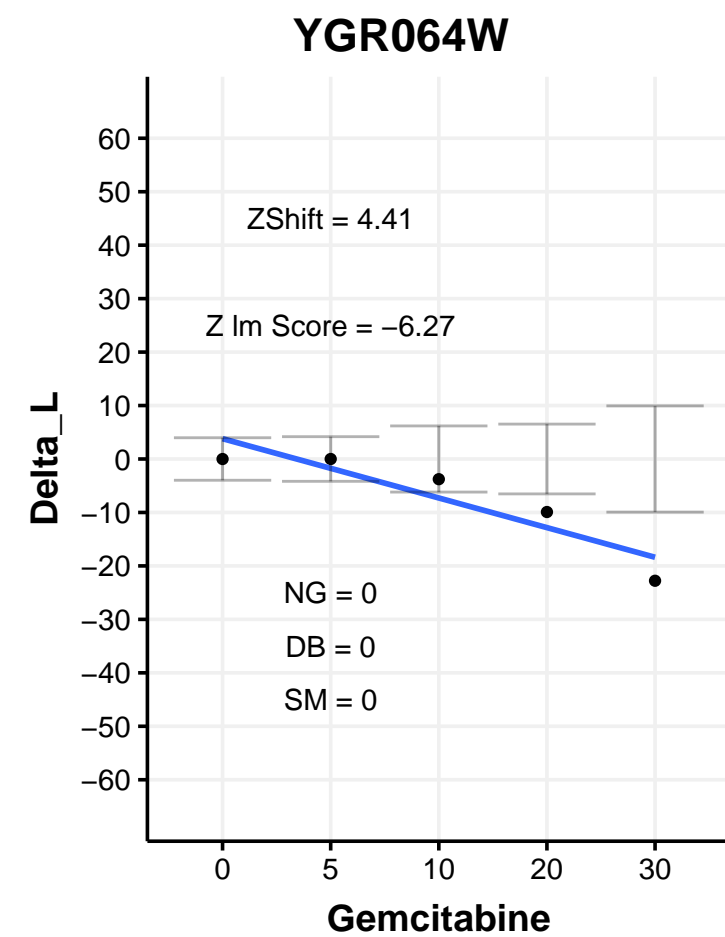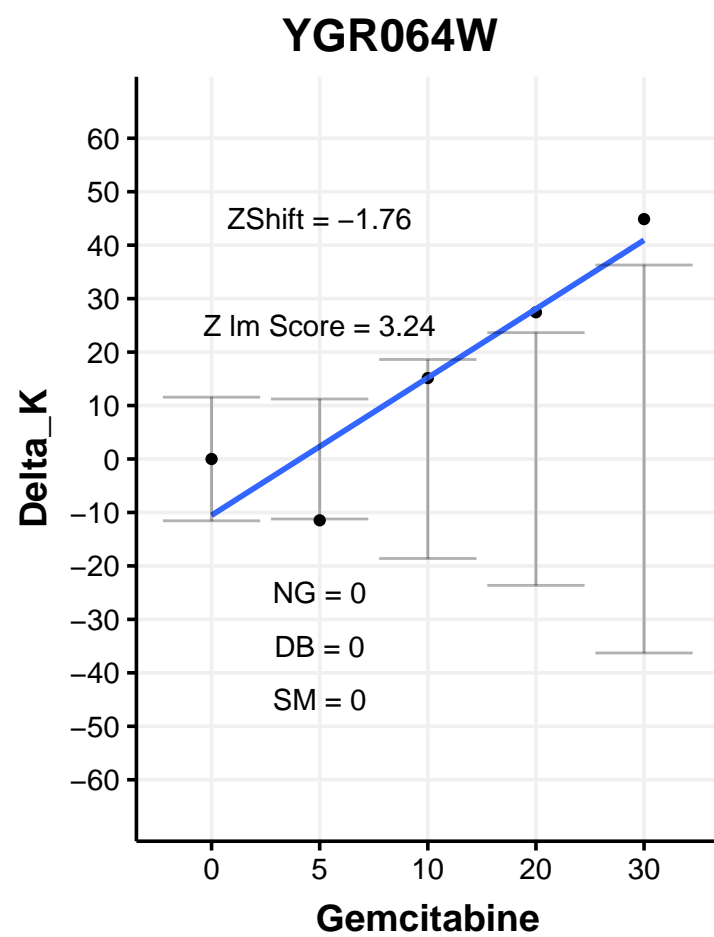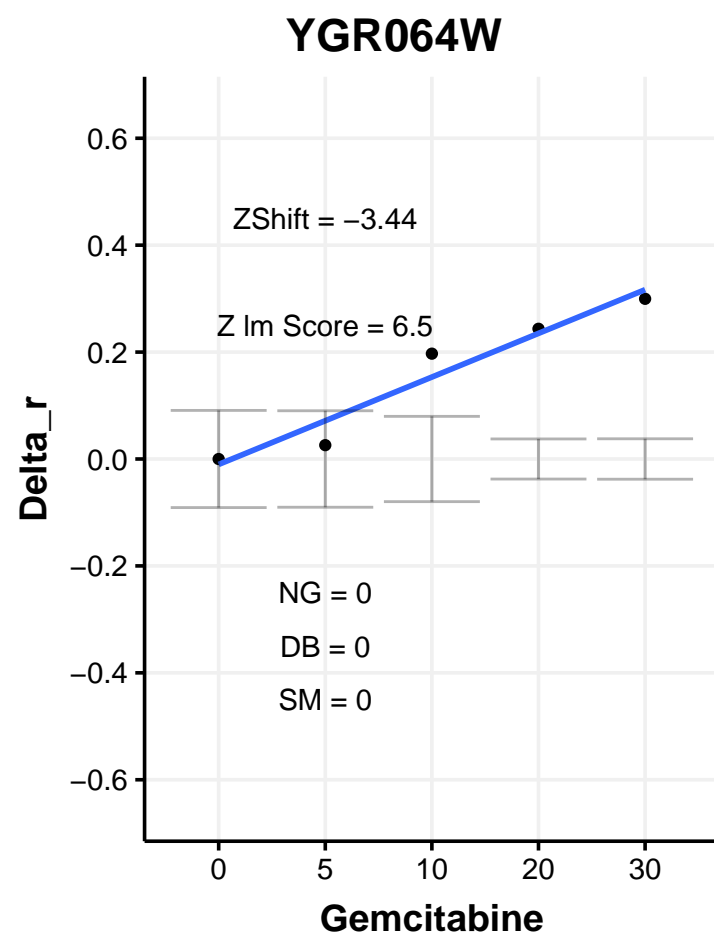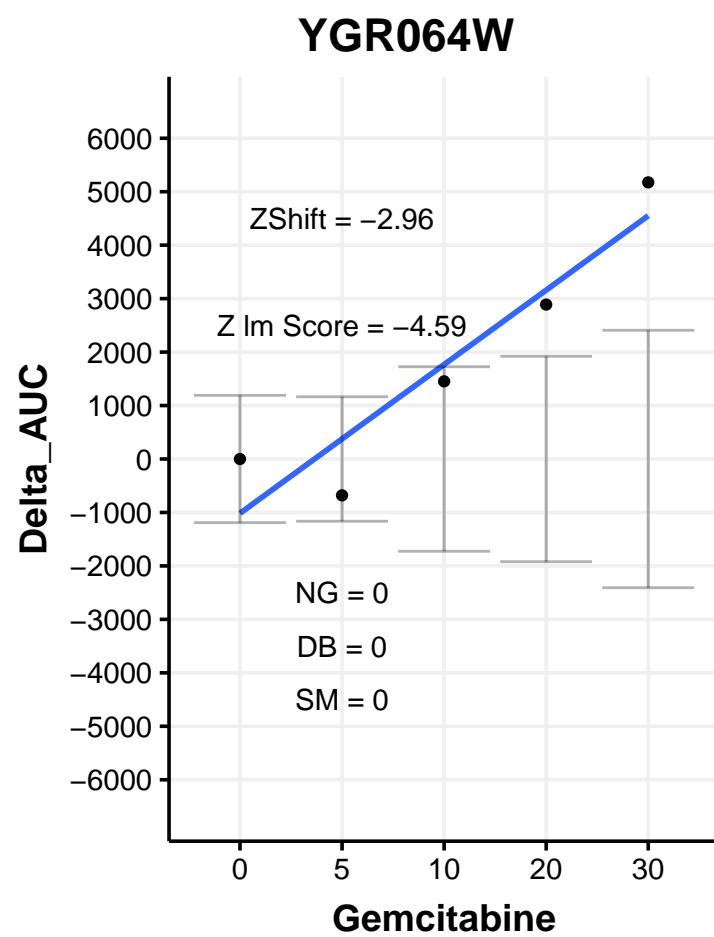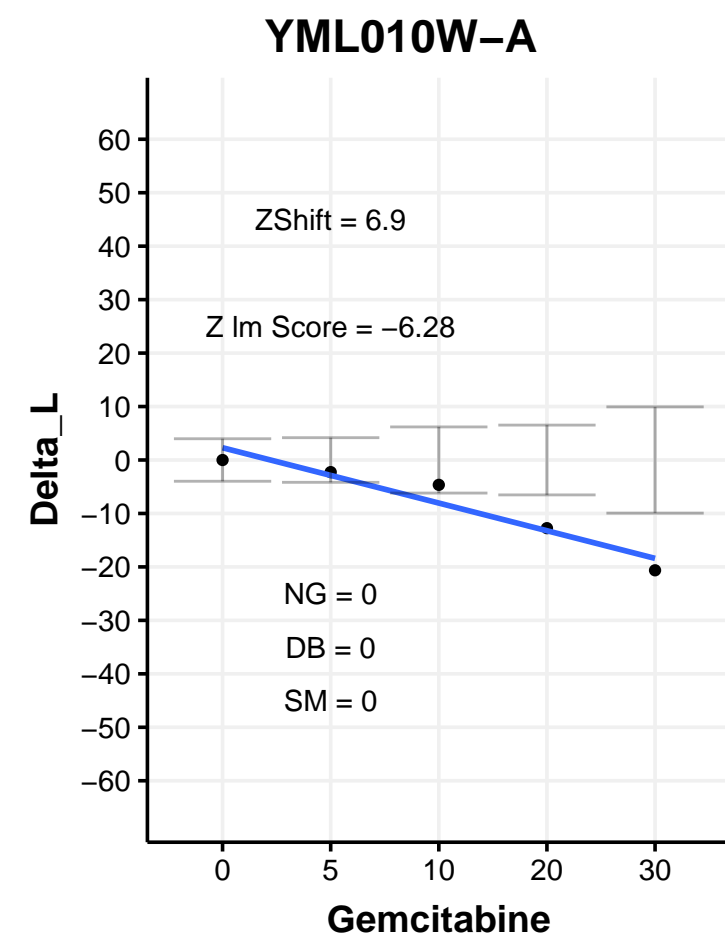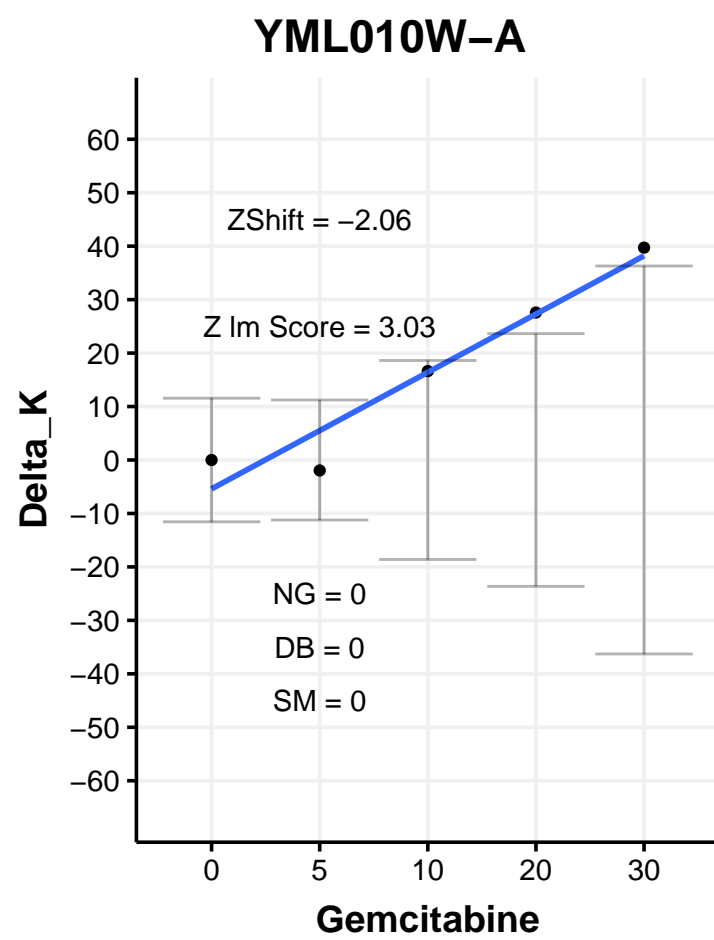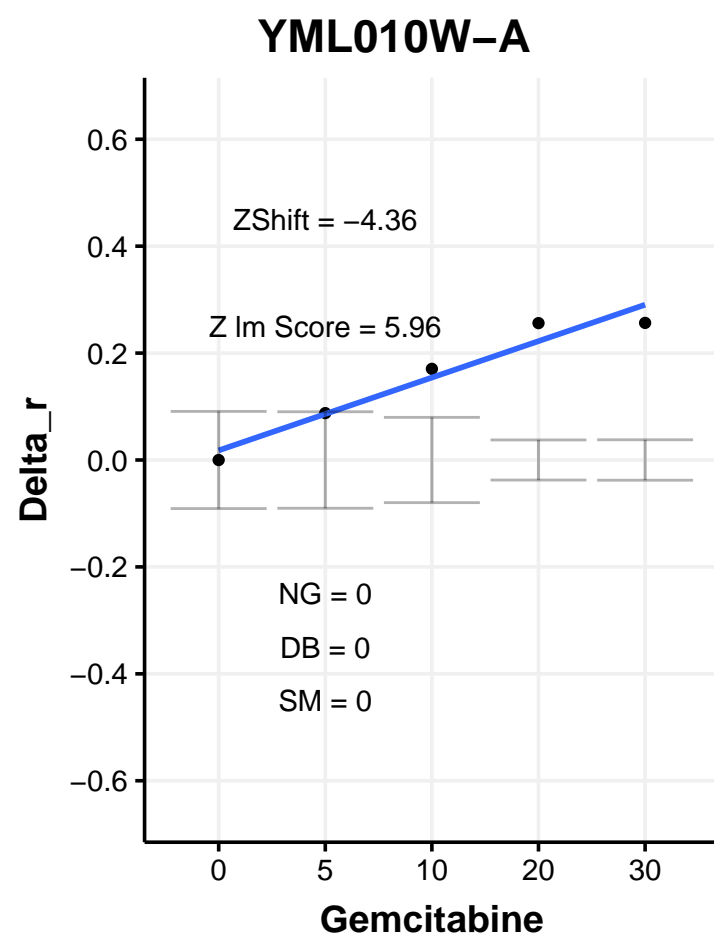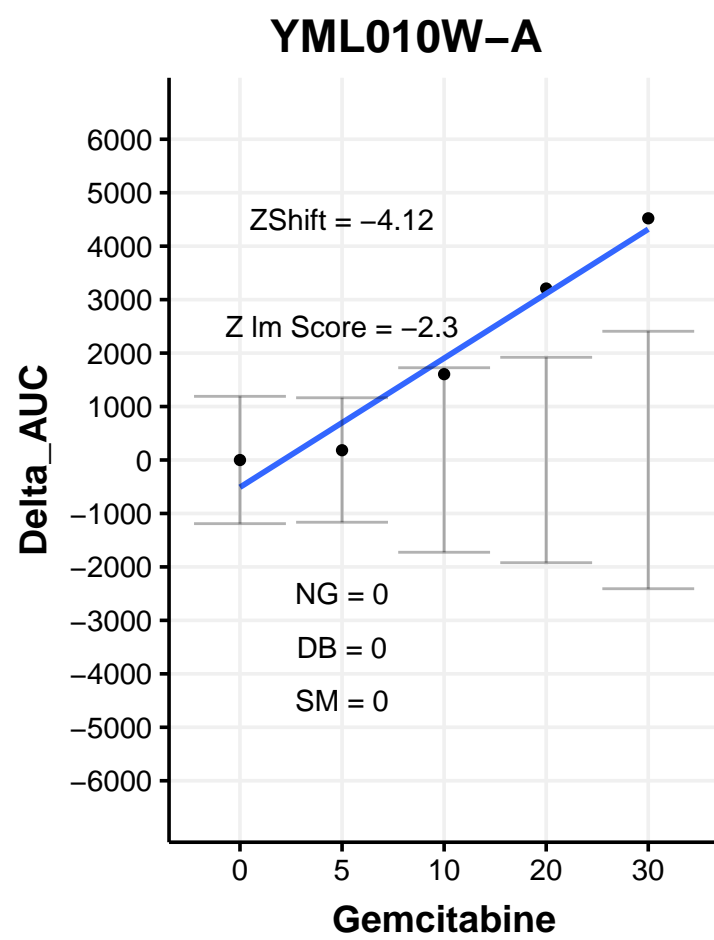

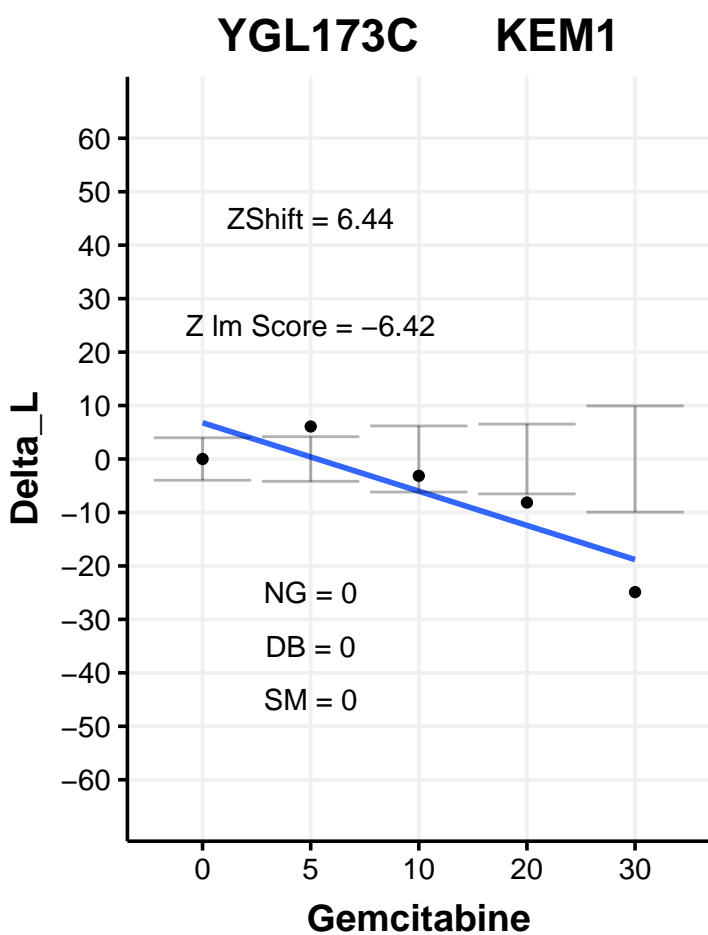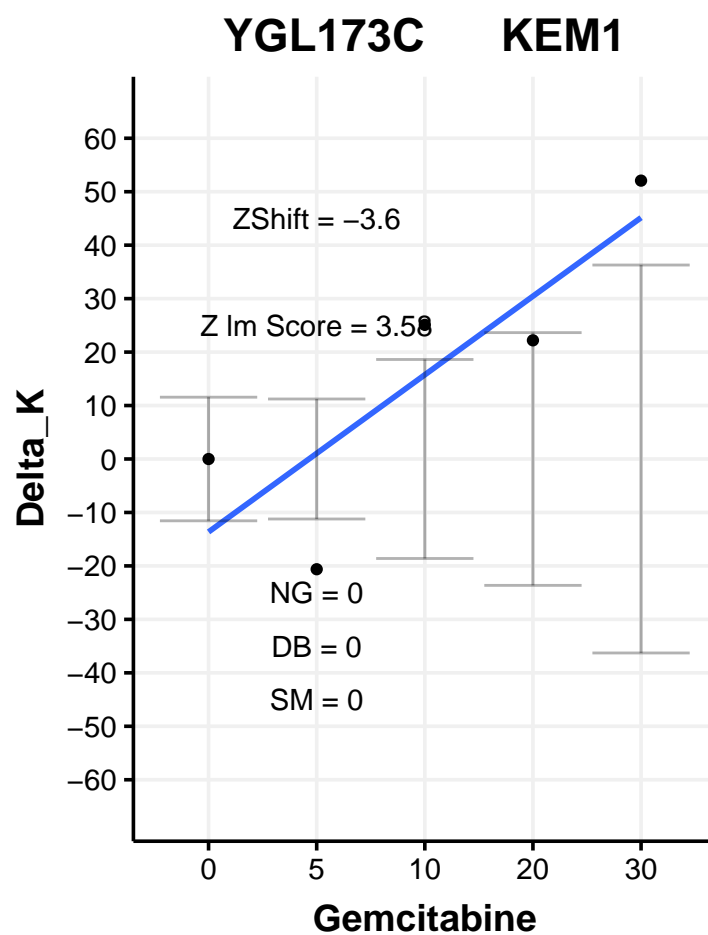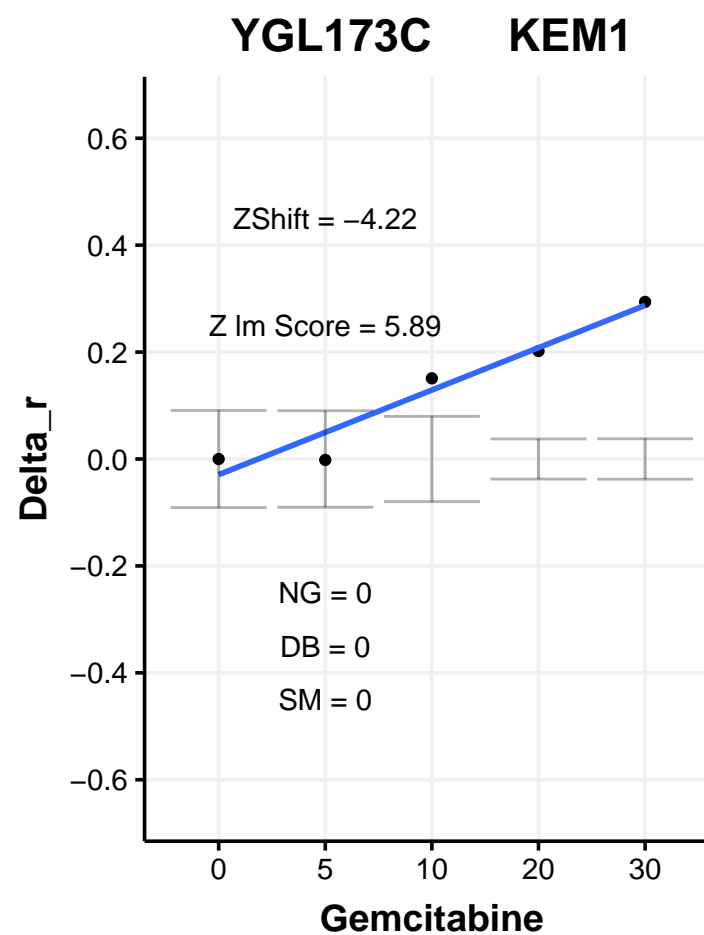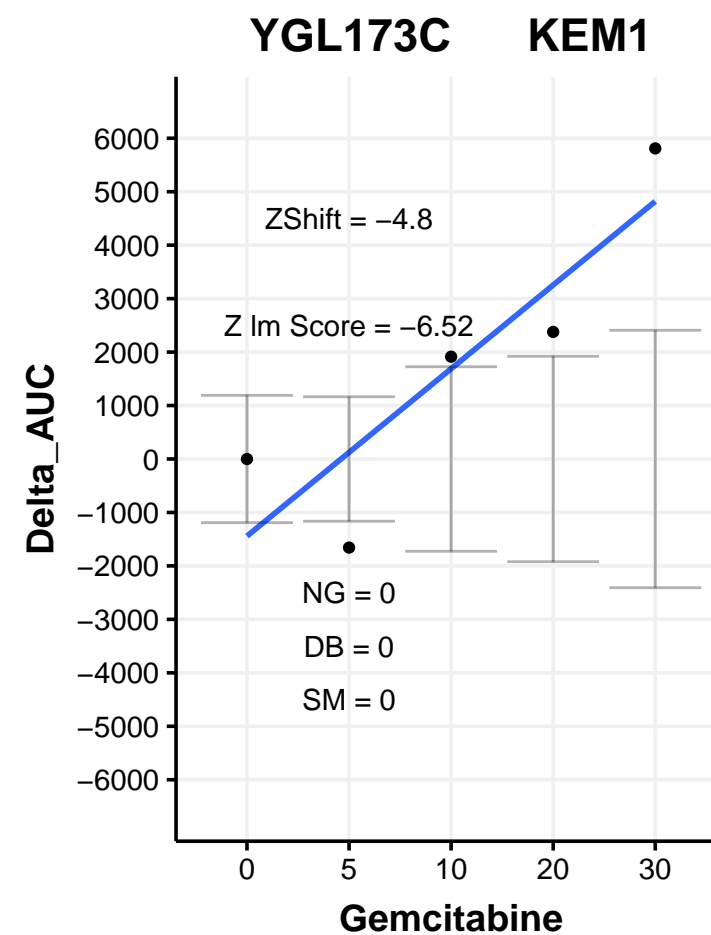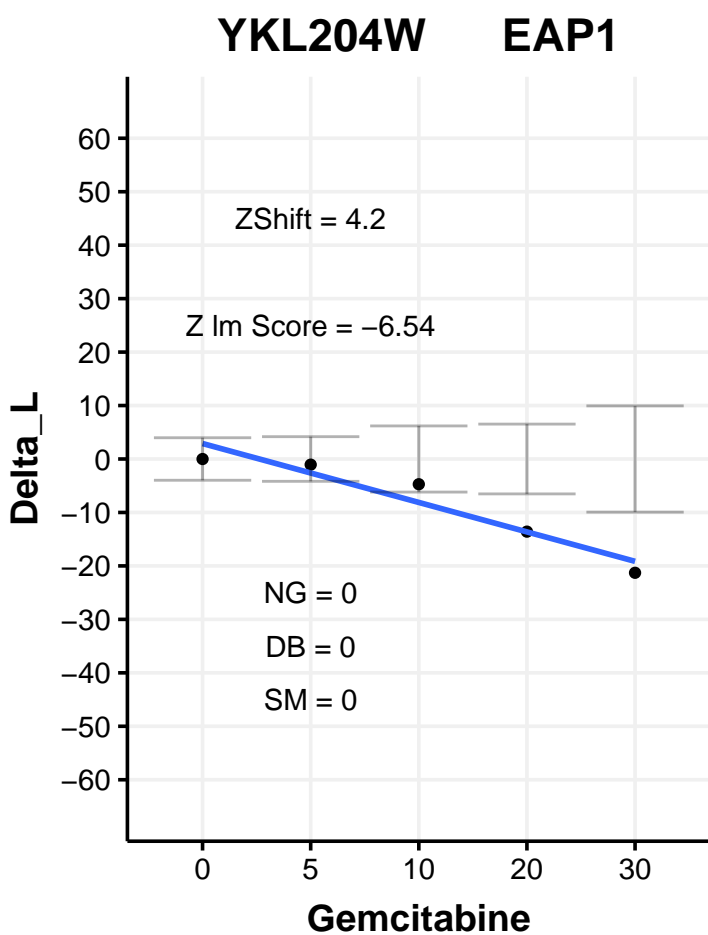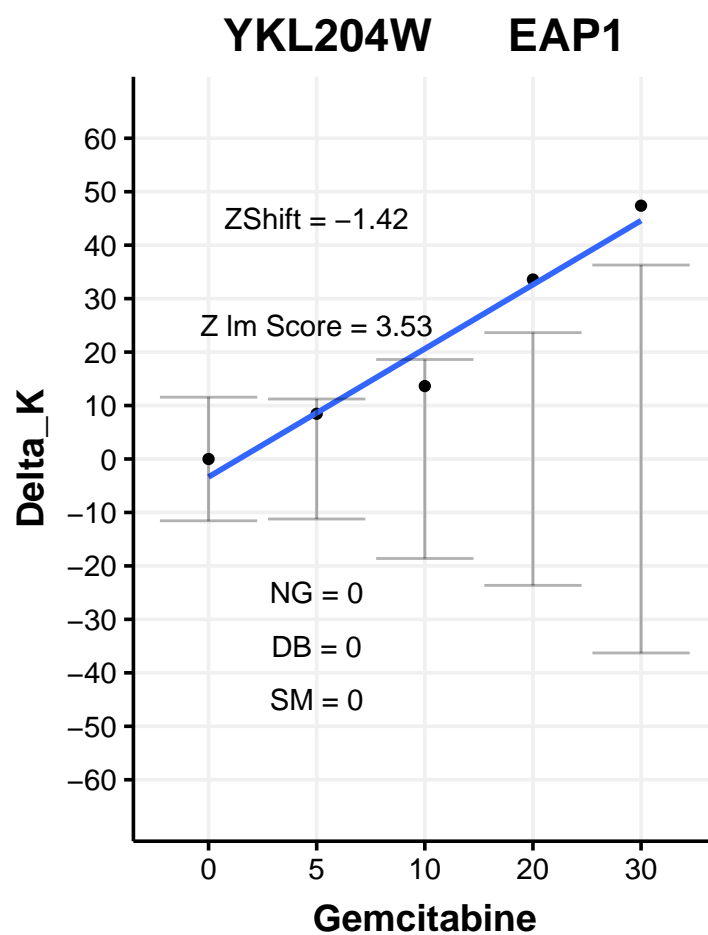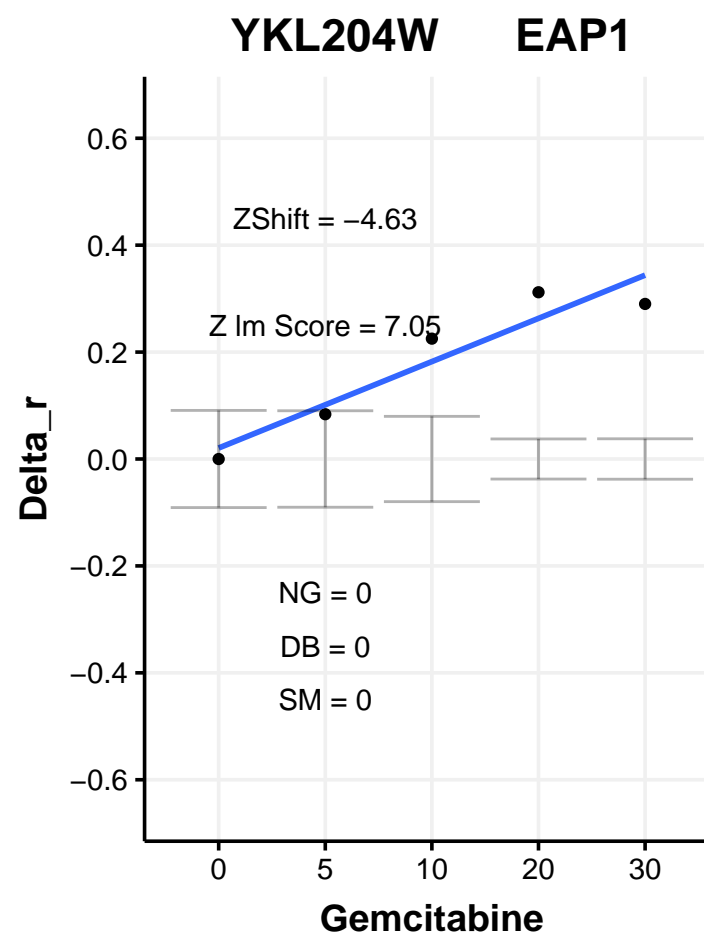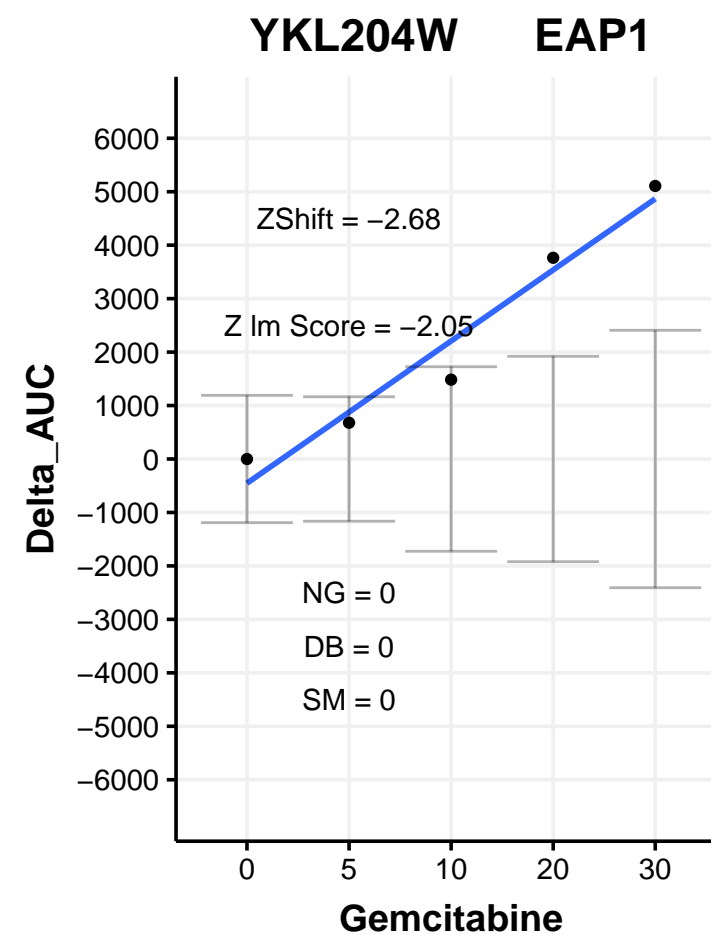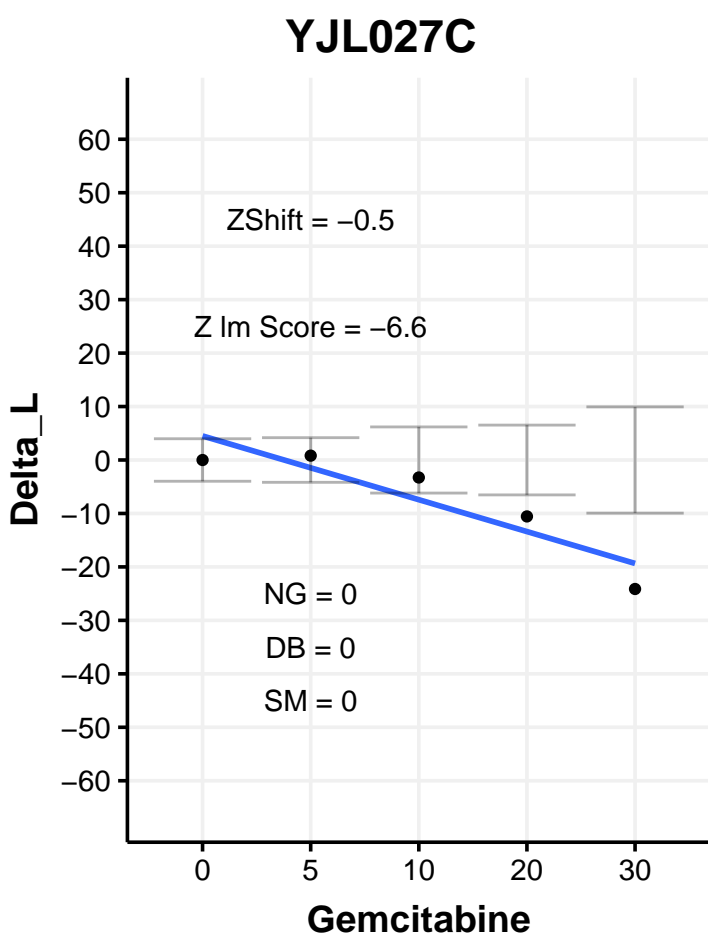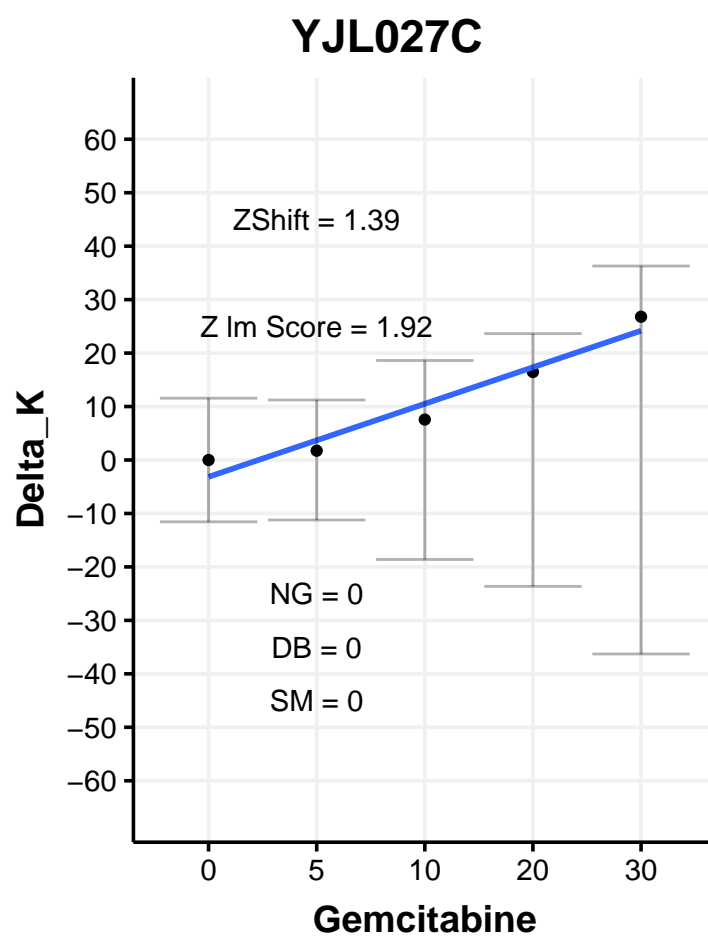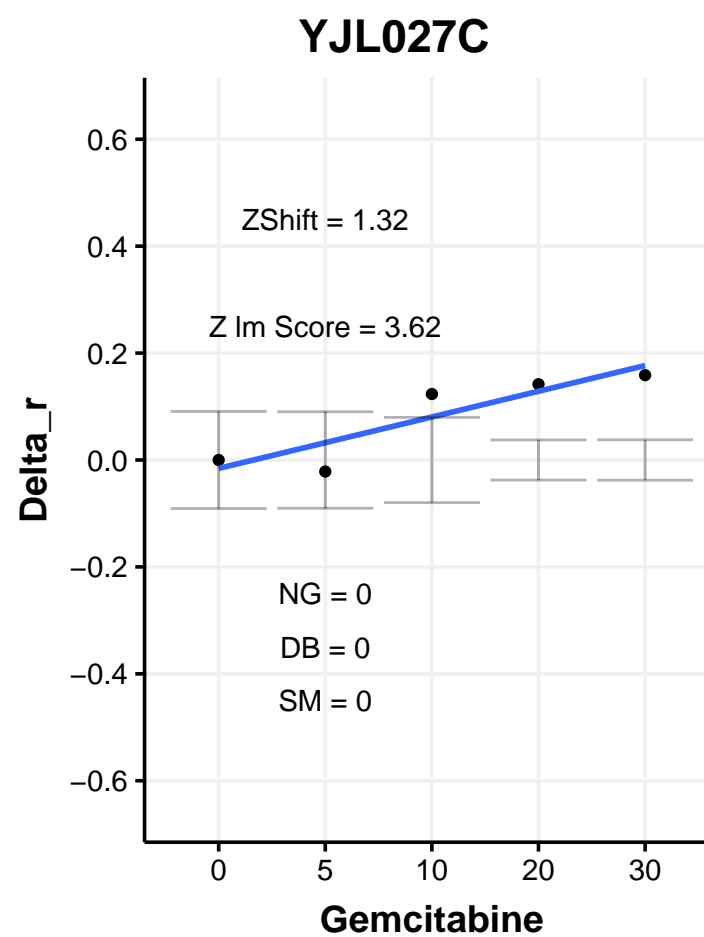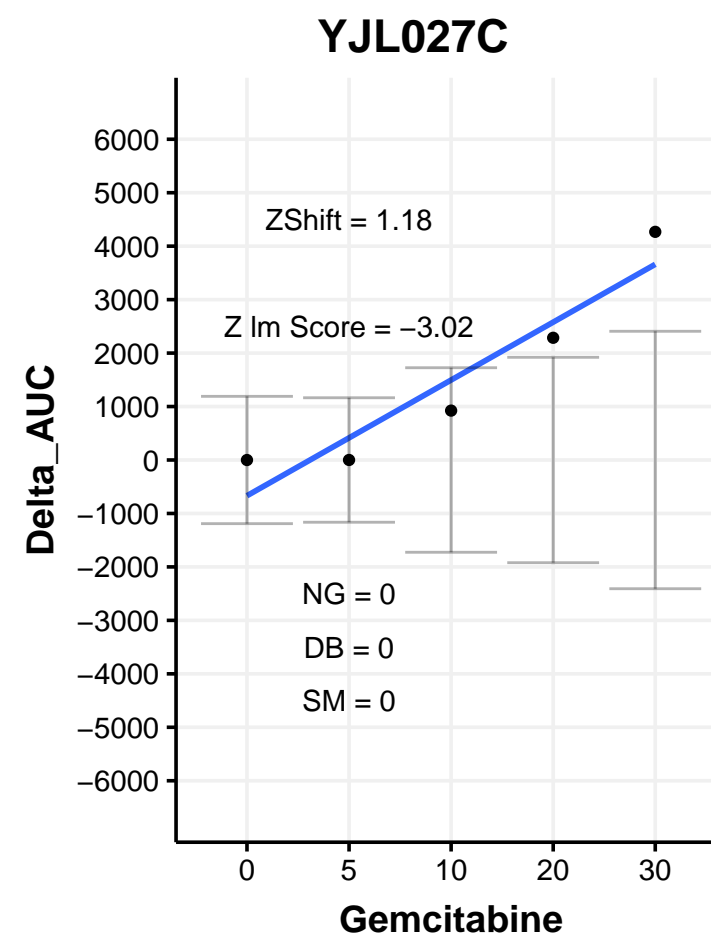



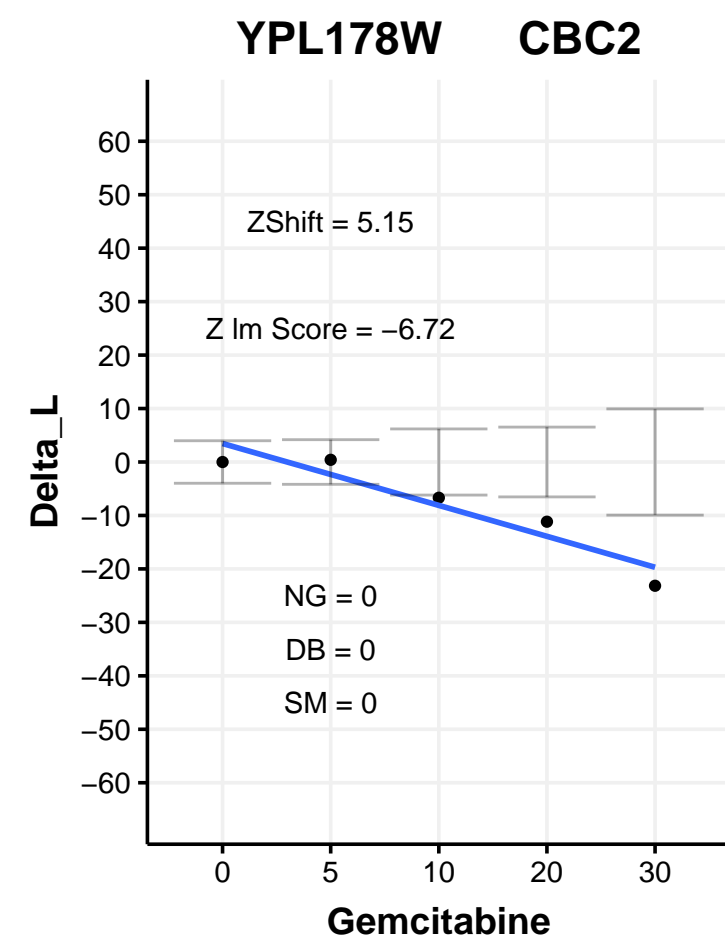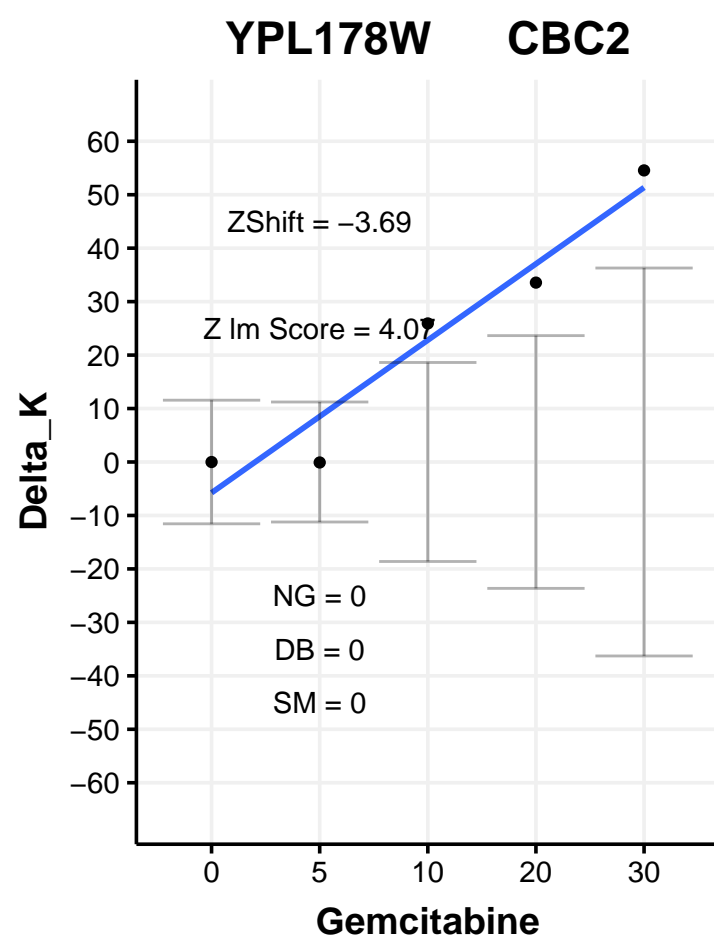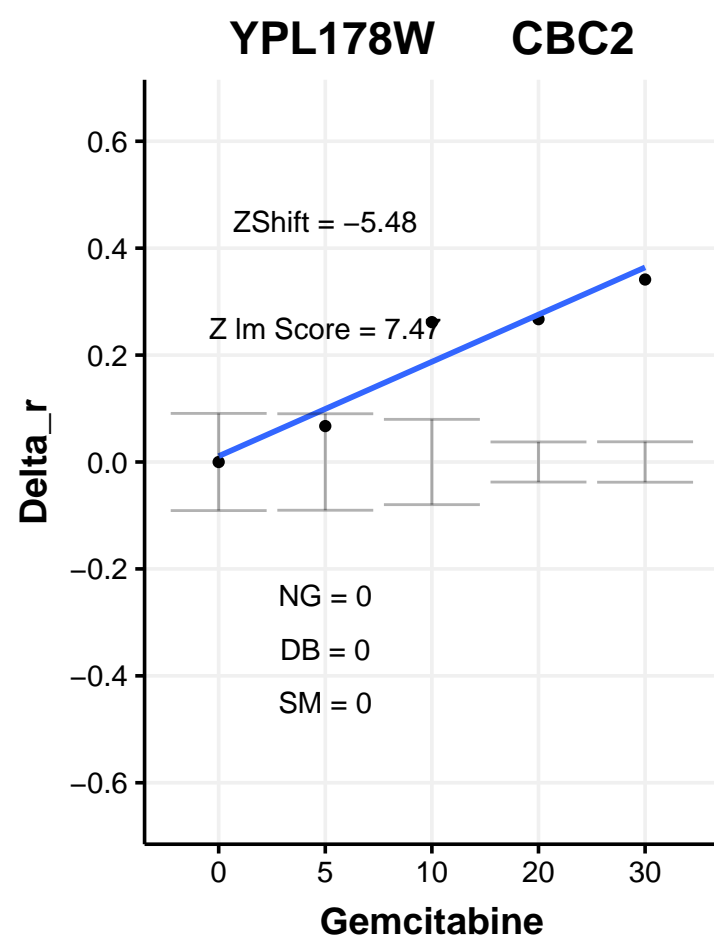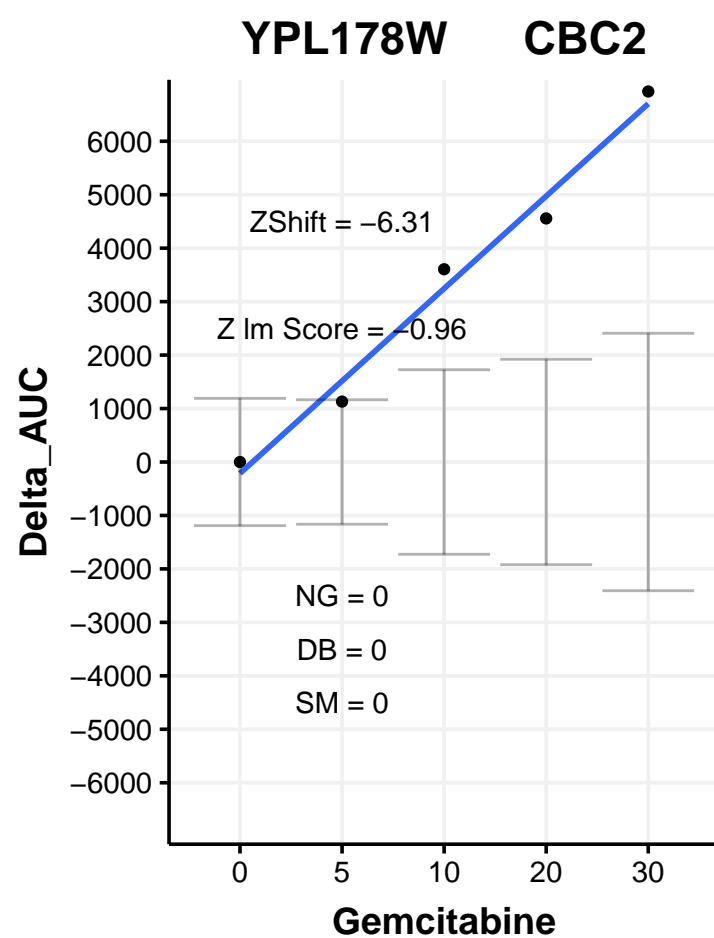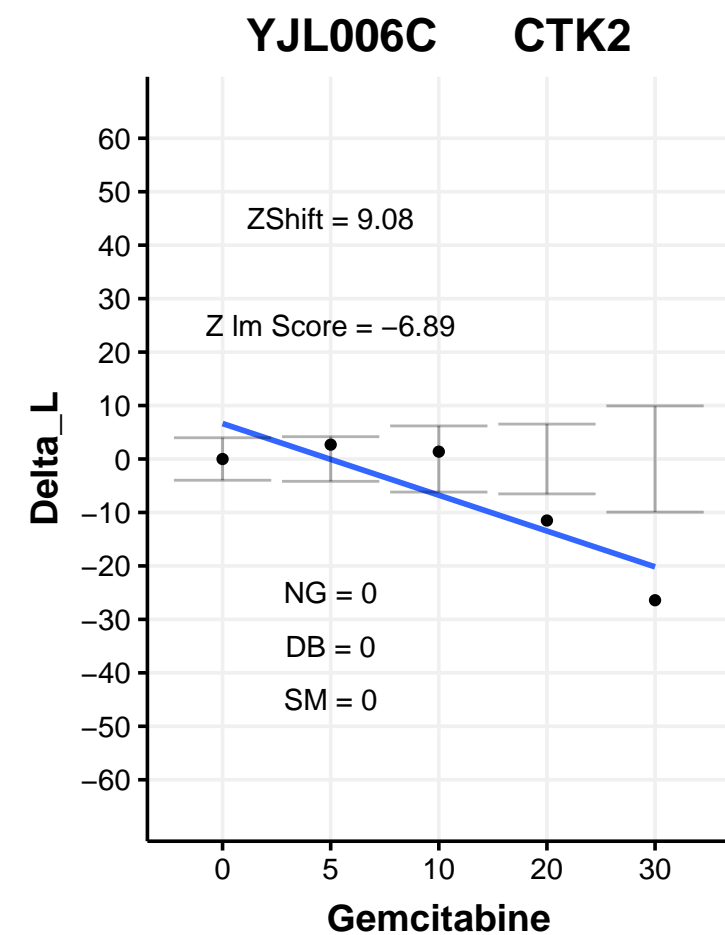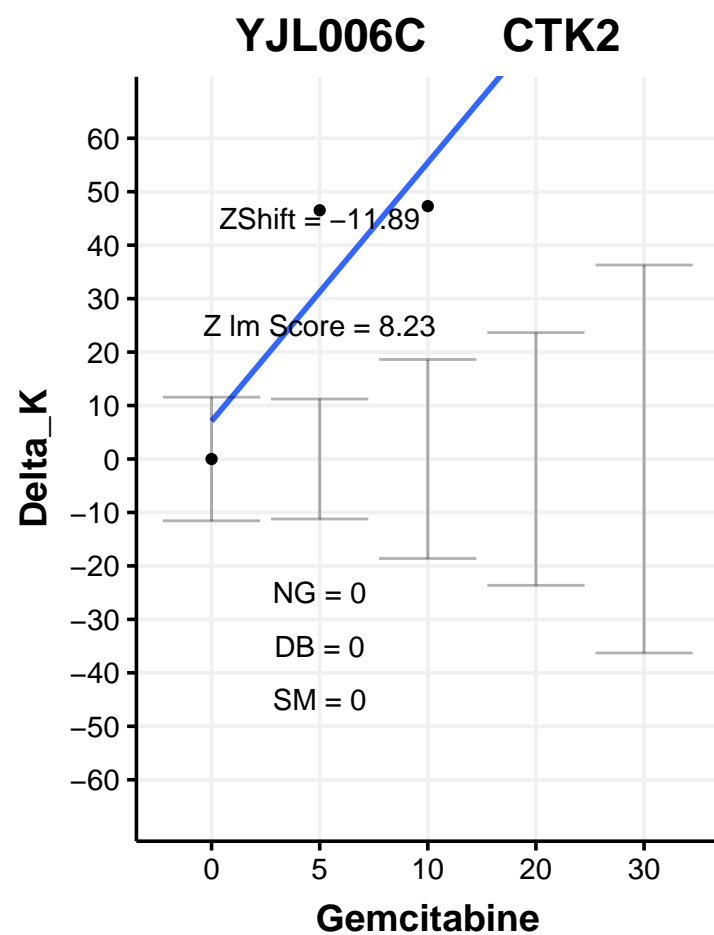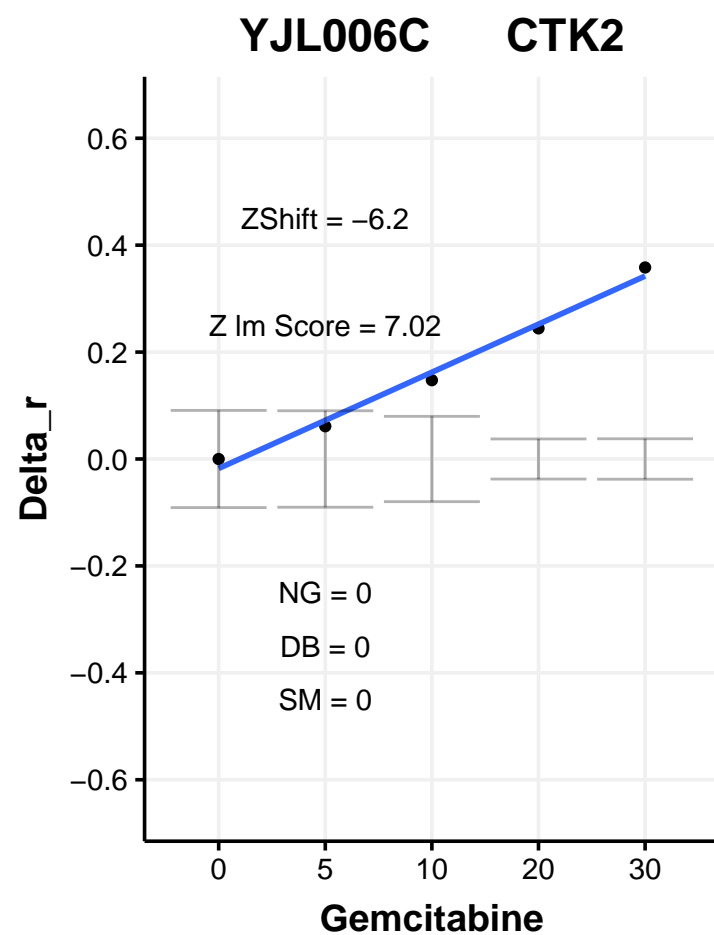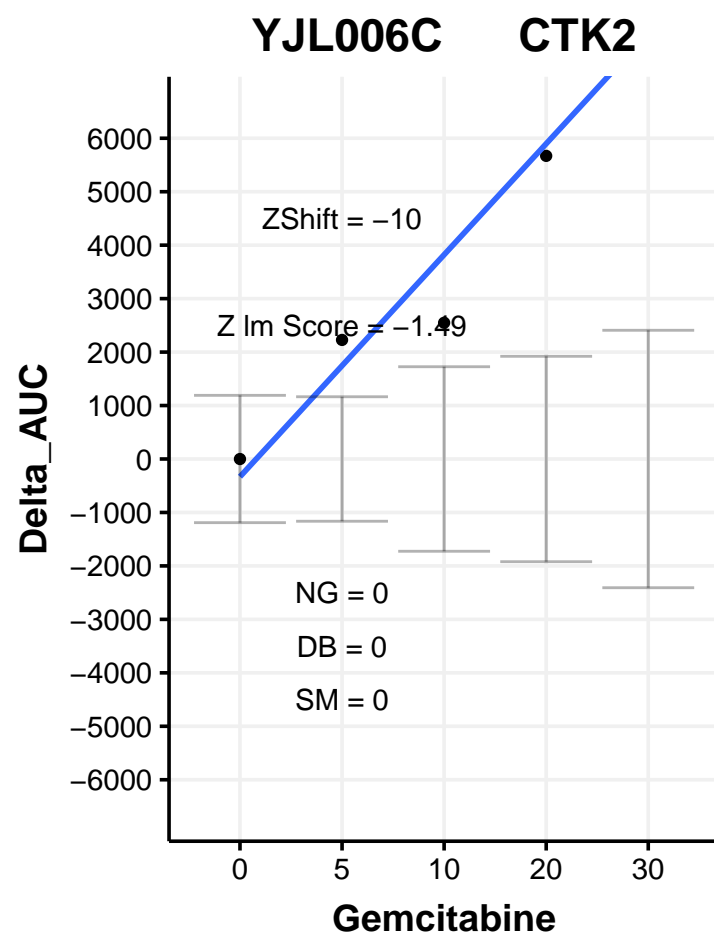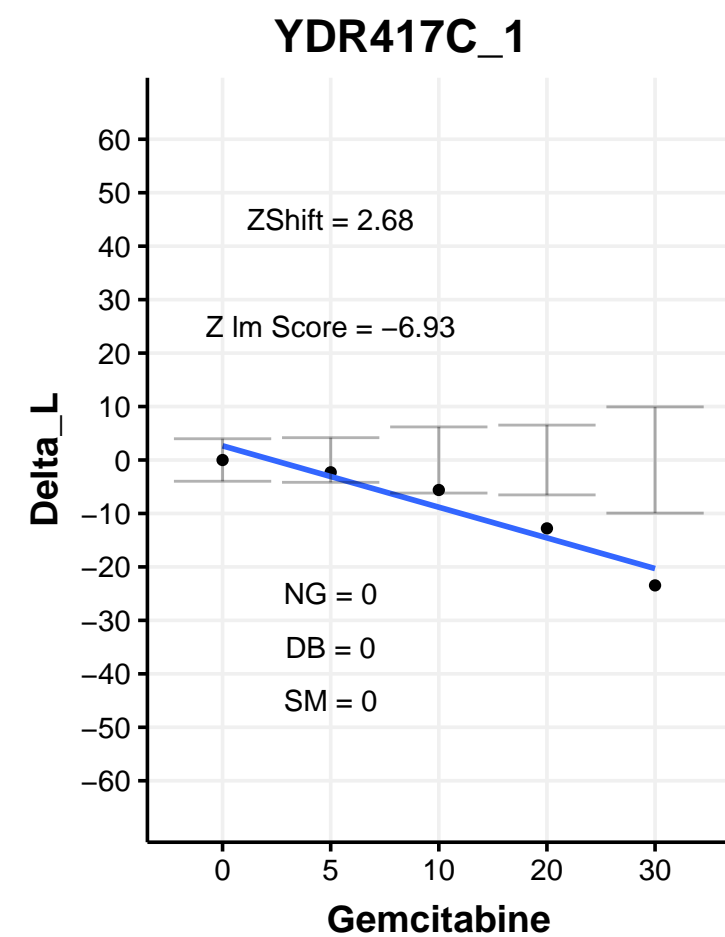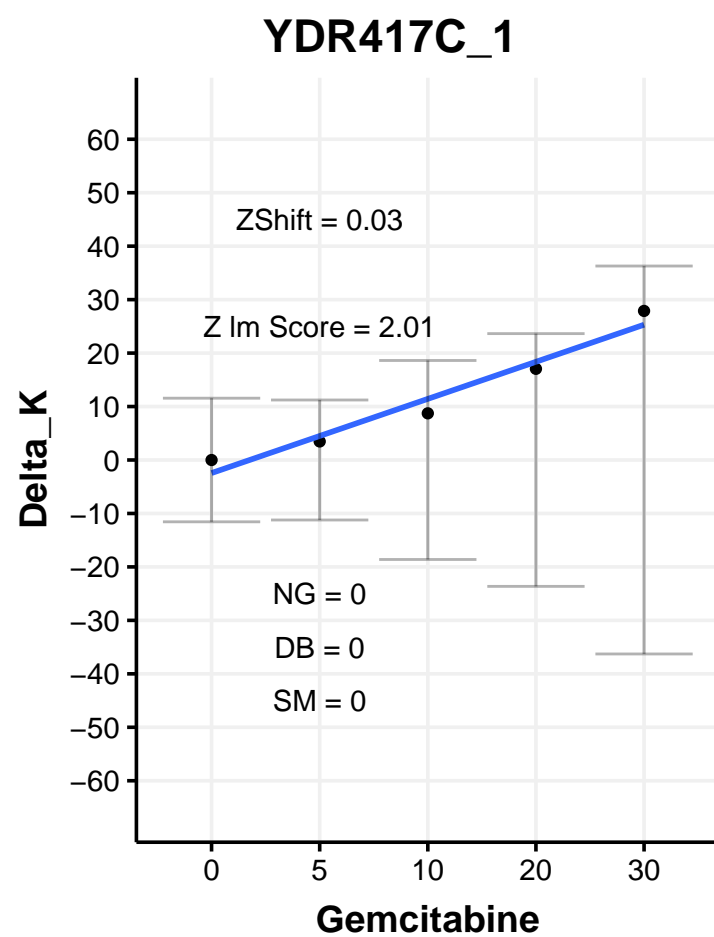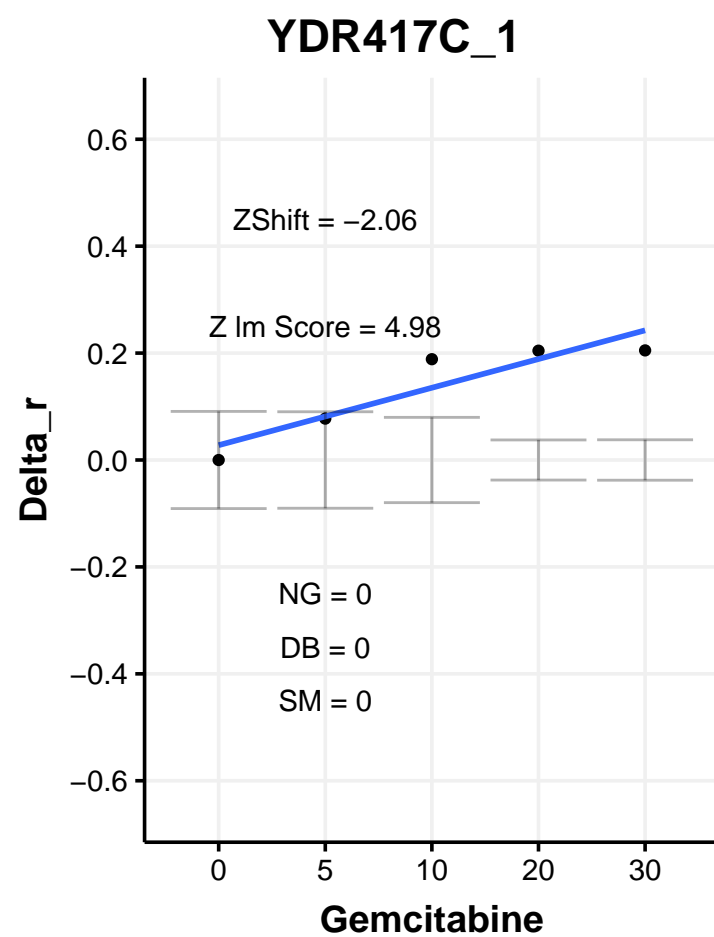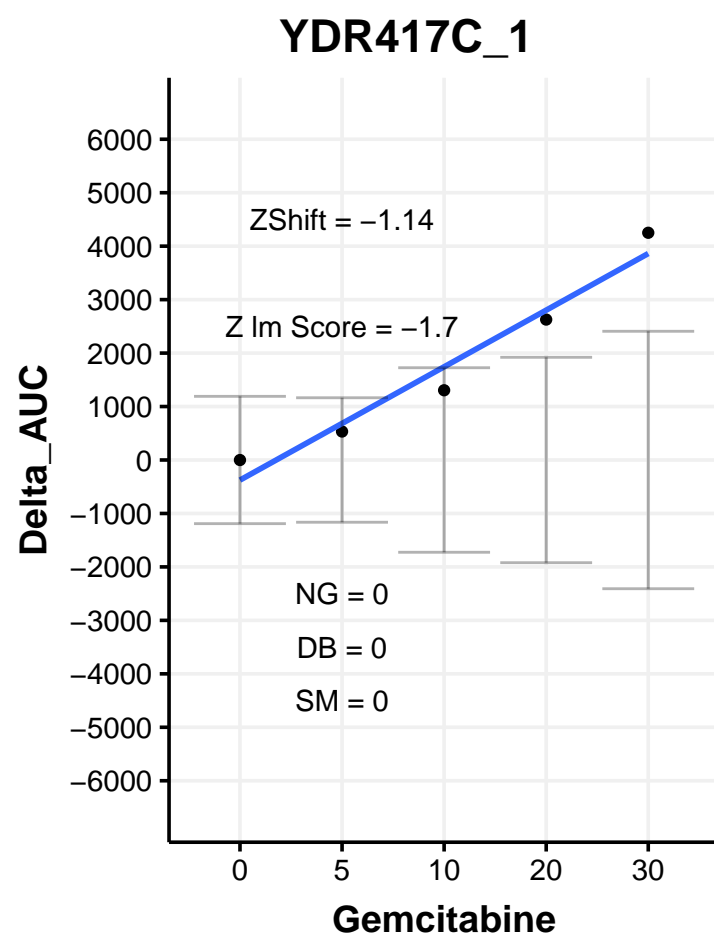

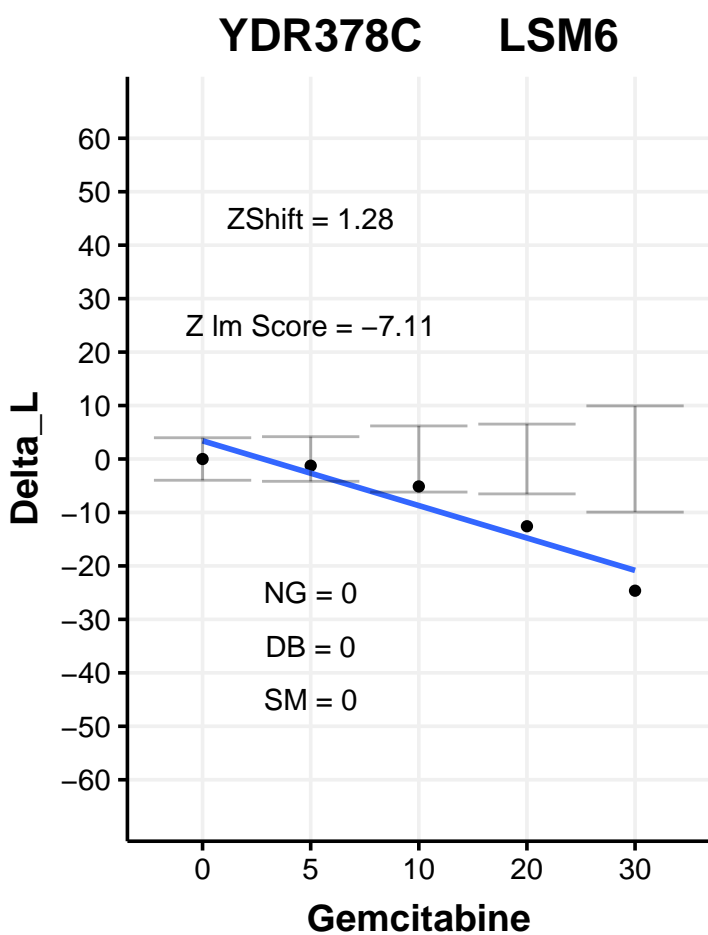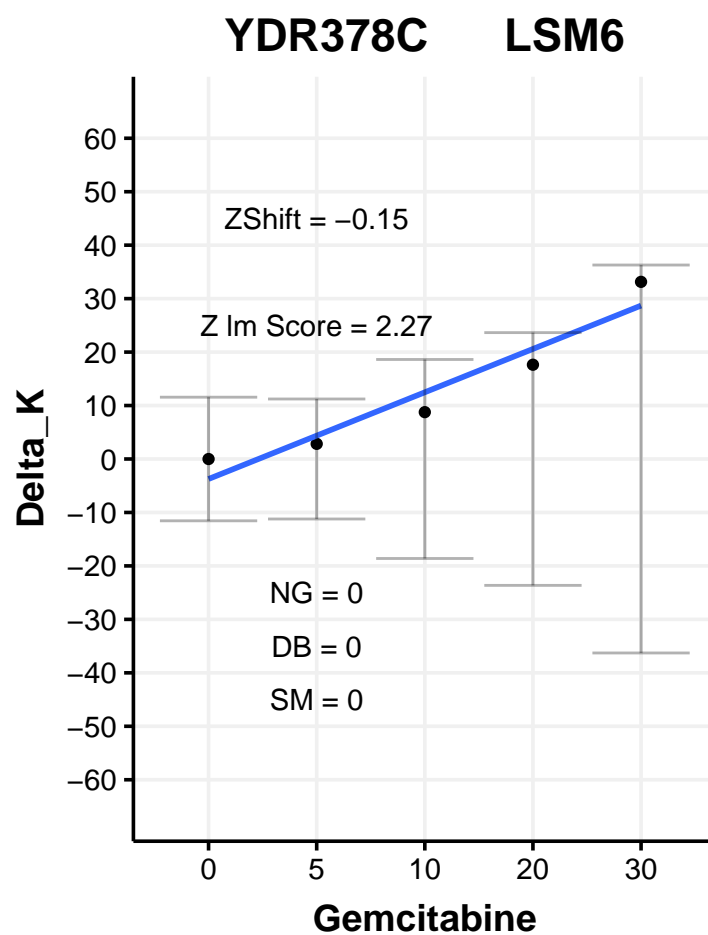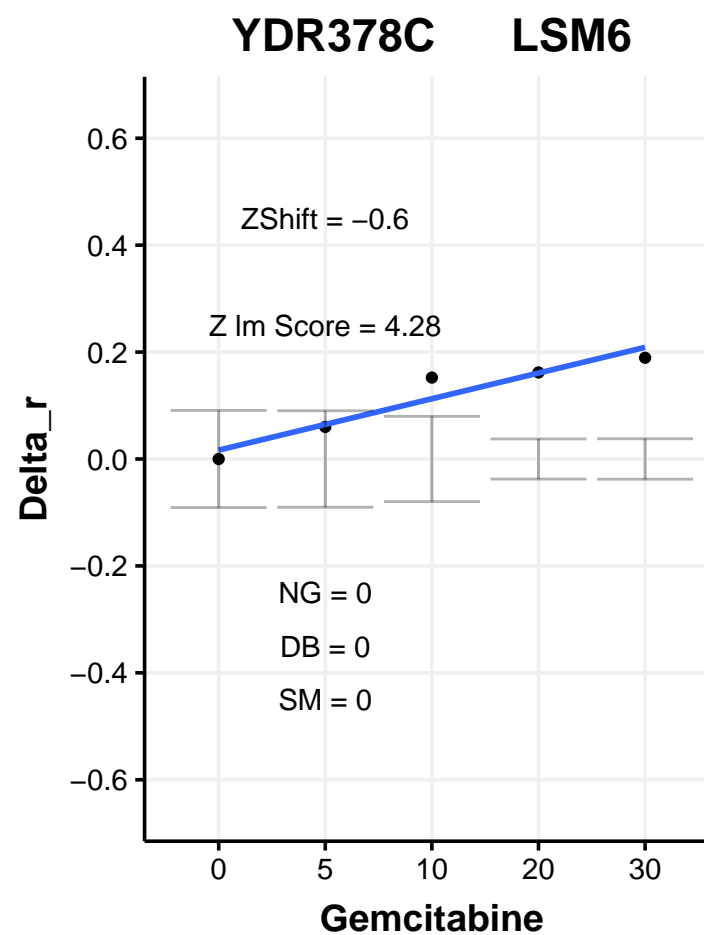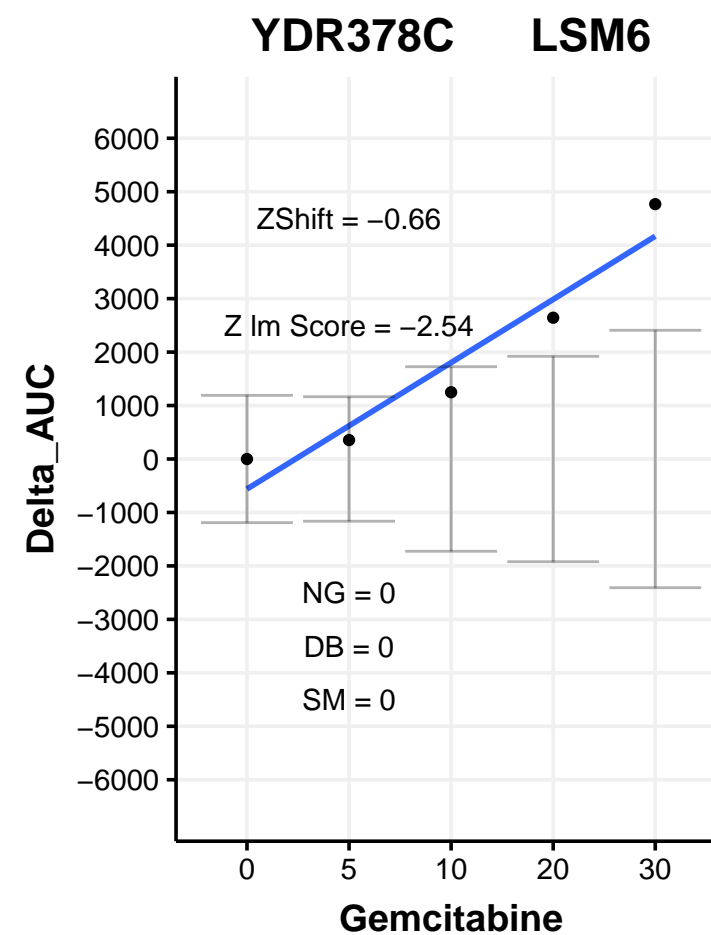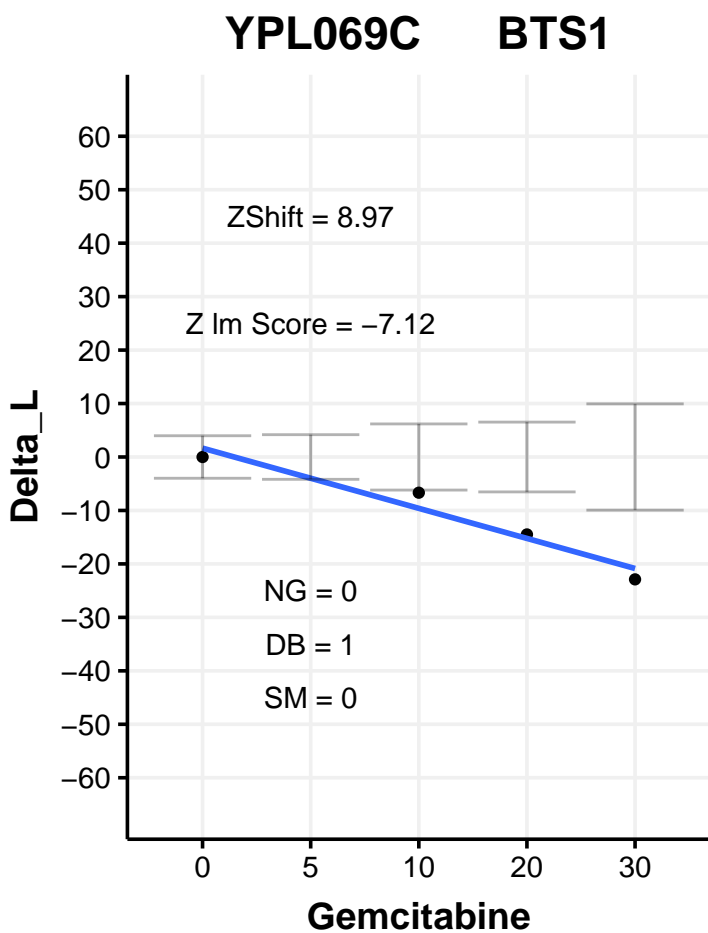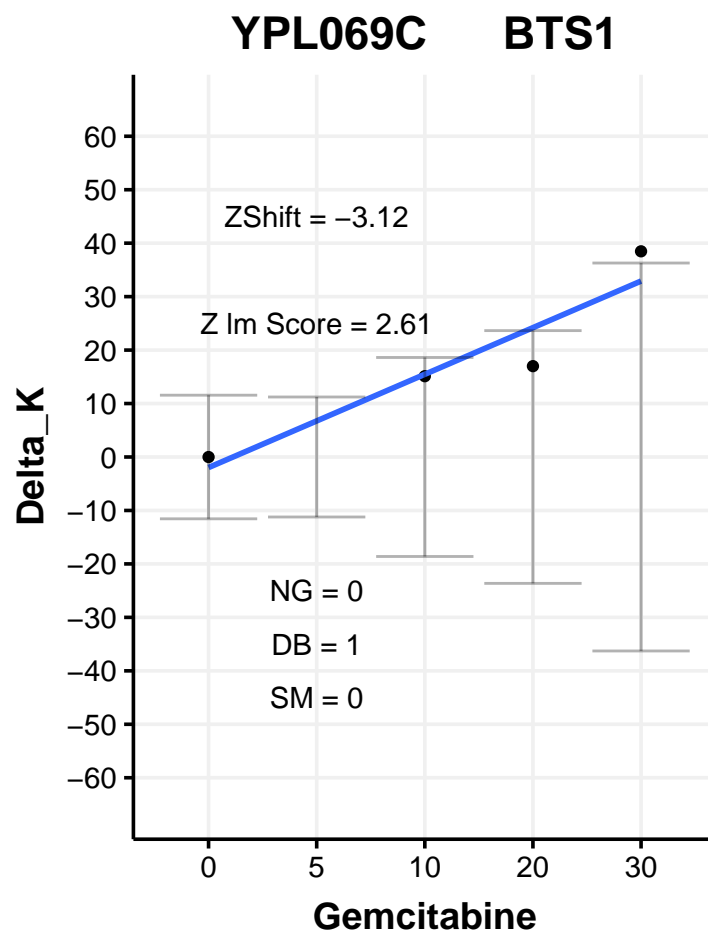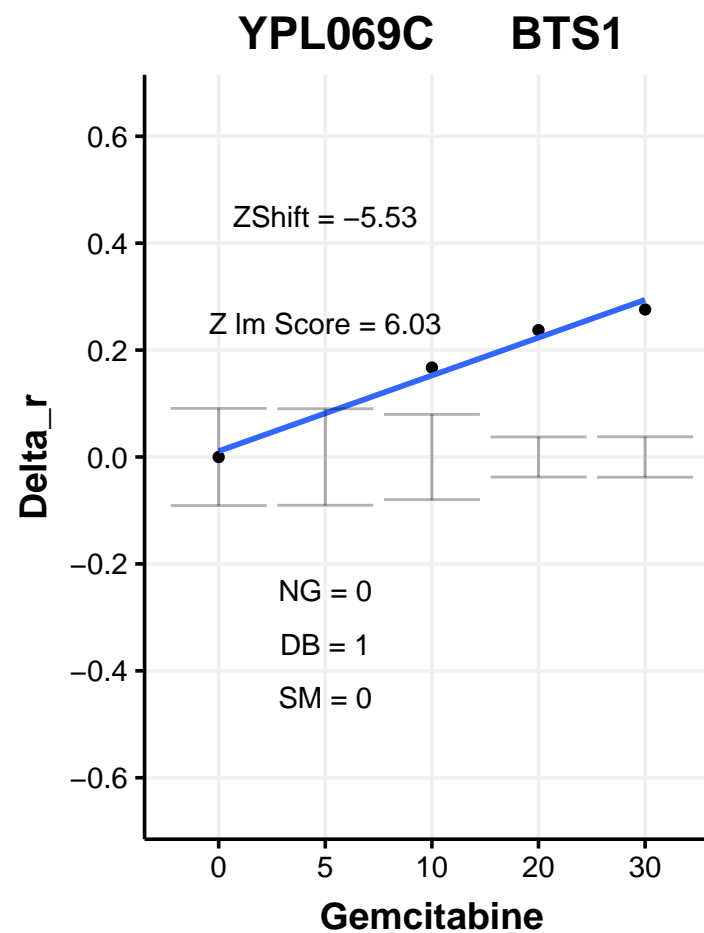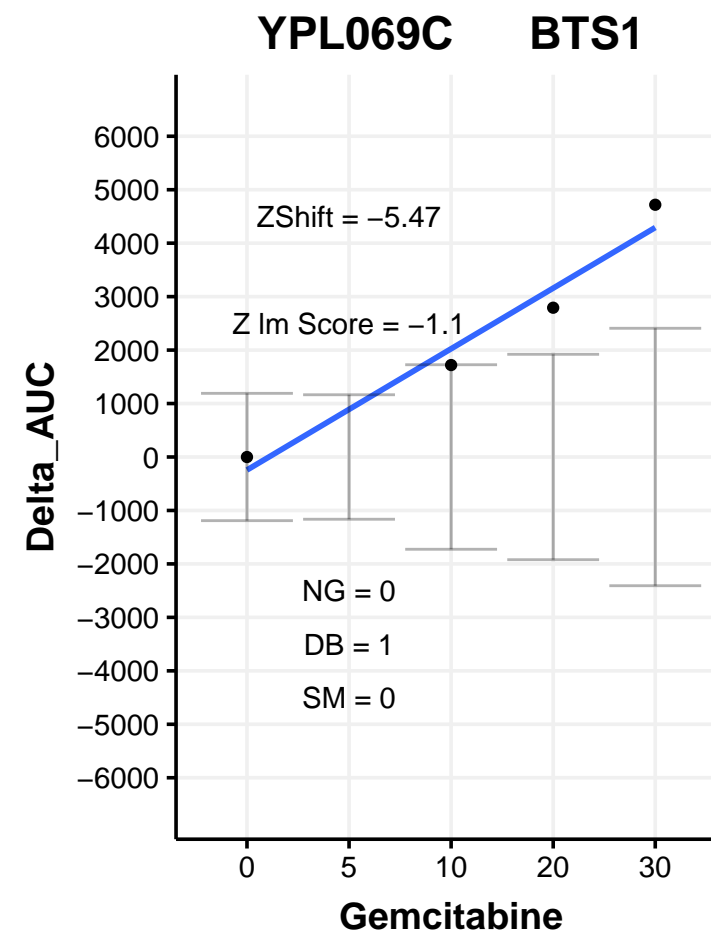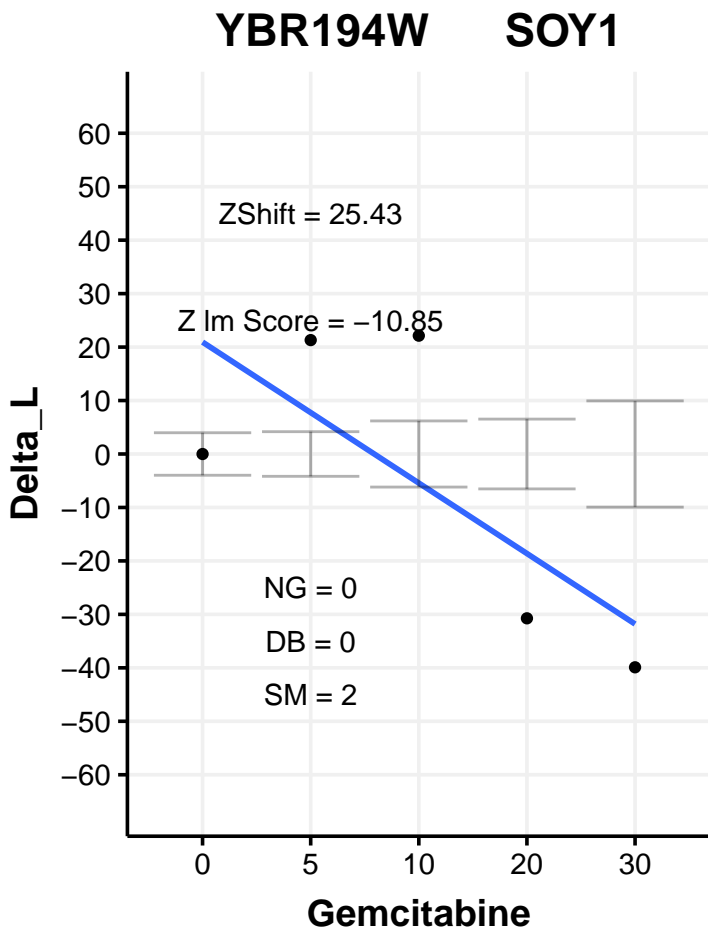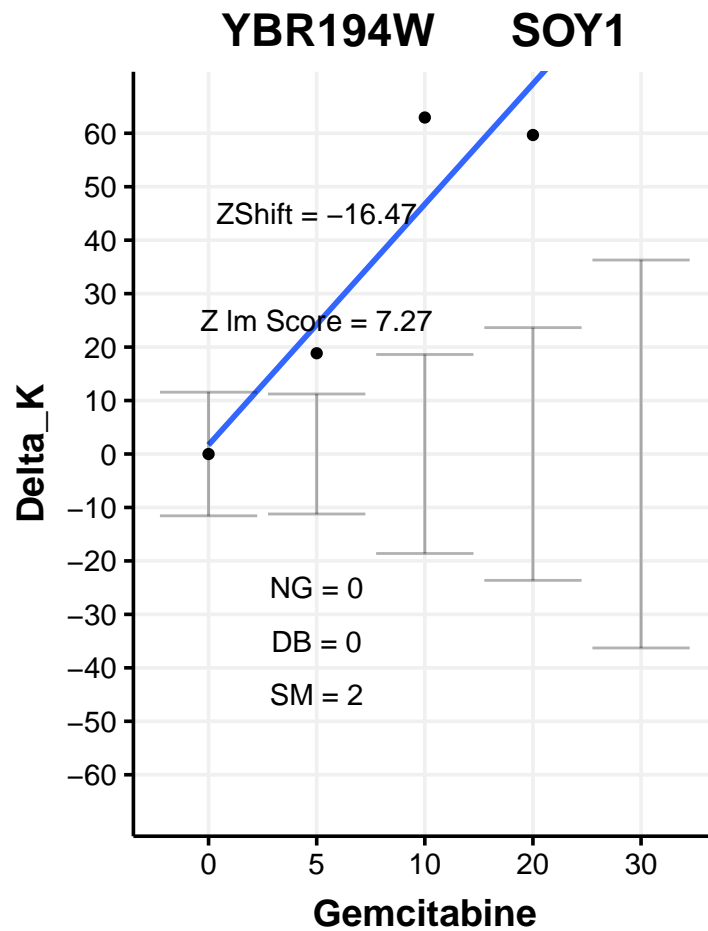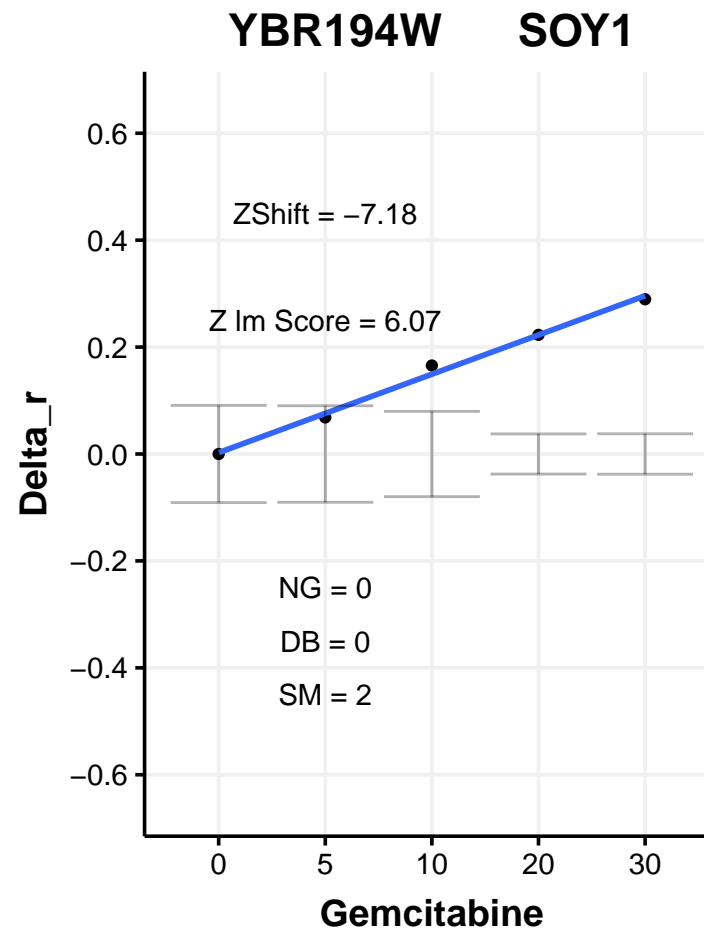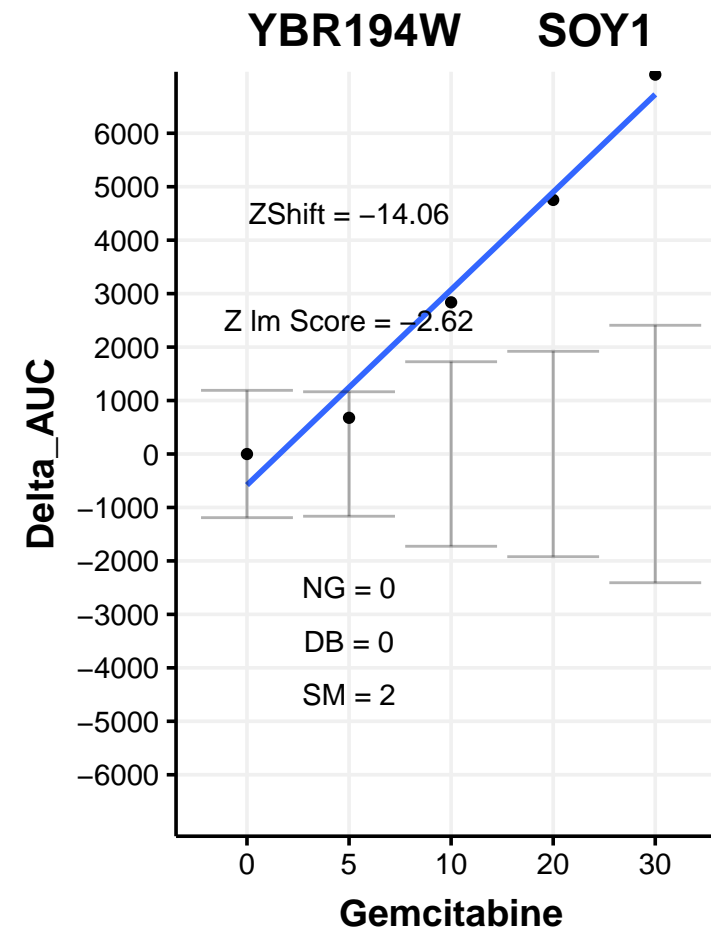

Supplement: s1 [file s1]
