# Supplementary material for: A Humanized Yeast Phenomic Model of Deoxycytidine Kinase to Predict Genetic Buffering of Nucleoside Analog Cytotoxicity
Source: MDPI journal article supplement (doi:10.3390/genes10100770), 2019-09-30

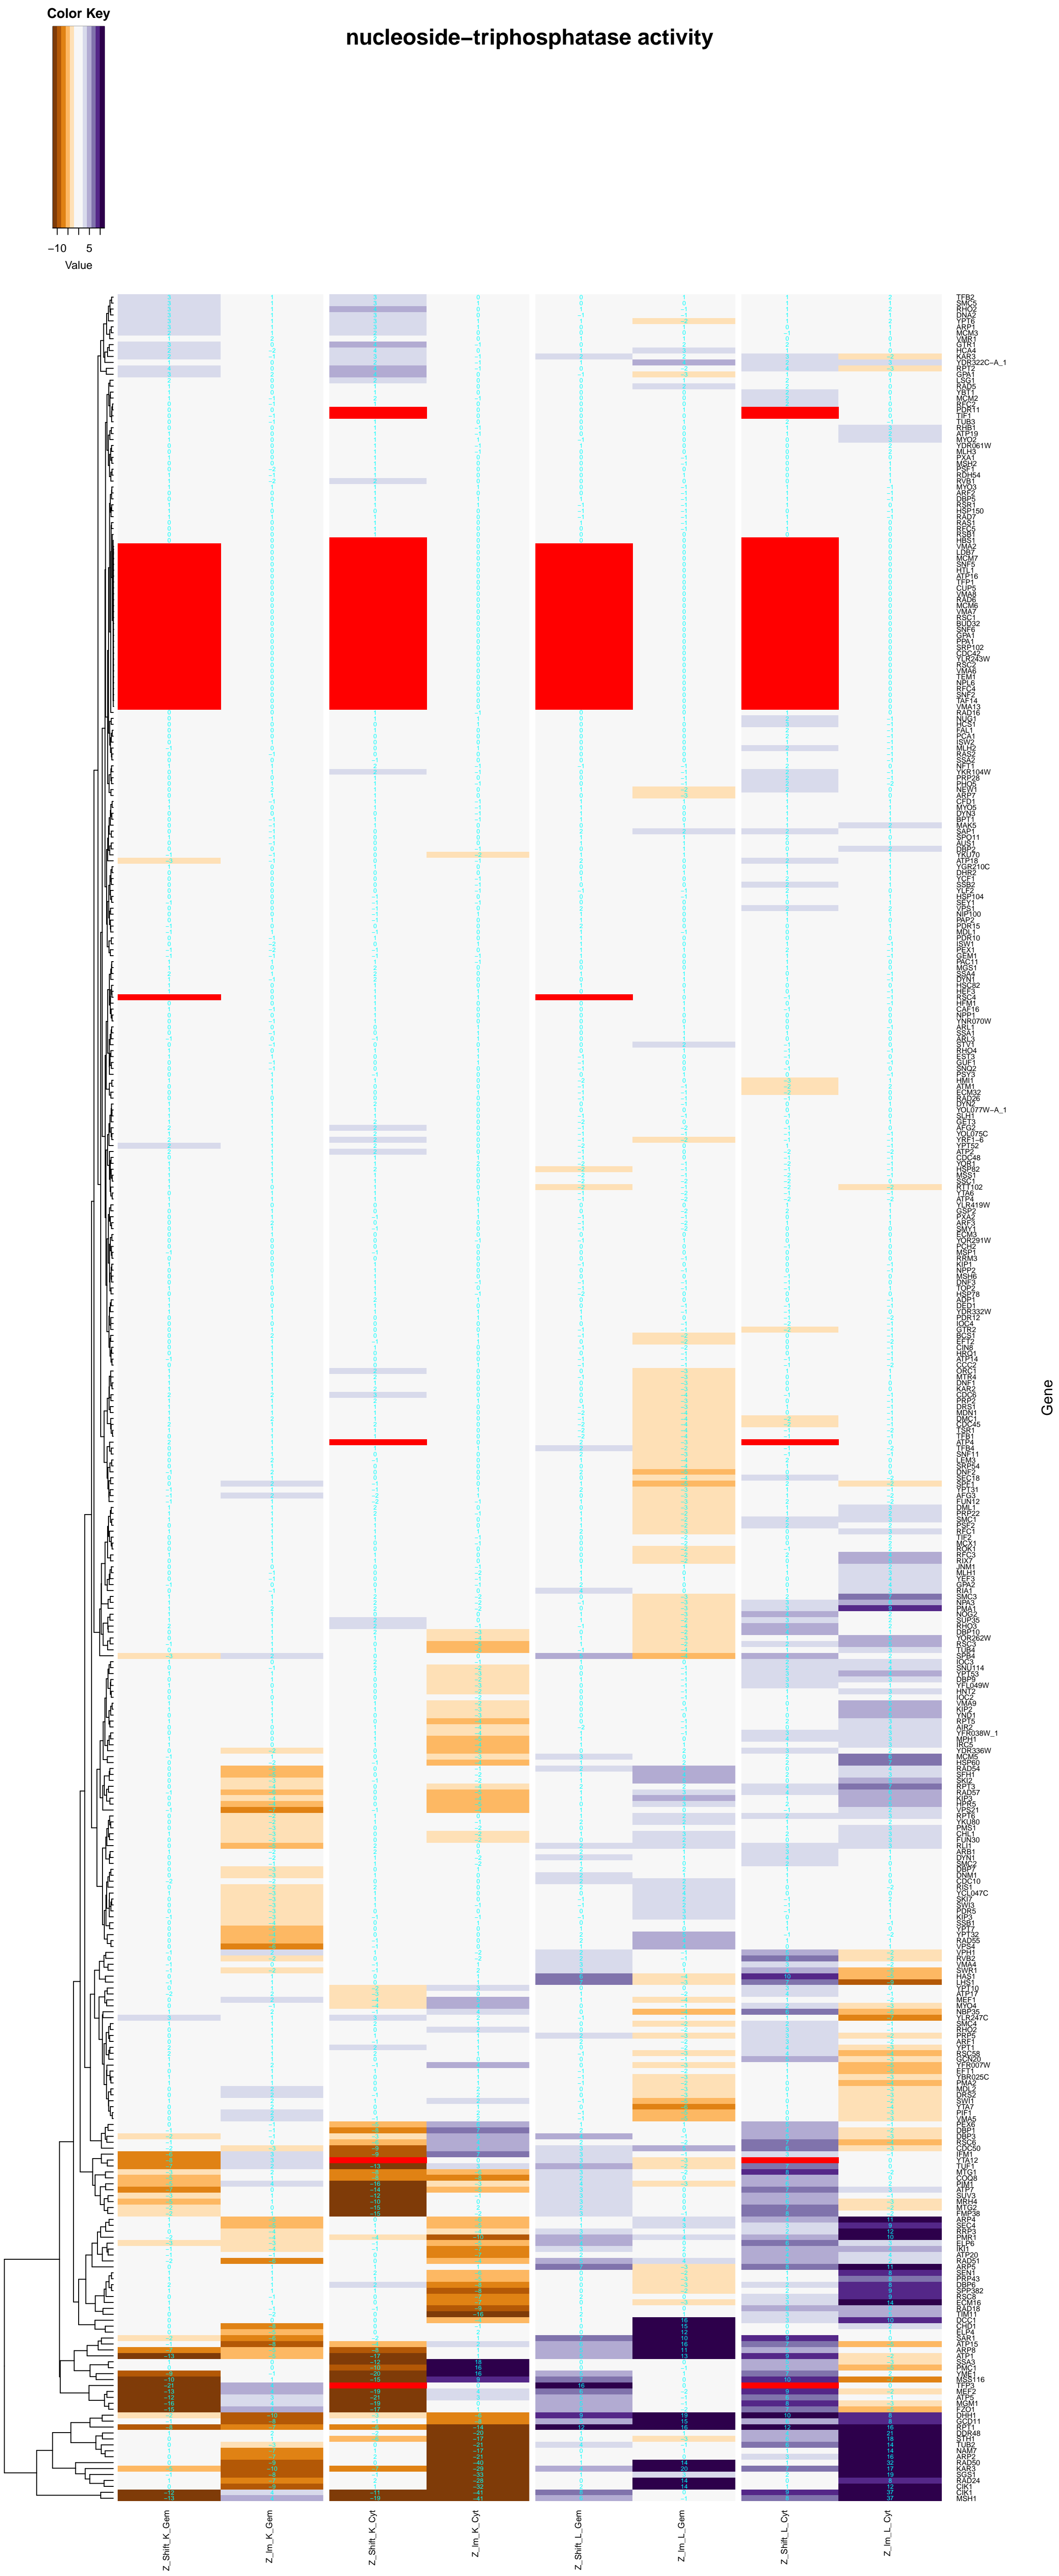

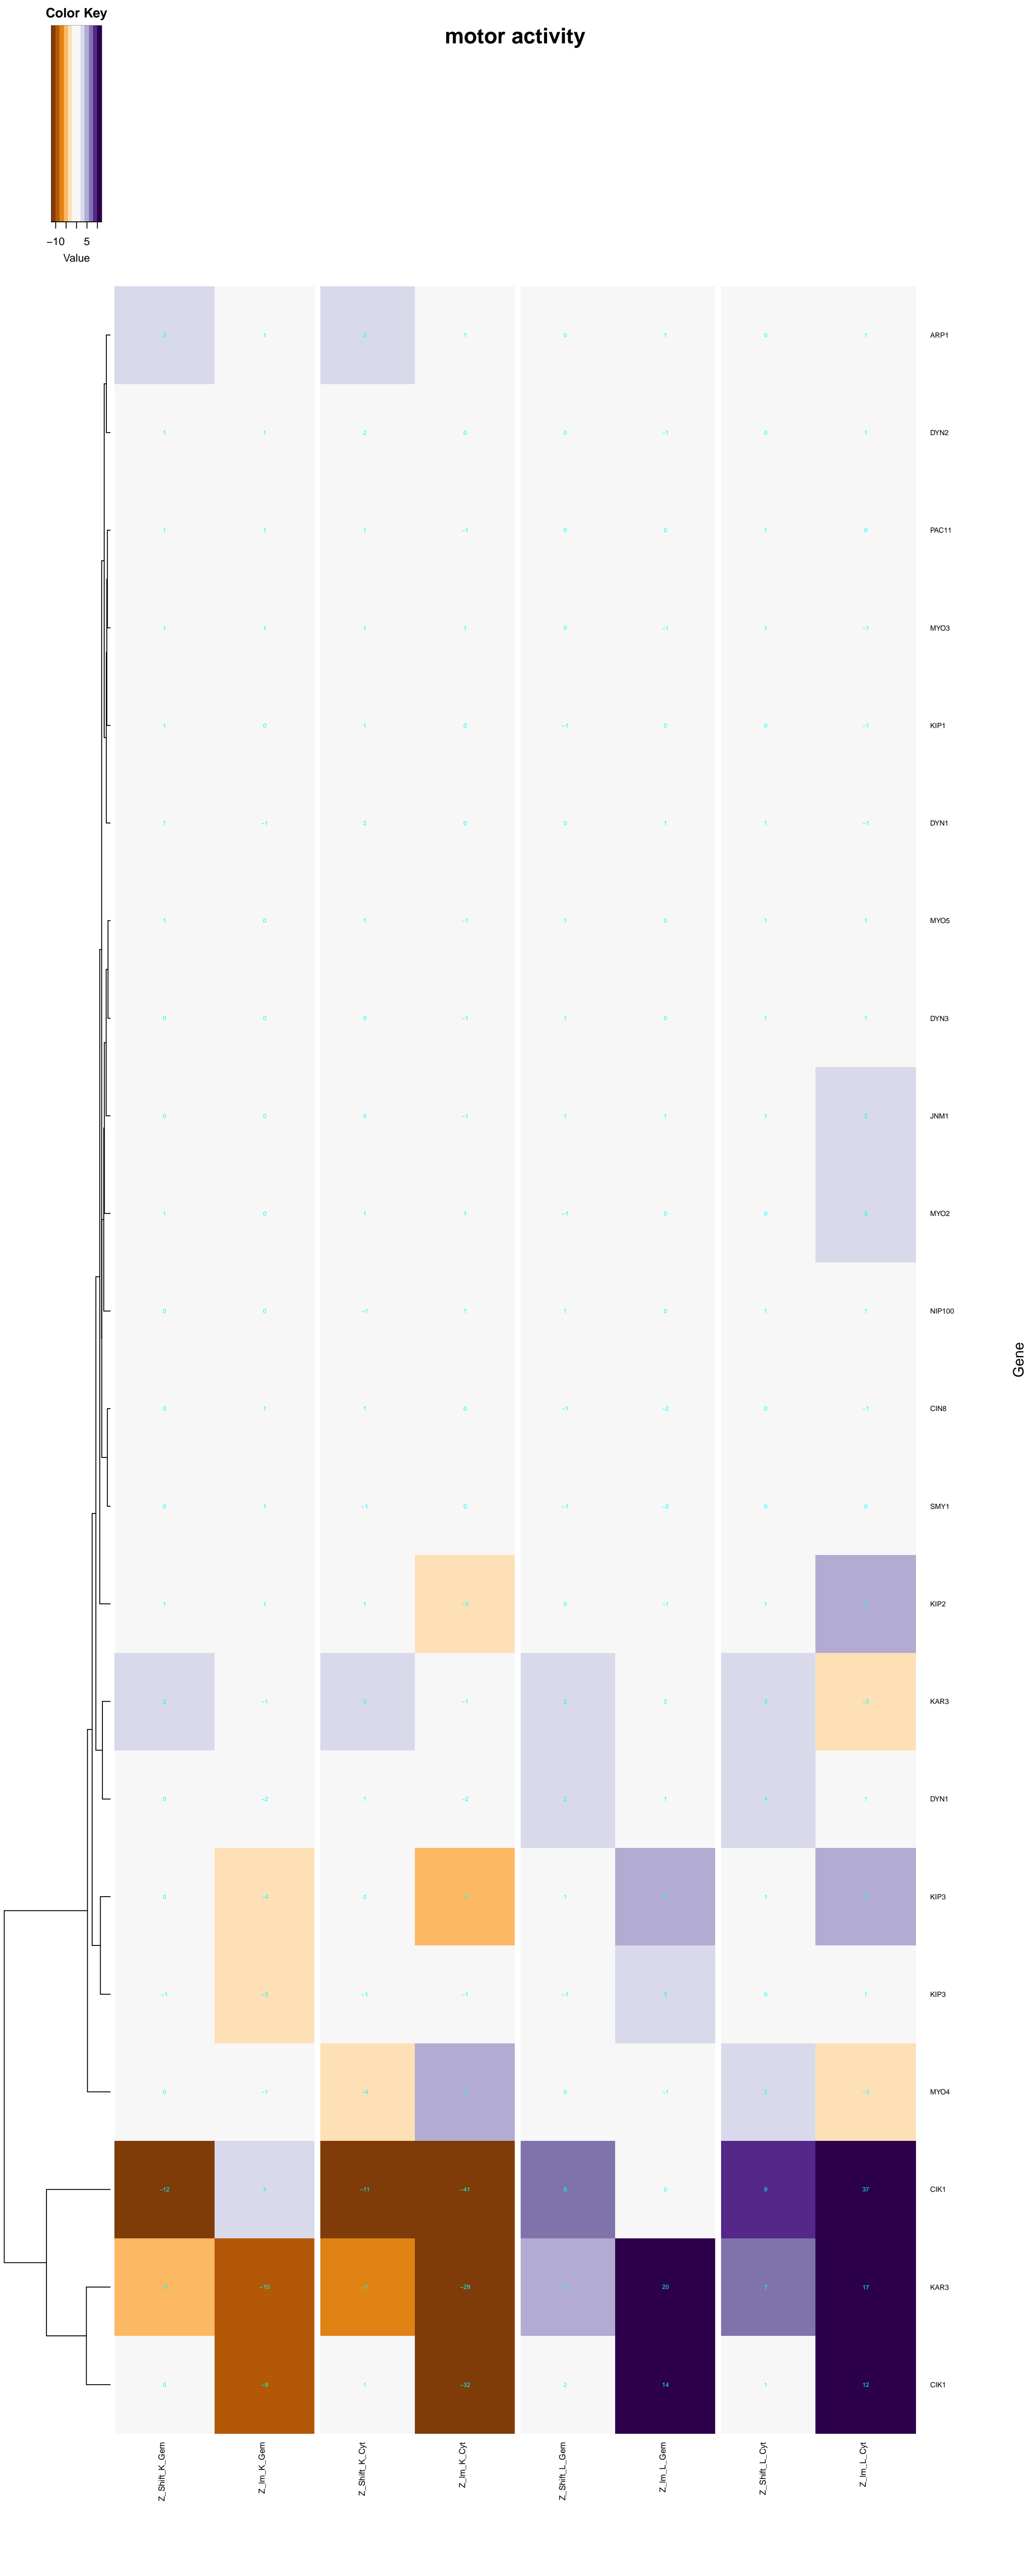

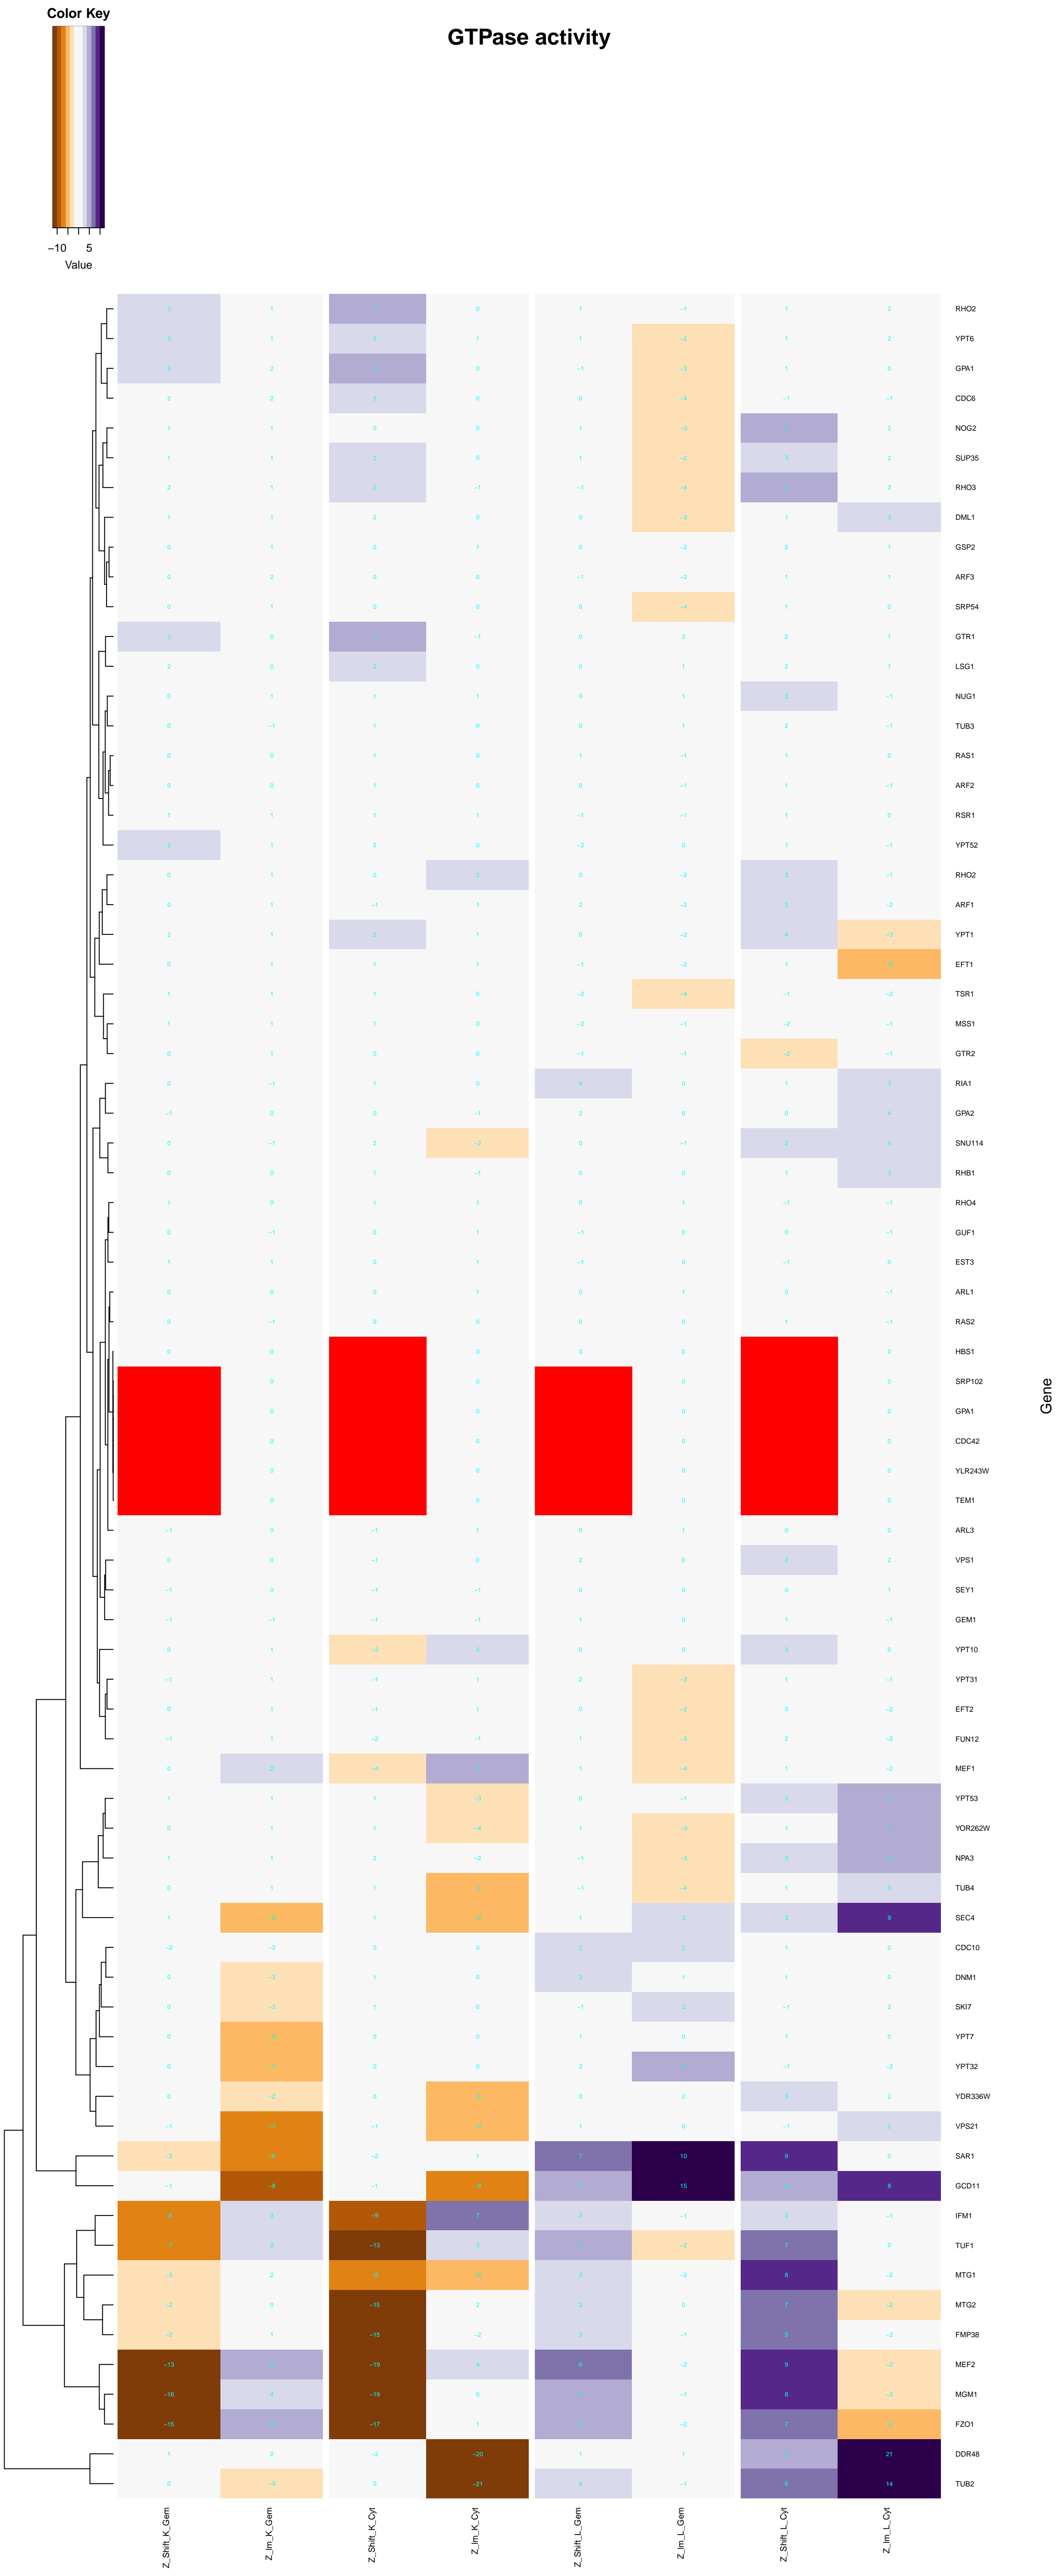

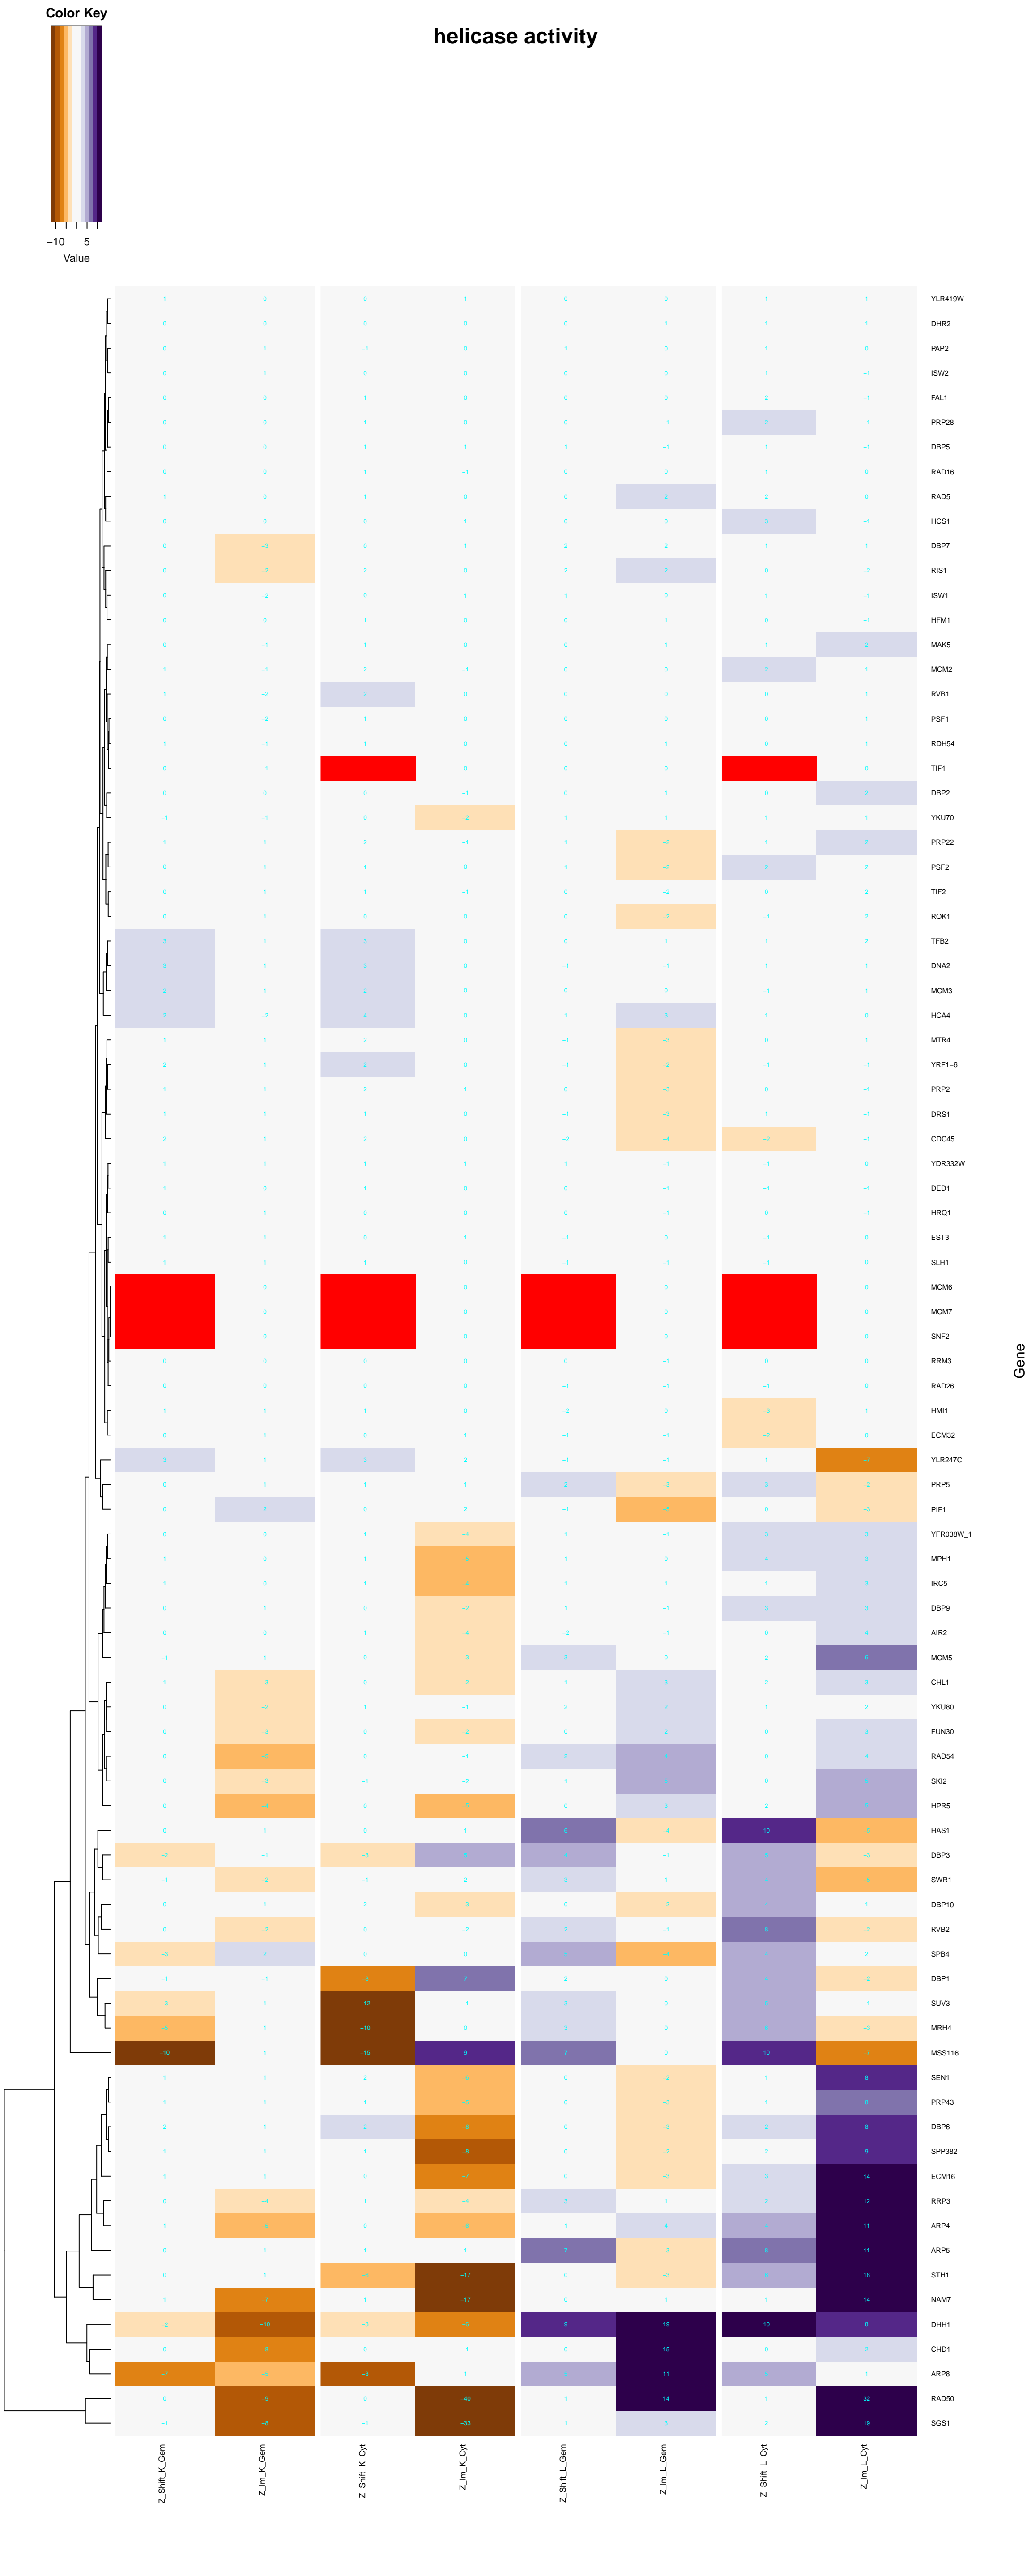

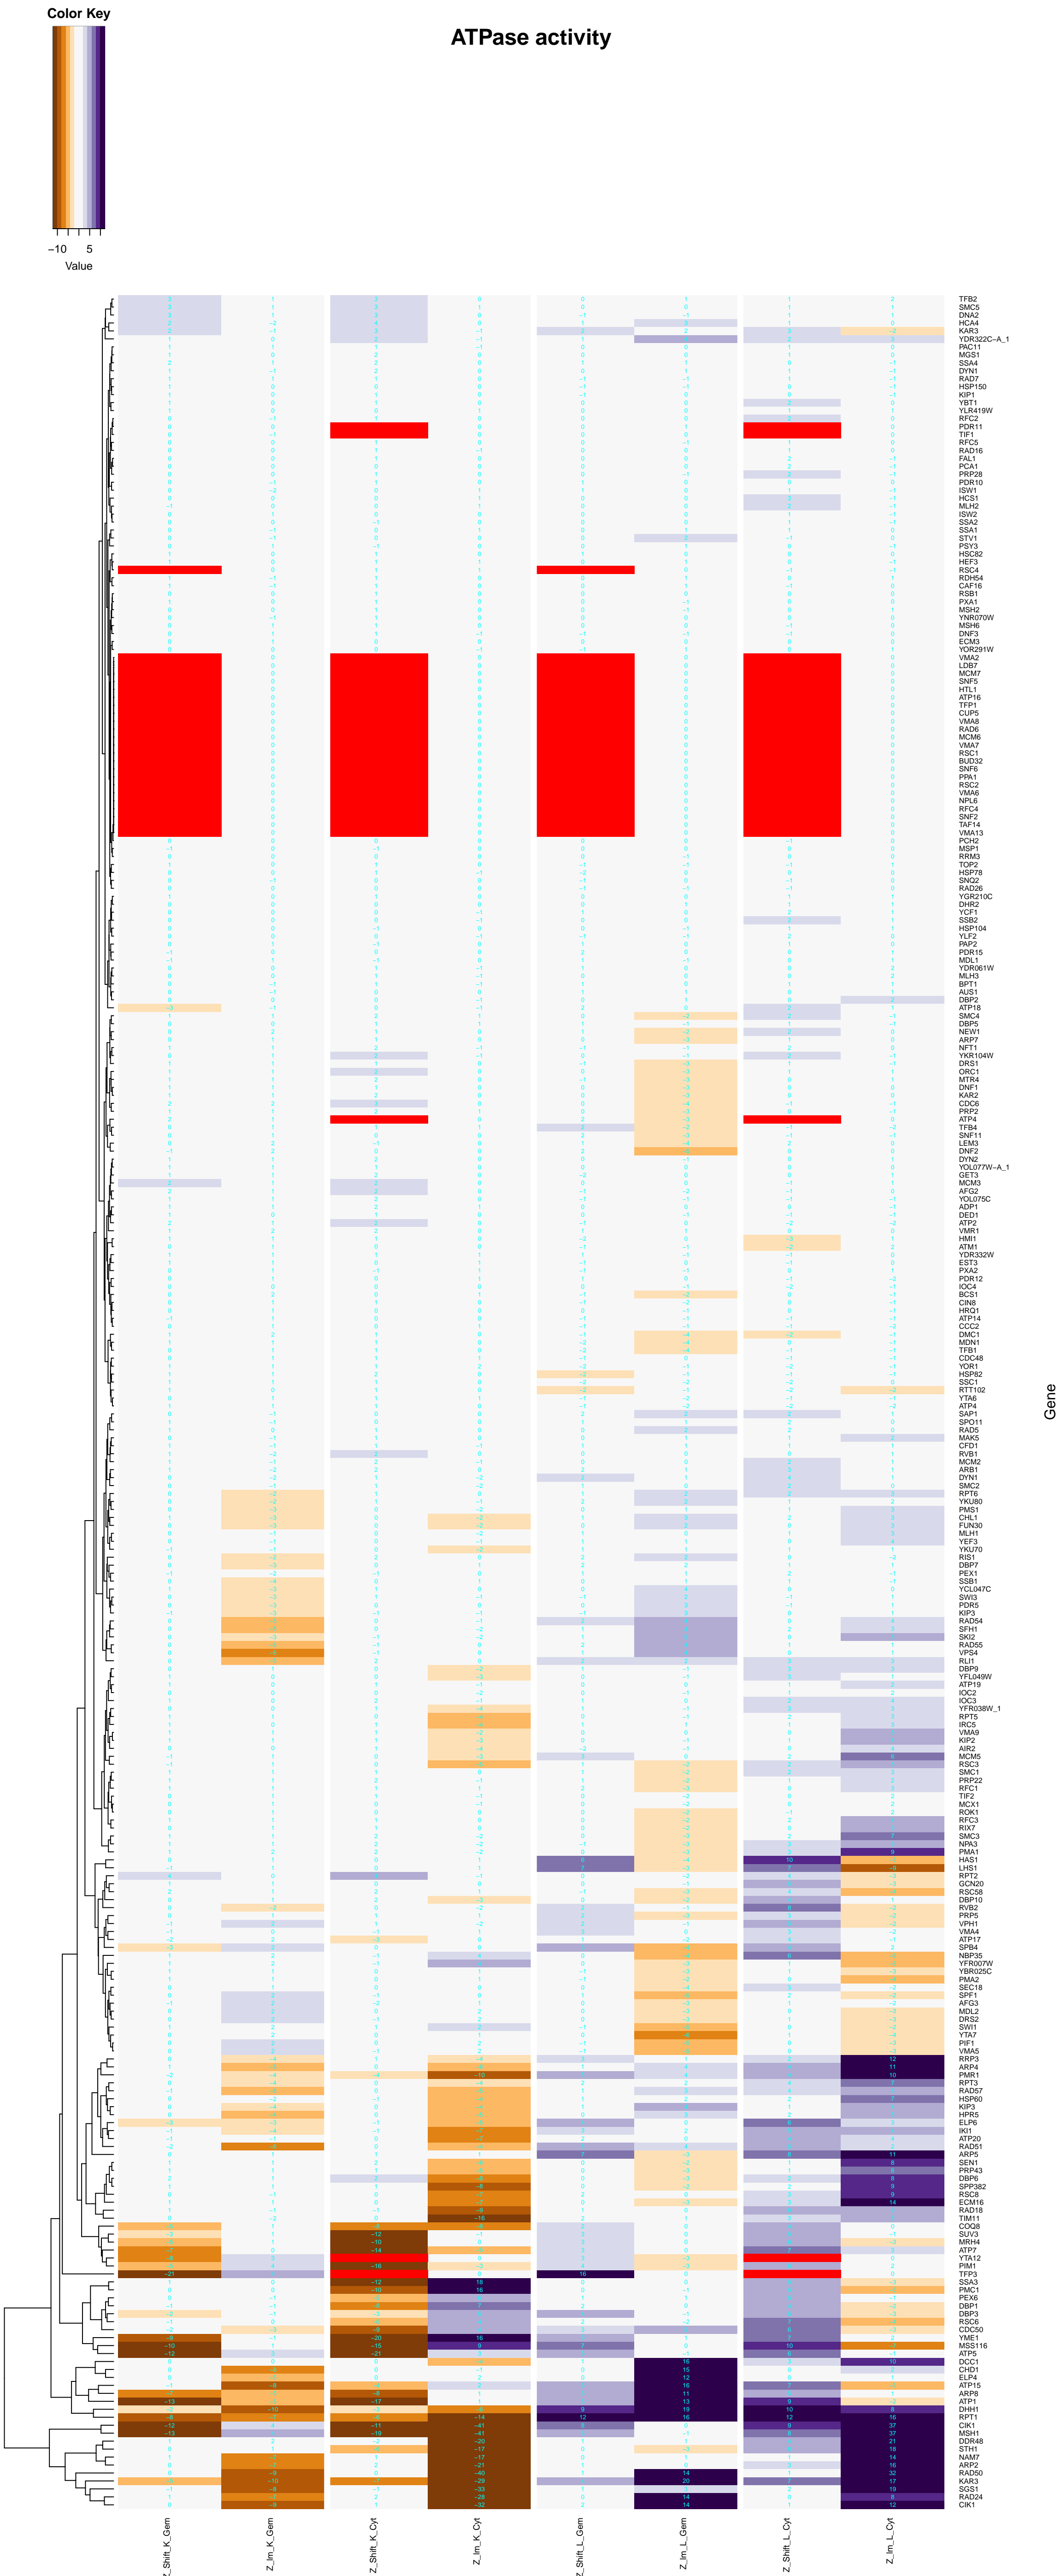

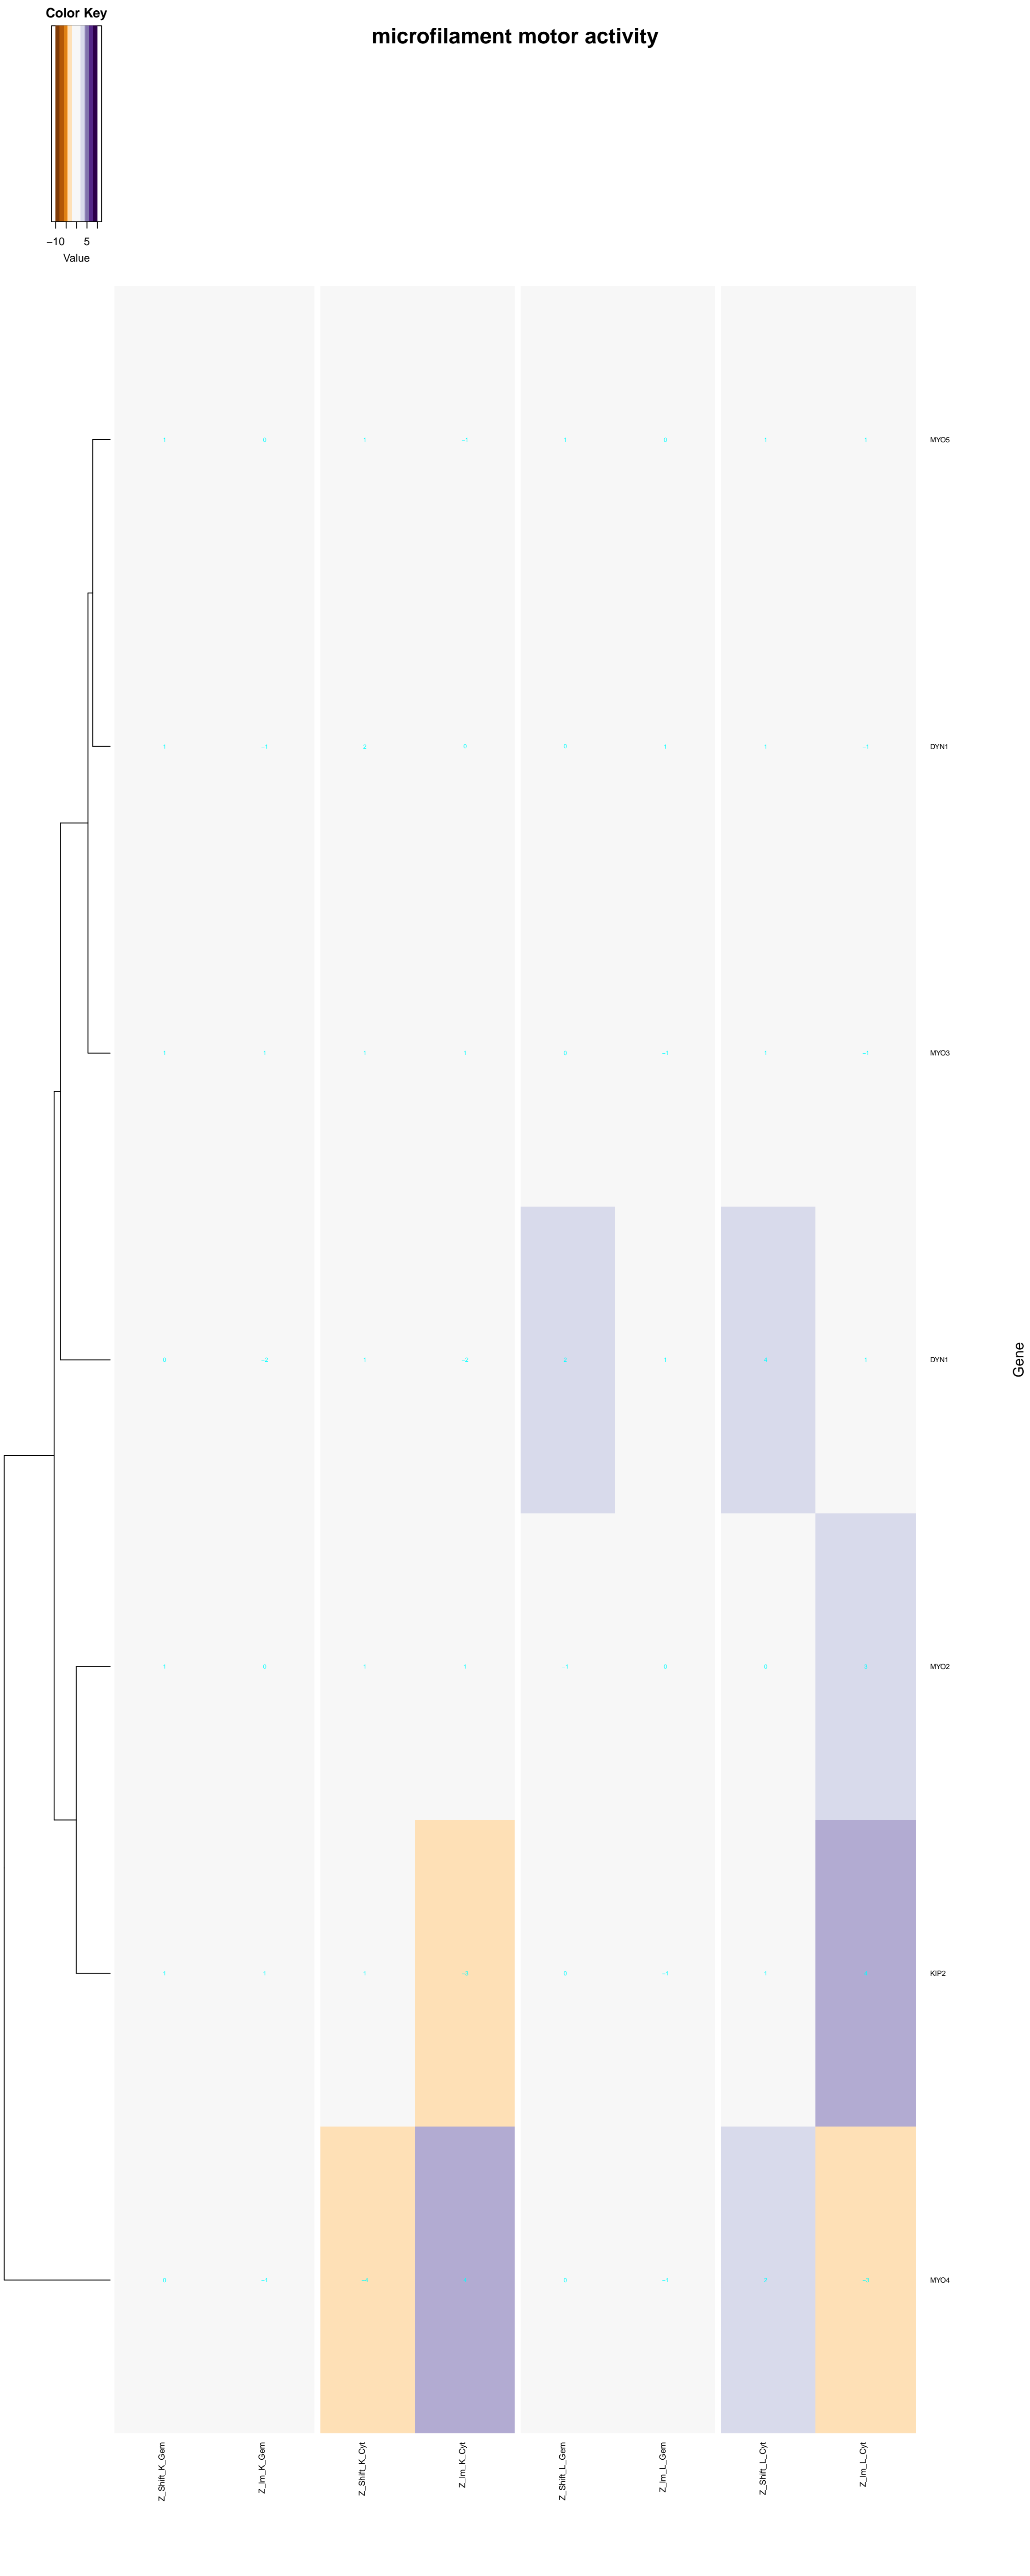

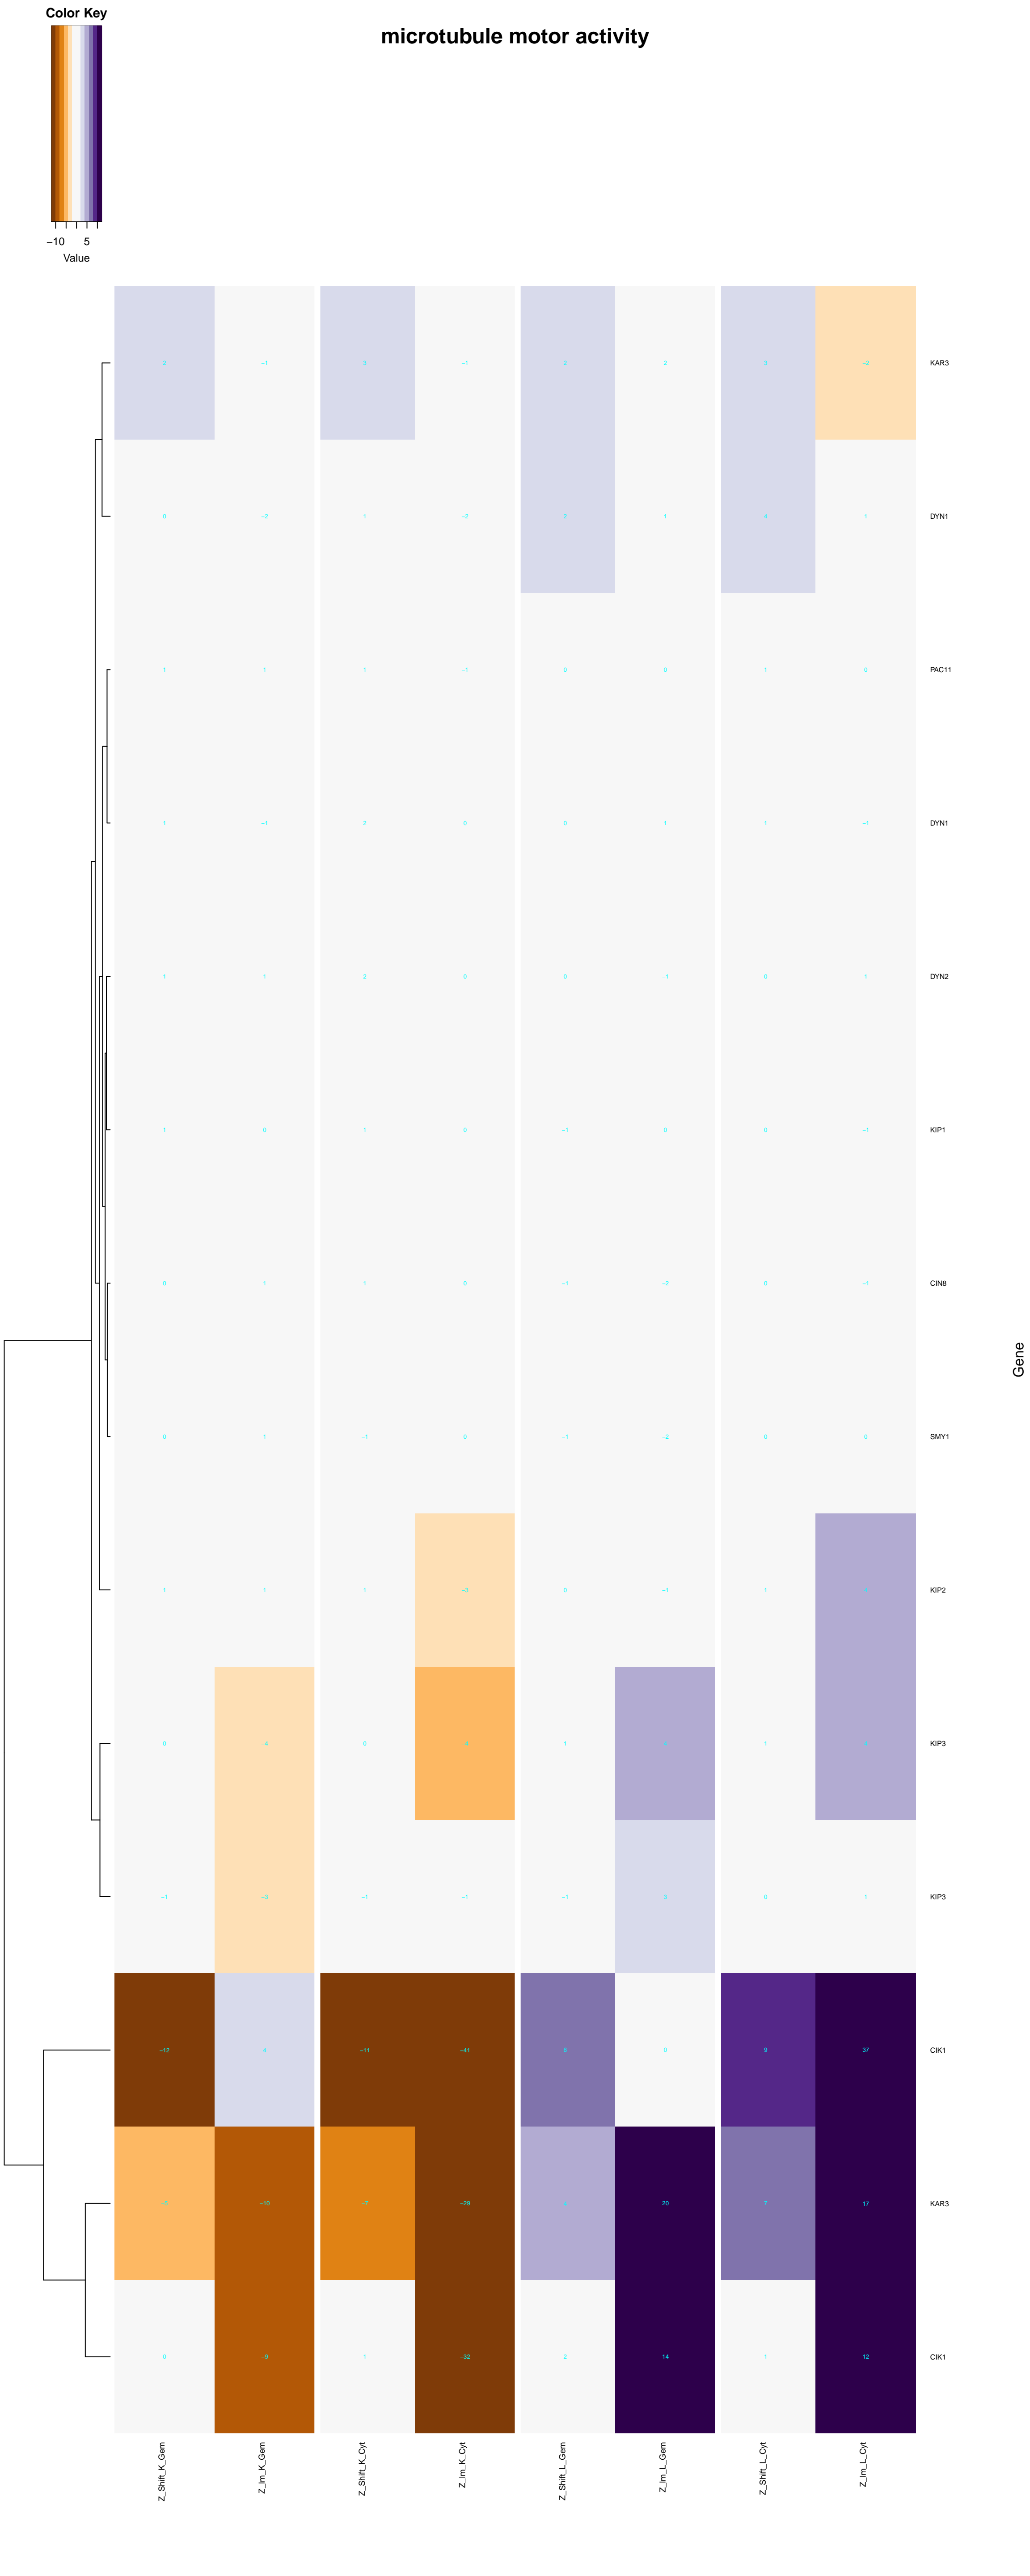

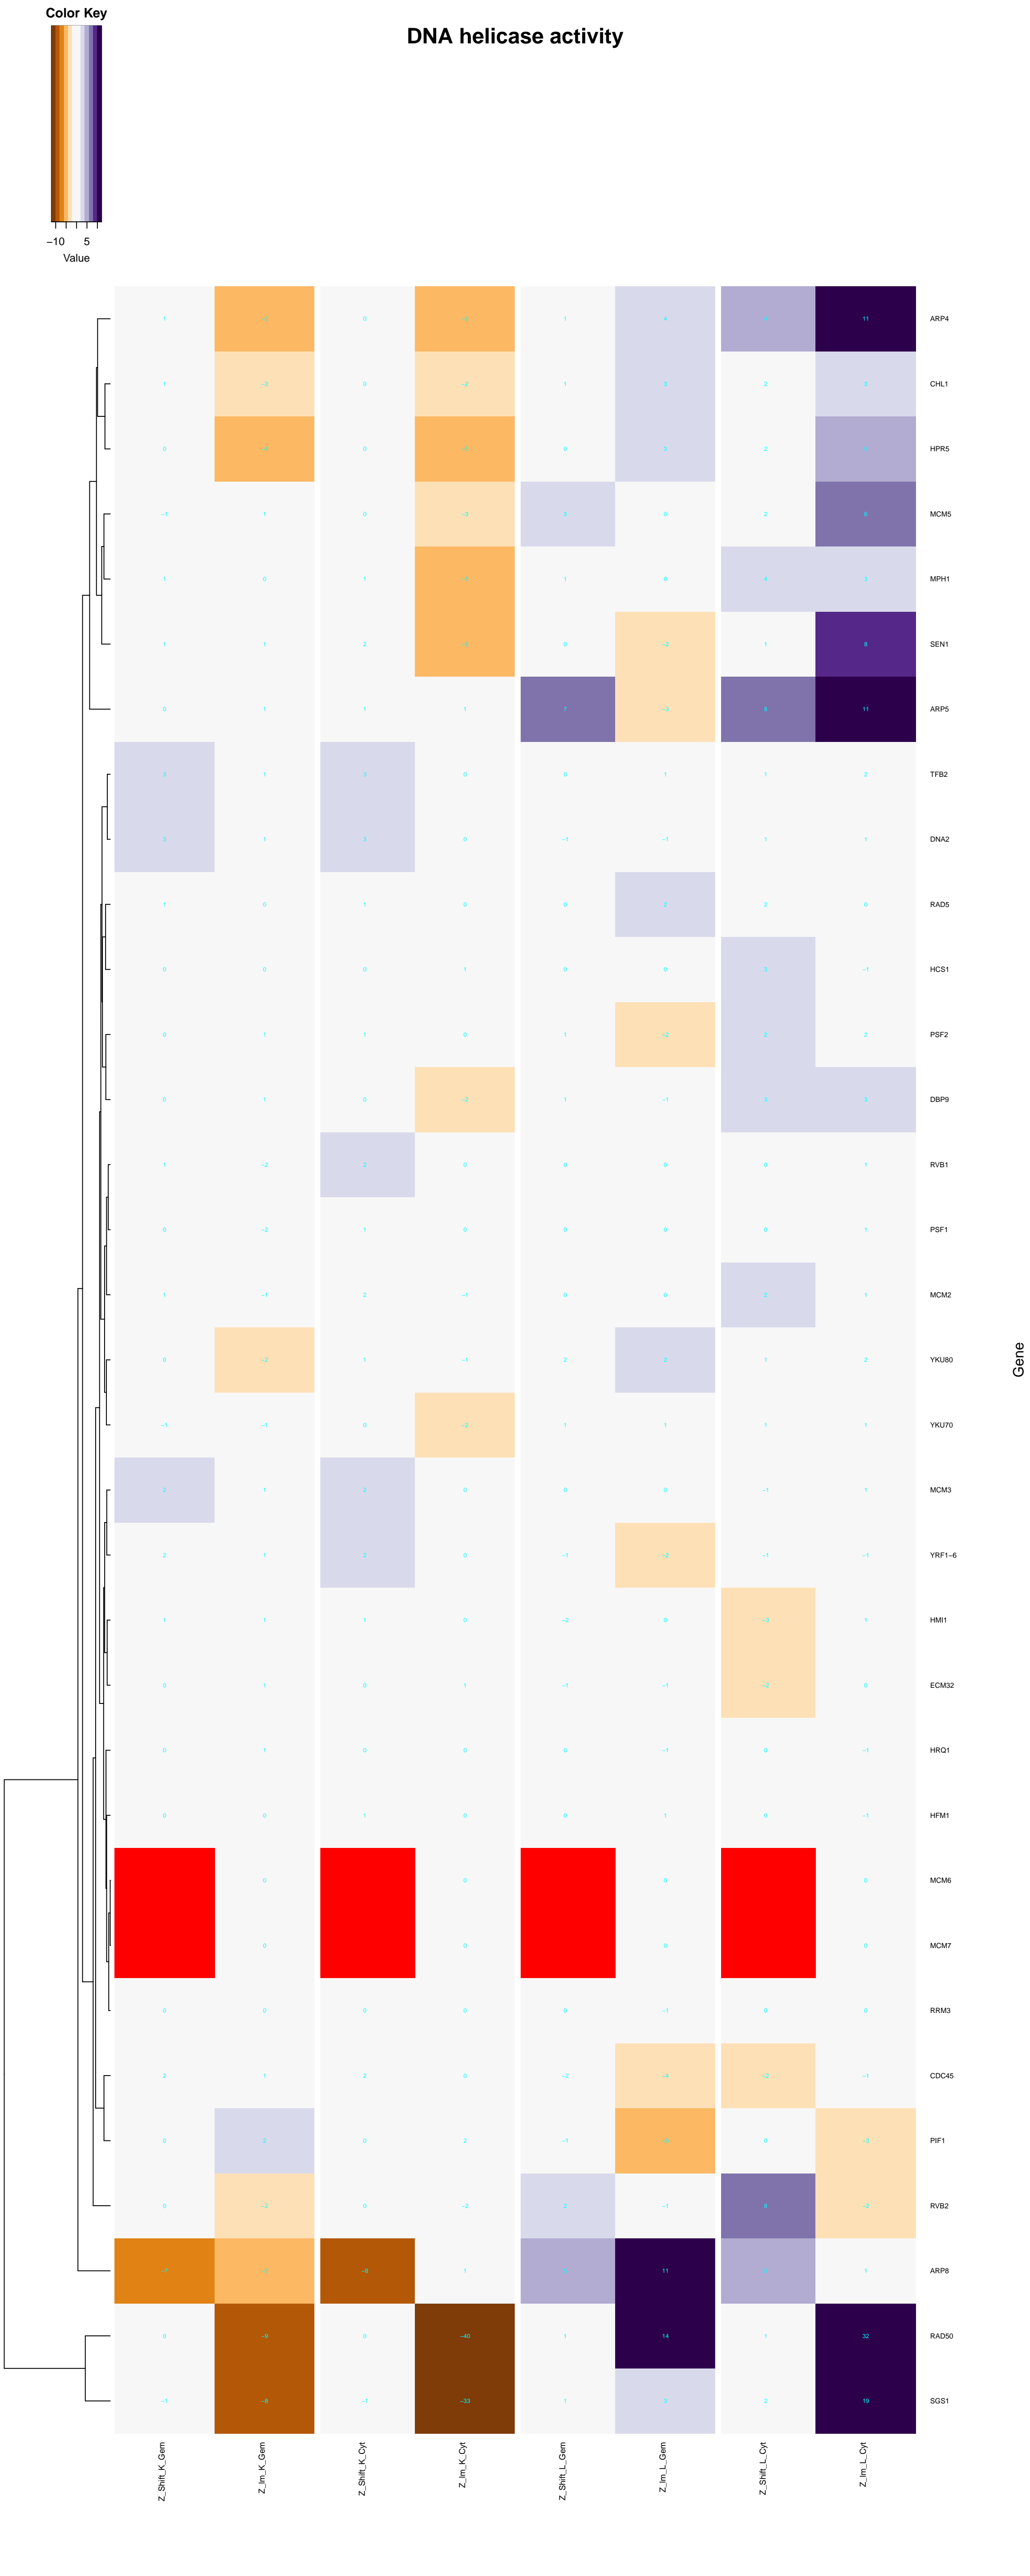



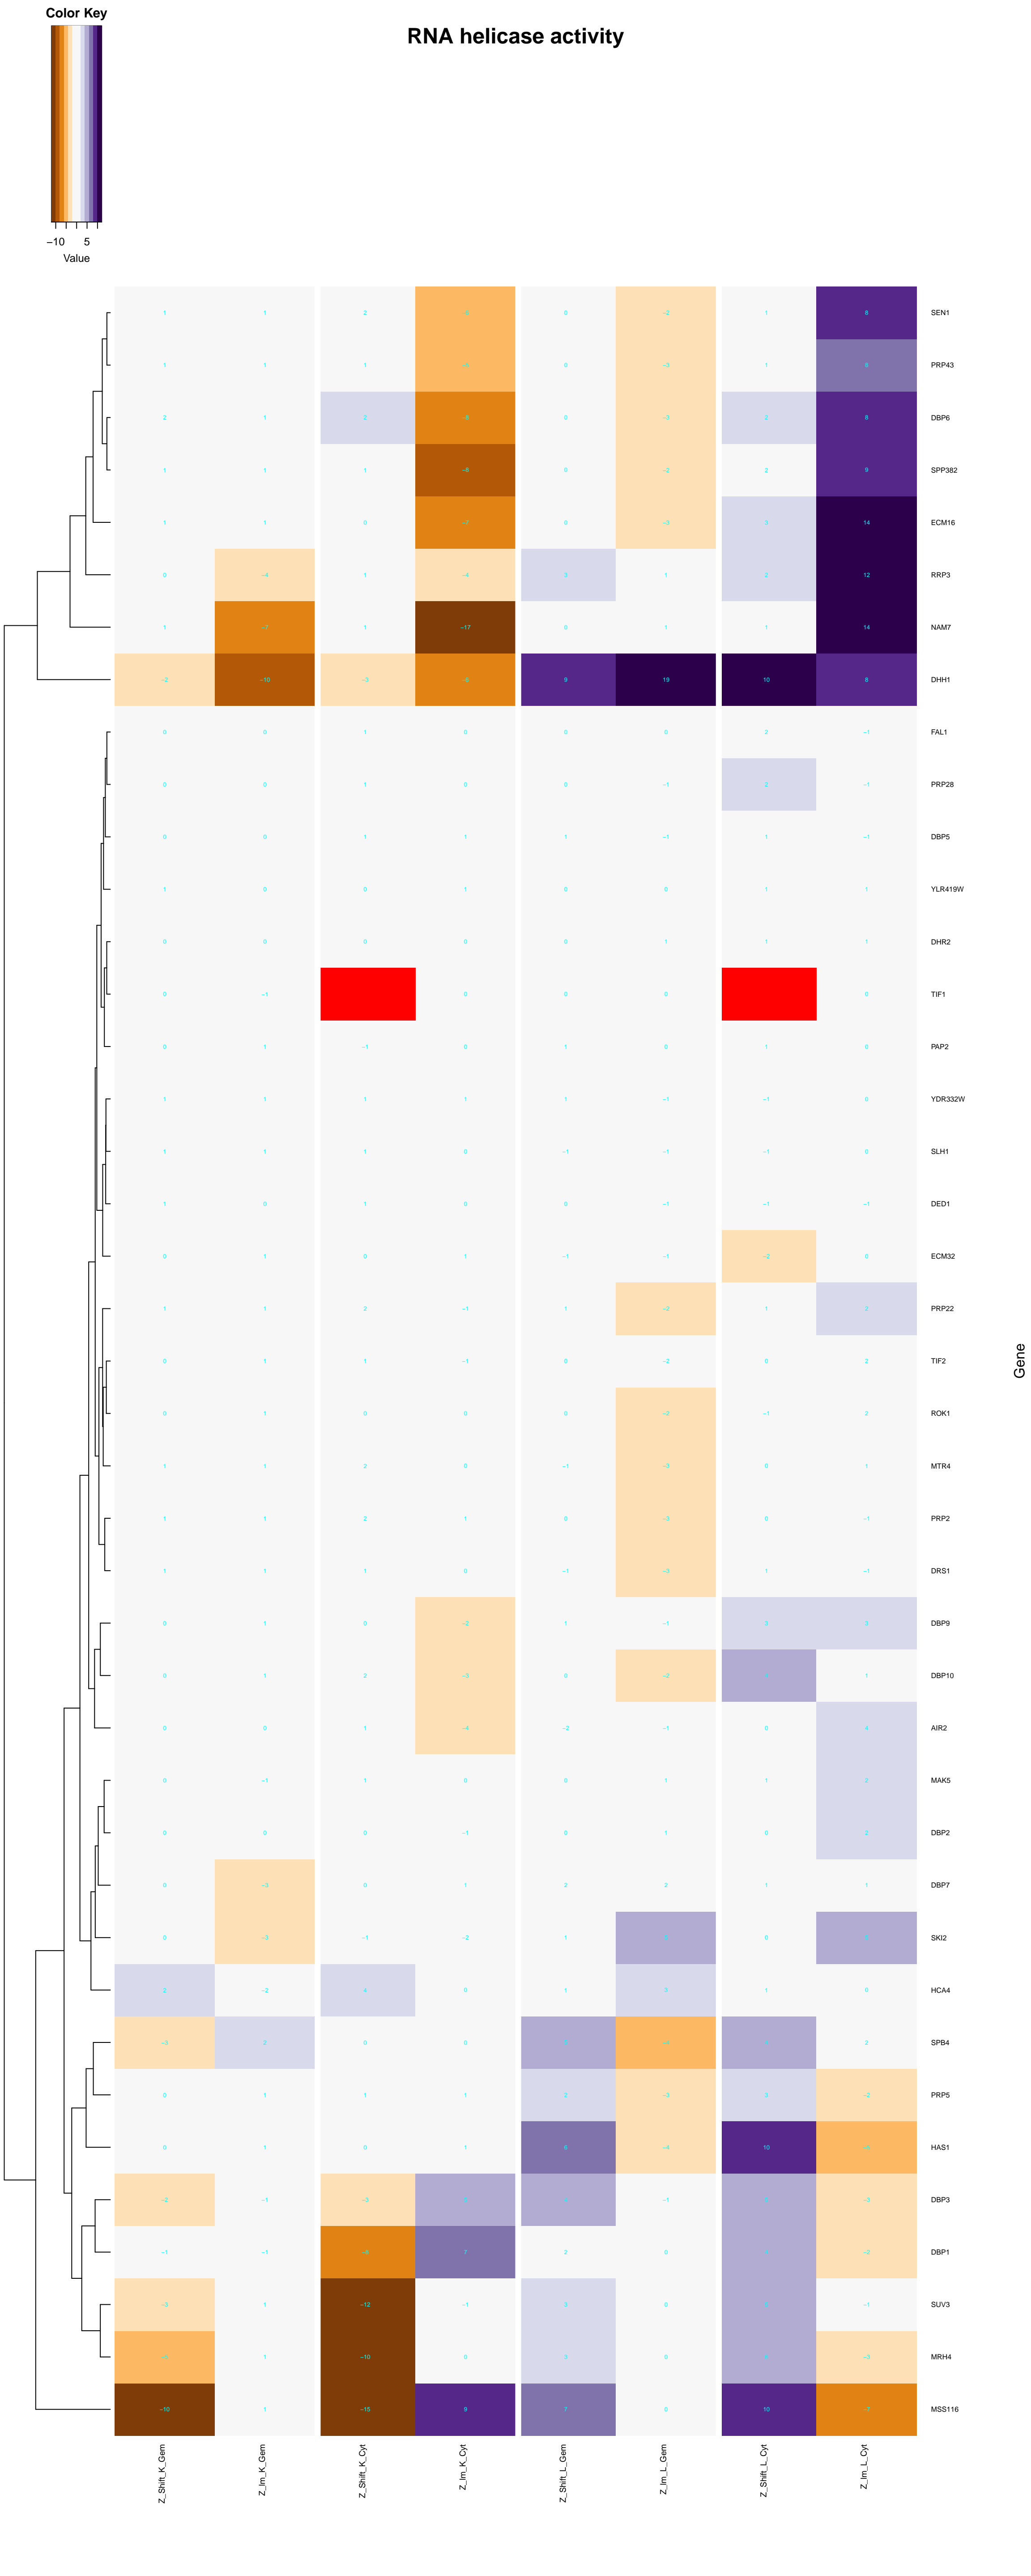

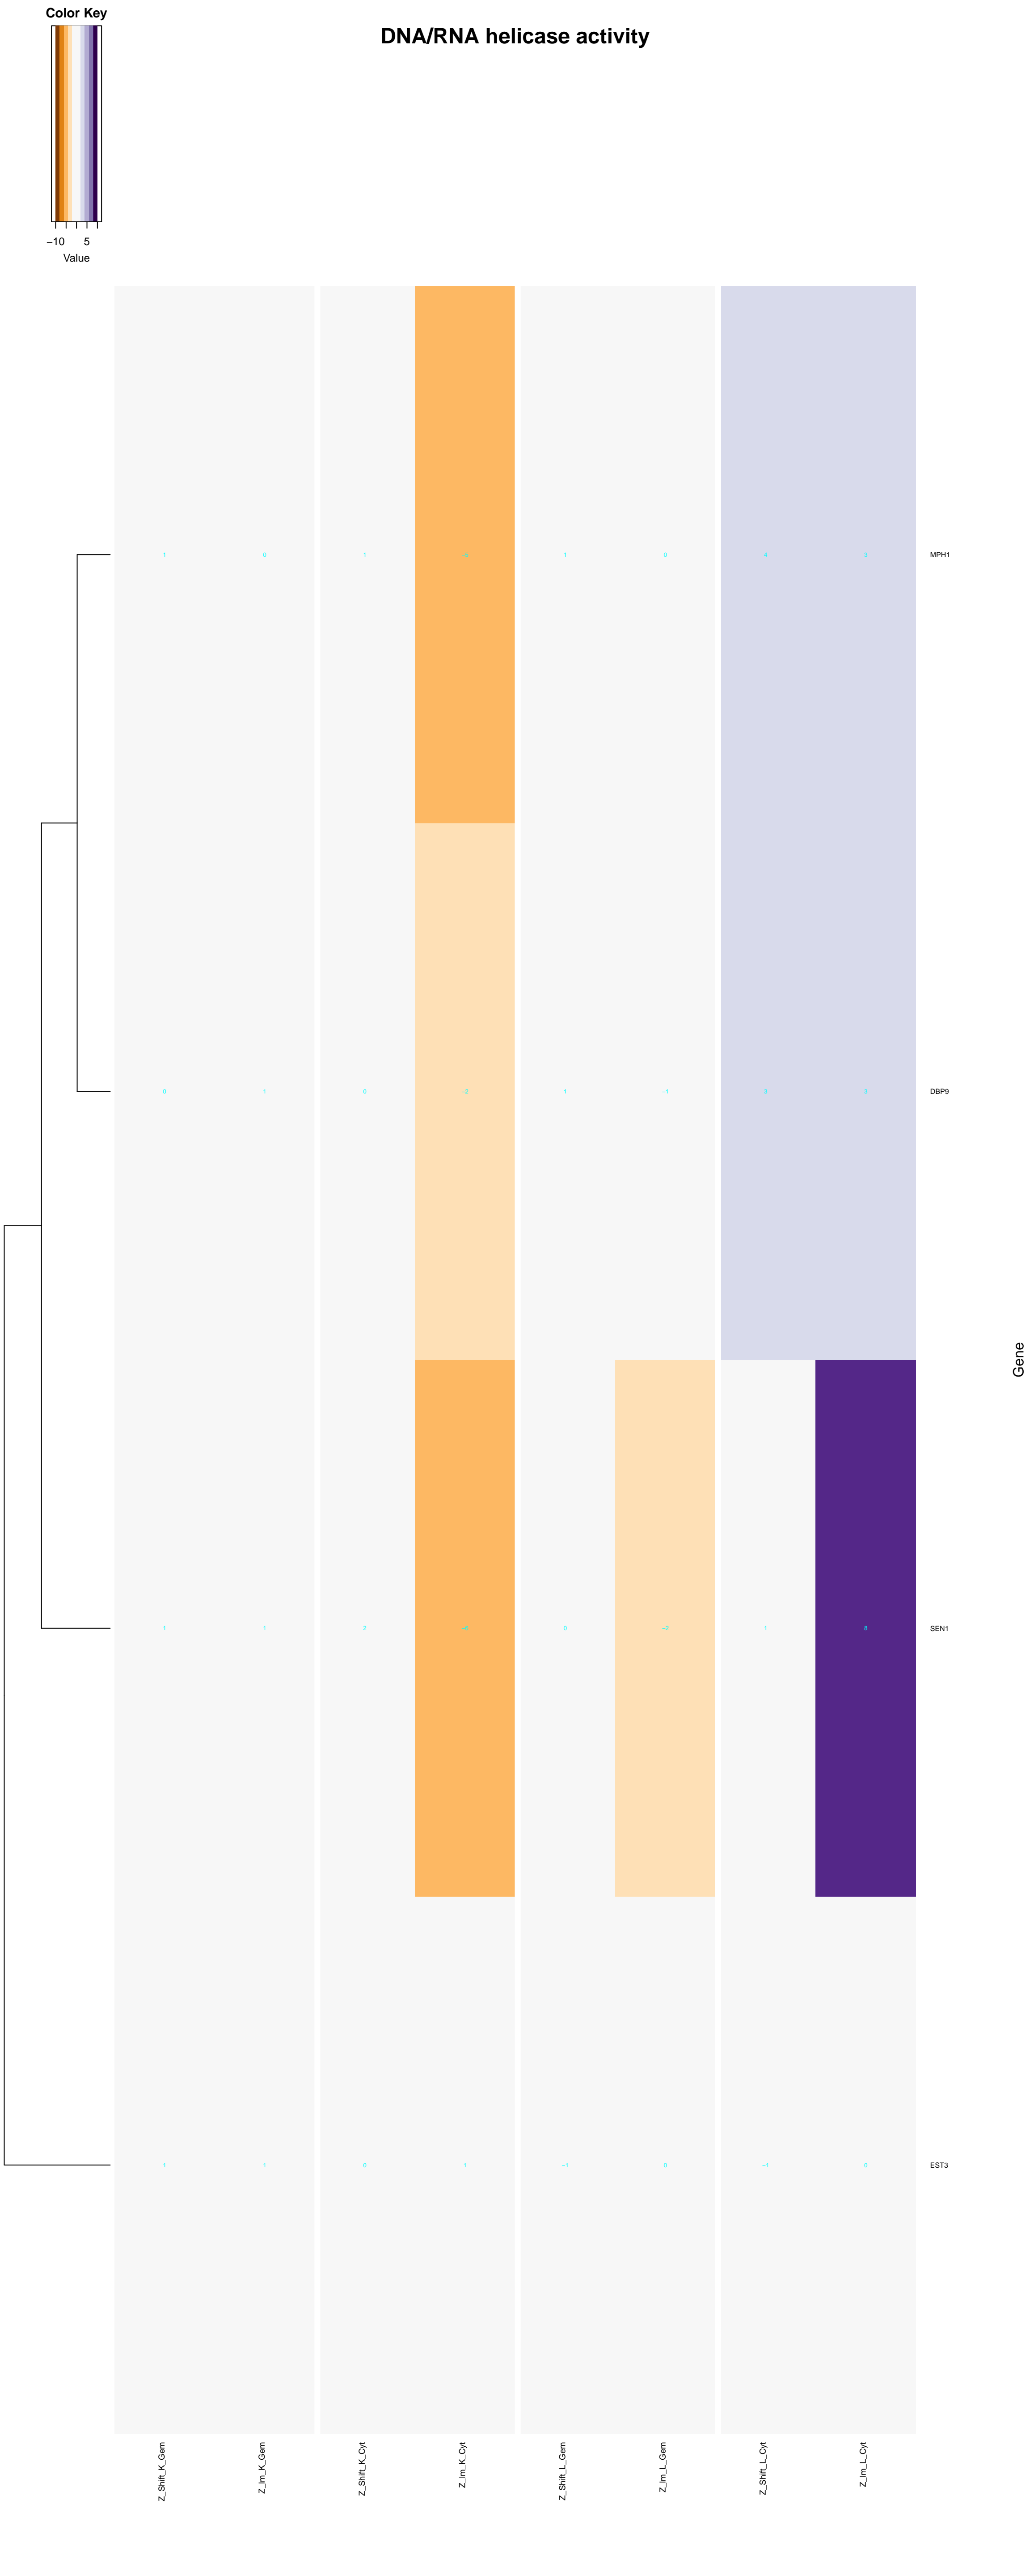

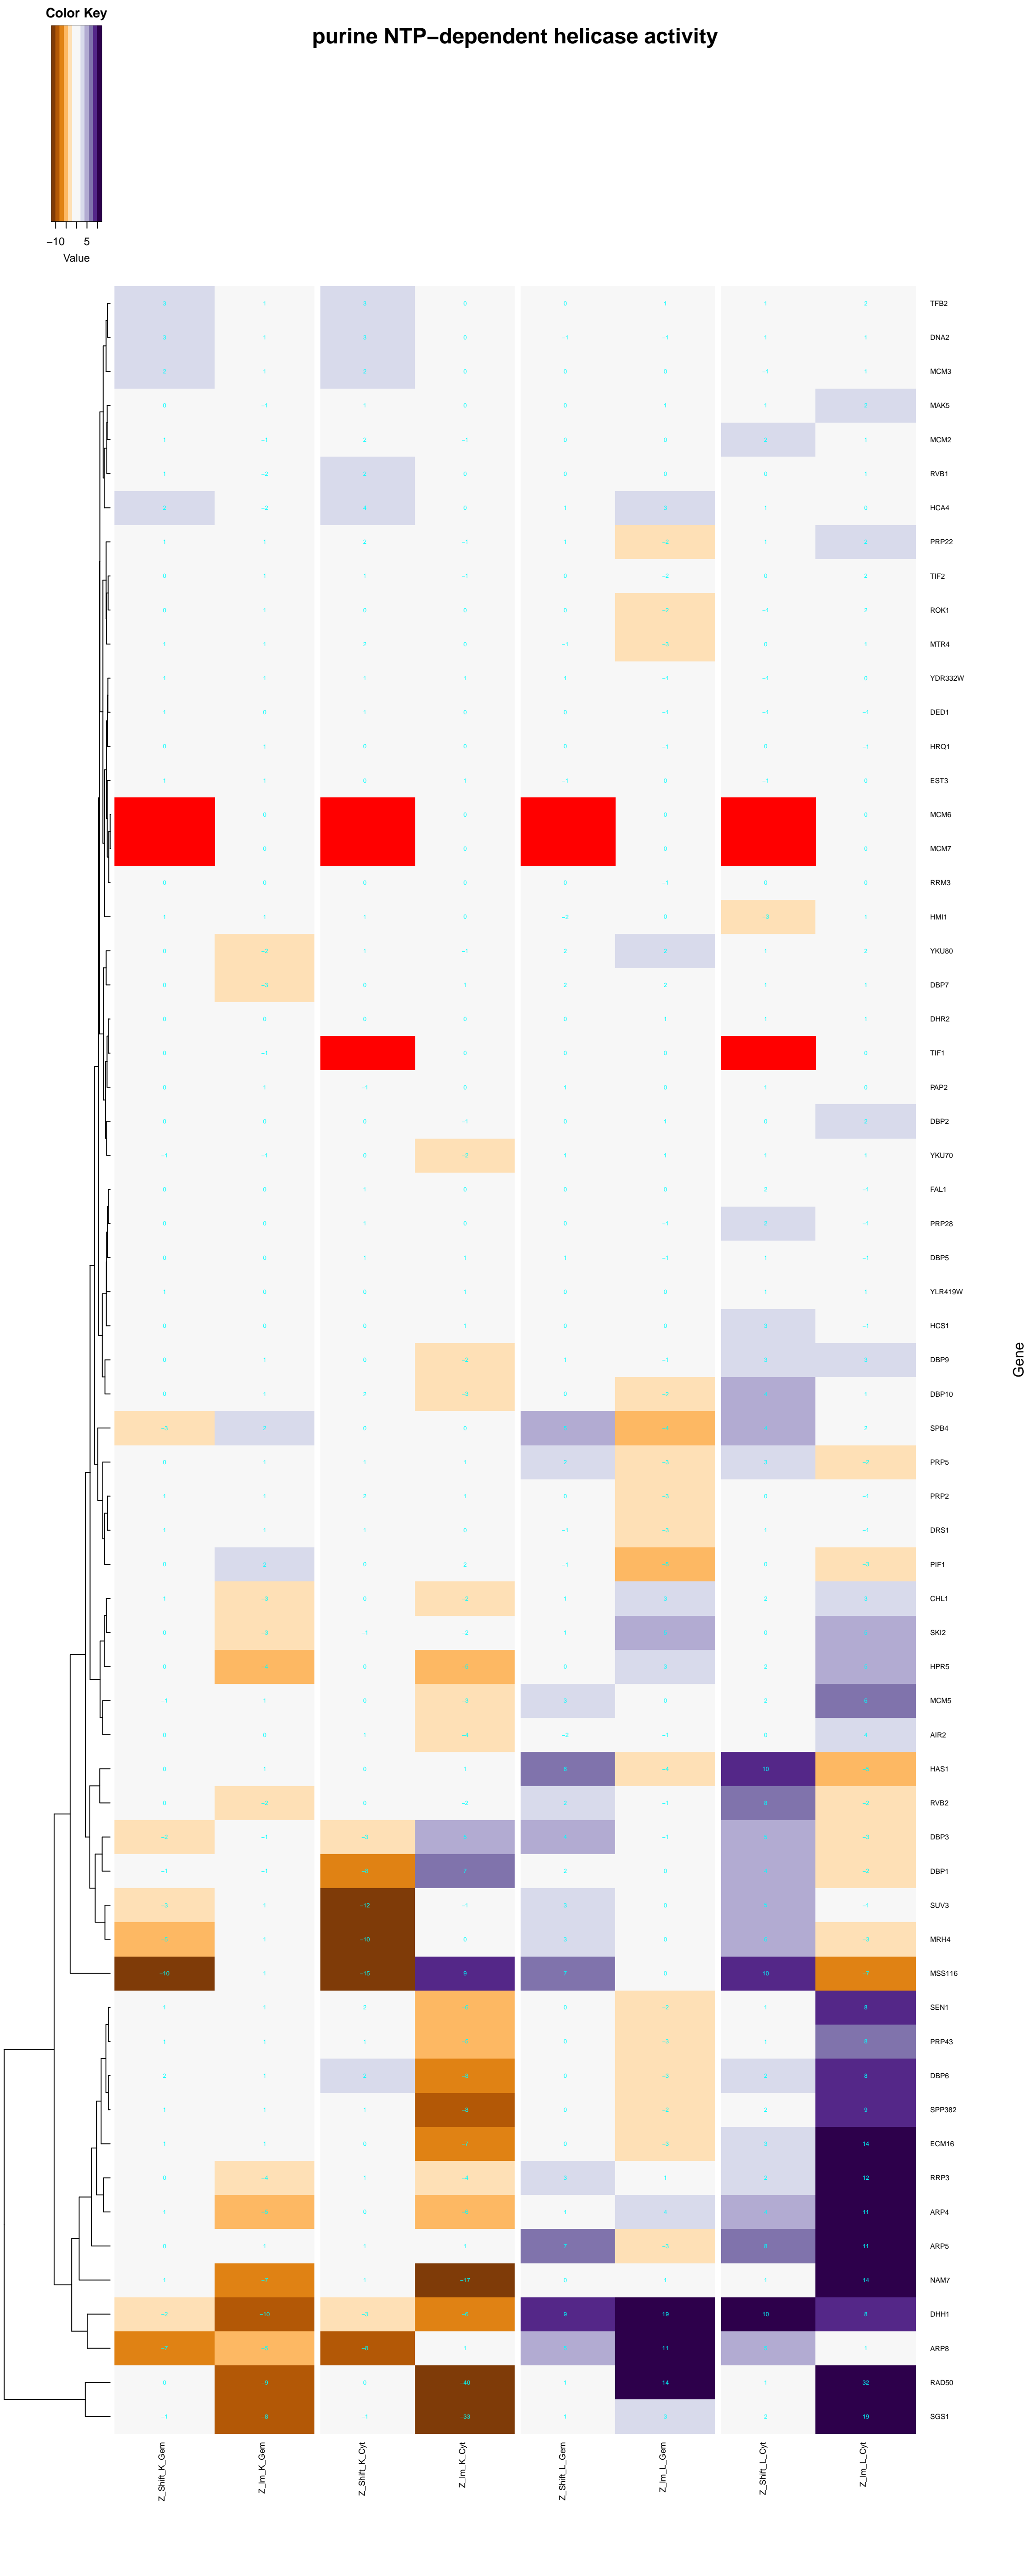

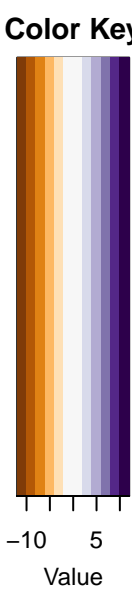

ATP-dependent microtubule motor activity, minus-end-directed

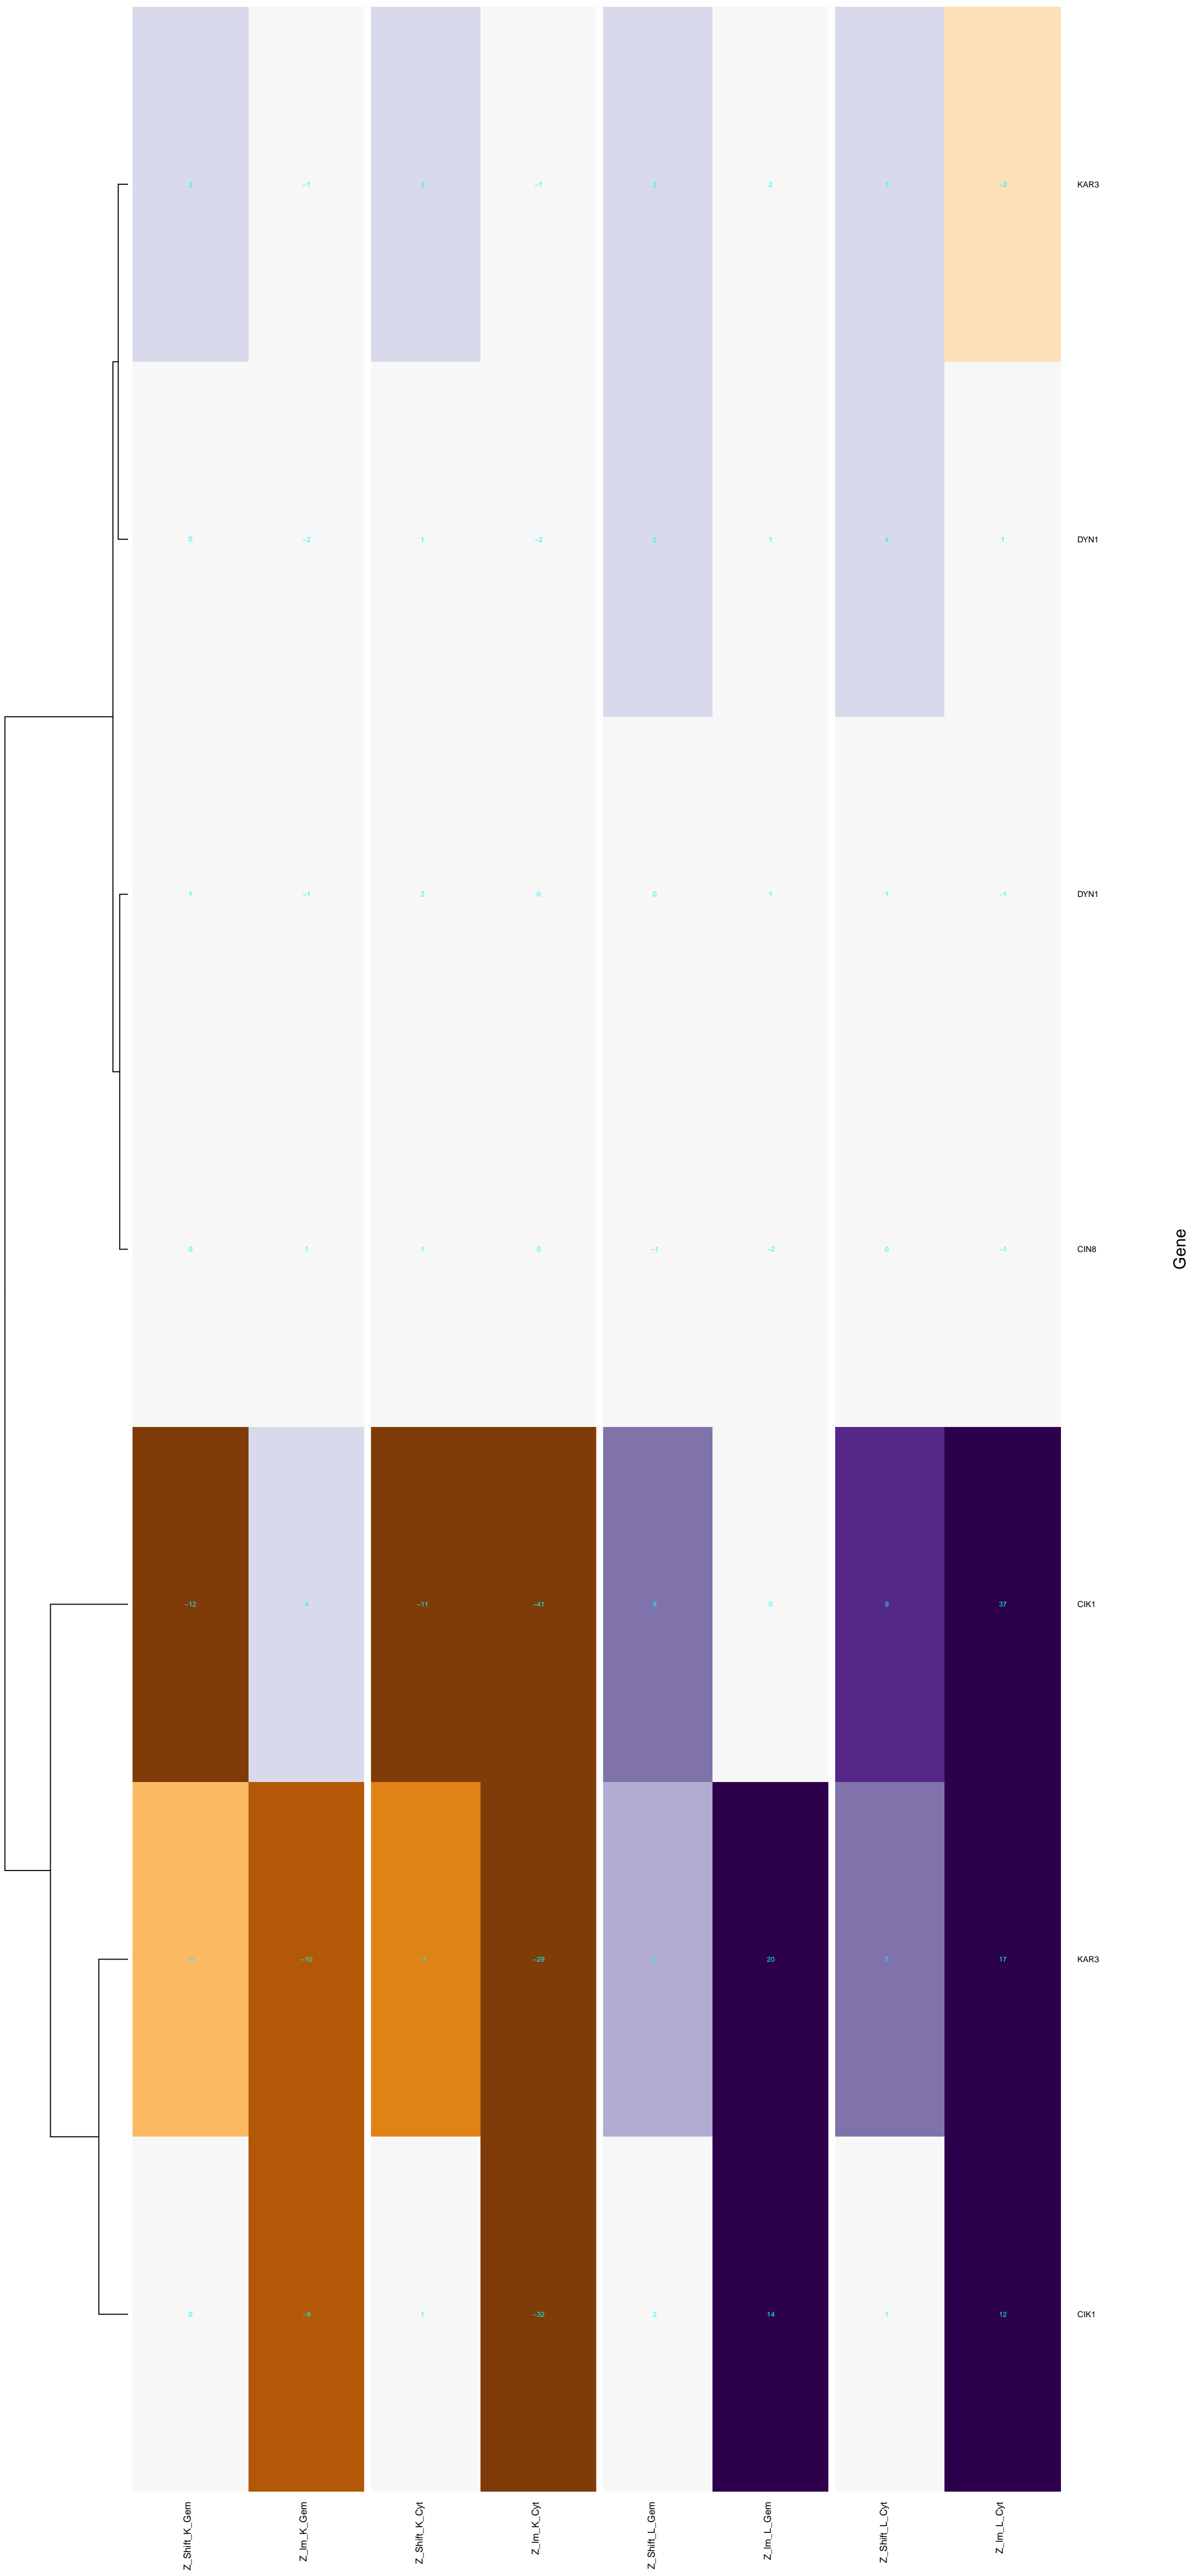

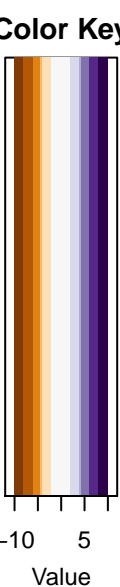

ATP-dependent microtubule motor activity, plus-end-directed

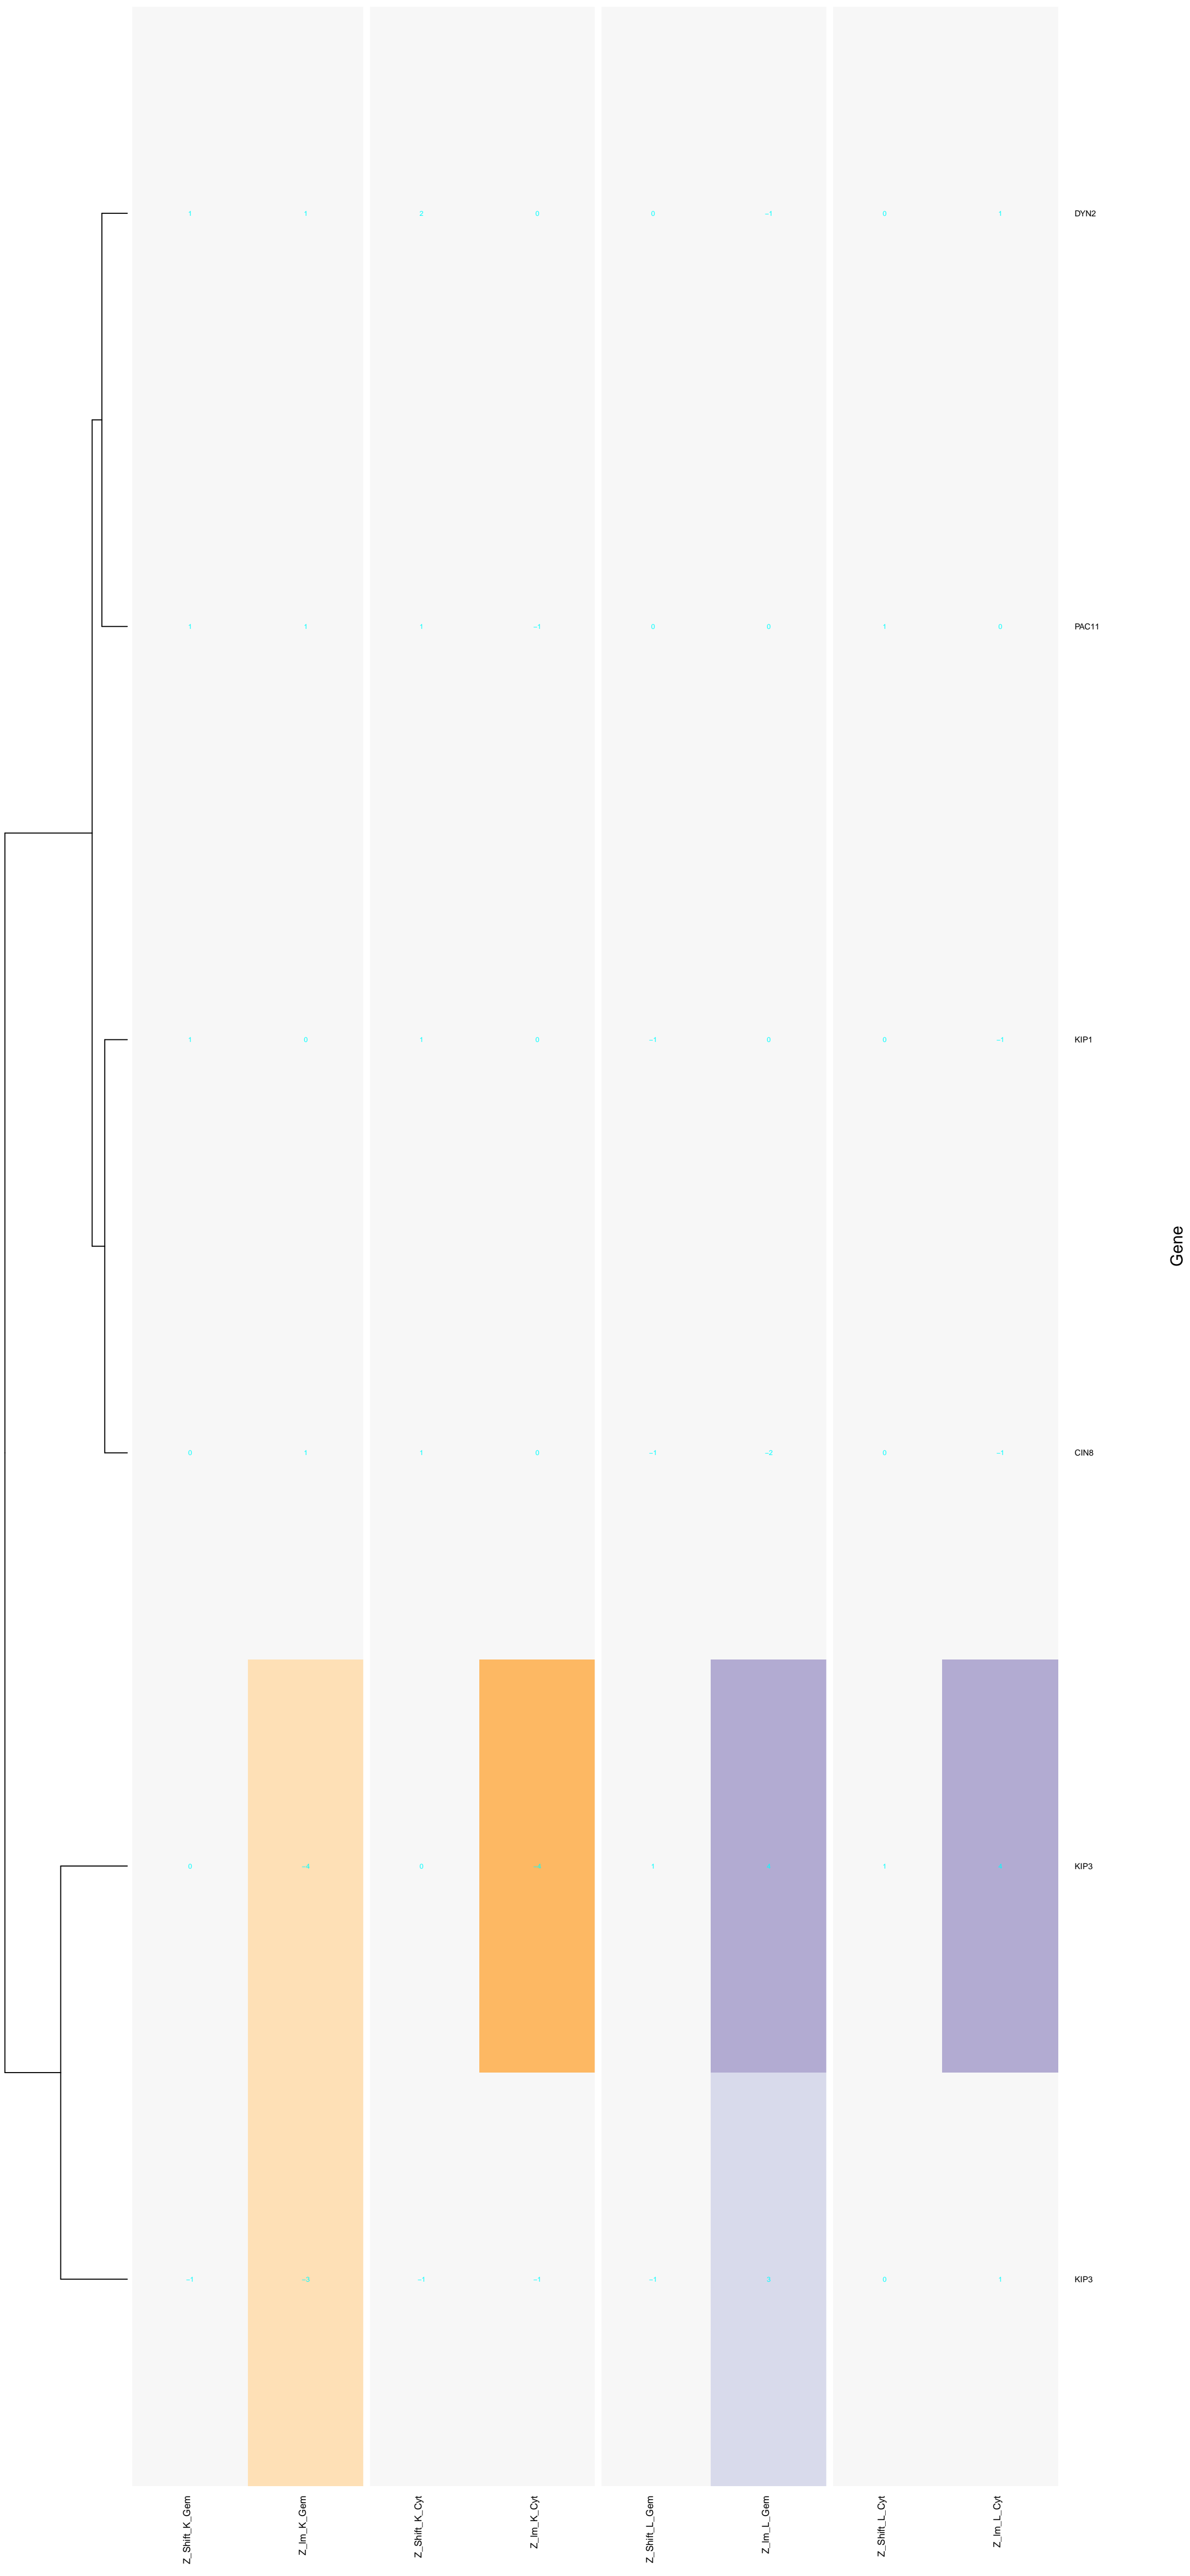

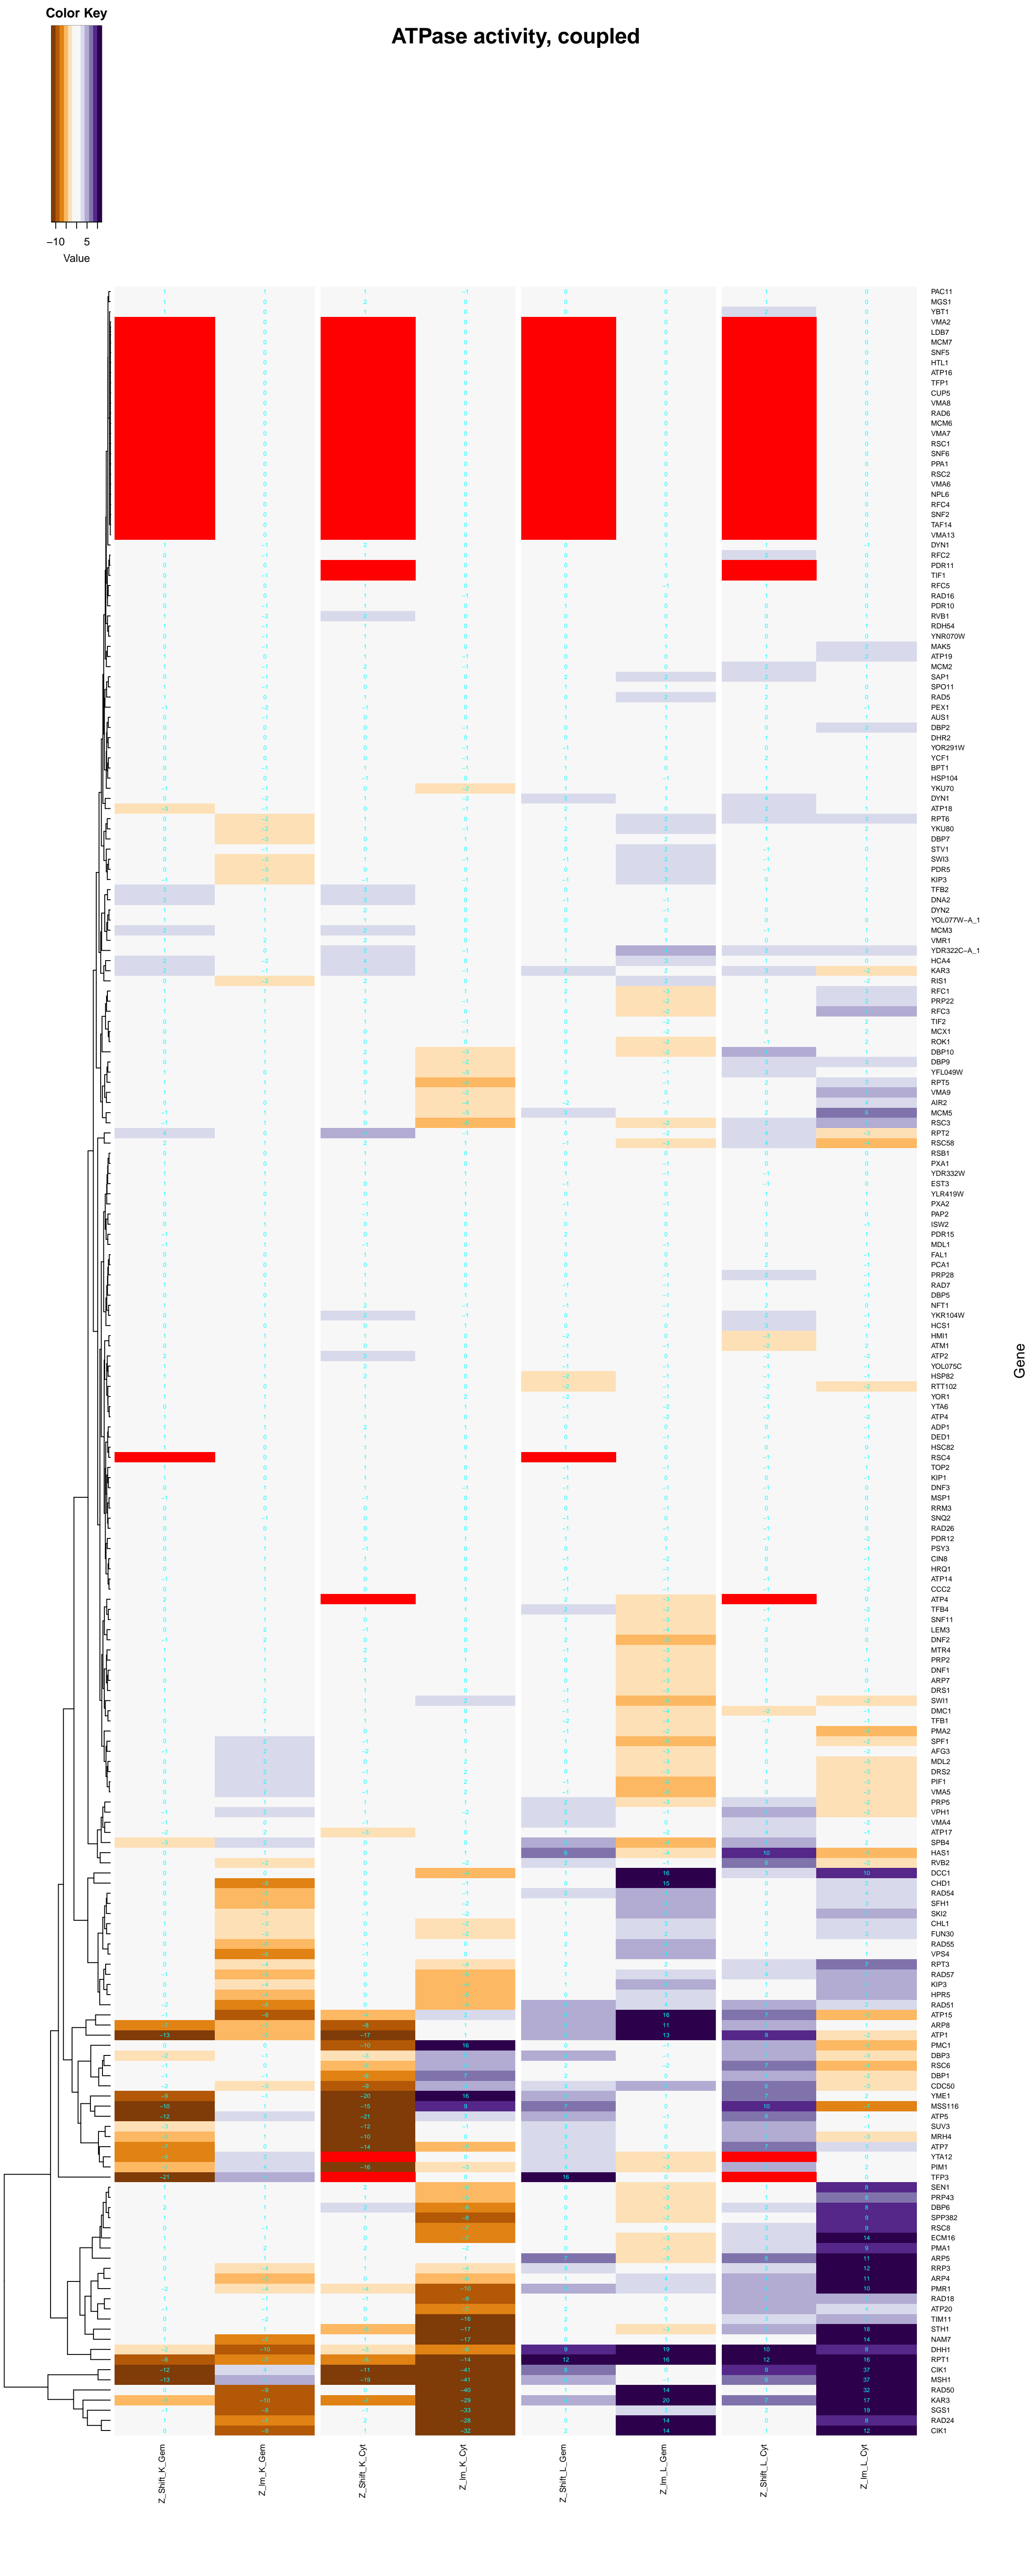

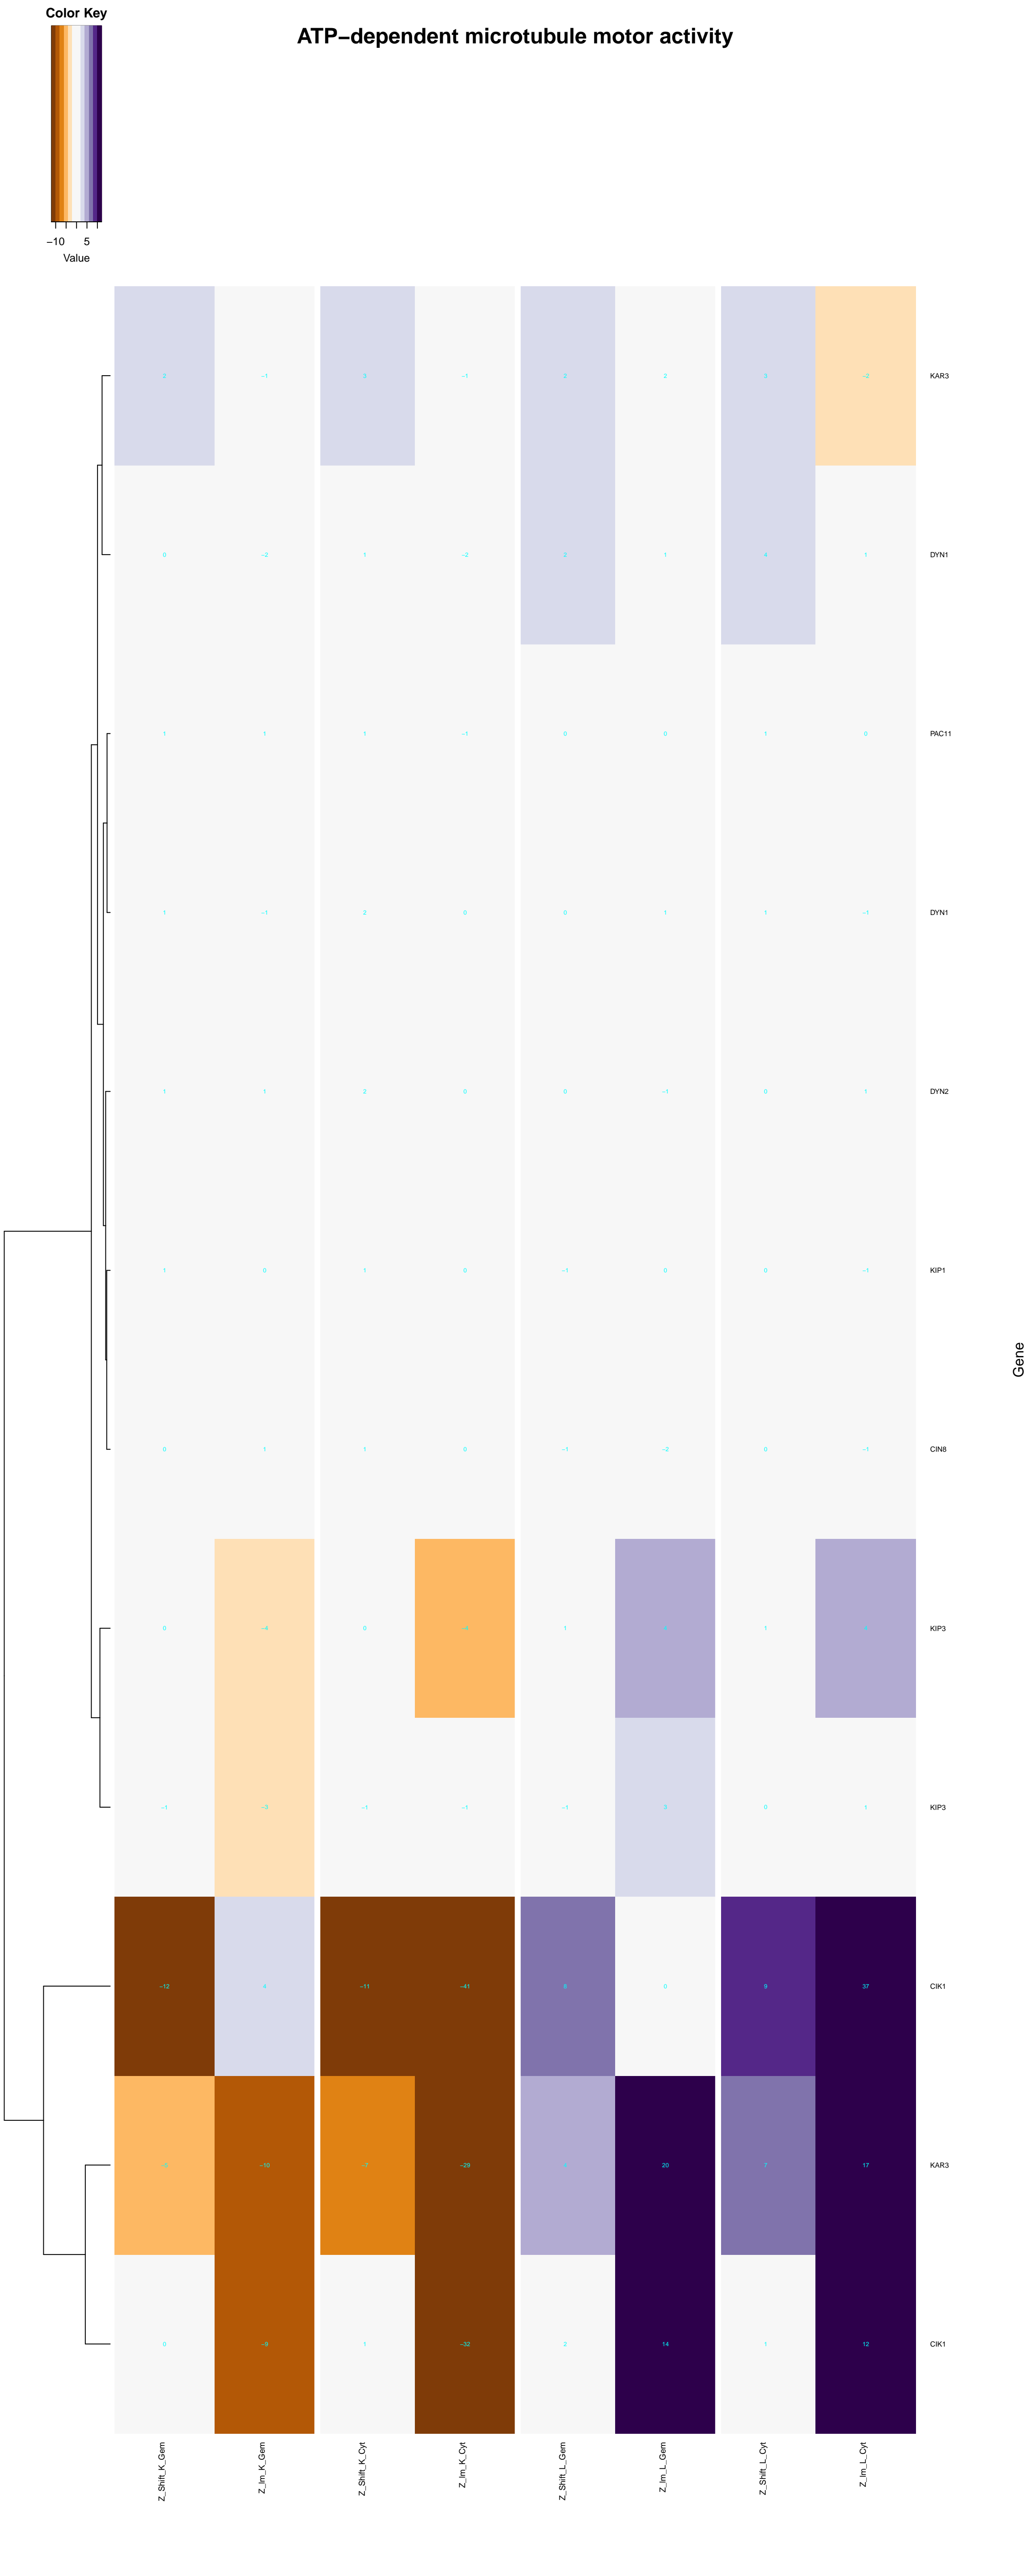

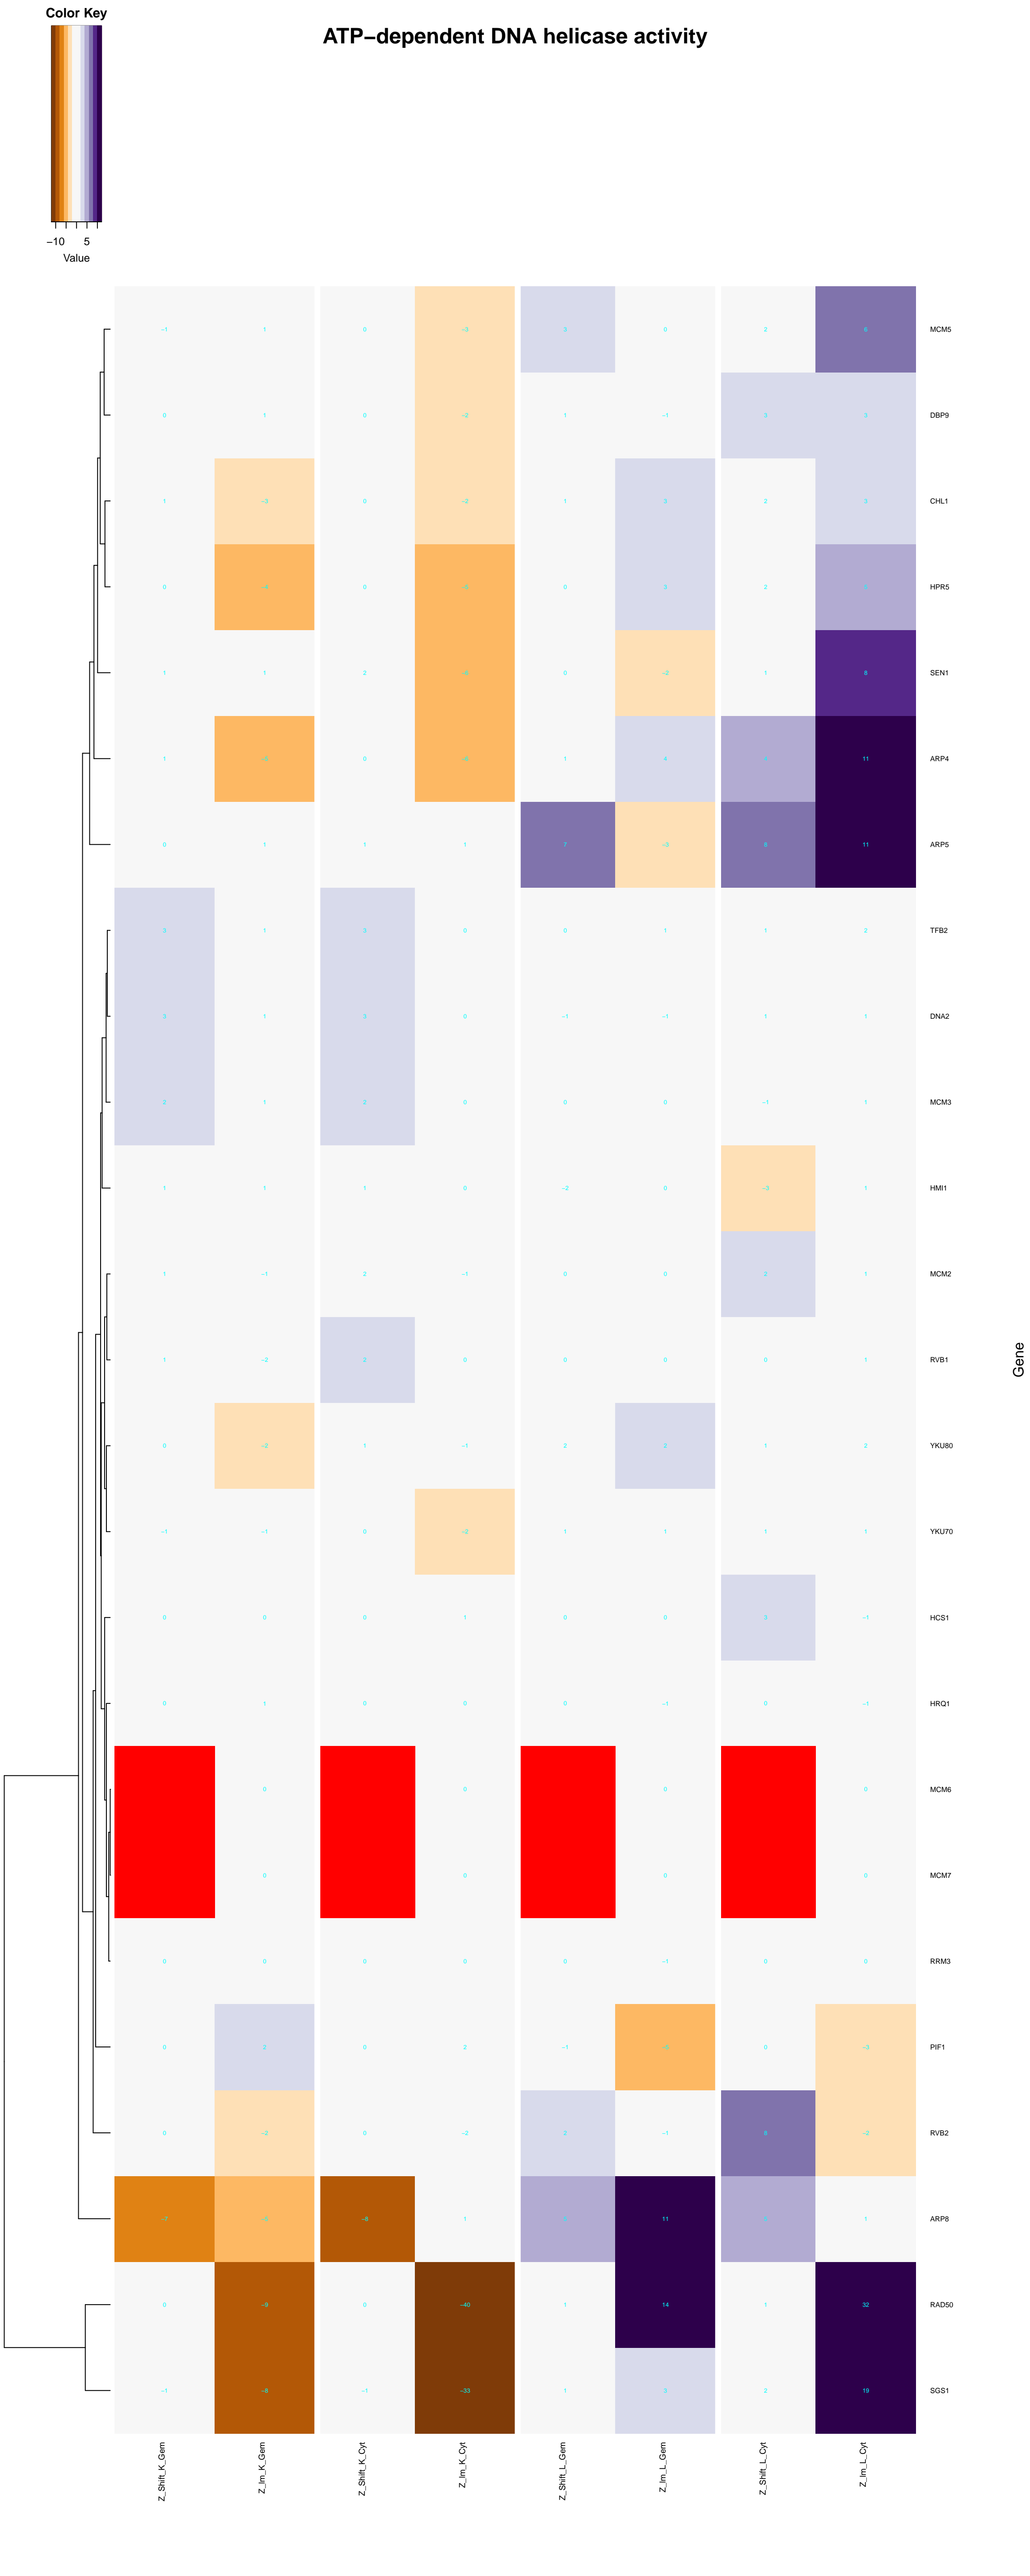



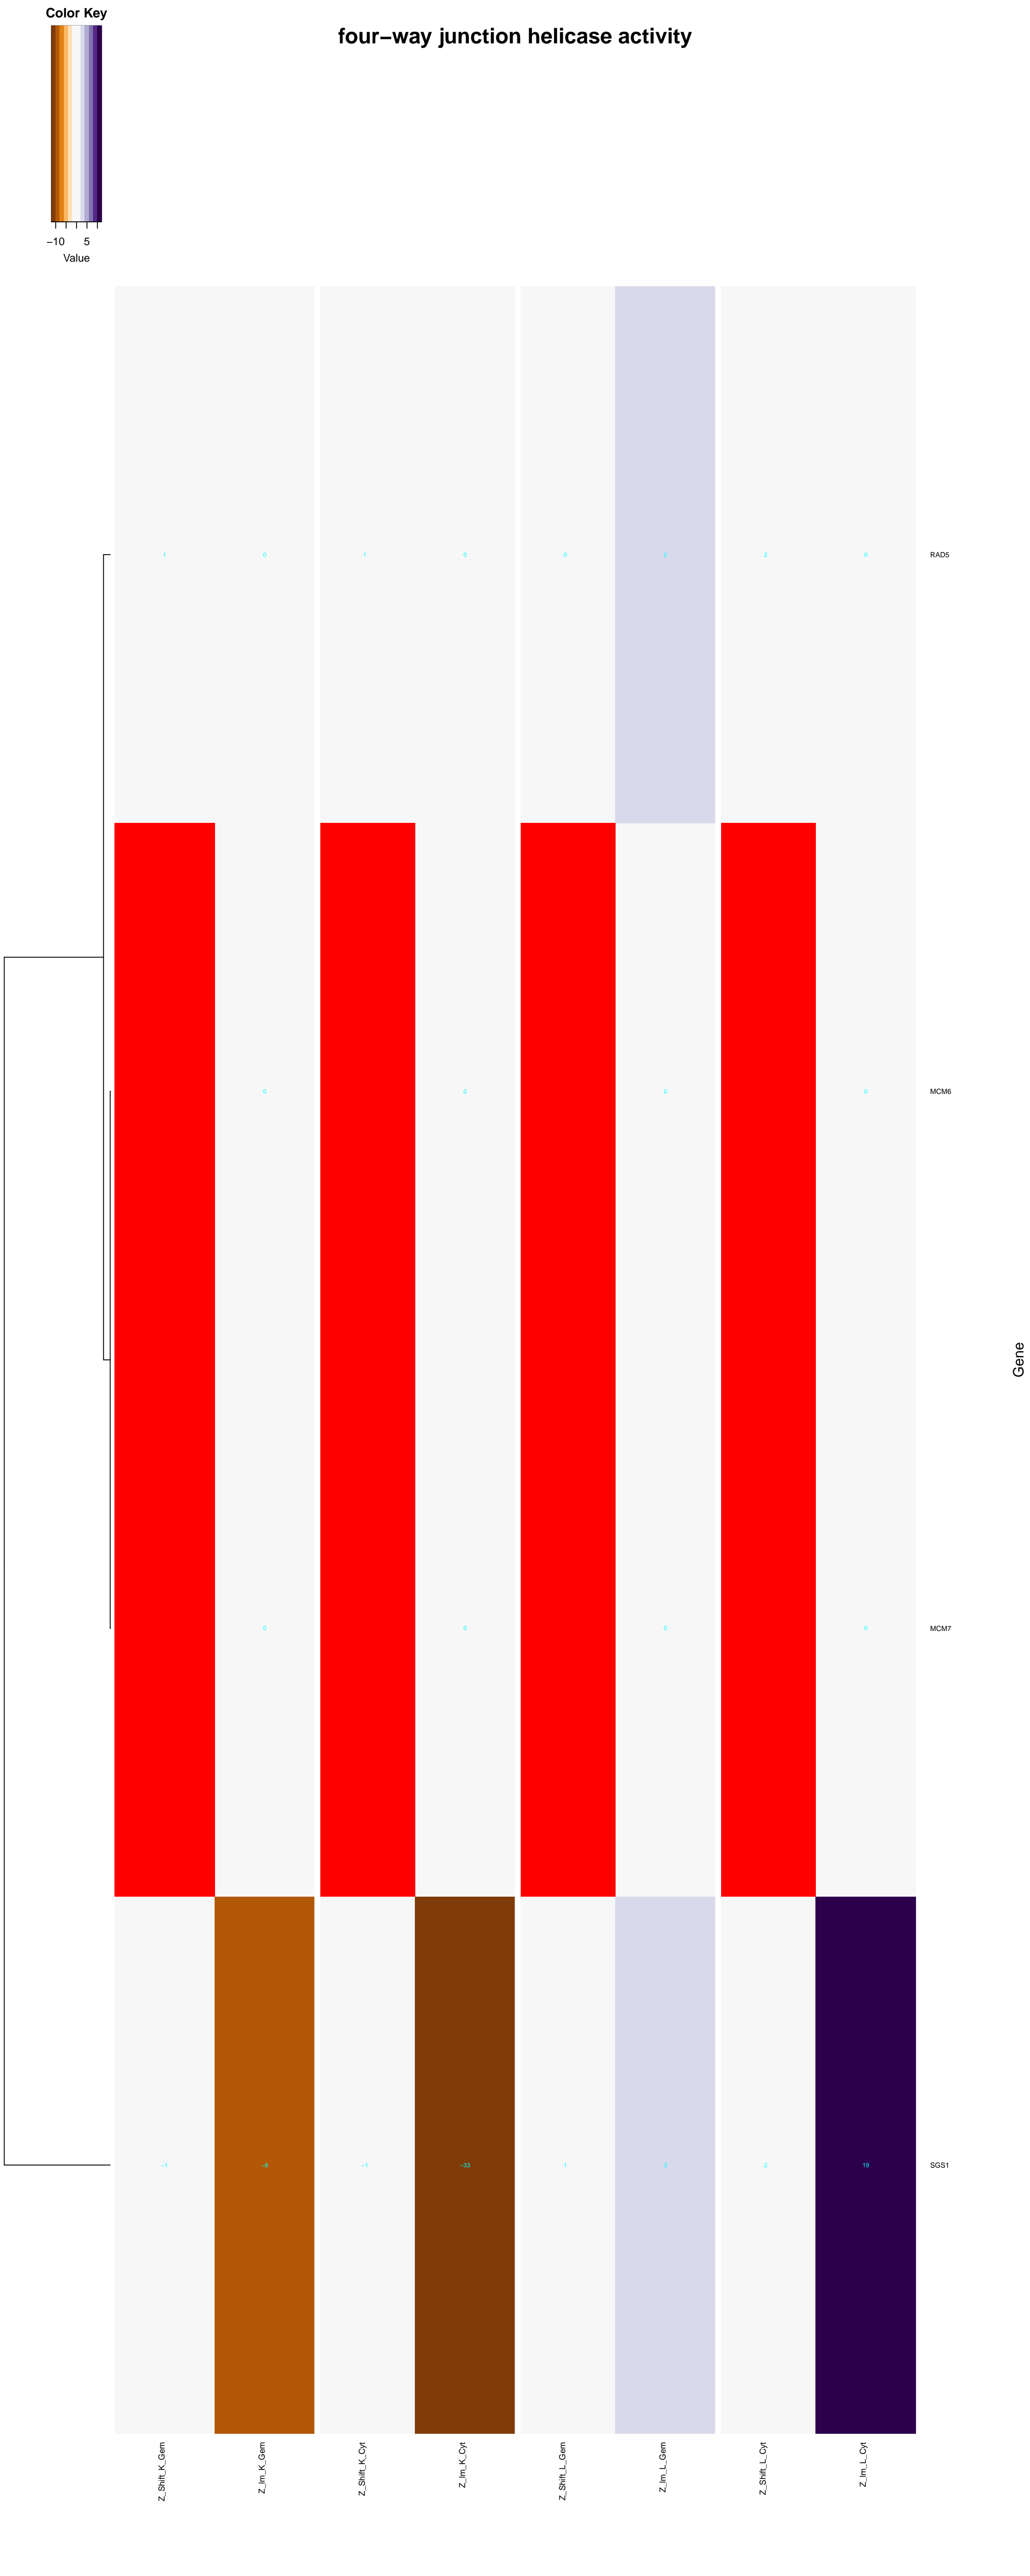

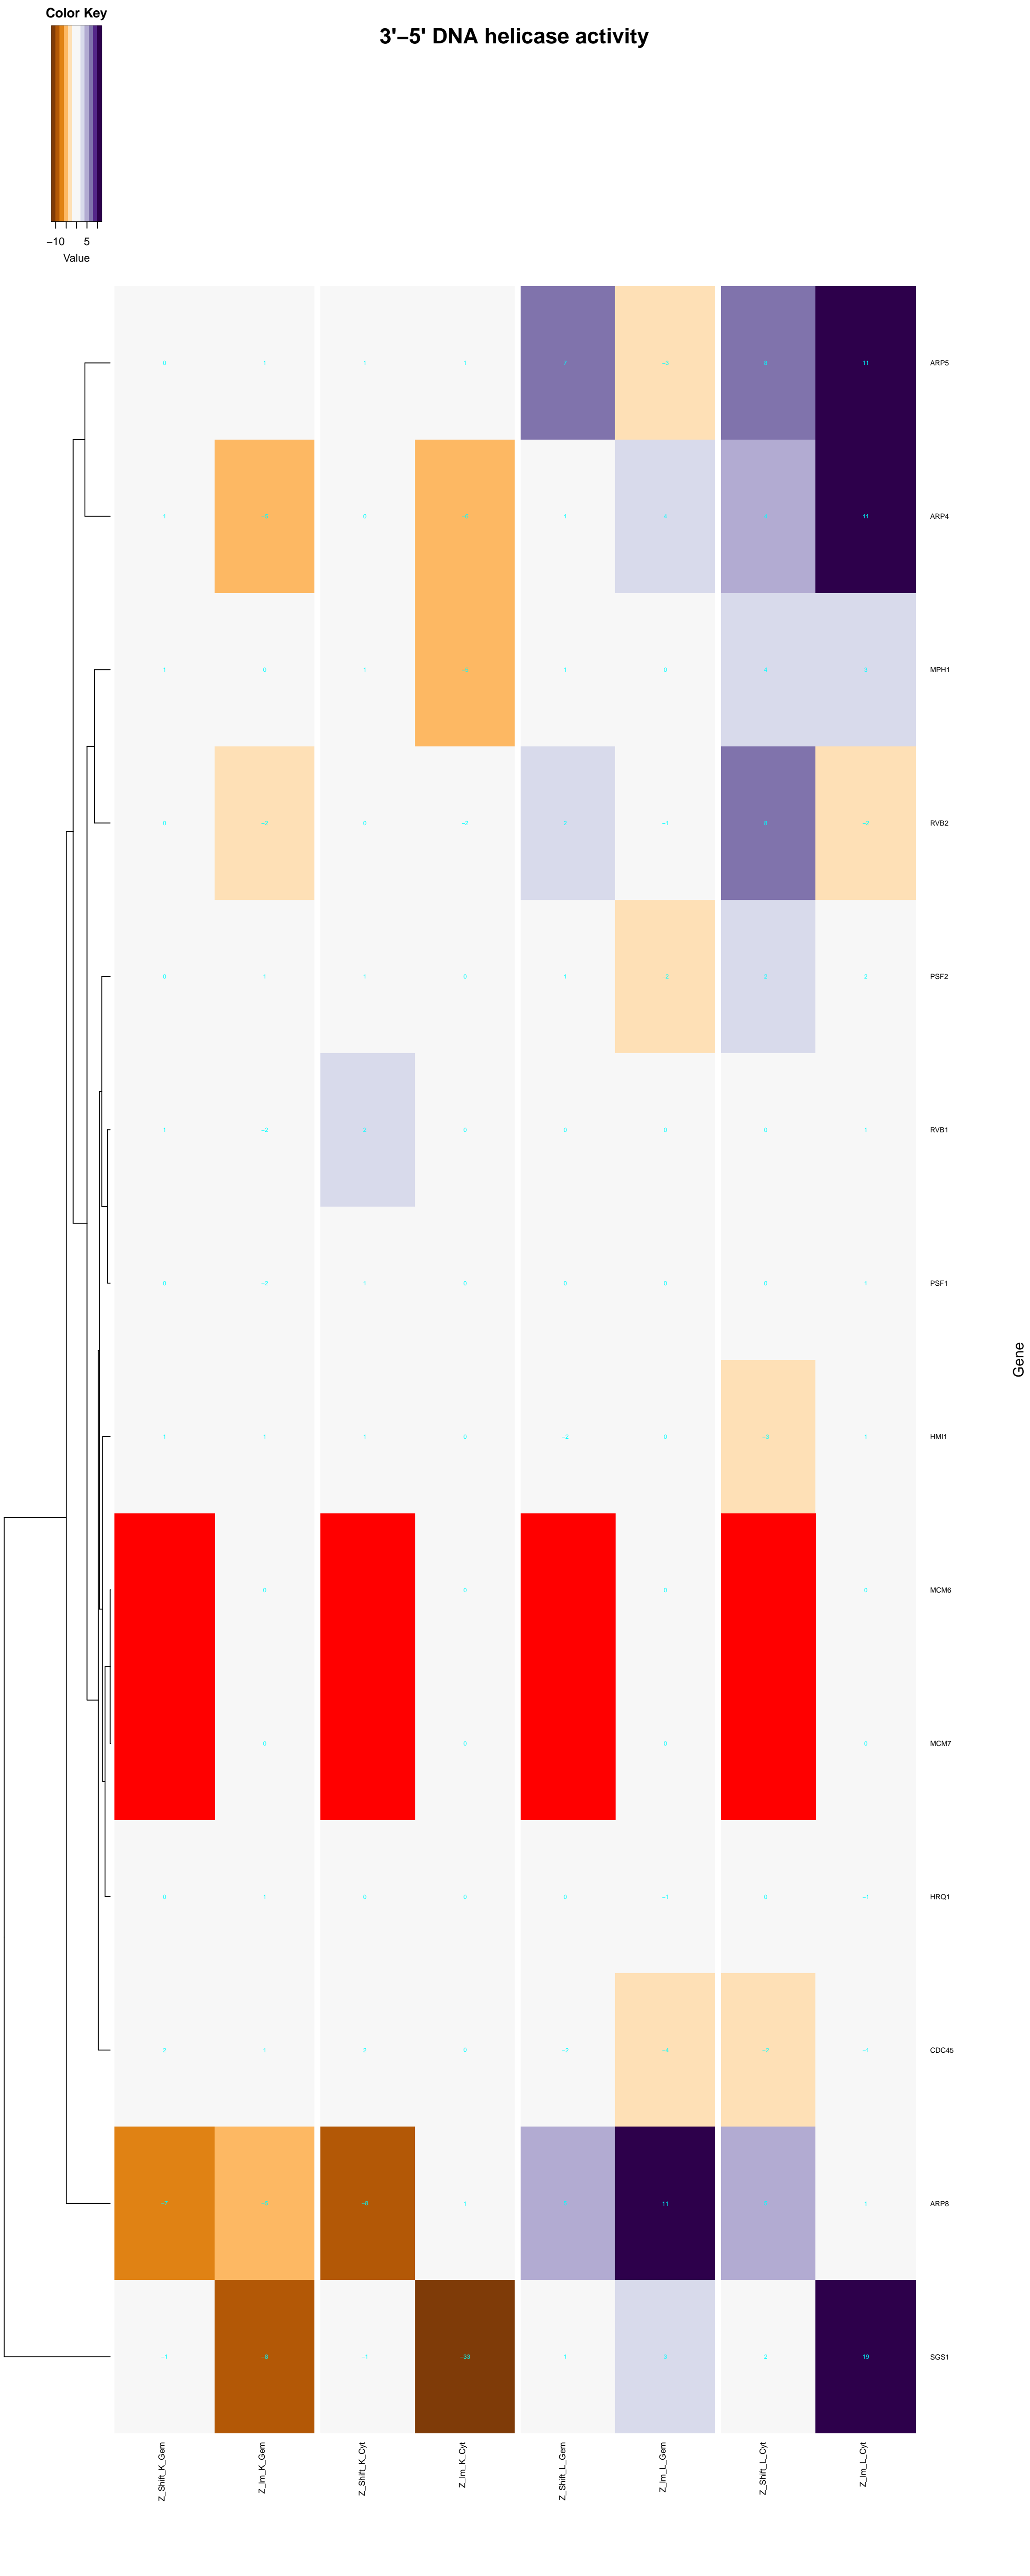

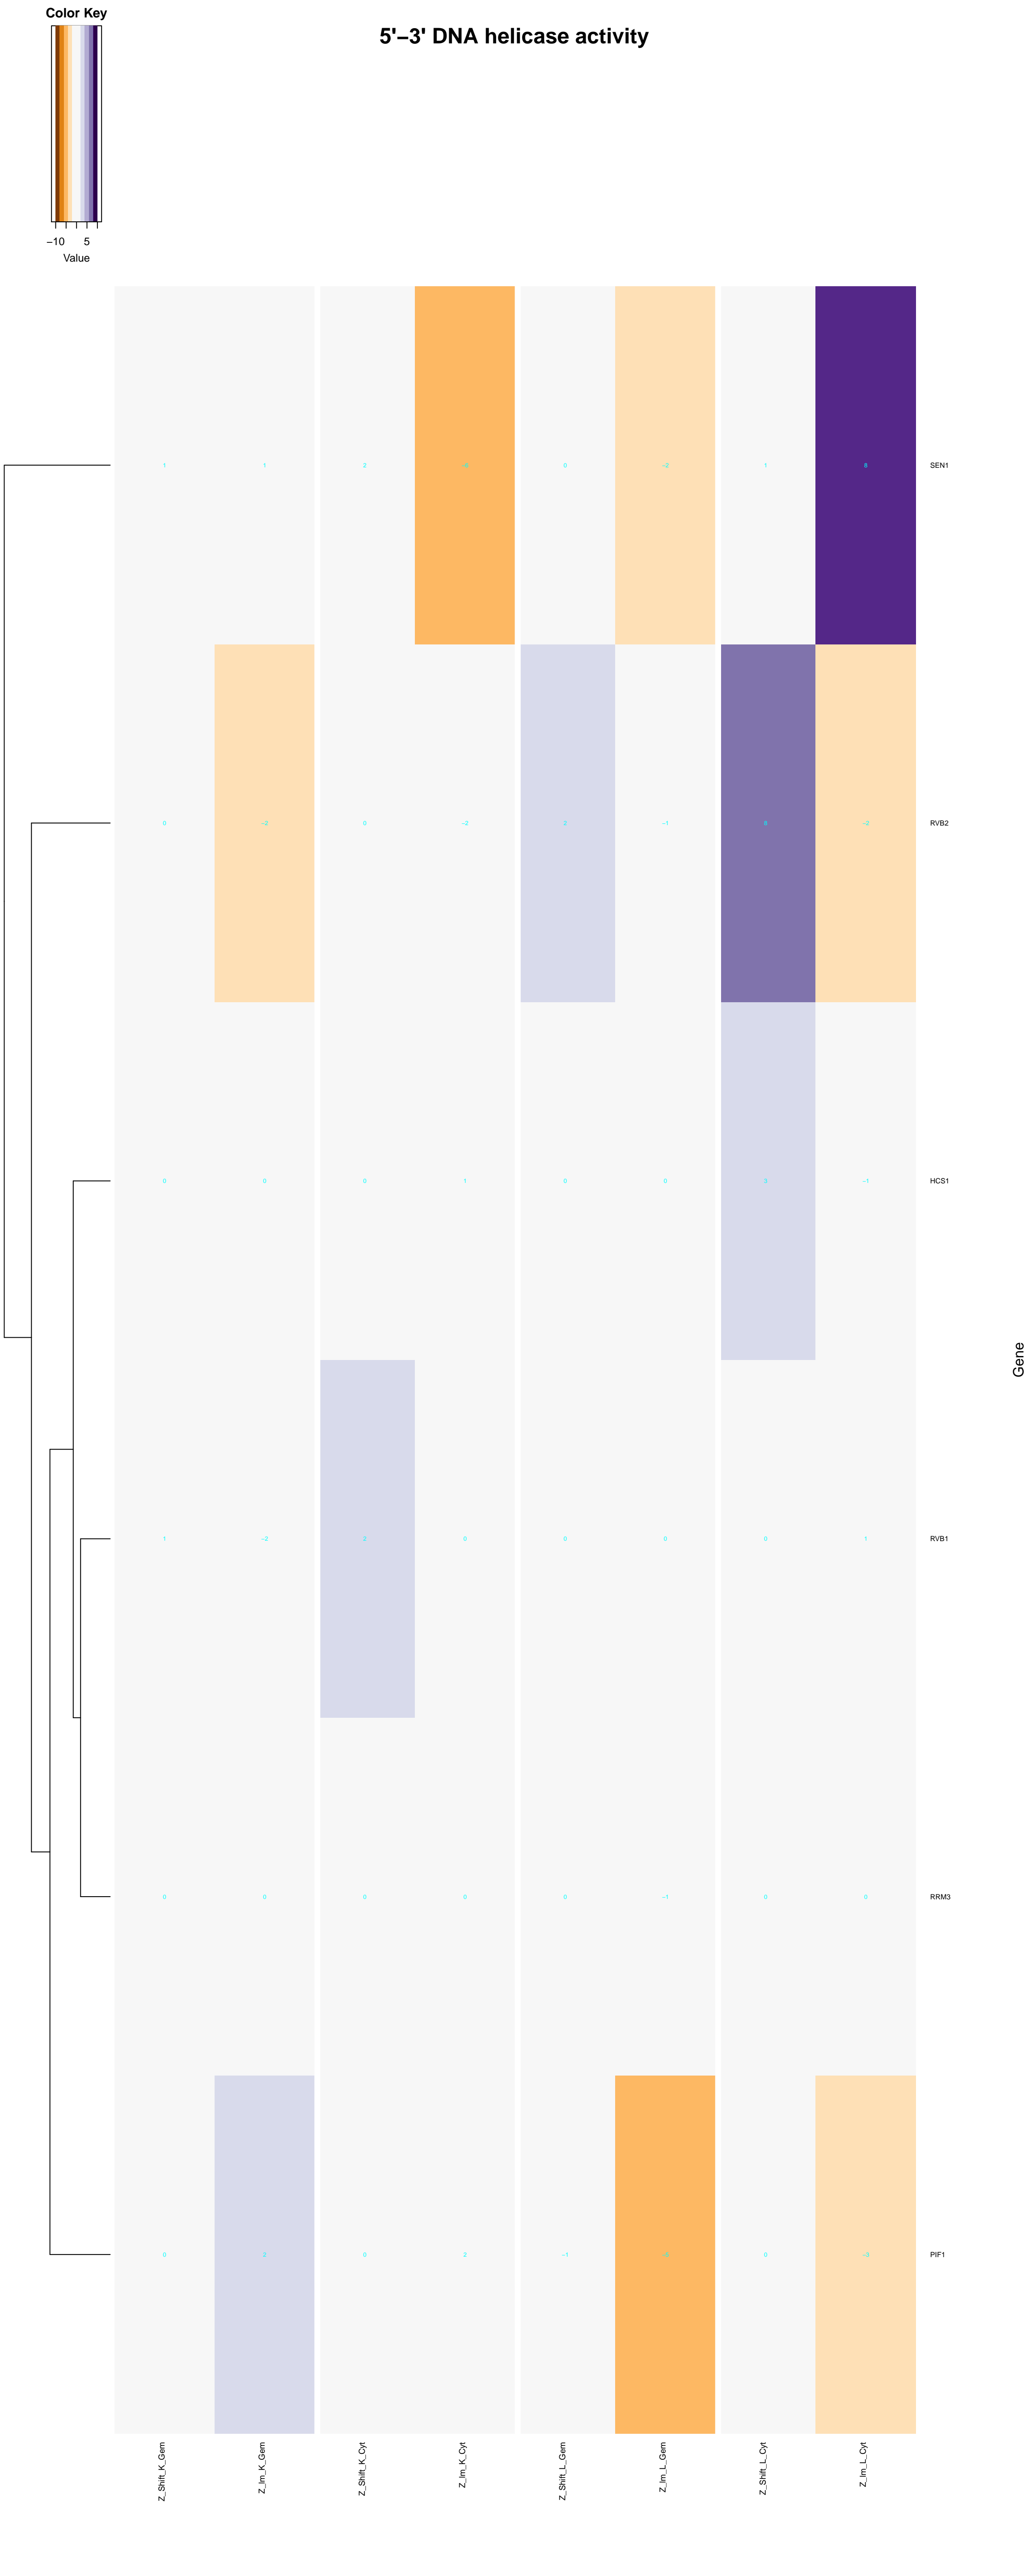

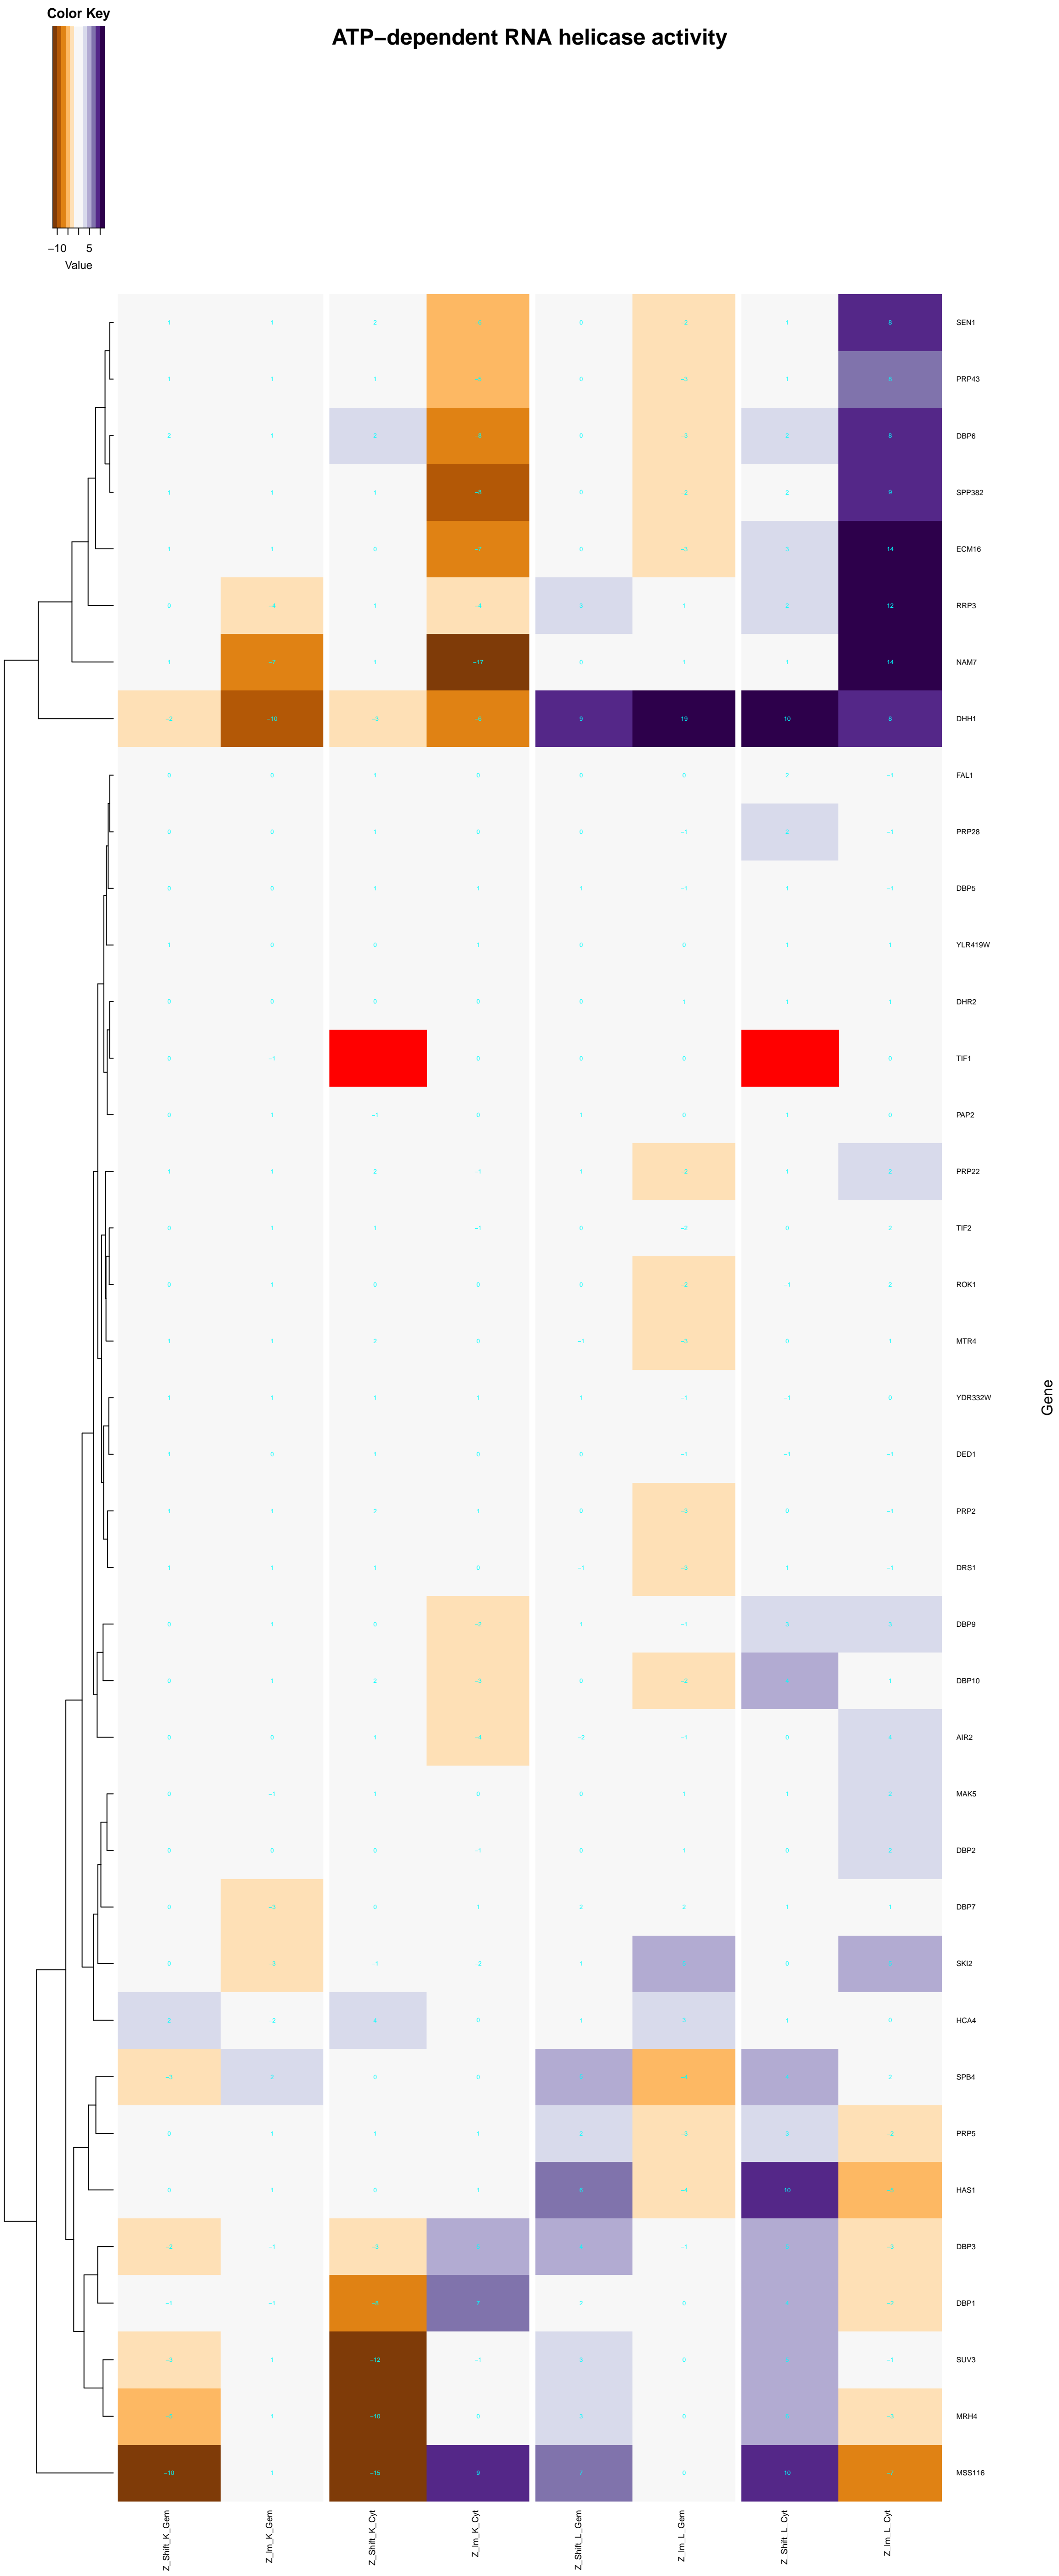

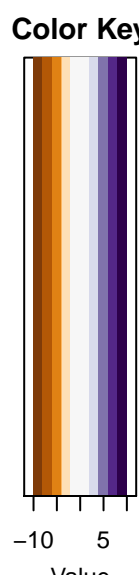

3'-5' RNA helicase activity

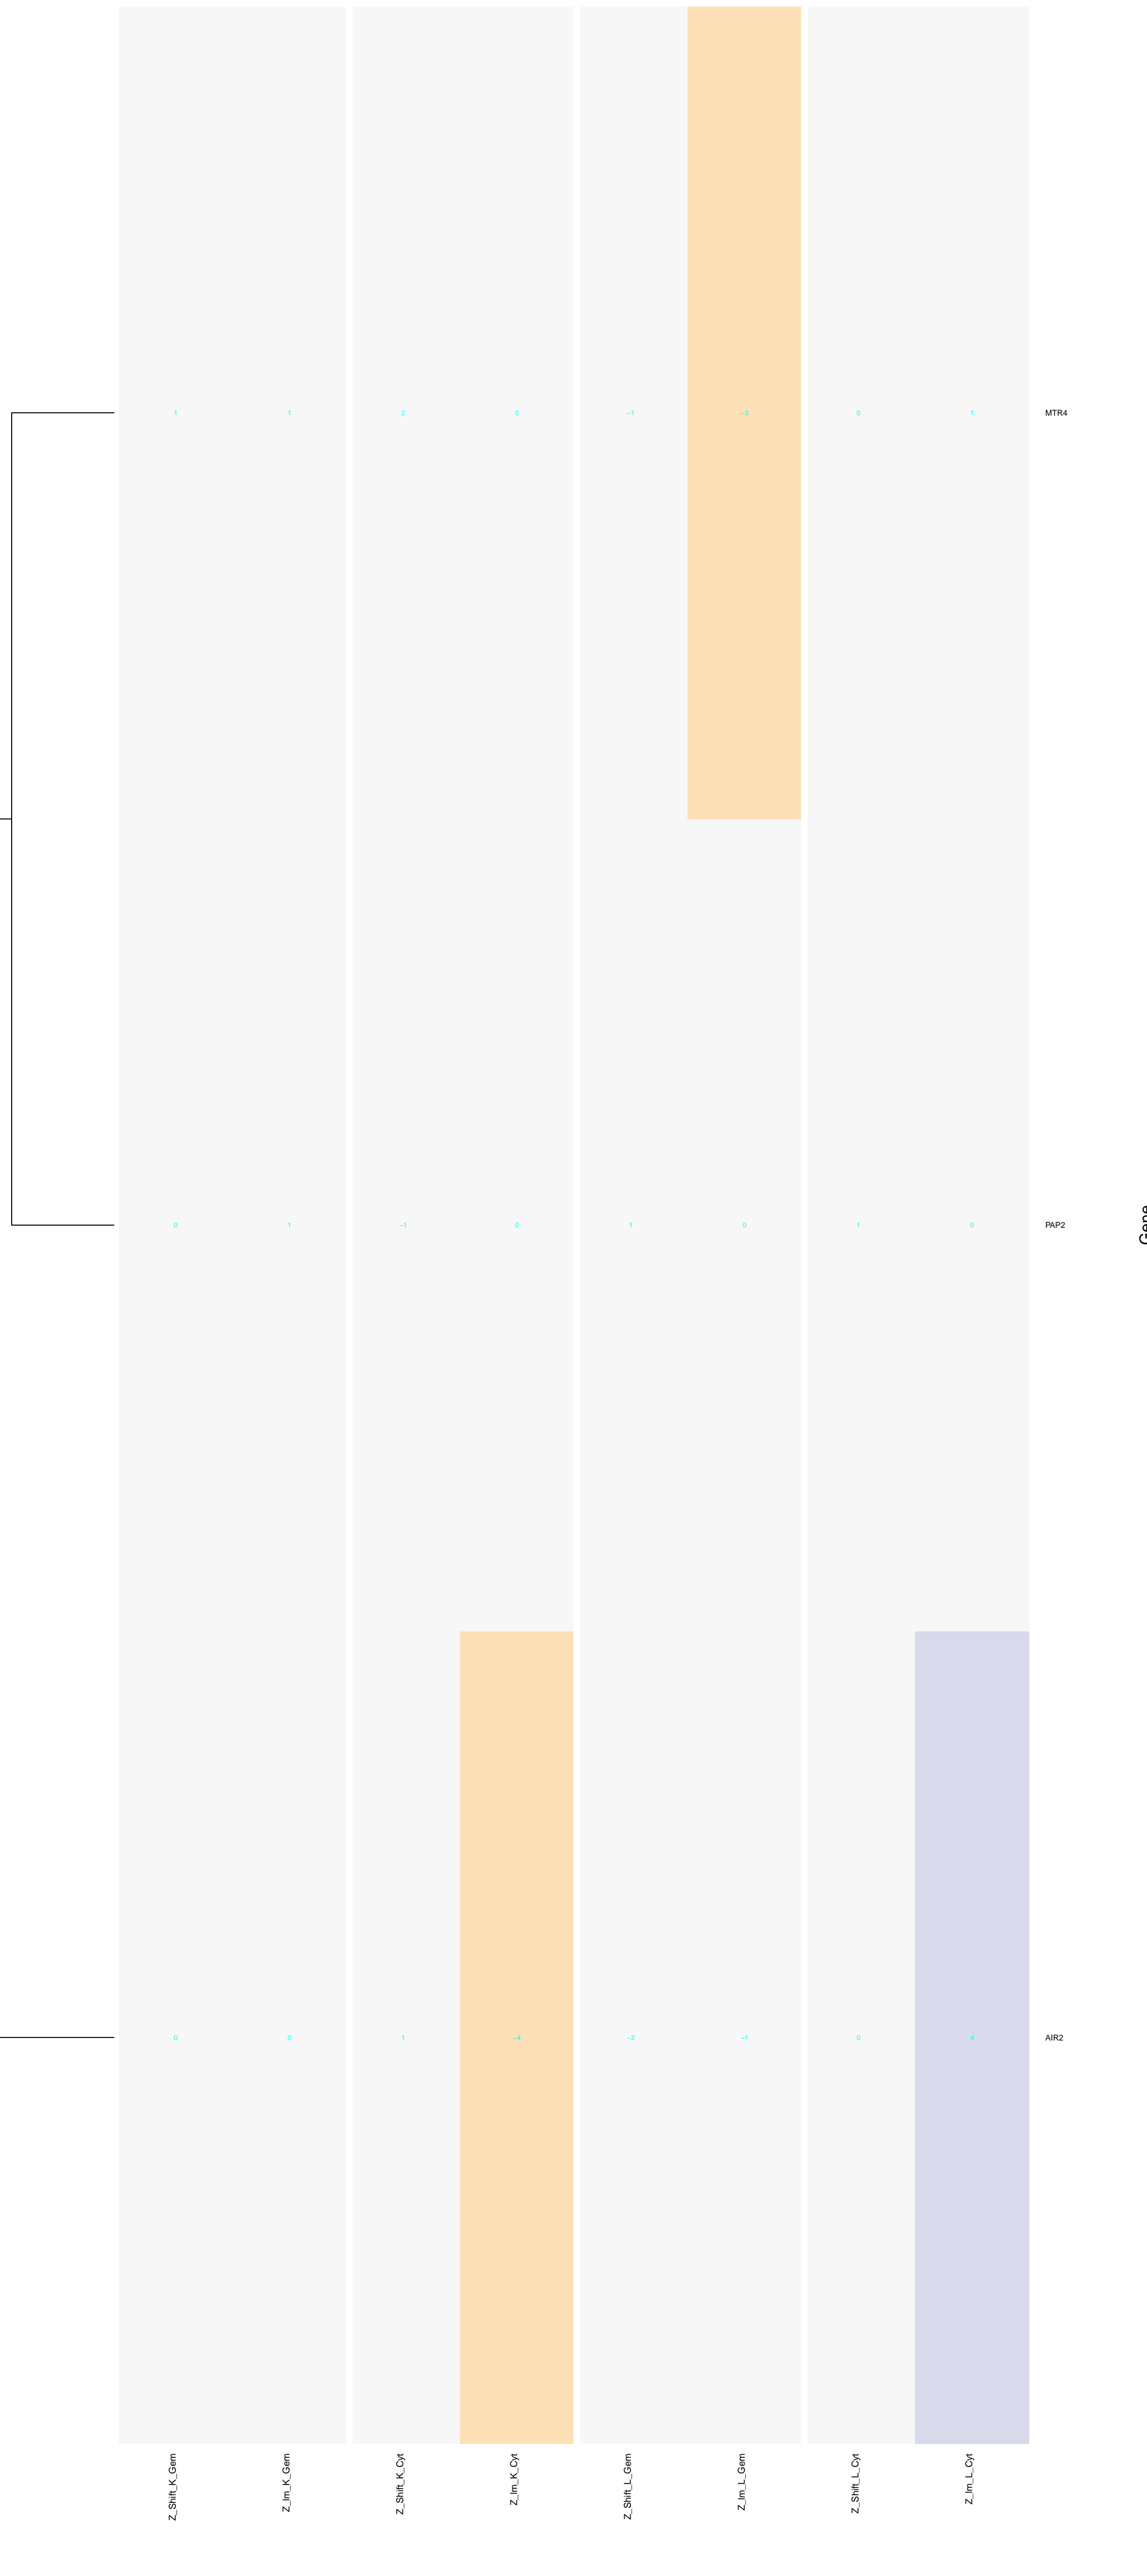

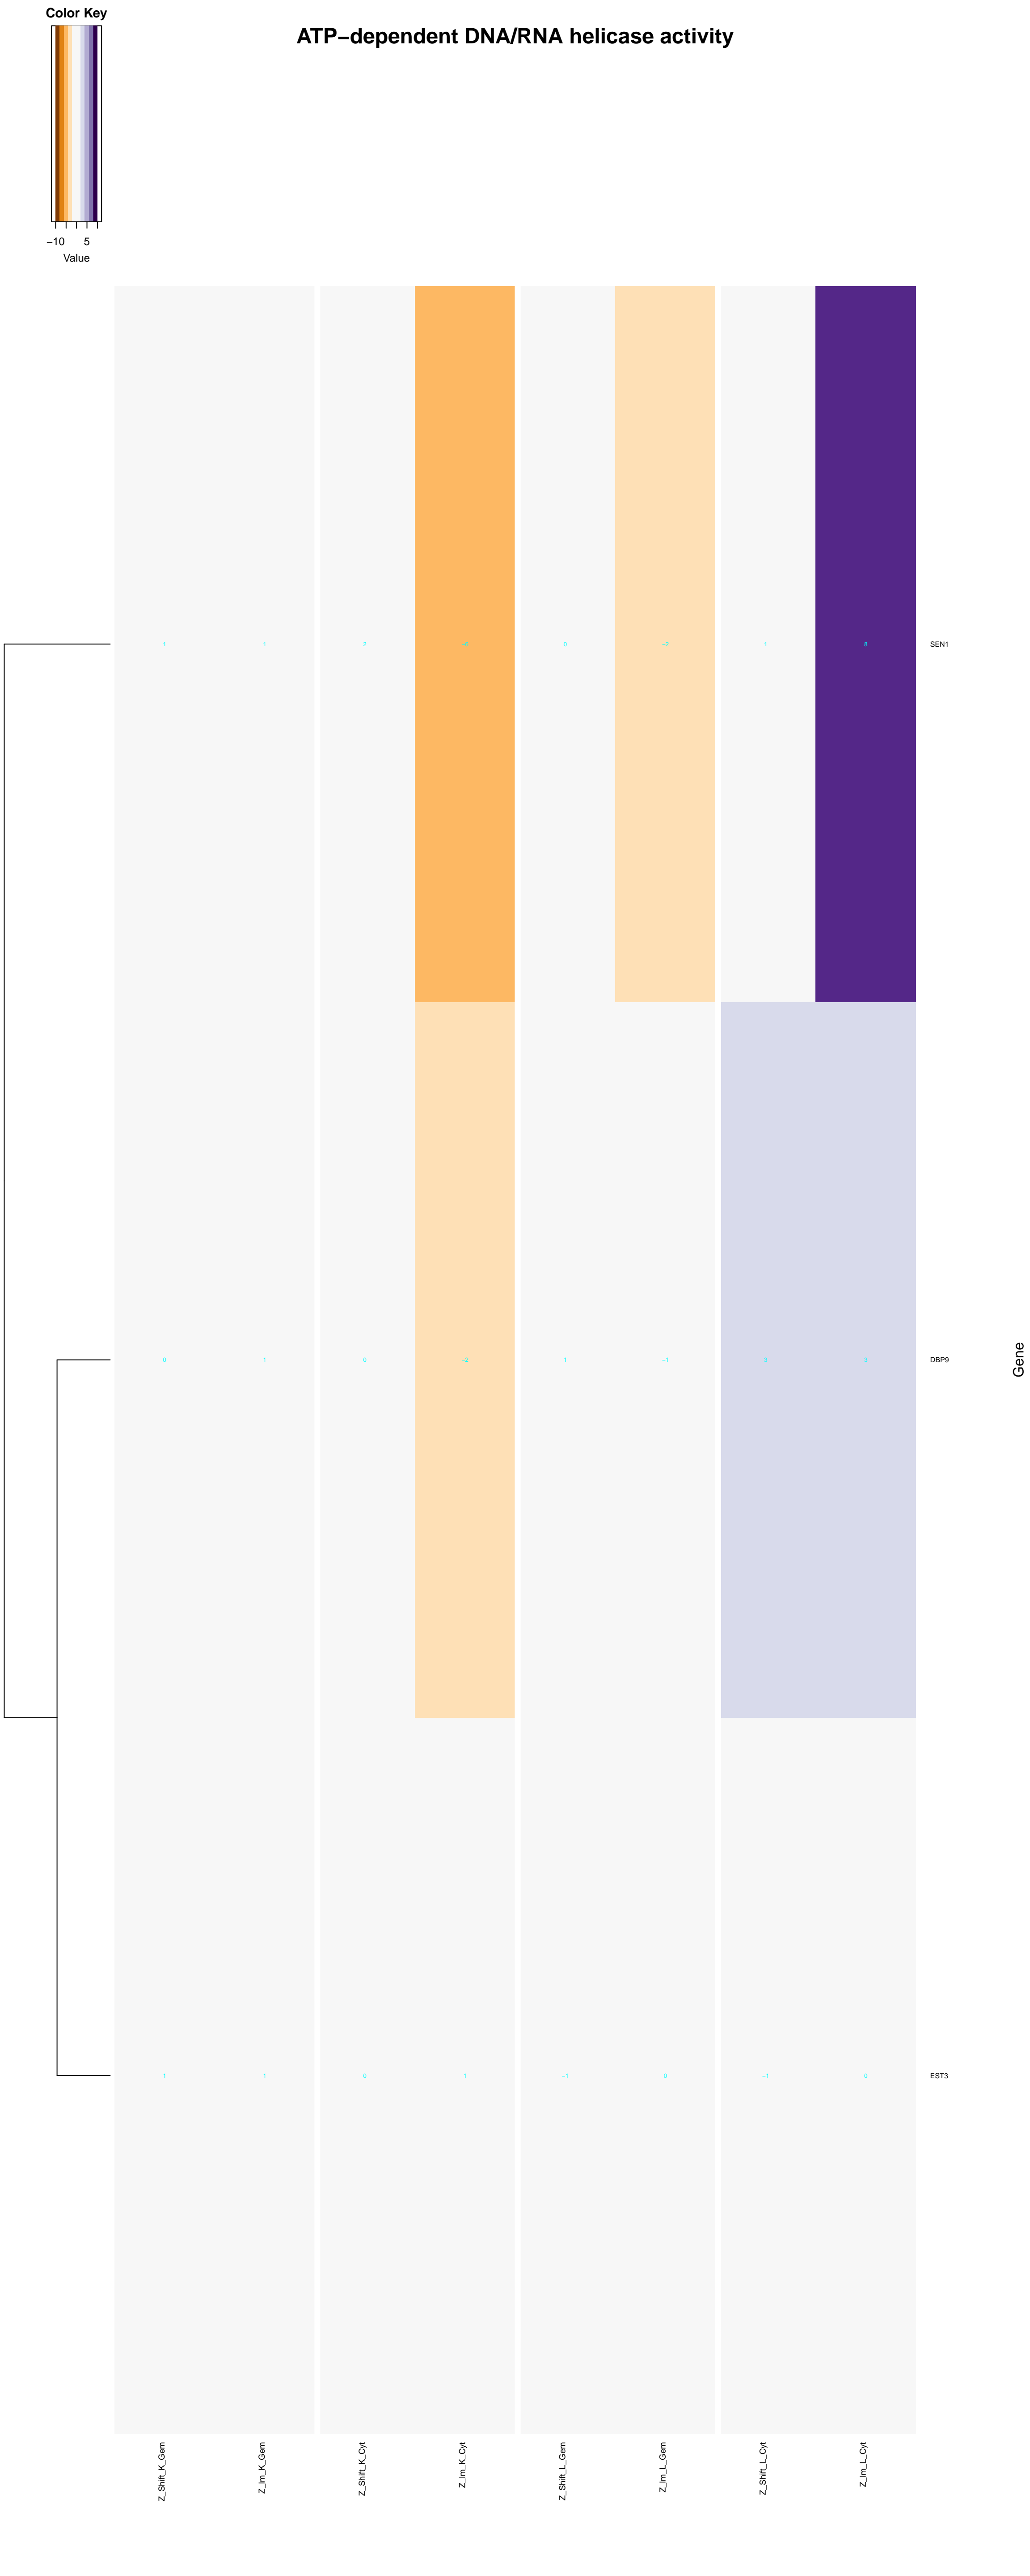

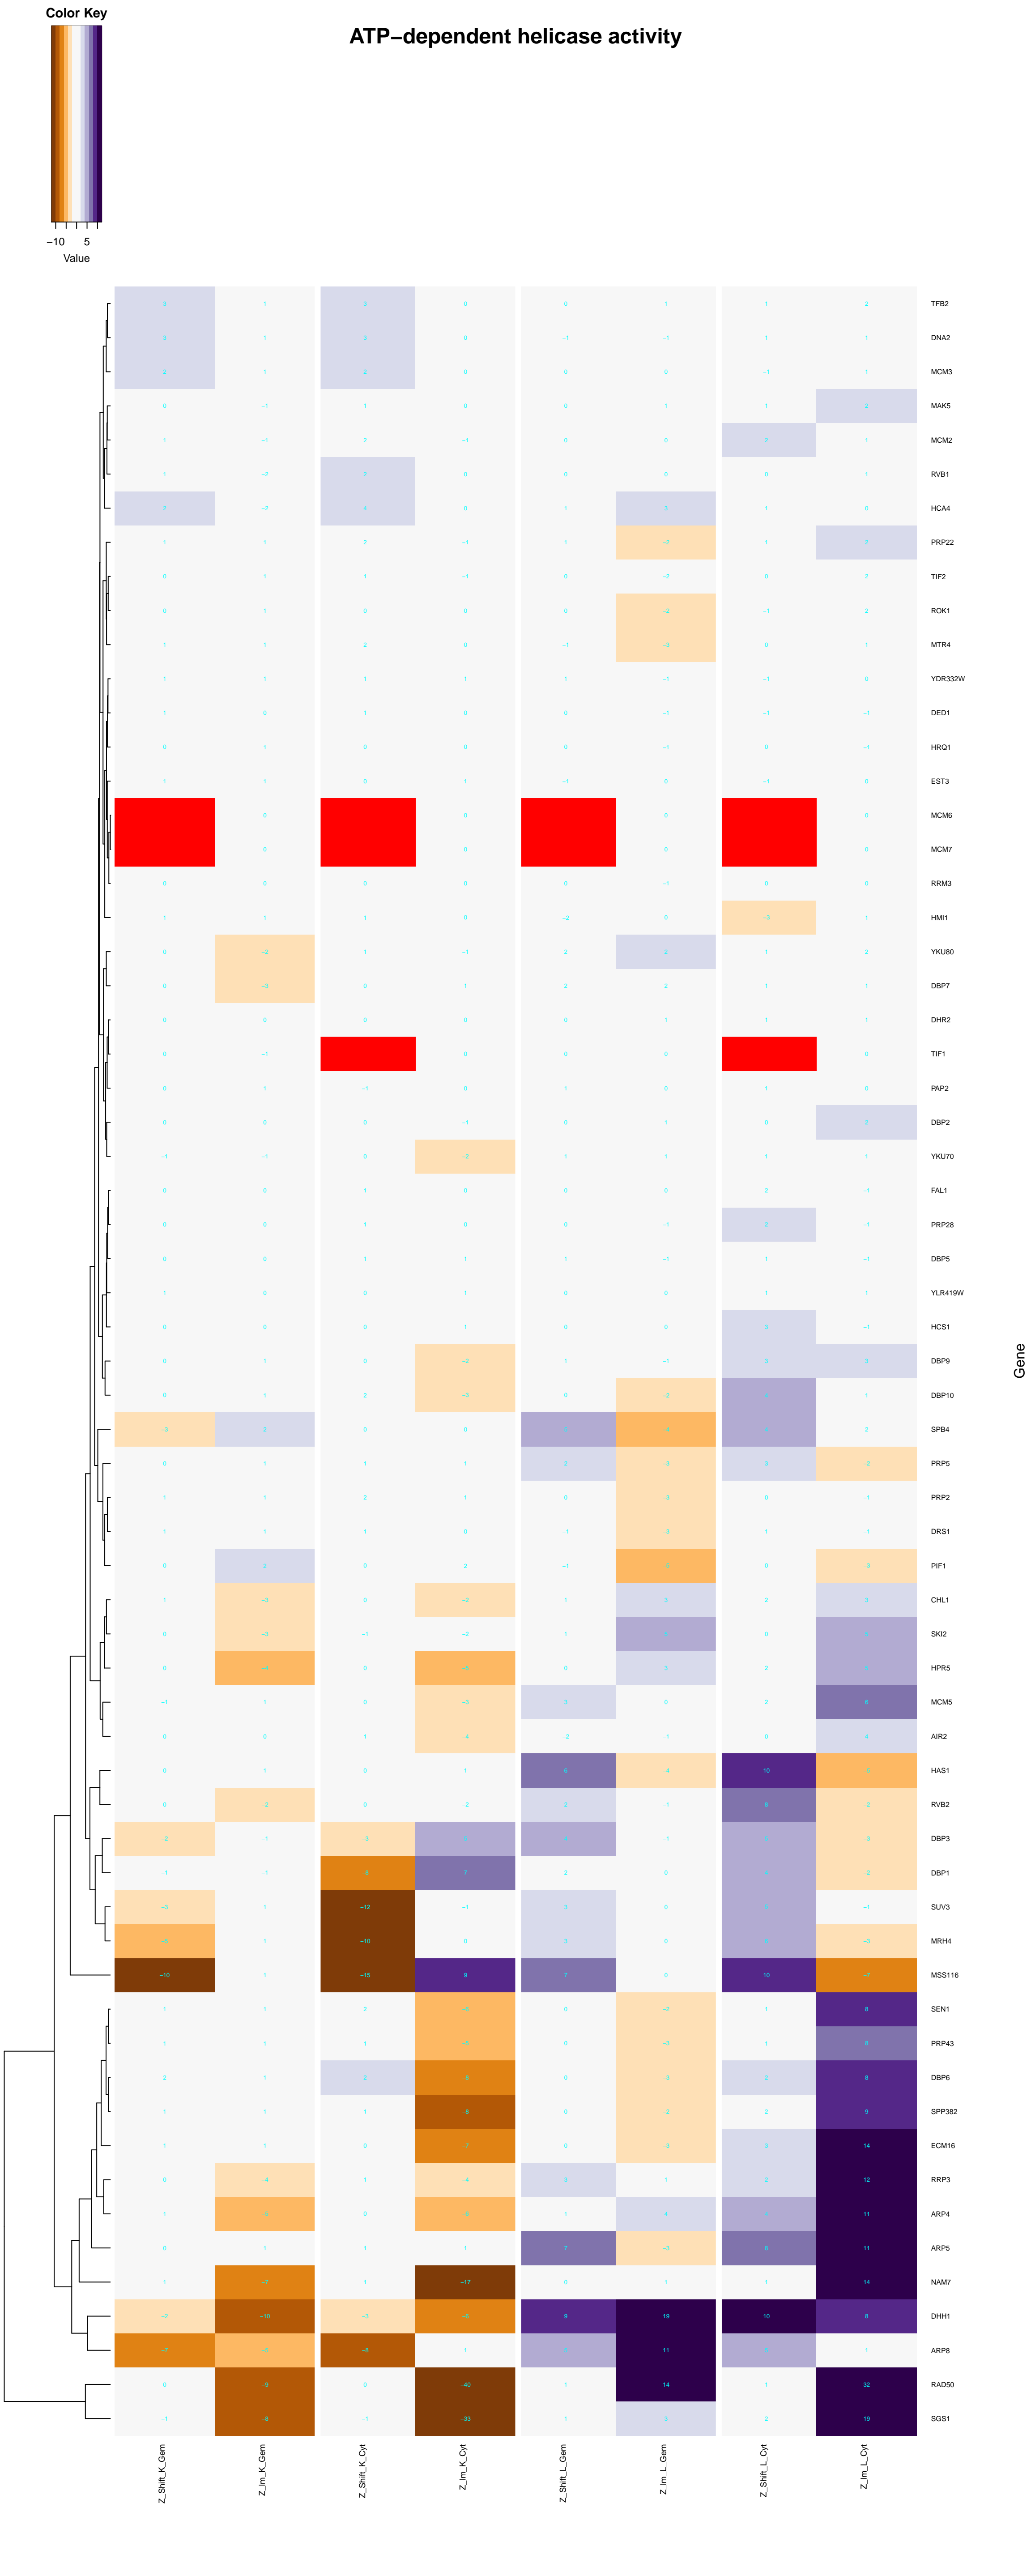

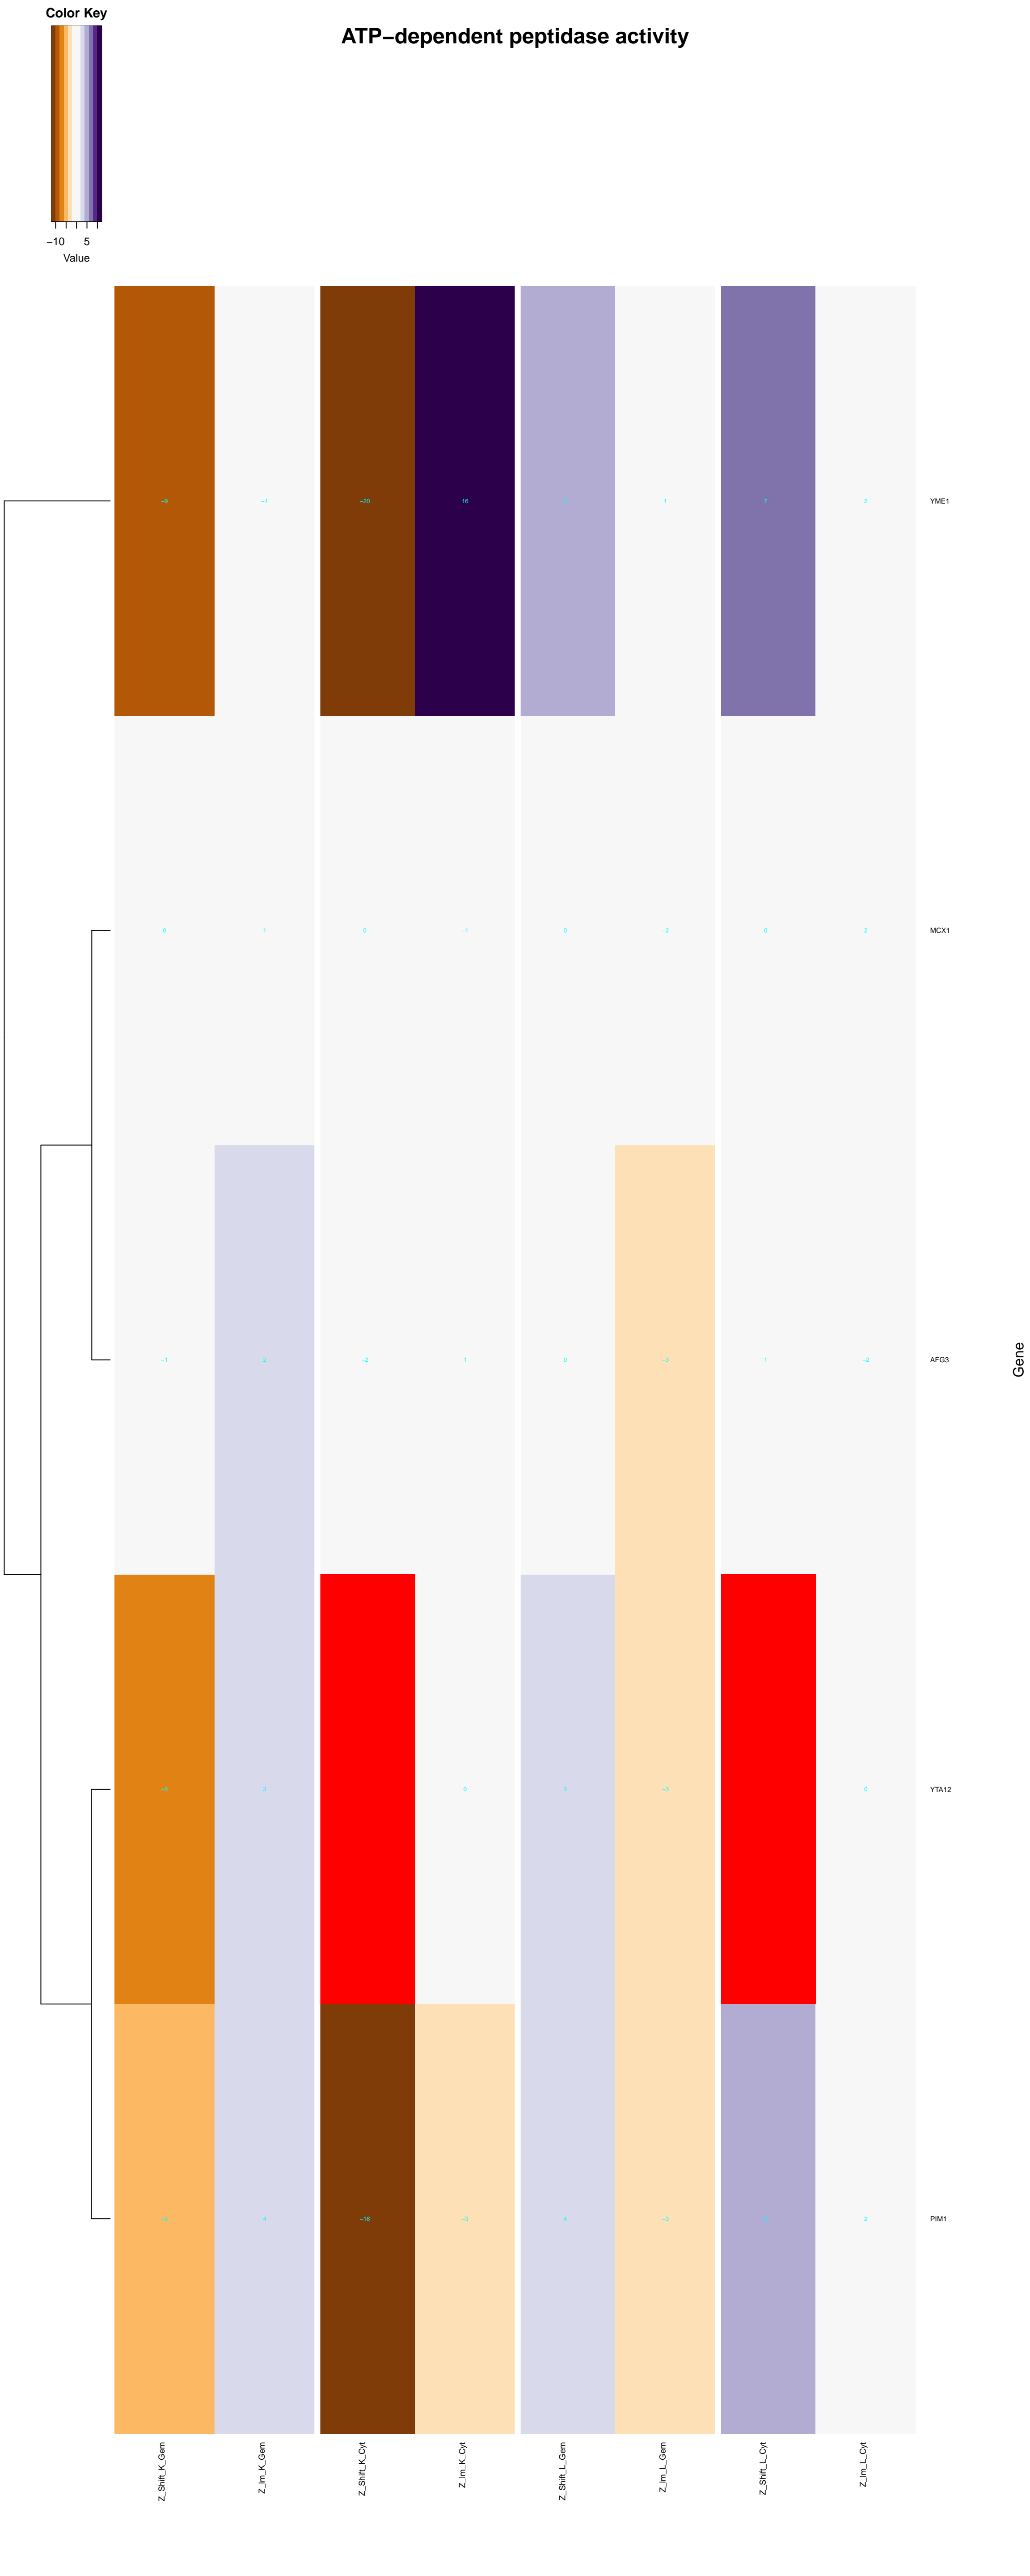



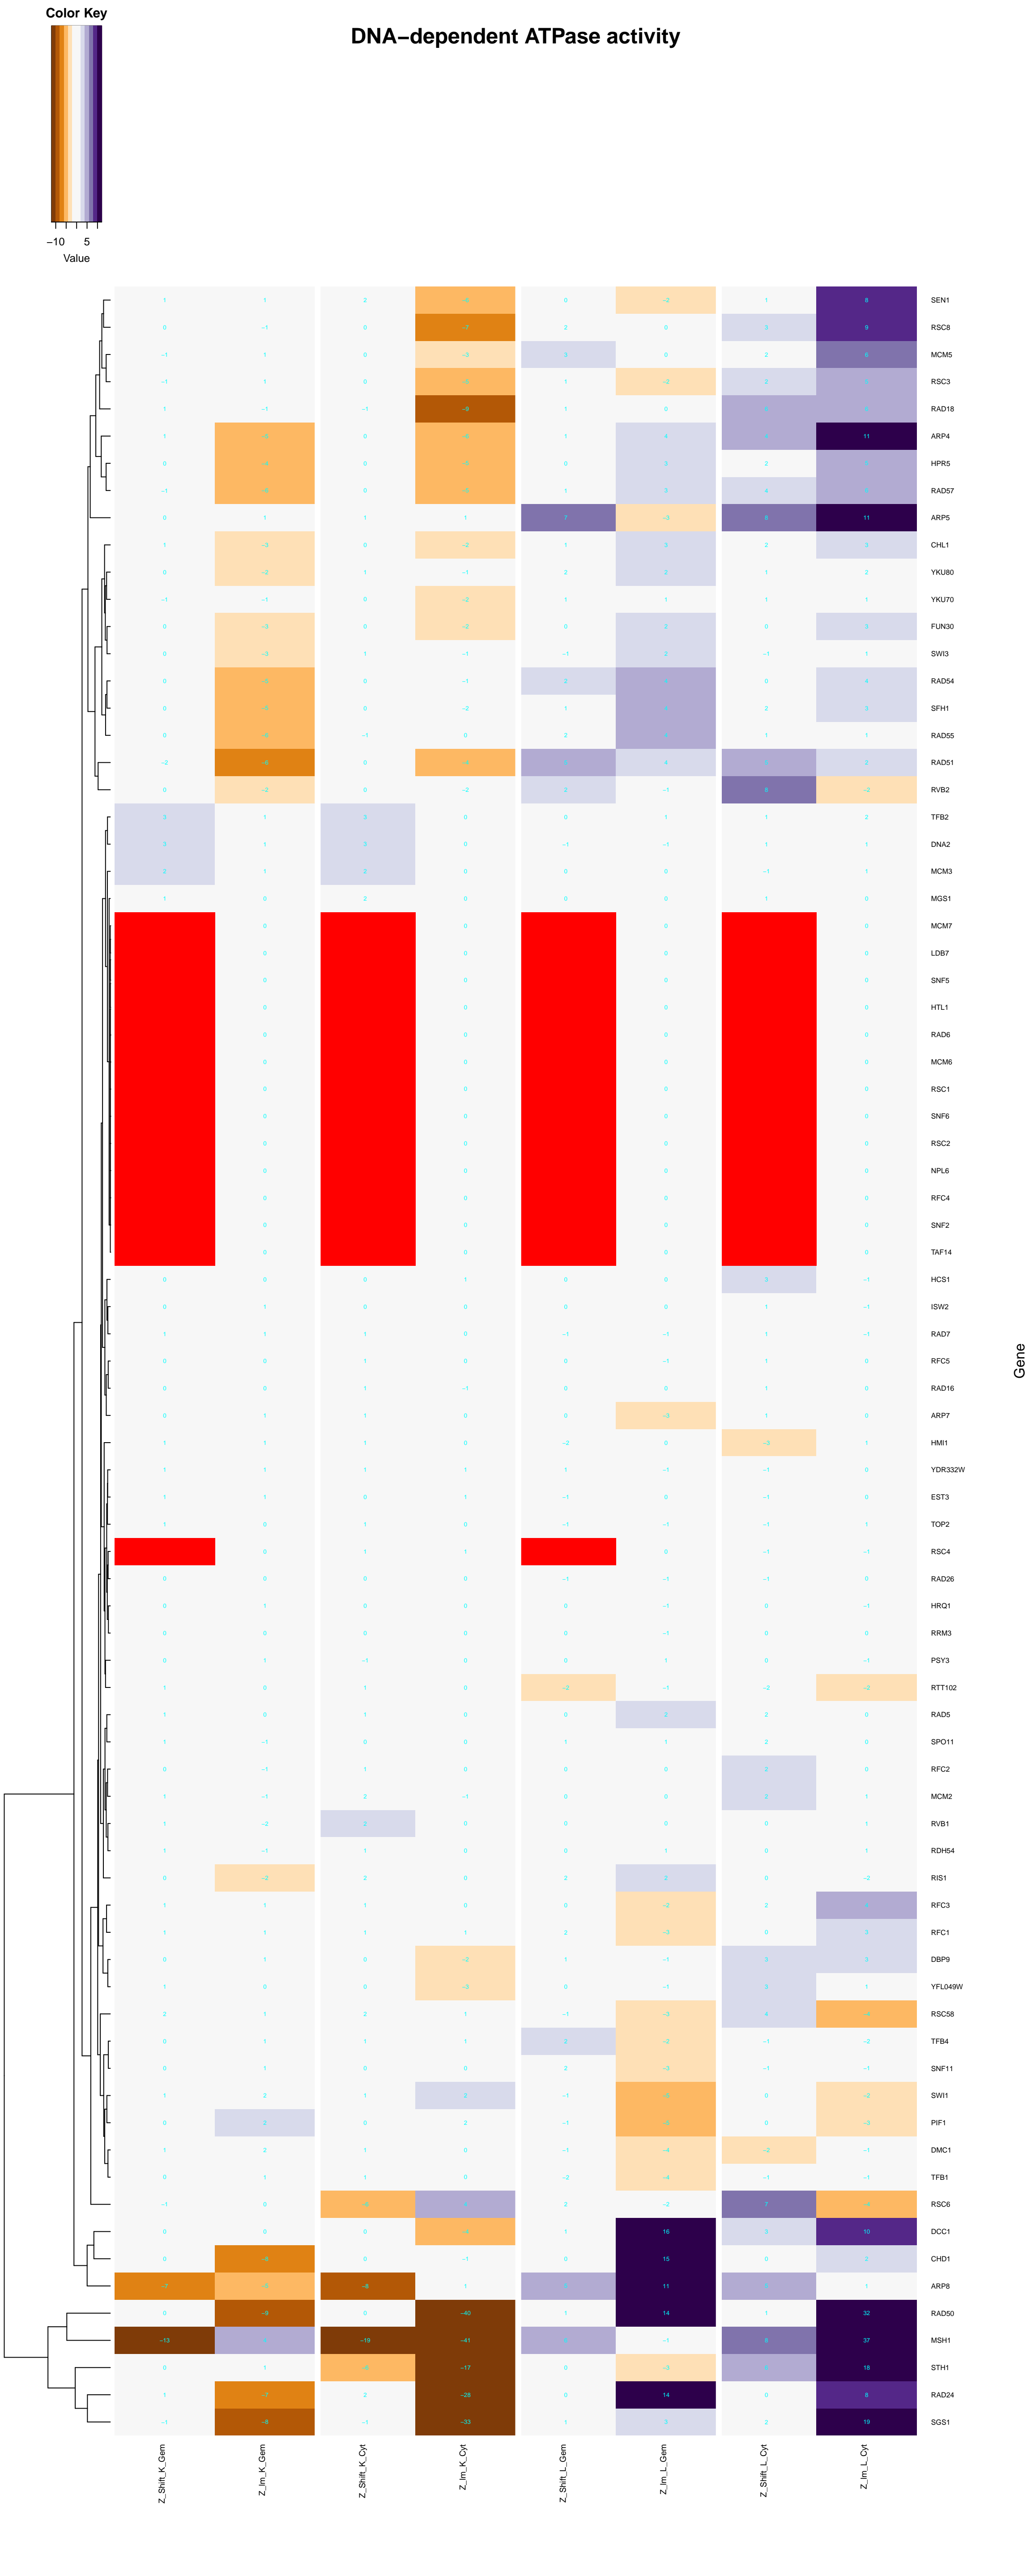

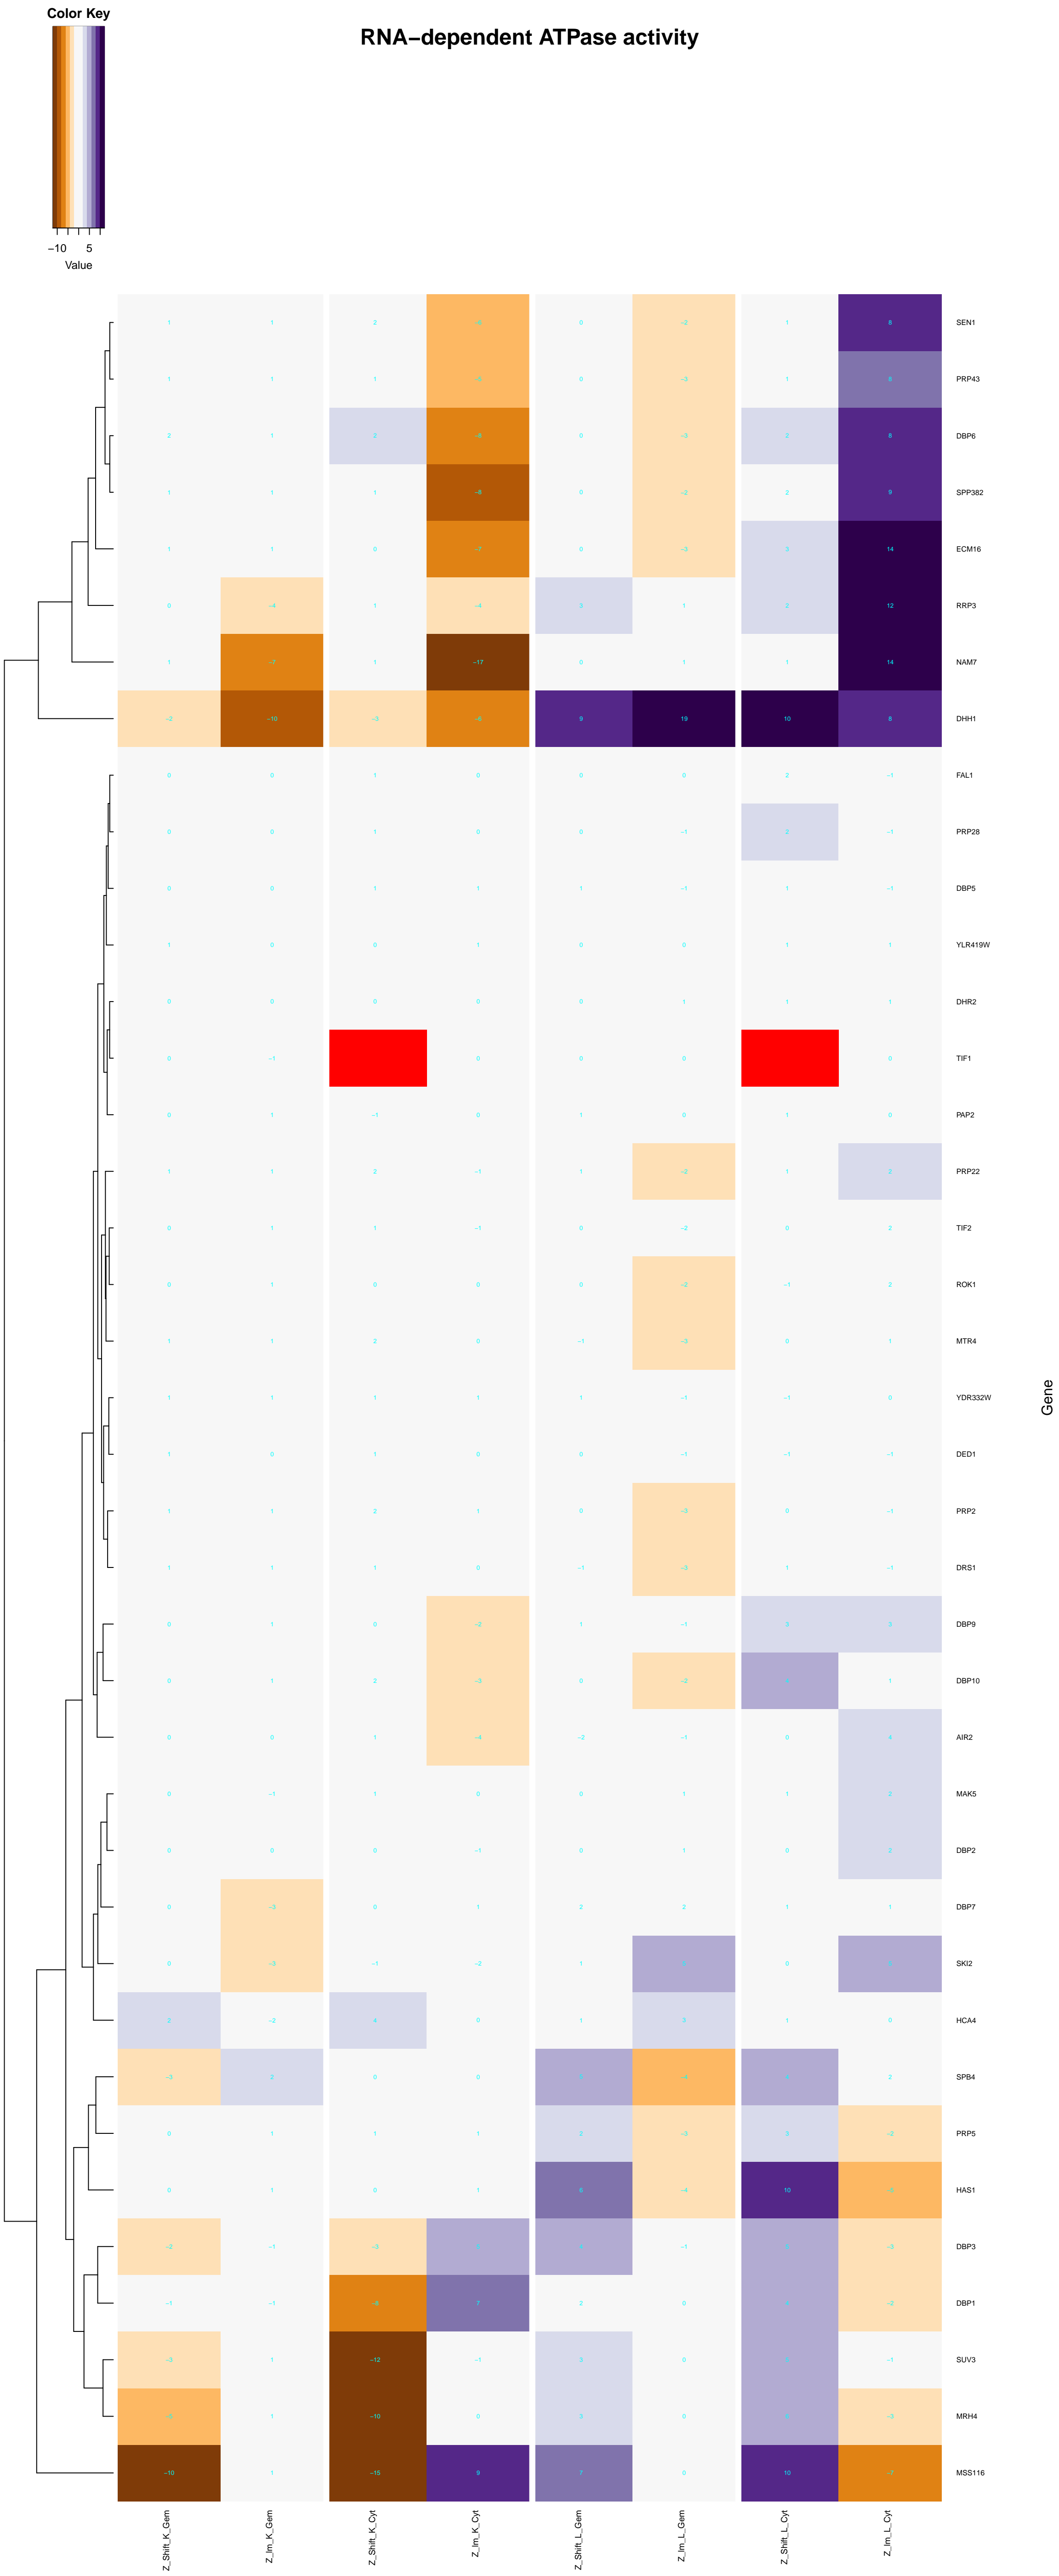

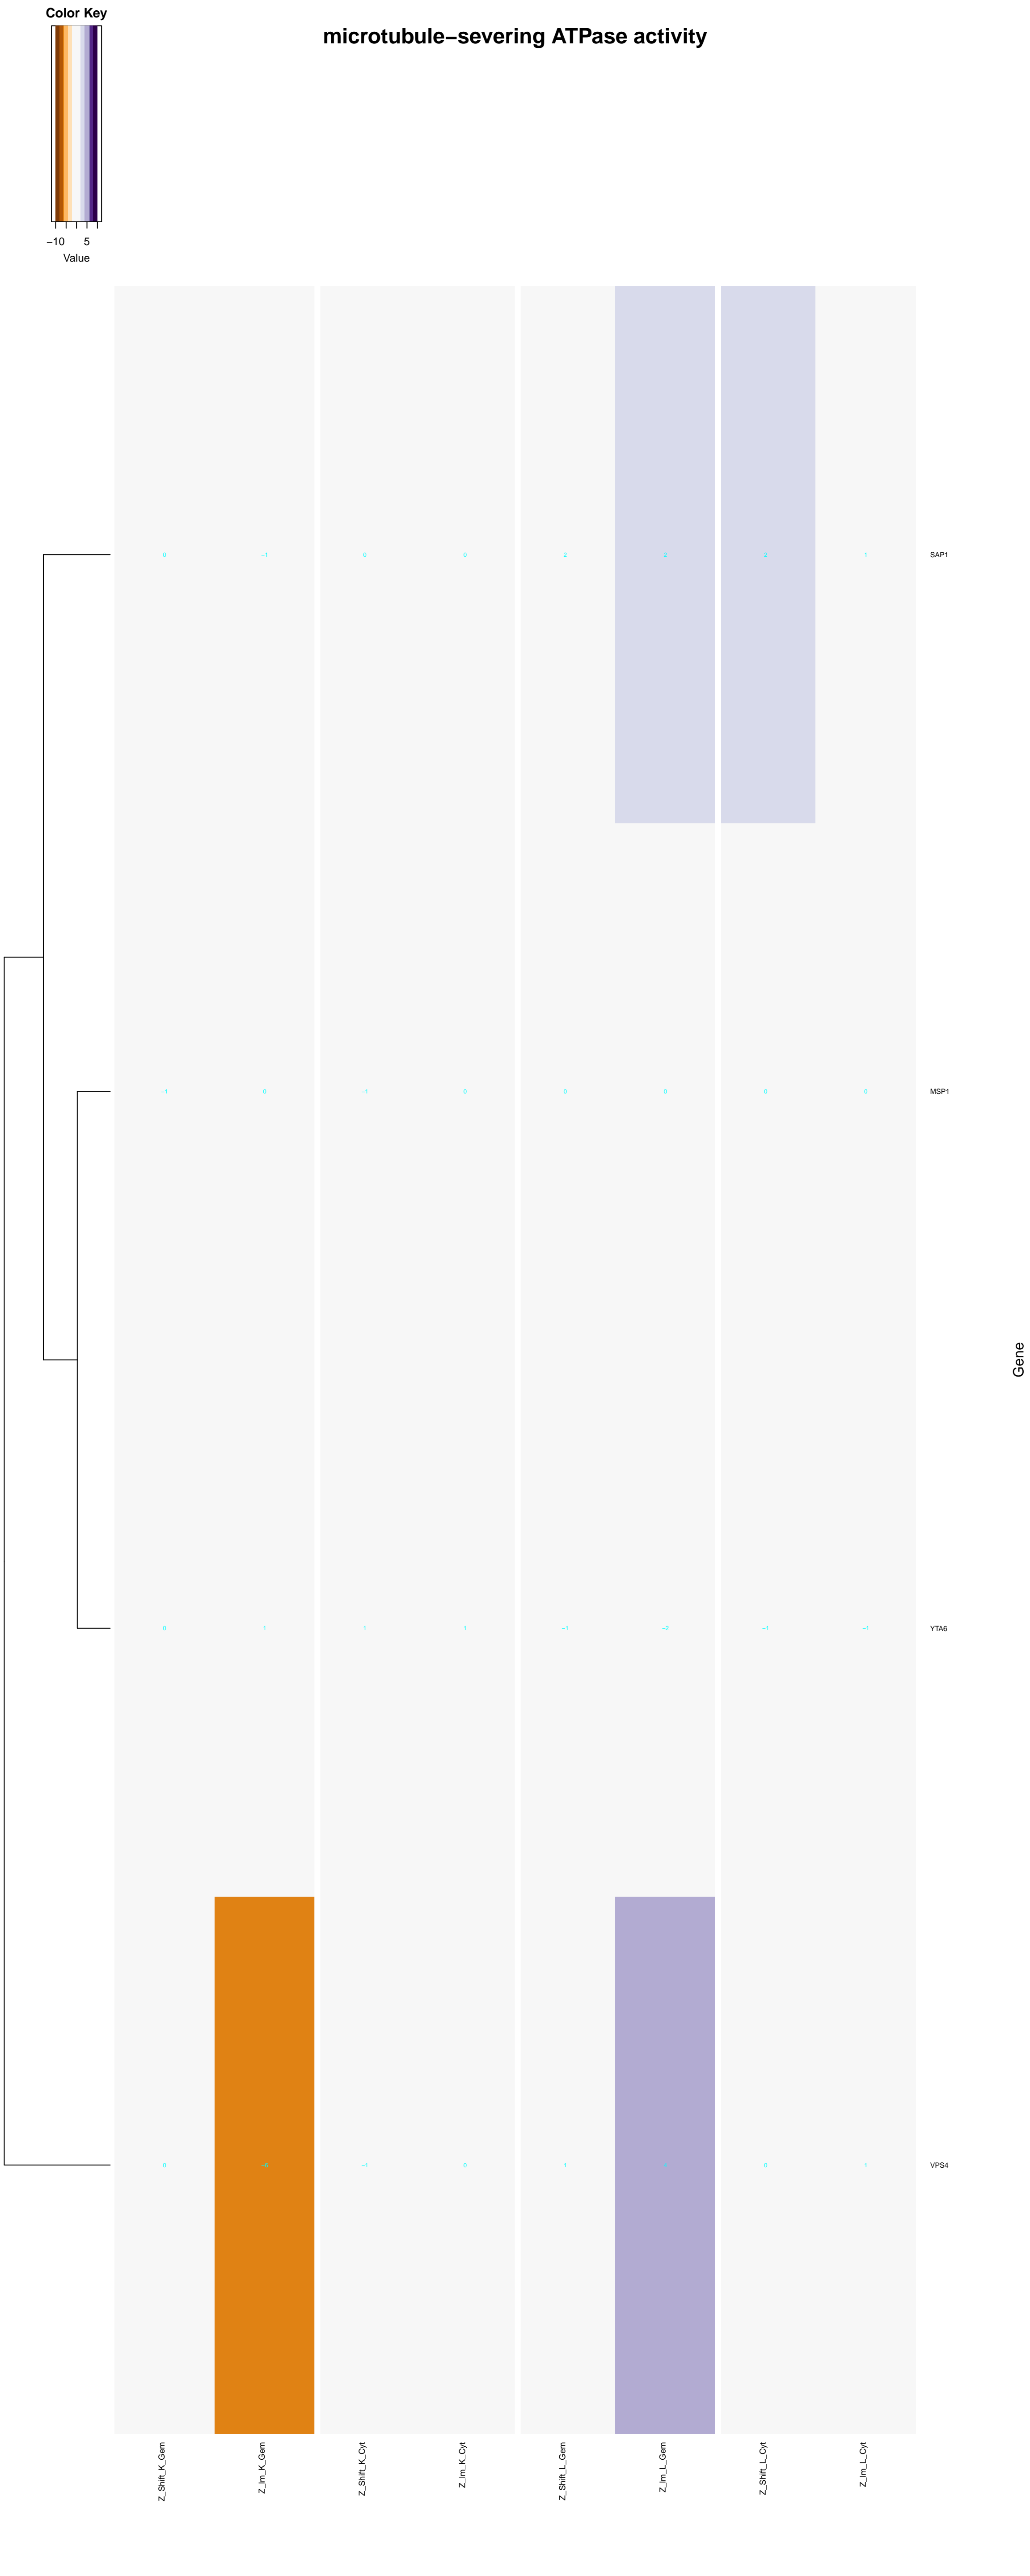

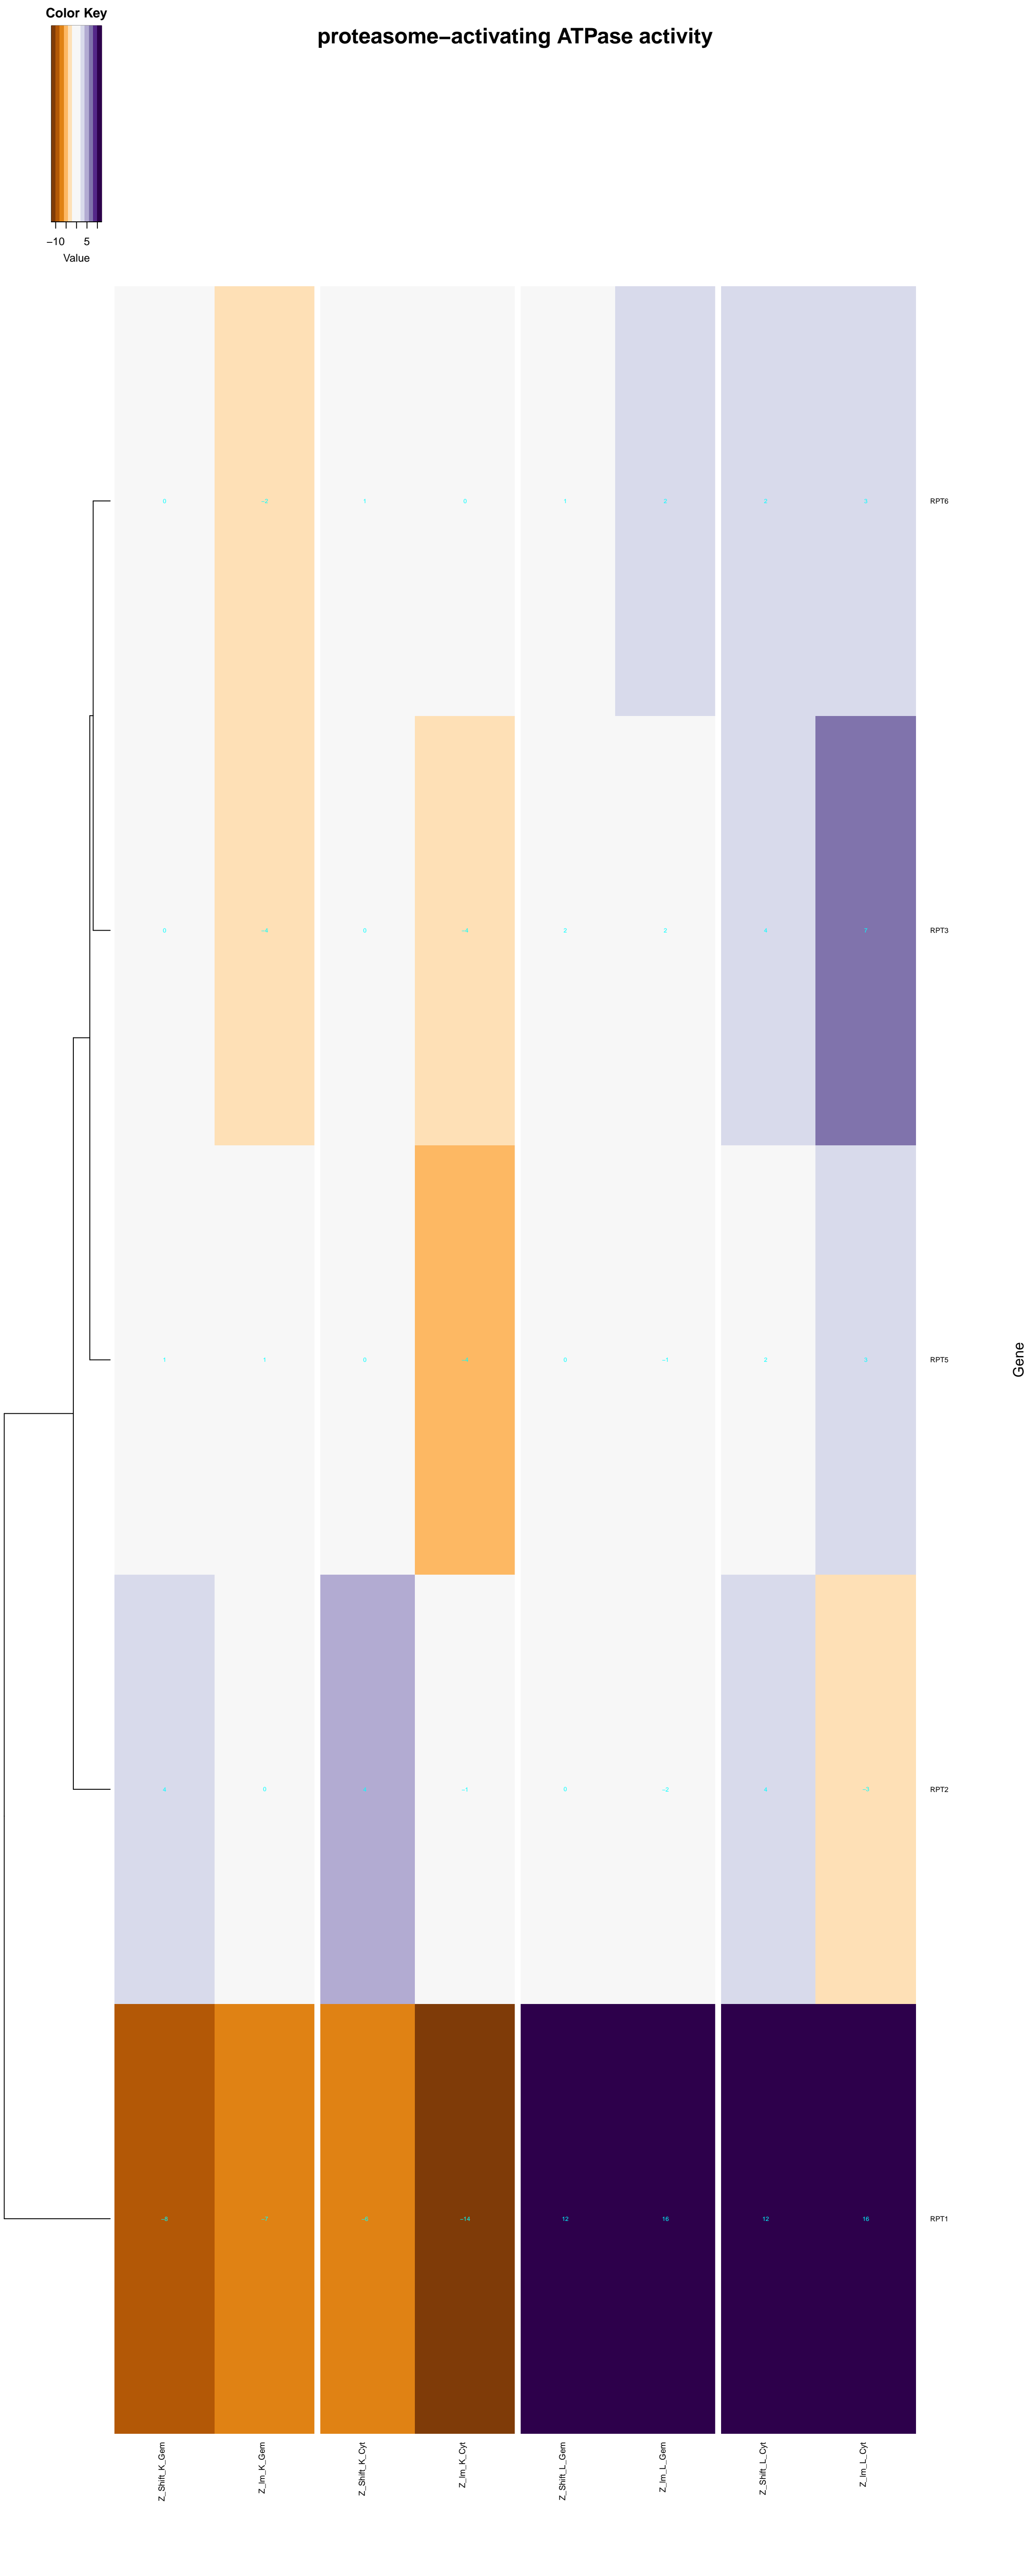

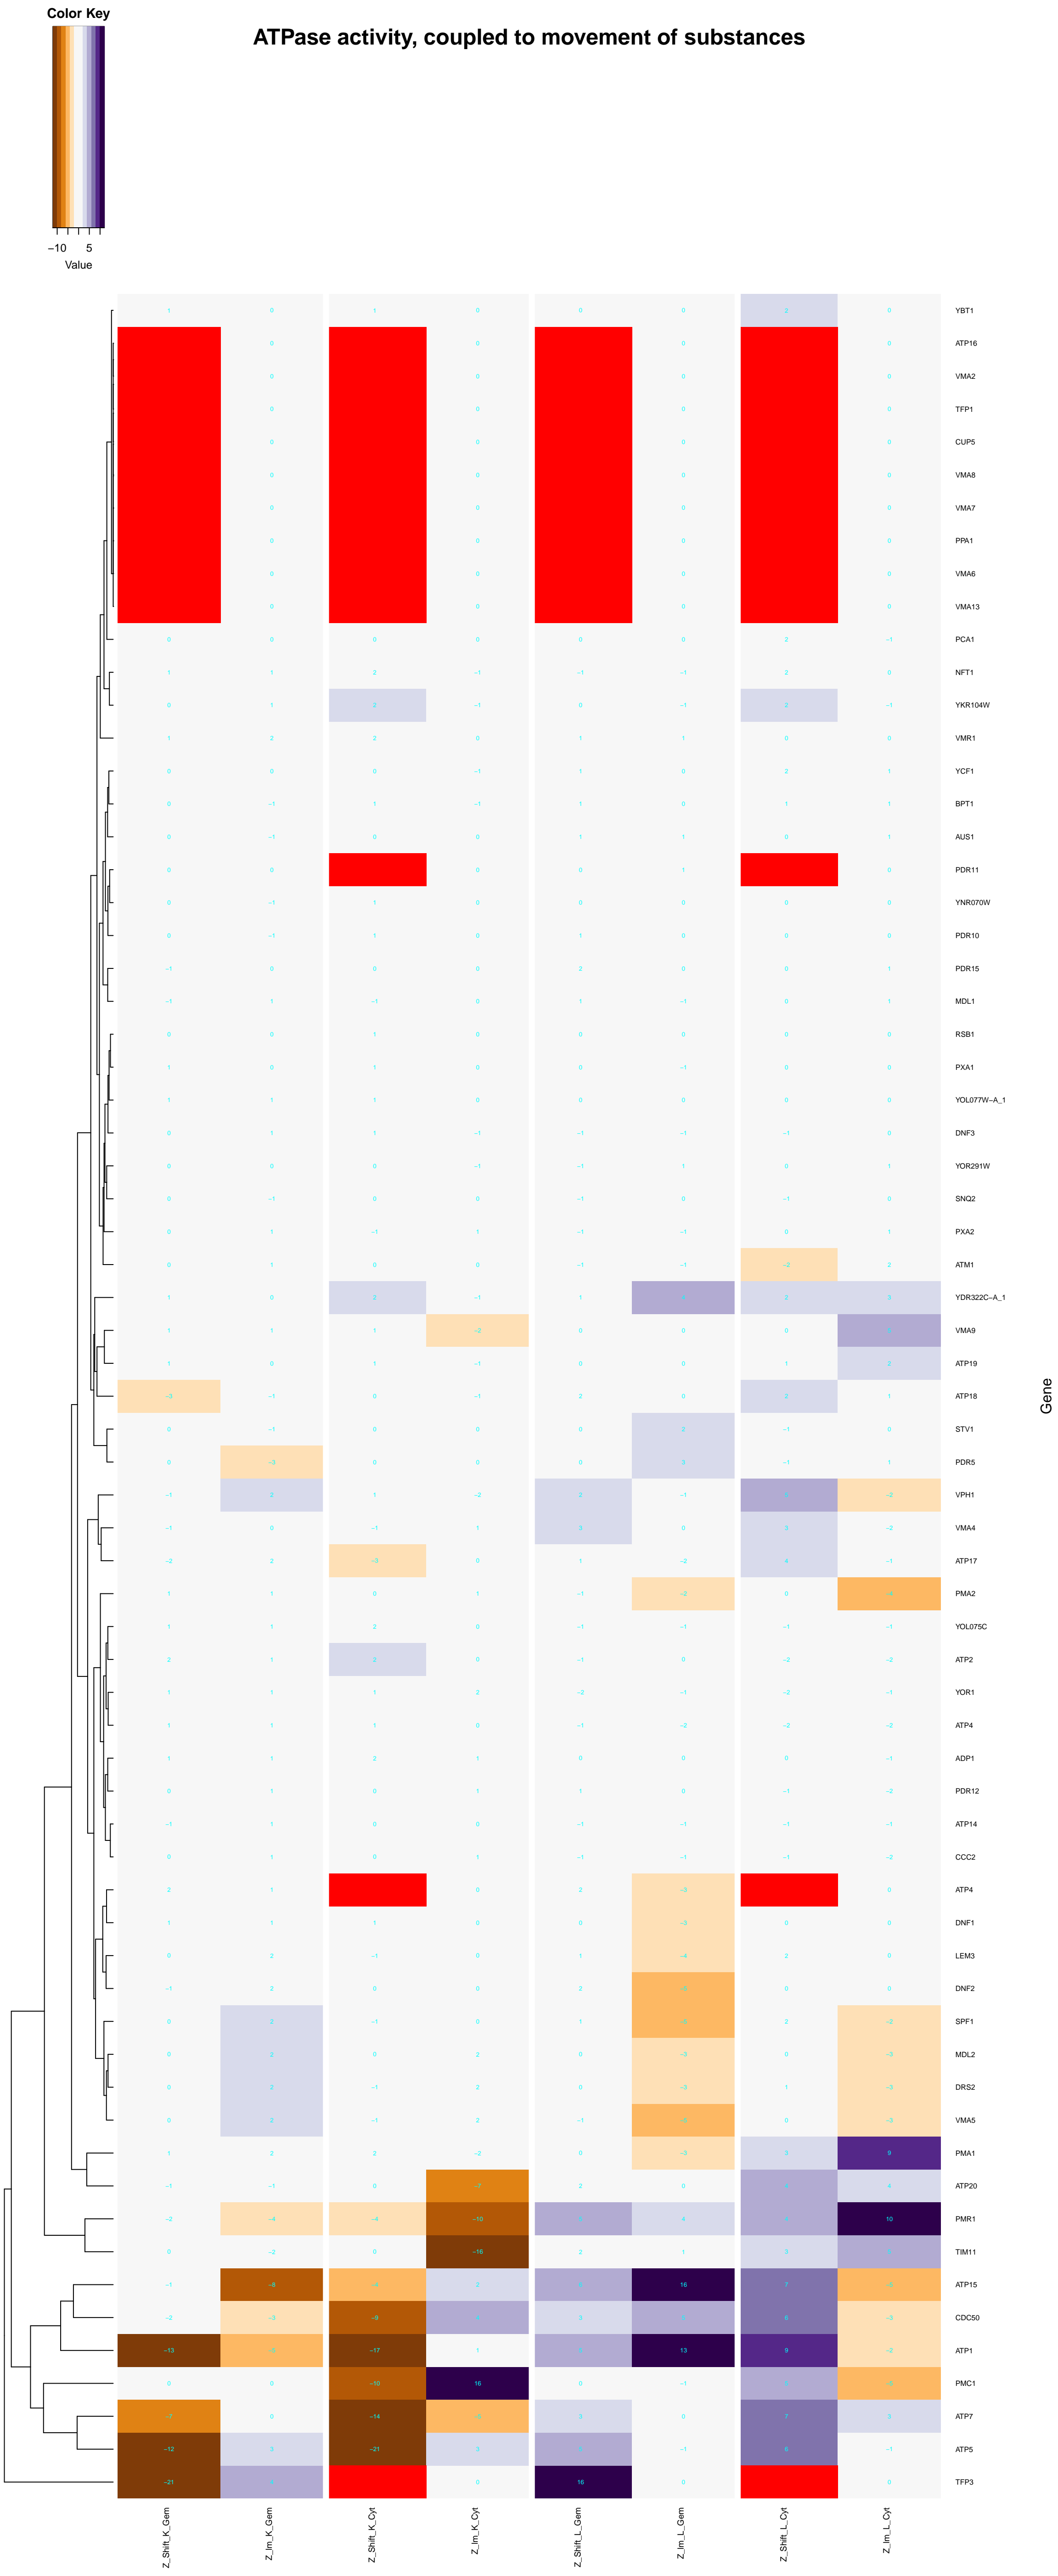



ATP-dependent microtubule motor activity, minus-end-directed



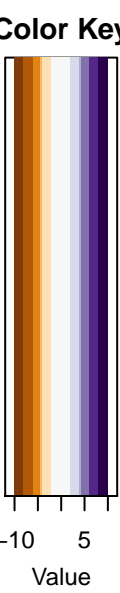

ATP-dependent microtubule motor activity, plus-end-directed



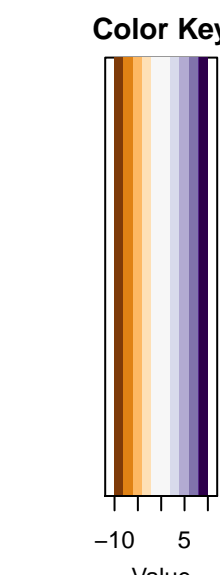

single-stranded DNA-dependent ATP-dependent DNA helicase activity

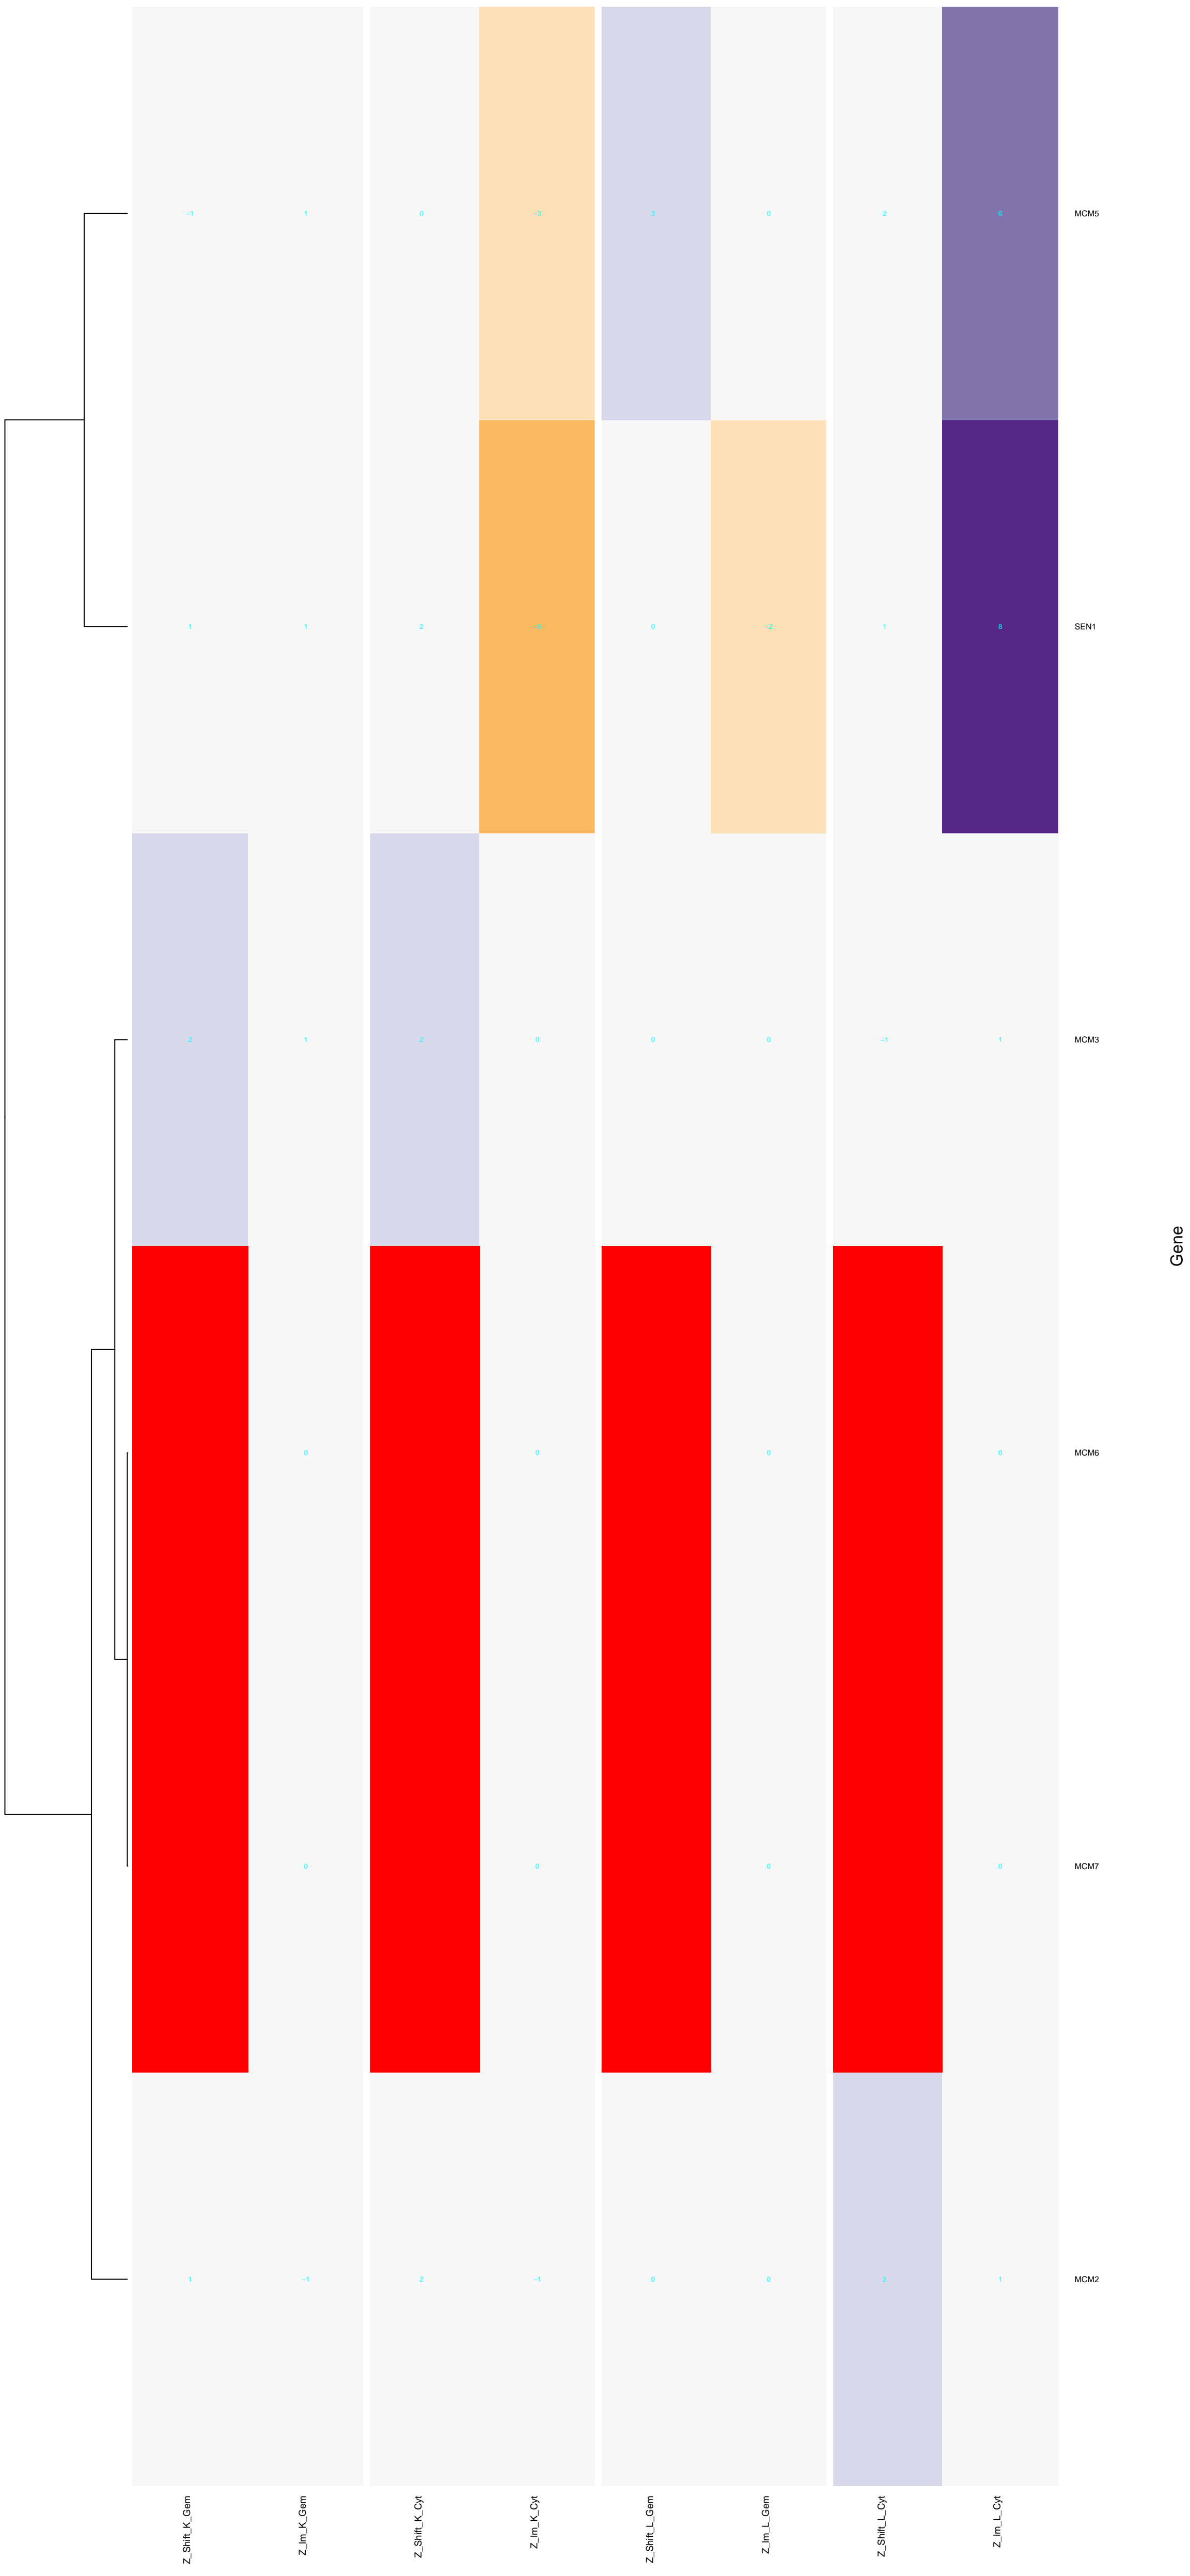



### ATP-dependent 3'-5' DNA helicase activity

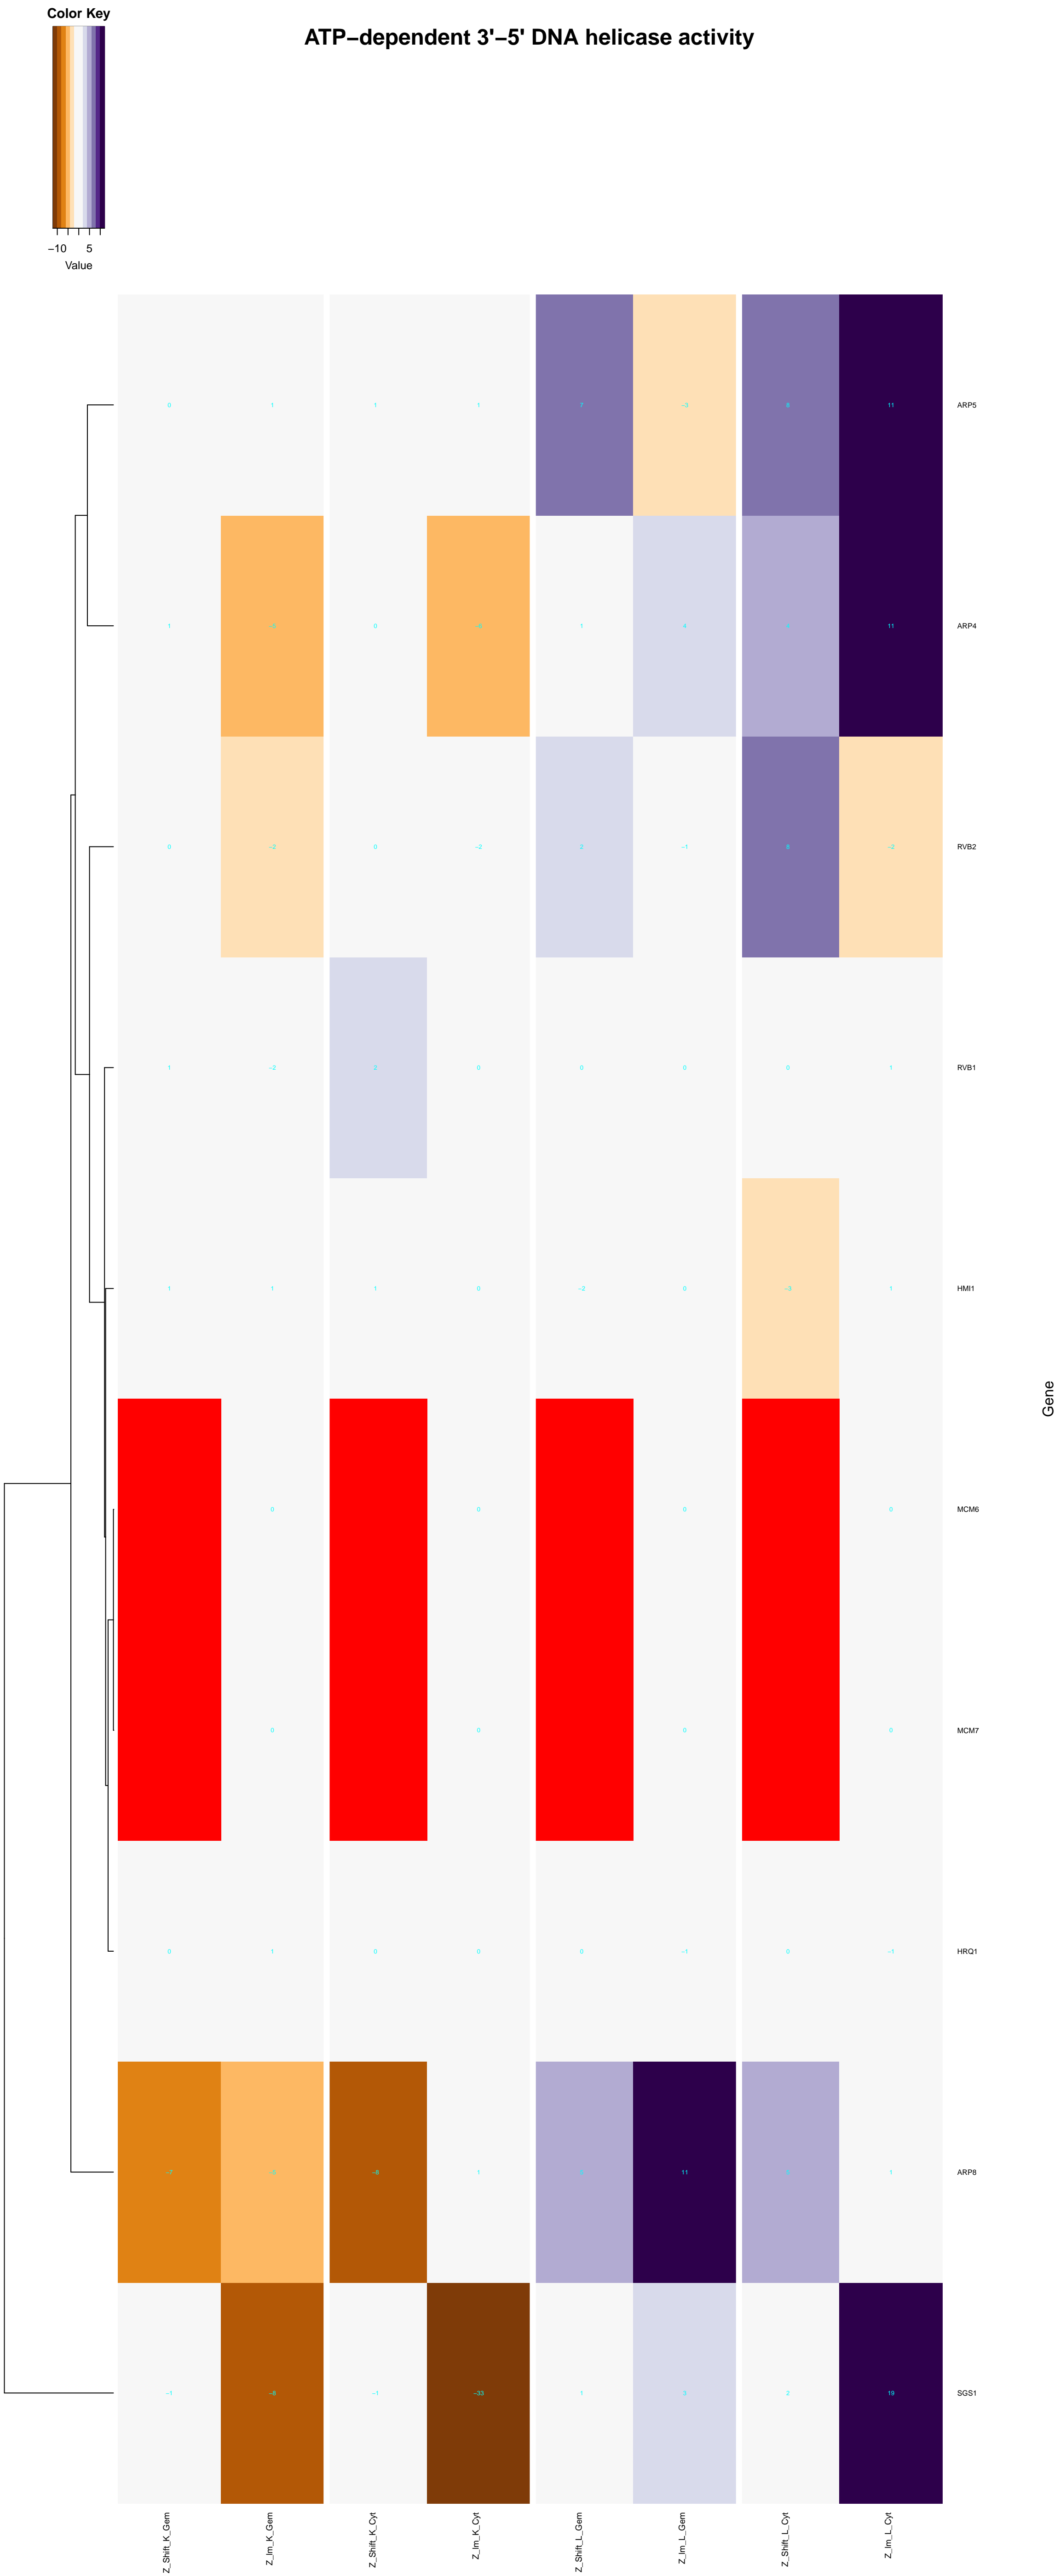

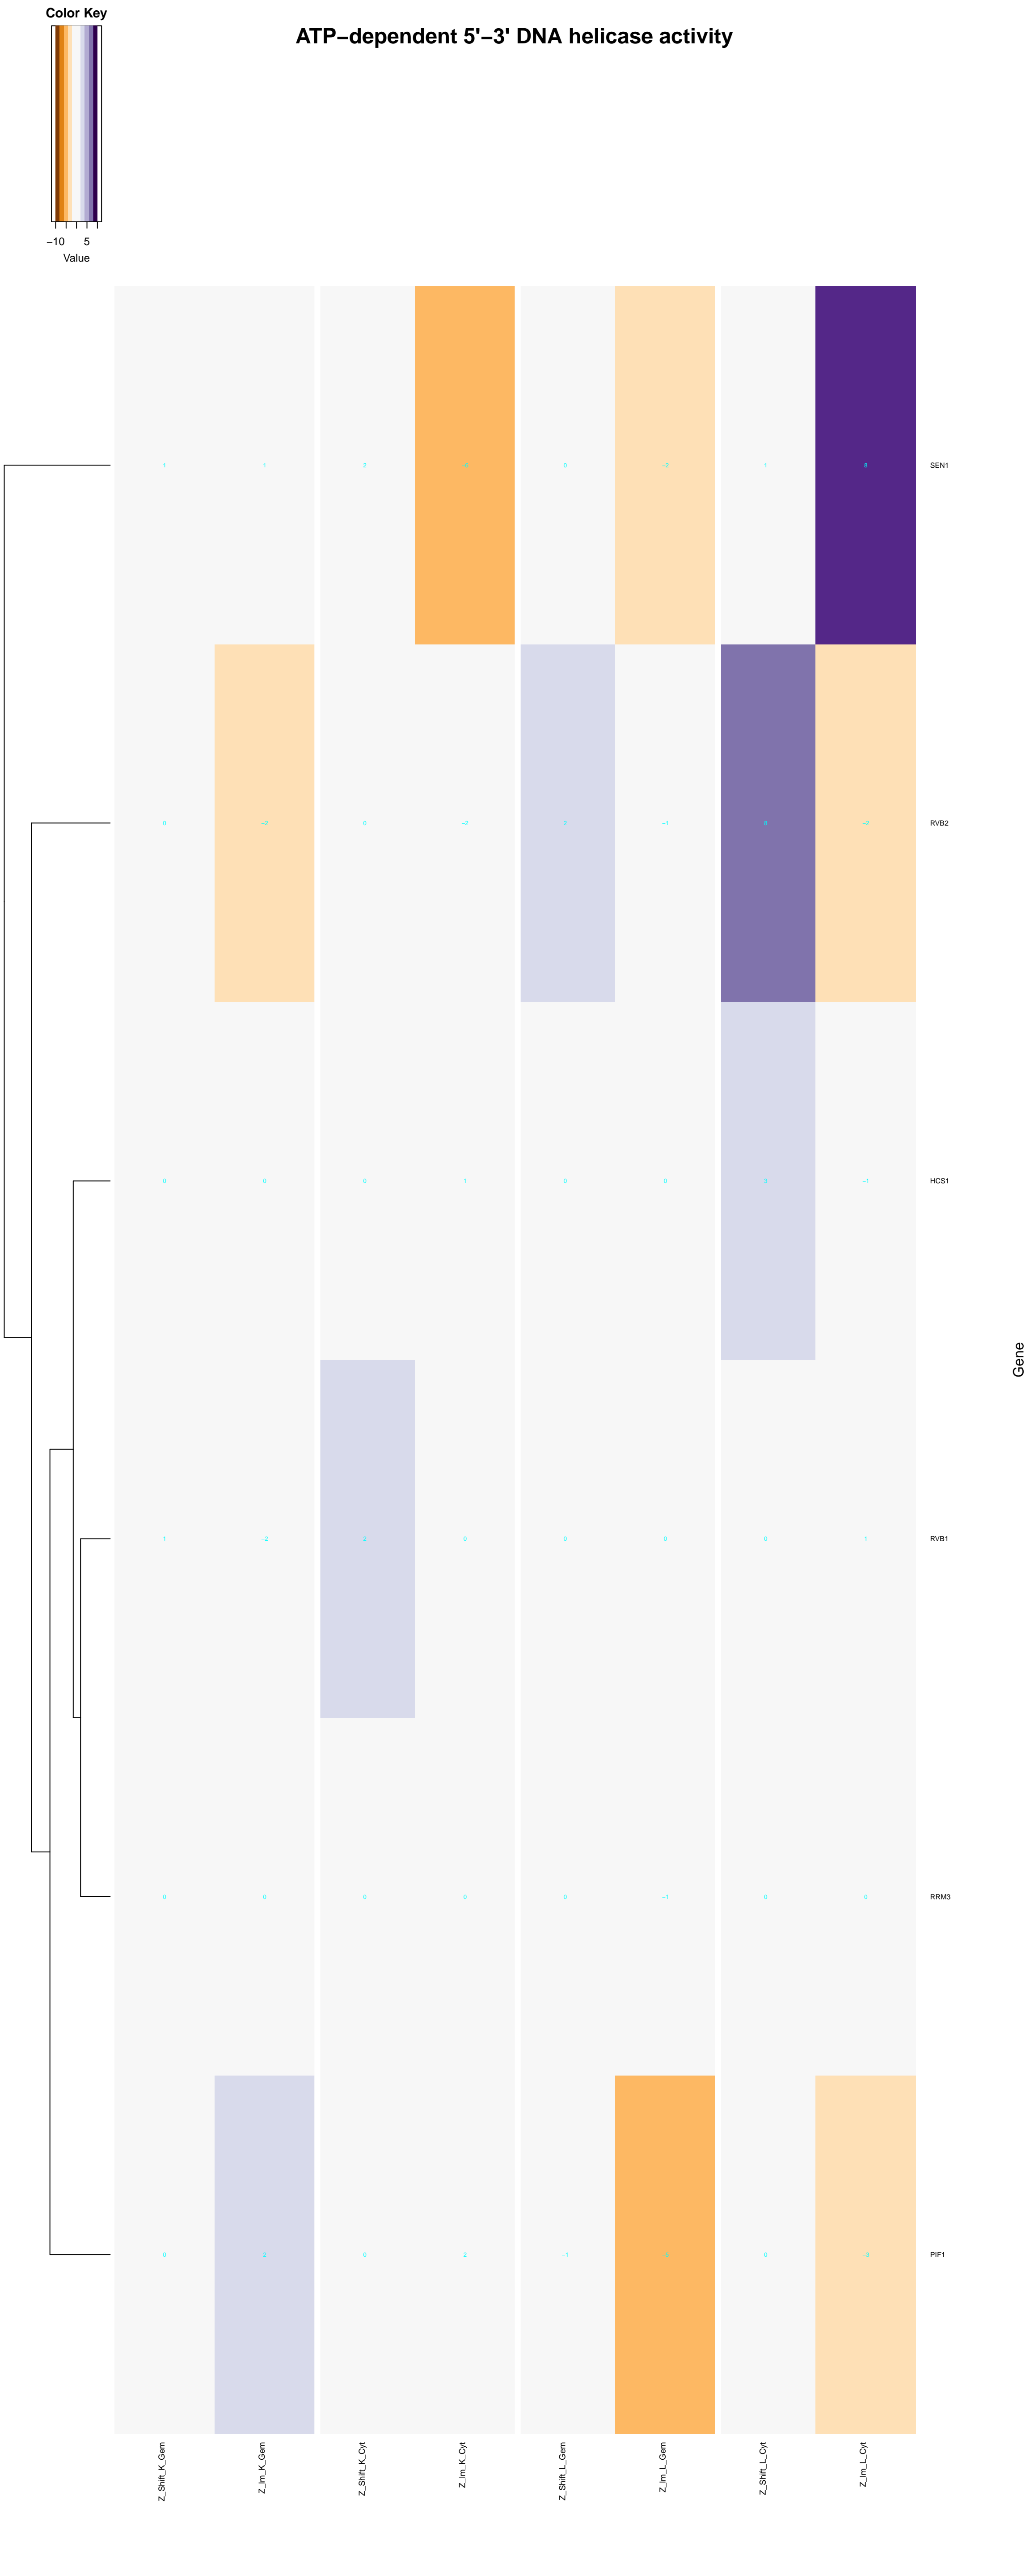

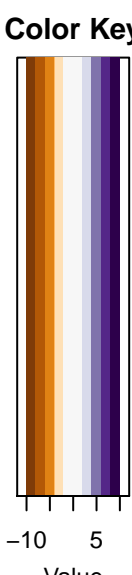

ATP-dependent 3'-5' RNA helicase activity

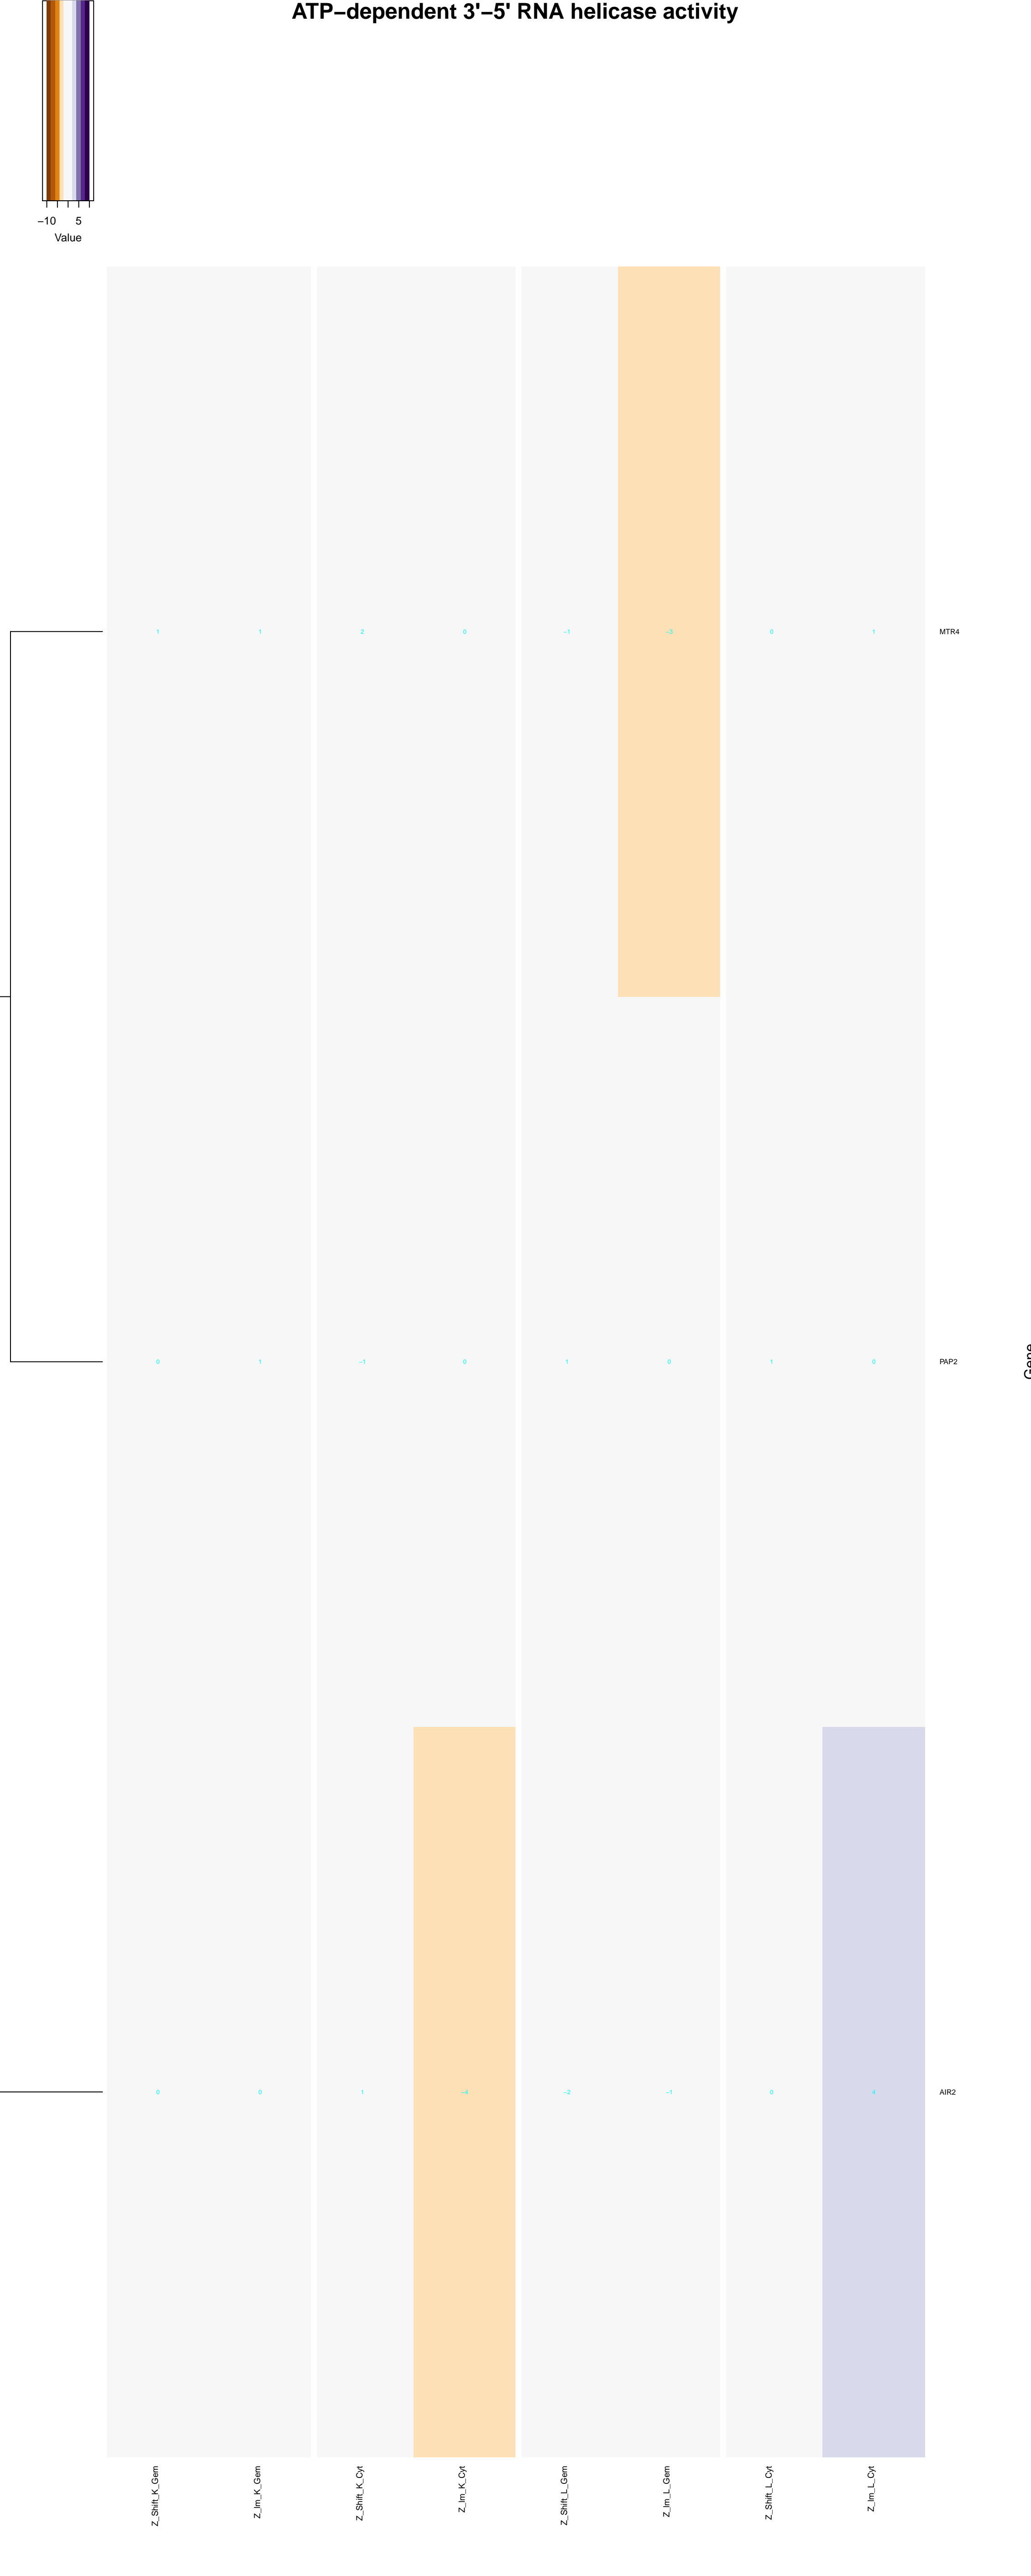

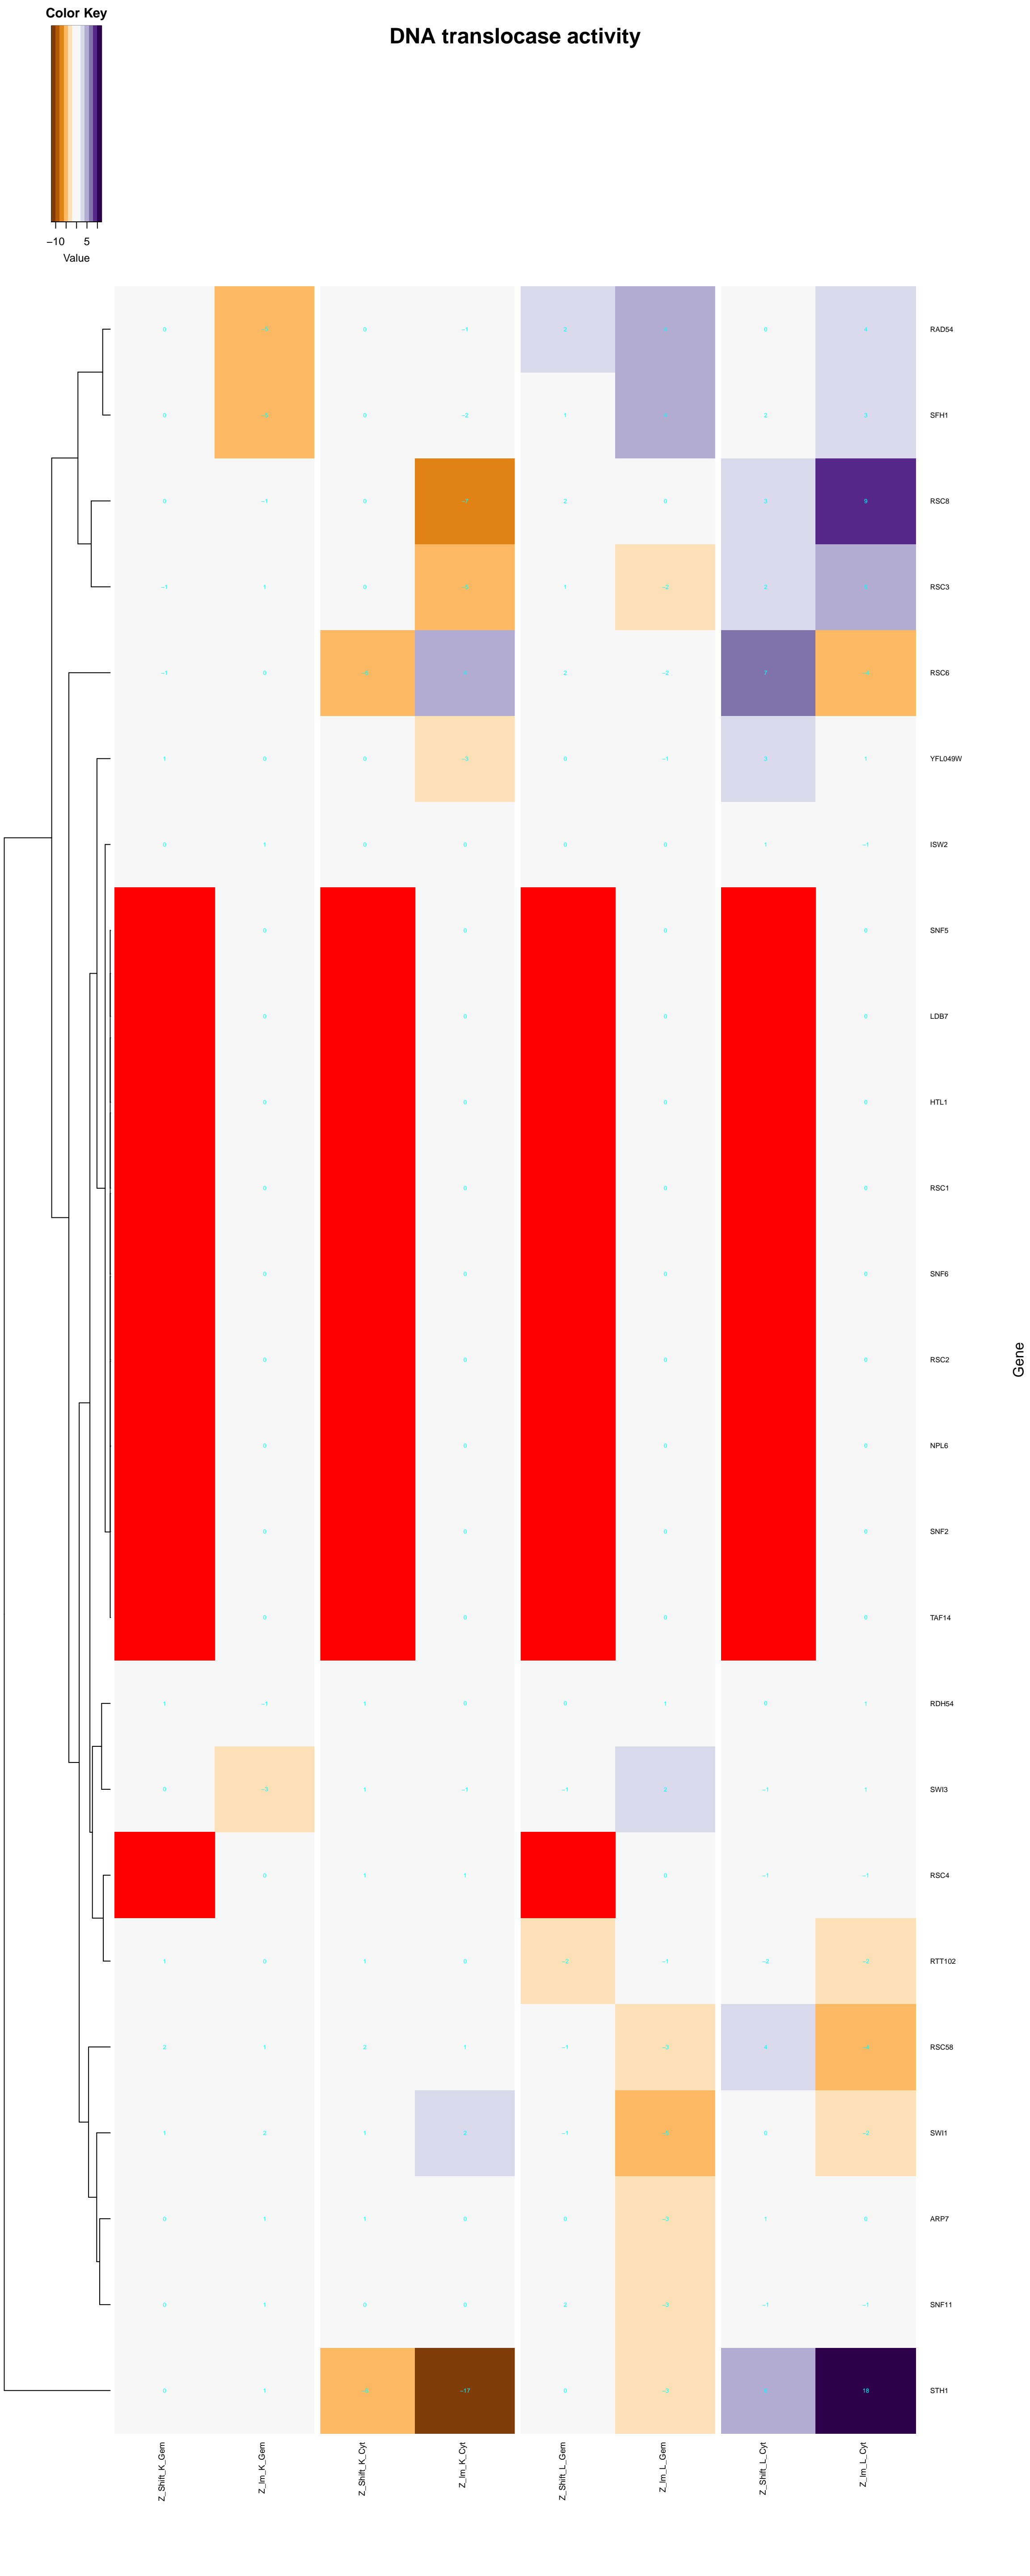

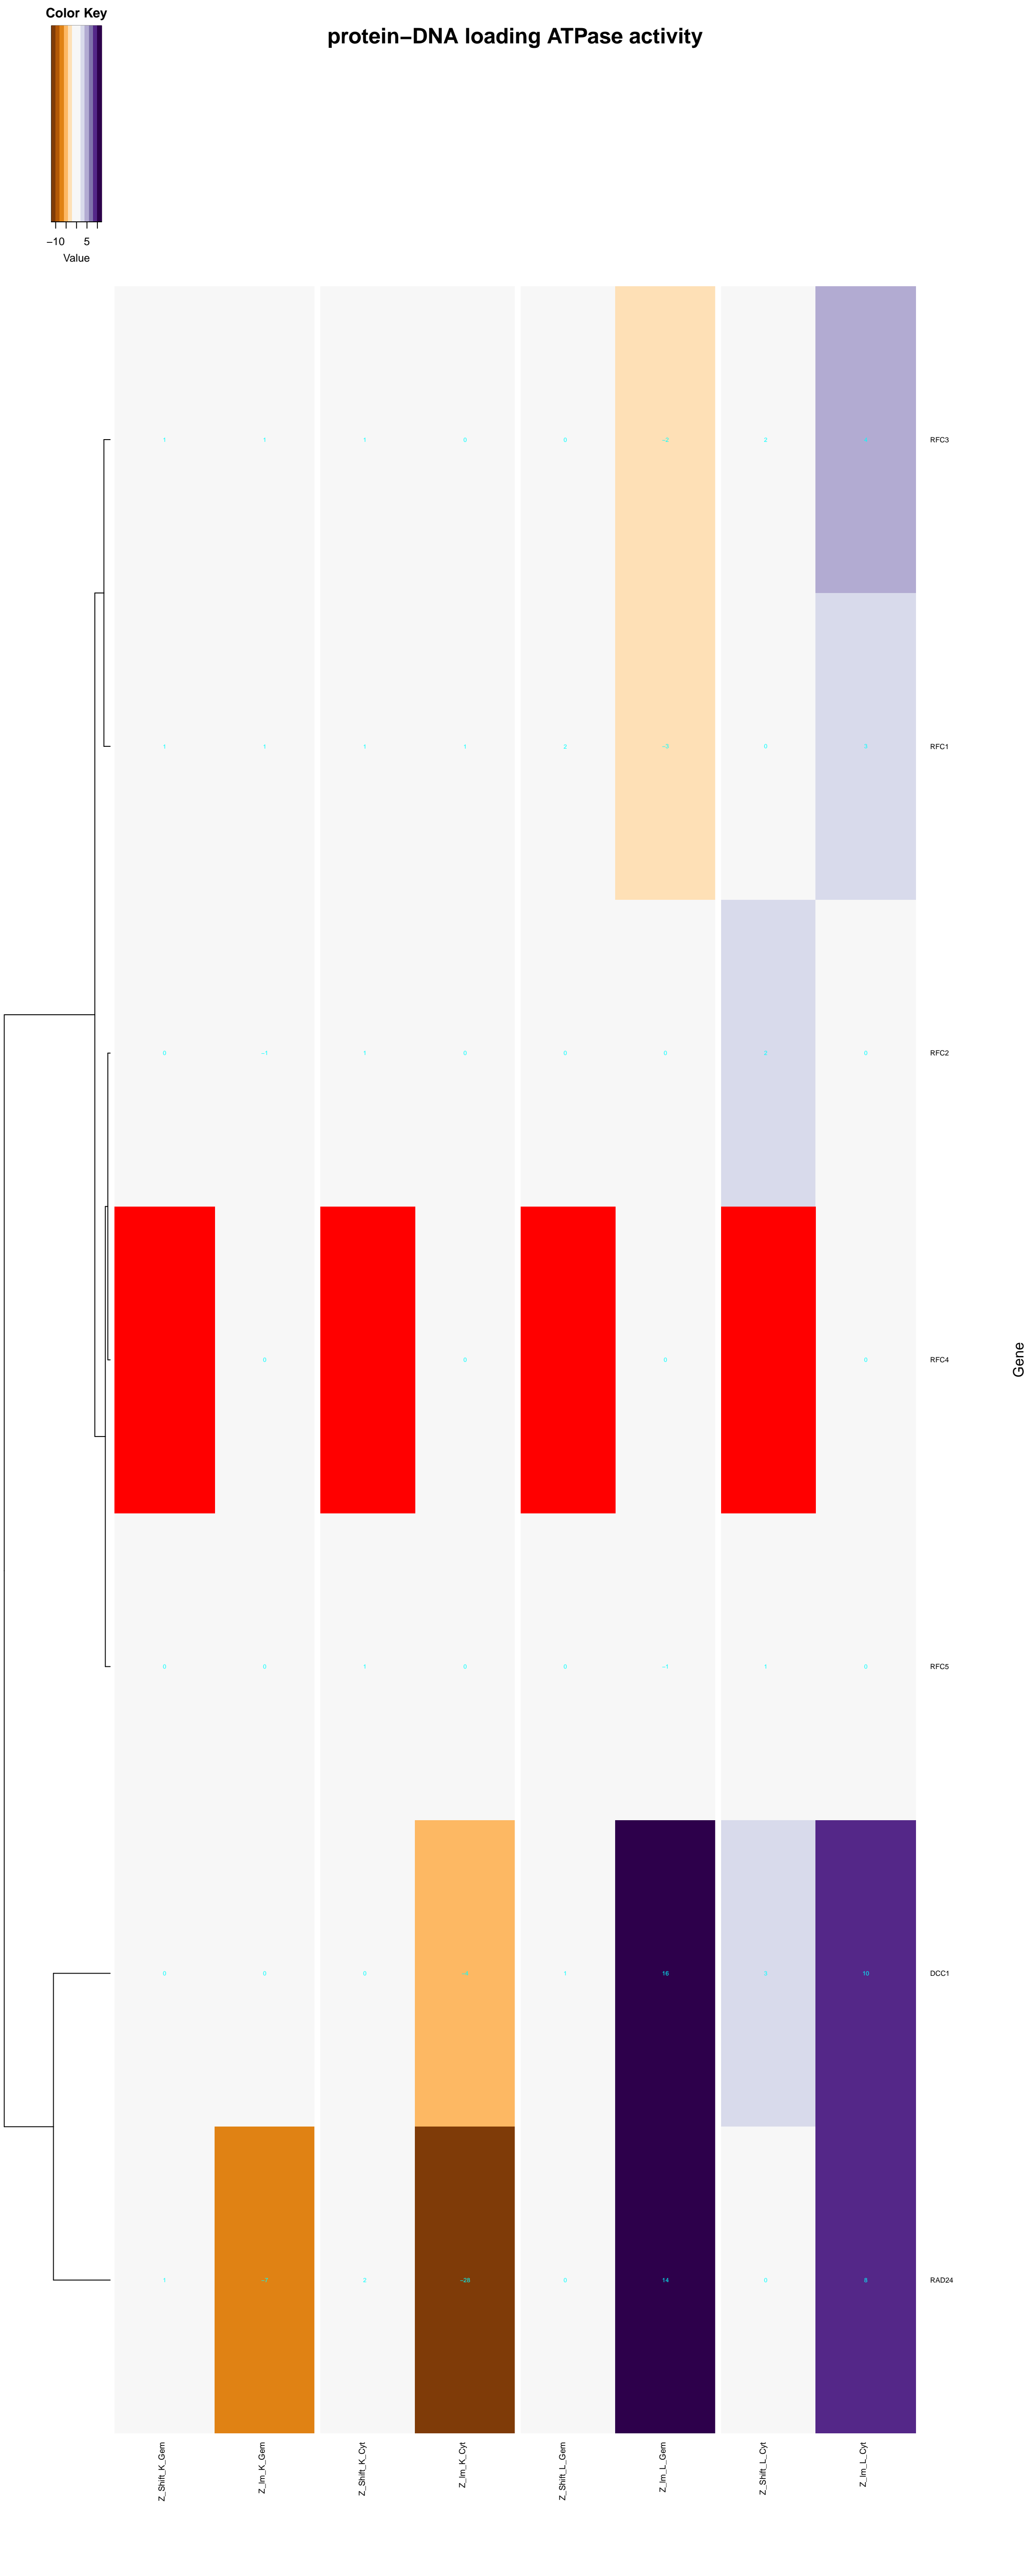

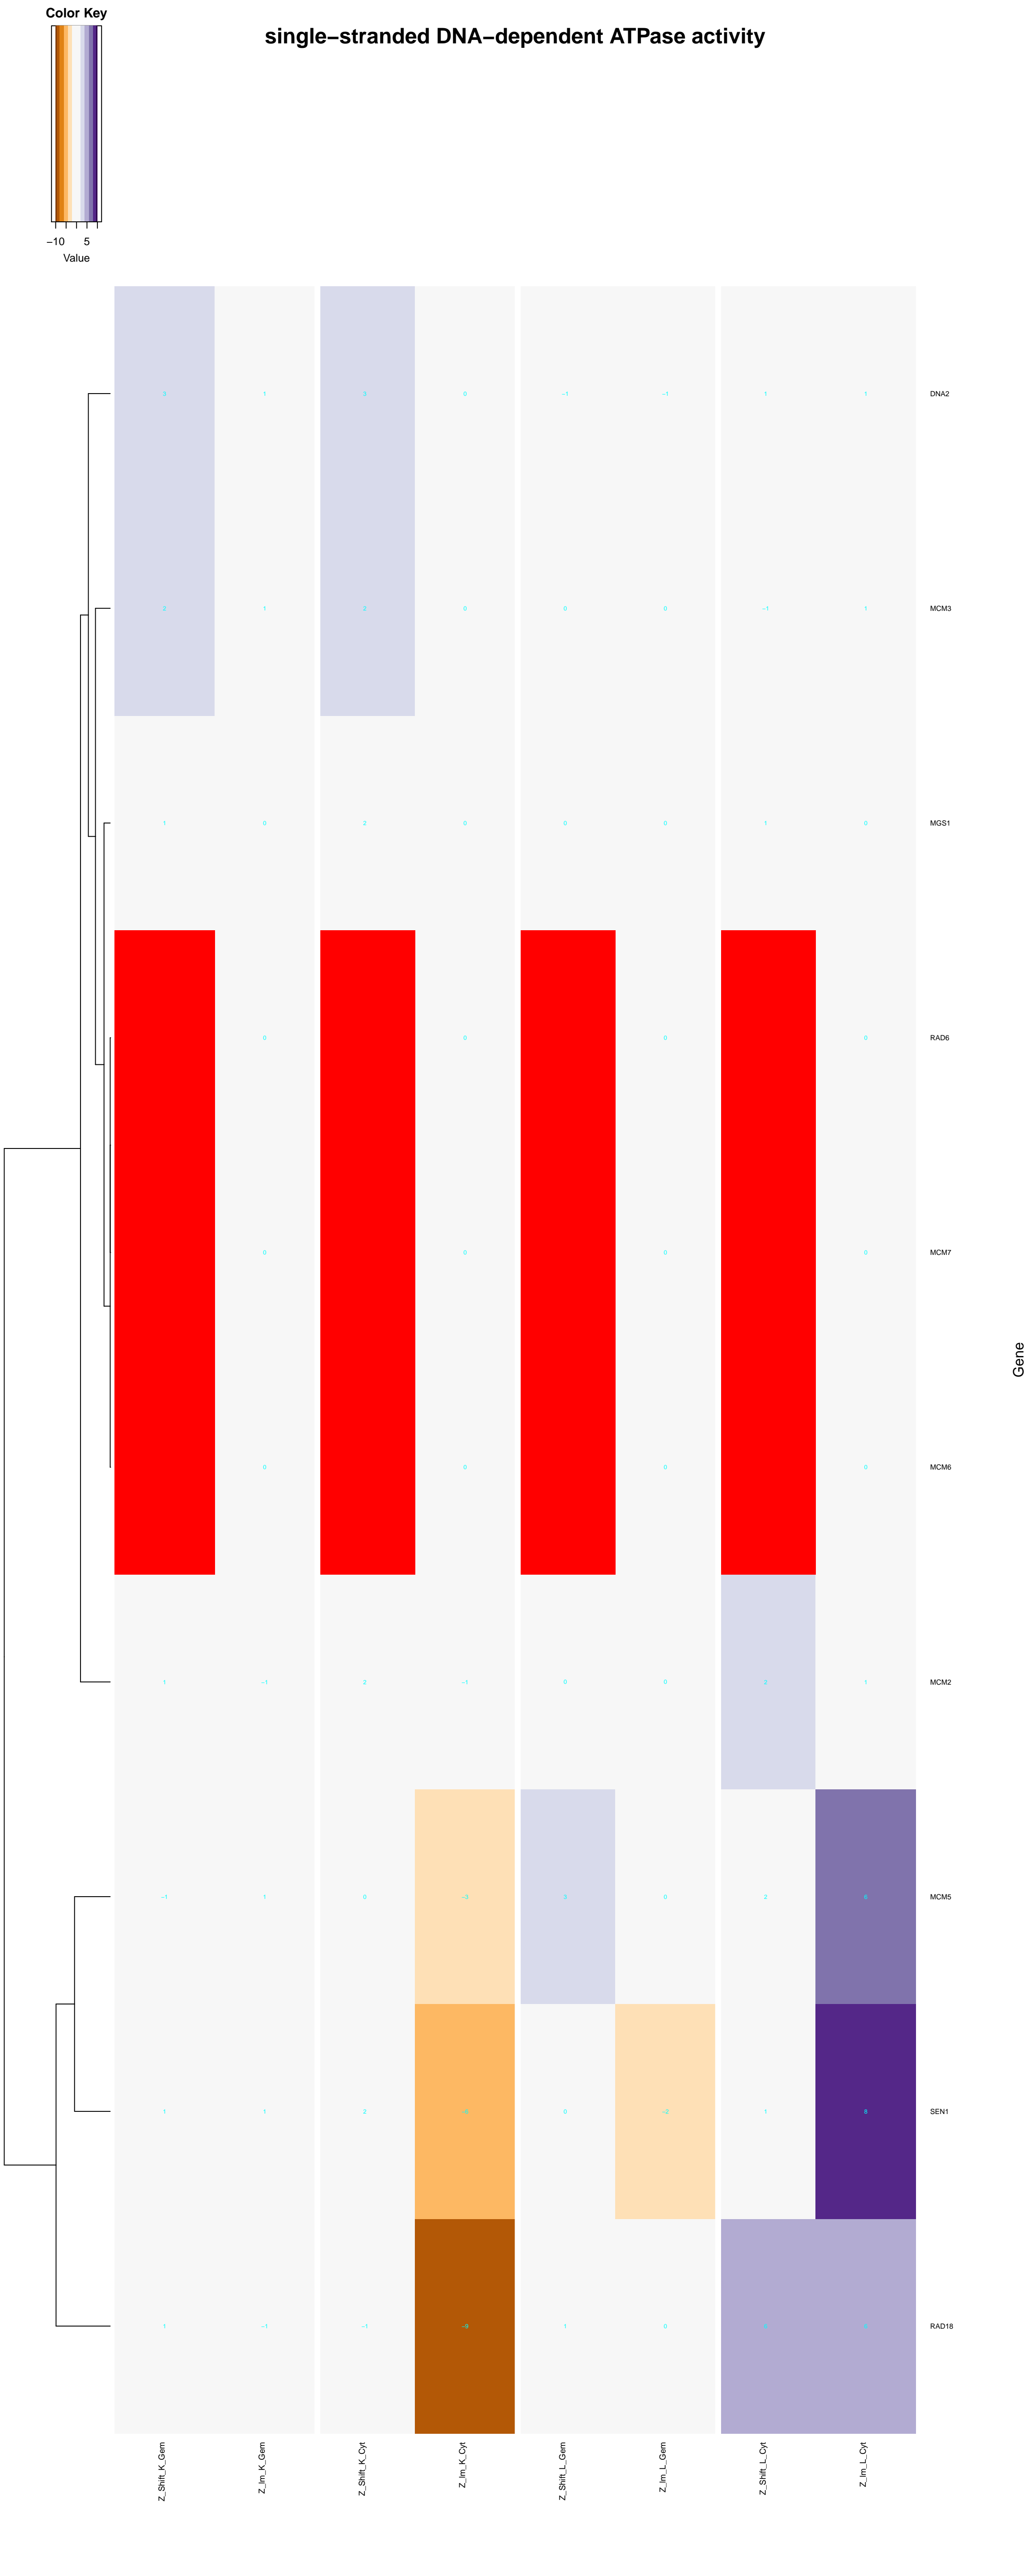

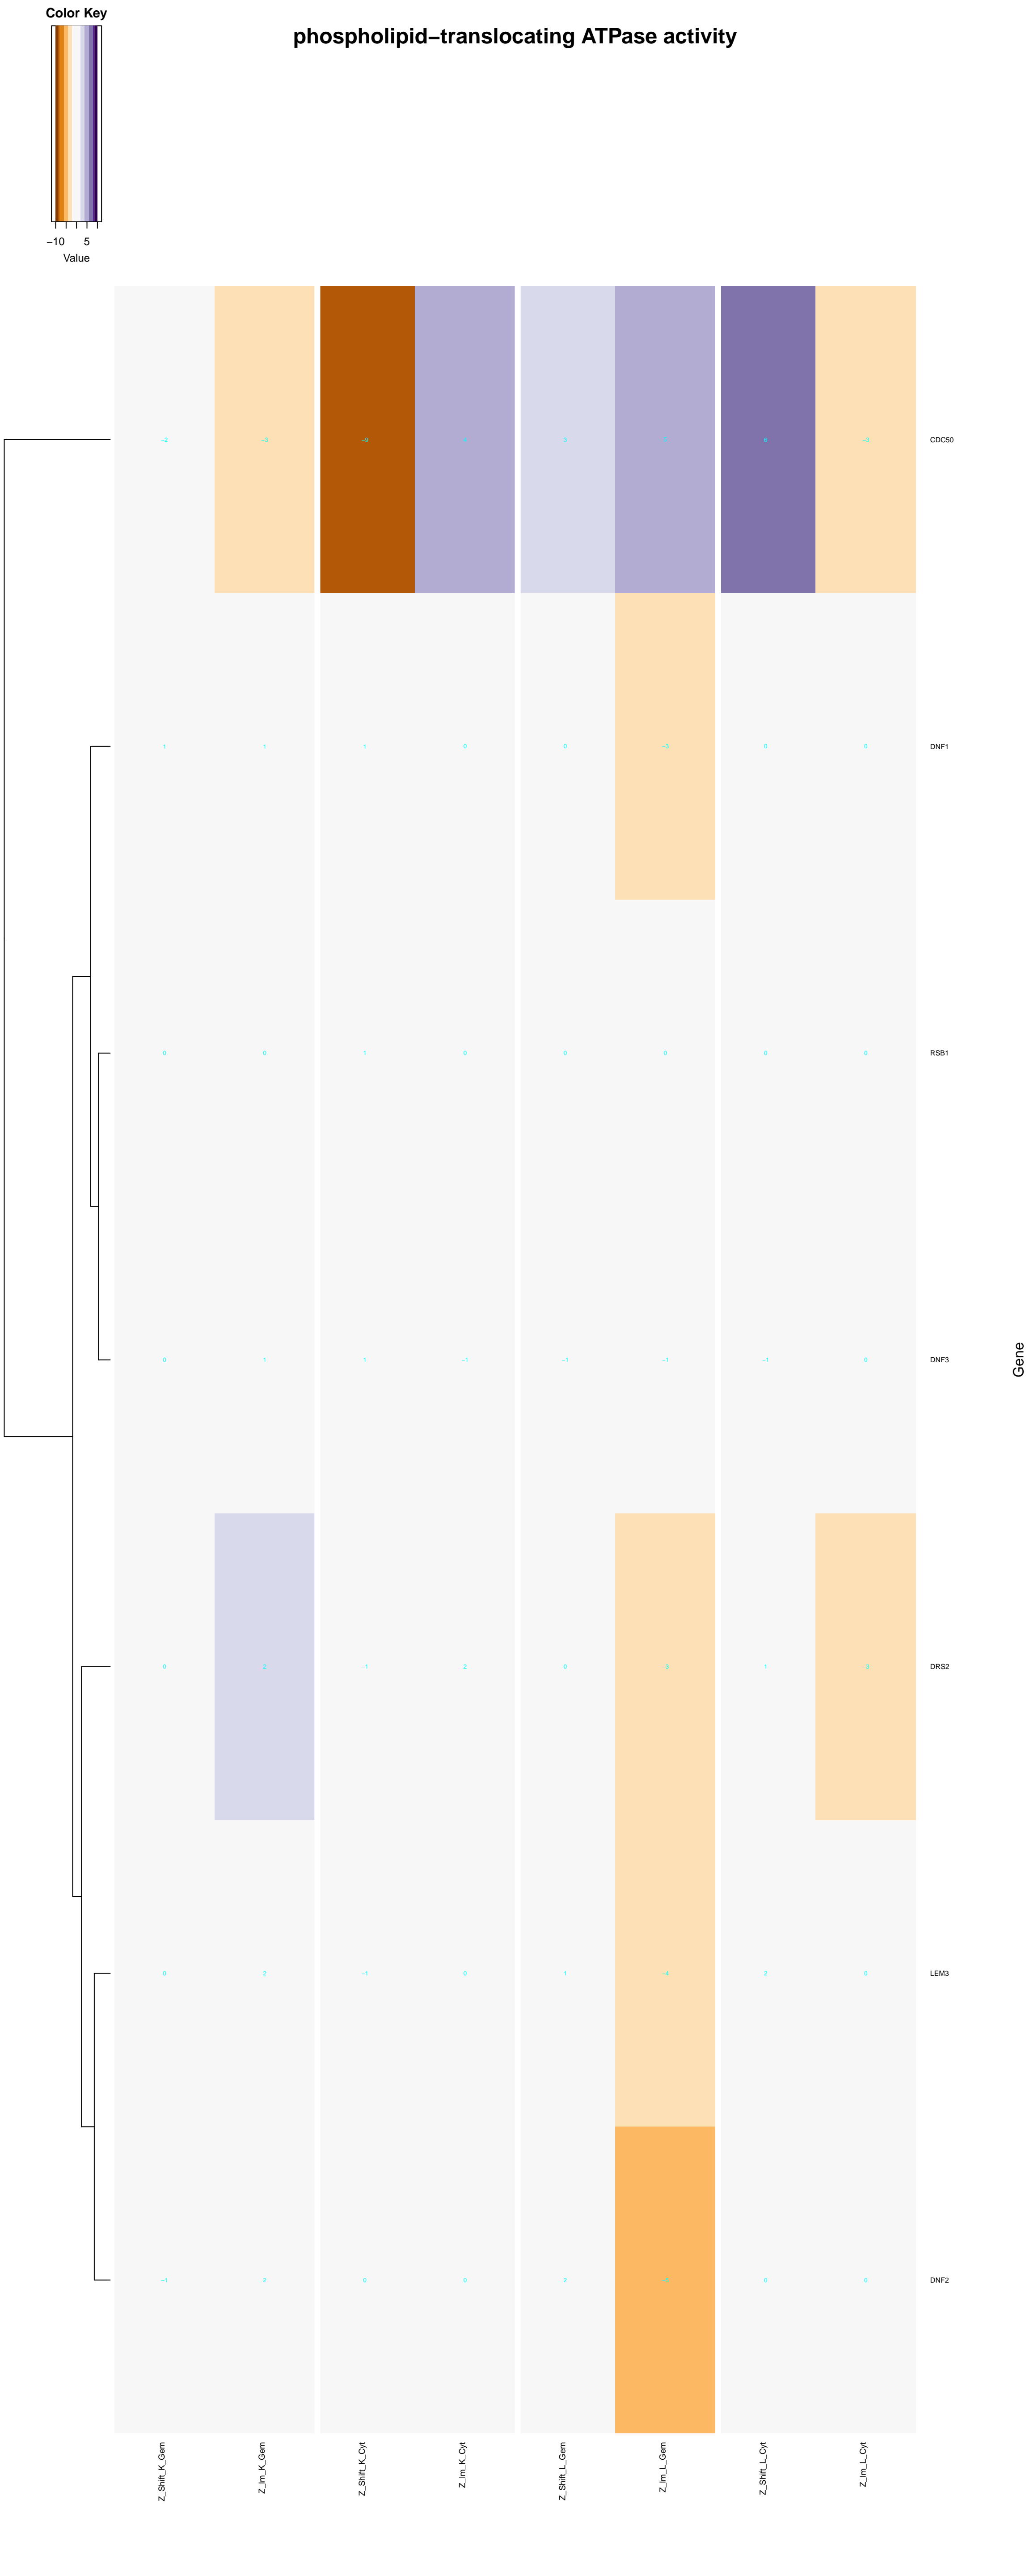

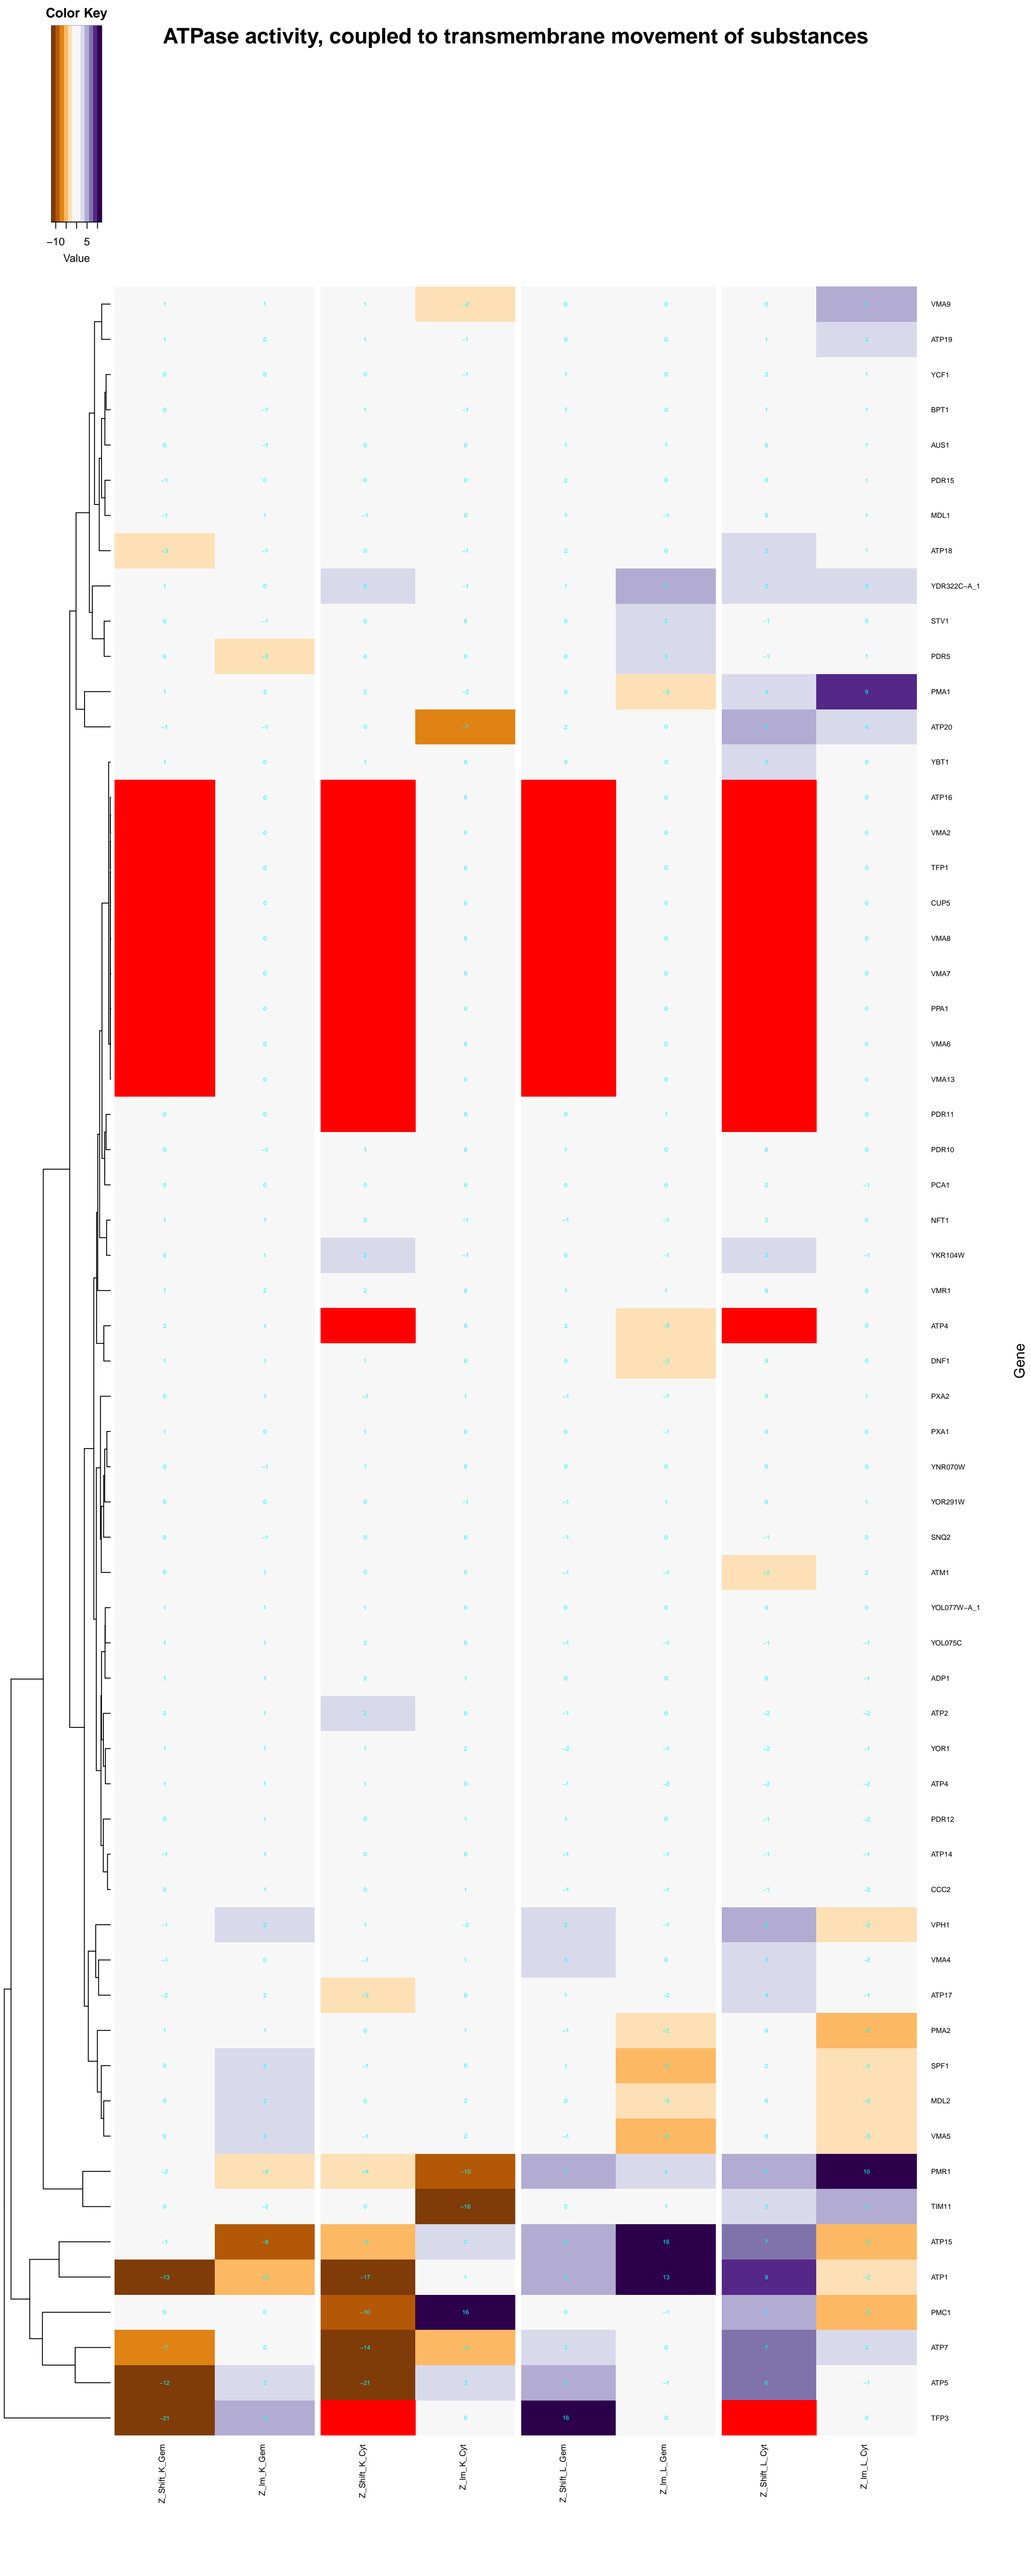



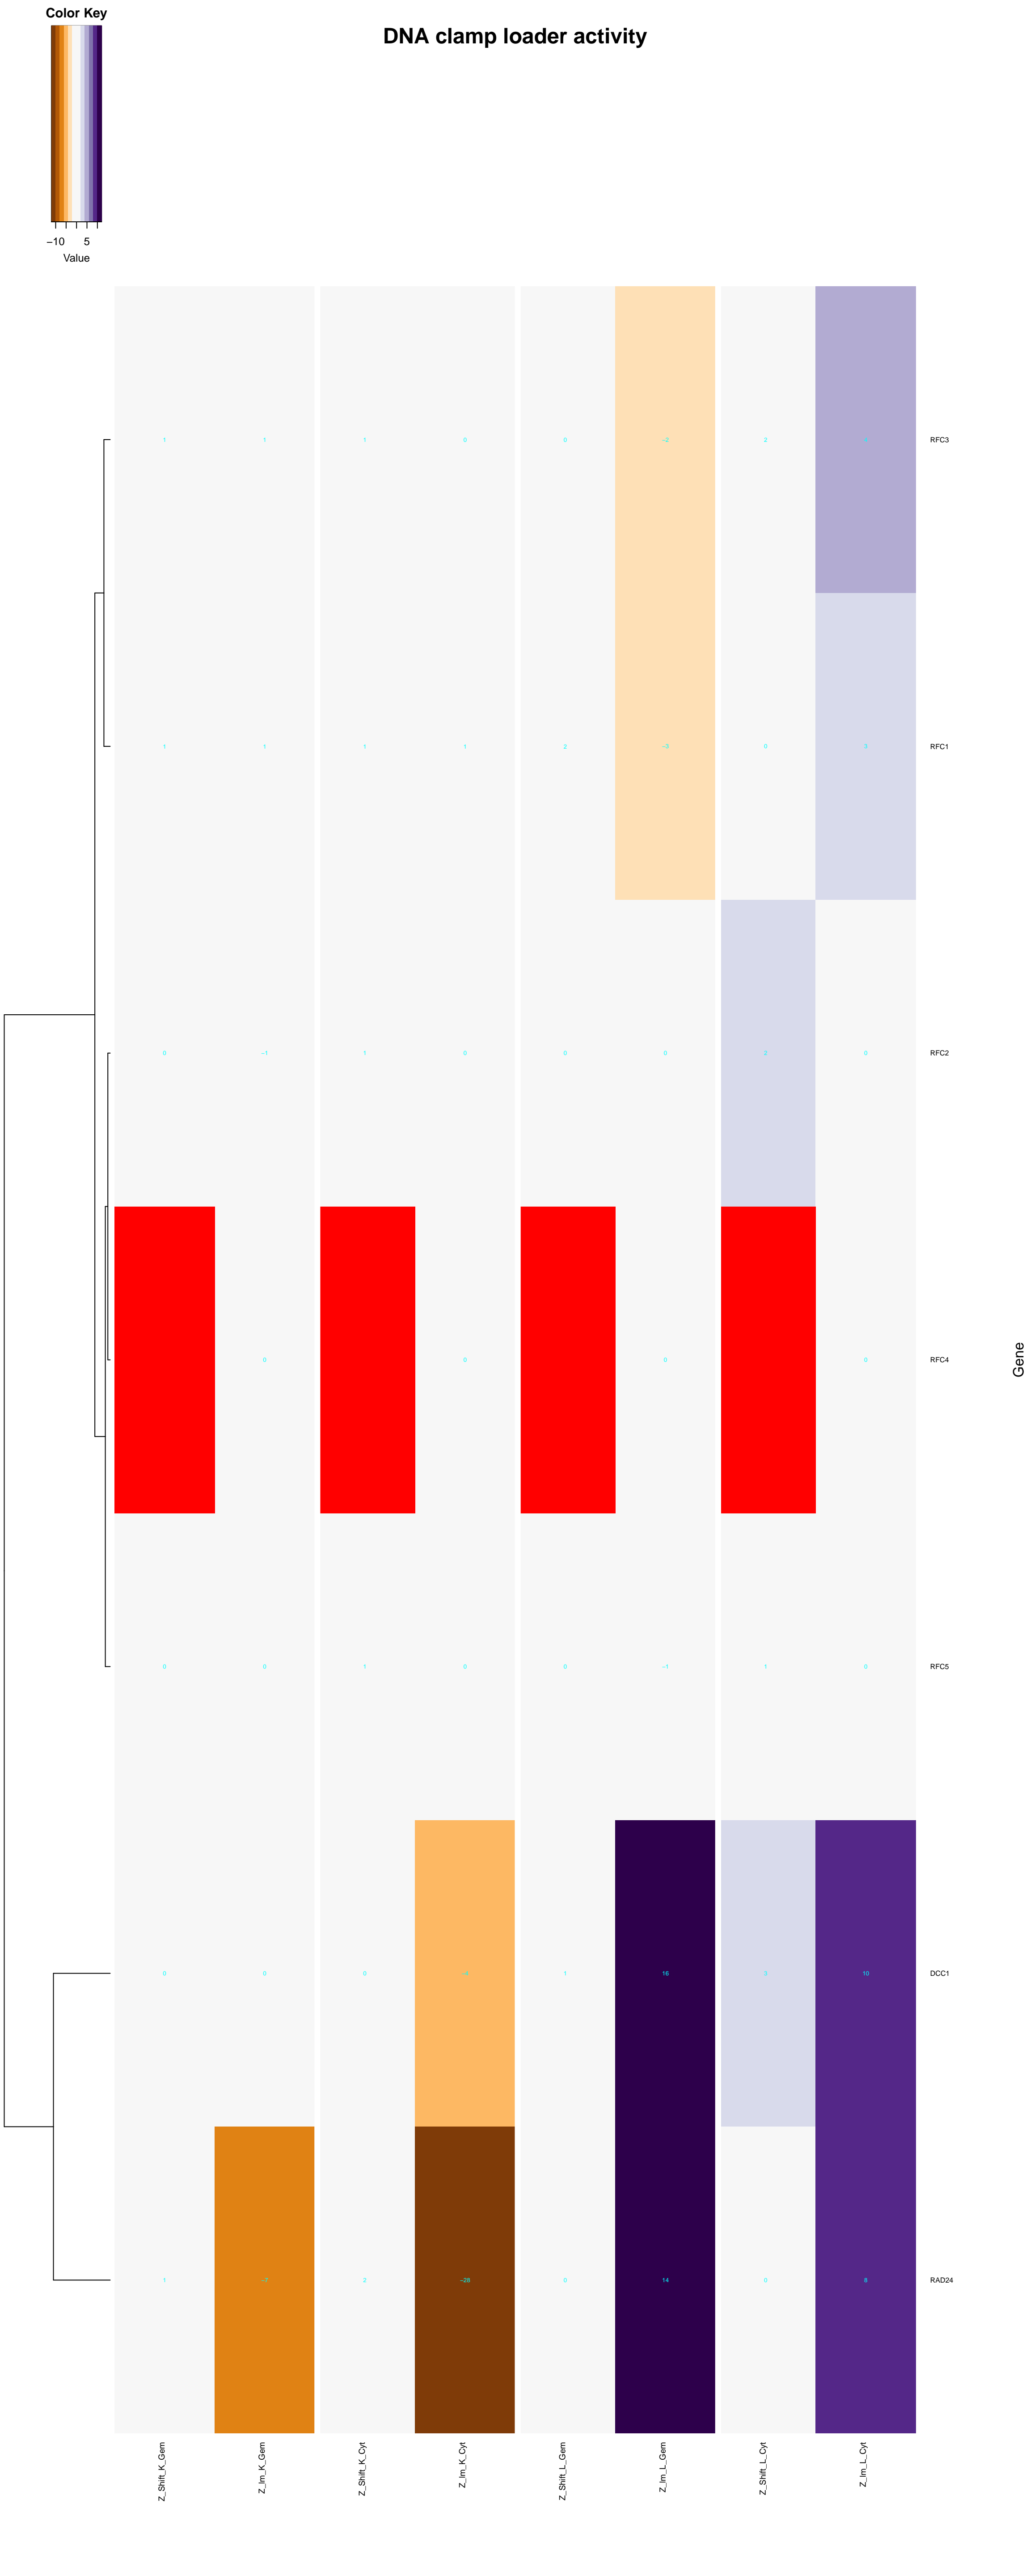

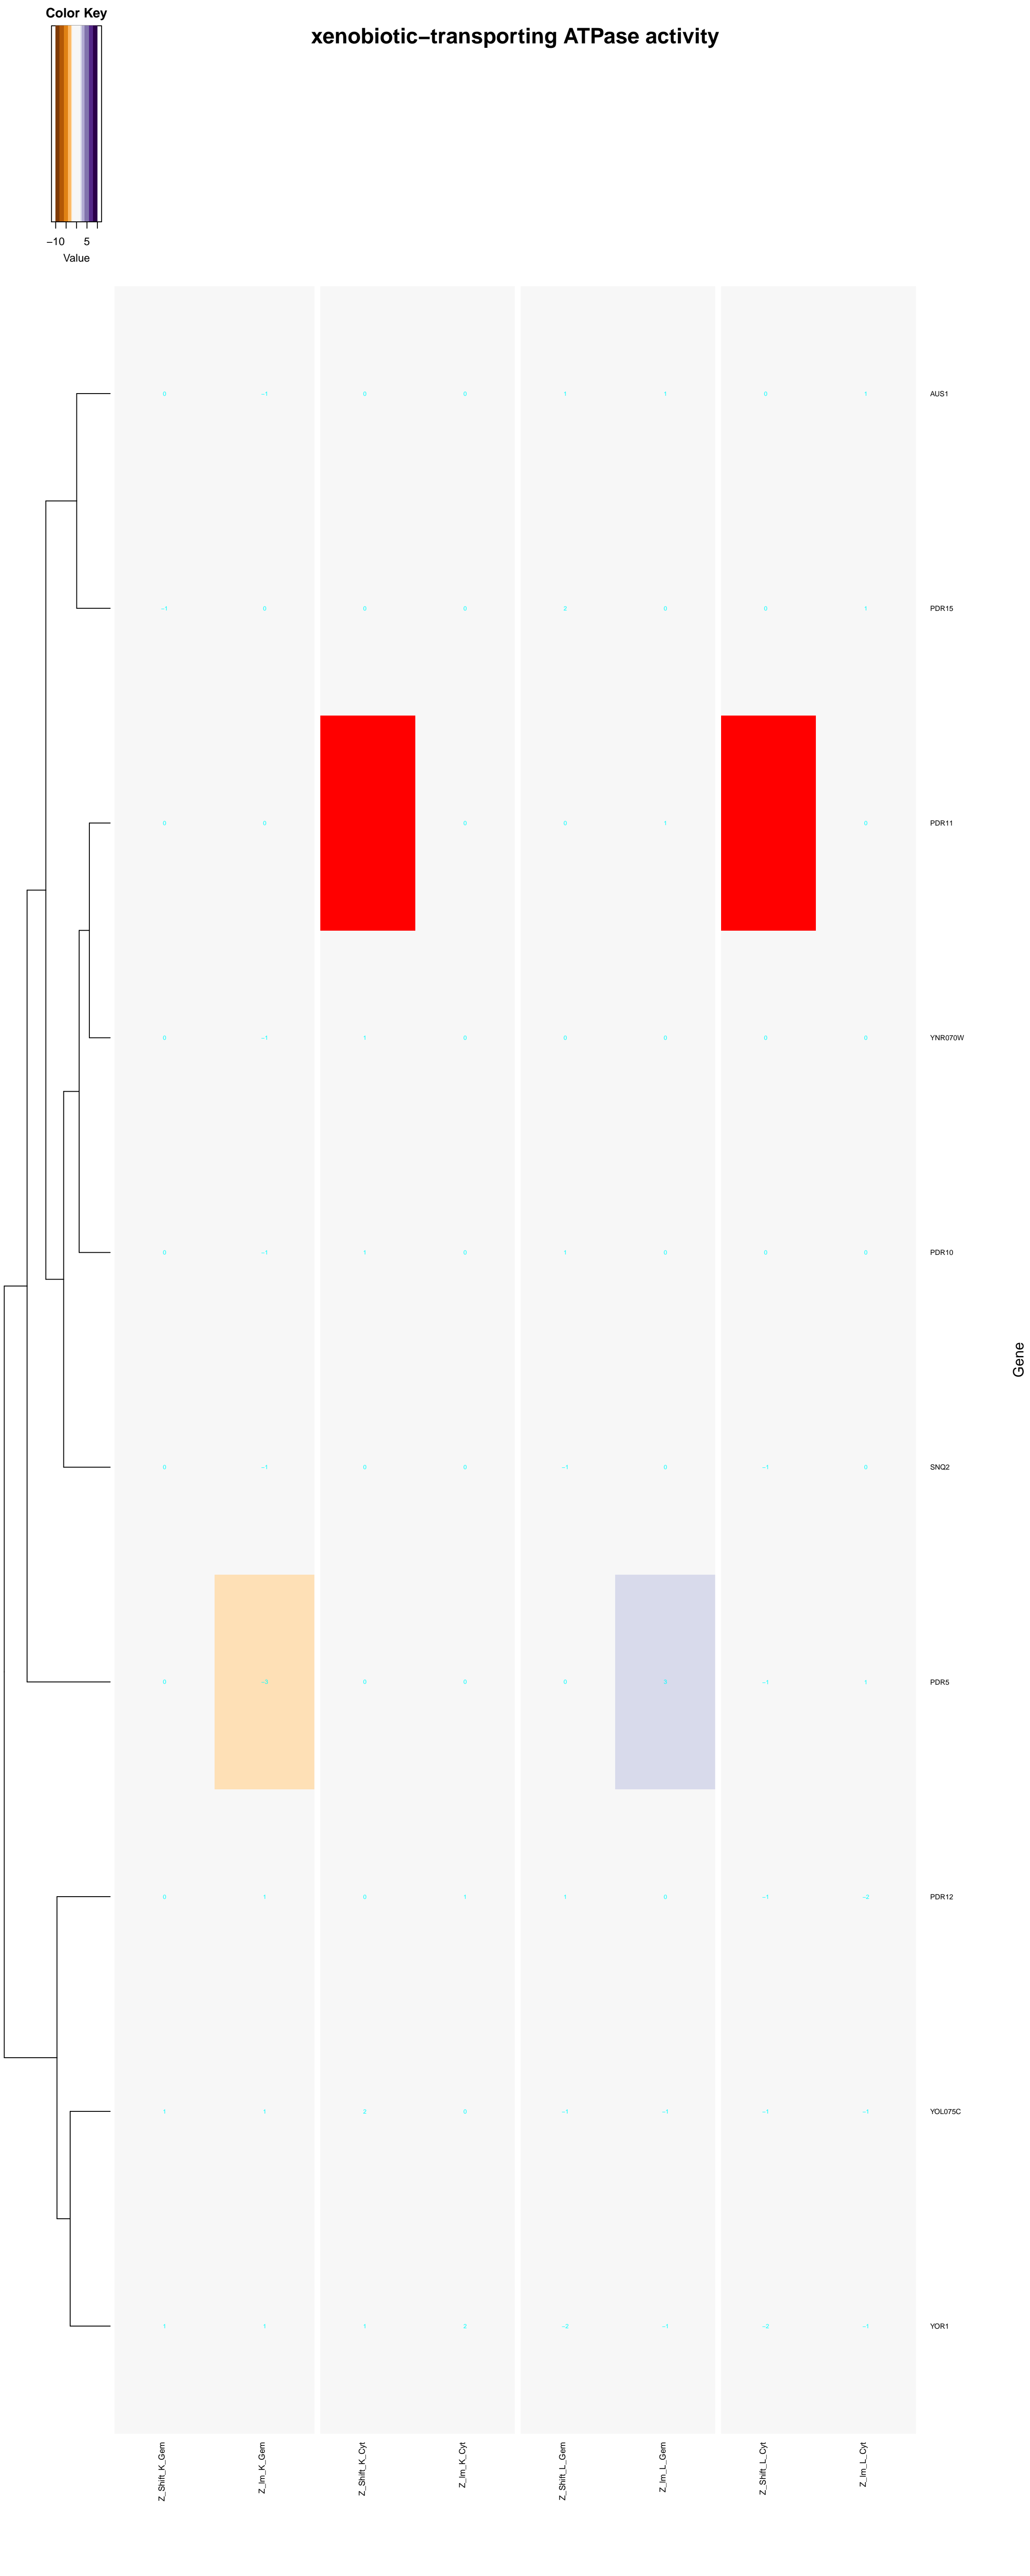

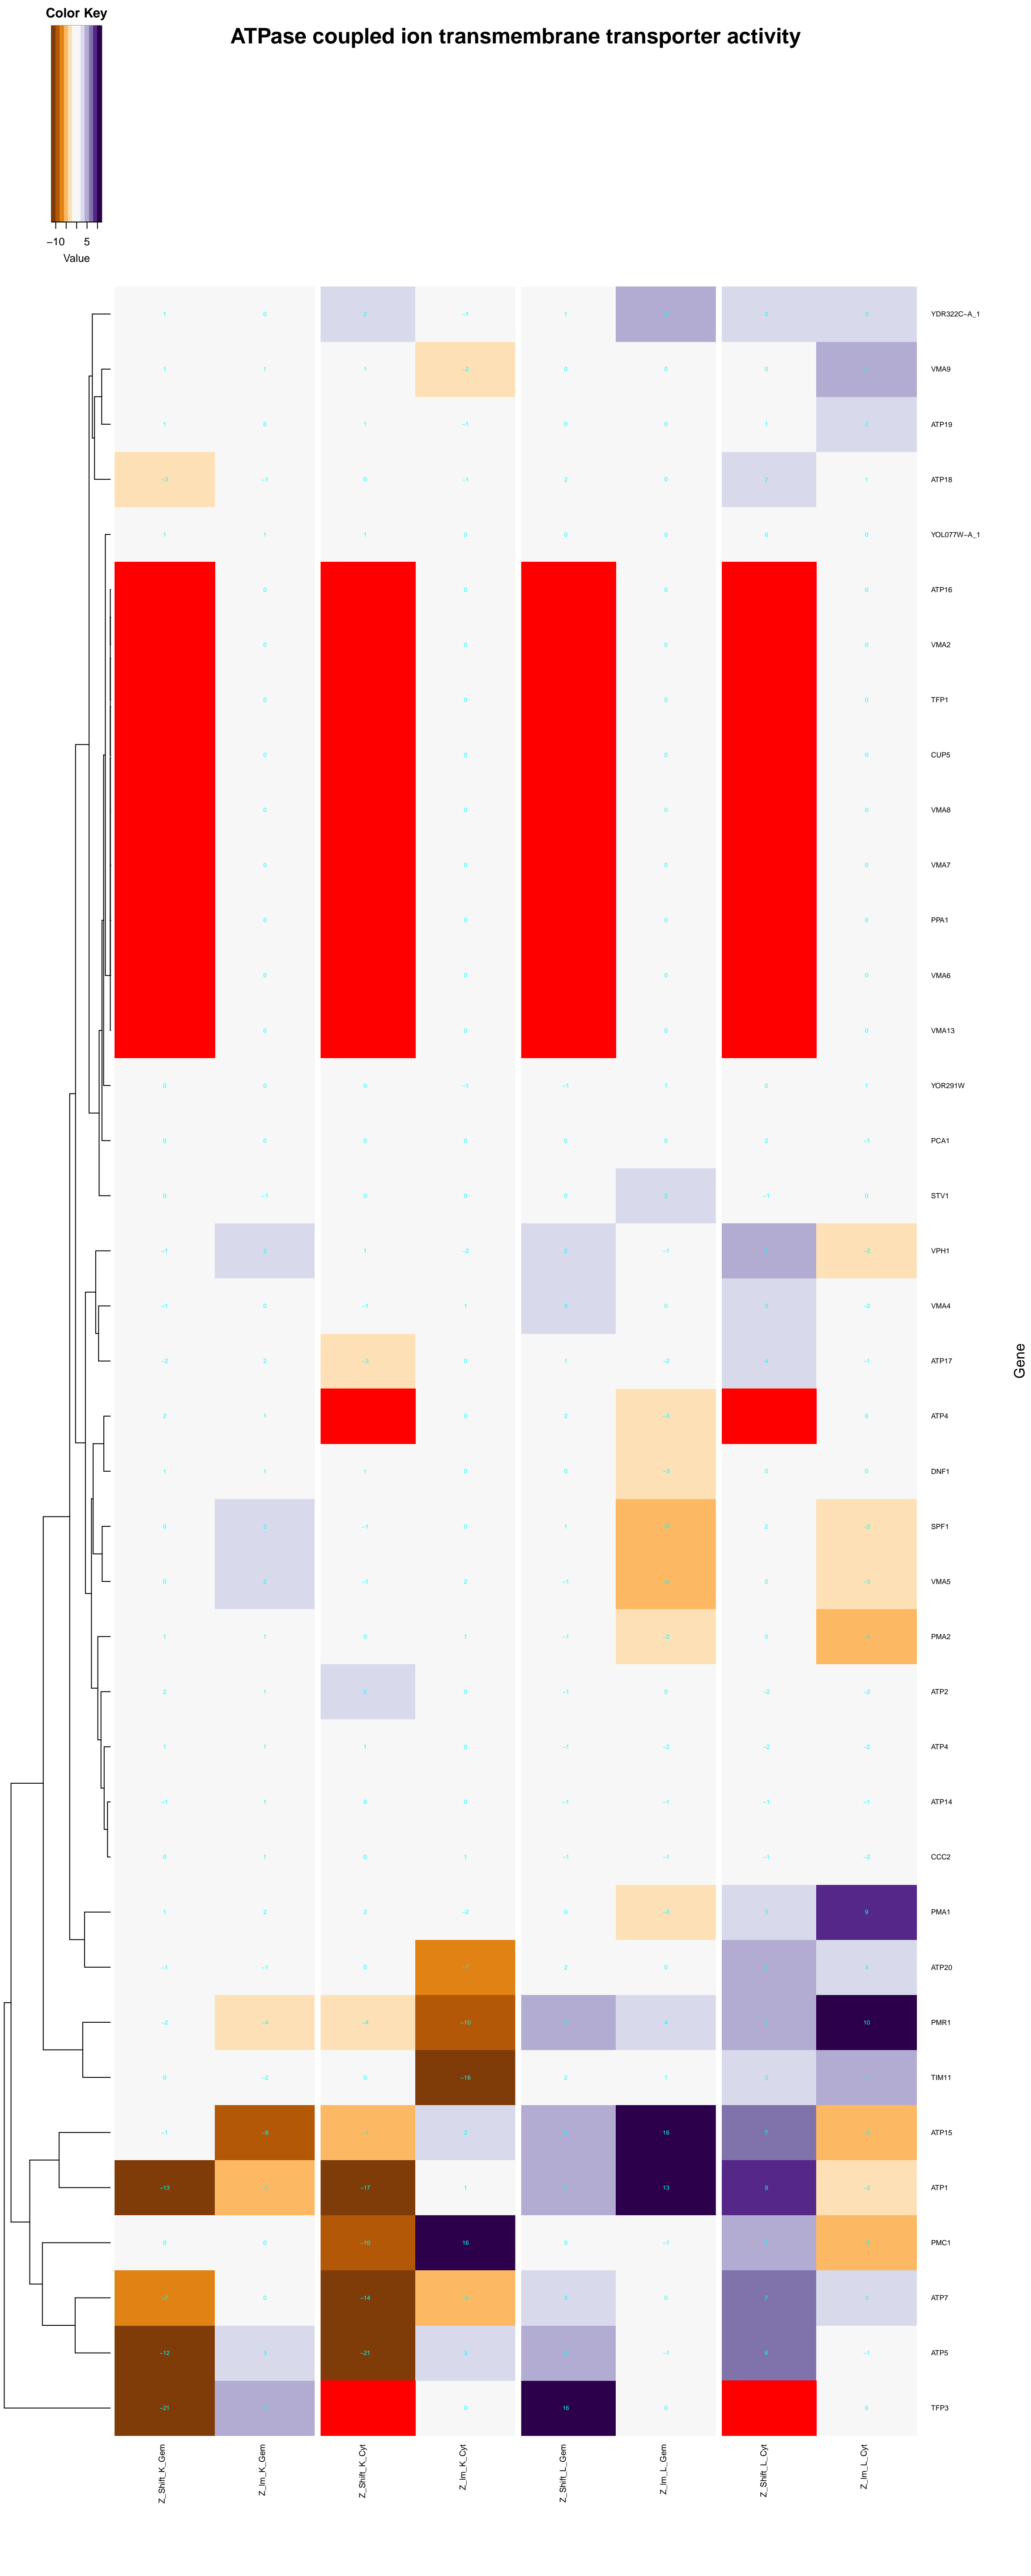

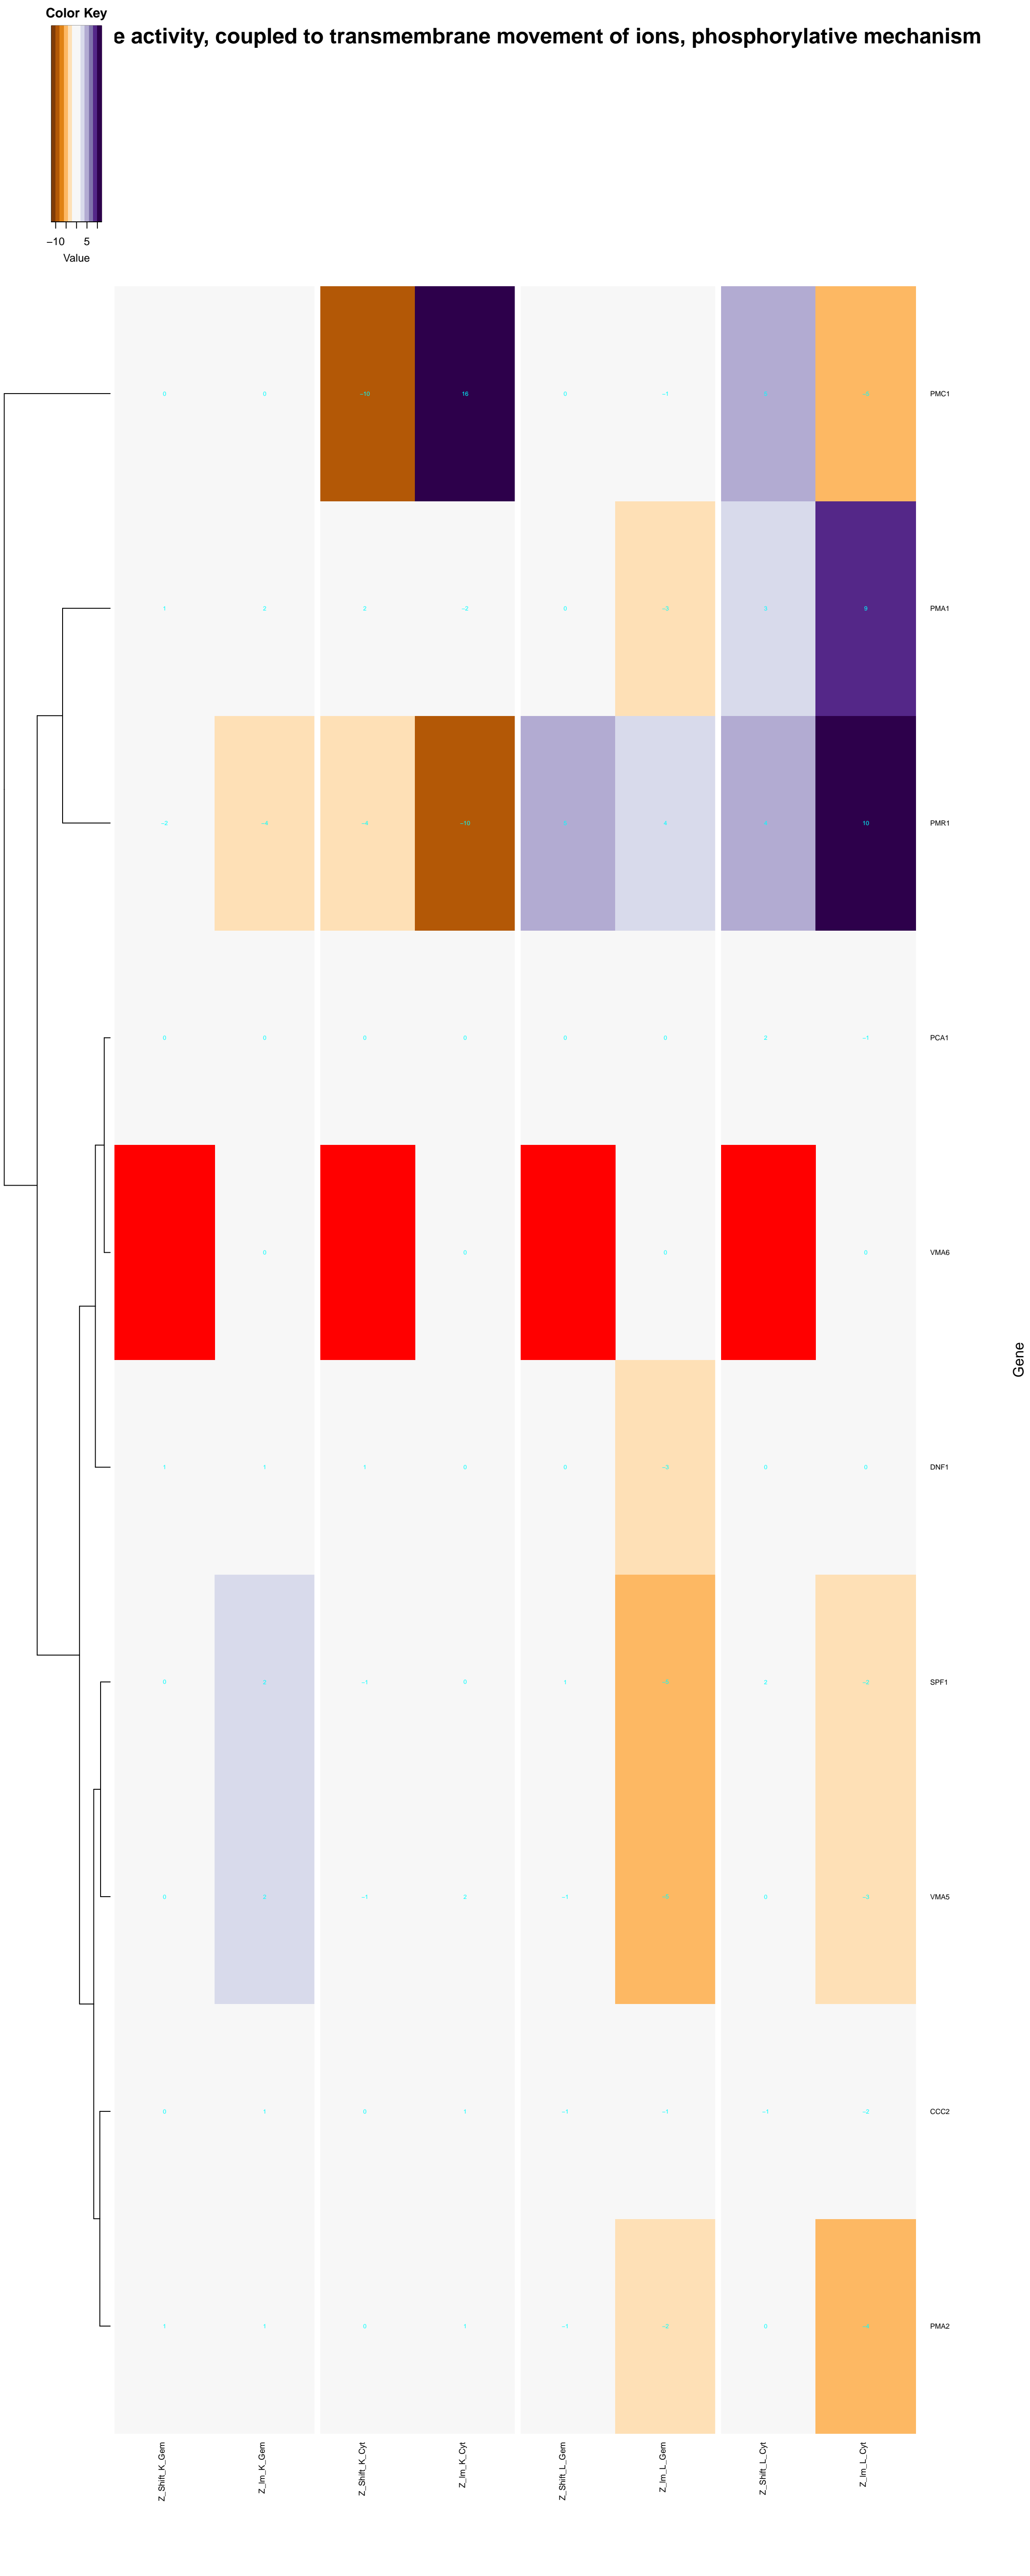

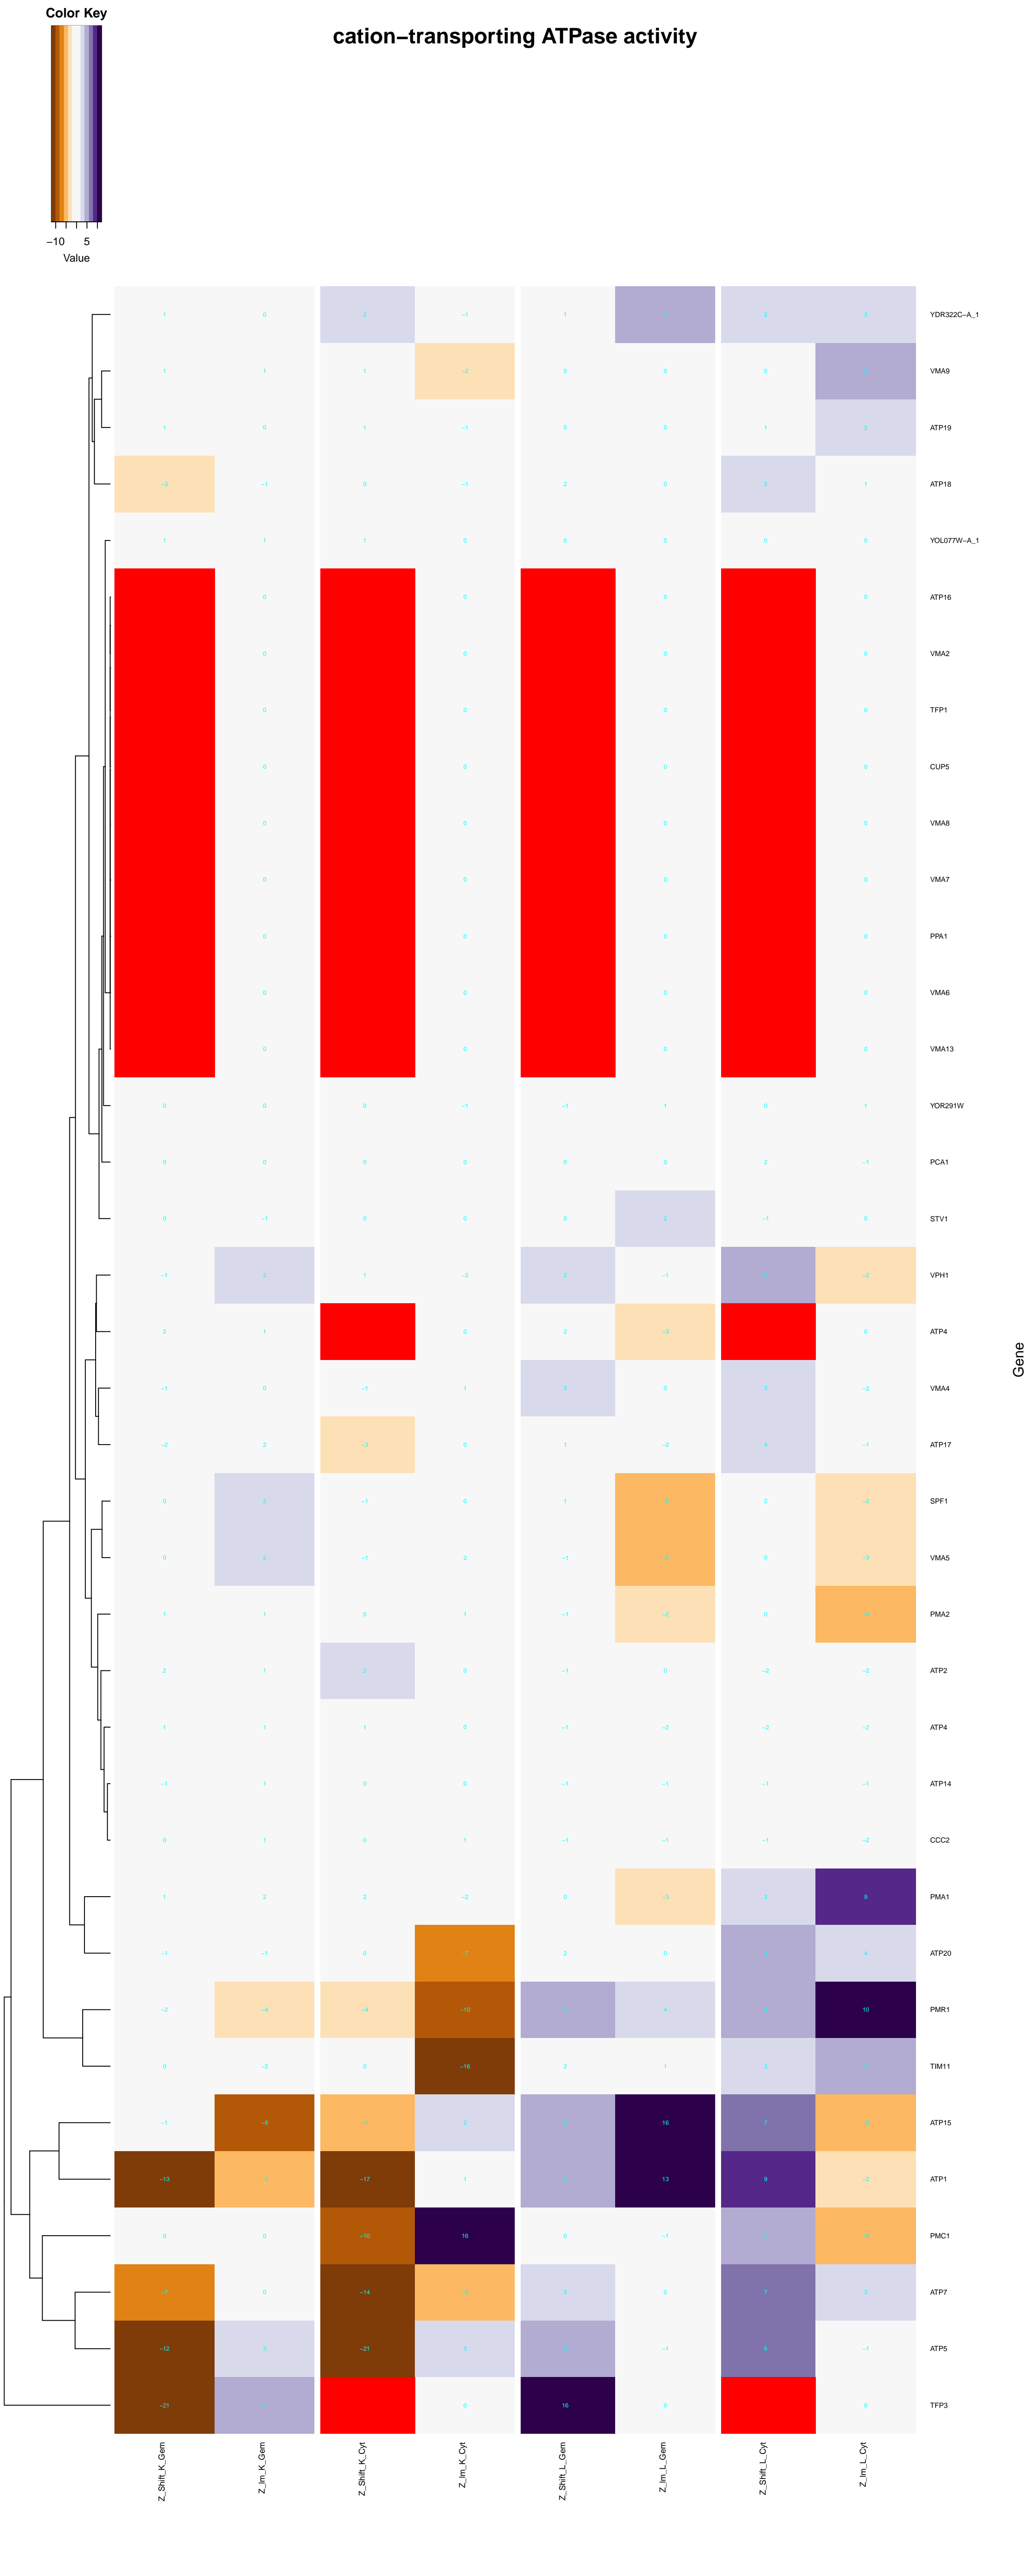

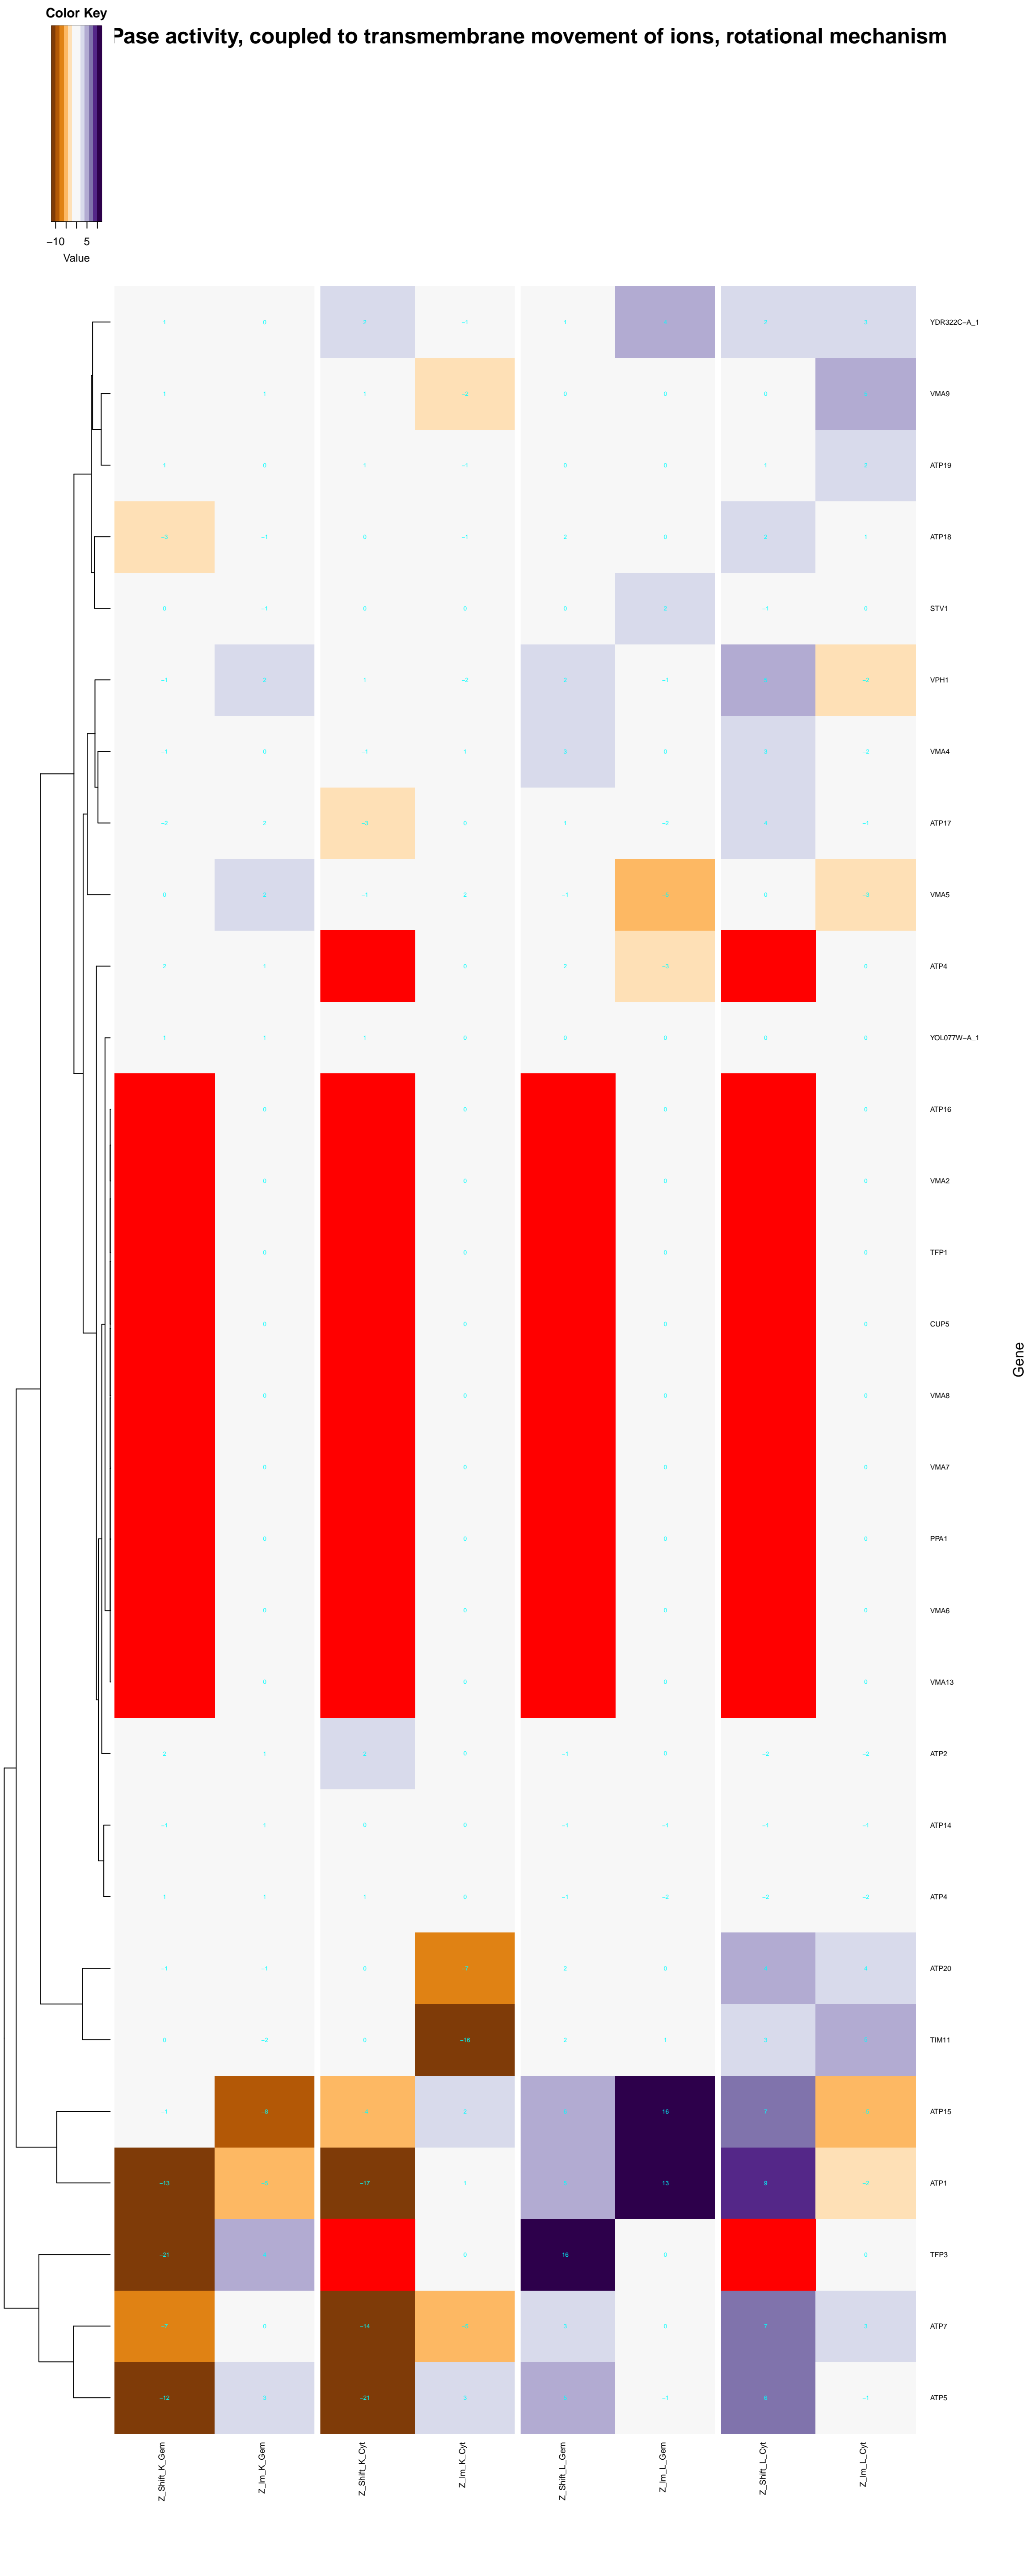

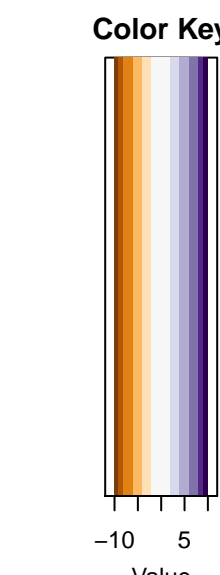

hydrogen-exporting ATPase activity, phosphorylative mechanism

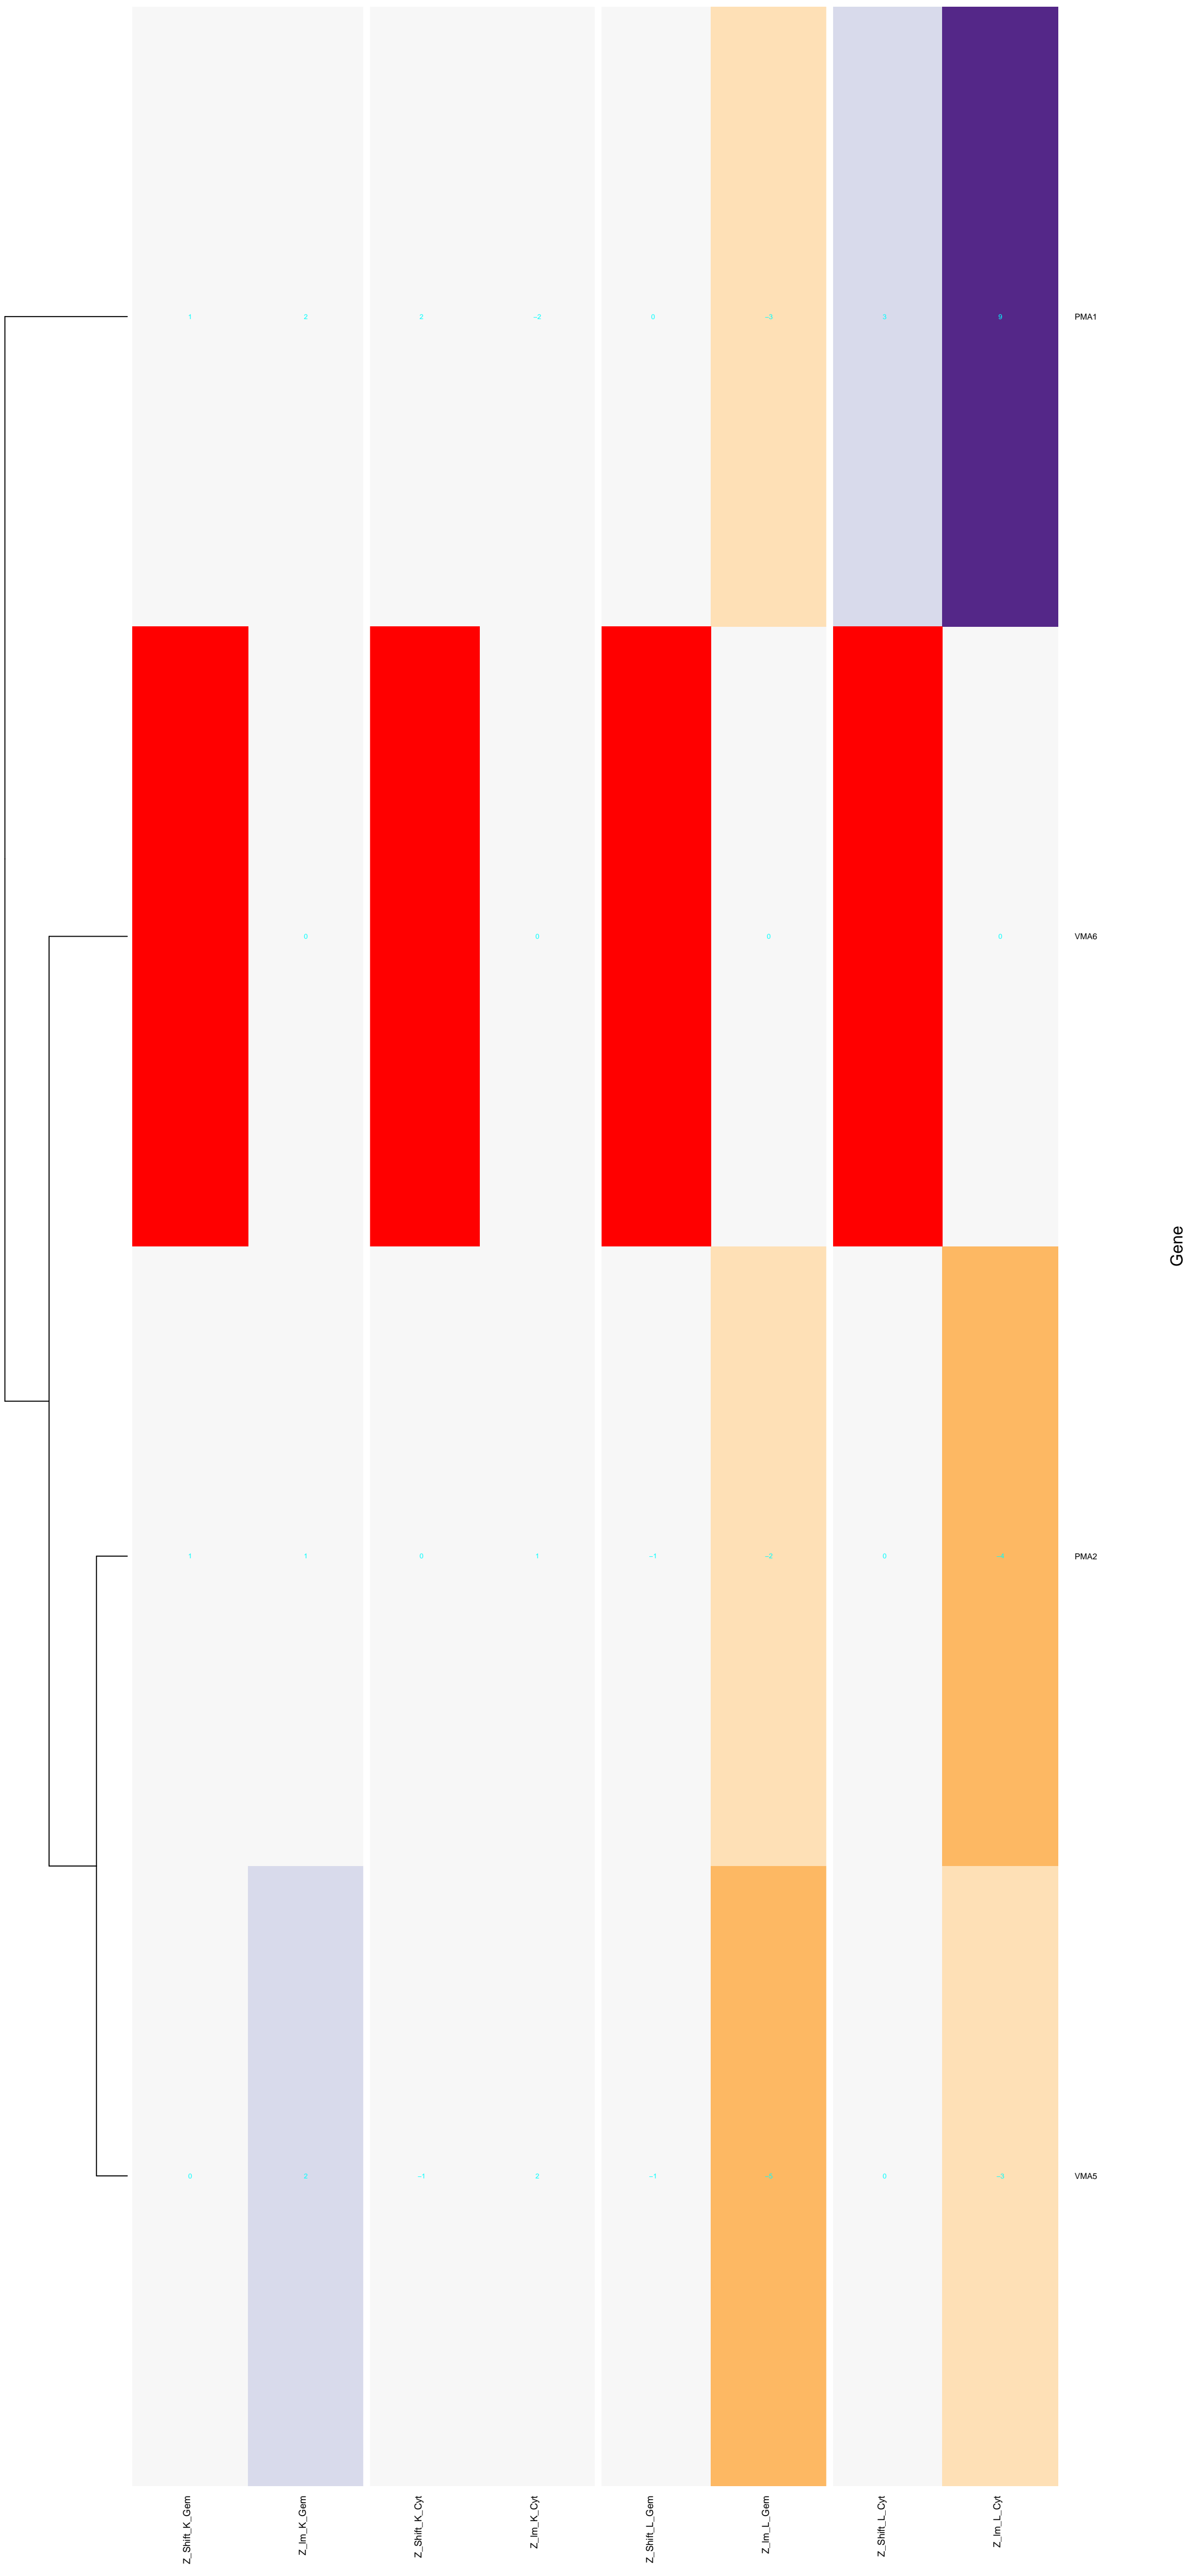

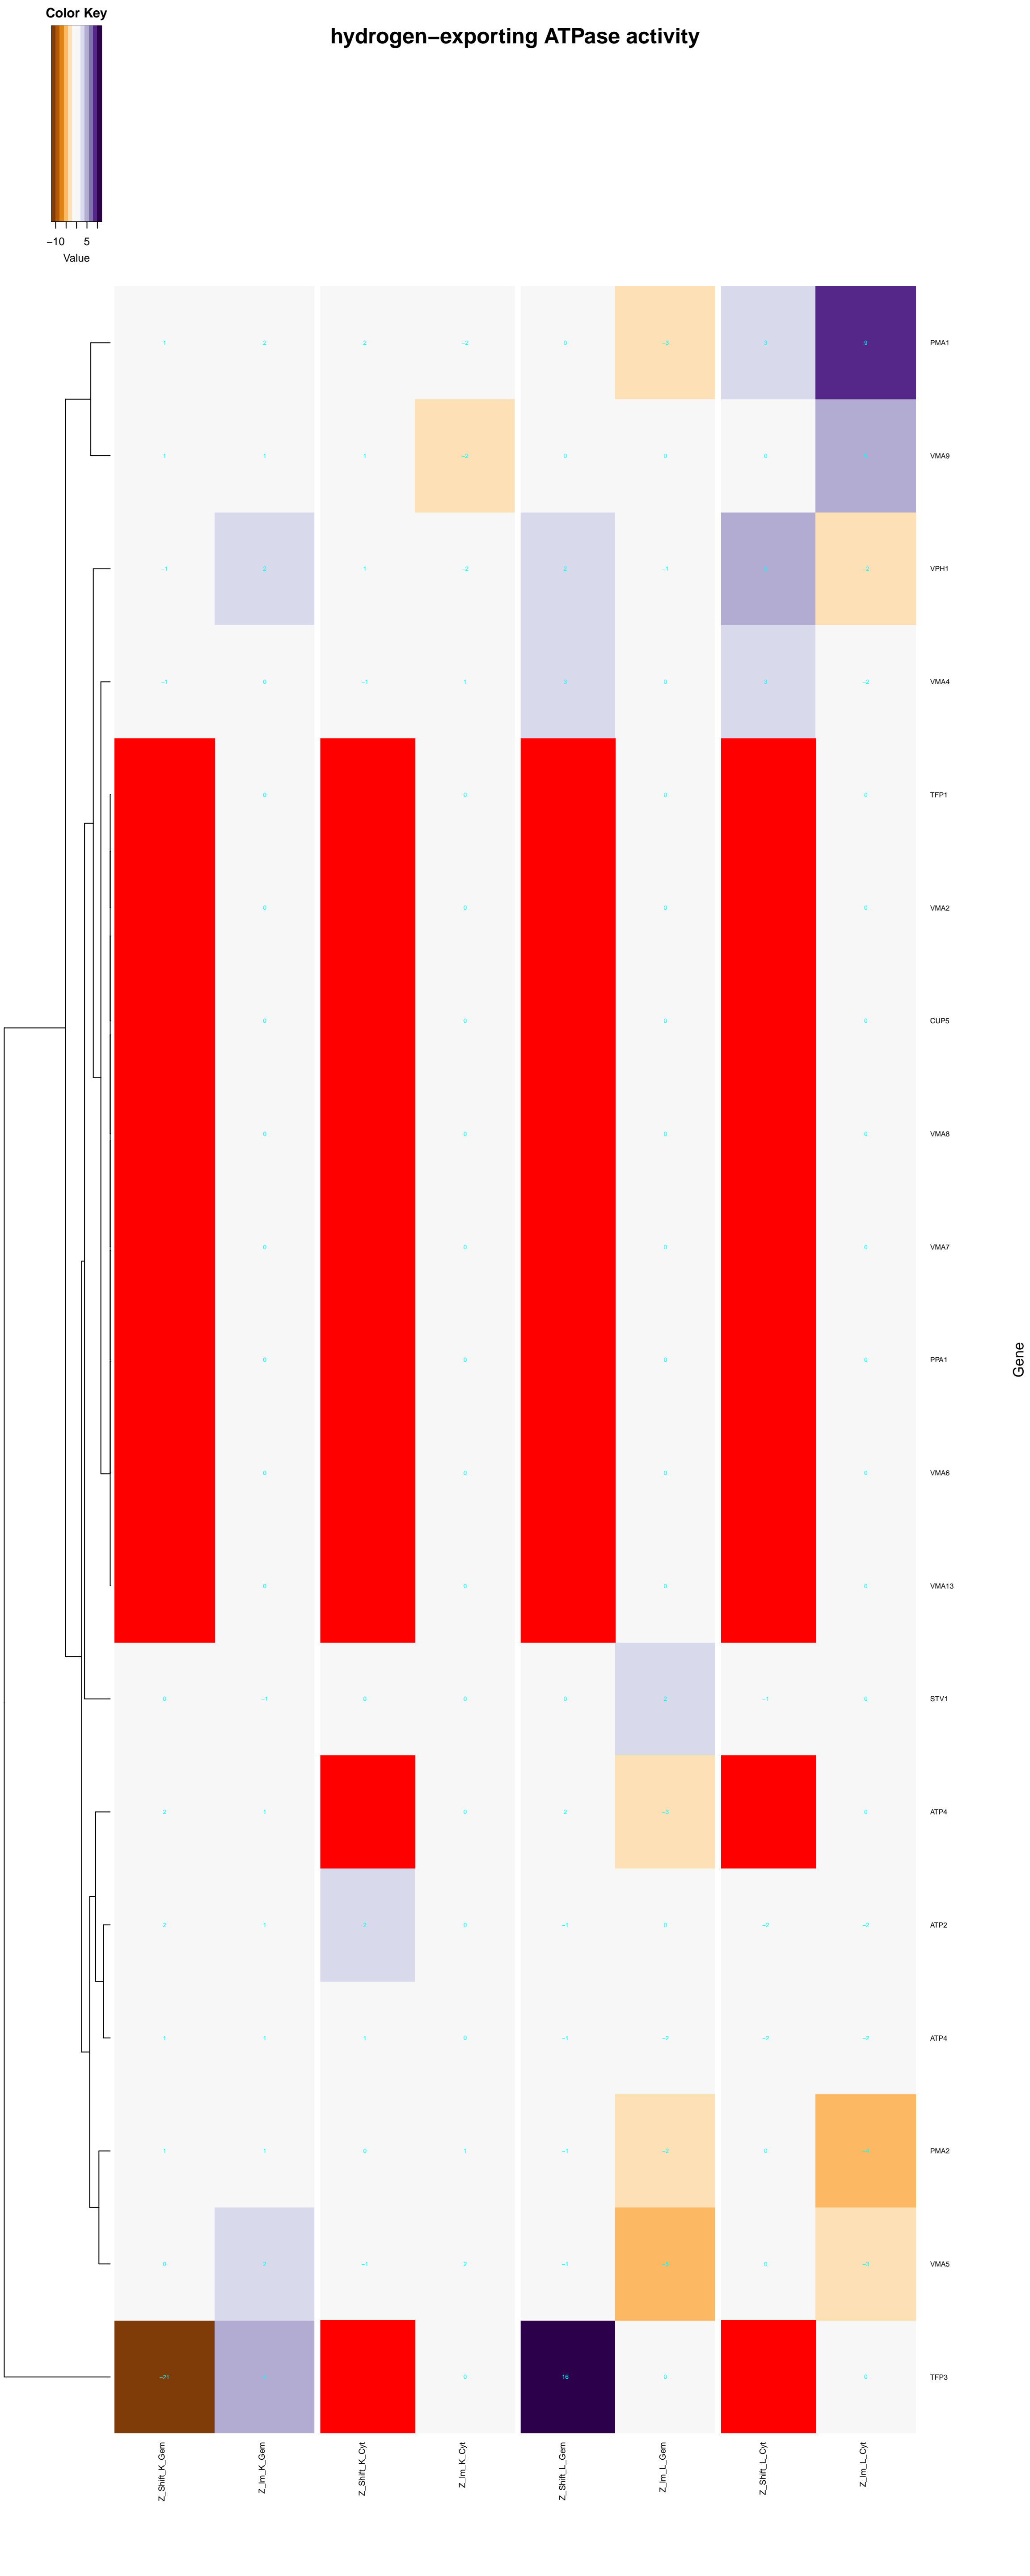



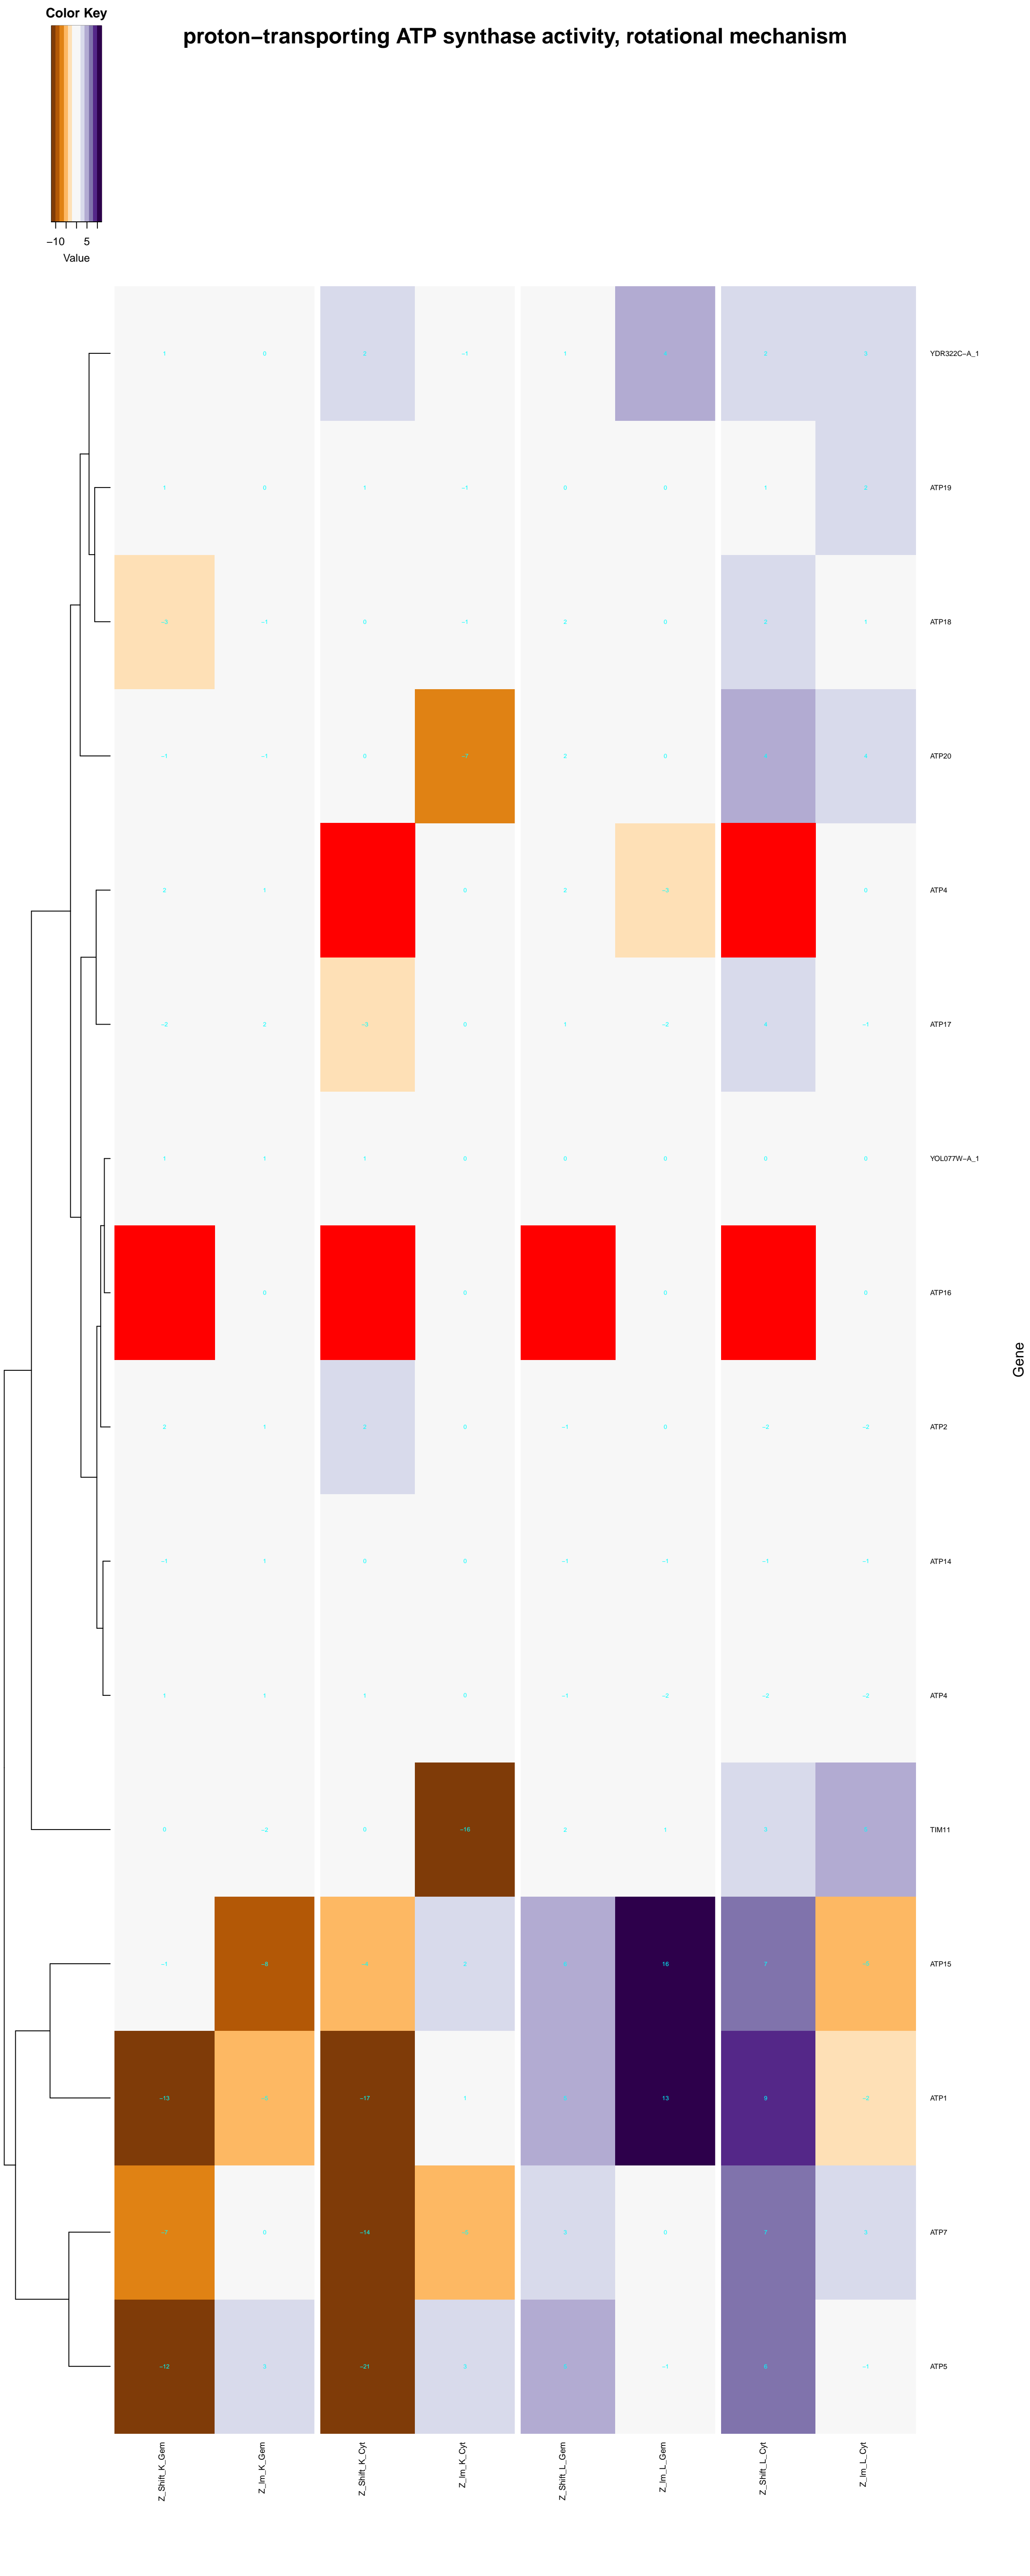

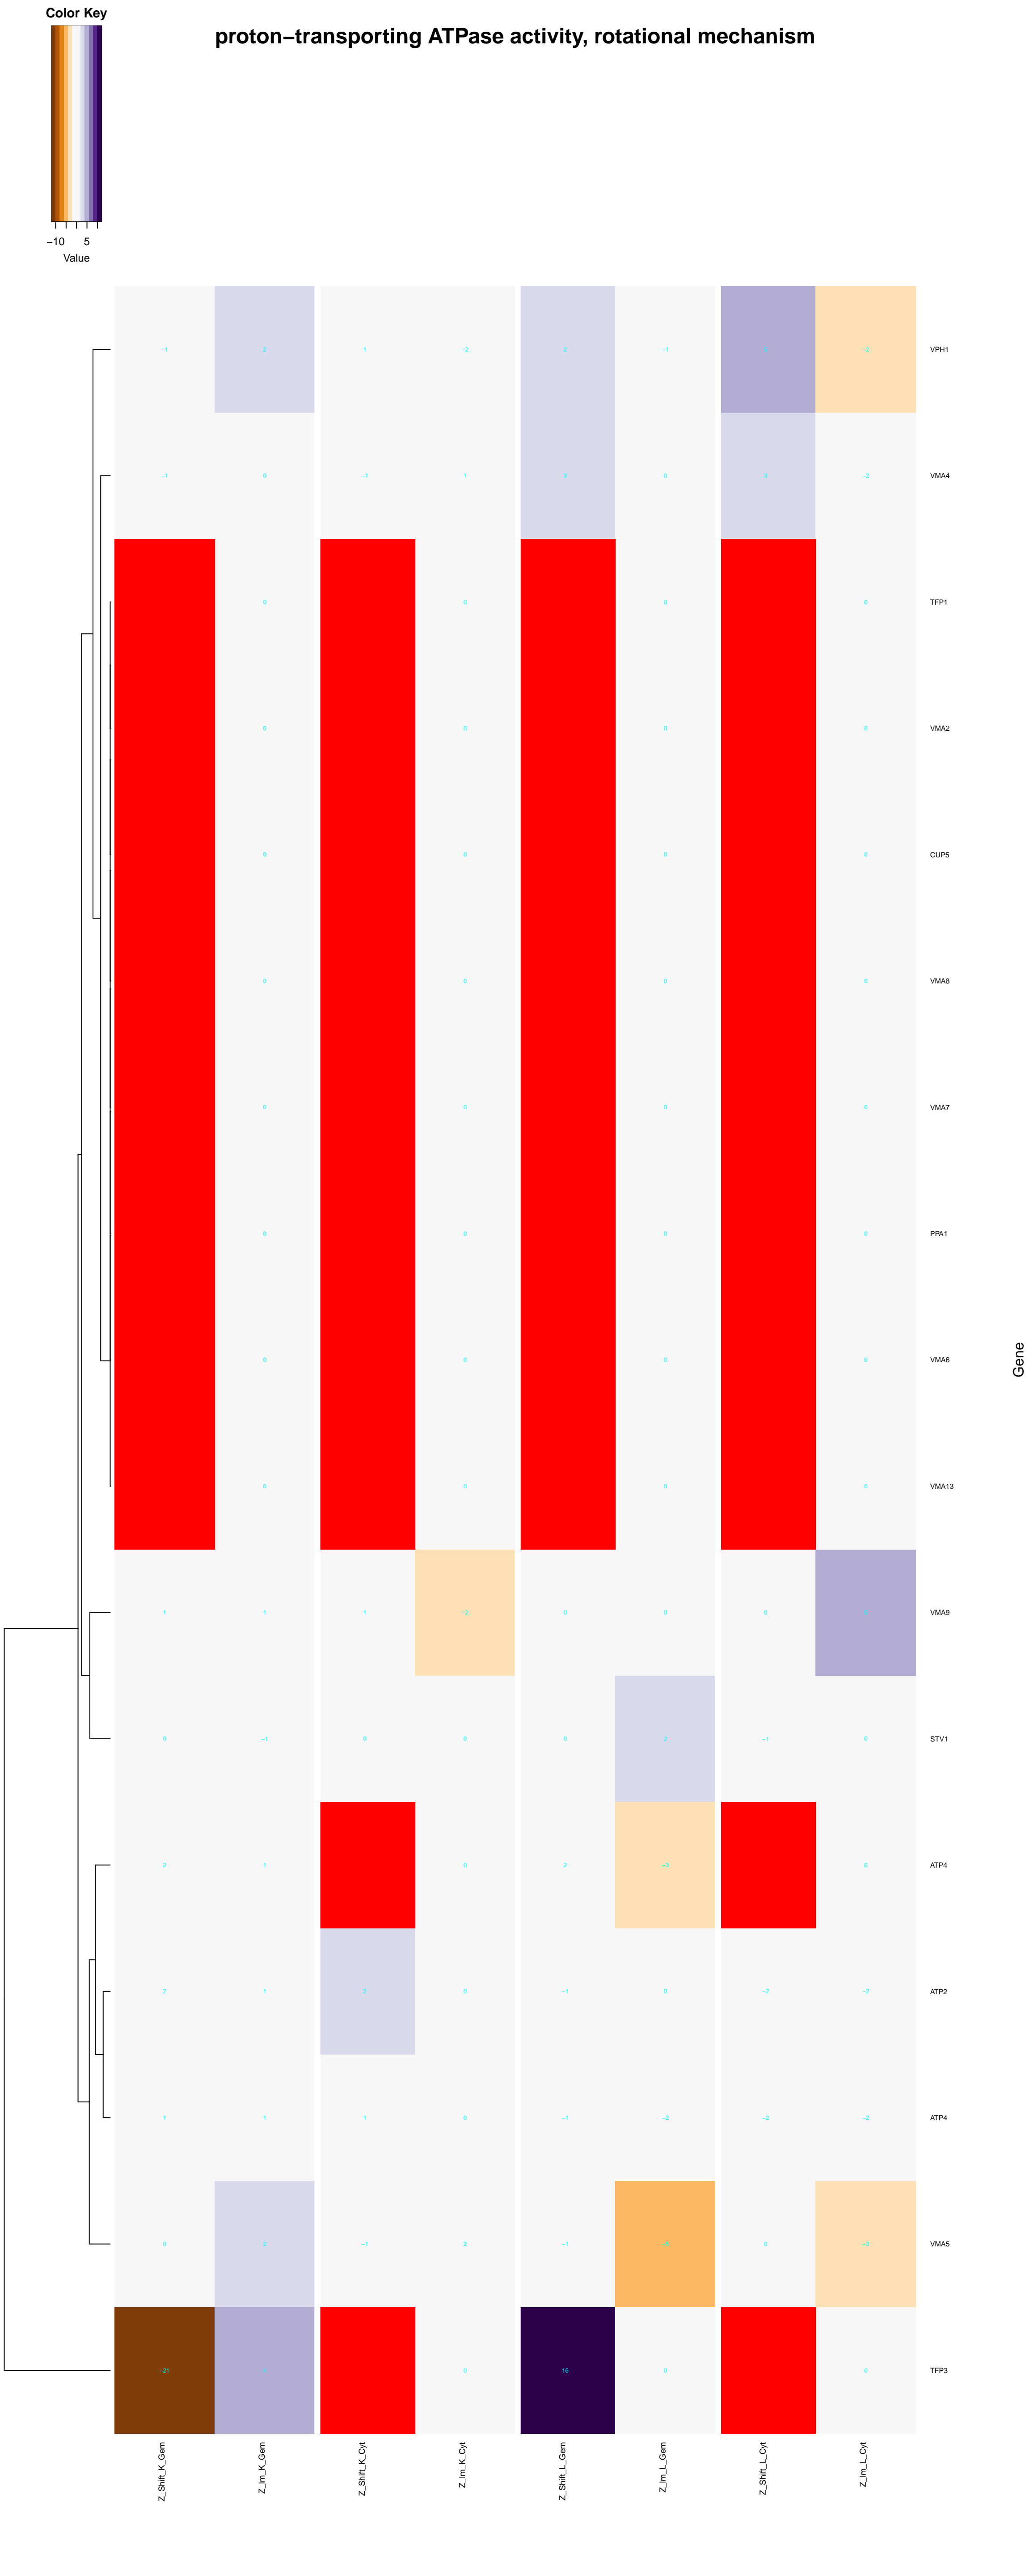

Supplement: s1 [file s1]
