# Supplementary material for: A Humanized Yeast Phenomic Model of Deoxycytidine Kinase to Predict Genetic Buffering of Nucleoside Analog Cytotoxicity
Source: MDPI journal article supplement (doi:10.3390/genes10100770), 2019-09-30

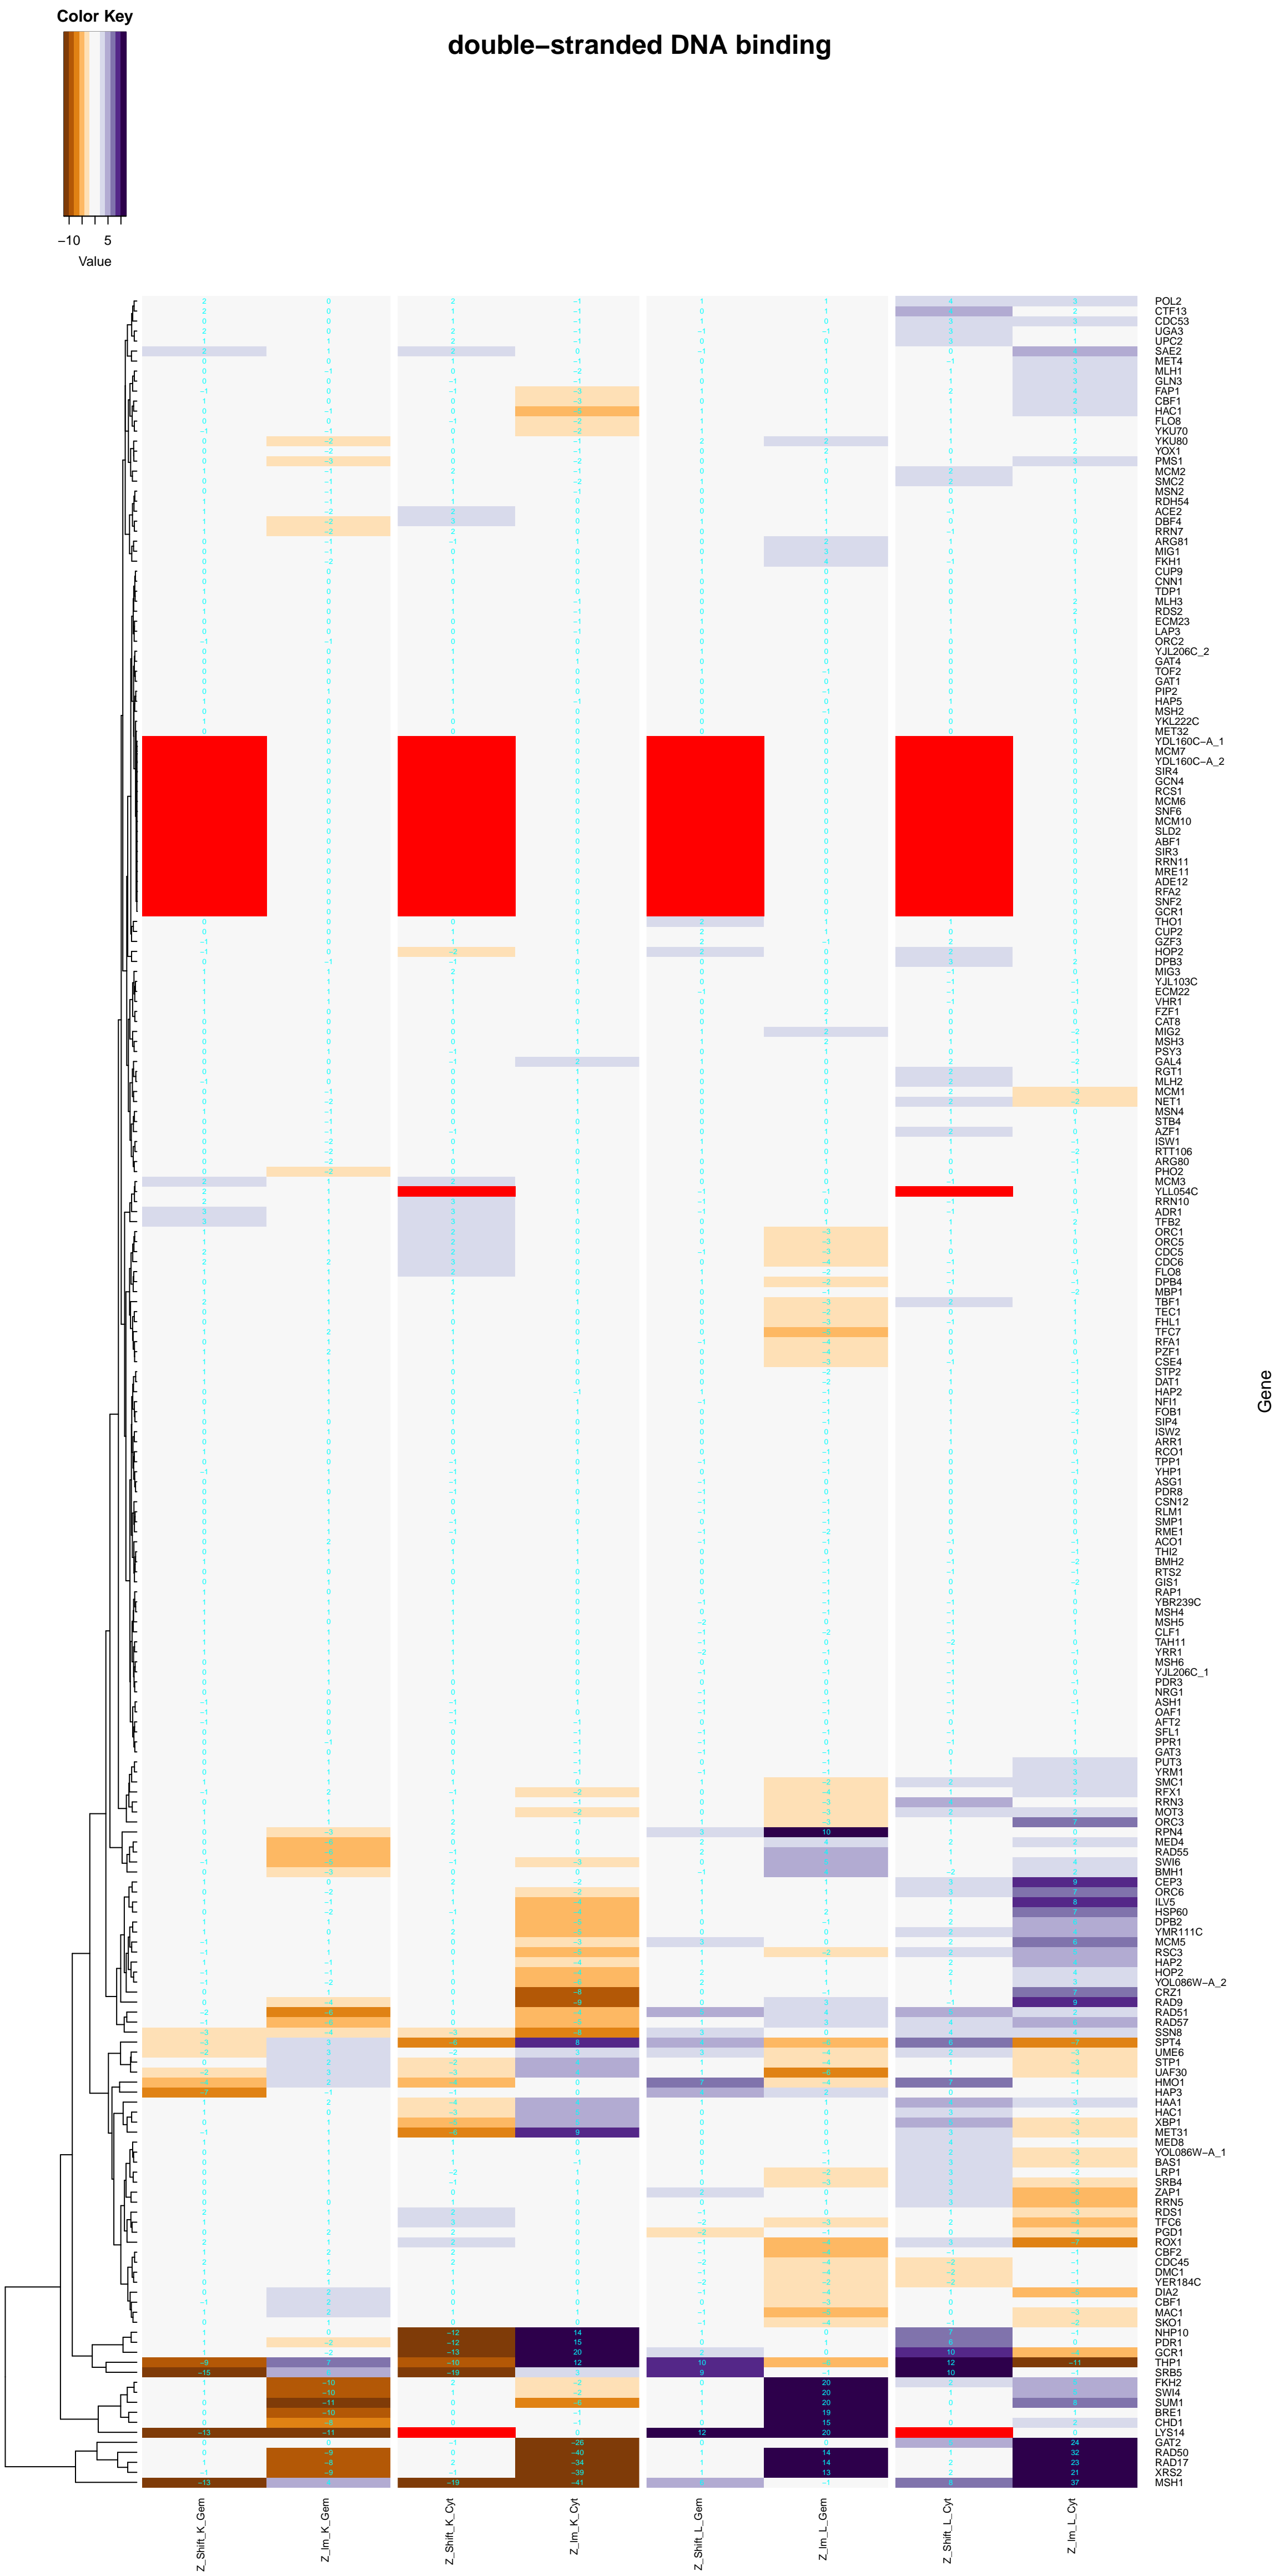

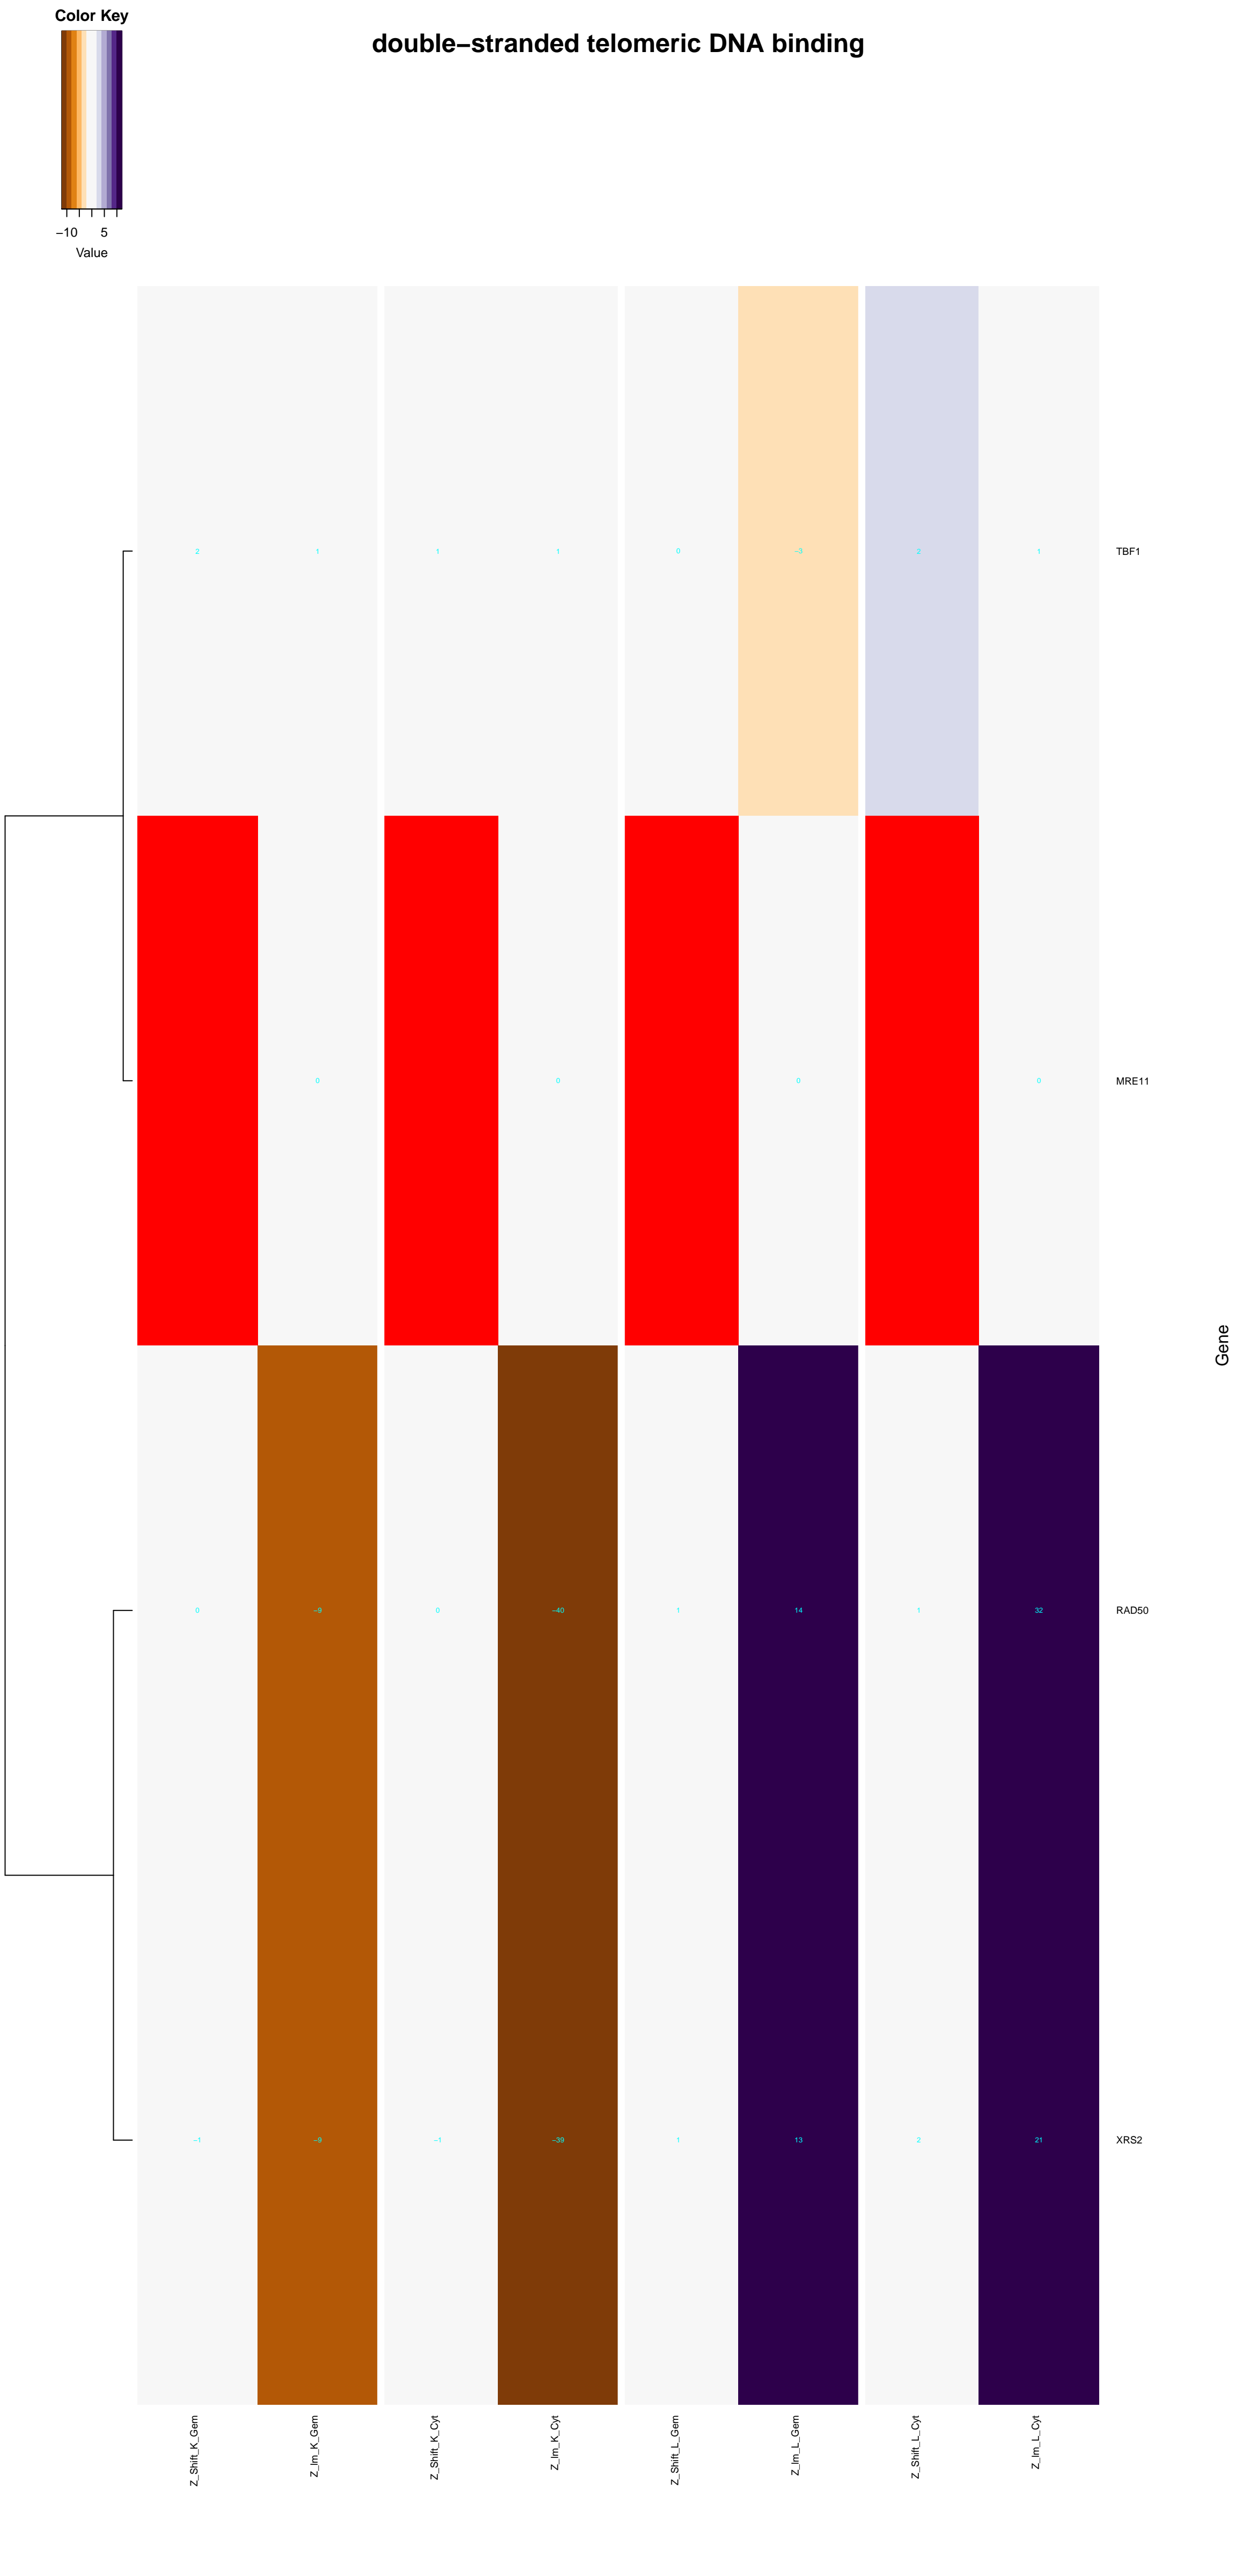

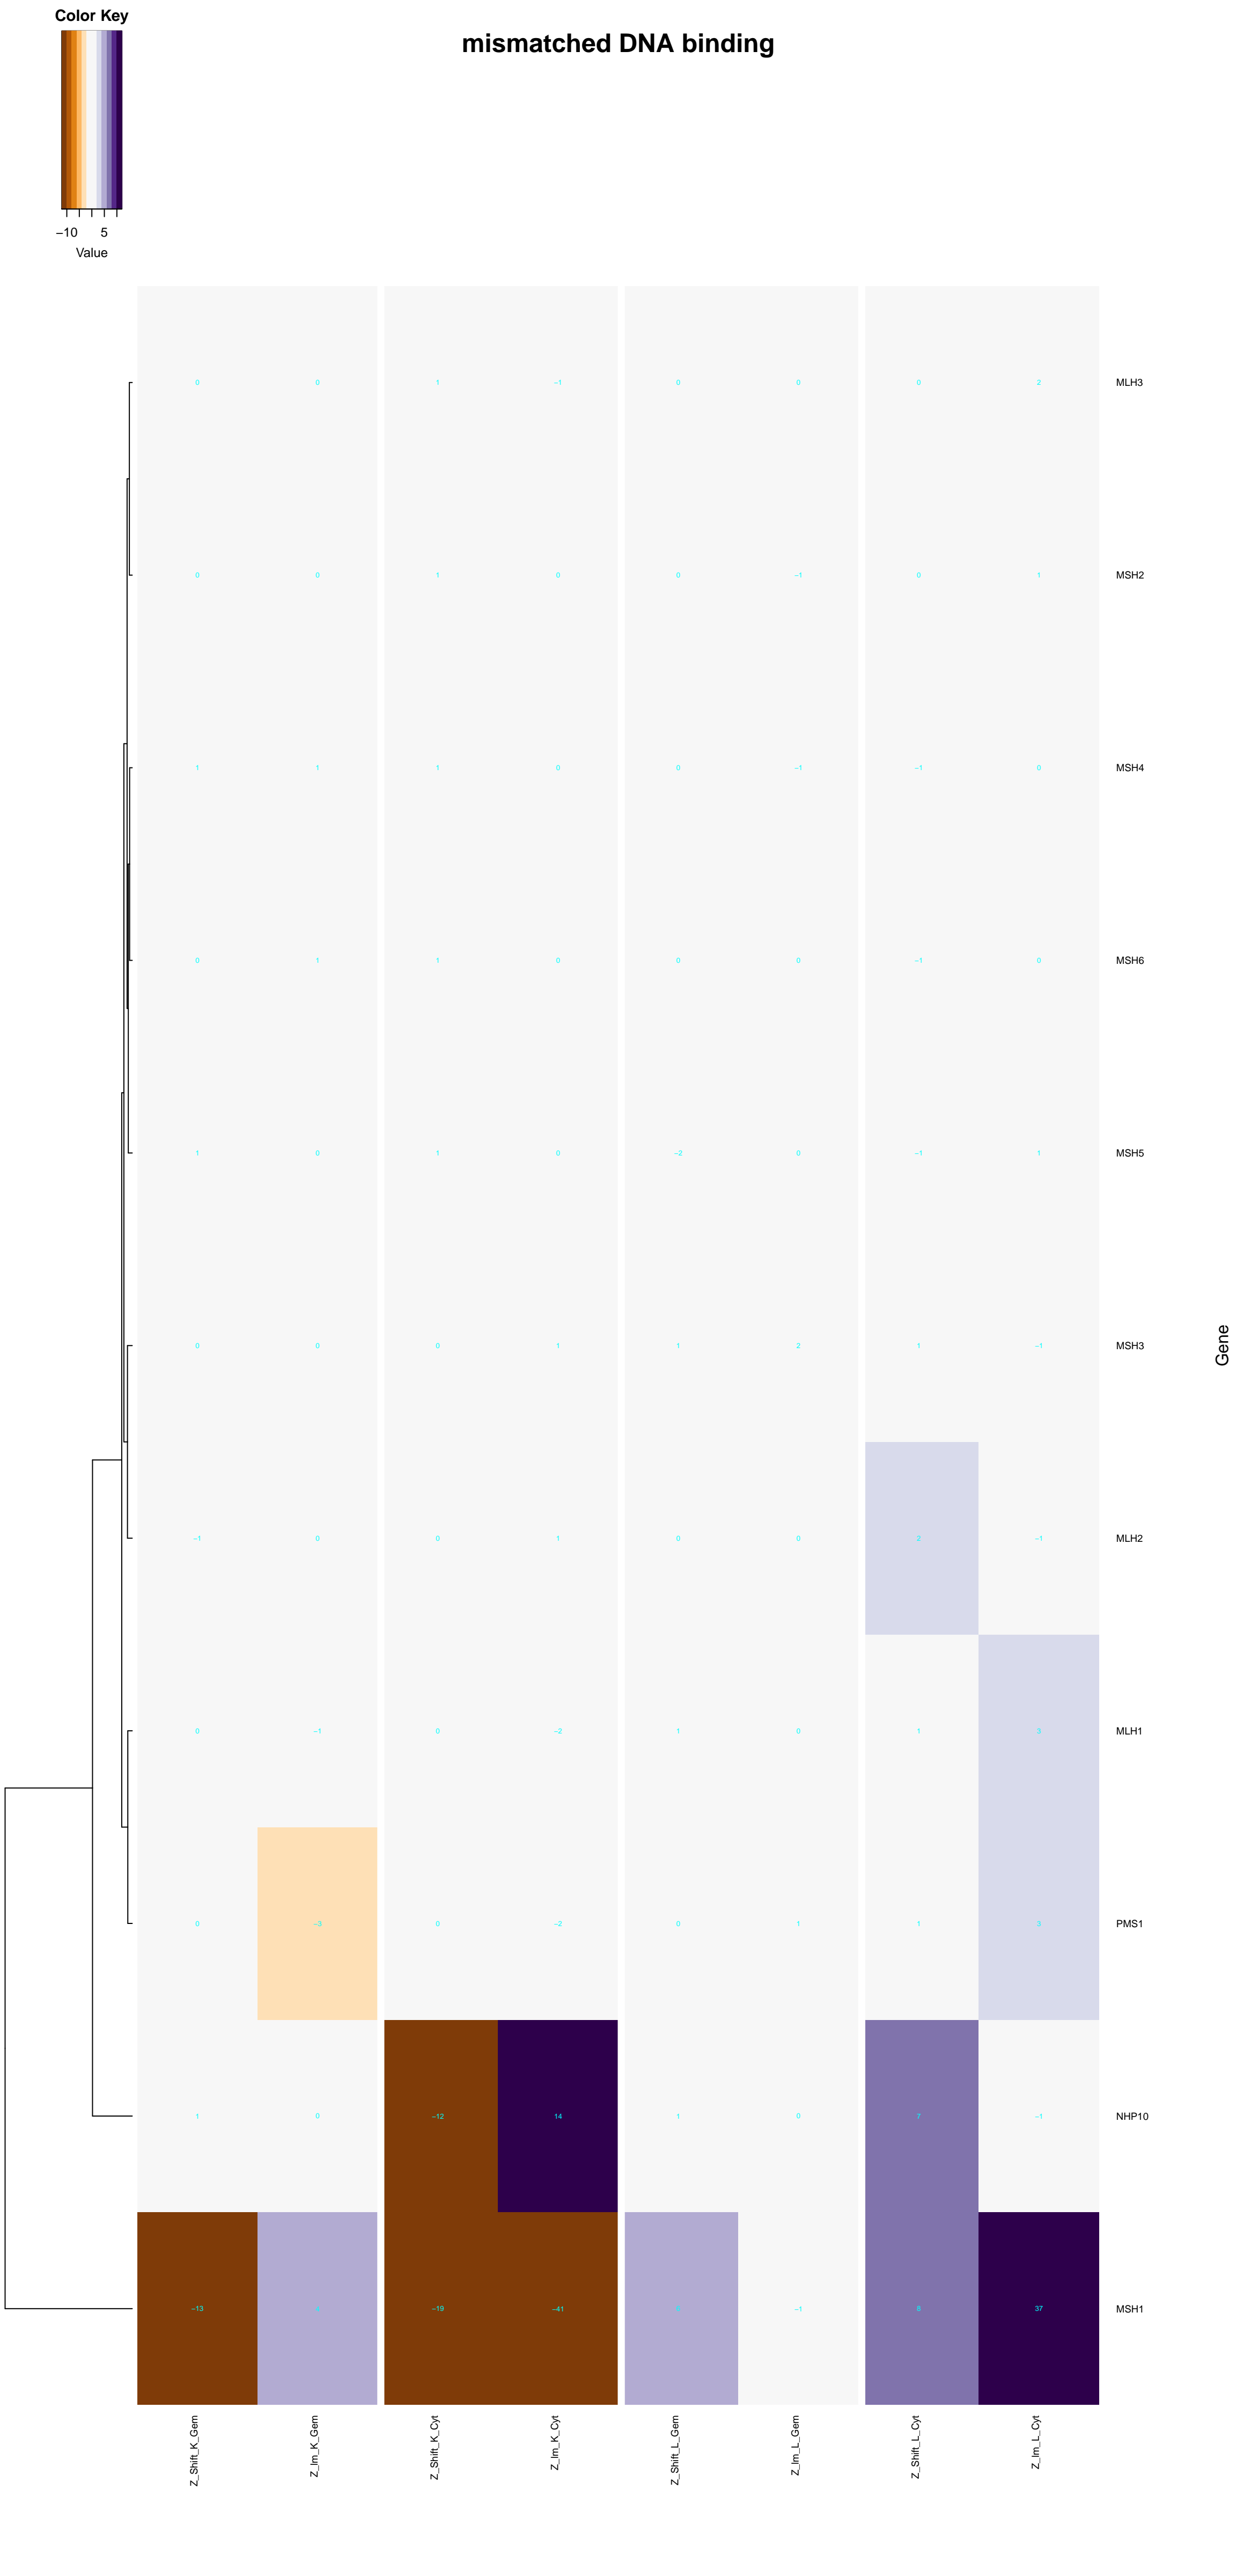

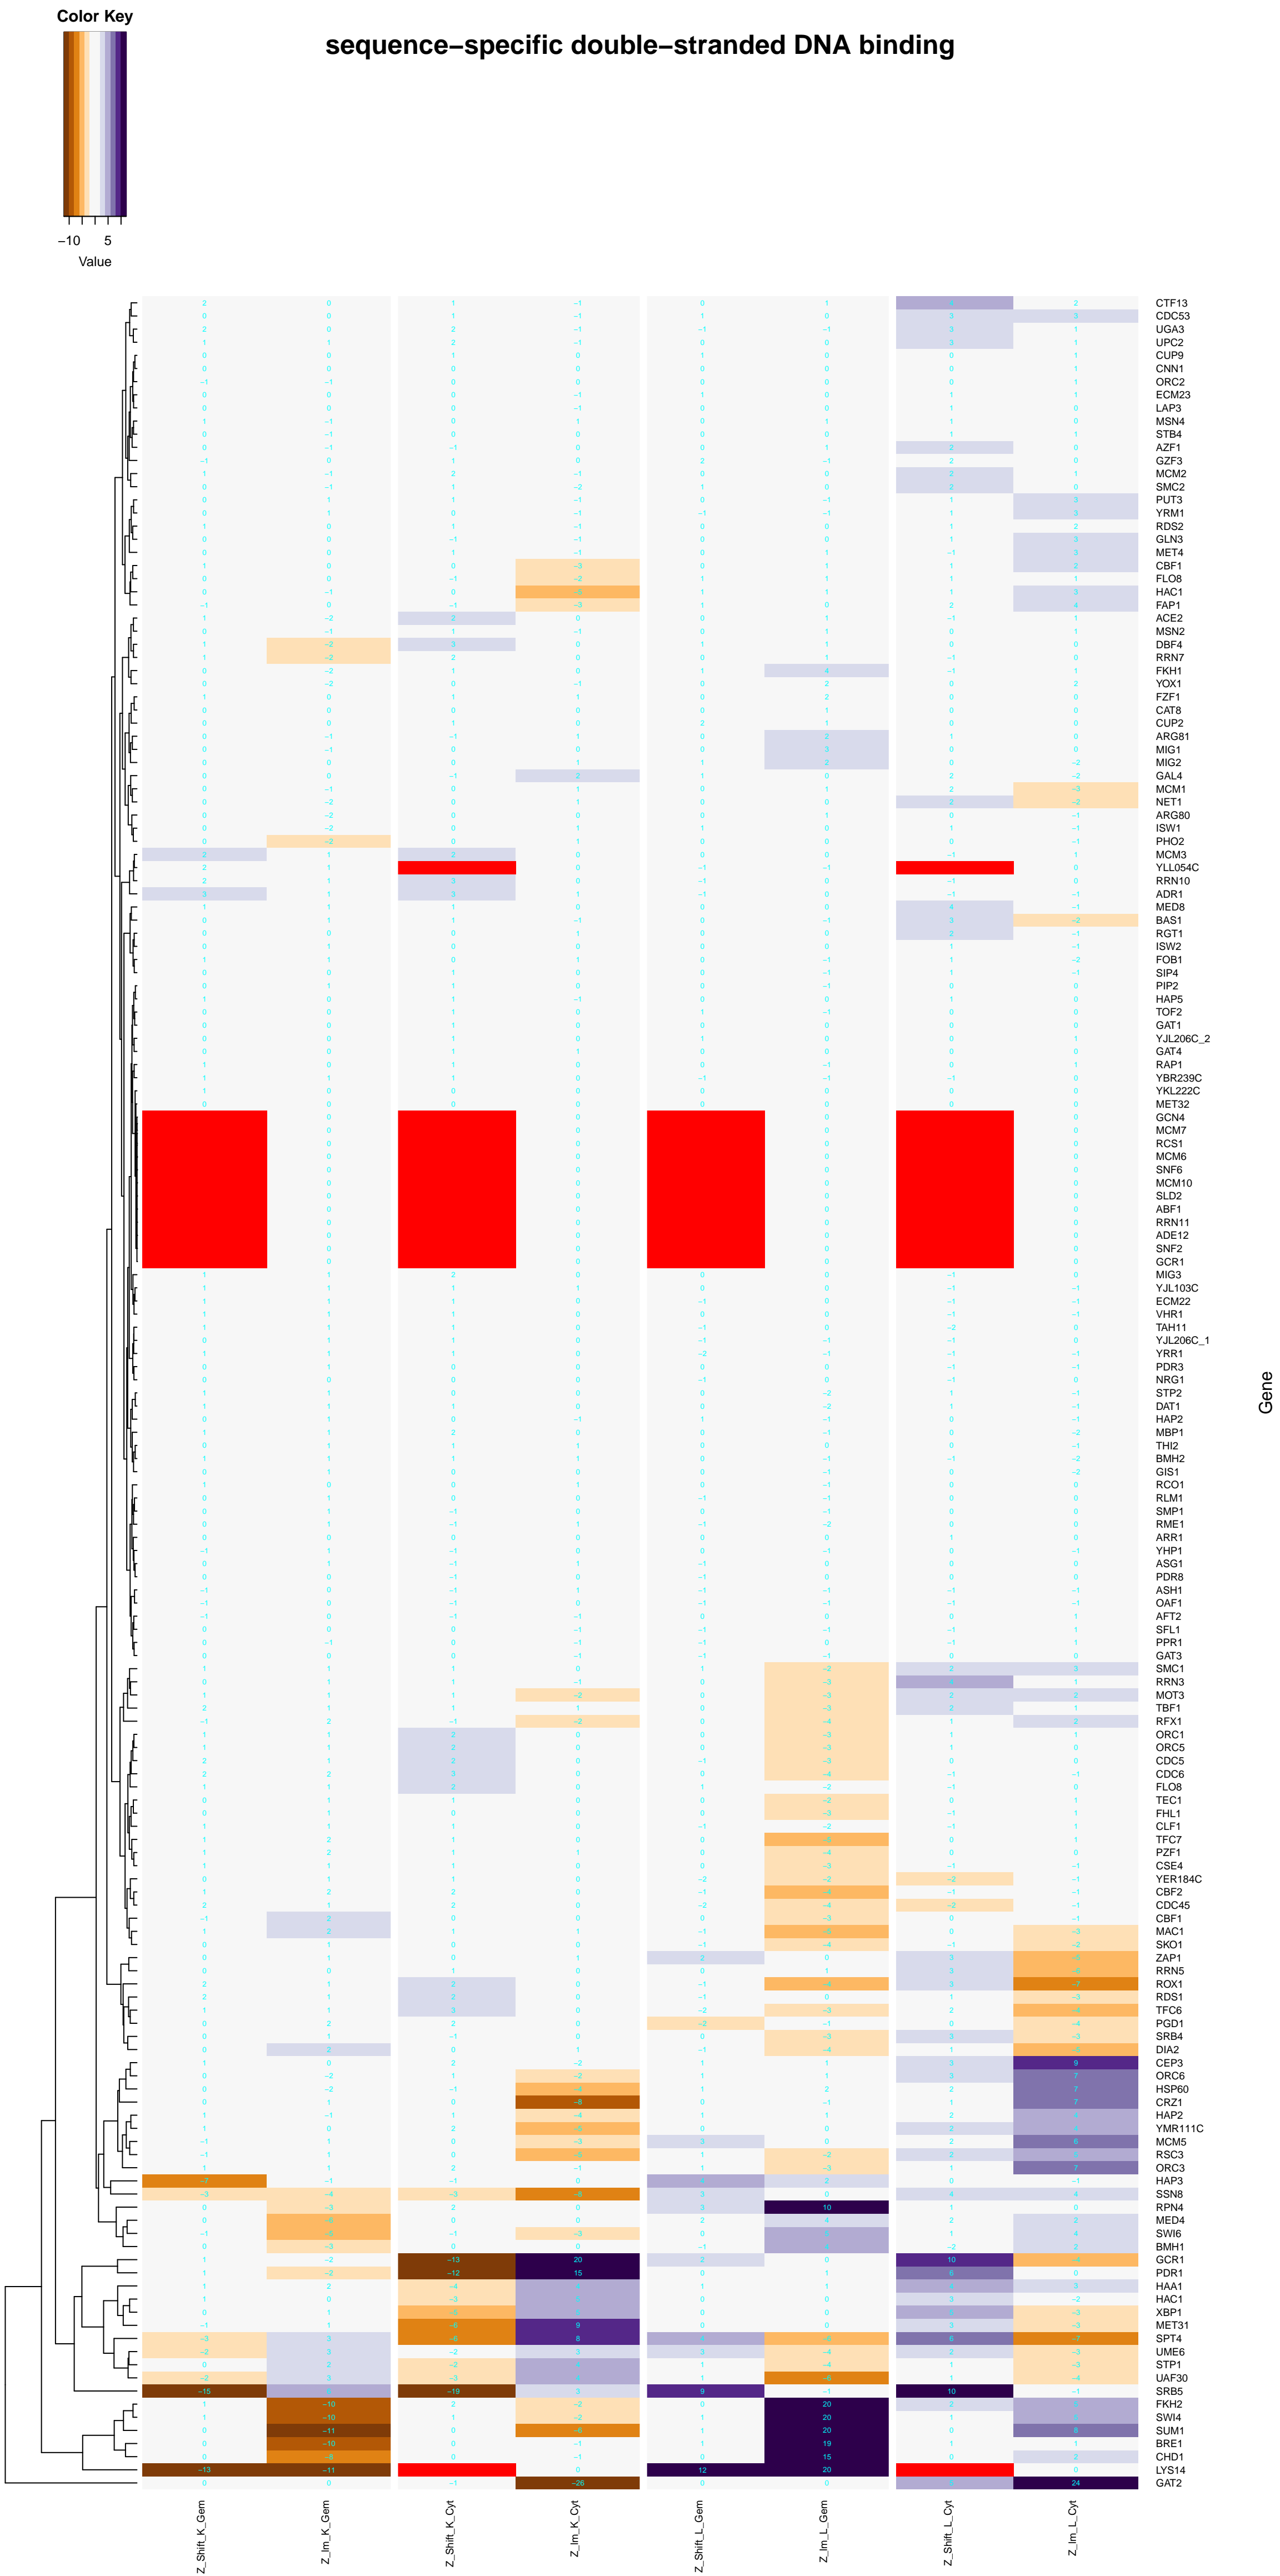

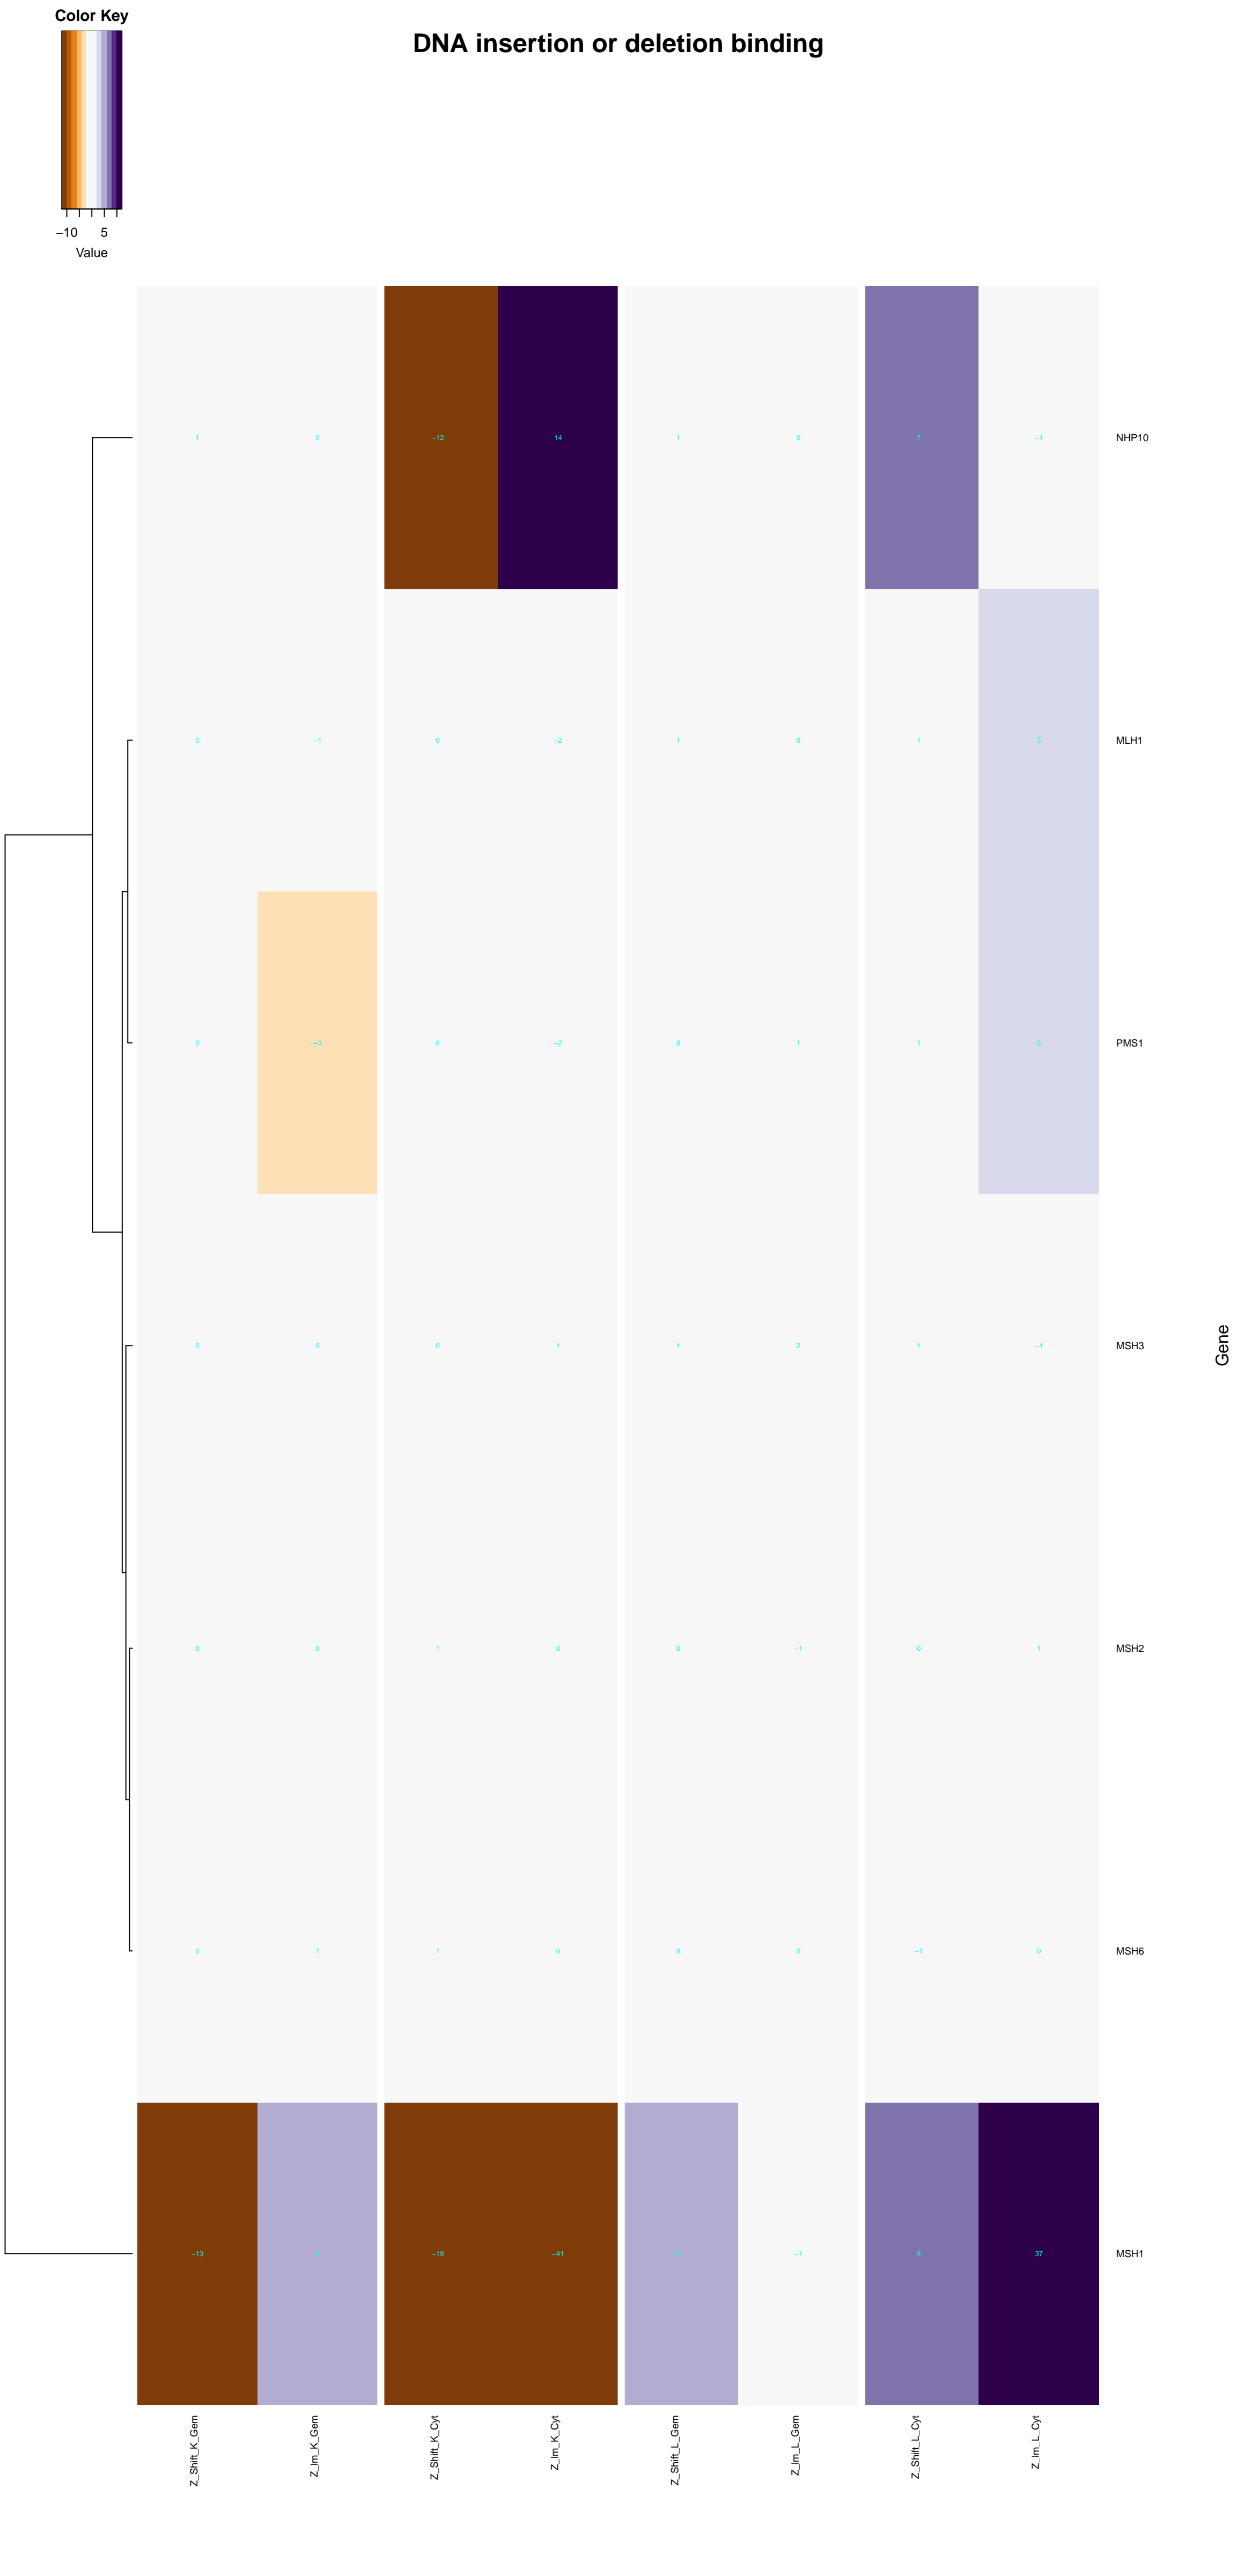

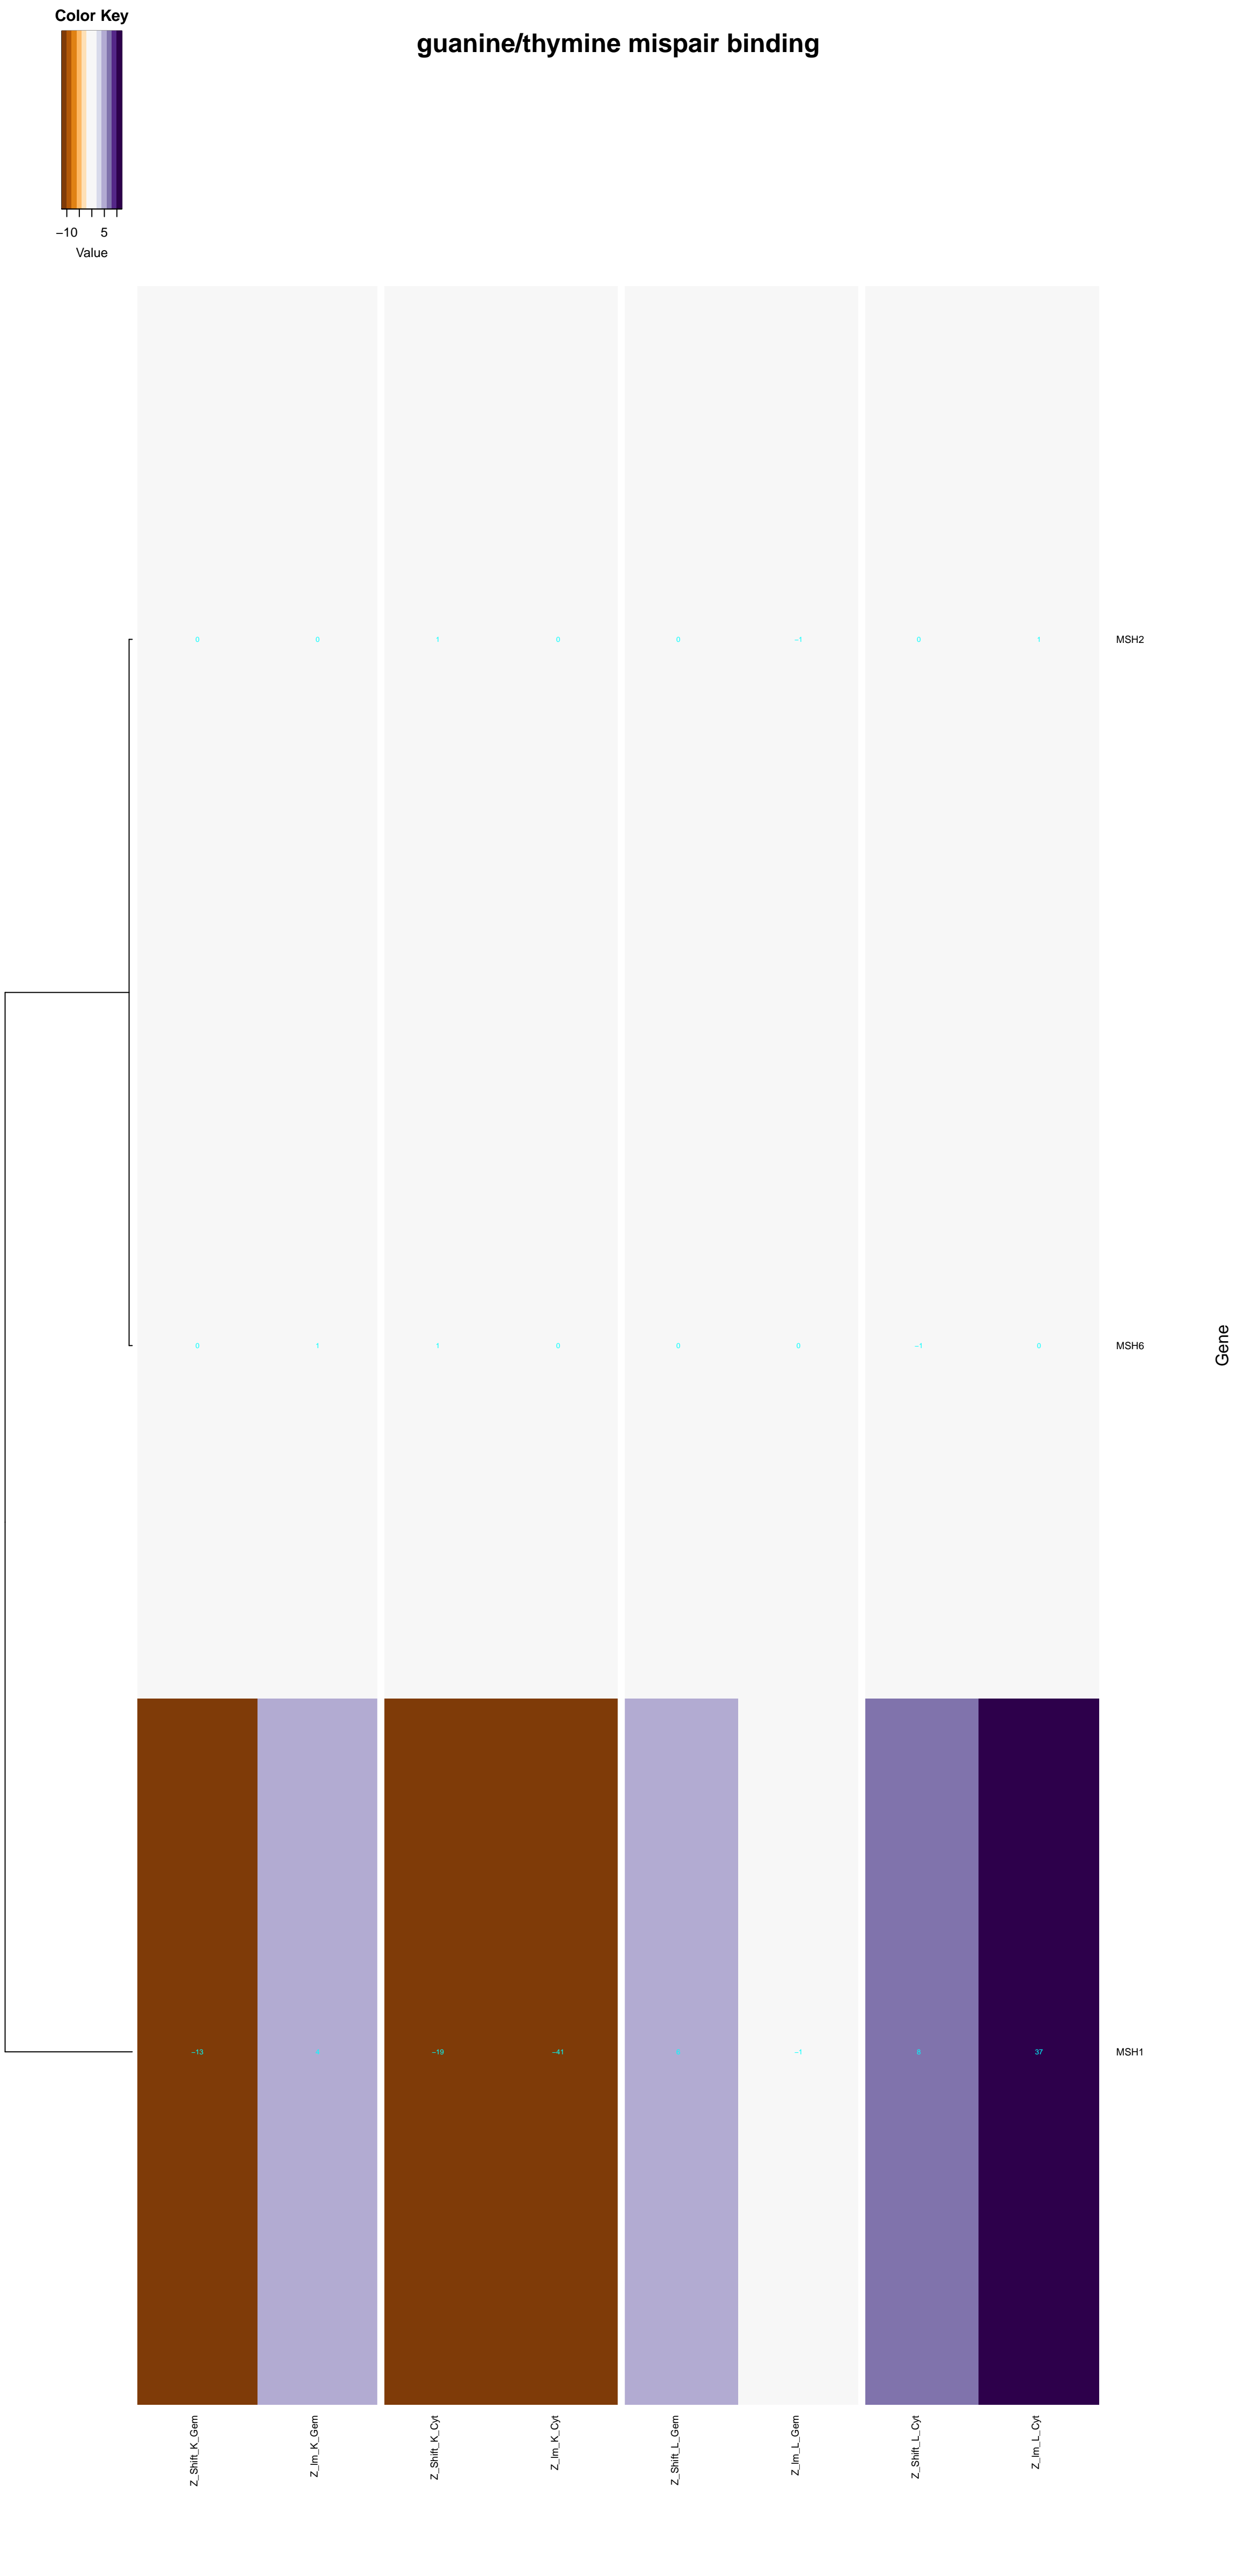

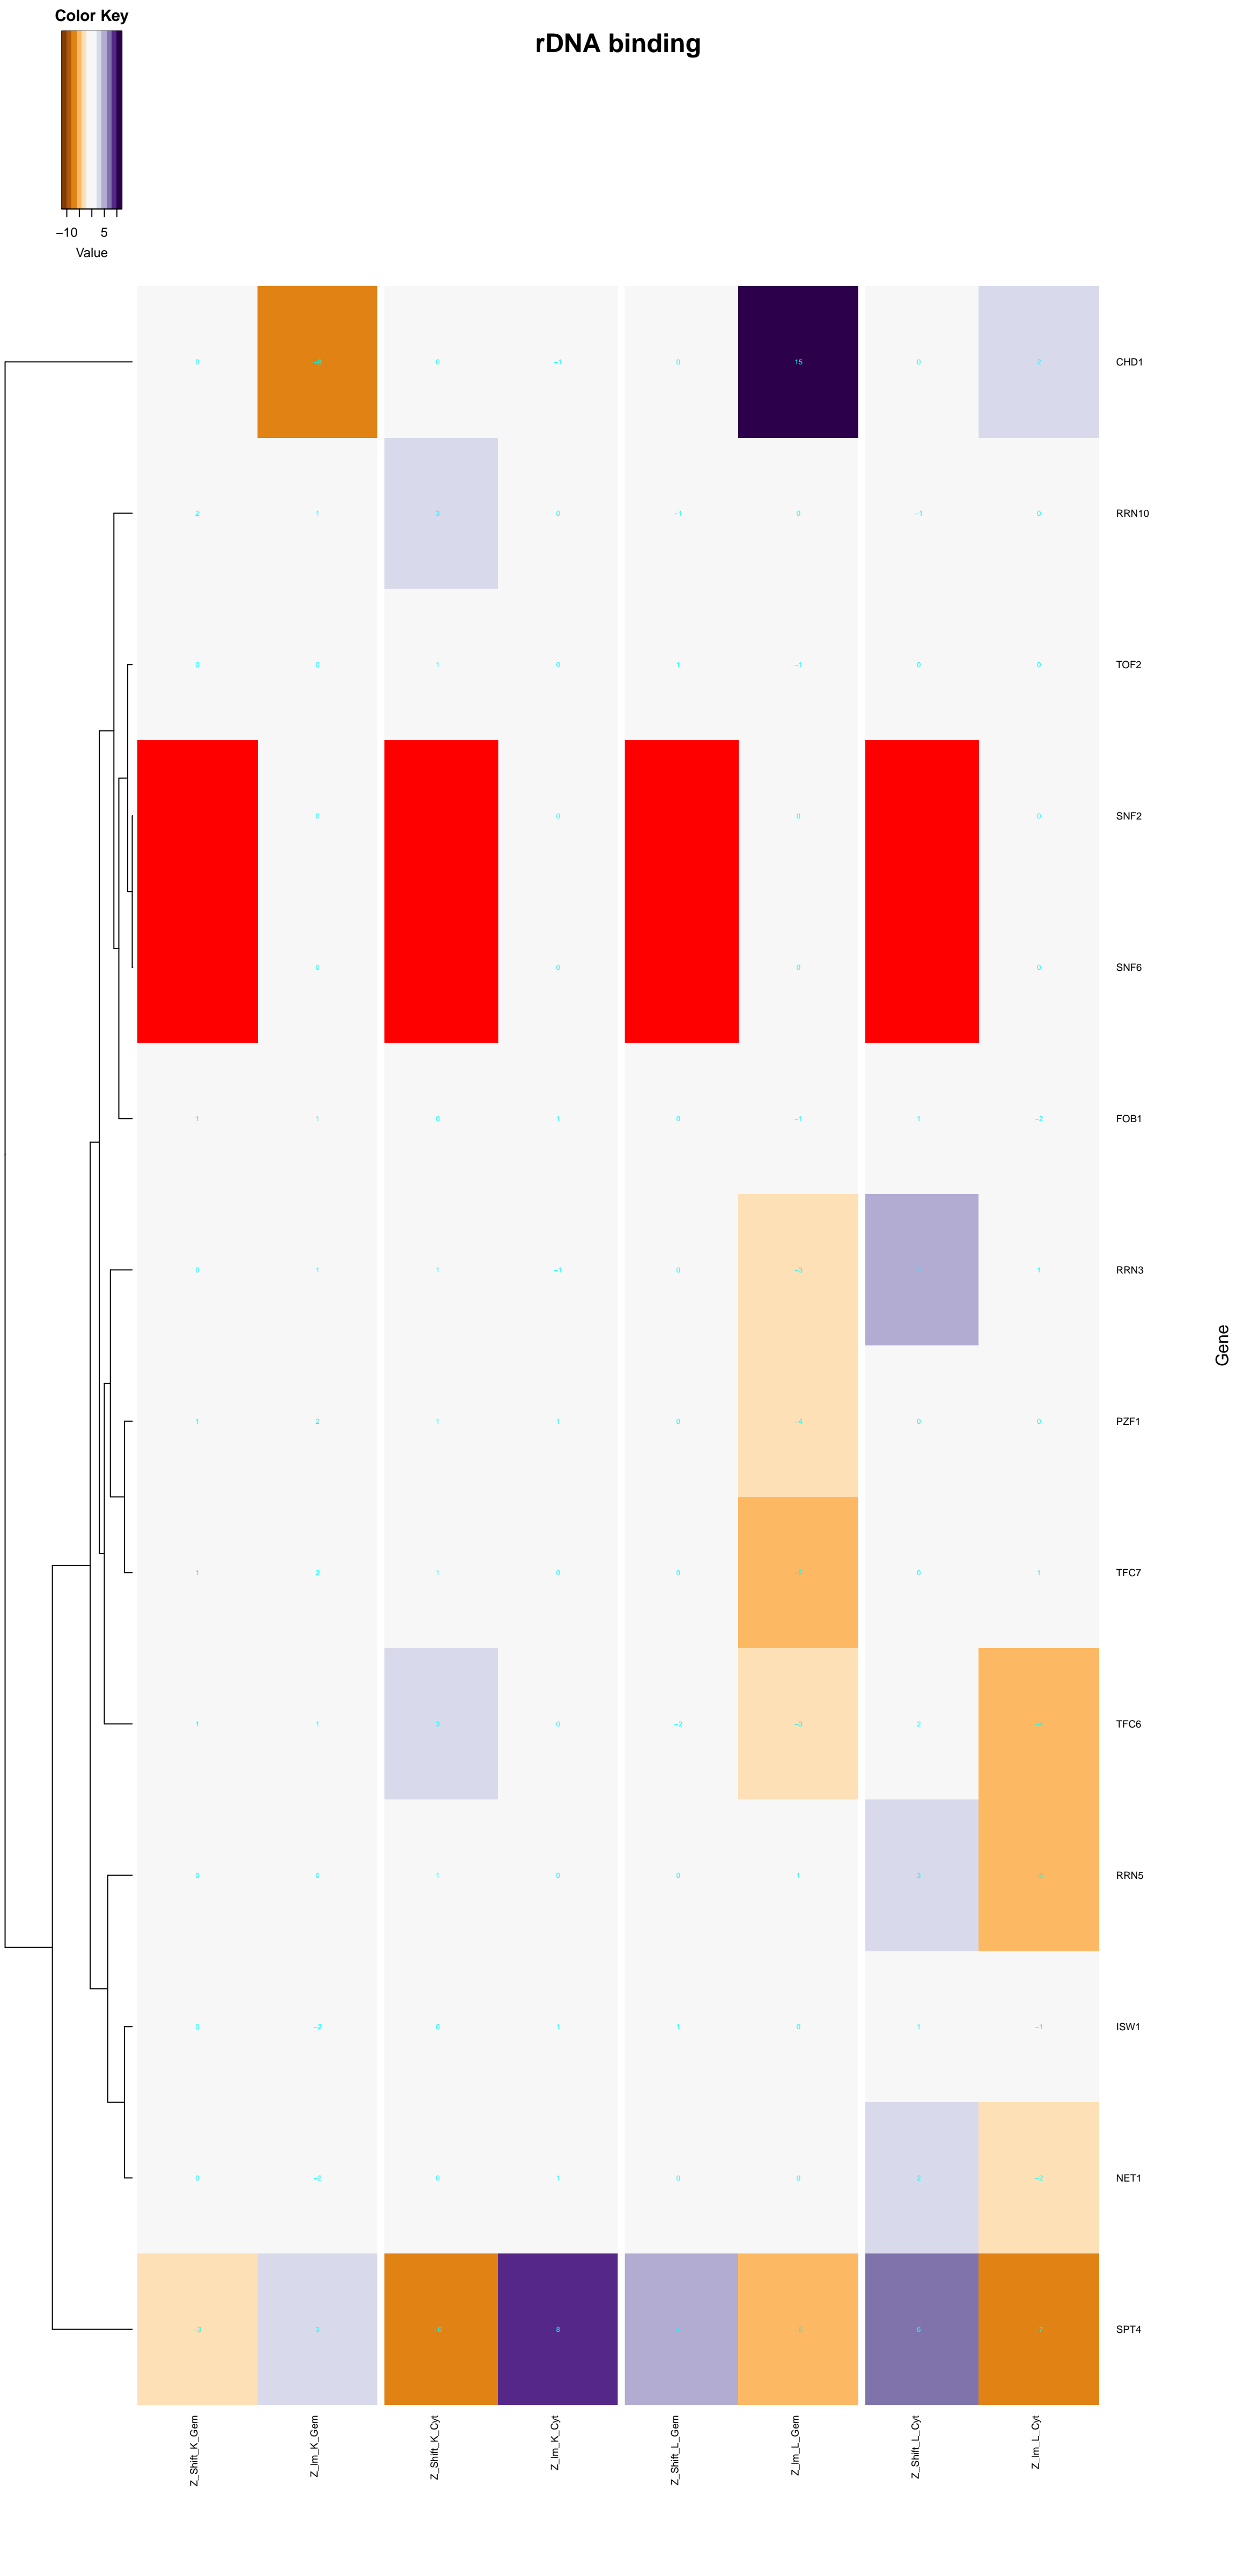

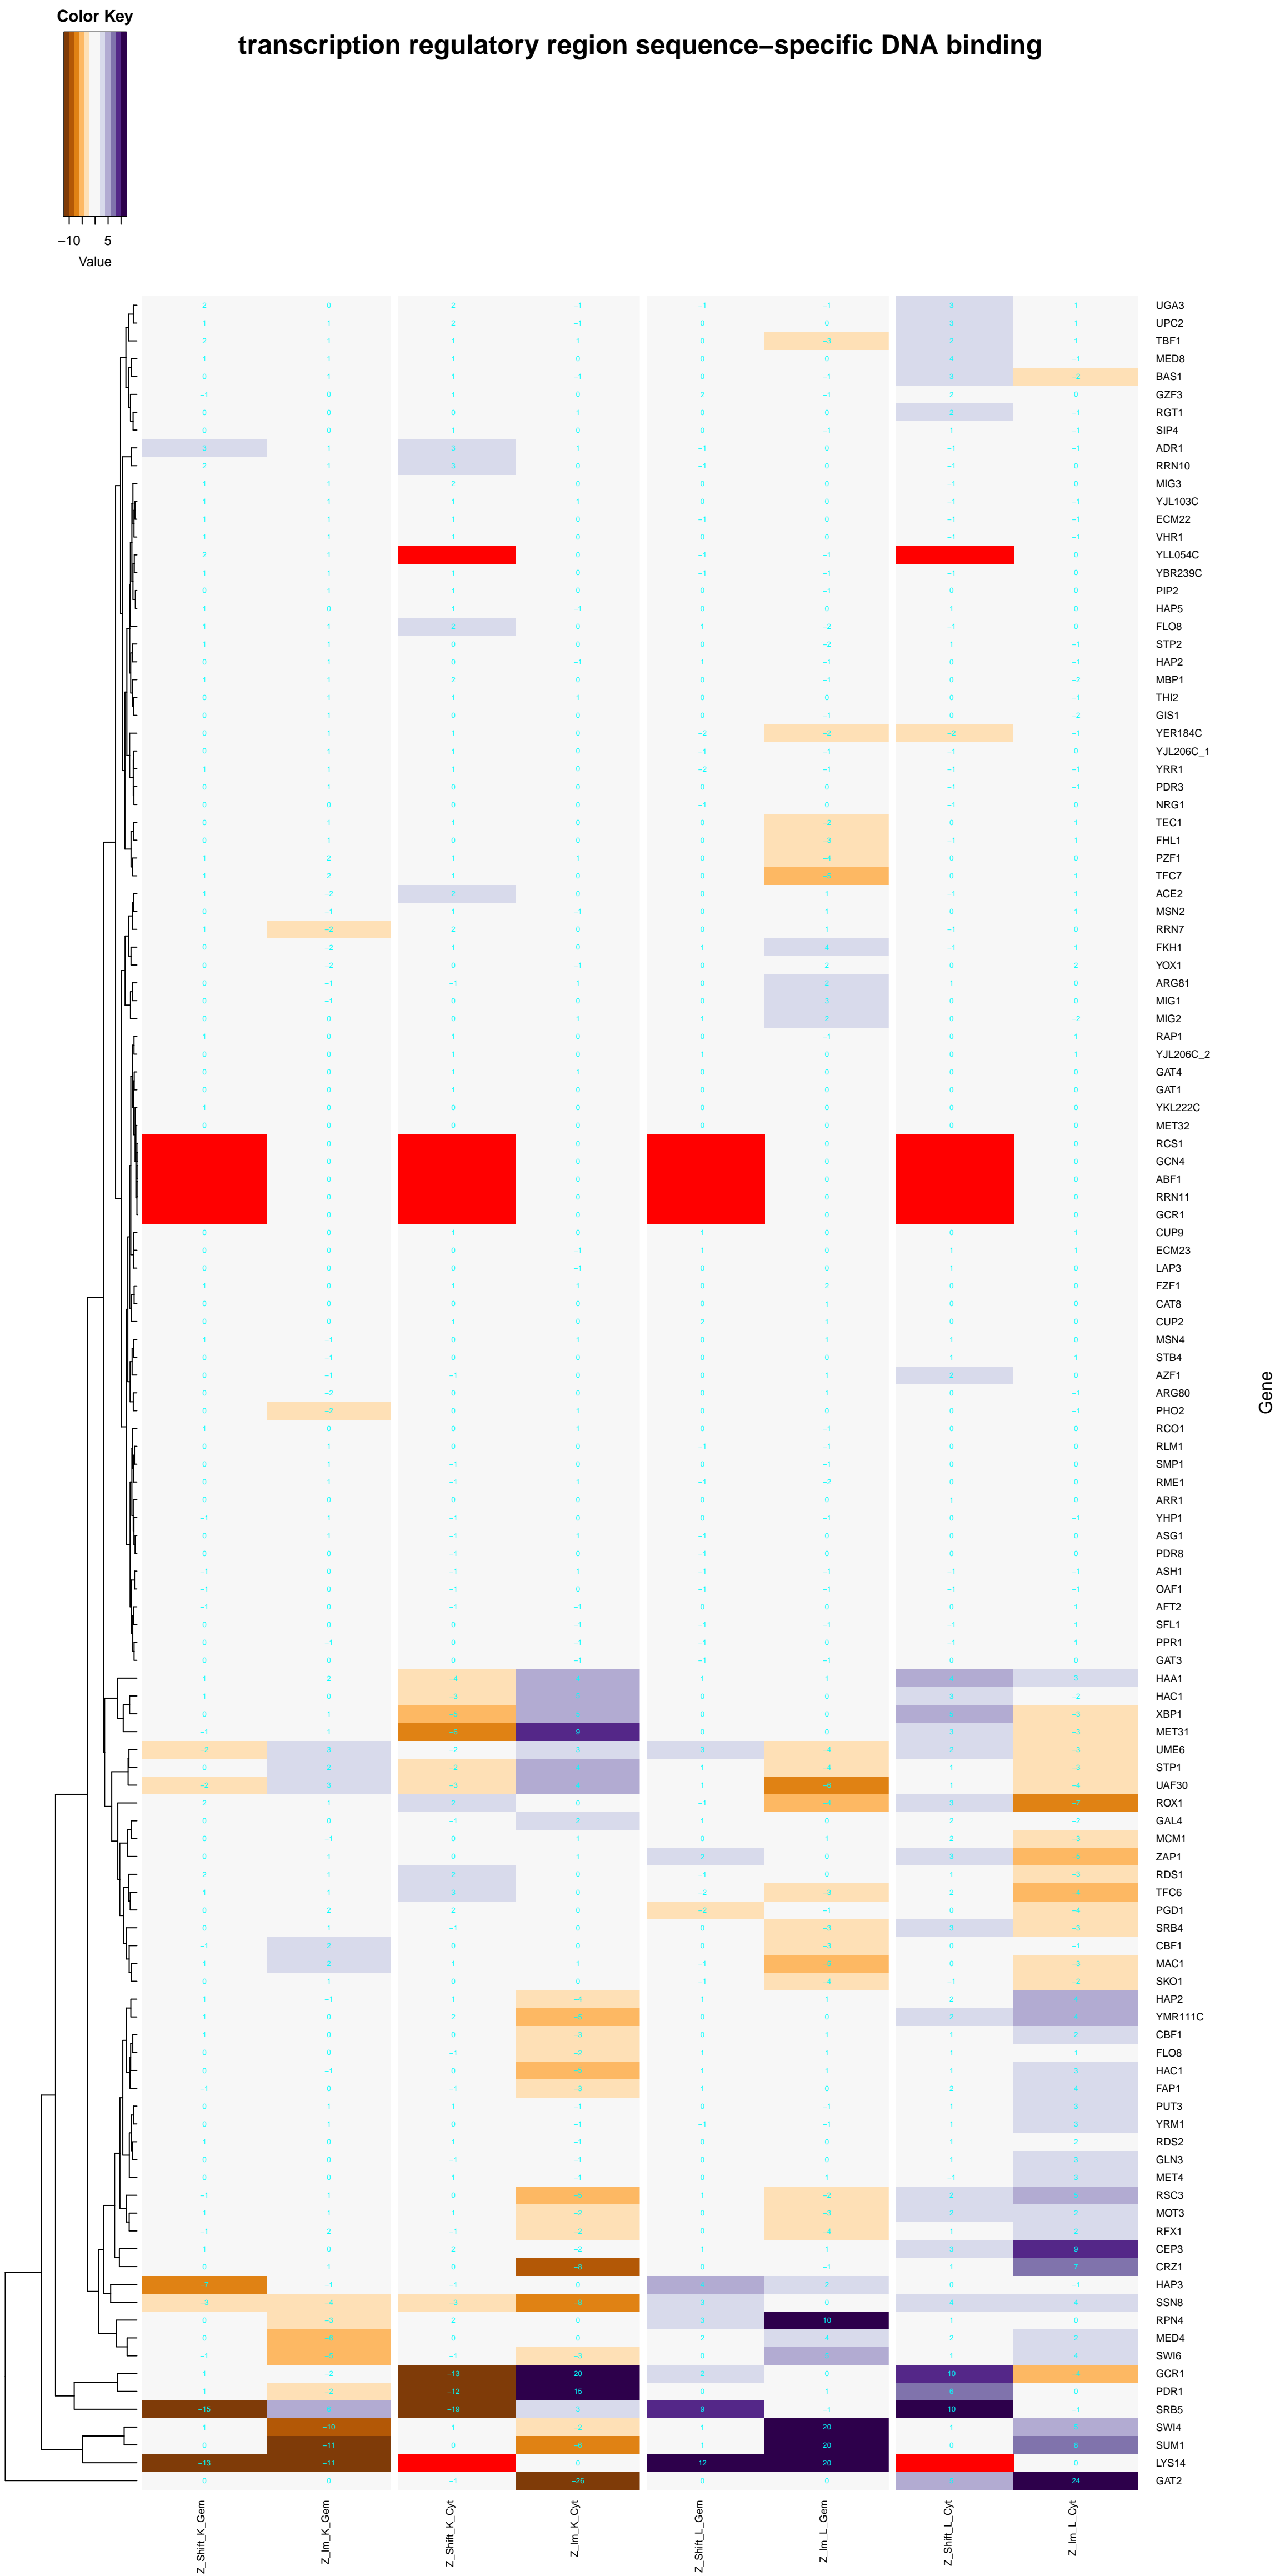

AT DNA binding

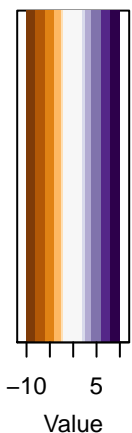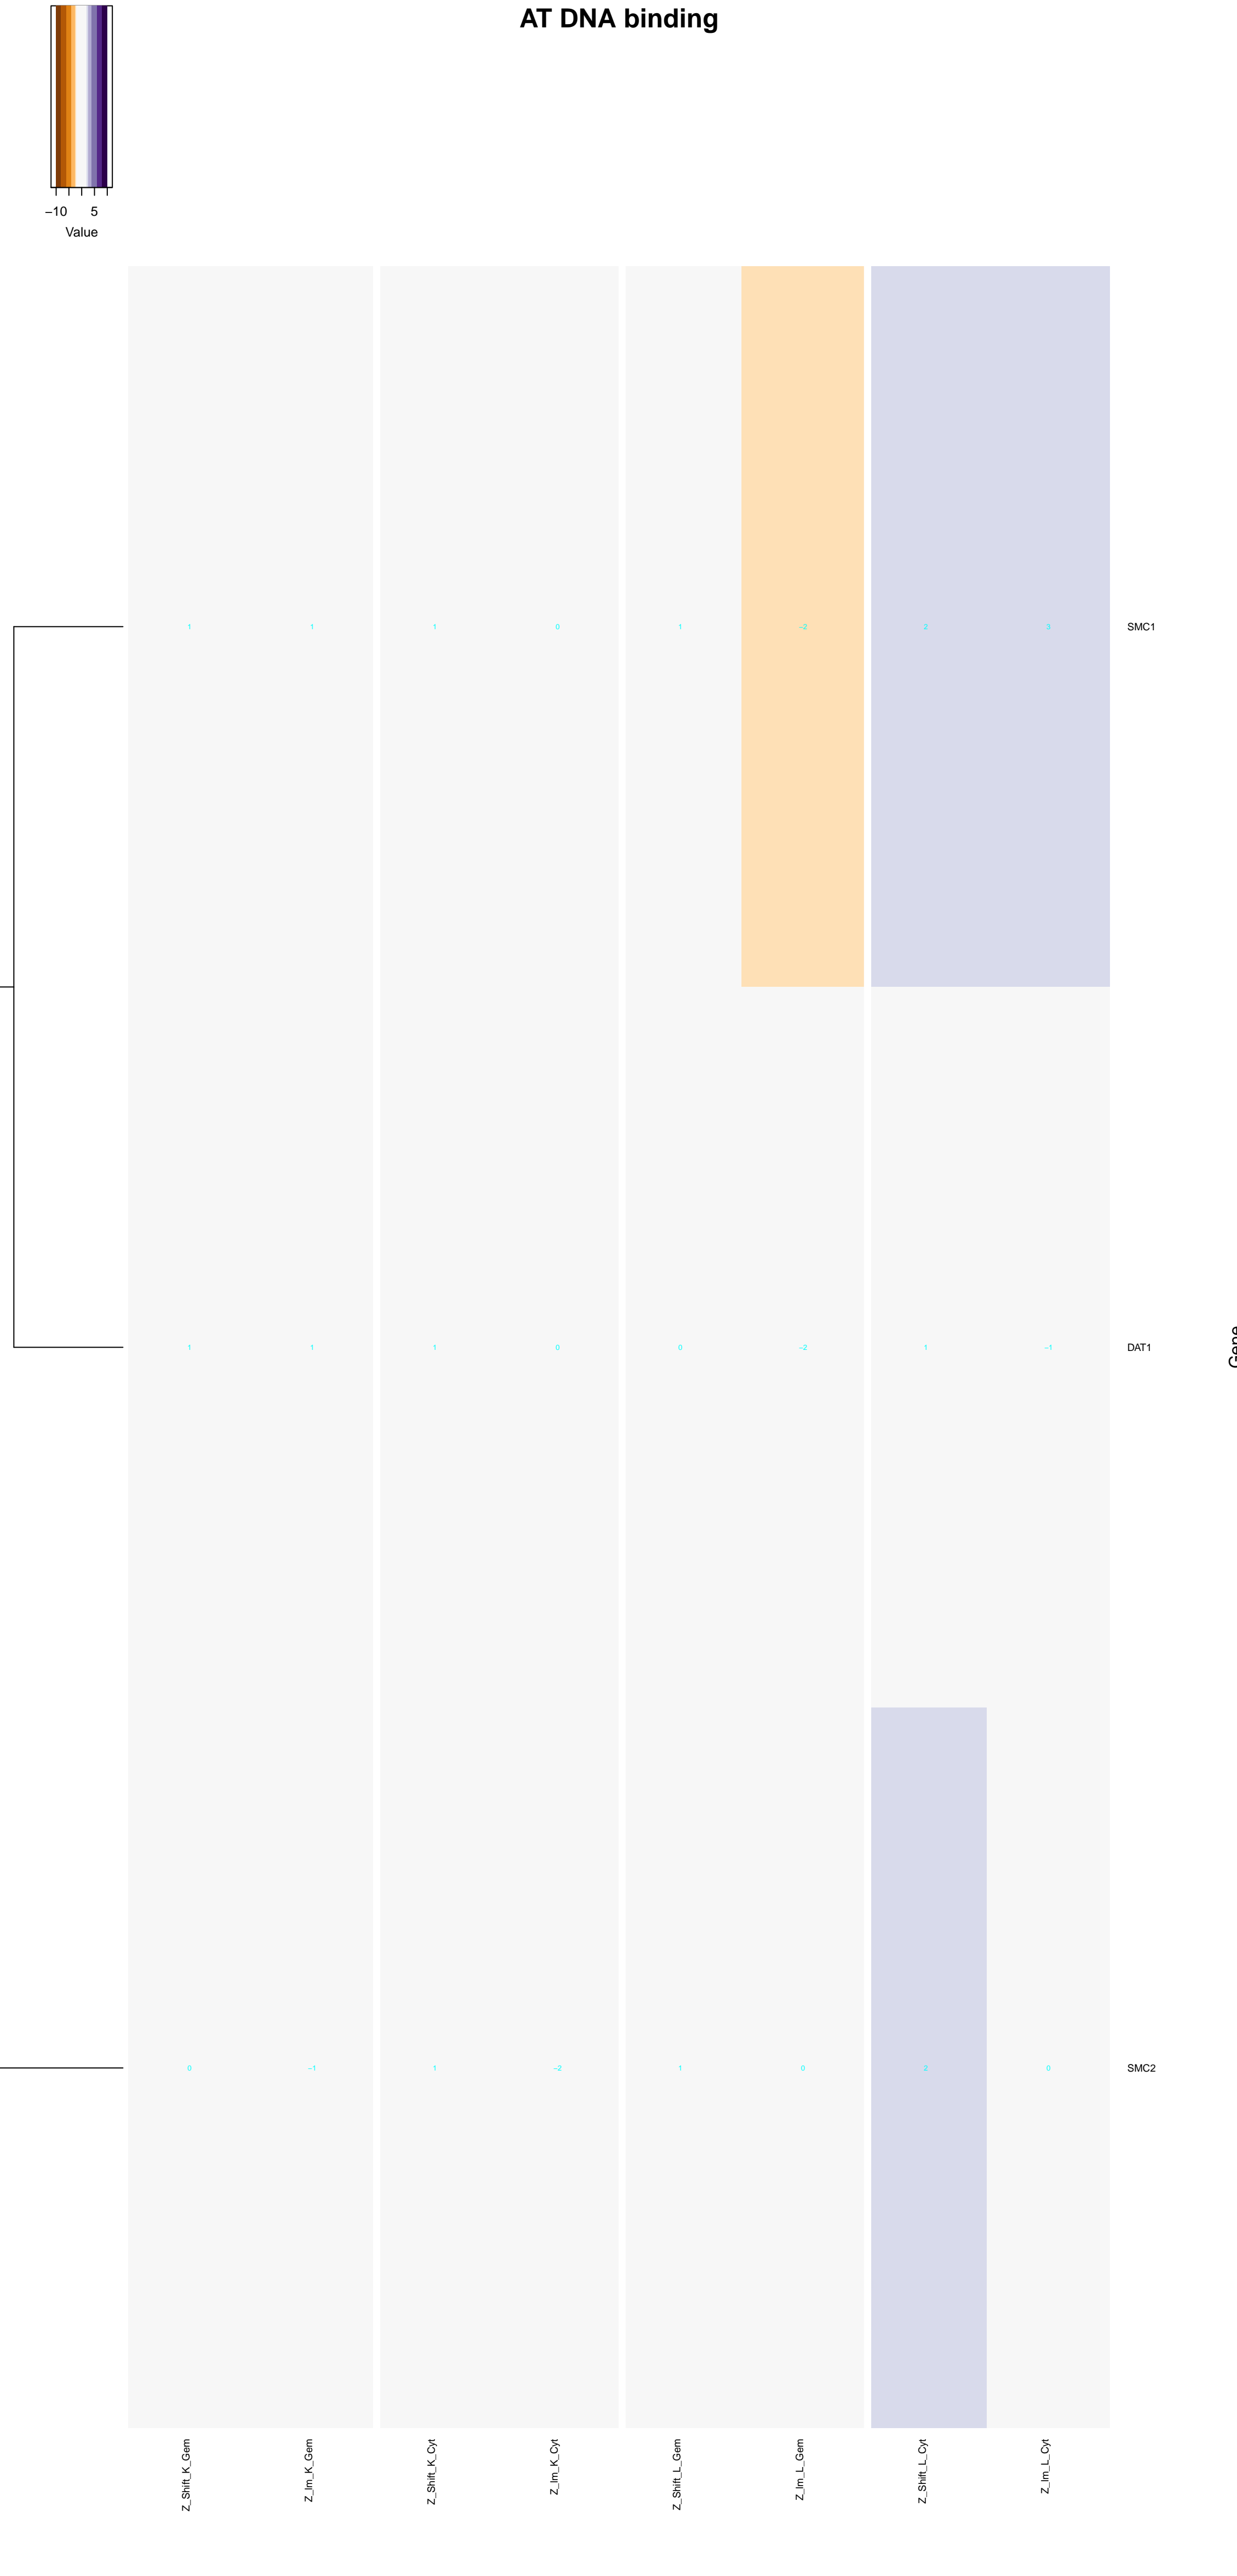

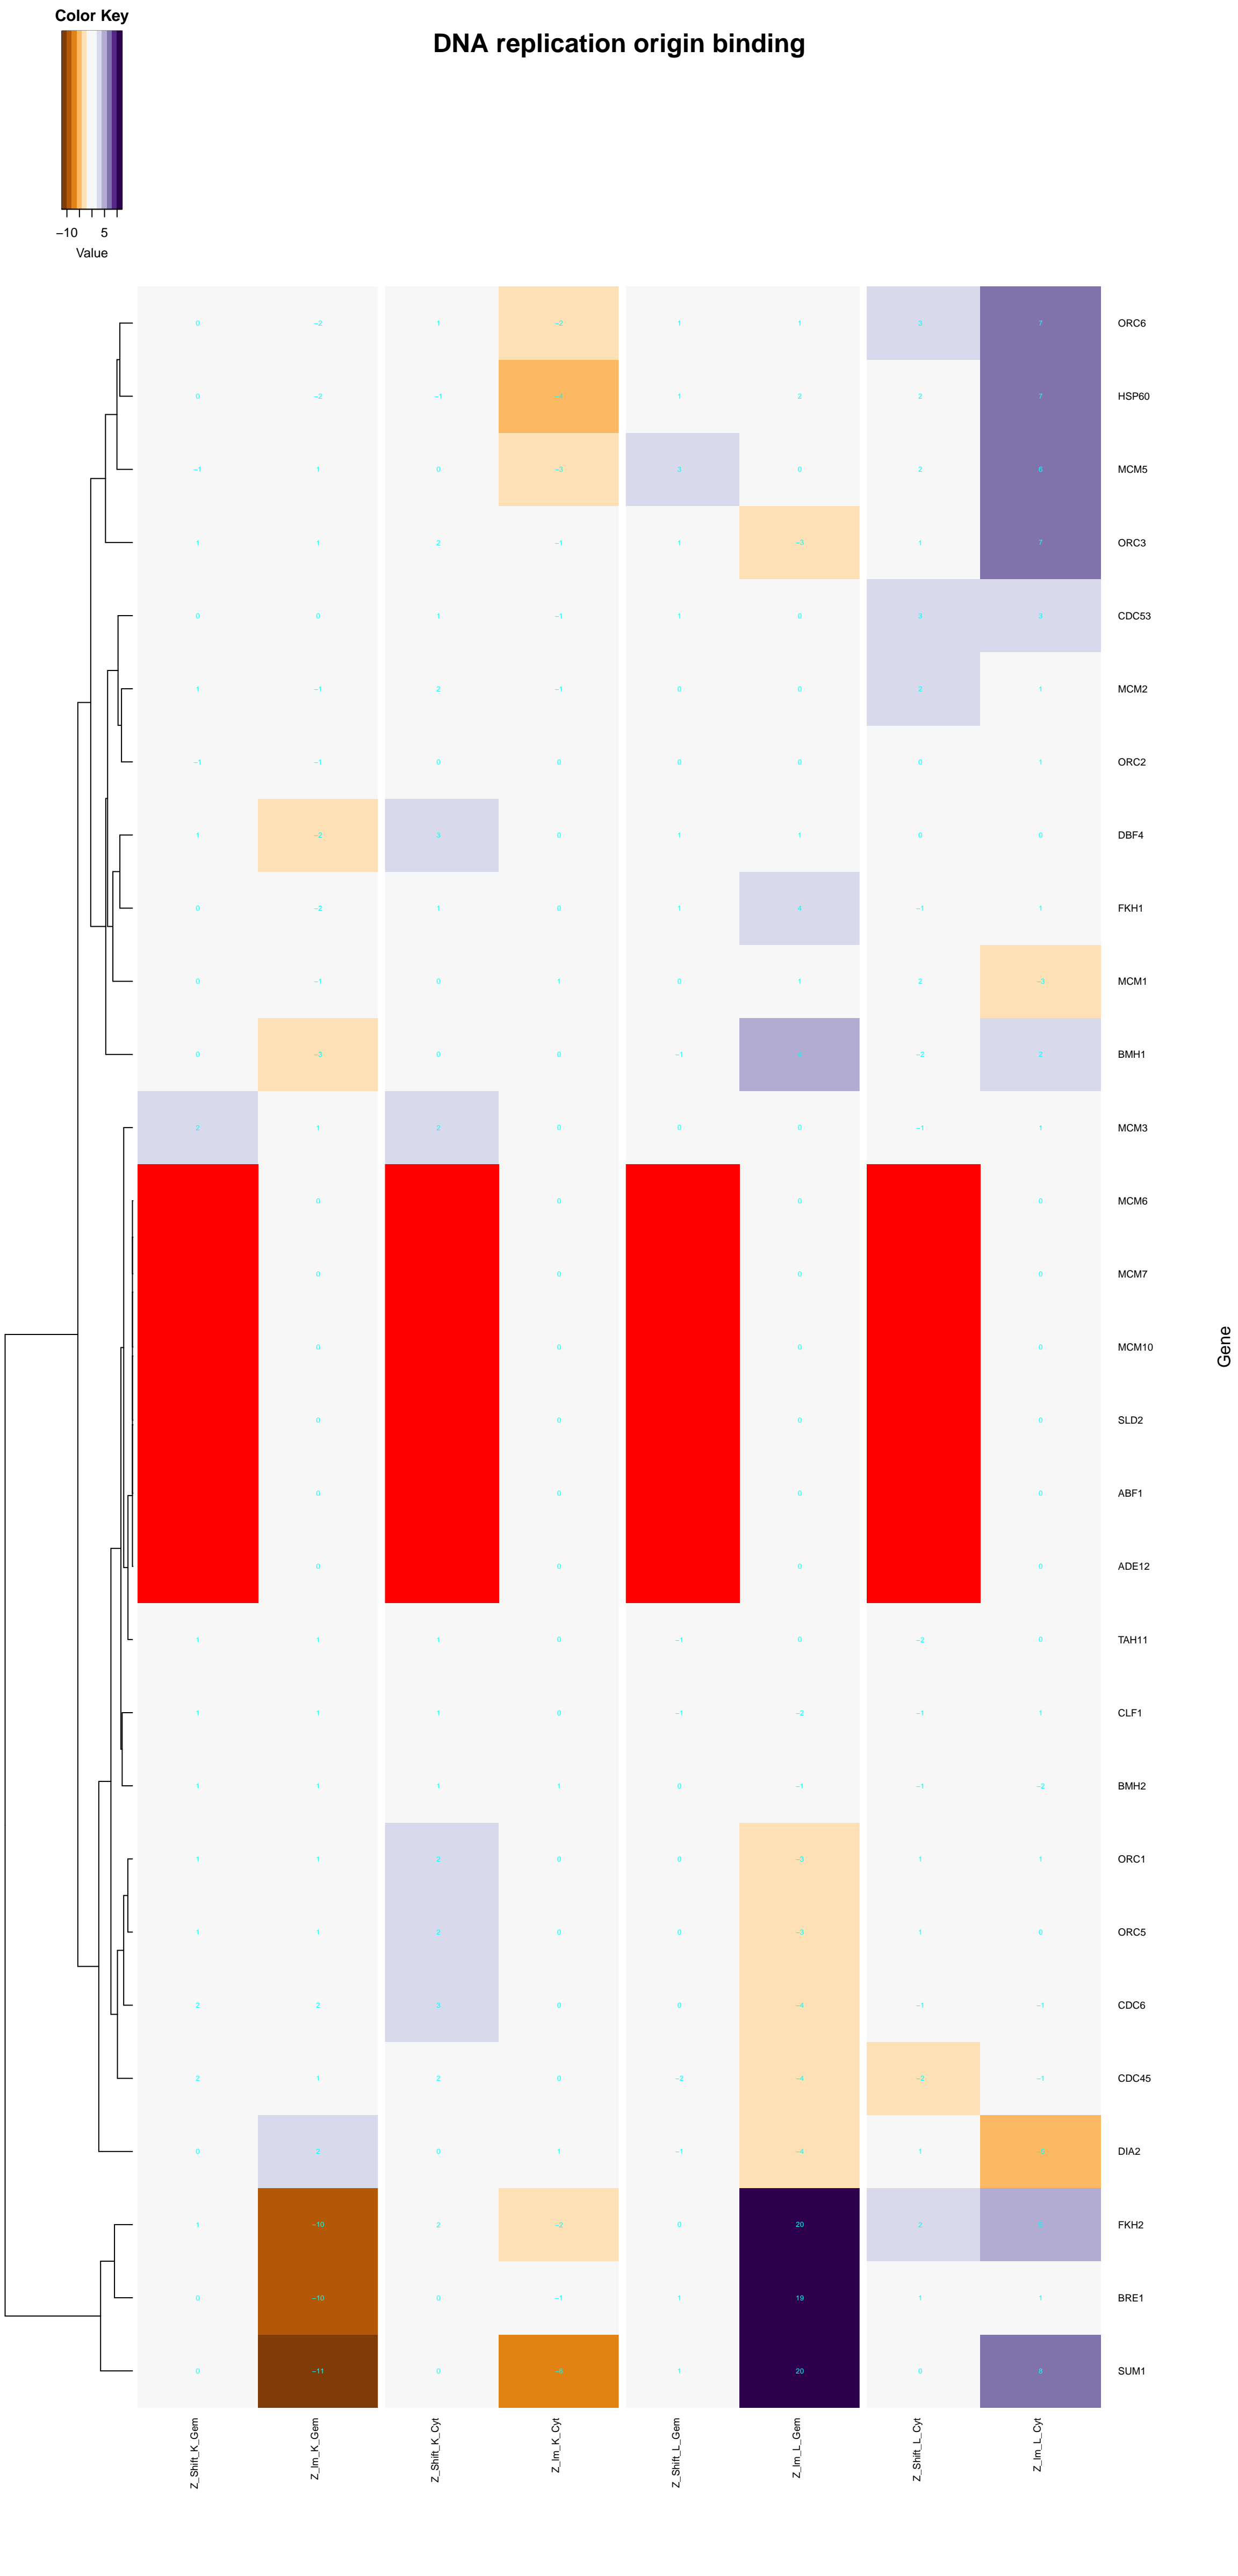

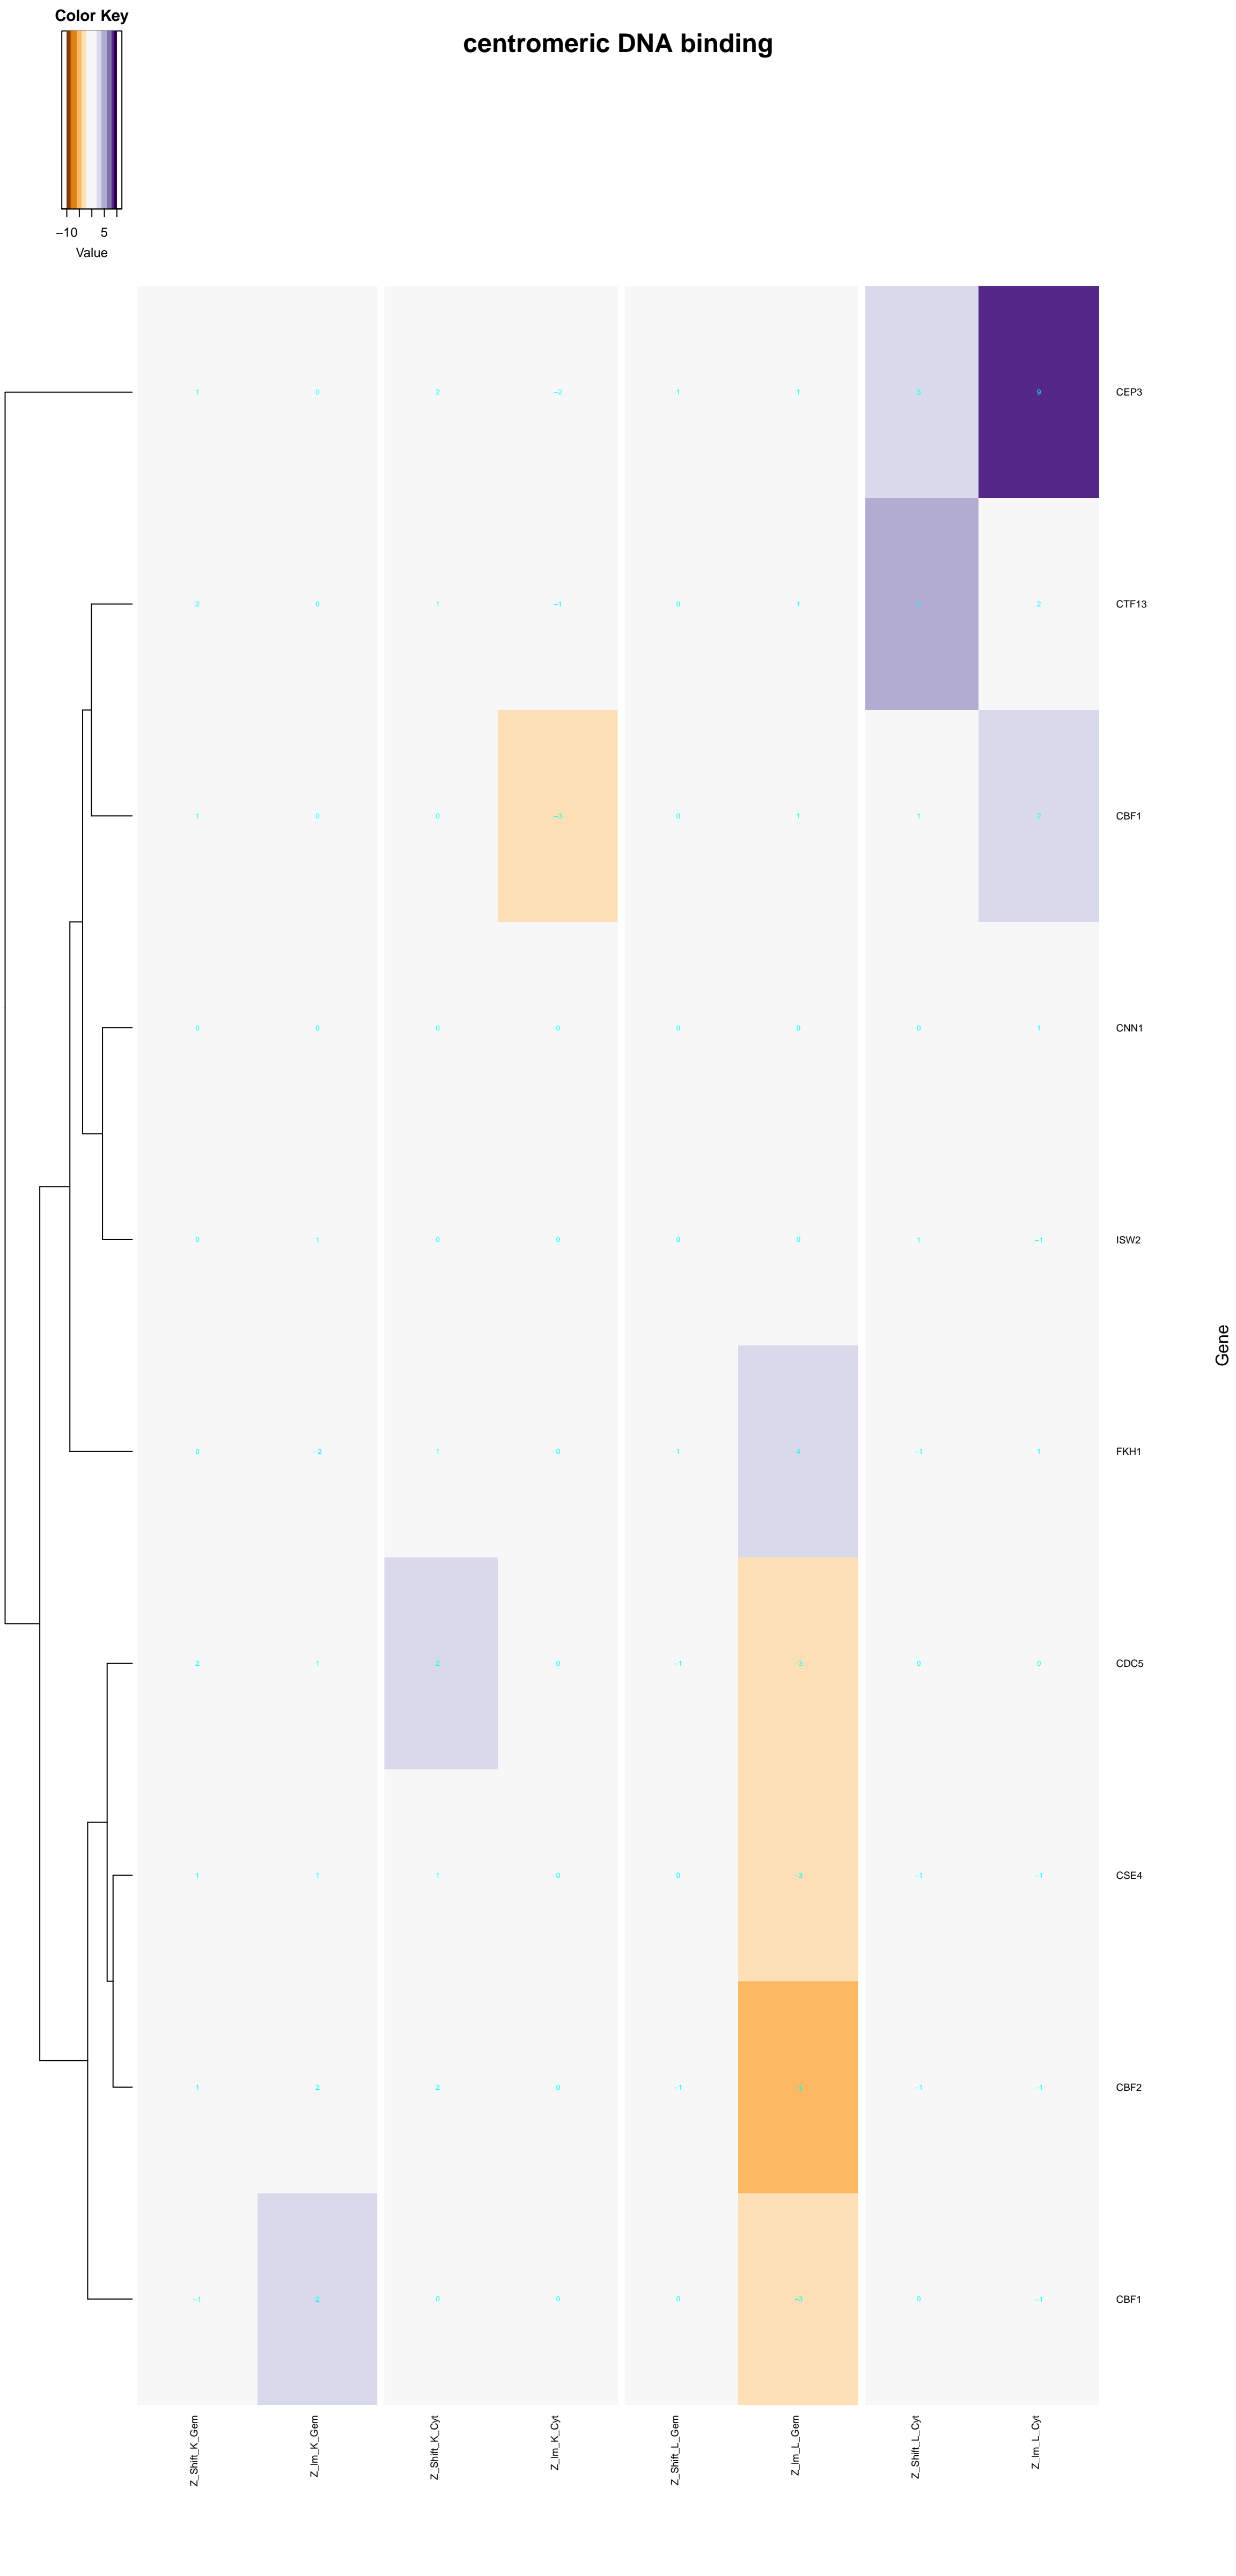

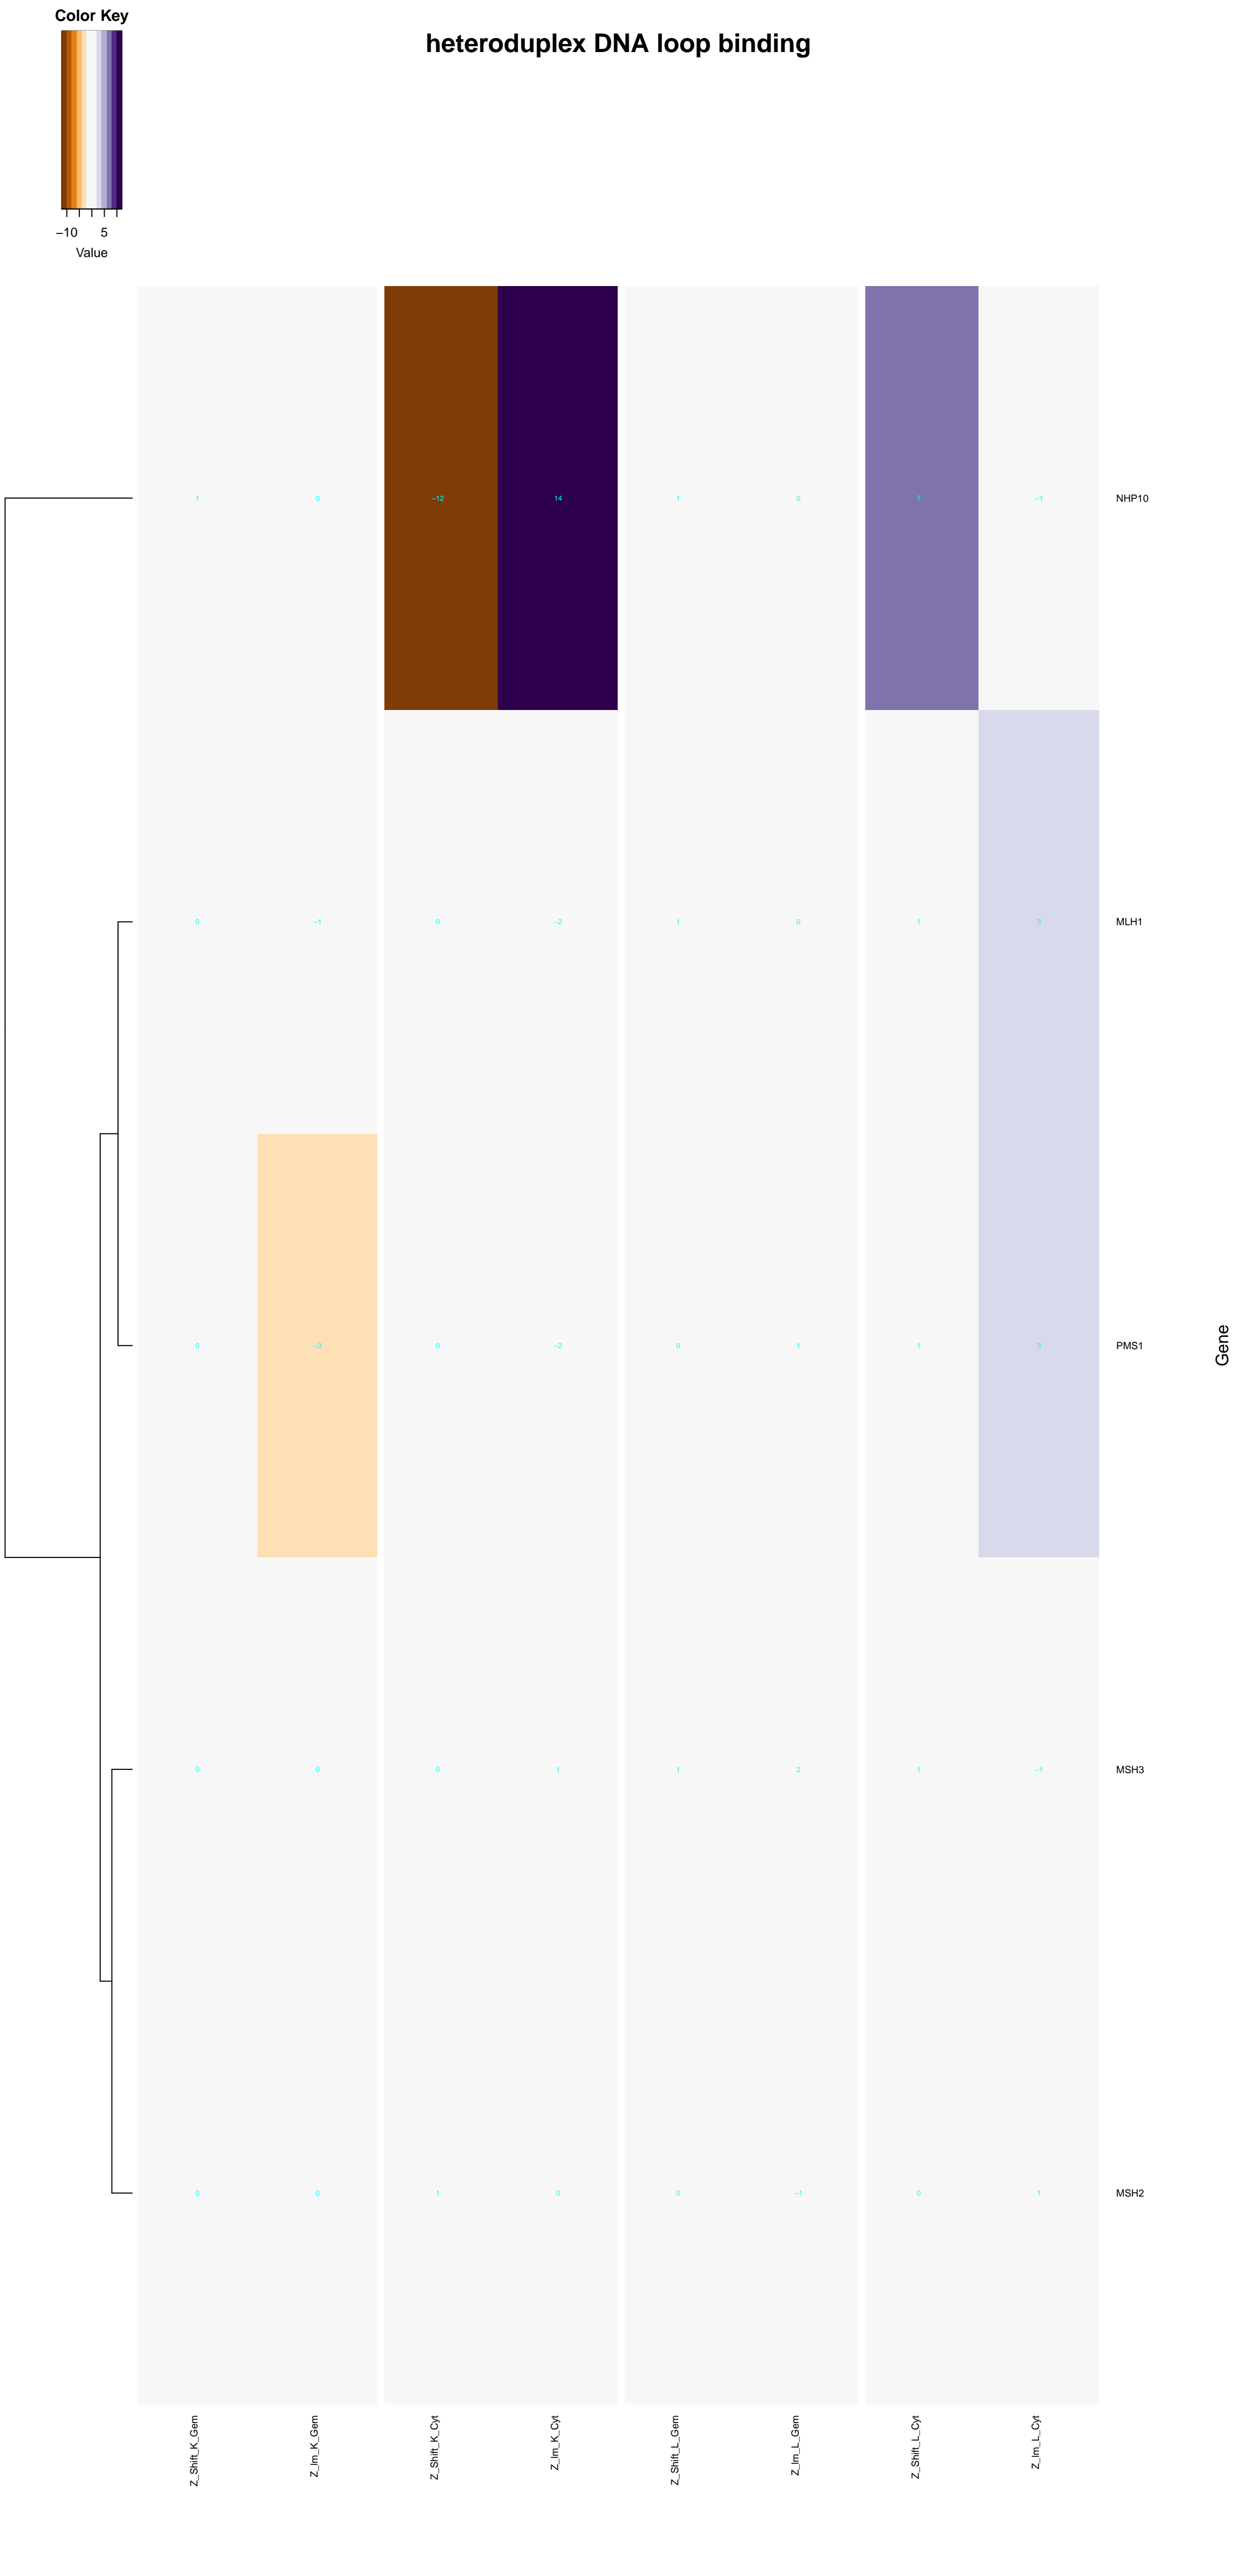

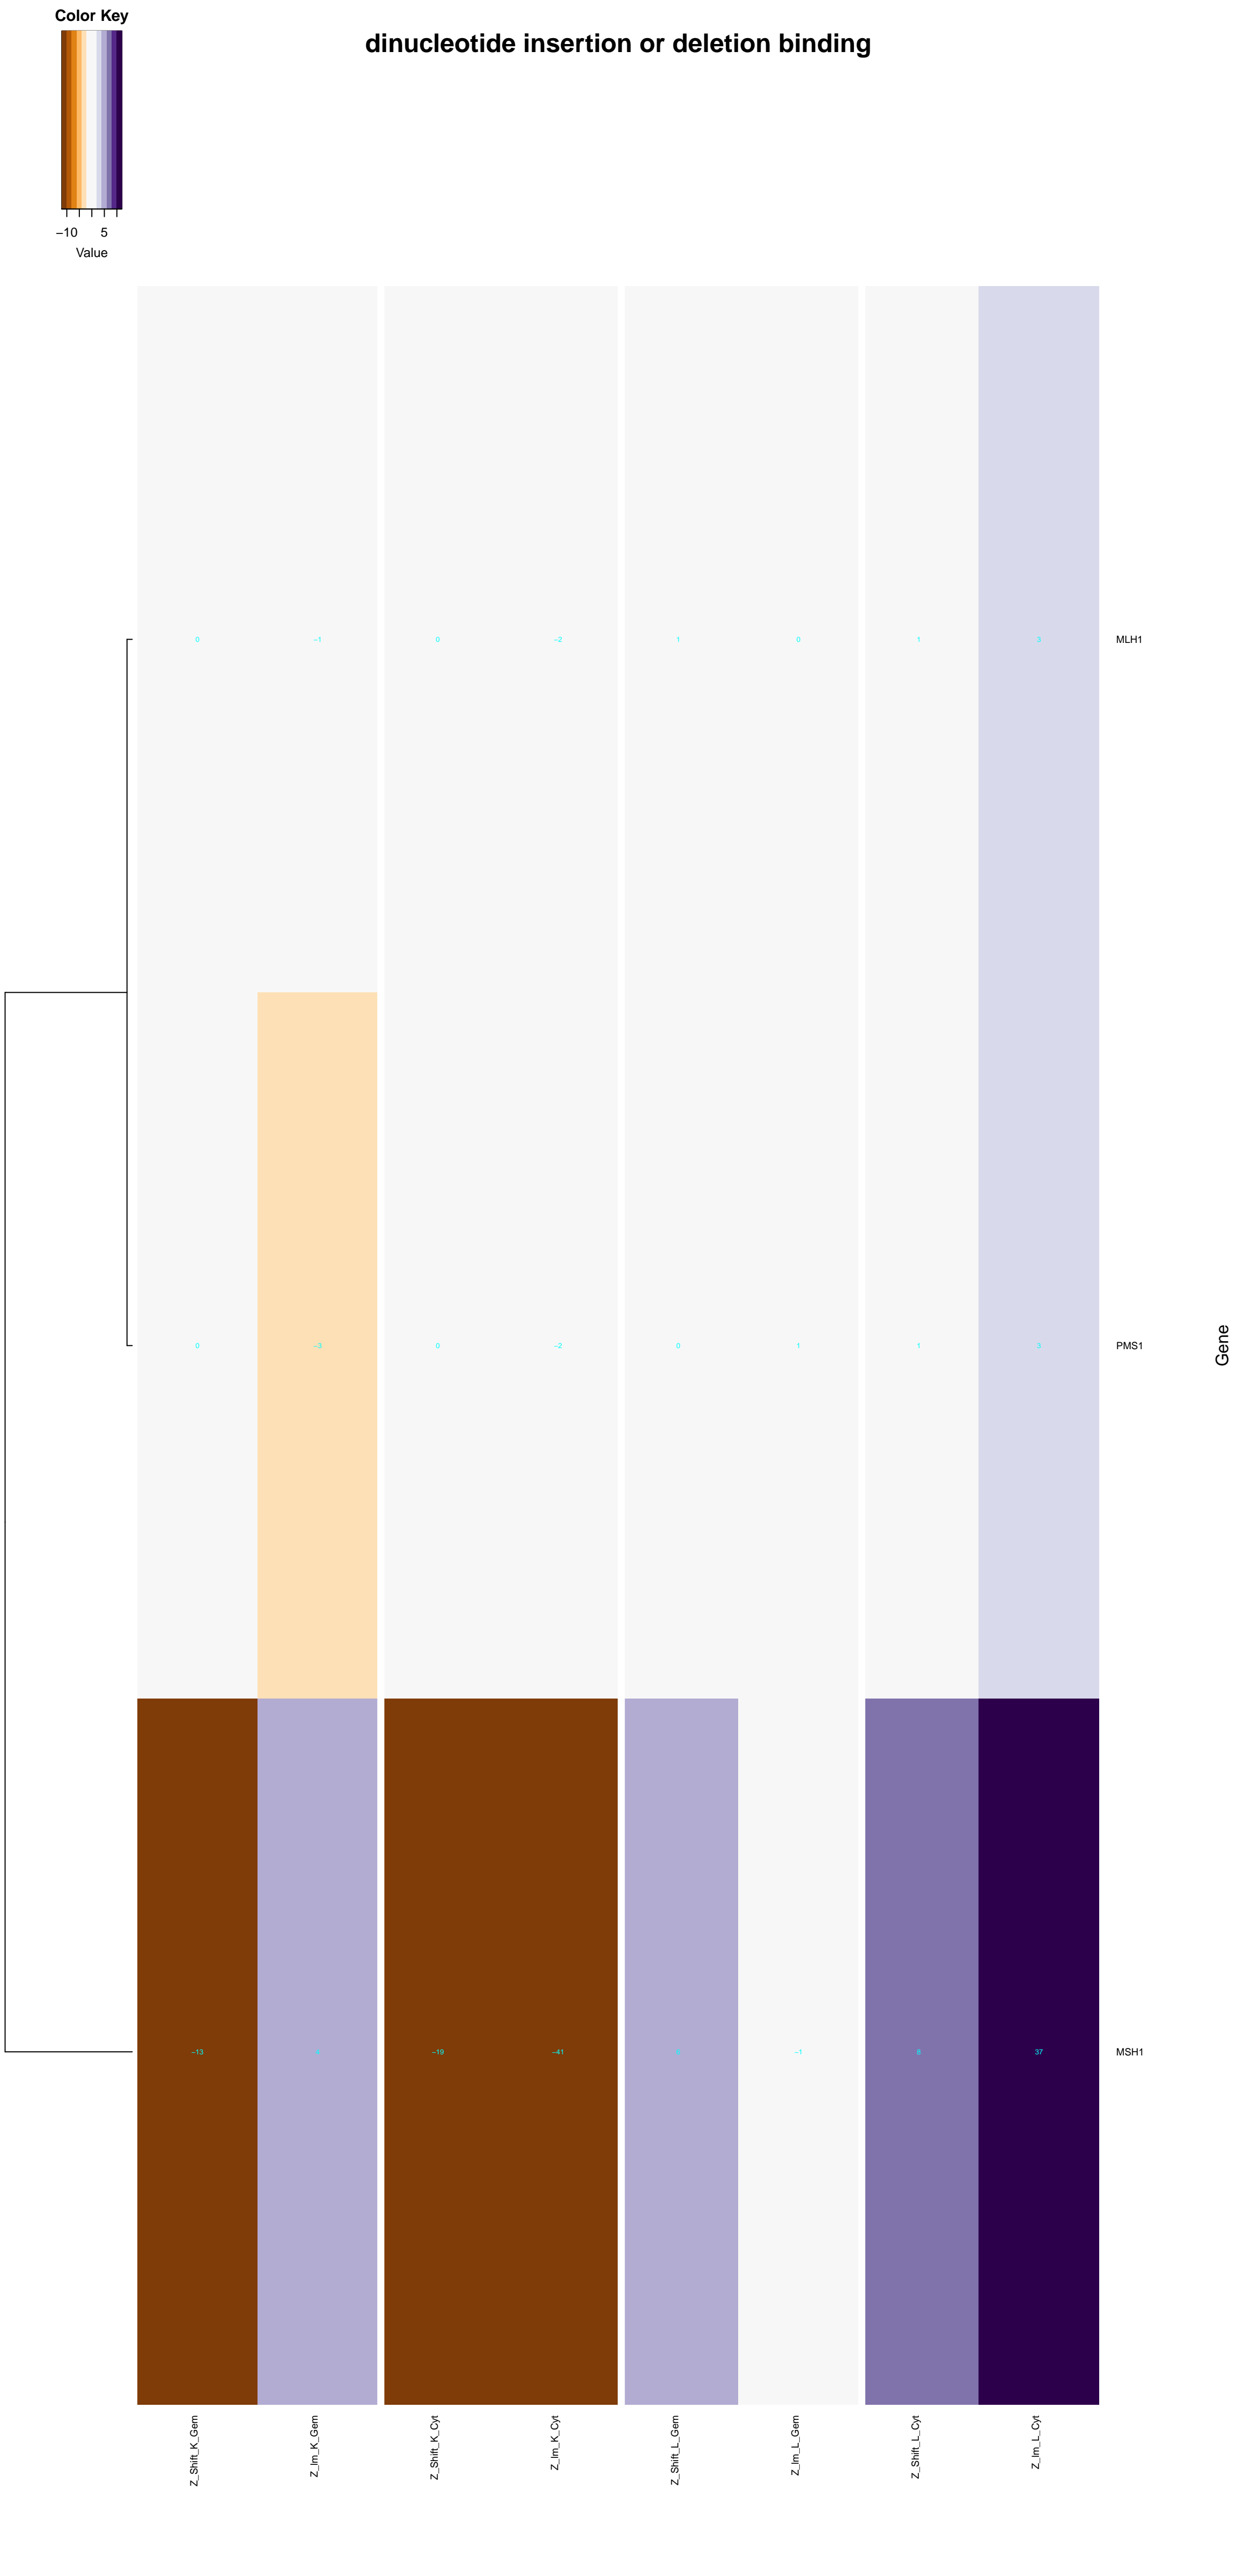

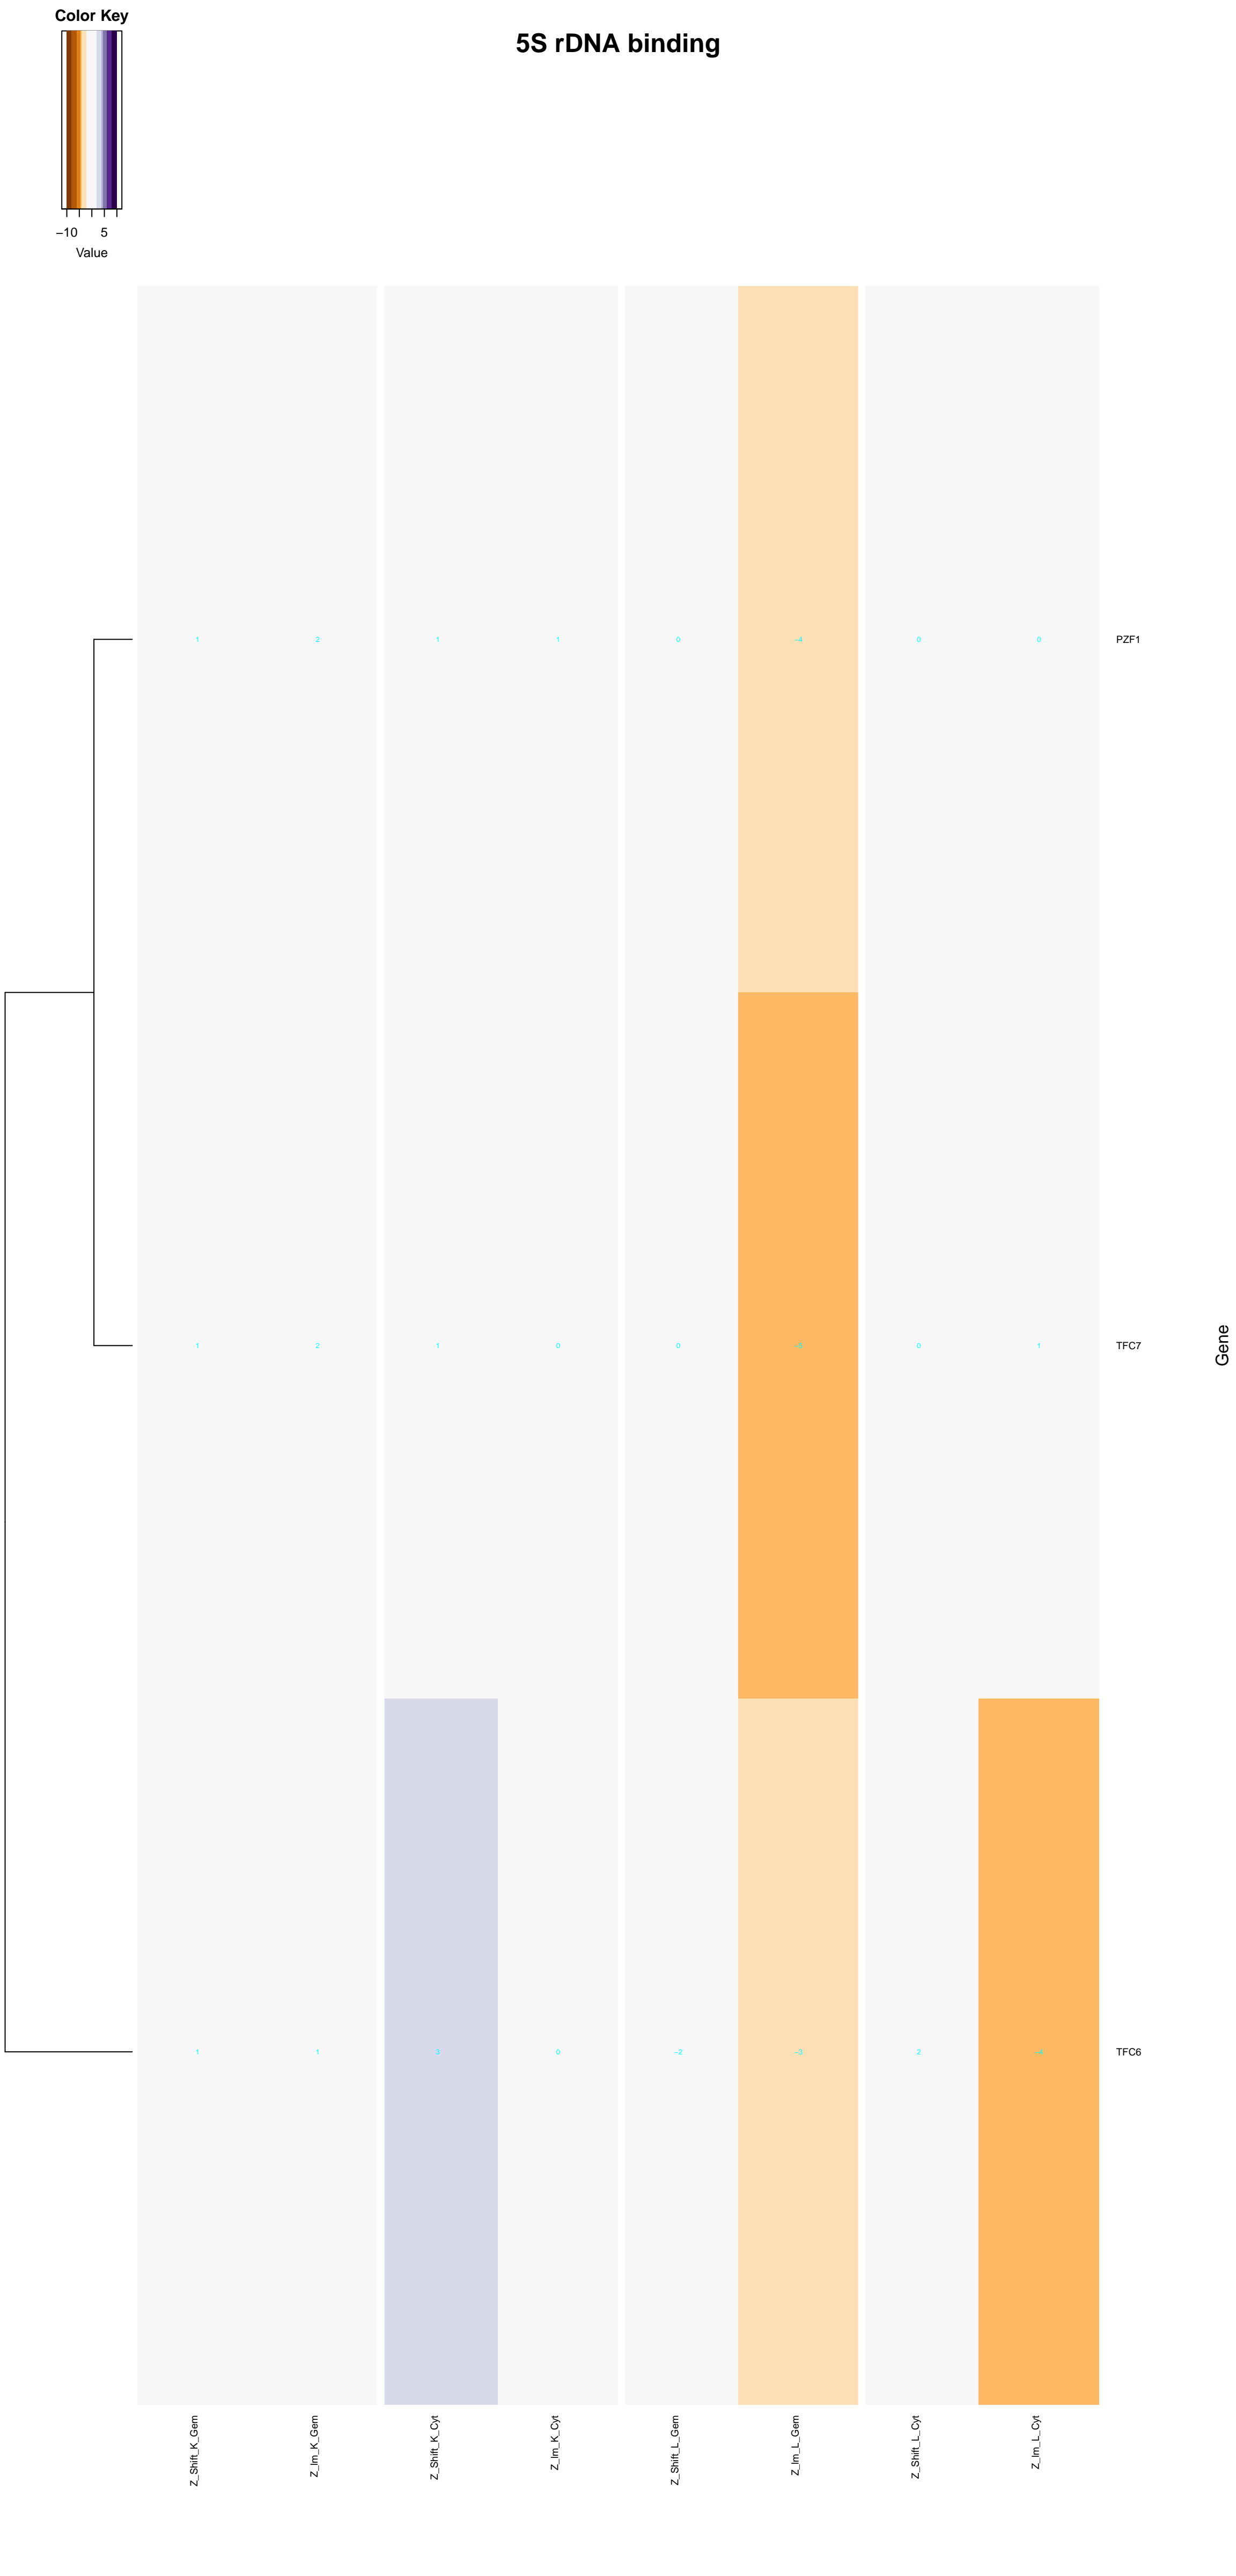

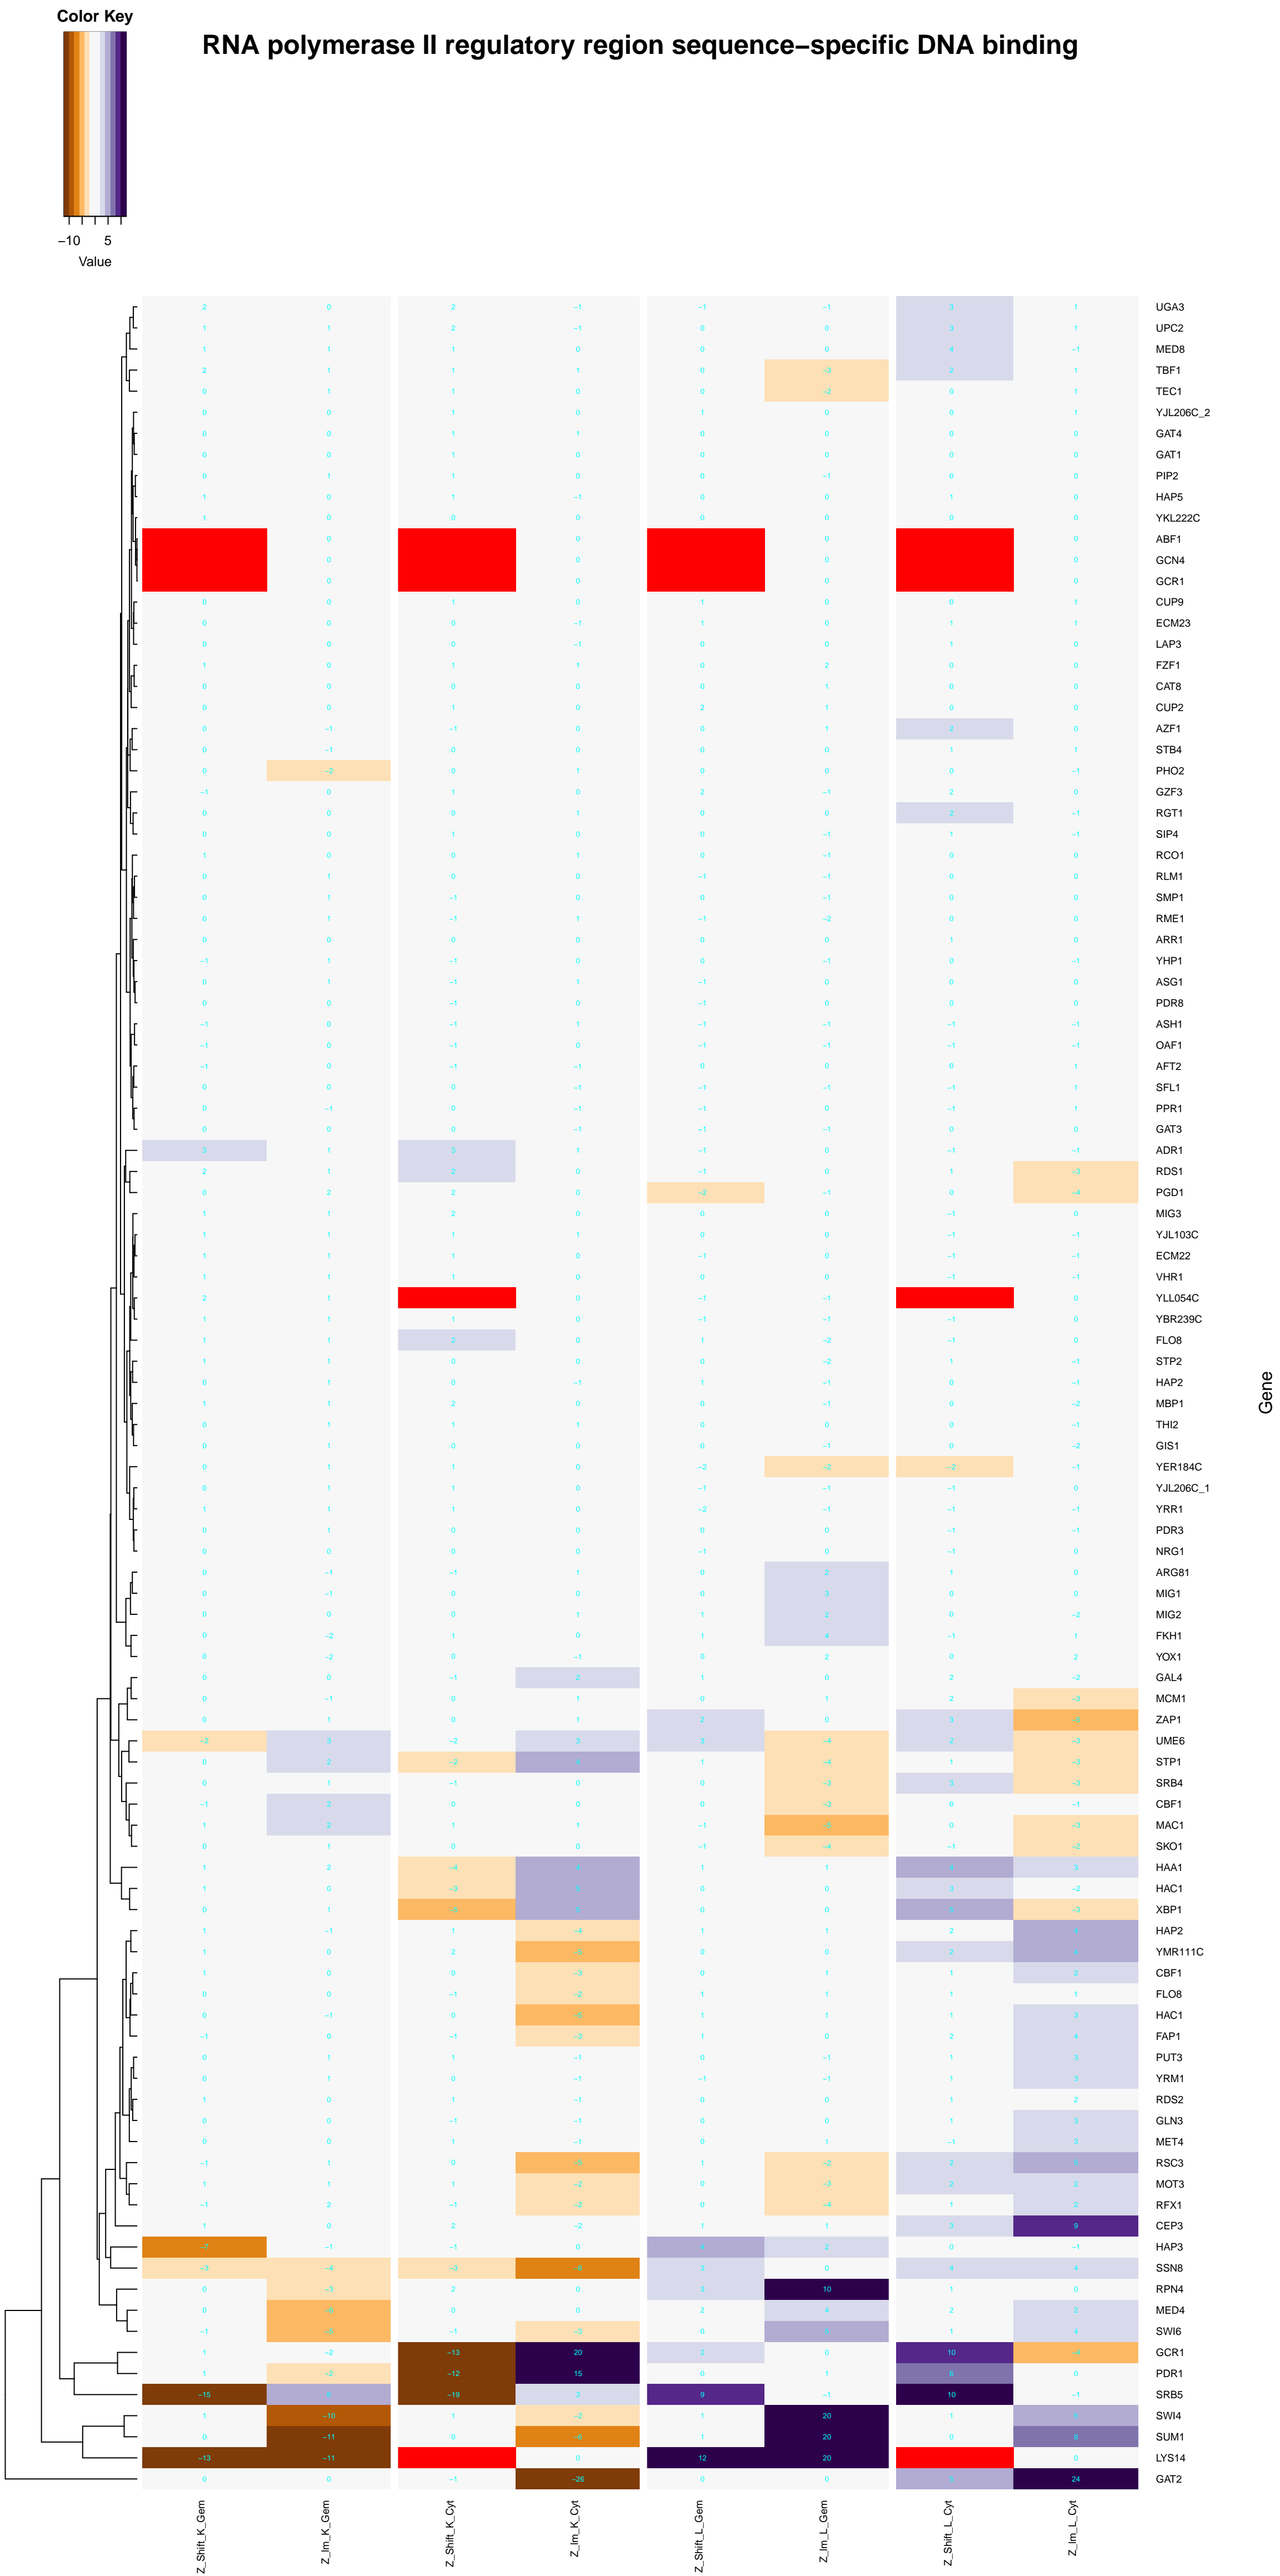

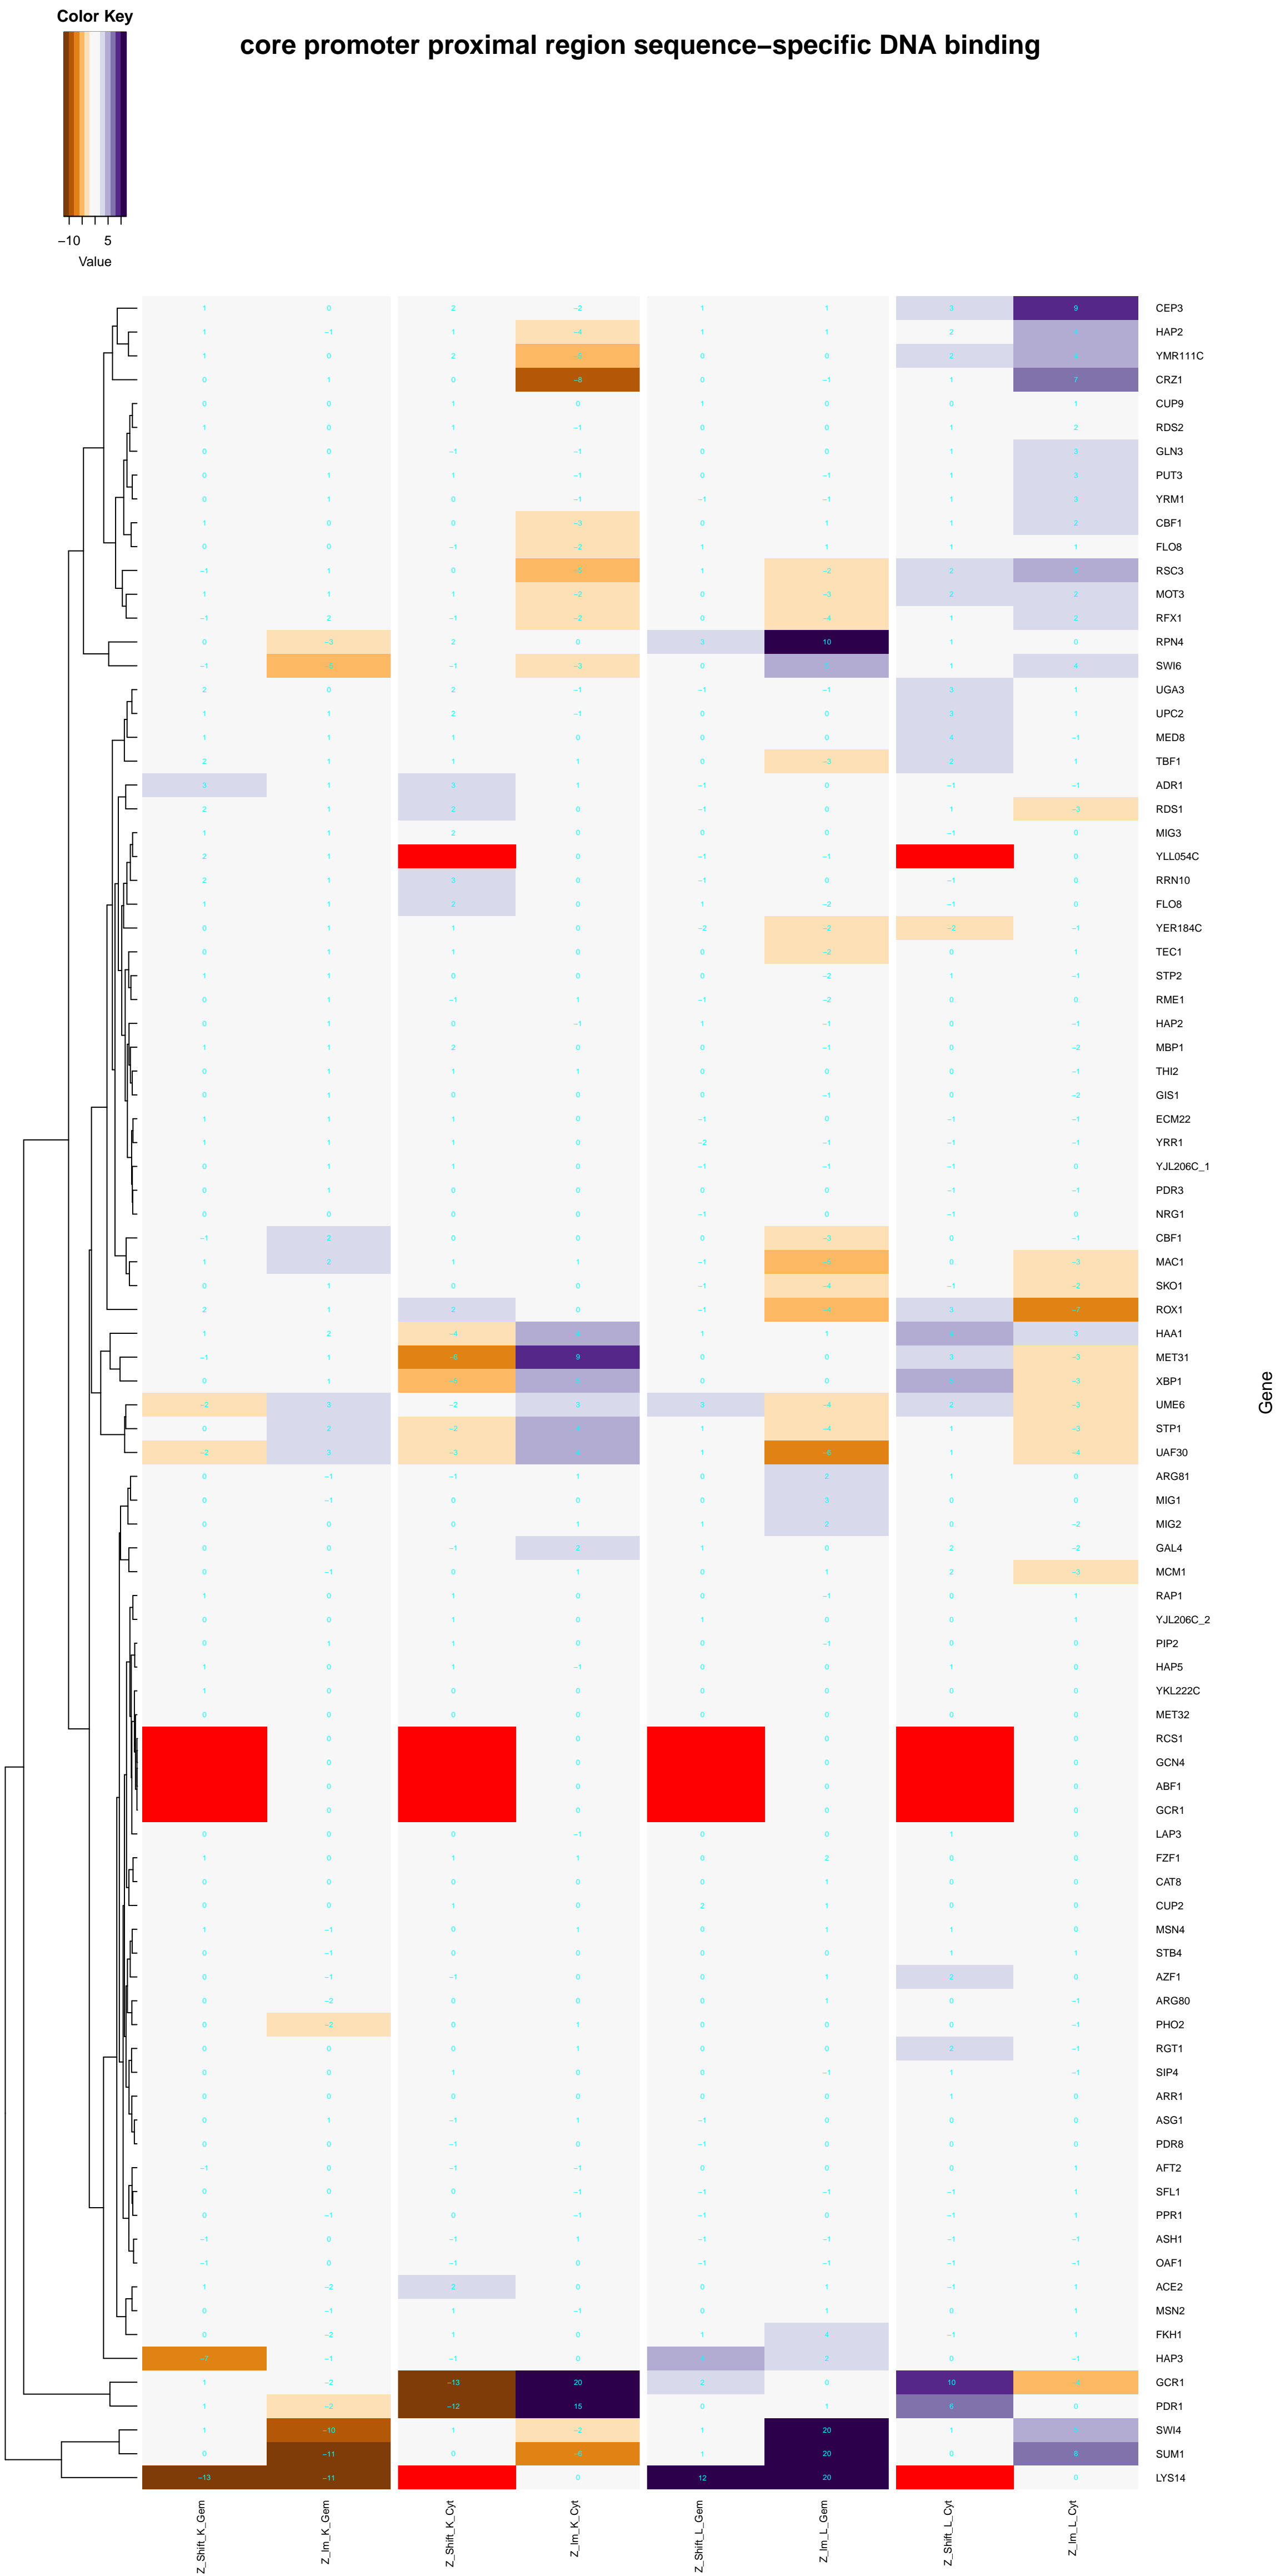

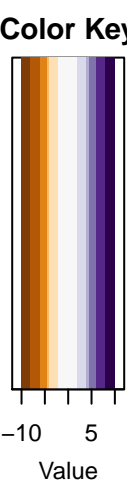

polymerase III regulatory region sequence-specific DNA binding

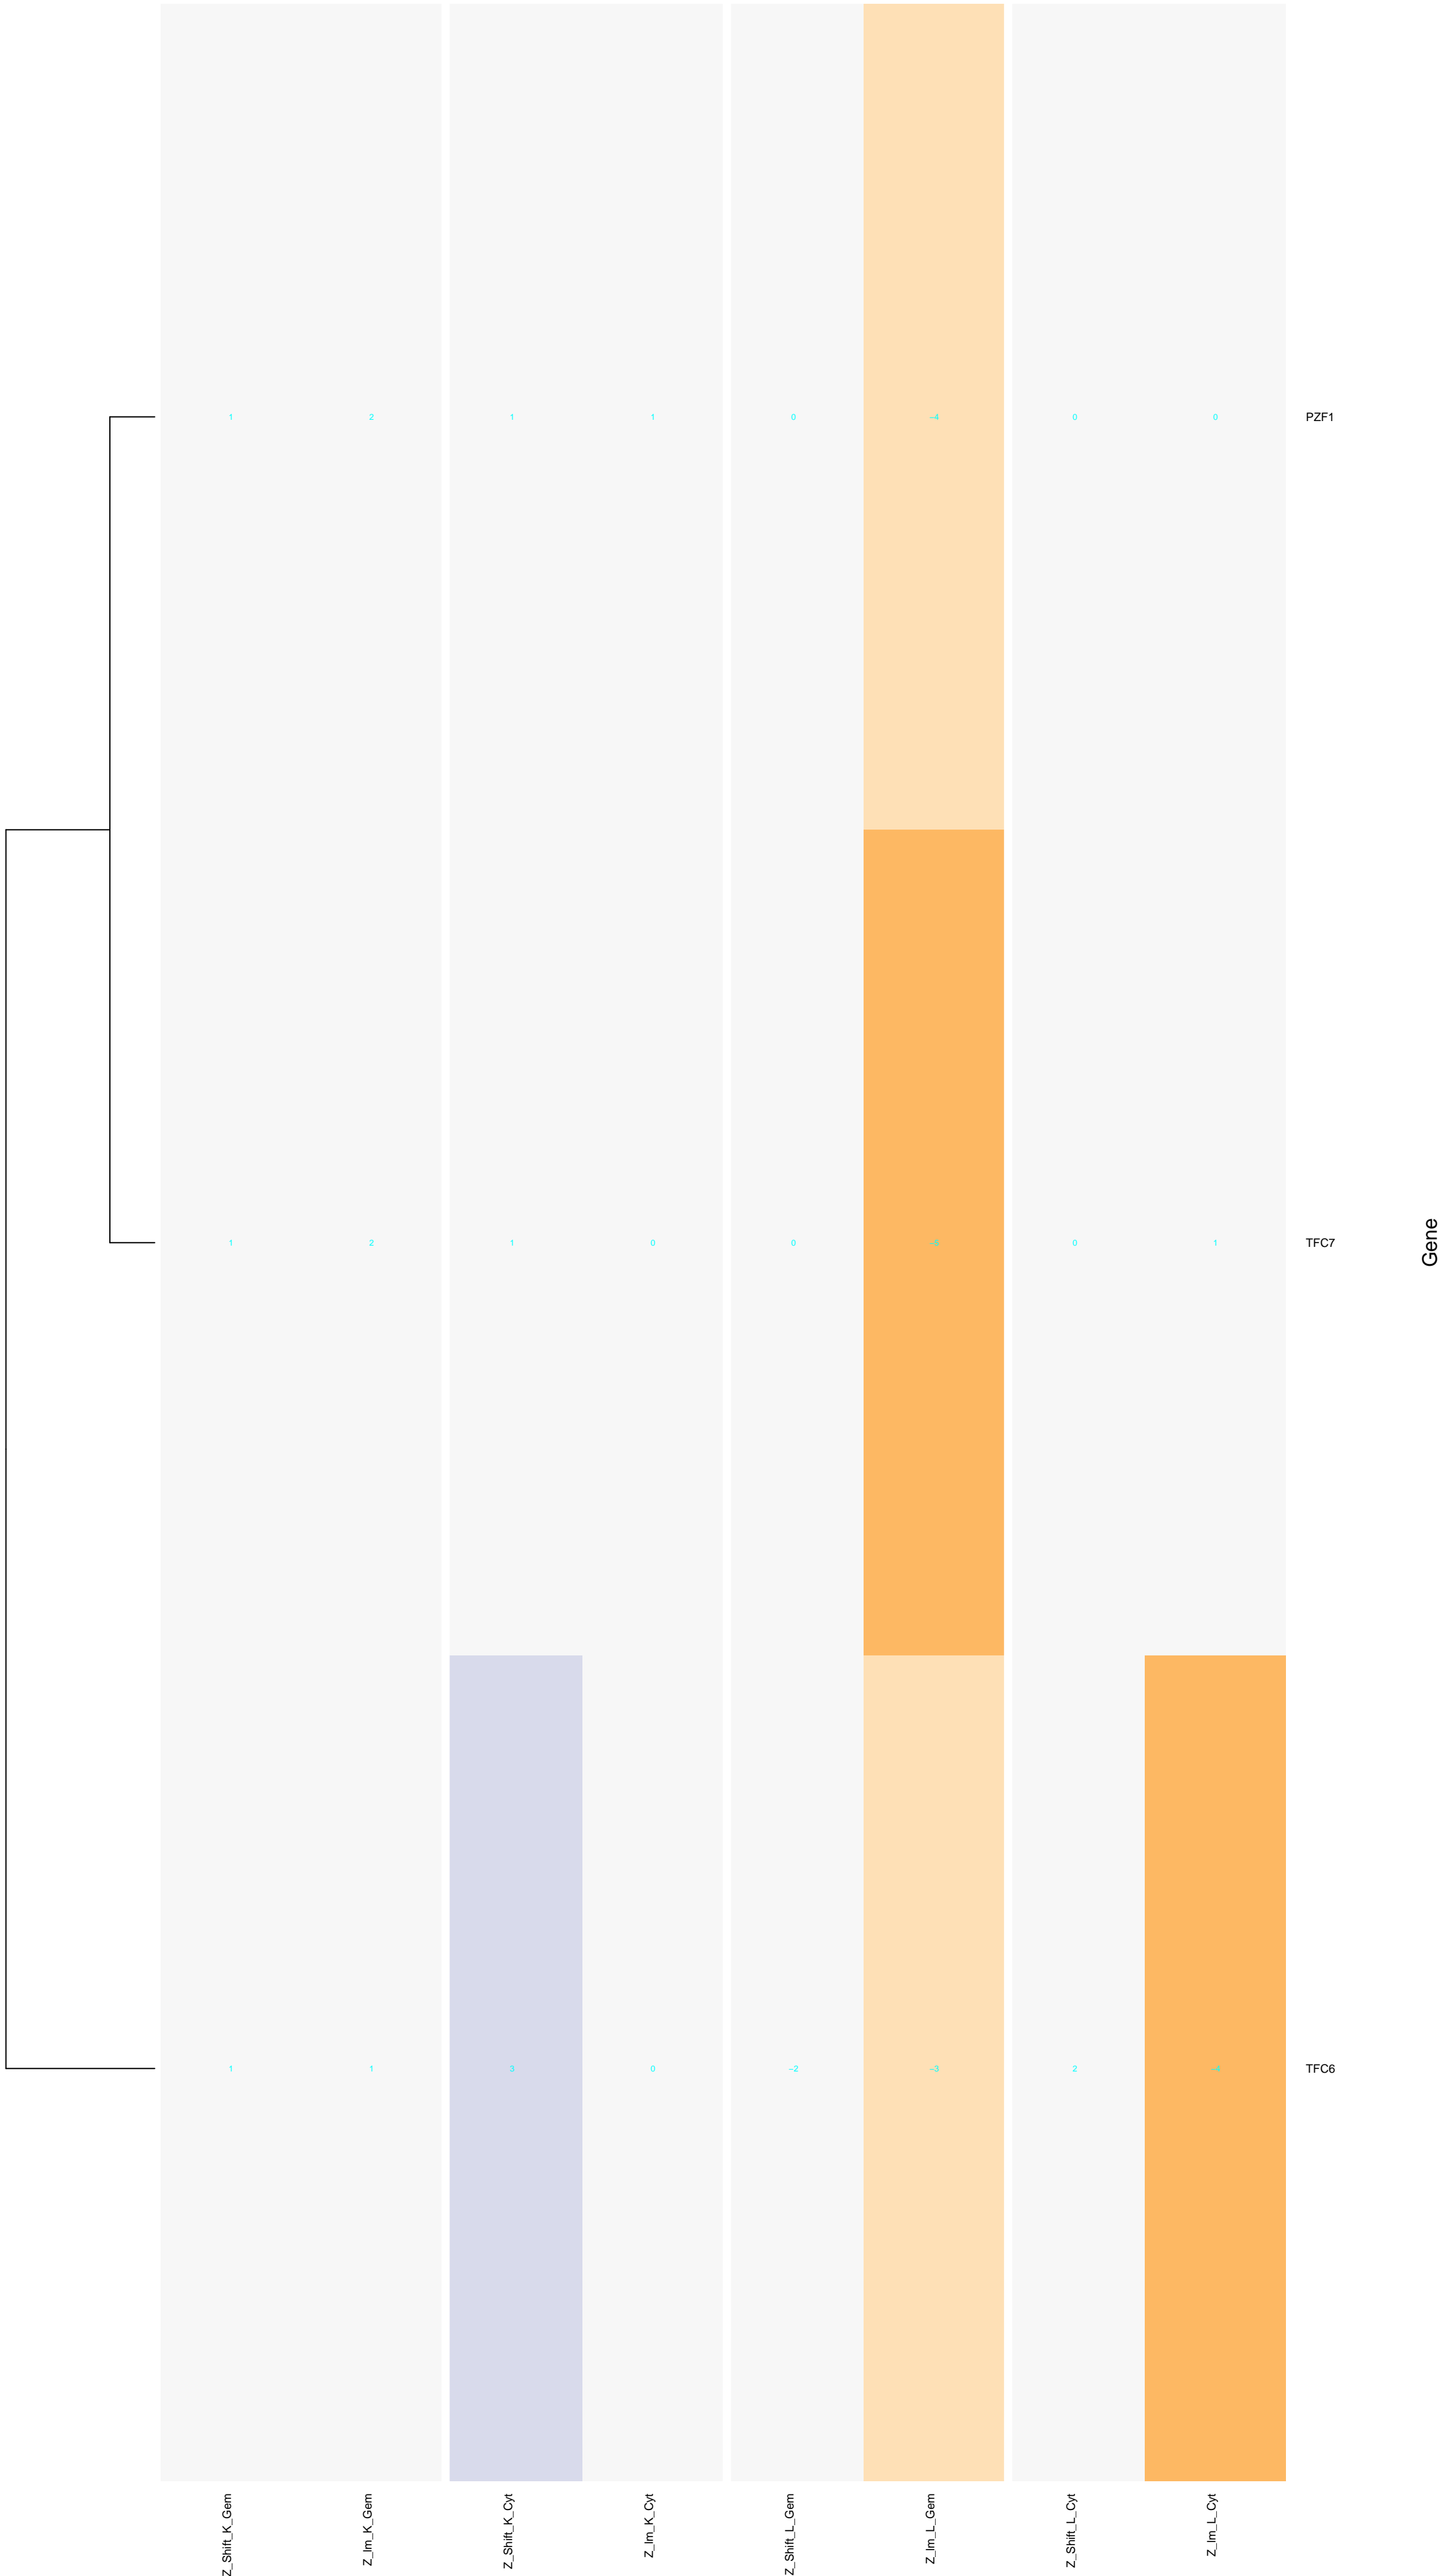

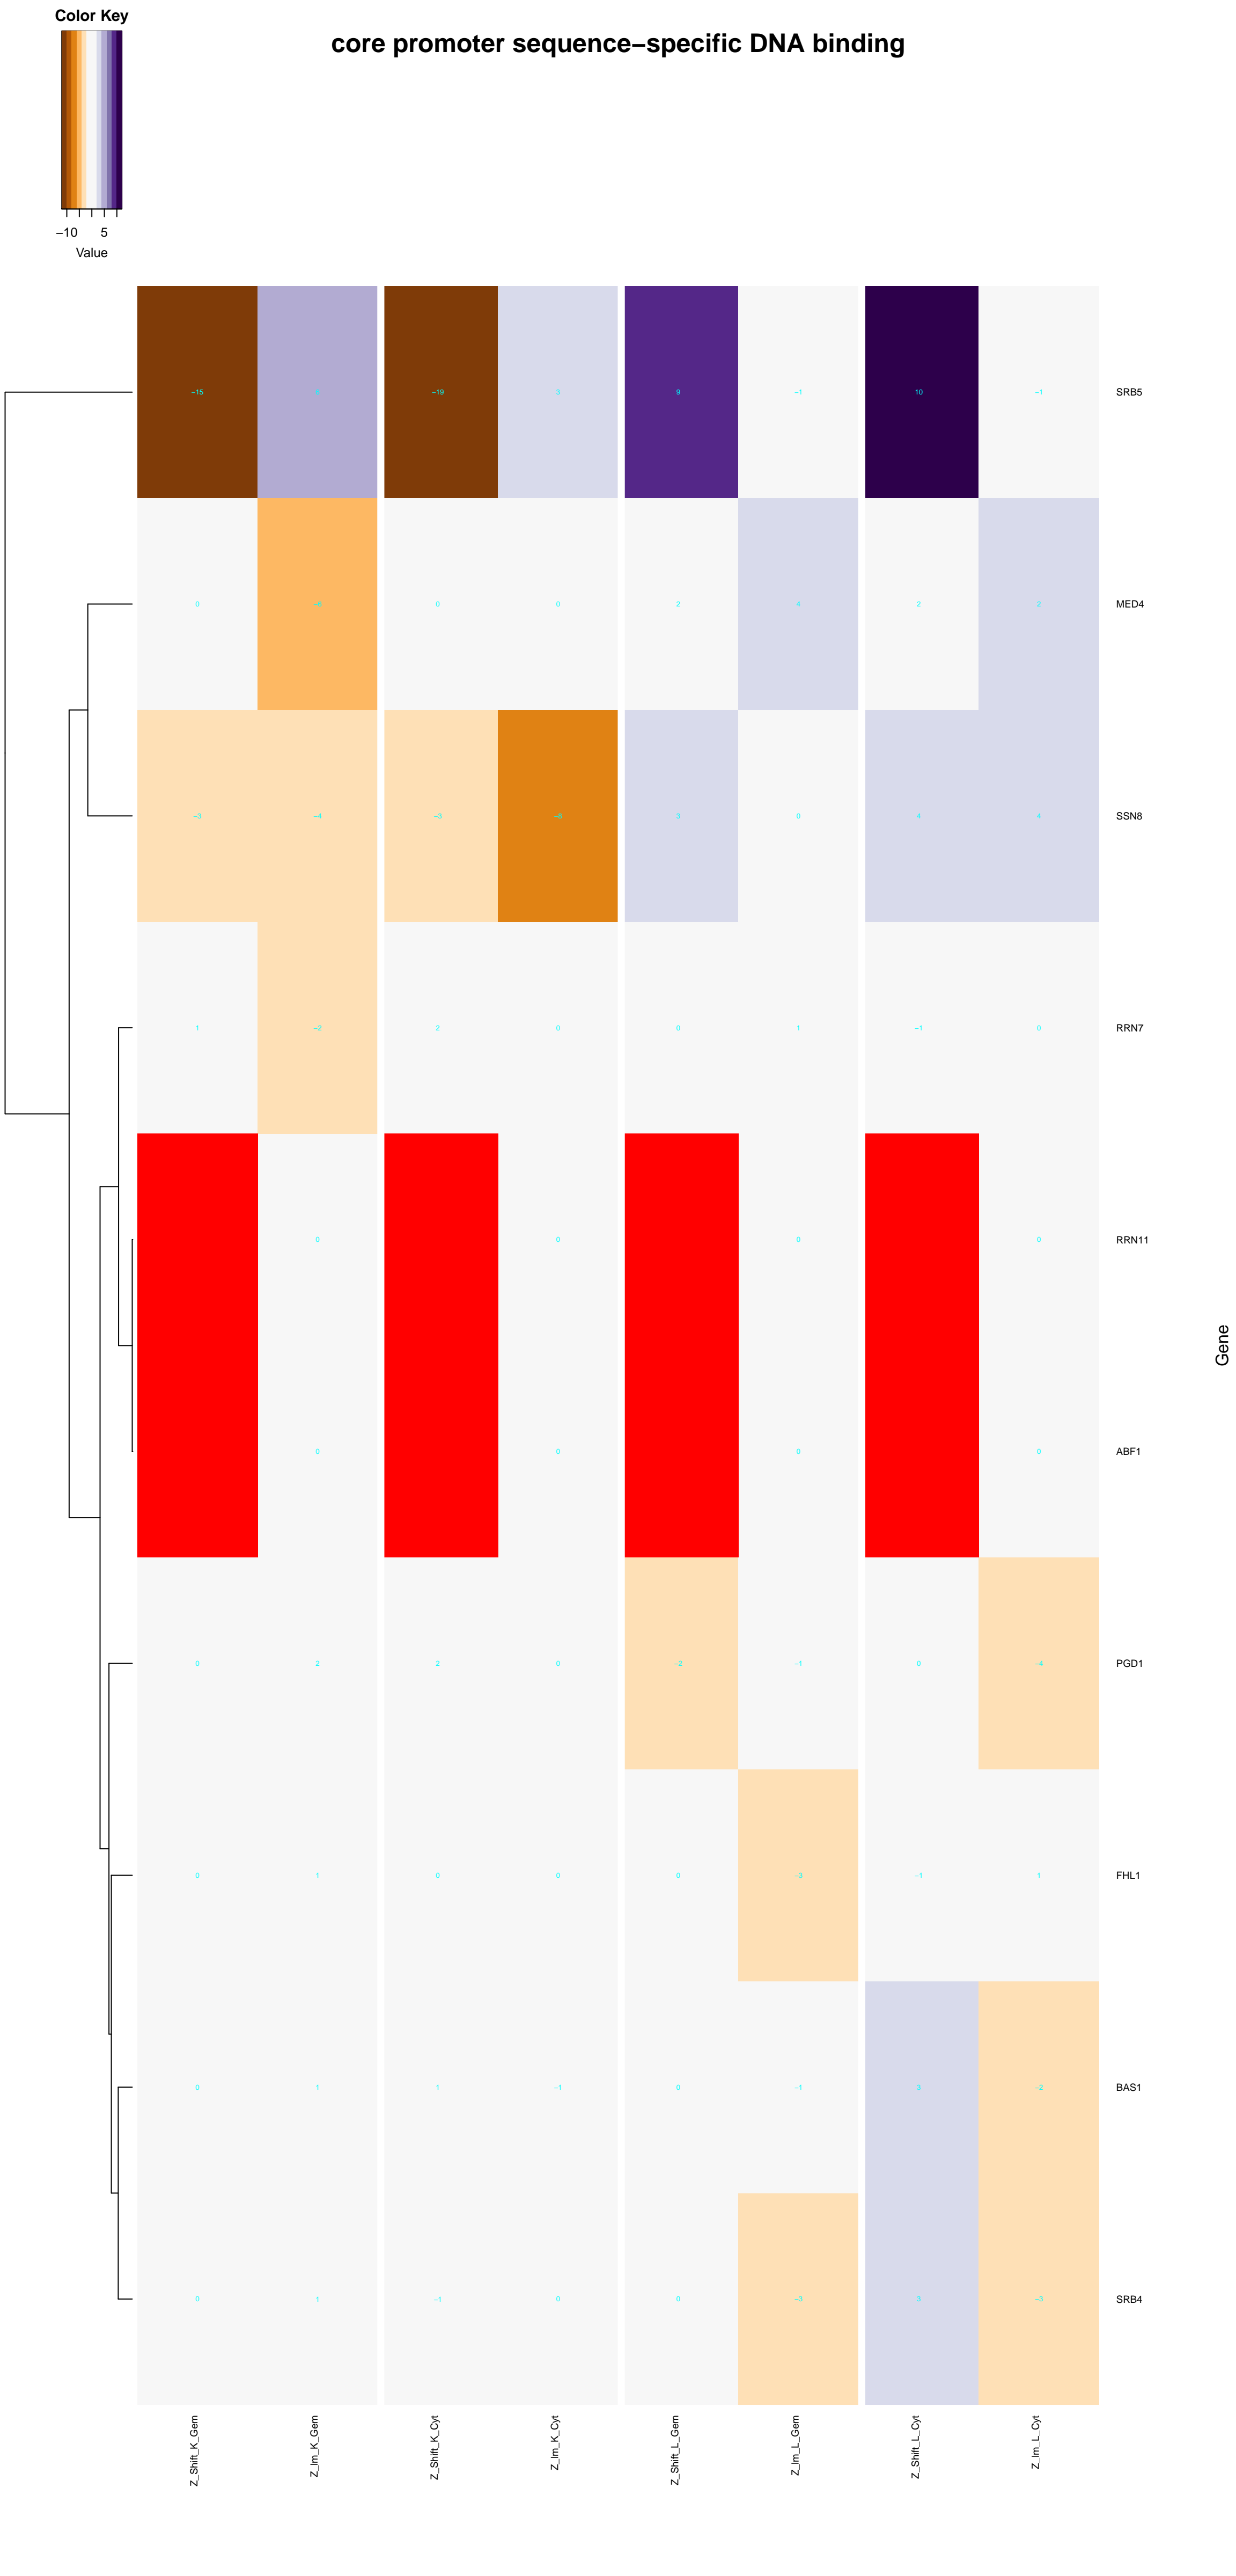

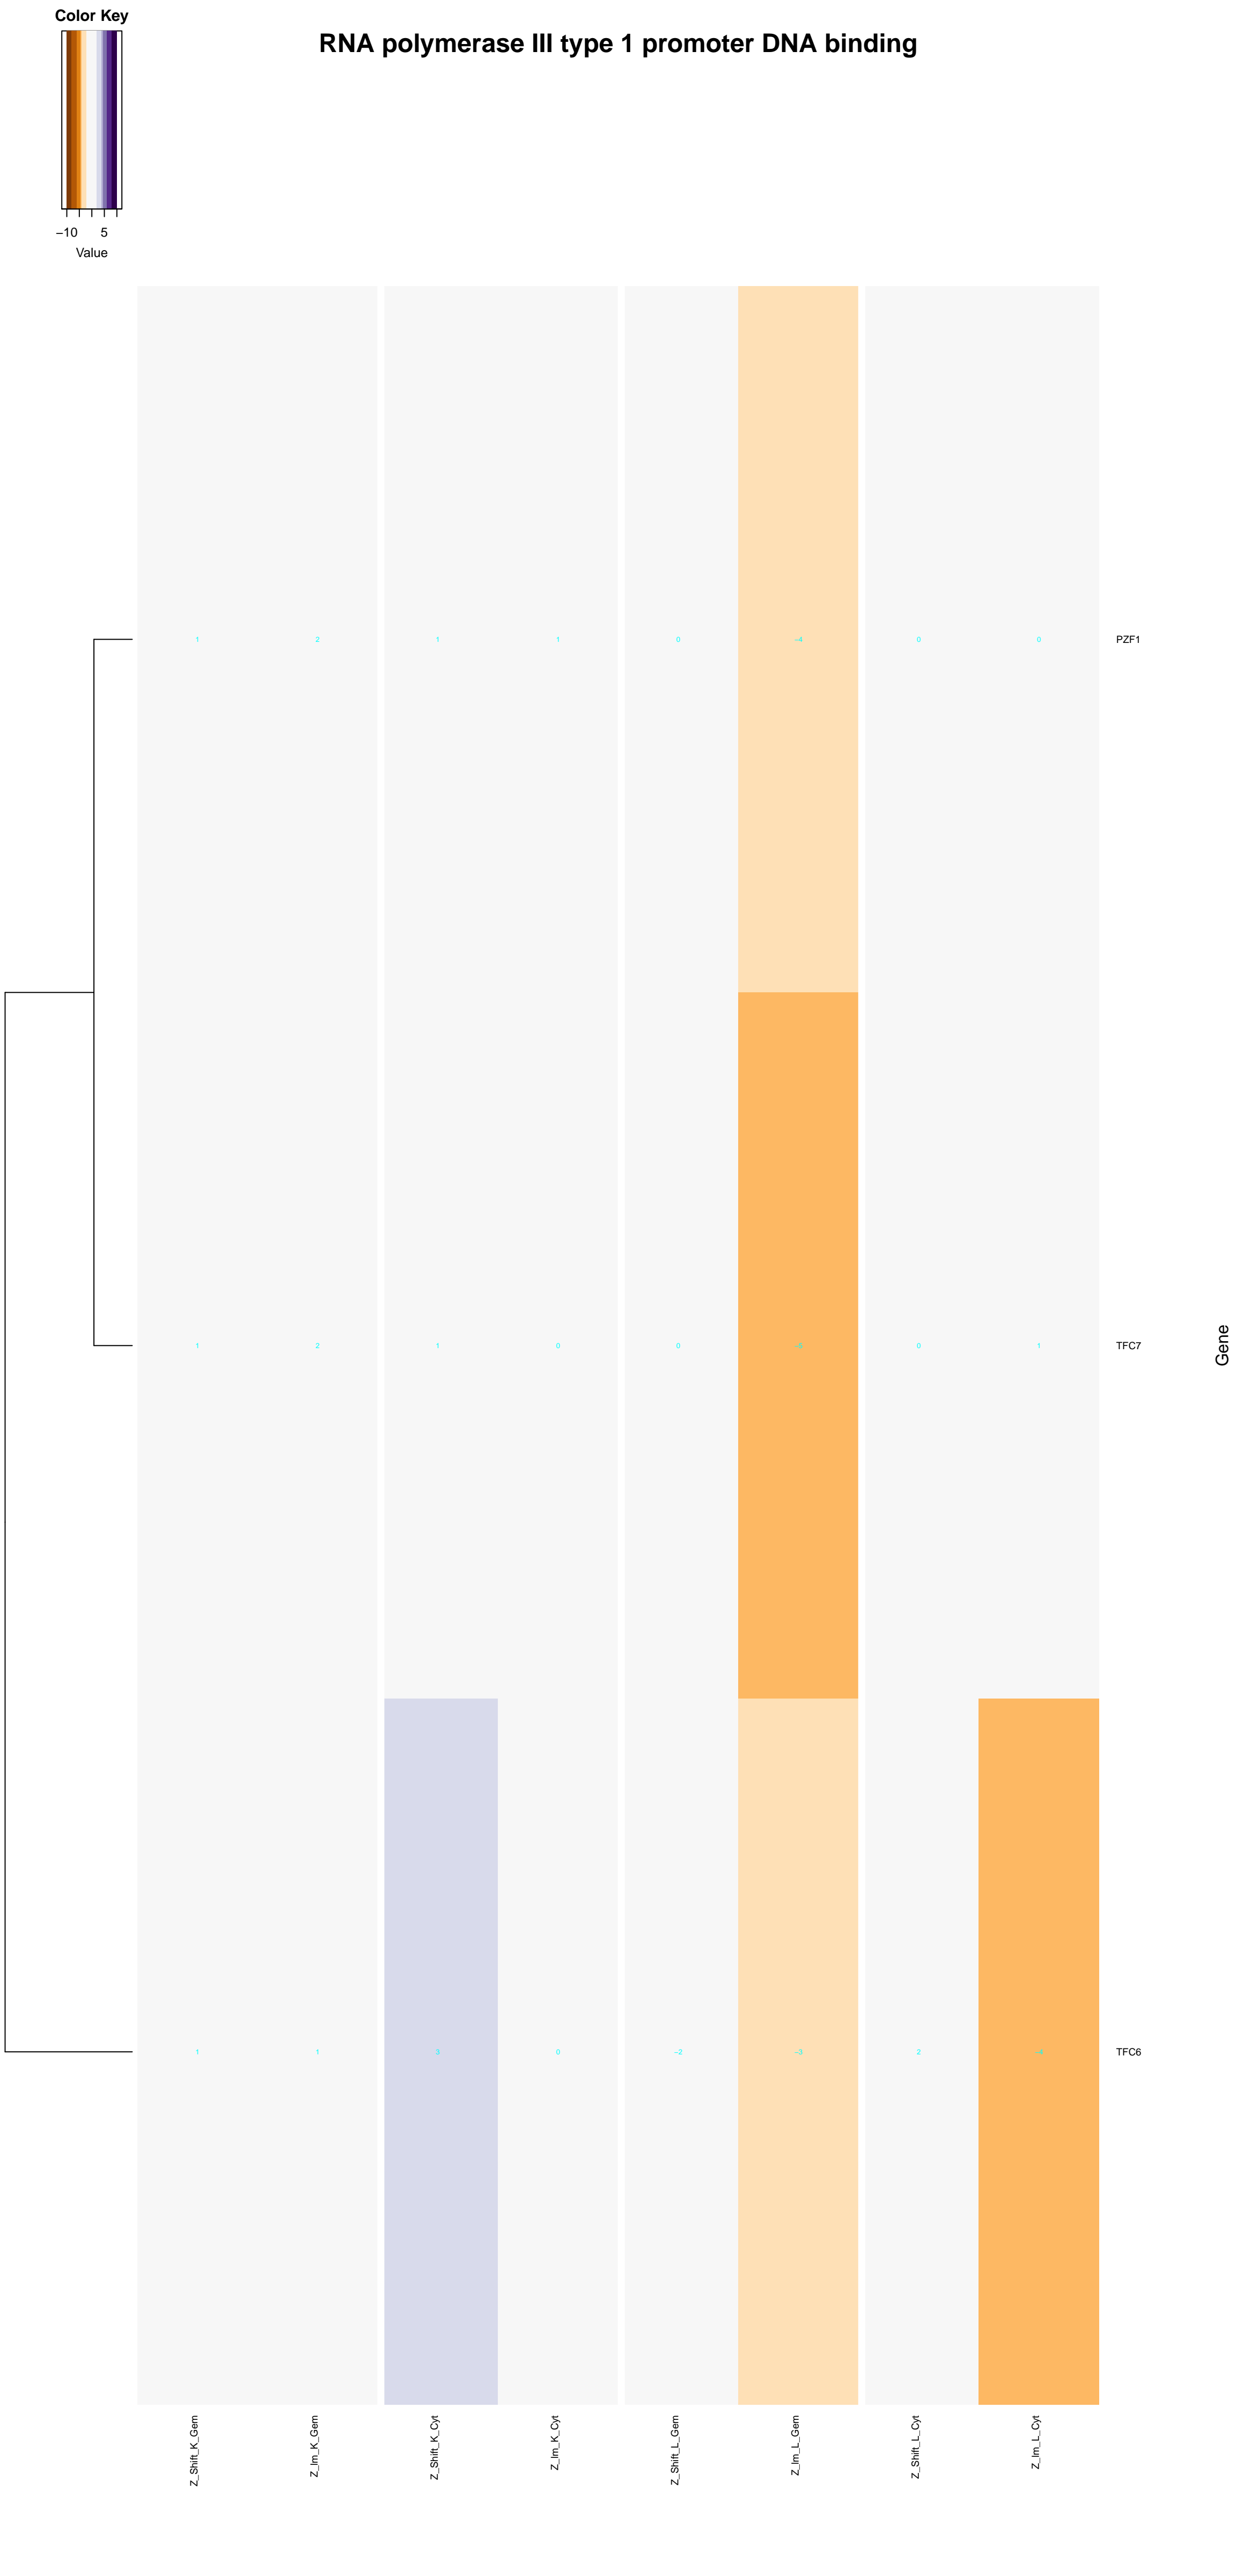

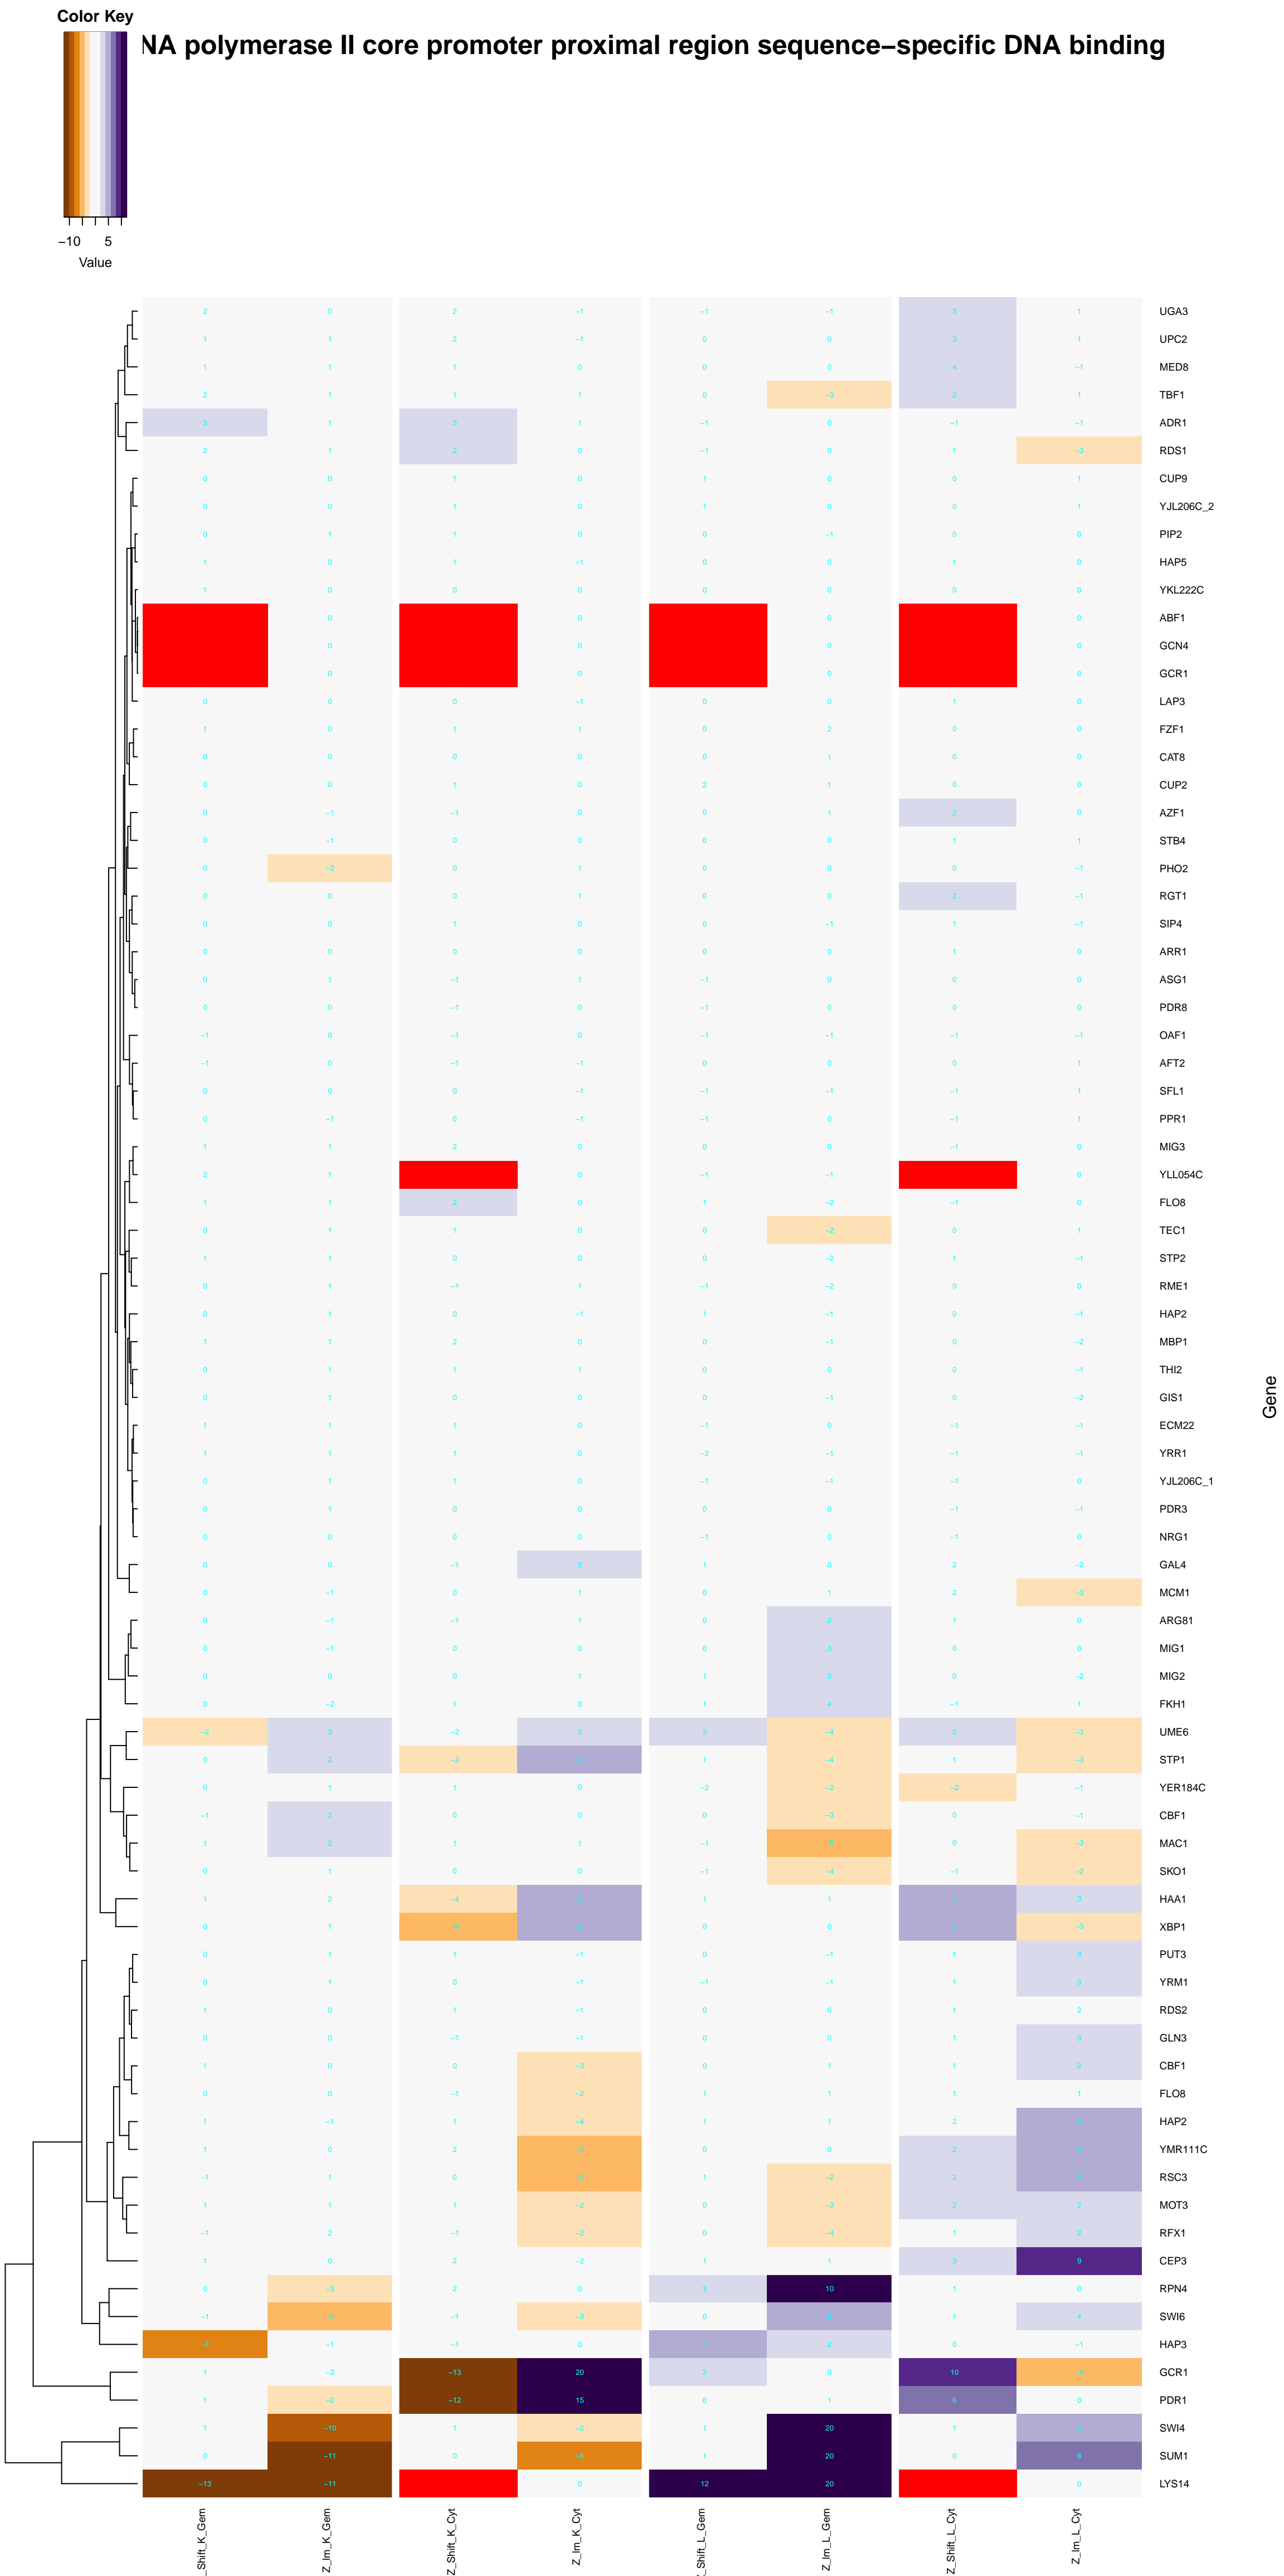

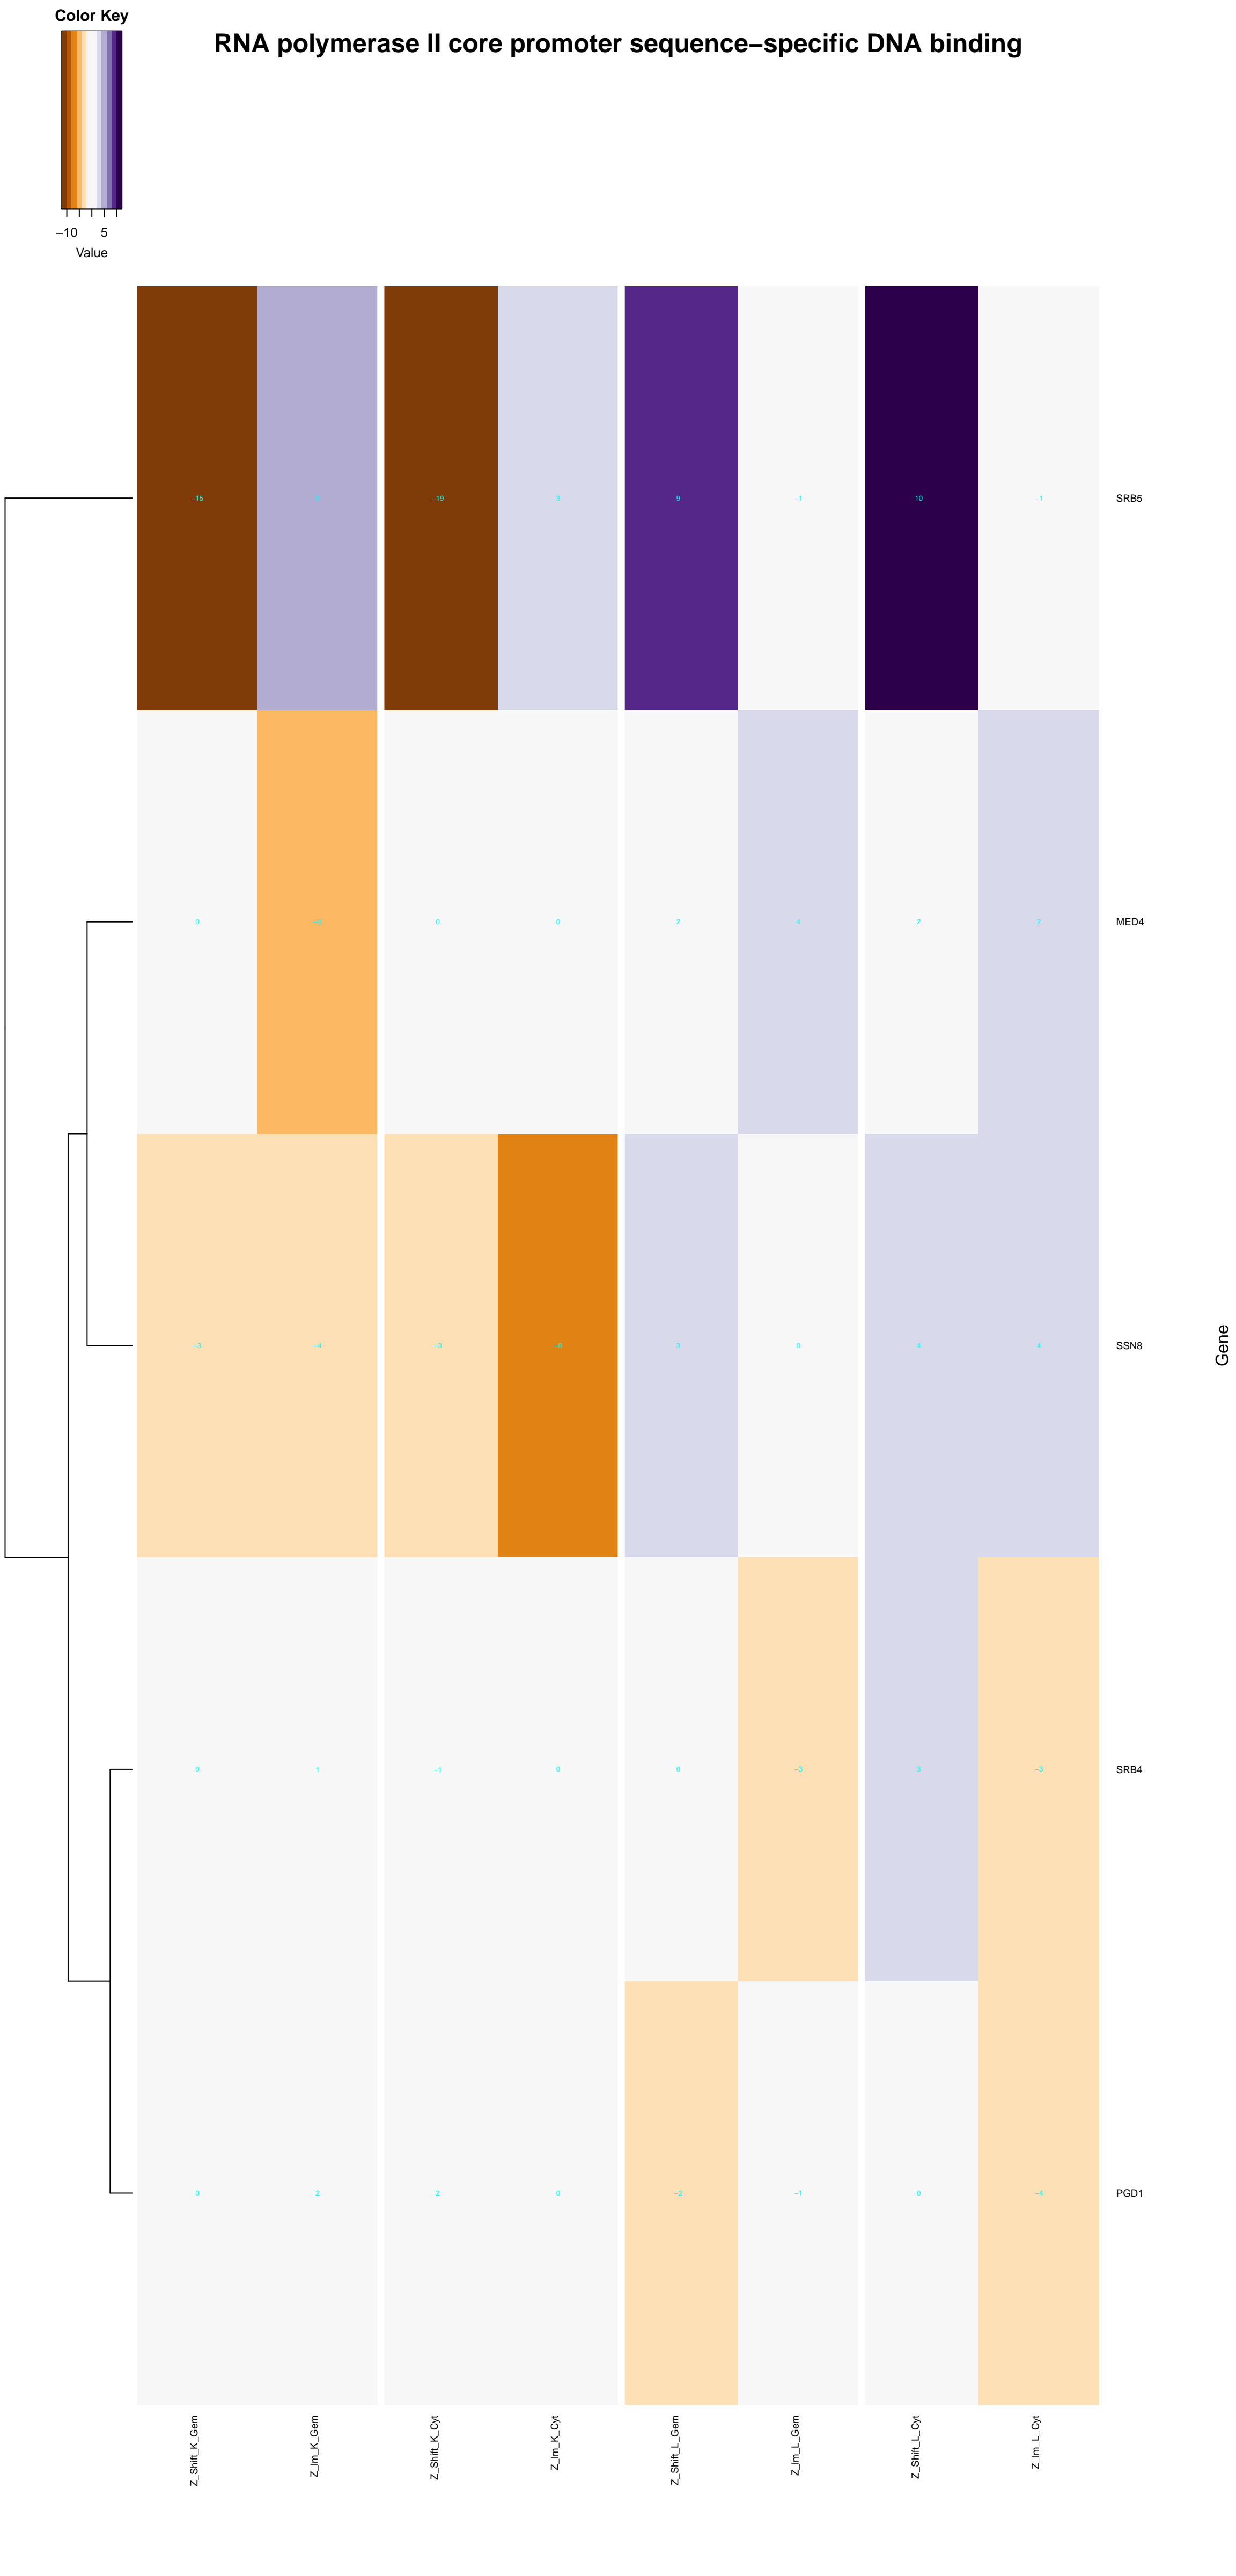



RNA polymerase III type 1 promoter sequence-specific DNA binding



Supplement: s1 [file s1]
