# Supplementary material for: A Humanized Yeast Phenomic Model of Deoxycytidine Kinase to Predict Genetic Buffering of Nucleoside Analog Cytotoxicity
Source: MDPI journal article supplement (doi:10.3390/genes10100770), 2019-09-30

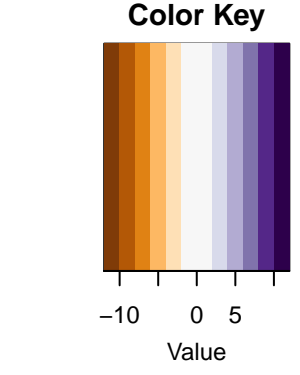

0-0-0

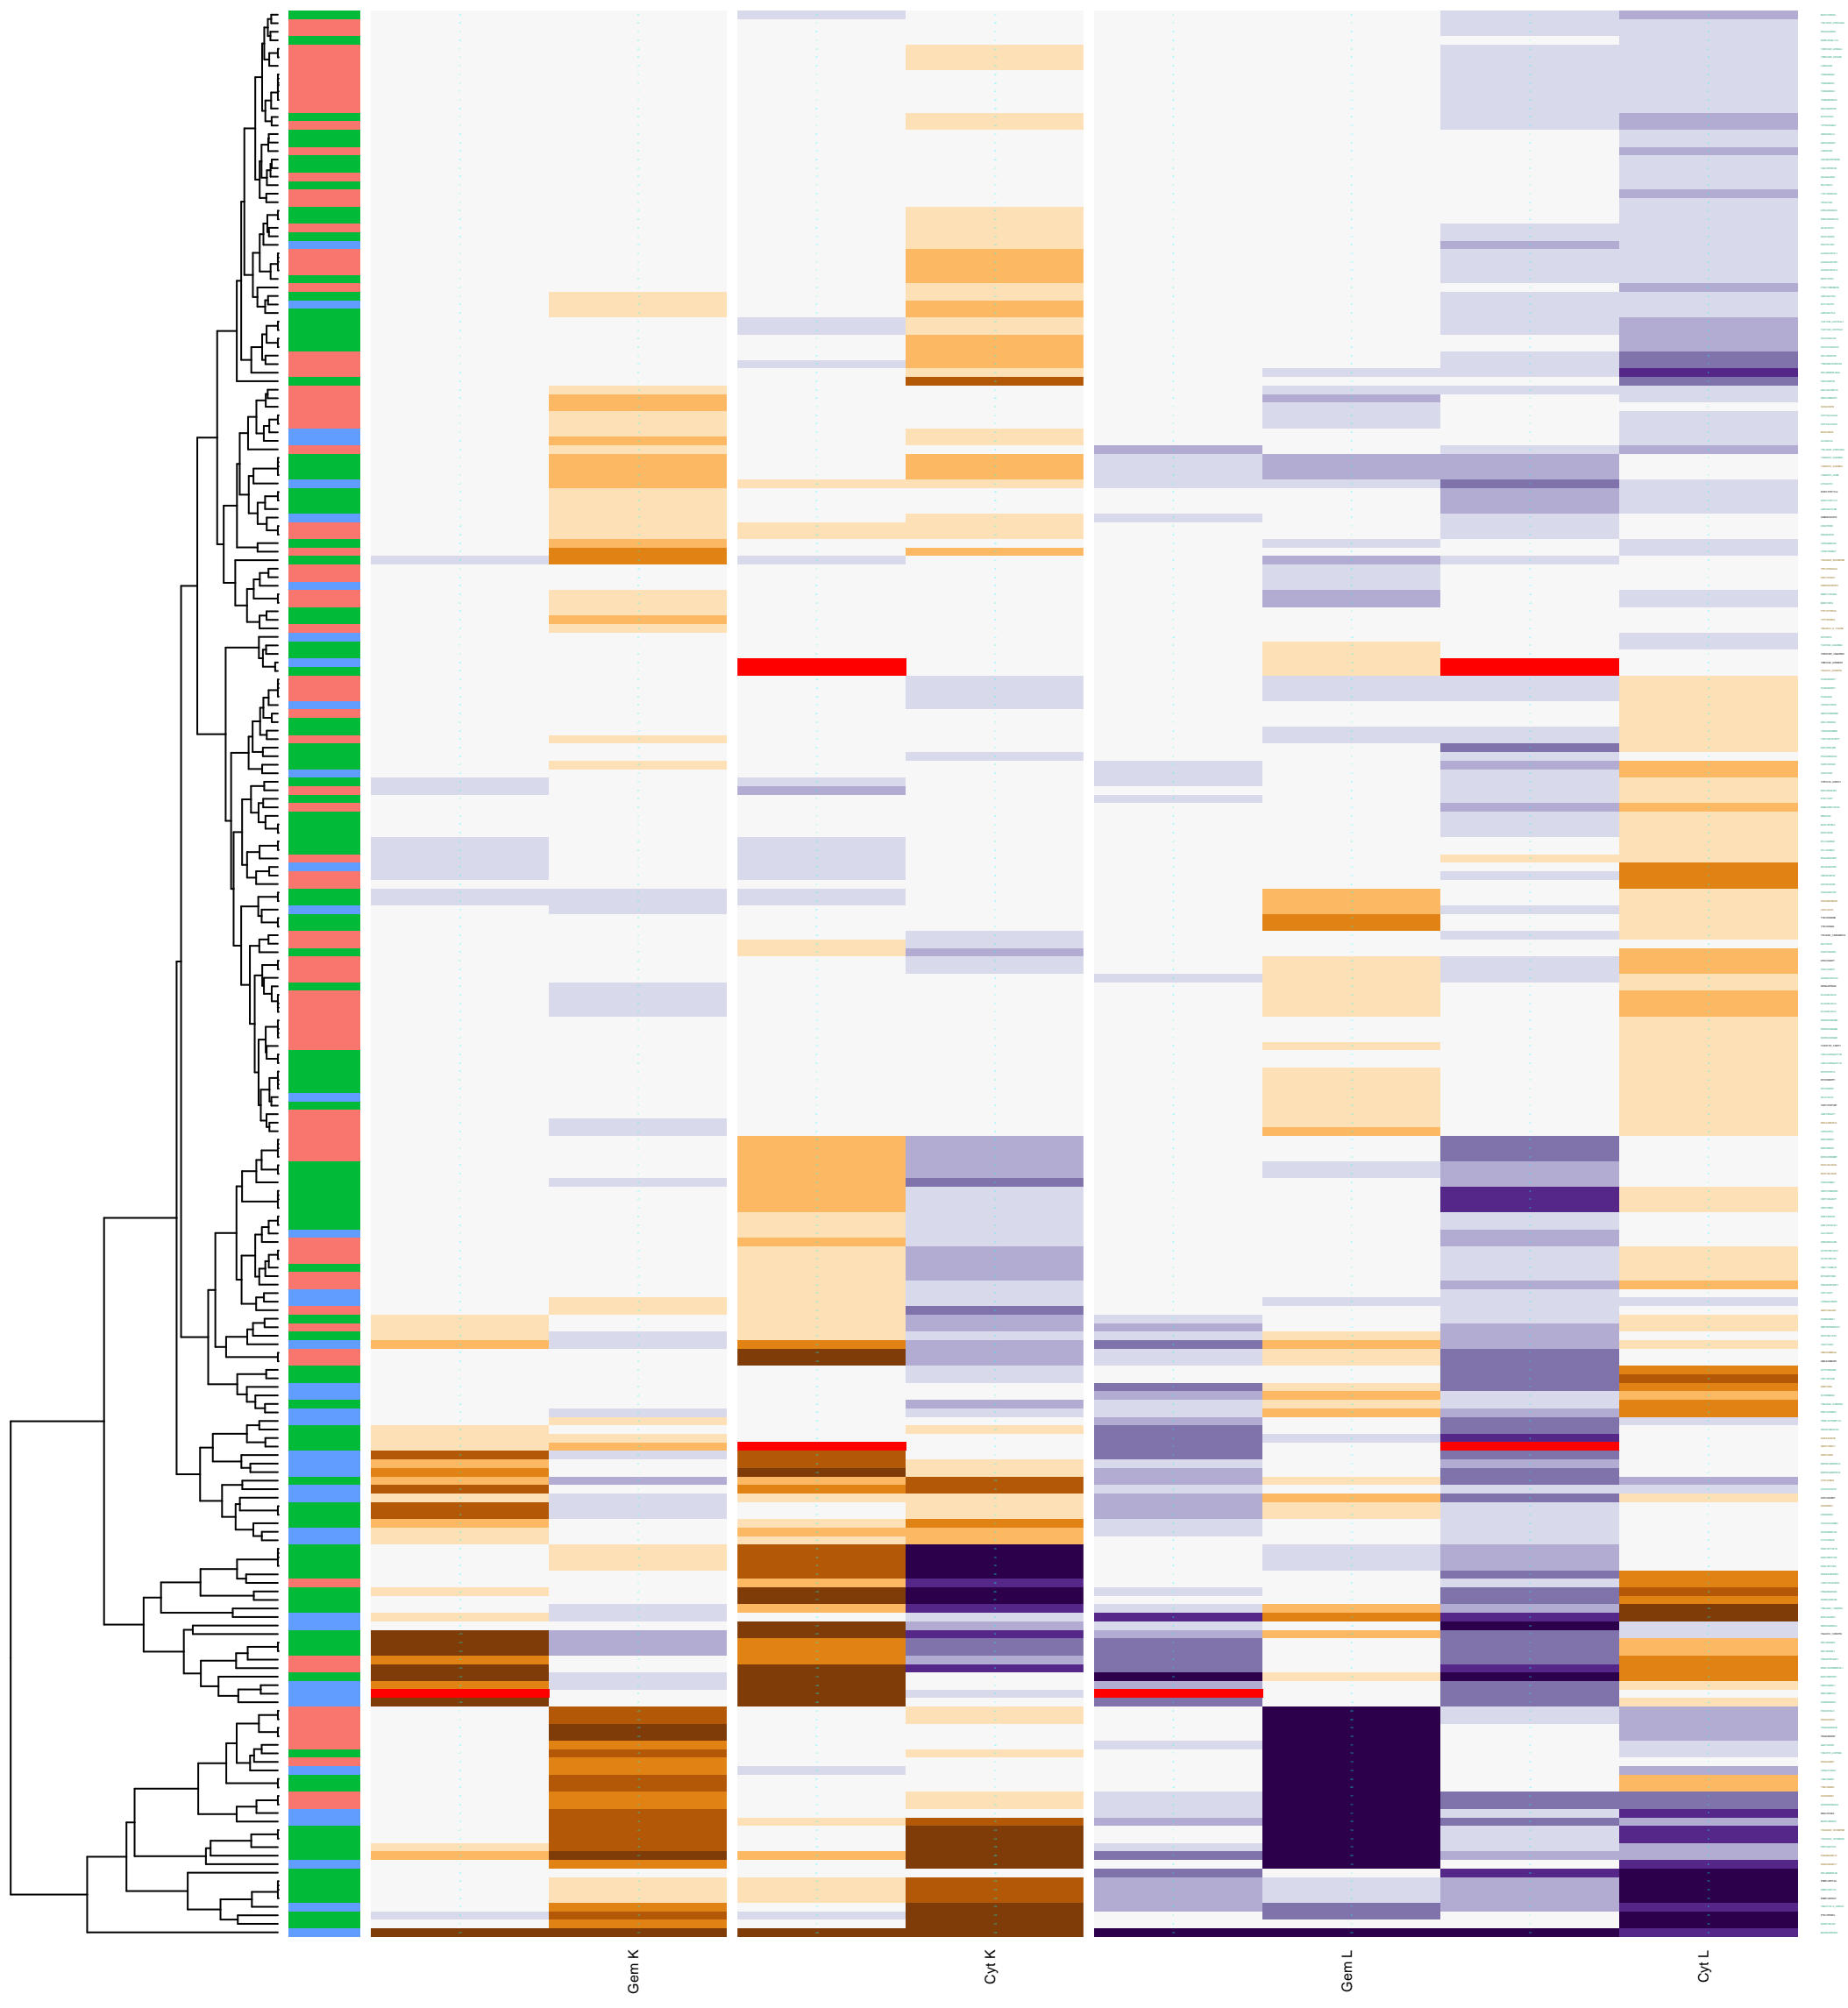

Color Key

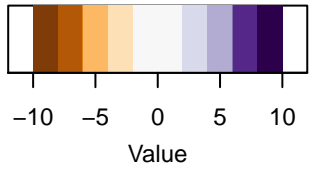

1-0-0

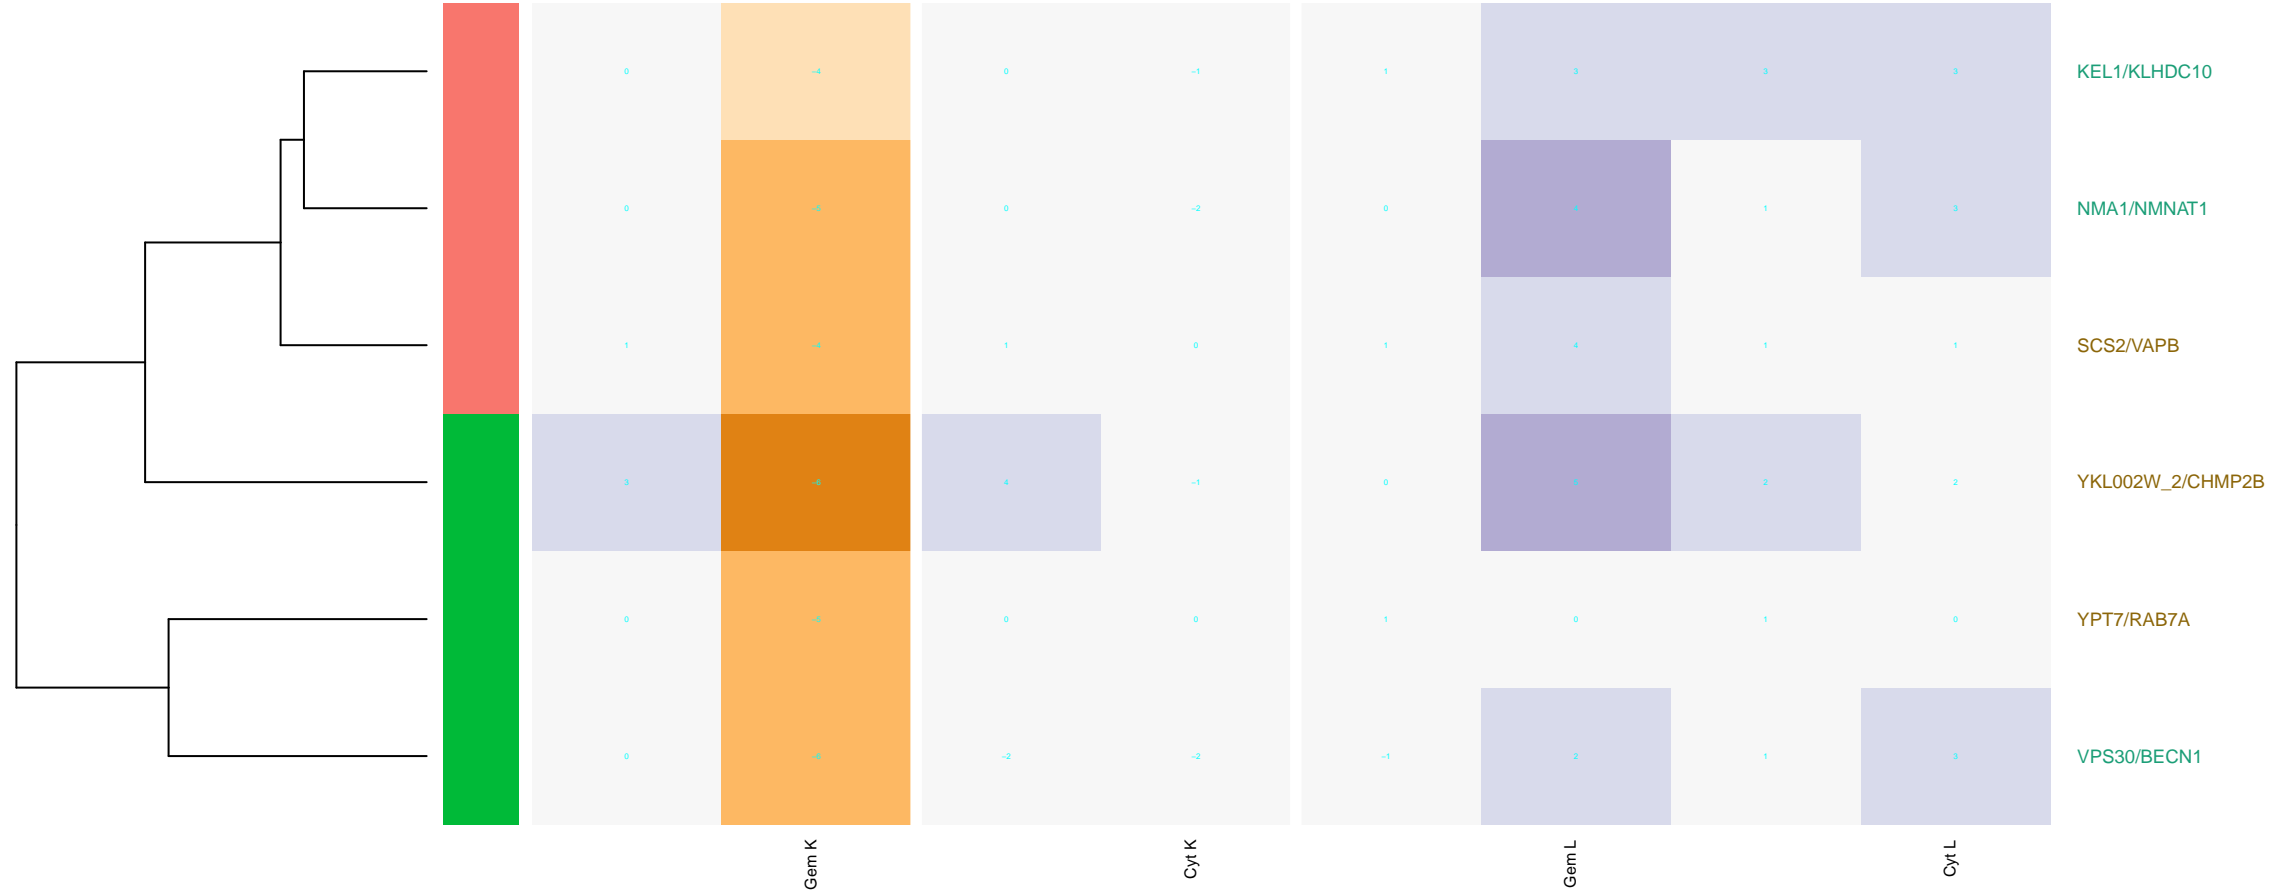

Color Key

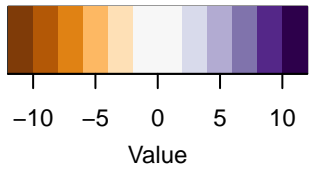

1-0-1

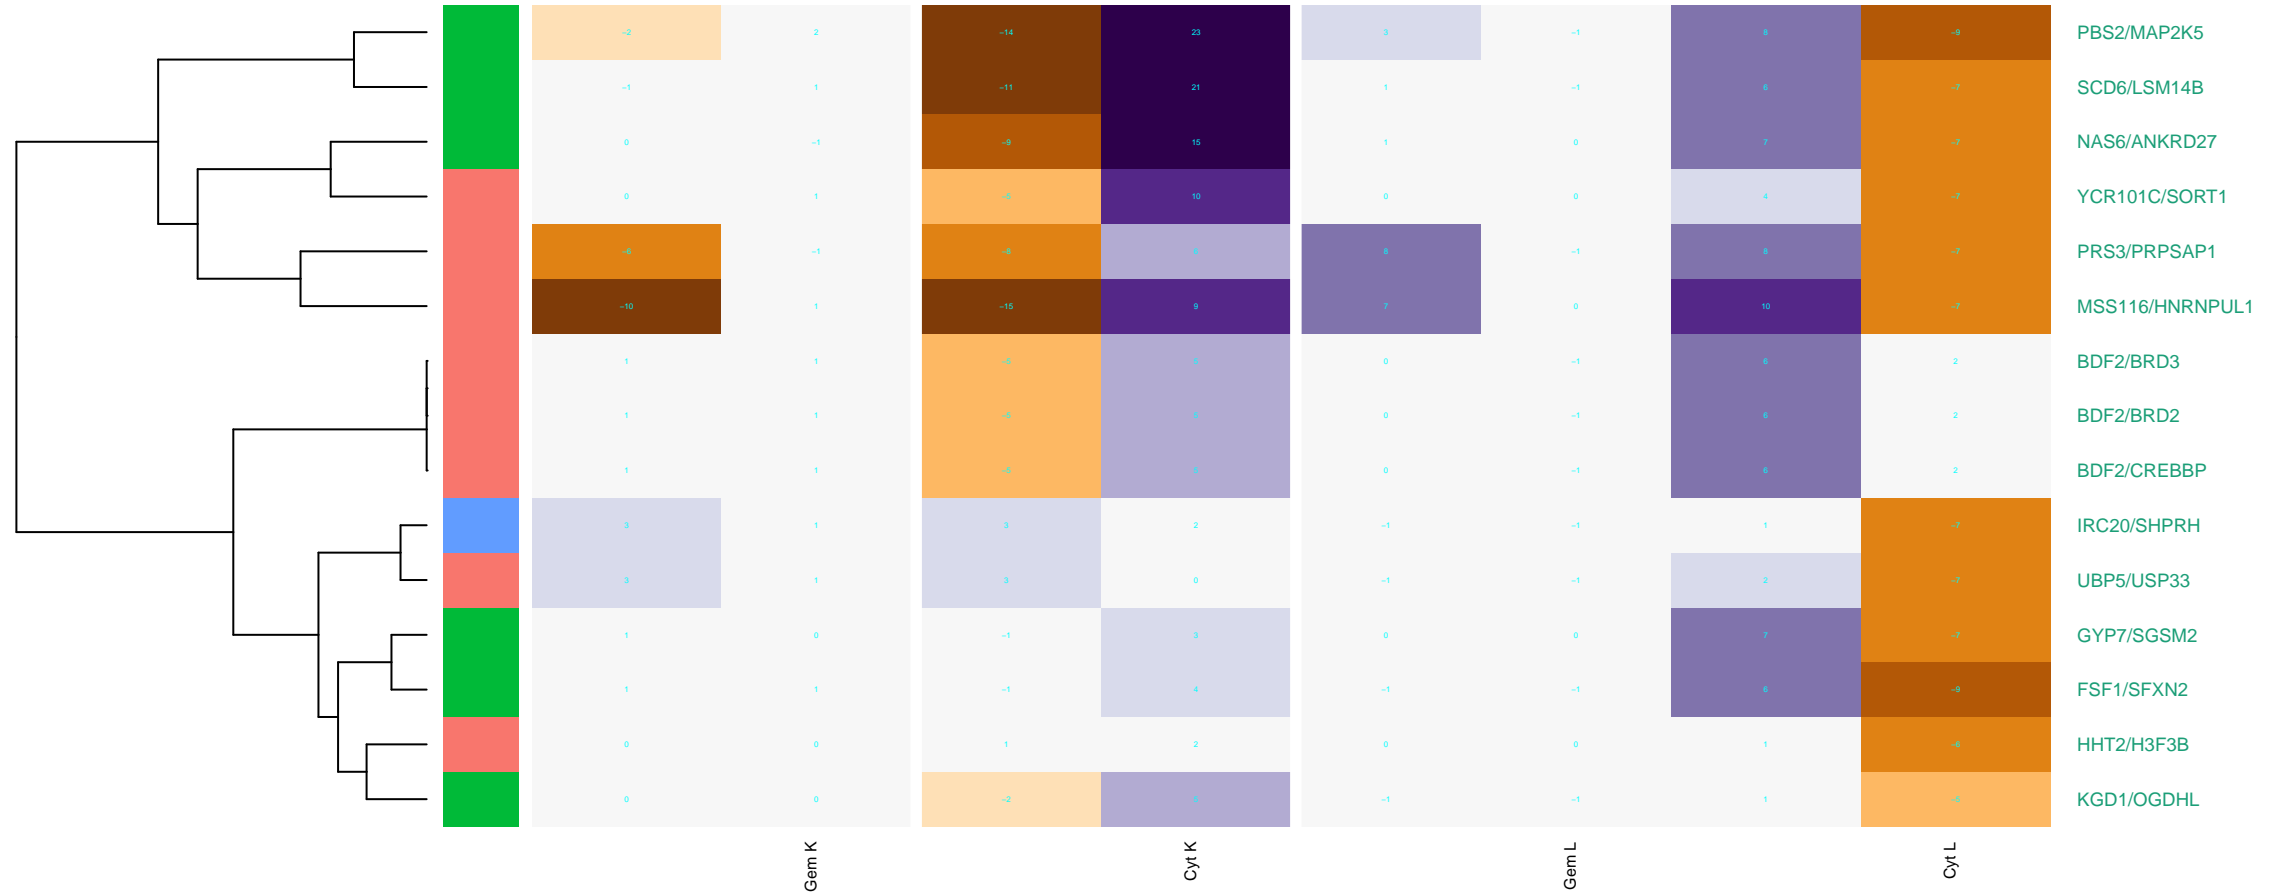

Color Key

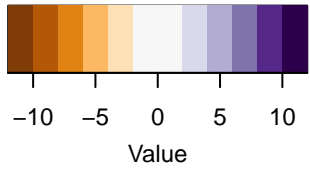

1-0-10

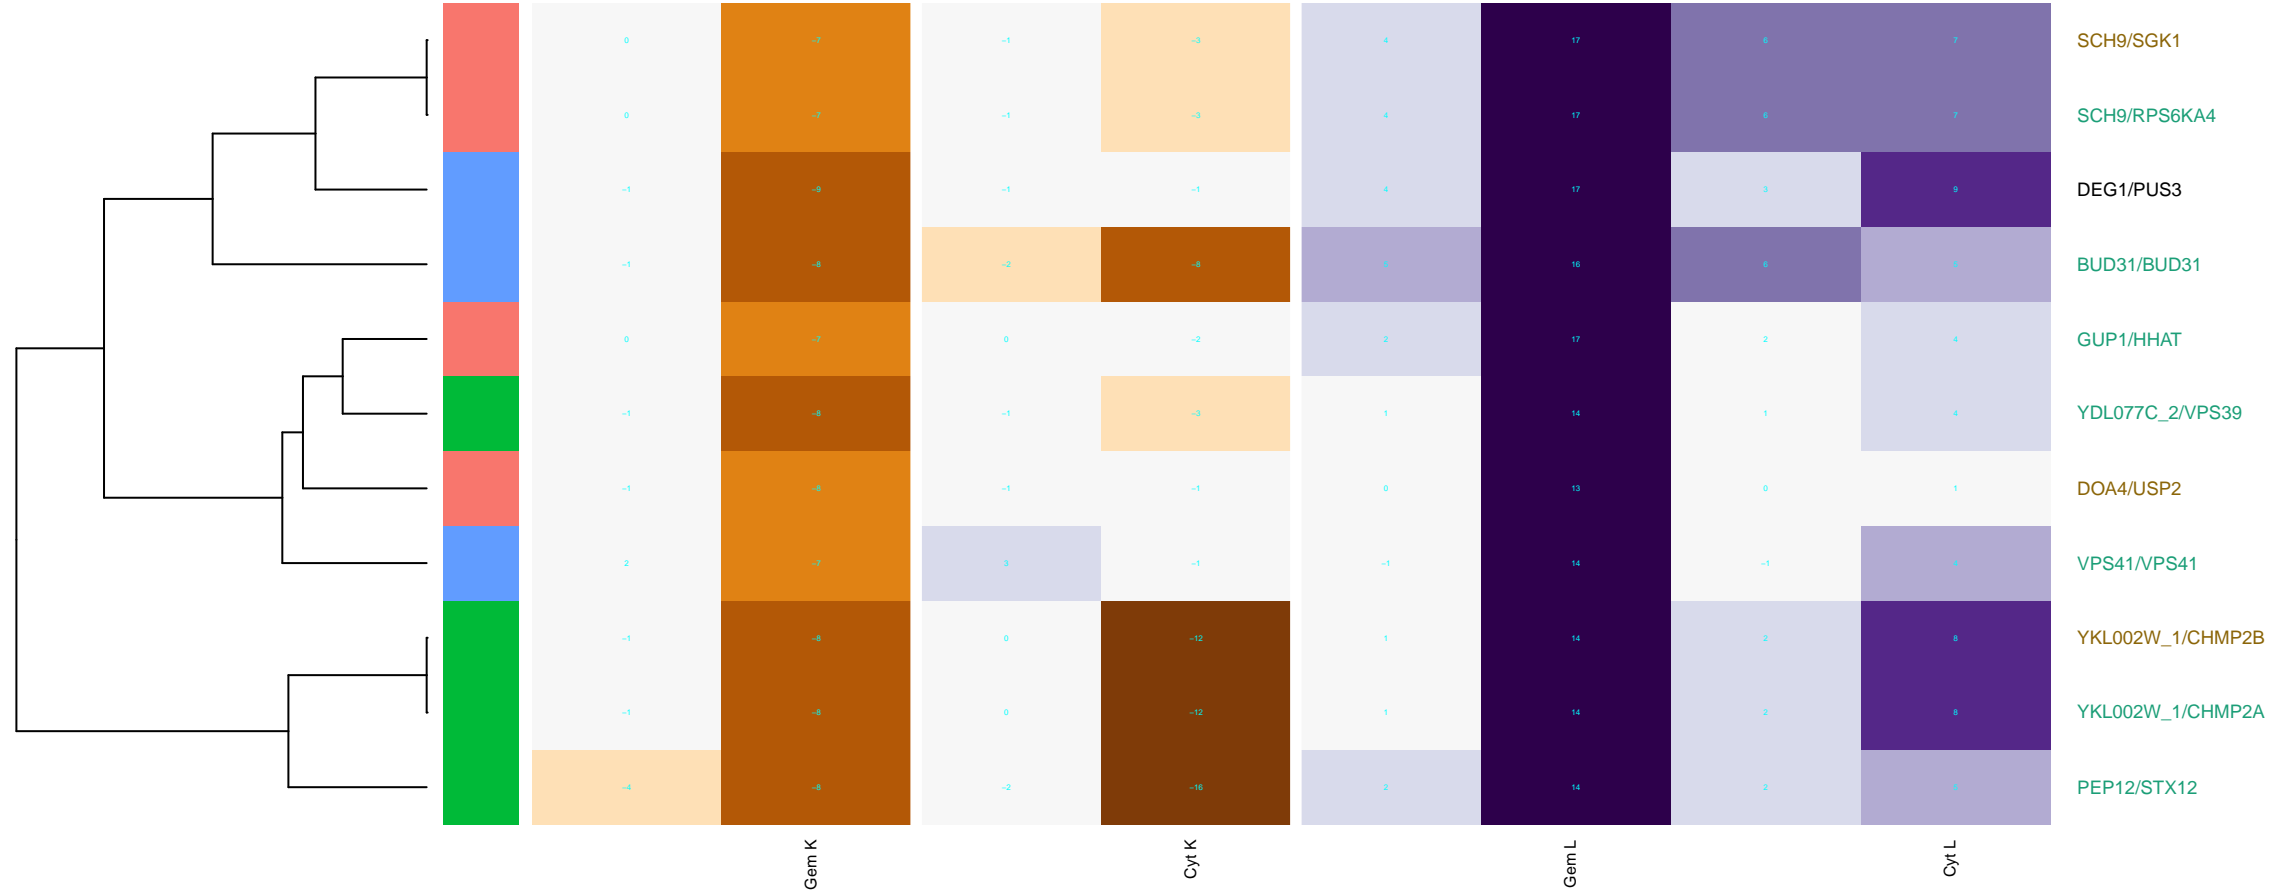

Color Key



1-0-11

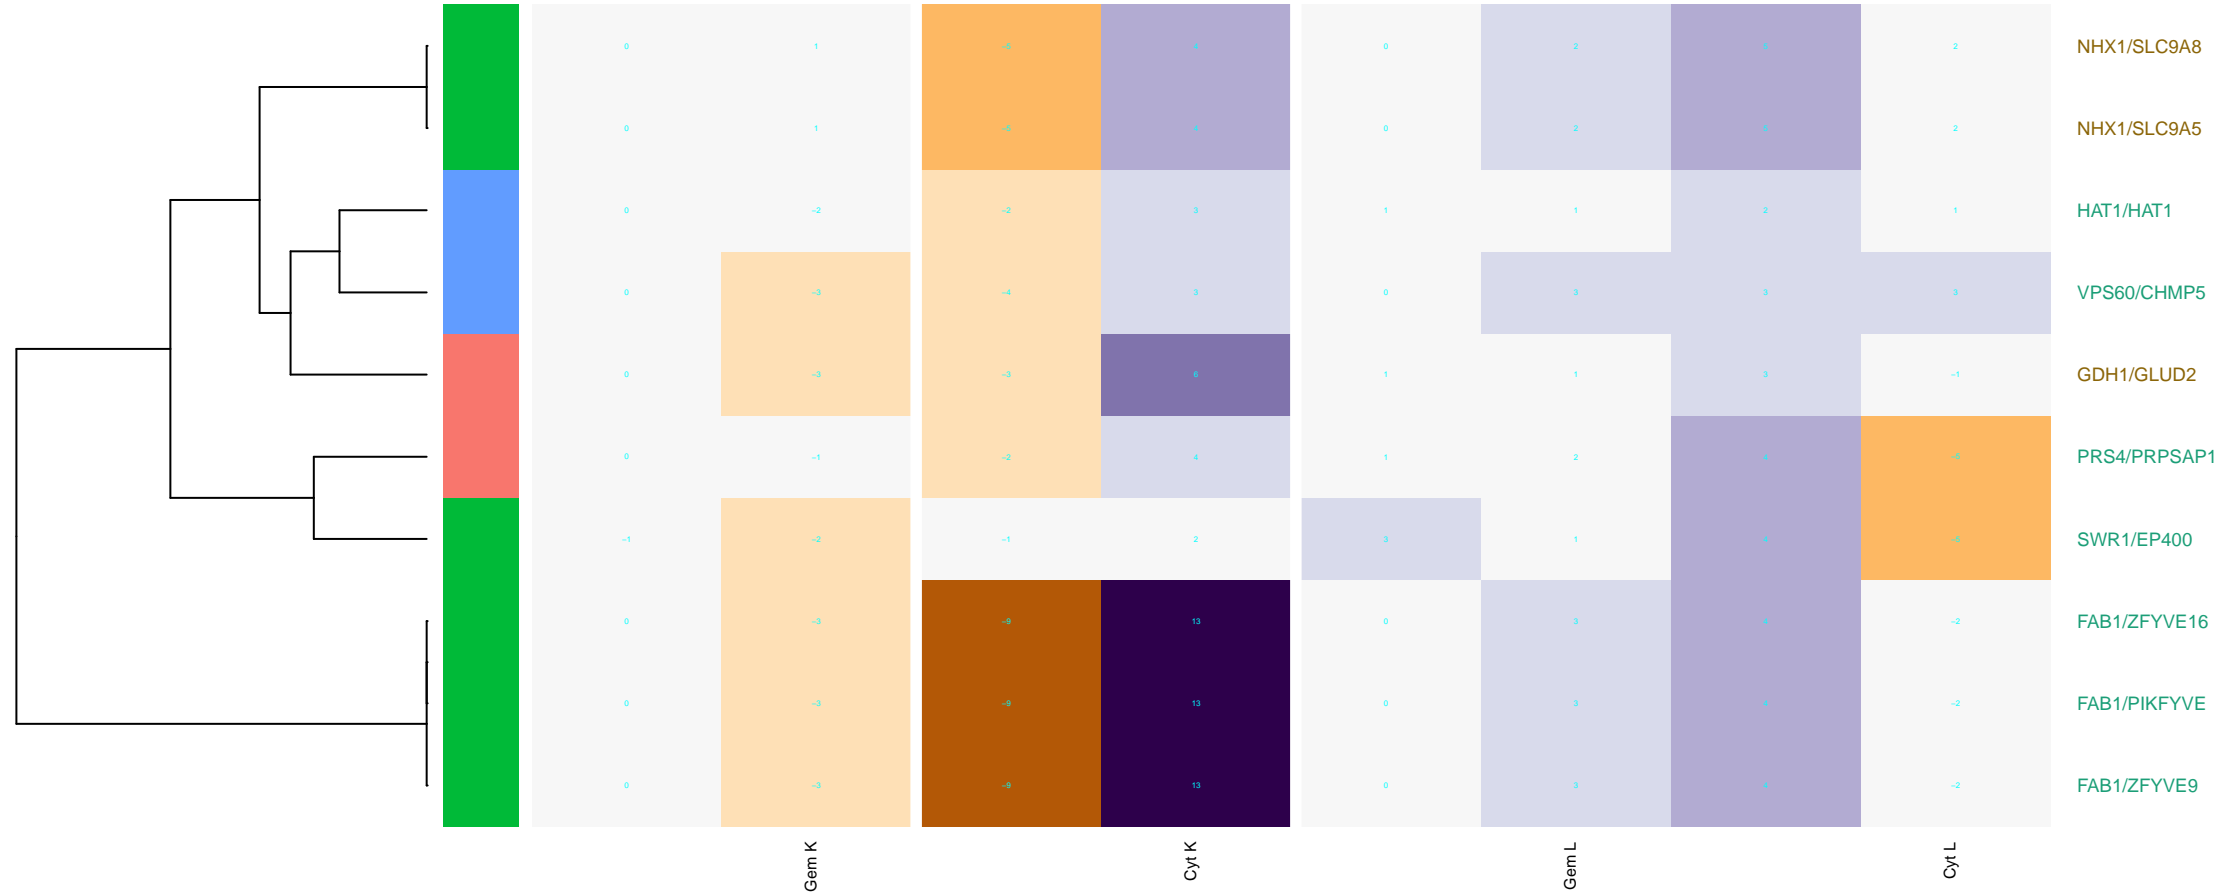

Color Key

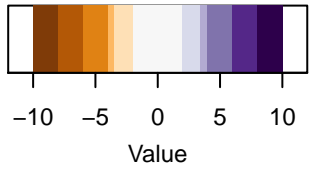

1-0-12

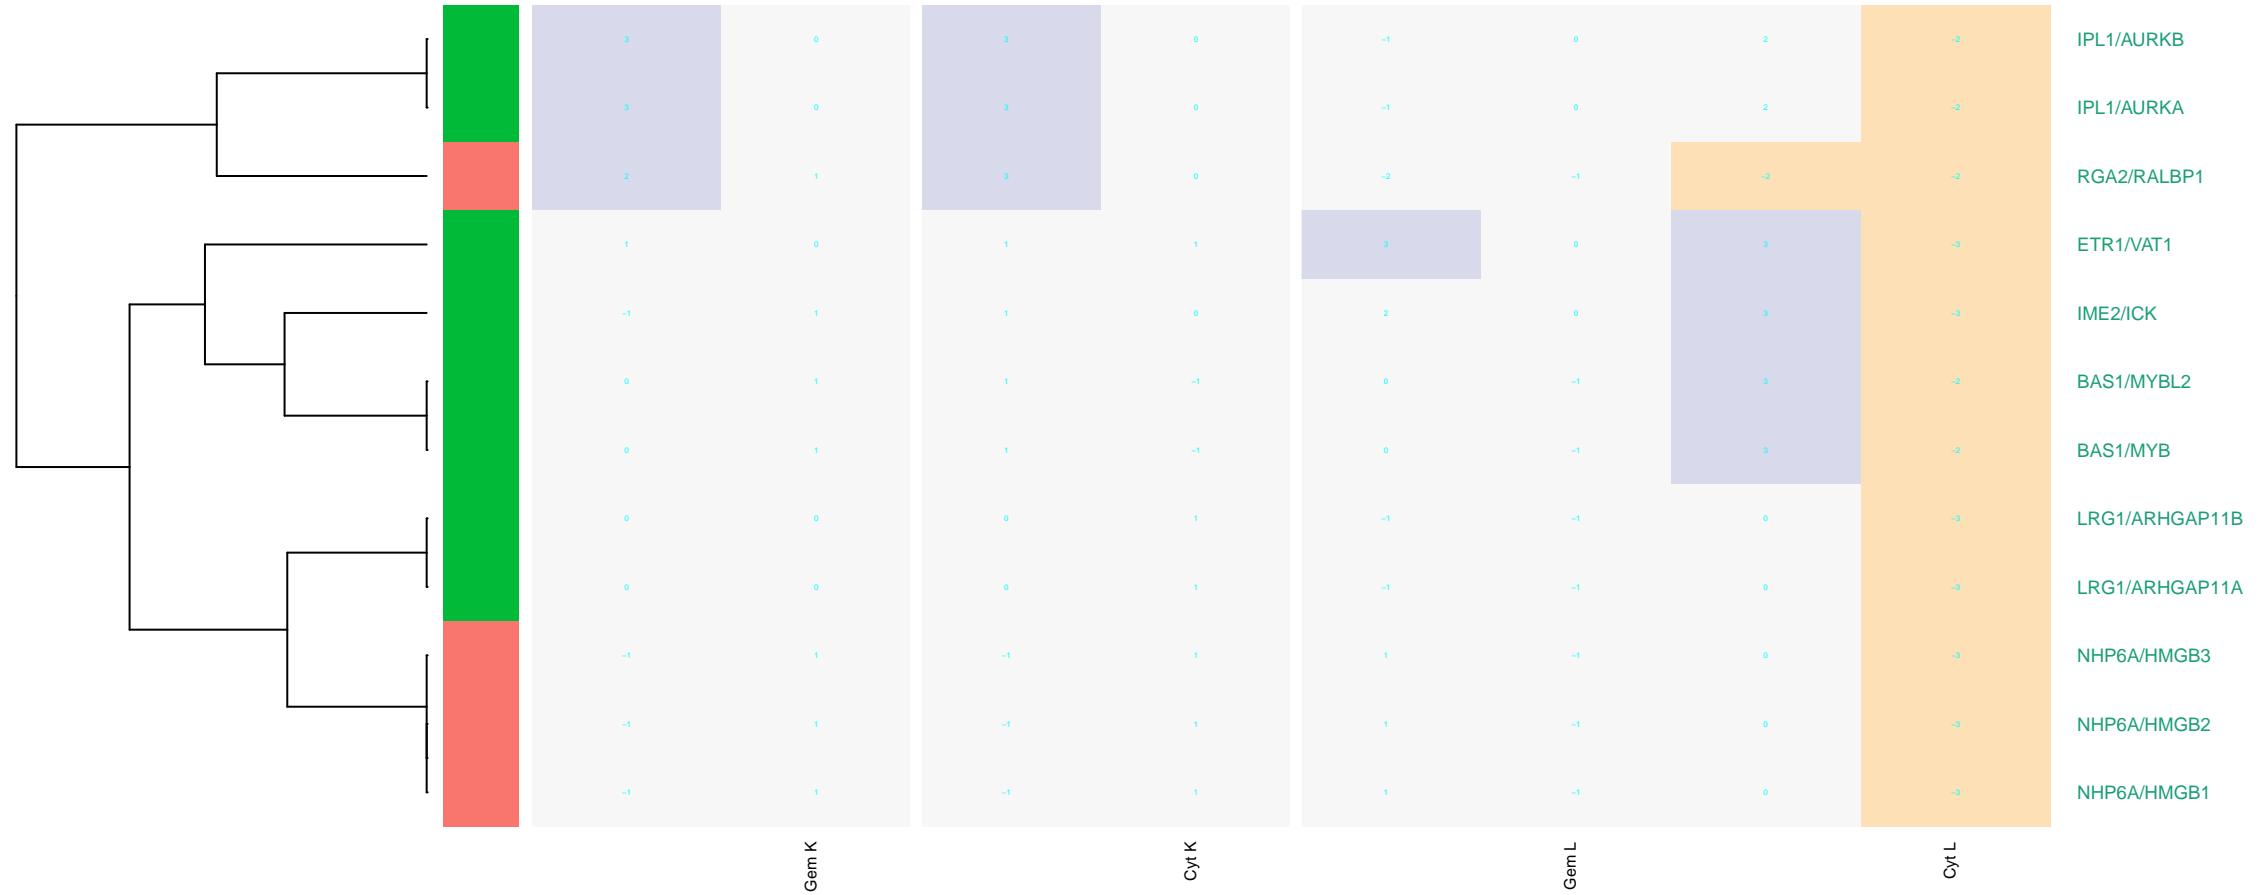

Color Key

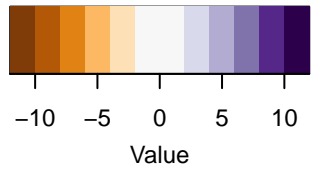

1-0-13

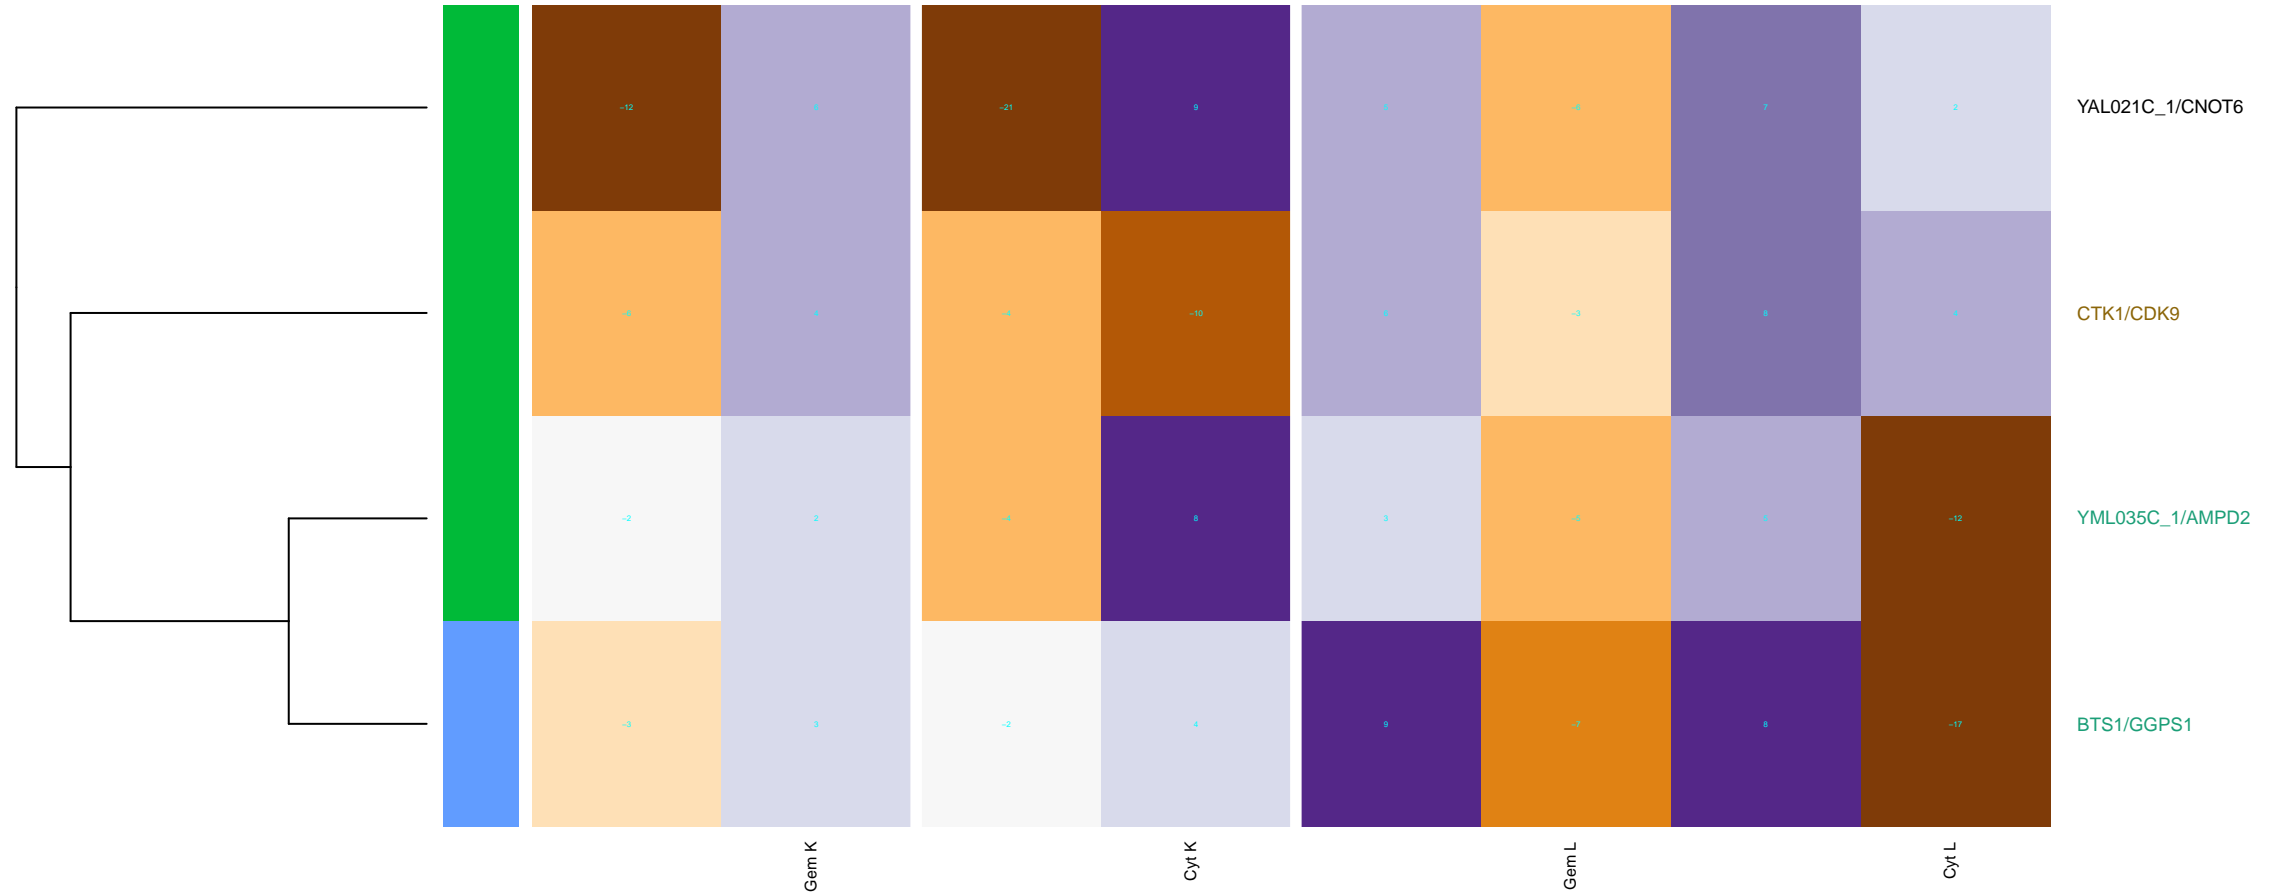

Color Key



1-0-14

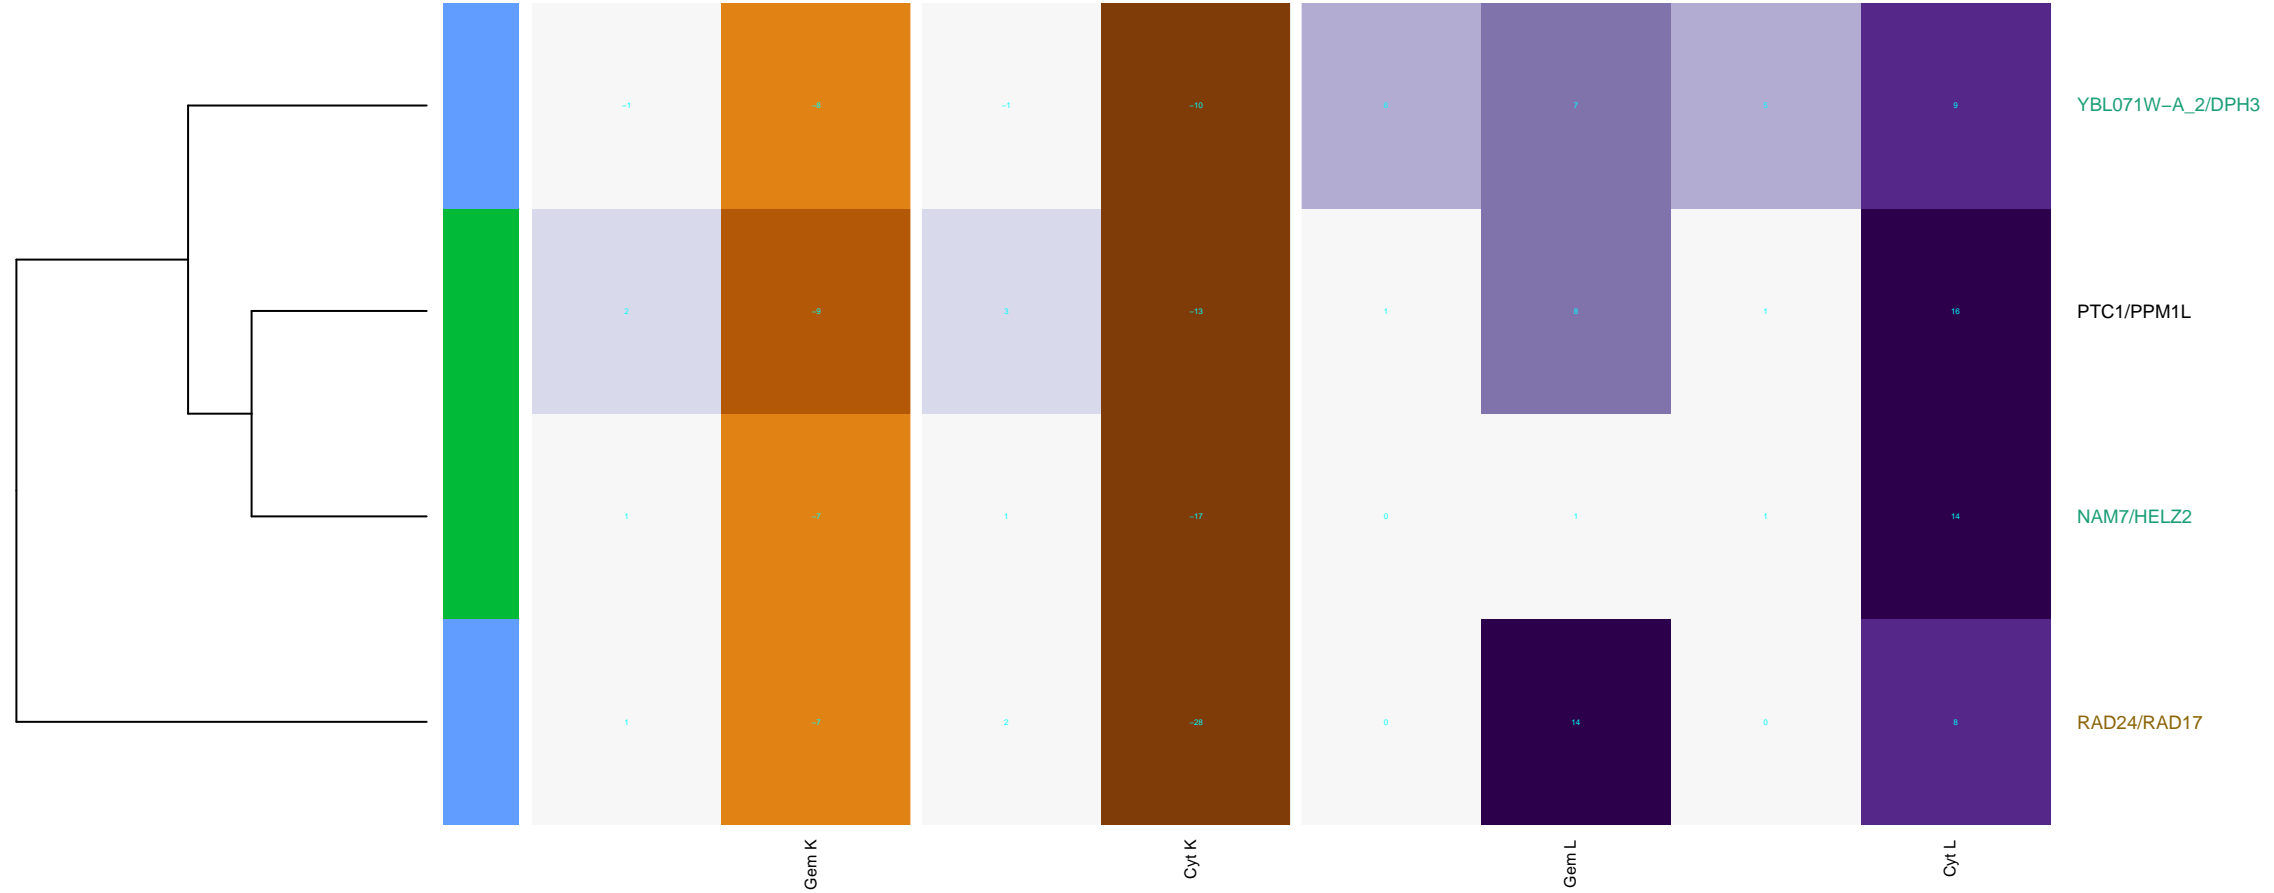



Color Key

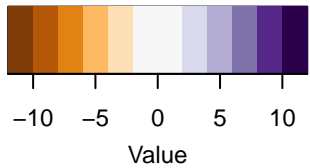

1-0-15

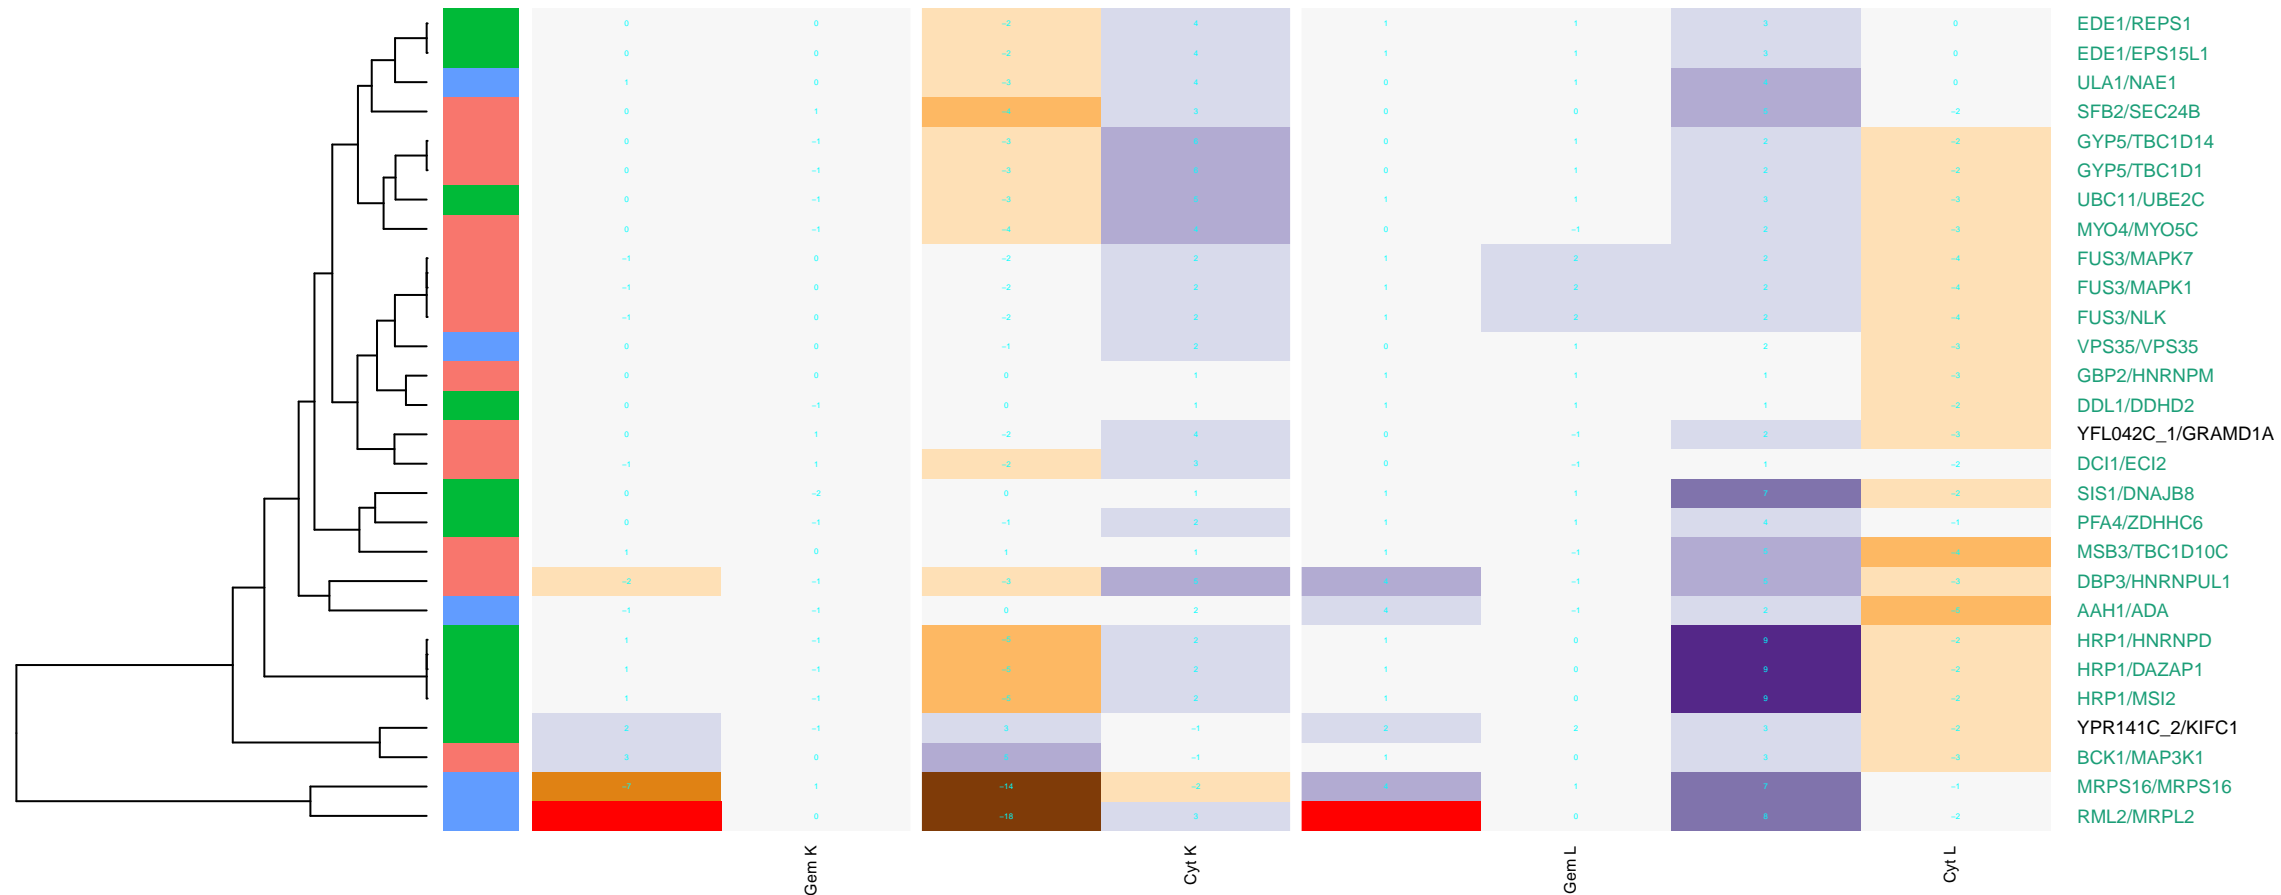

Color Key

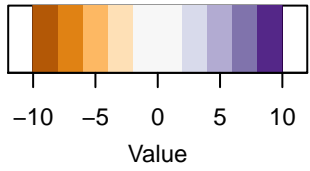

1-0-16

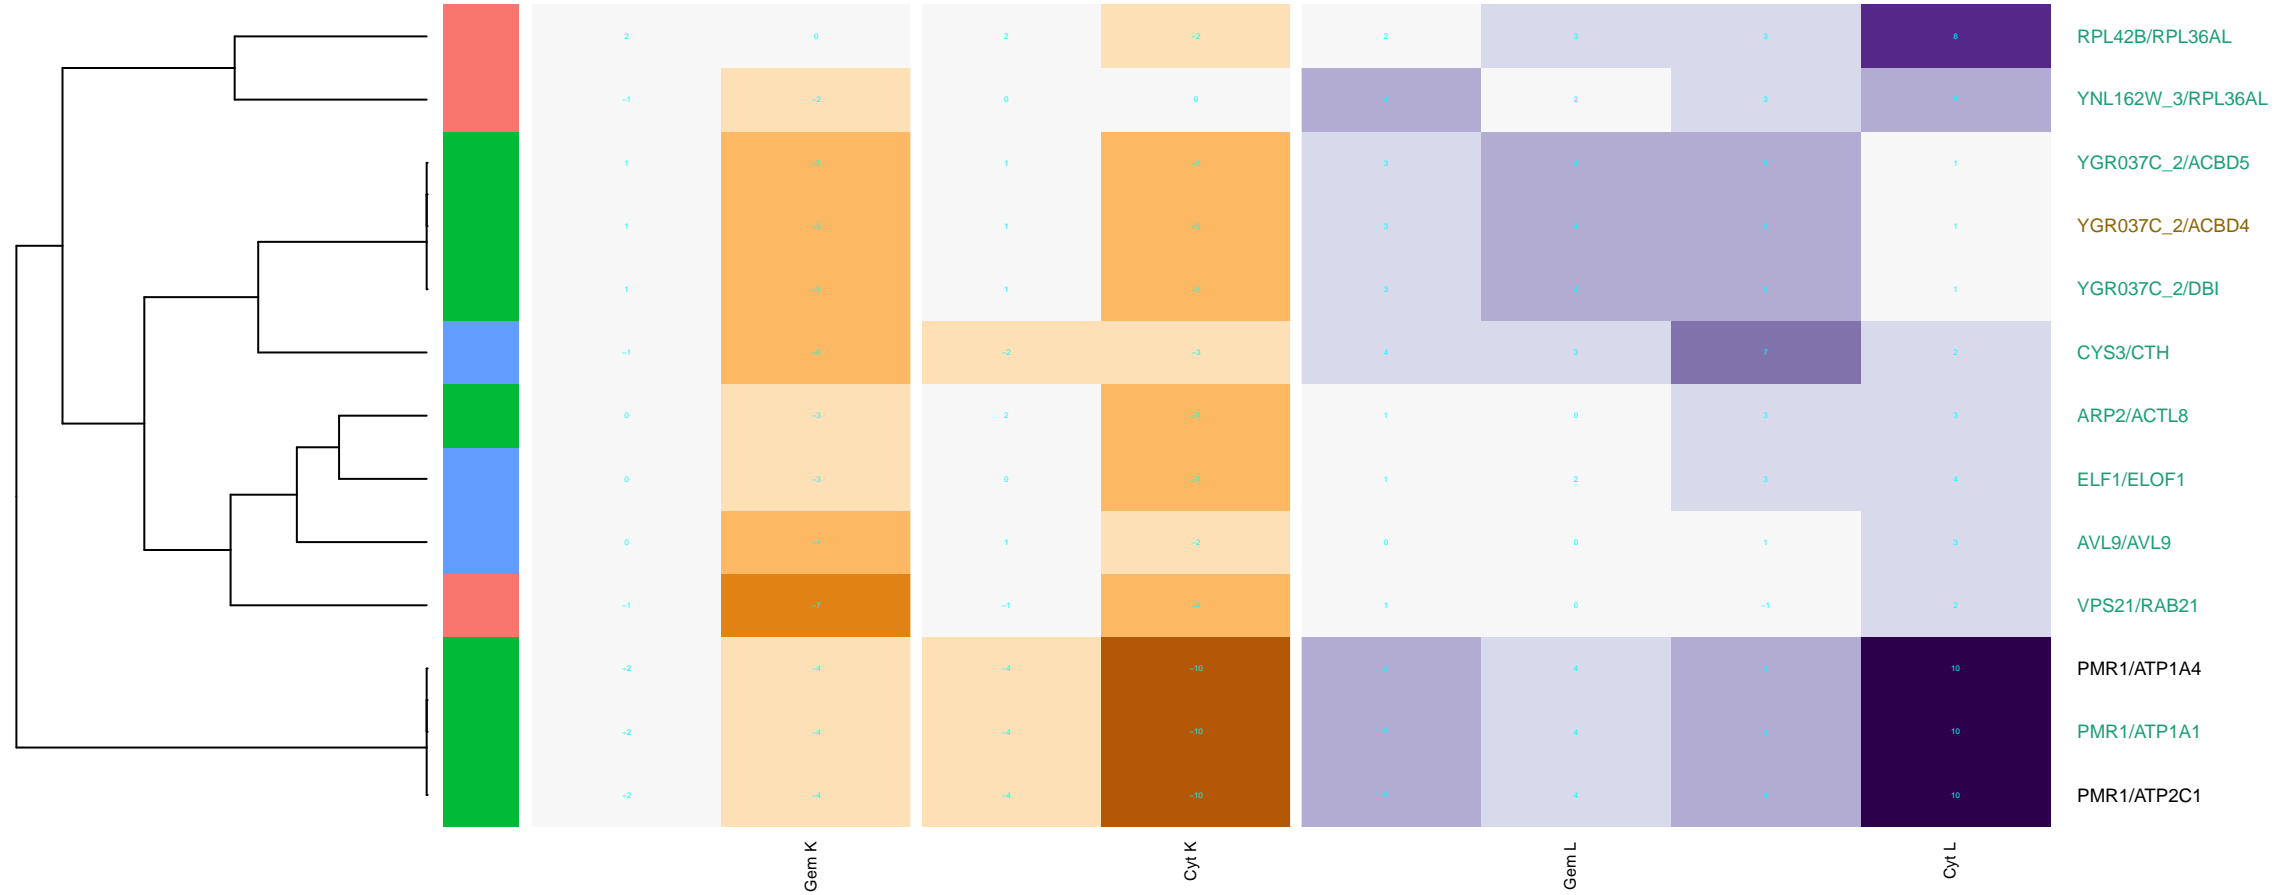

Color Key

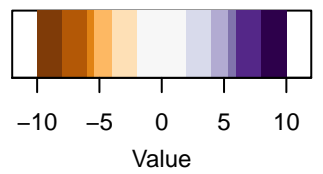

1-0-17

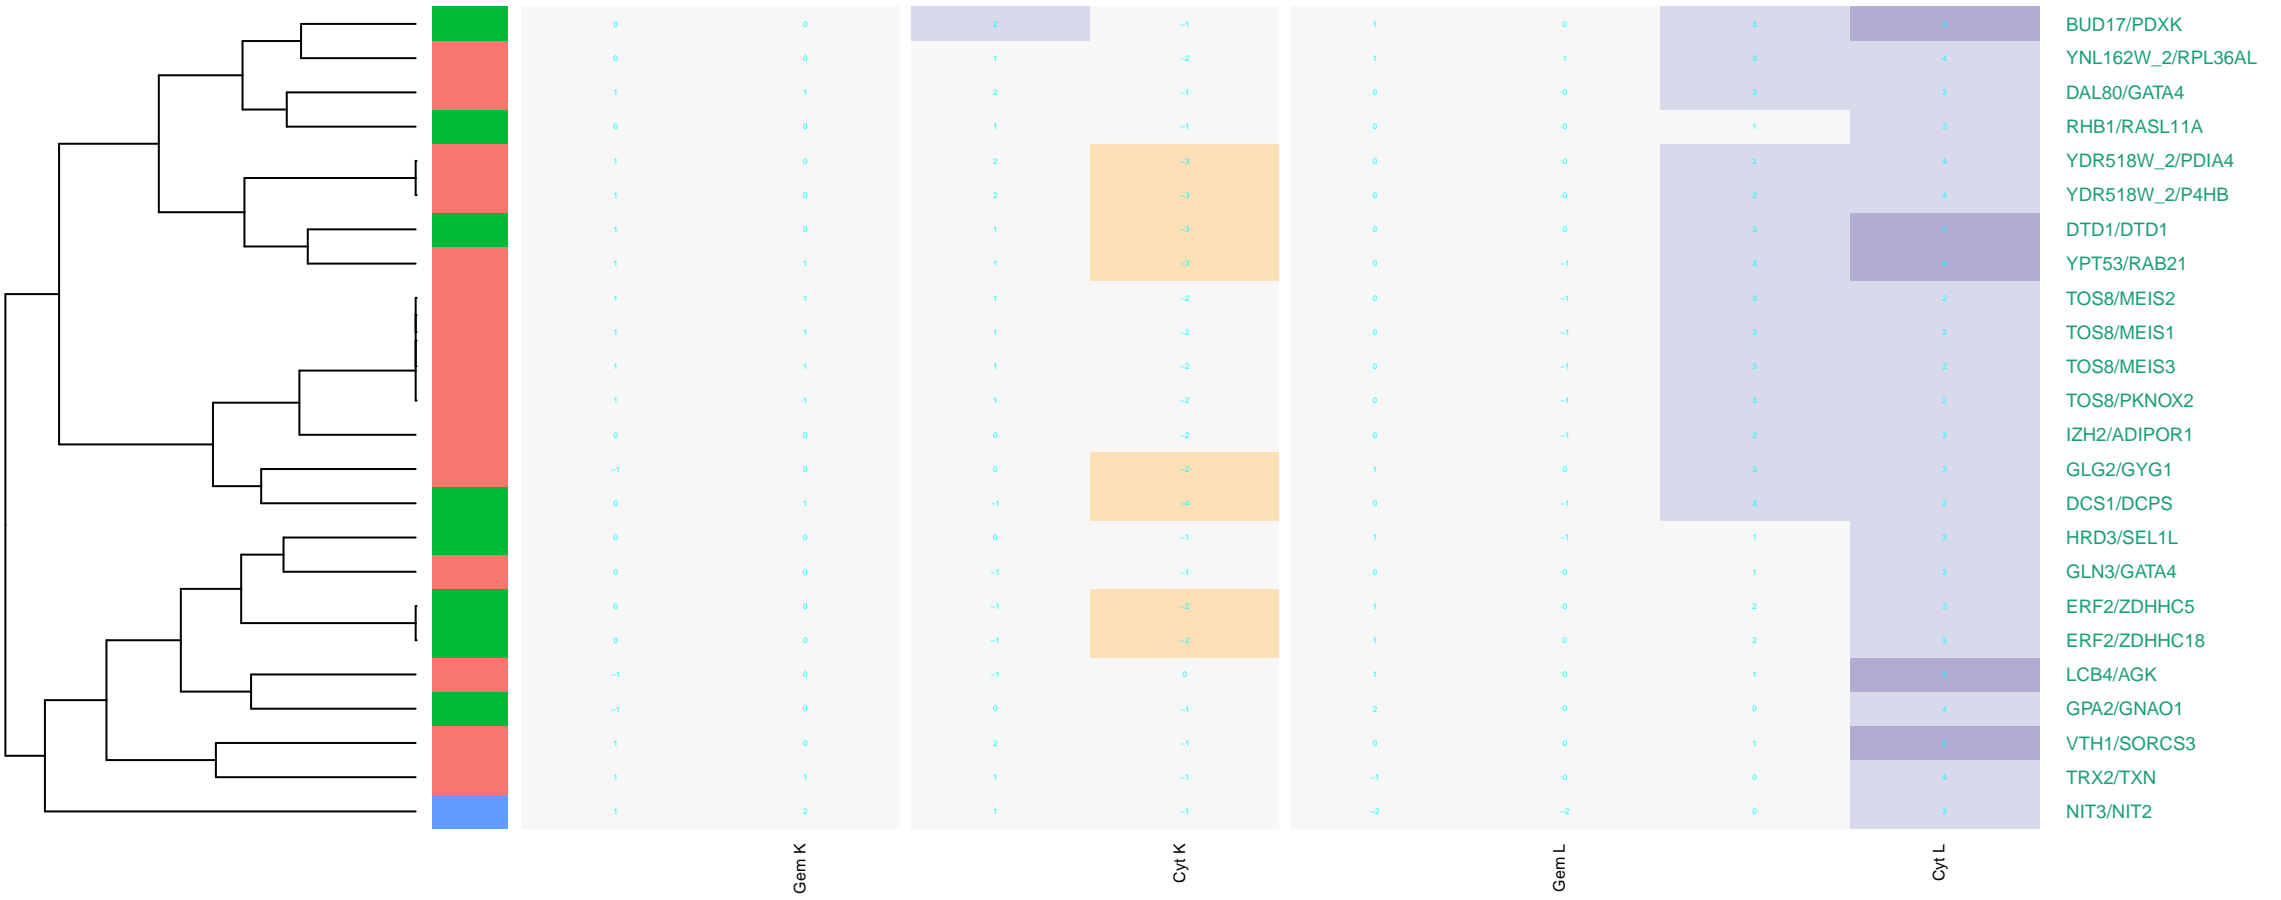

Color Key



1-0-2

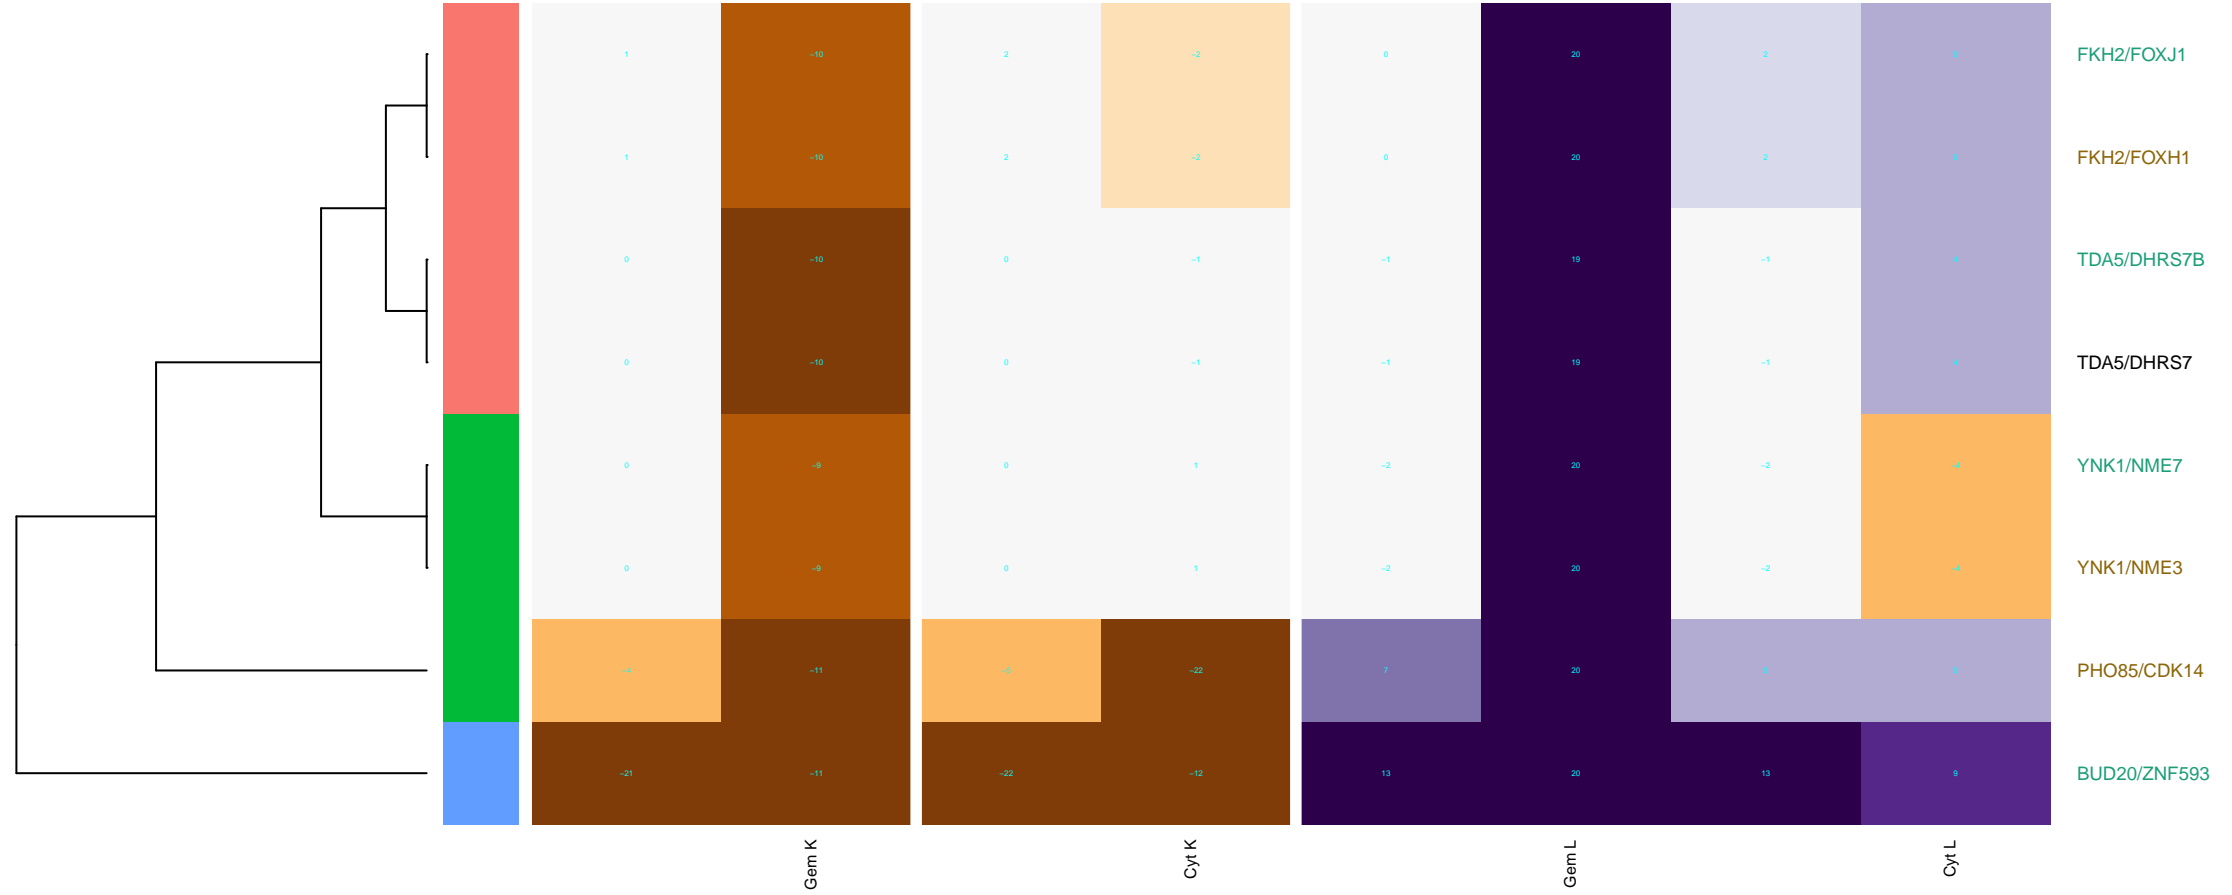

# Color Key

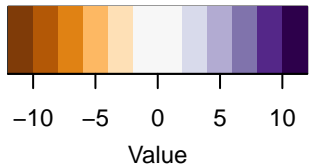

1-0-3

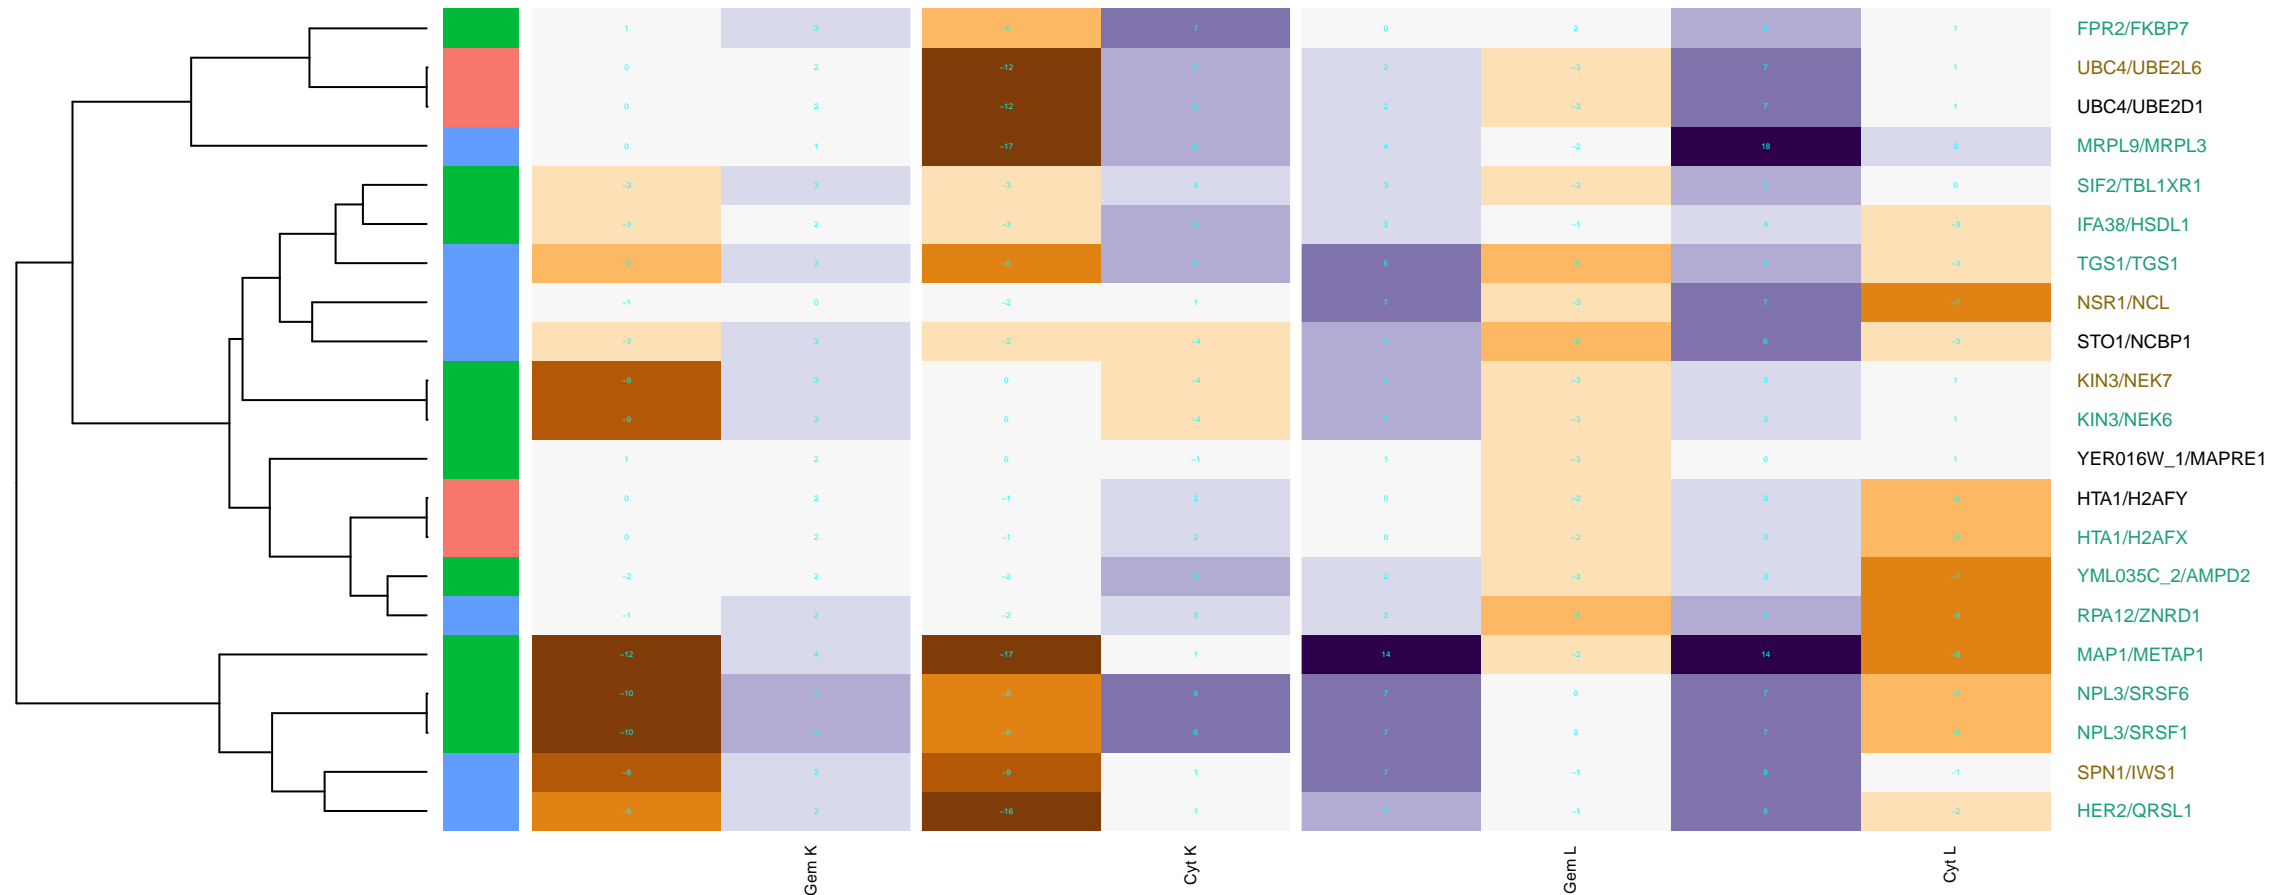

Color Key

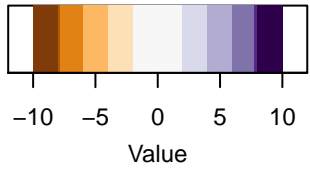

1-0-4

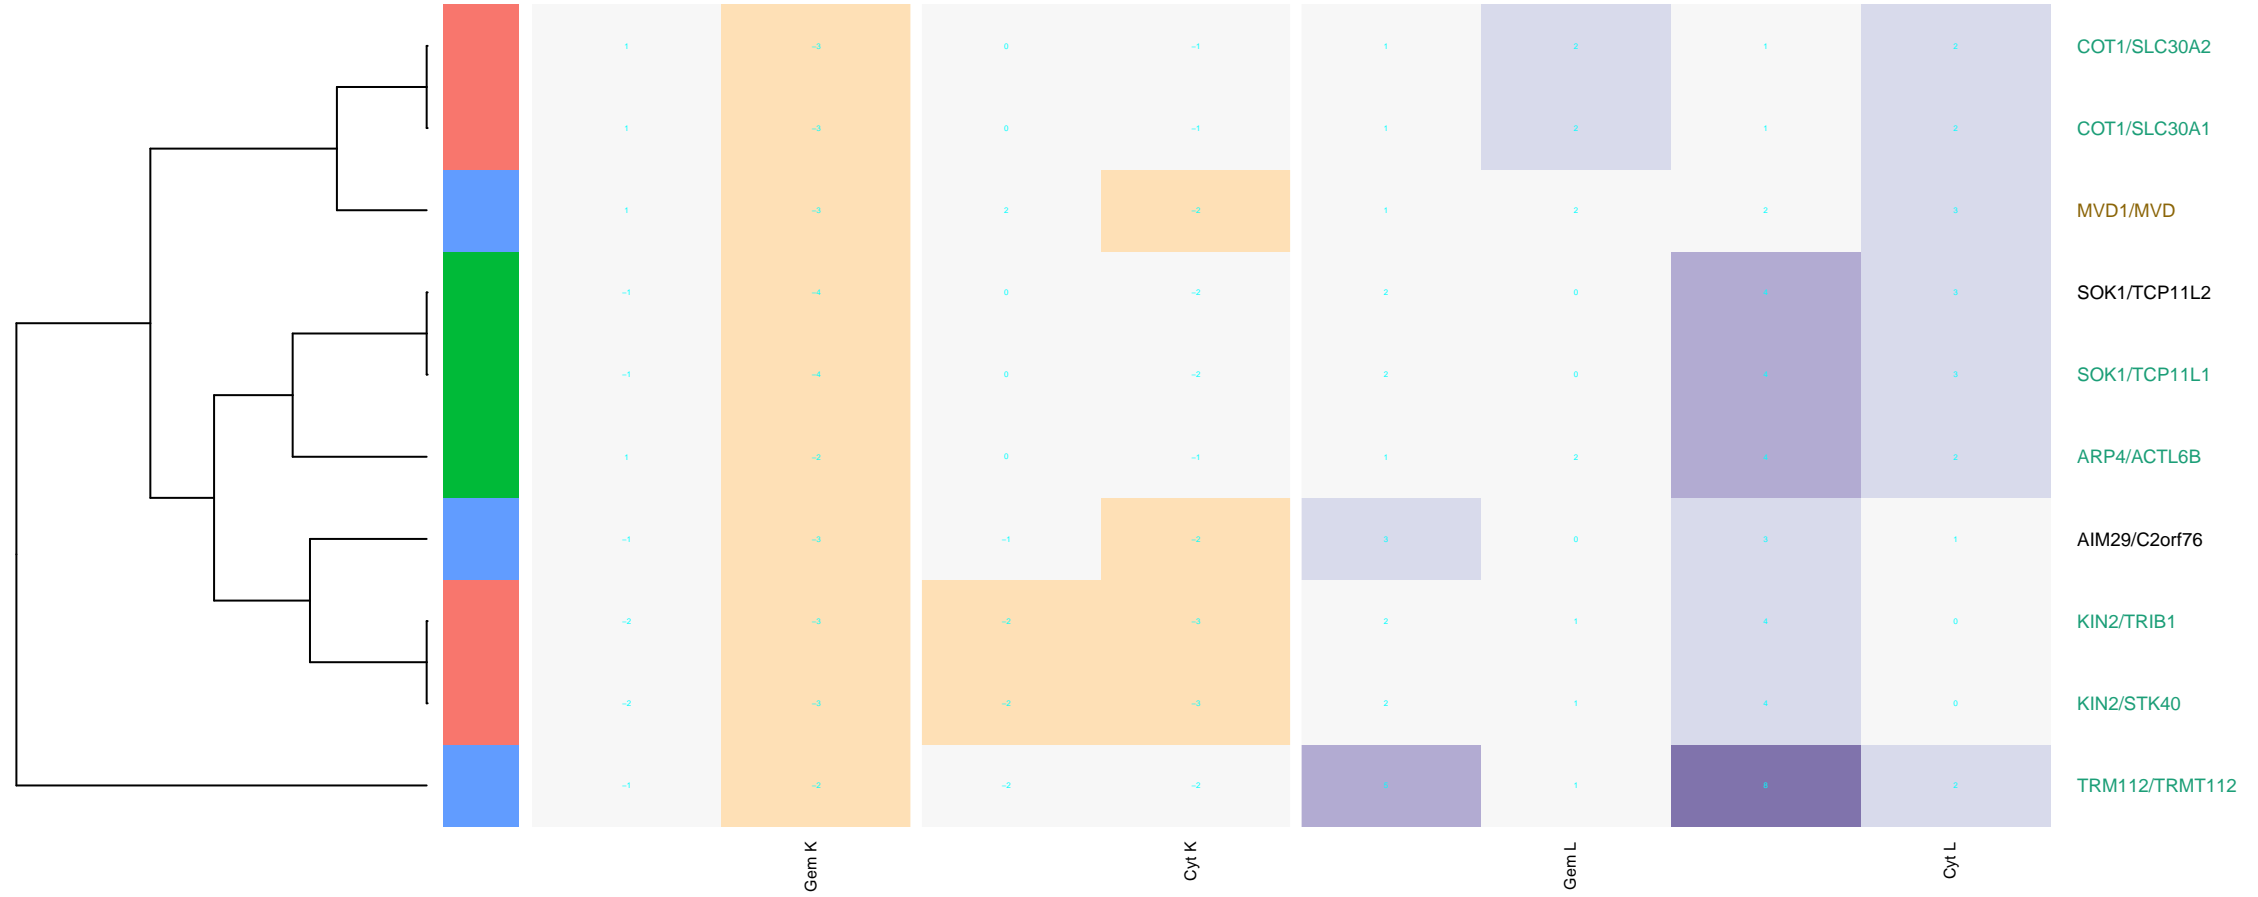

Color Key

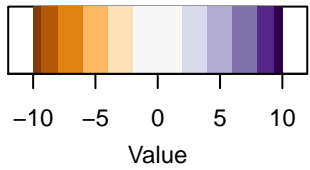

1-0-5

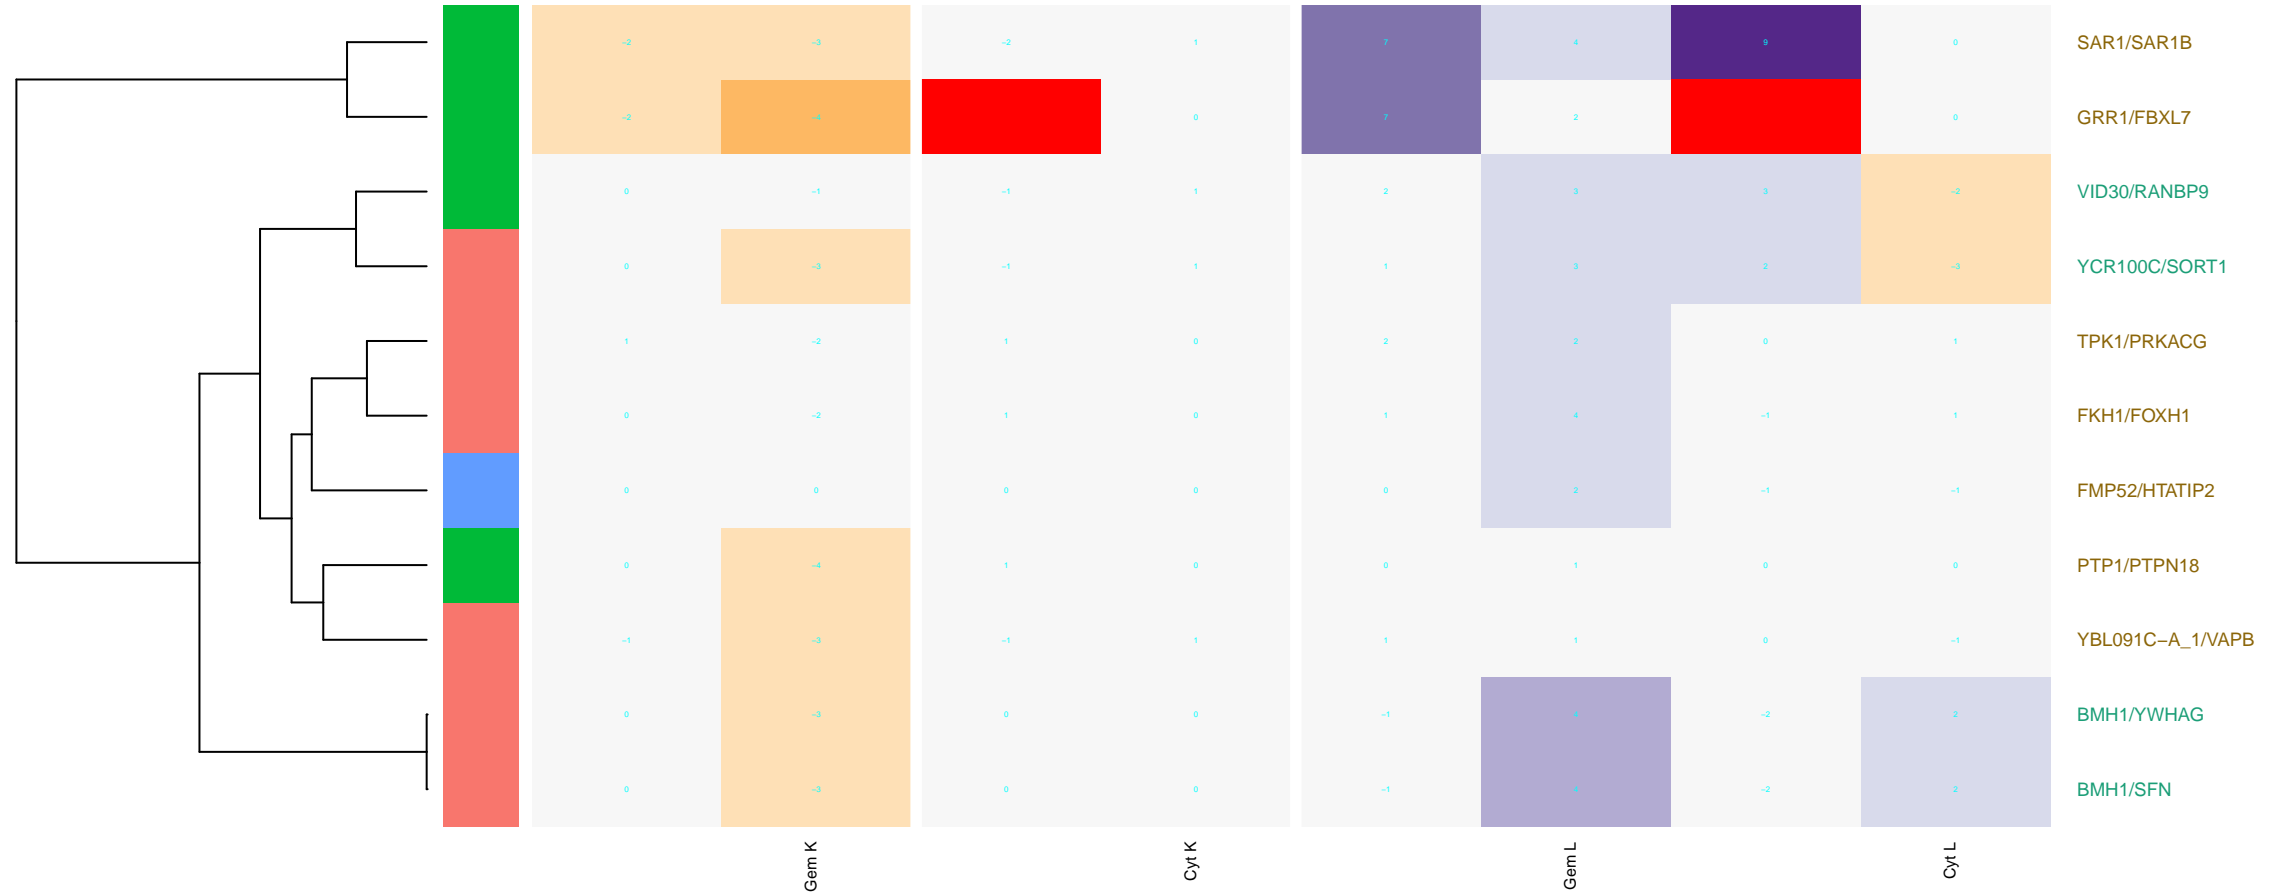

Color Key

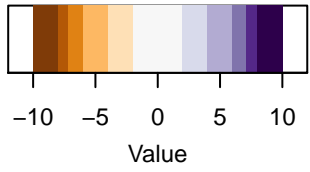

1-0-6

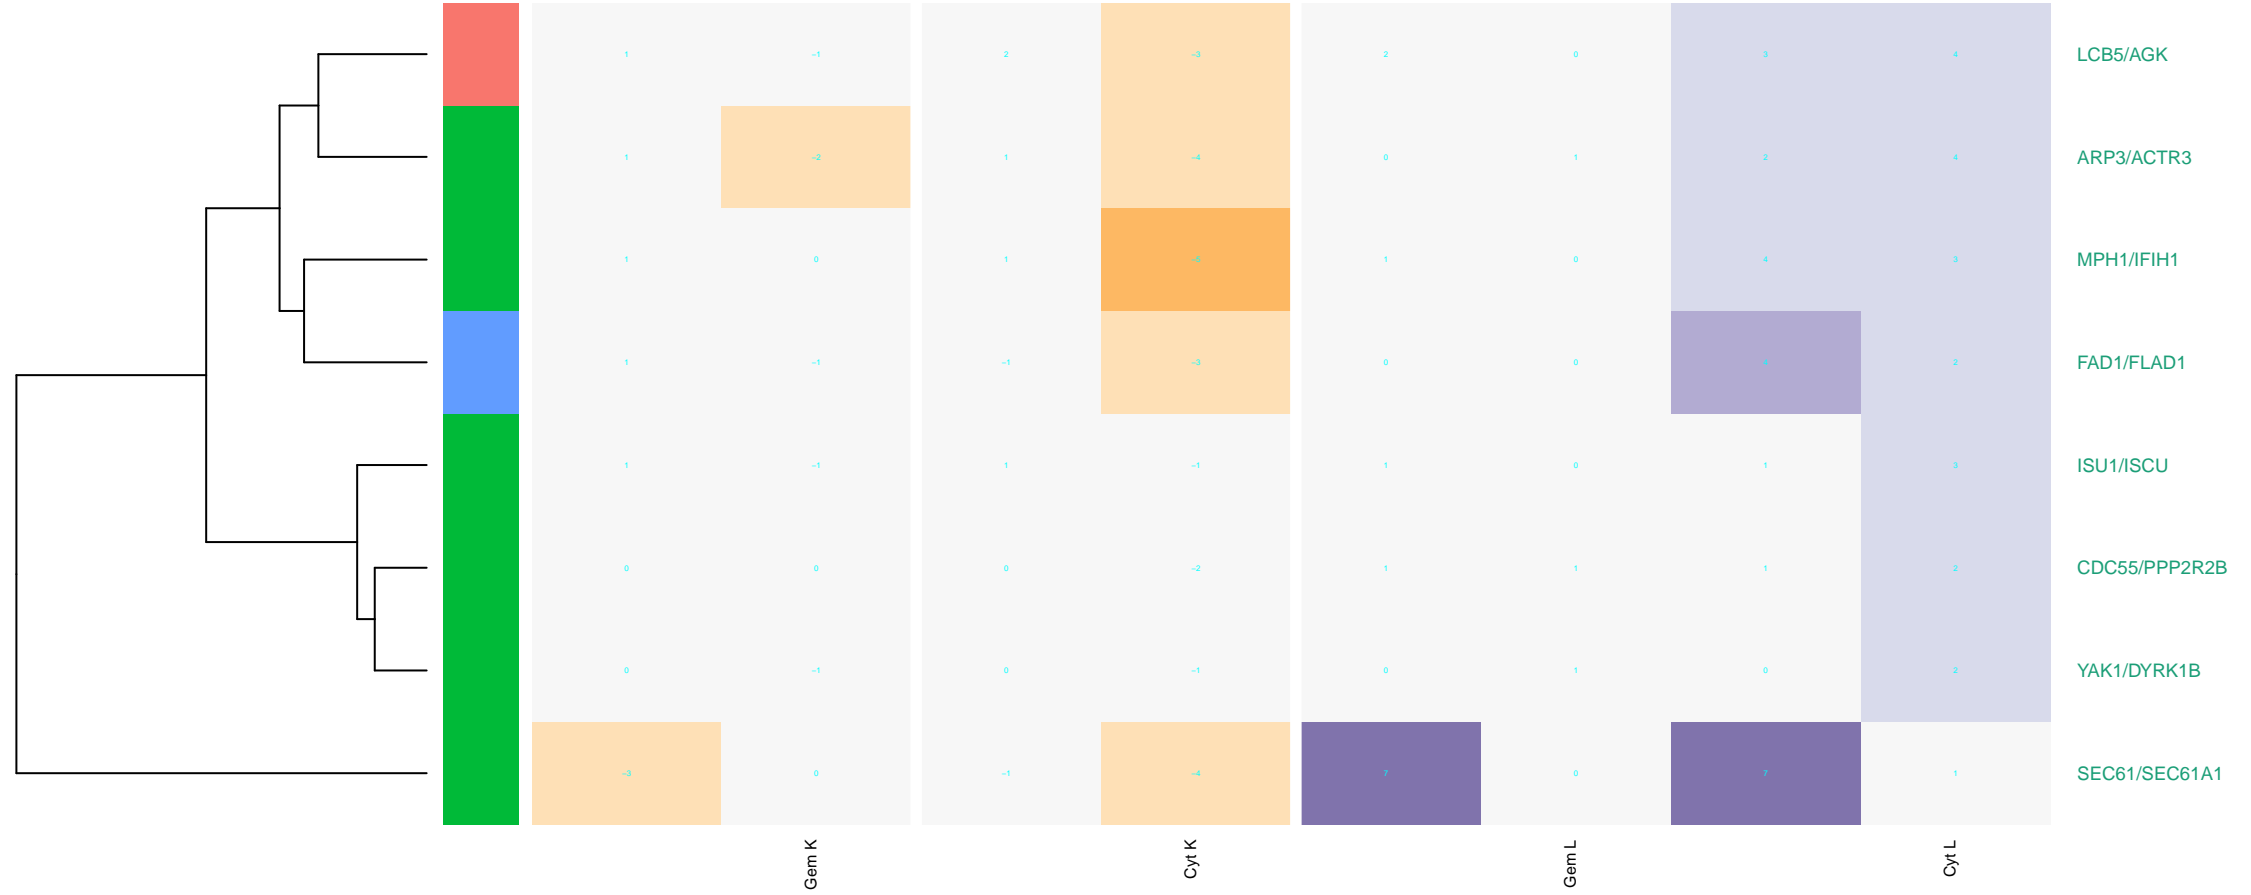



Color Key



1-0-7

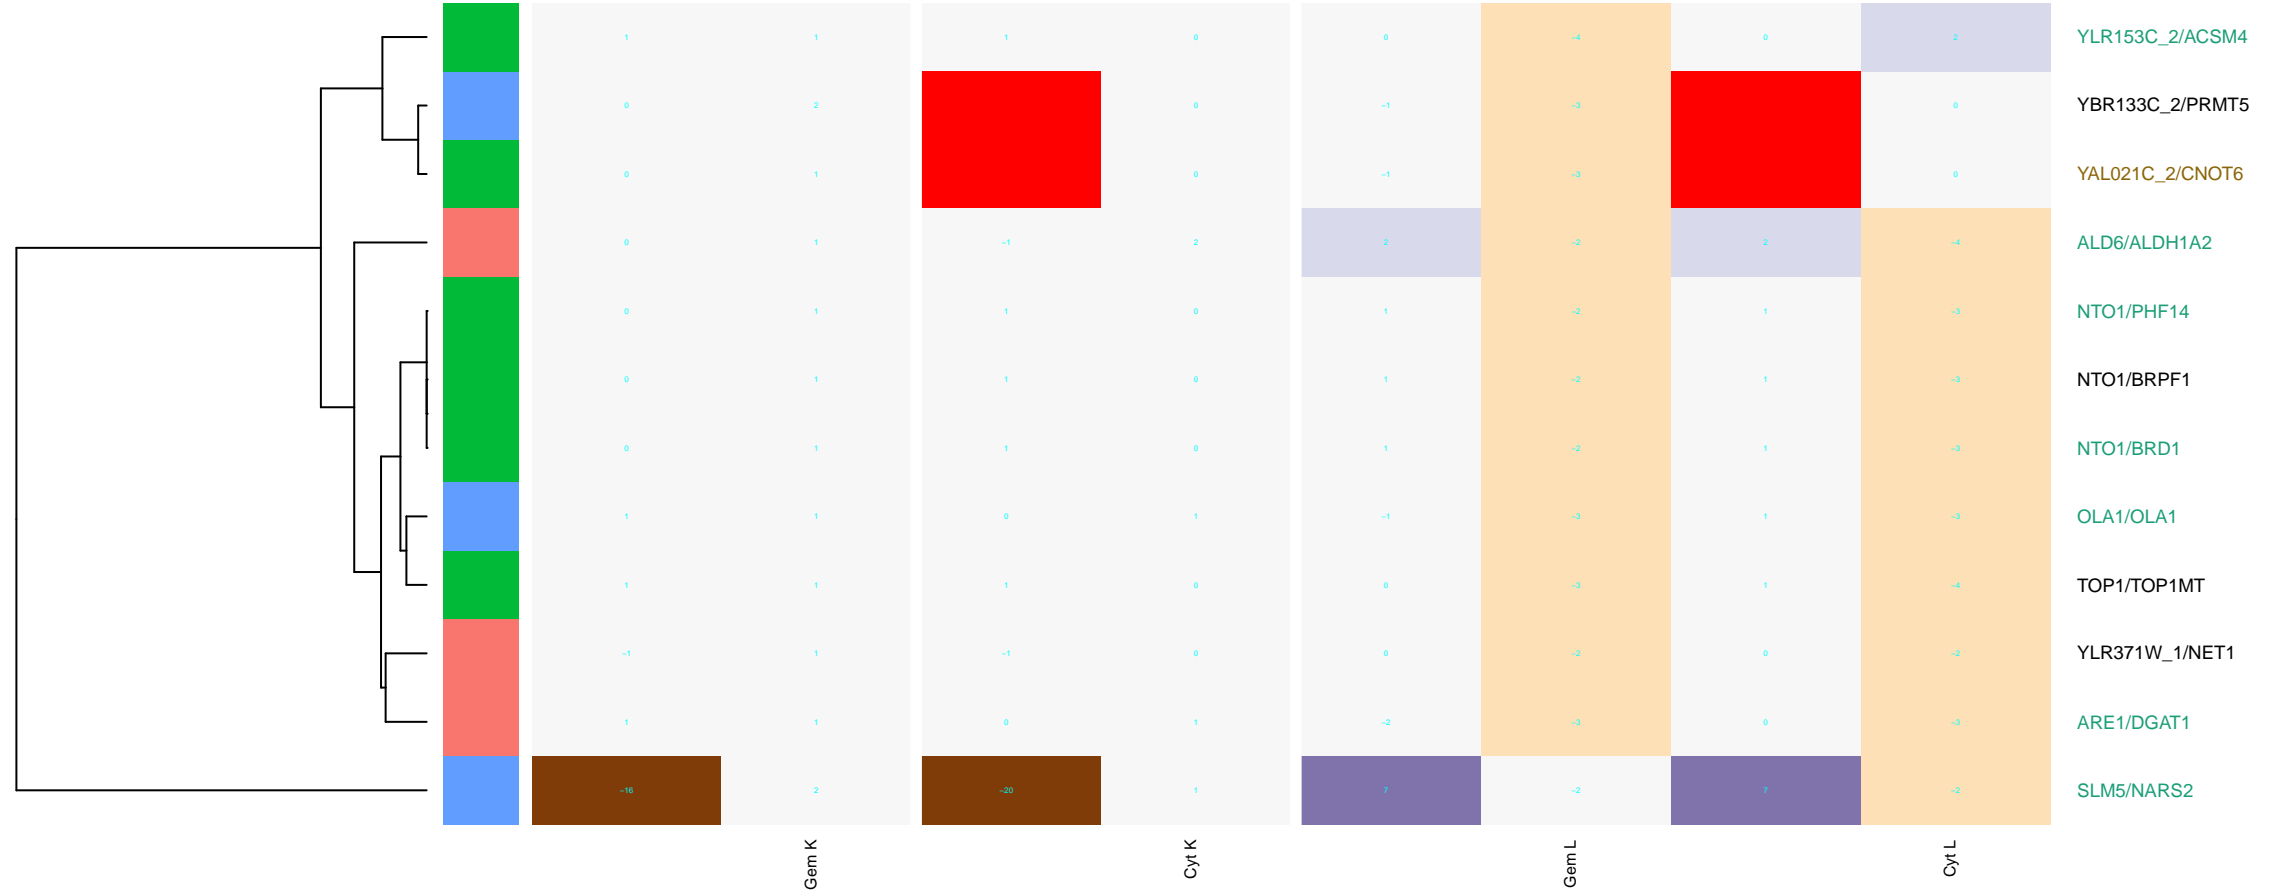

Color Key



1-0-8

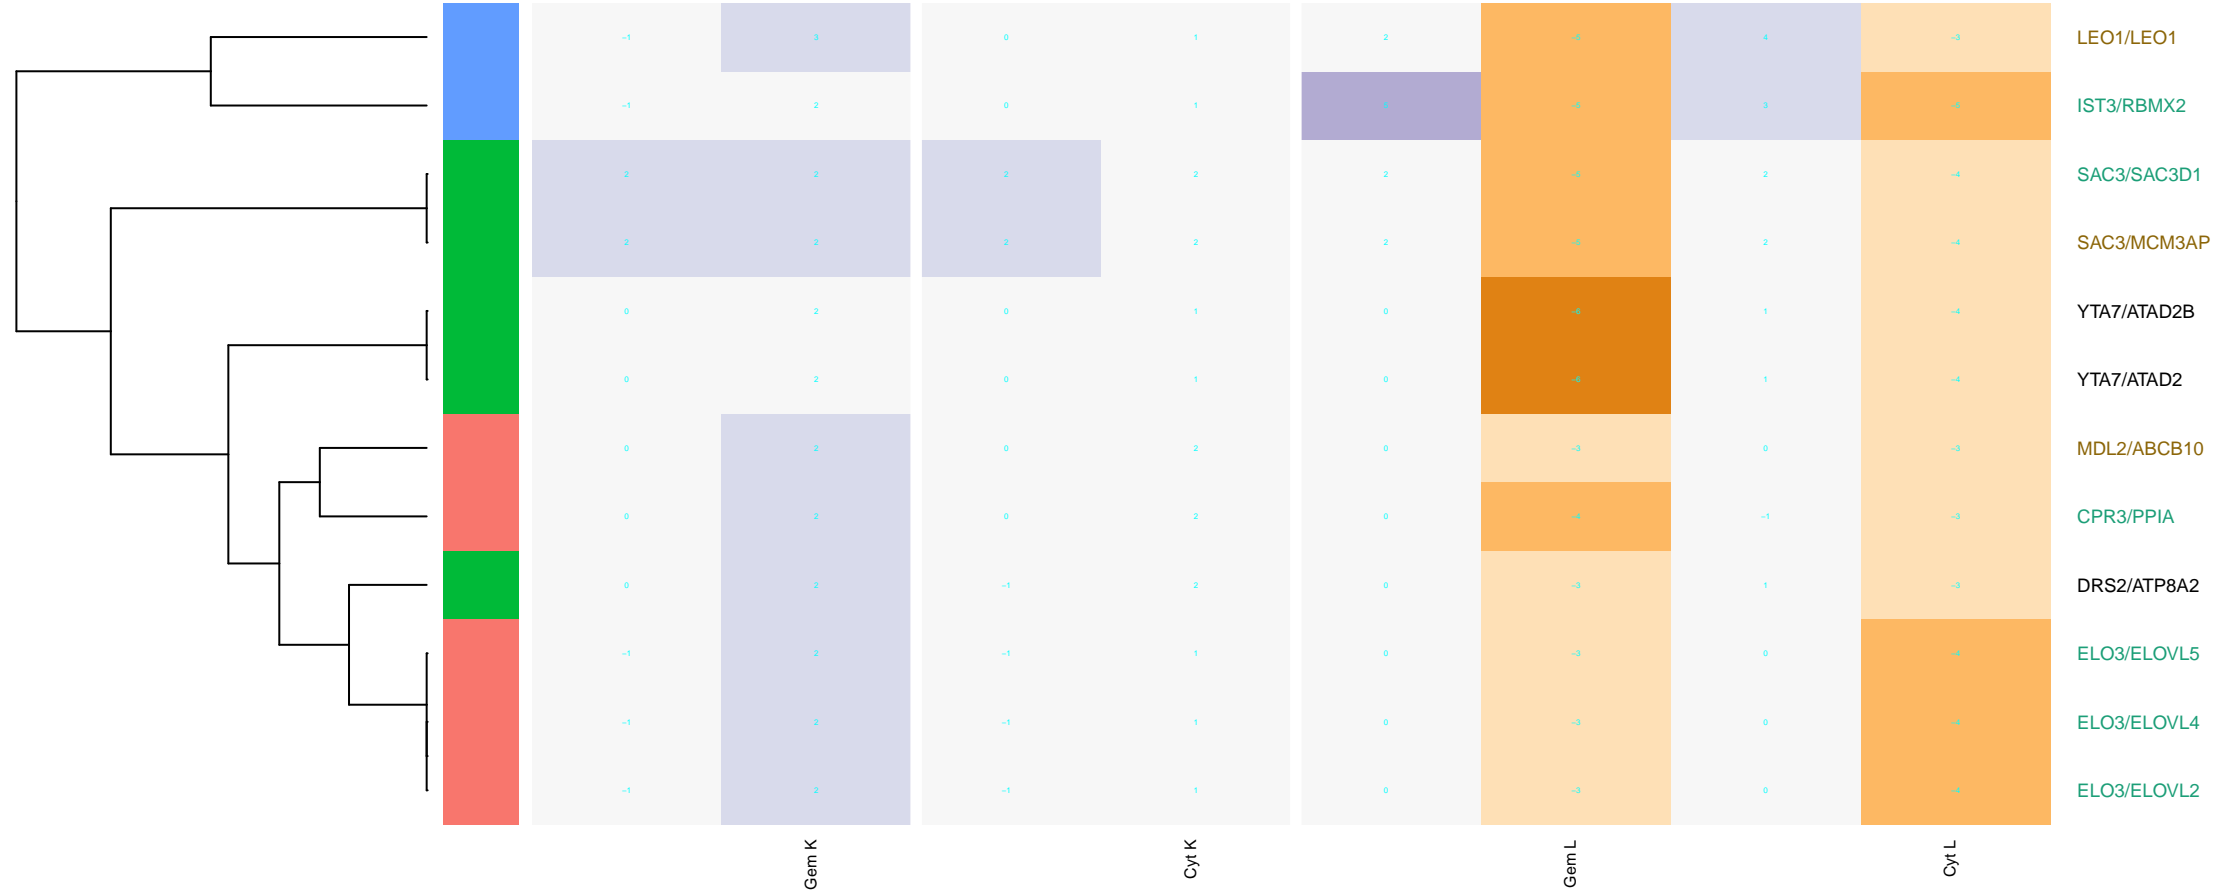

Color Key

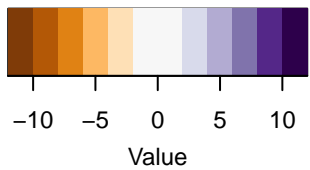

1-0-9

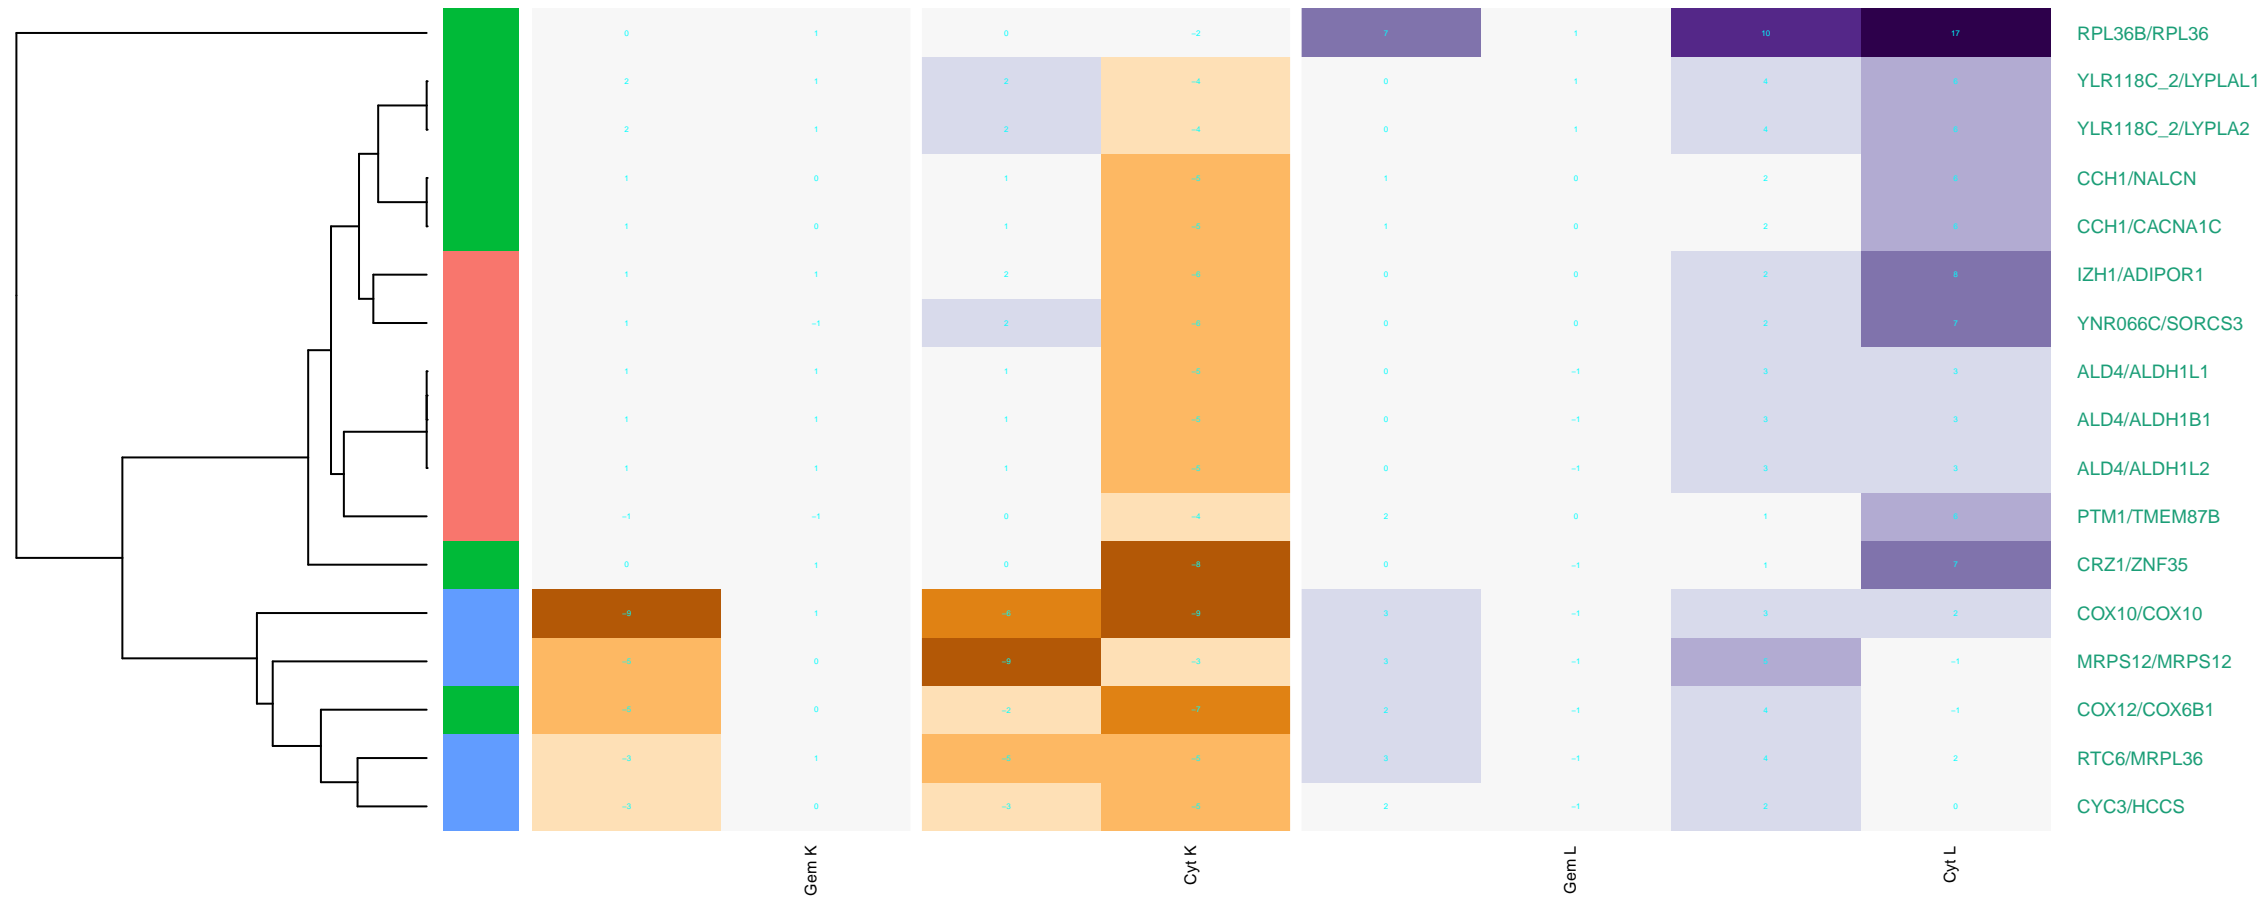

Color Key

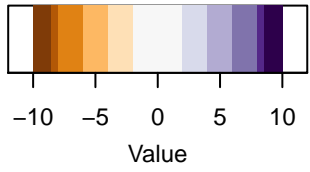

2-0.1-0

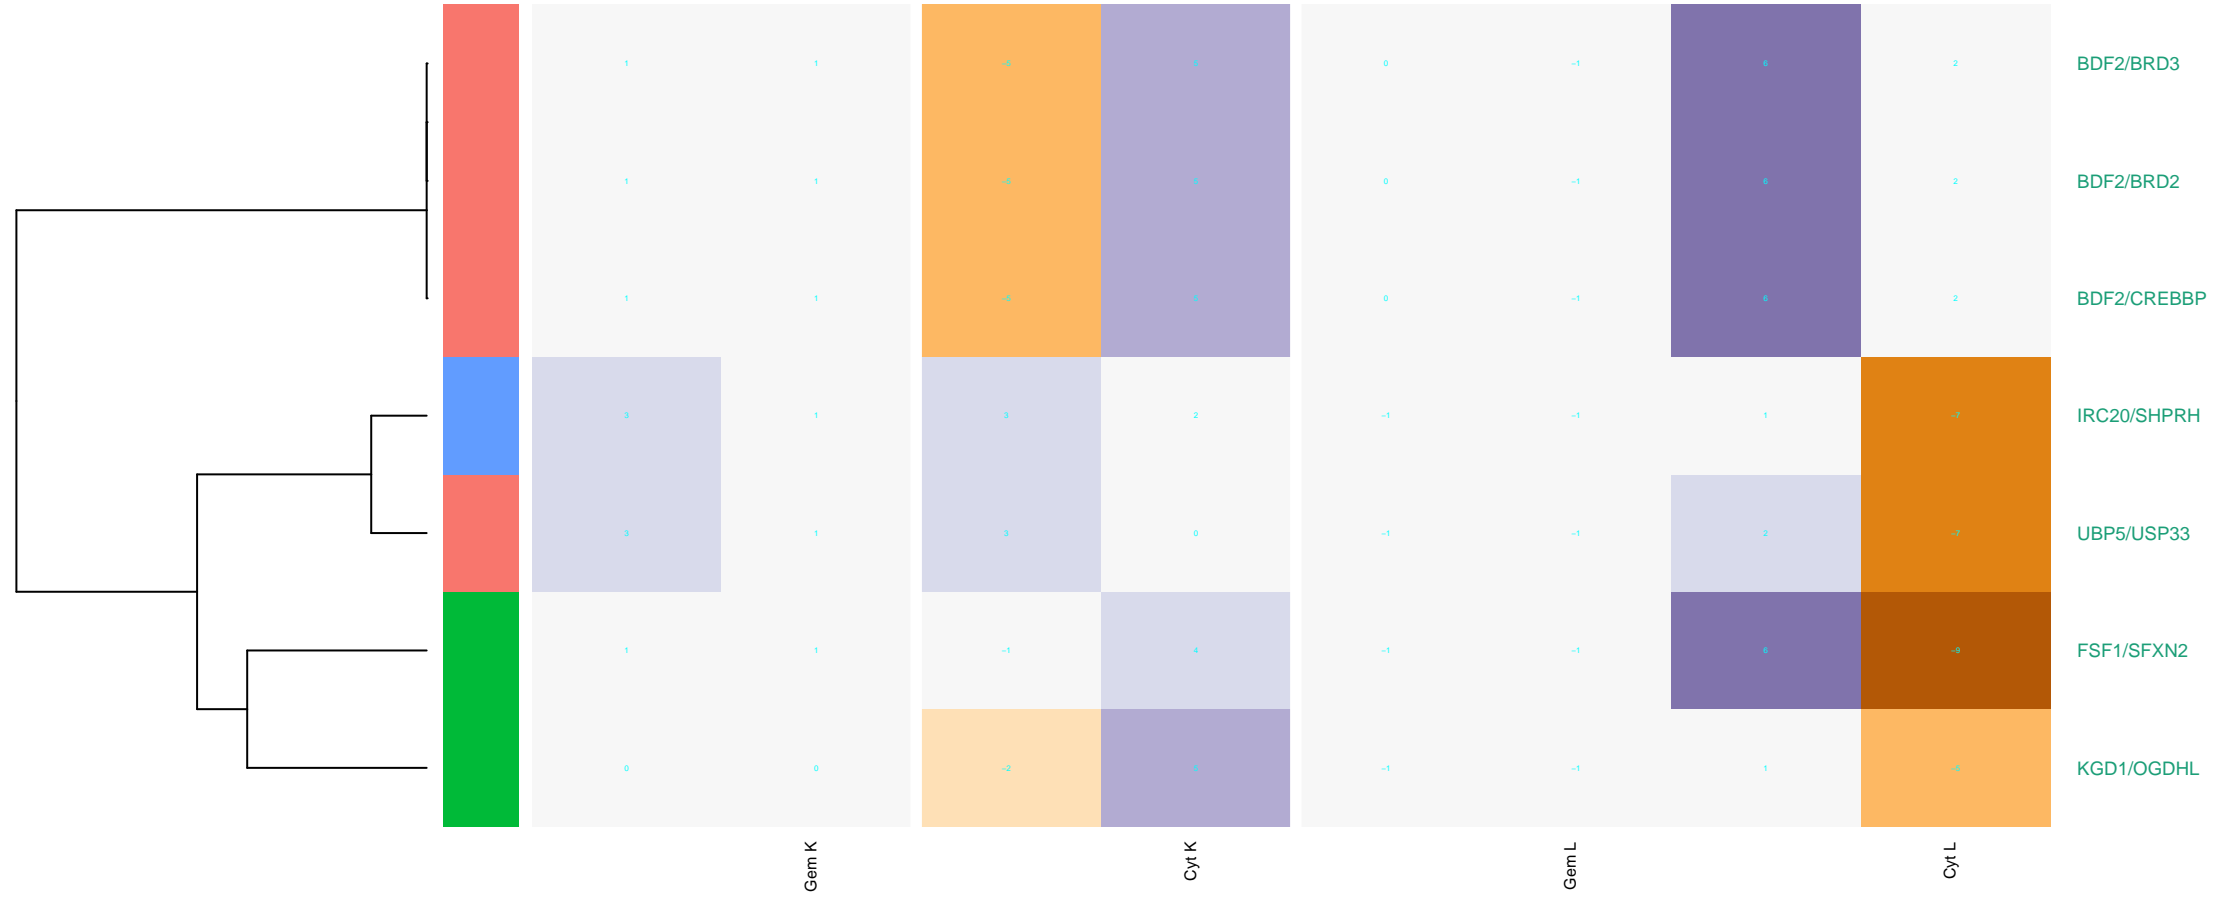

Color Key



2-0.1-1

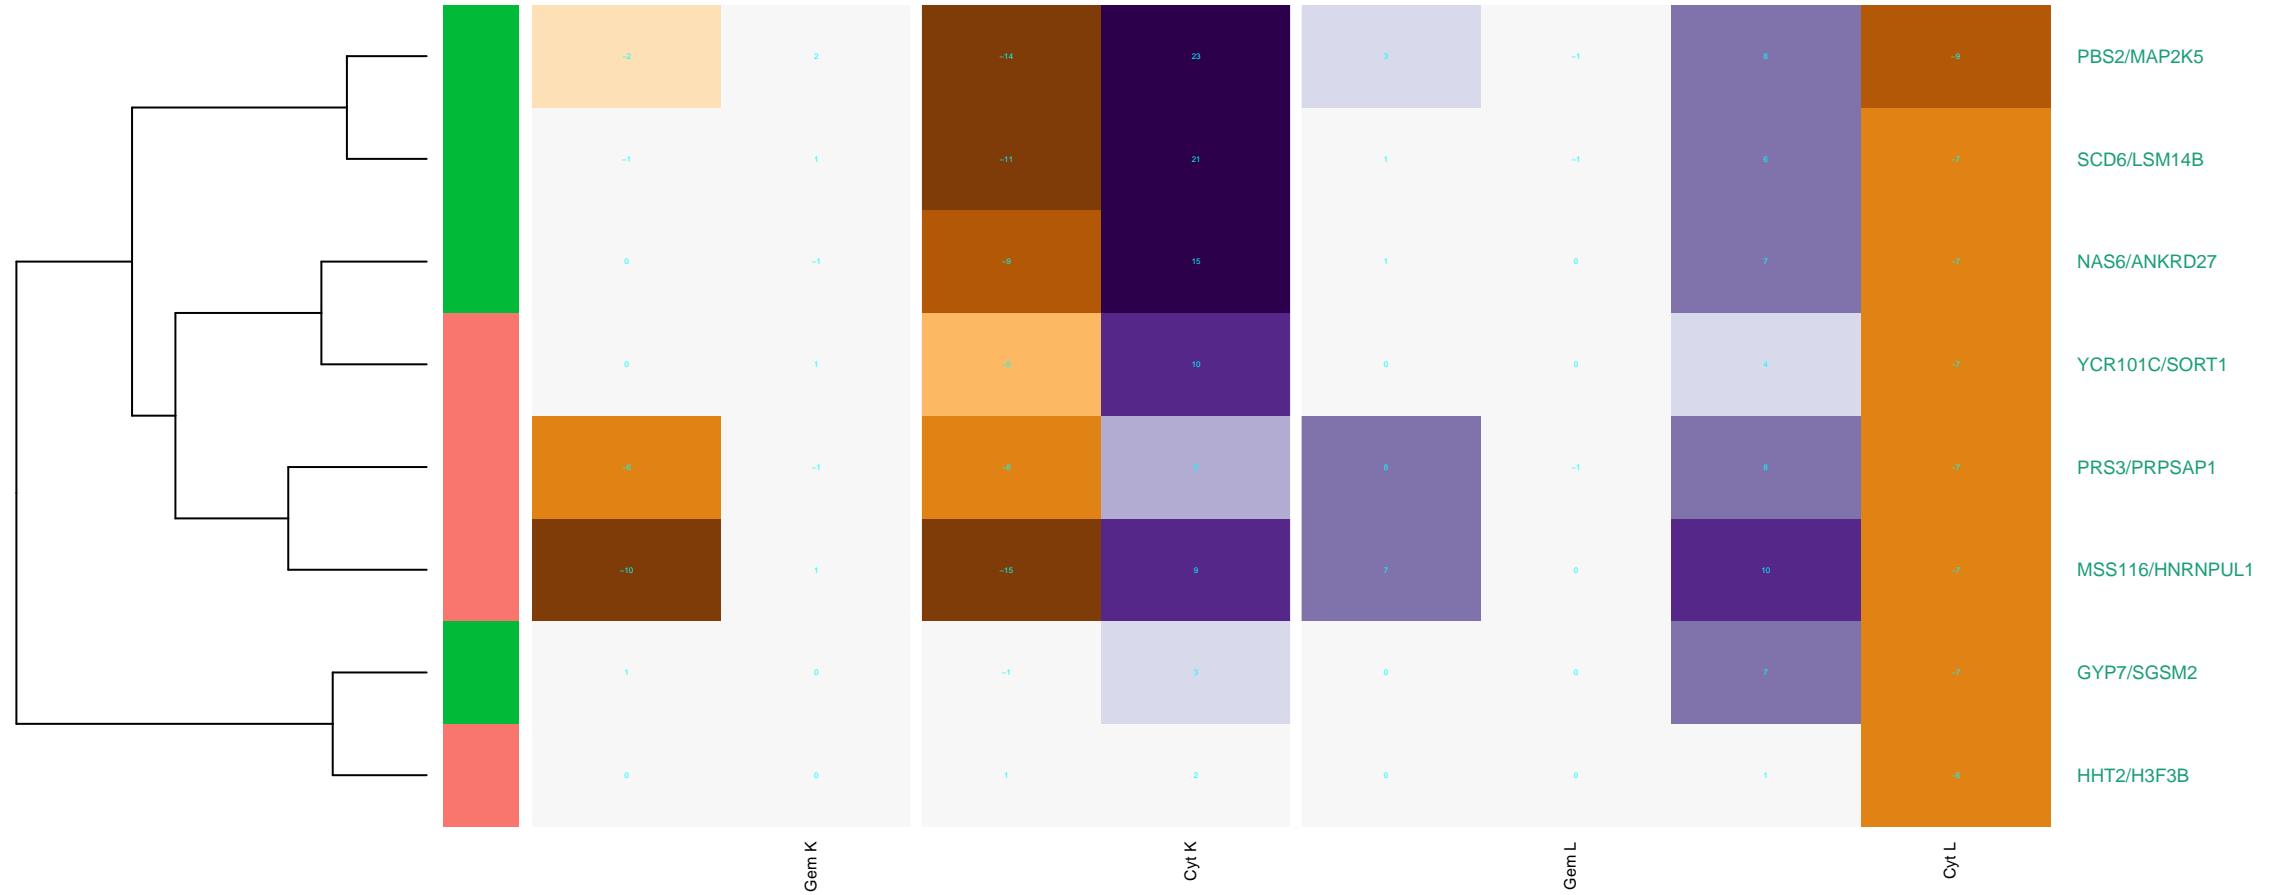

2-0.13-3

Color Key

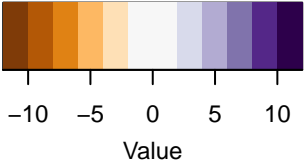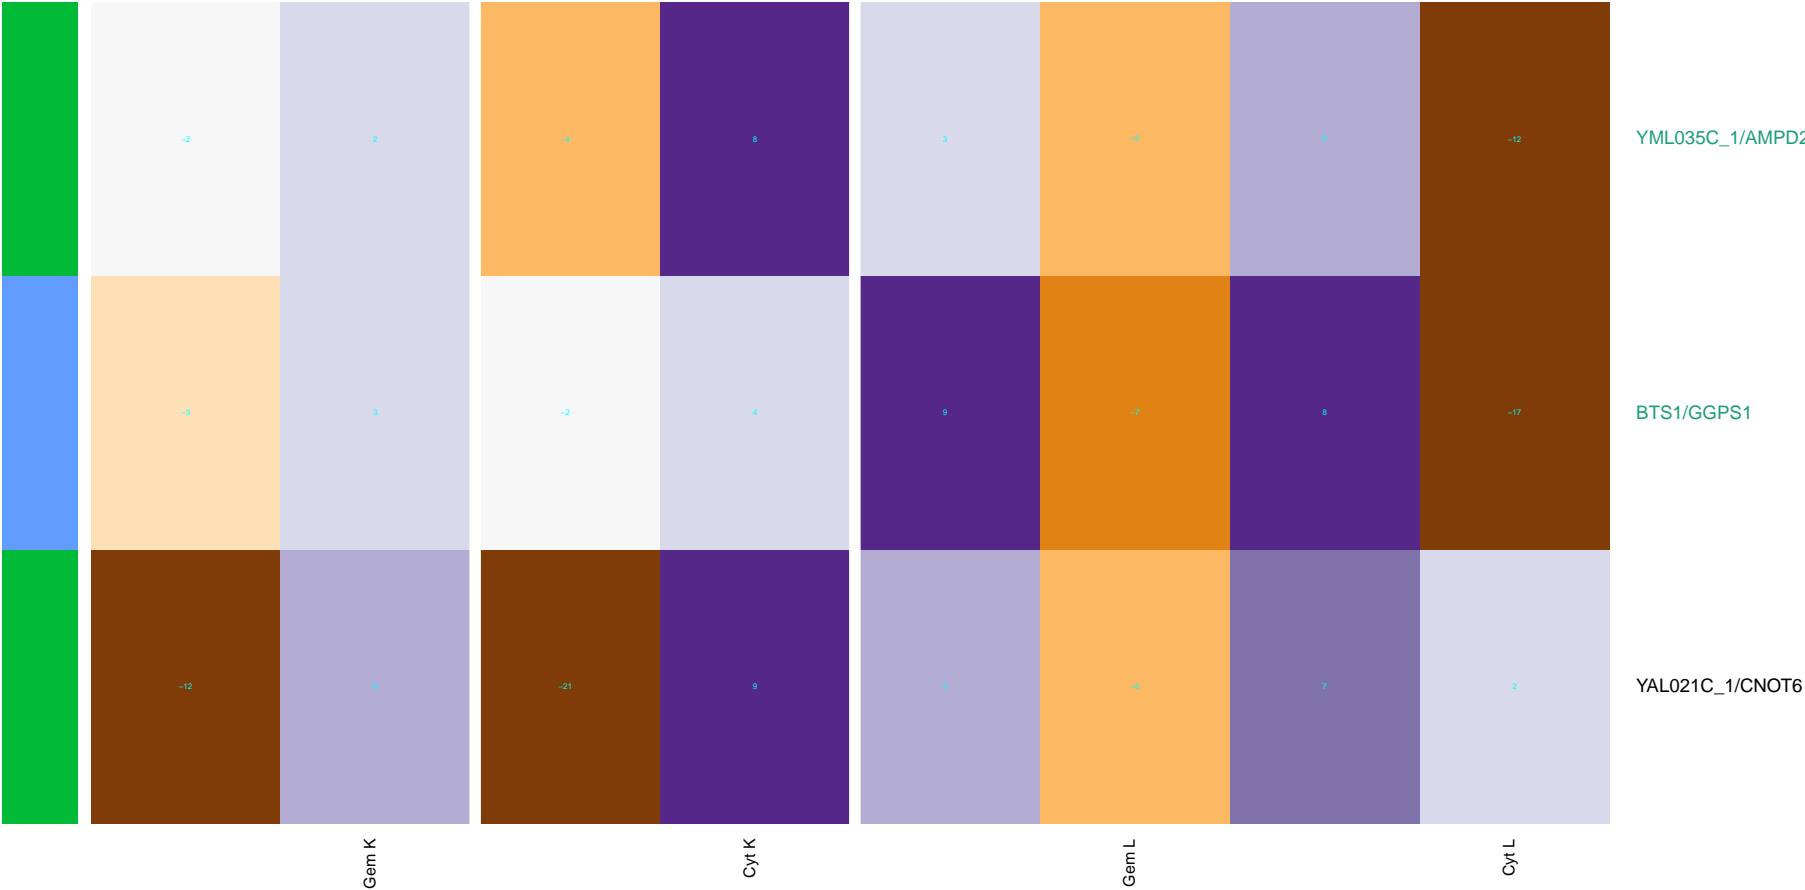

Color Key



2-0.14-0

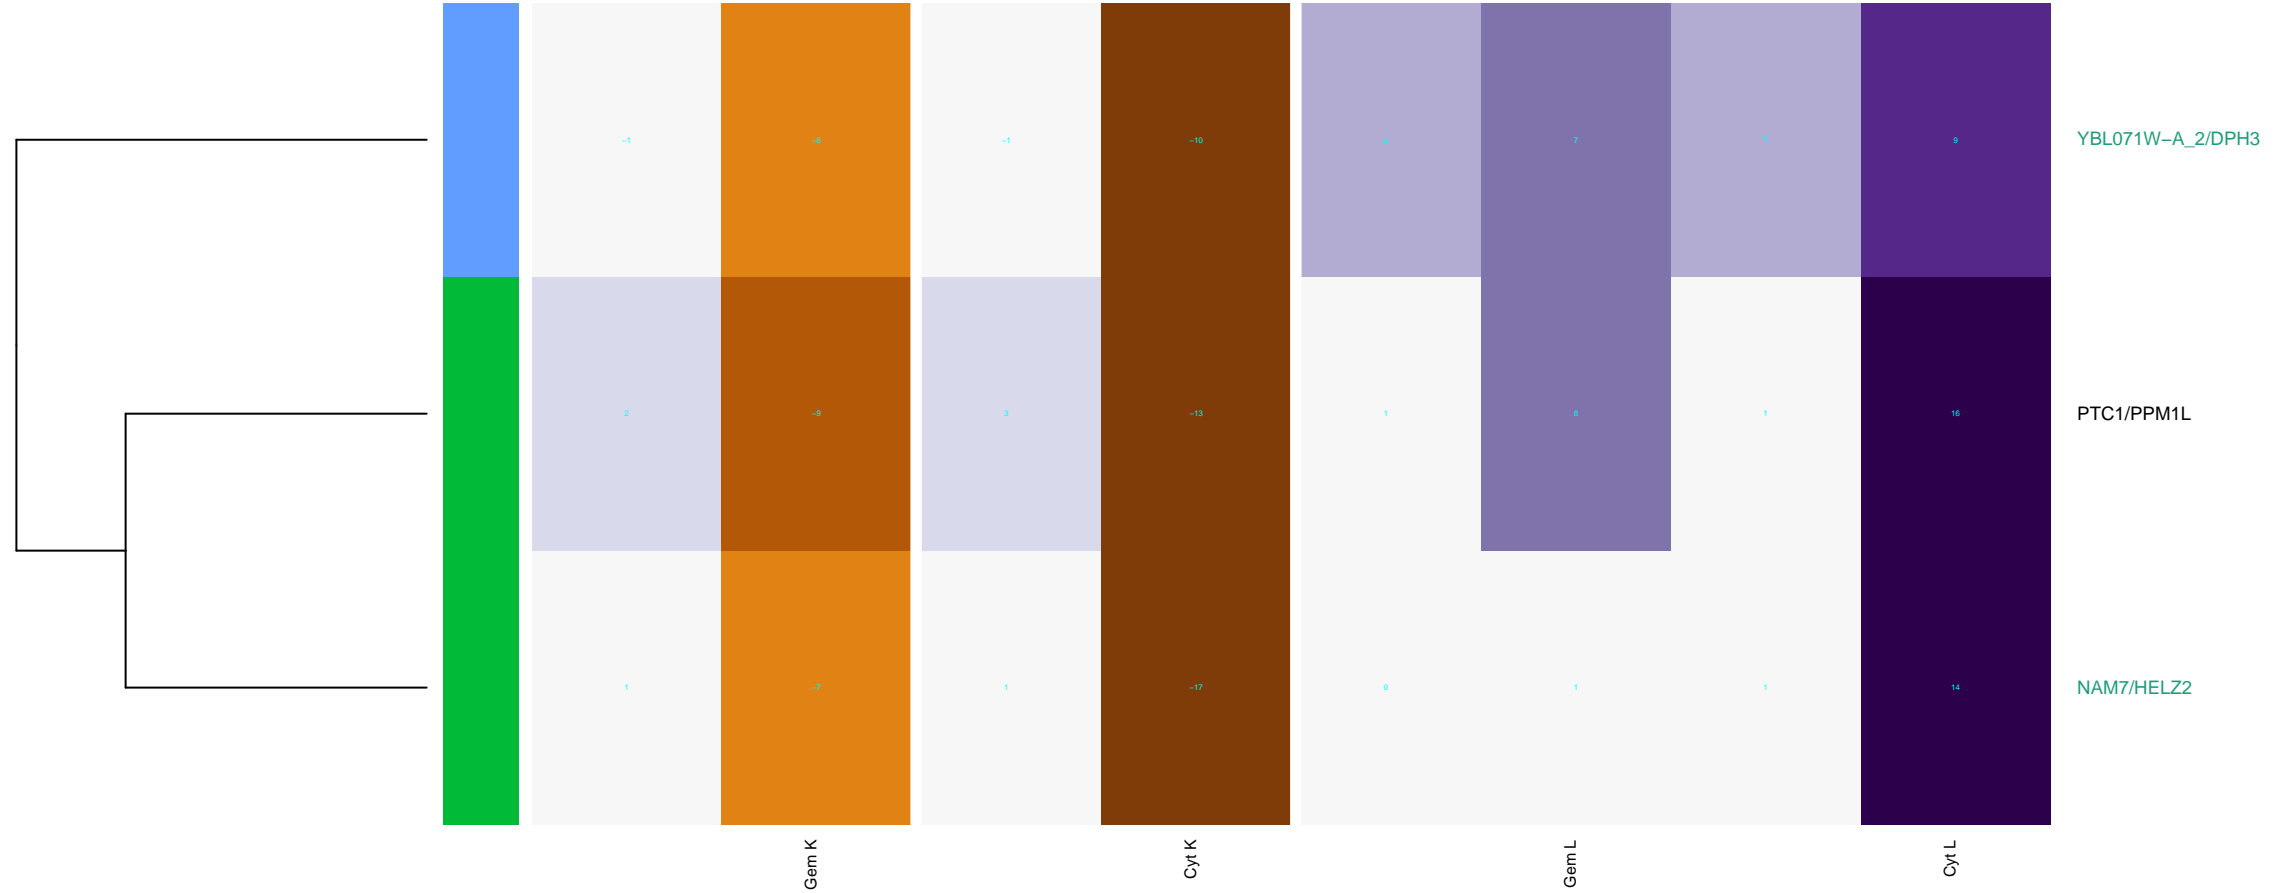

Color Key

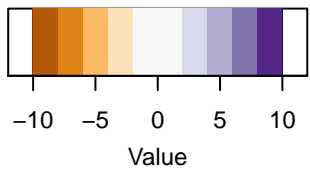

2-0.16-1

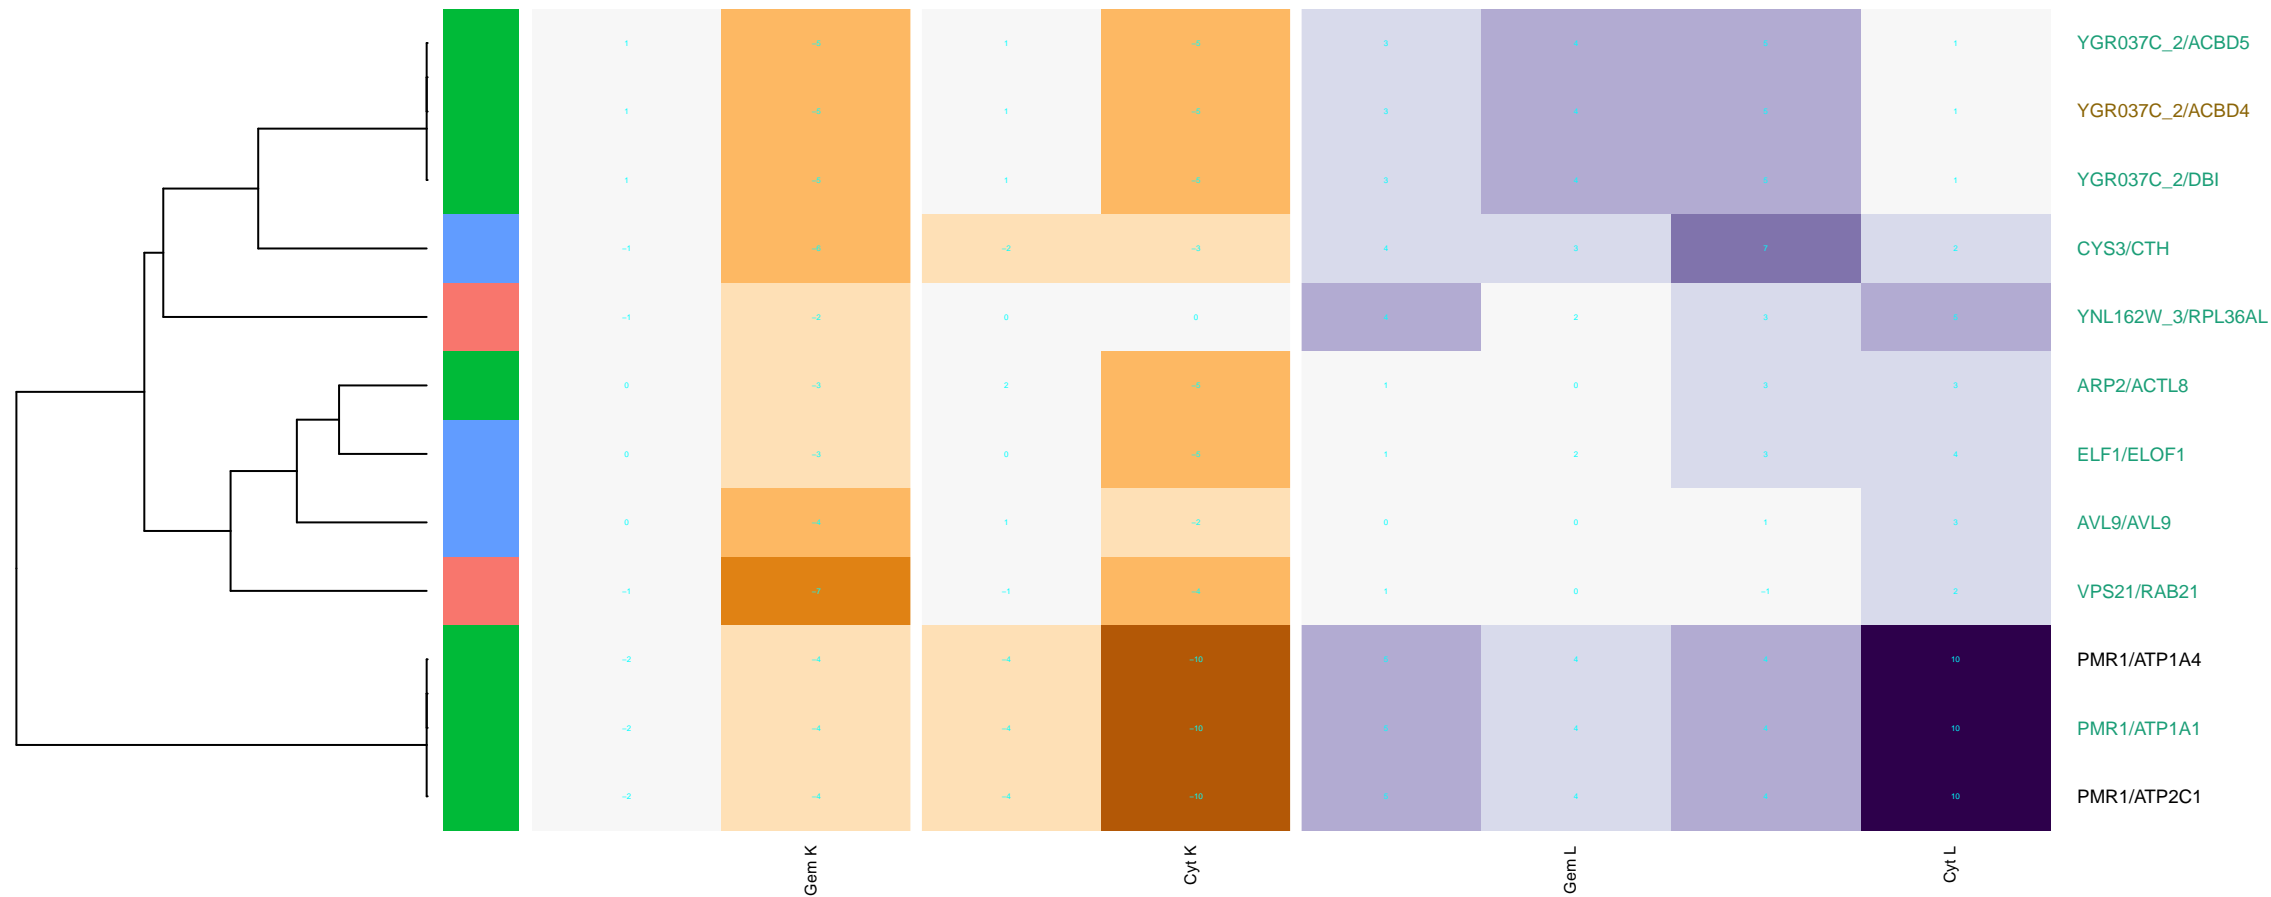



Color Key

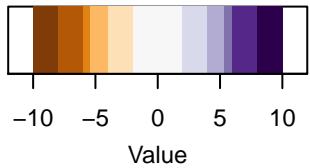

2-0.17-0

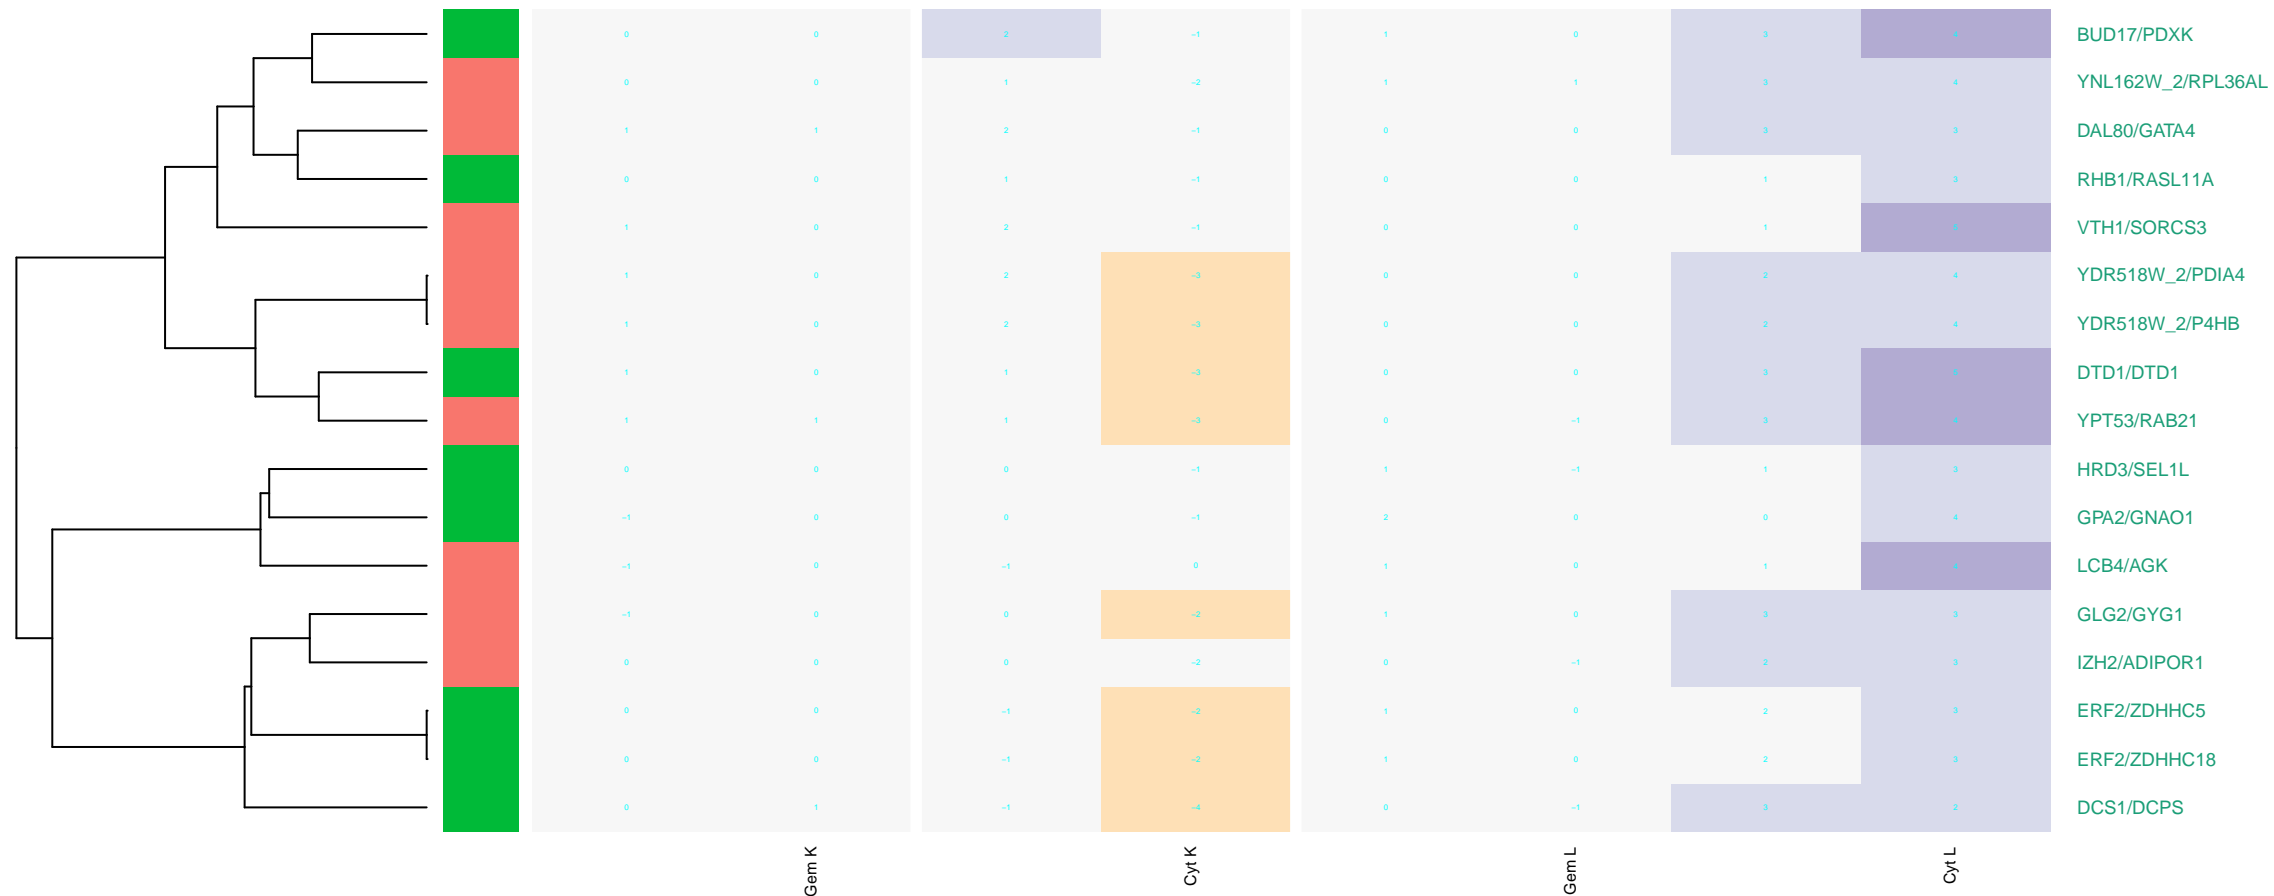

Color Key

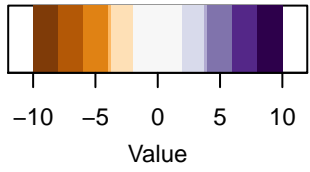

2-0.17-2

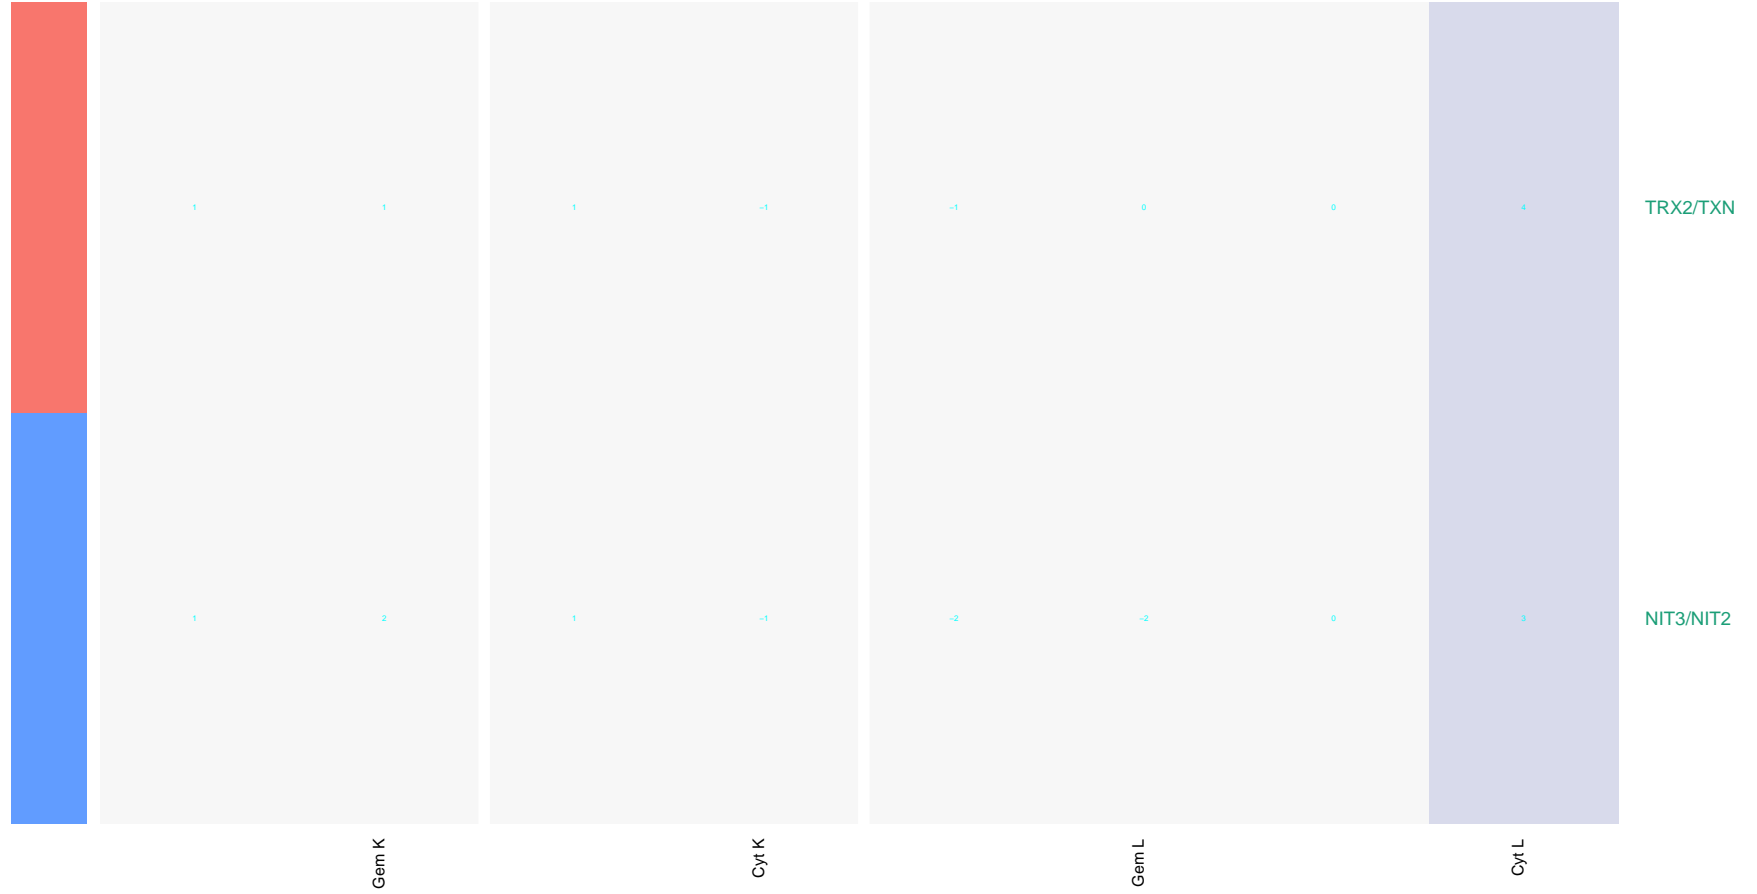

Color Key

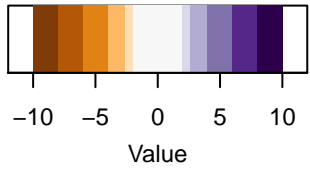

2-0.17-3

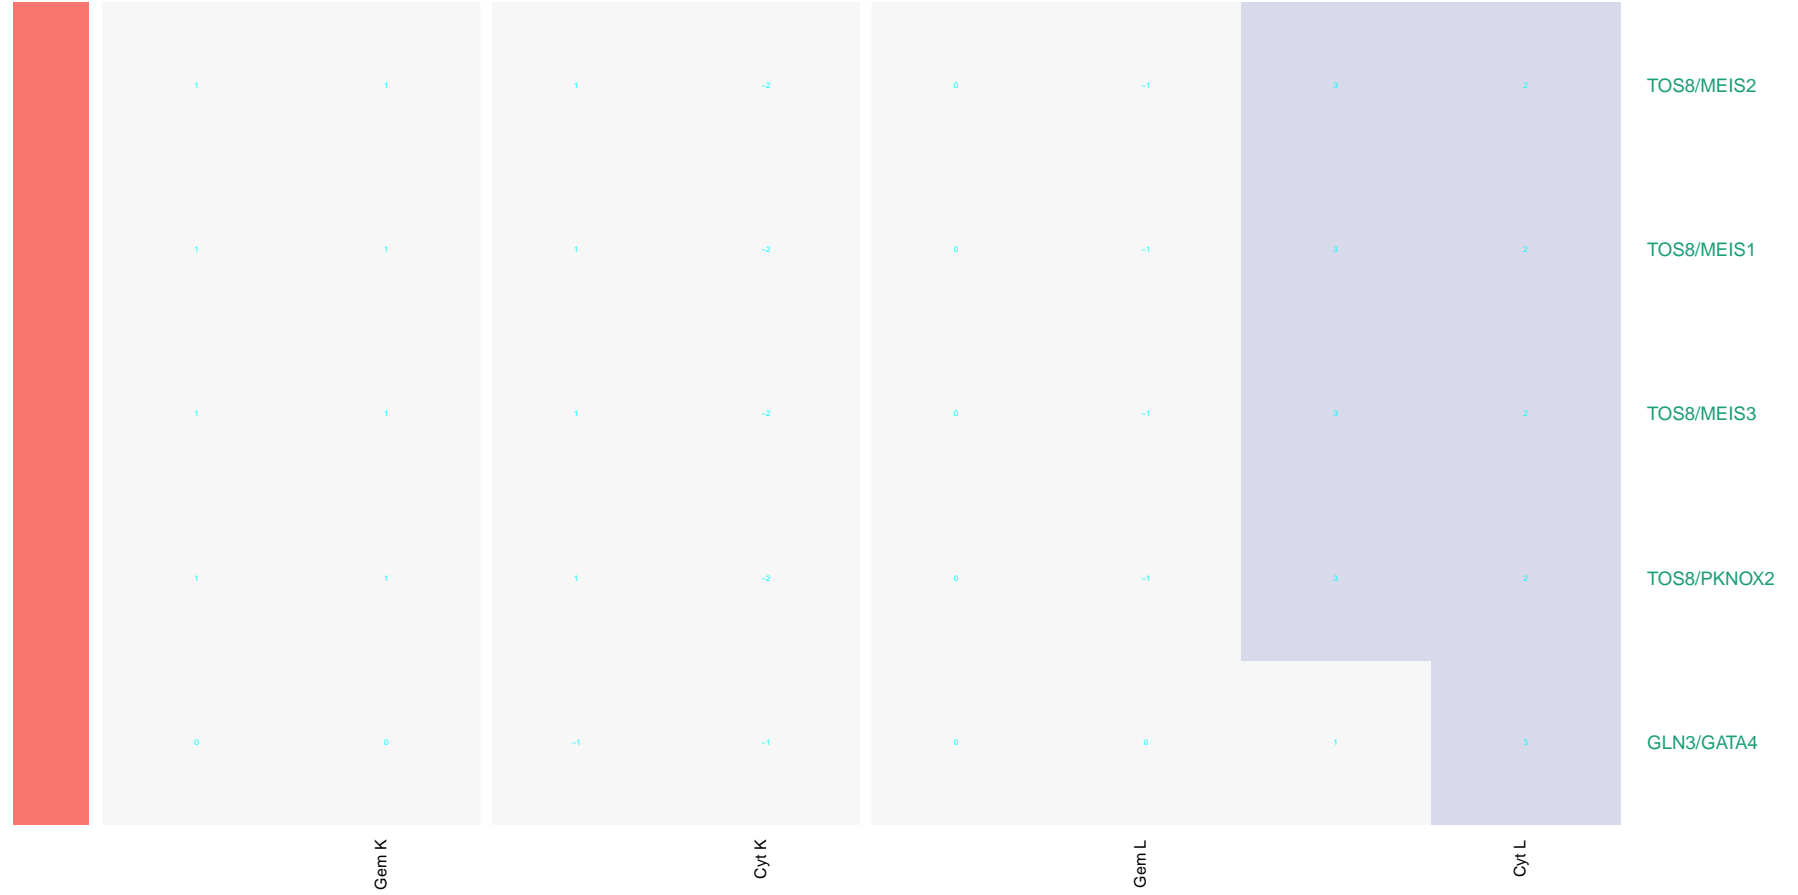

Color Key



2-0.2-1

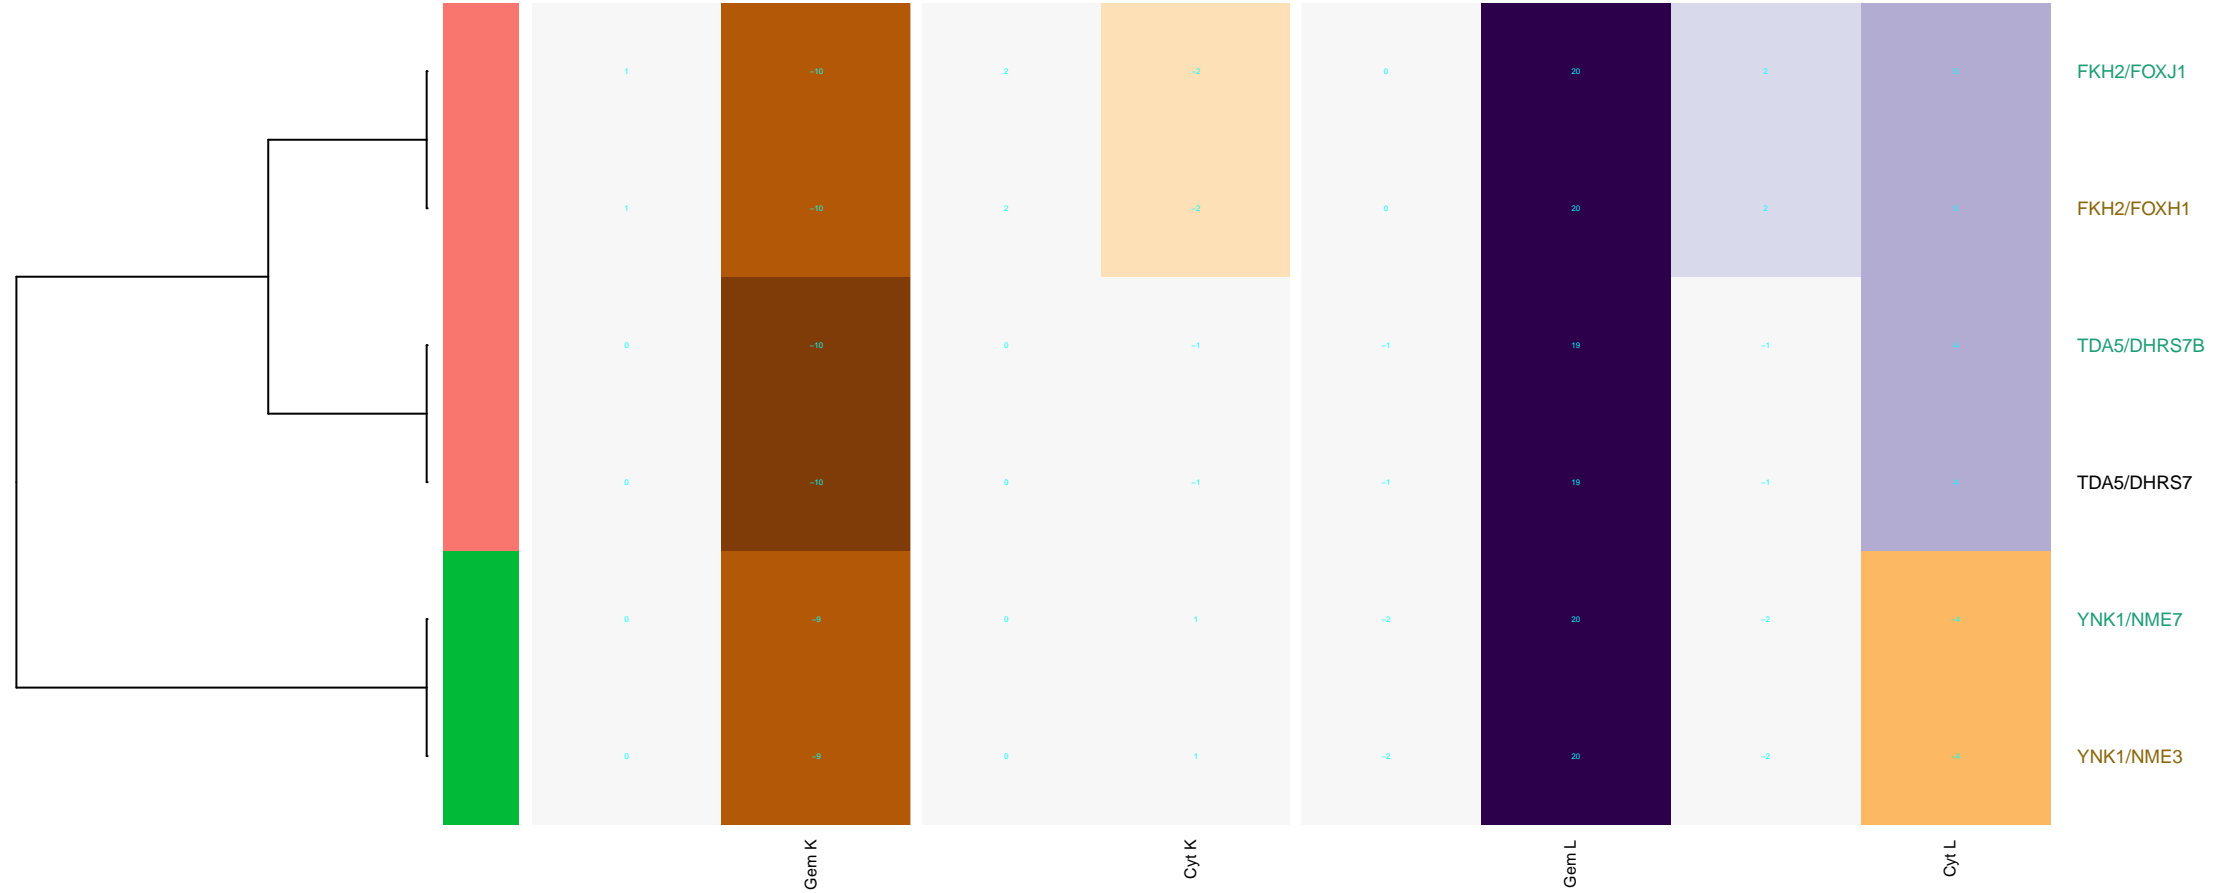

Color Key

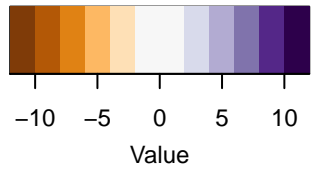

2-0.2-2

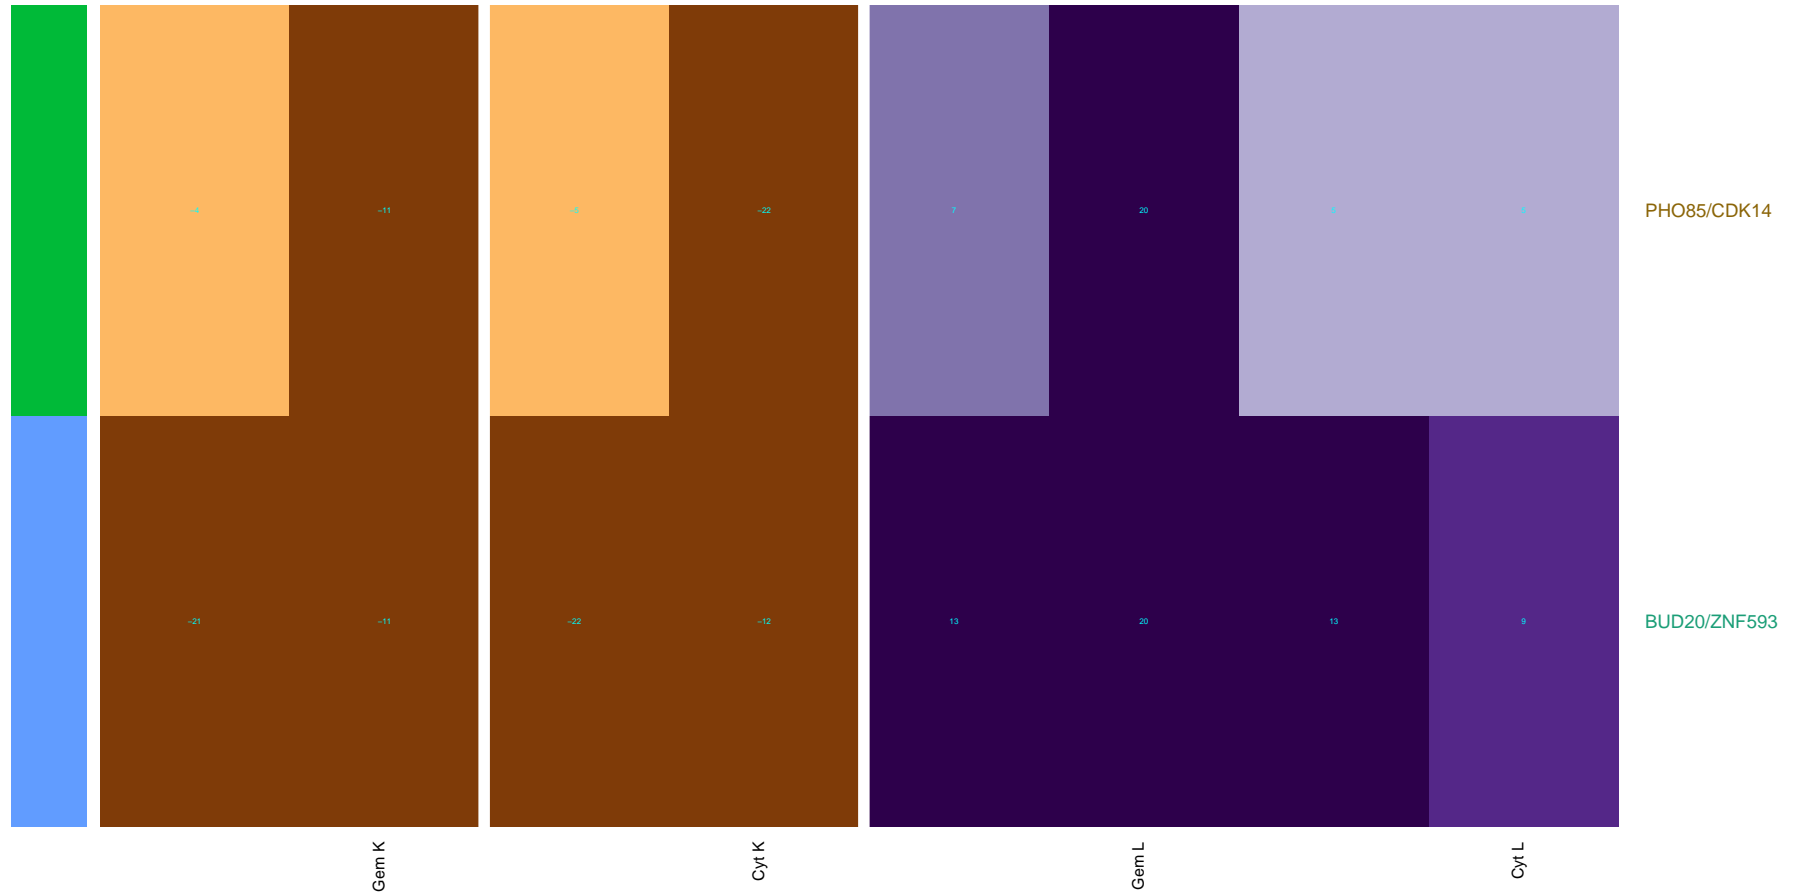

Color Key



2-0.8-1

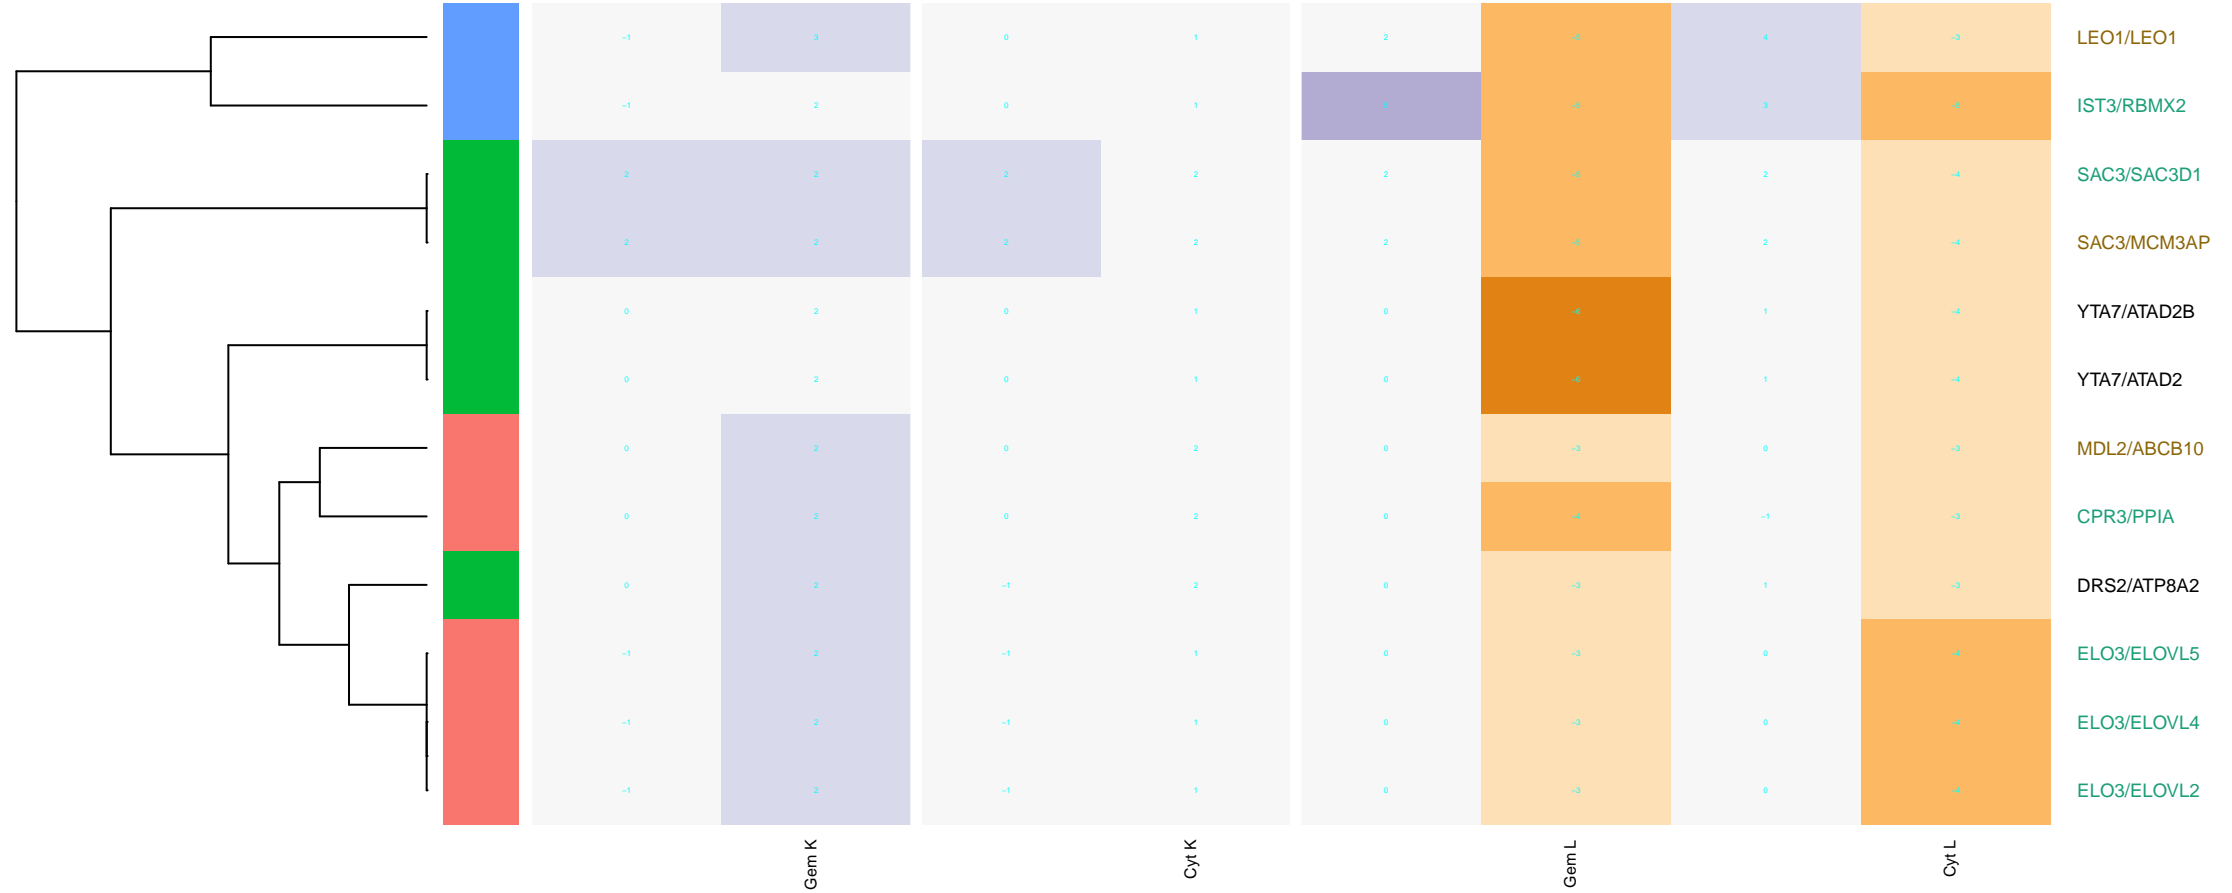

Color Key

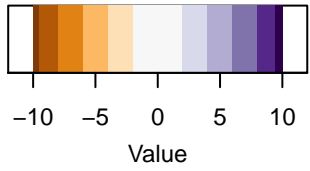

2-0.9-0

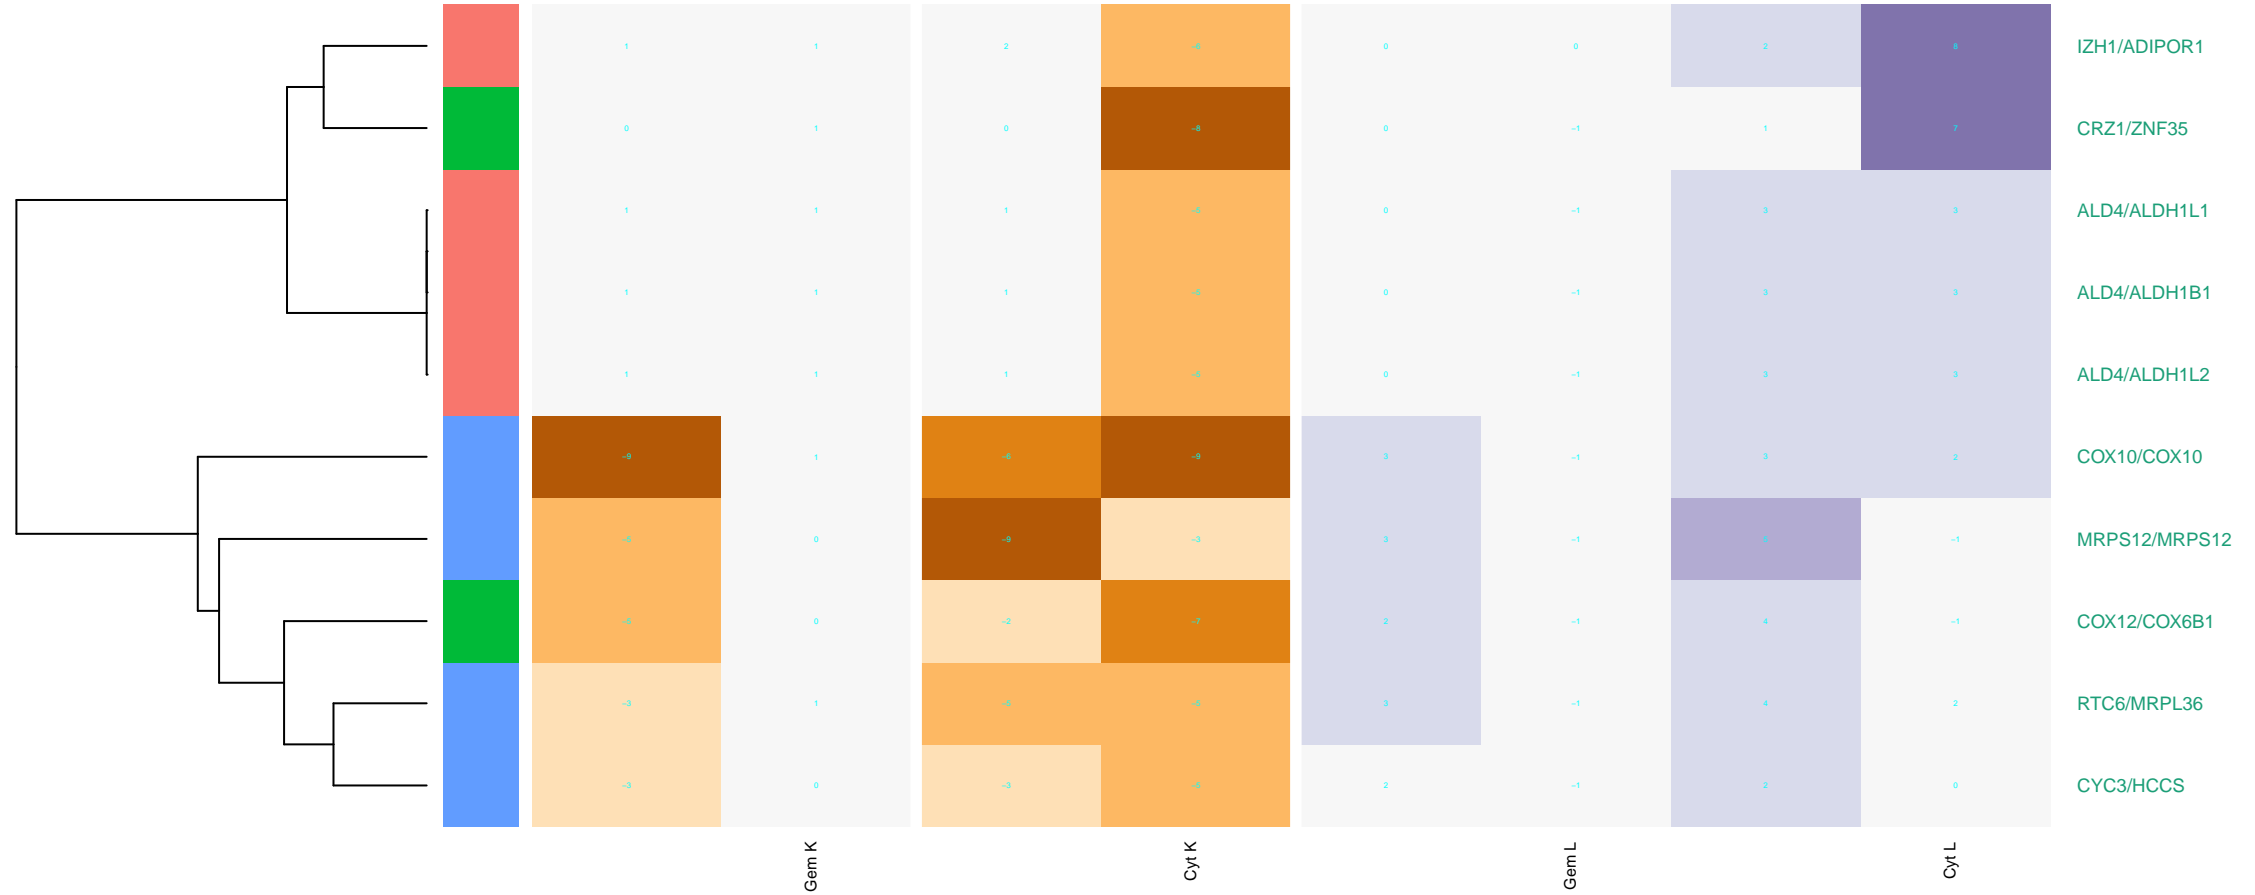

Color Key



2-0.9-1

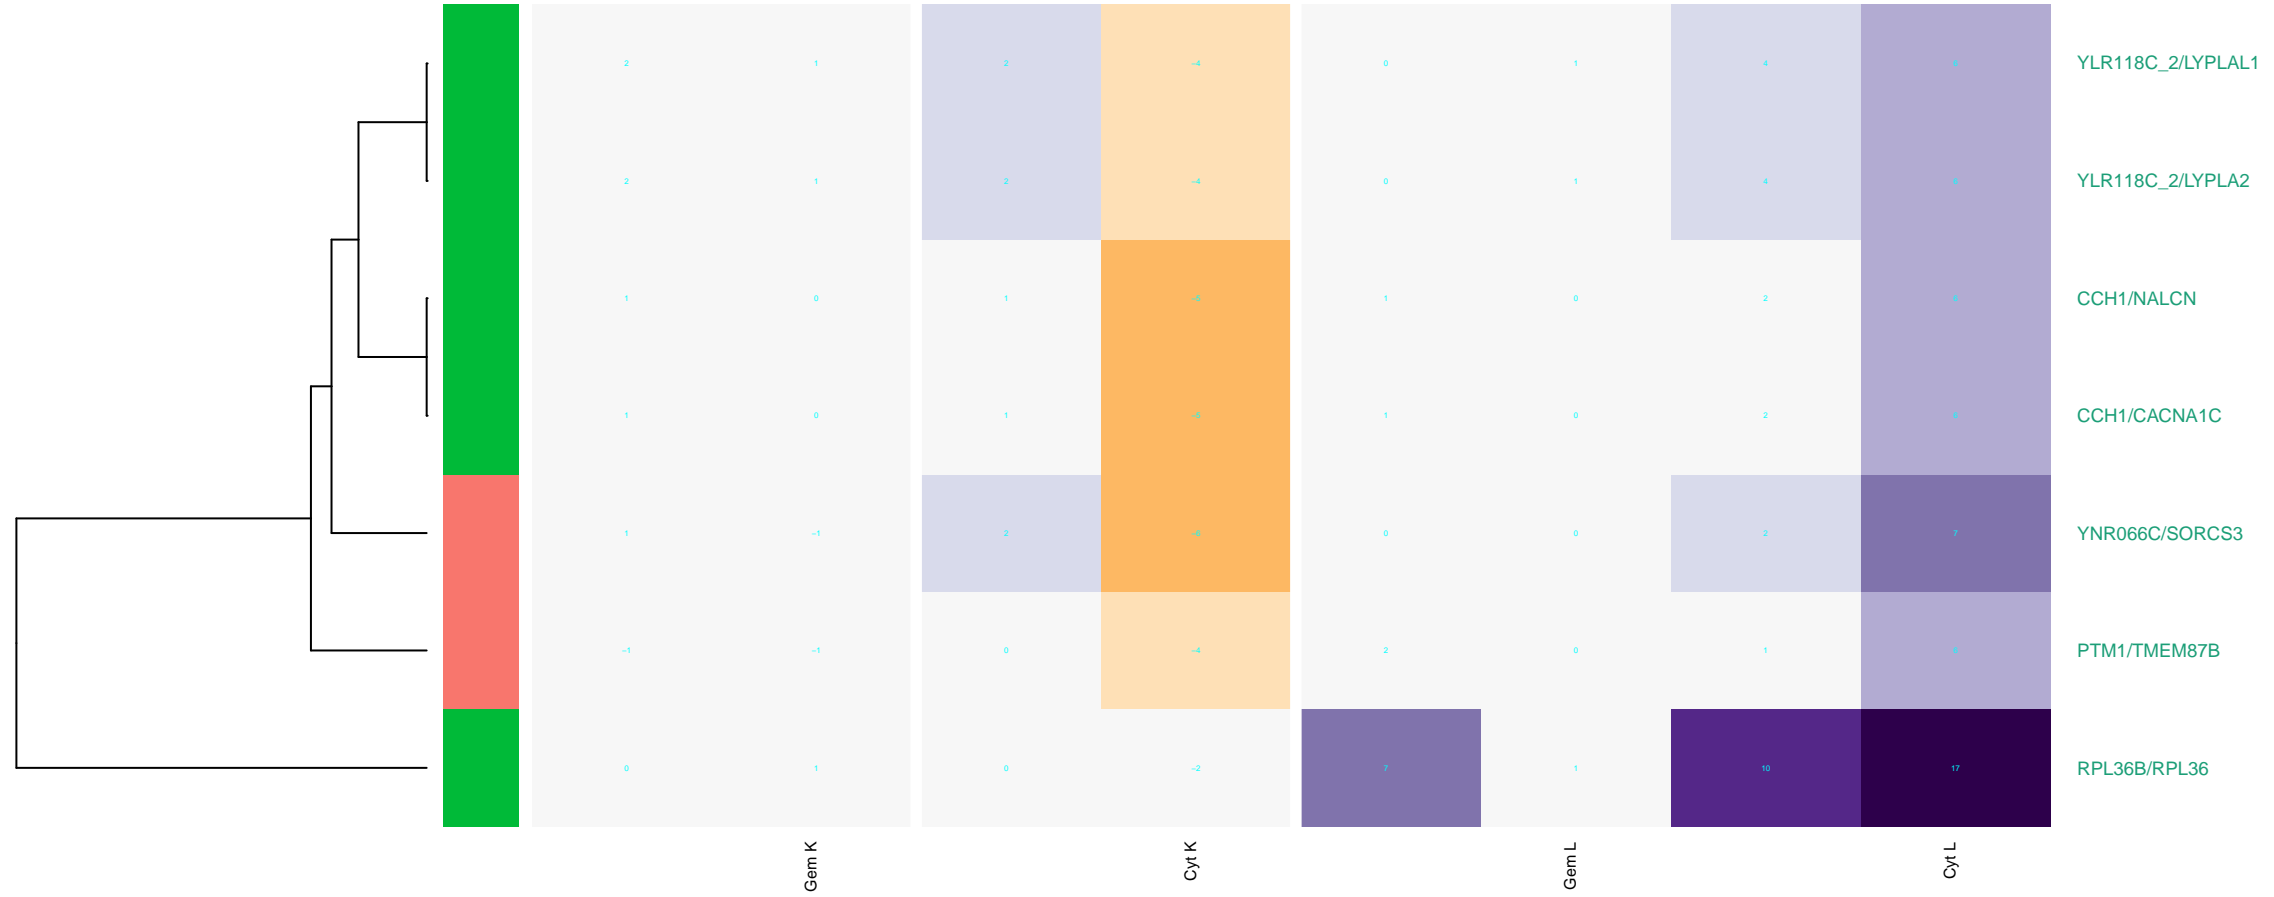



Color Key



3-0.2.2-0

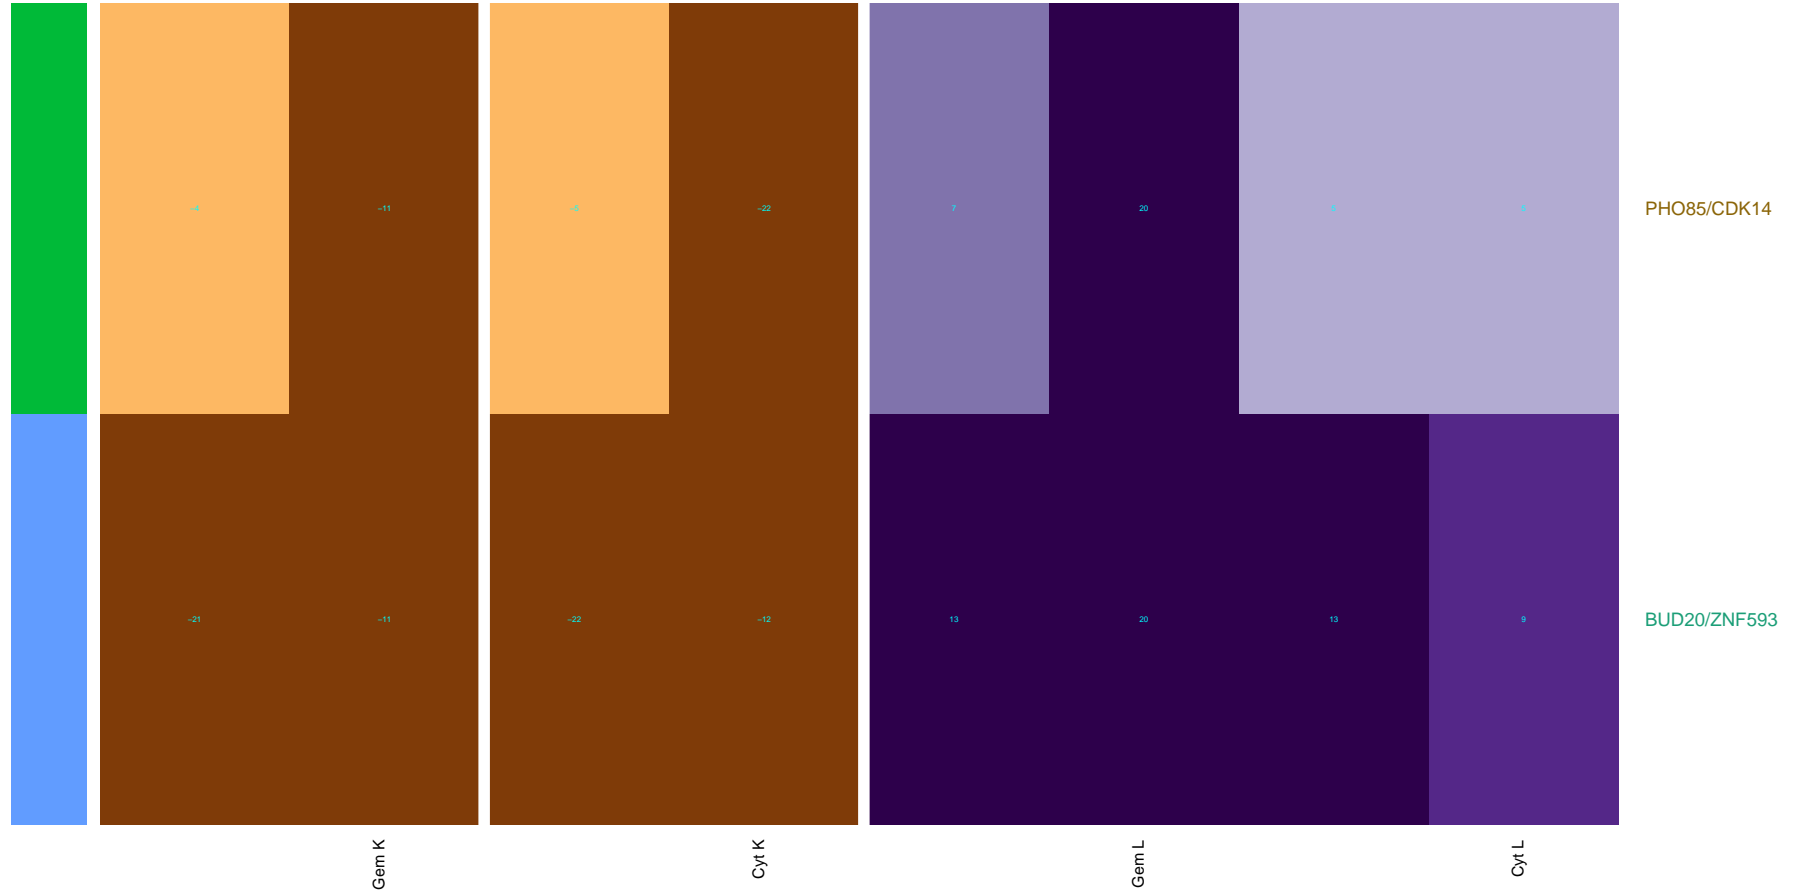

Supplement: s1 [file s1]
