# Supplementary material for: A Humanized Yeast Phenomic Model of Deoxycytidine Kinase to Predict Genetic Buffering of Nucleoside Analog Cytotoxicity
Source: MDPI journal article supplement (doi:10.3390/genes10100770), 2019-09-30

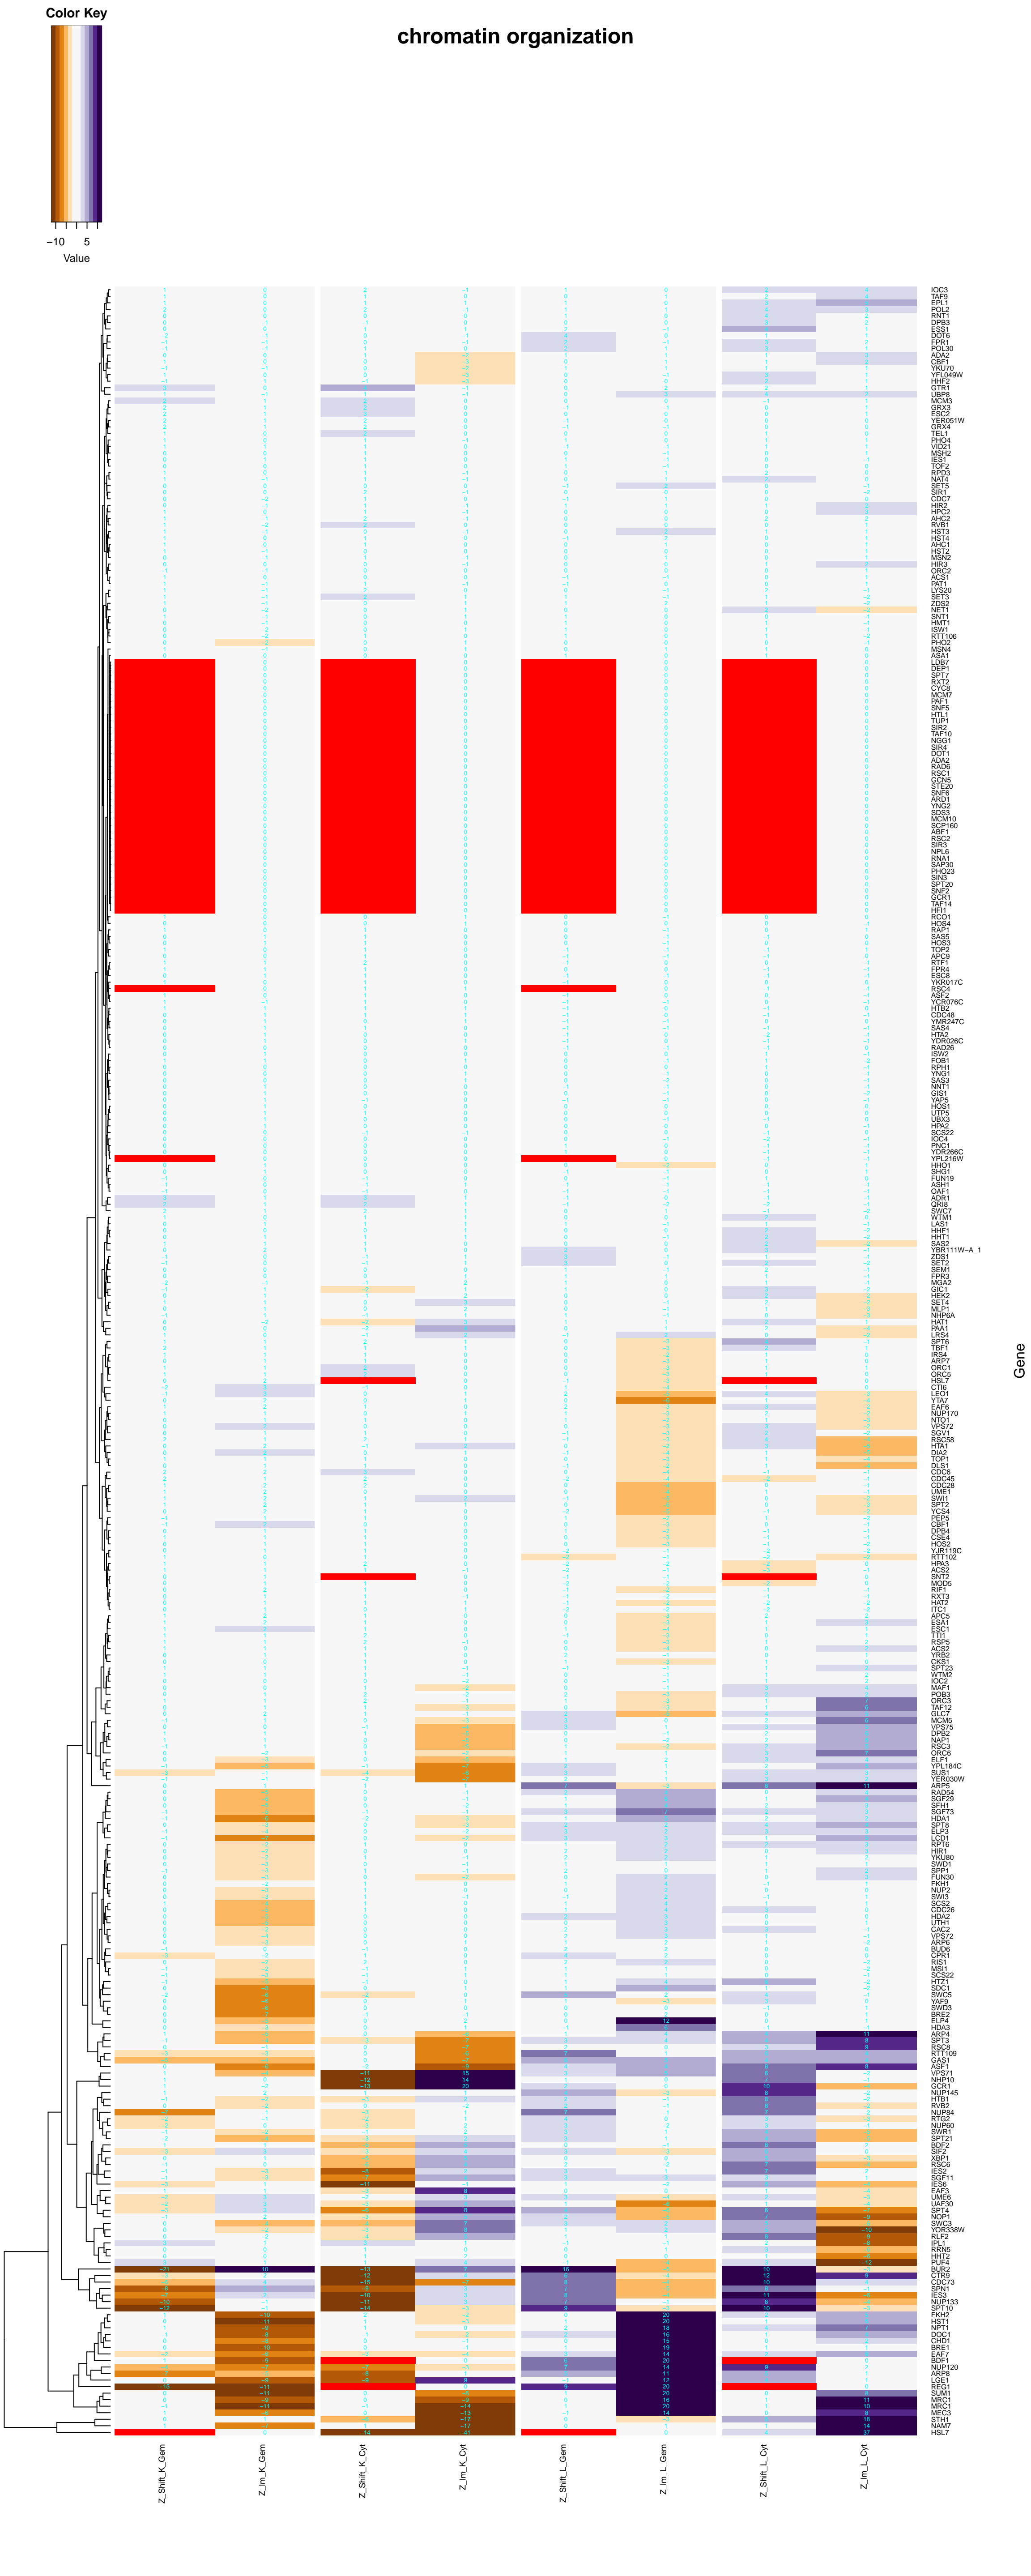

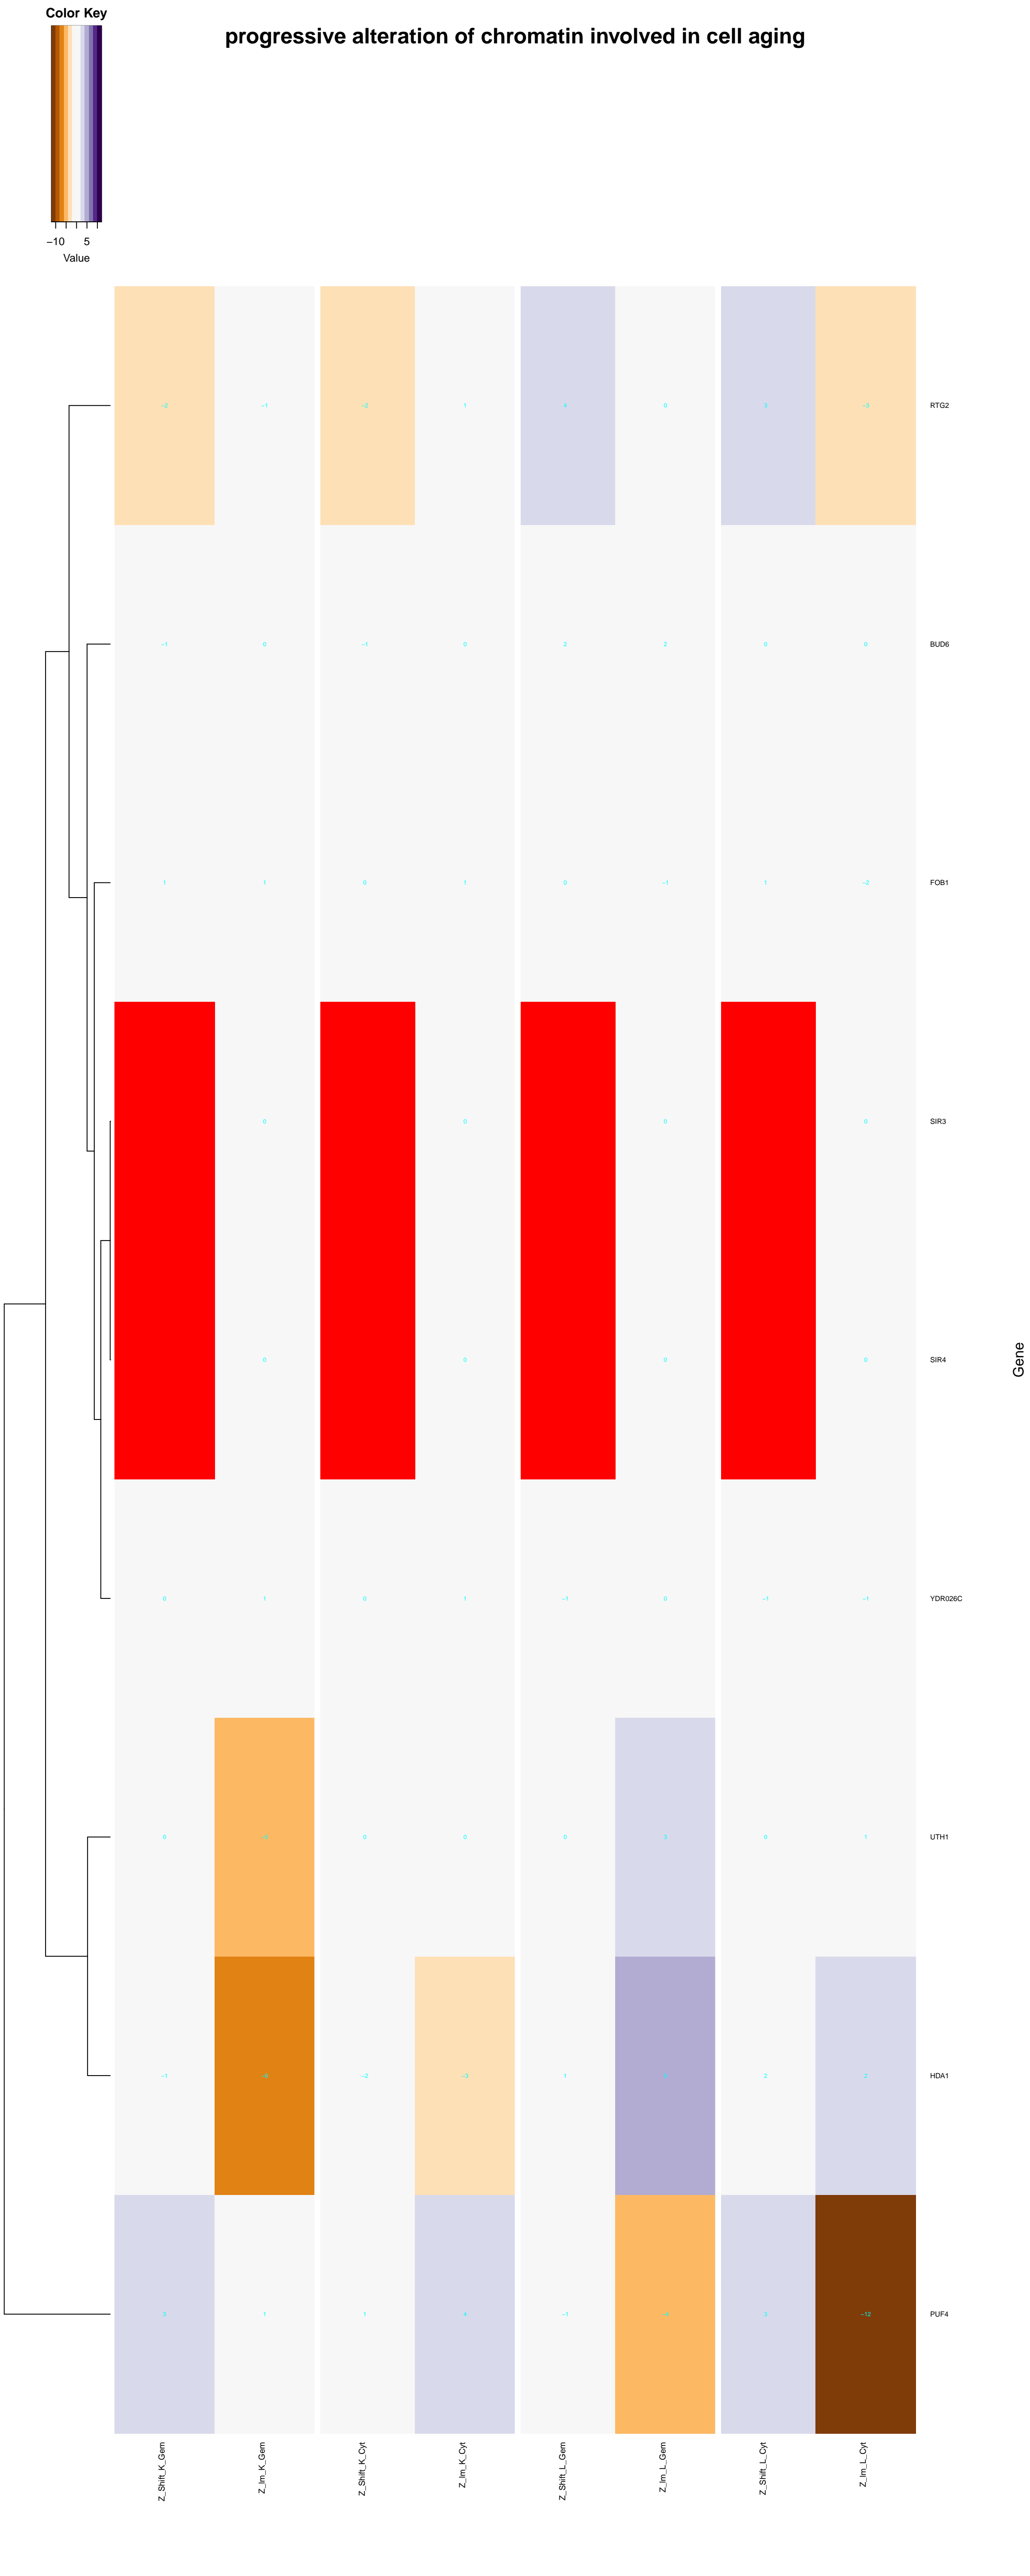

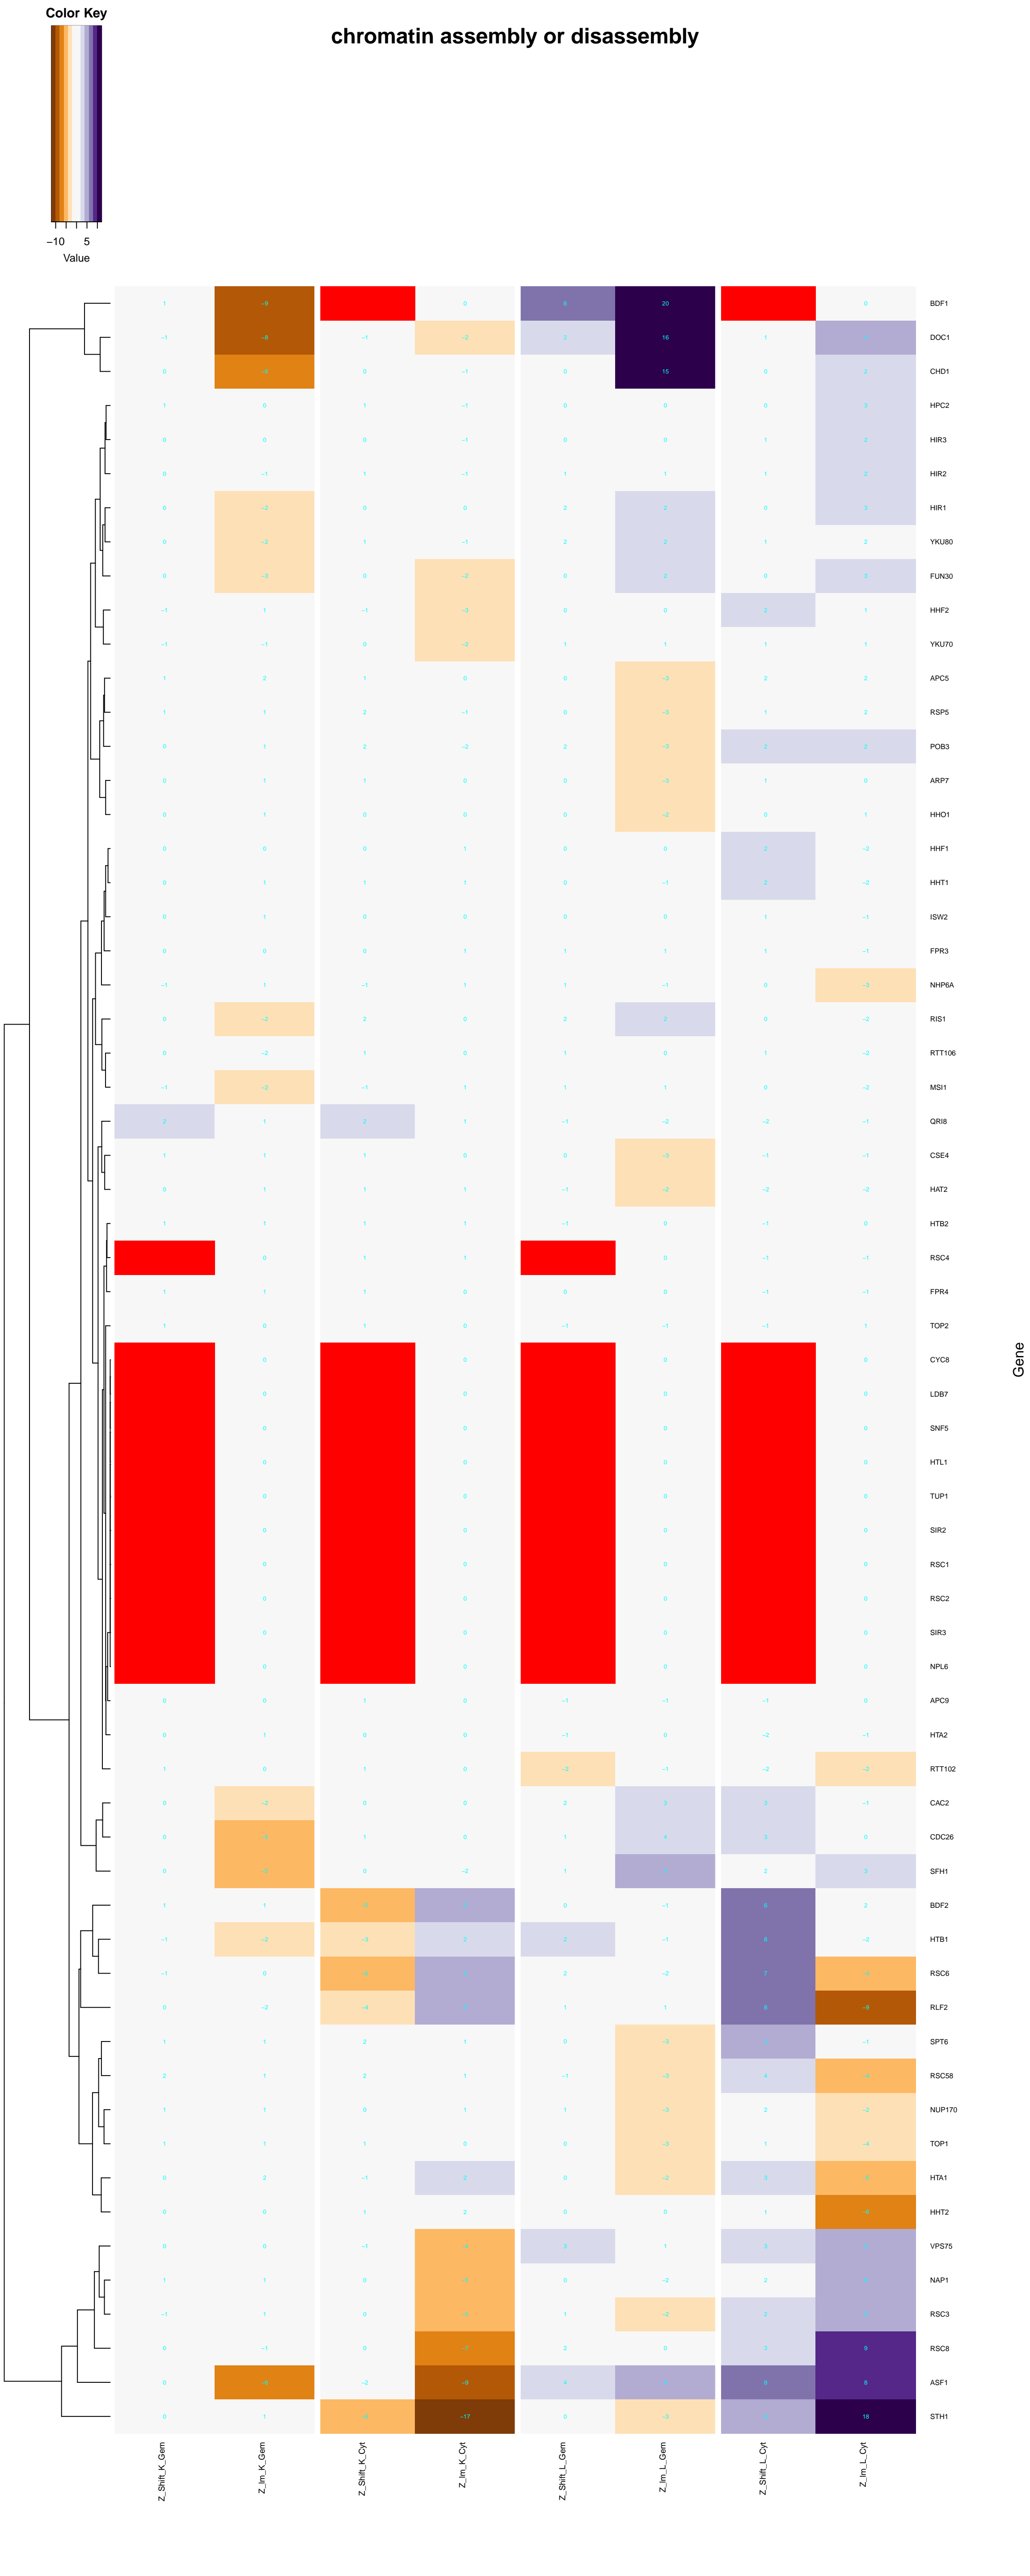

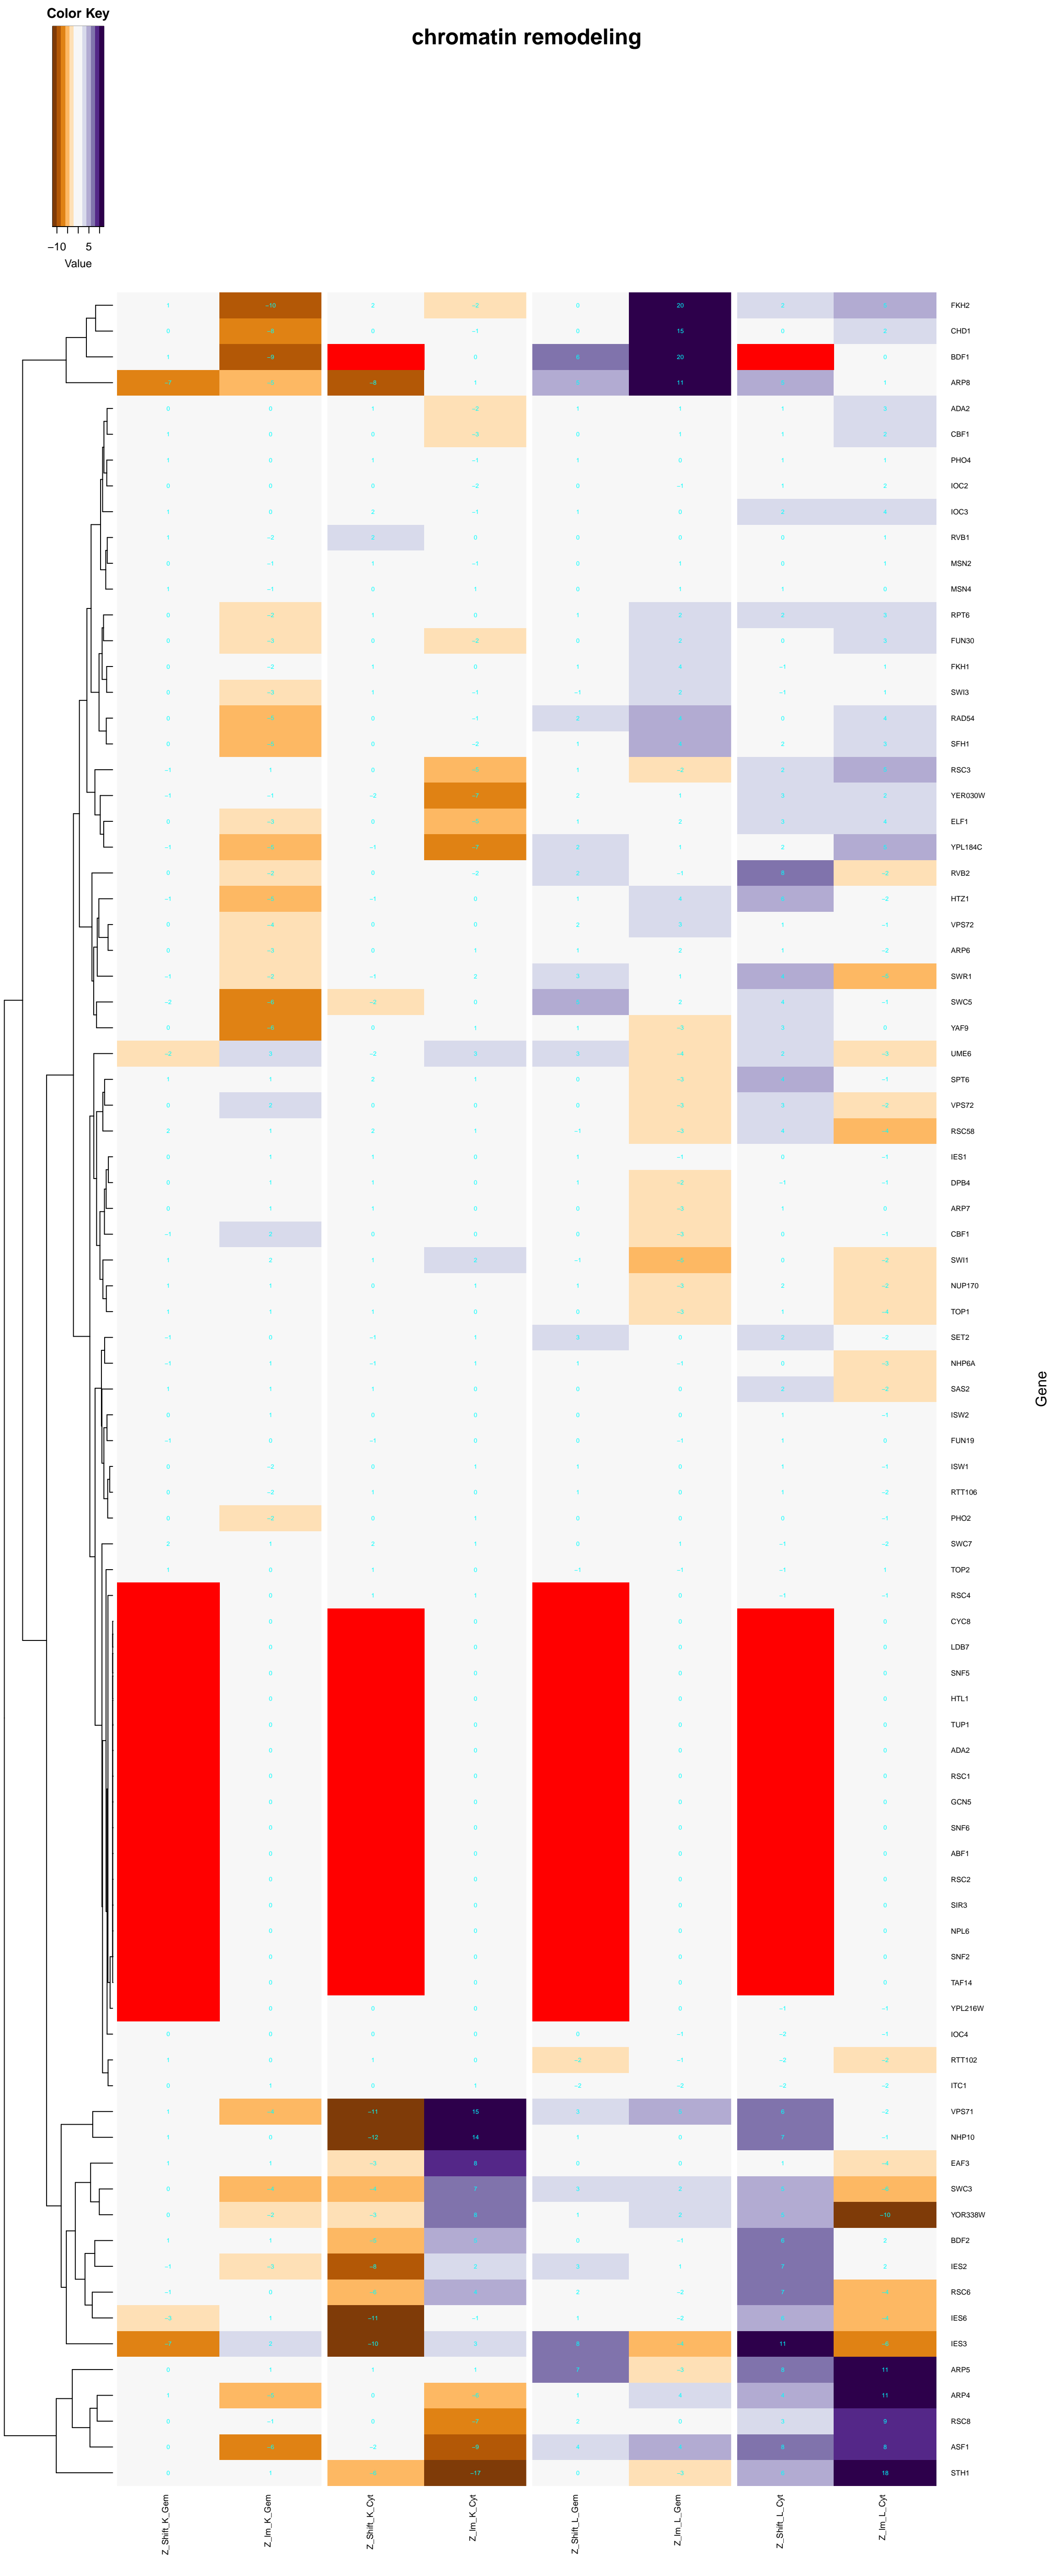

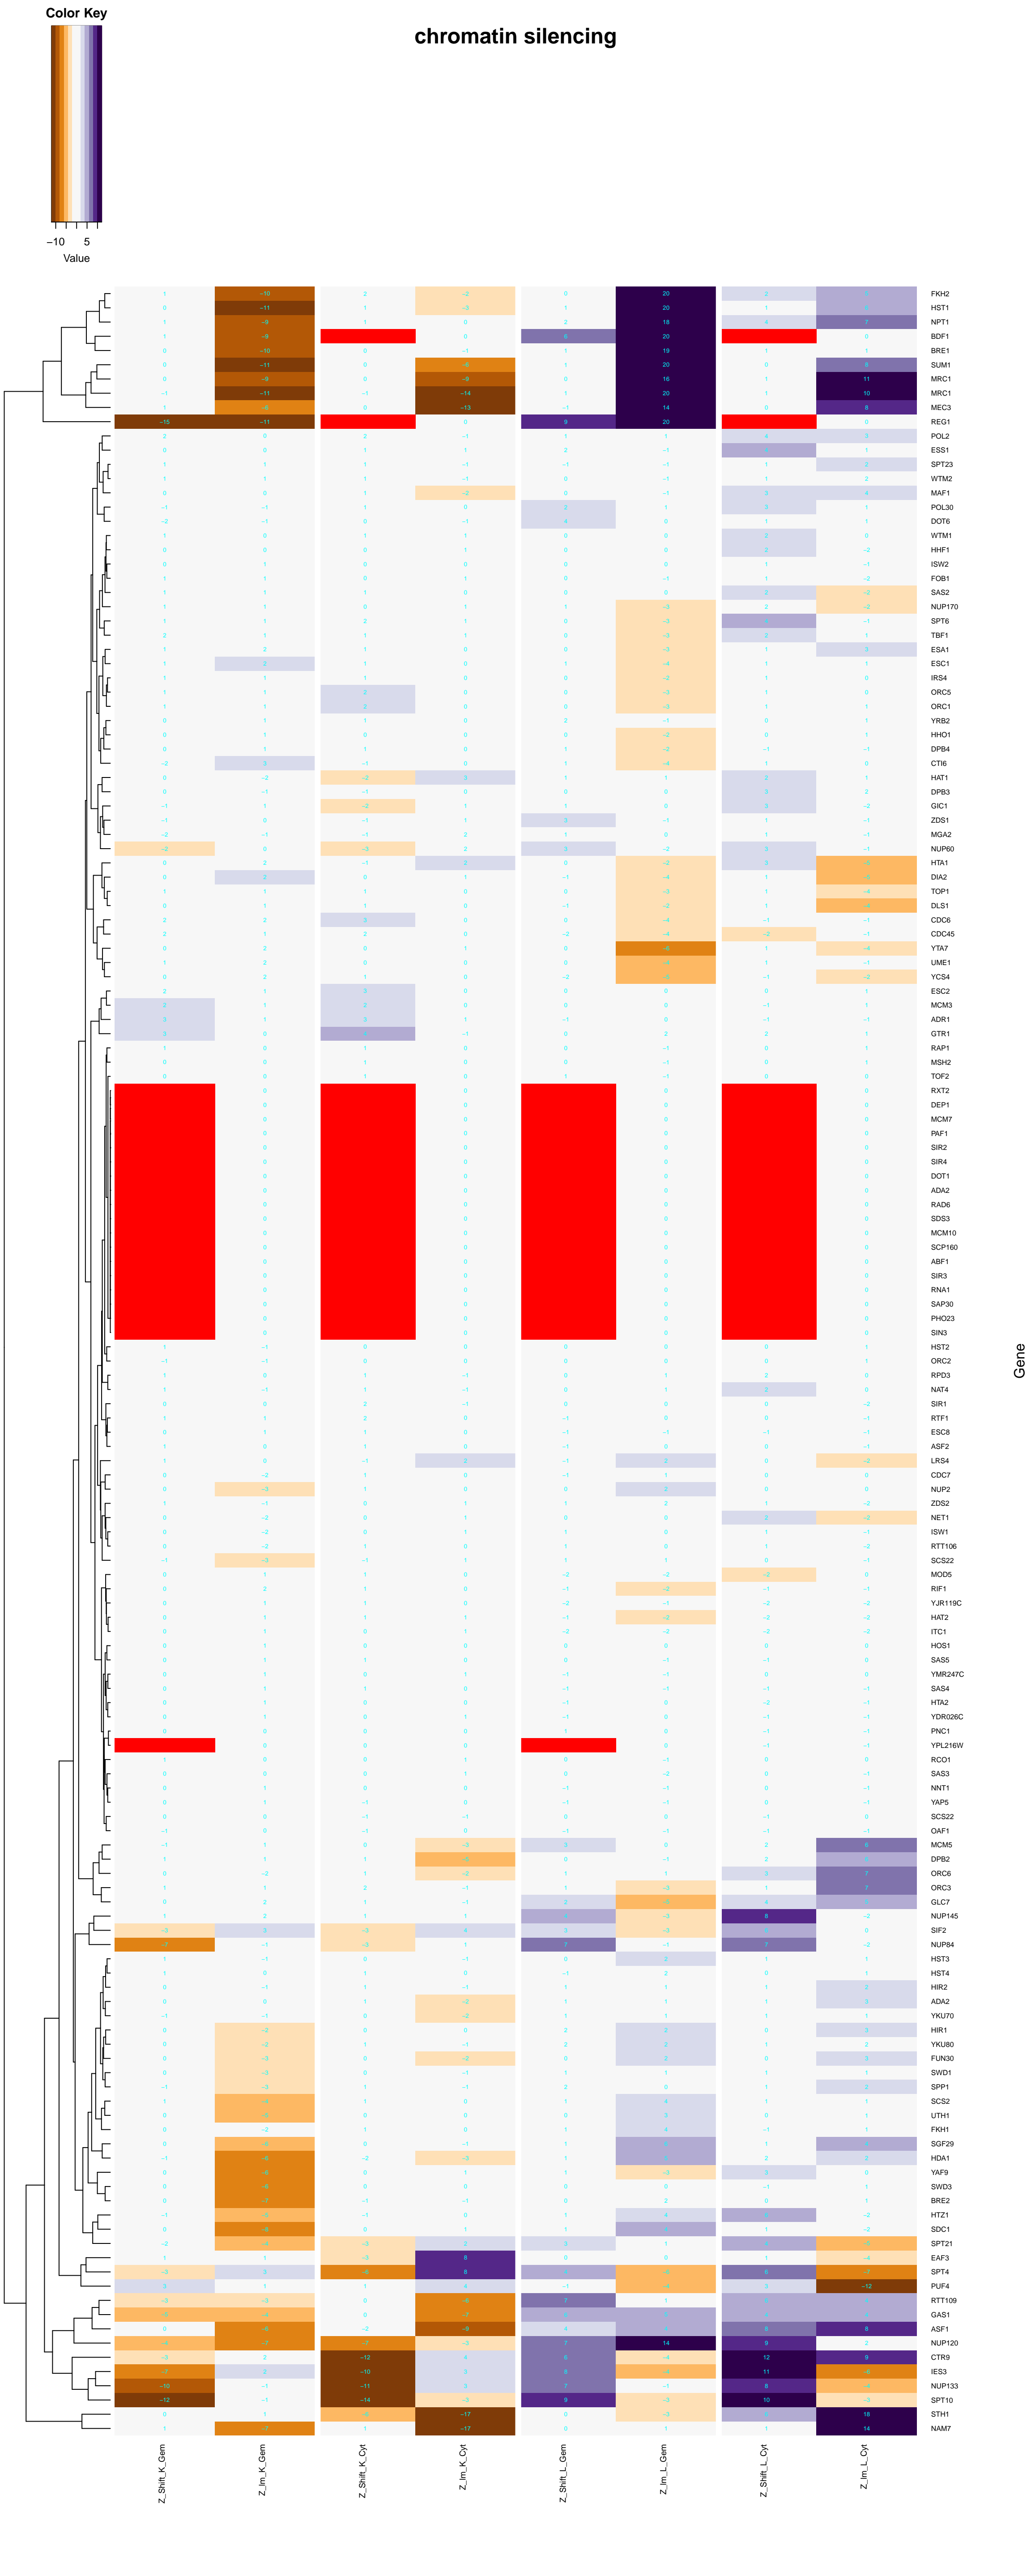

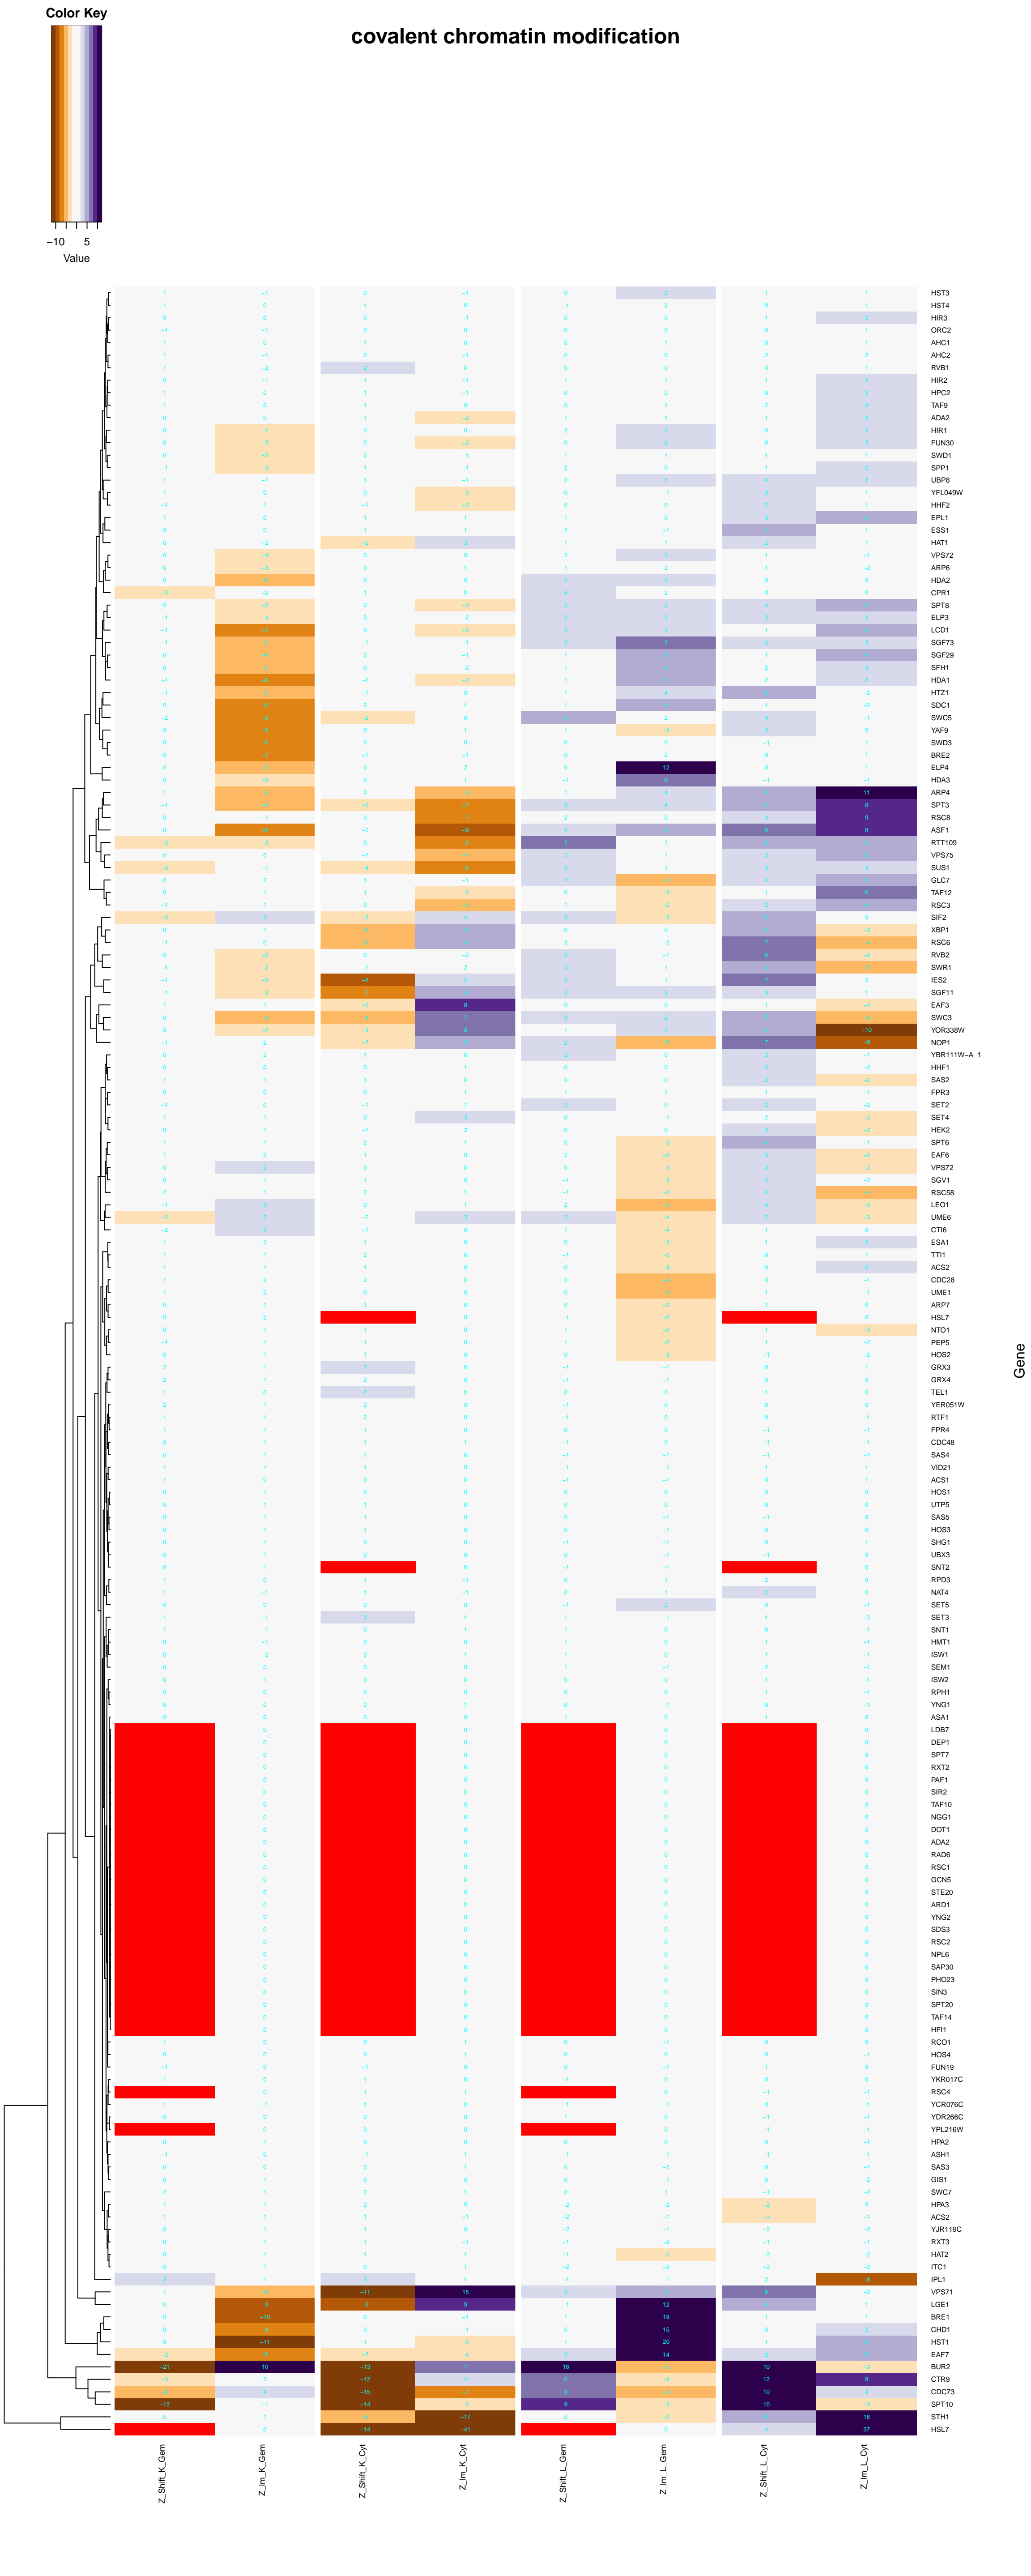

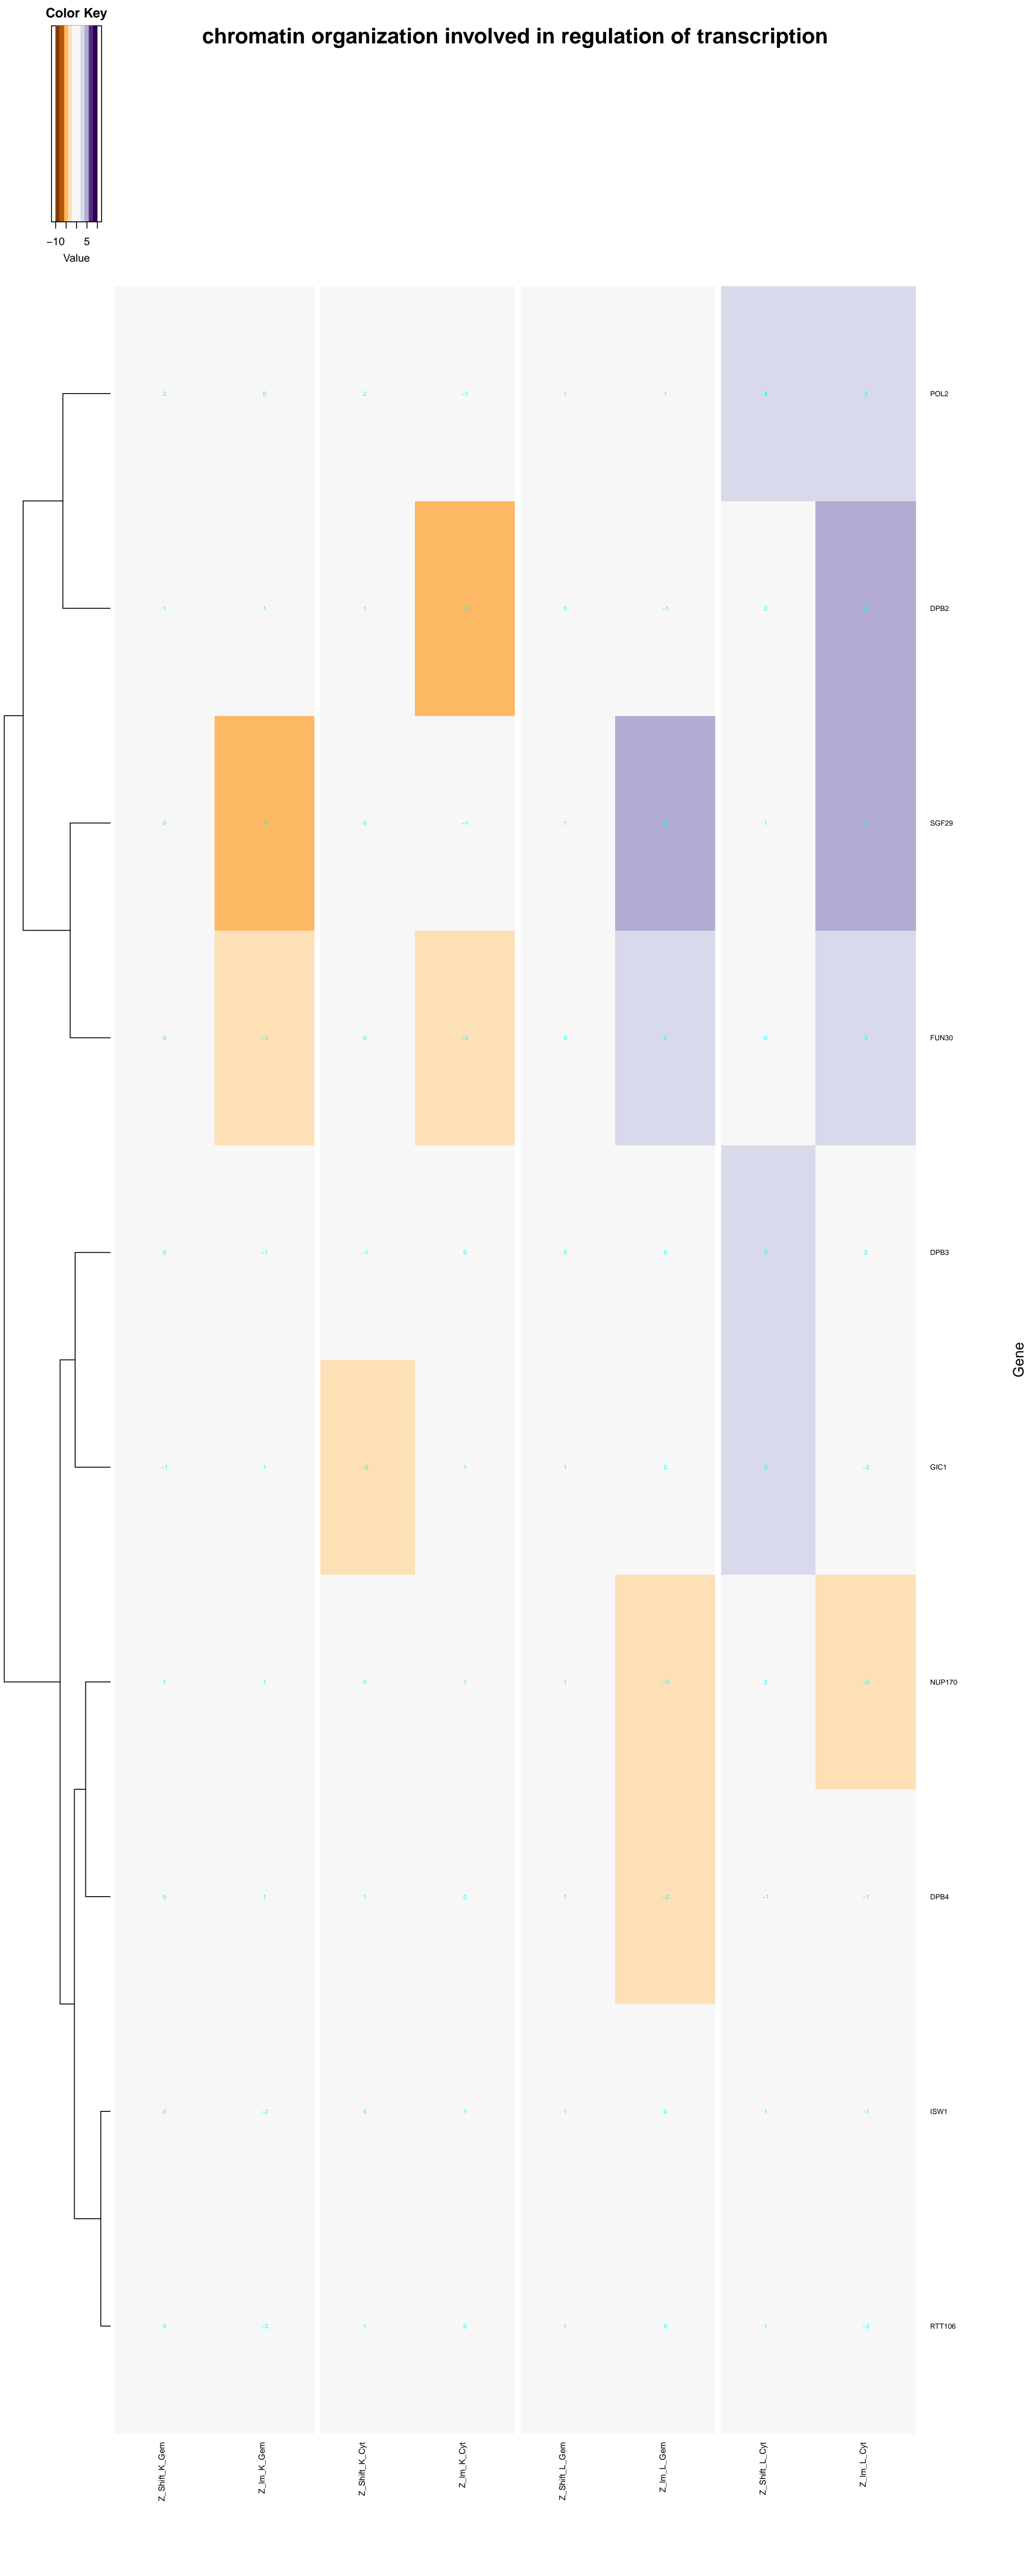

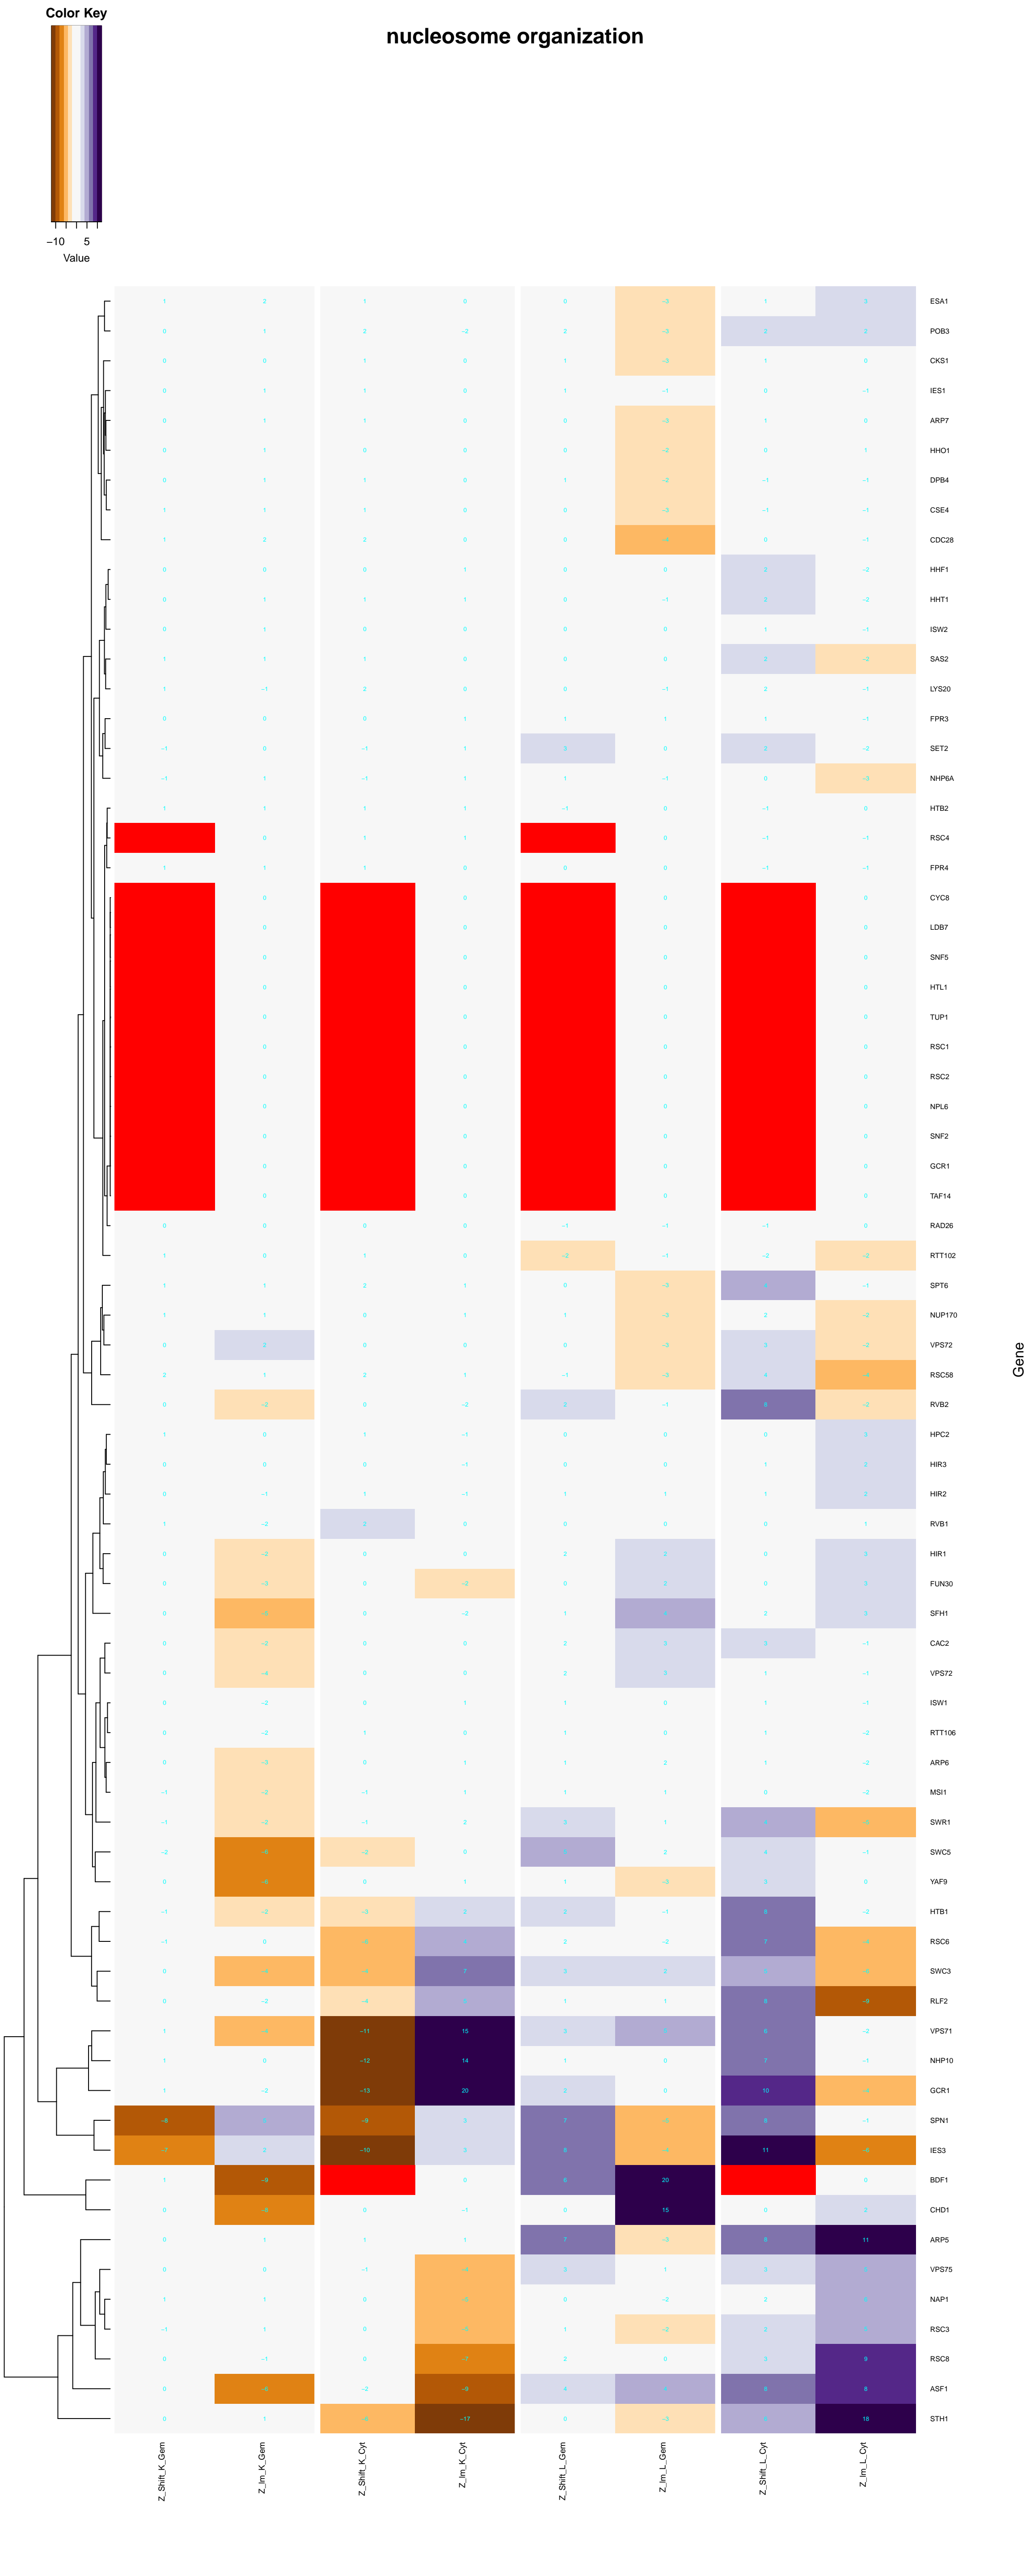



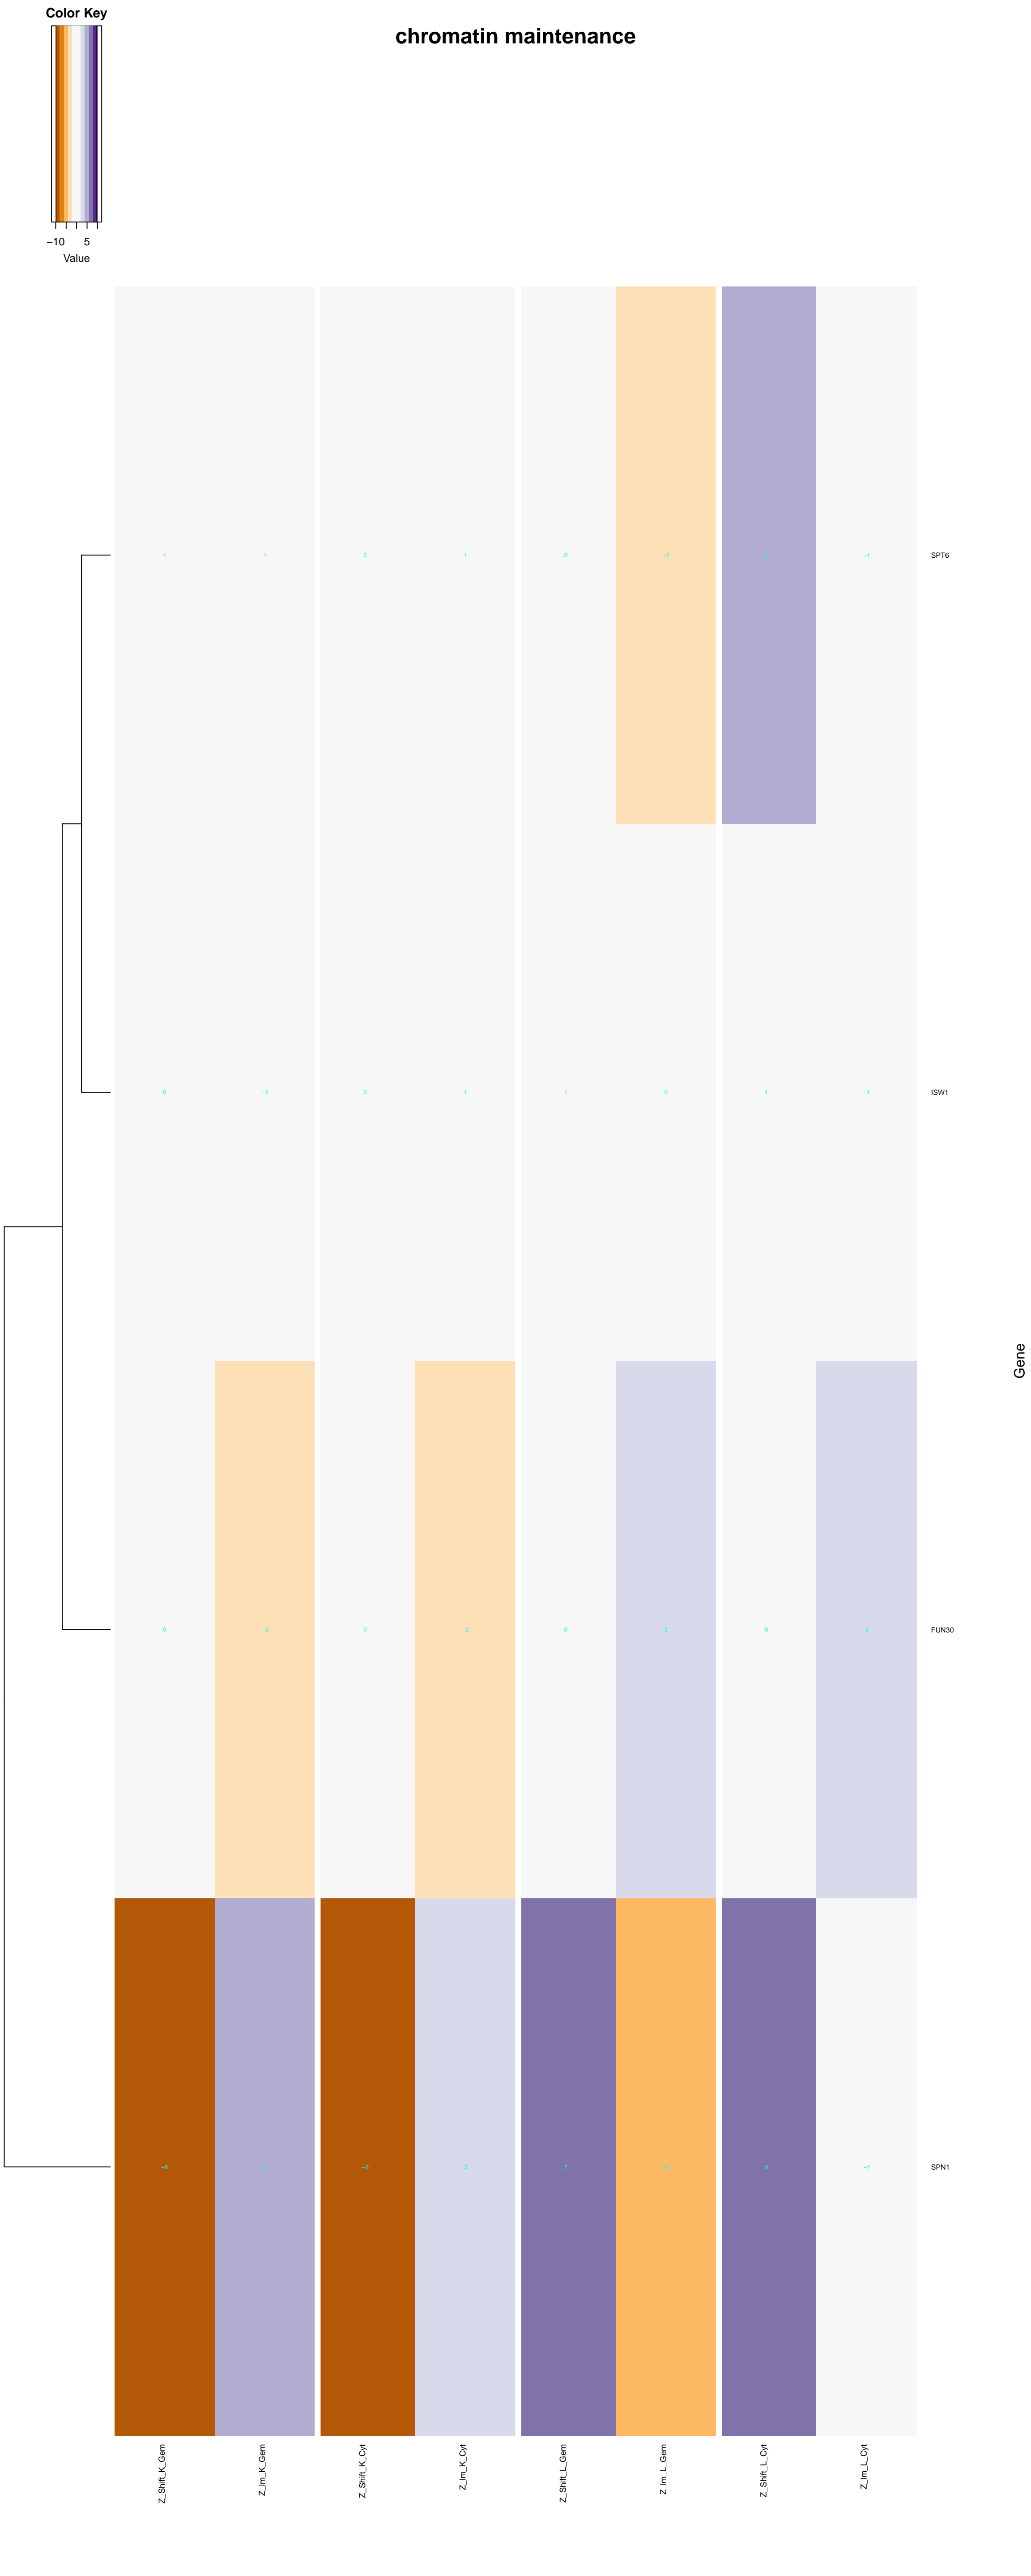

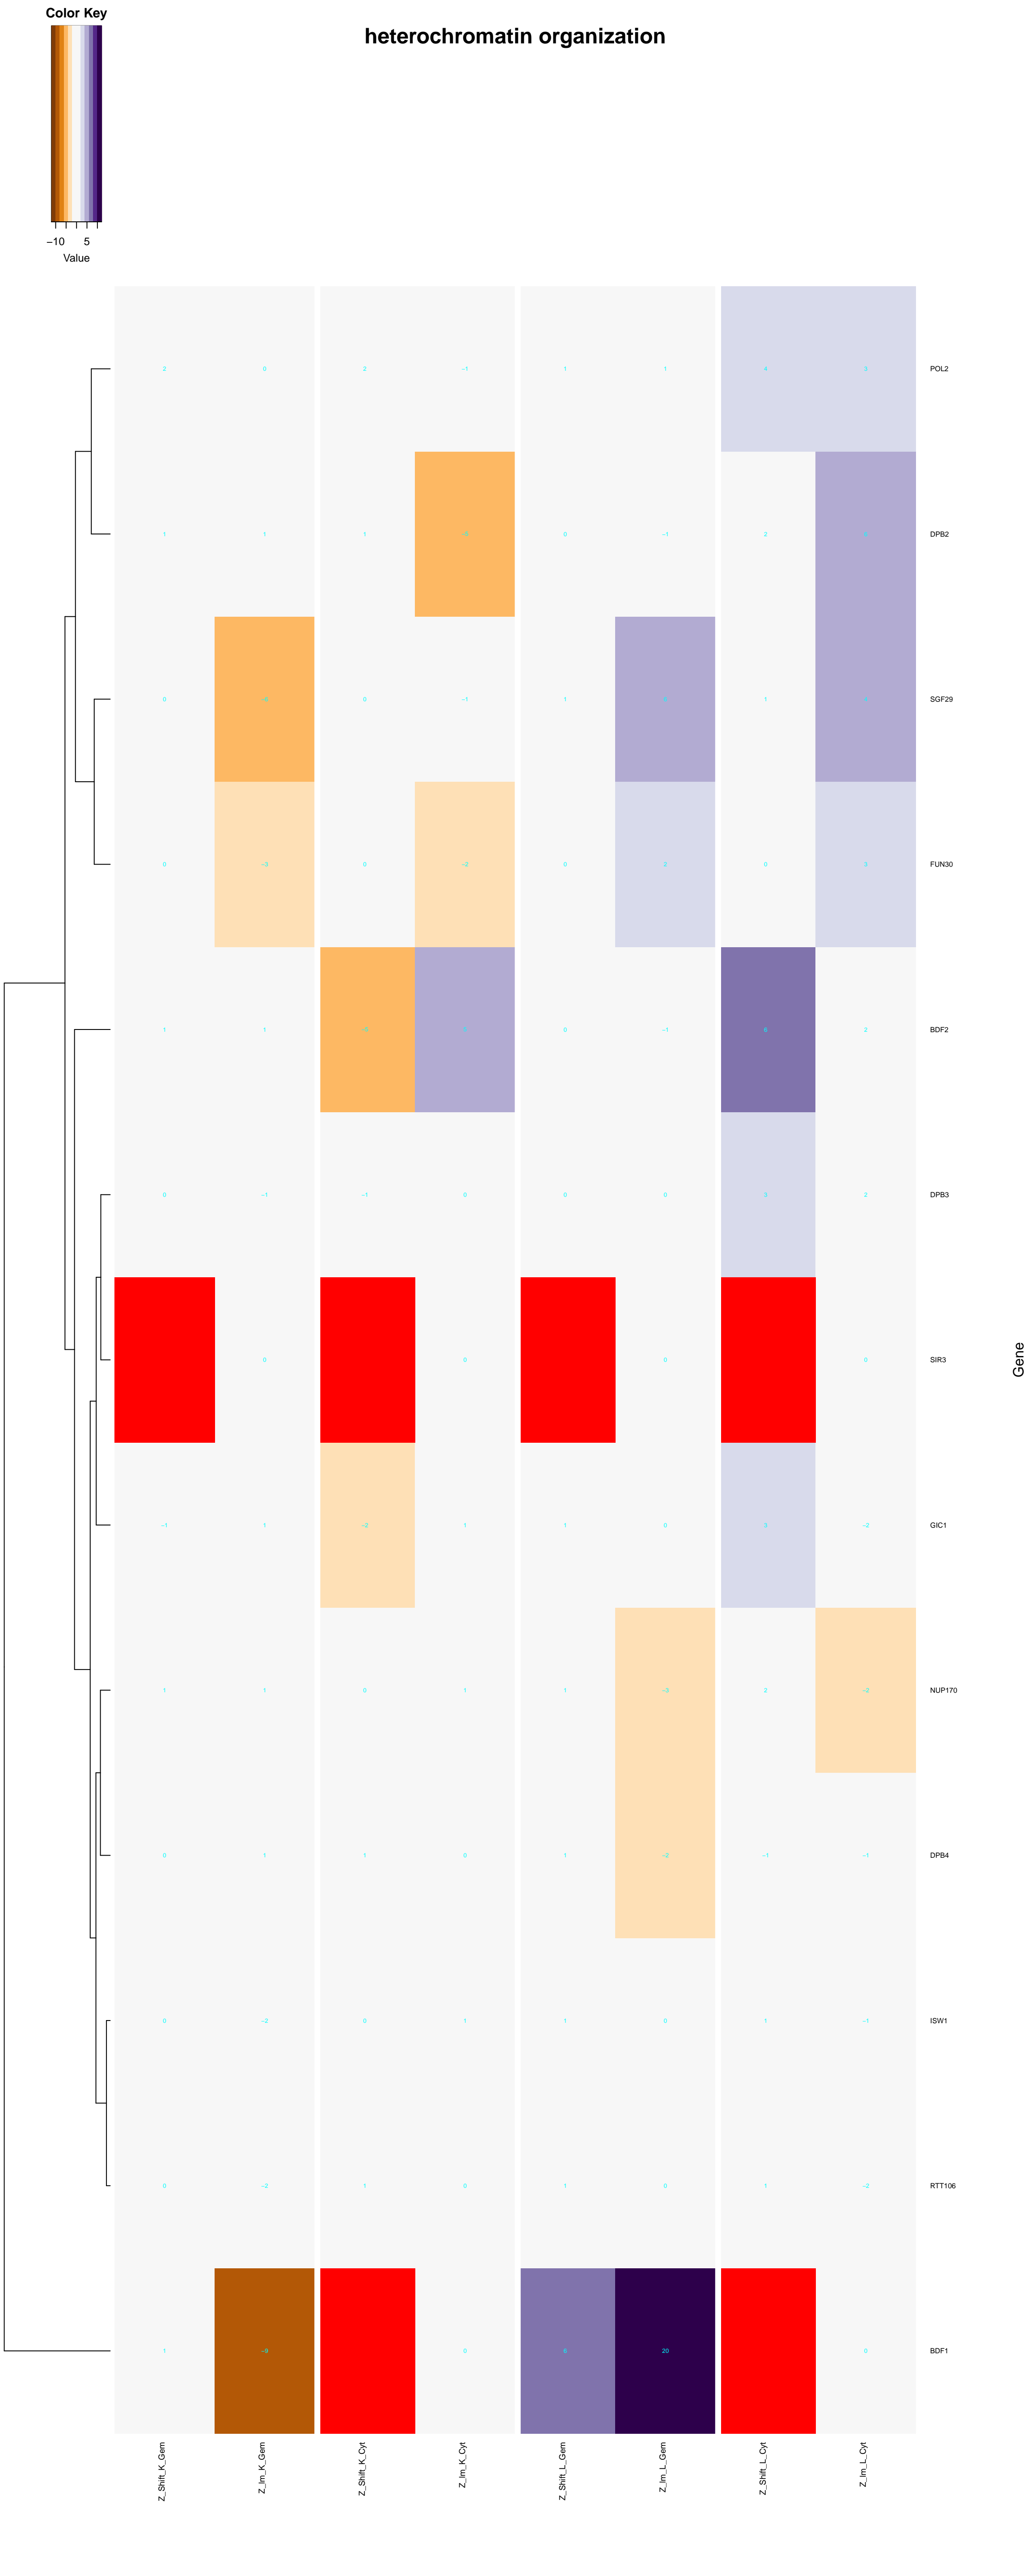

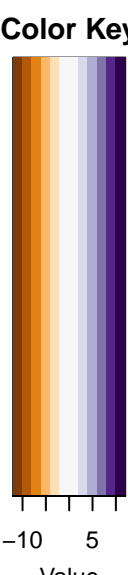

progressive alteration of chromatin involved in replicative cell aging

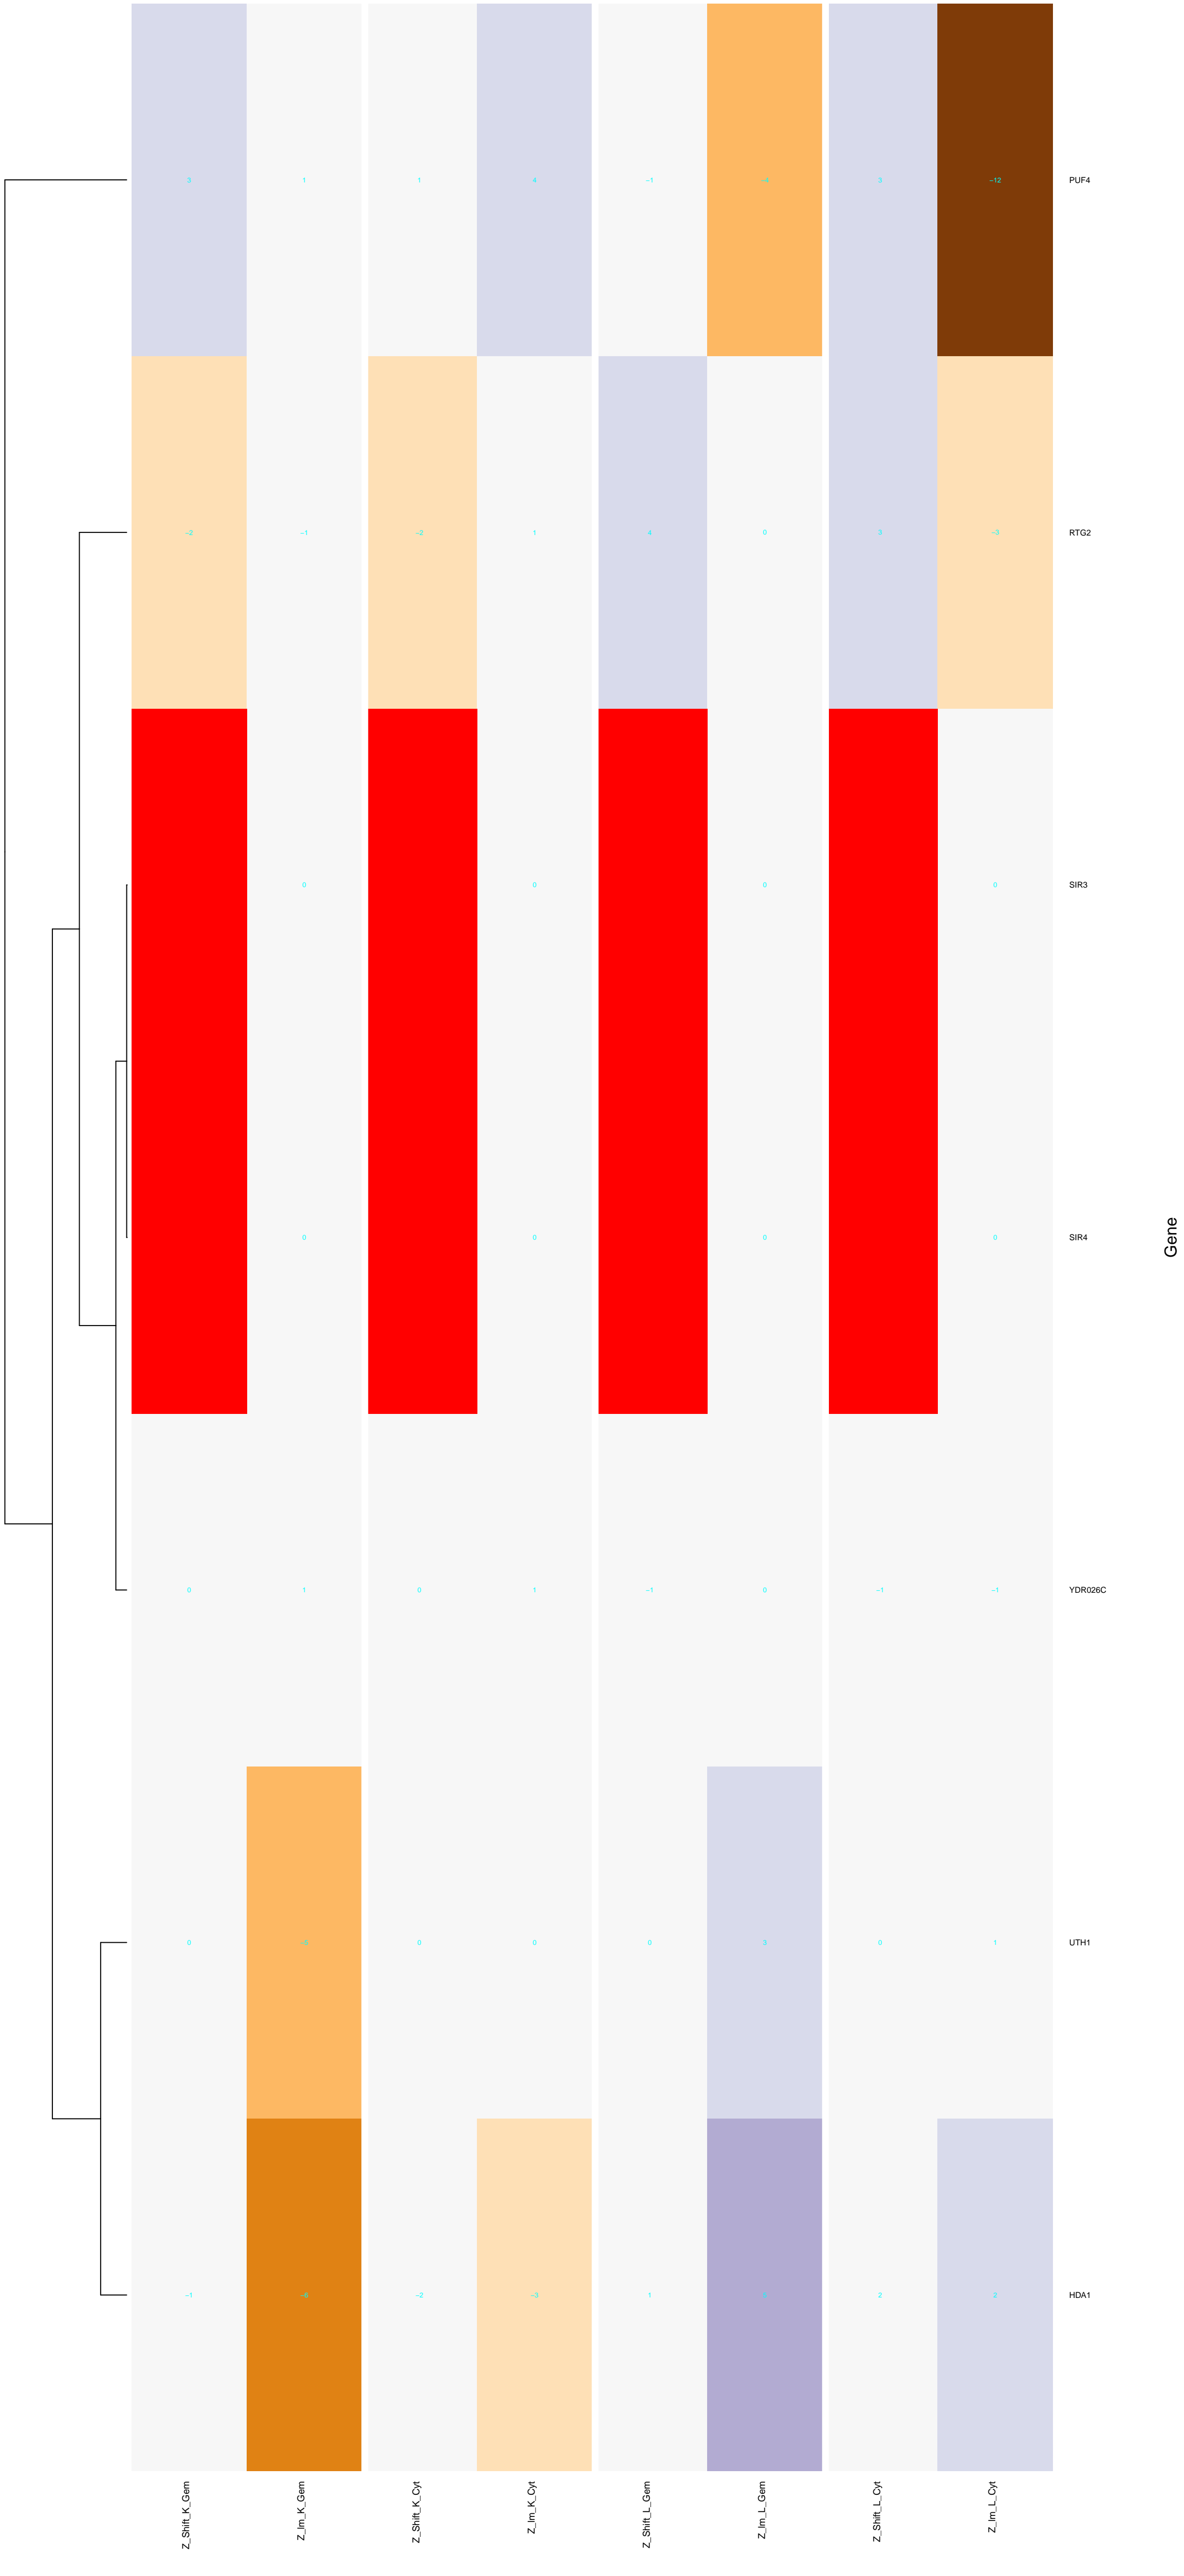

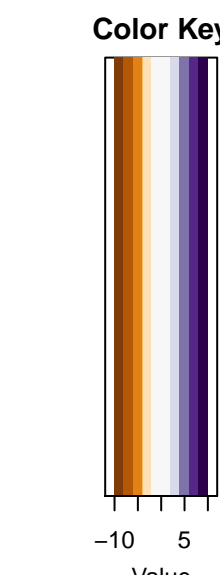

extrachromosomal circular DNA accumulation involved in cell aging

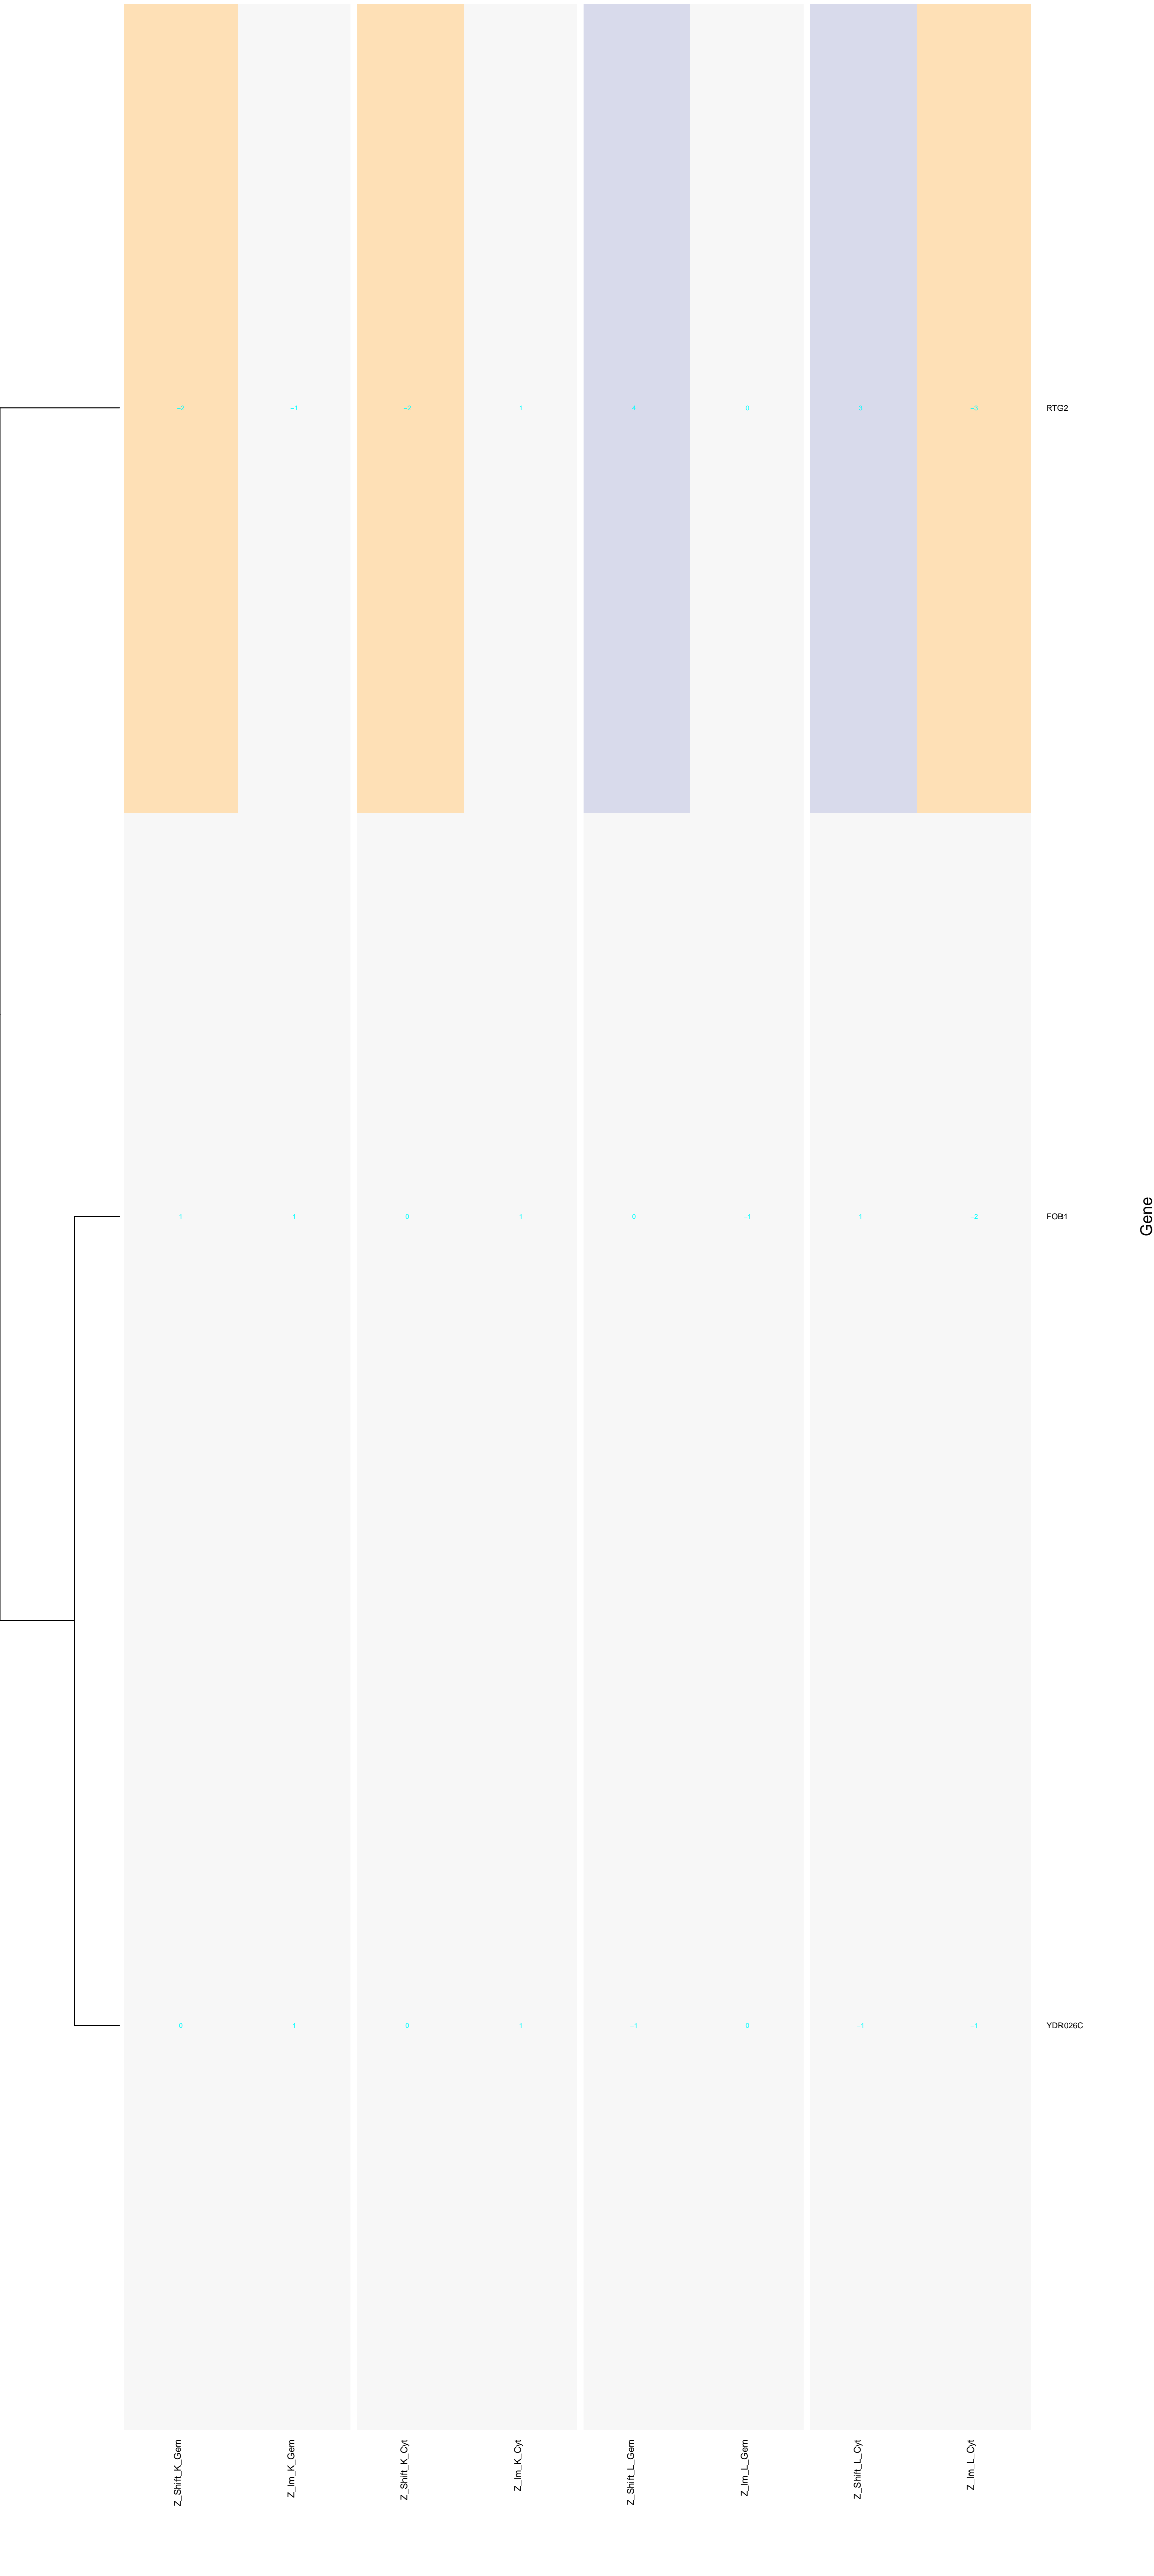

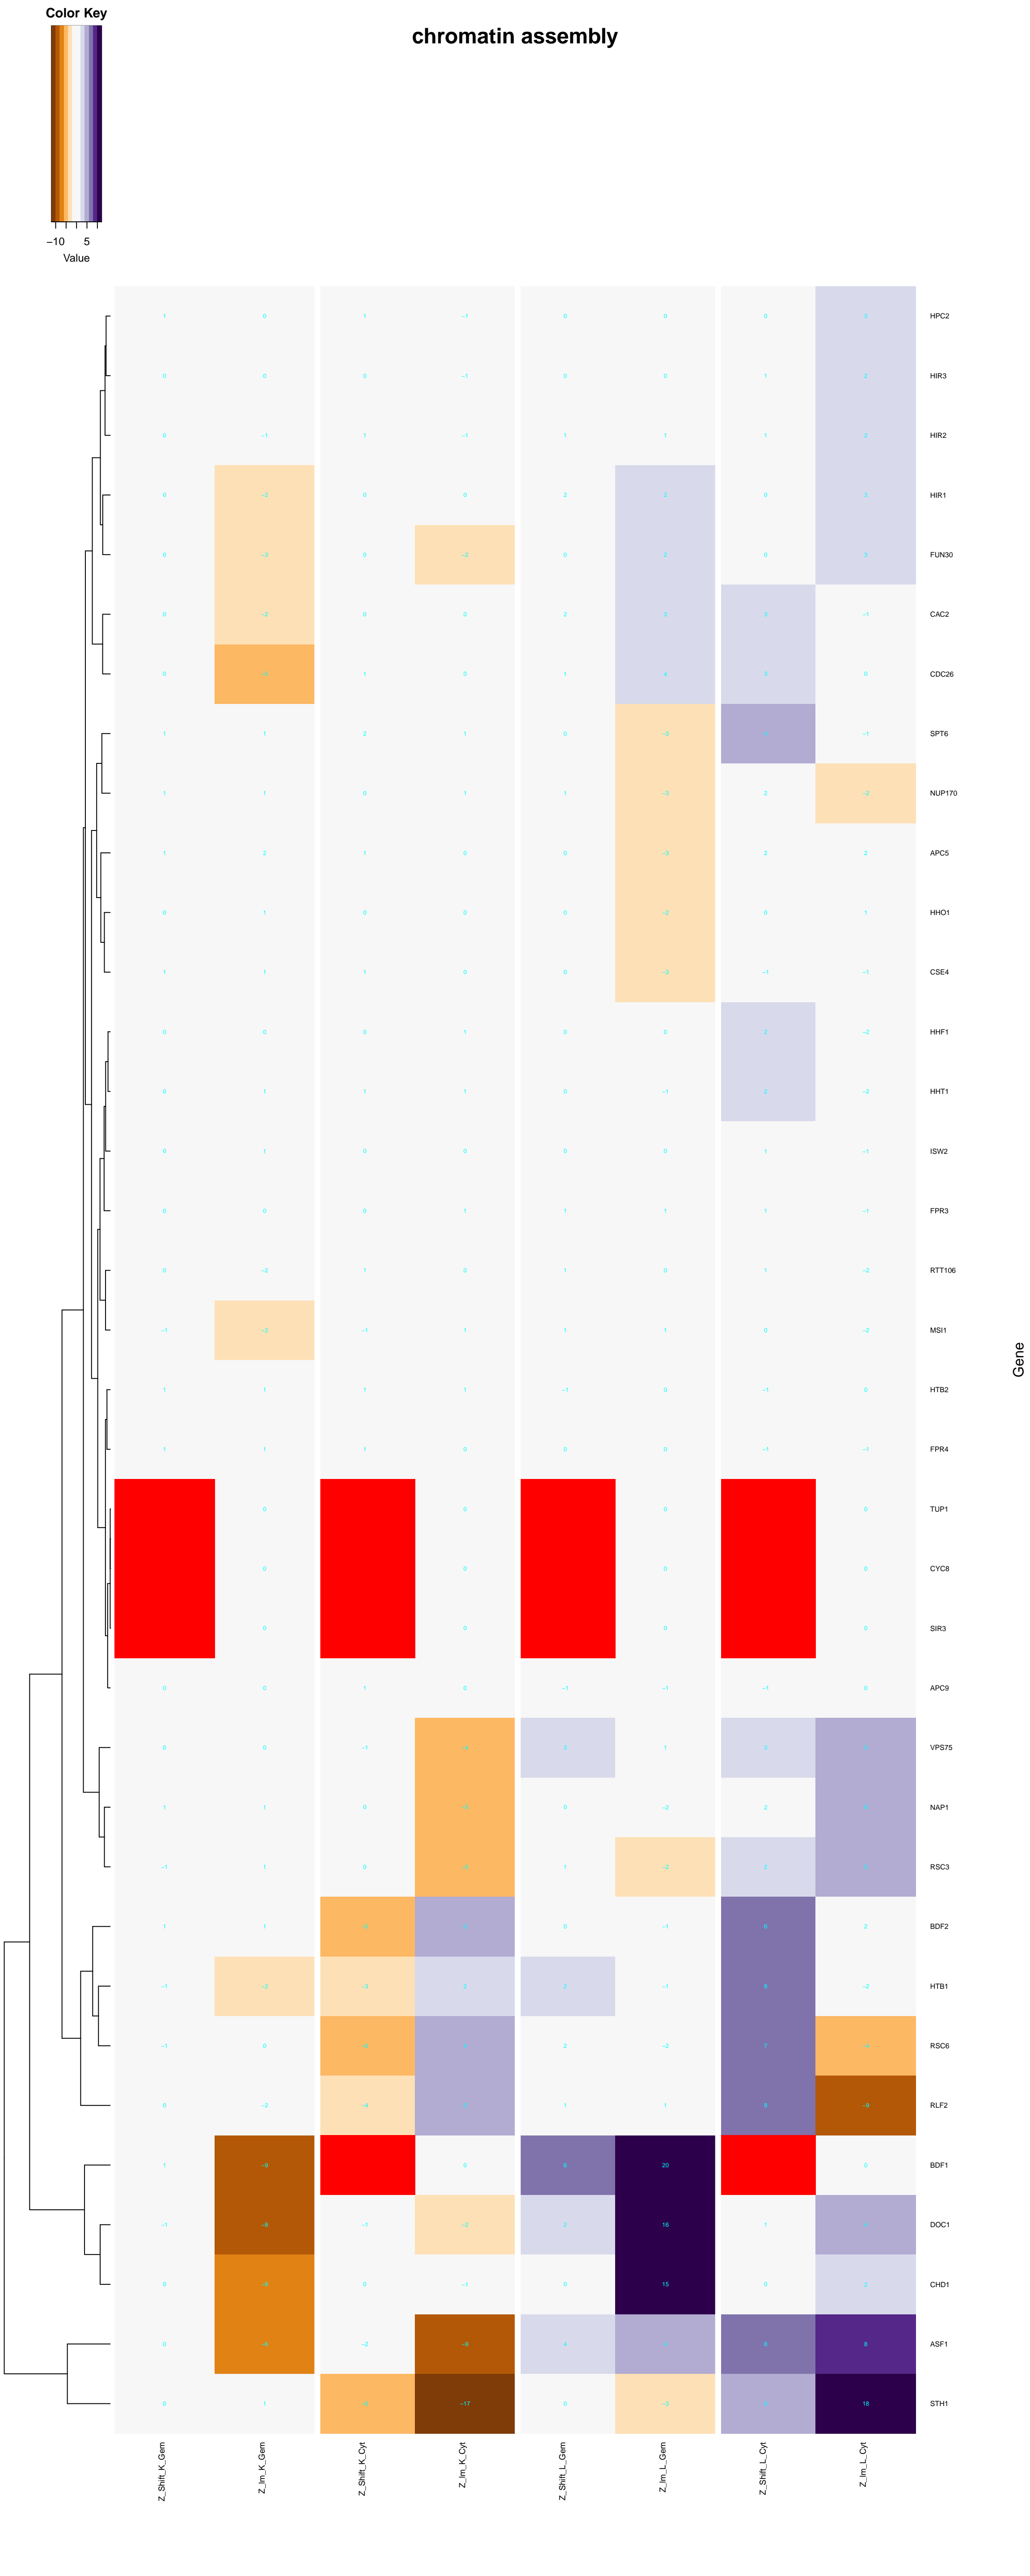

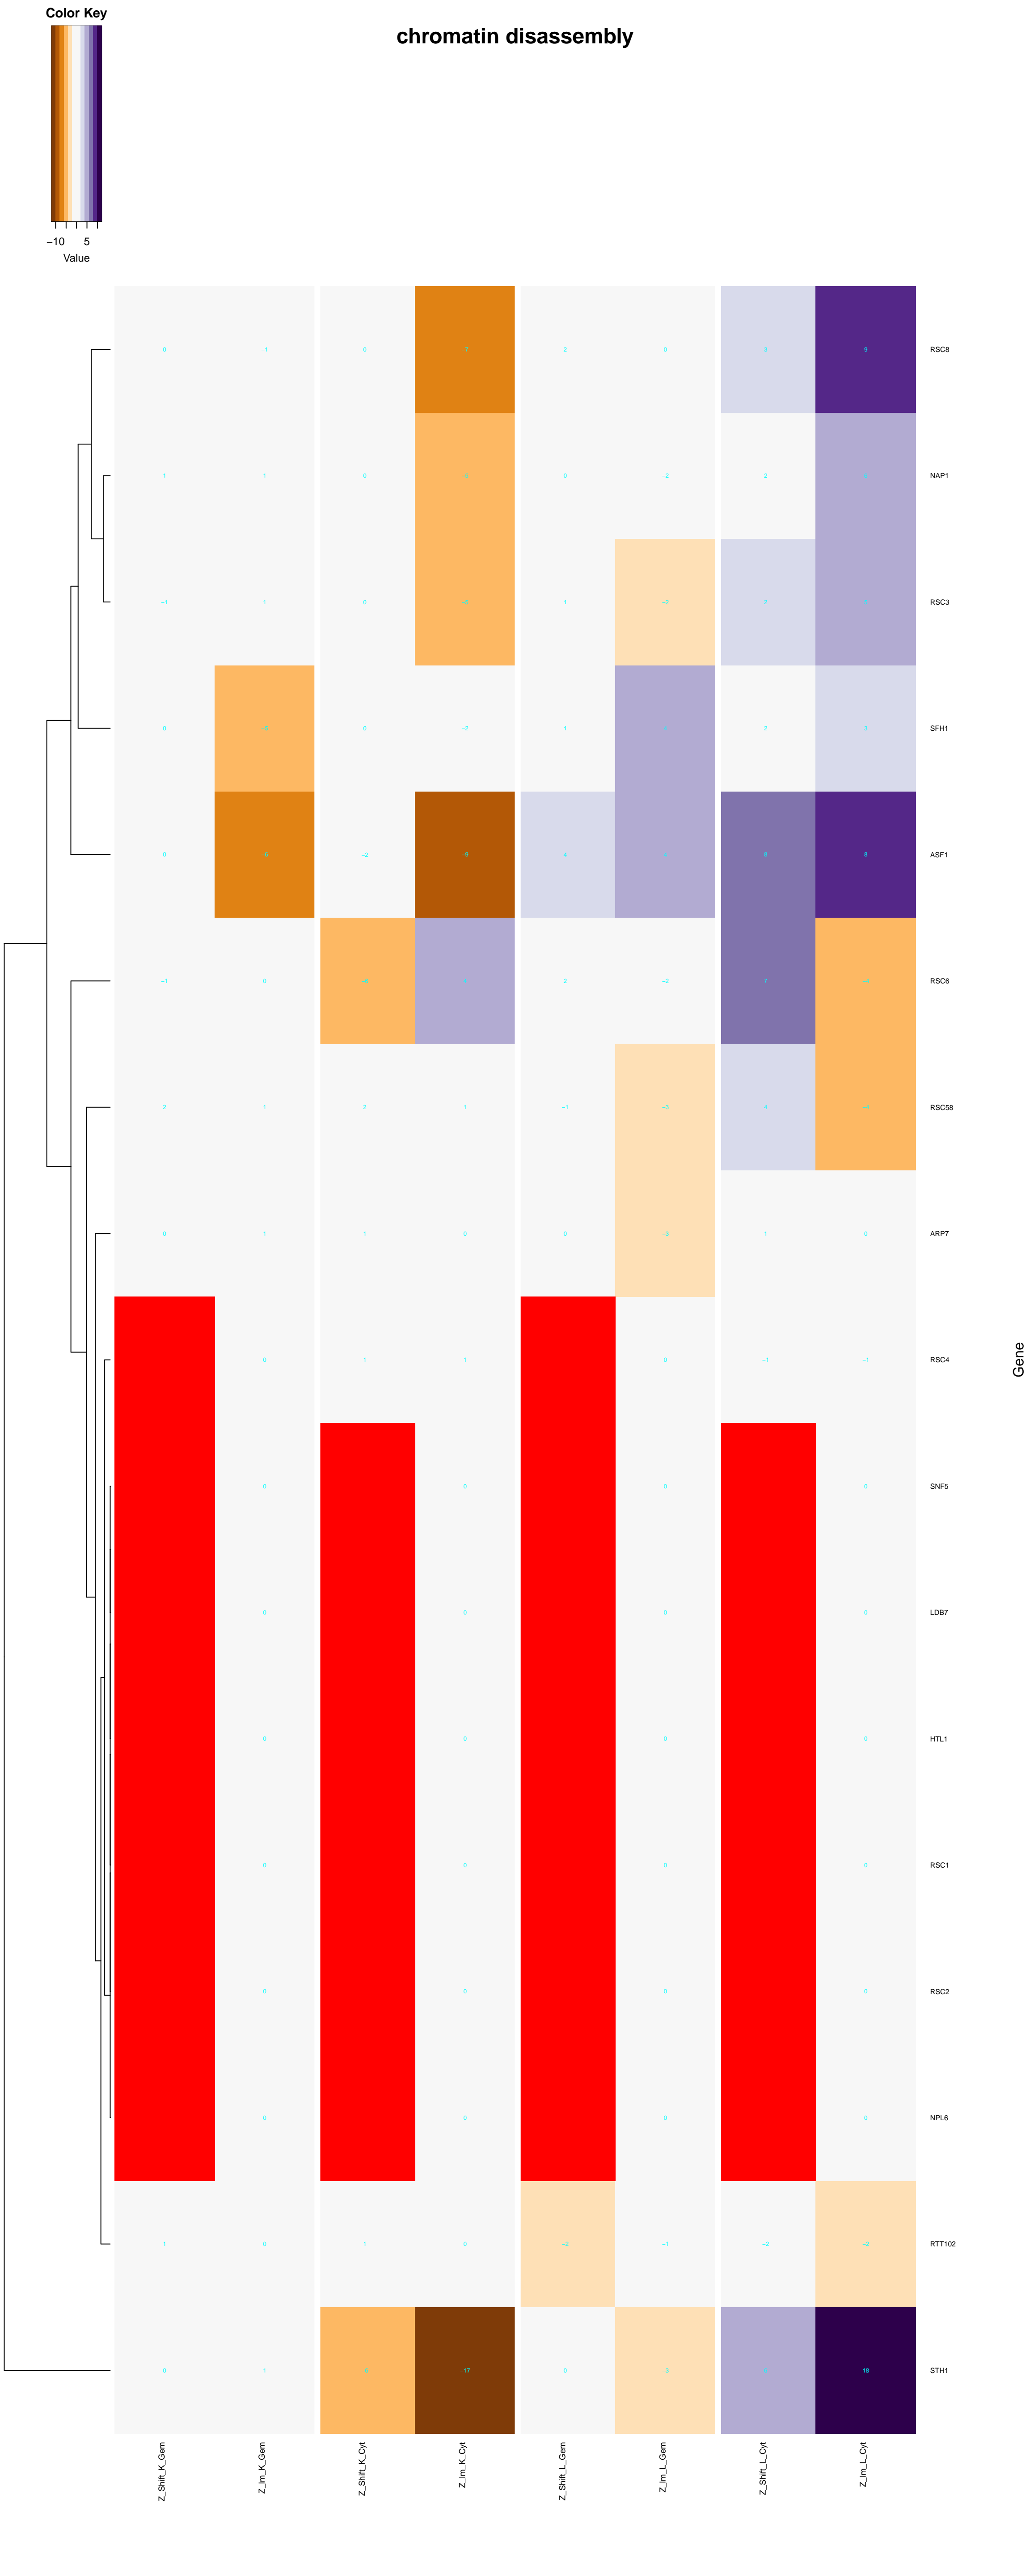

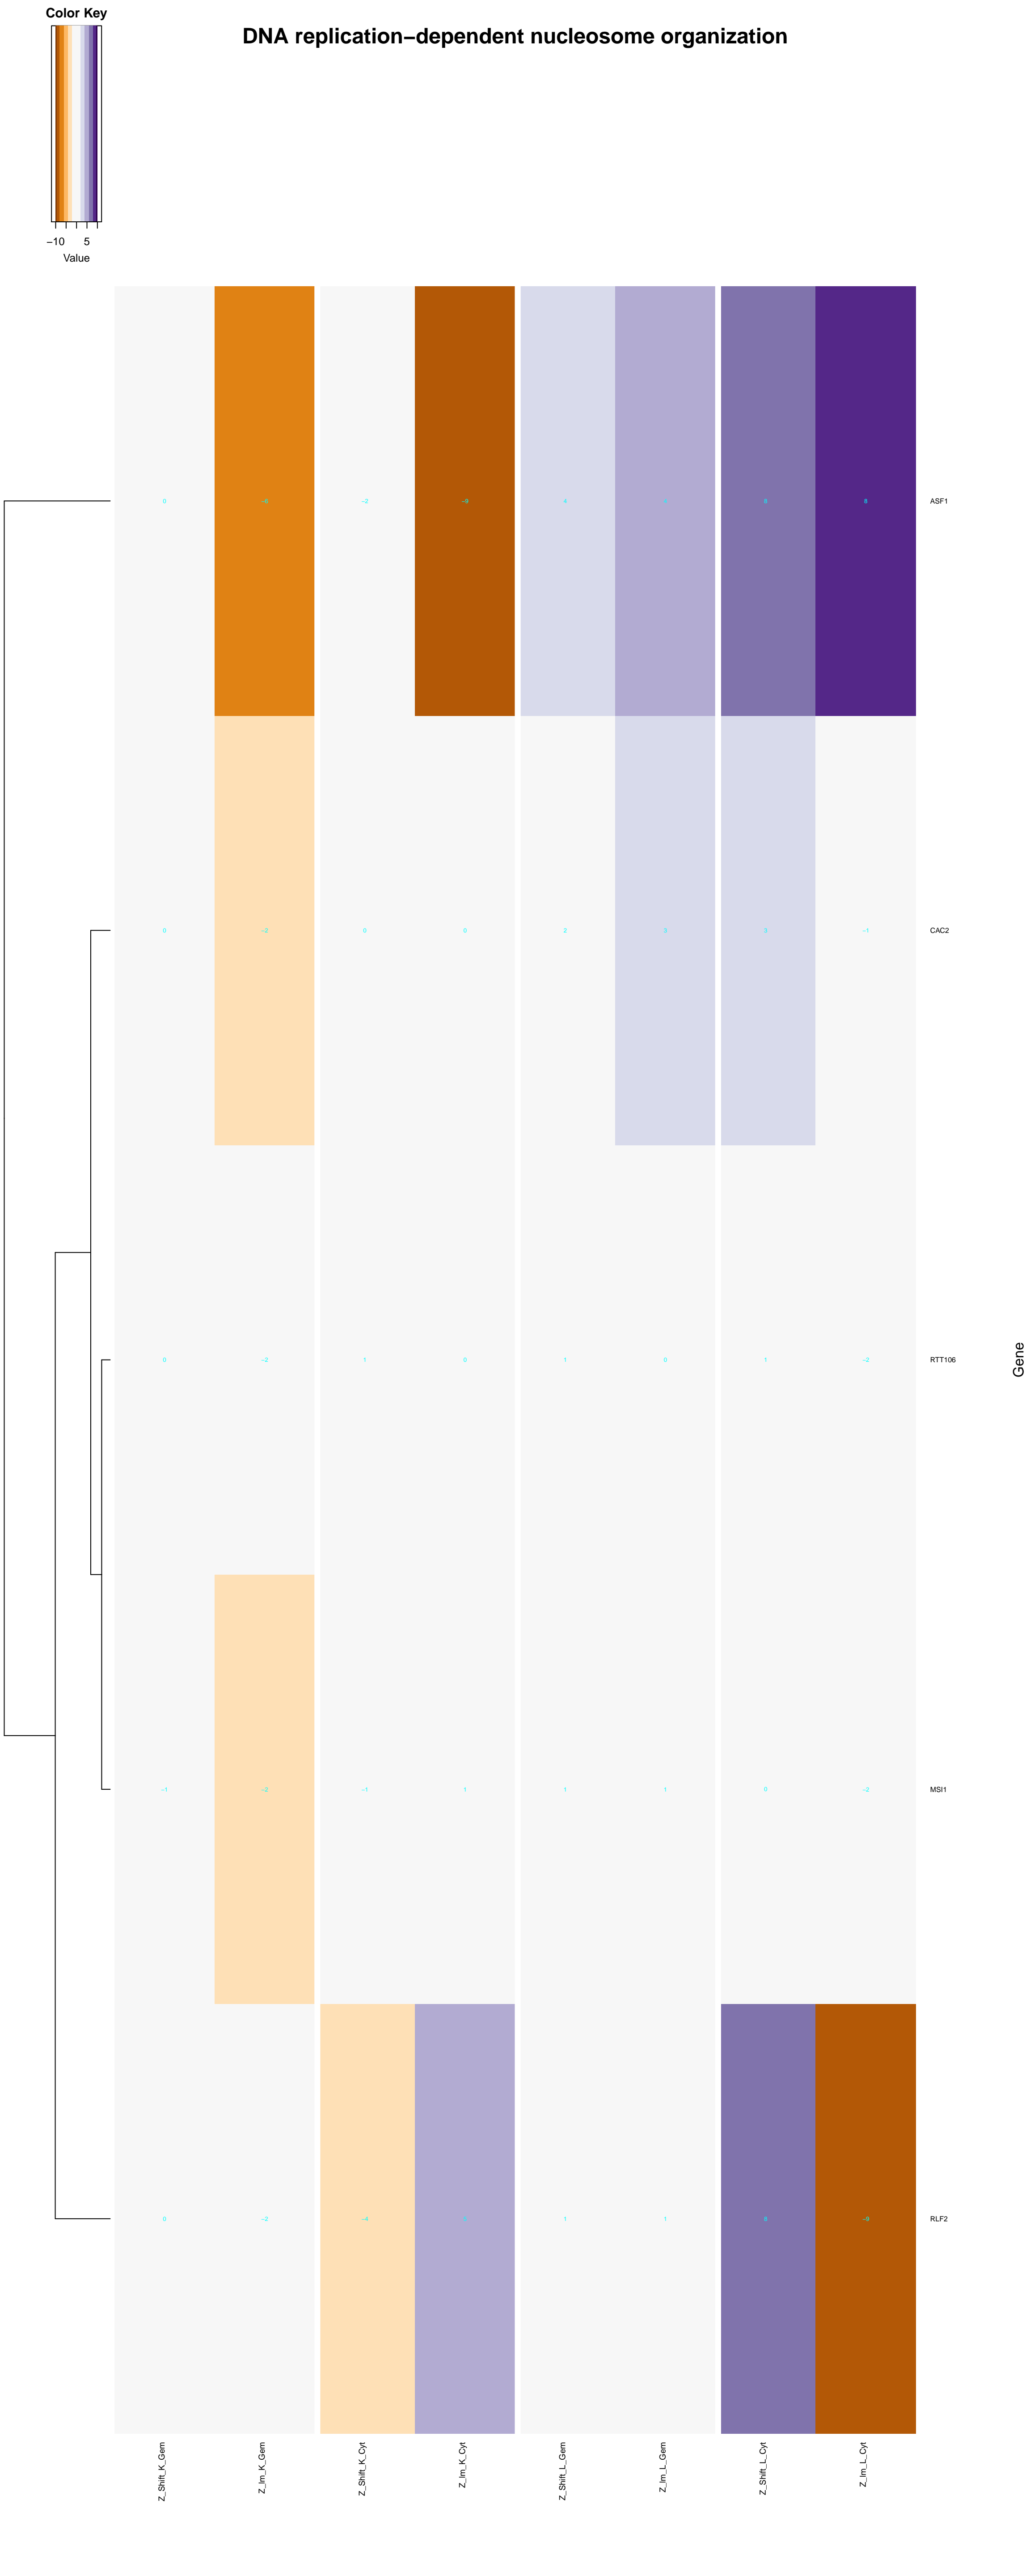

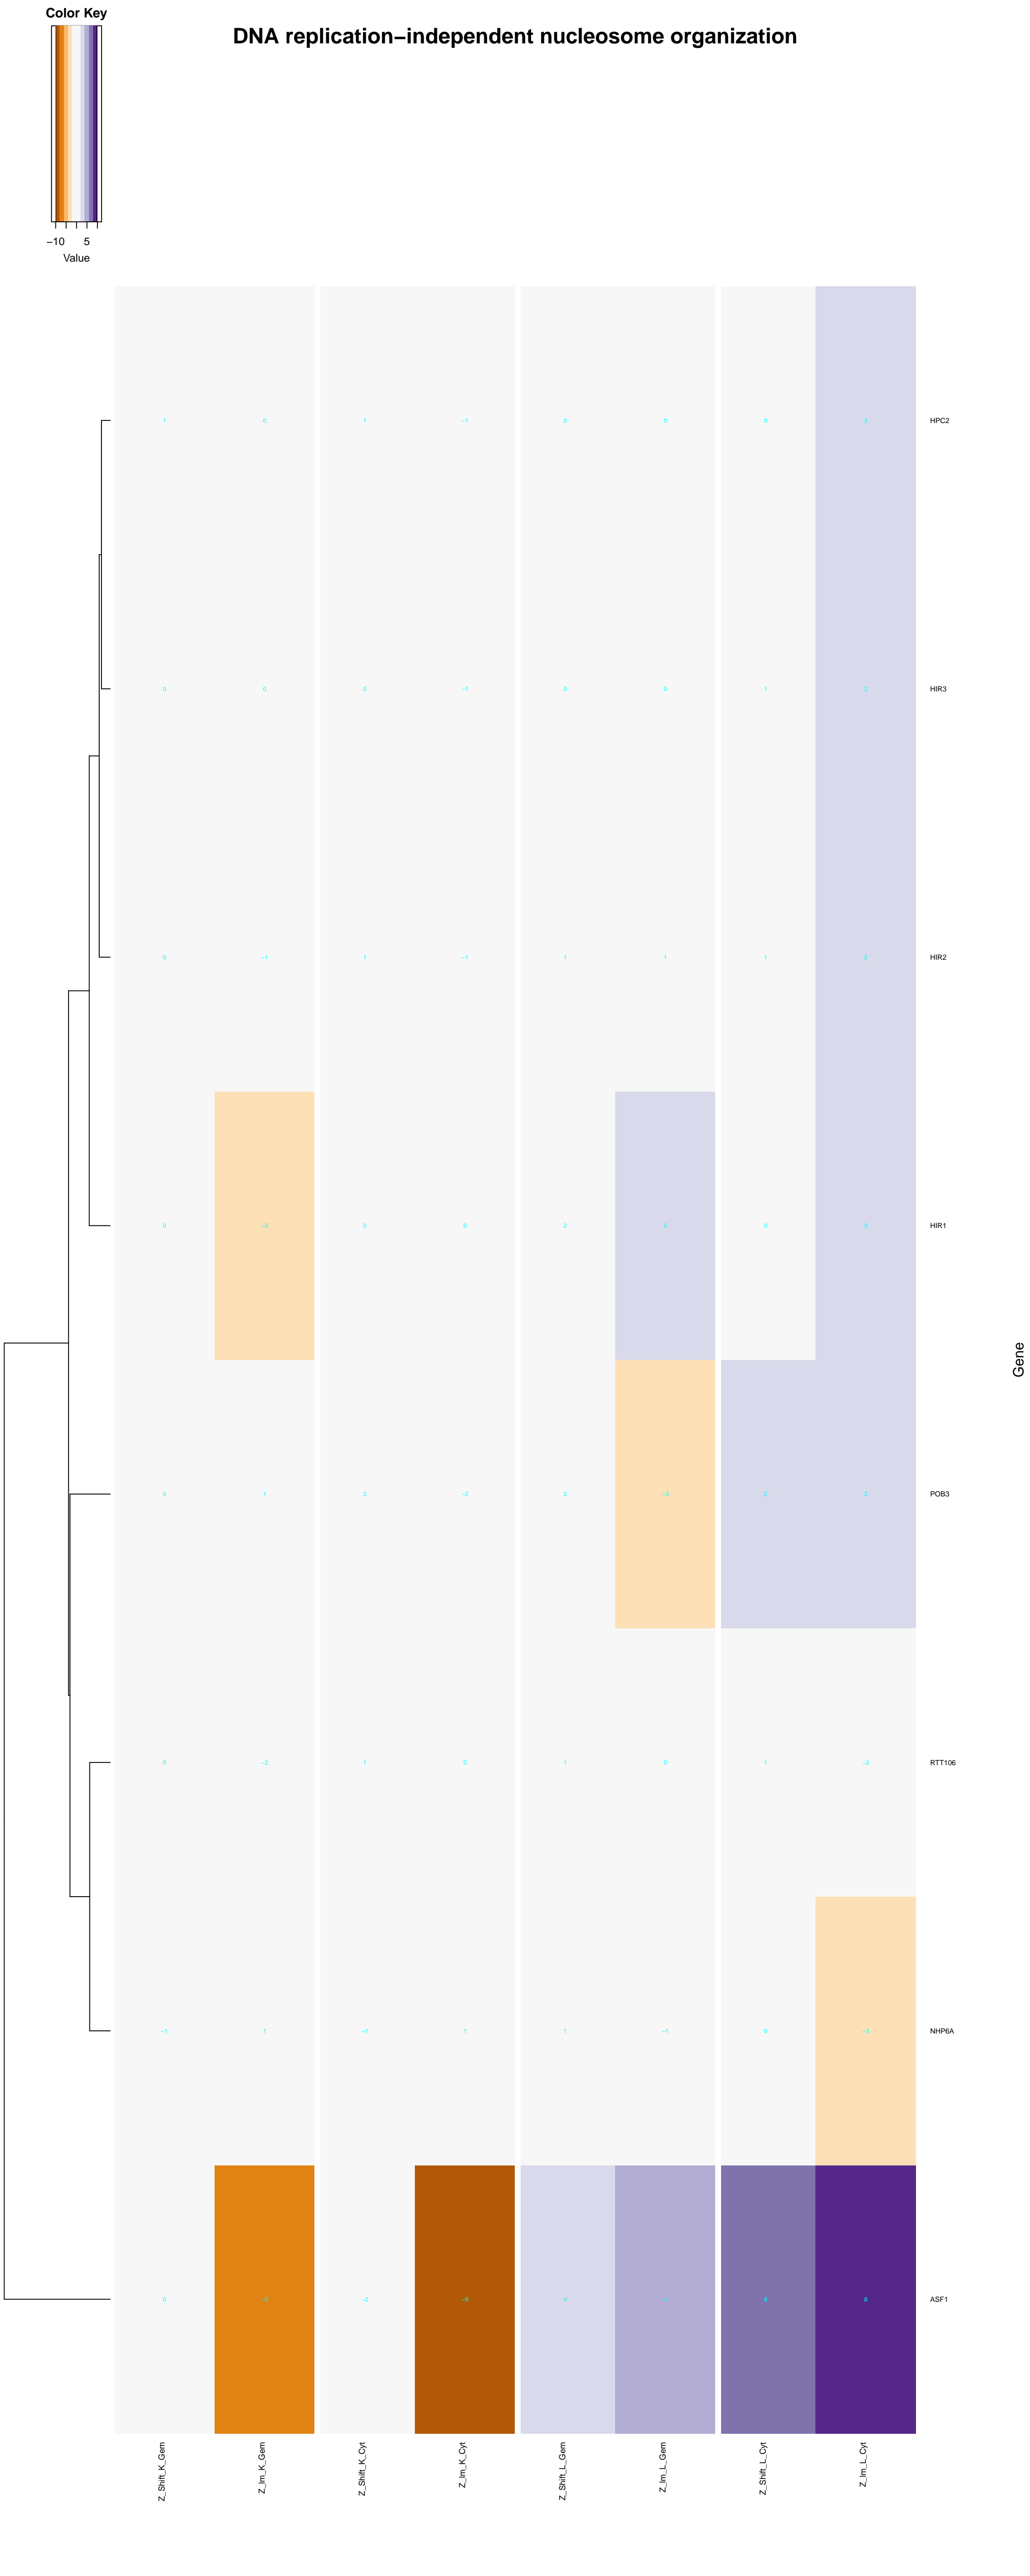



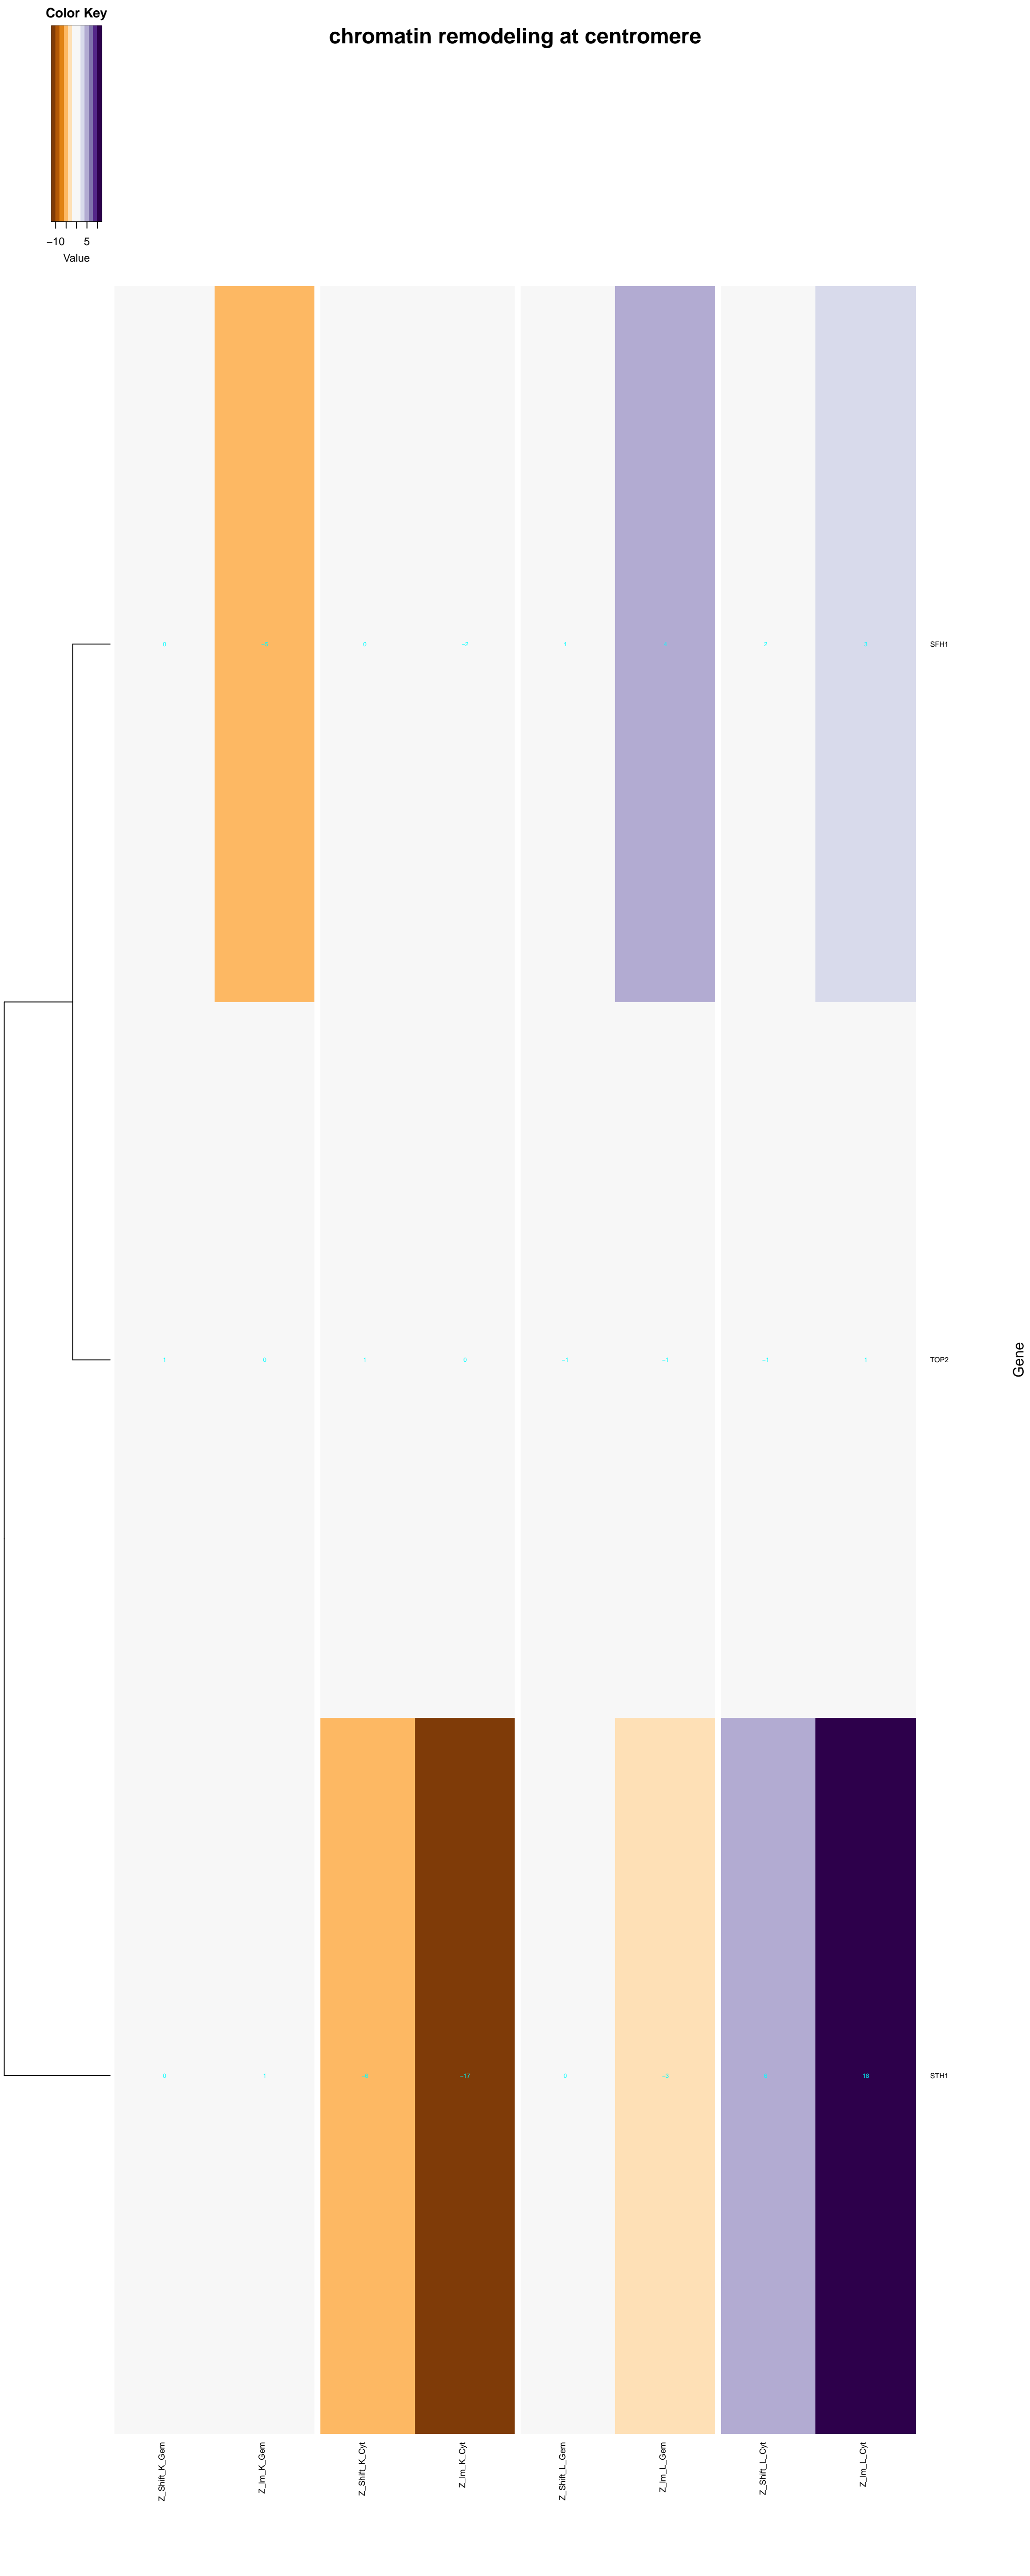

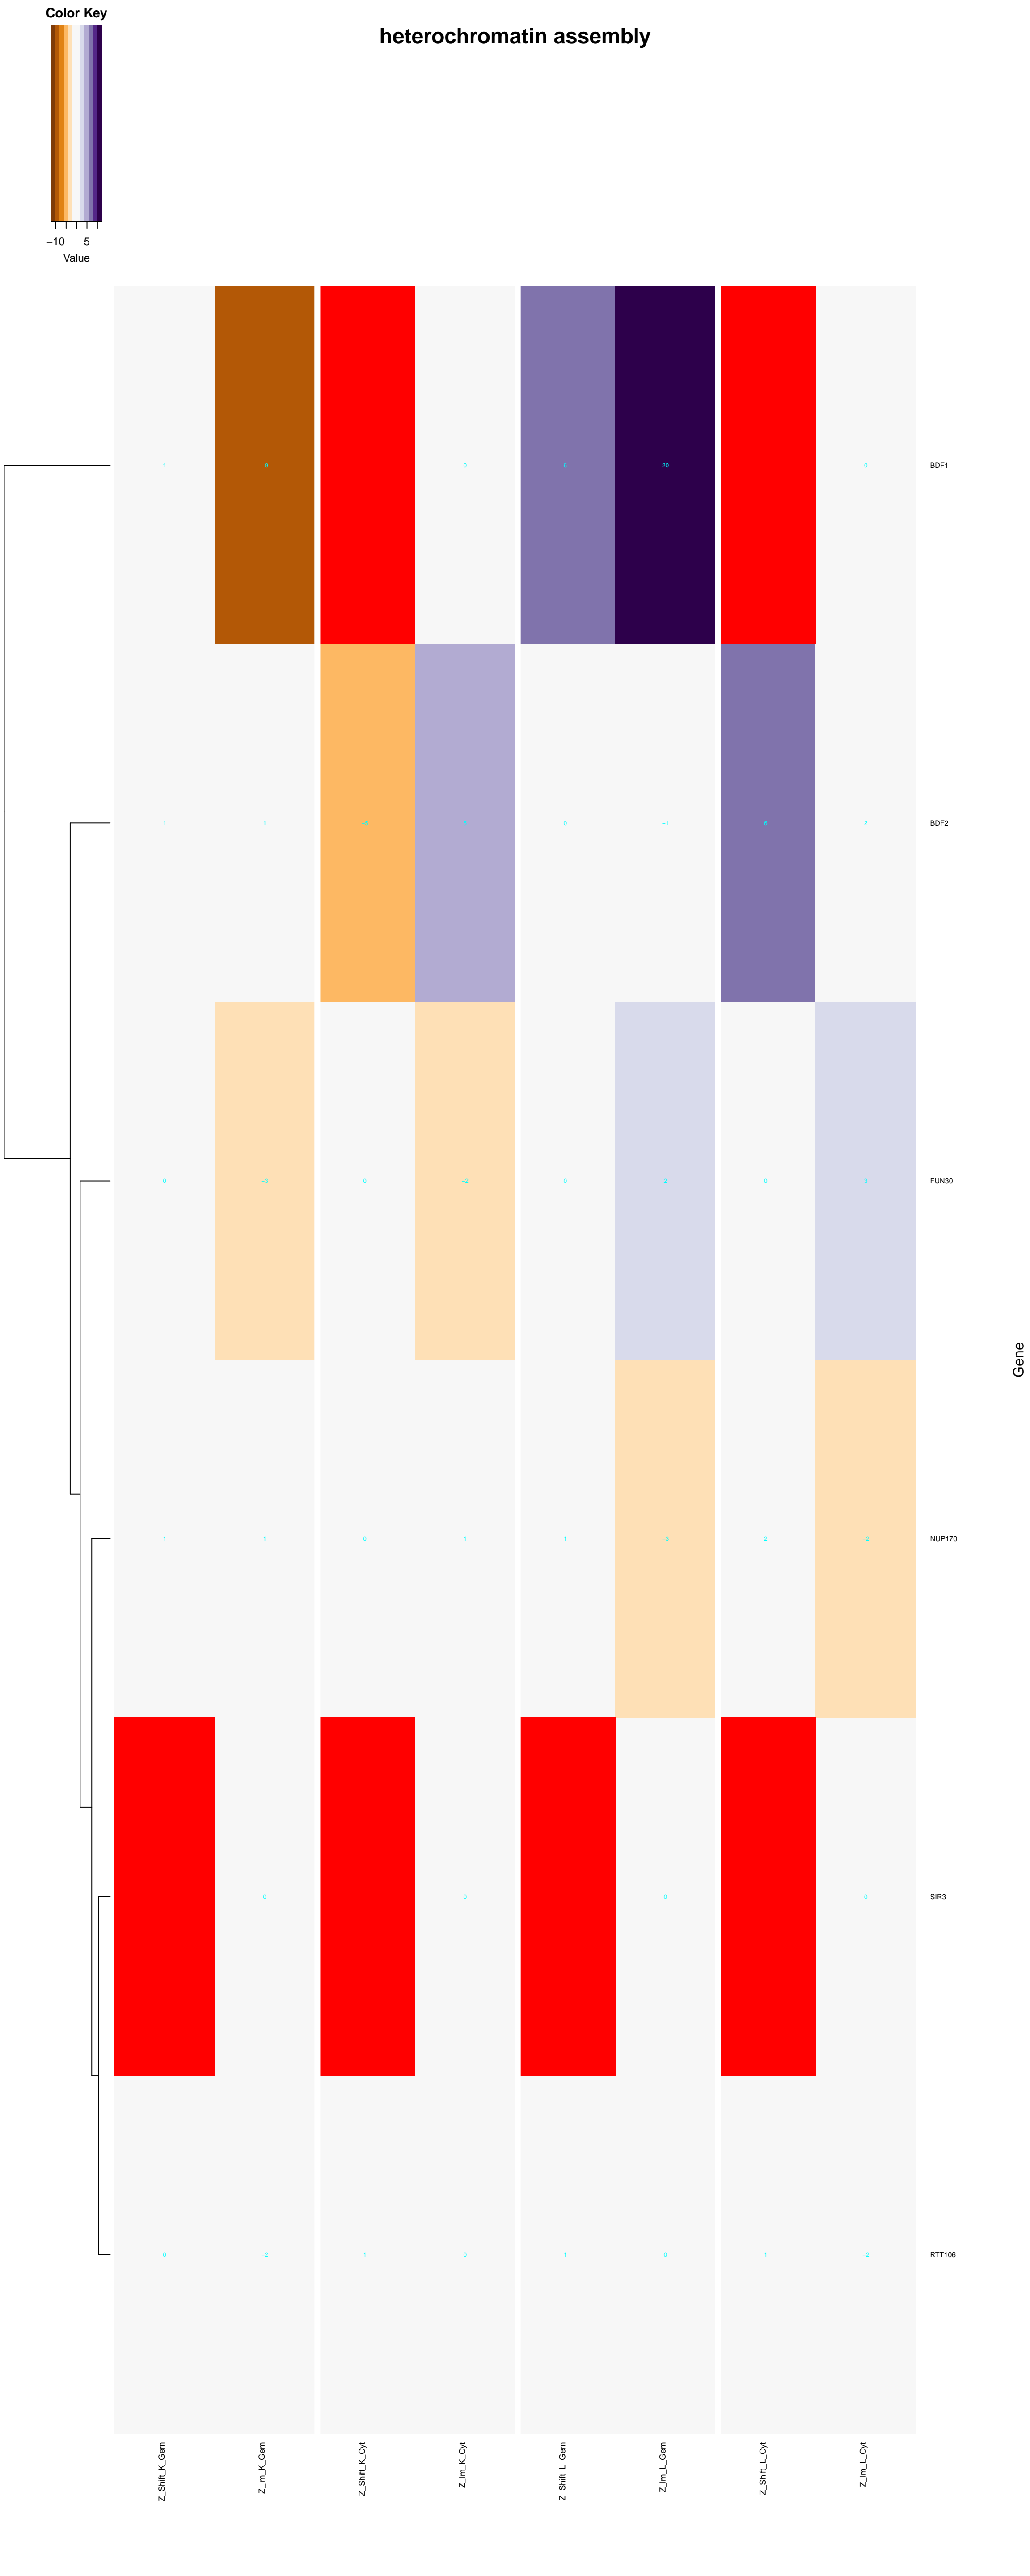

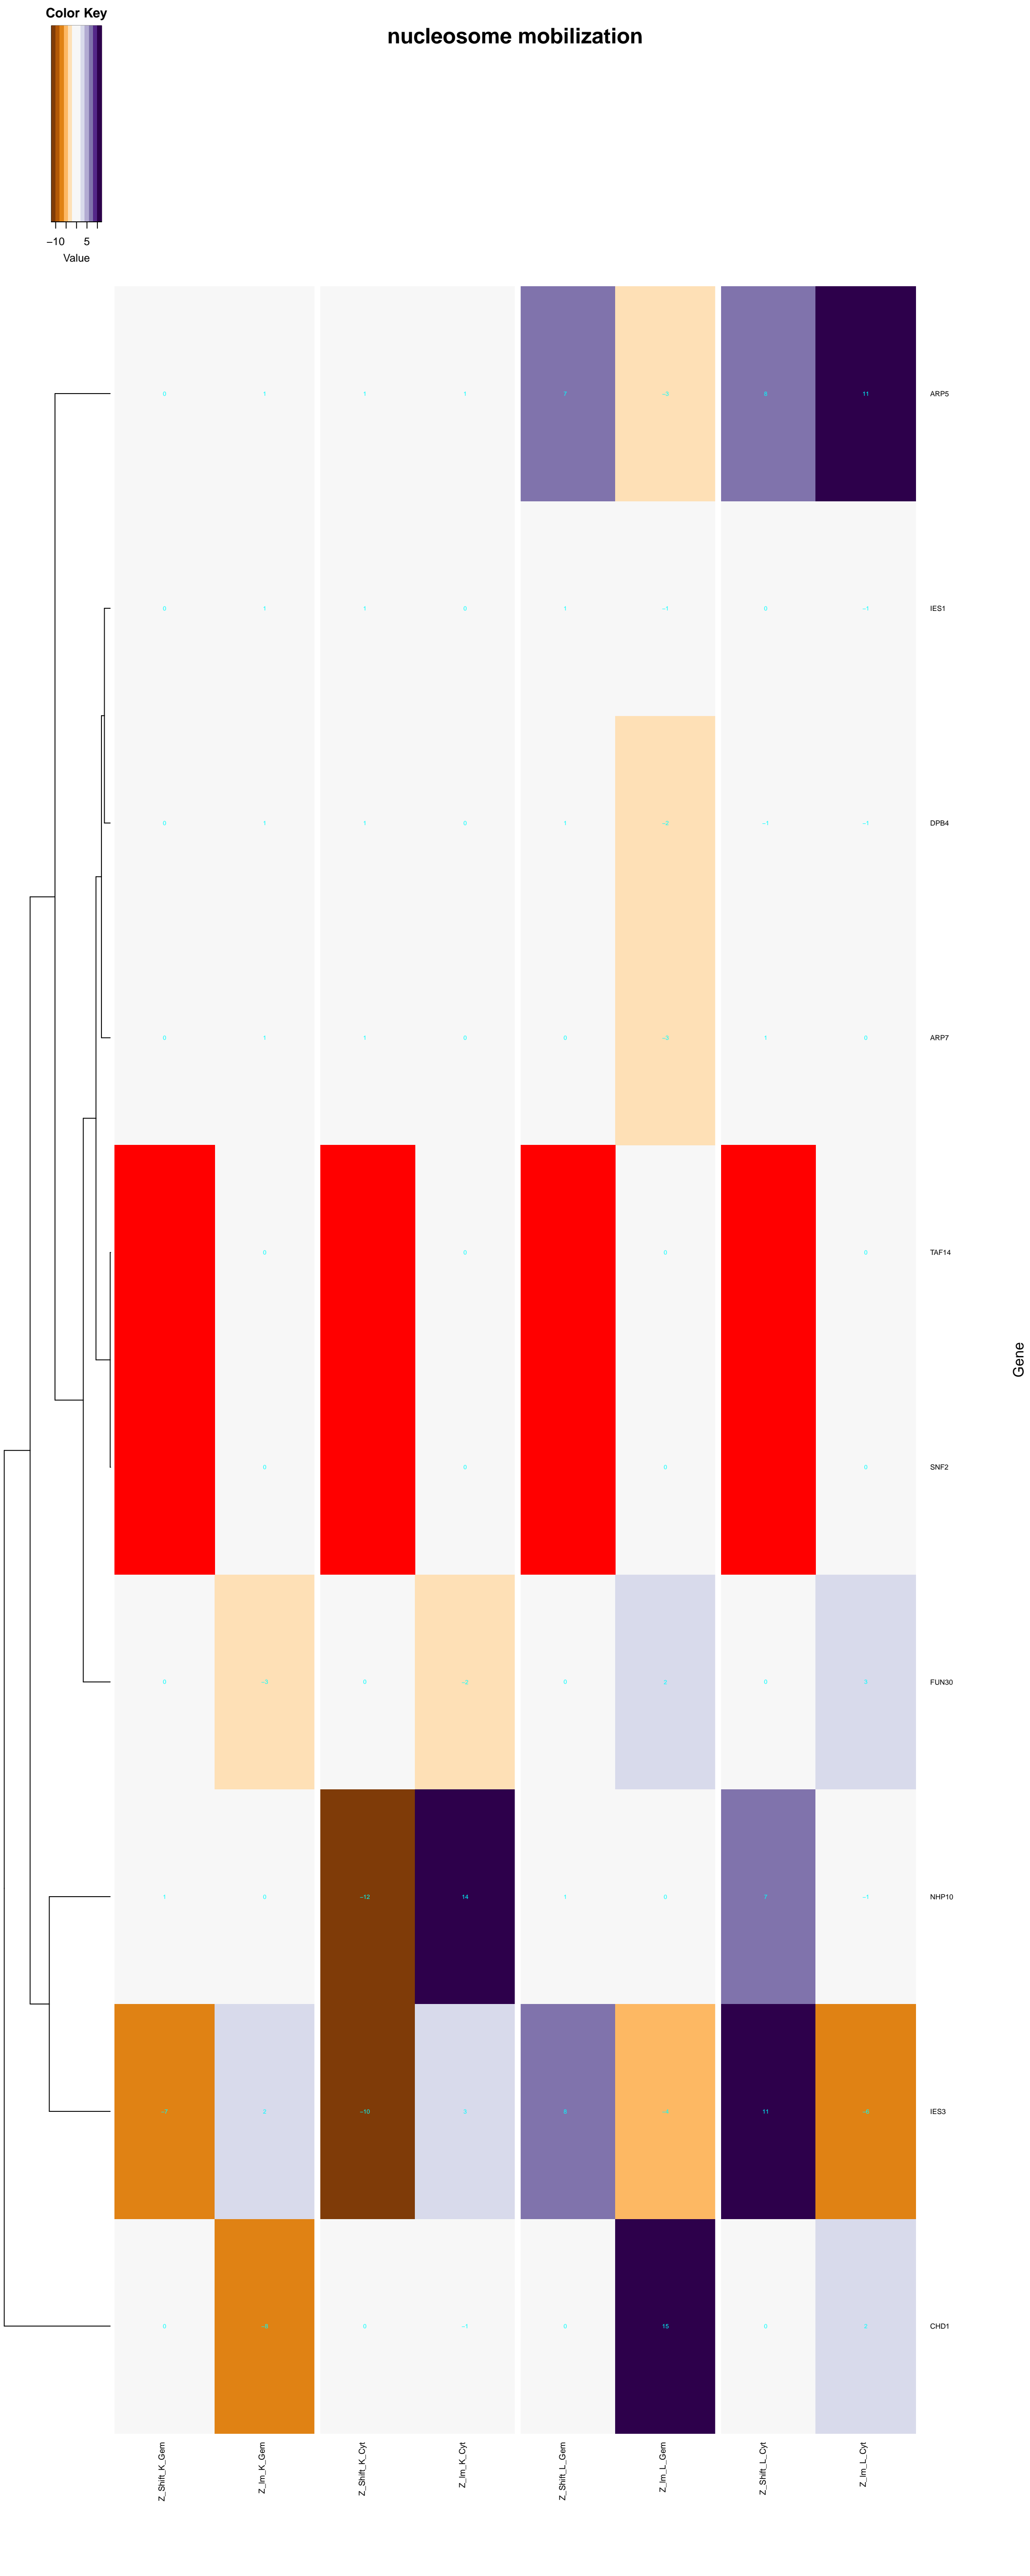

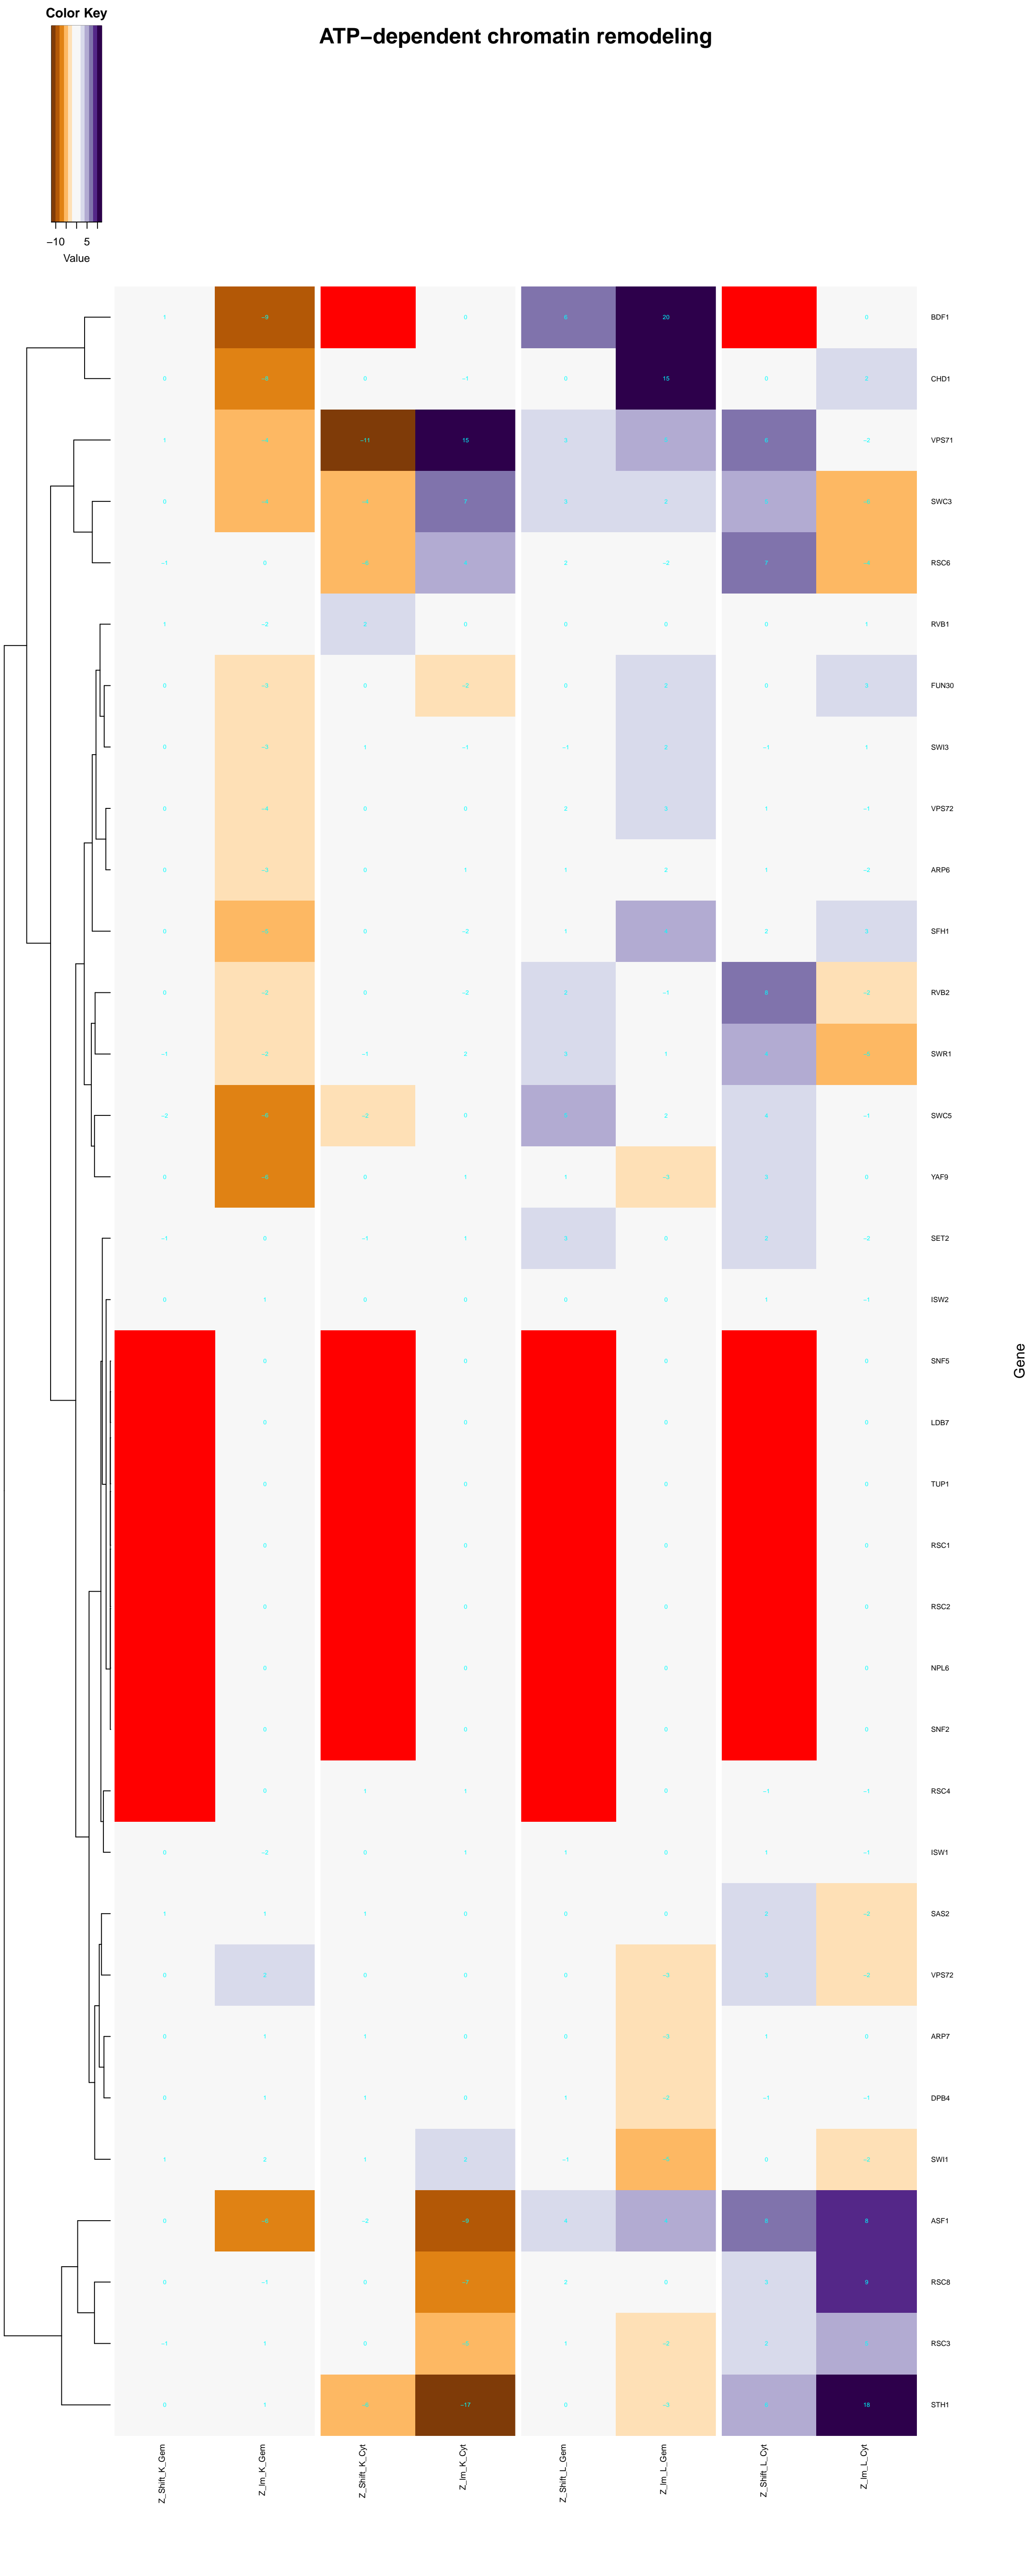

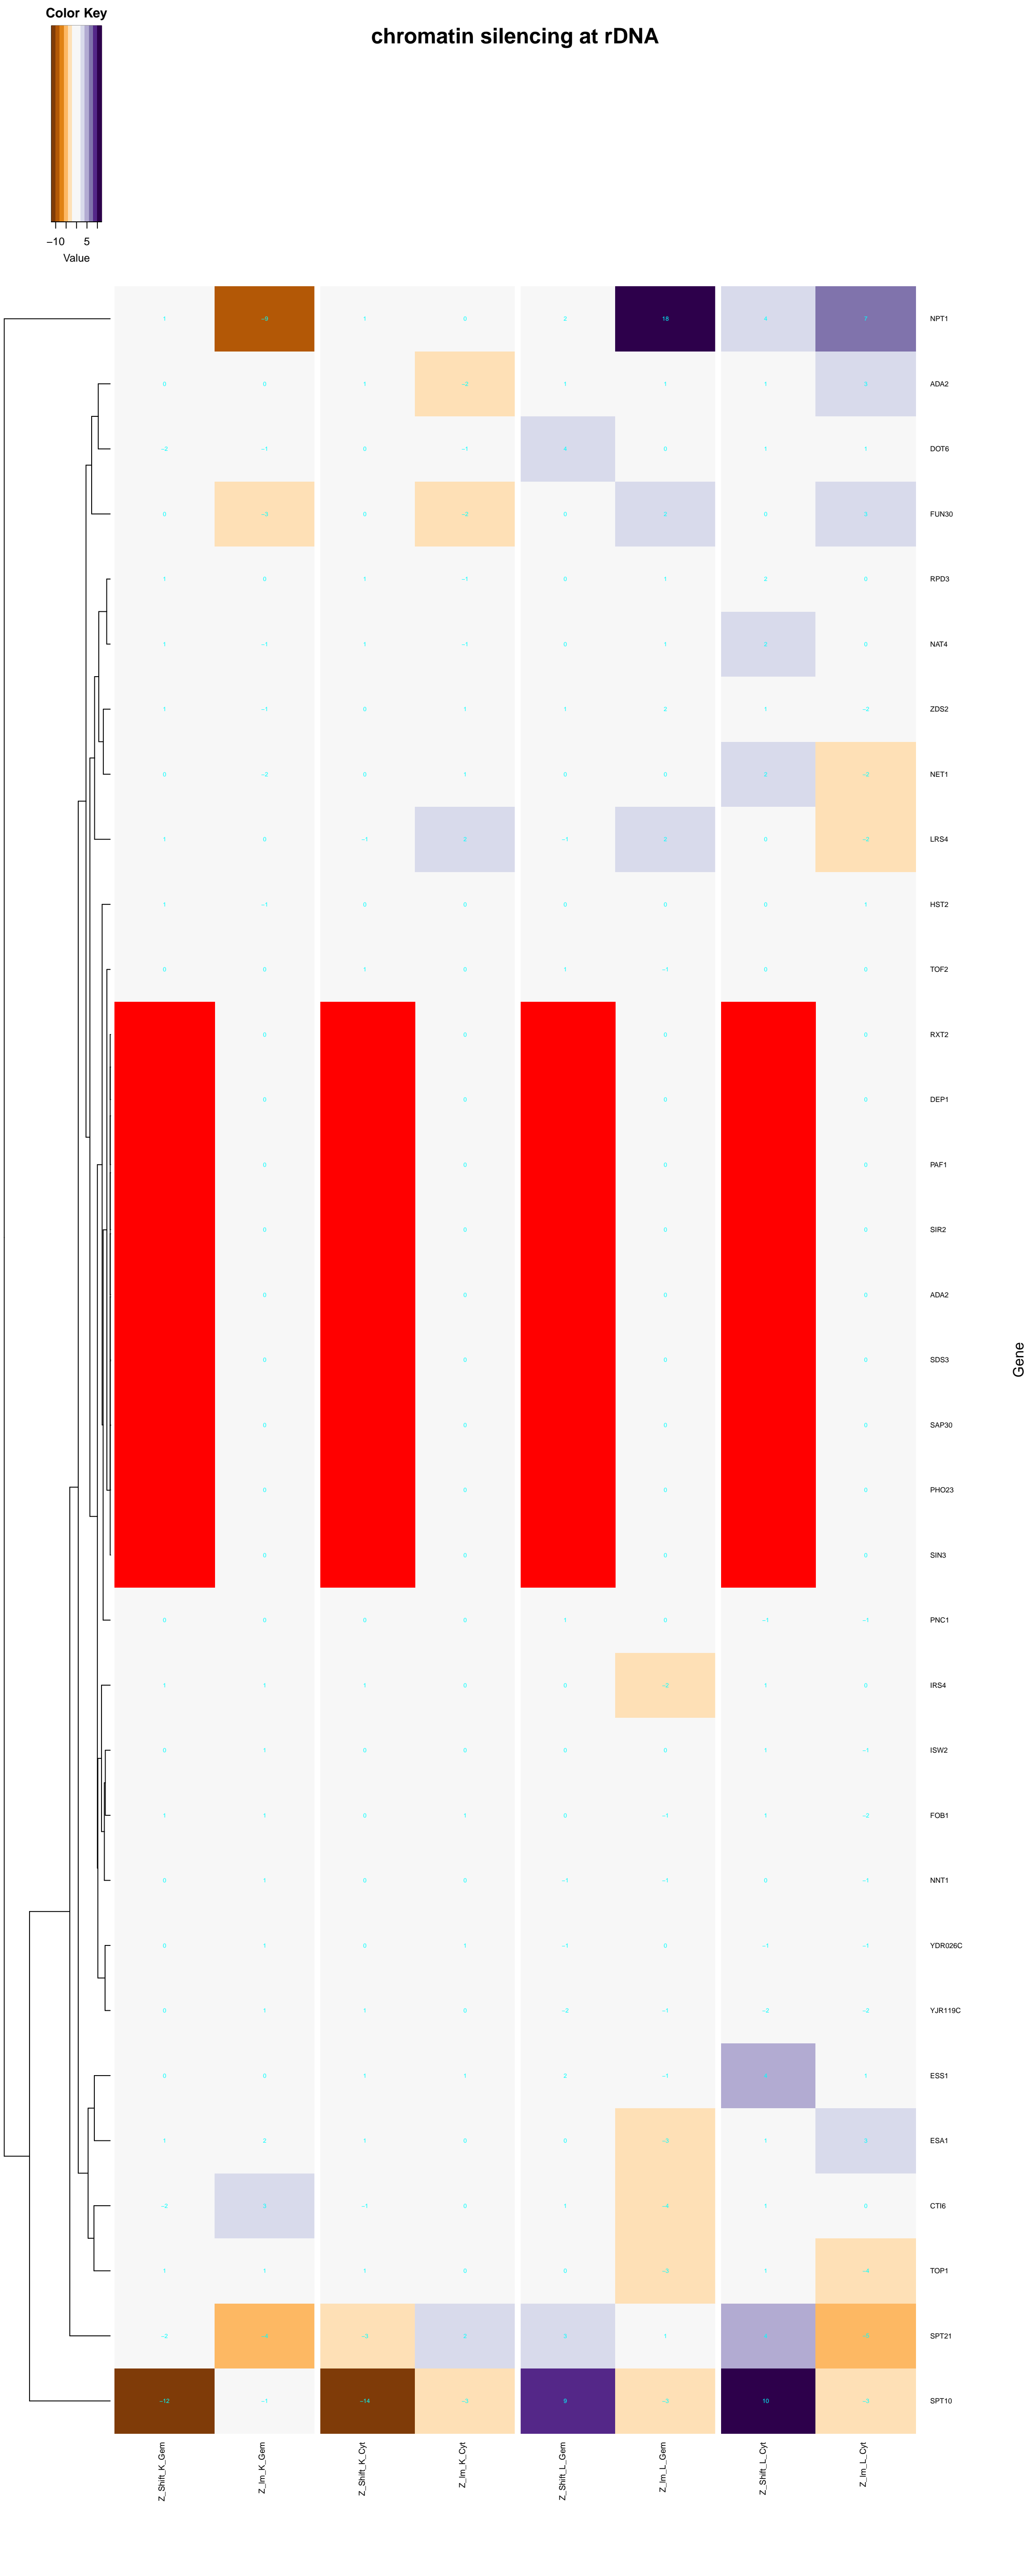

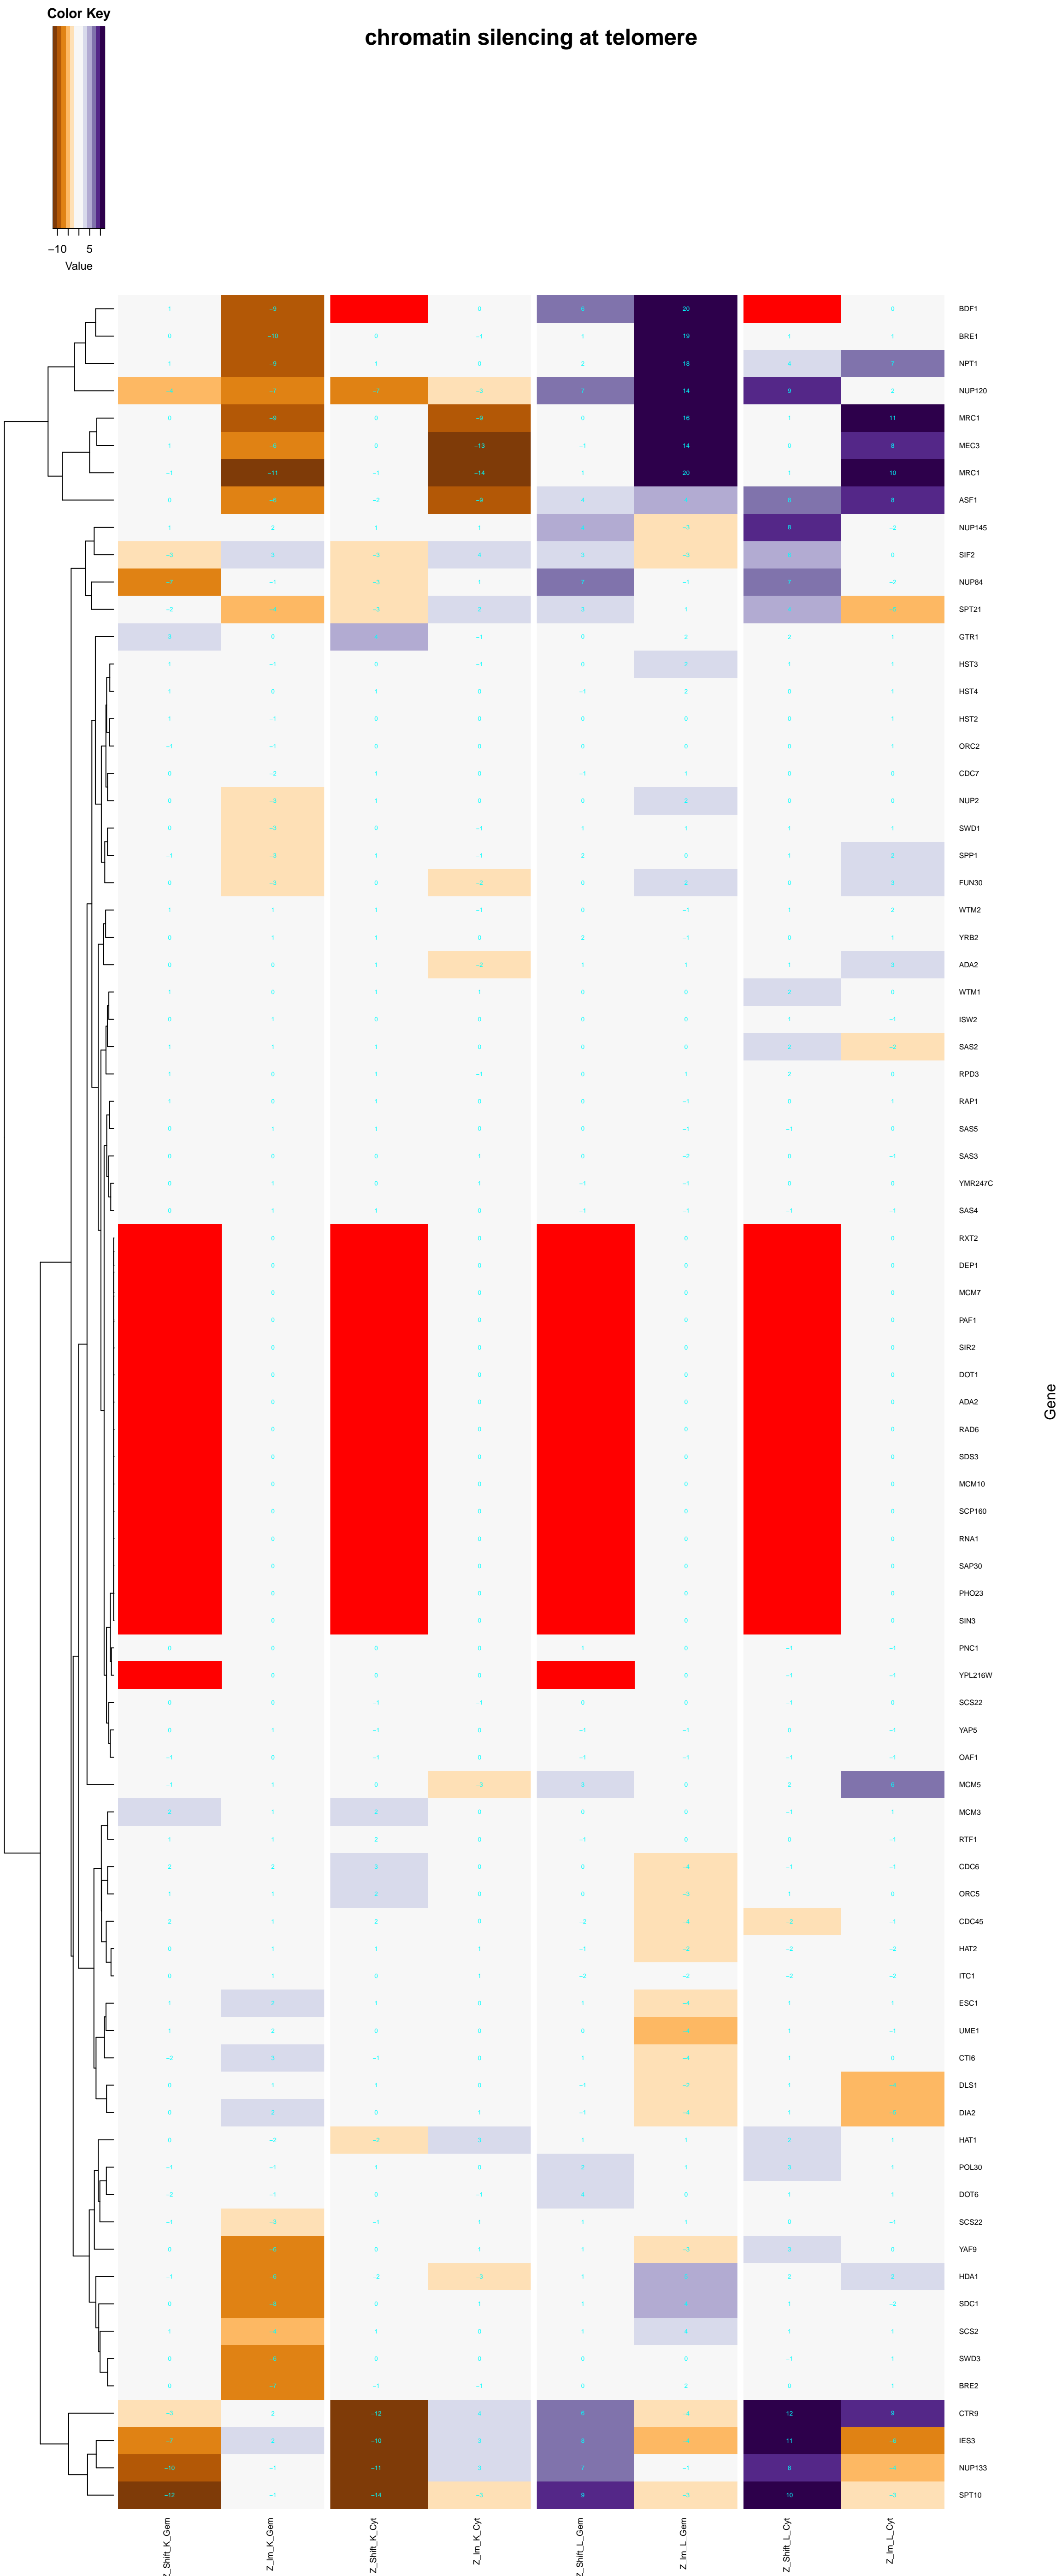

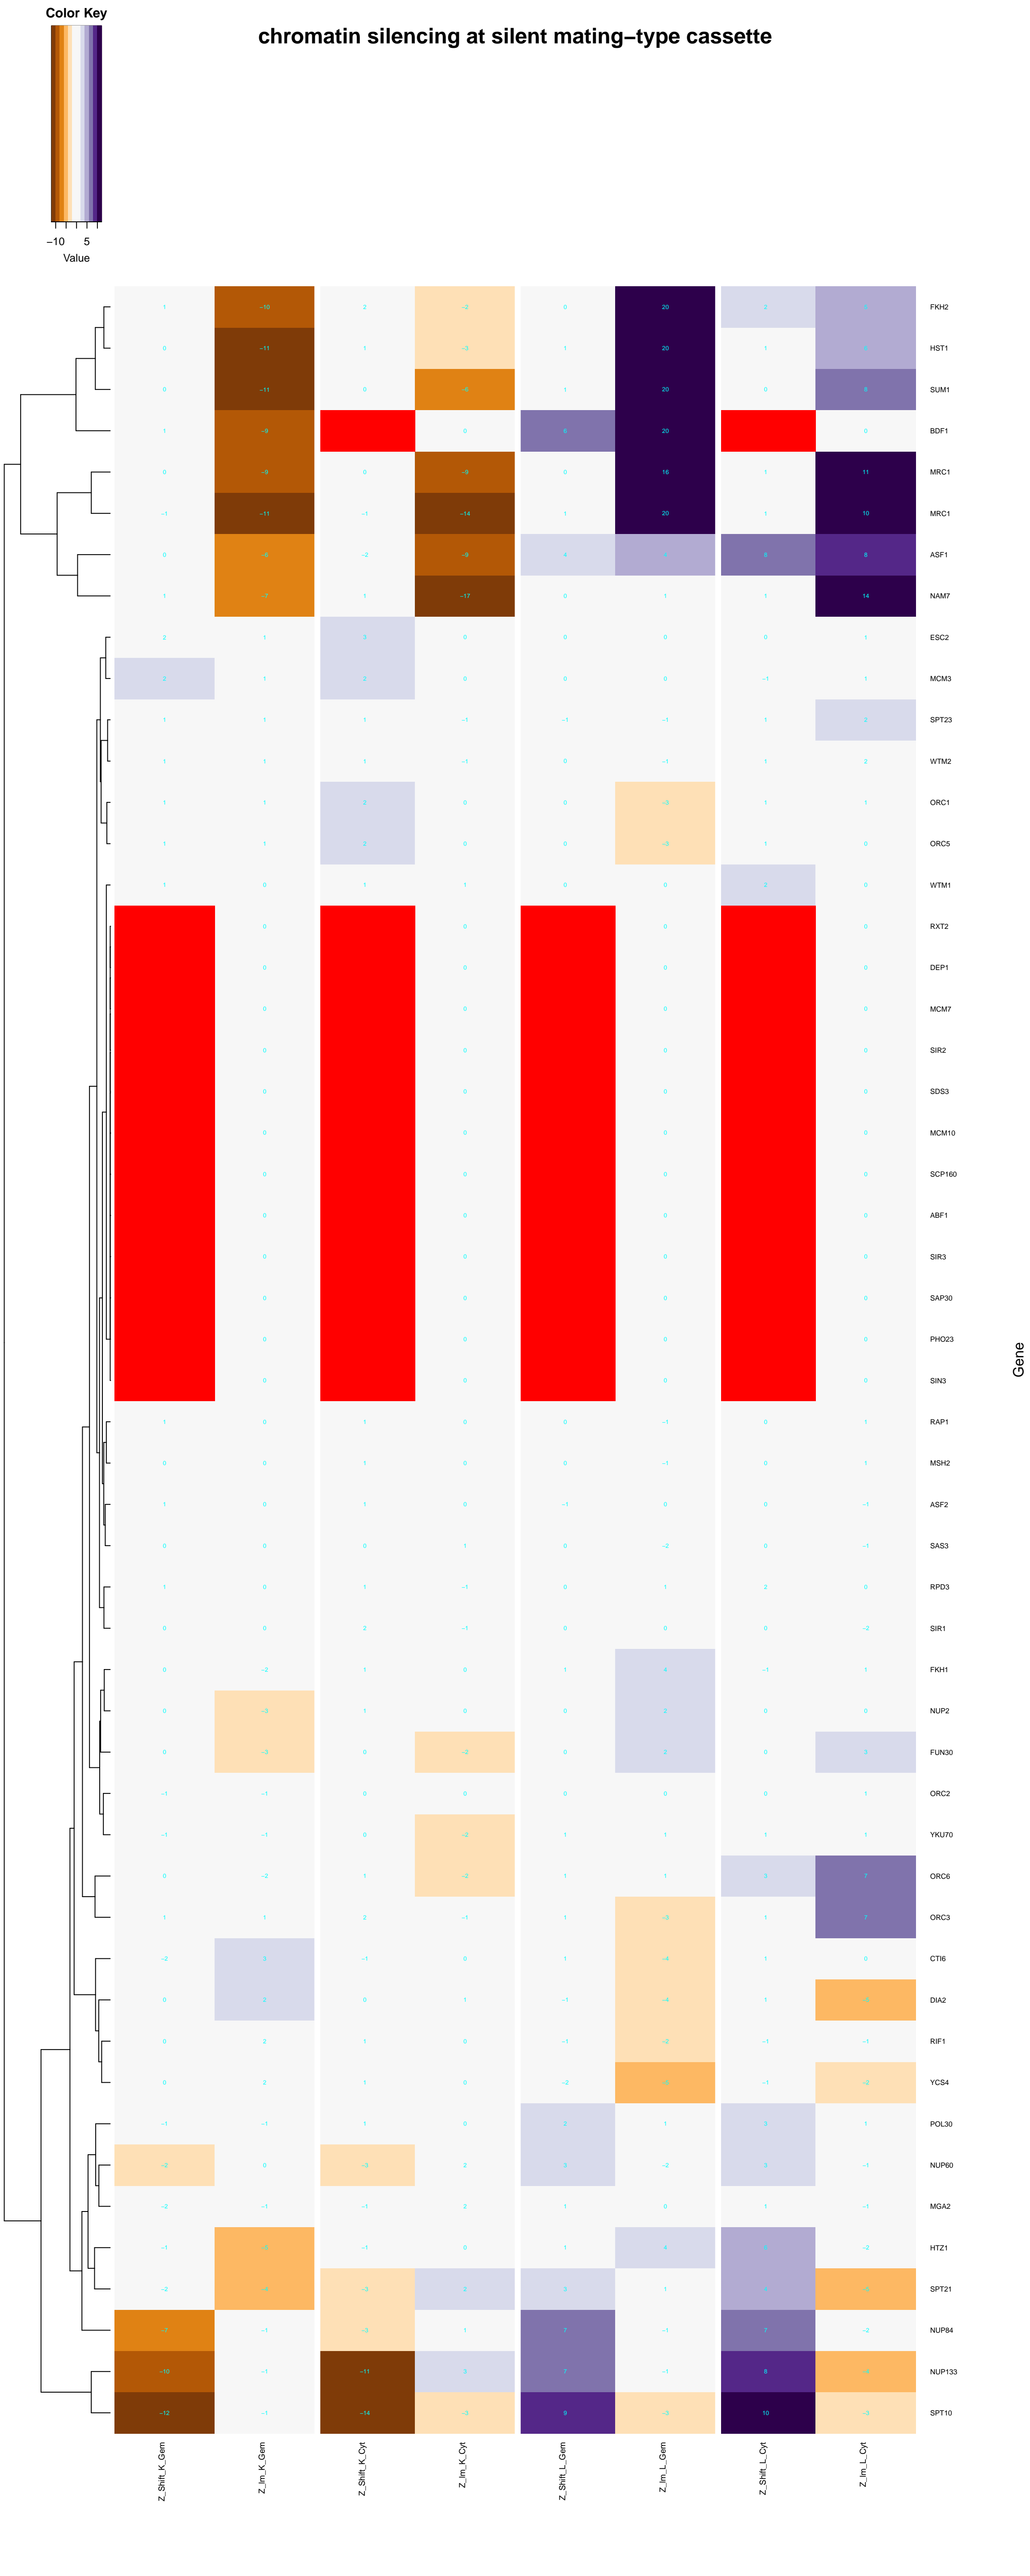

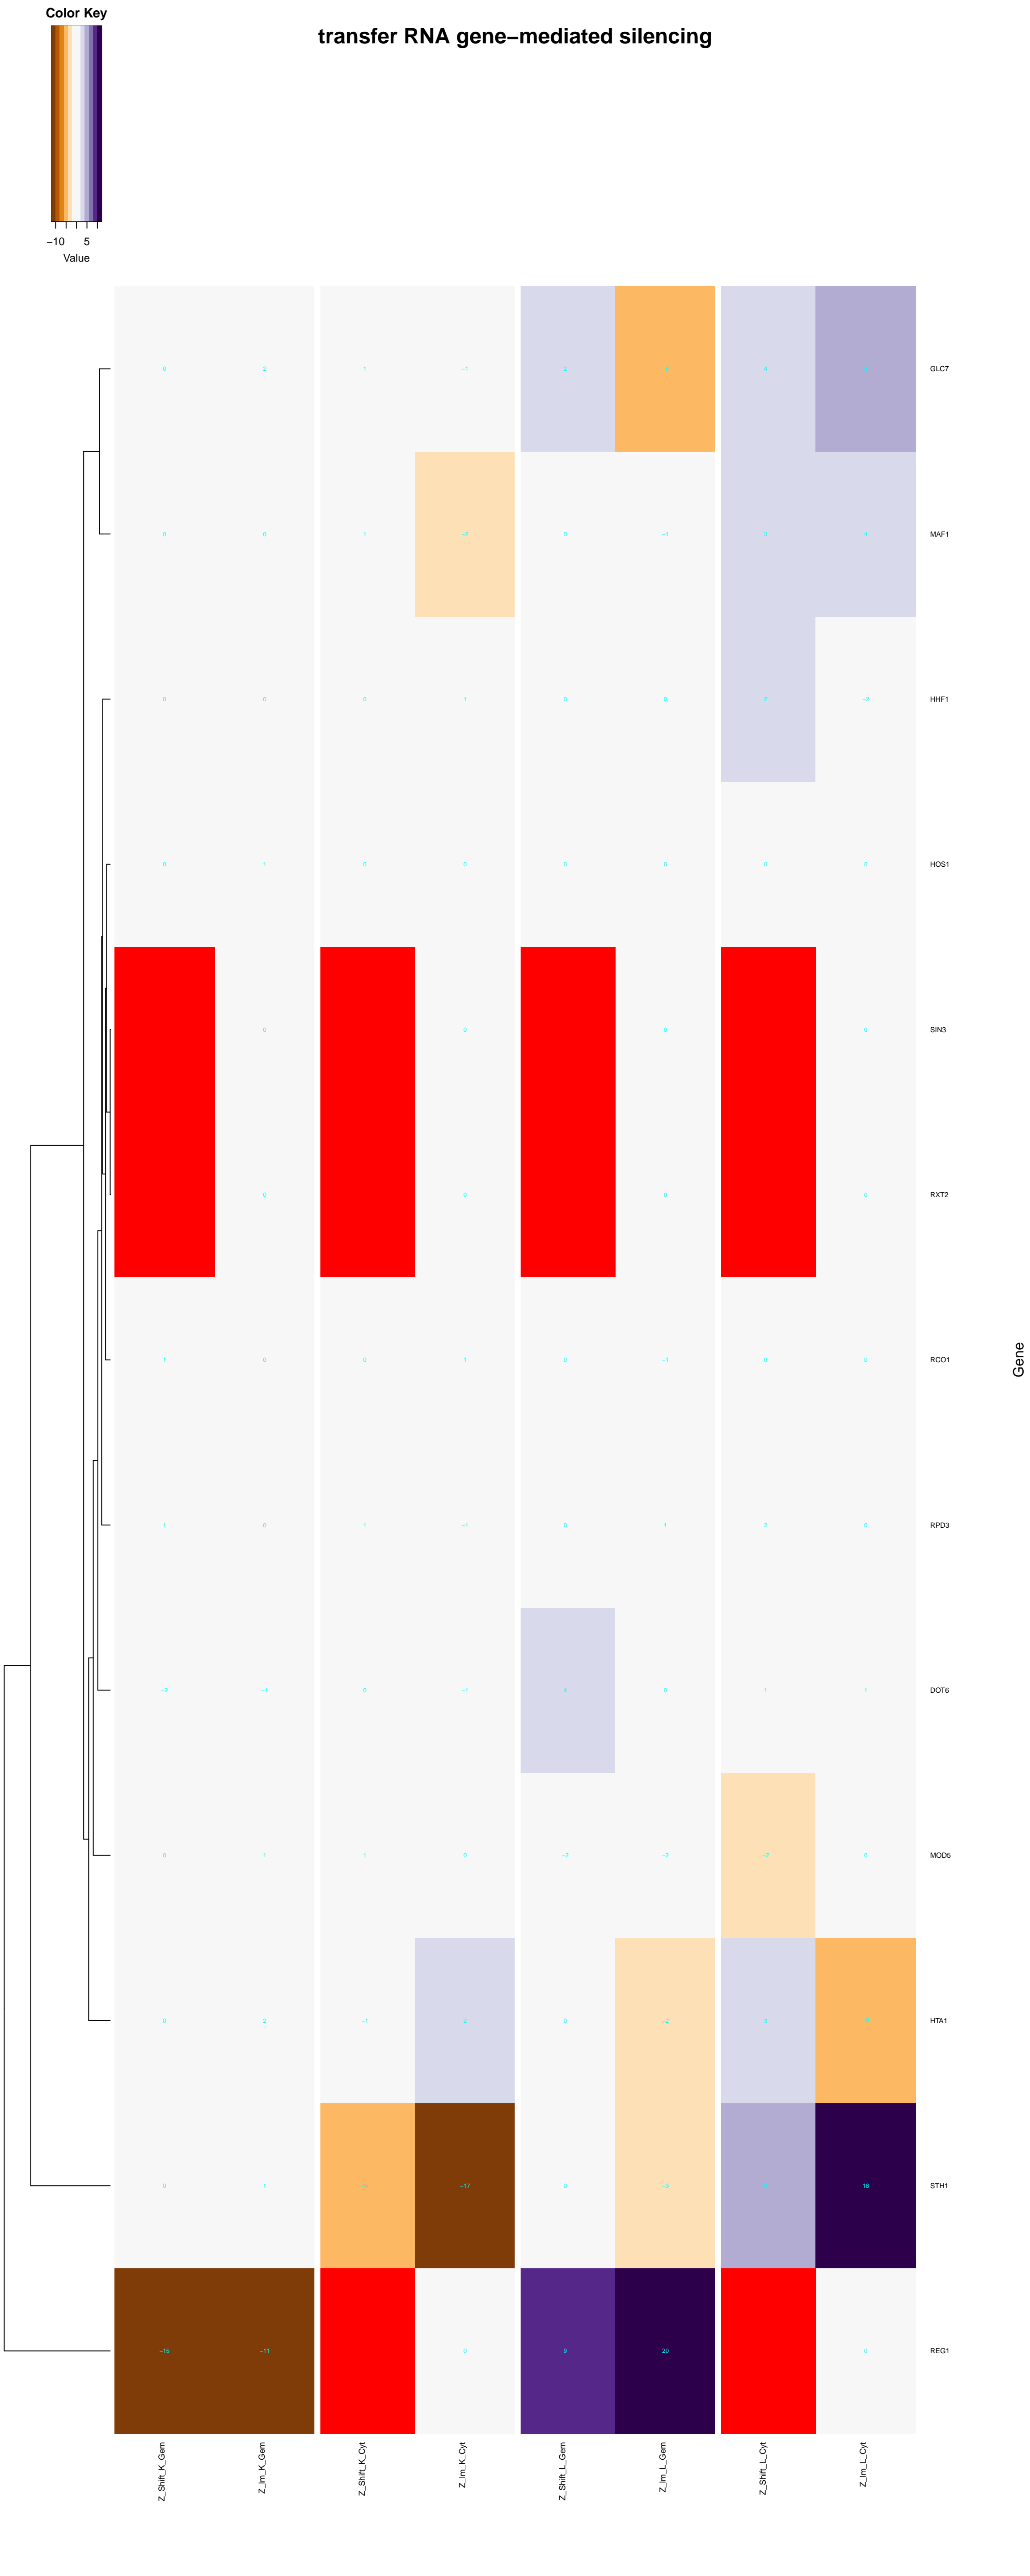



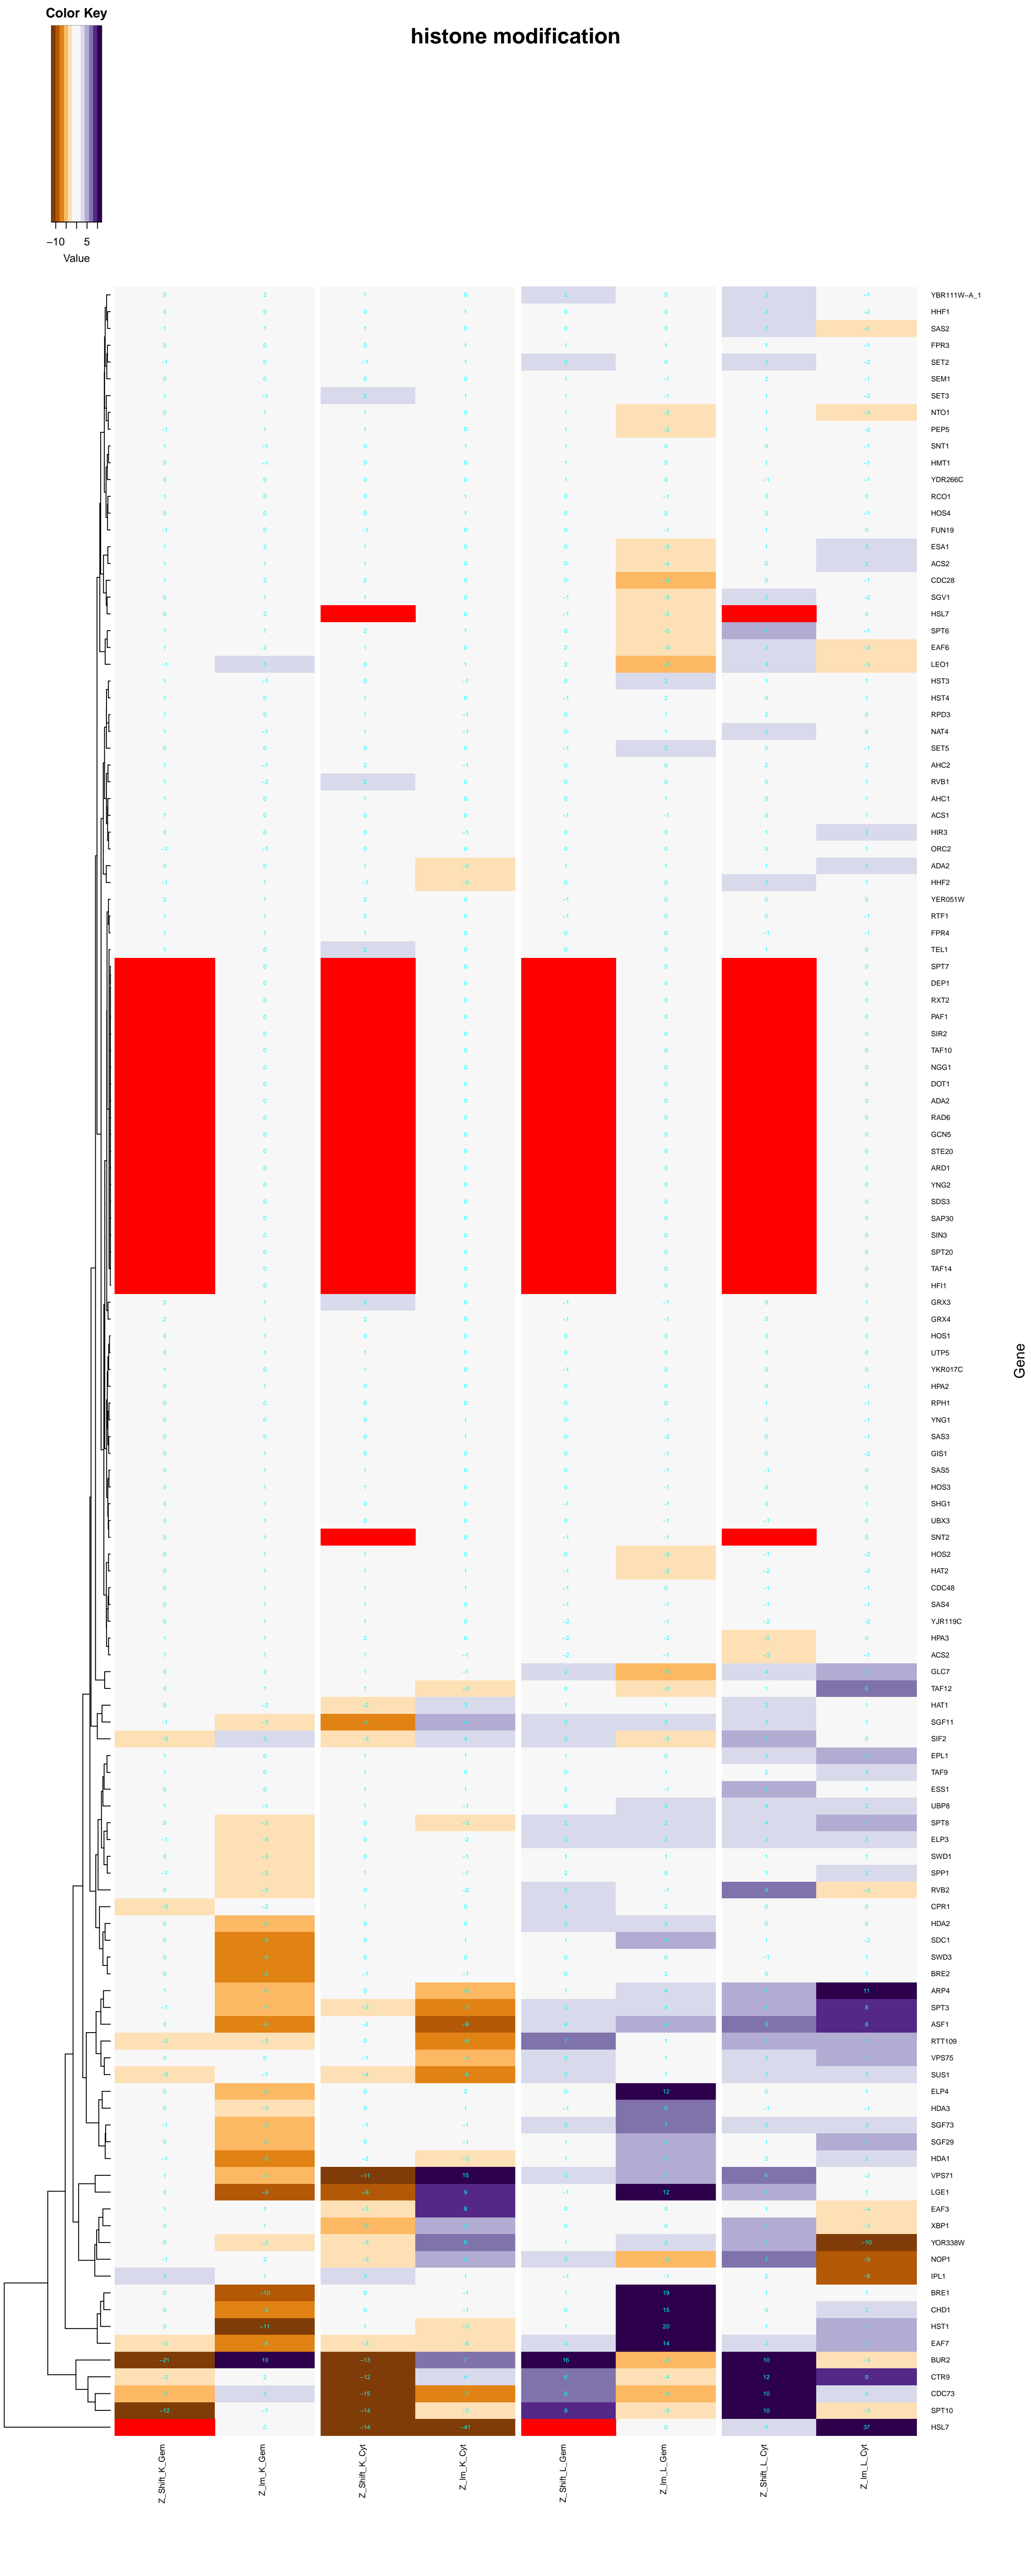

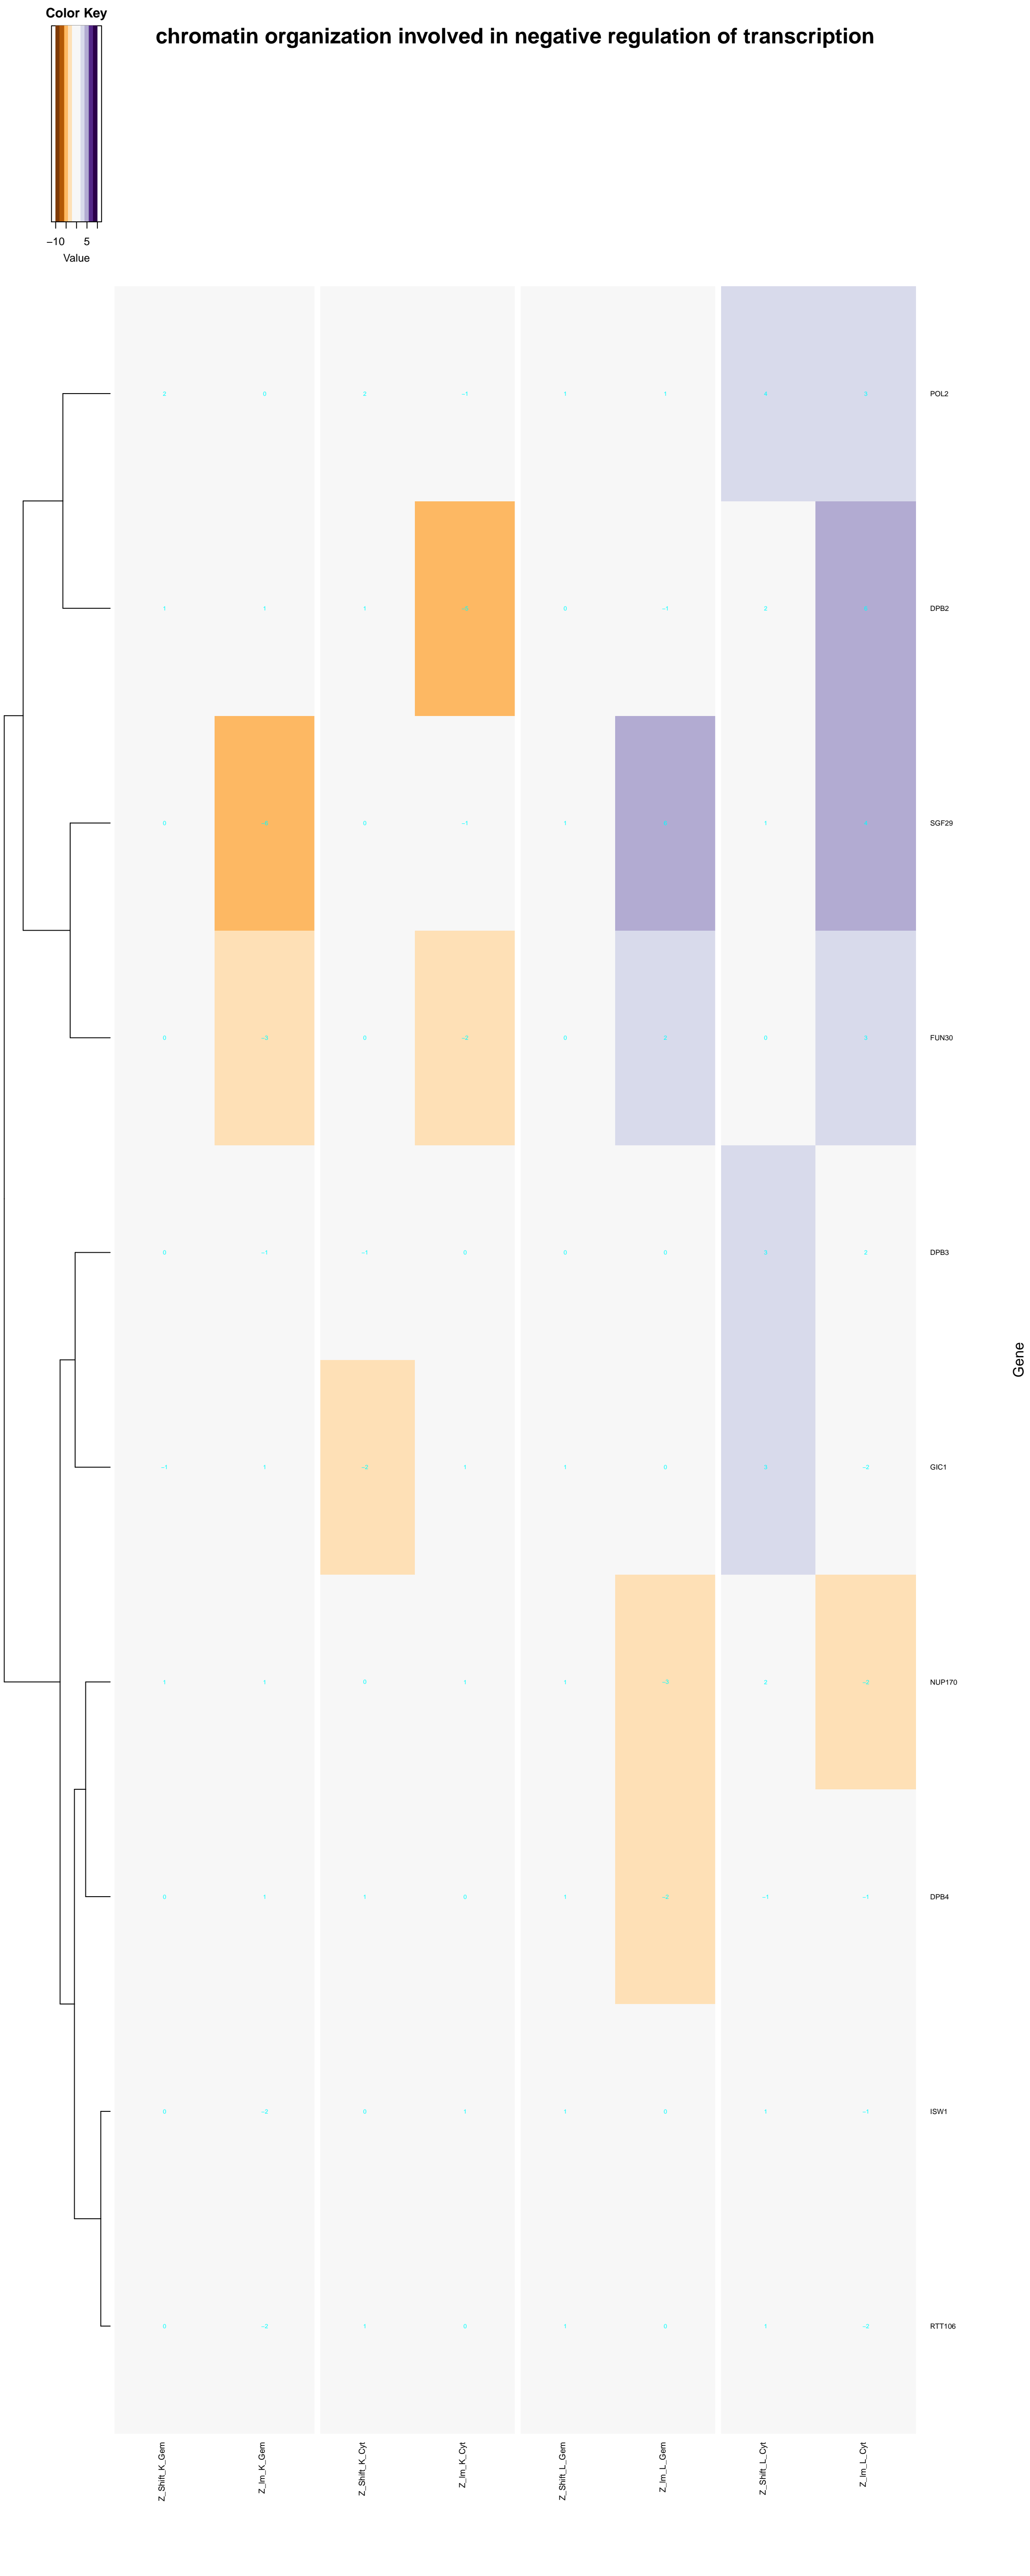



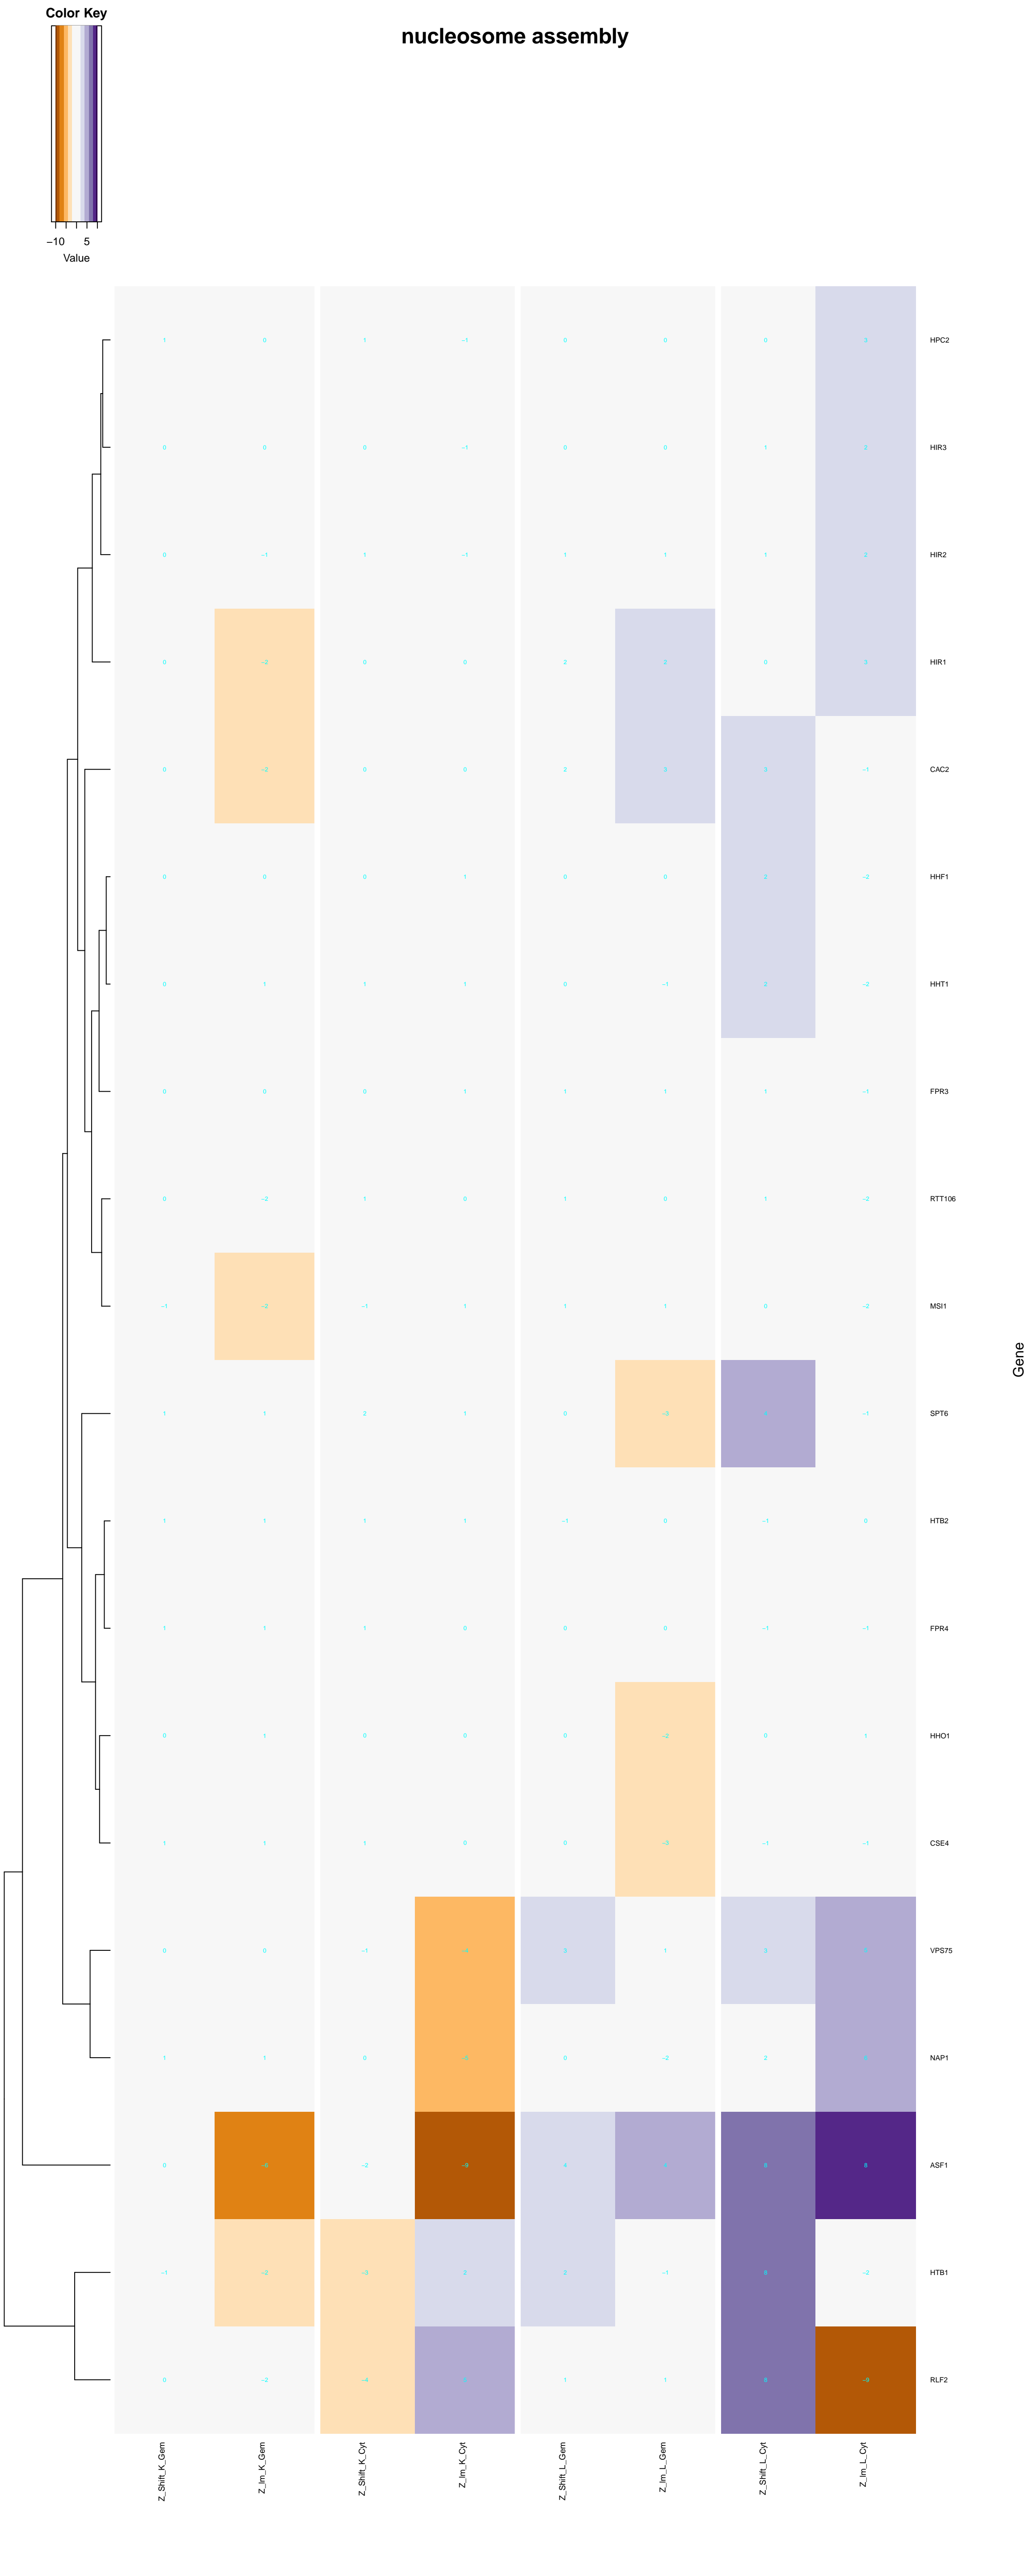

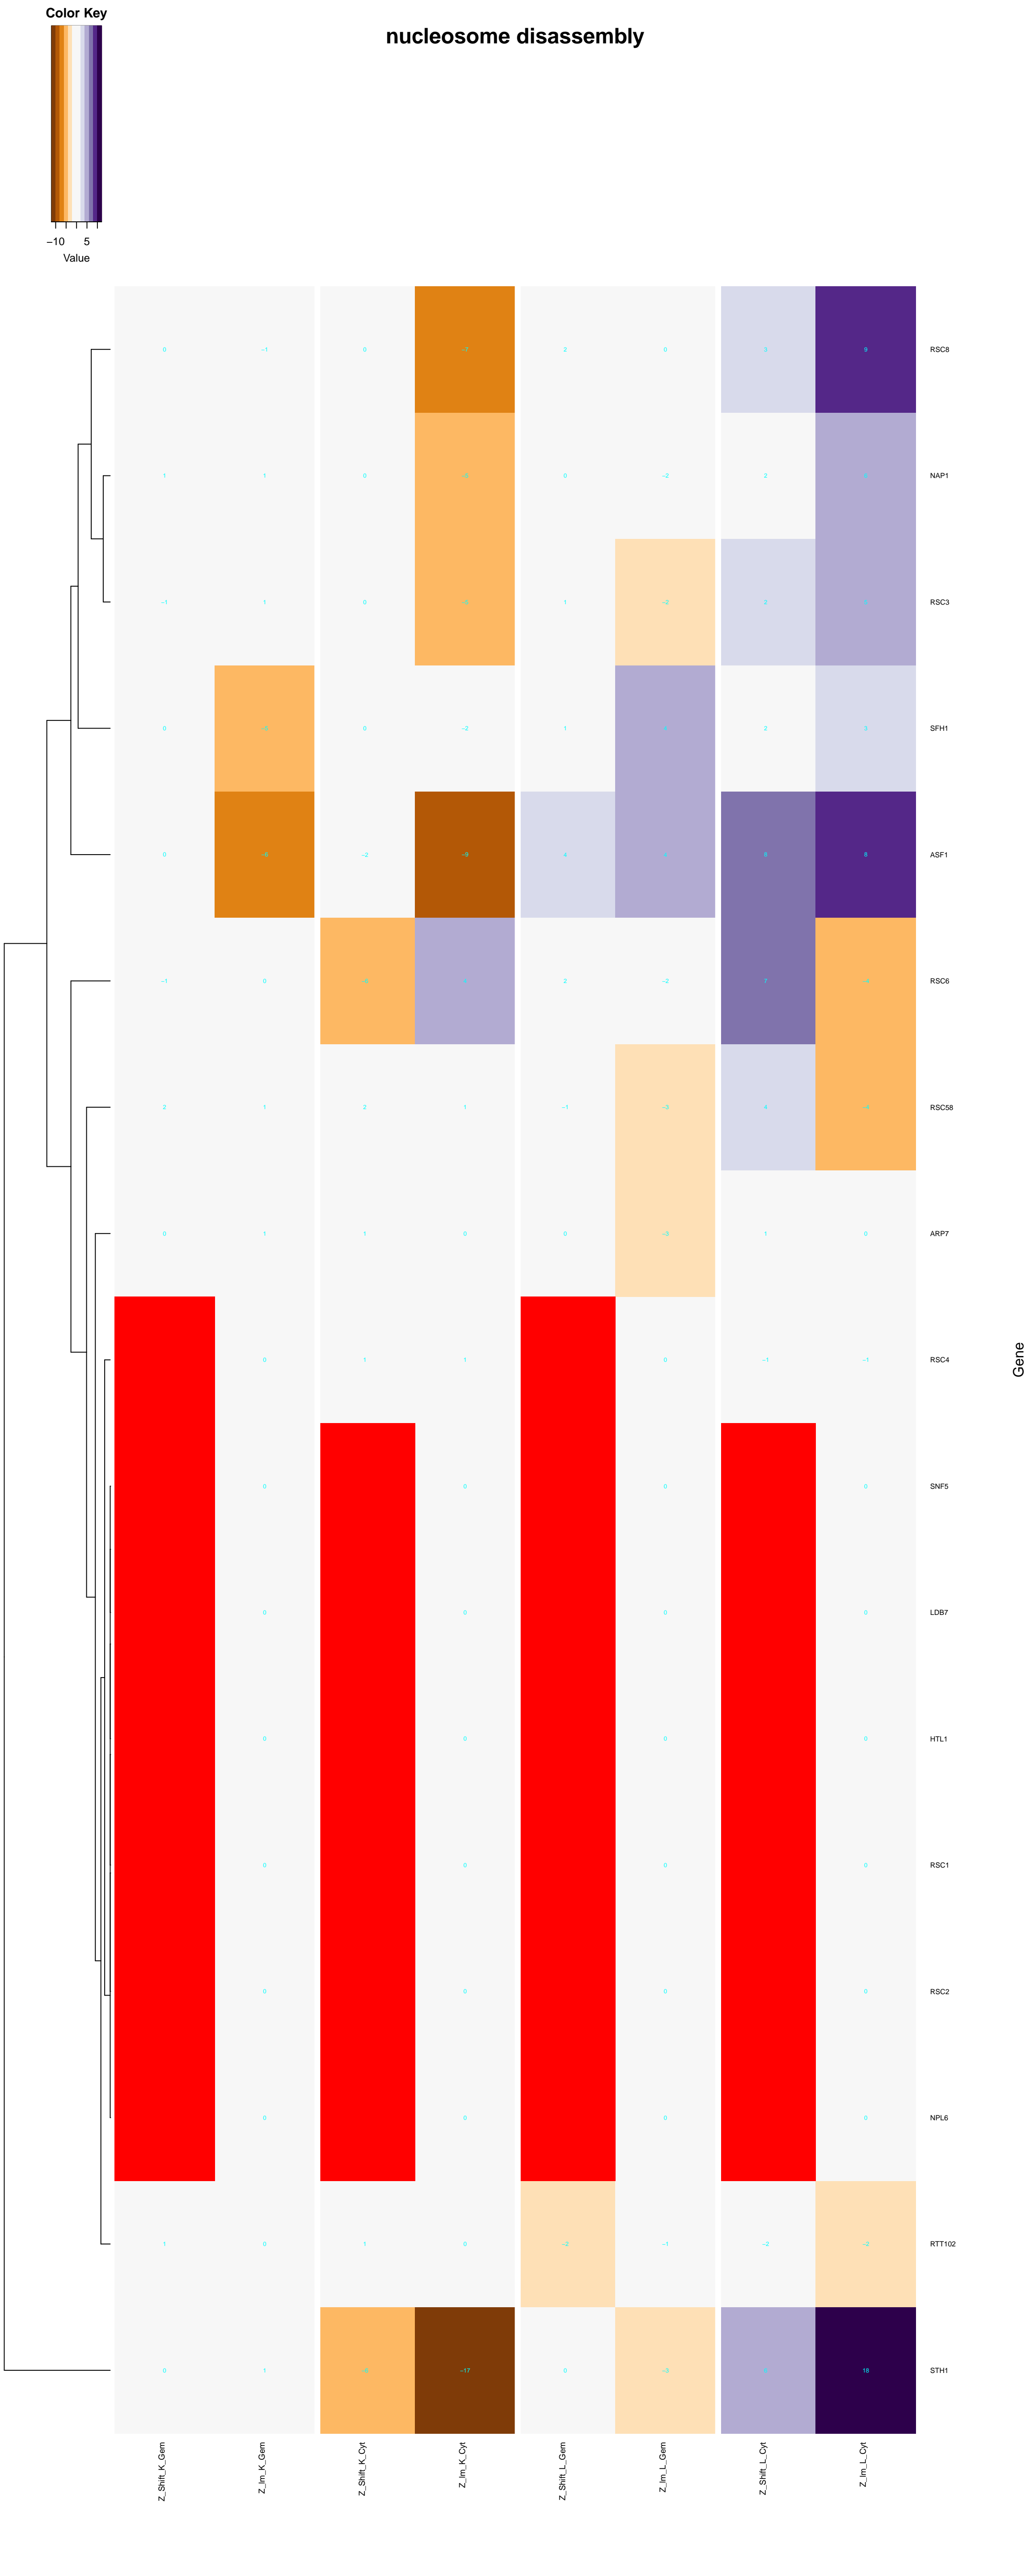

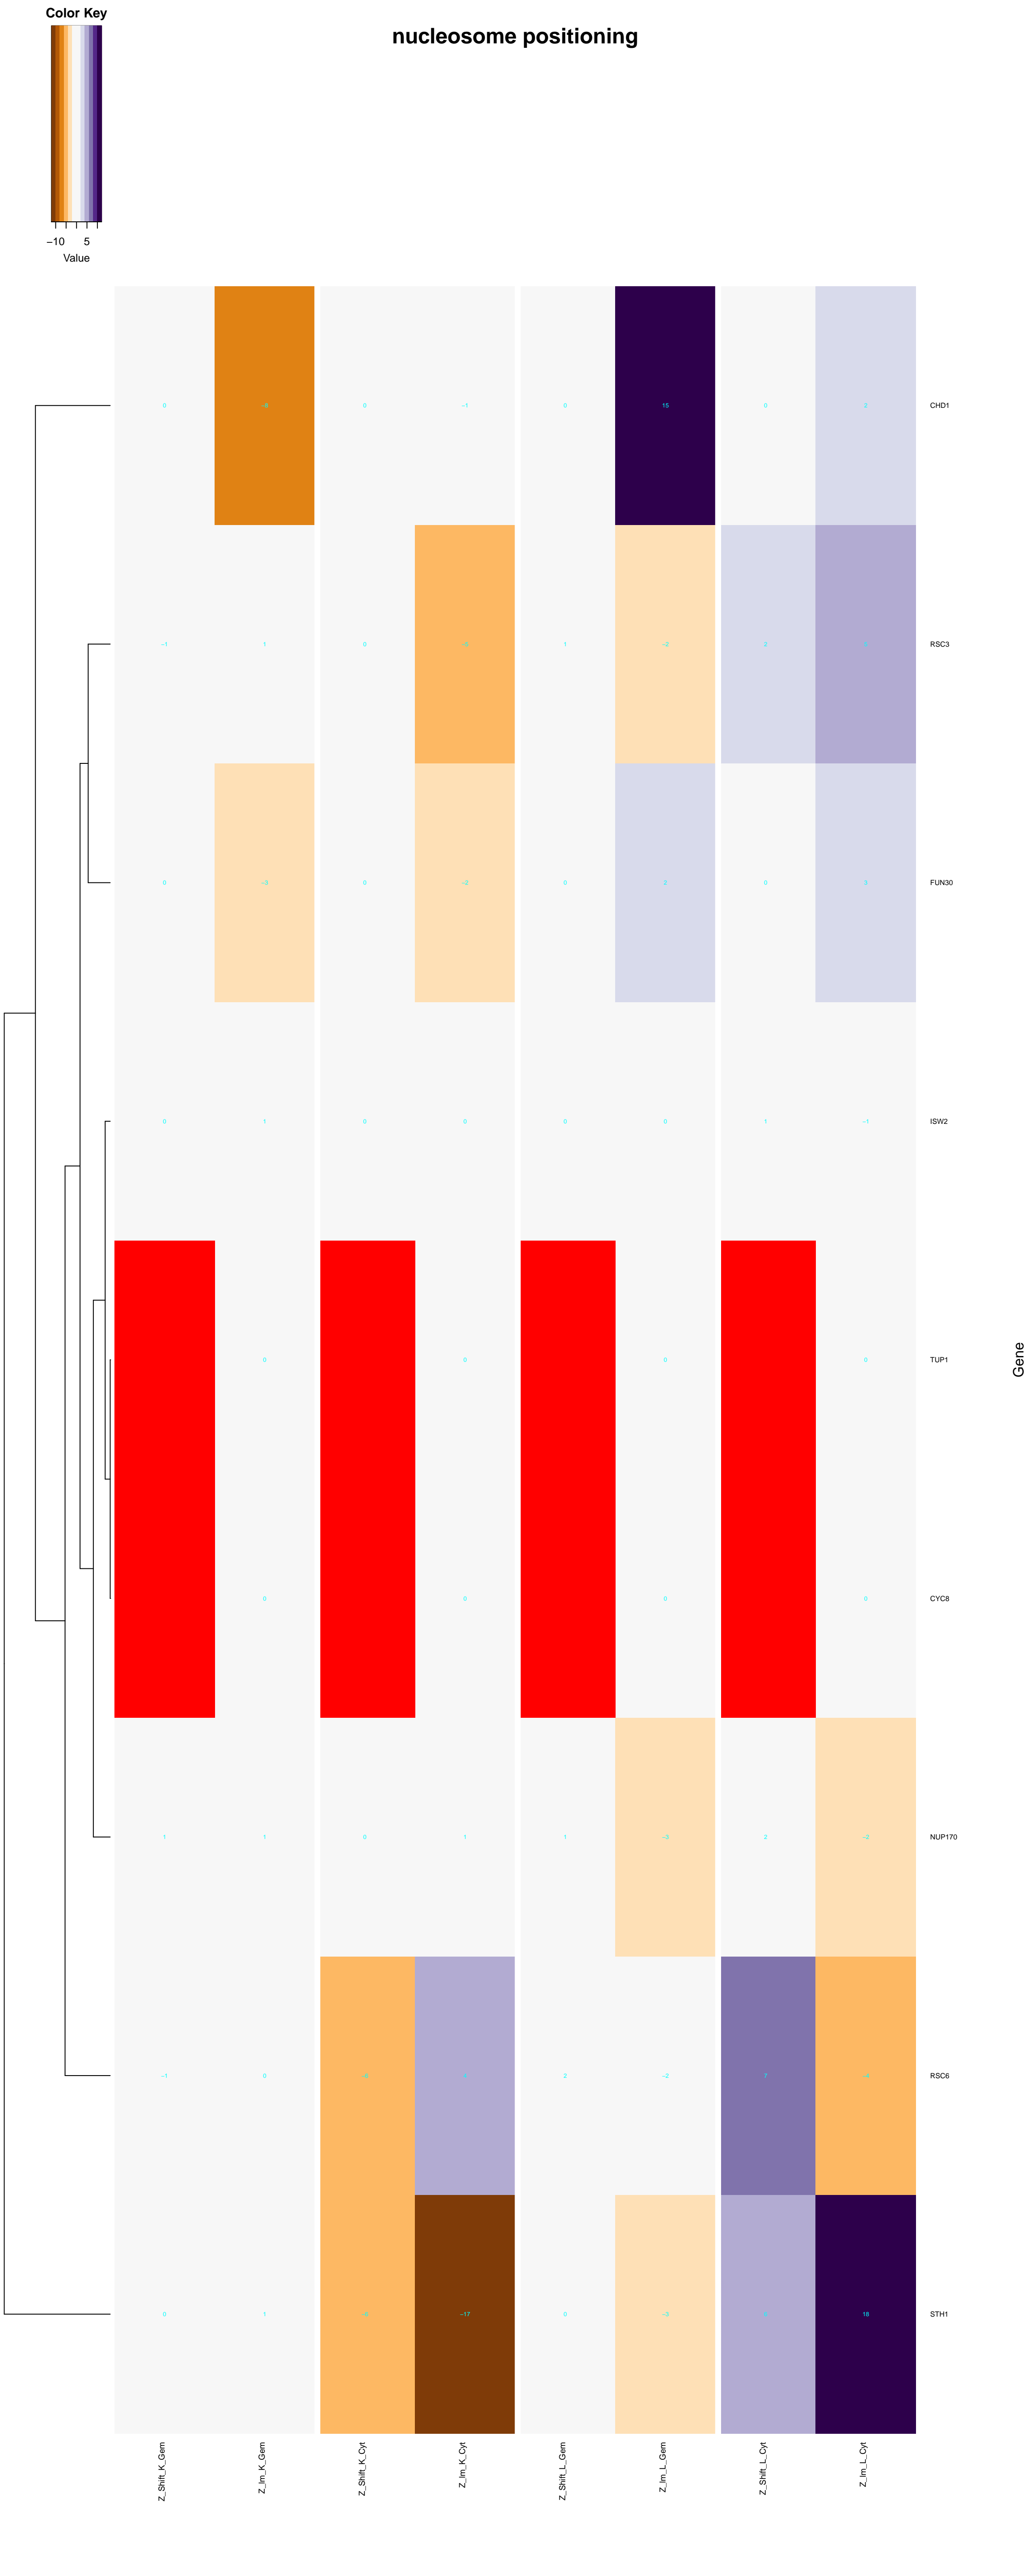

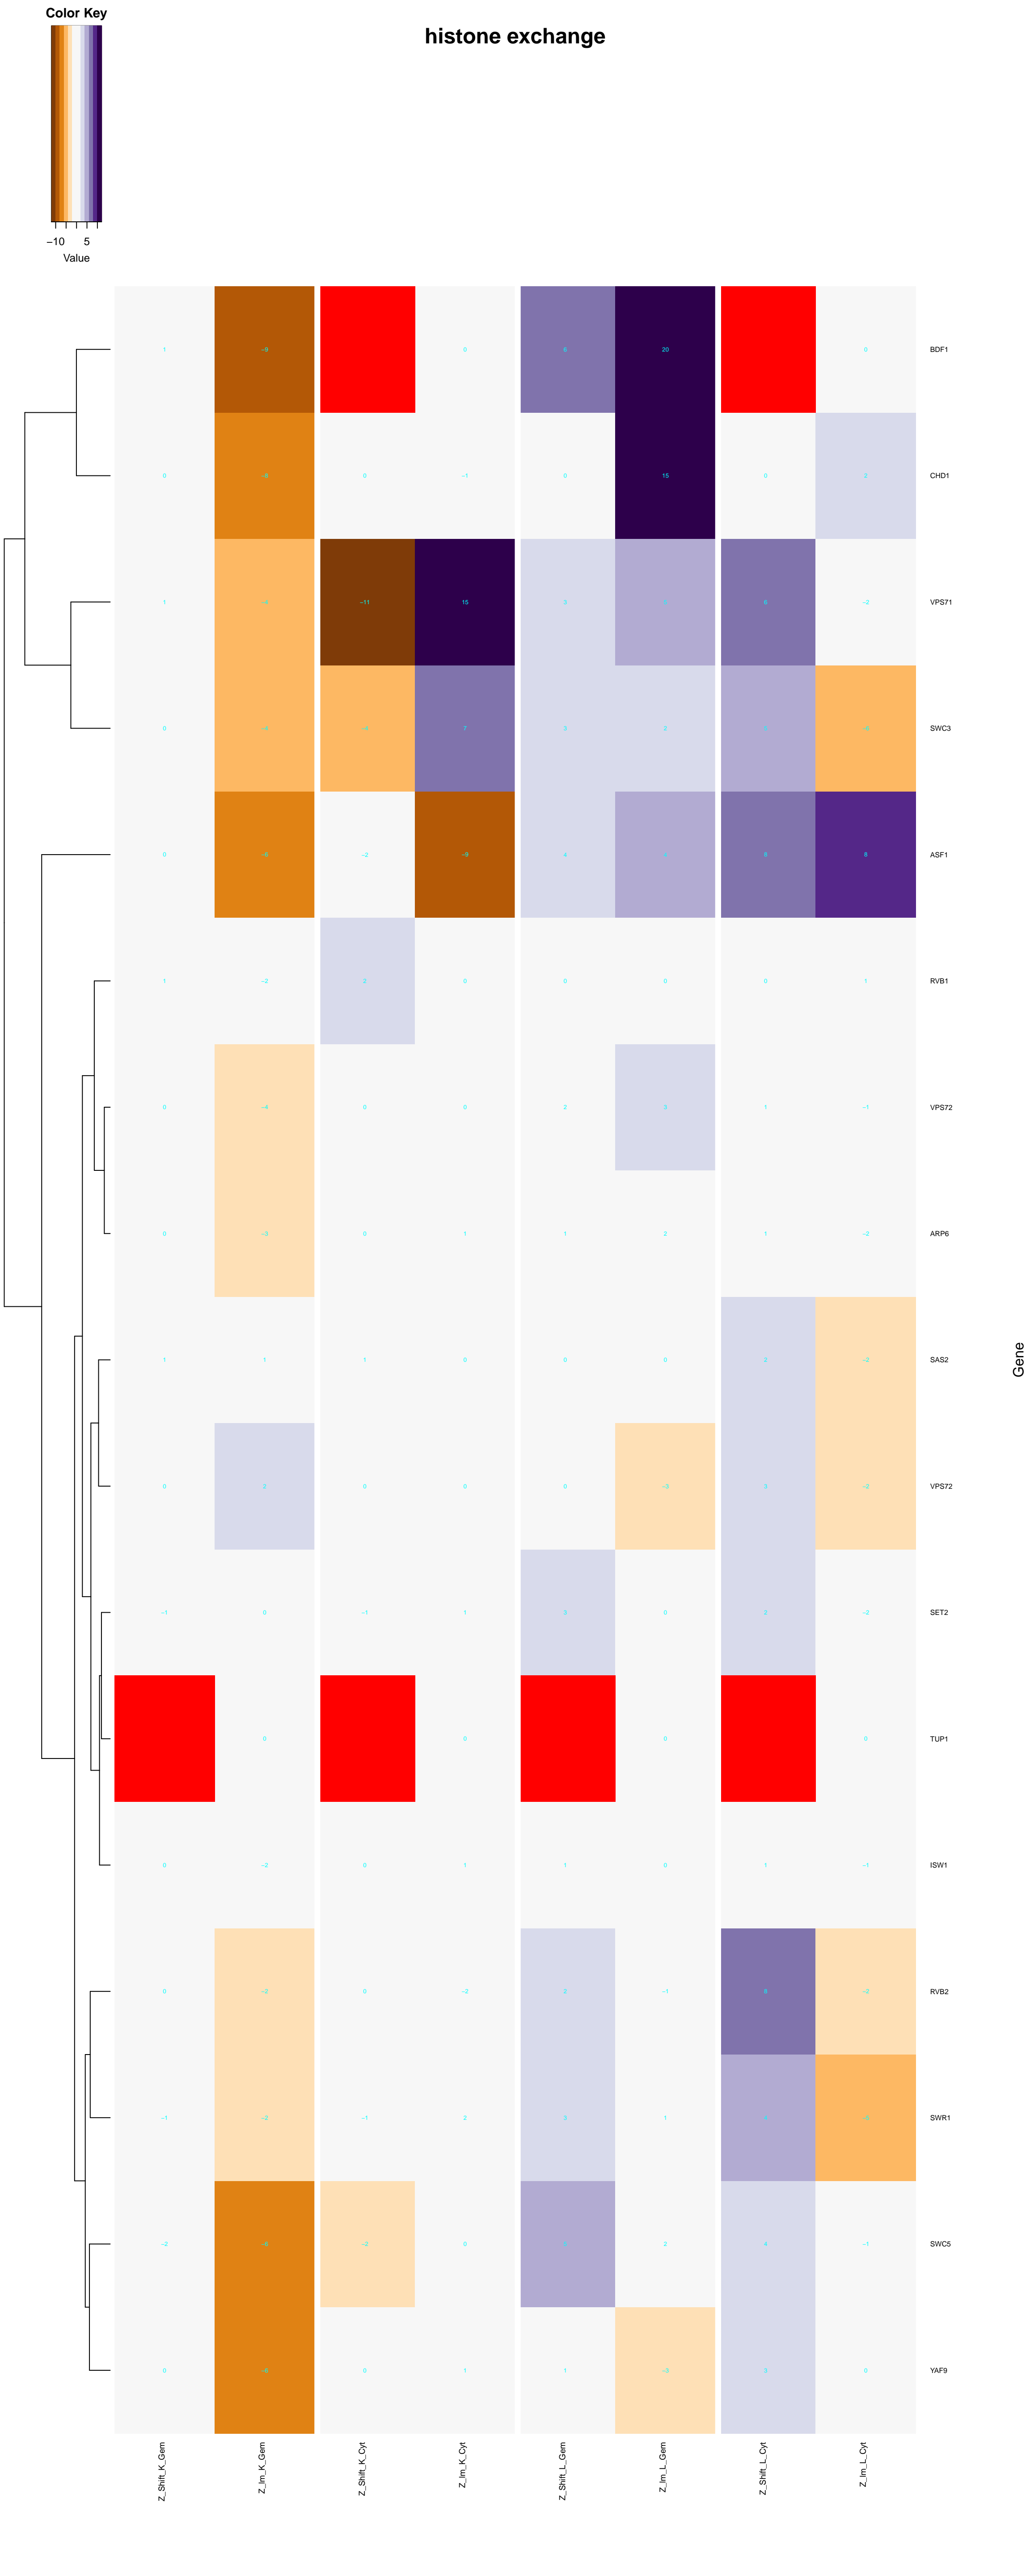

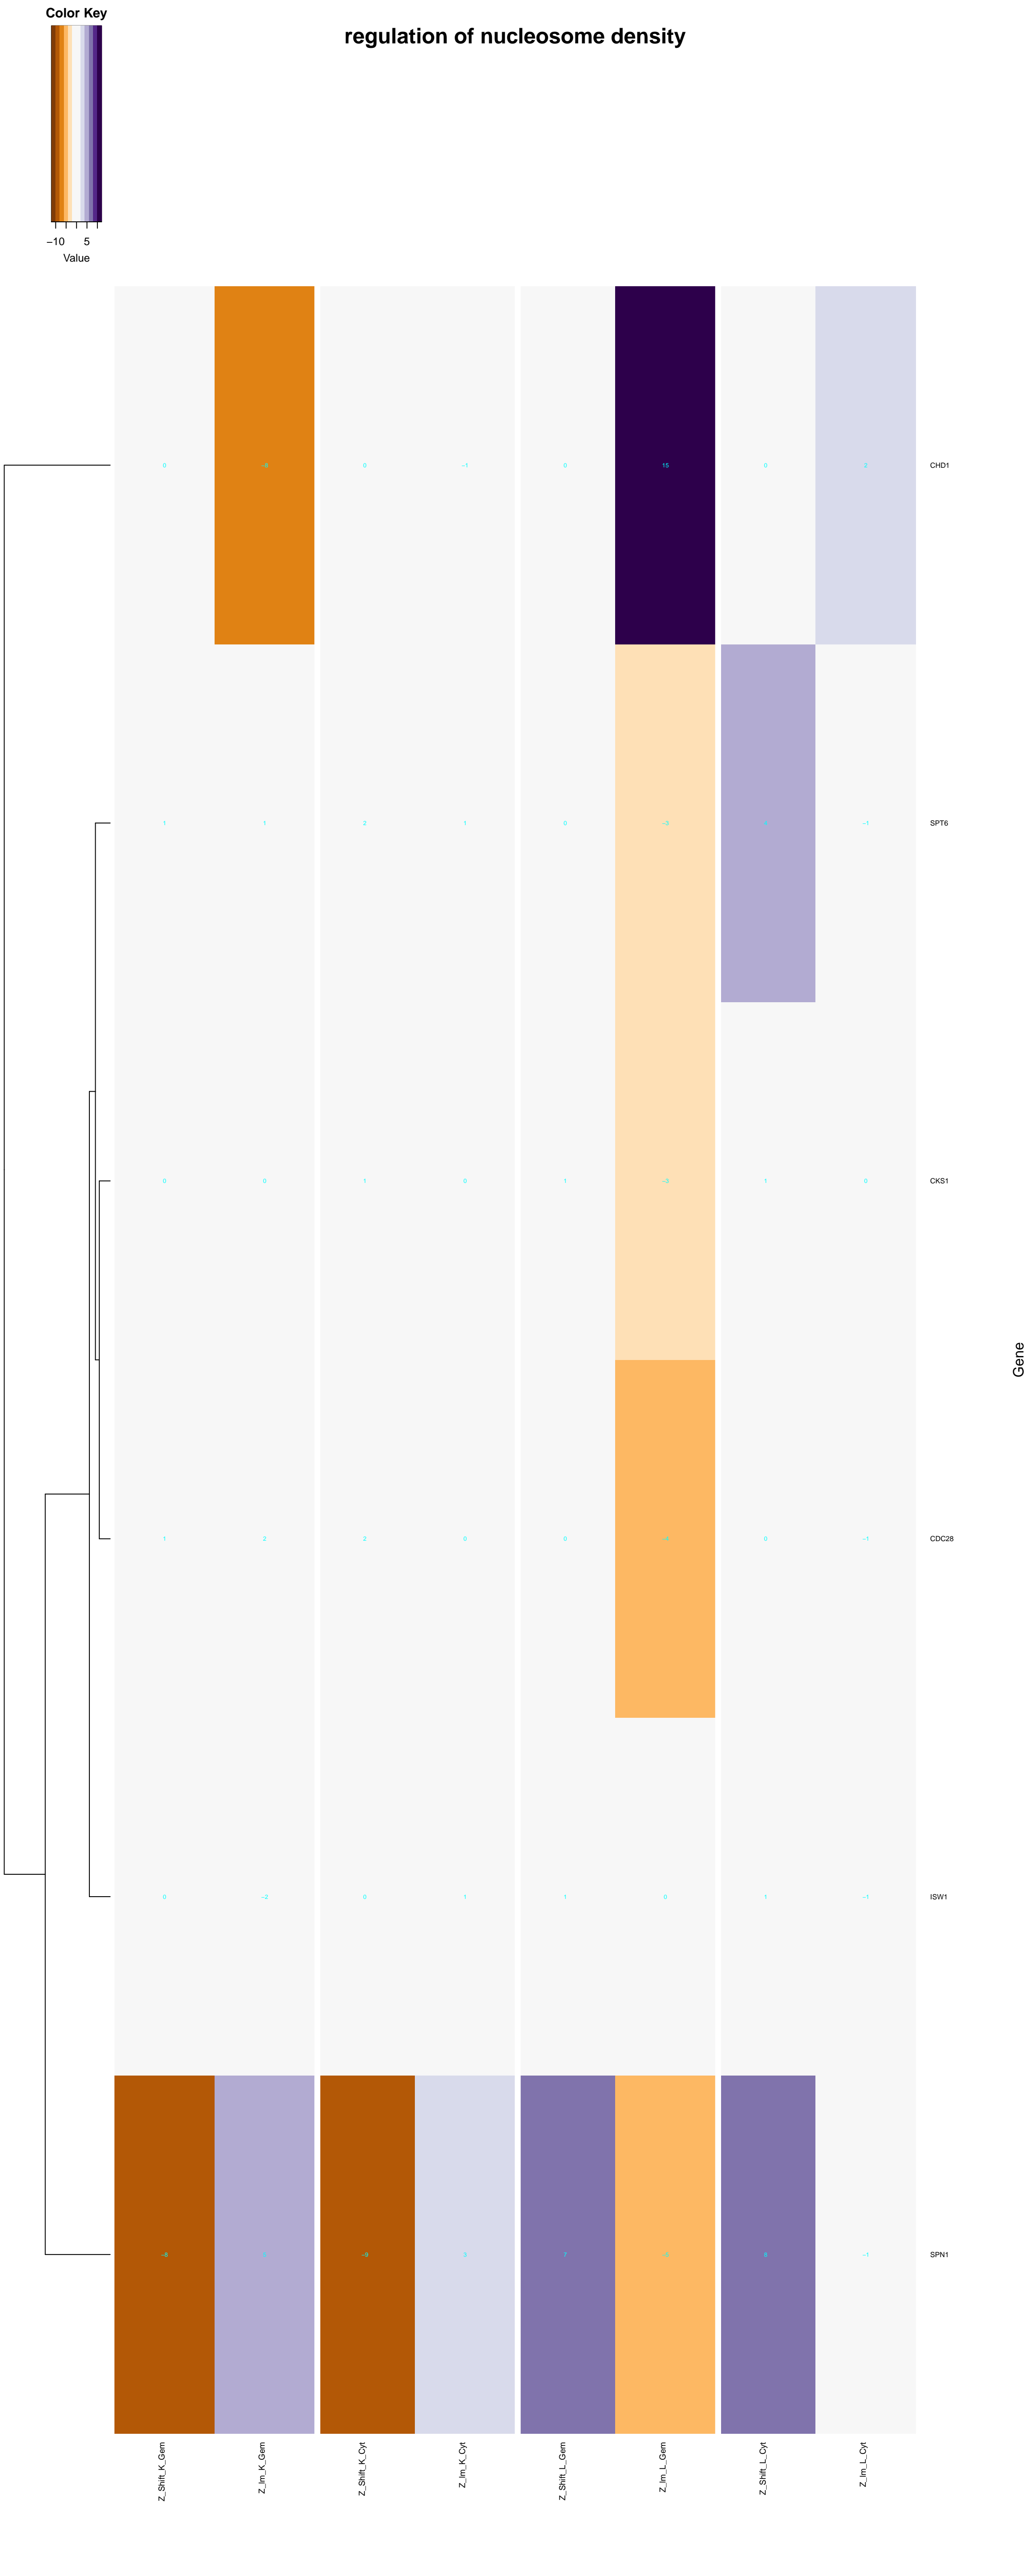



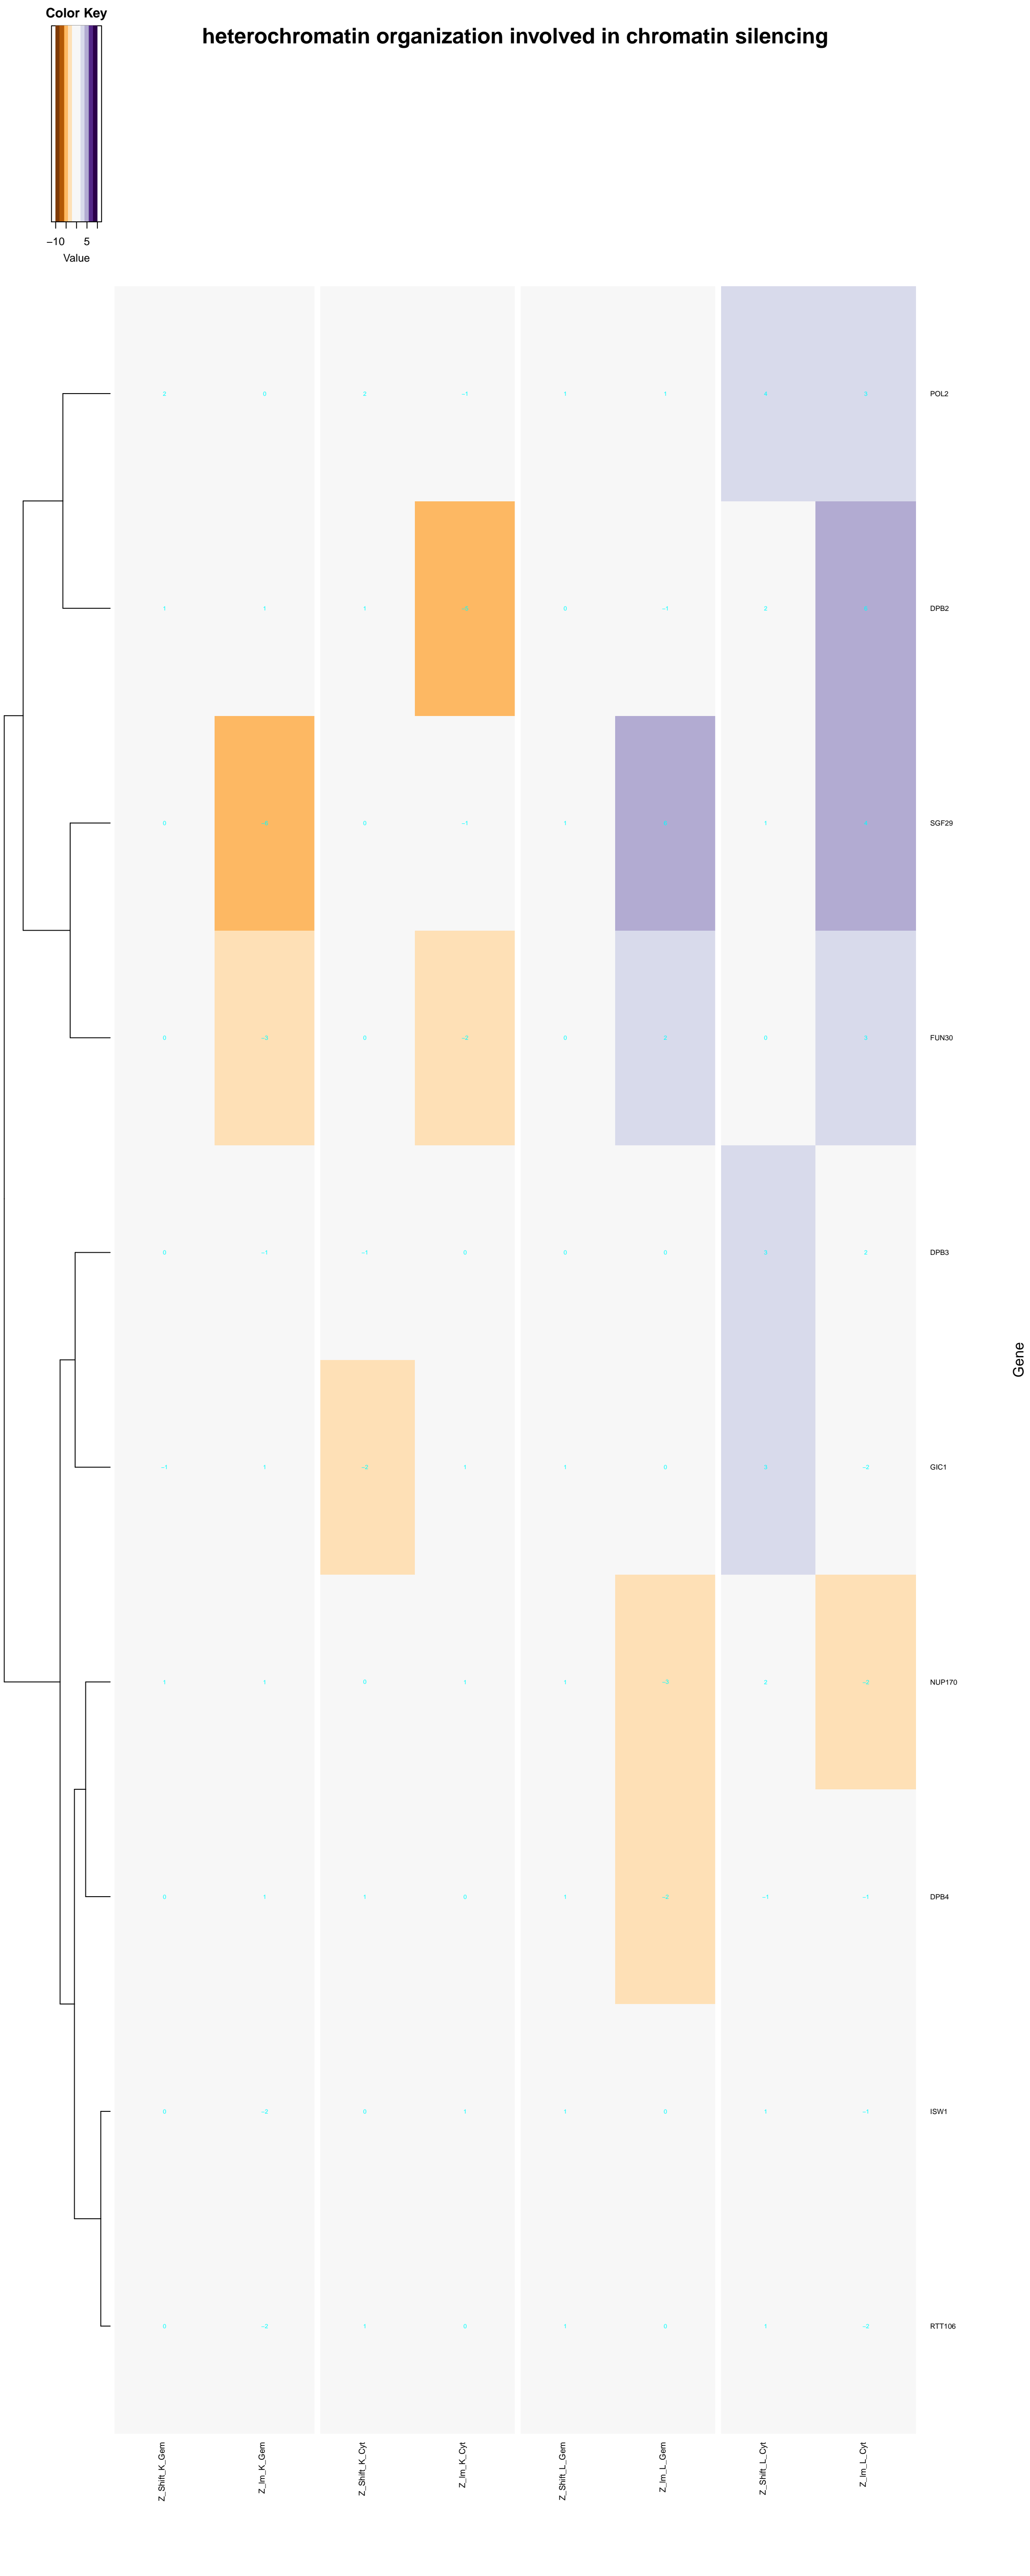



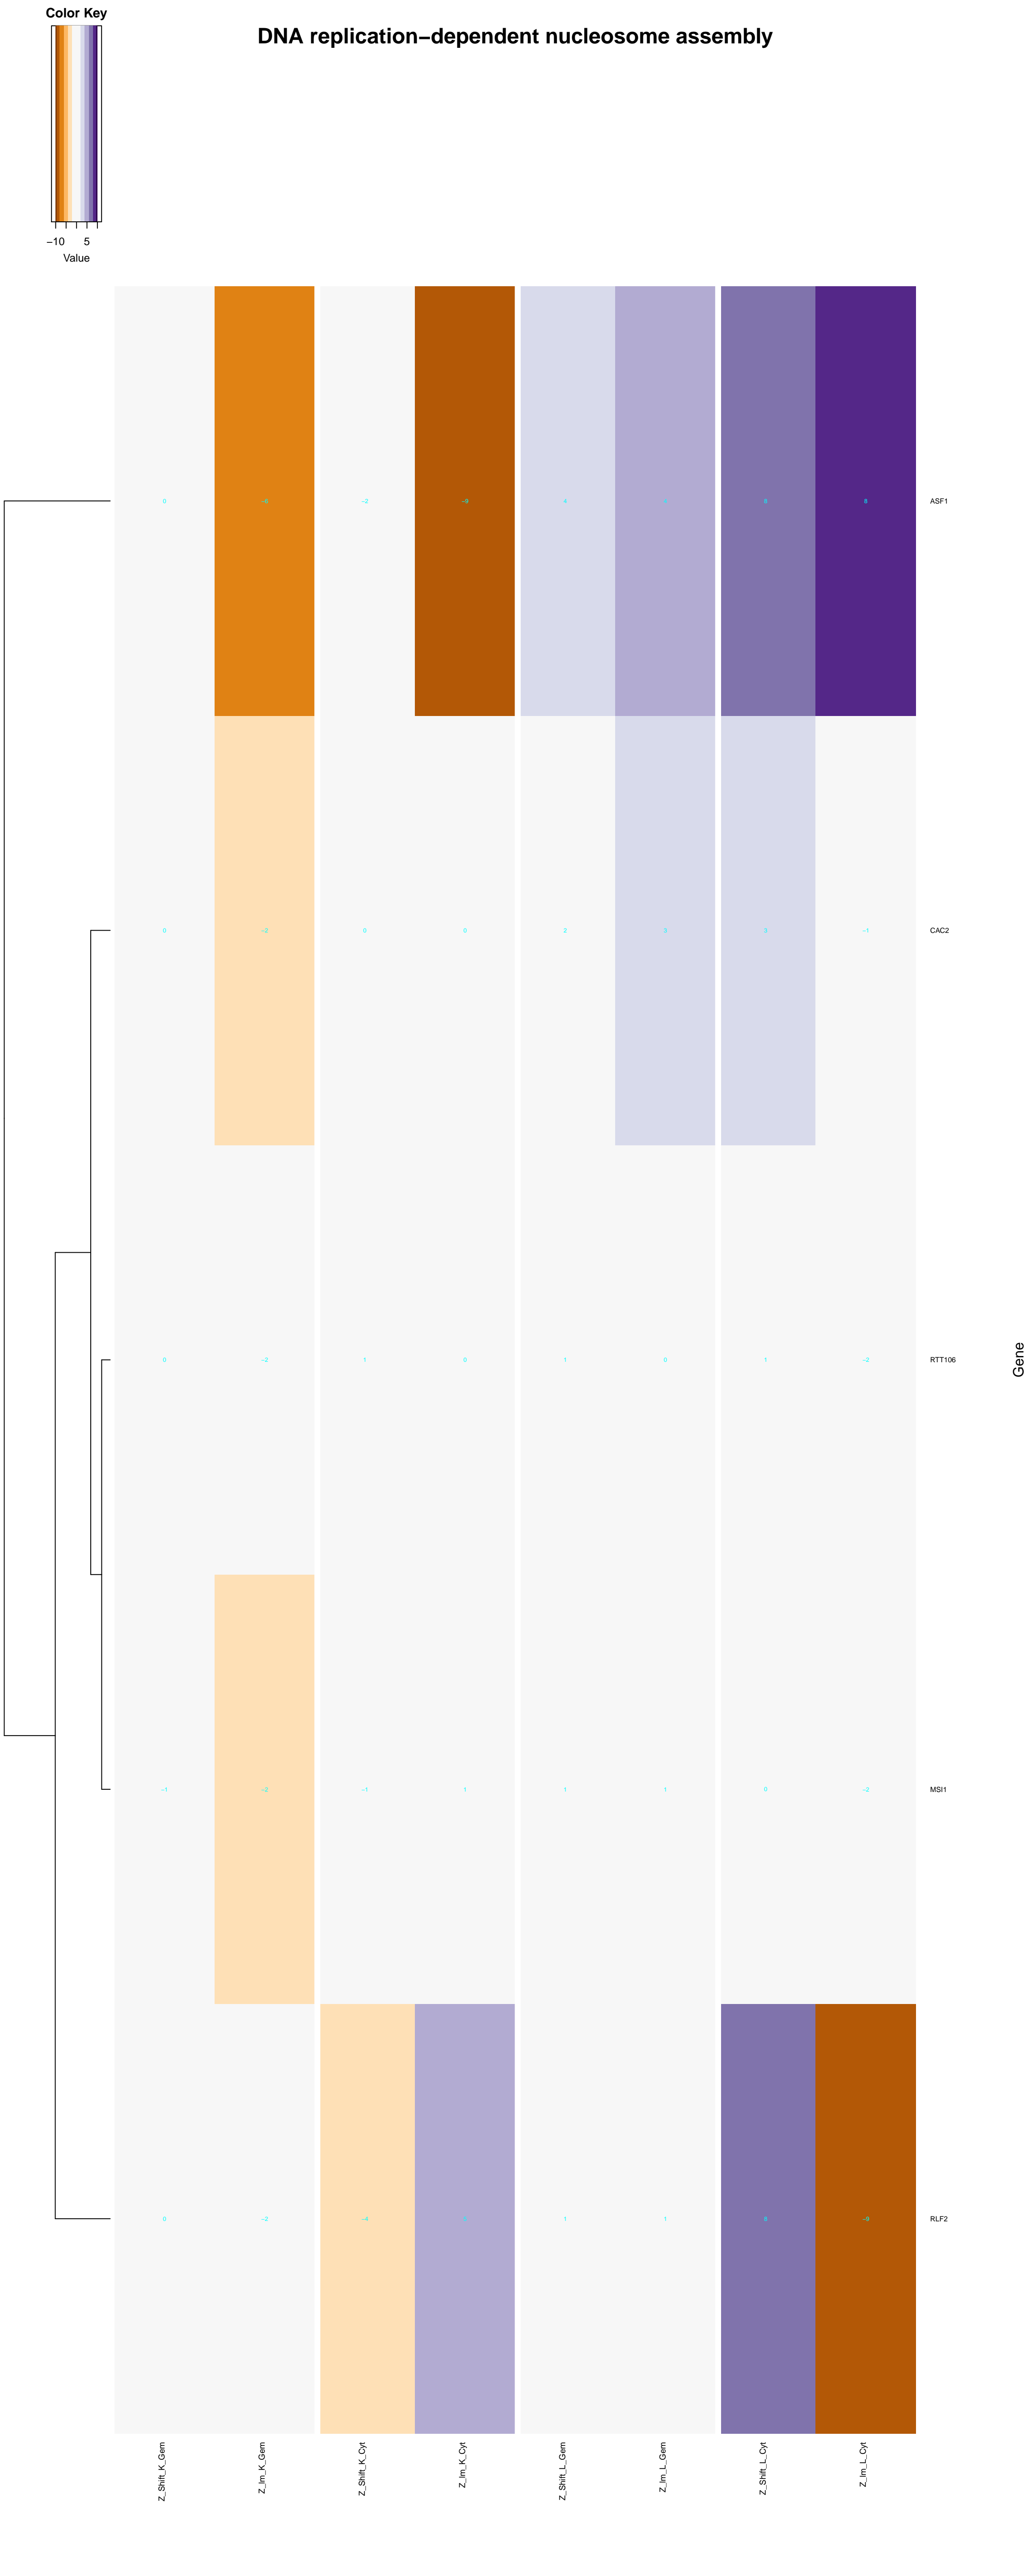

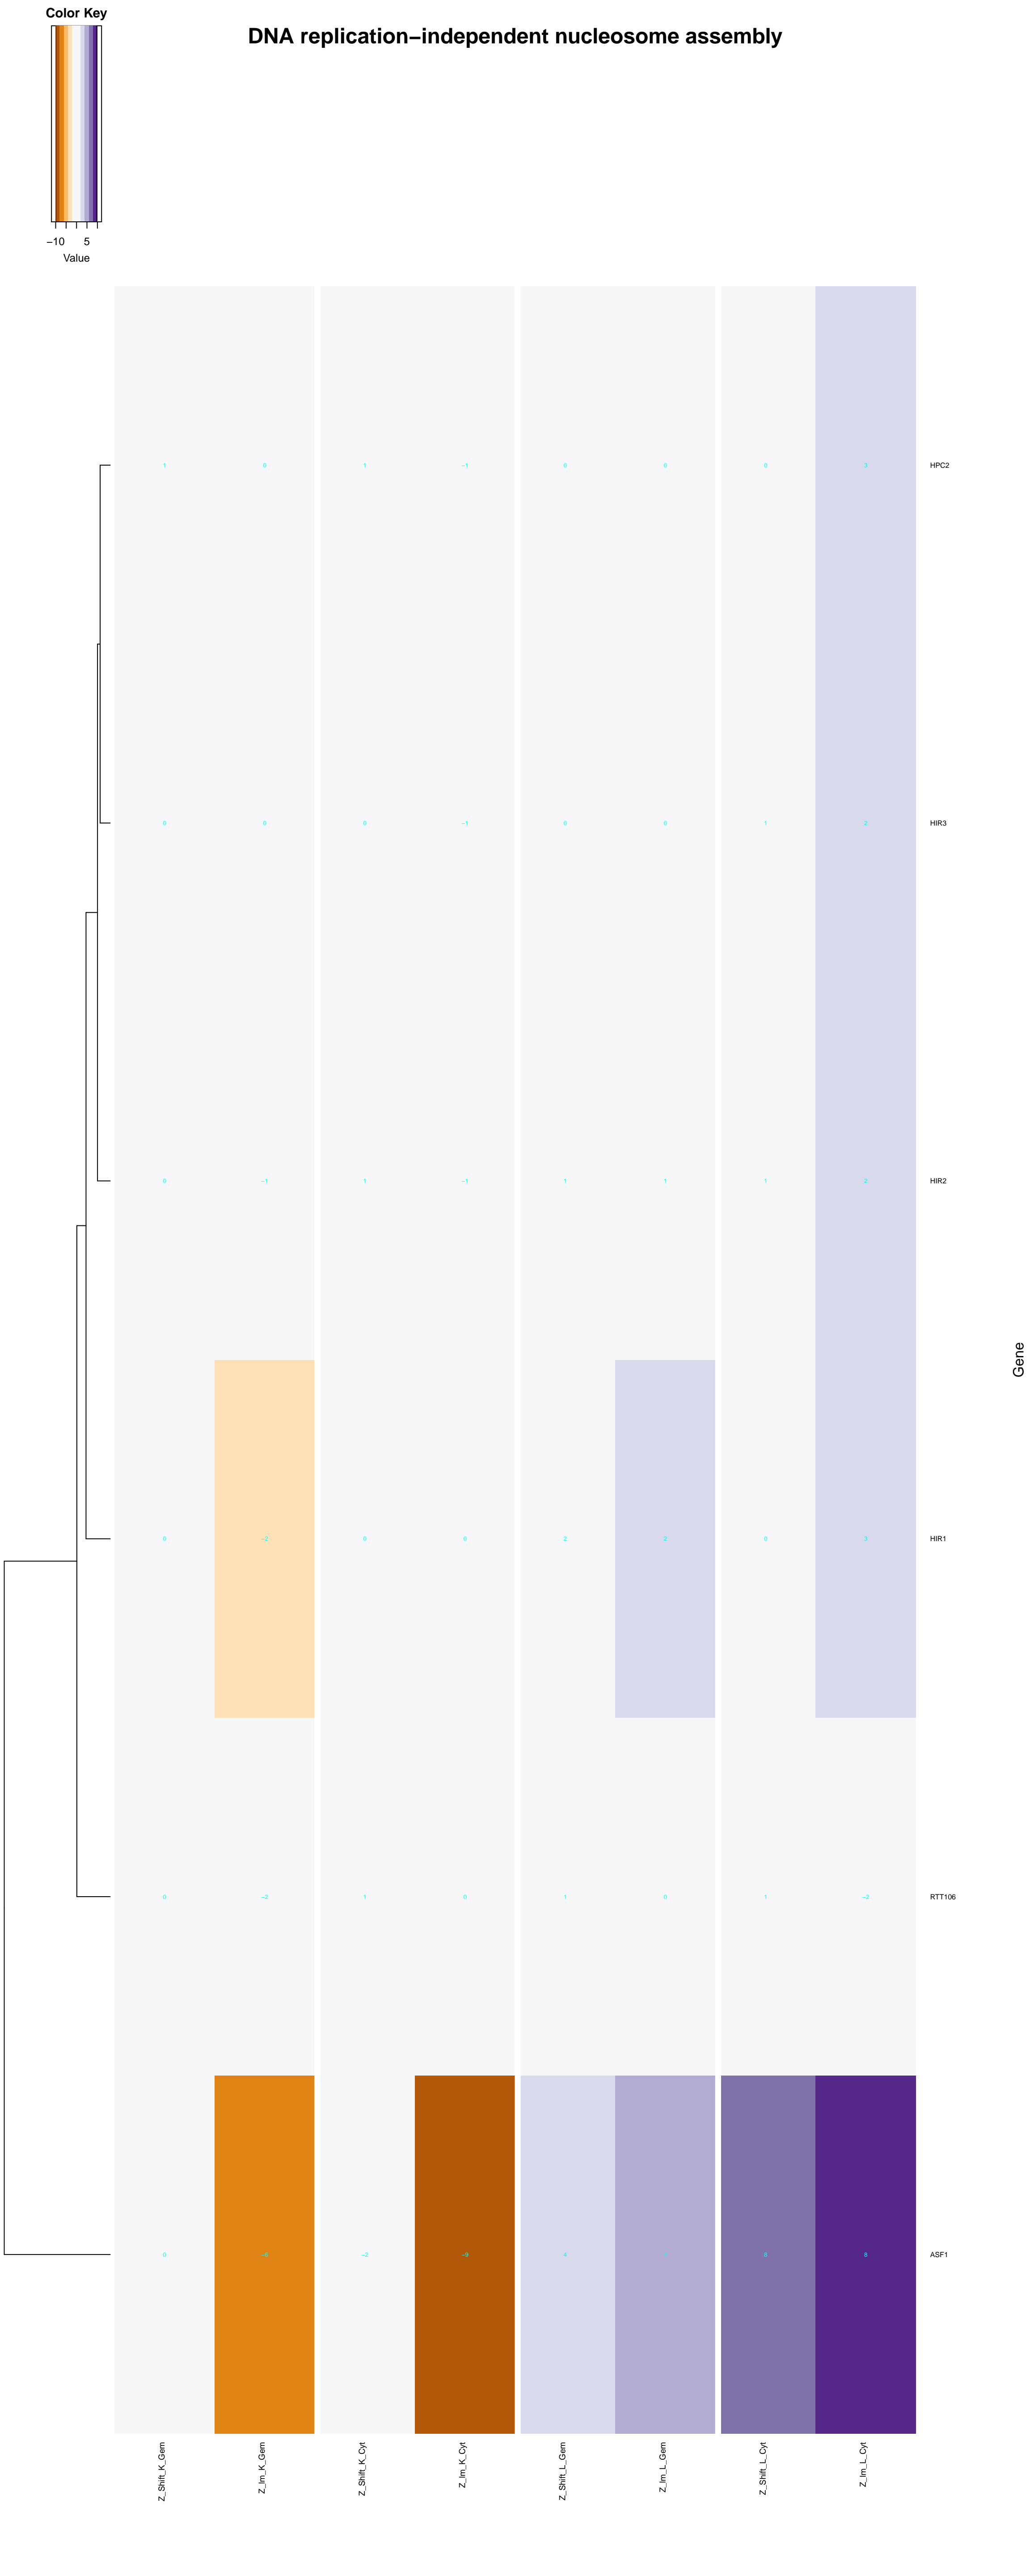

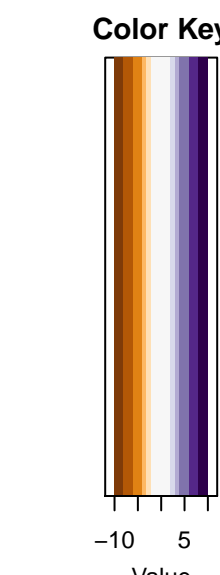

heterochromatin assembly involved in chromatin silencing

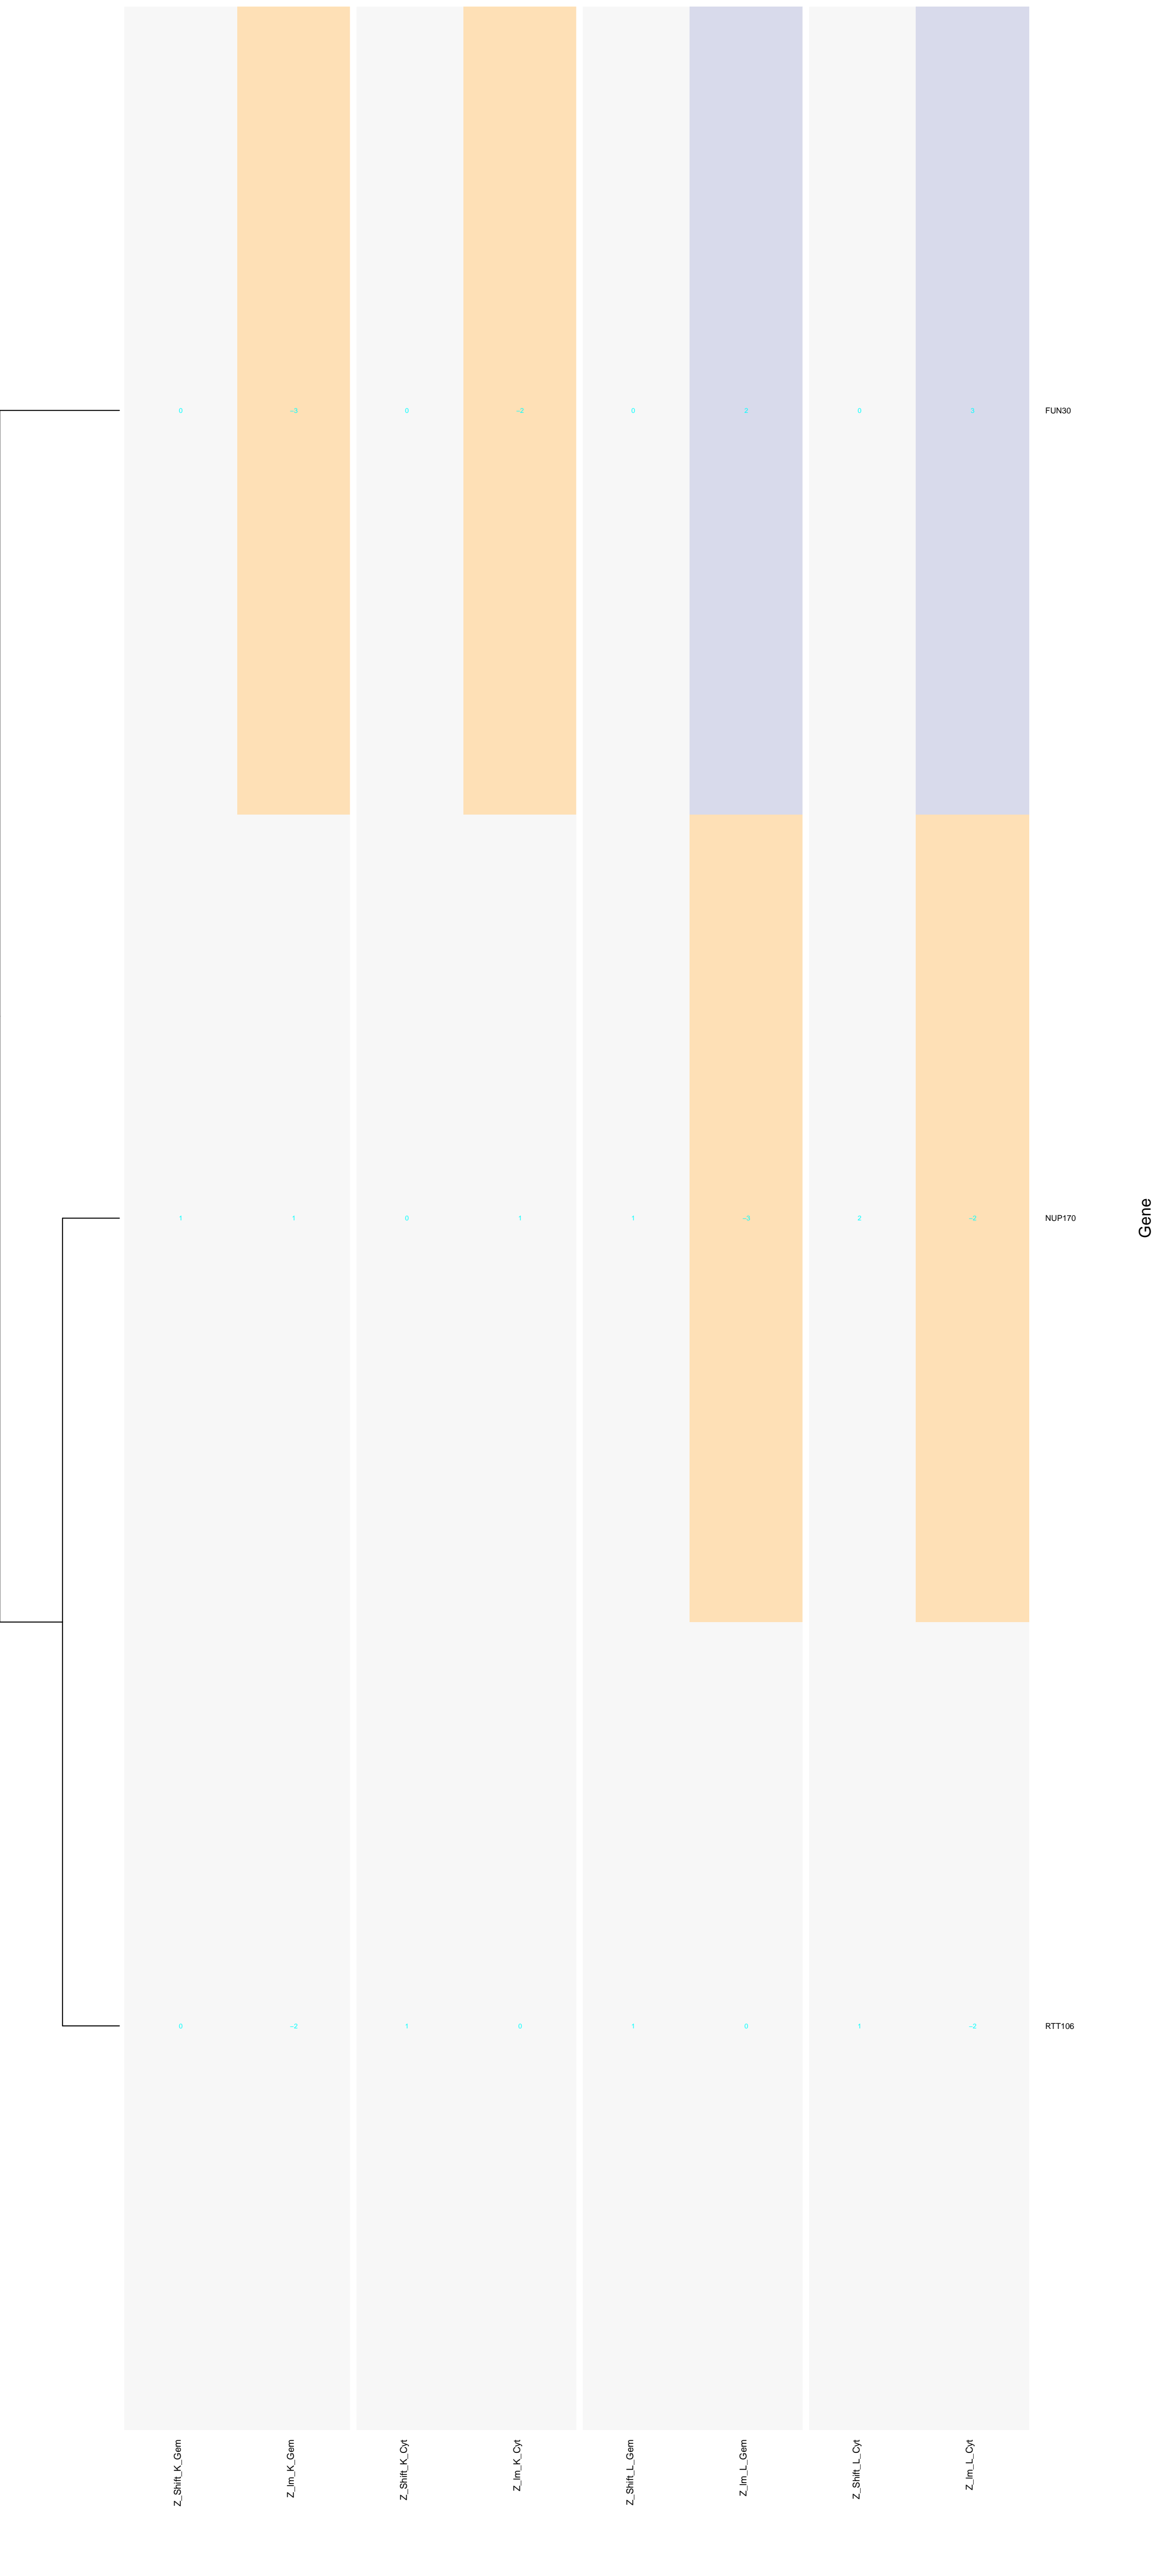

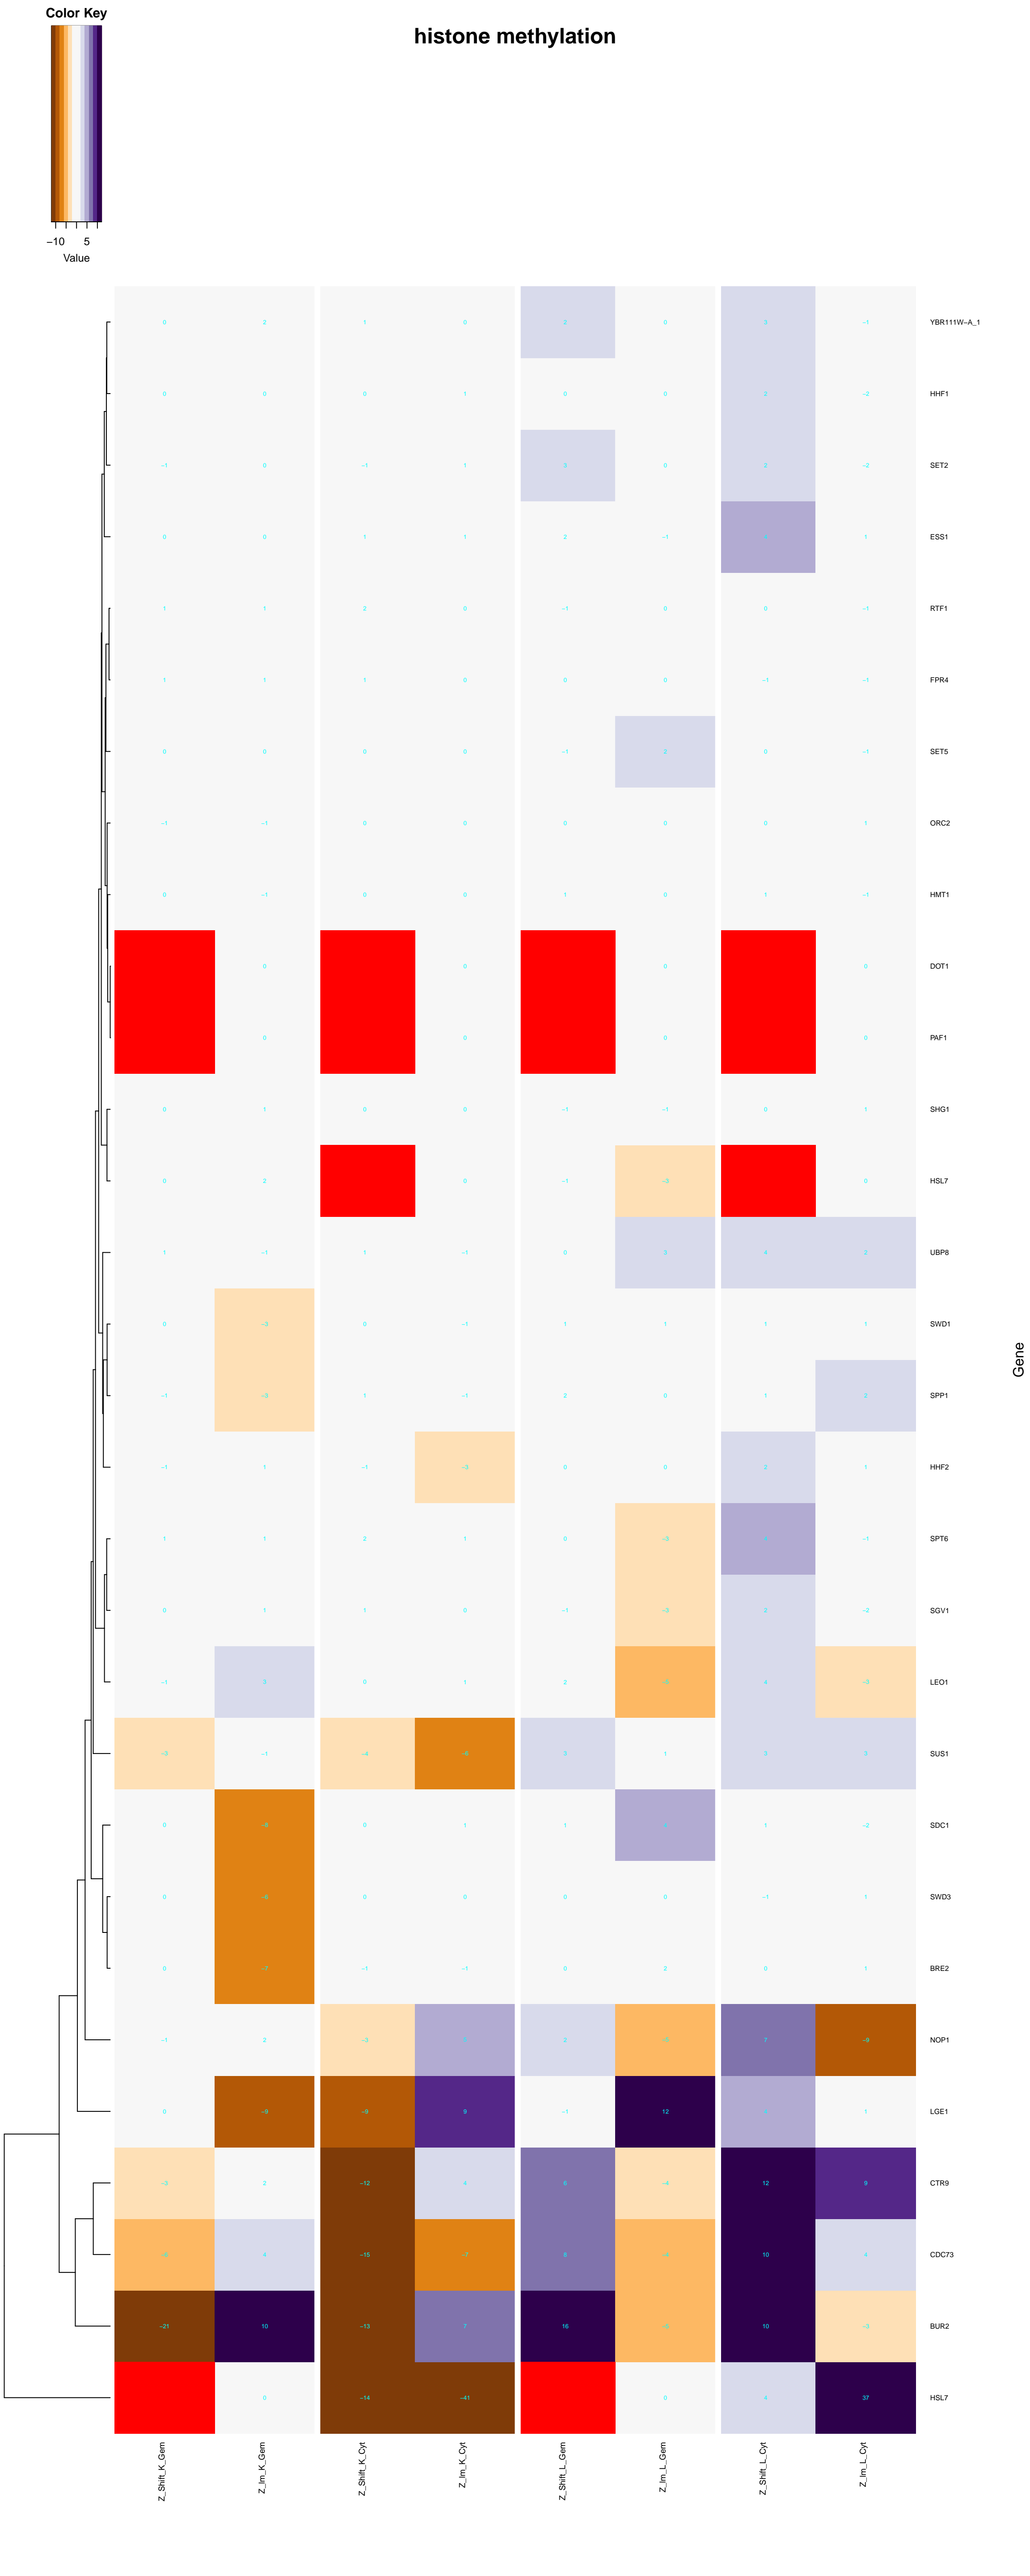

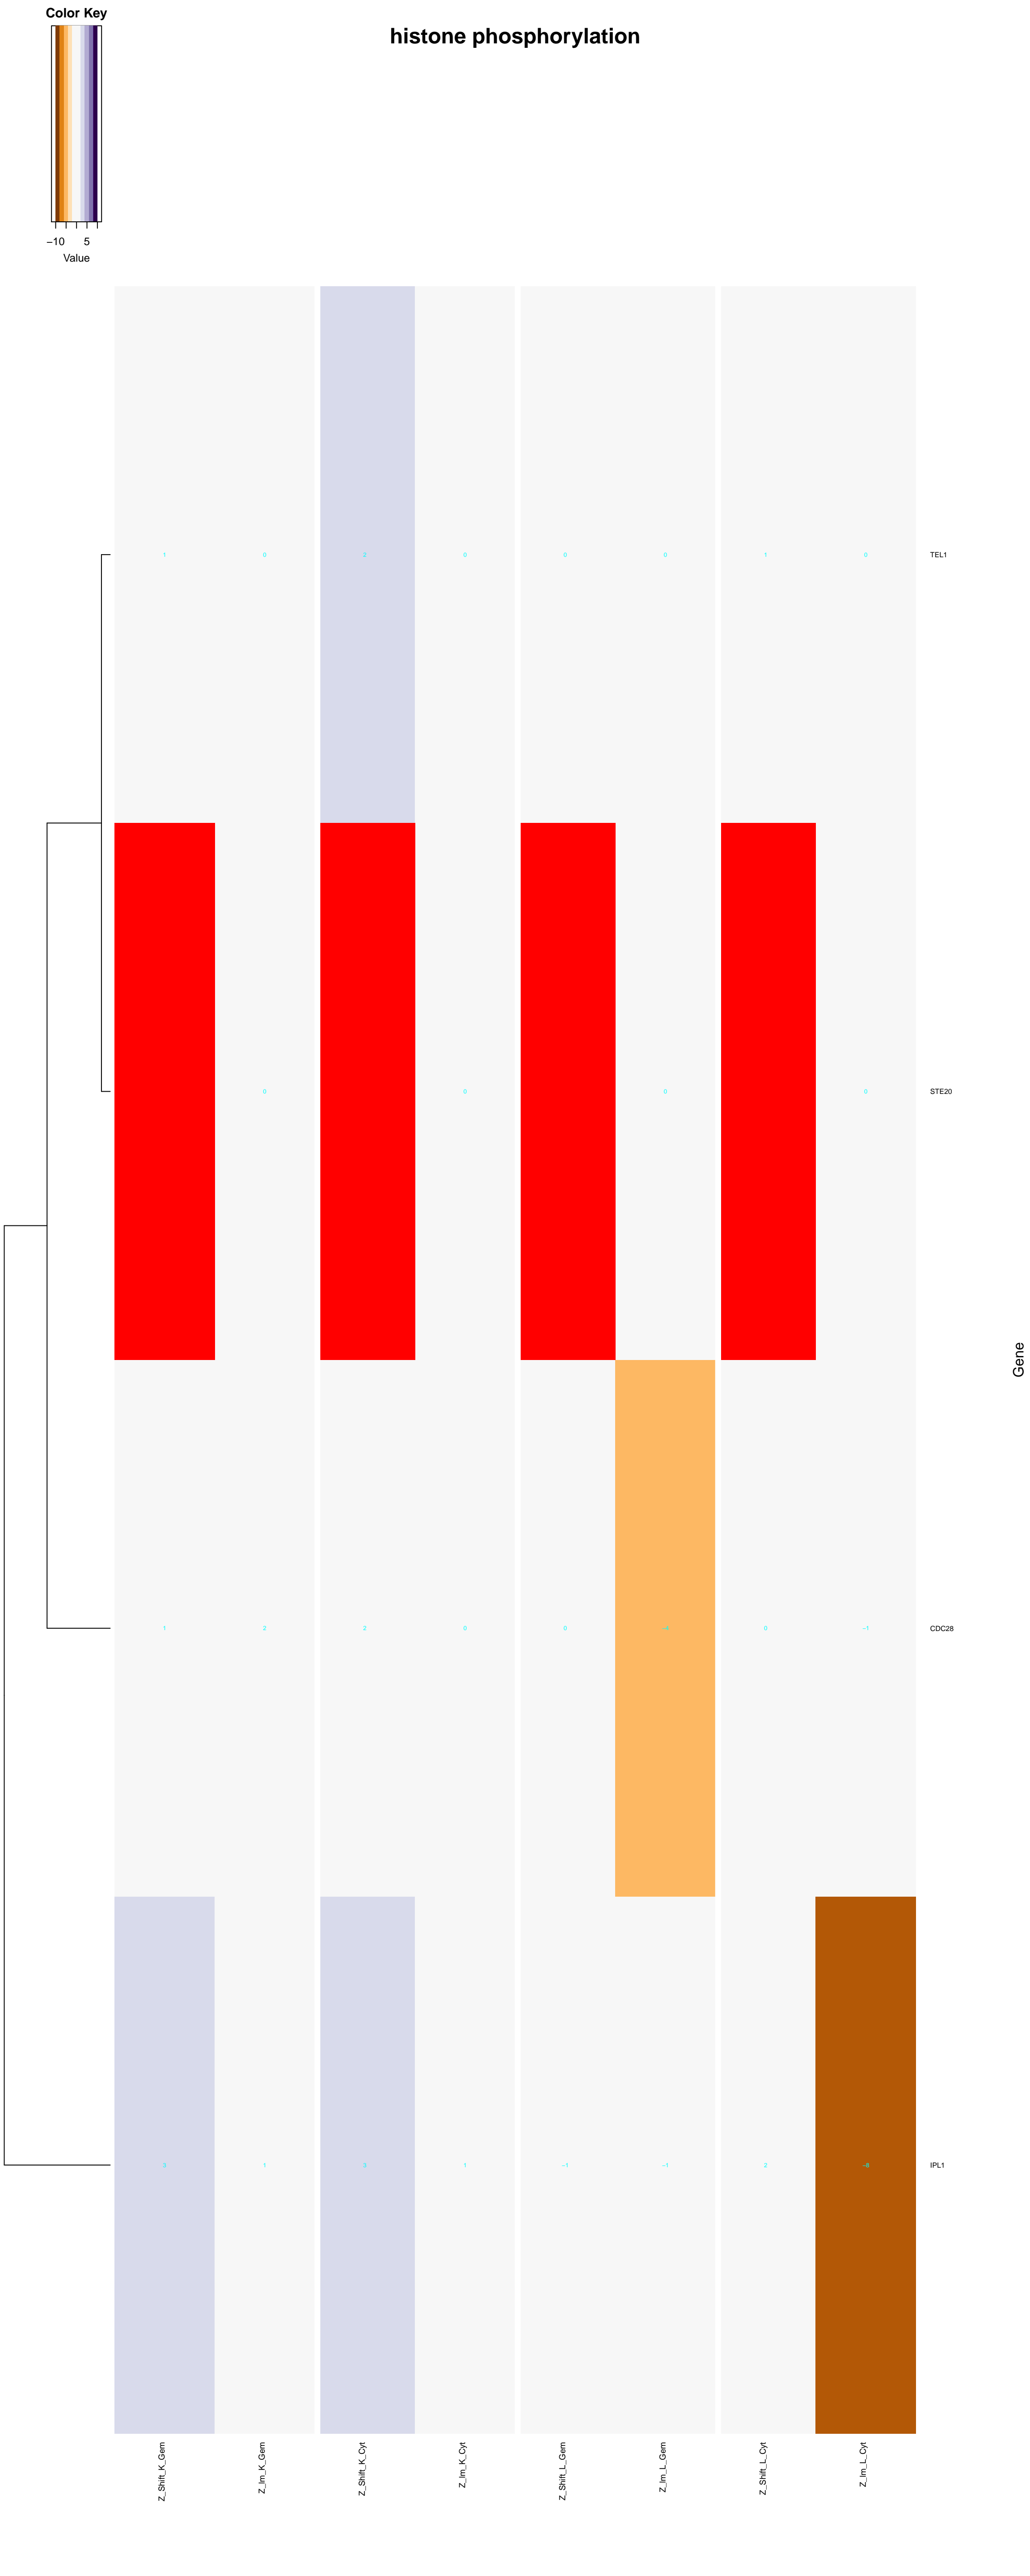

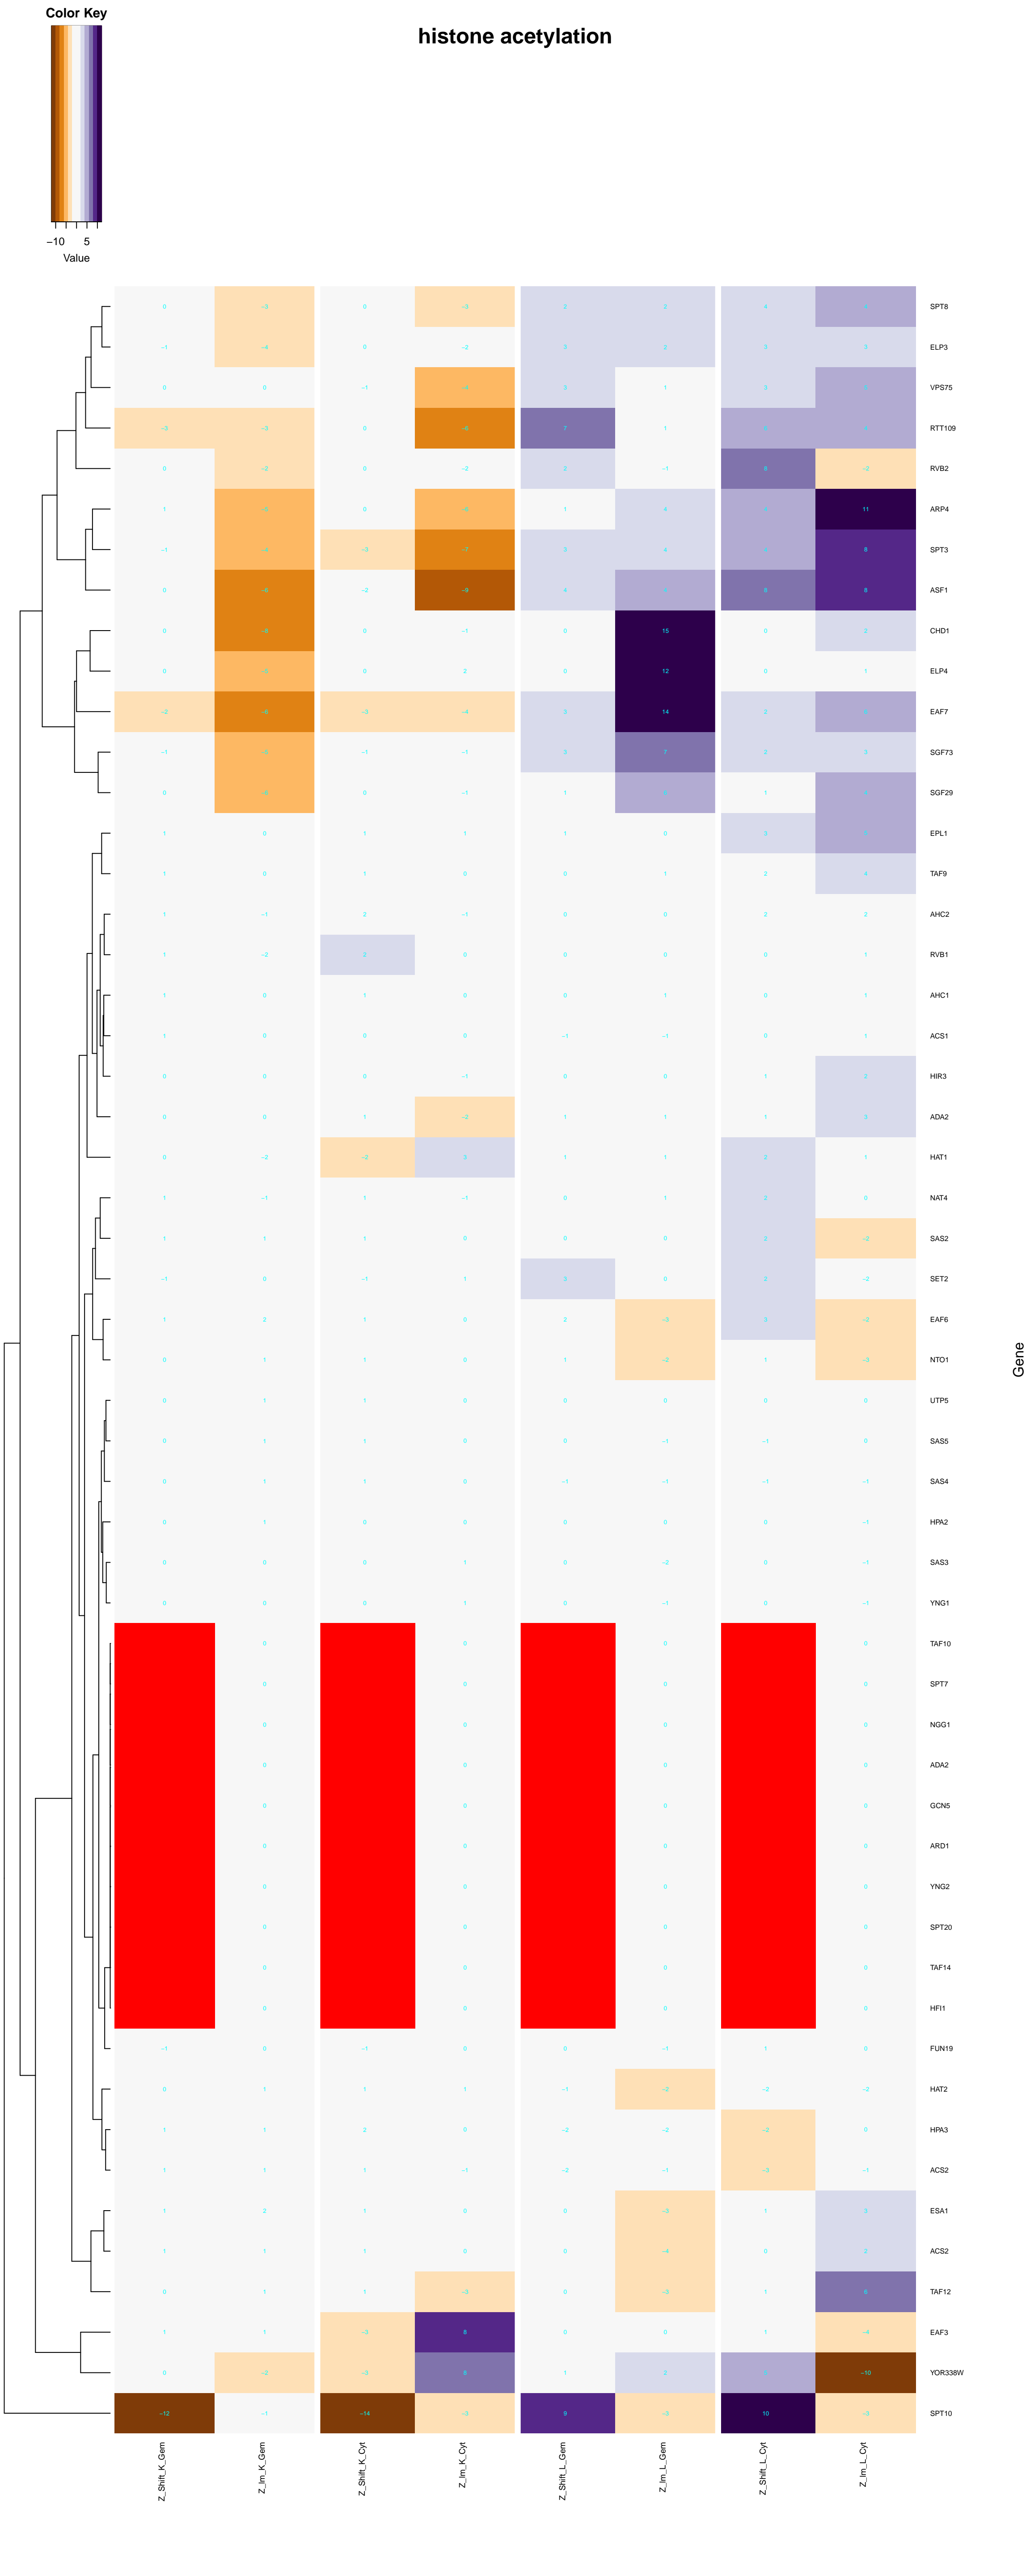



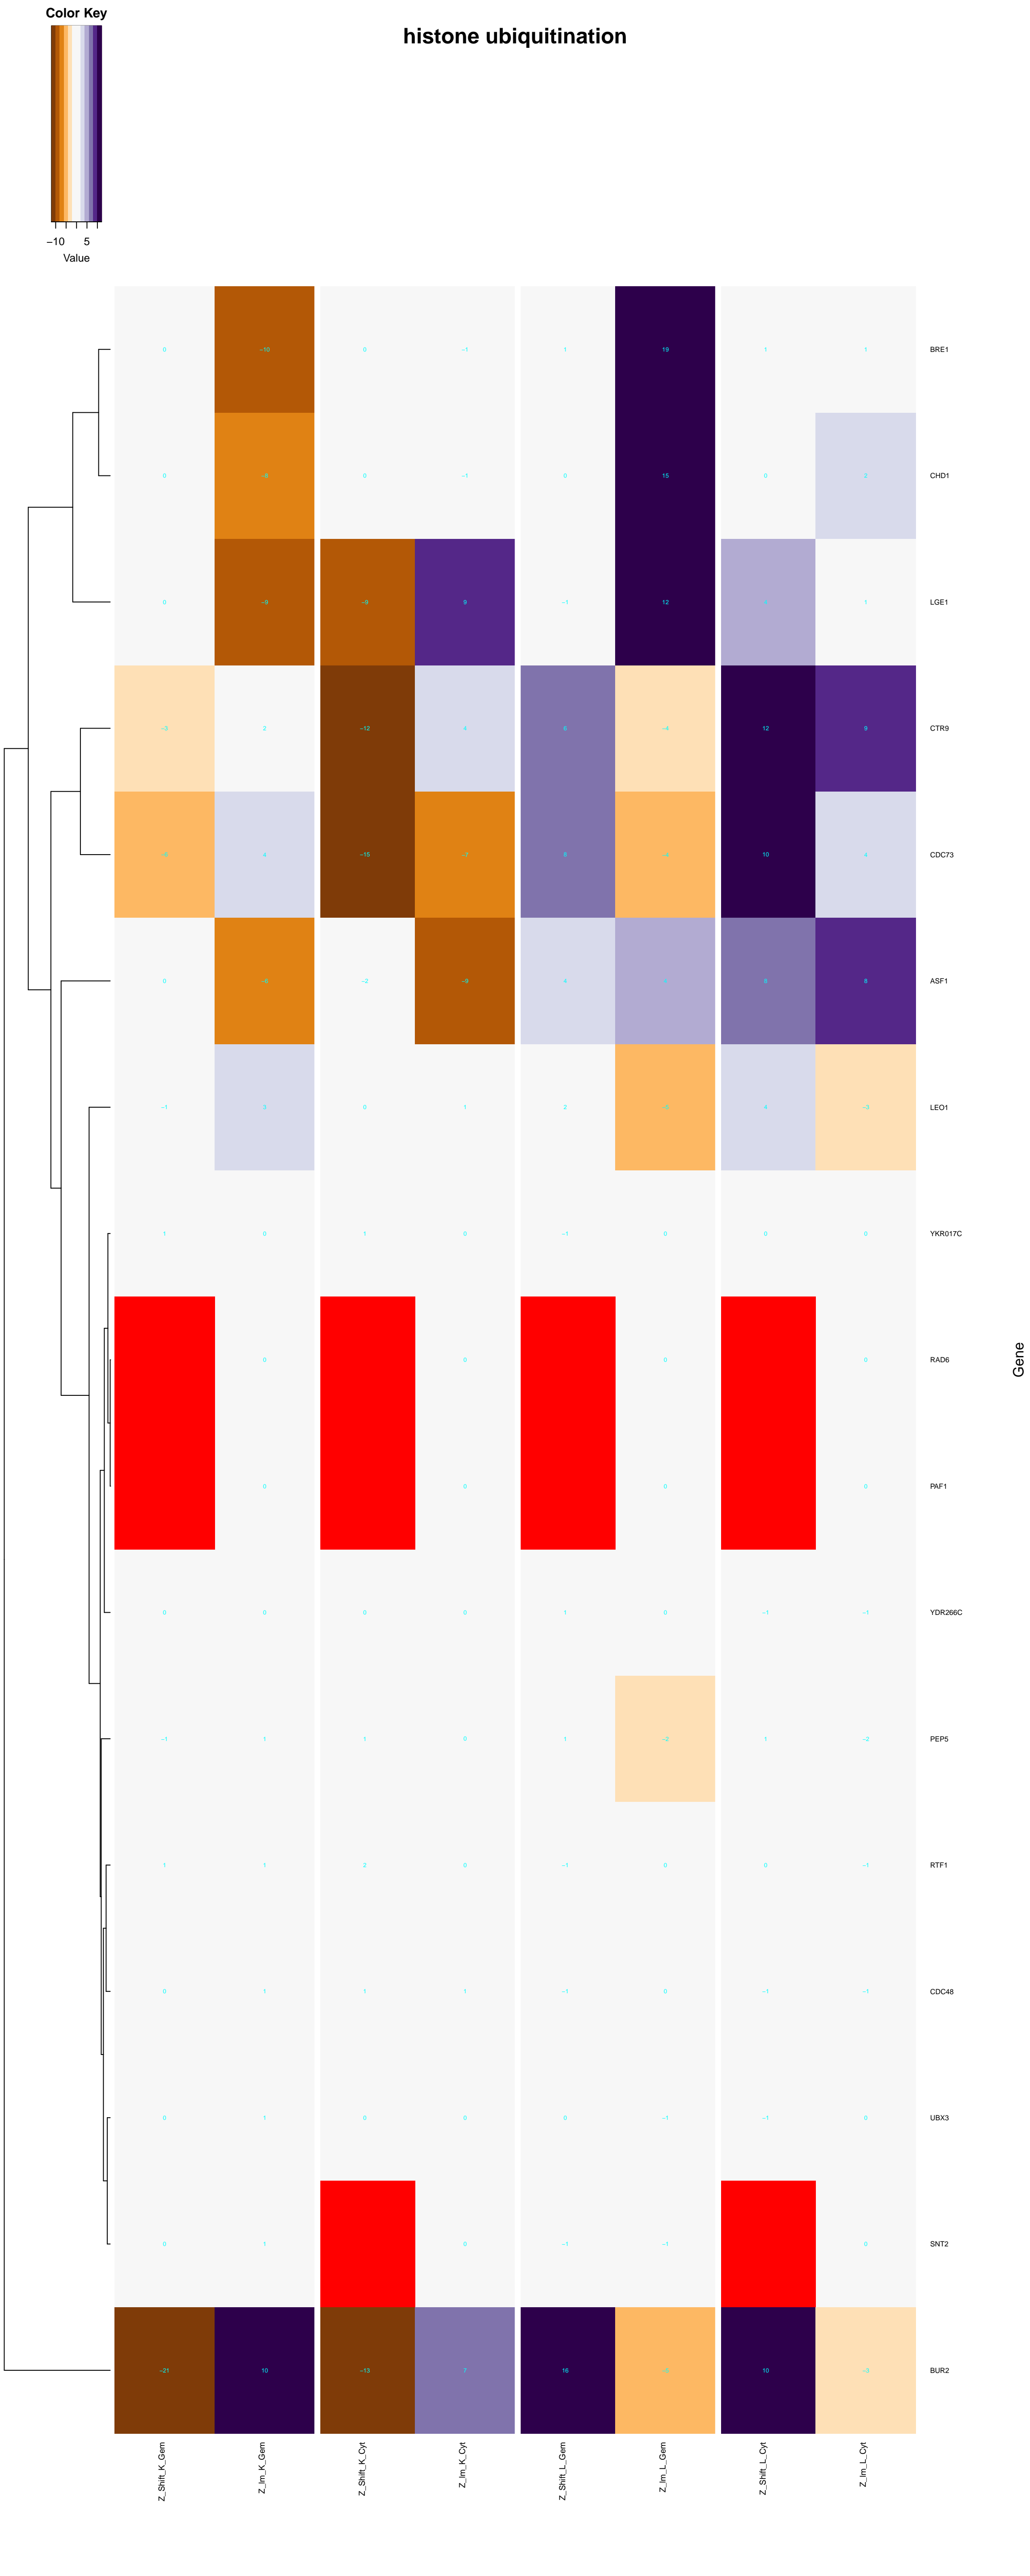

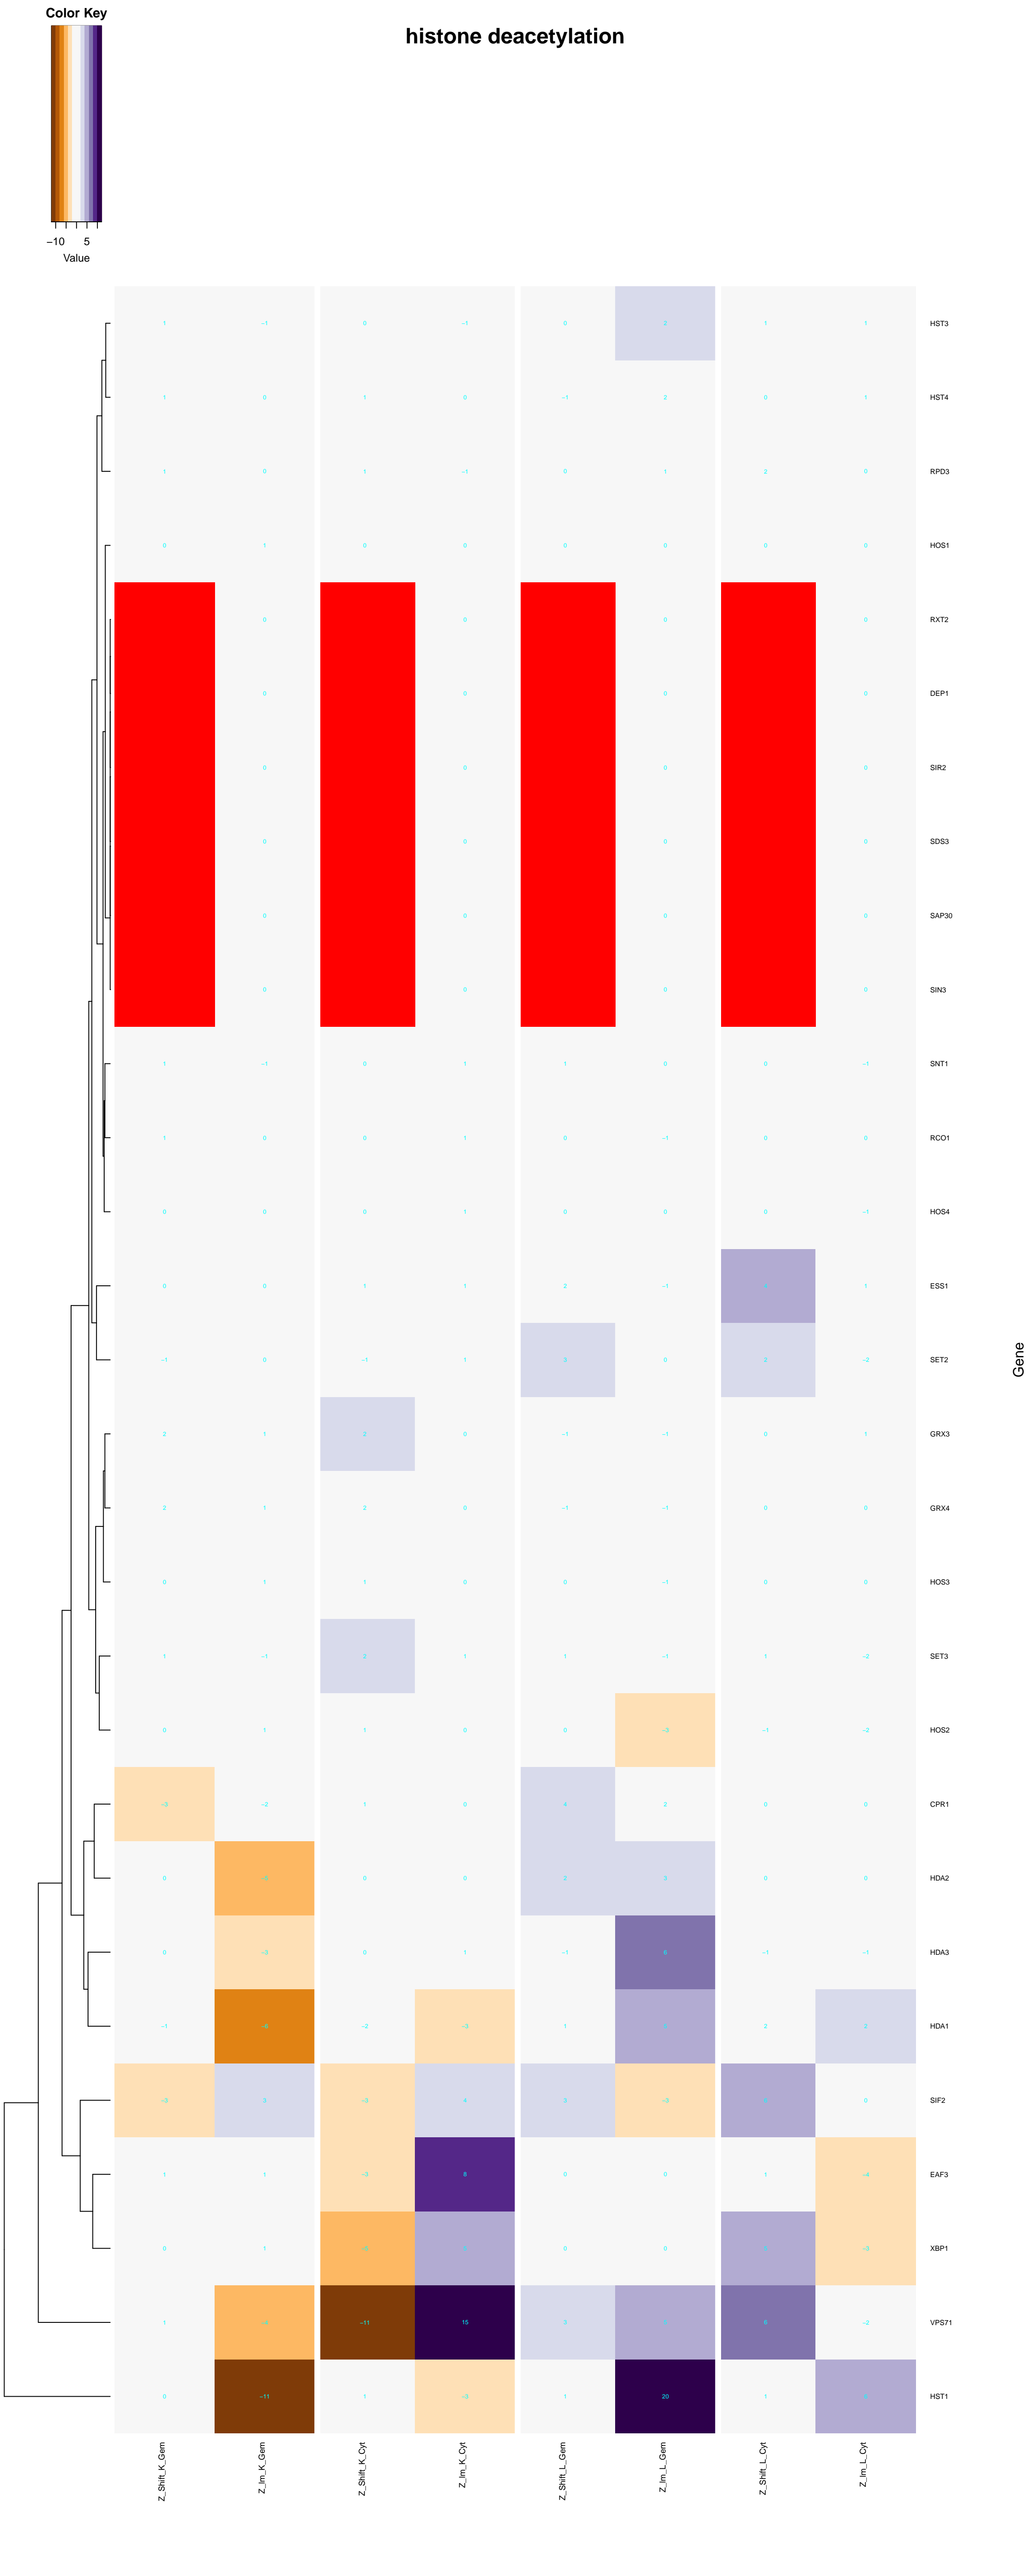

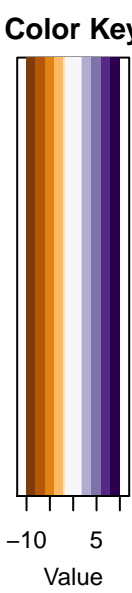

histone demethylation

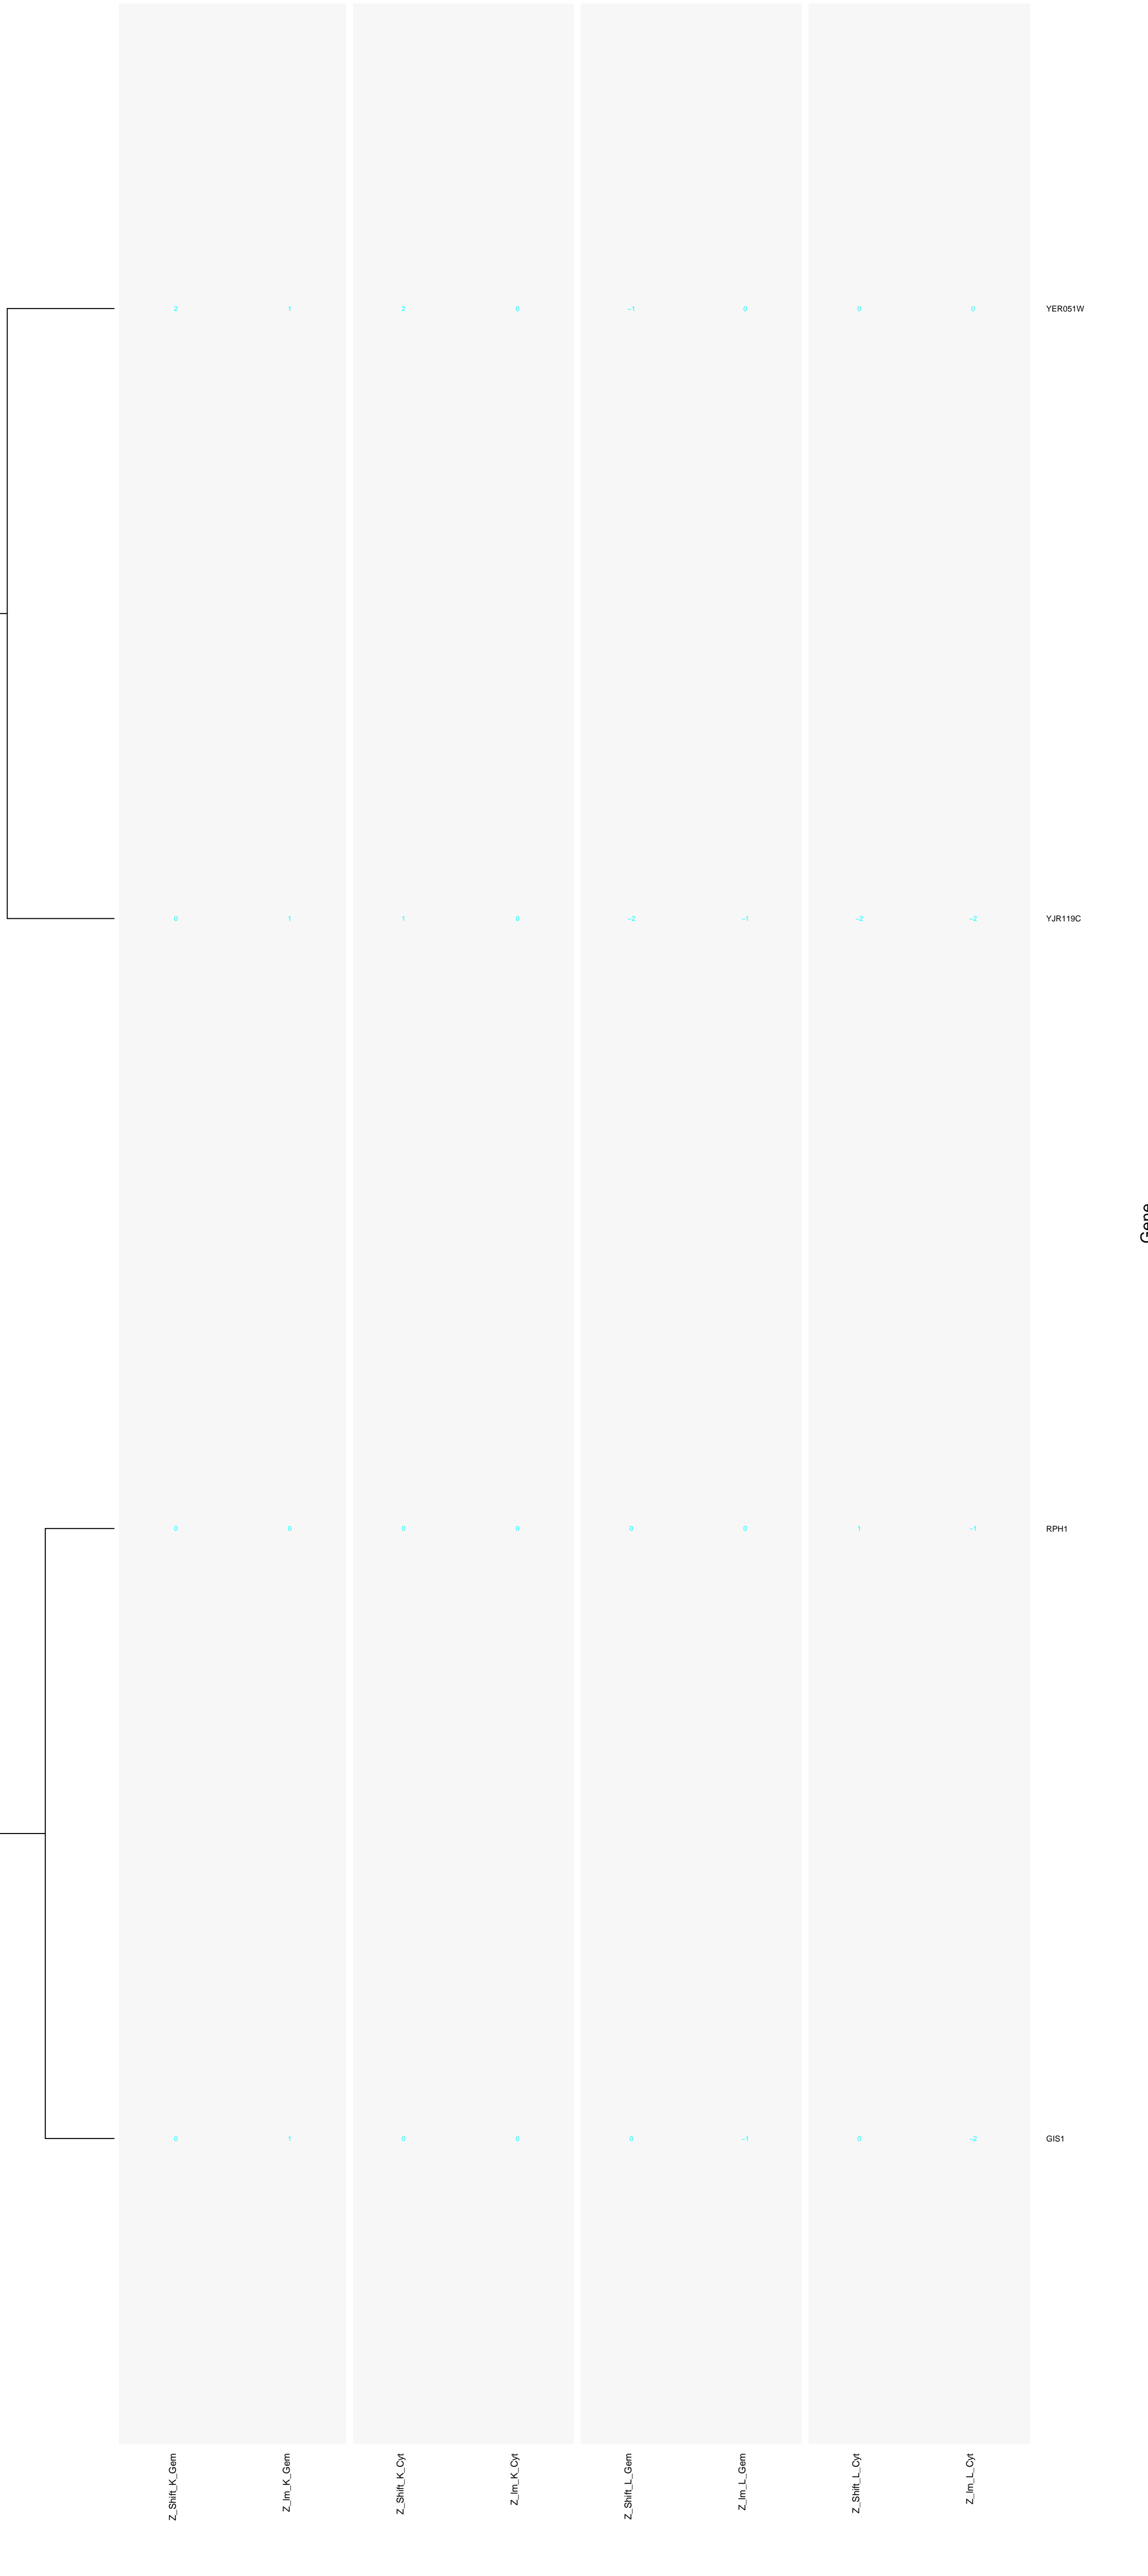

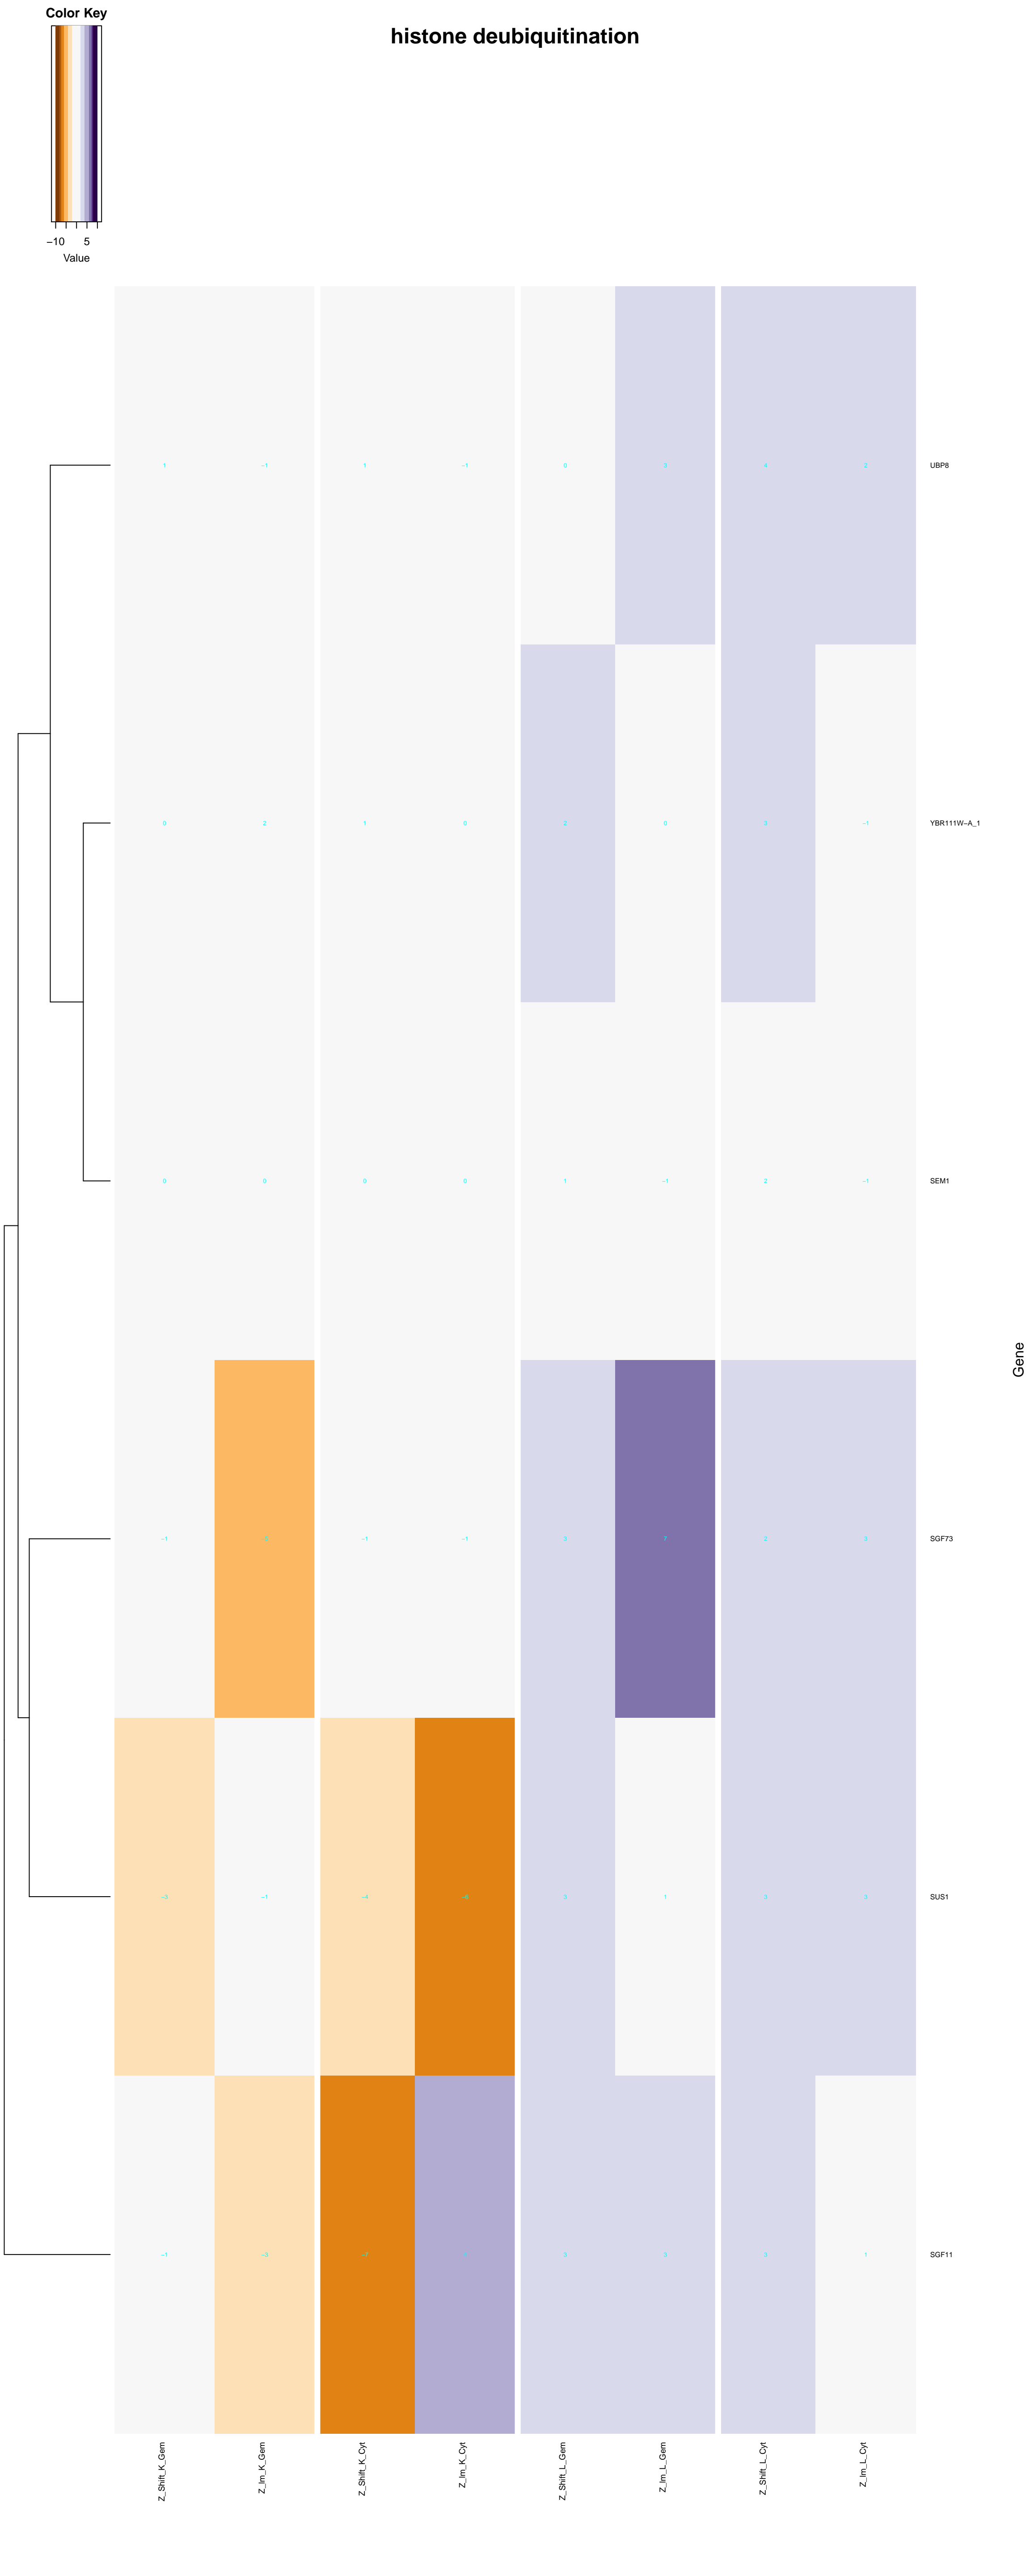

## histone H3-K9 modification

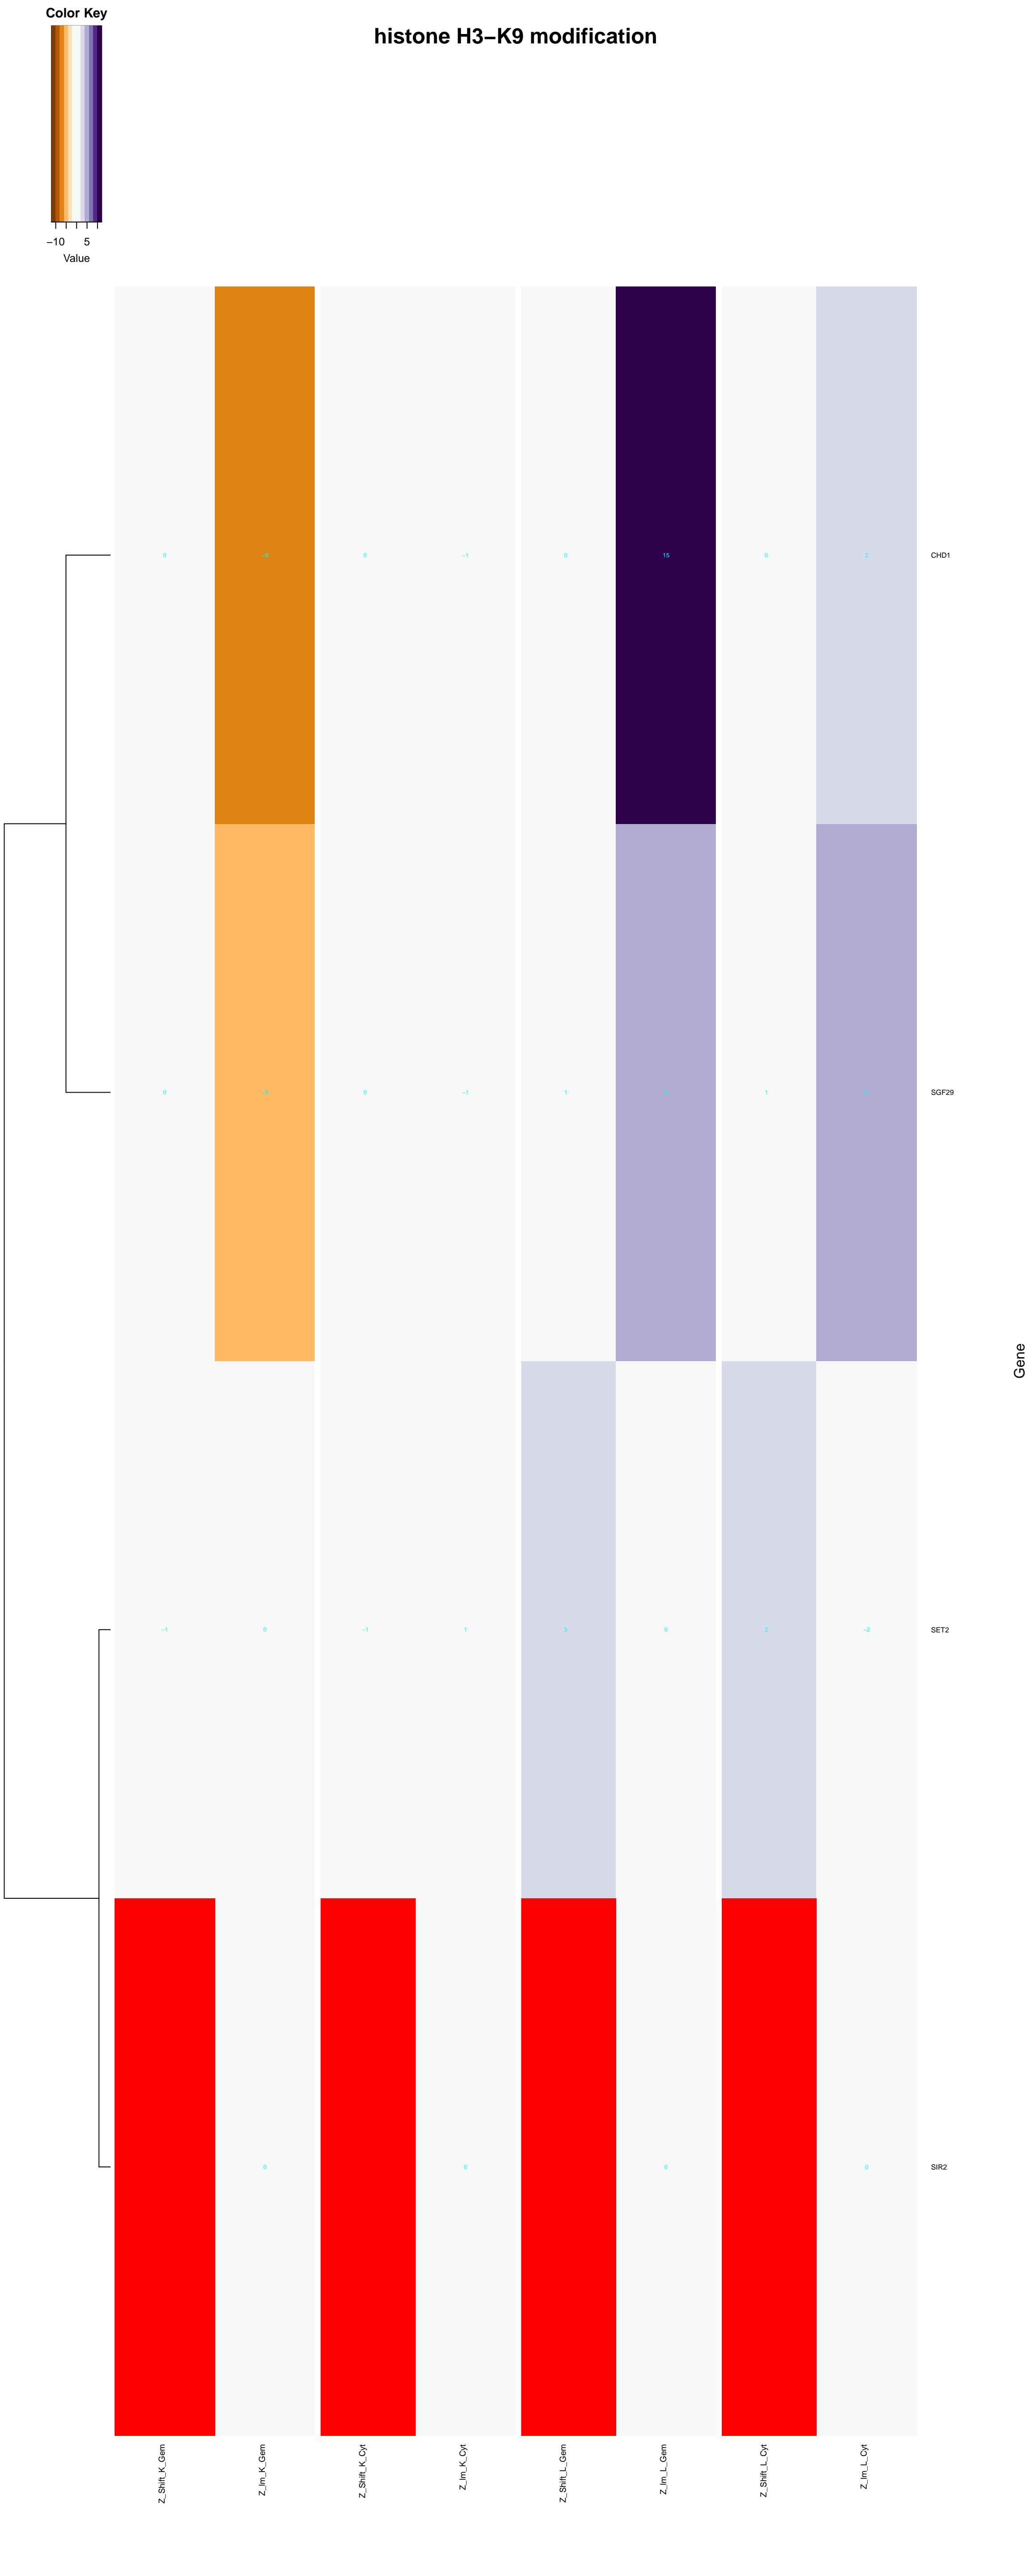

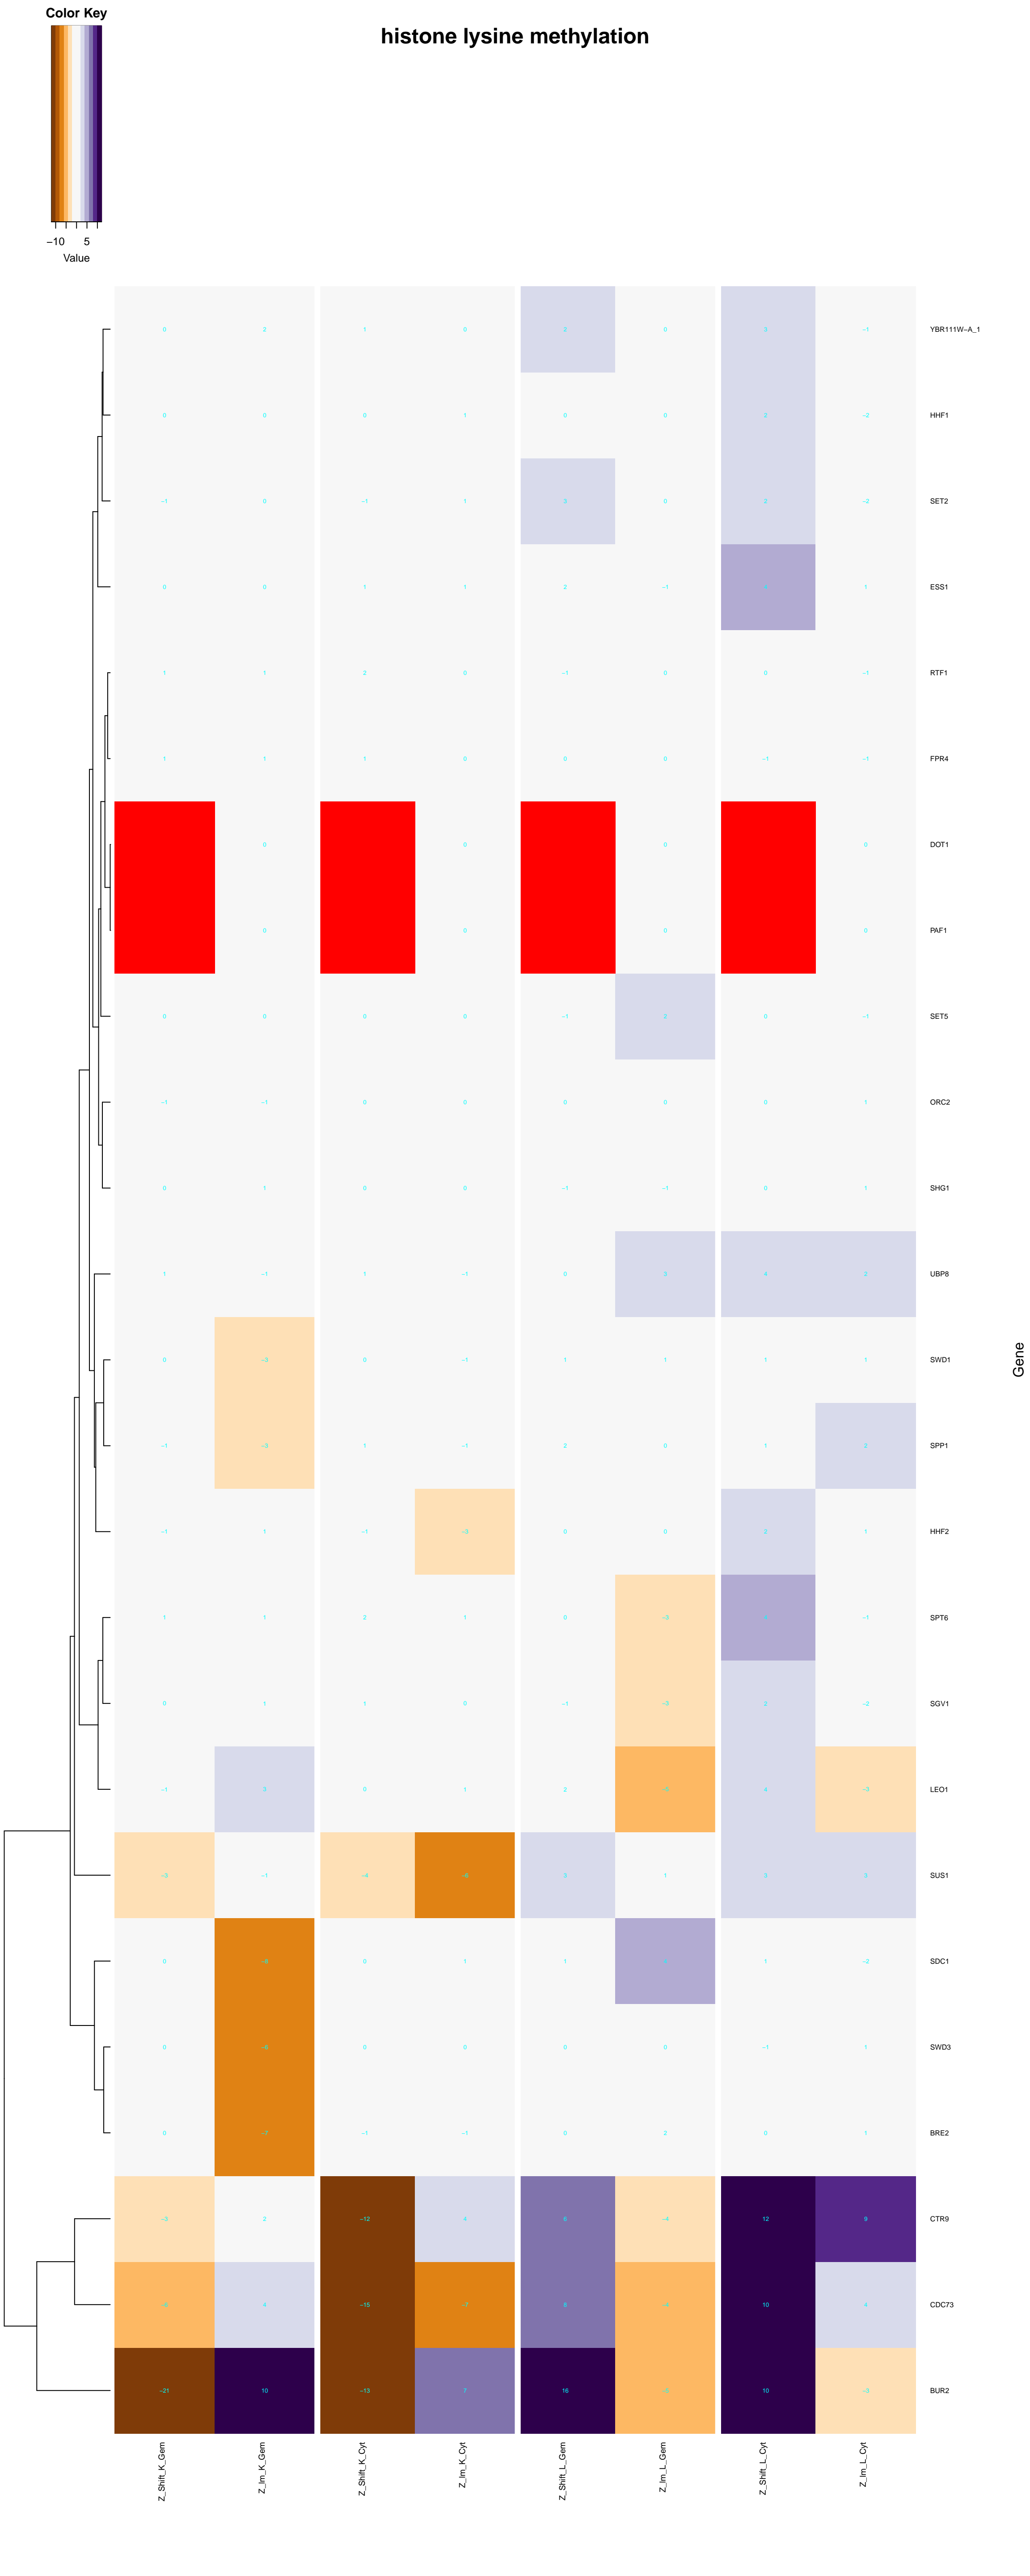



histone arginine methylation

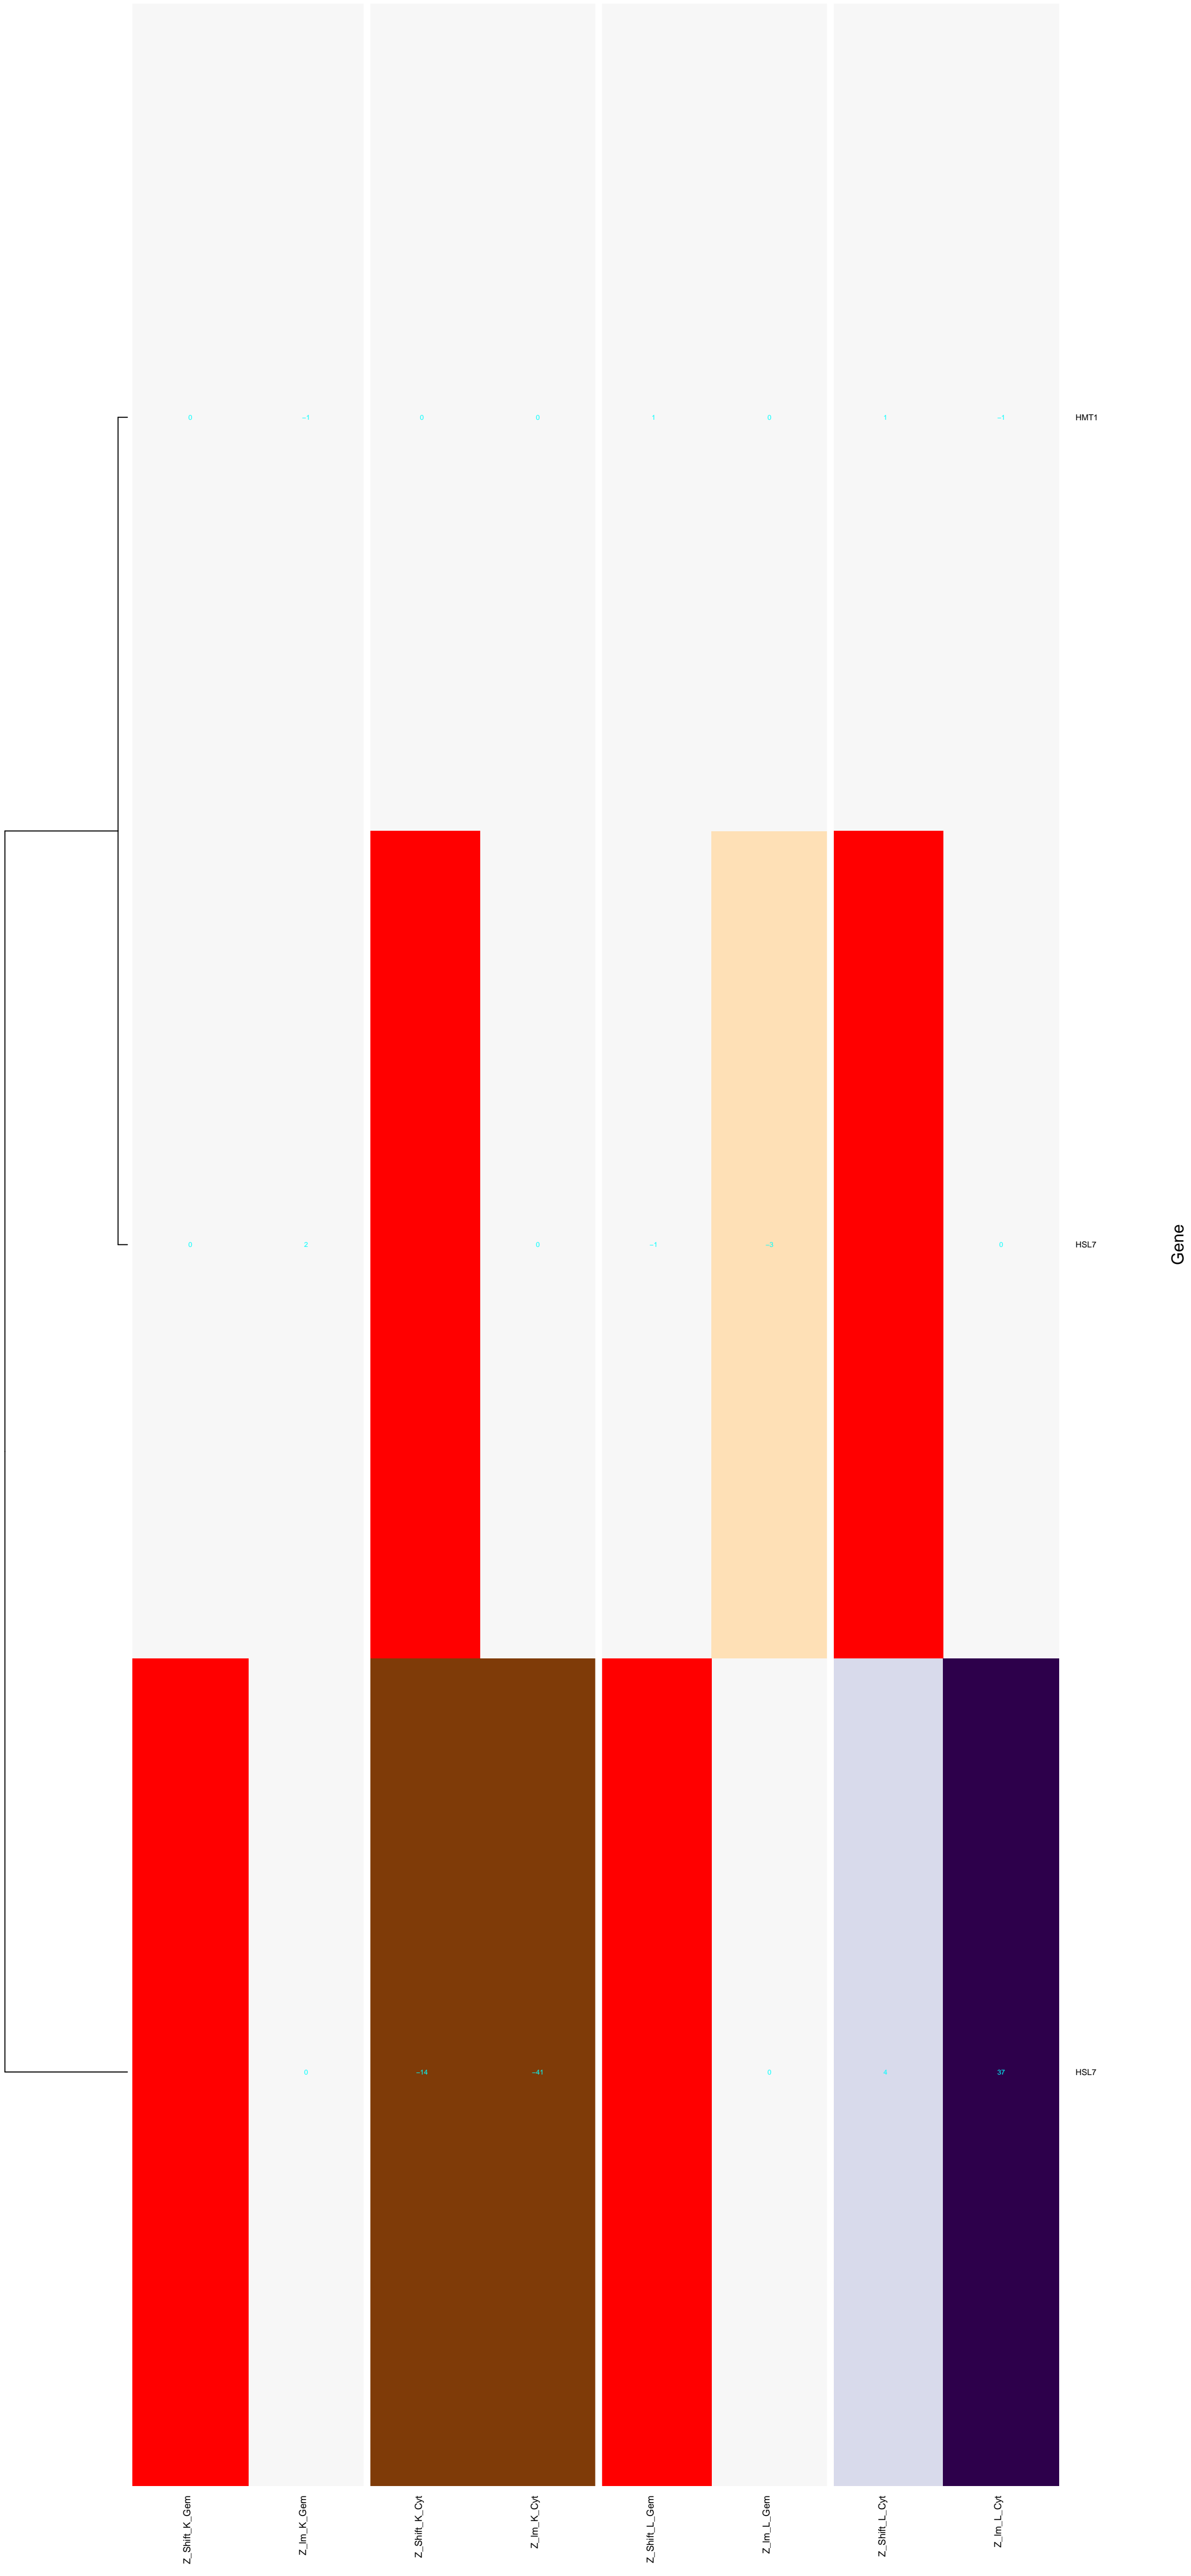

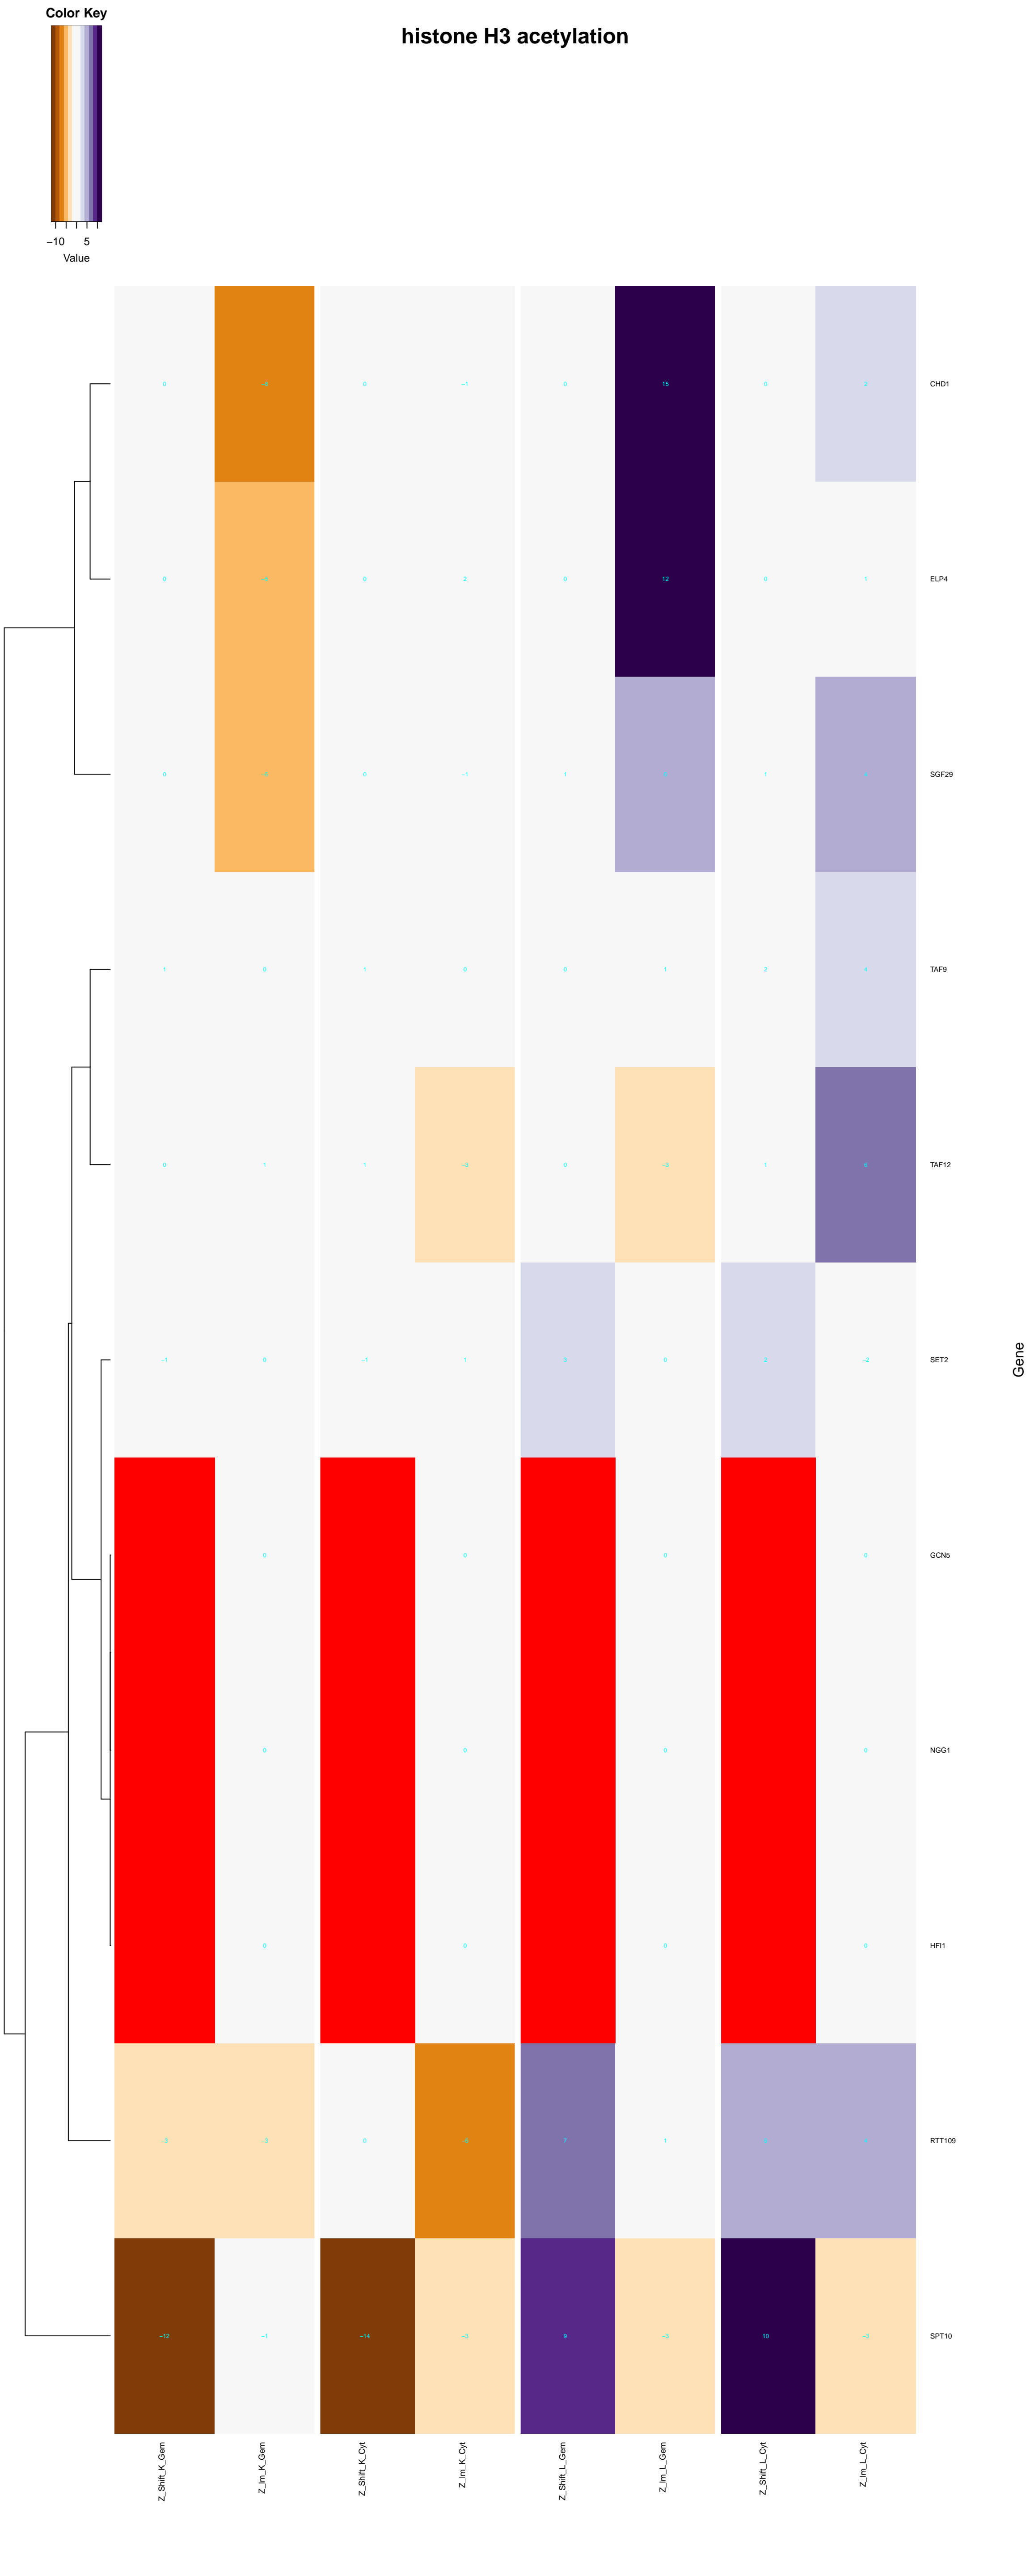



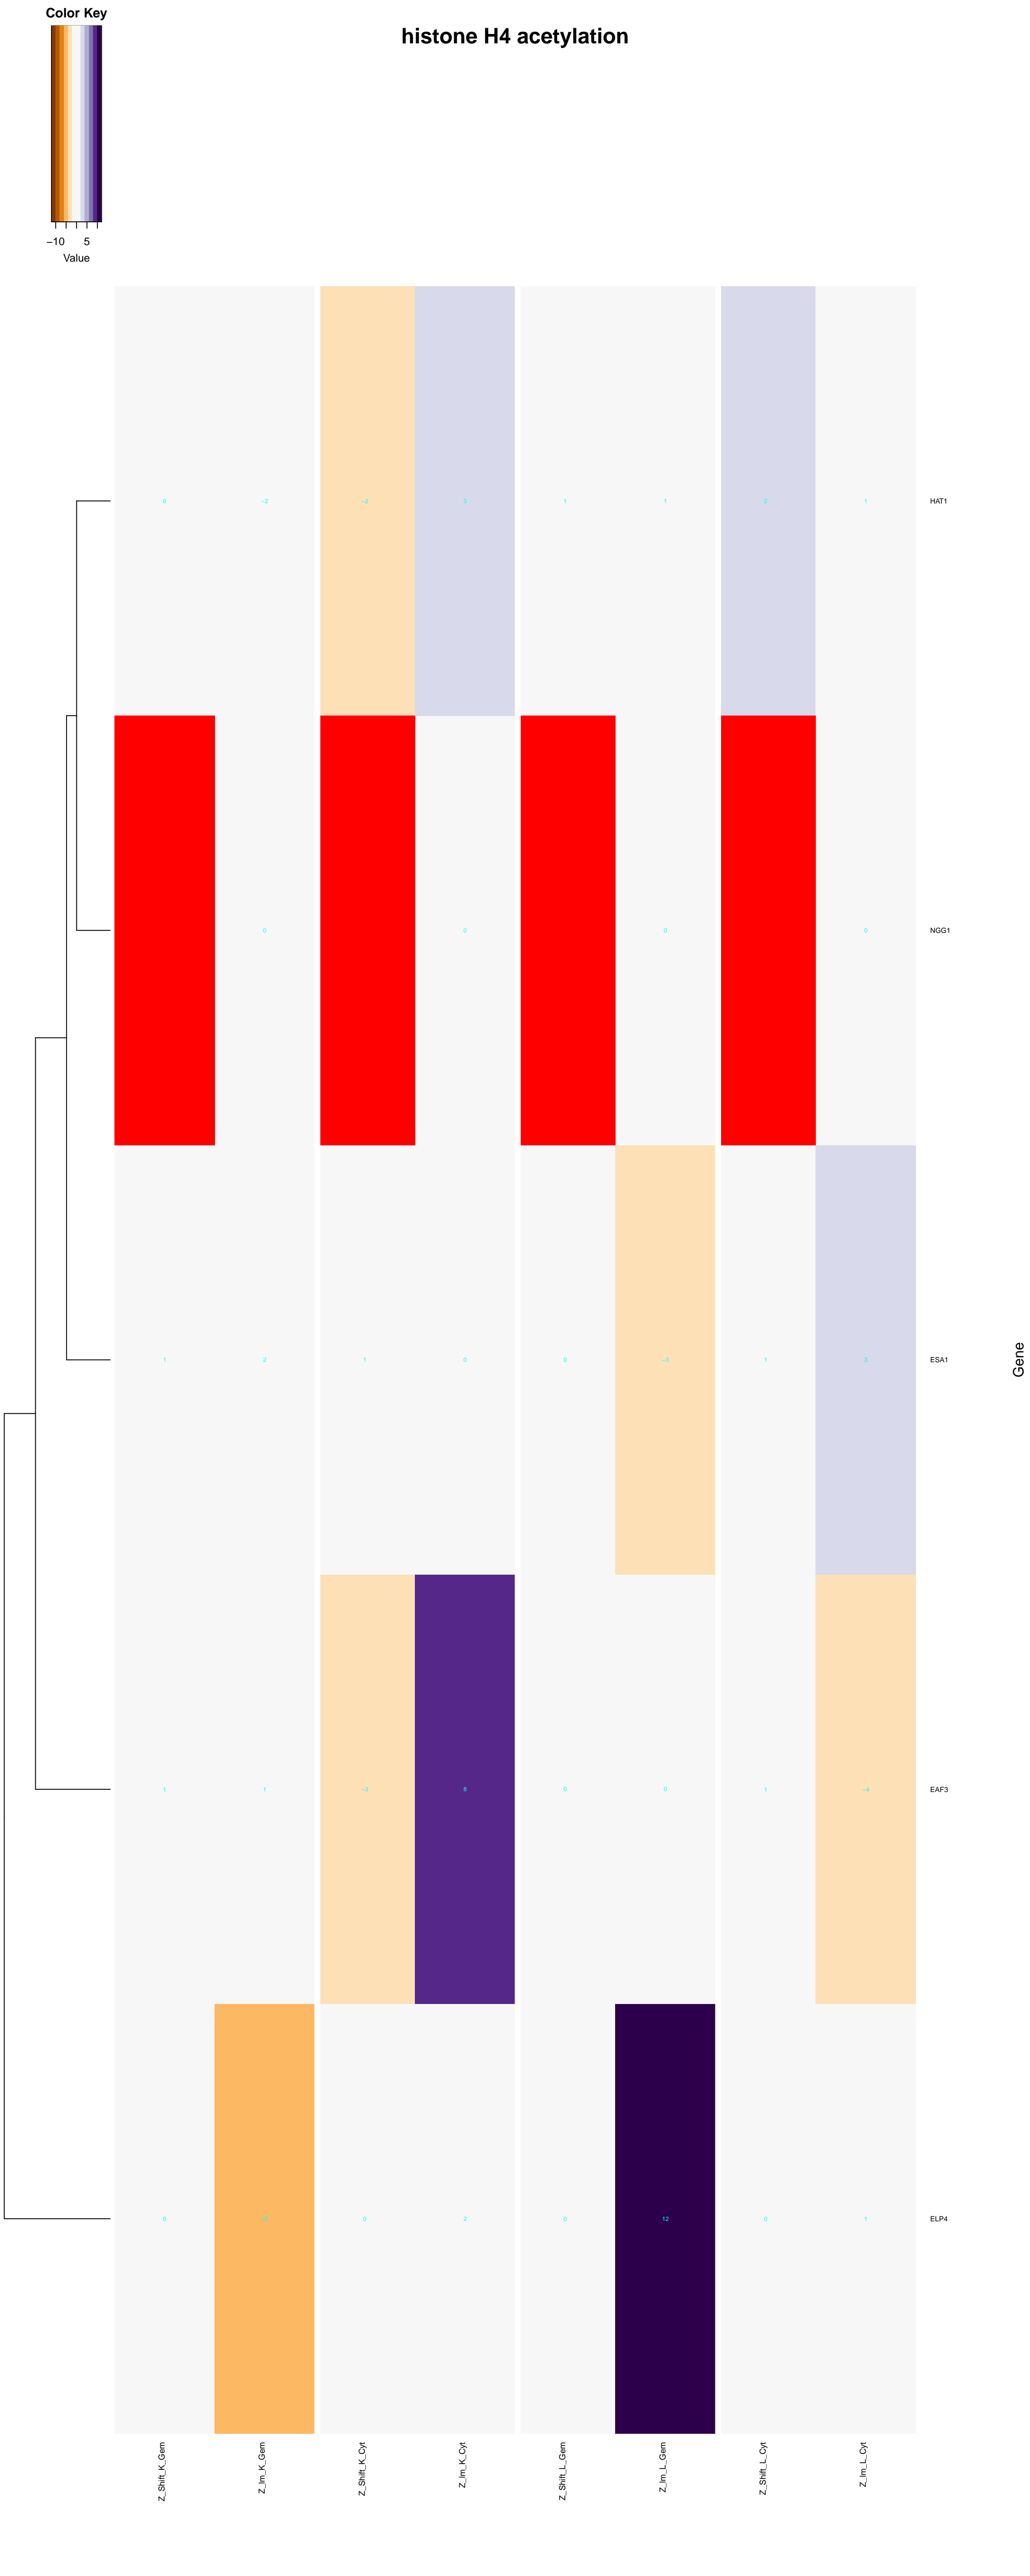

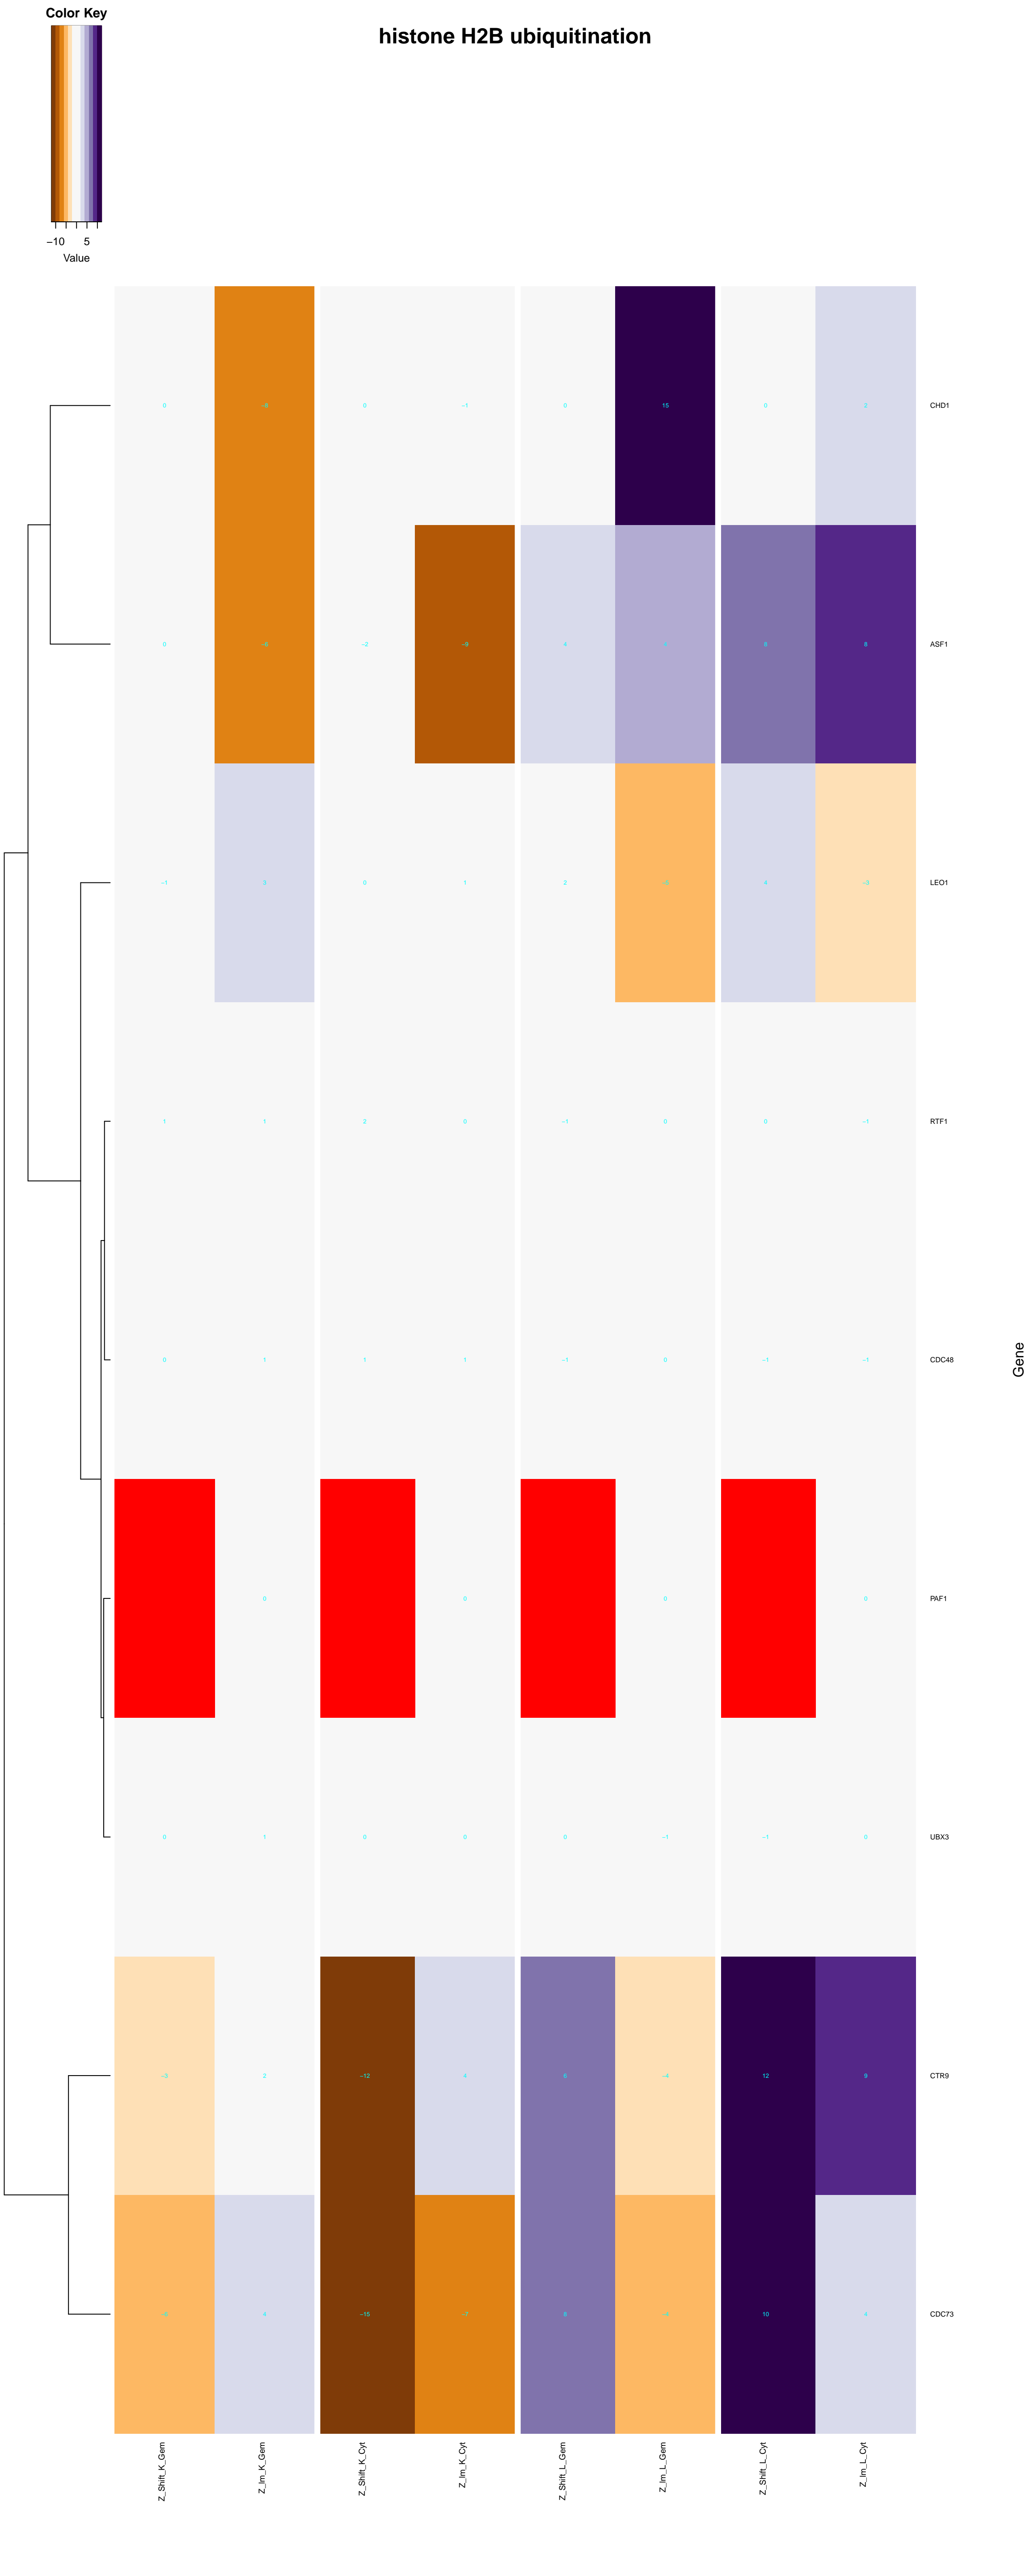

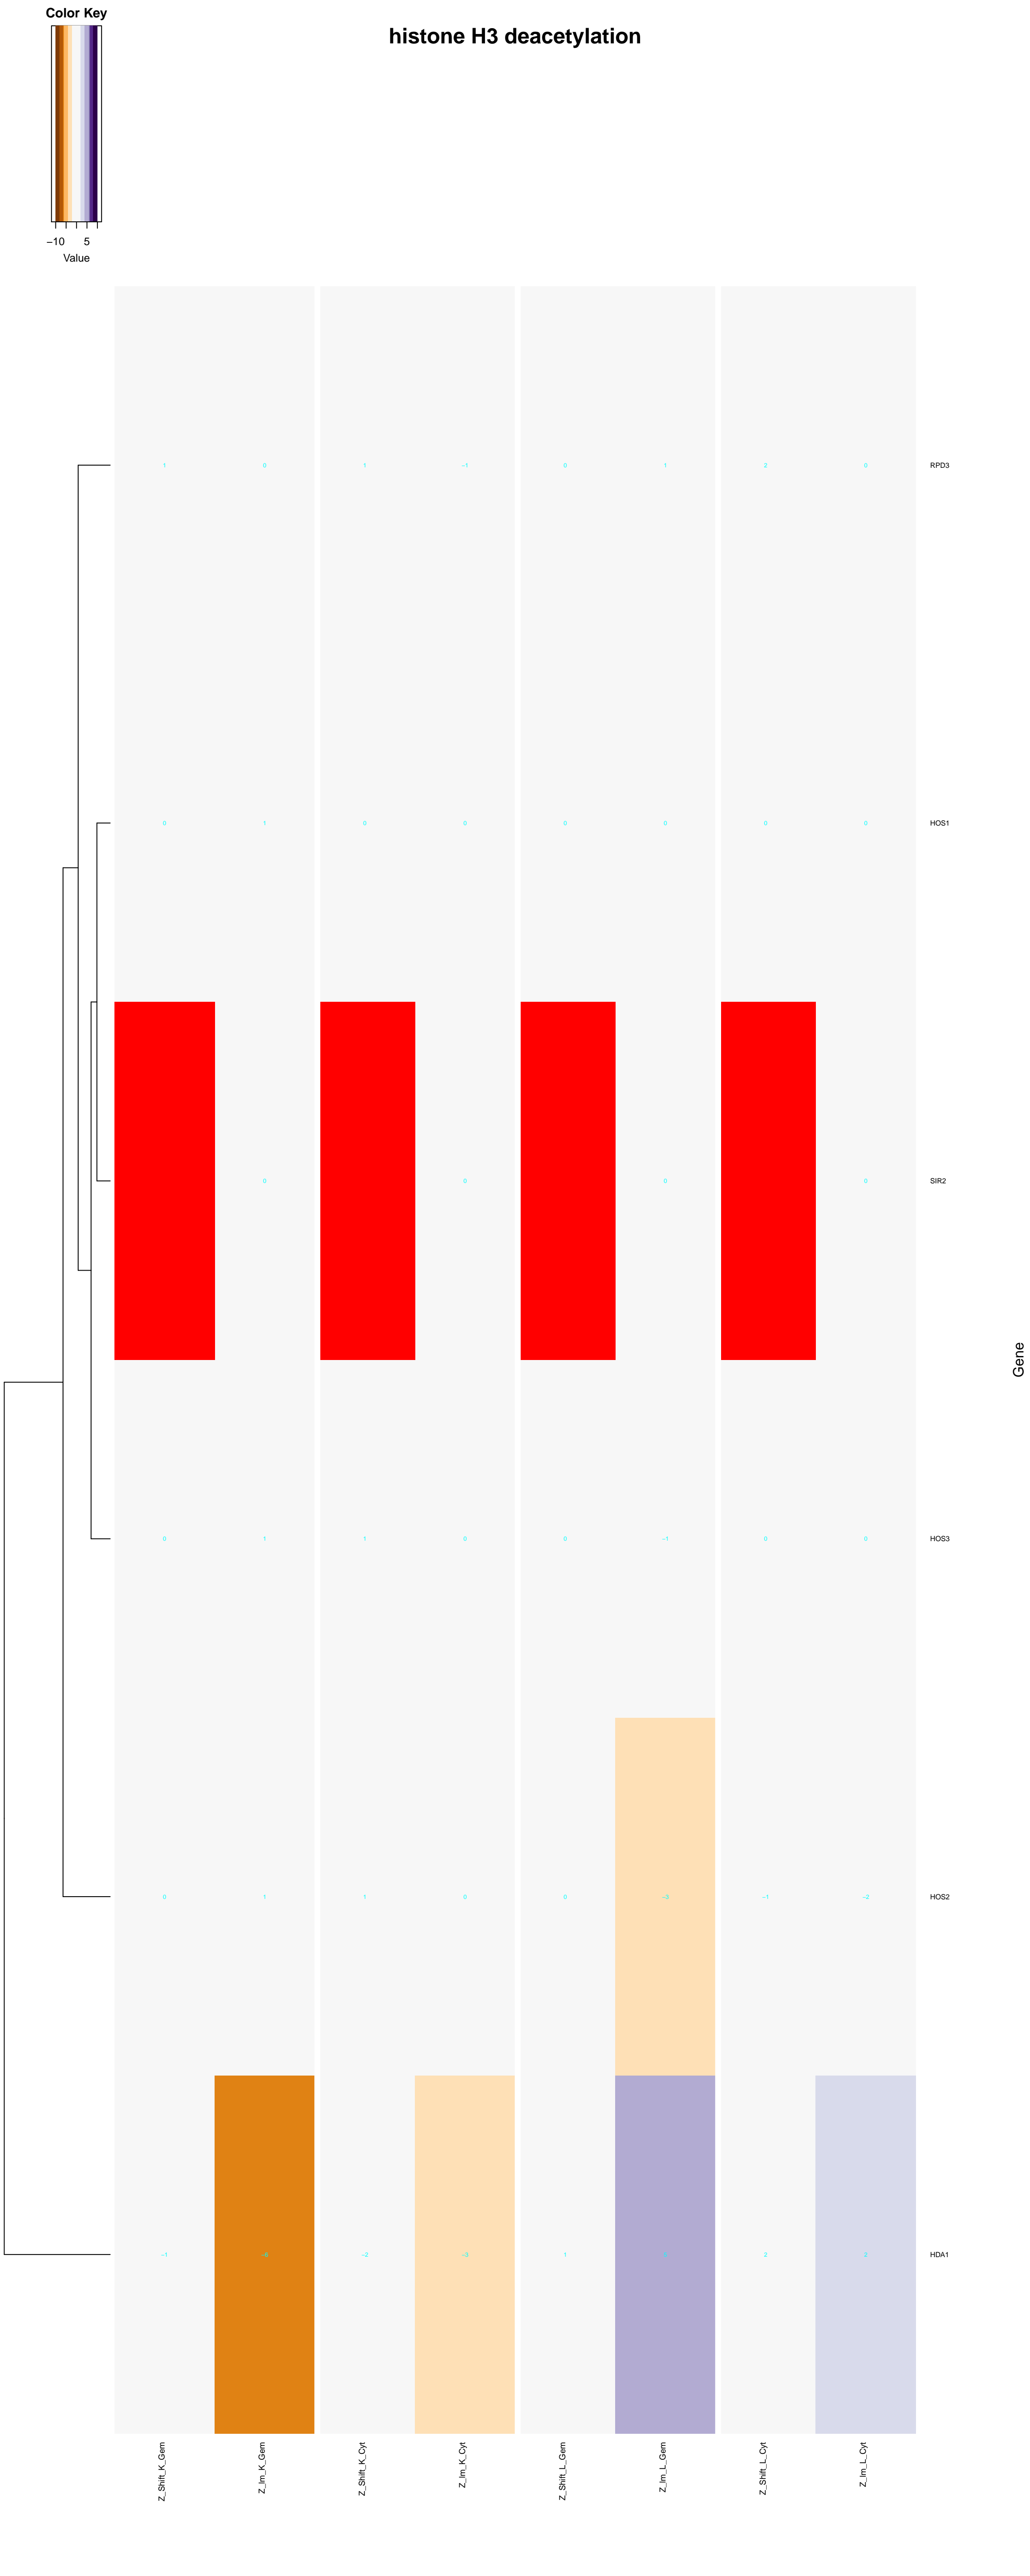

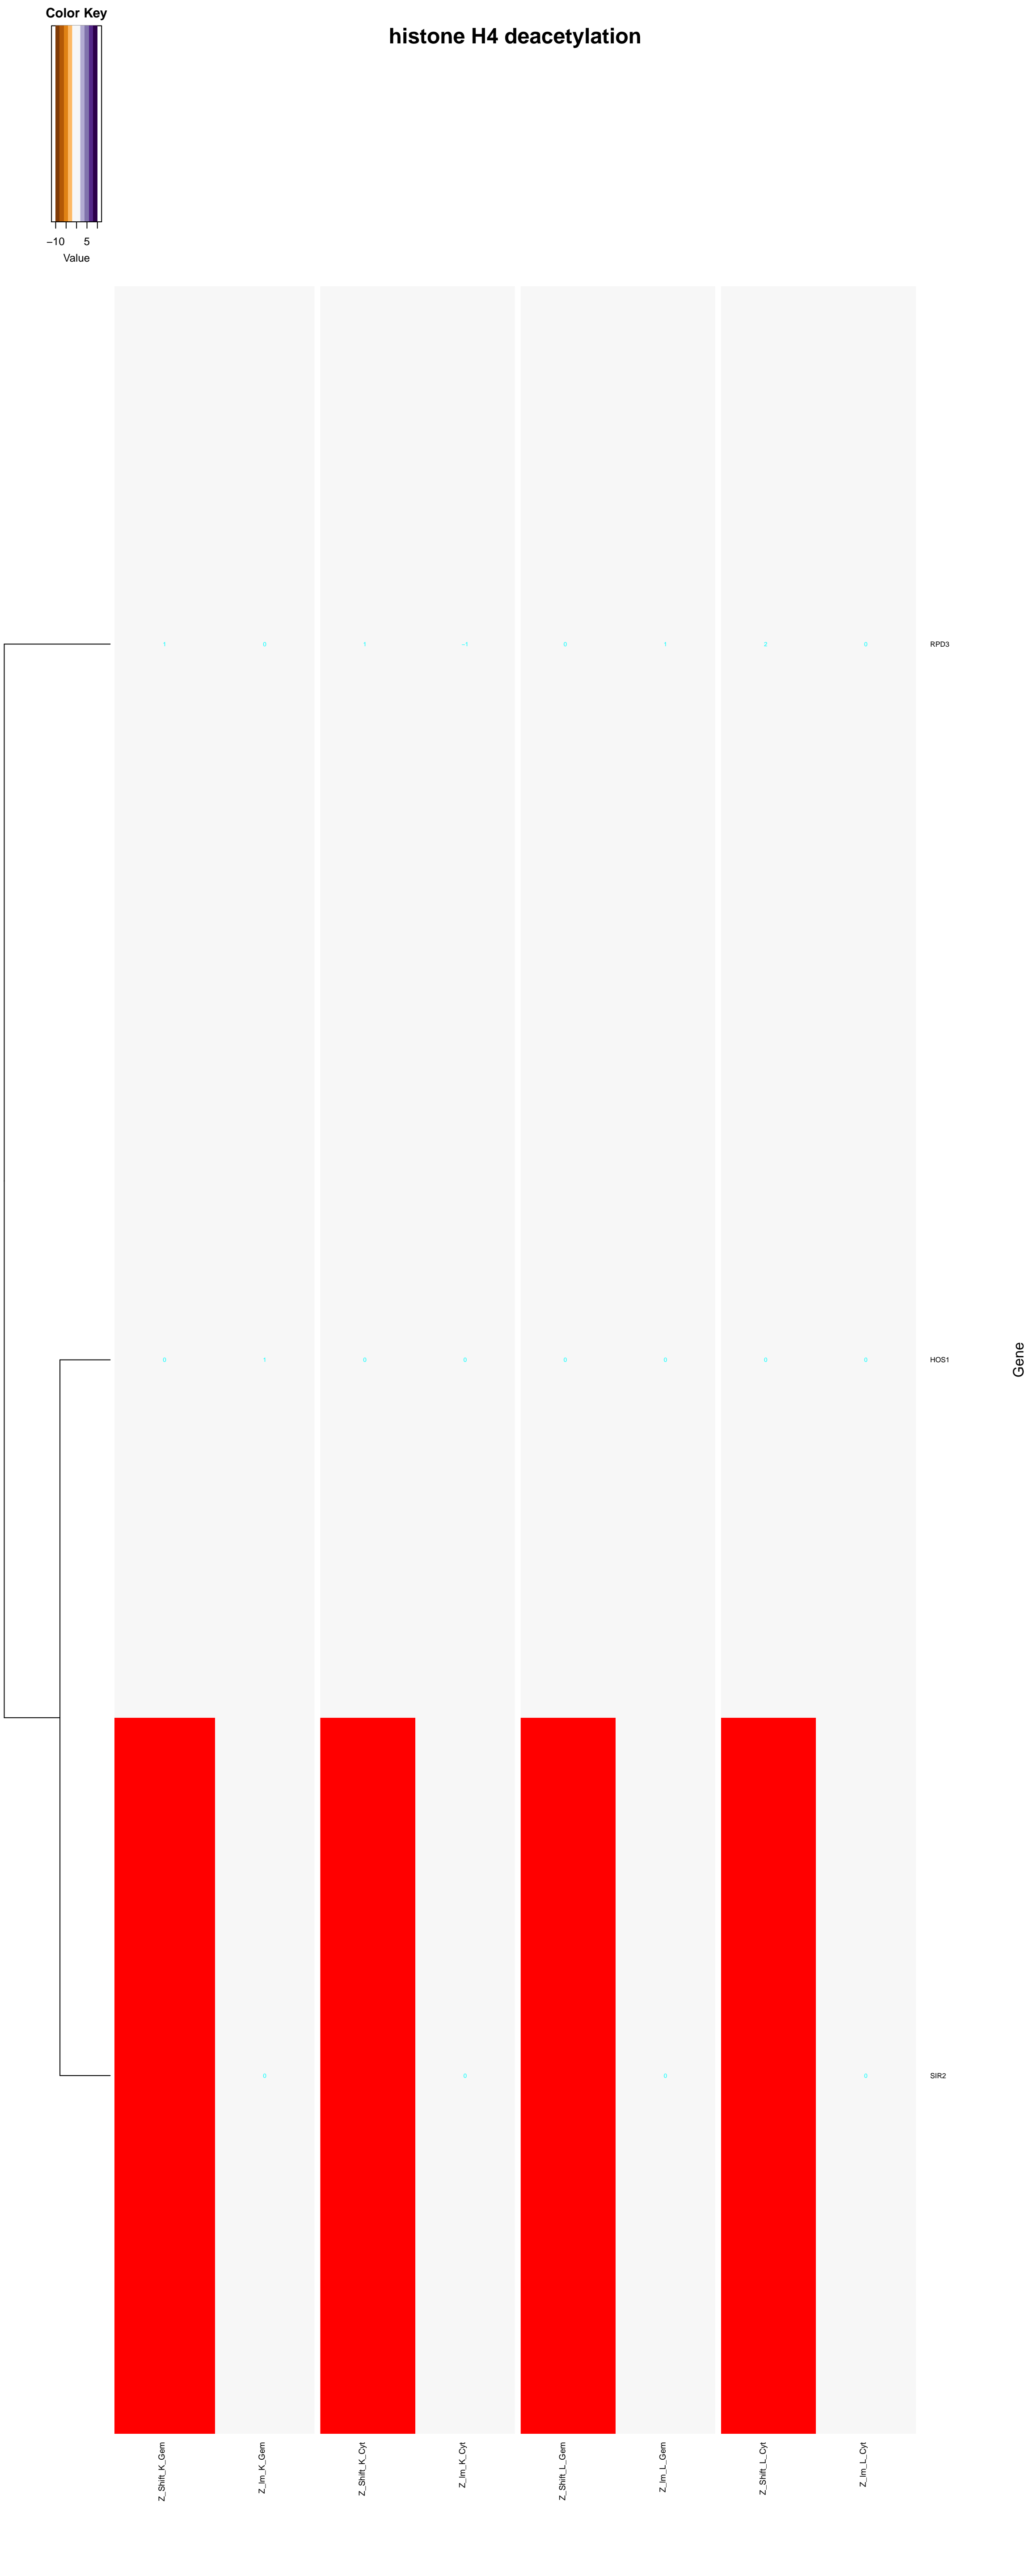

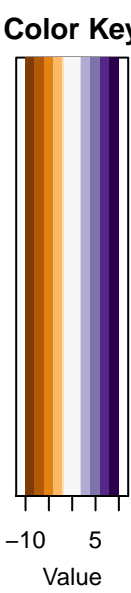

histone lysine demethylation



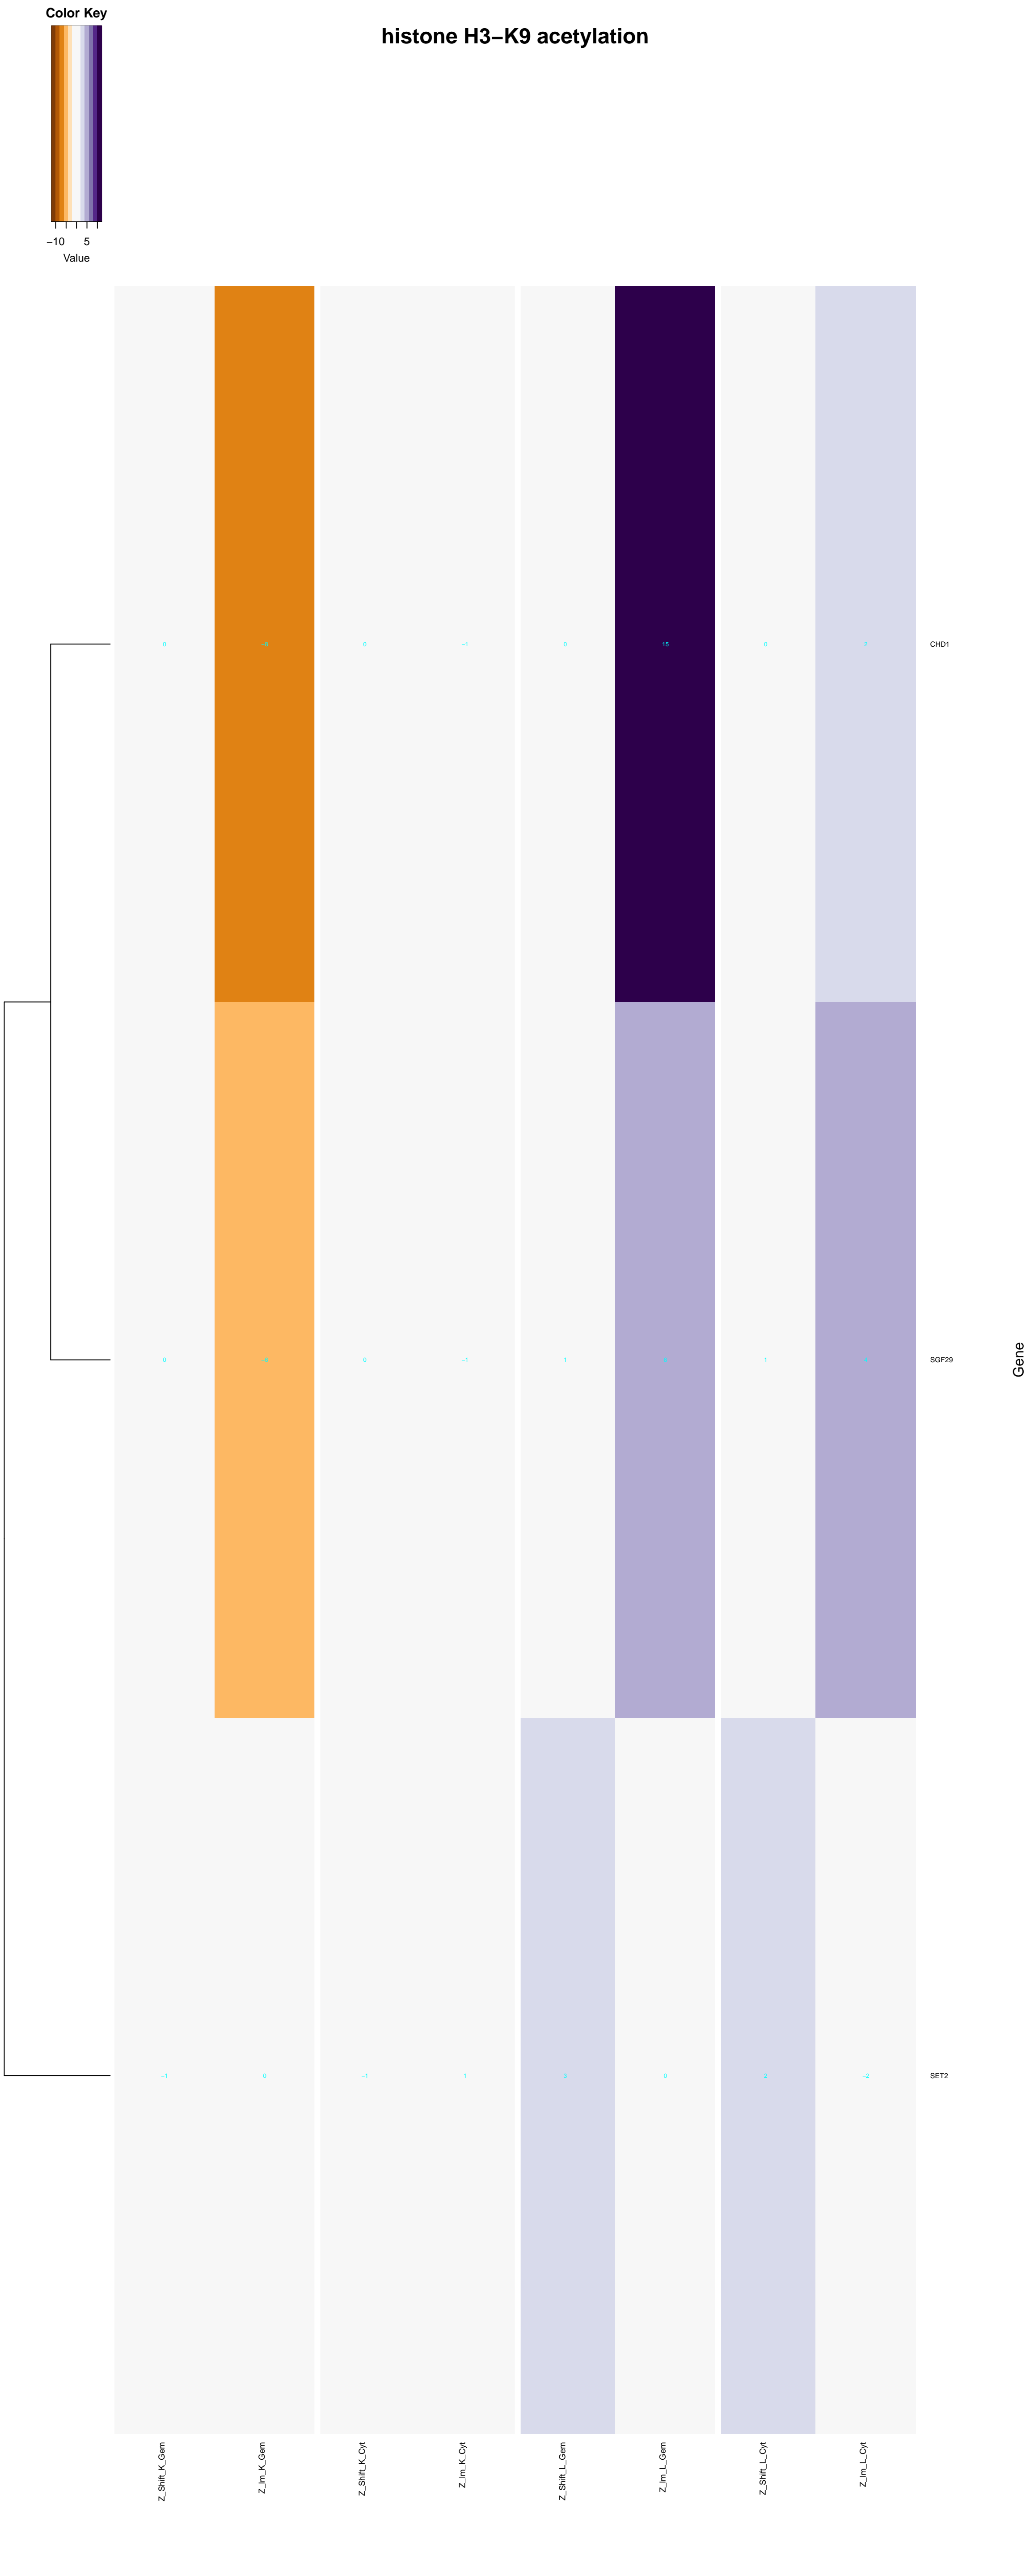

## histone H3–K36 methylation

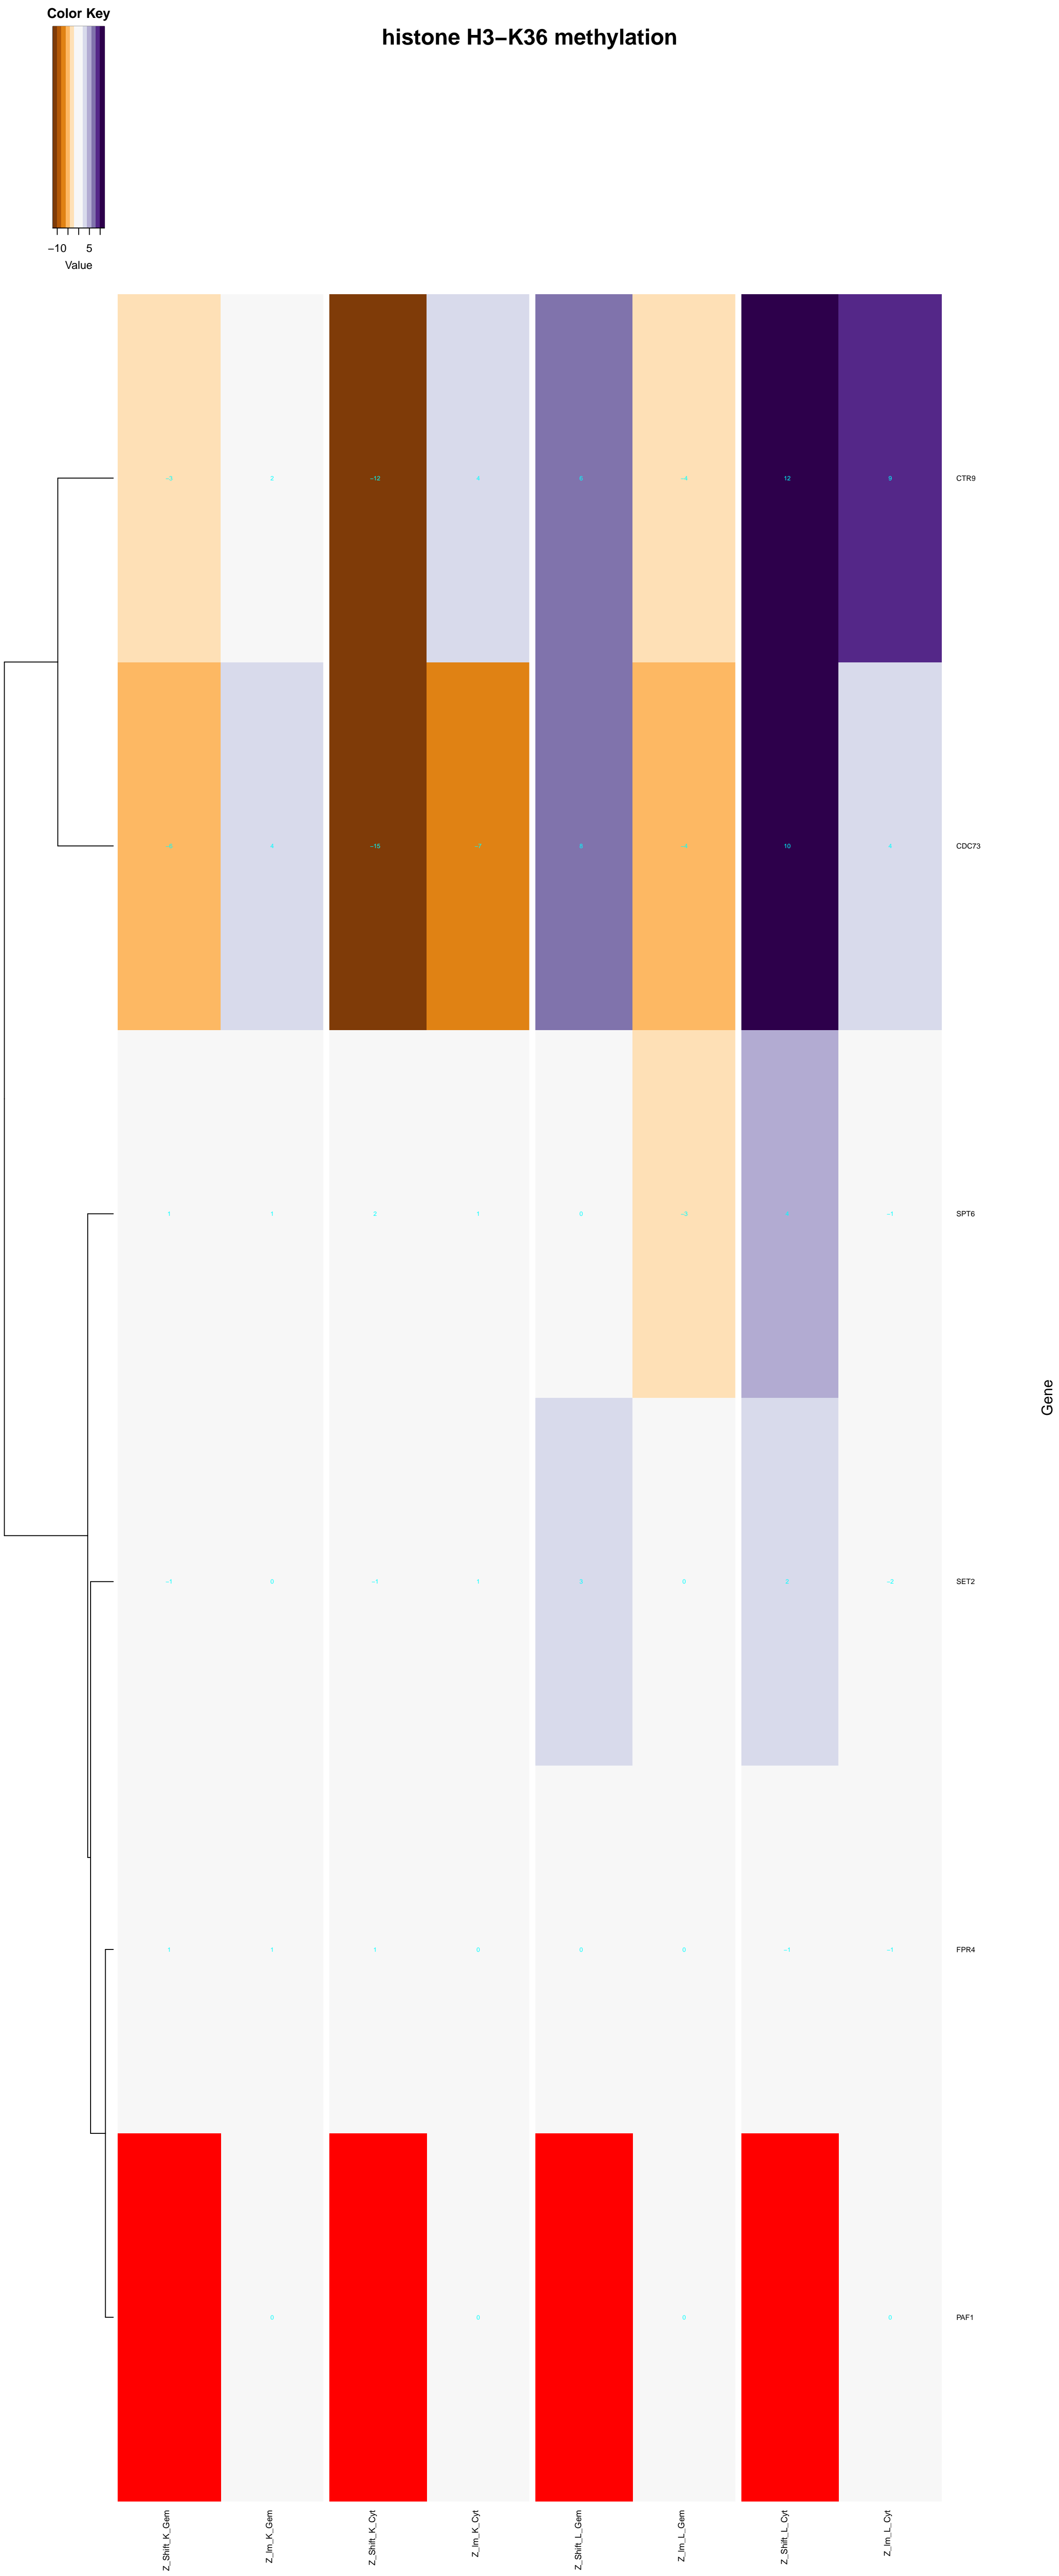

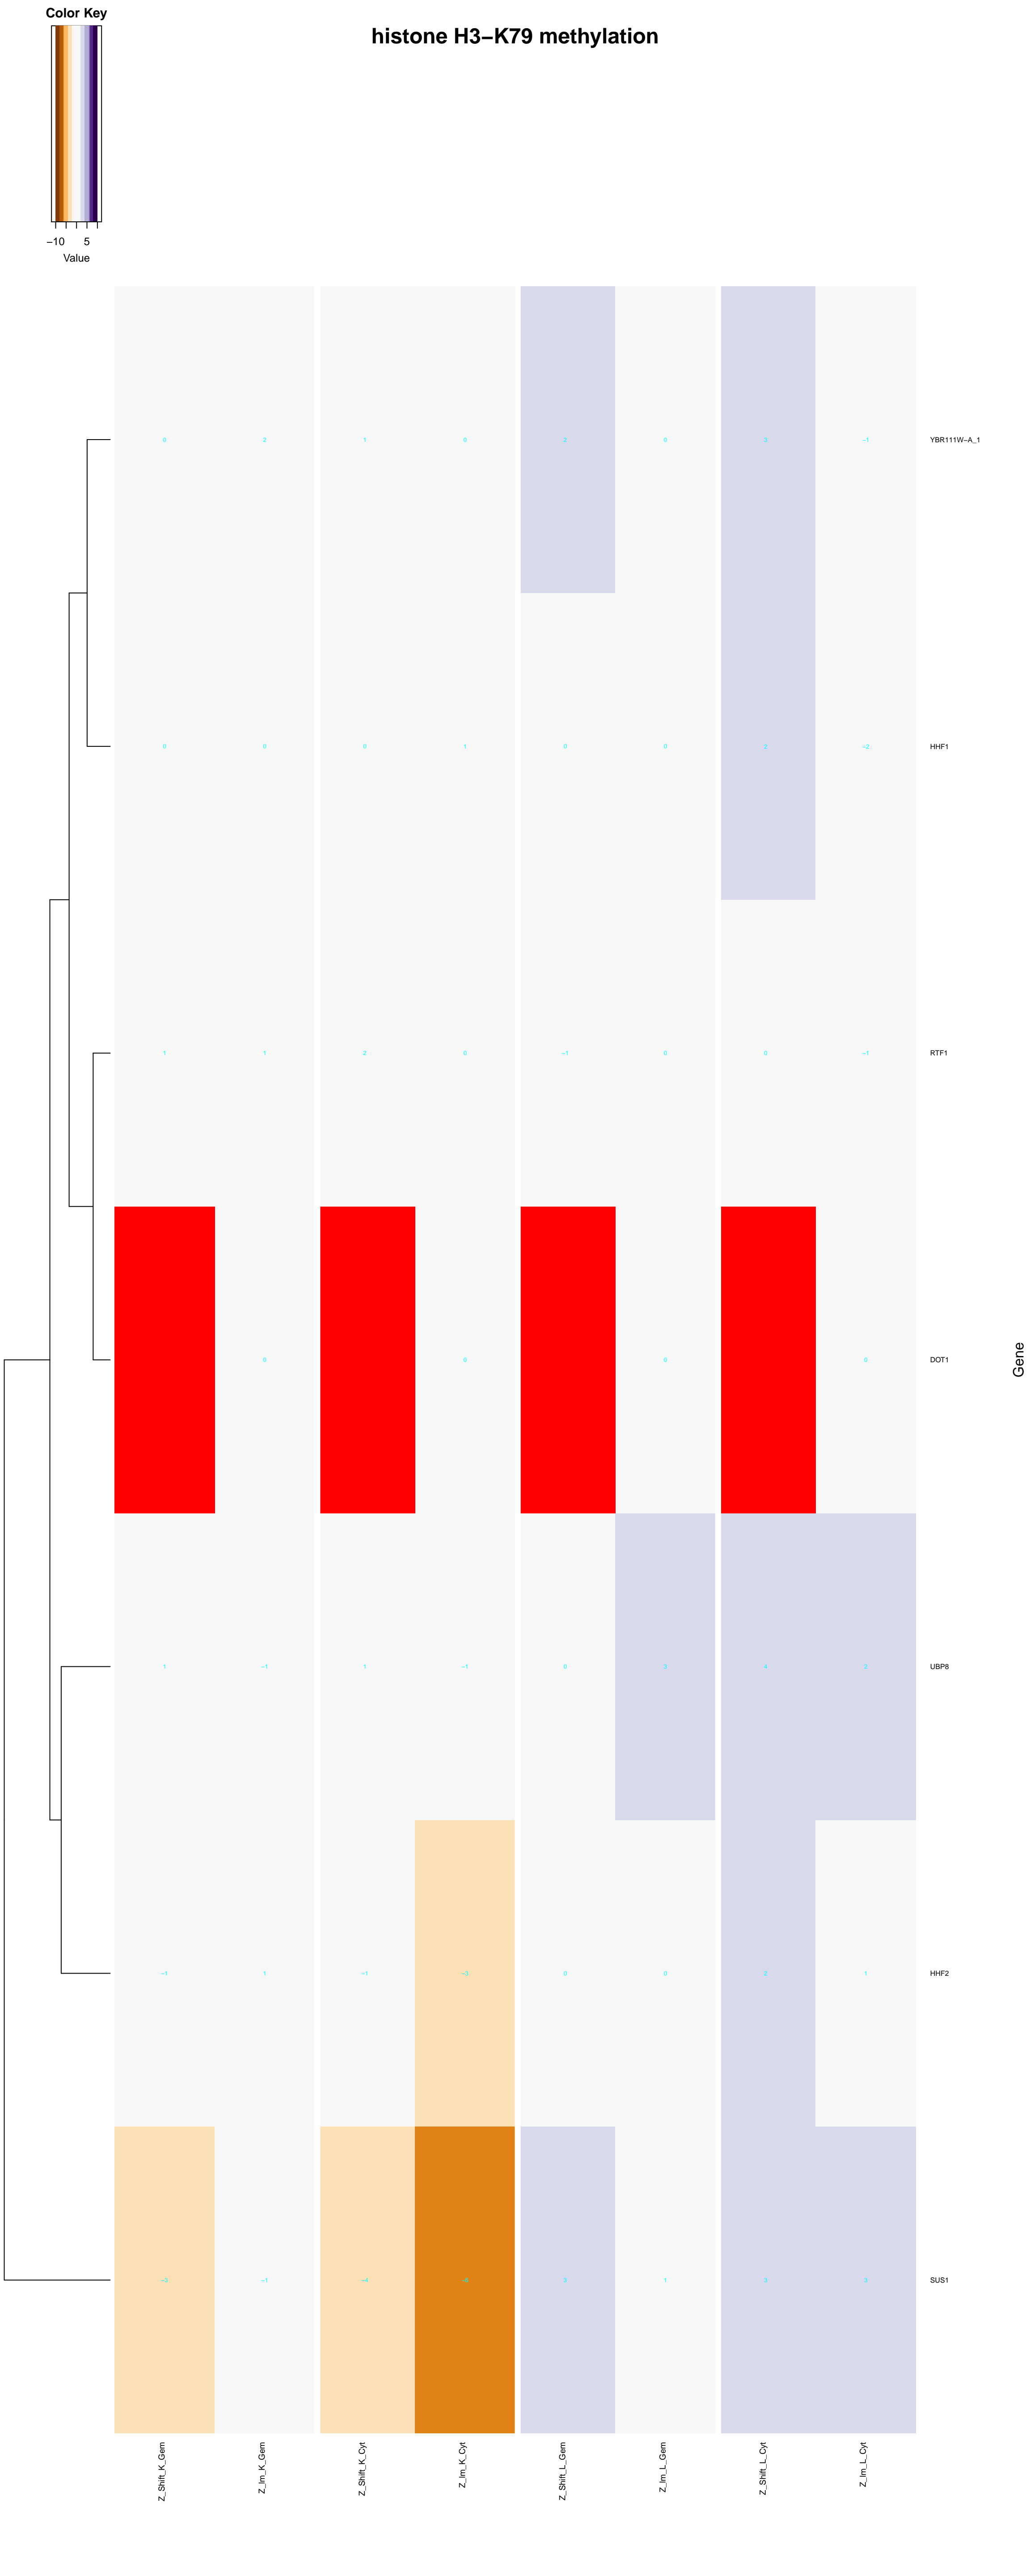



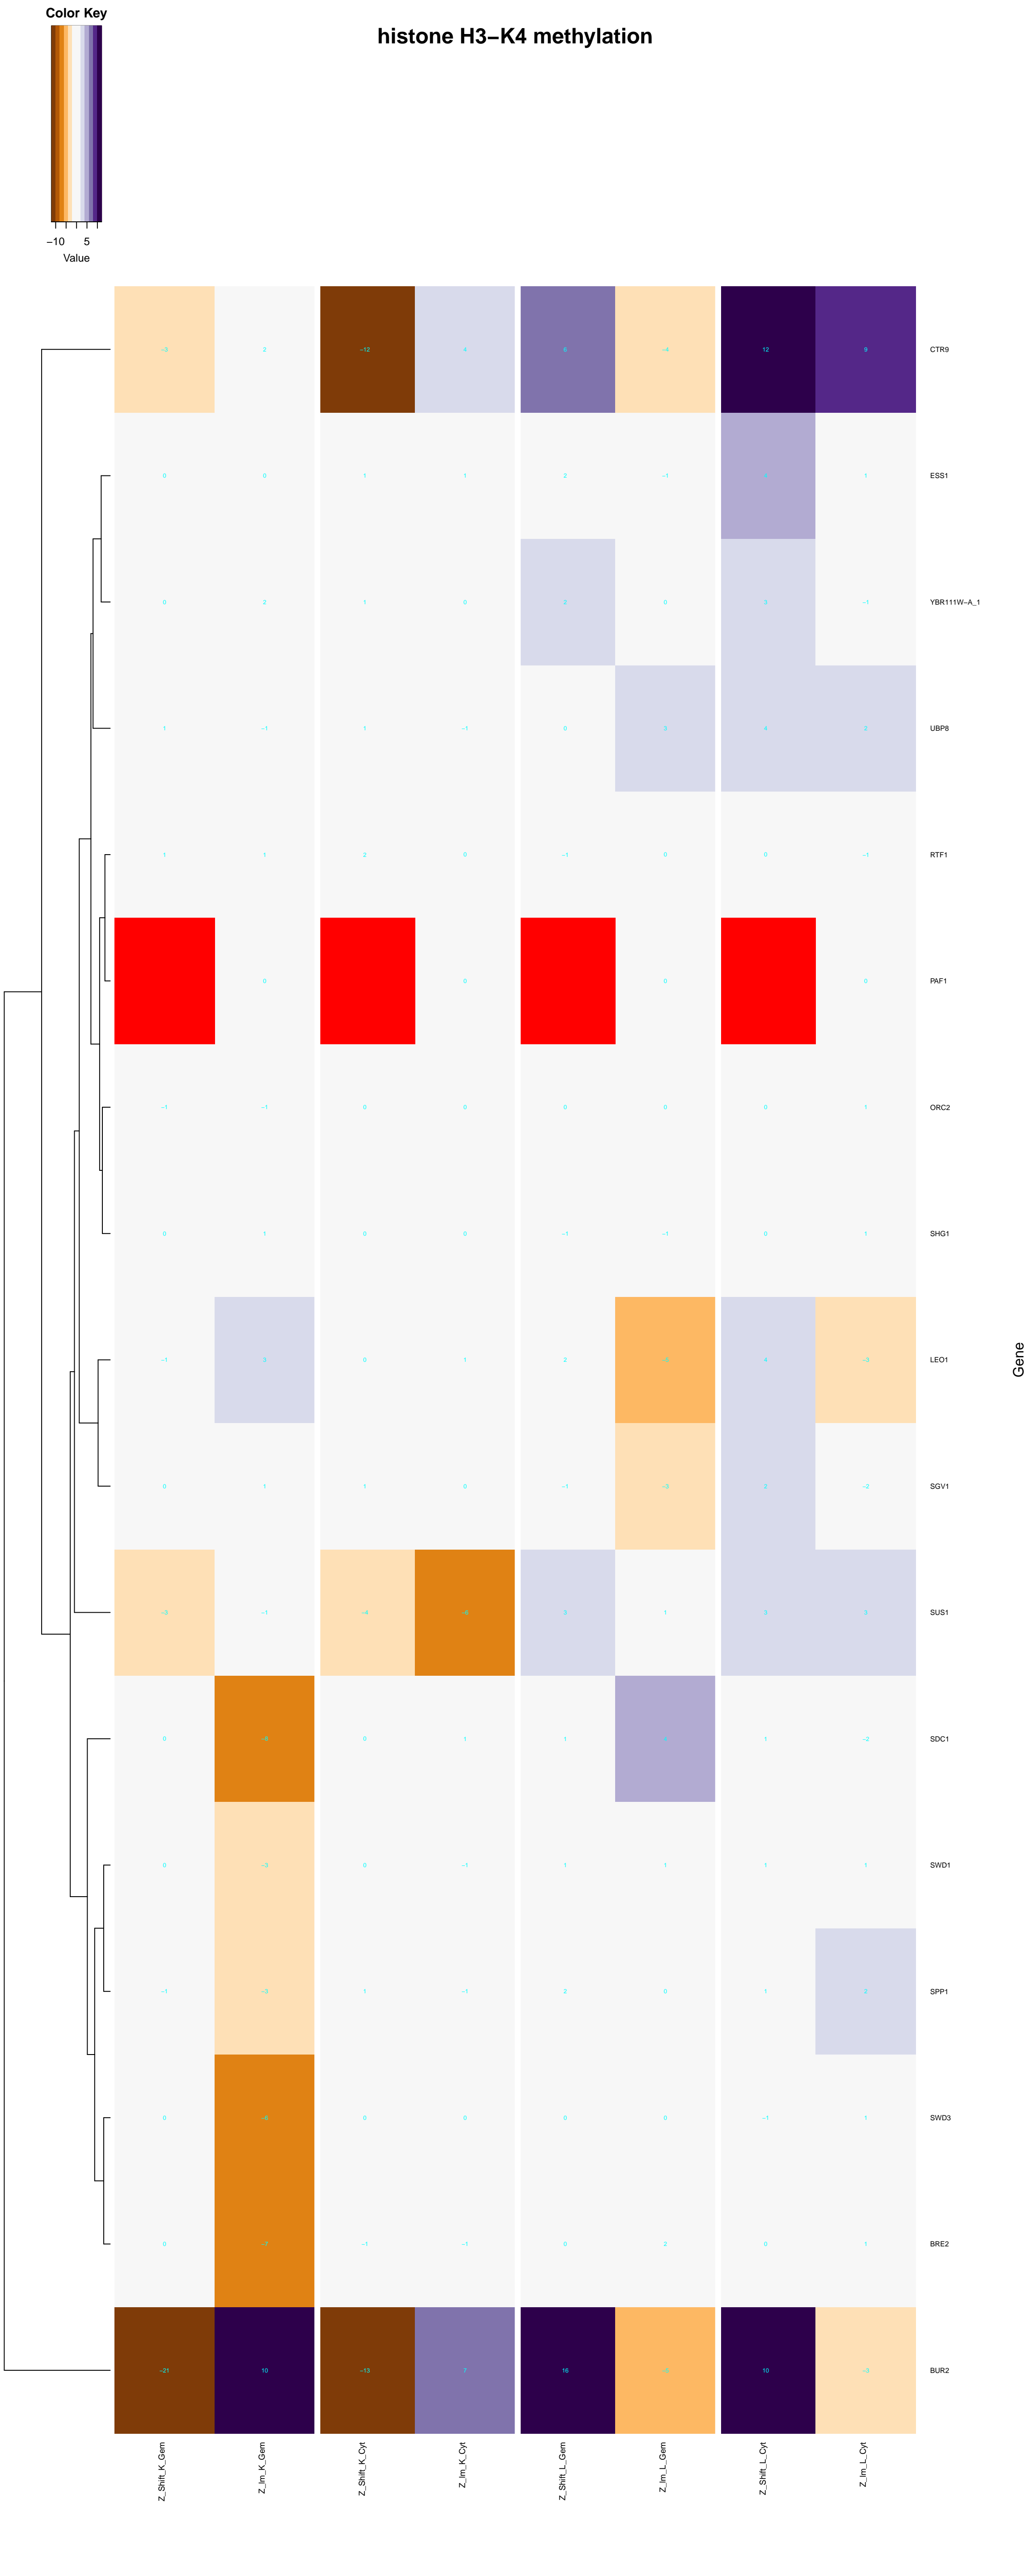

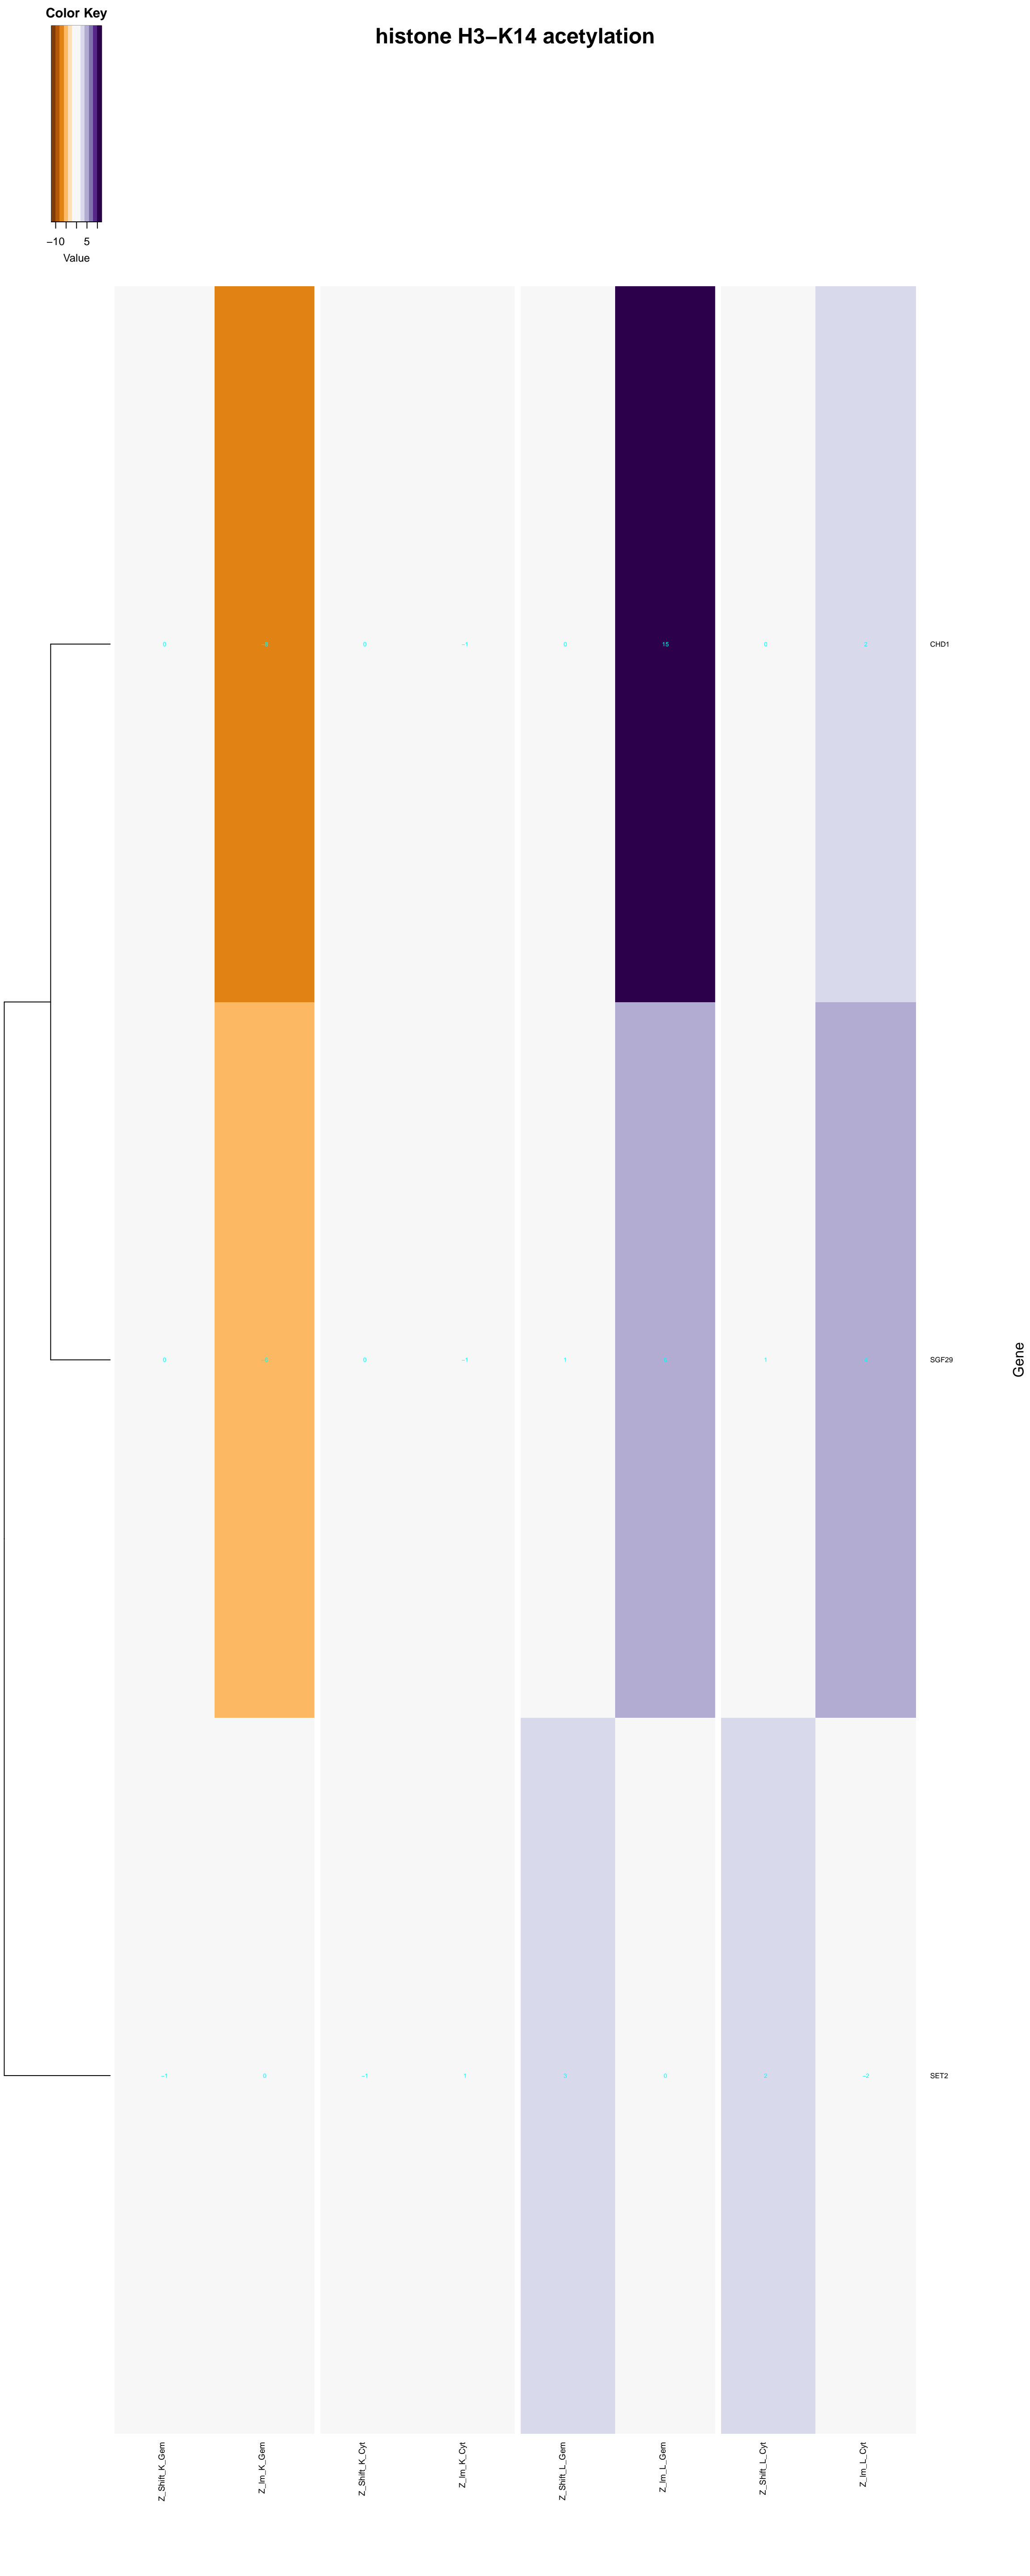

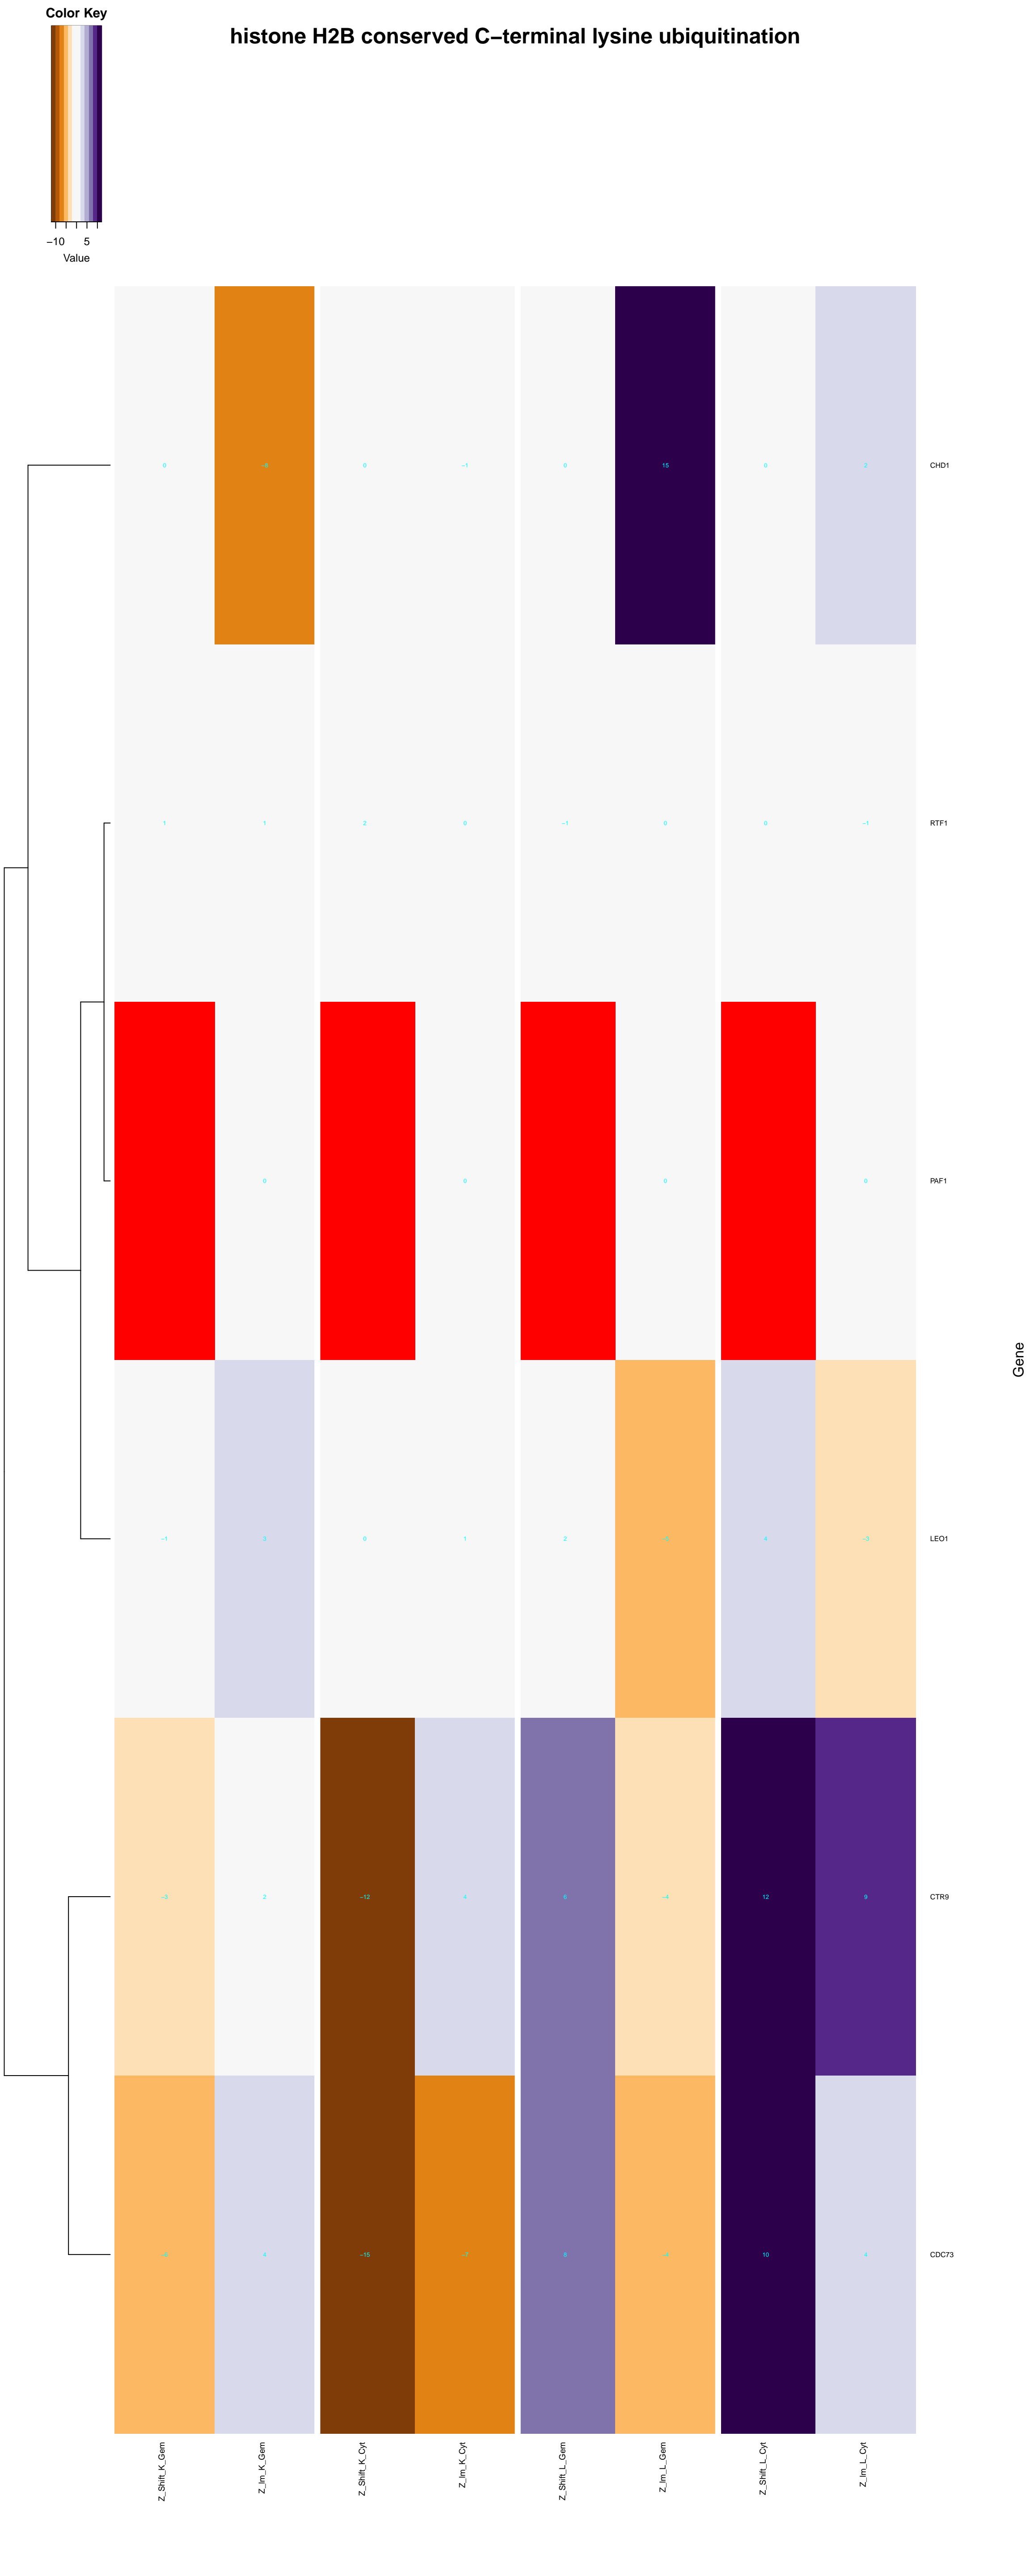



histone H3-K36 demethylation

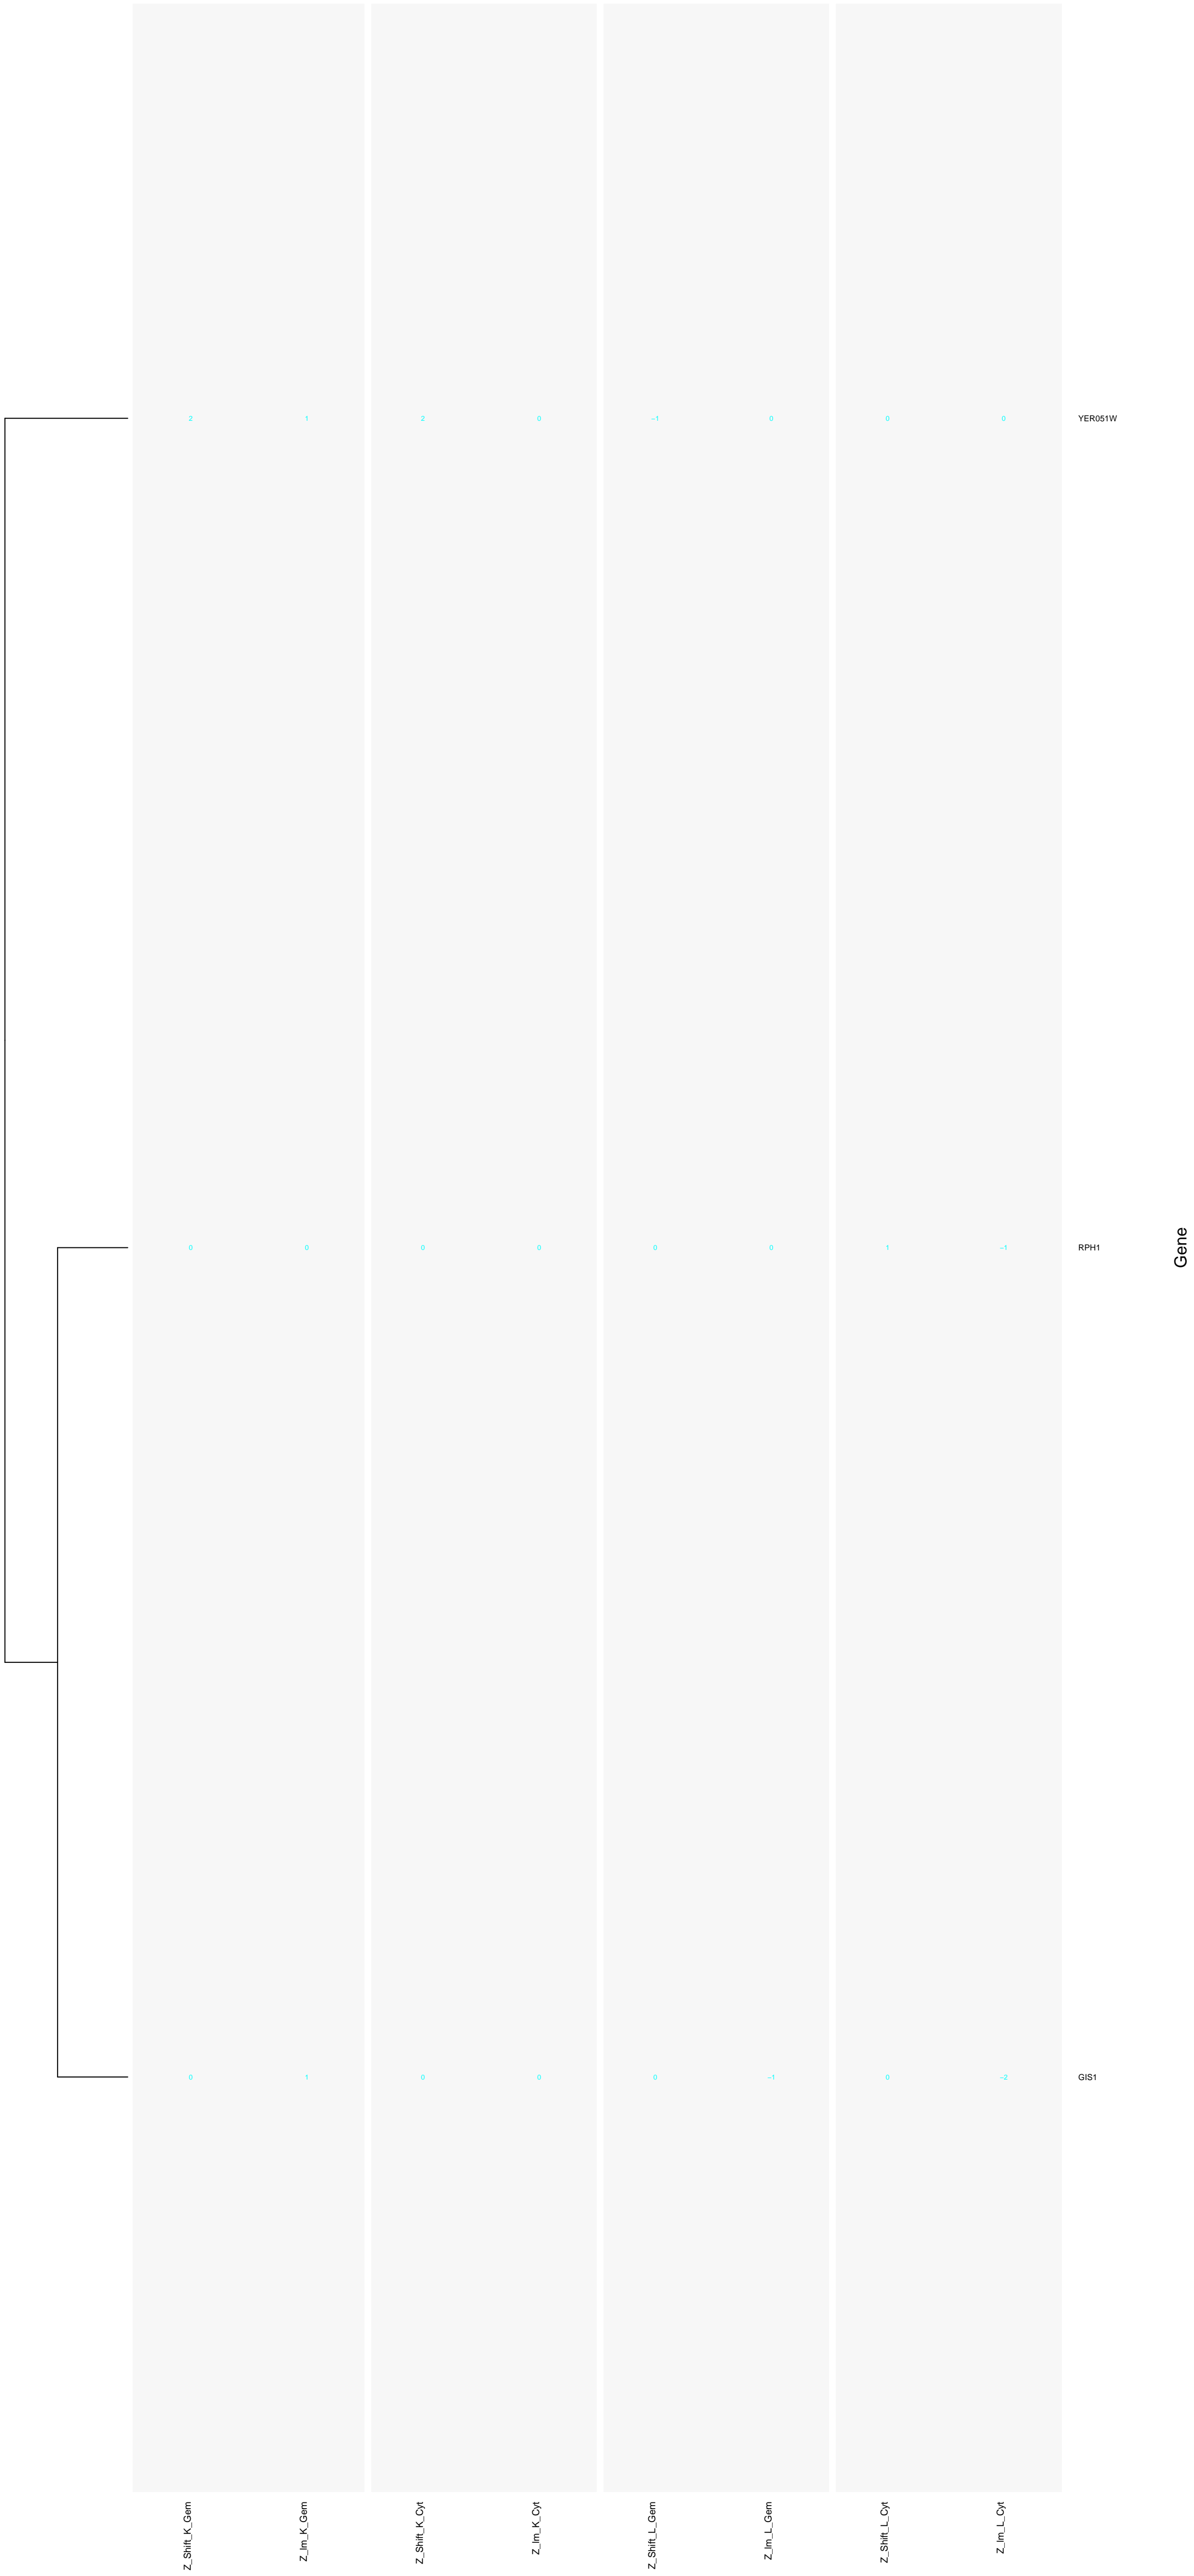

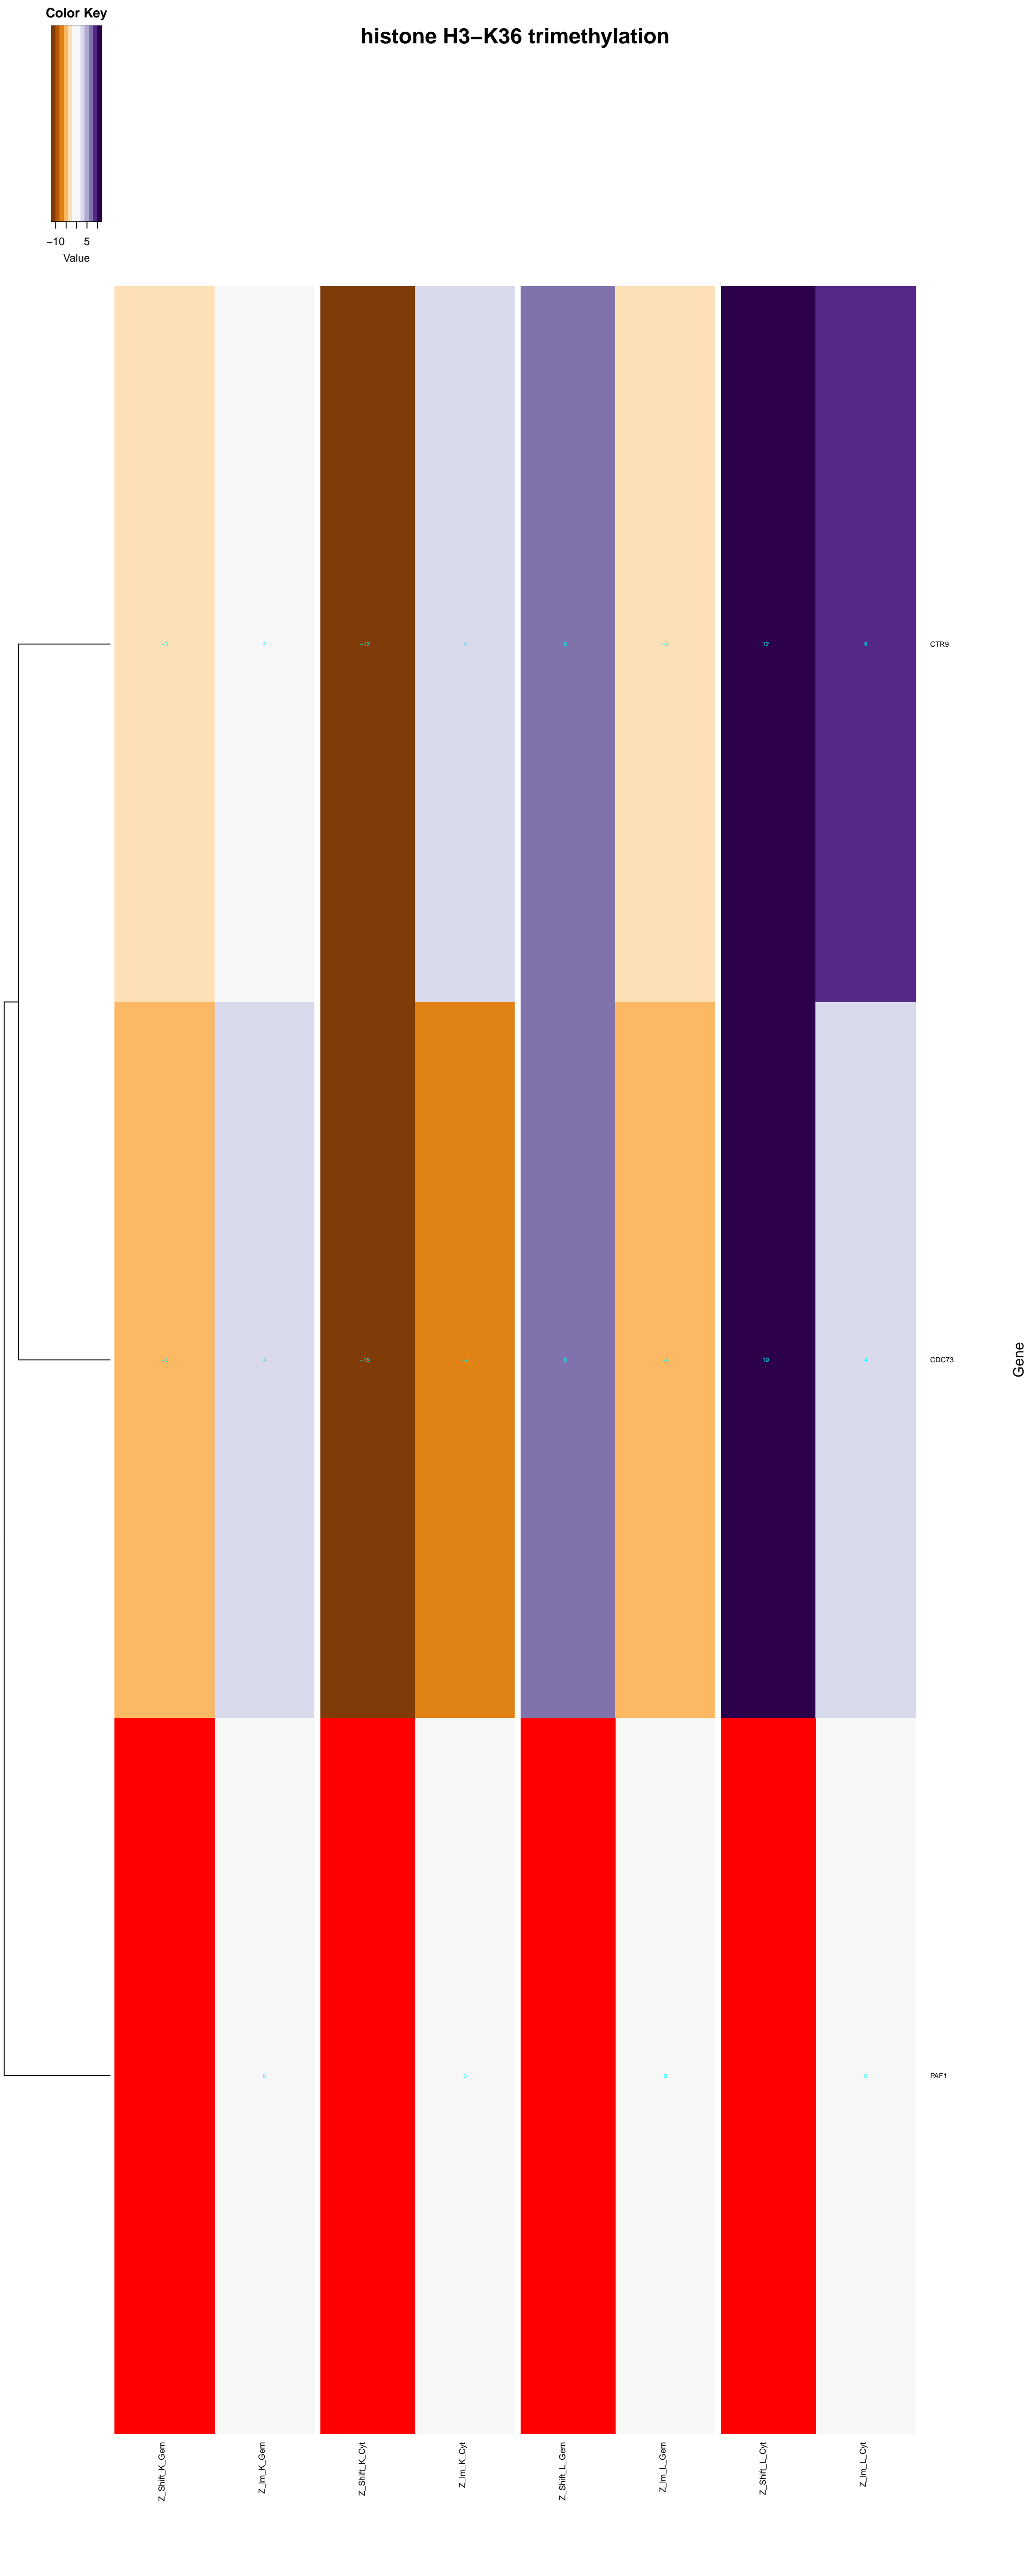

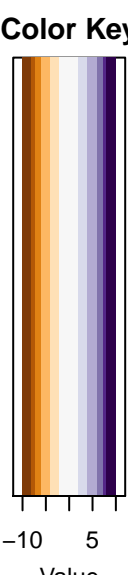

histone H3-K4 trimethylation

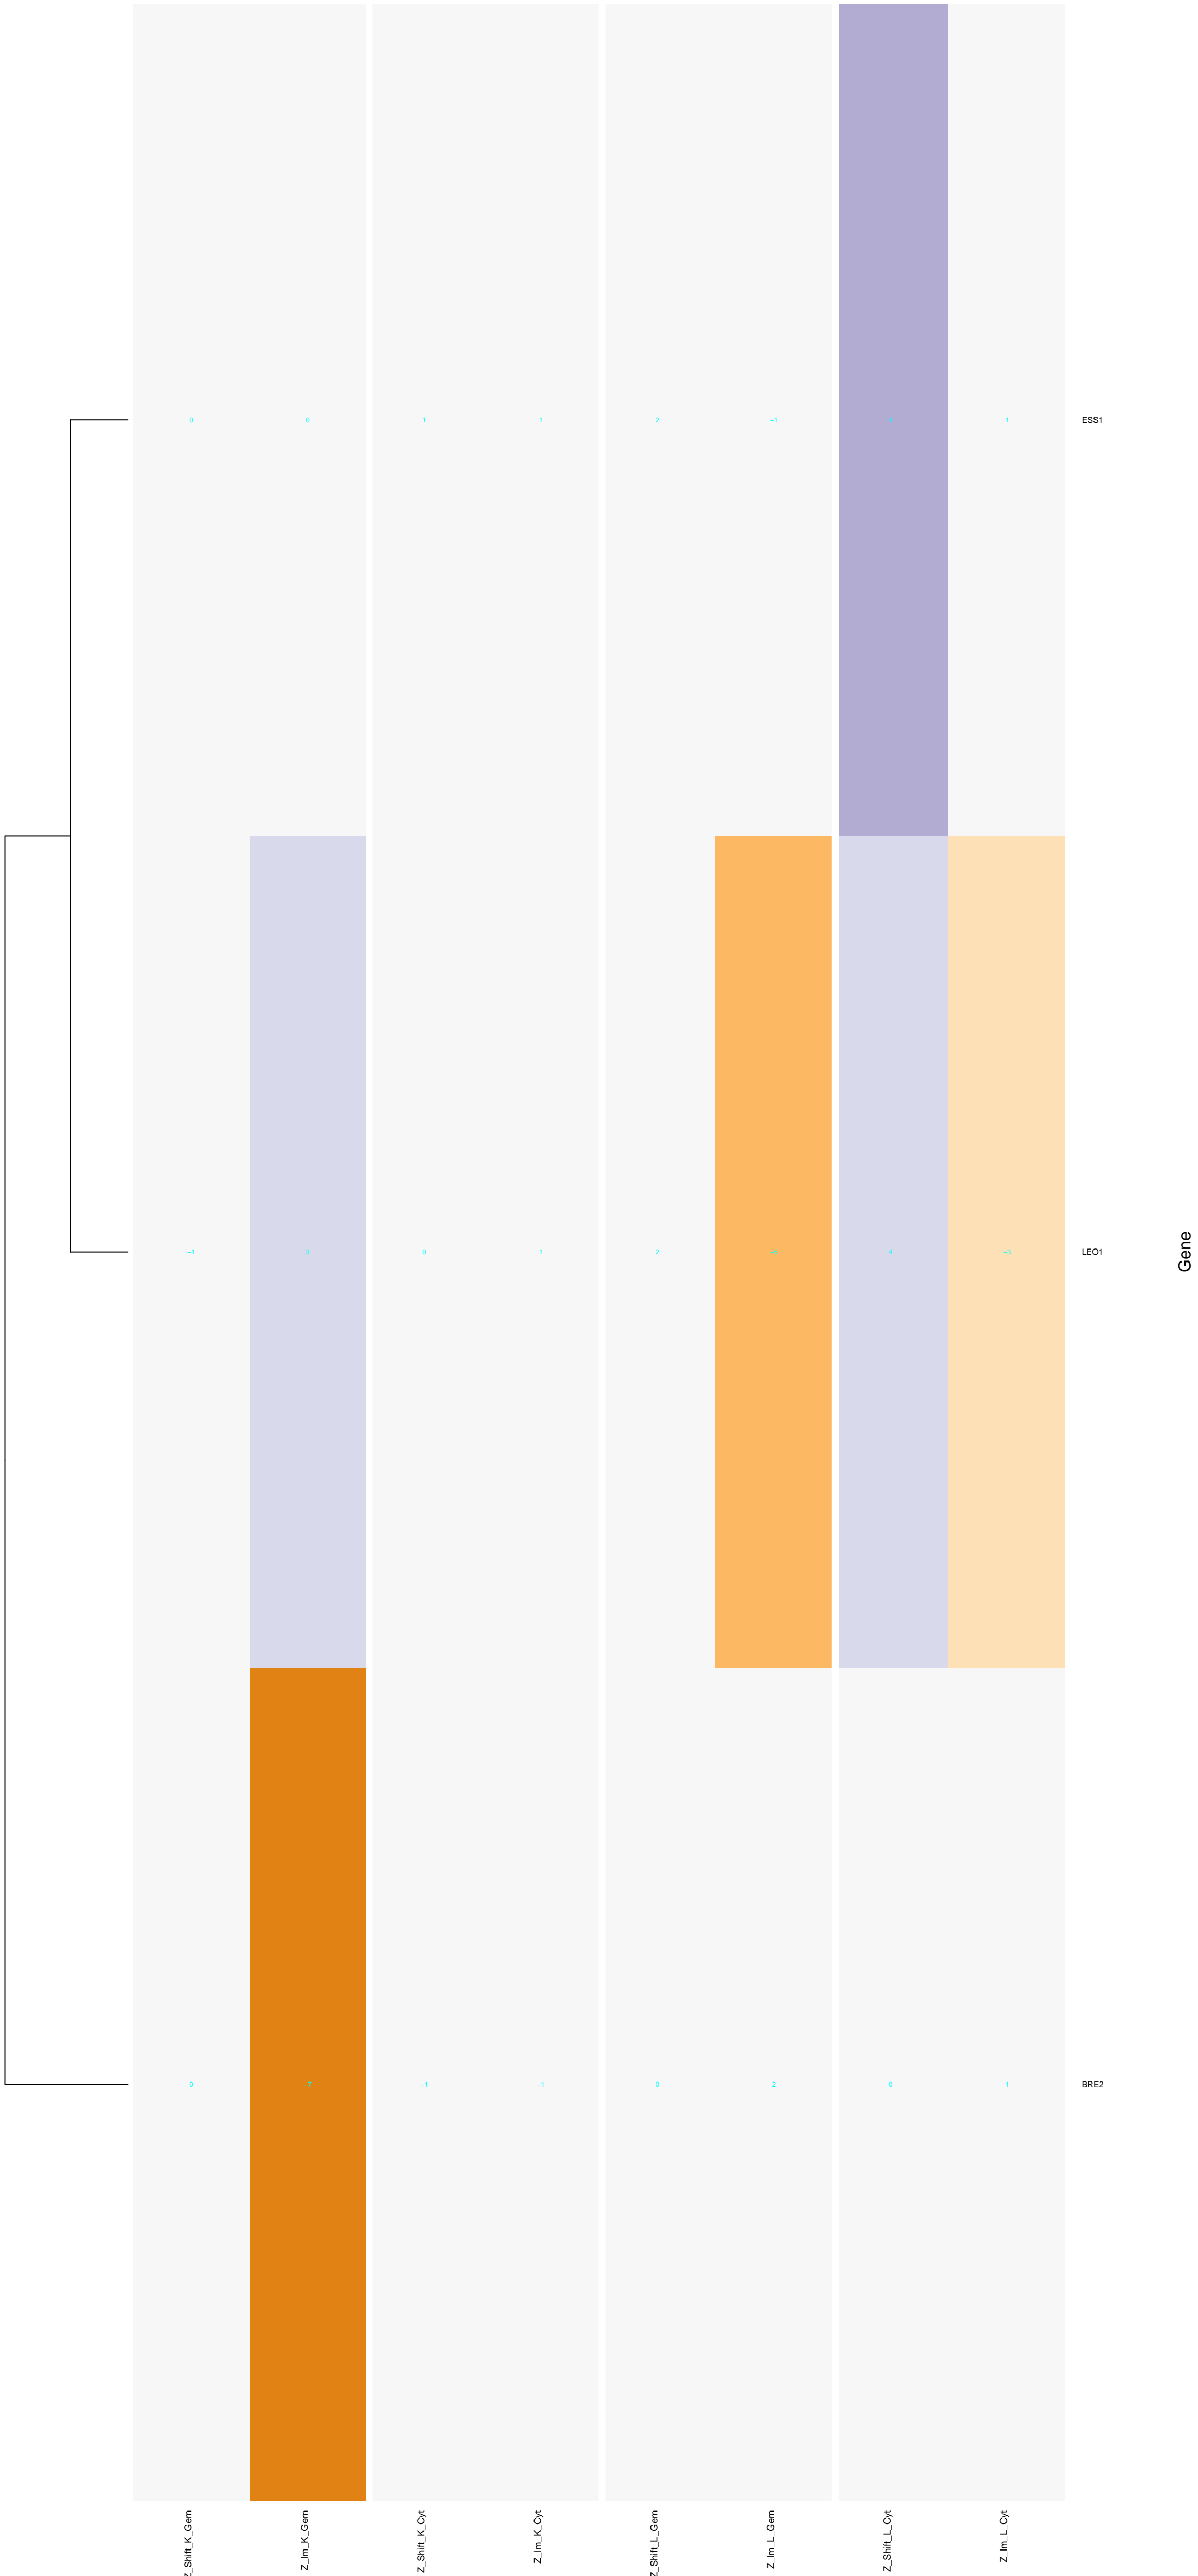

Supplement: s1 [file s1]
