# Supplementary material for: A Humanized Yeast Phenomic Model of Deoxycytidine Kinase to Predict Genetic Buffering of Nucleoside Analog Cytotoxicity
Source: MDPI journal article supplement (doi:10.3390/genes10100770), 2019-09-30

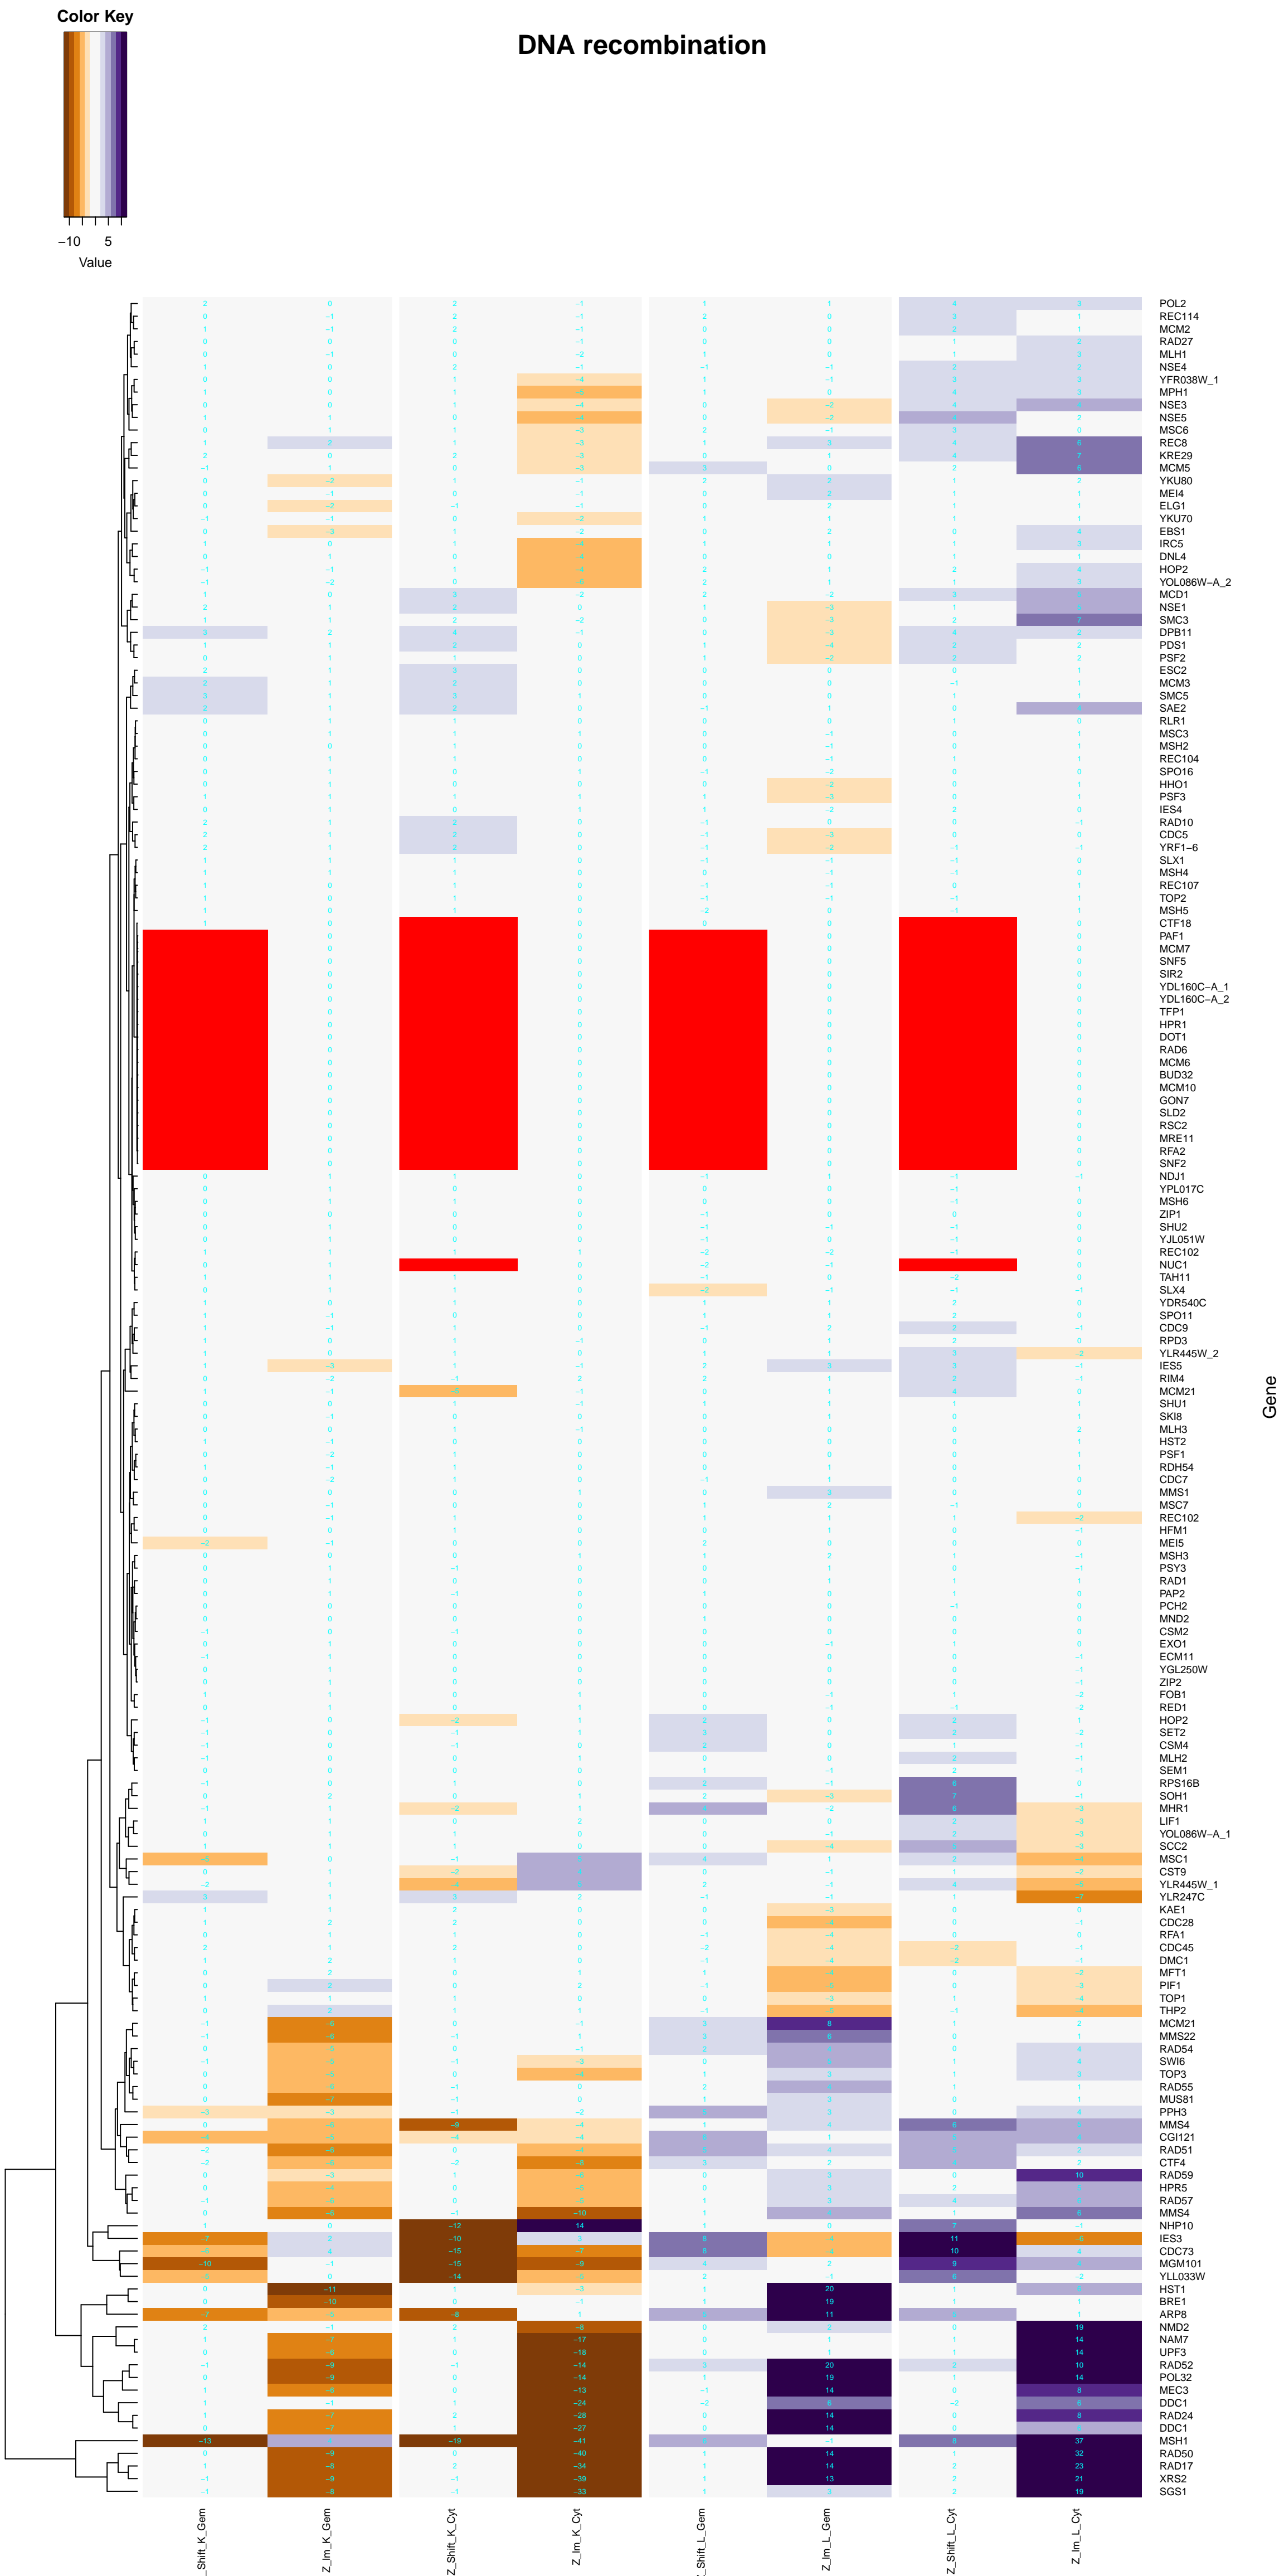

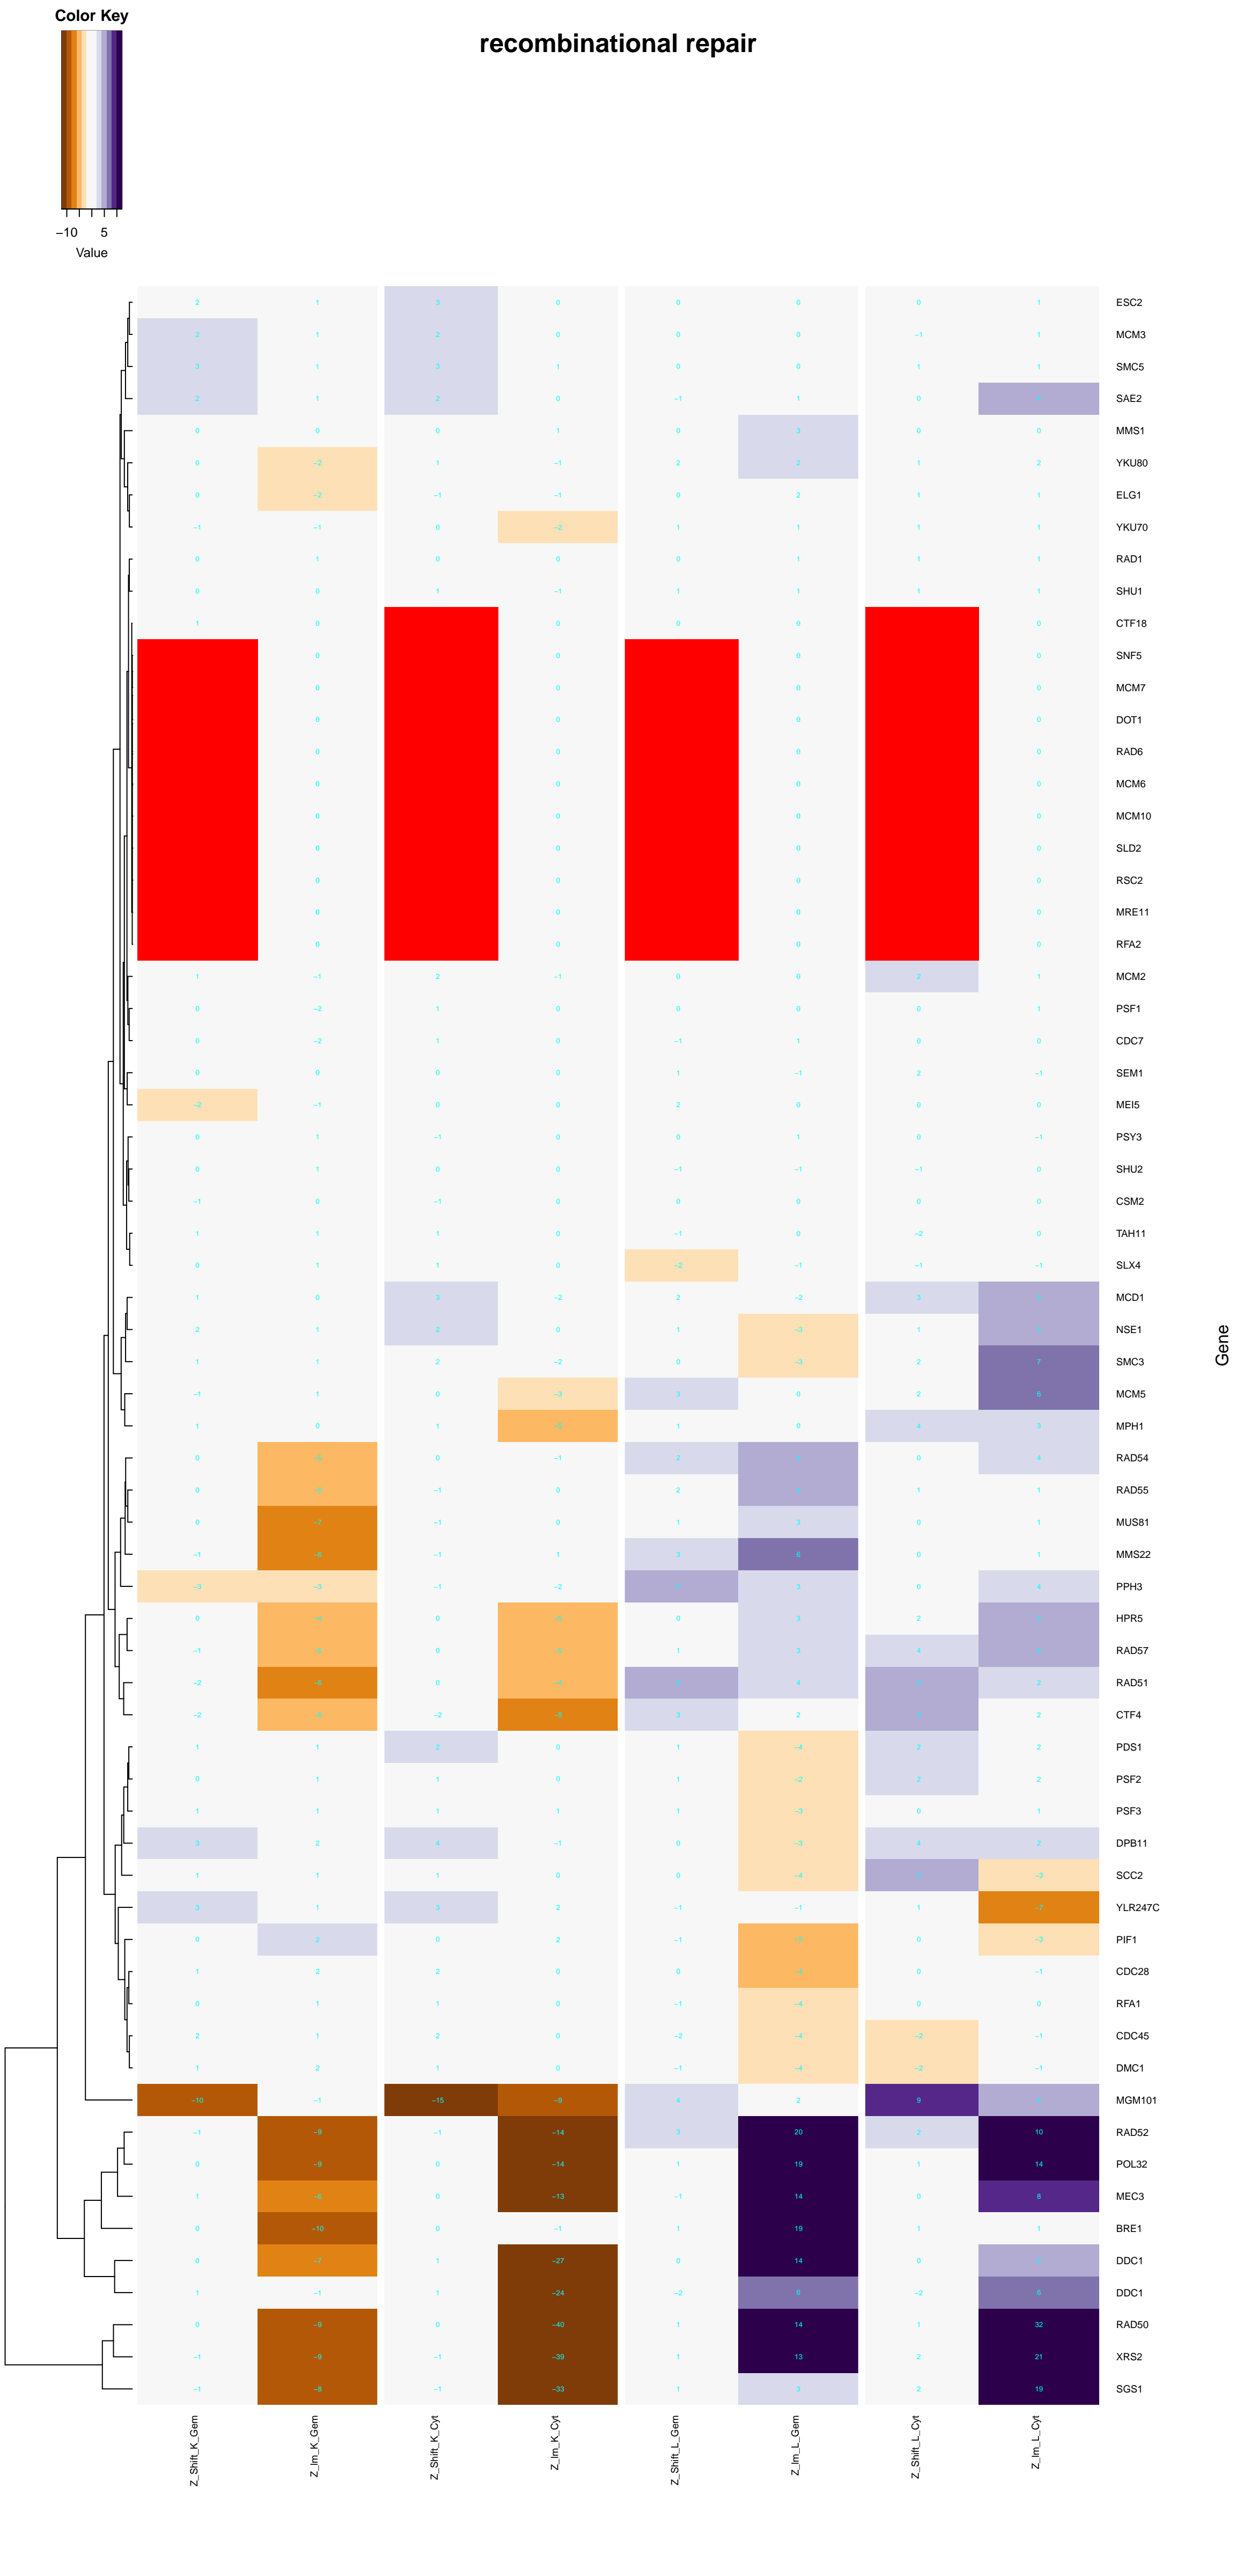

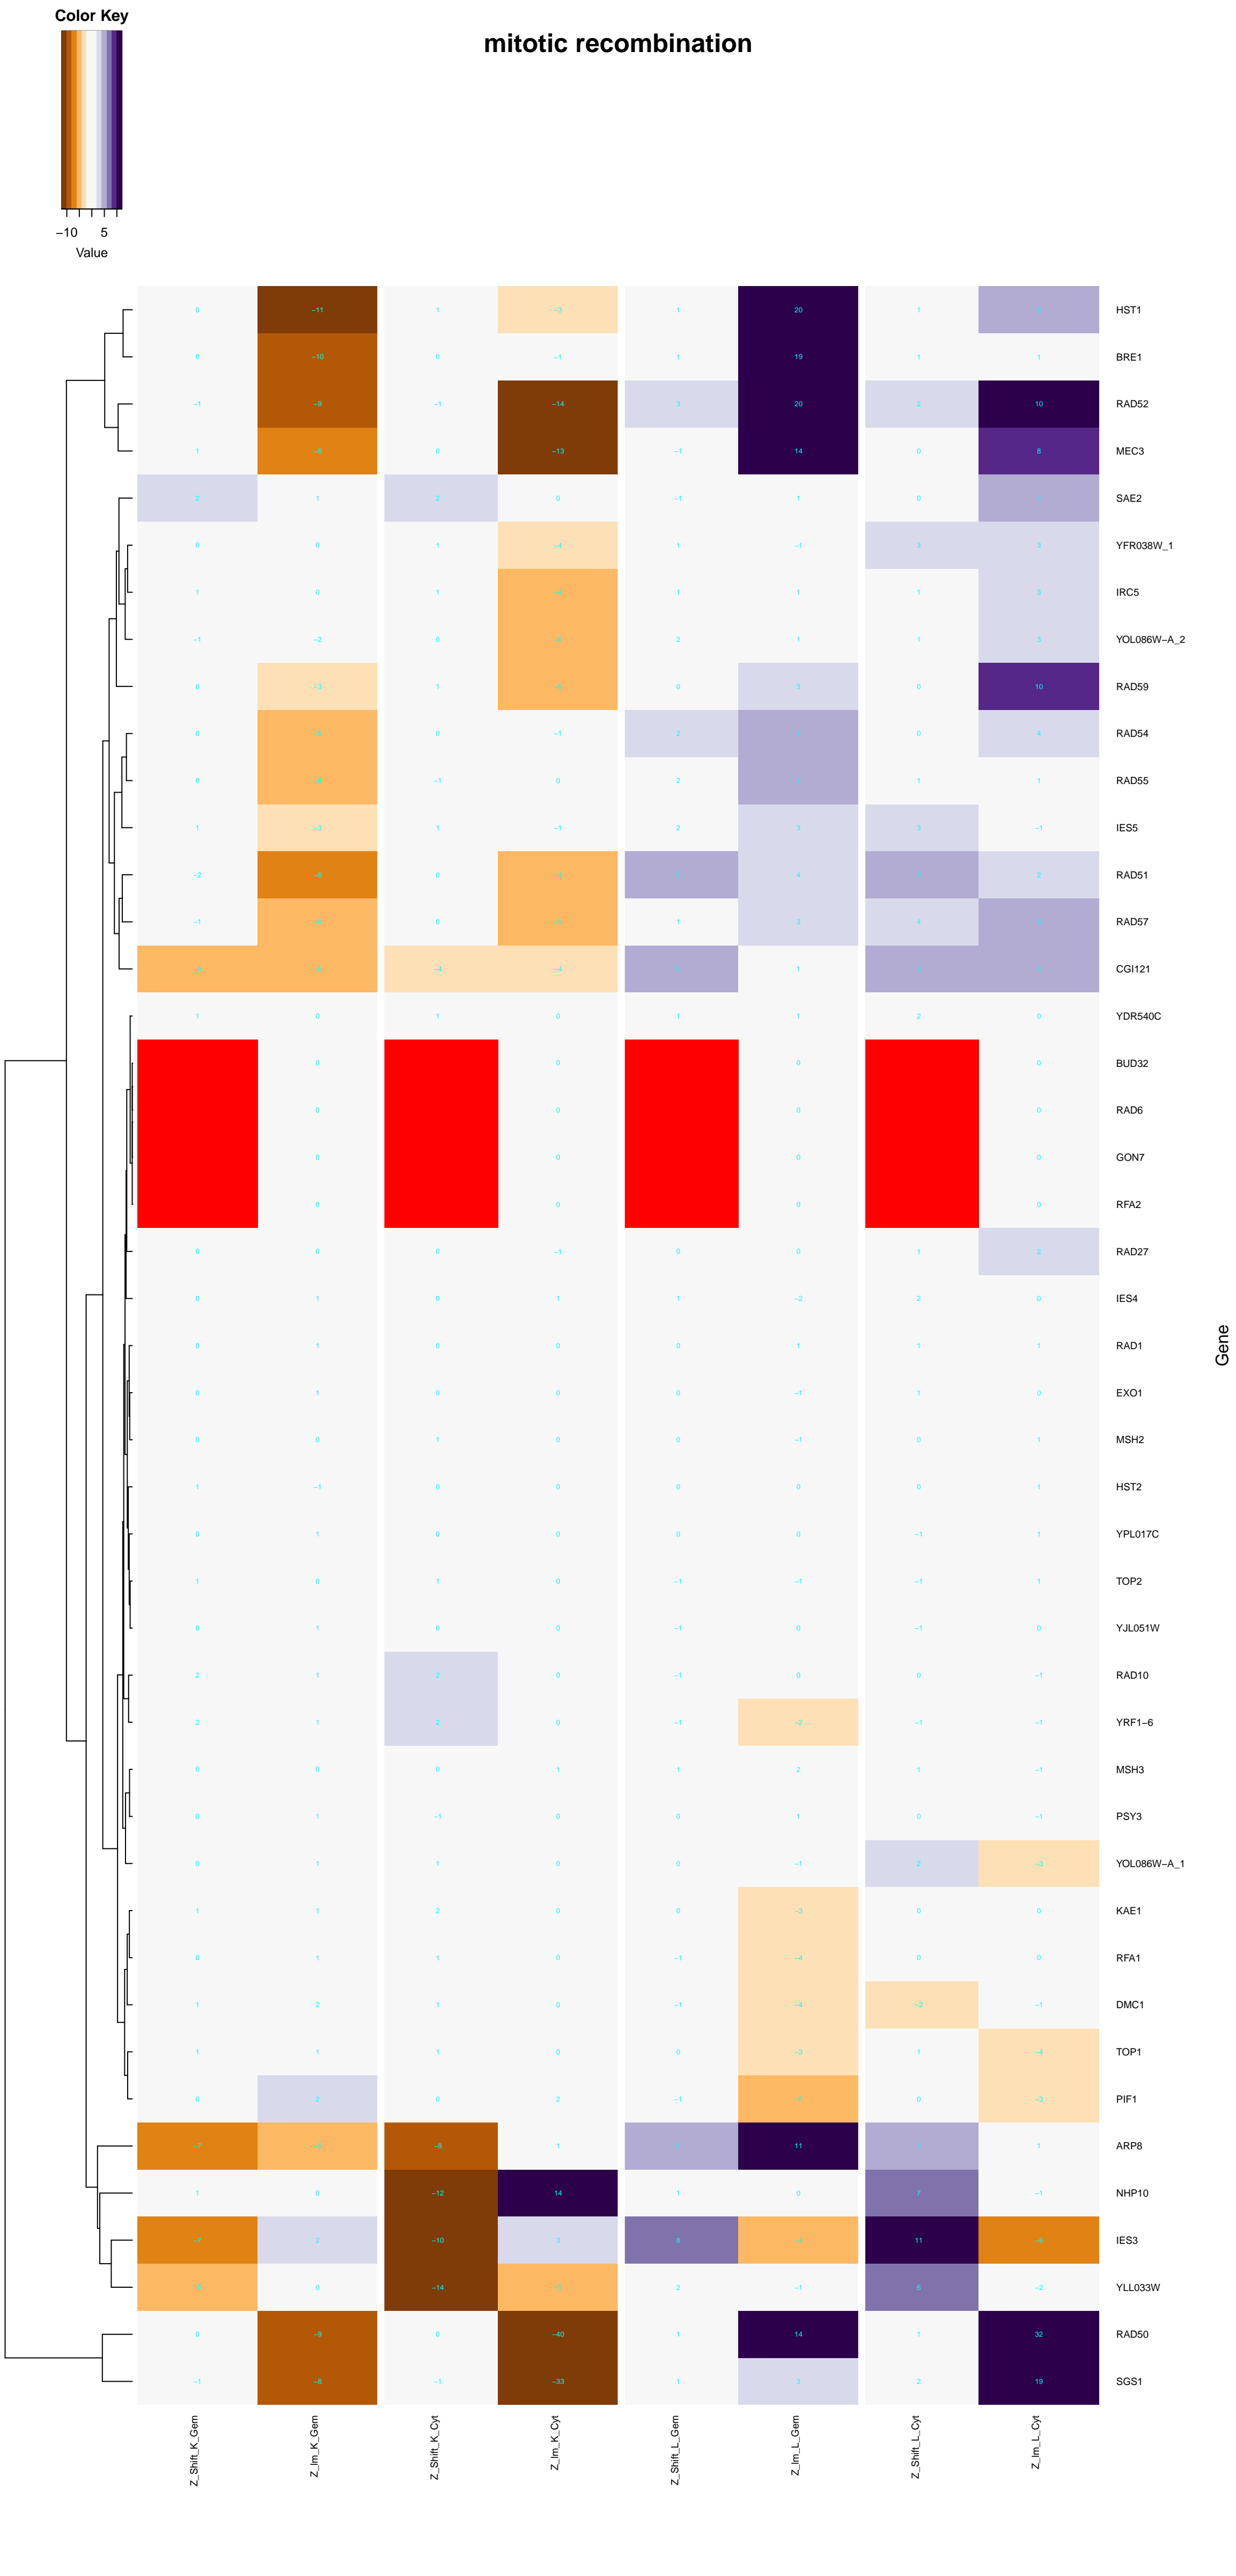

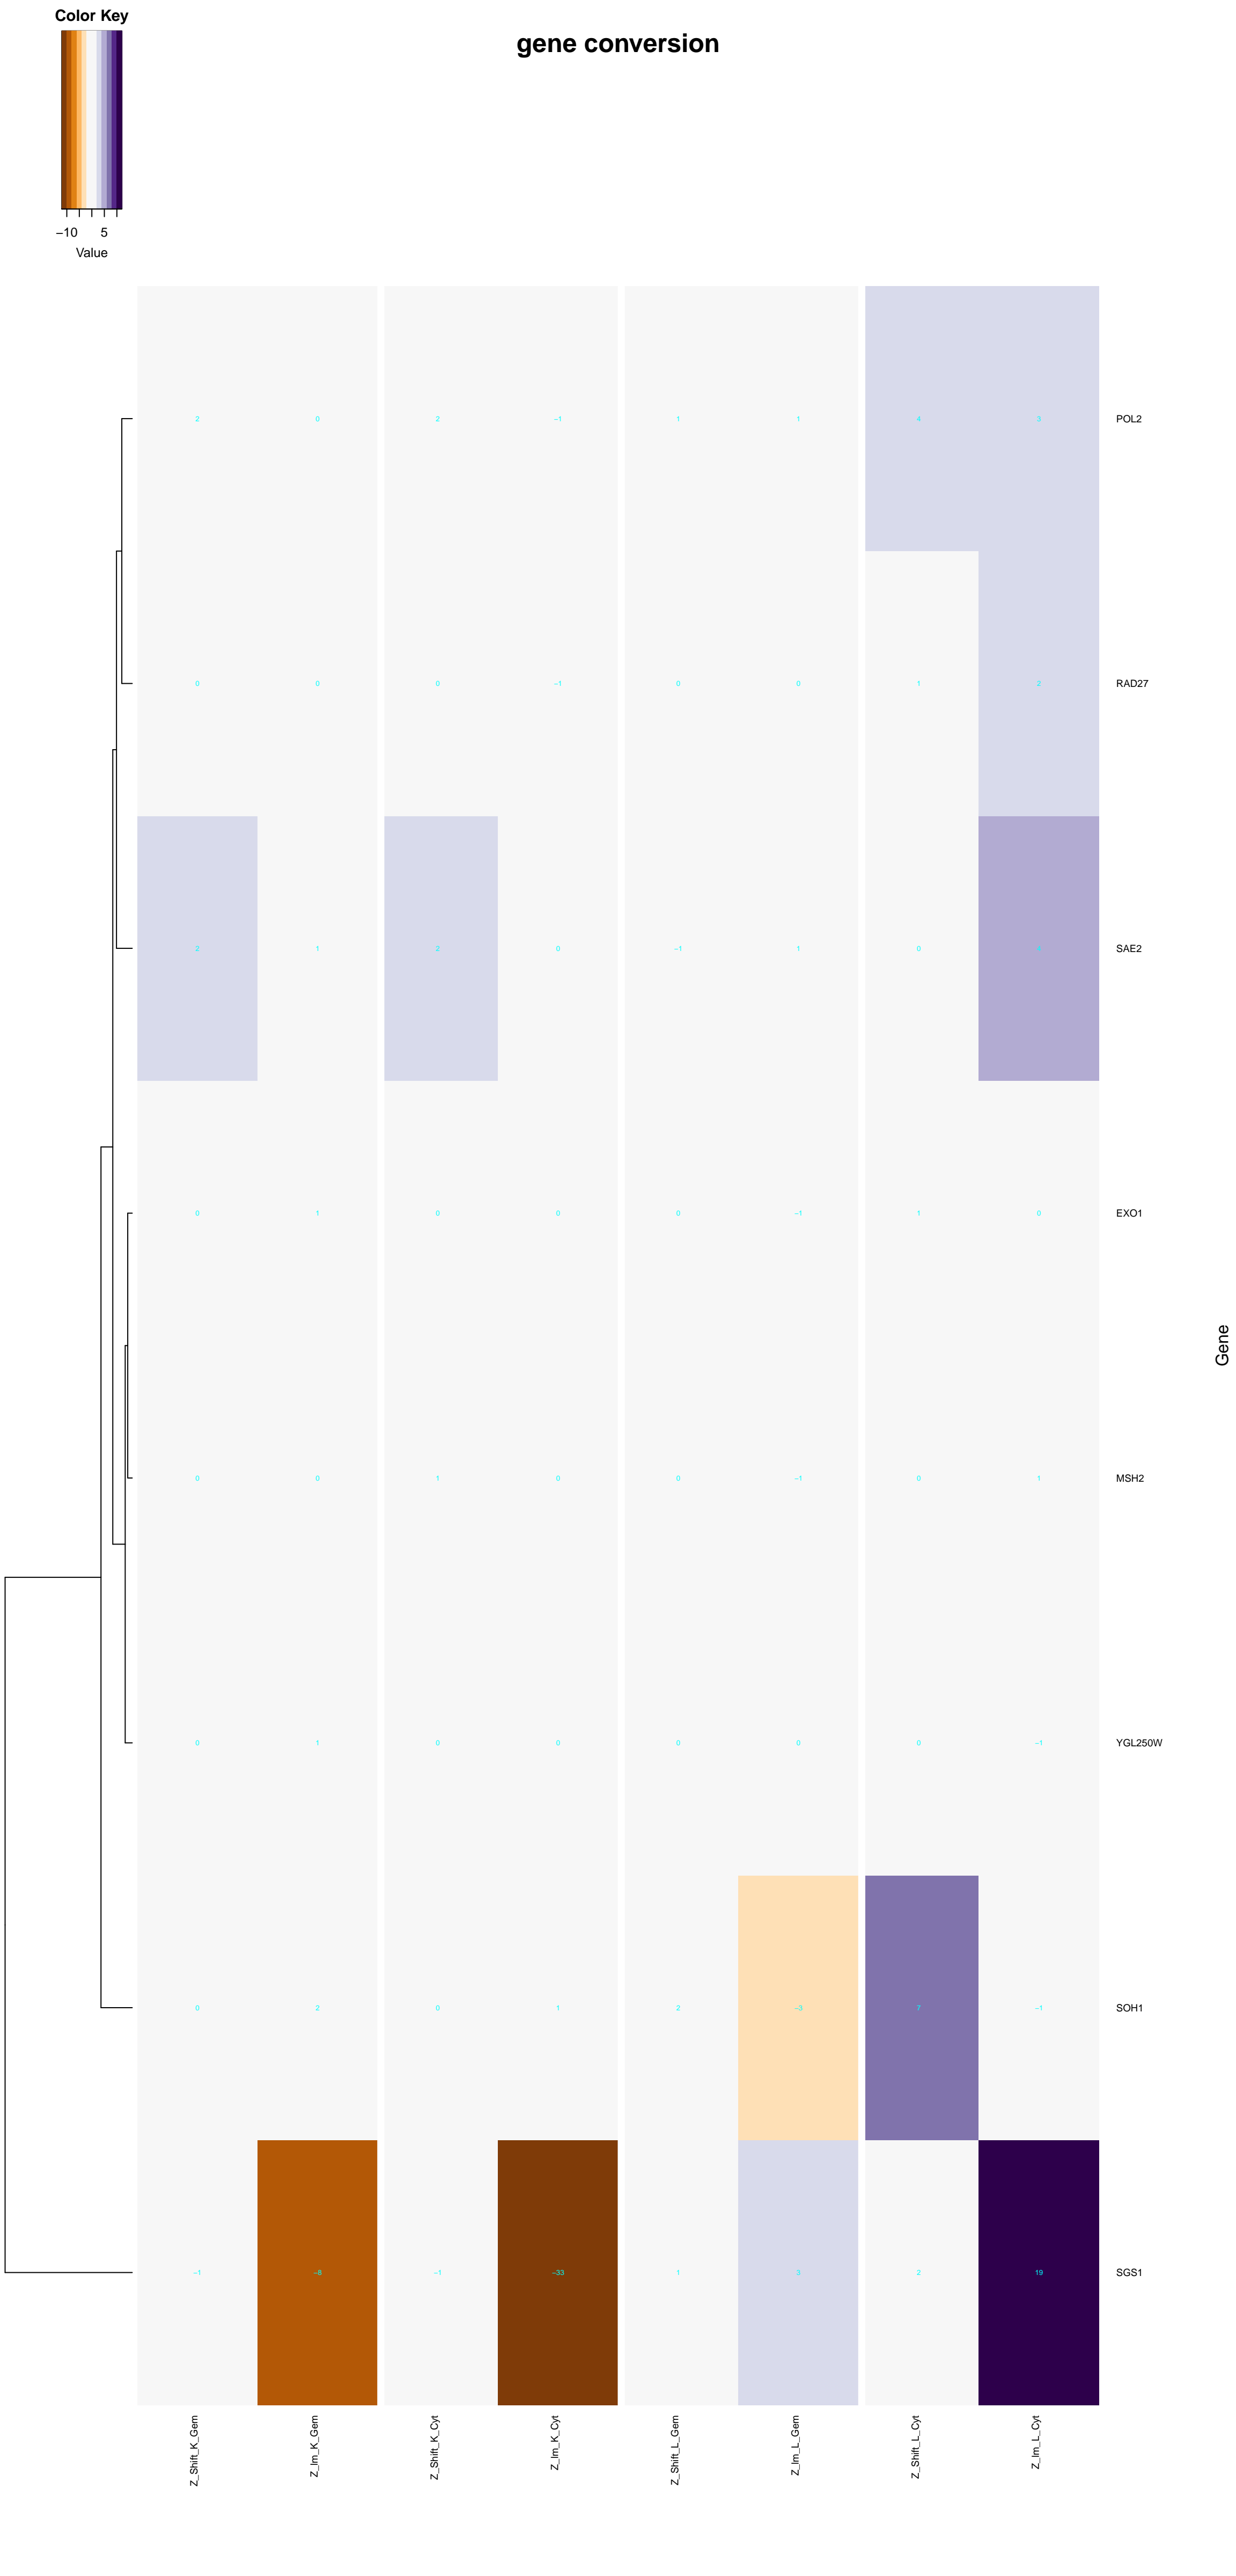

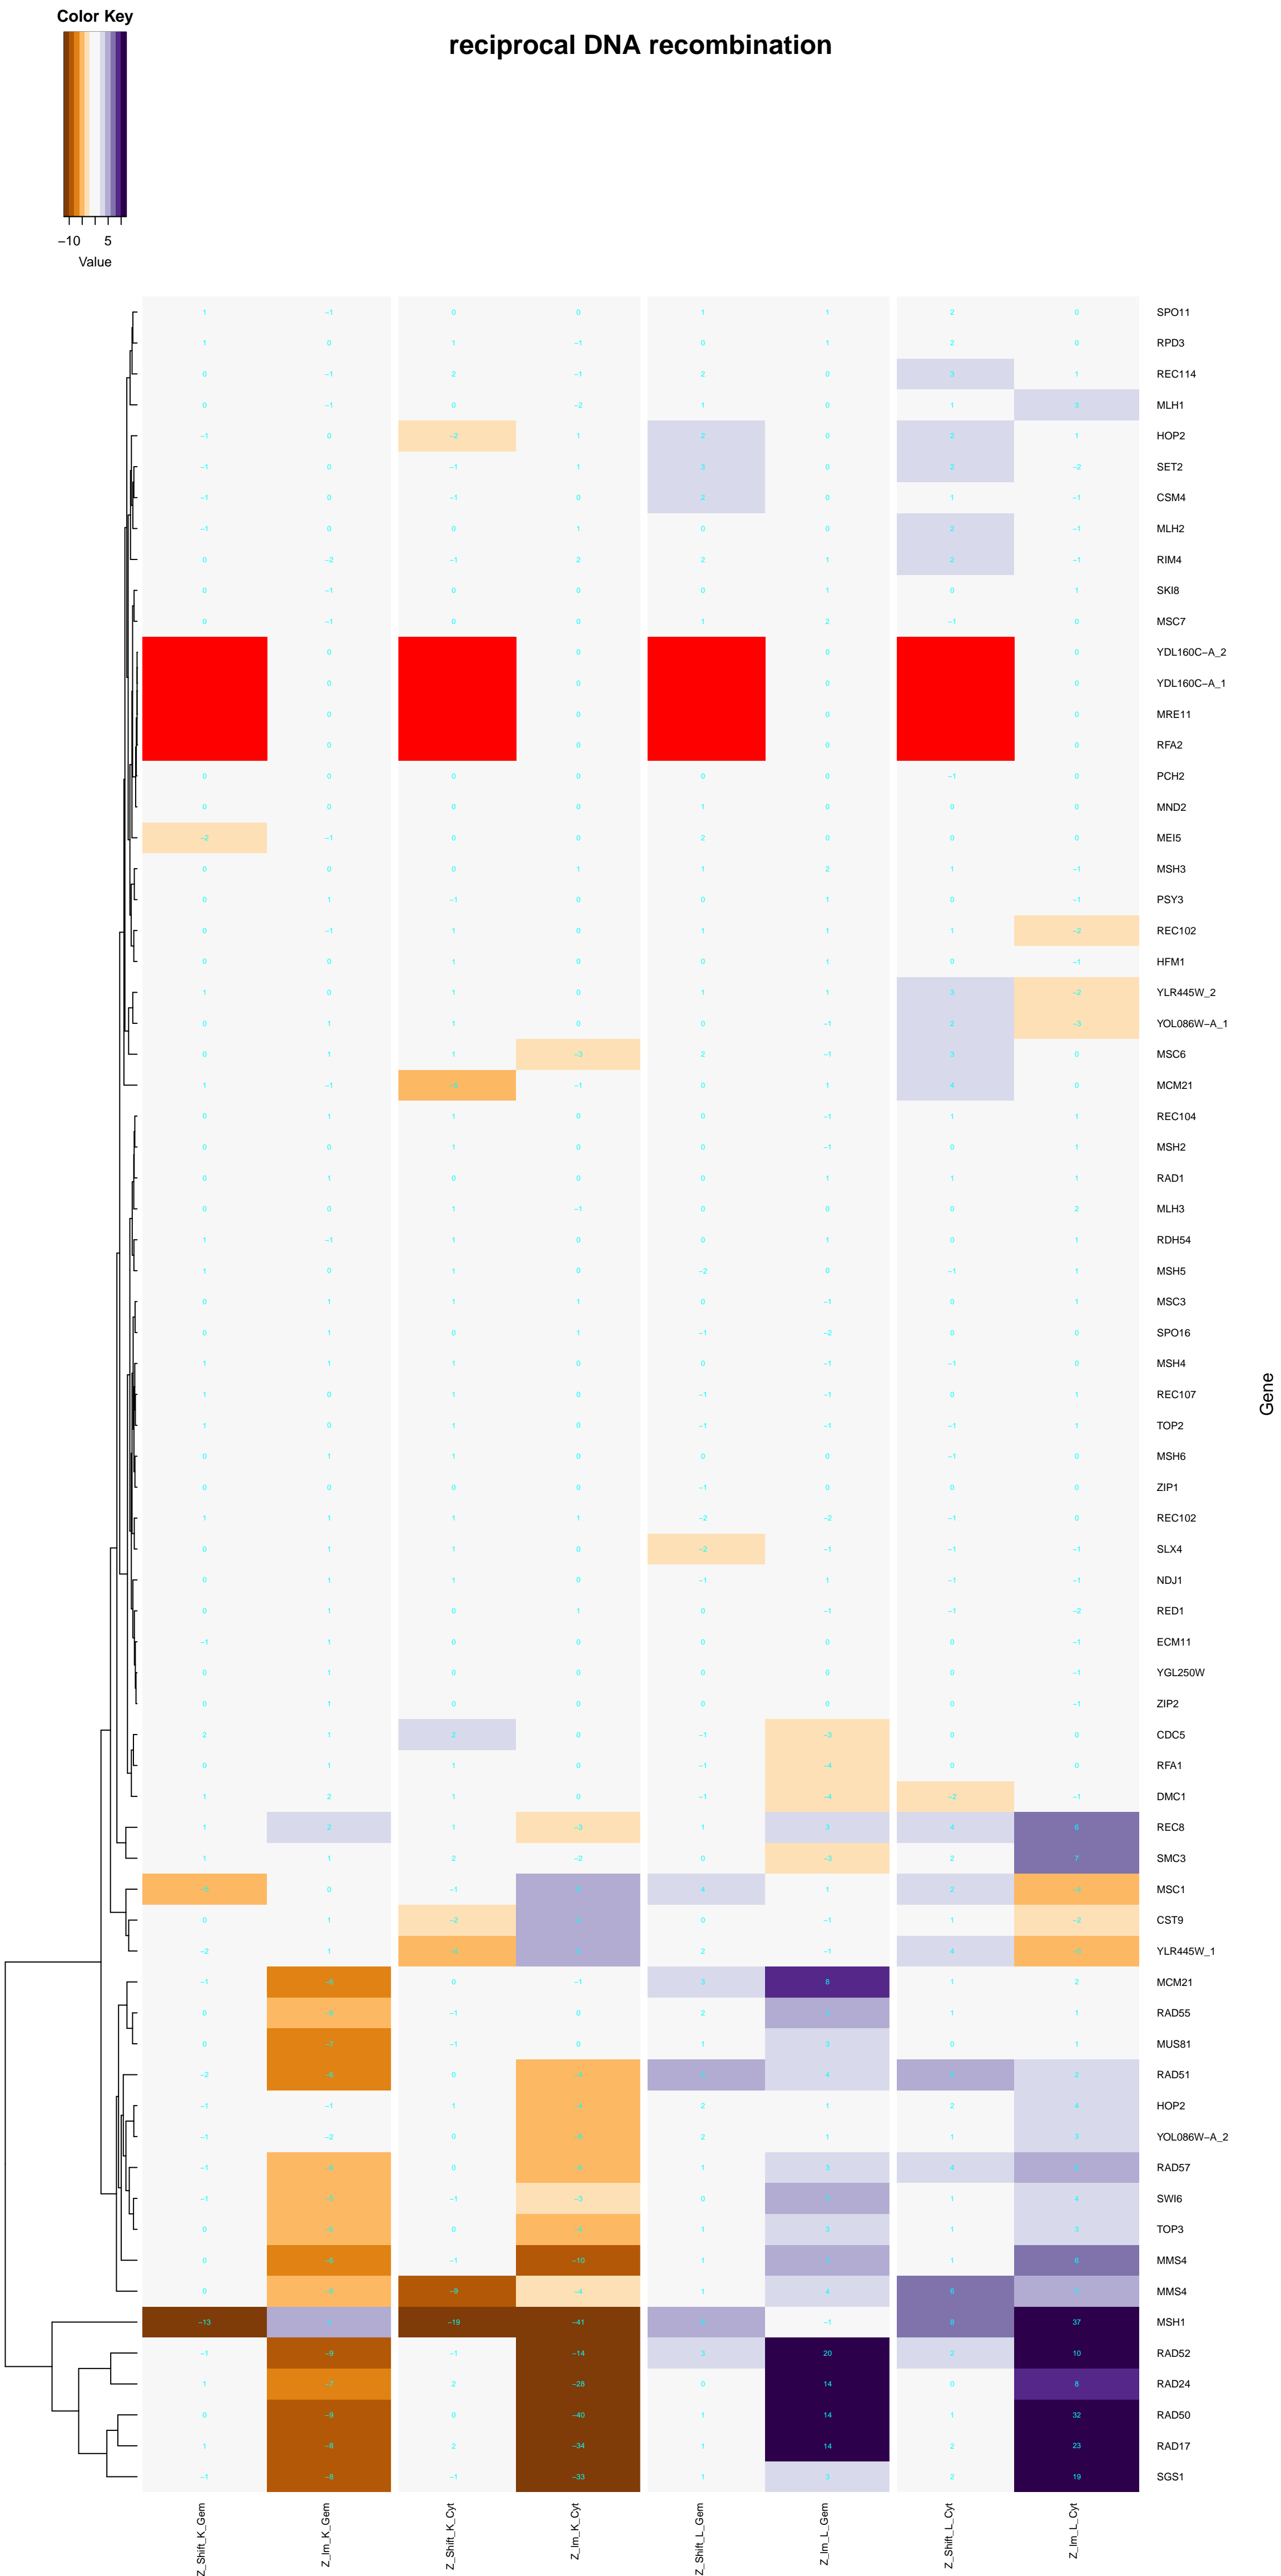

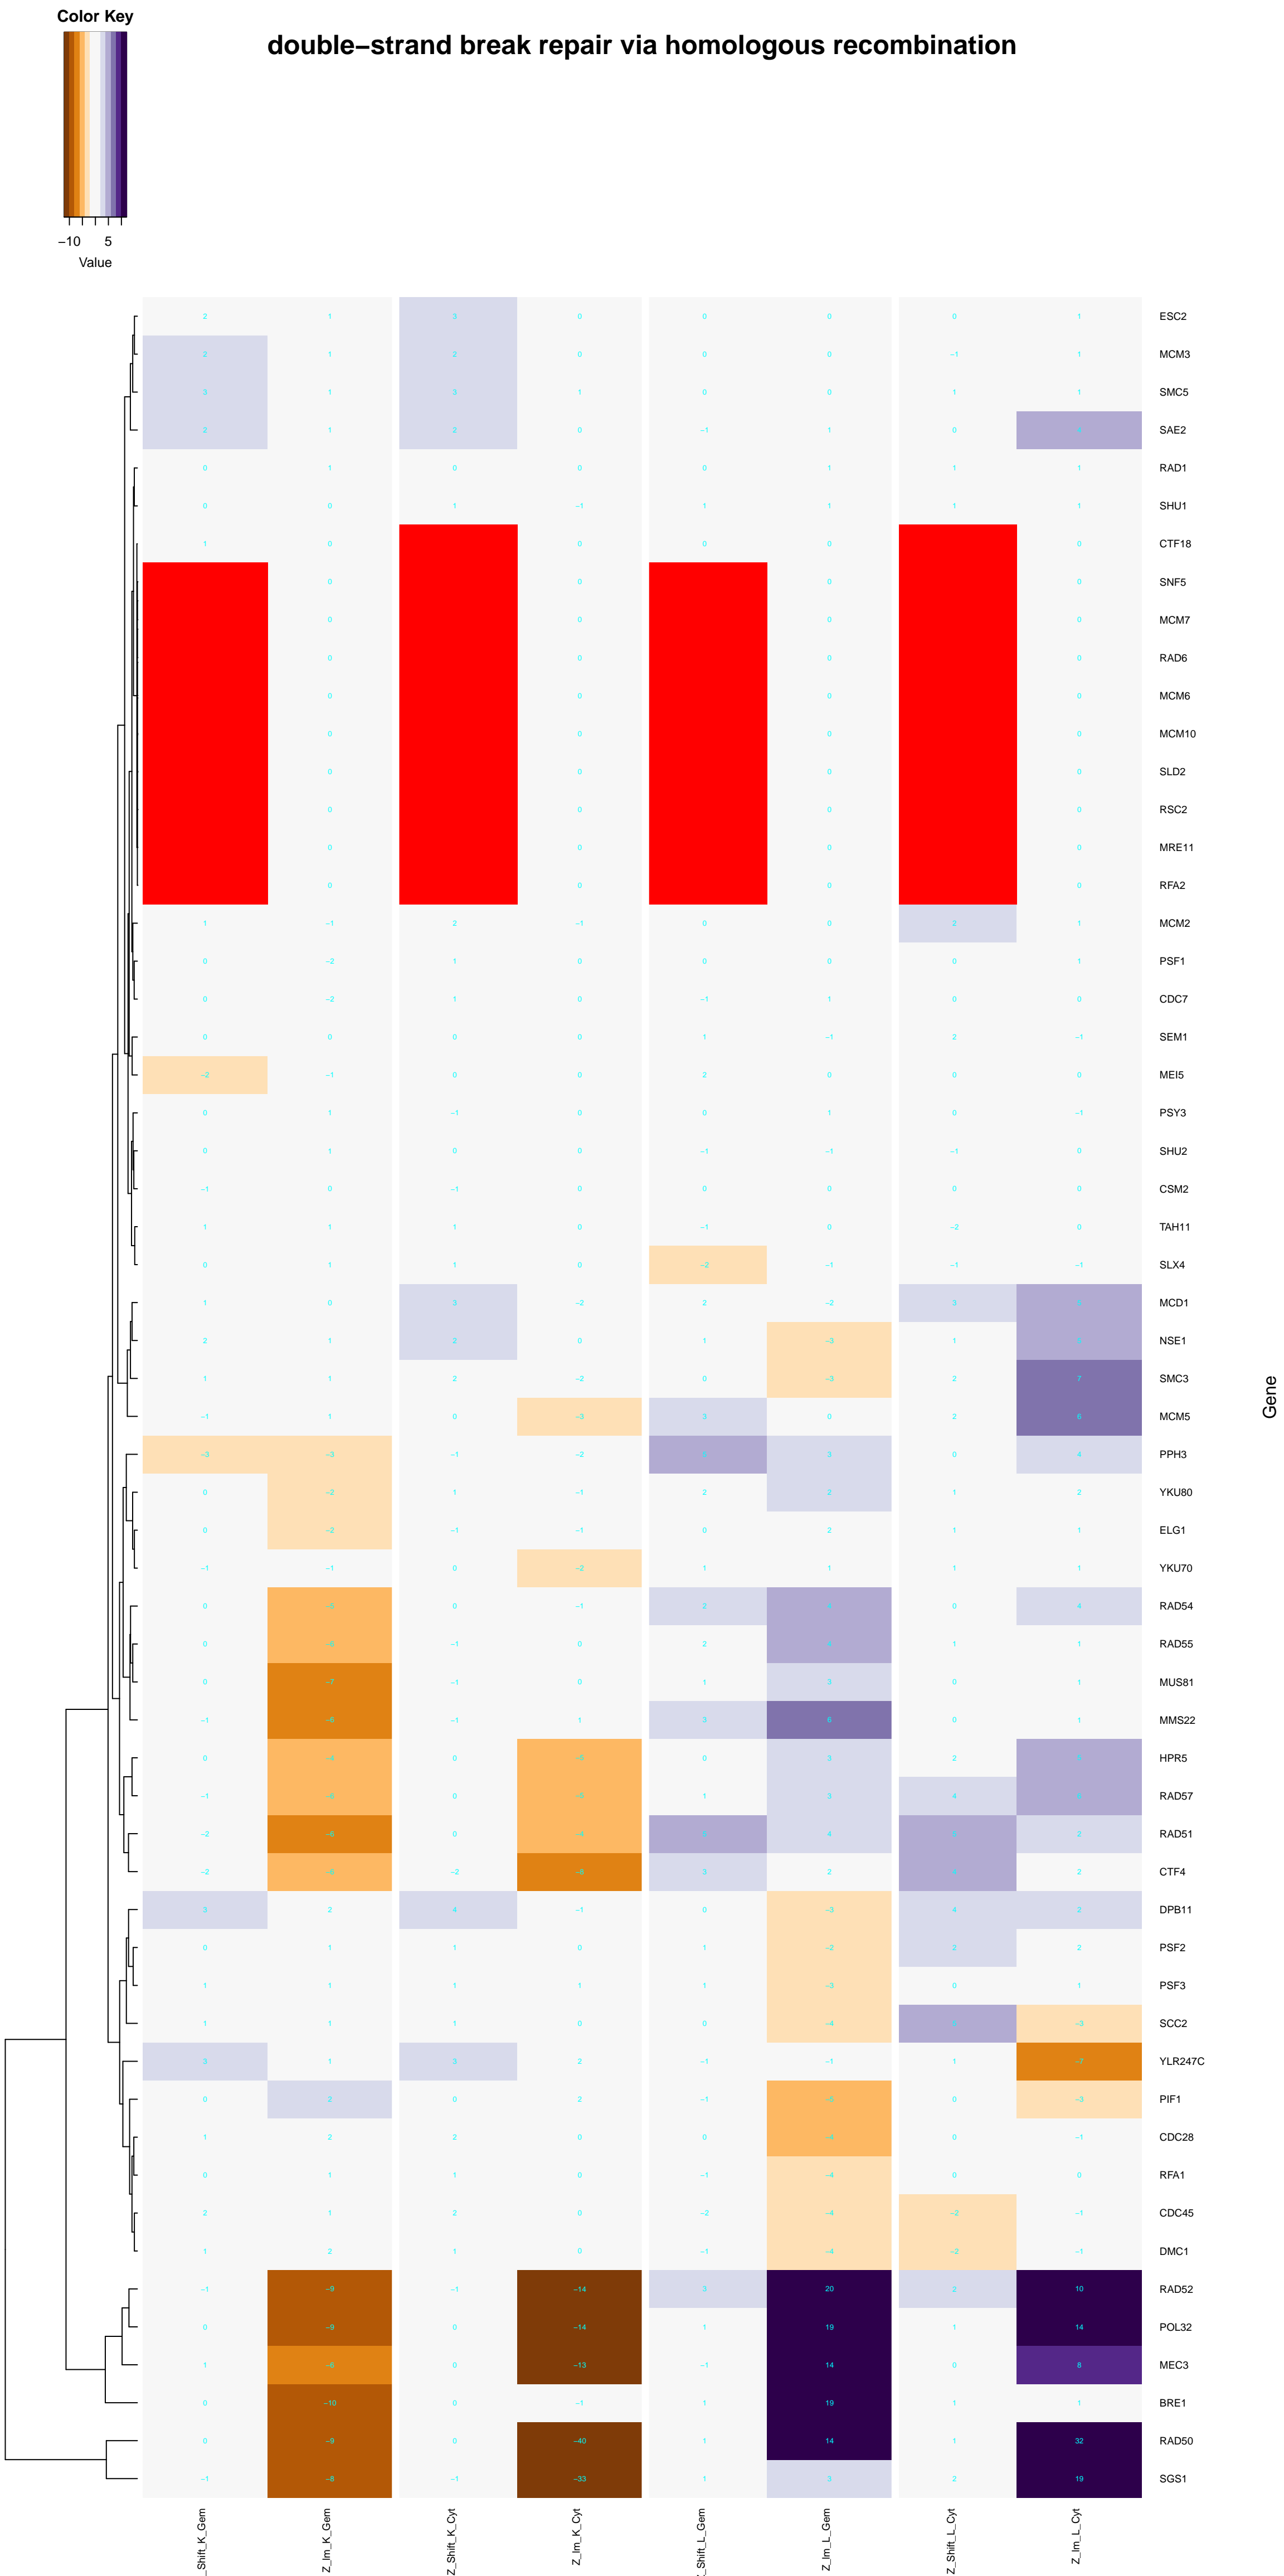

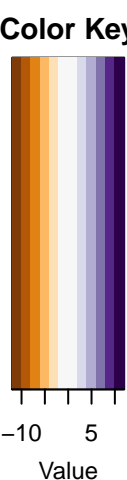

mitochondrial double-strand break repair via homologous recombination

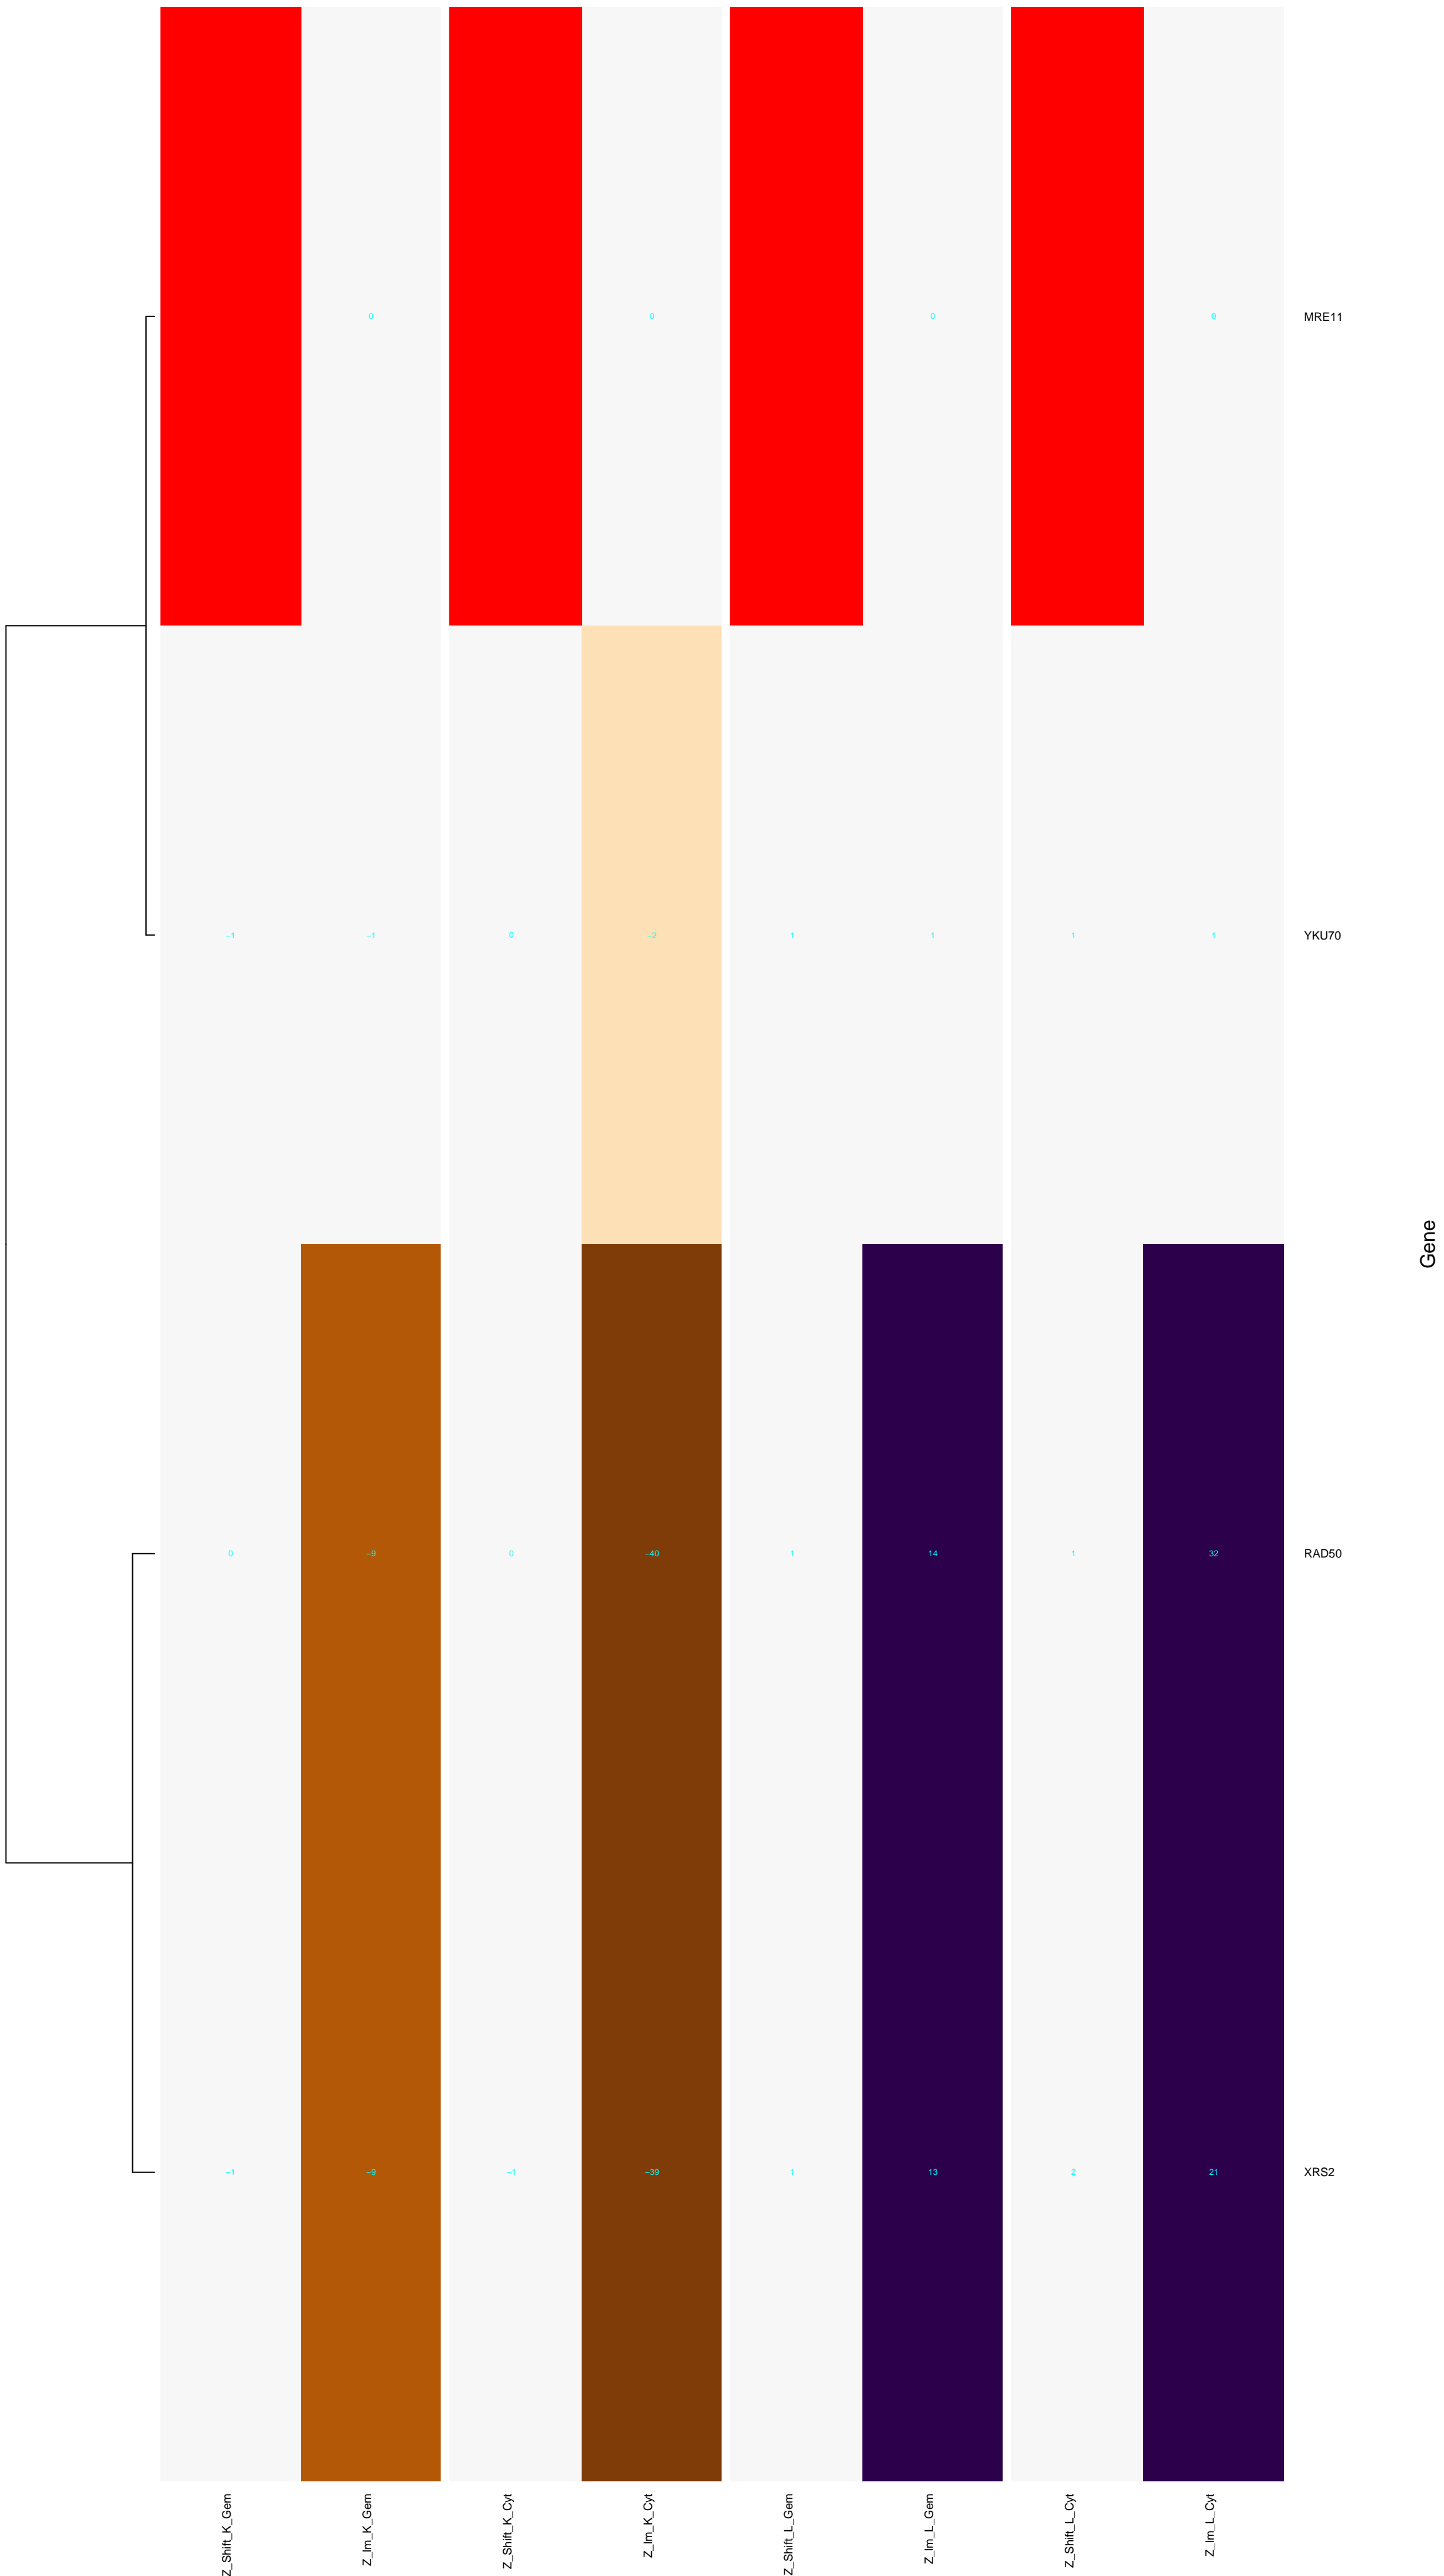

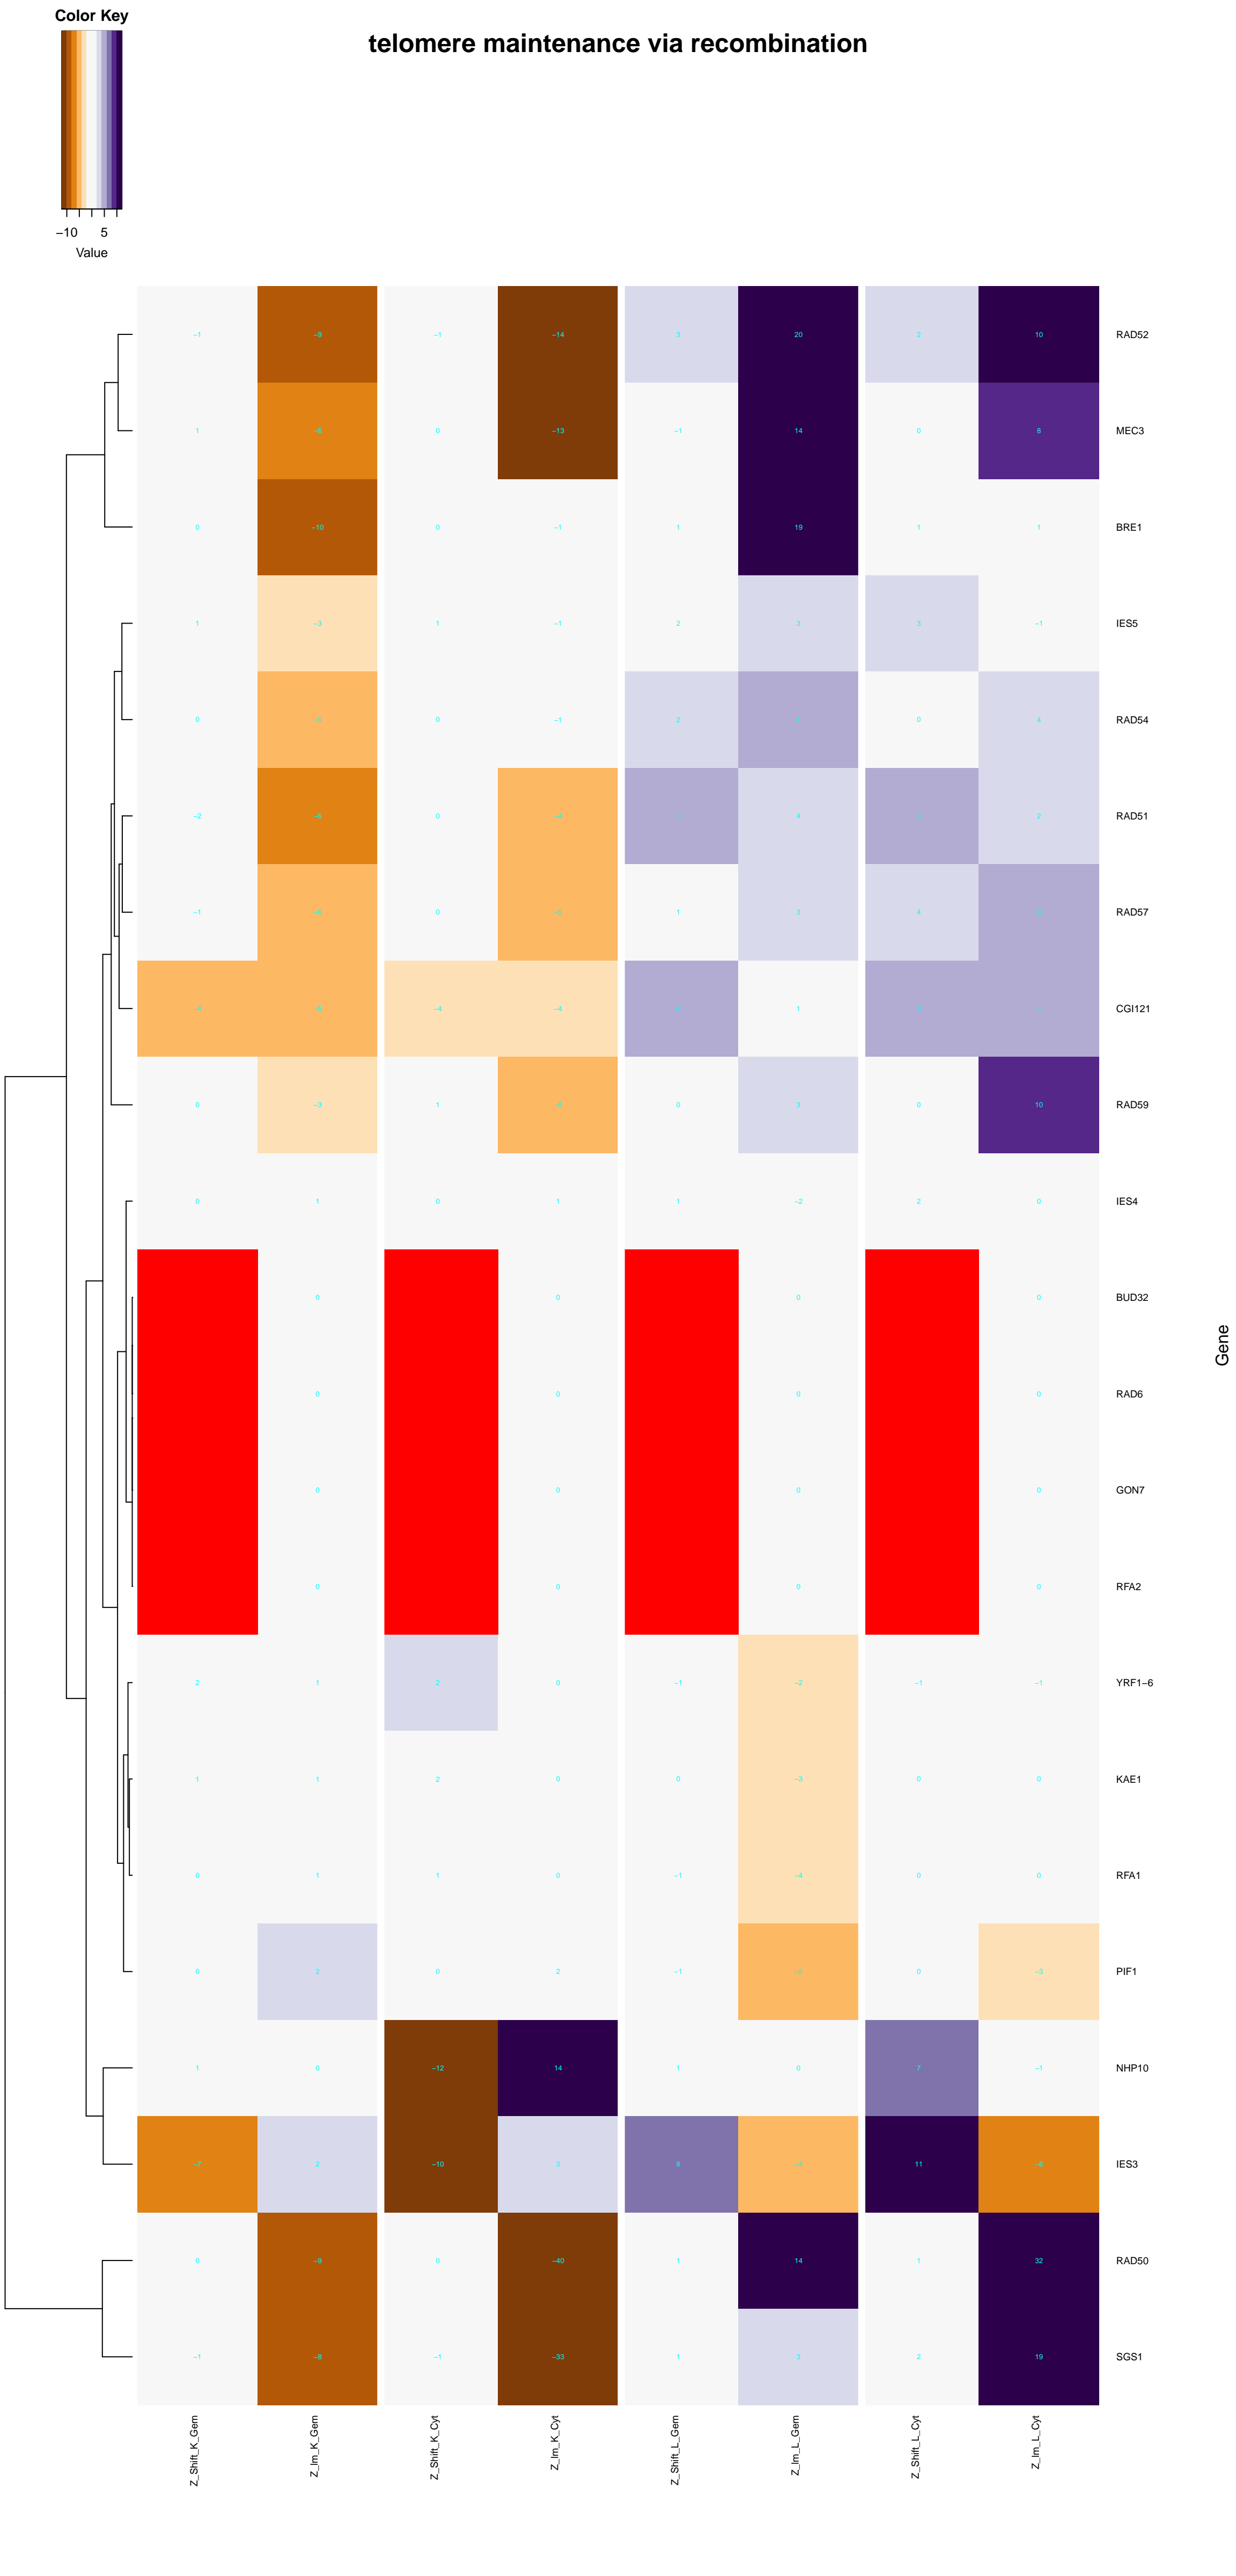



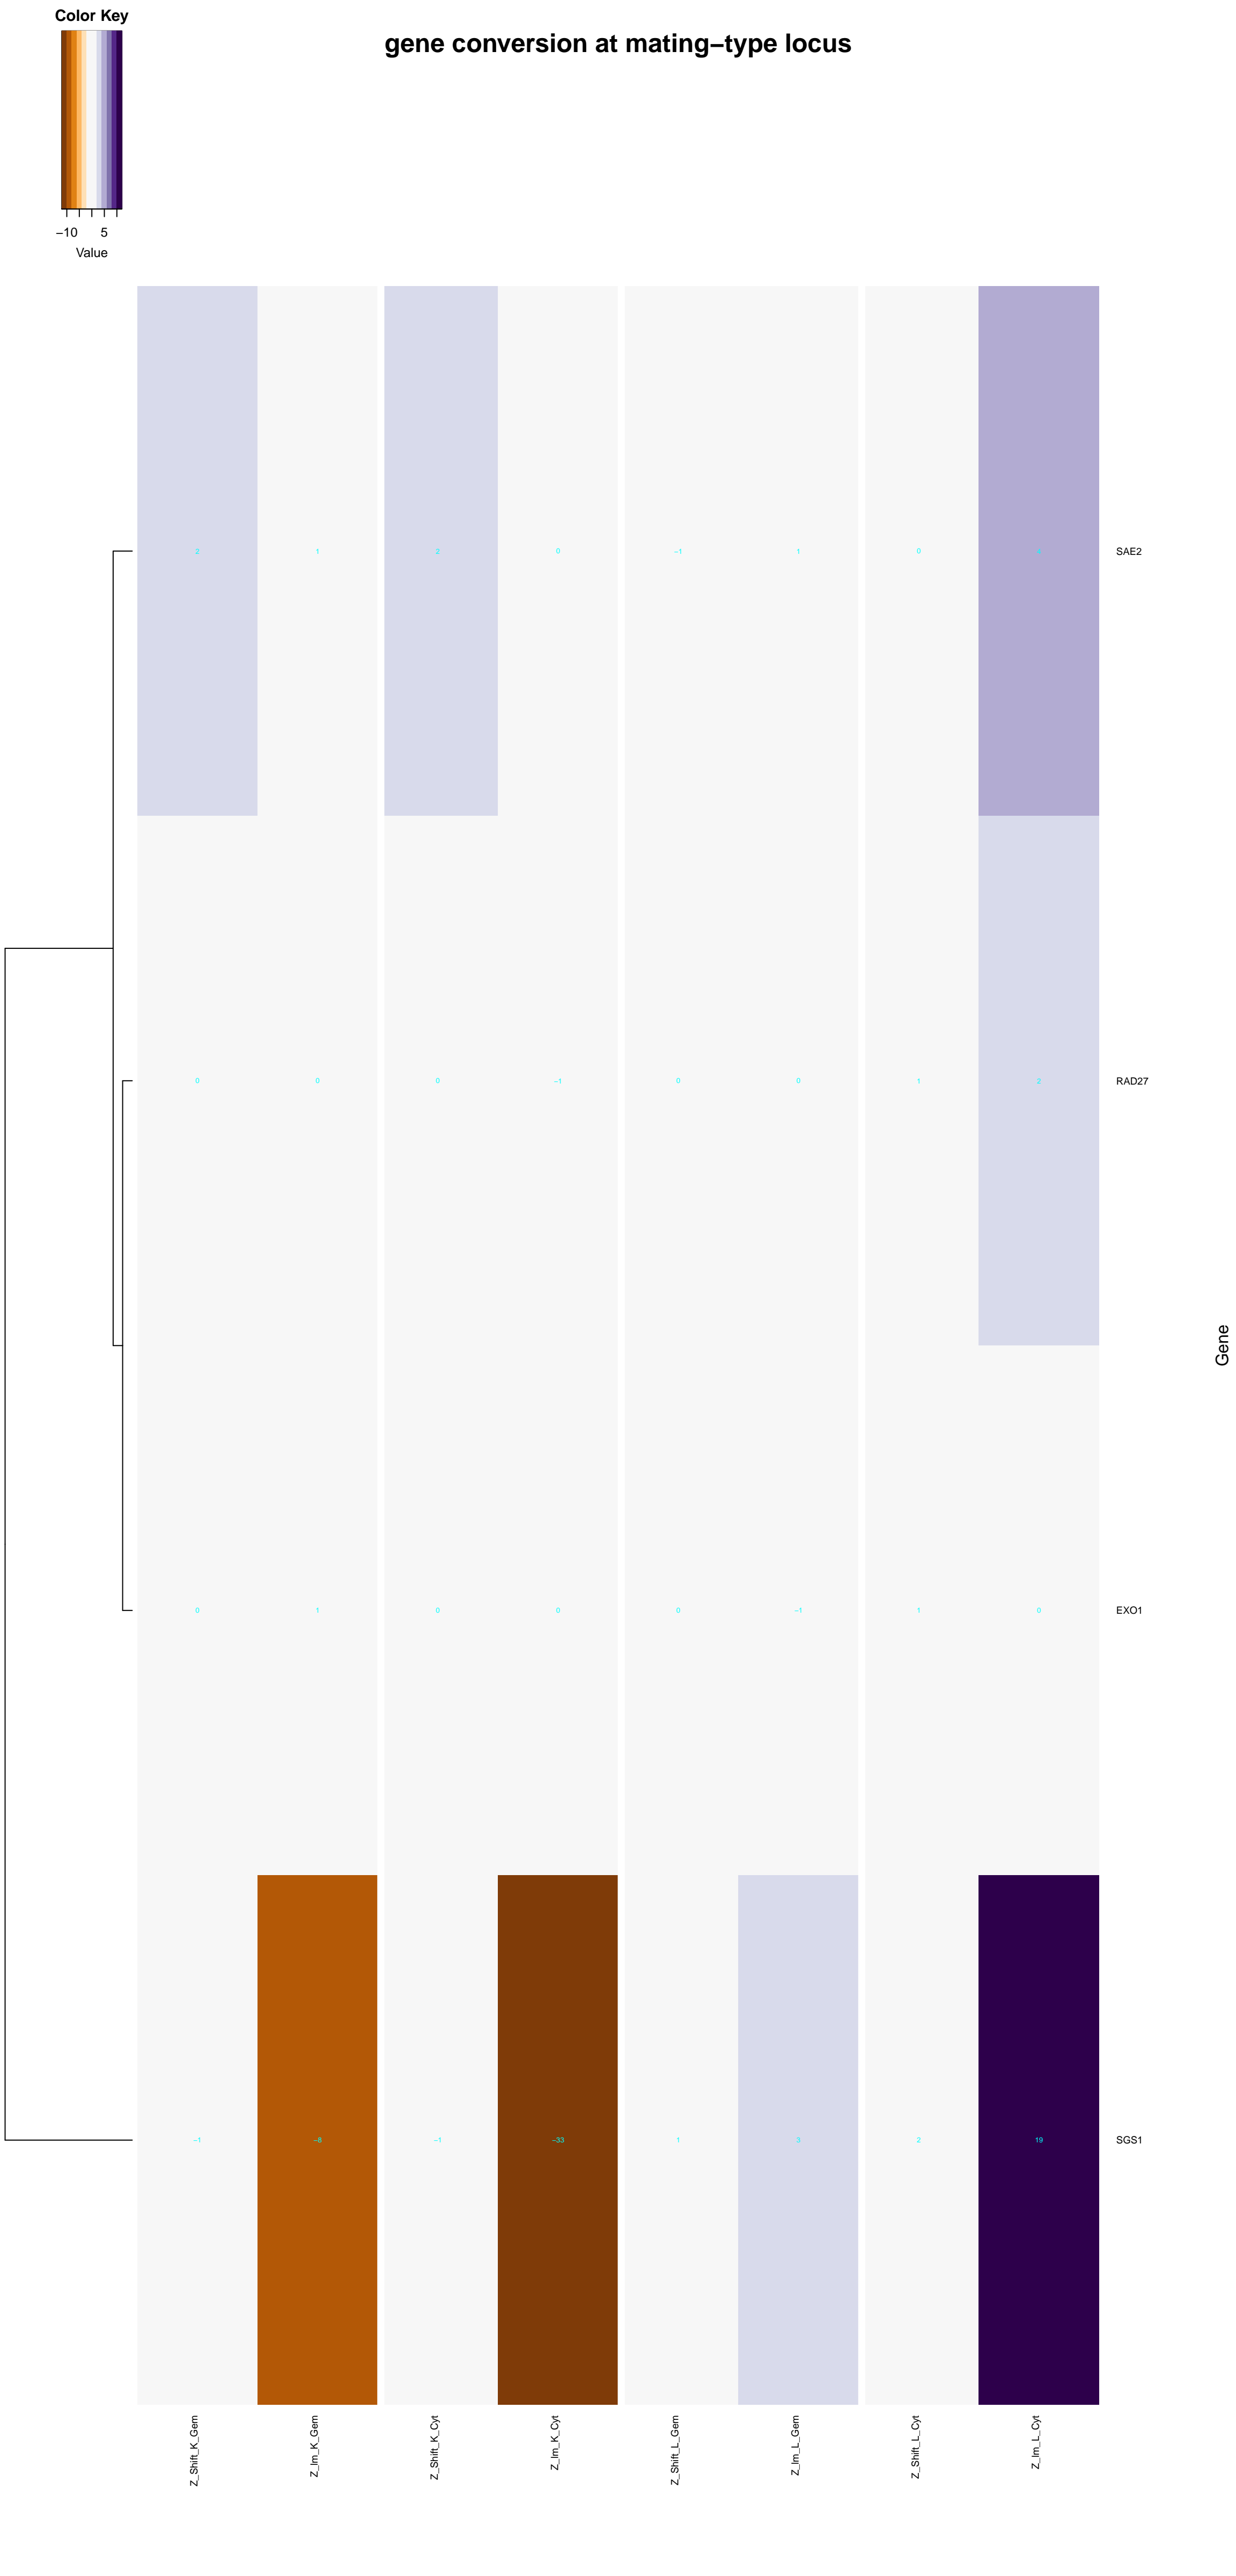

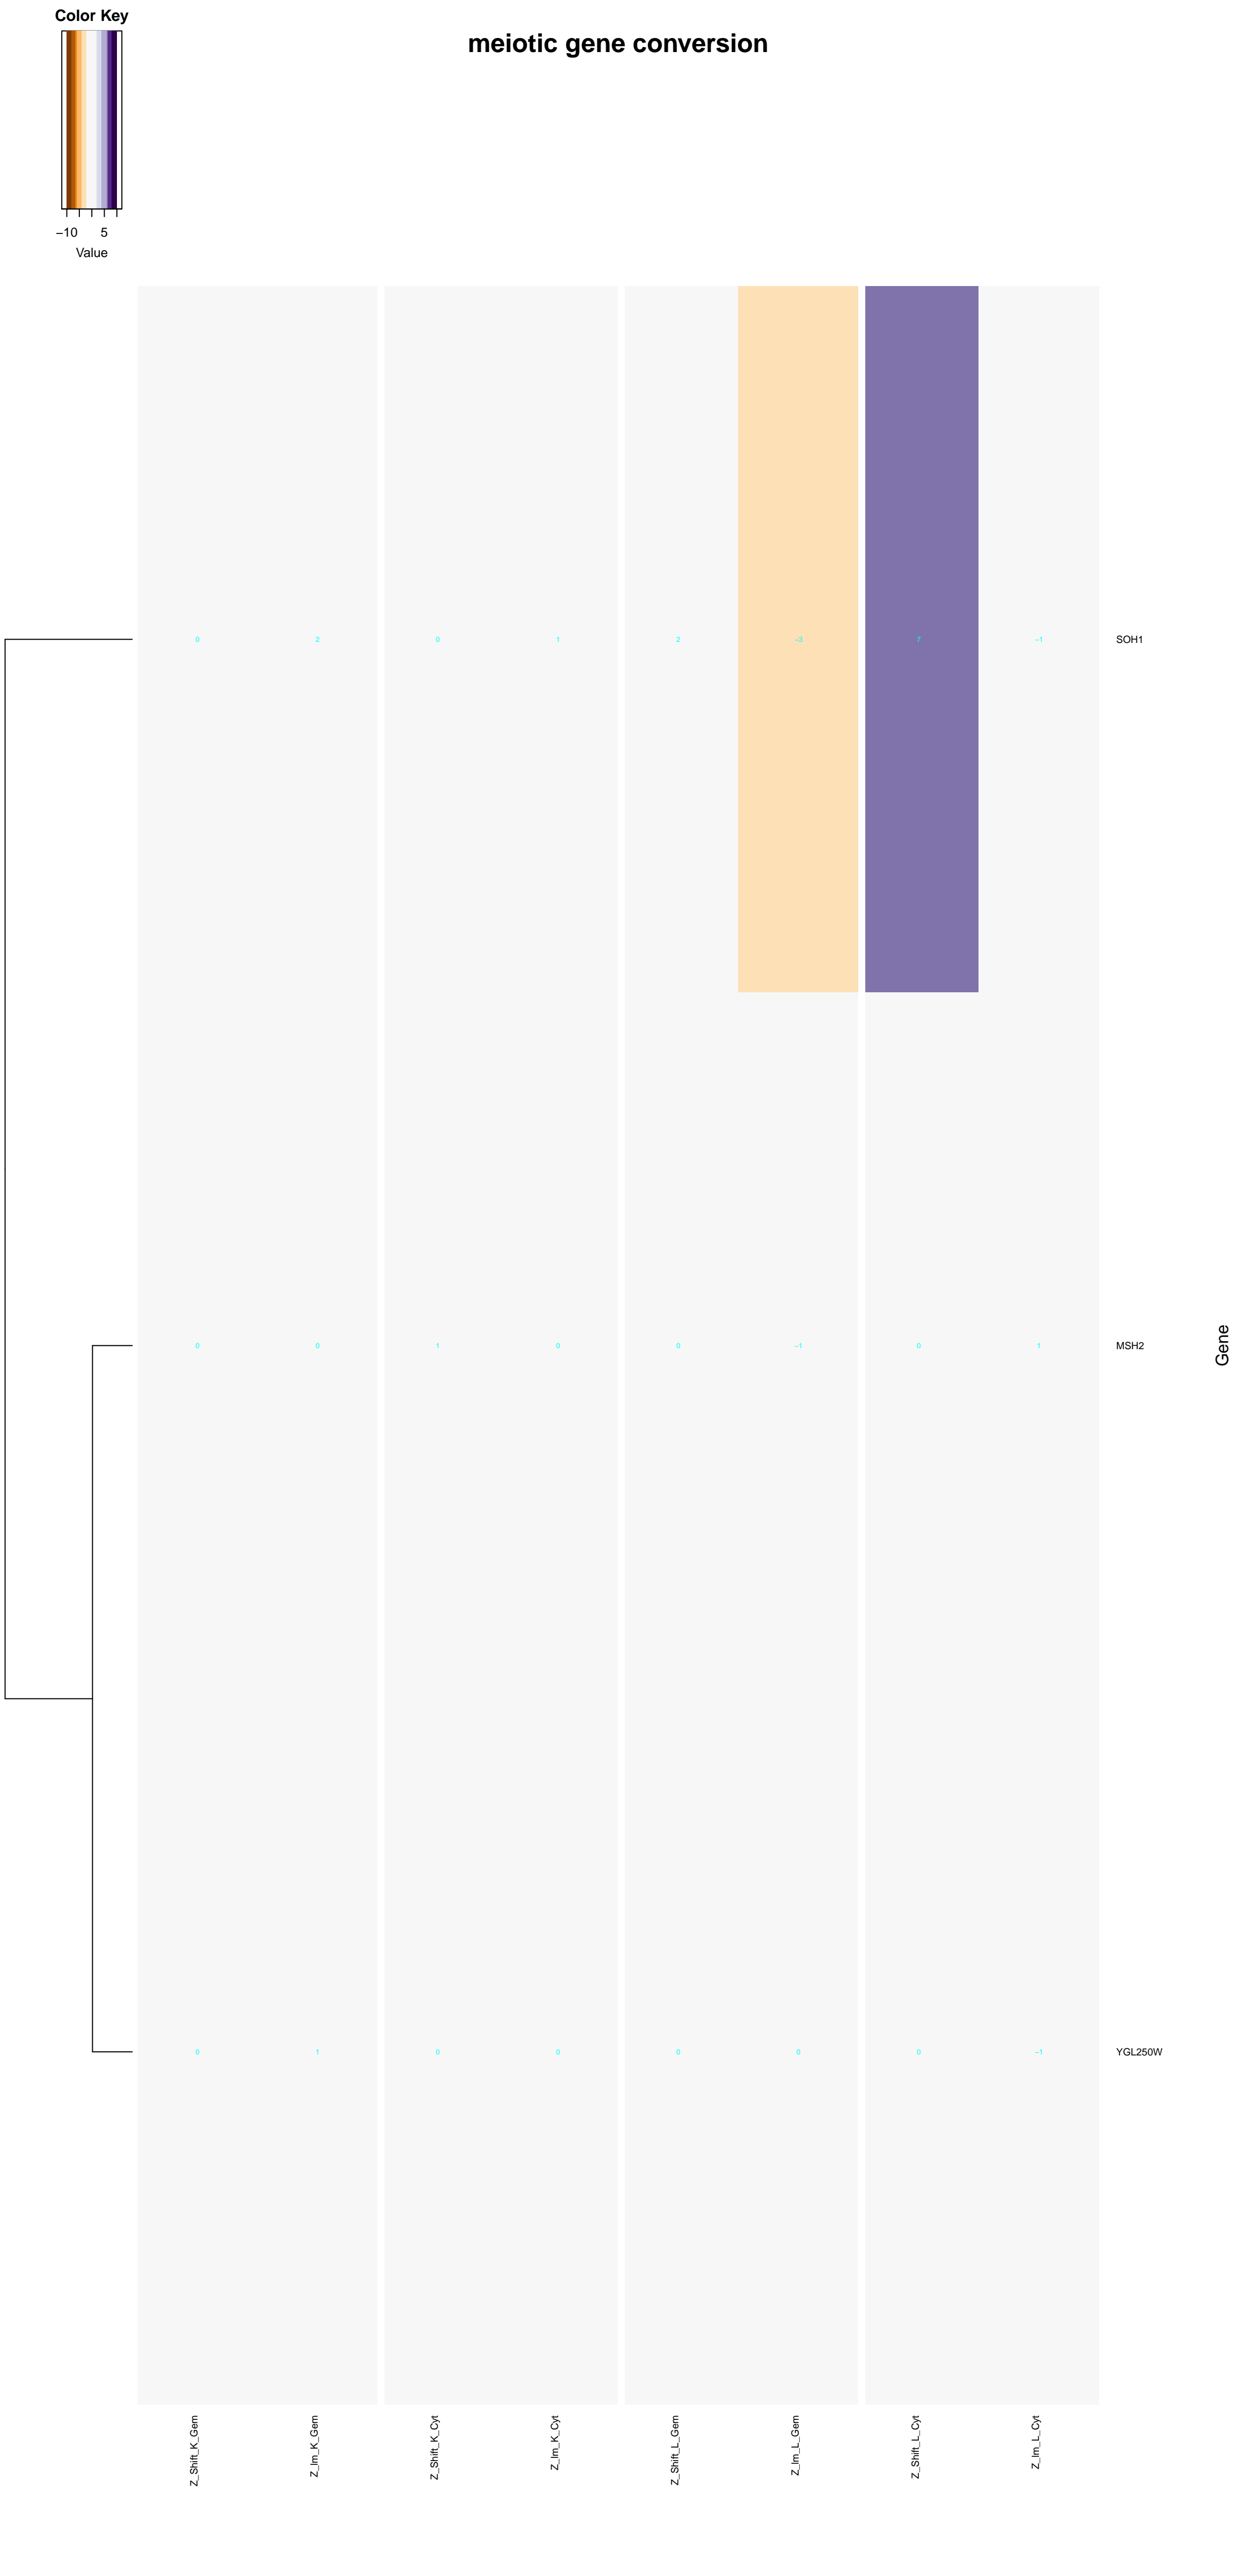

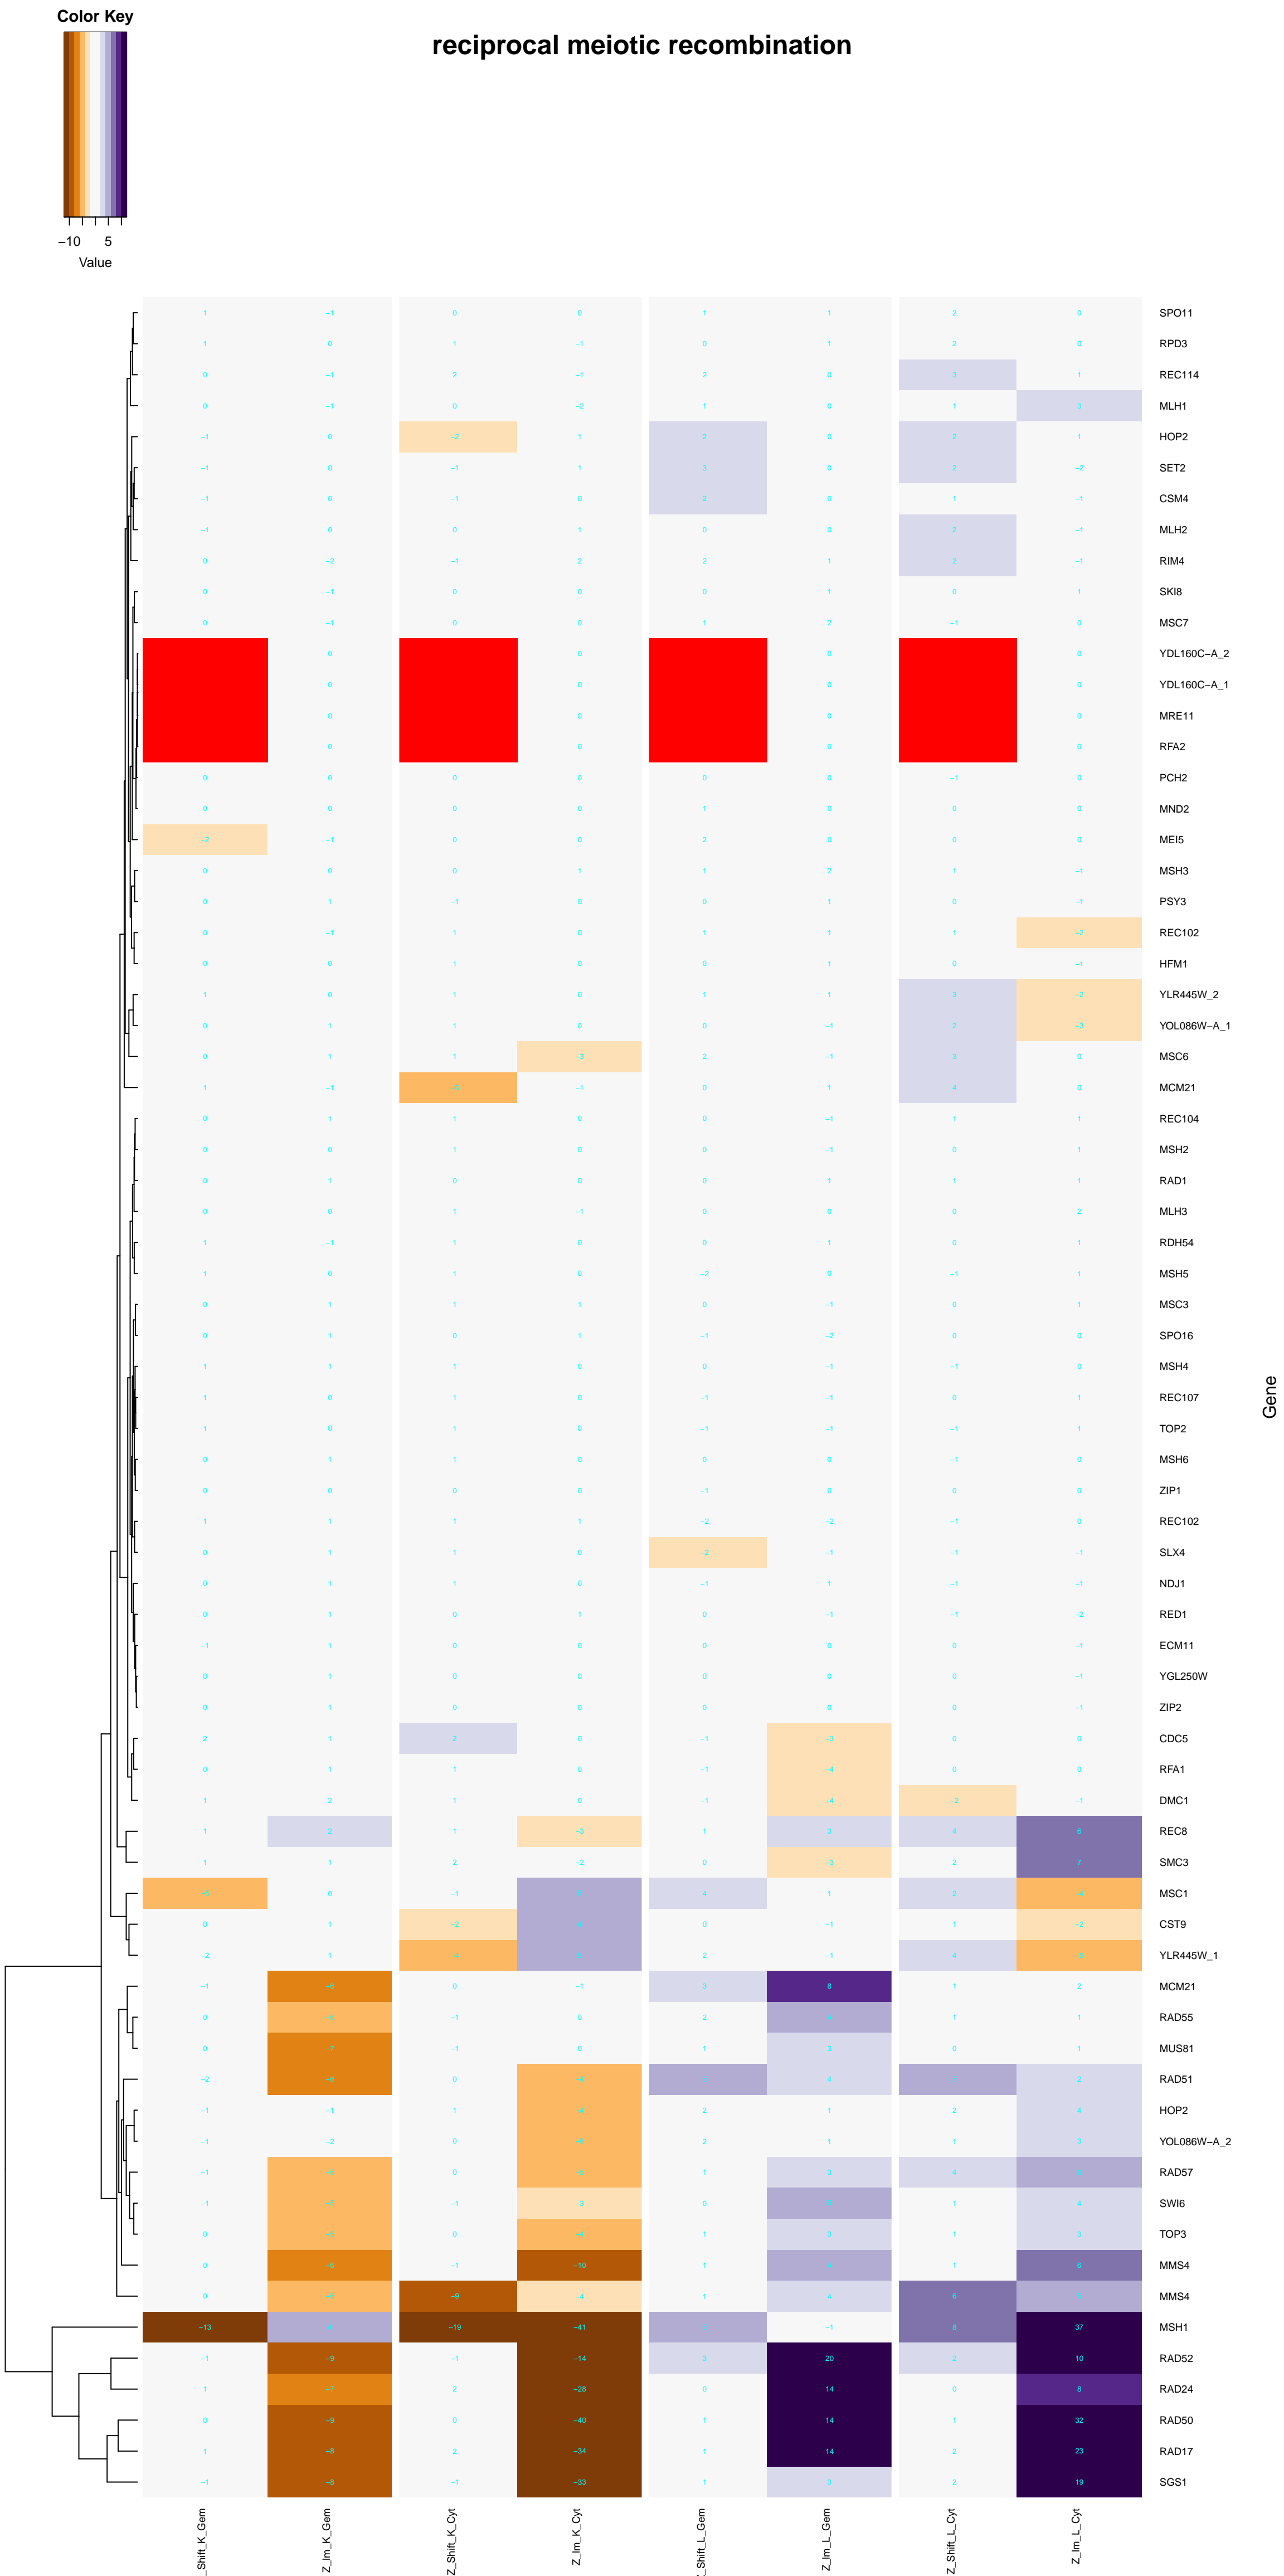

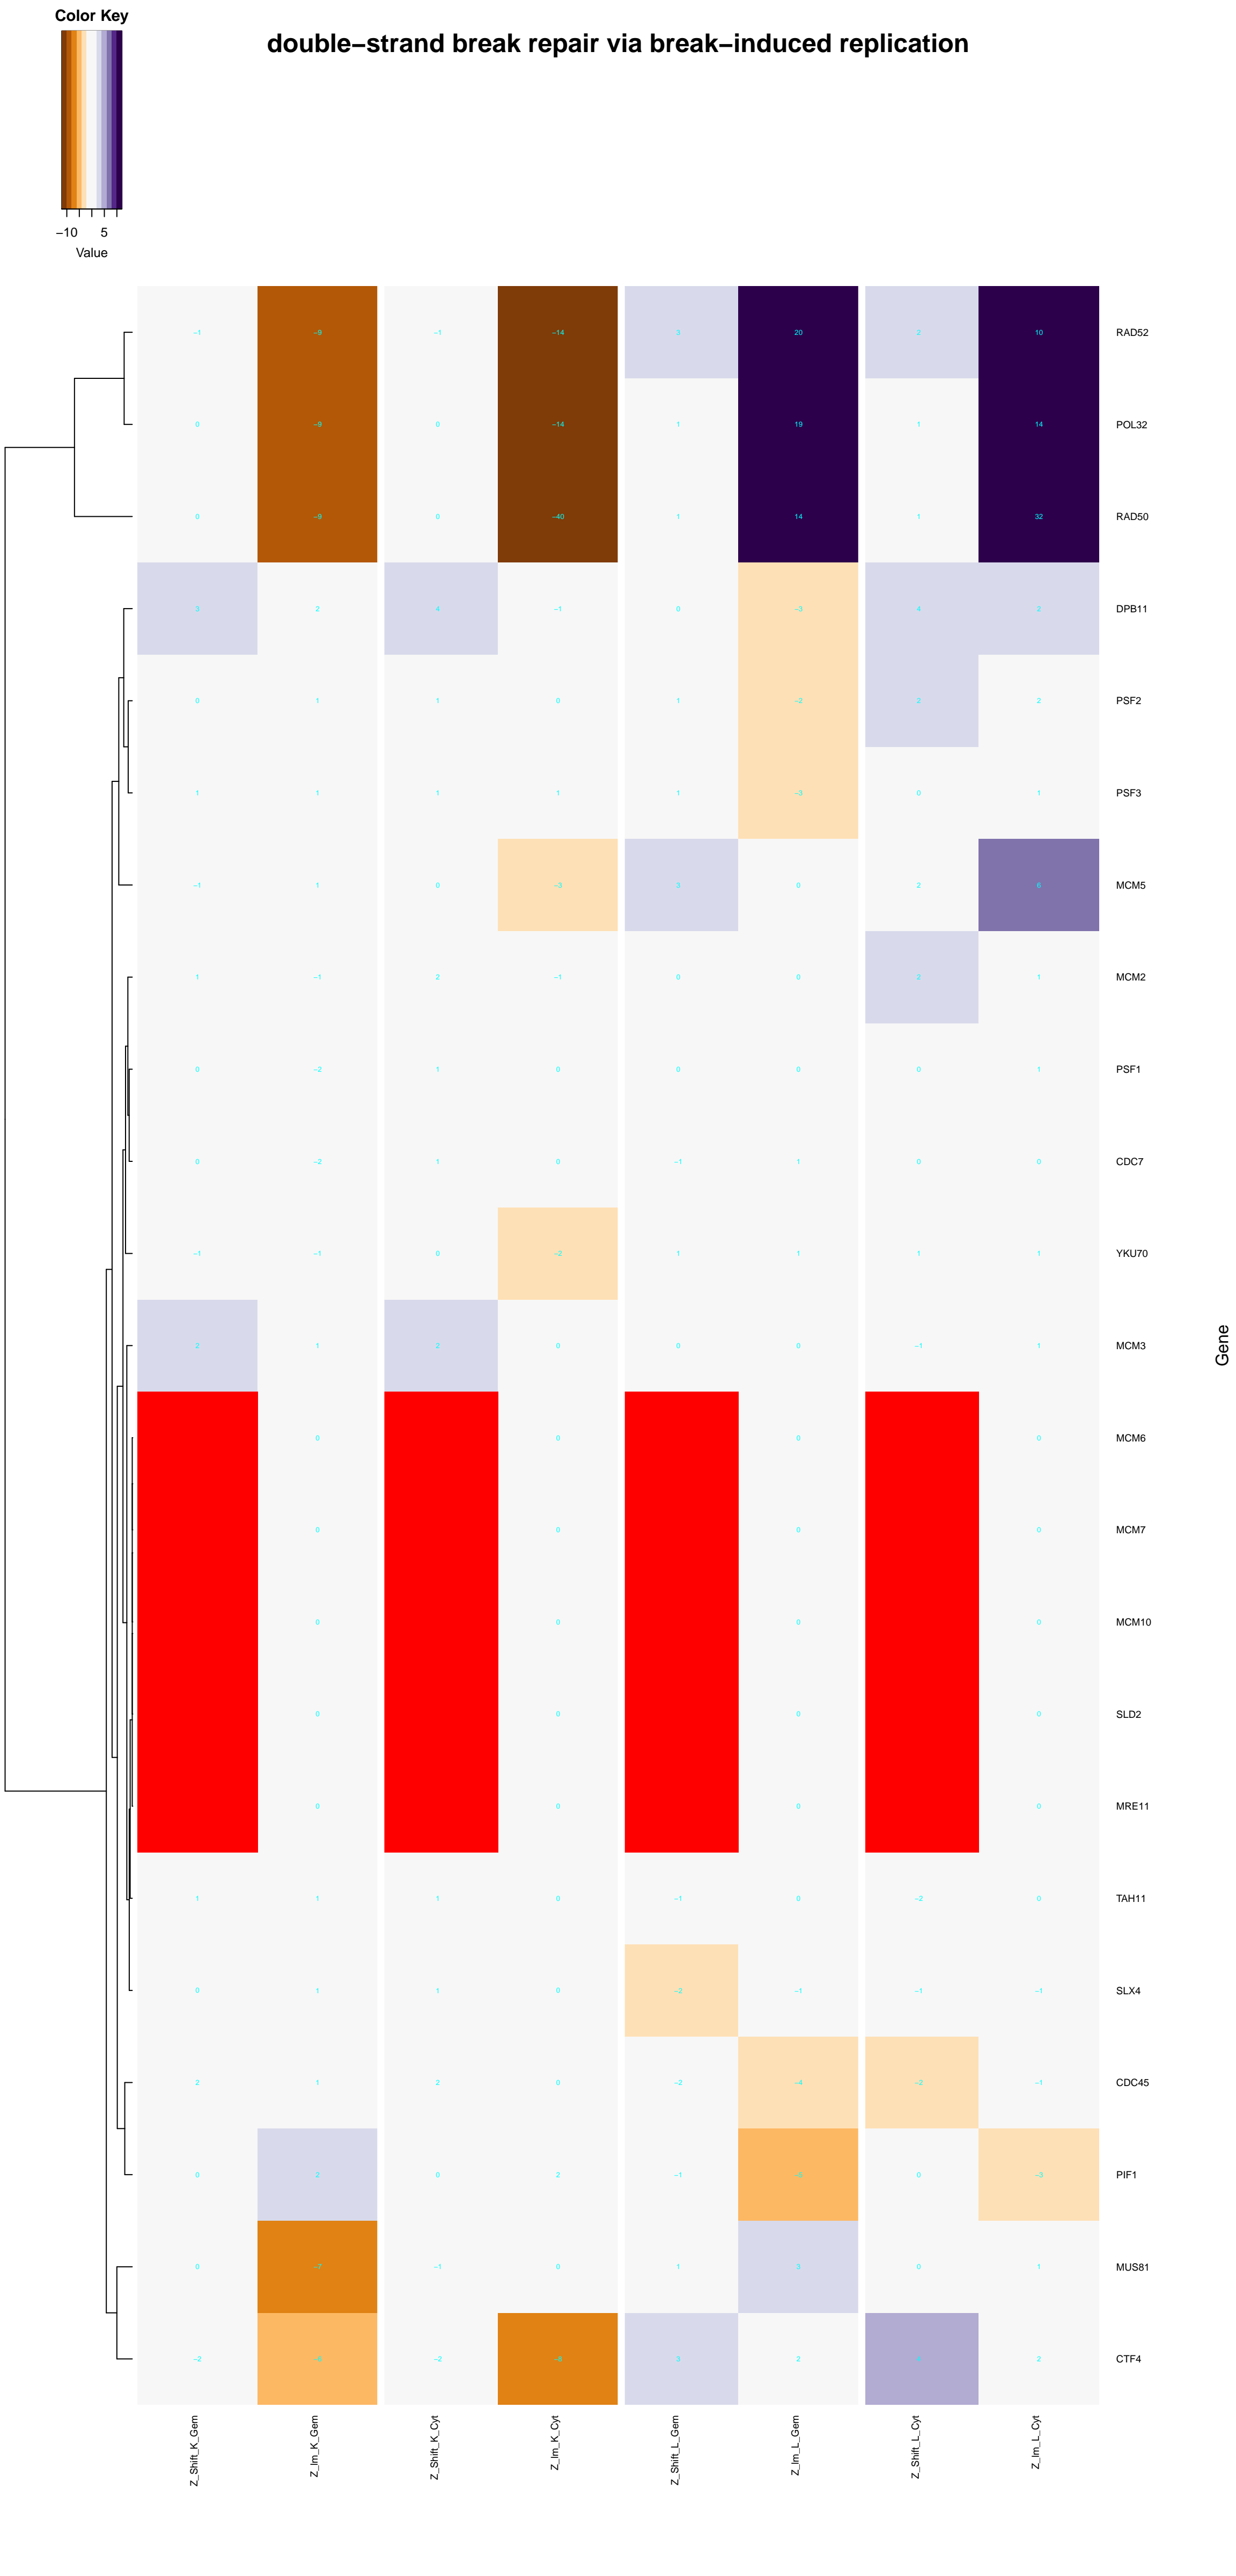

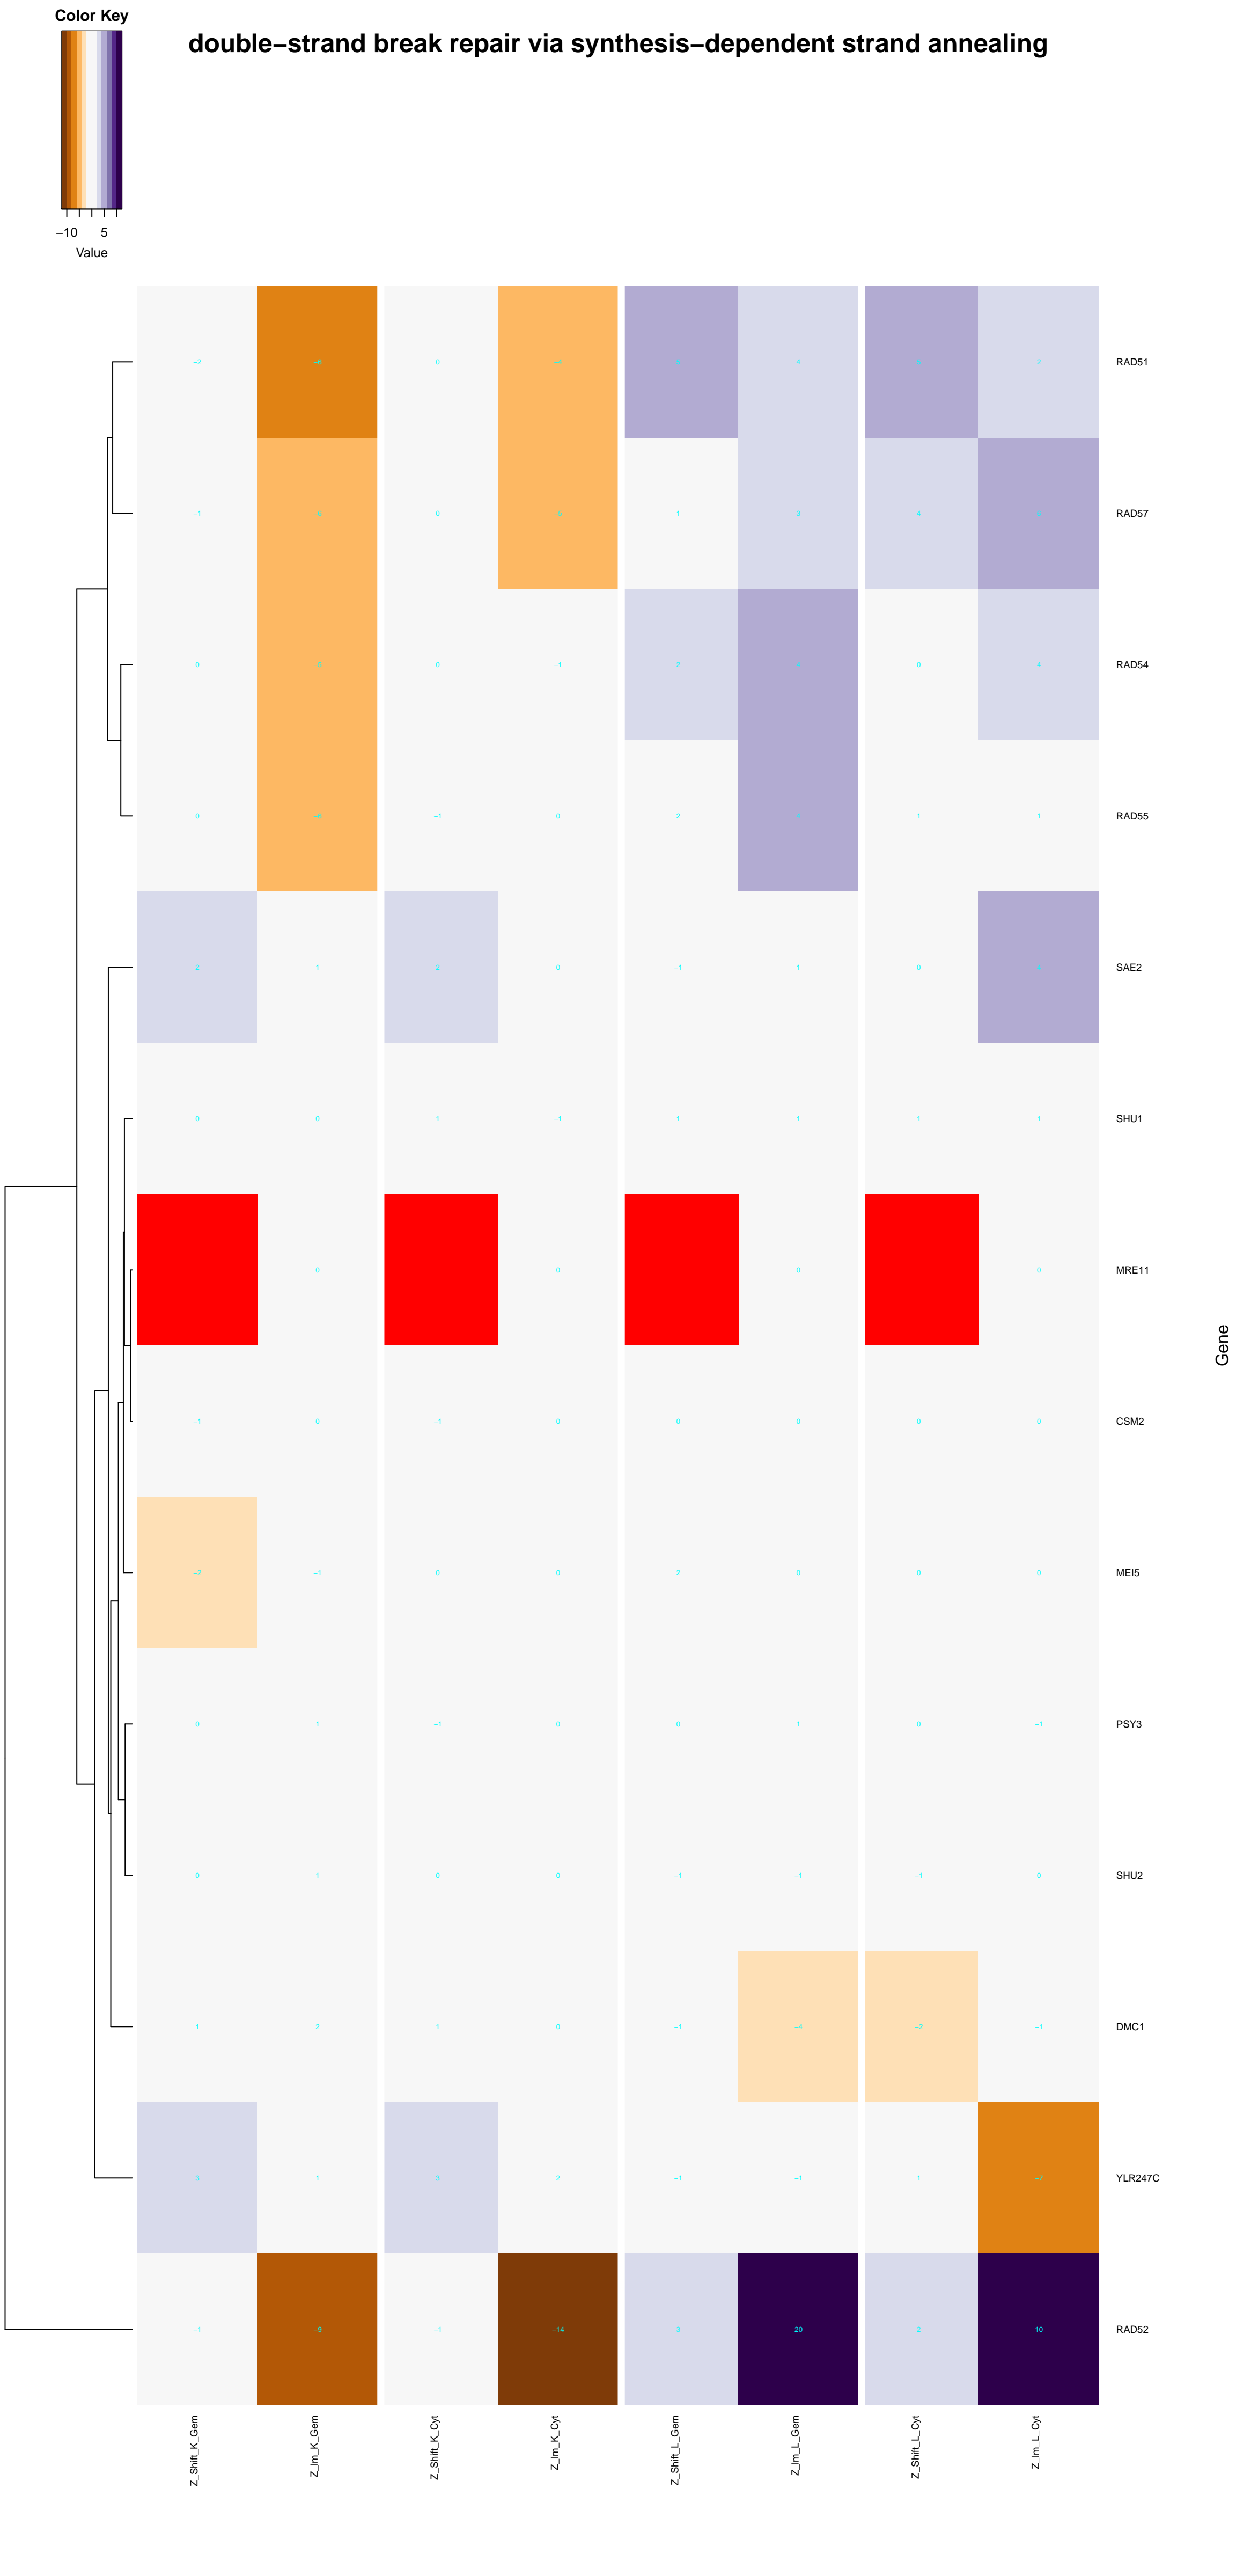

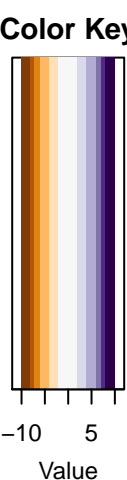

replication–born double–strand break repair via sister chromatid exchange

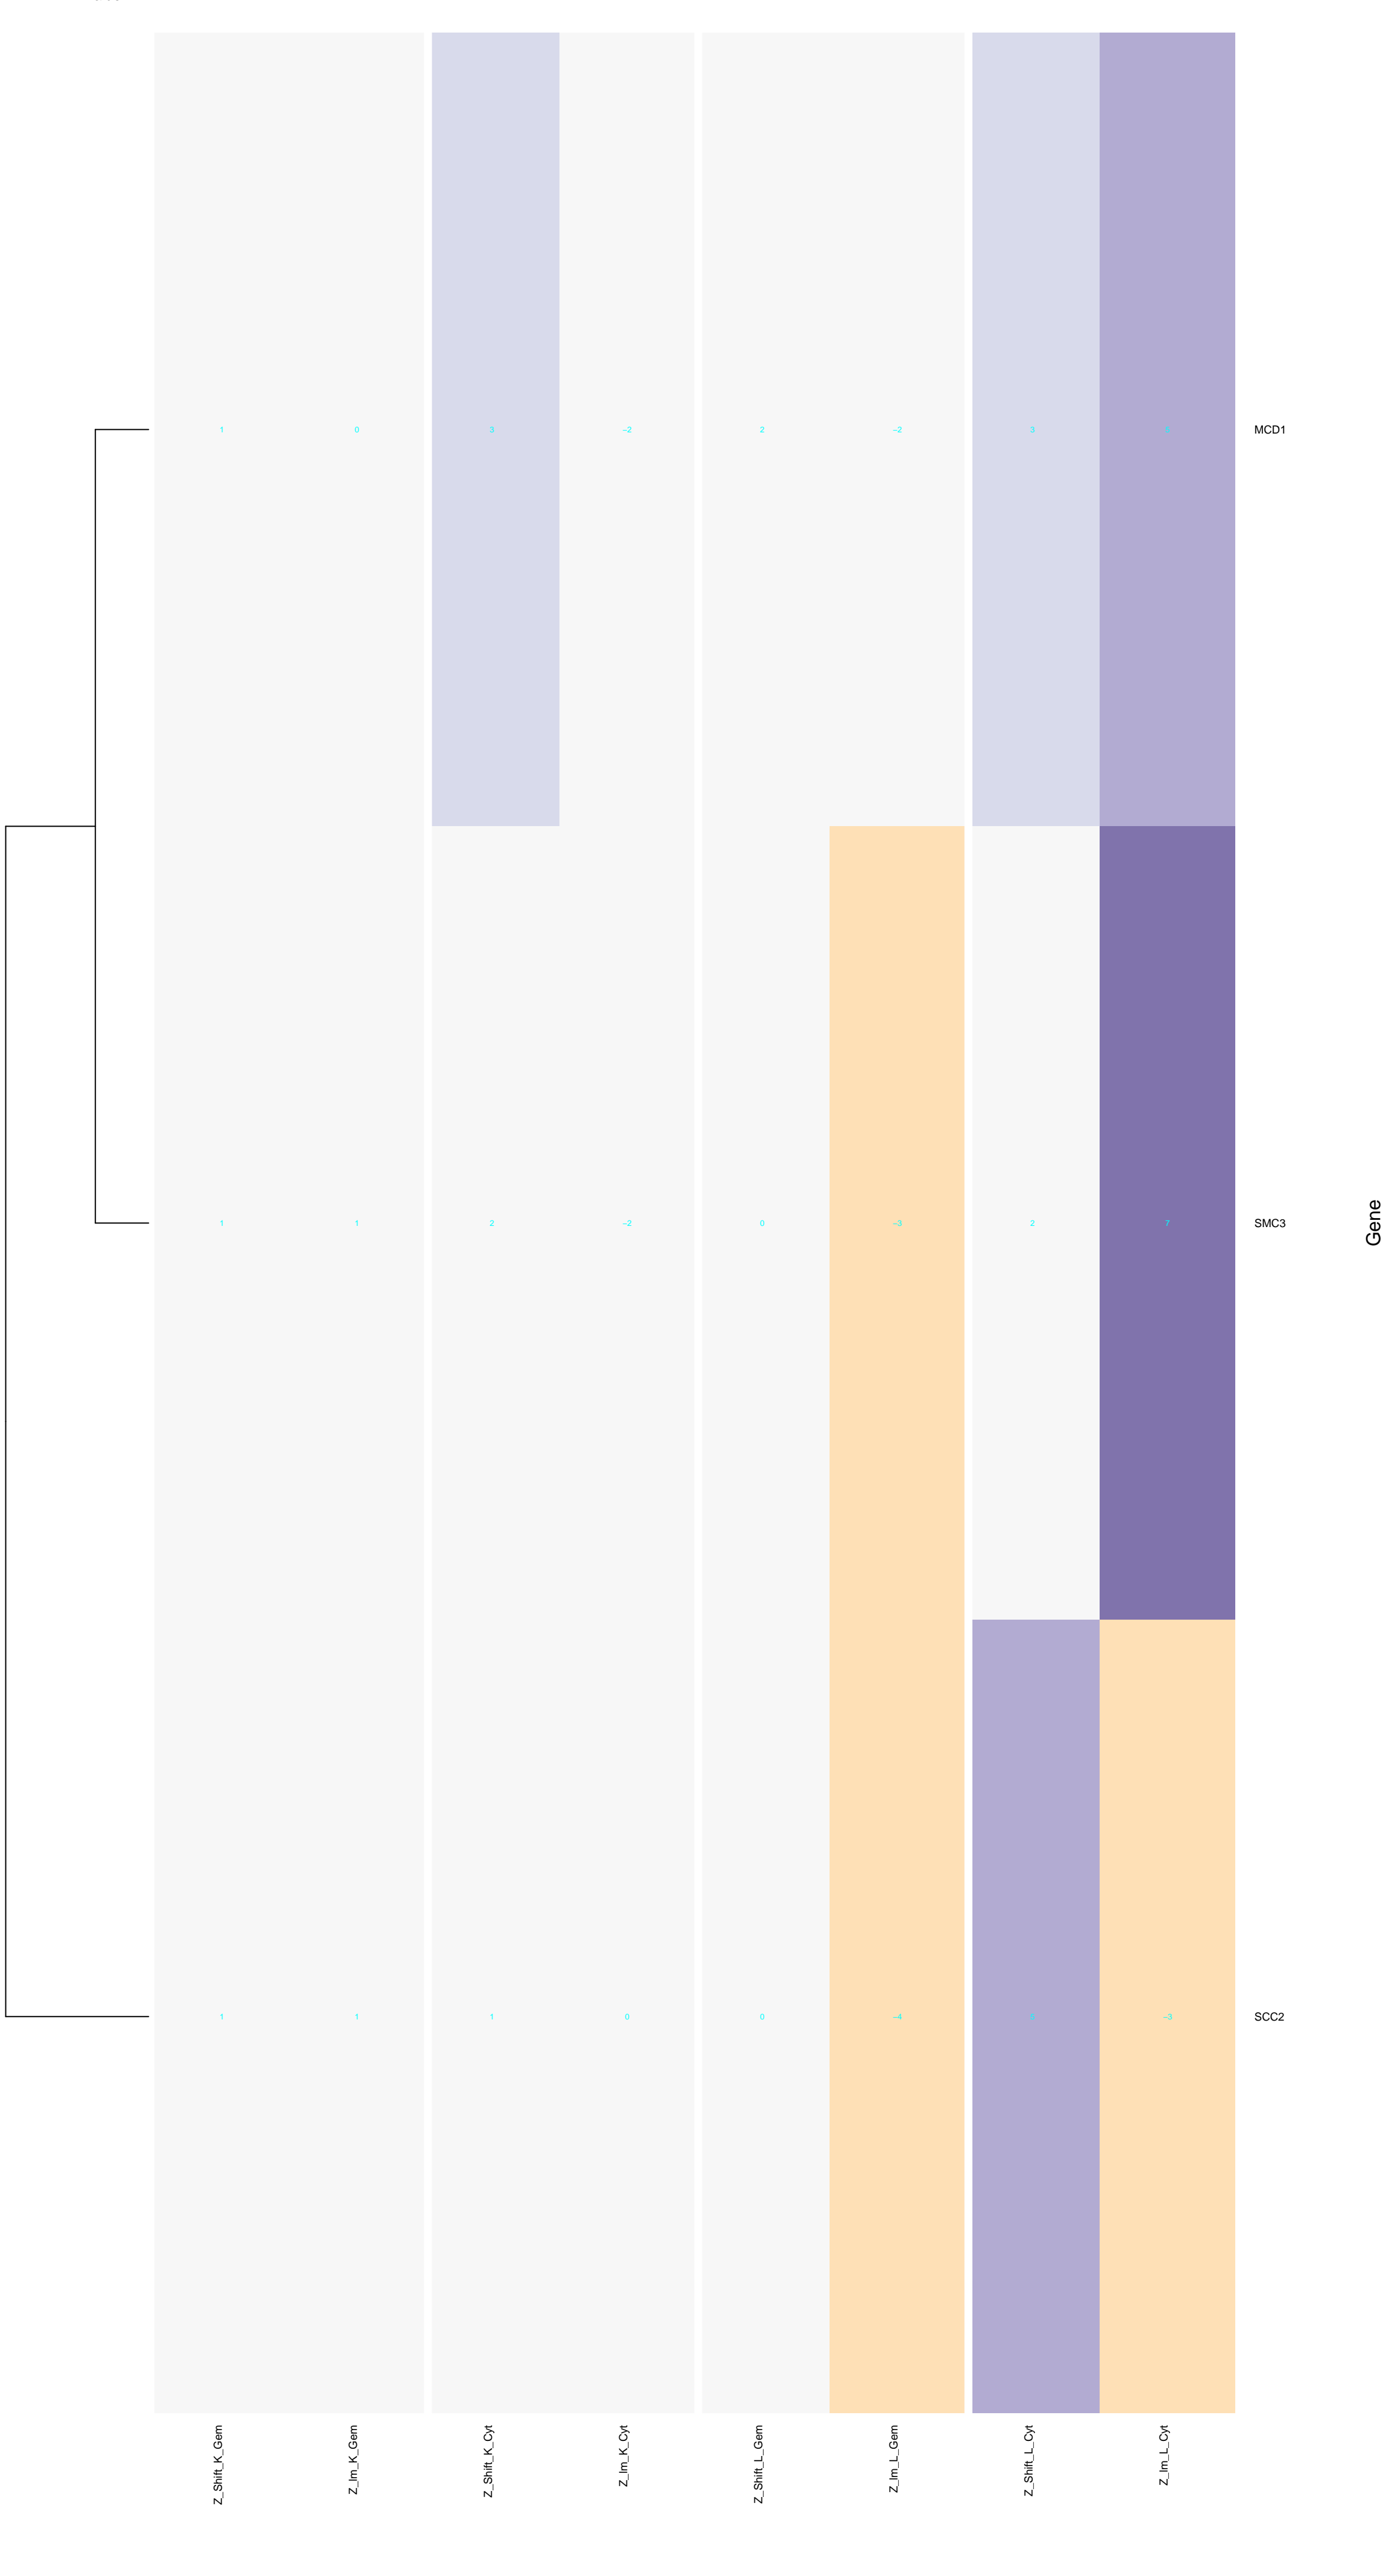

Supplement: s1 [file s1]
