# Supplementary material for: A Humanized Yeast Phenomic Model of Deoxycytidine Kinase to Predict Genetic Buffering of Nucleoside Analog Cytotoxicity
Source: MDPI journal article supplement (doi:10.3390/genes10100770), 2019-09-30

Color Key

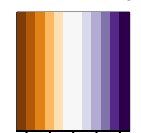

-10 5  
Value

regulation of DNA replication

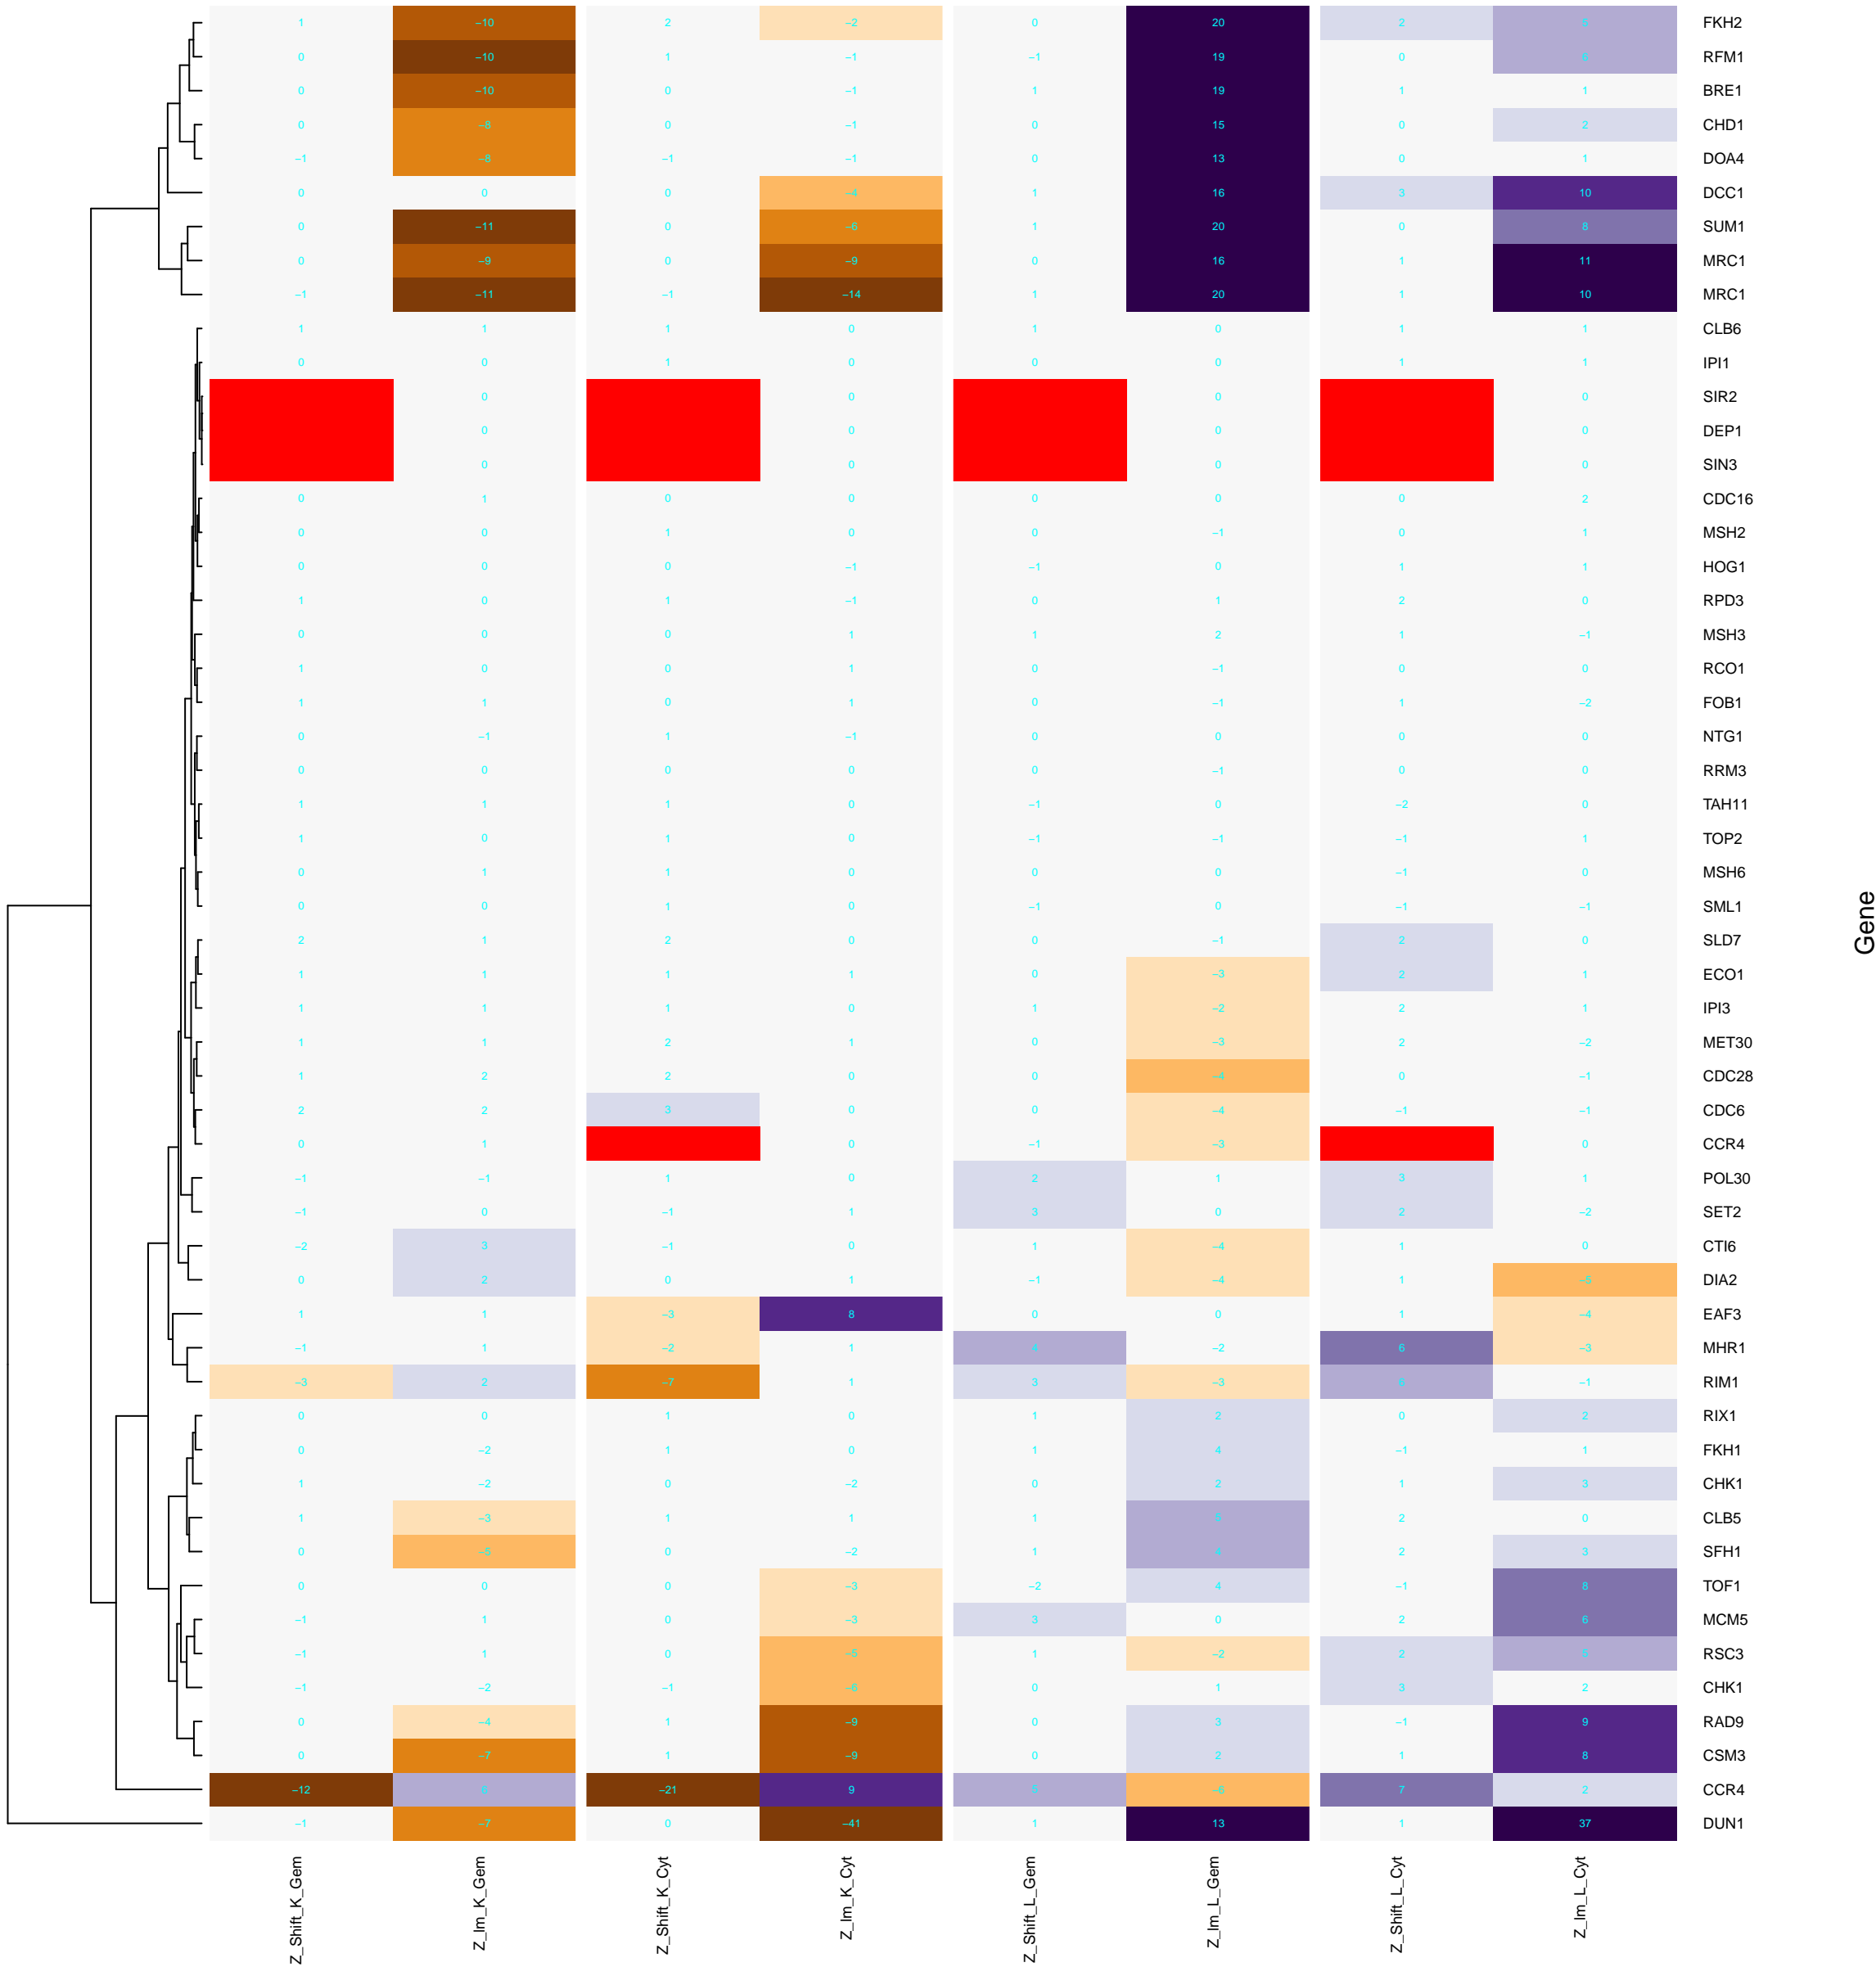

Gene

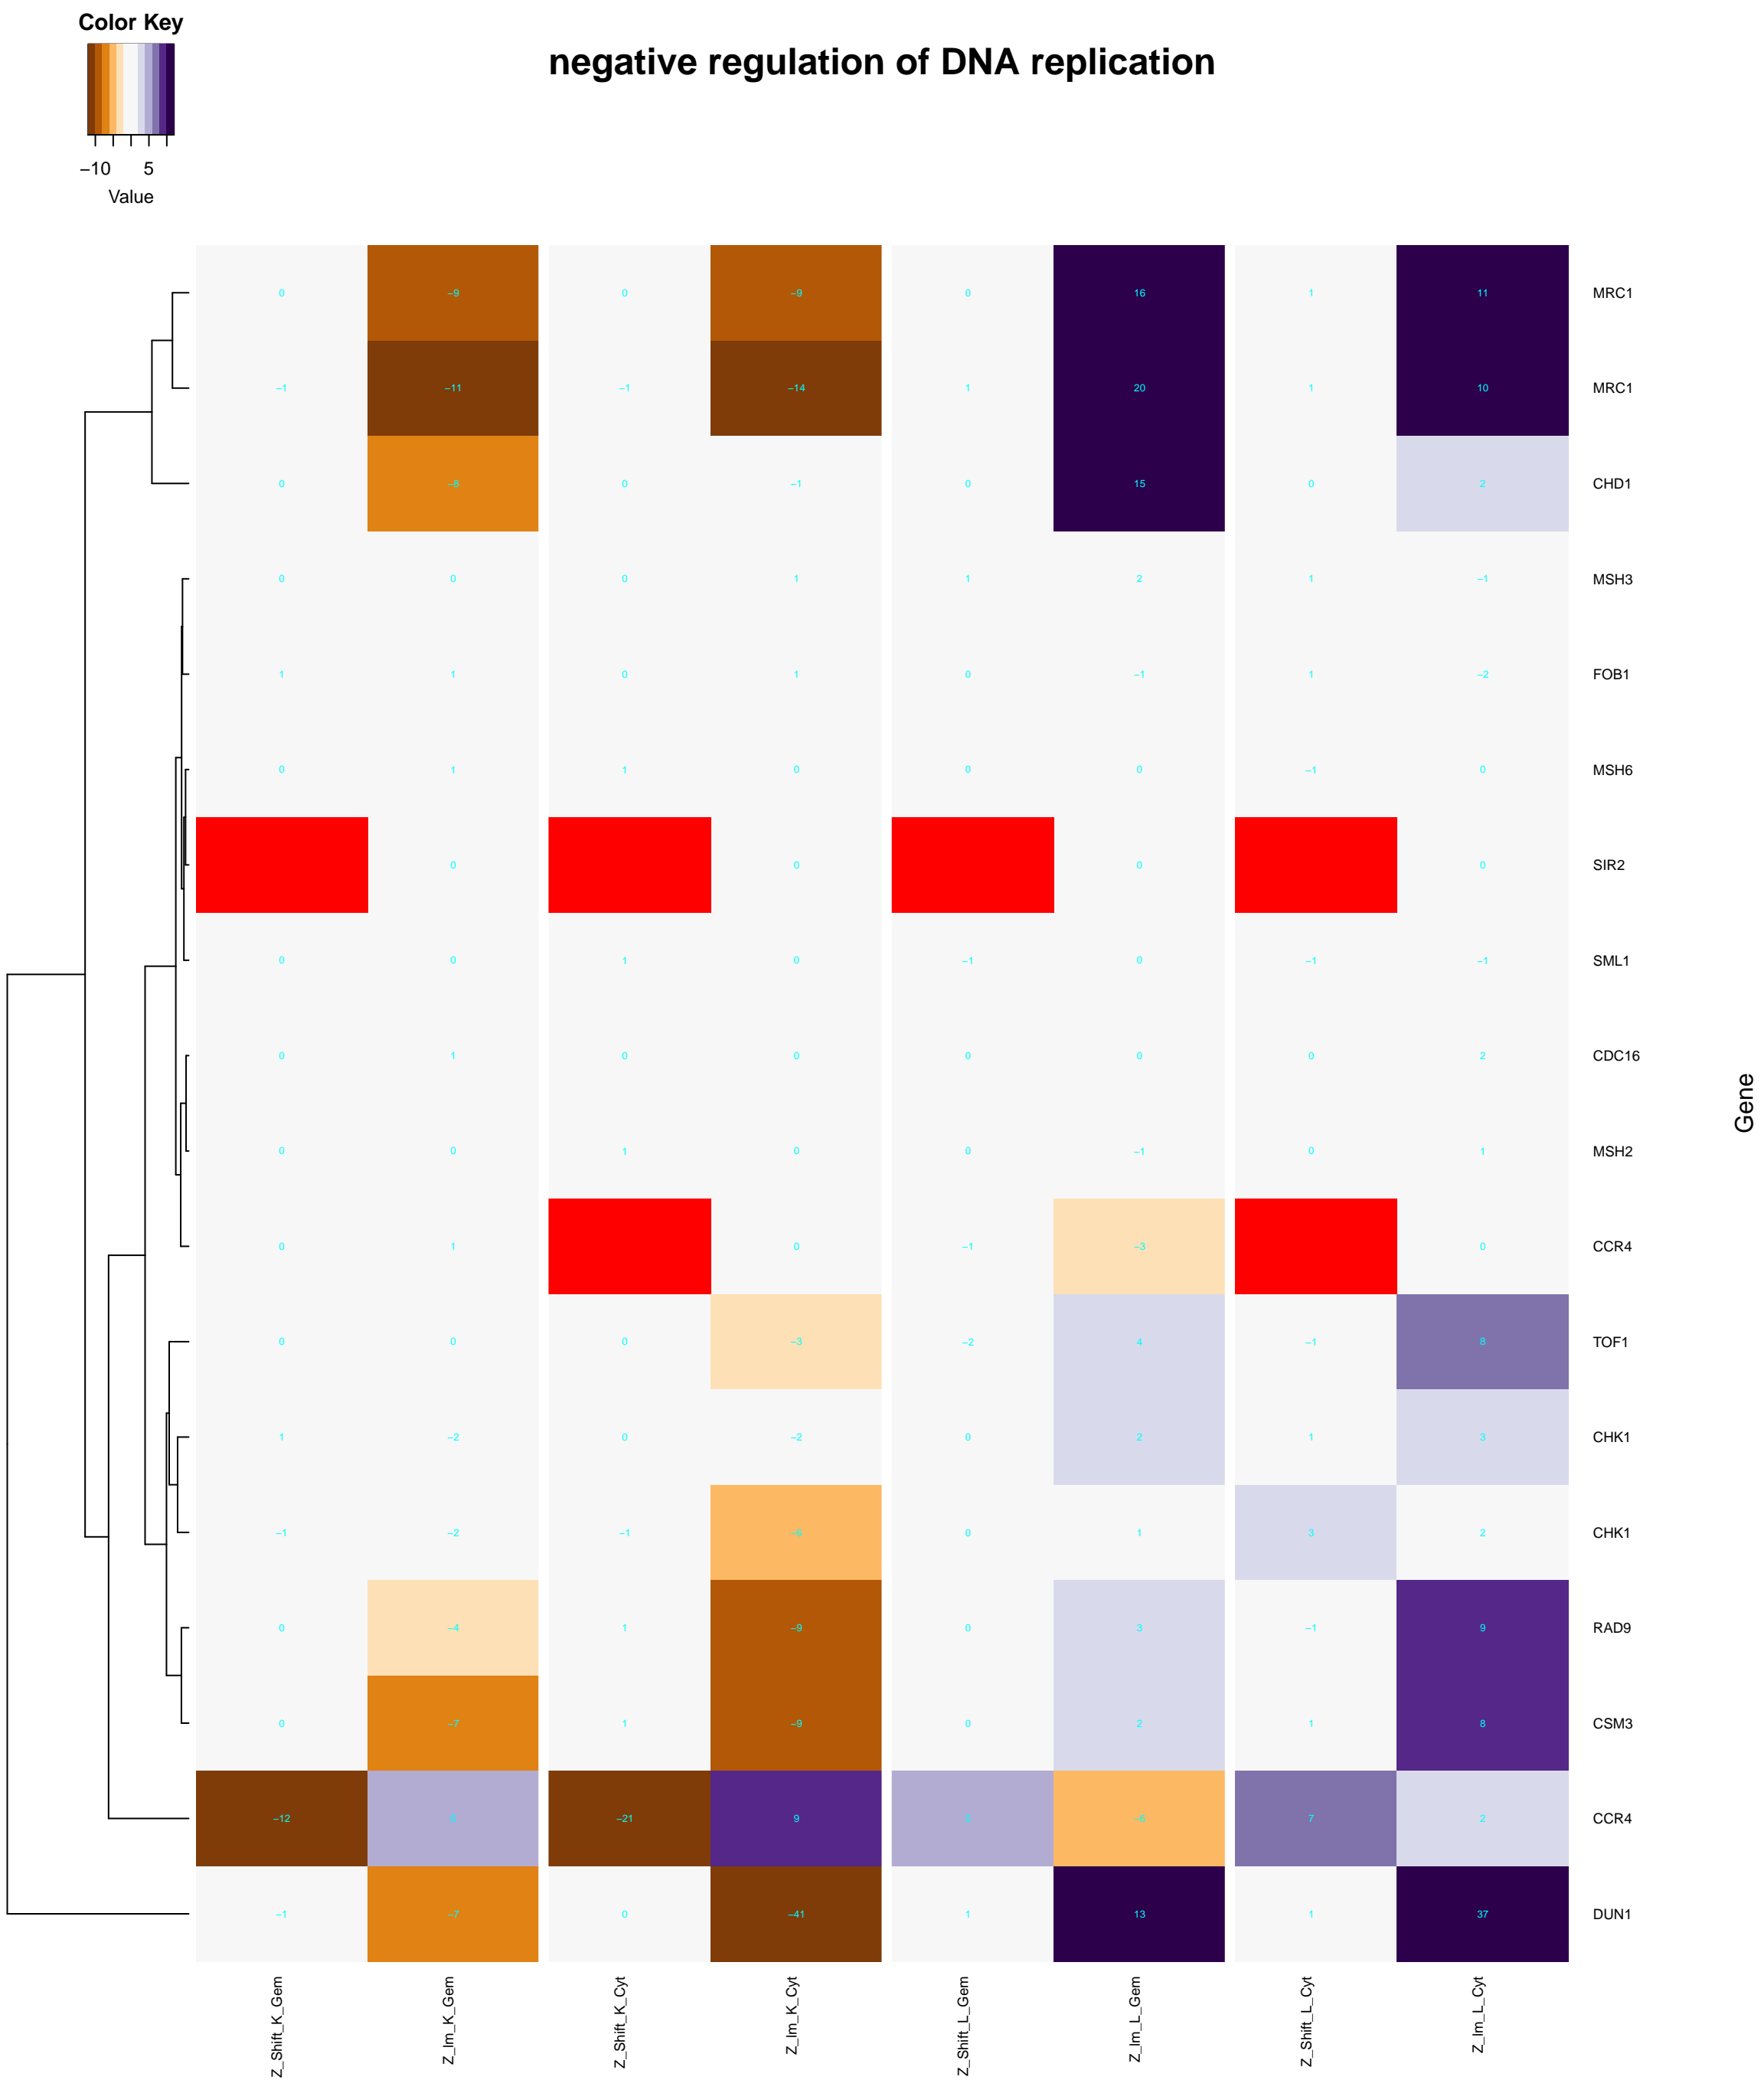

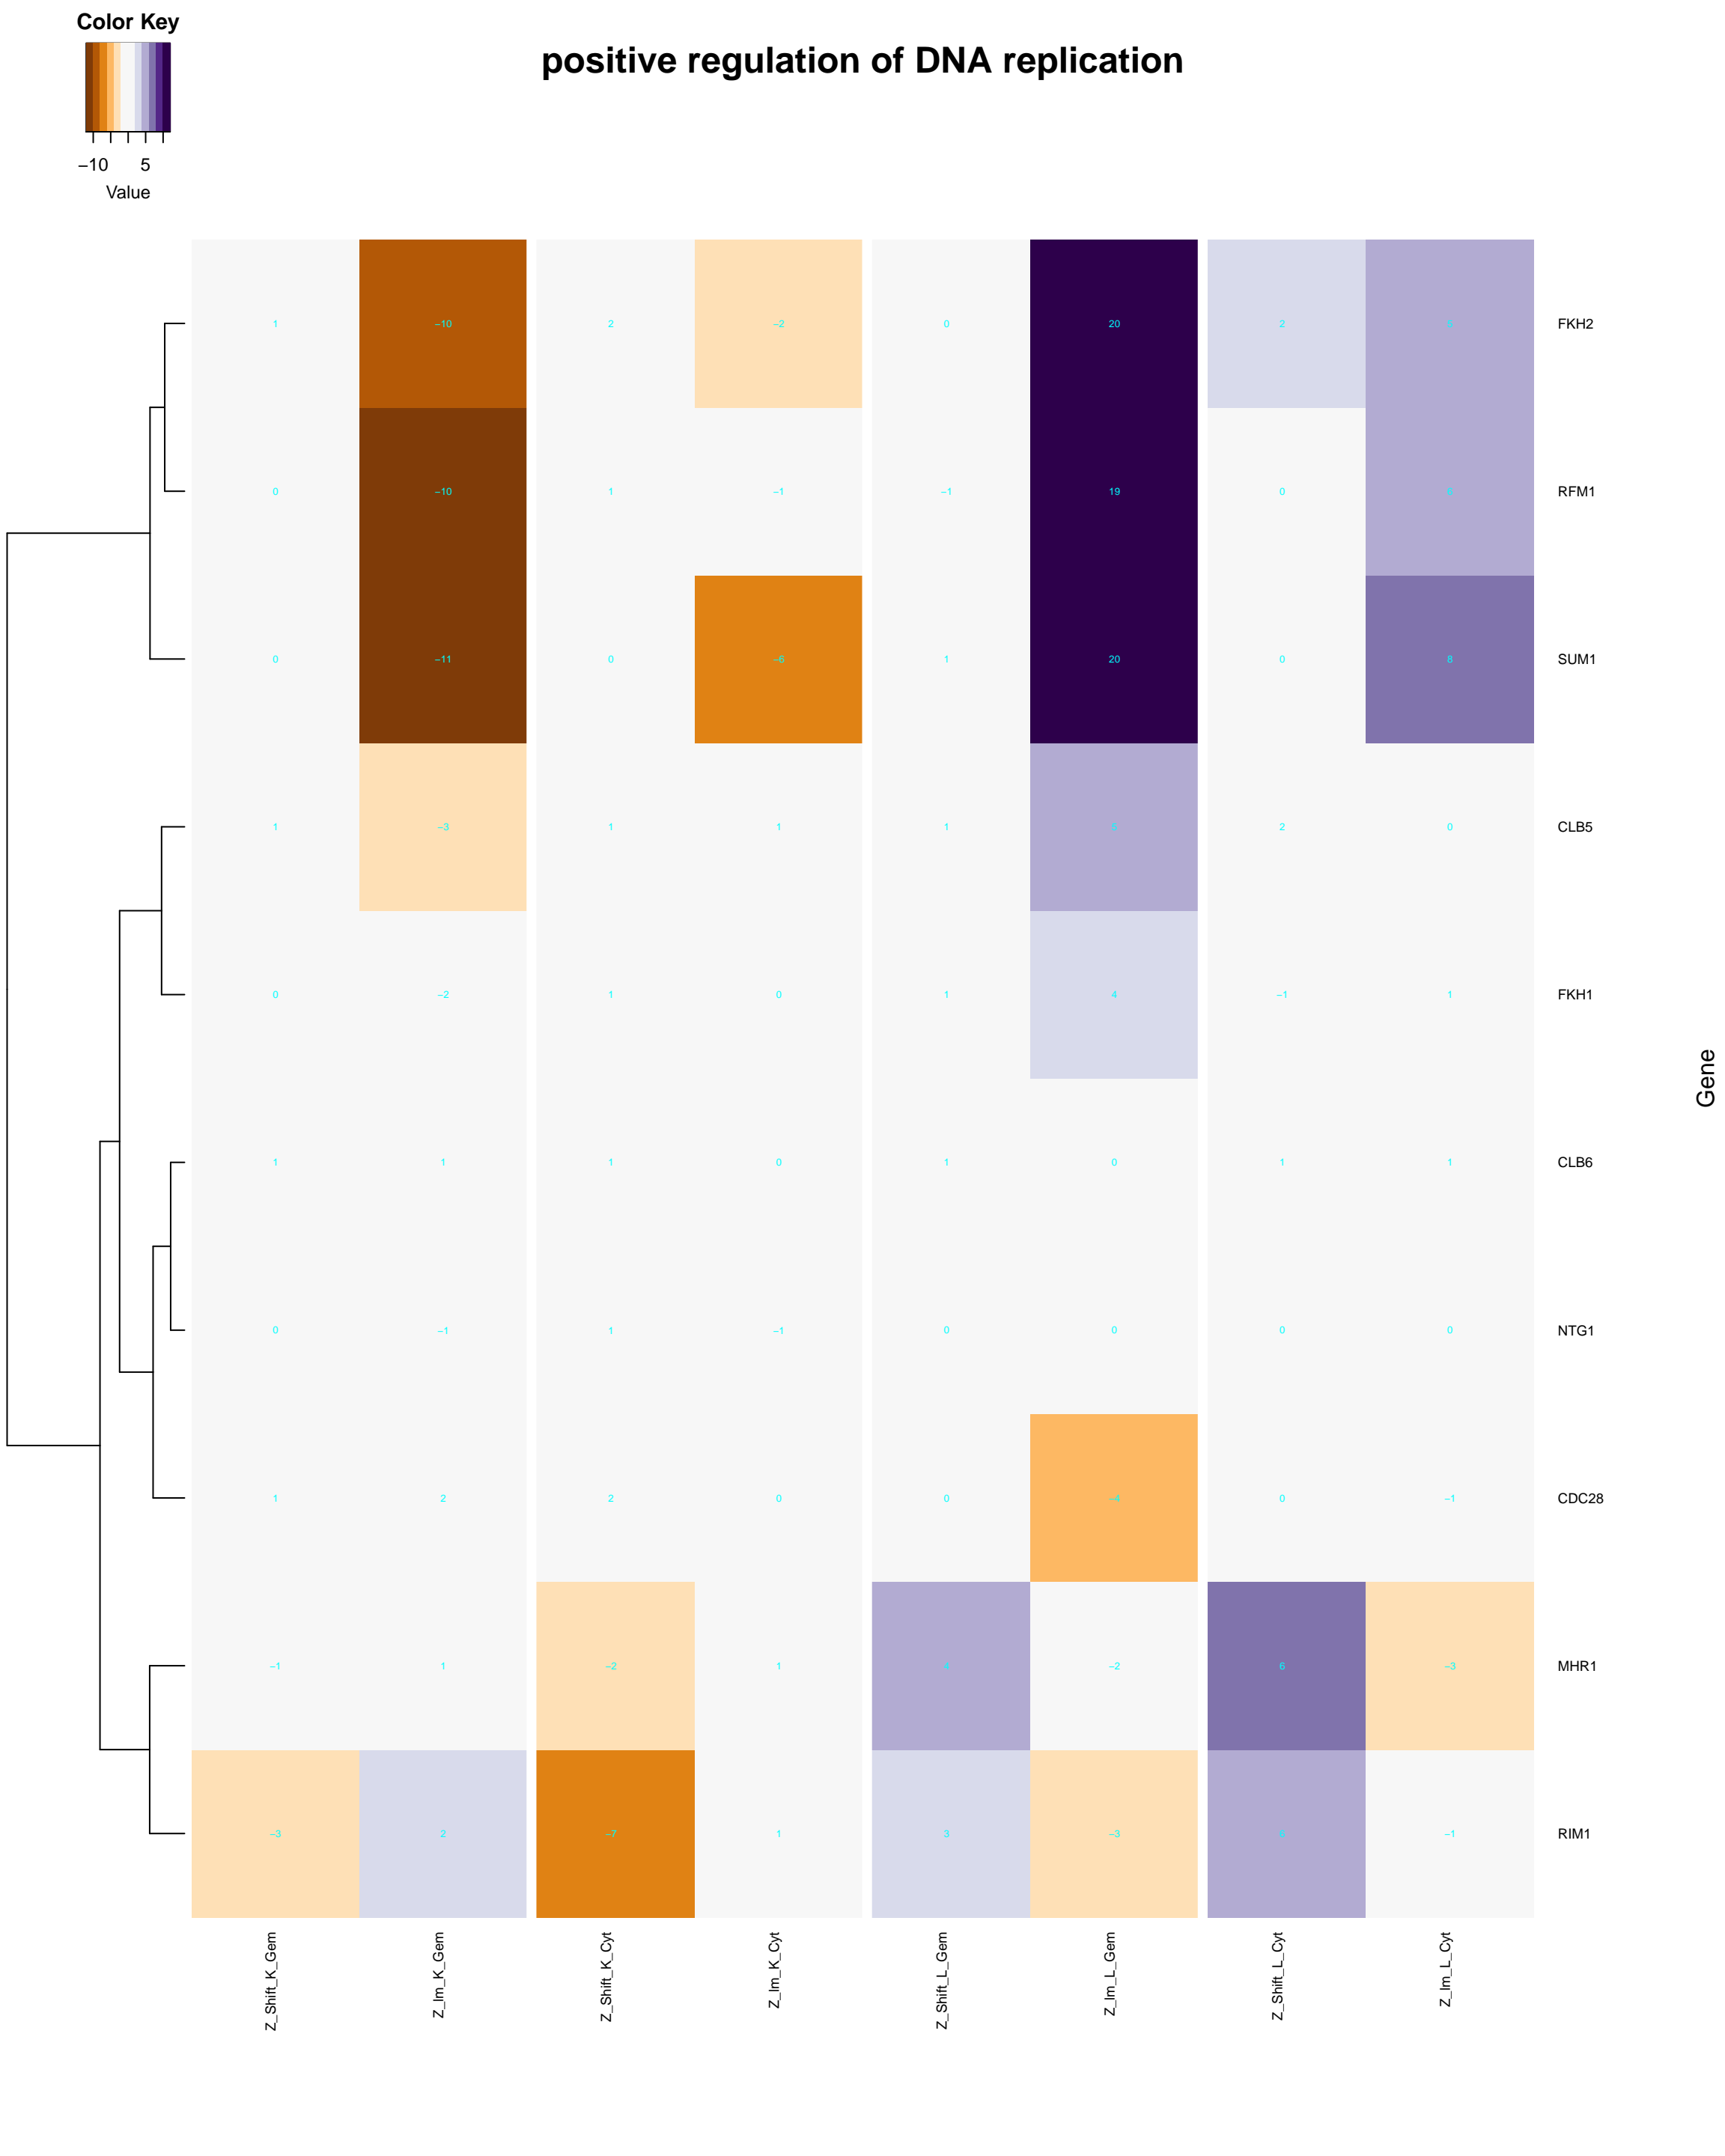

Color Key

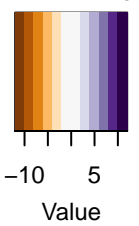

regulation of DNA-dependent DNA replication

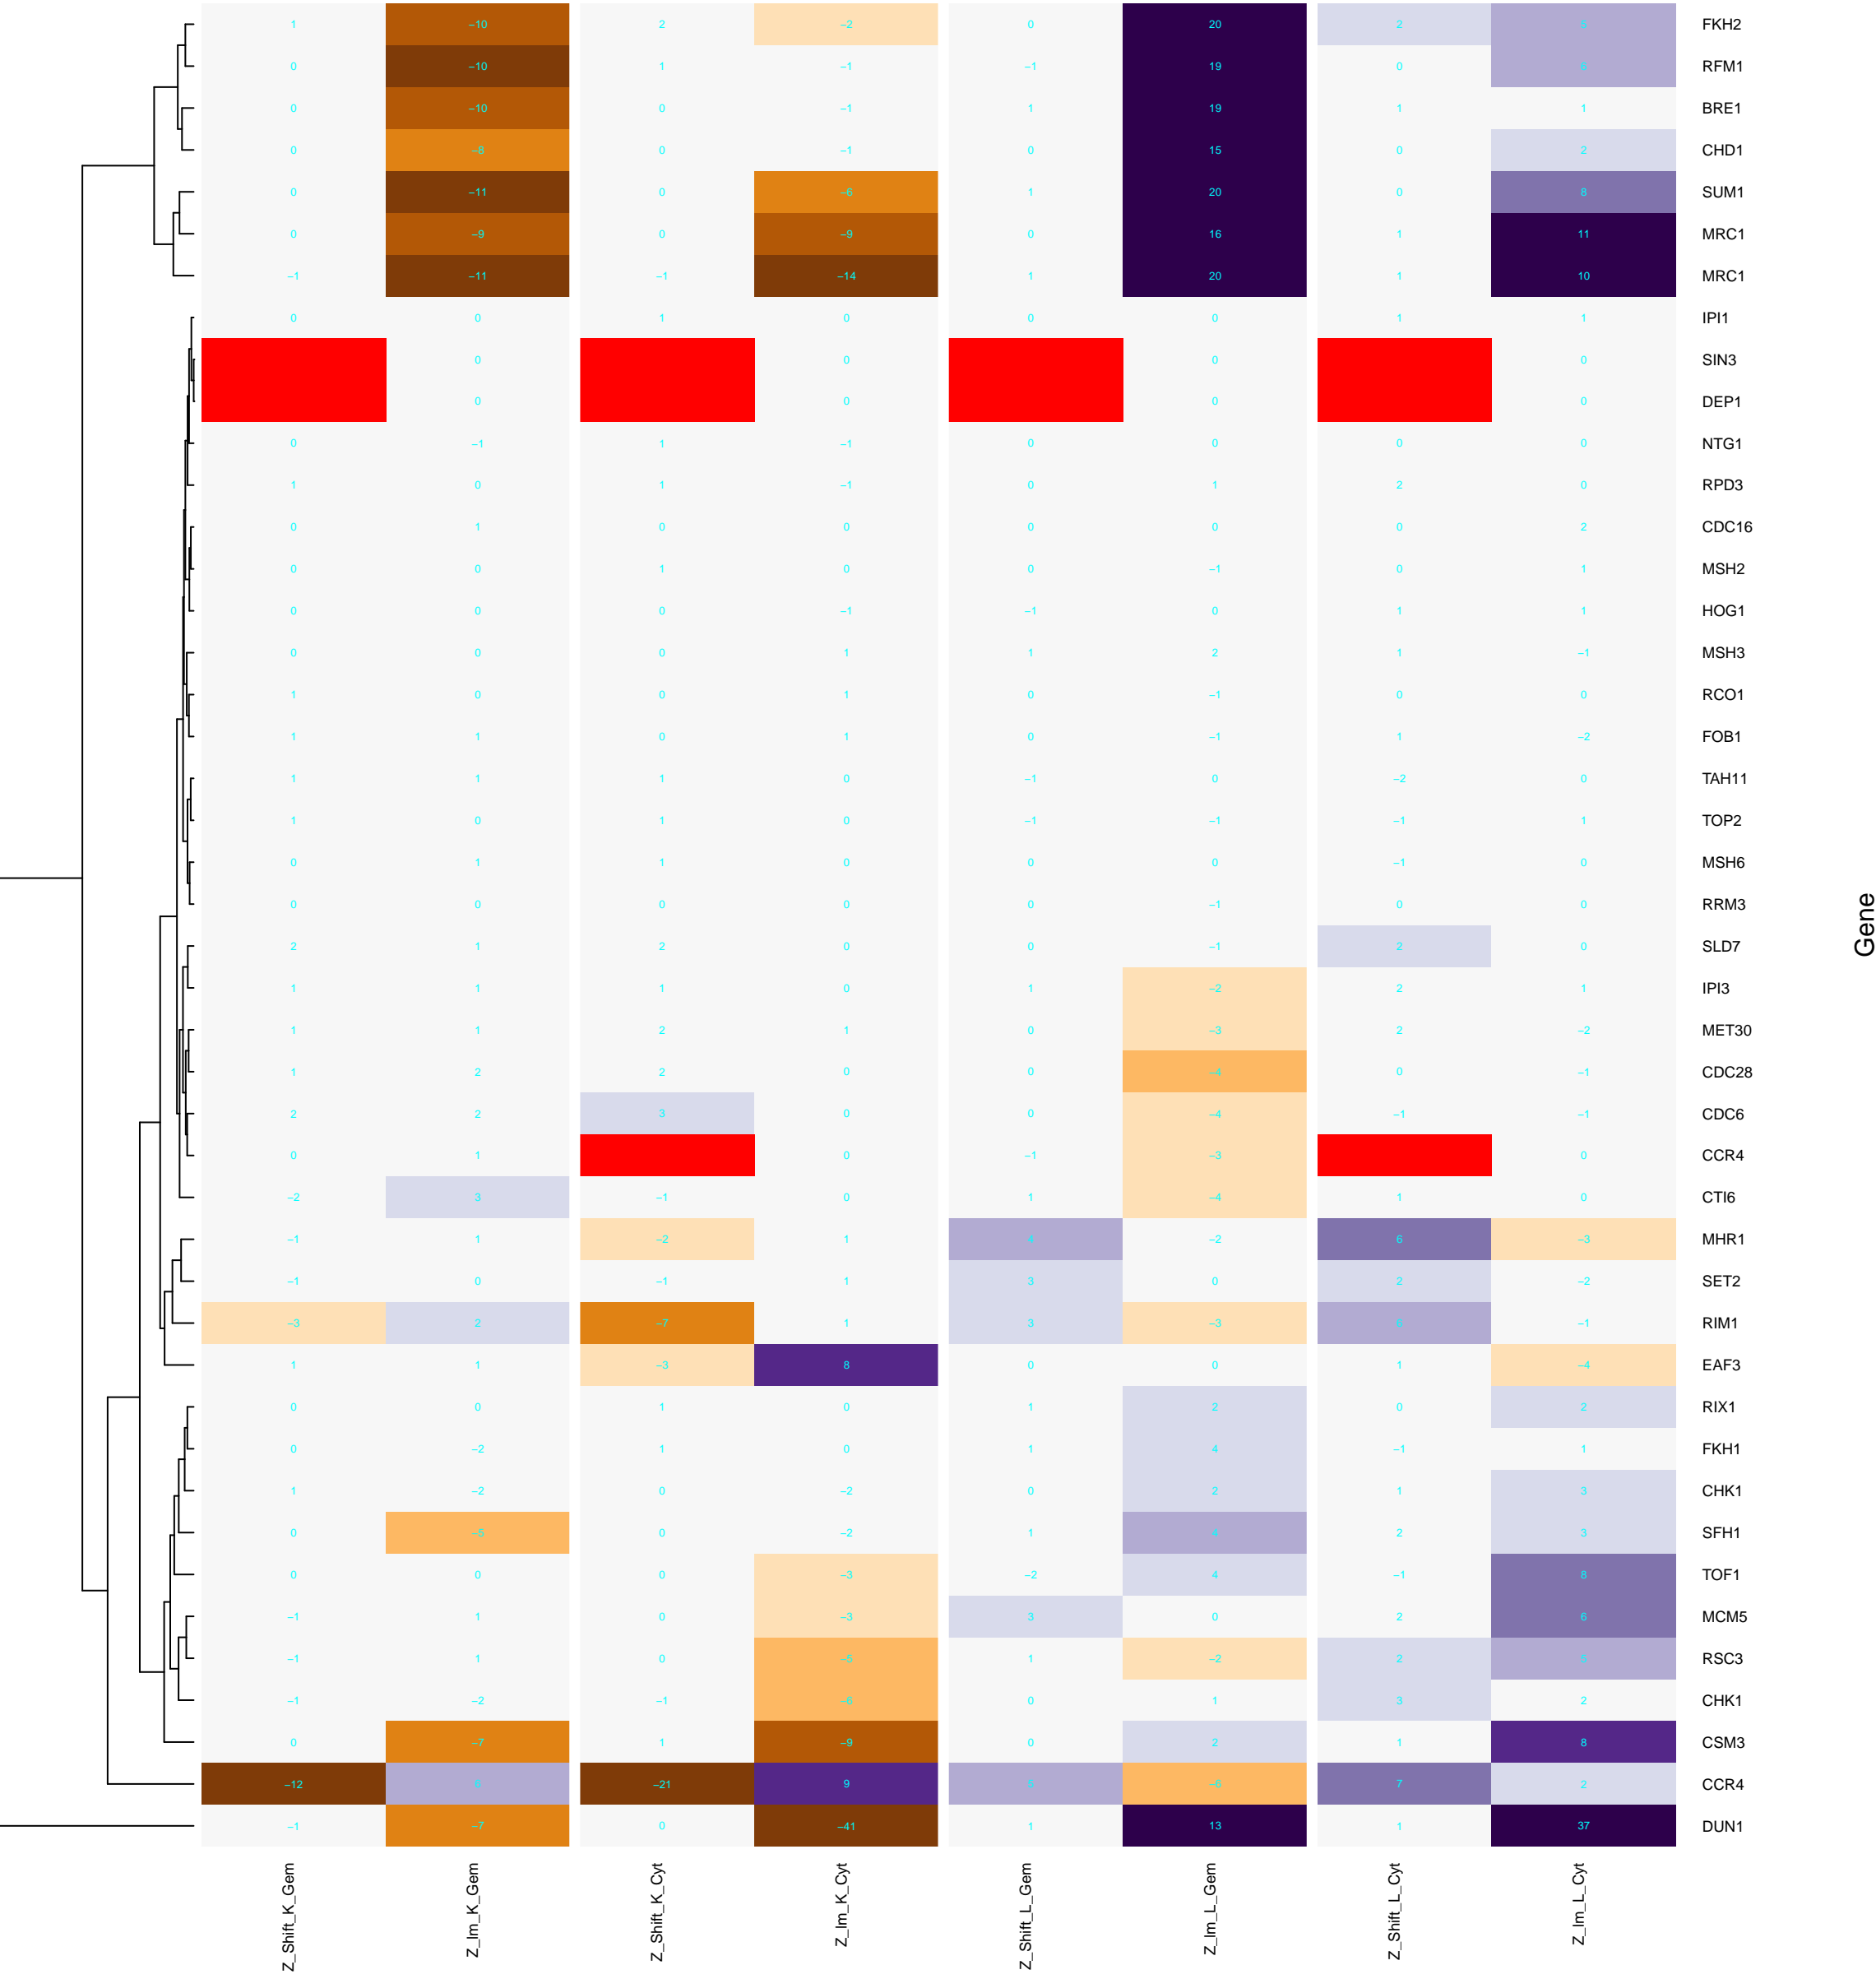

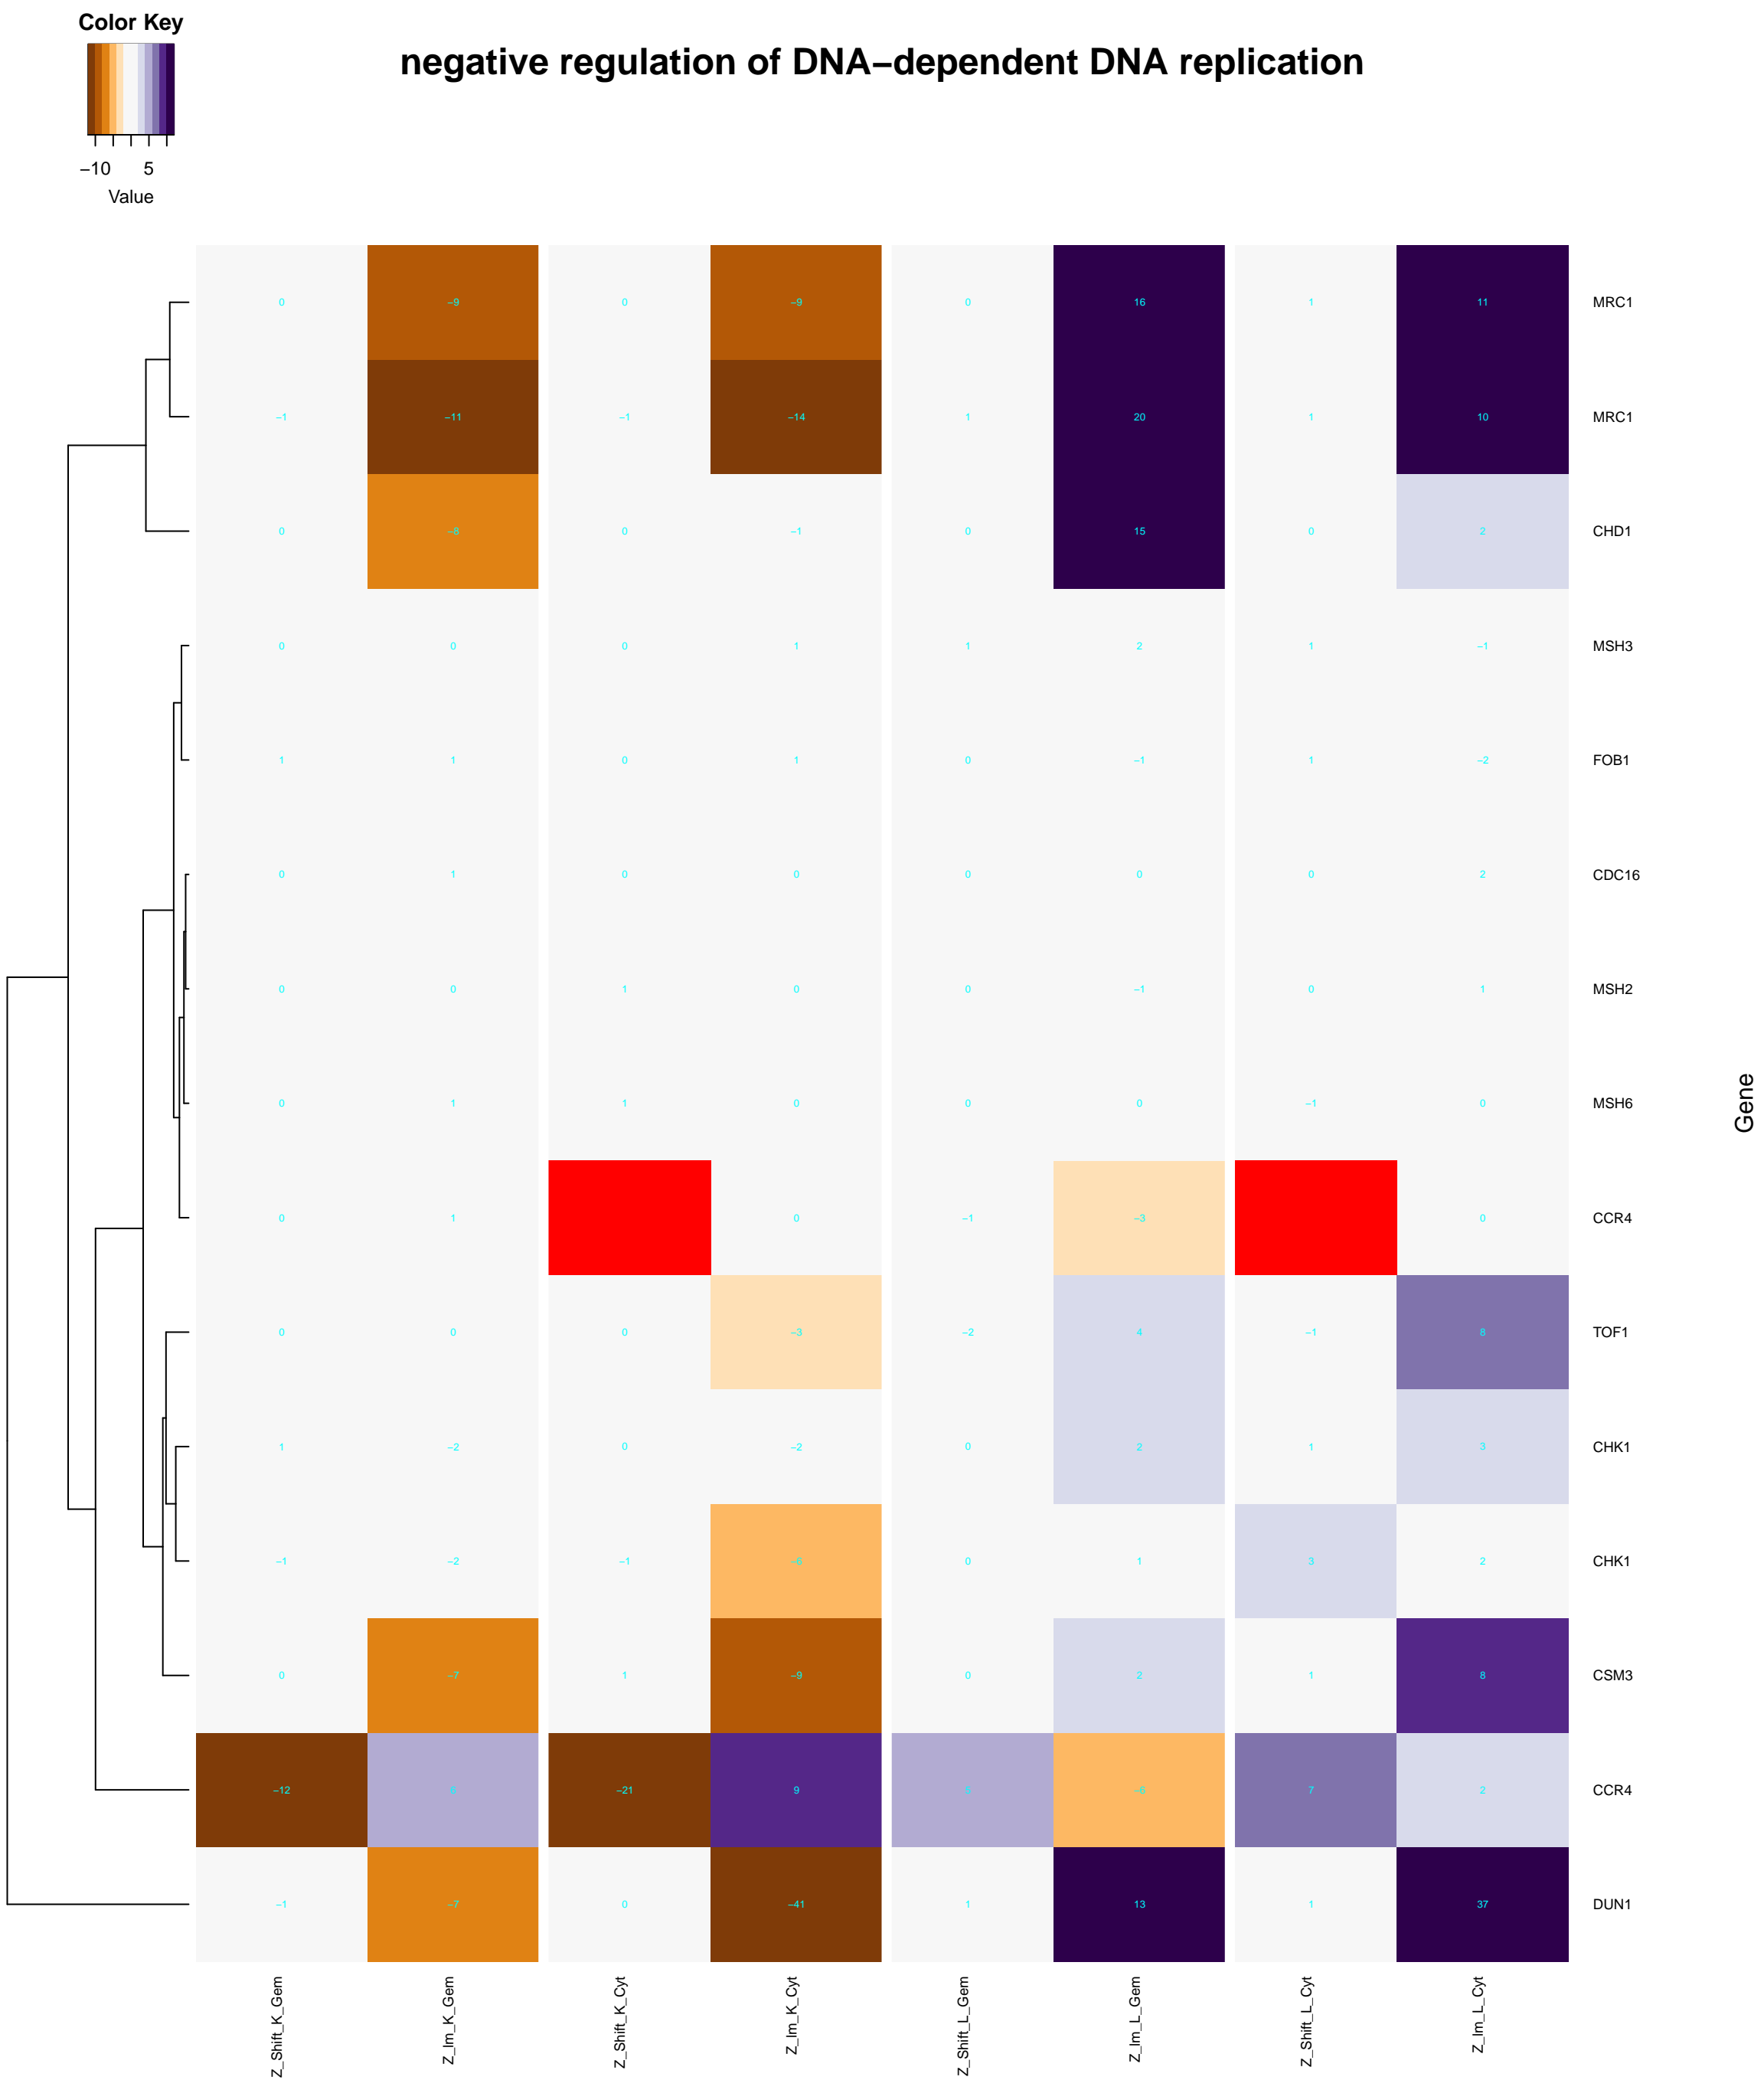

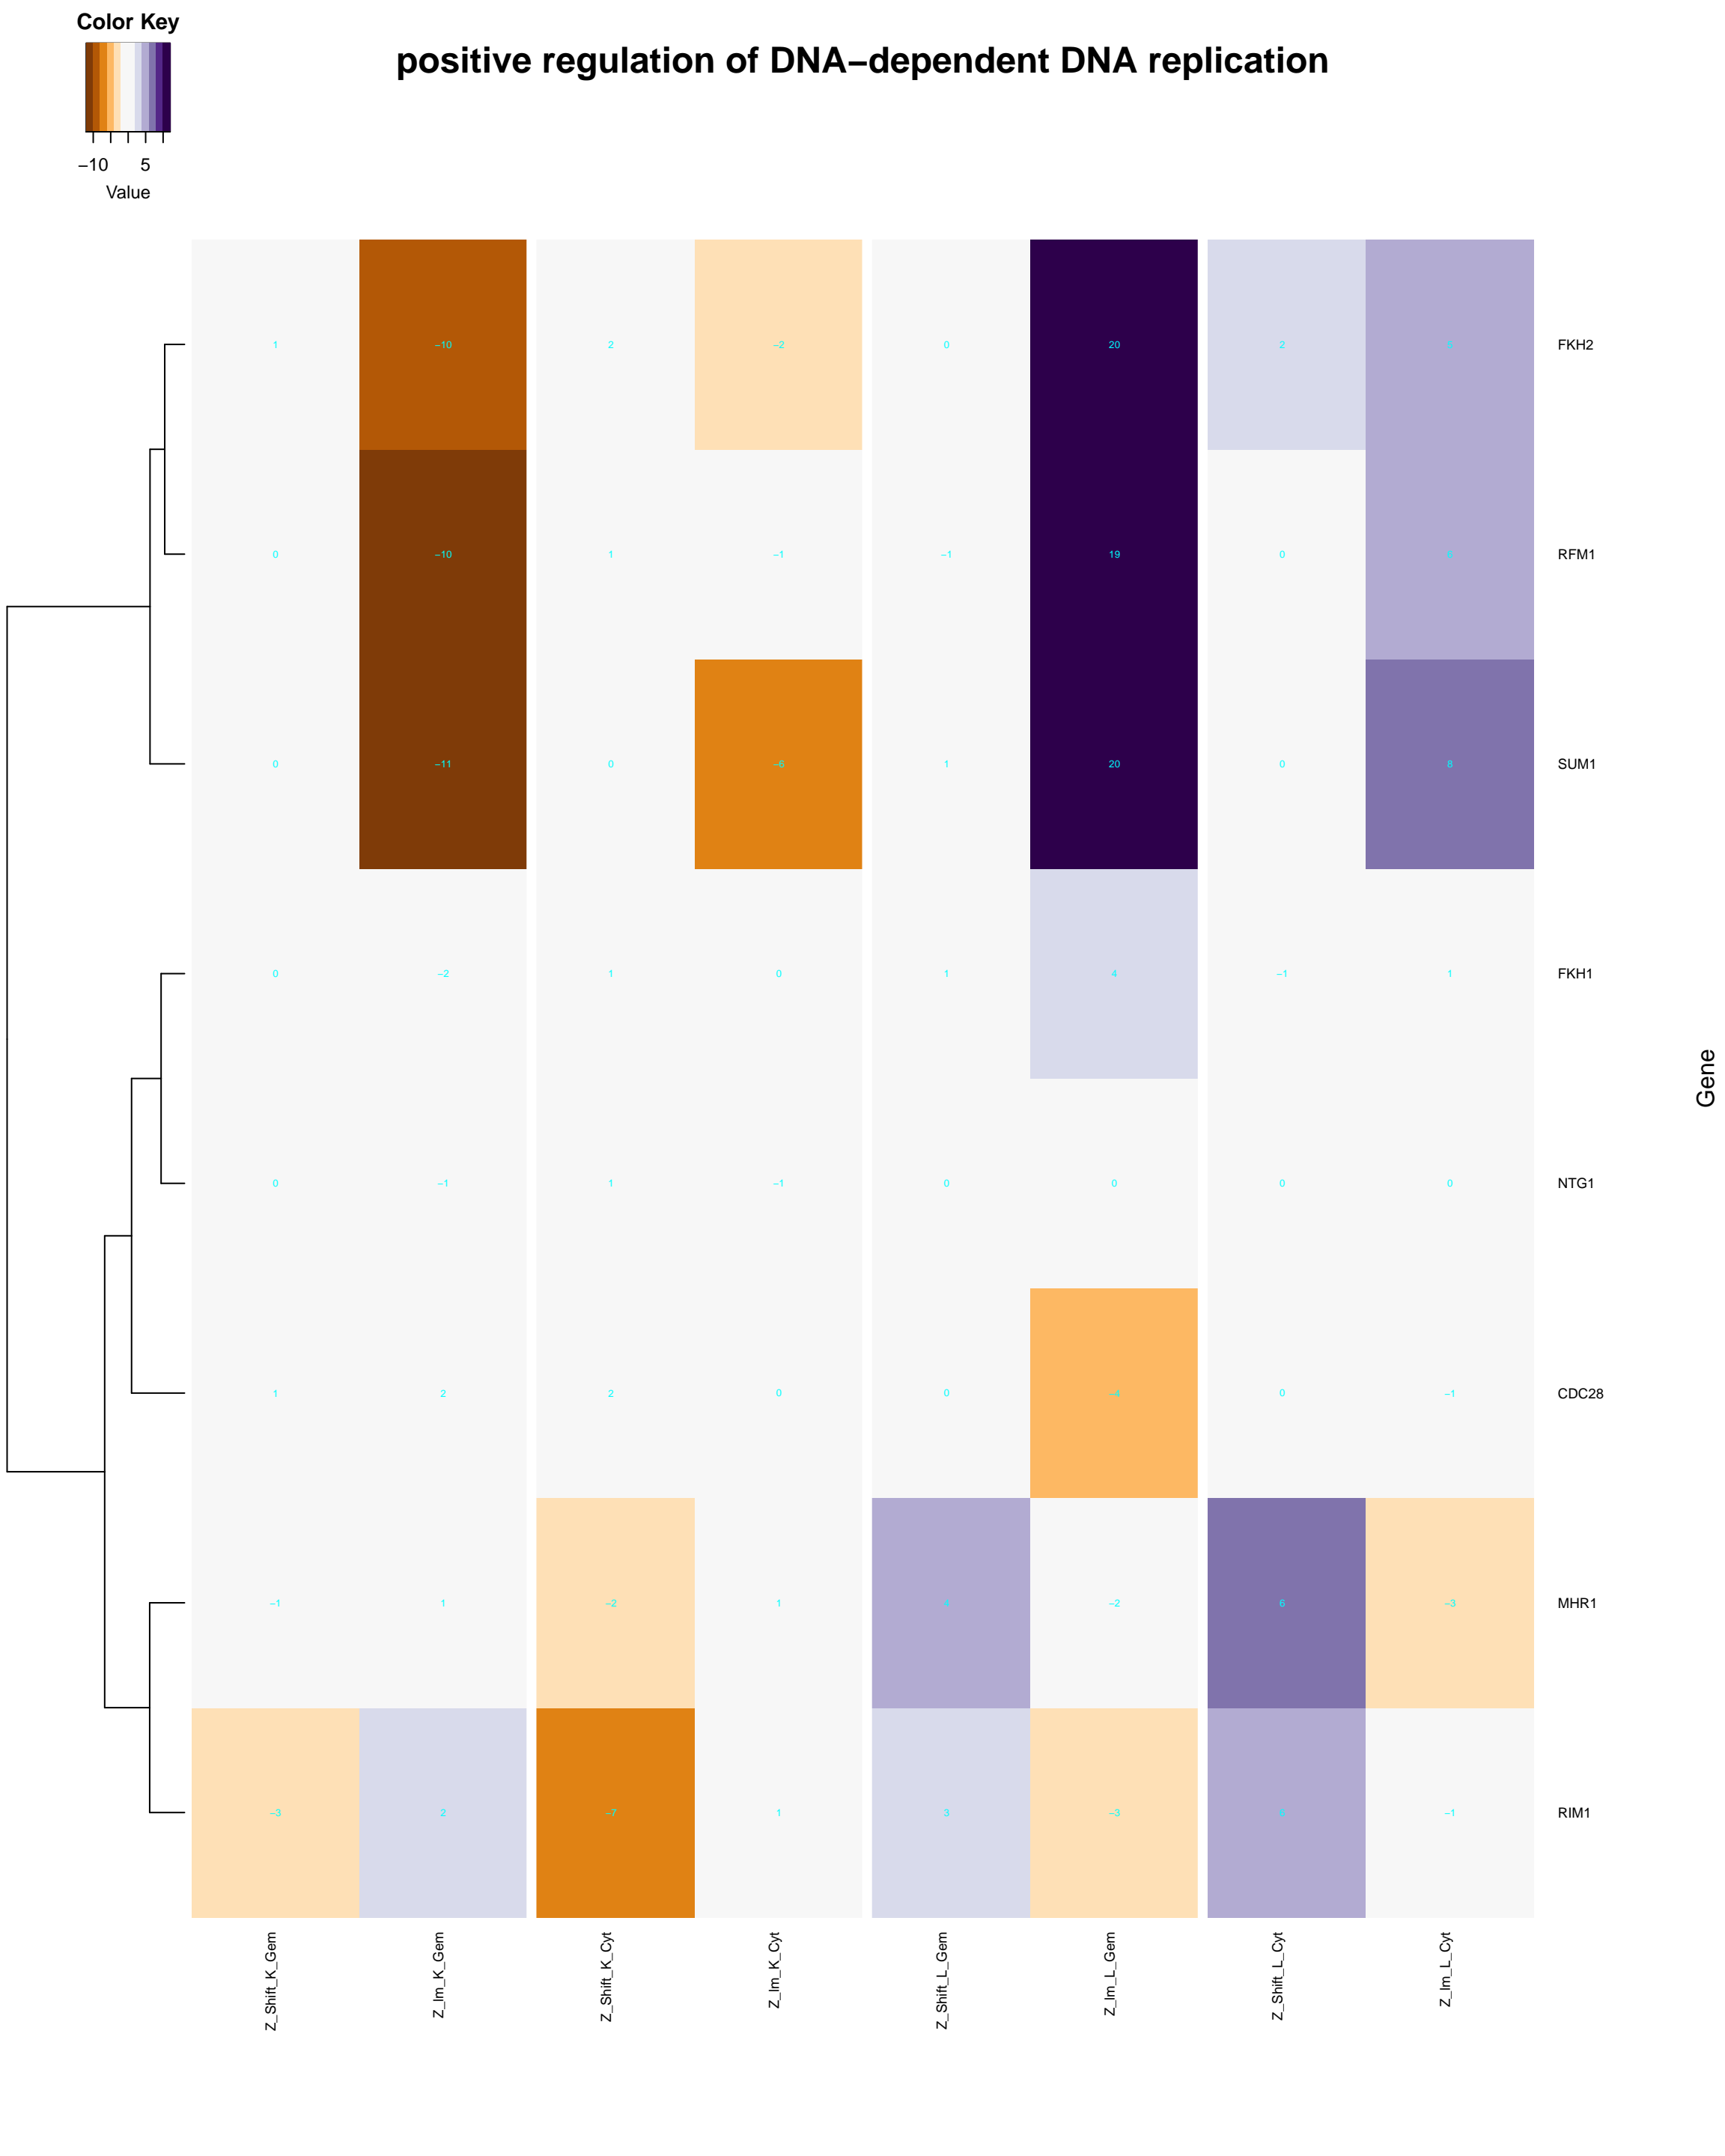

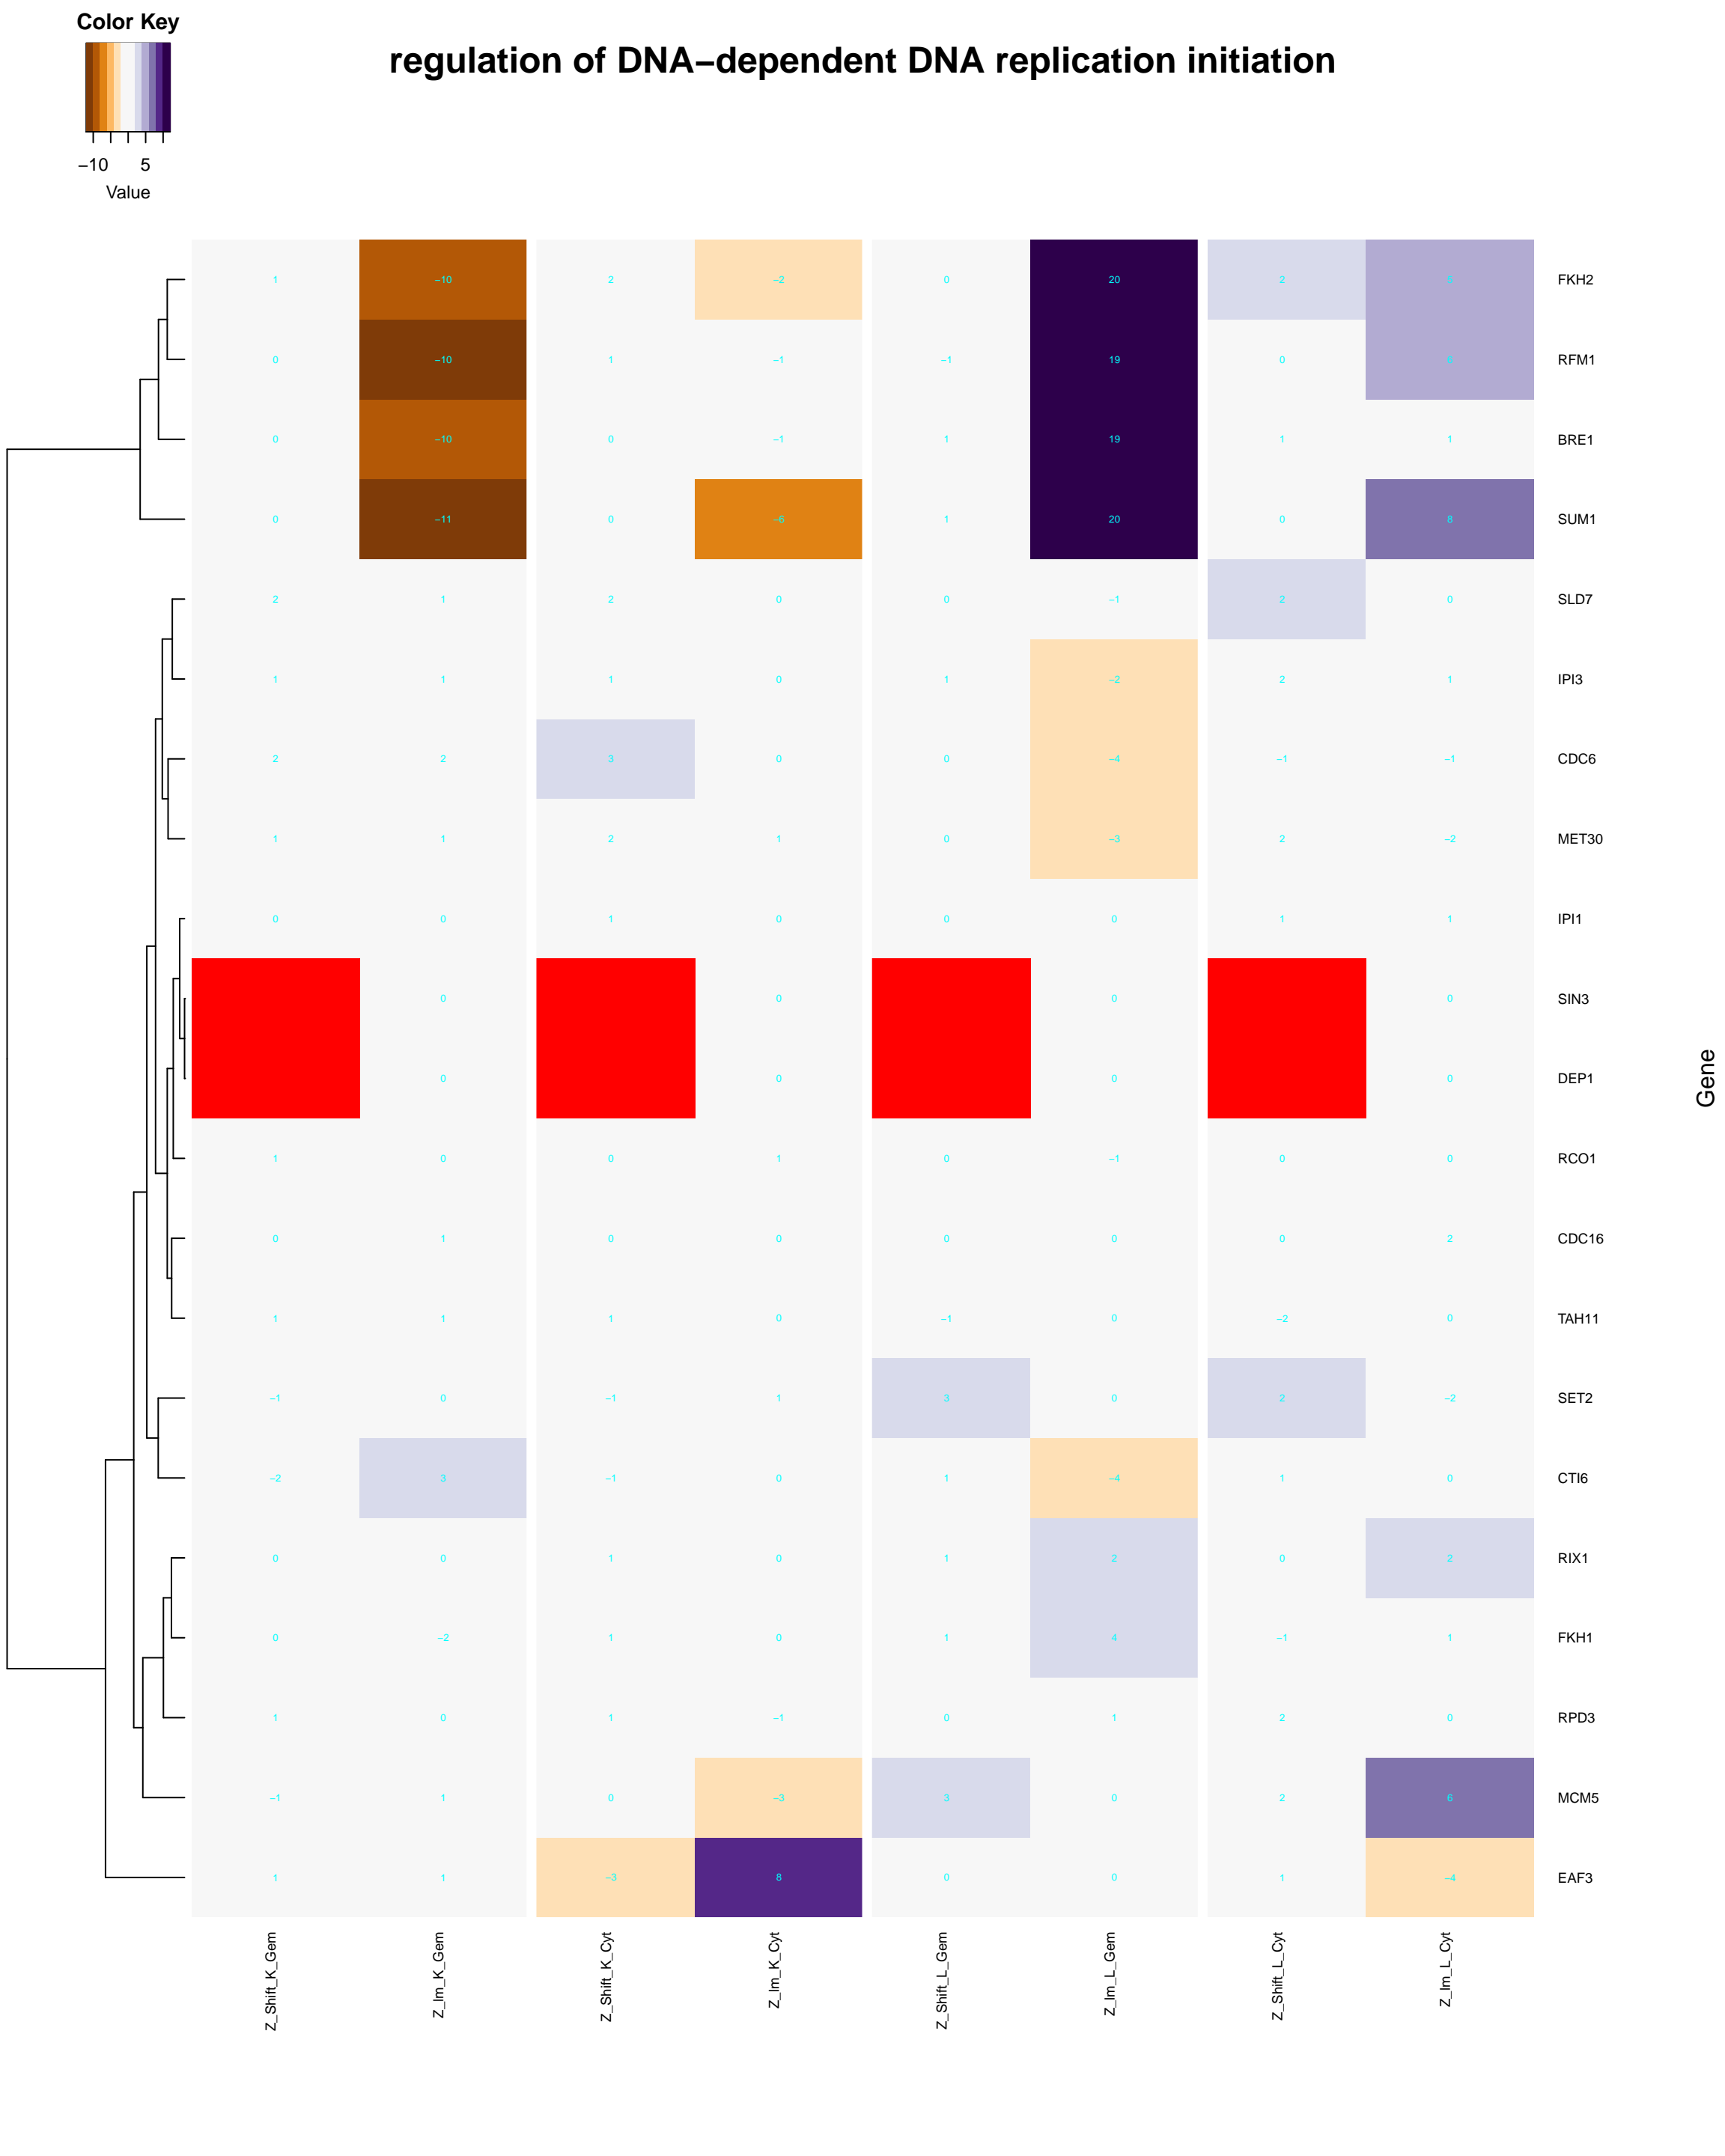

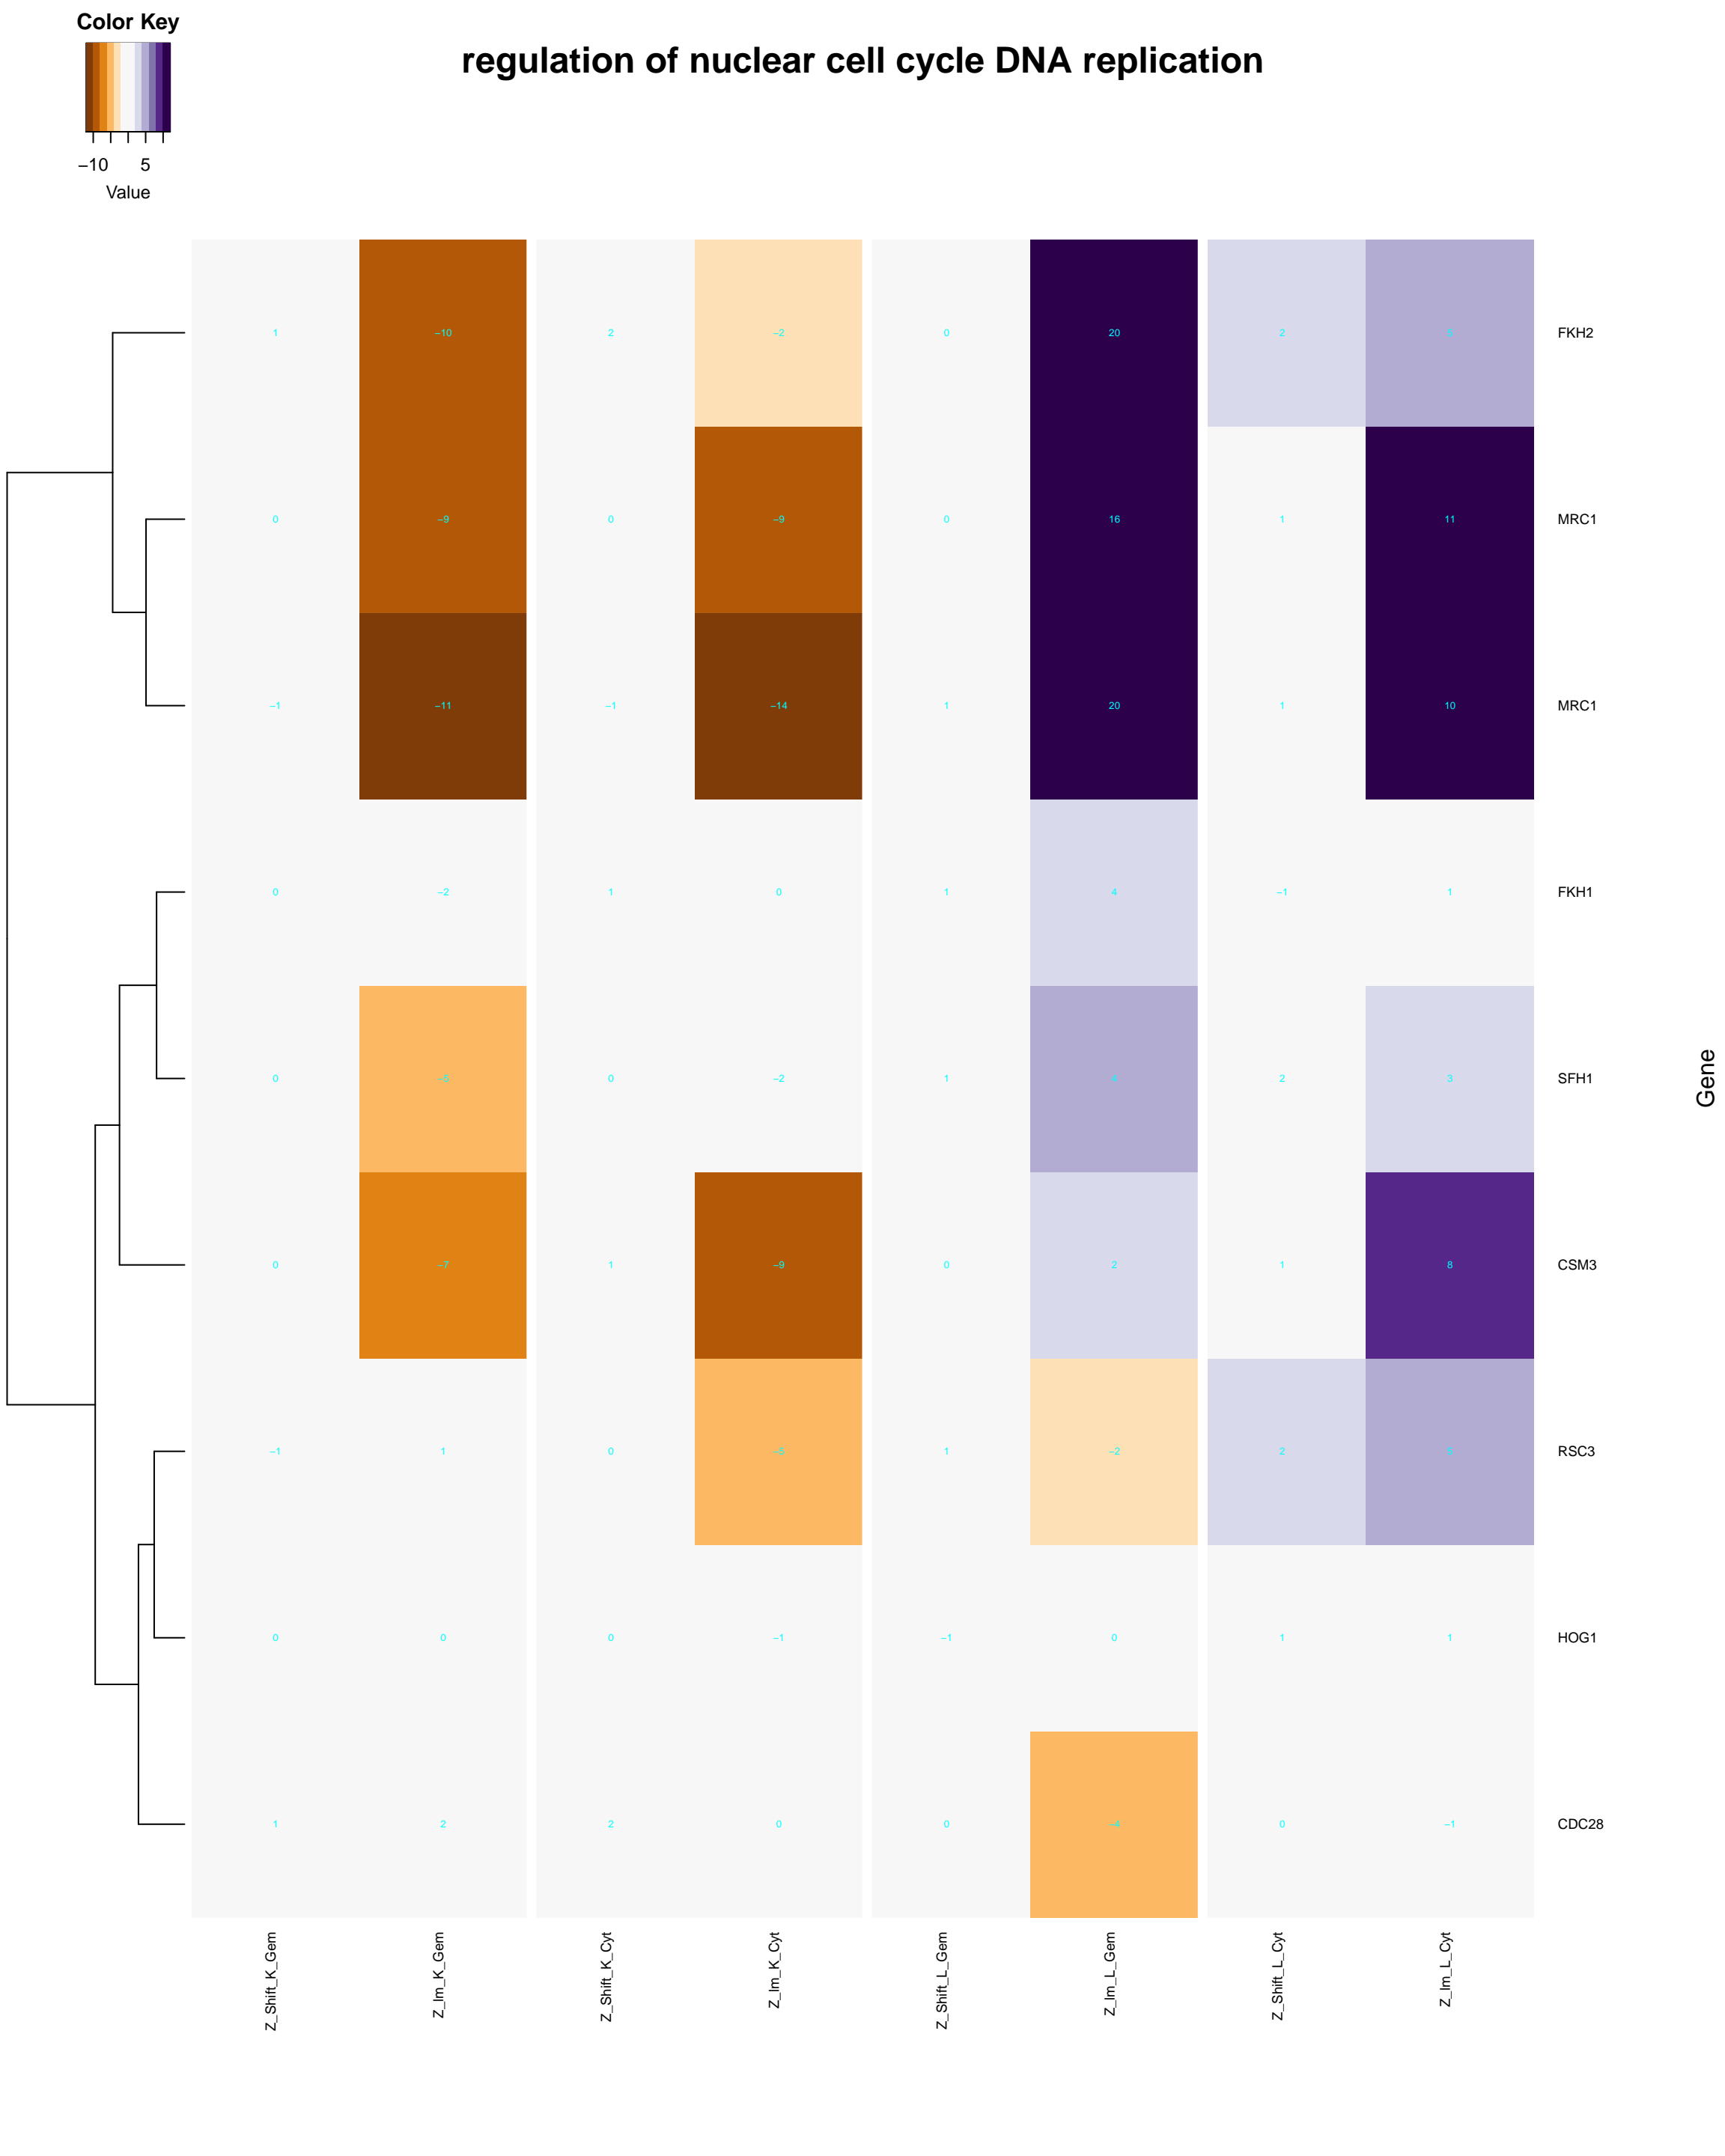



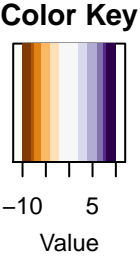

regulation of mitochondrial DNA replication

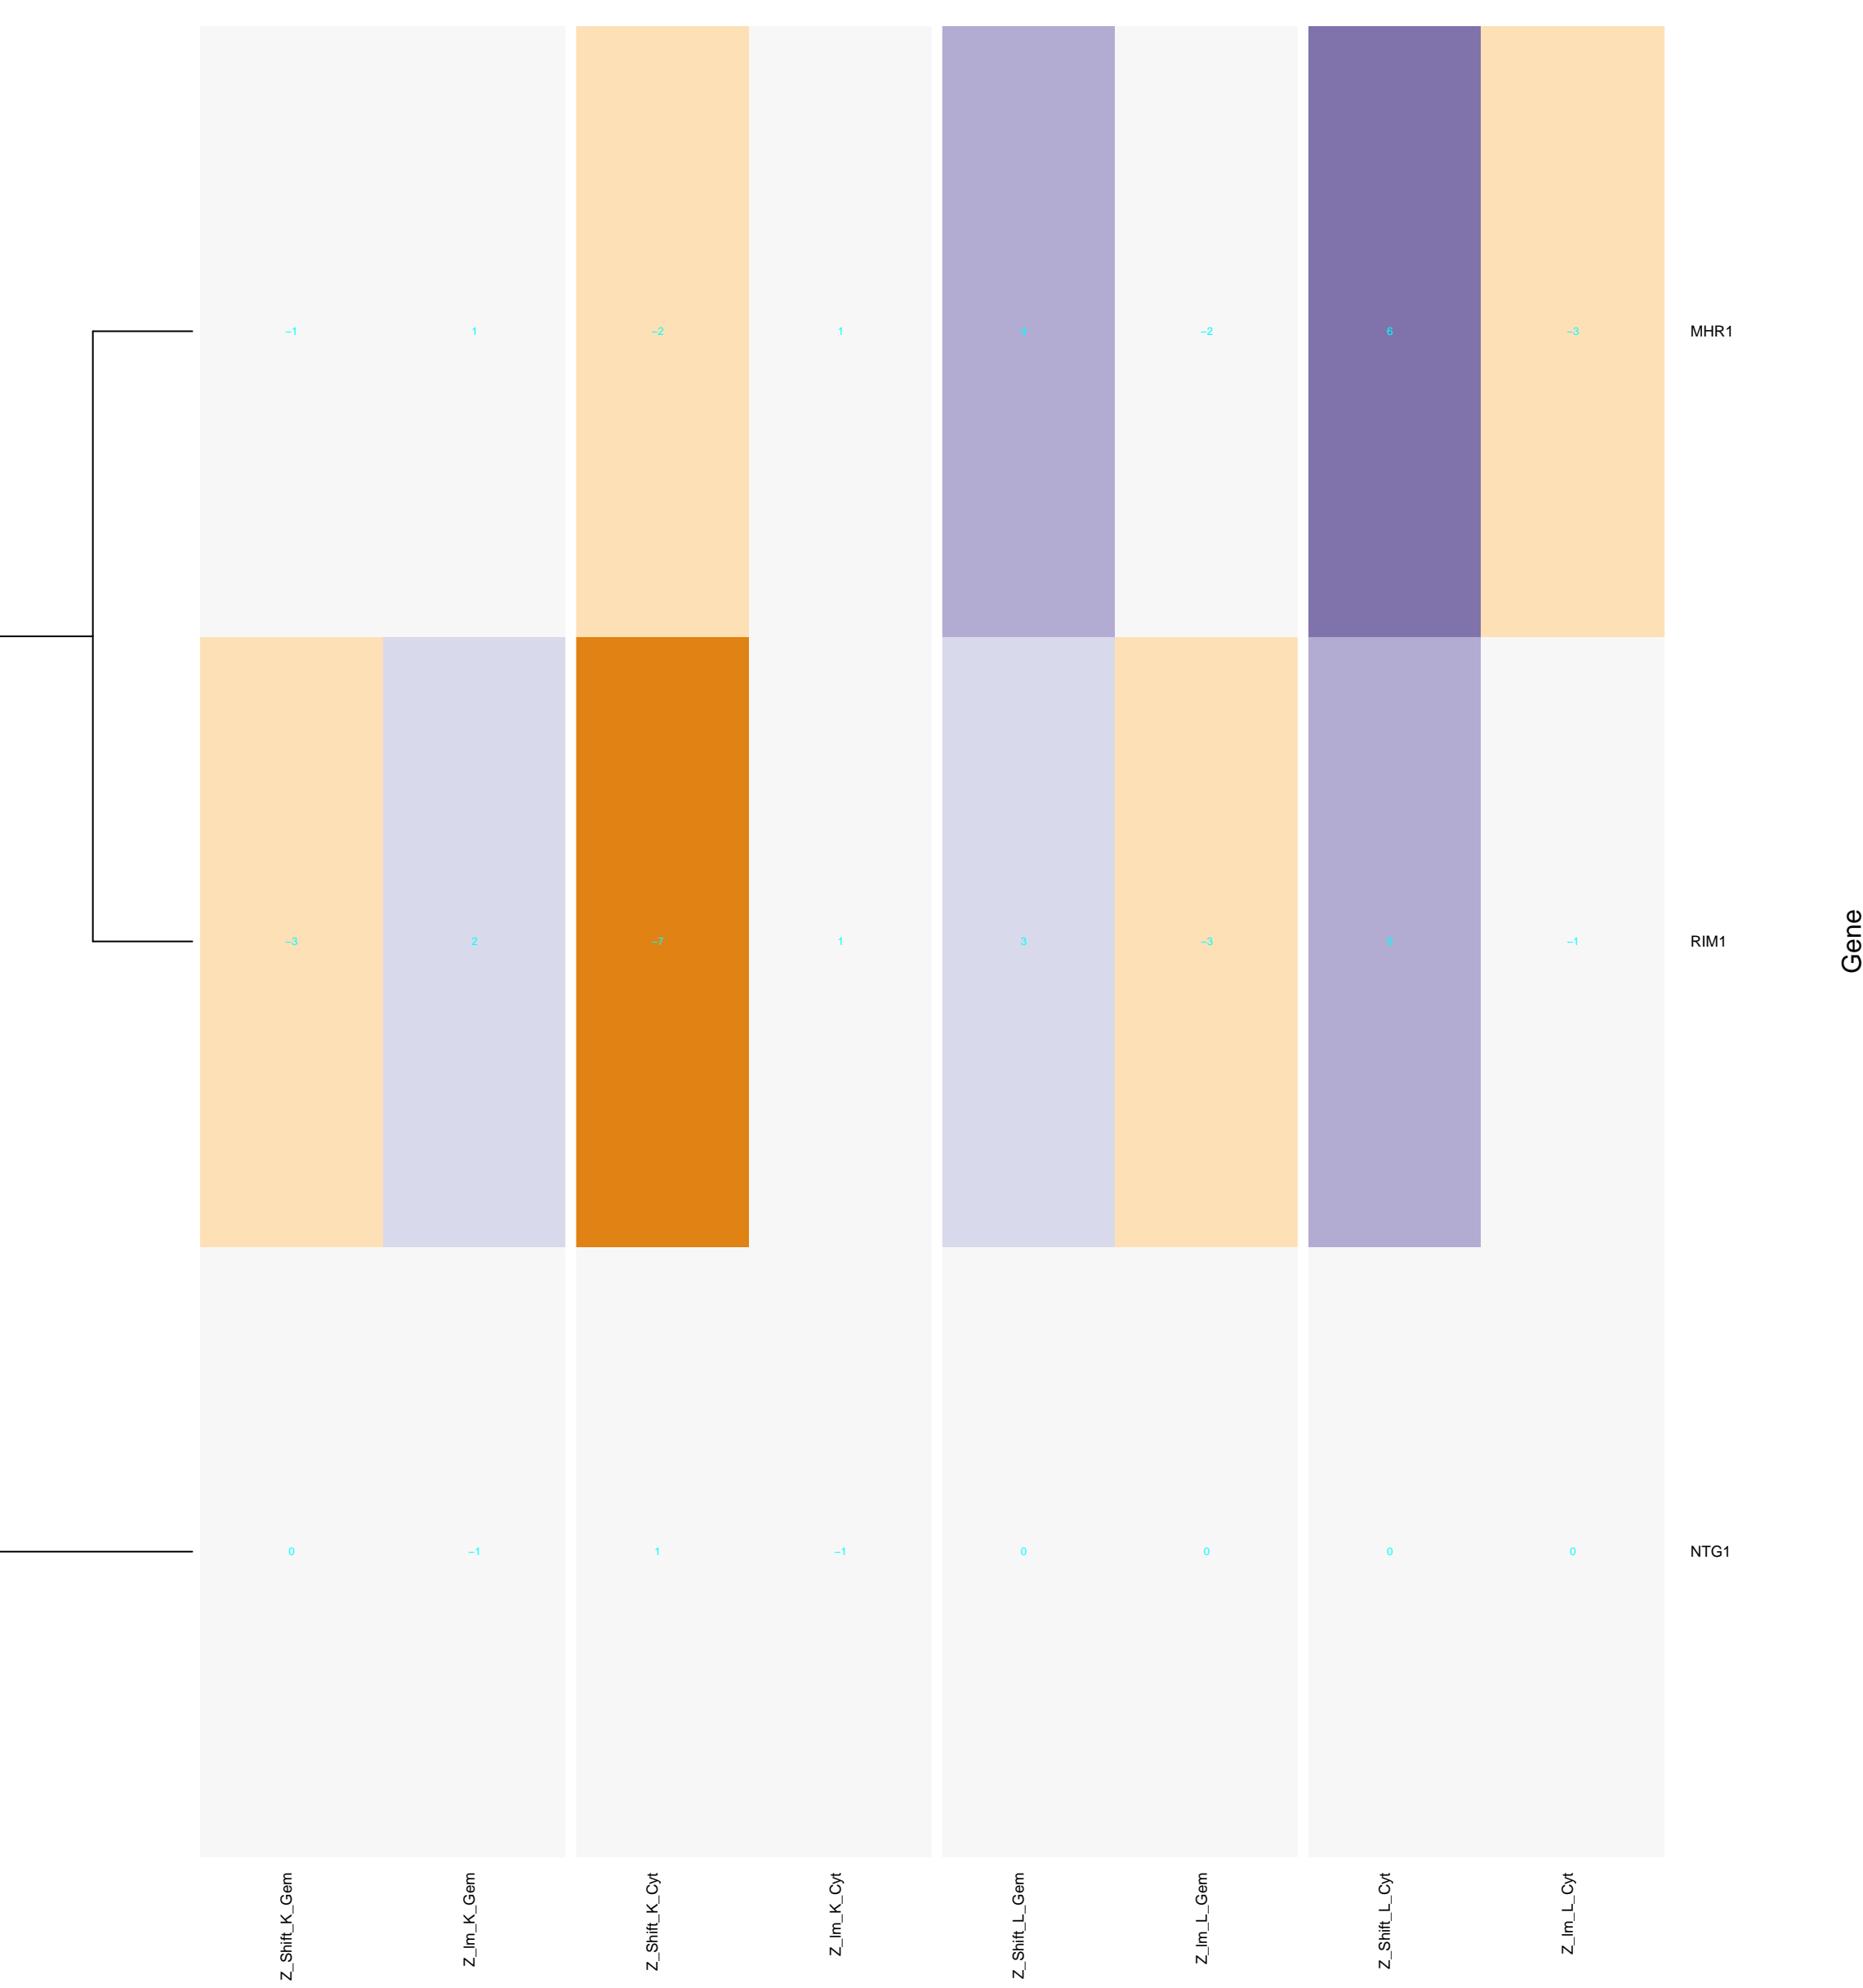

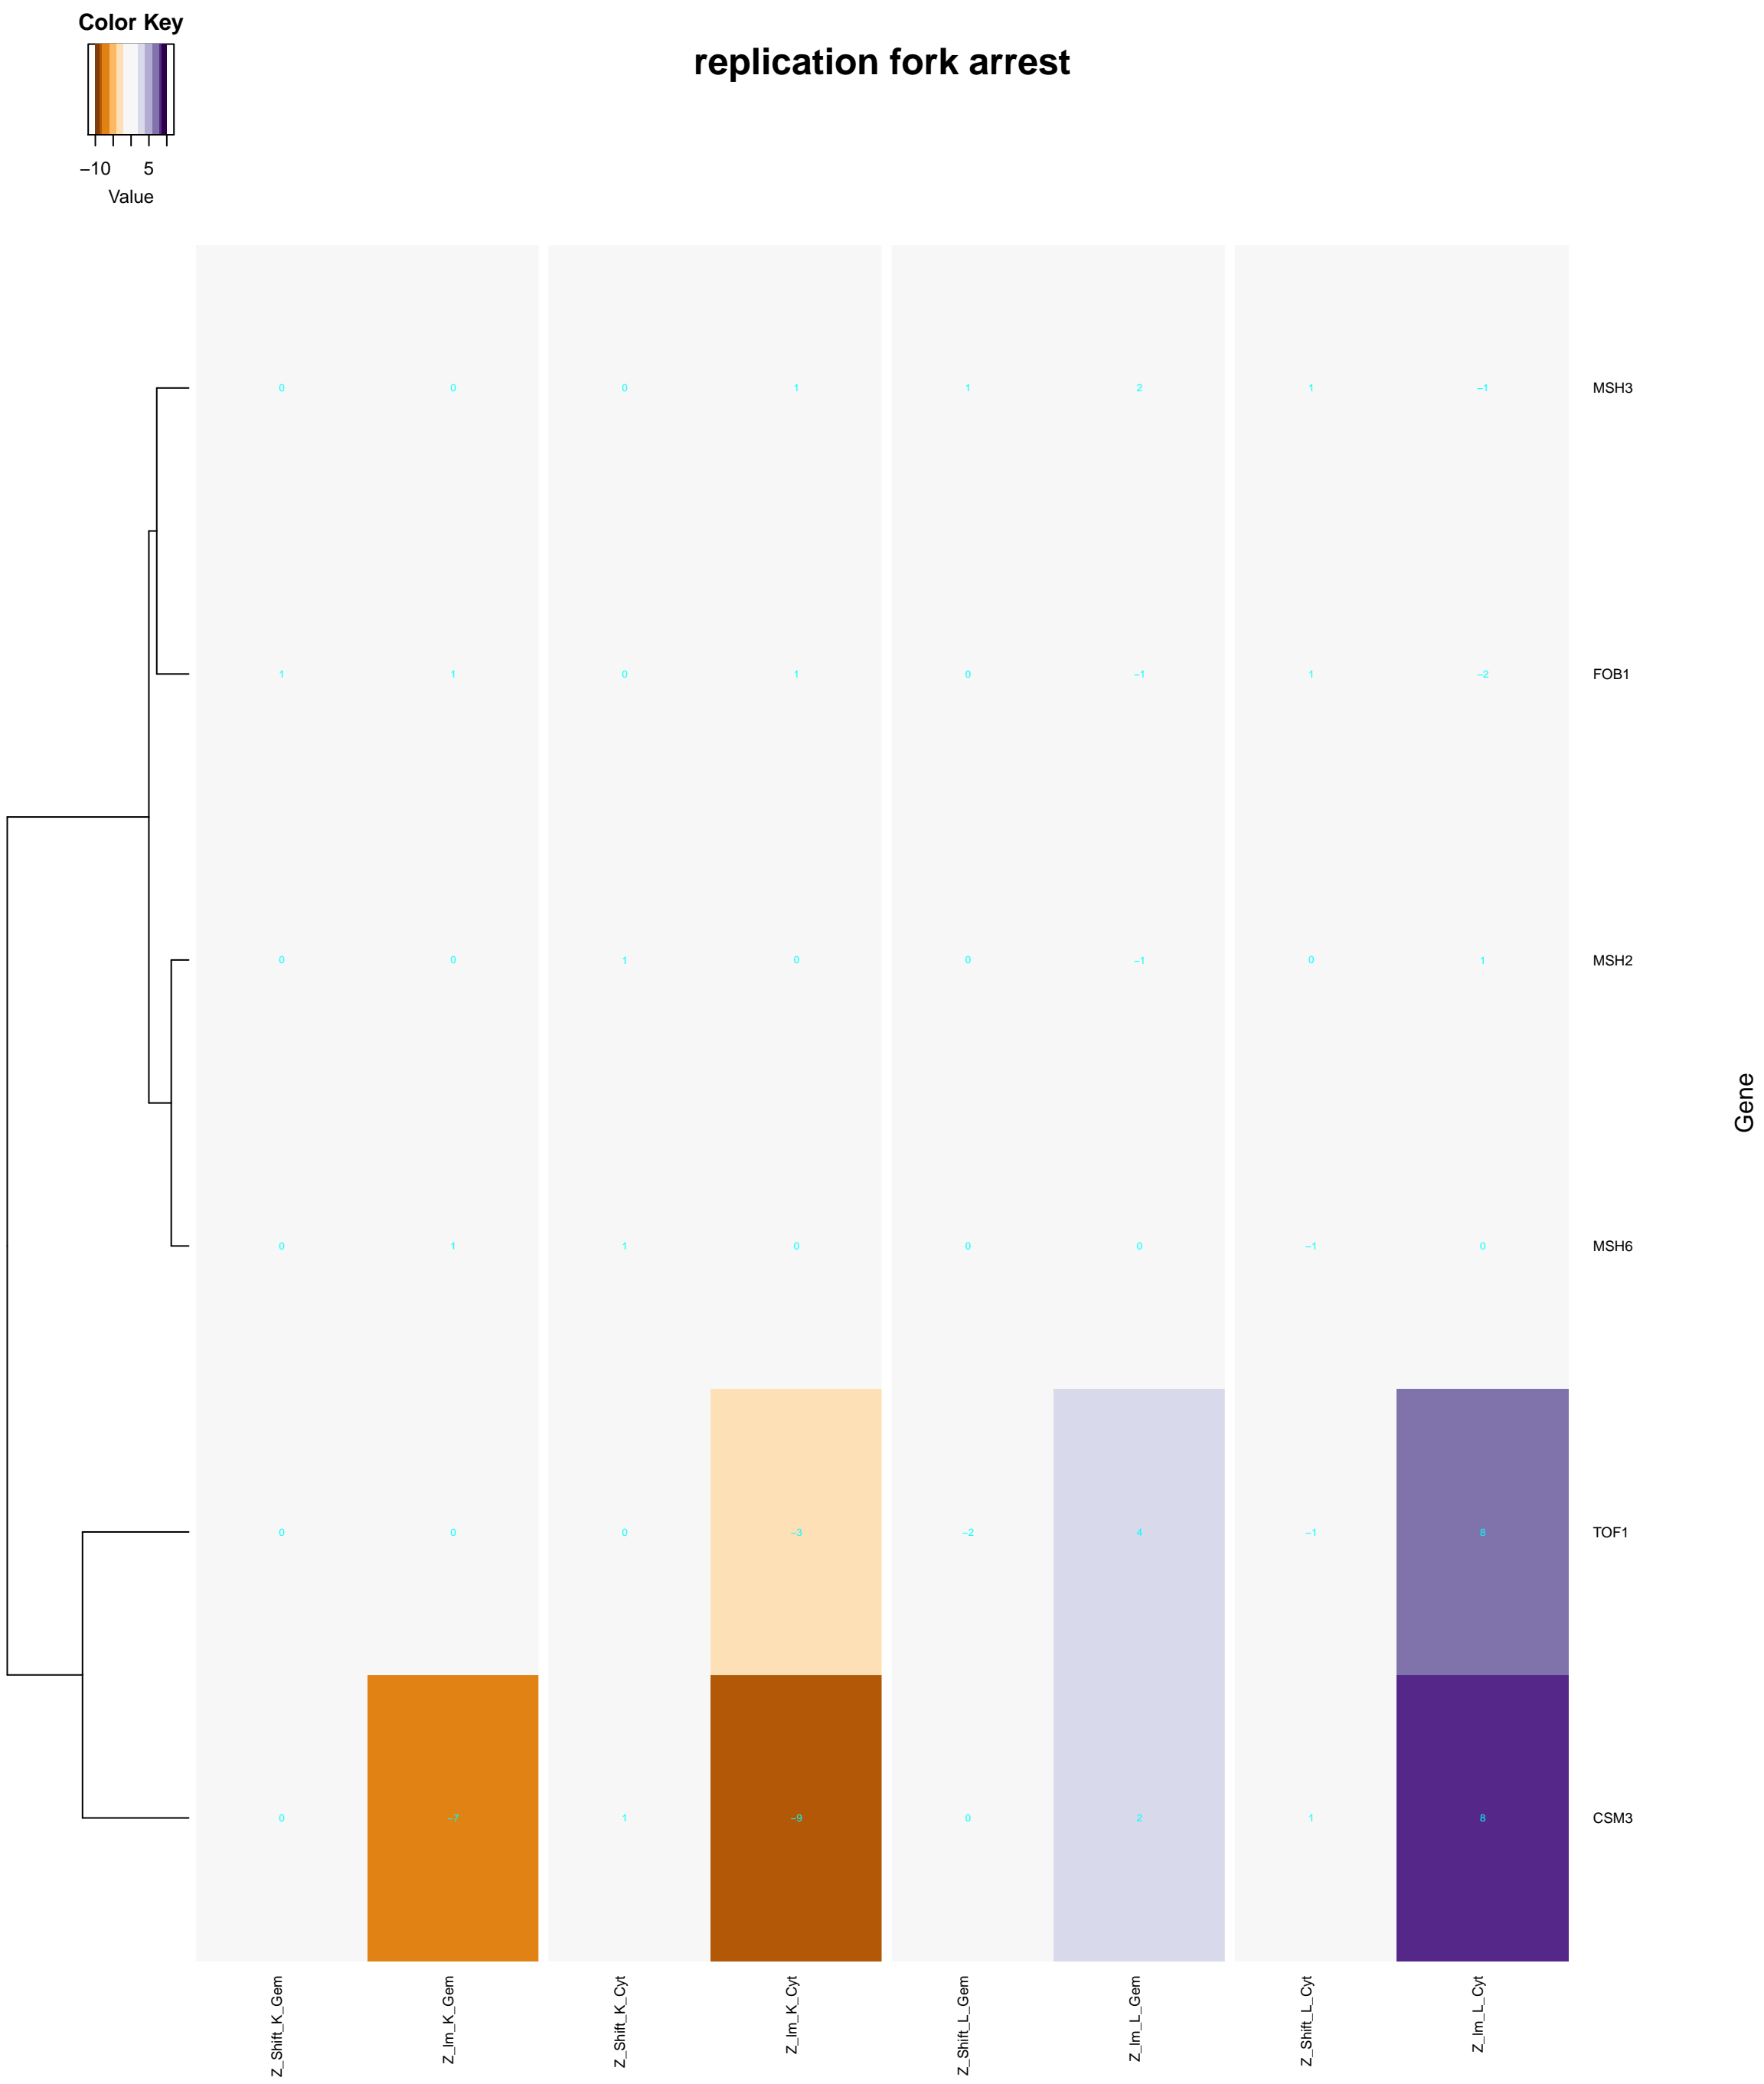

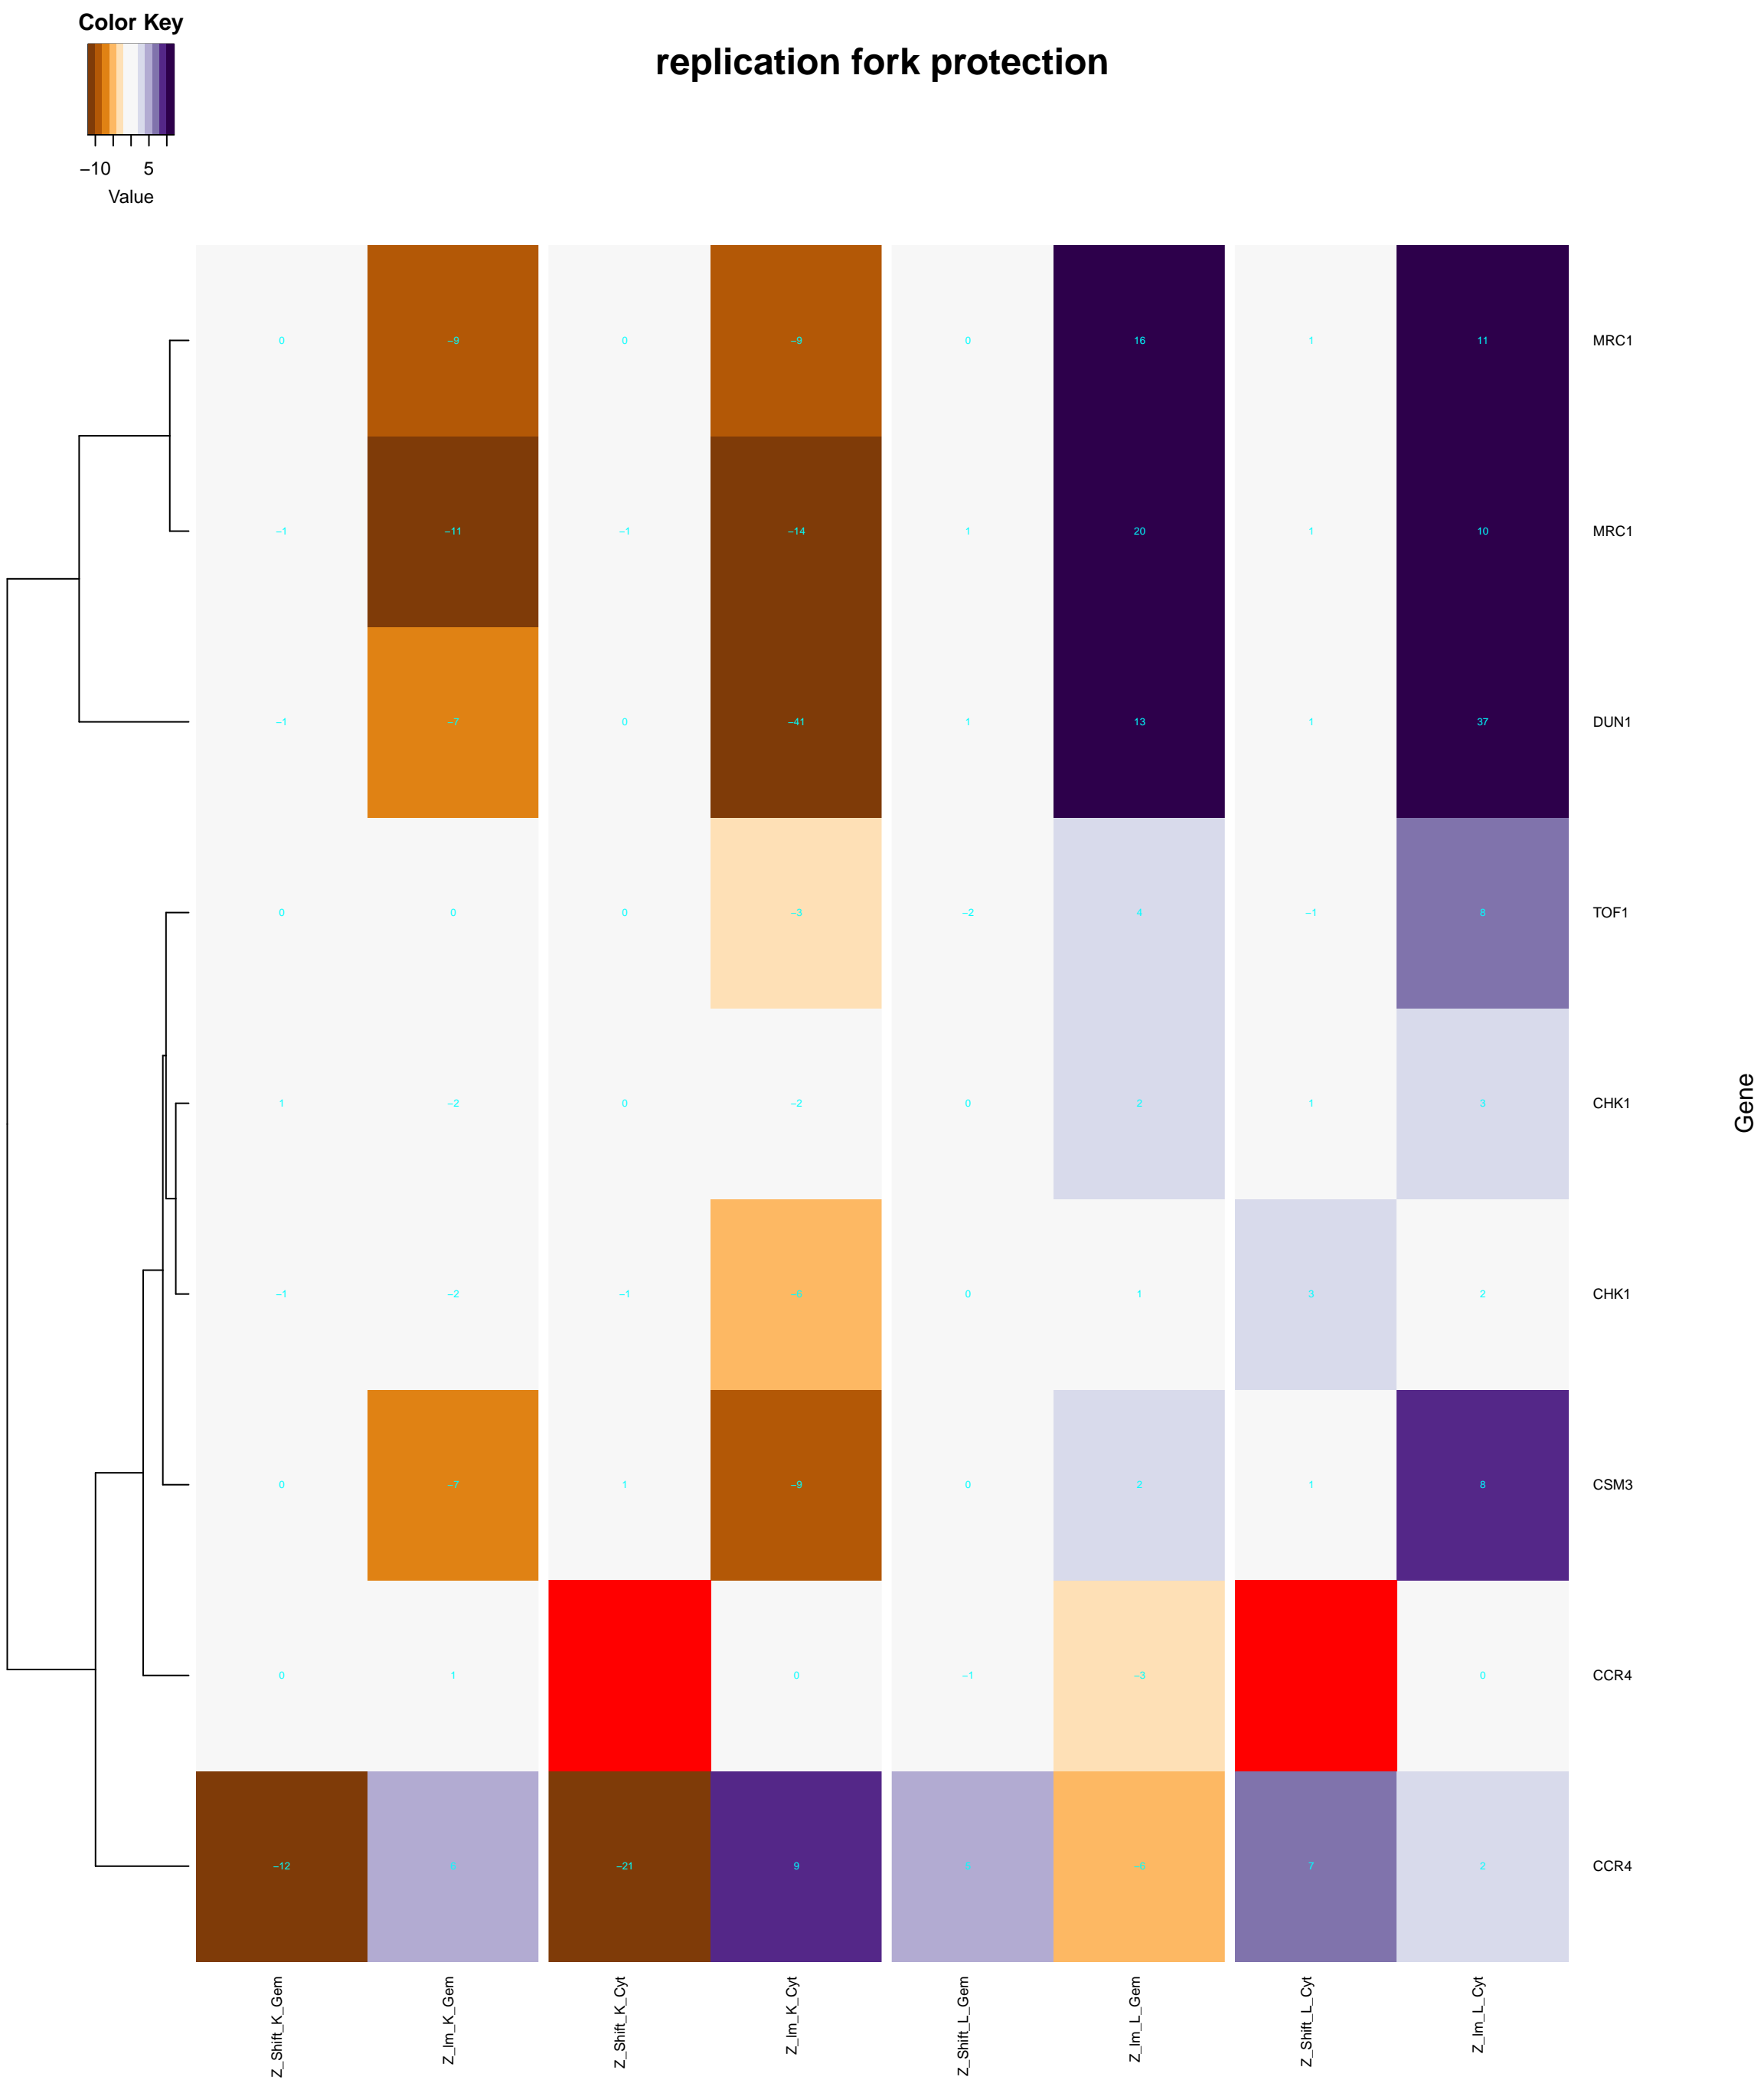

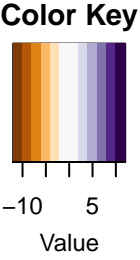

positive regulation of nuclear cell cycle DNA replication

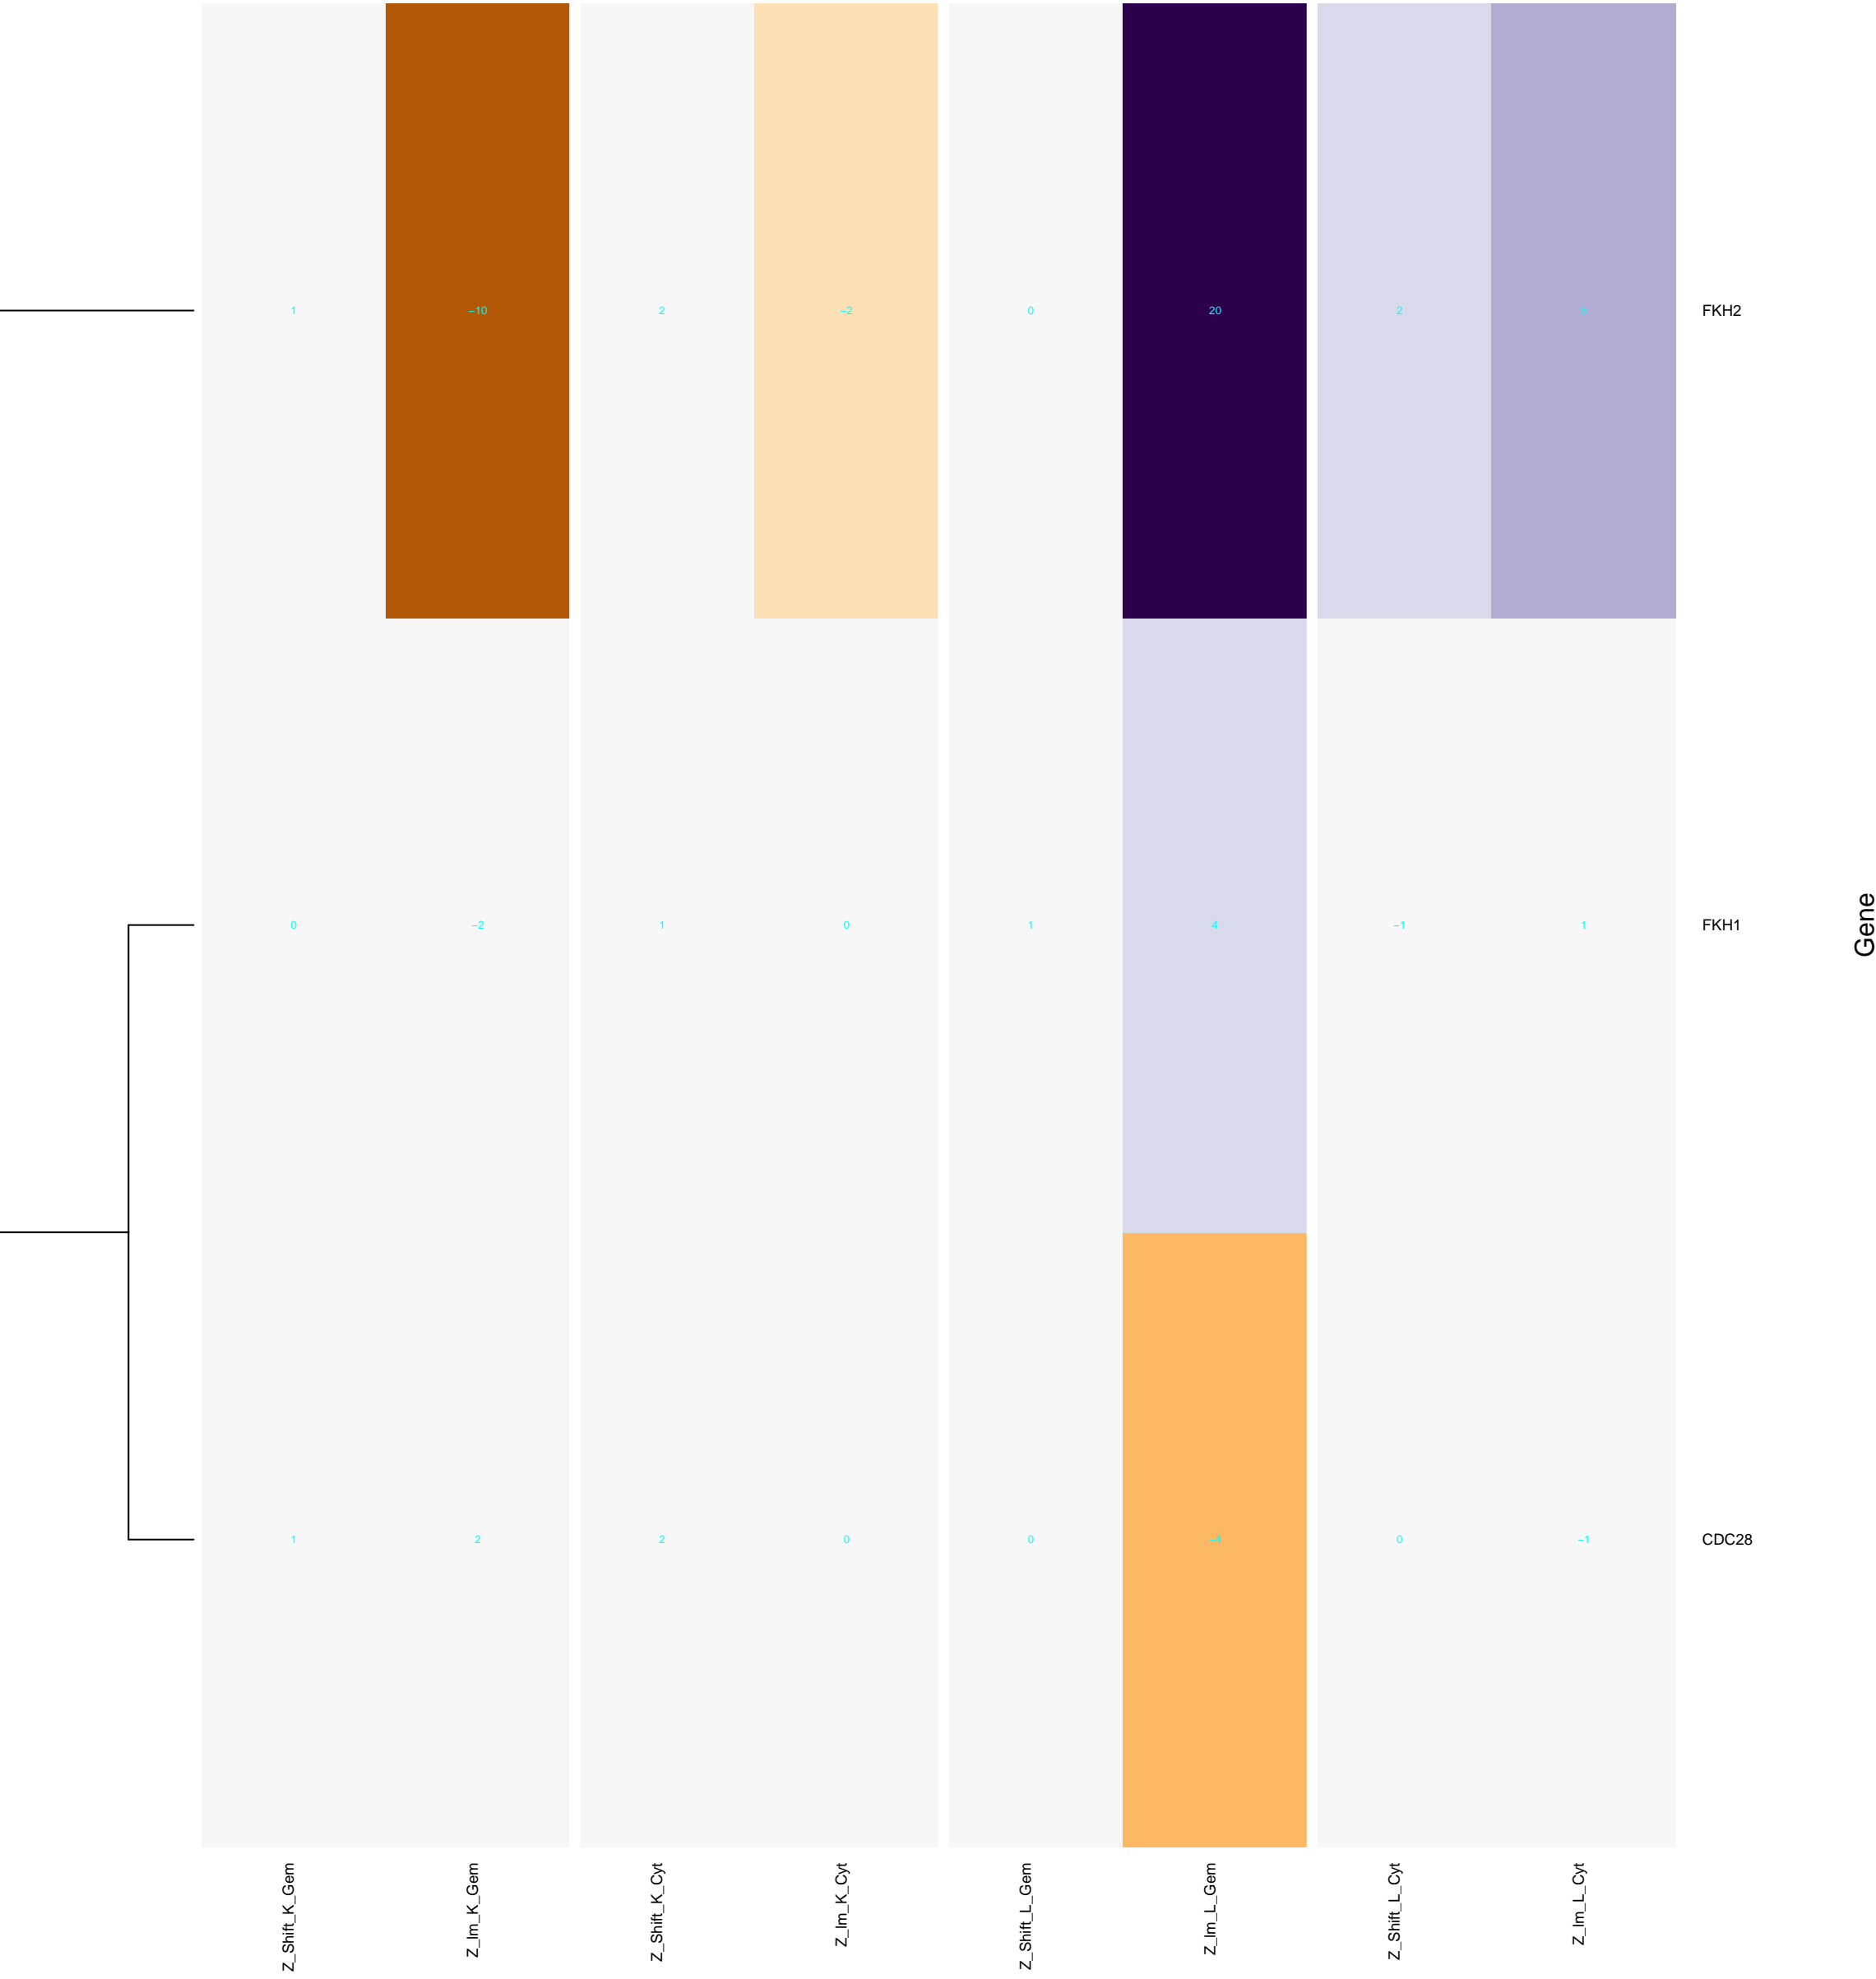



positive regulation of DNA-dependent DNA replication initiation

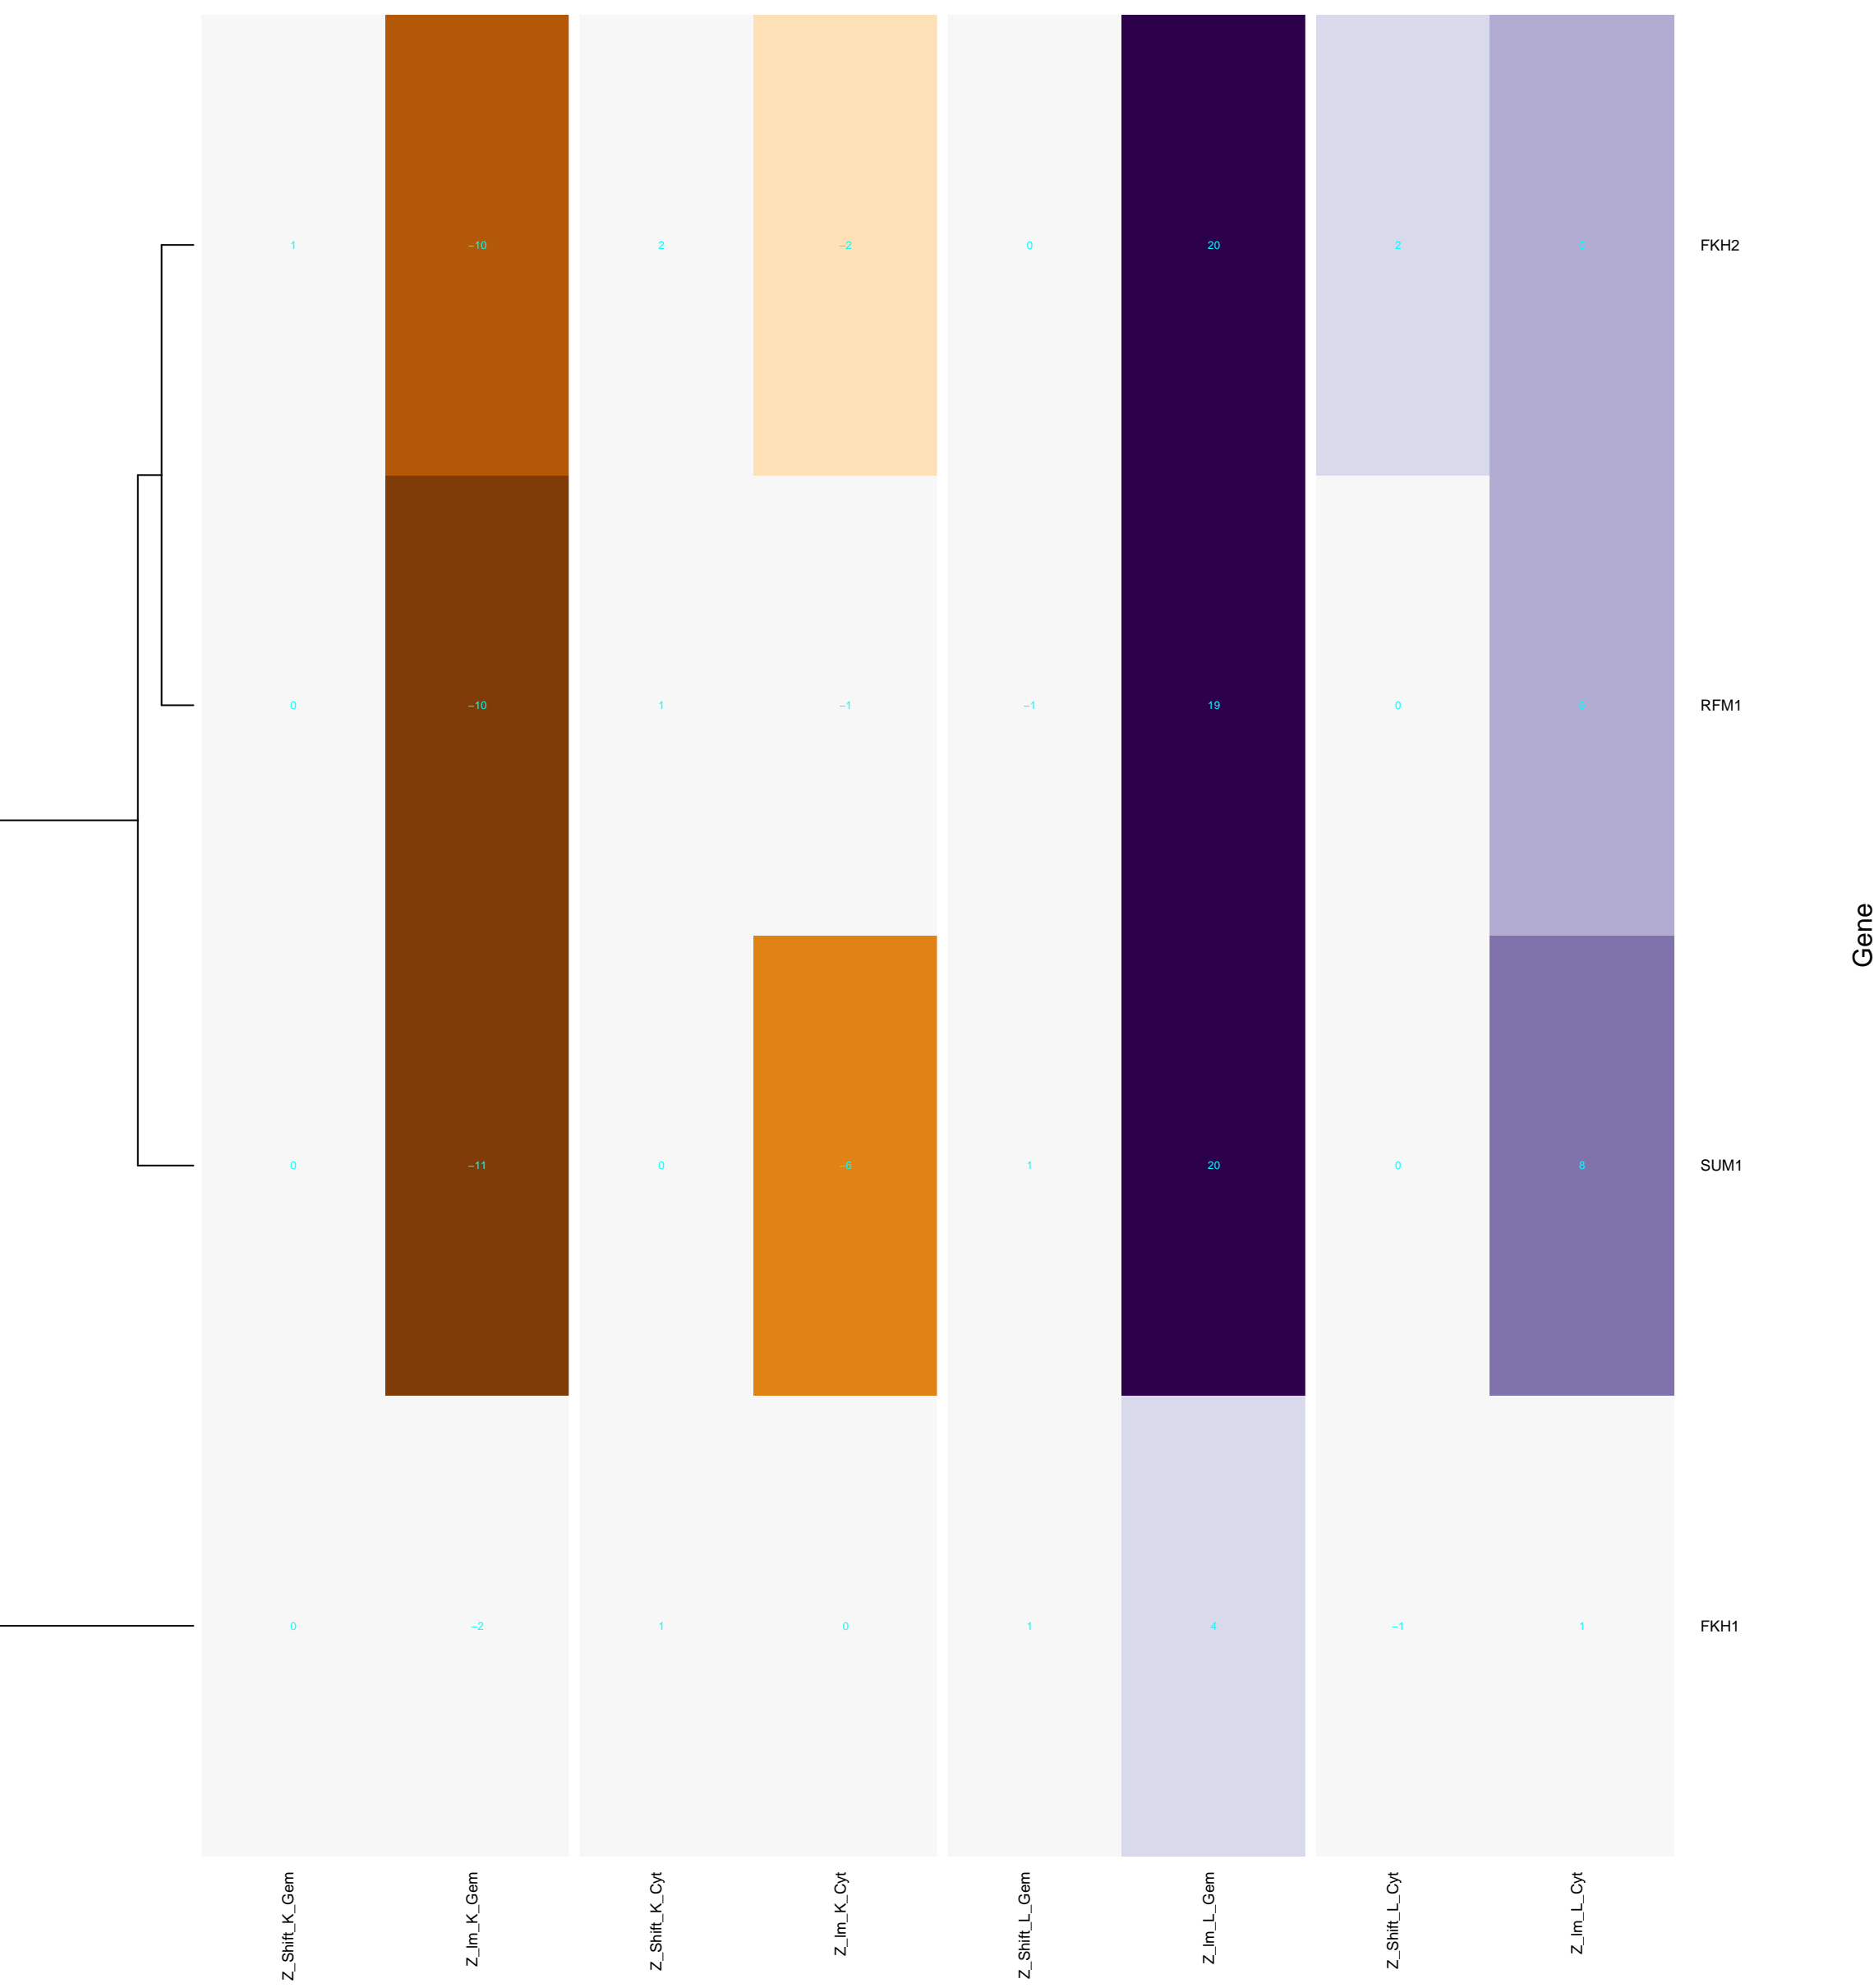



positive regulation of mitochondrial DNA replication



Supplement: s1 [file s1]
