# Supplementary material for: A Humanized Yeast Phenomic Model of Deoxycytidine Kinase to Predict Genetic Buffering of Nucleoside Analog Cytotoxicity
Source: MDPI journal article supplement (doi:10.3390/genes10100770), 2019-09-30

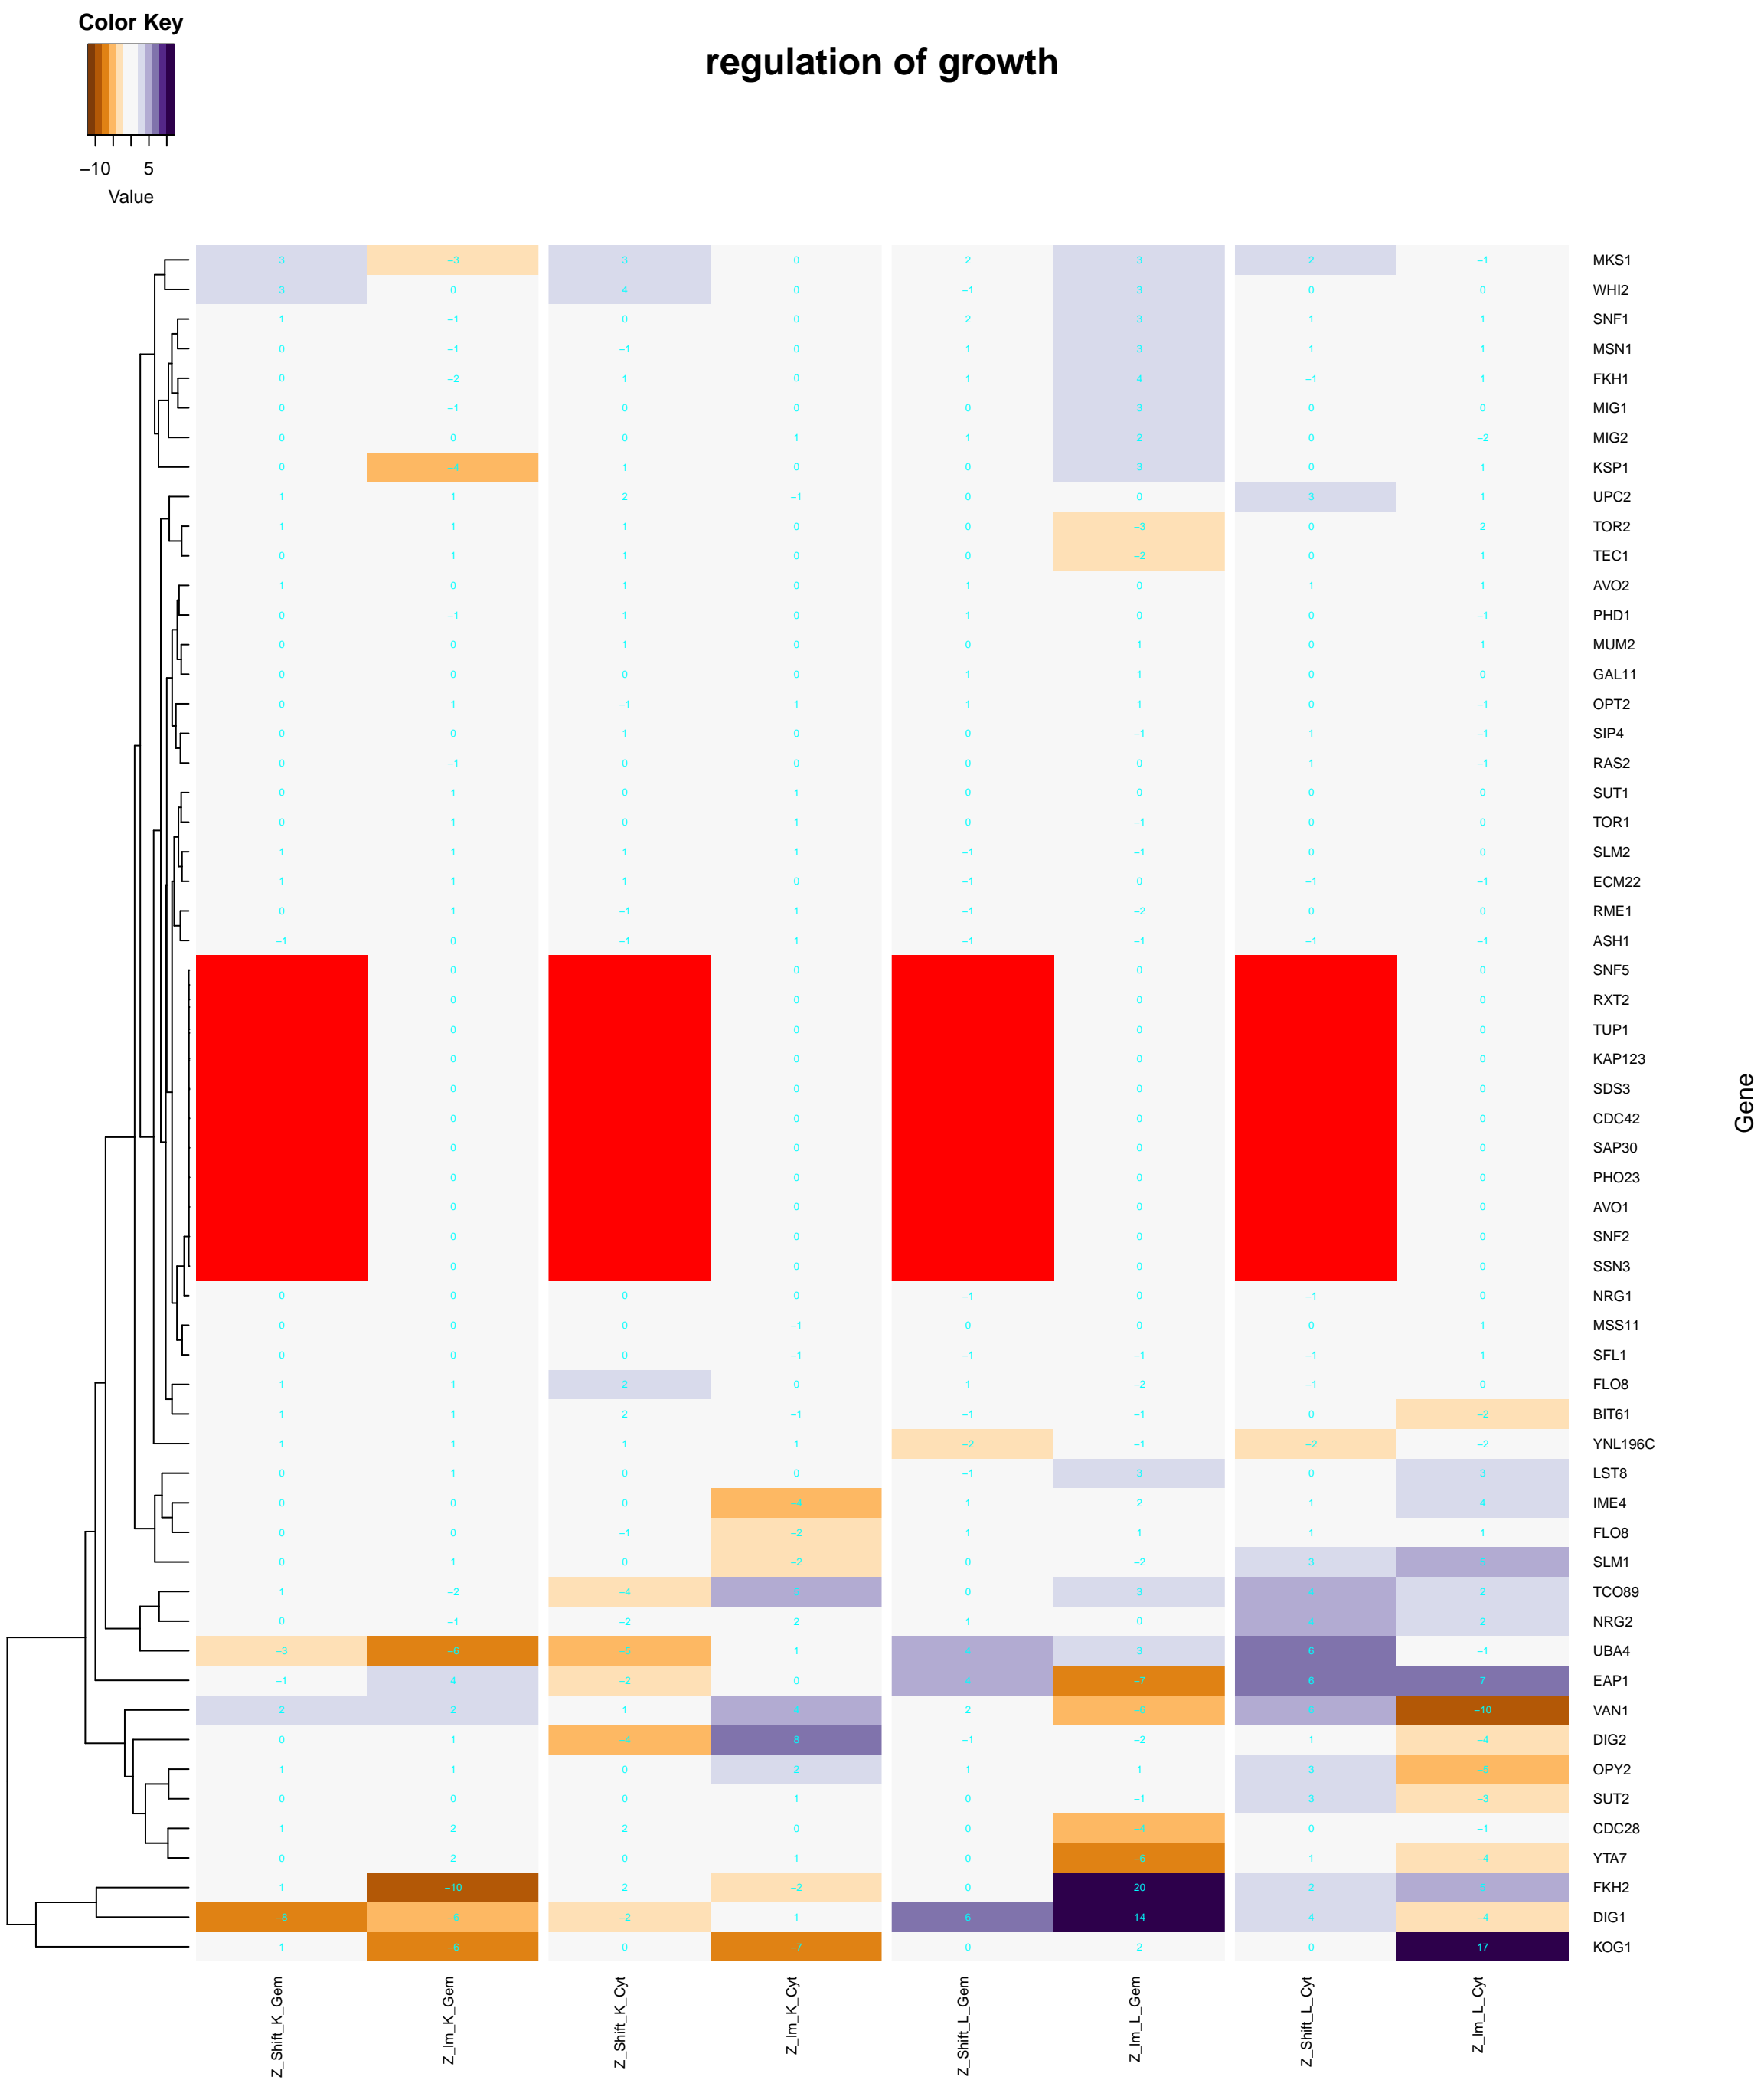

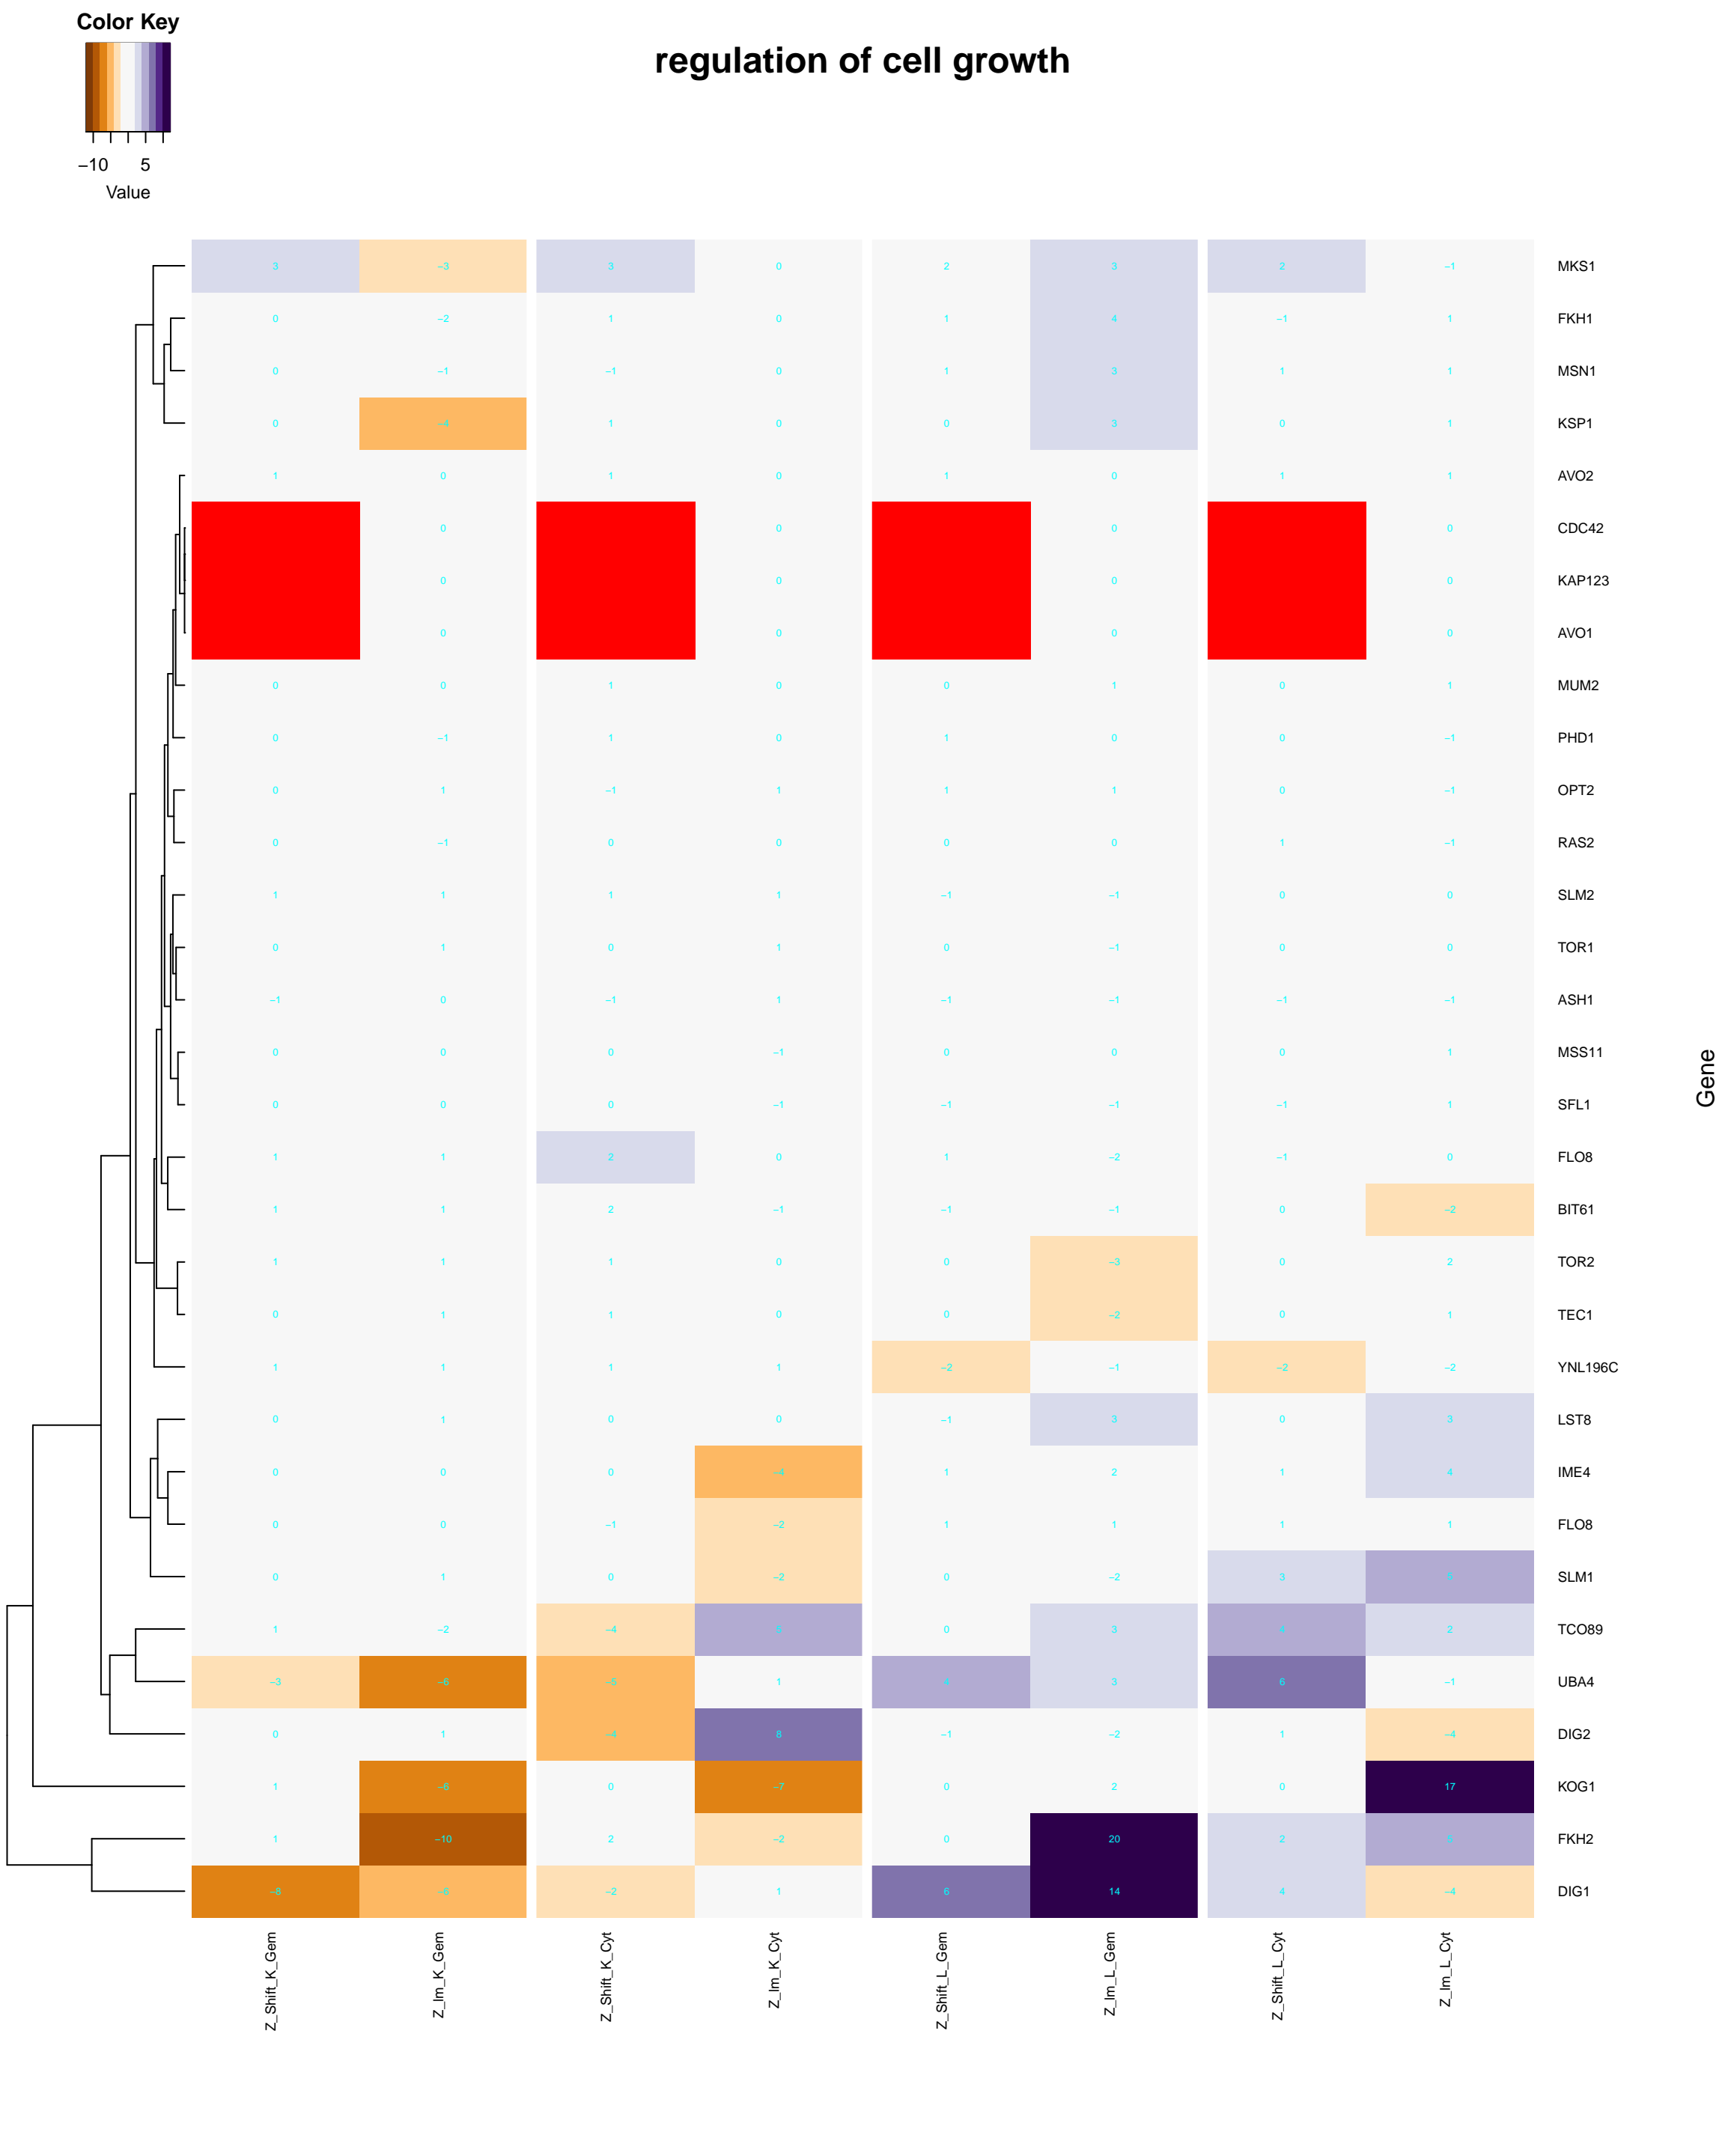

Value

## regulation of filamentous growth

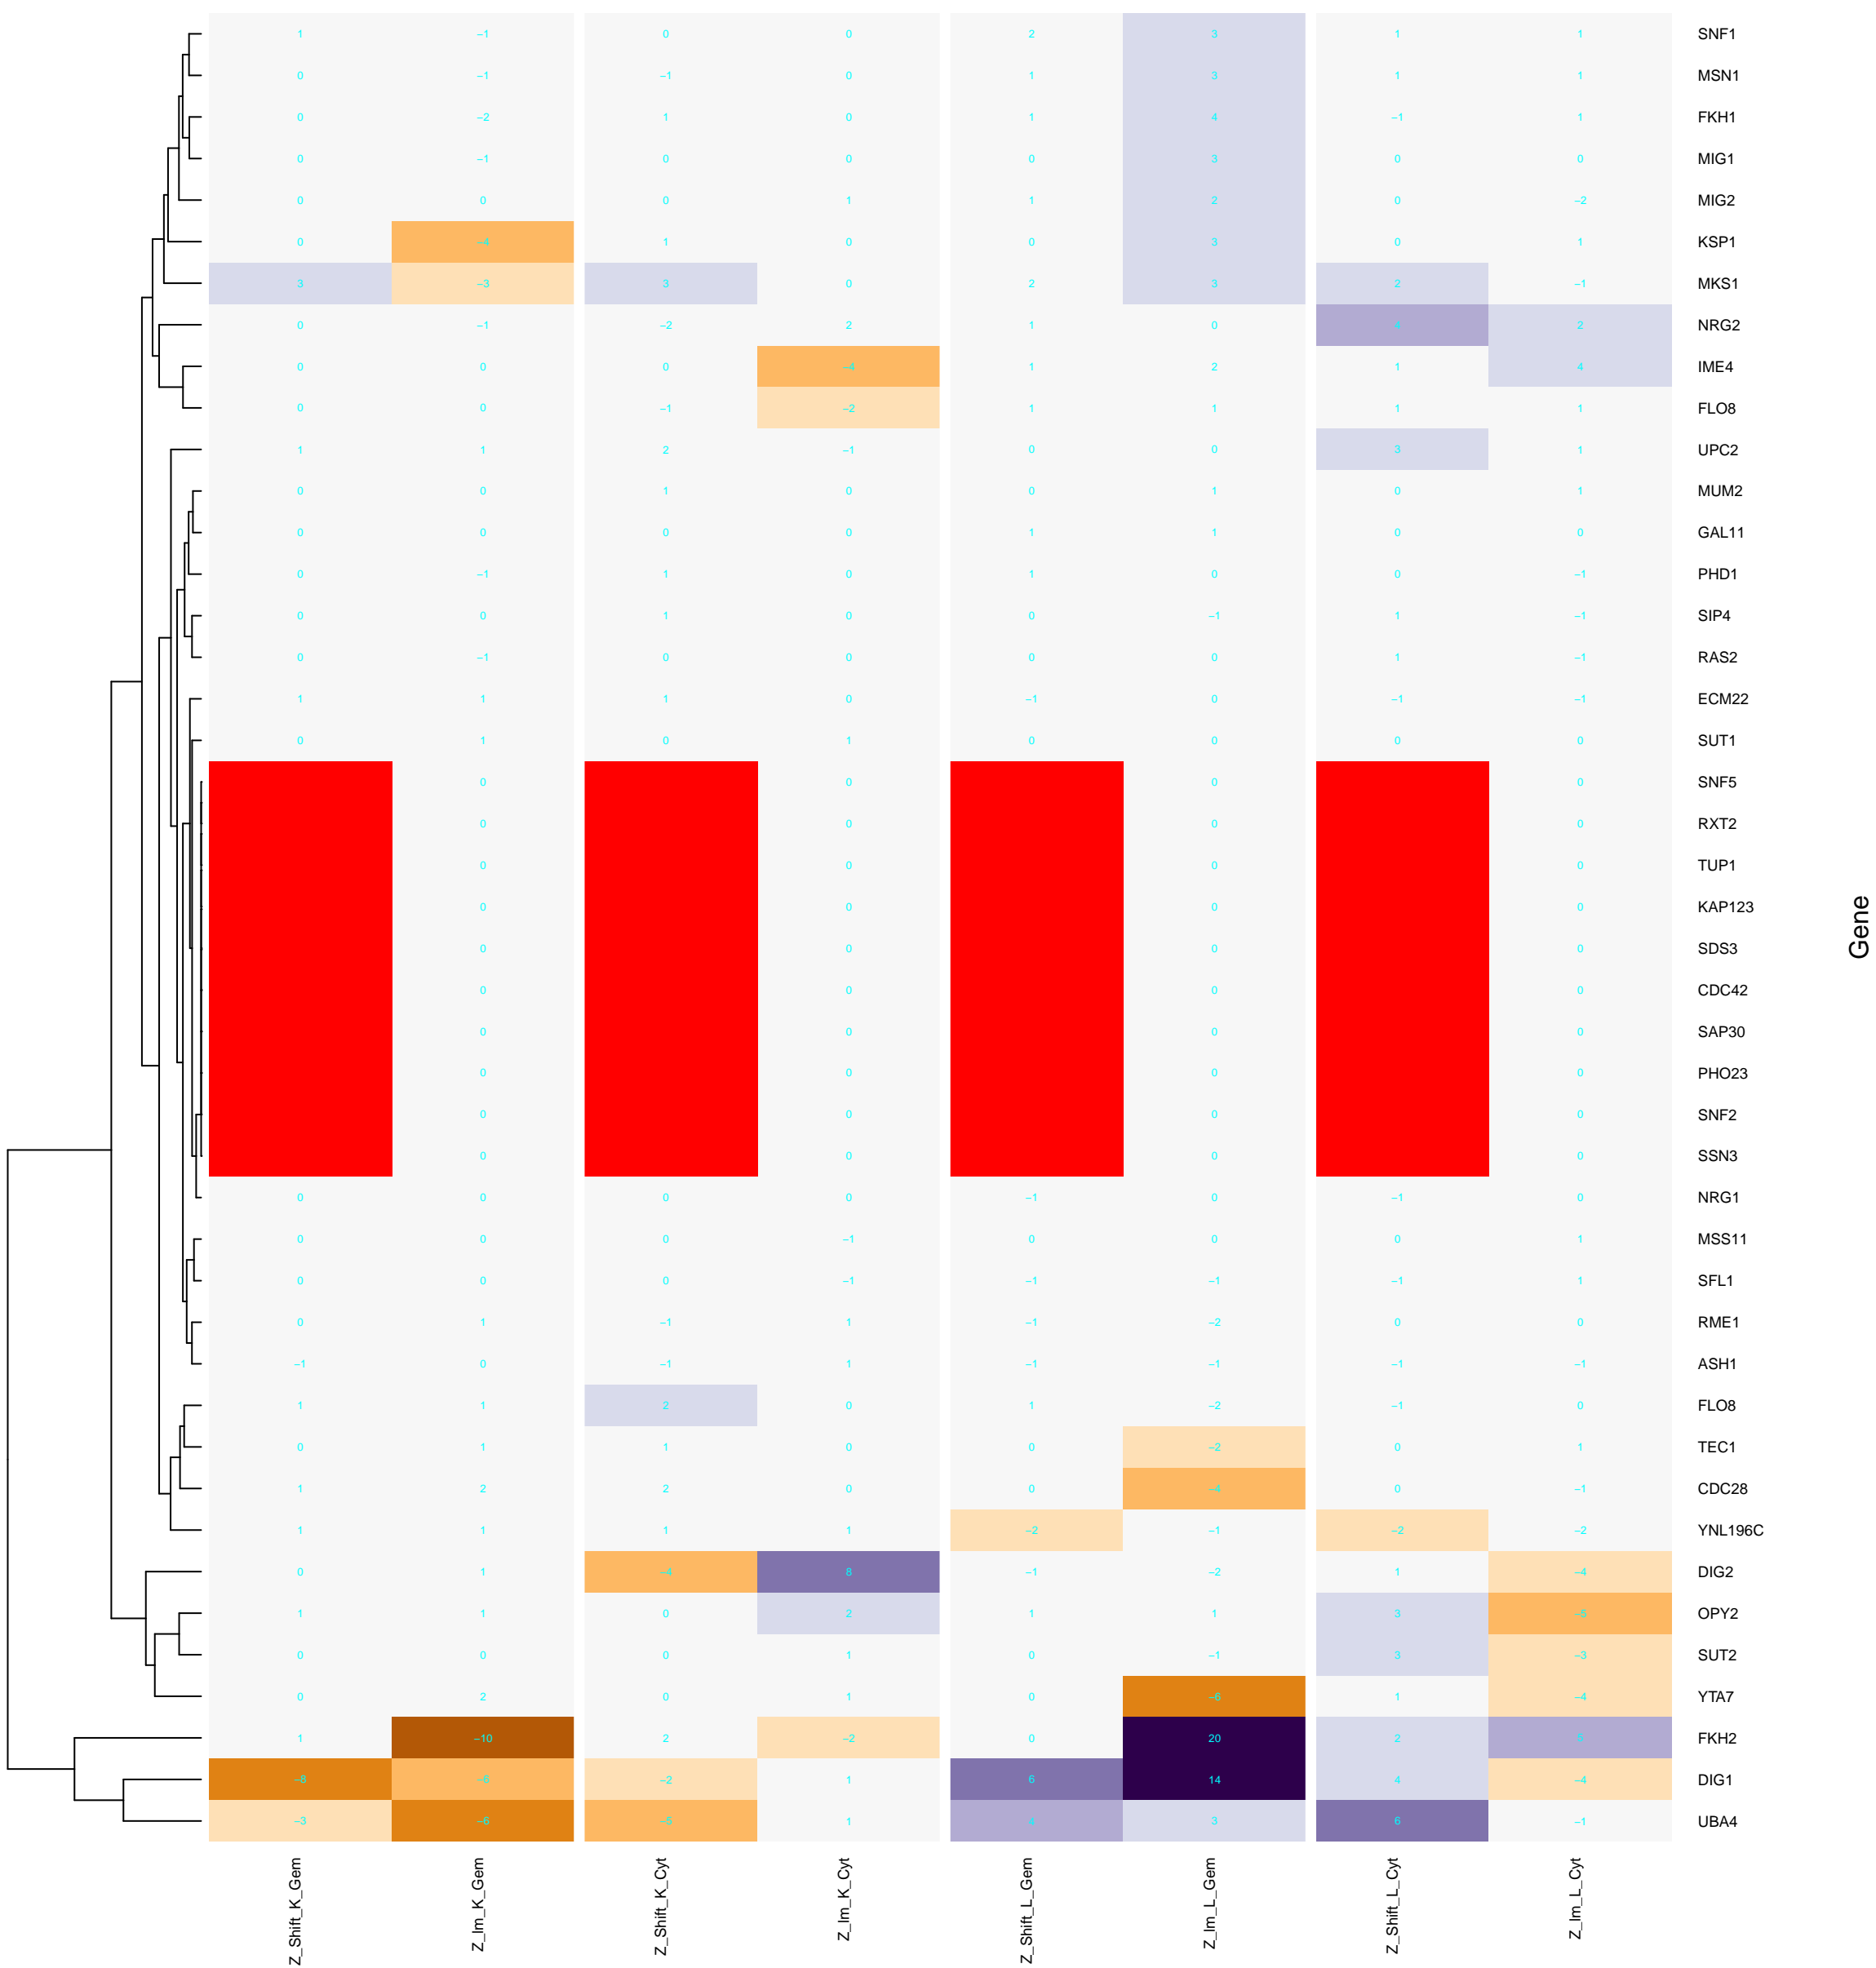

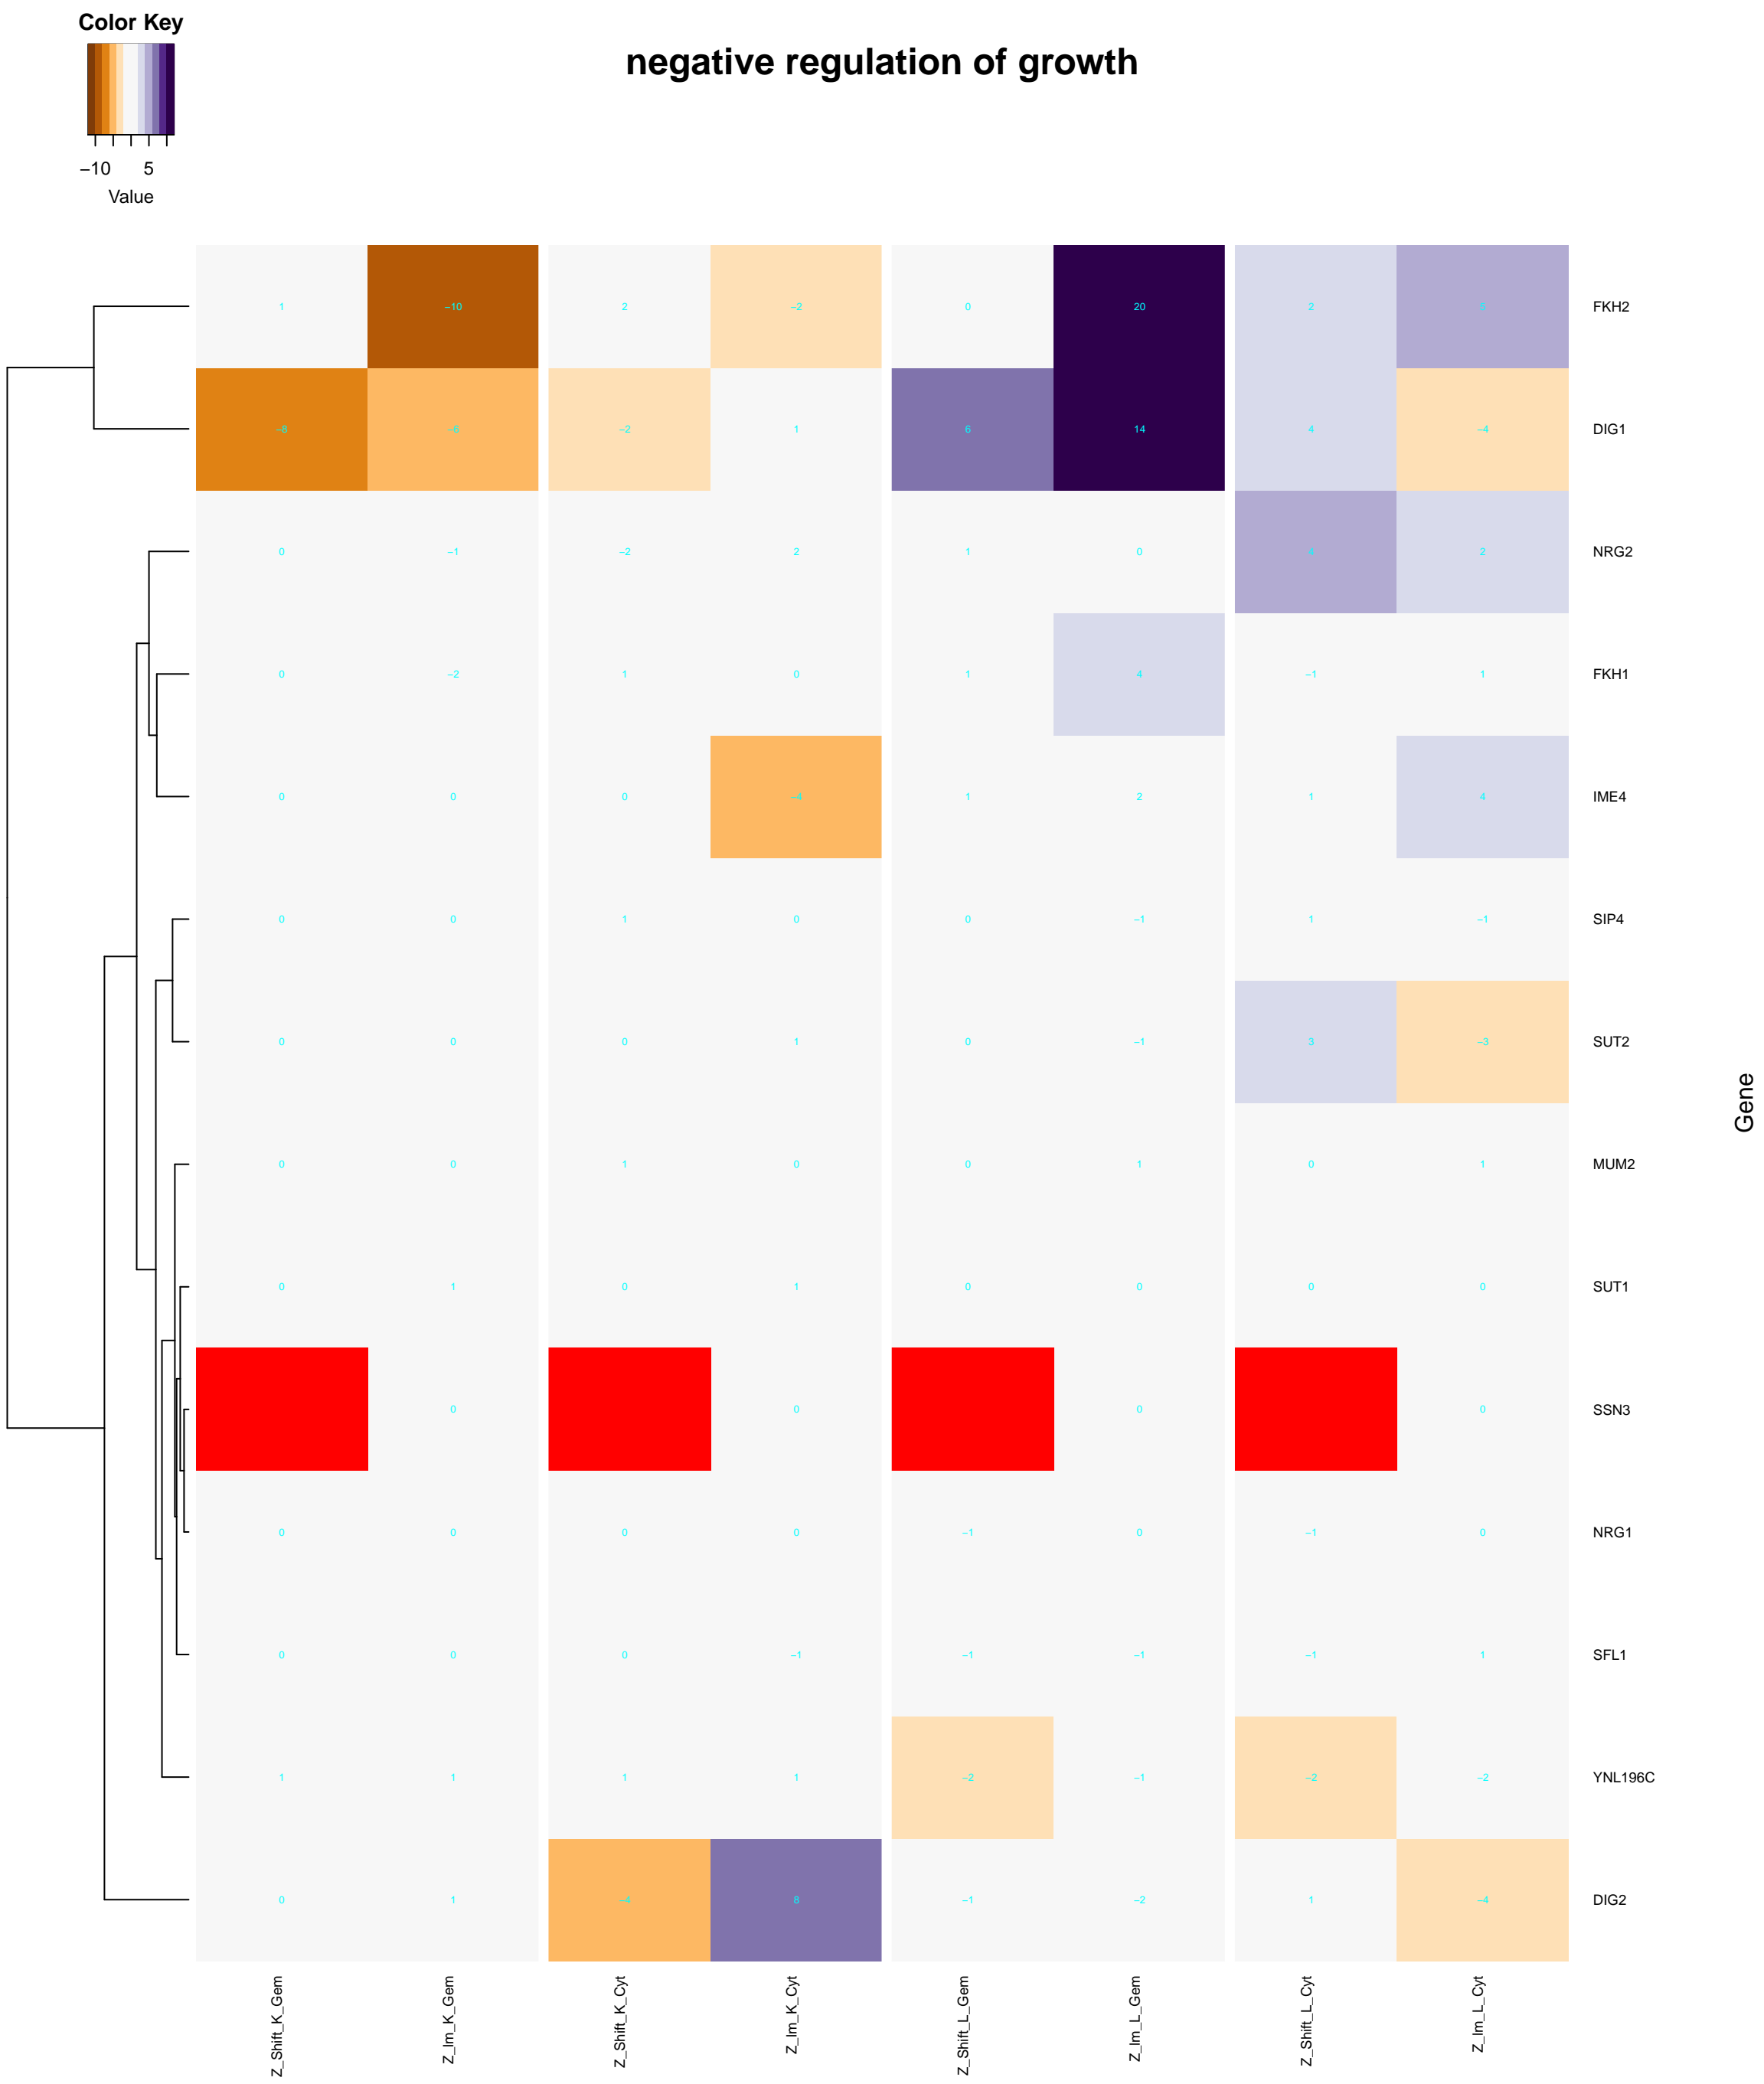

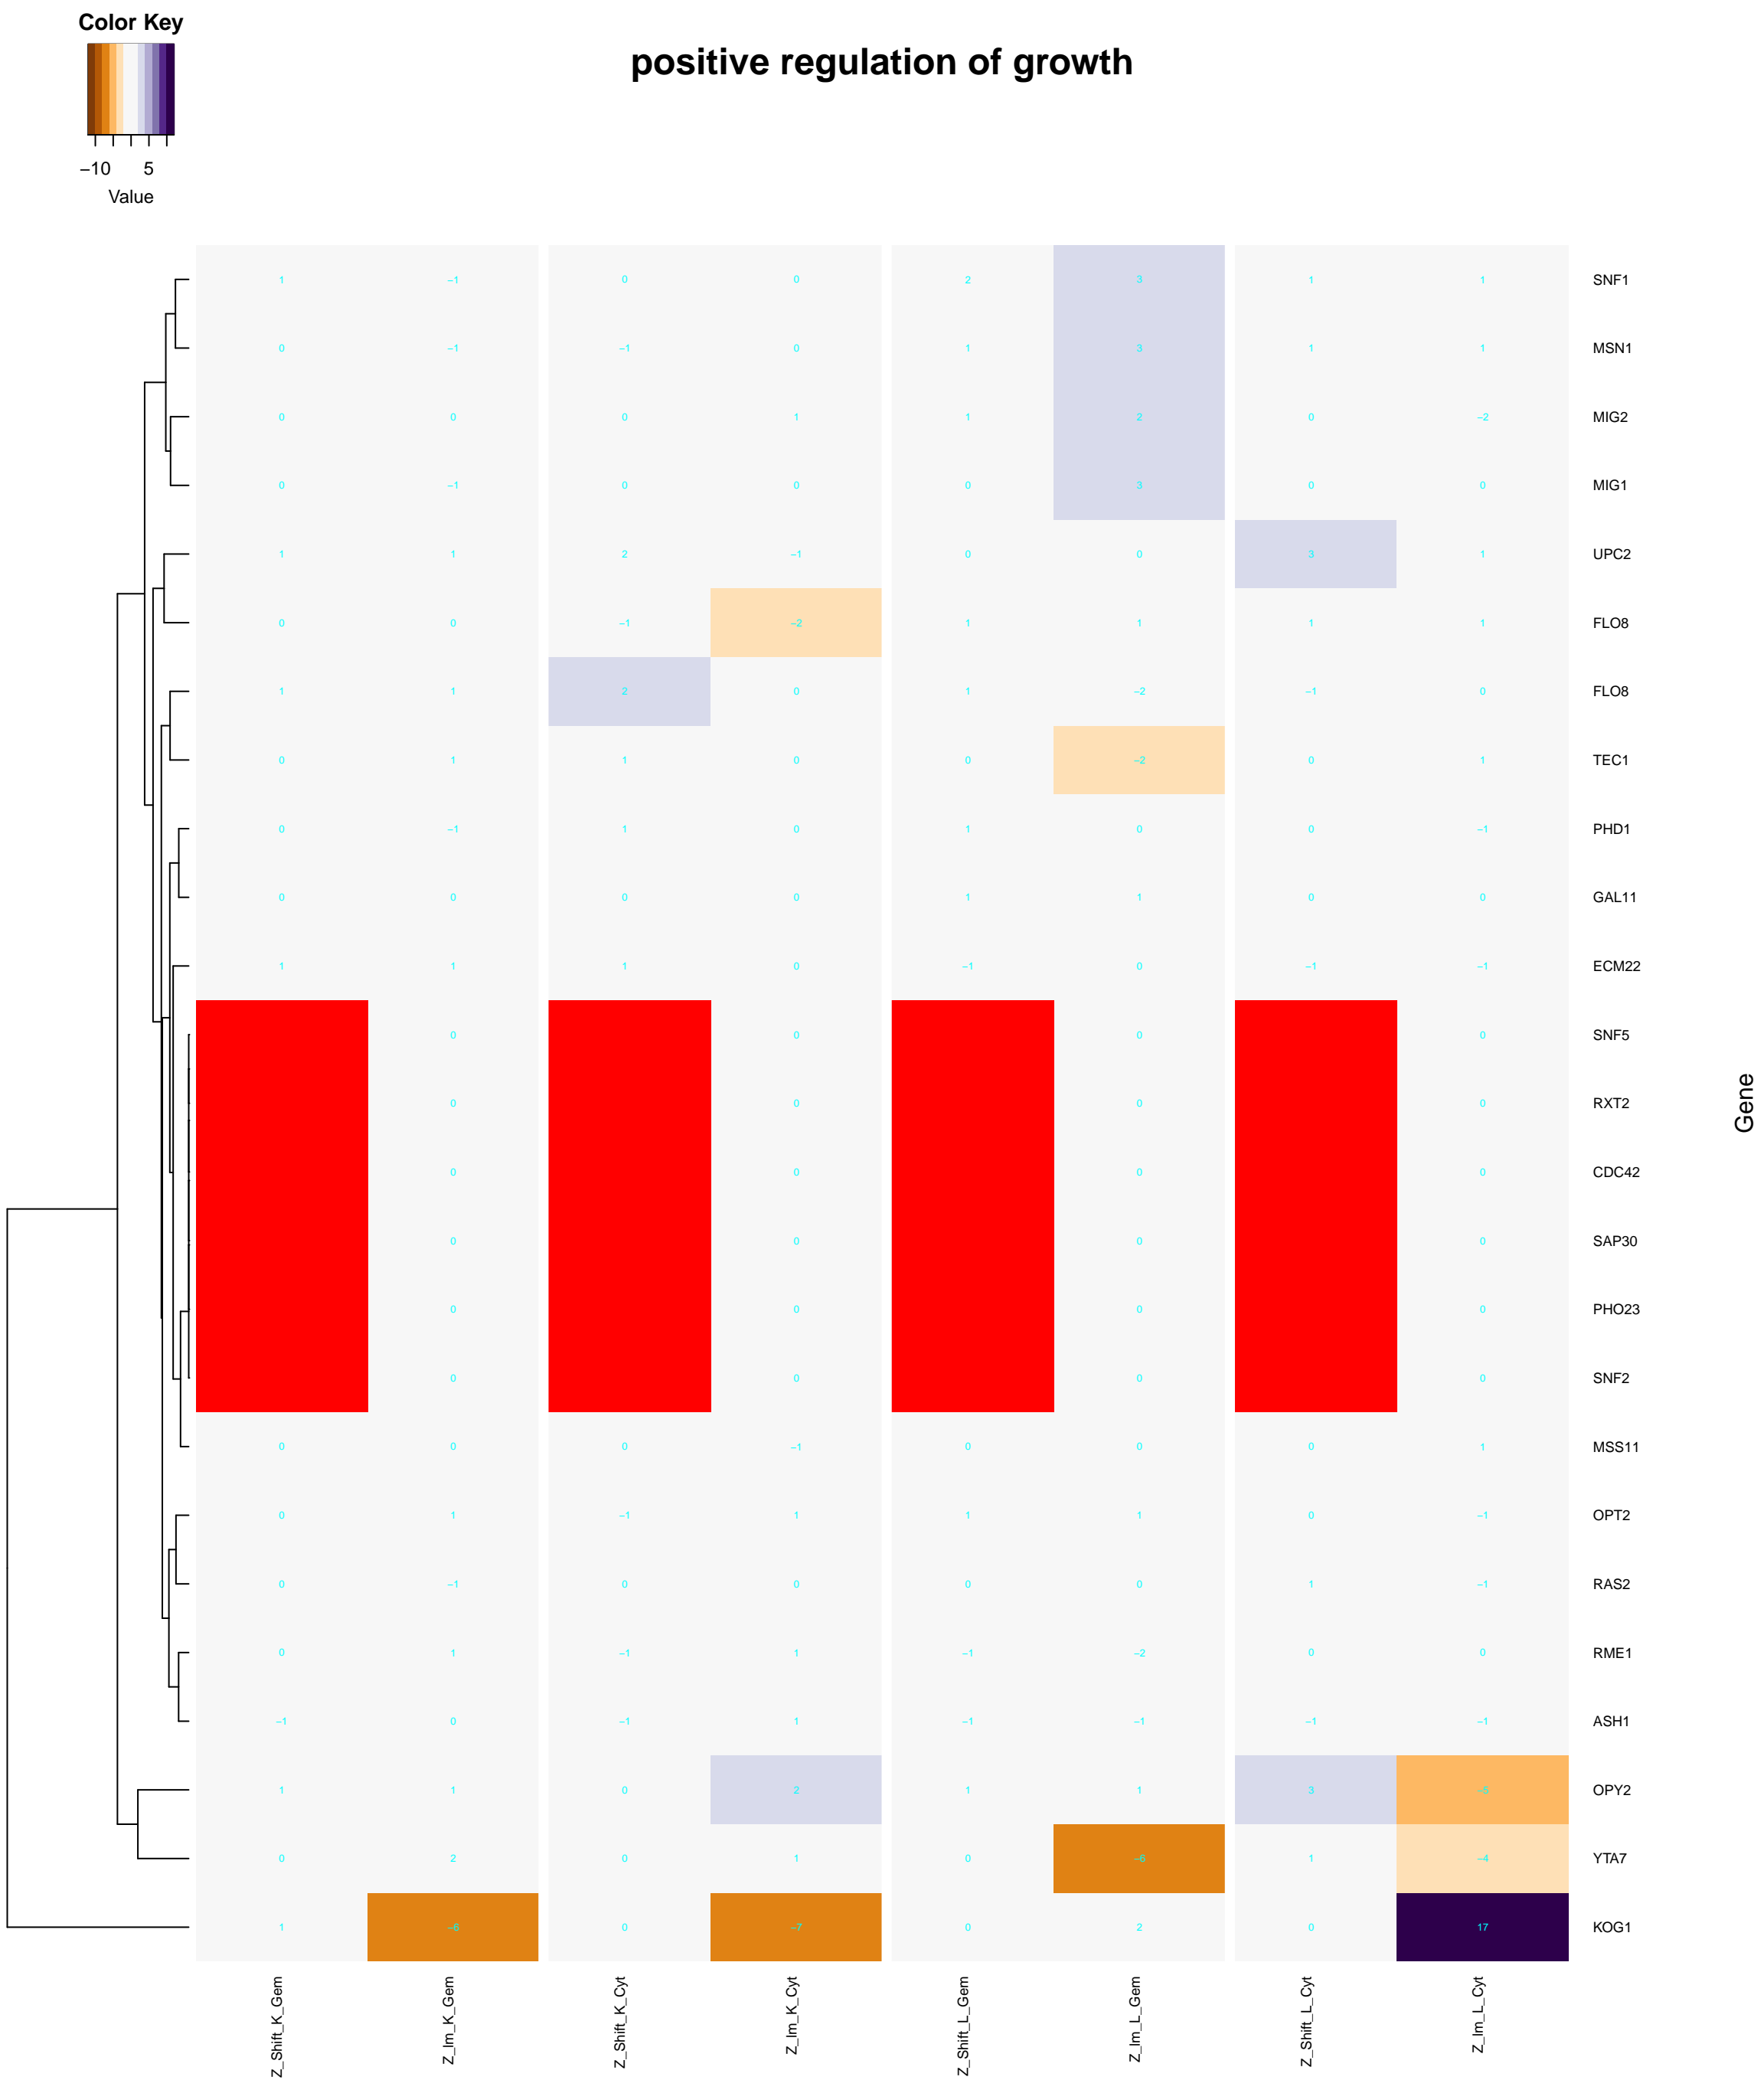

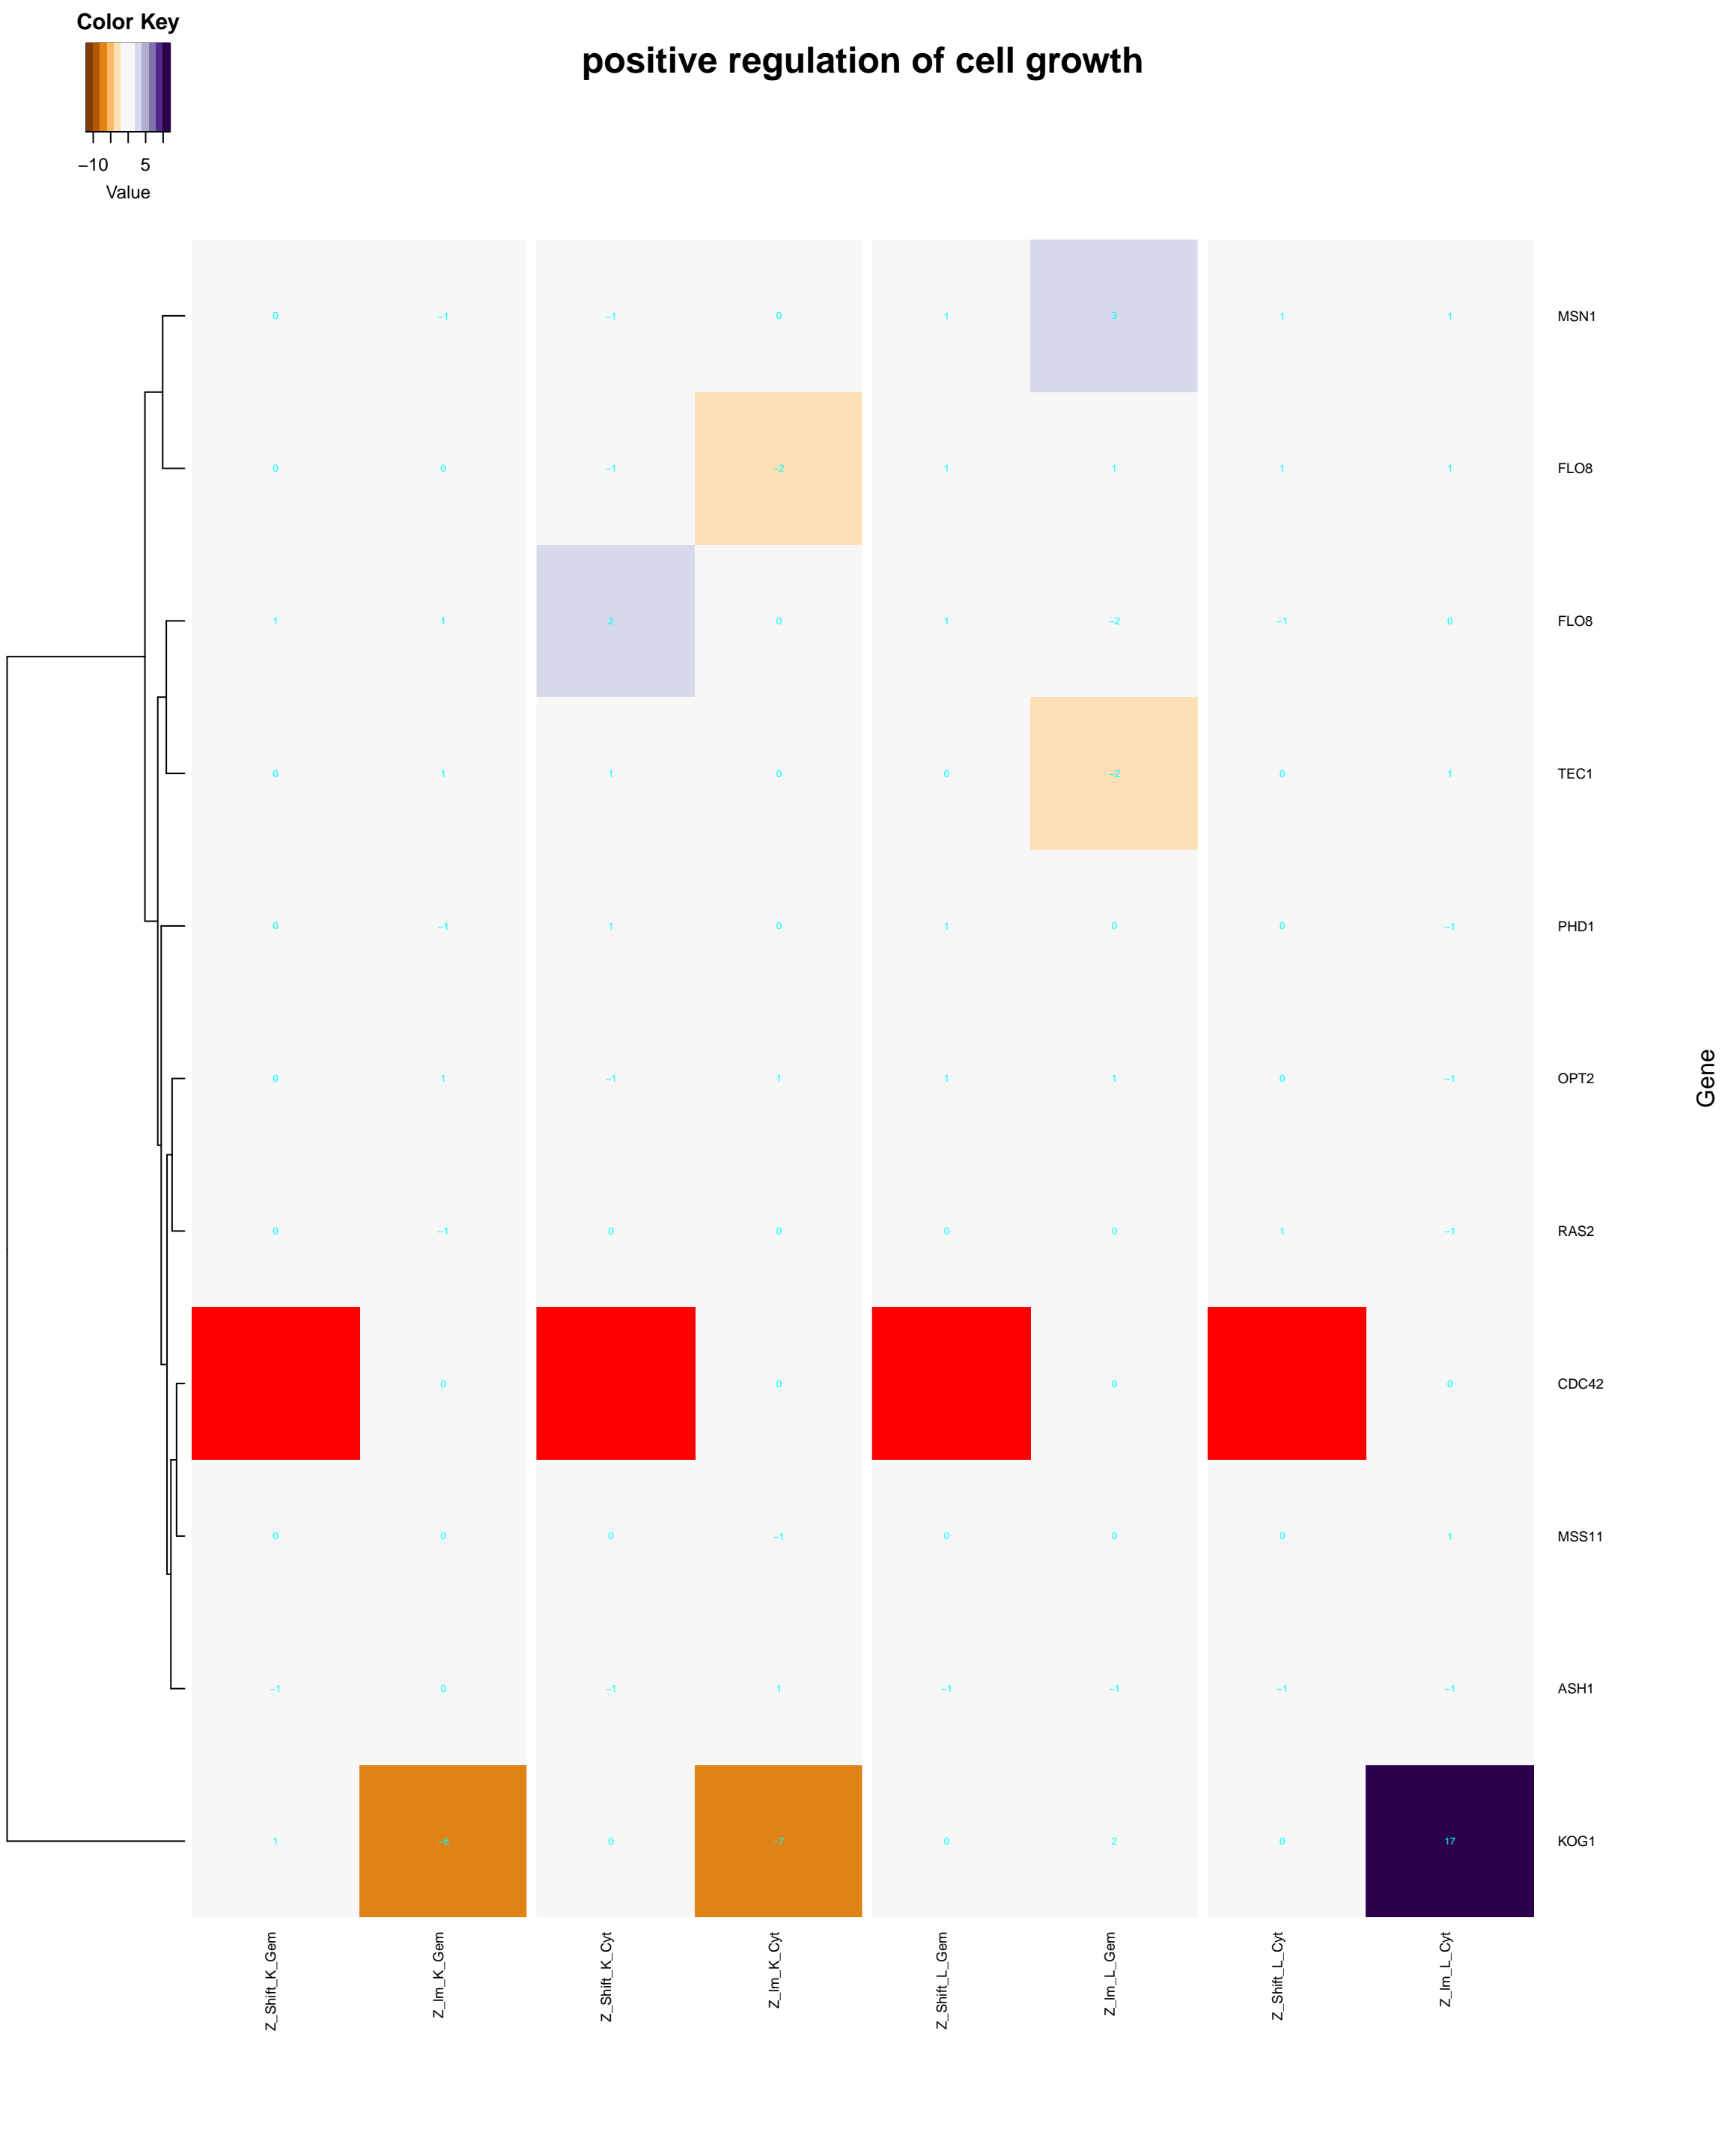

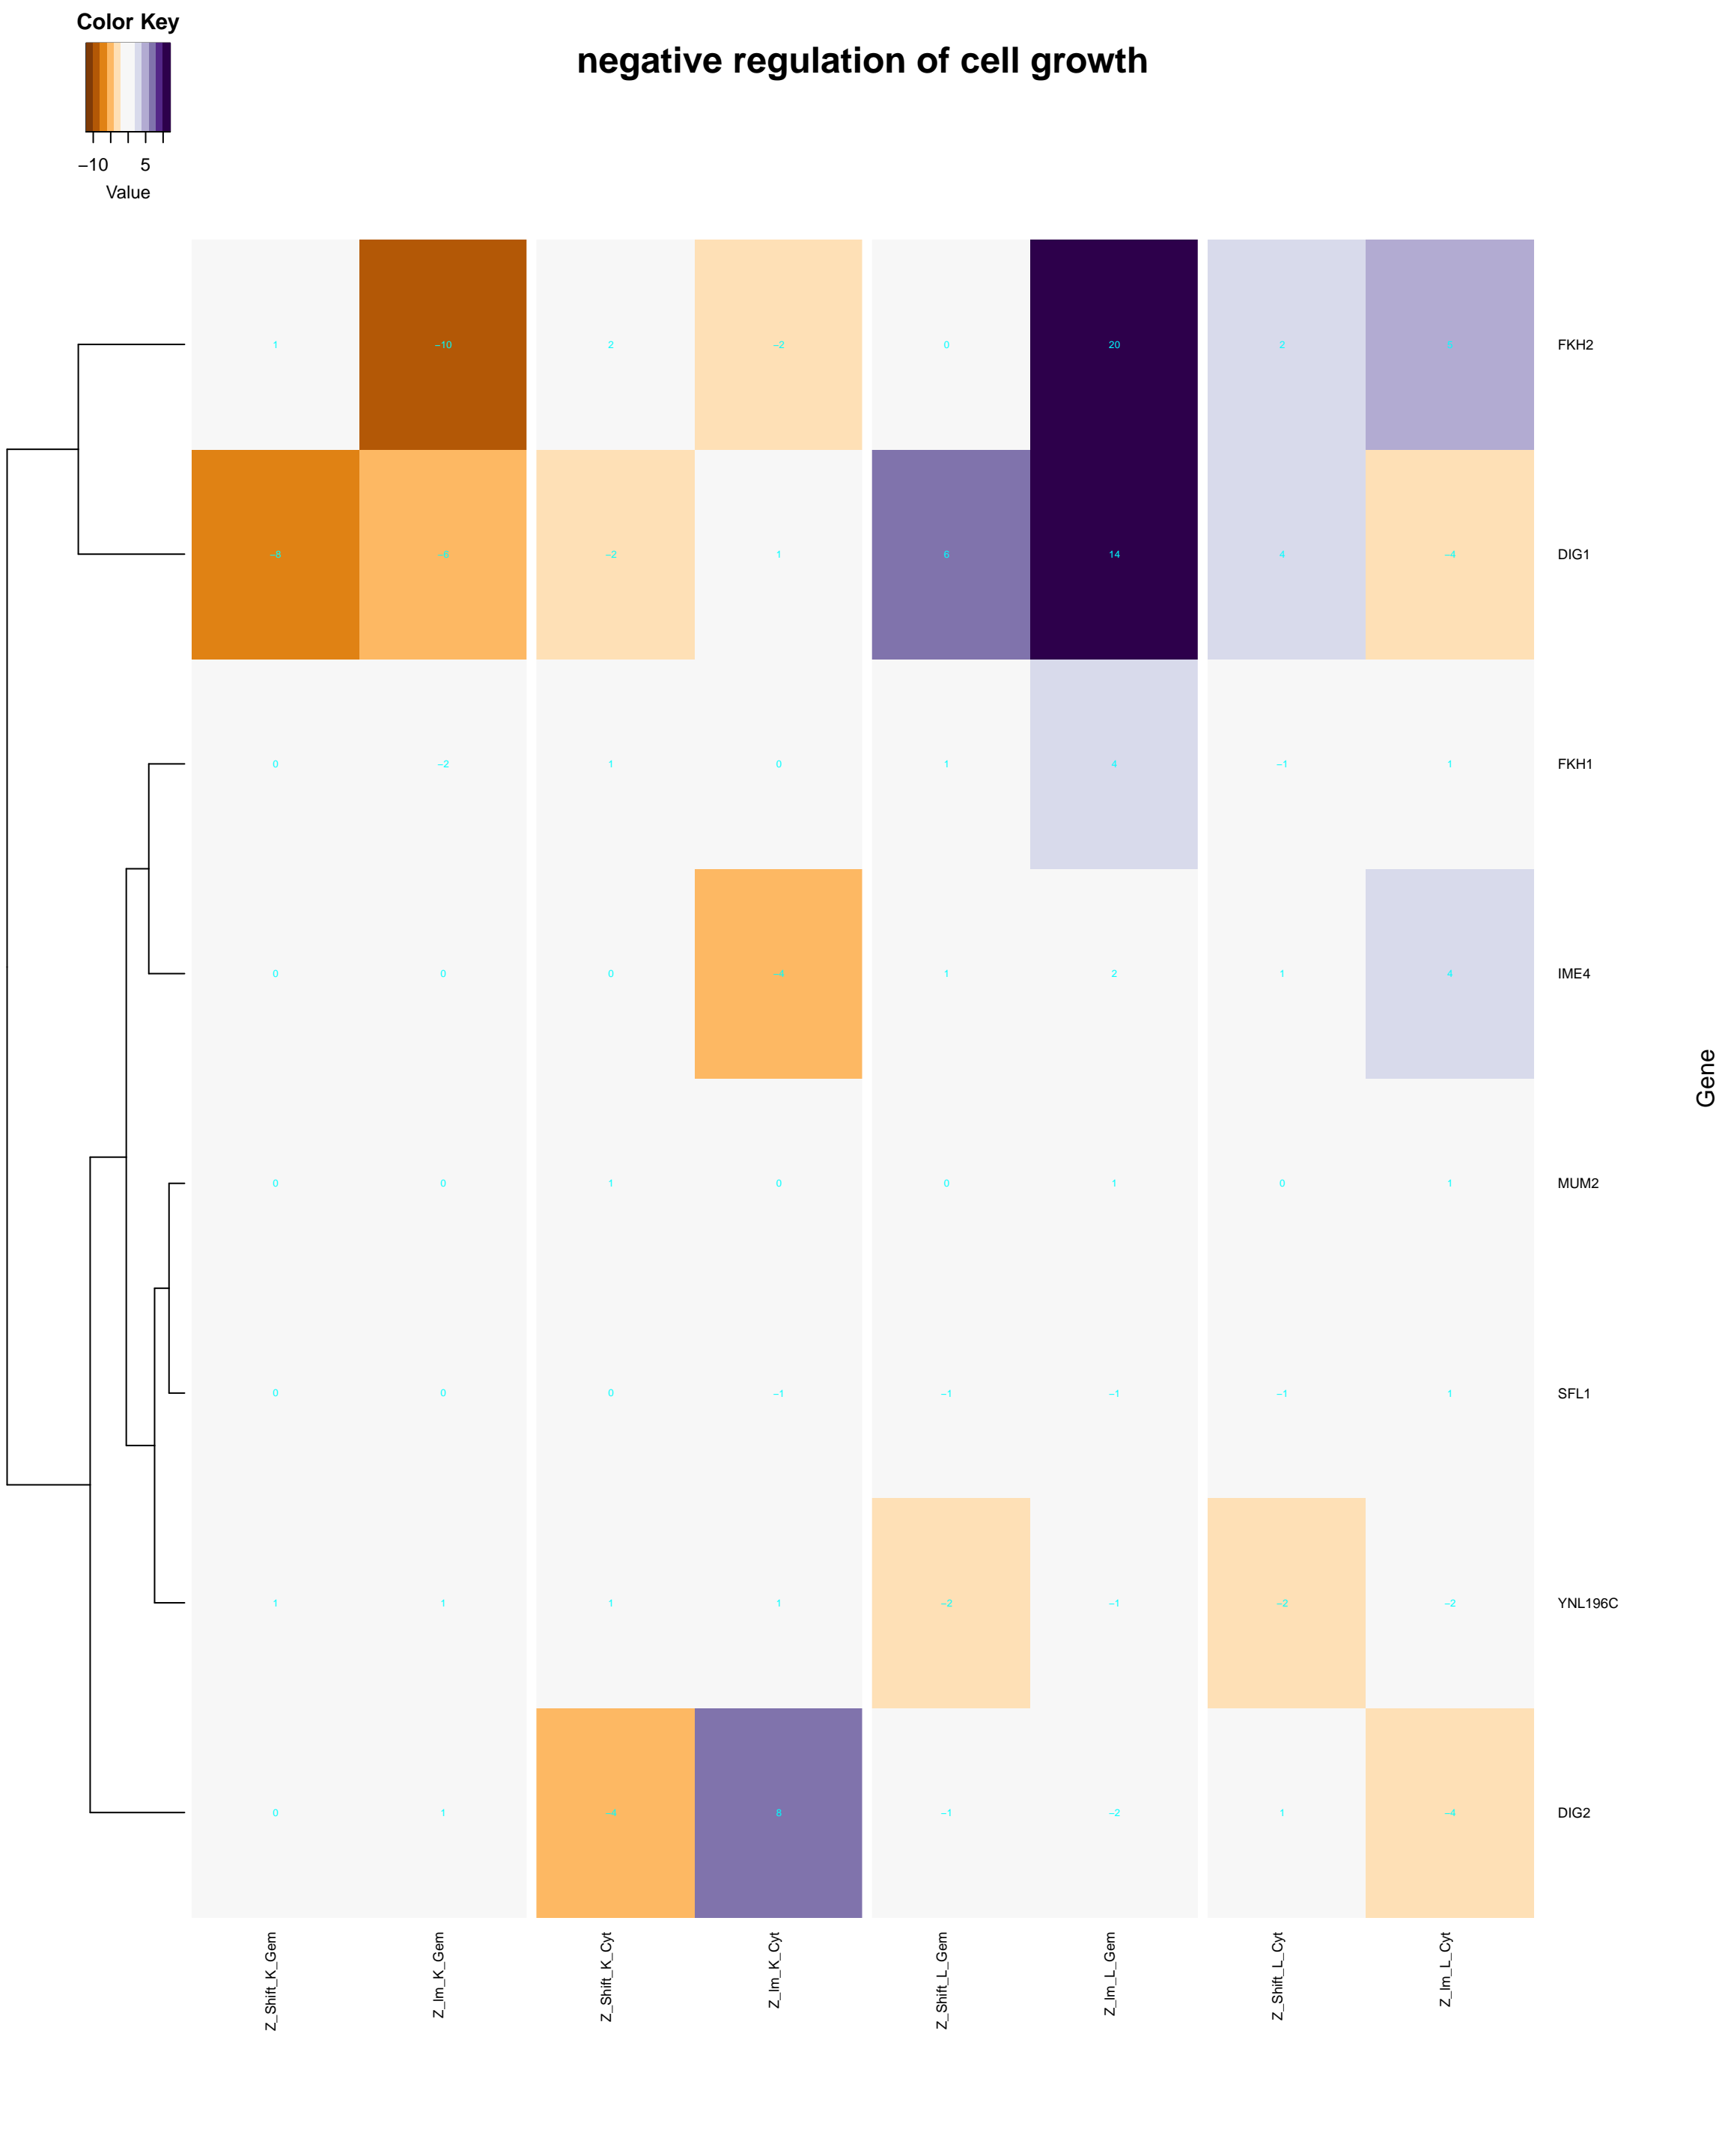

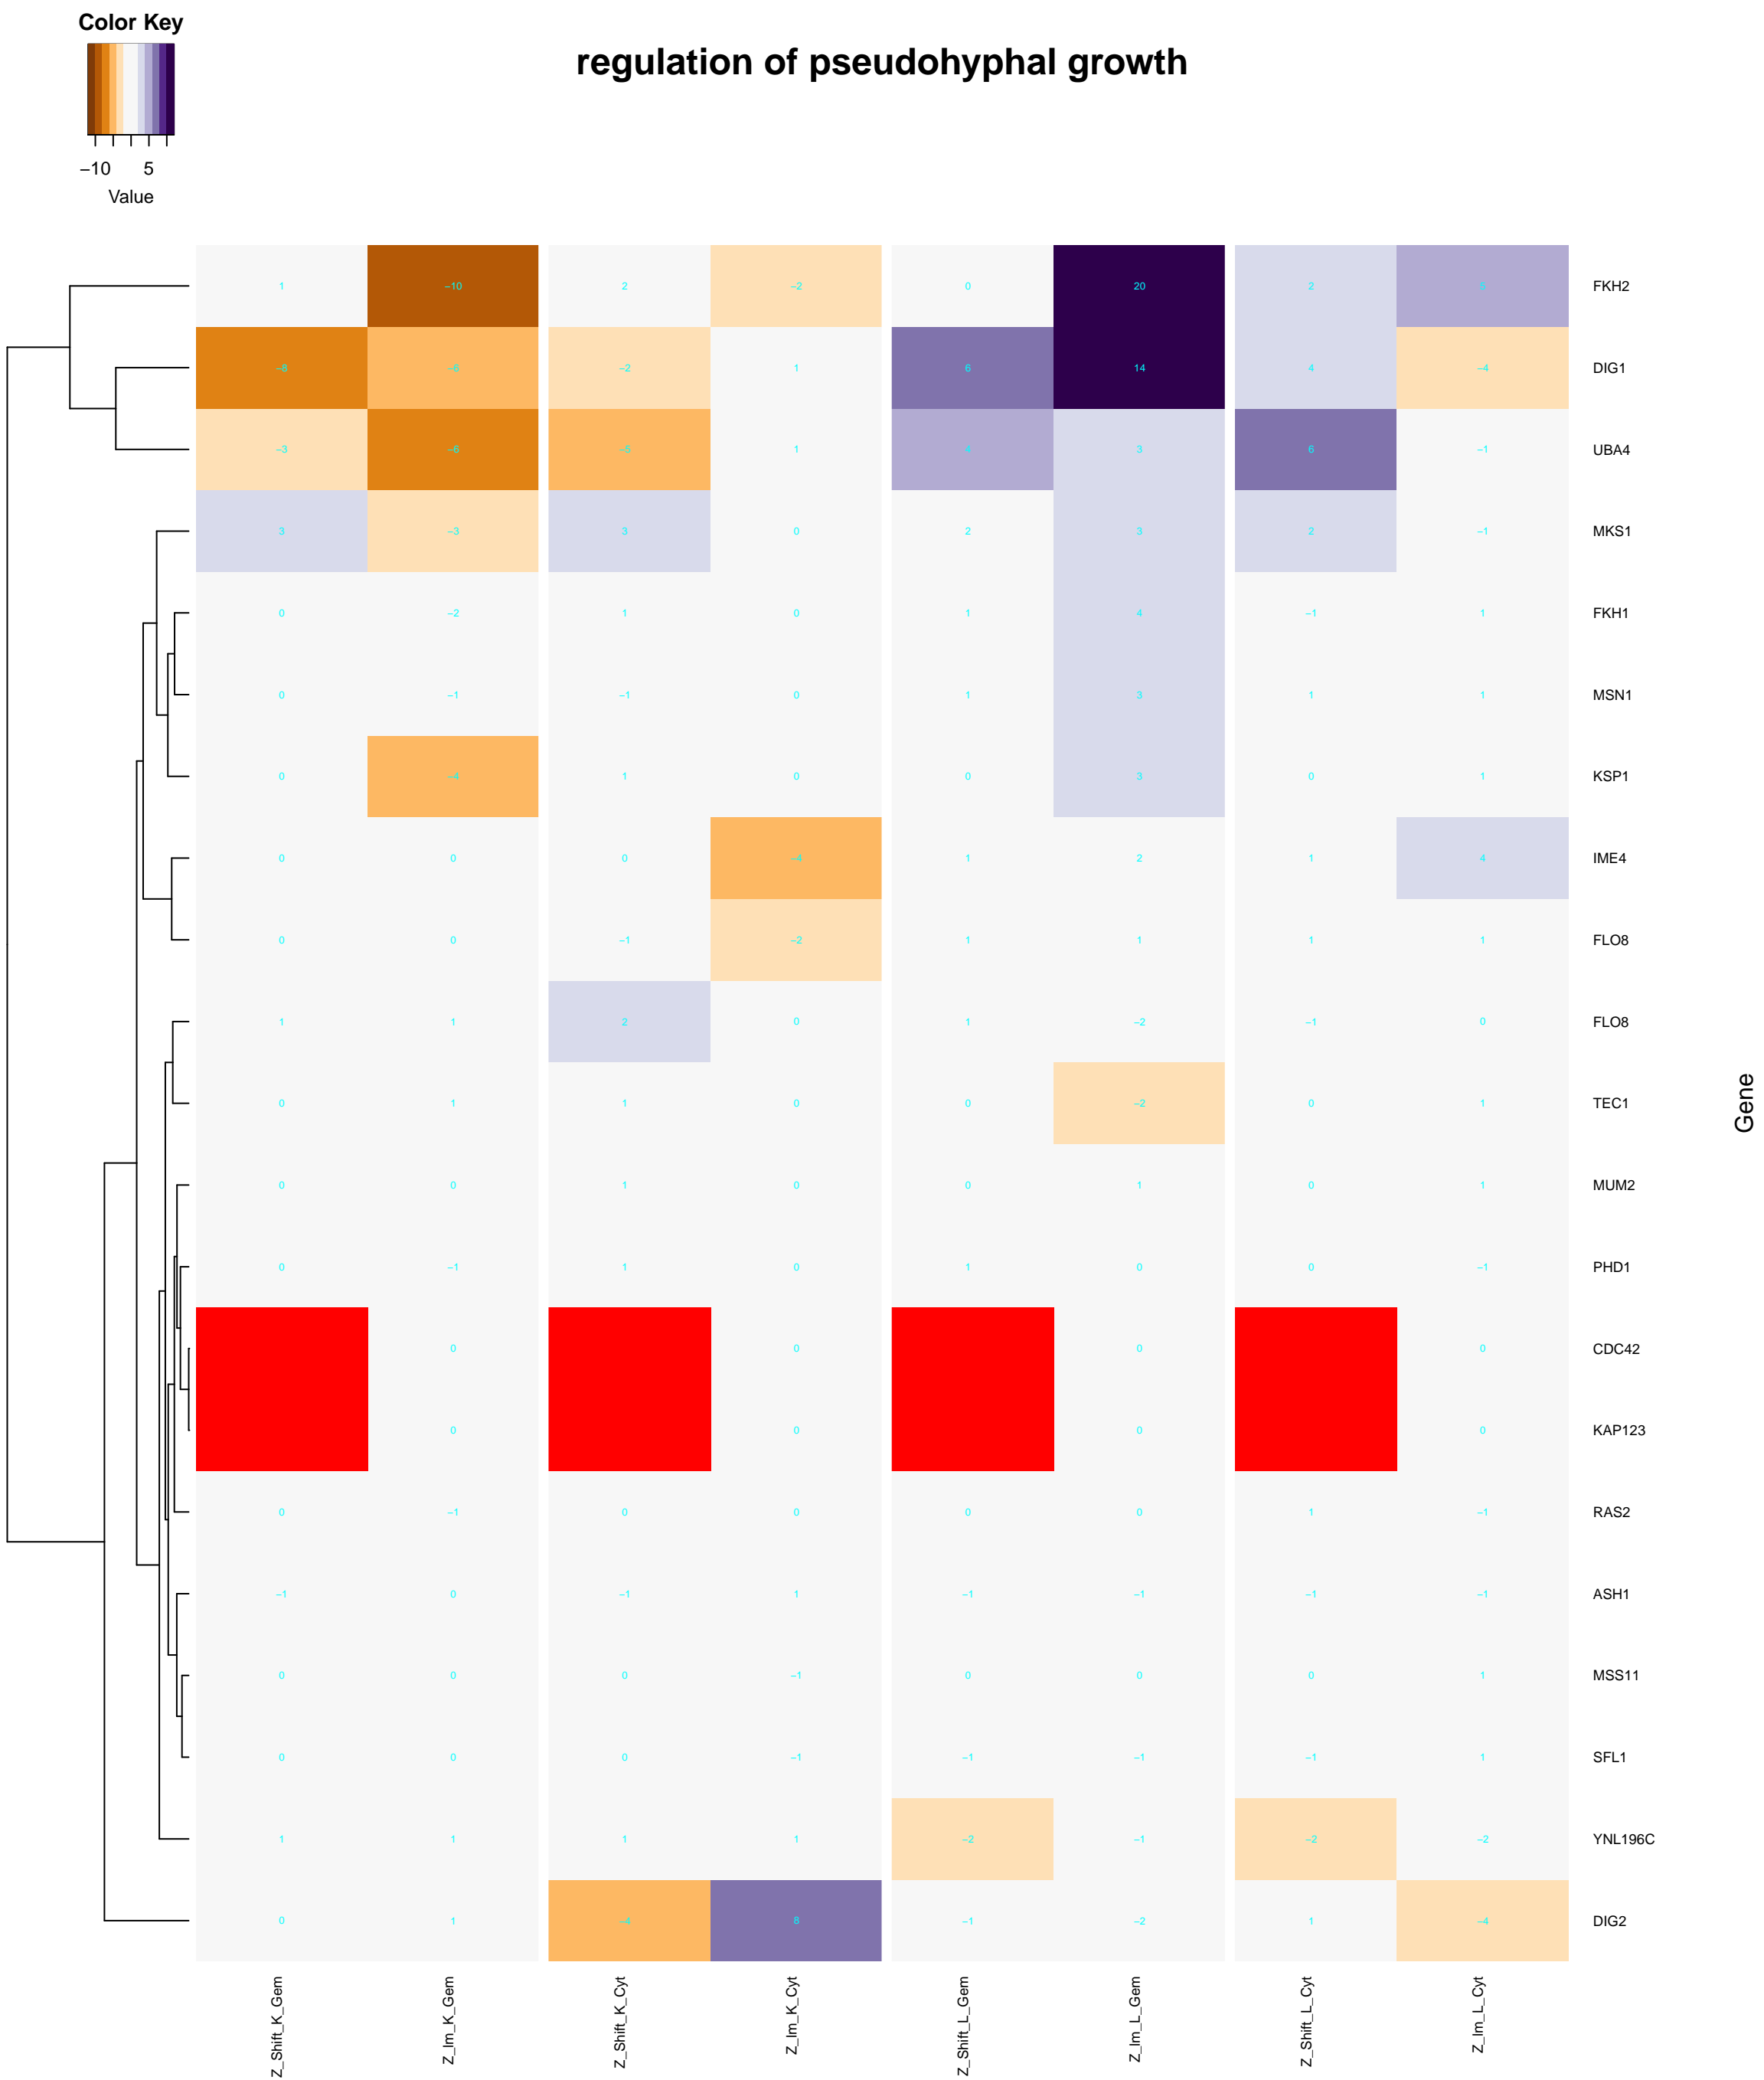

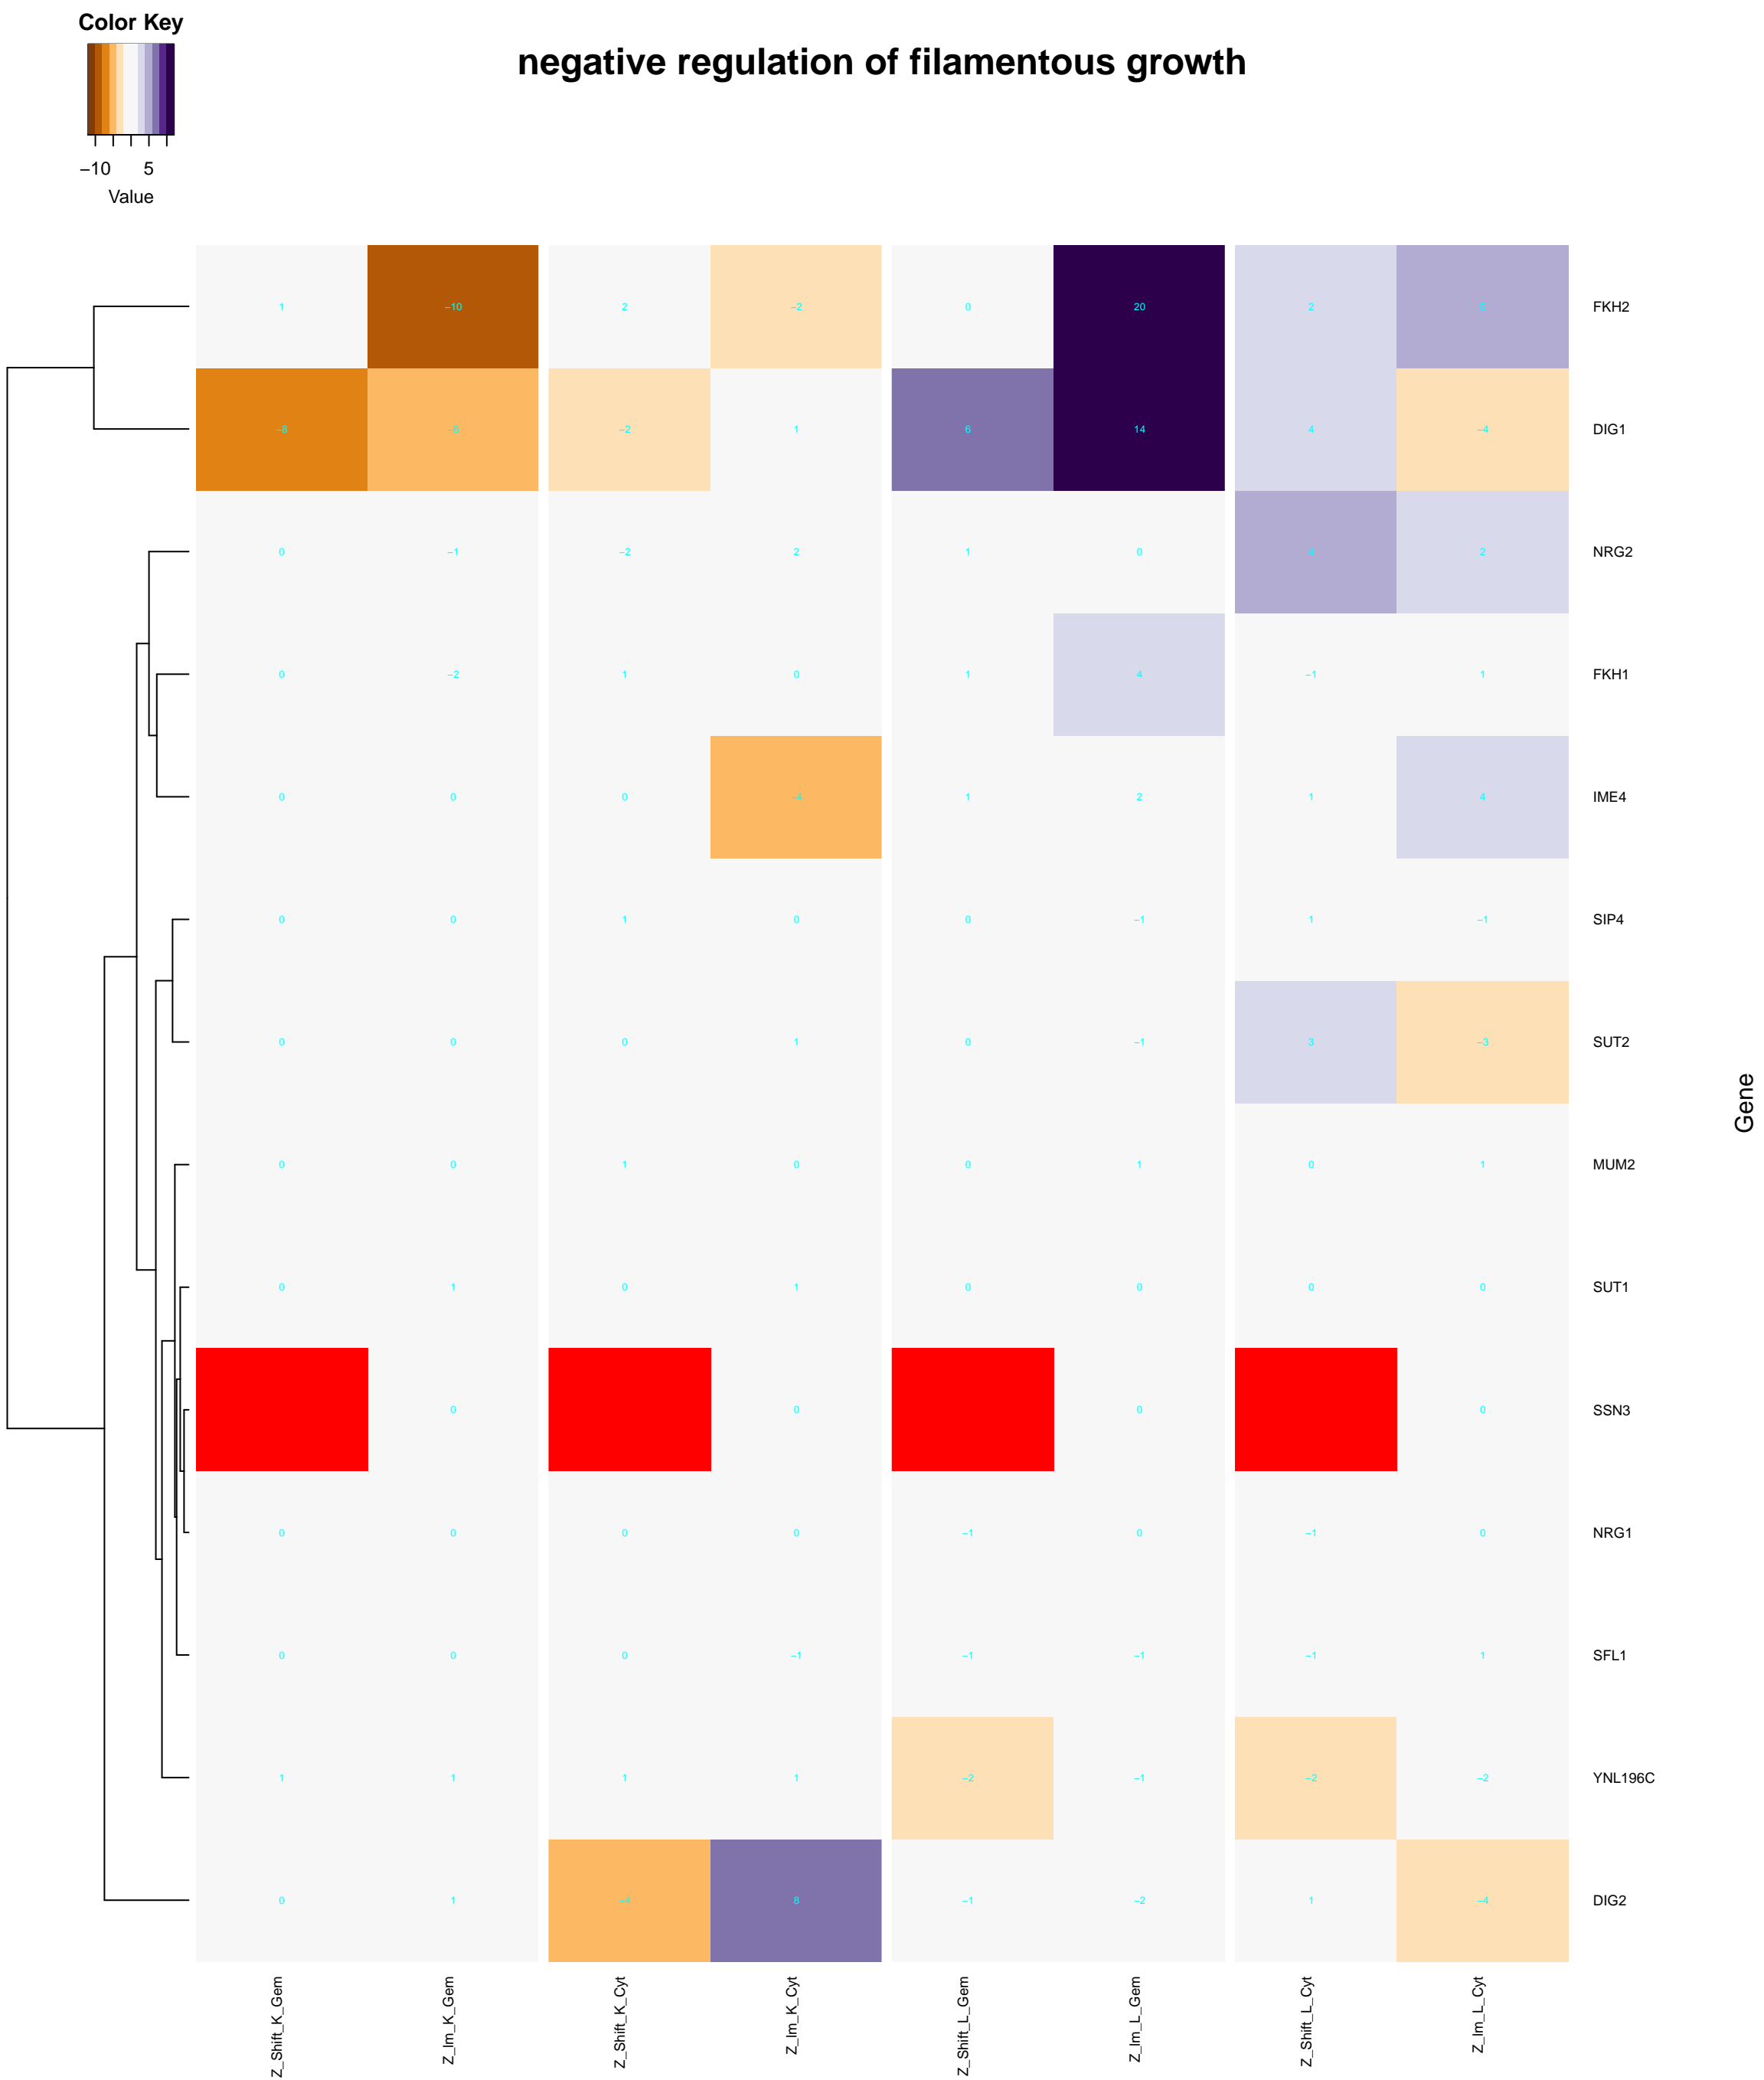

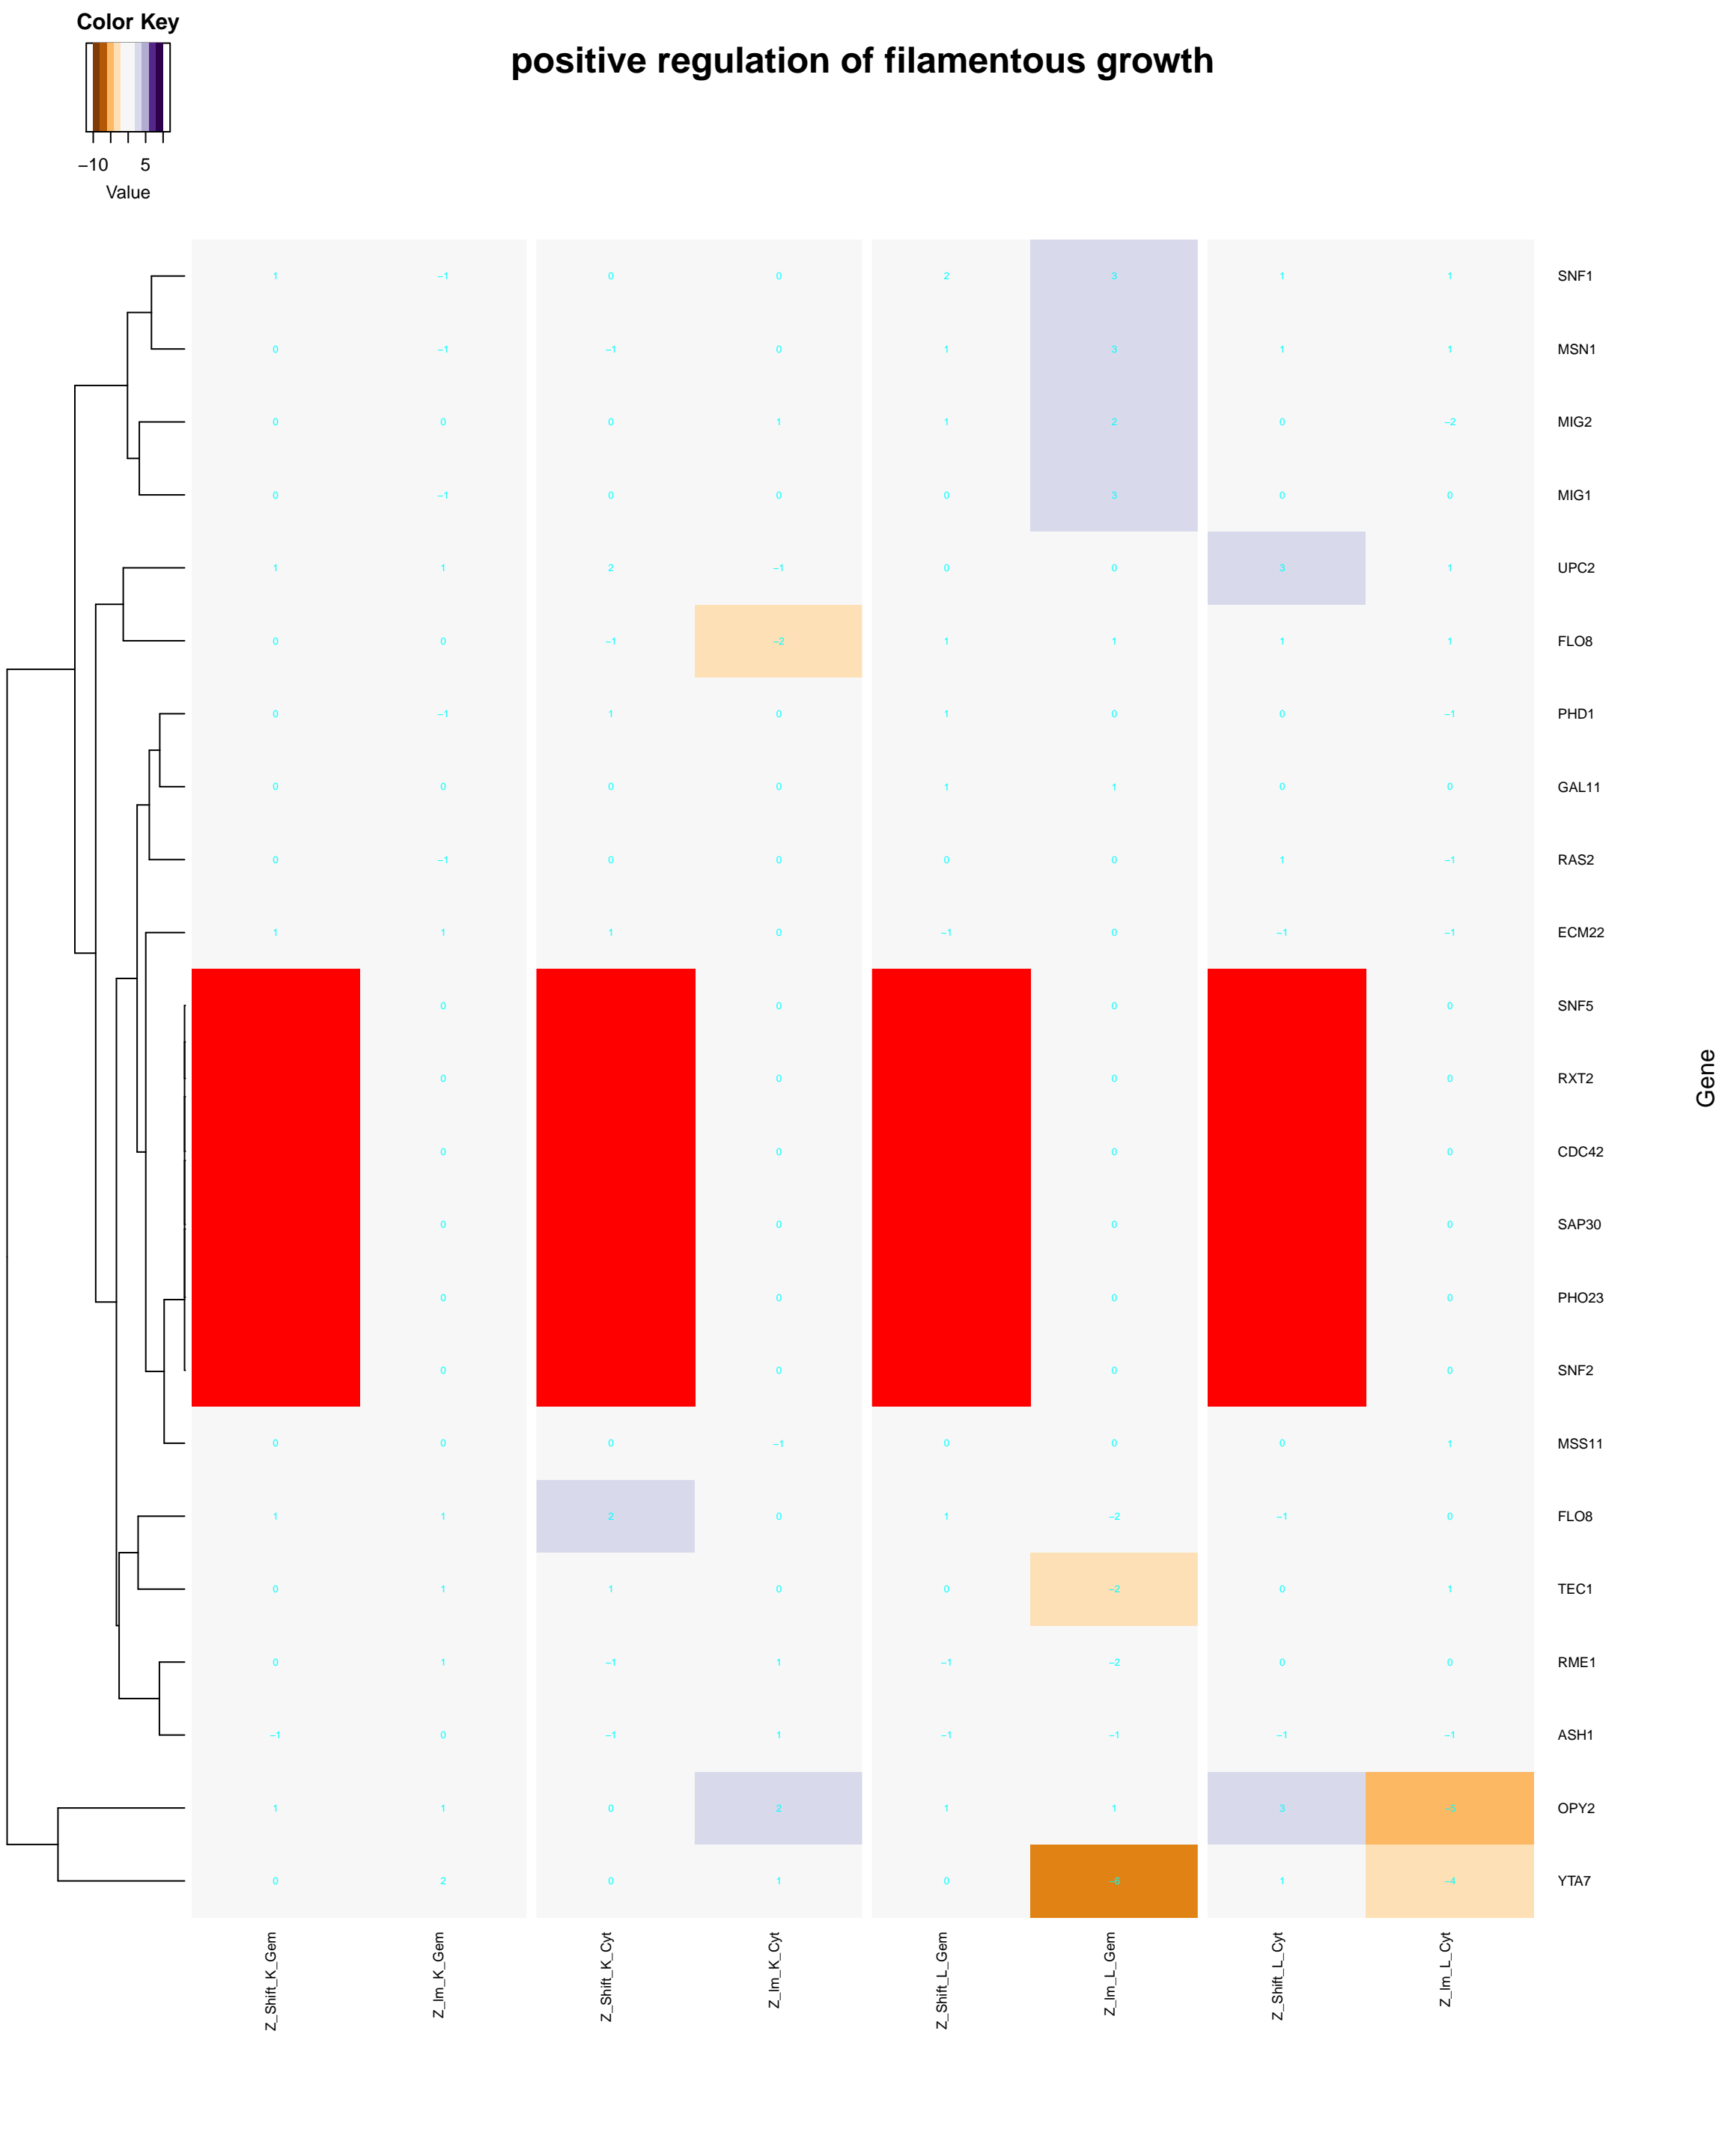

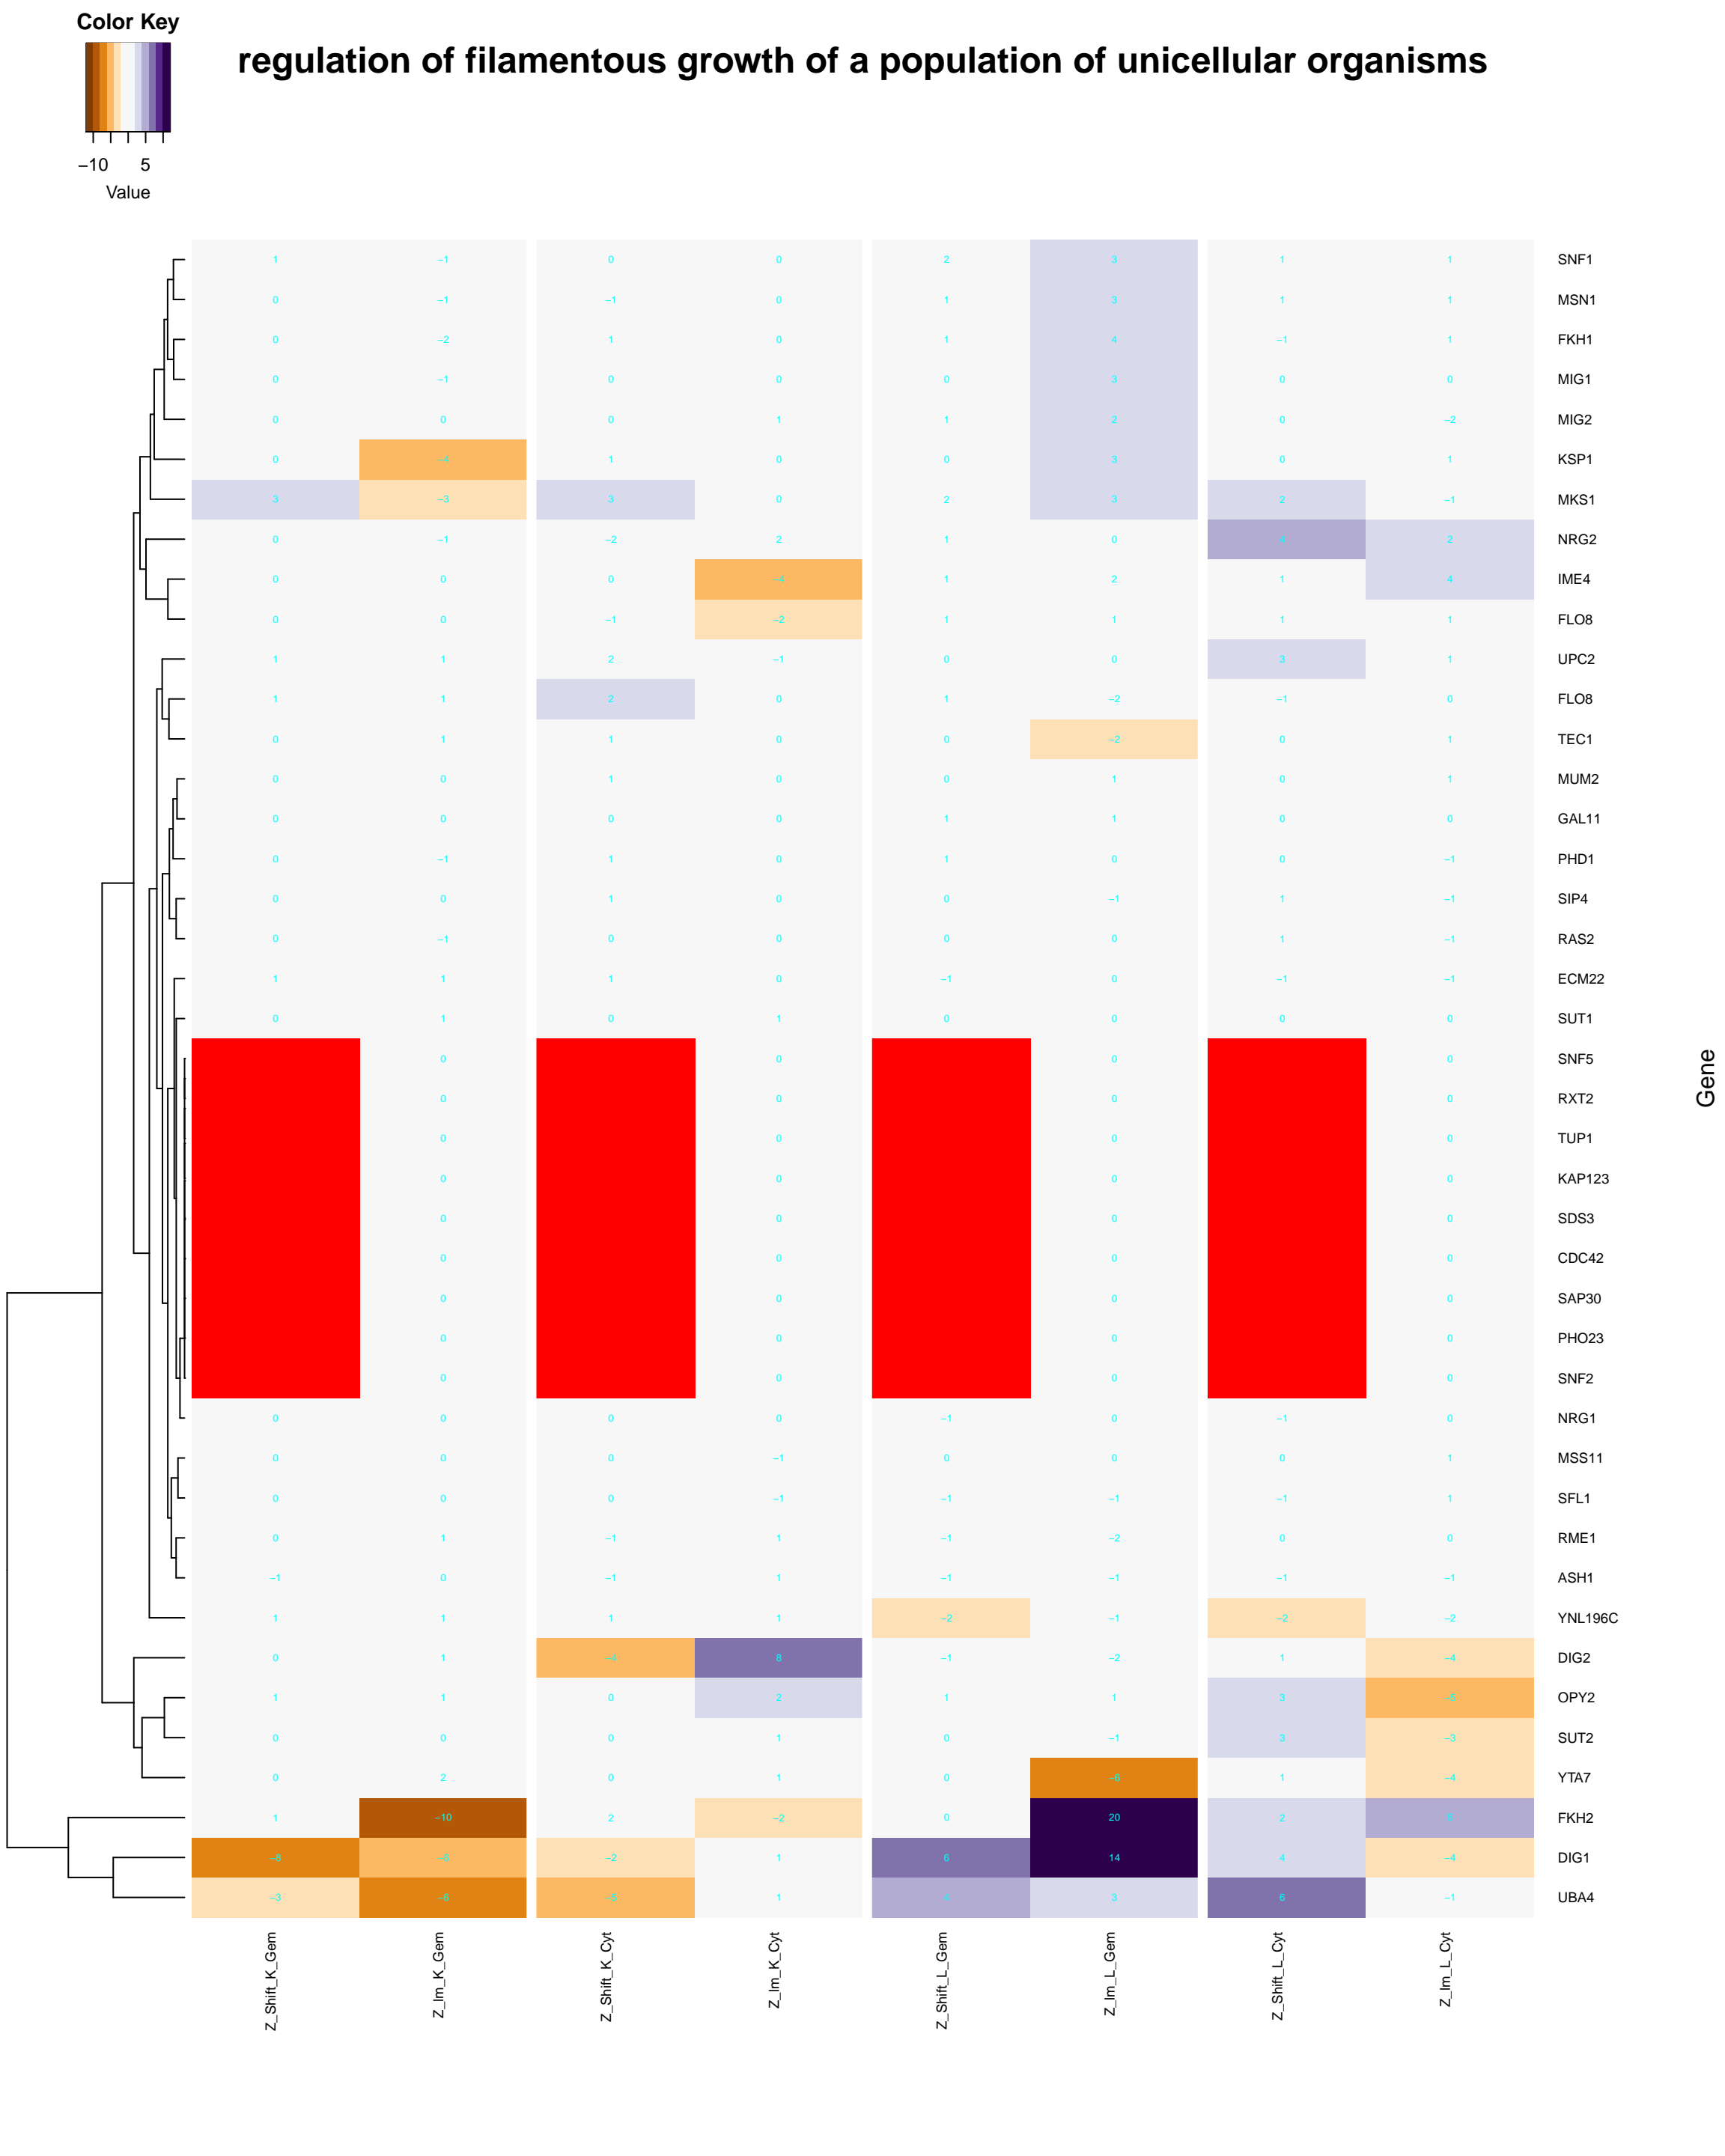

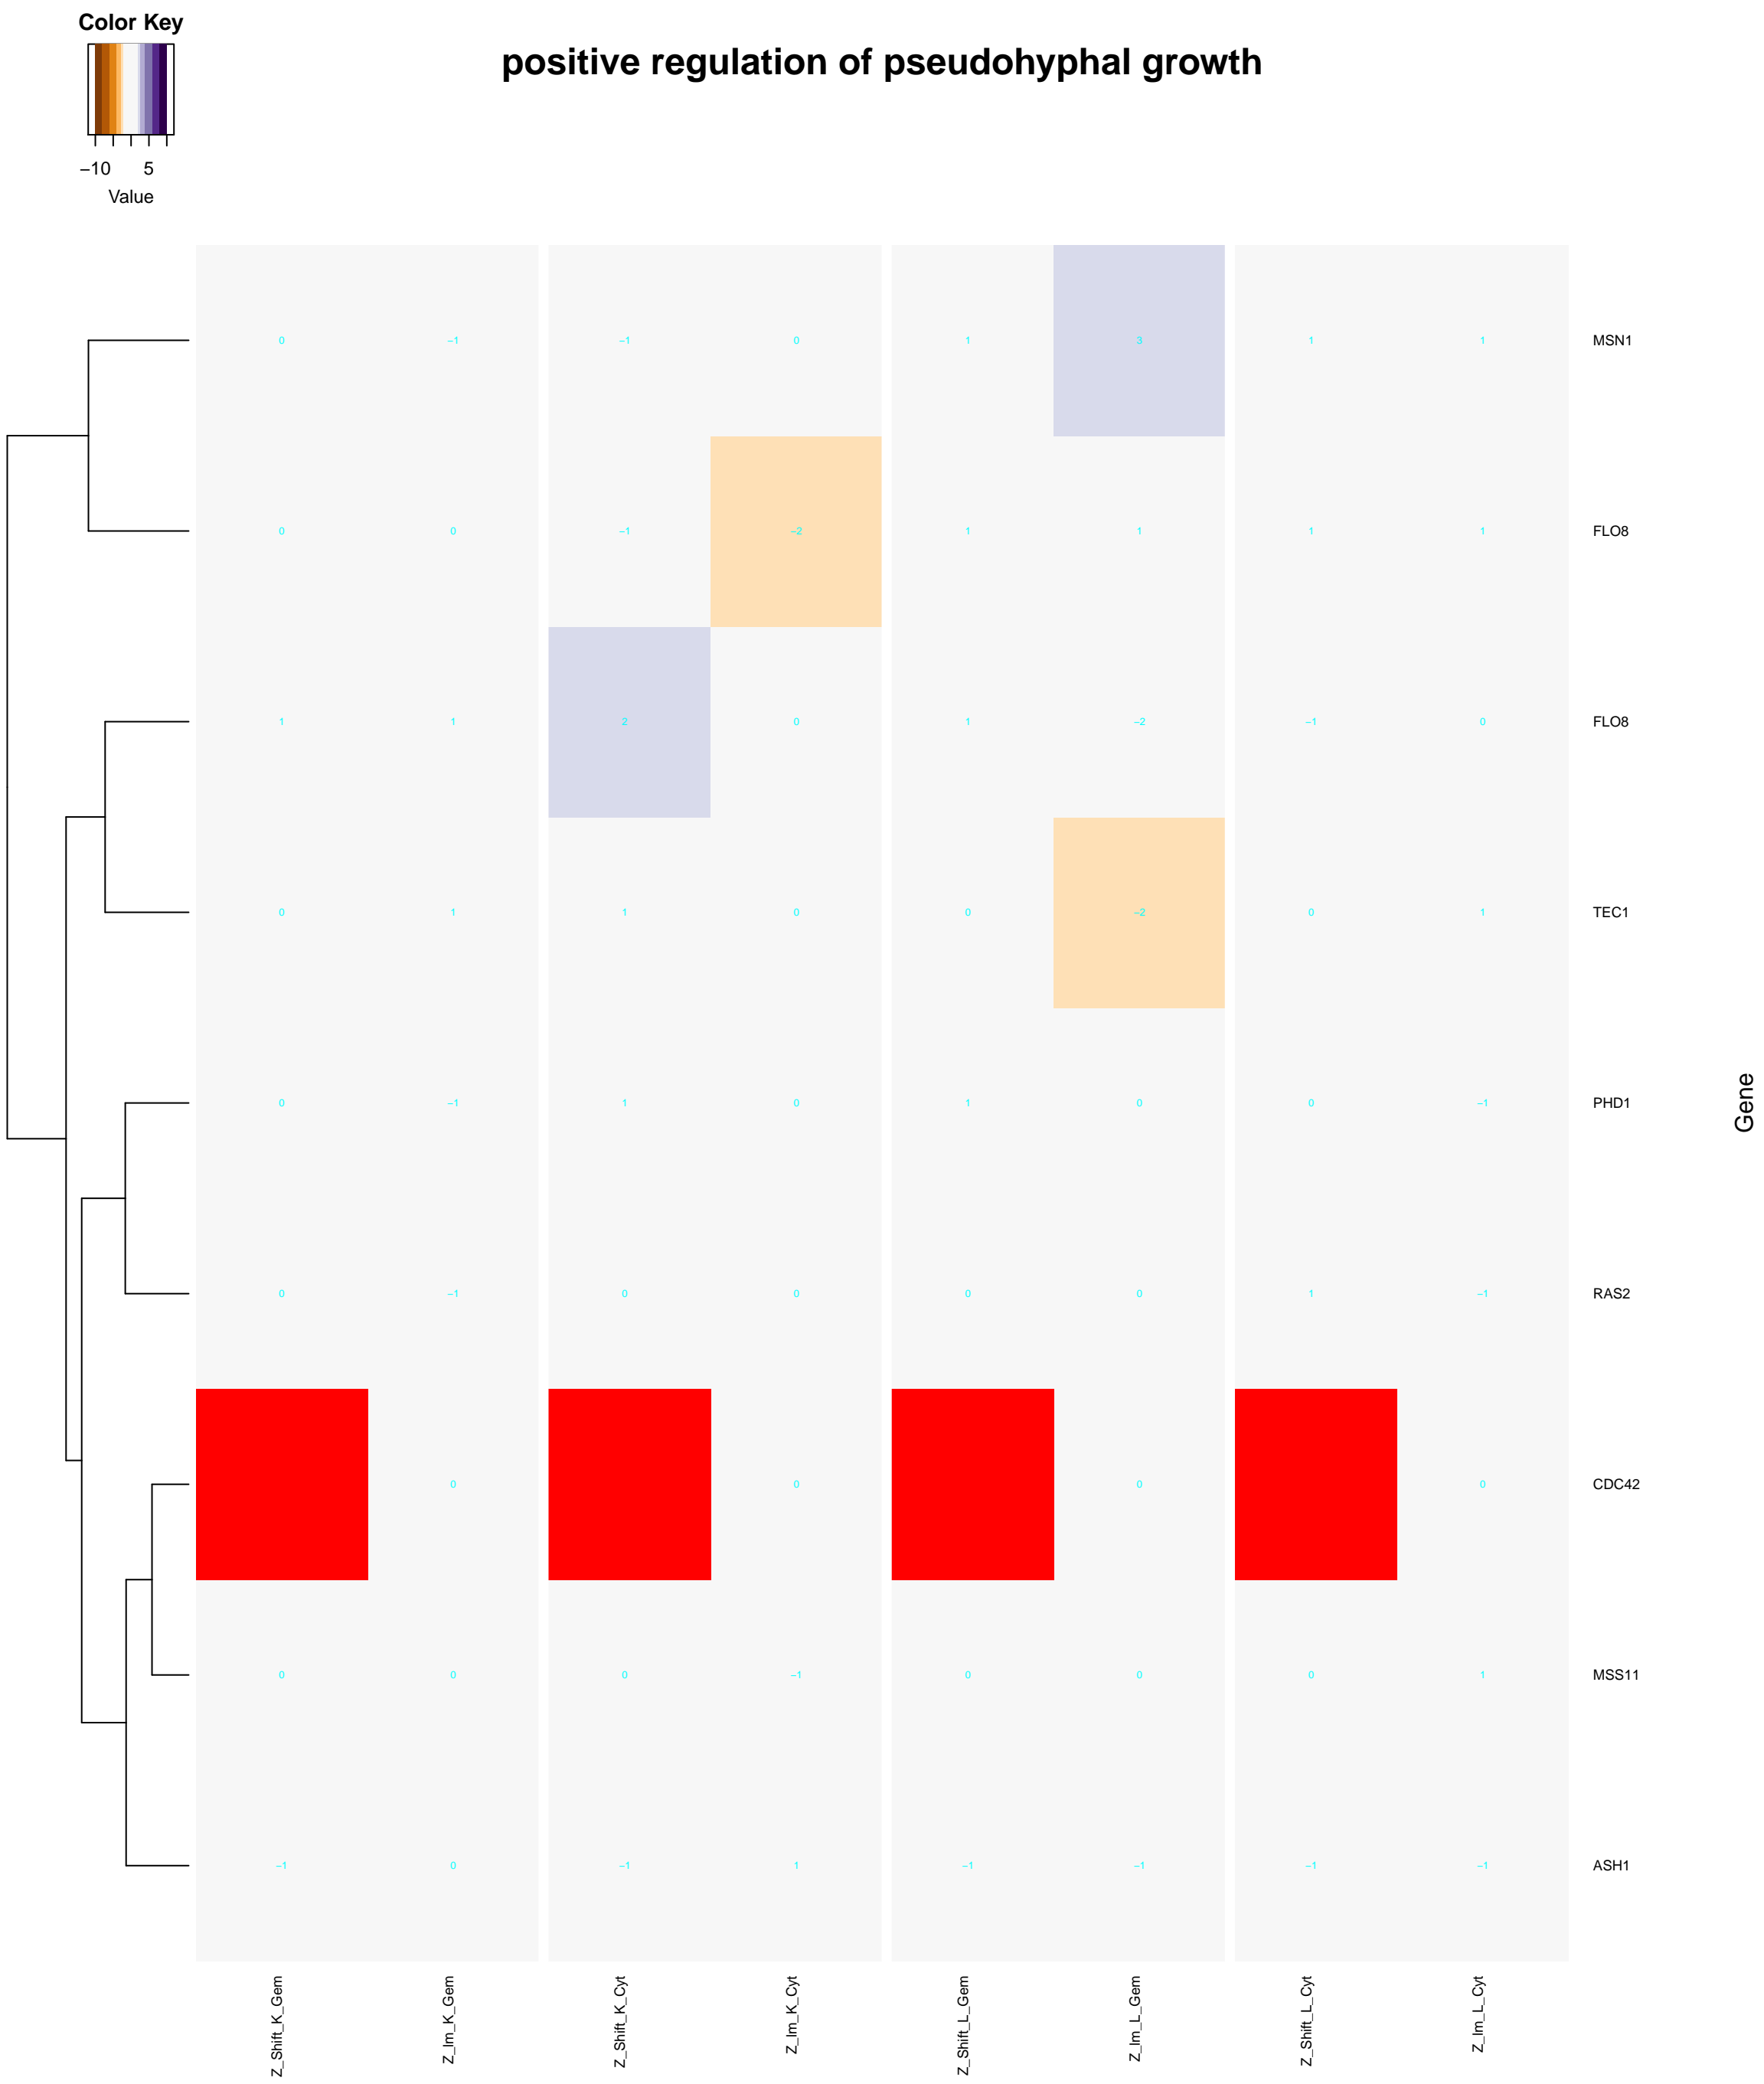

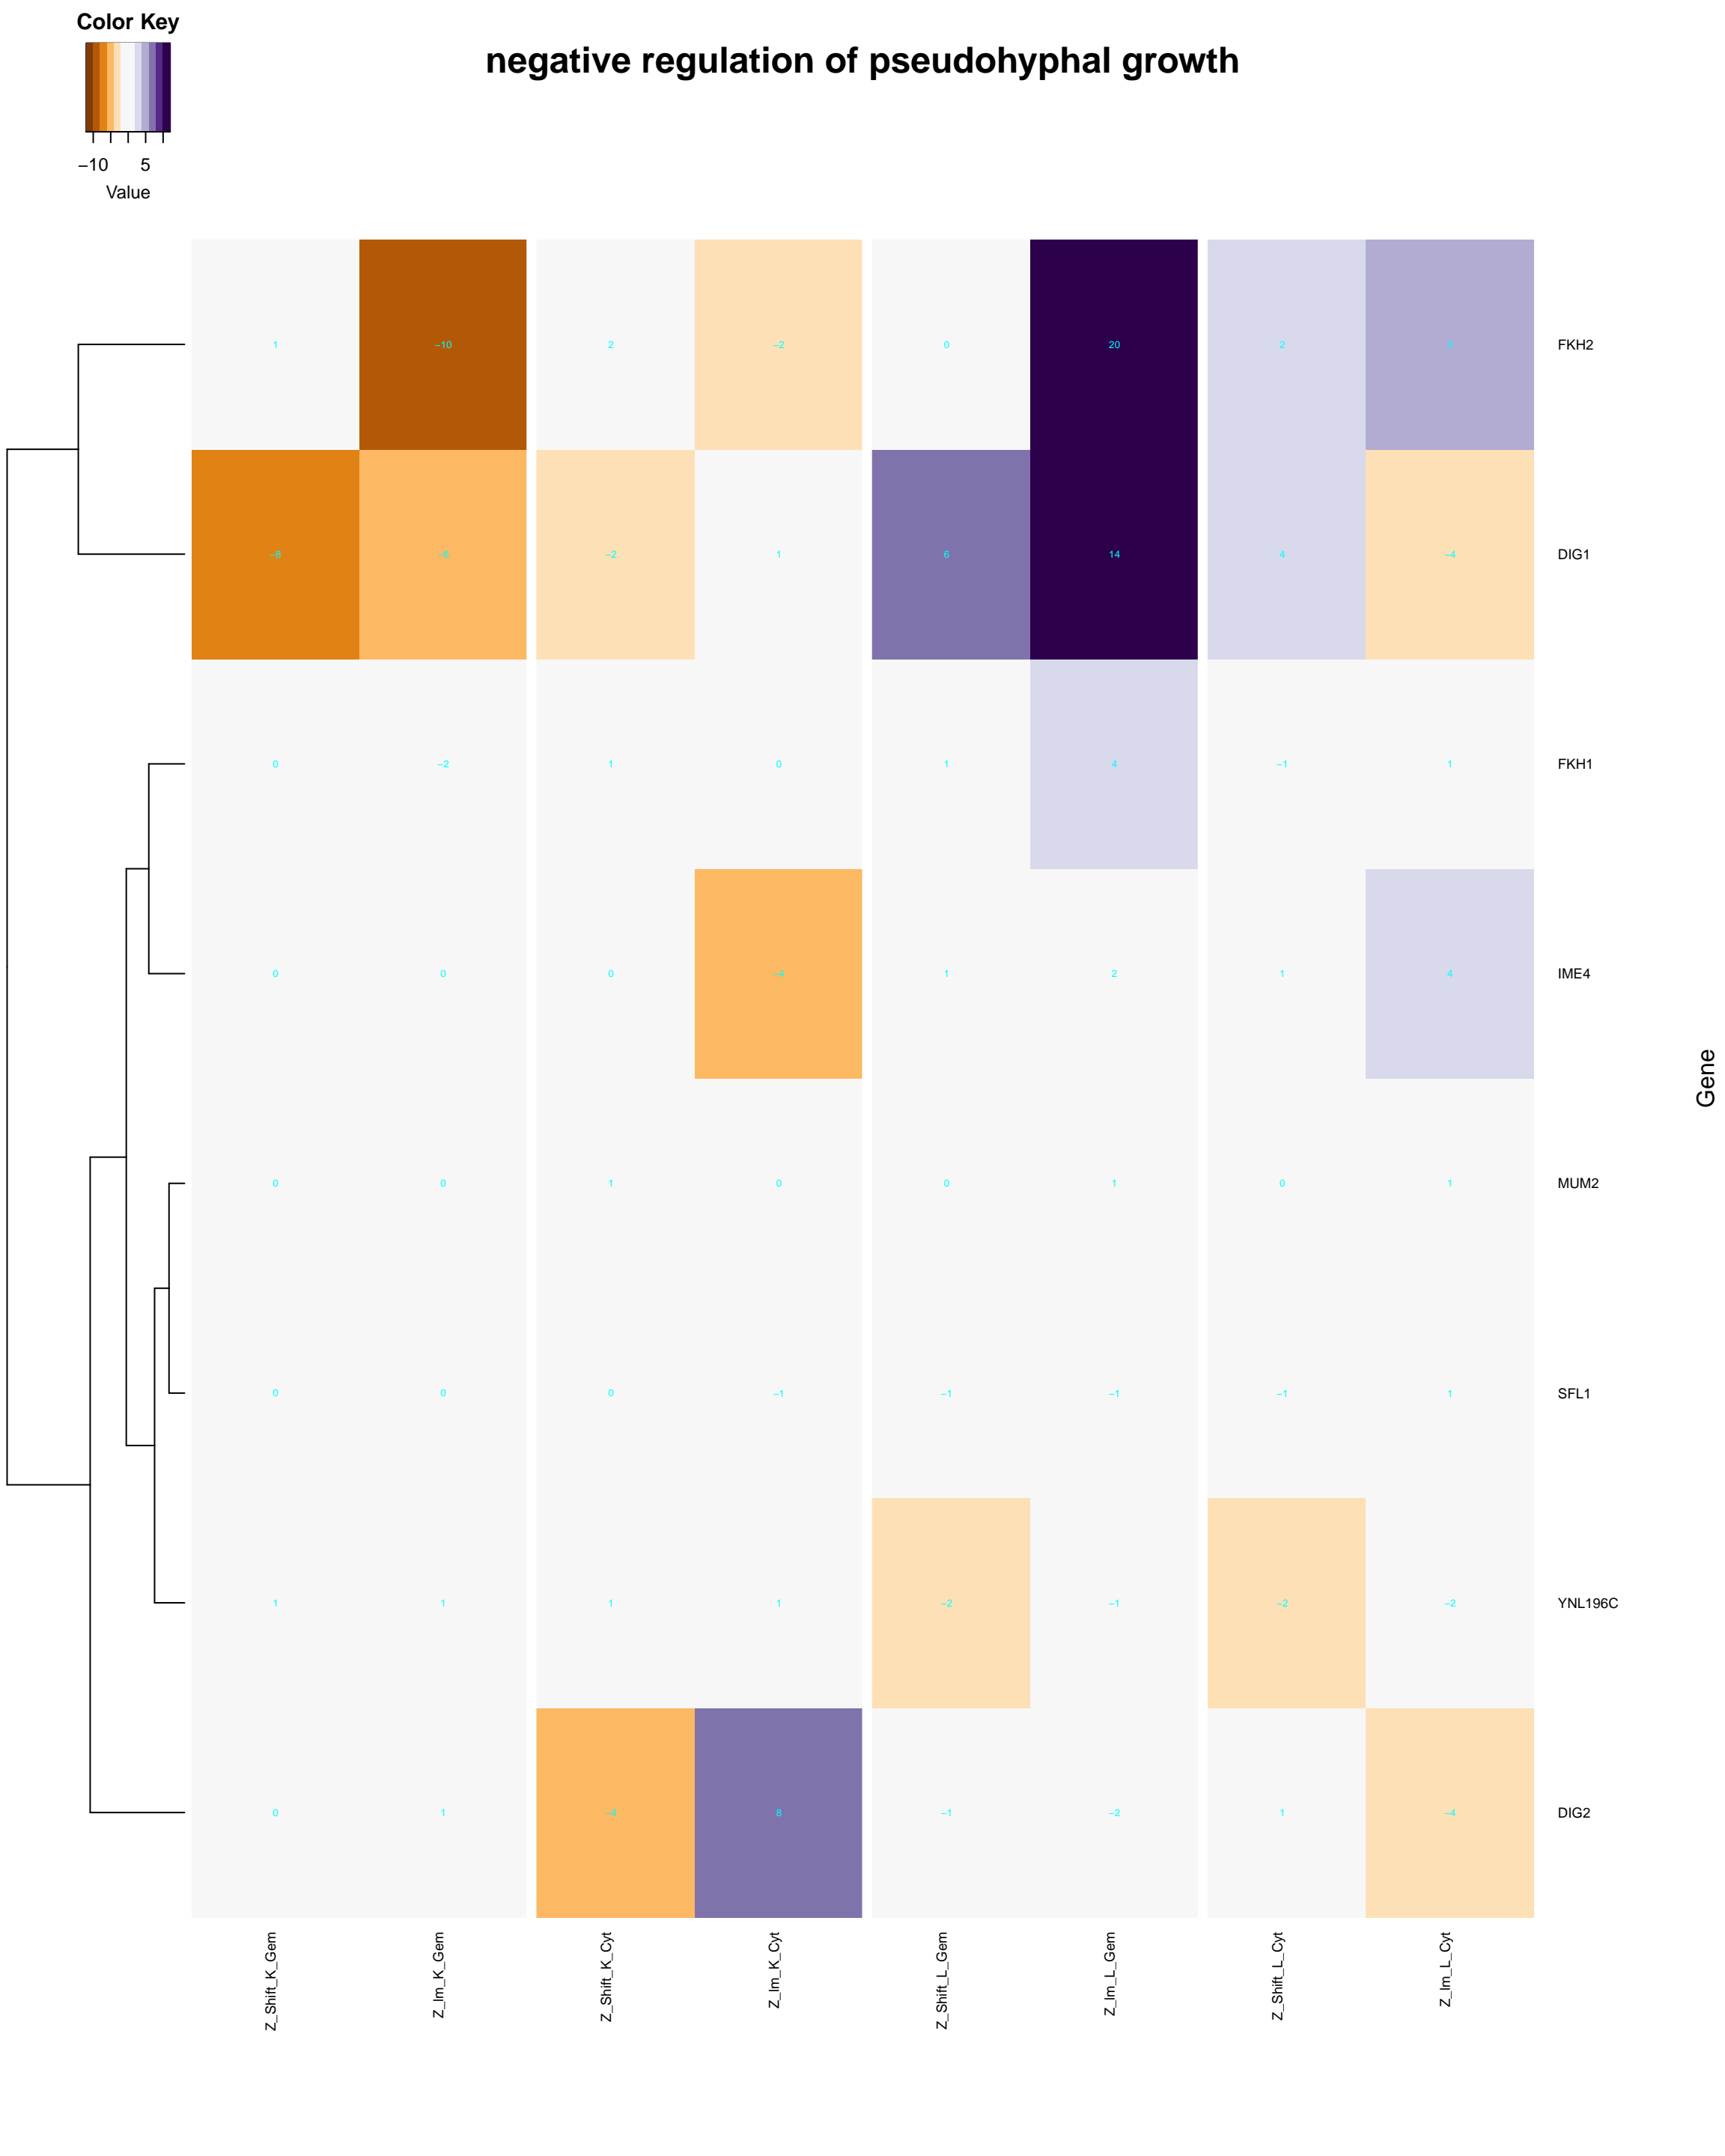

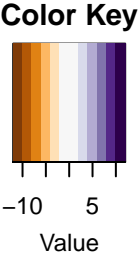

egative regulation of filamentous growth of a population of unicellular organisms

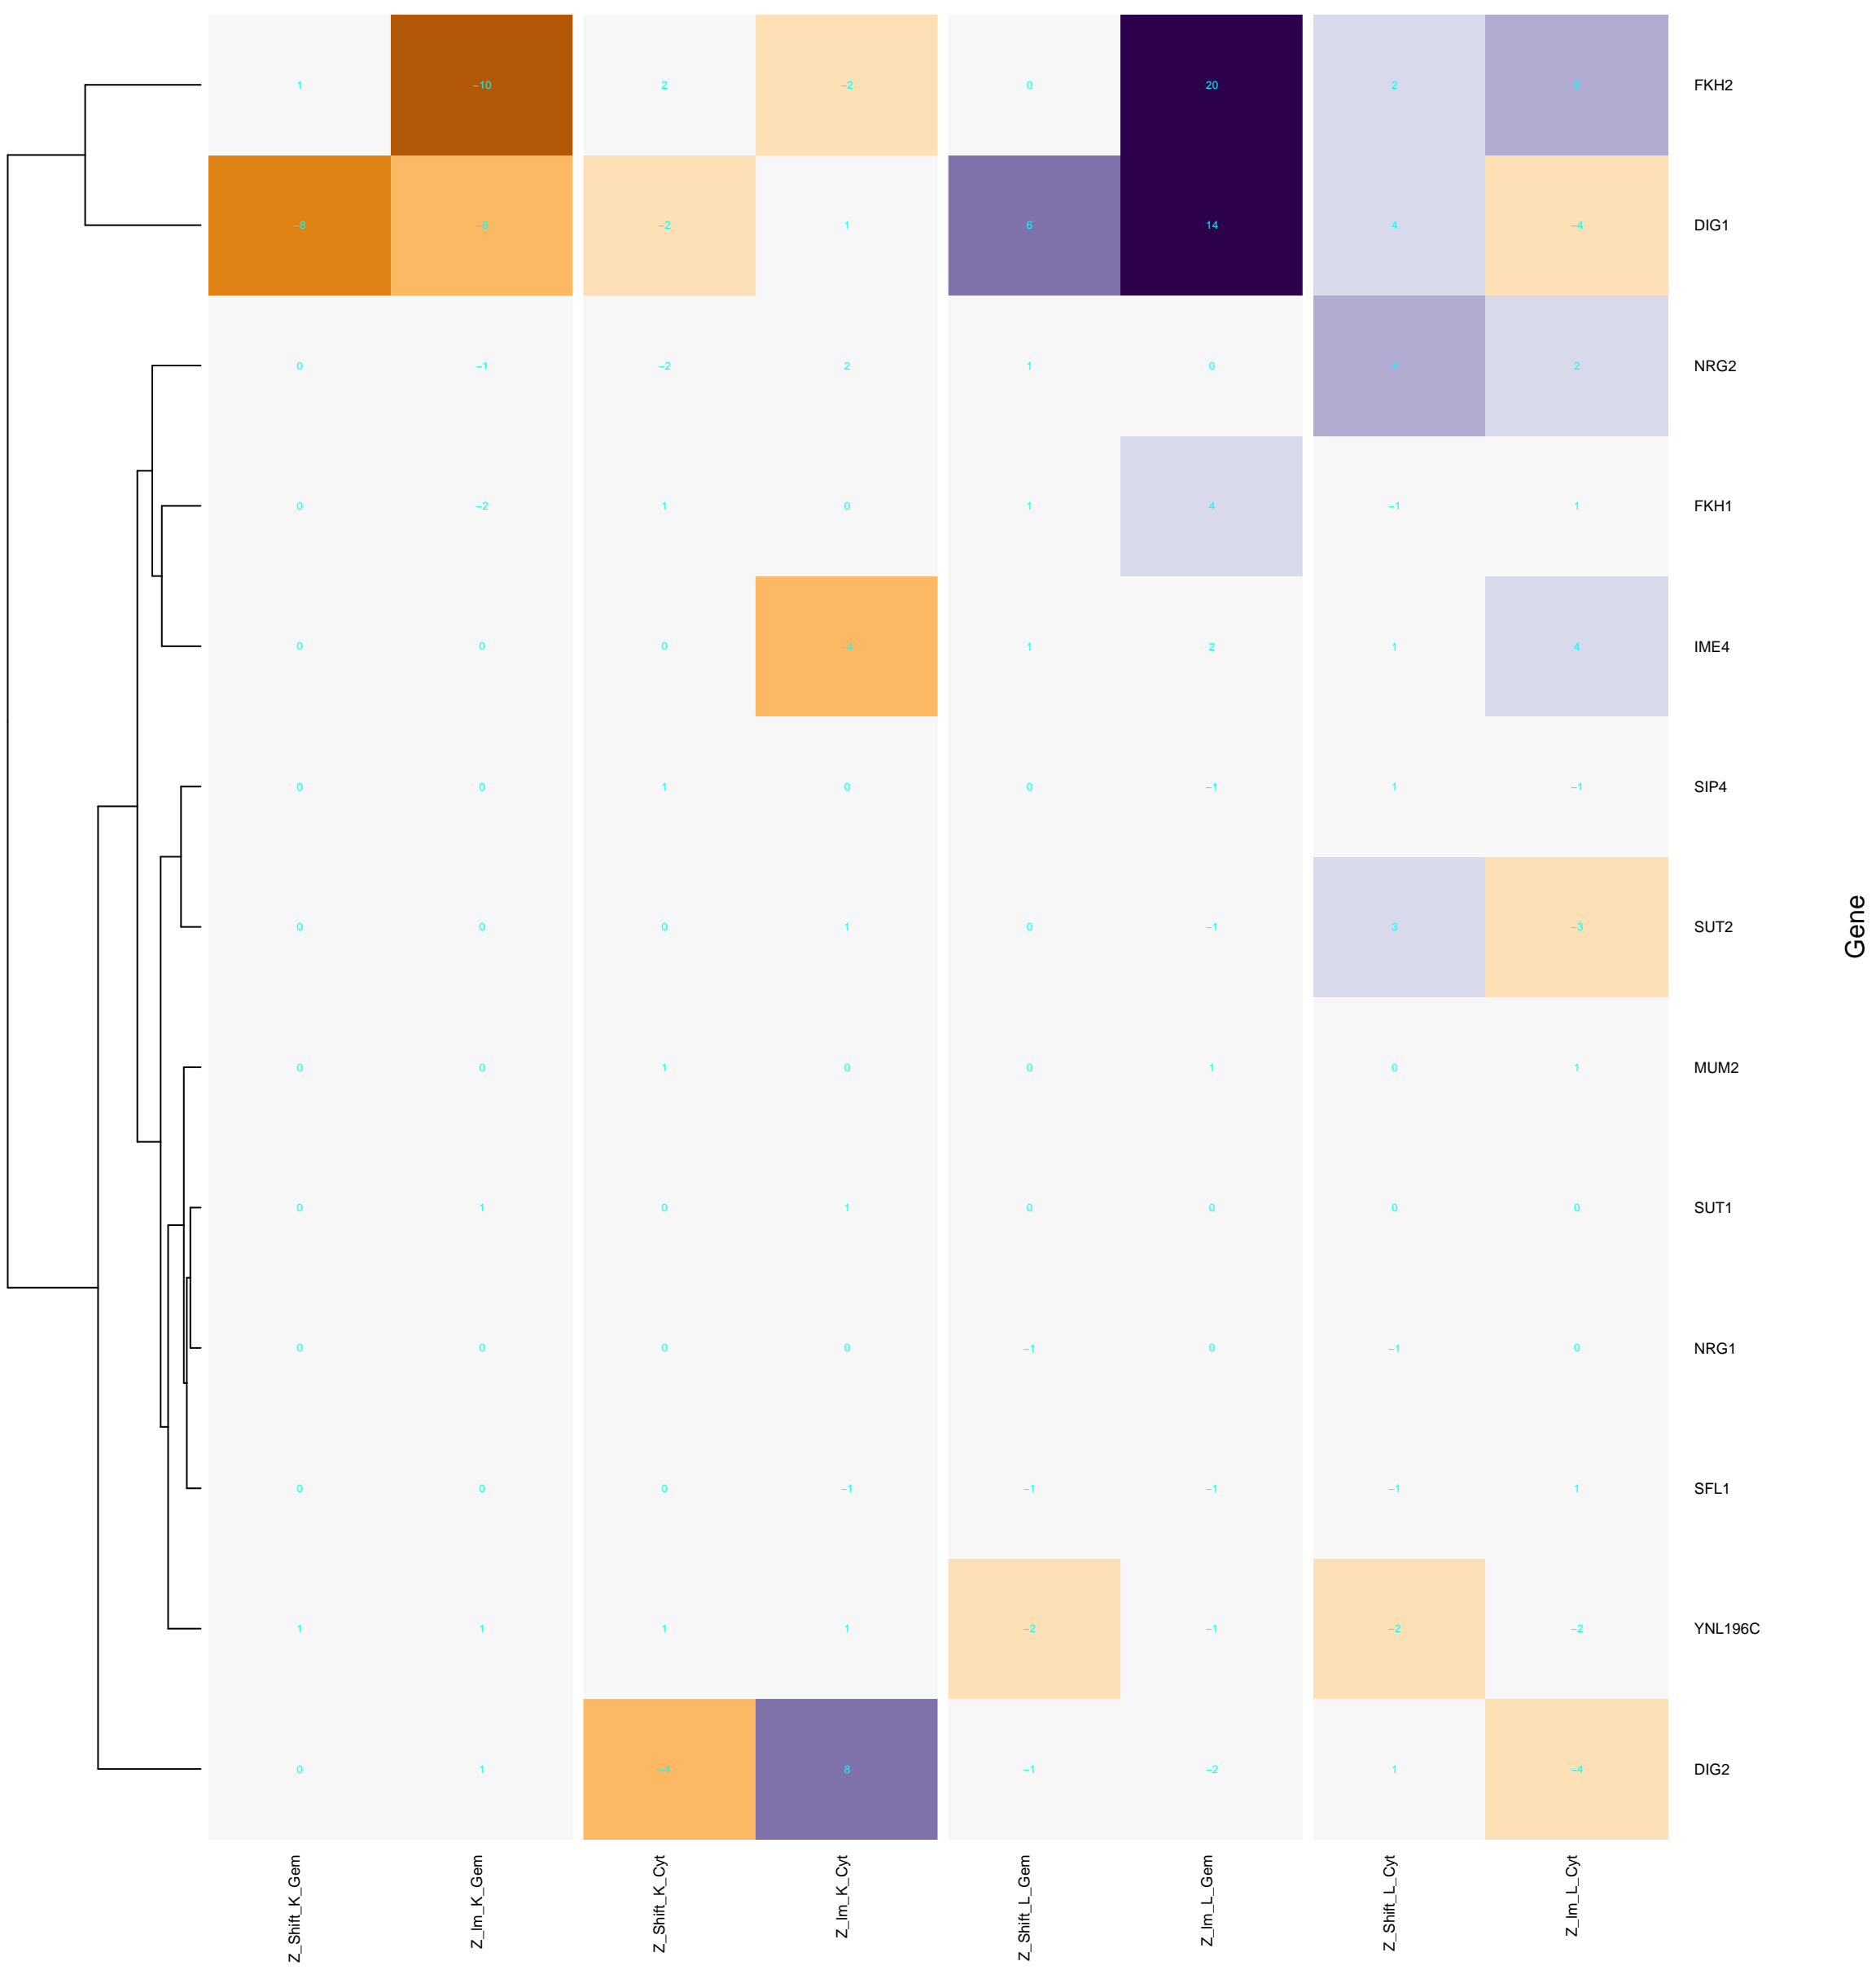

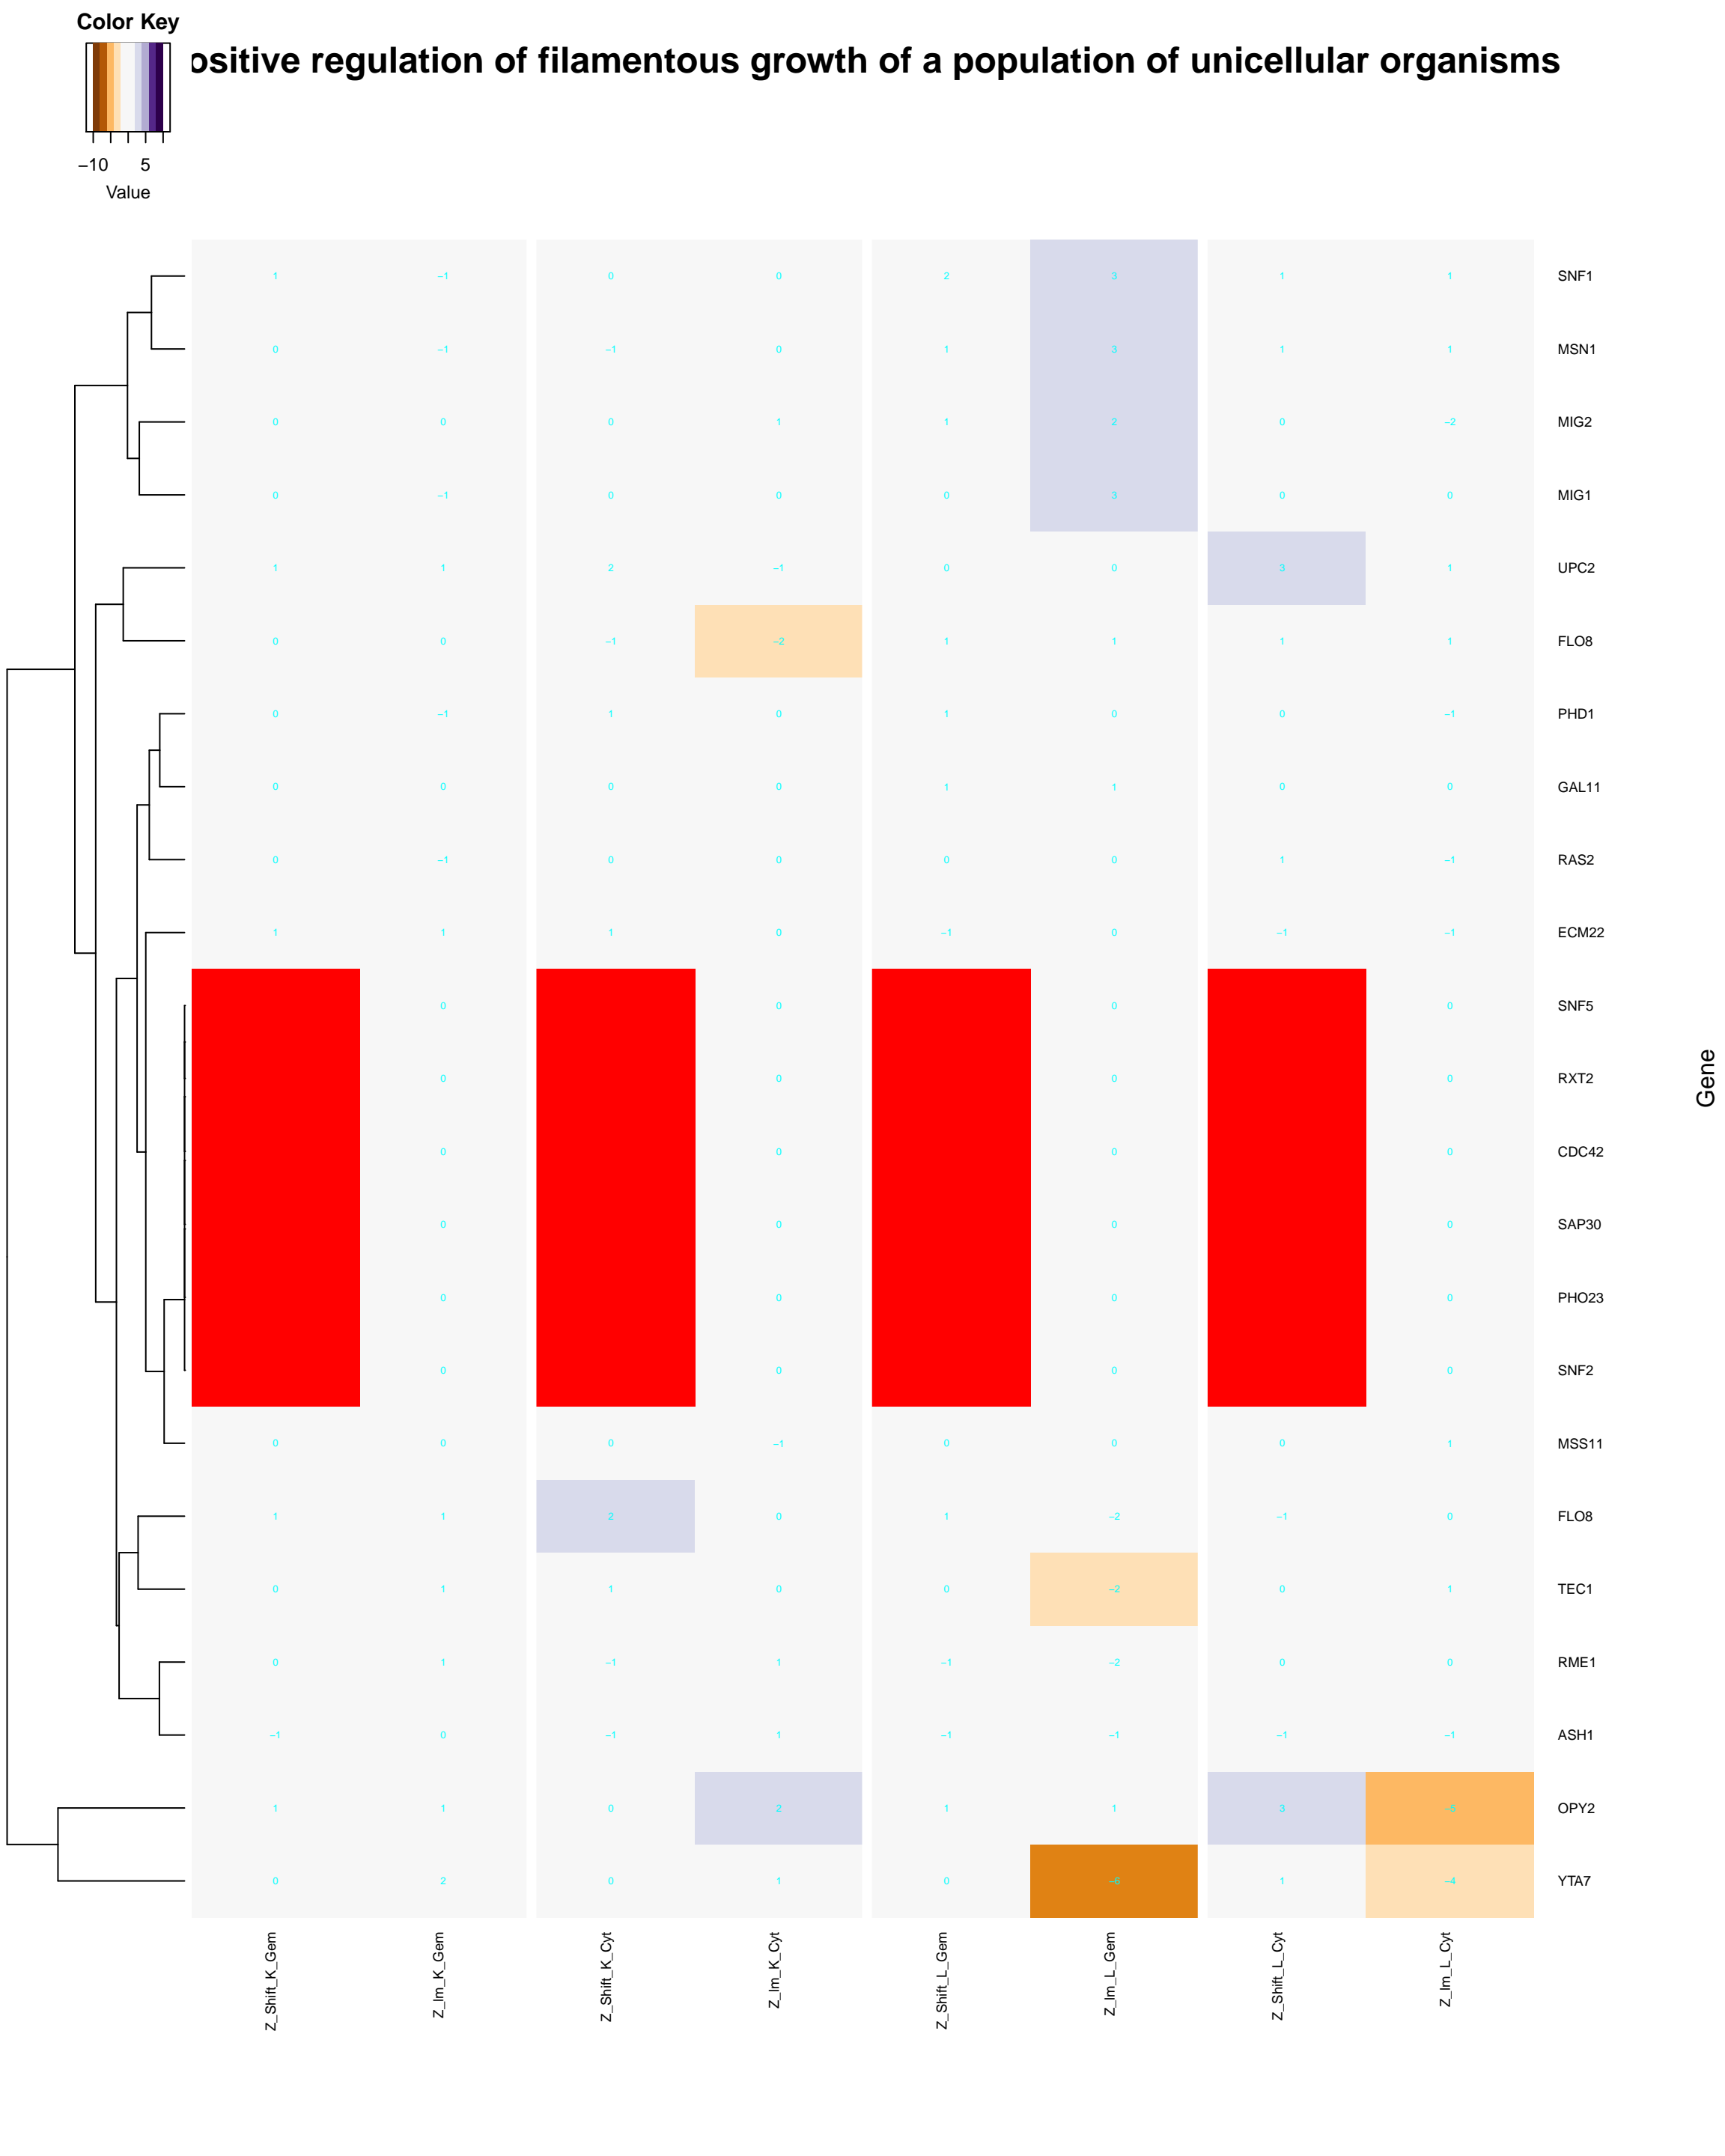

Color Key

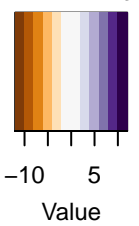

regulation of growth of unicellular organism as a thread of attached cells

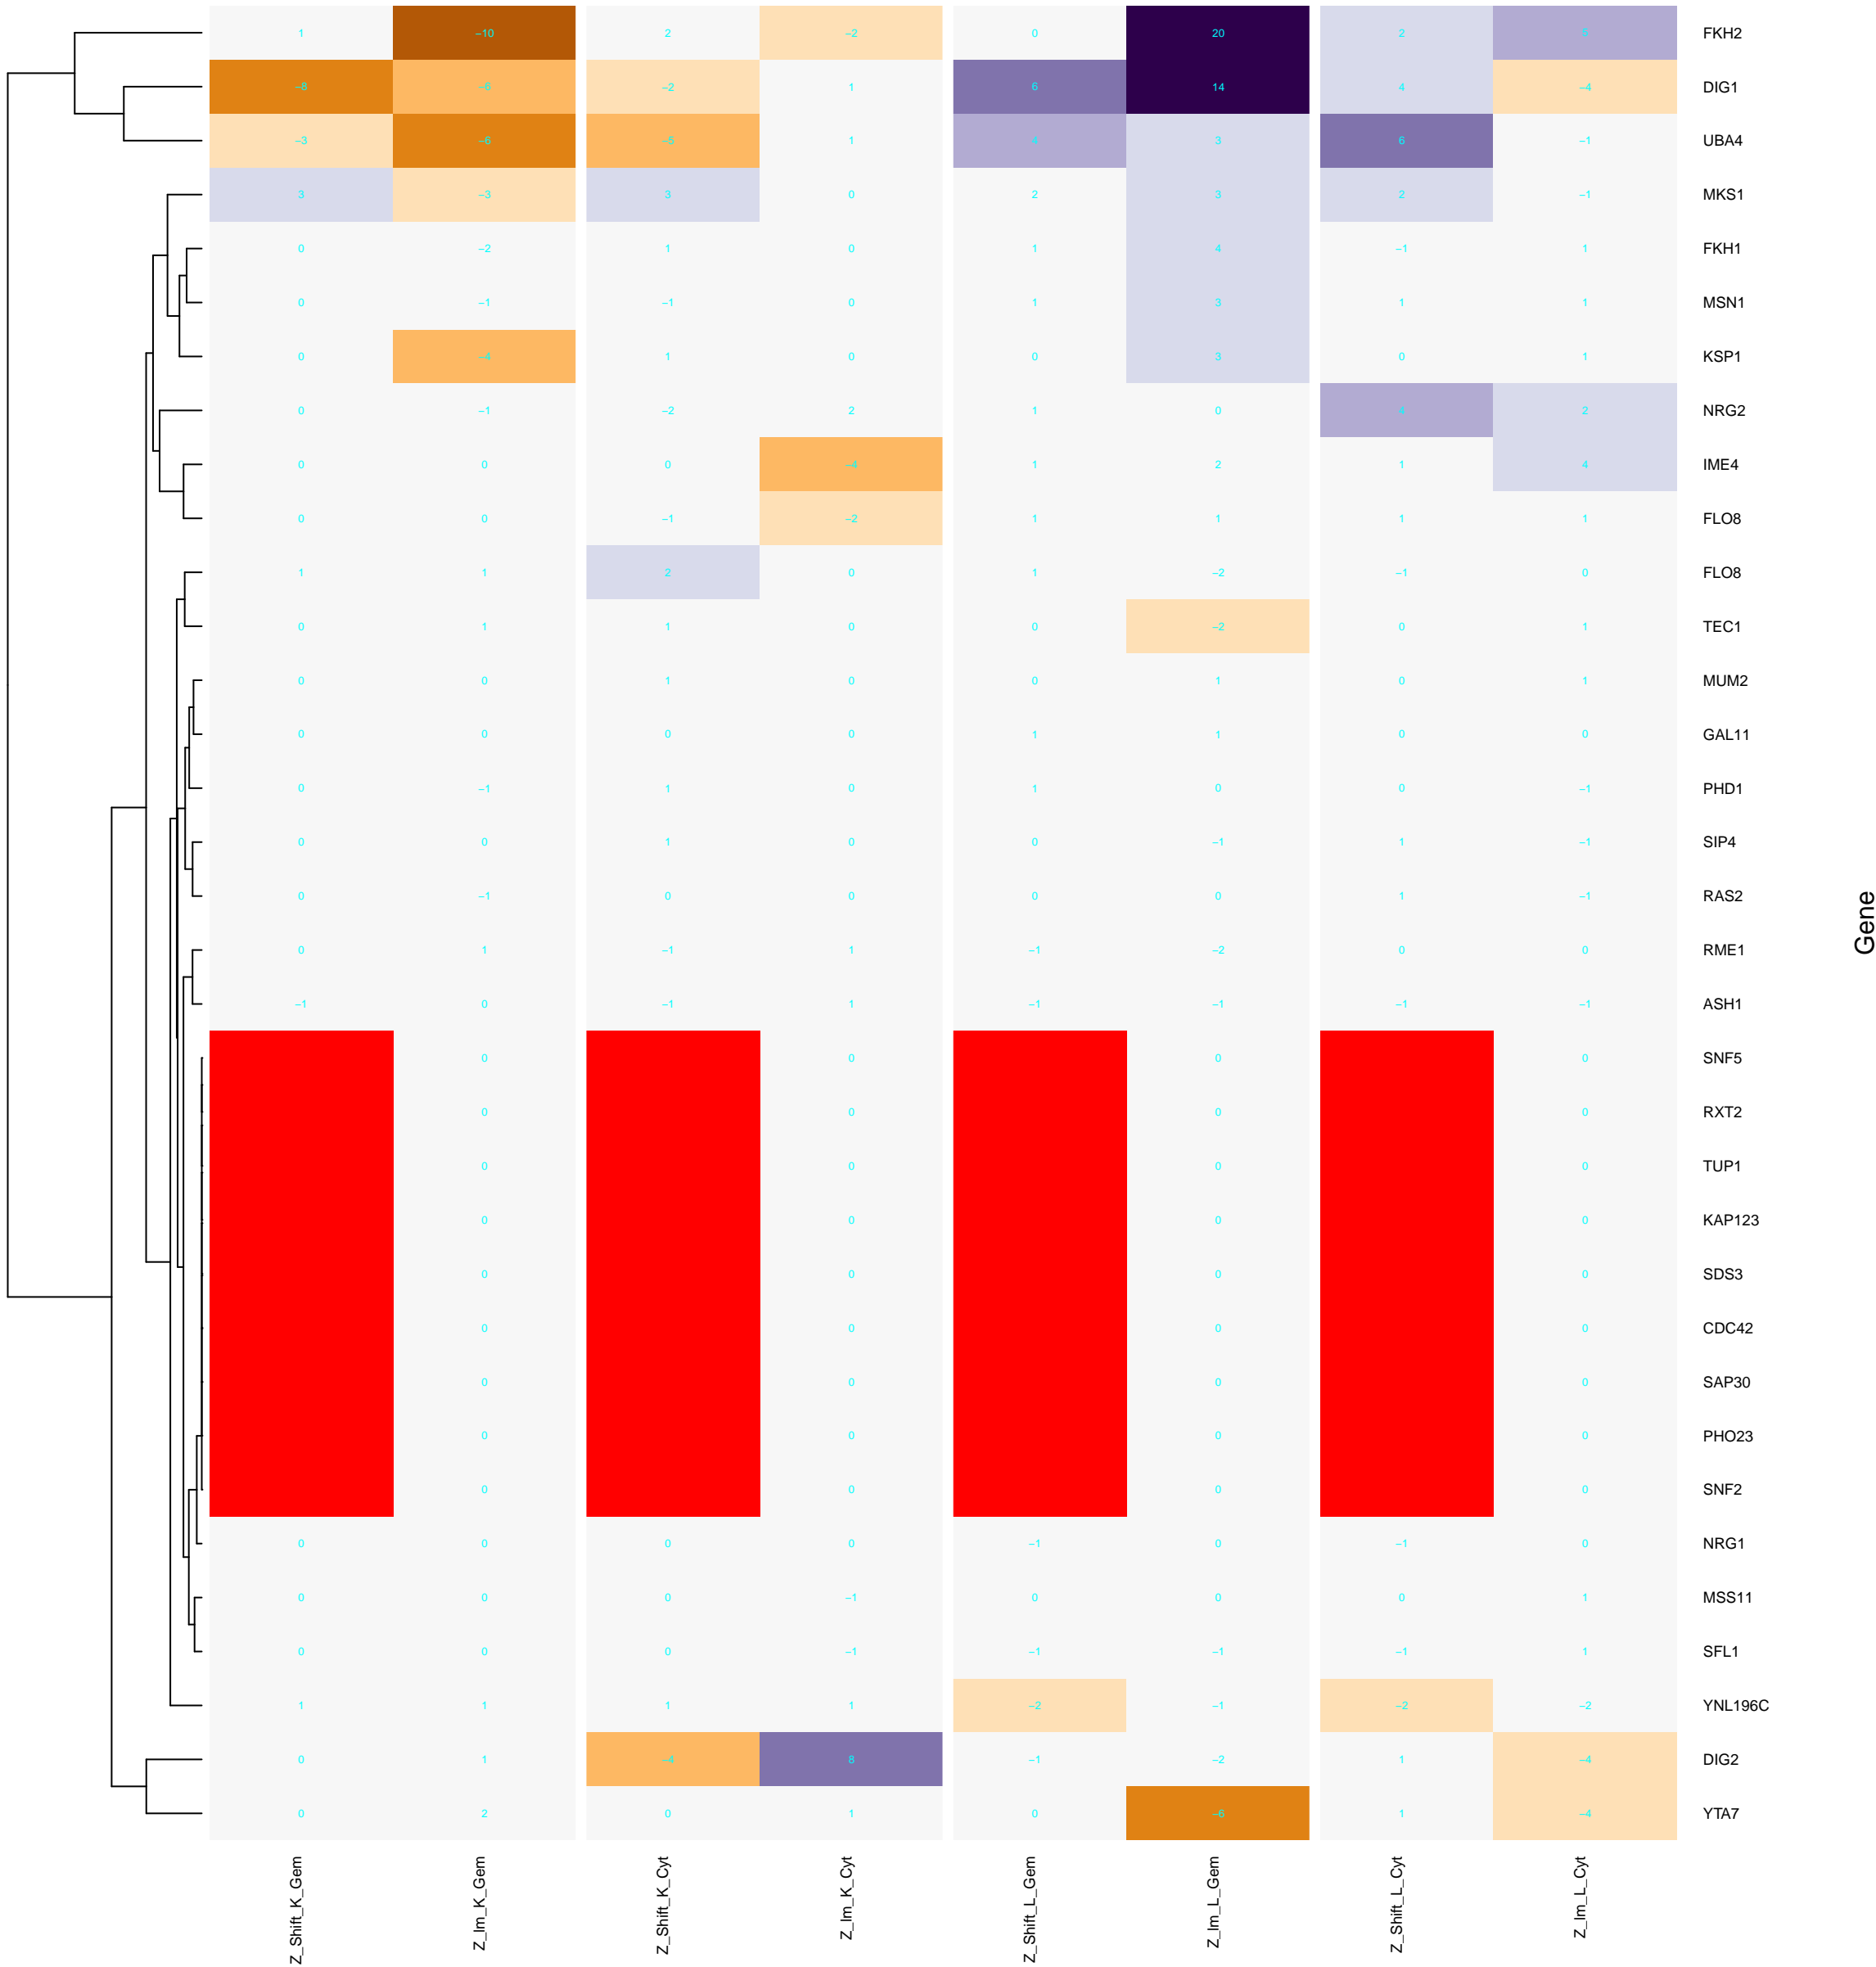

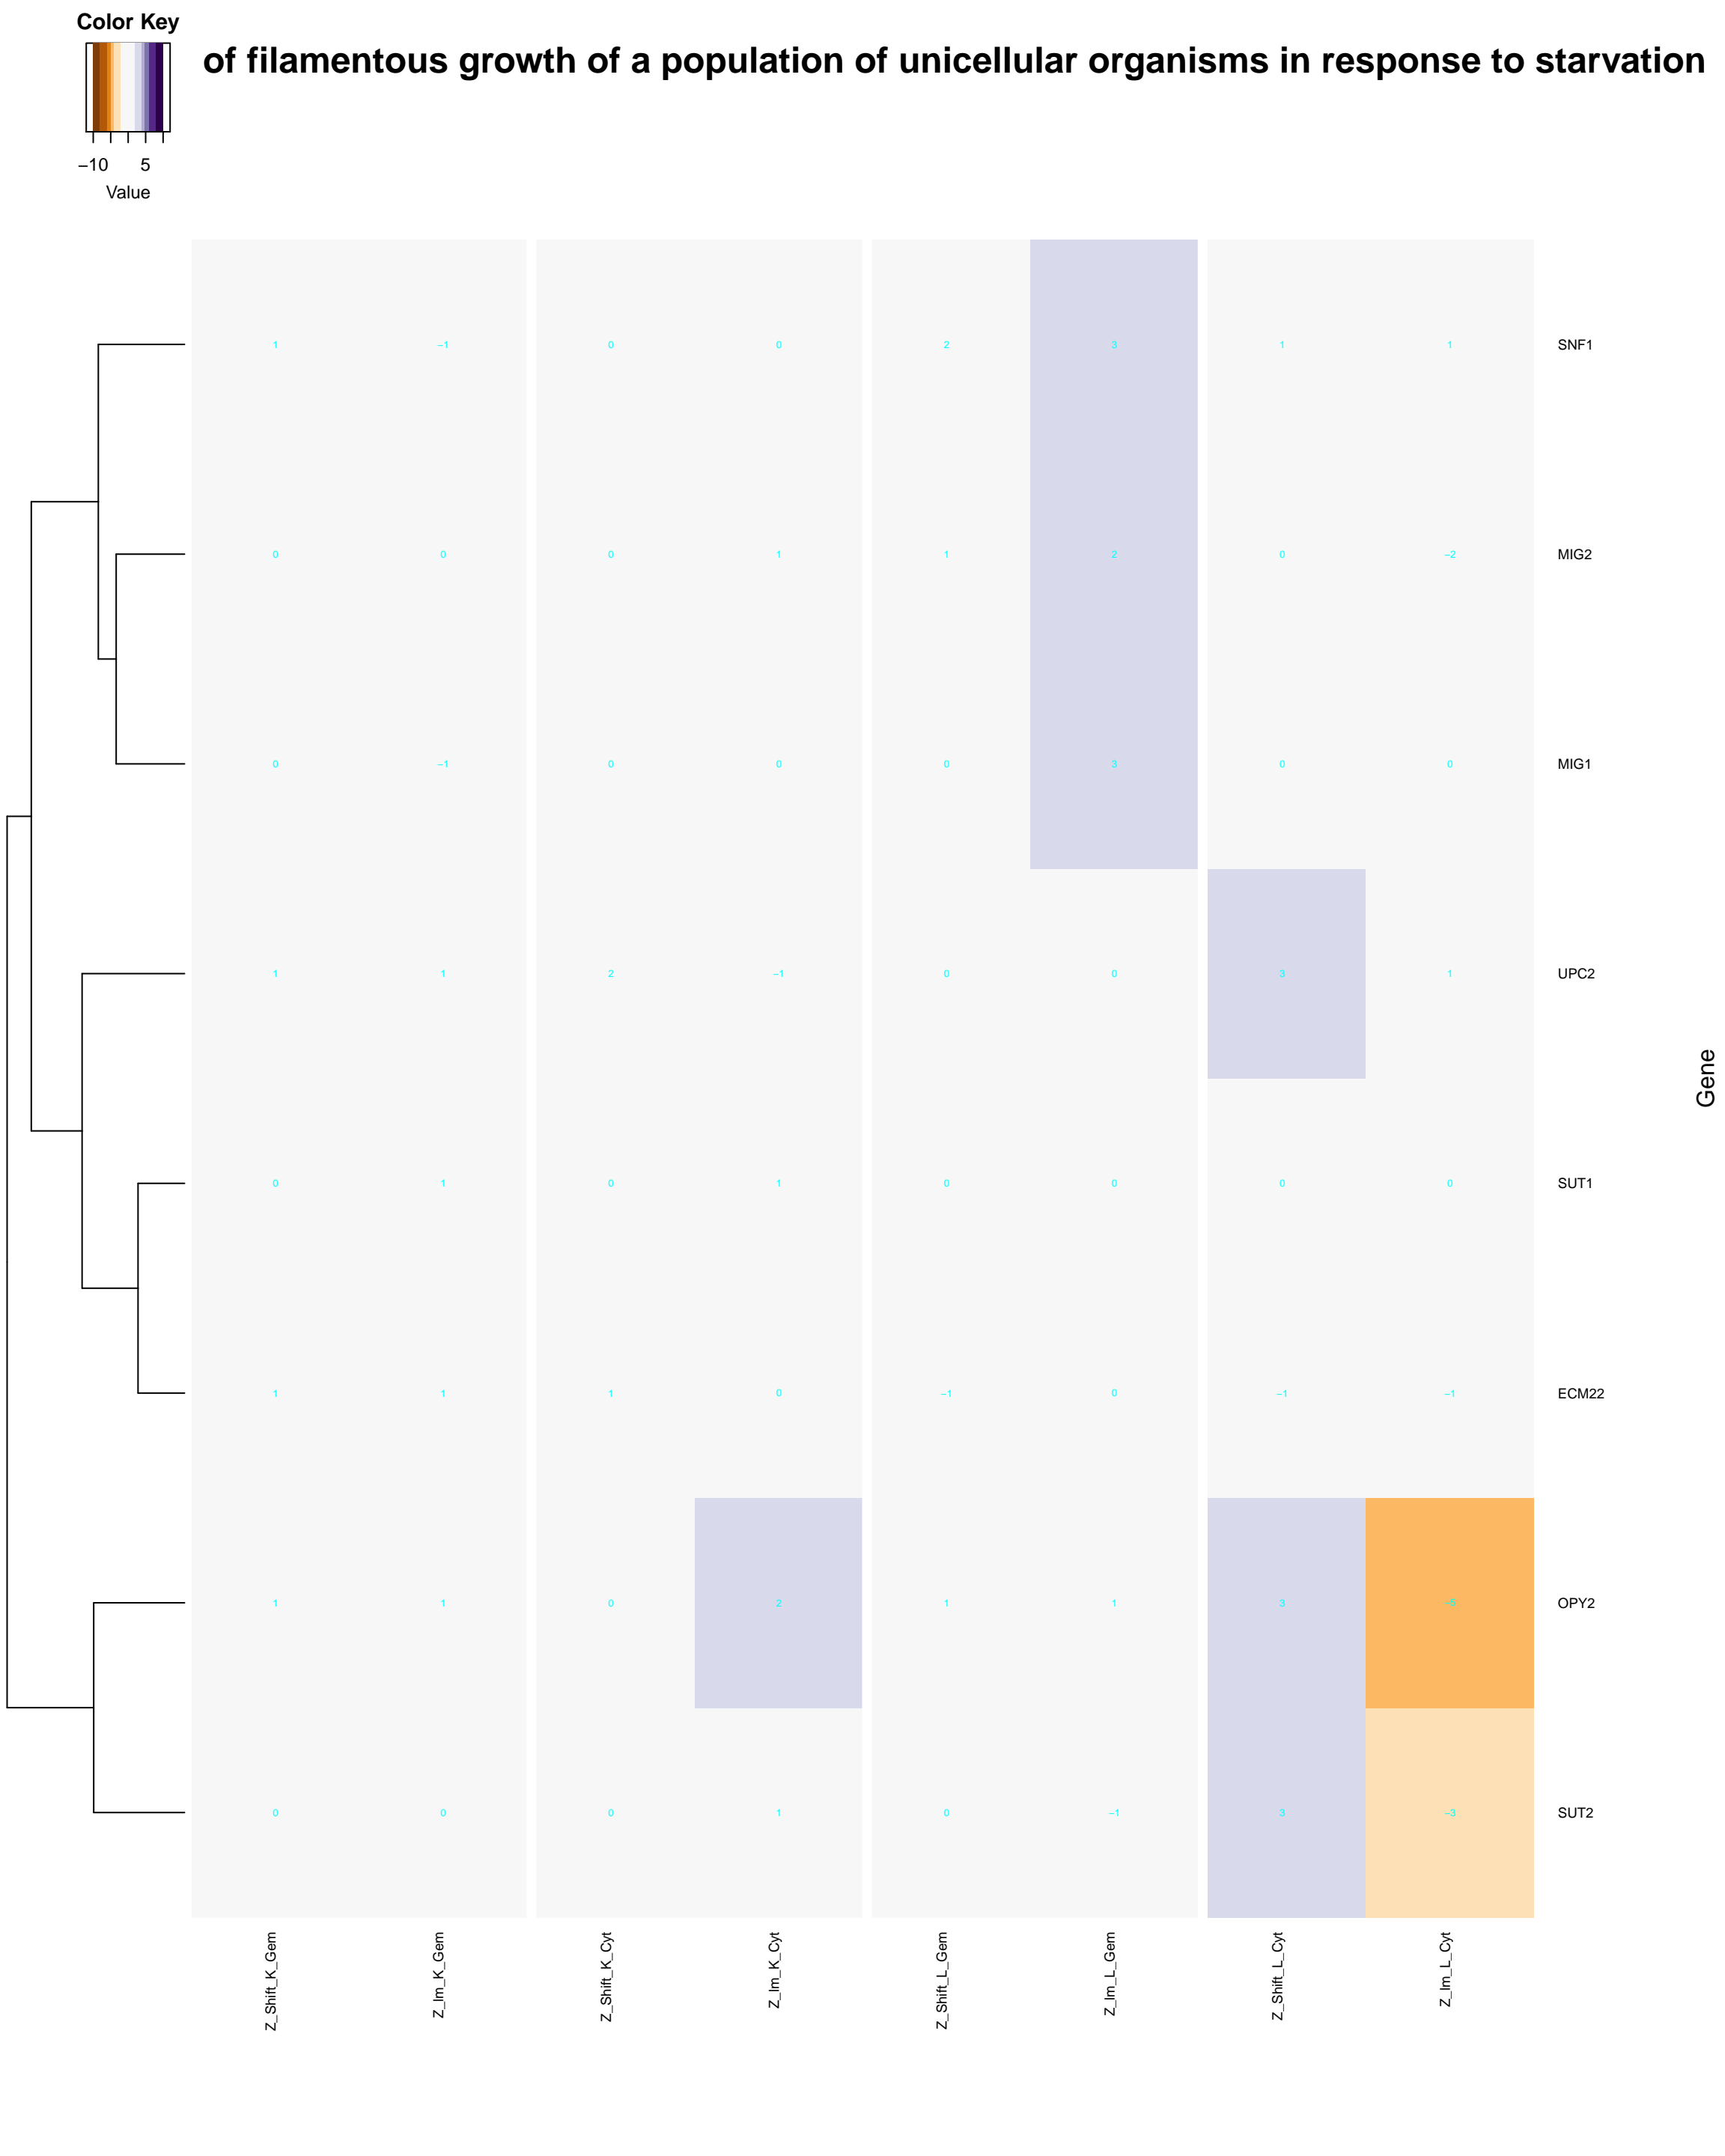

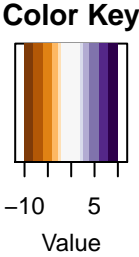

of pseudohyphal growth by positive regulation of transcription from RNA polymerase II pr

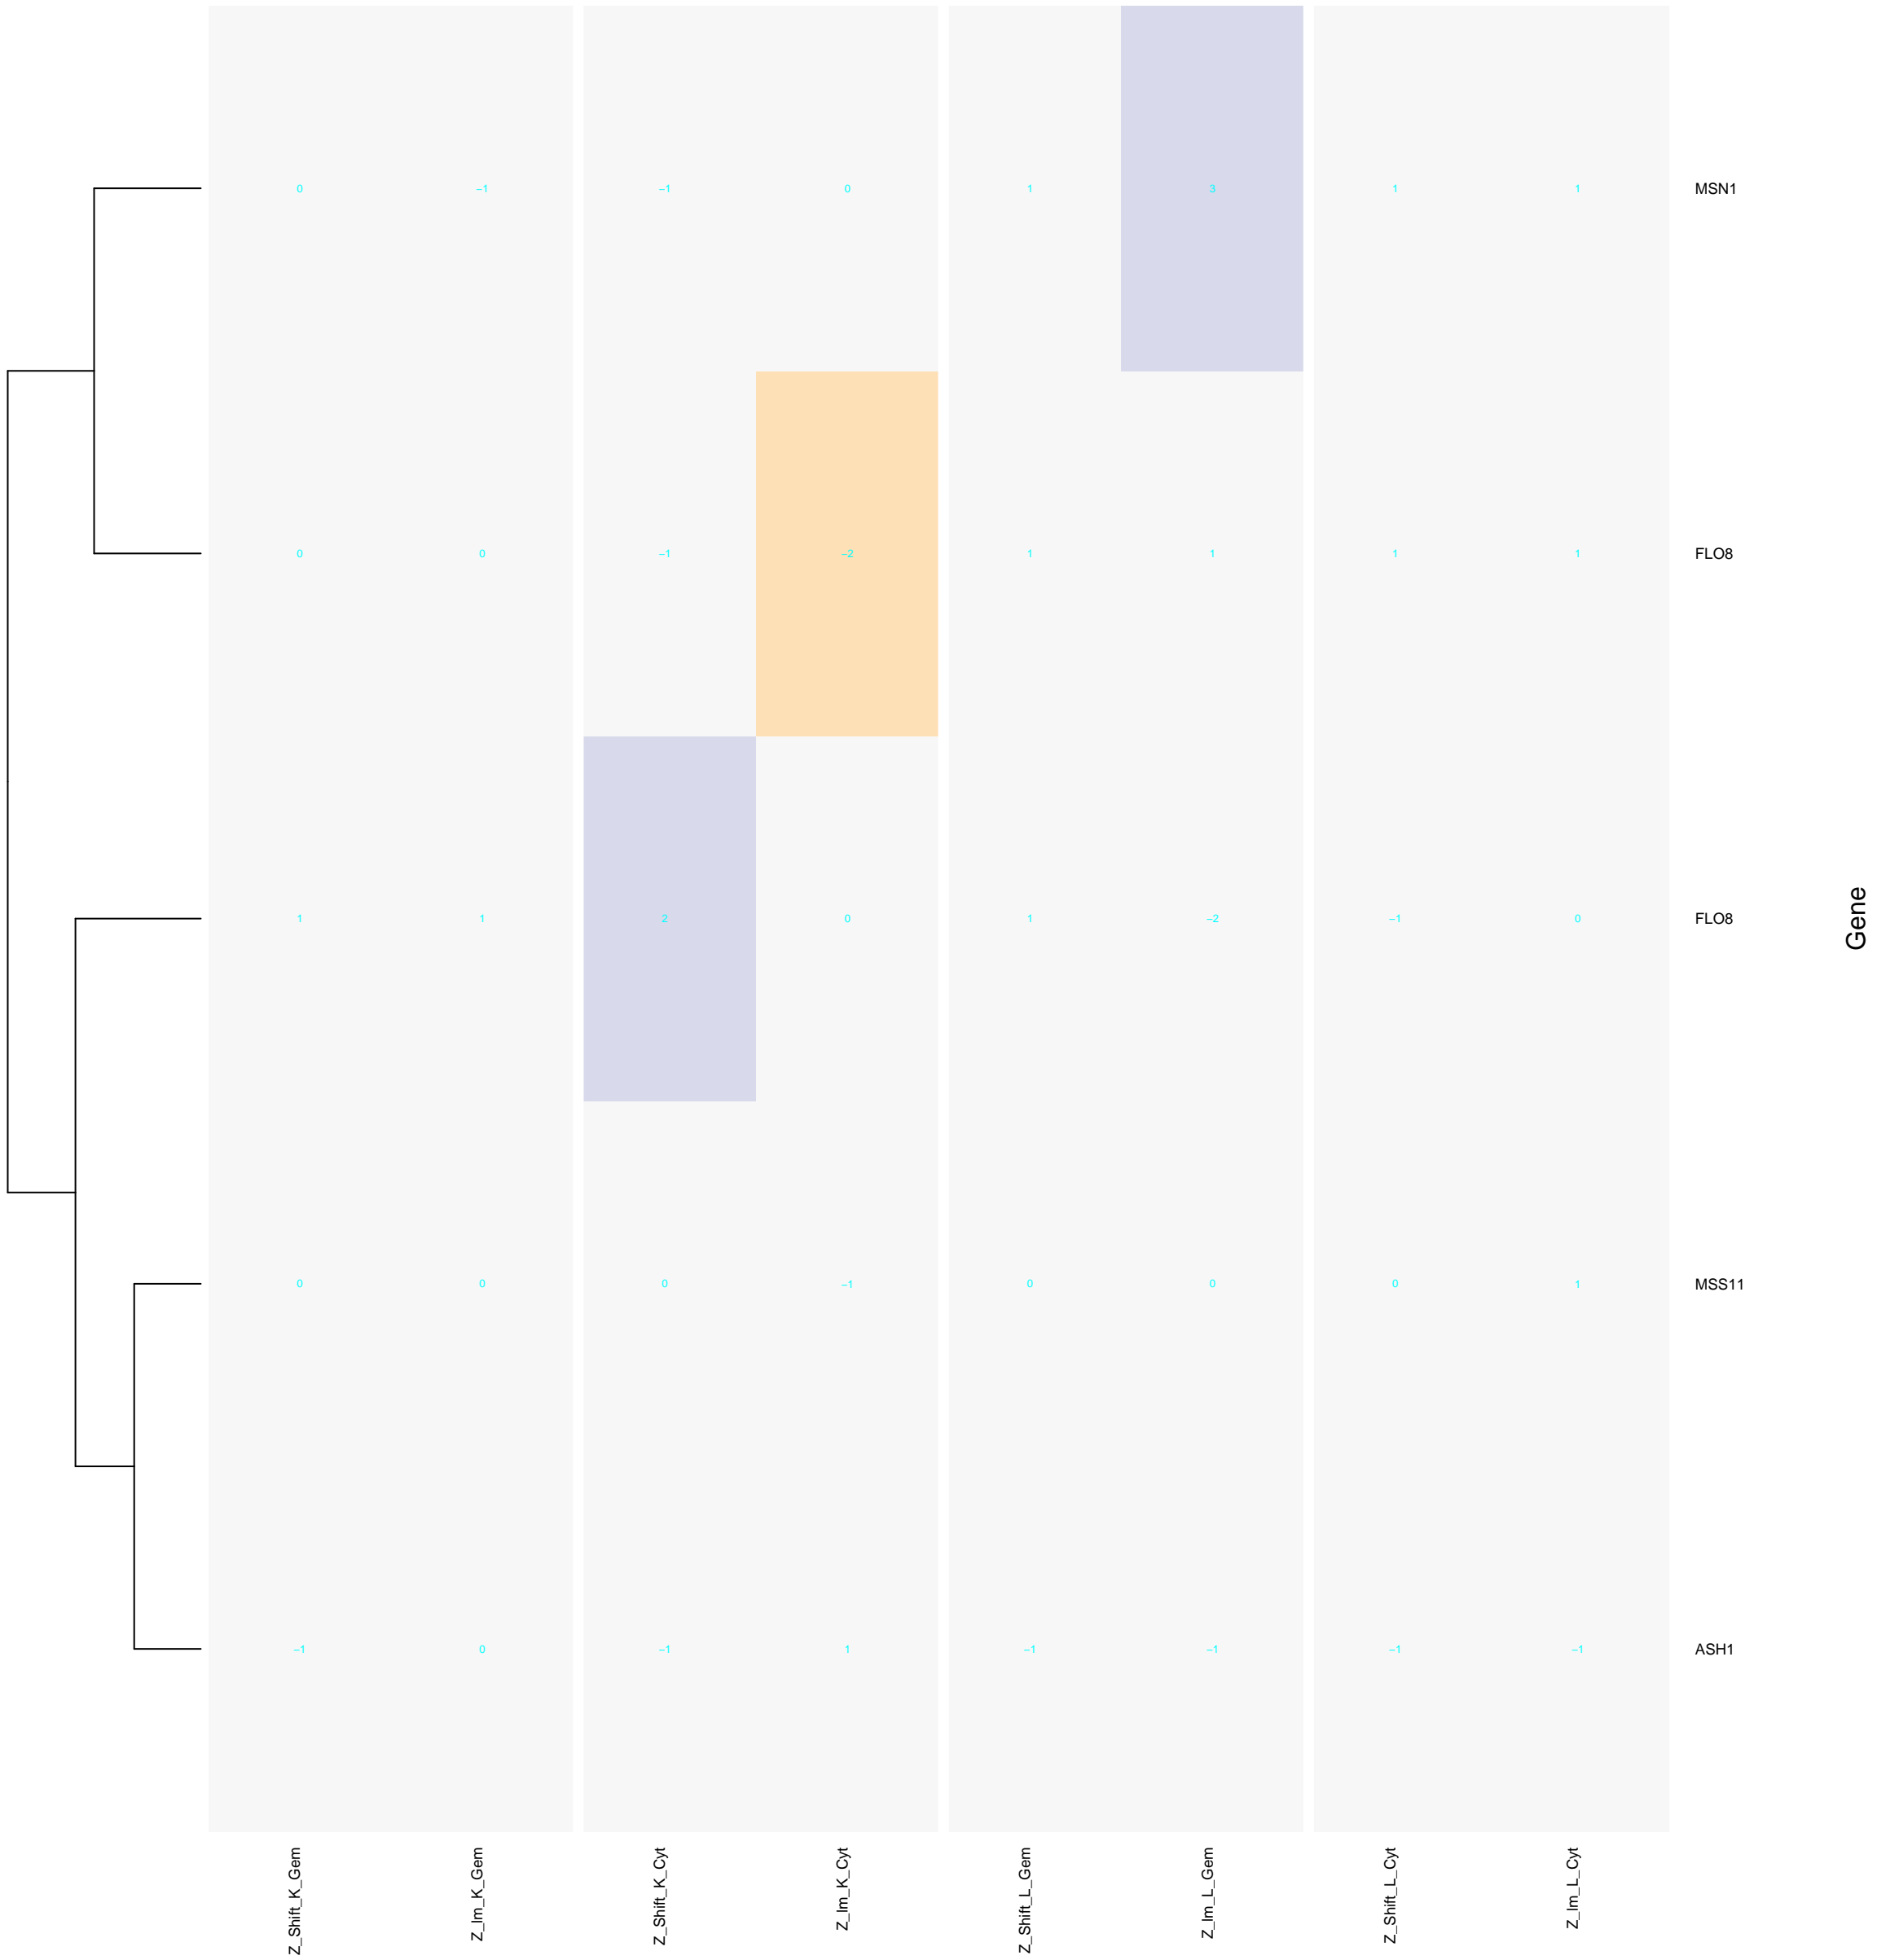



egative regulation of growth of unicellular organism as a thread of attached cells

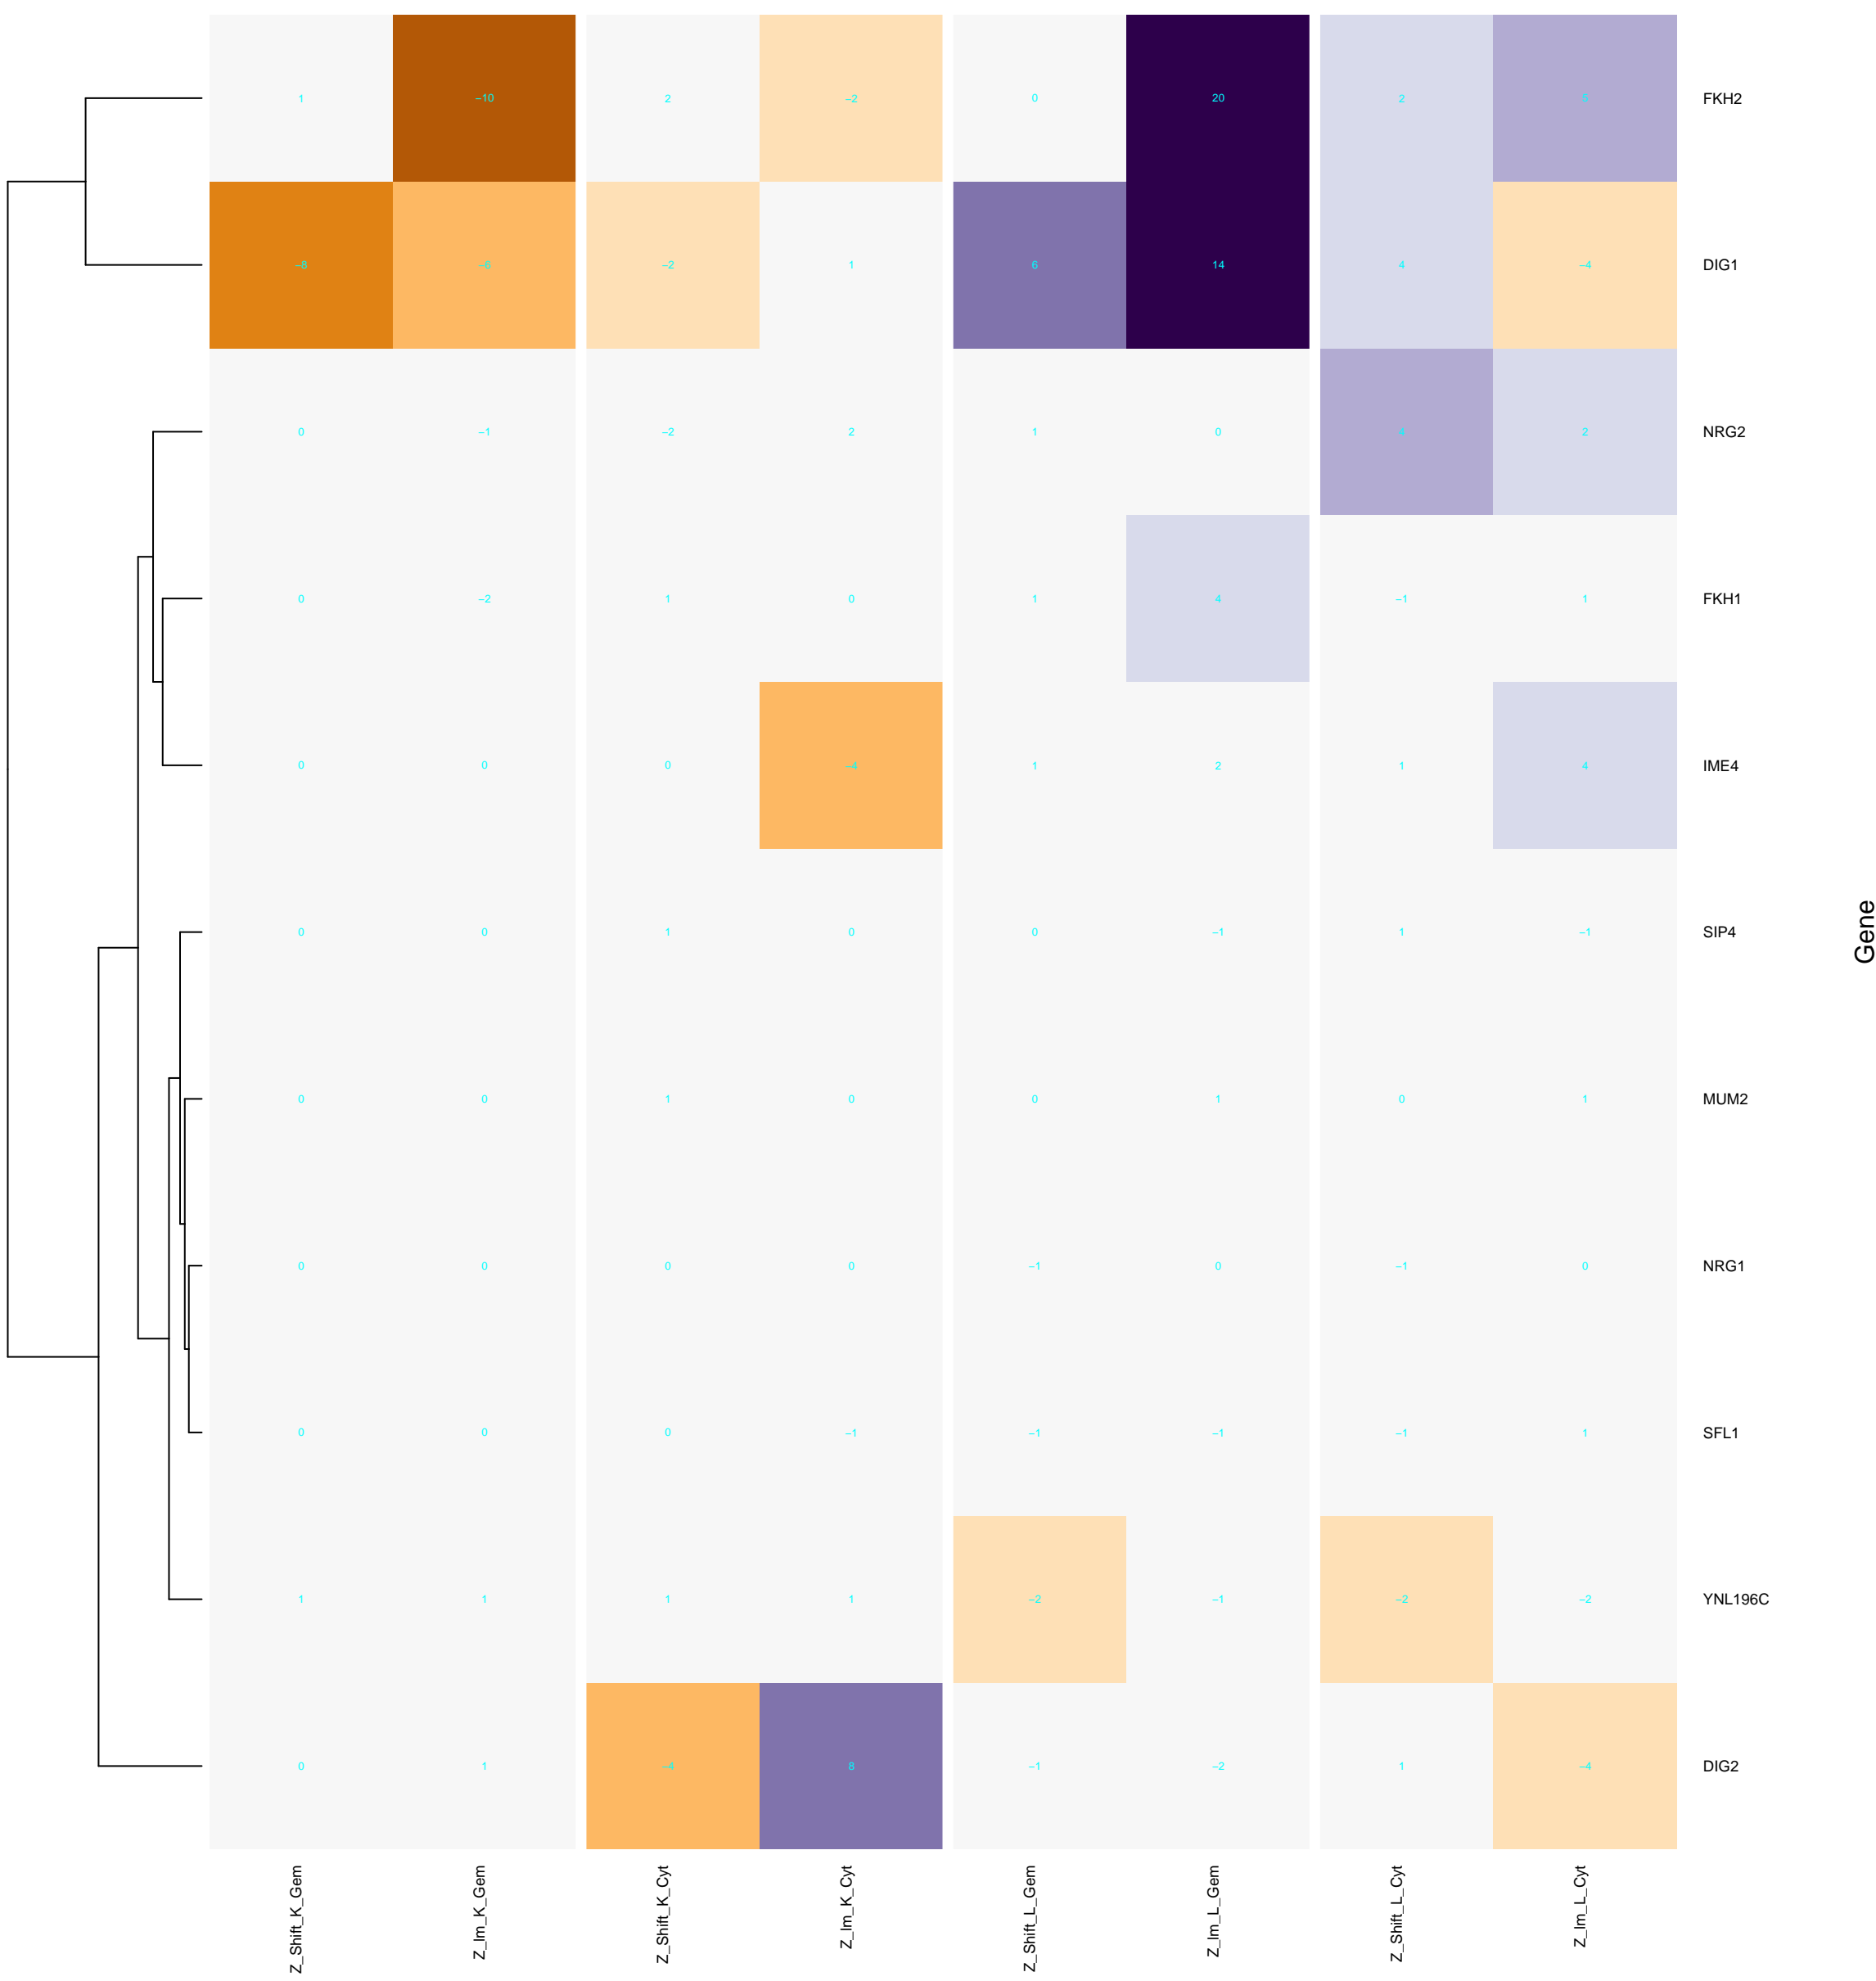

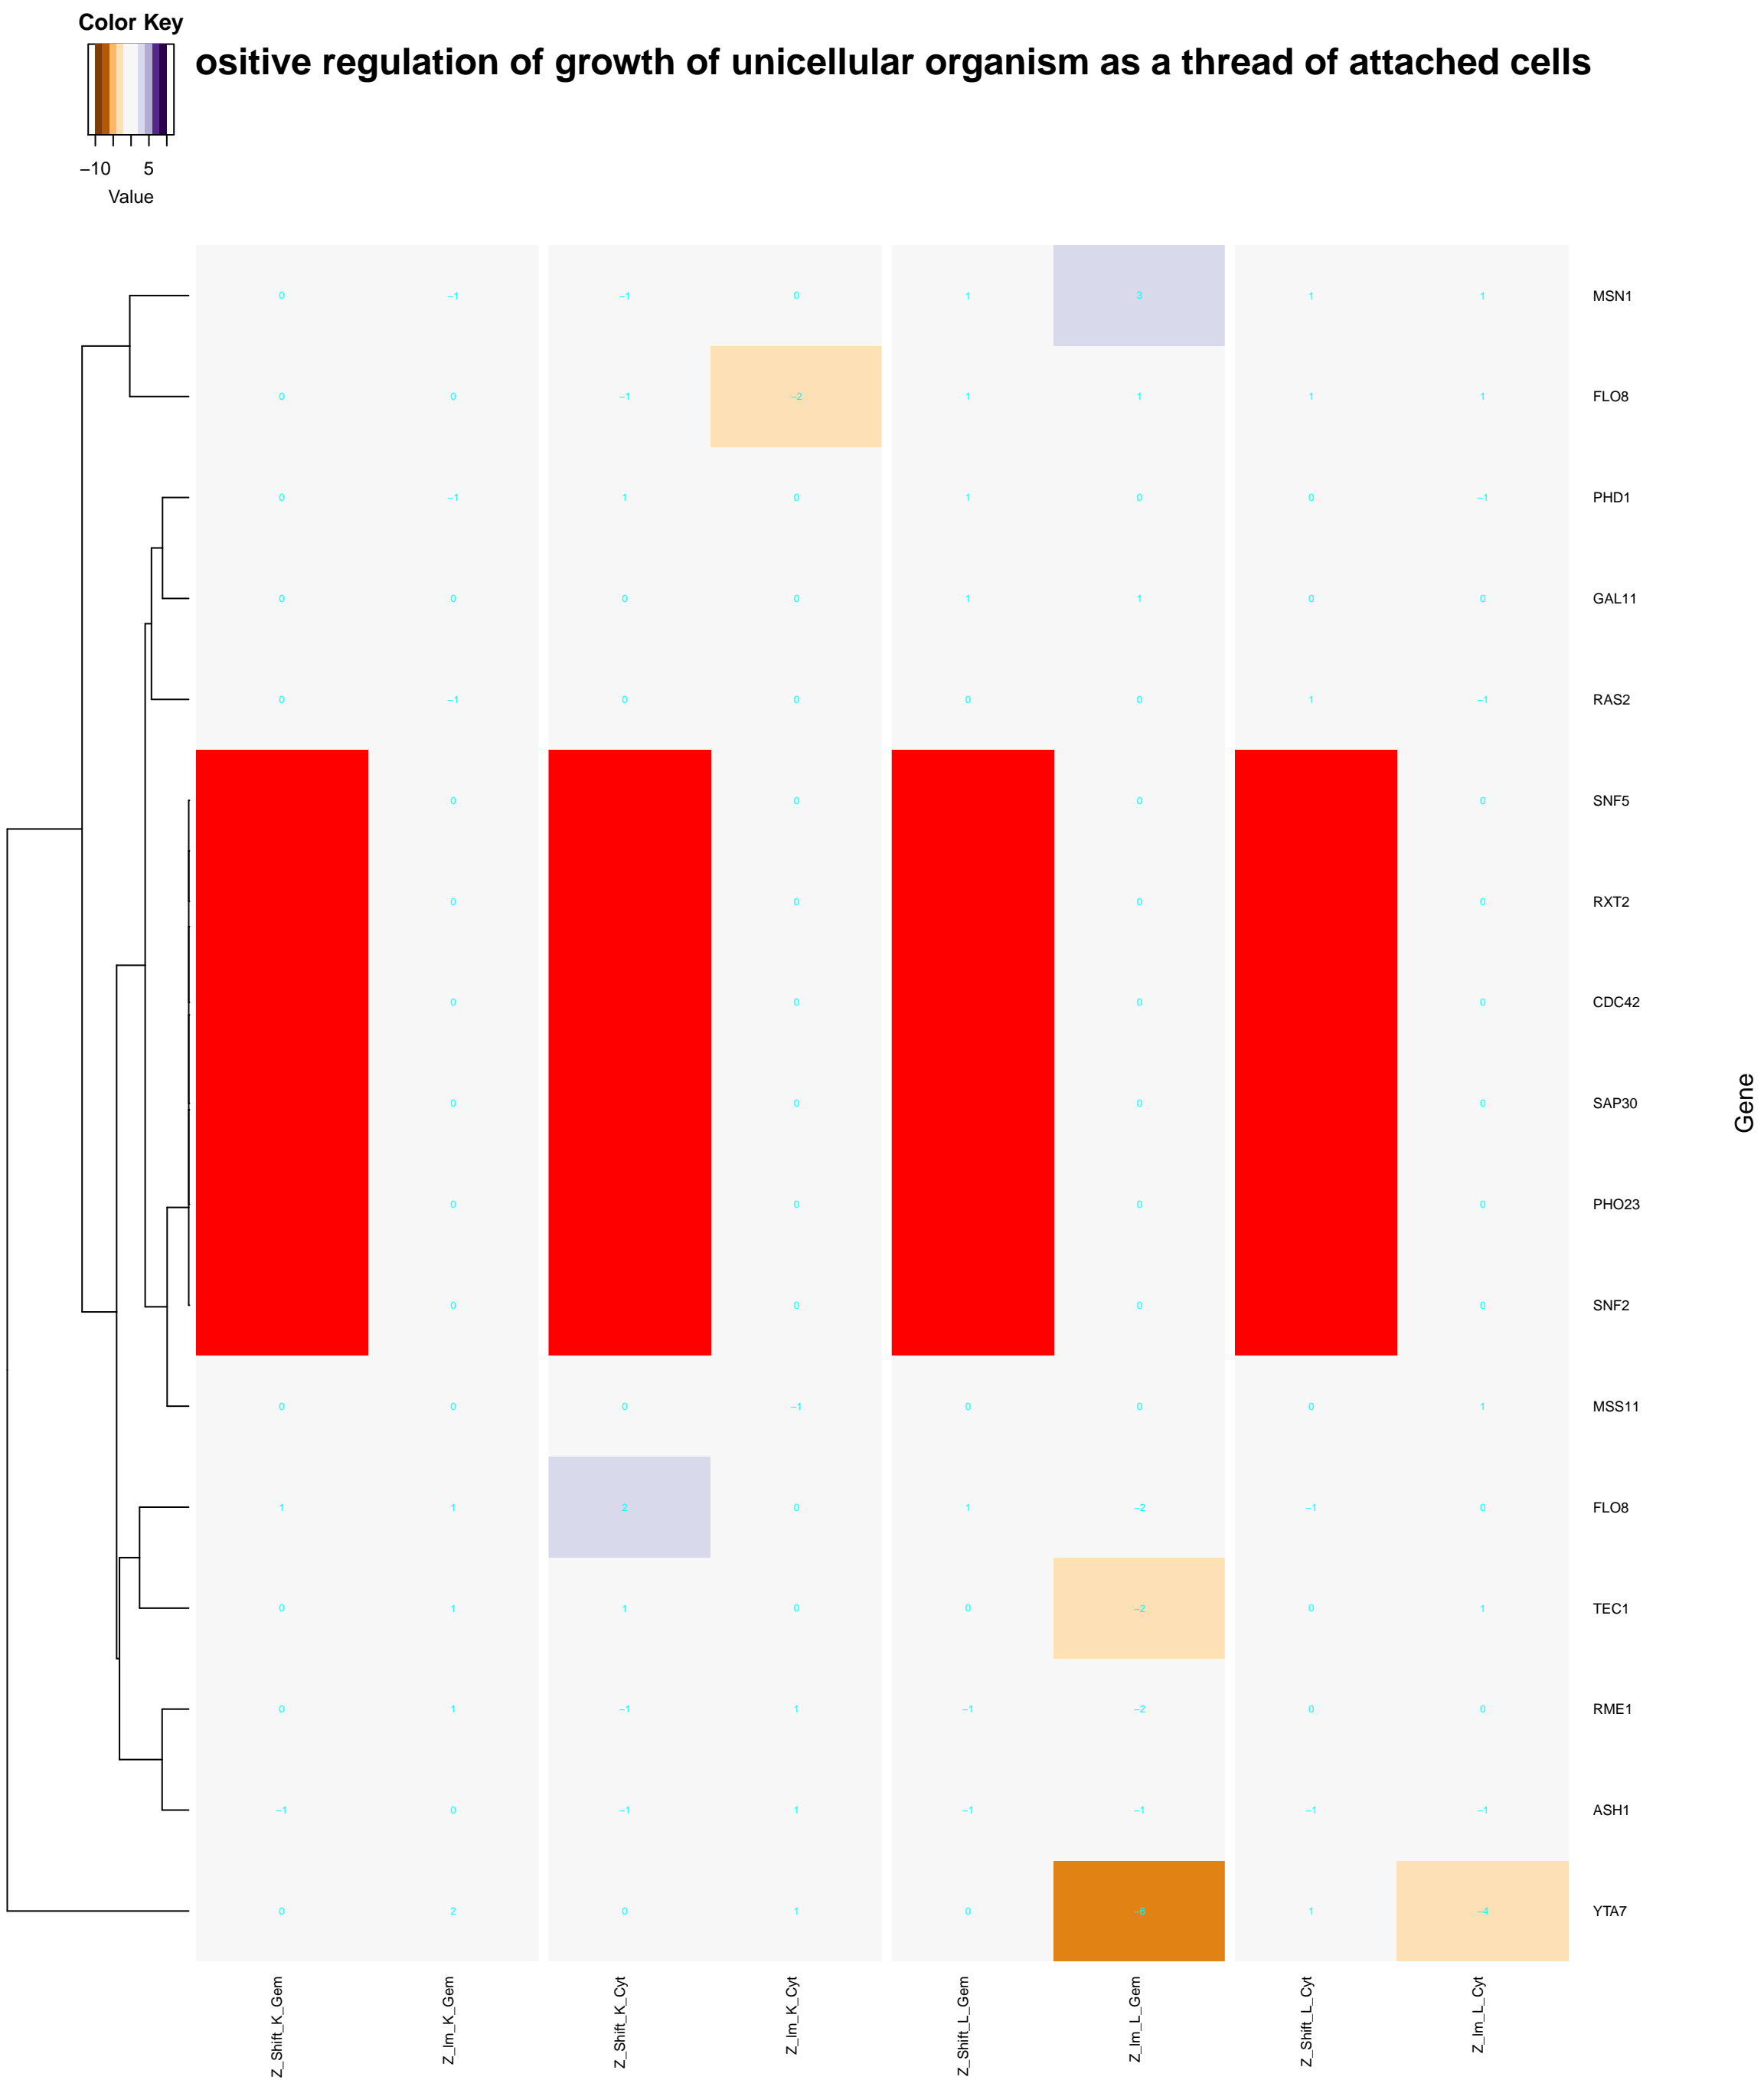

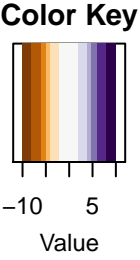

ation of filamentous growth of a population of unicellular organisms in response to starvation

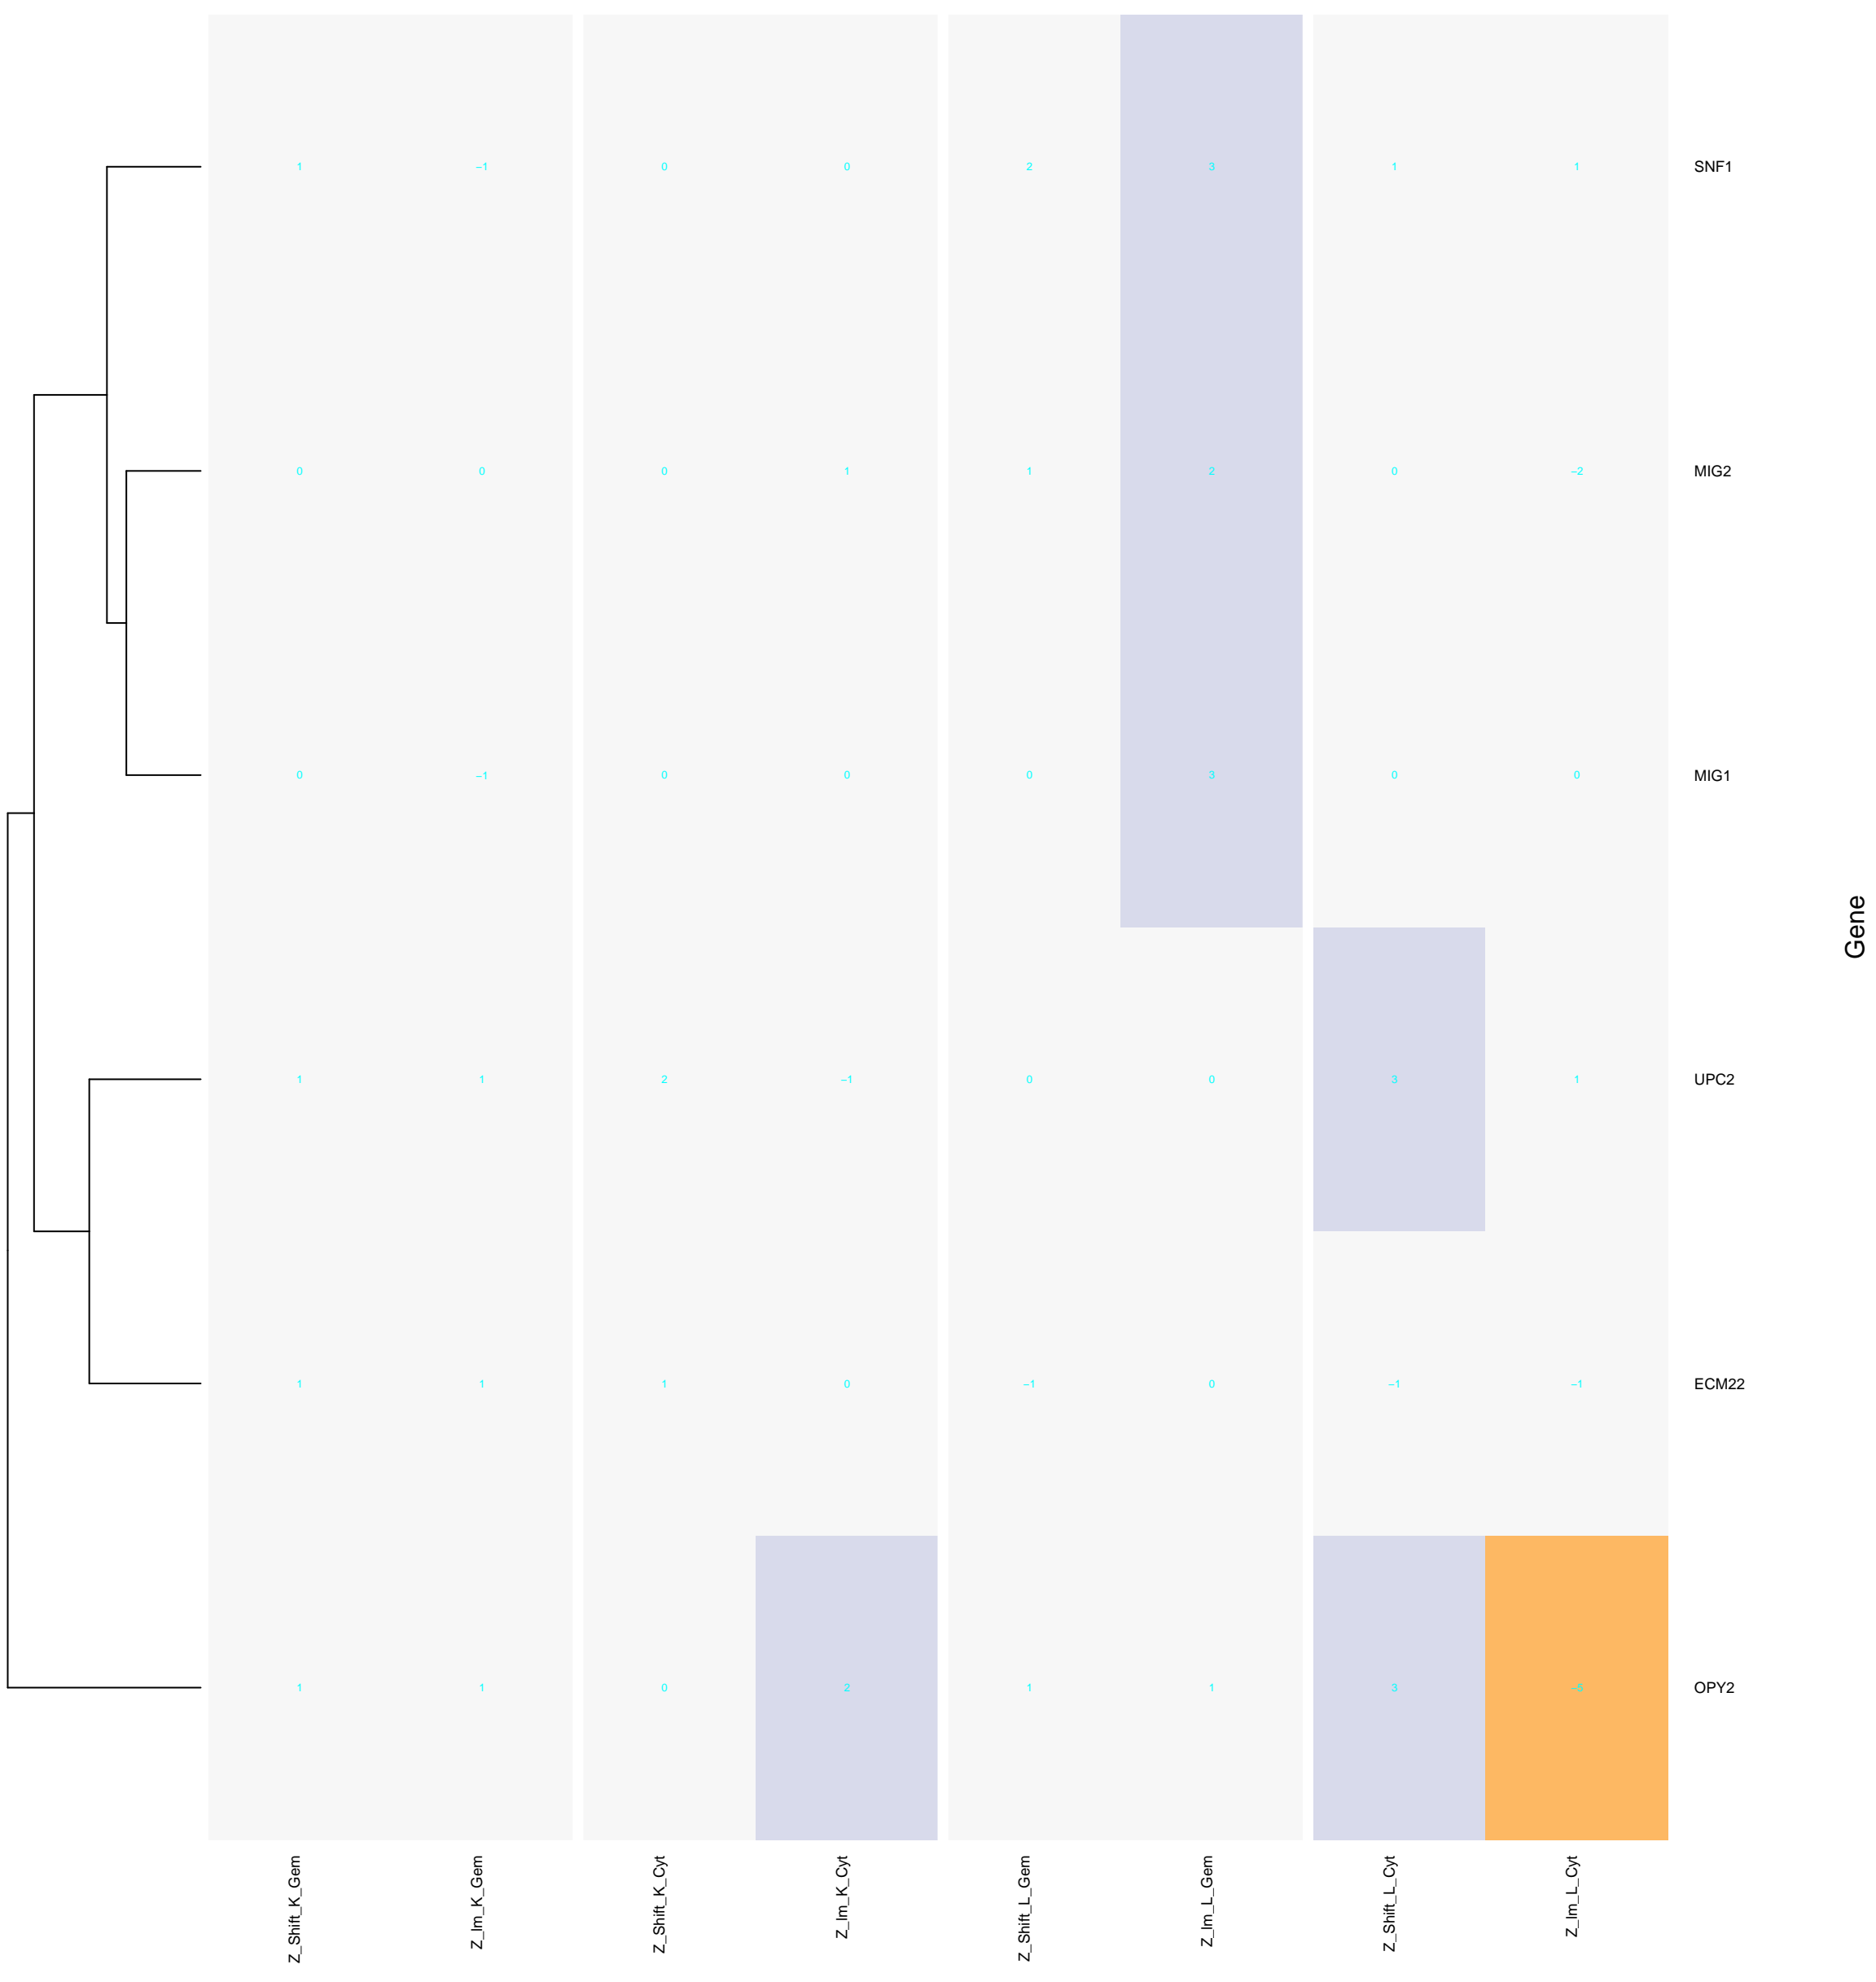

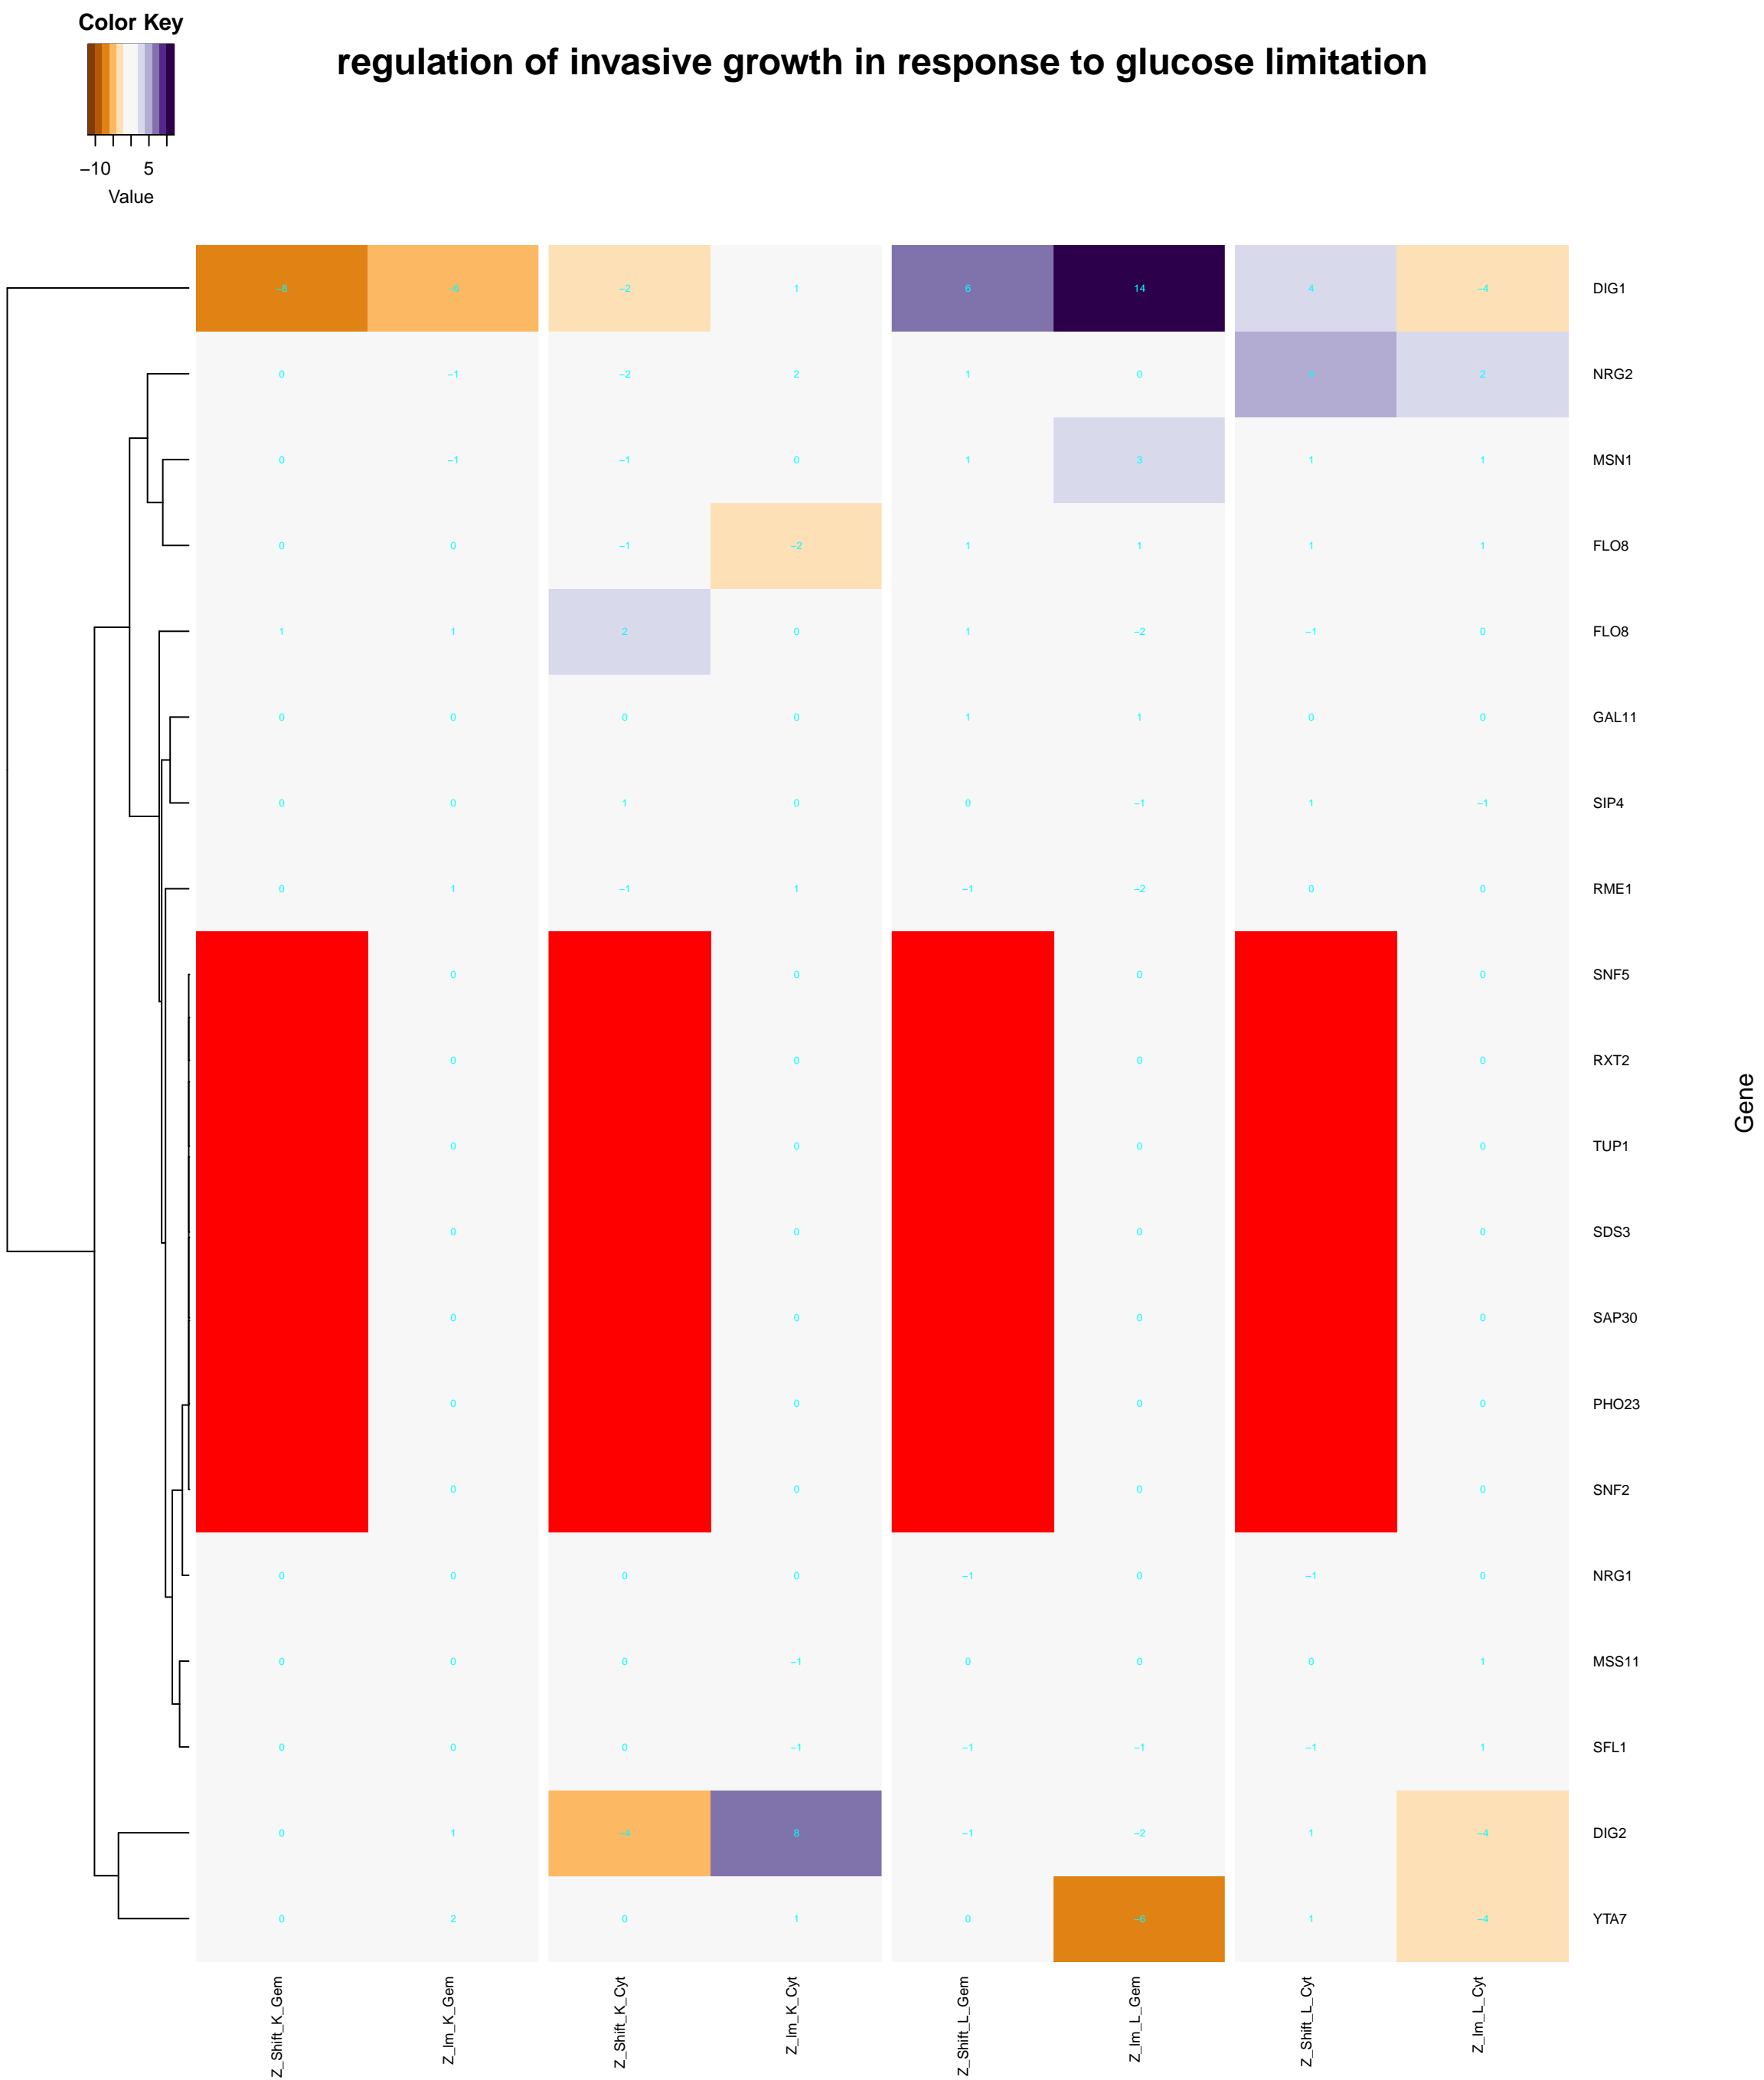





negative regulation of invasive growth in response to glucose limitation

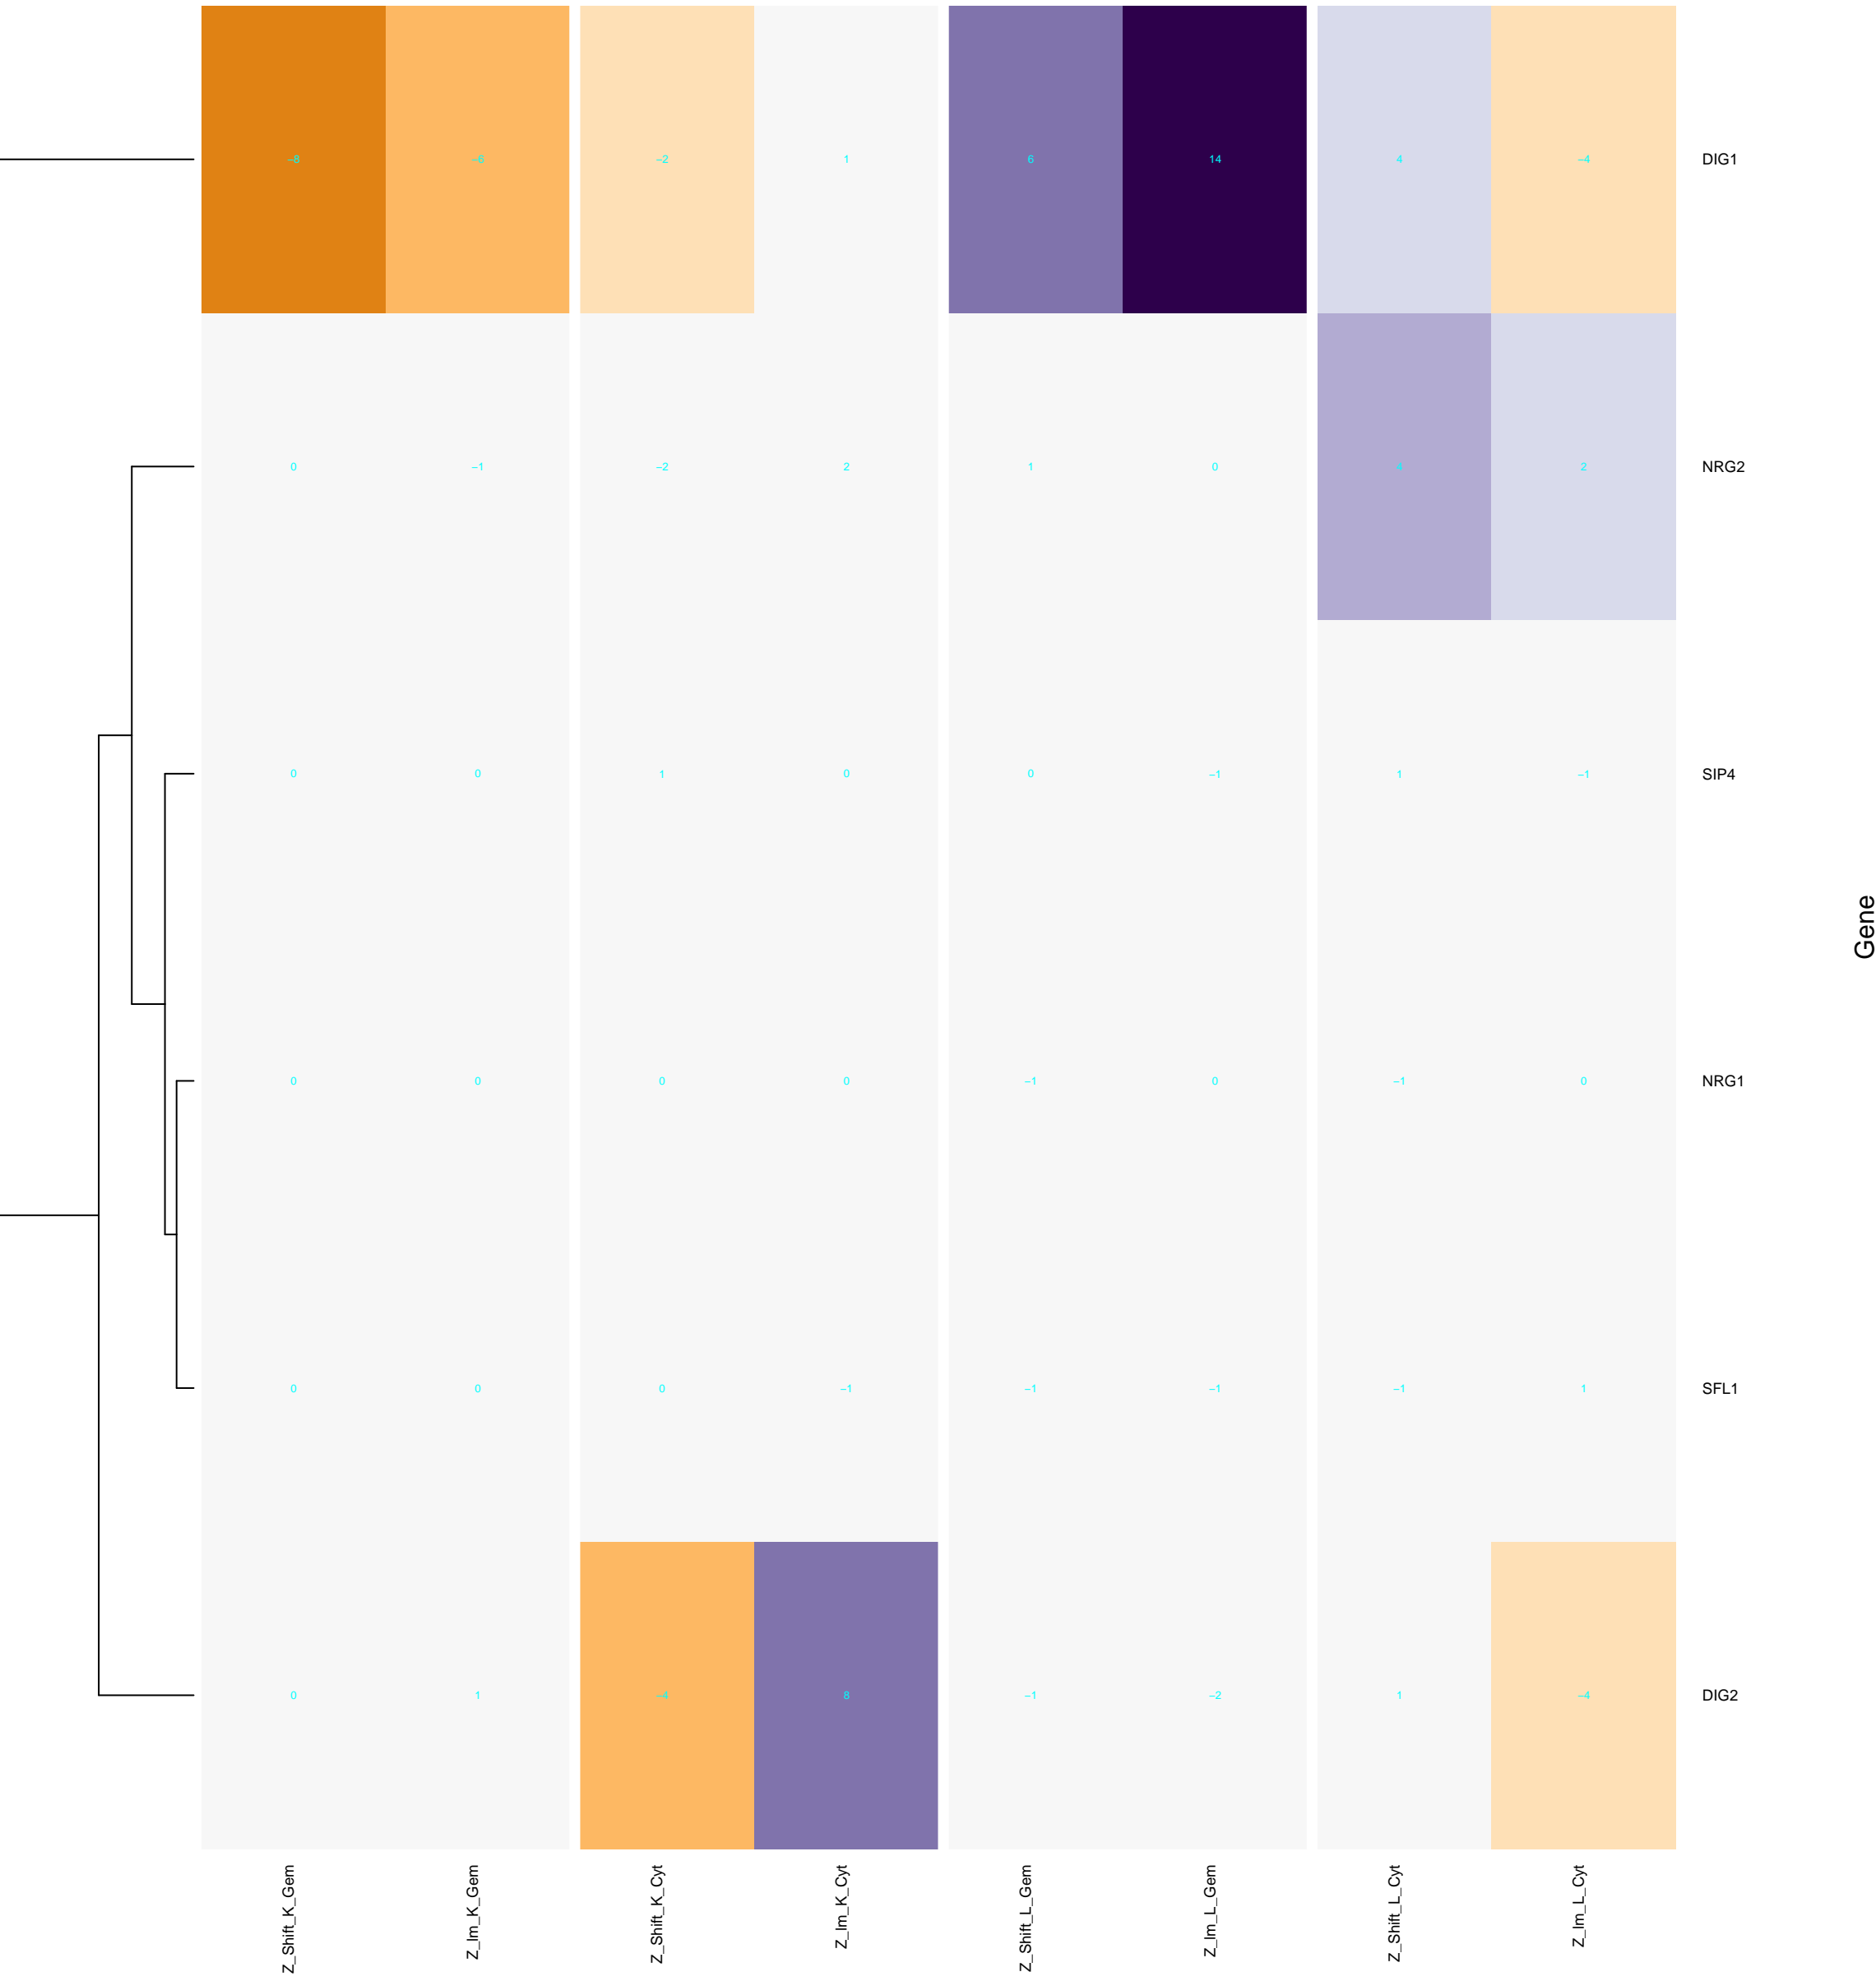



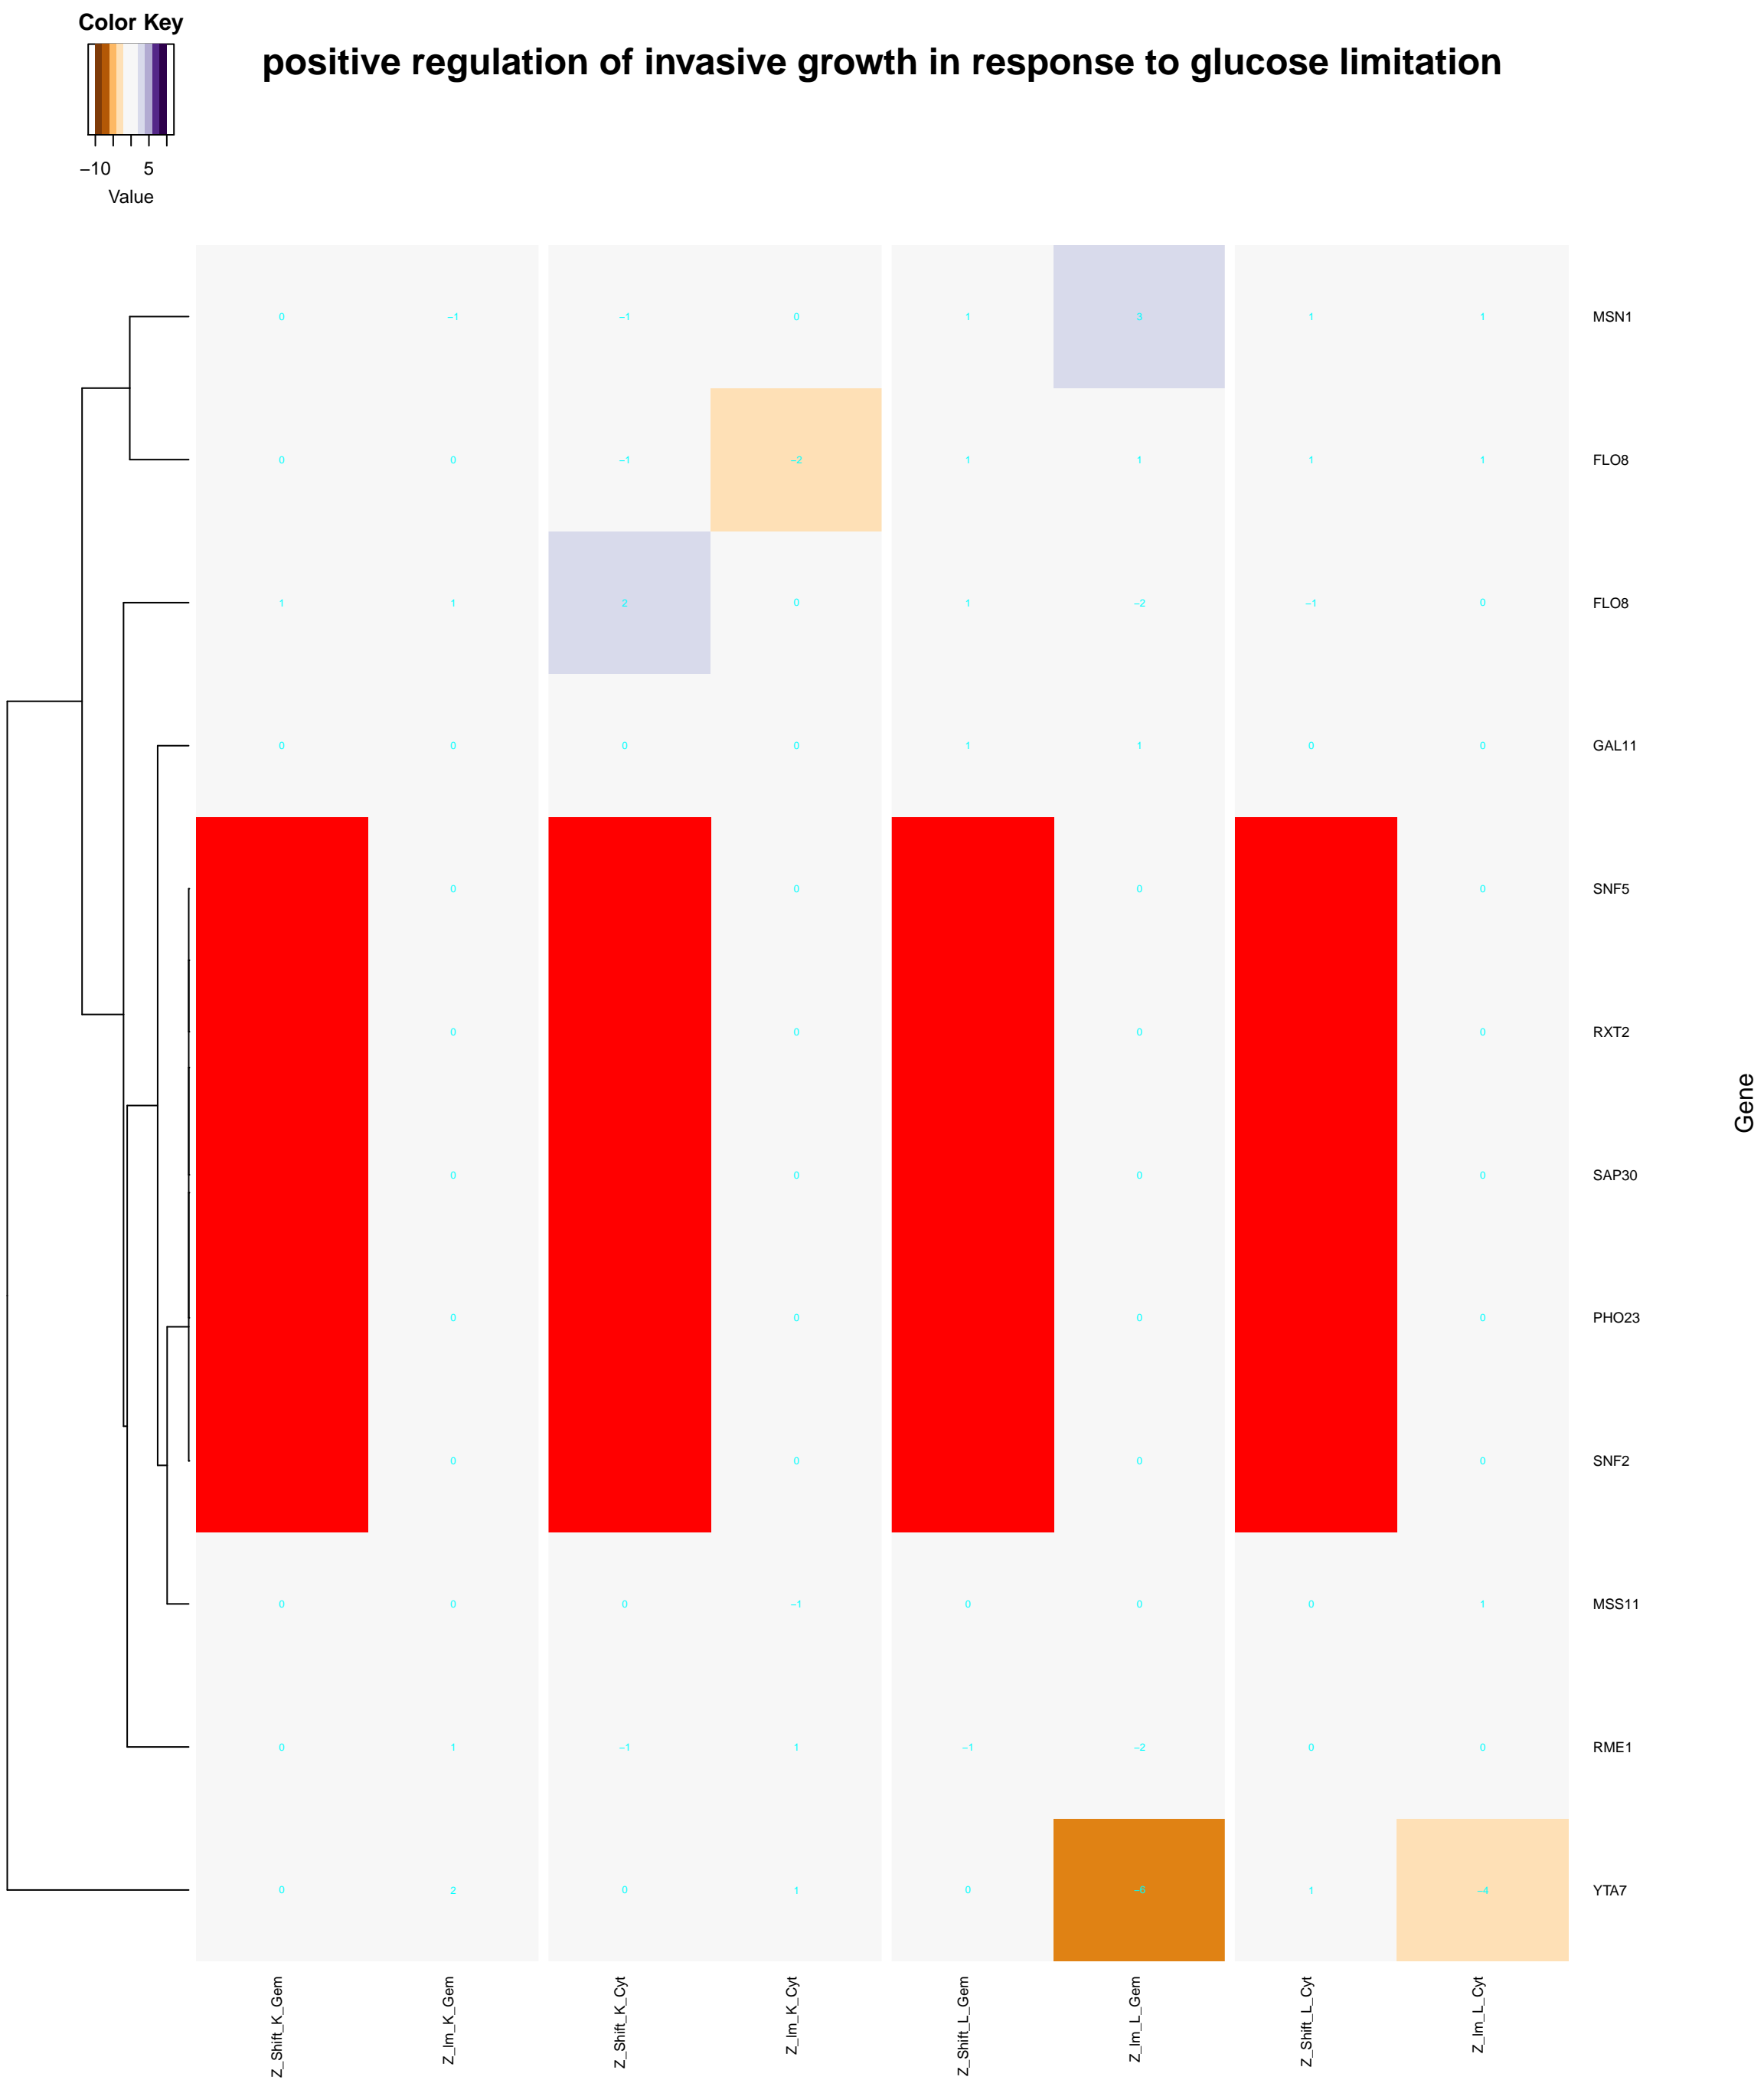



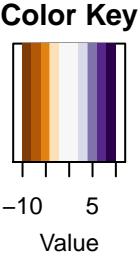

Growth in response to glucose limitation by negative regulation of transcription from RNA p

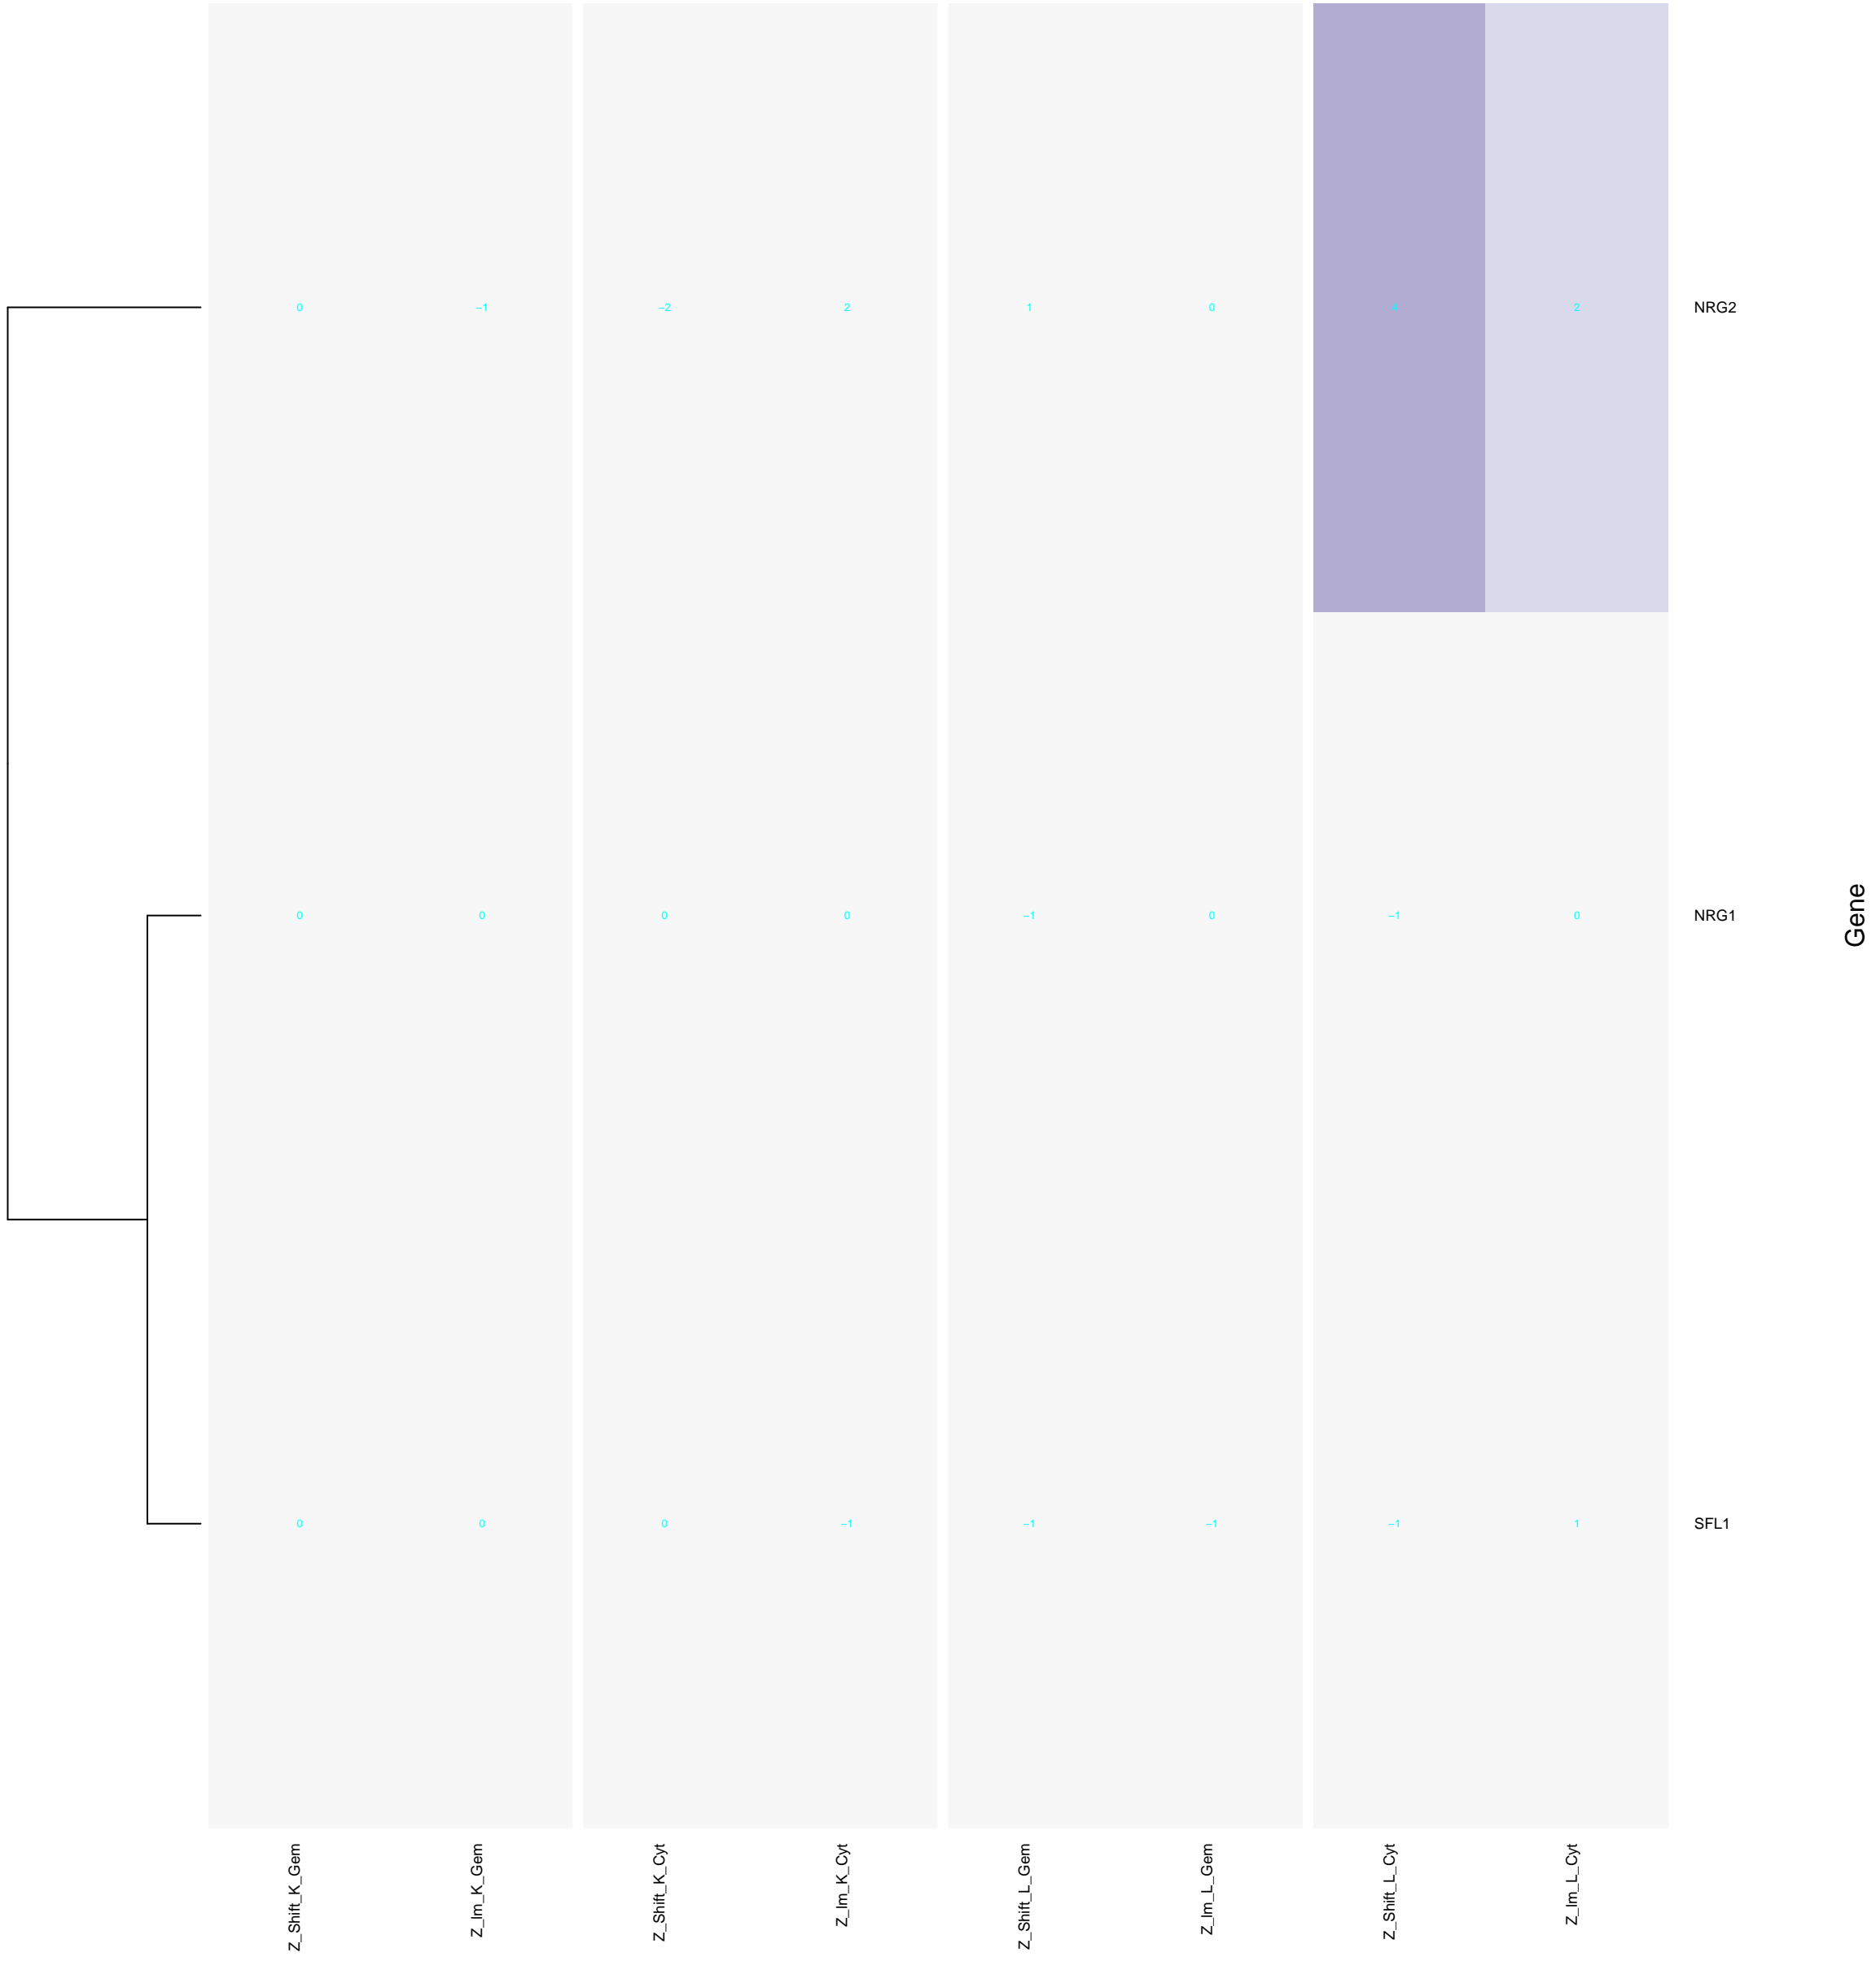

Gene

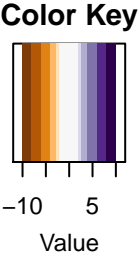

Growth in response to glucose limitation by positive regulation of transcription from RNA pol

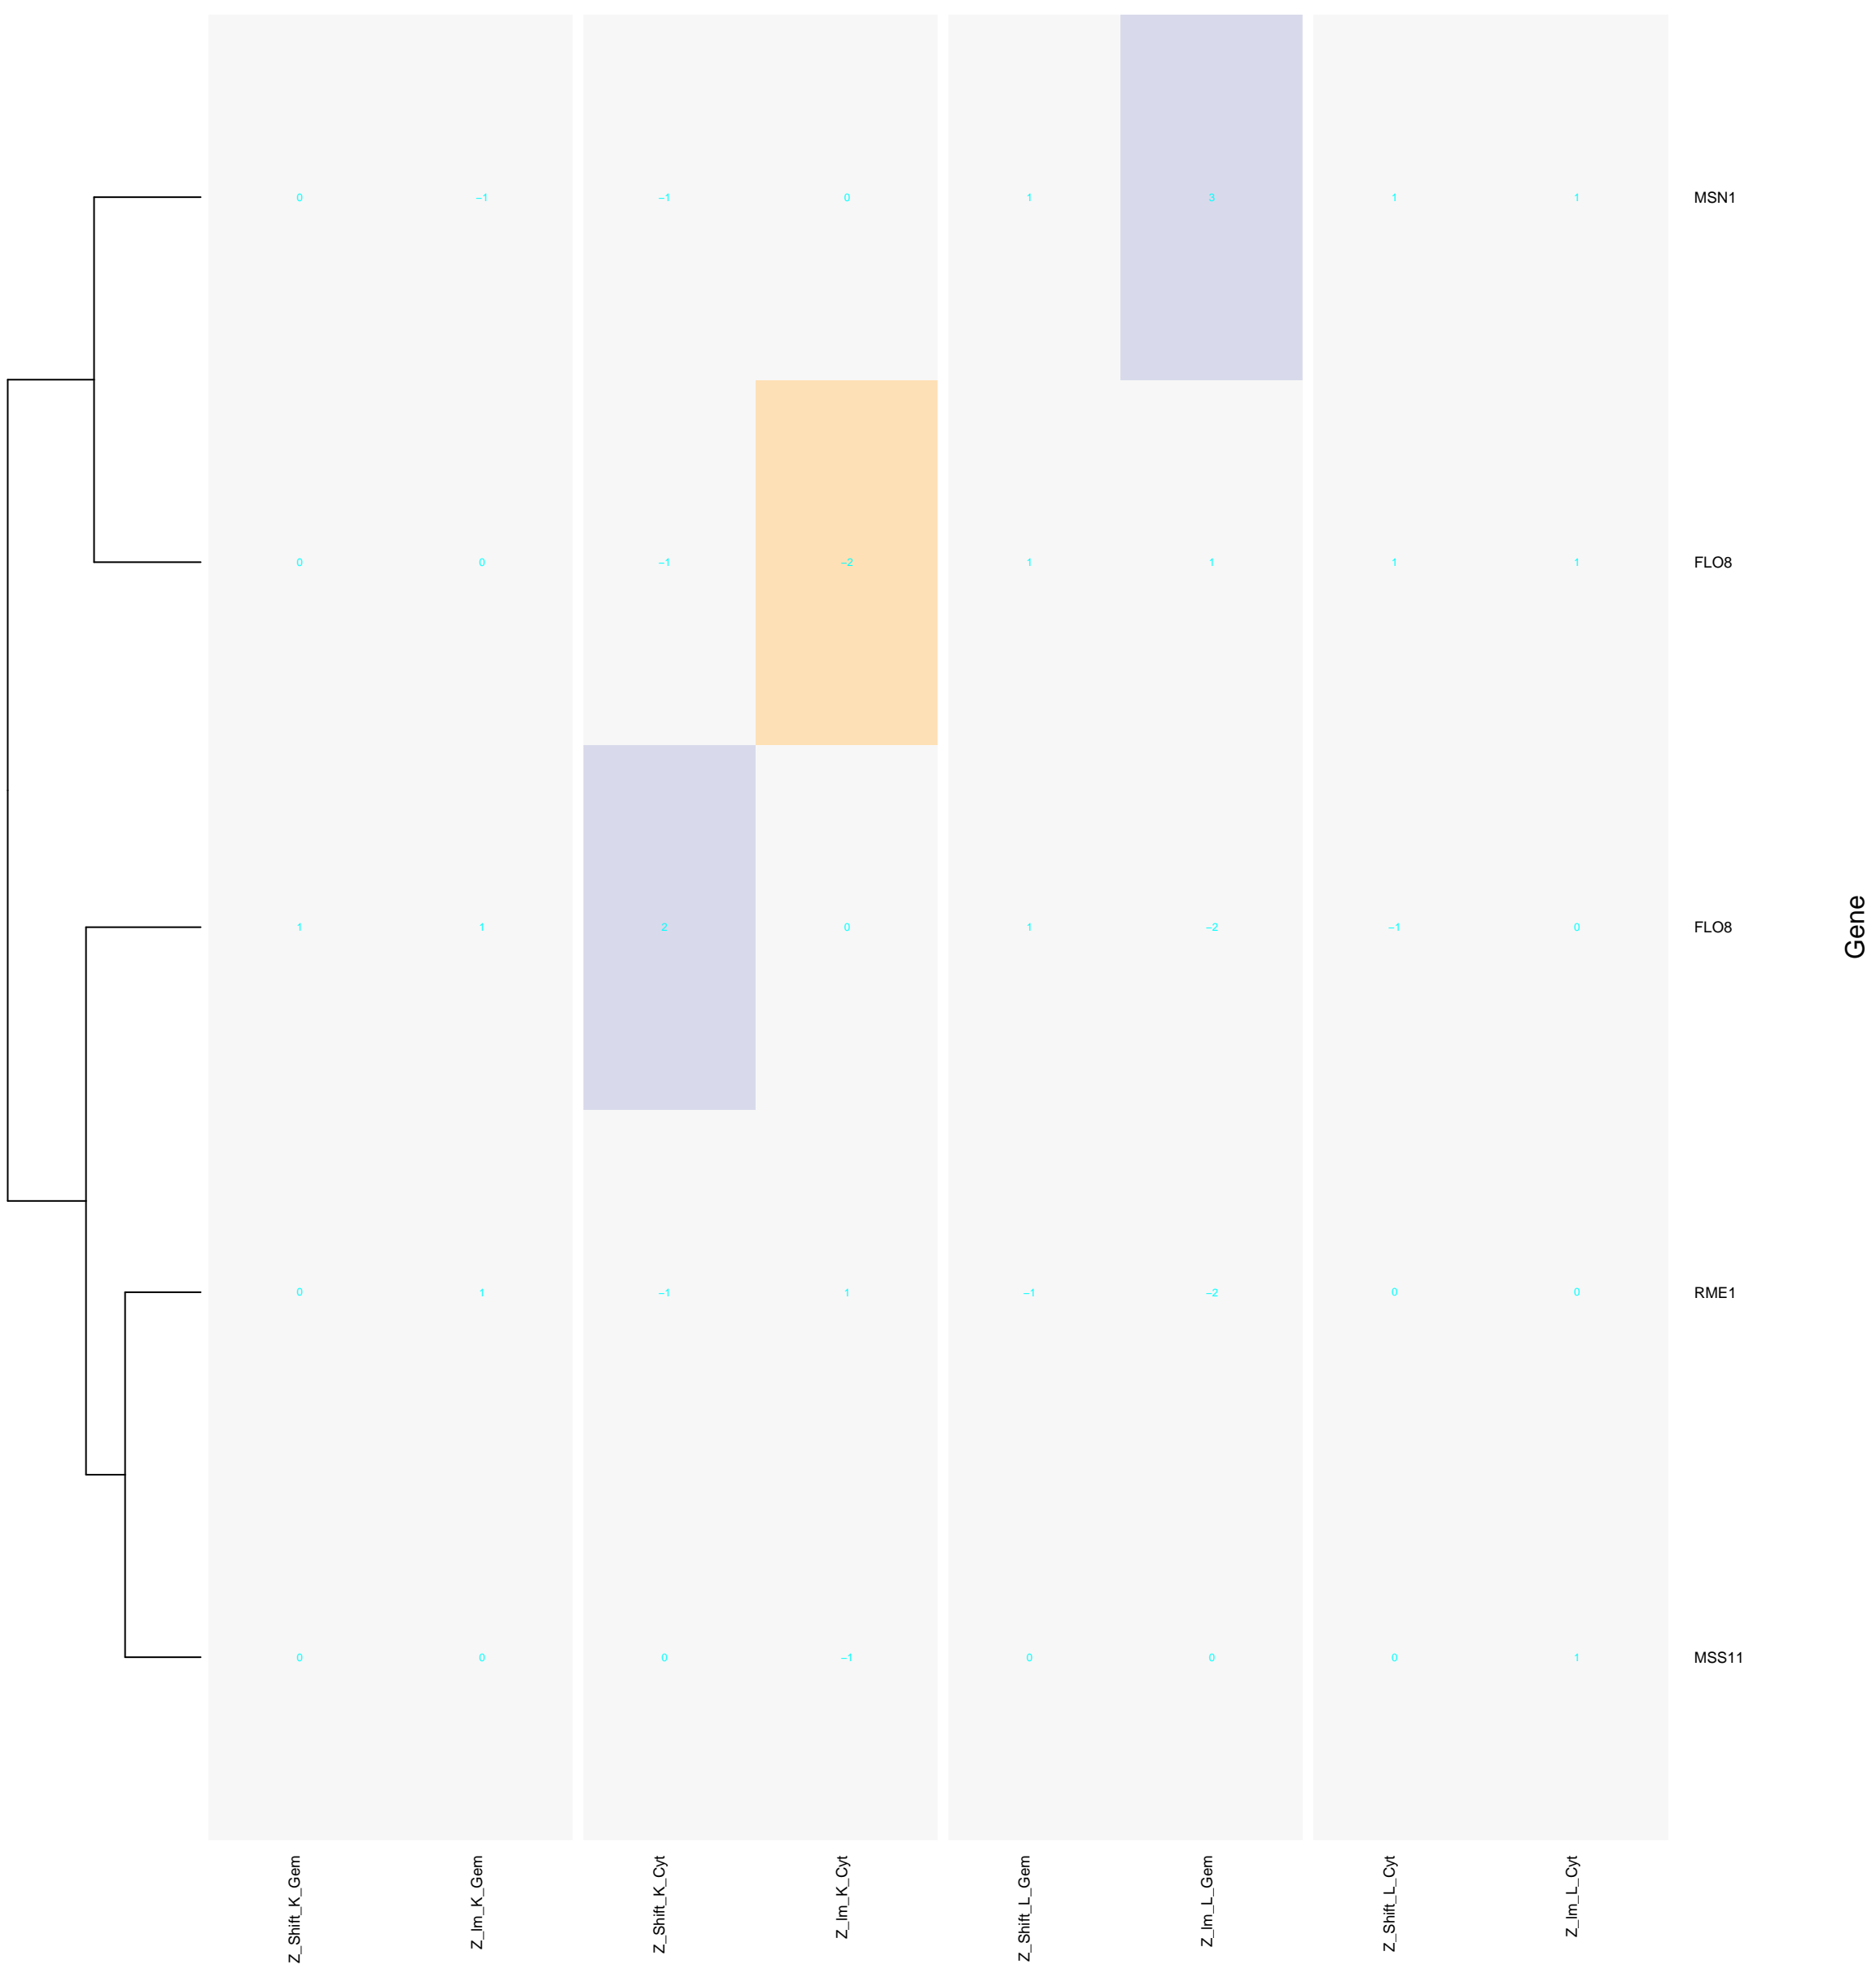



of pseudohyphal growth by positive regulation of transcription from RNA polymerase II pr

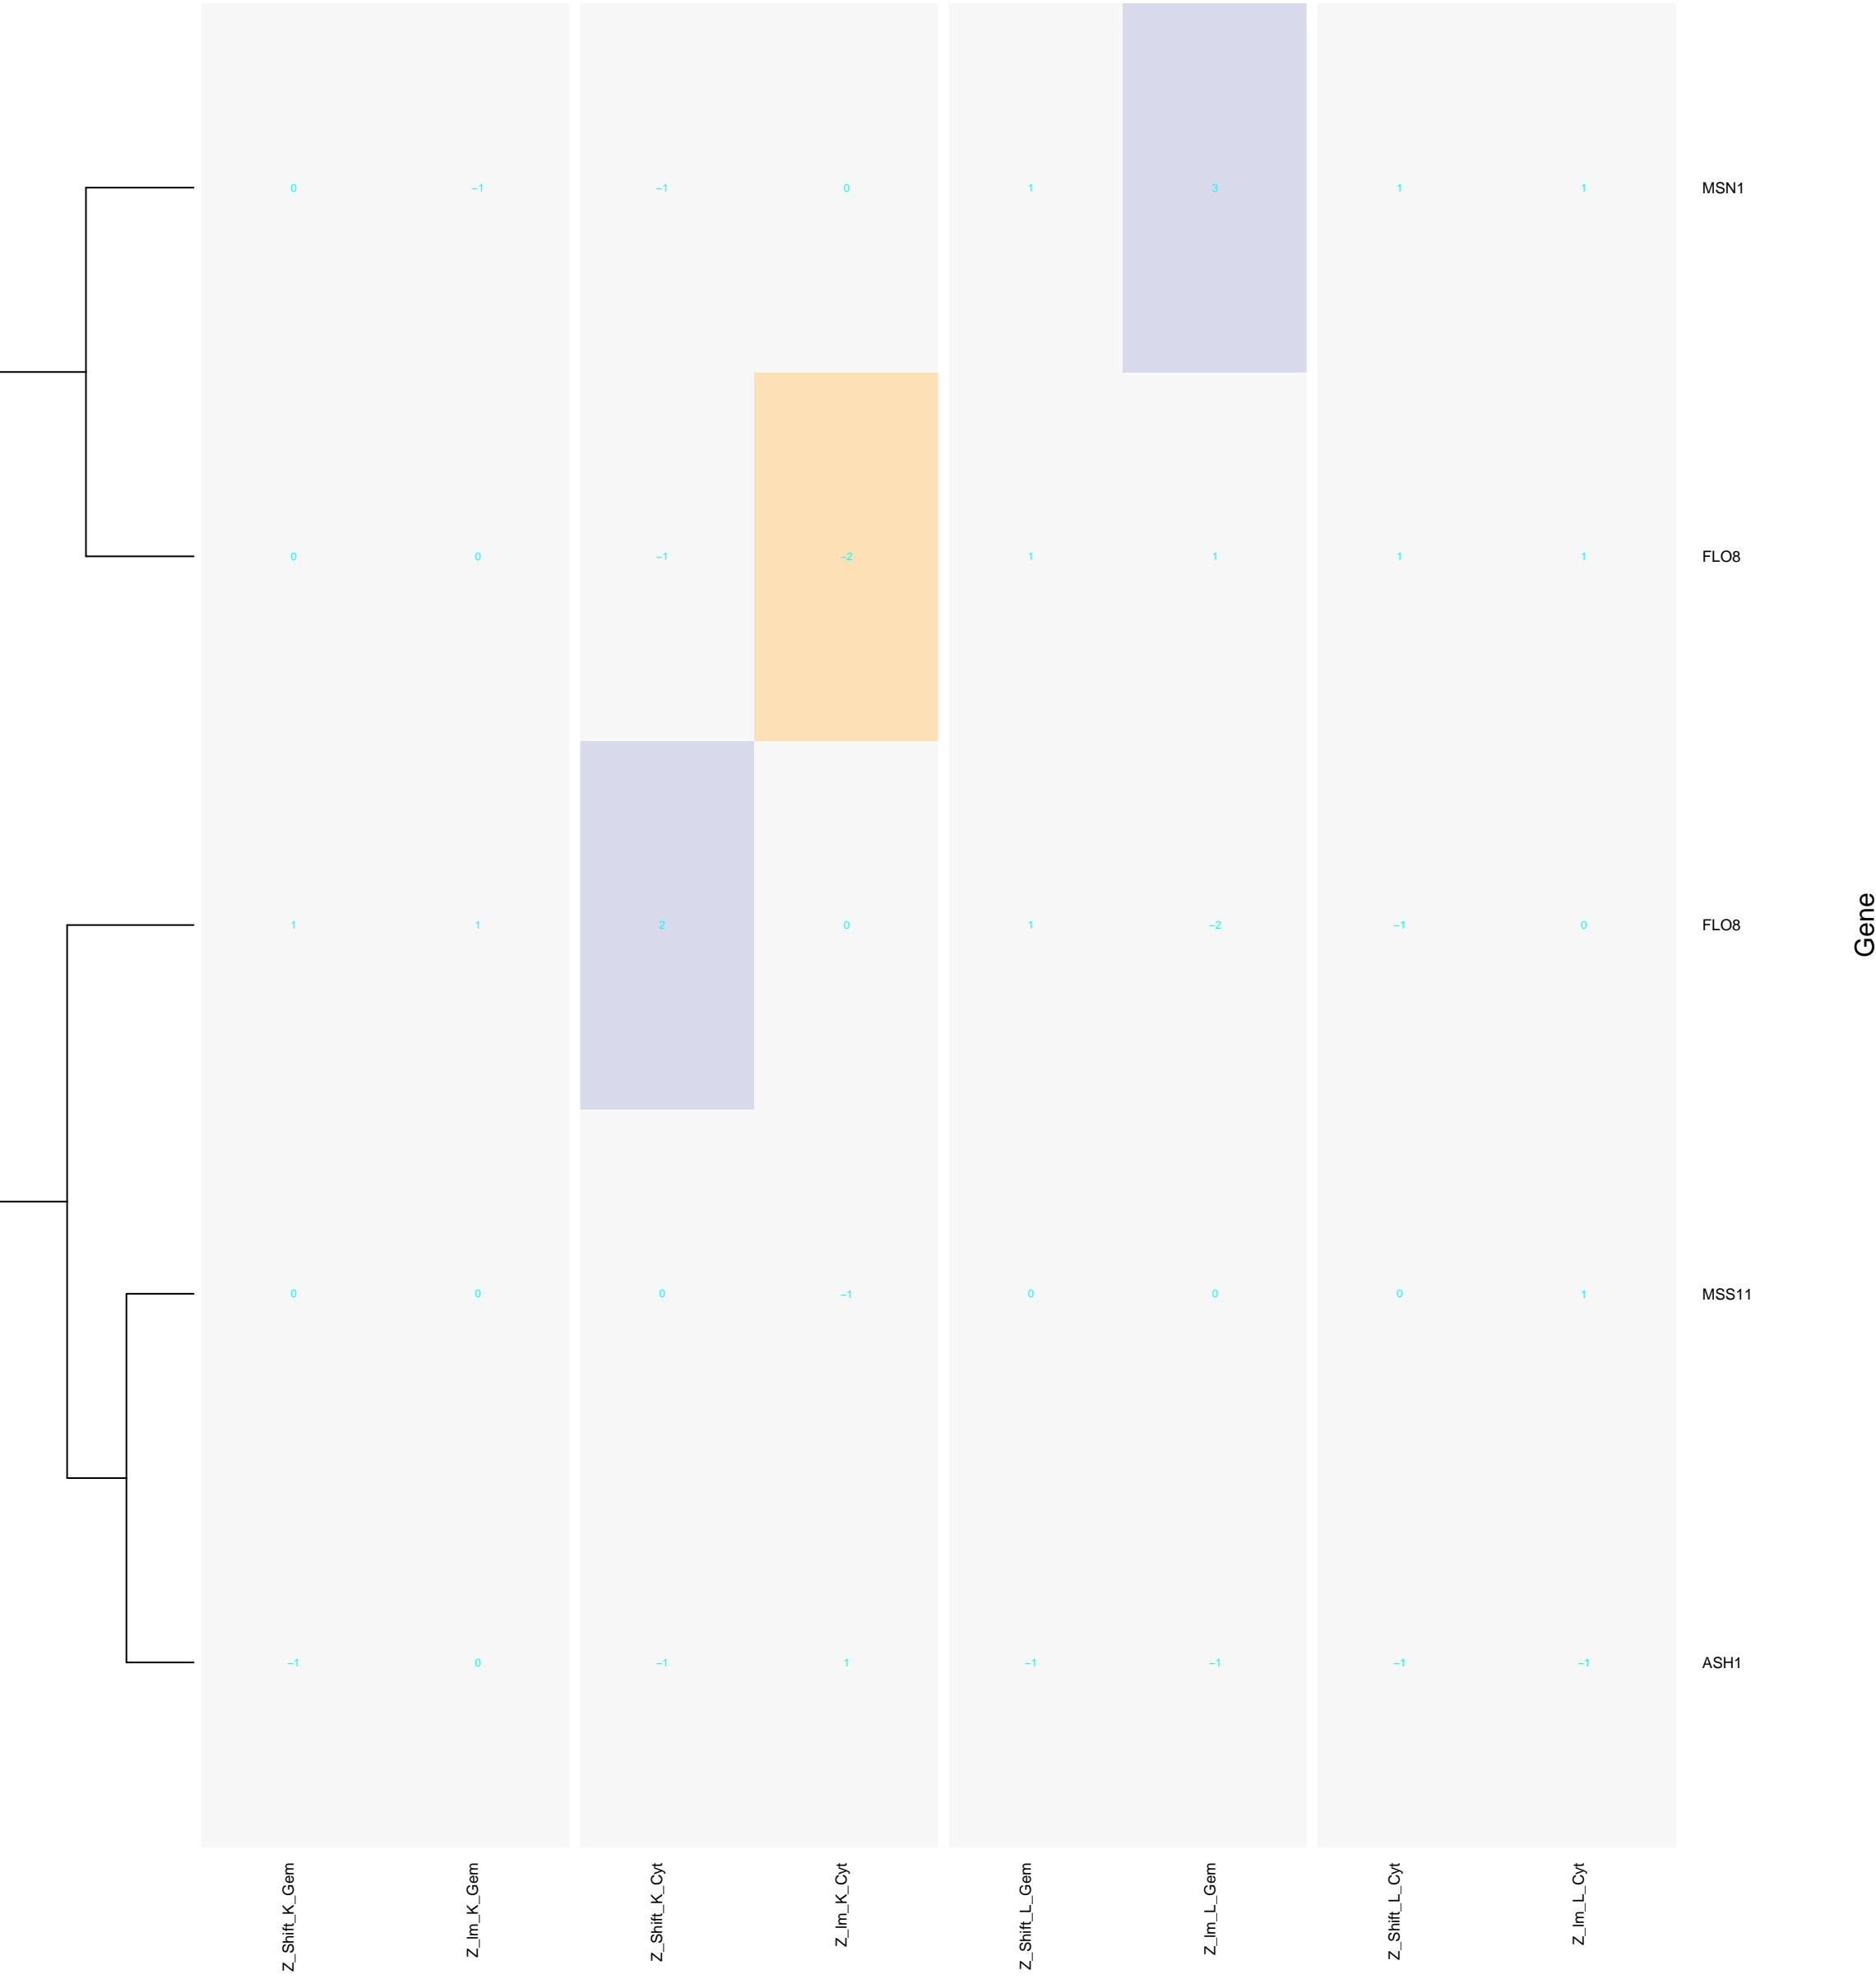

Supplement: s1 [file s1]
