# Supplementary material for: A Humanized Yeast Phenomic Model of Deoxycytidine Kinase to Predict Genetic Buffering of Nucleoside Analog Cytotoxicity
Source: MDPI journal article supplement (doi:10.3390/genes10100770), 2019-09-30

Color Key

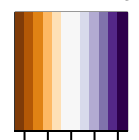

-10 5  
Value

regulation of vesicle-mediated transport

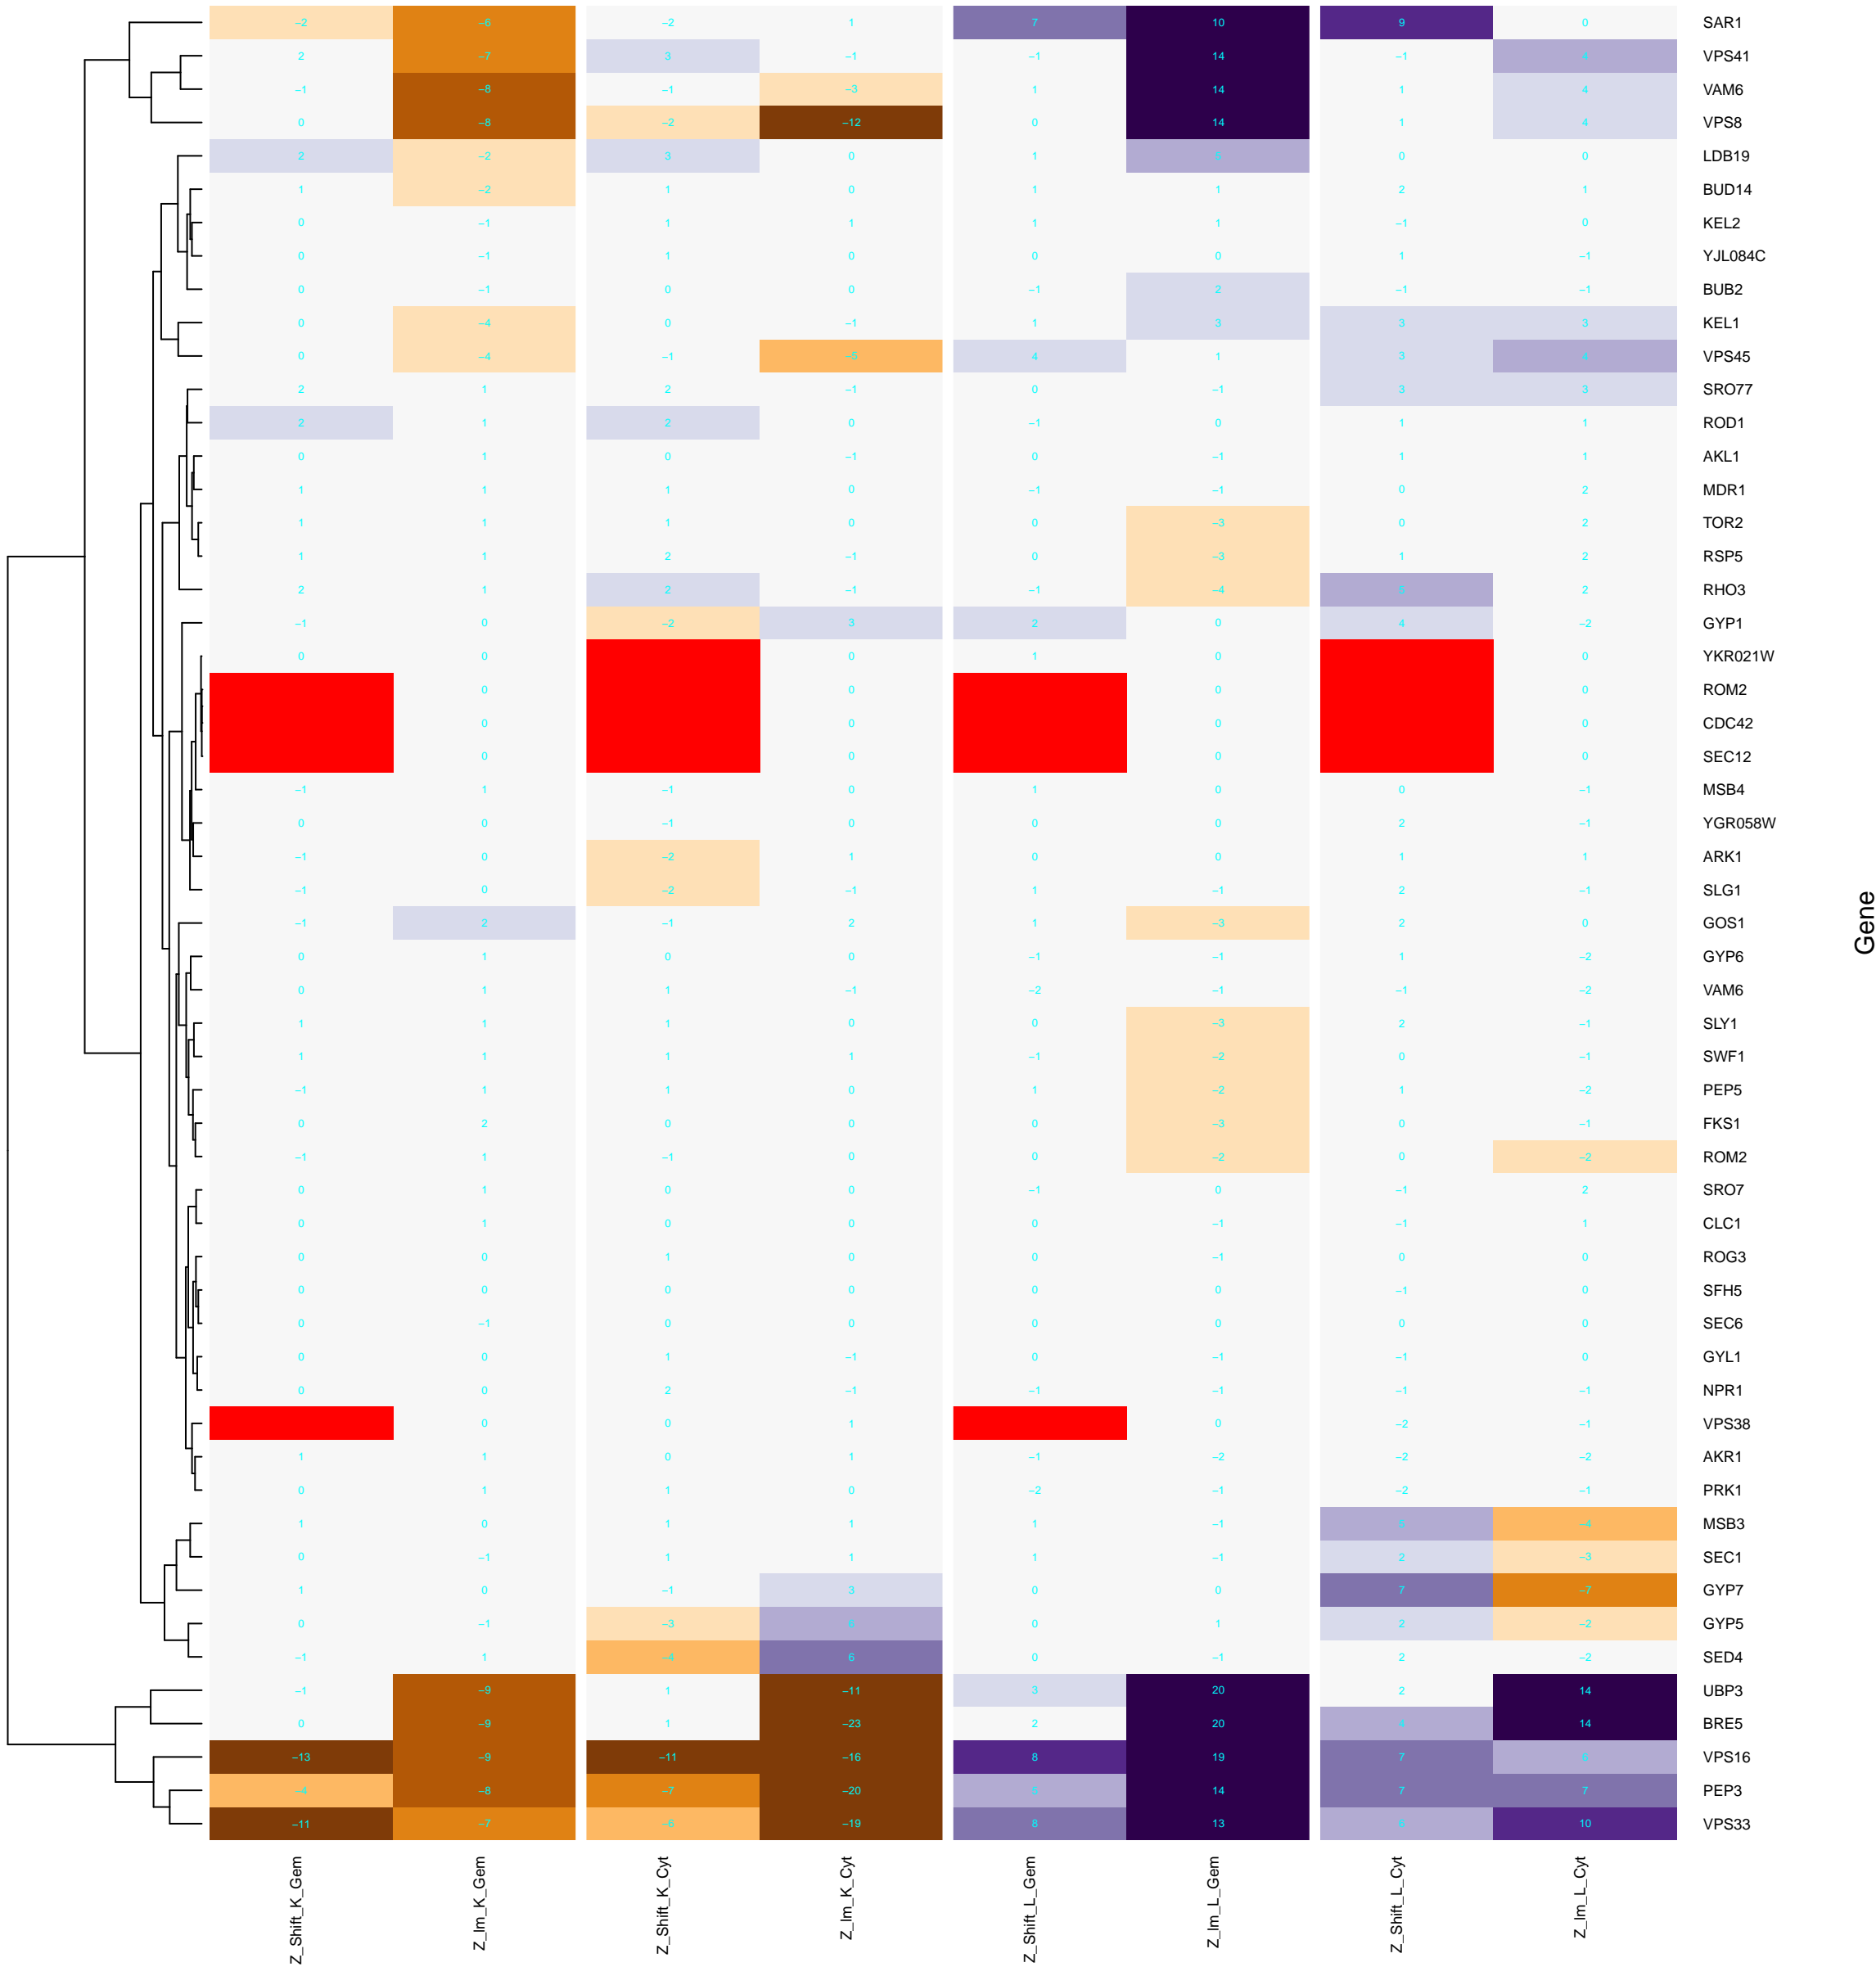

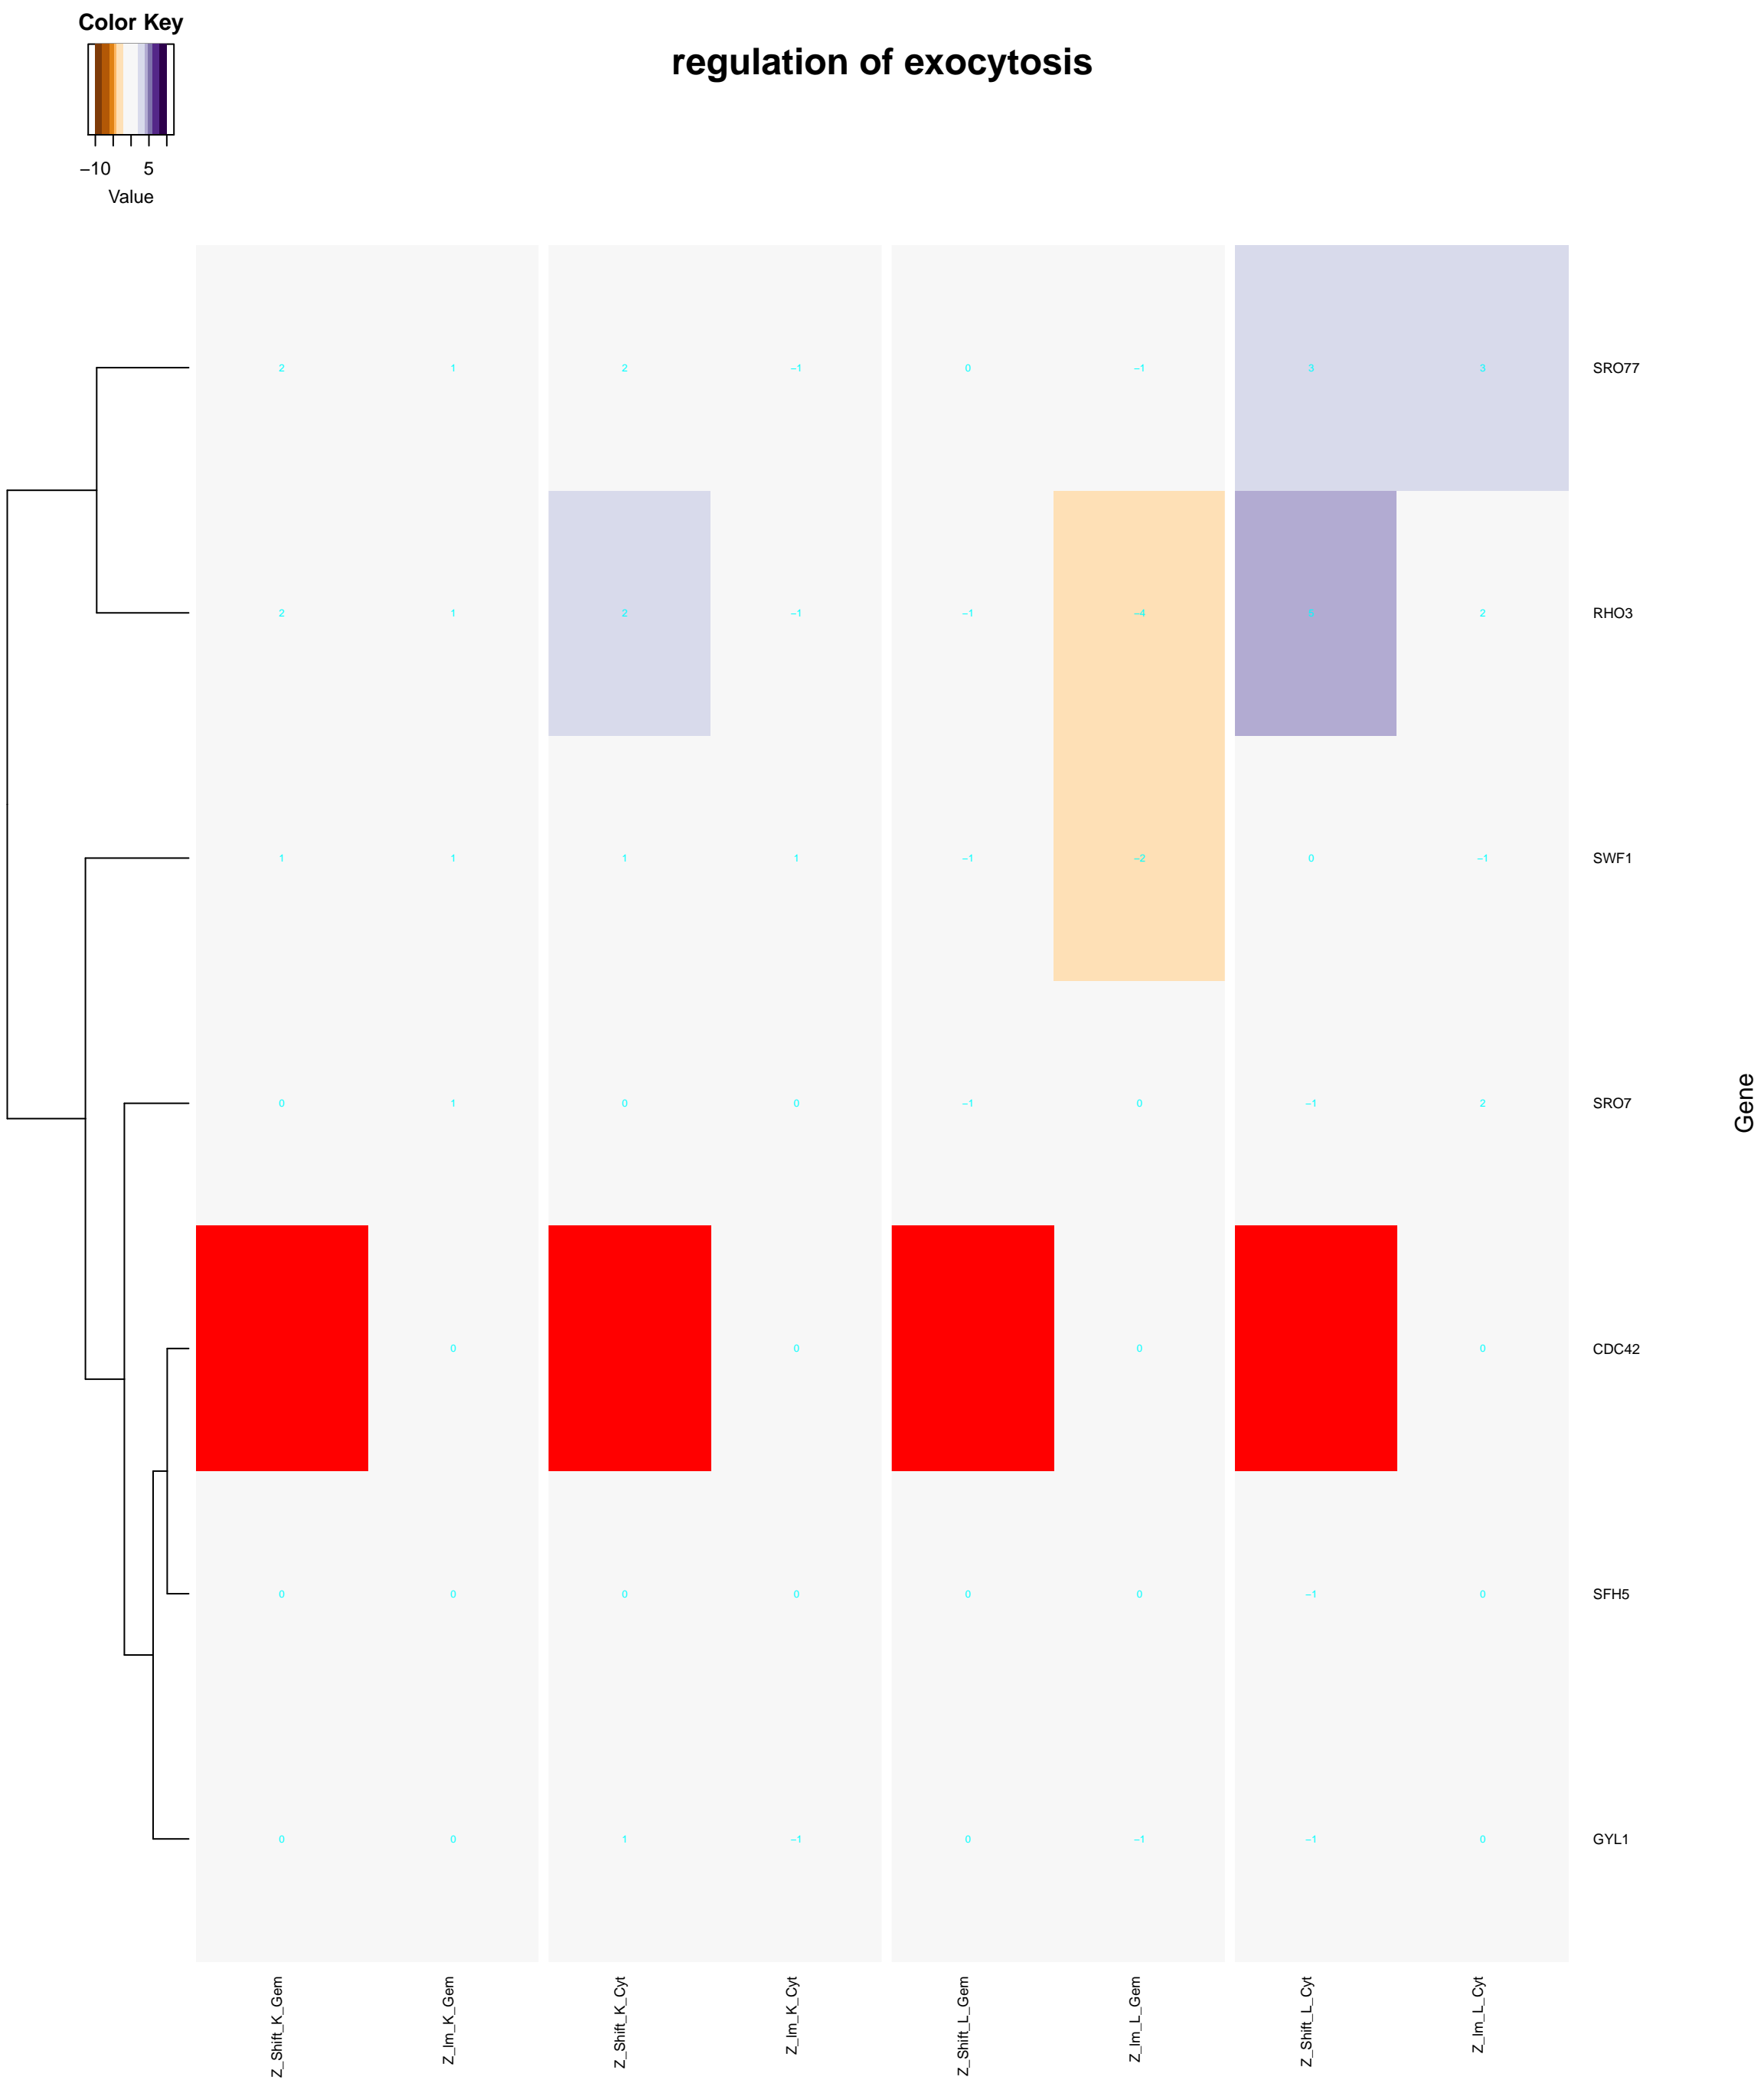

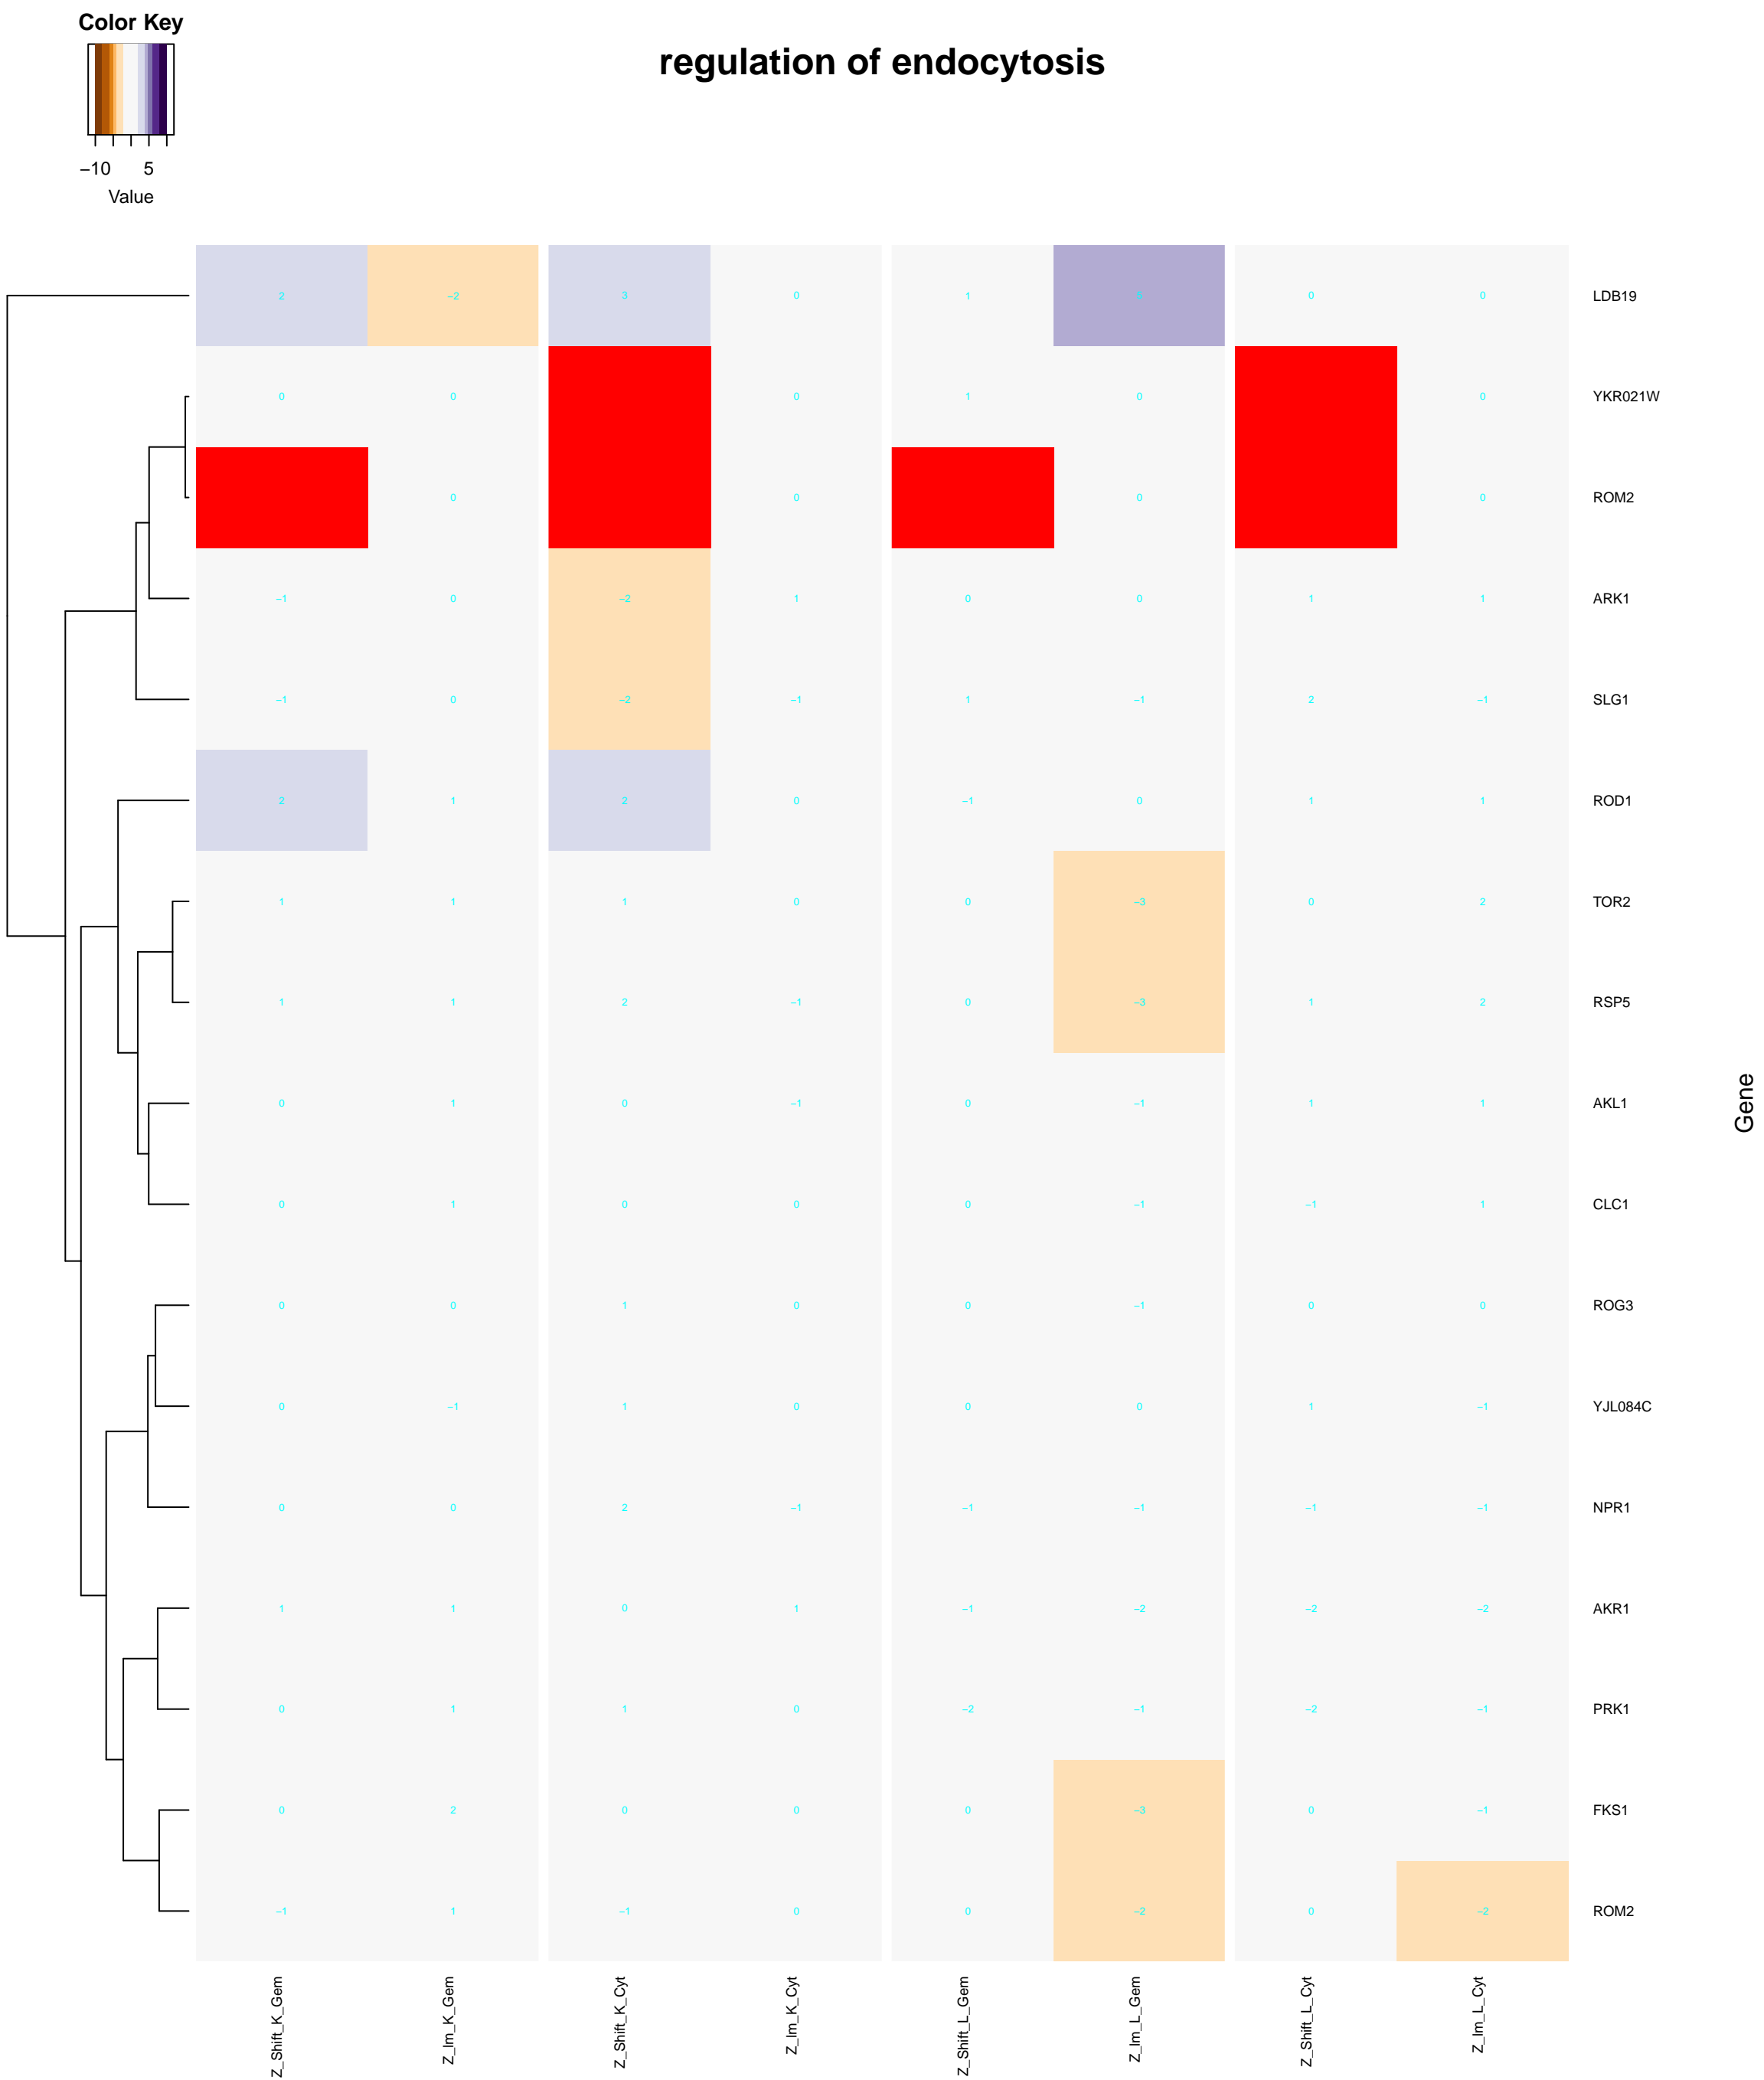

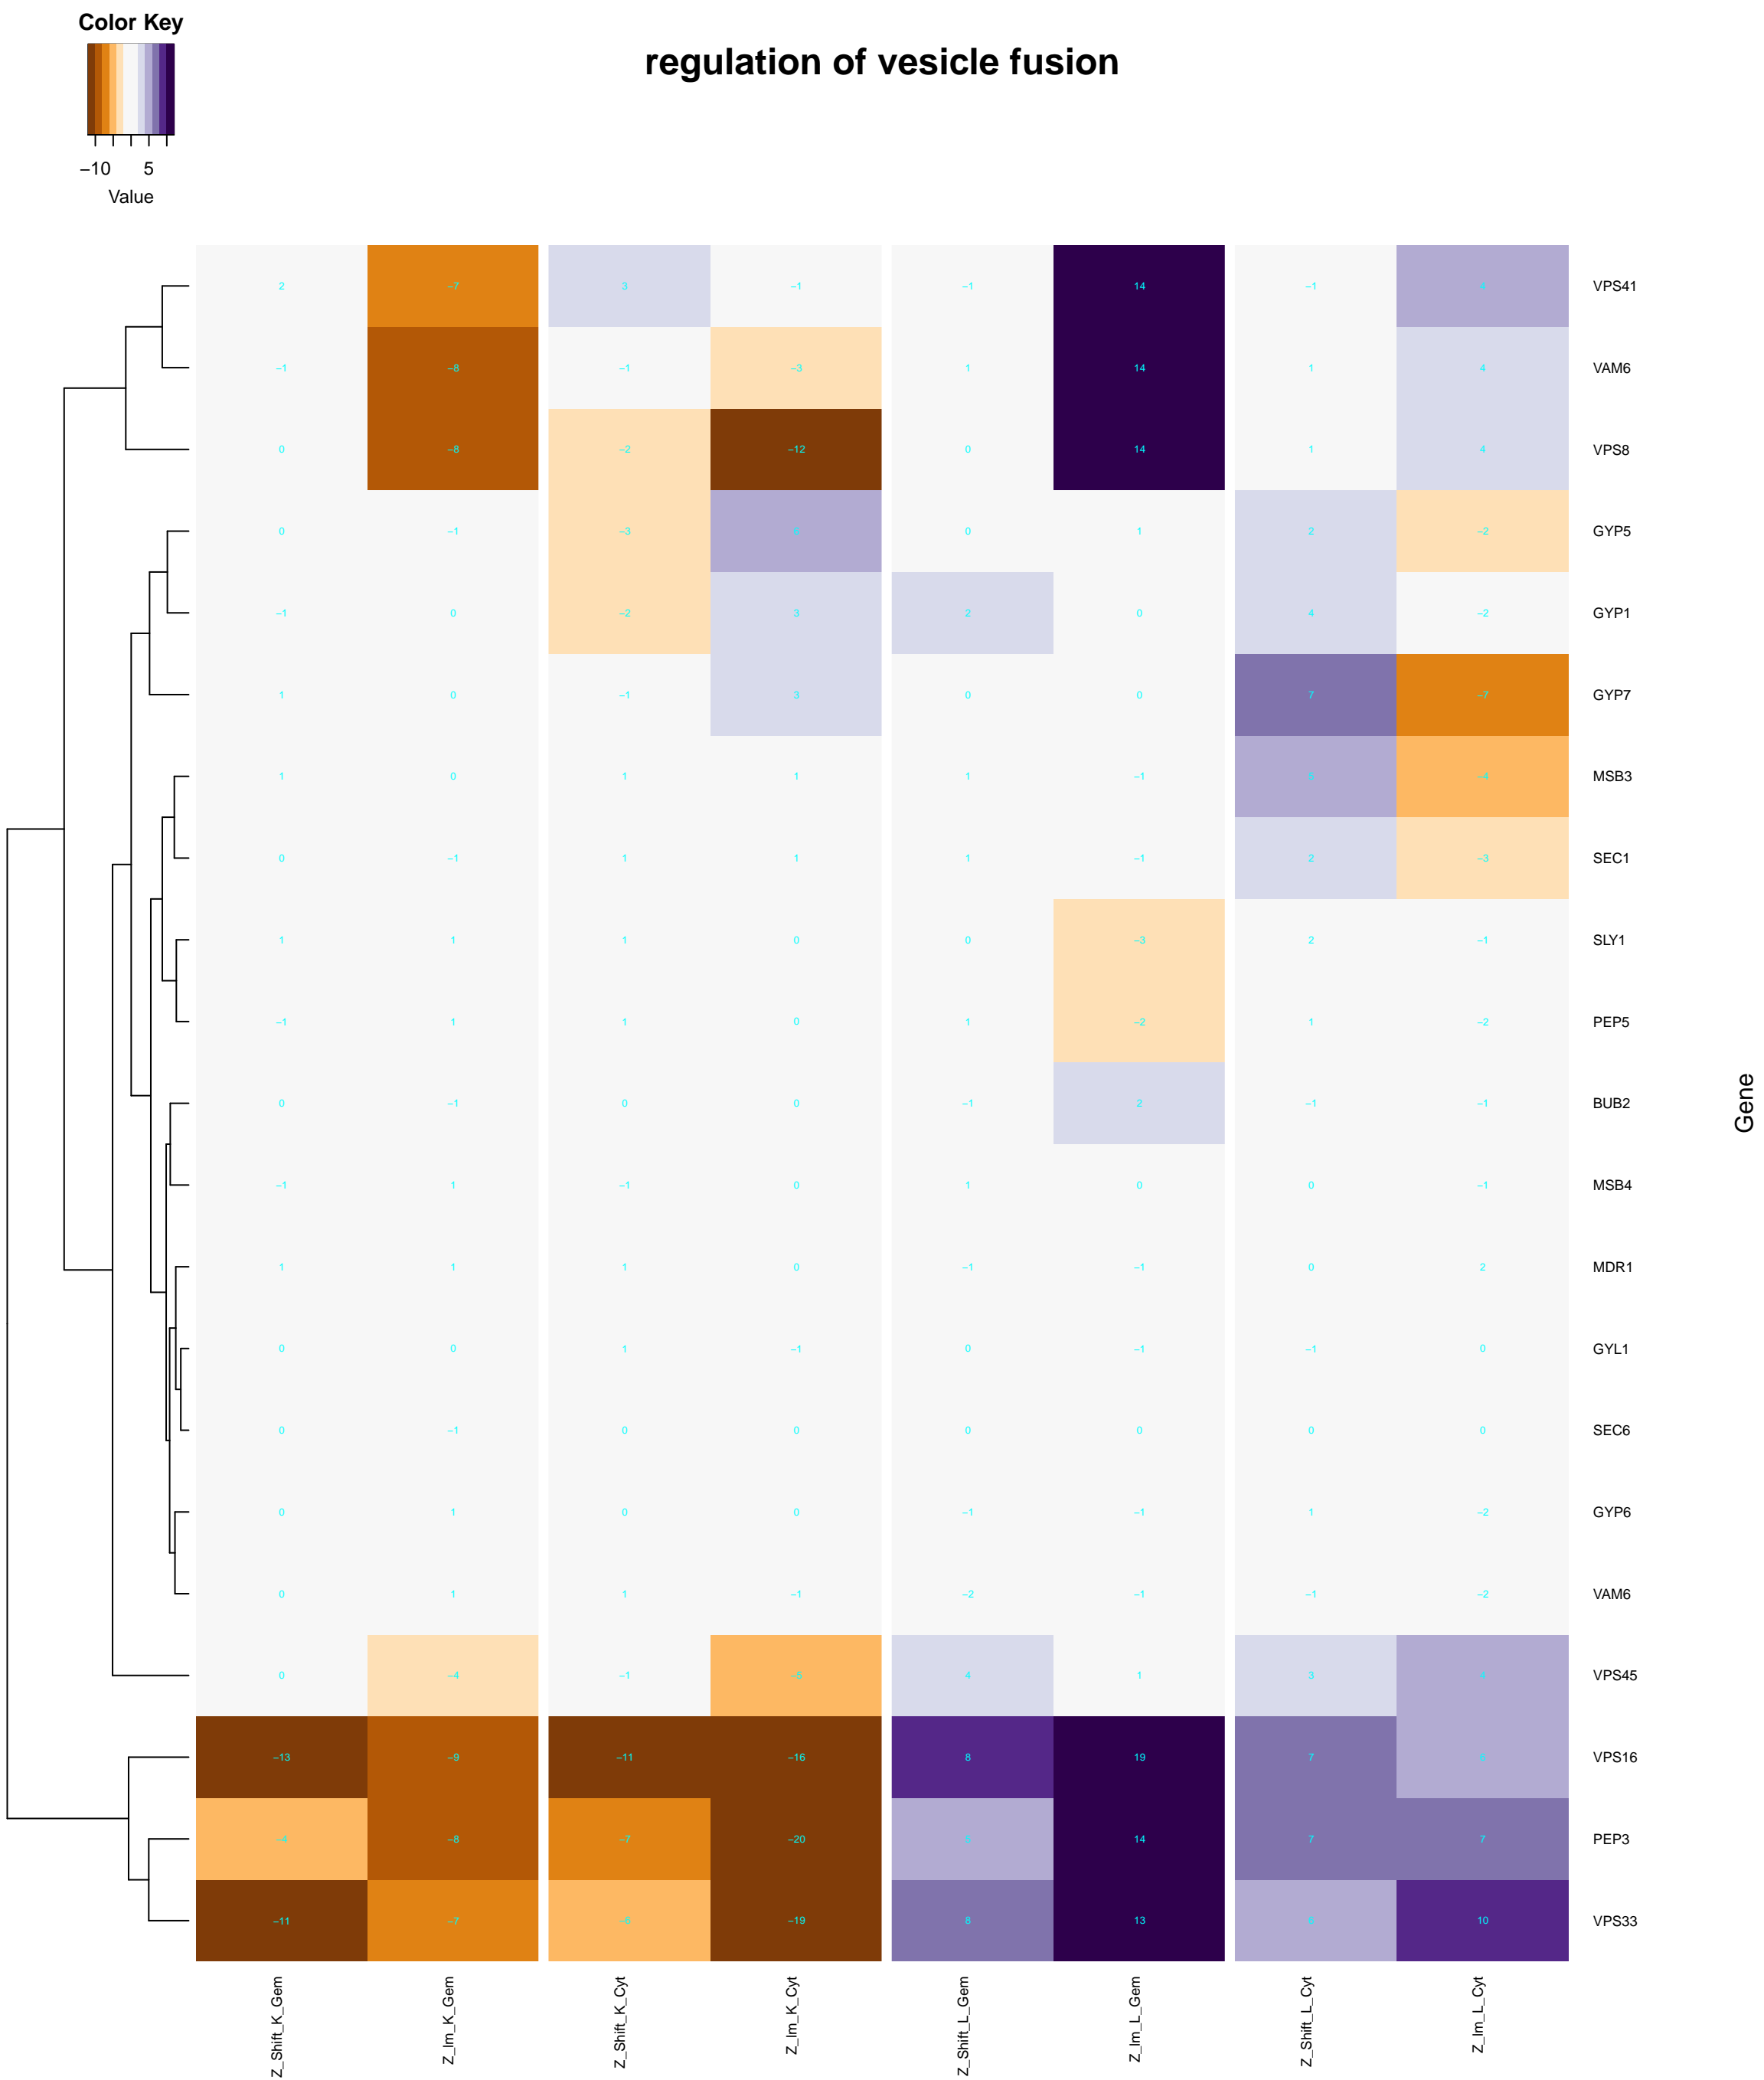

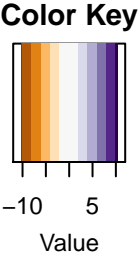

regulation of vesicle targeting, to, from or within Golgi

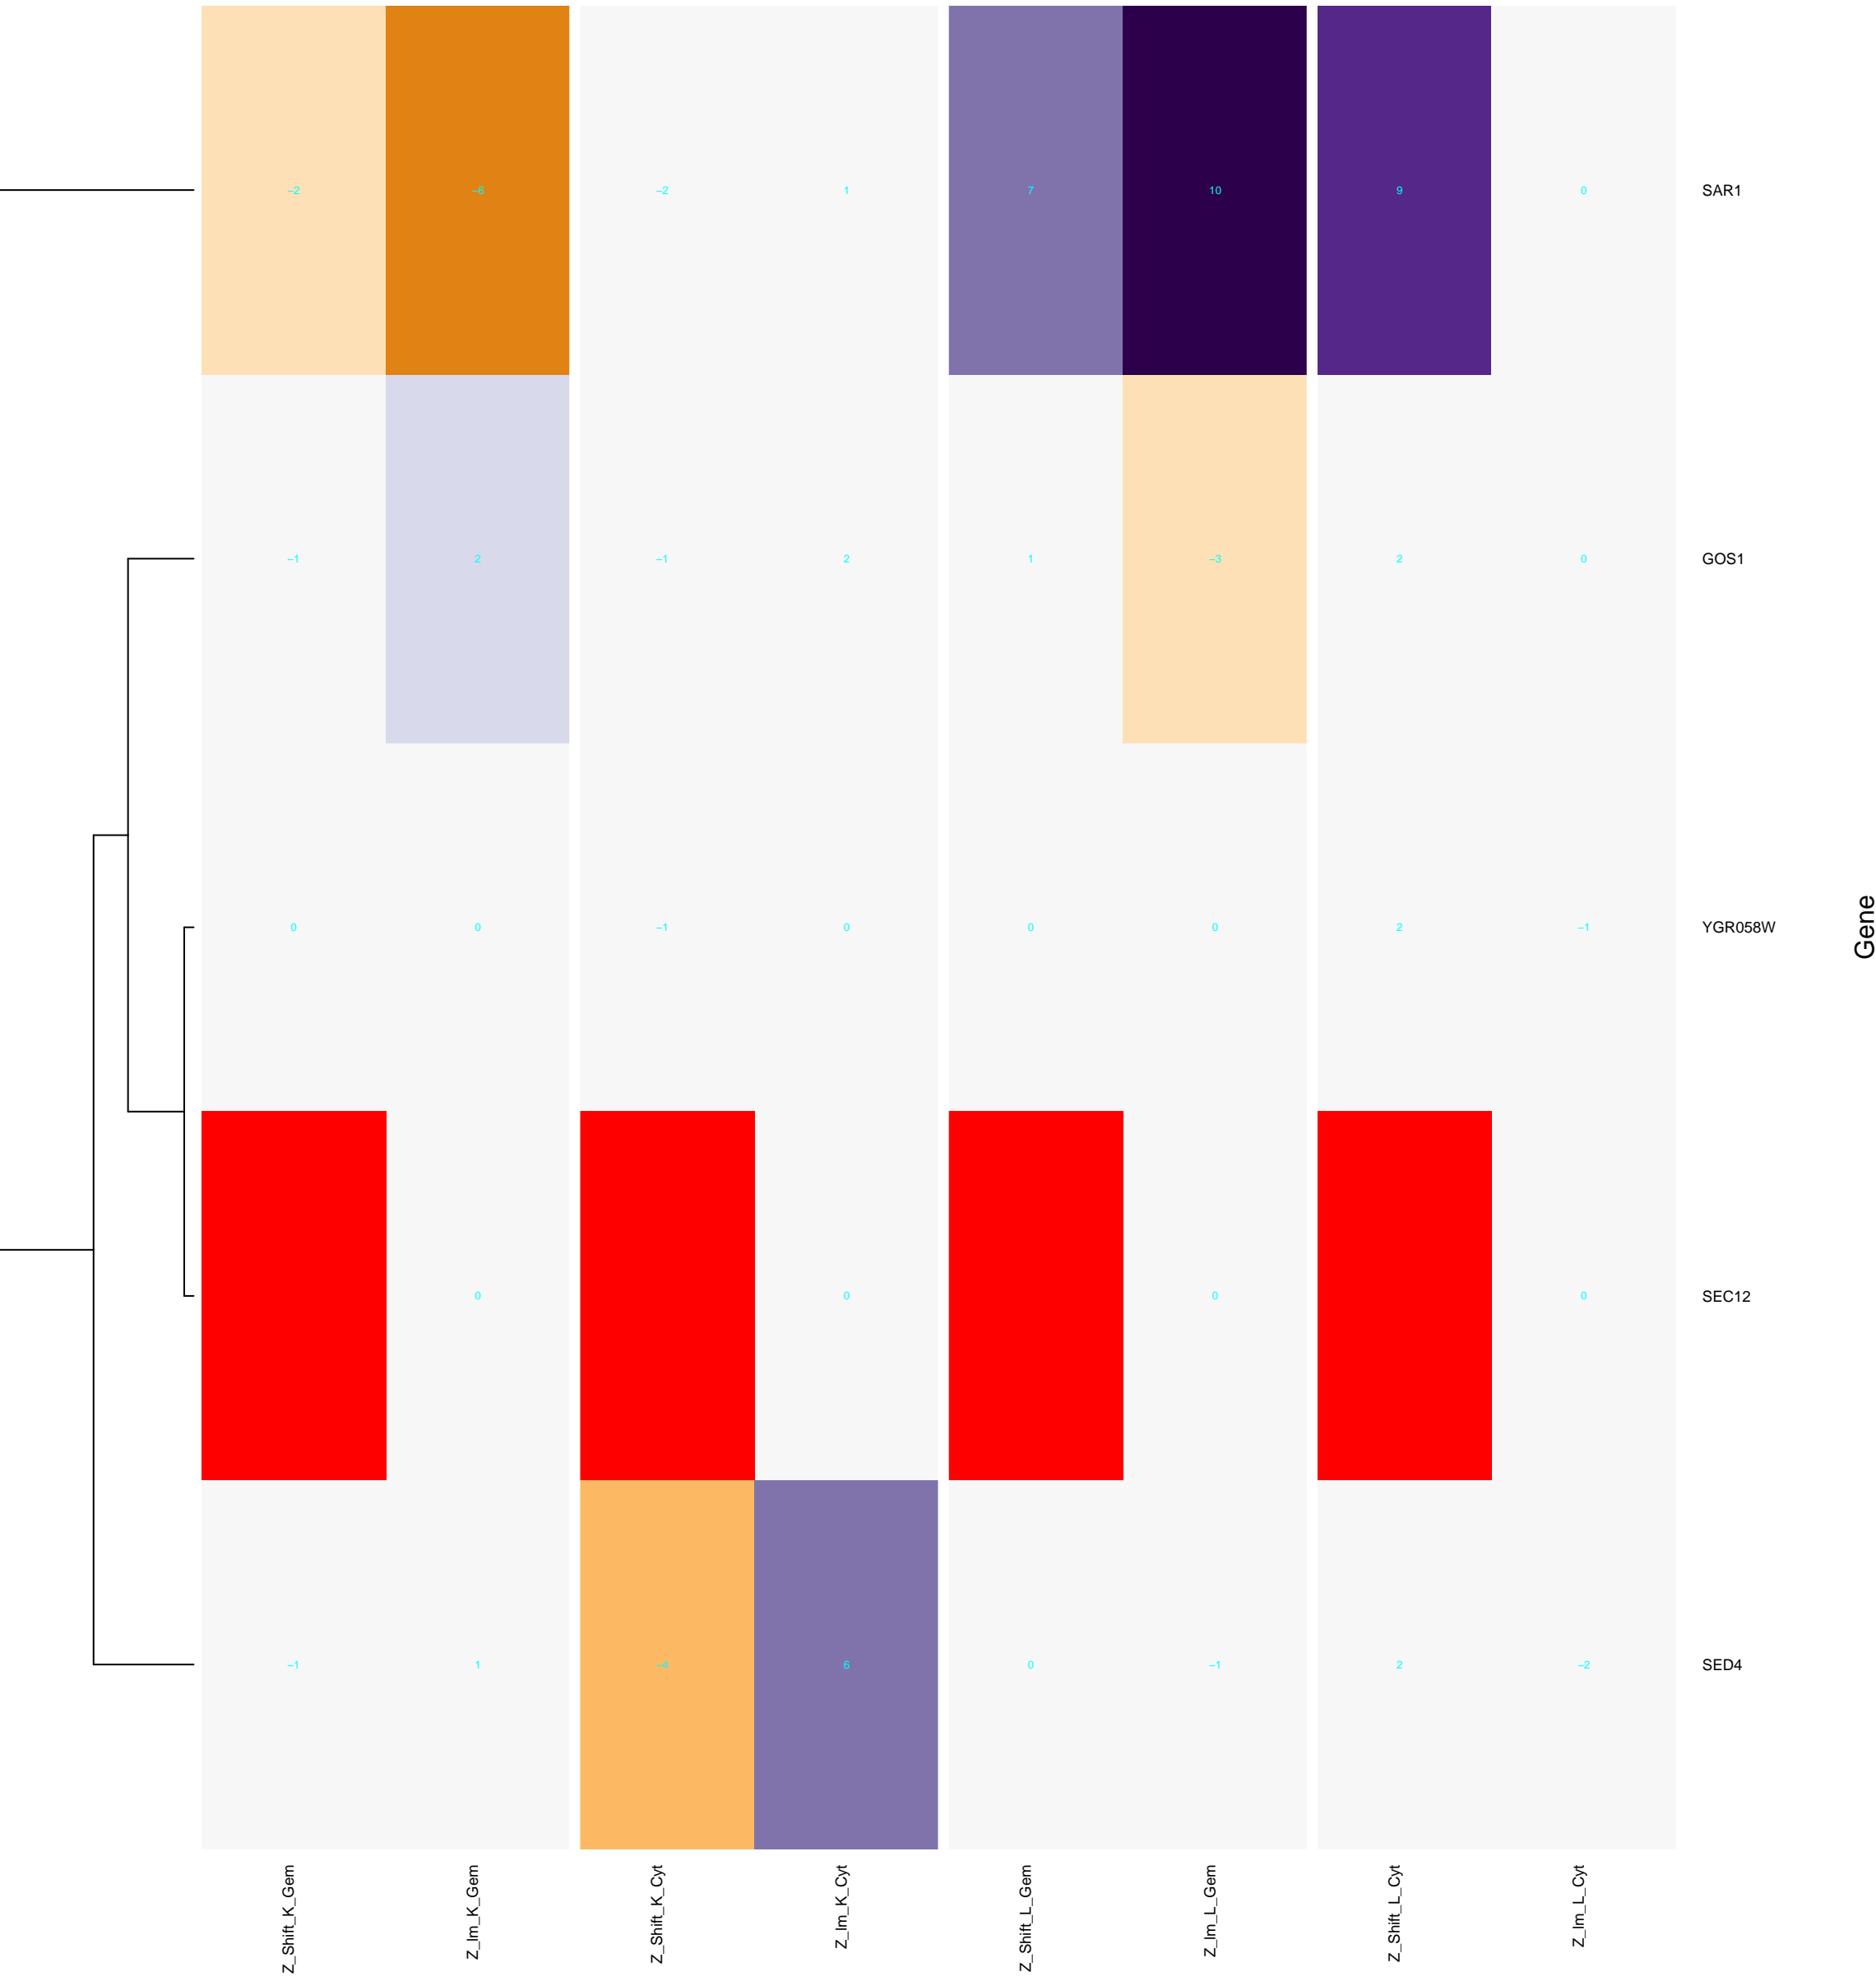

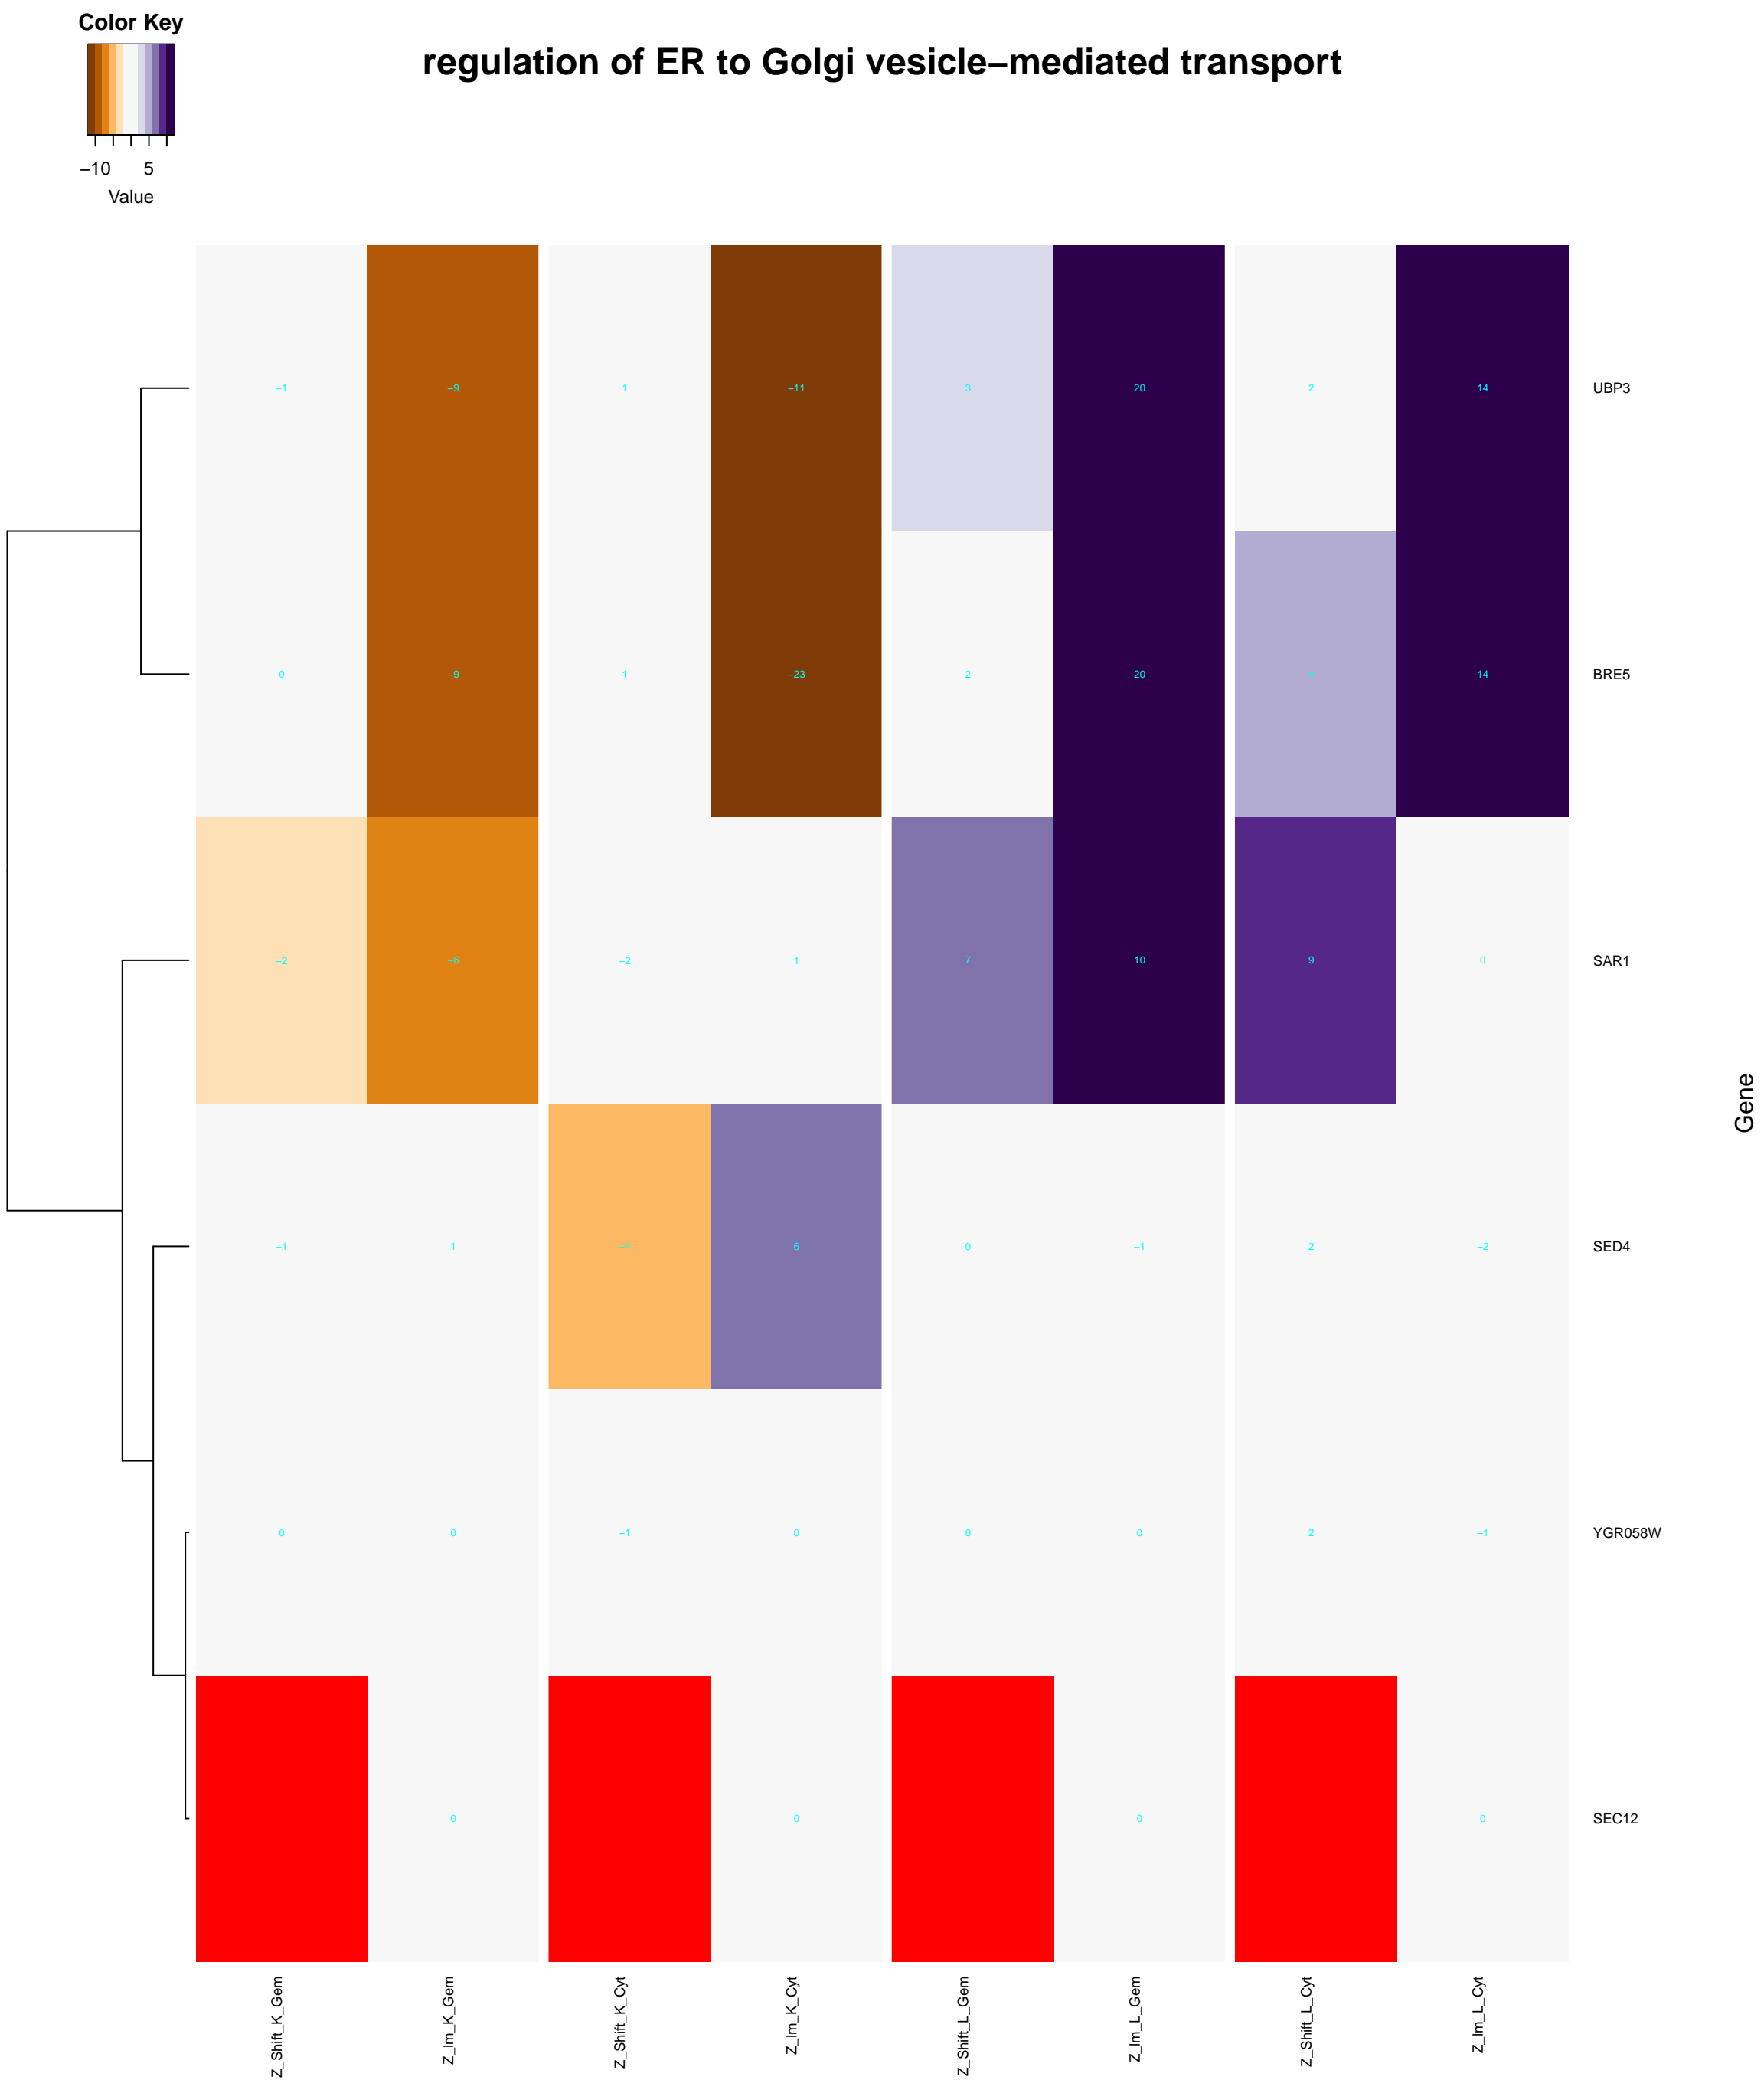

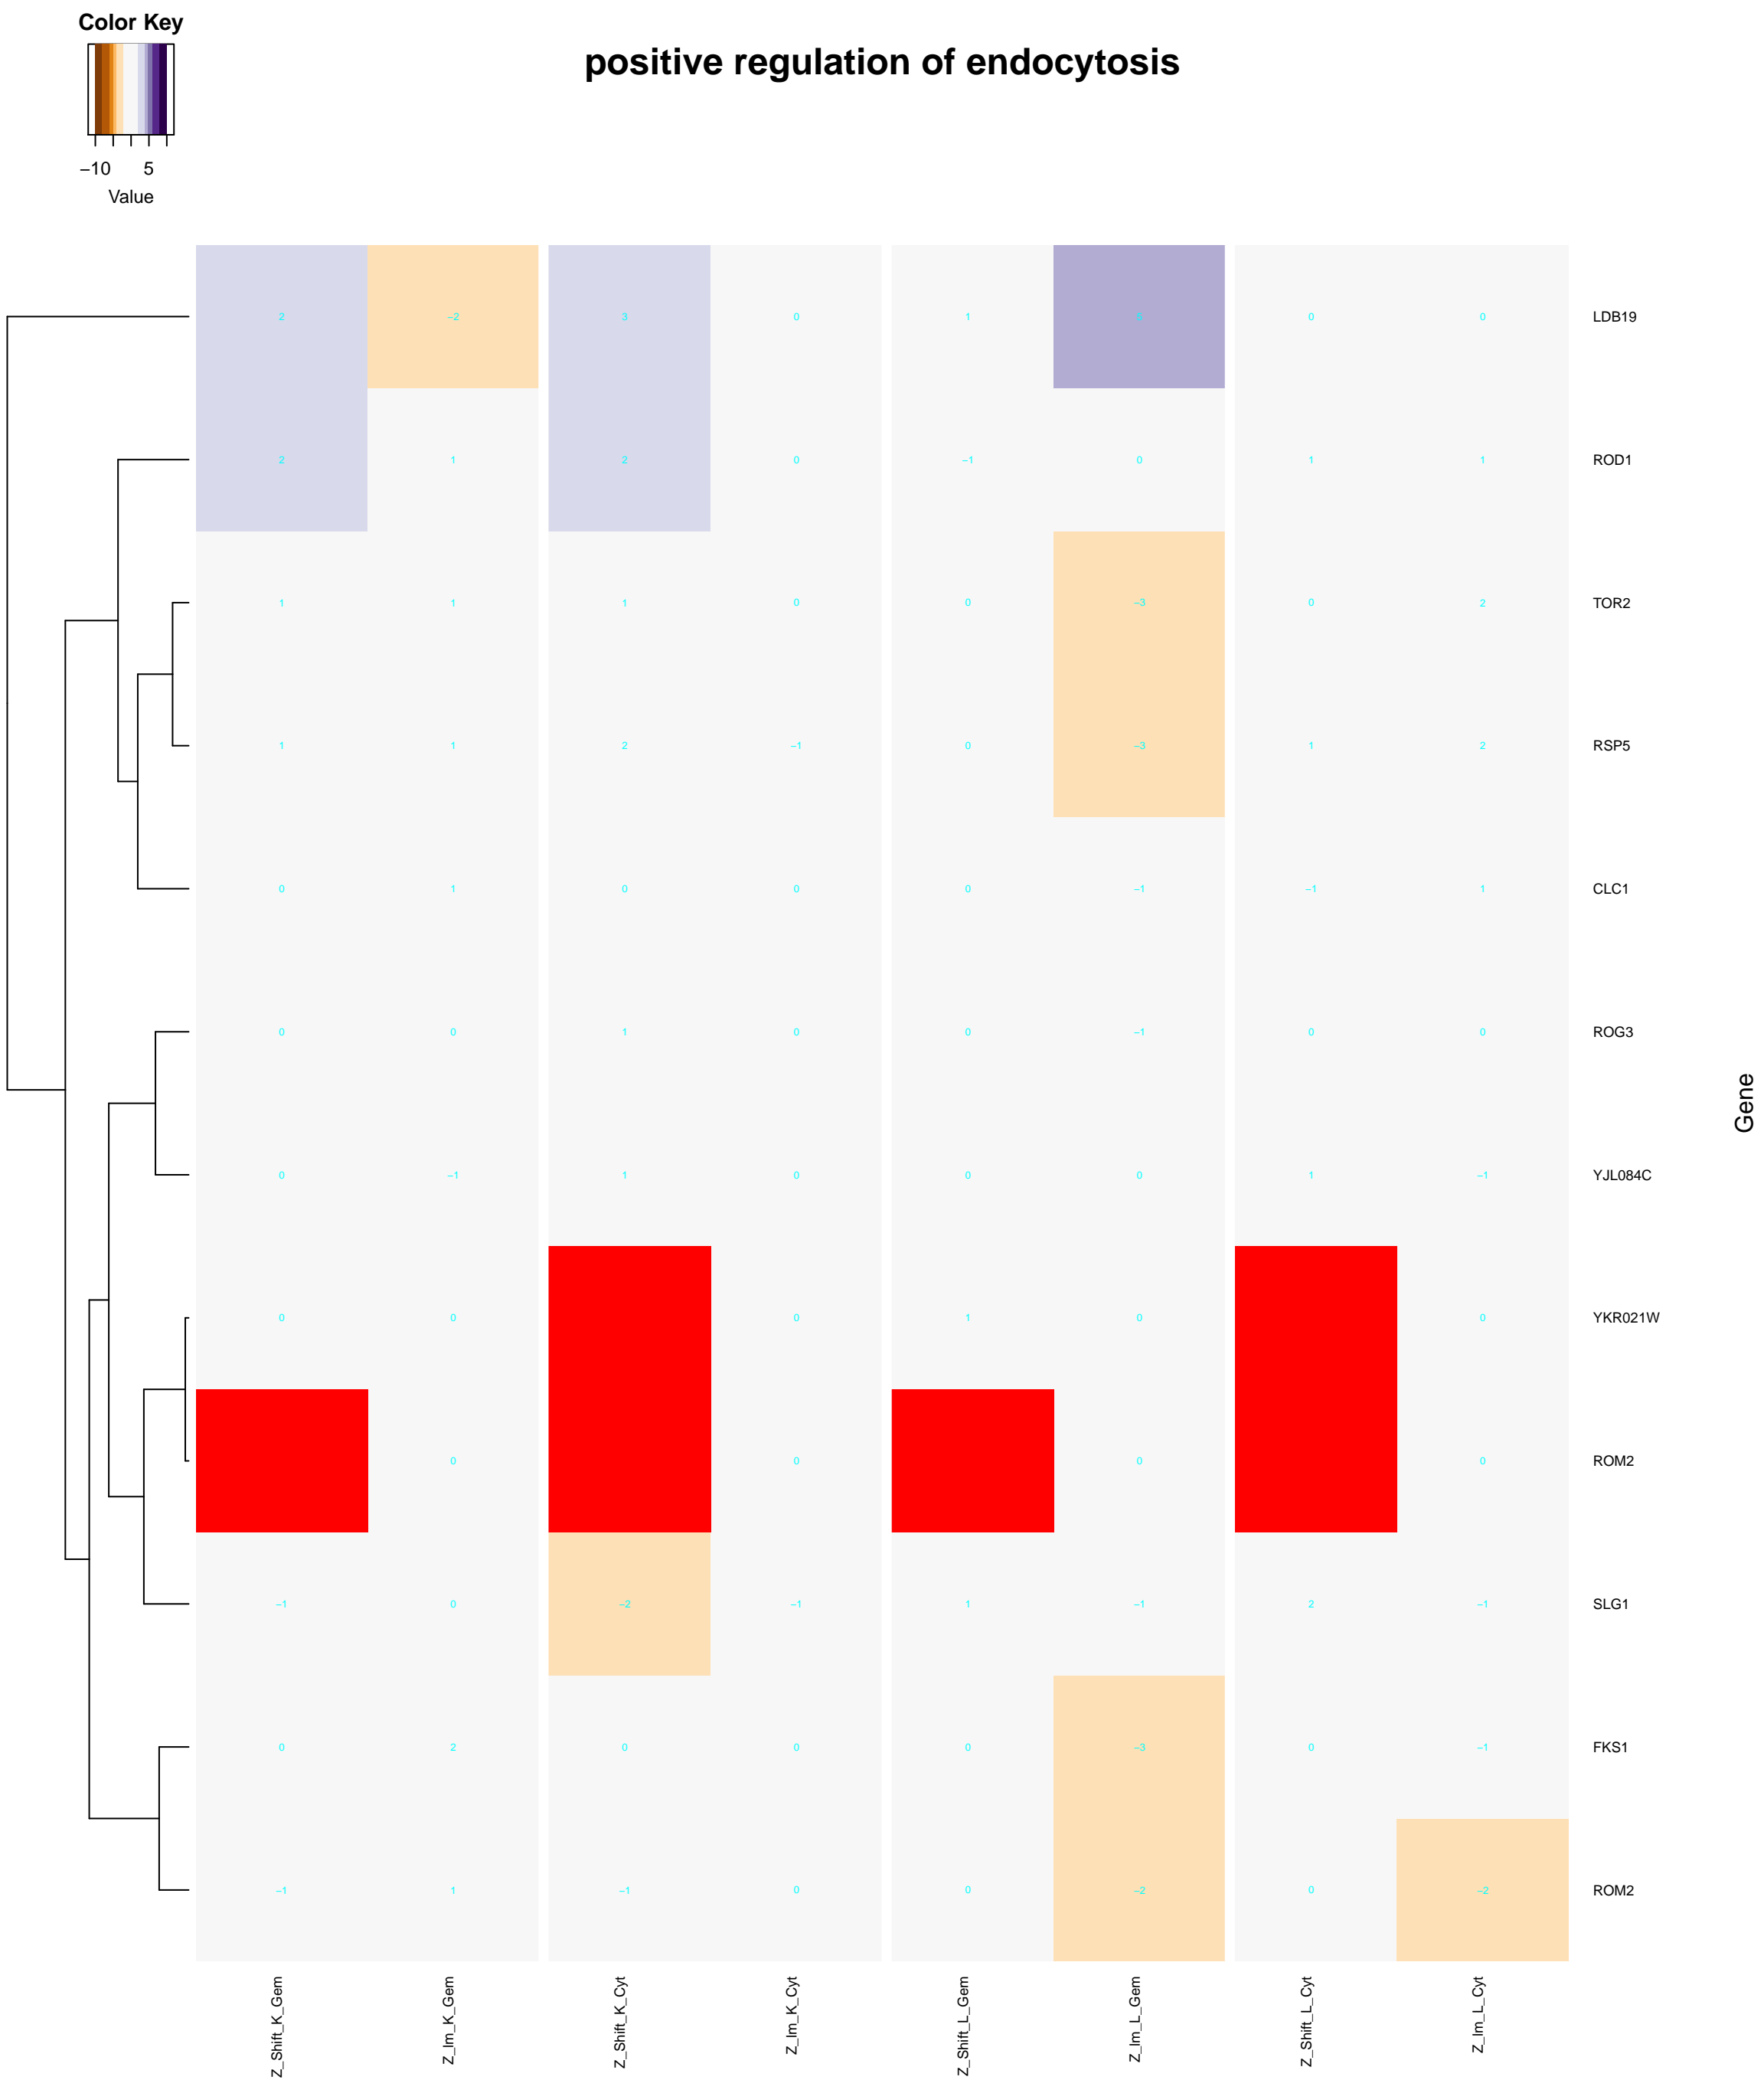

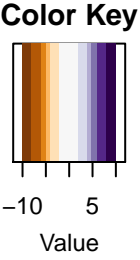

regulation of receptor-mediated endocytosis

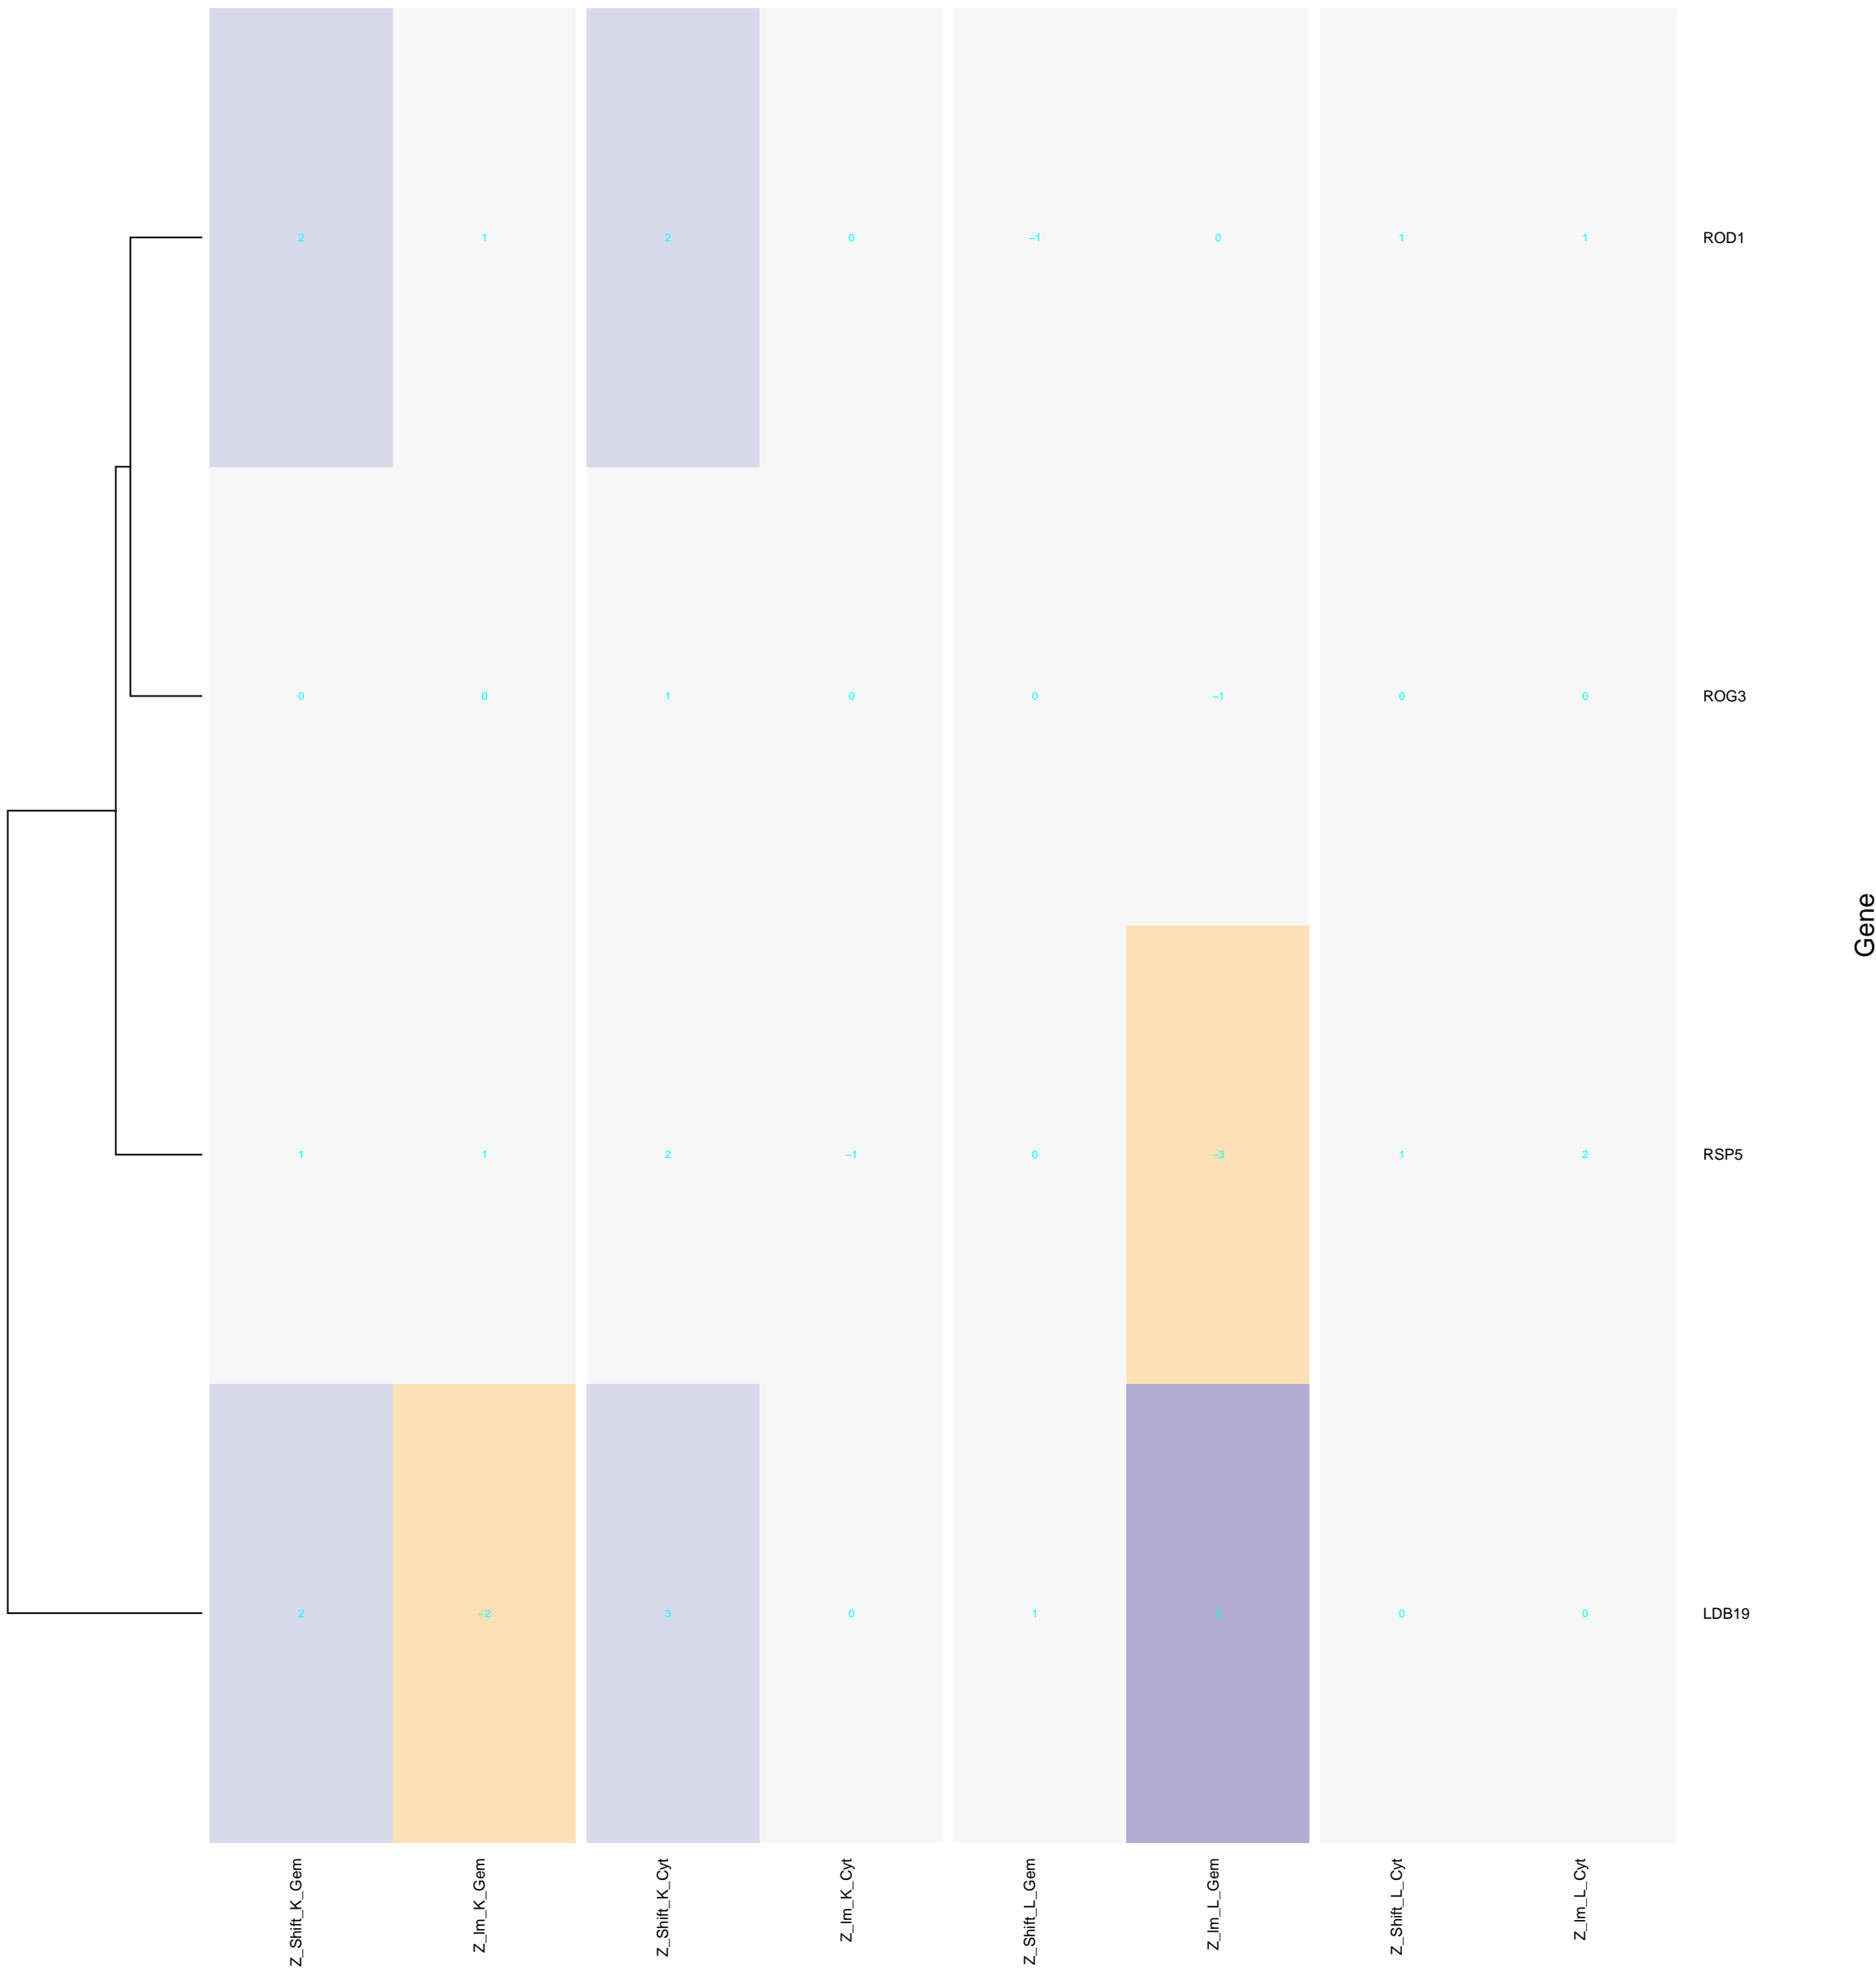

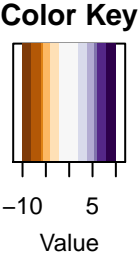

positive regulation of vesicle fusion

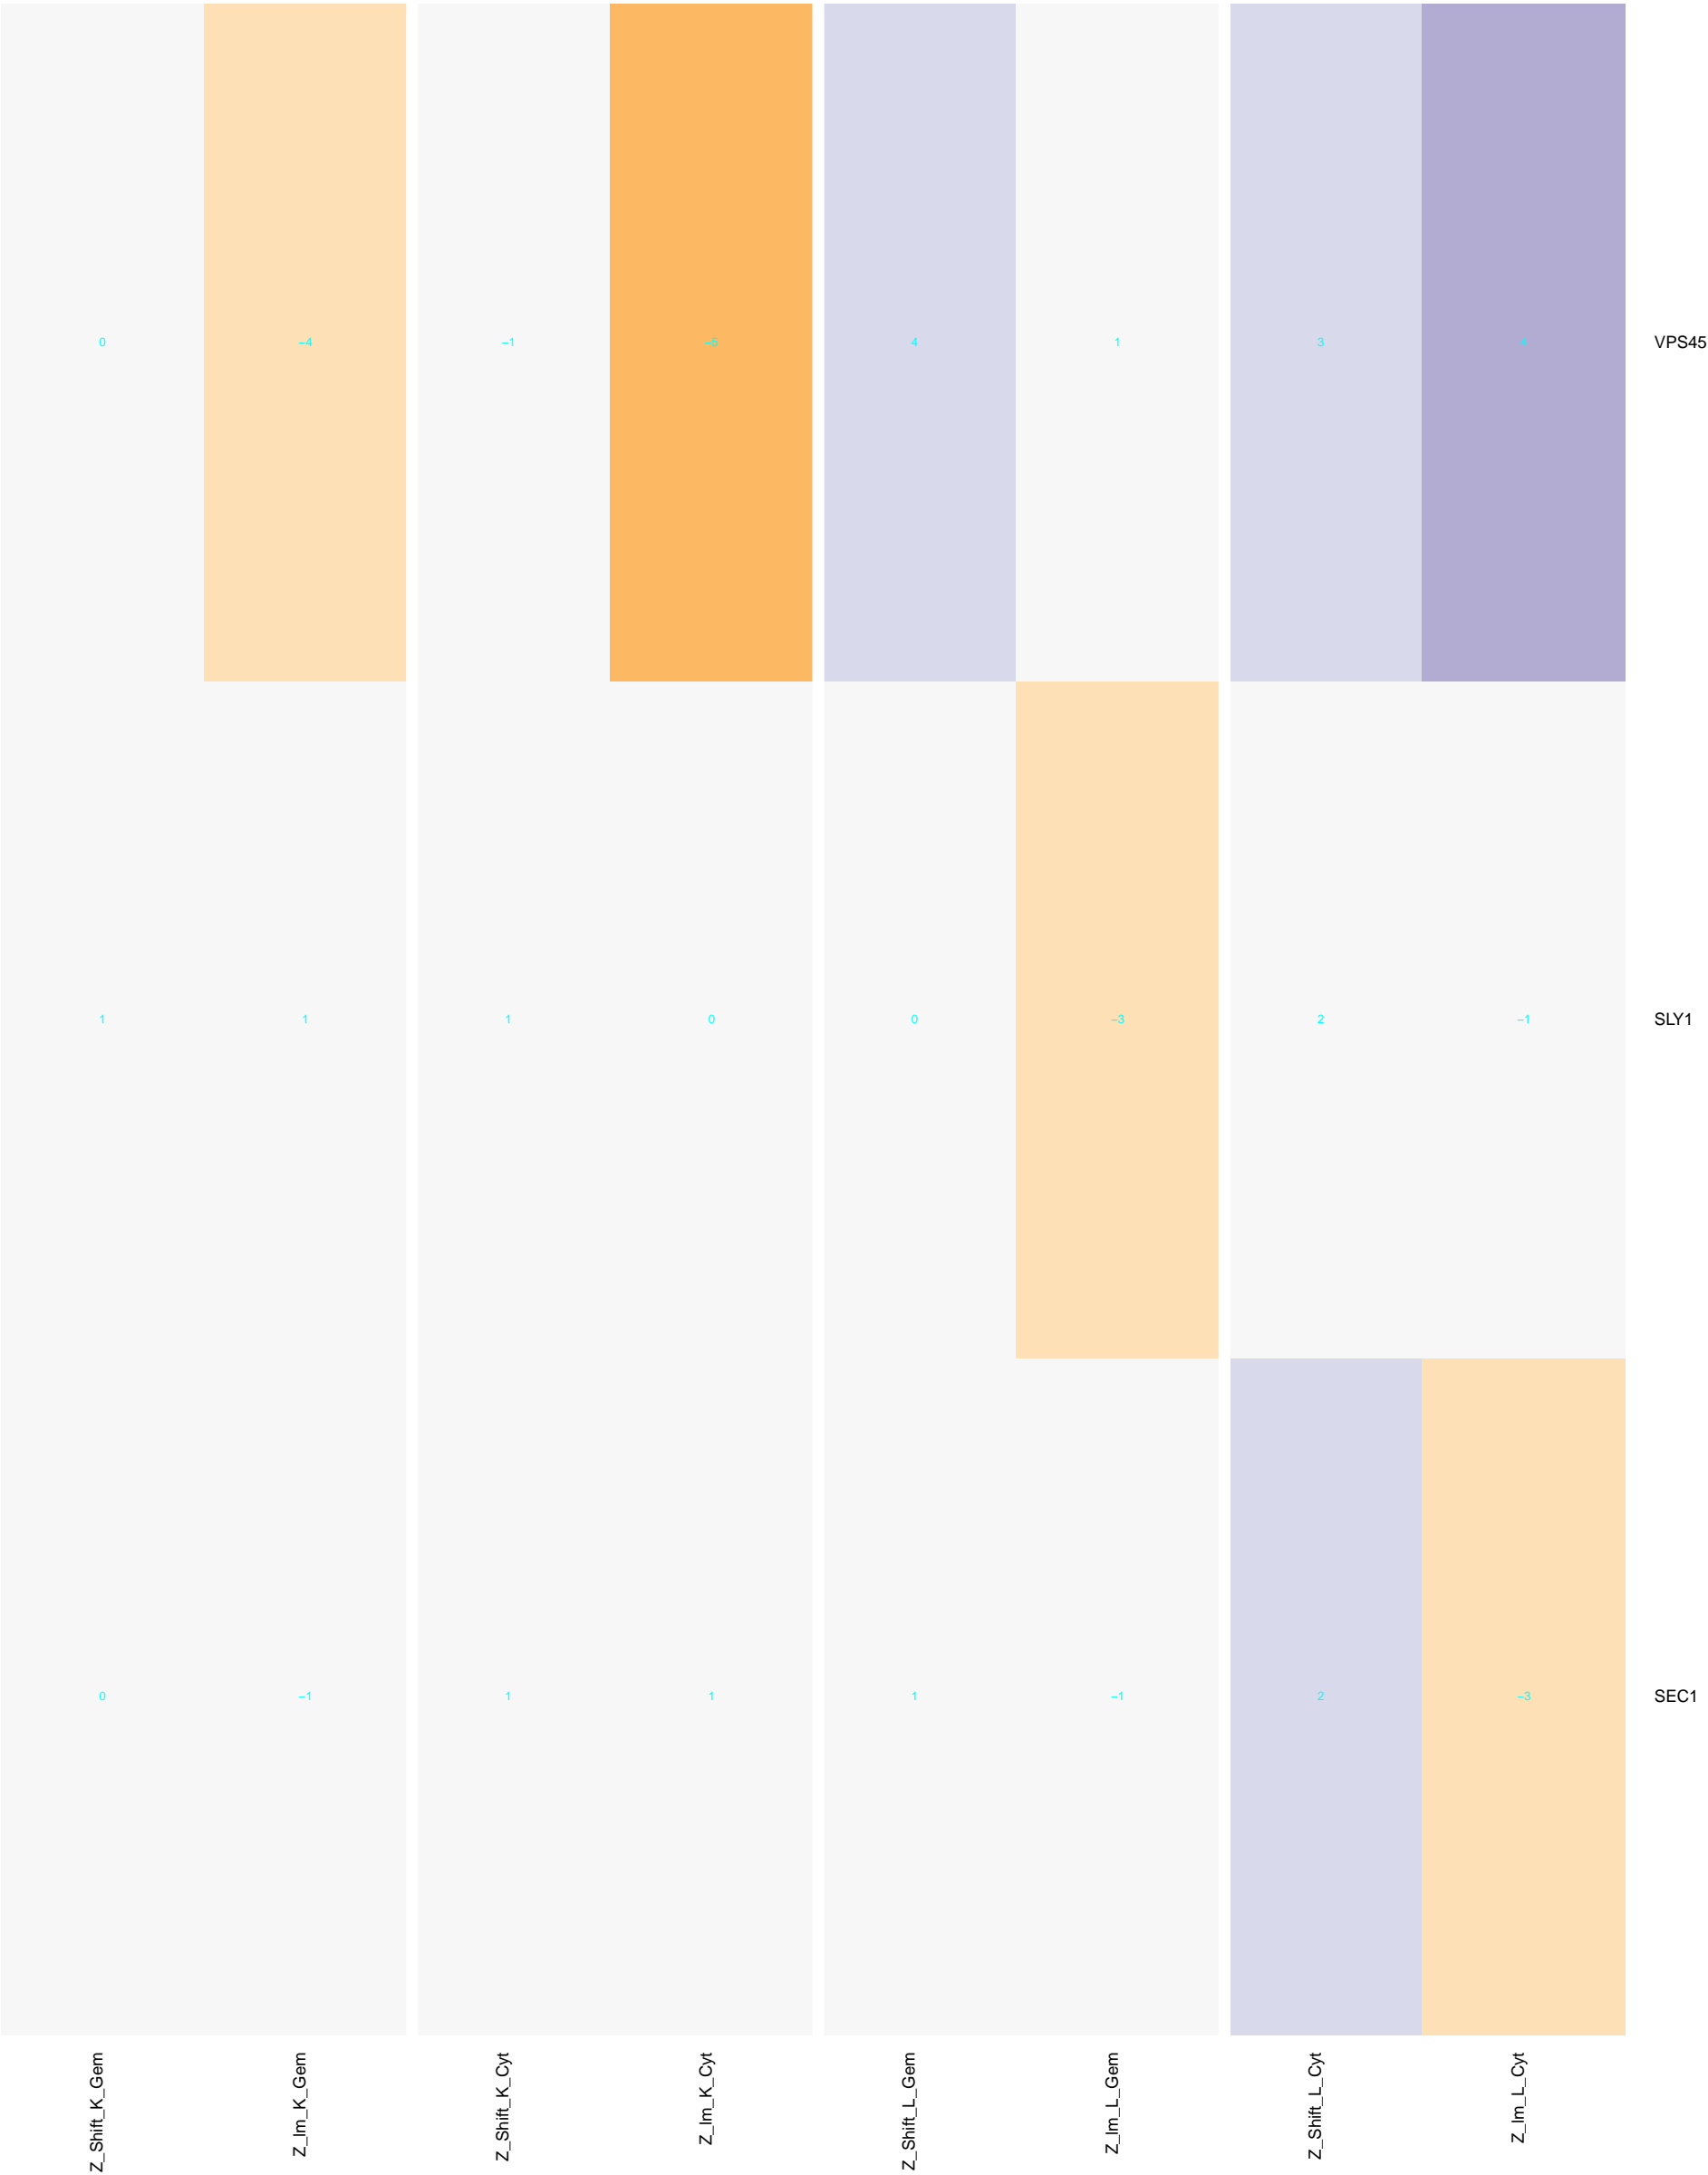

Gene

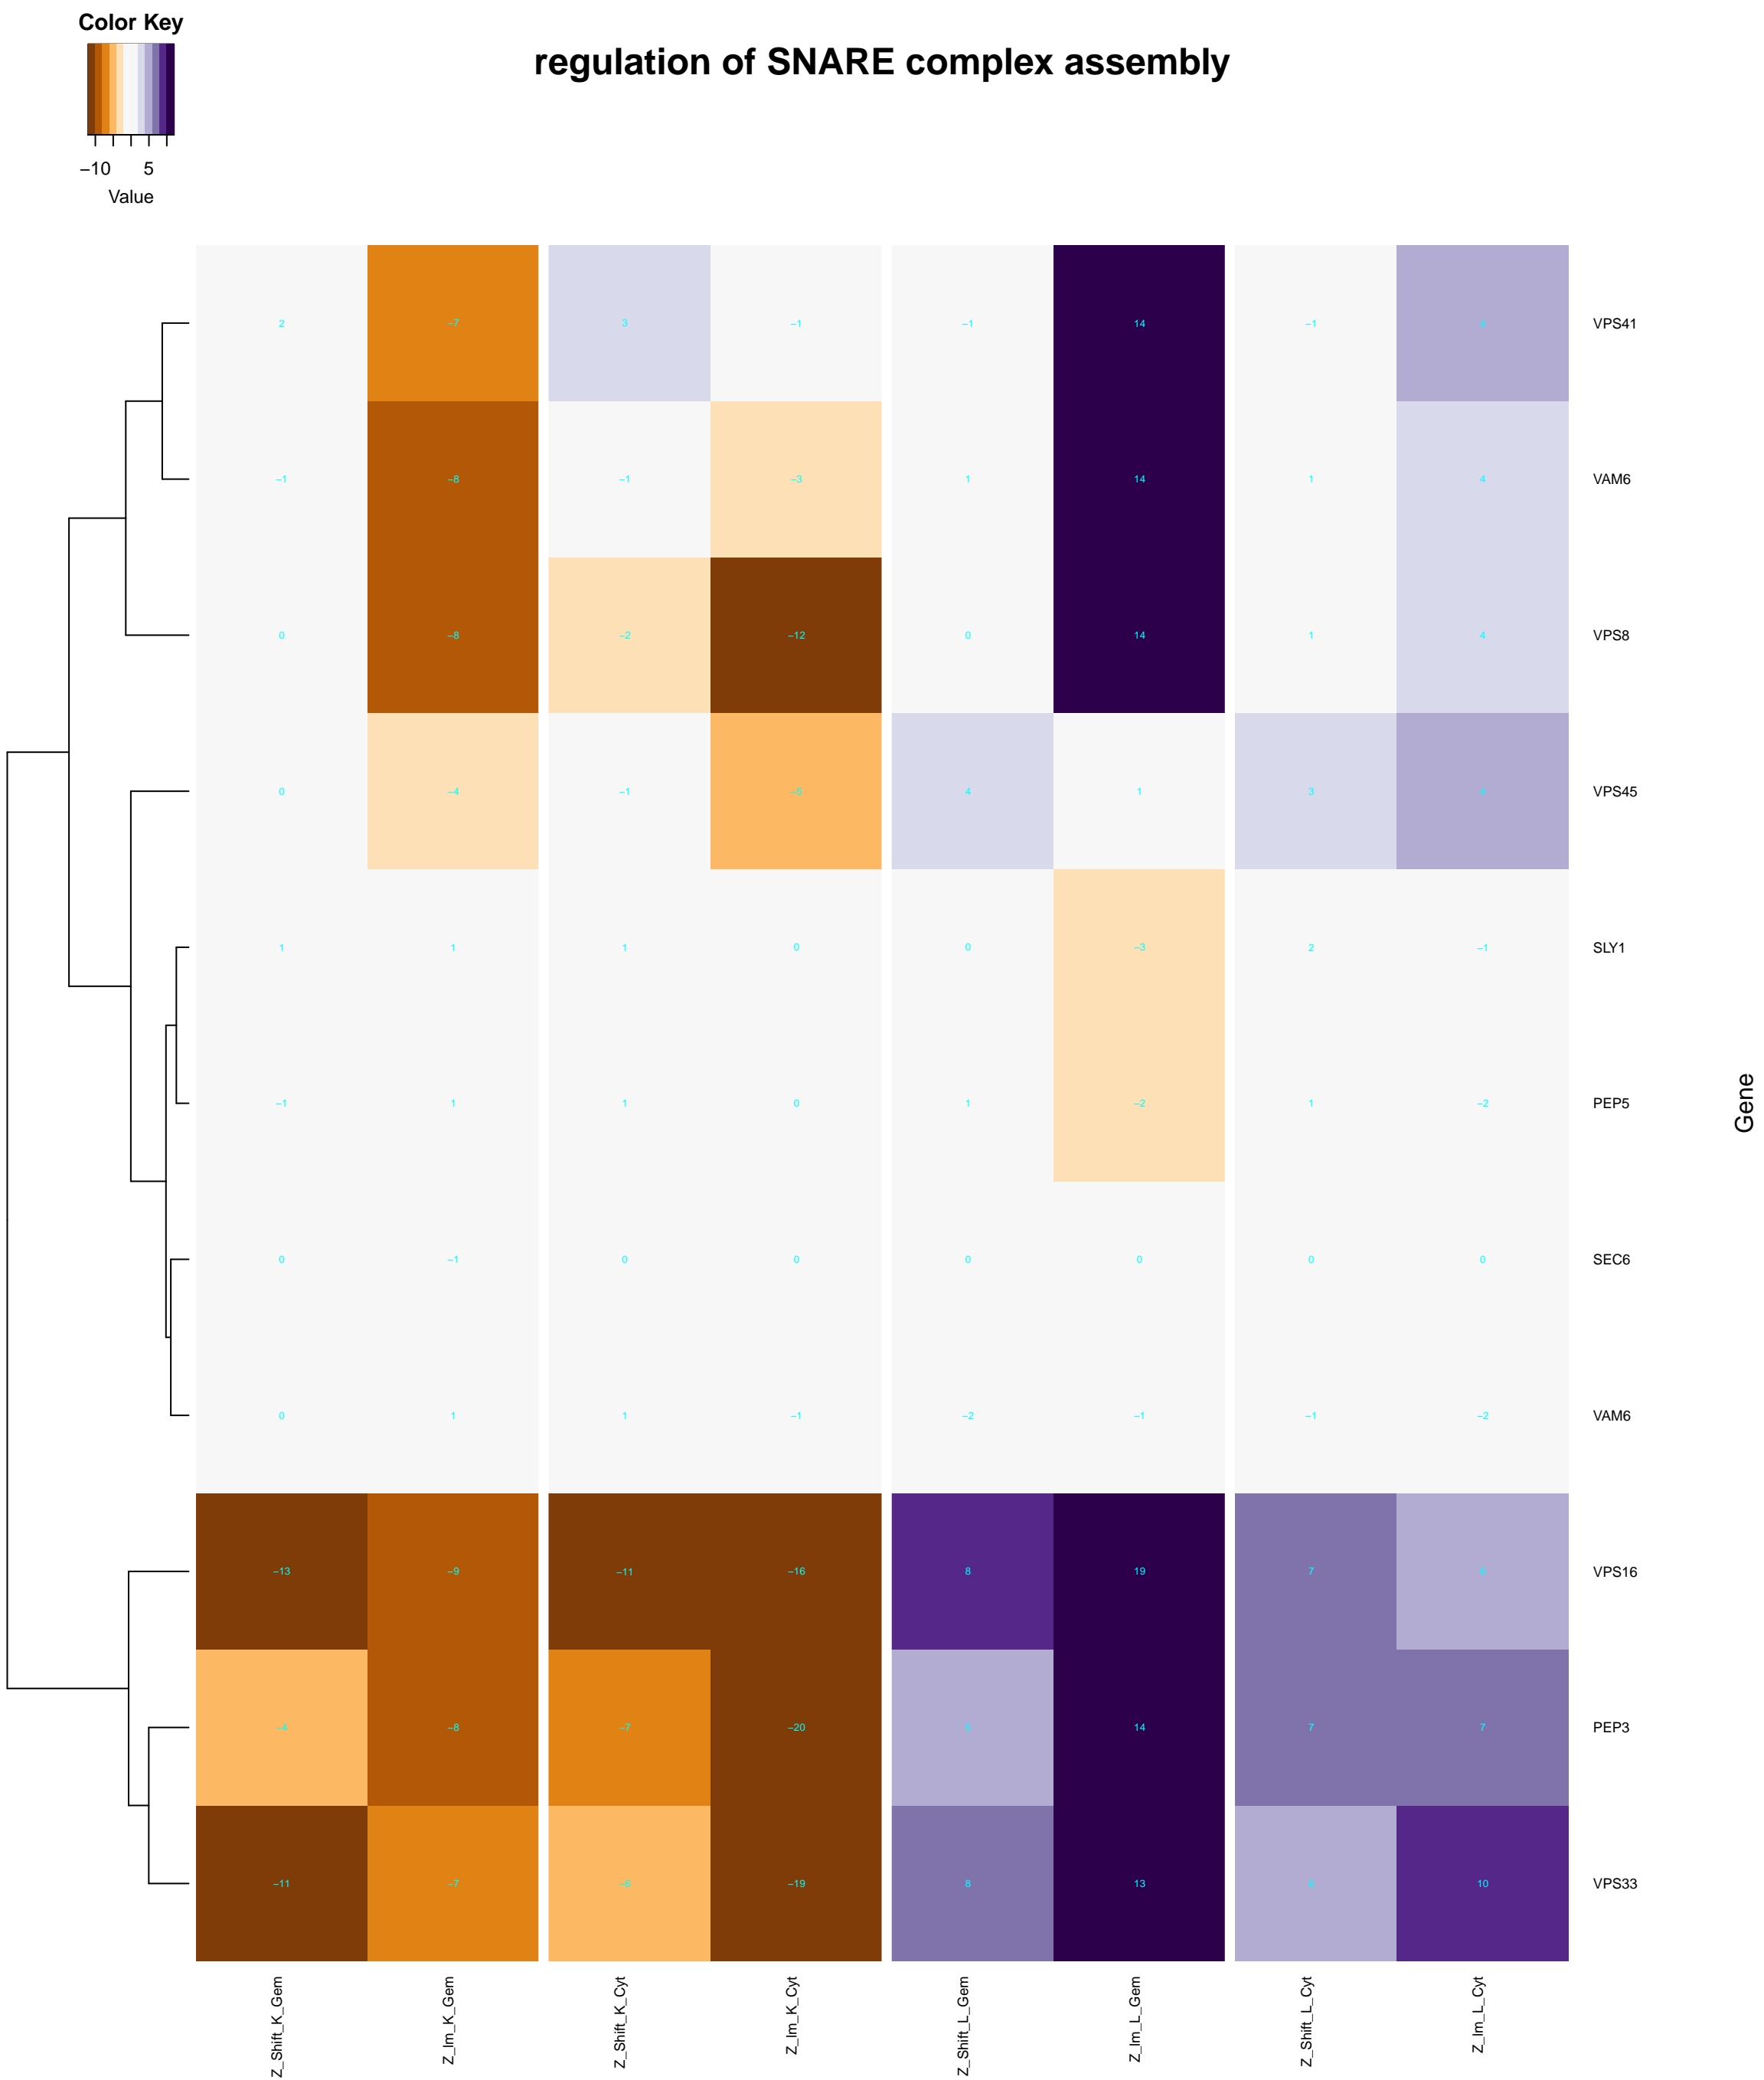

## regulation of COPII vesicle coating

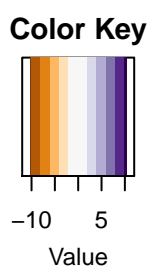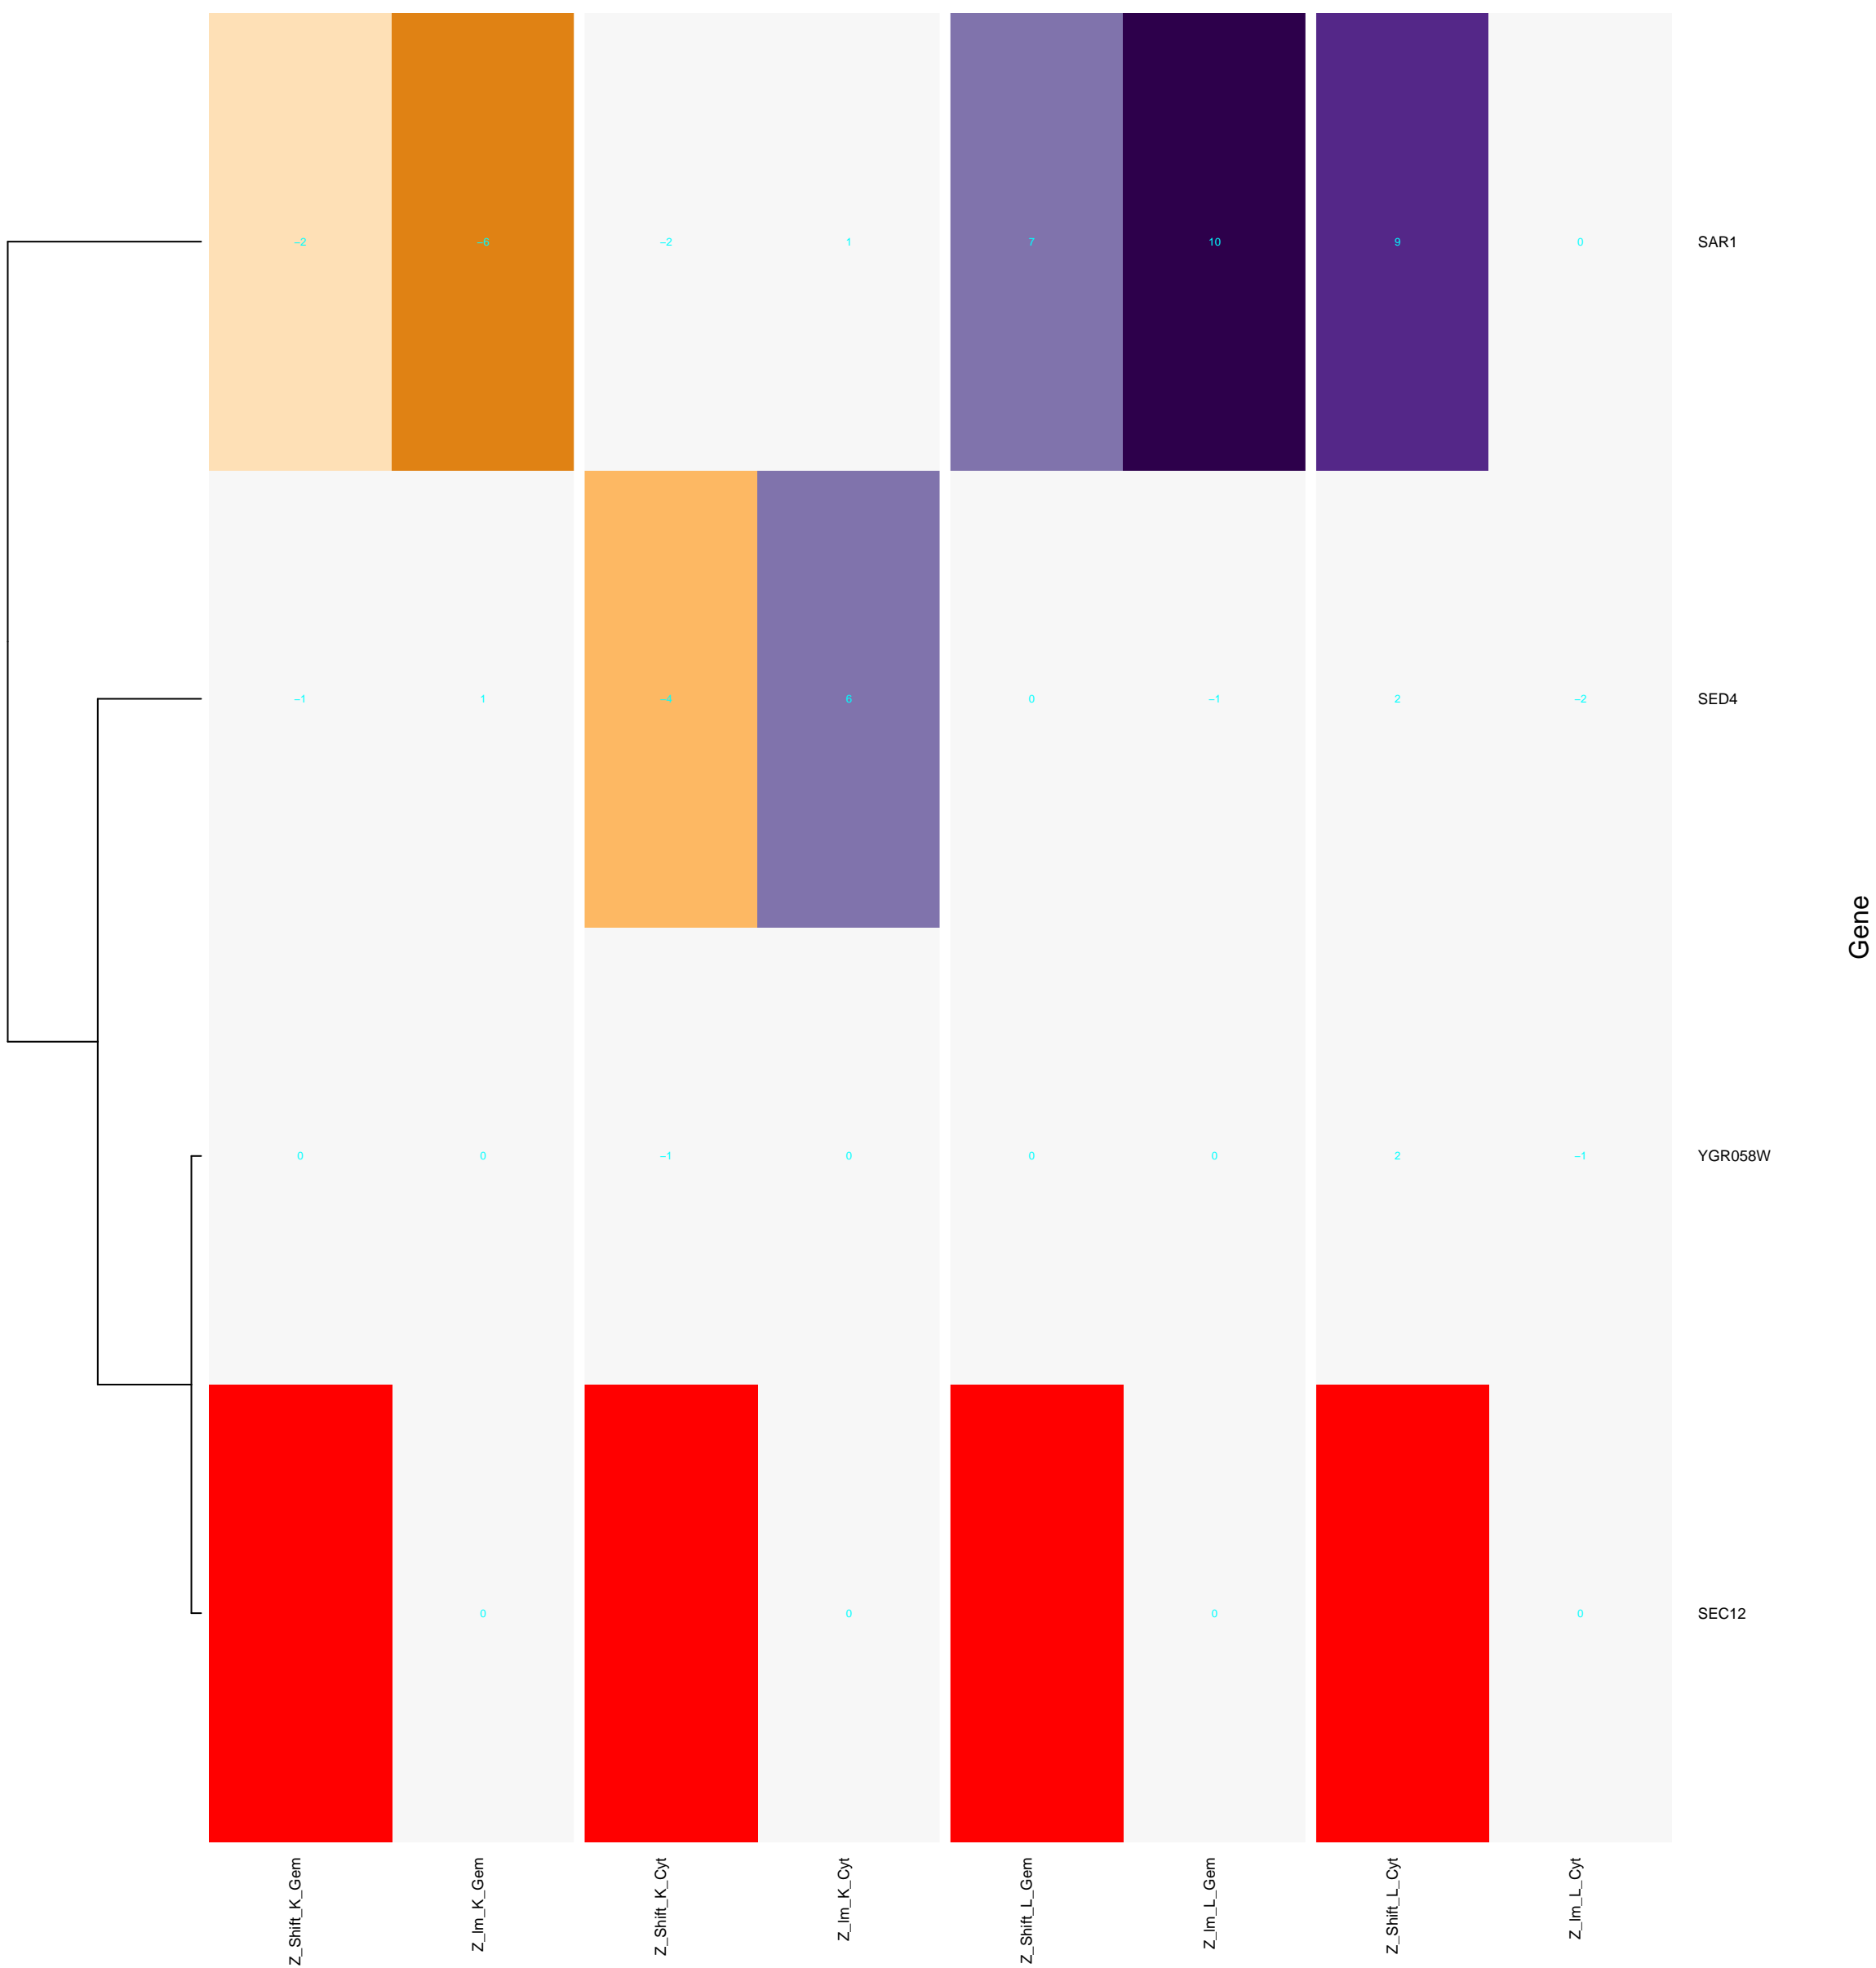



-10

## regulation of ER to Golgi vesicle-mediated transport by GTP hydrolysis





positive regulation of receptor-mediated endocytosis

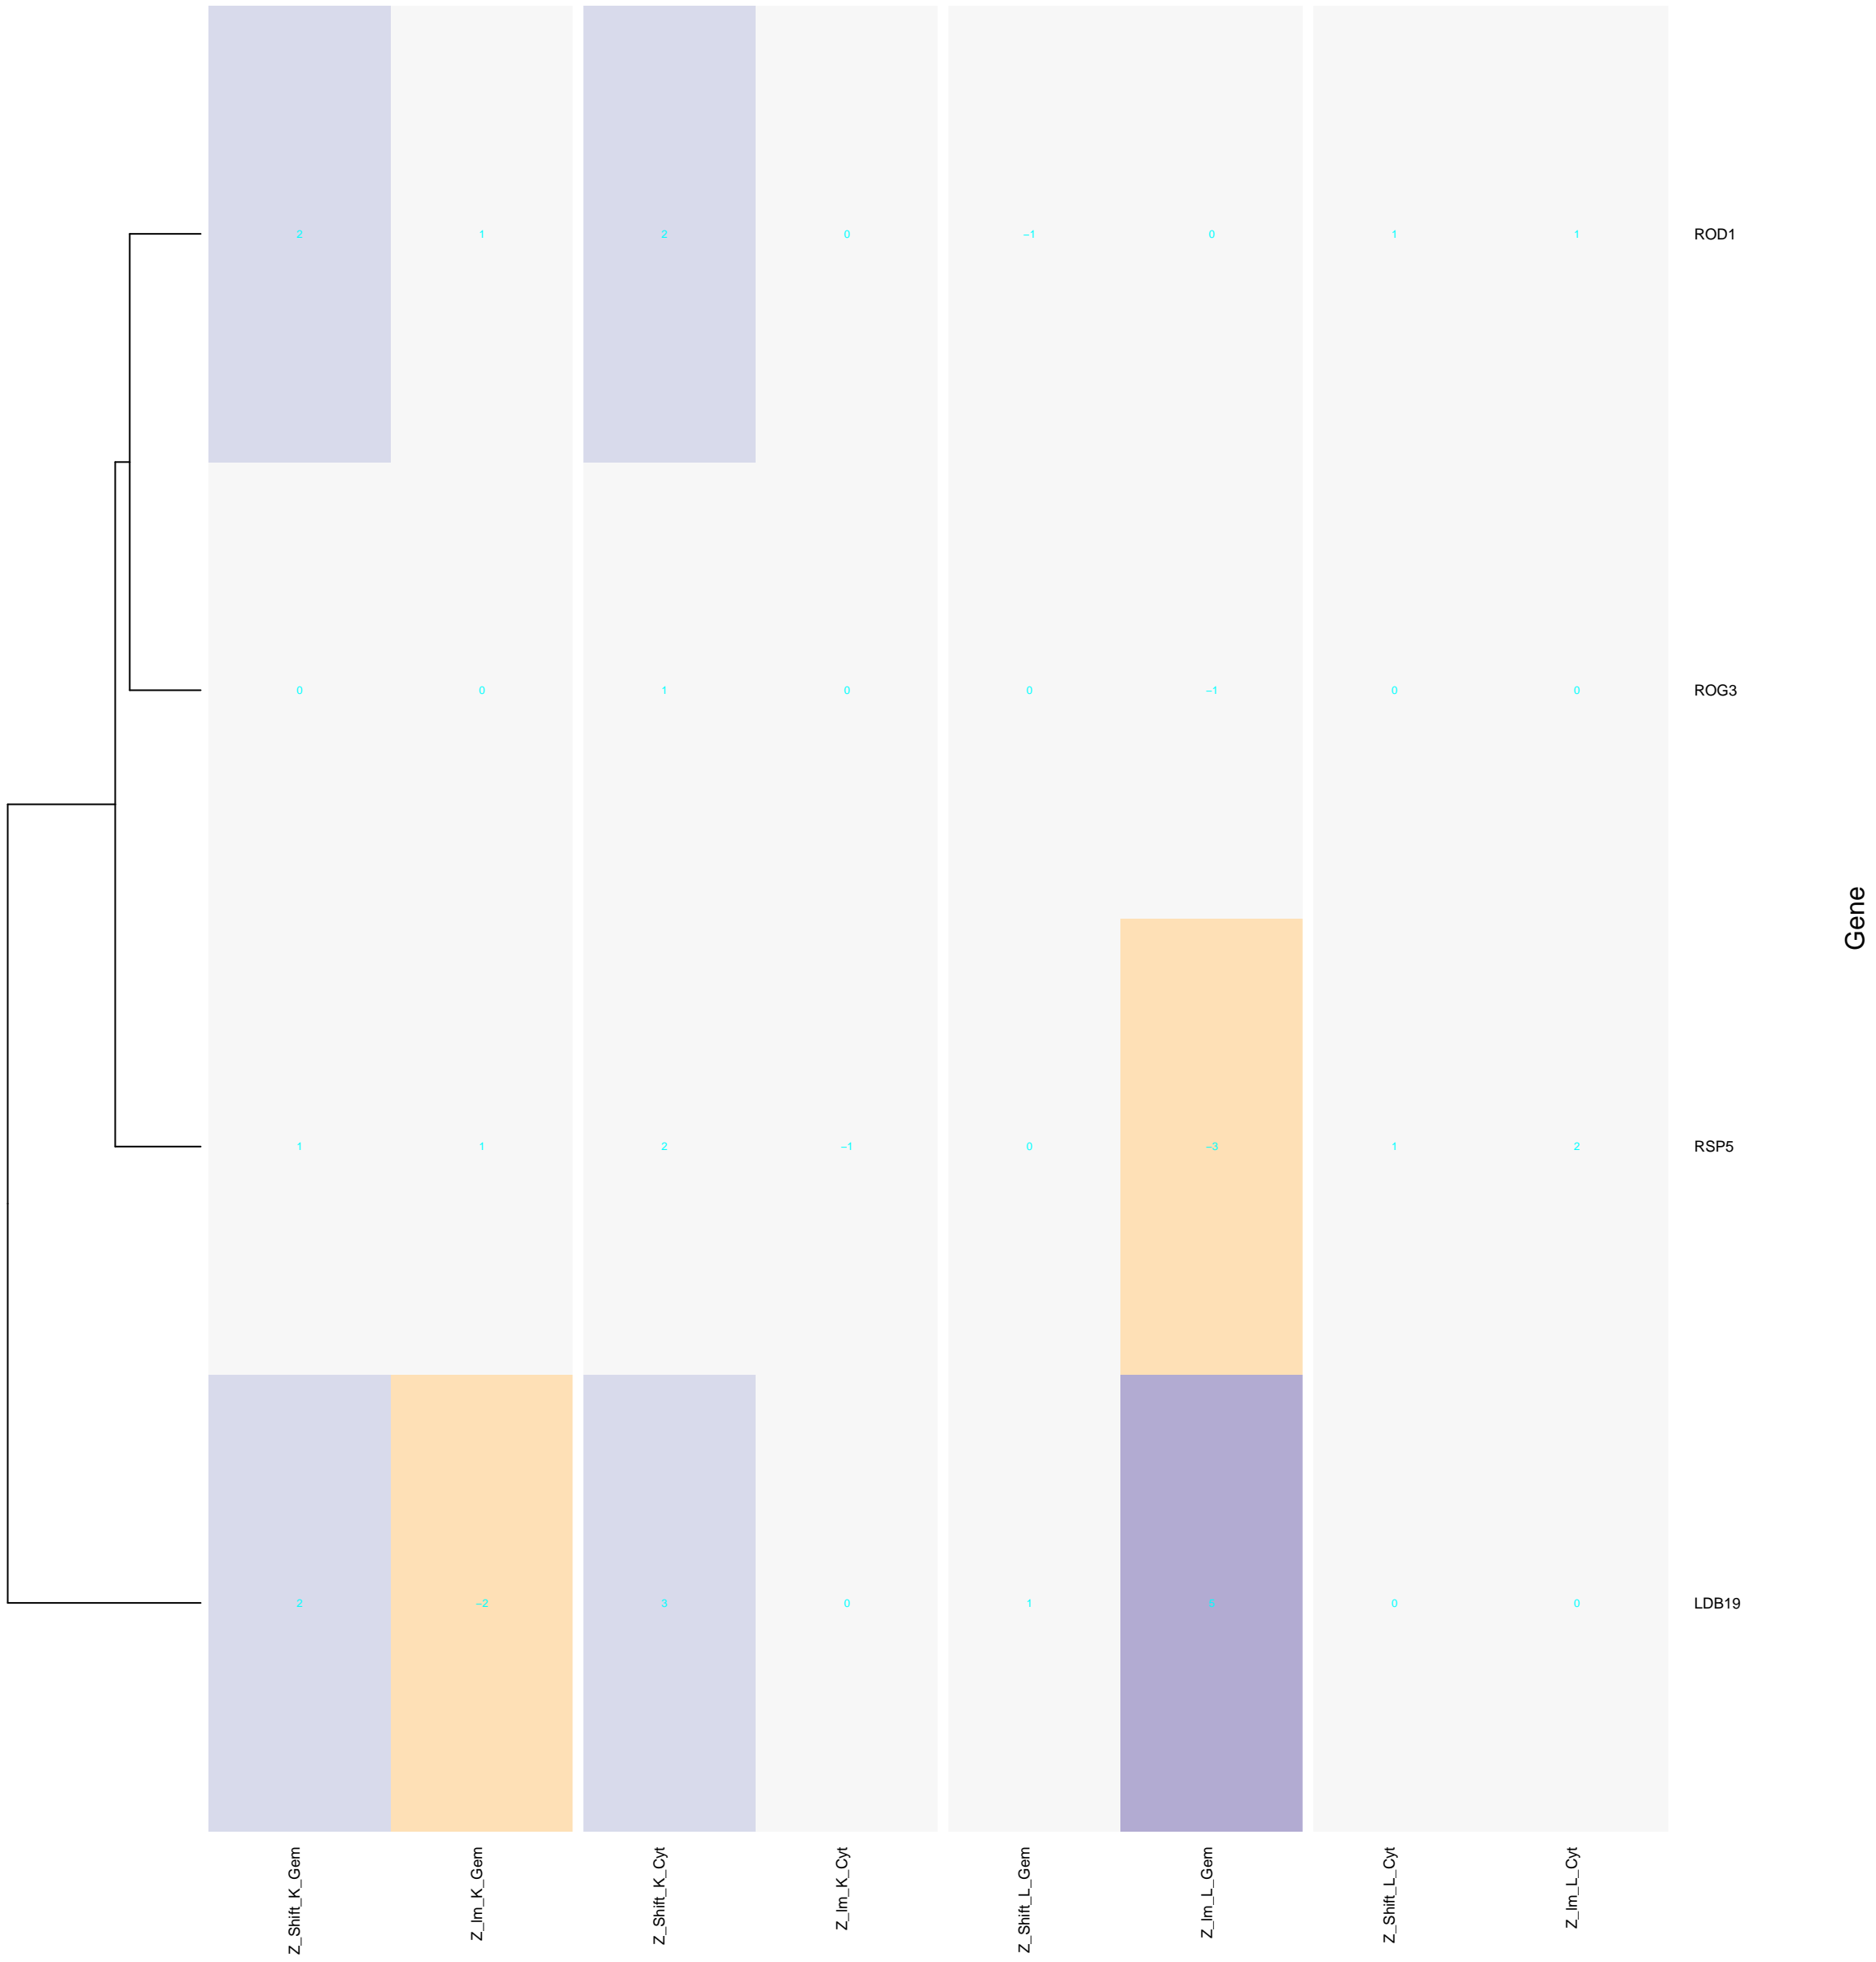



regulation of receptor internalization

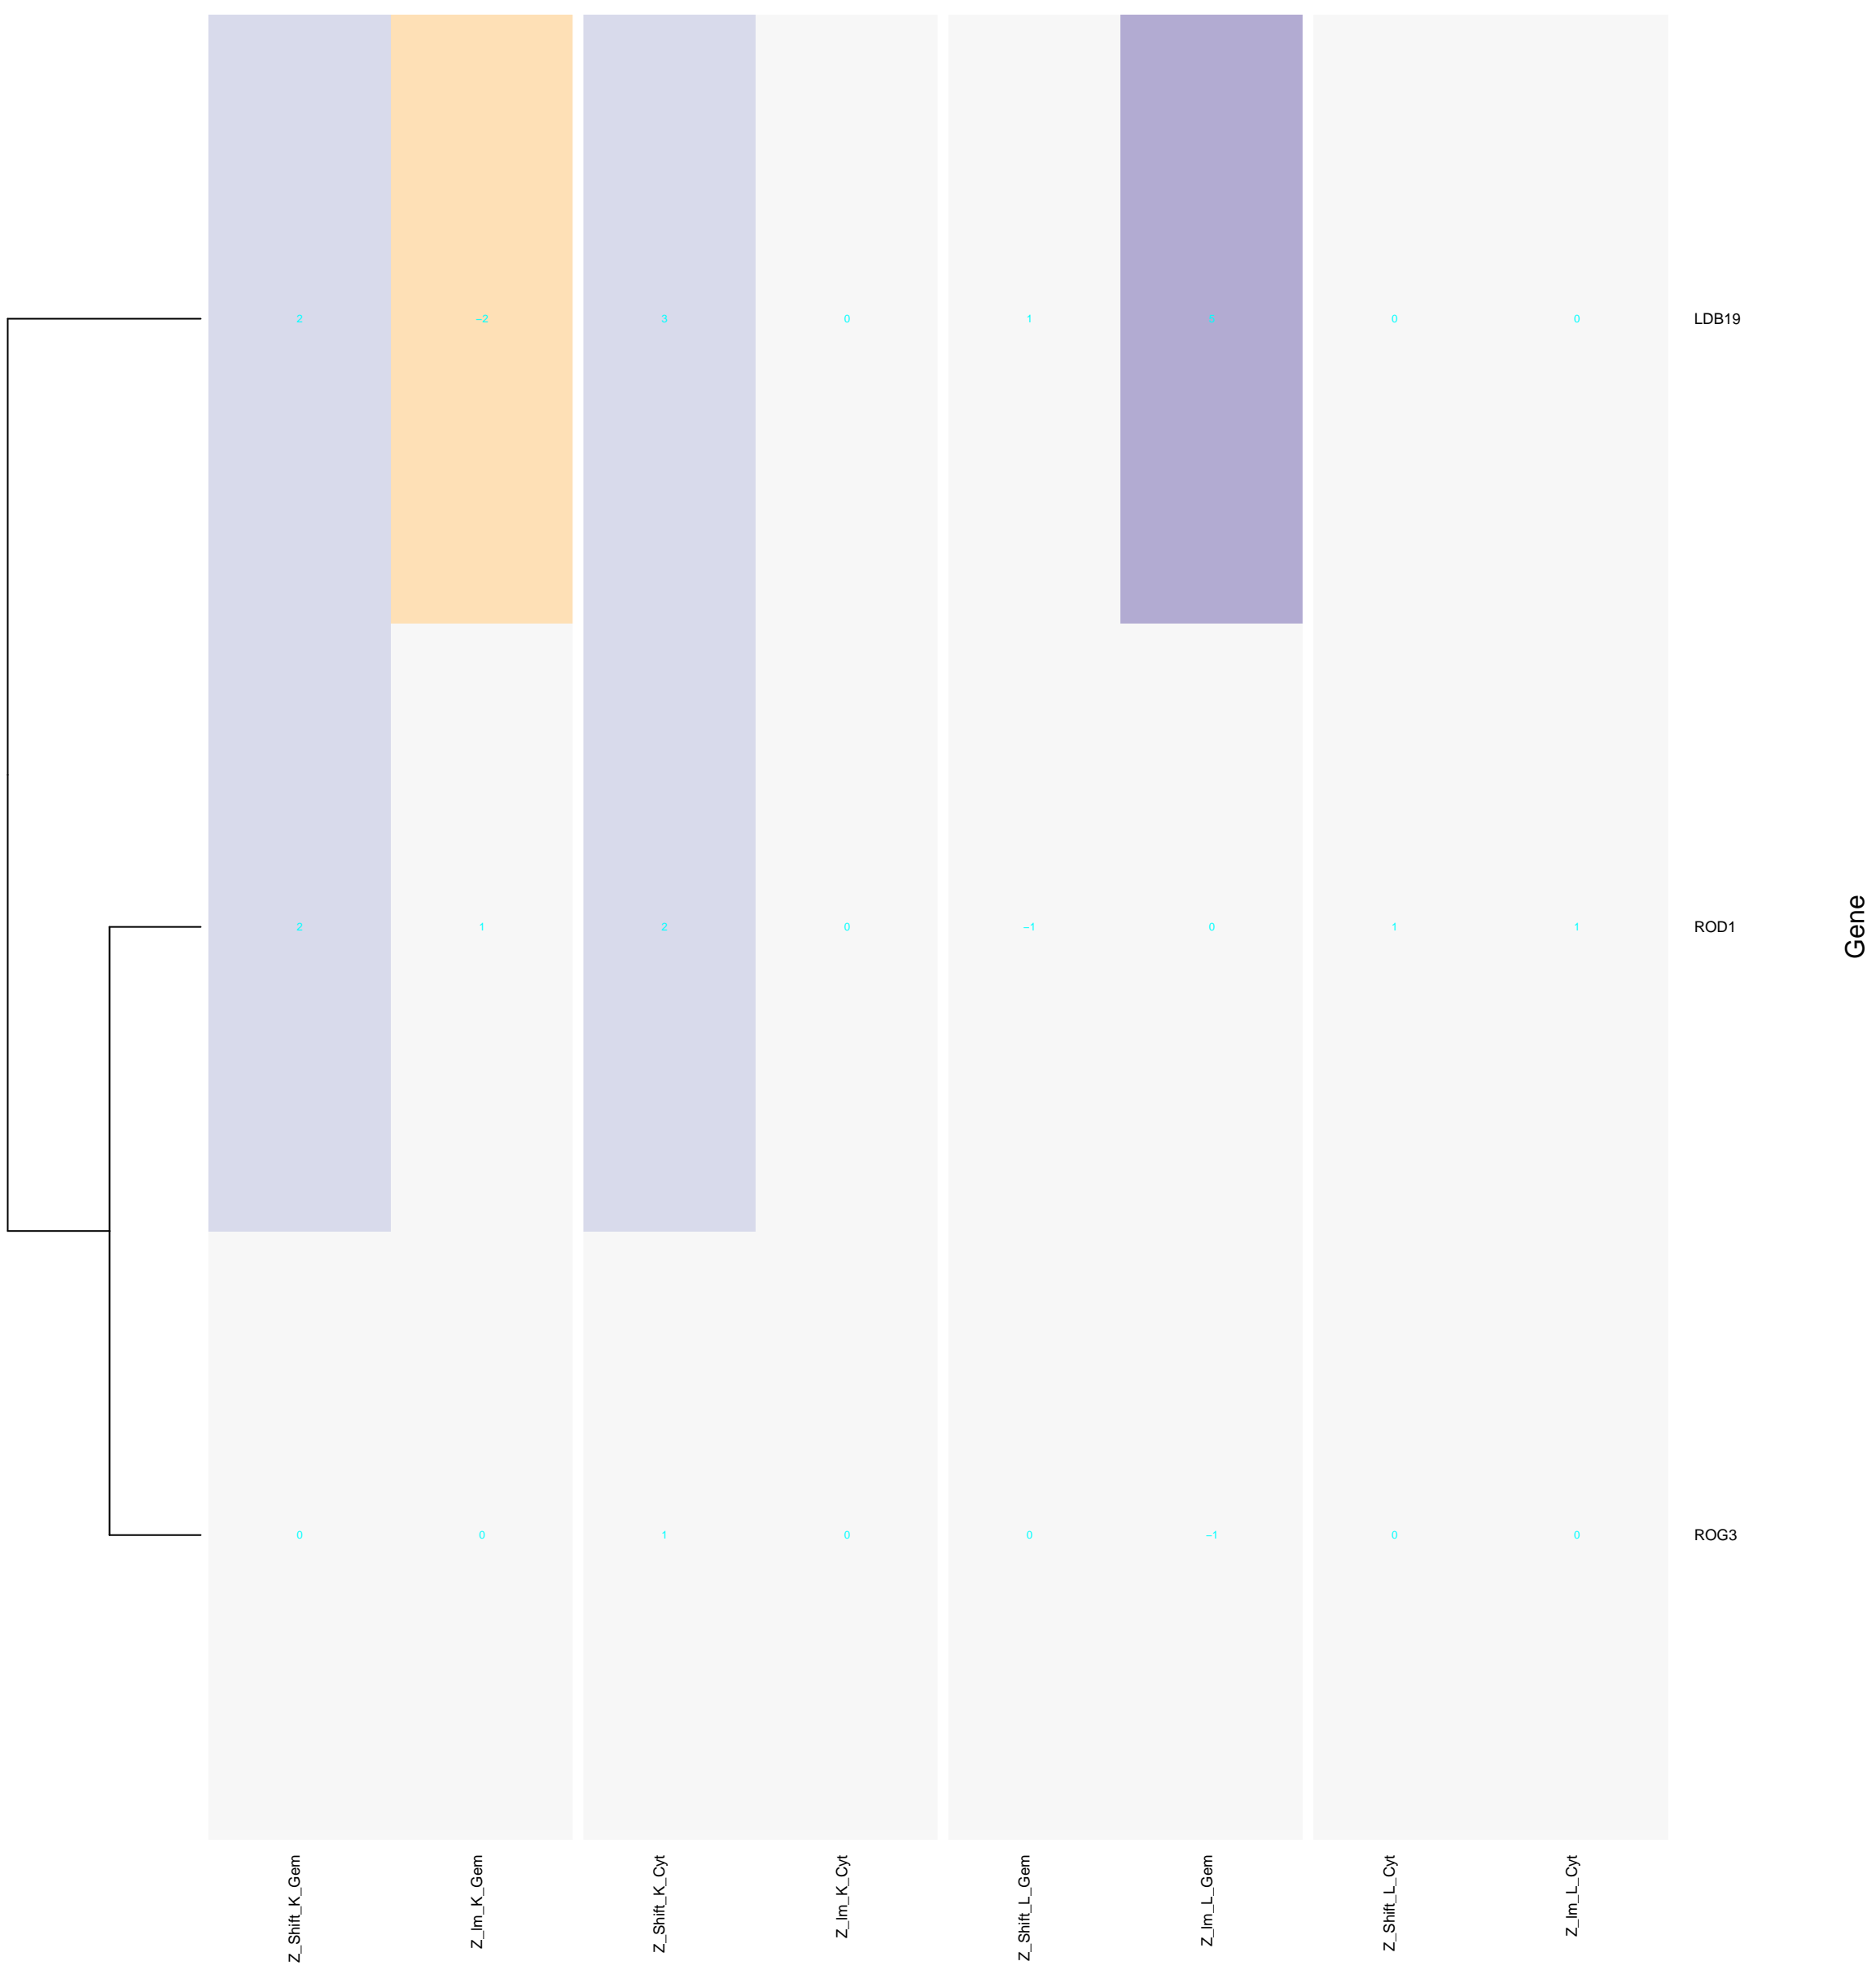



positive regulation of receptor internalization

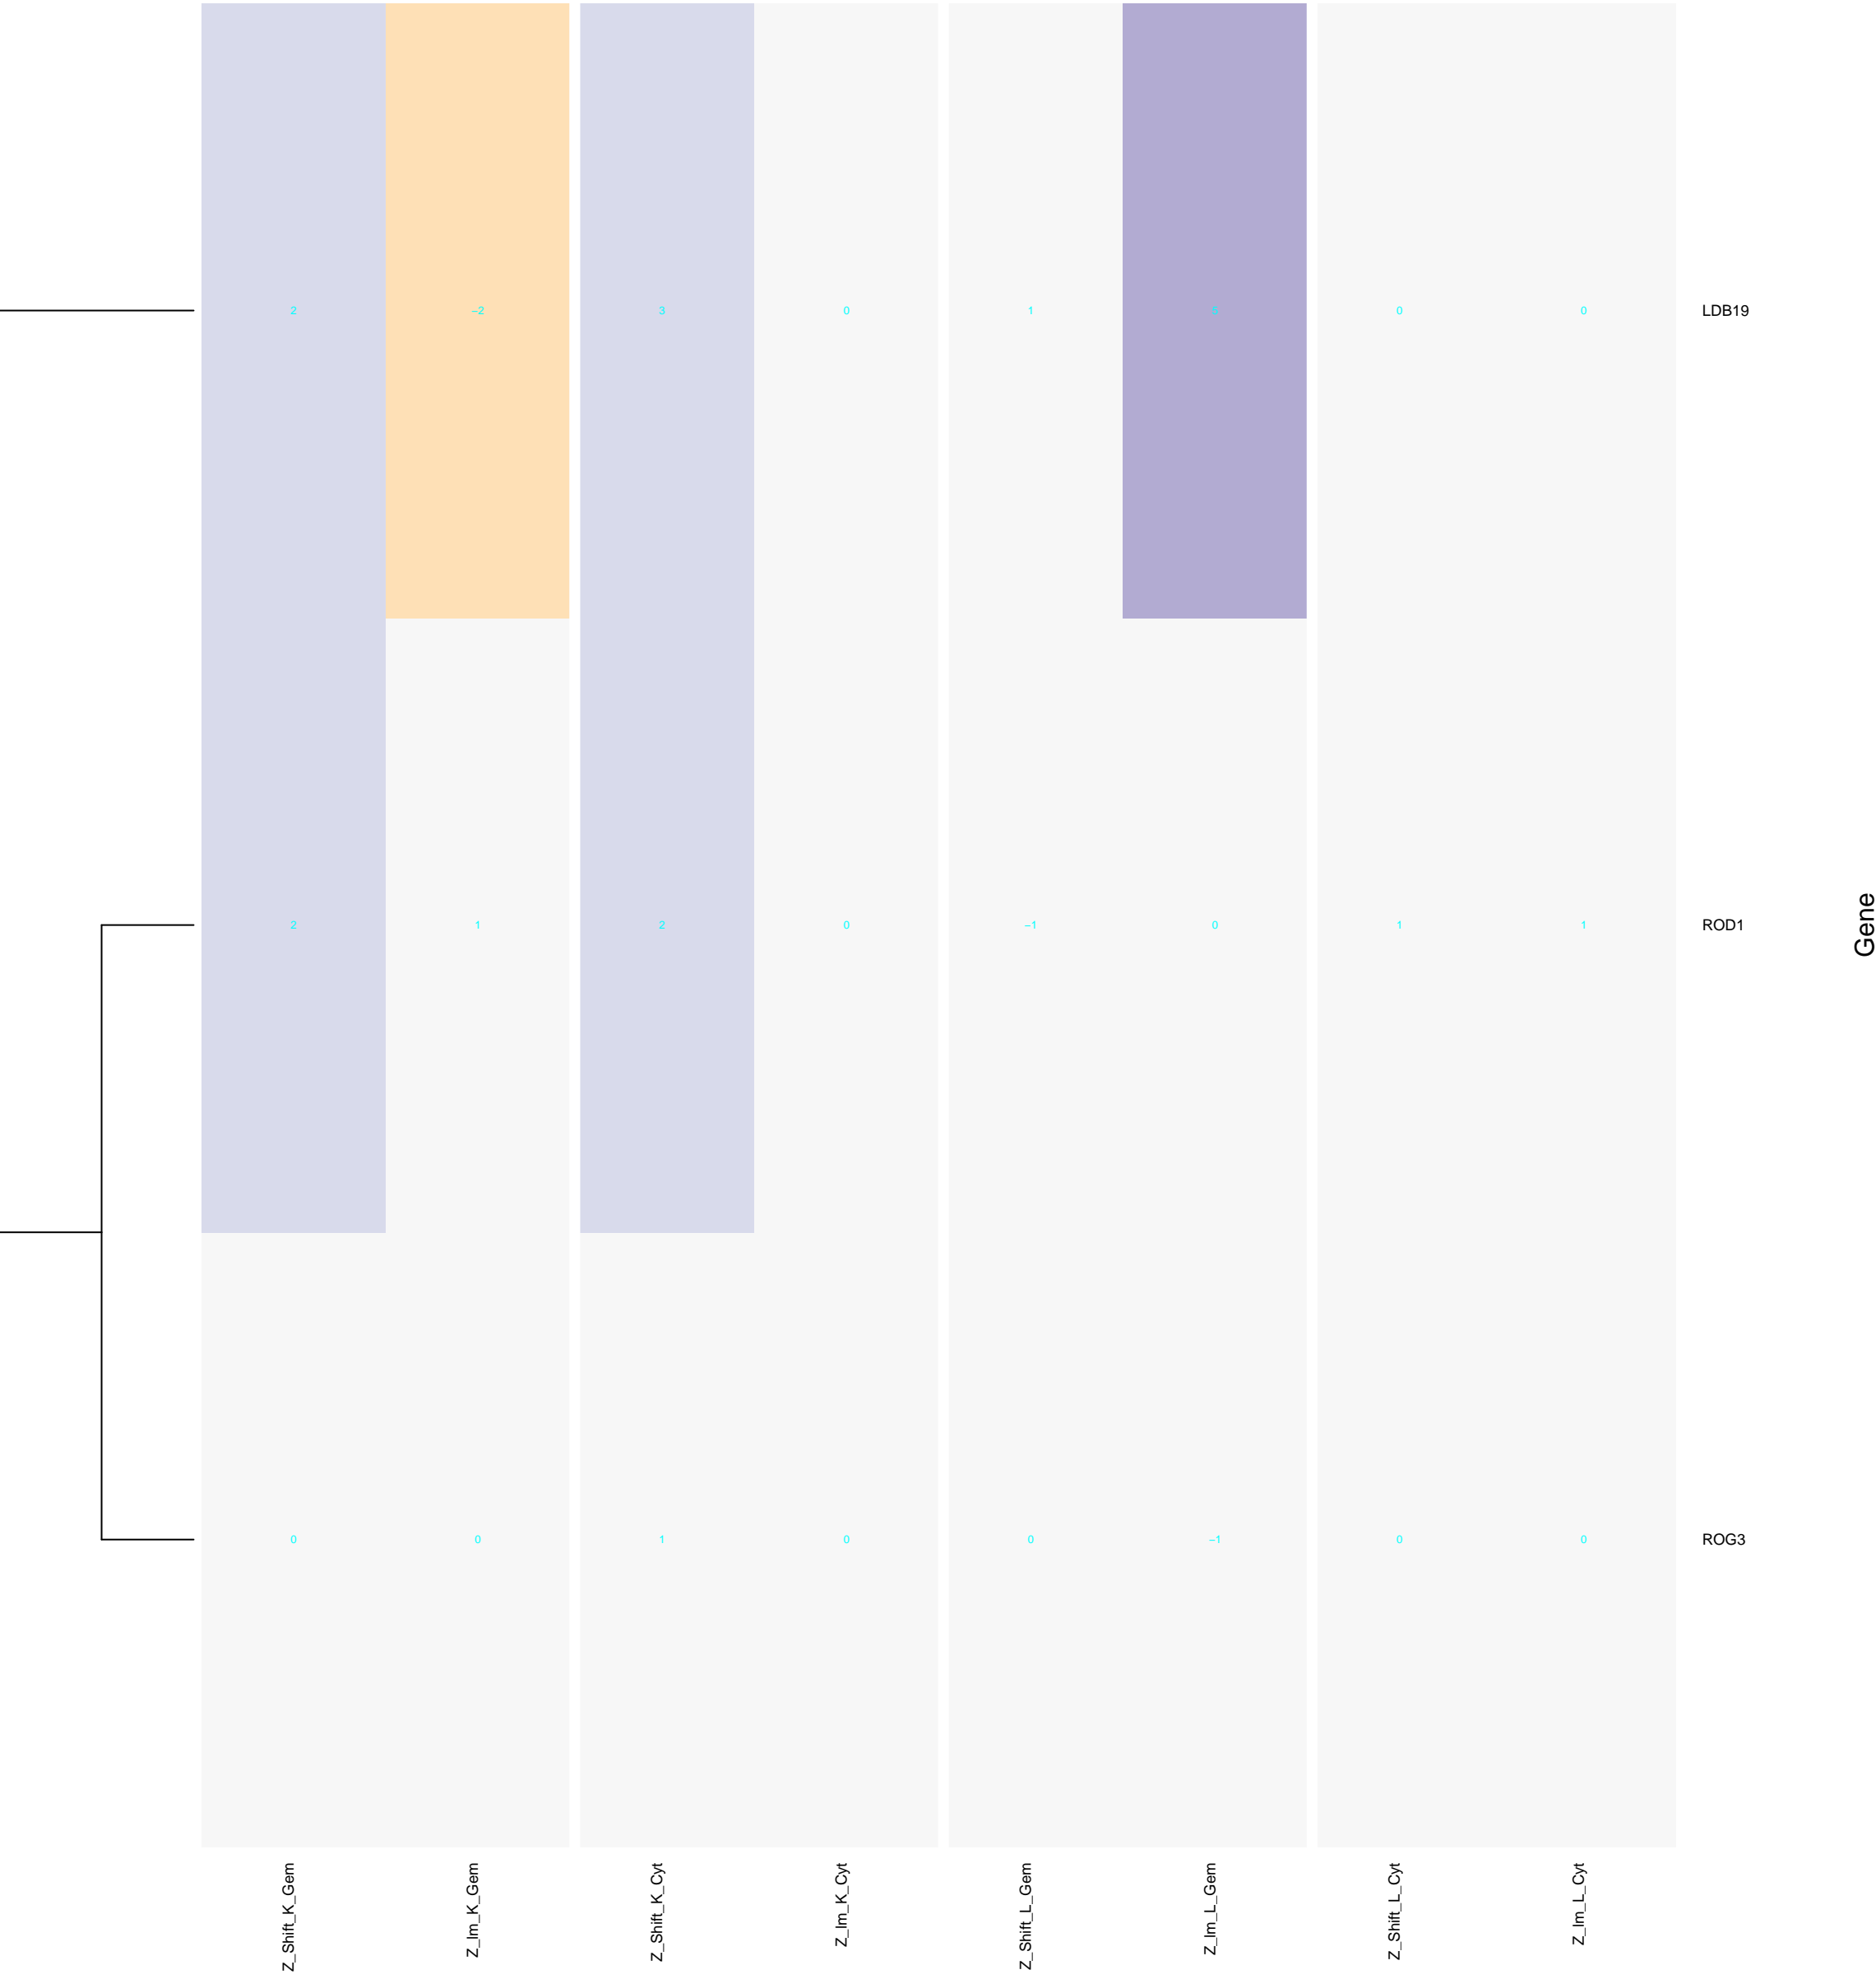

Supplement: s1 [file s1]
