# Supplementary material for: A Humanized Yeast Phenomic Model of Deoxycytidine Kinase to Predict Genetic Buffering of Nucleoside Analog Cytotoxicity
Source: MDPI journal article supplement (doi:10.3390/genes10100770), 2019-09-30

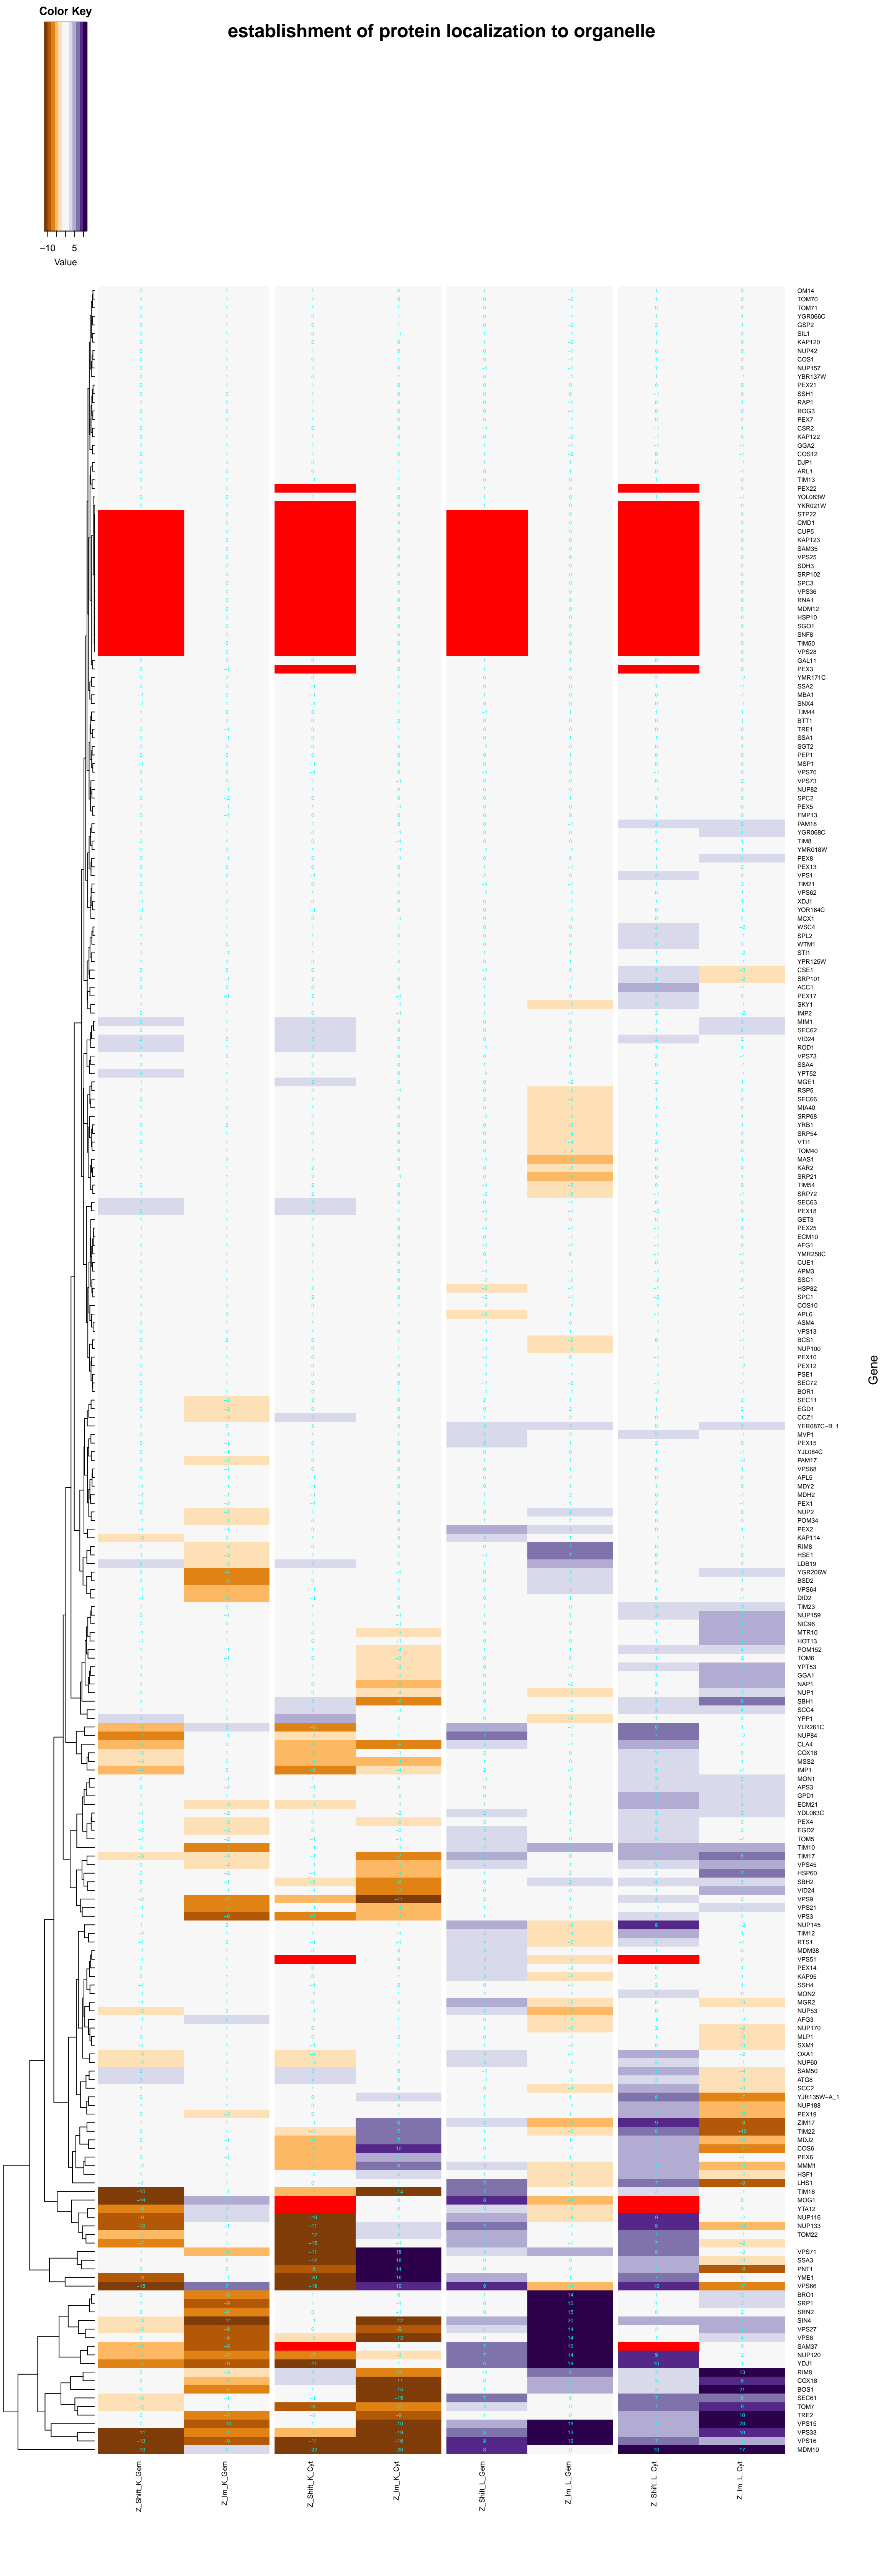

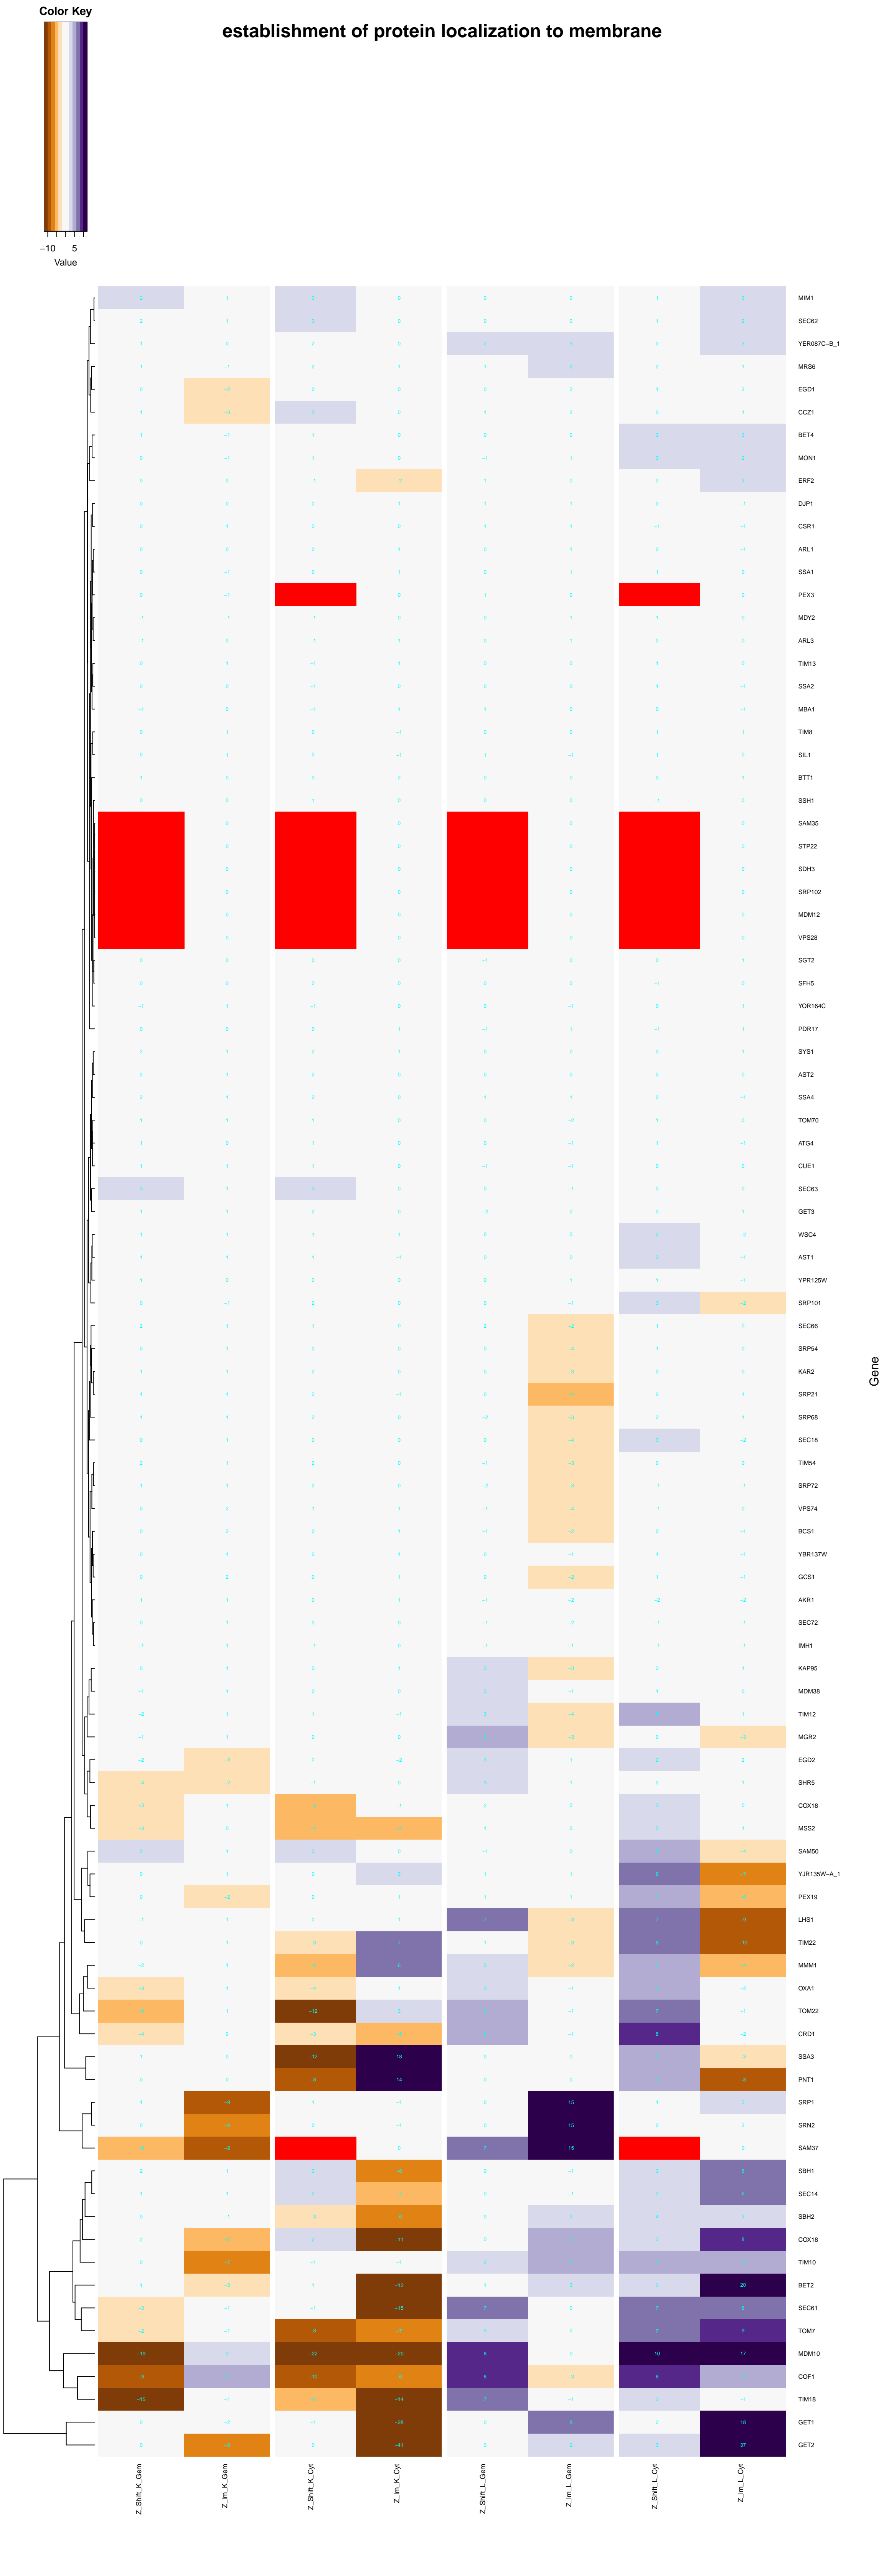



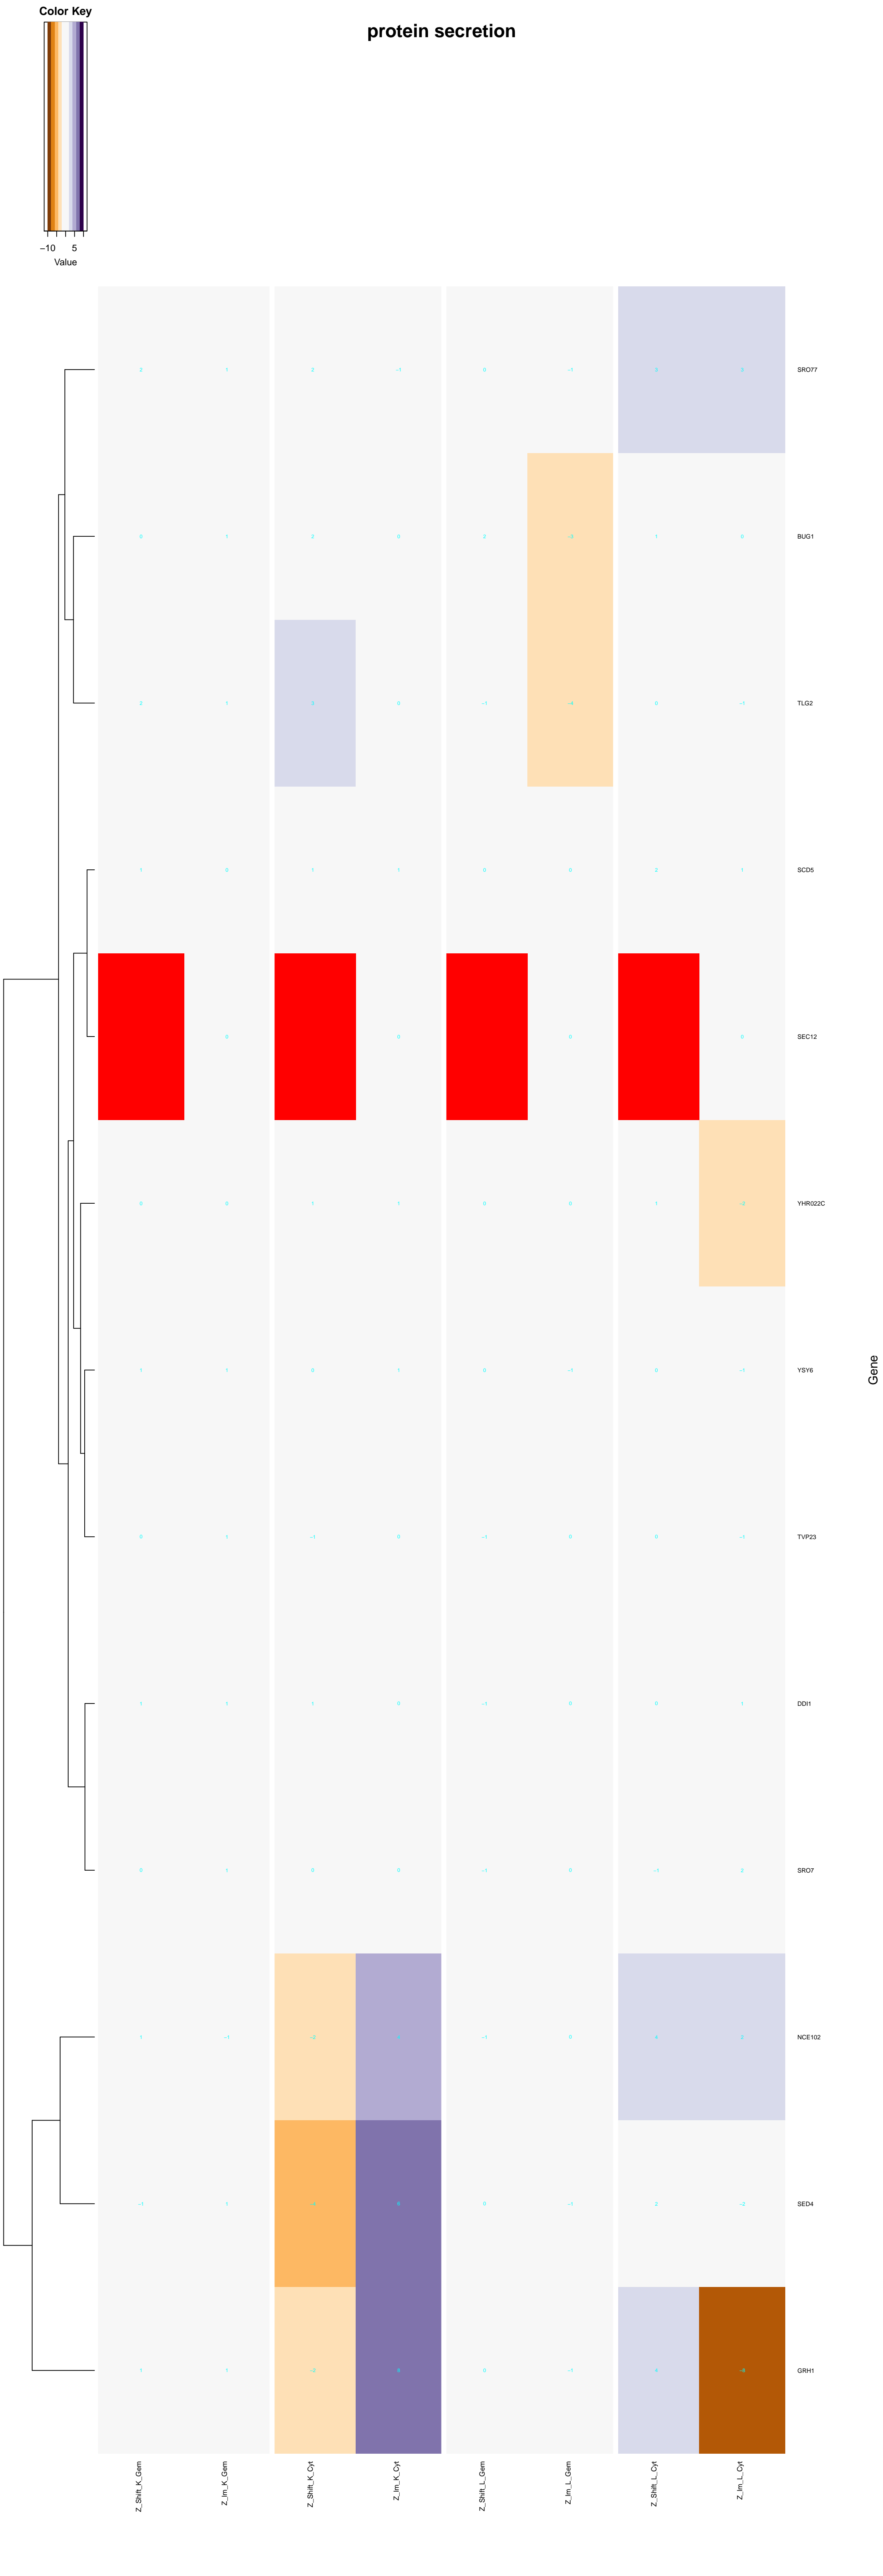

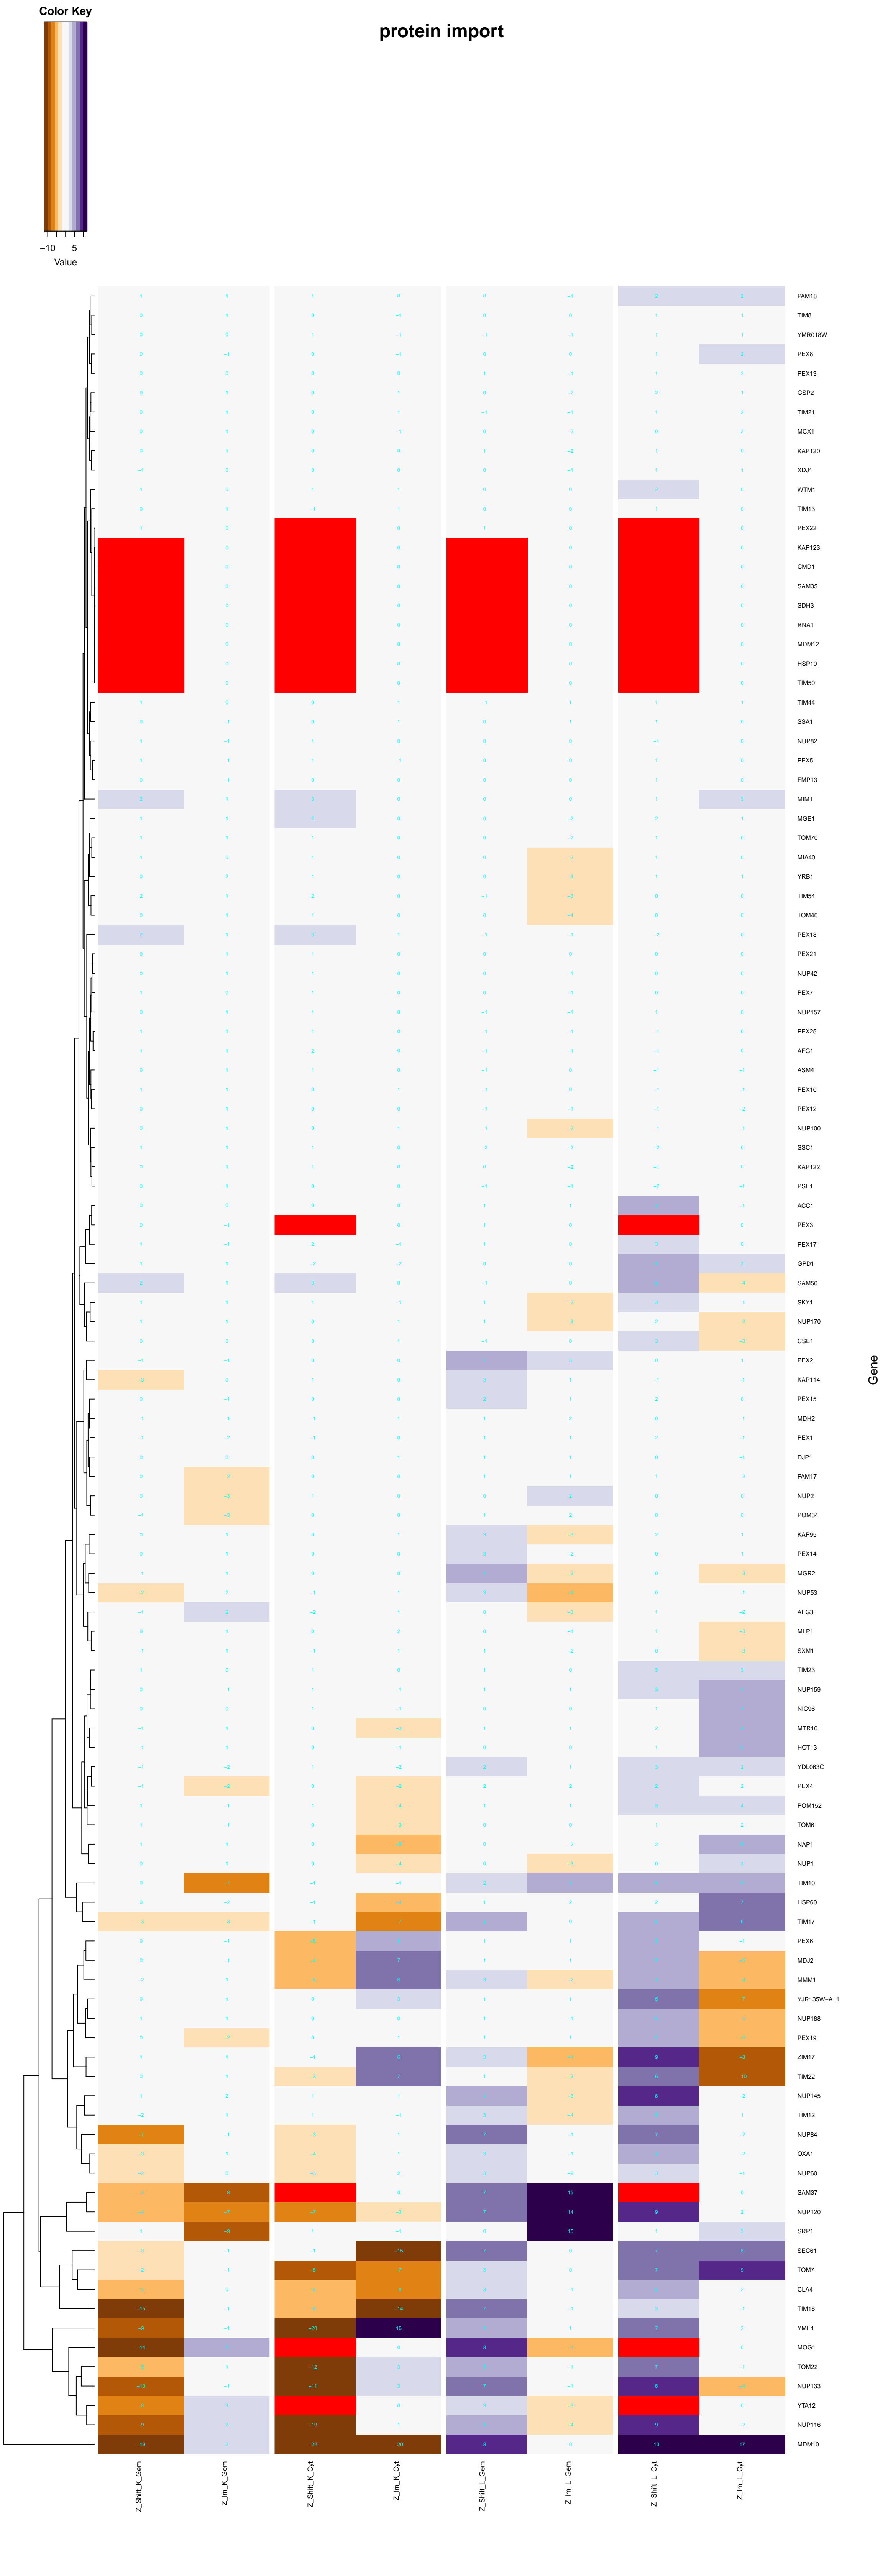

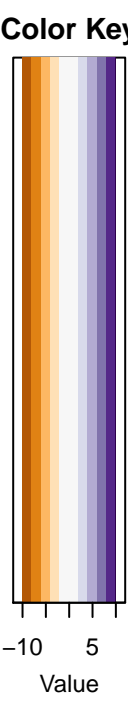

Golgi to plasma membrane protein transport

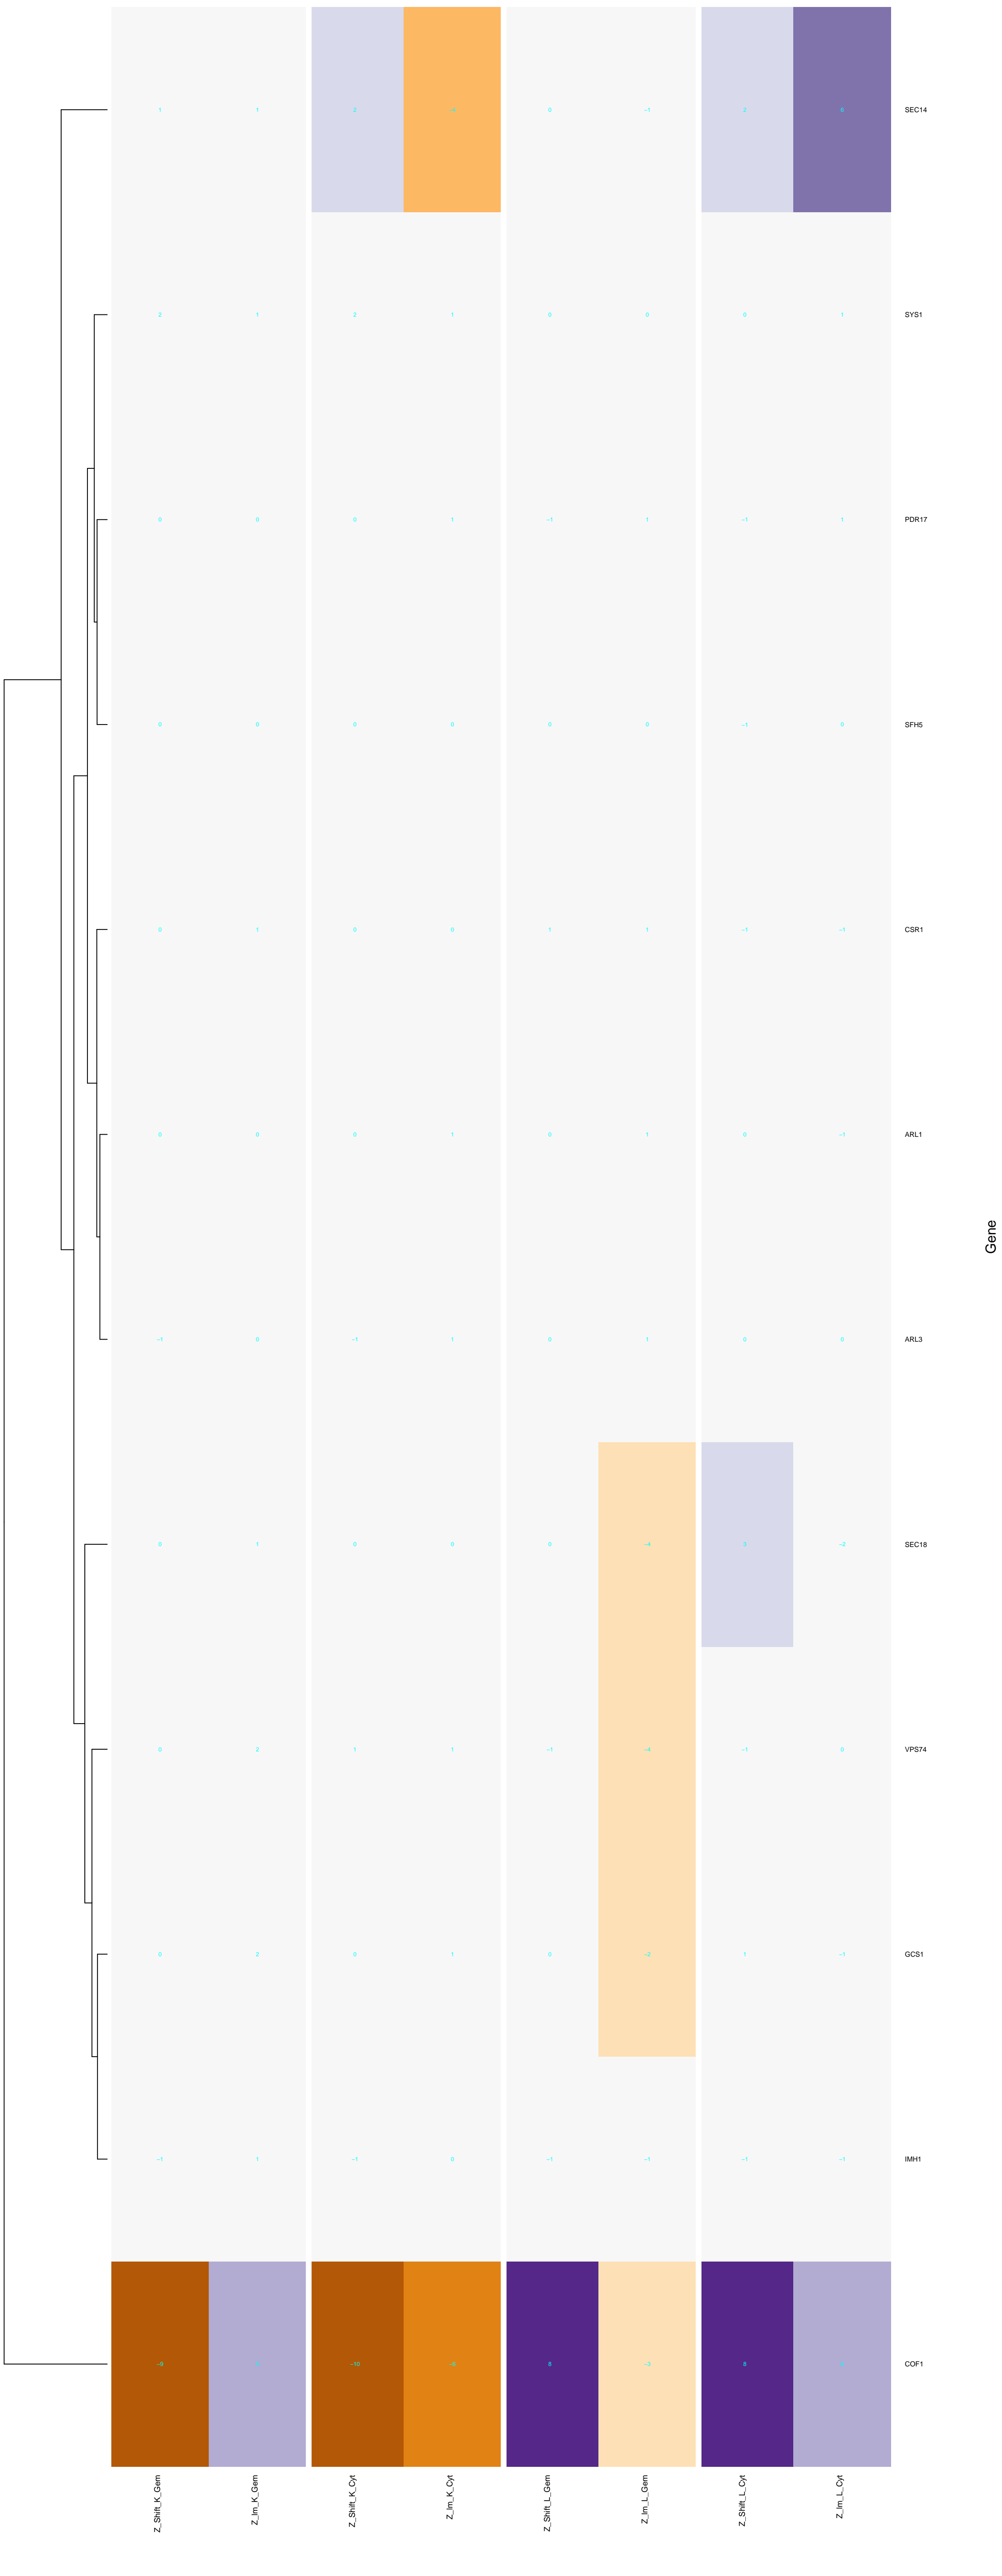

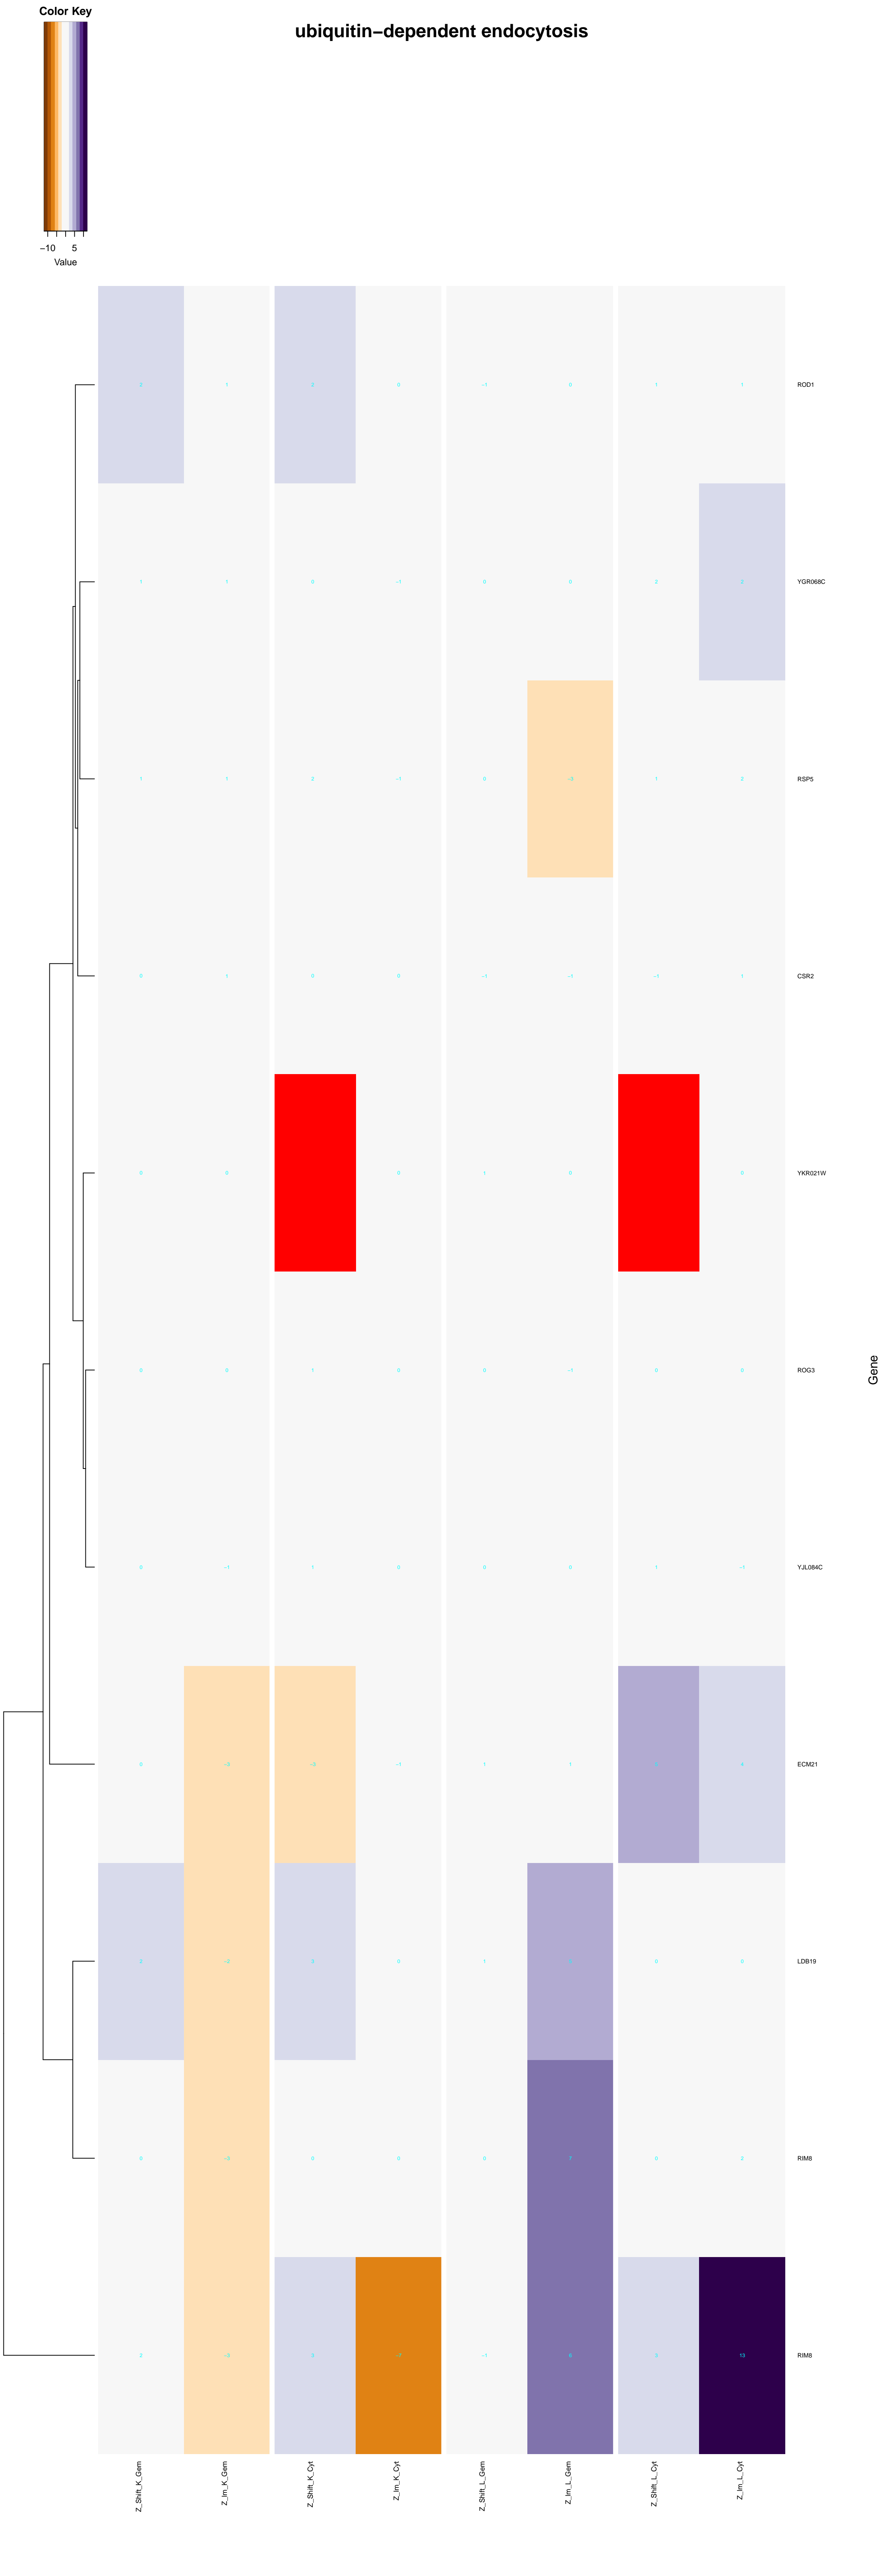



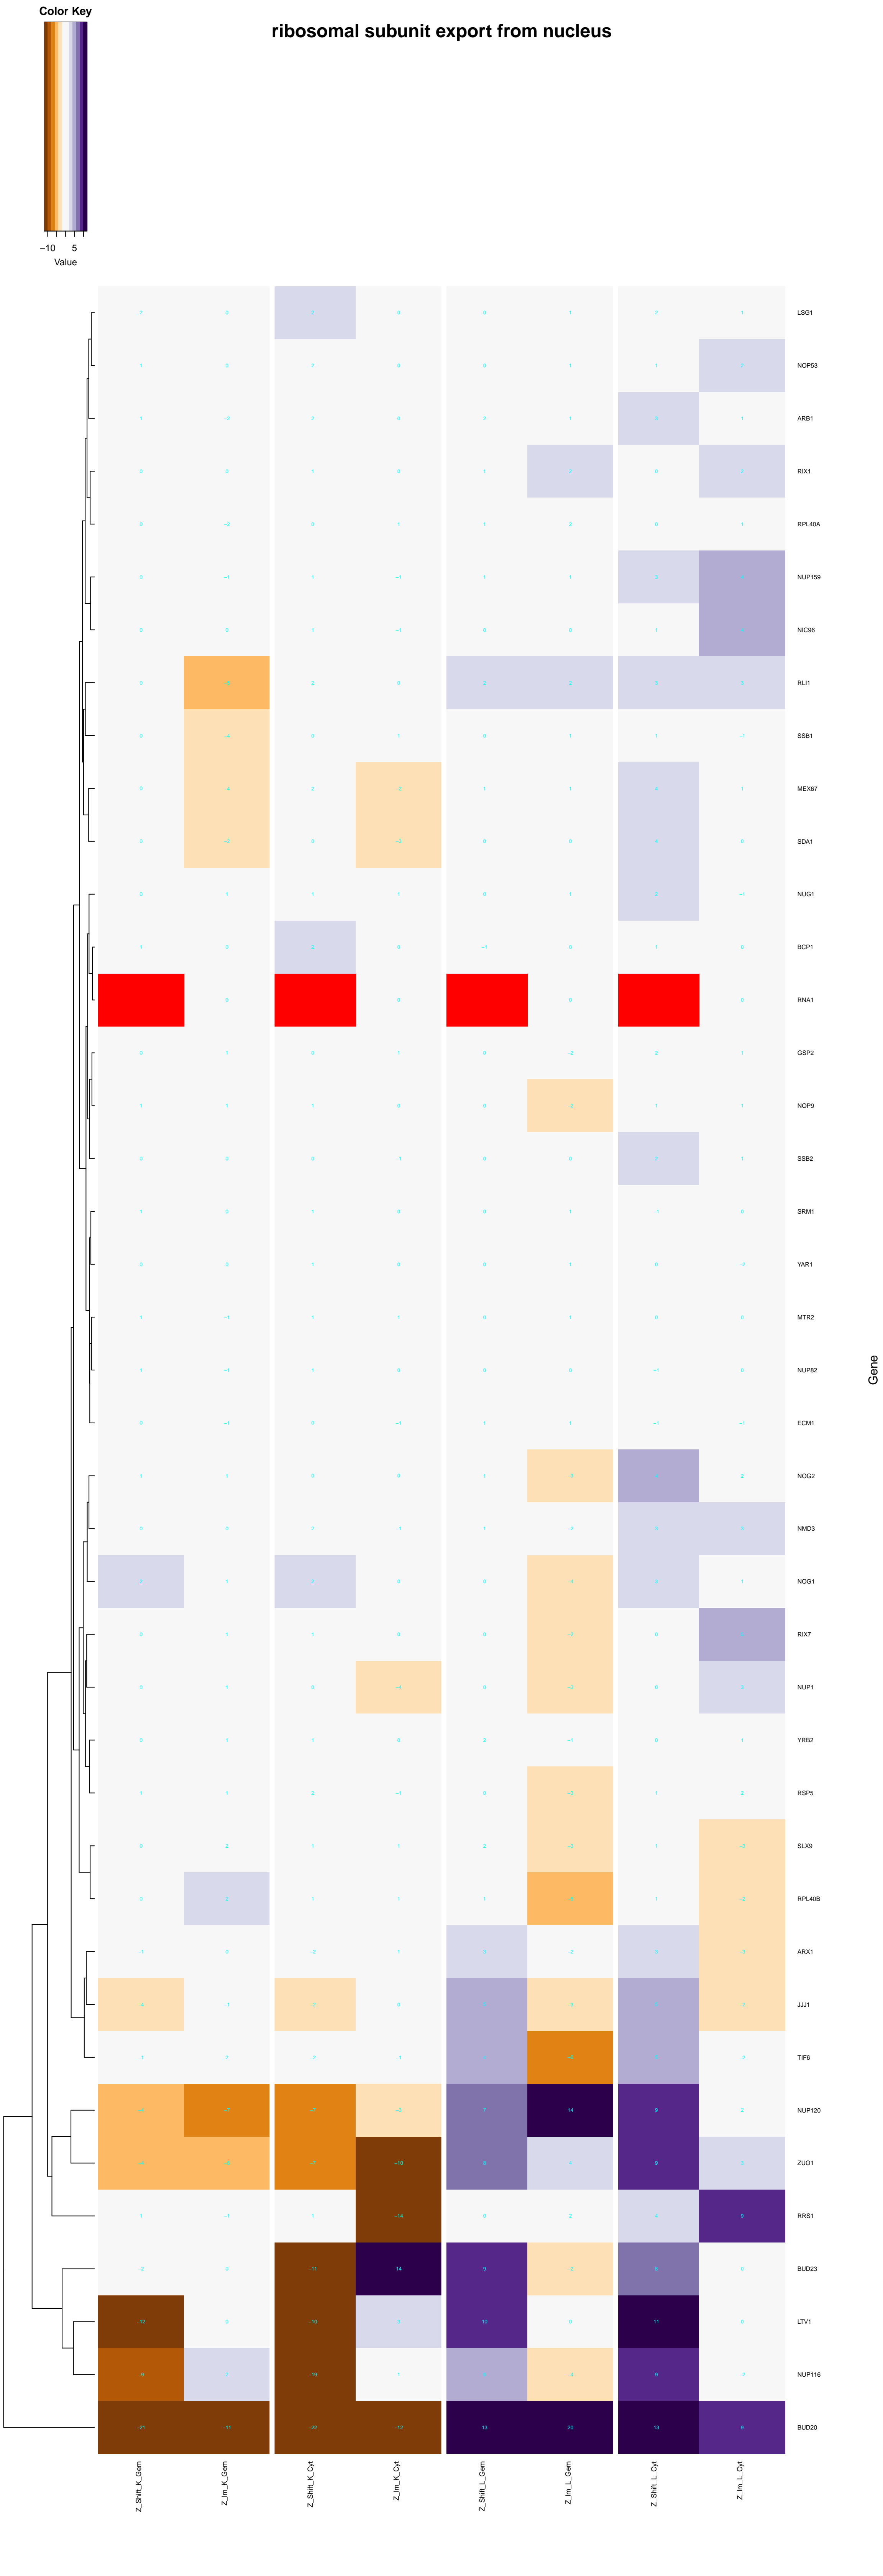

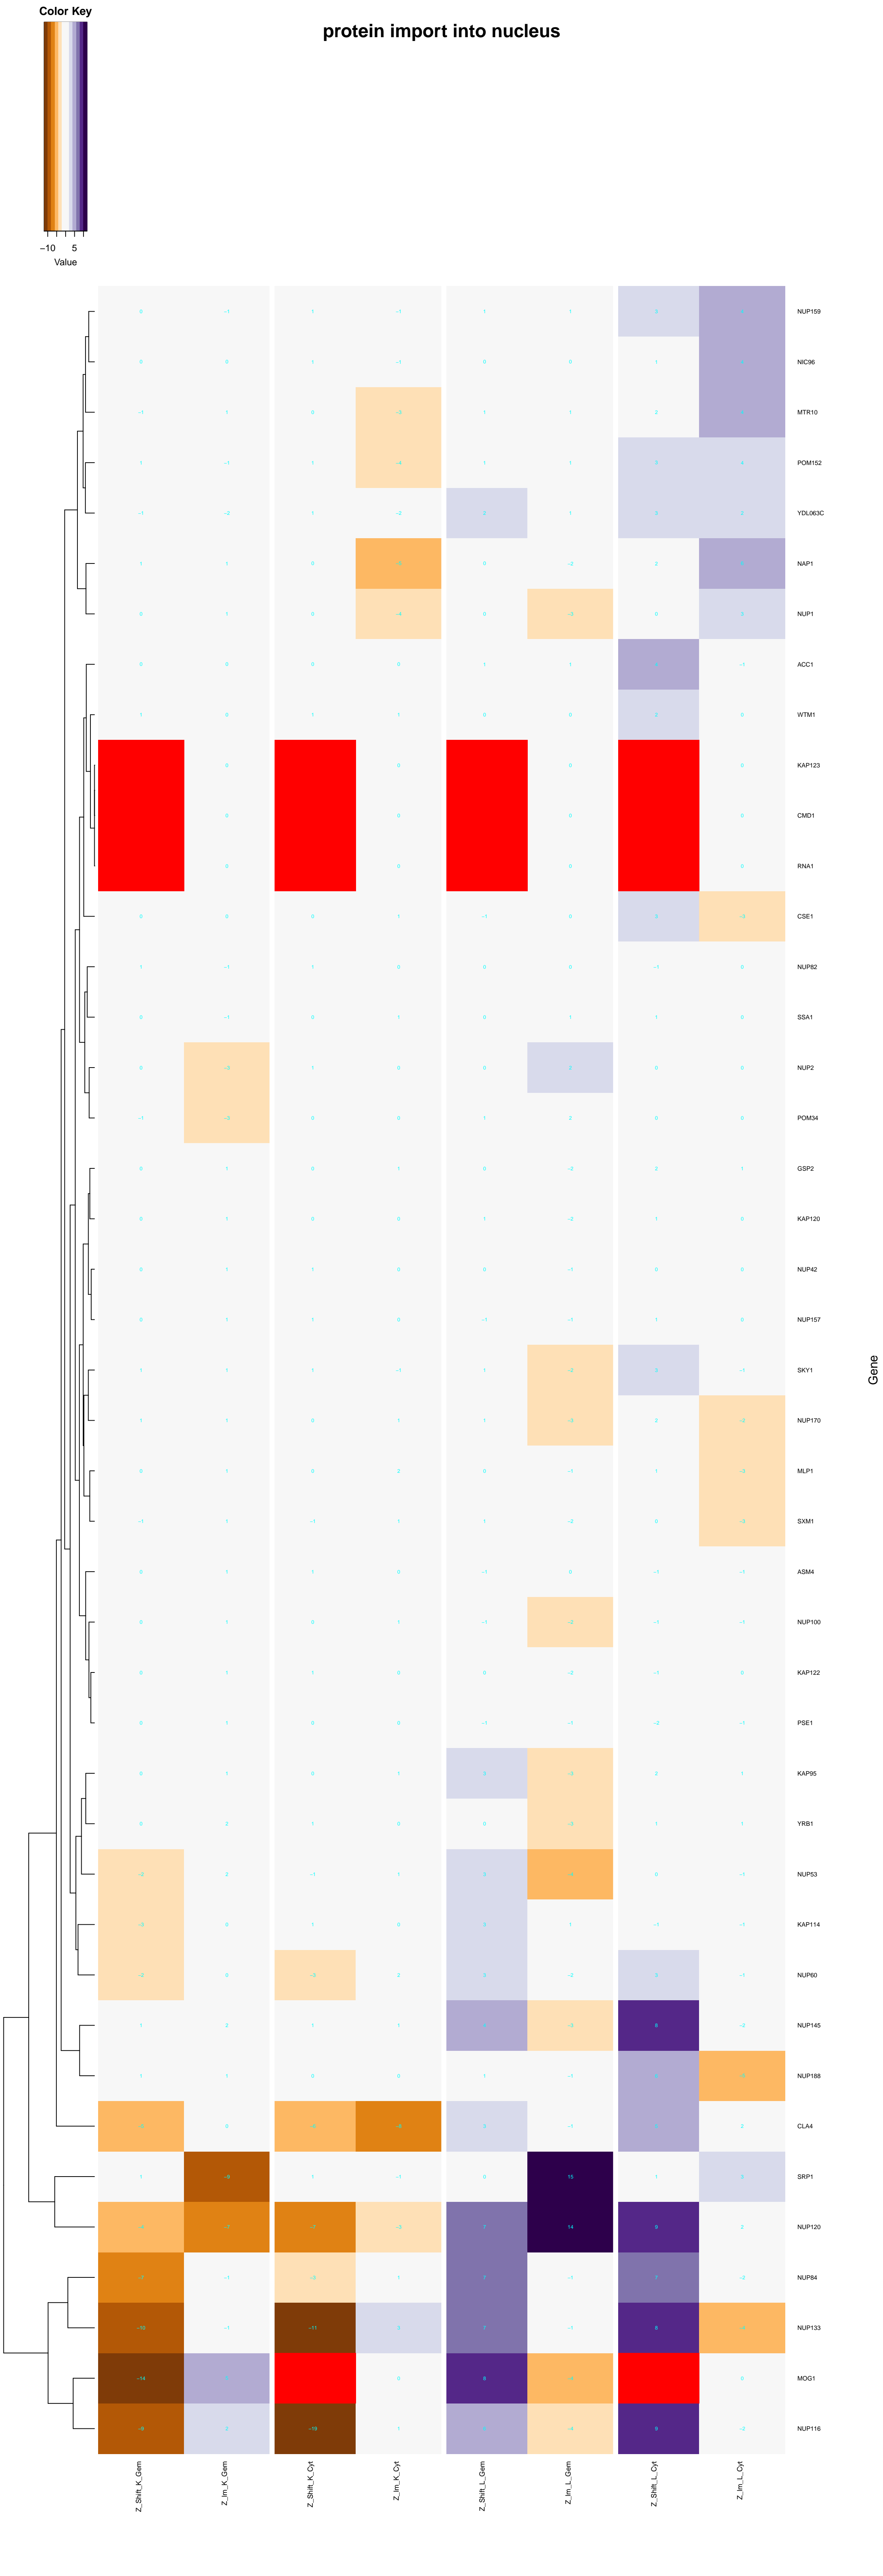

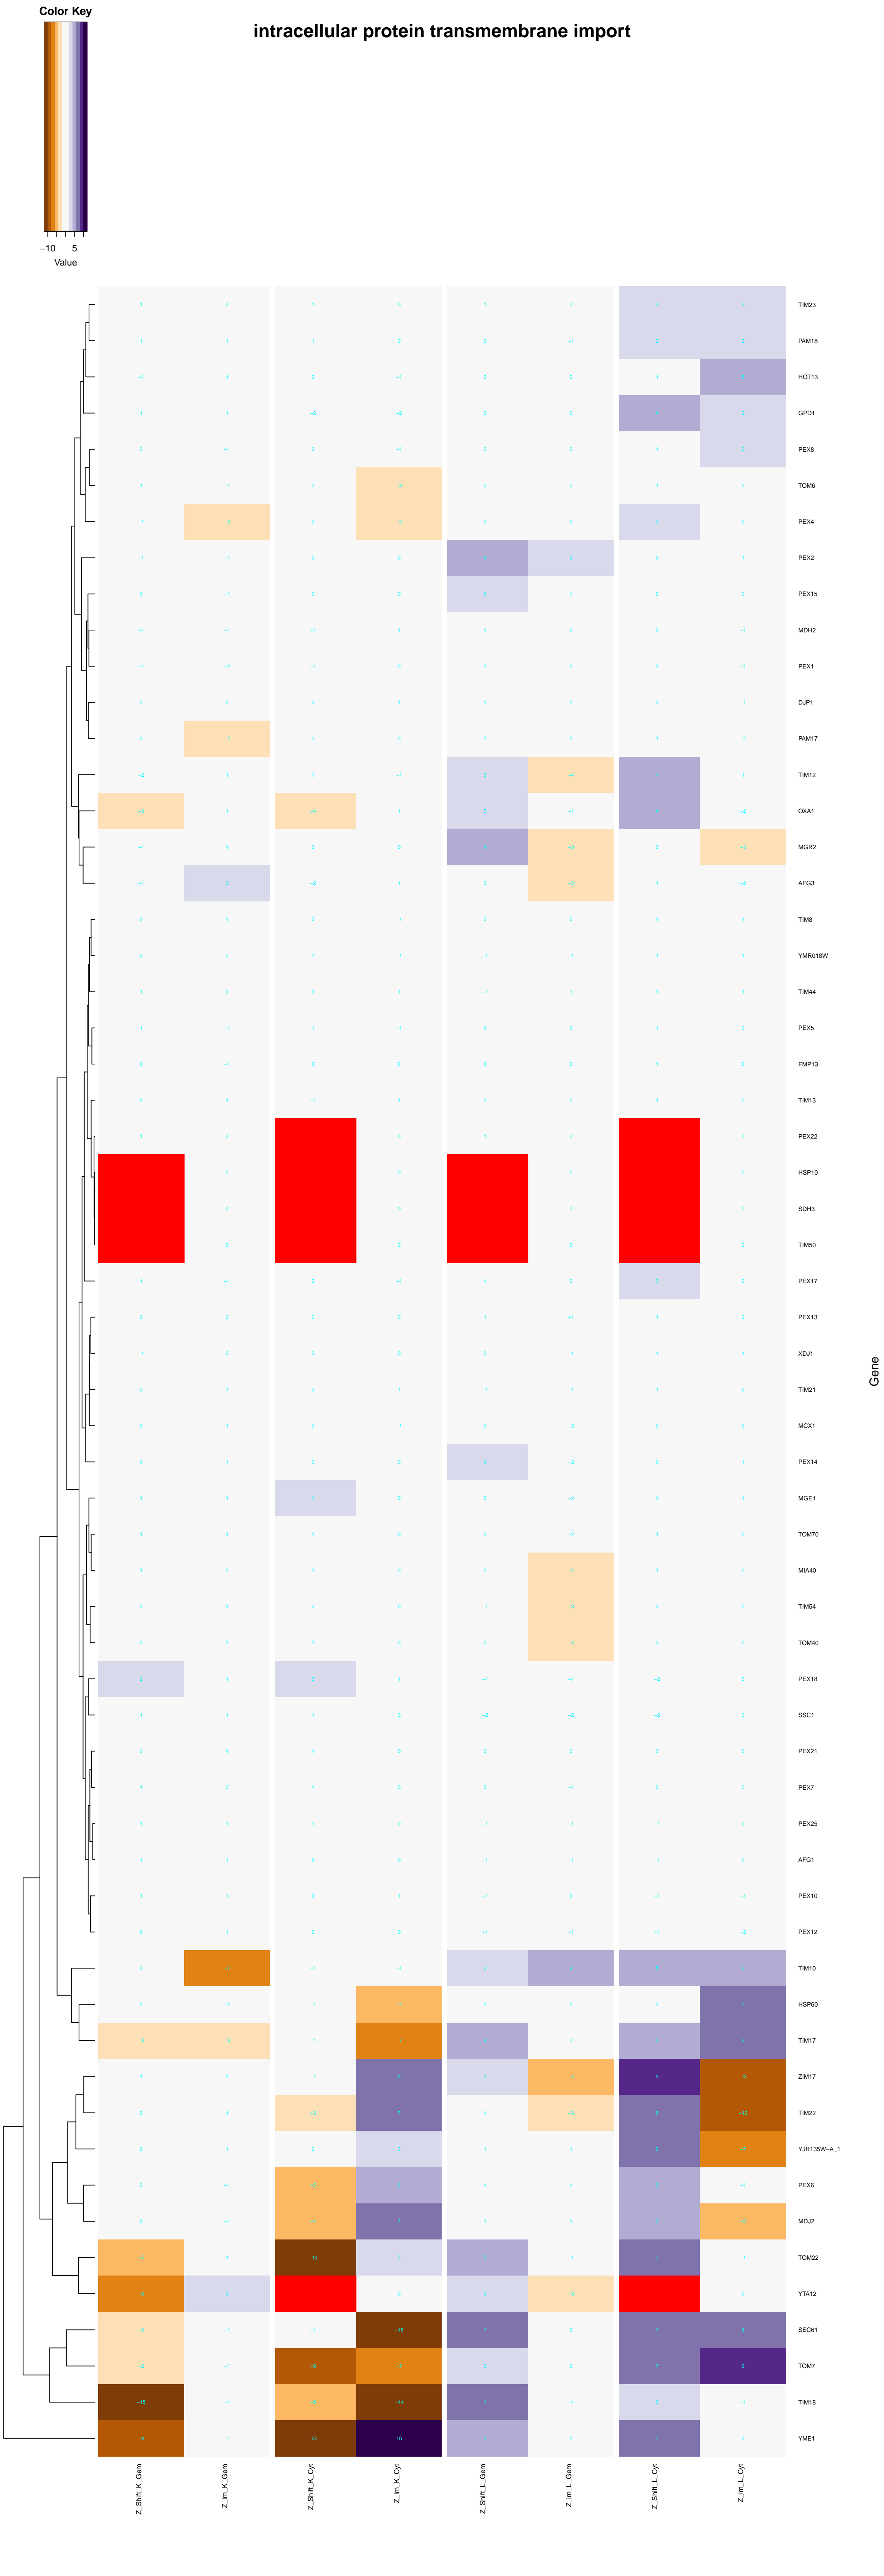

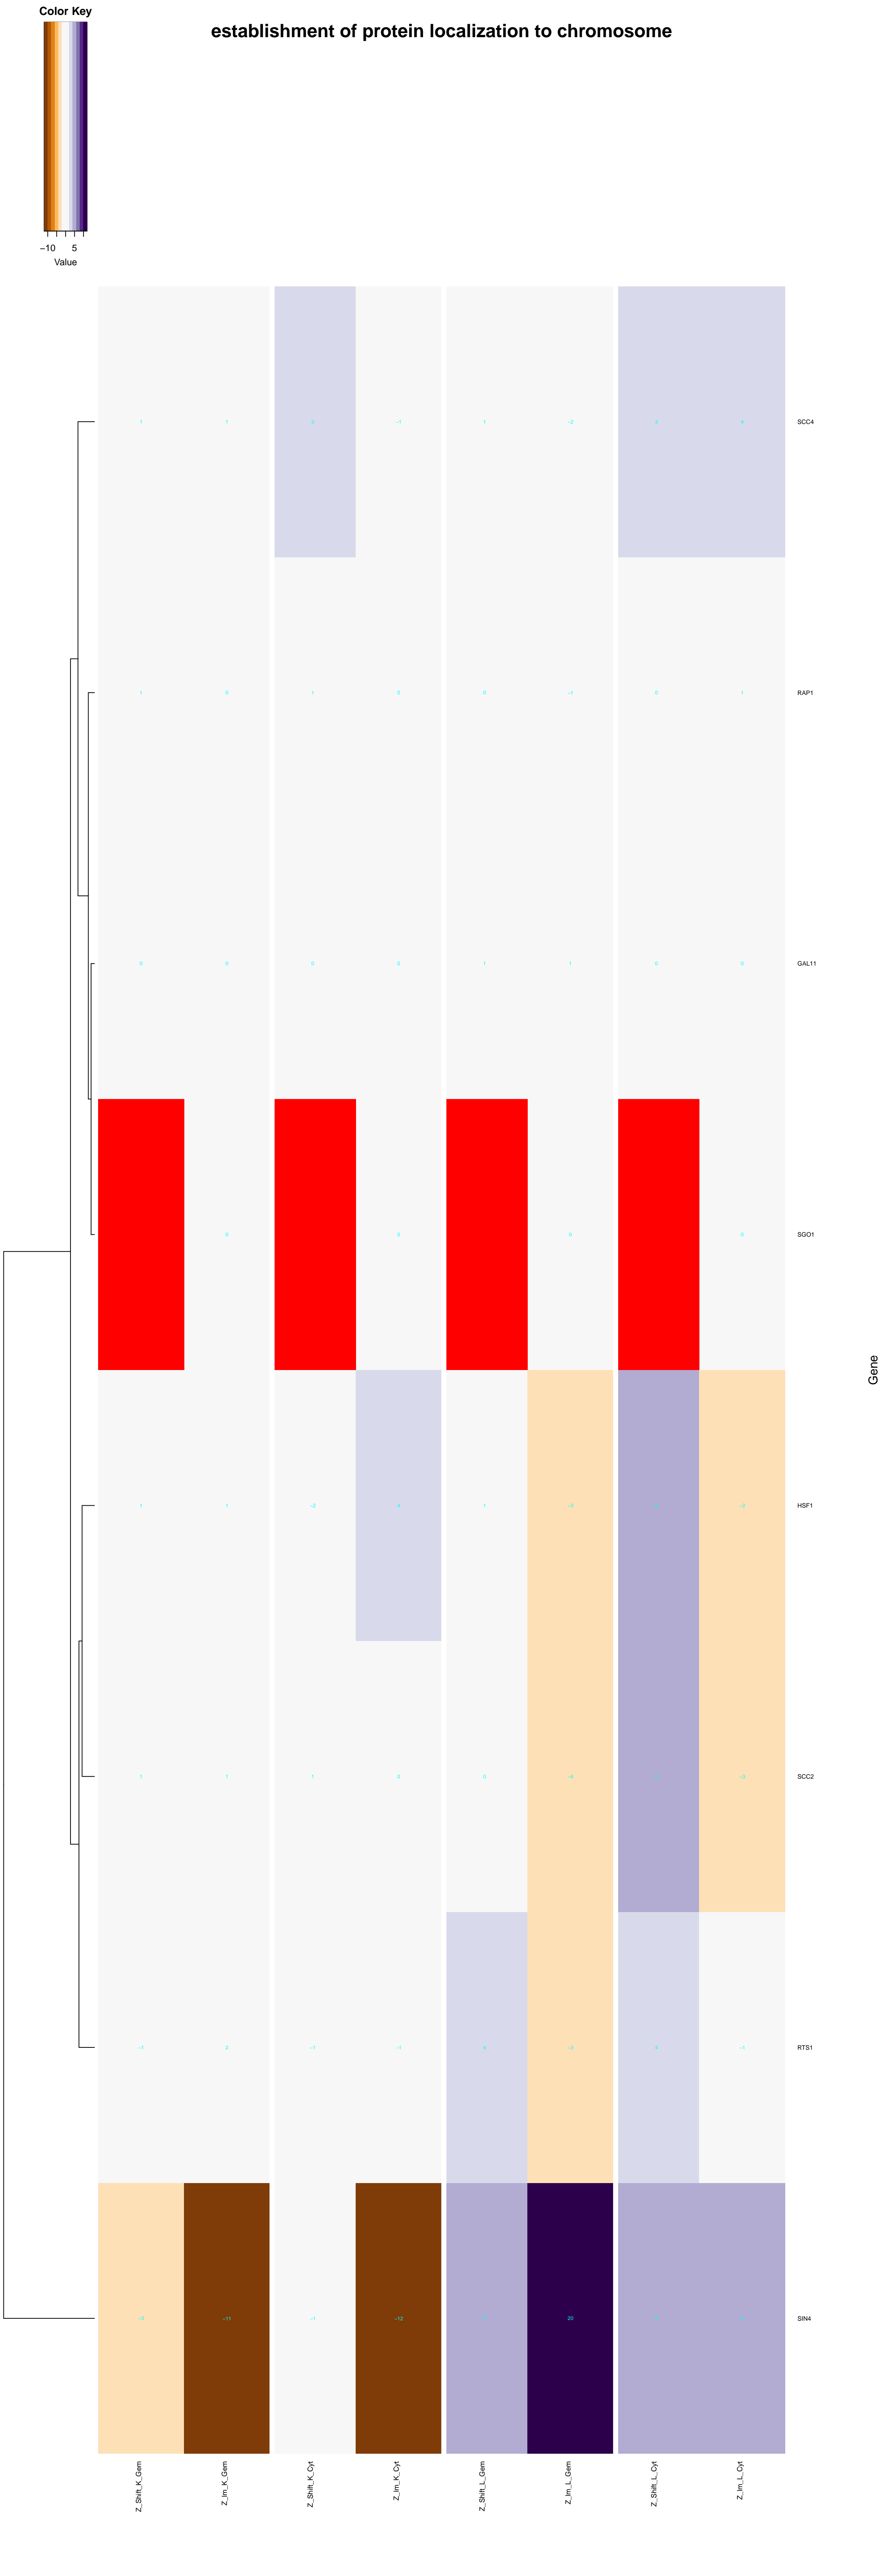

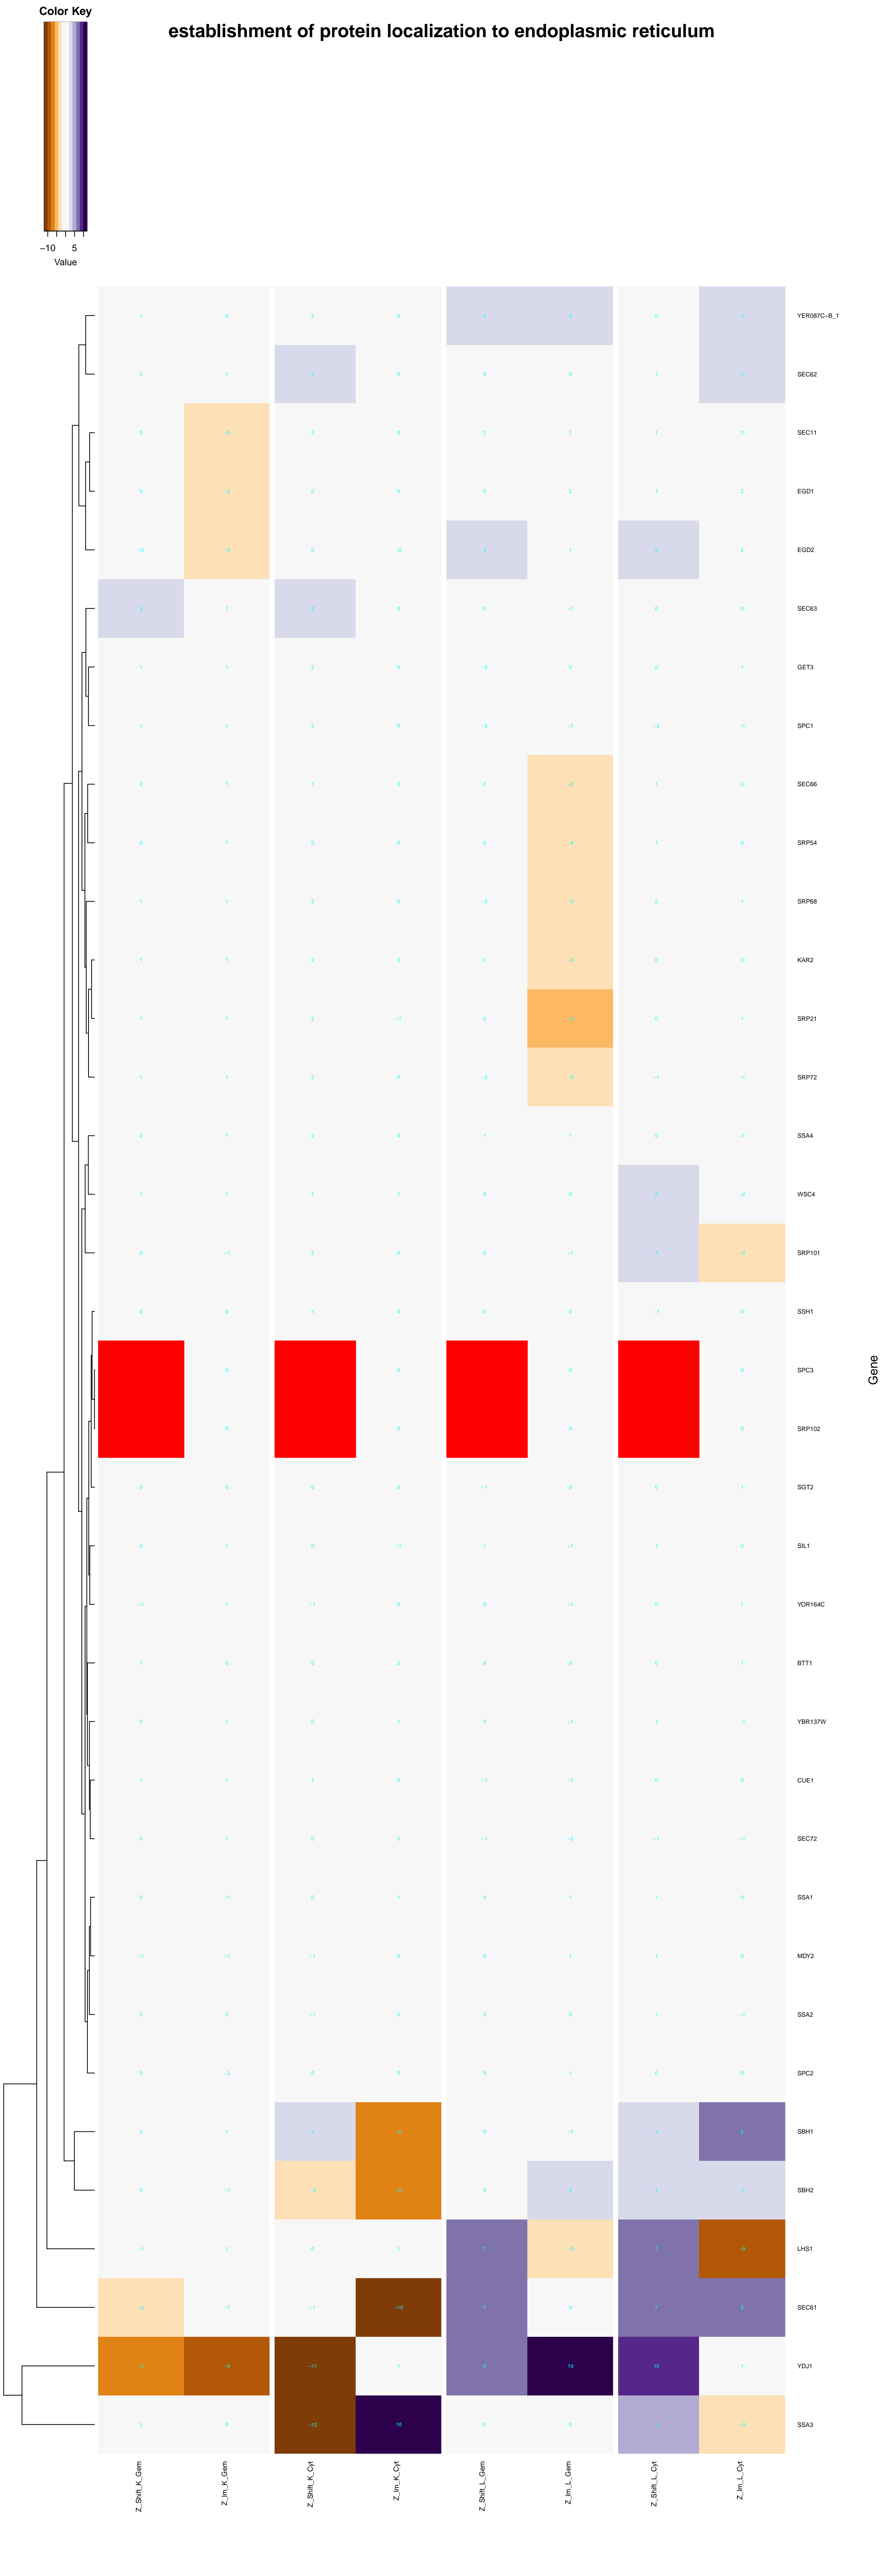

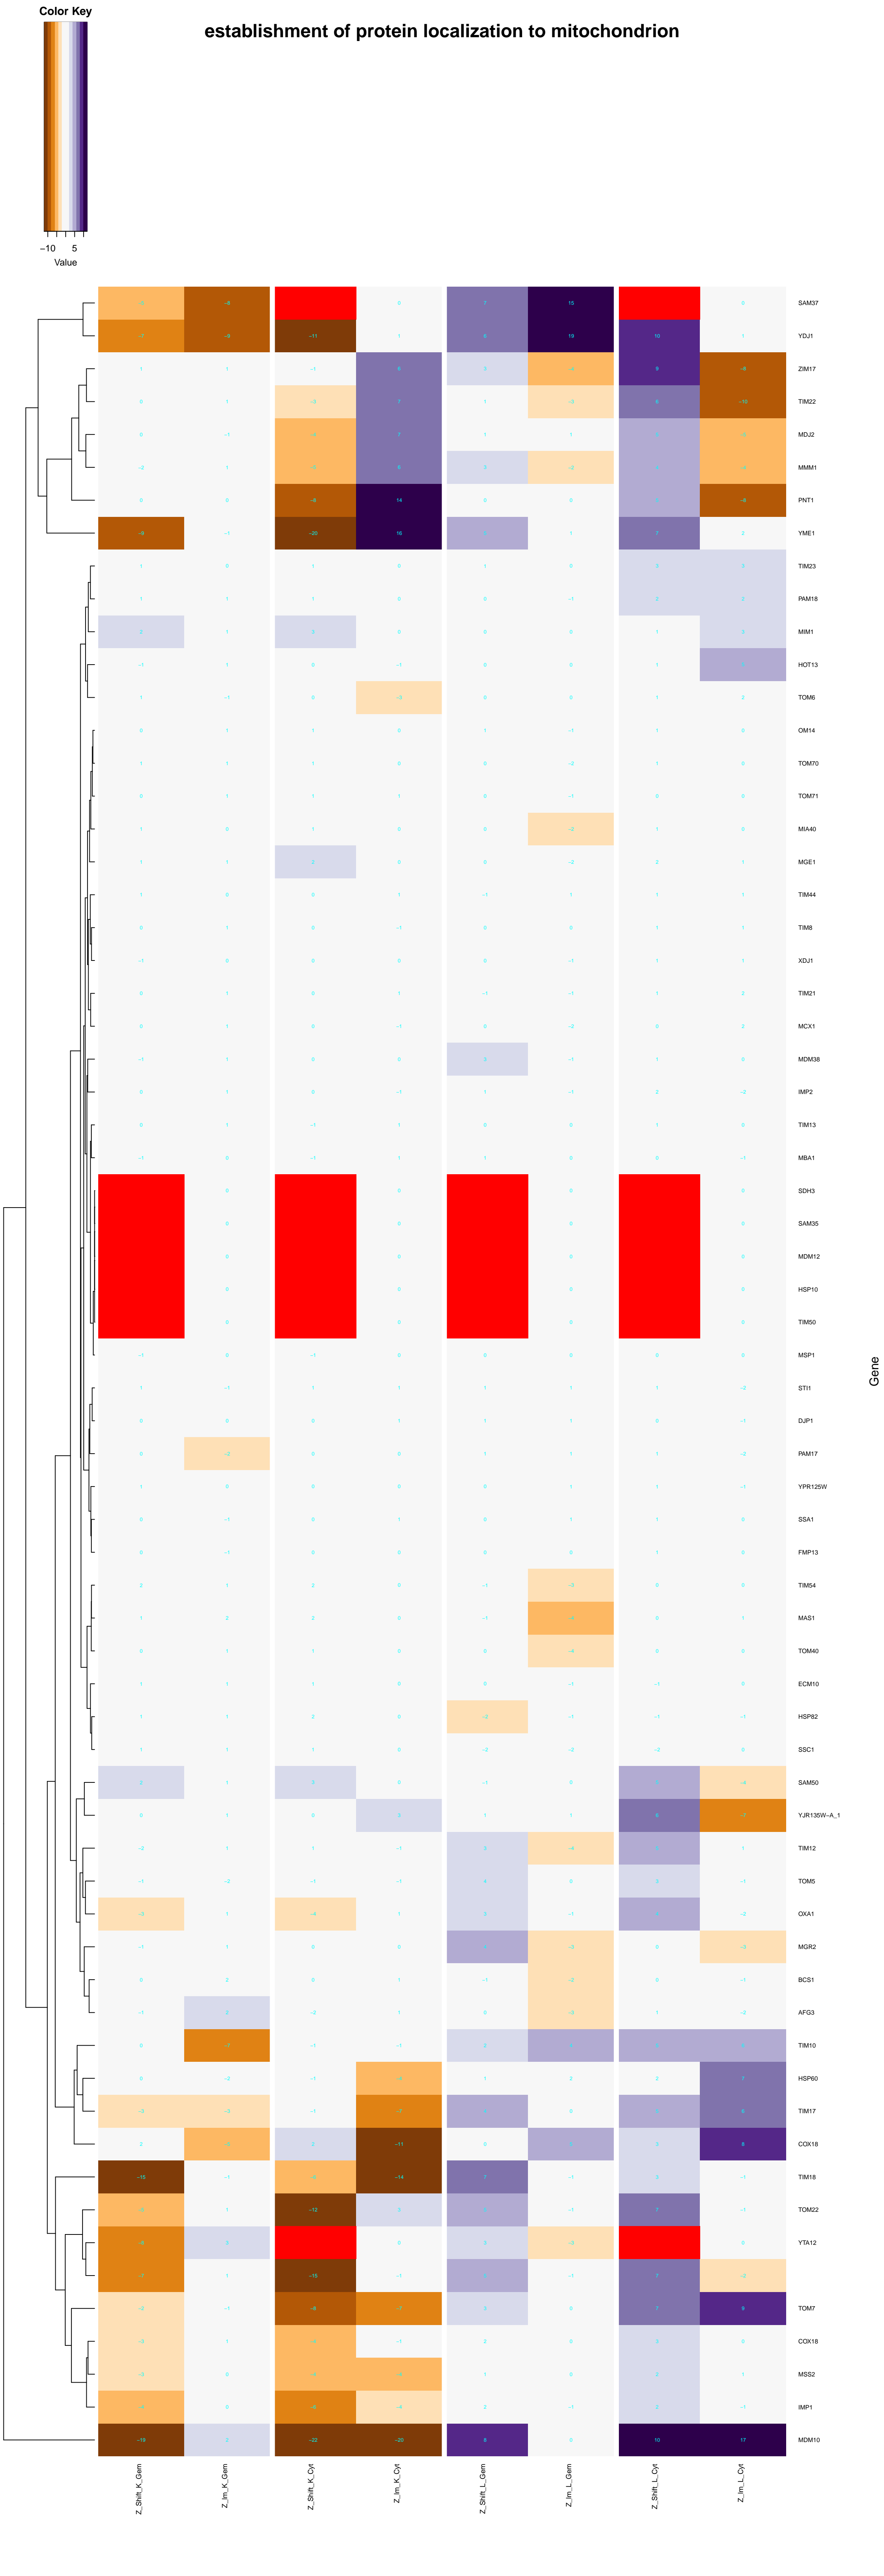

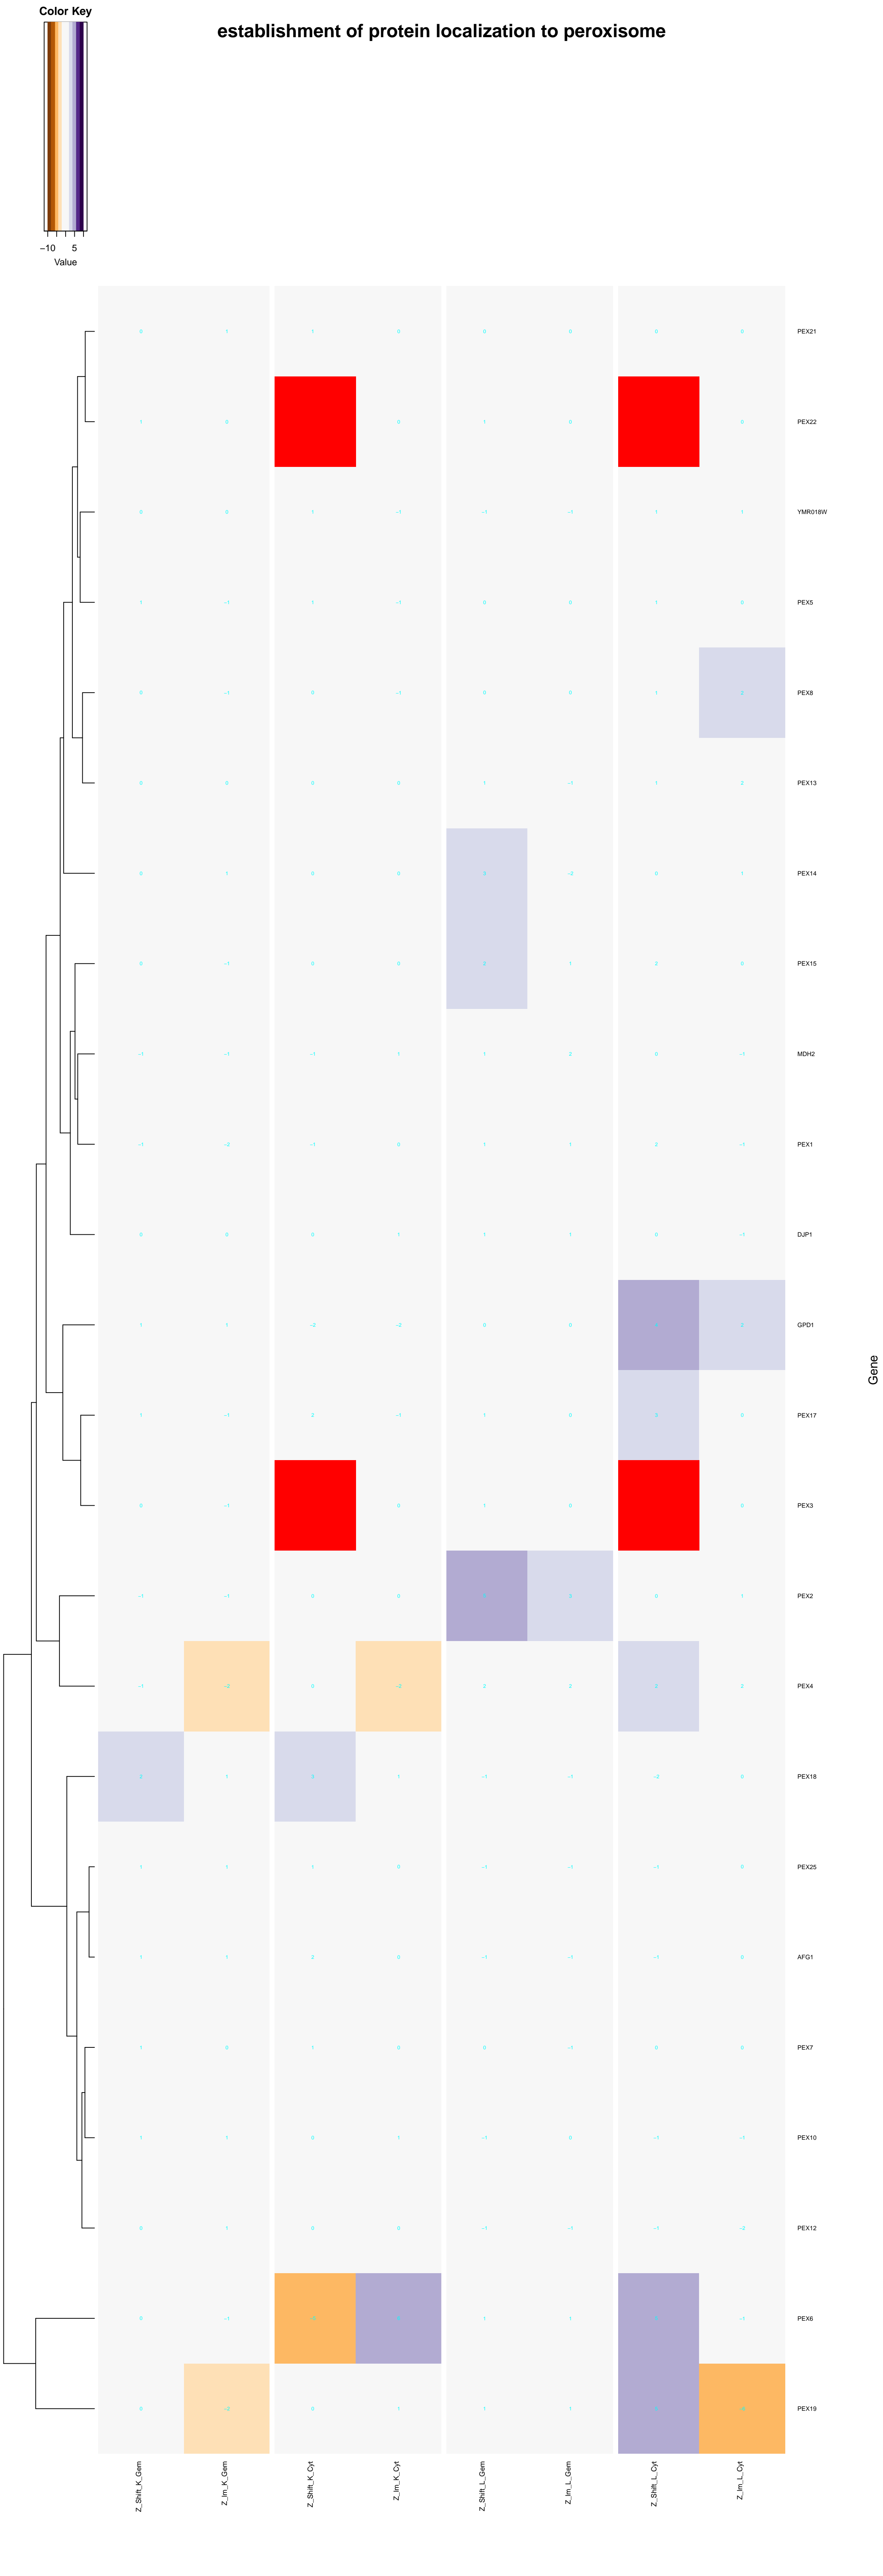

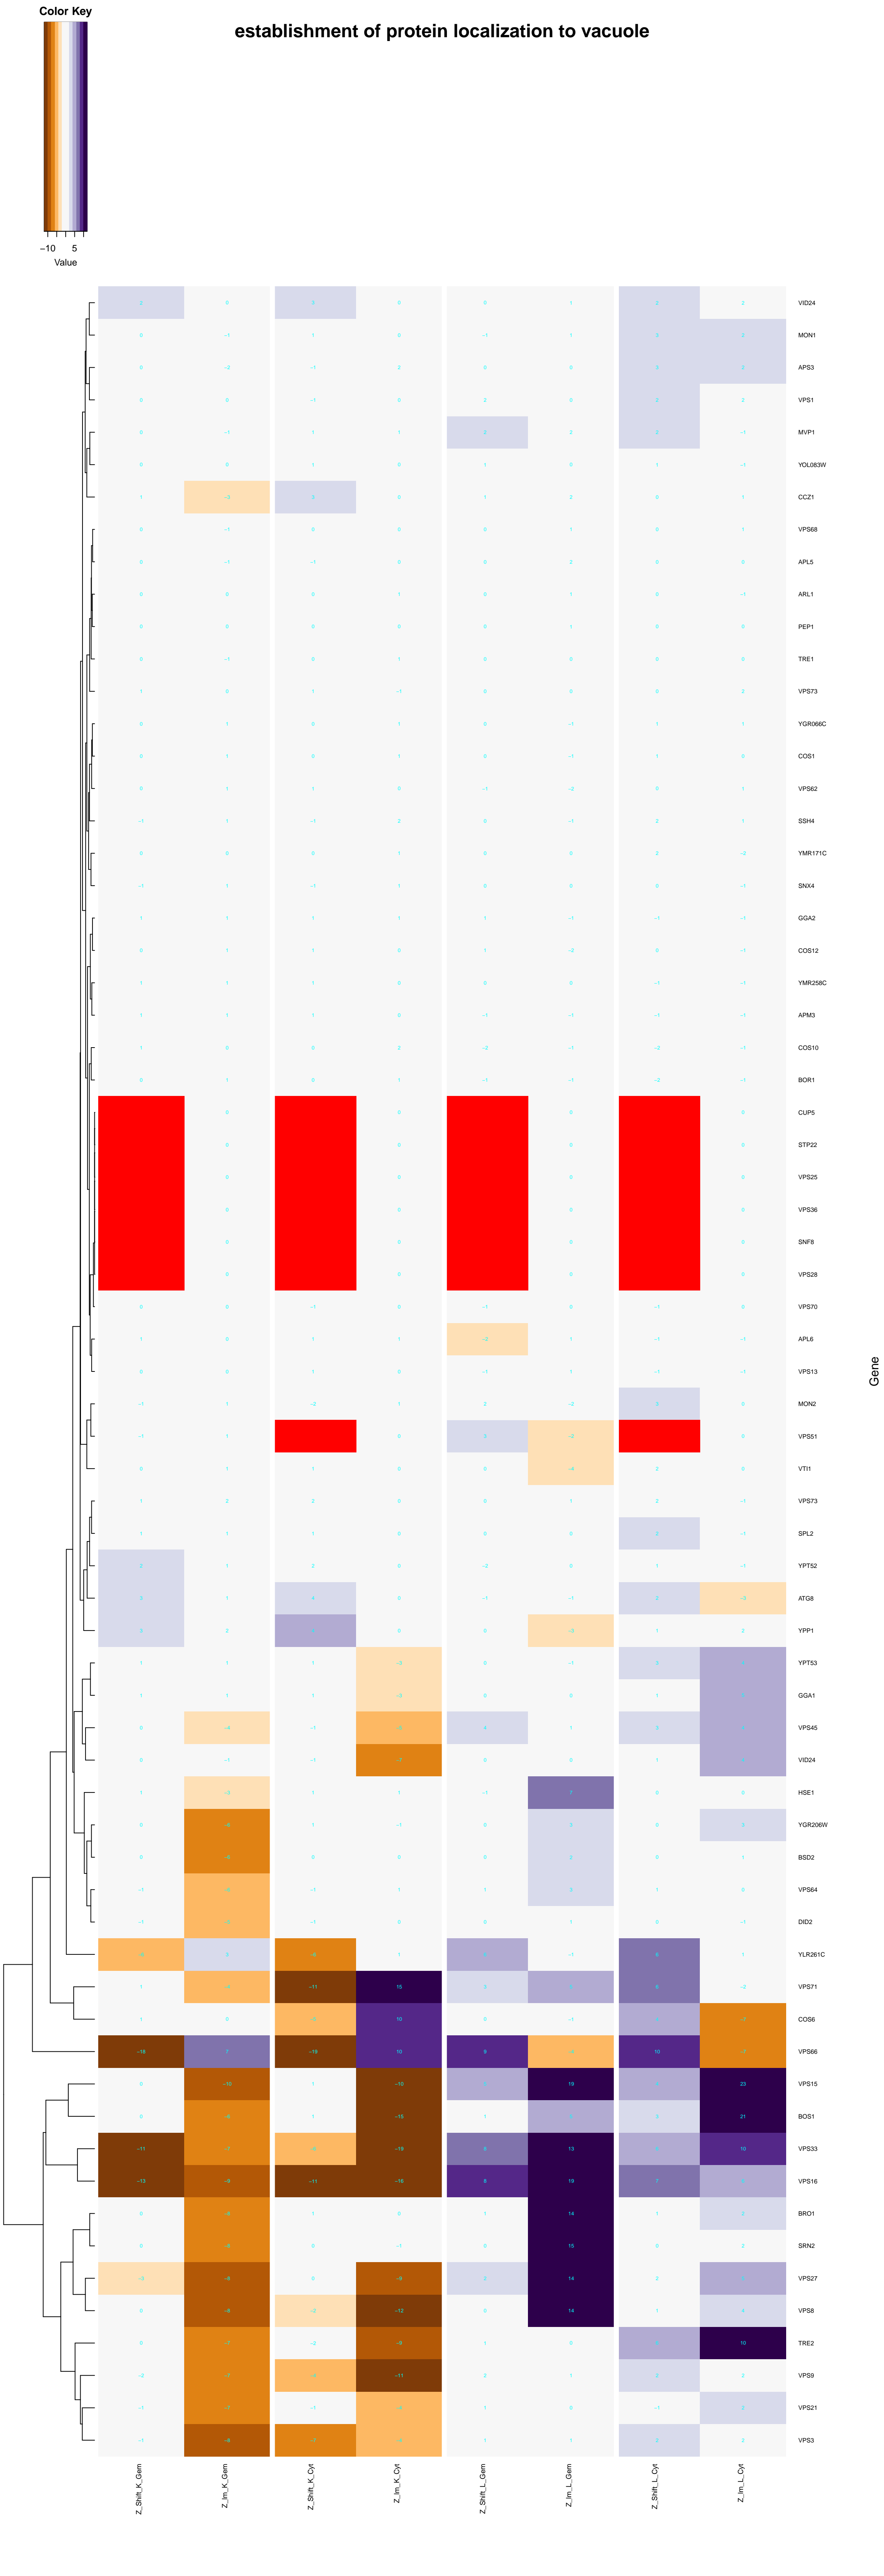

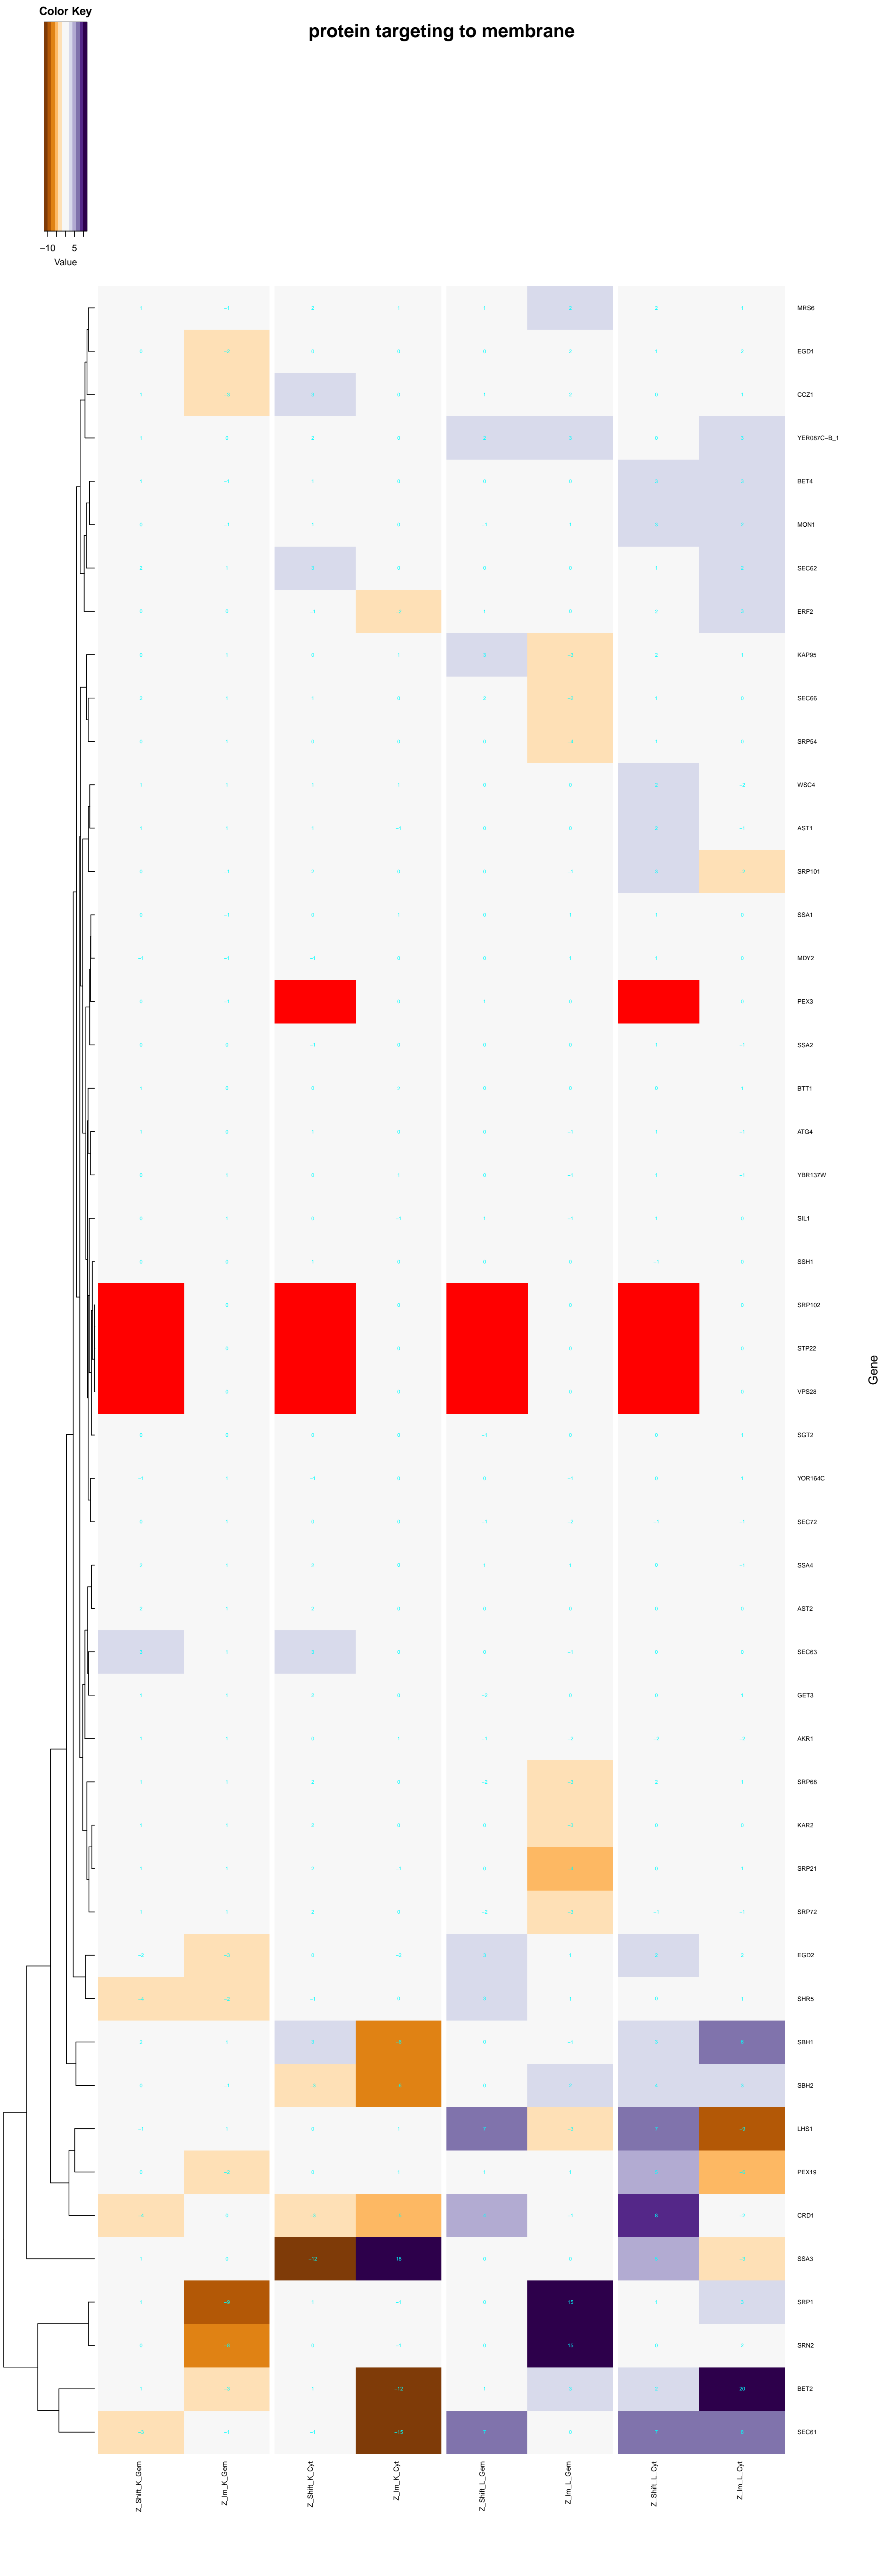

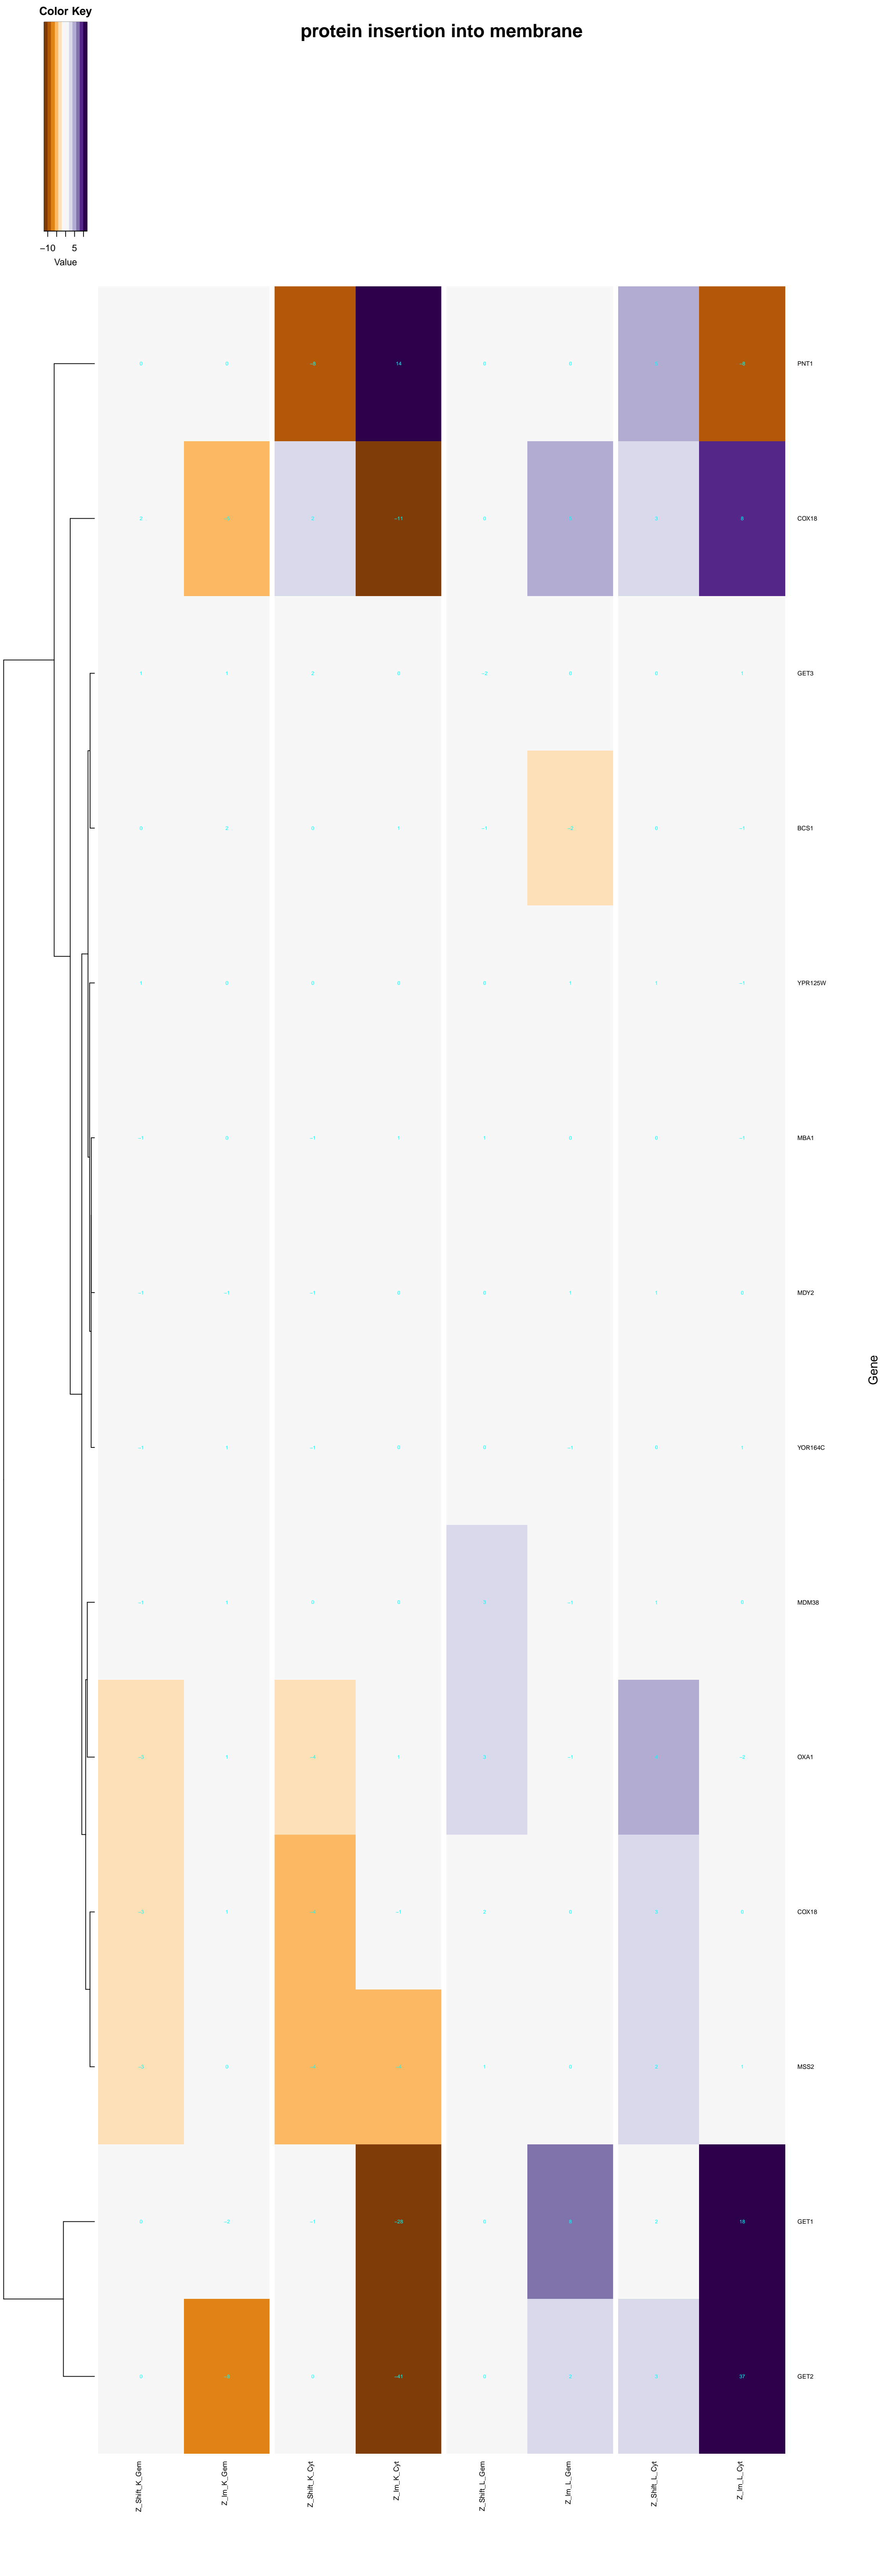

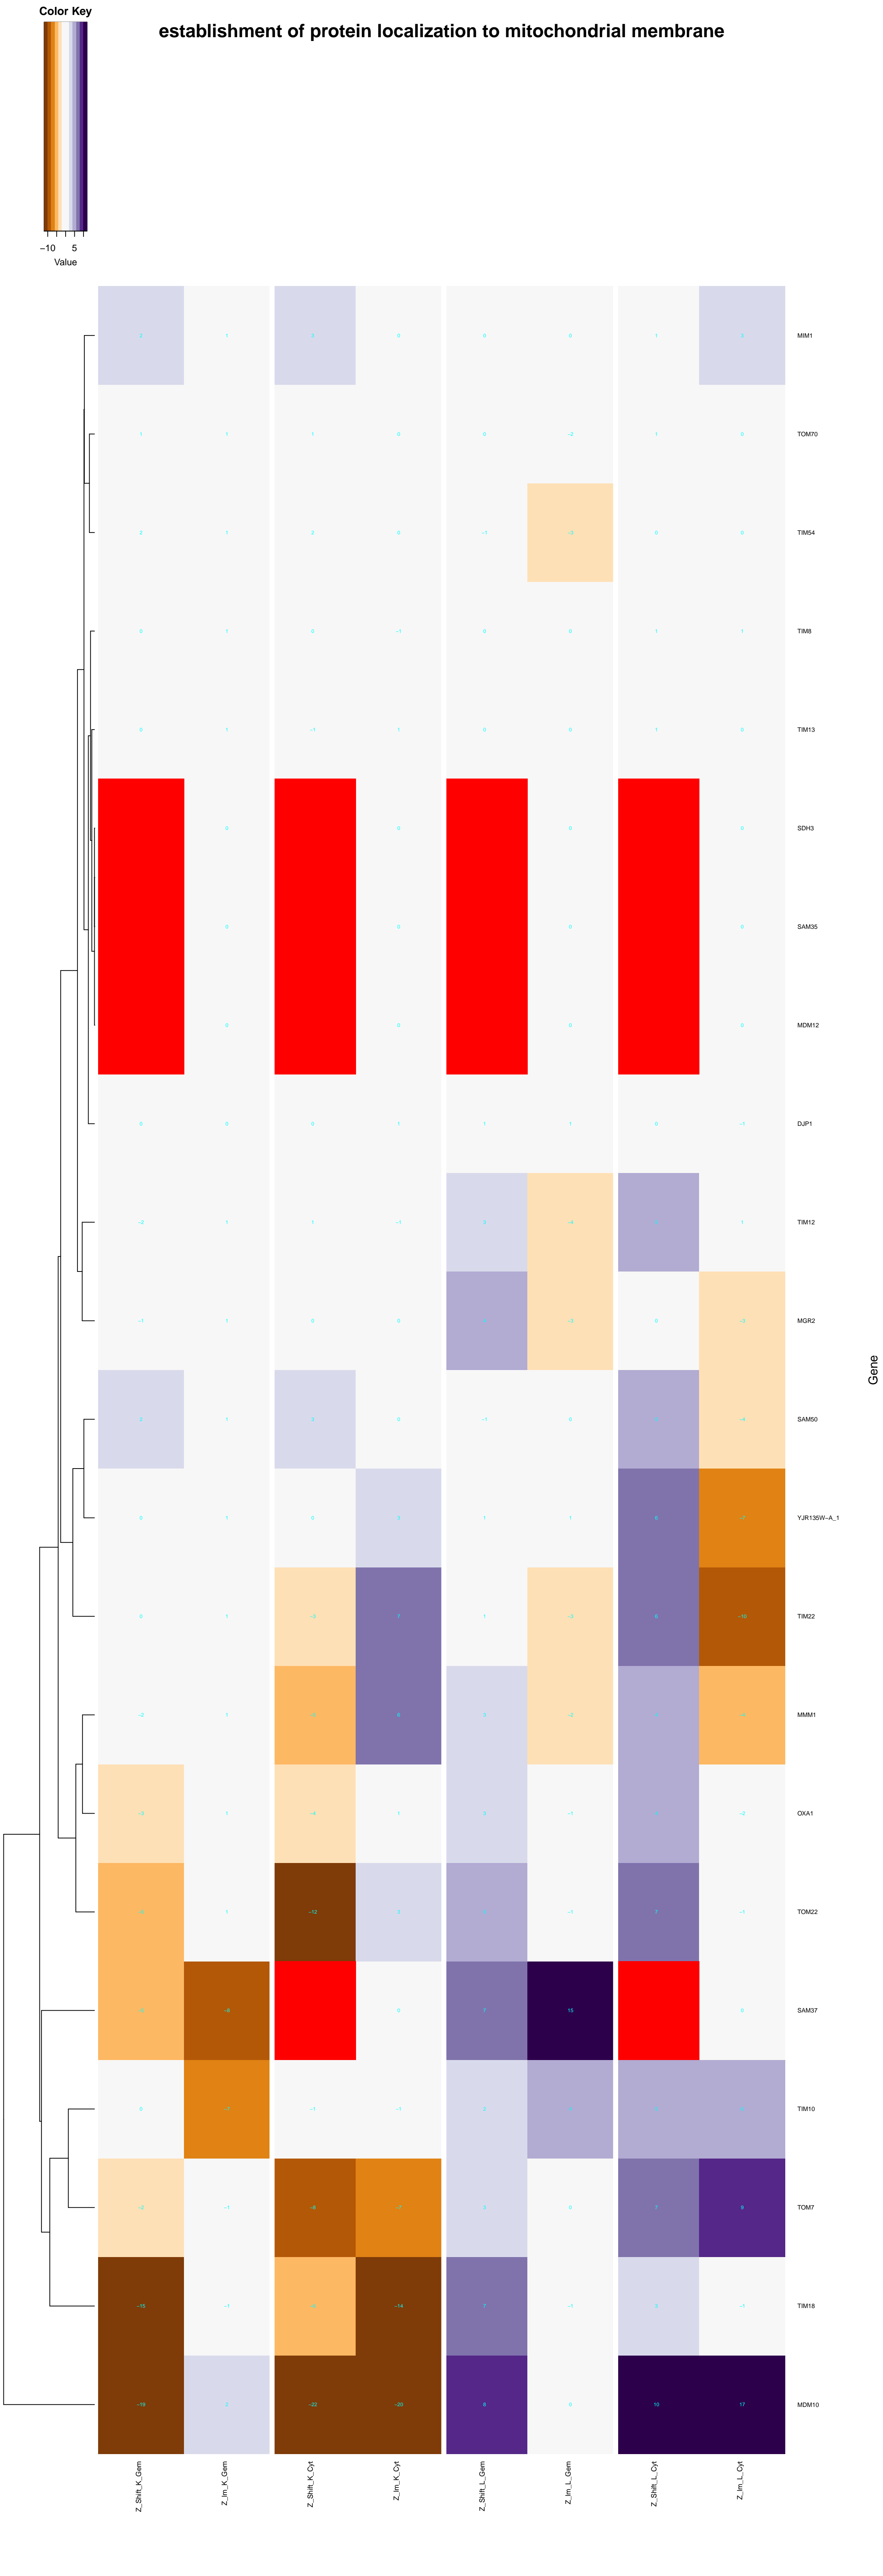

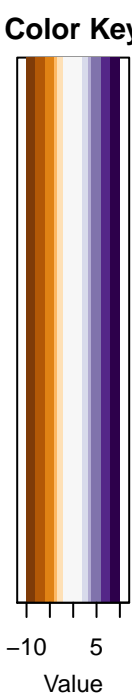

protein import into nucleus, translocation

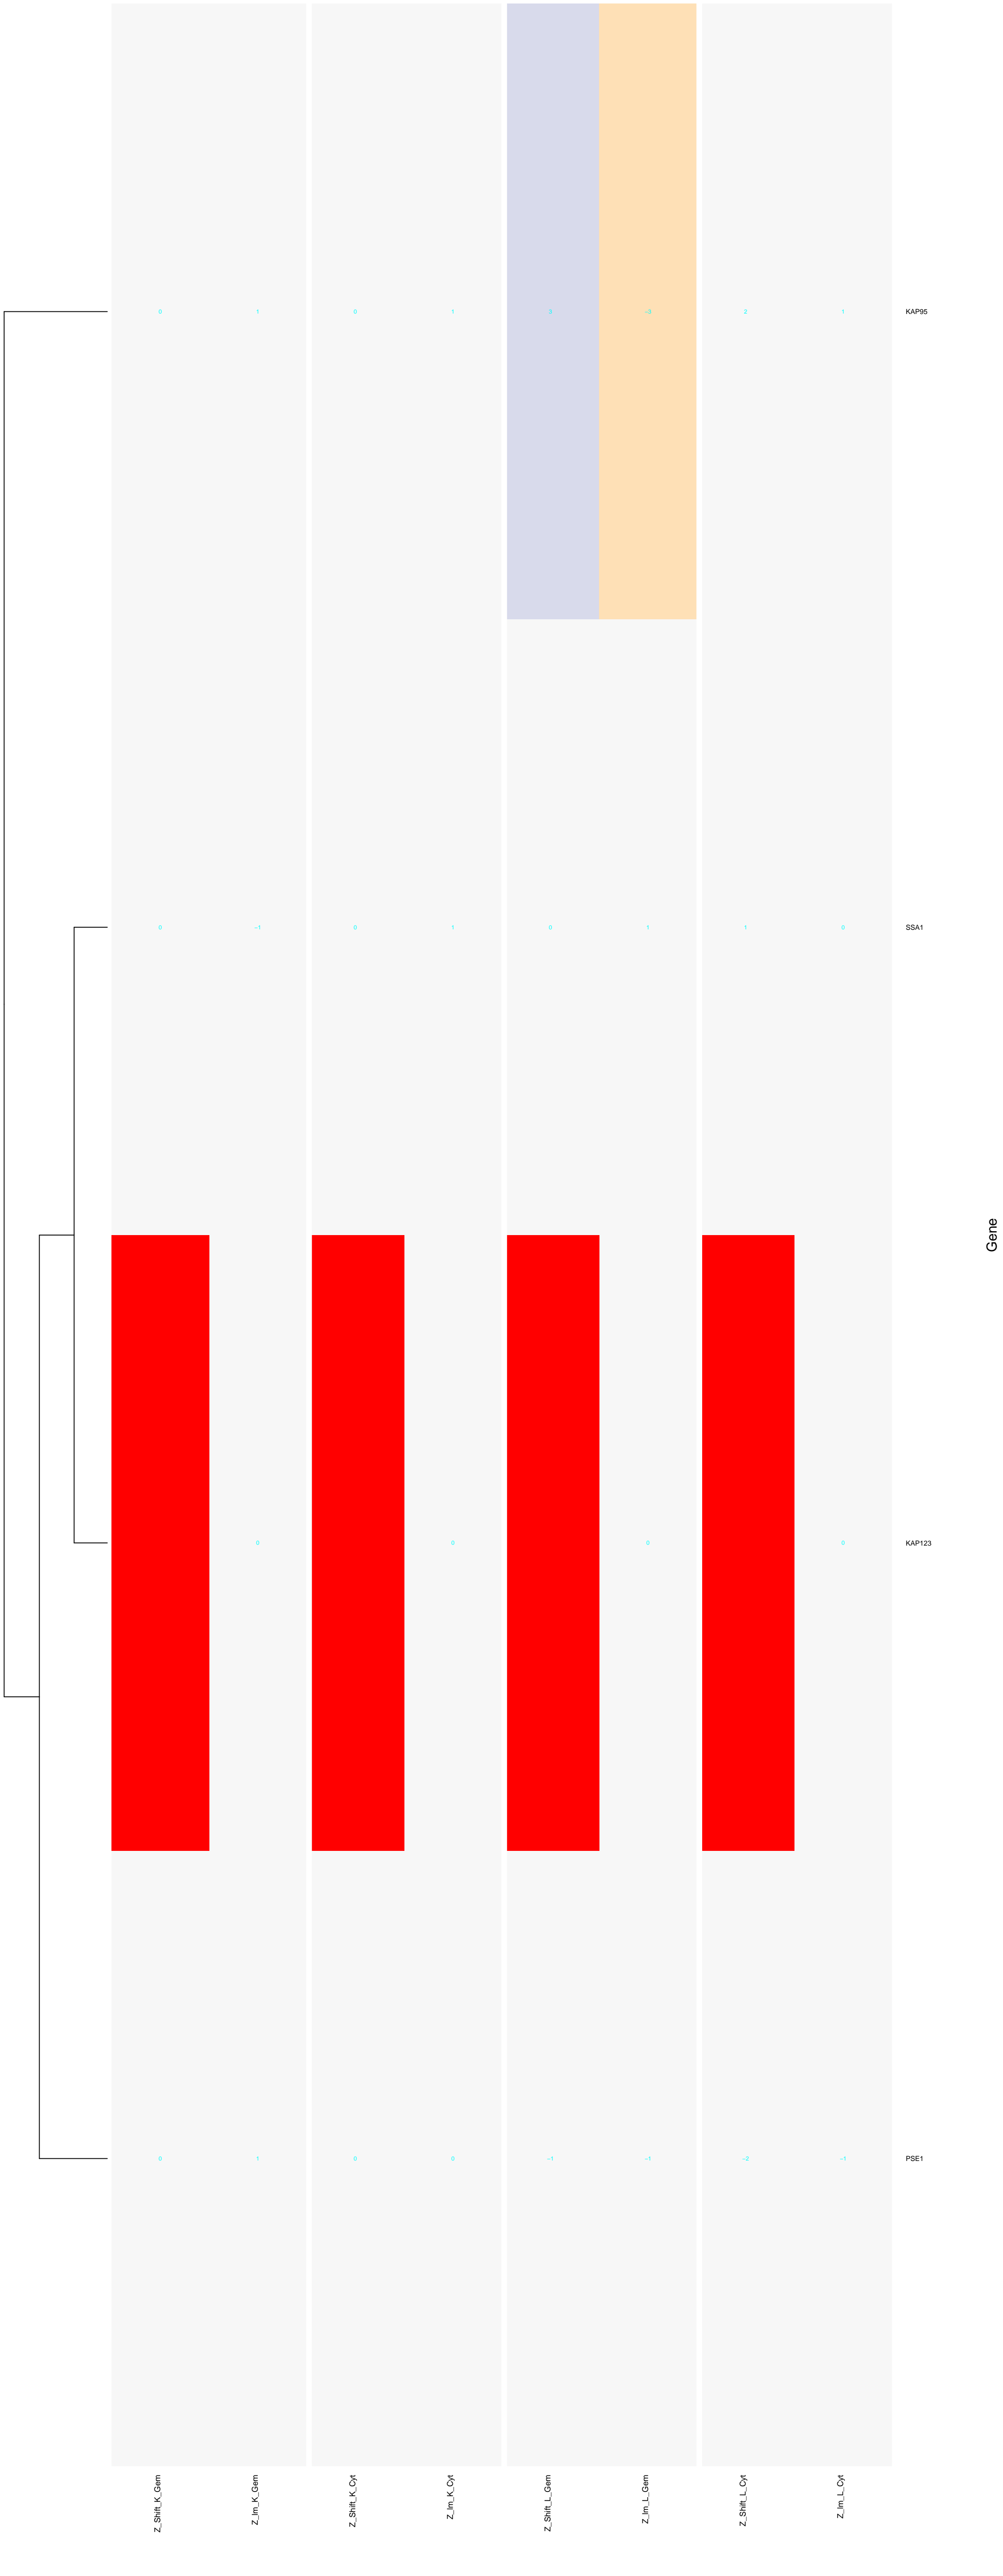



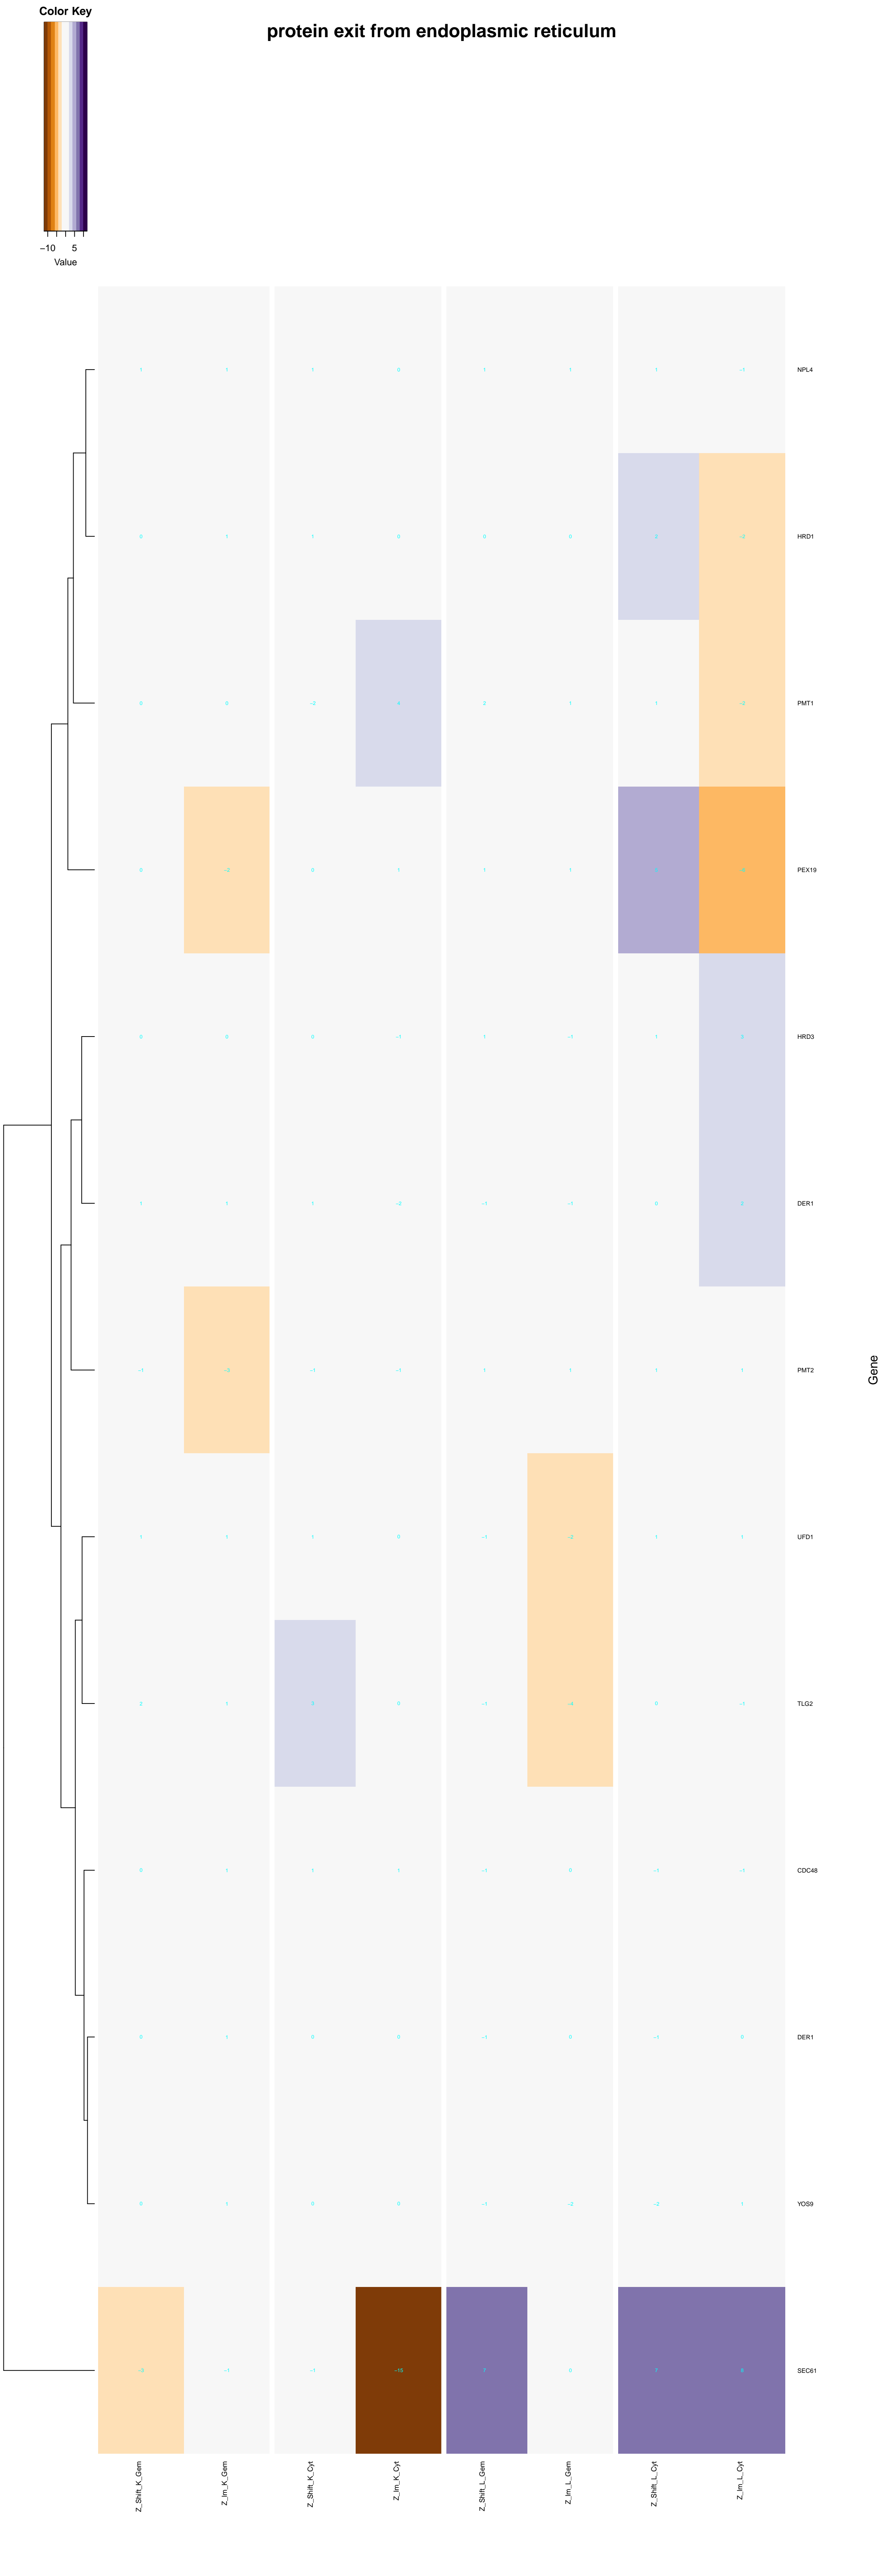

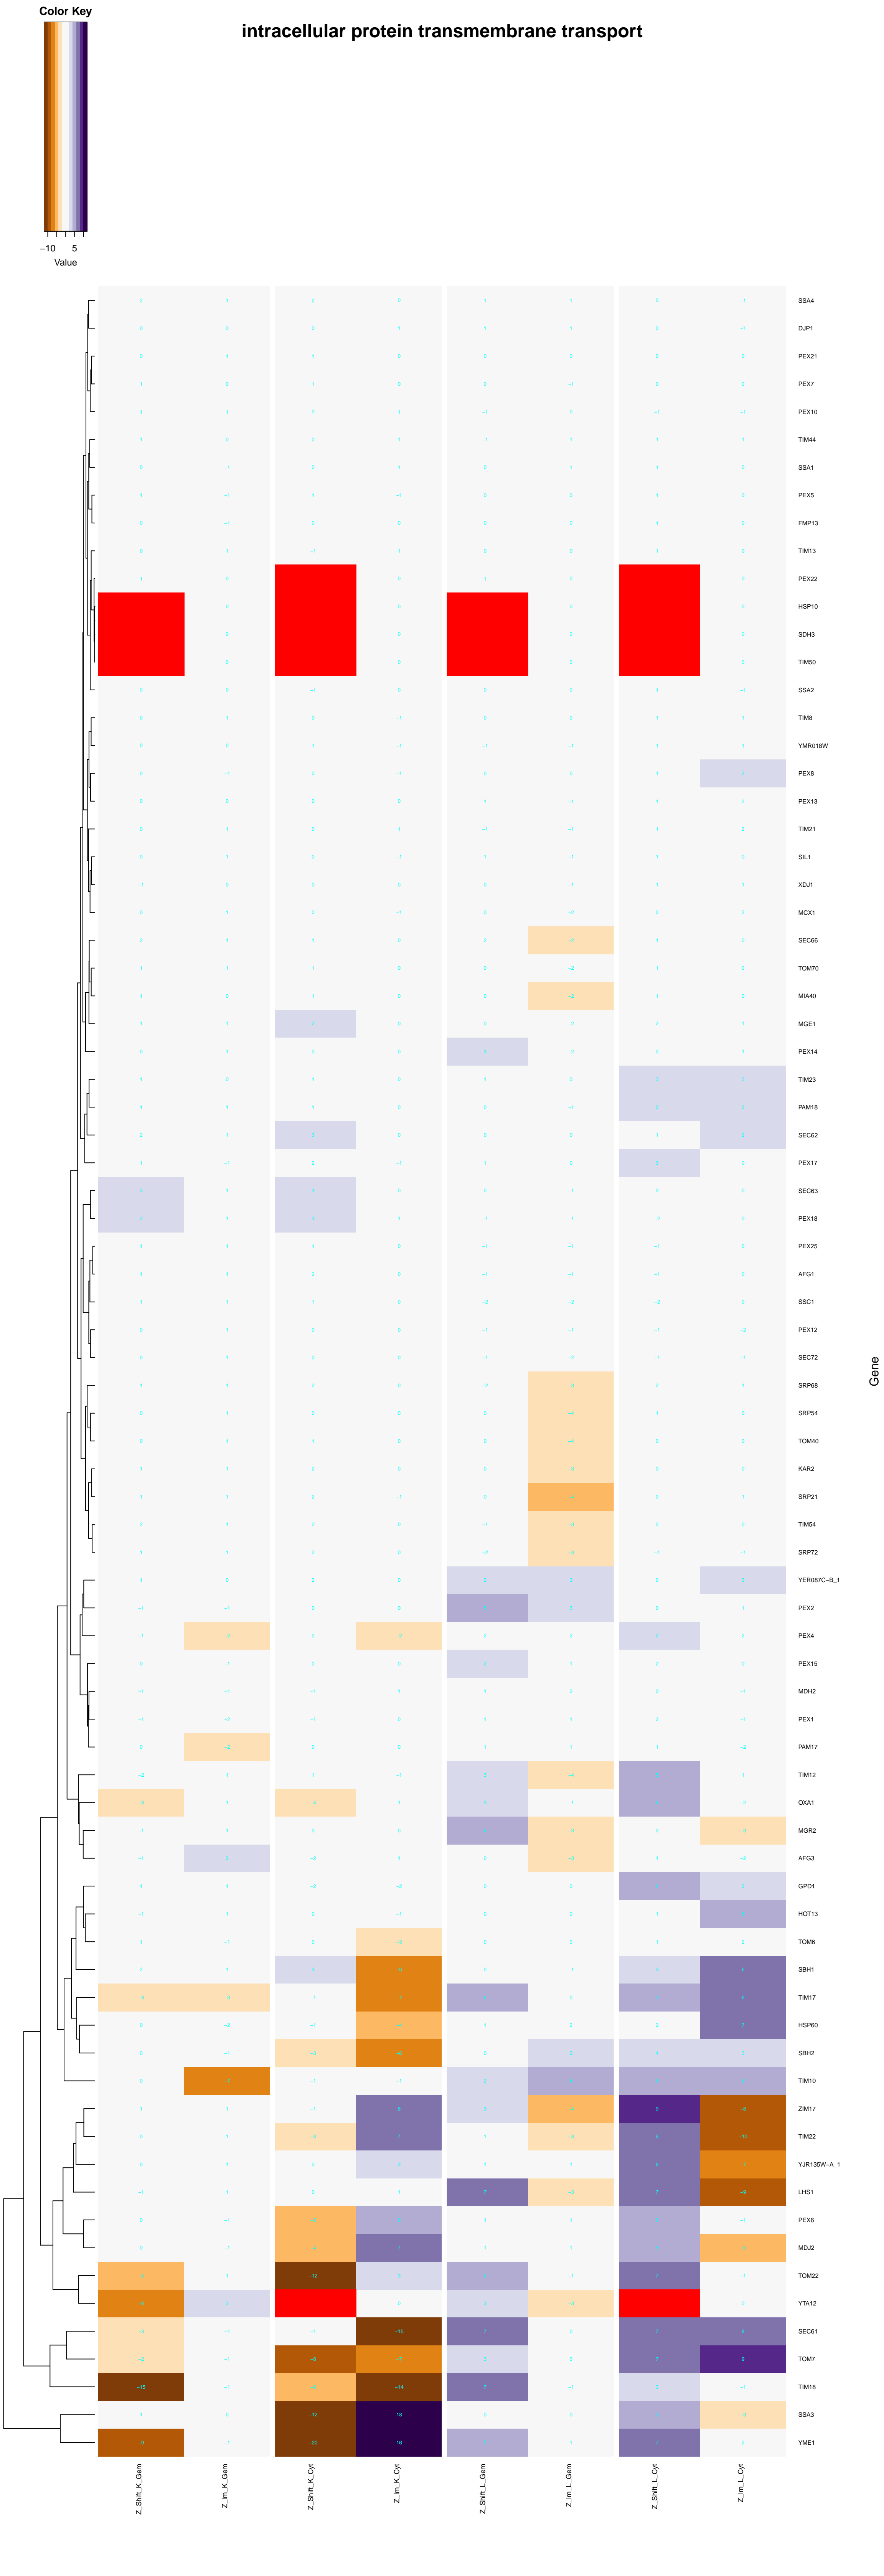

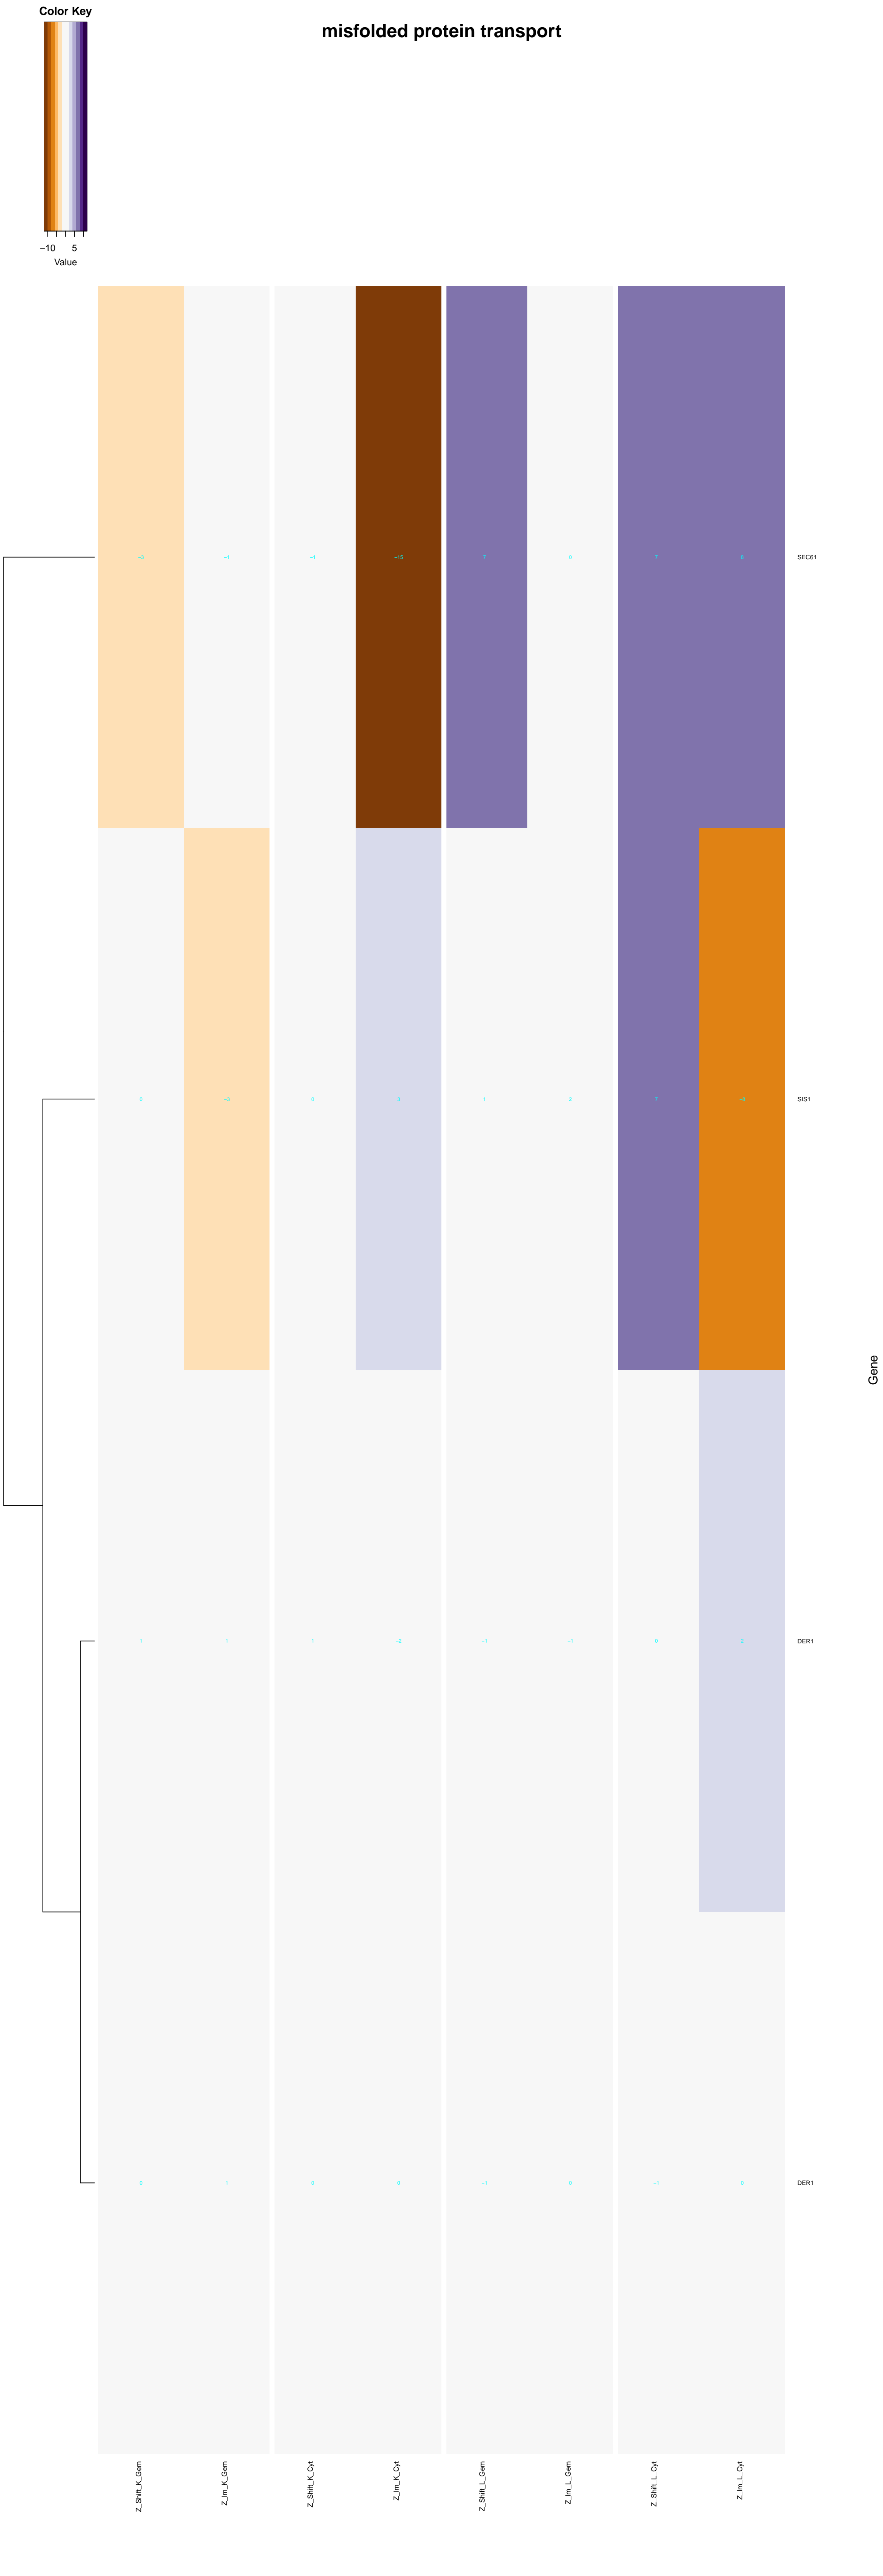

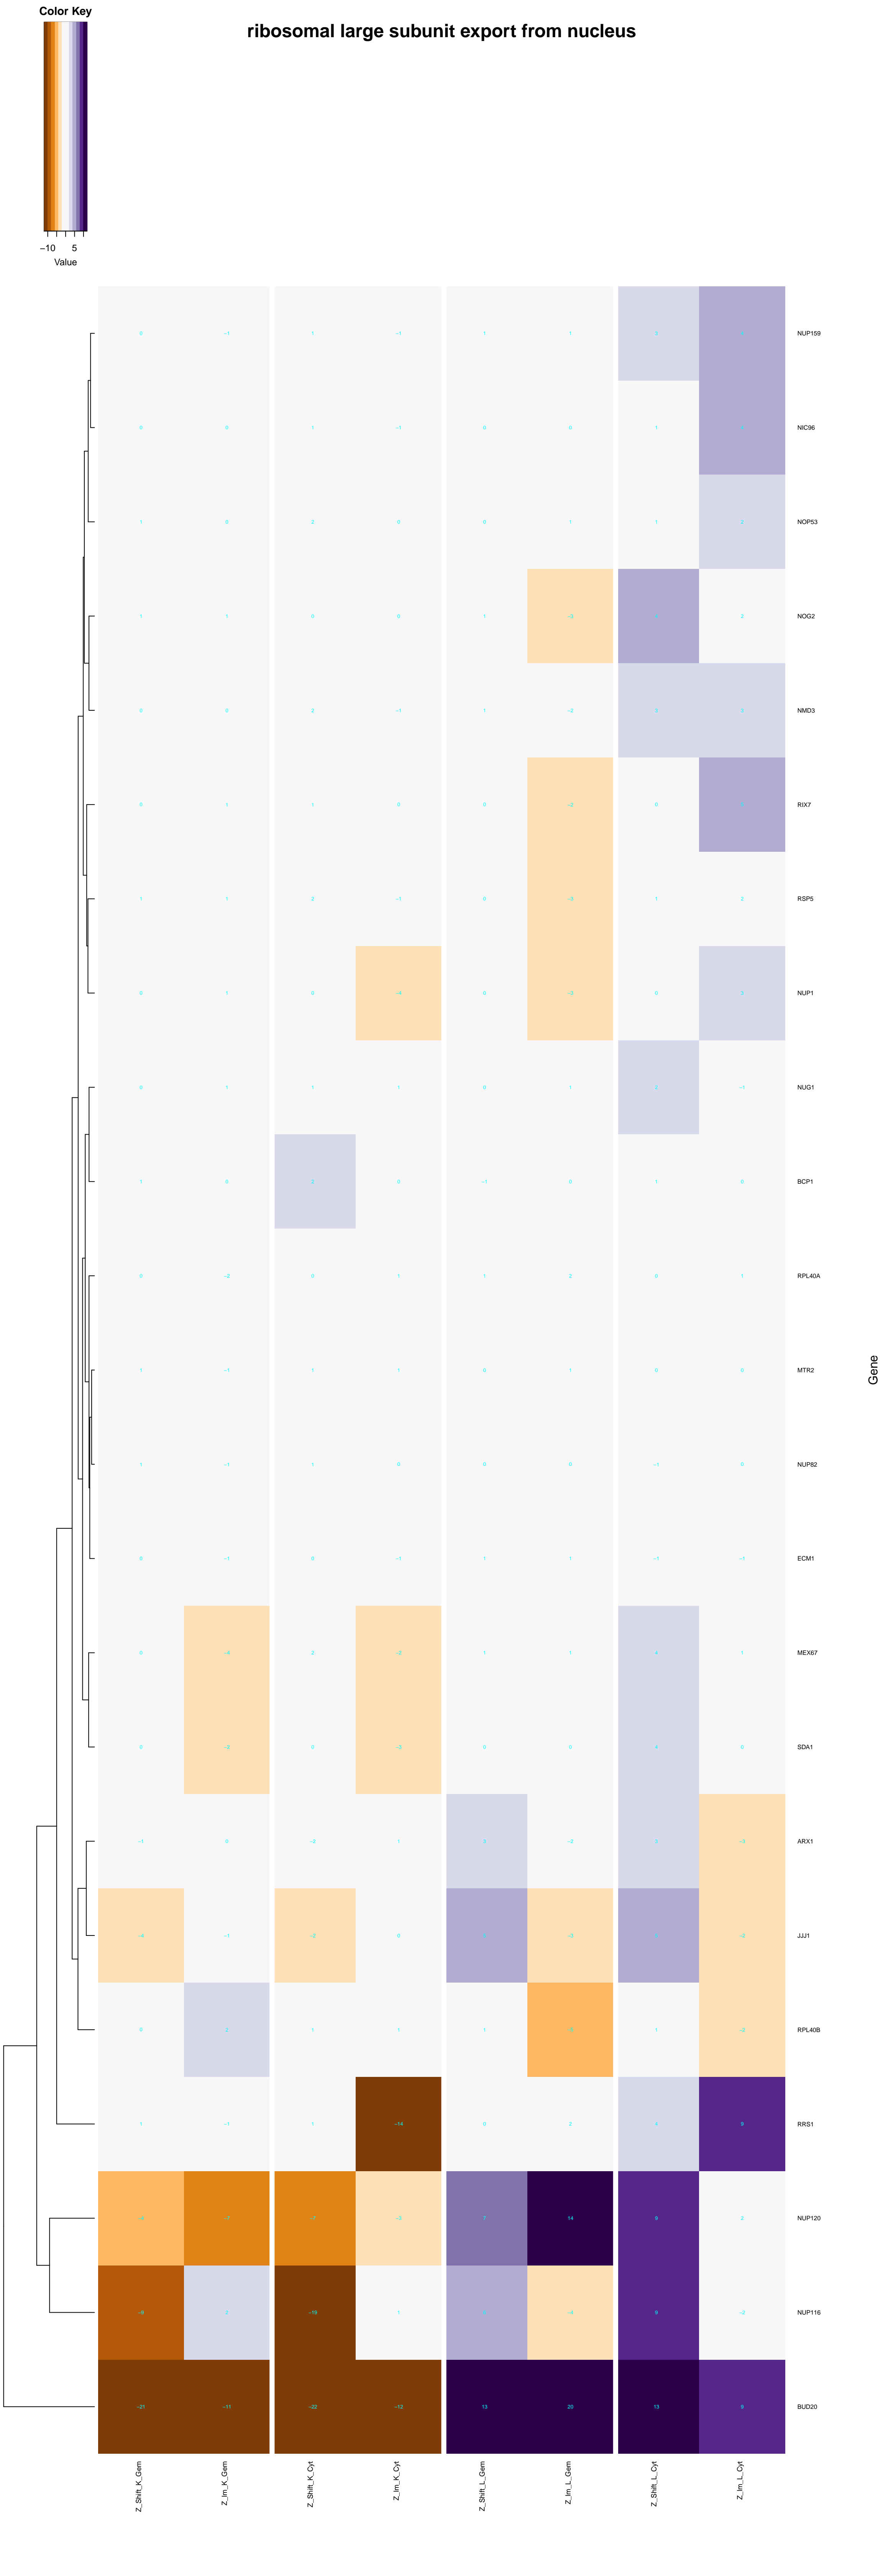

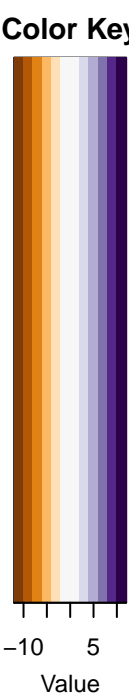

ribosomal small subunit export from nucleus

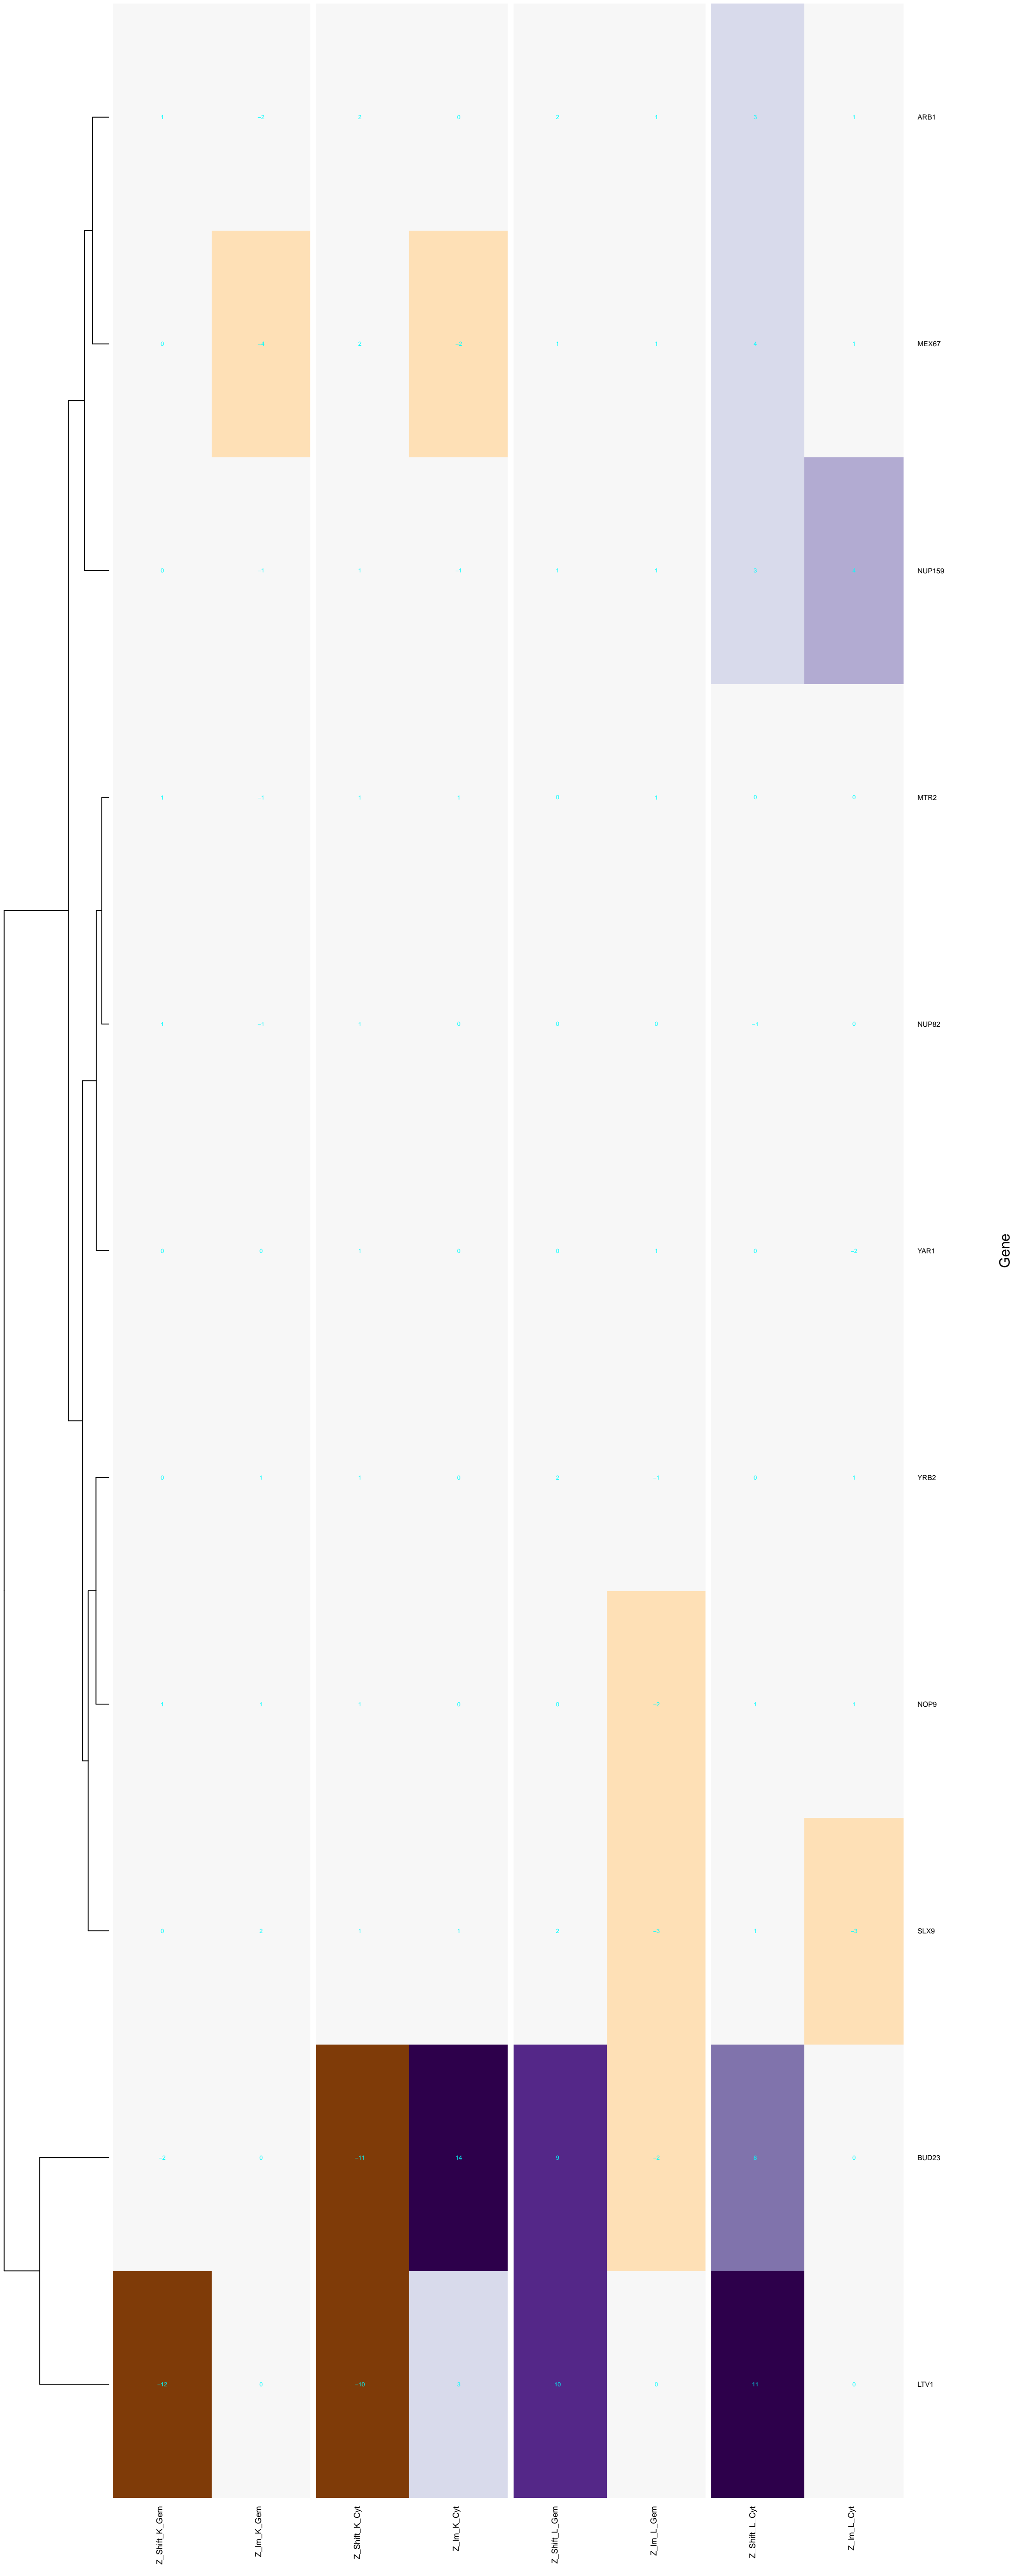

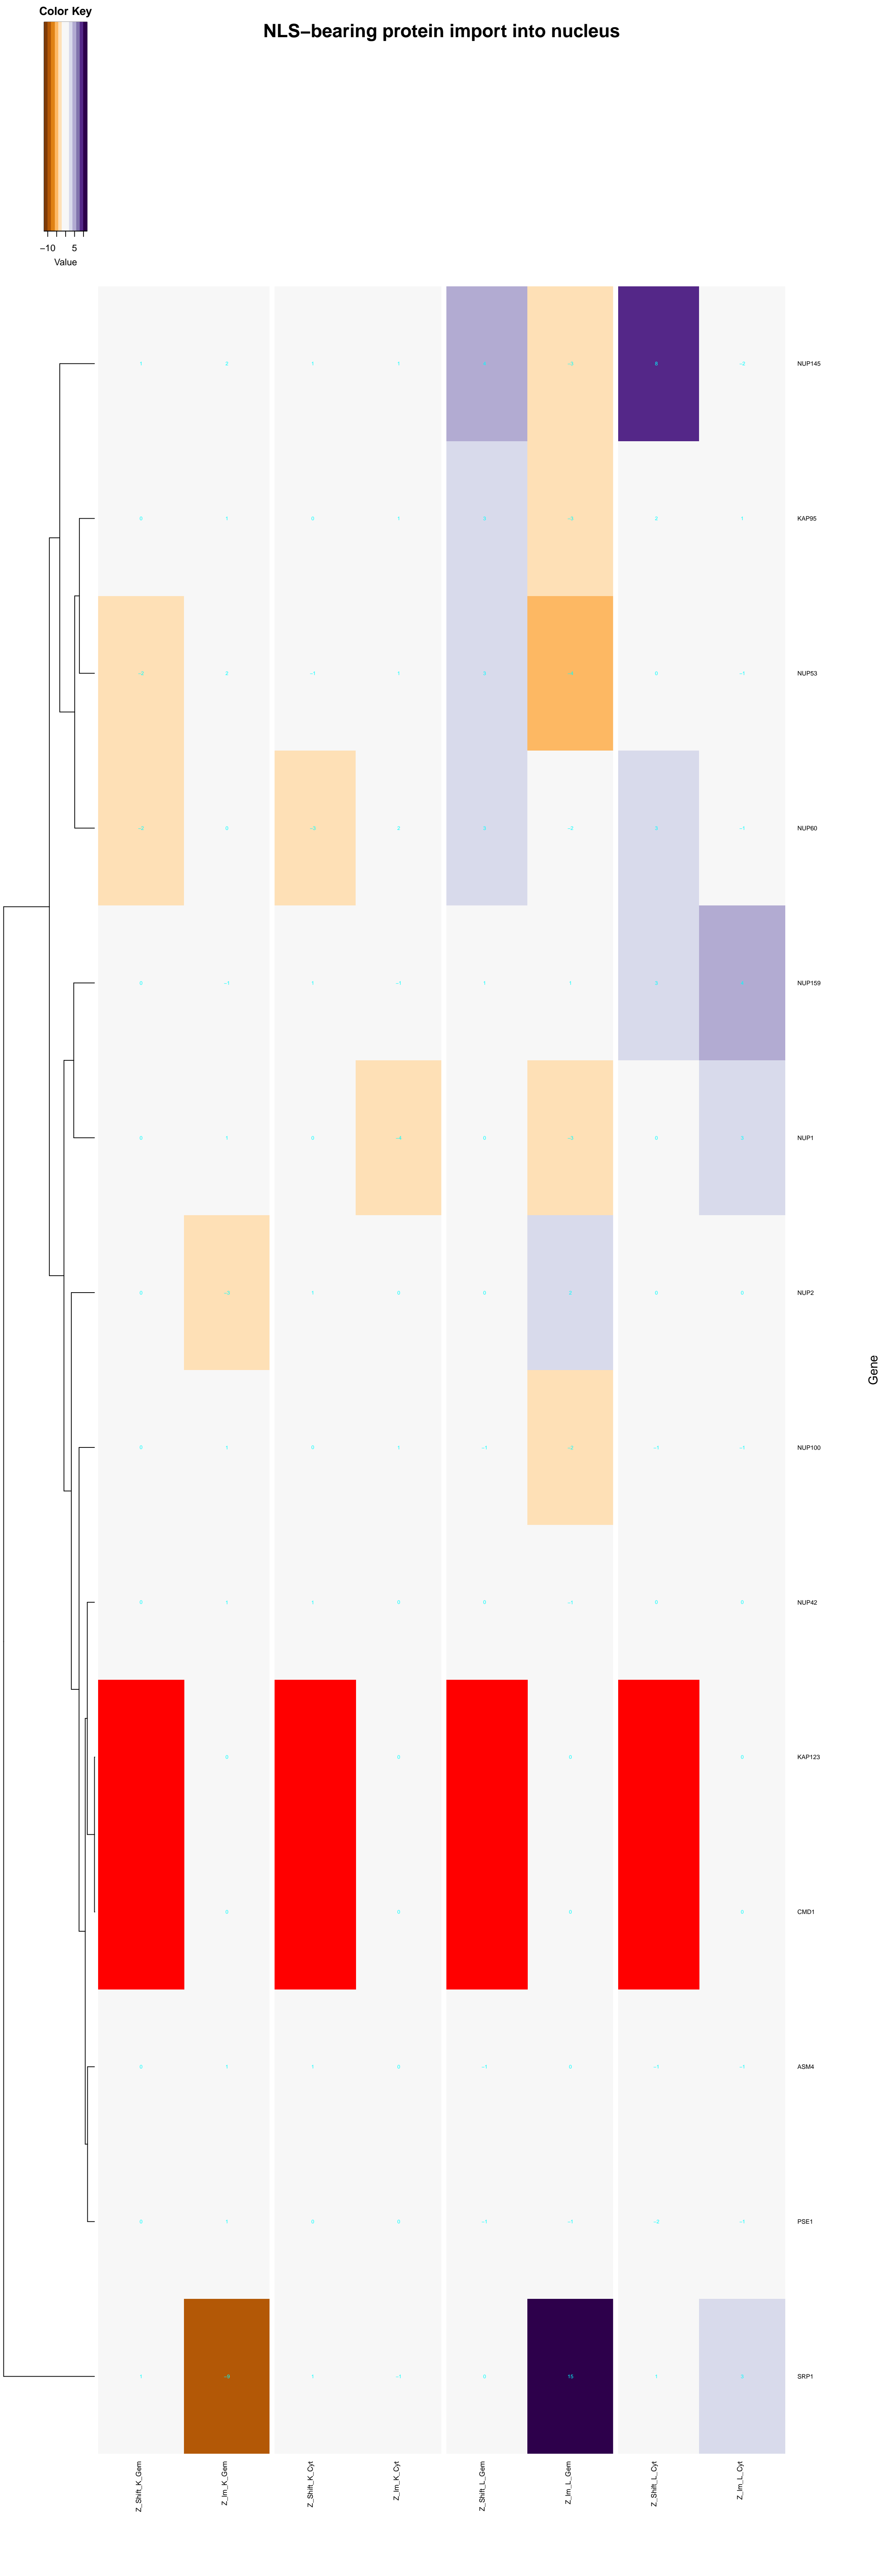

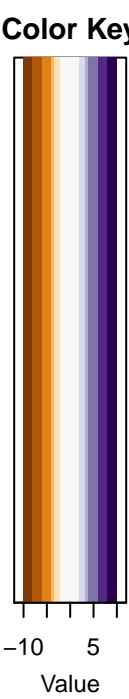

ribosomal protein import into nucleus

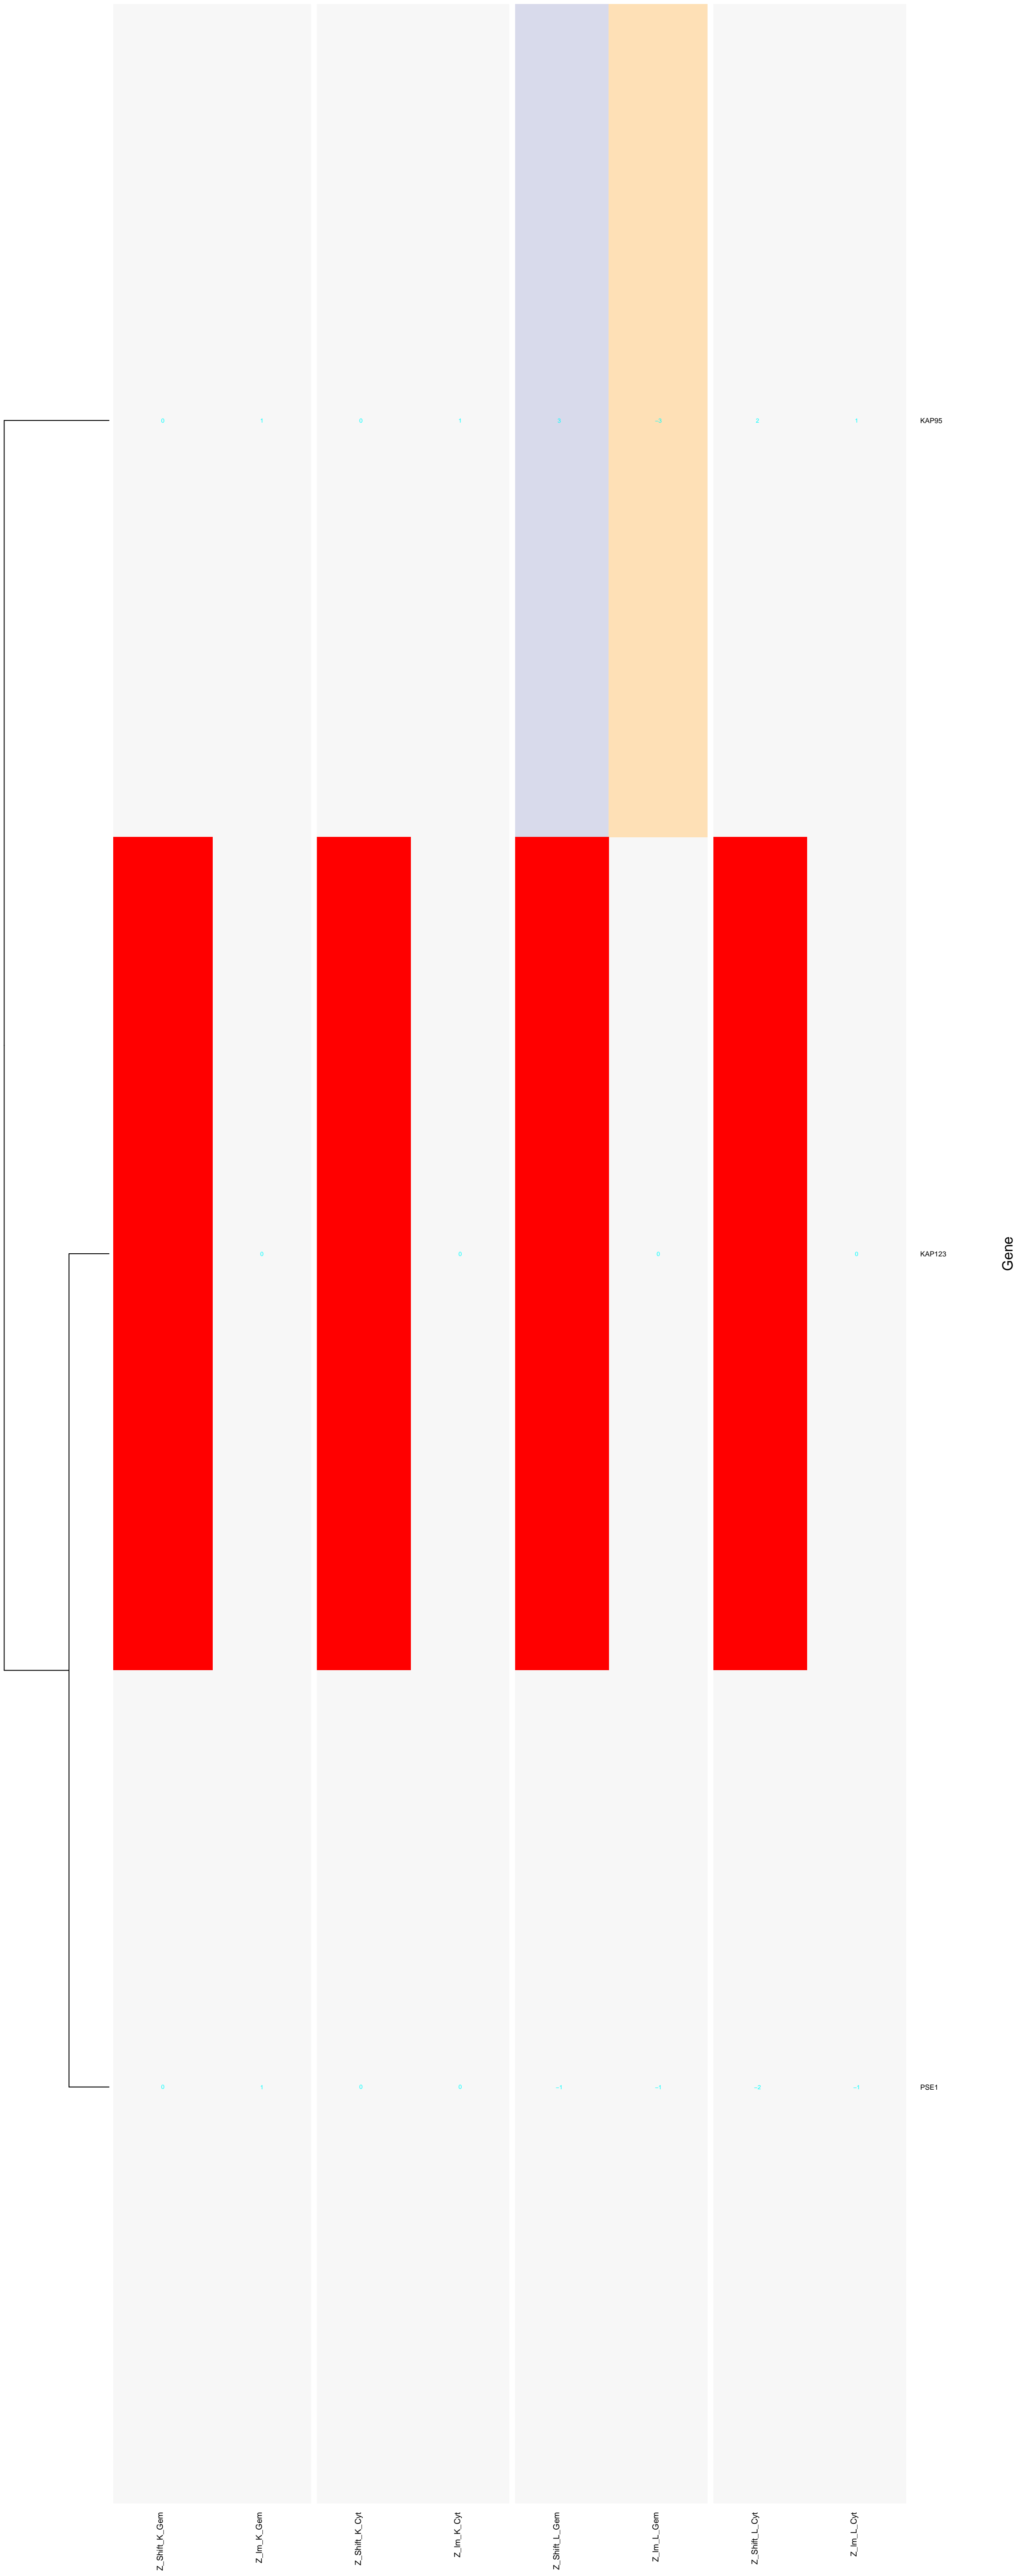

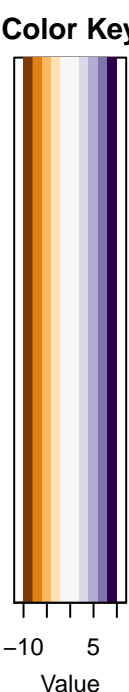

transcription factor import into nucleus

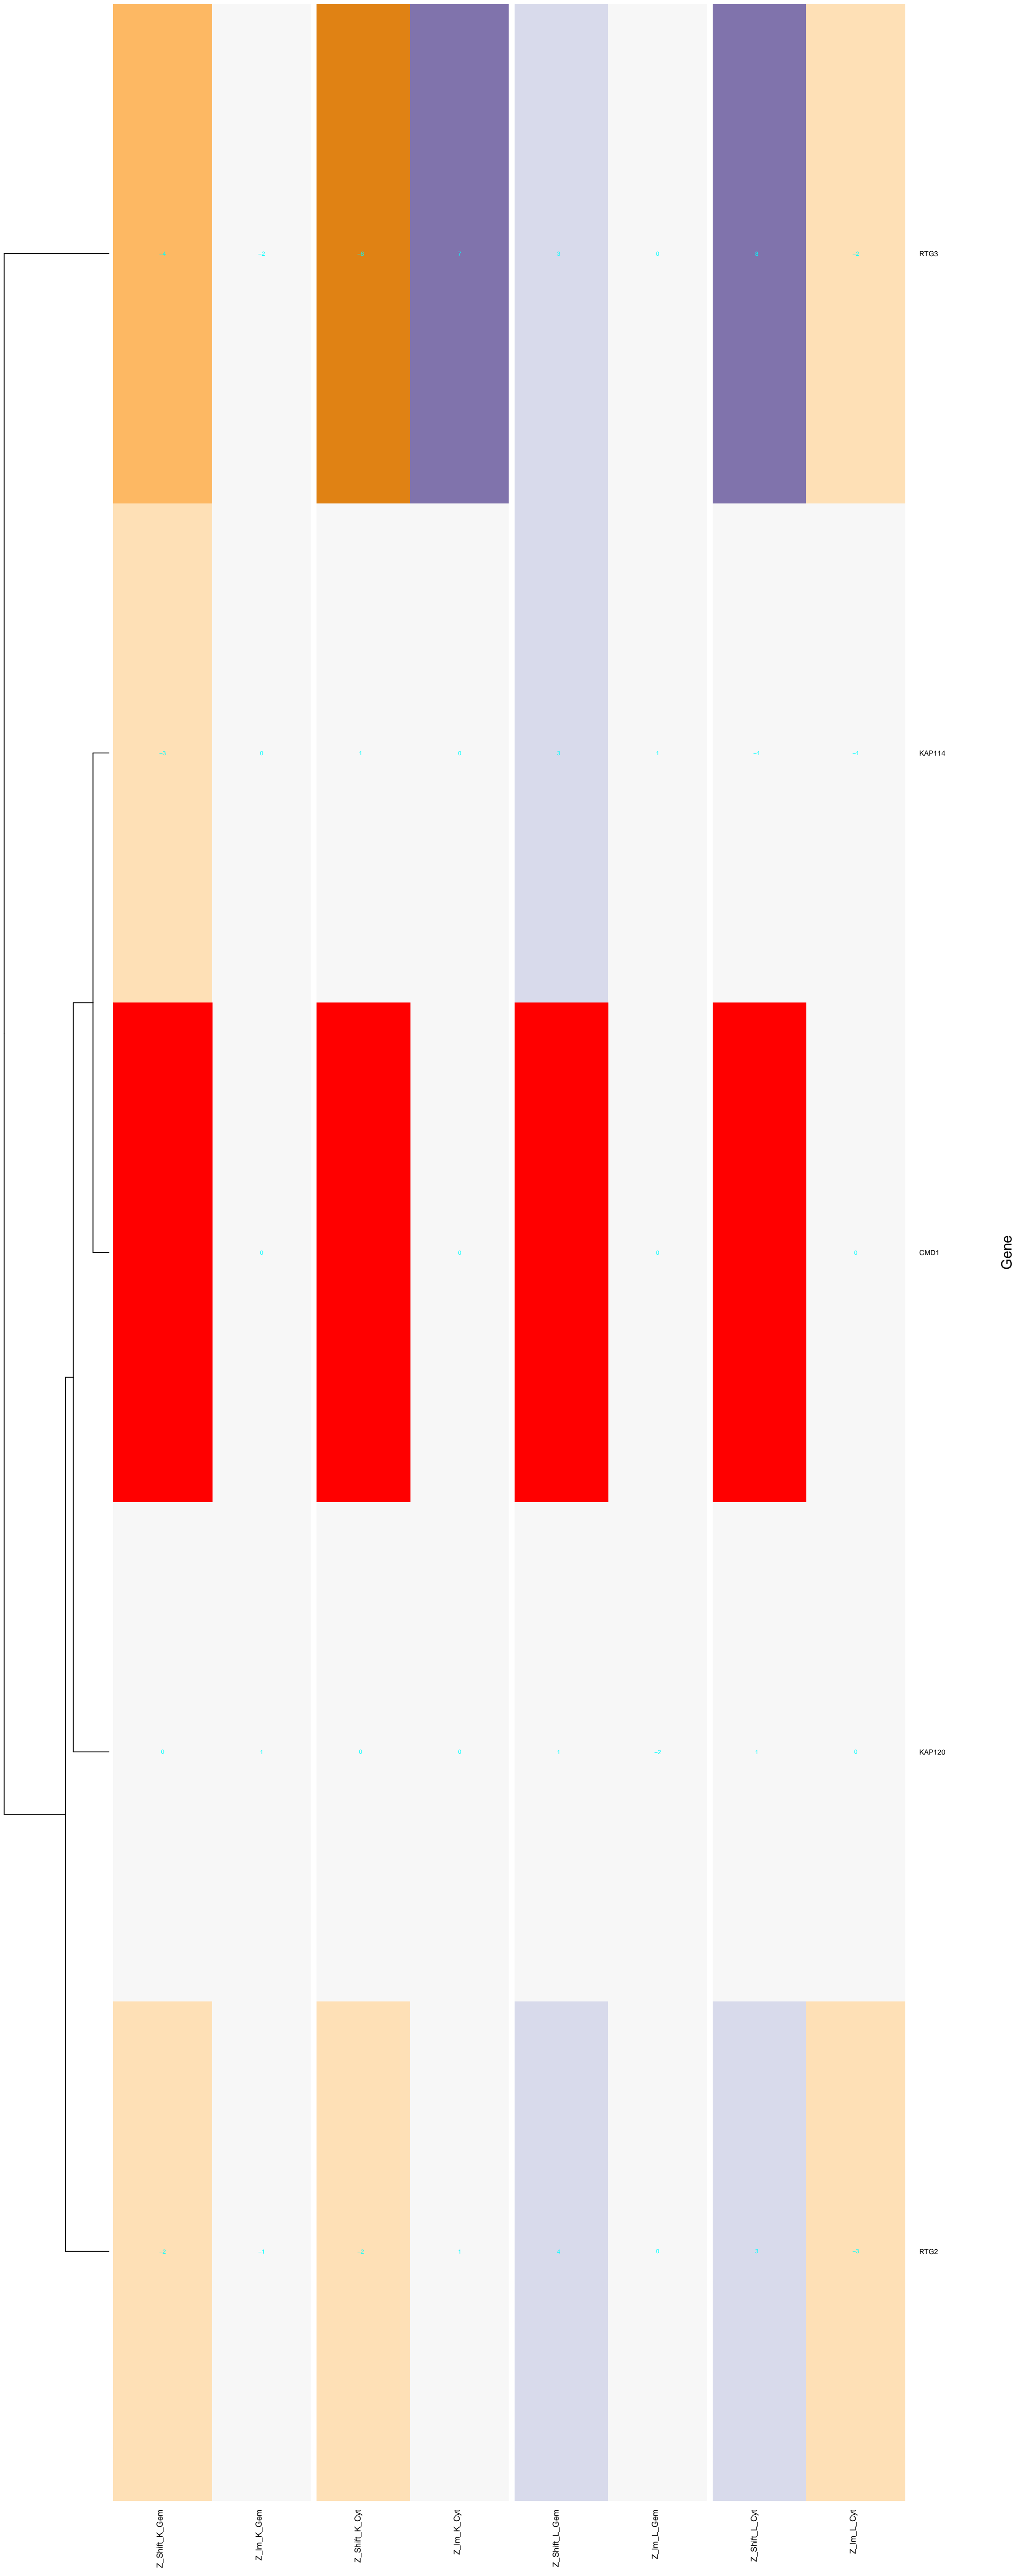

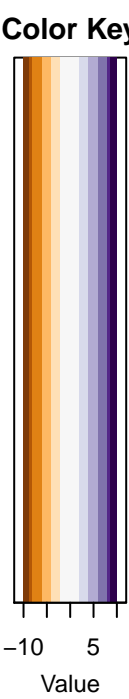

RNA polymerase II complex import to nucleus

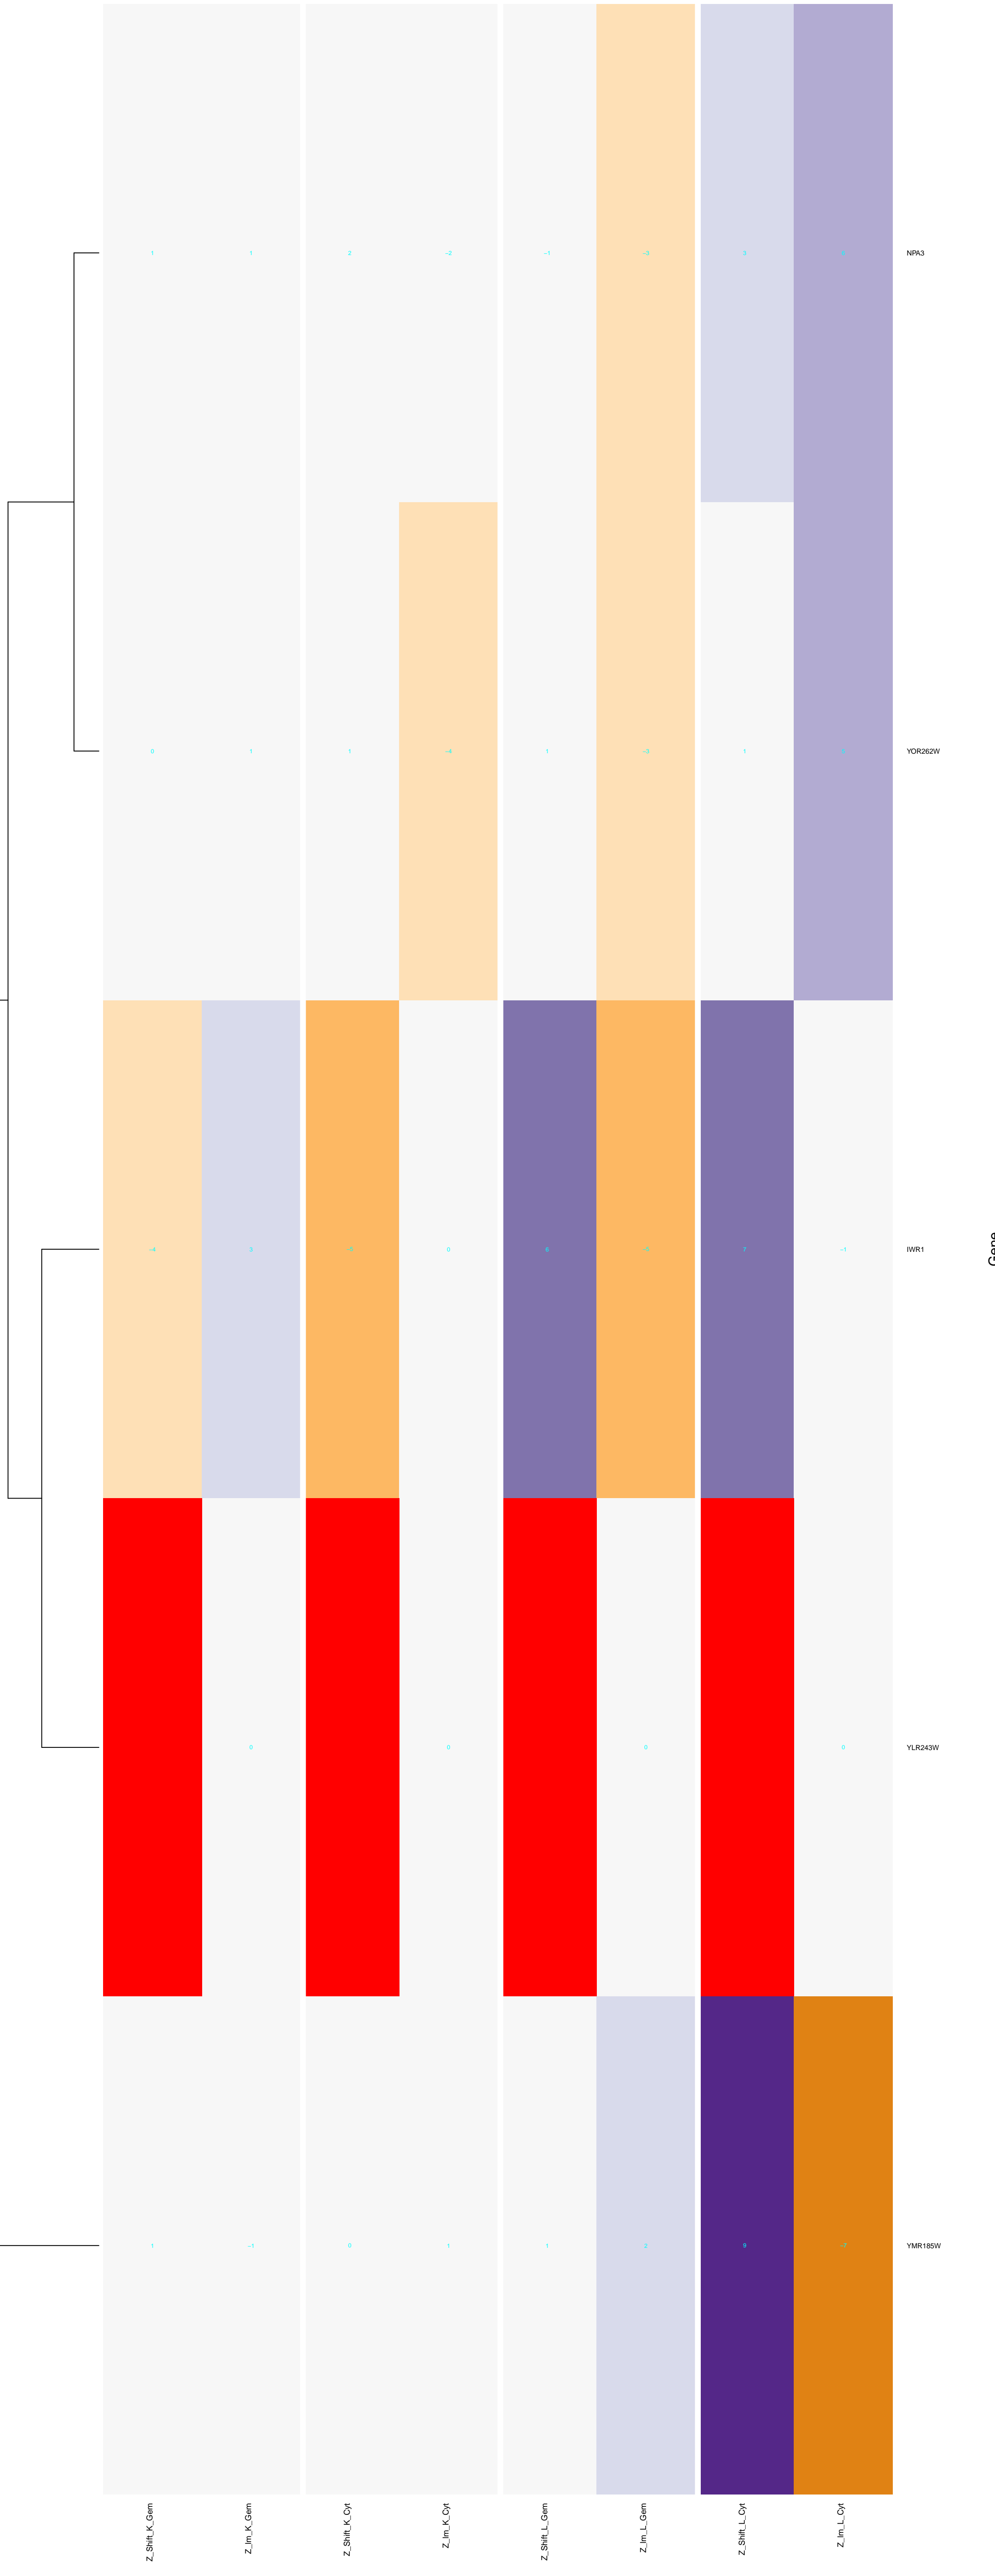

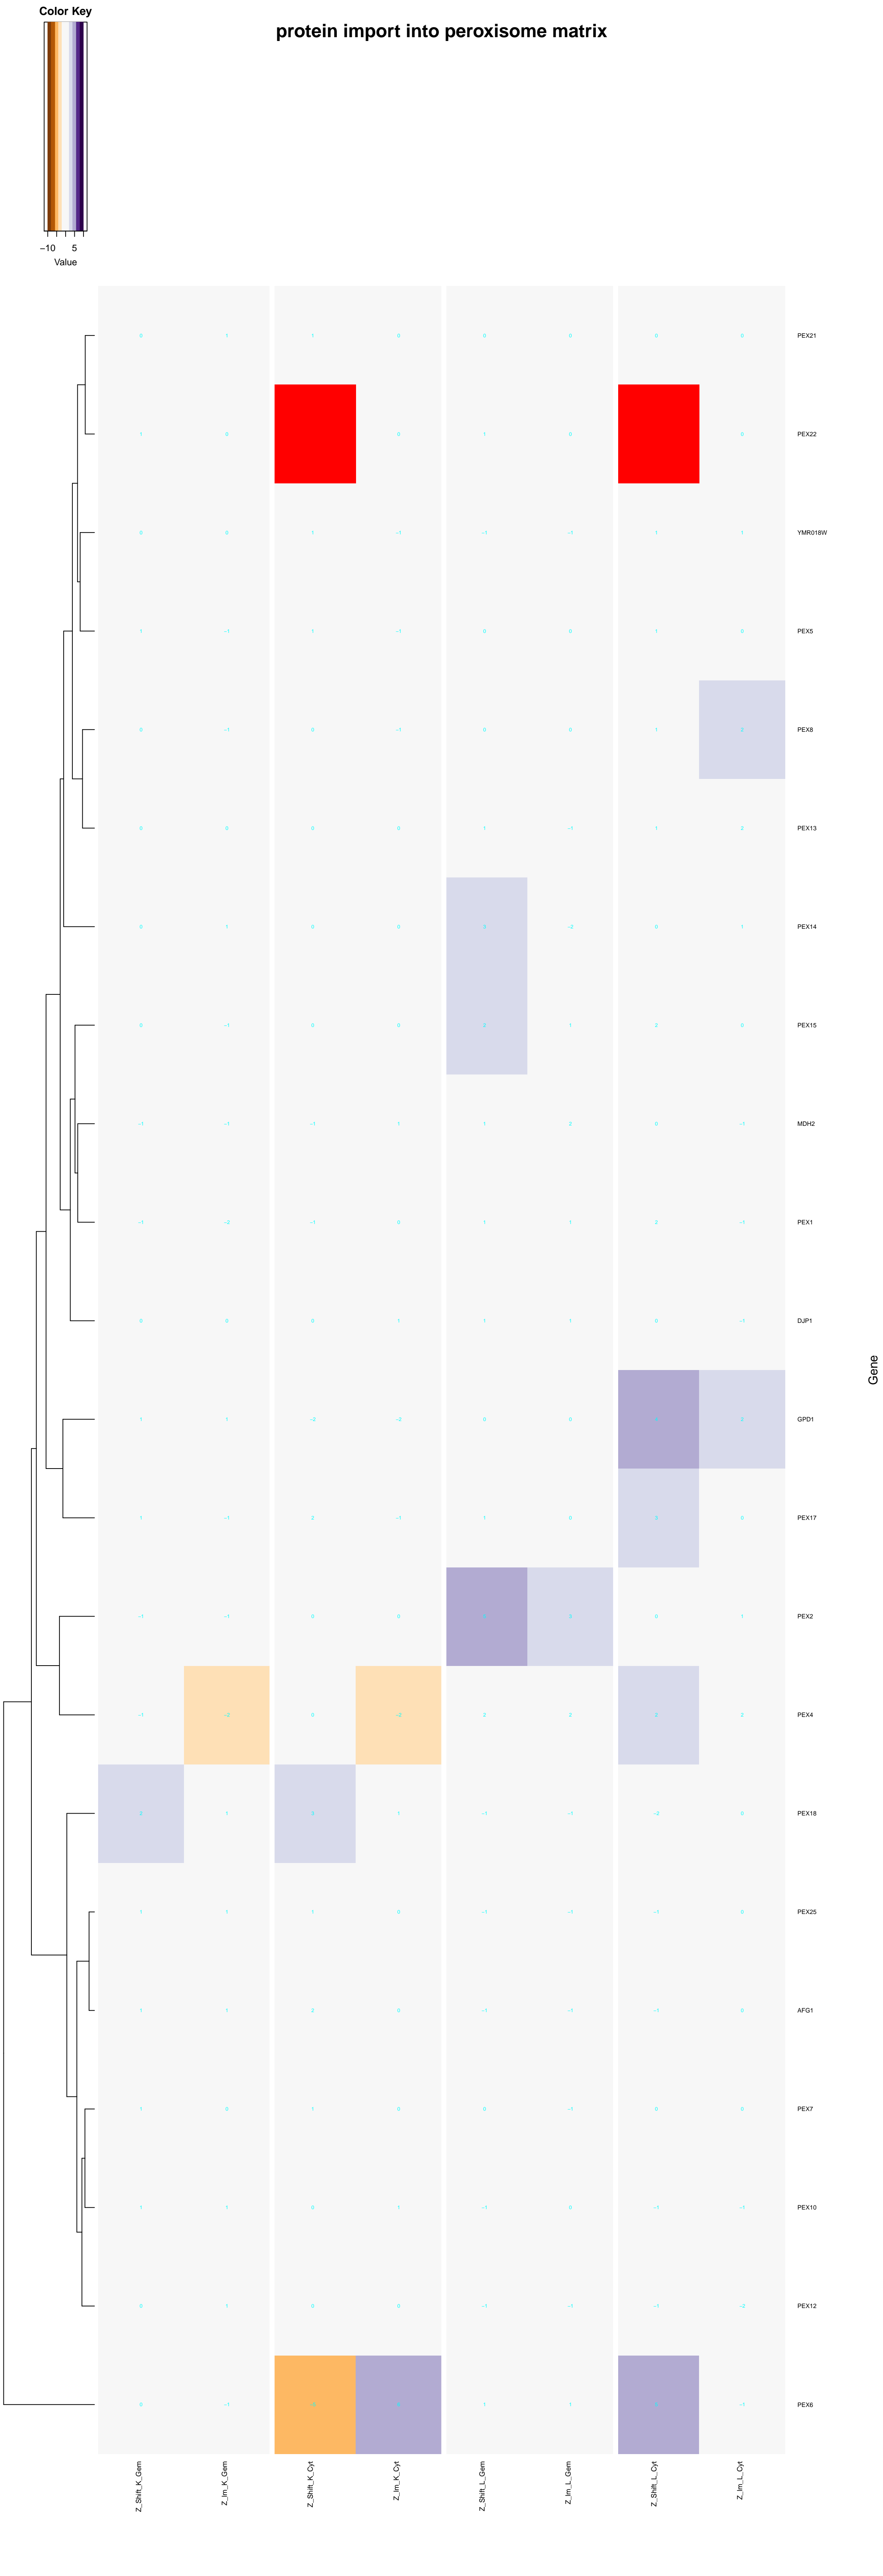

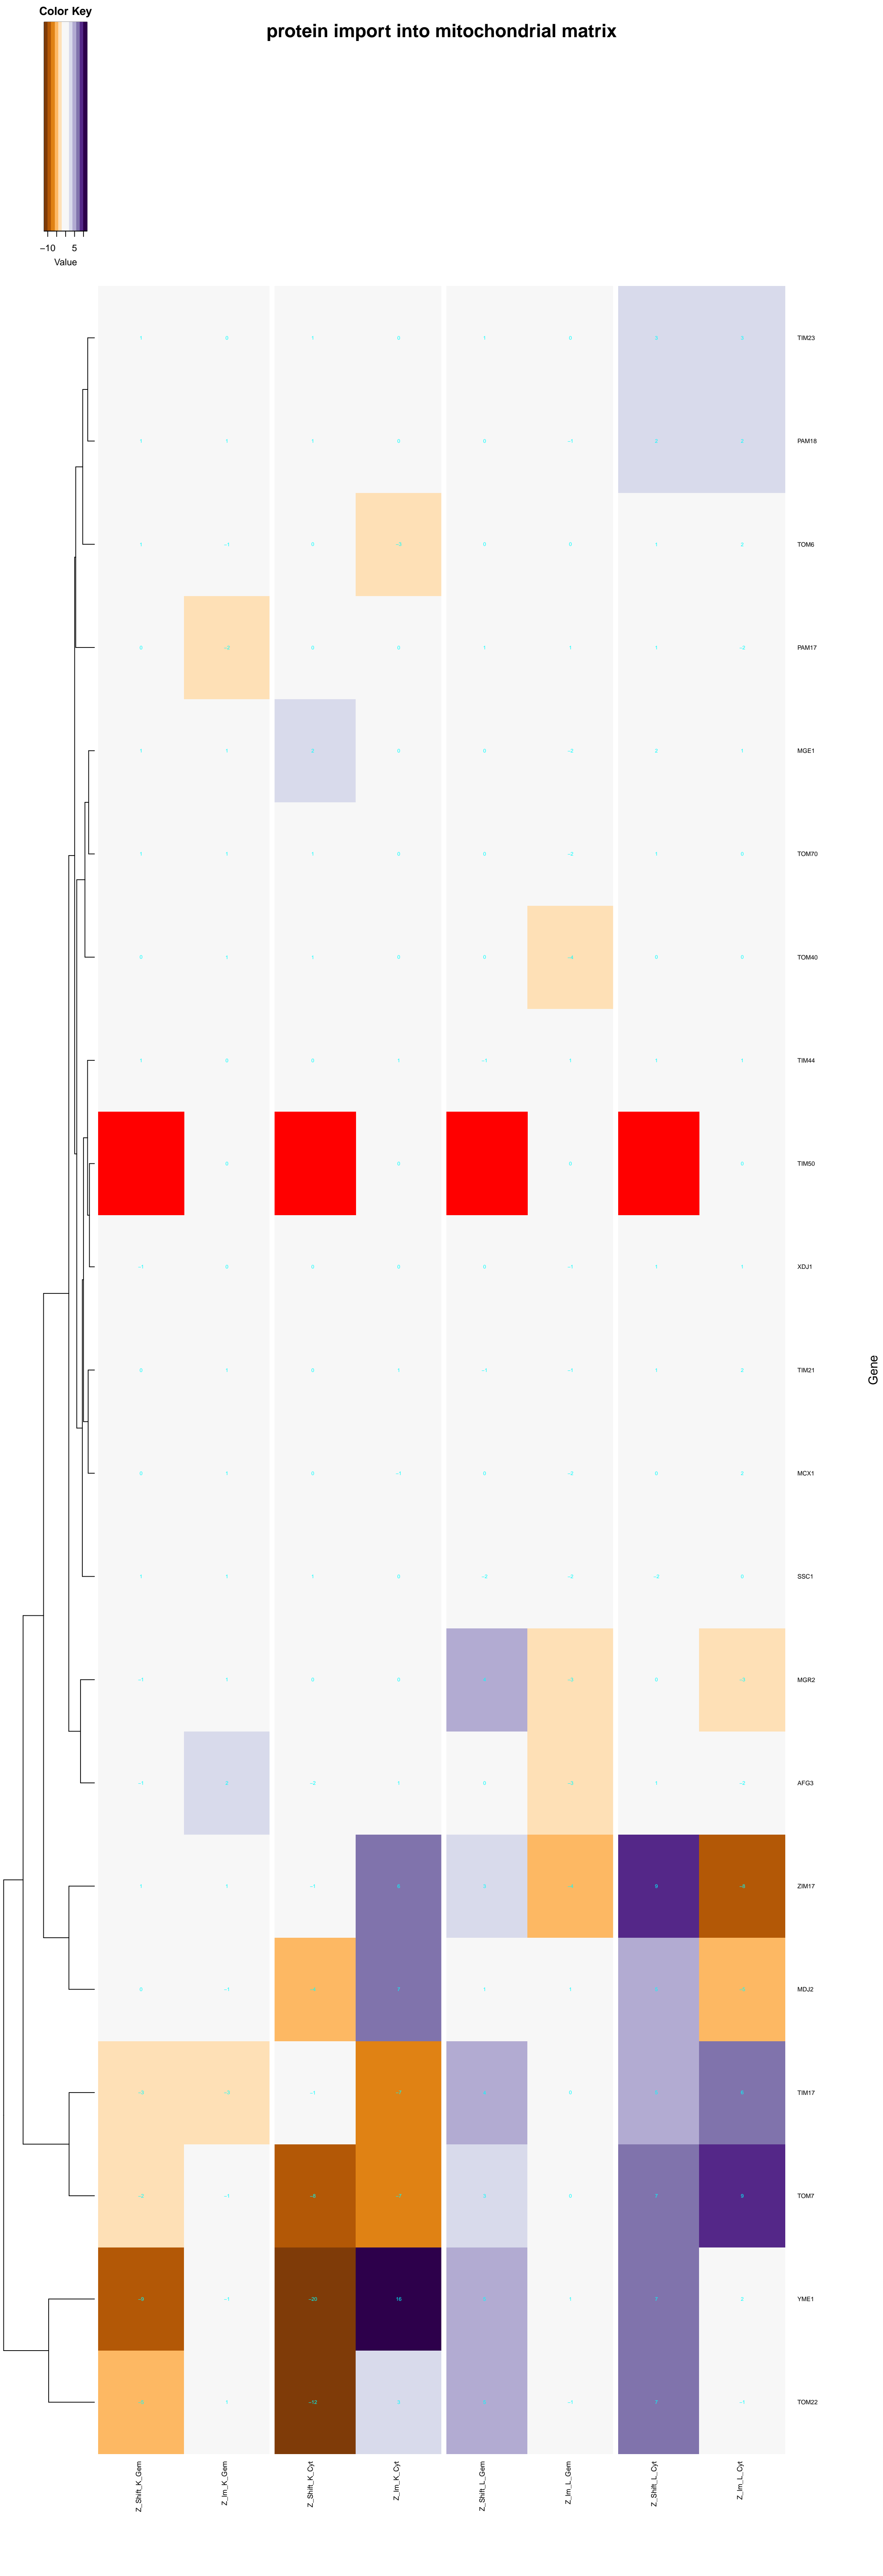

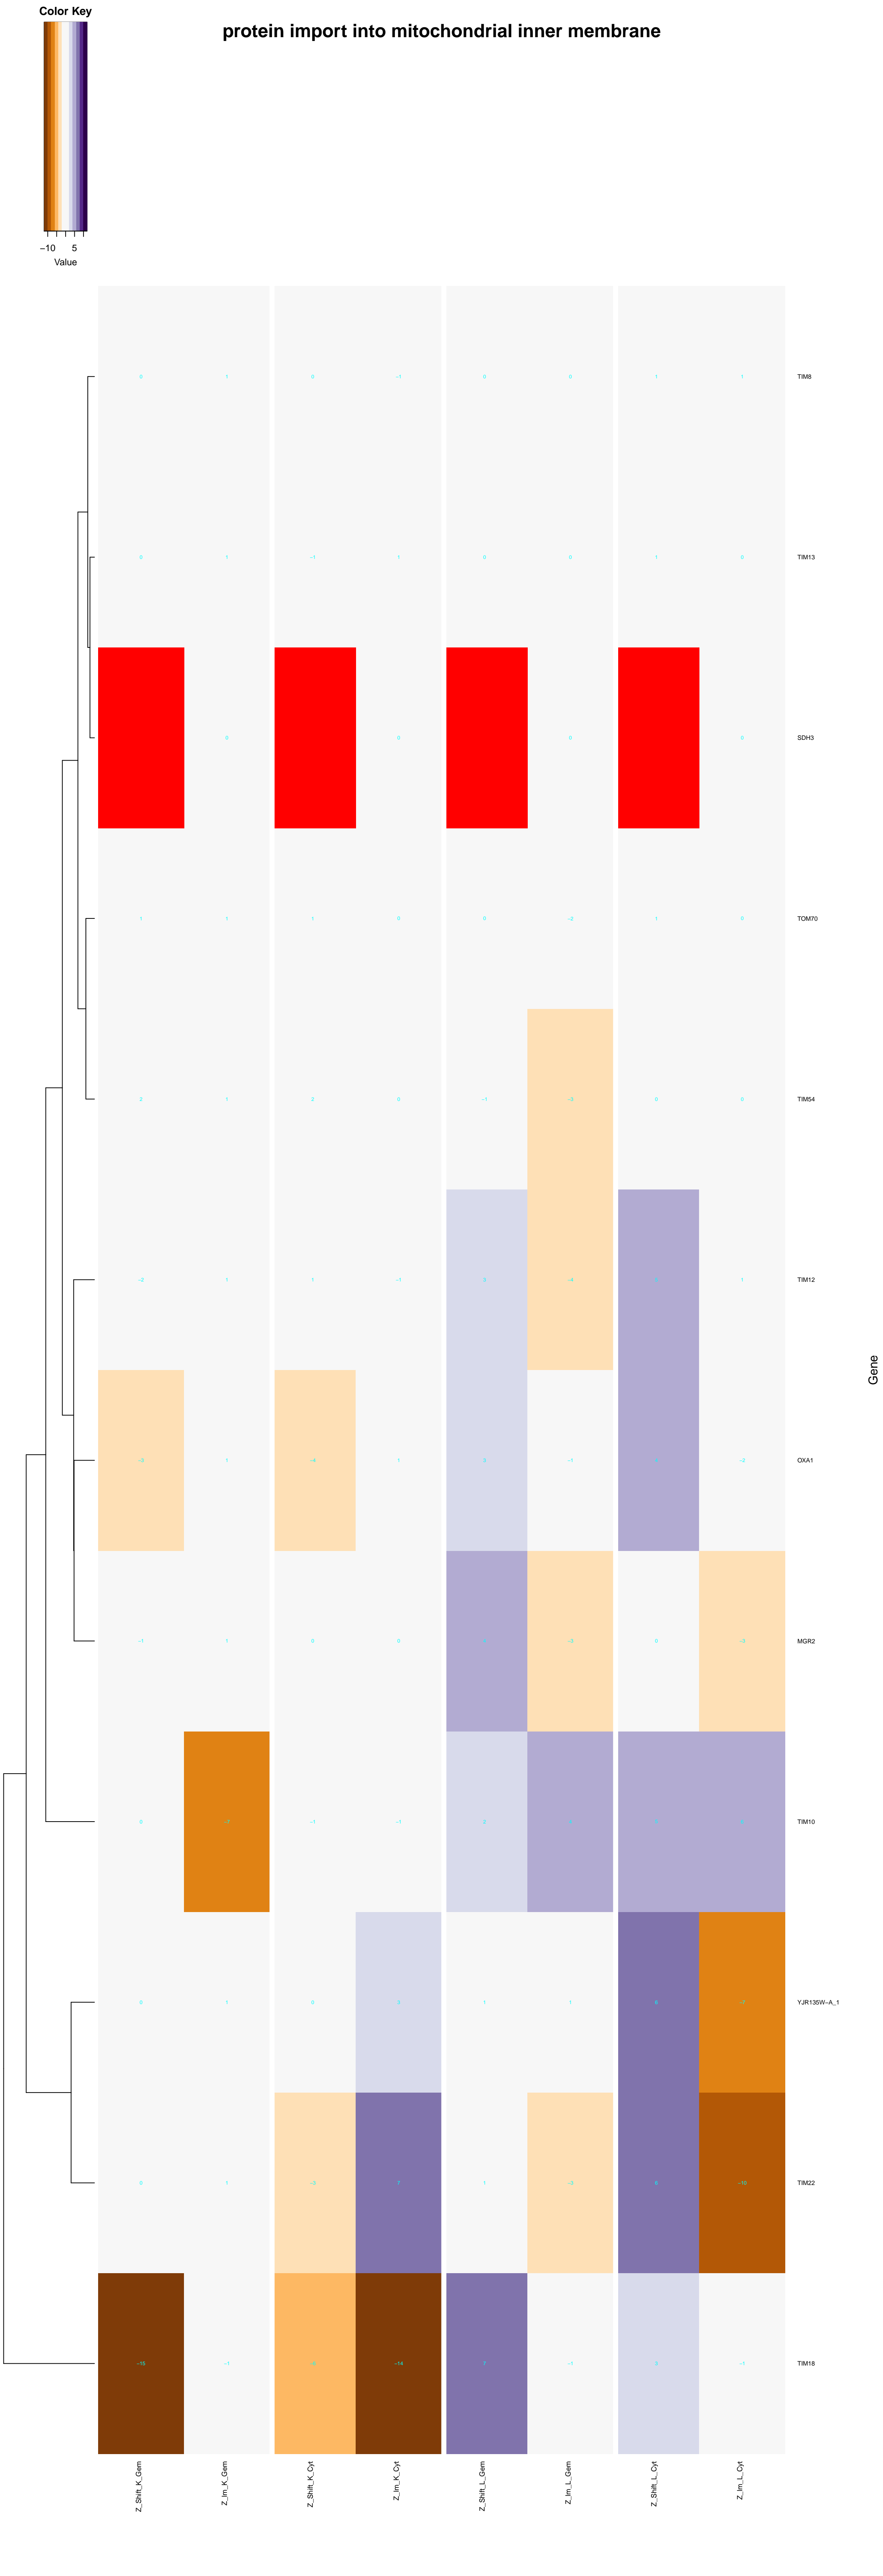

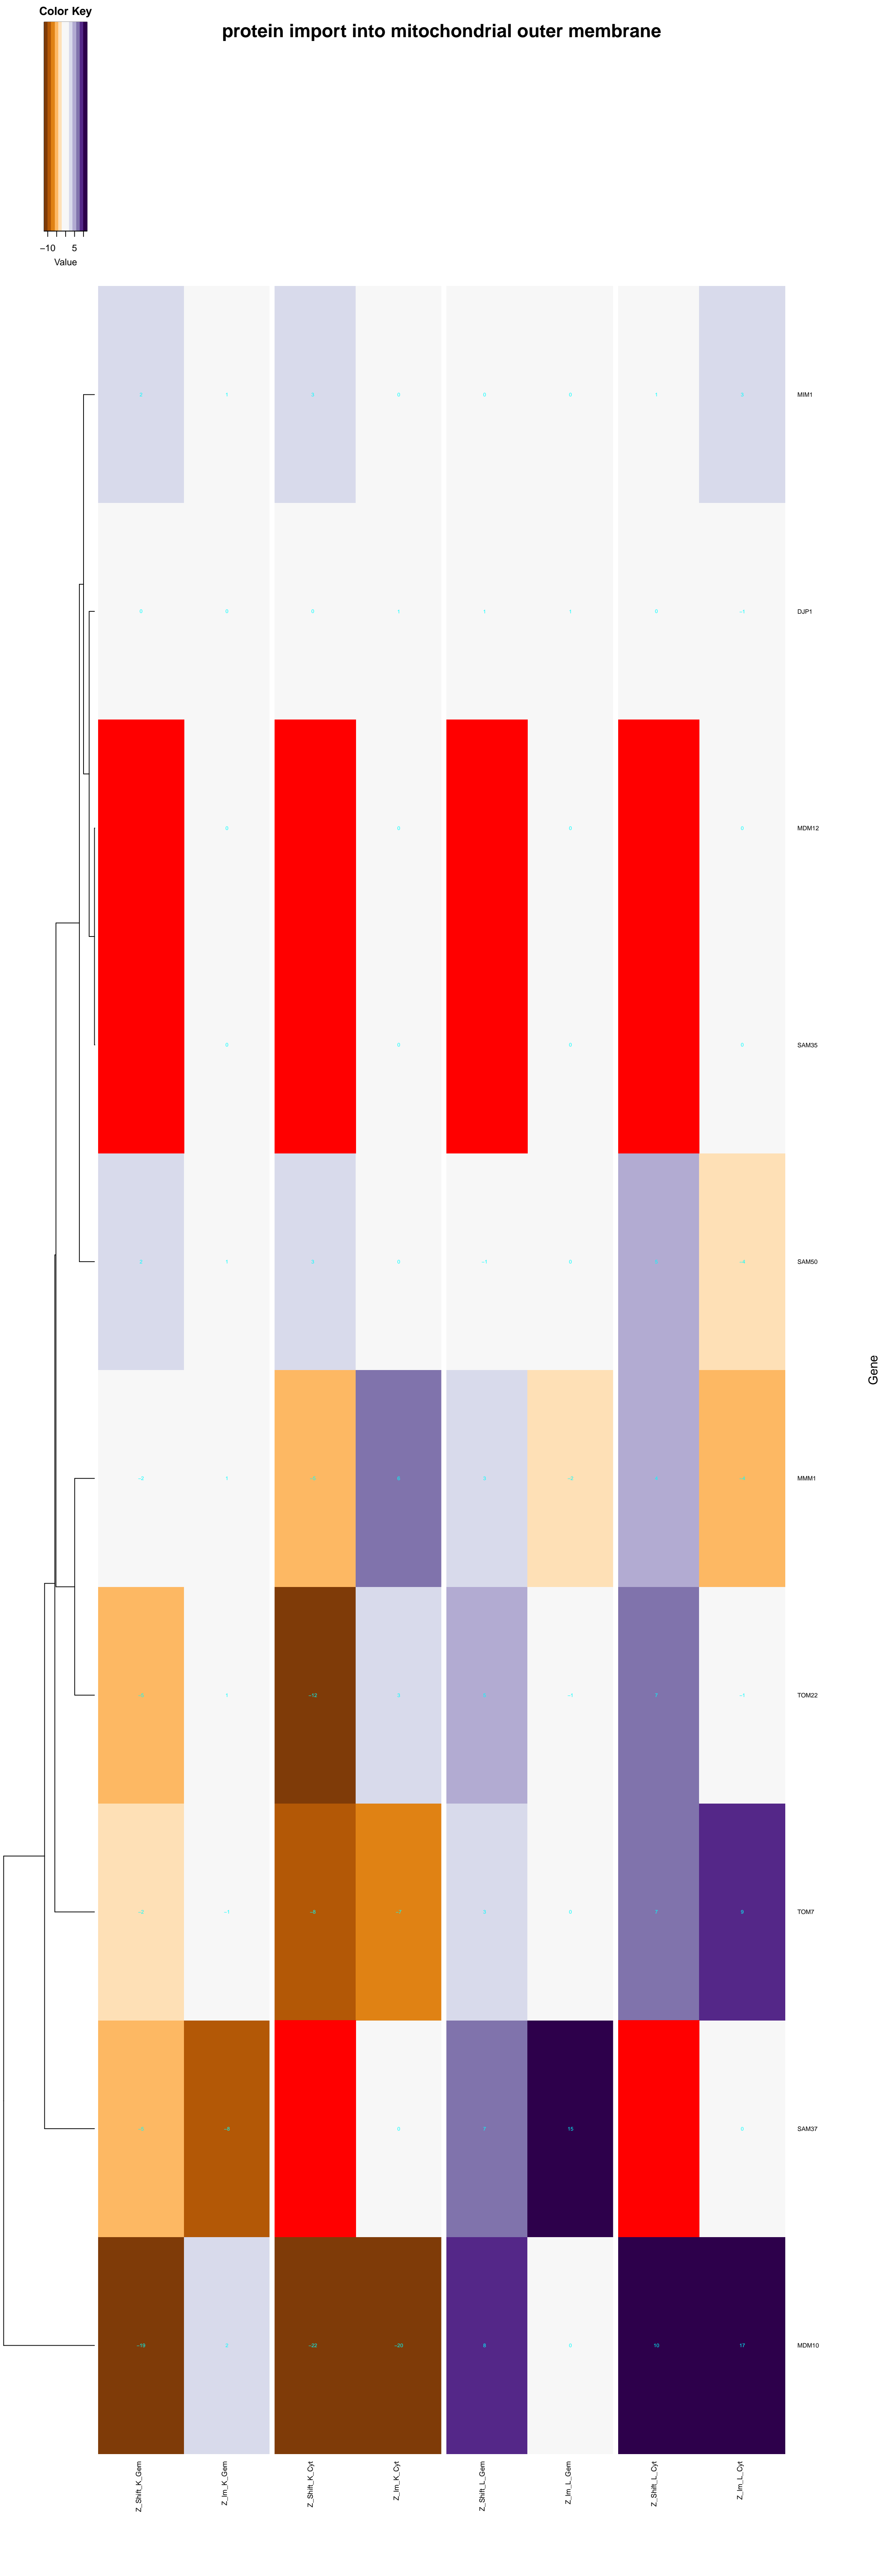

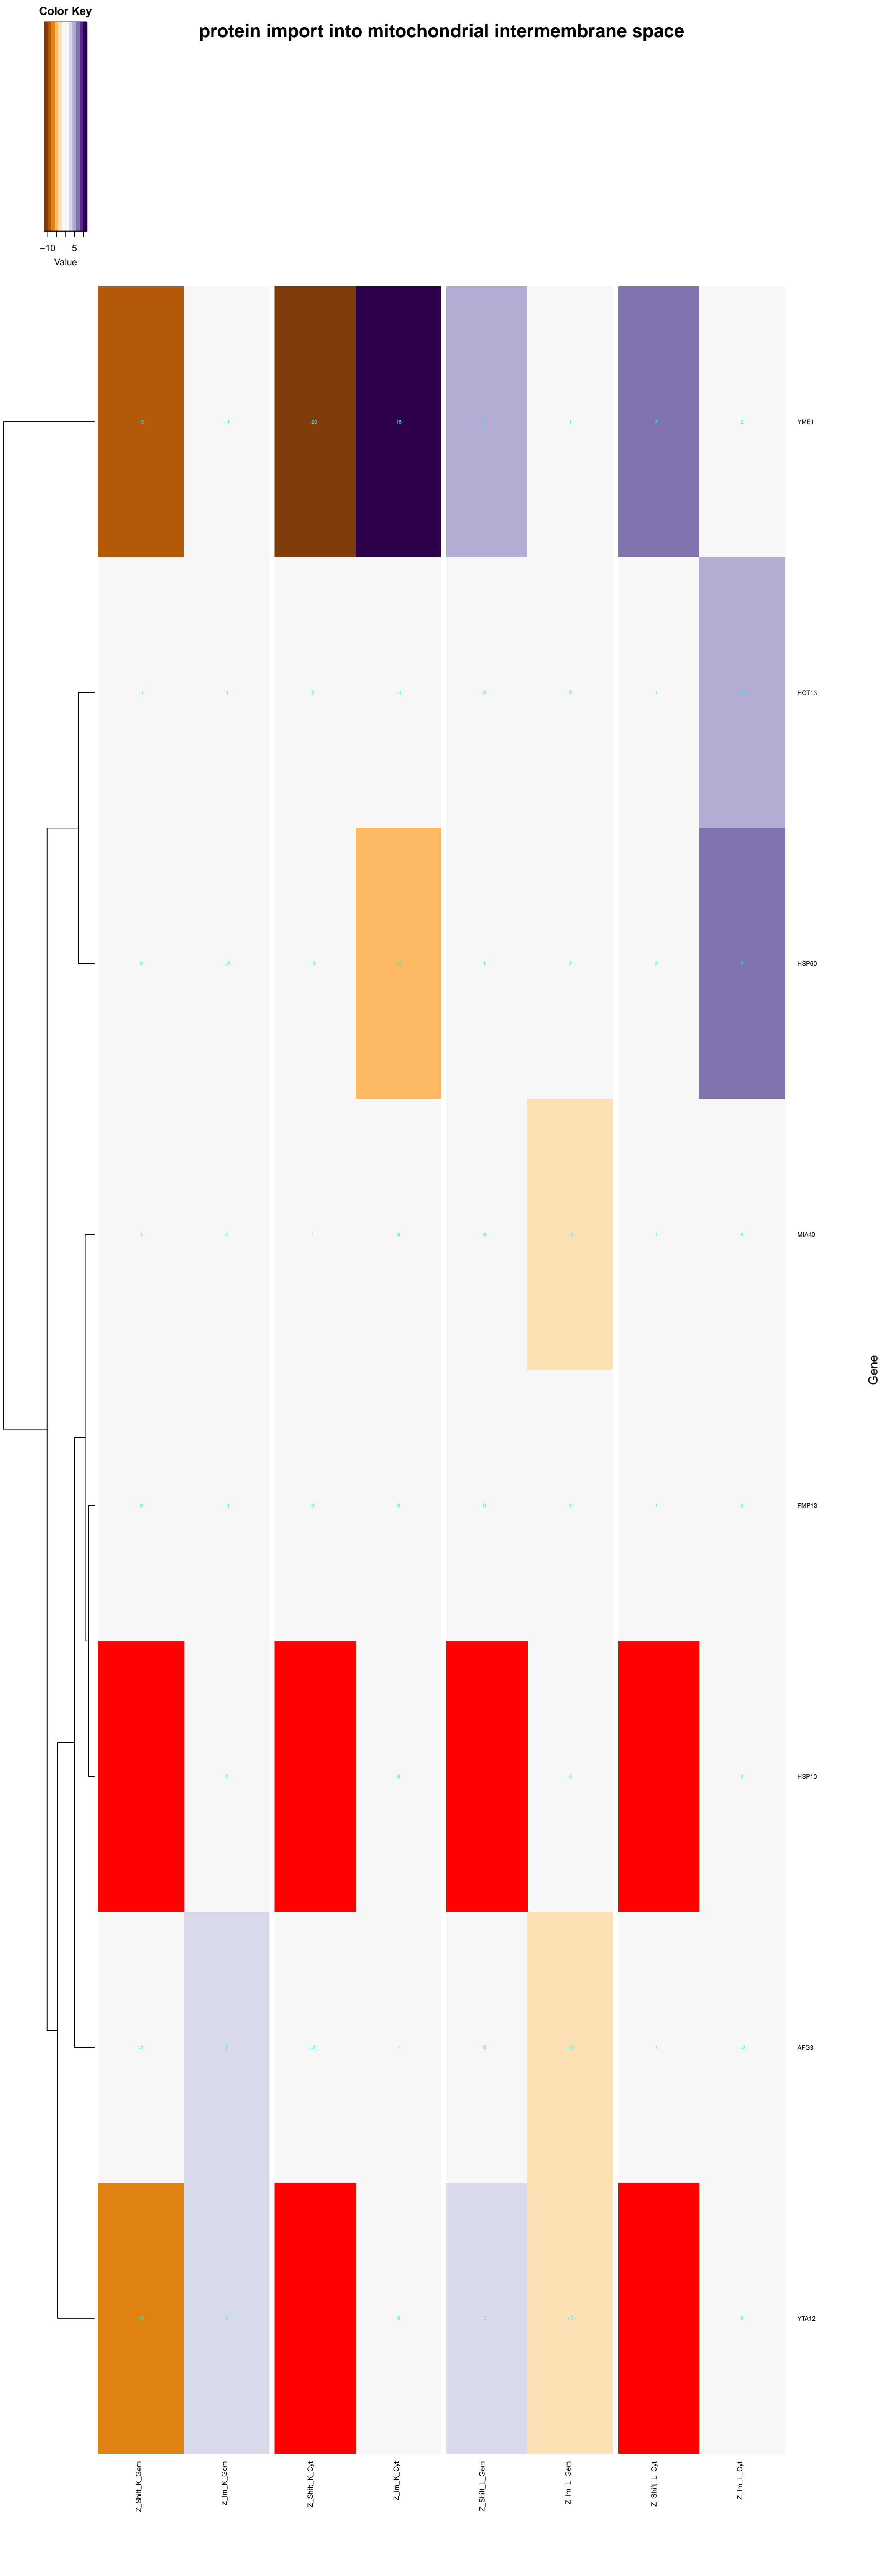

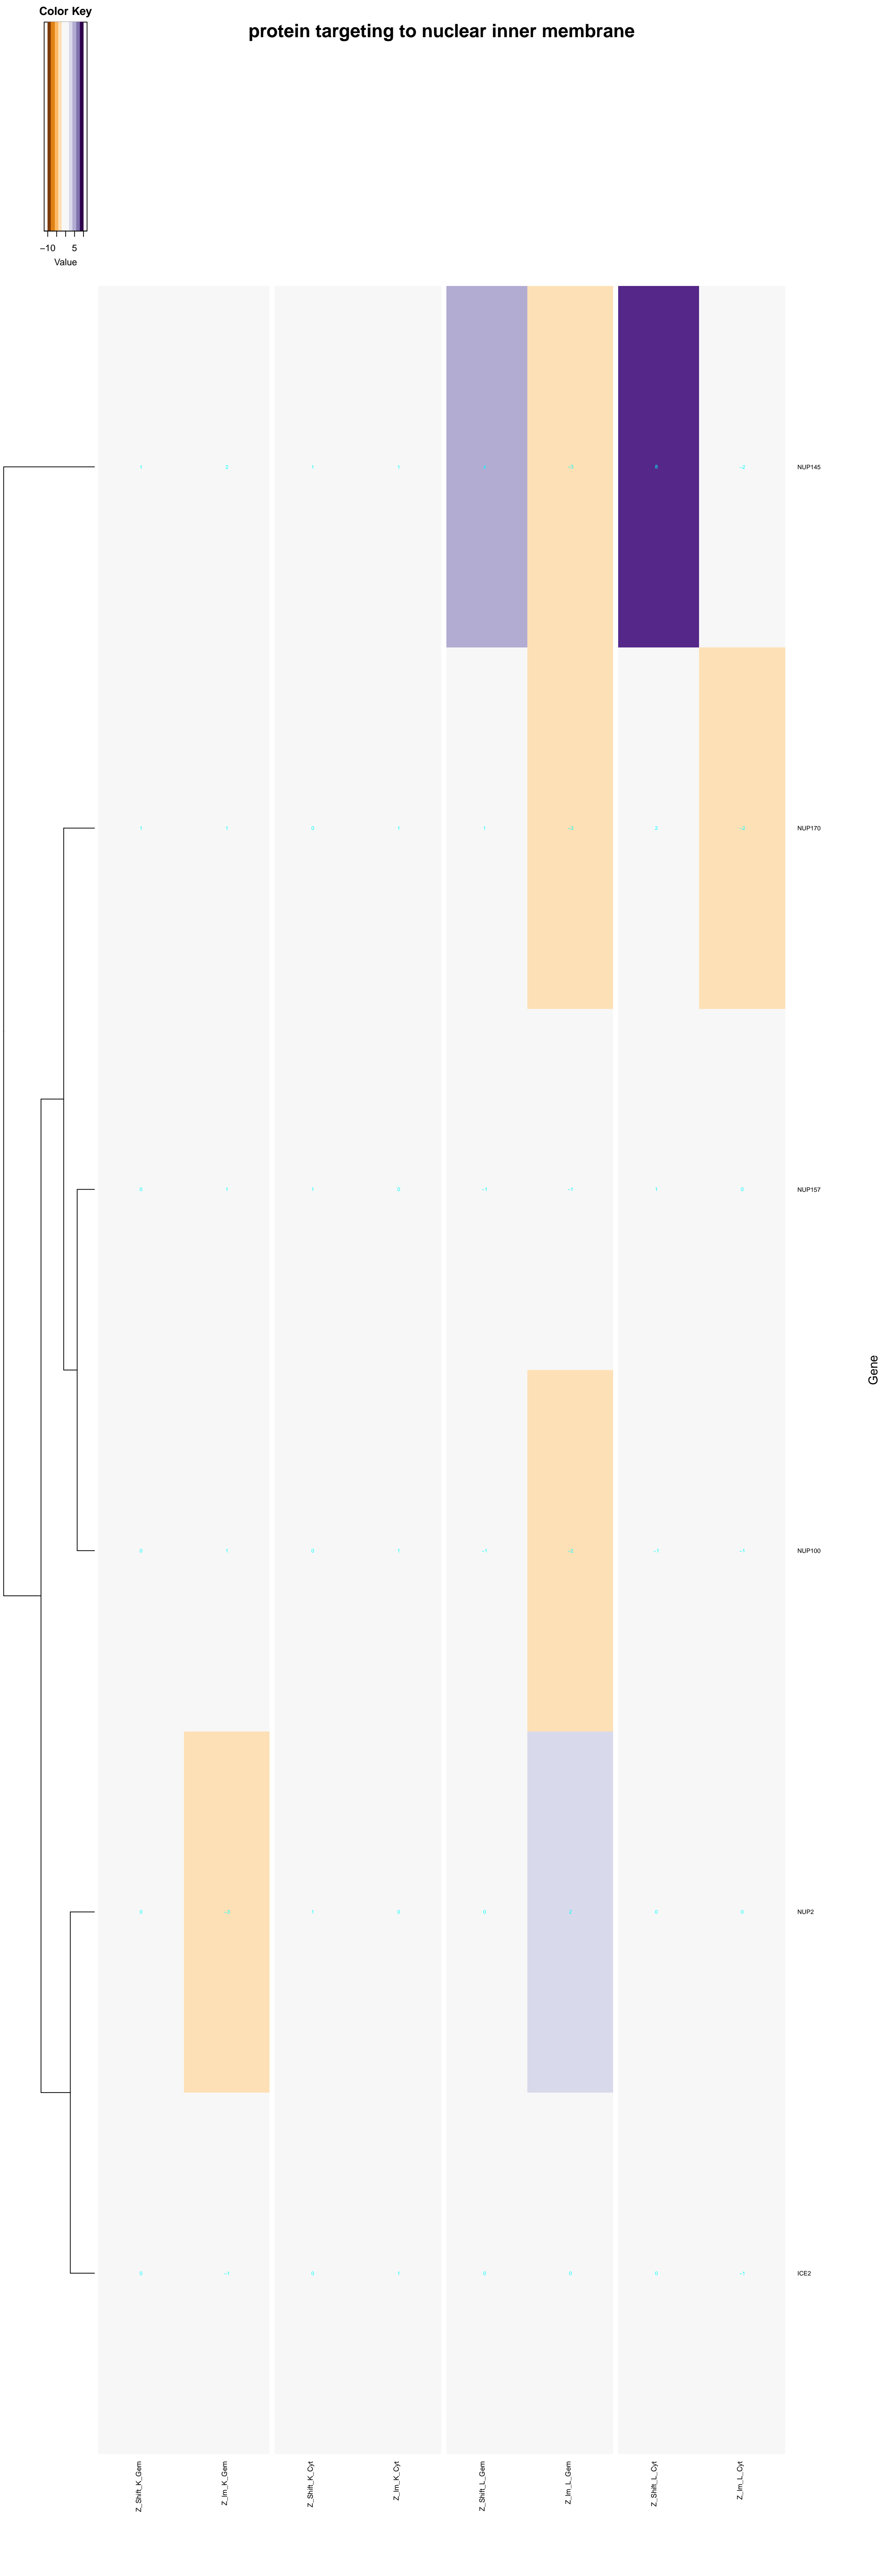

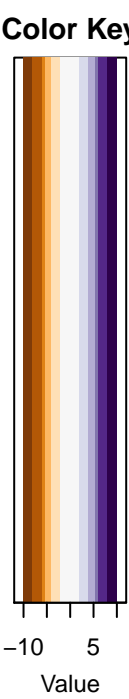

establishment of protein localization to chromatin

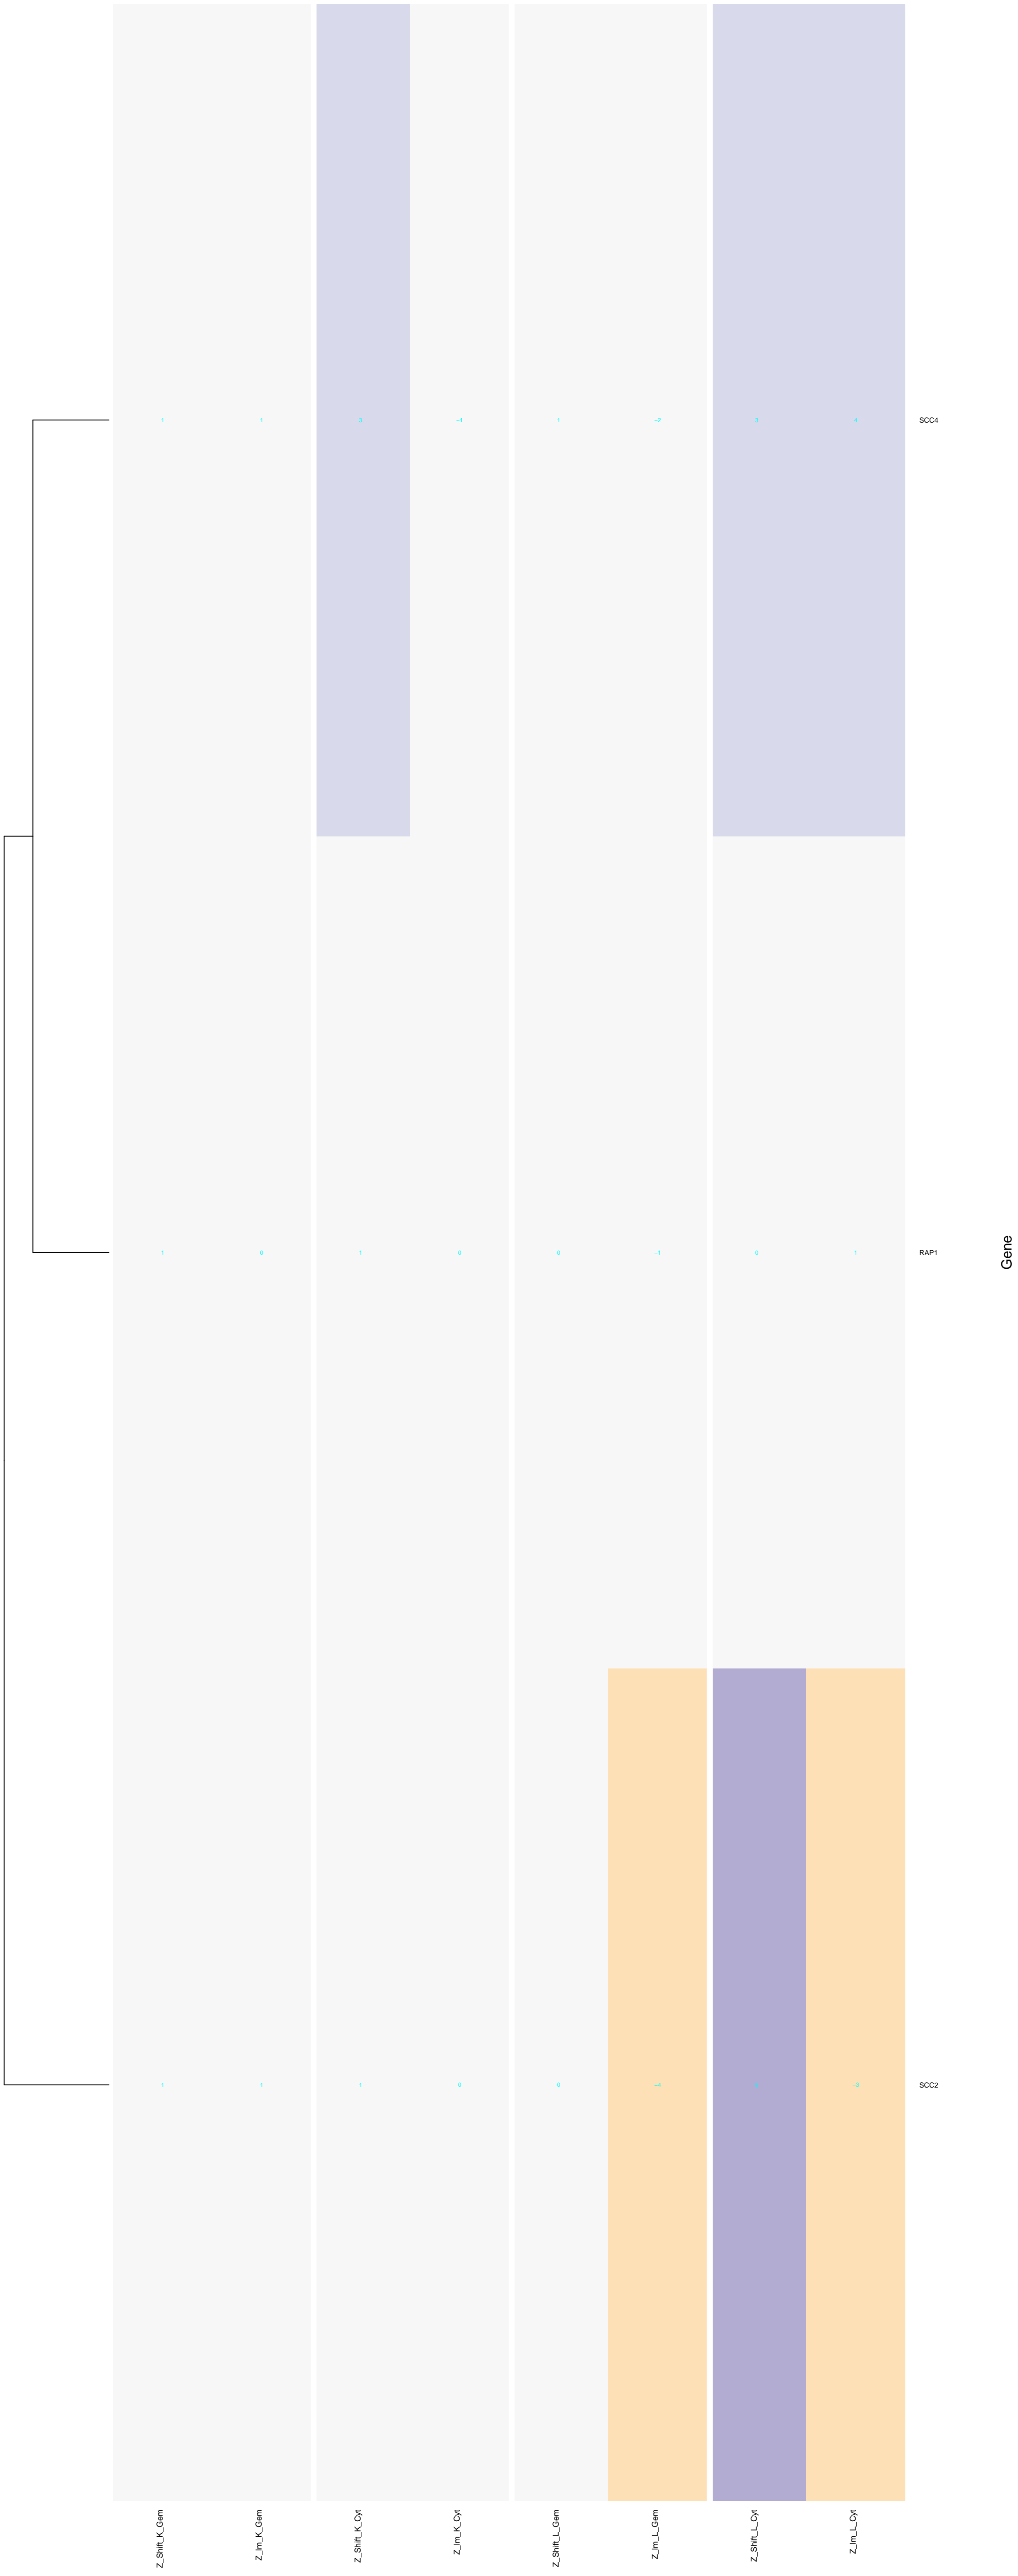

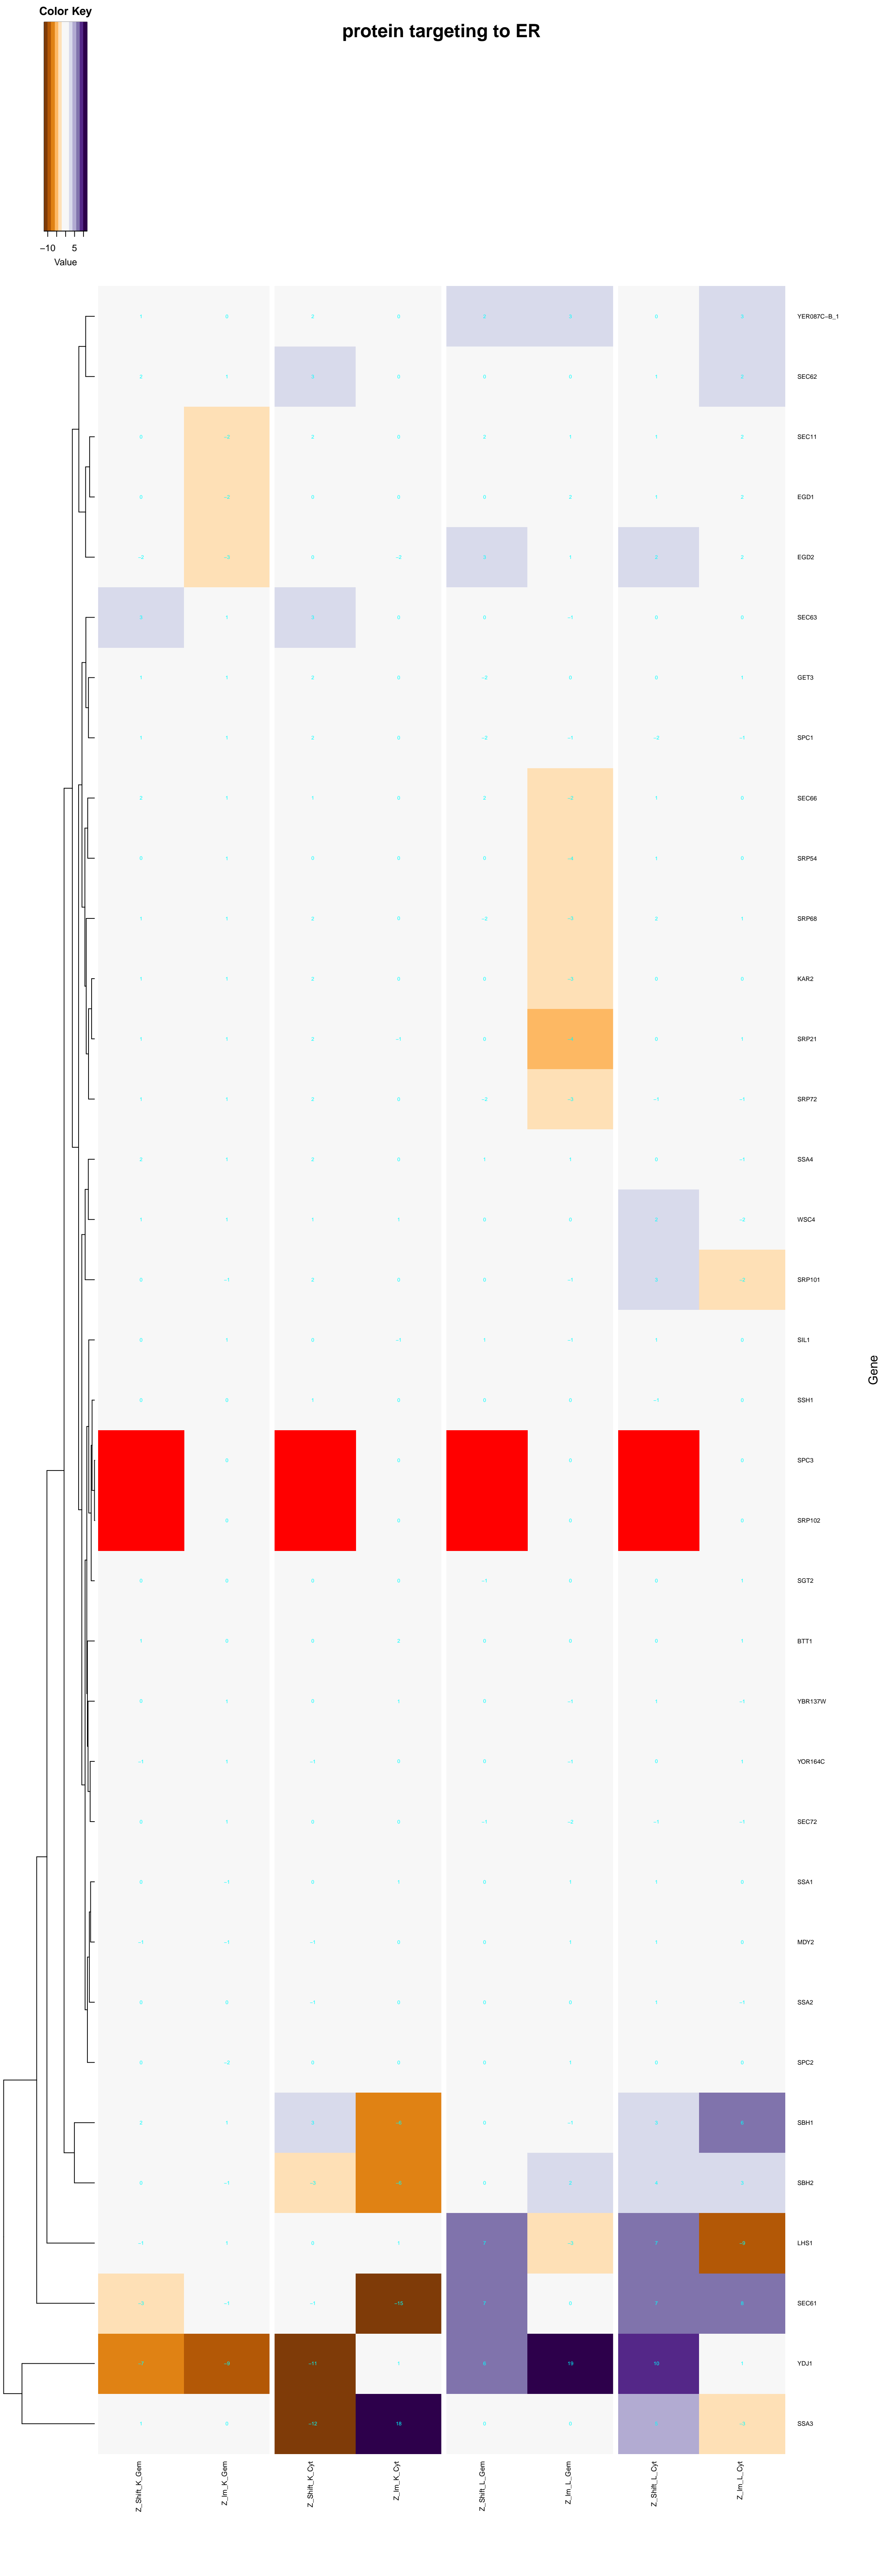

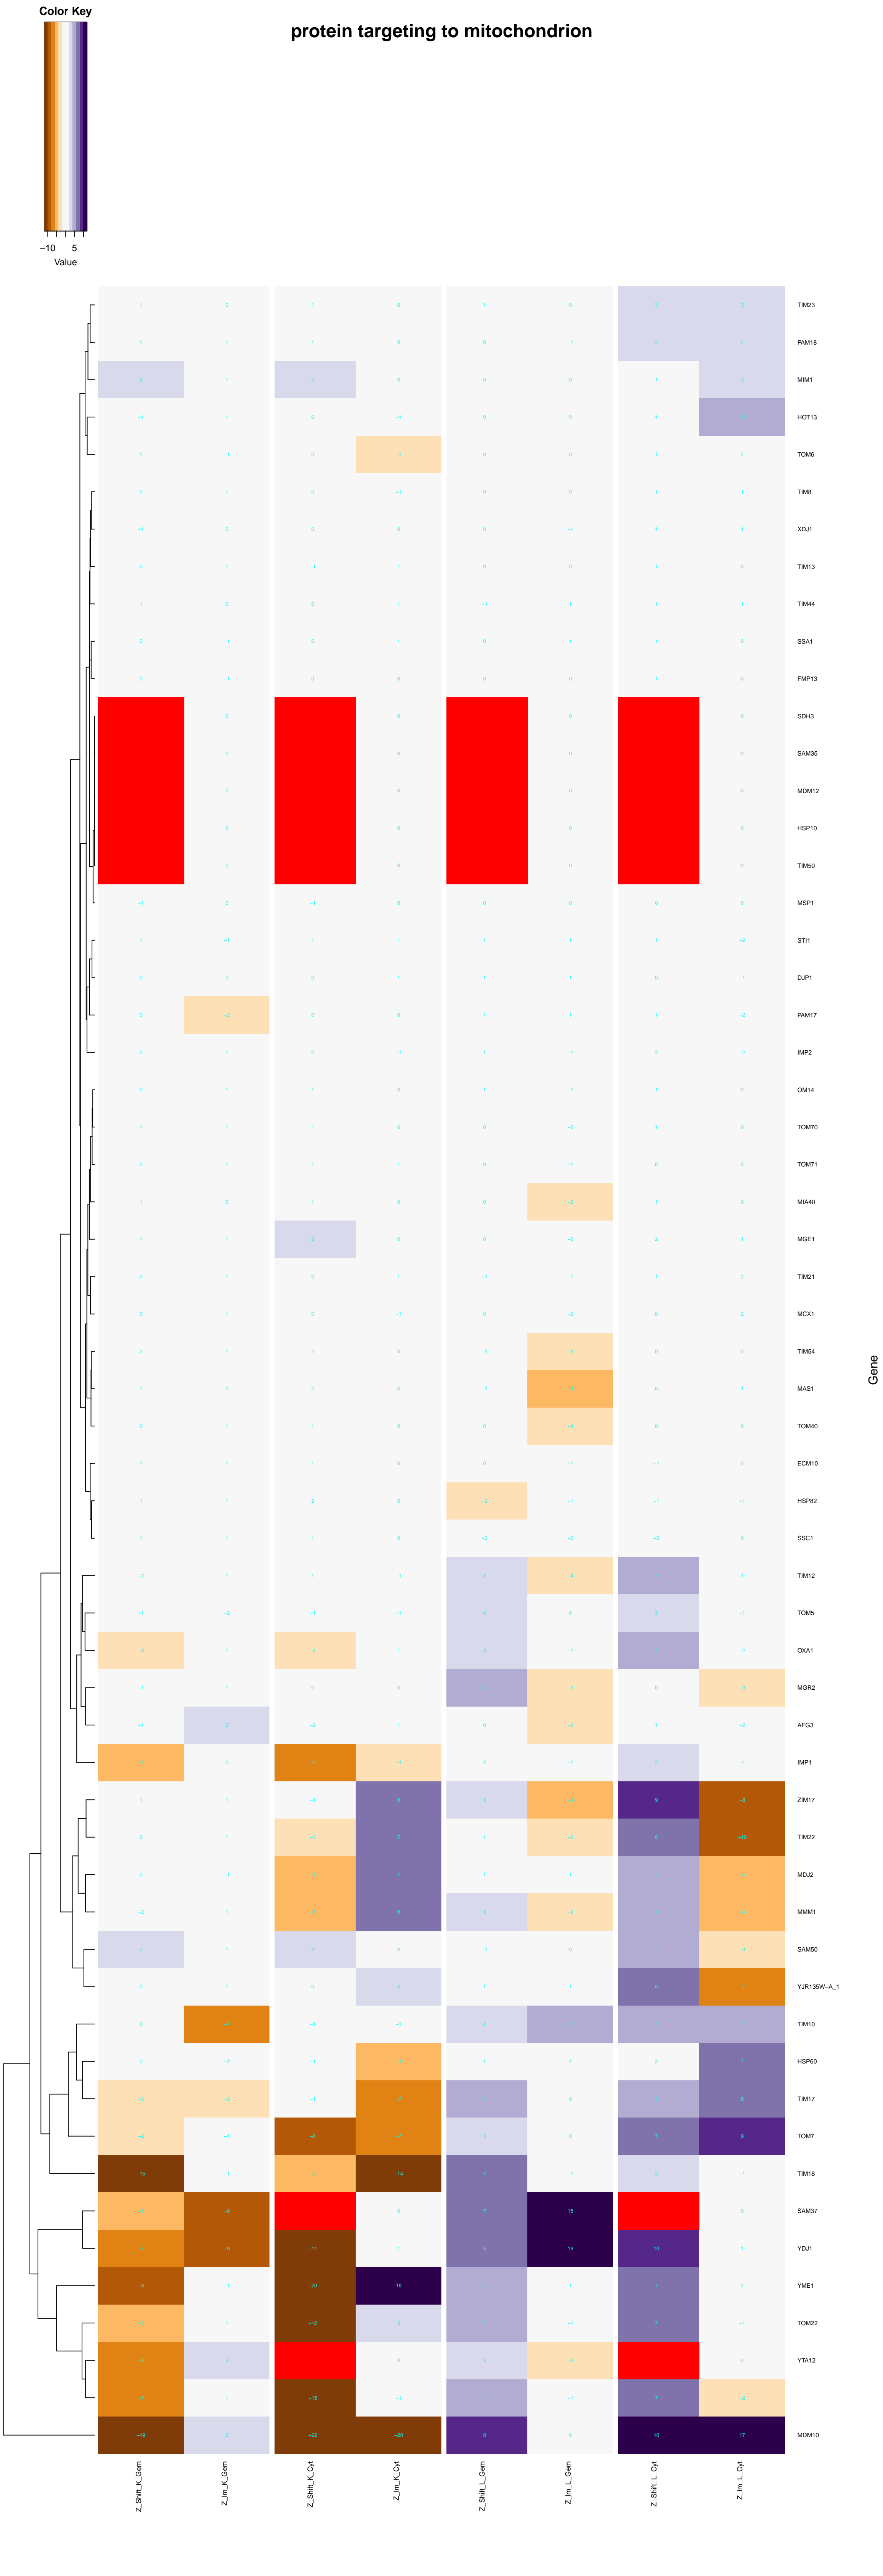

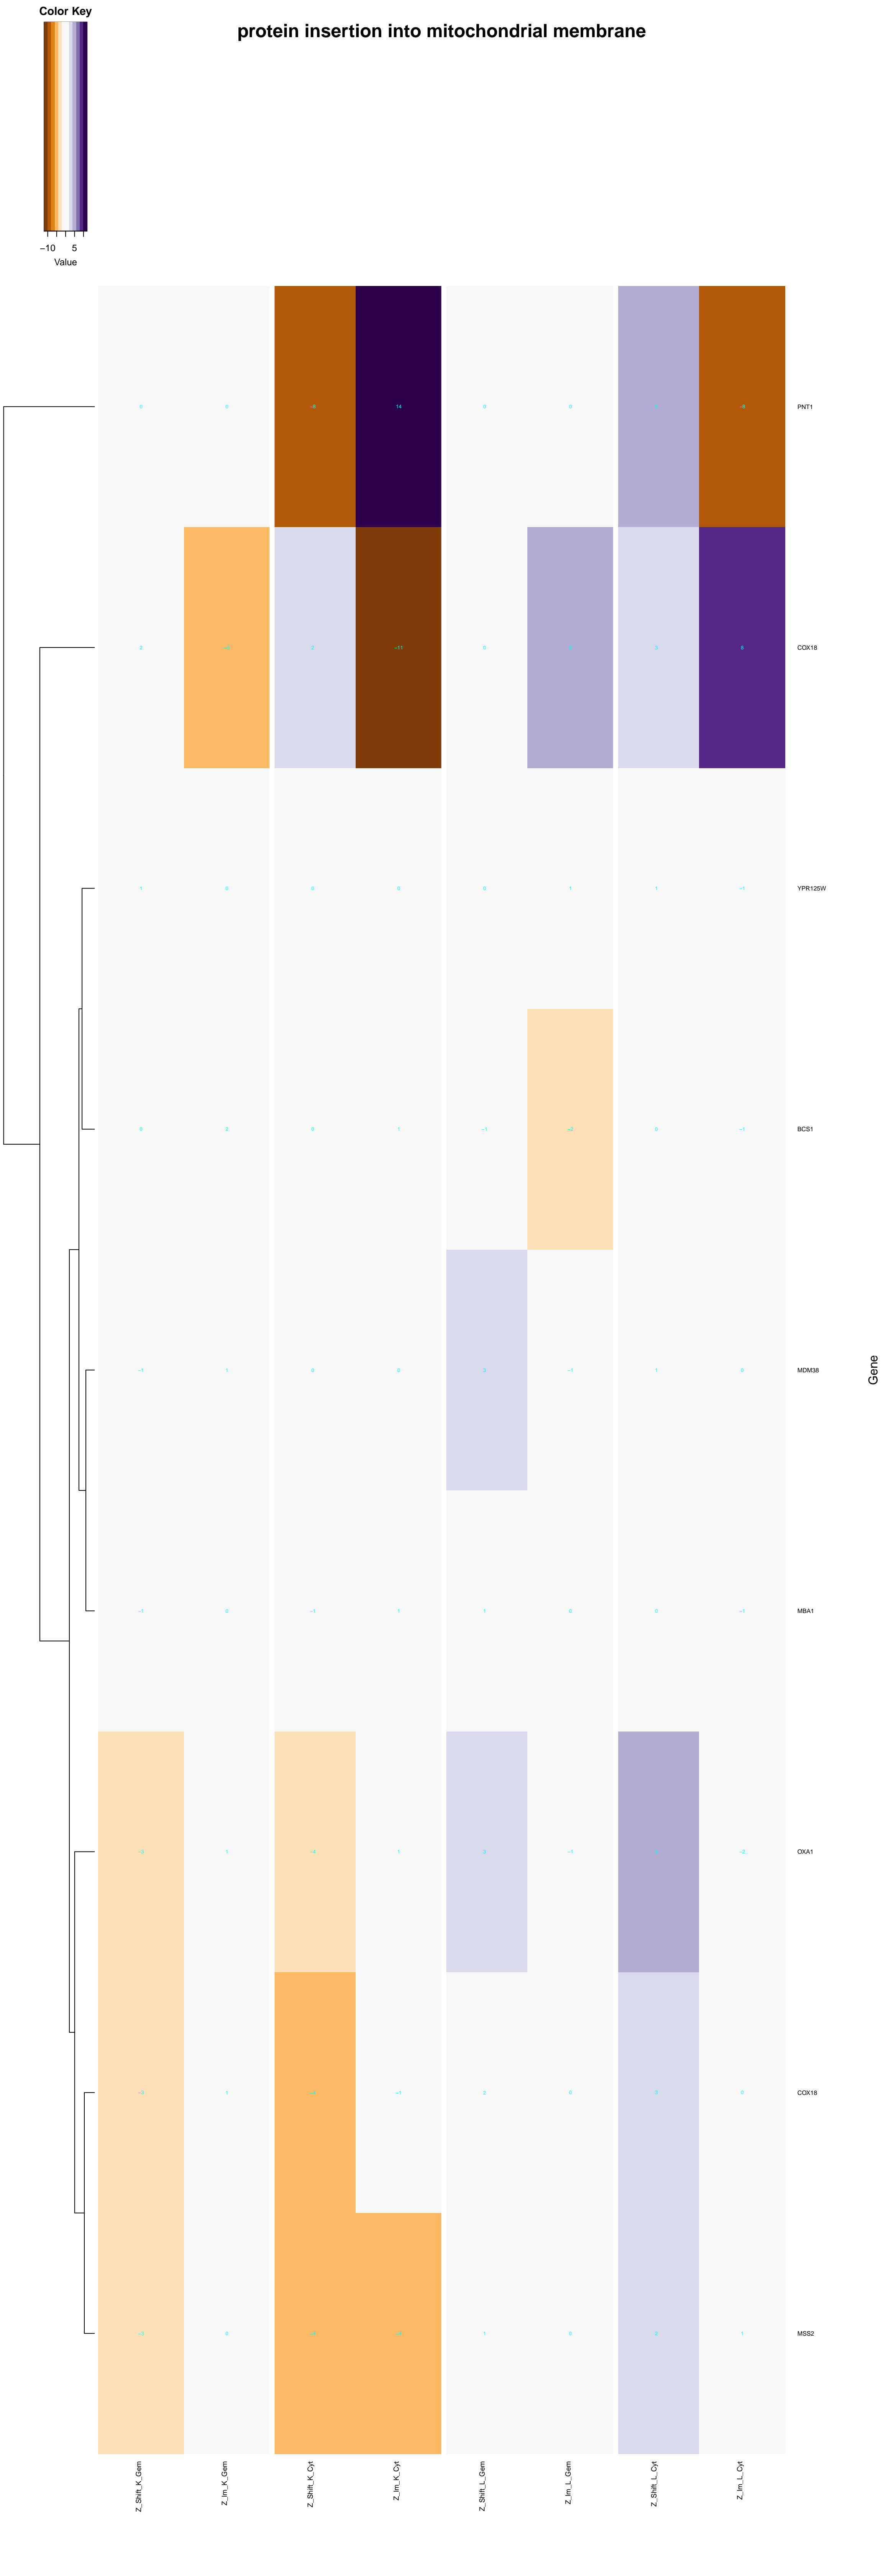

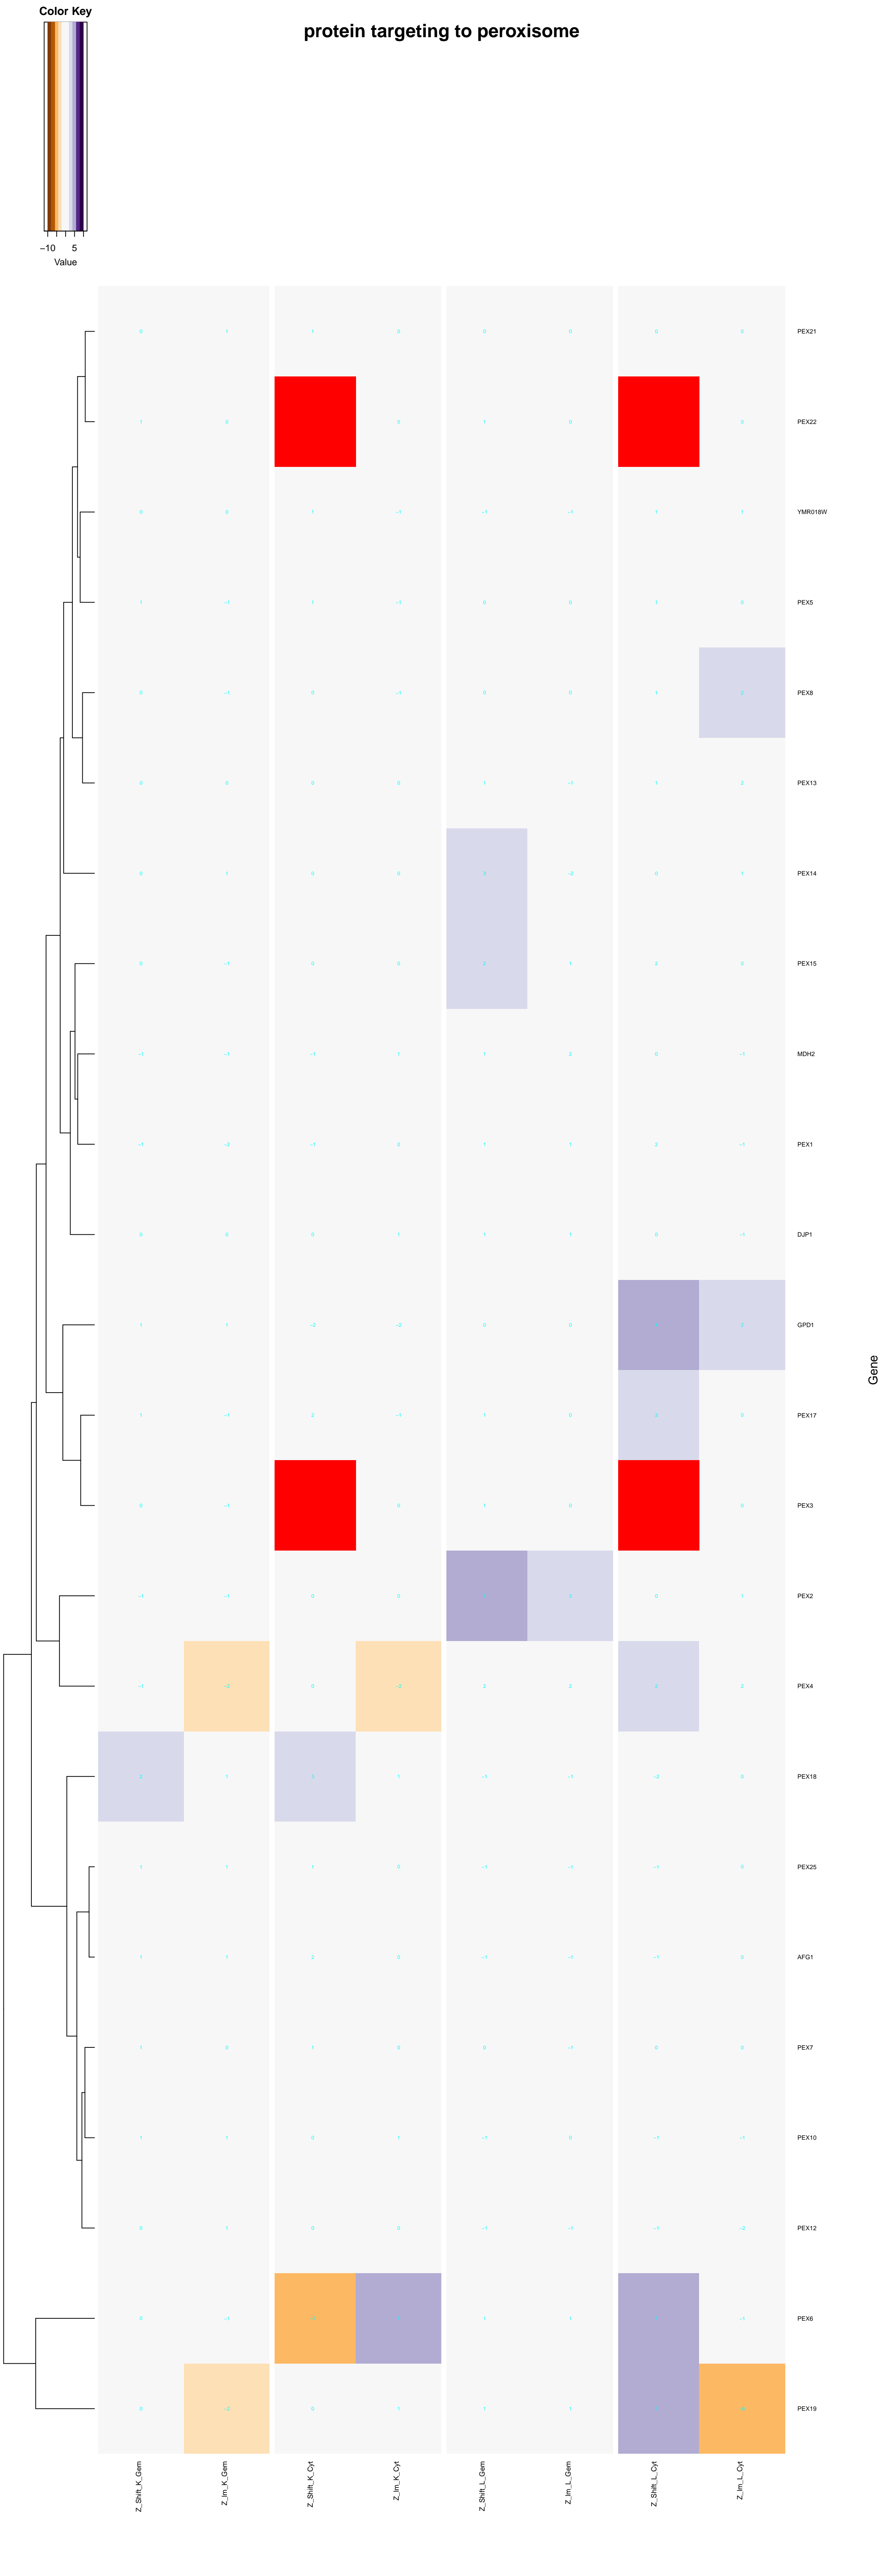

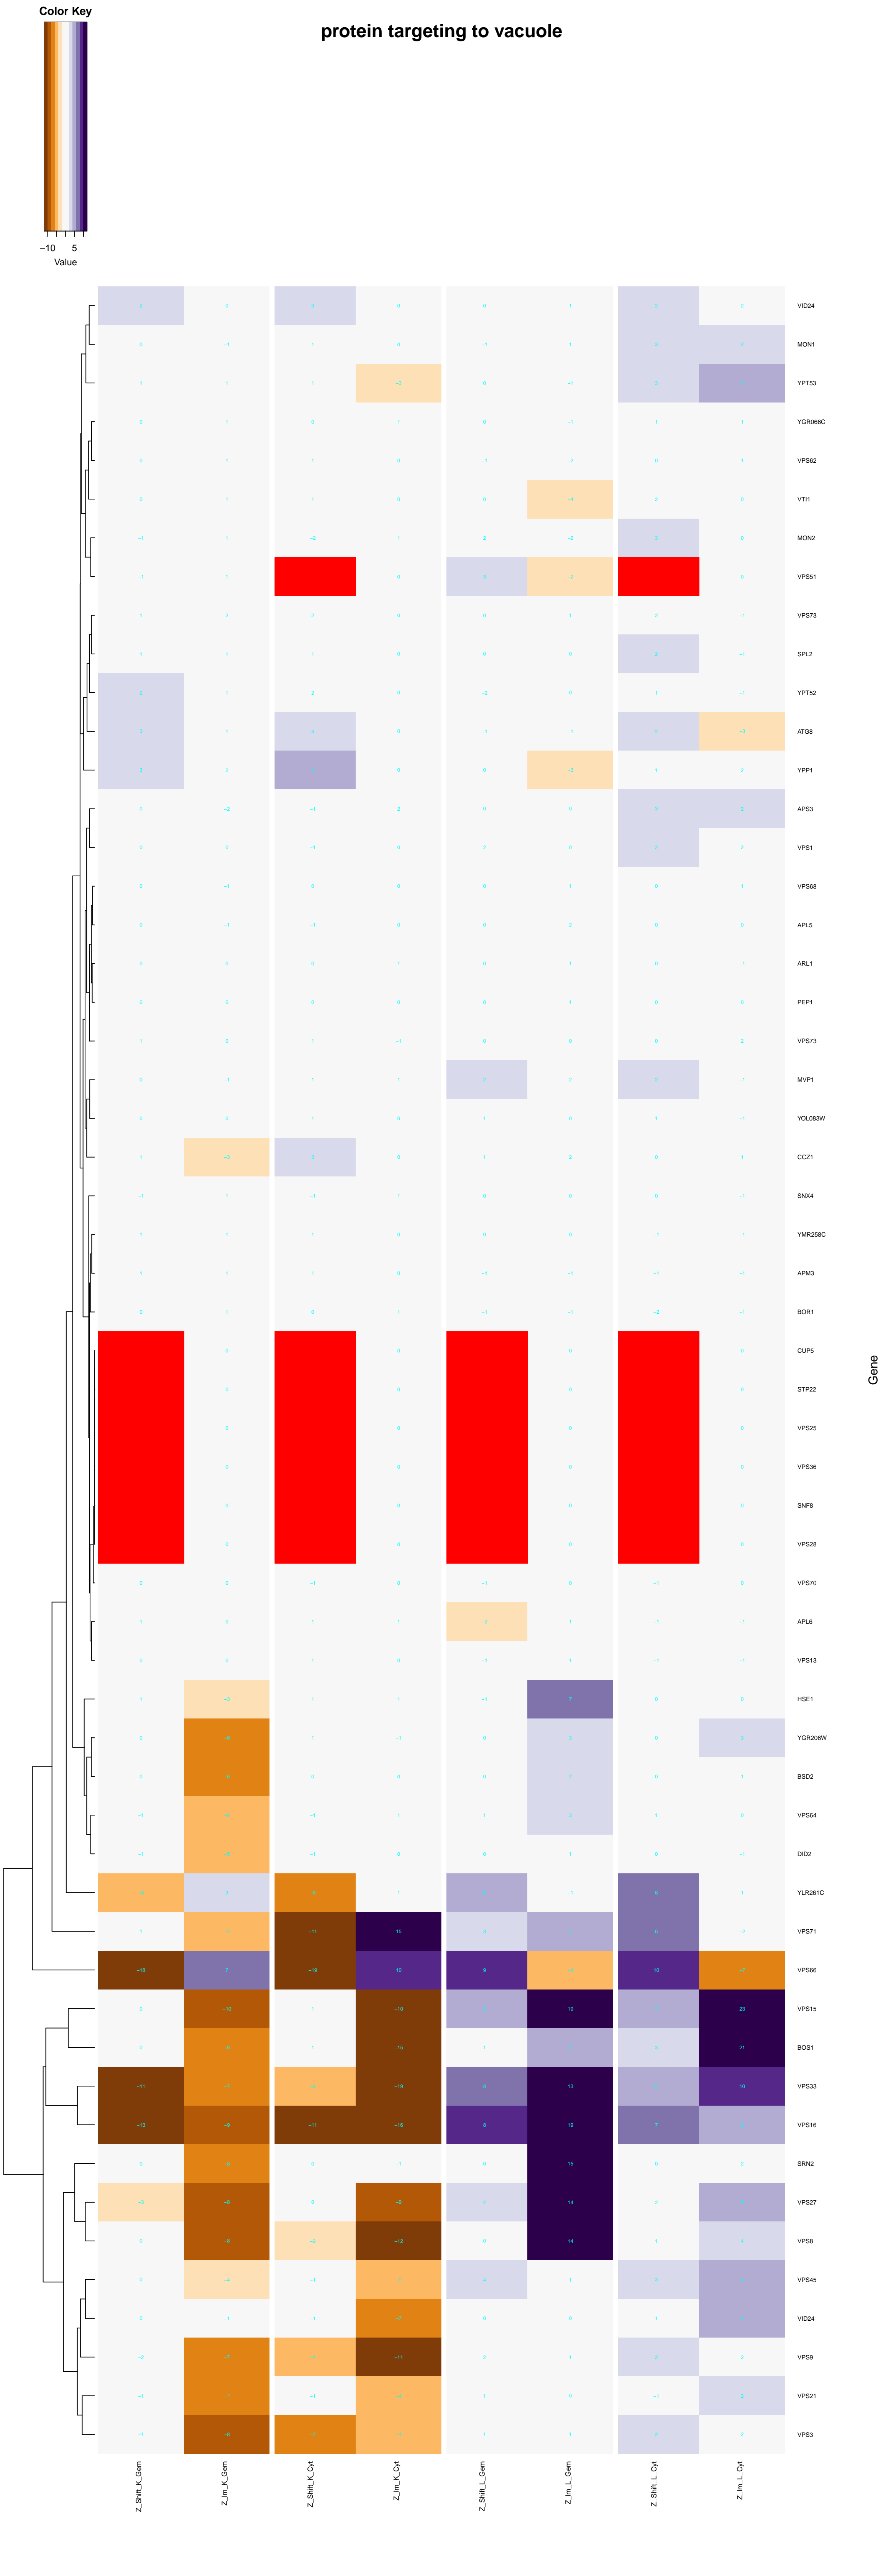

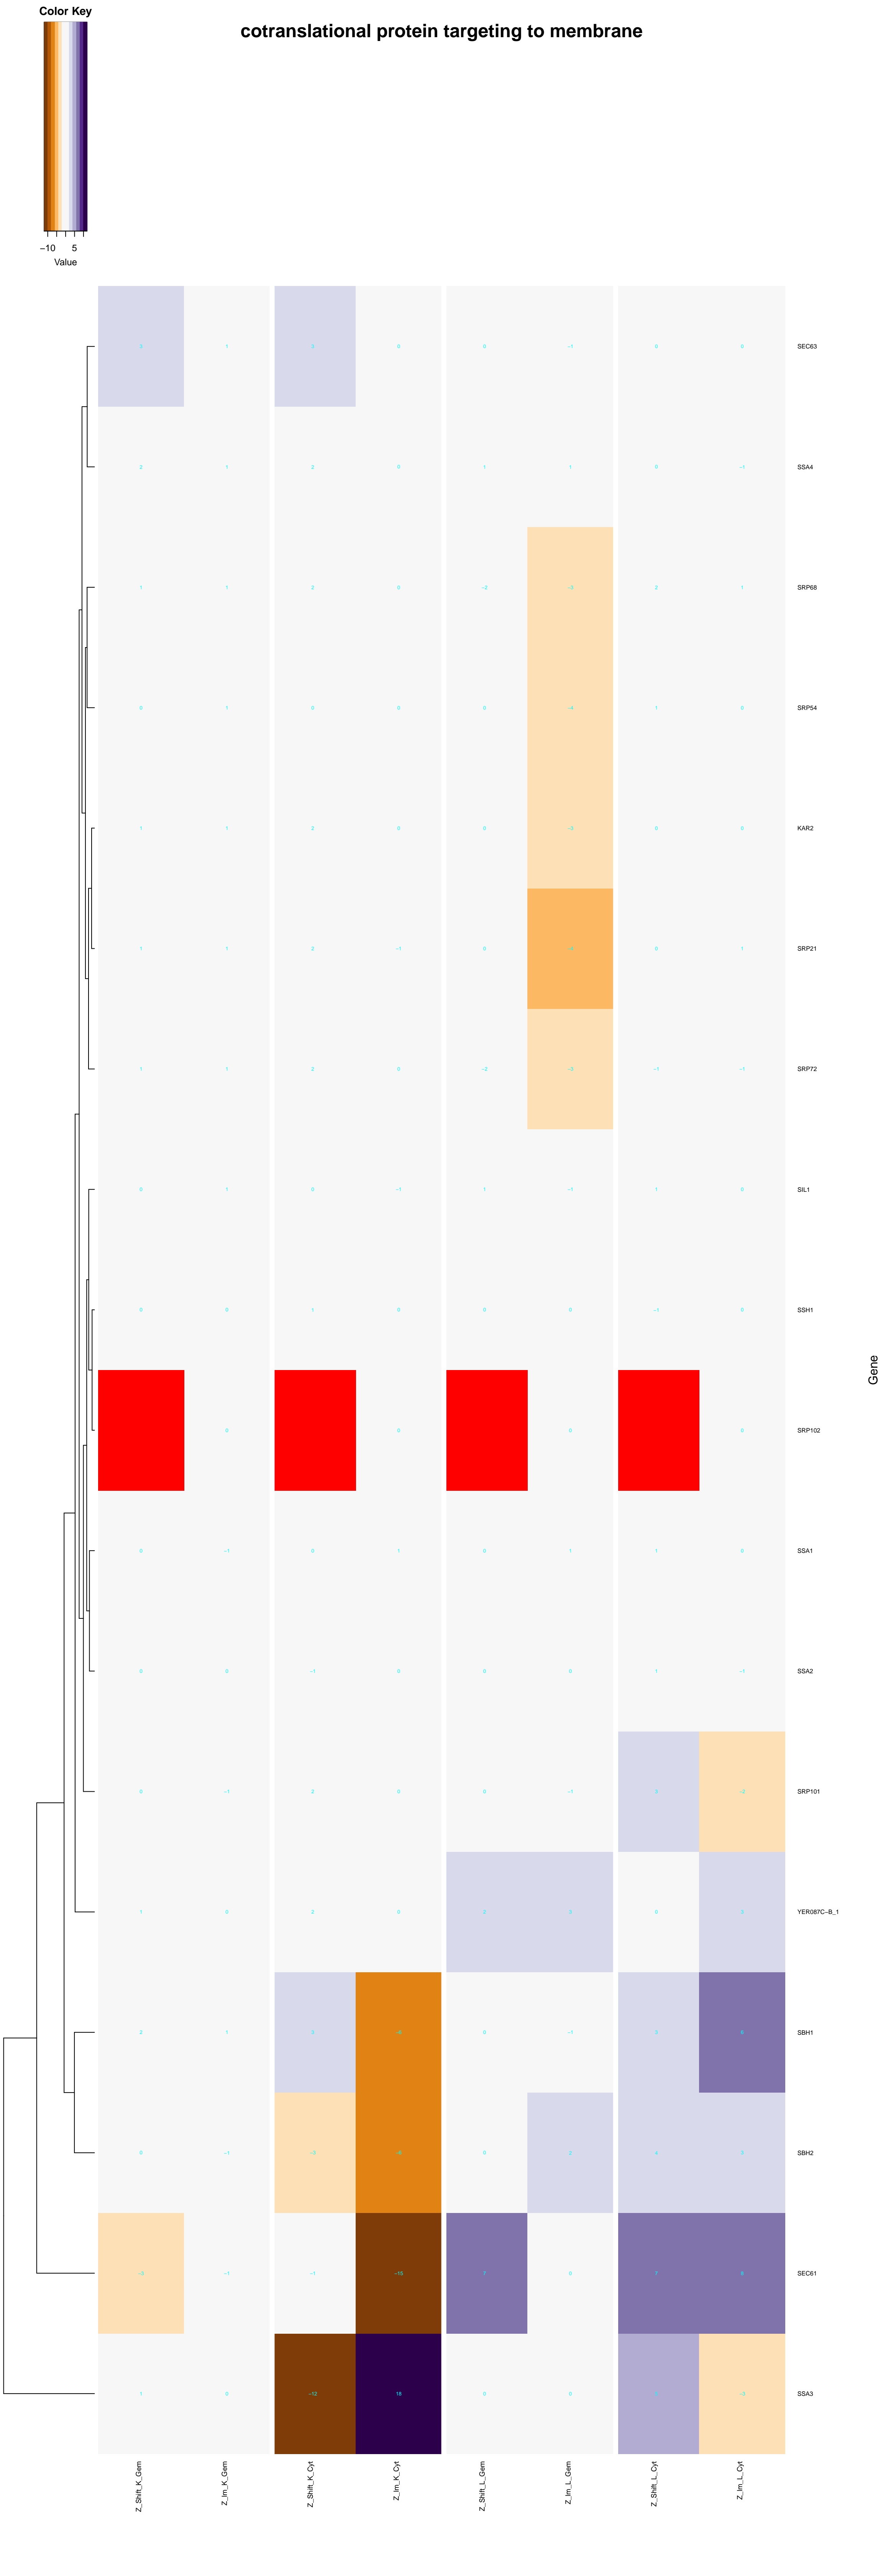

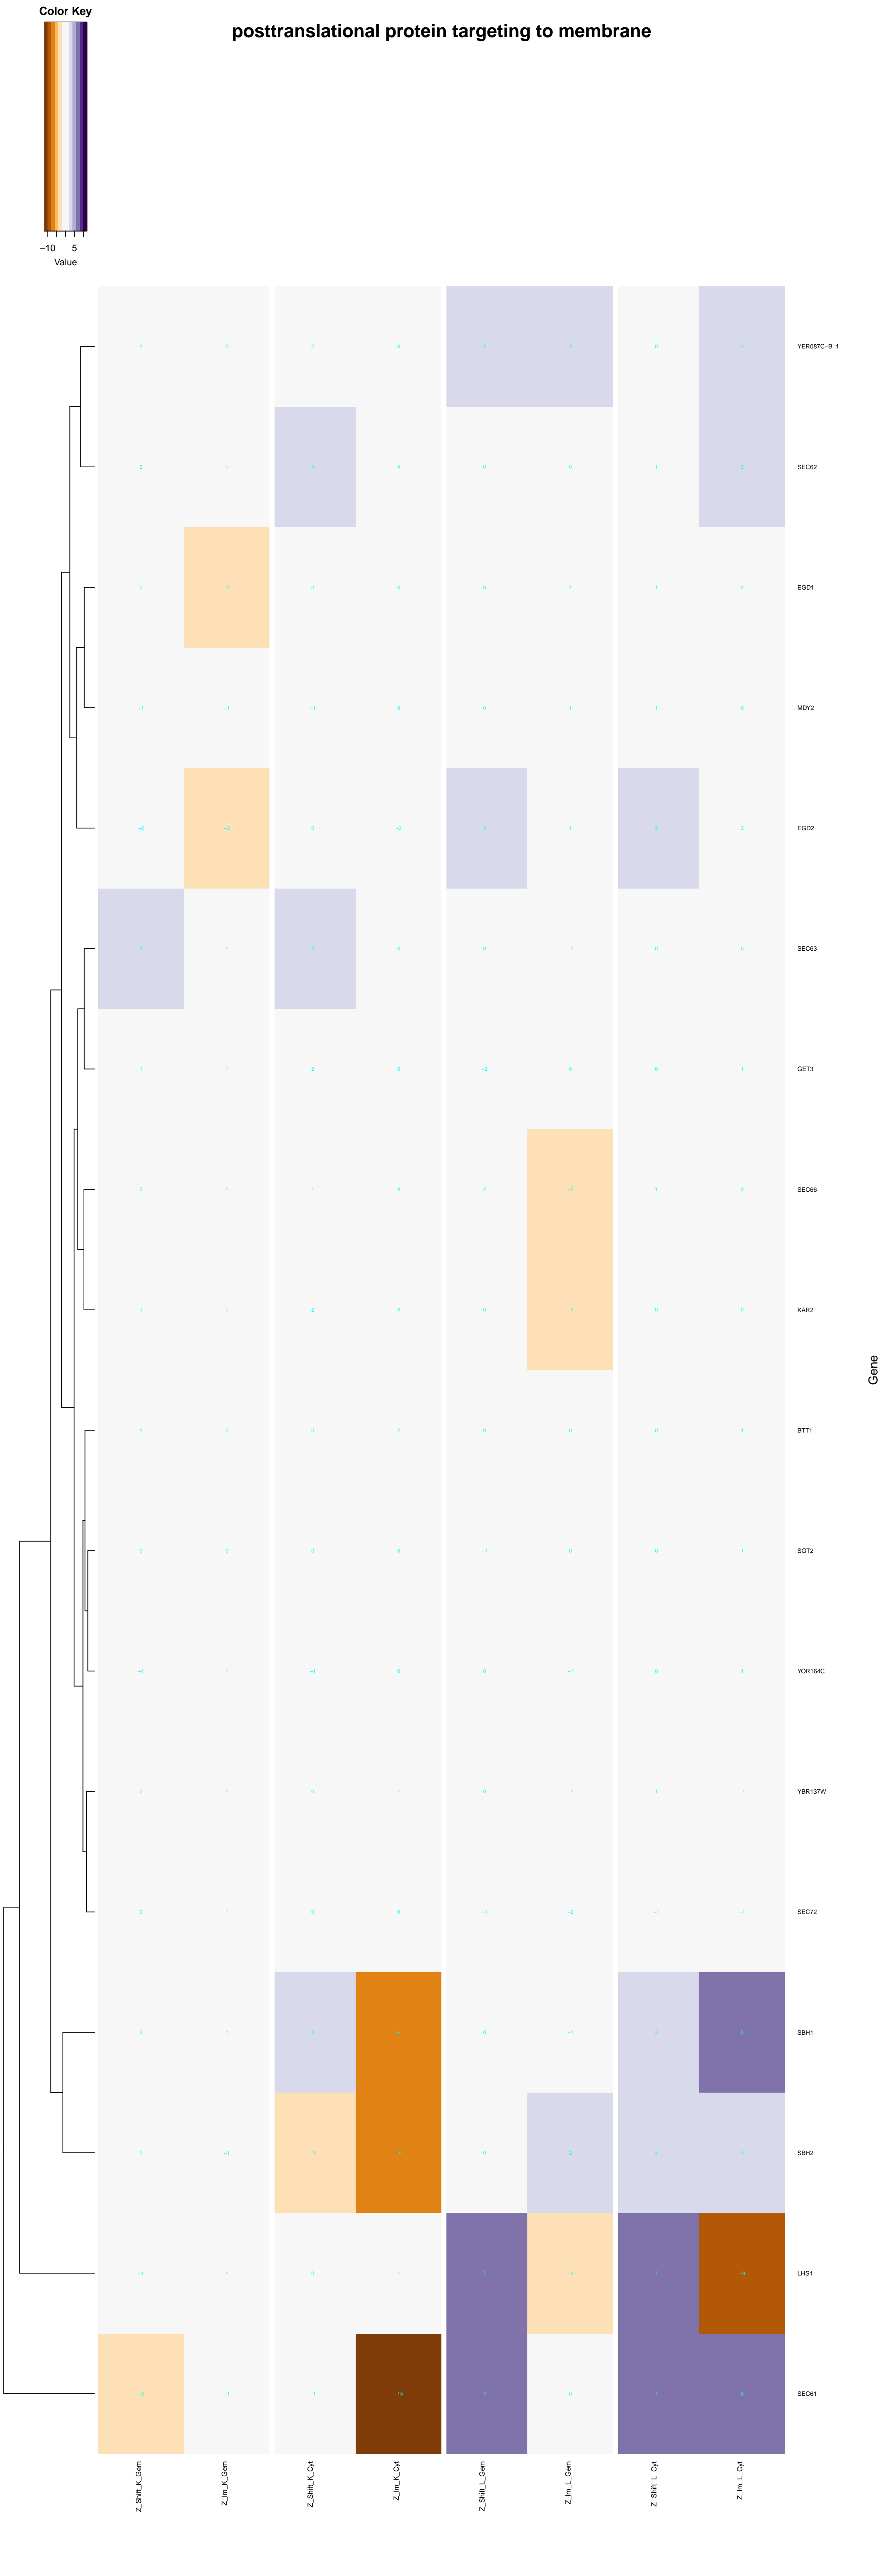

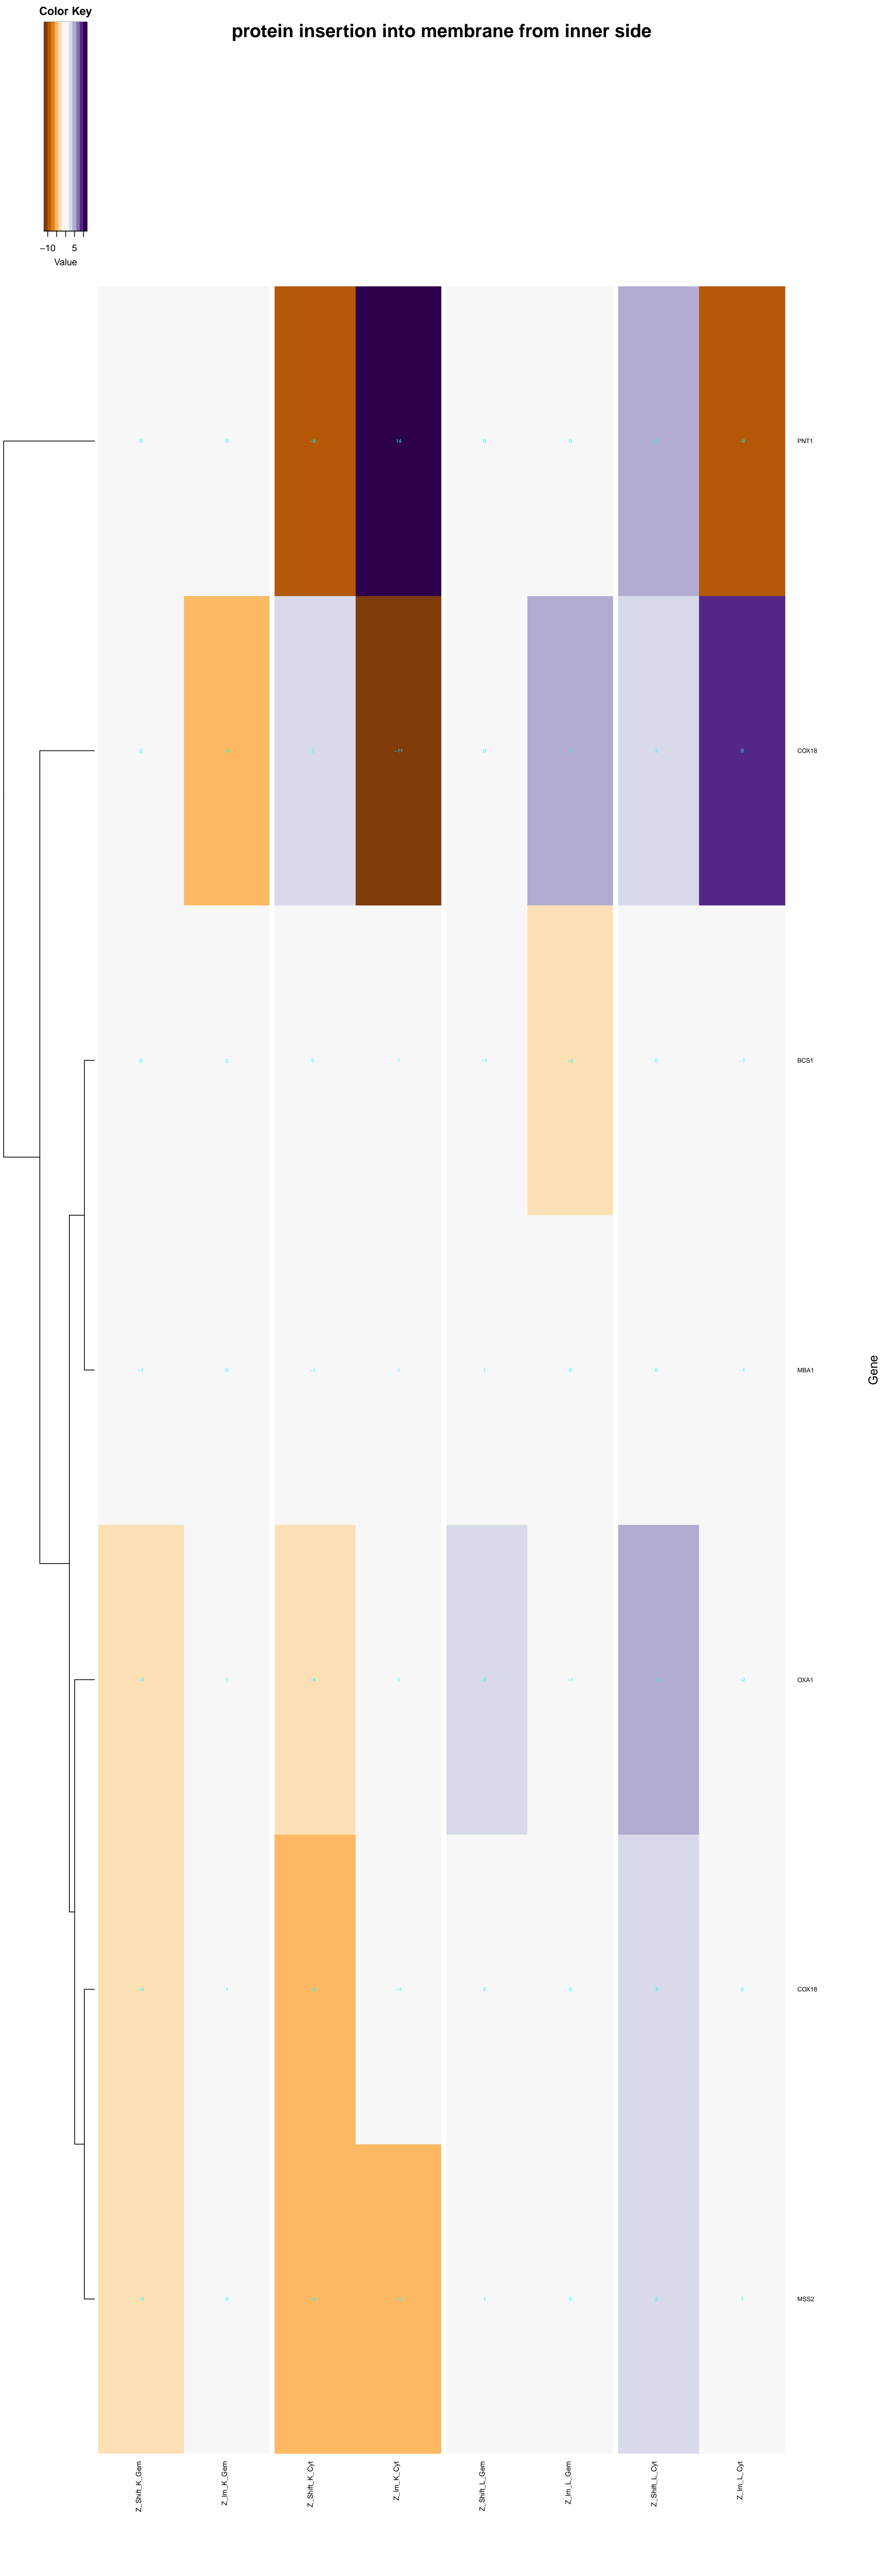

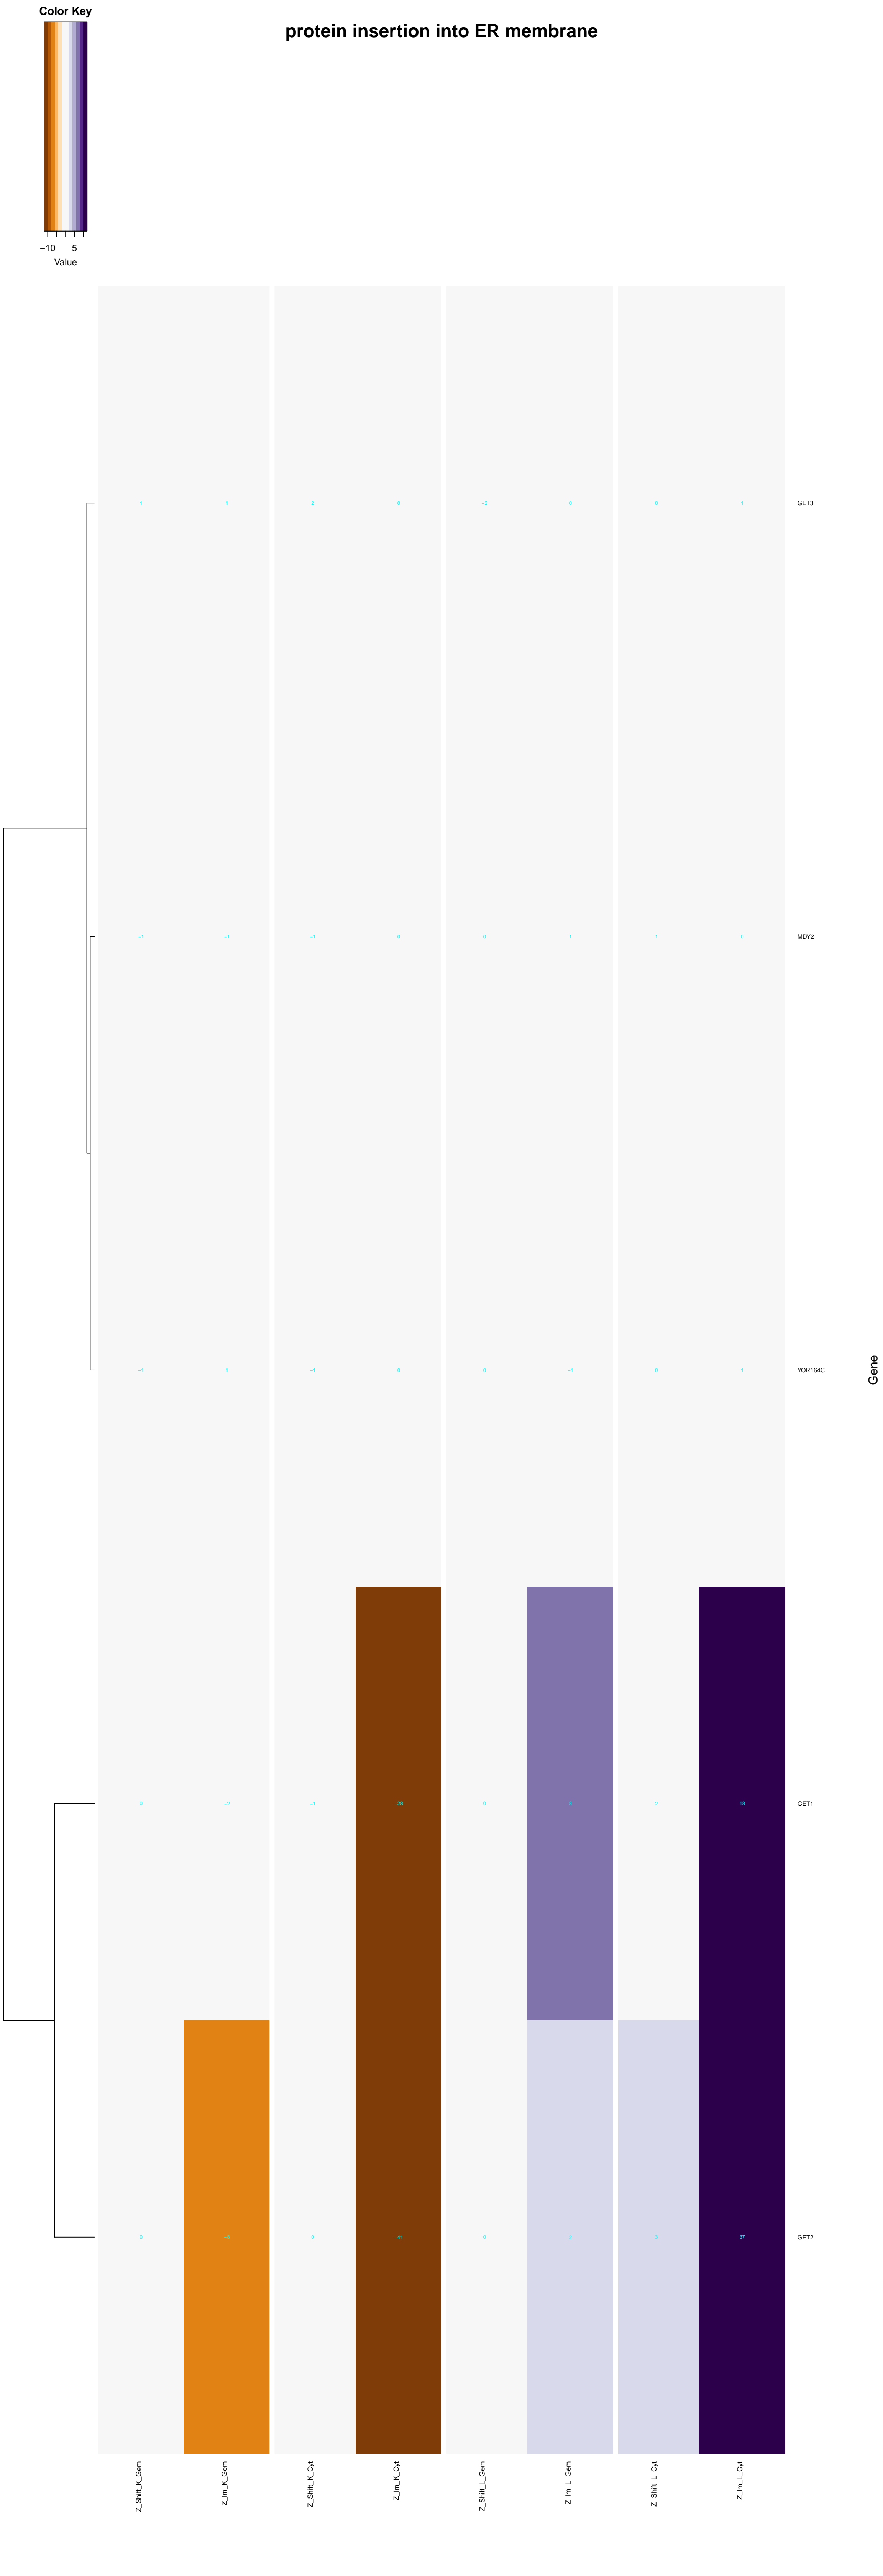



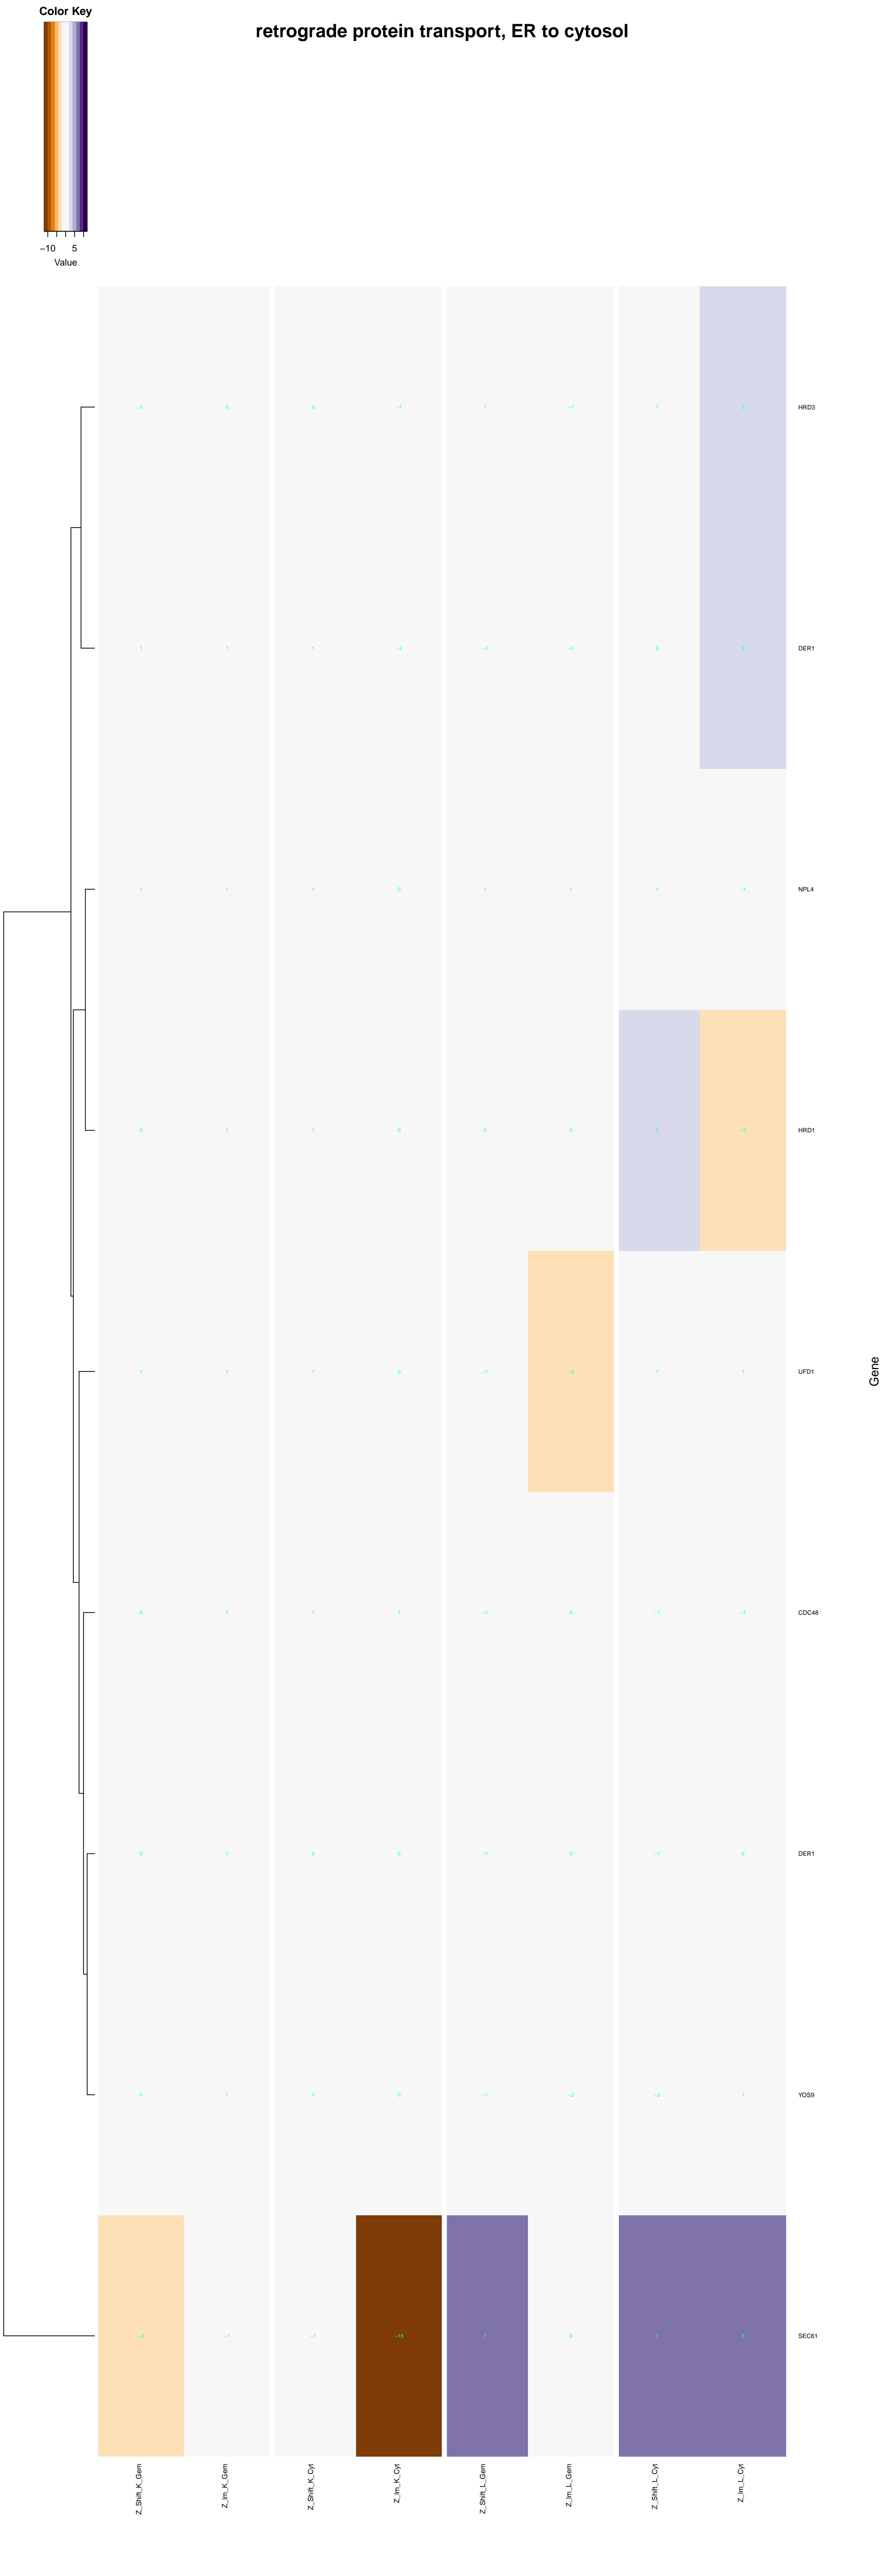

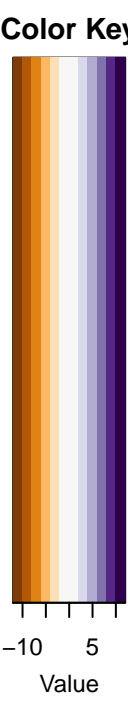

SRP-dependent cotranslational protein targeting to membrane, translocation

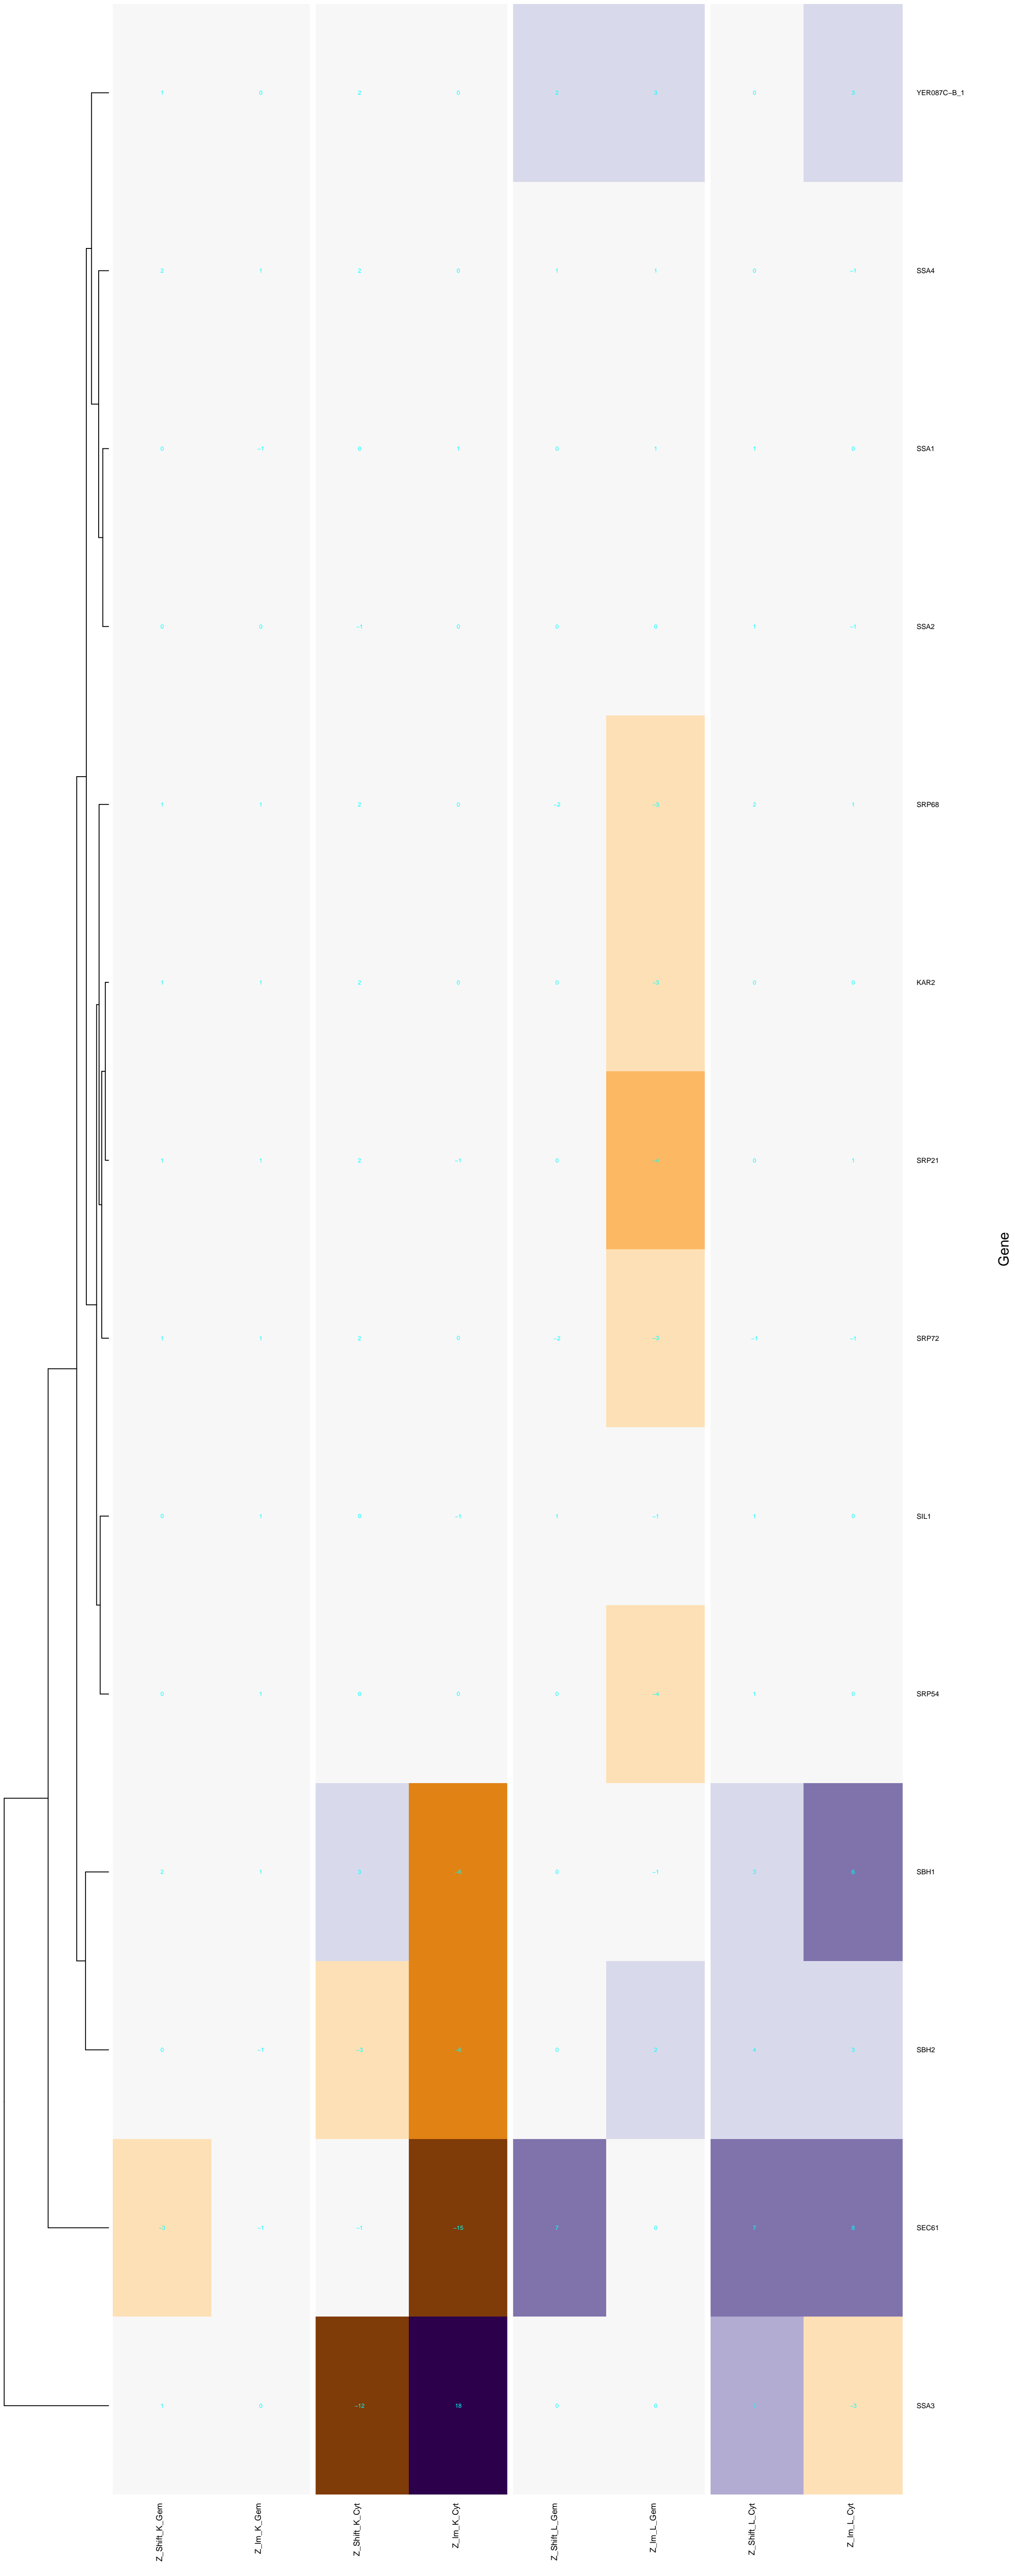



posttranslational protein targeting to membrane, translocation

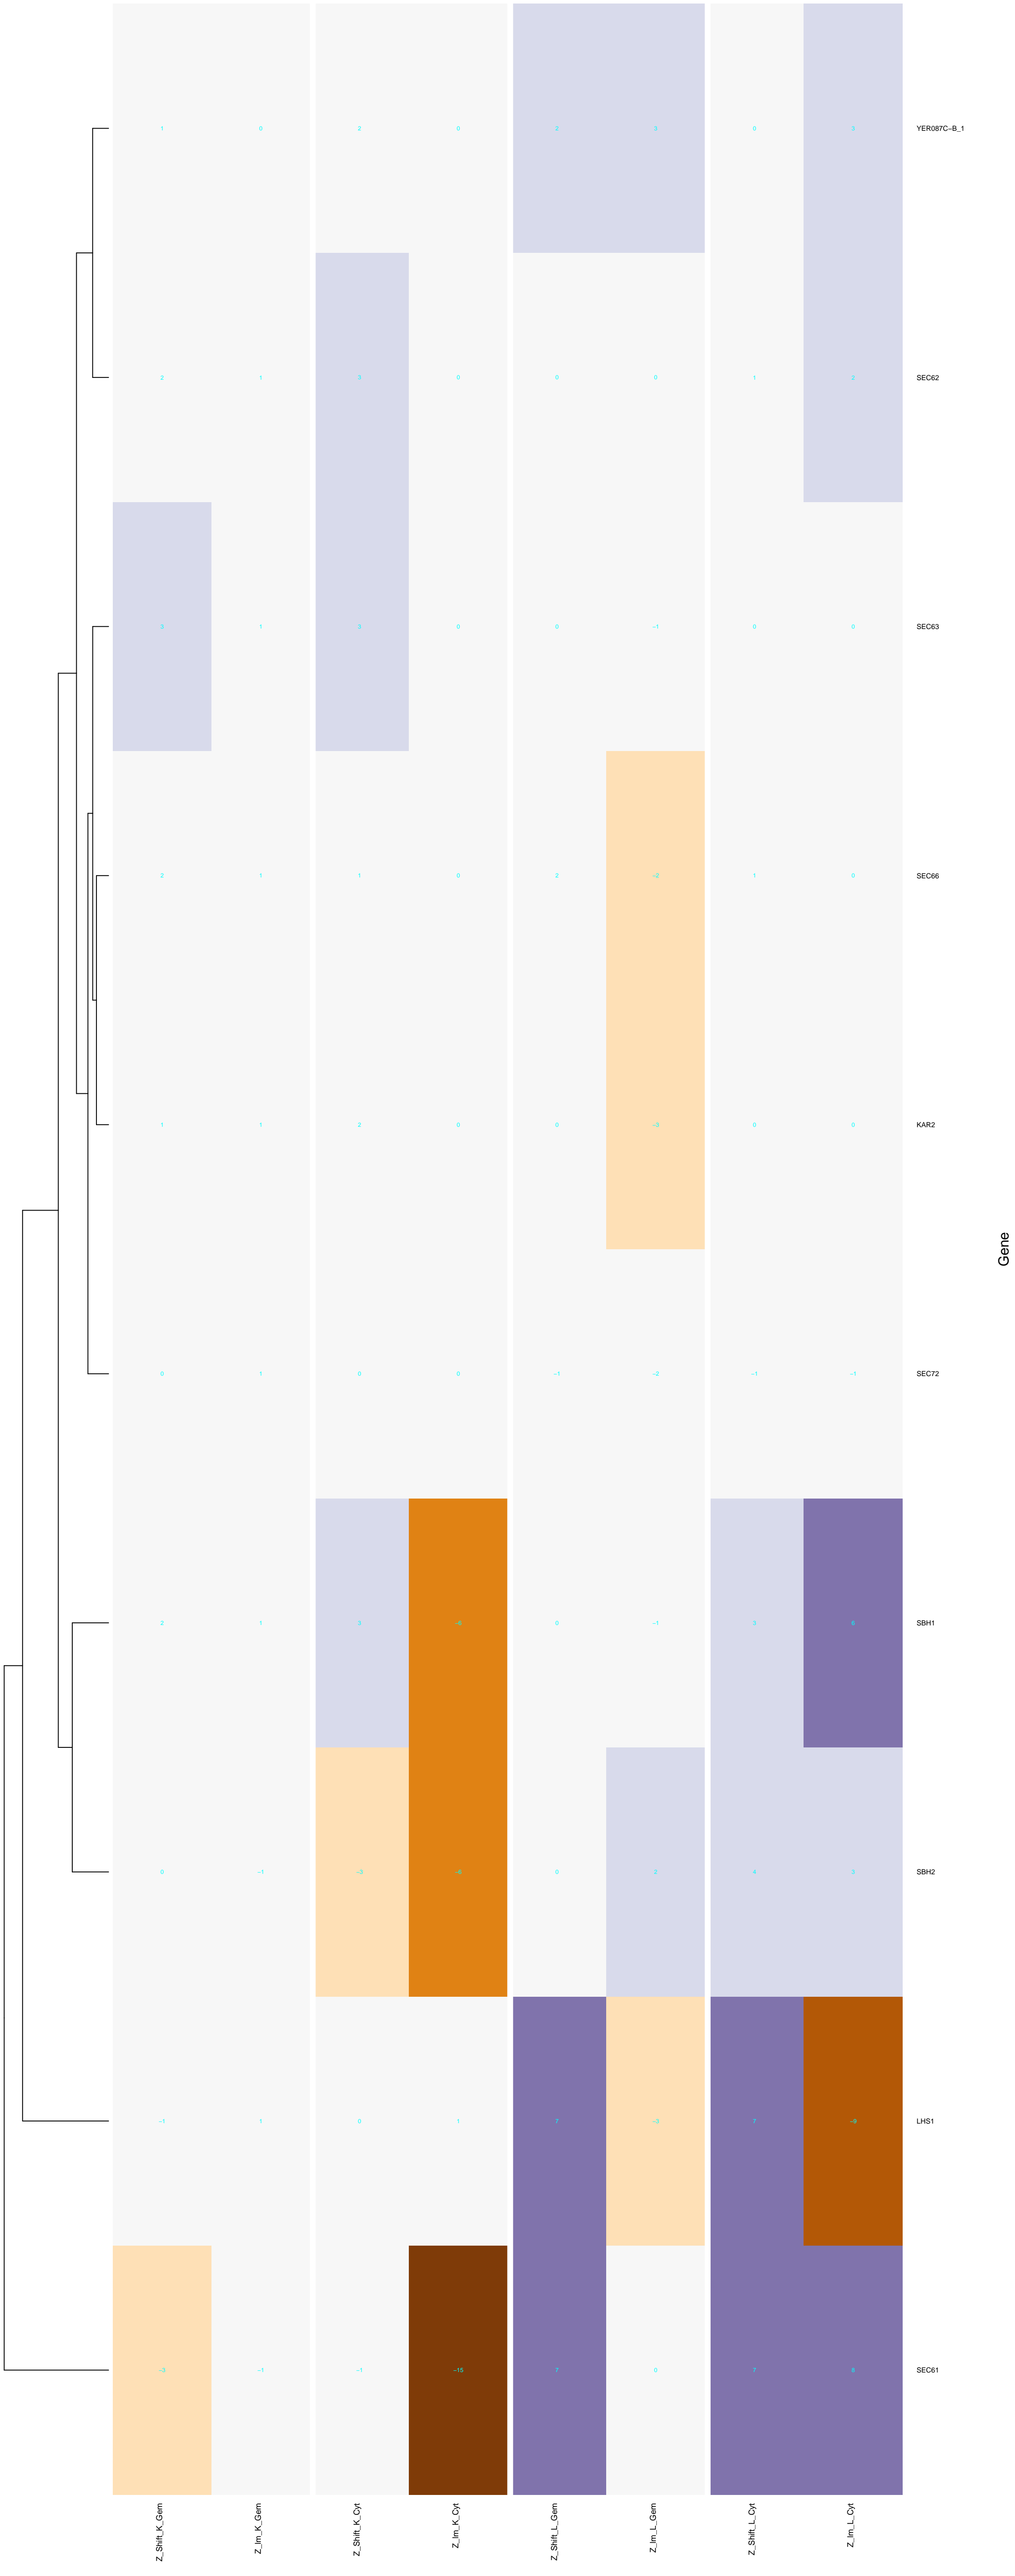



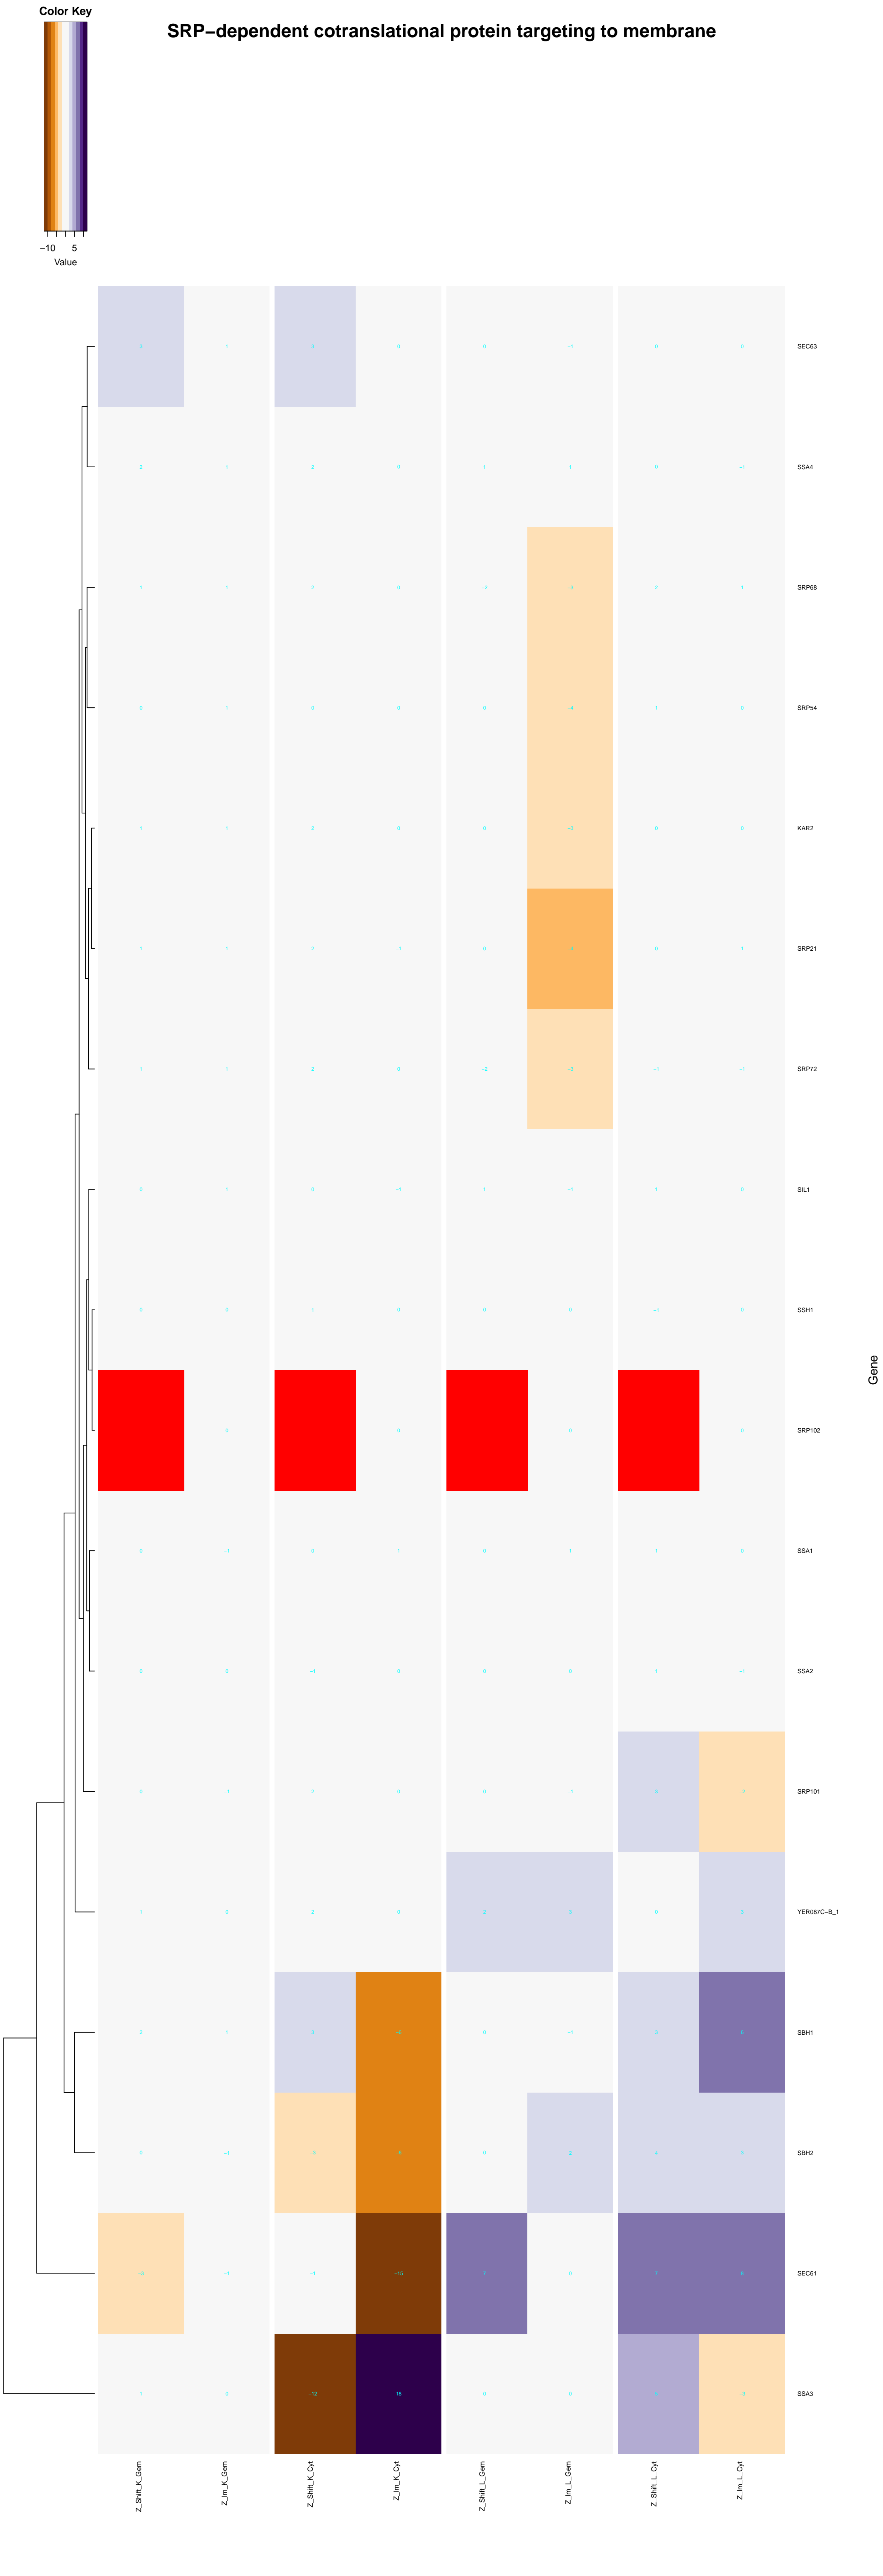



protein insertion into mitochondrial membrane from inner side

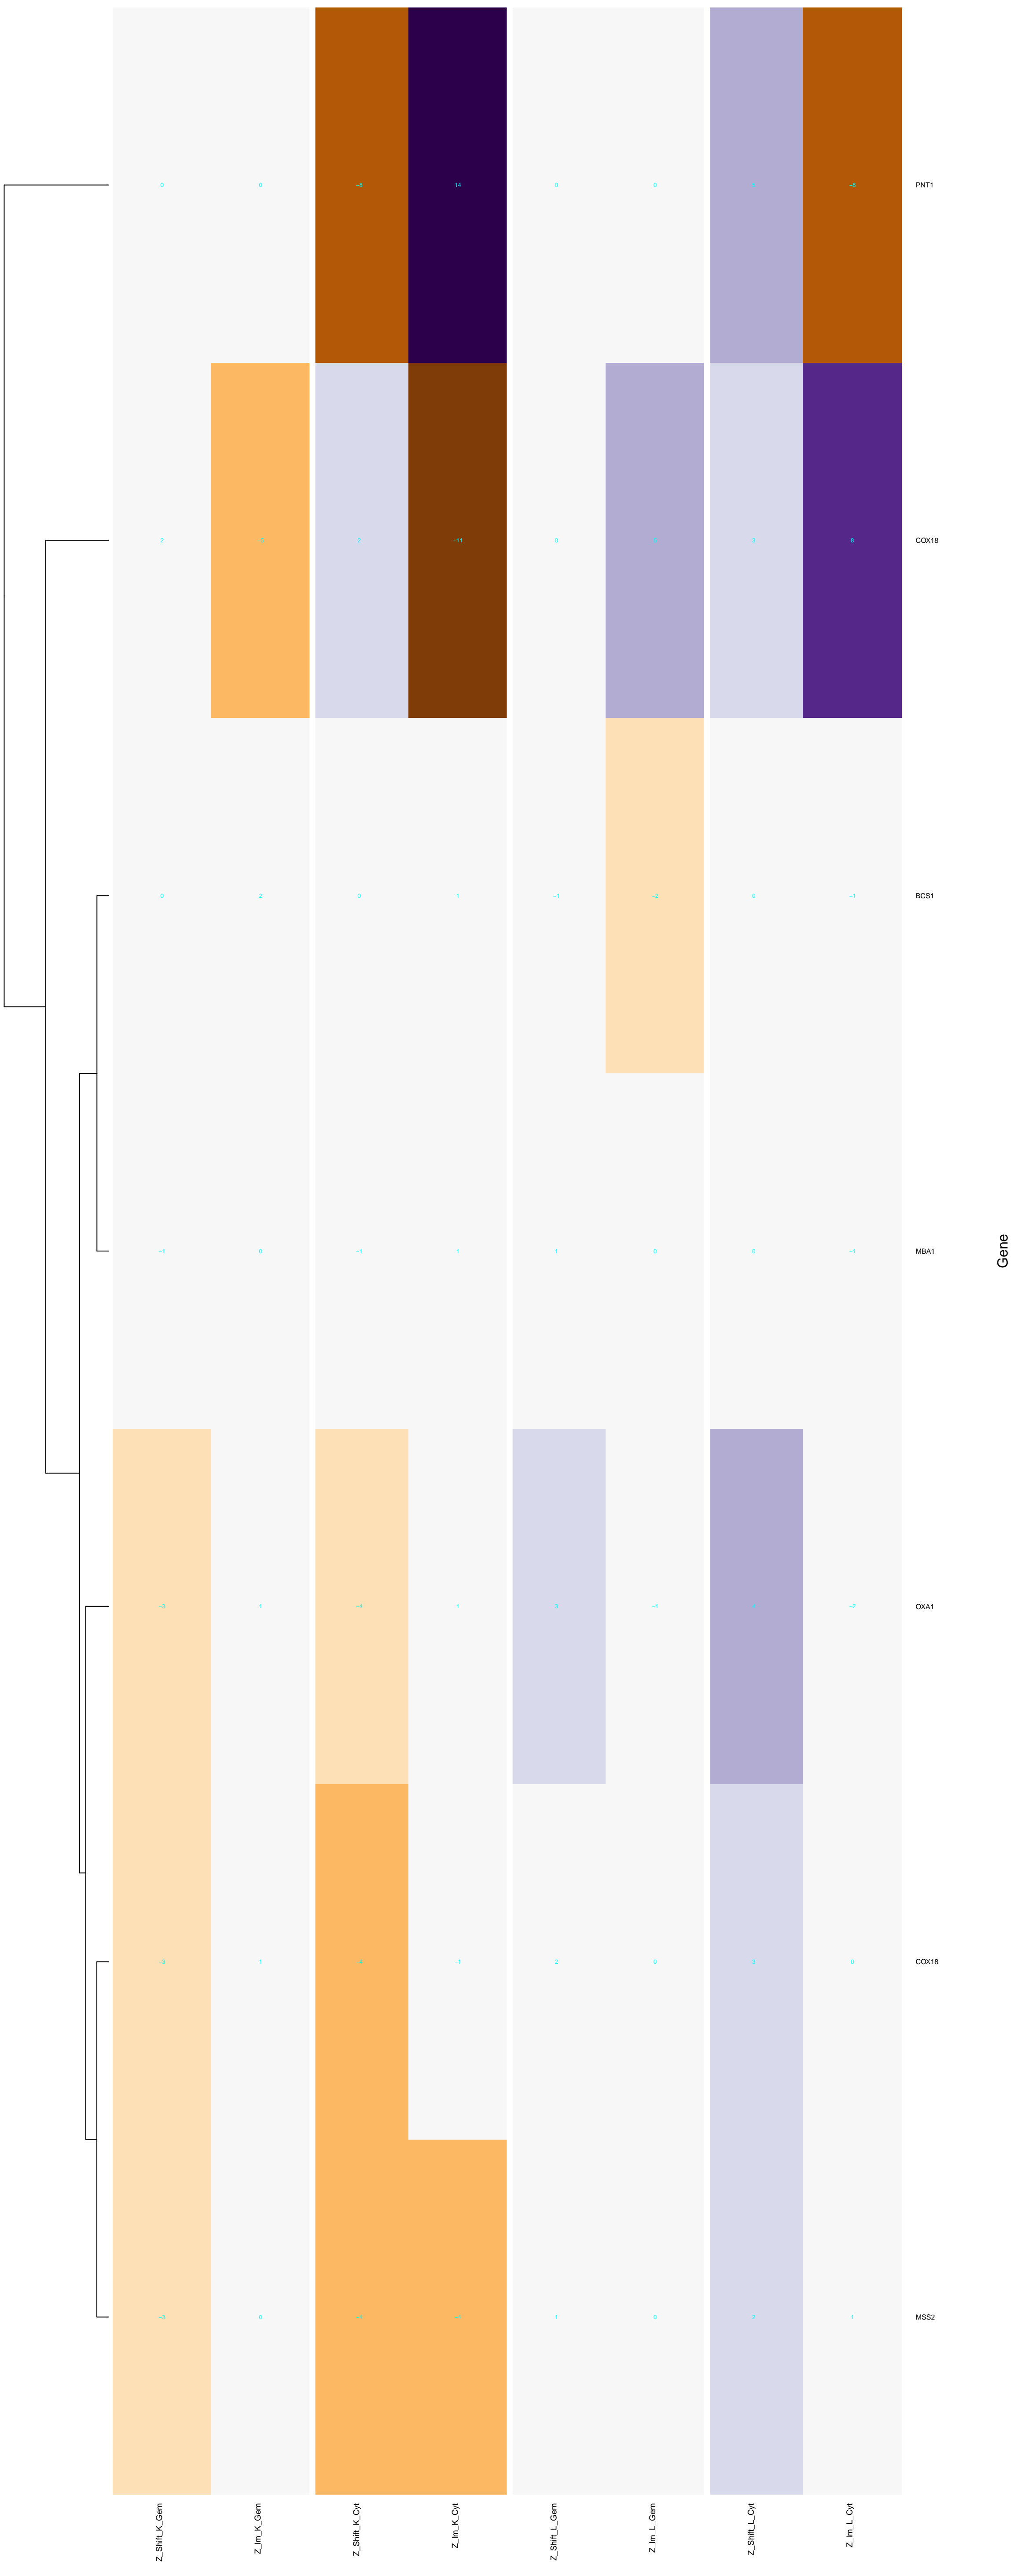

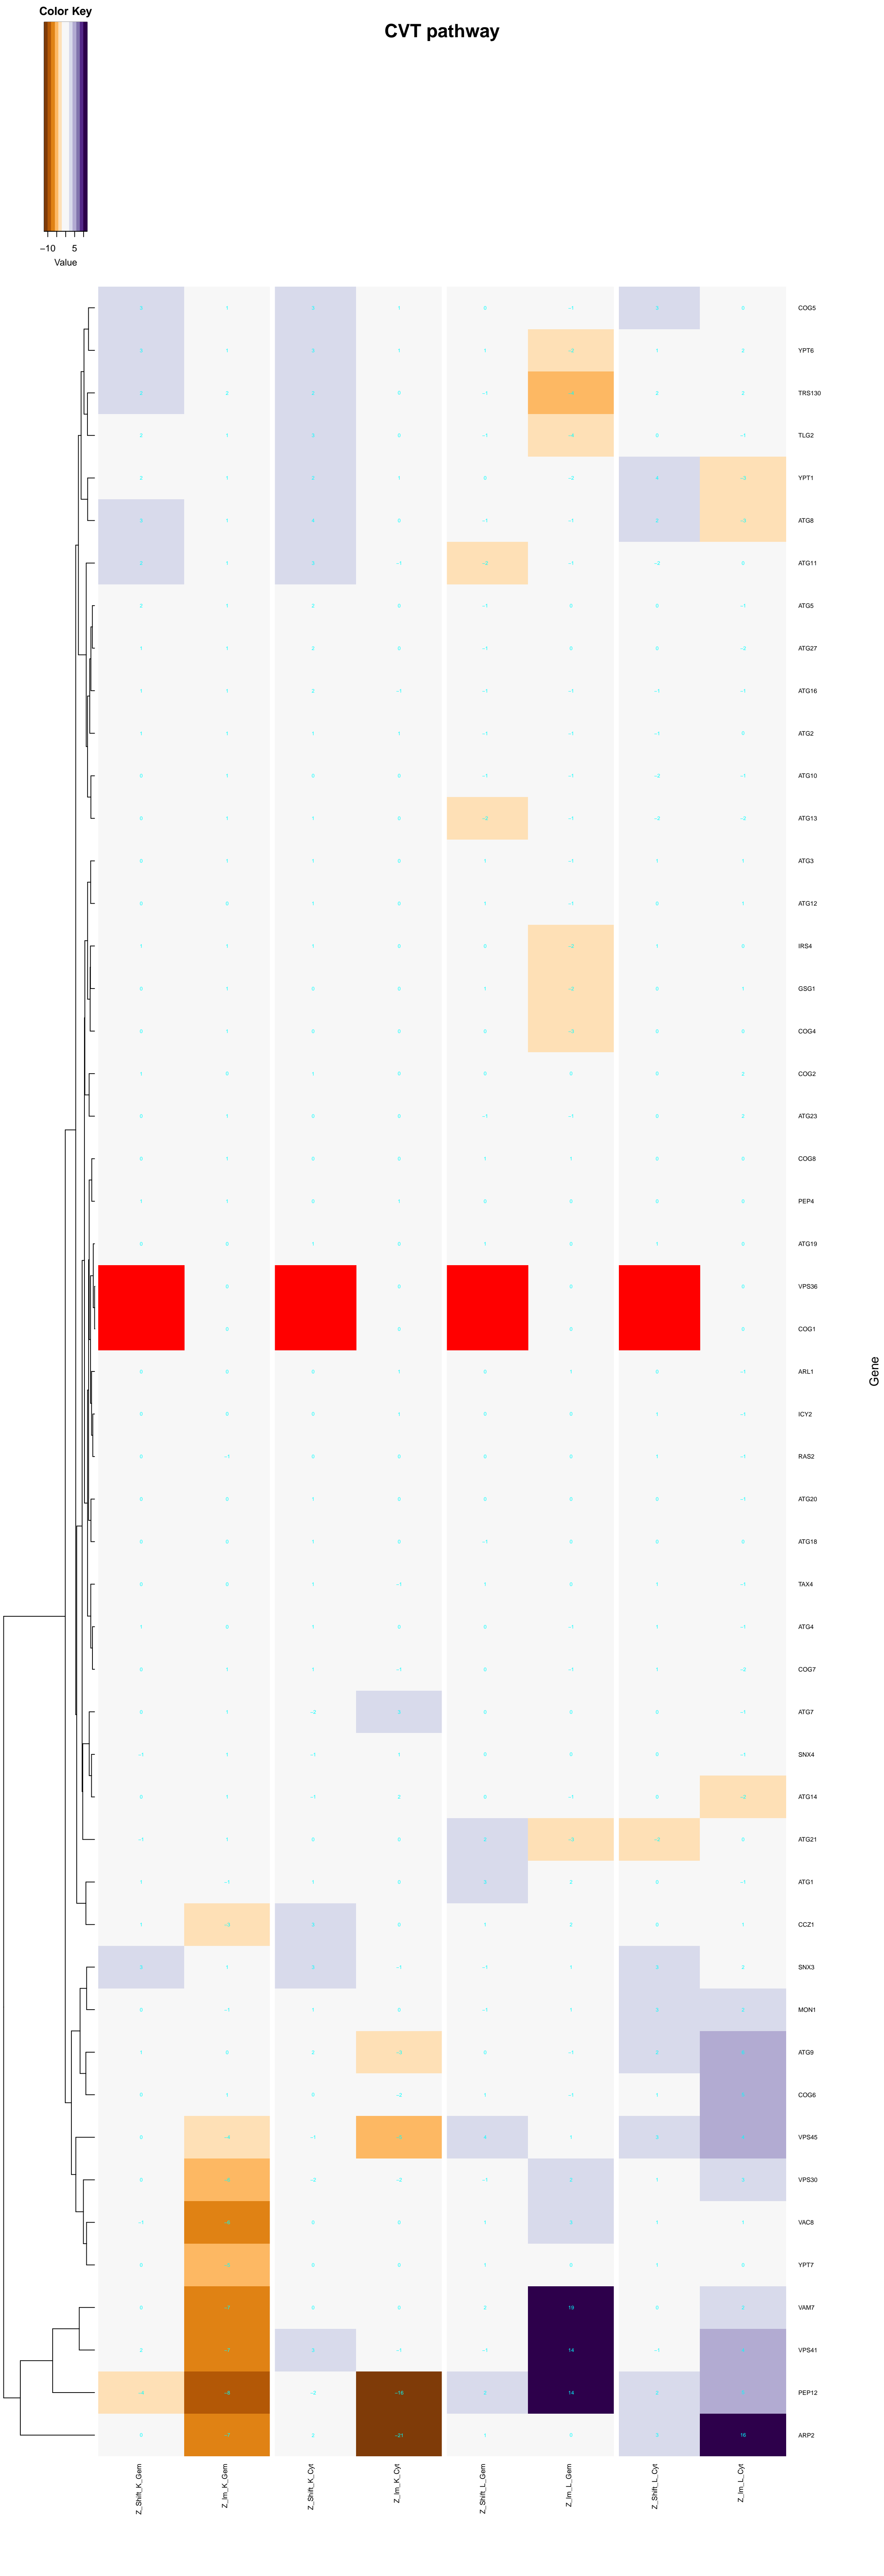

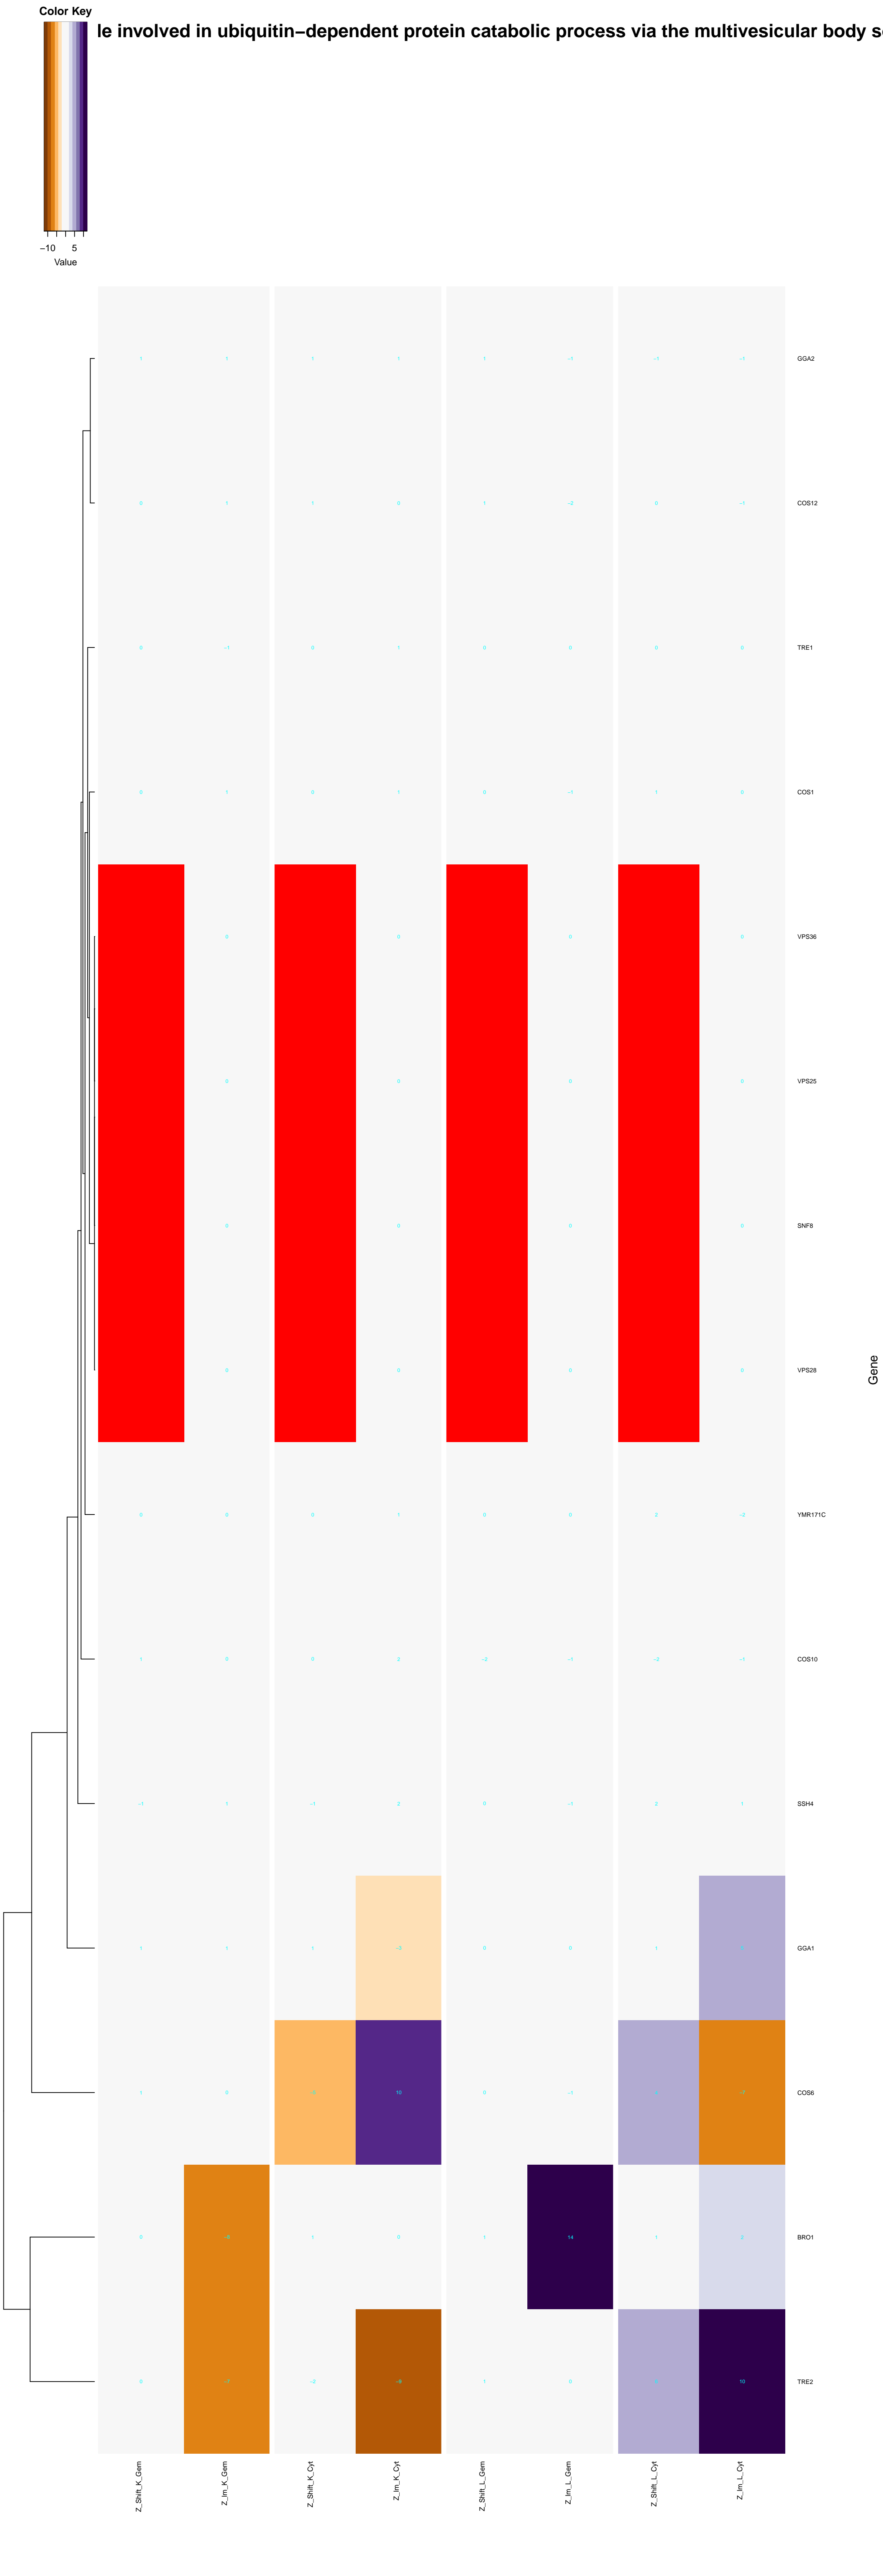







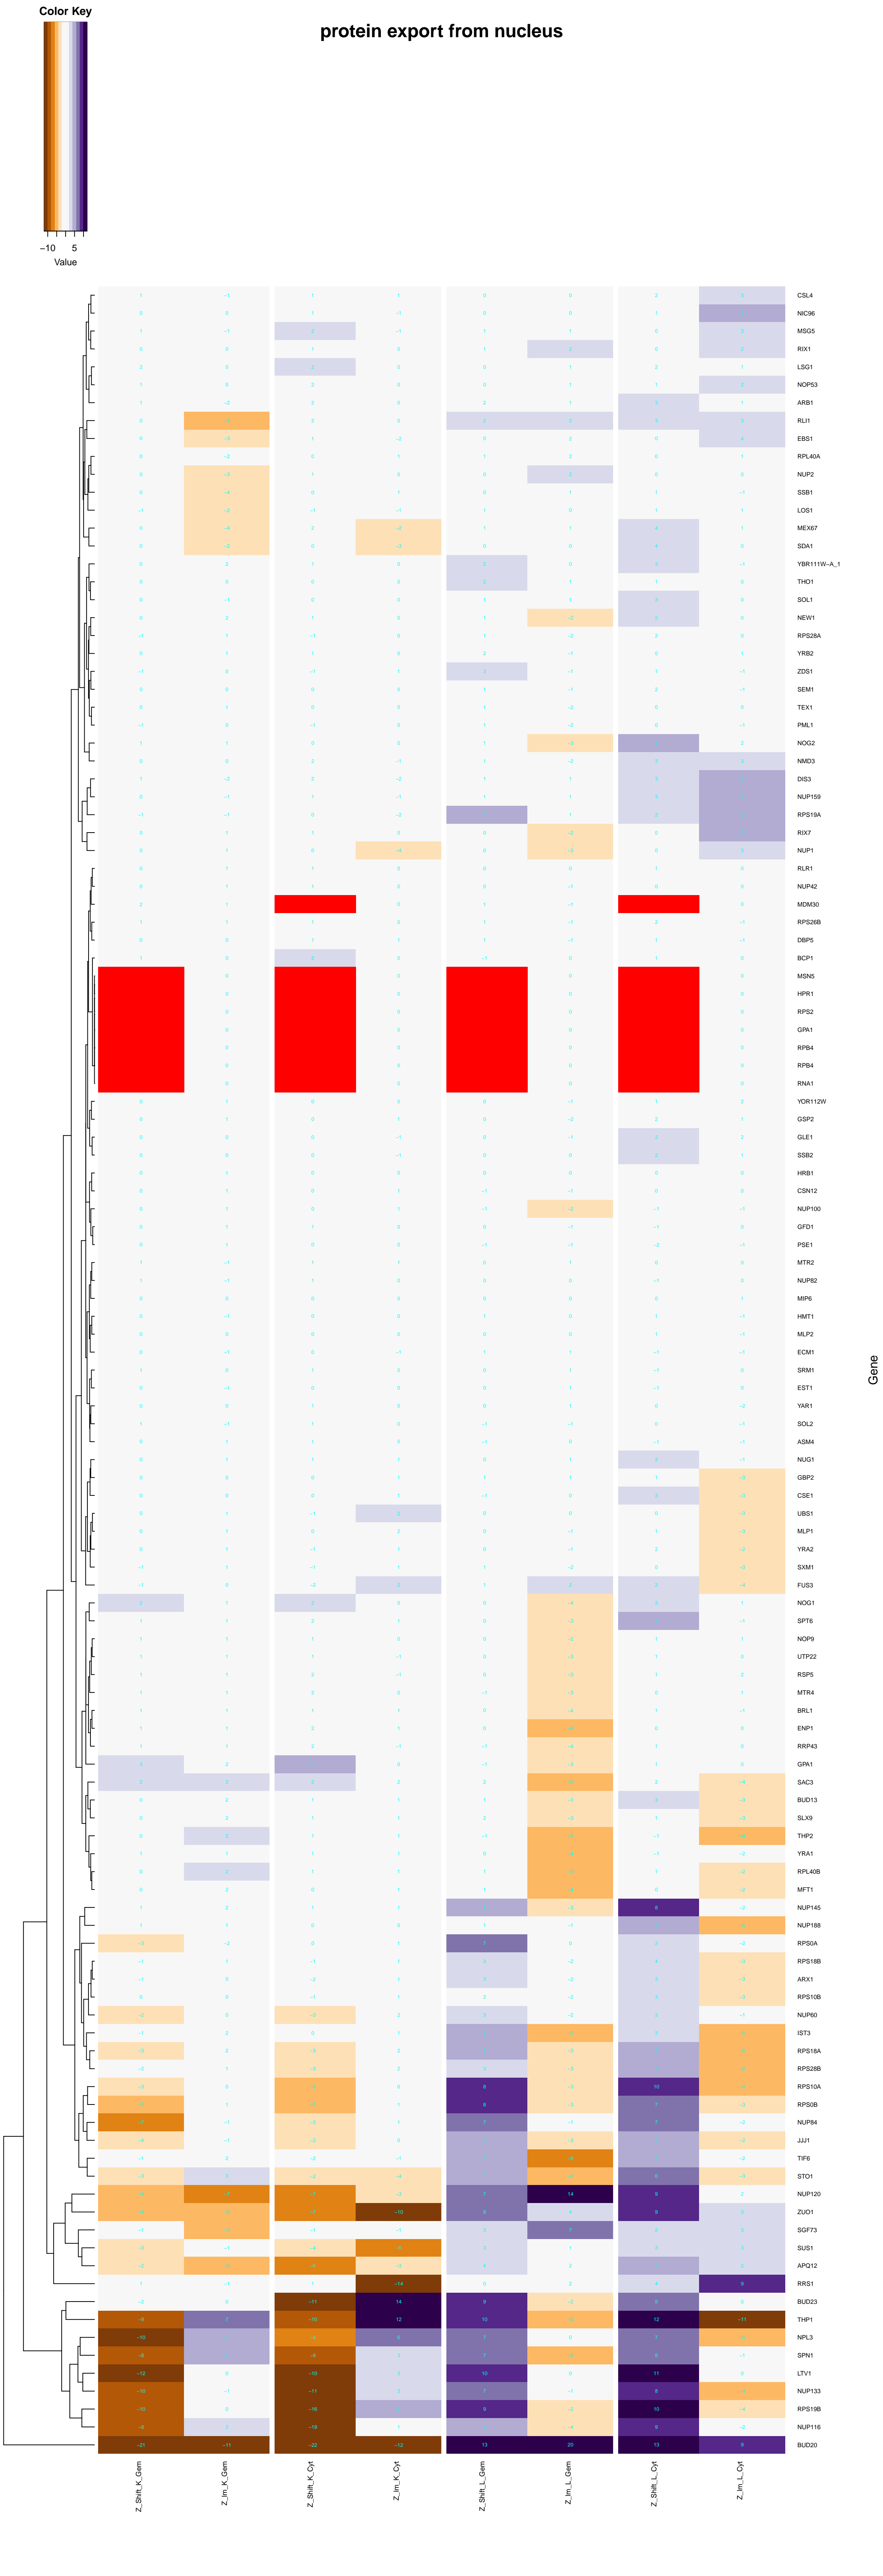



RNA polymerase II complex import to nucleus















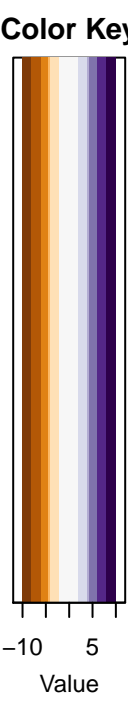

MAPK export from nucleus

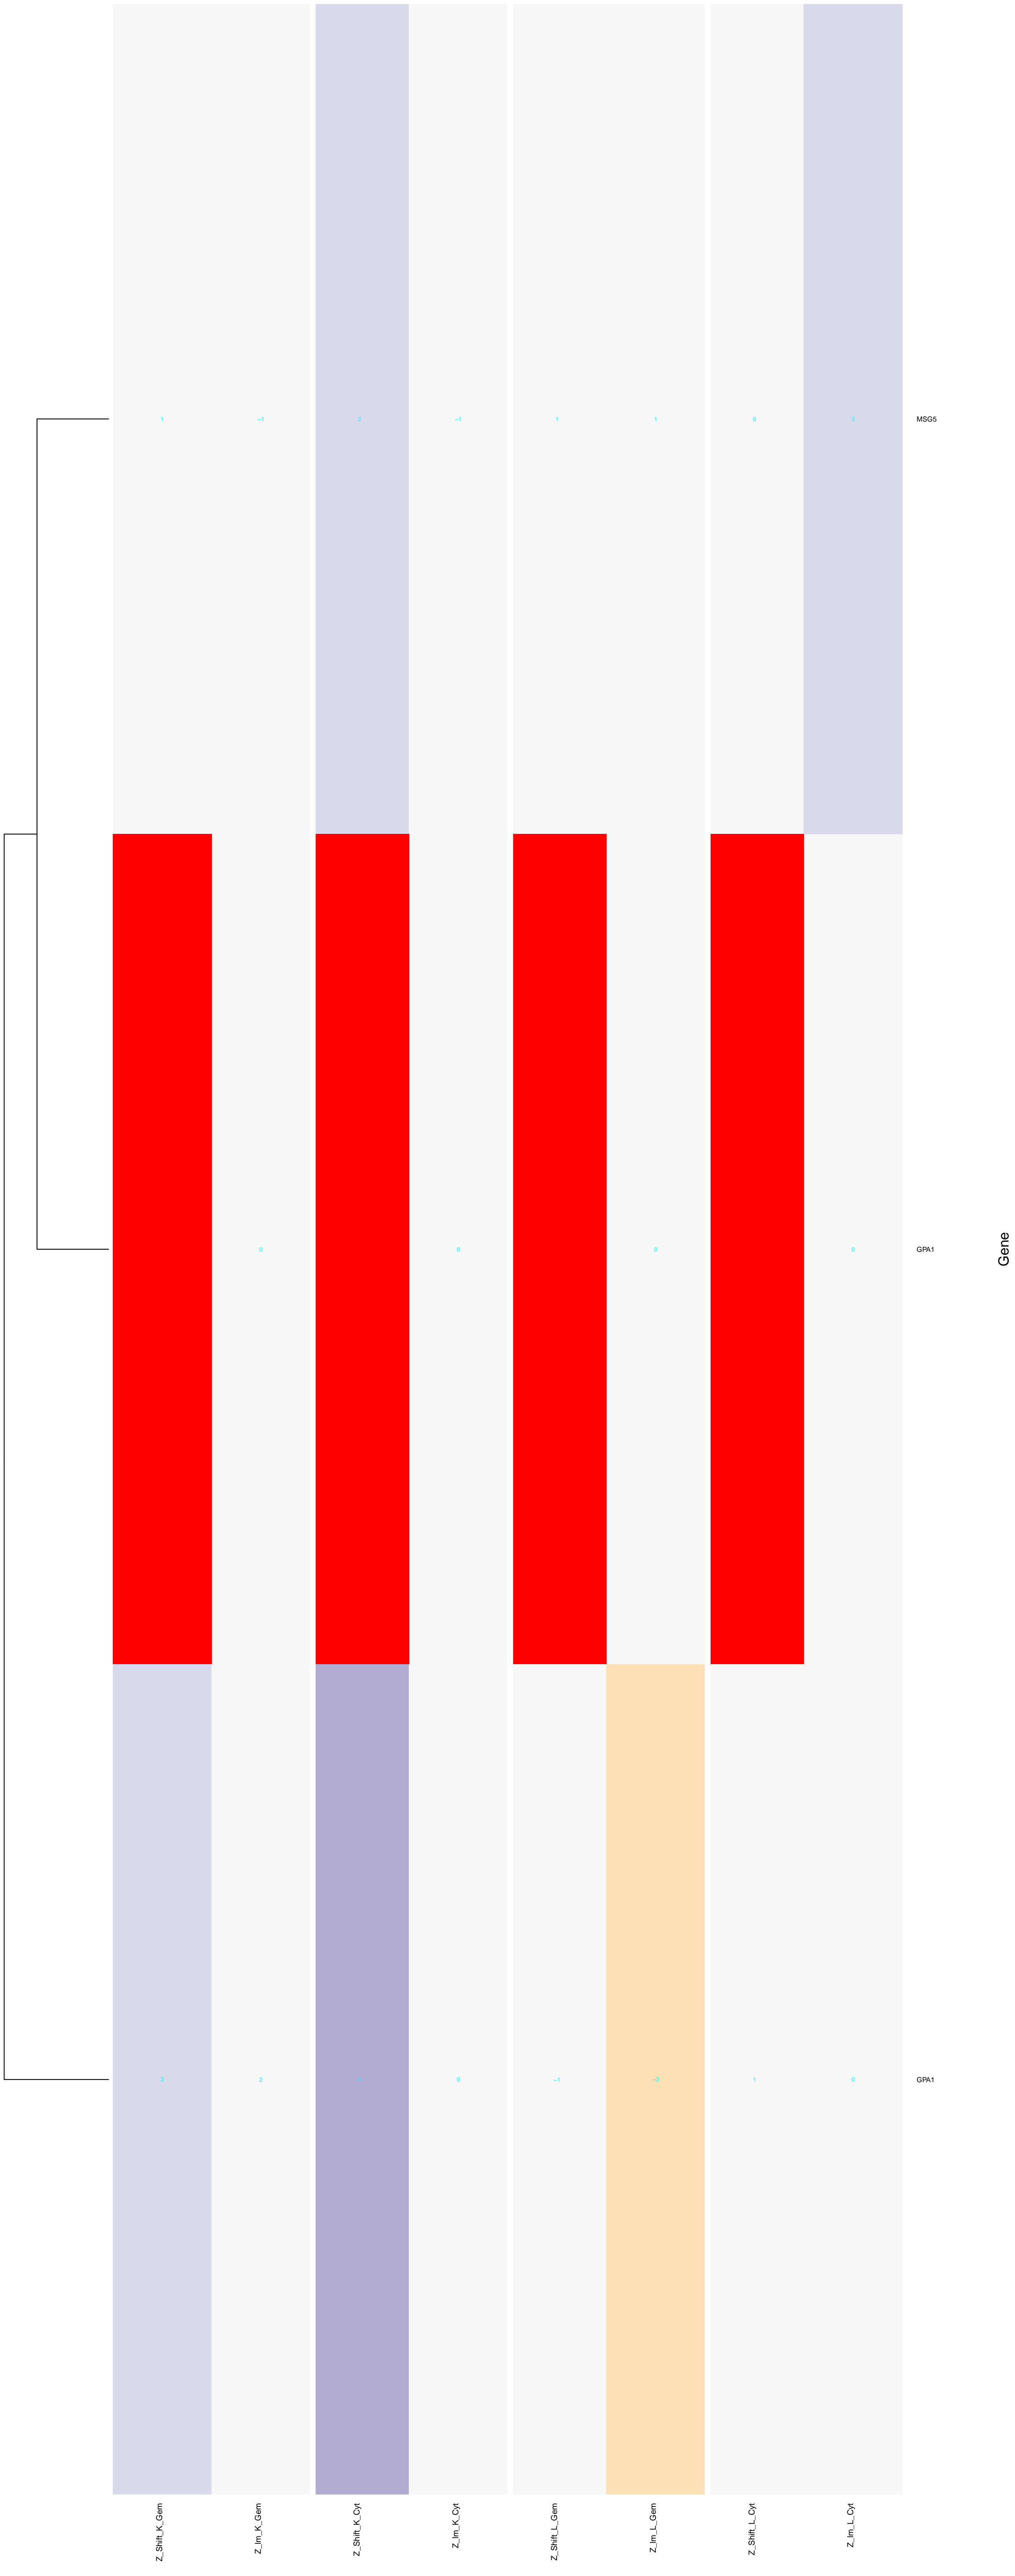

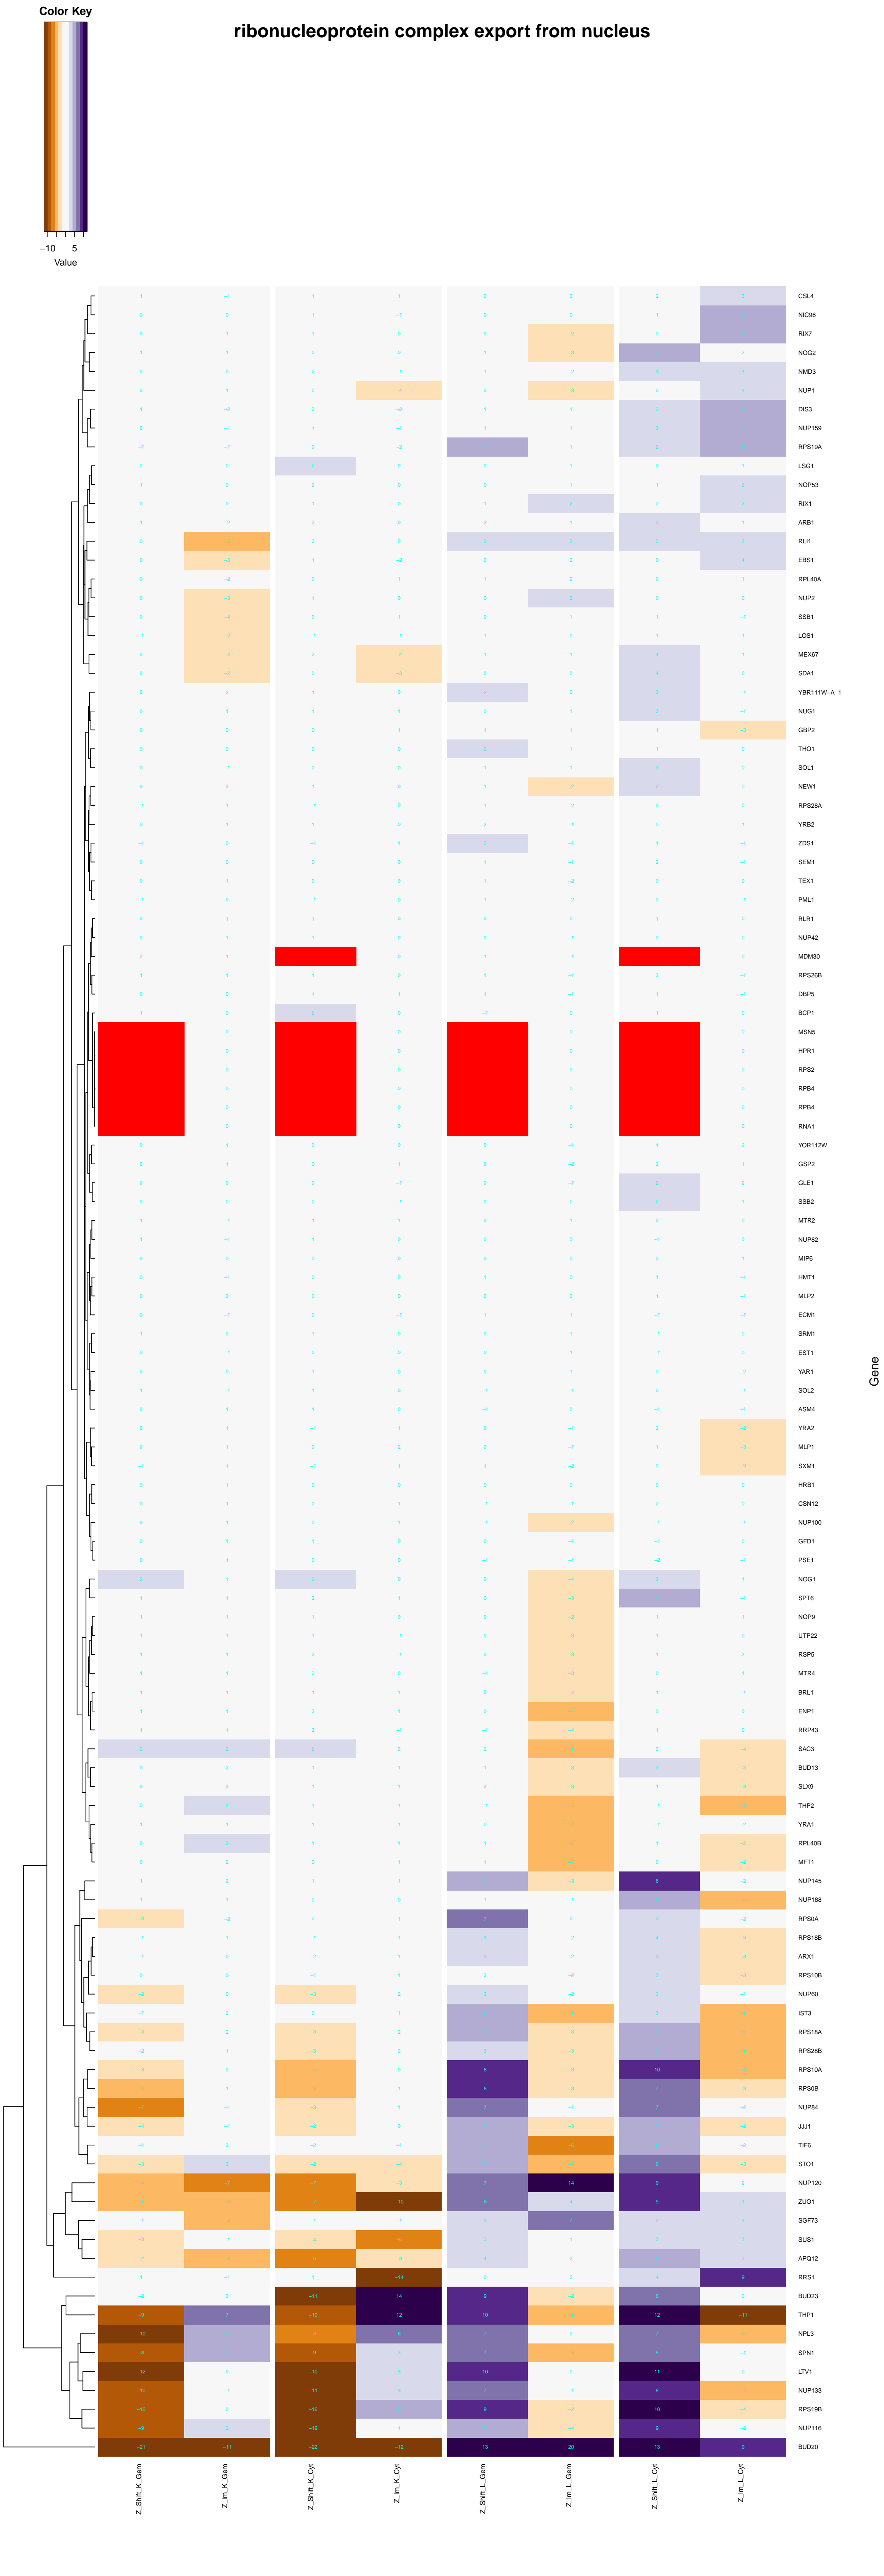

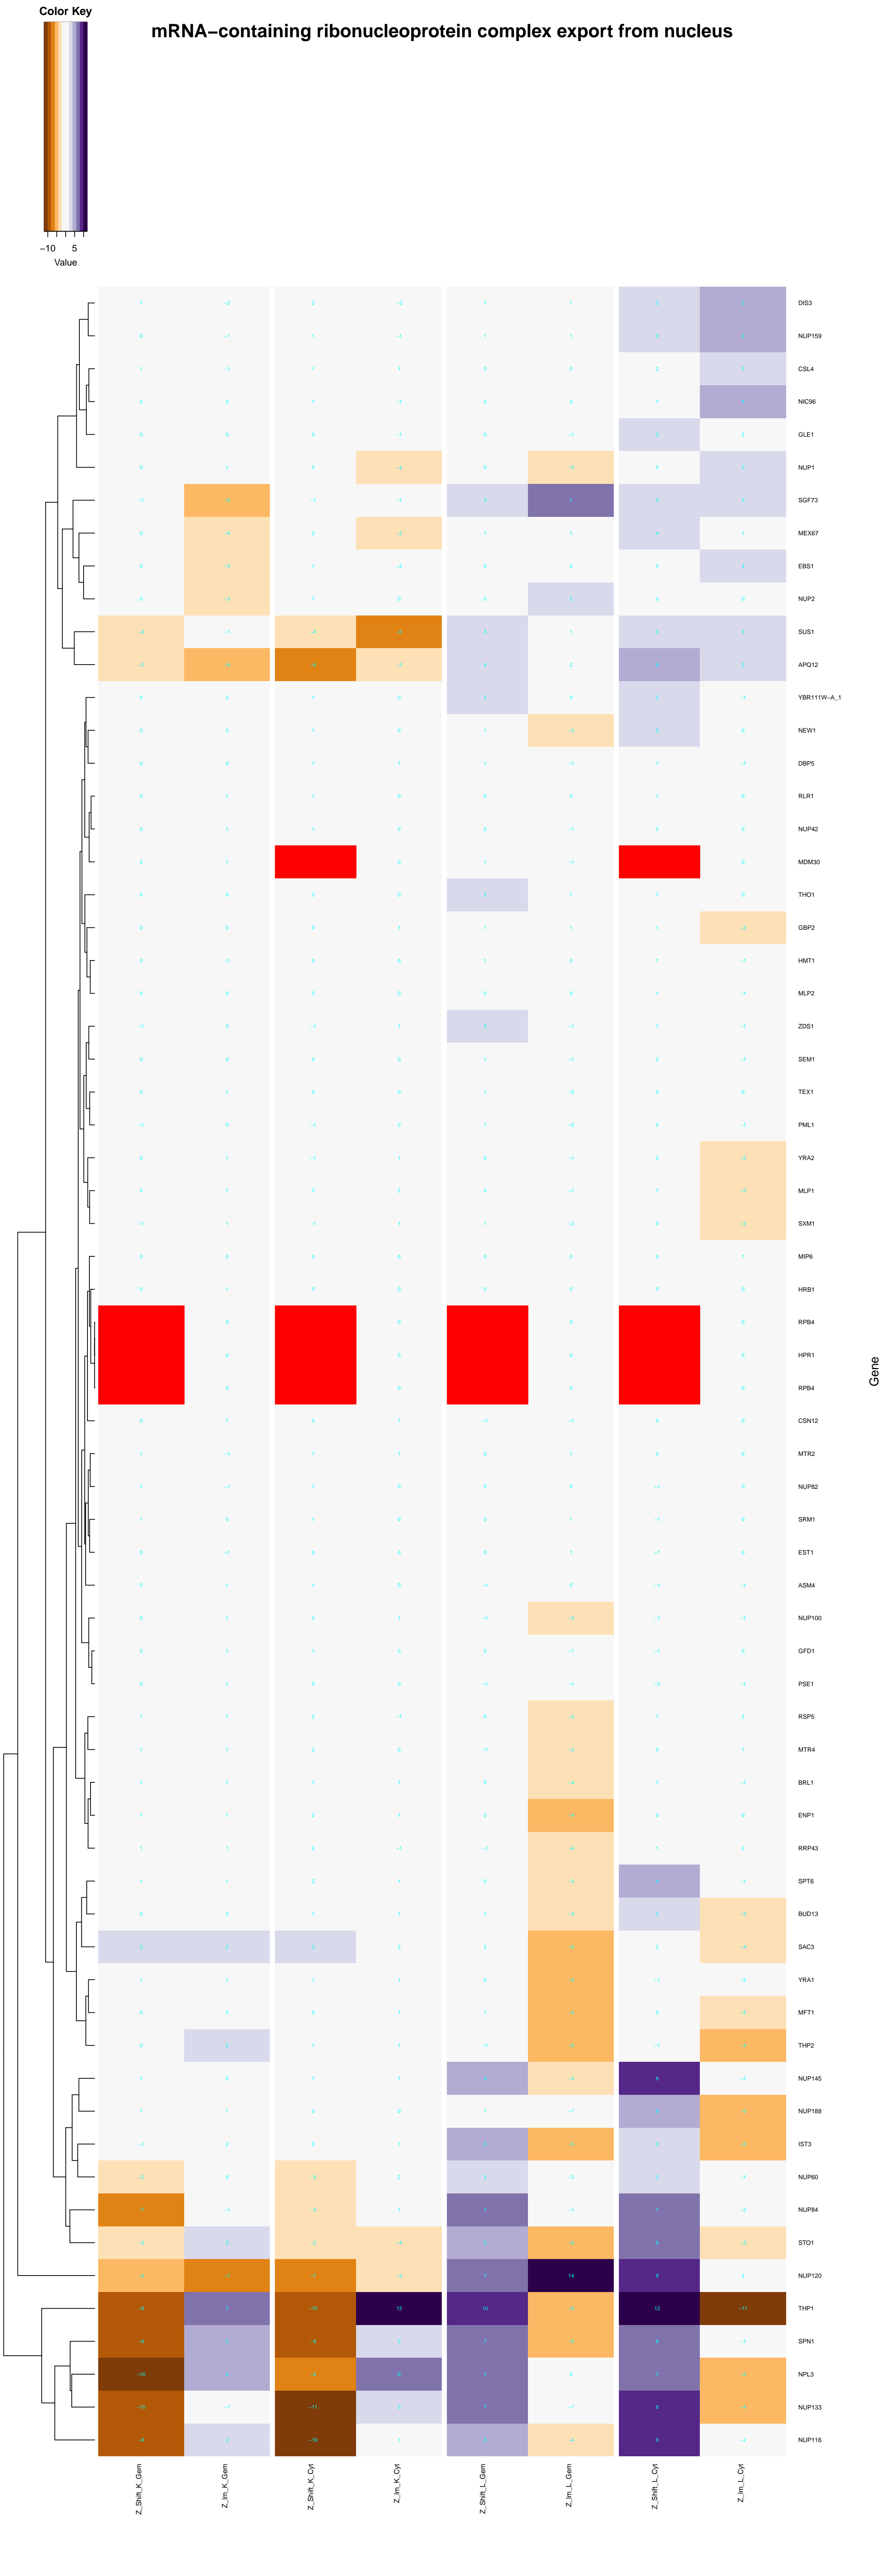

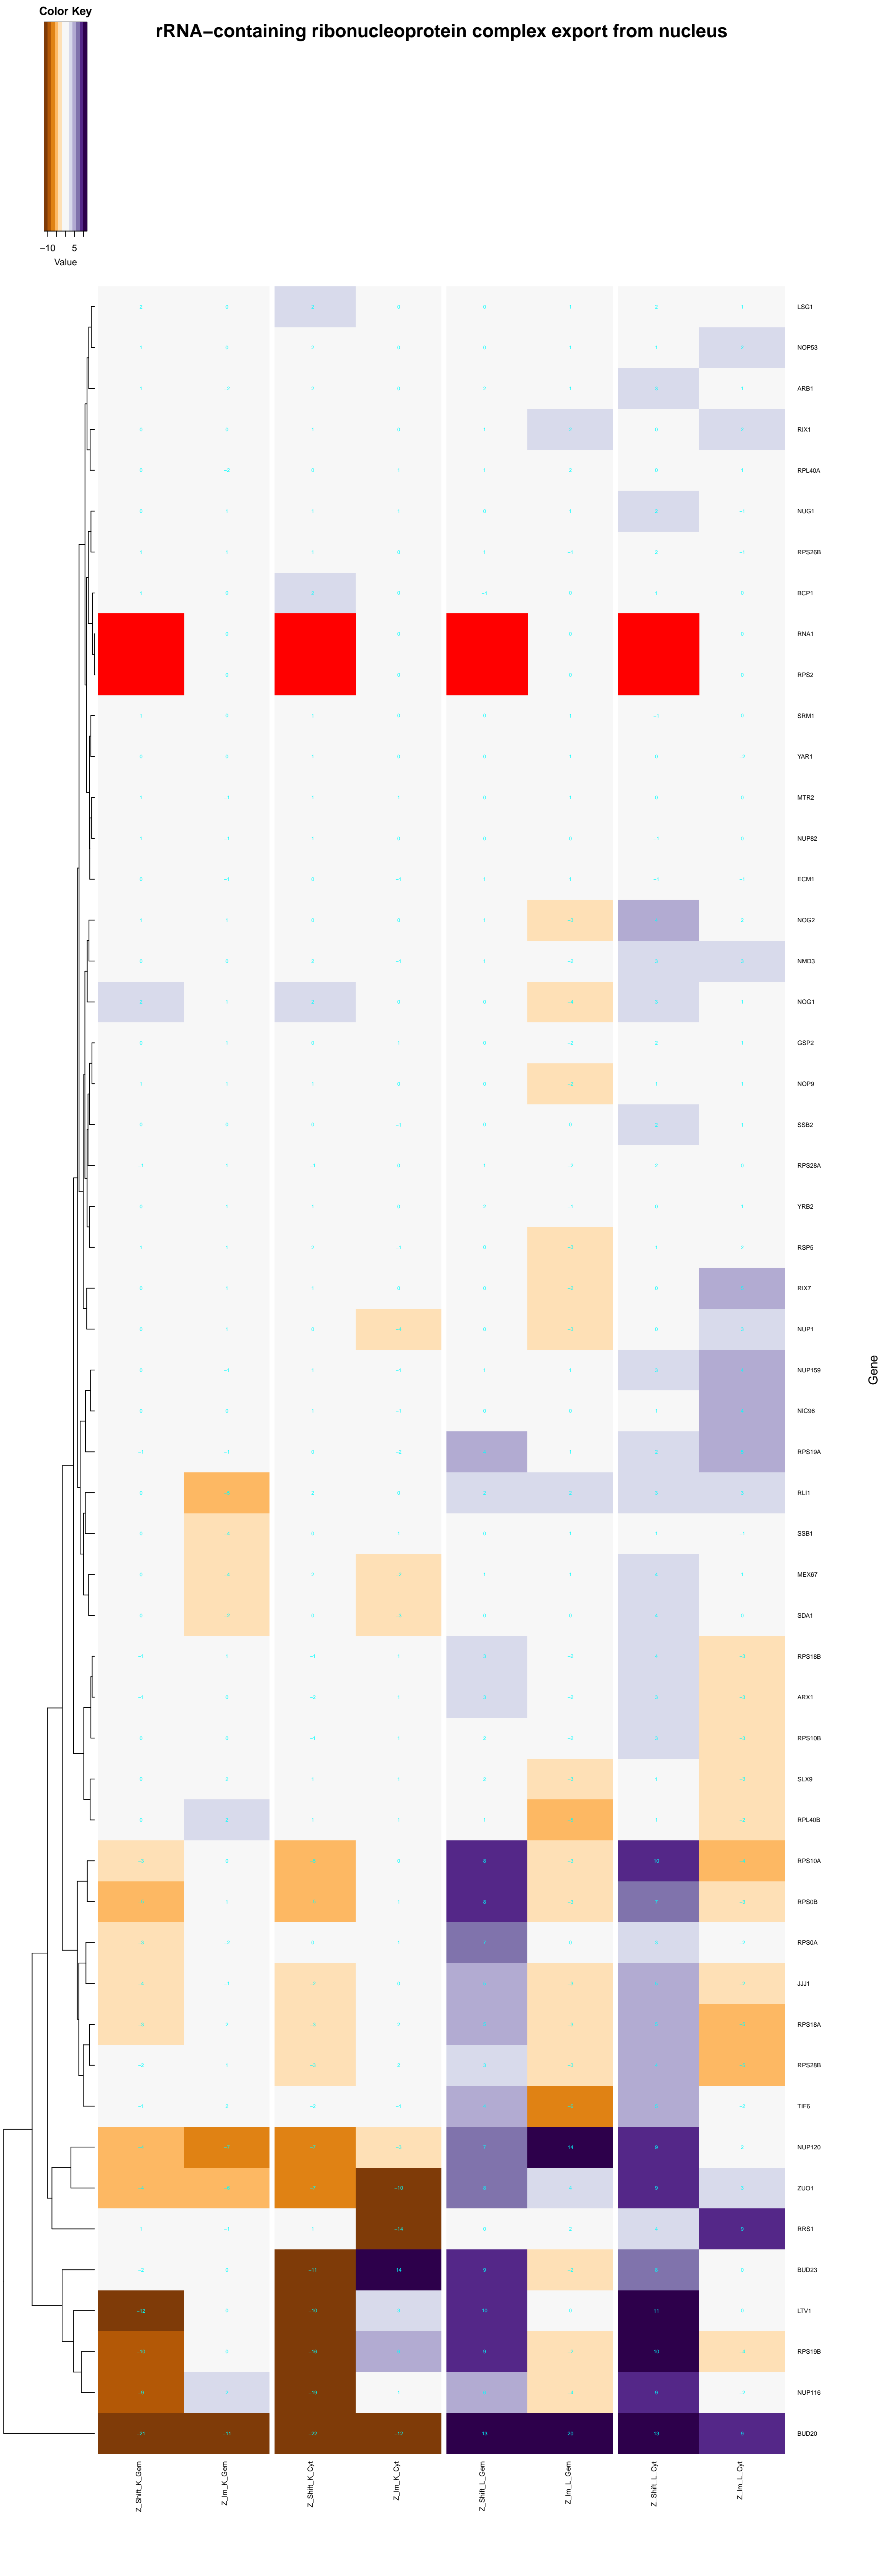



tRNA-containing ribonucleoprotein complex export from nucleus

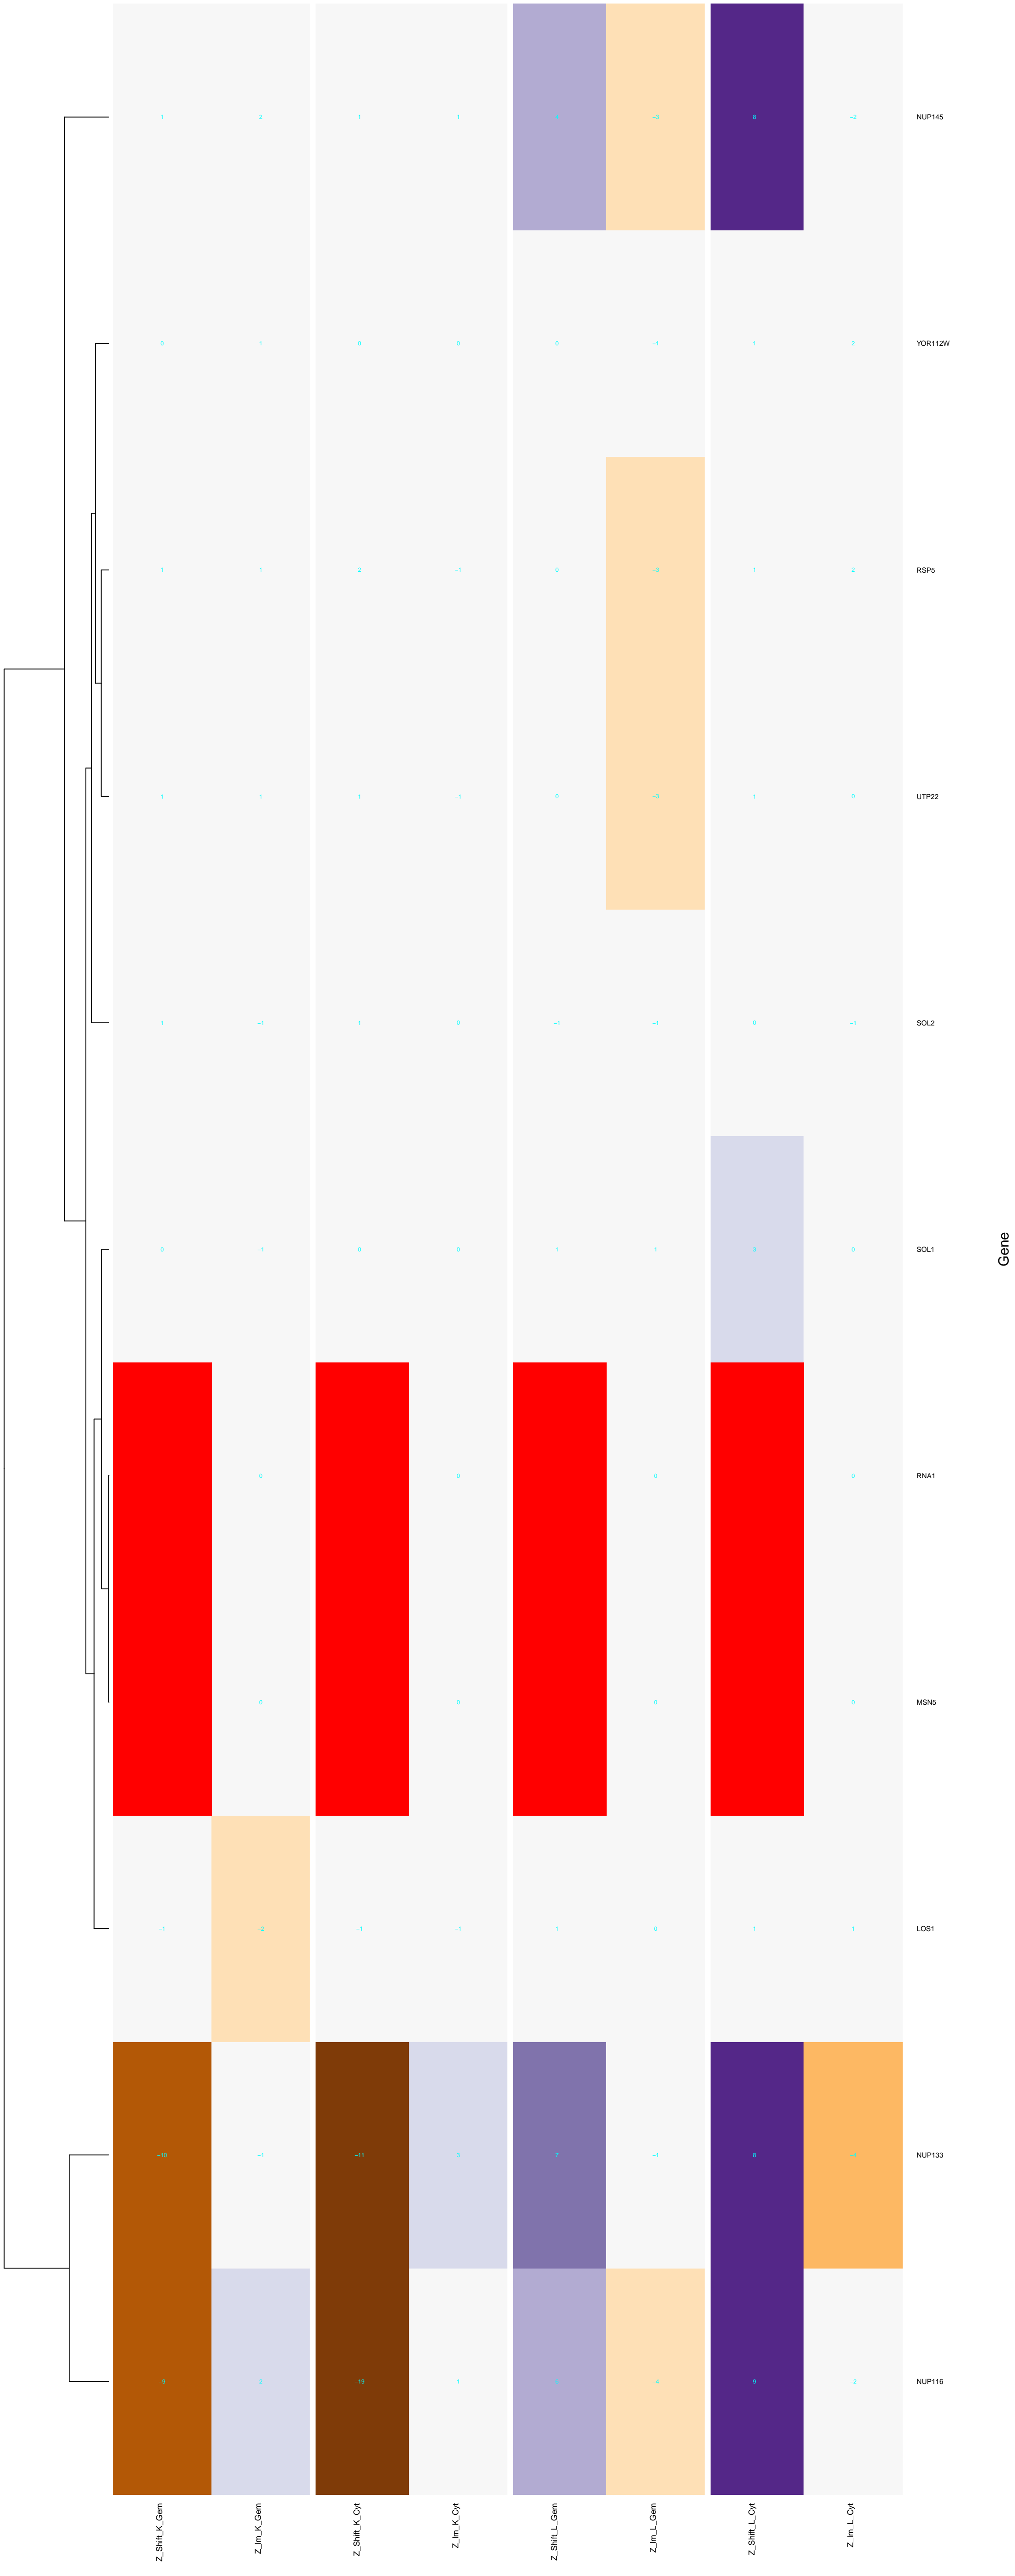







ribosomal small subunit export from nucleus

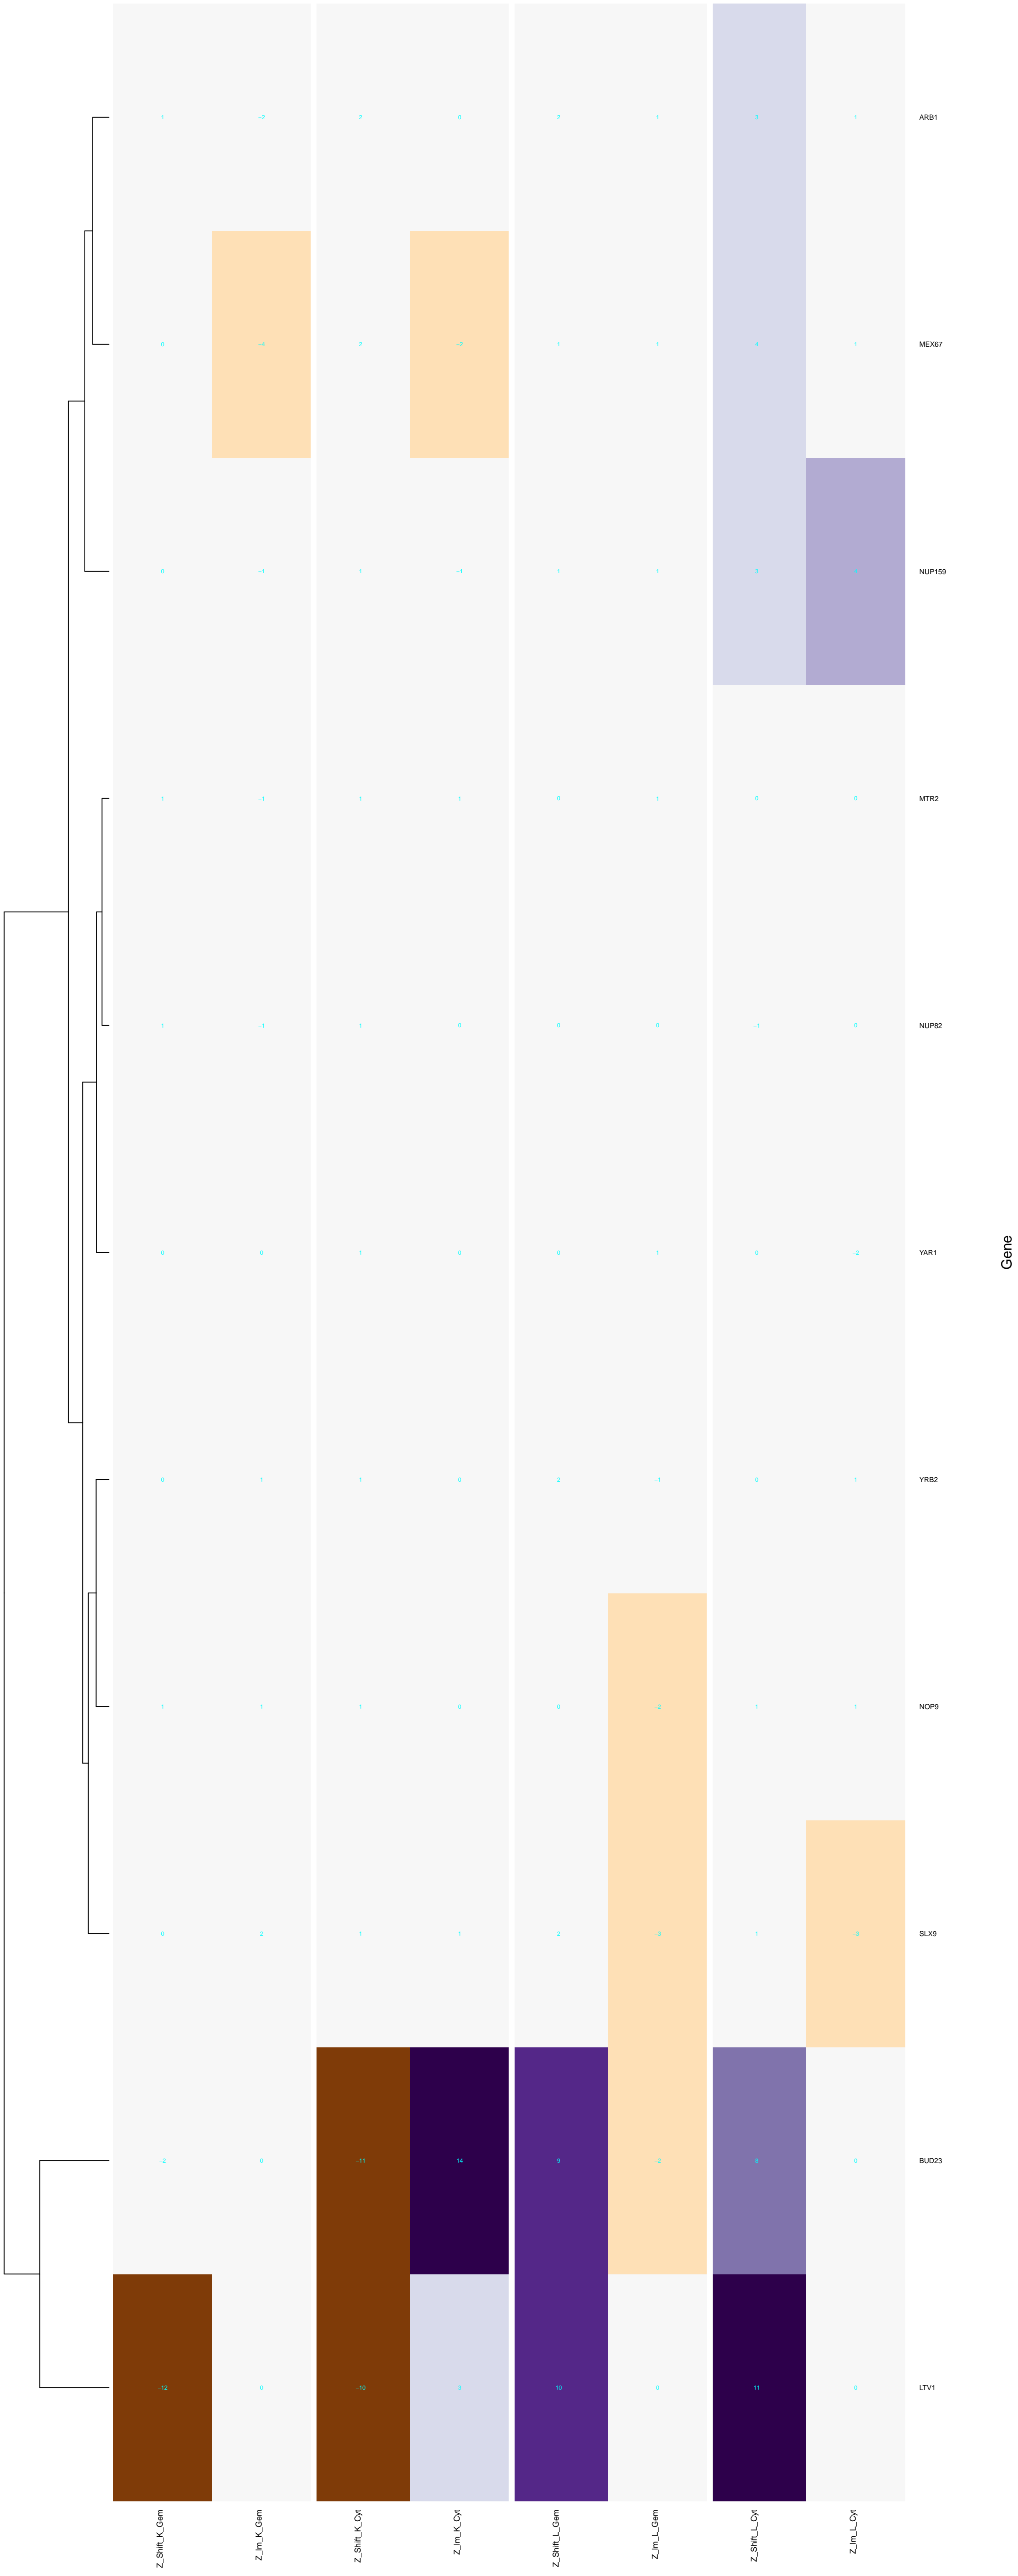

Supplement: s1 [file s1]
