# Supplementary material for: A Humanized Yeast Phenomic Model of Deoxycytidine Kinase to Predict Genetic Buffering of Nucleoside Analog Cytotoxicity
Source: MDPI journal article supplement (doi:10.3390/genes10100770), 2019-09-30

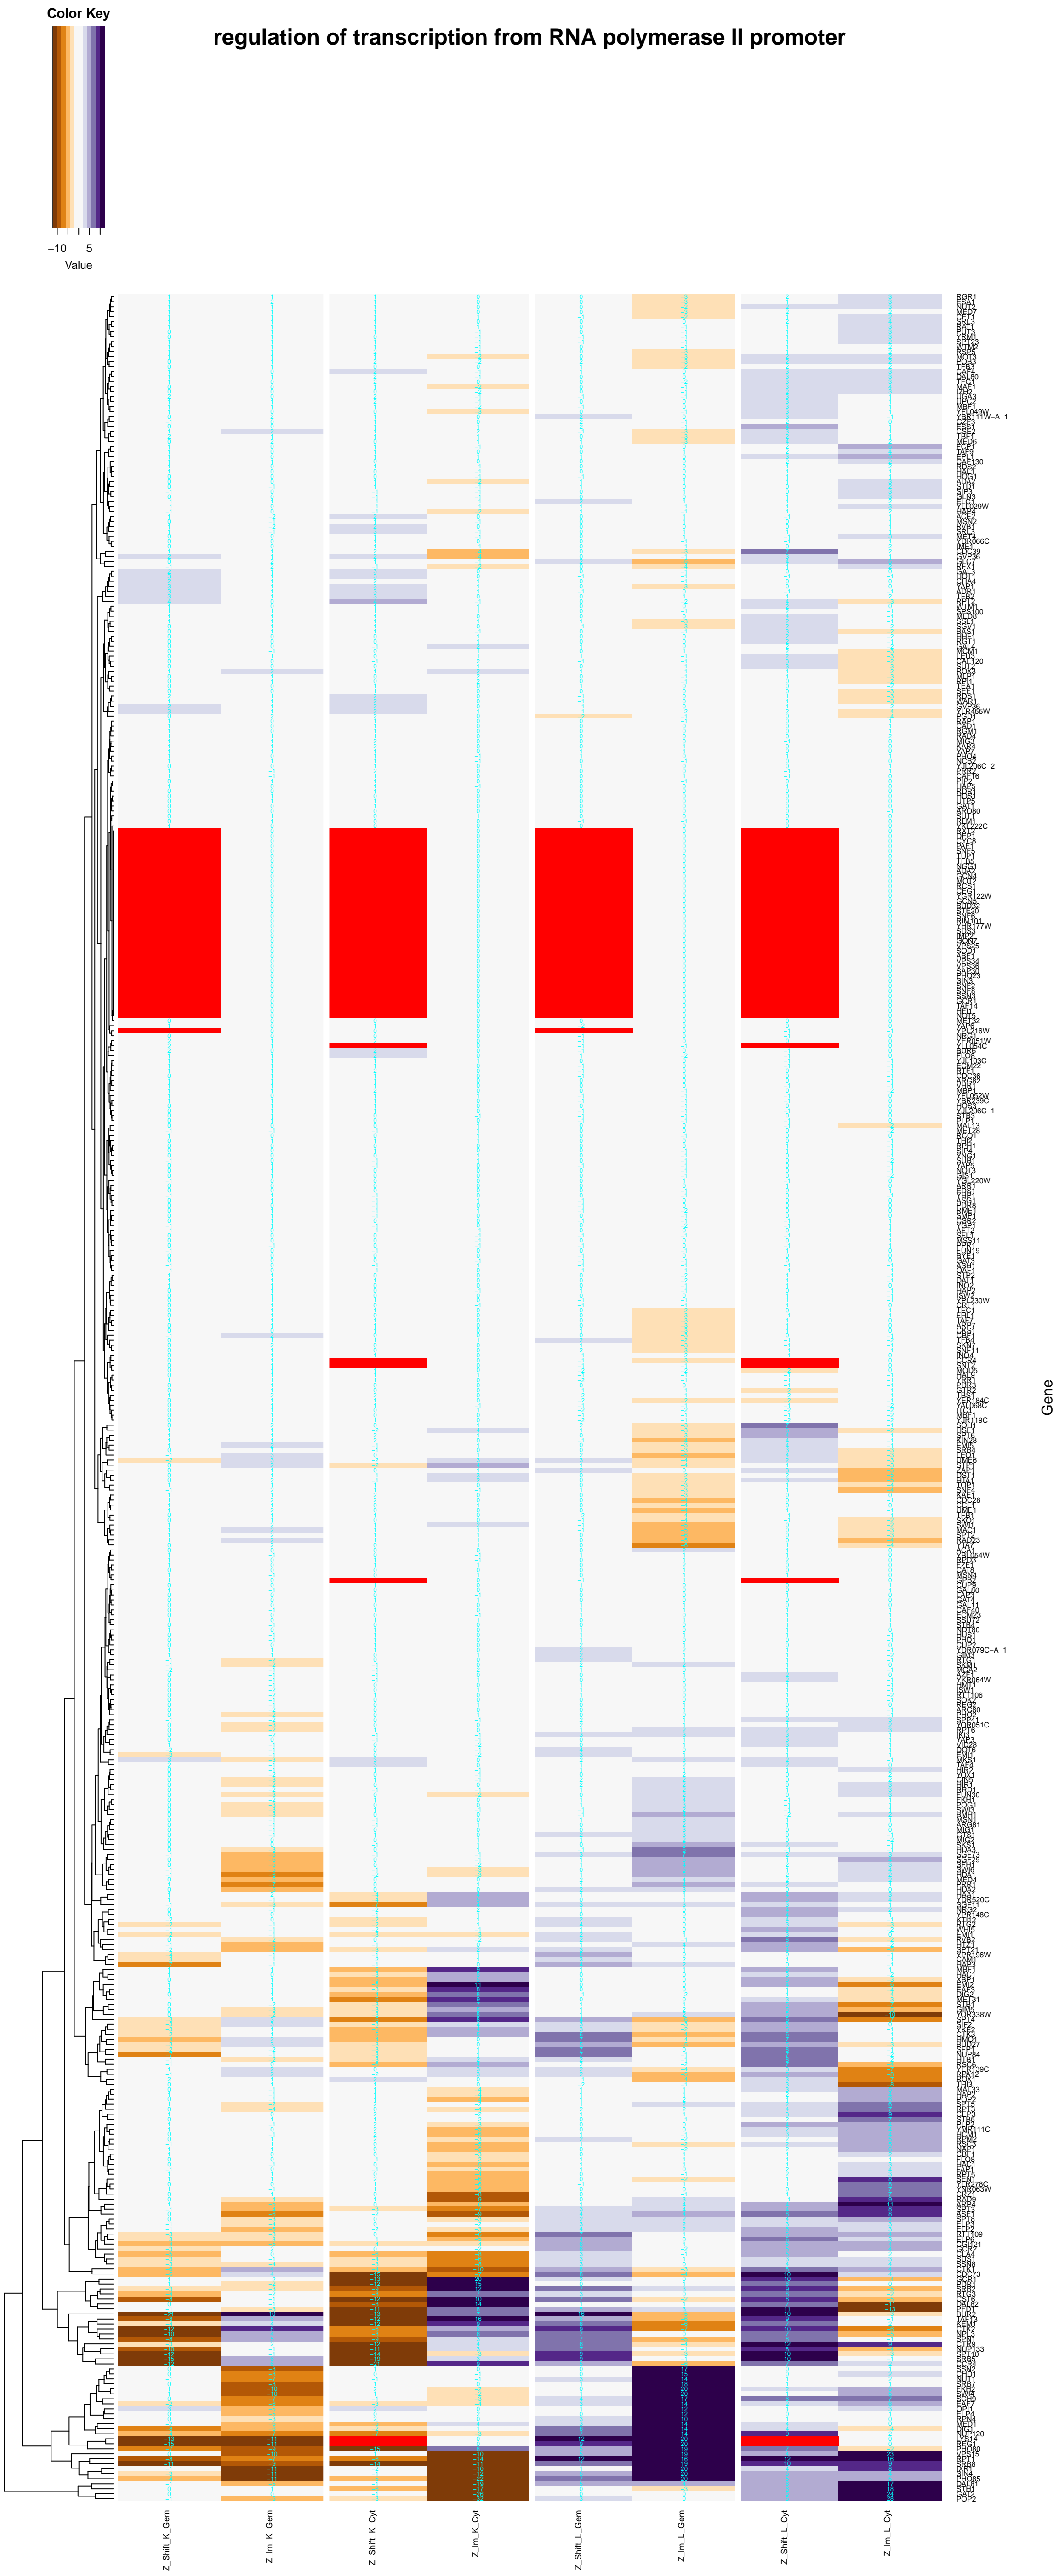

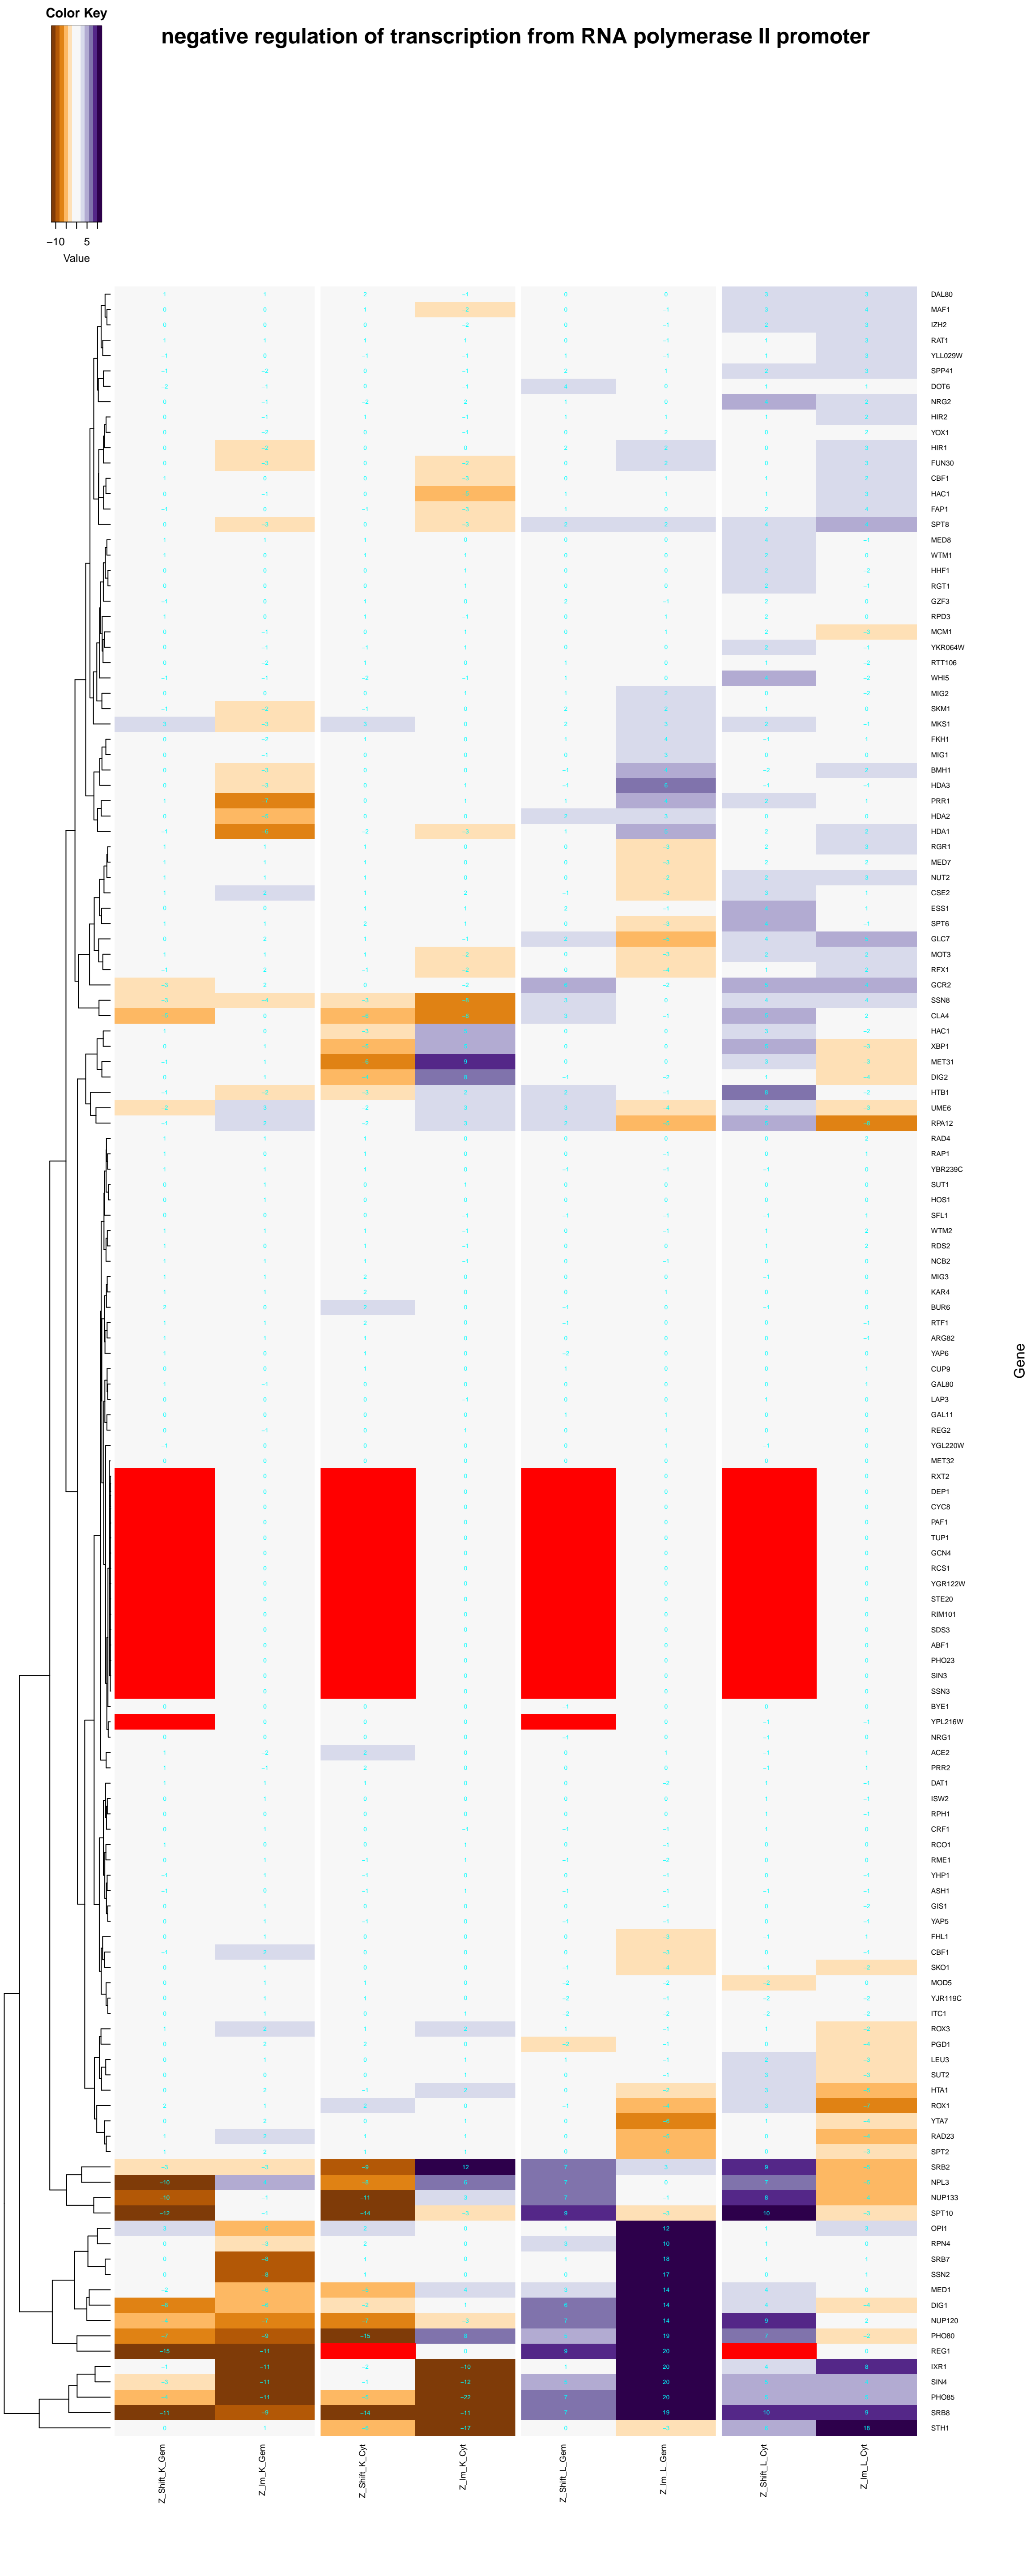

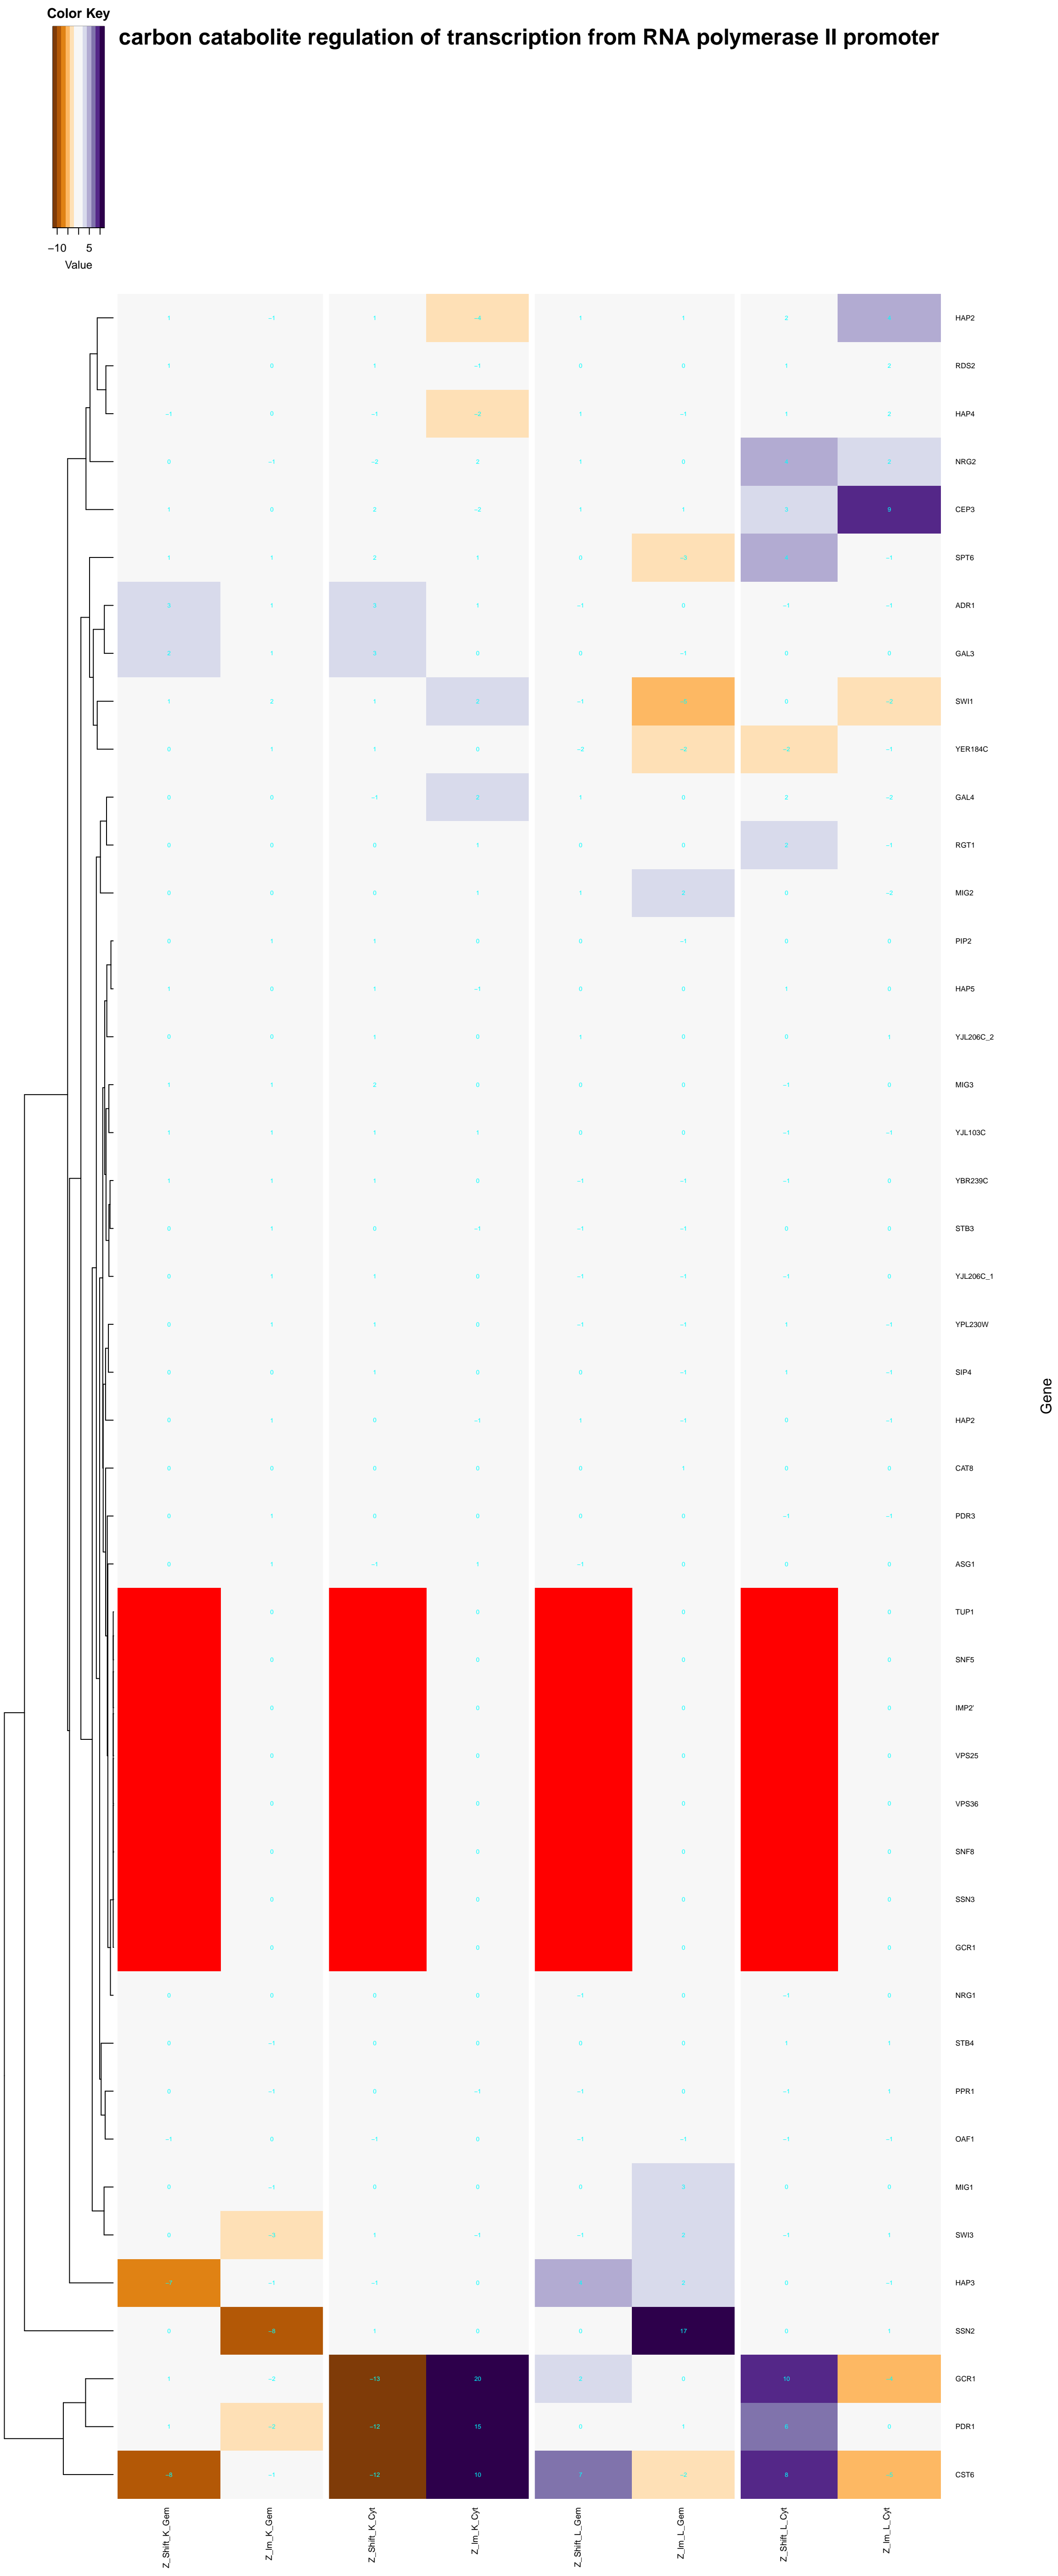

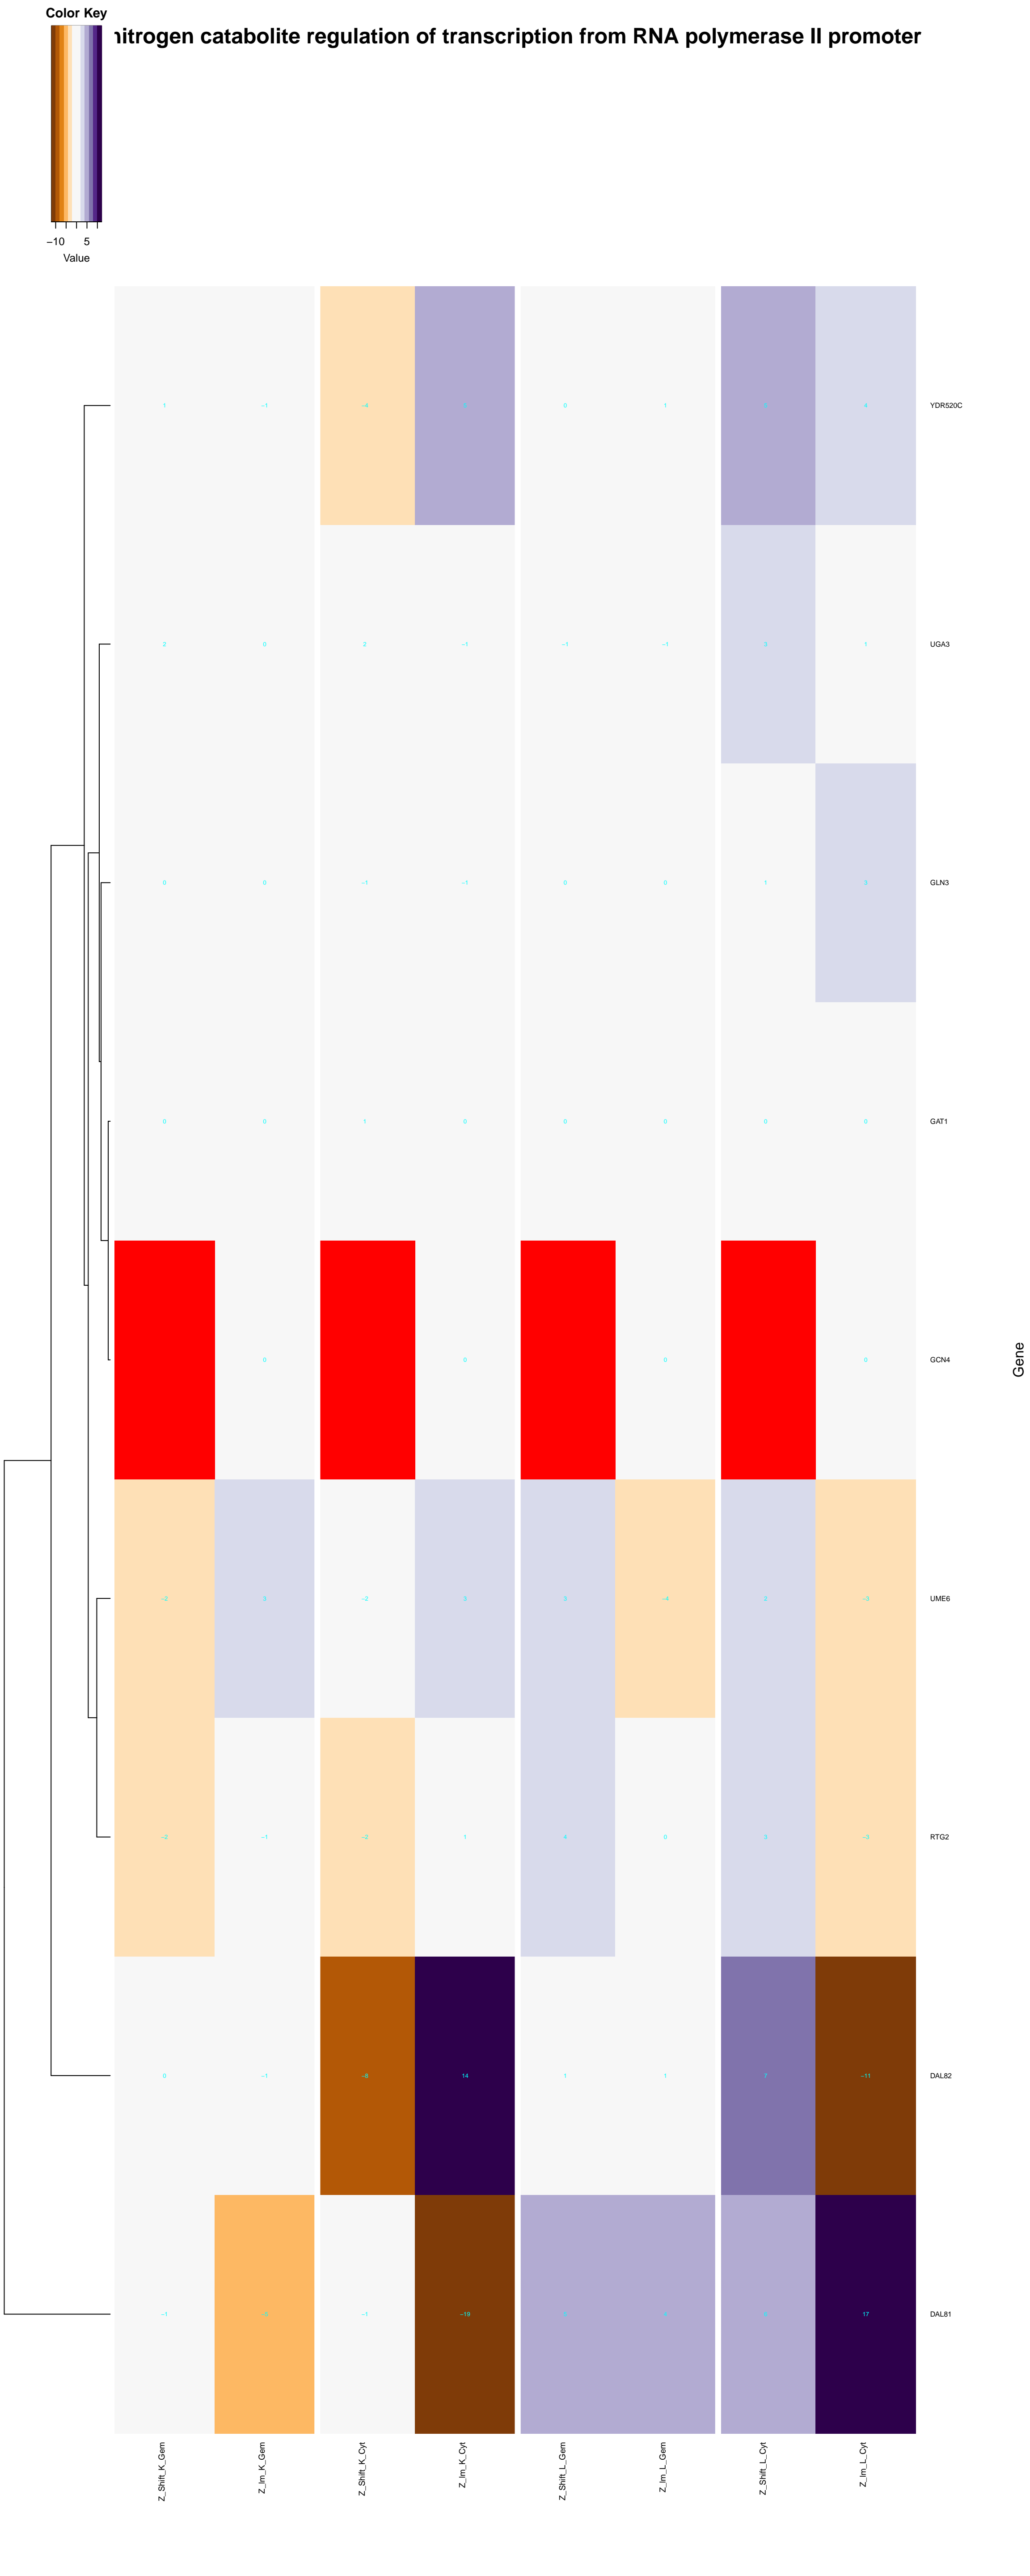

ation of transcription from RNA polymerase II promoter involved in meiotic cell cycle

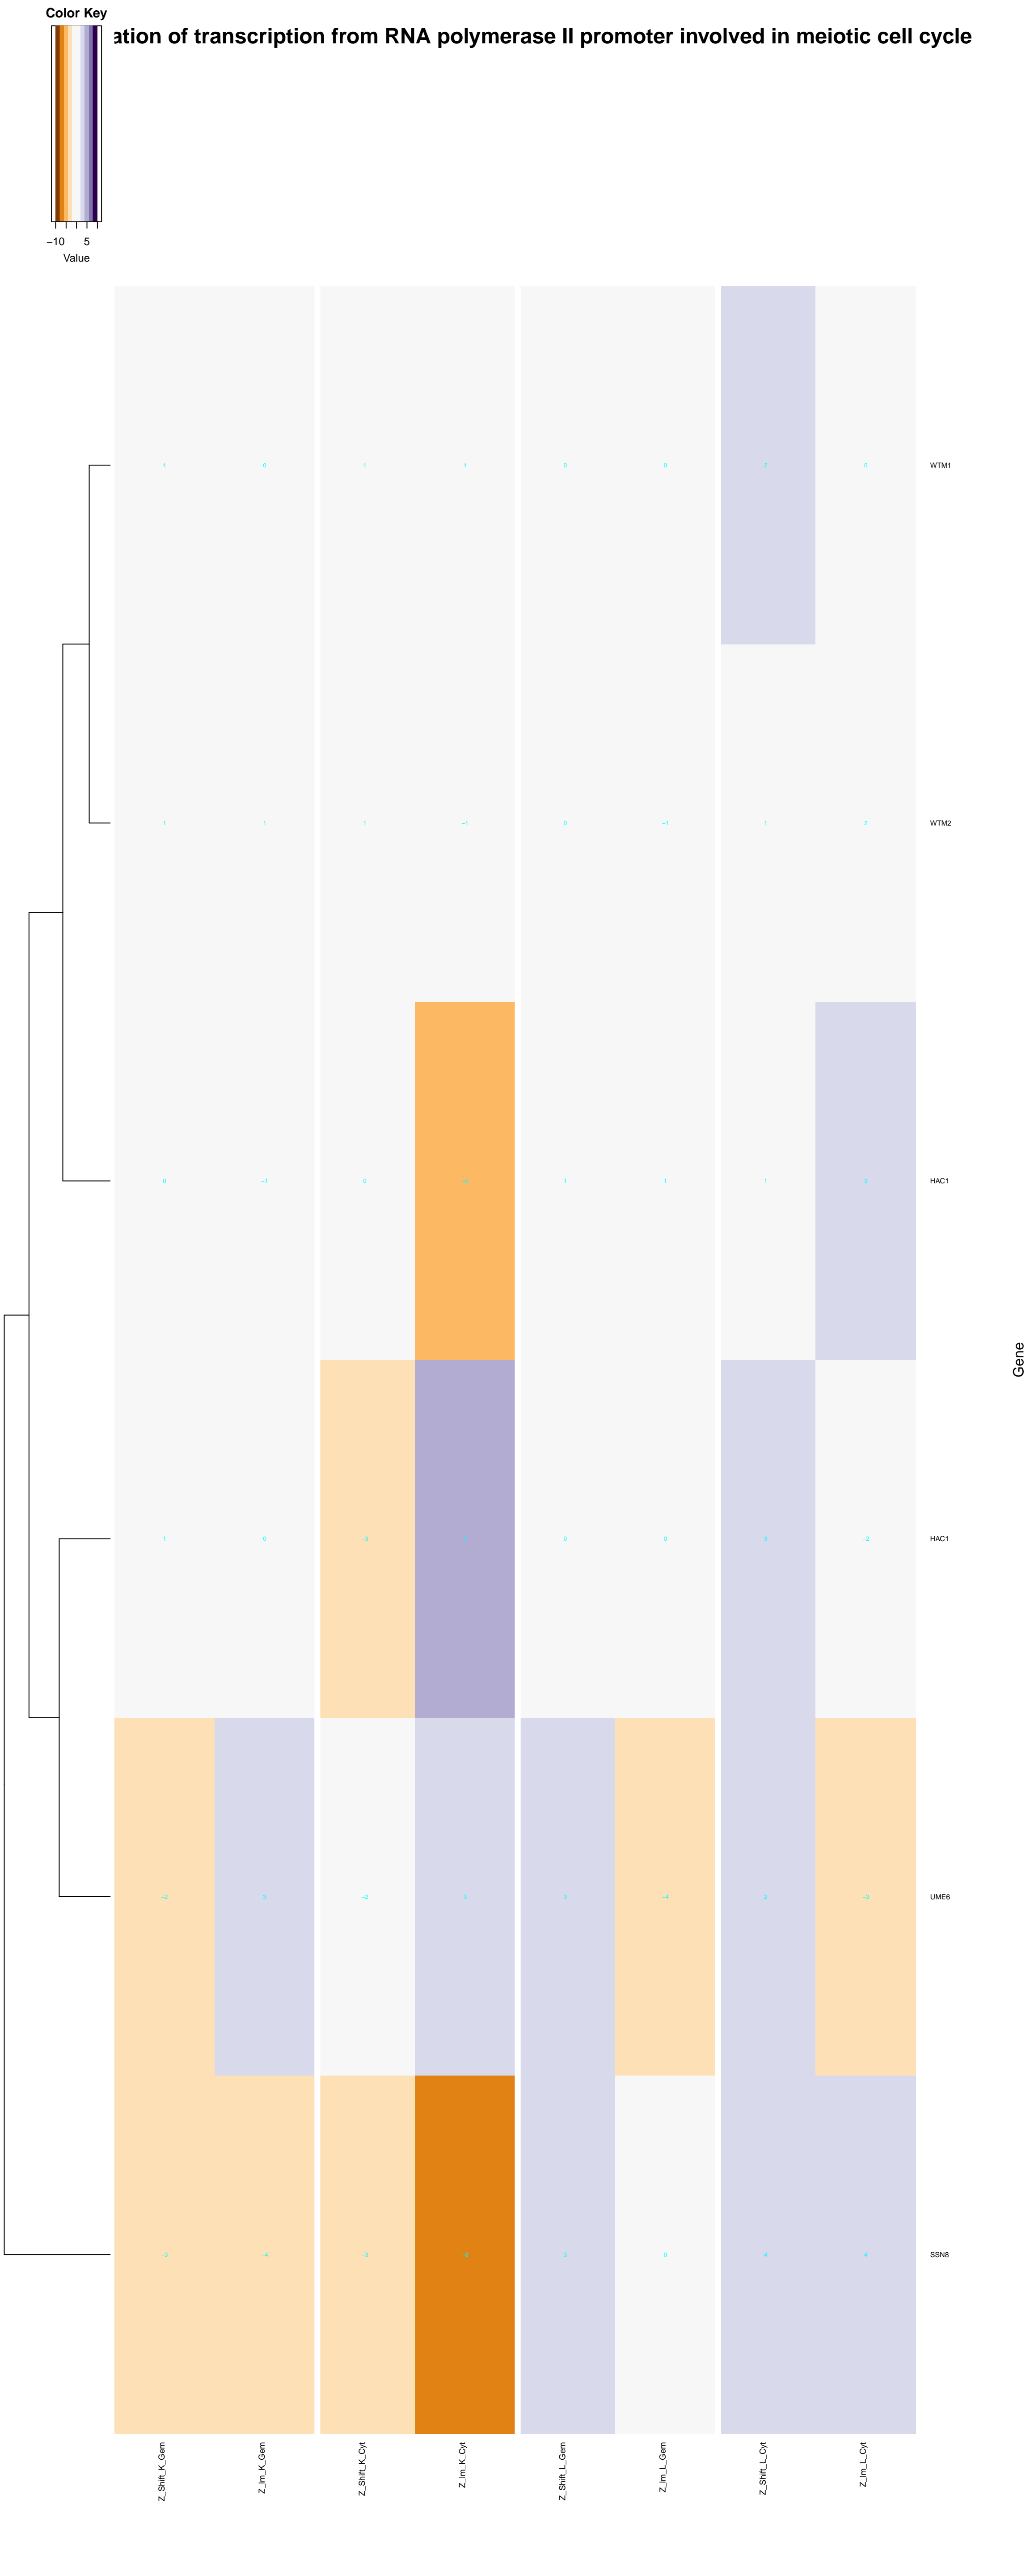

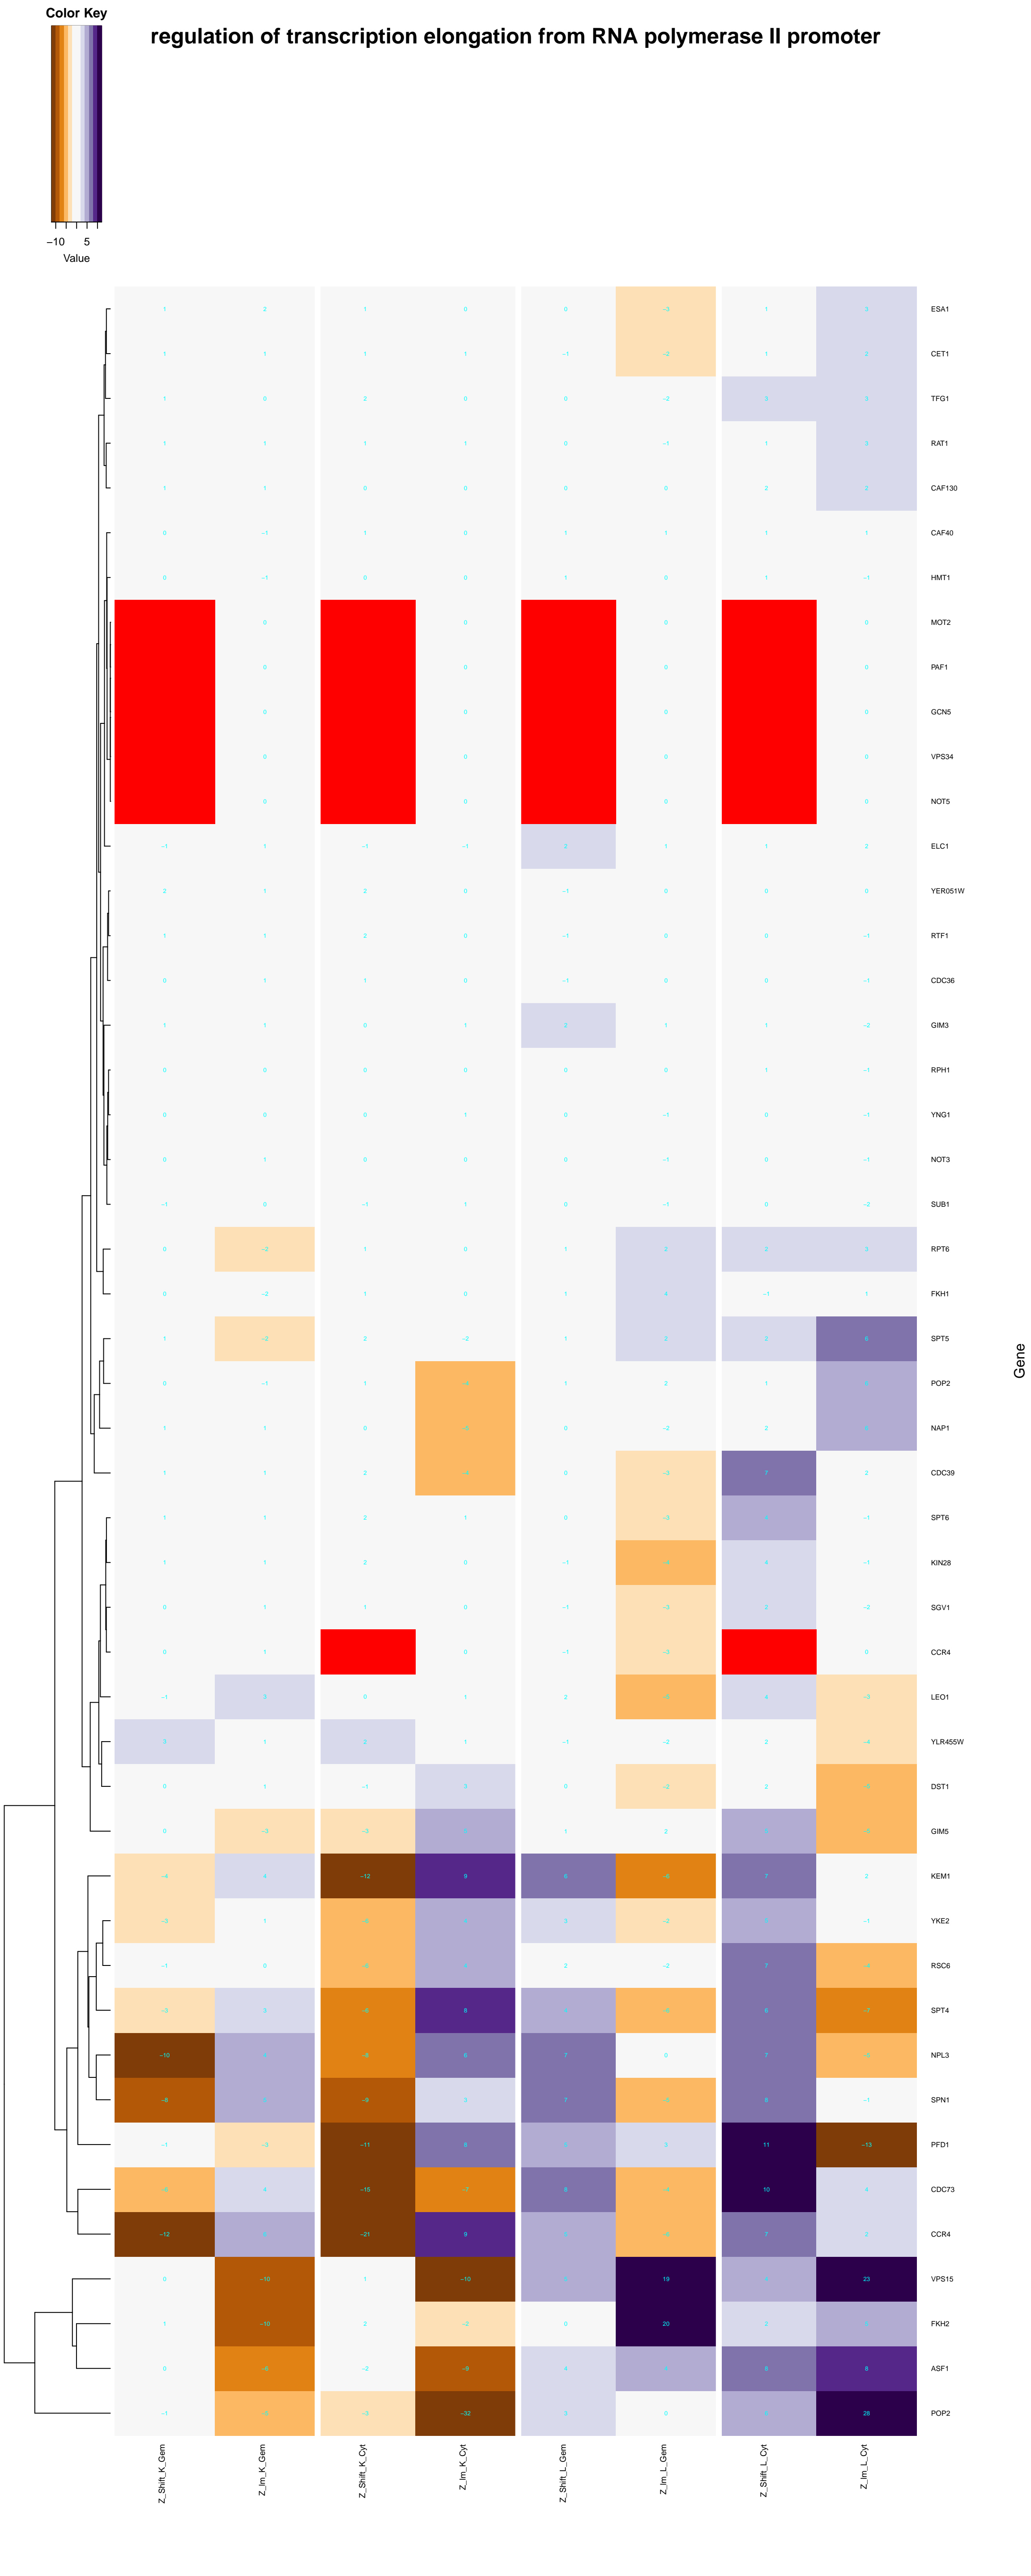

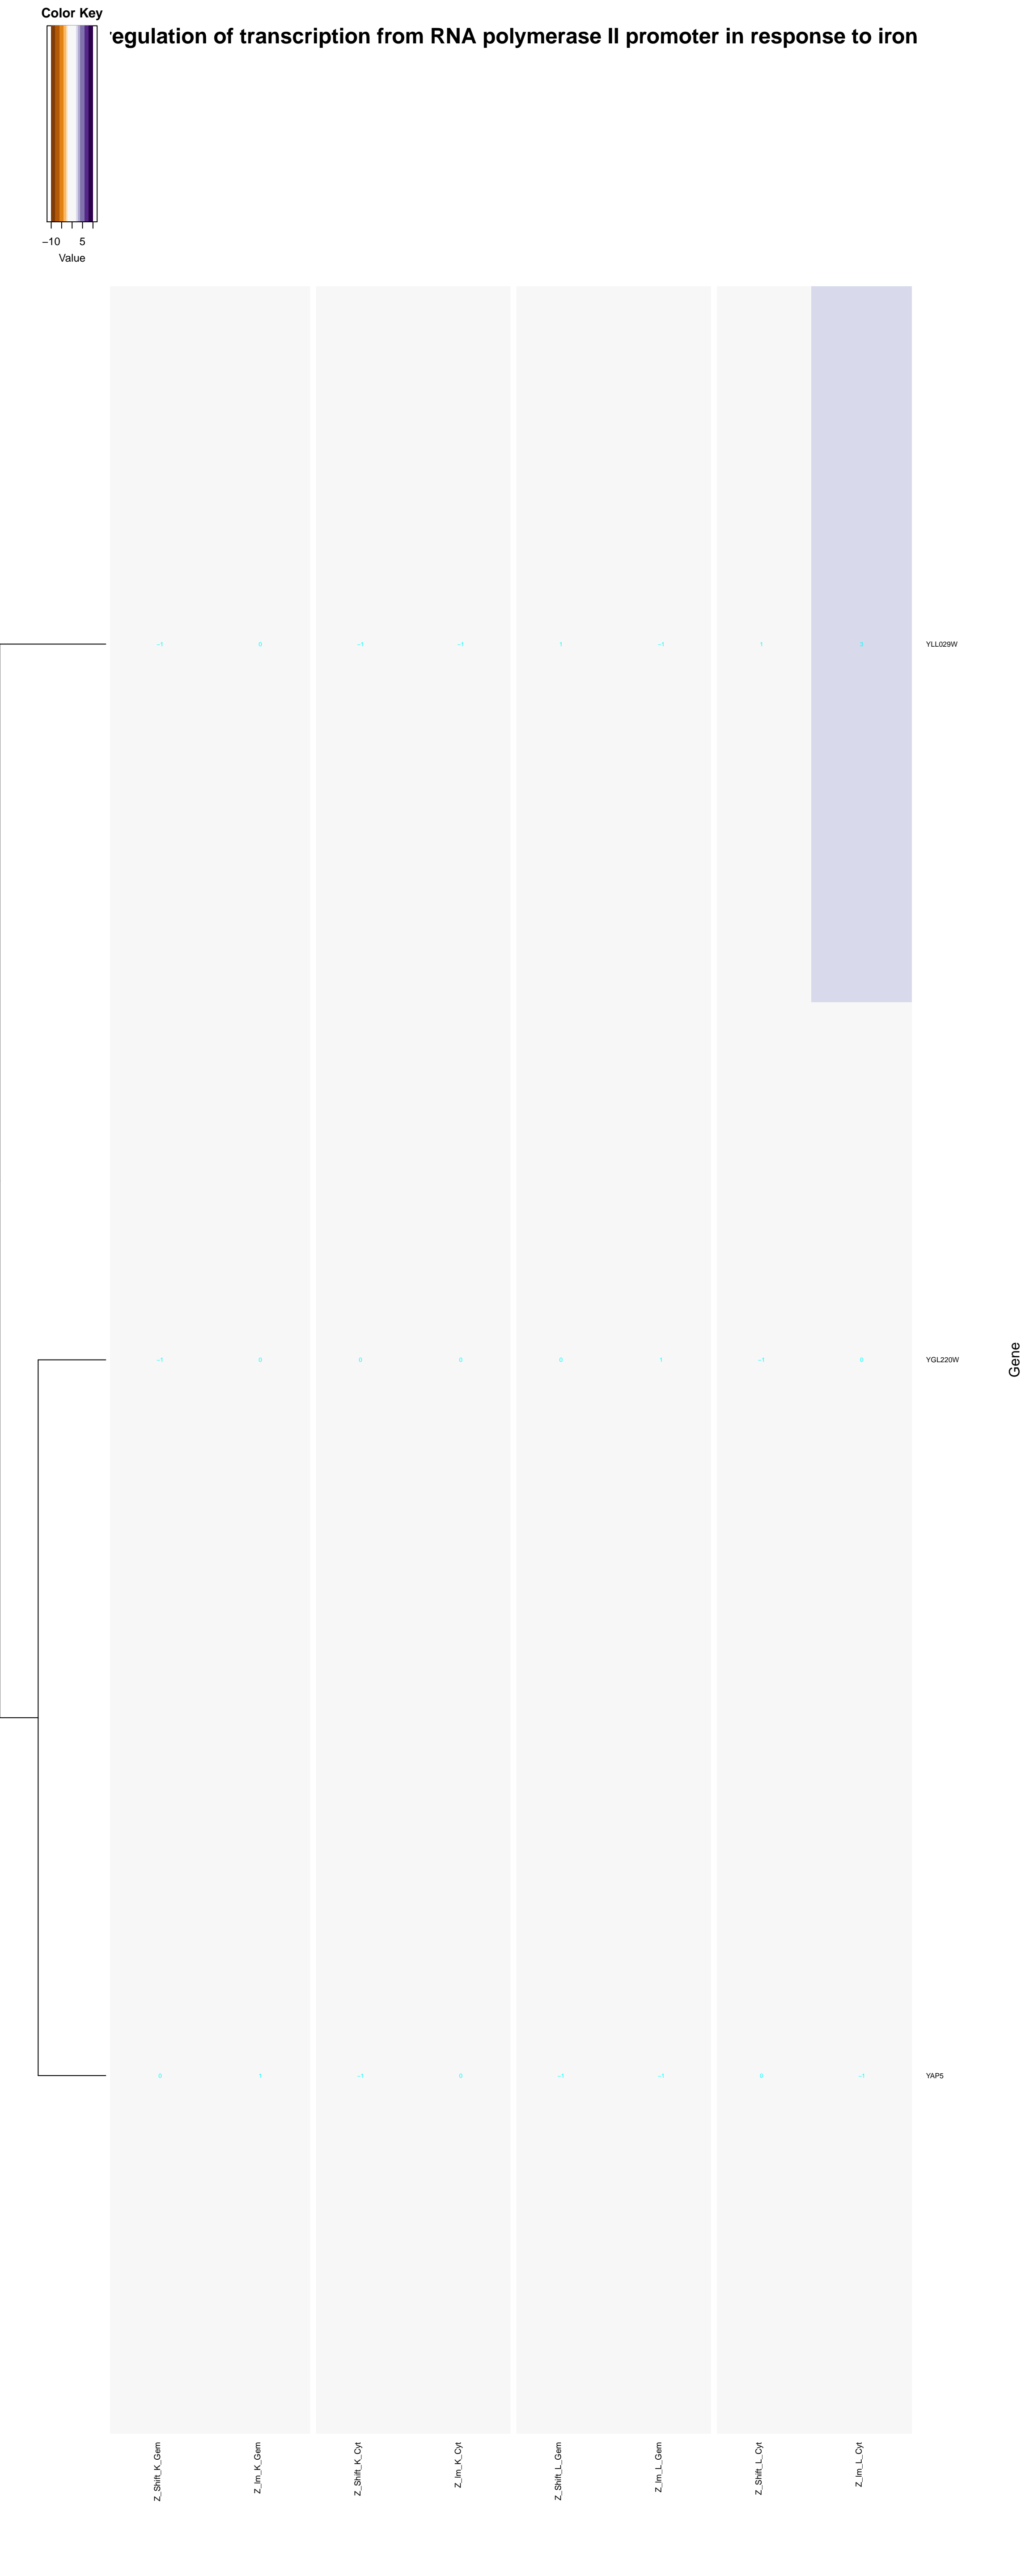

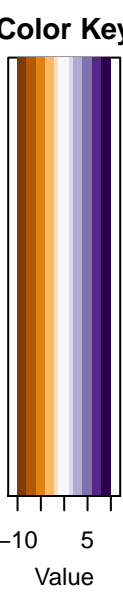

of oligopeptide transport by regulation of transcription from RNA polymerase II promoter

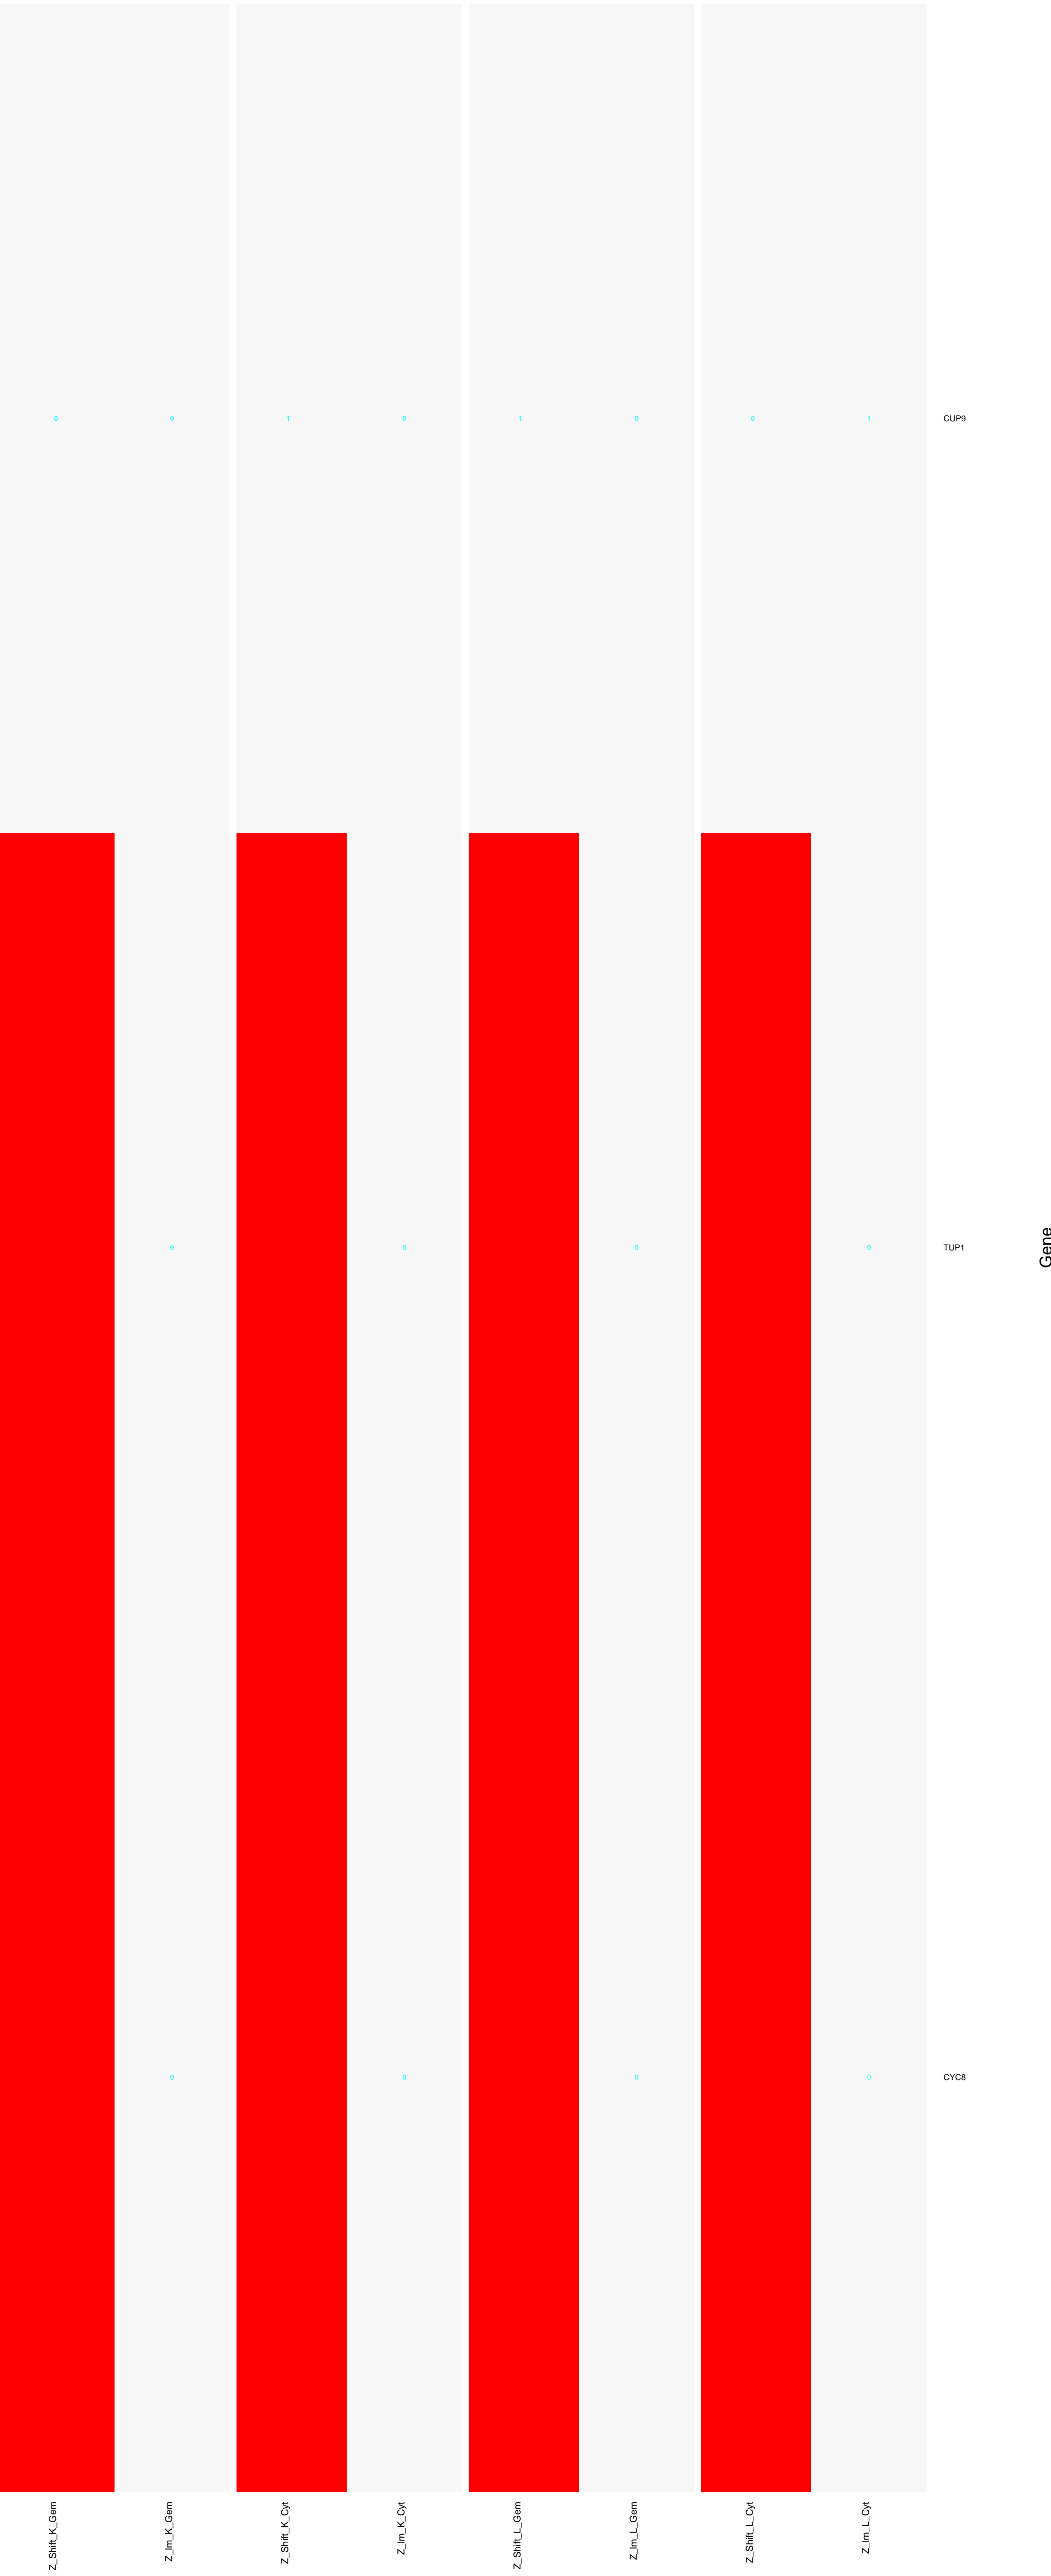



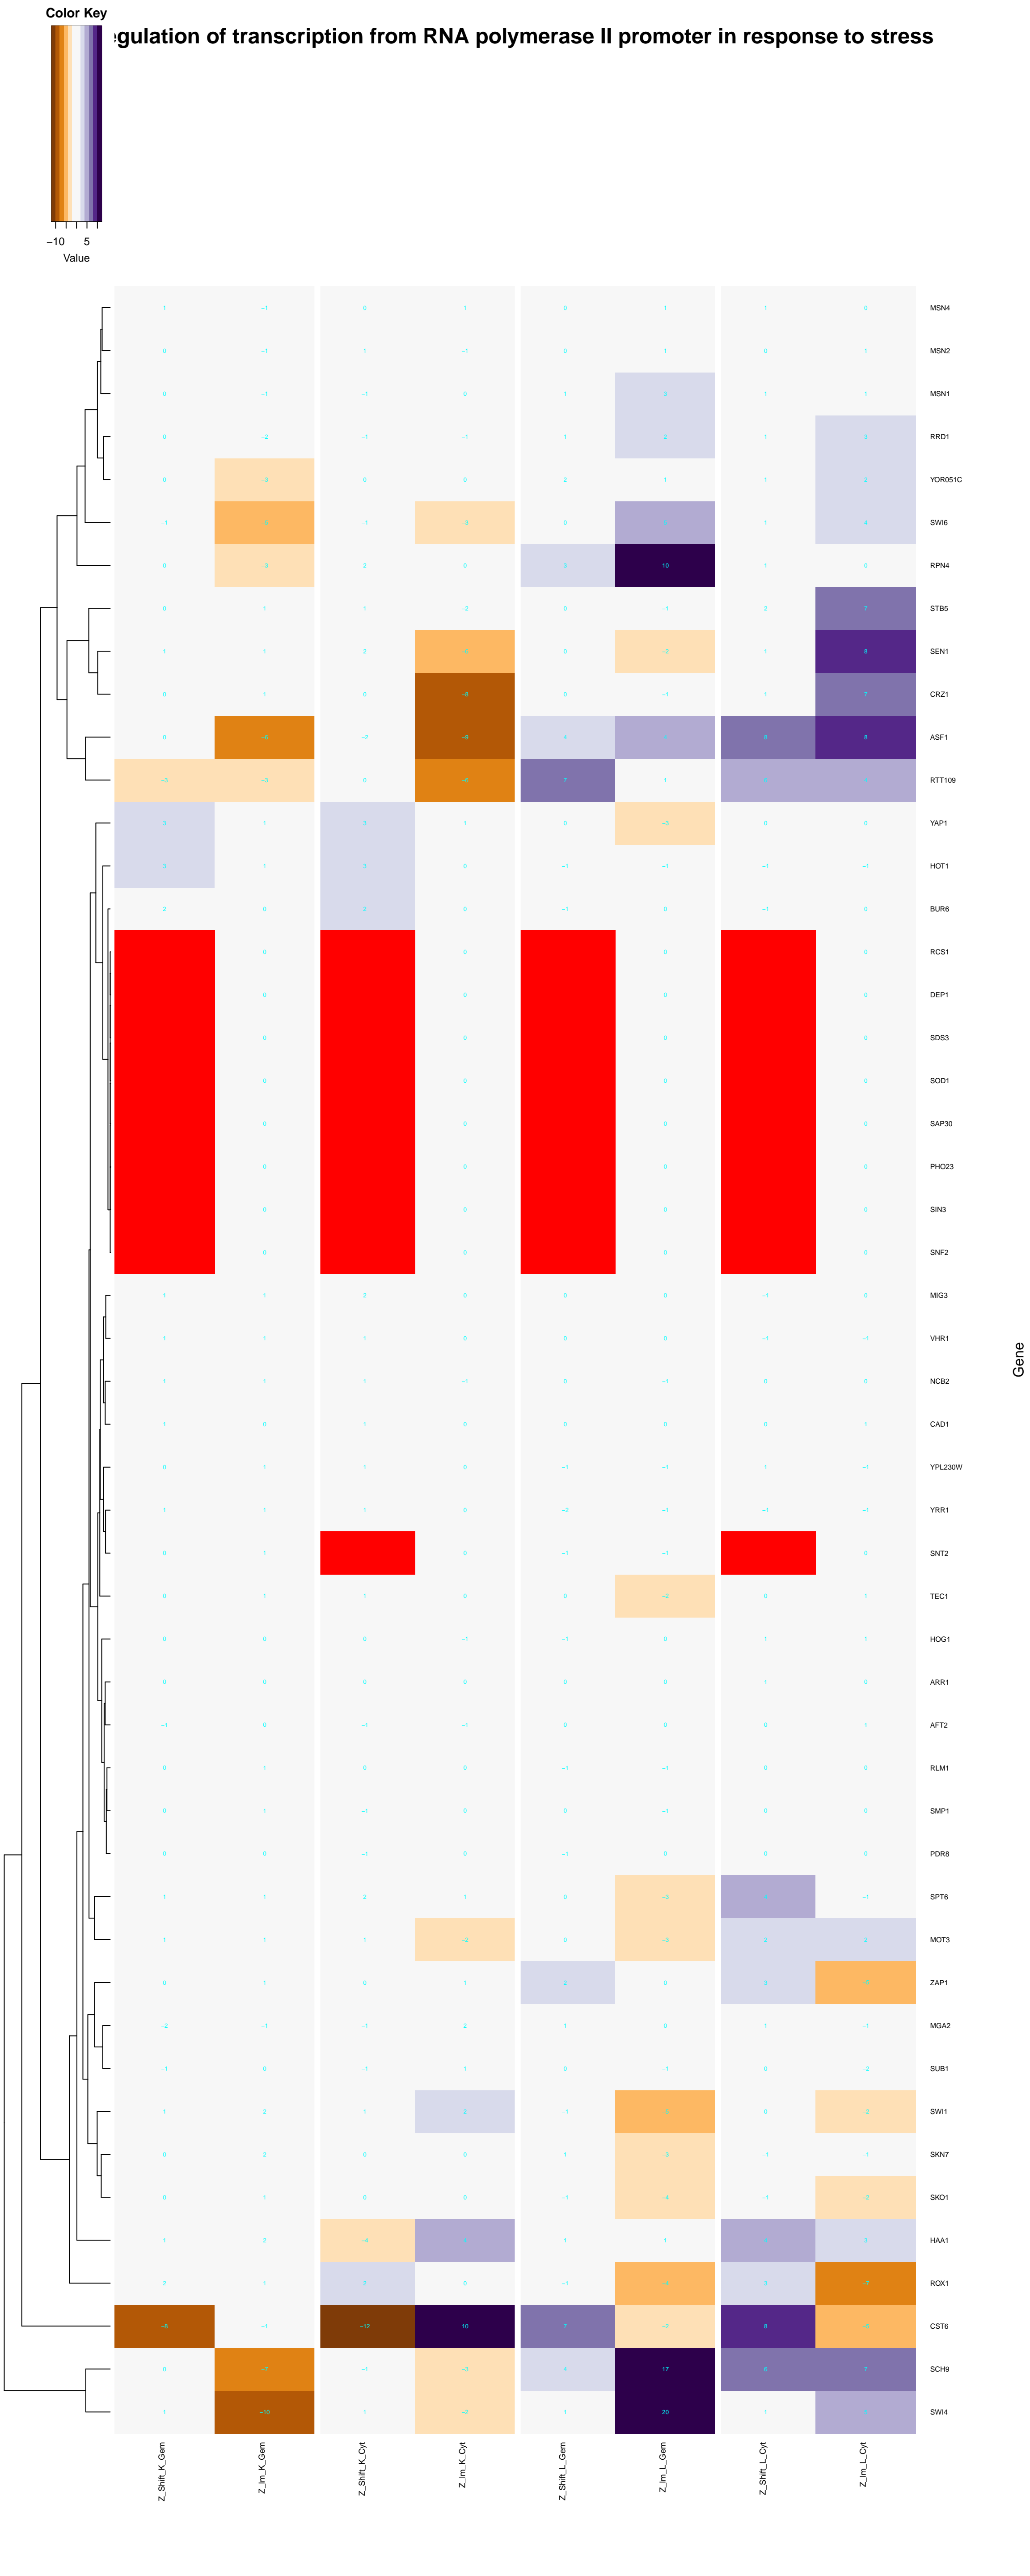



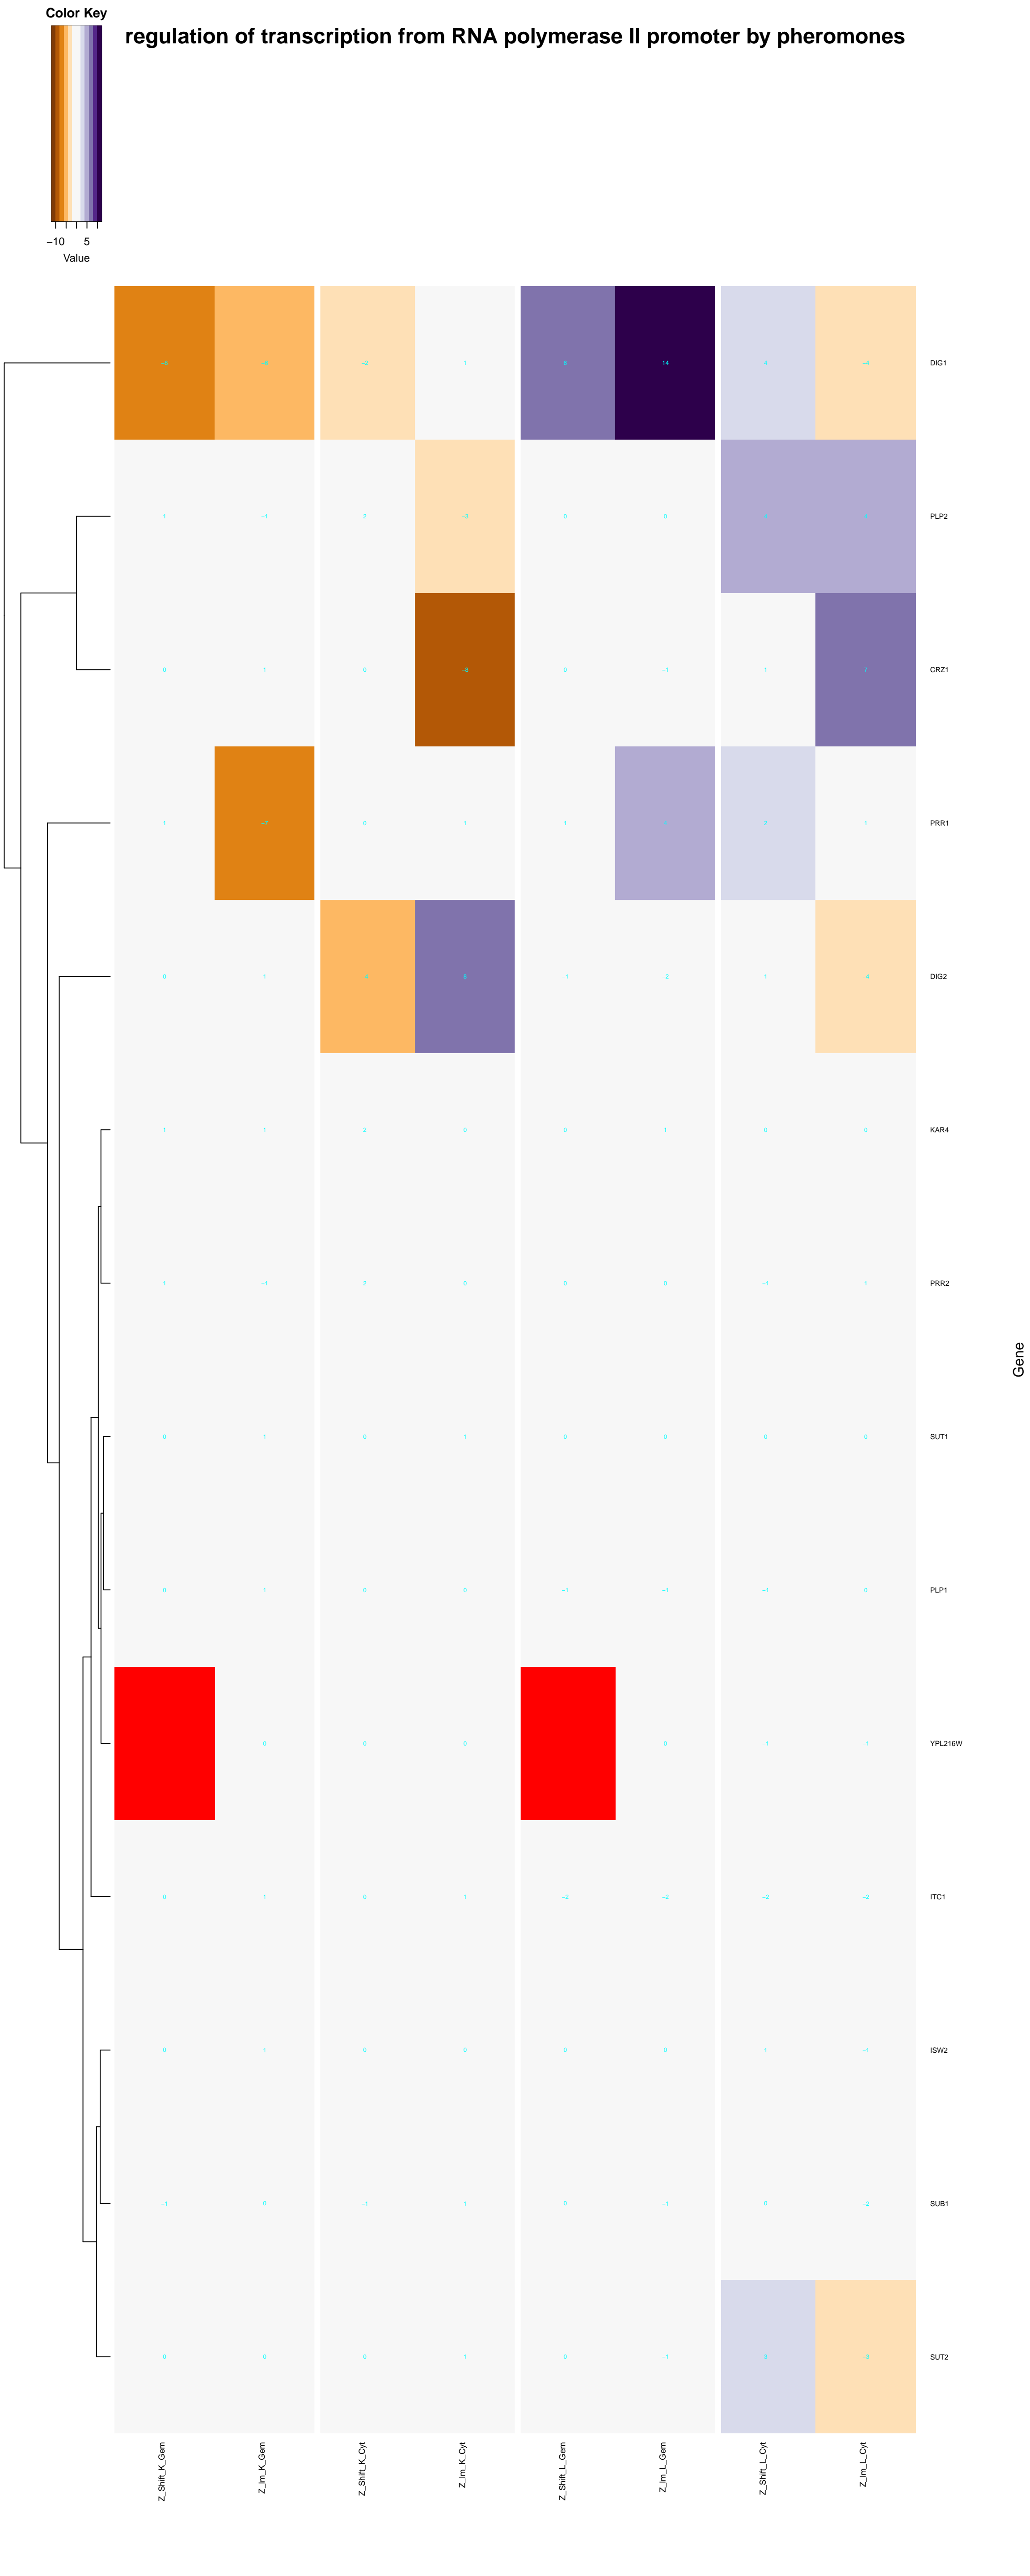

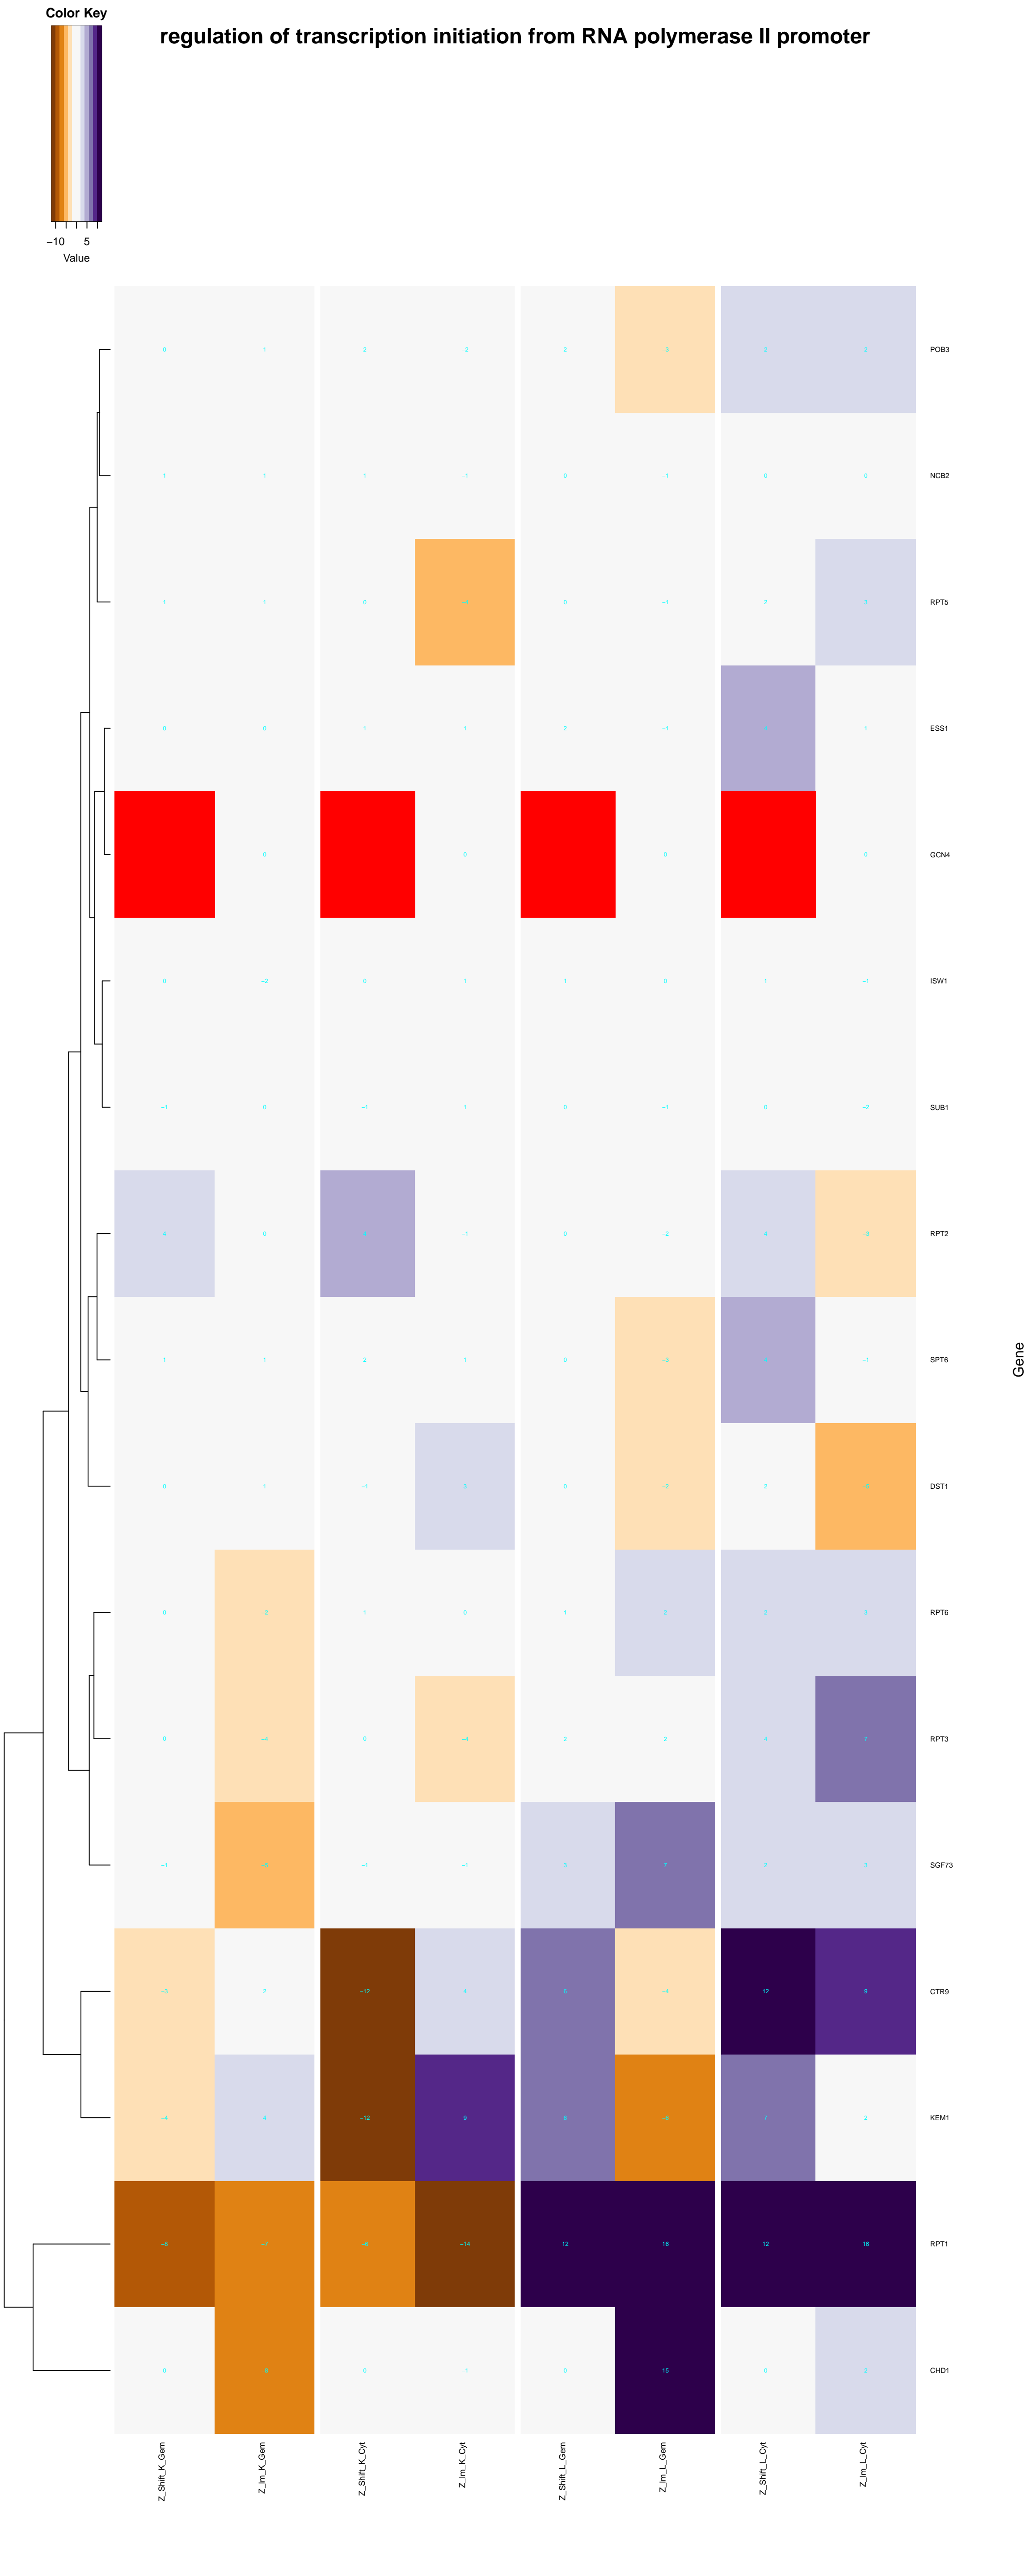

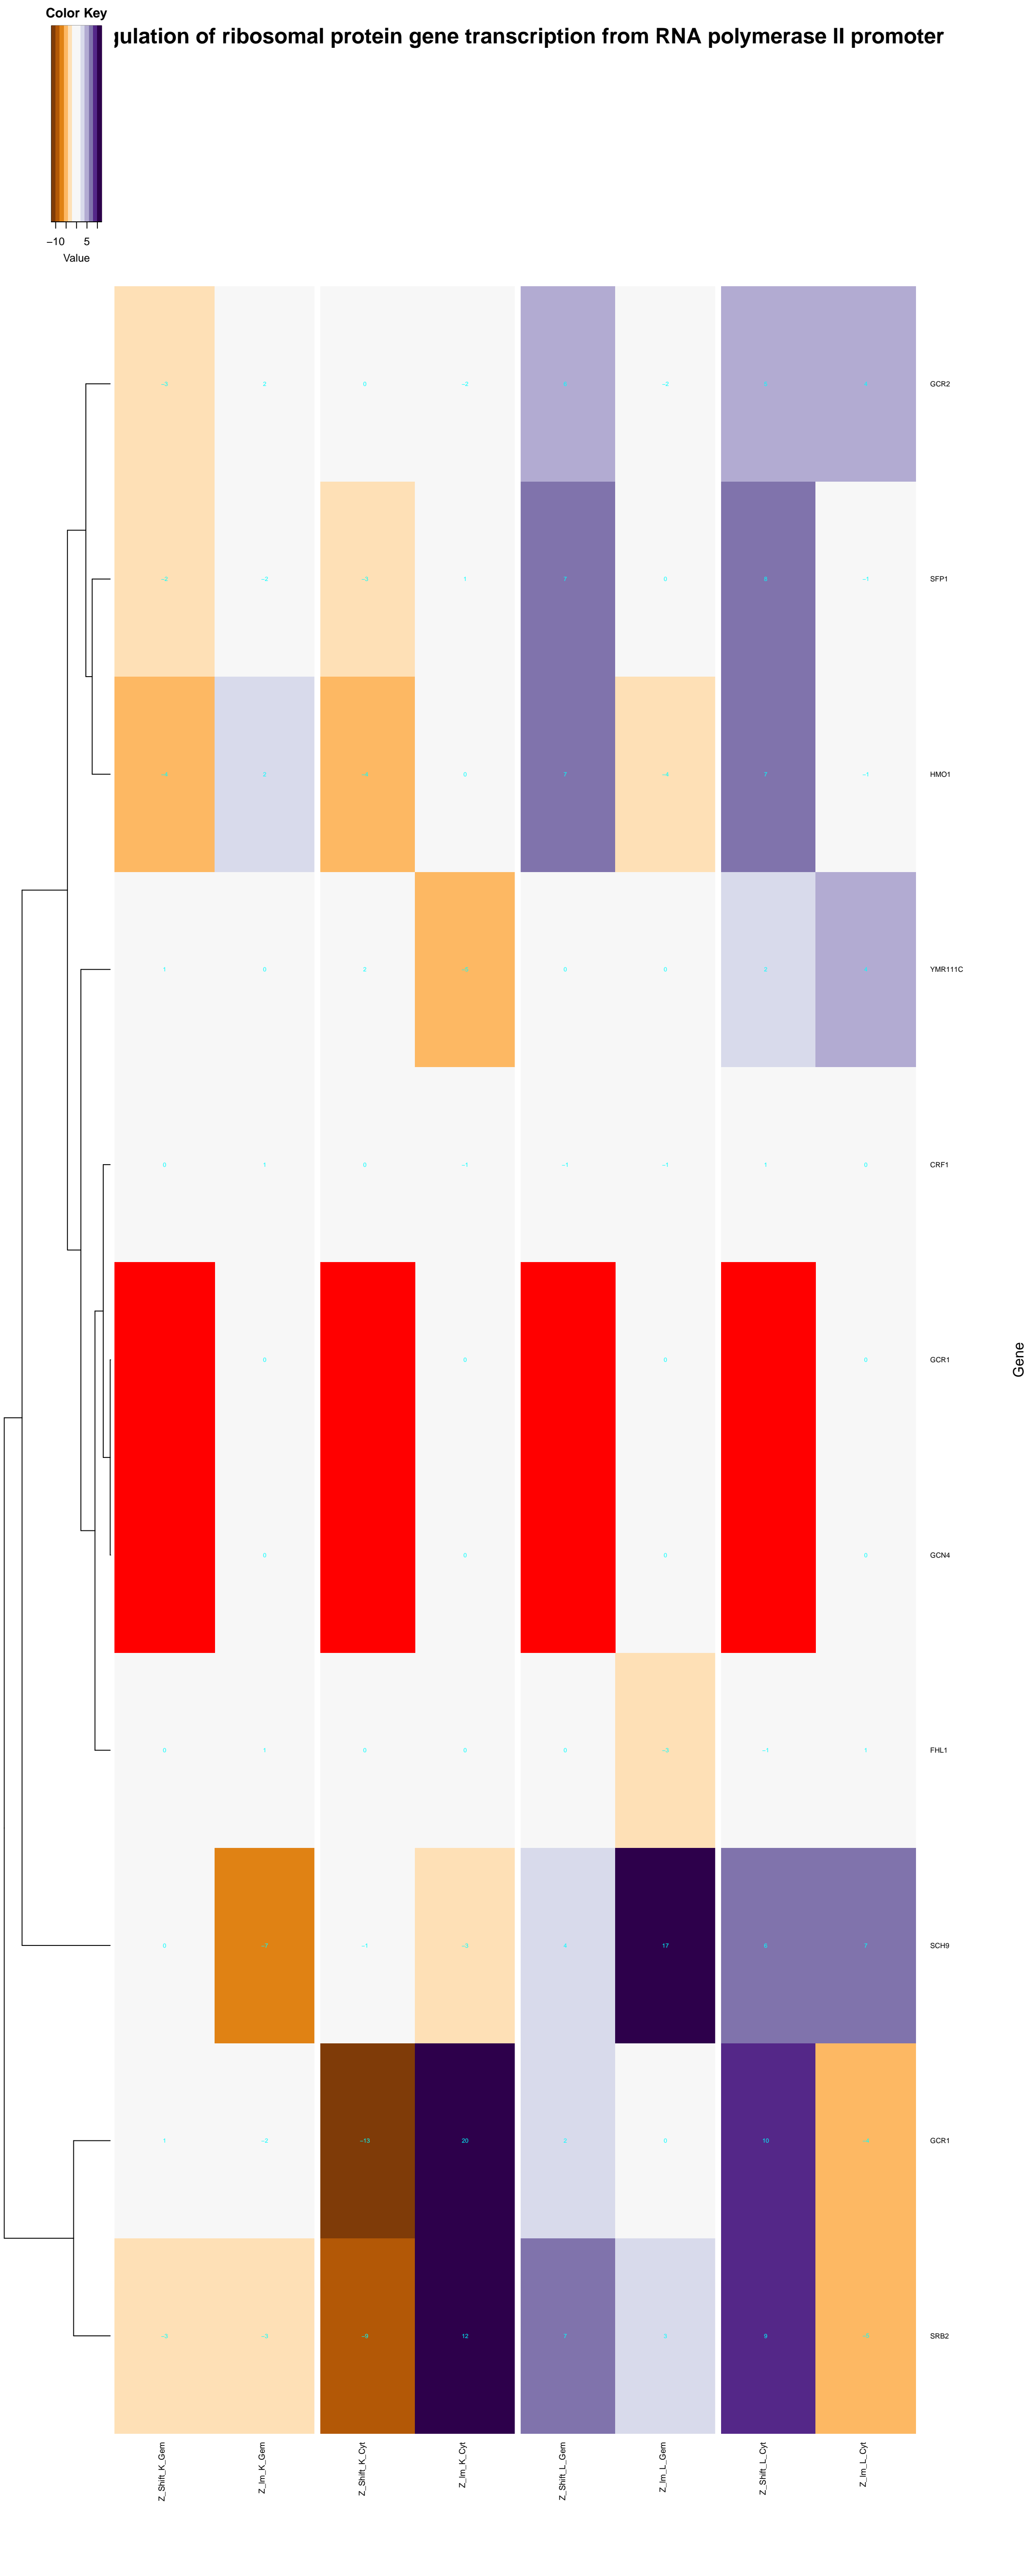

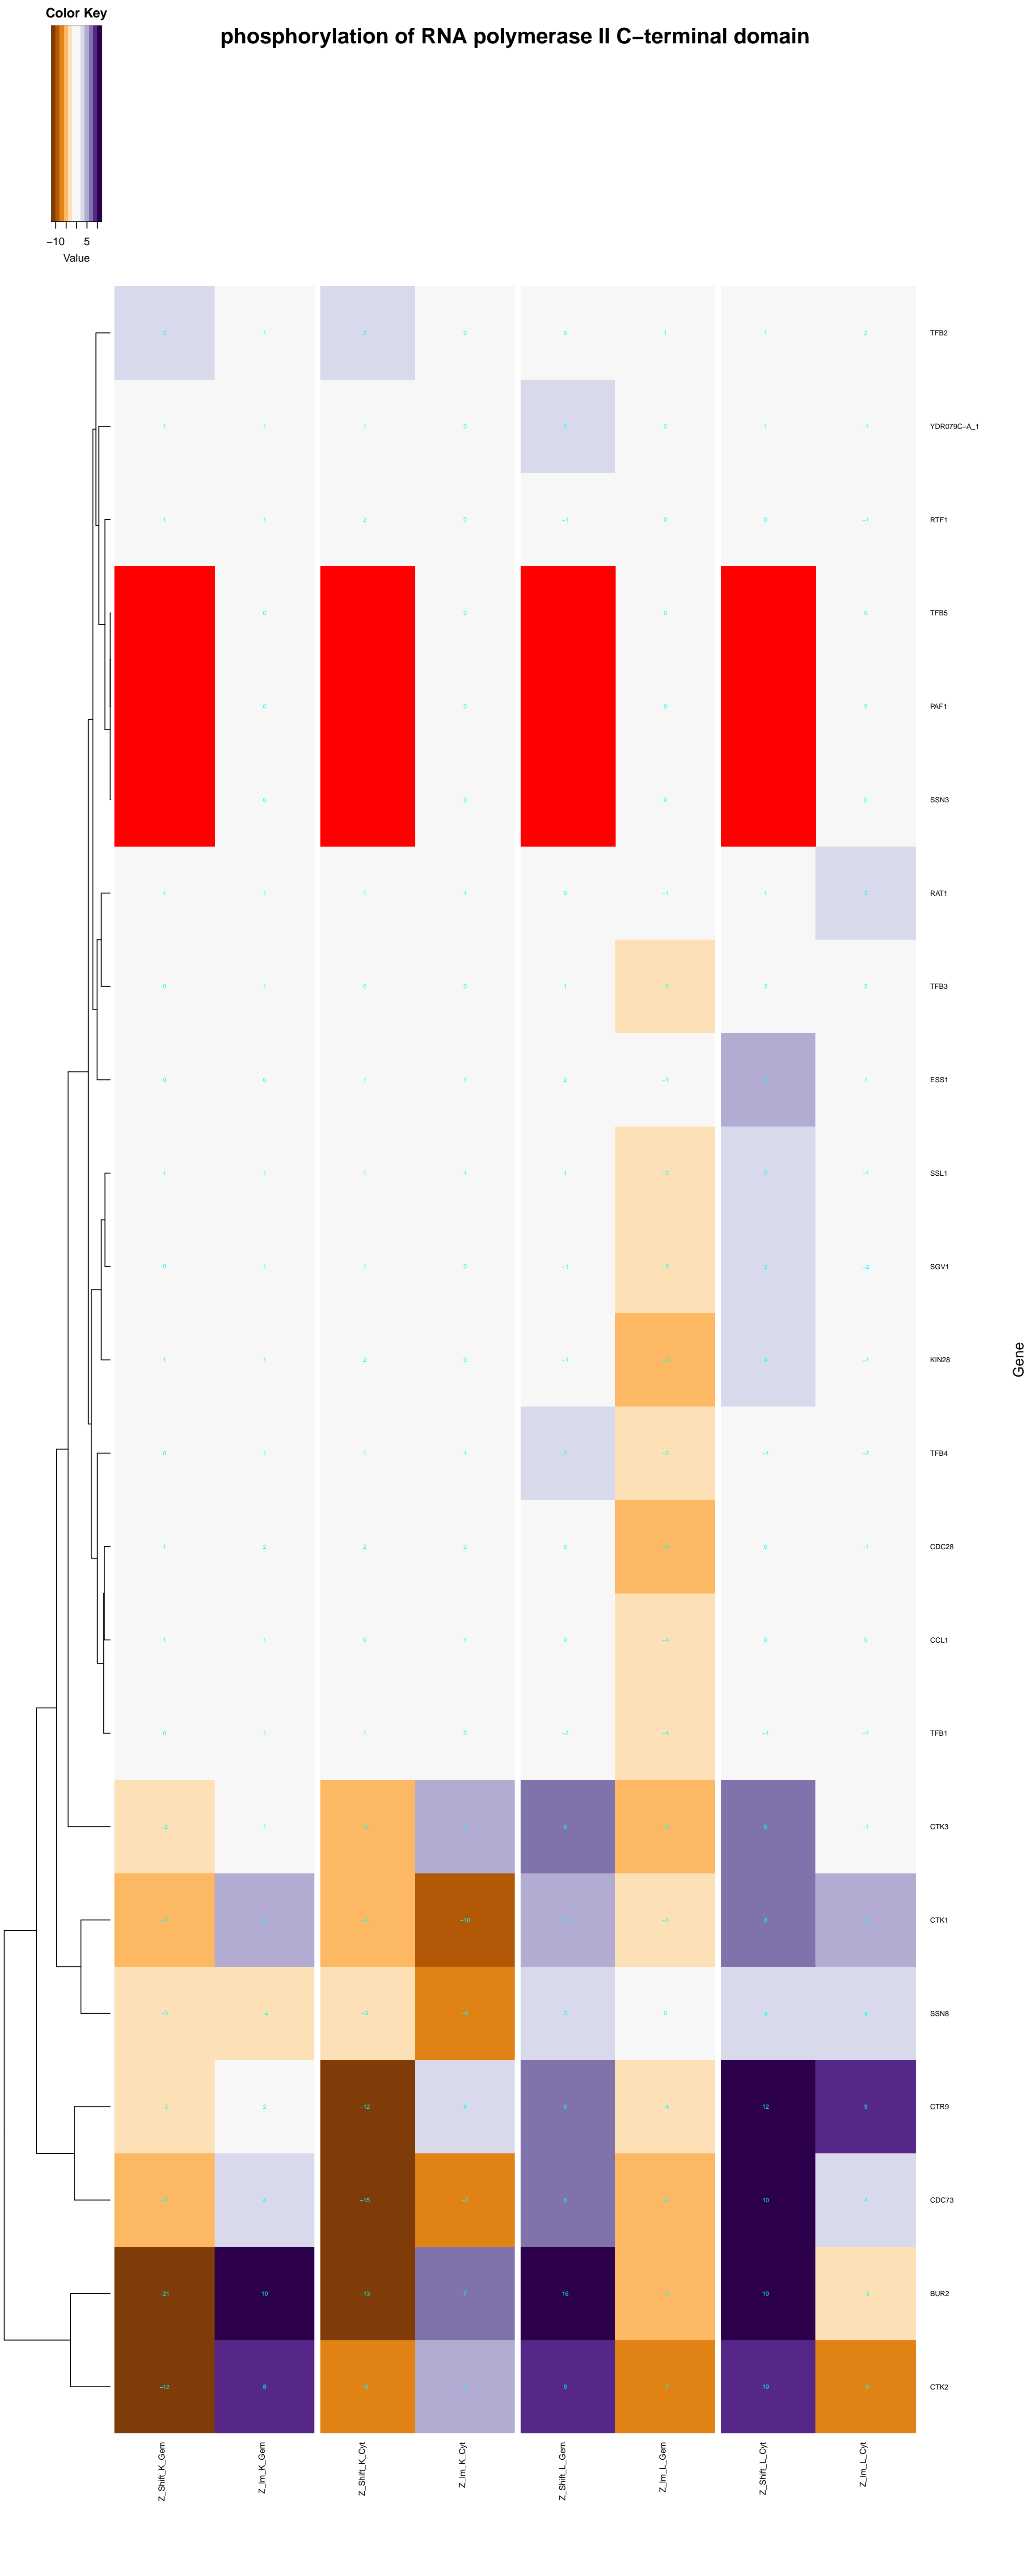

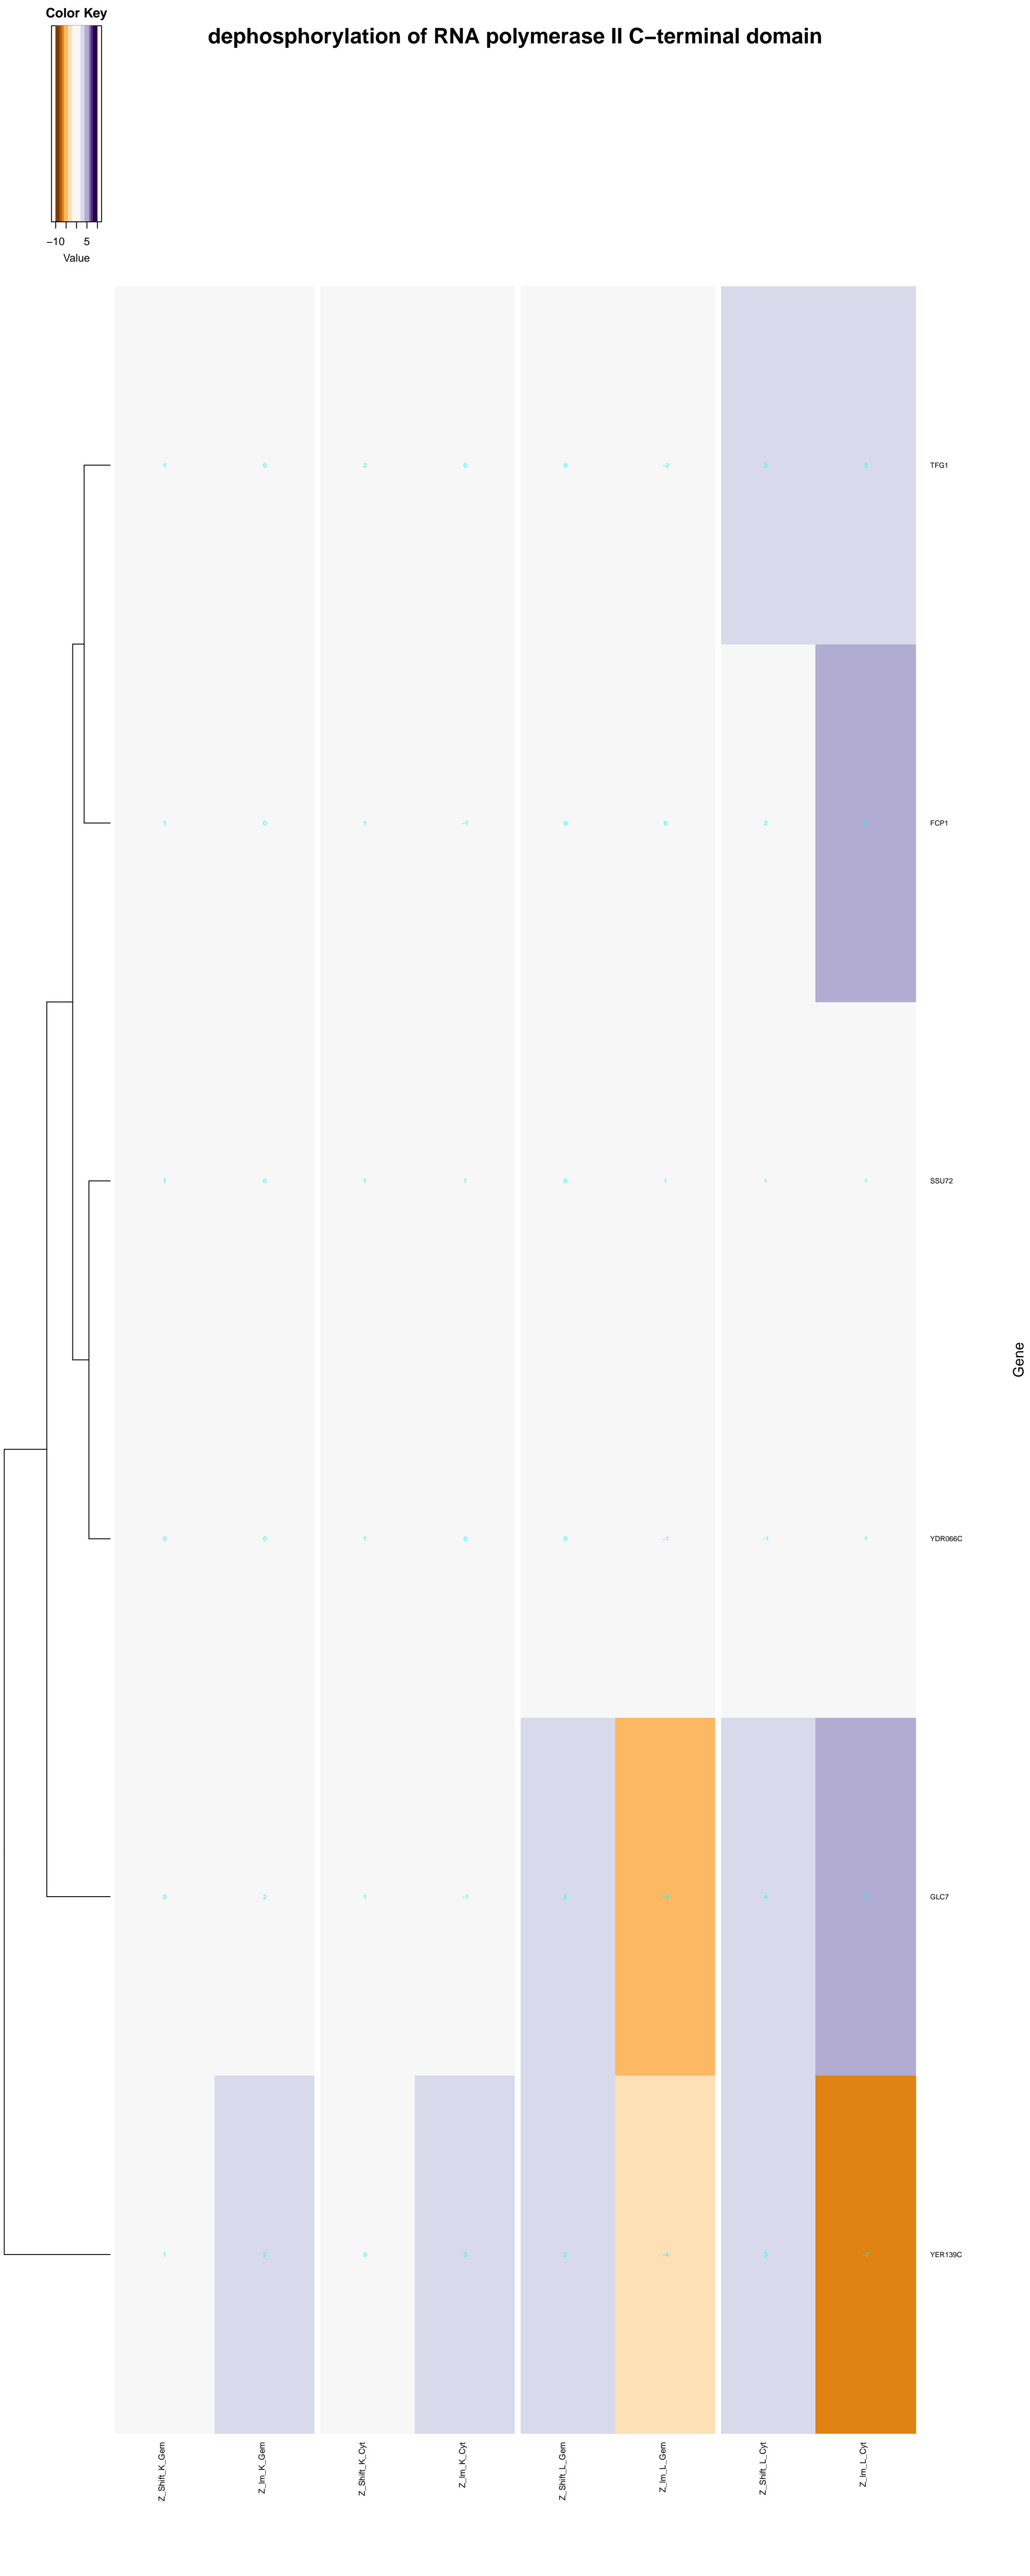

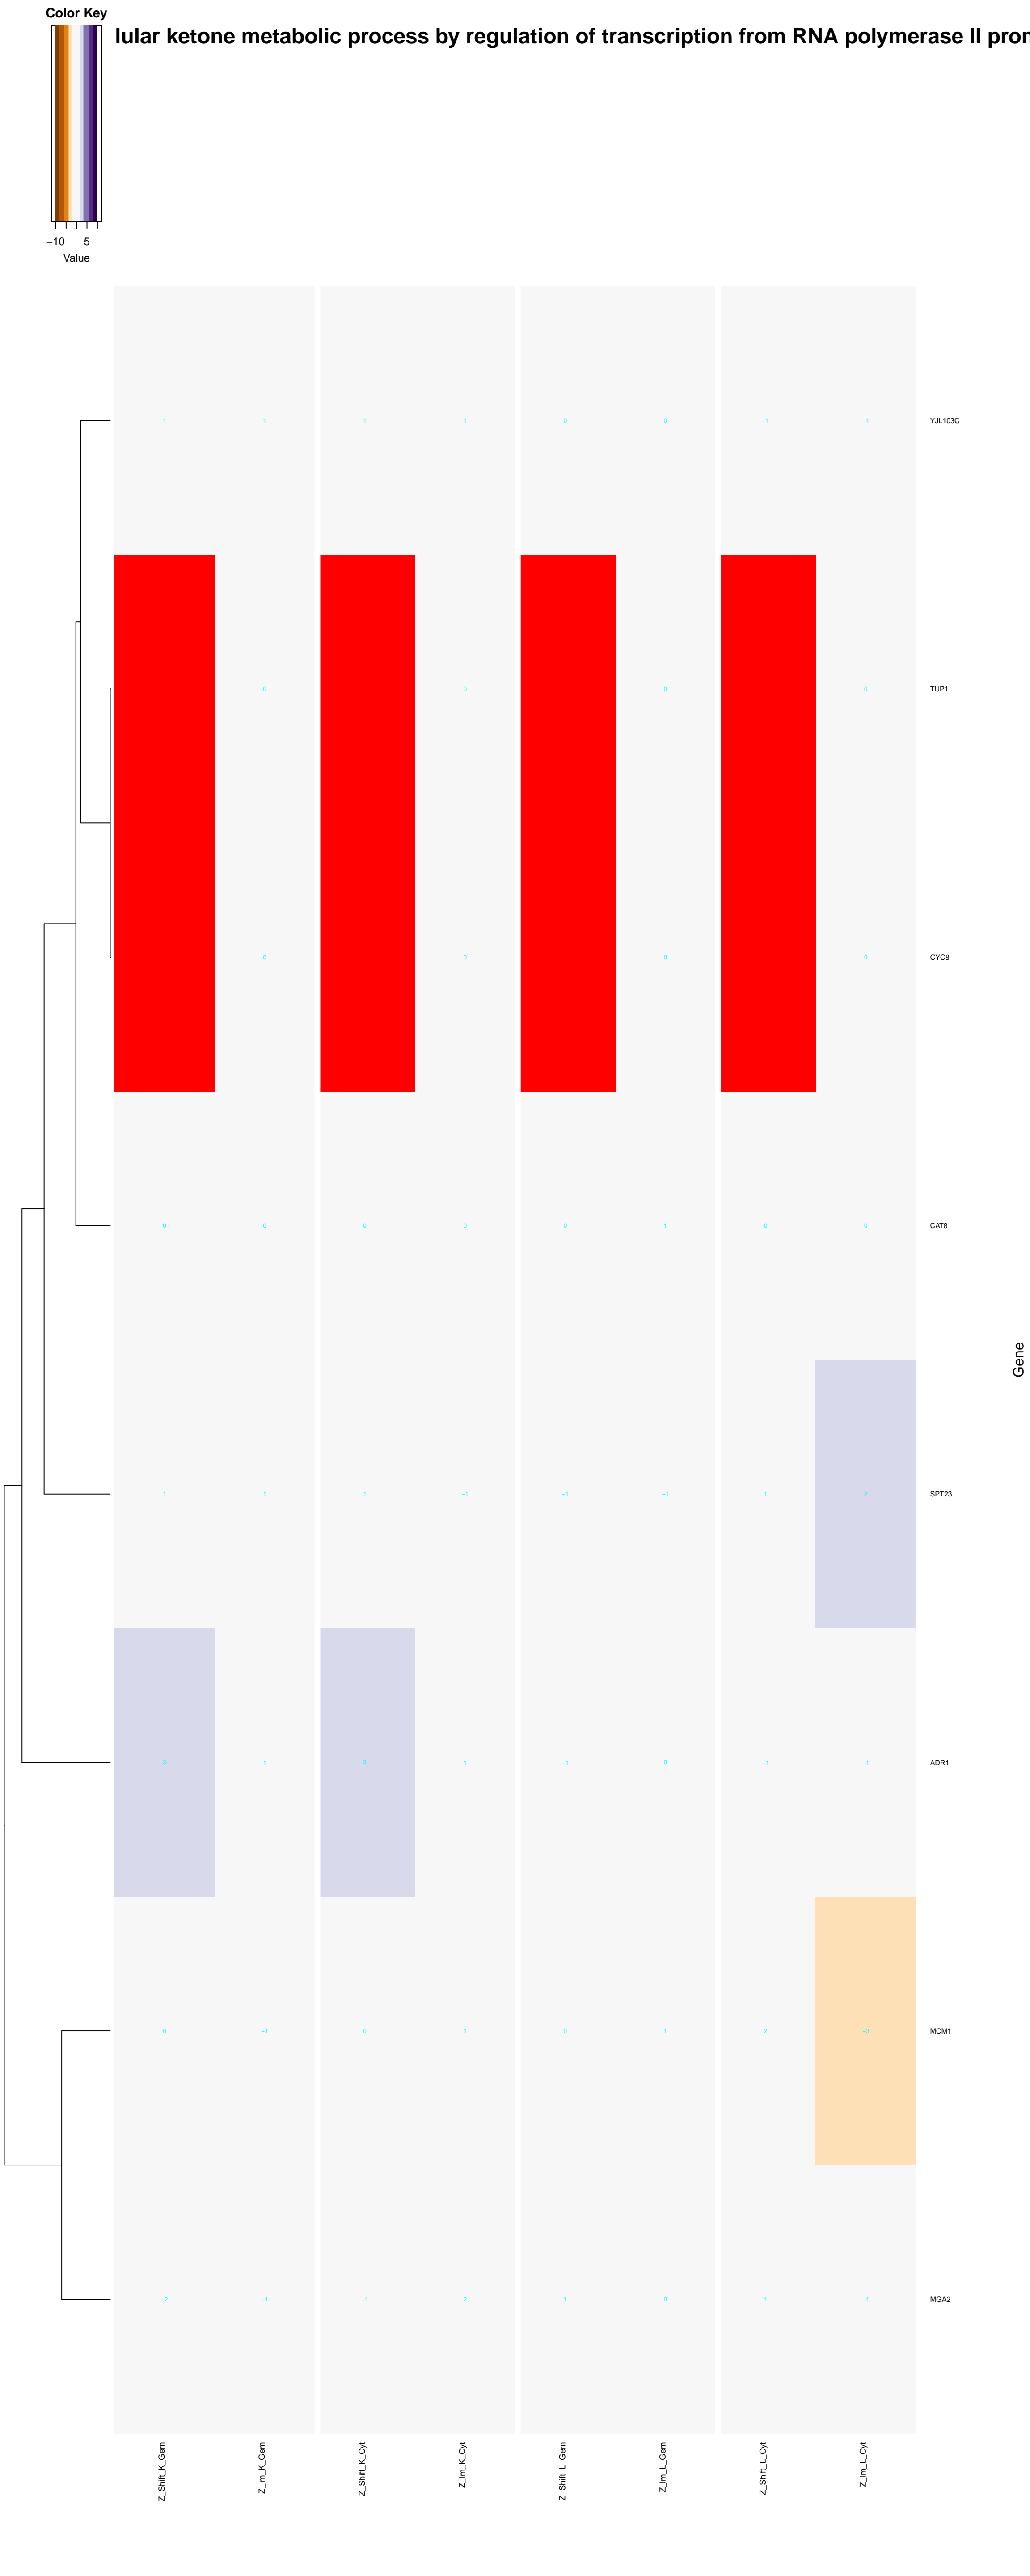



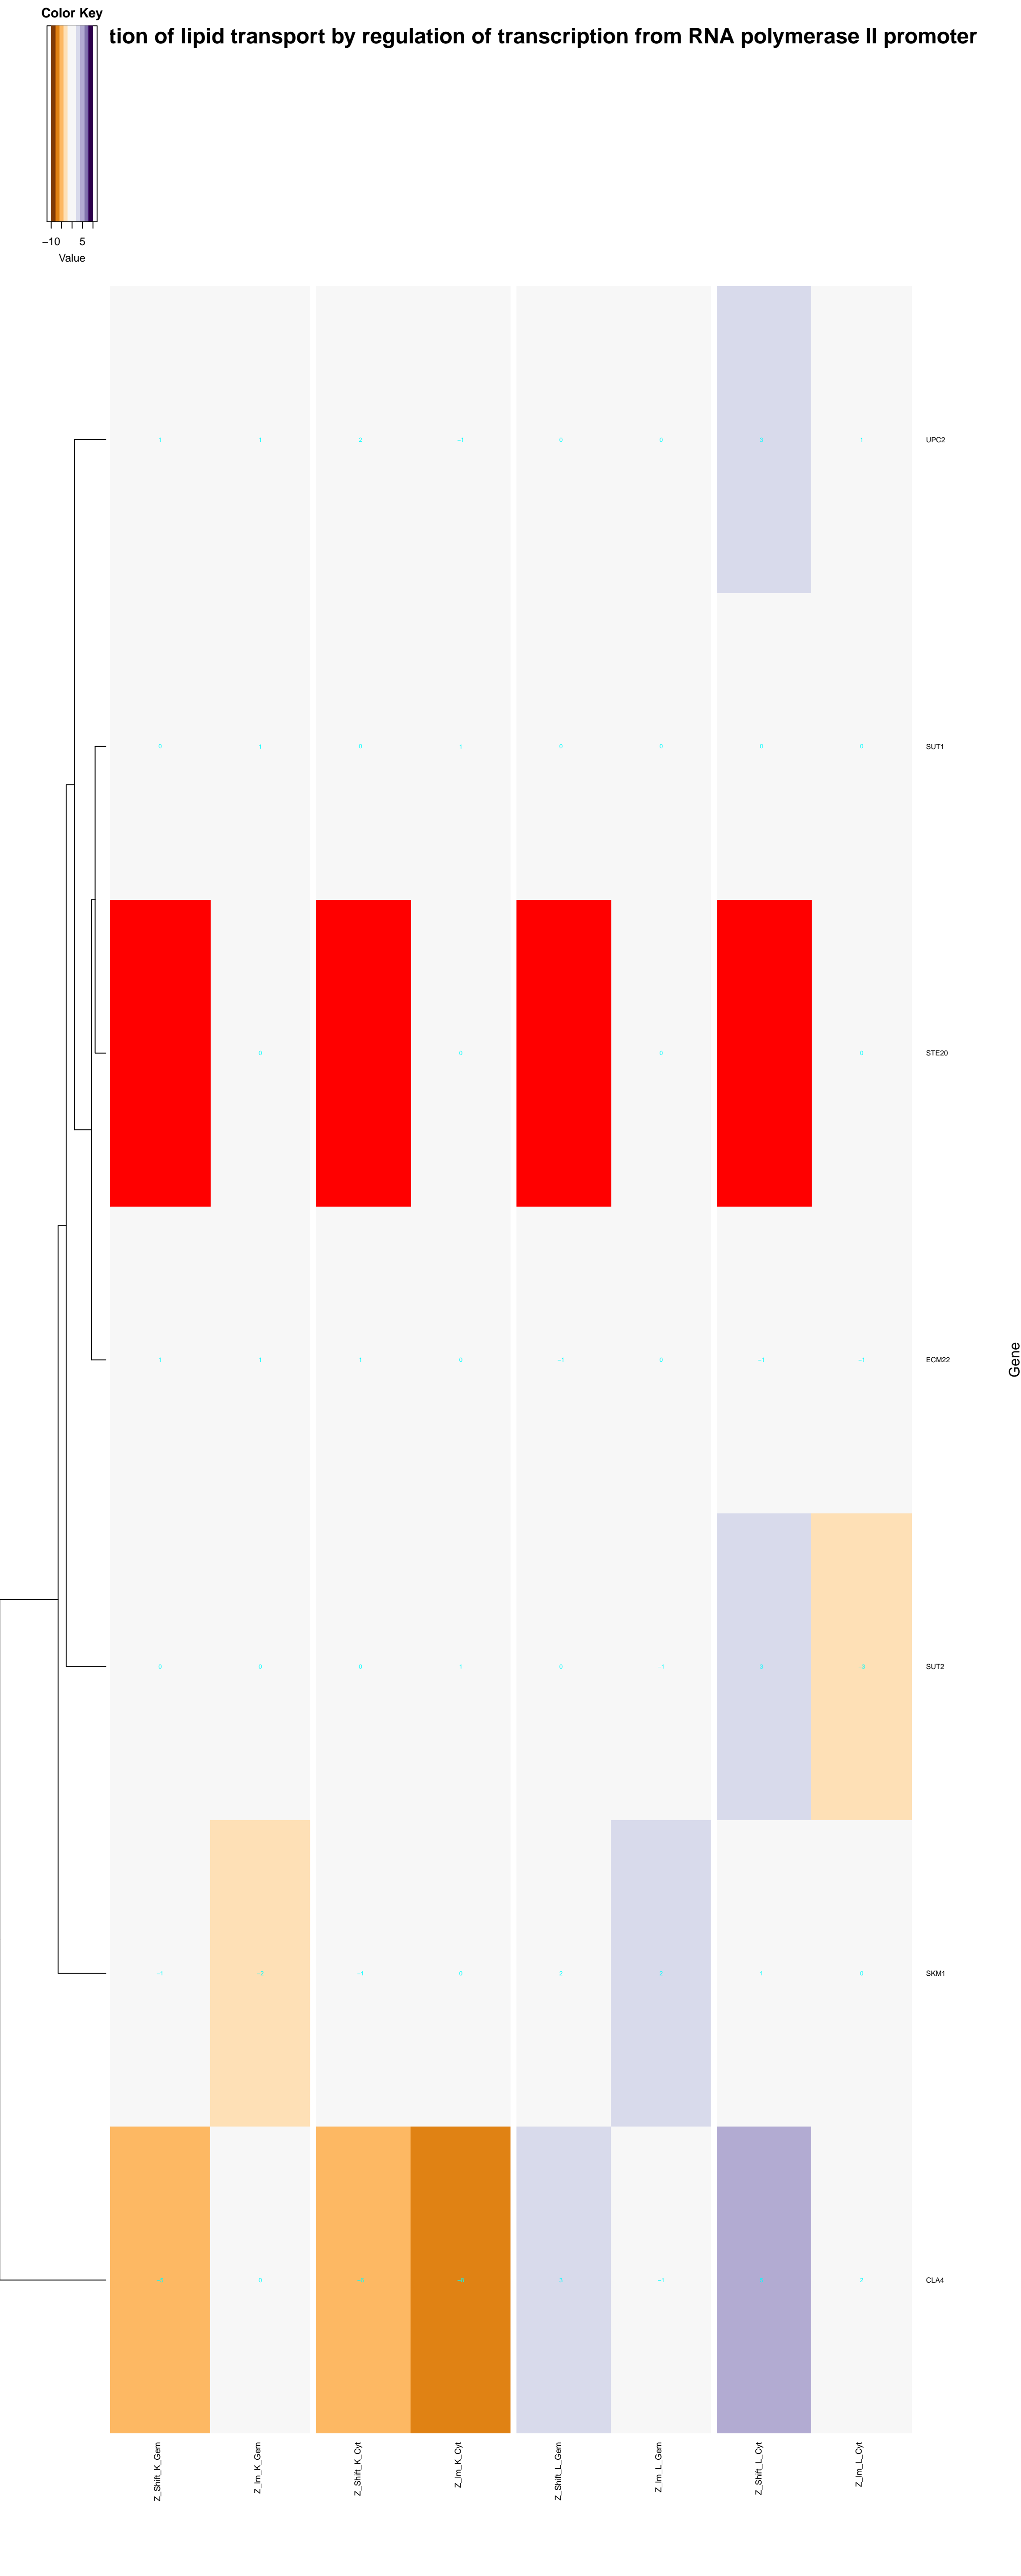

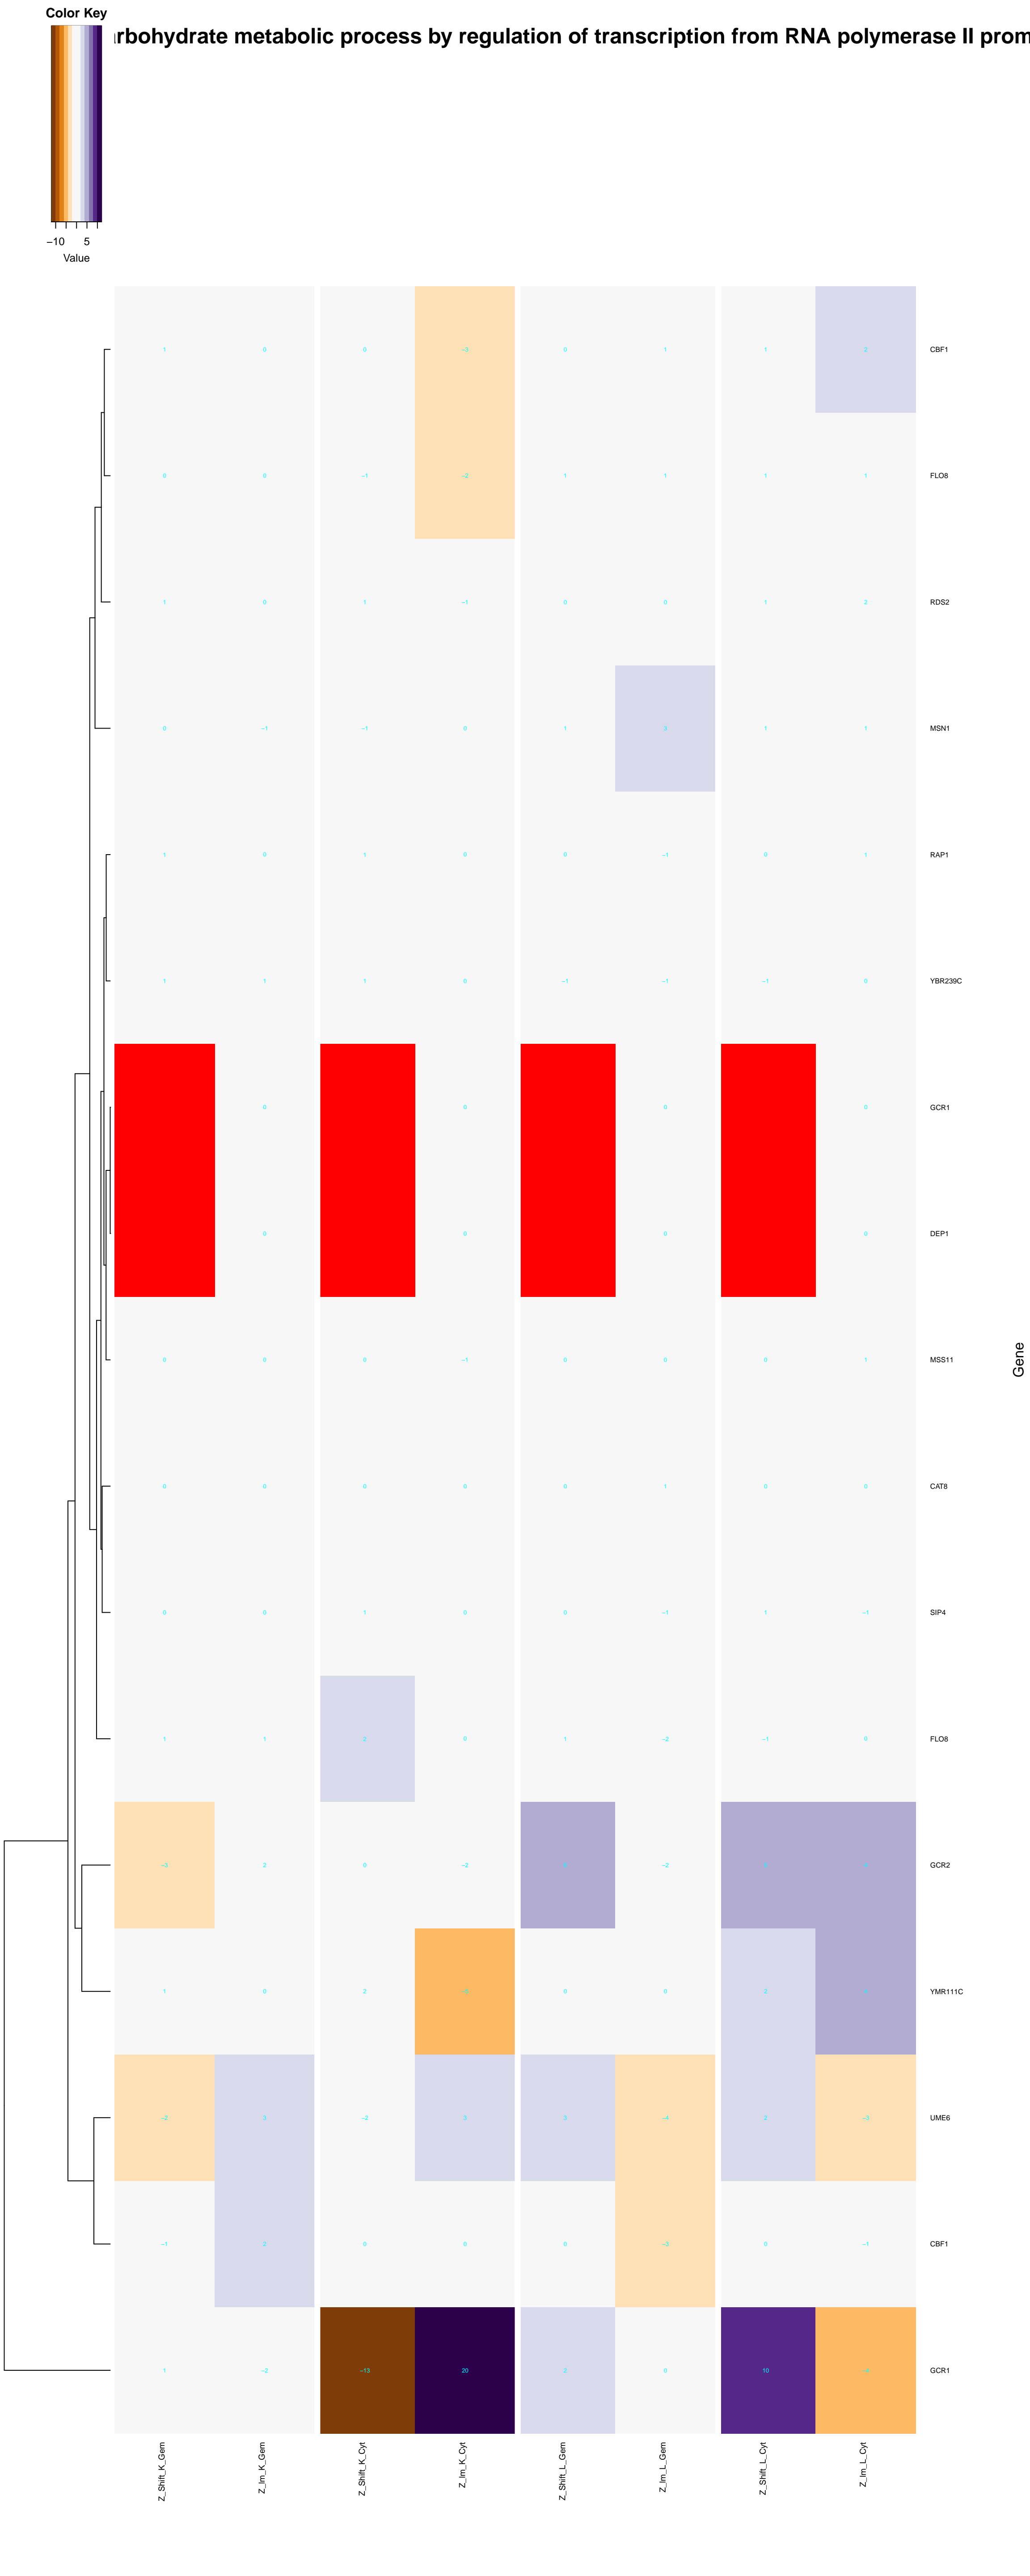

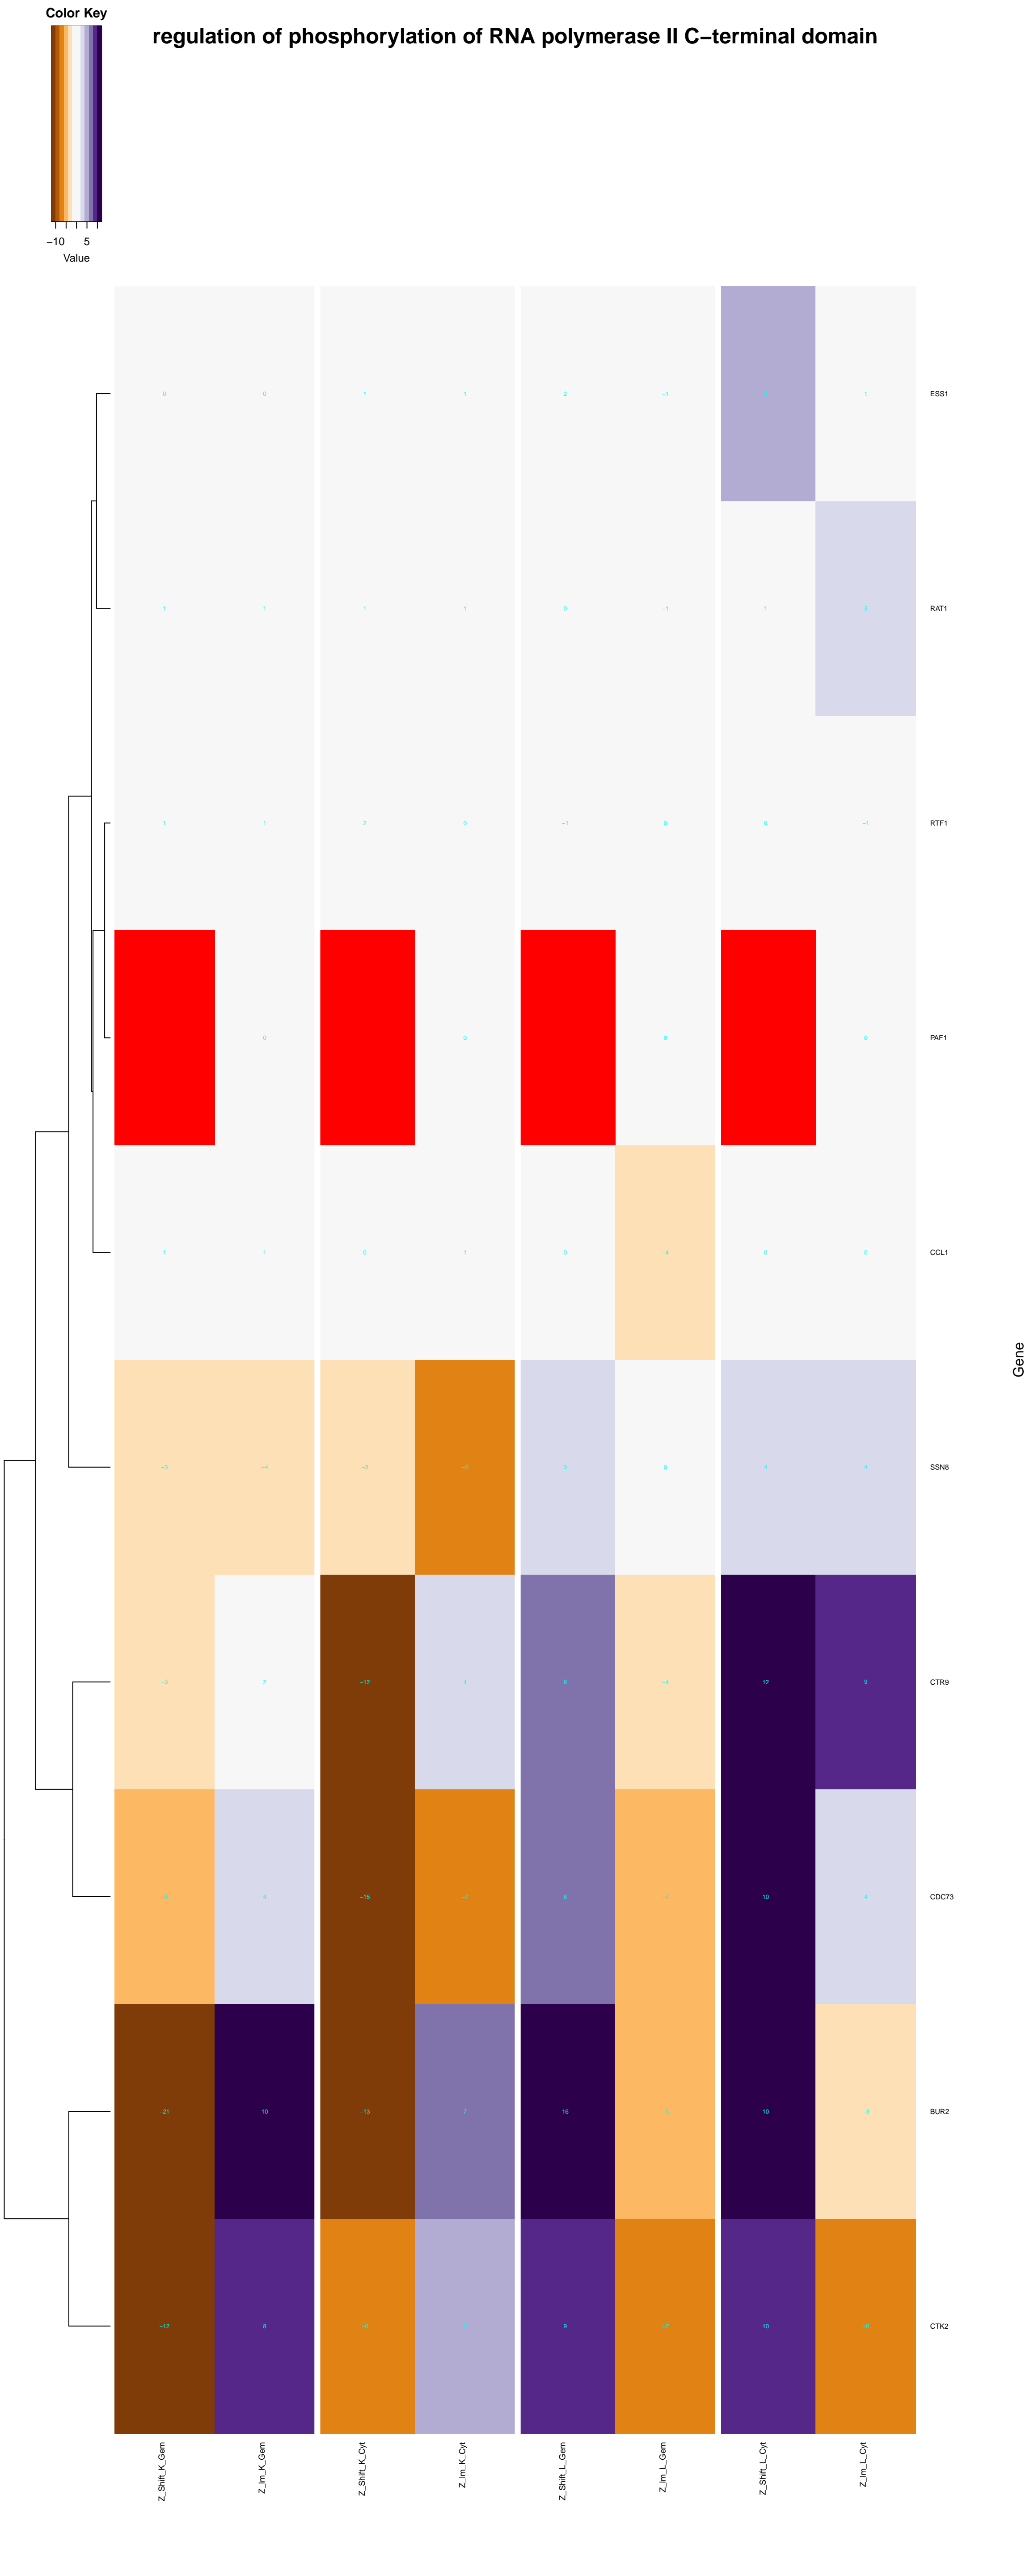



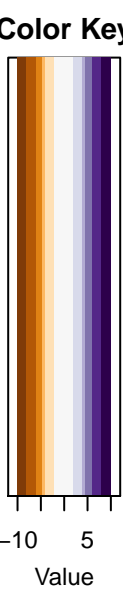

egulation of transcription from RNA polymerase II promoter involved in meiotic cell cycle

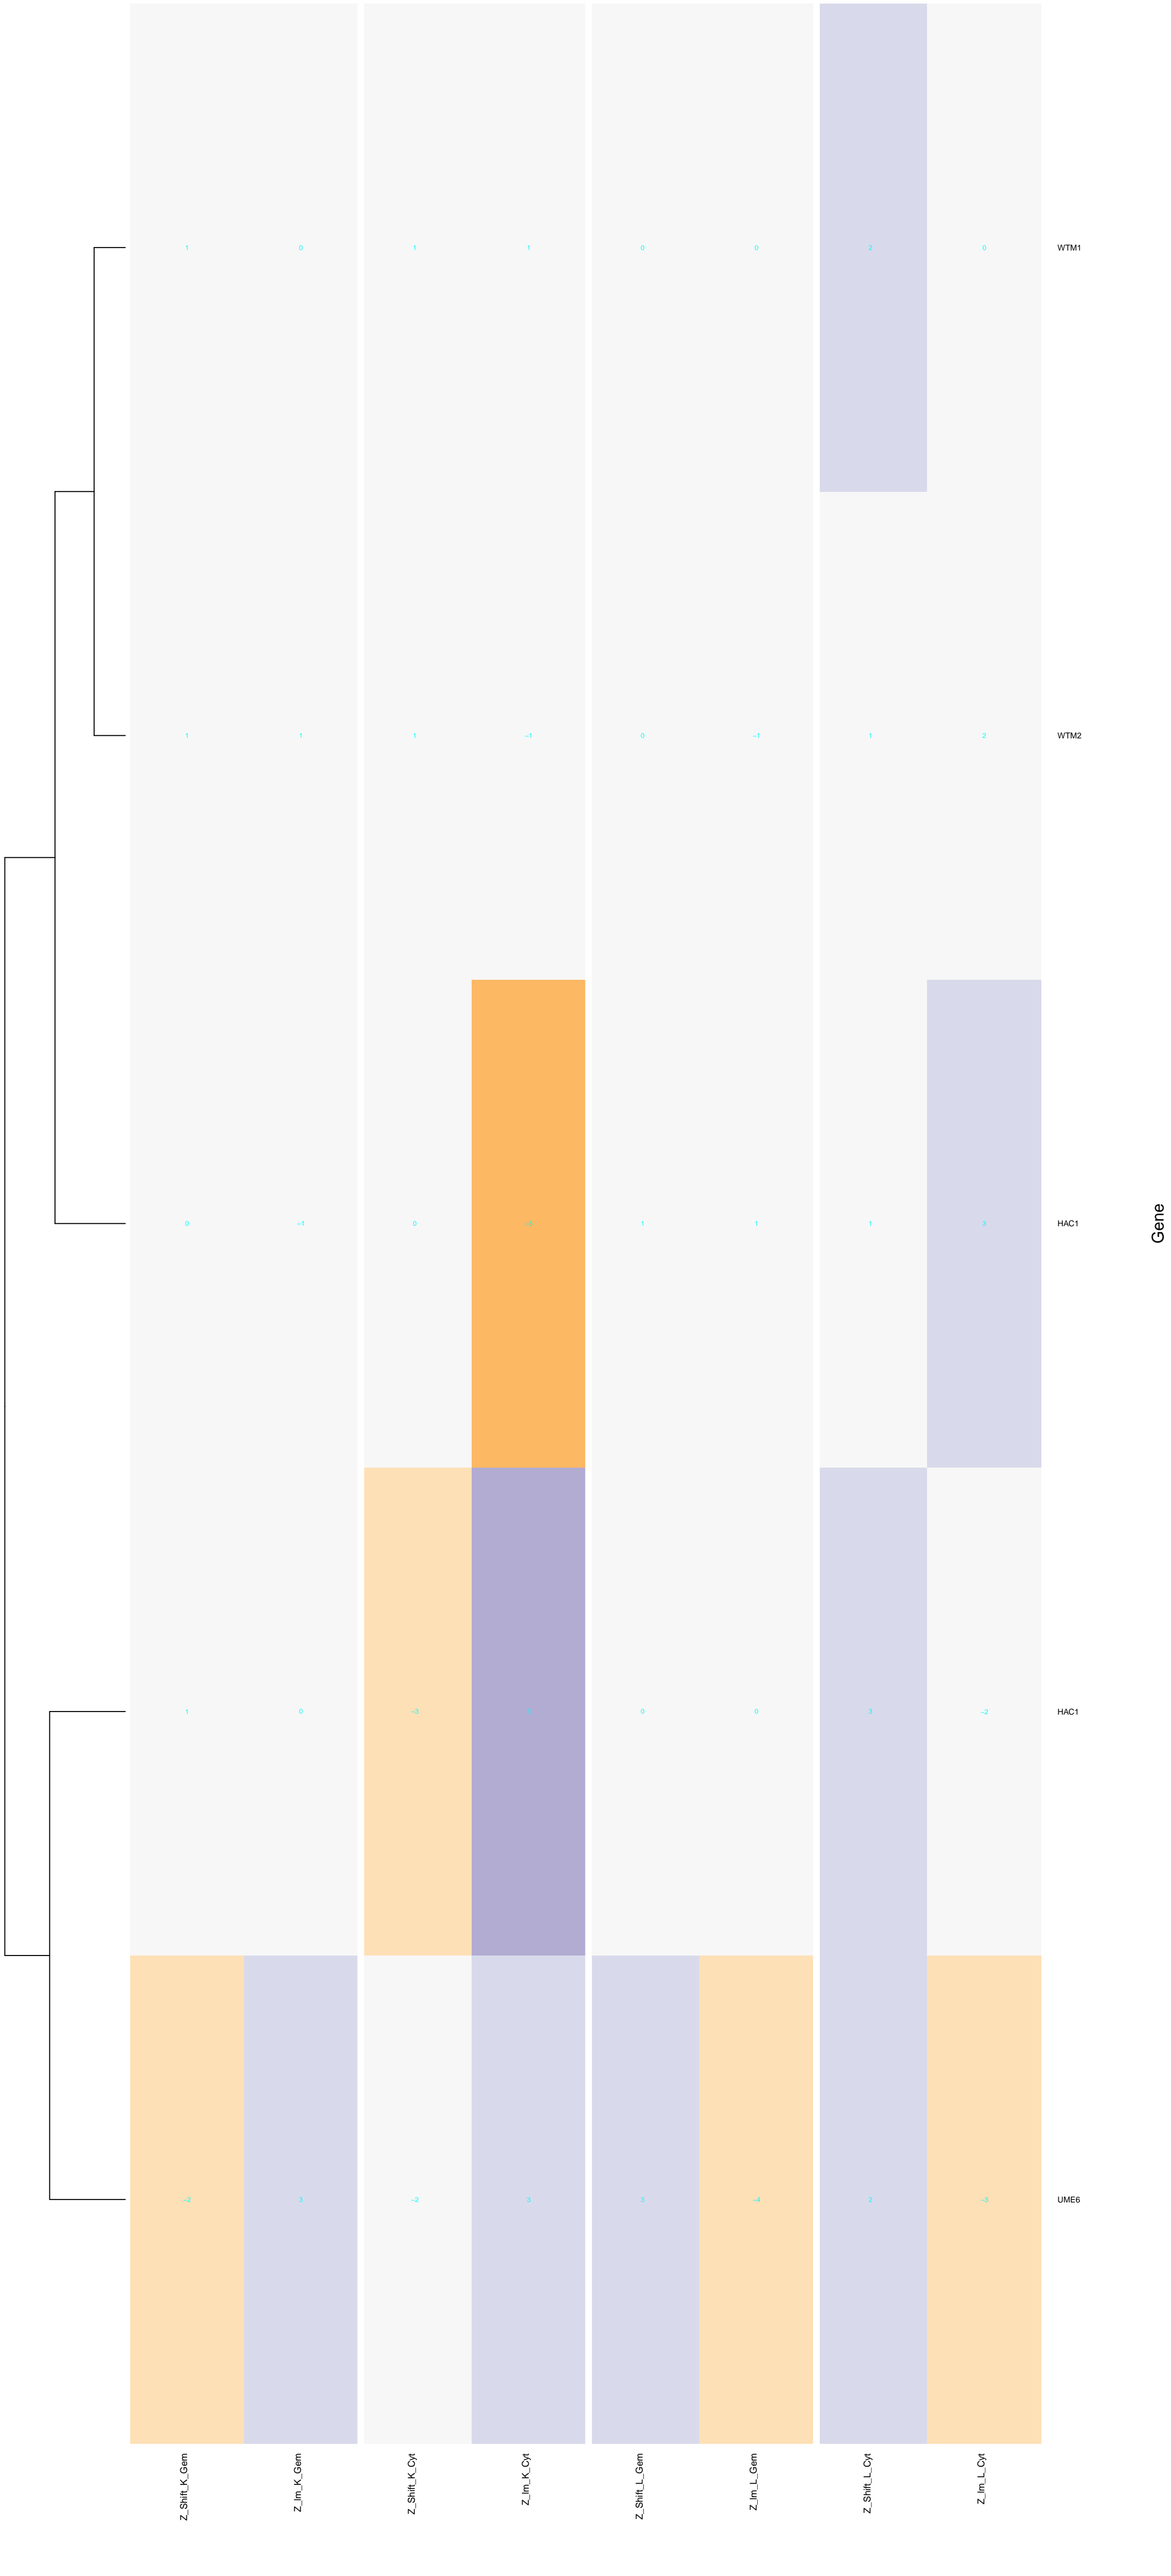

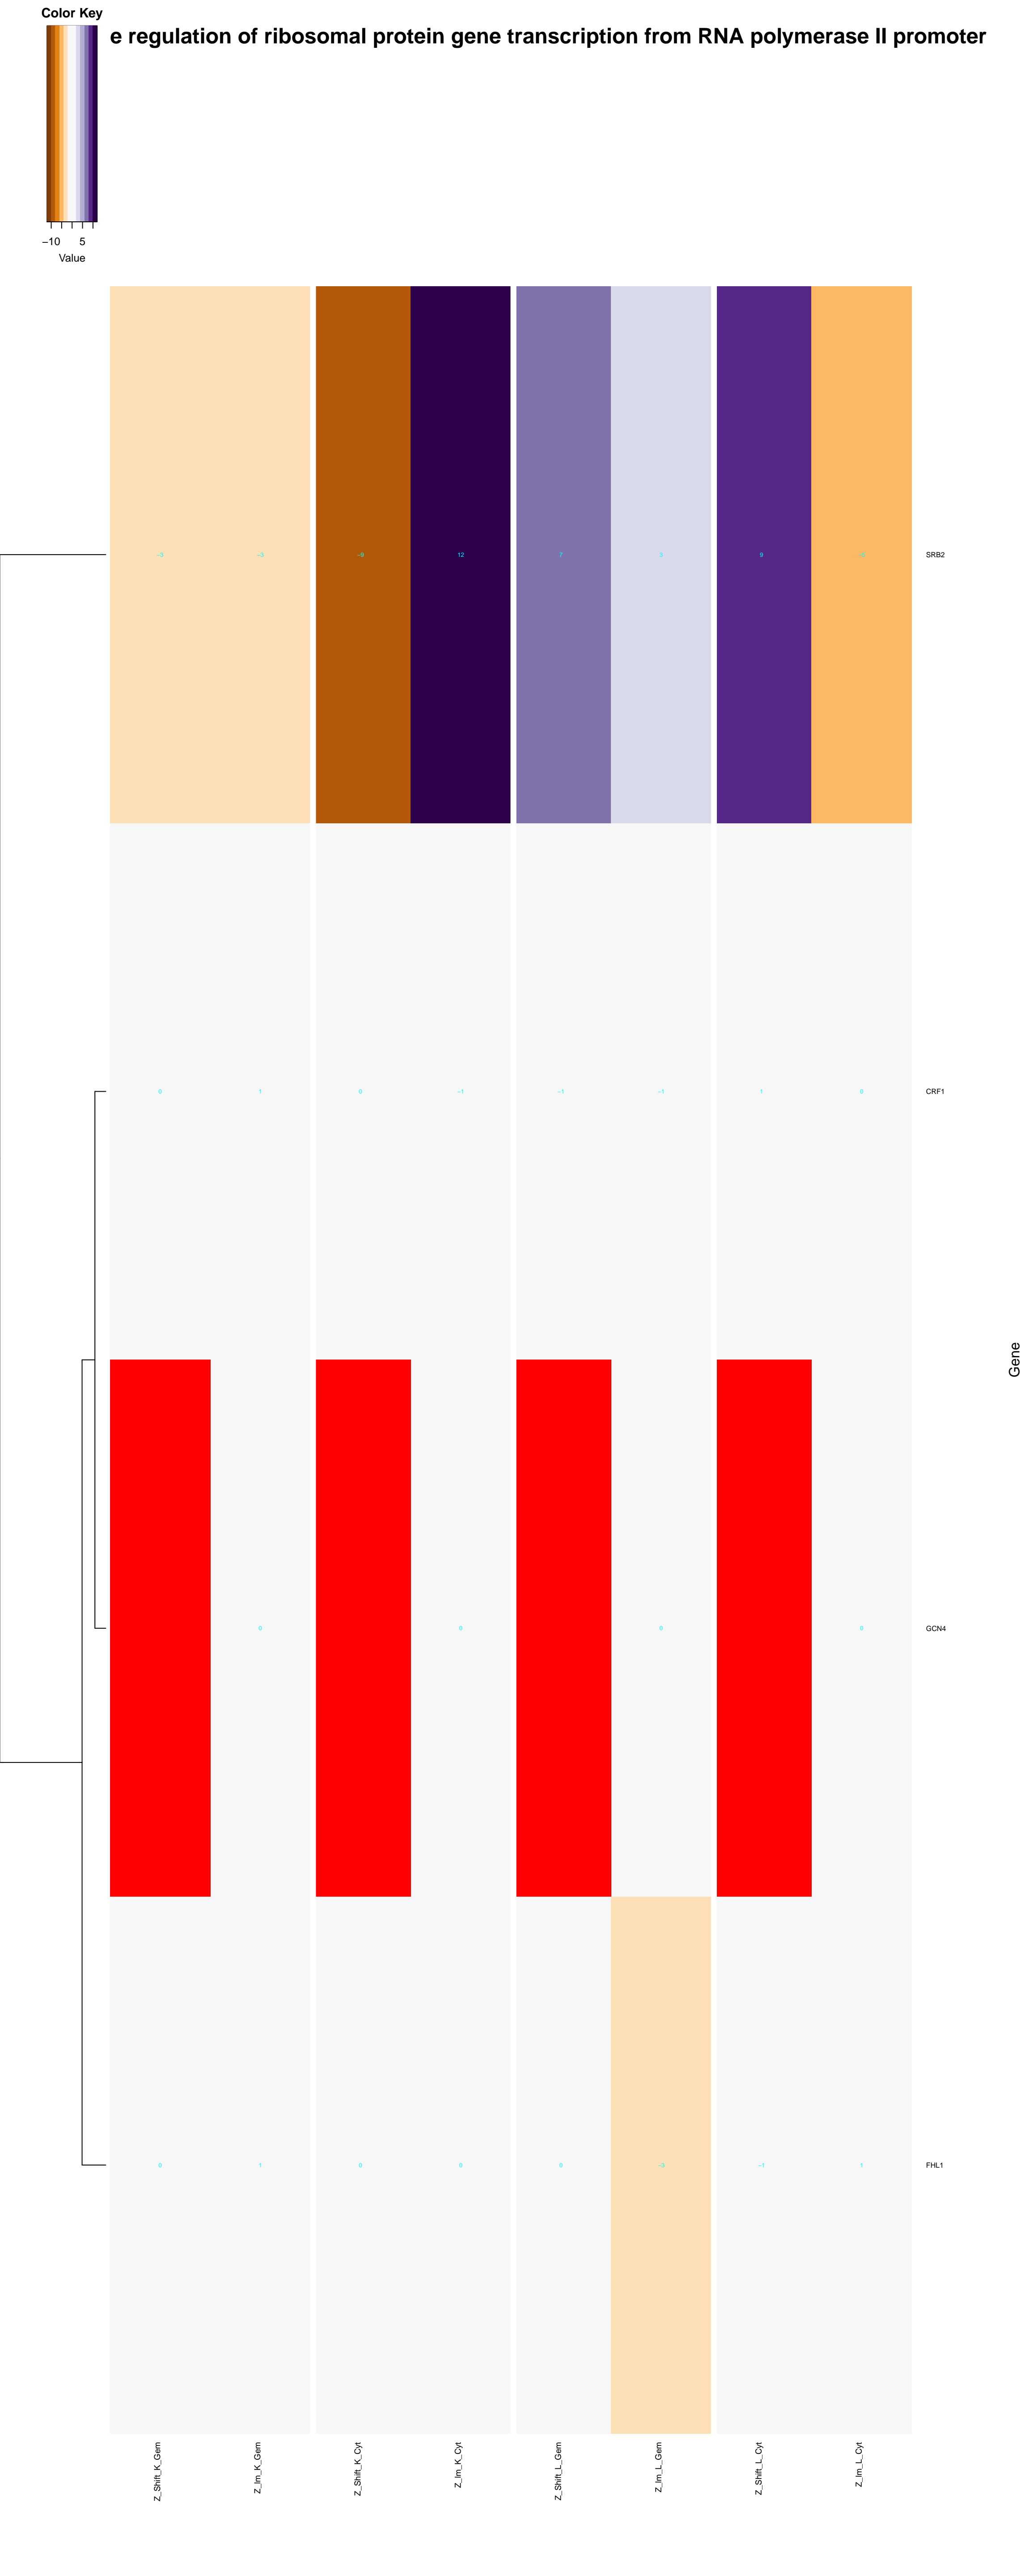

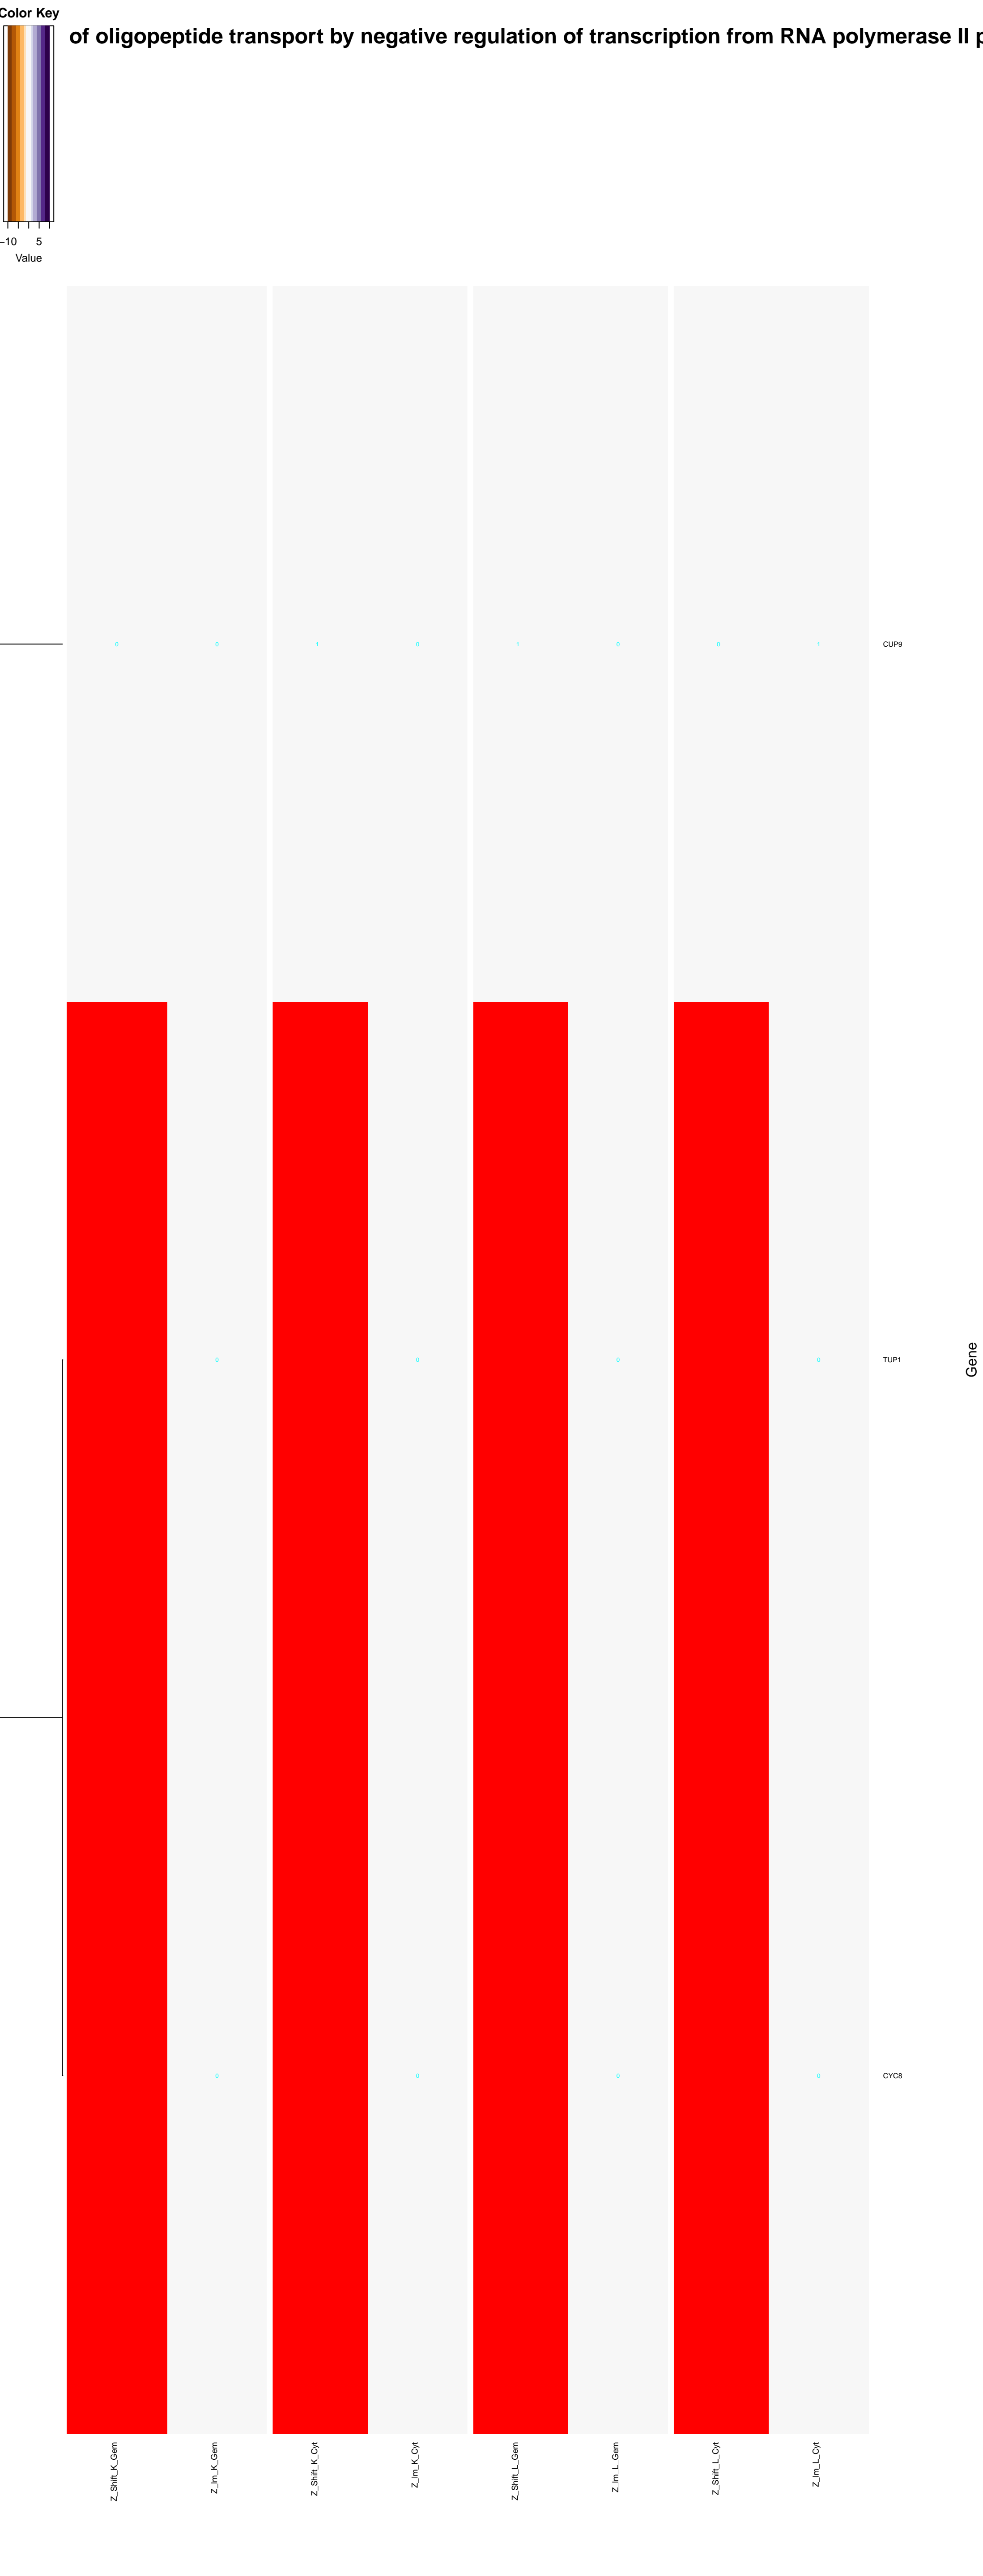

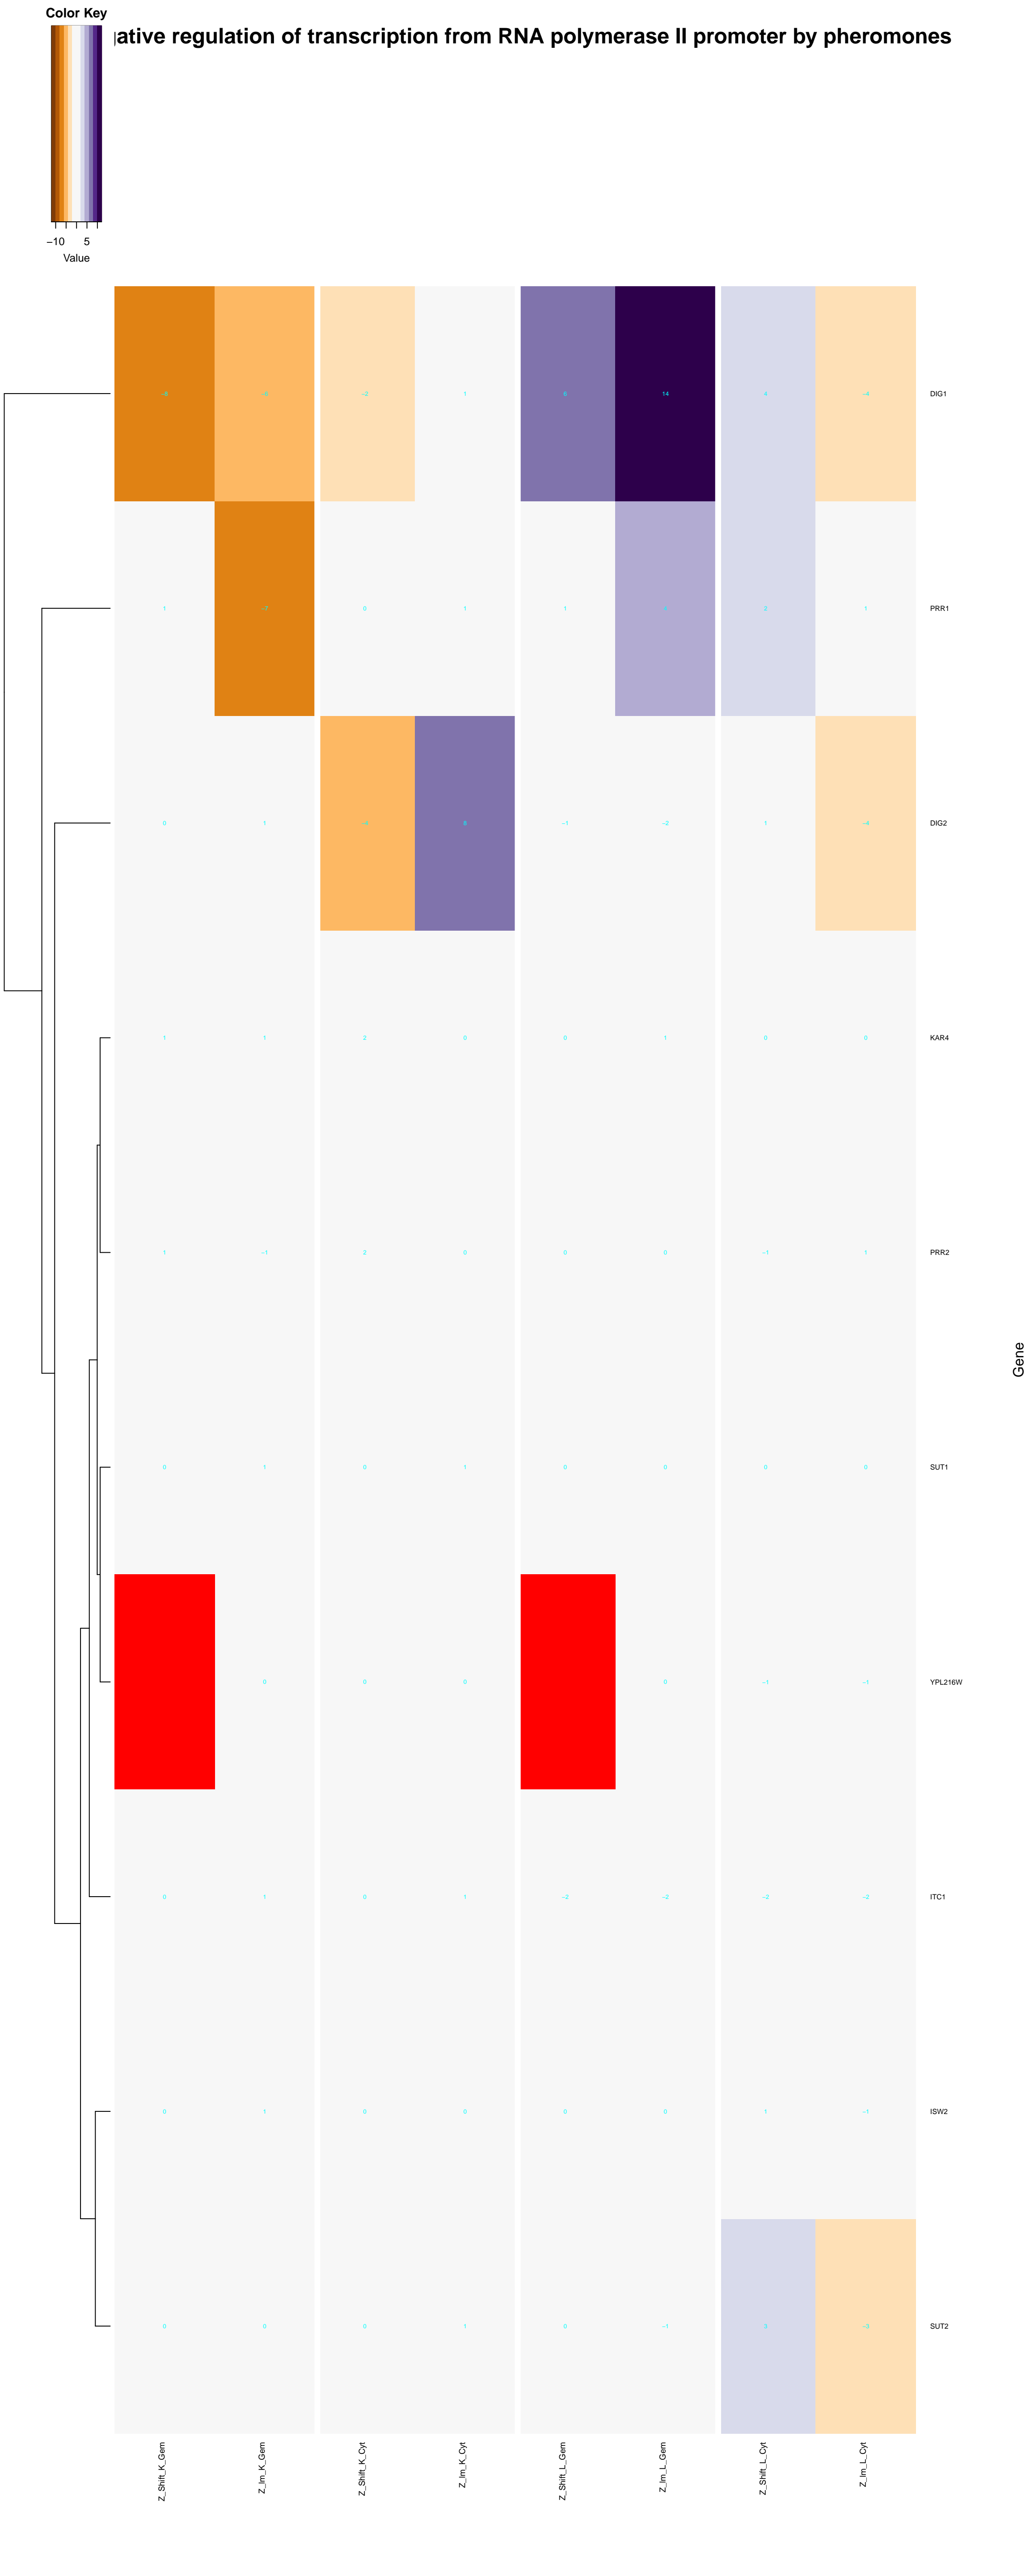



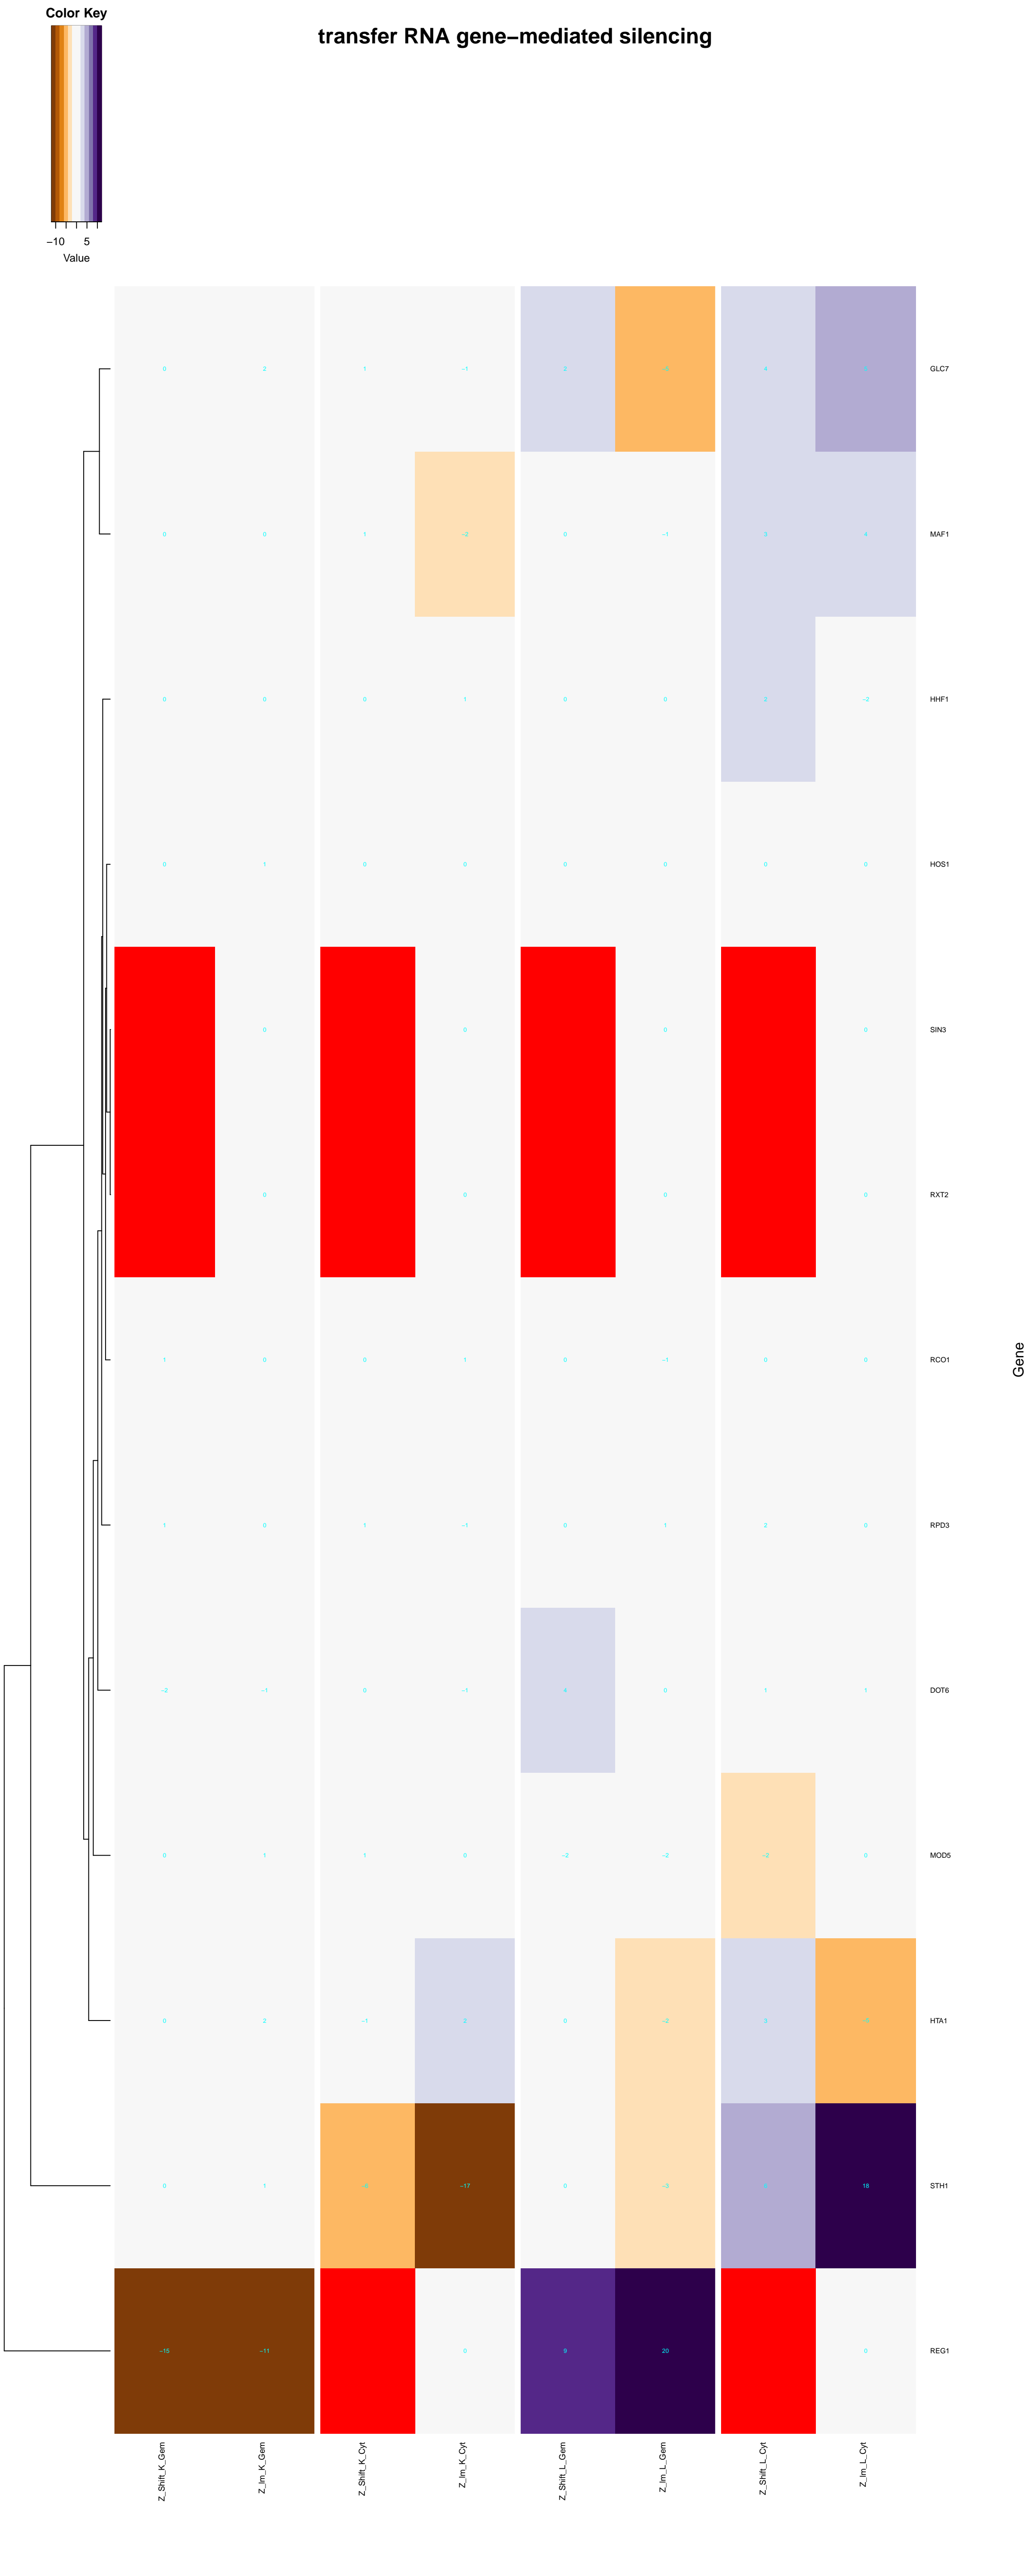

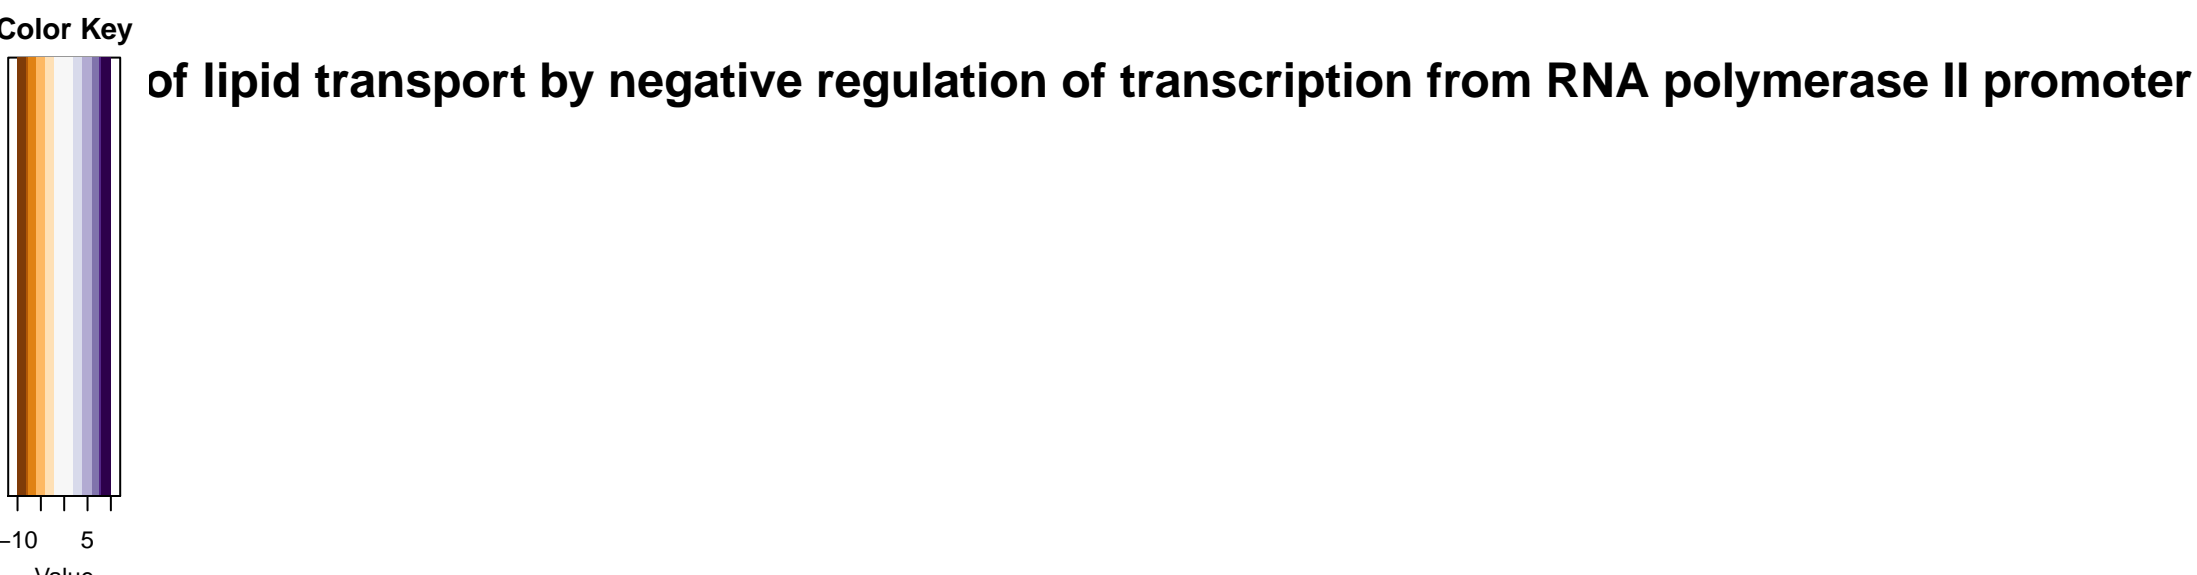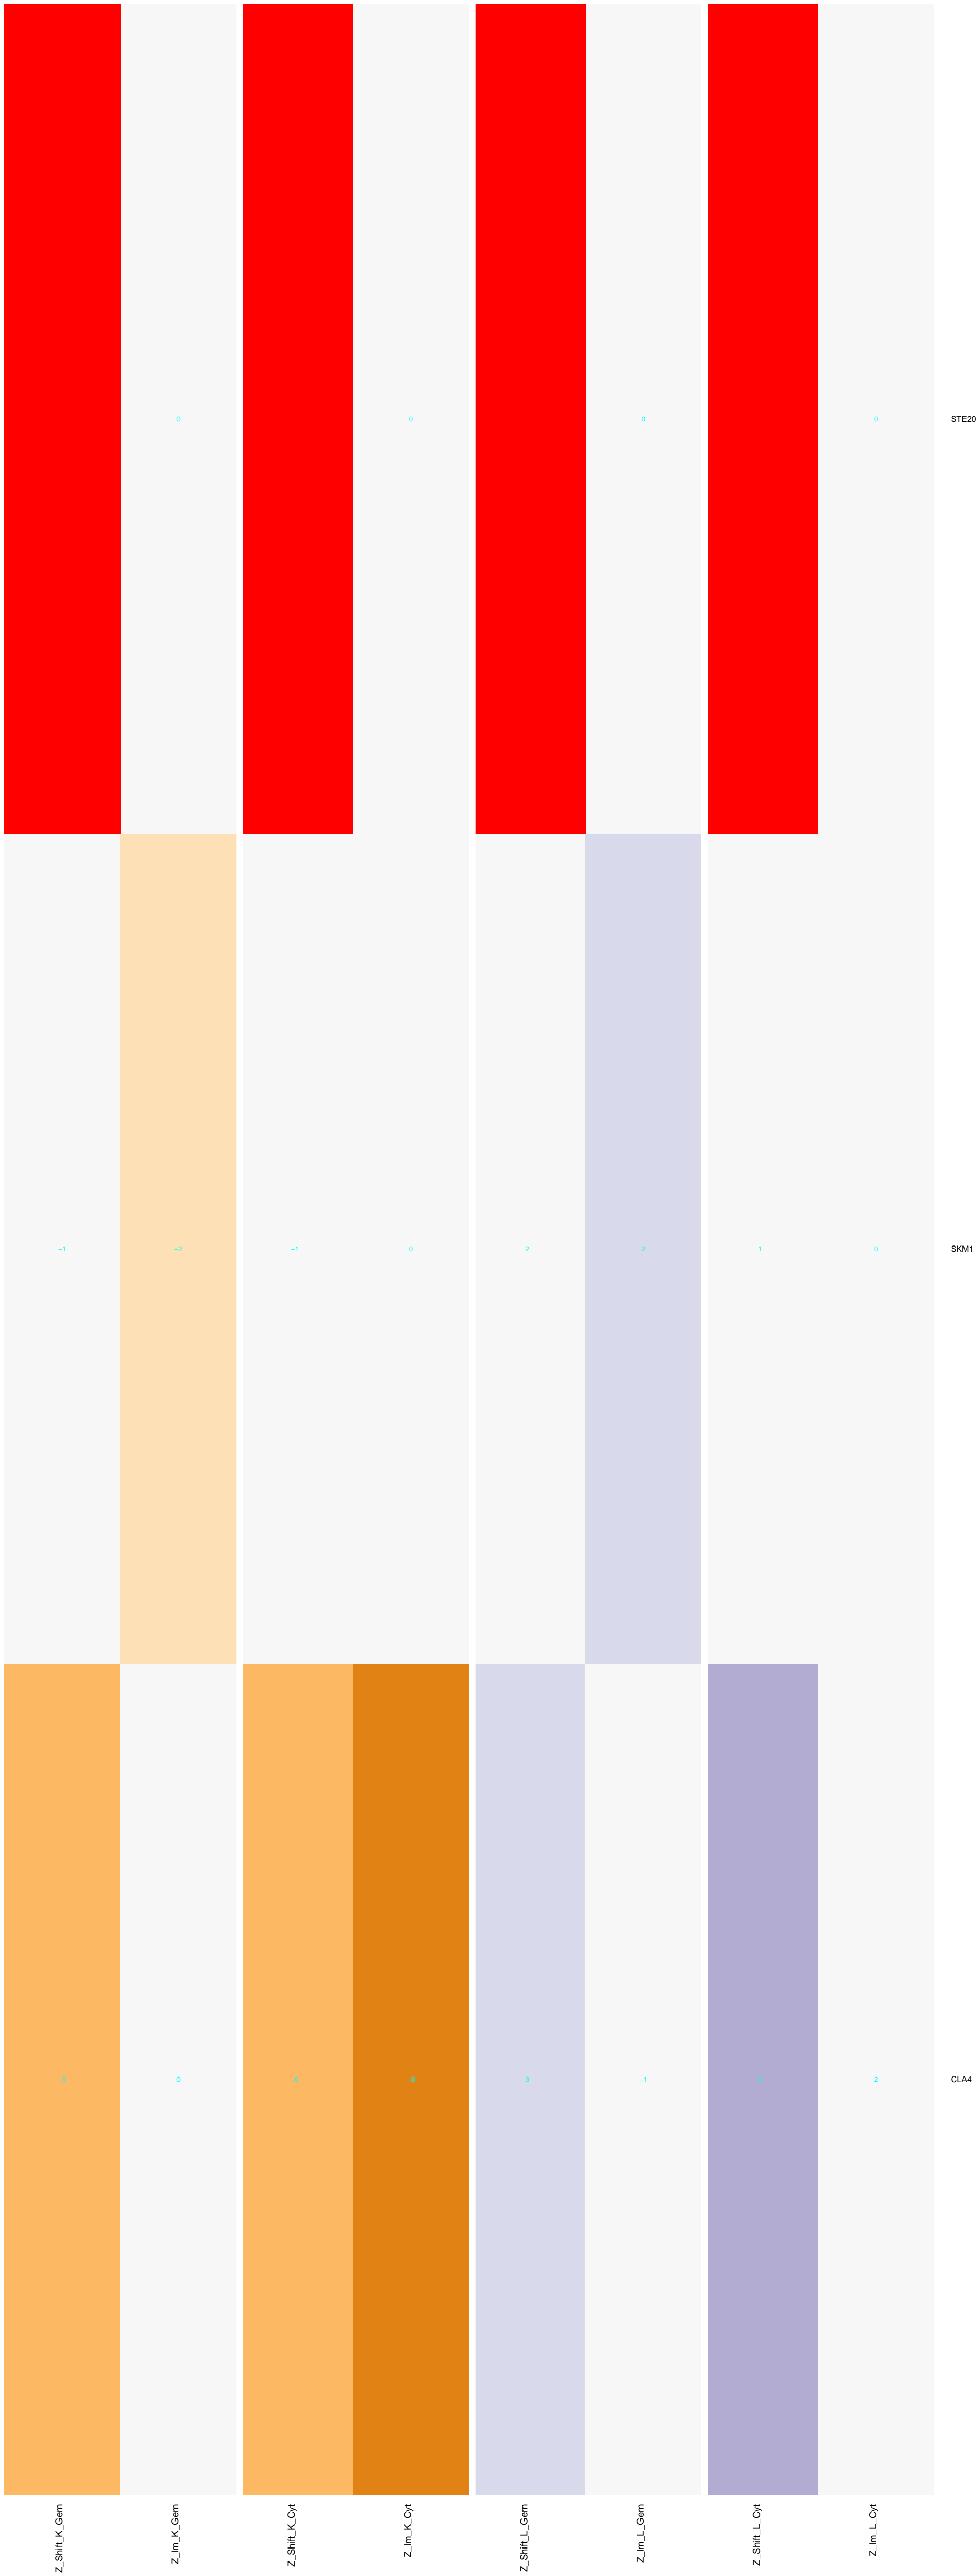

Gene

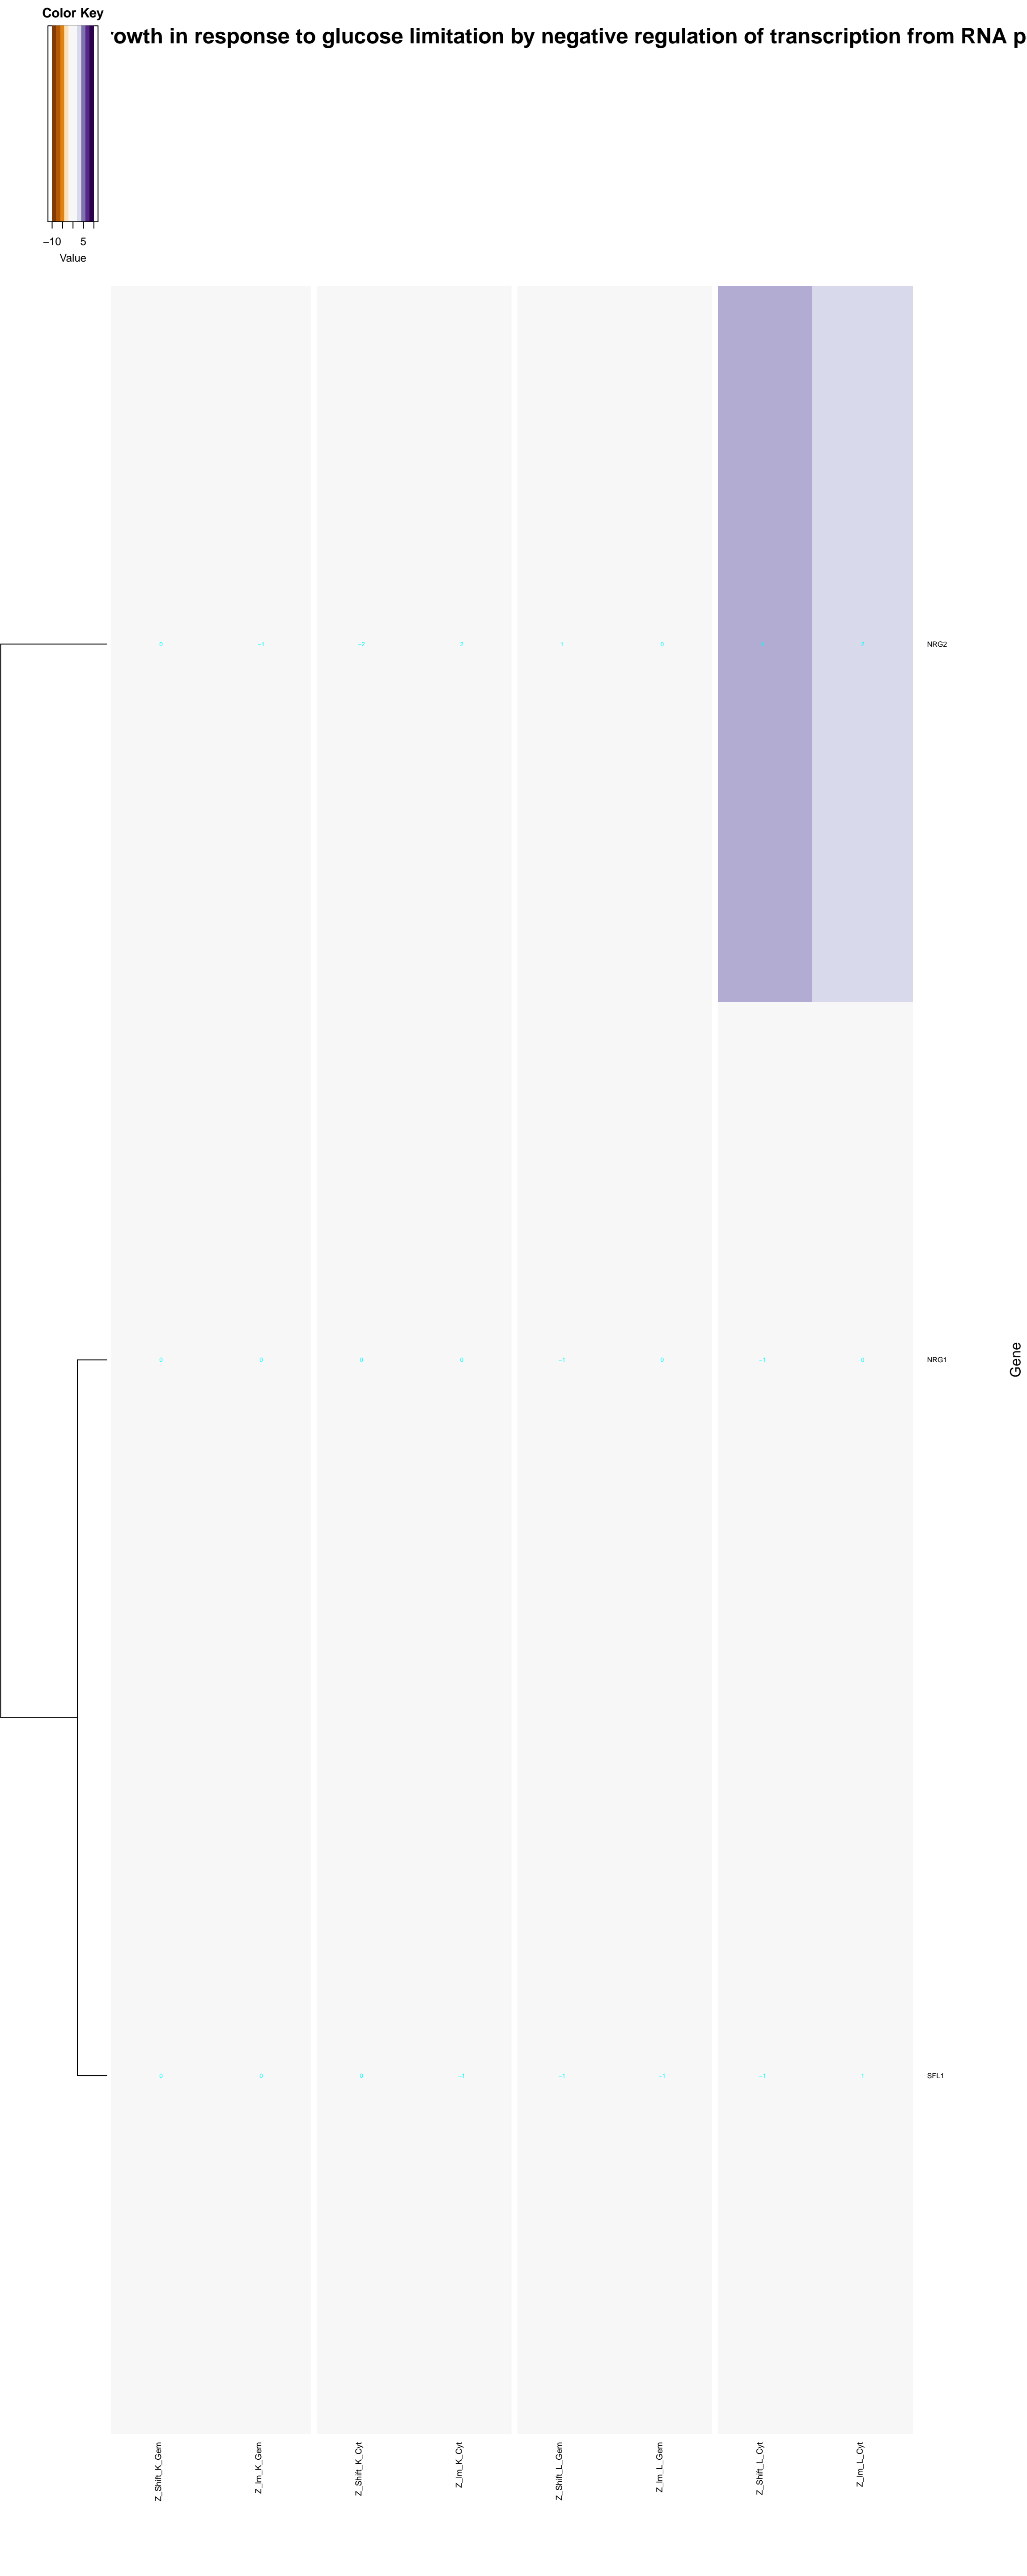

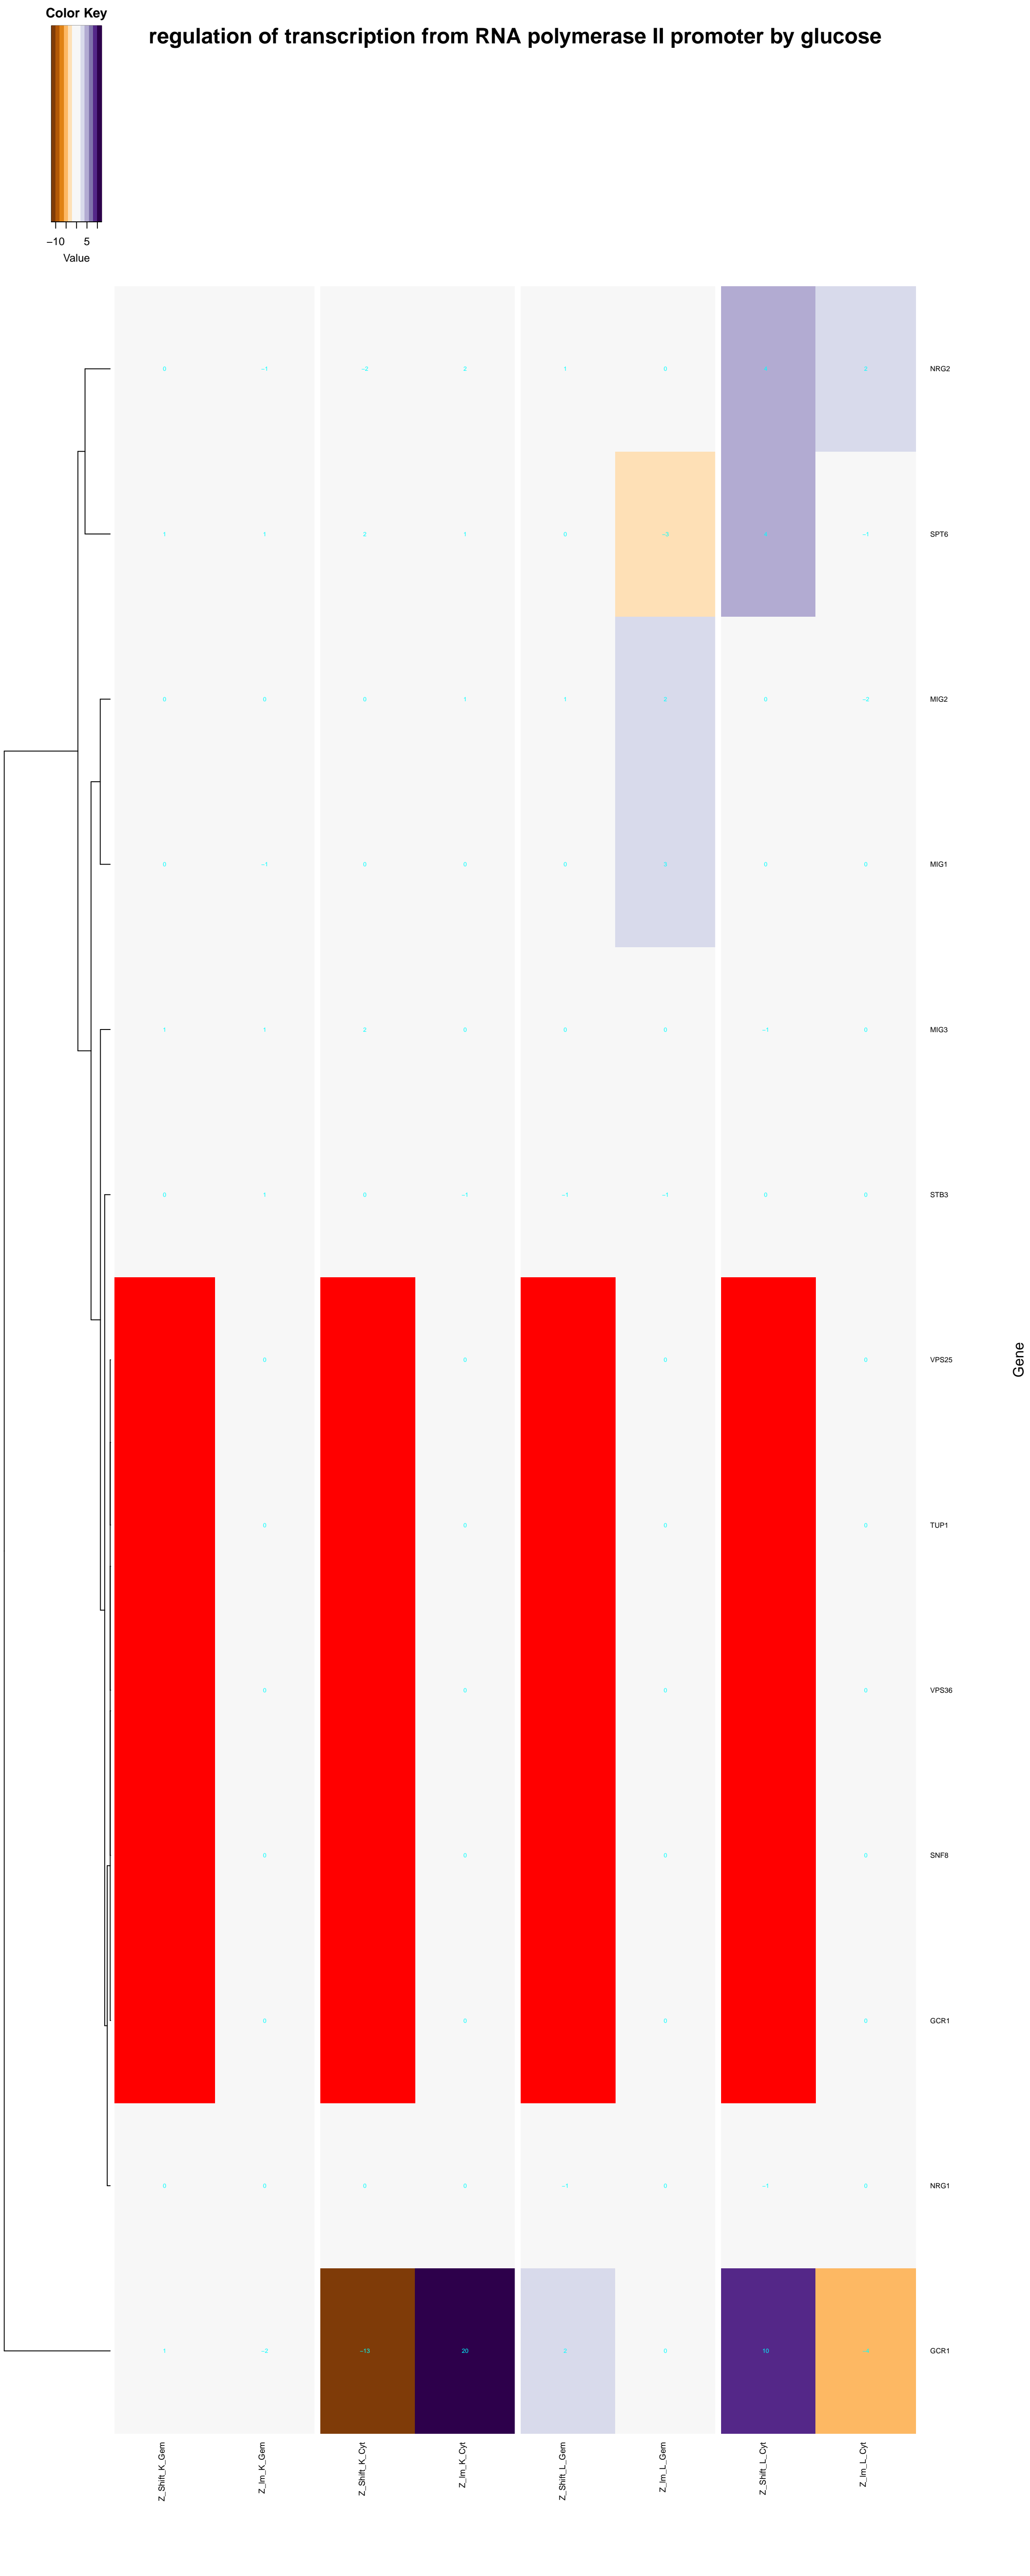

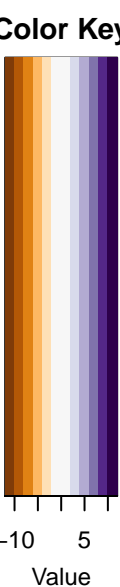

regulation of transcription from RNA polymerase II promoter by galactose

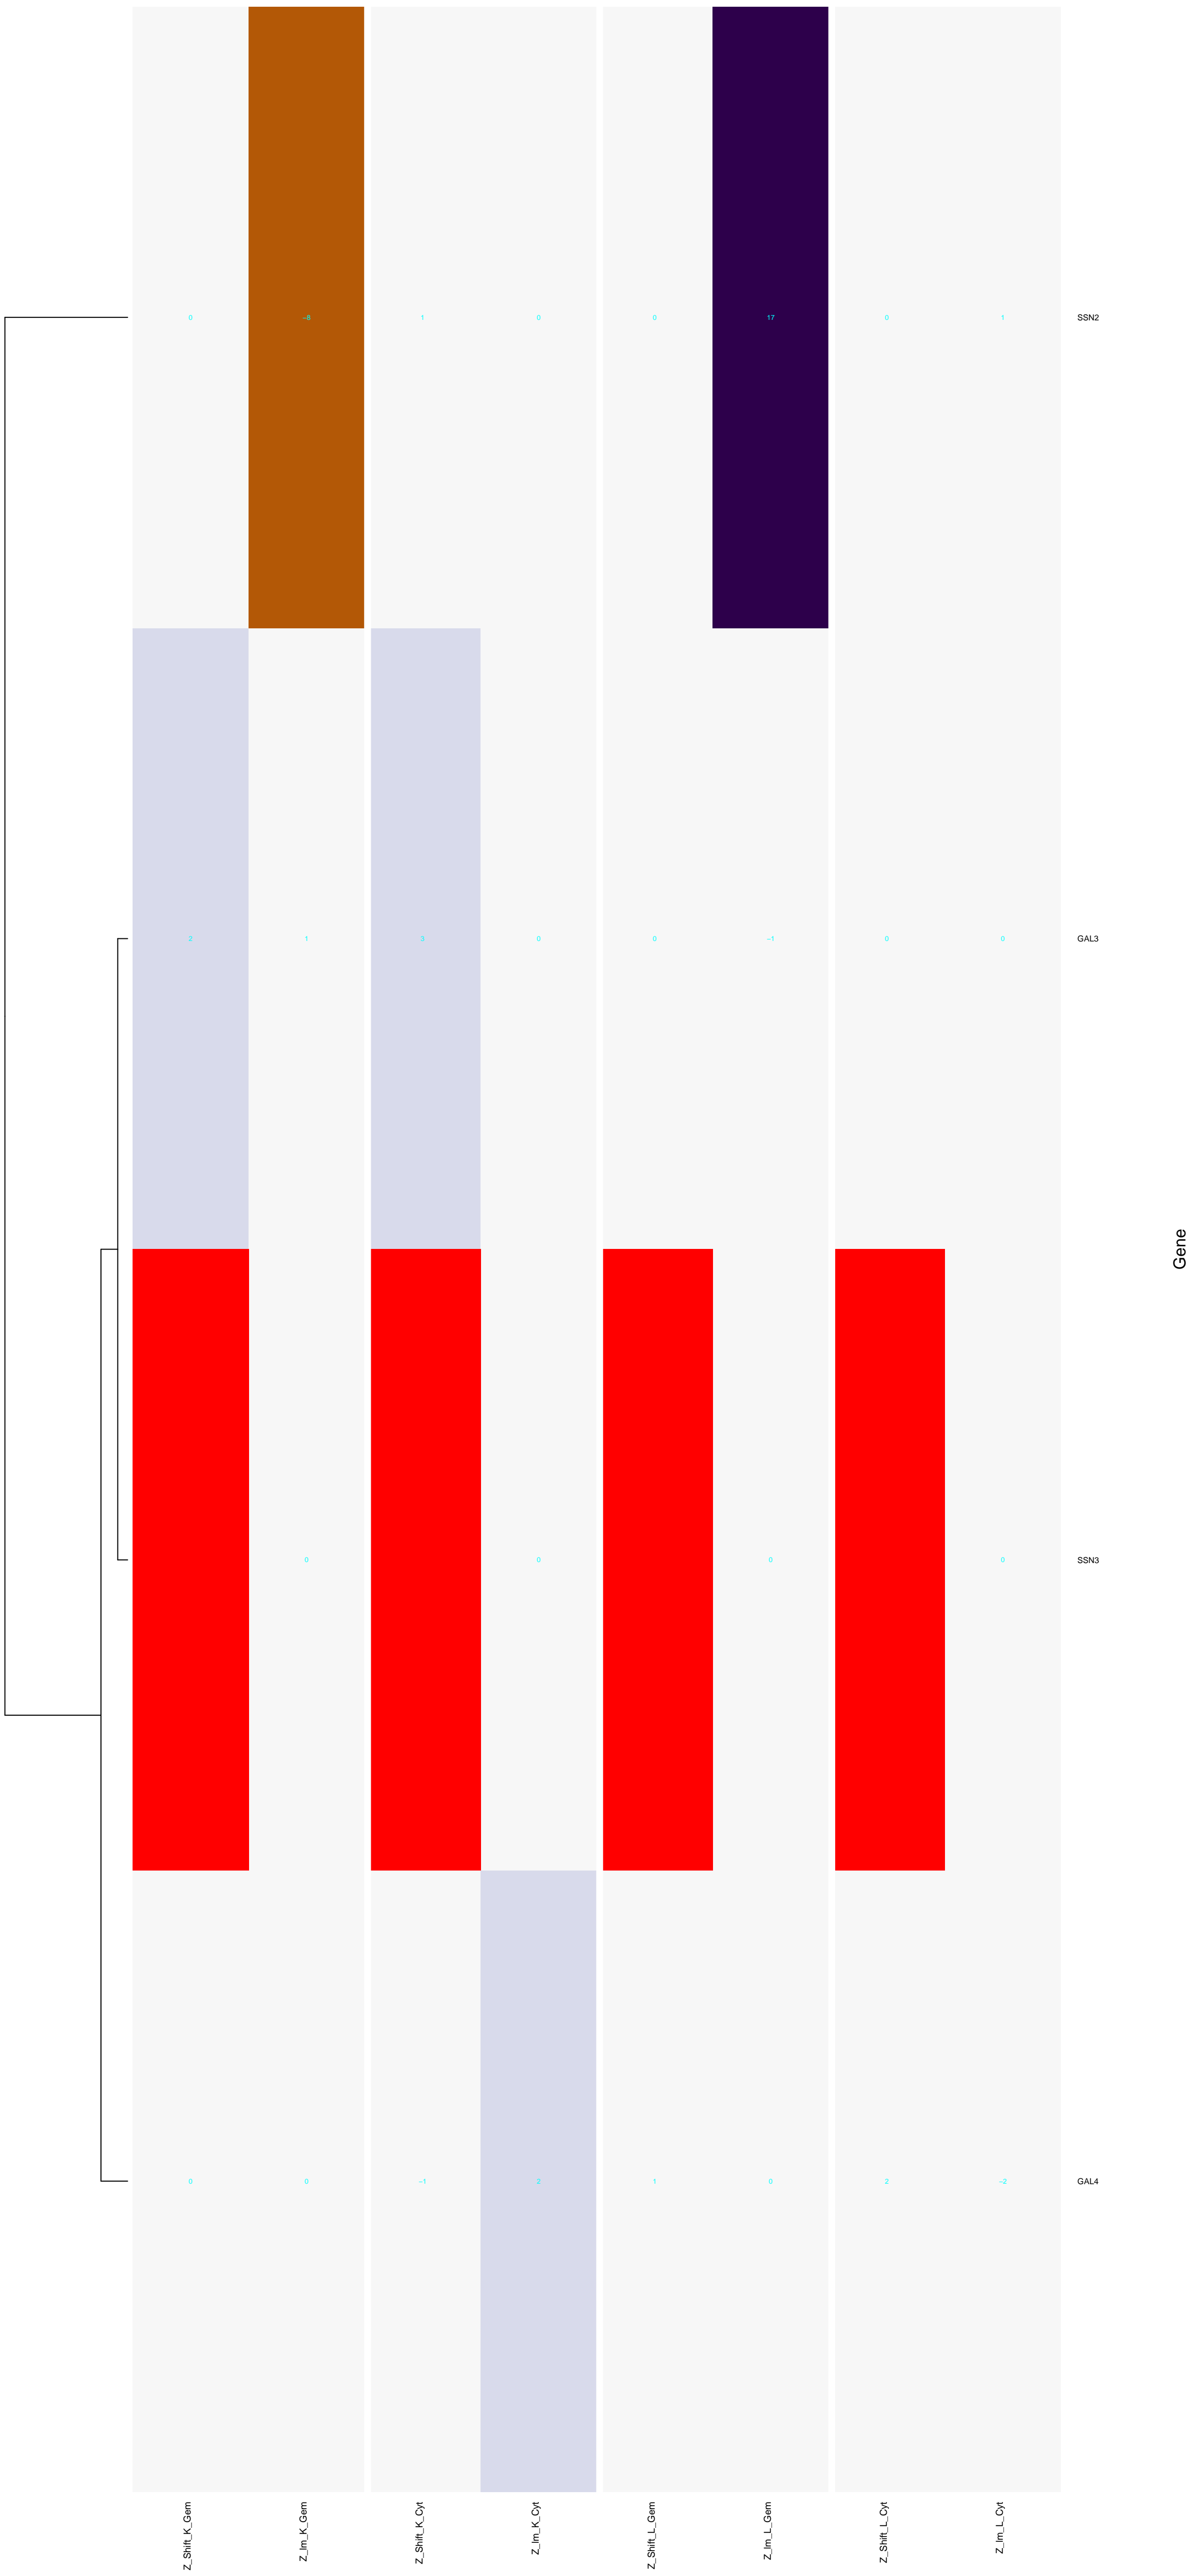

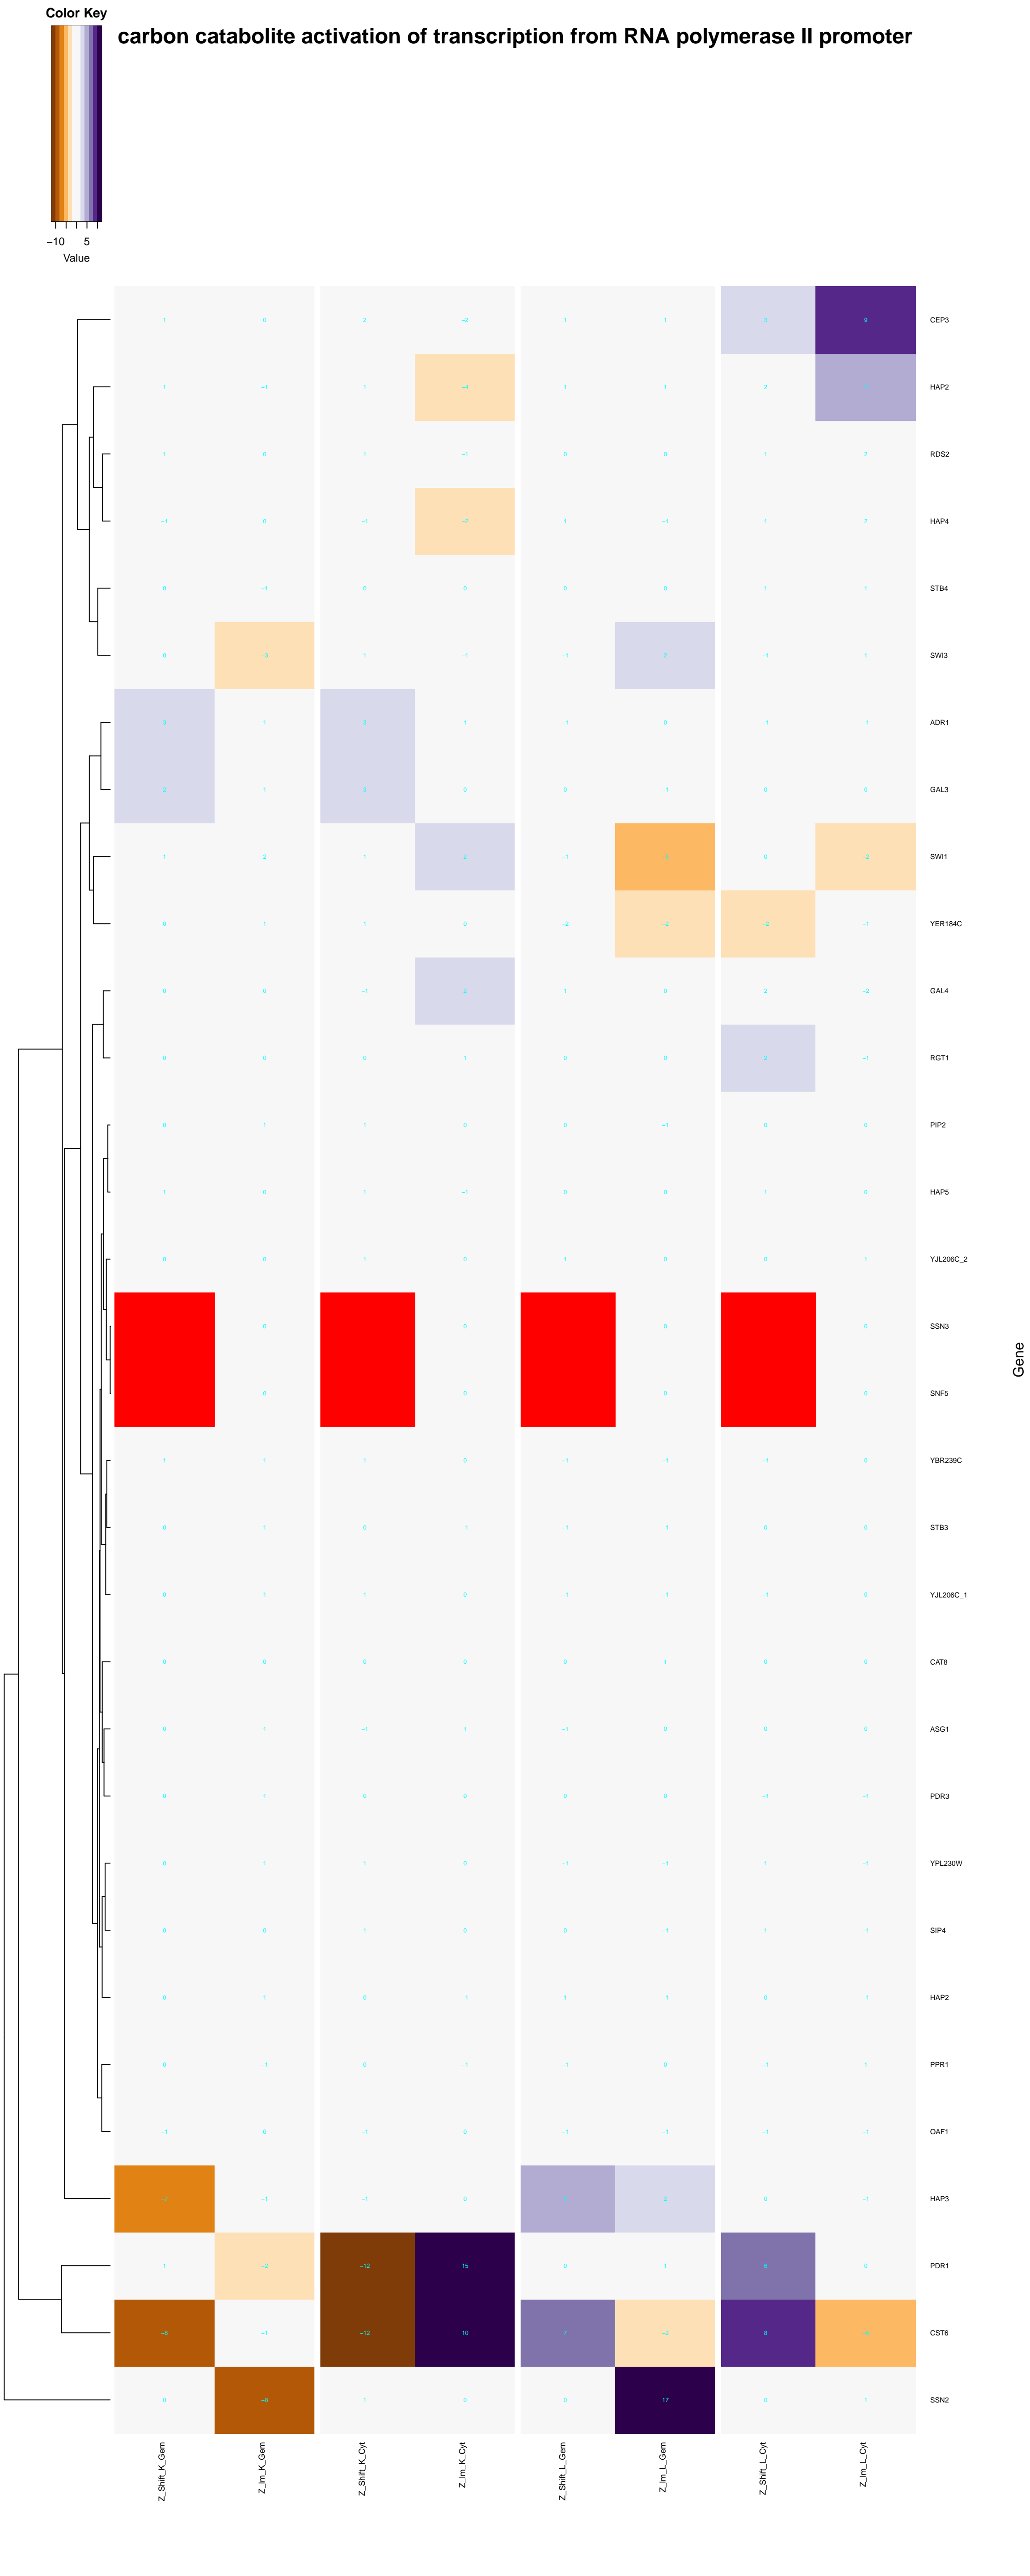

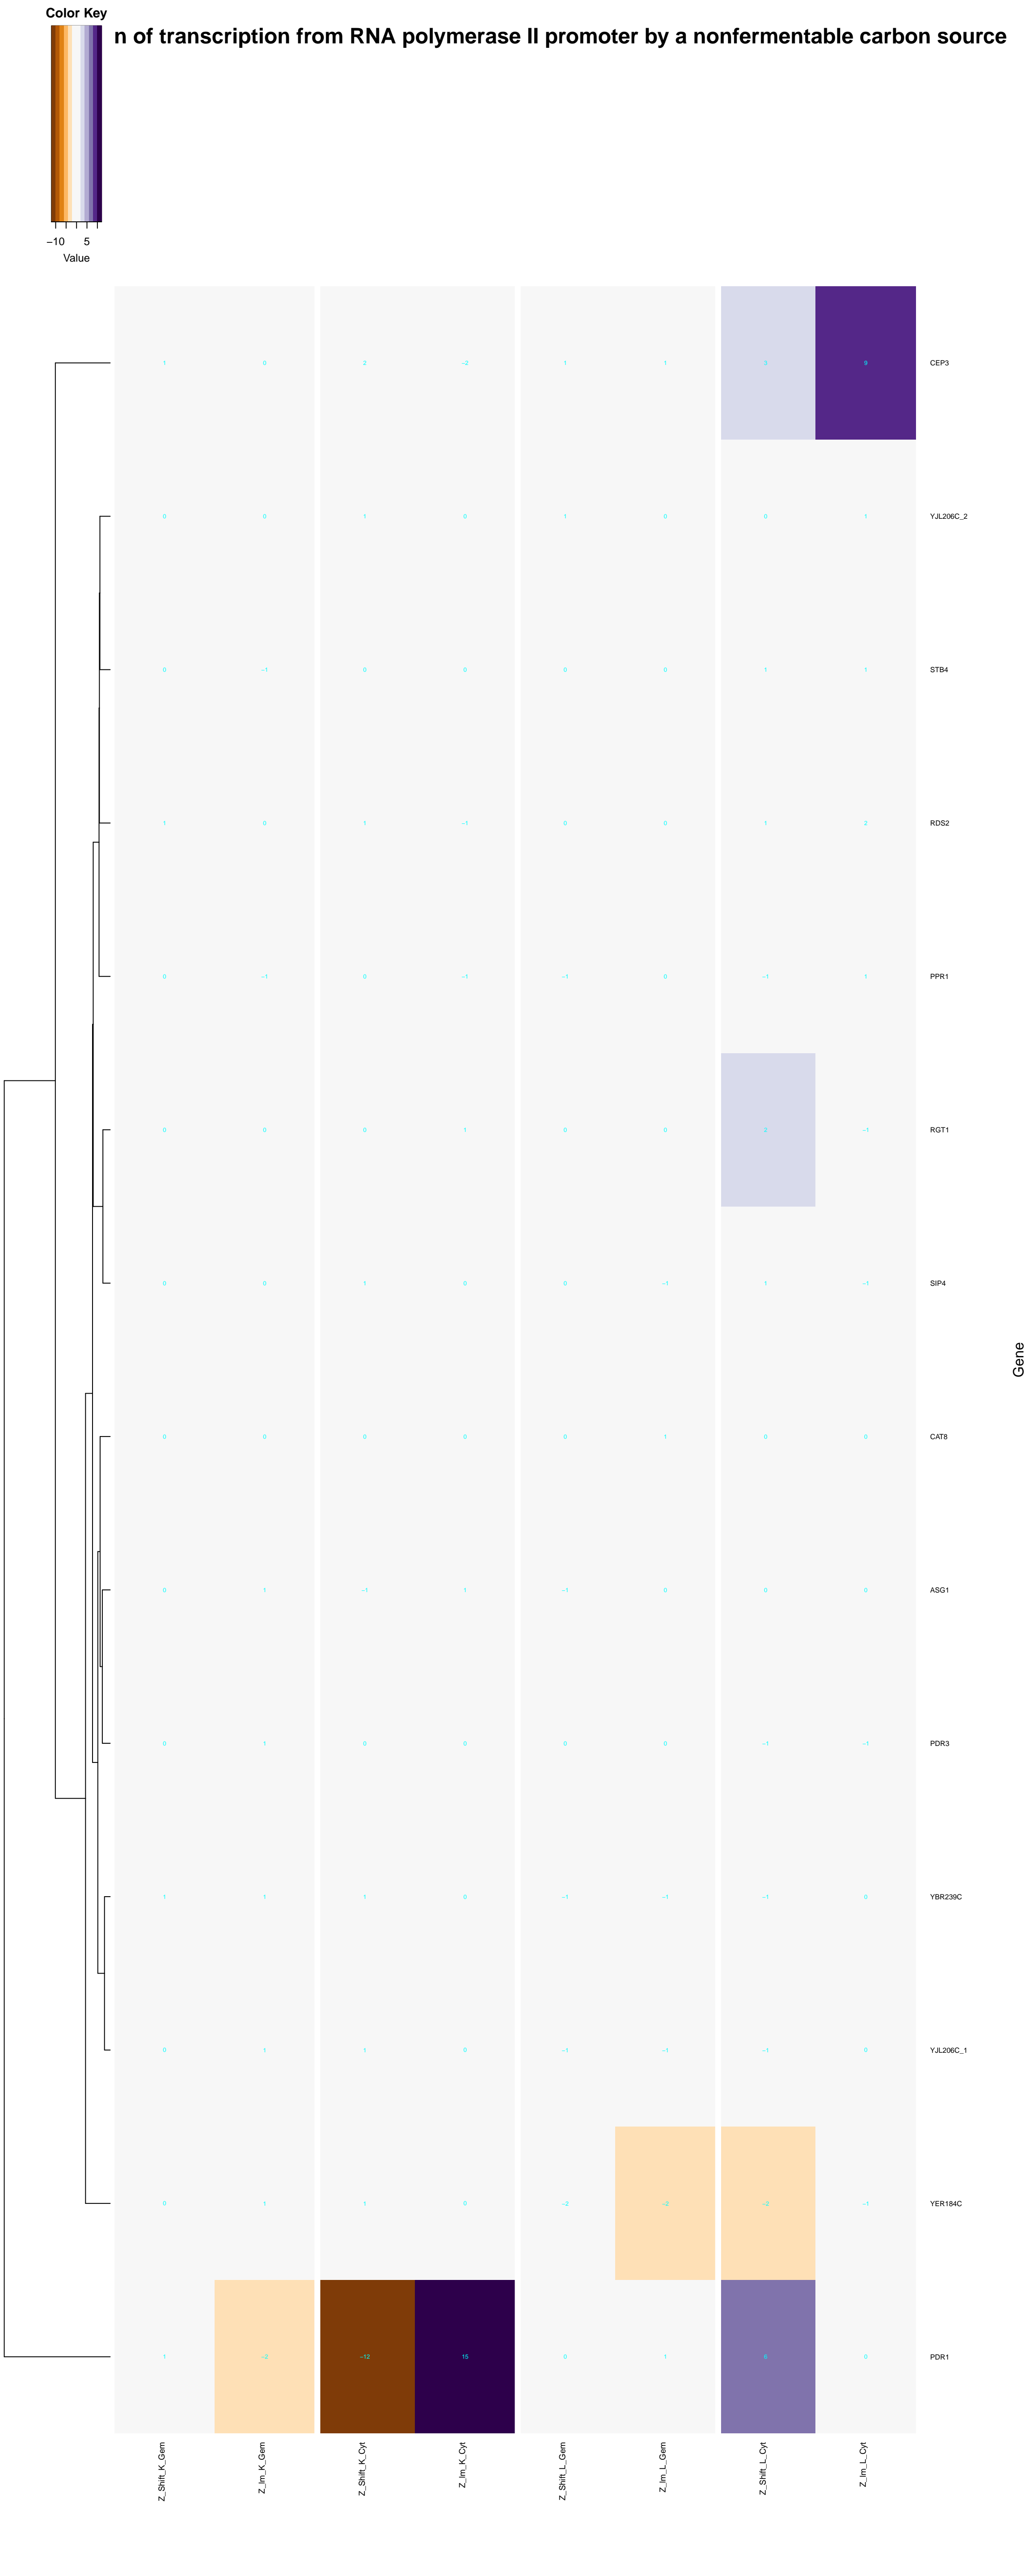

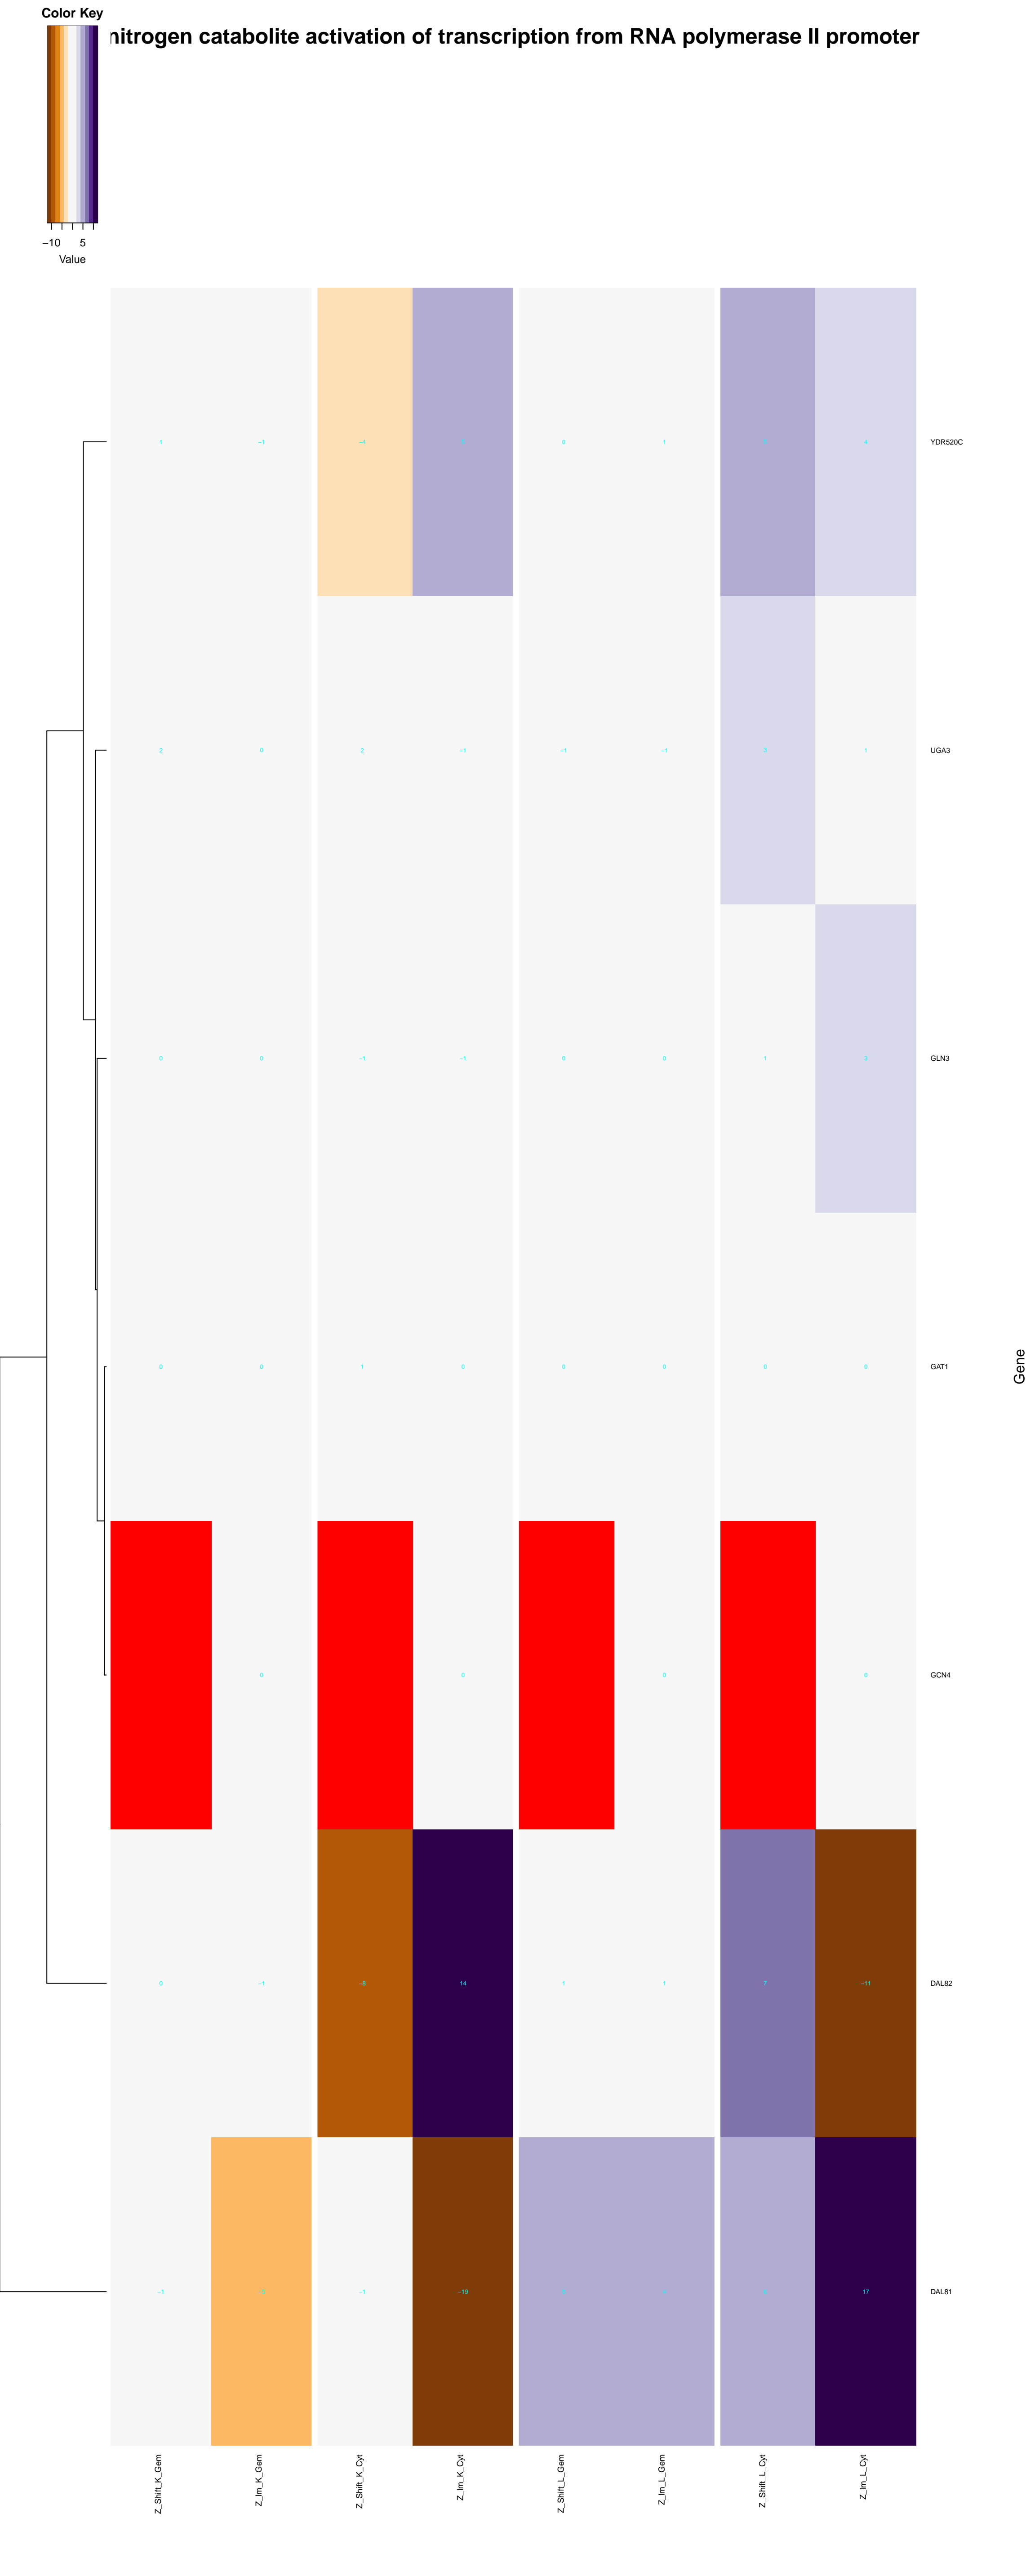



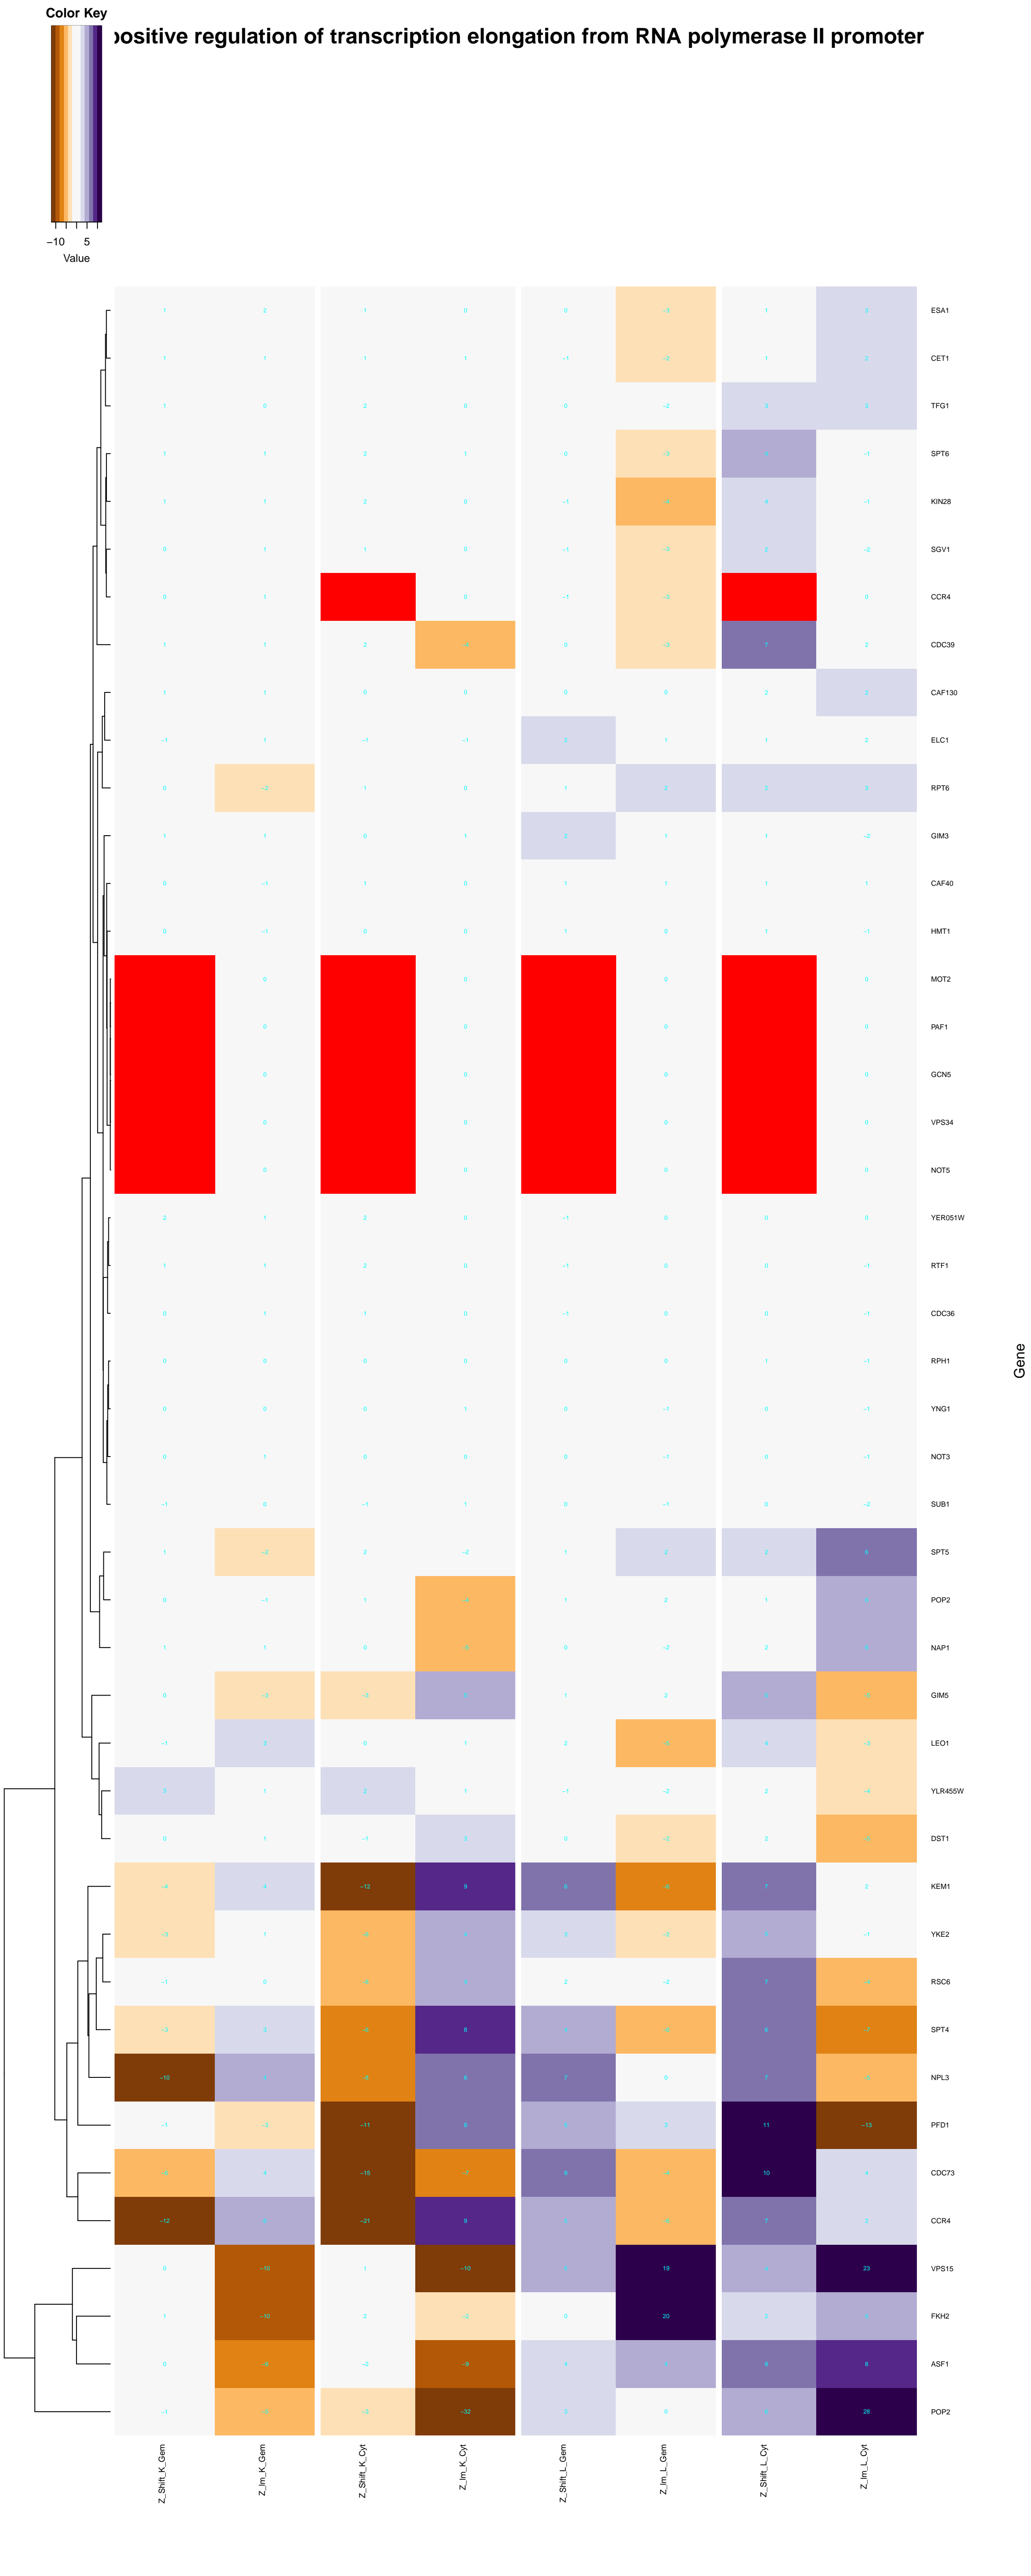

Color Key

n of dipeptide transport by regulation of transcription from RNA polymerase II promoter

Value

-10 5

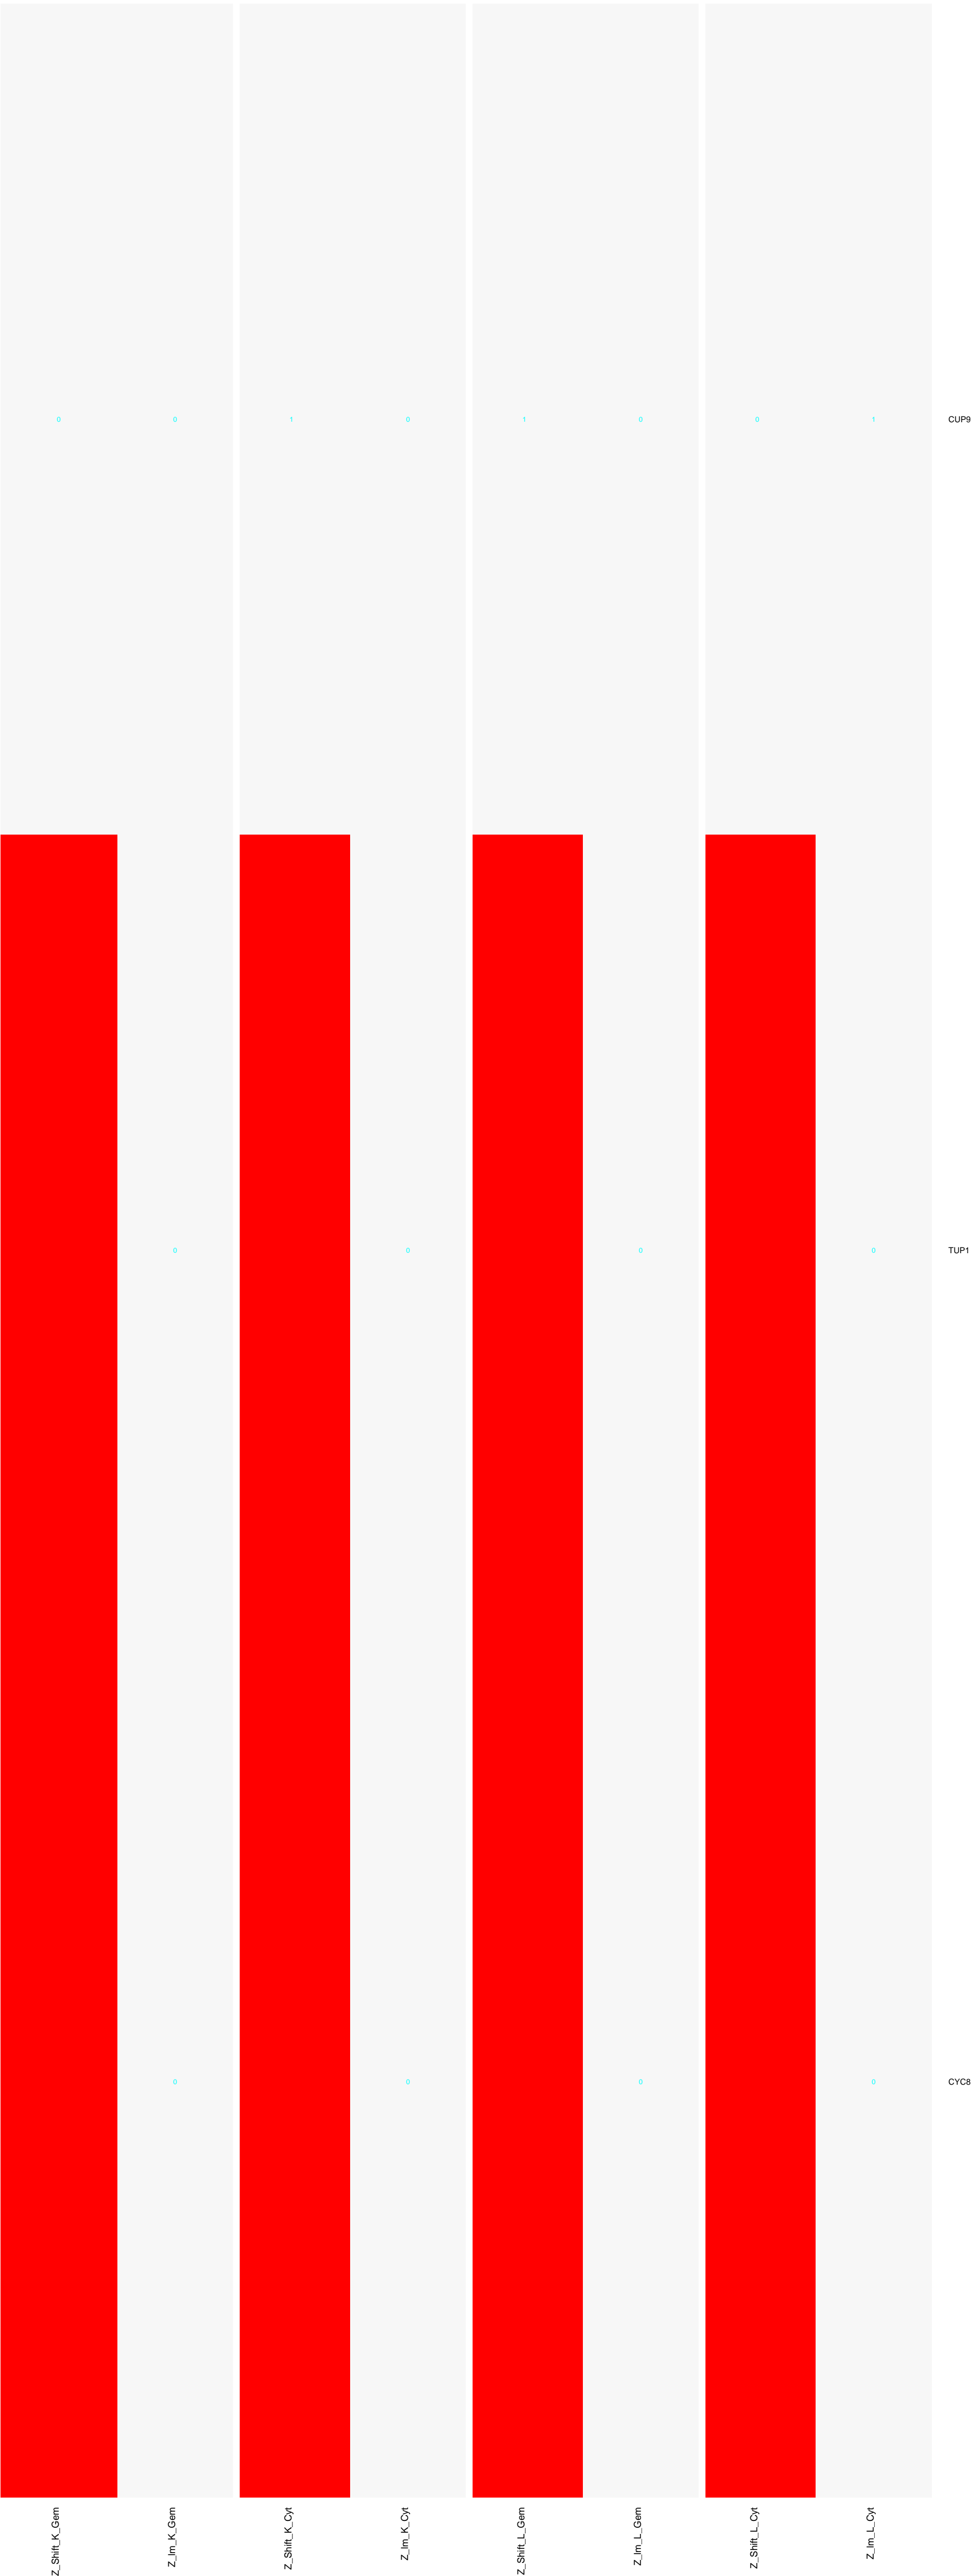

Gene

Color Key

on of transcription from RNA polymerase II promoter in response to zinc ion starvation

Value

-10 5

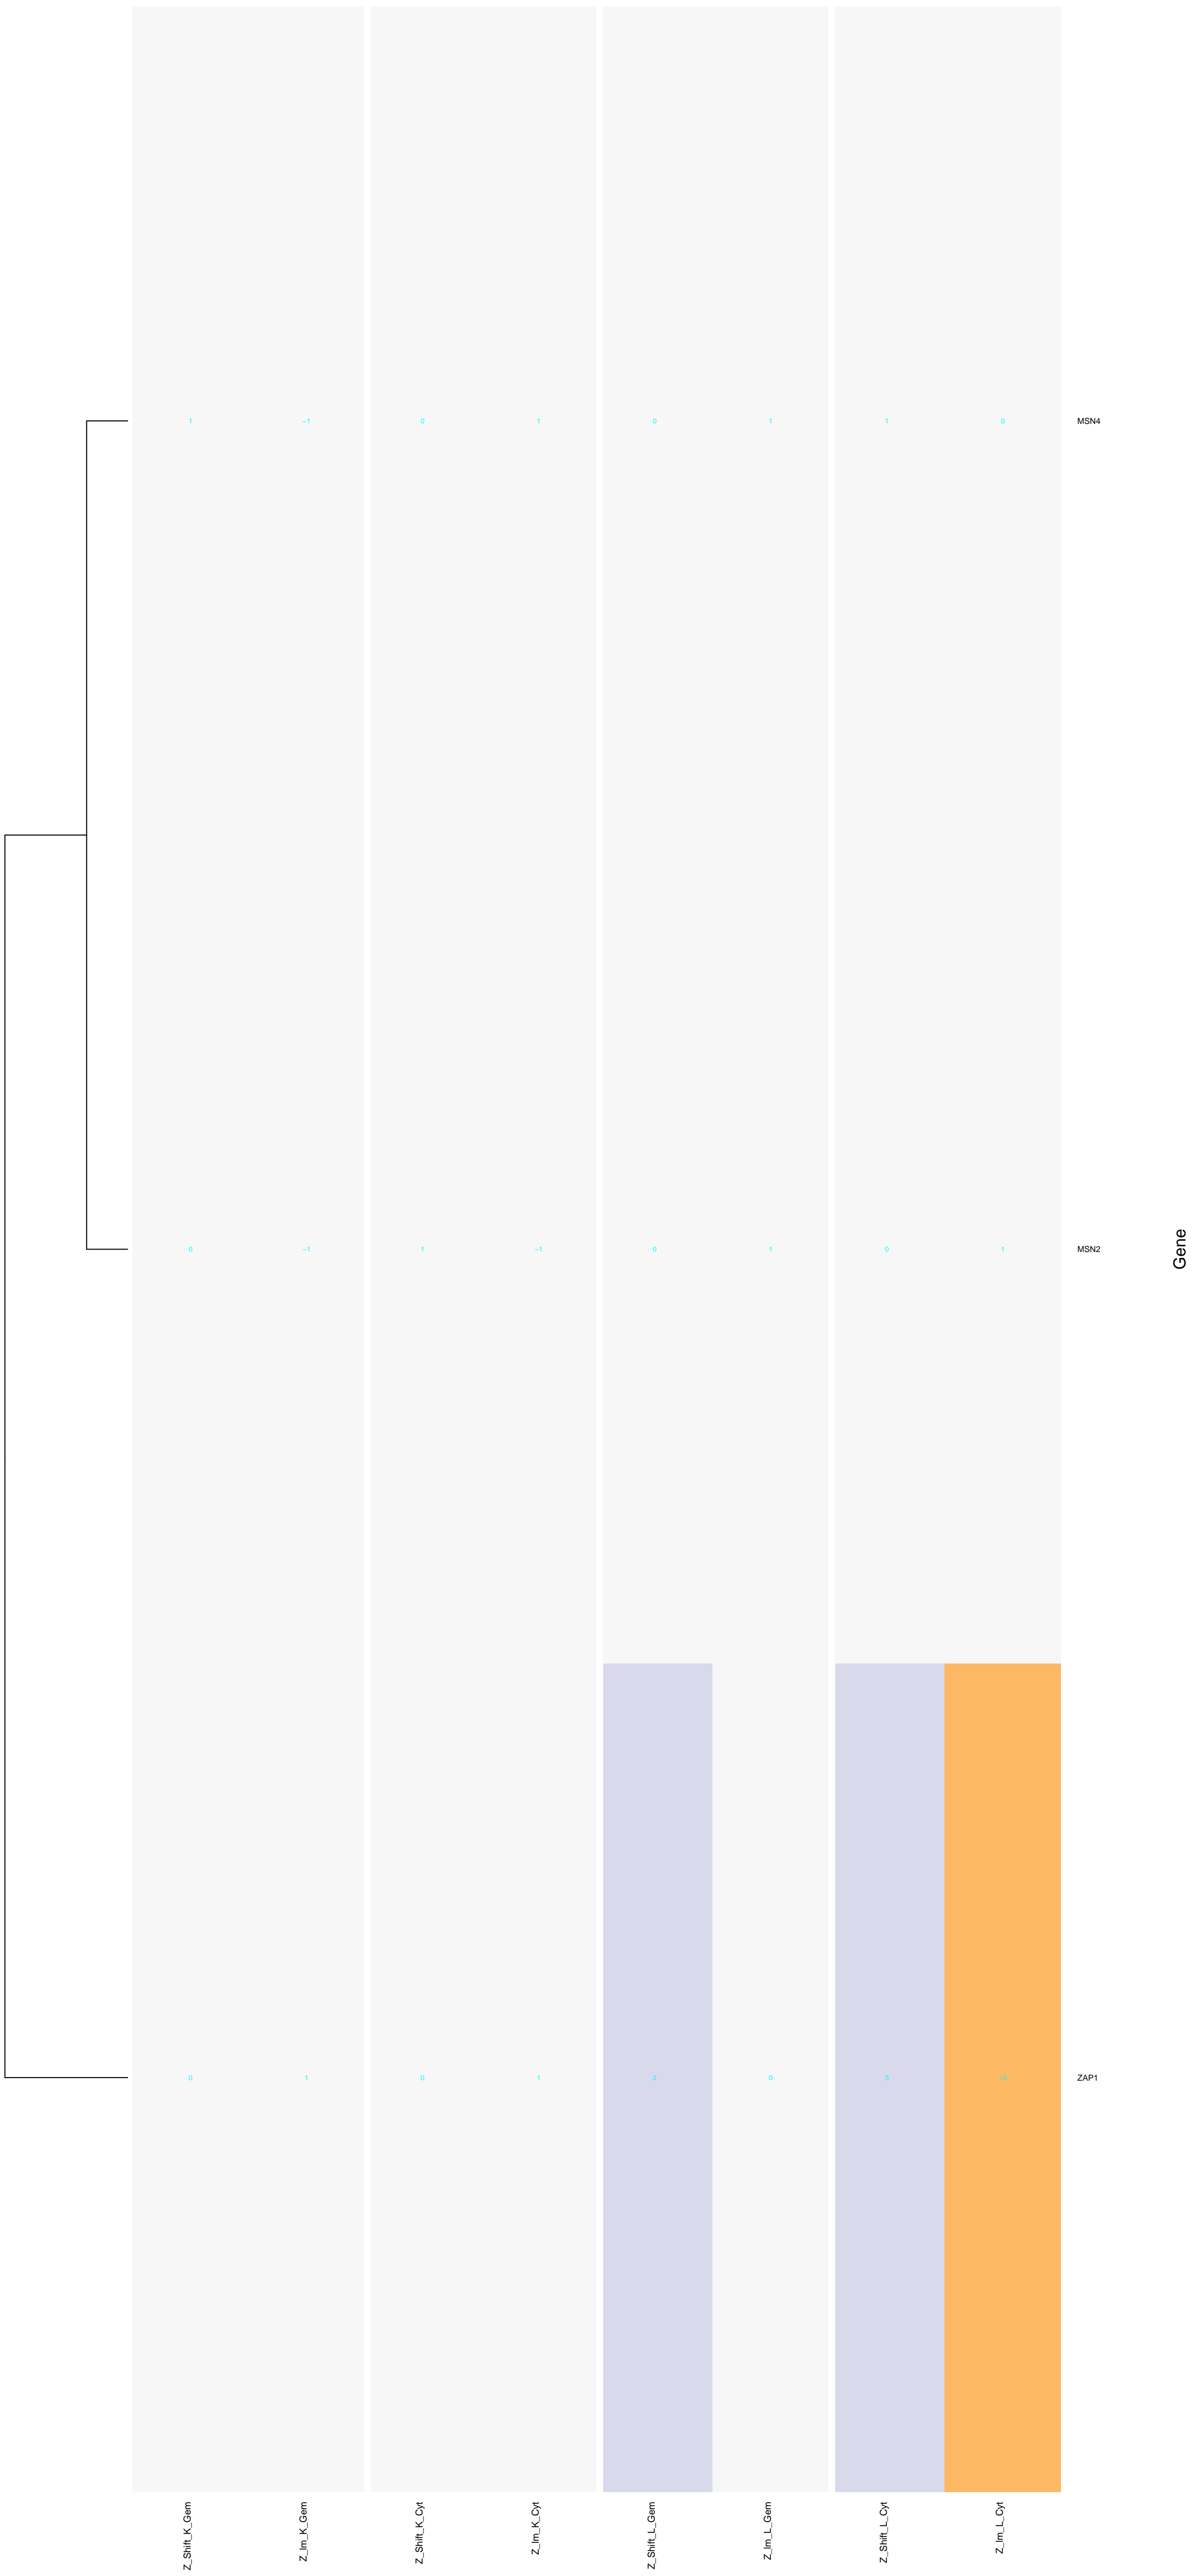

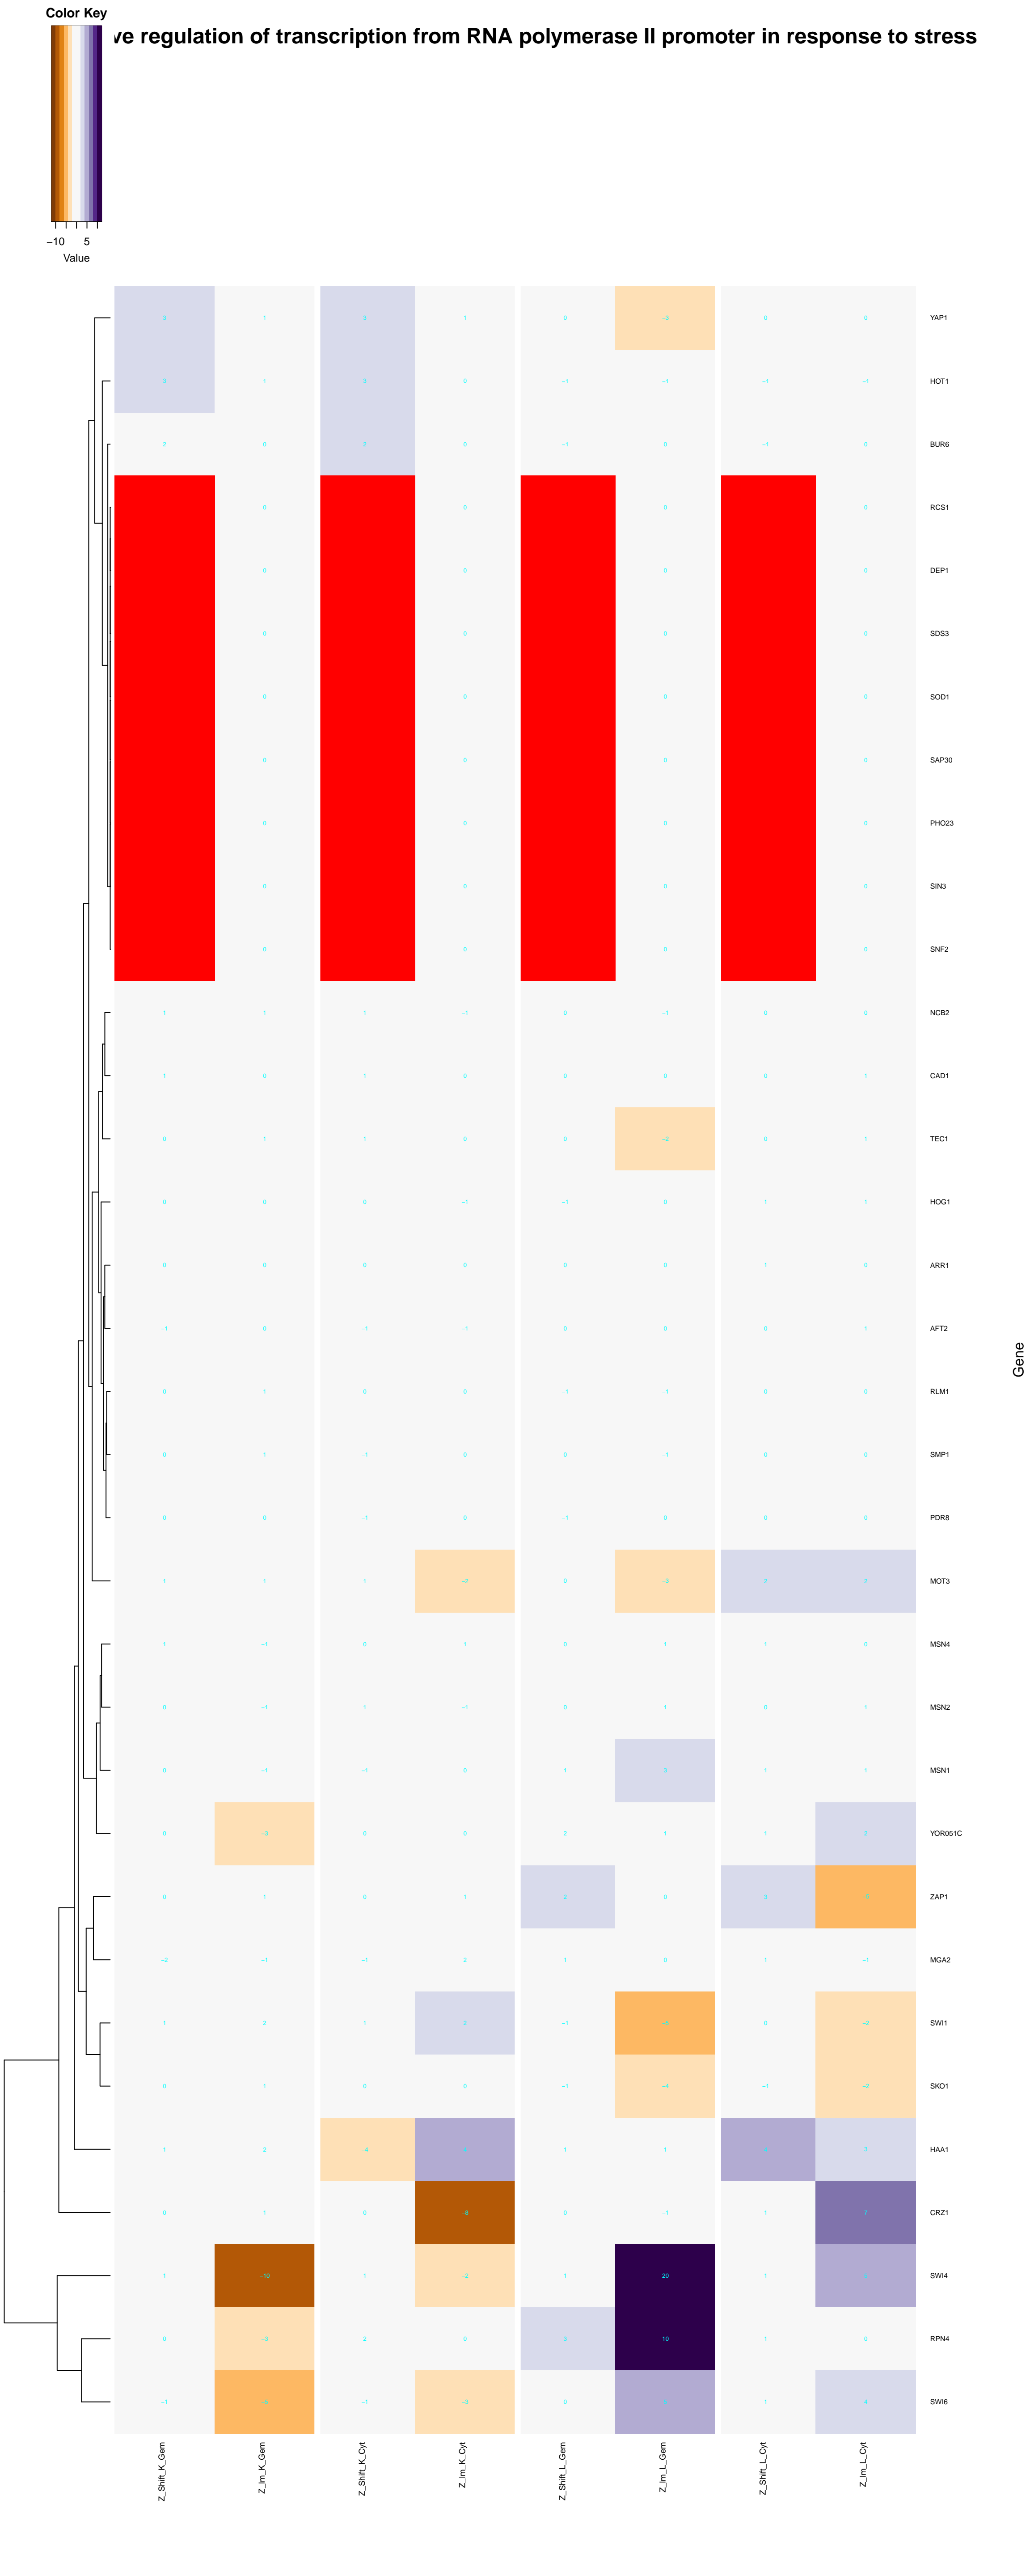

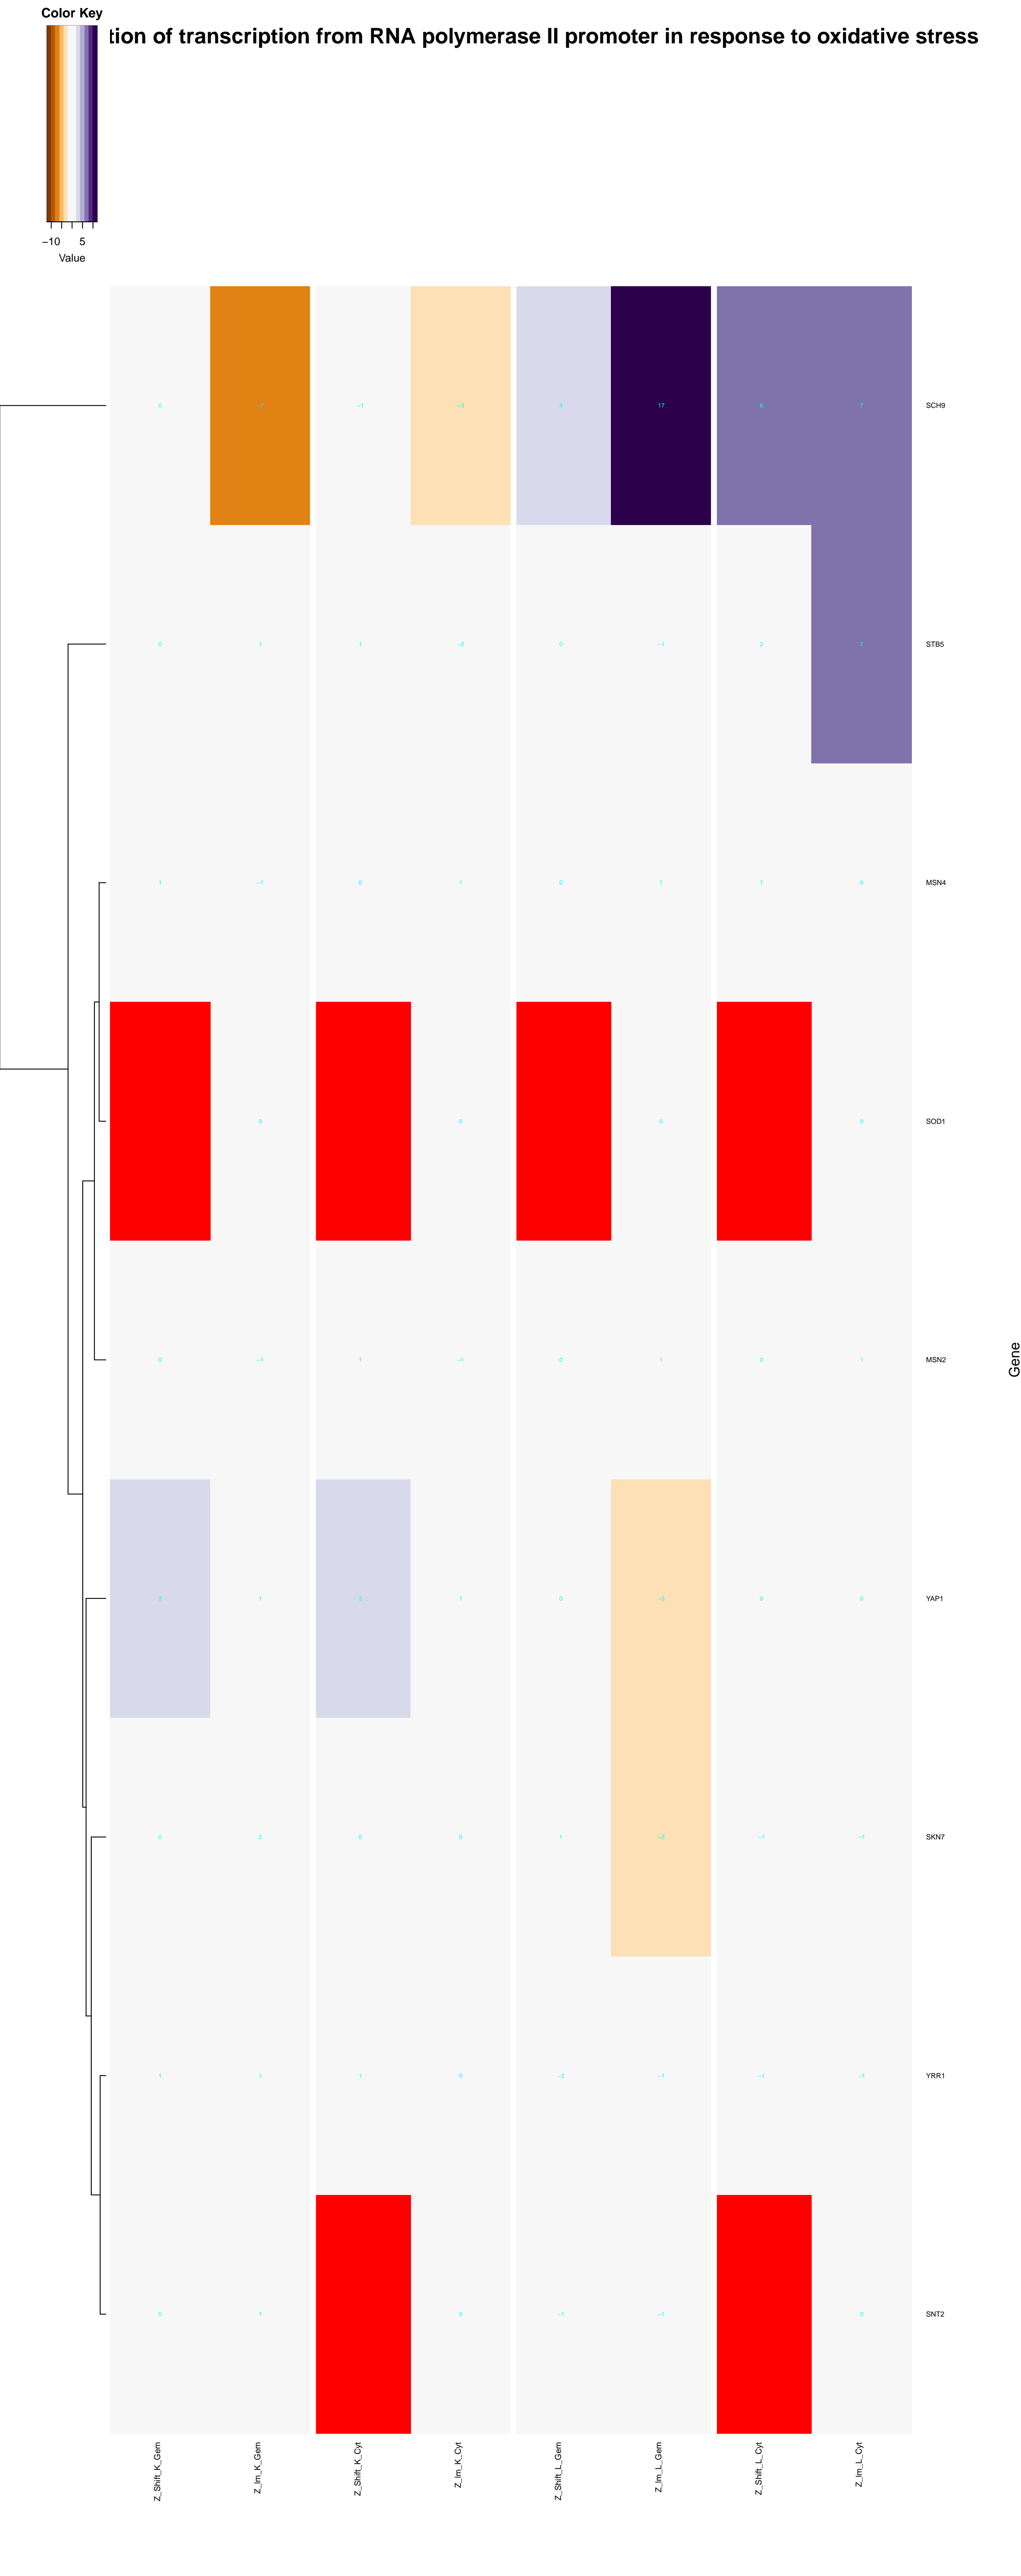

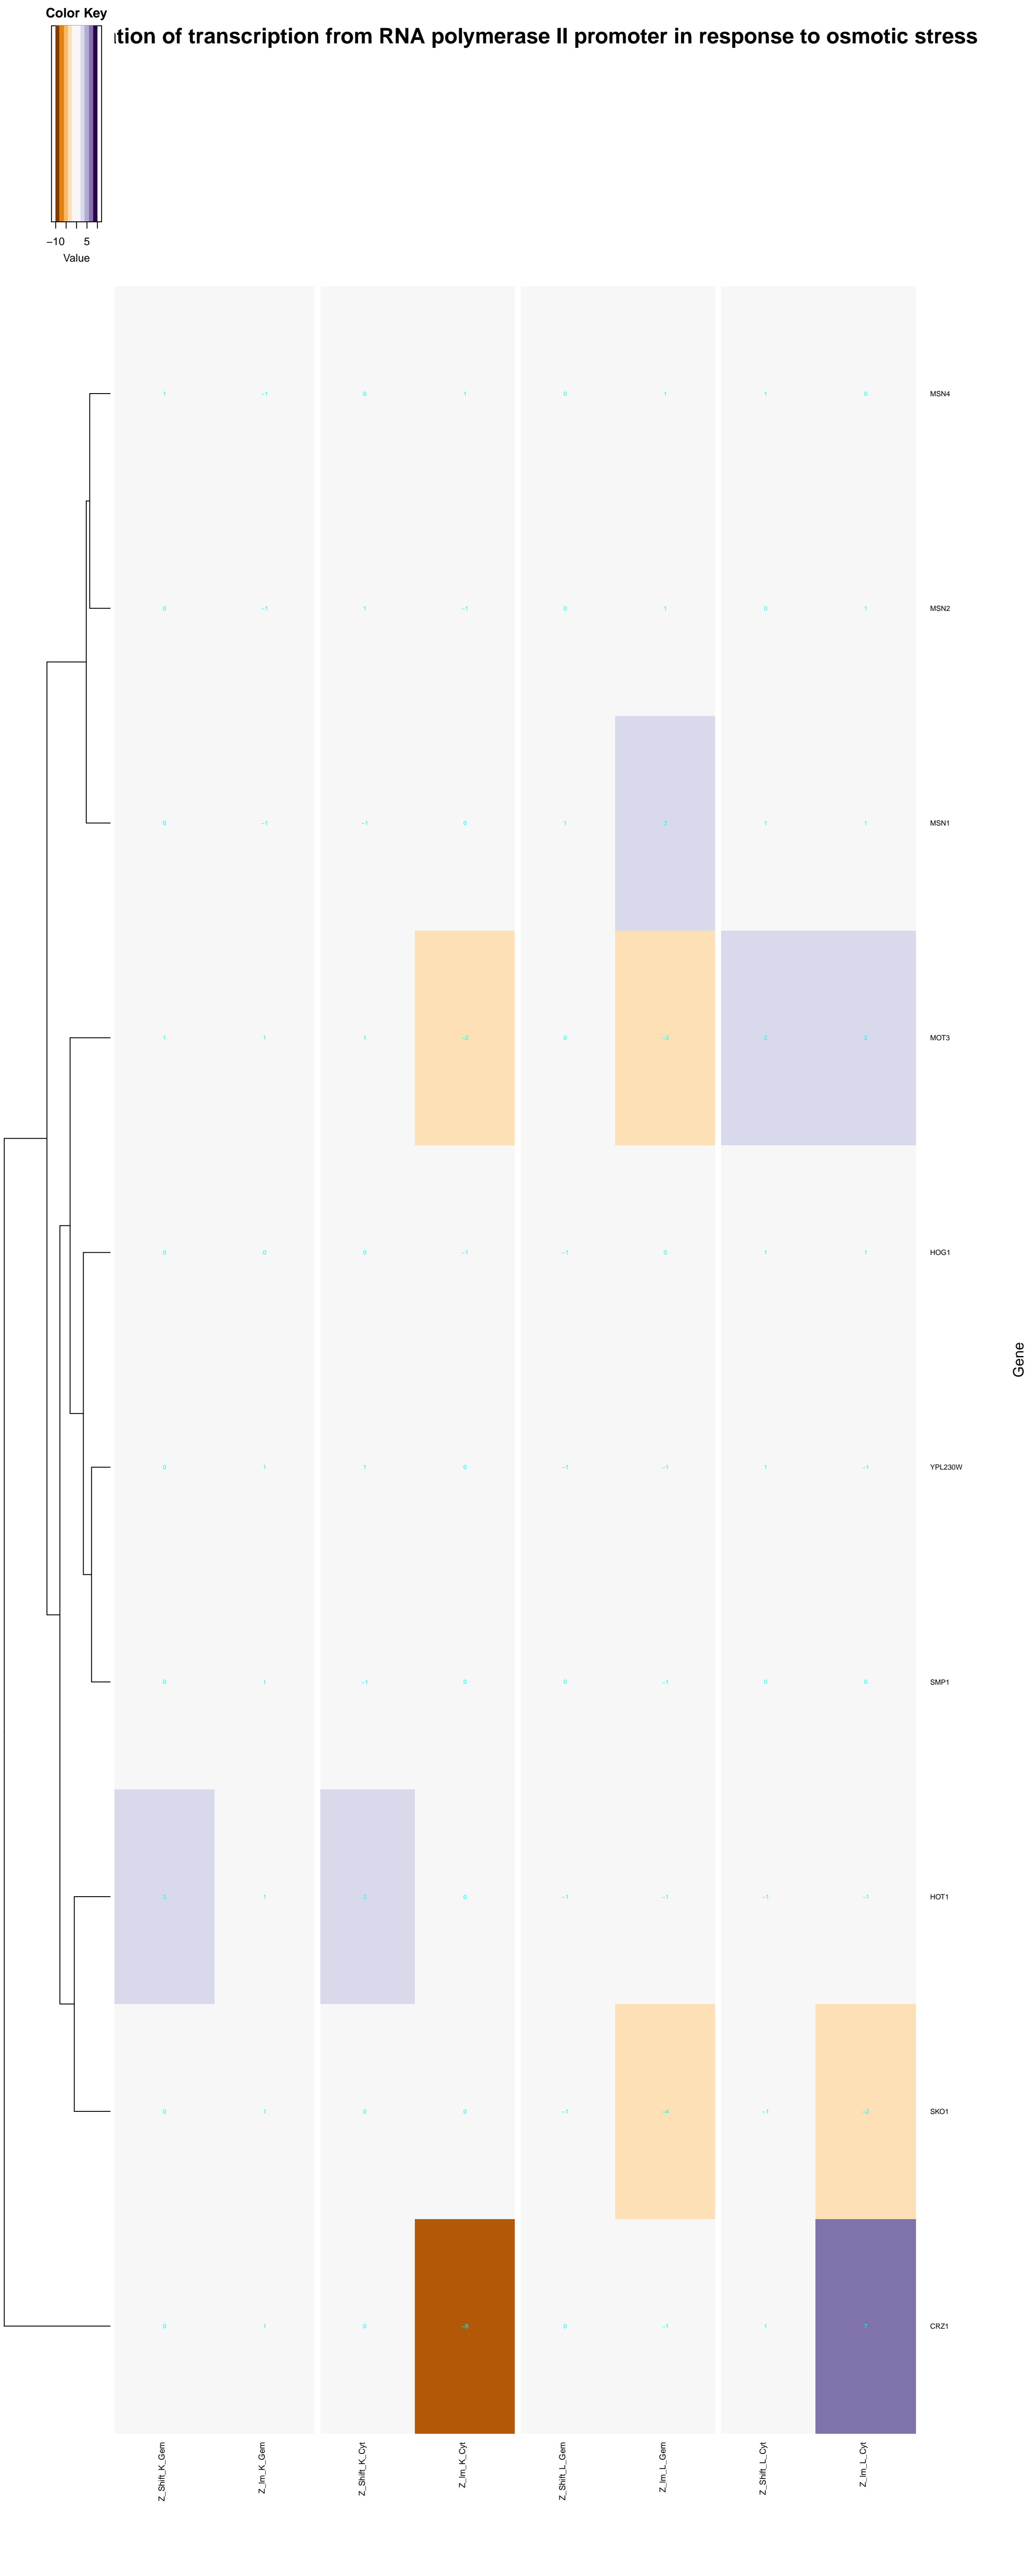

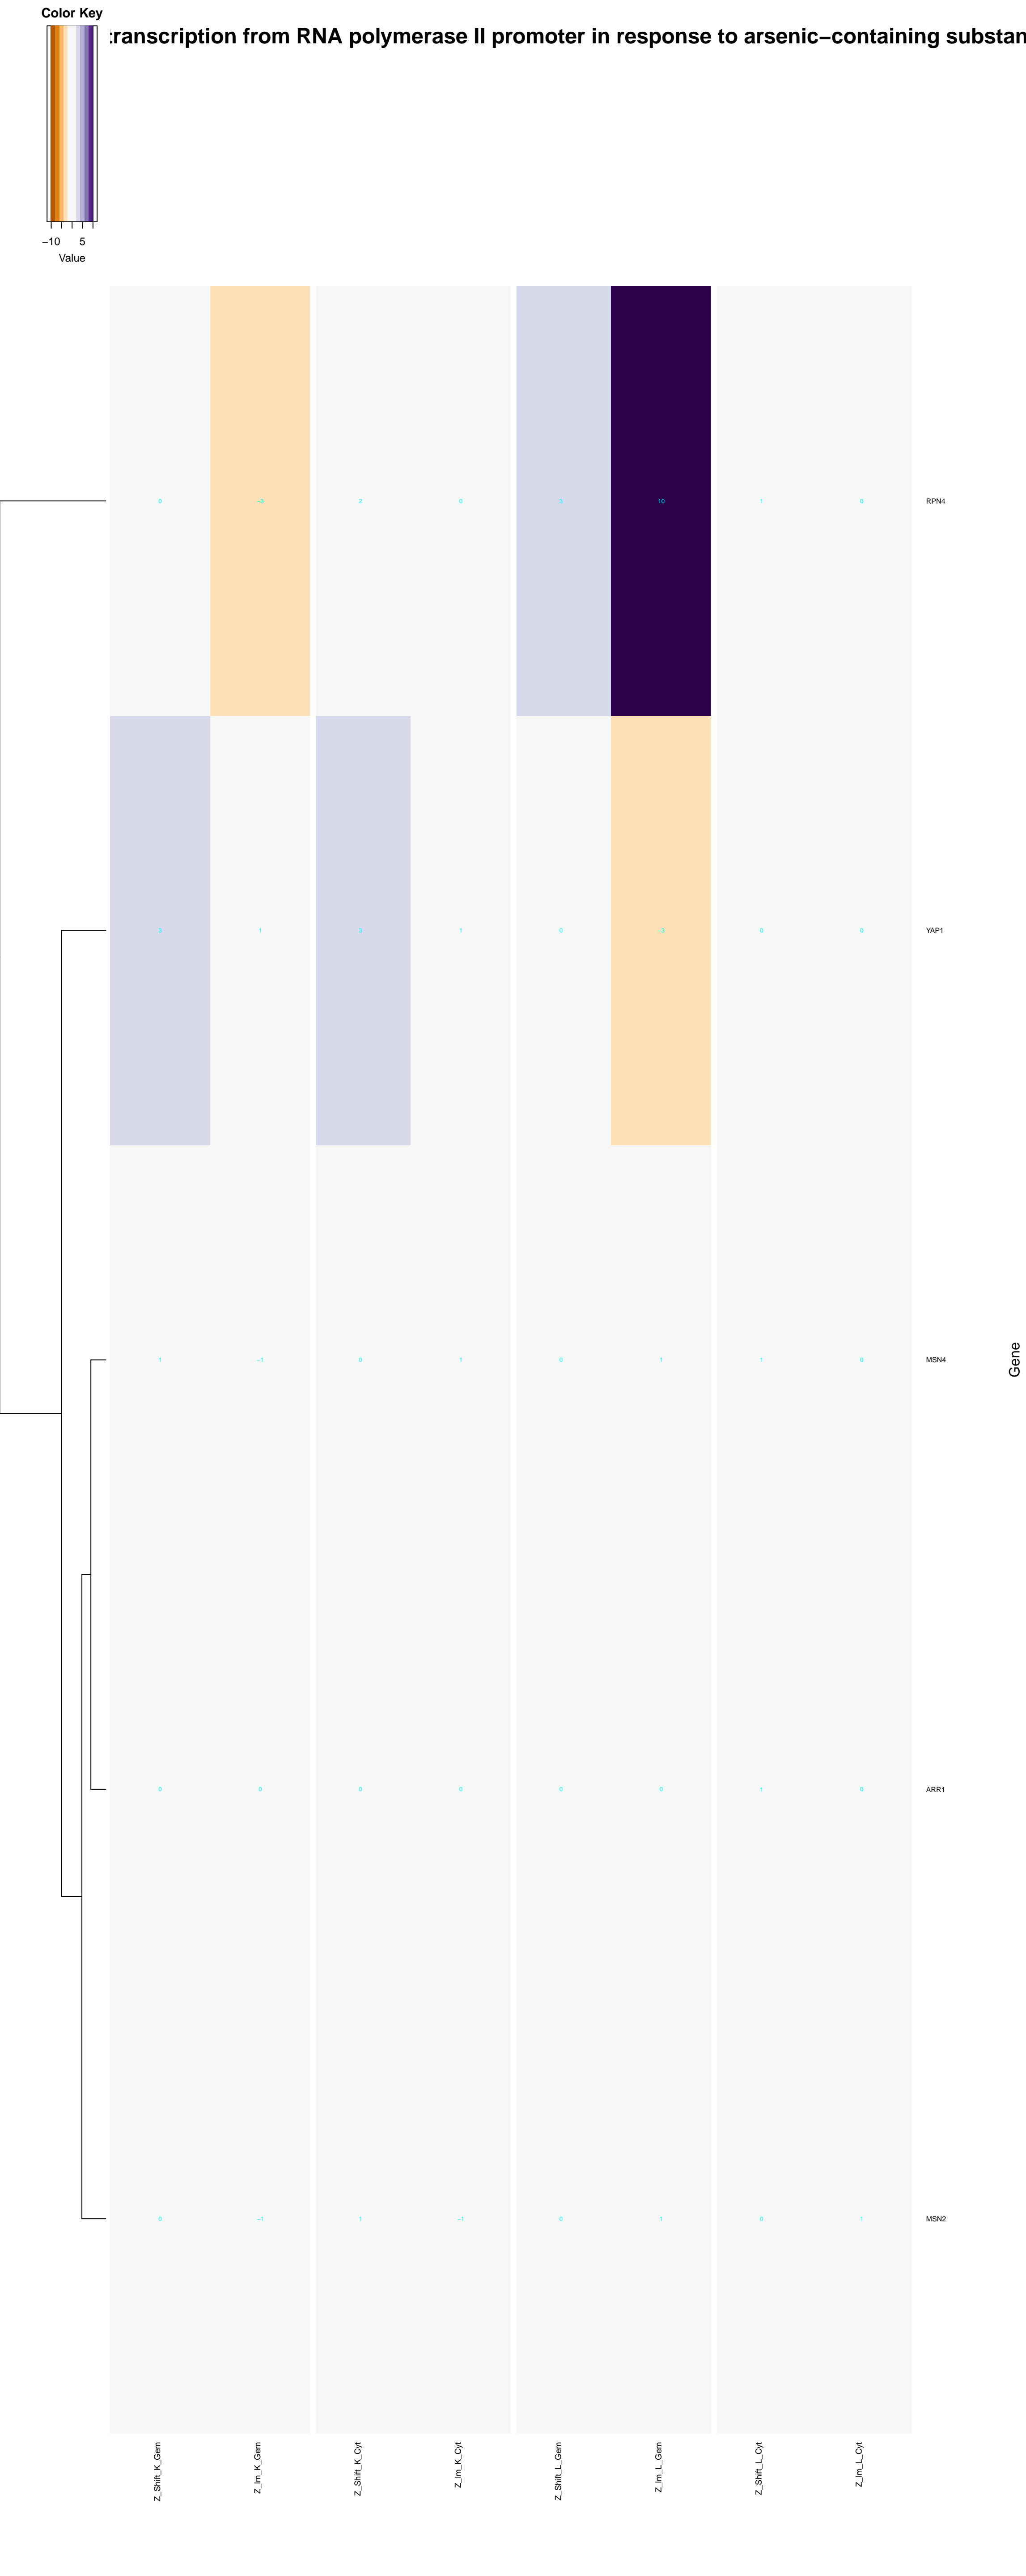

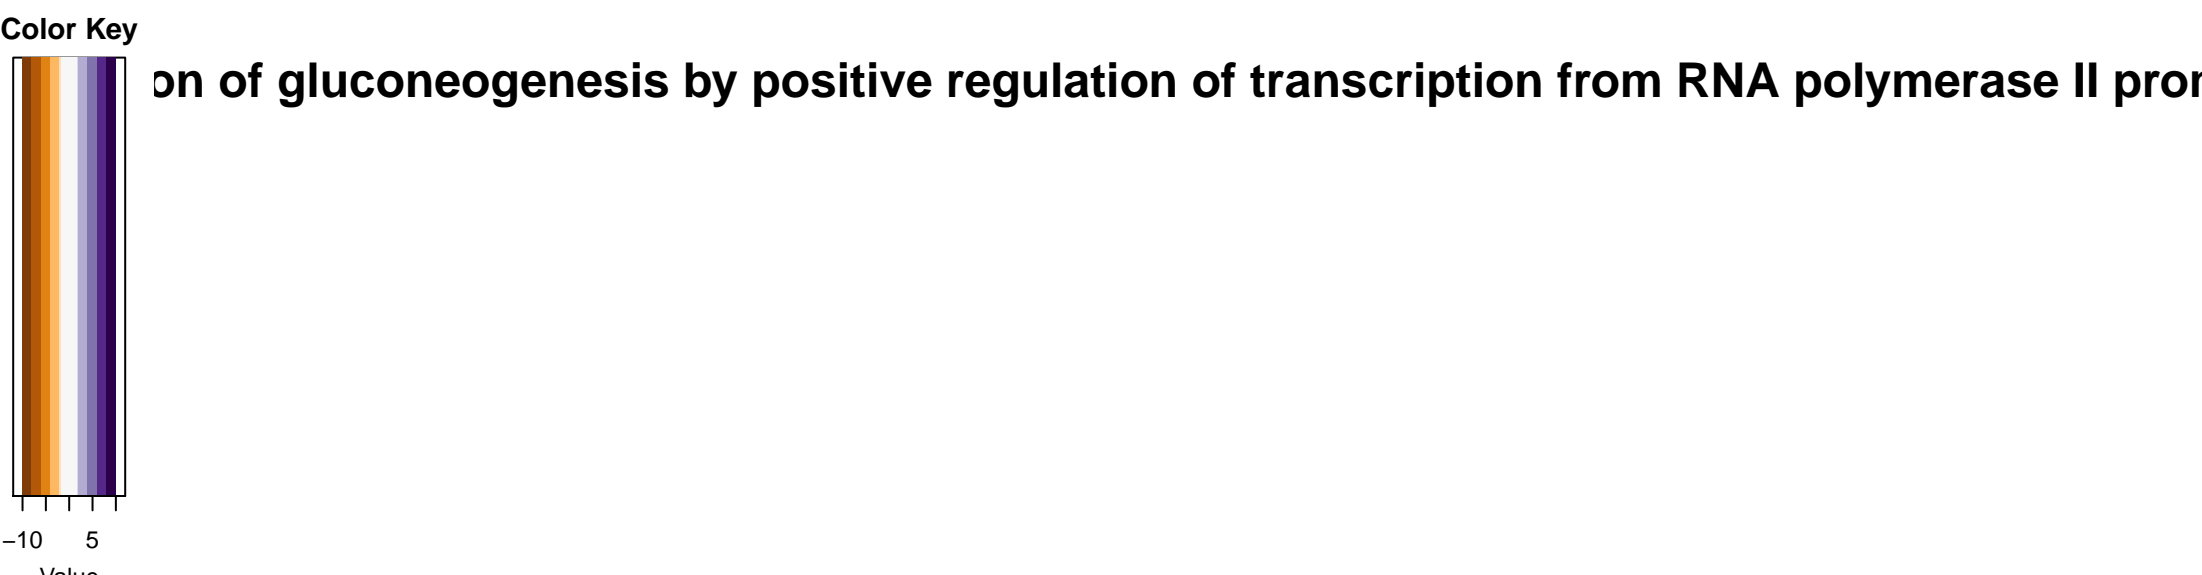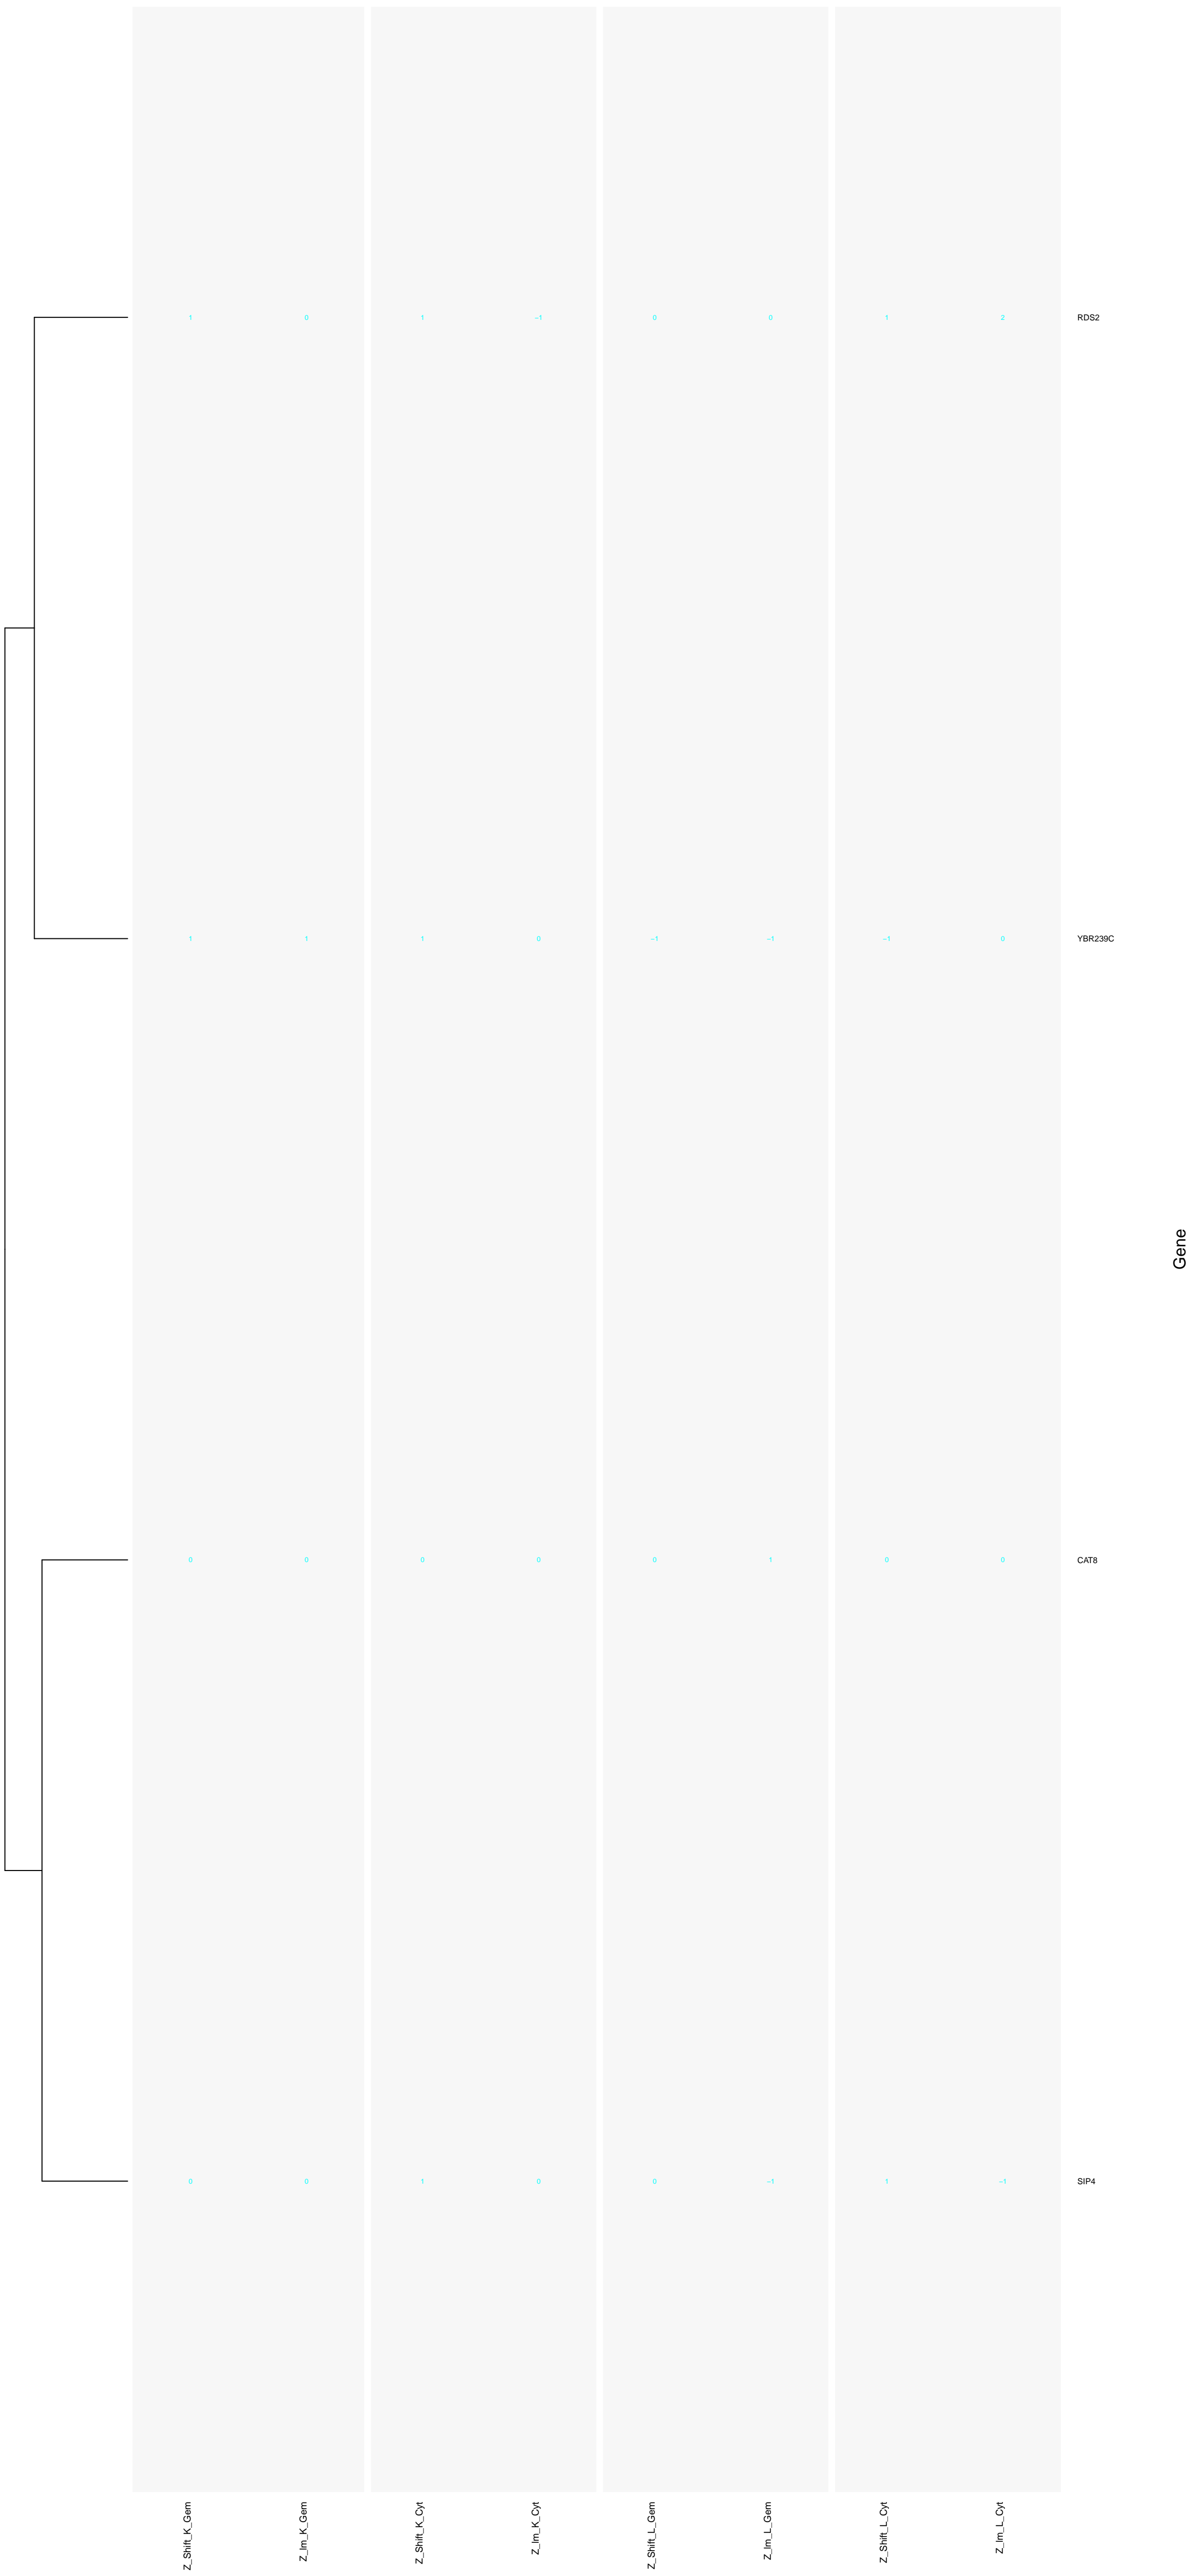



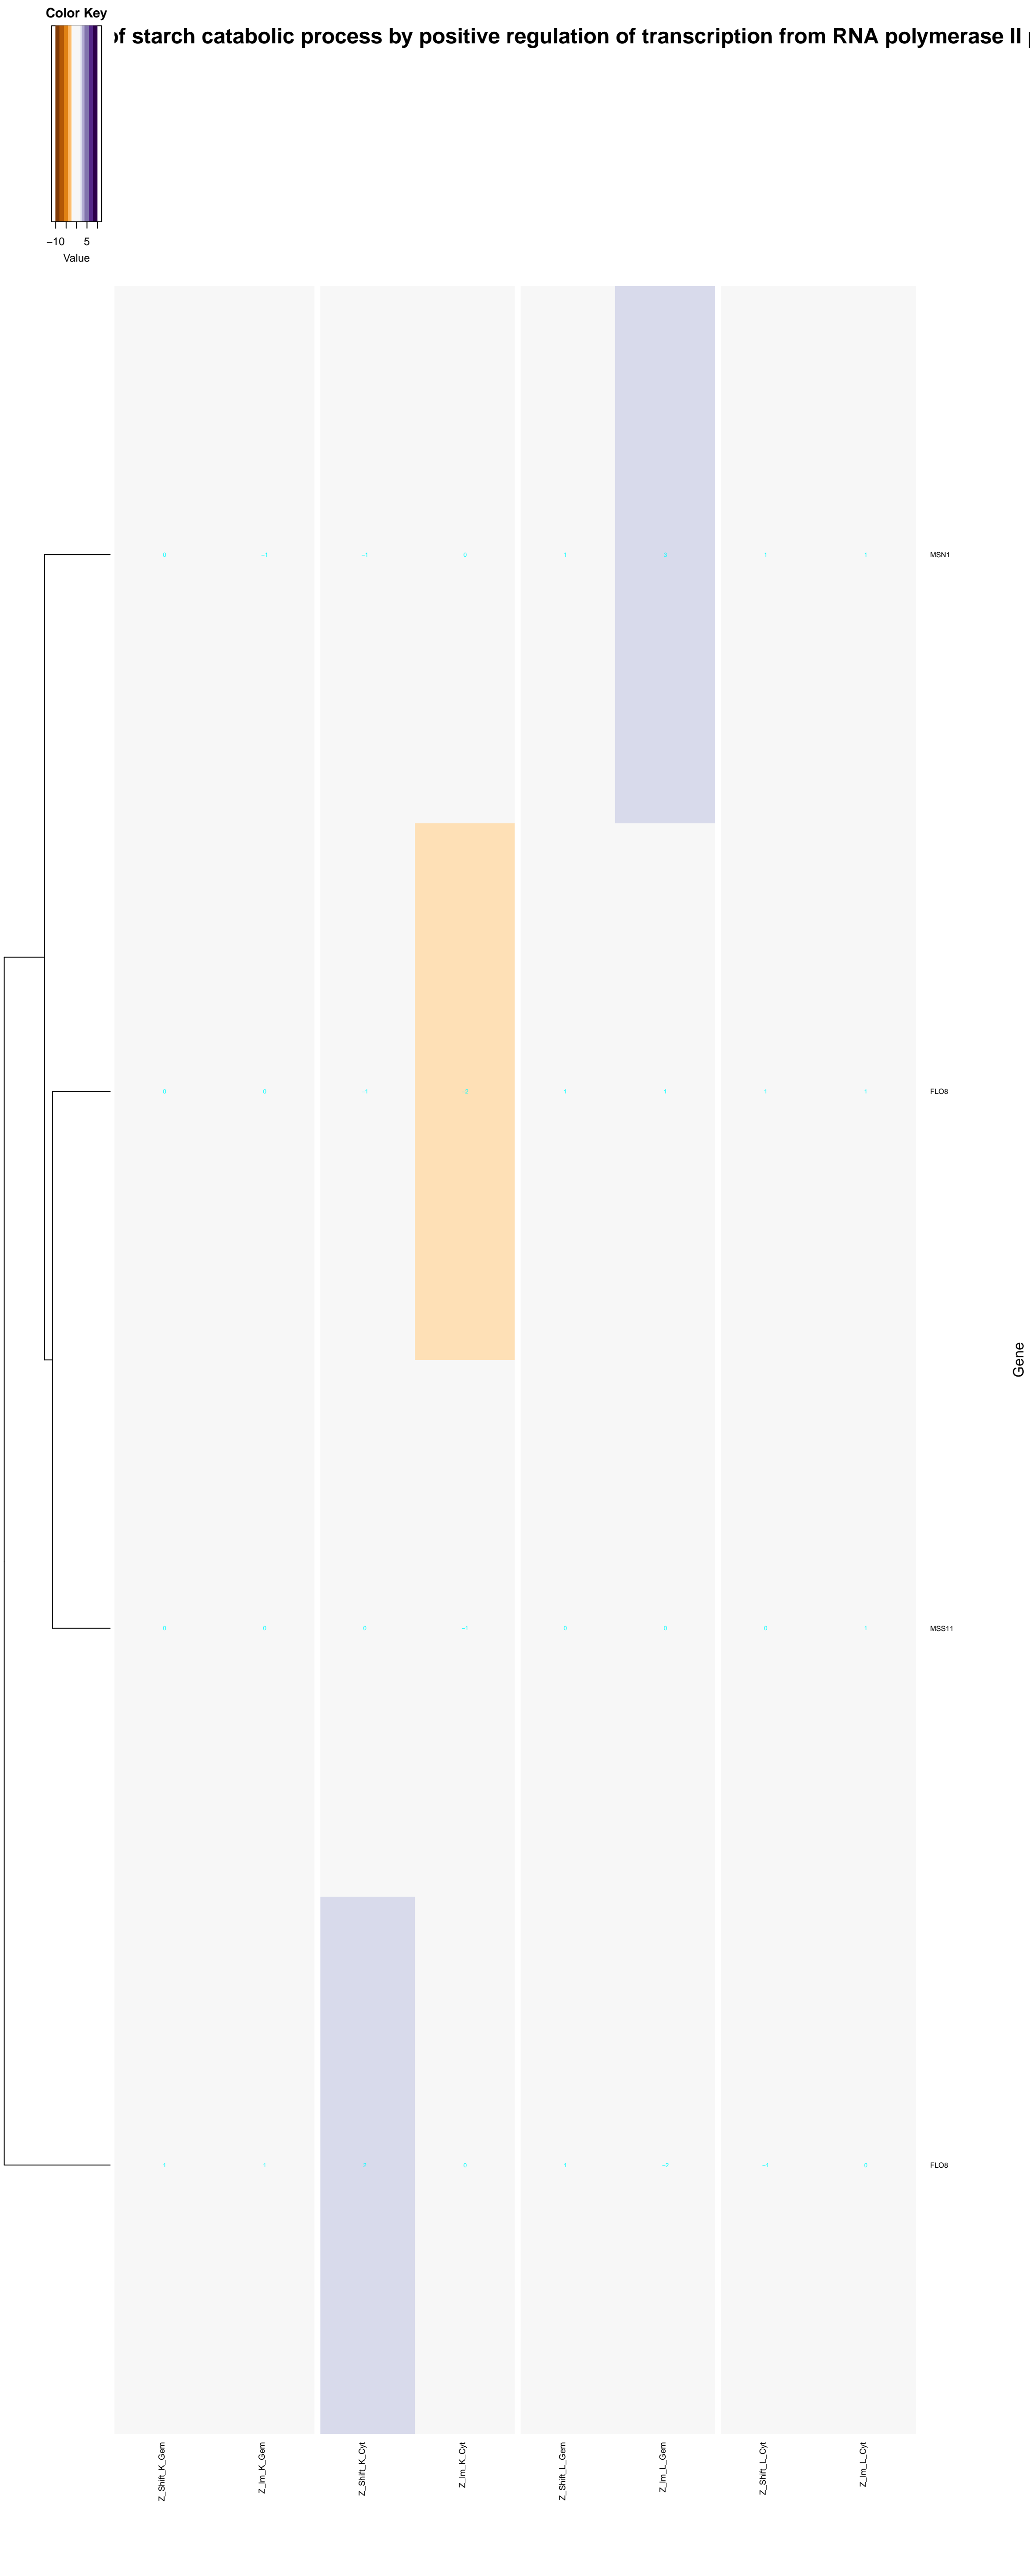

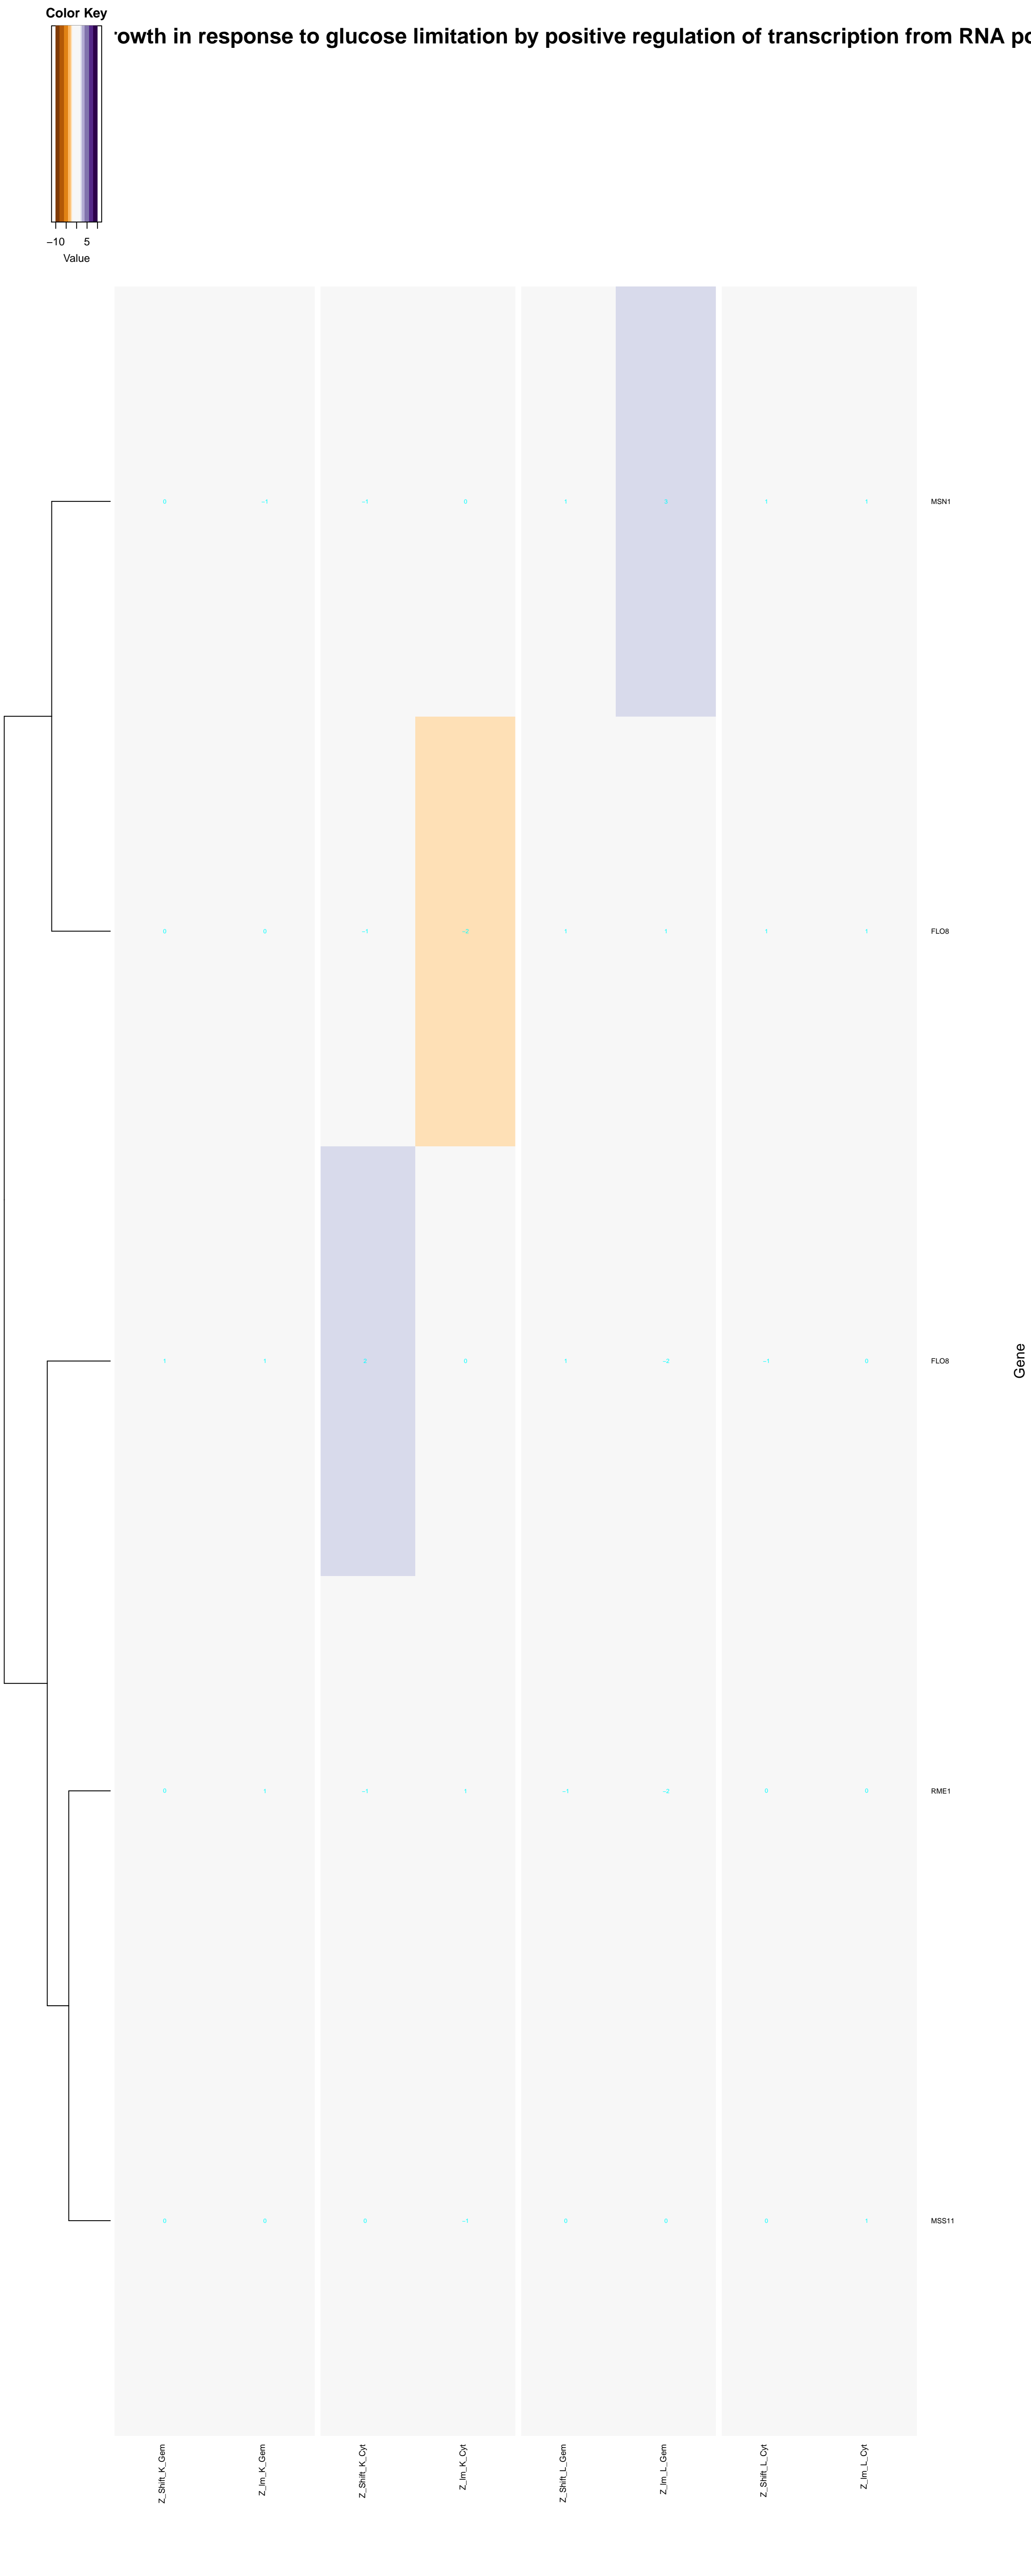

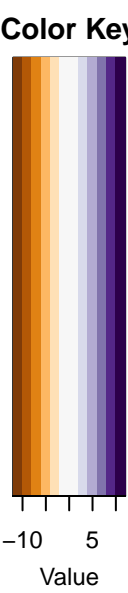

positive regulation of transcription initiation from RNA polymerase II promoter

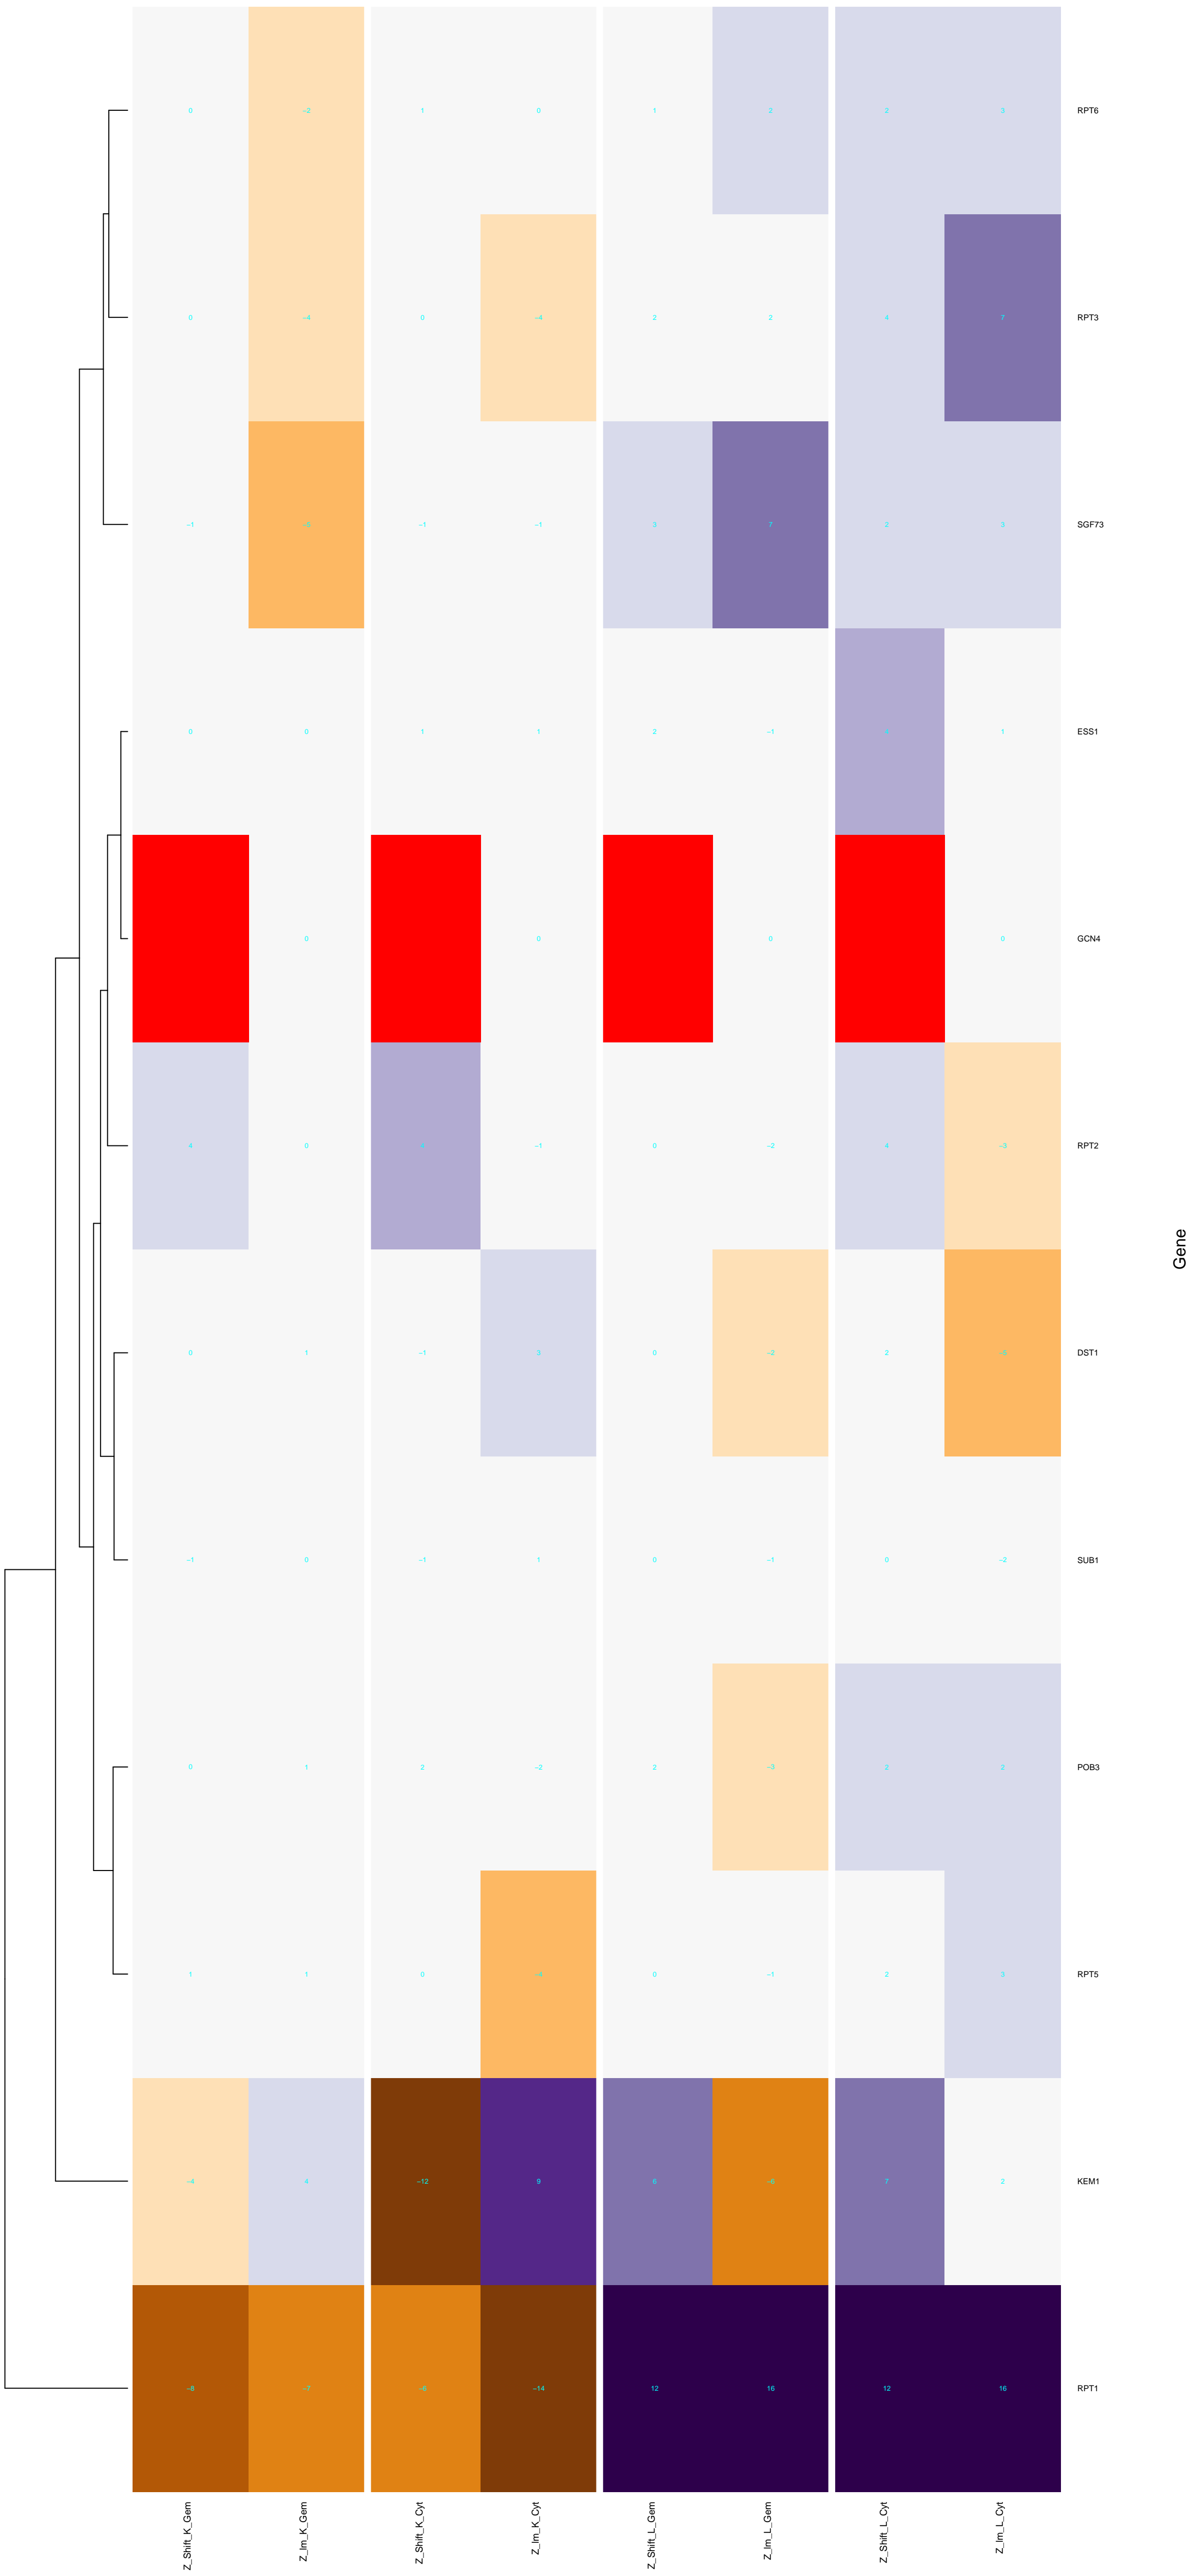

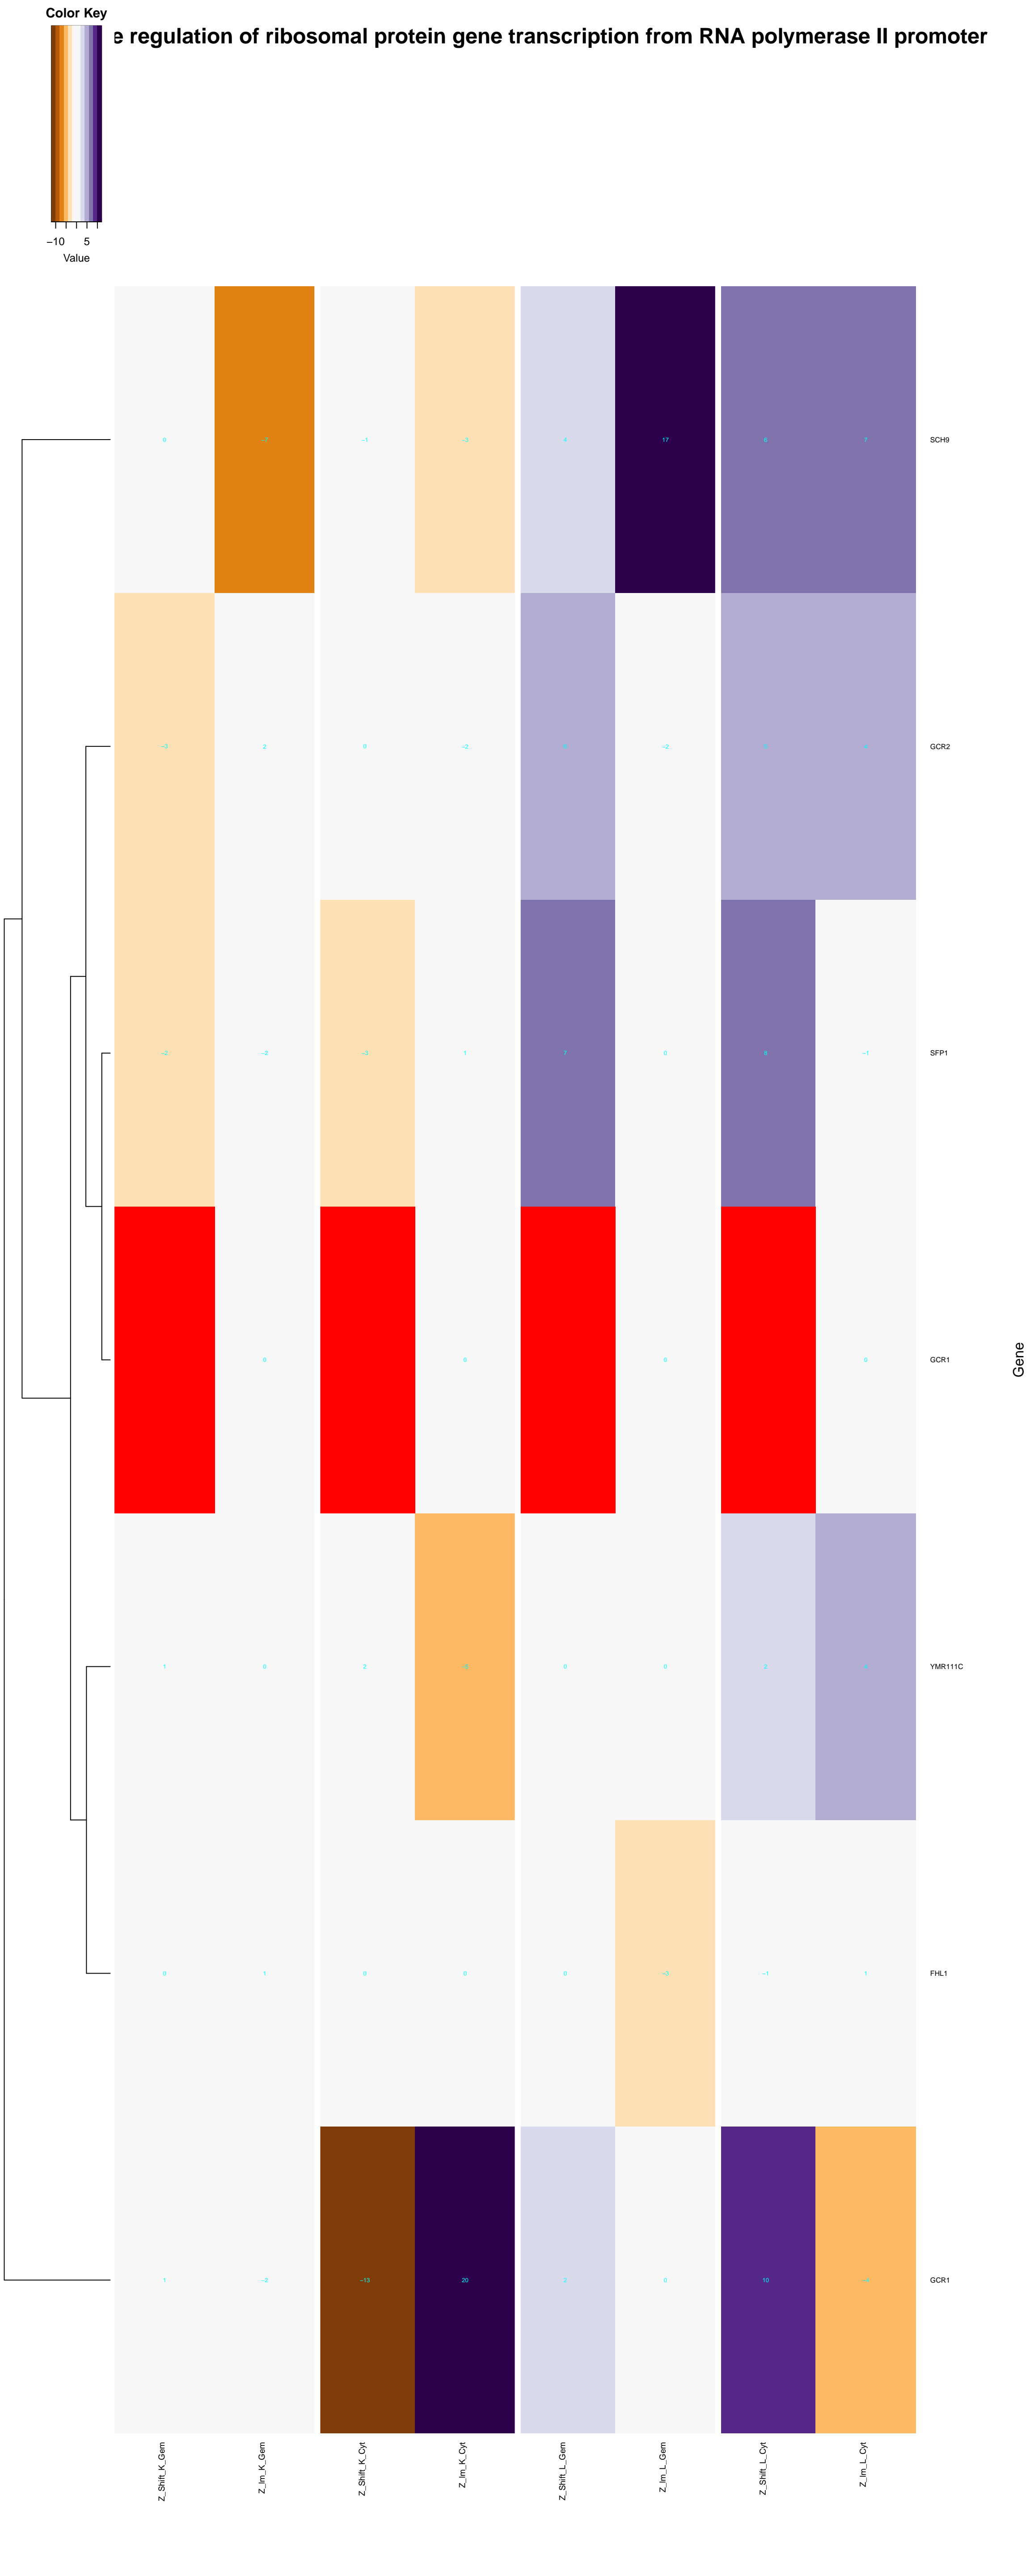

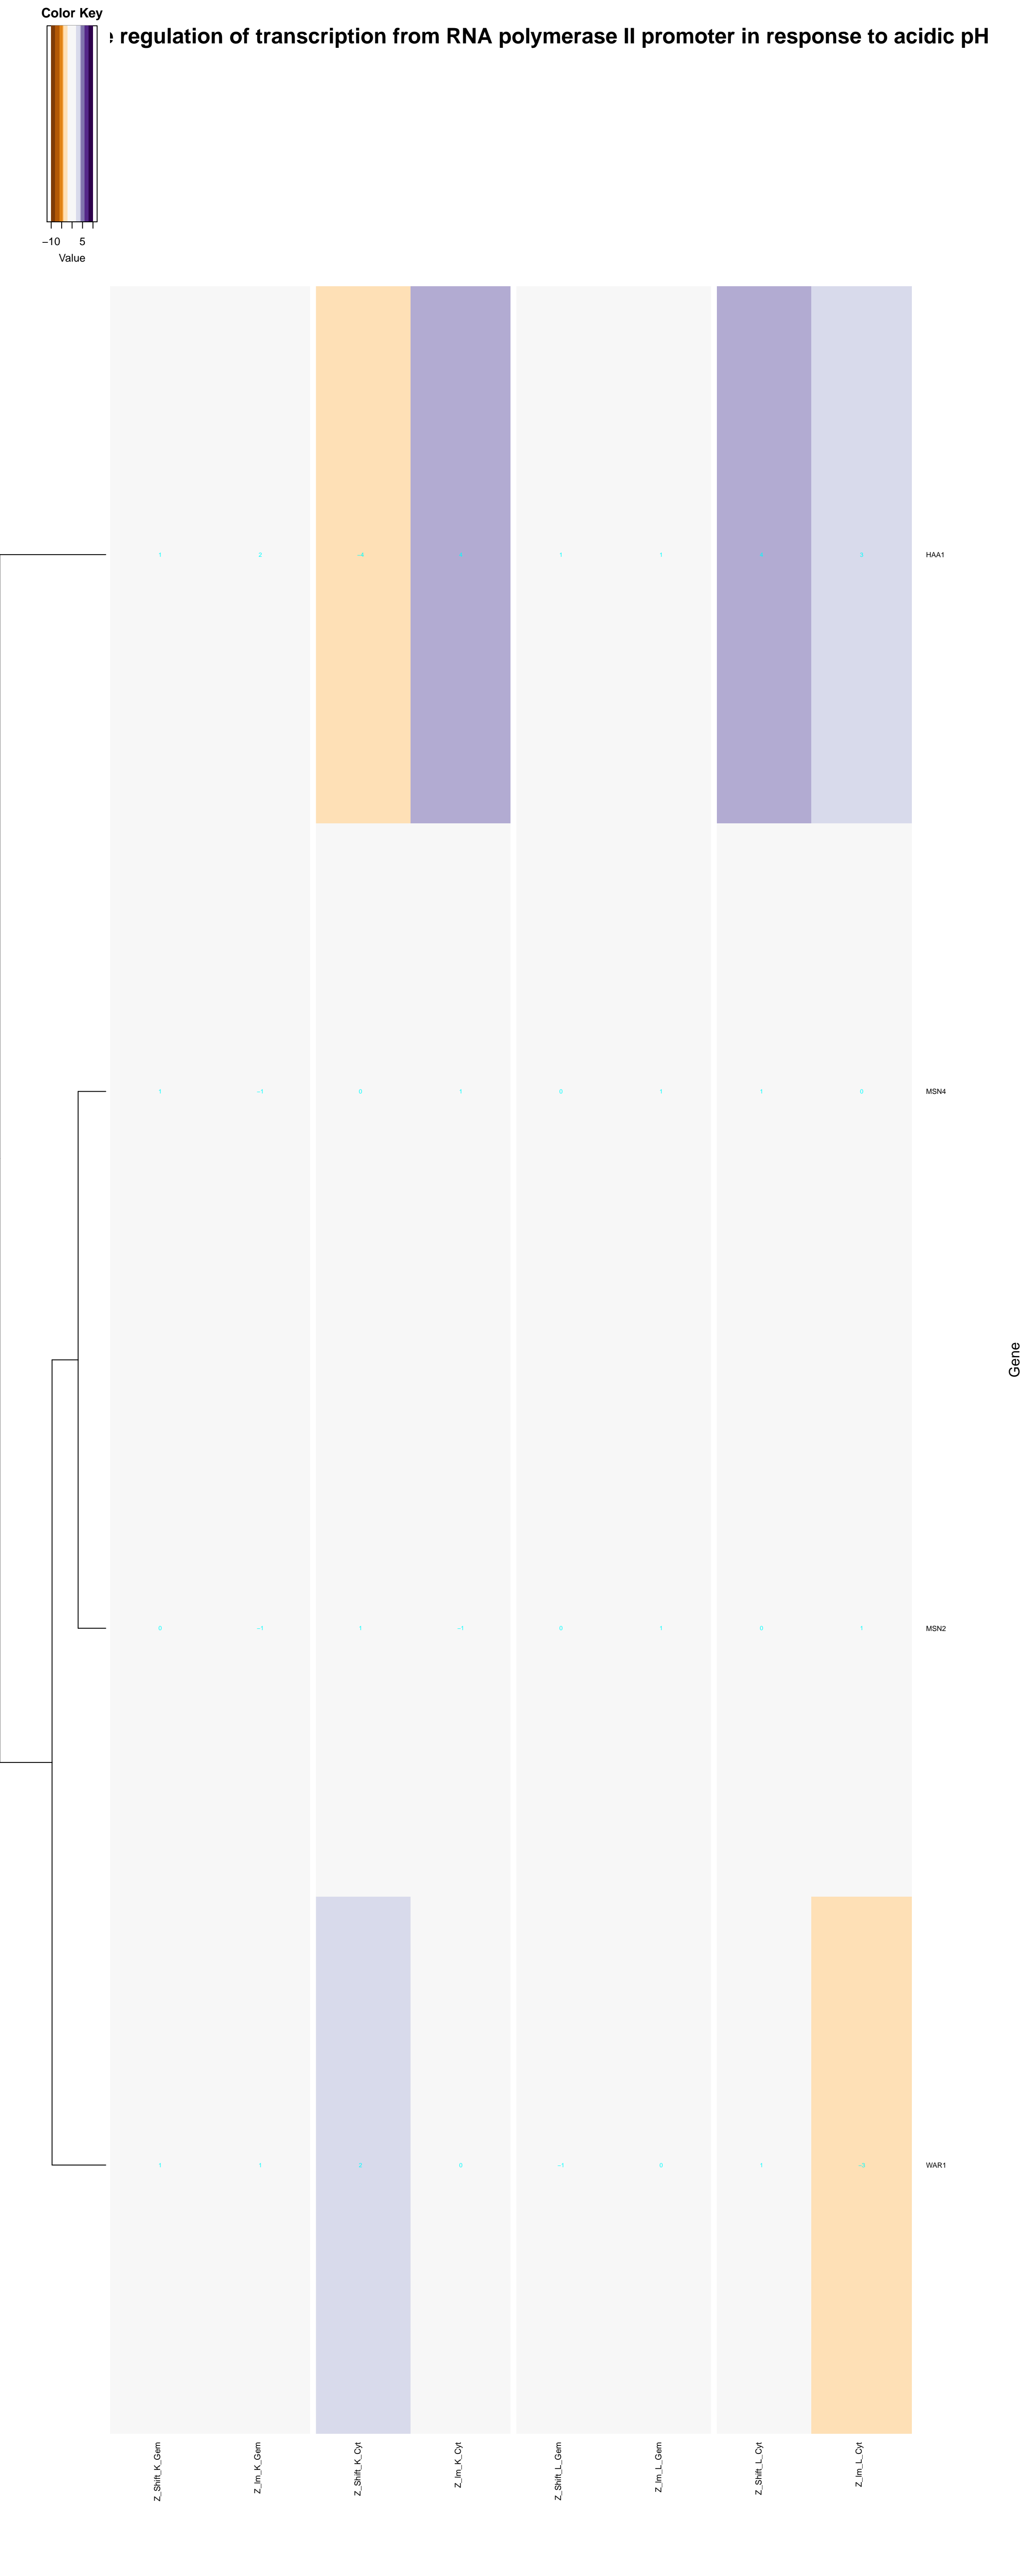

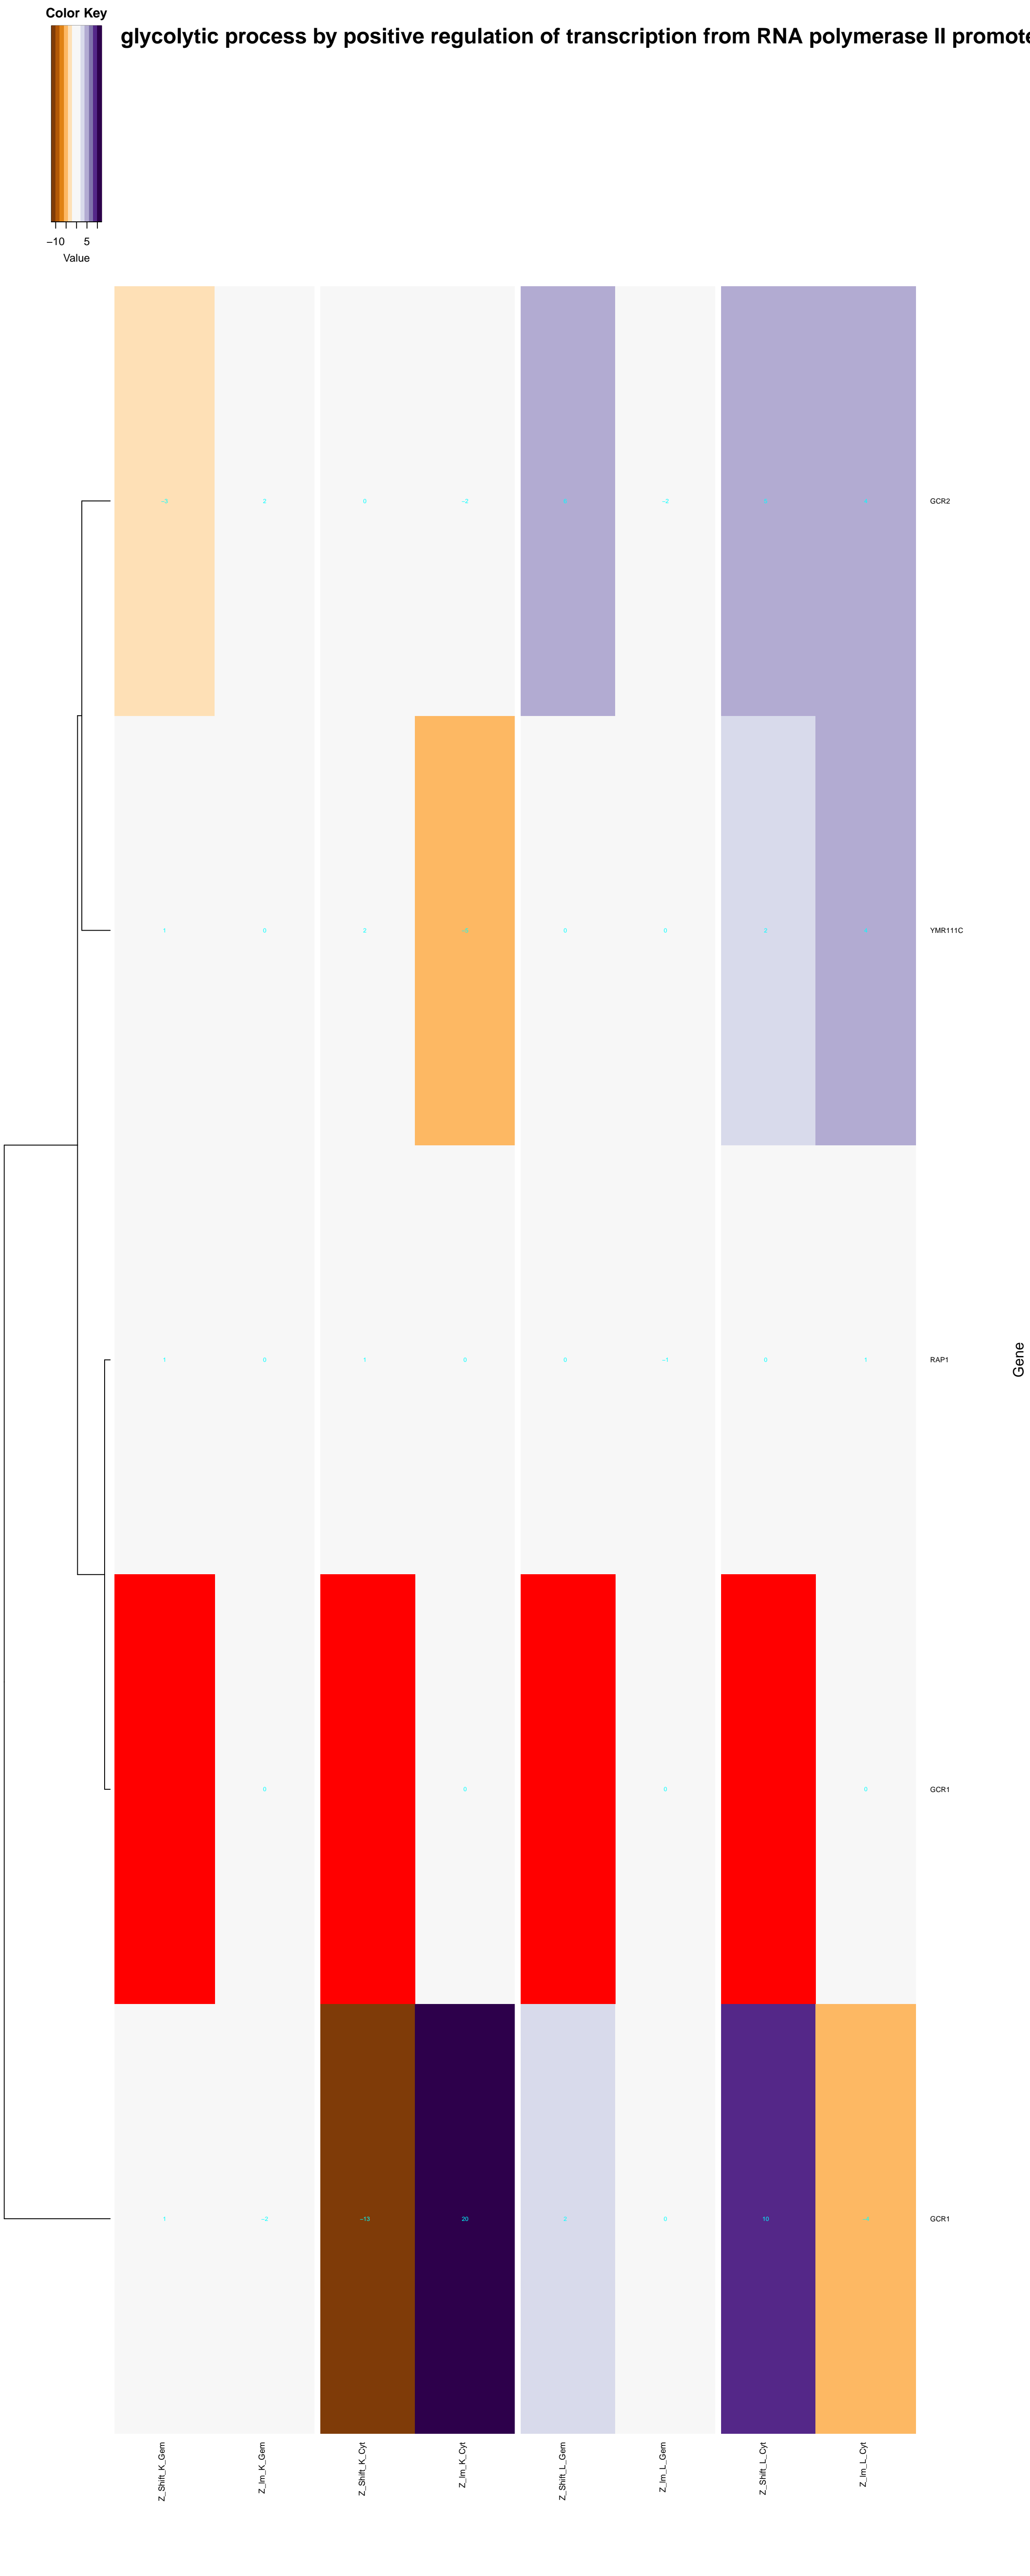

ketone metabolic process by positive regulation of transcription from RNA polymerase II

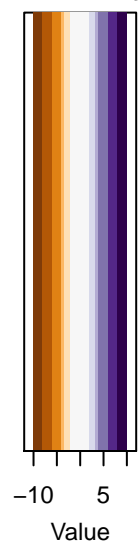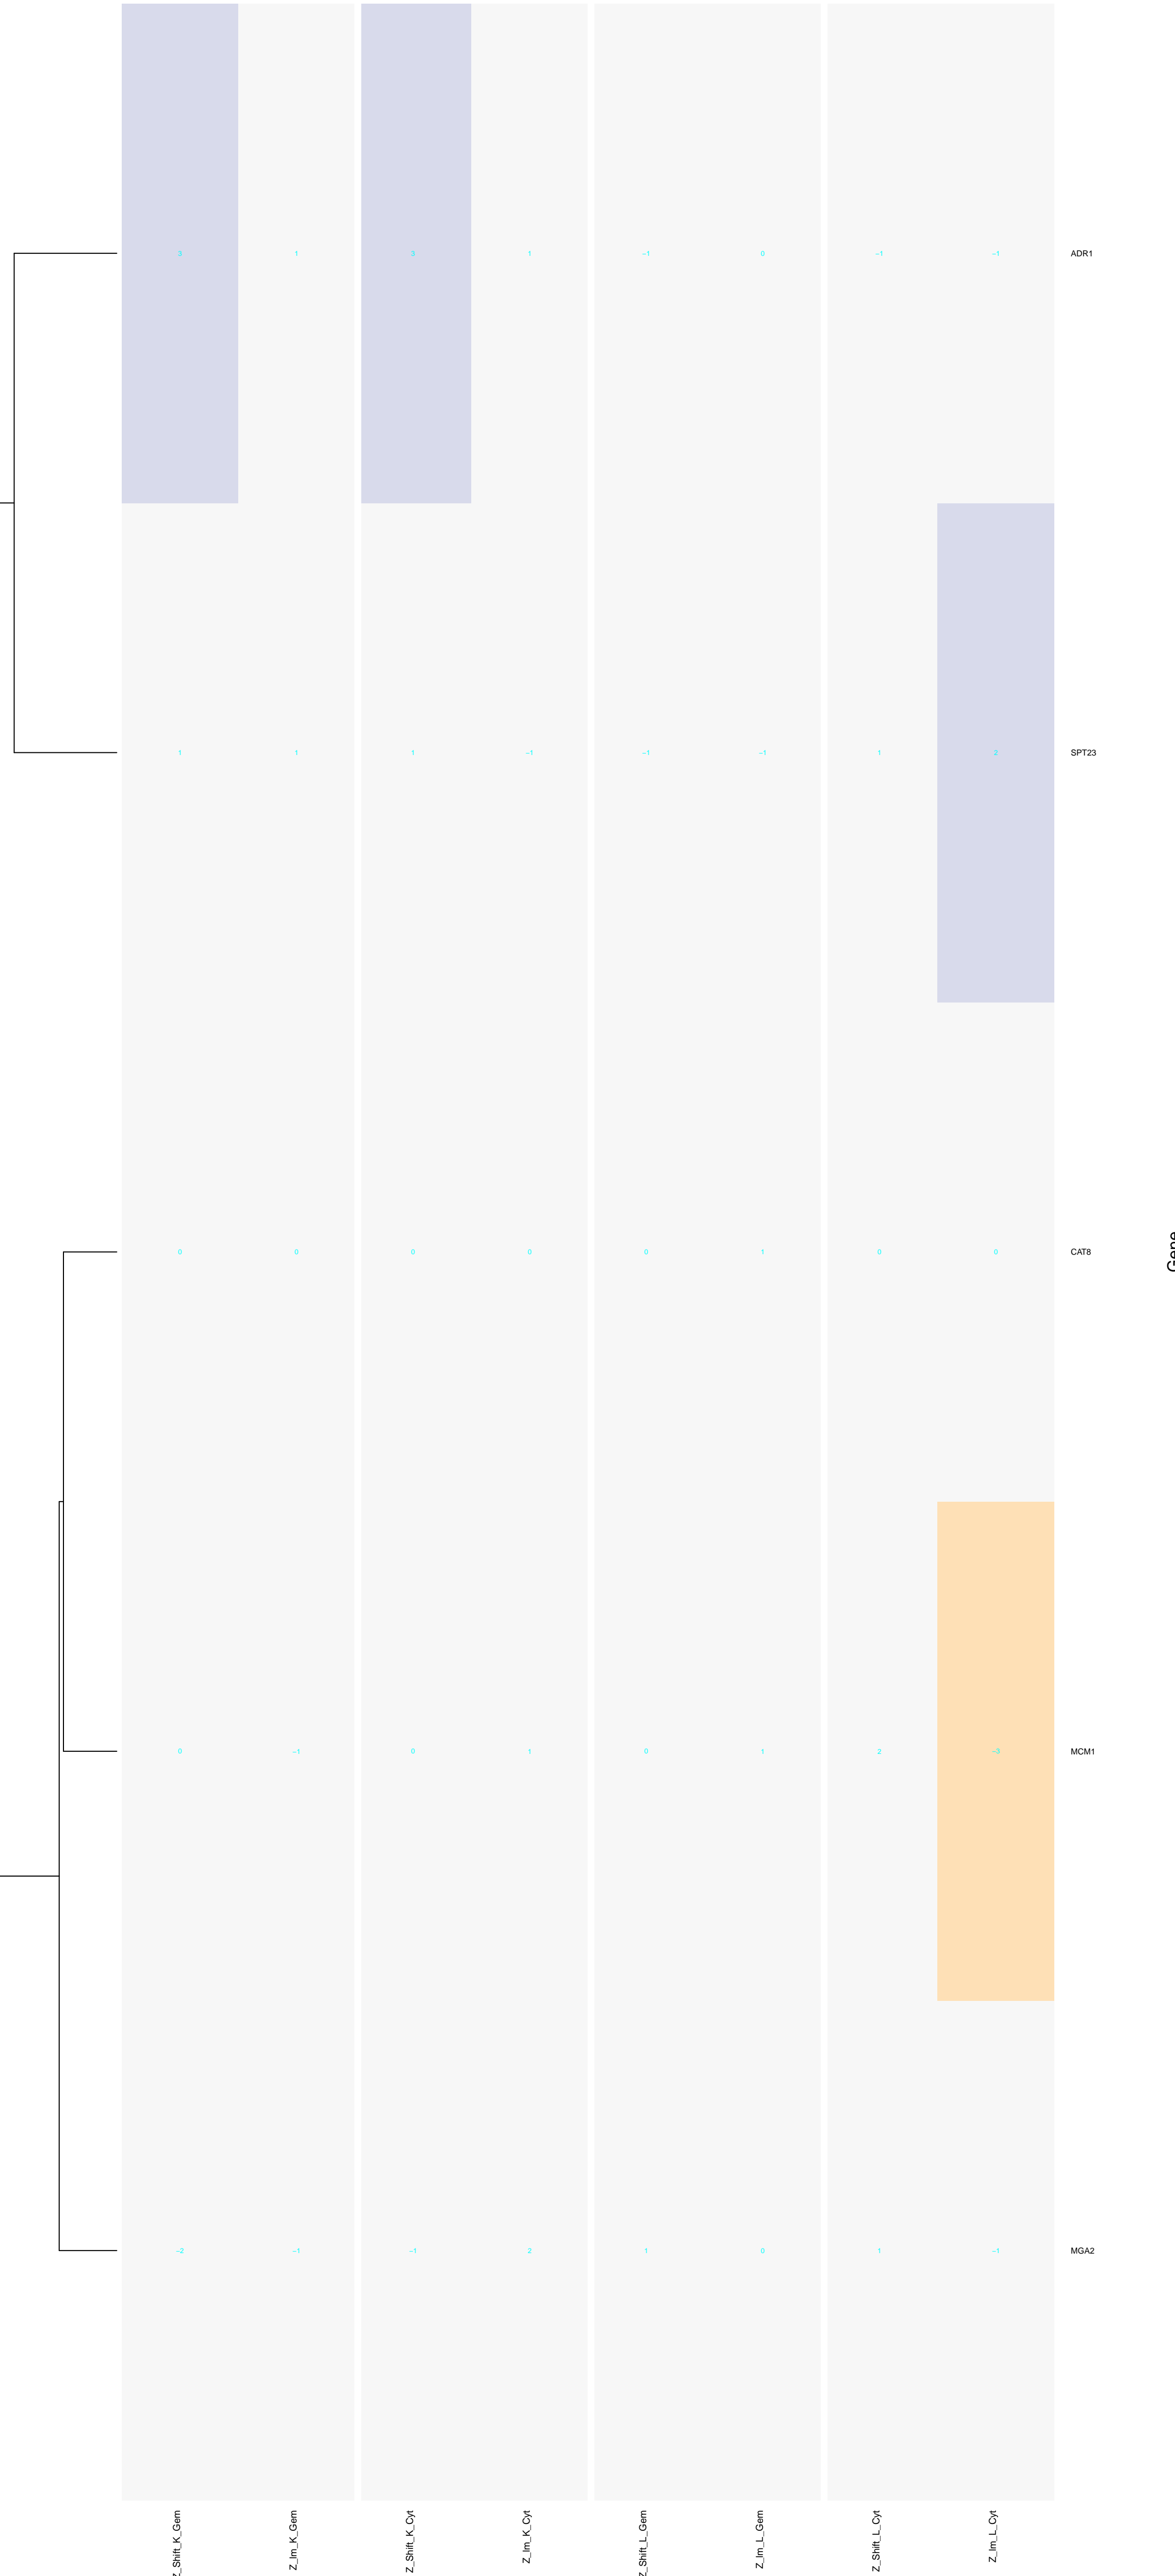

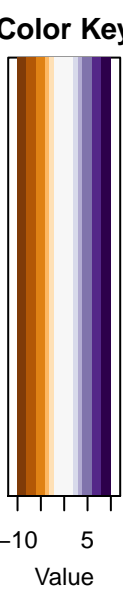

of lipid transport by positive regulation of transcription from RNA polymerase II promoter

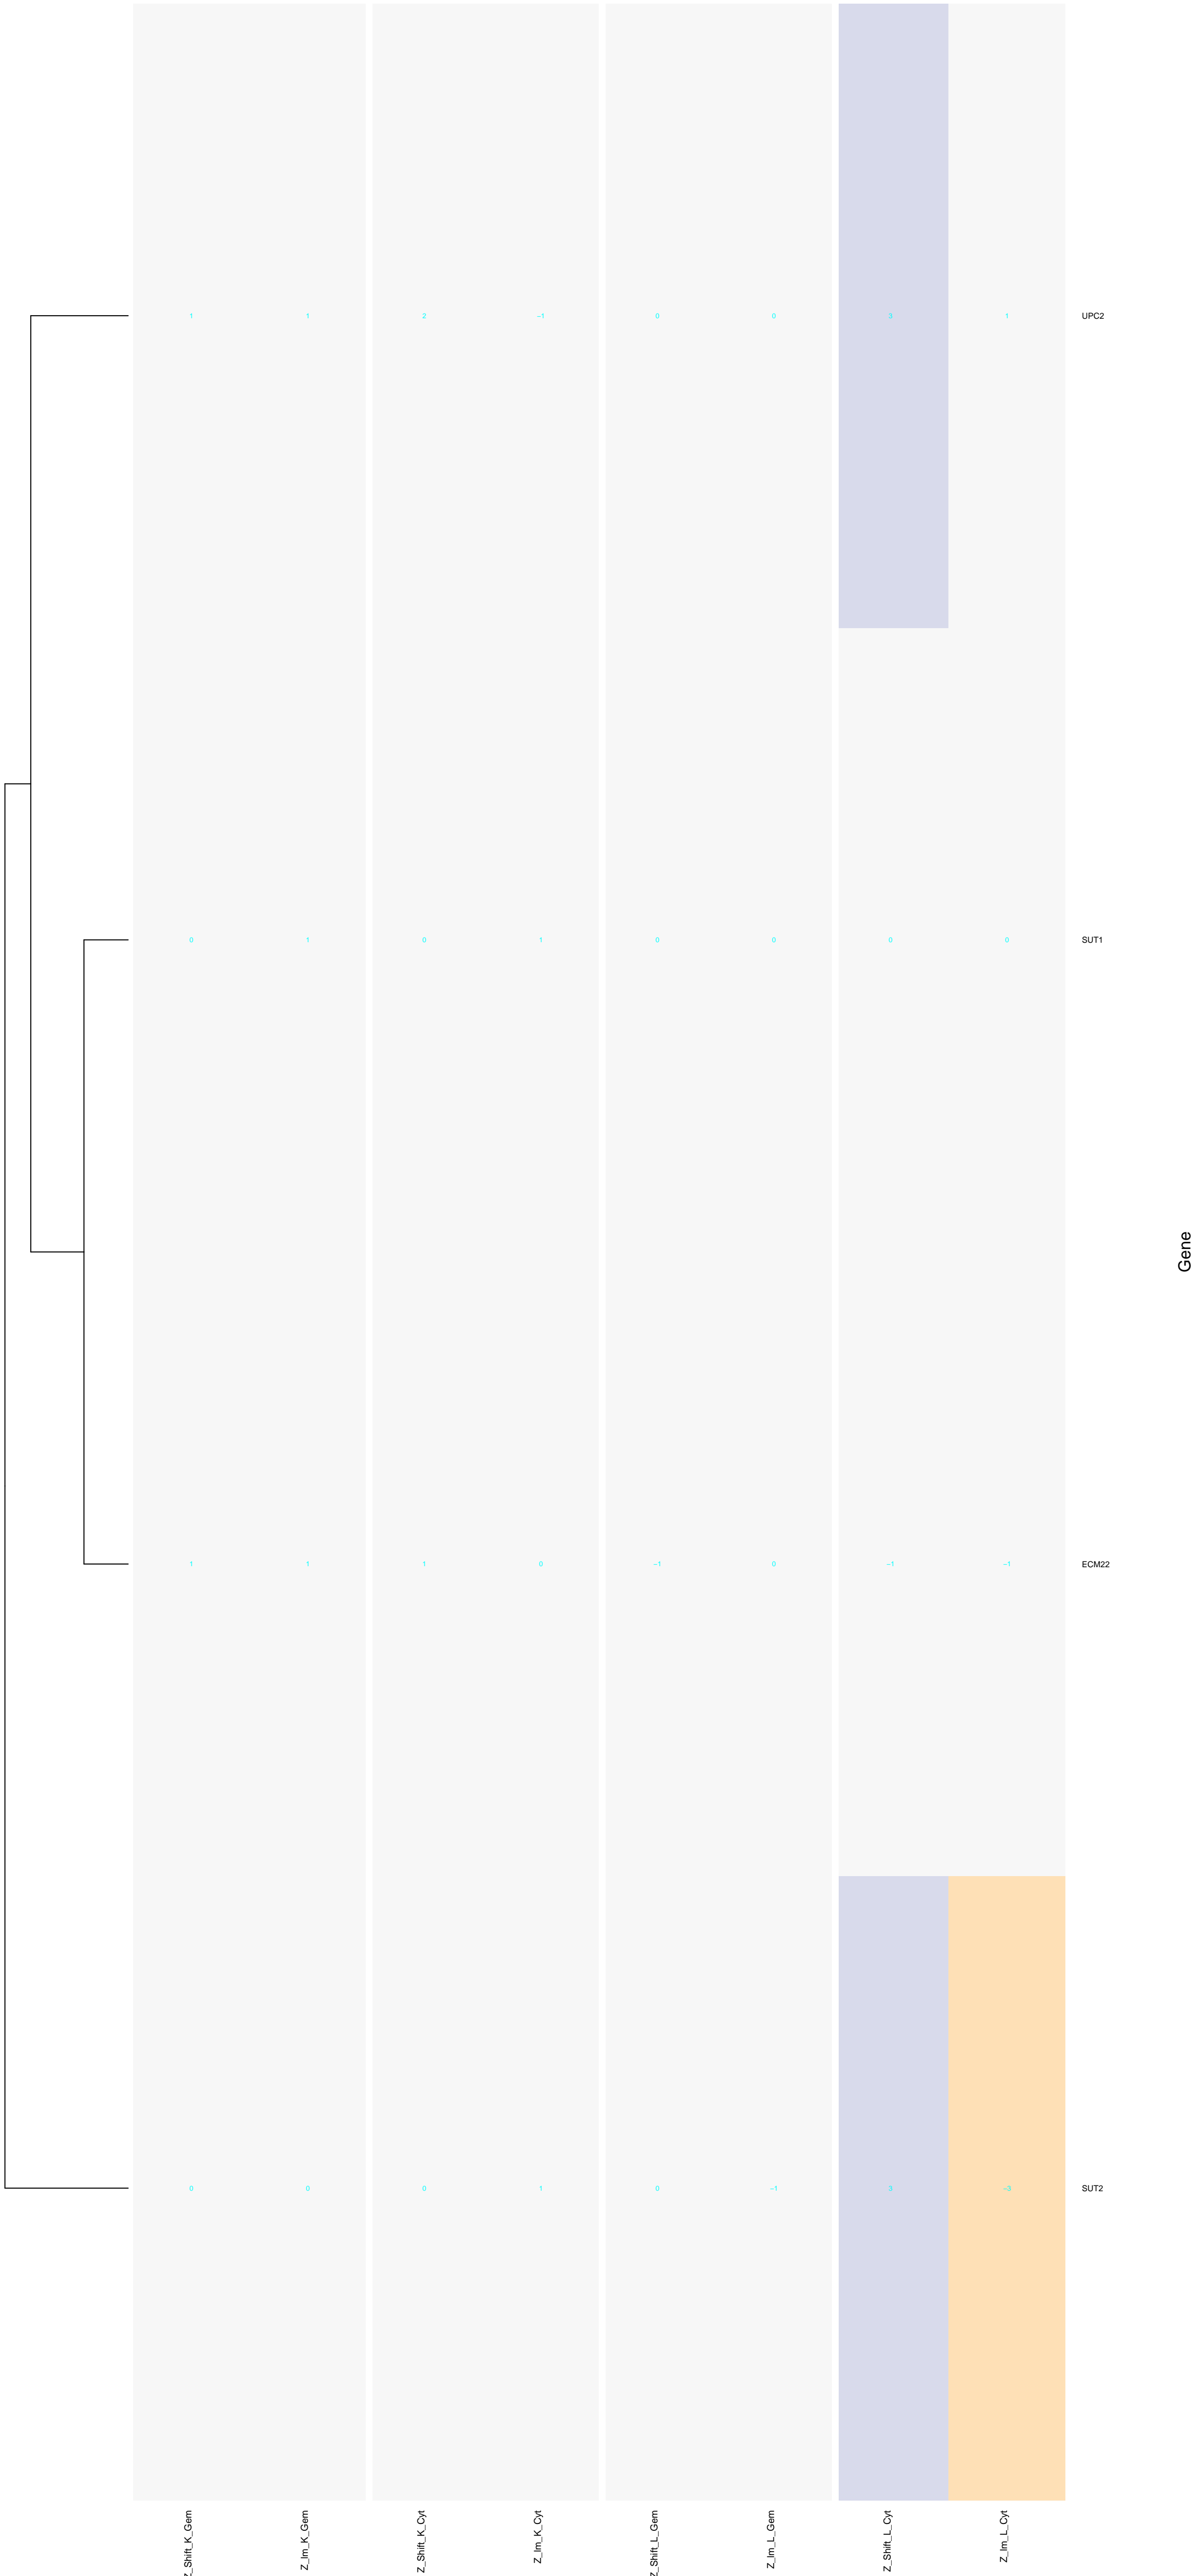





Positive regulation of transcription involved in G2/M transition of mitotic cell cycle

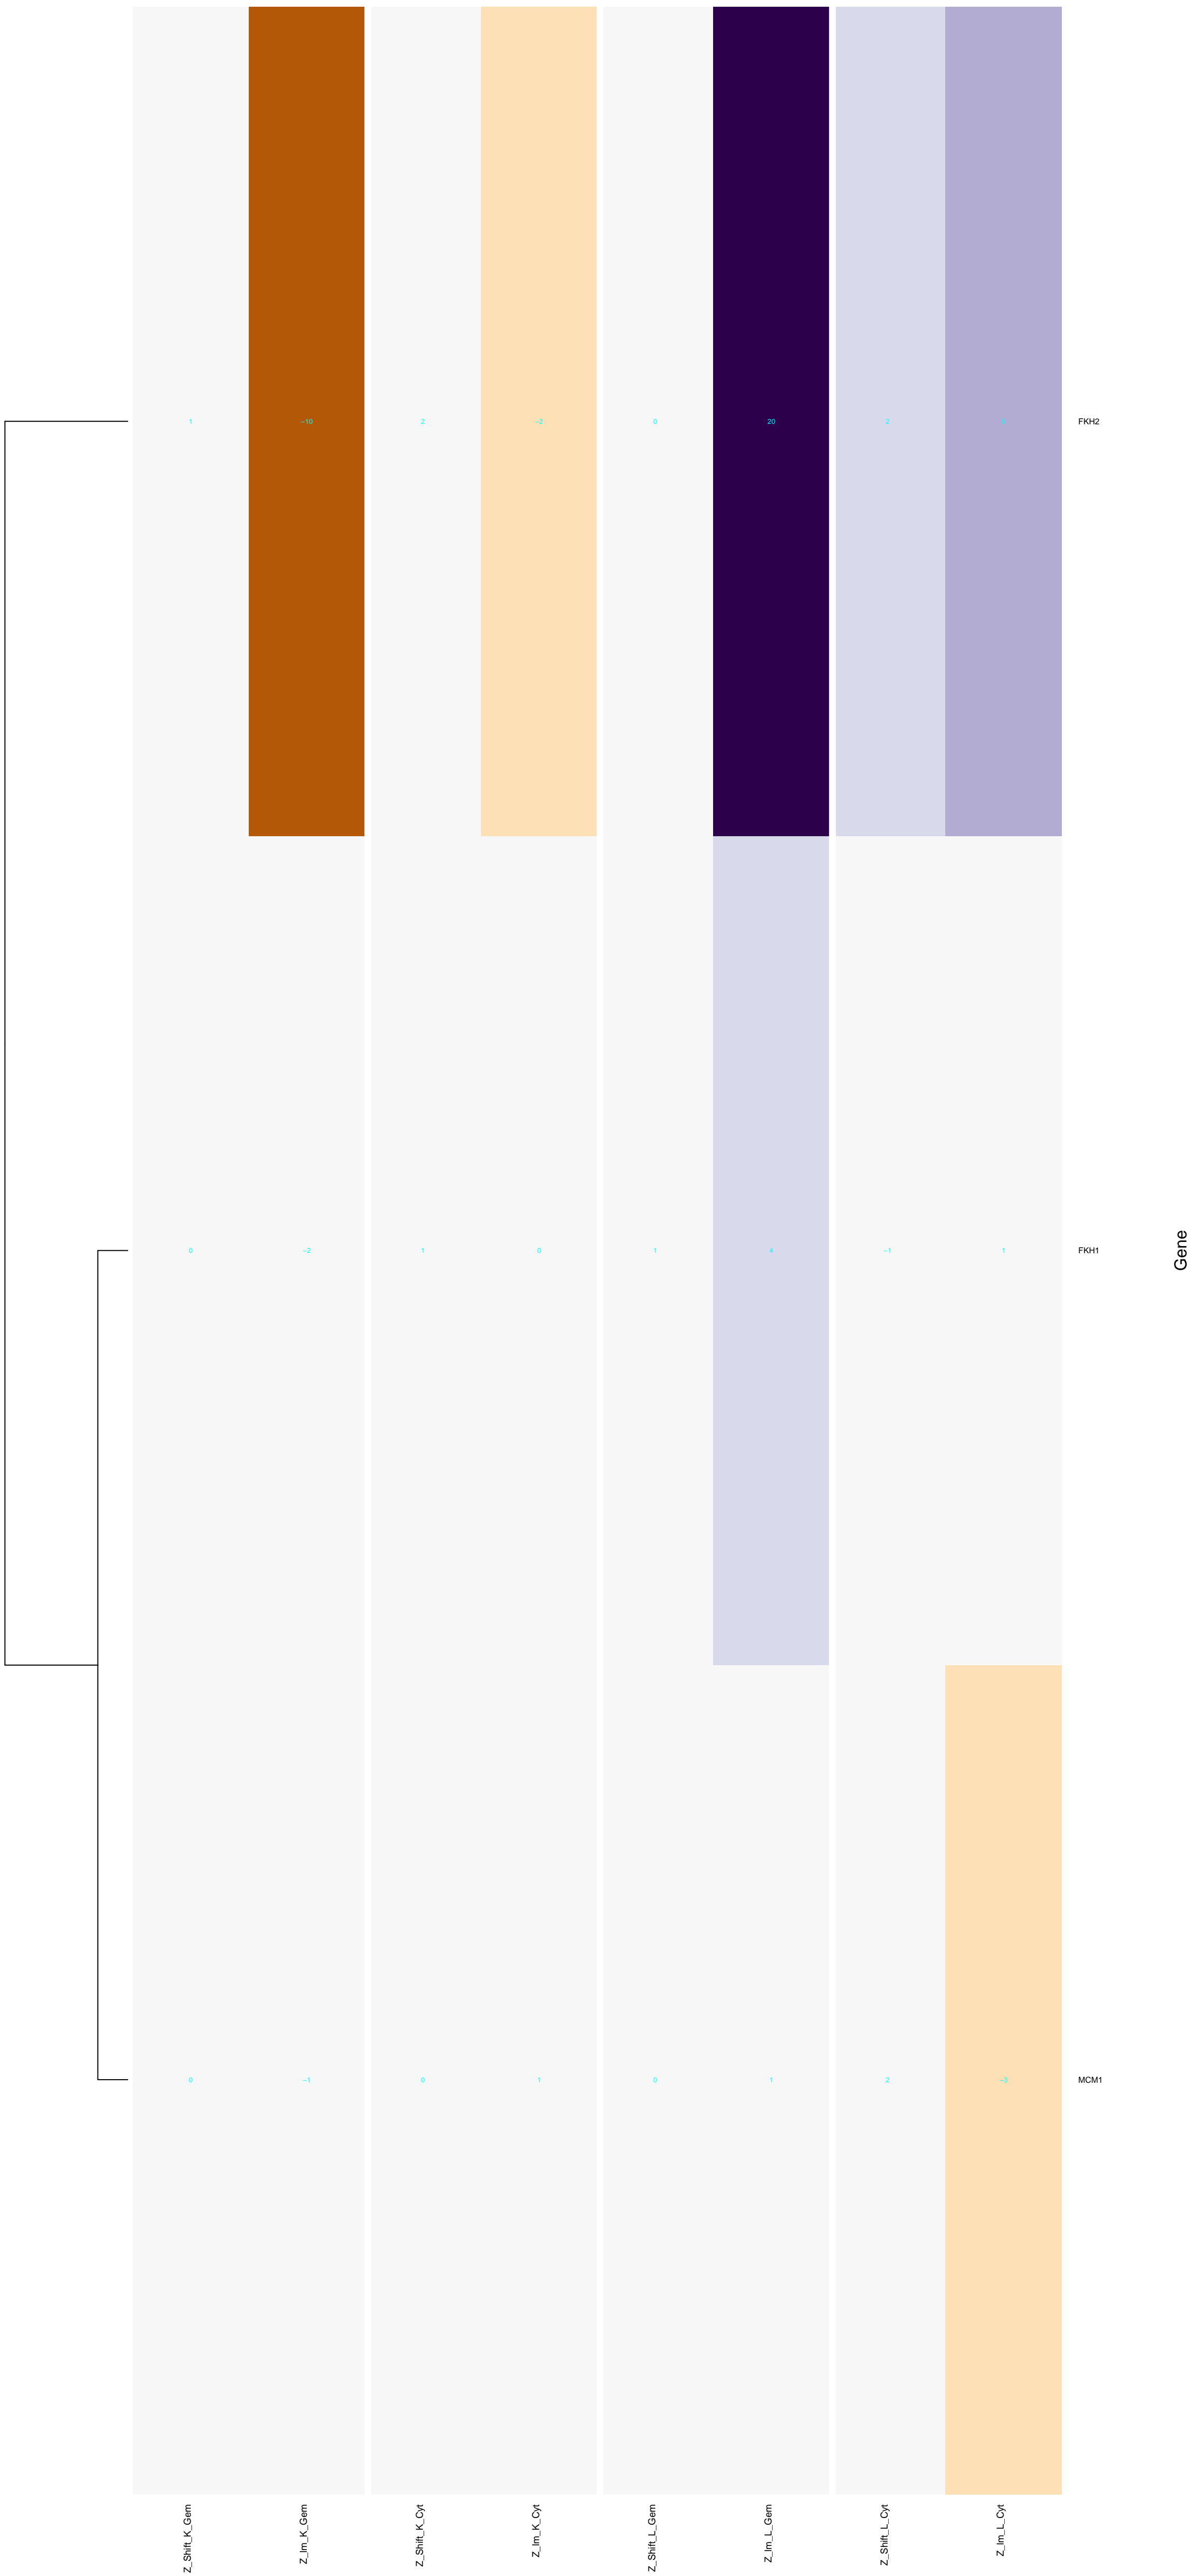

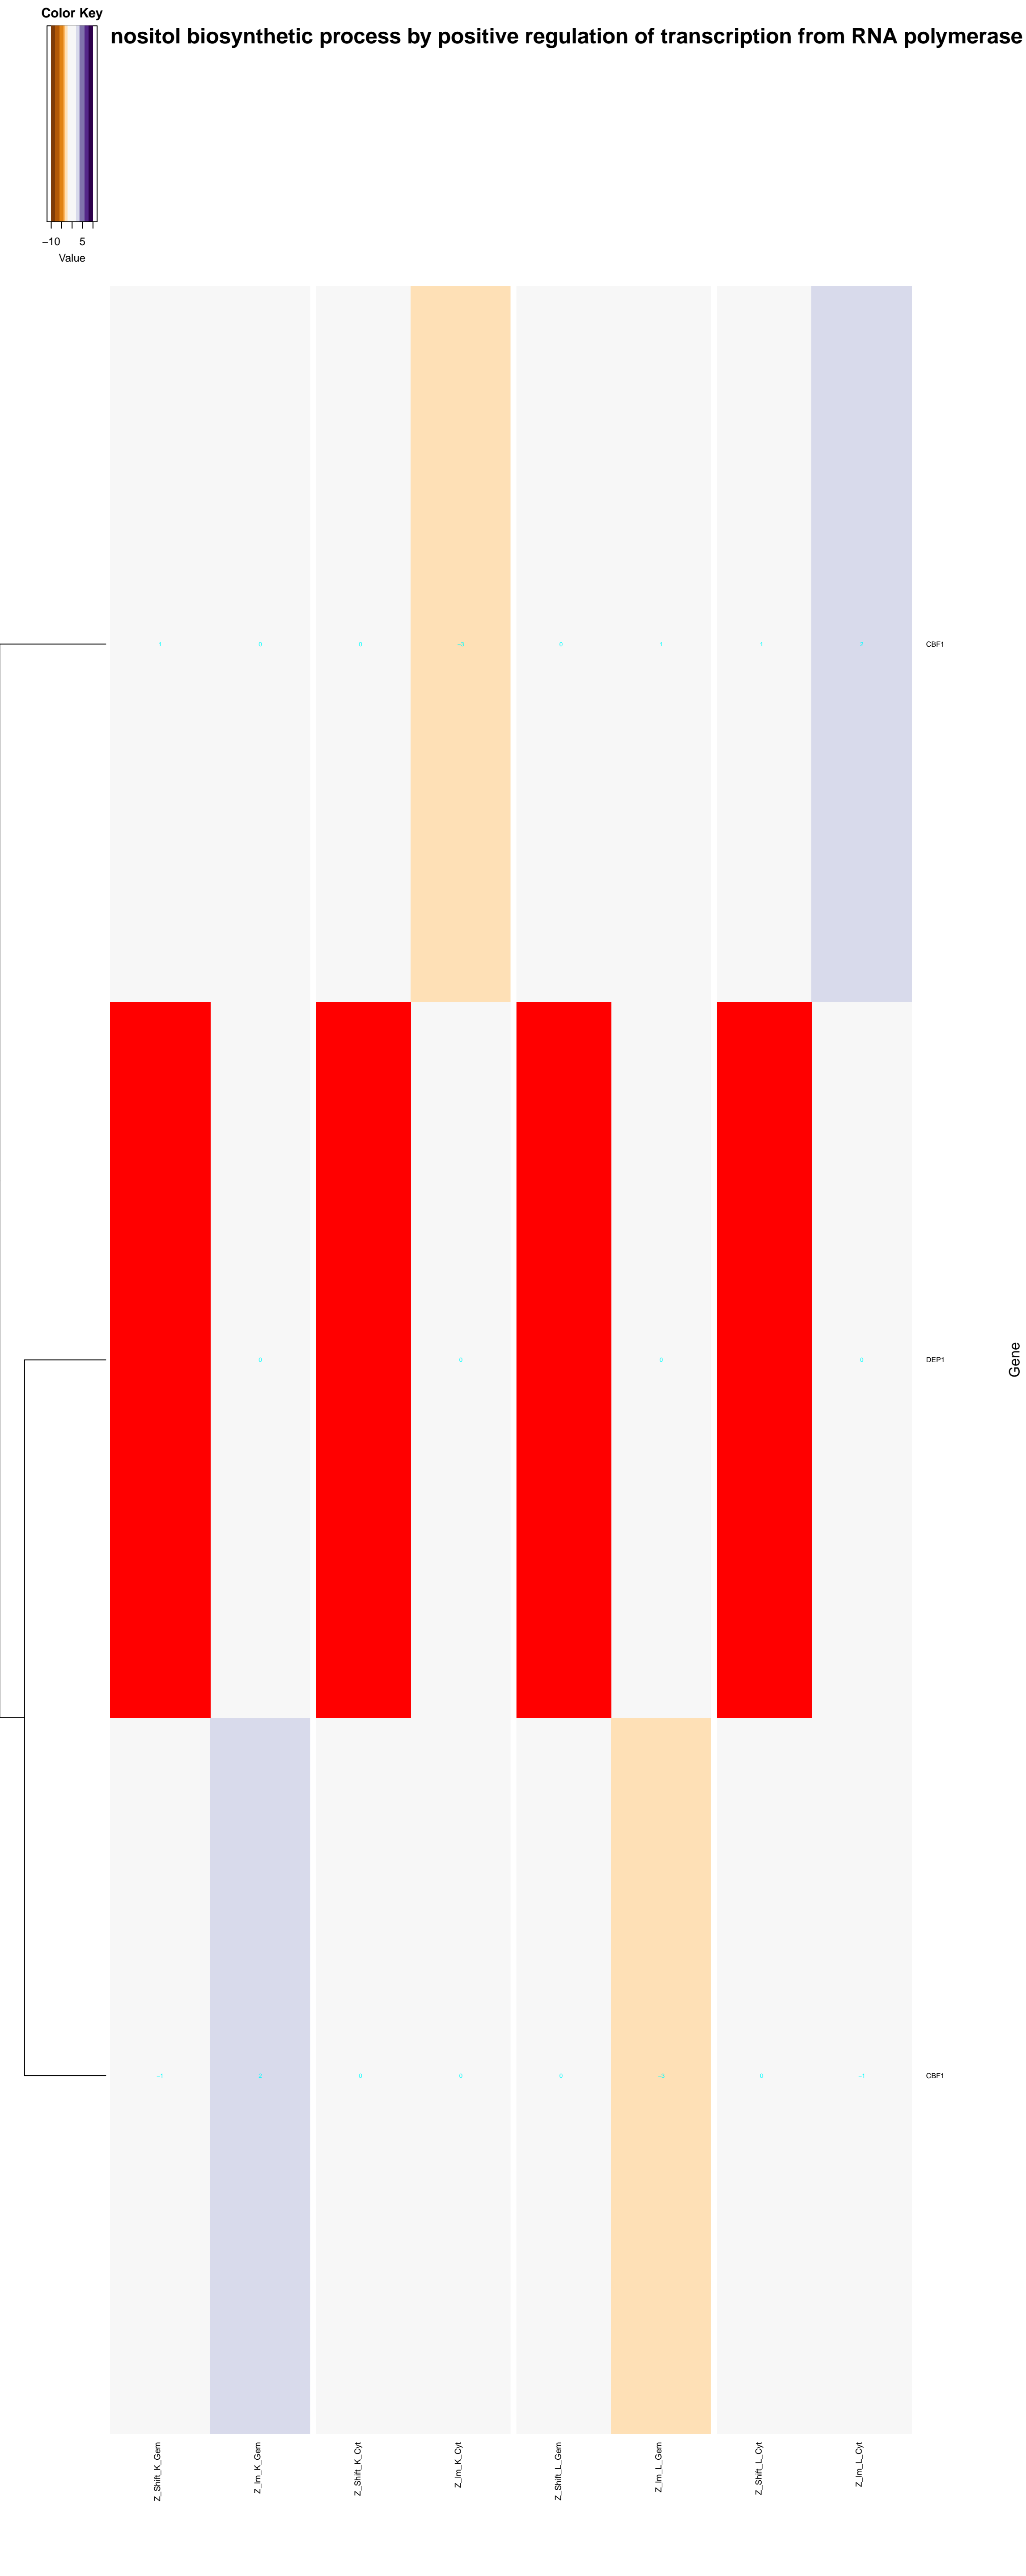

Color Key

of pseudohyphal growth by positive regulation of transcription from RNA polymerase II pr

Value

-10 5

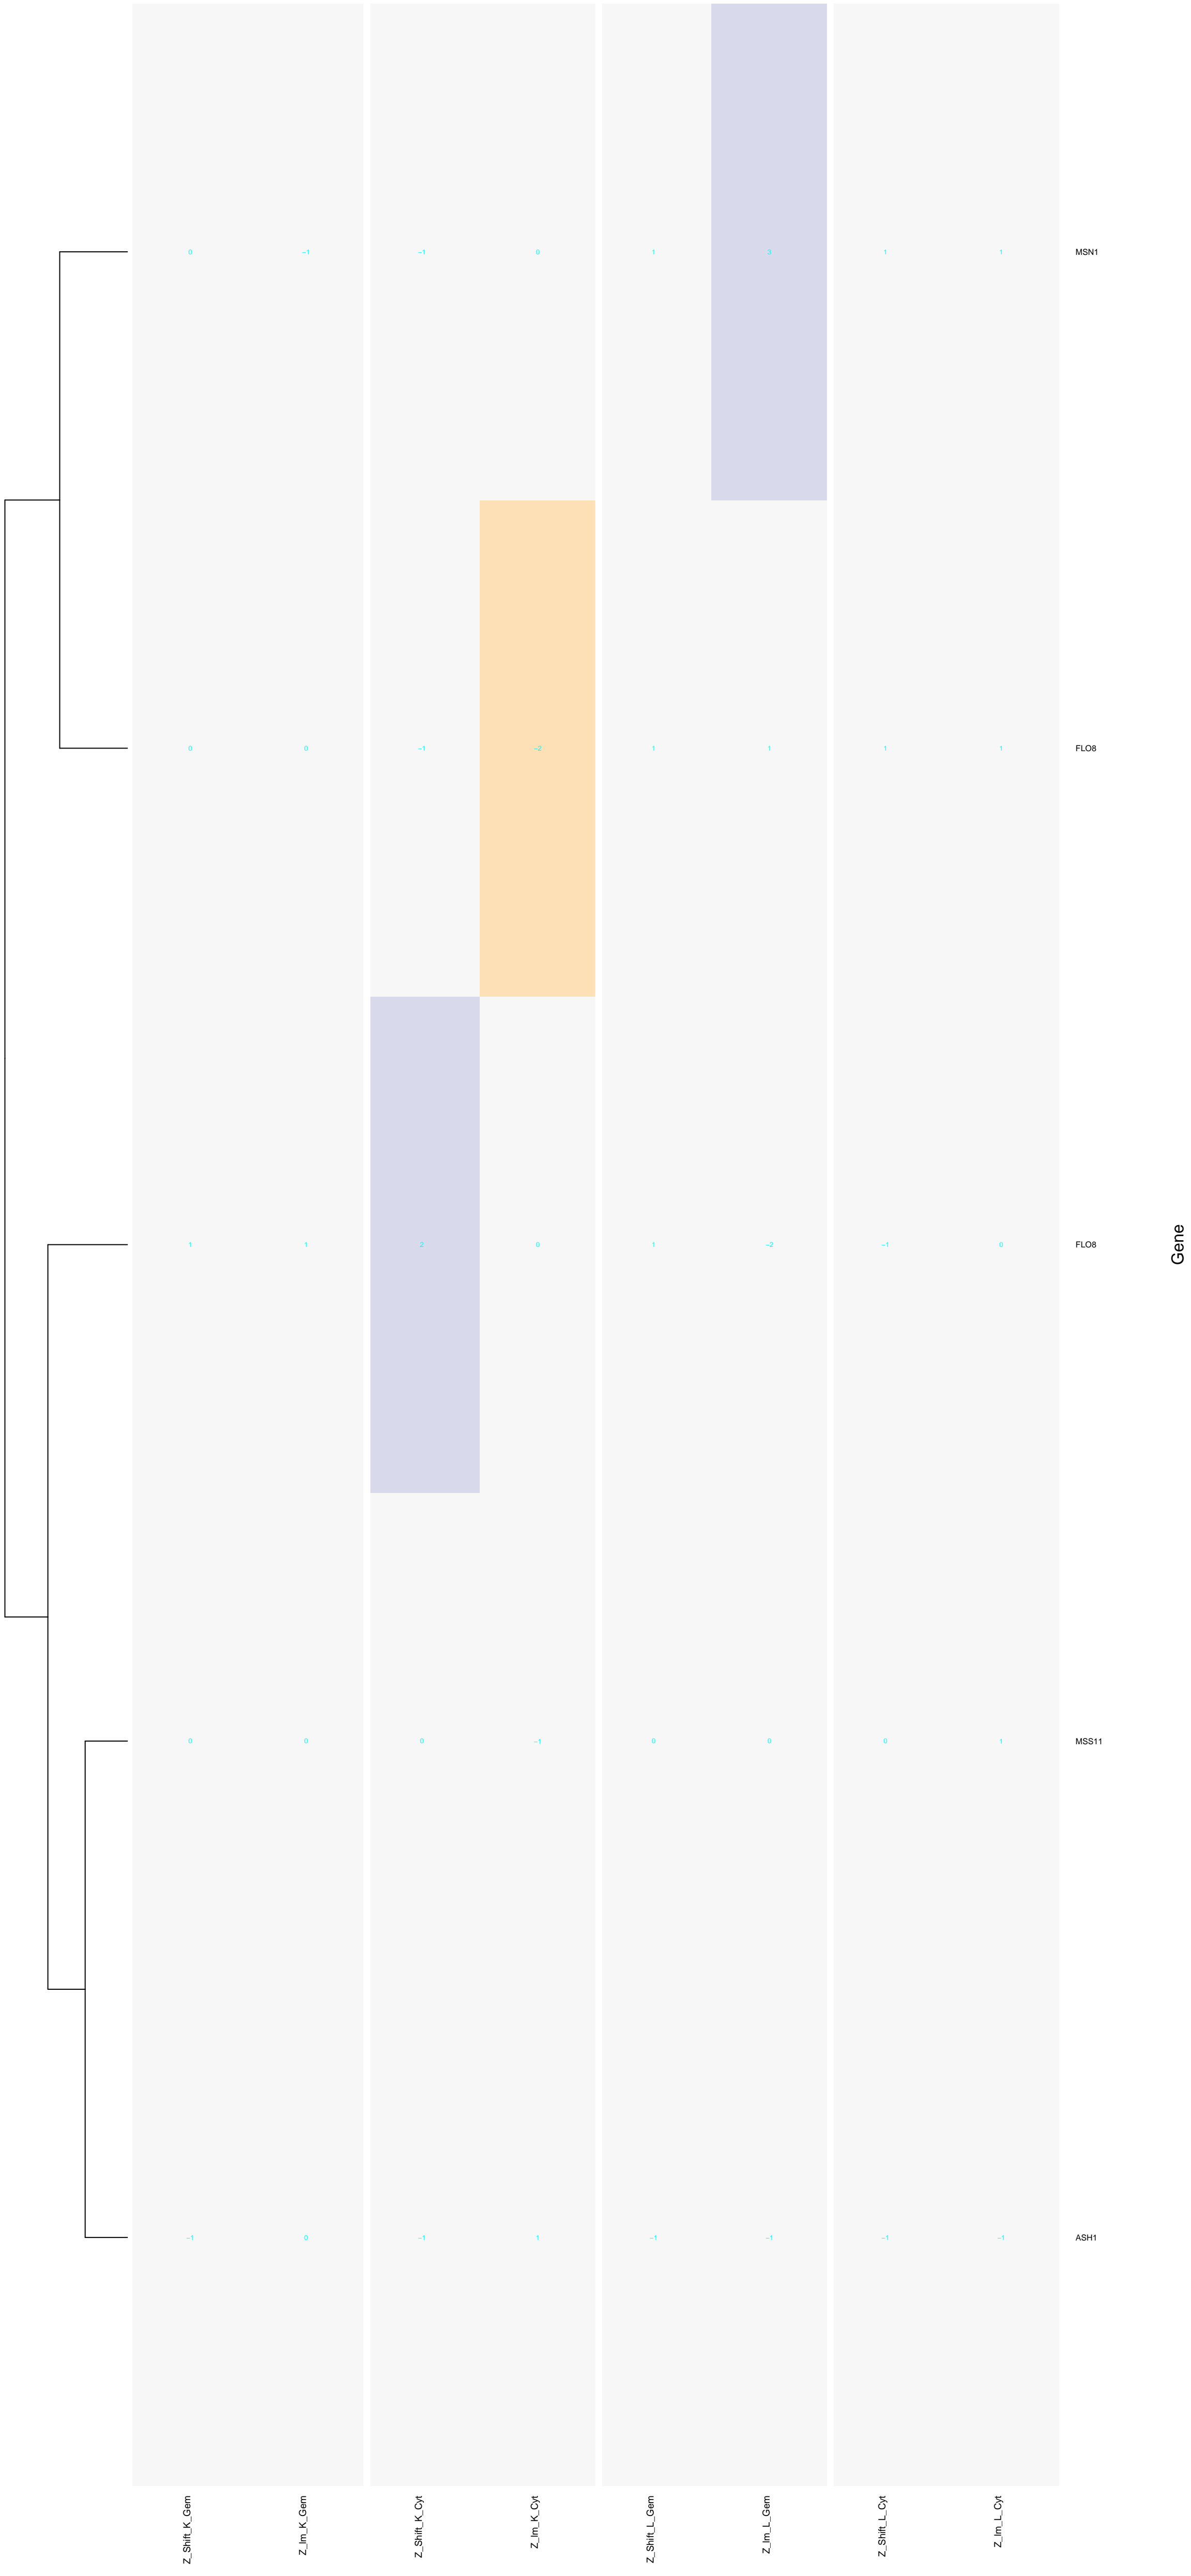

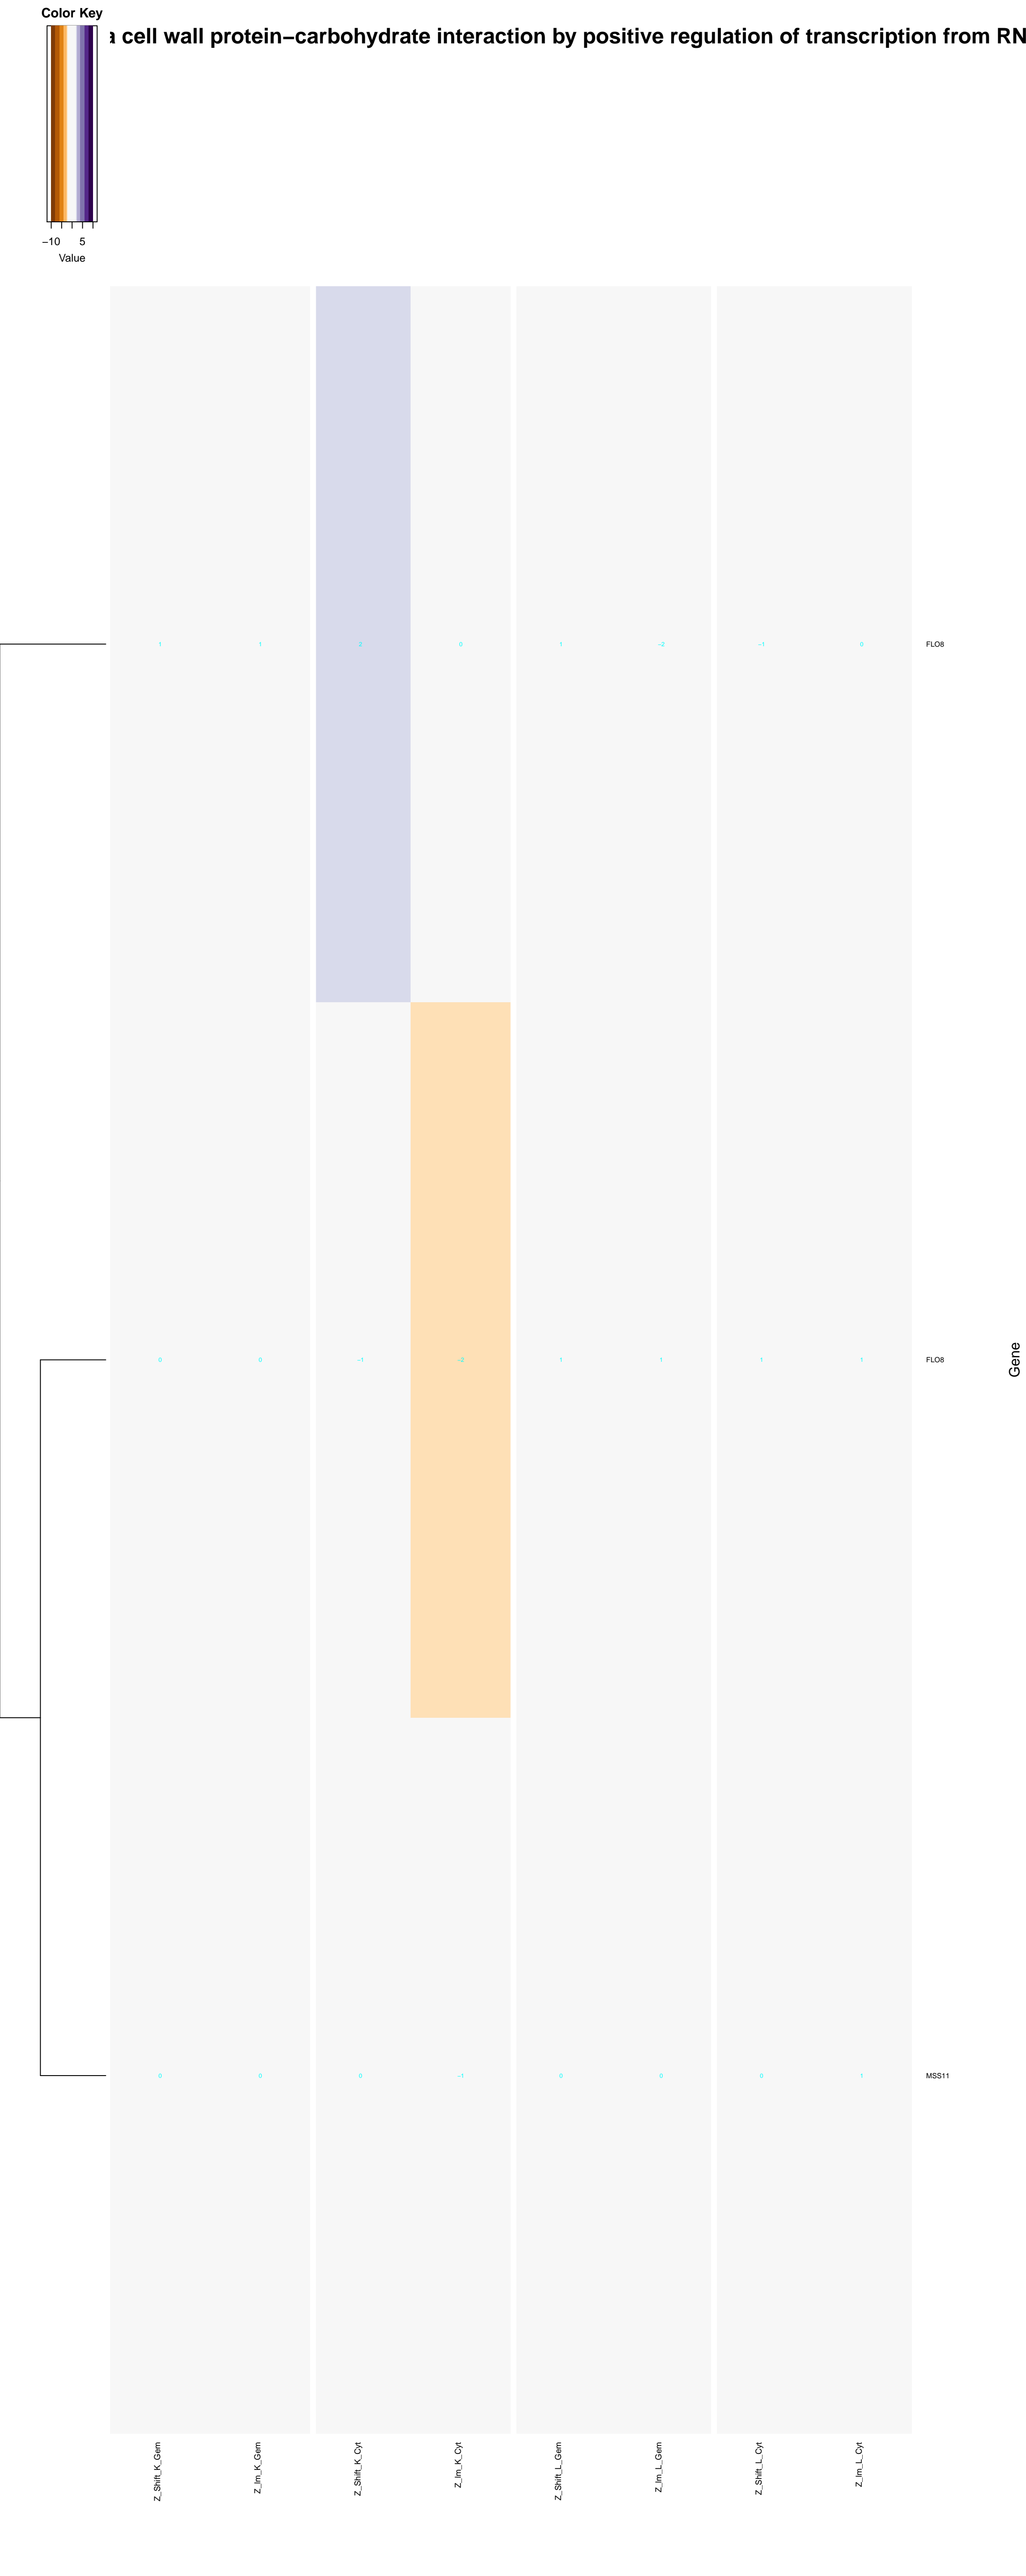

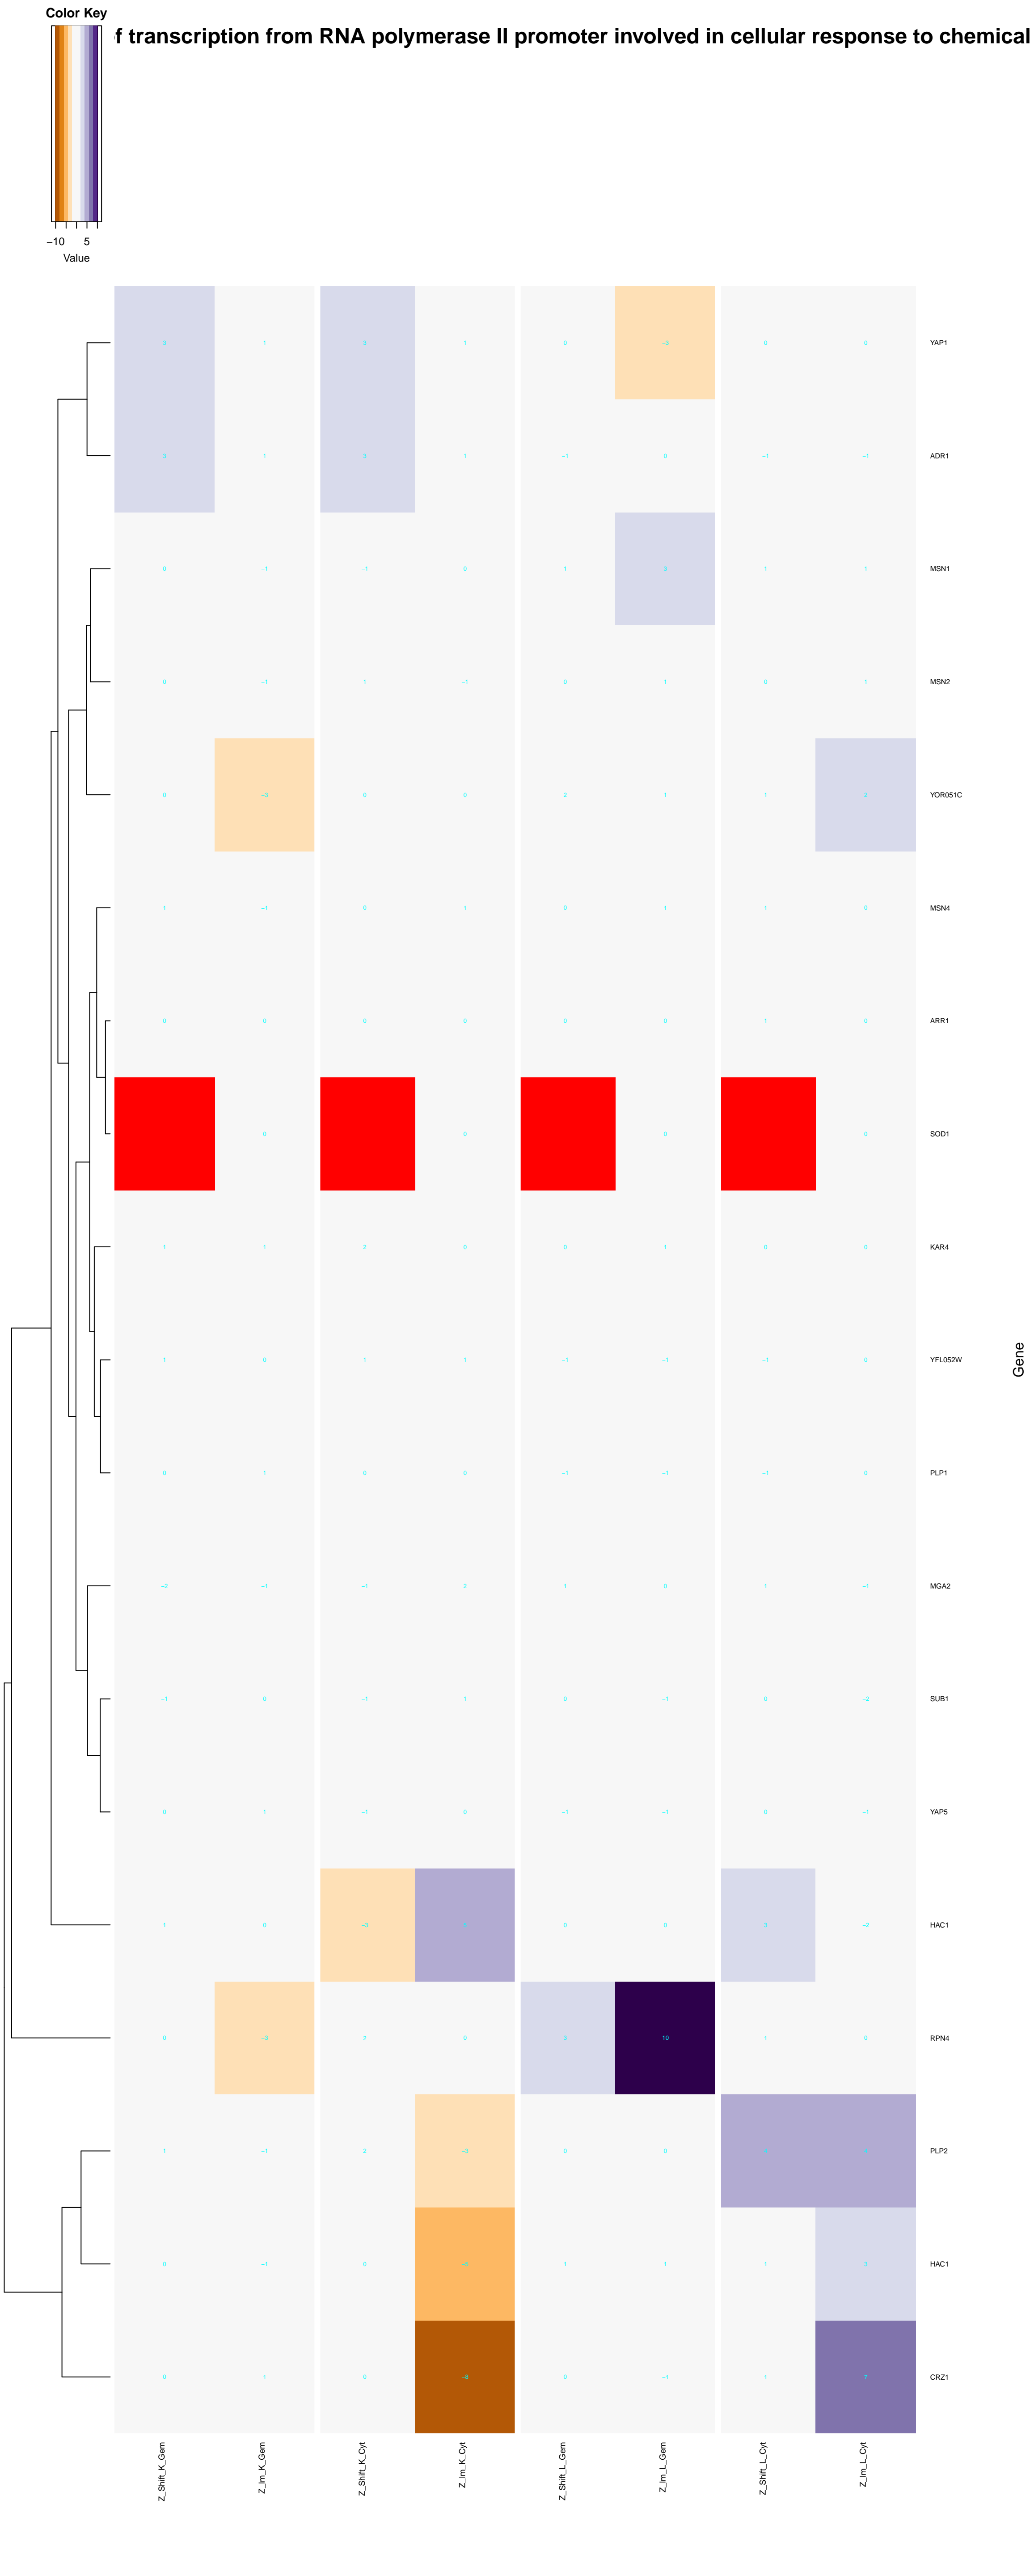

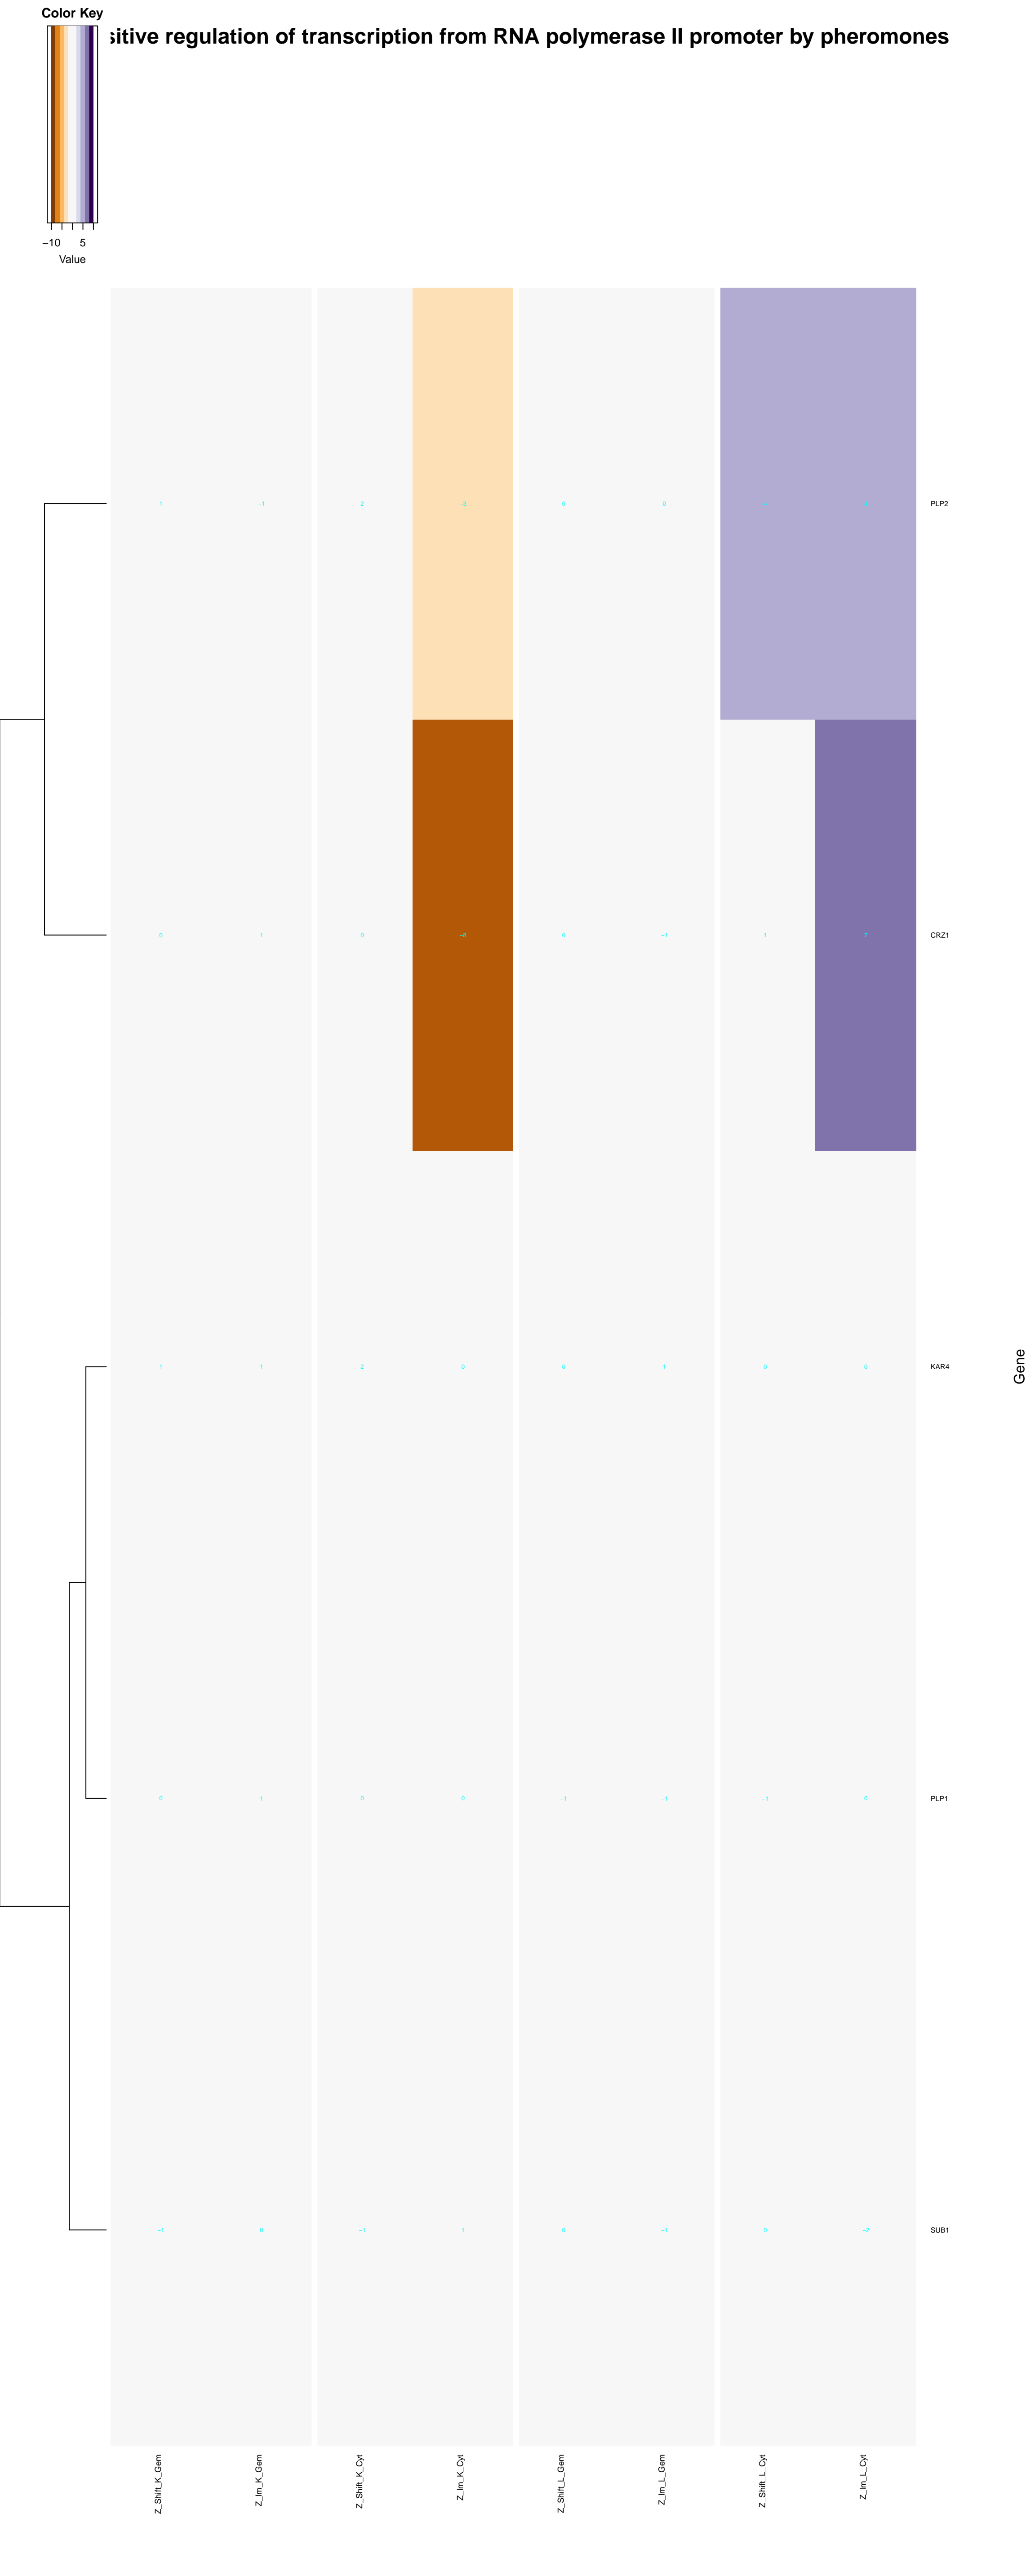

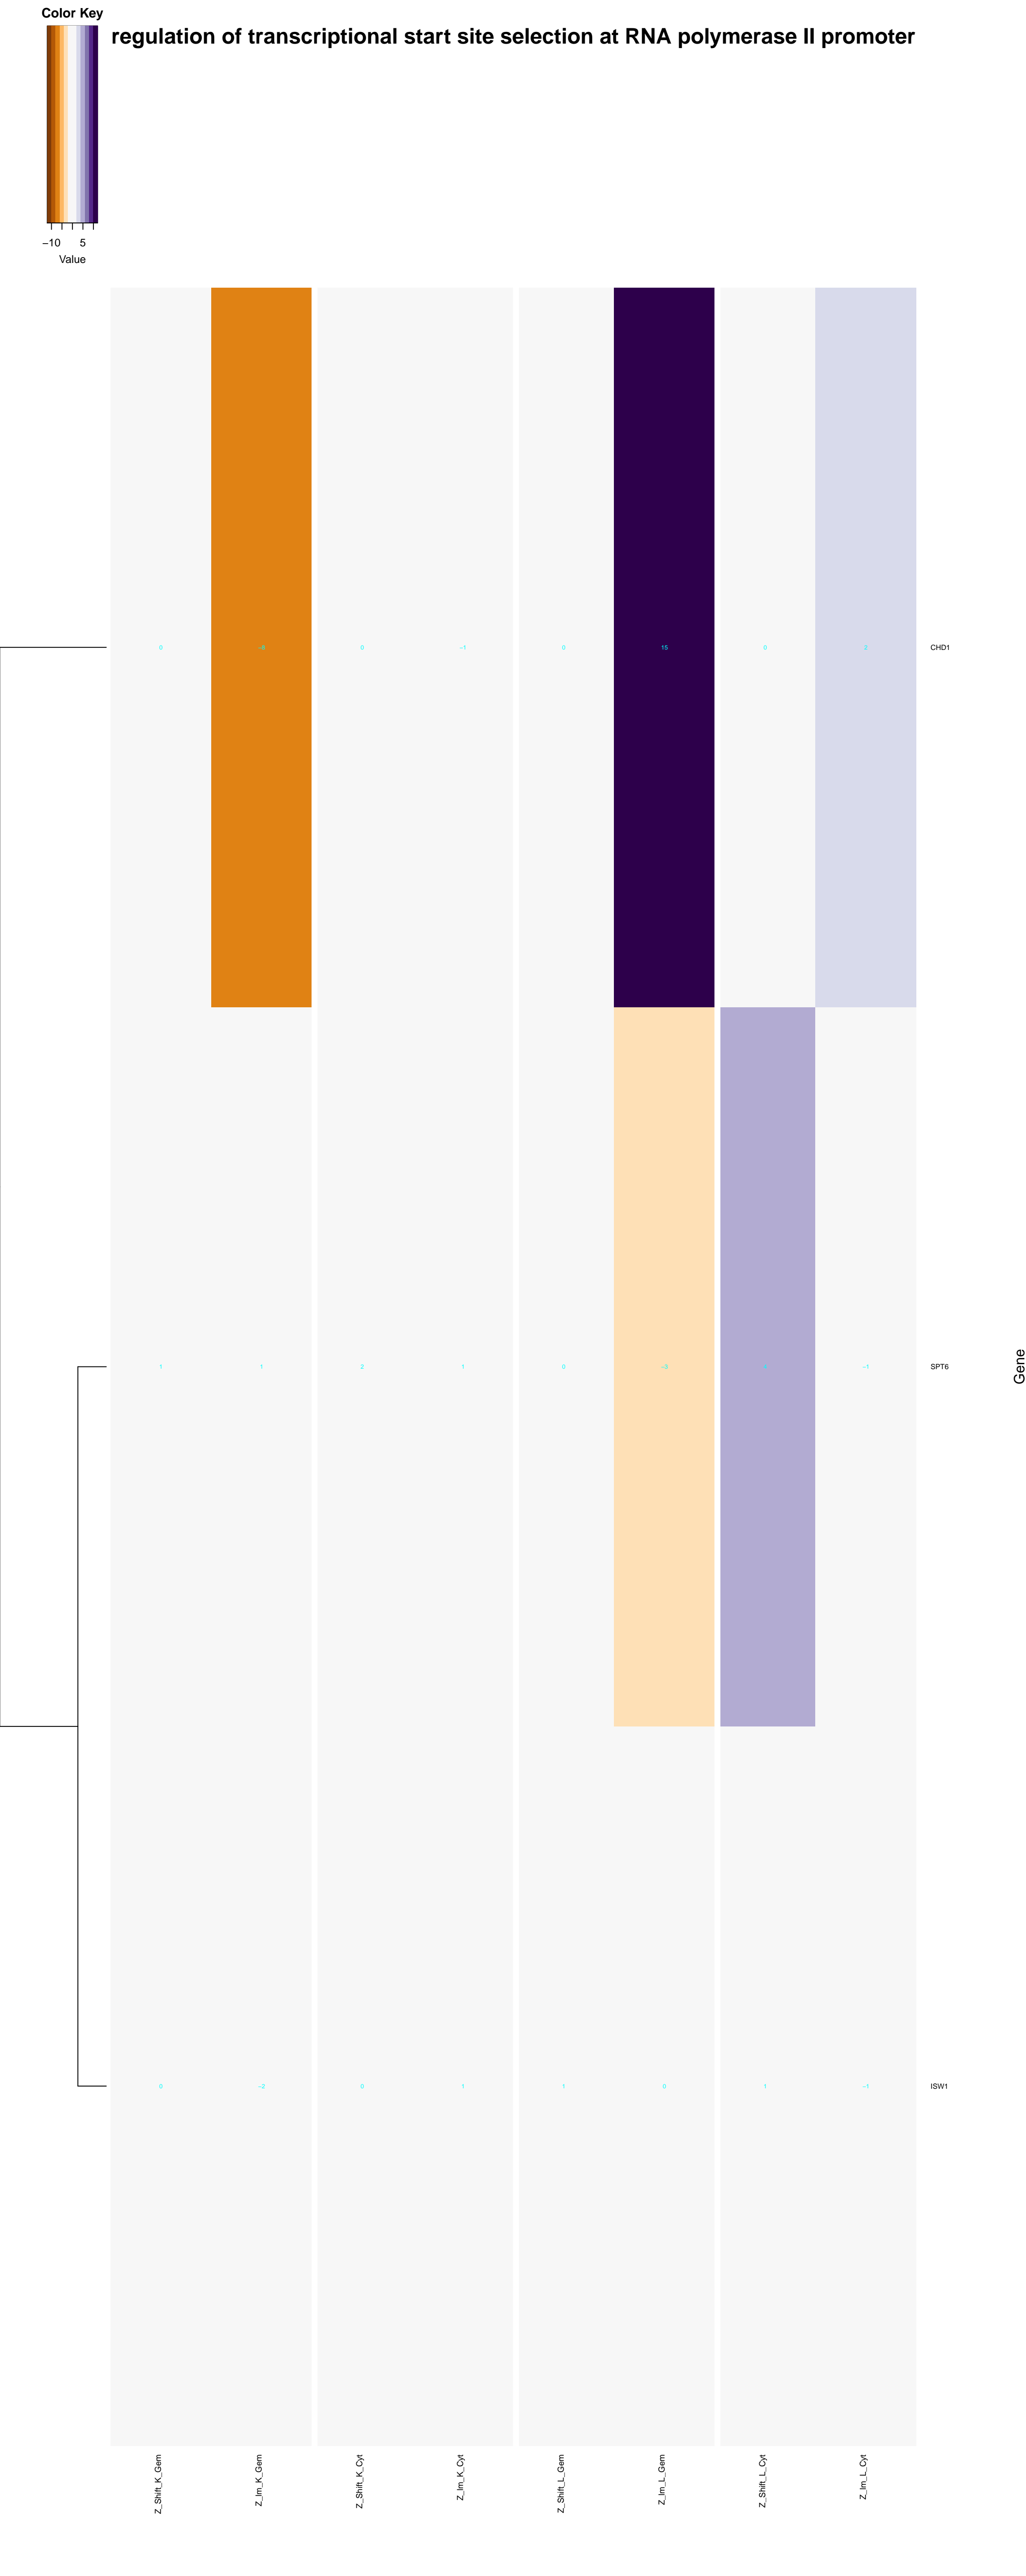

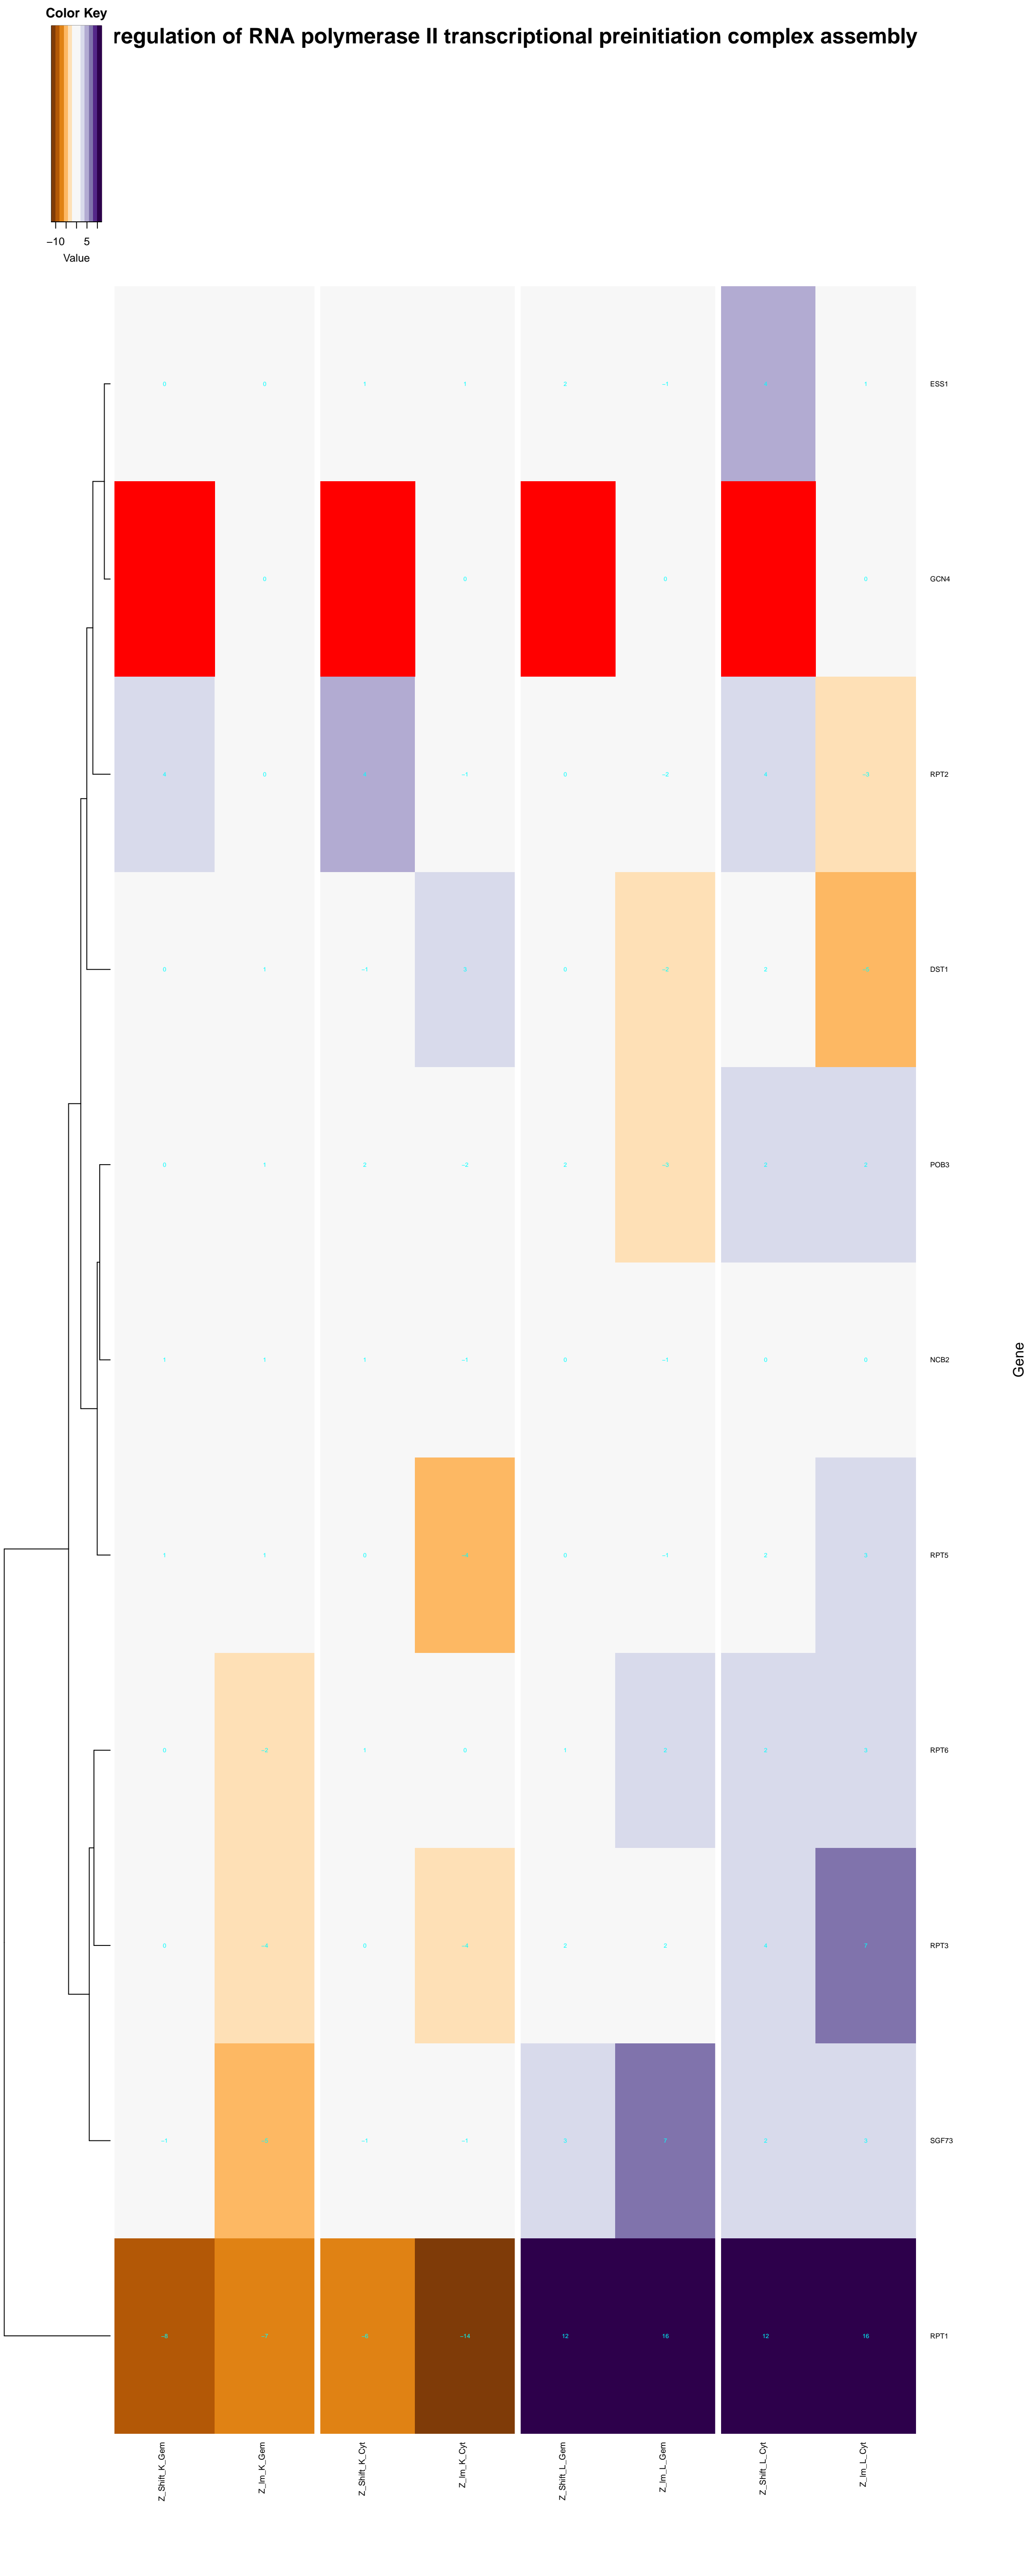



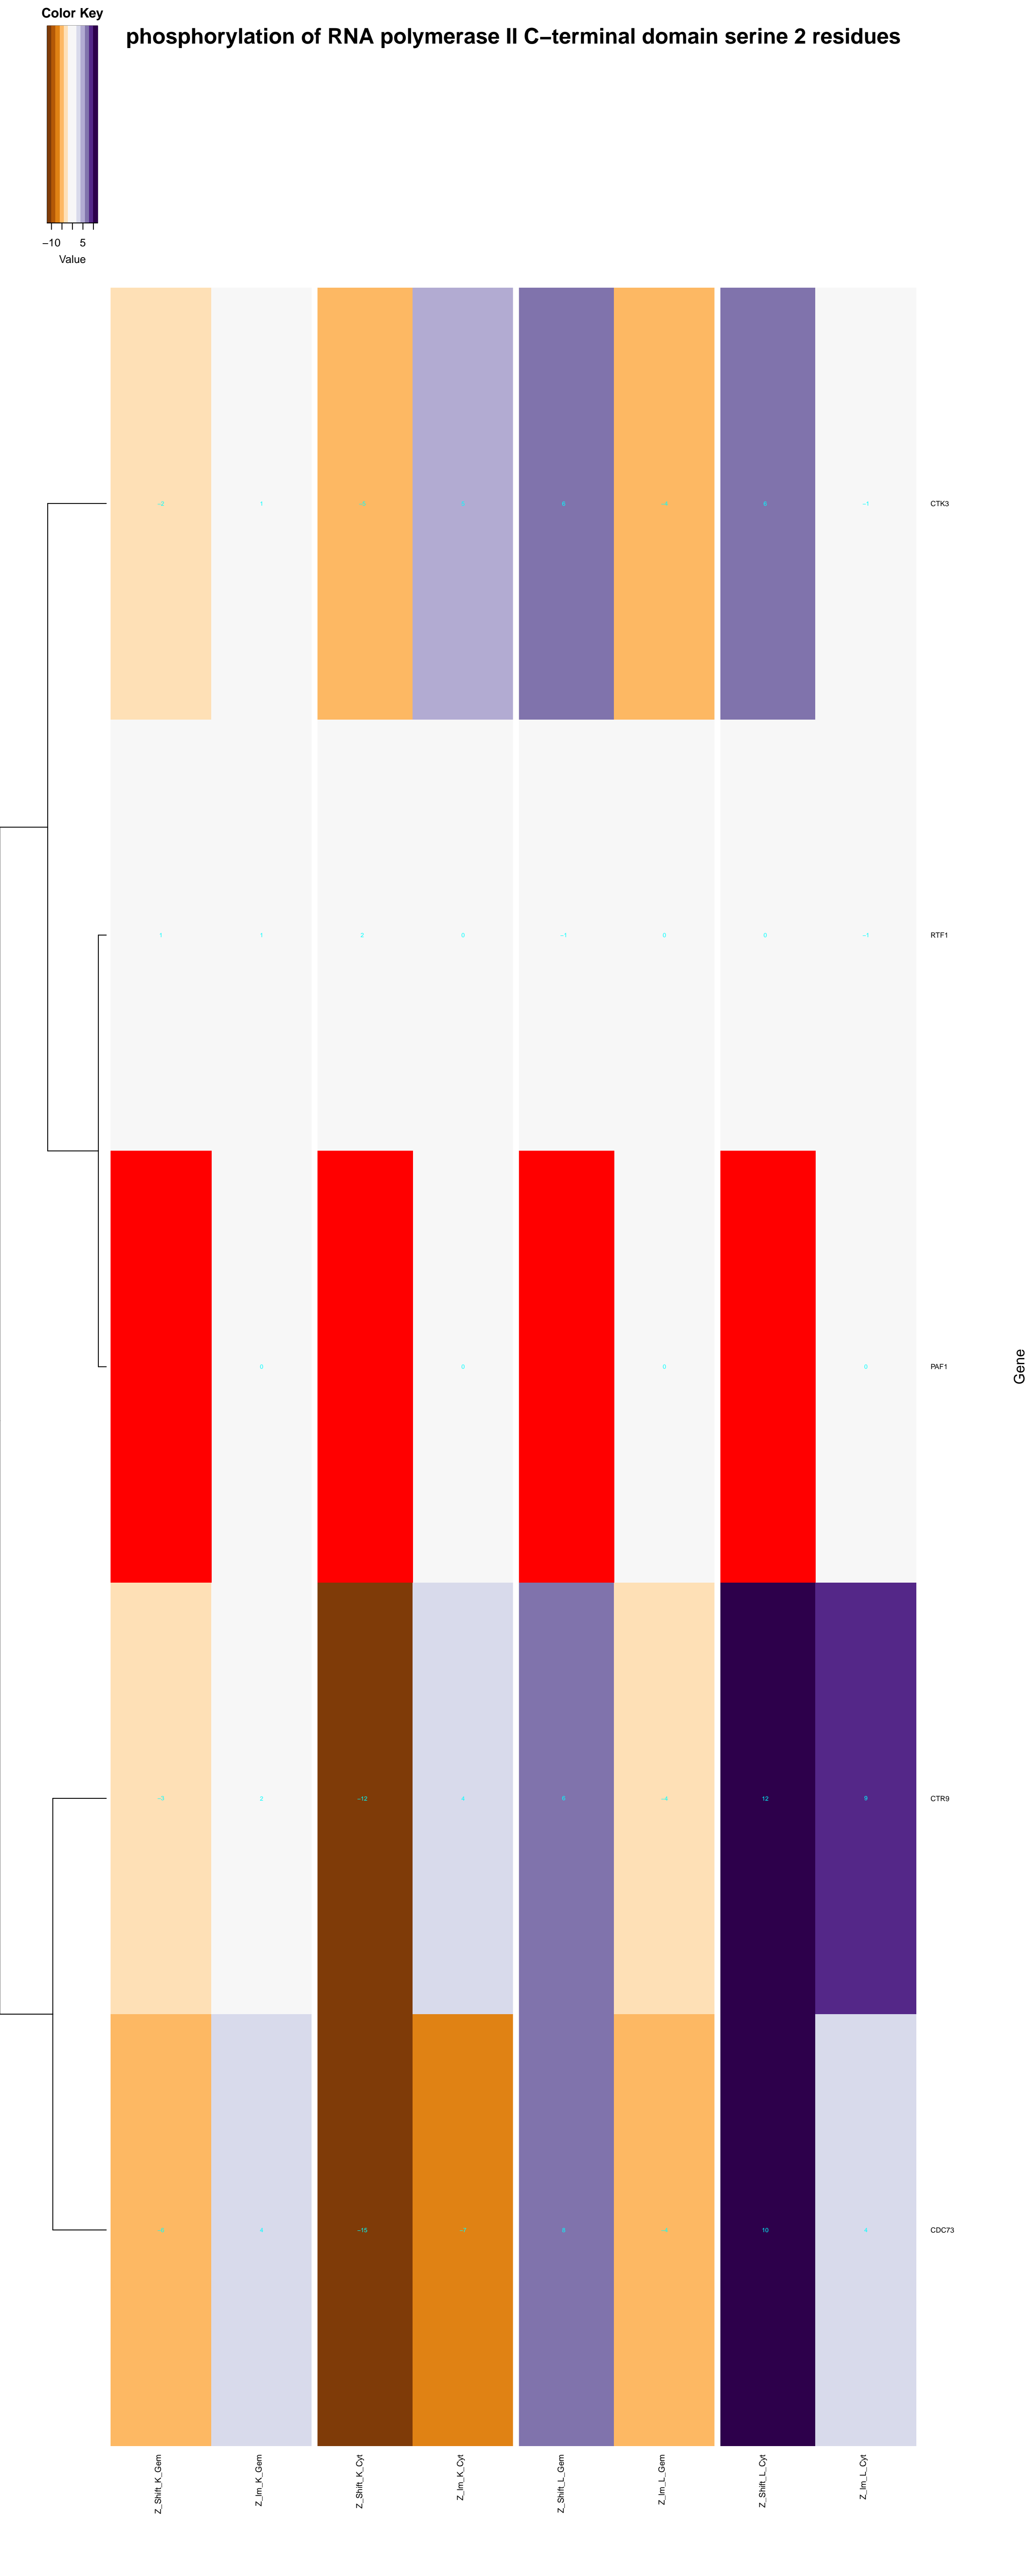

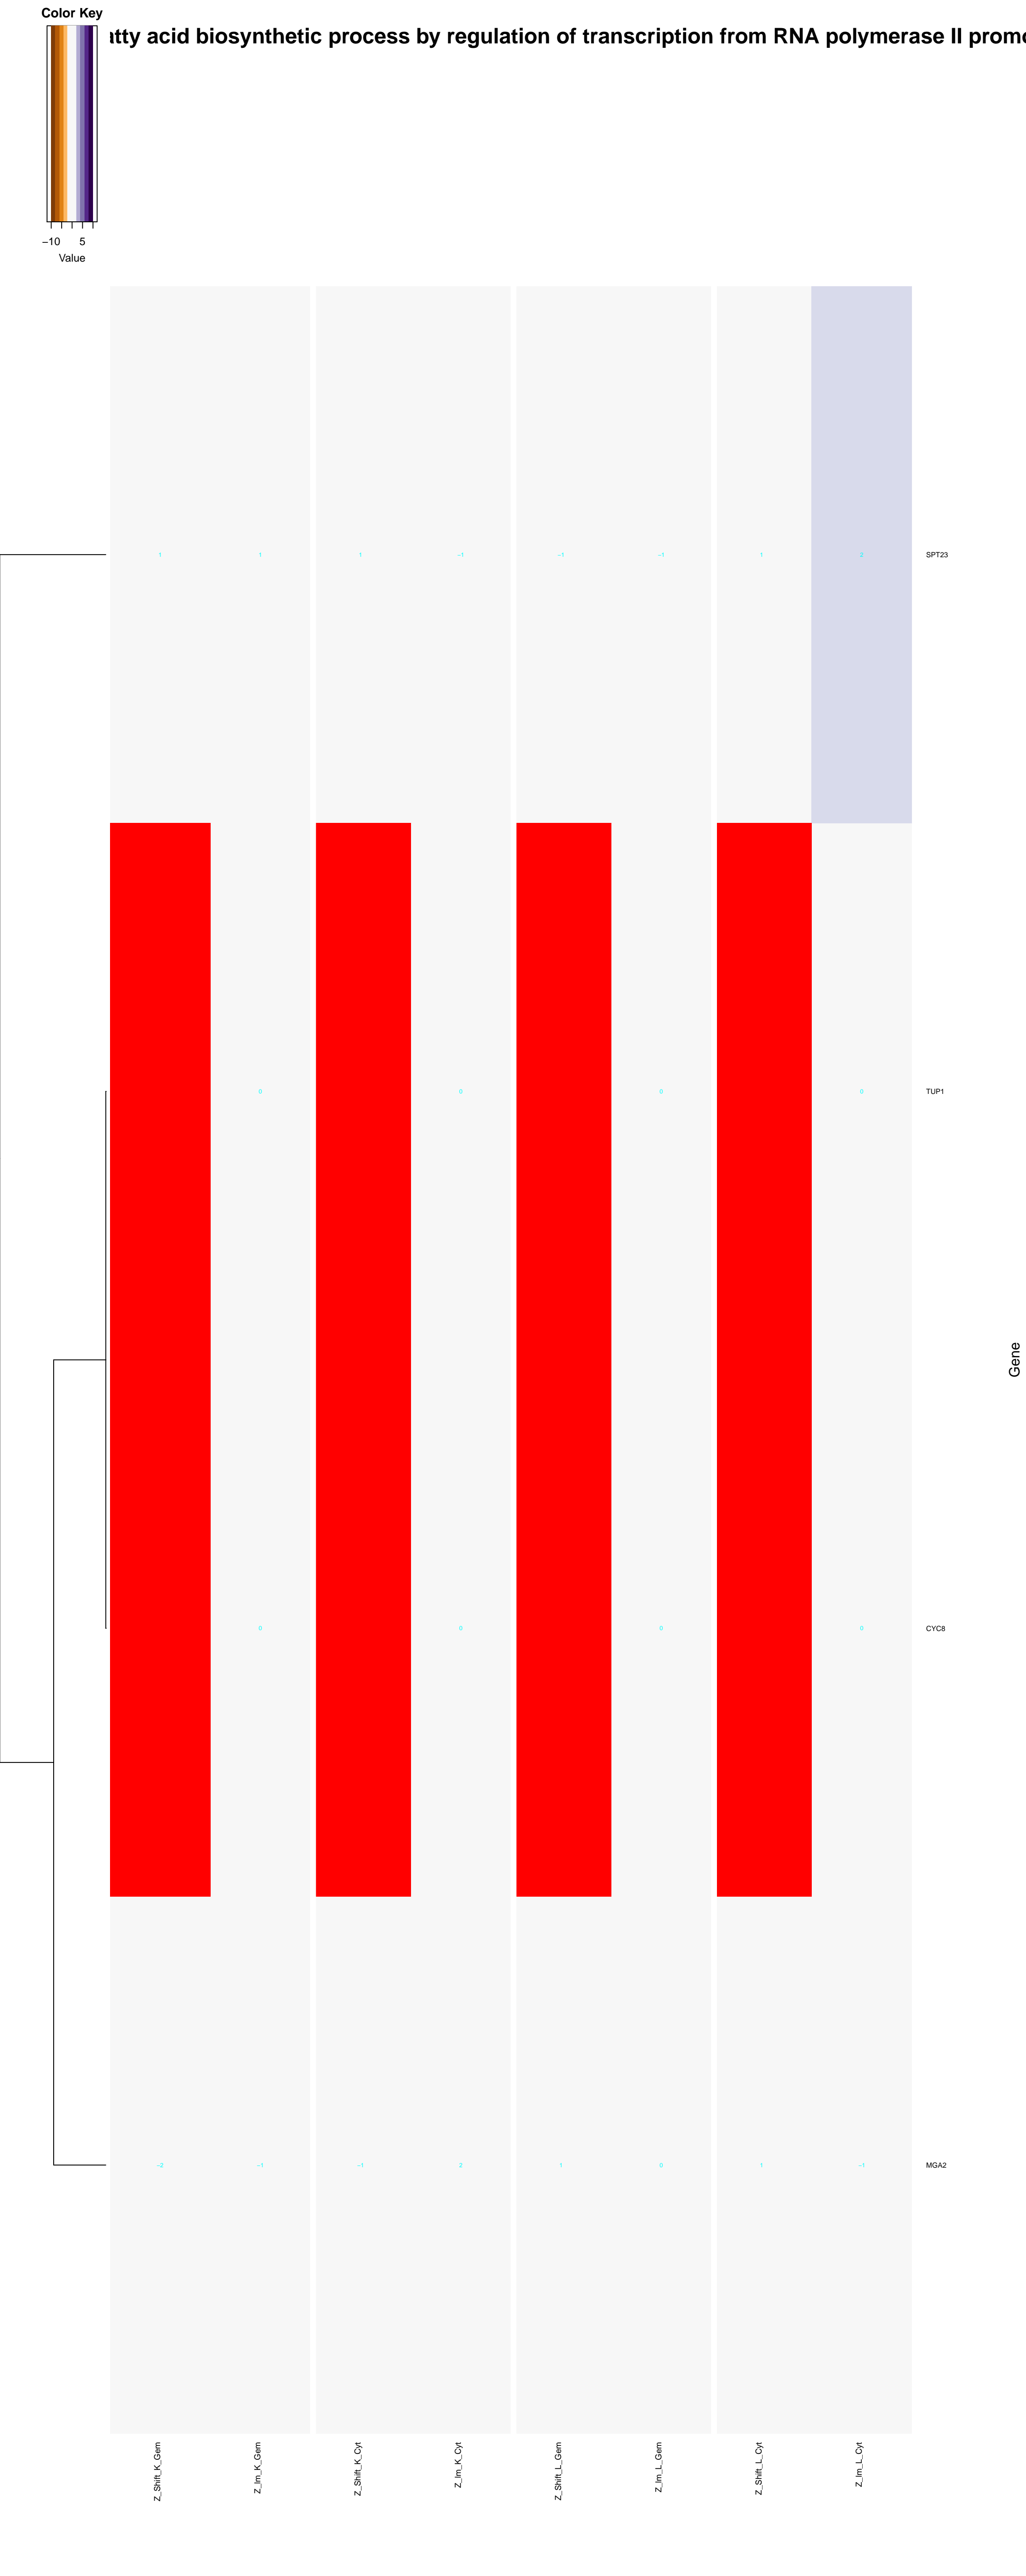

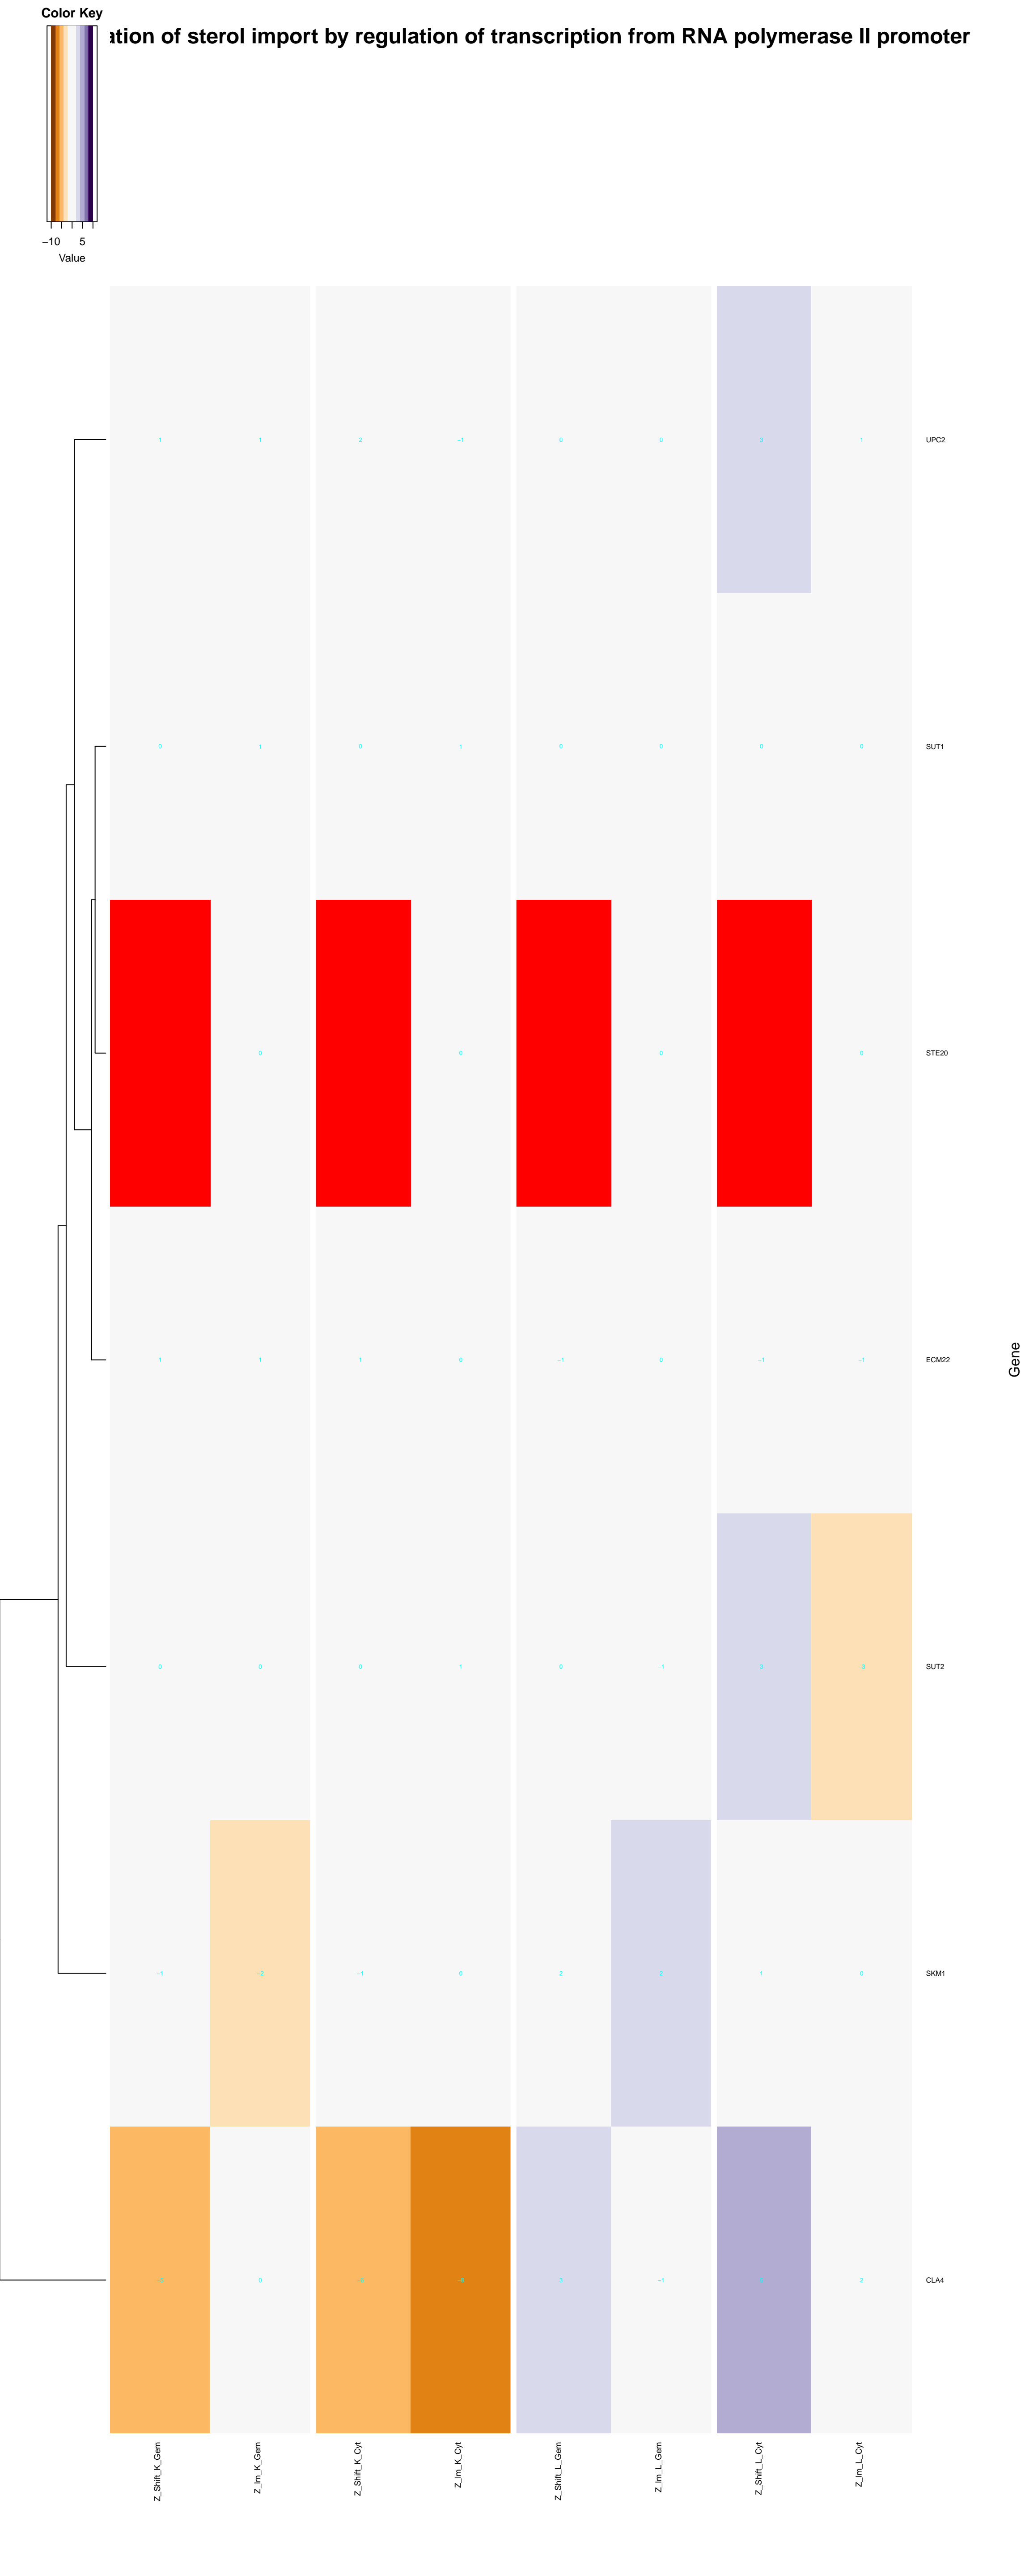

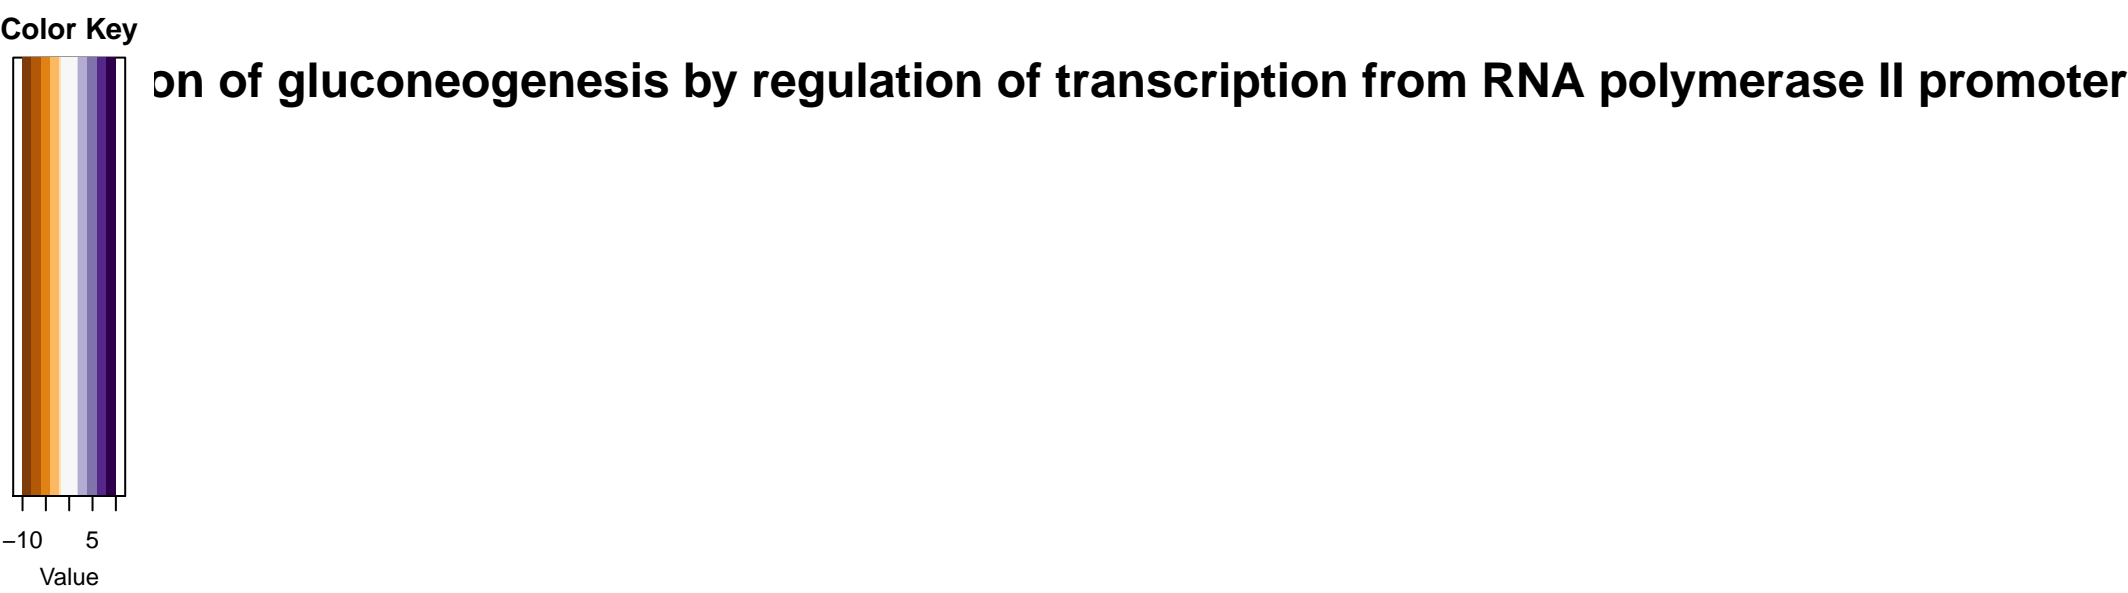

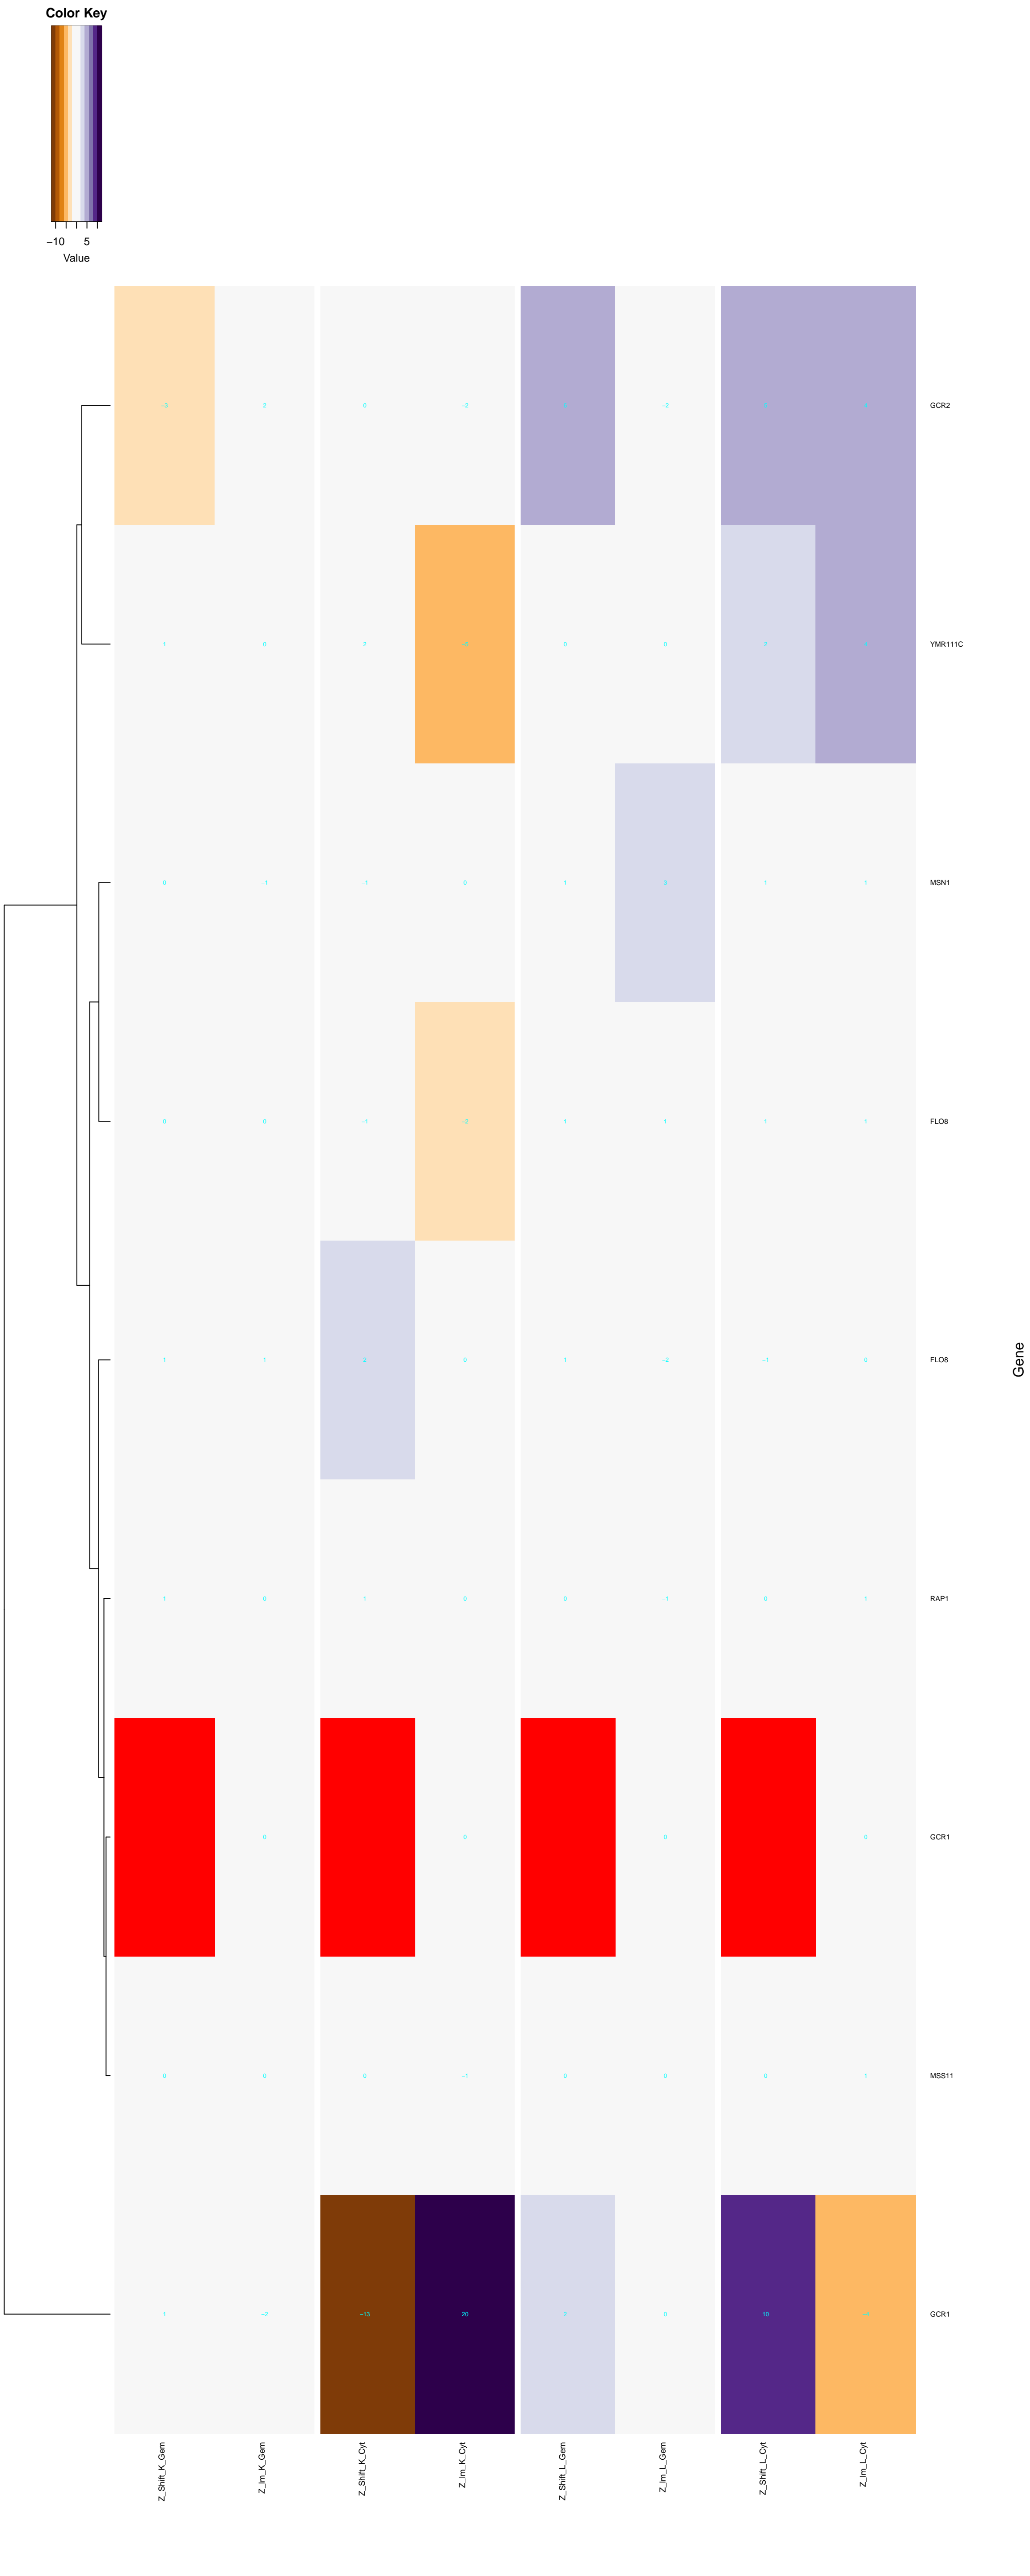

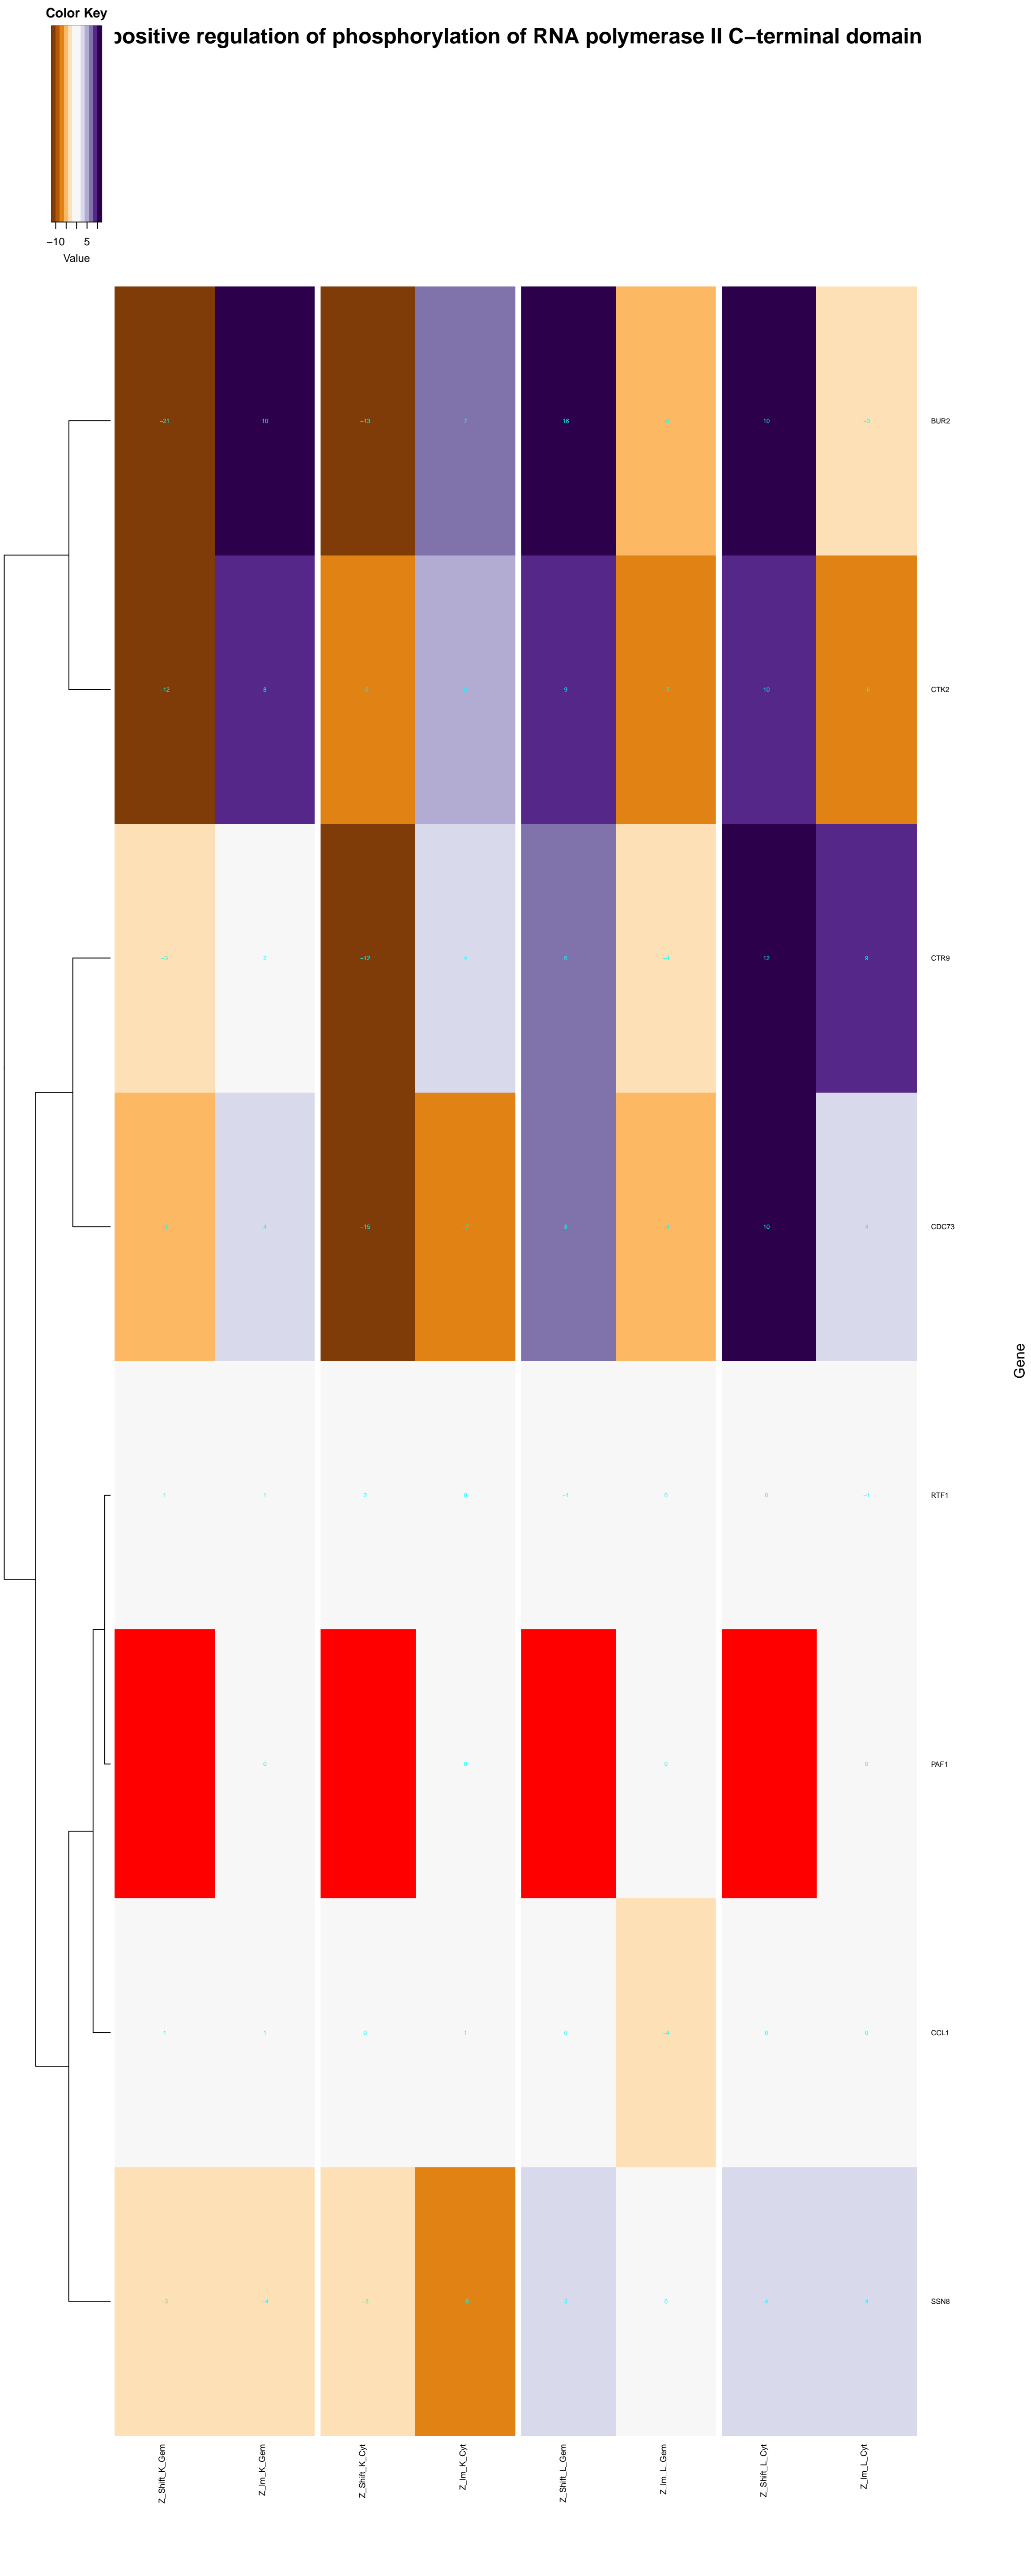

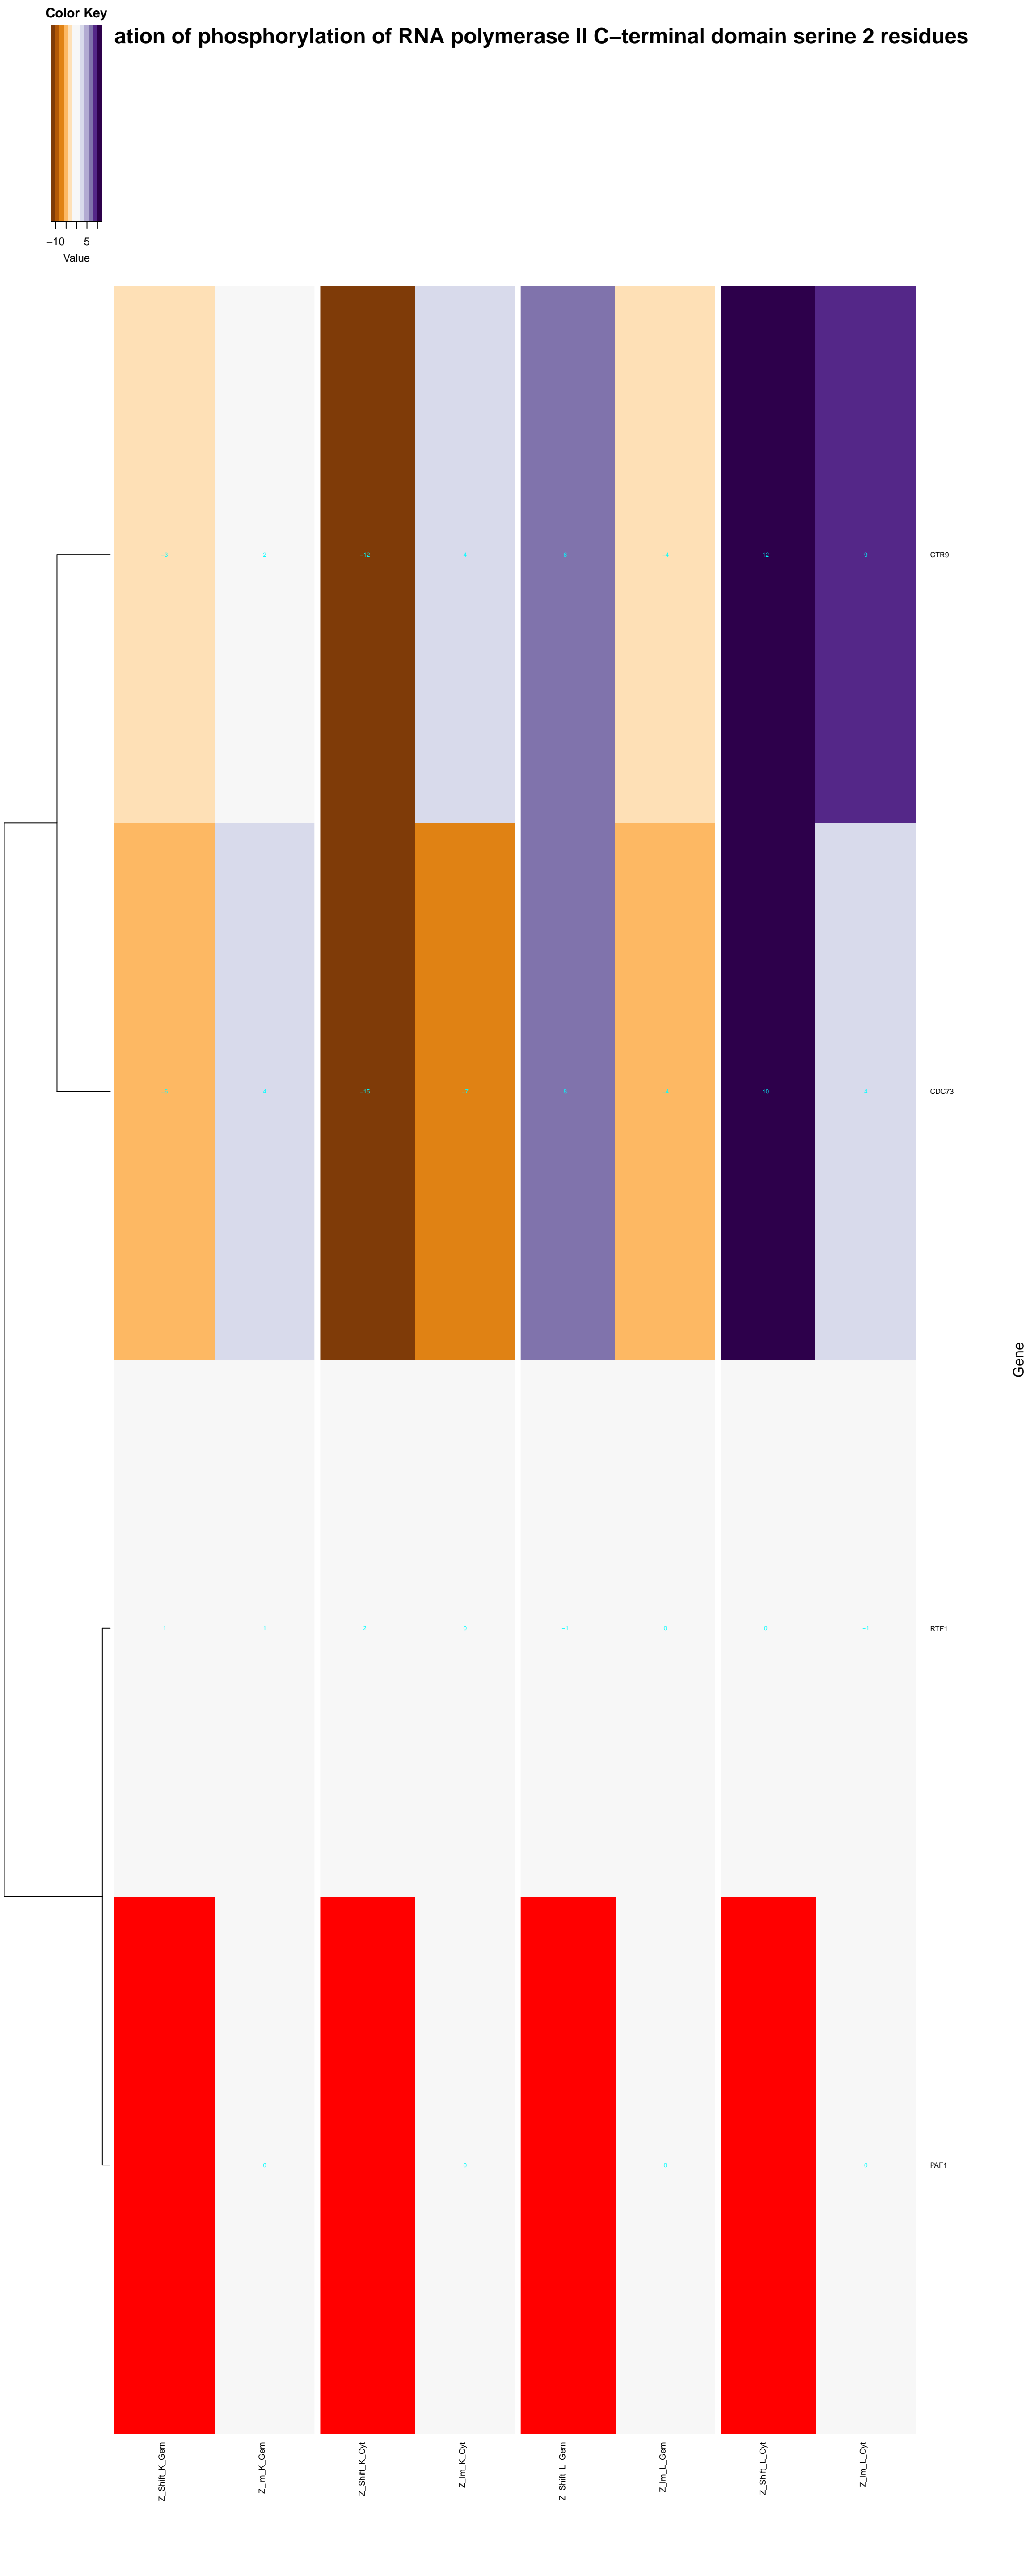

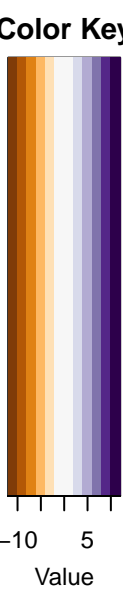

egative regulation of transcription from RNA polymerase II promoter by glucose

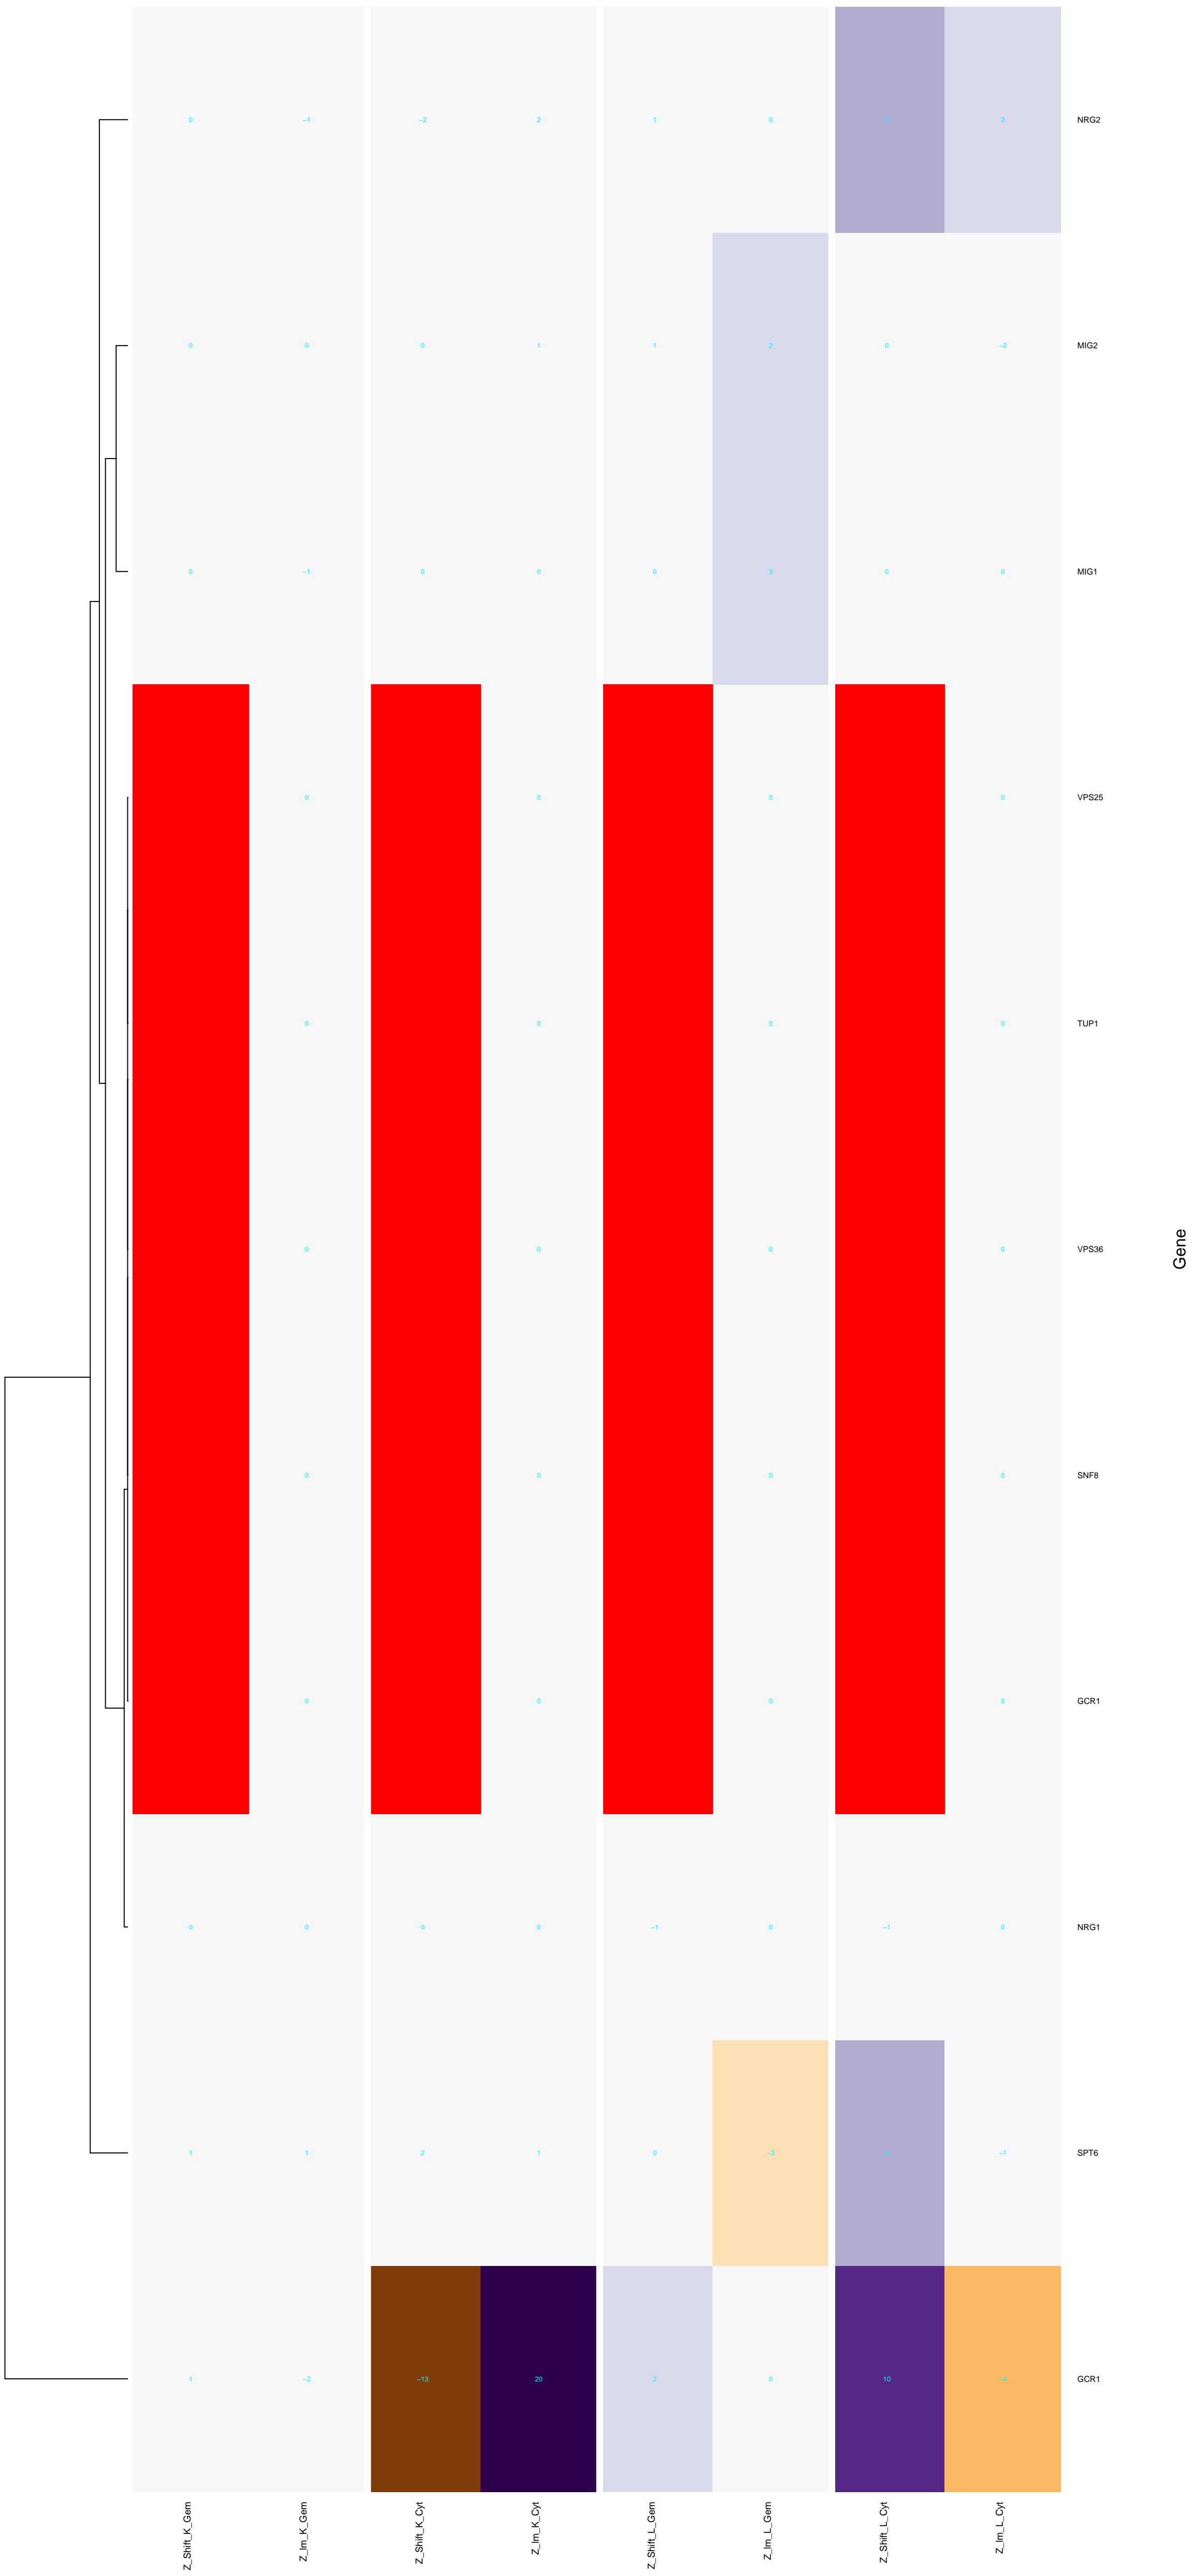



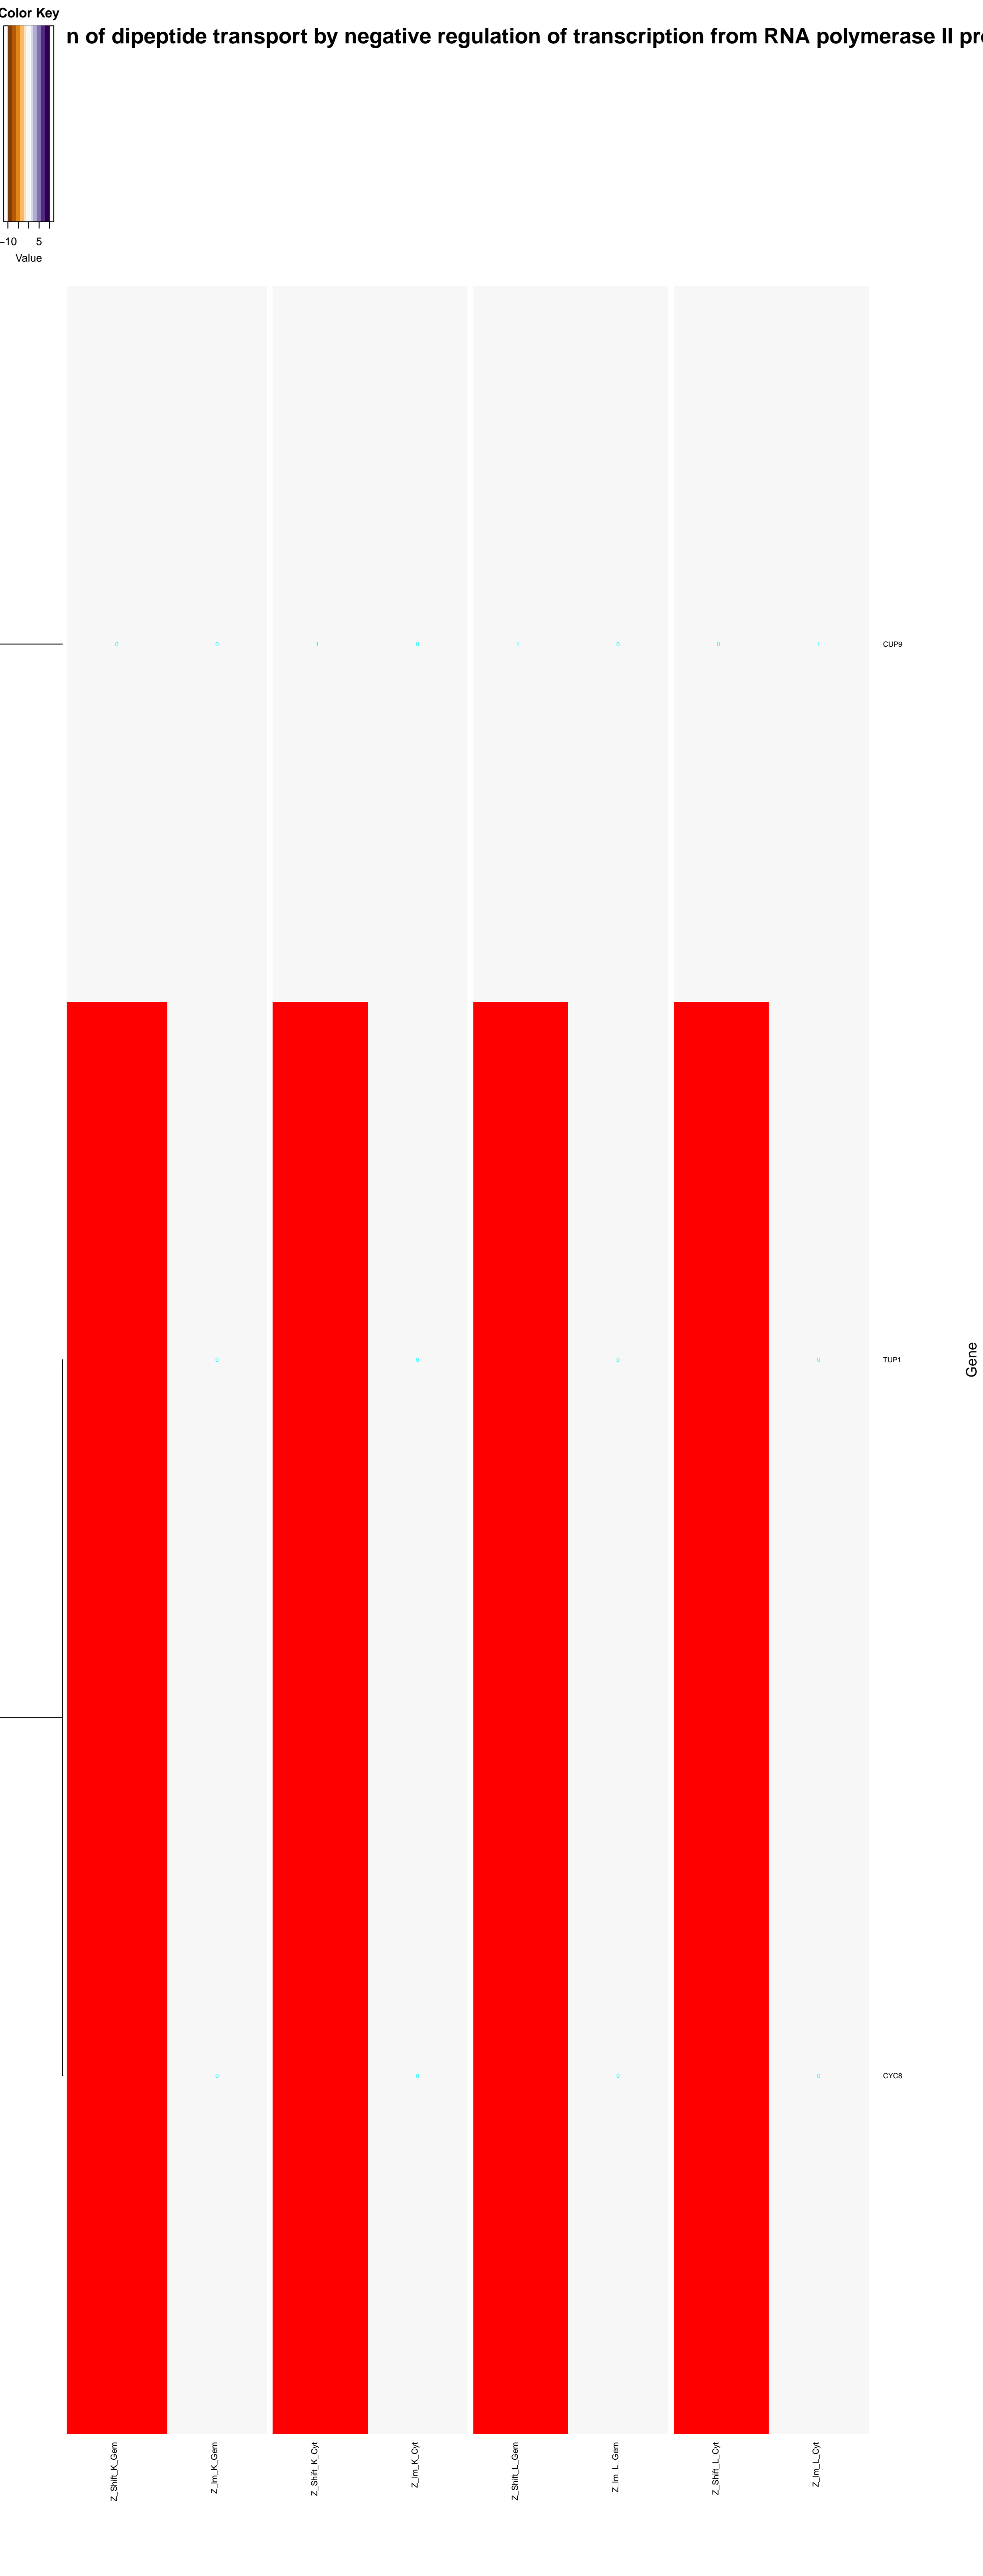

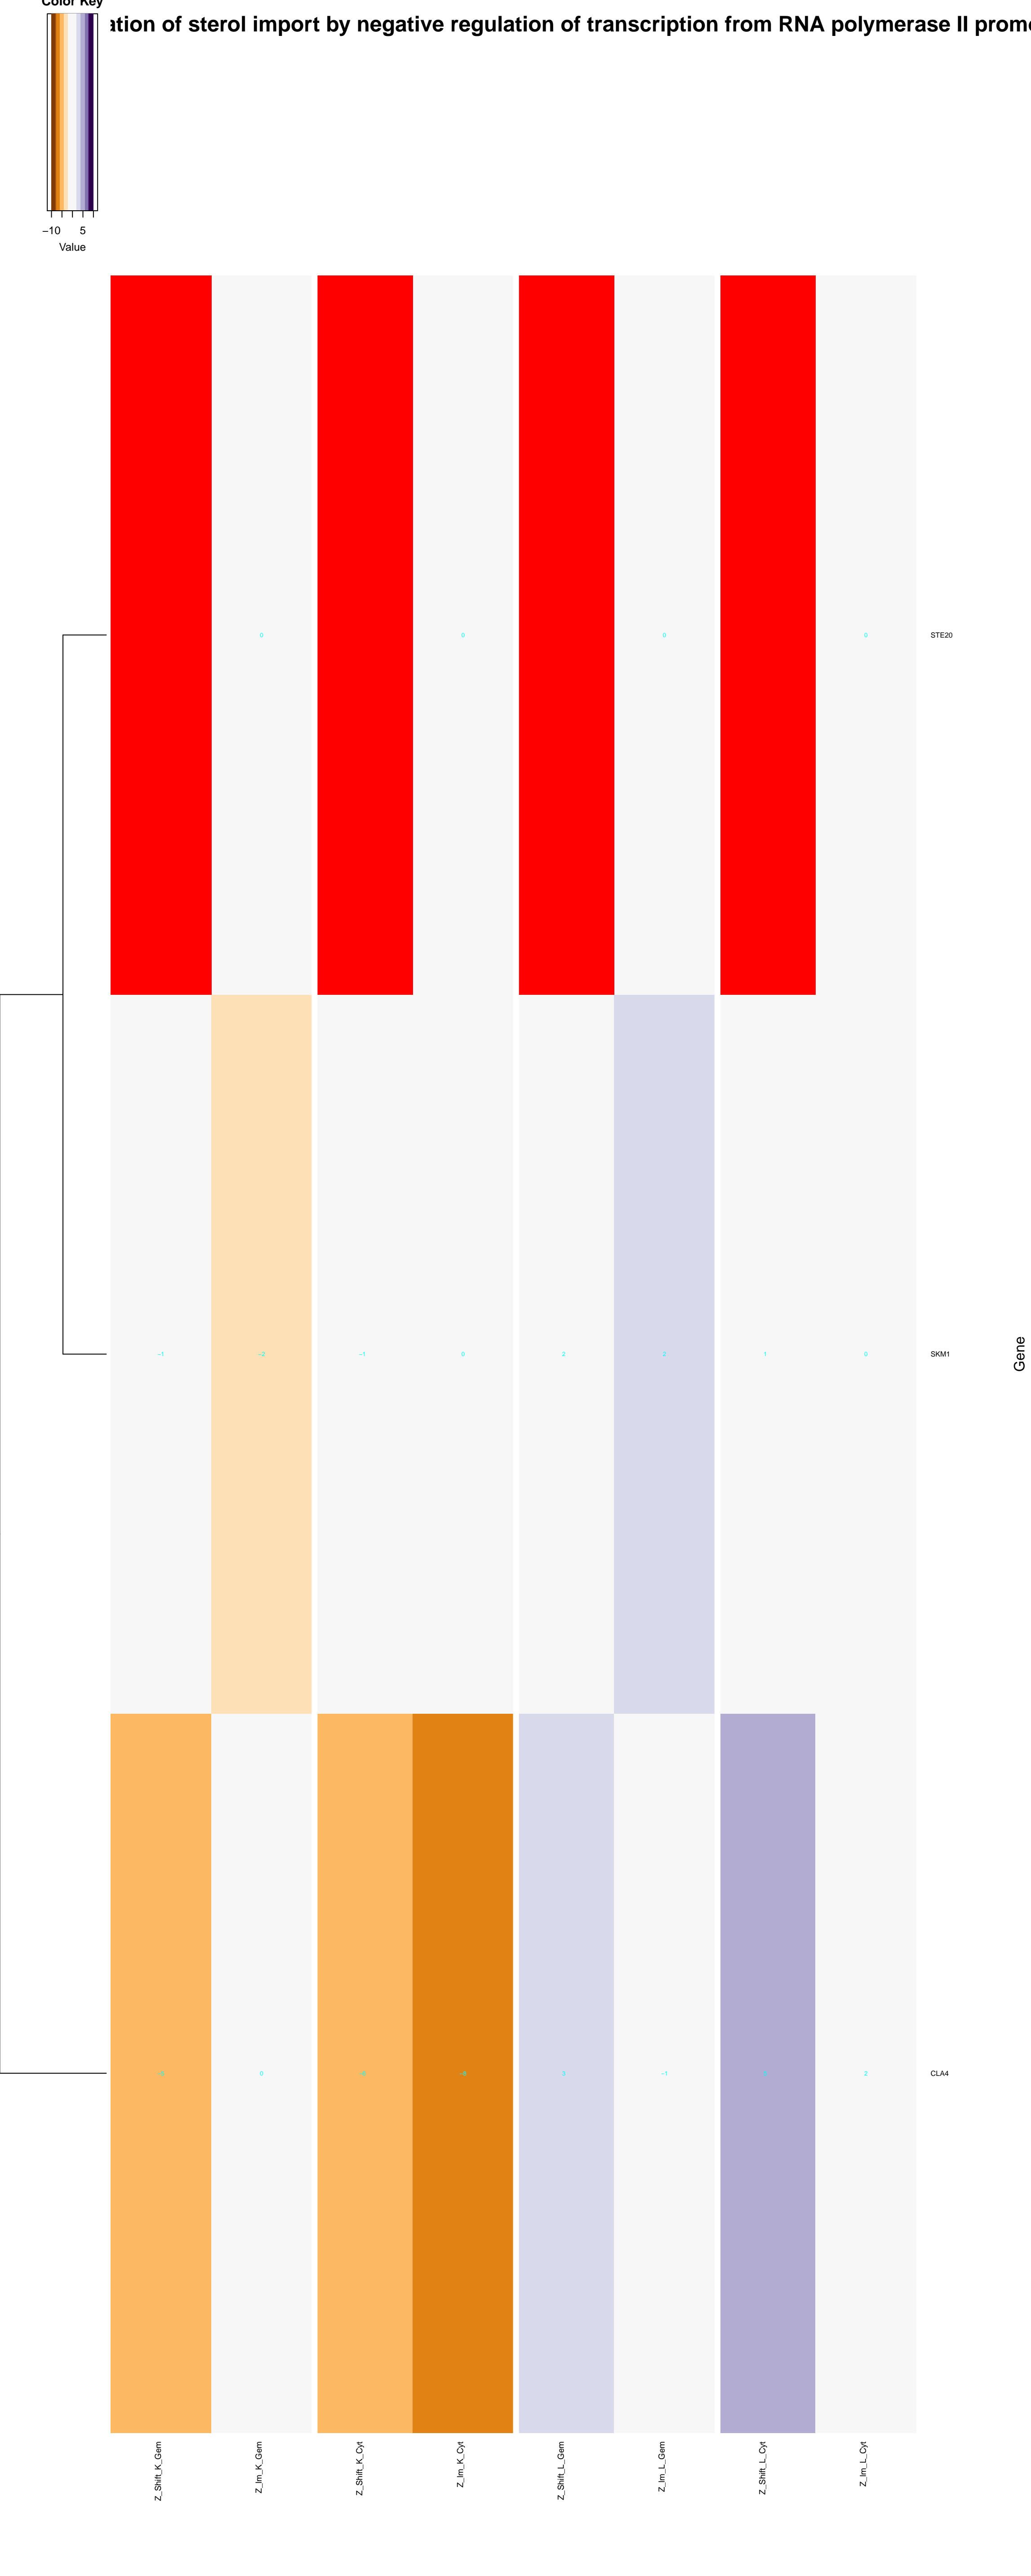

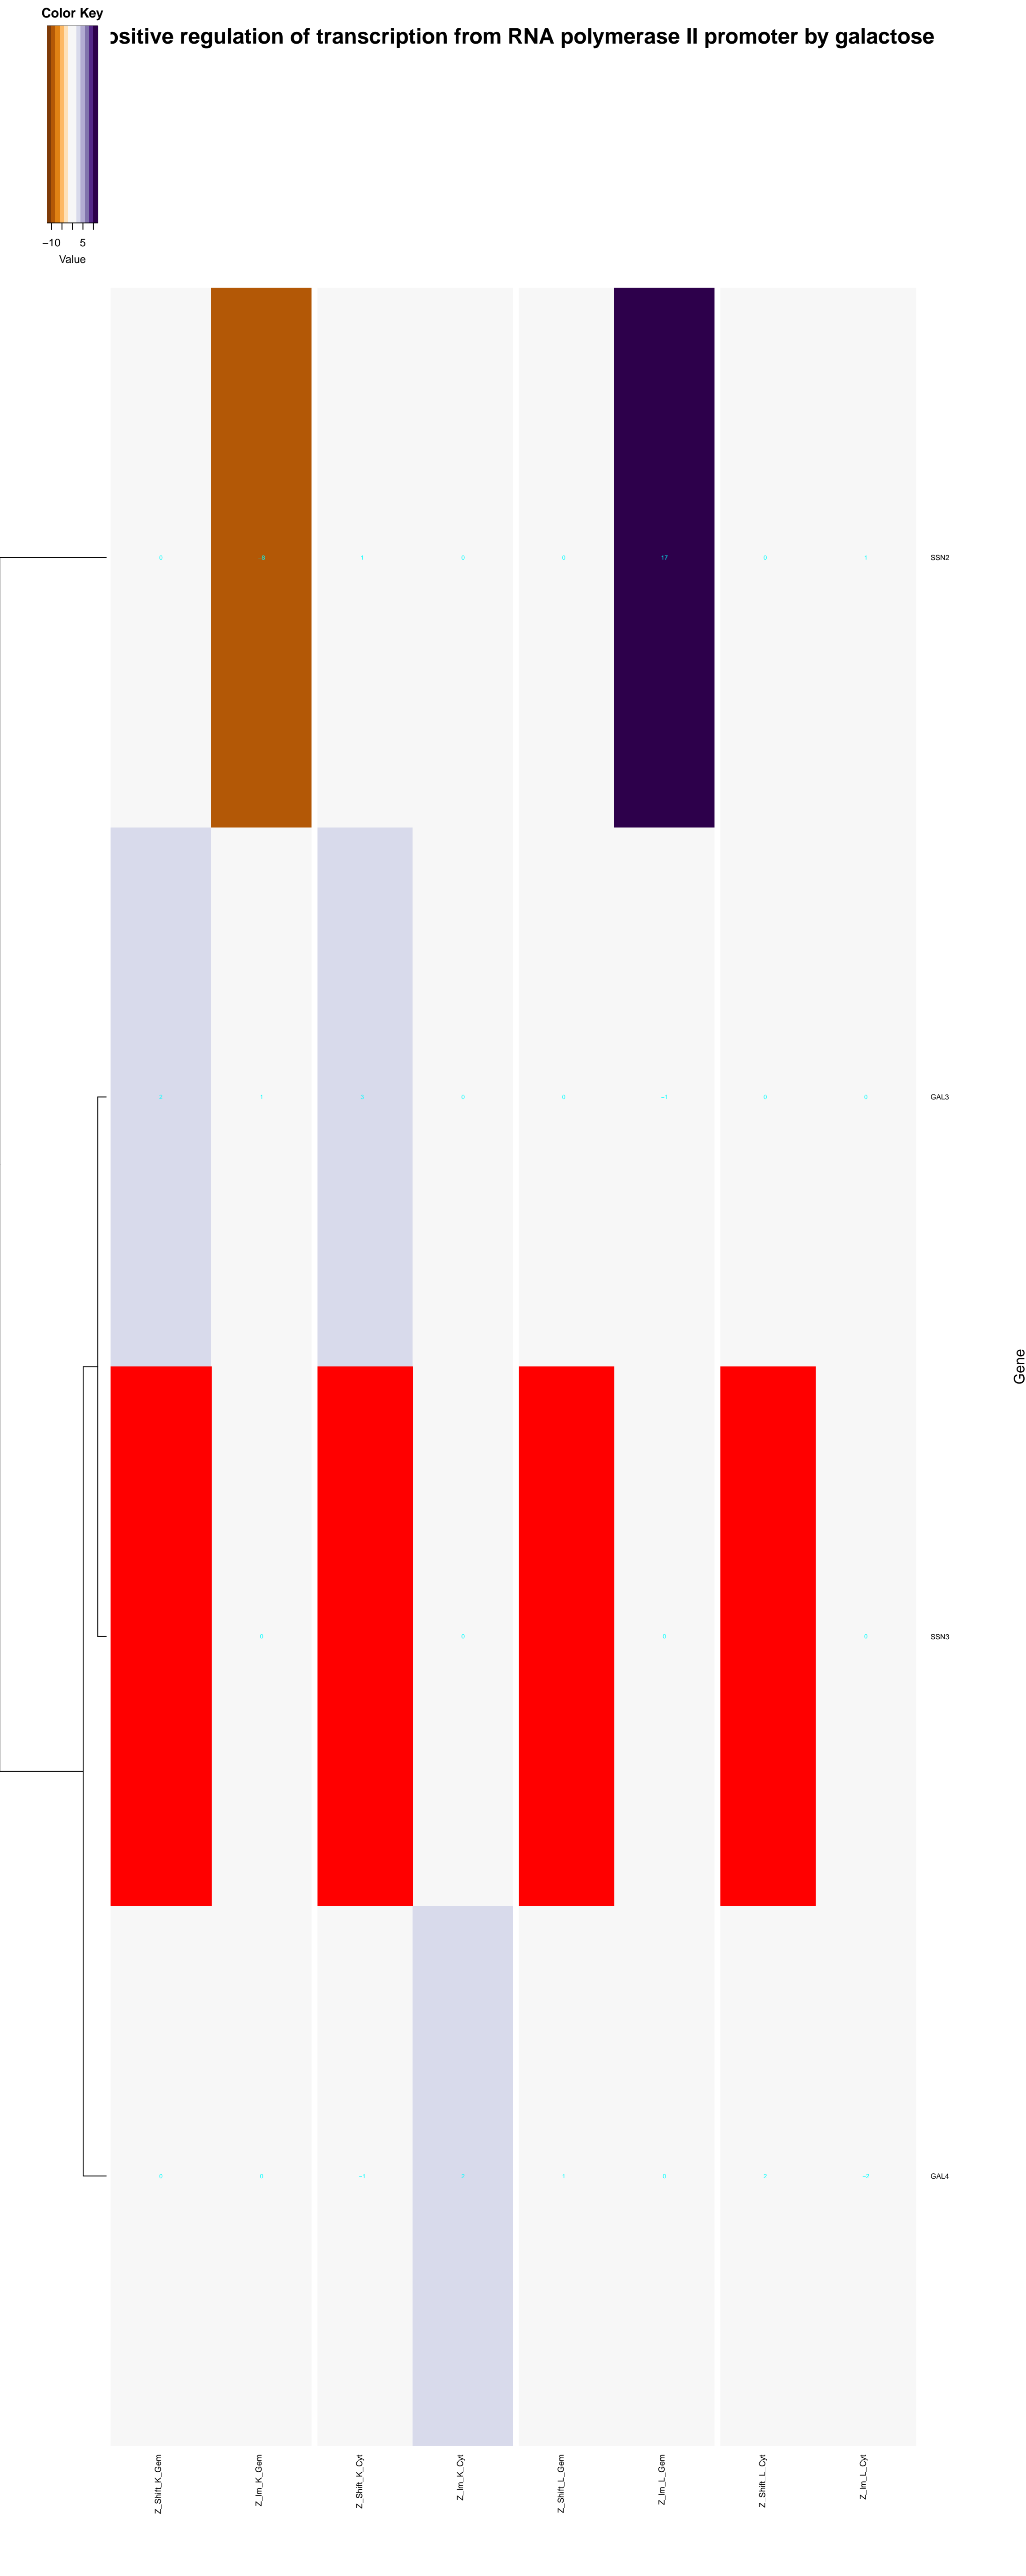

Color Key

10 5 0 -5 -10

Value

lation of transcription from RNA polymerase II promoter by a nonfermentable carbon source

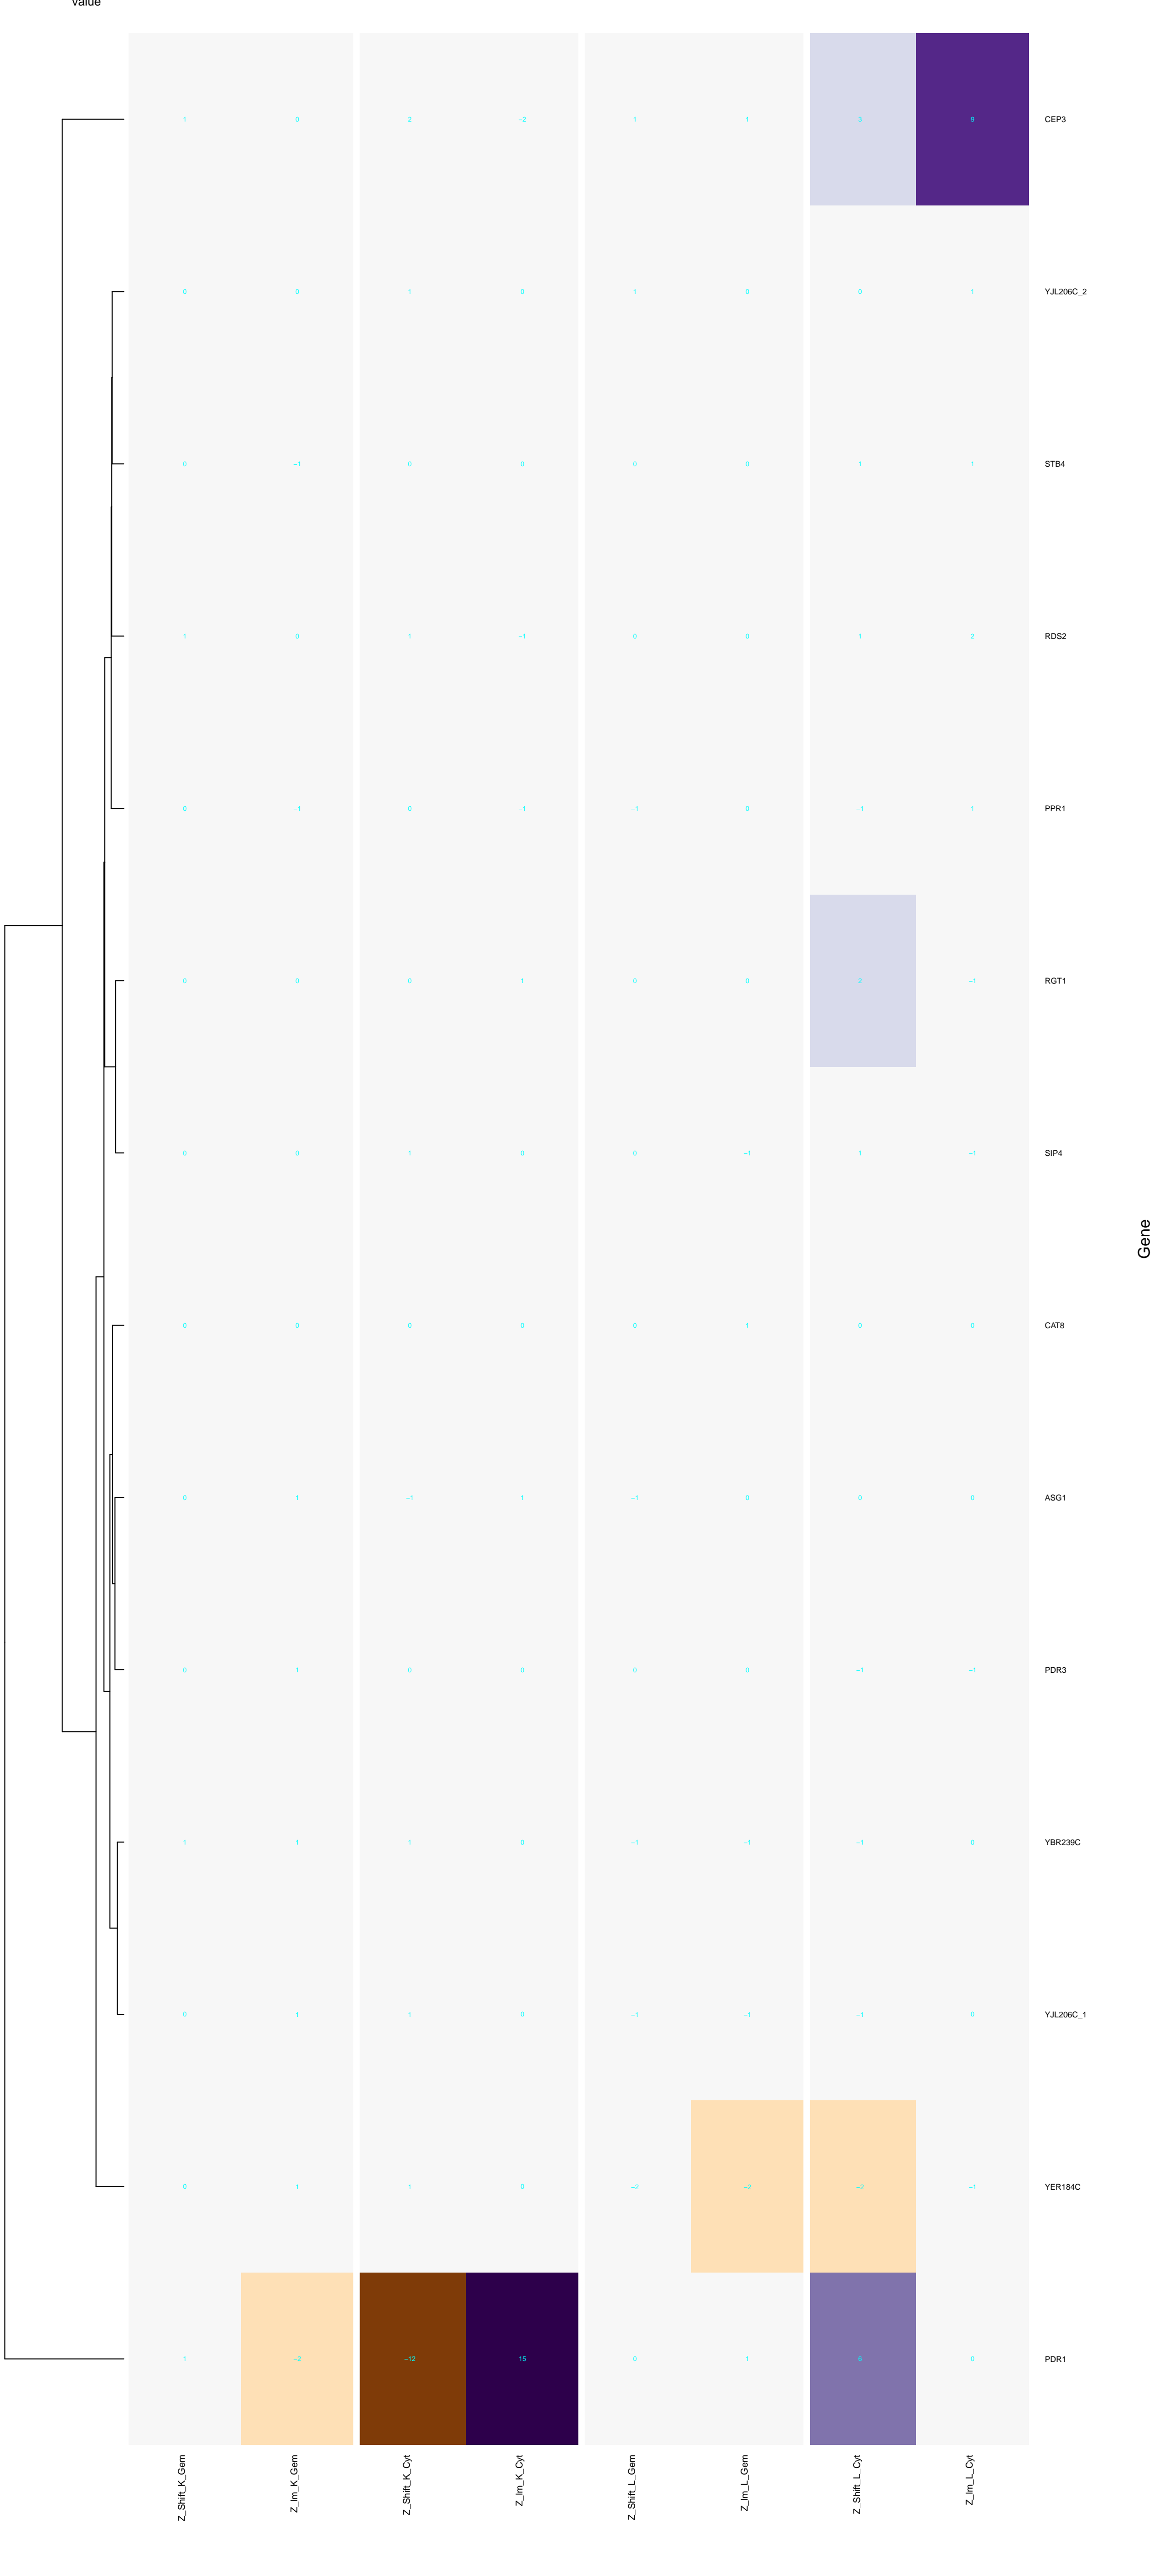

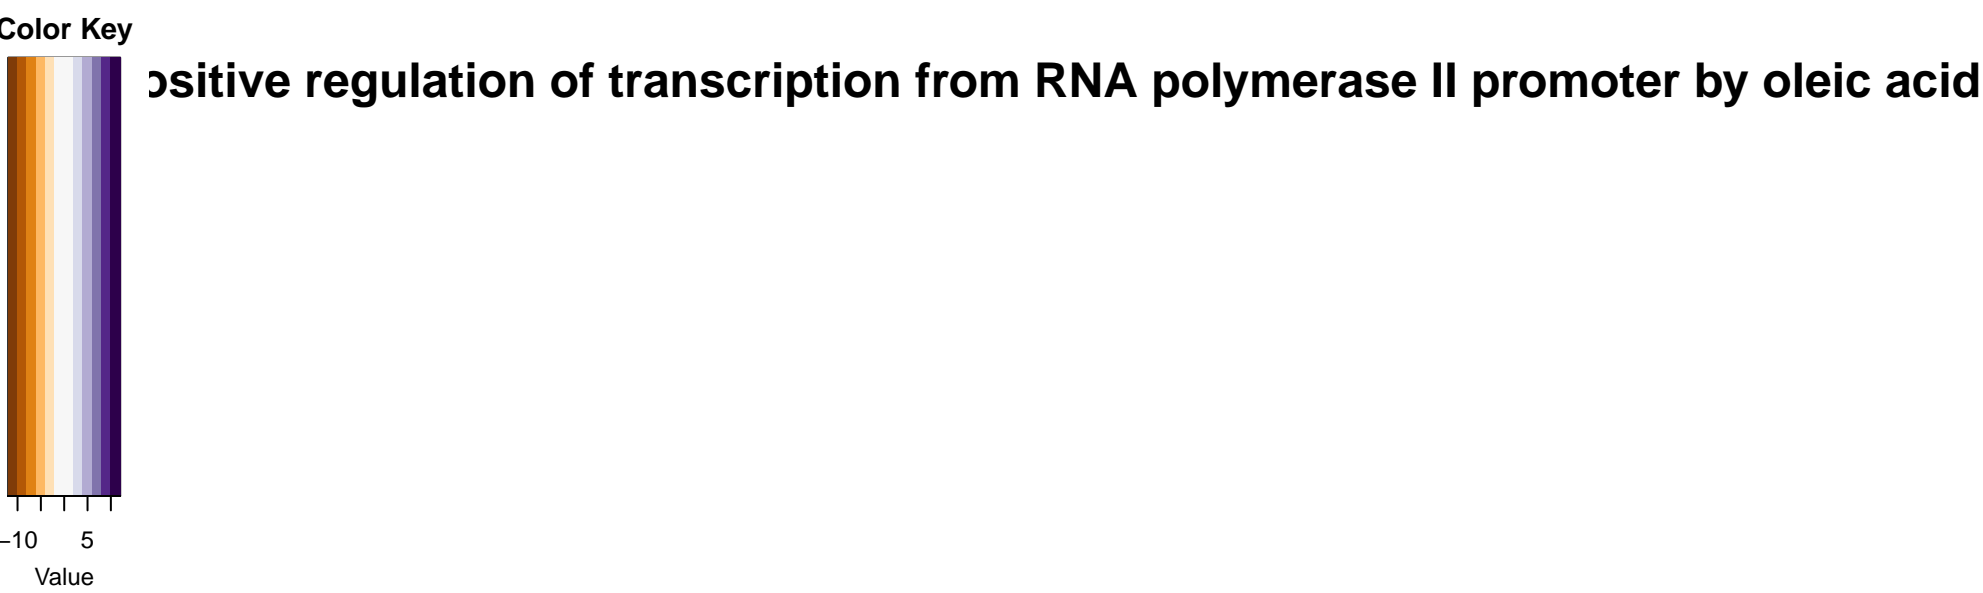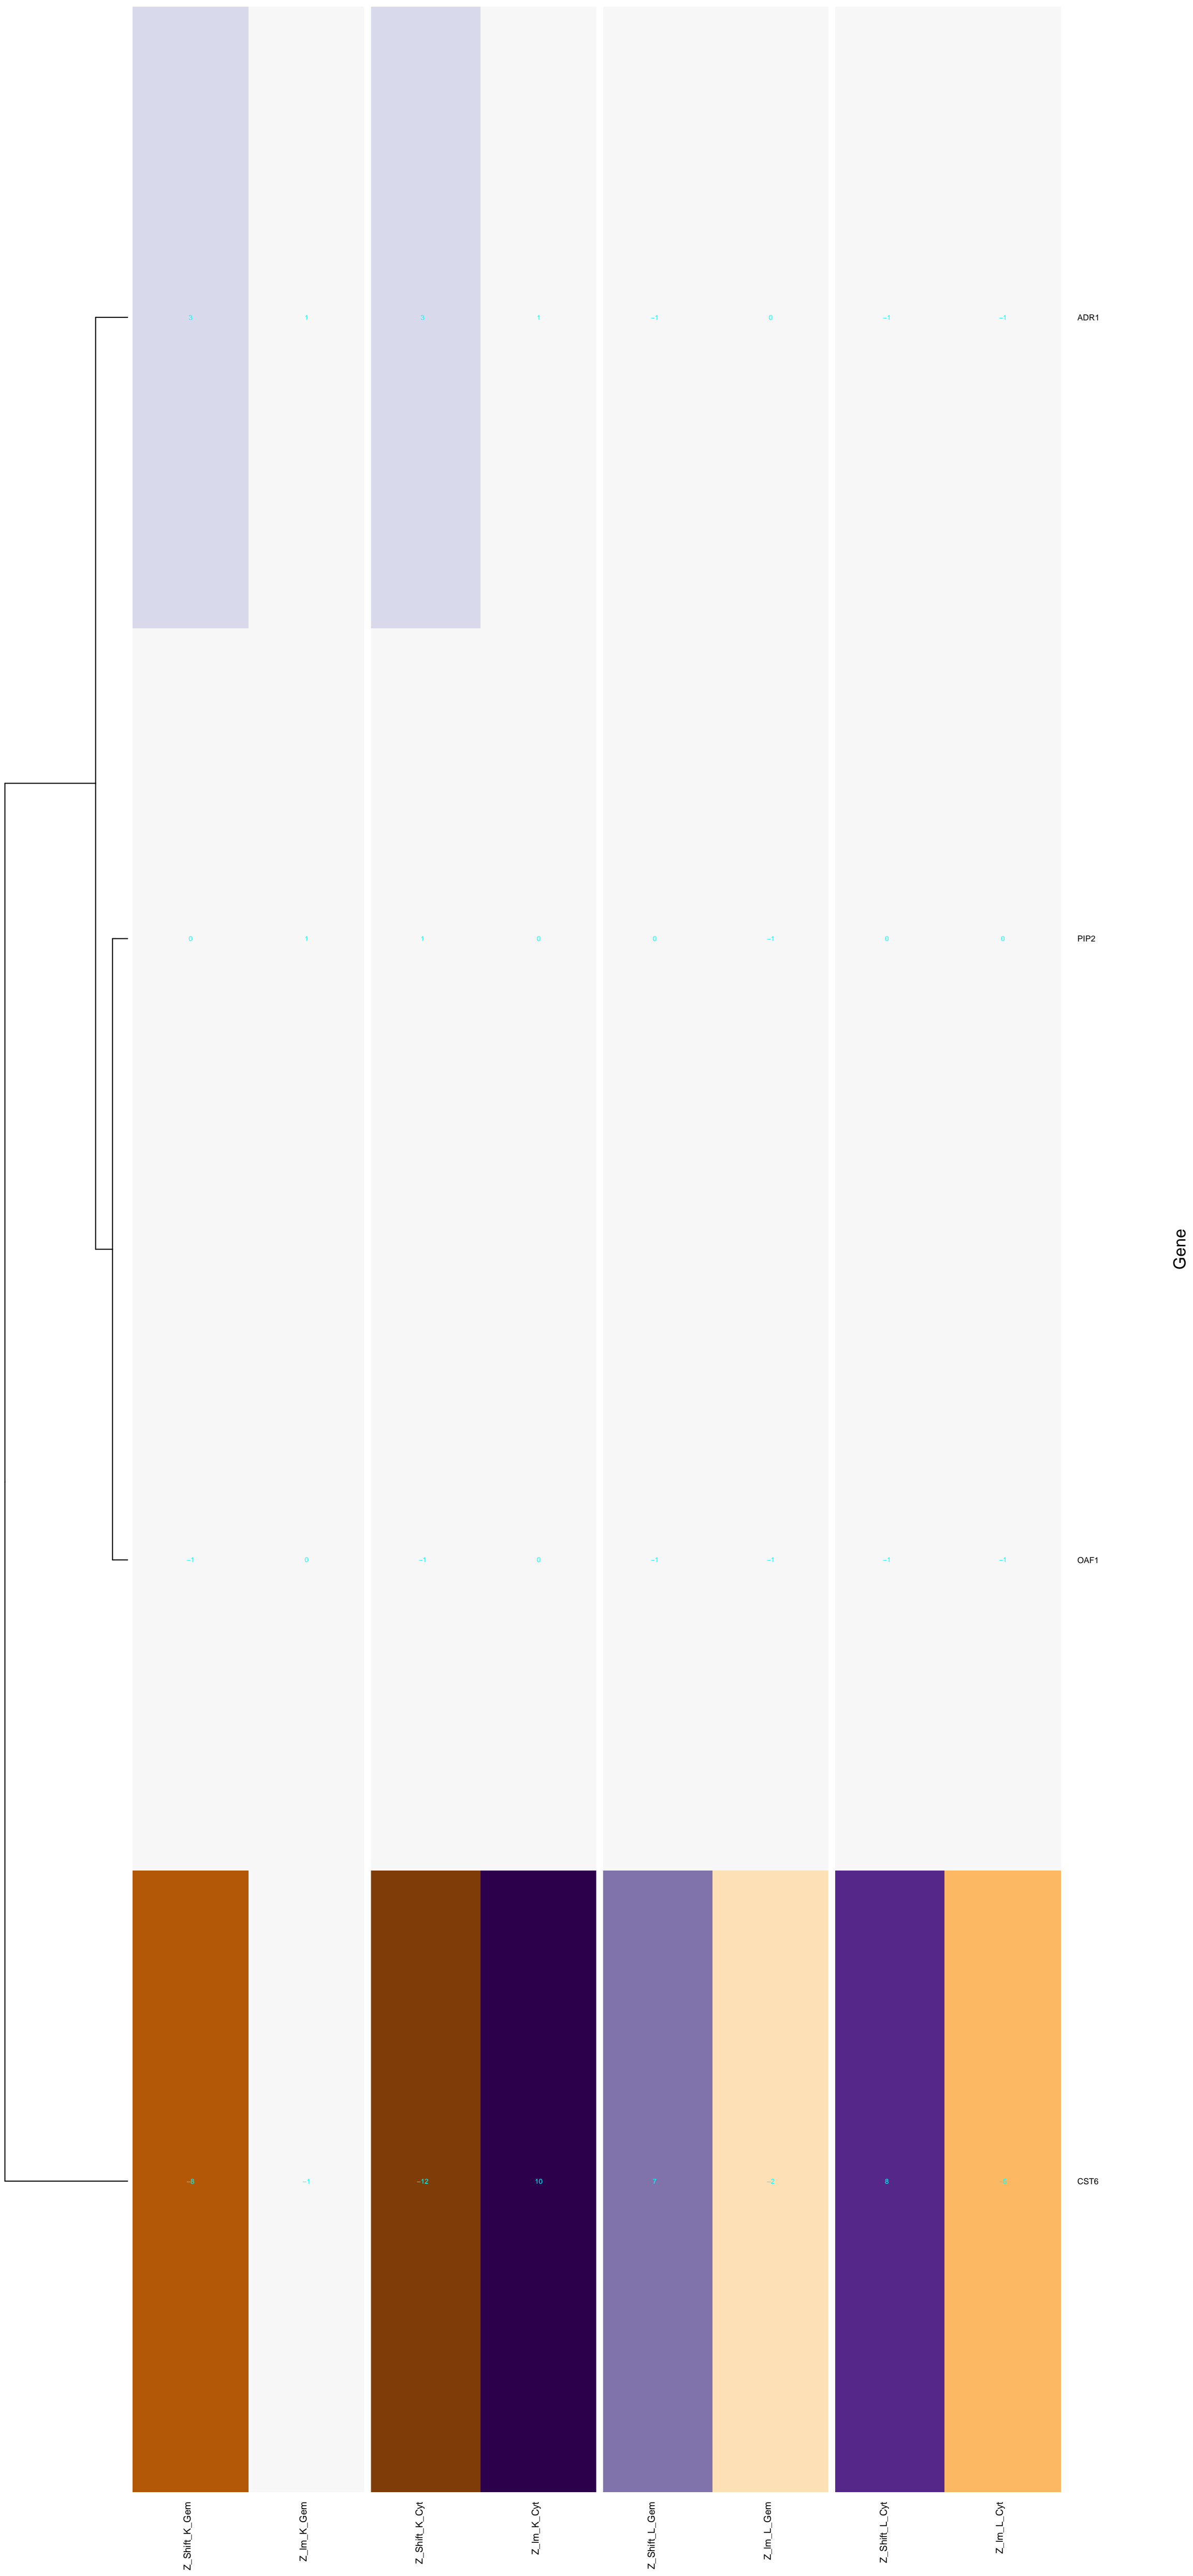

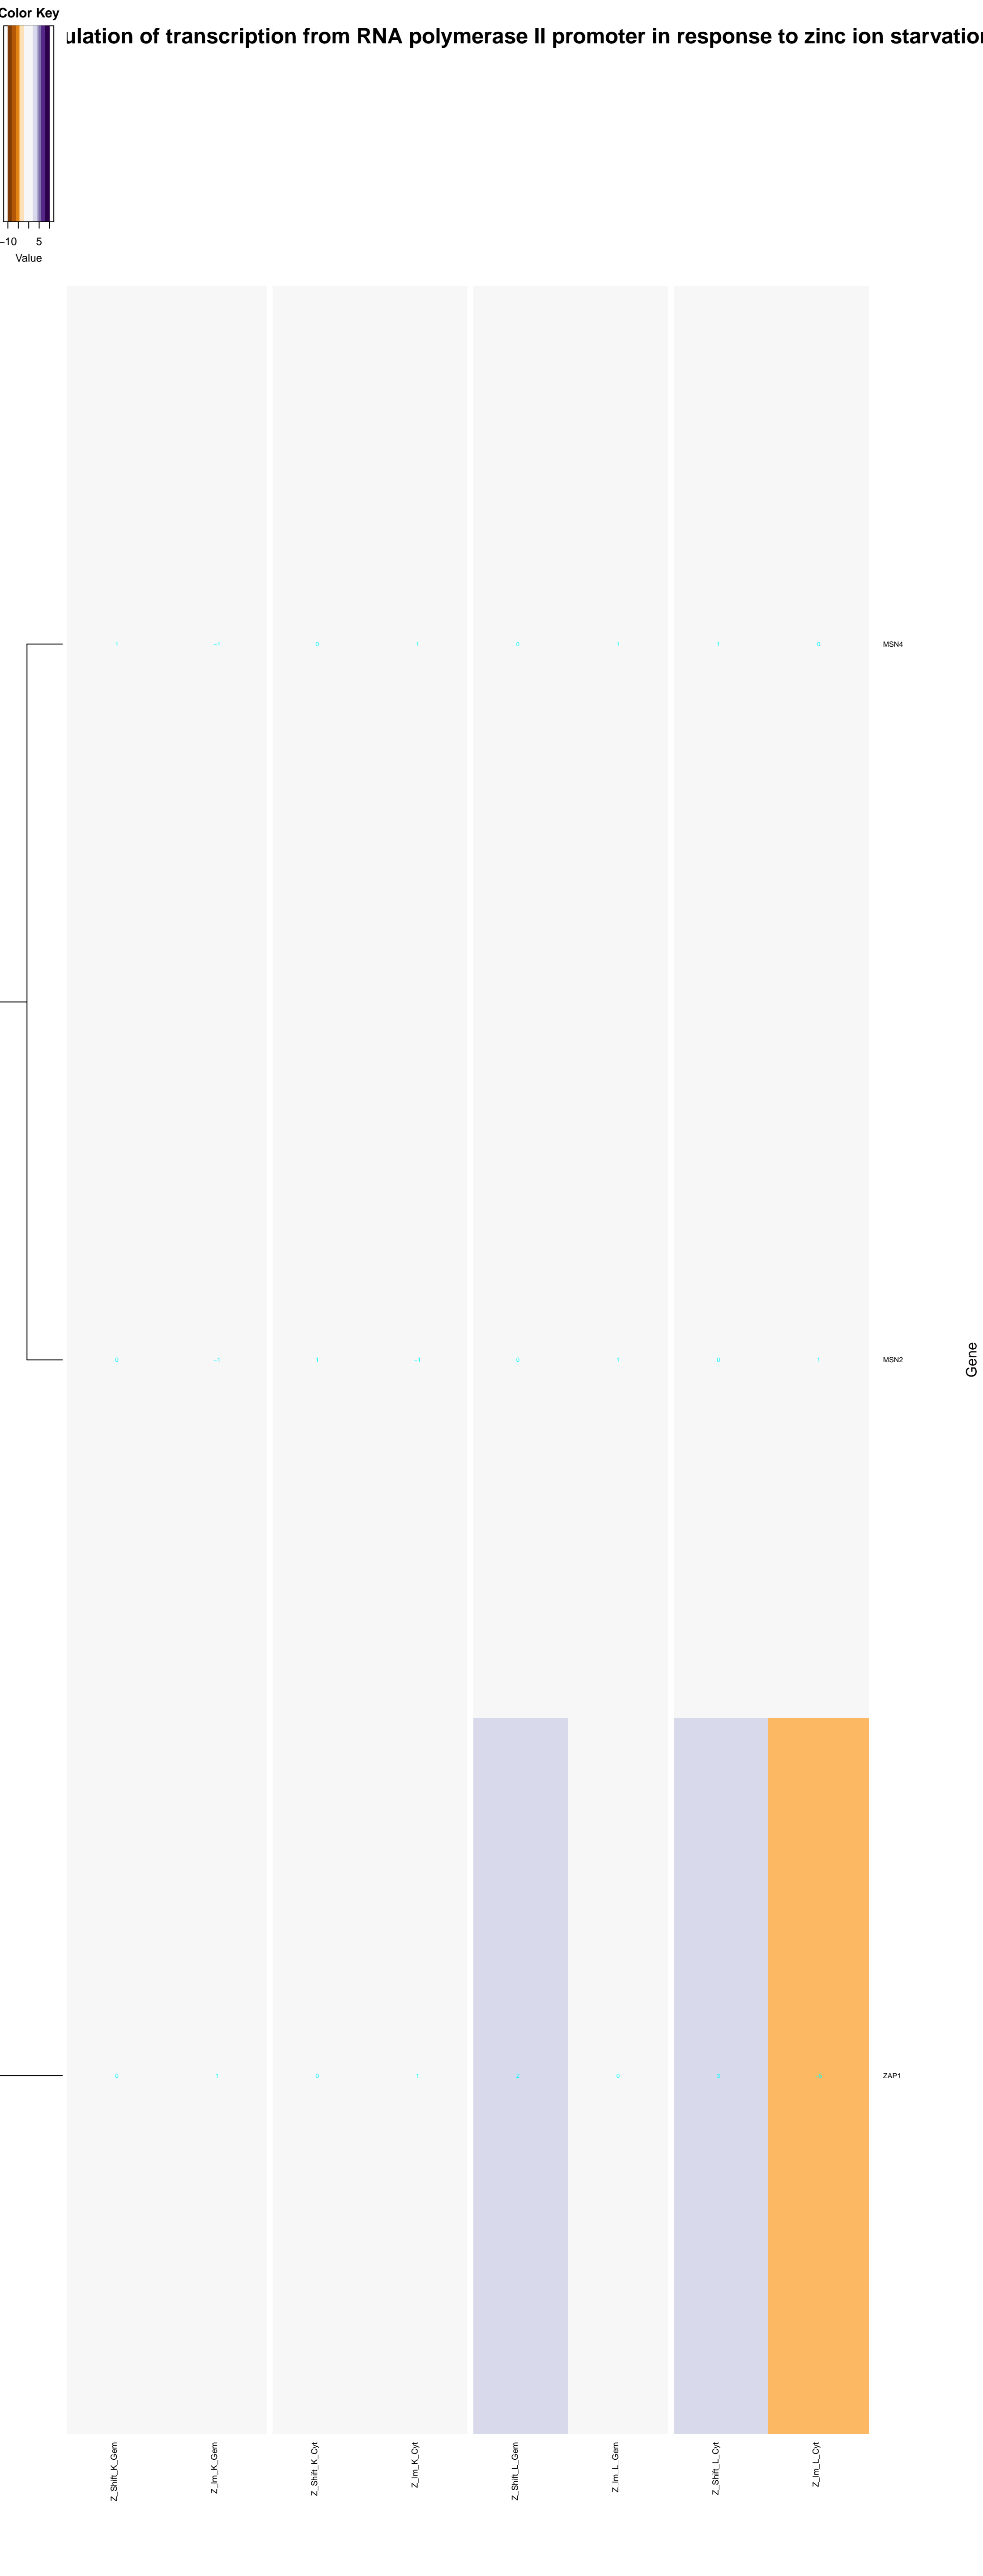

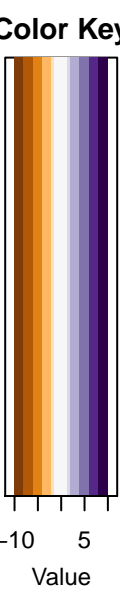

gulation of transcription from RNA polymerase II promoter in response to oxidative stress

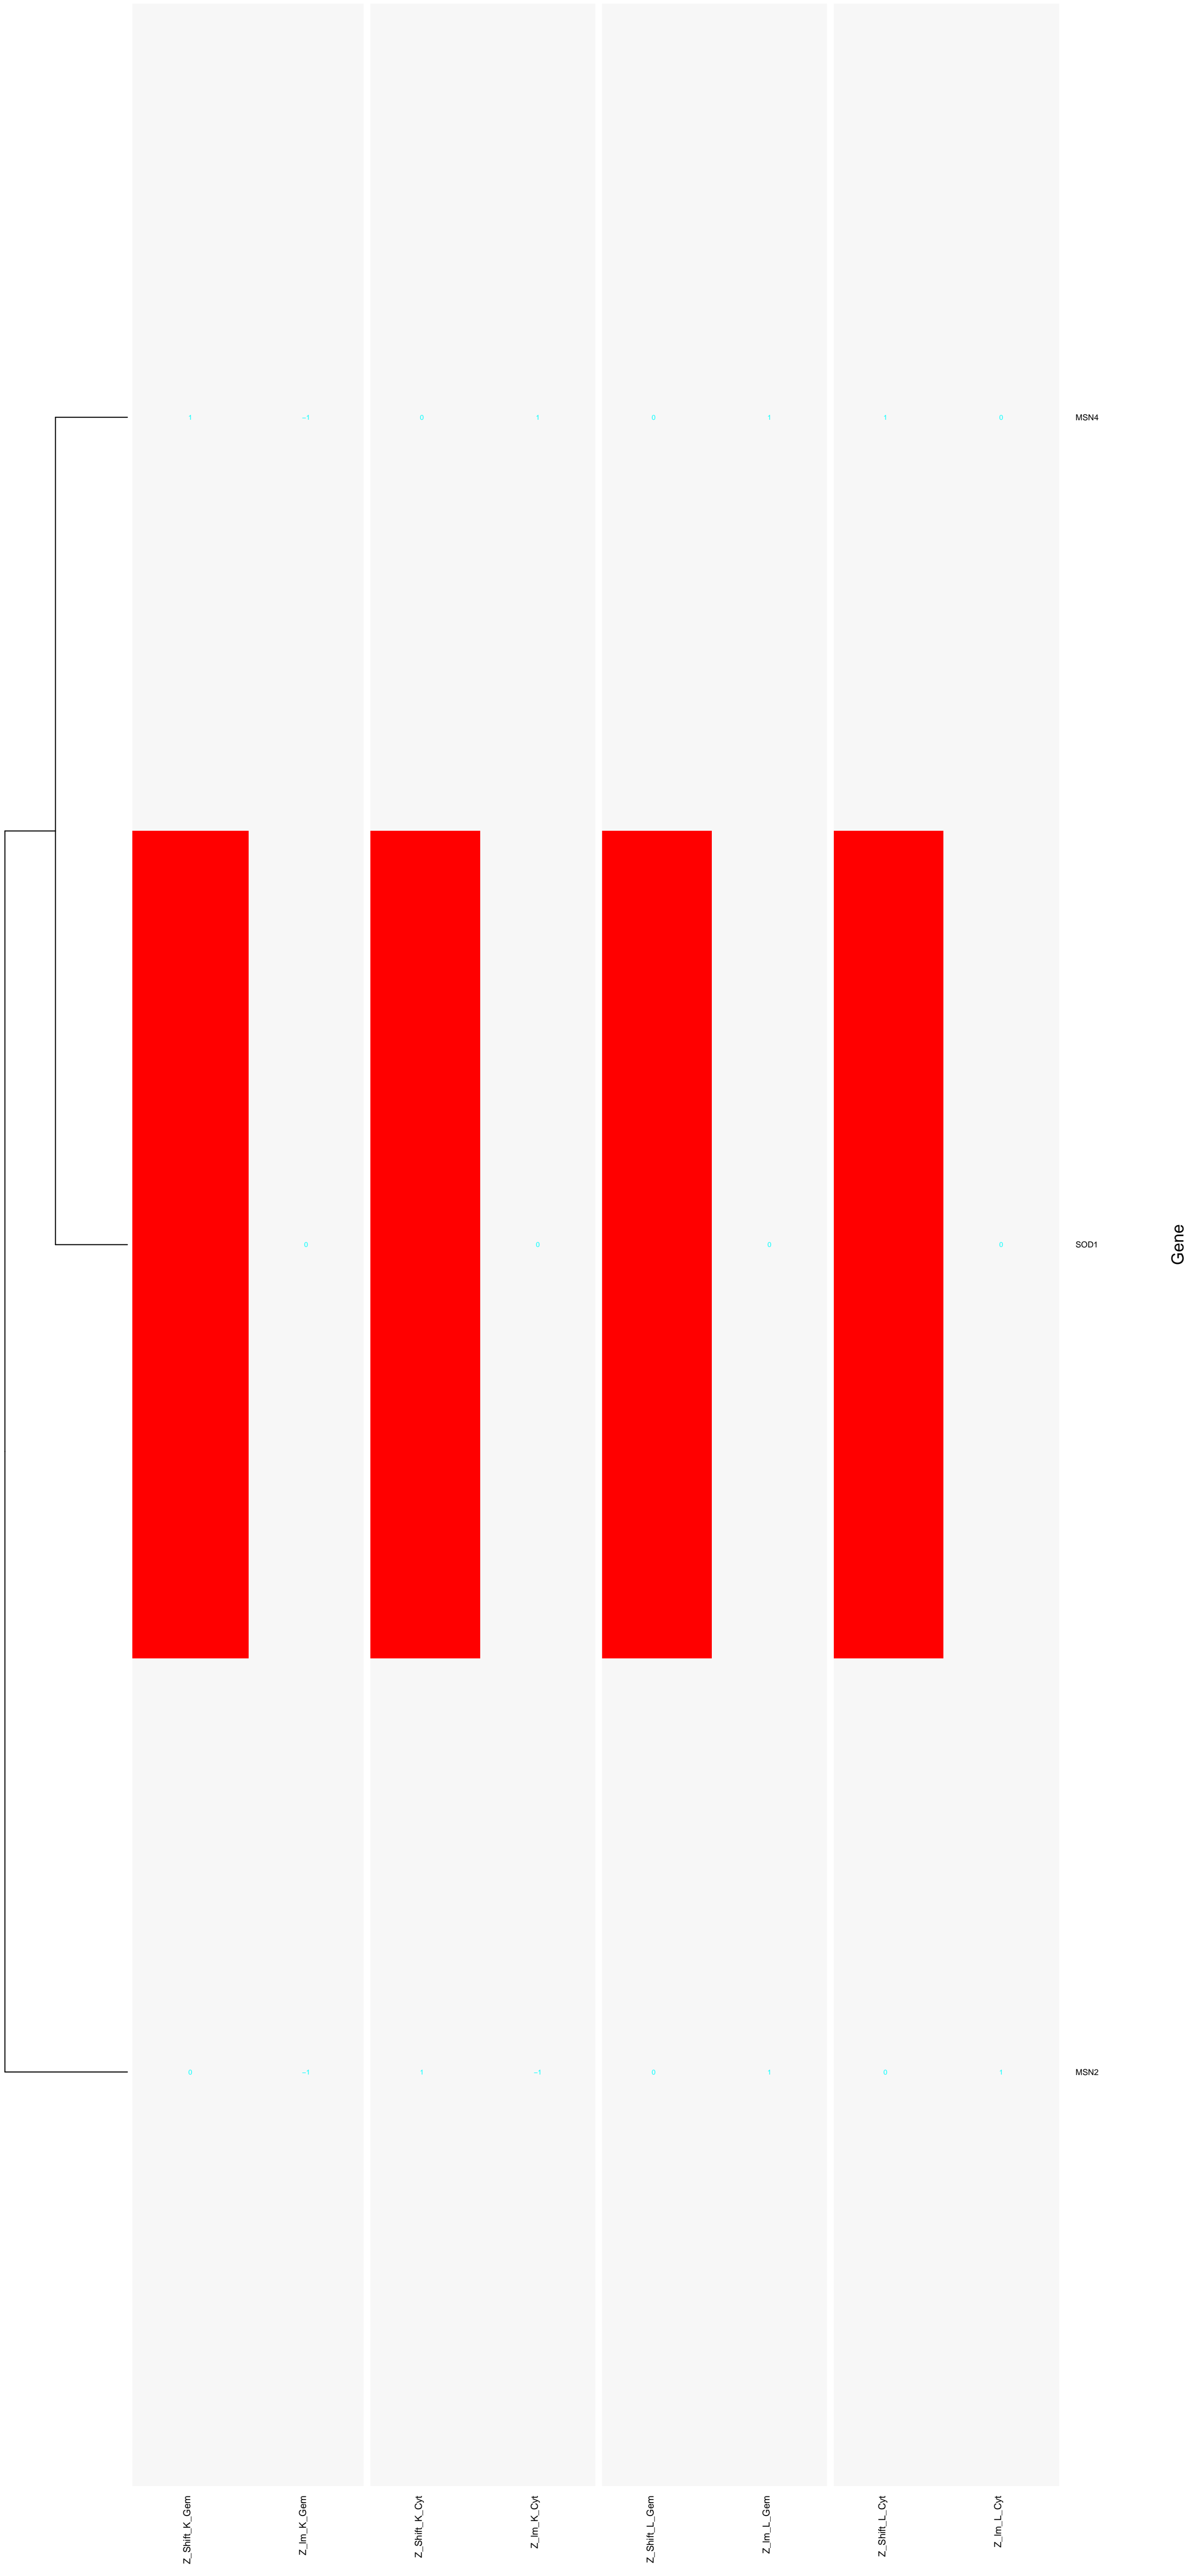

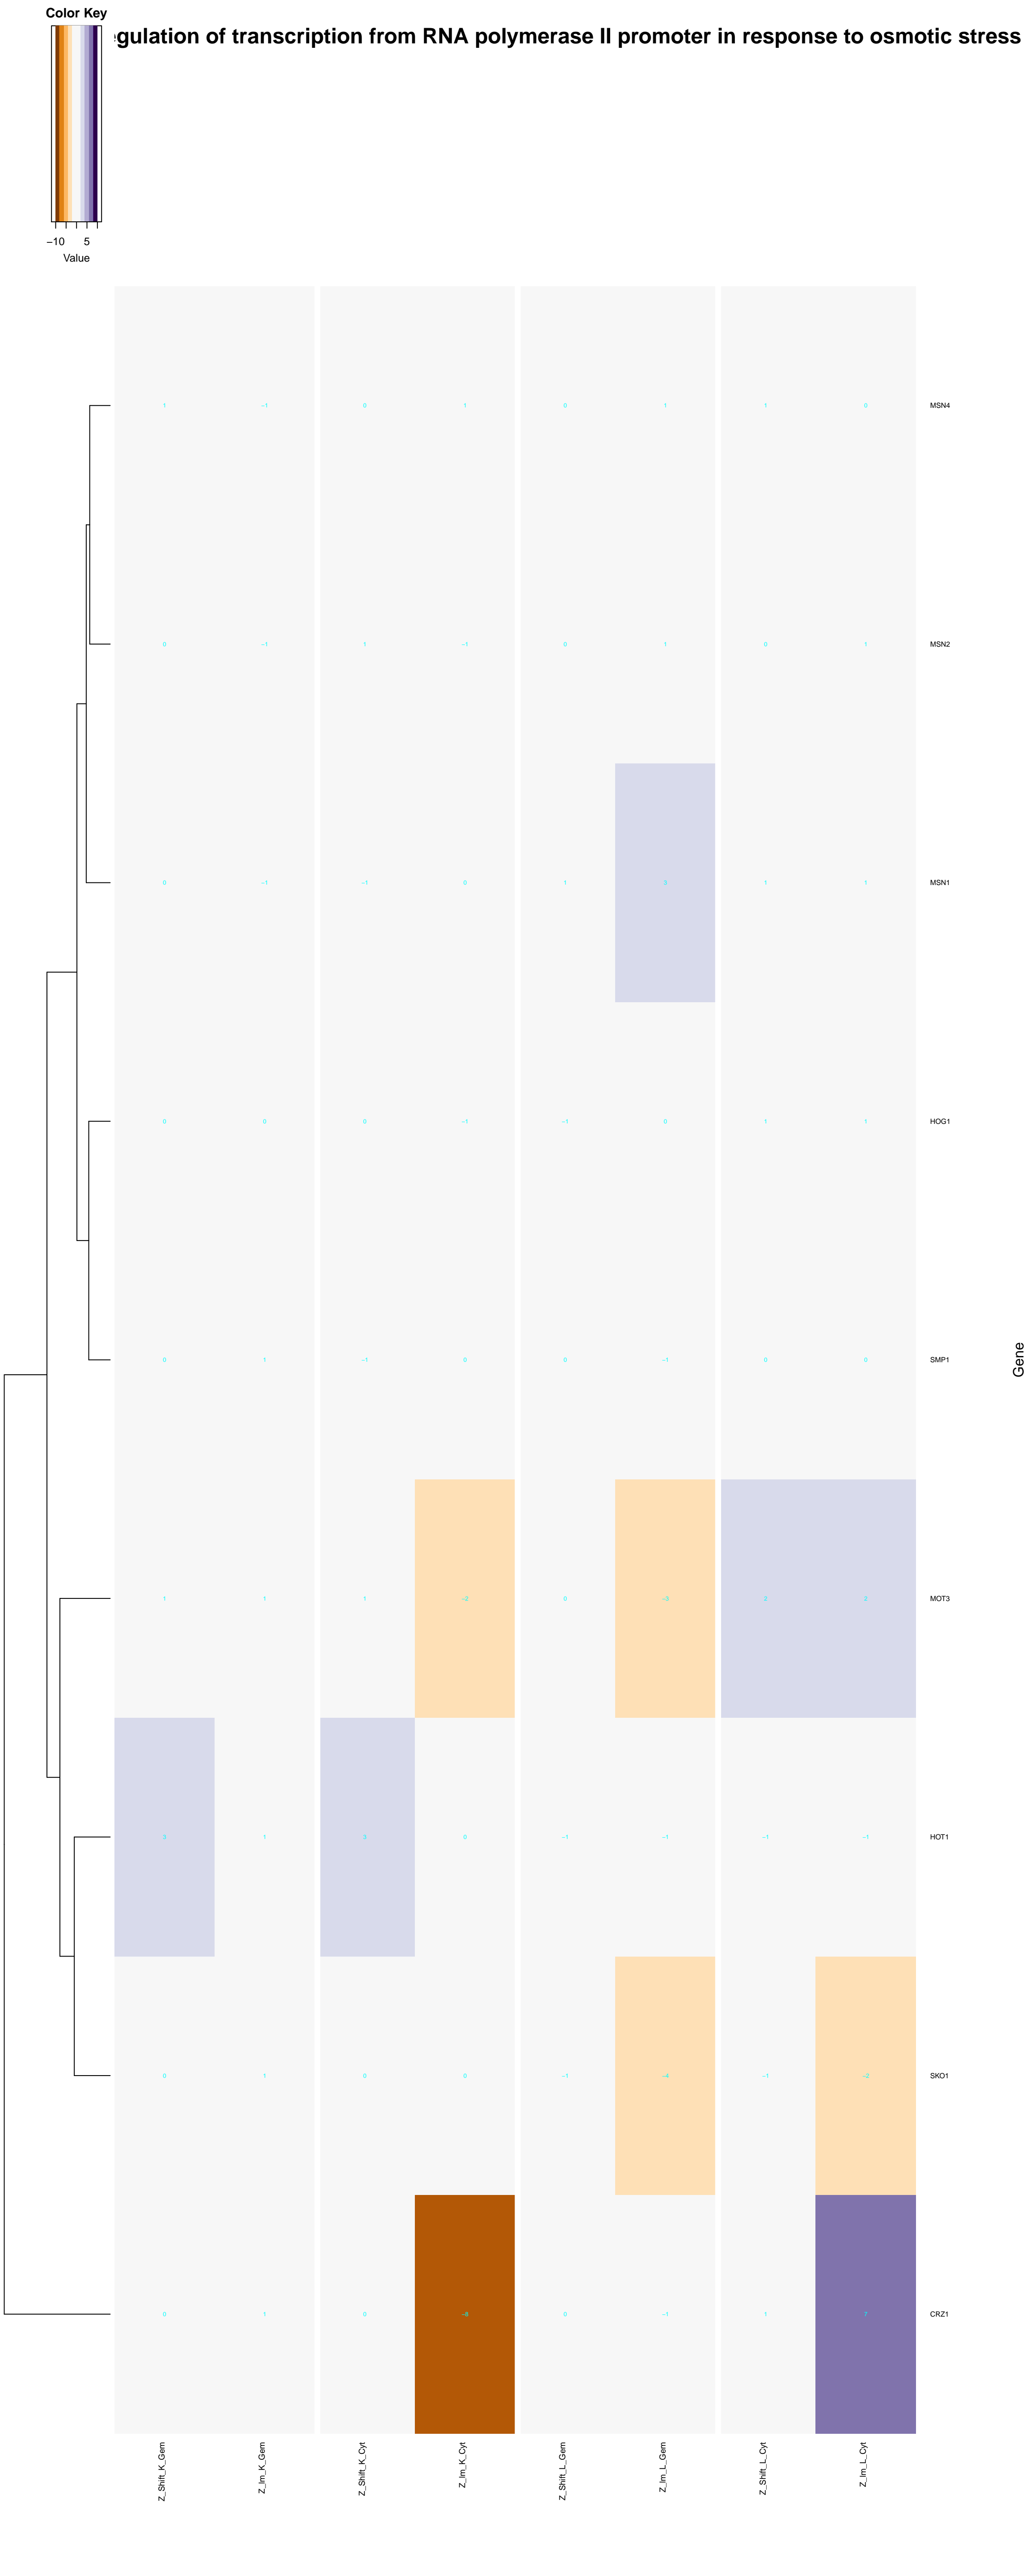



Figure 1: Heatmap showing the log2 fold change of transcription from RNA polymerase II promoter in response to arsenic-containing substances.

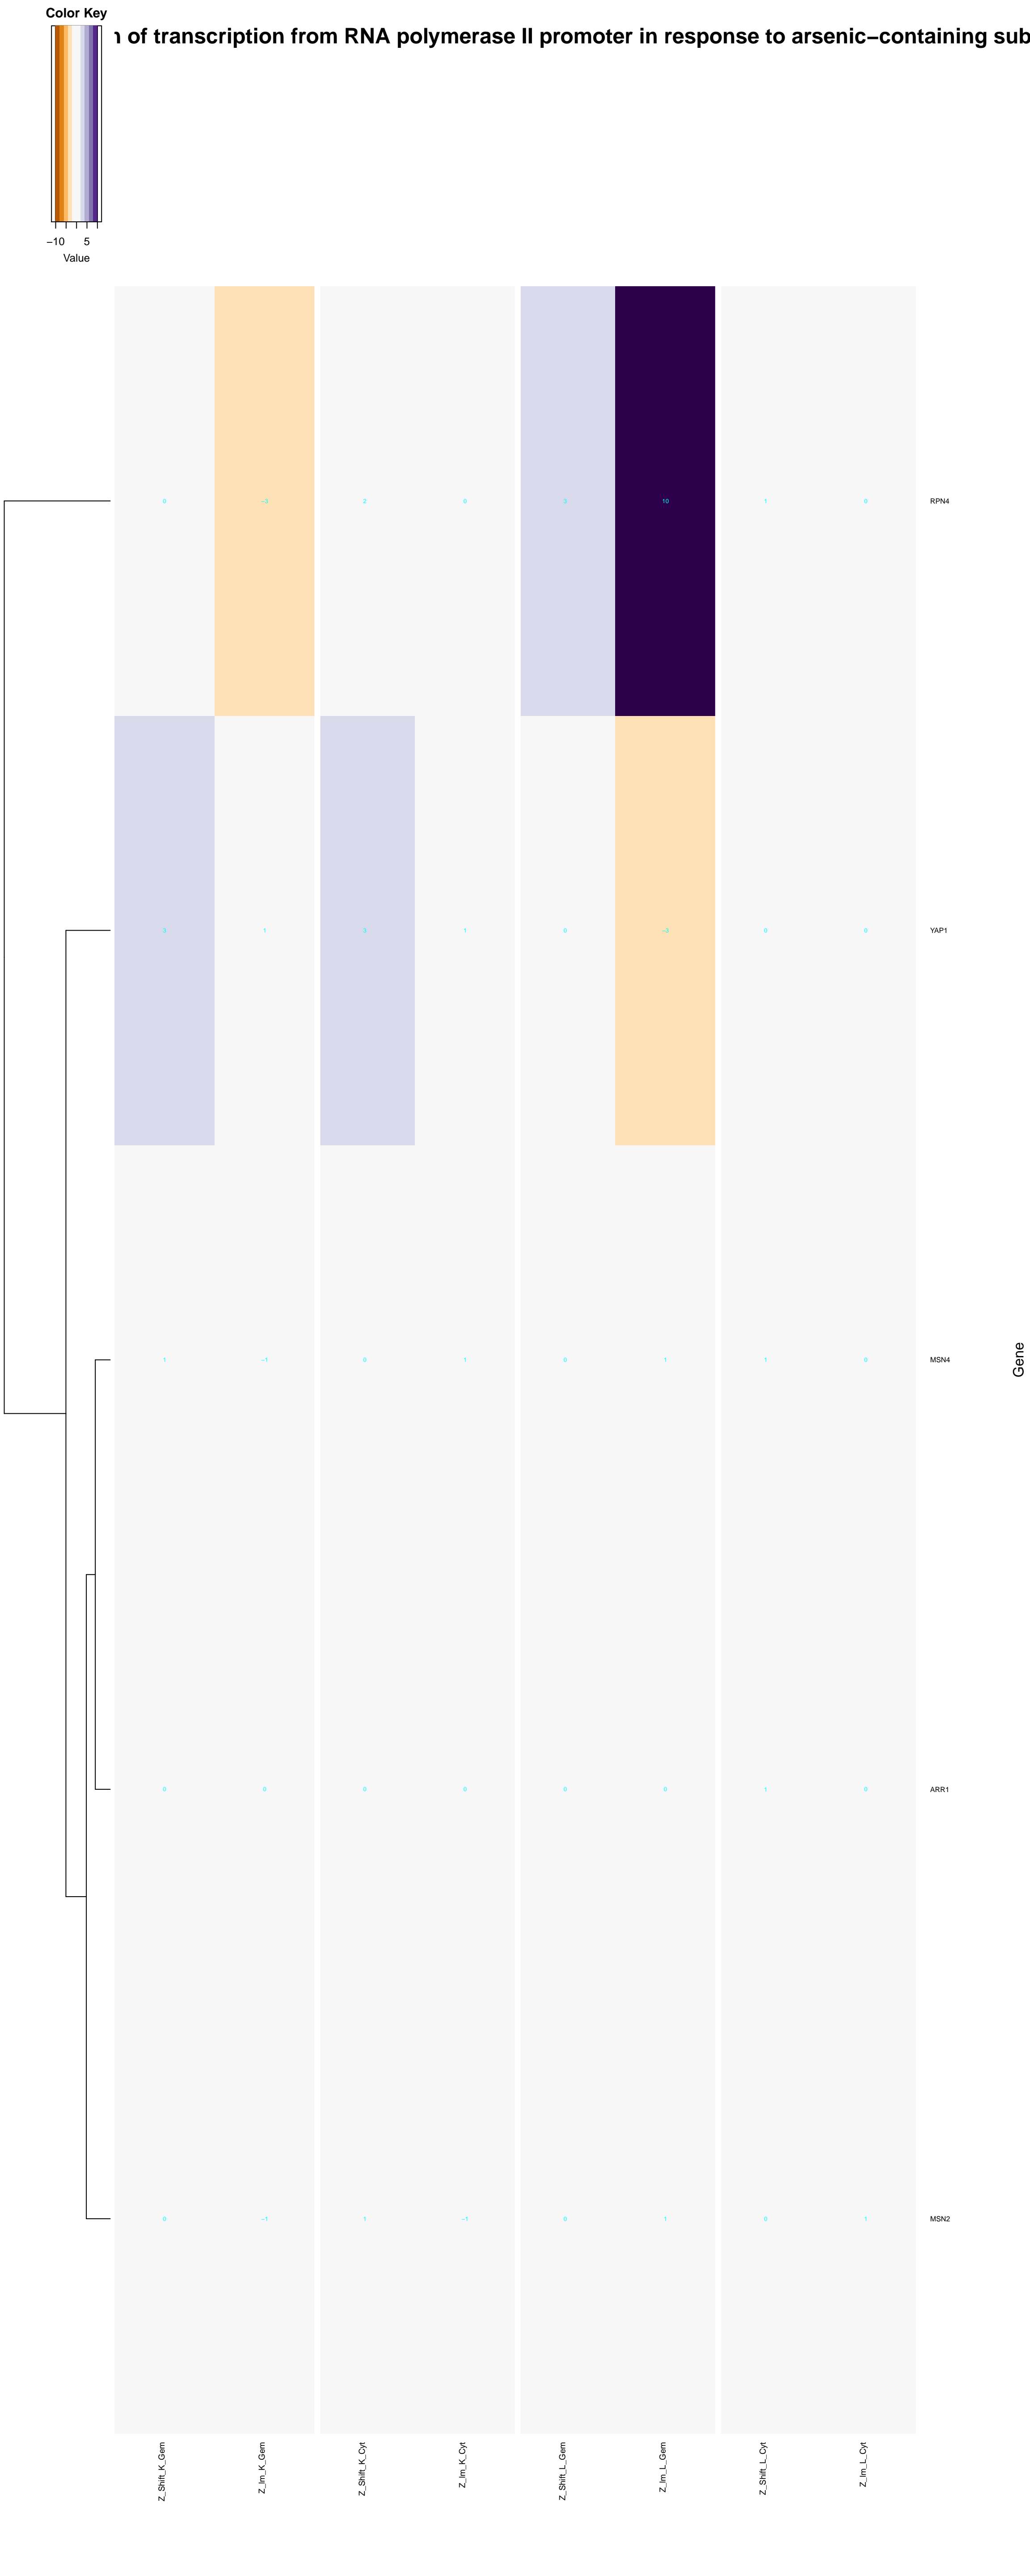

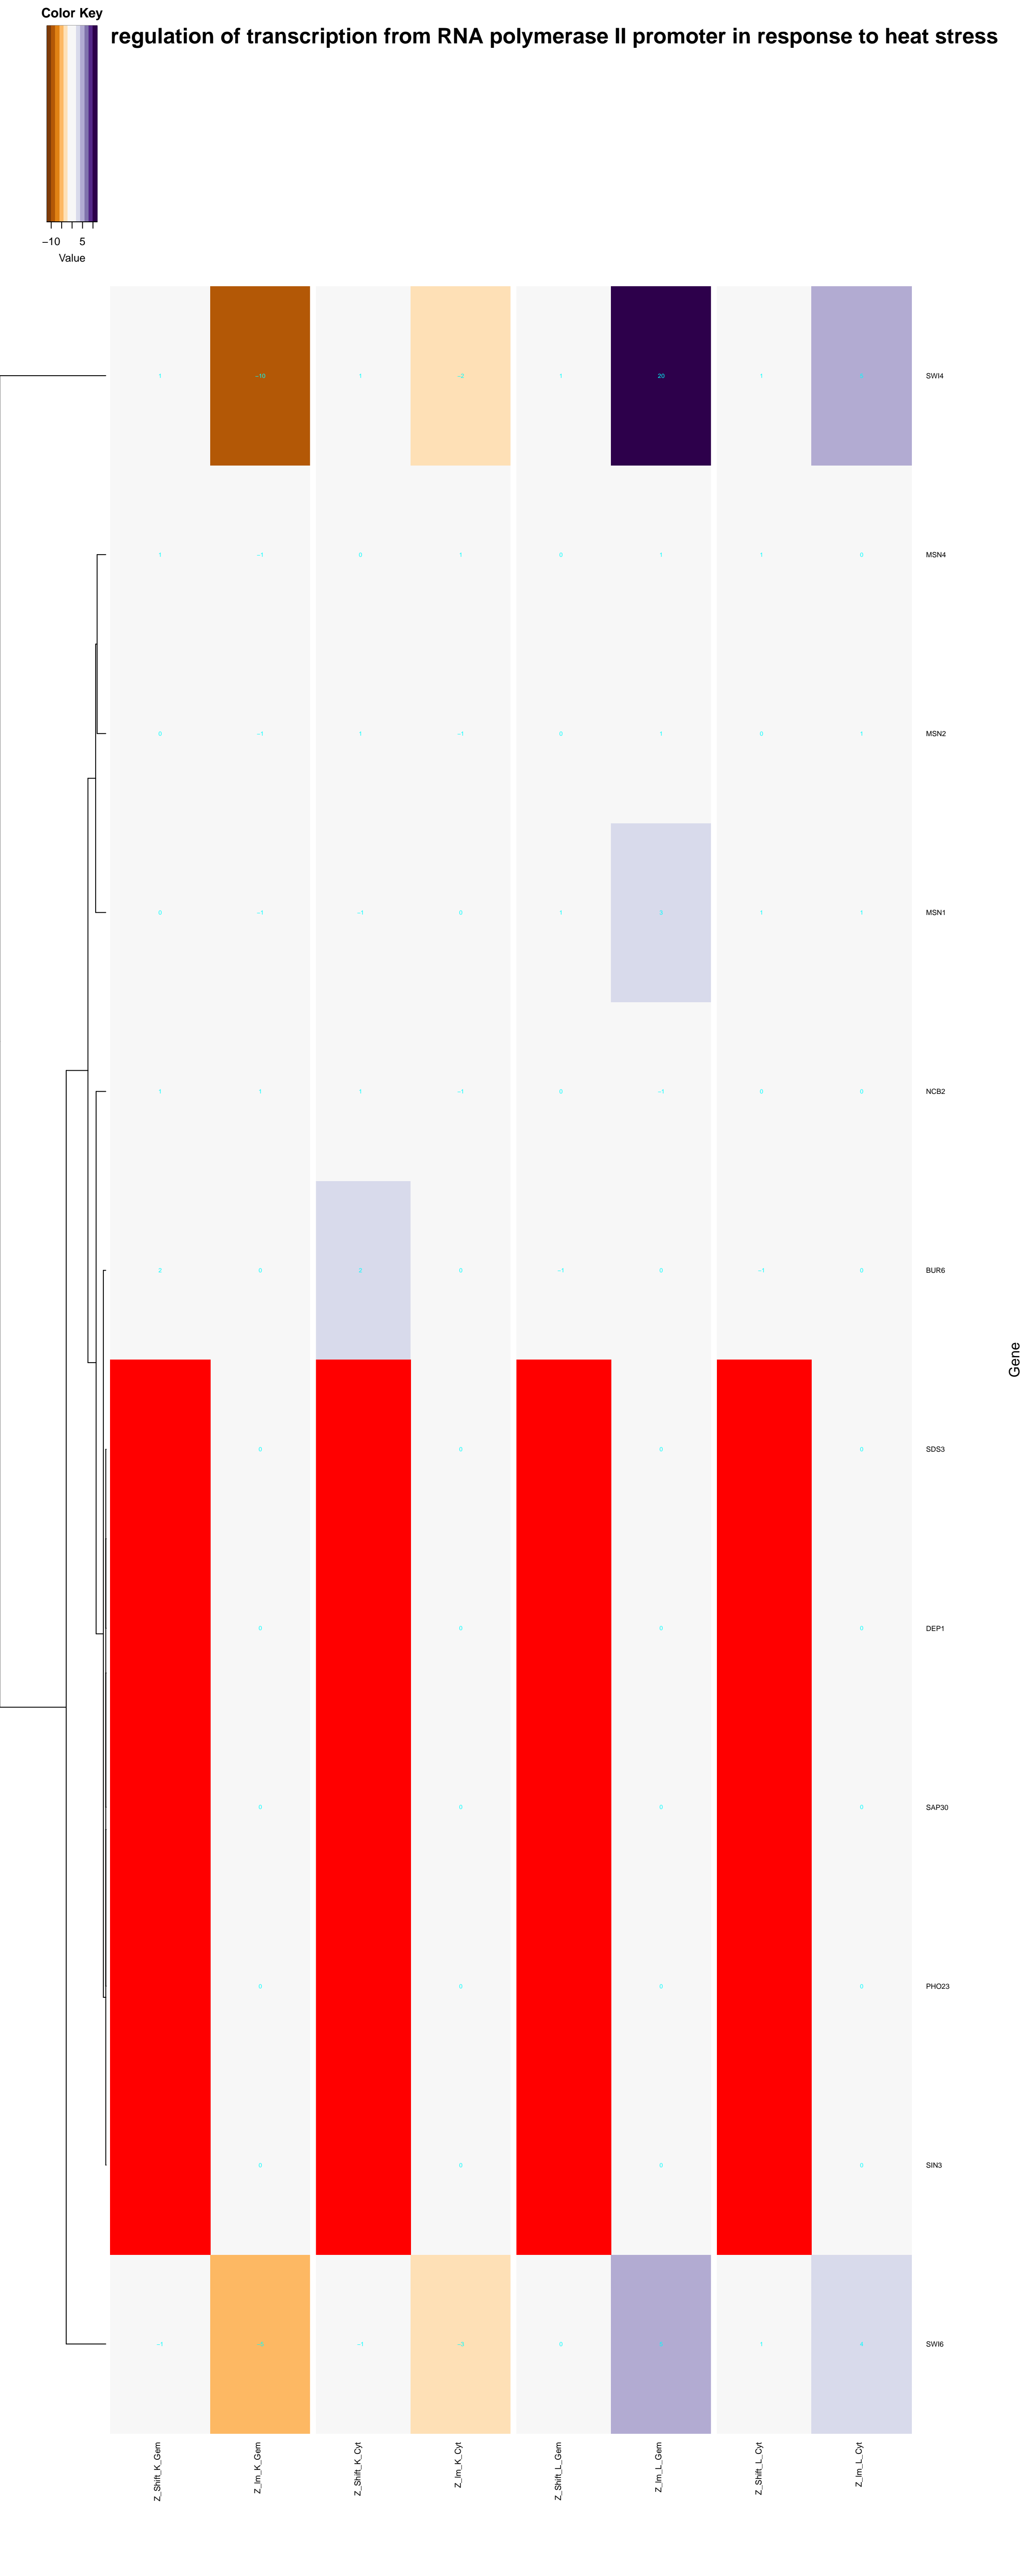

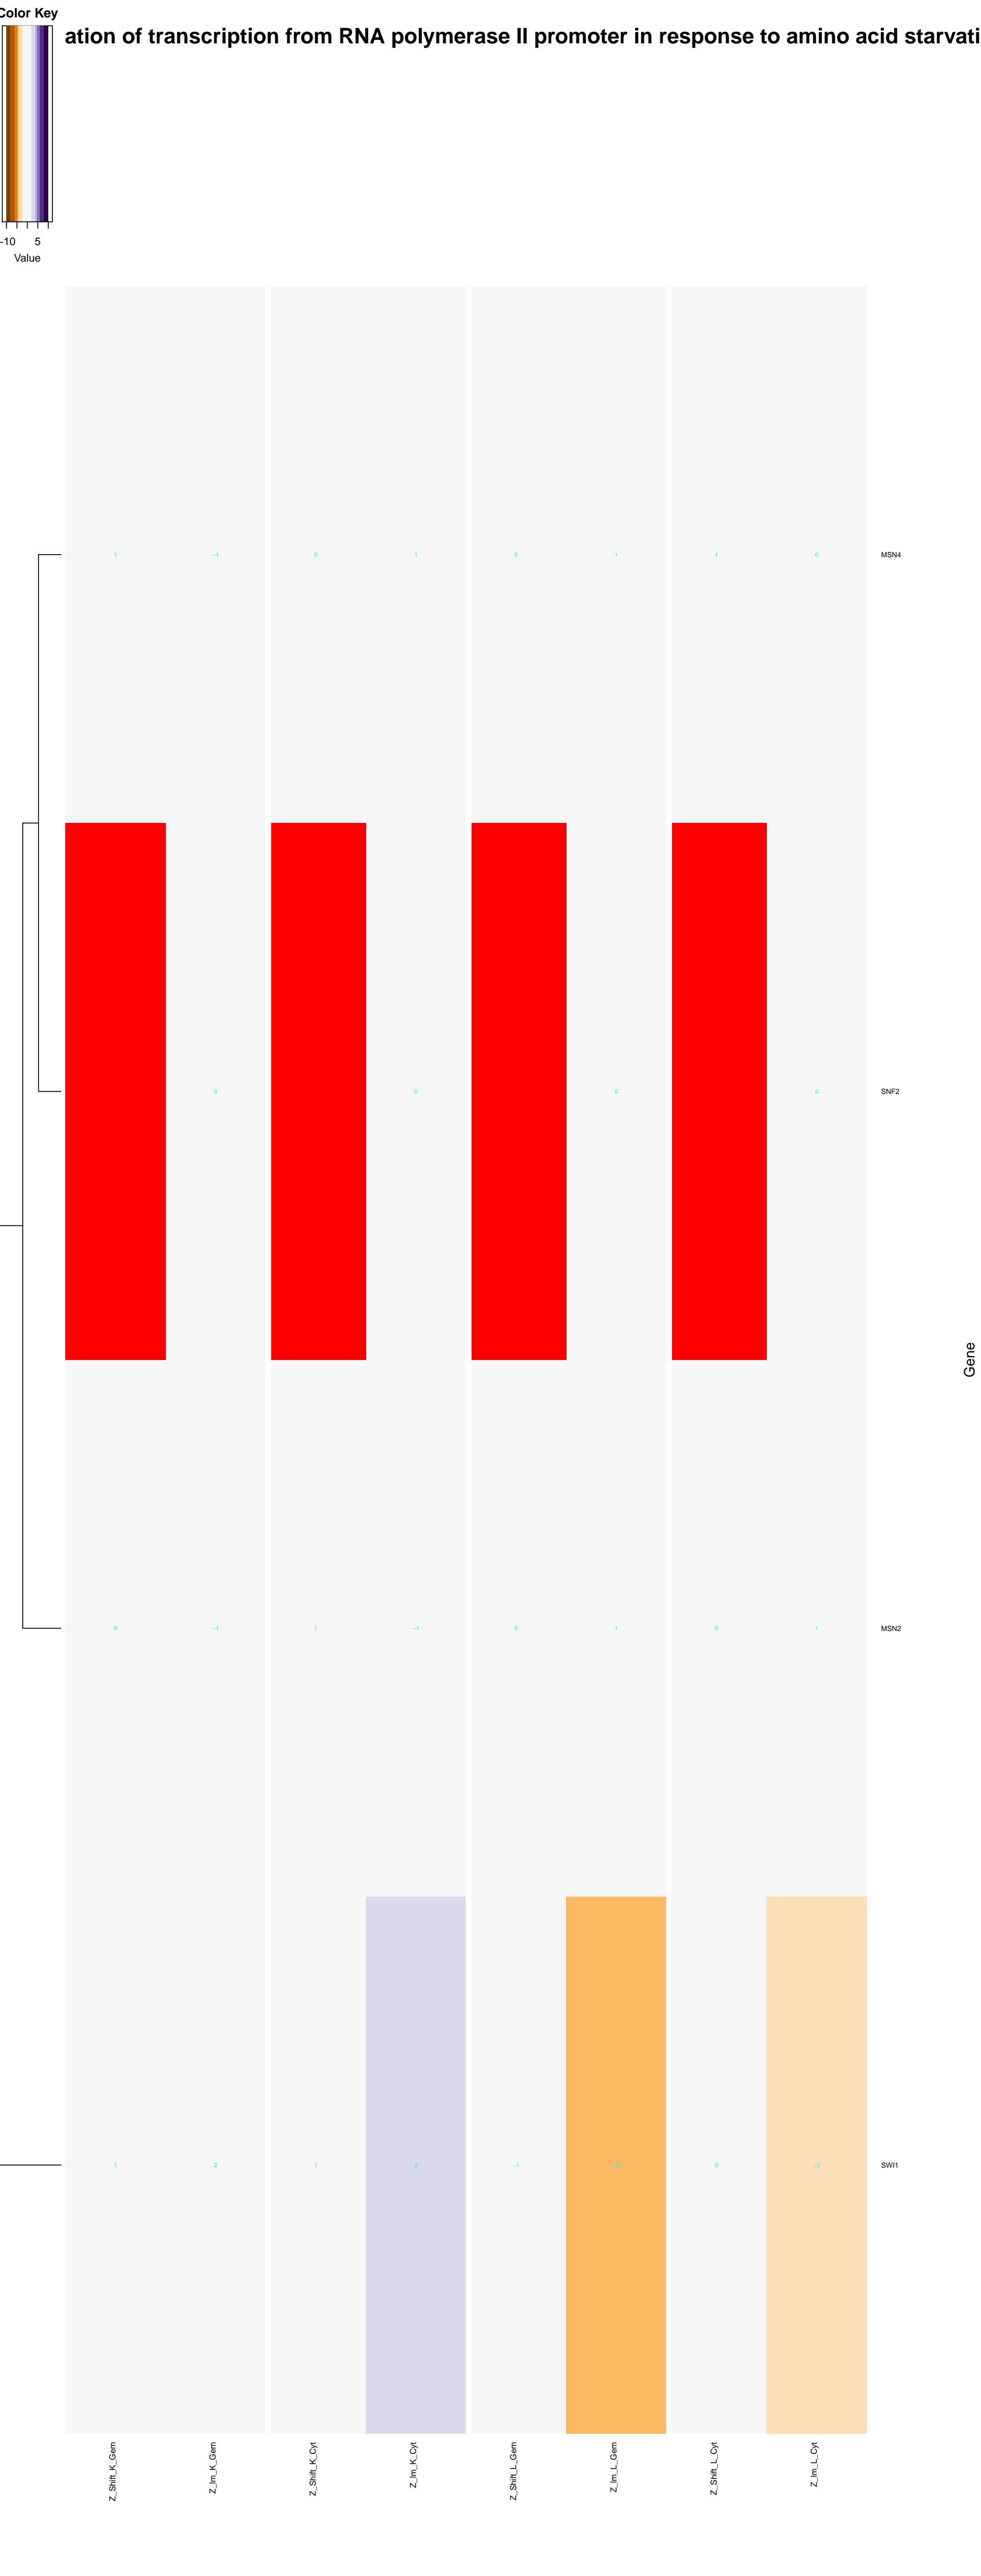

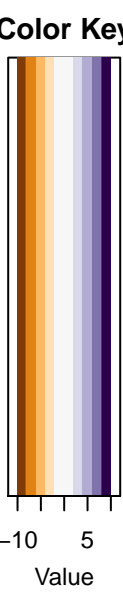

regulation of transcription from RNA polymerase II promoter in response to alkaline pH

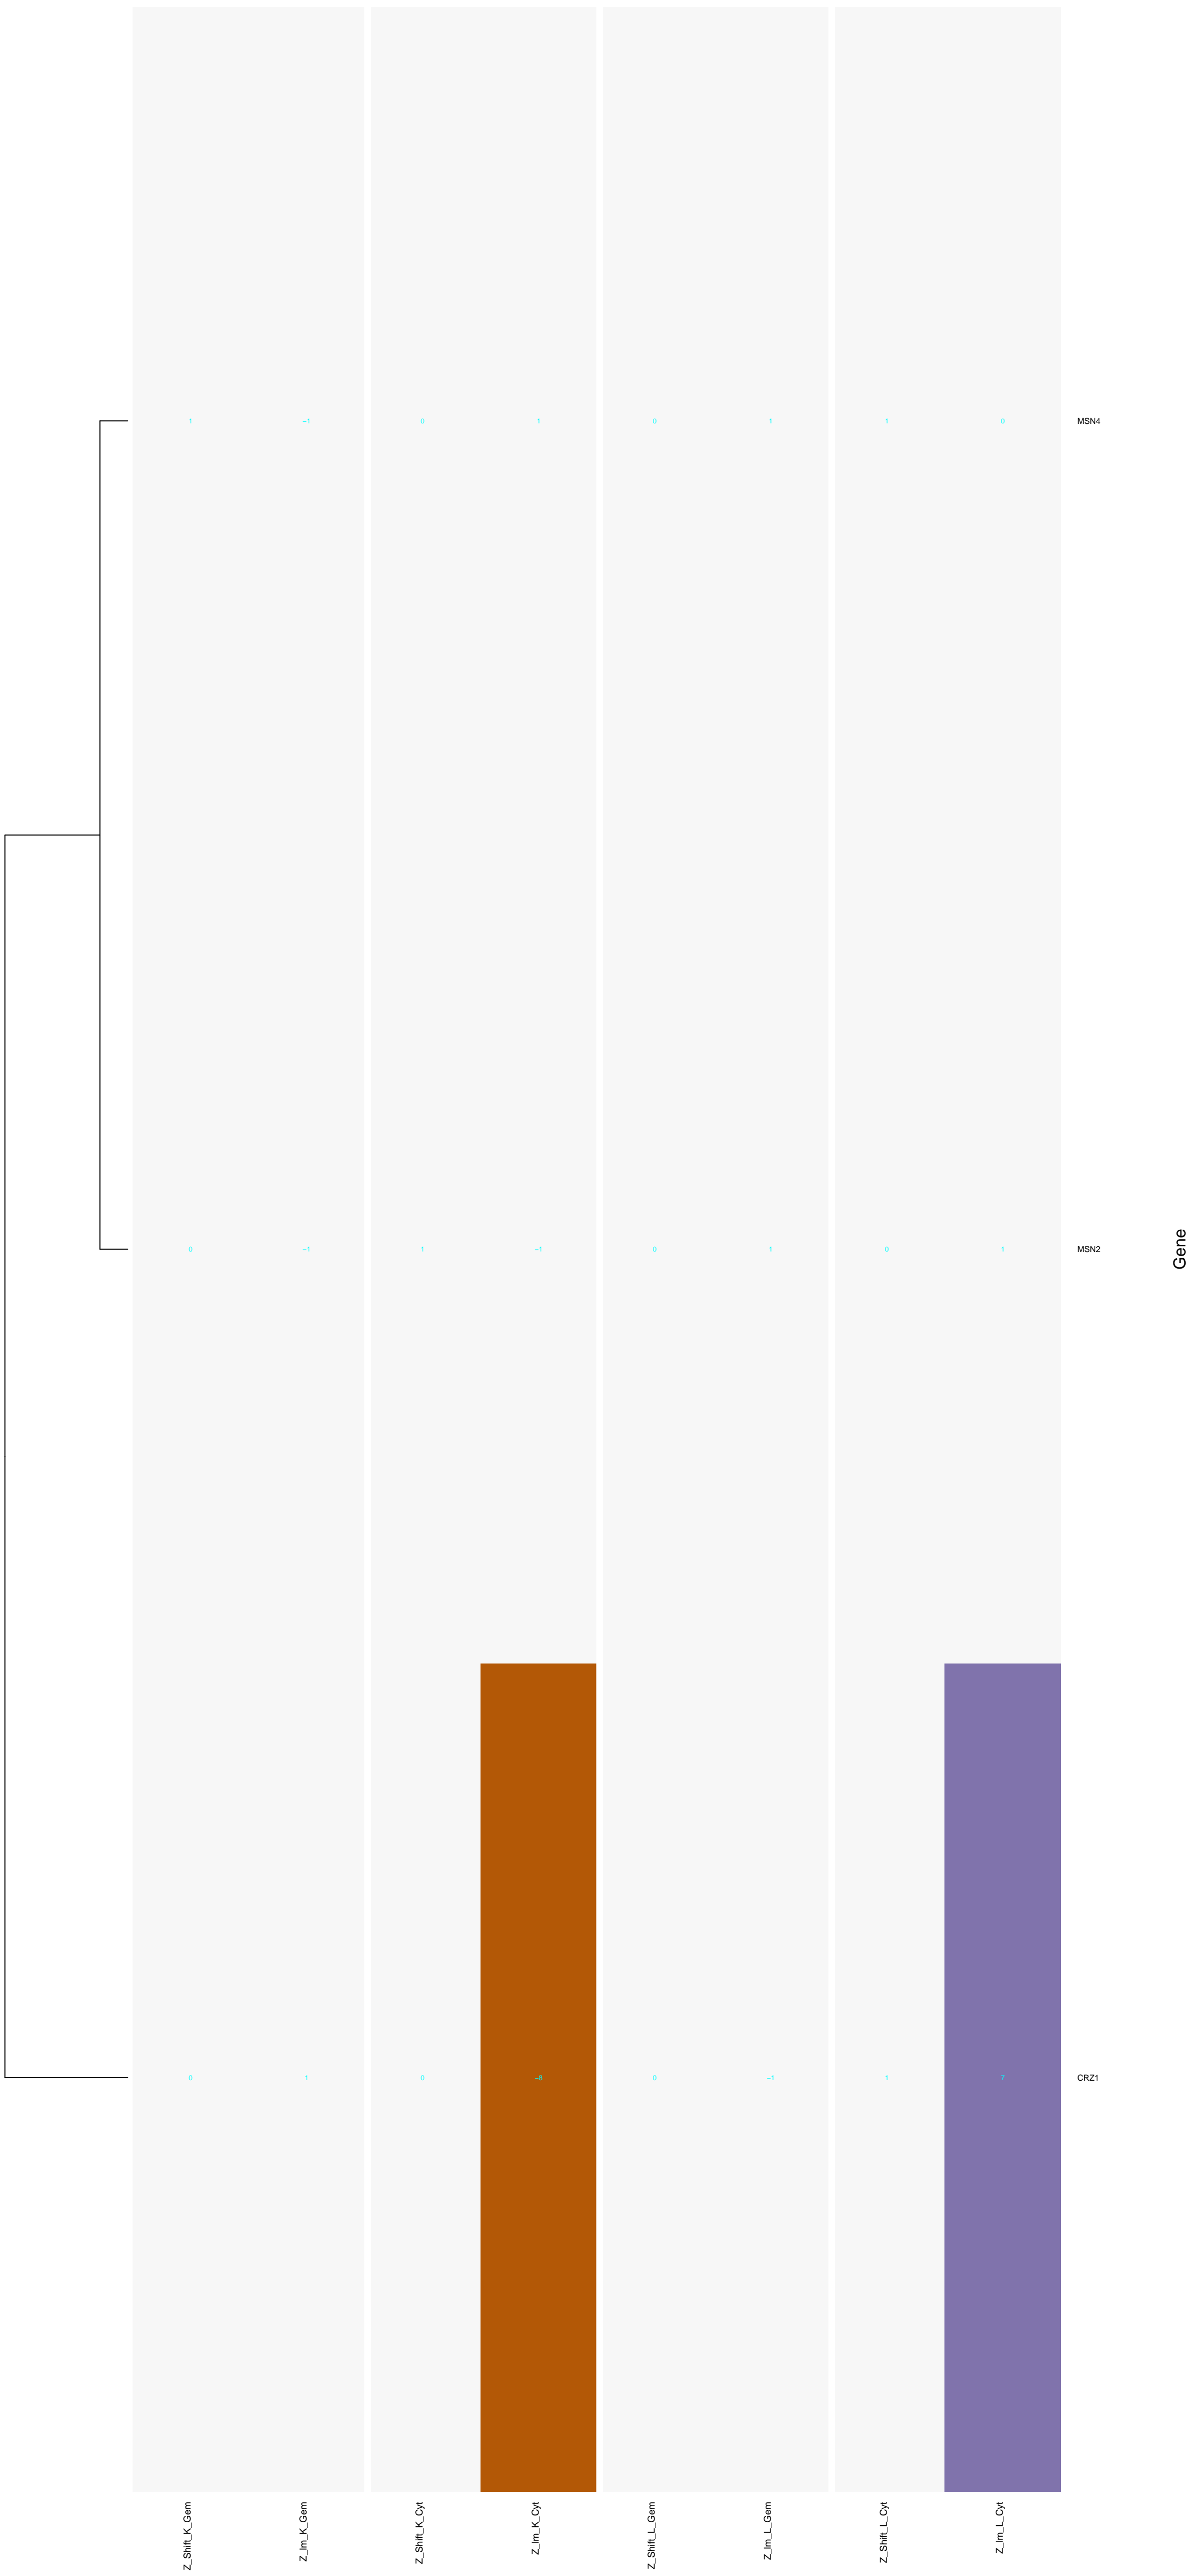

Color Key

Correlation of transcription from RNA polymerase II promoter in response to salt stress

Value

-10 5

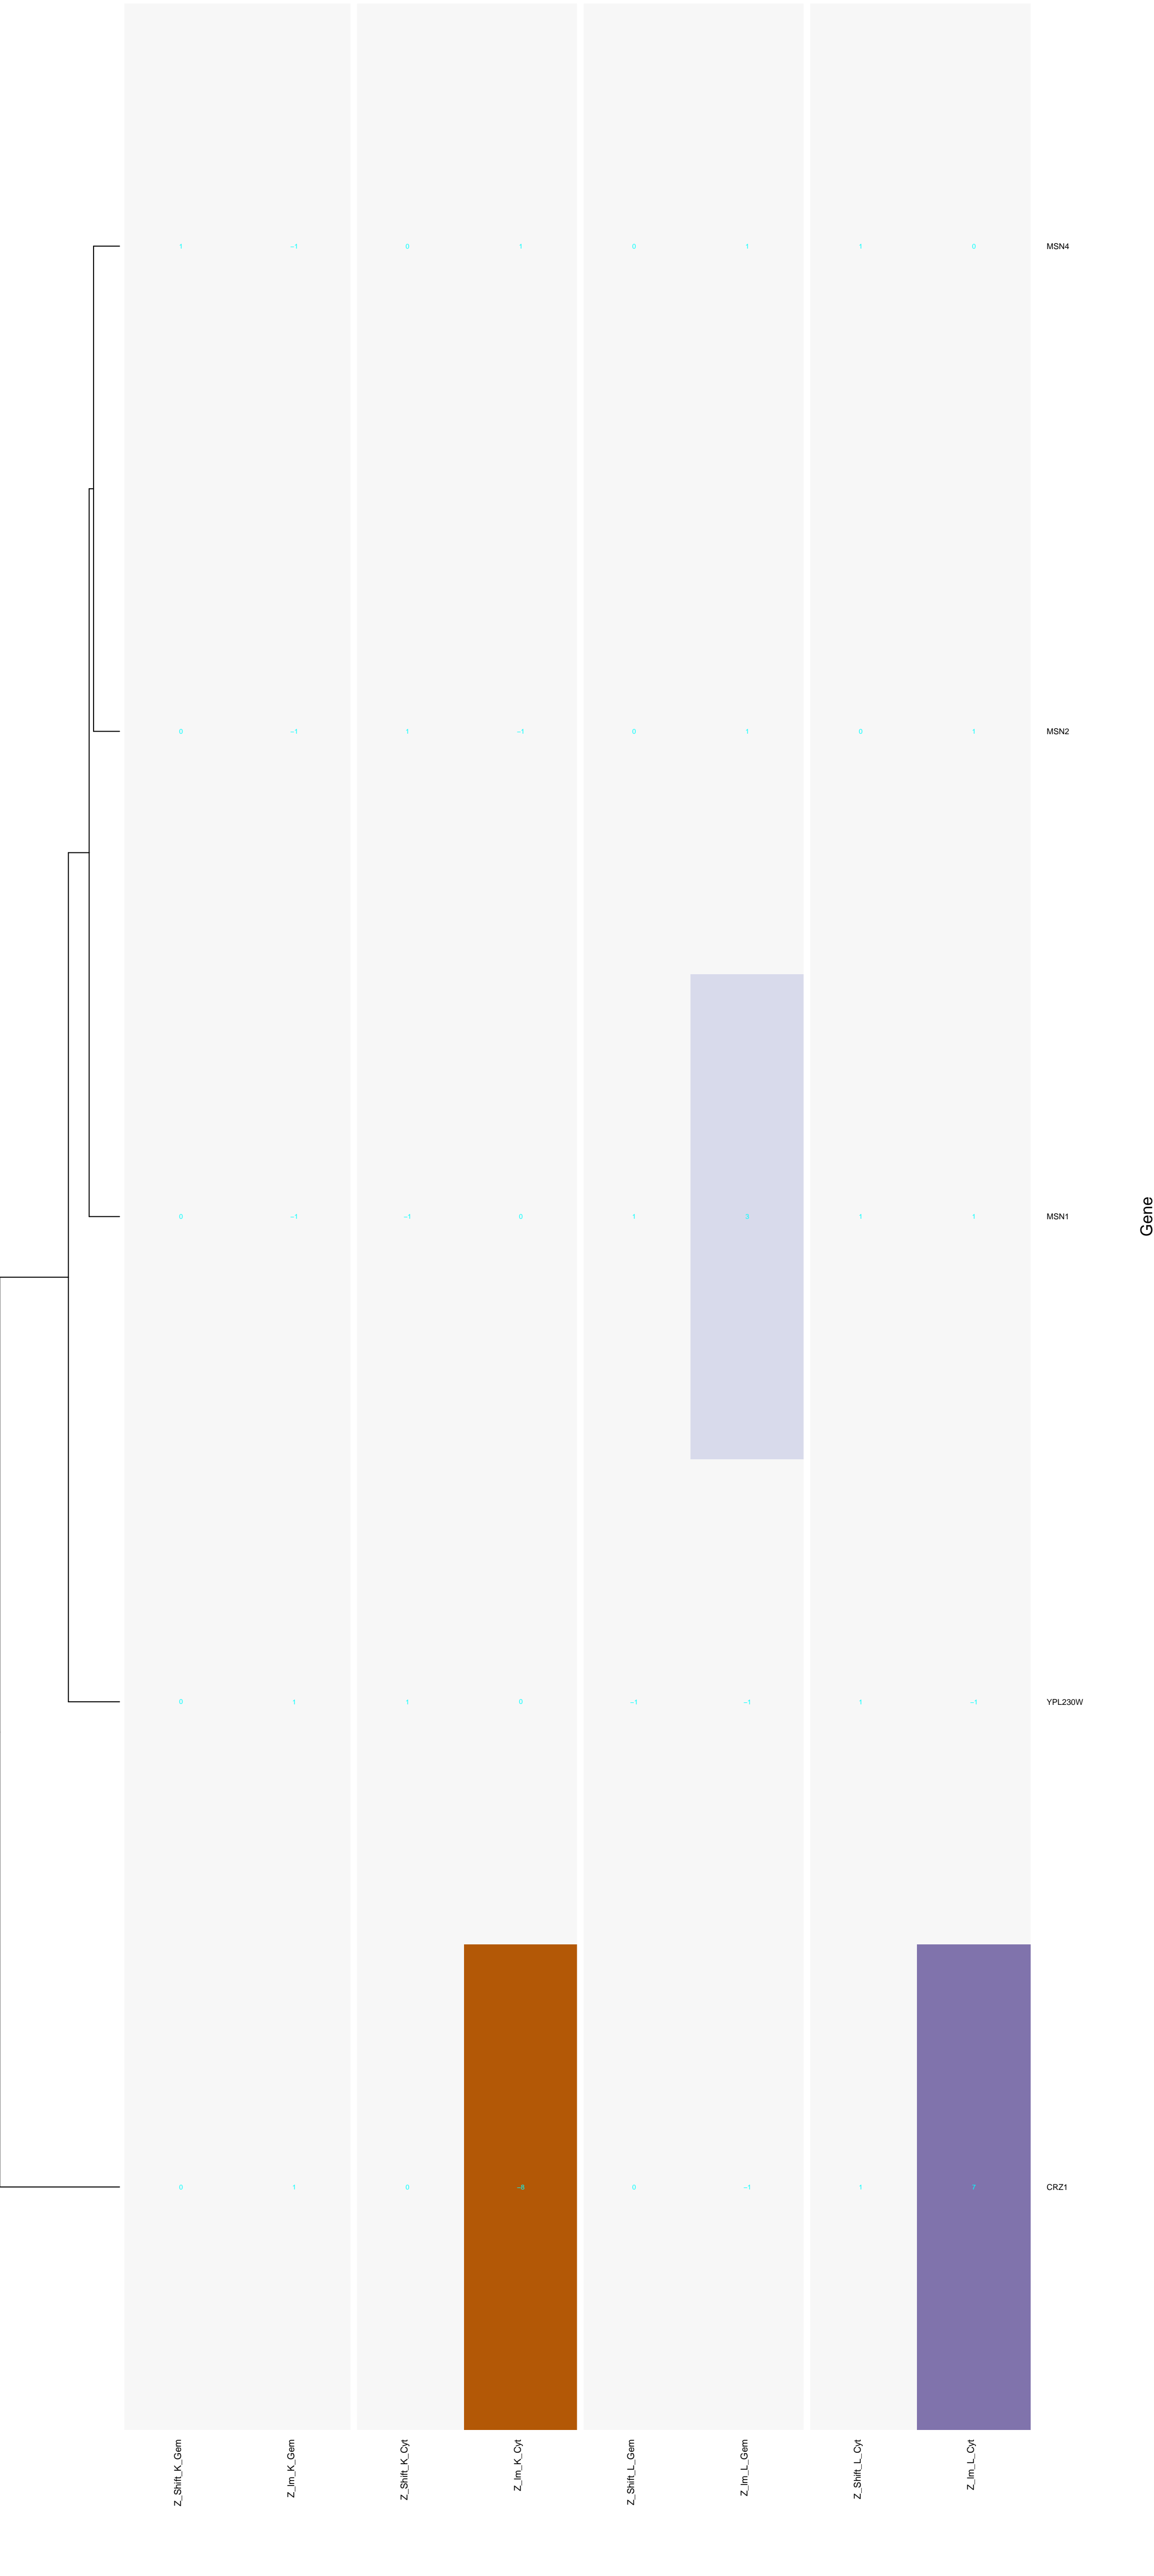

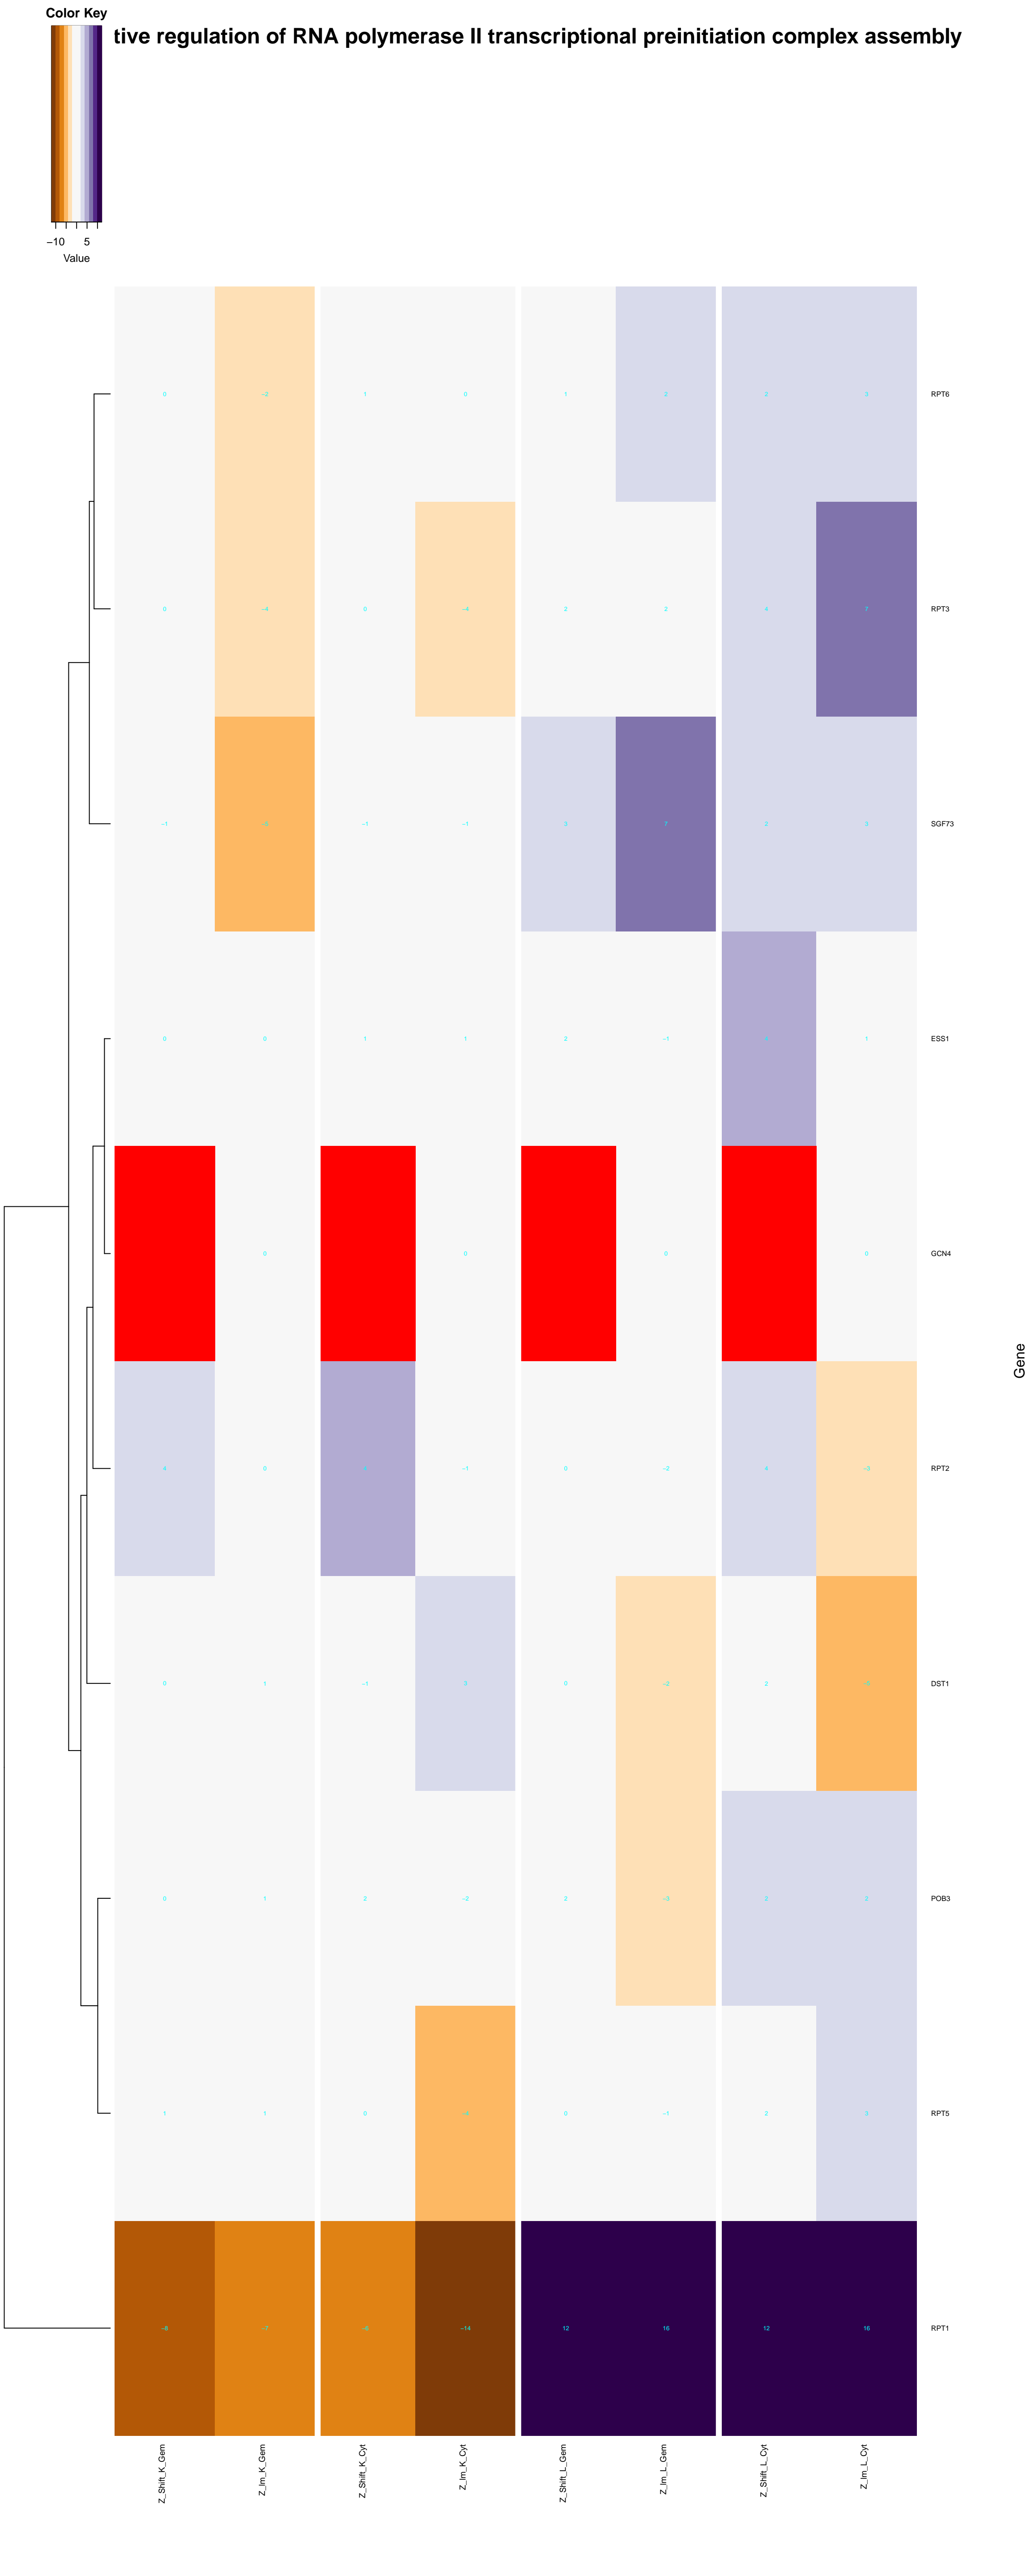

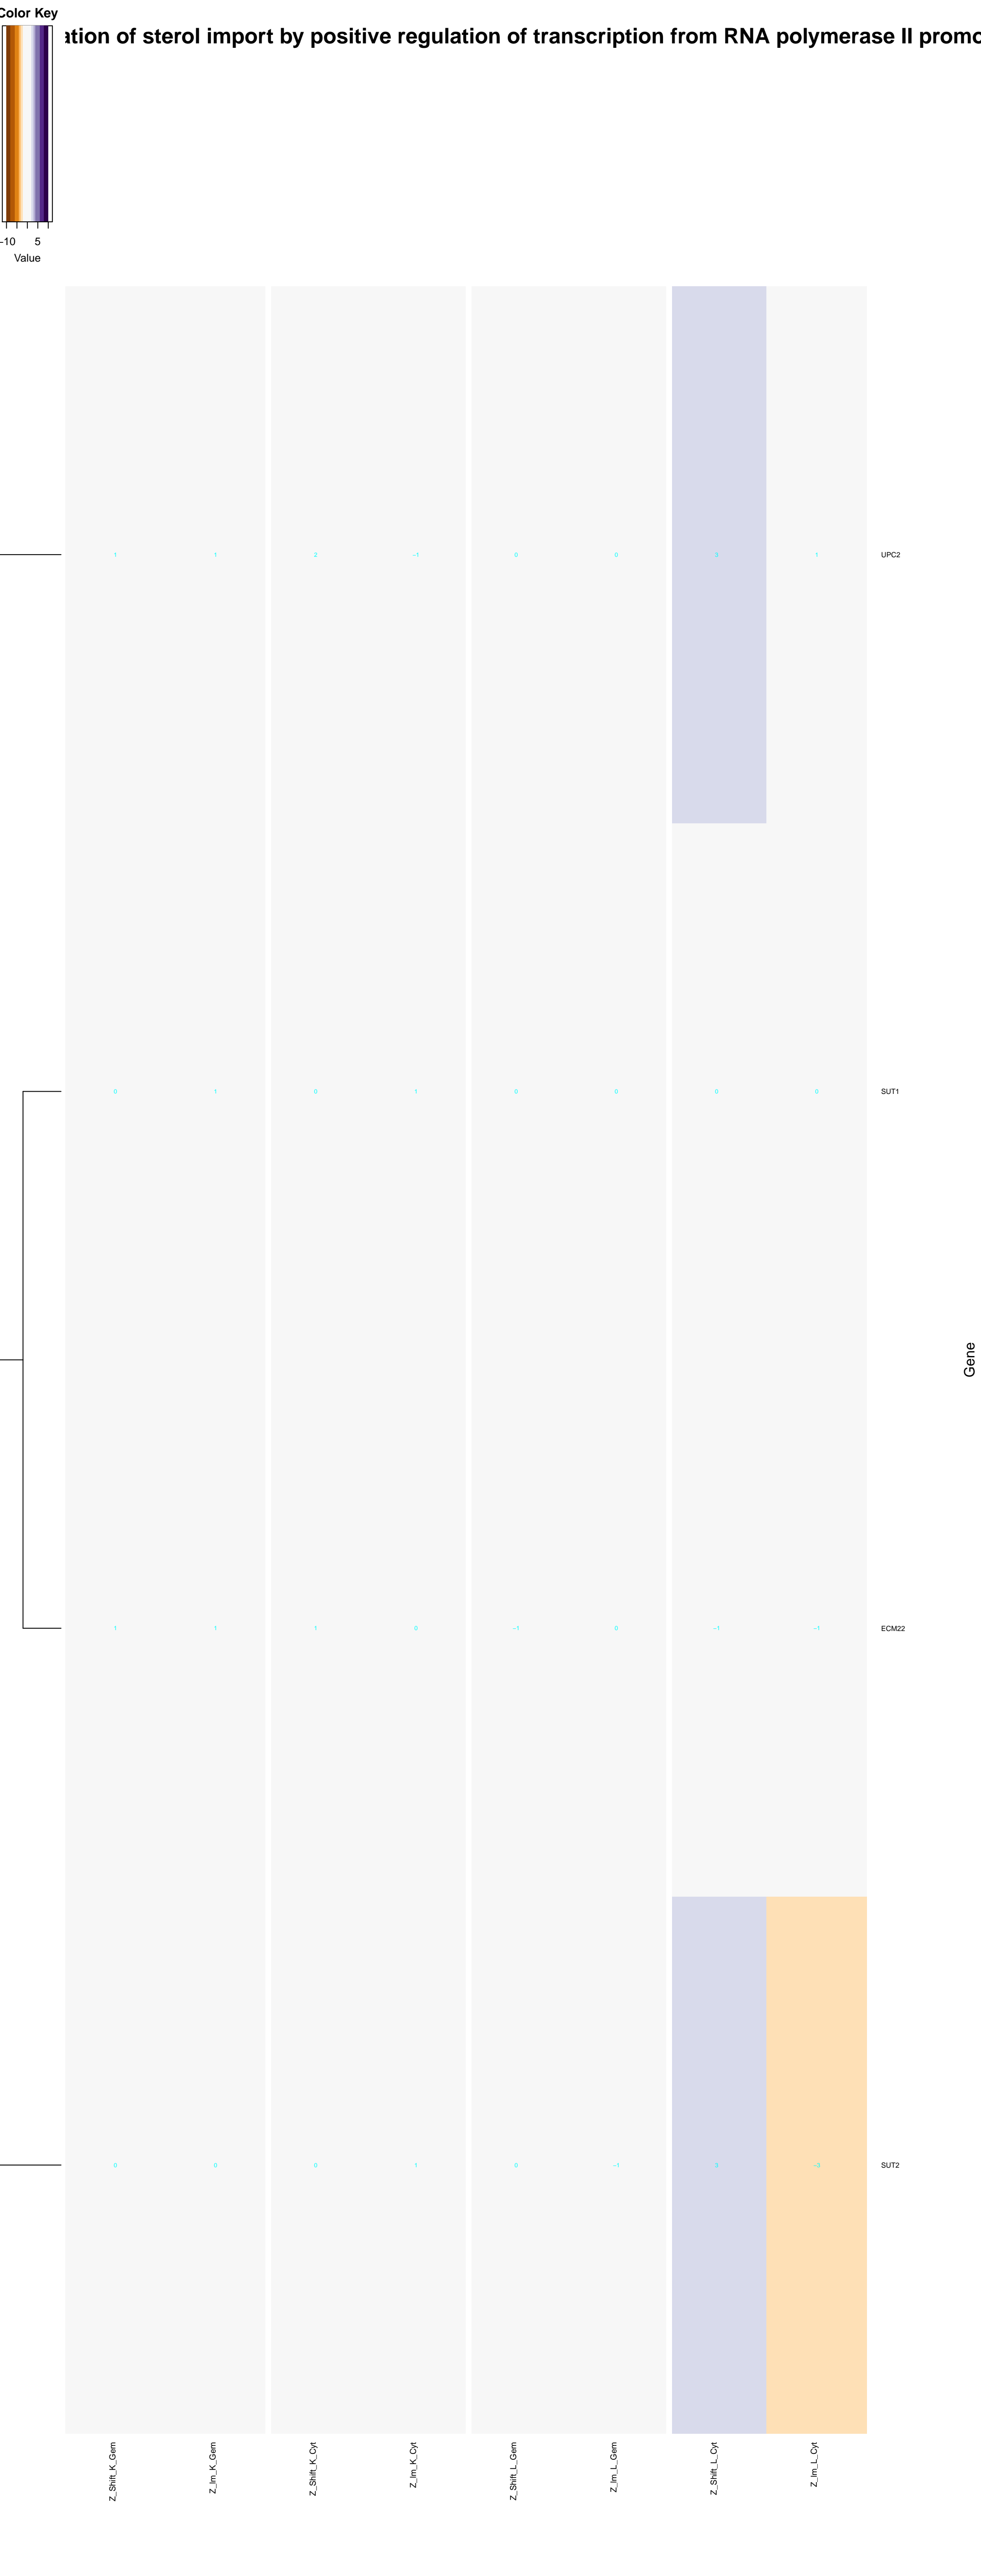

the regulation of transcription from RNA polymerase II promoter in response to ethanol

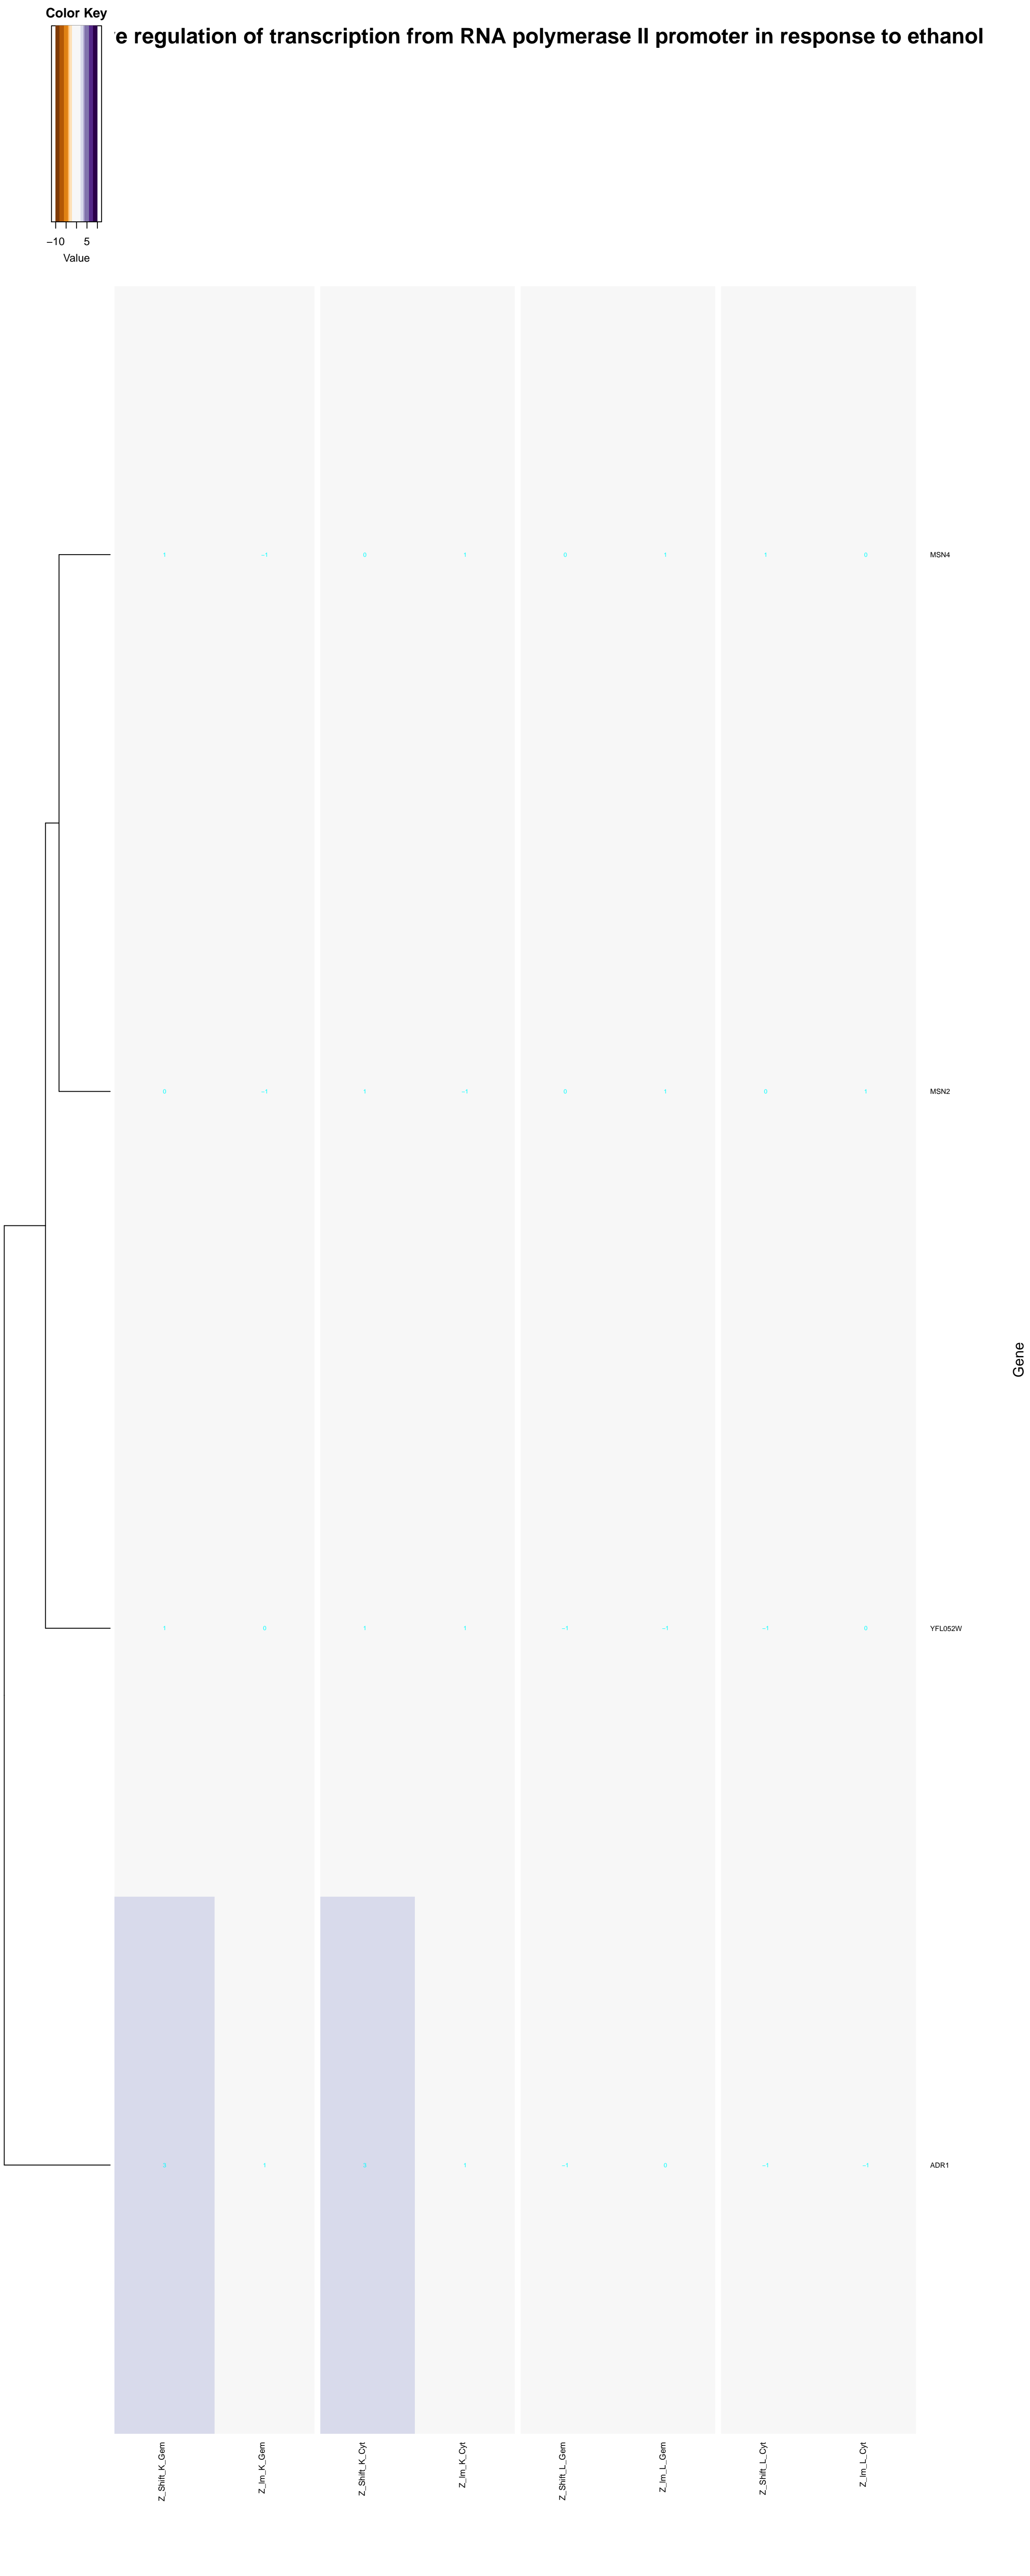



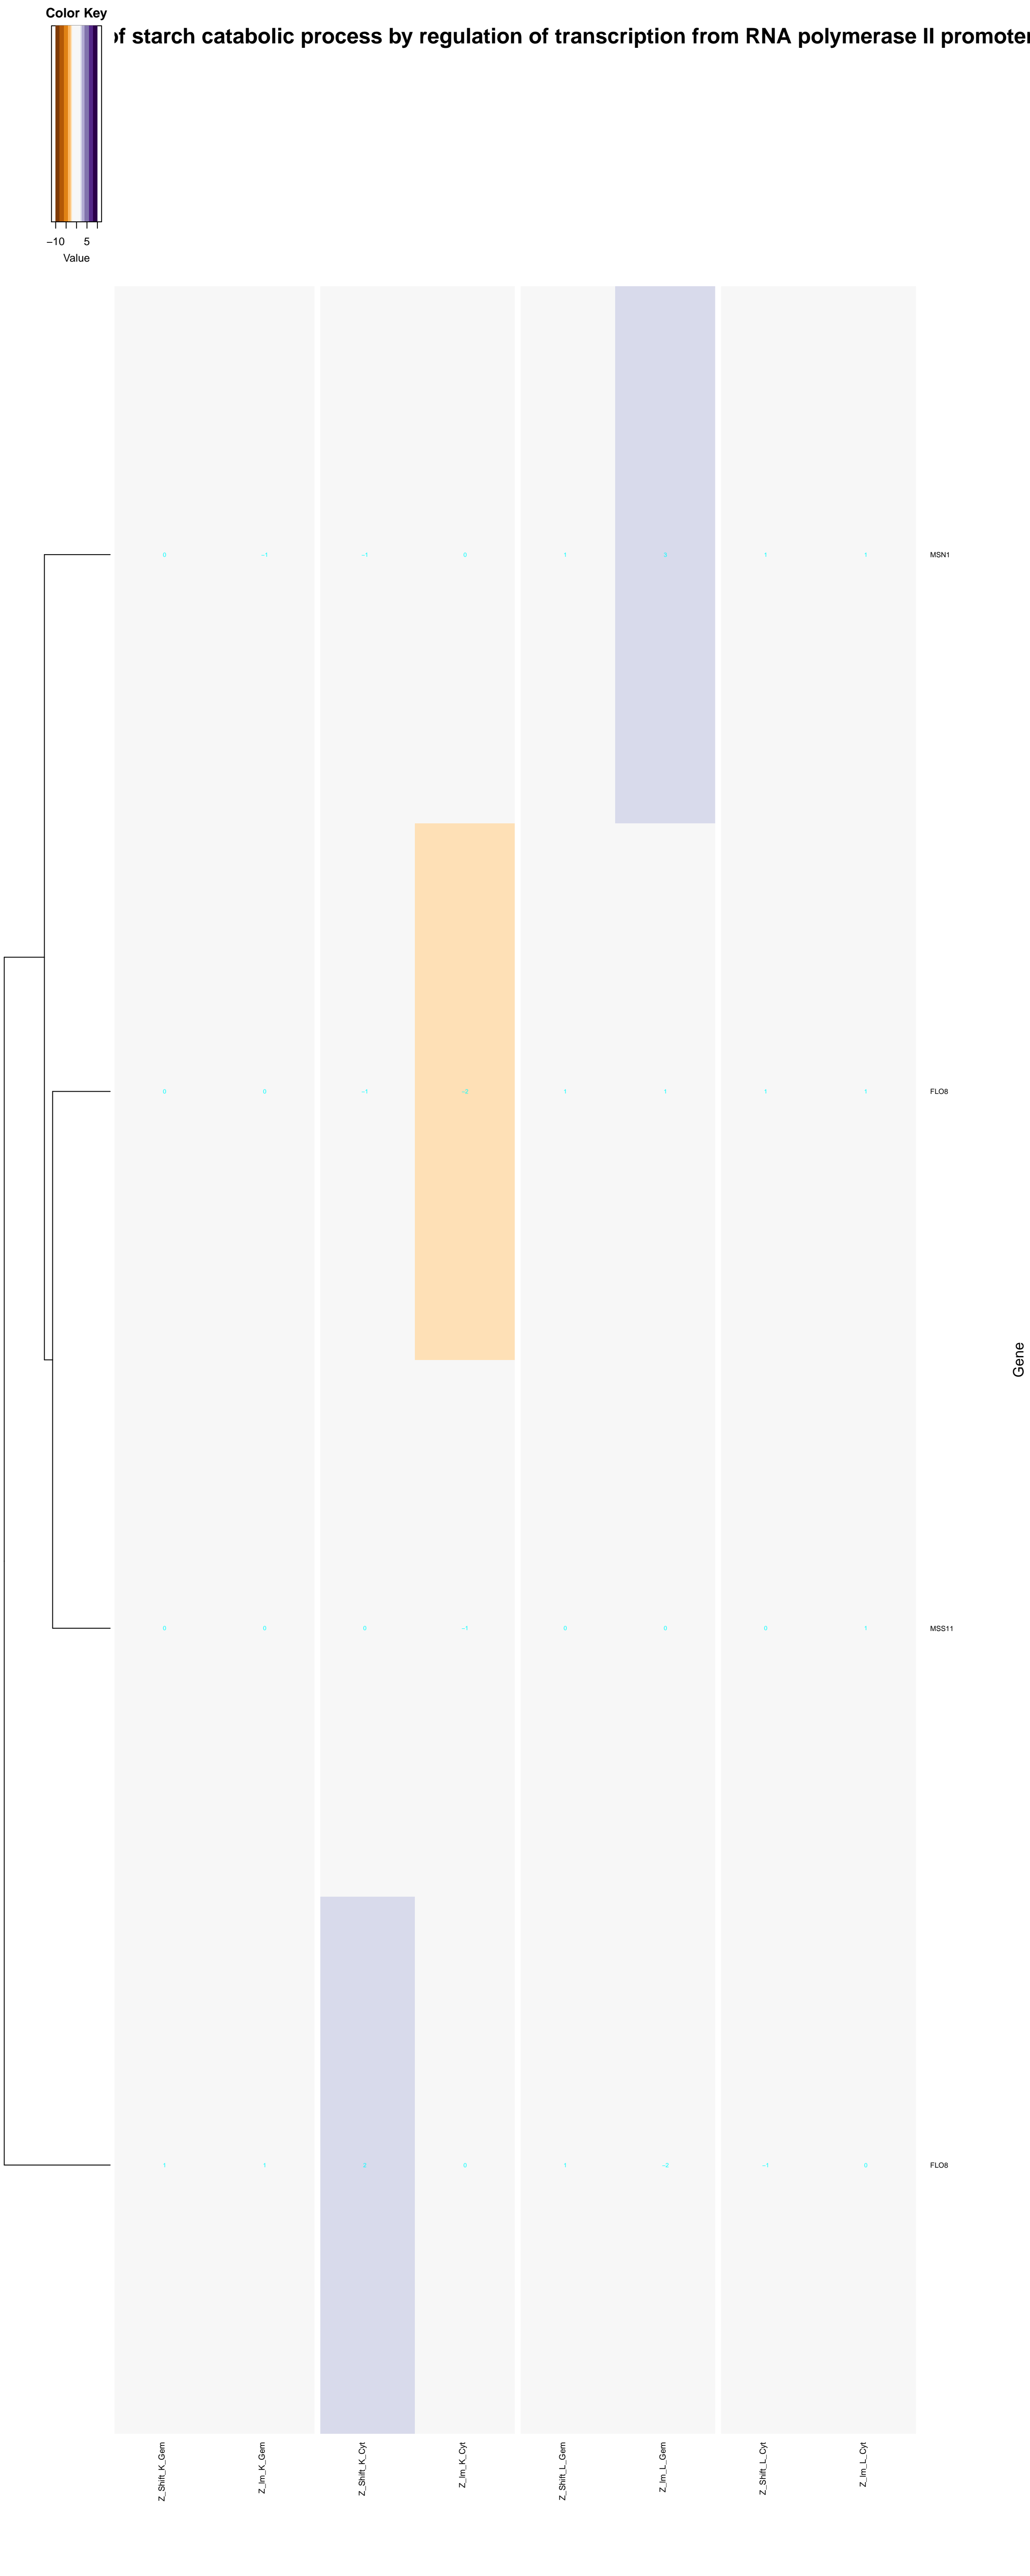

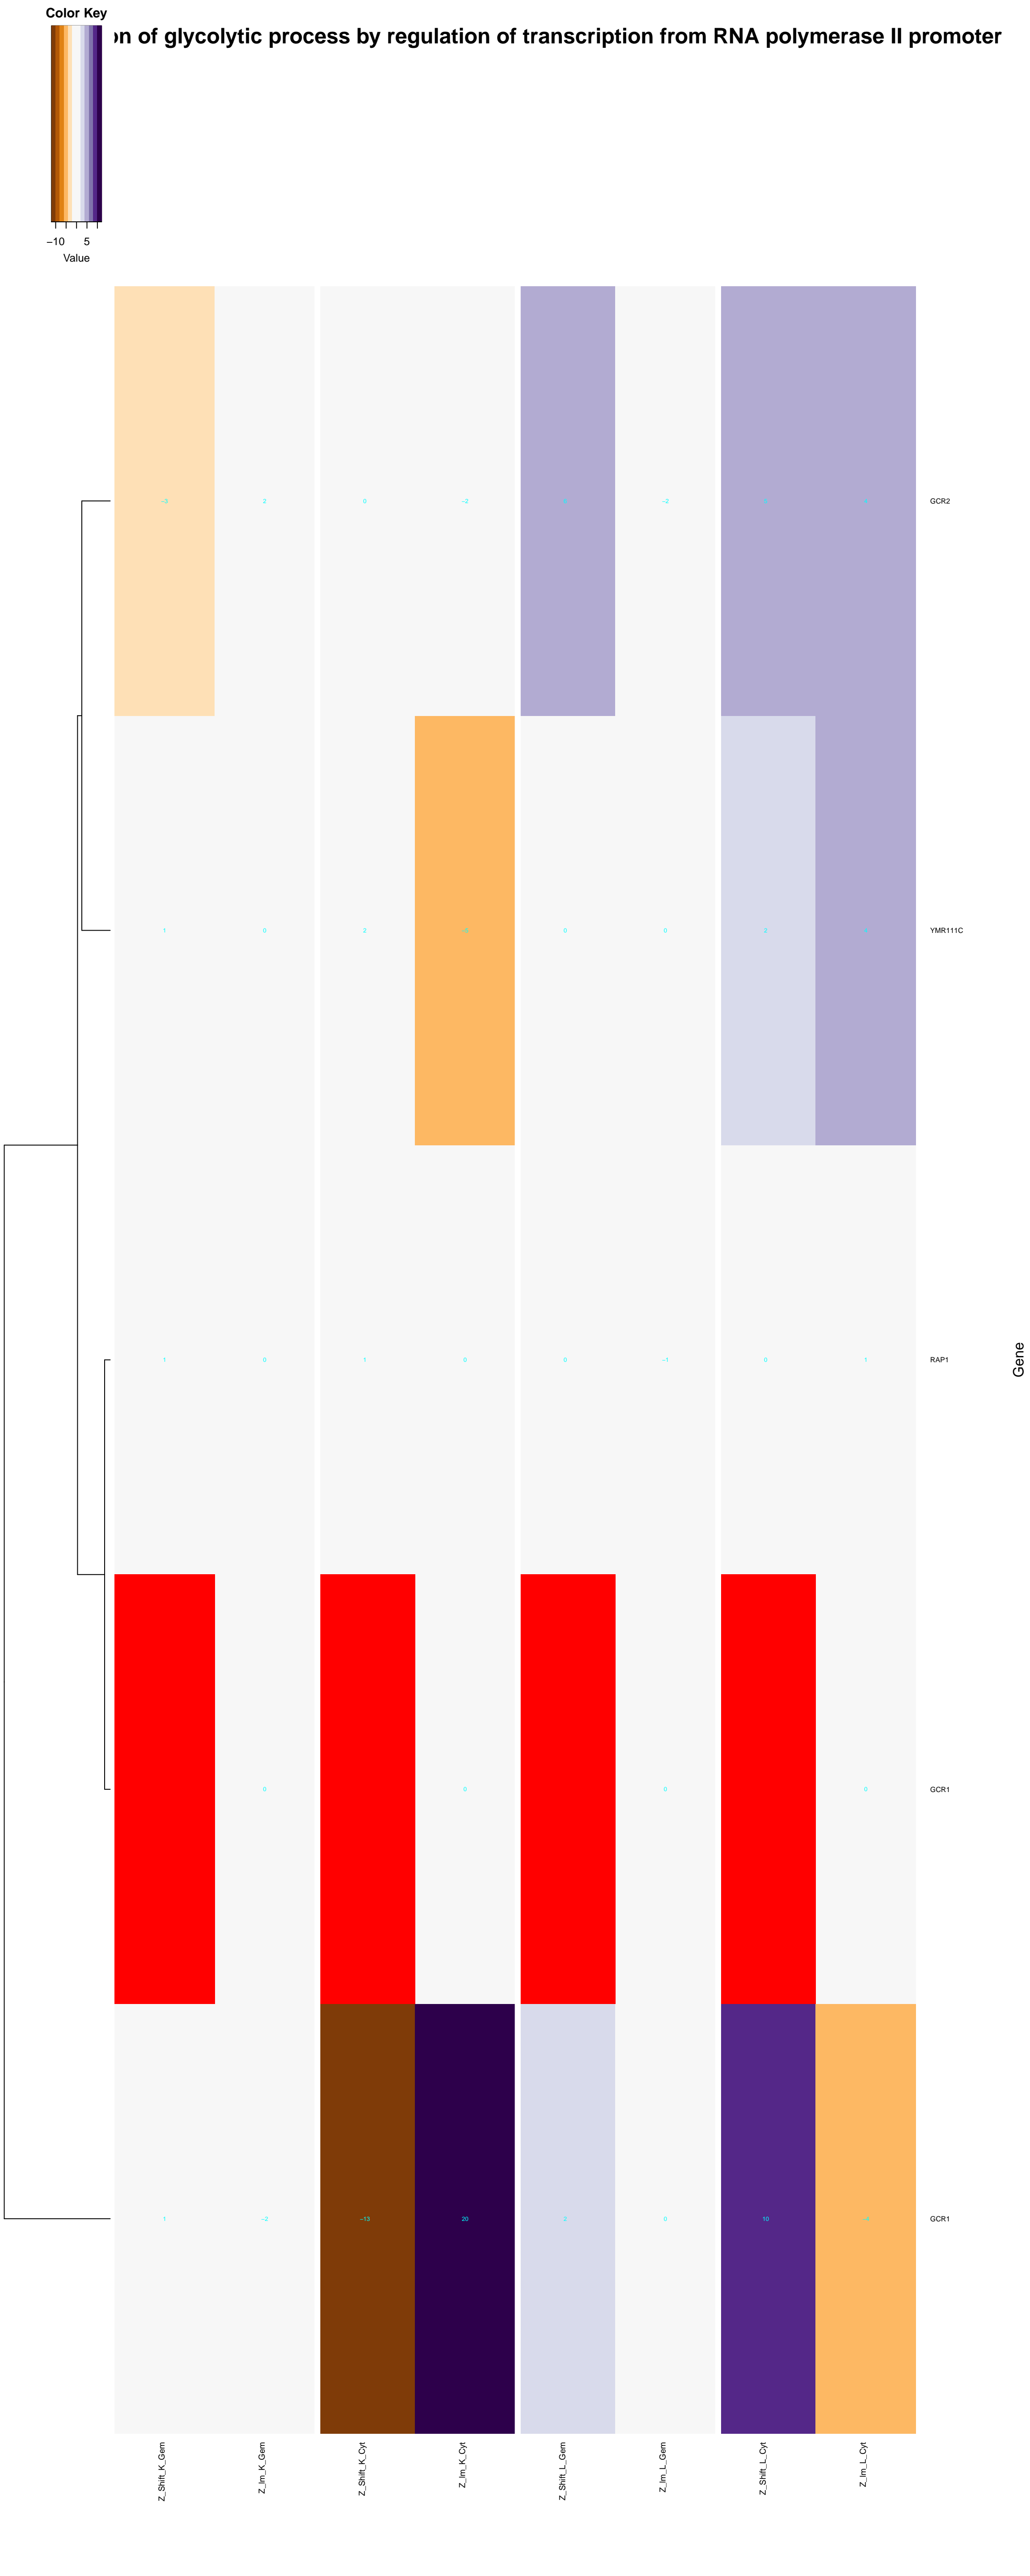

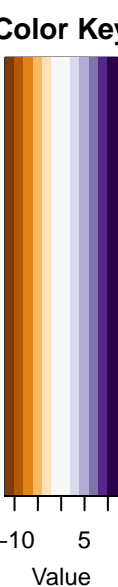

egulation of phosphorylation of RNA polymerase II C-terminal domain serine 2 residues

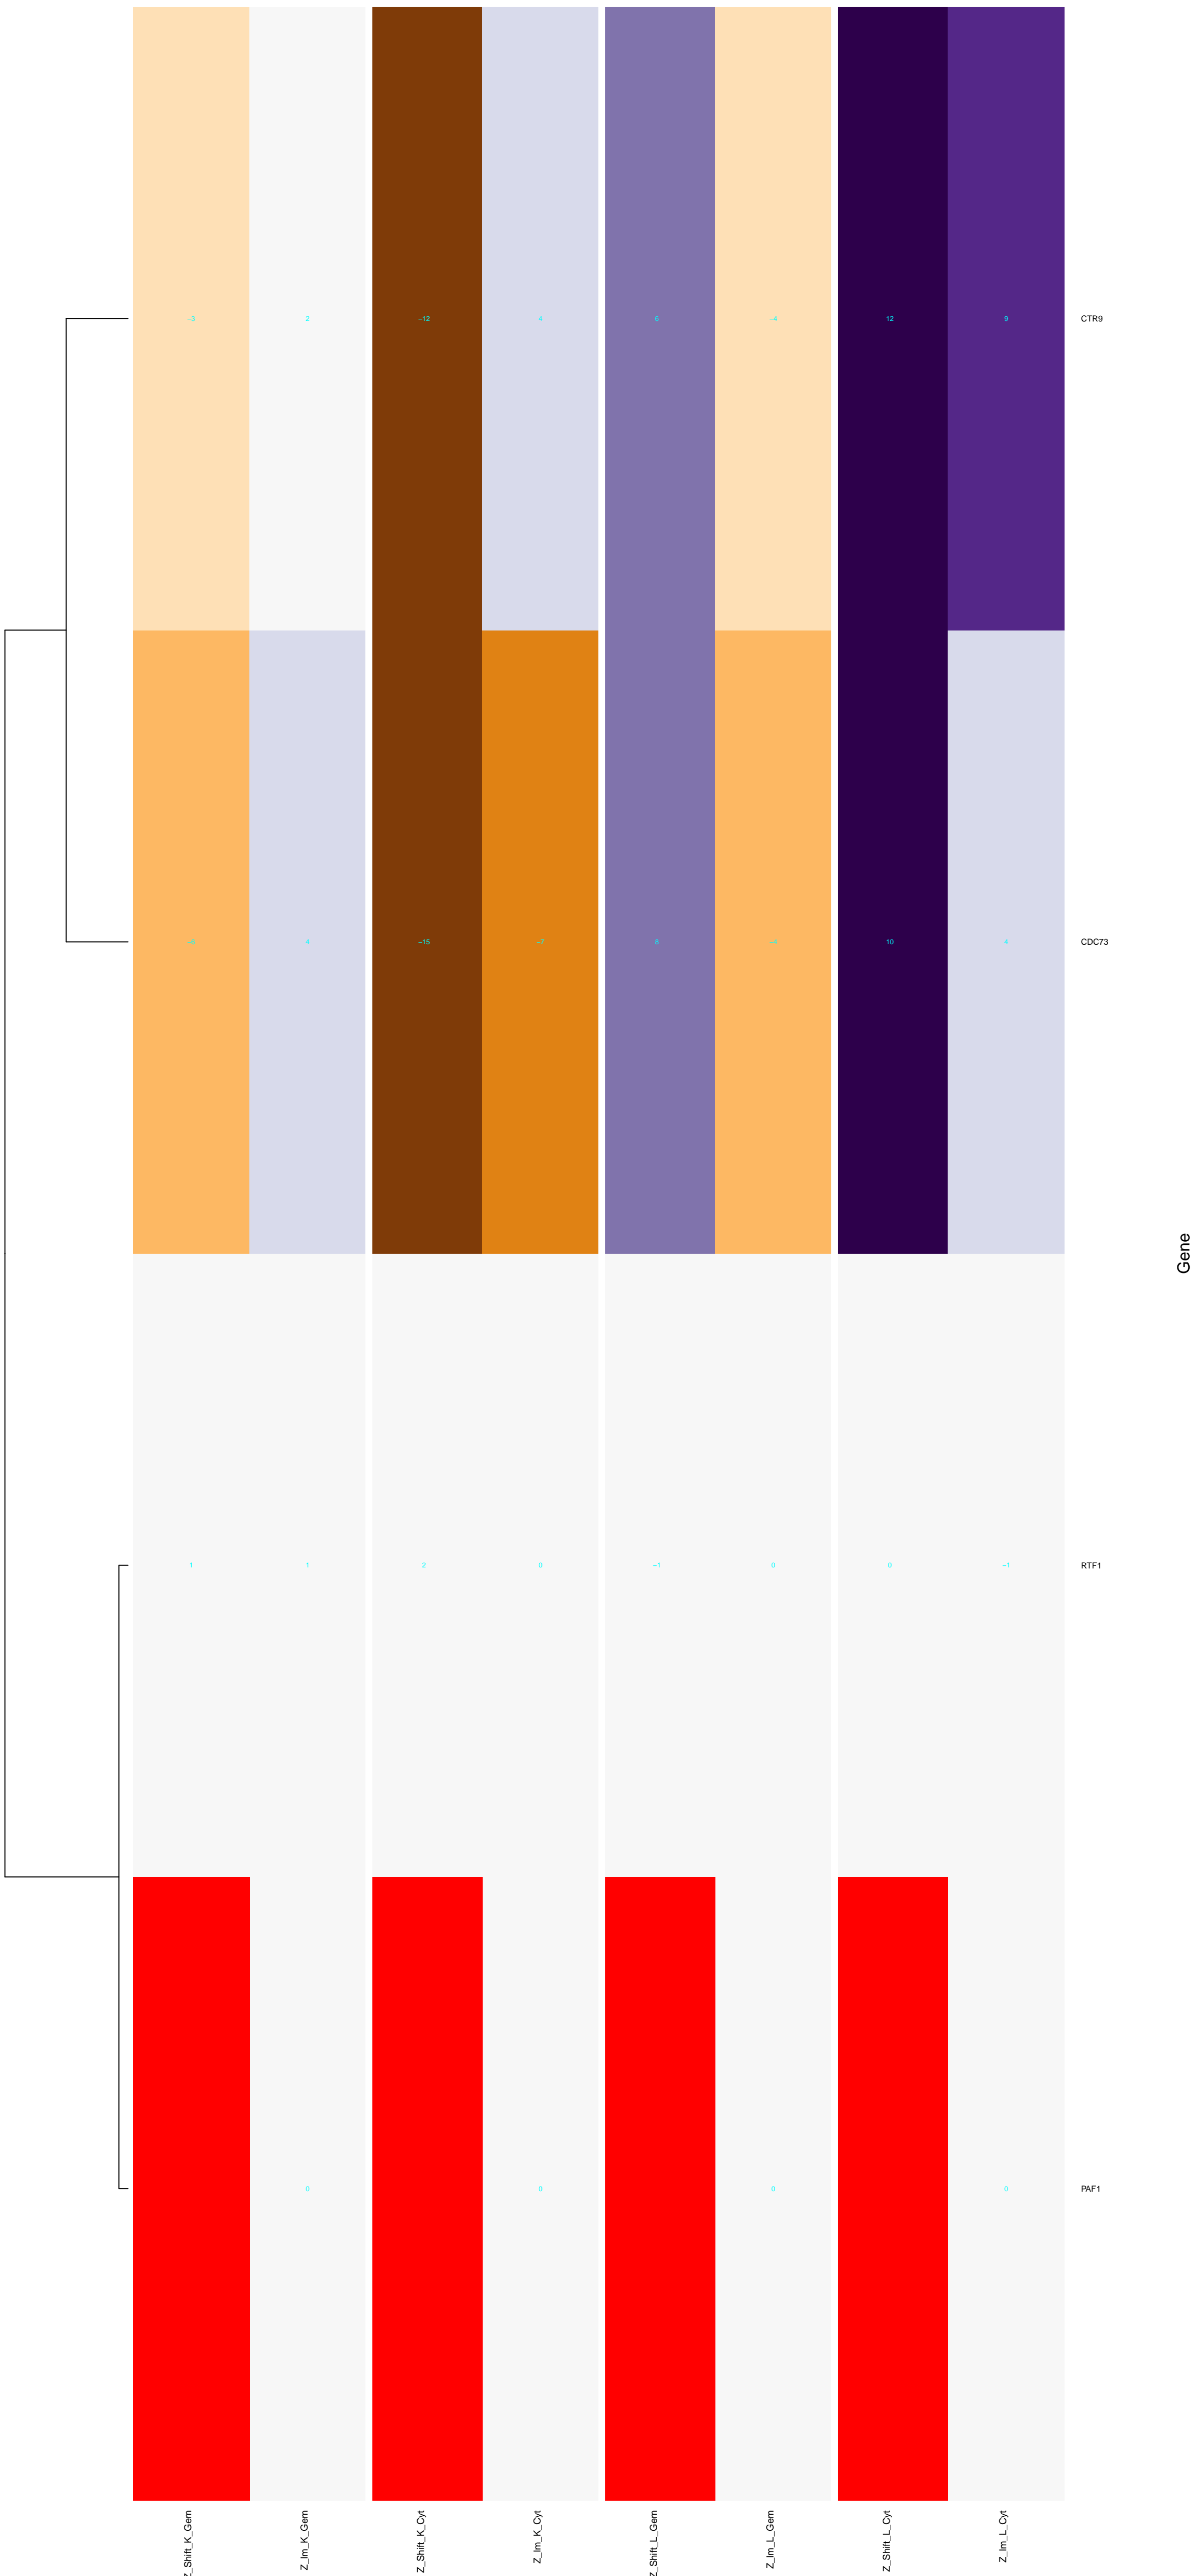

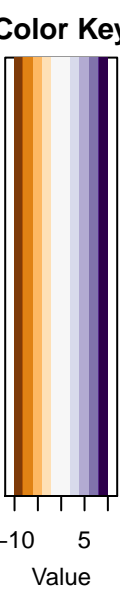

regulation of transcription from RNA polymerase II promoter in response to salt stress

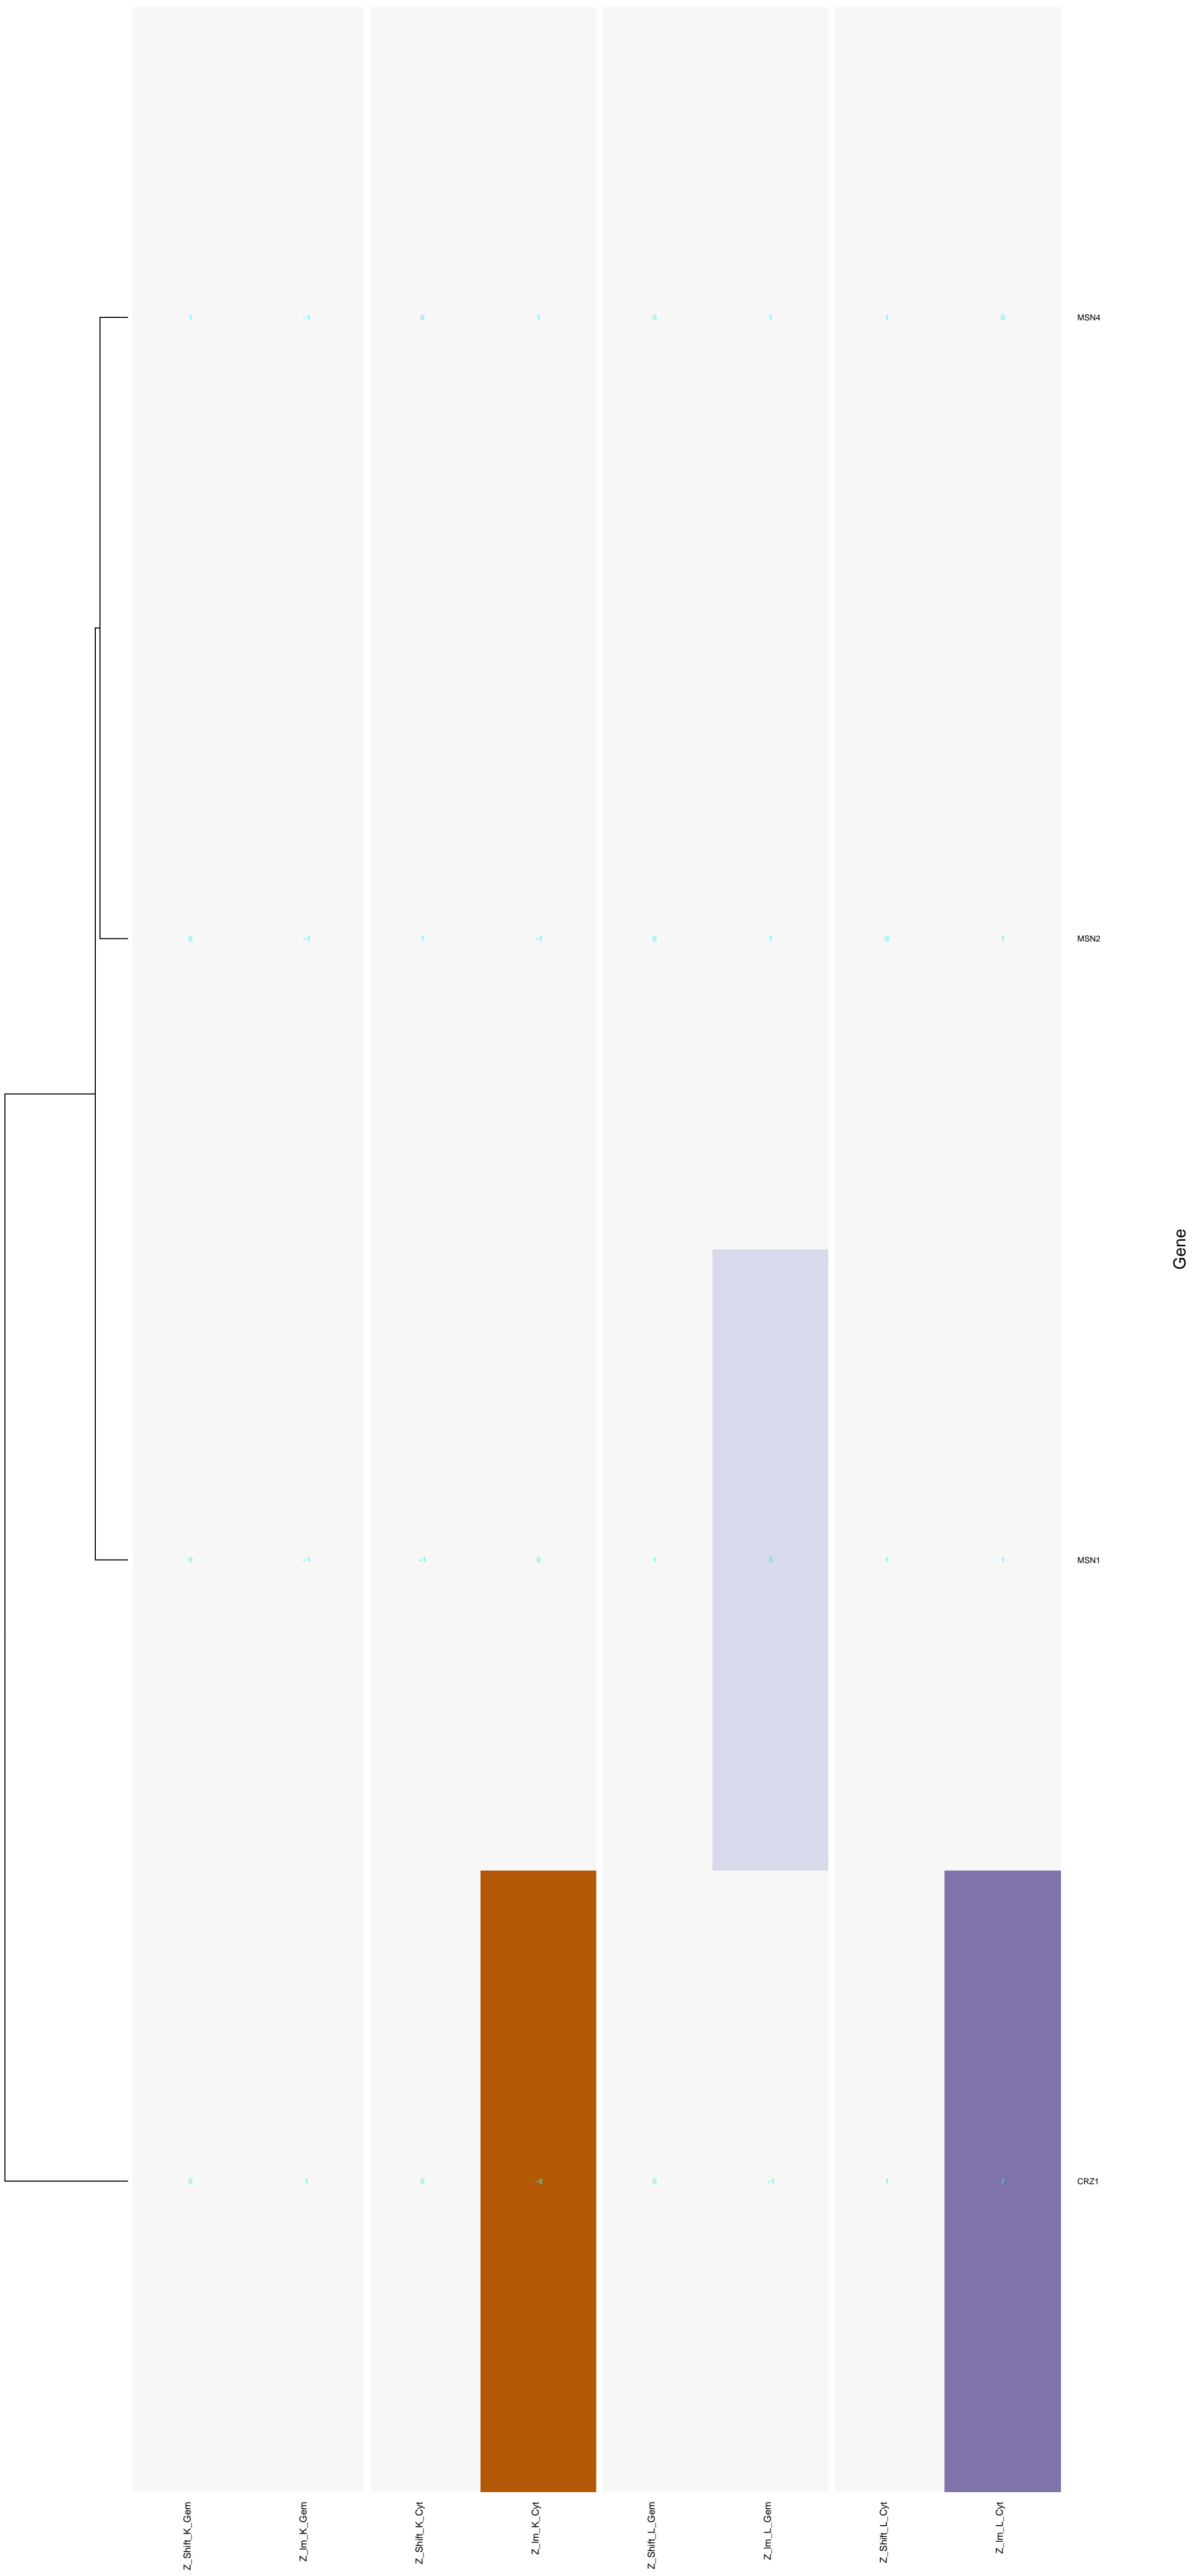





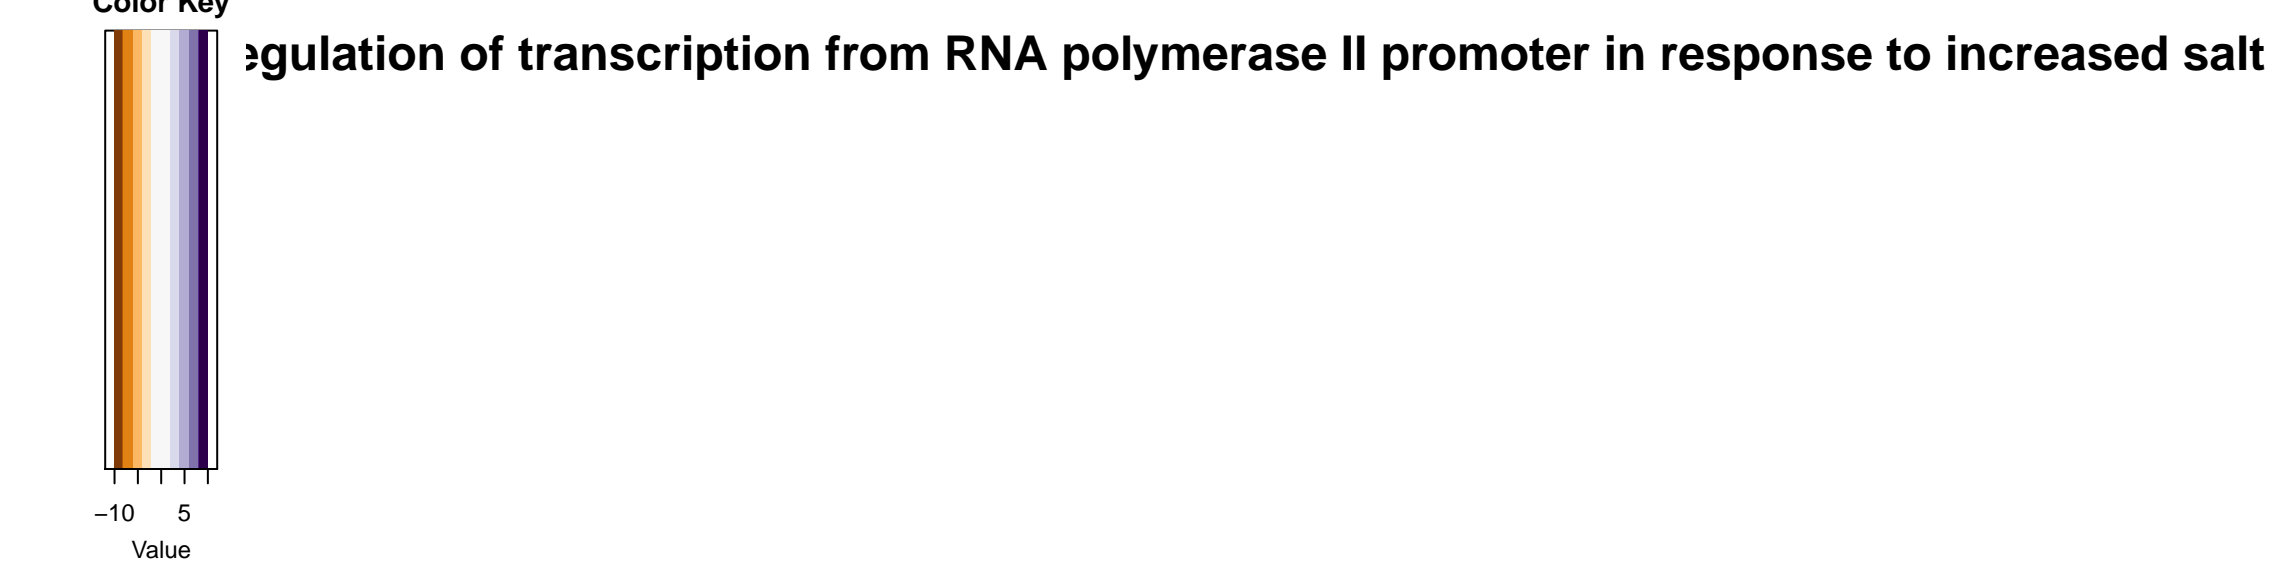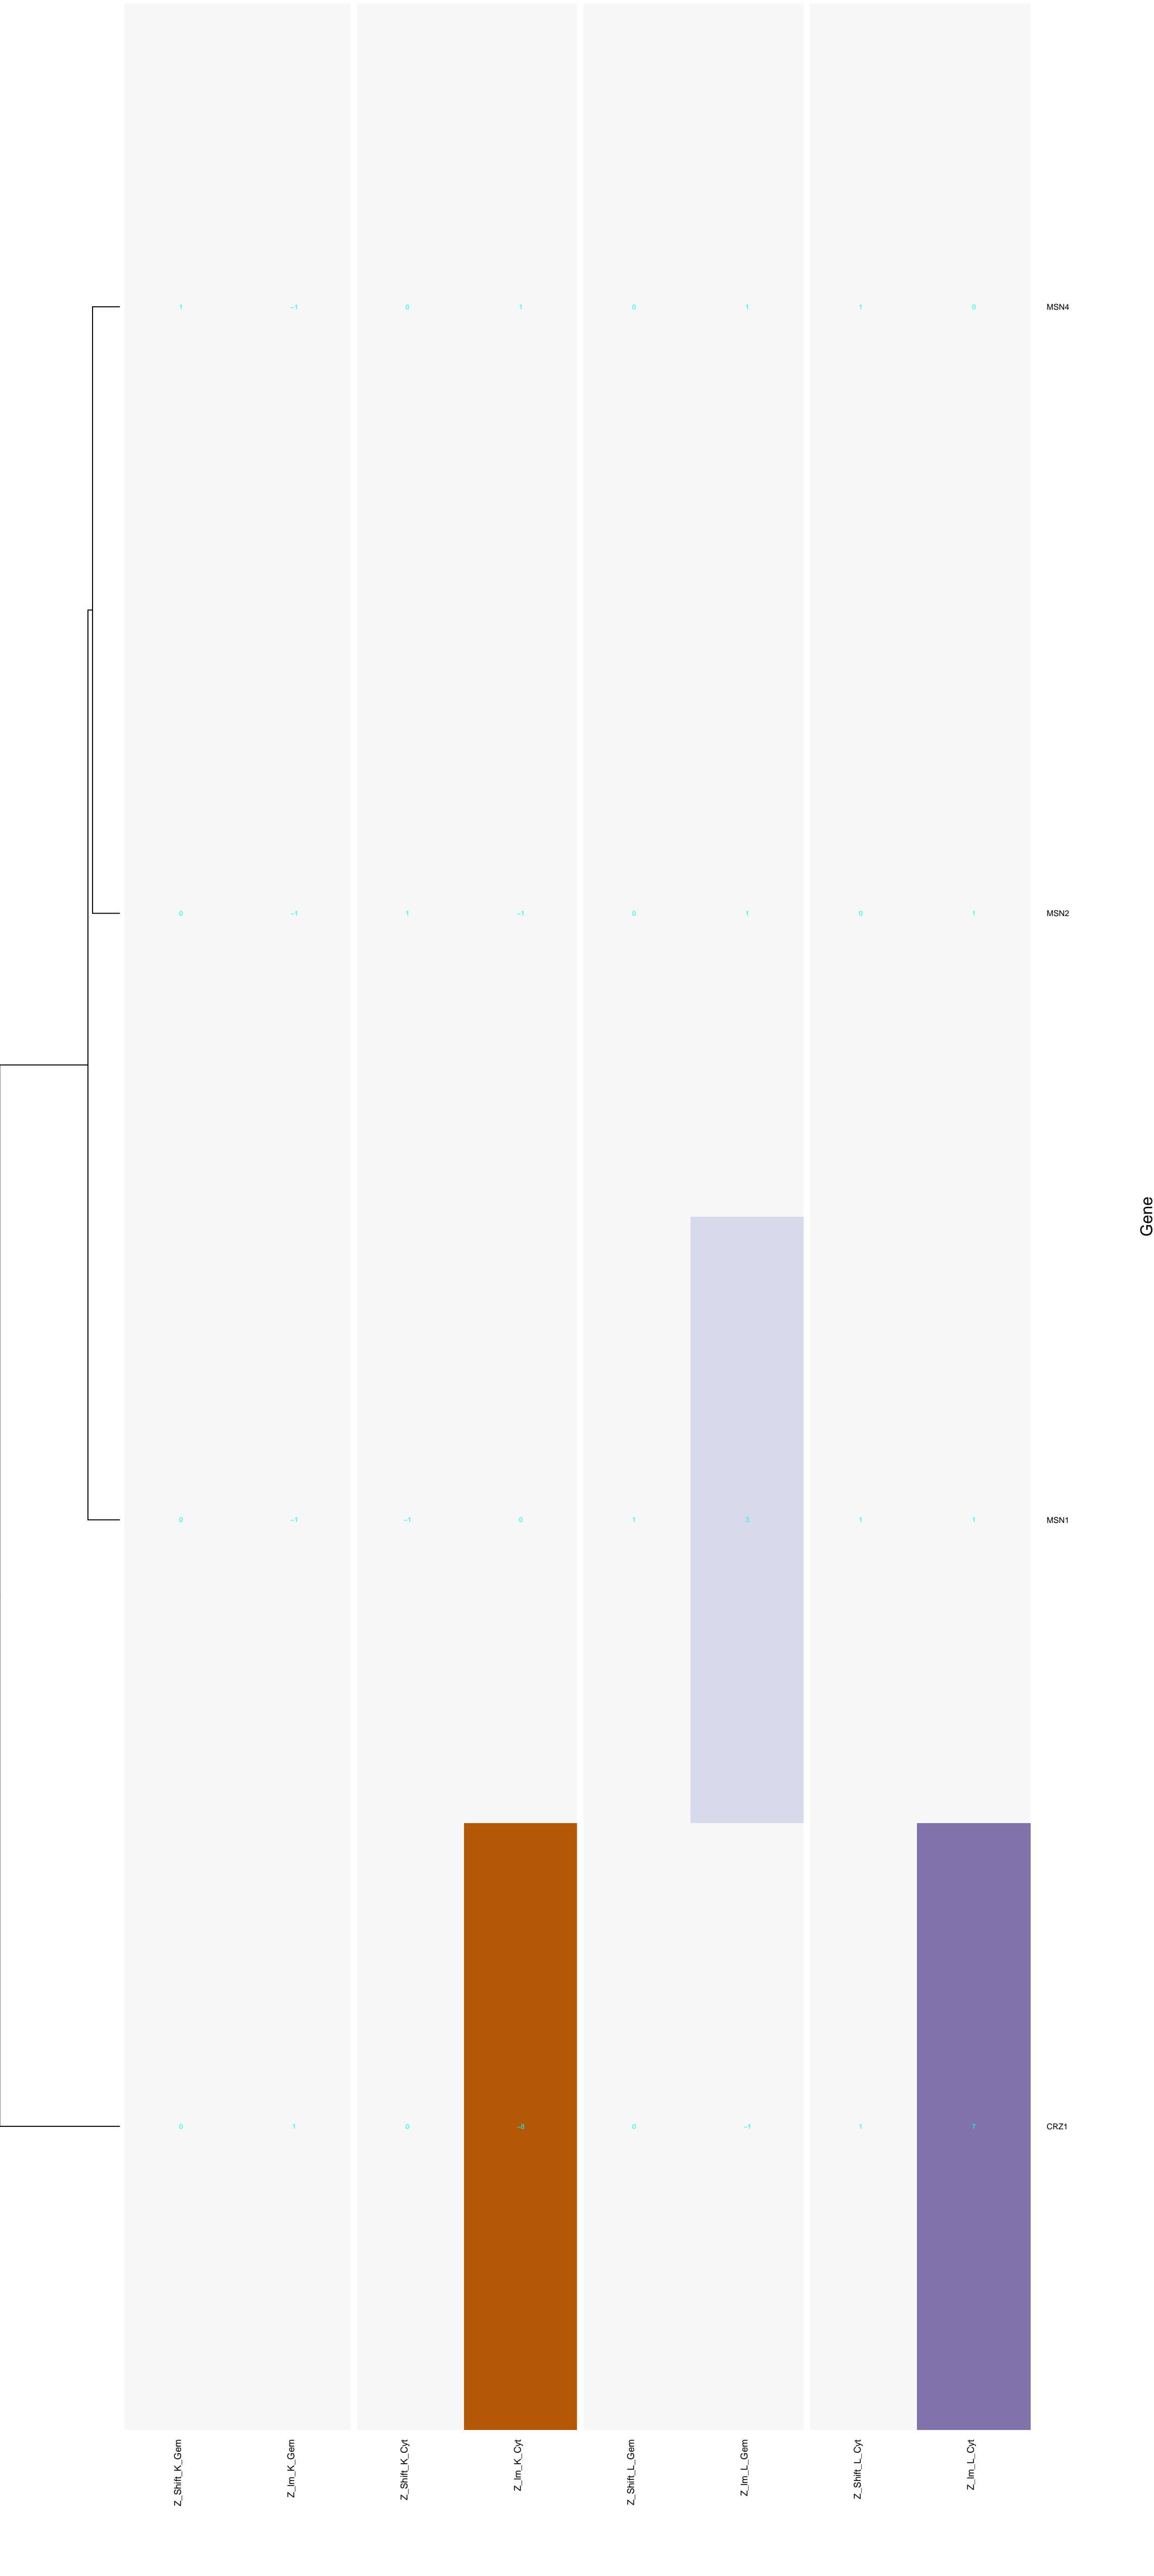

Supplement: s1 [file s1]
