# Supplementary material for: A Humanized Yeast Phenomic Model of Deoxycytidine Kinase to Predict Genetic Buffering of Nucleoside Analog Cytotoxicity
Source: MDPI journal article supplement (doi:10.3390/genes10100770), 2019-09-30

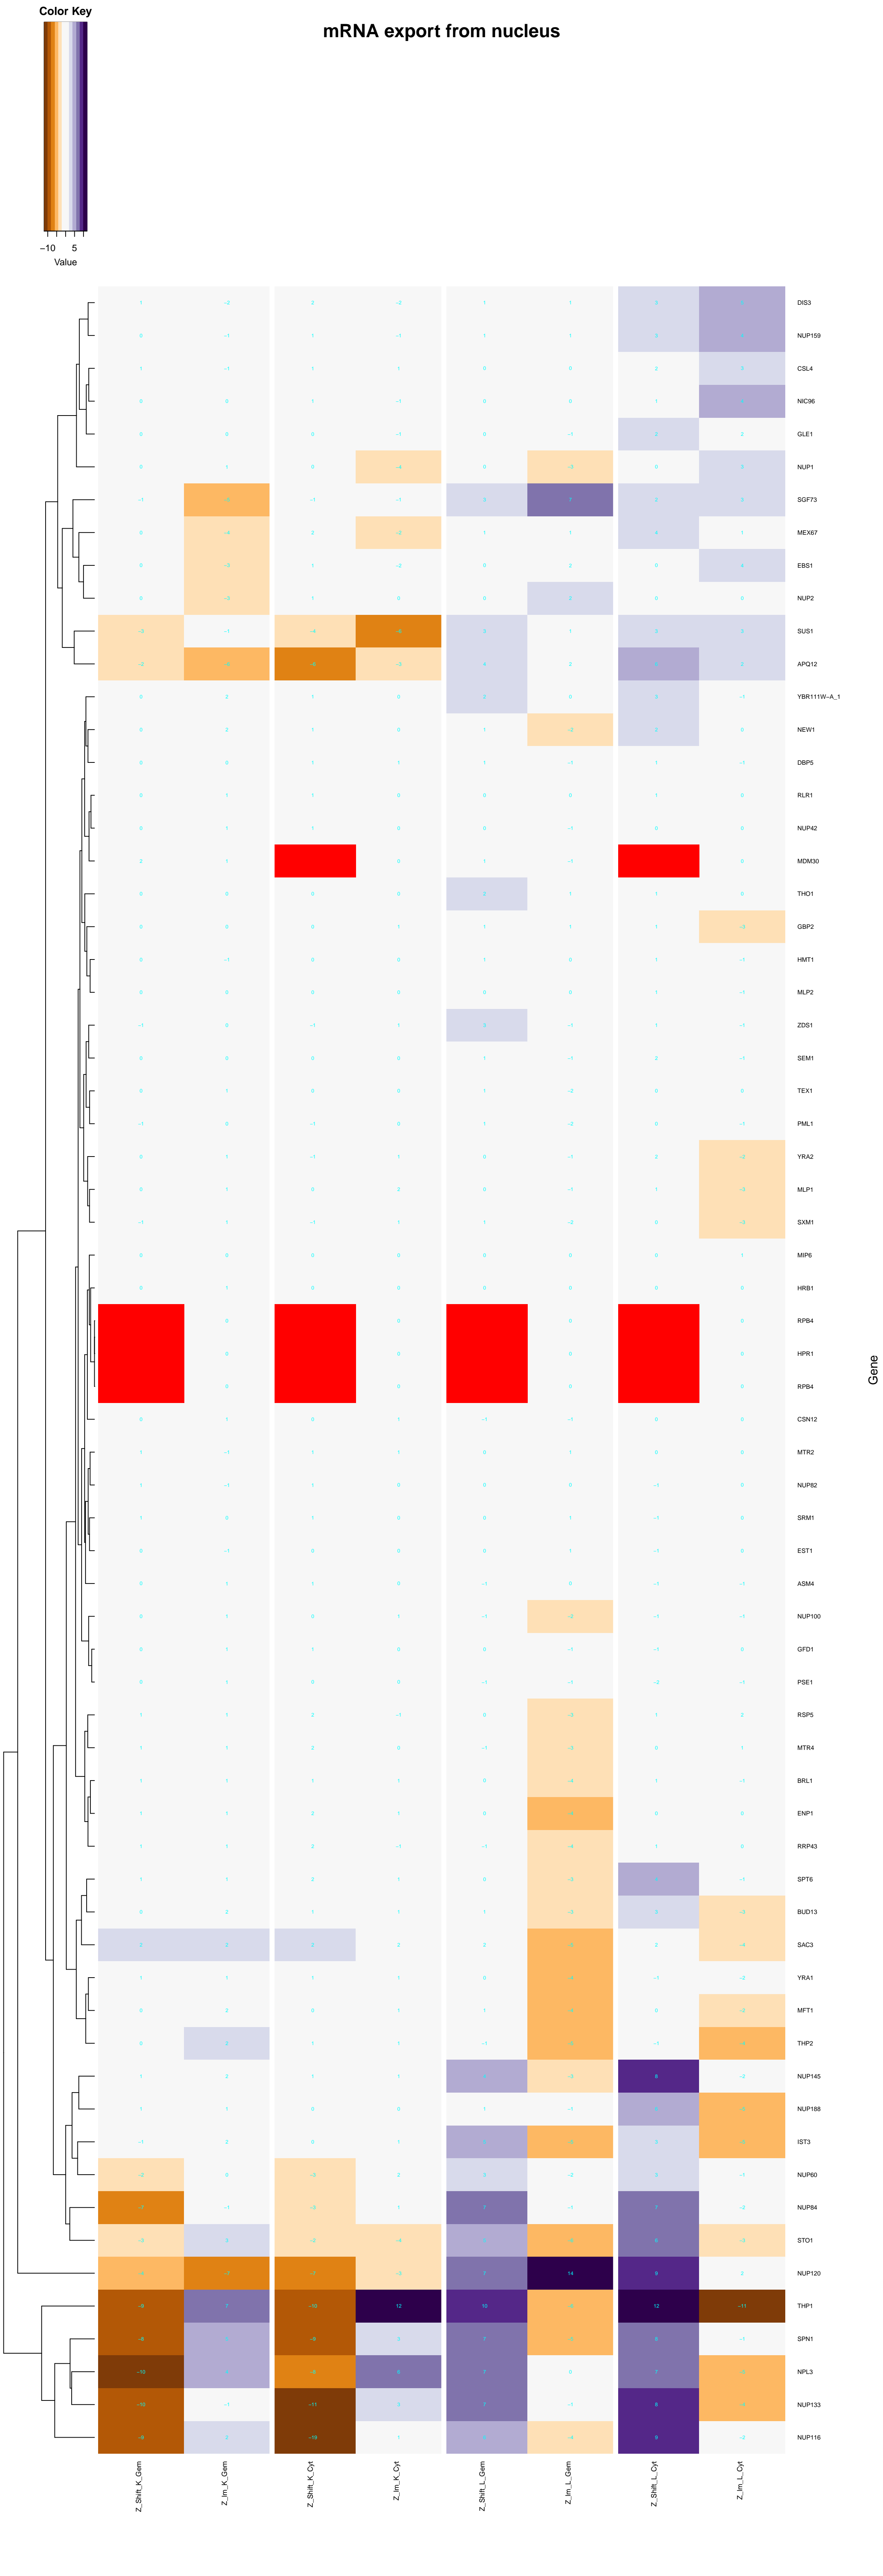

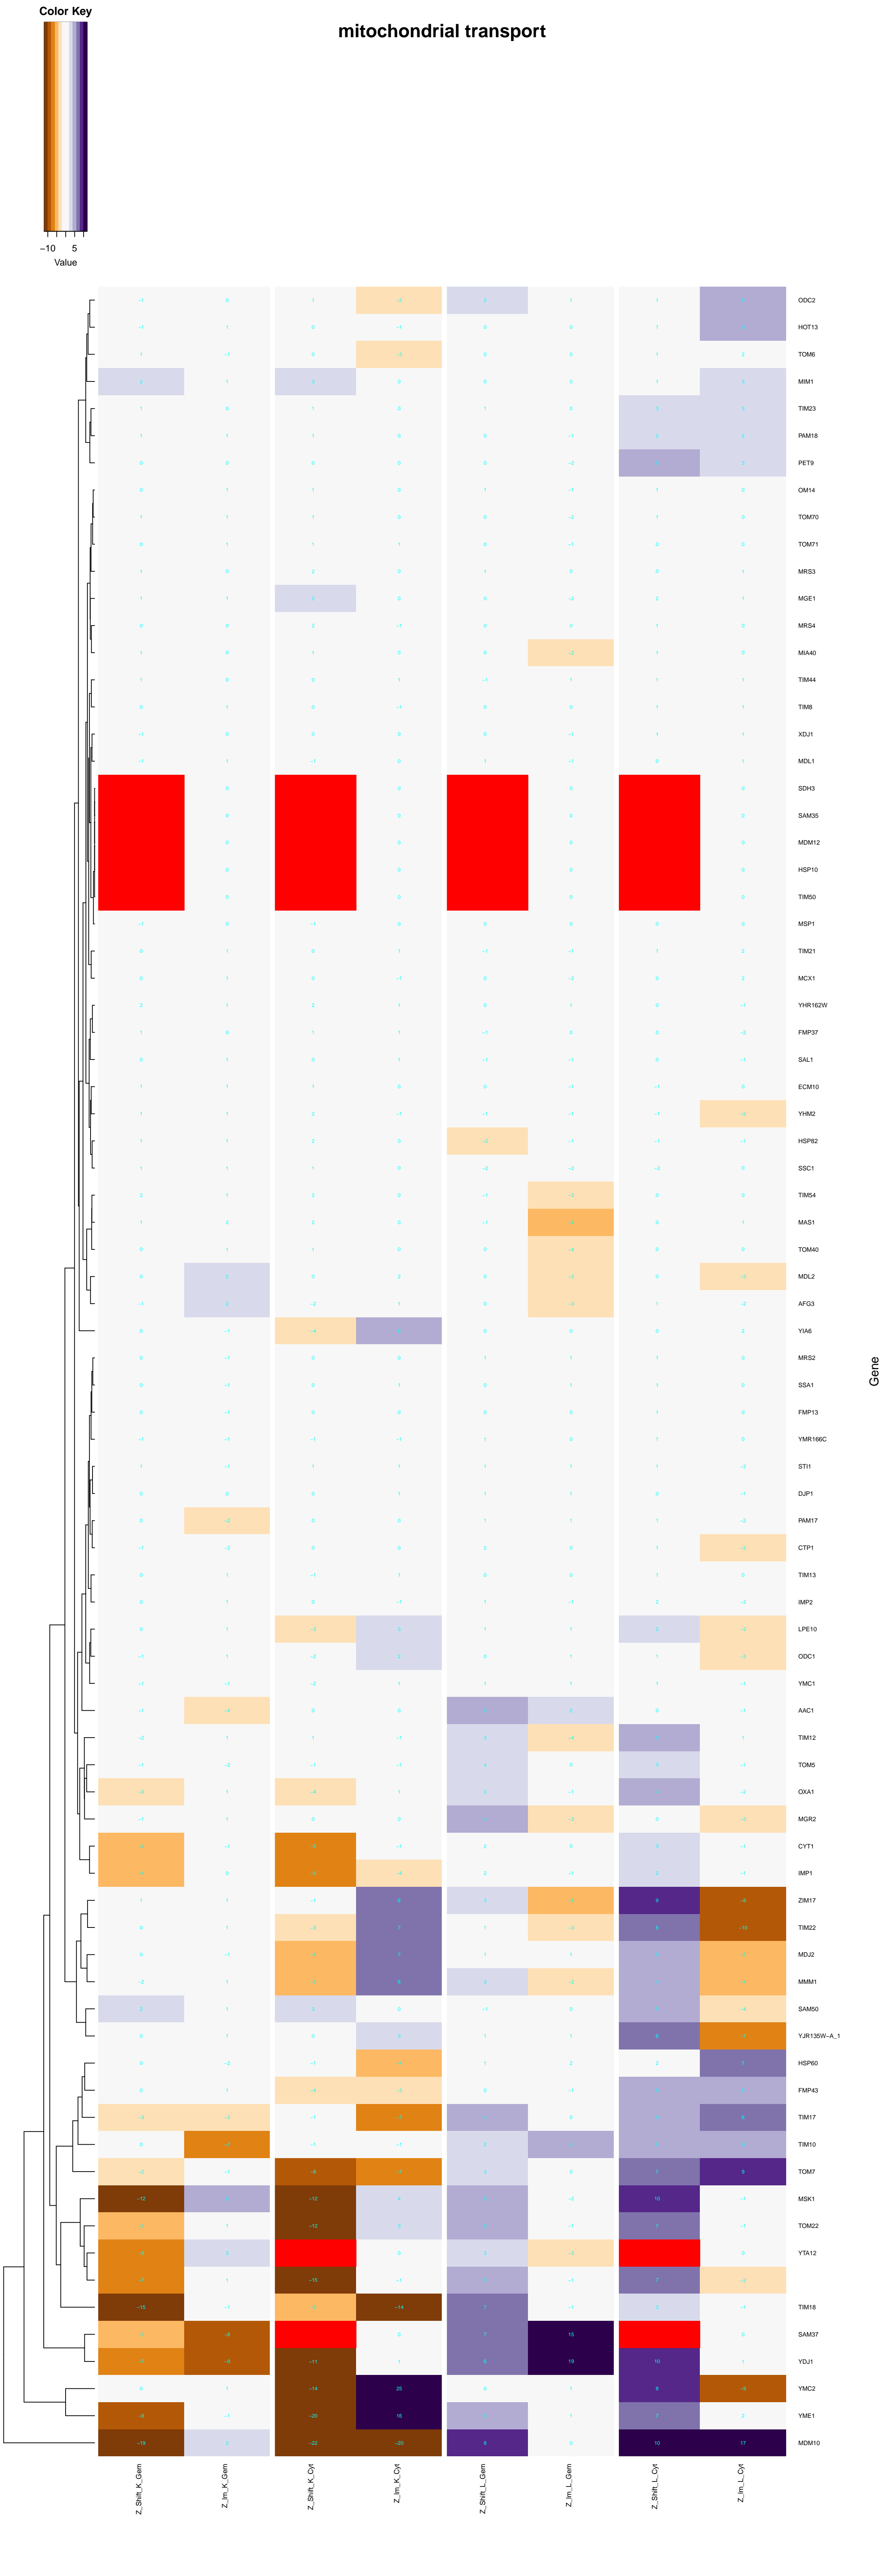

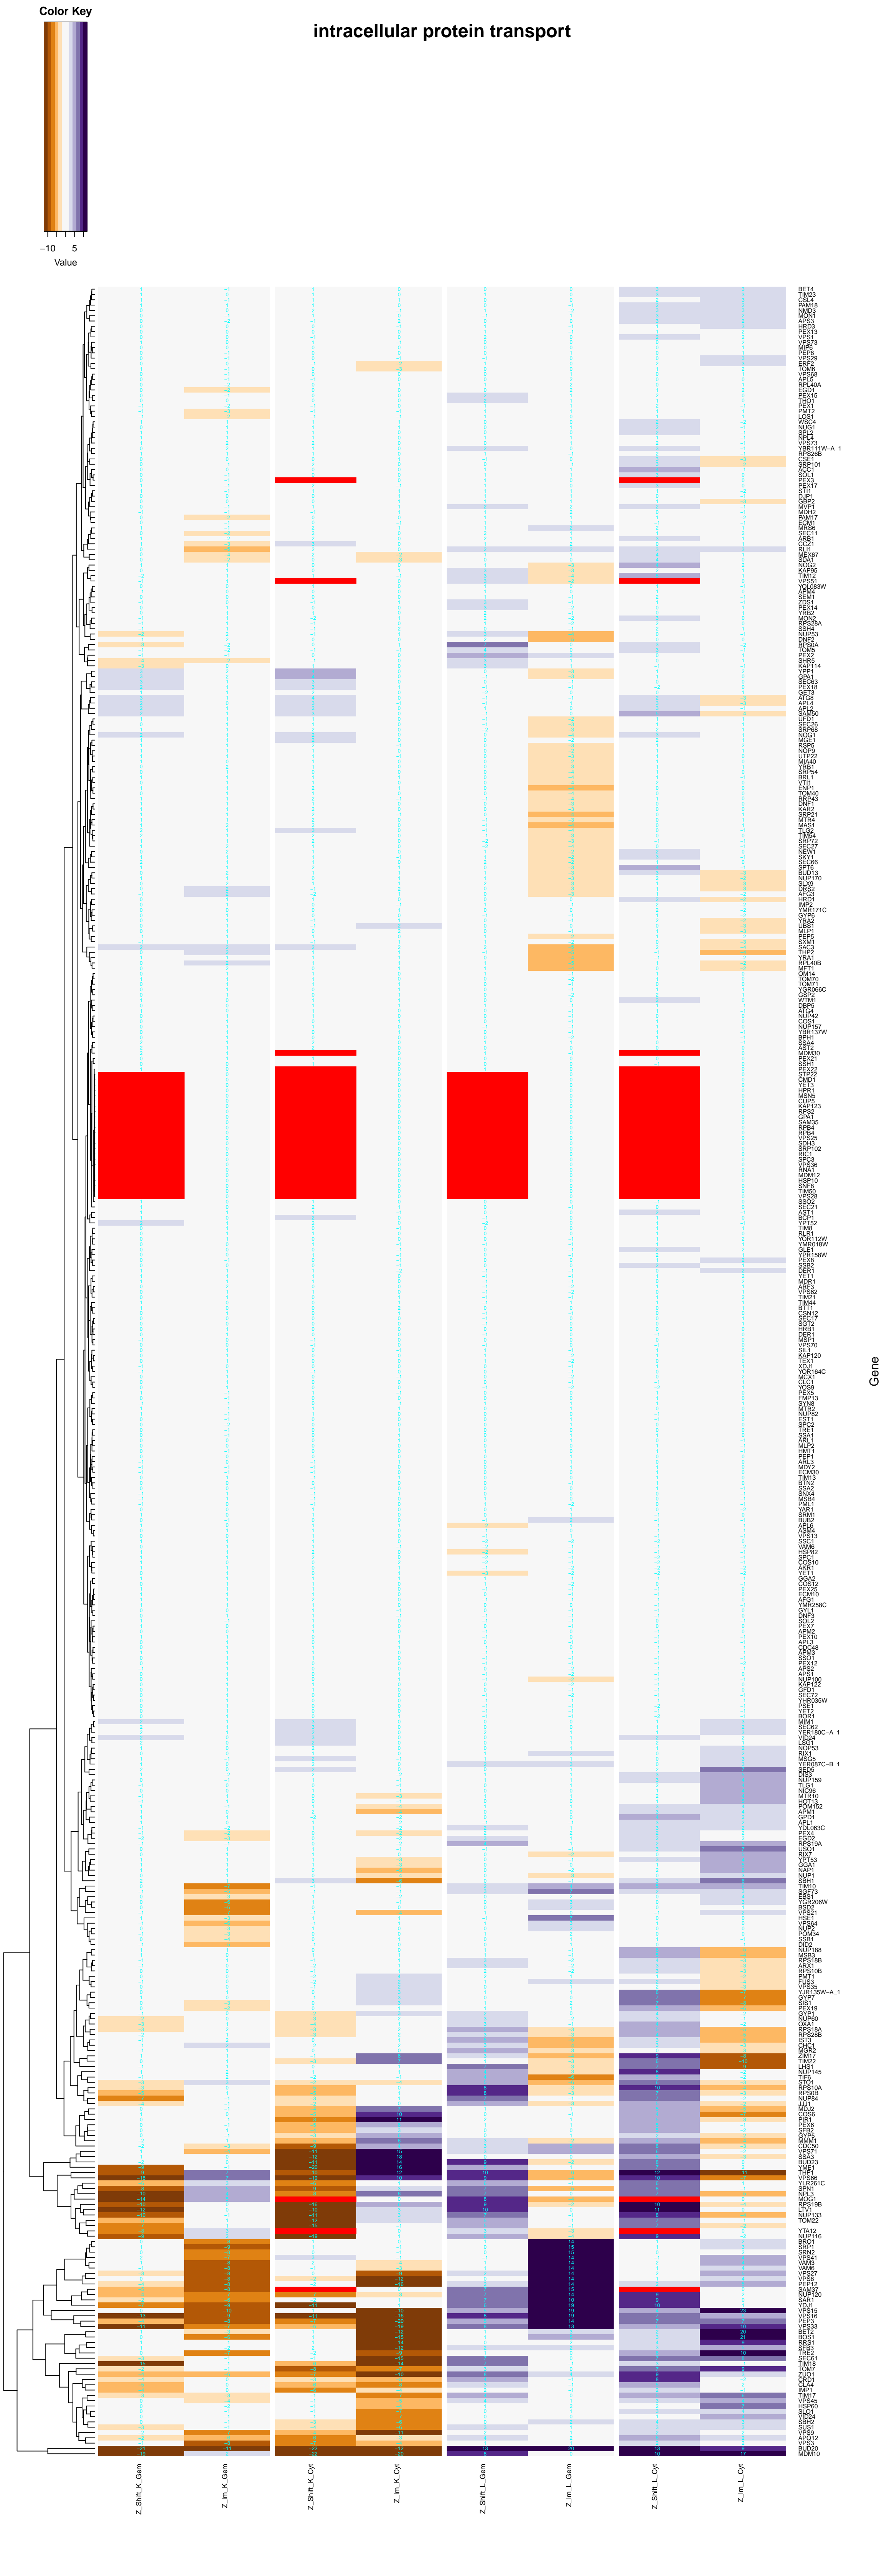

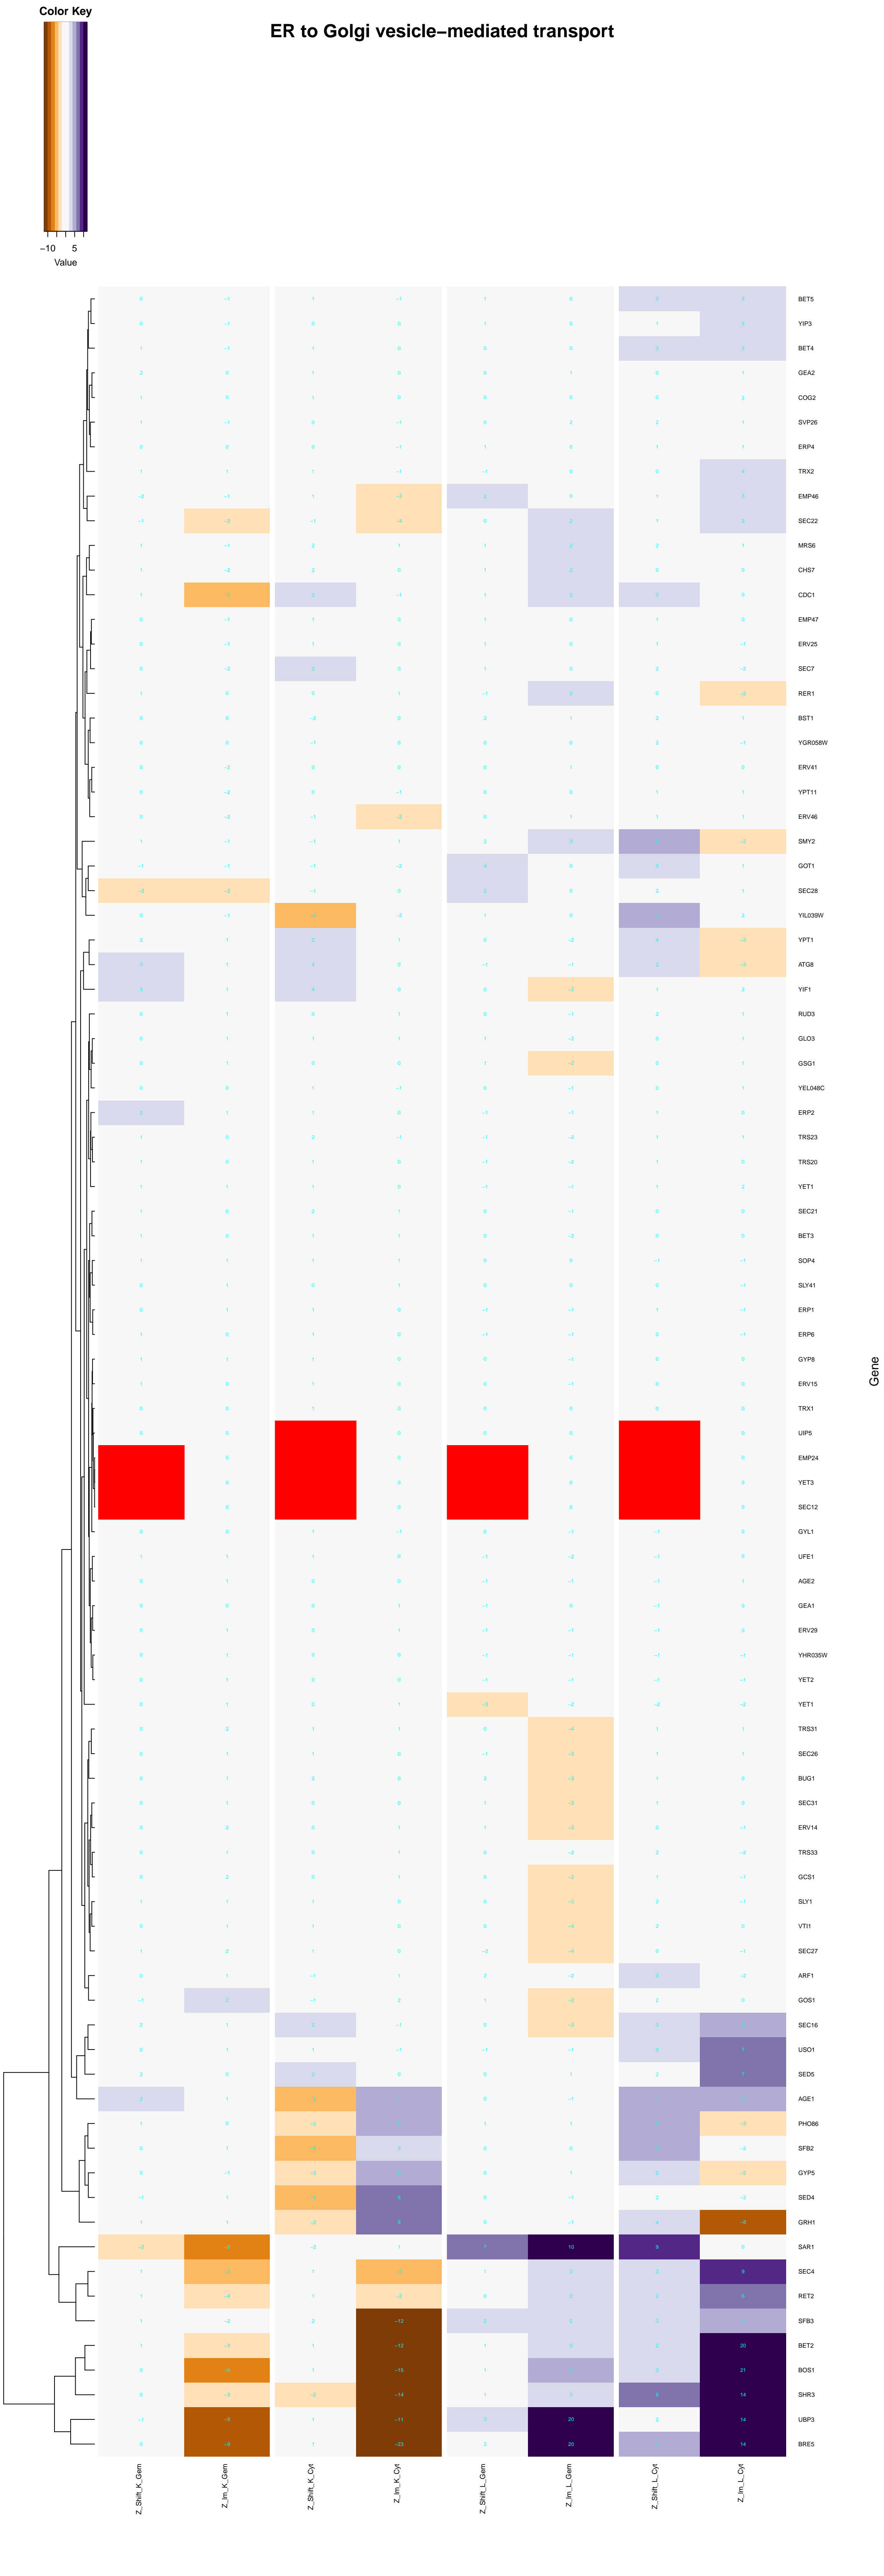

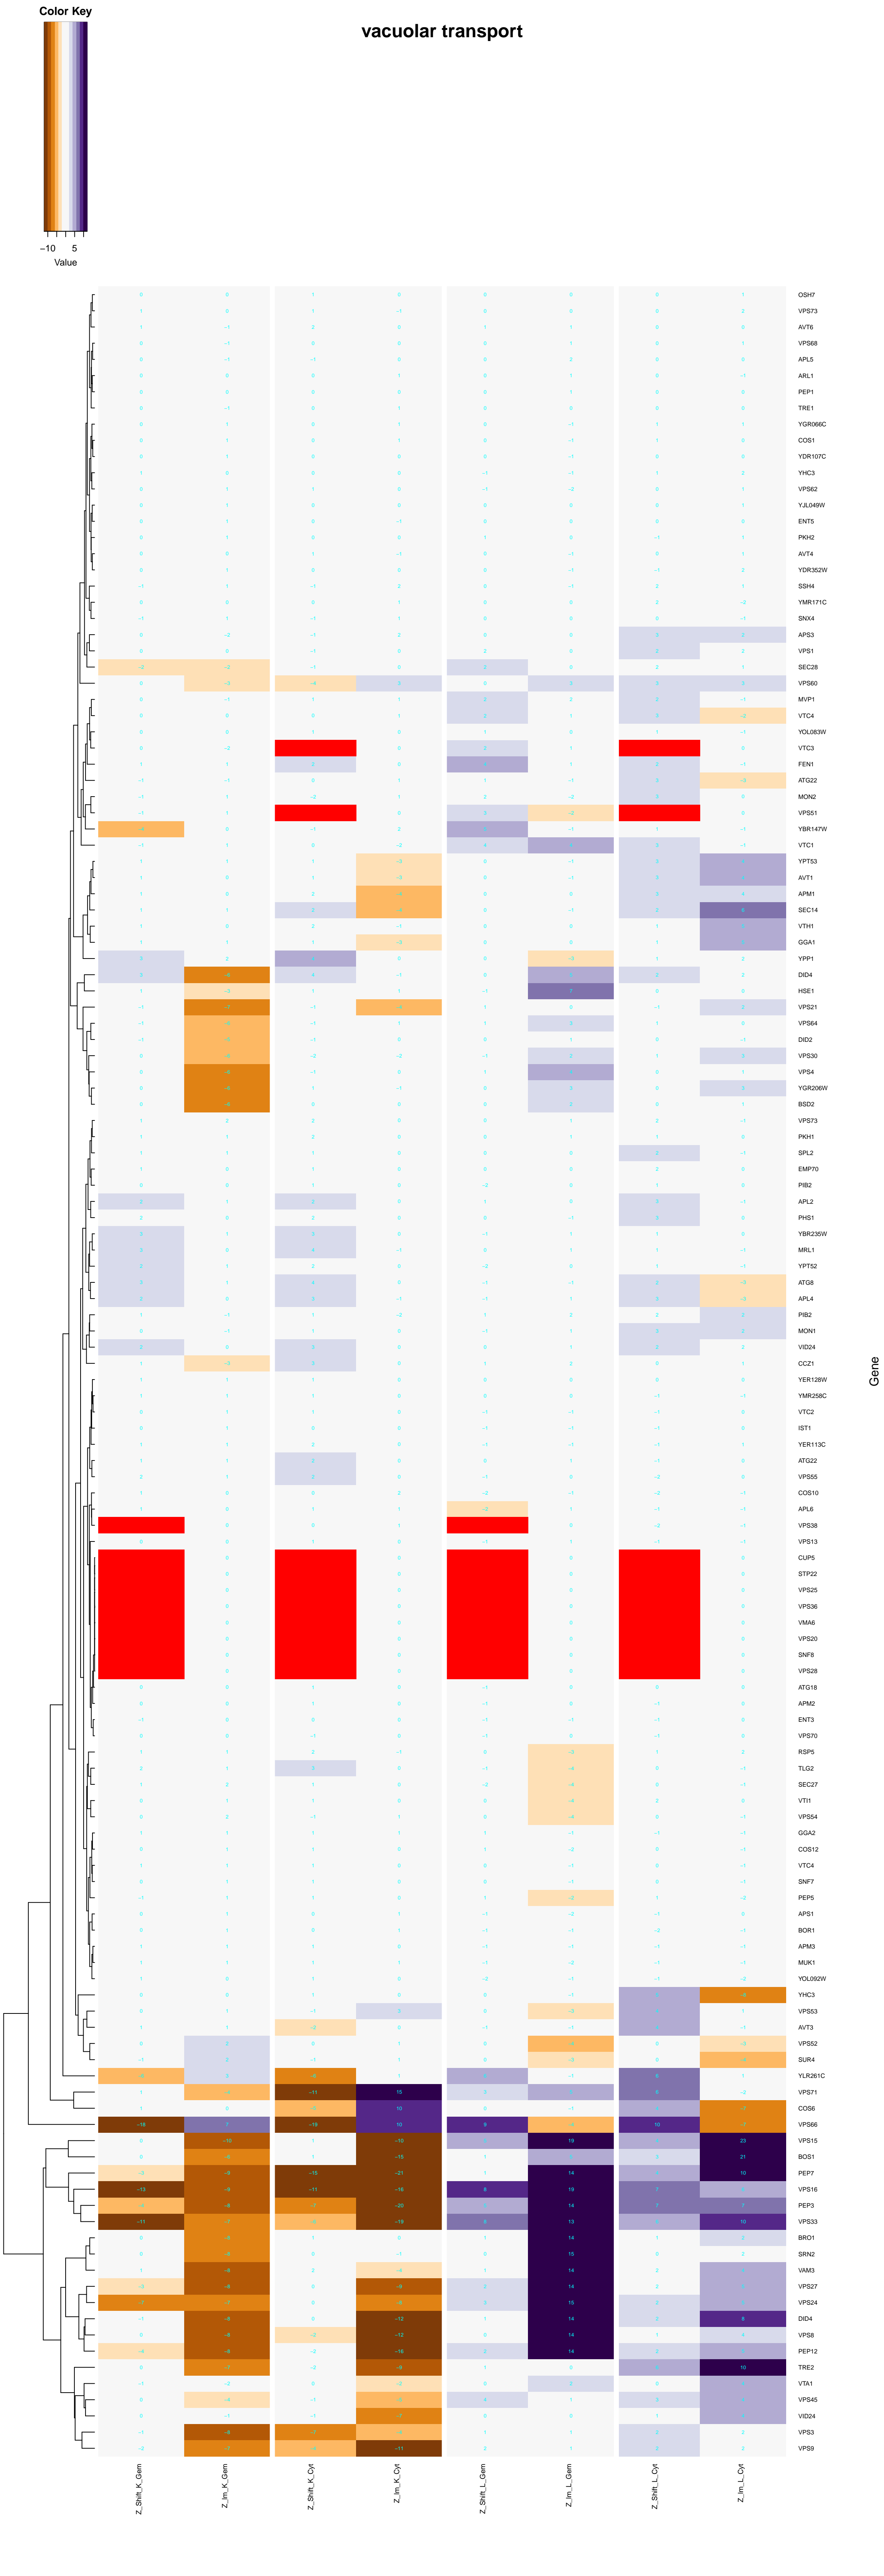



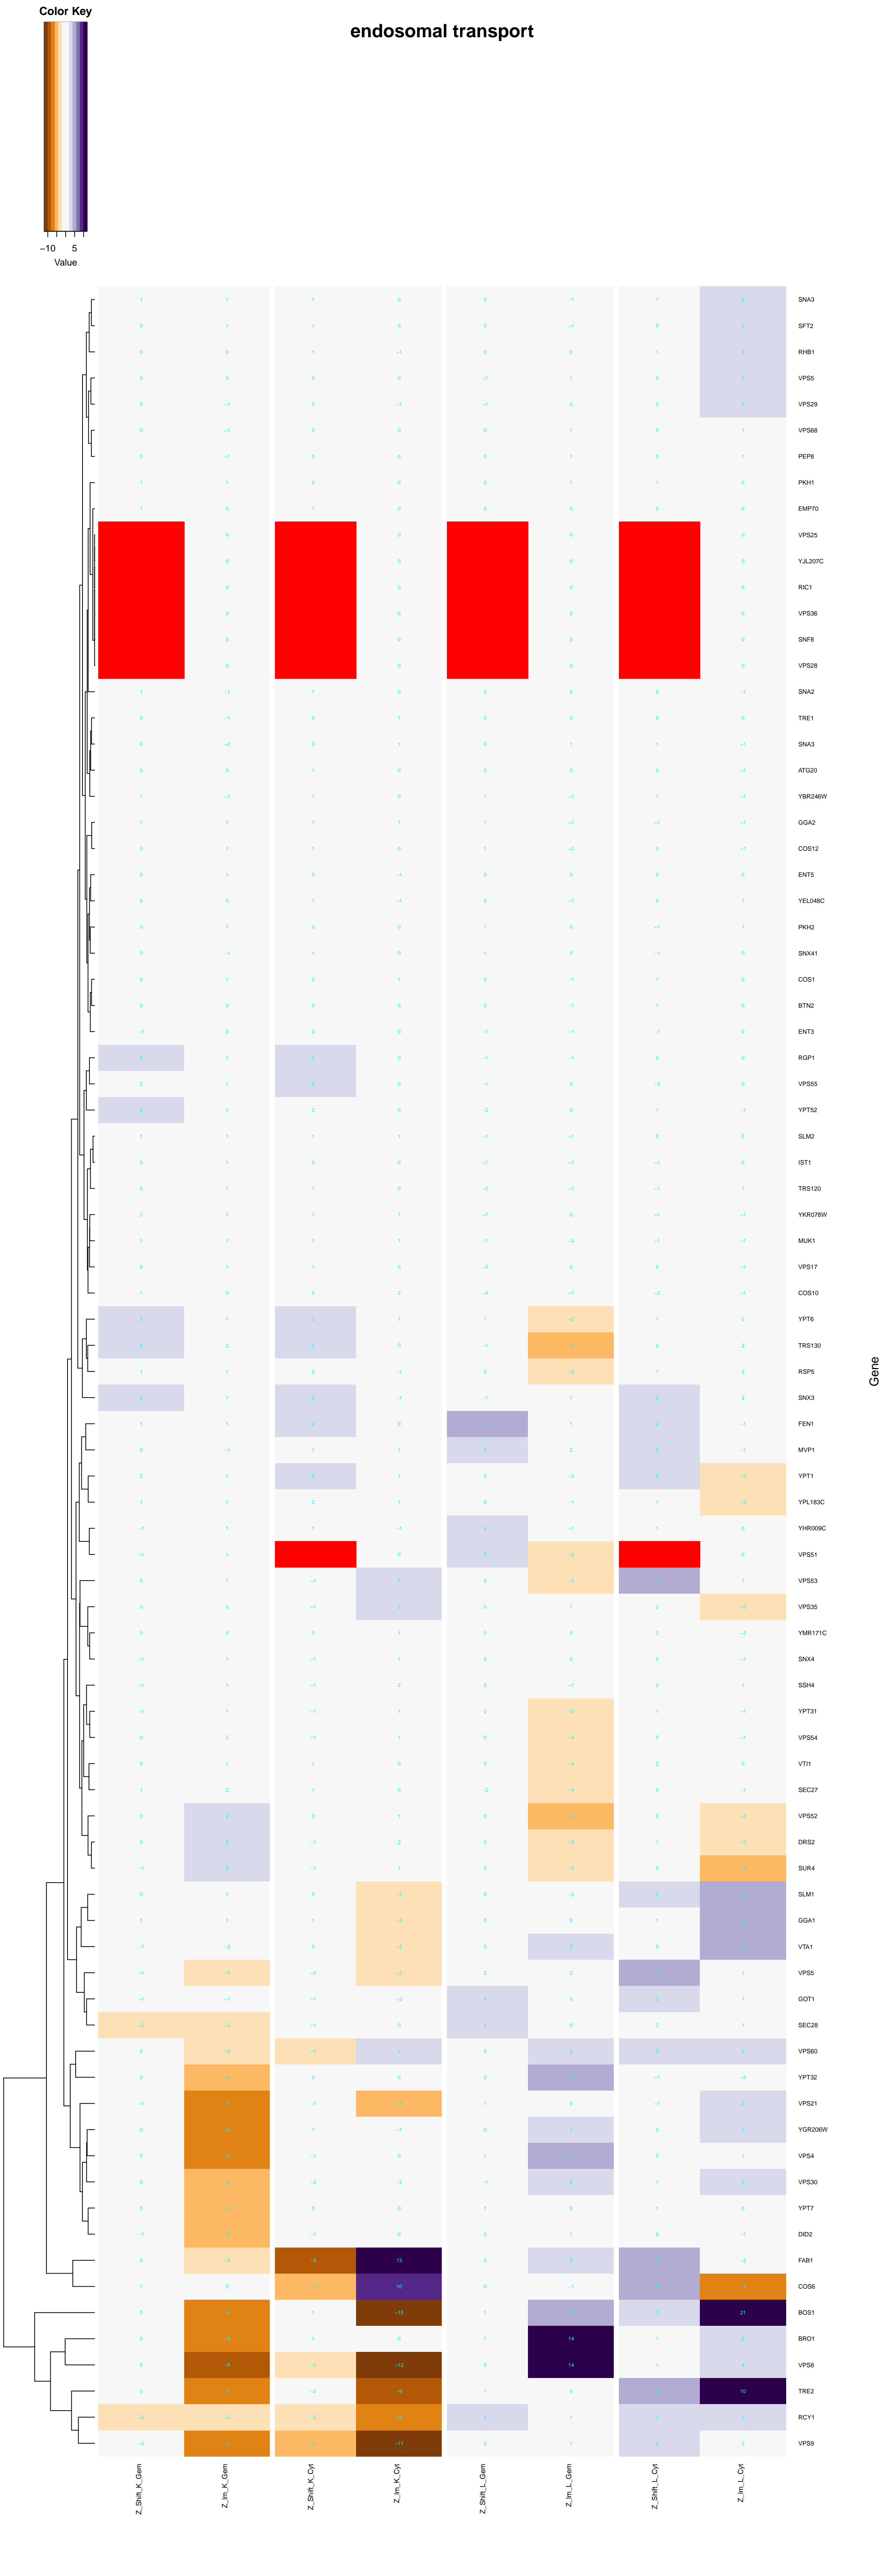

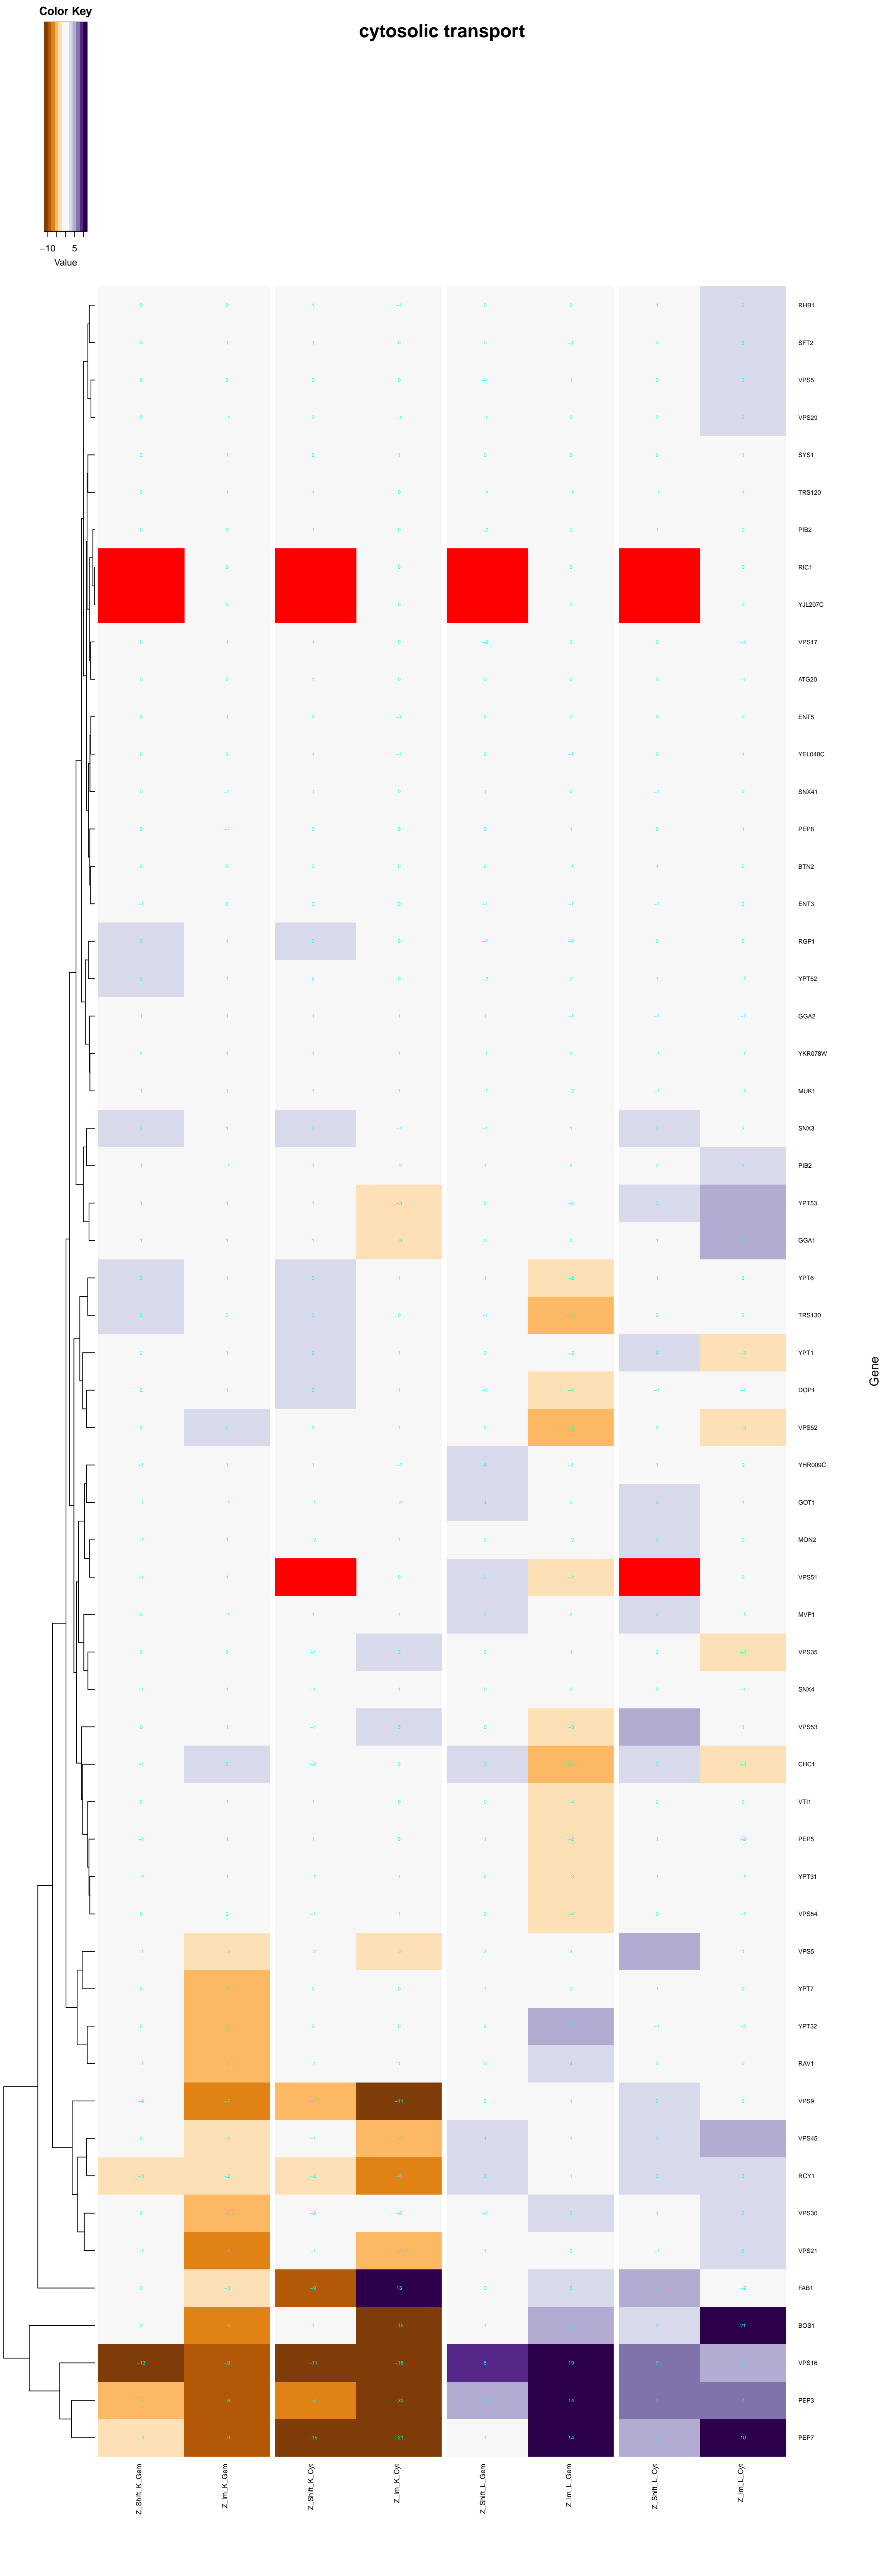

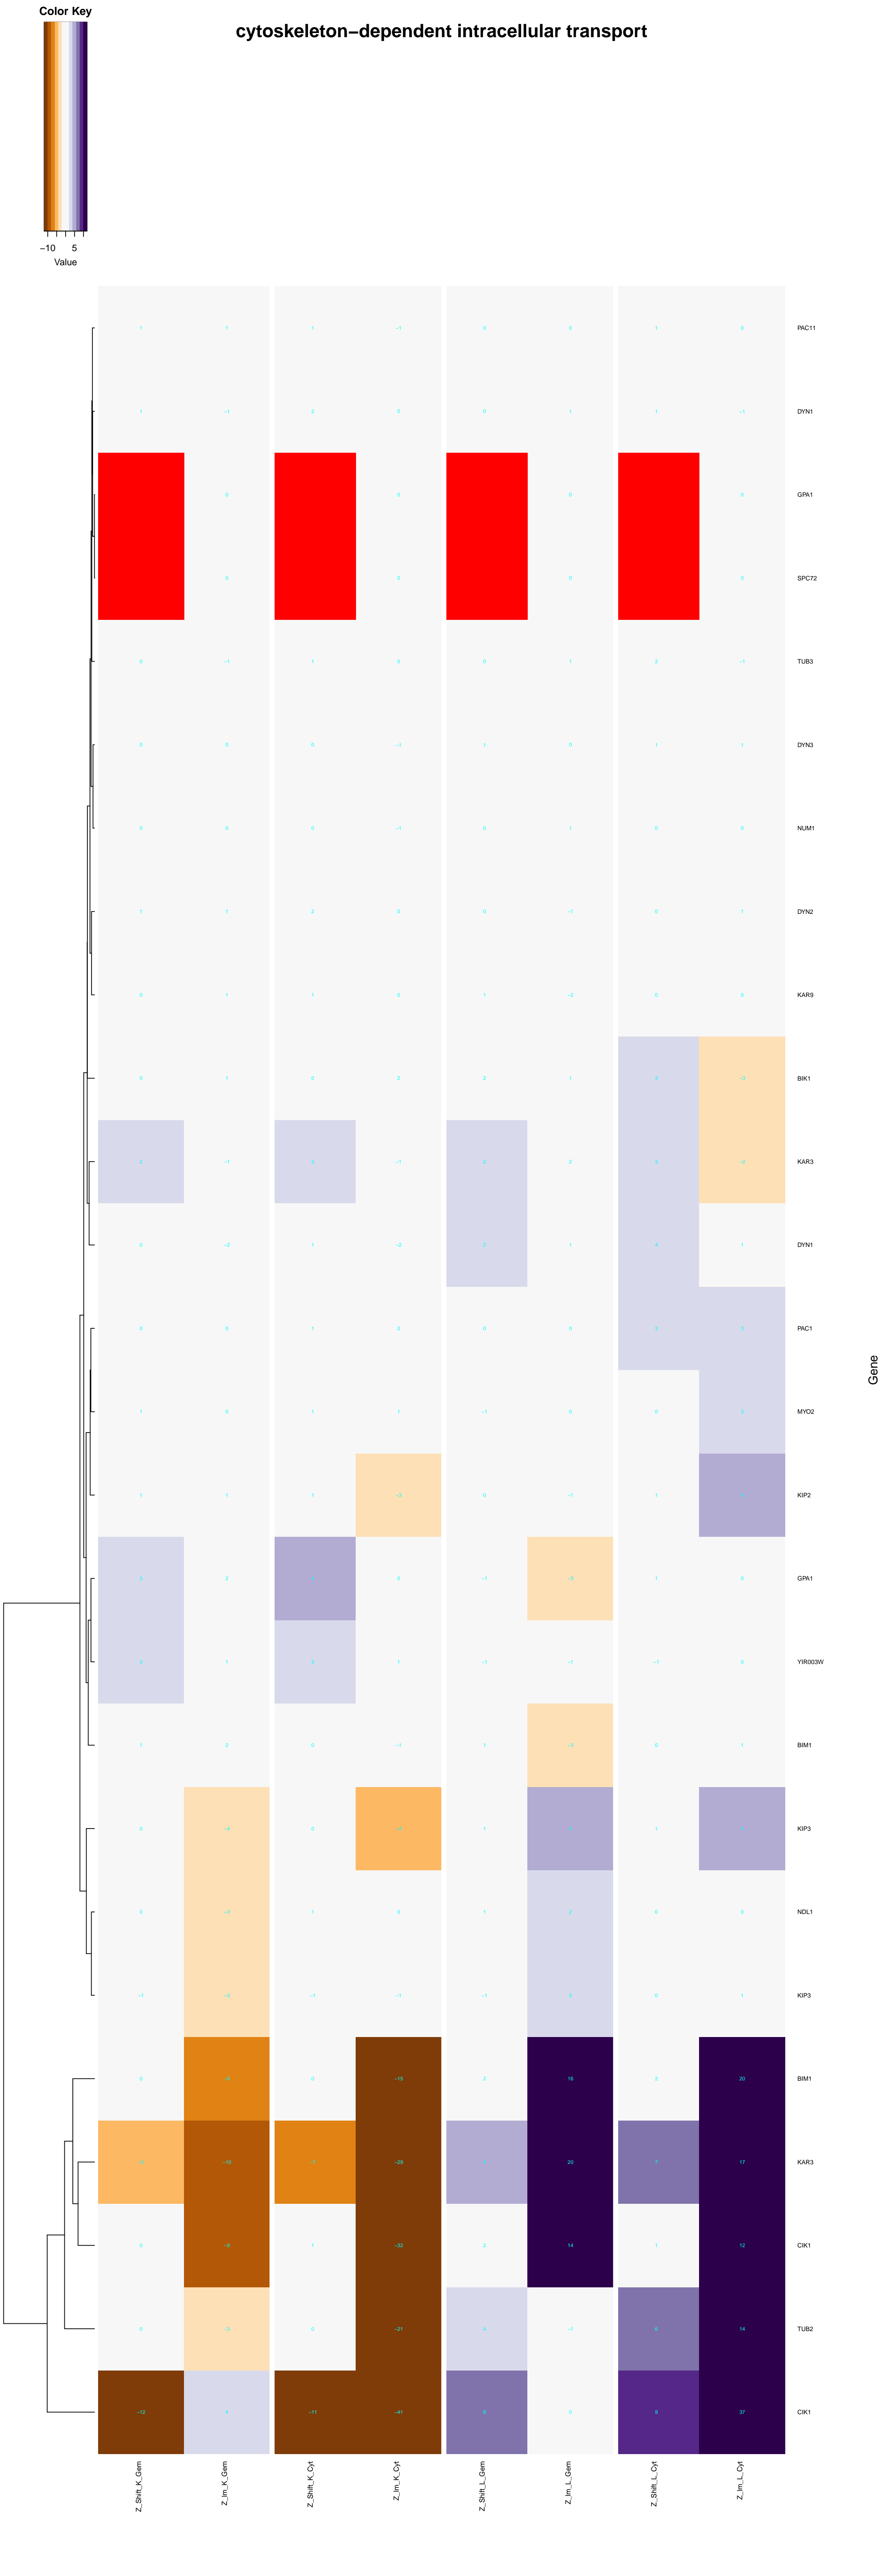

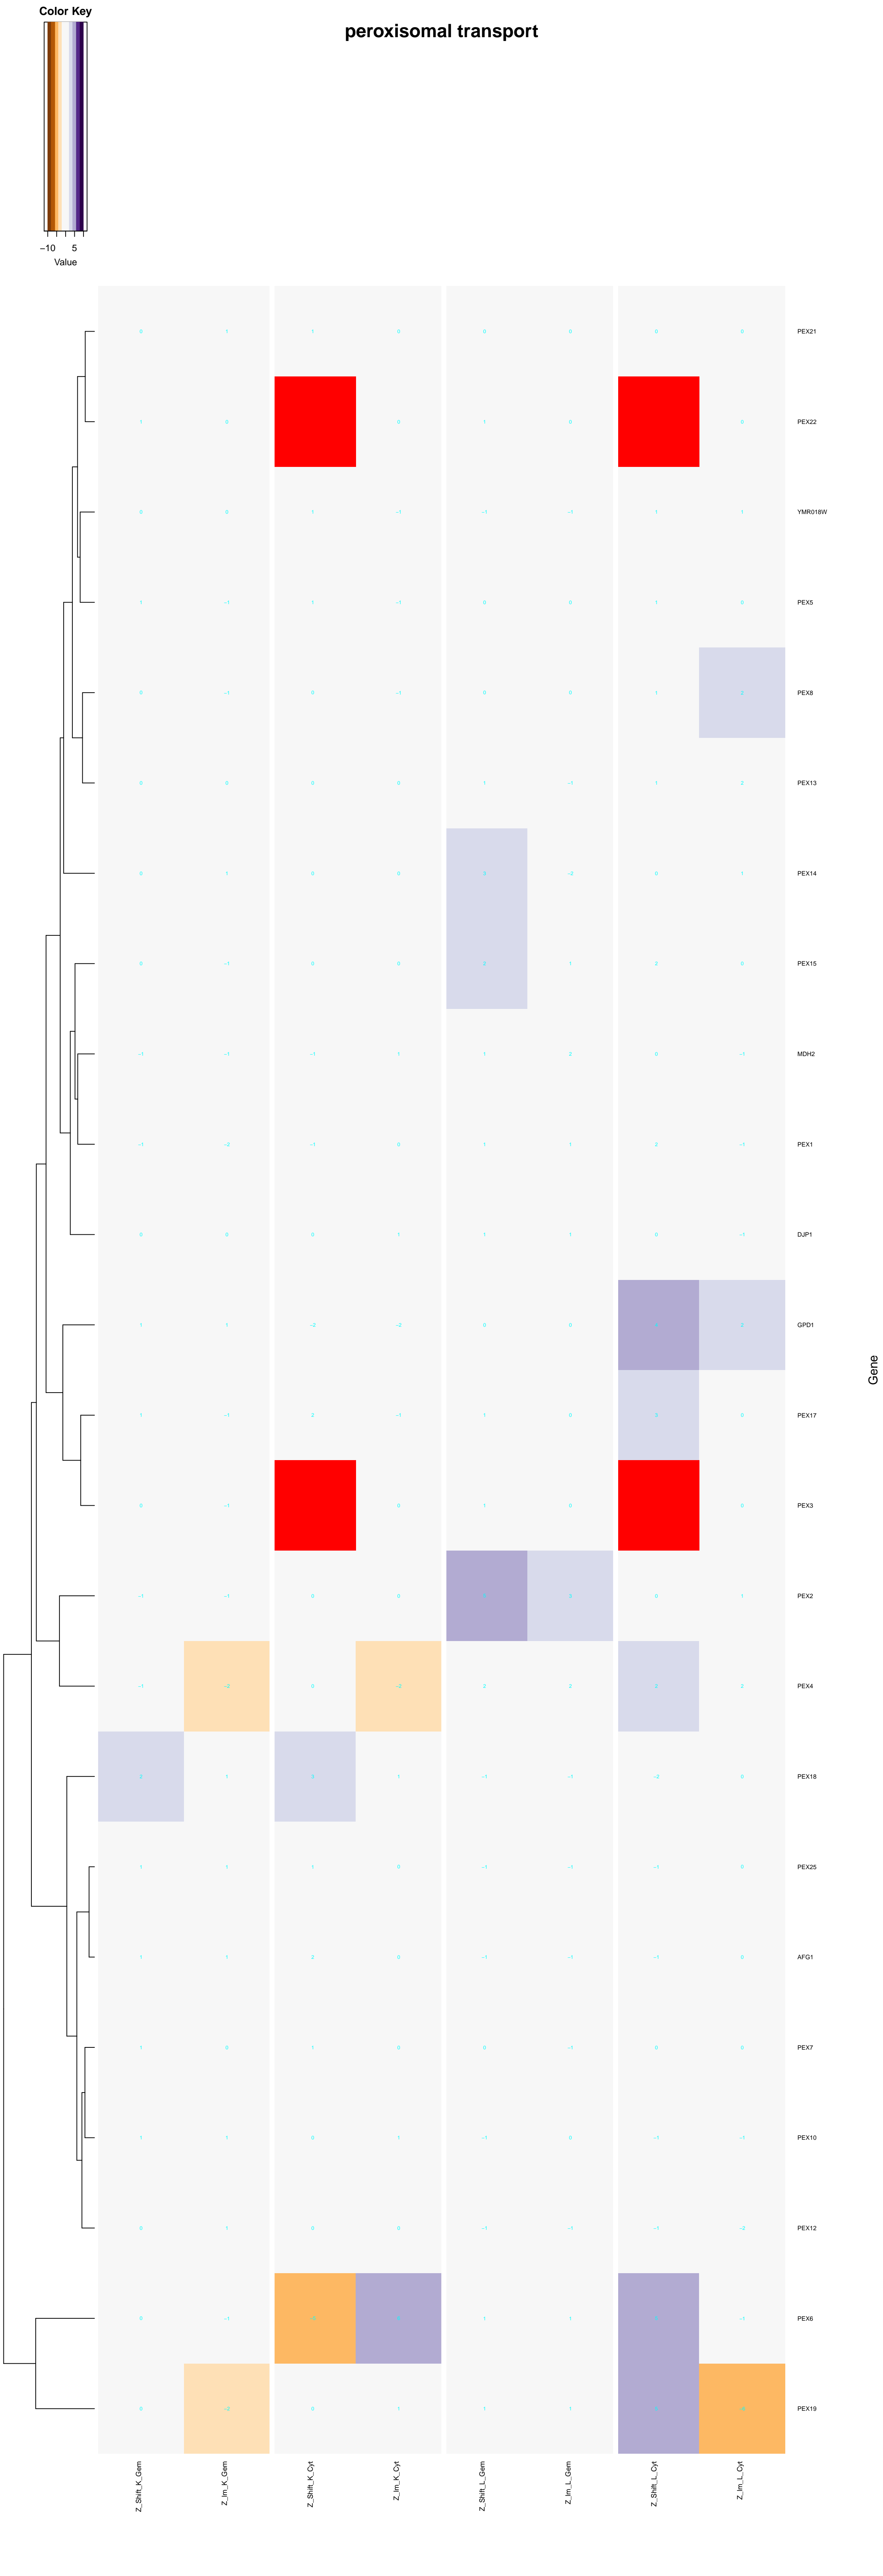

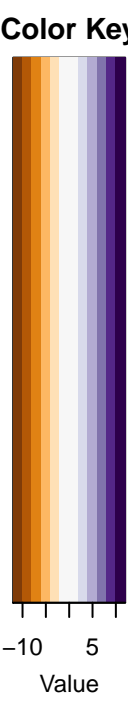

endoplasmic reticulum to cytosol transport

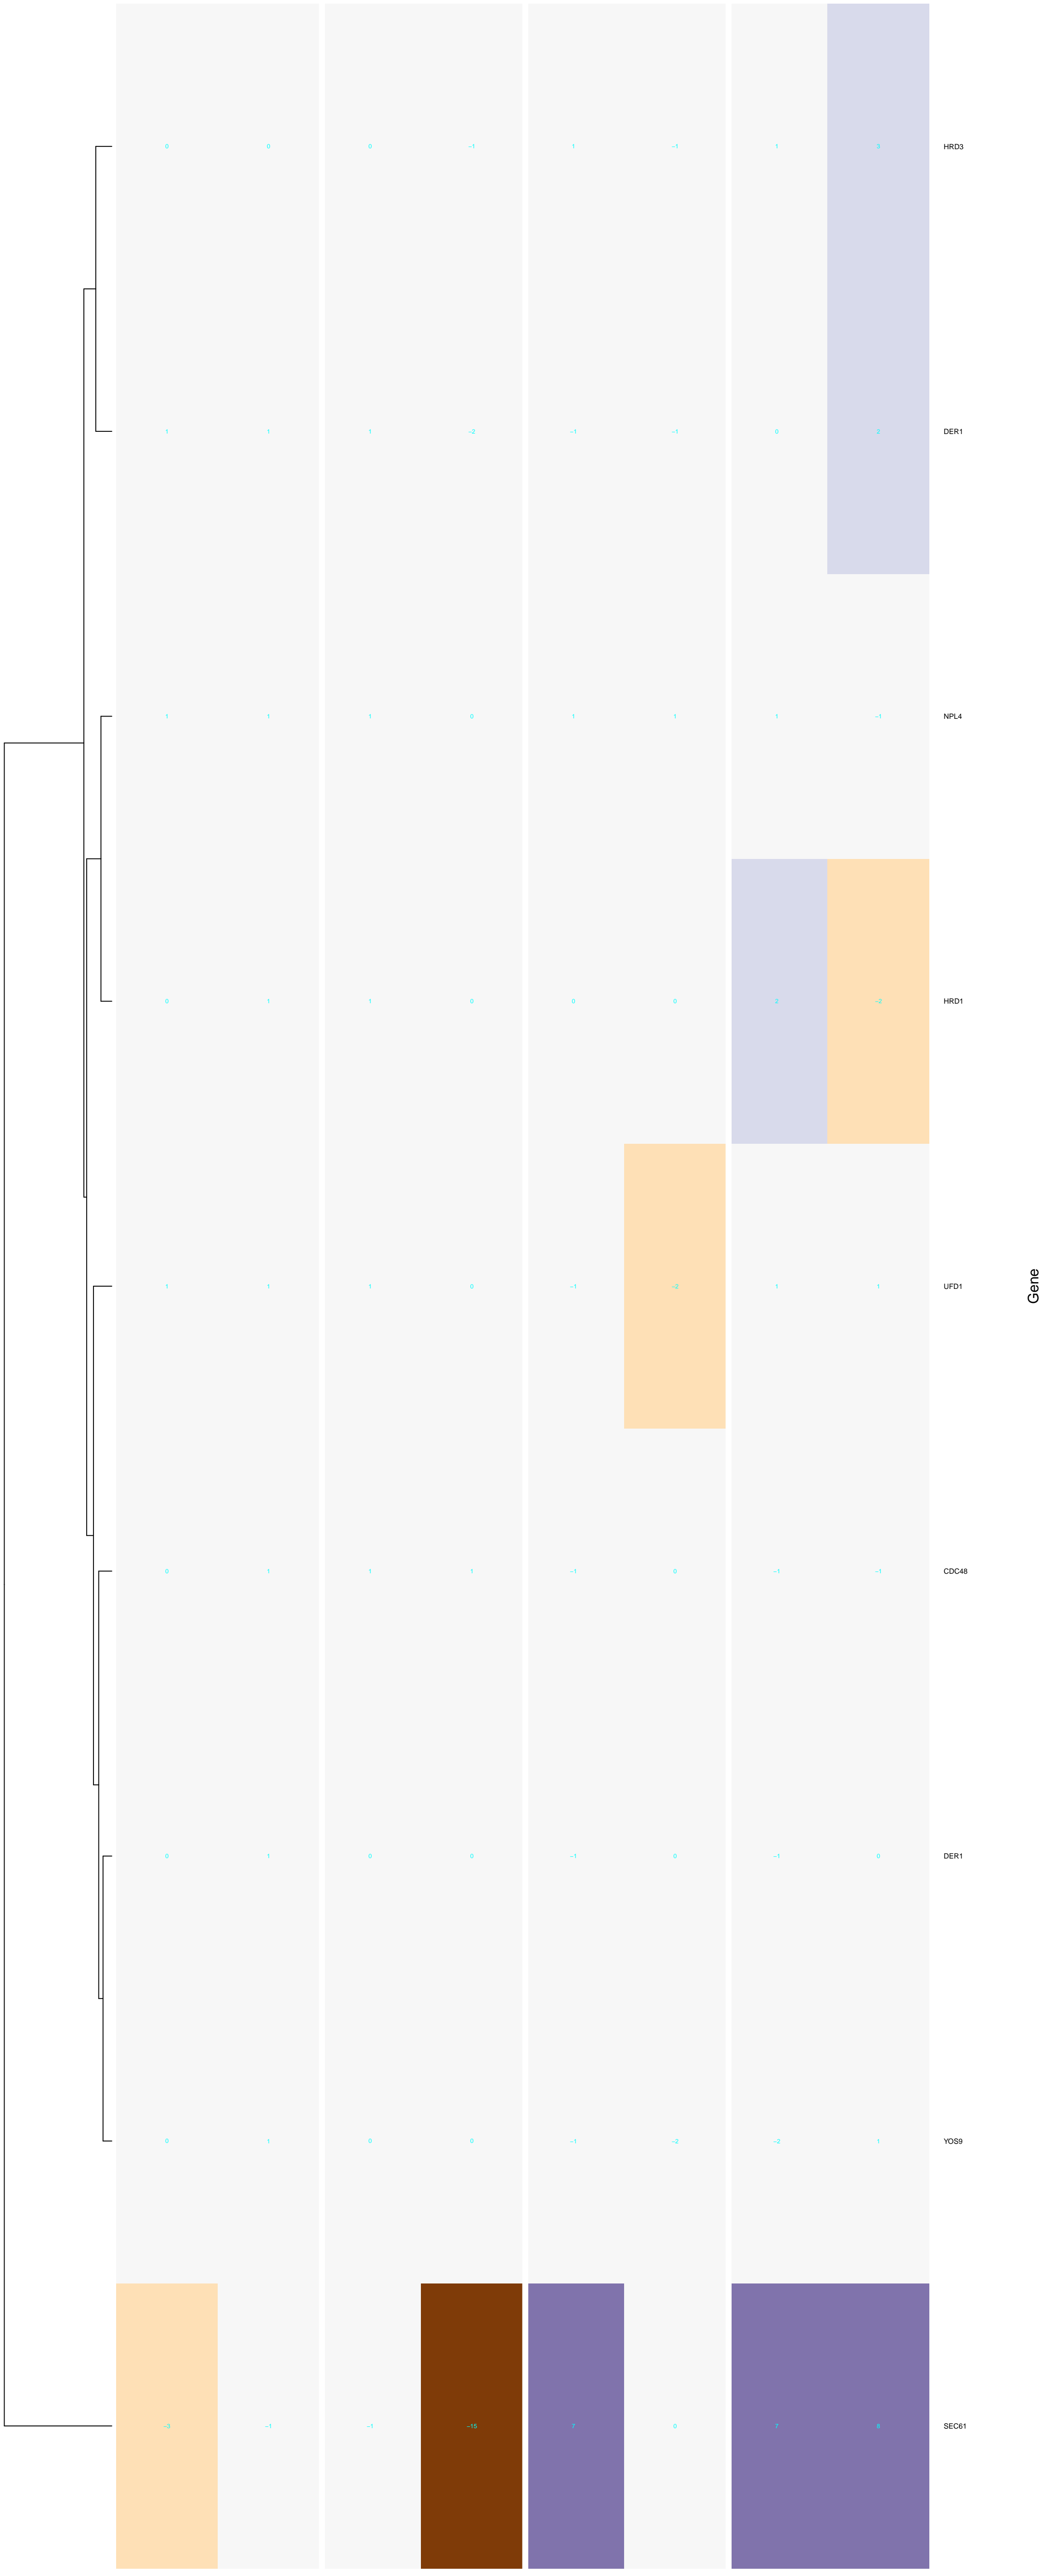

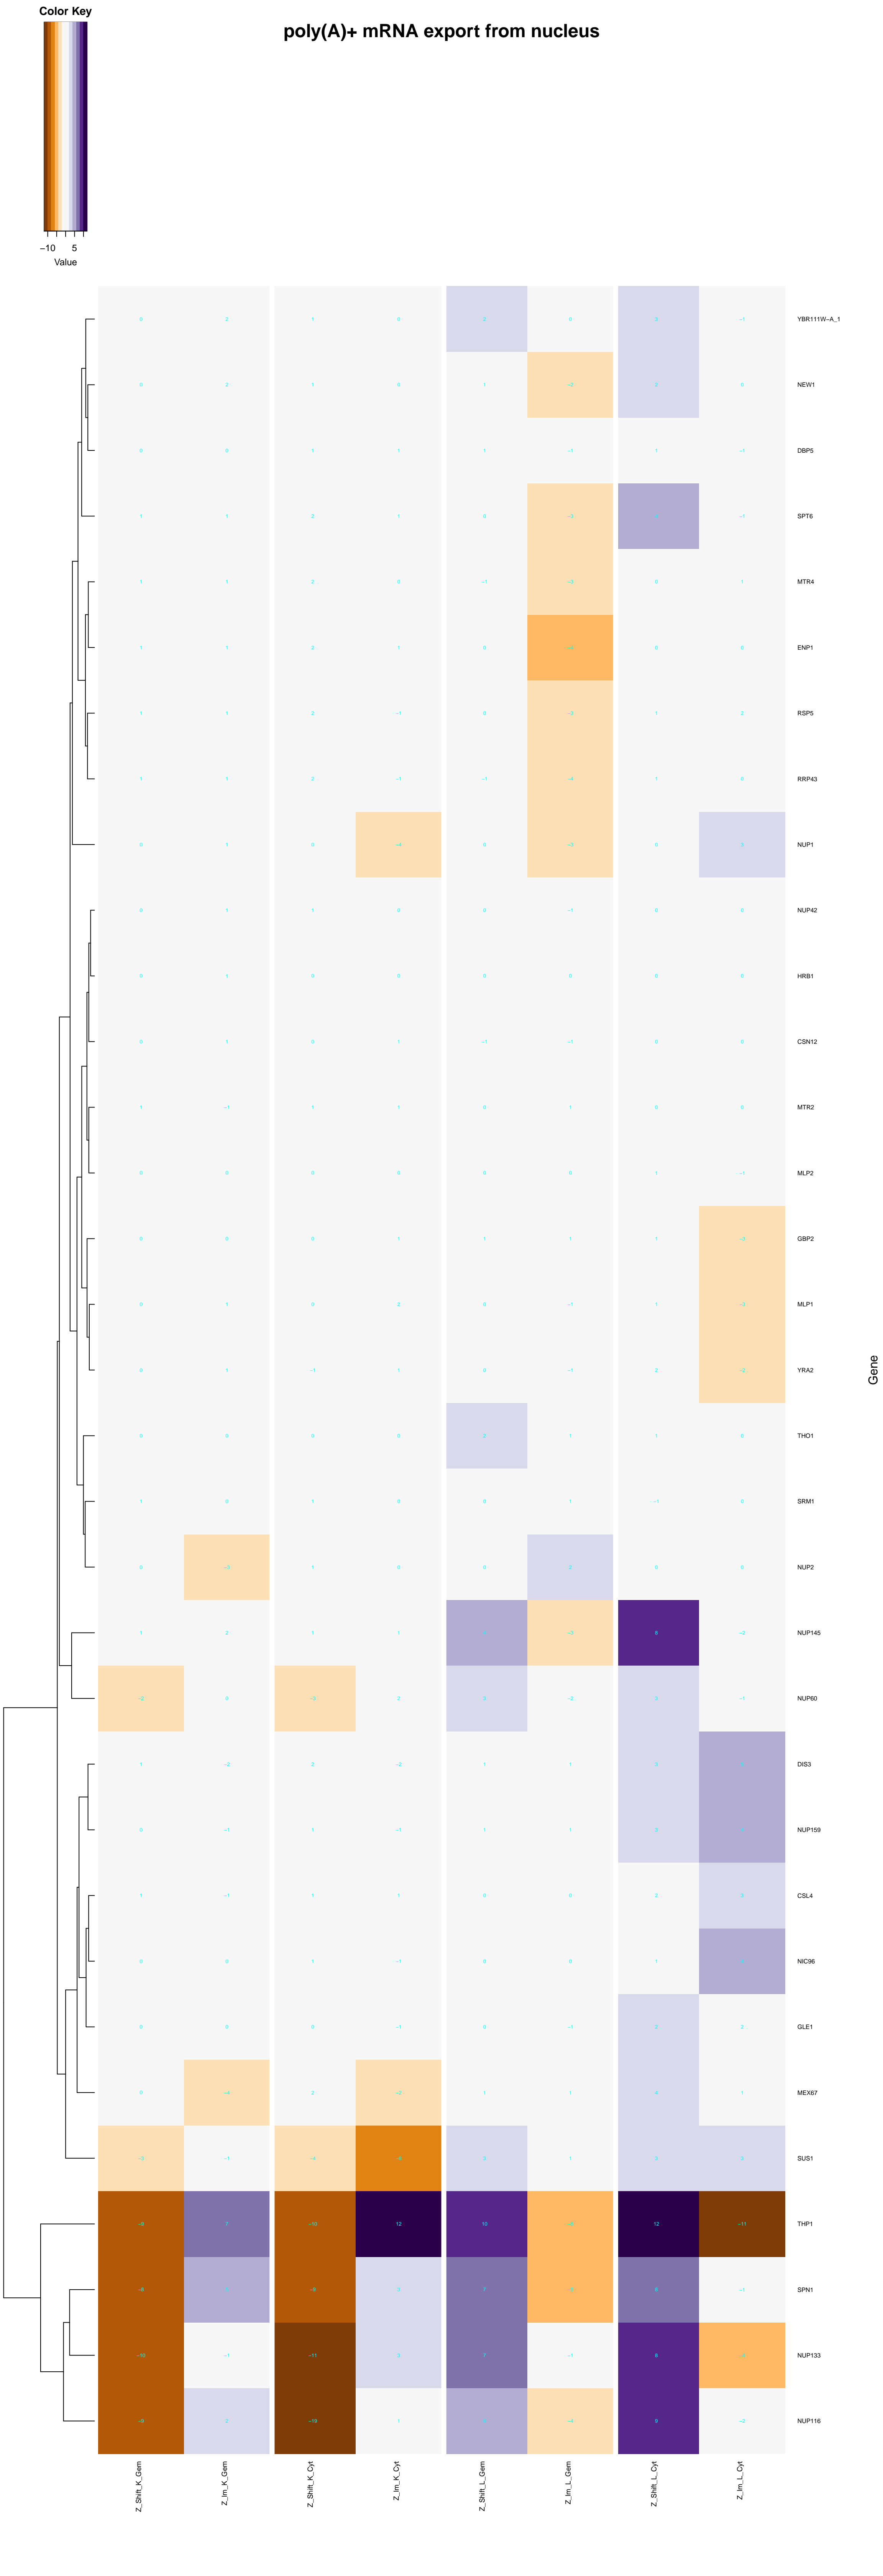

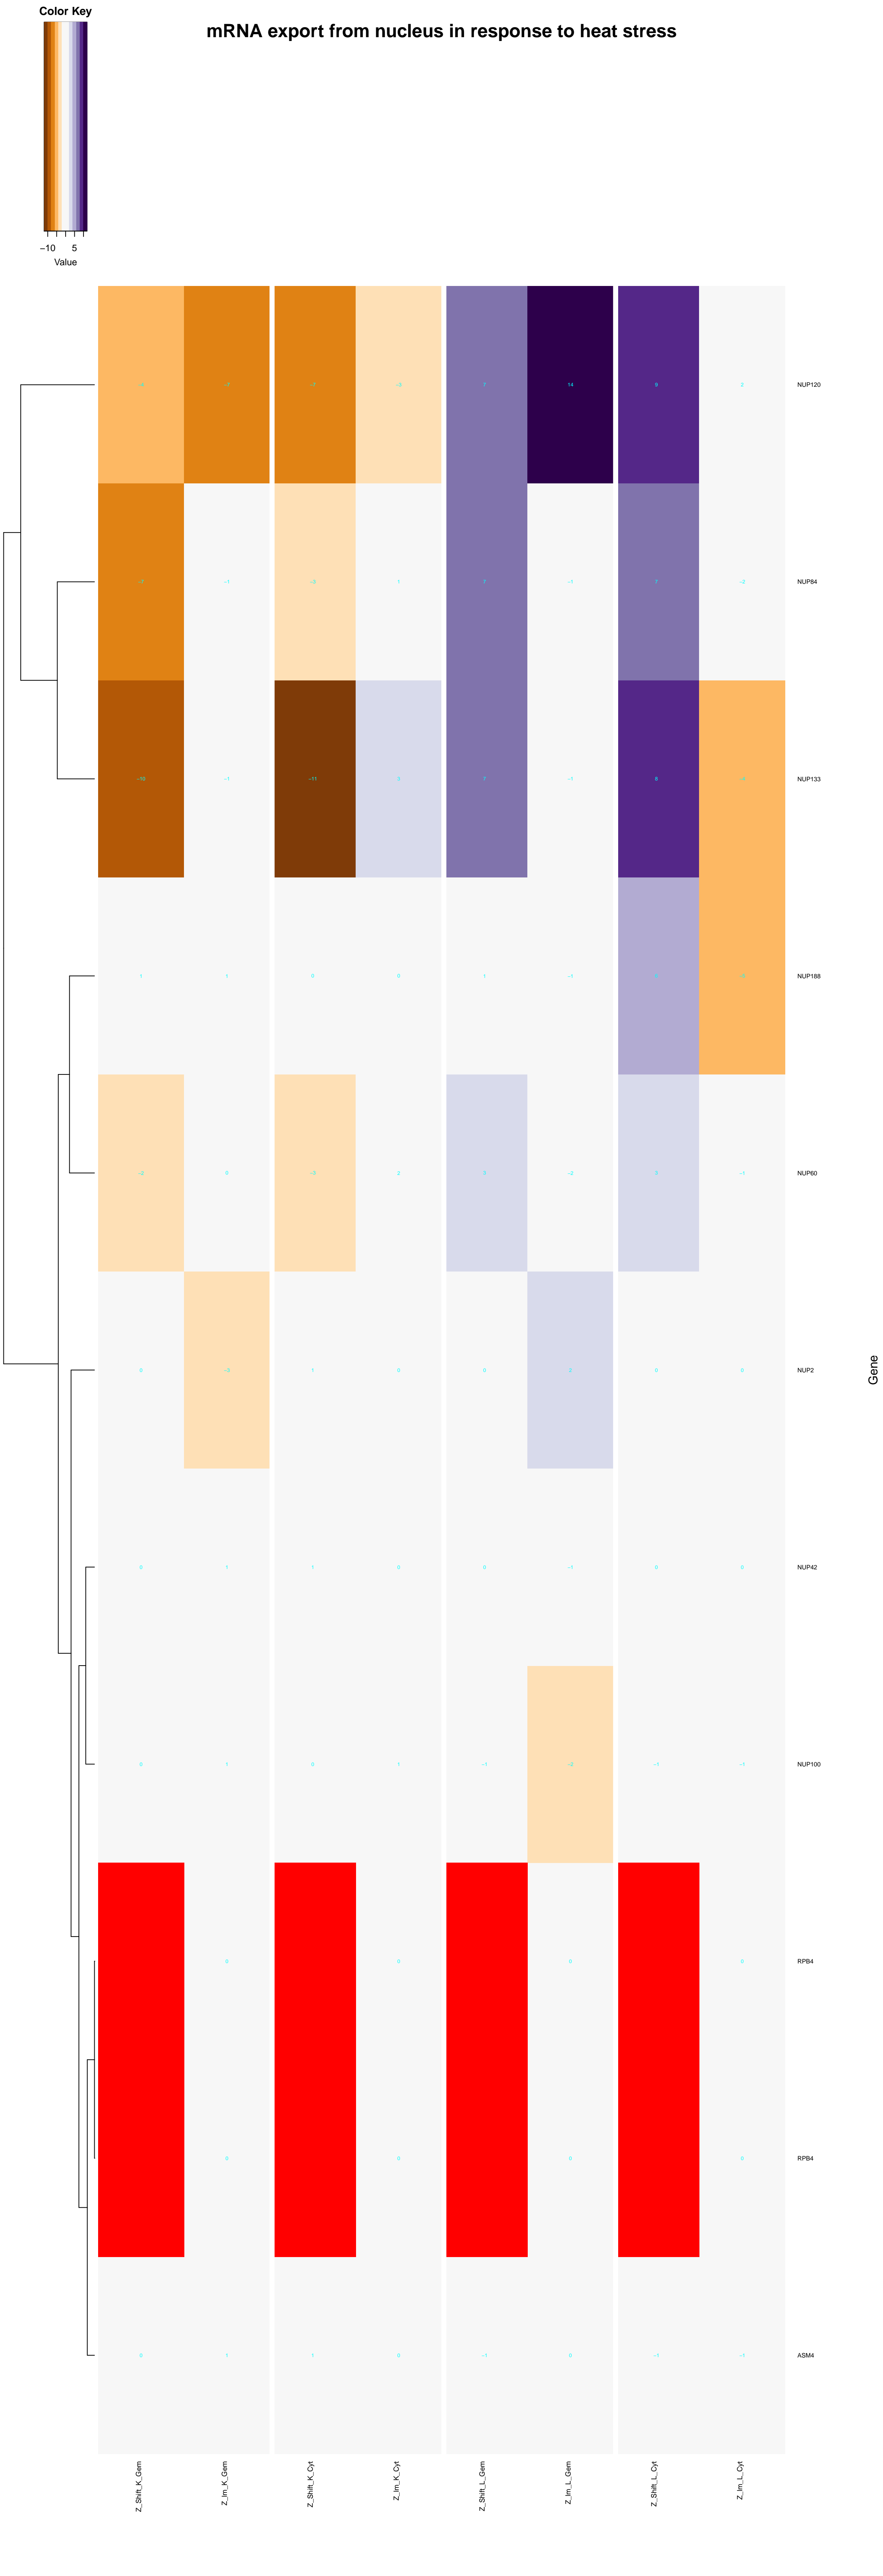

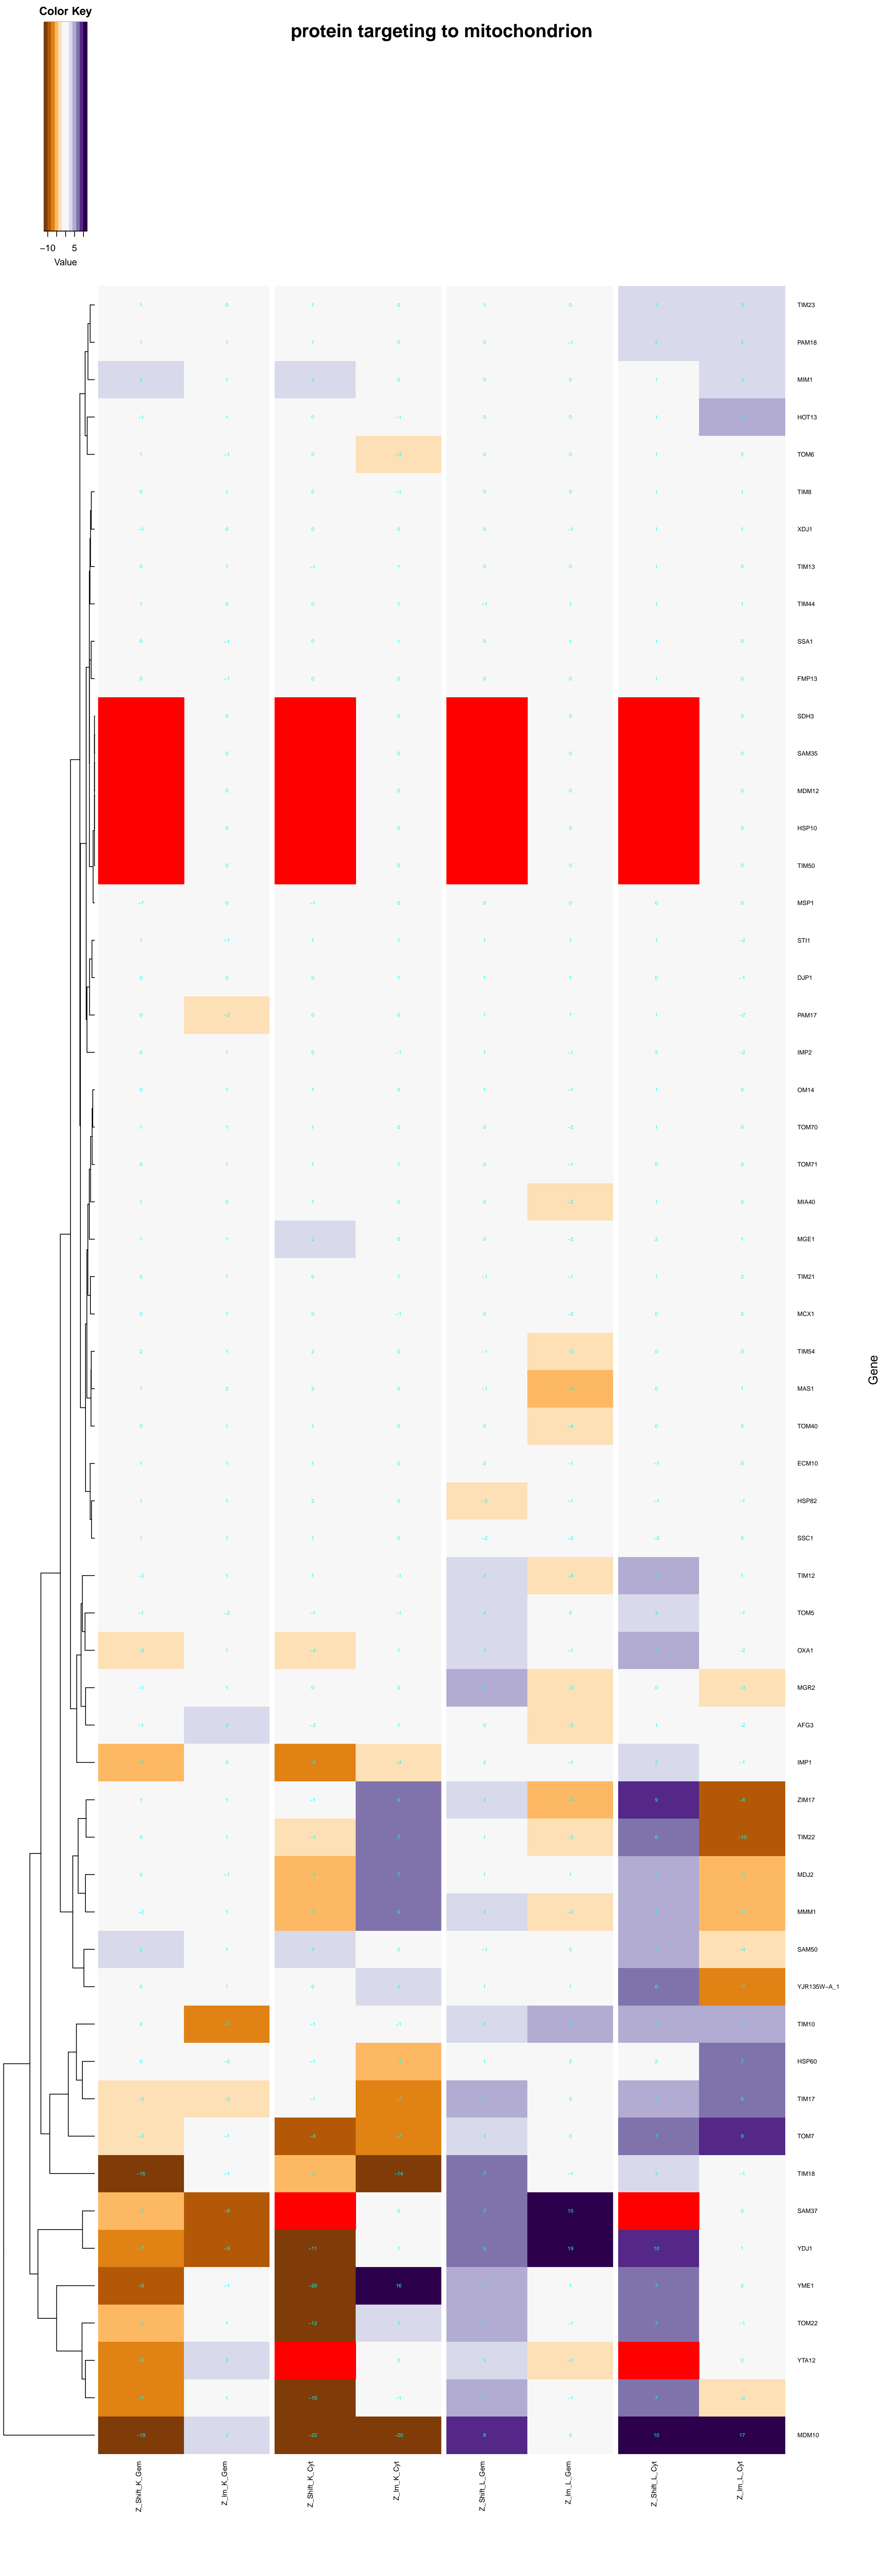

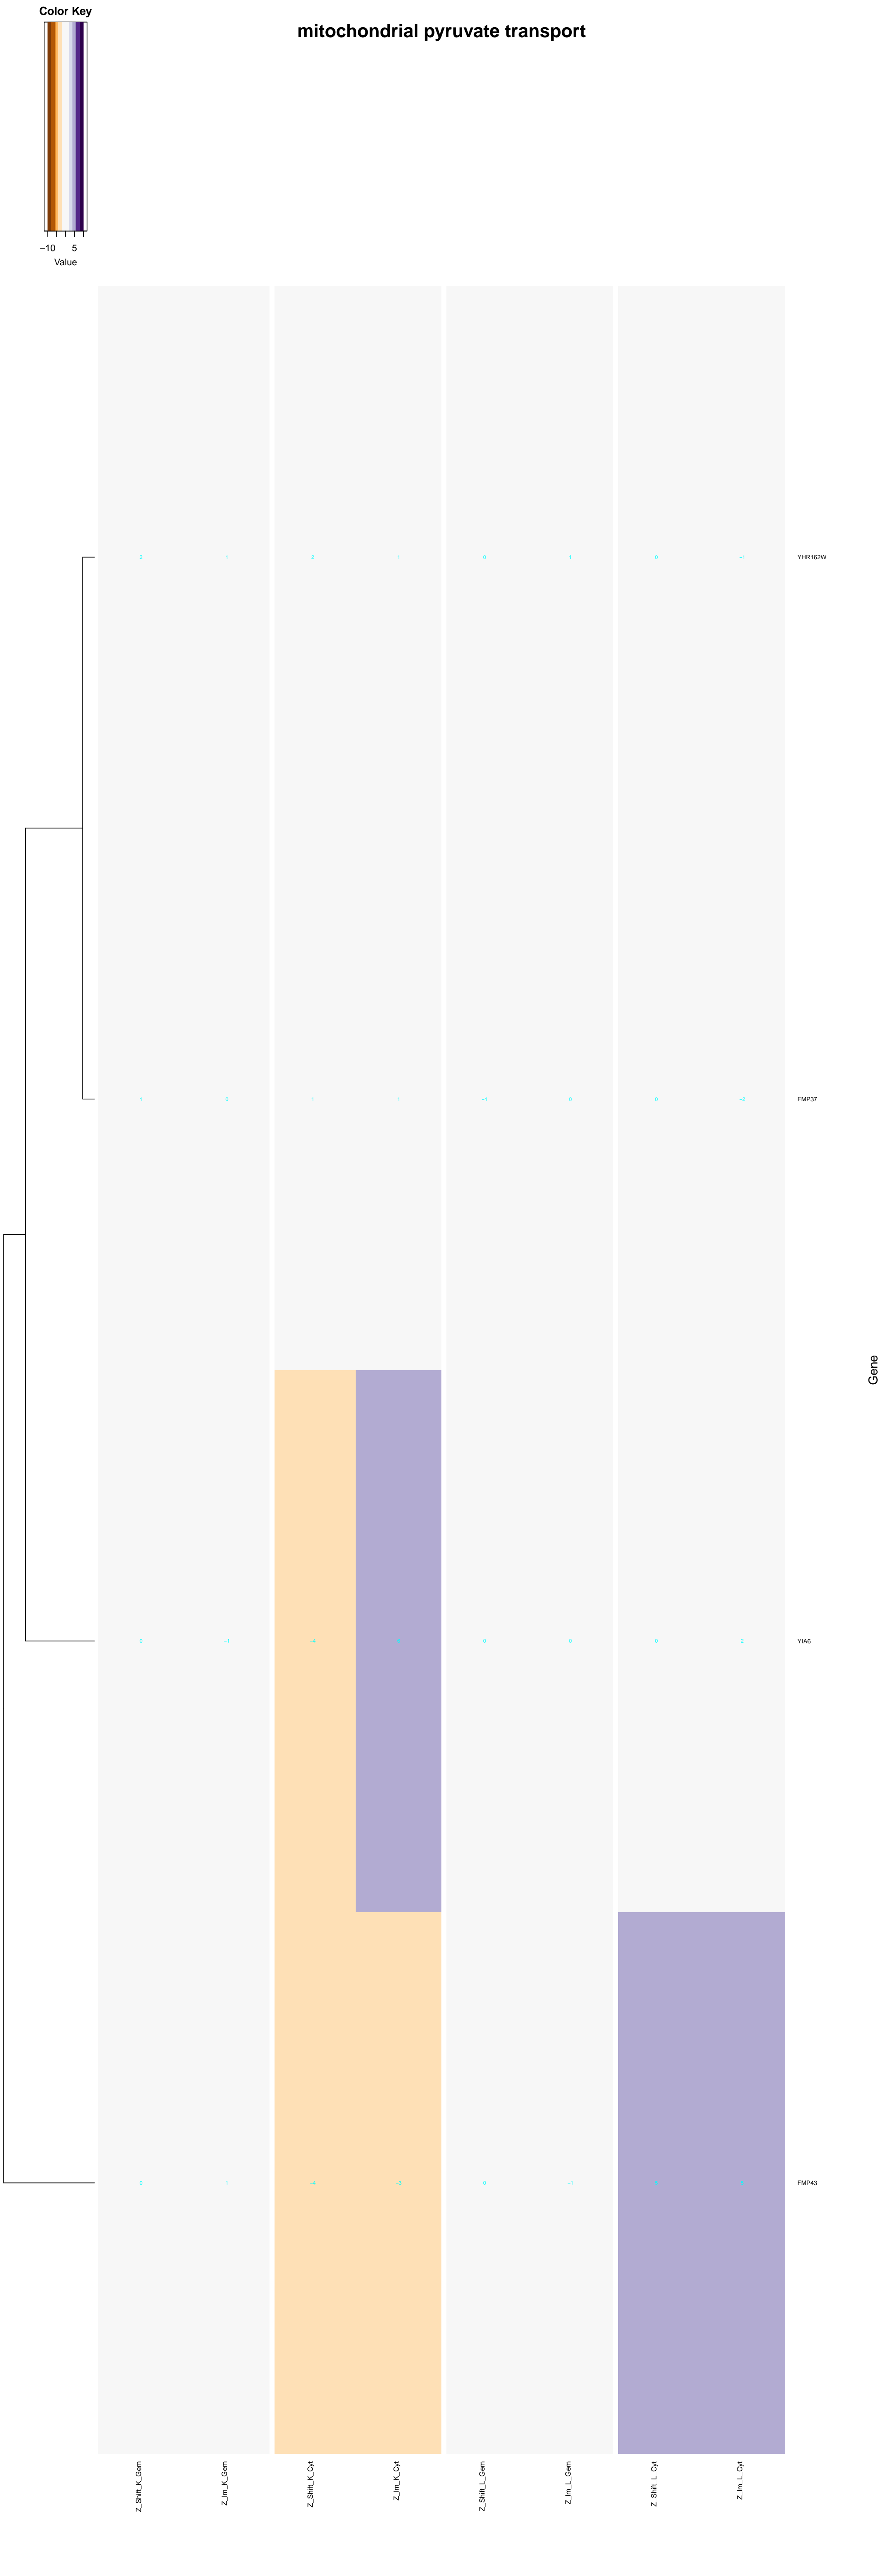

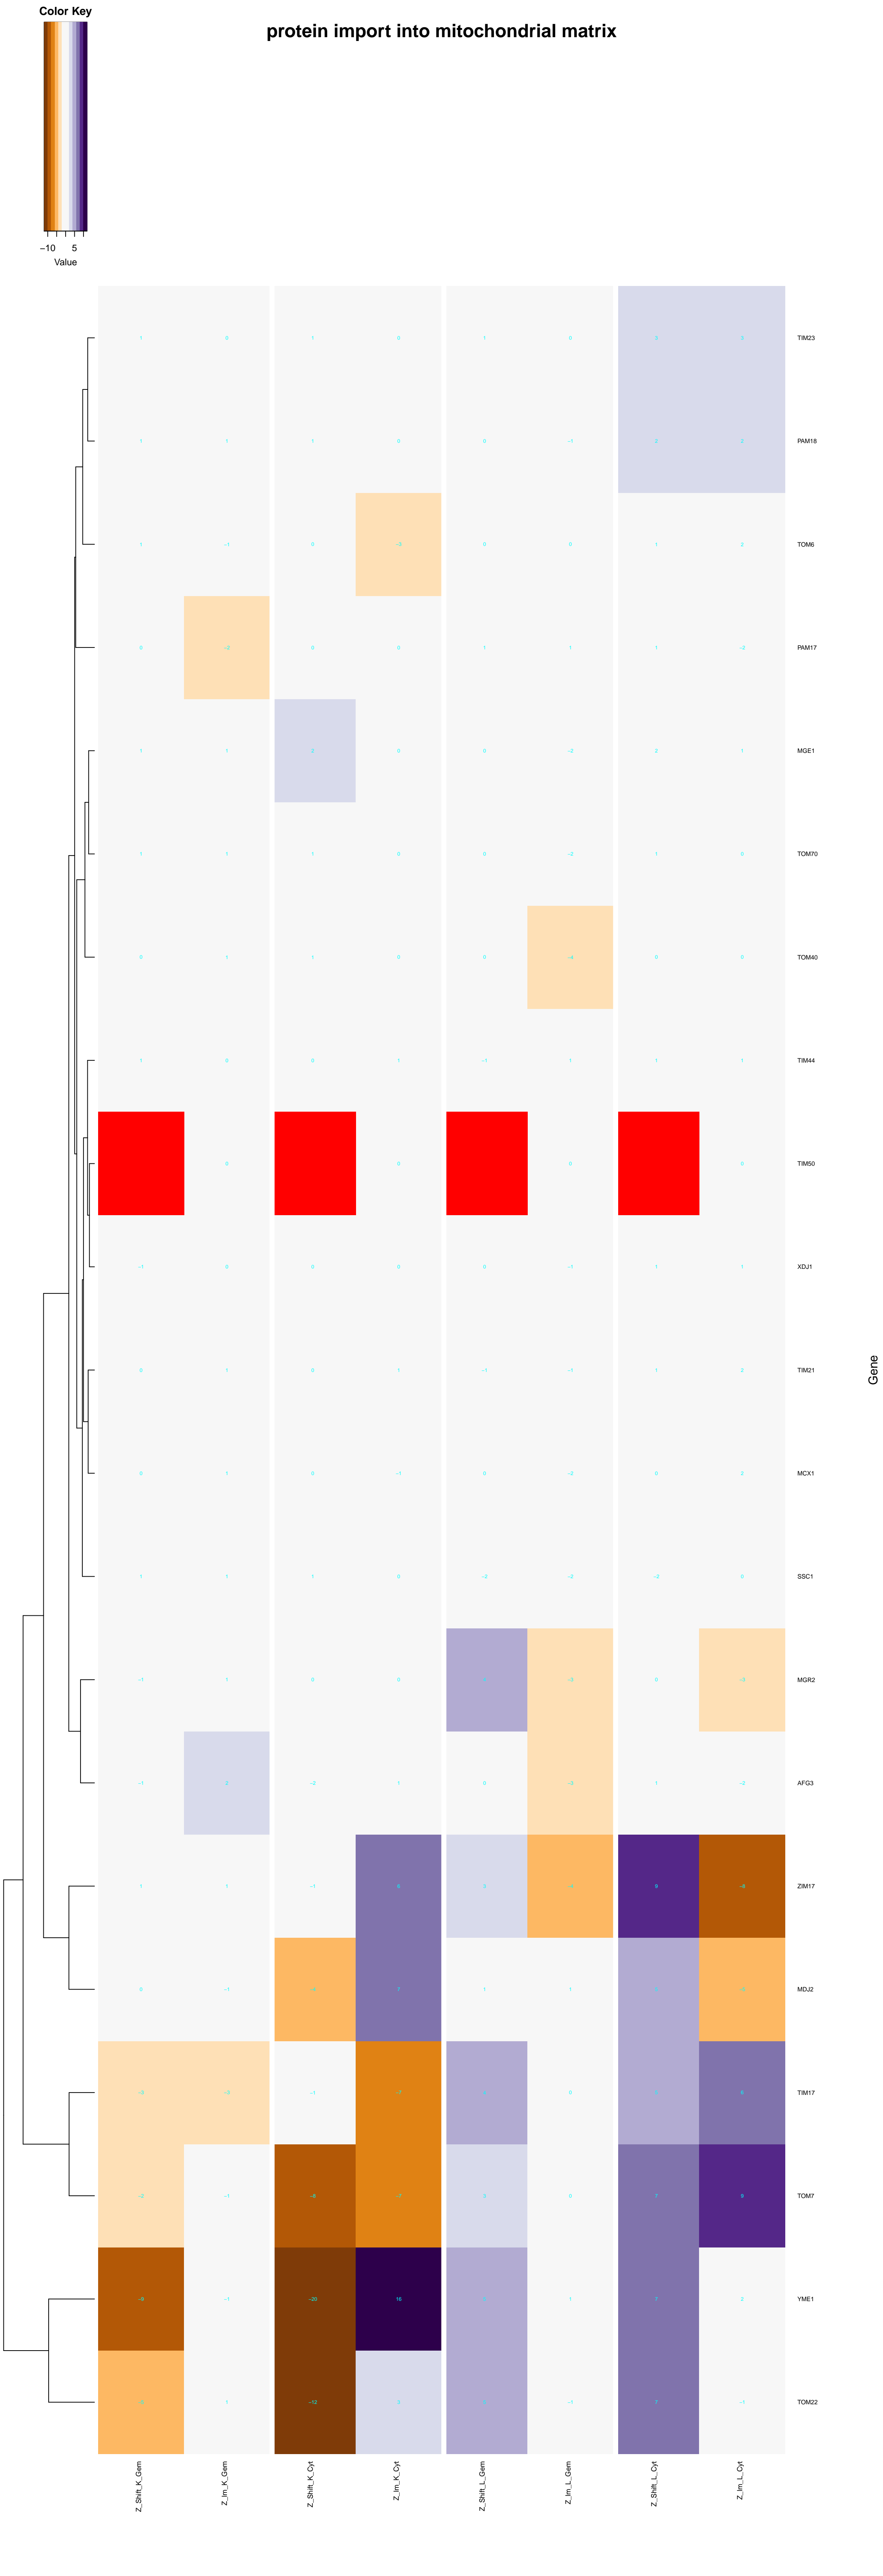

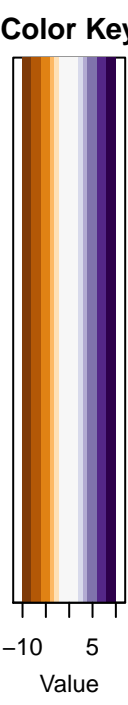

mitochondrial magnesium ion transport

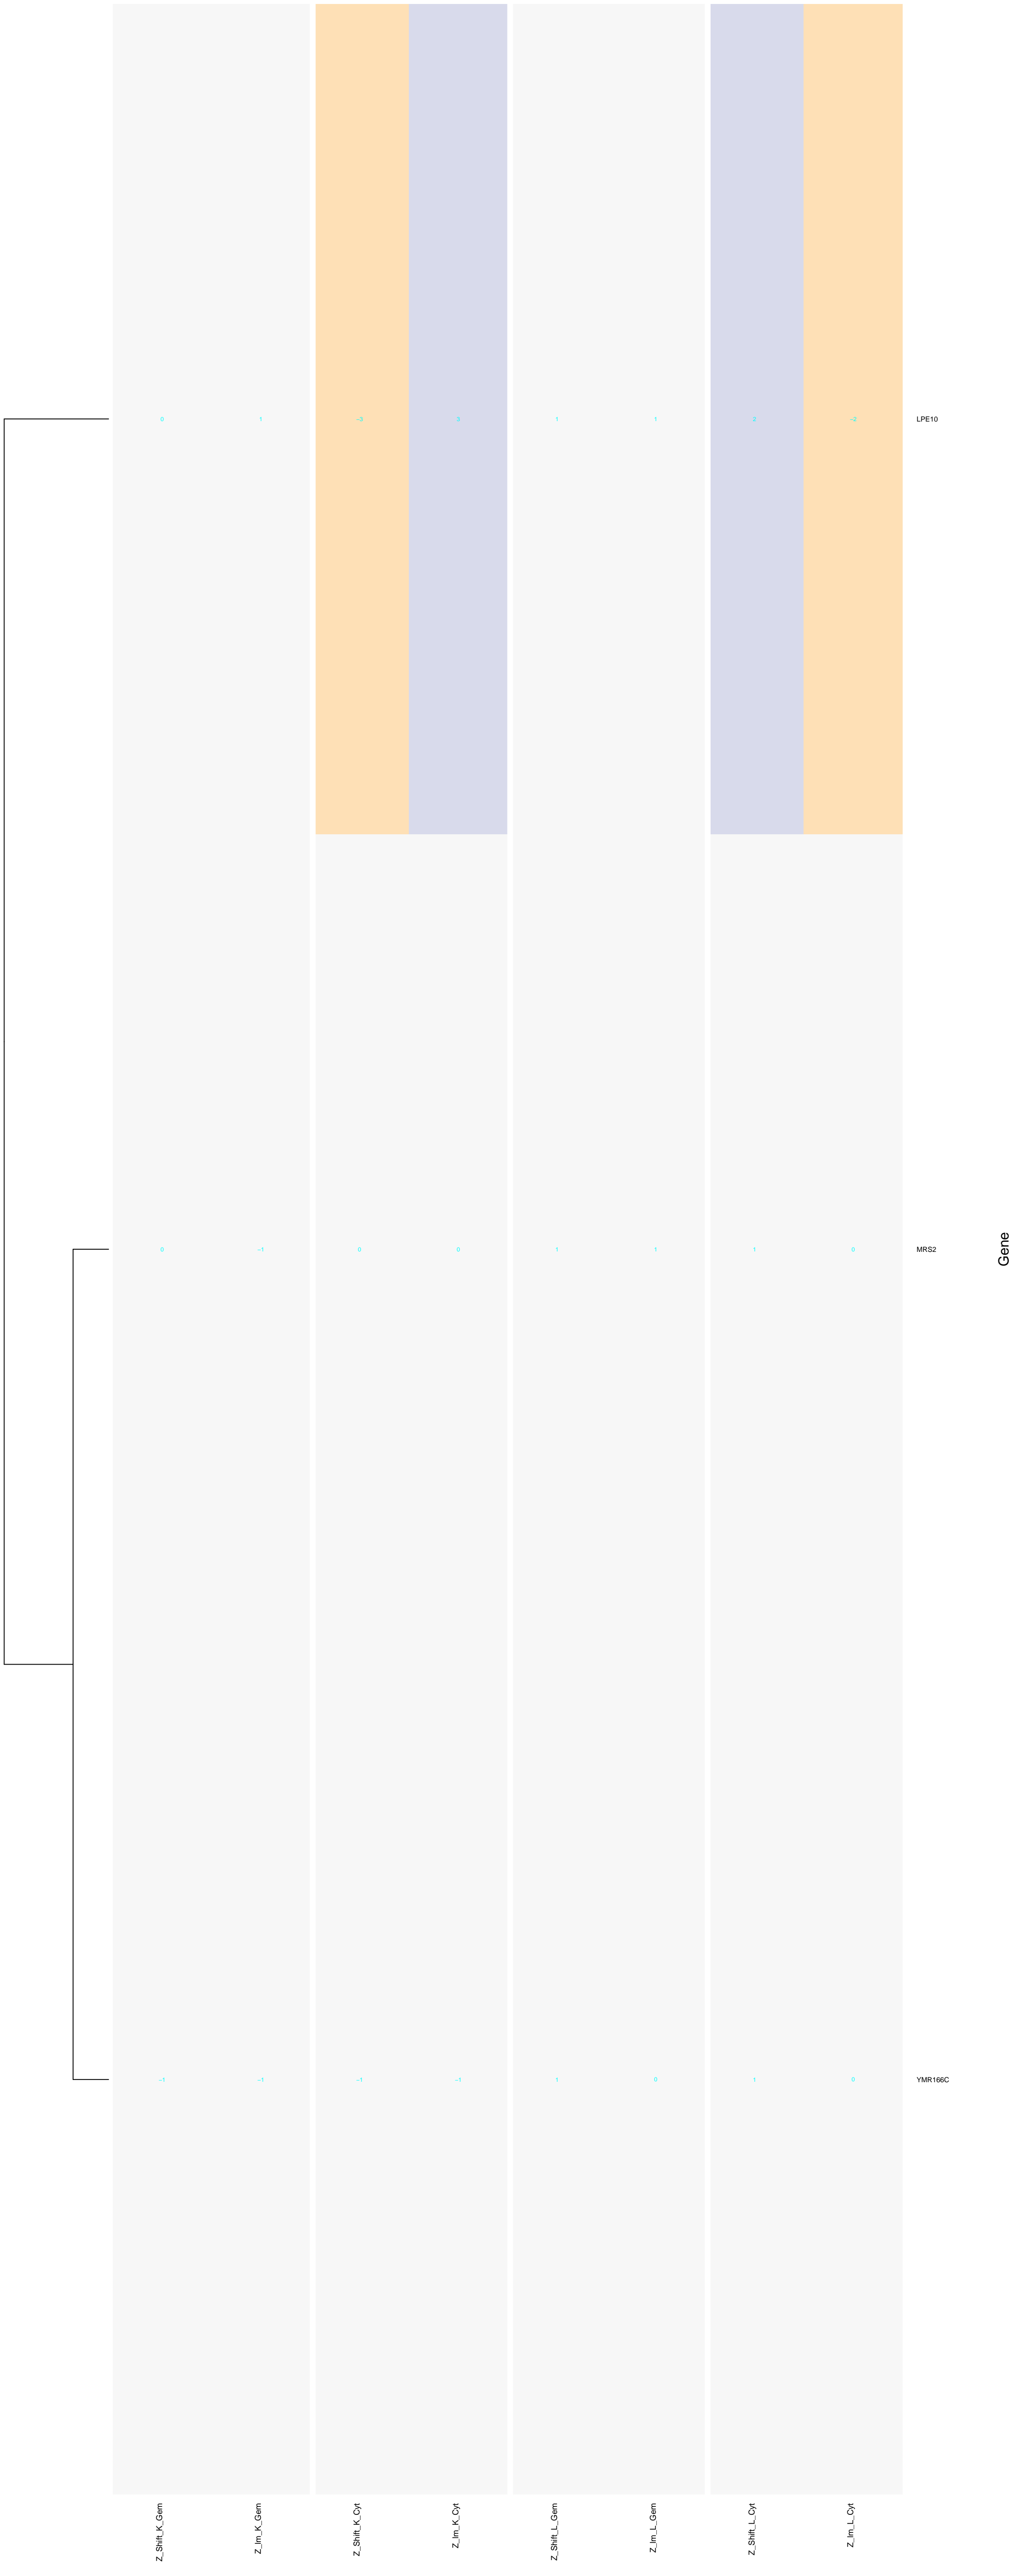

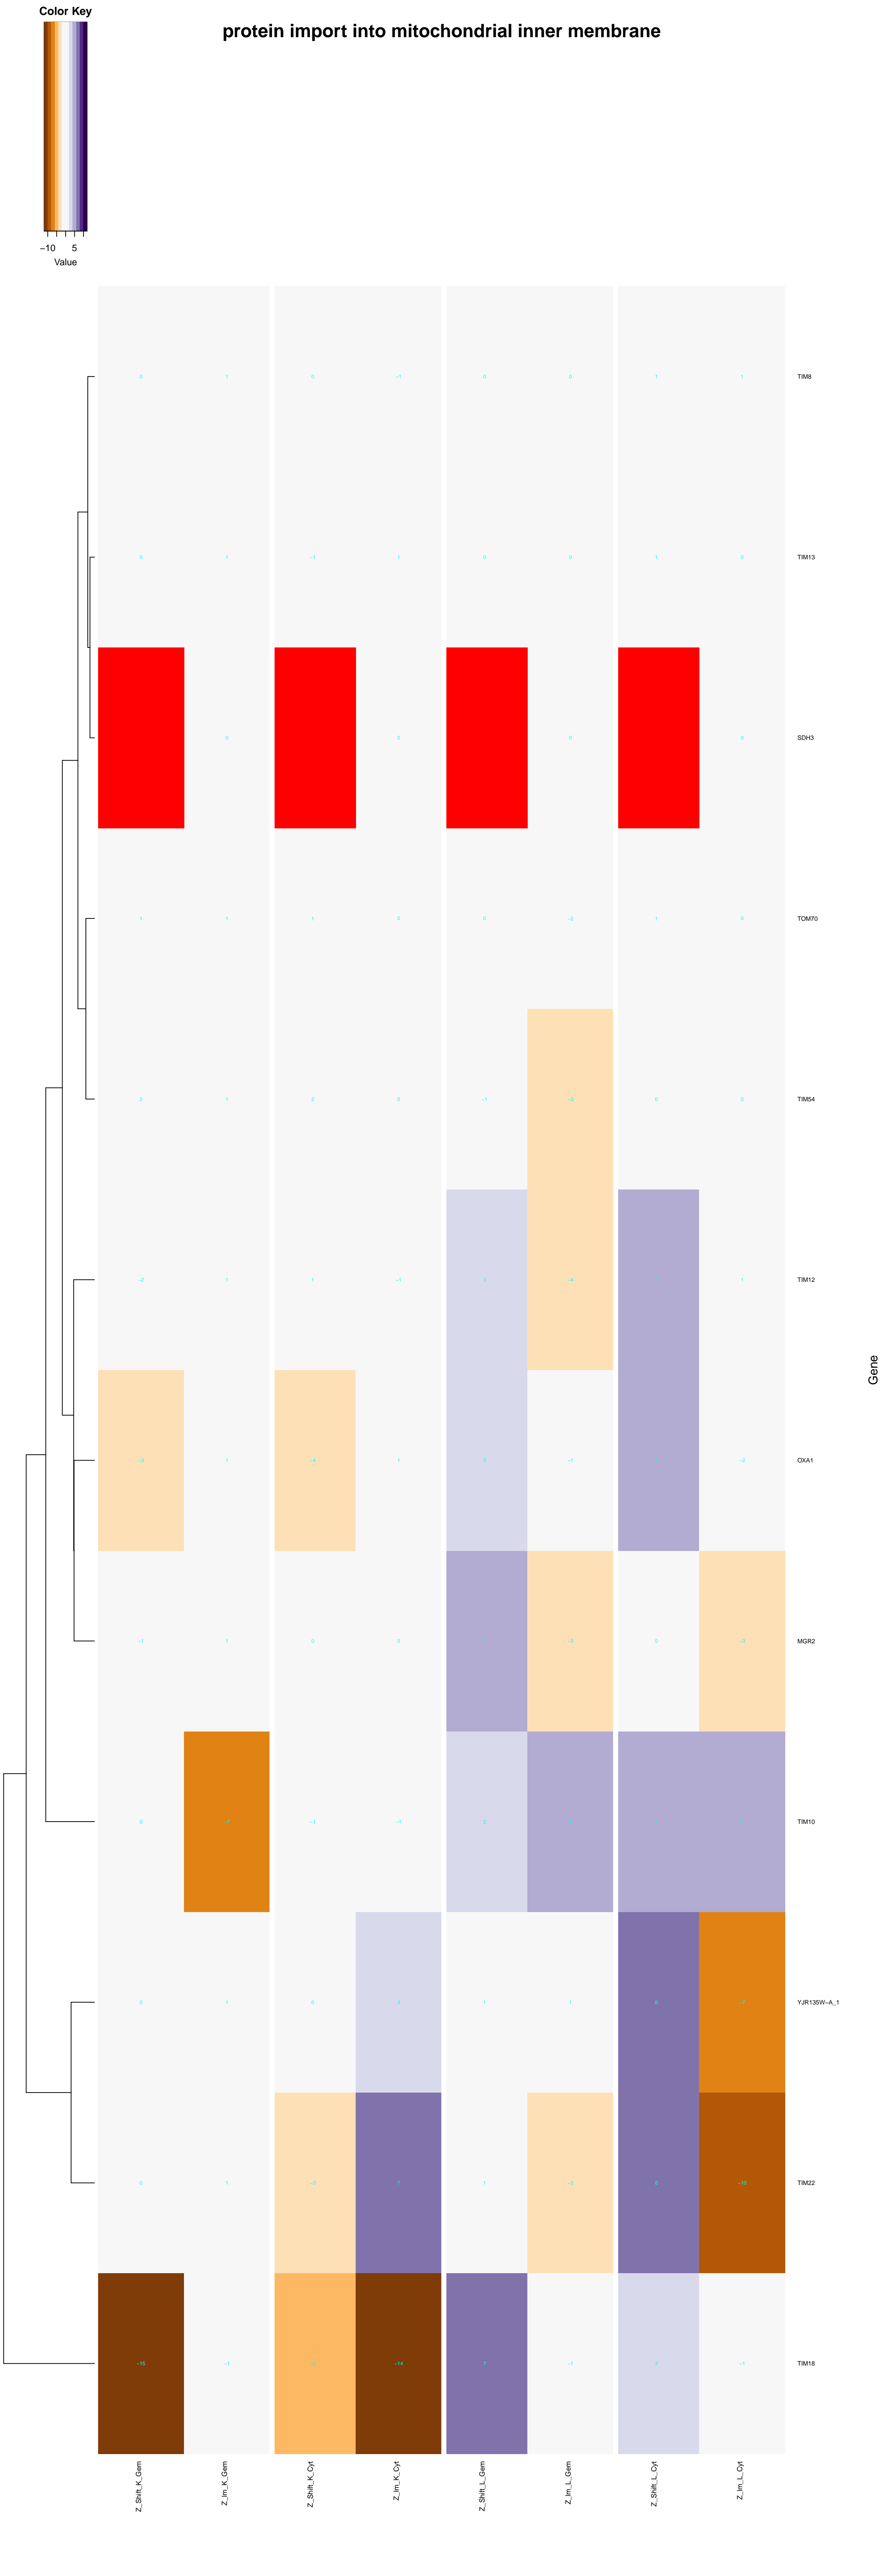

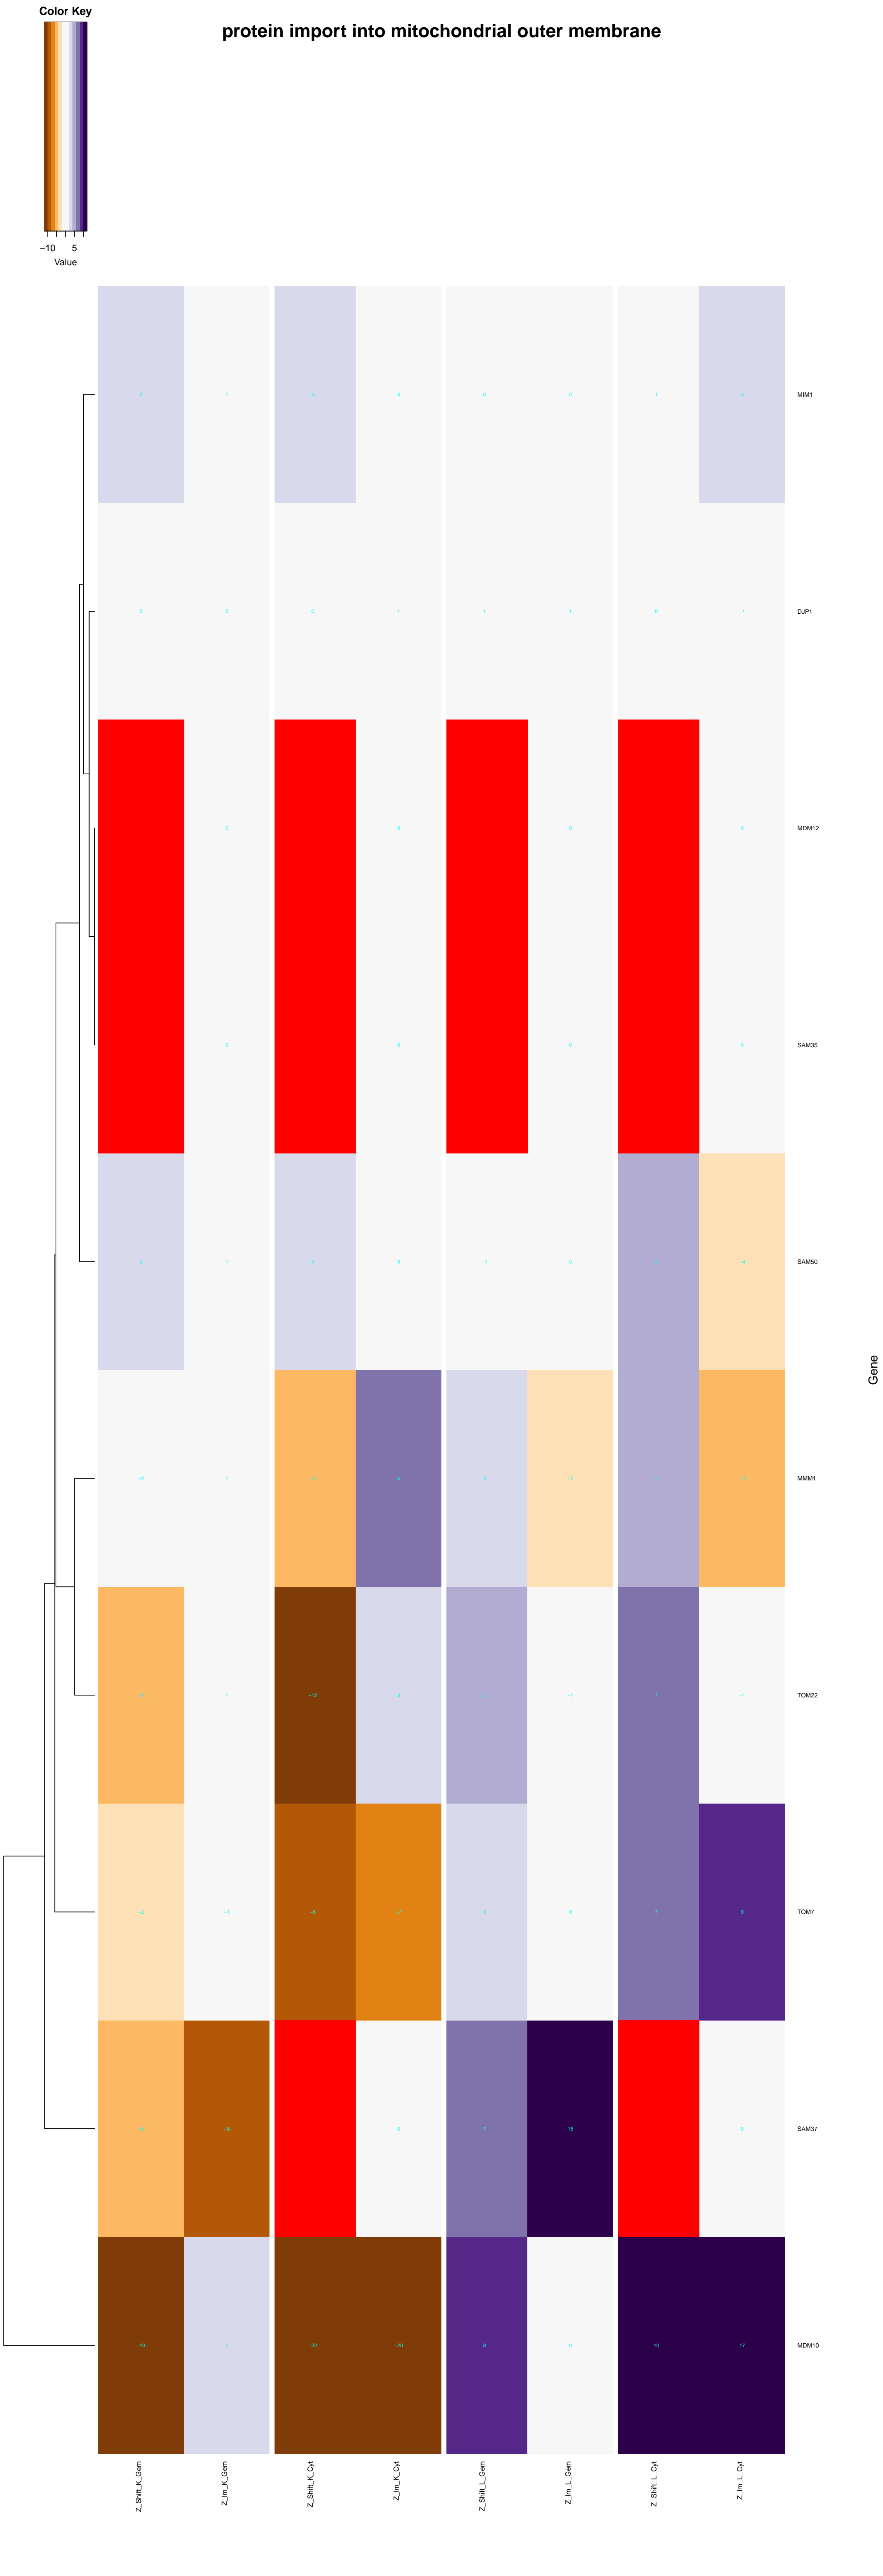

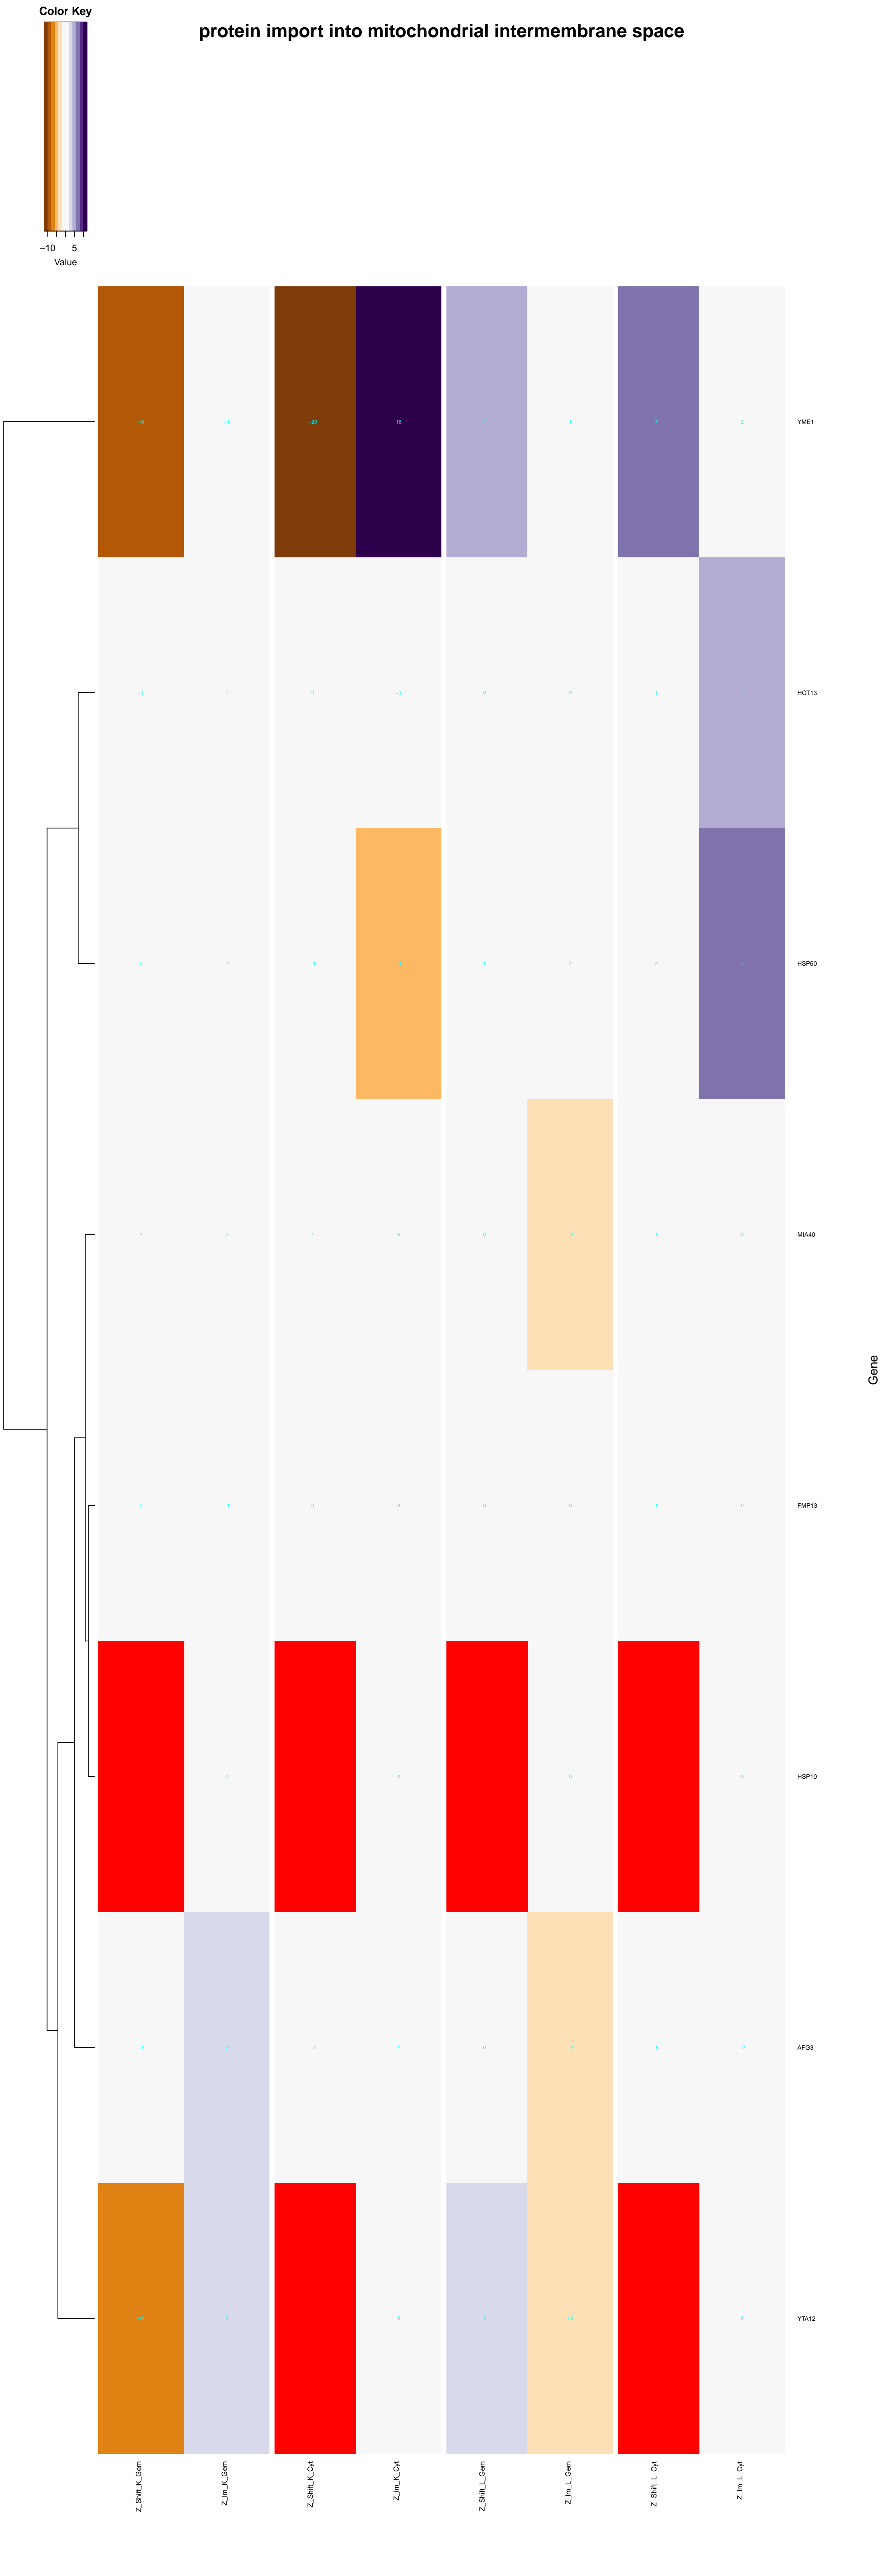

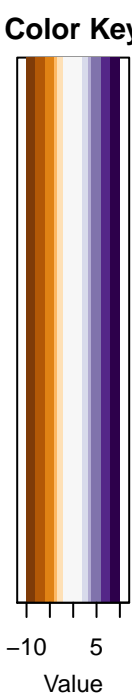

protein import into nucleus, translocation

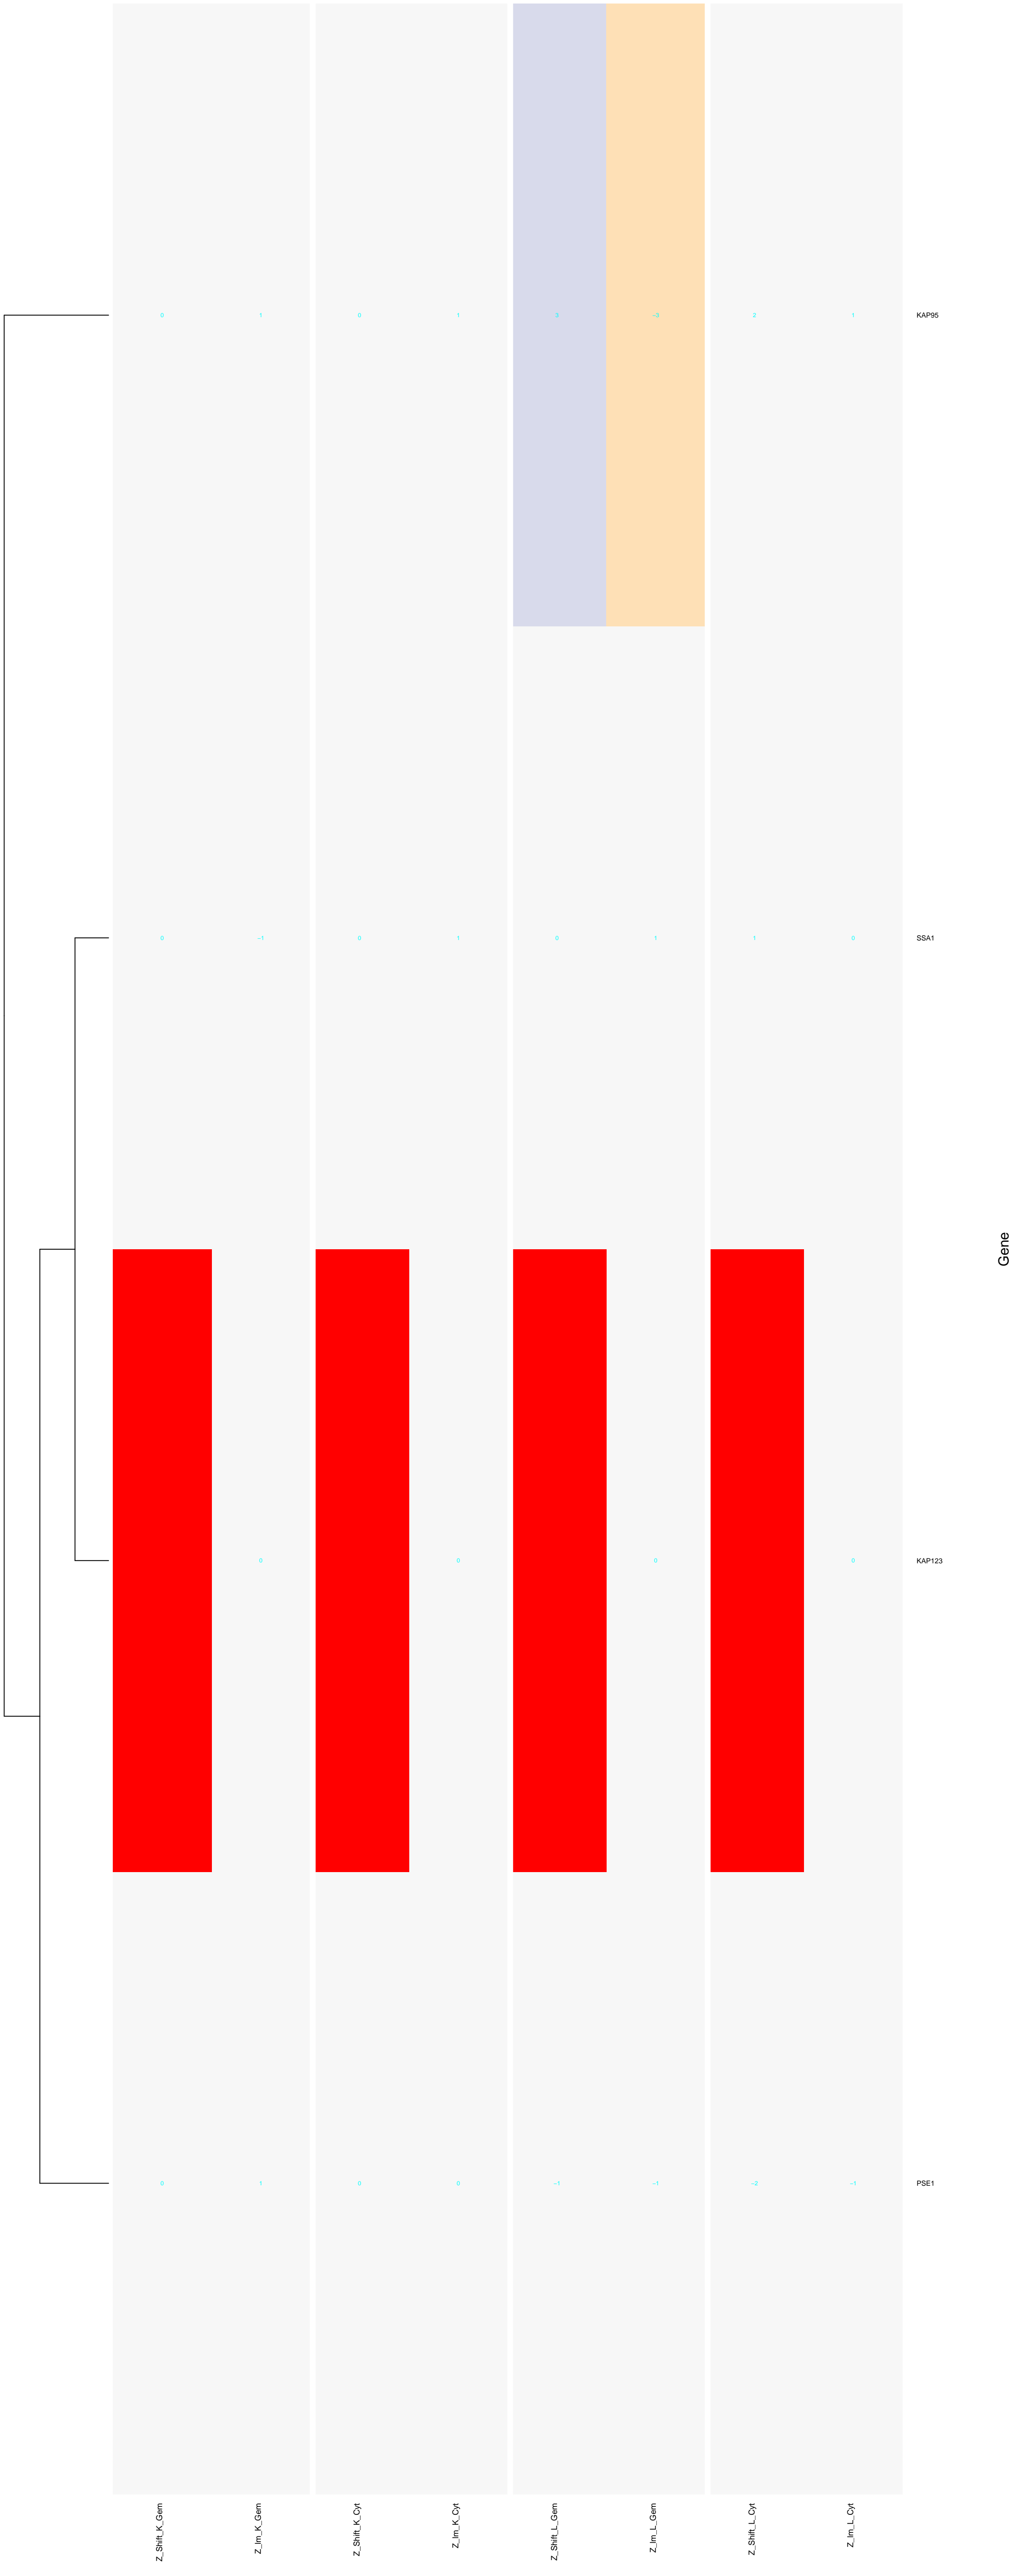

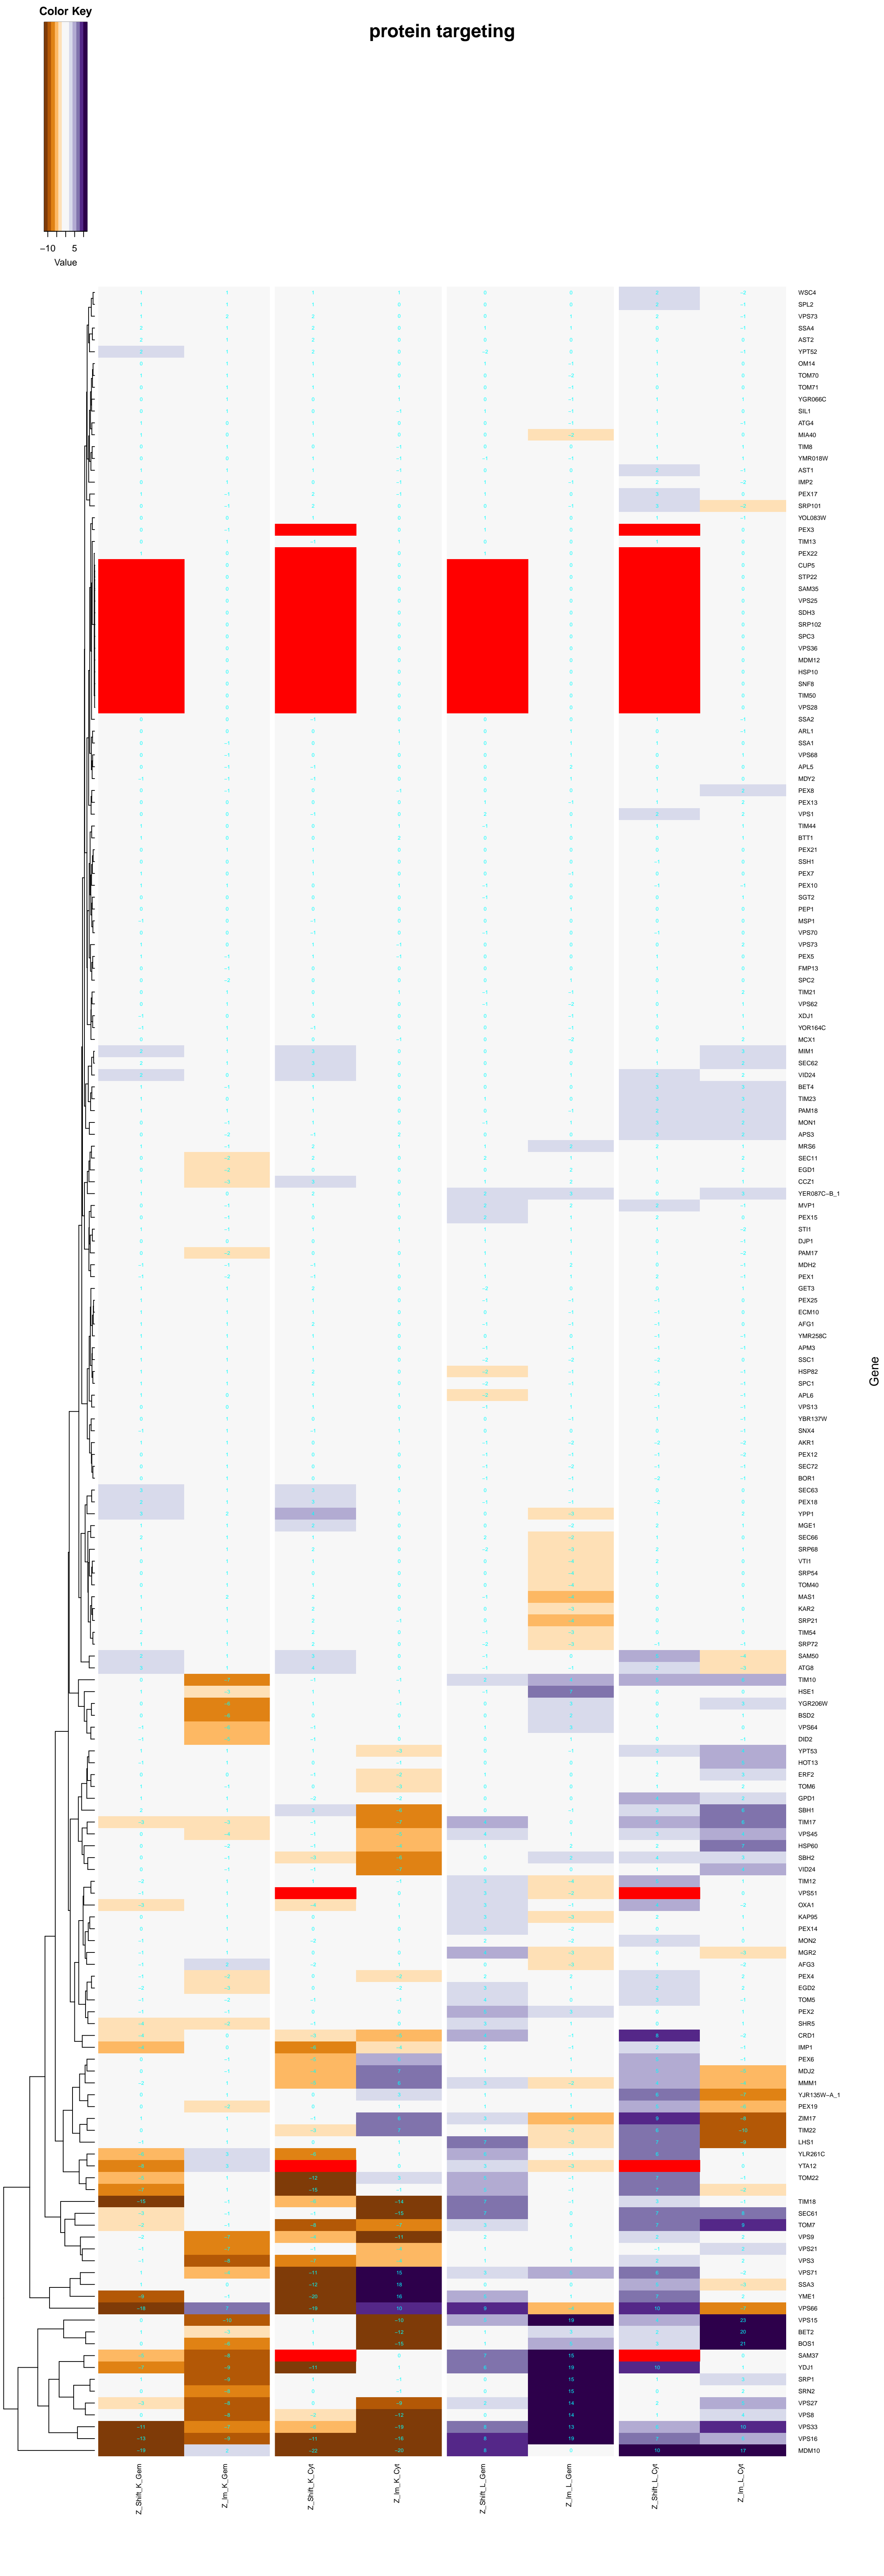

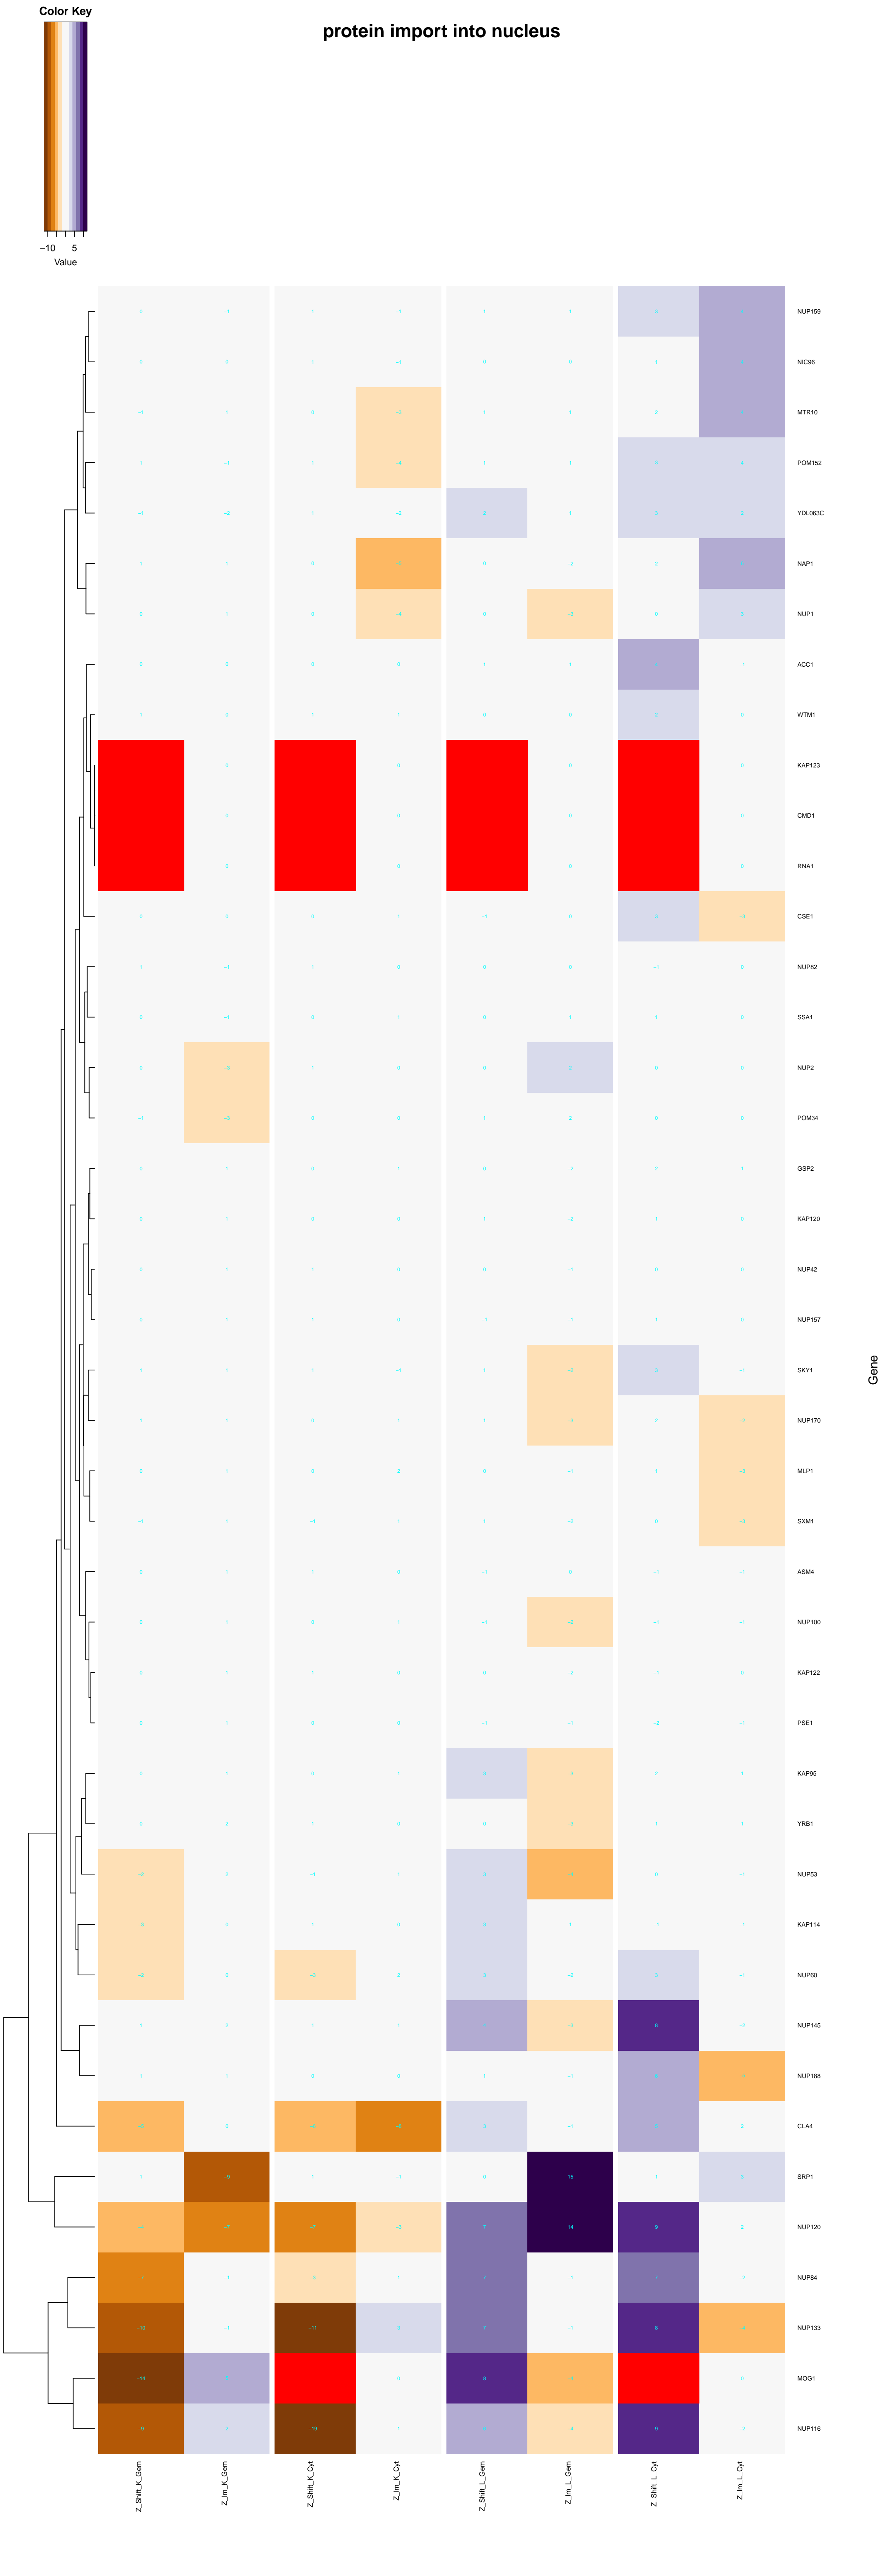

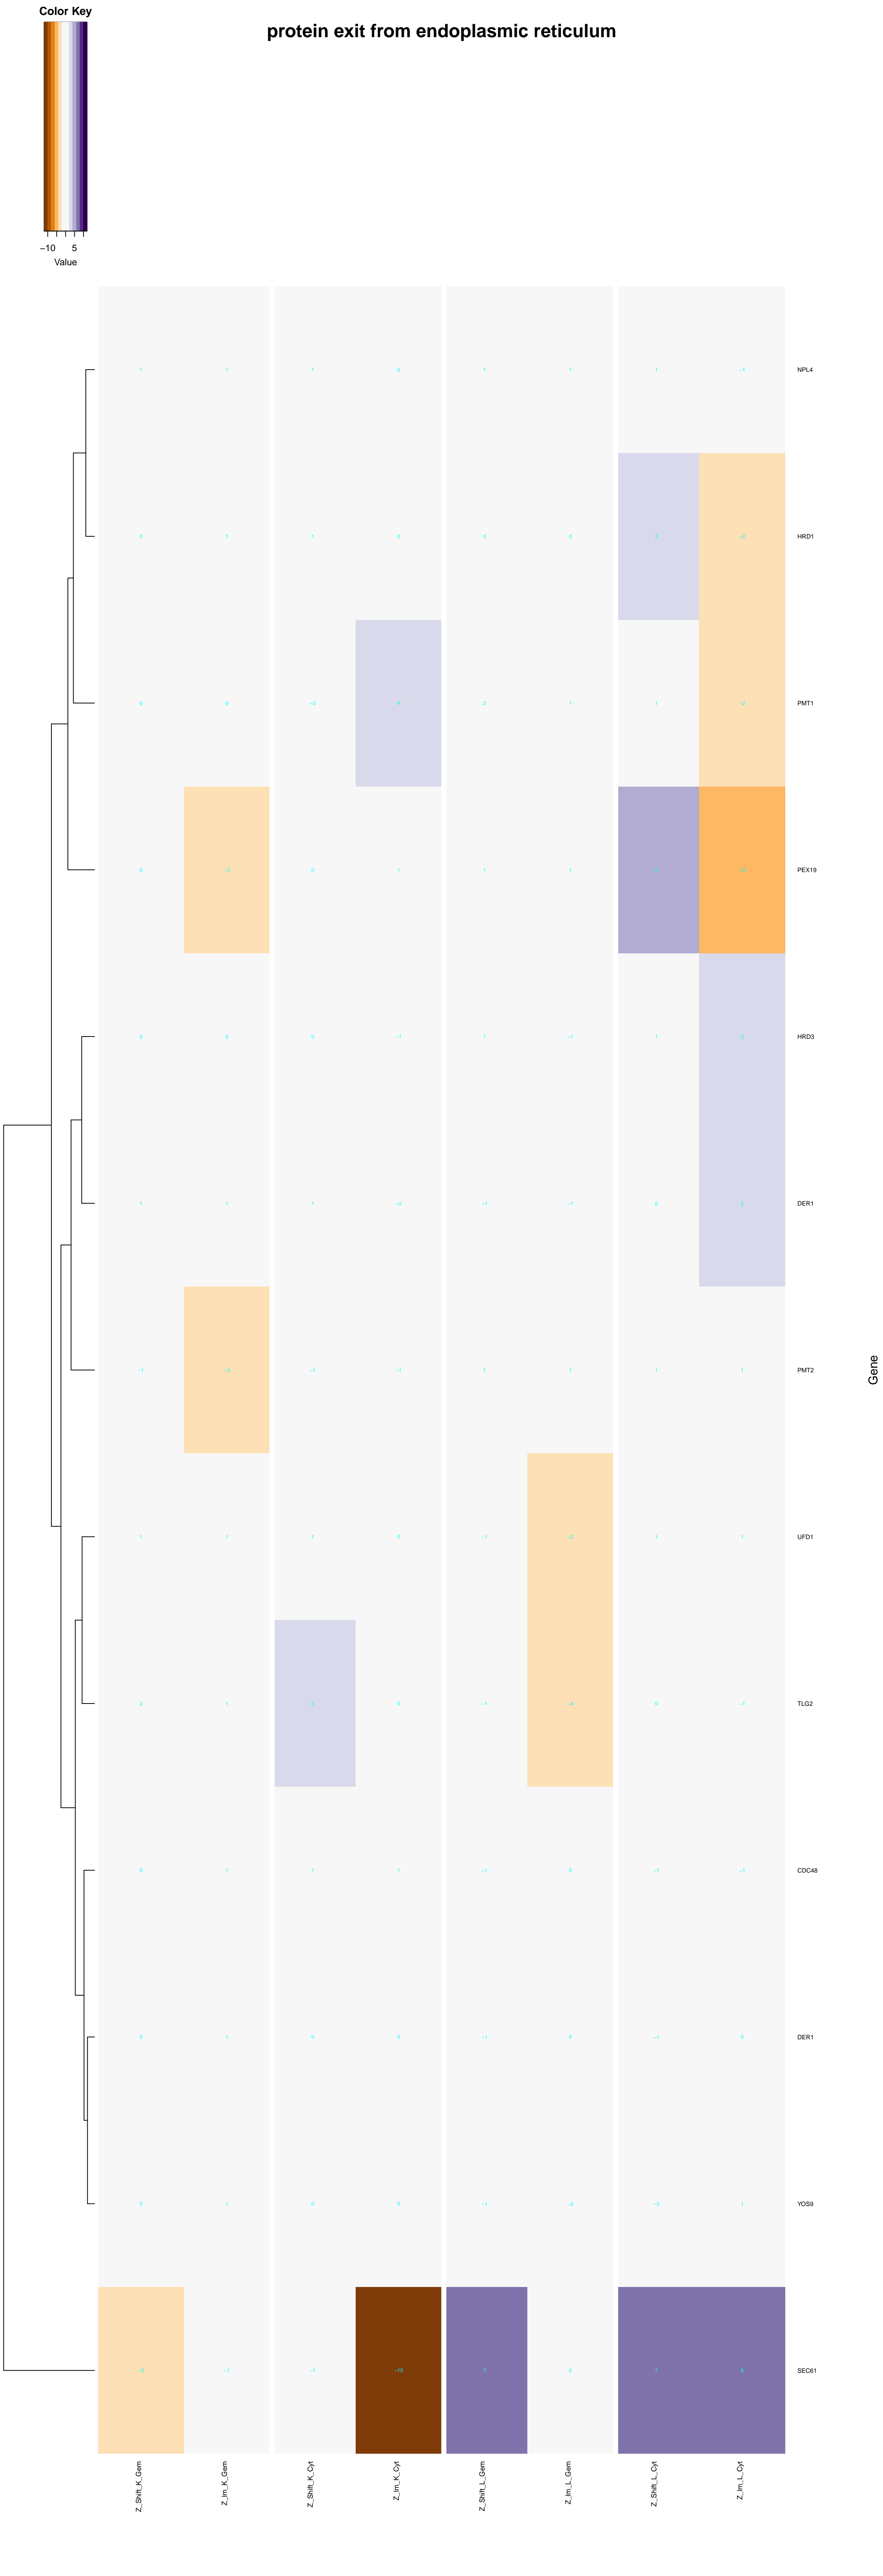

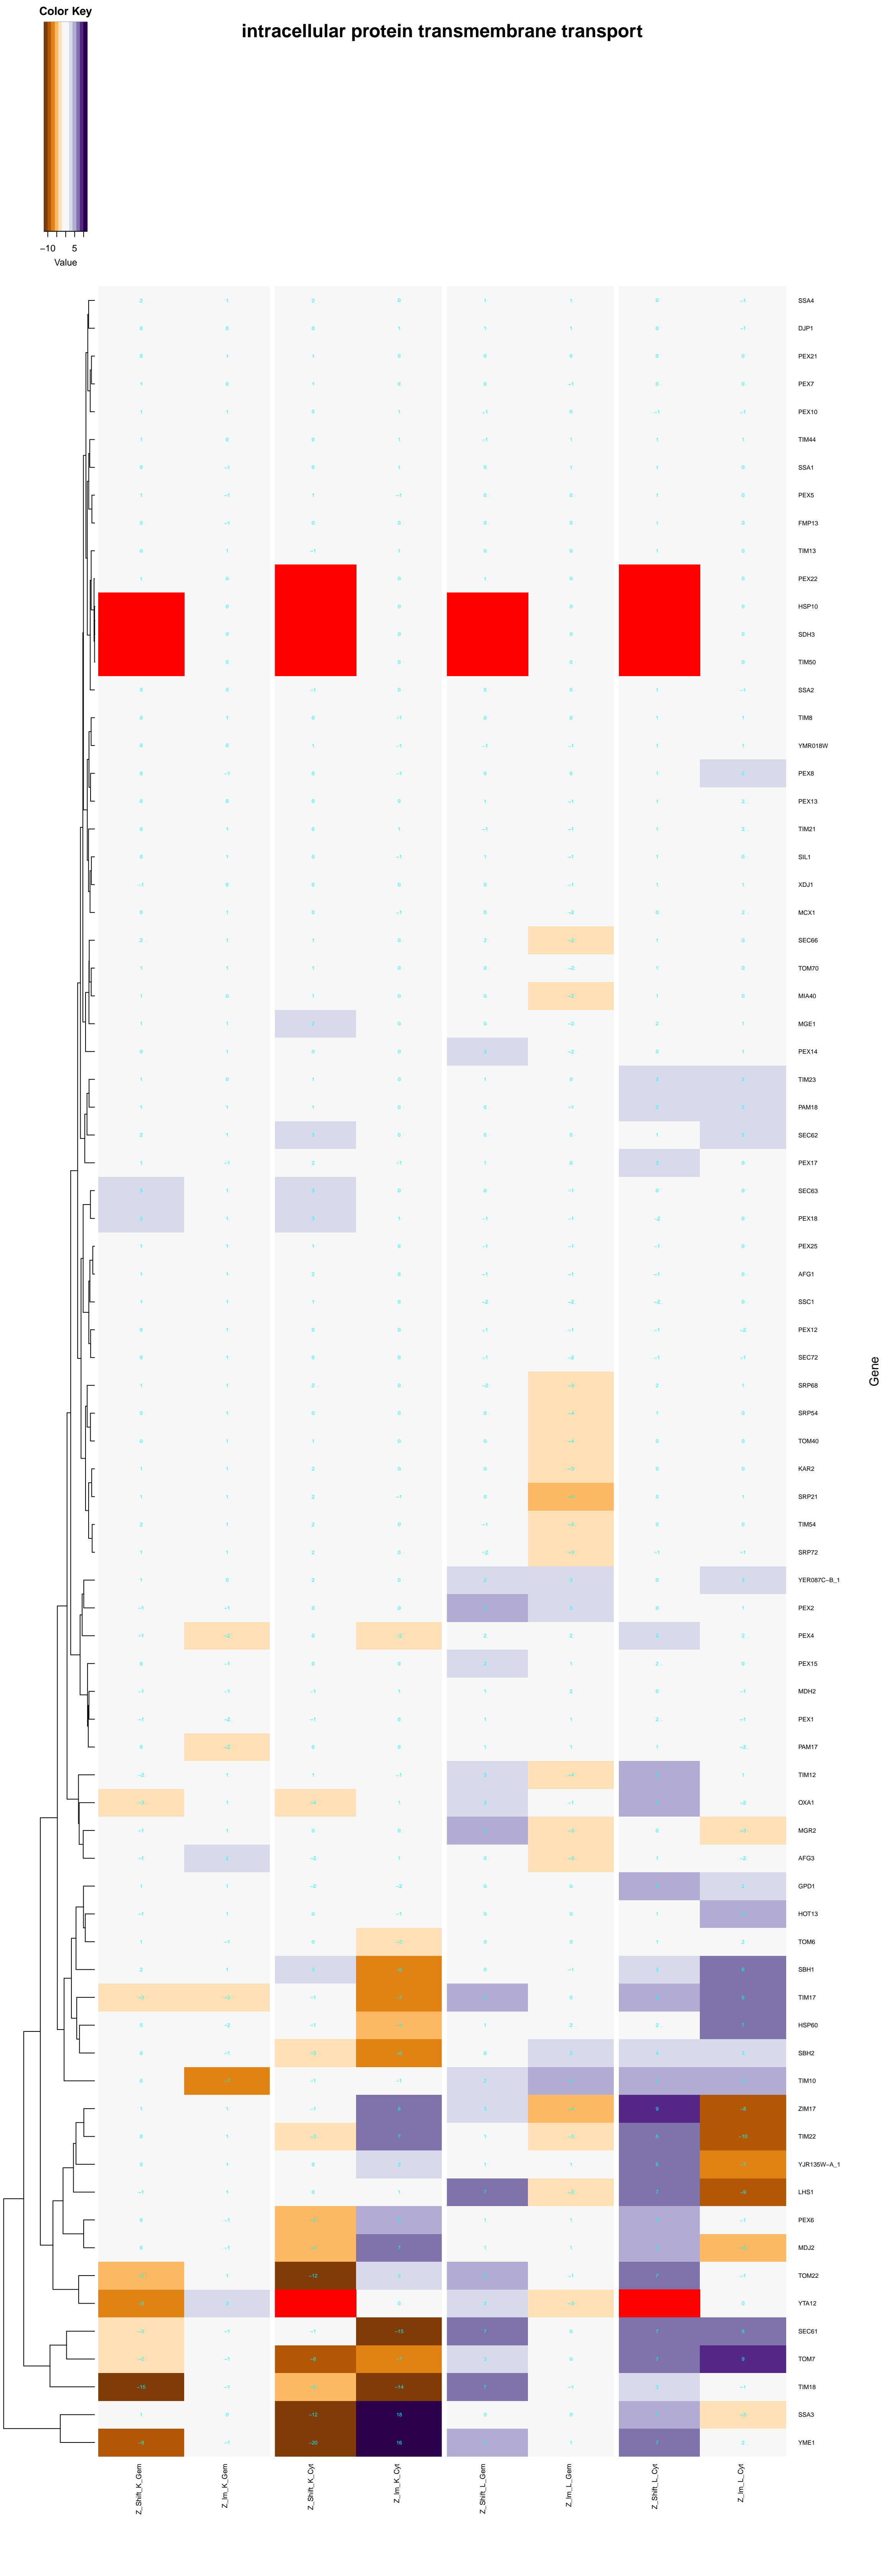

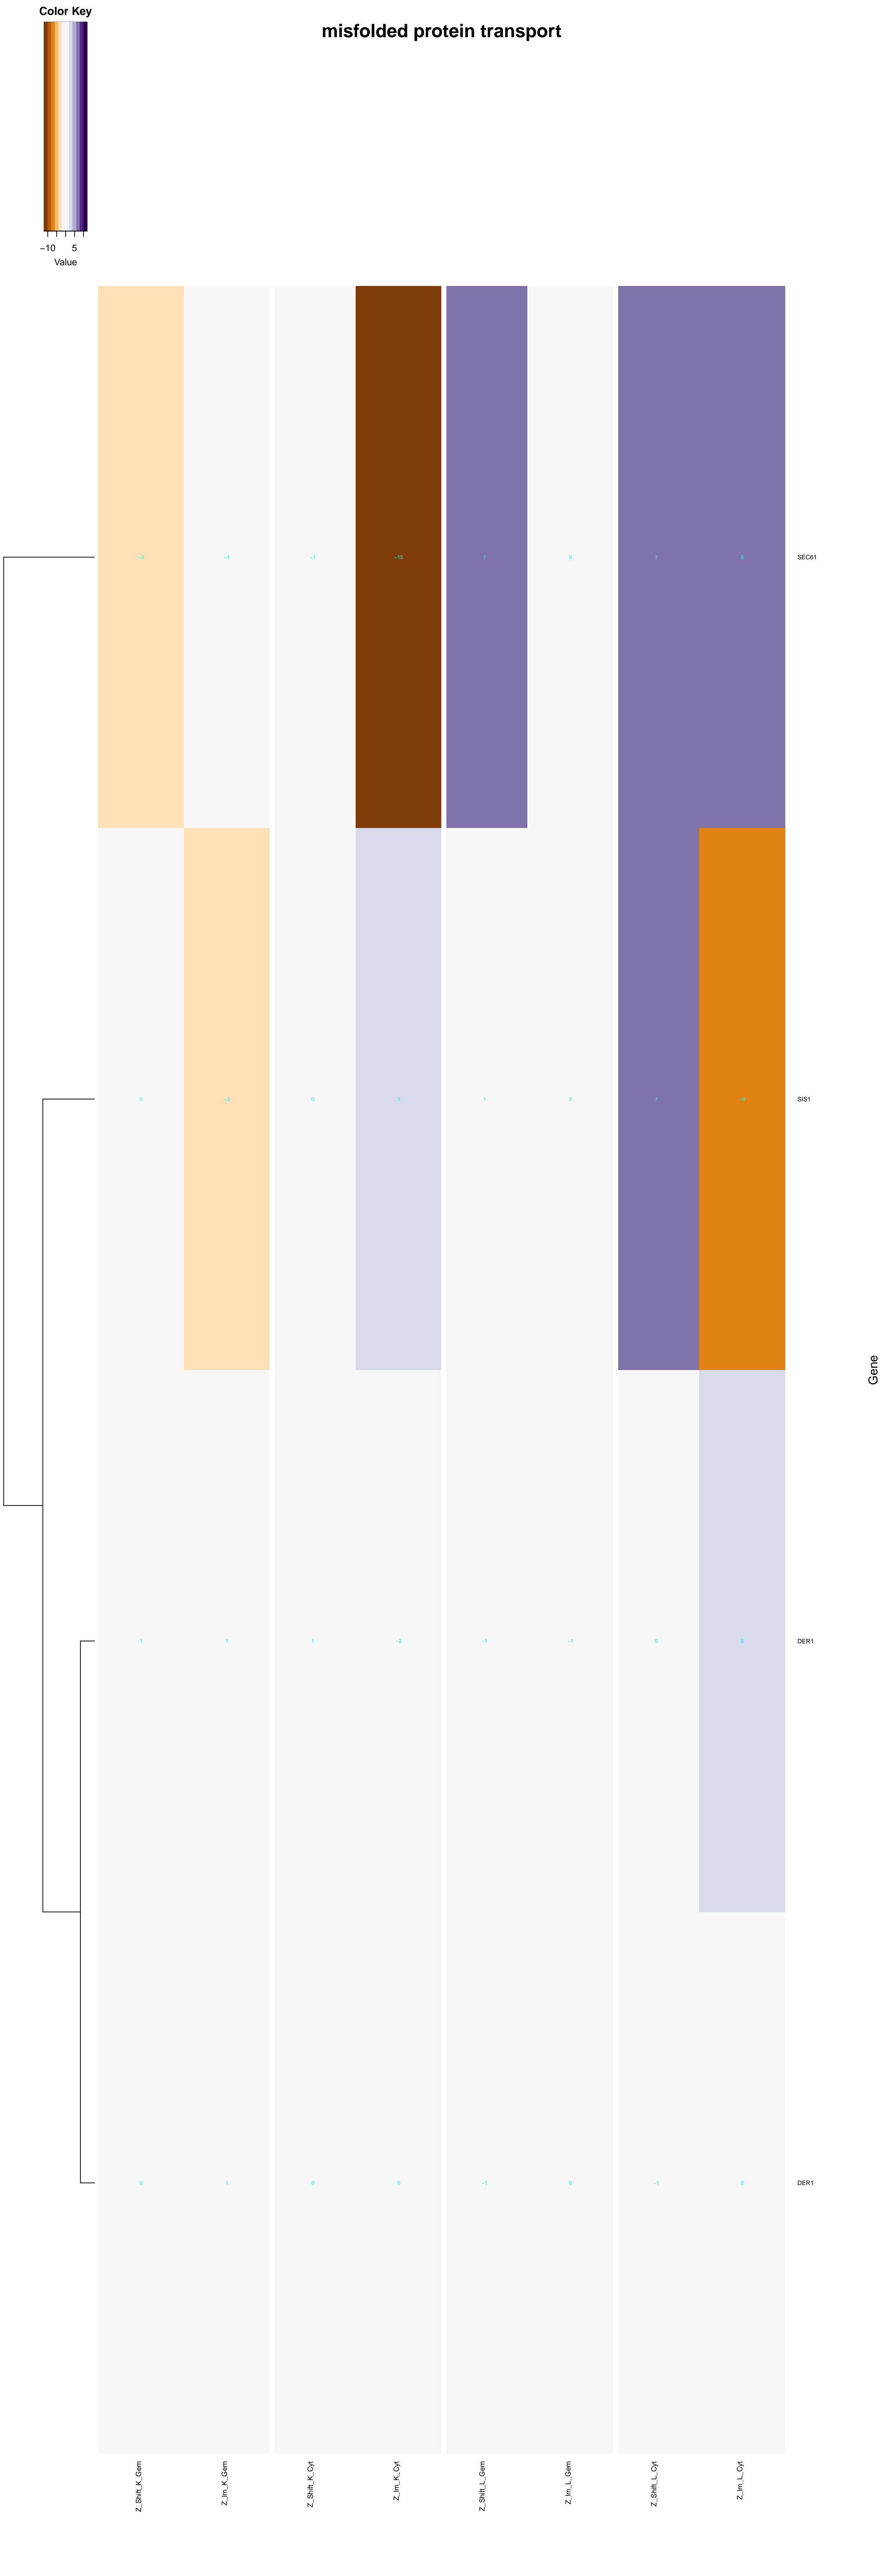

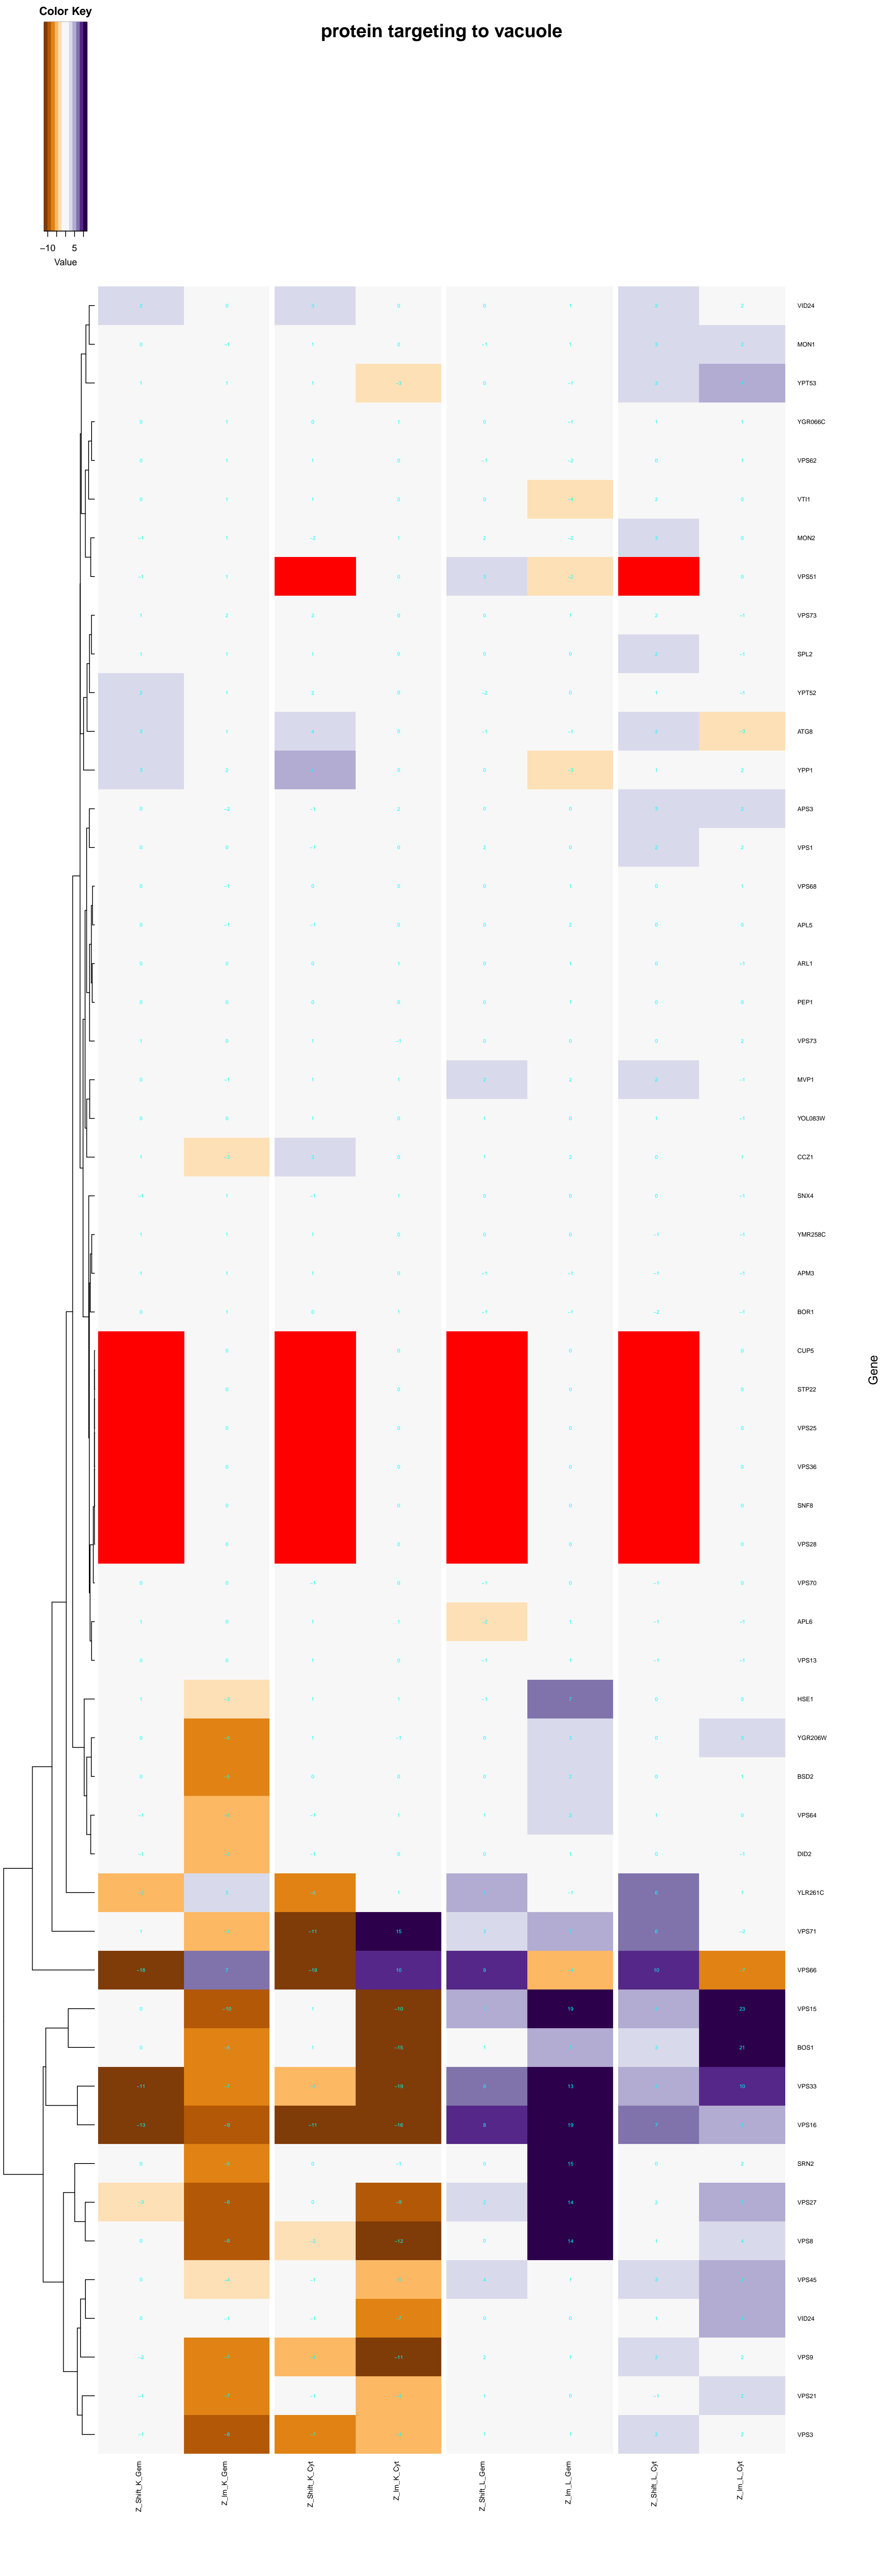

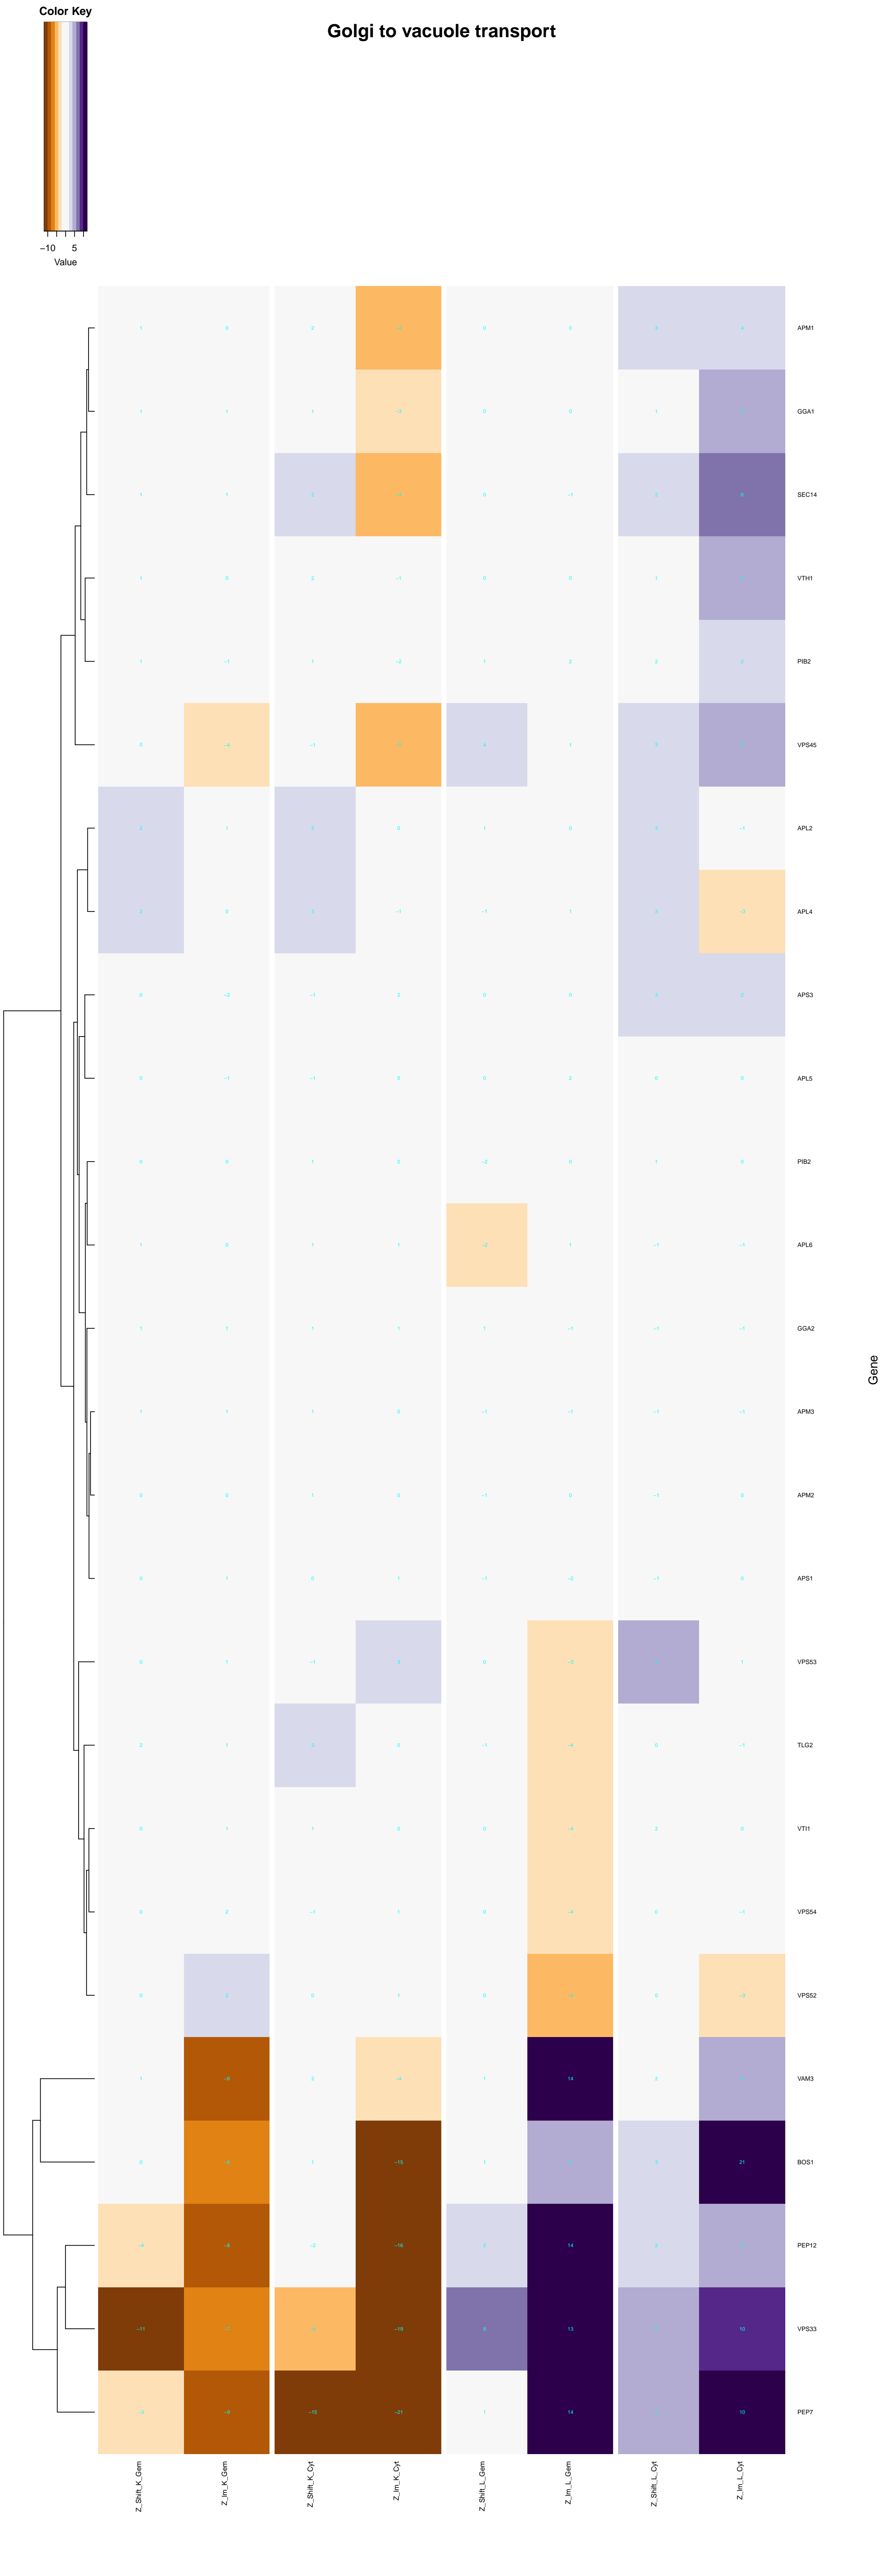

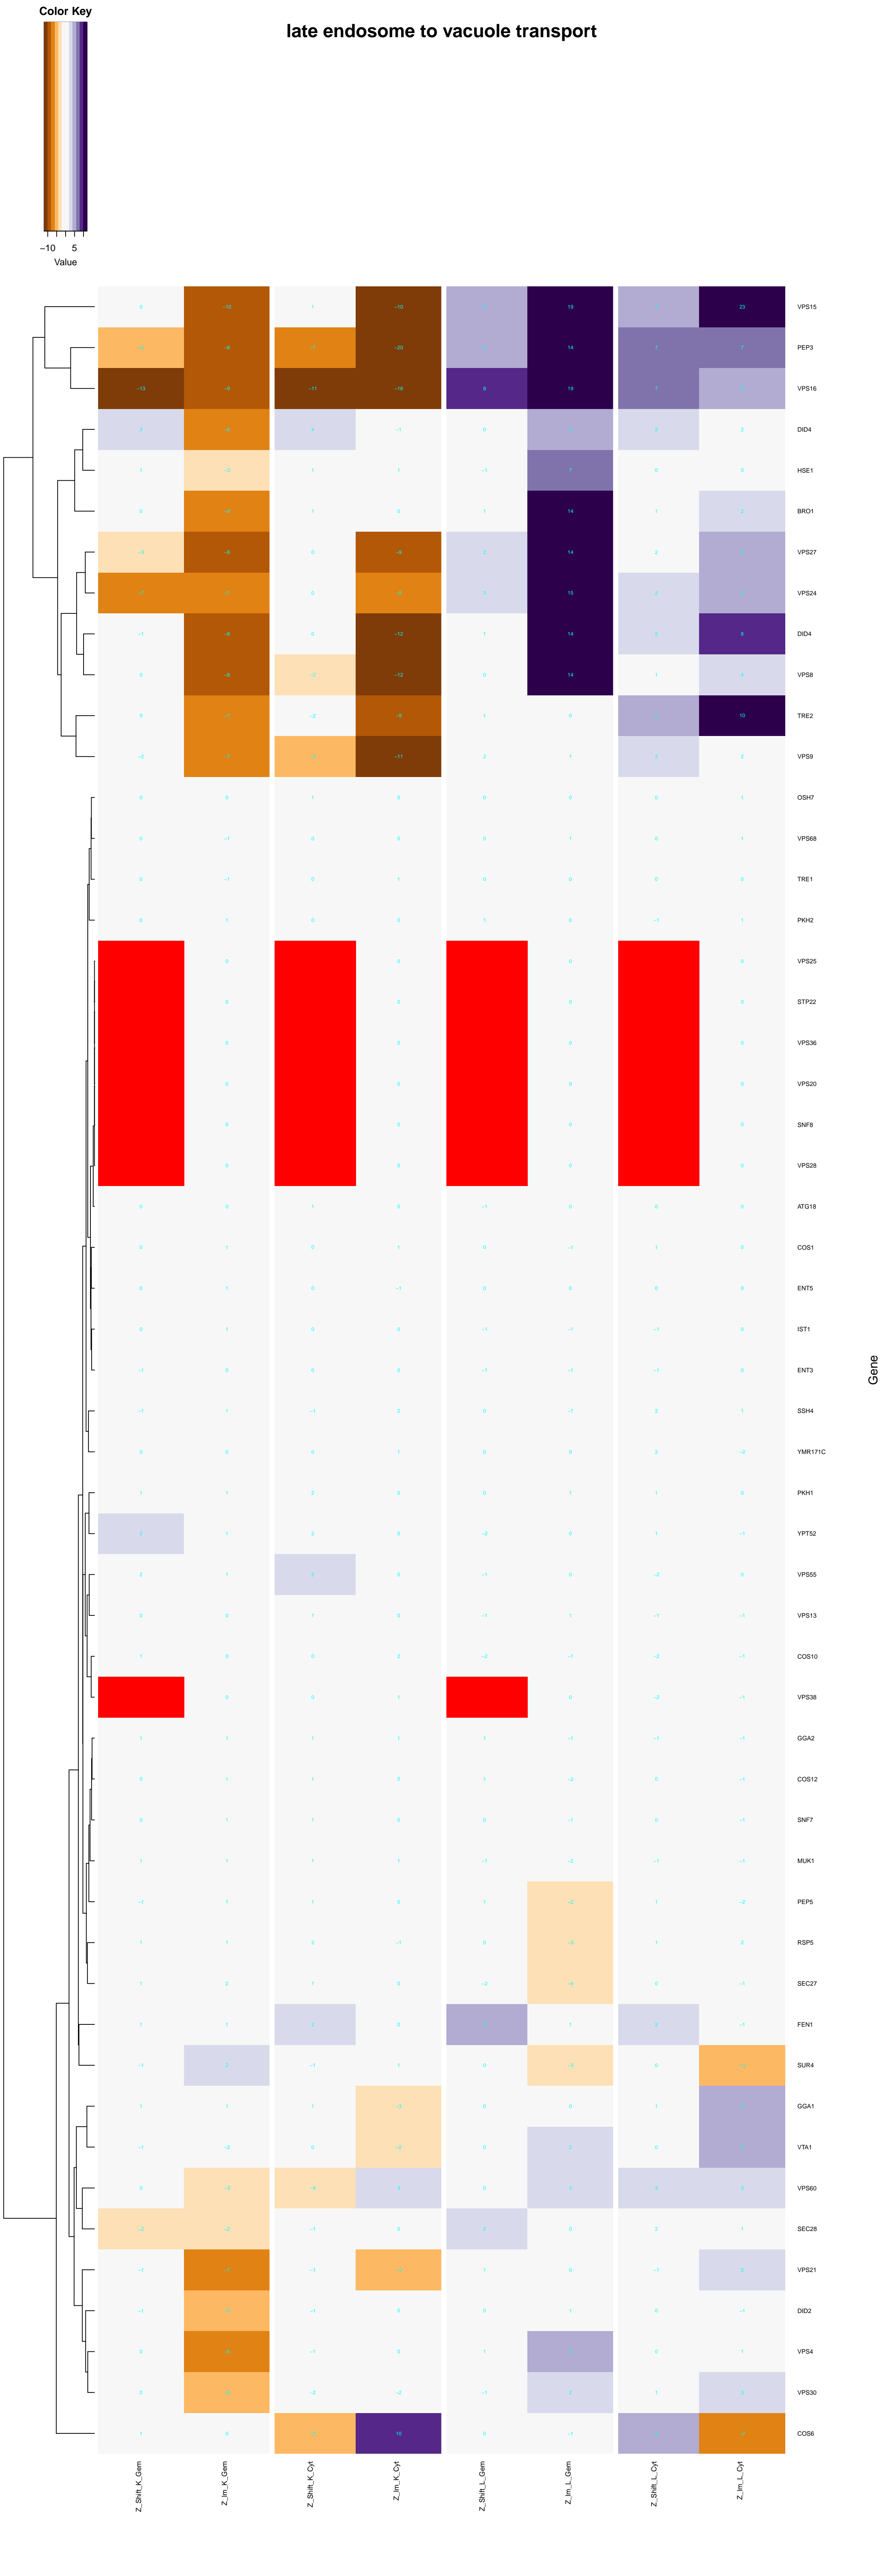

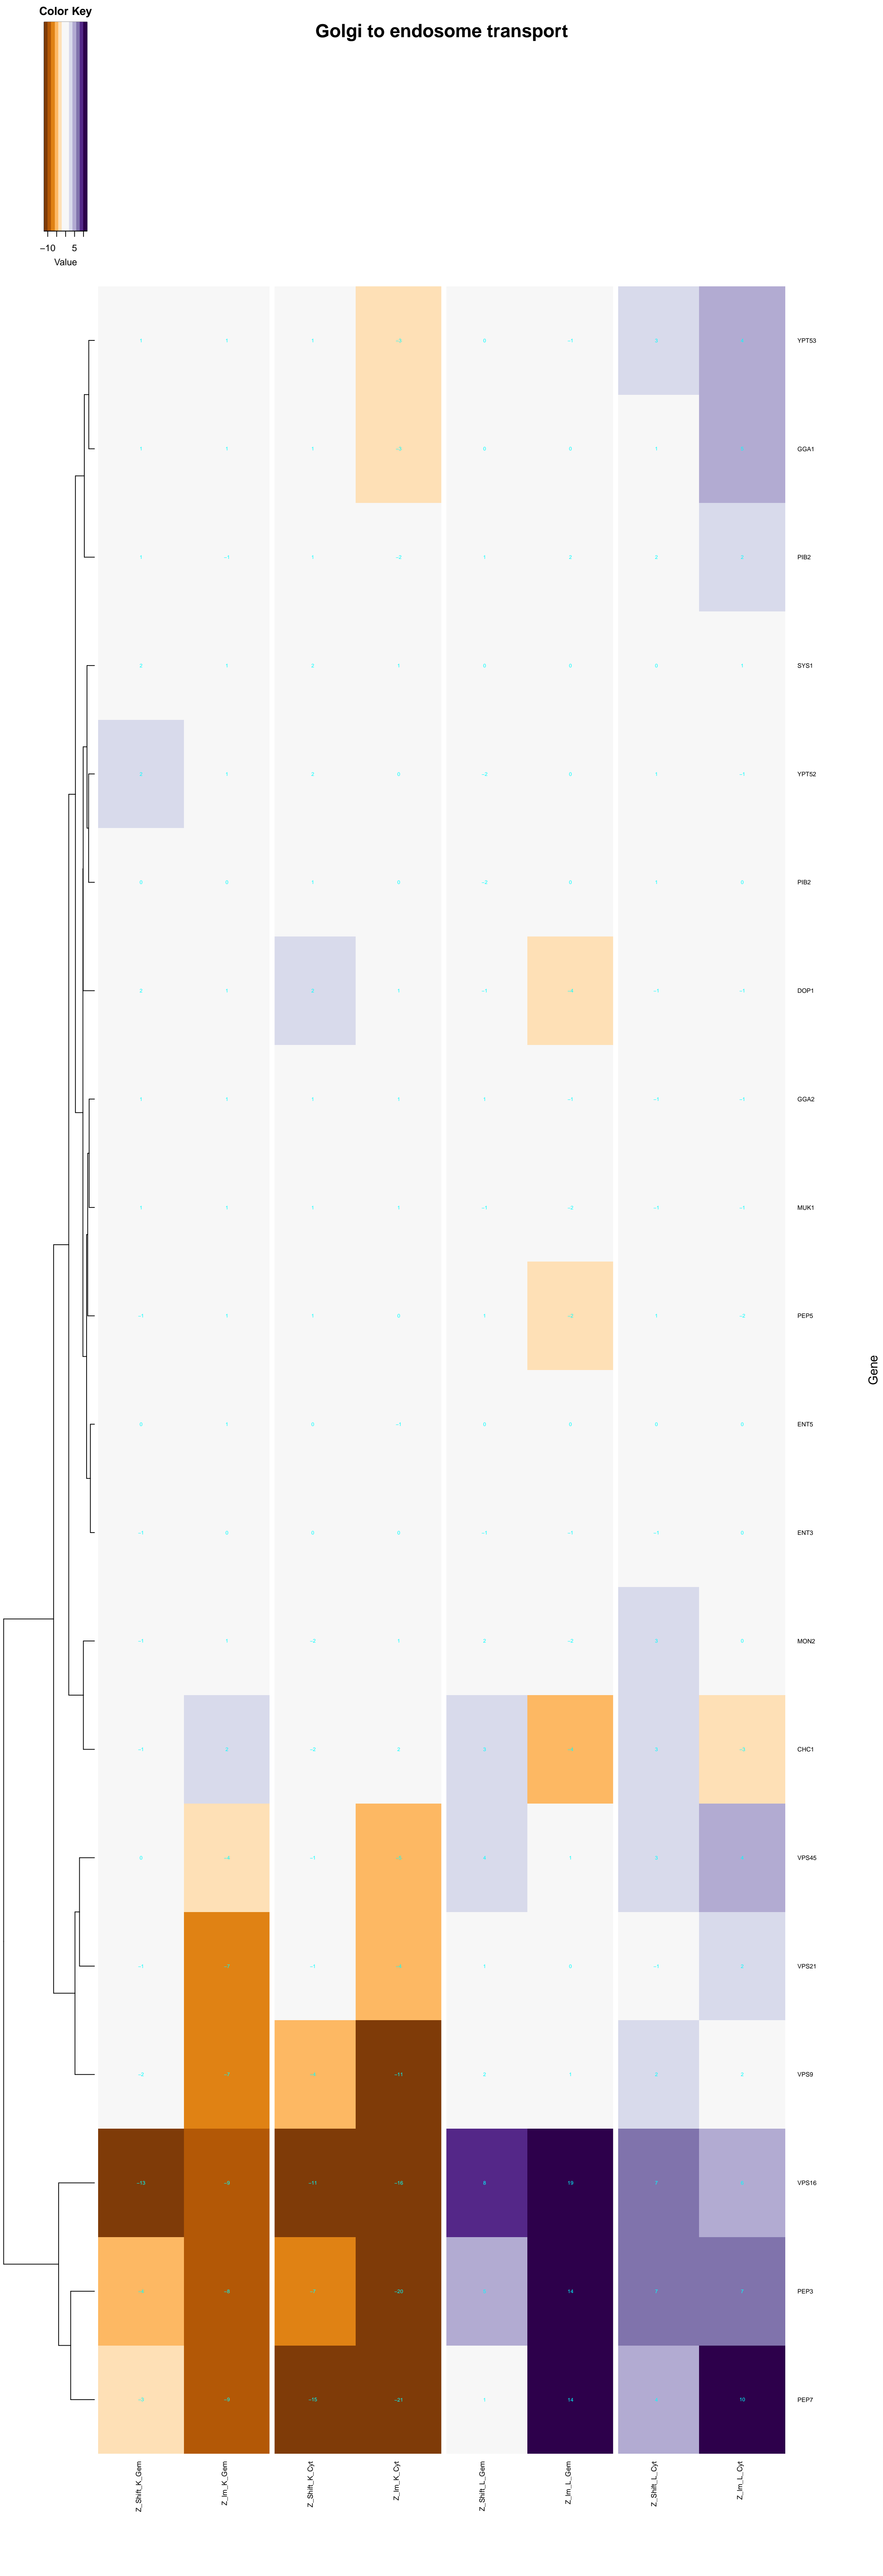

endocytic recycling

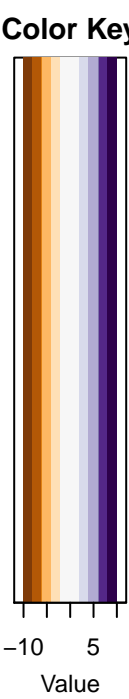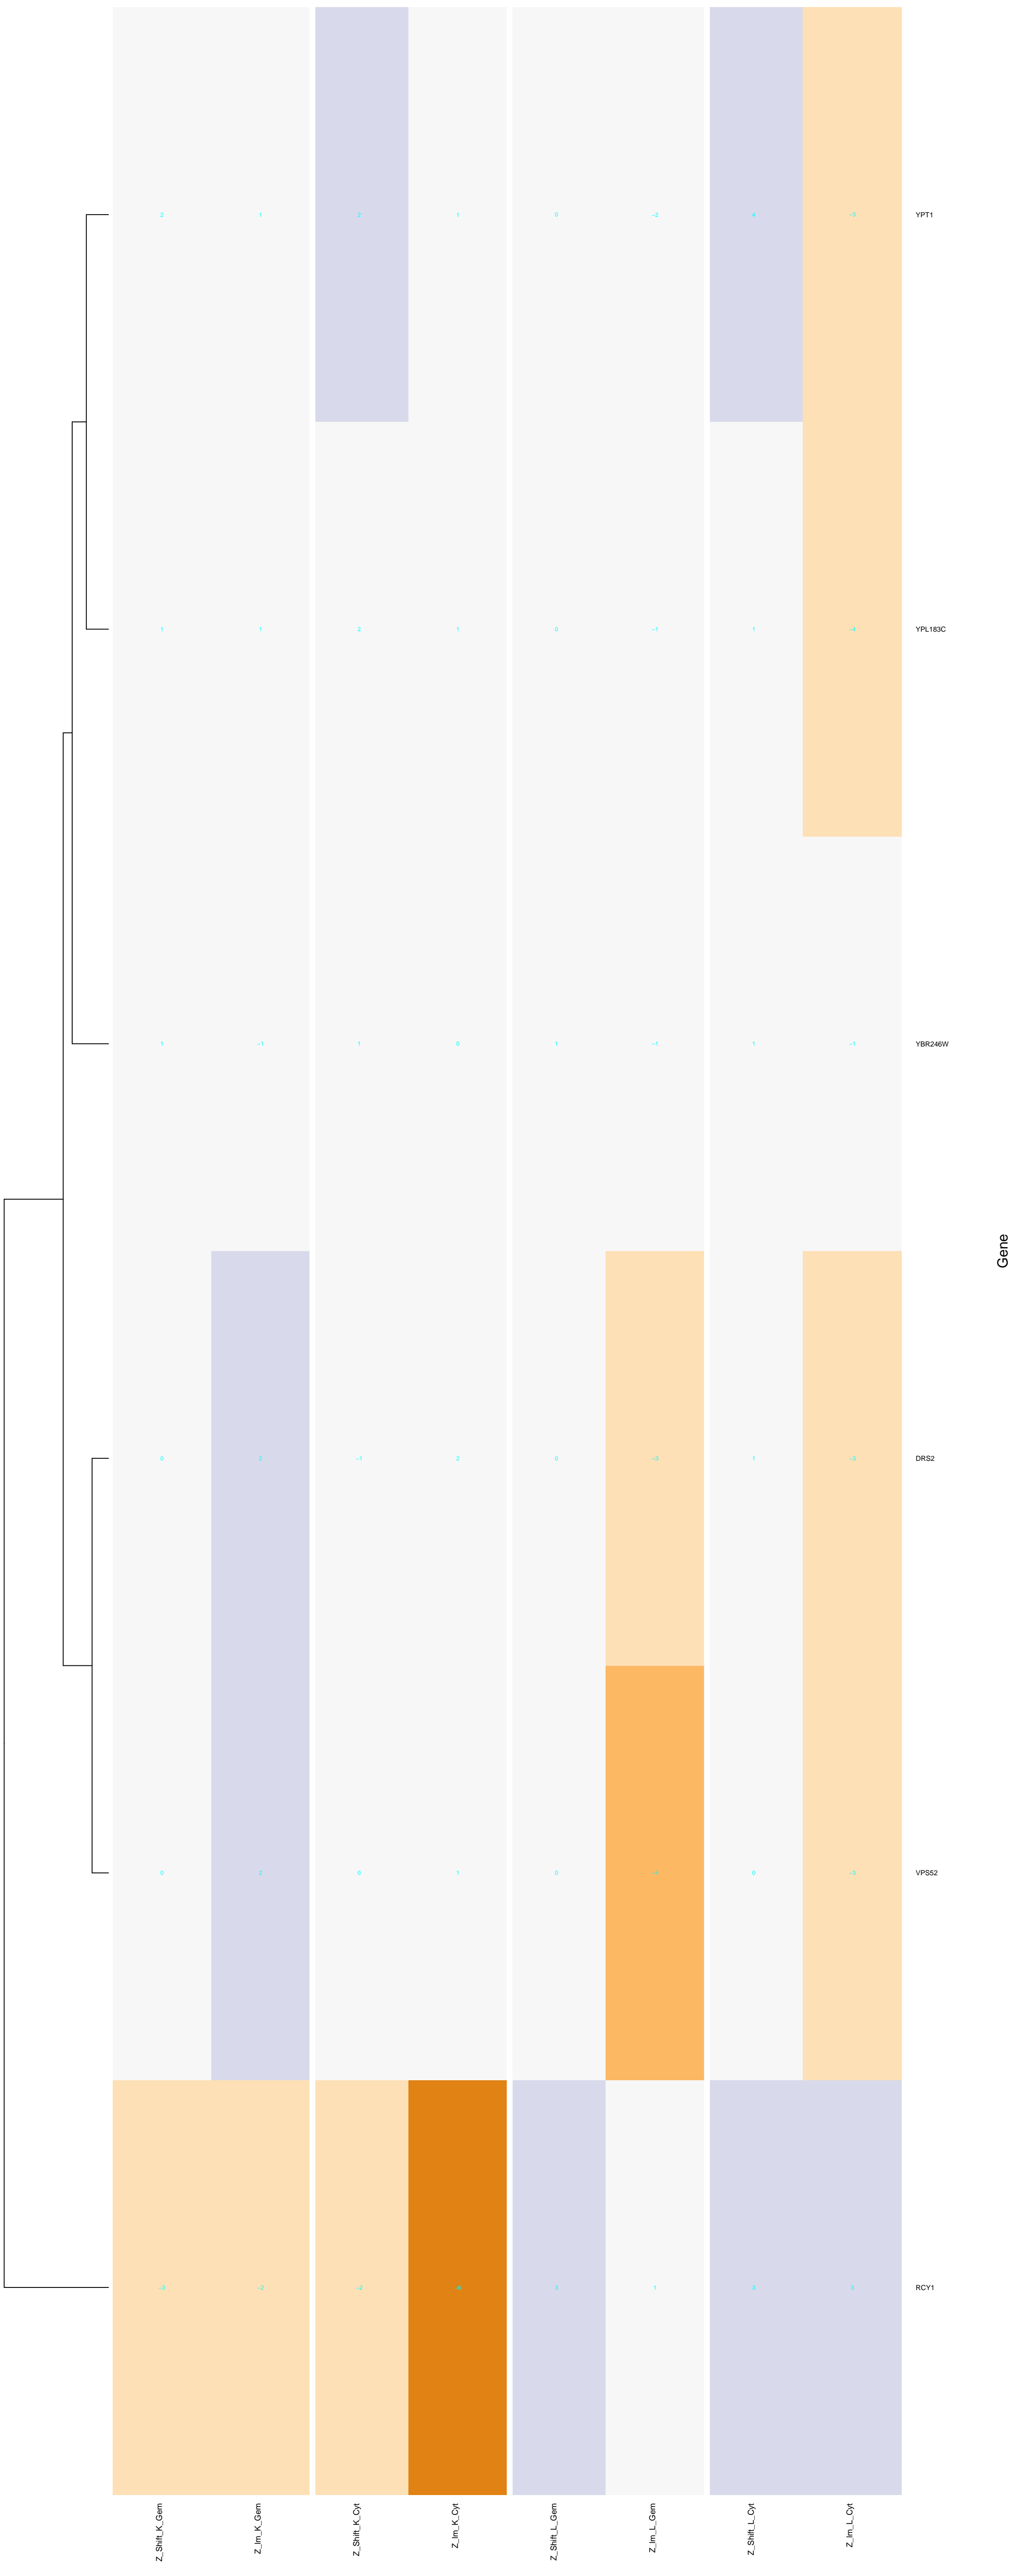

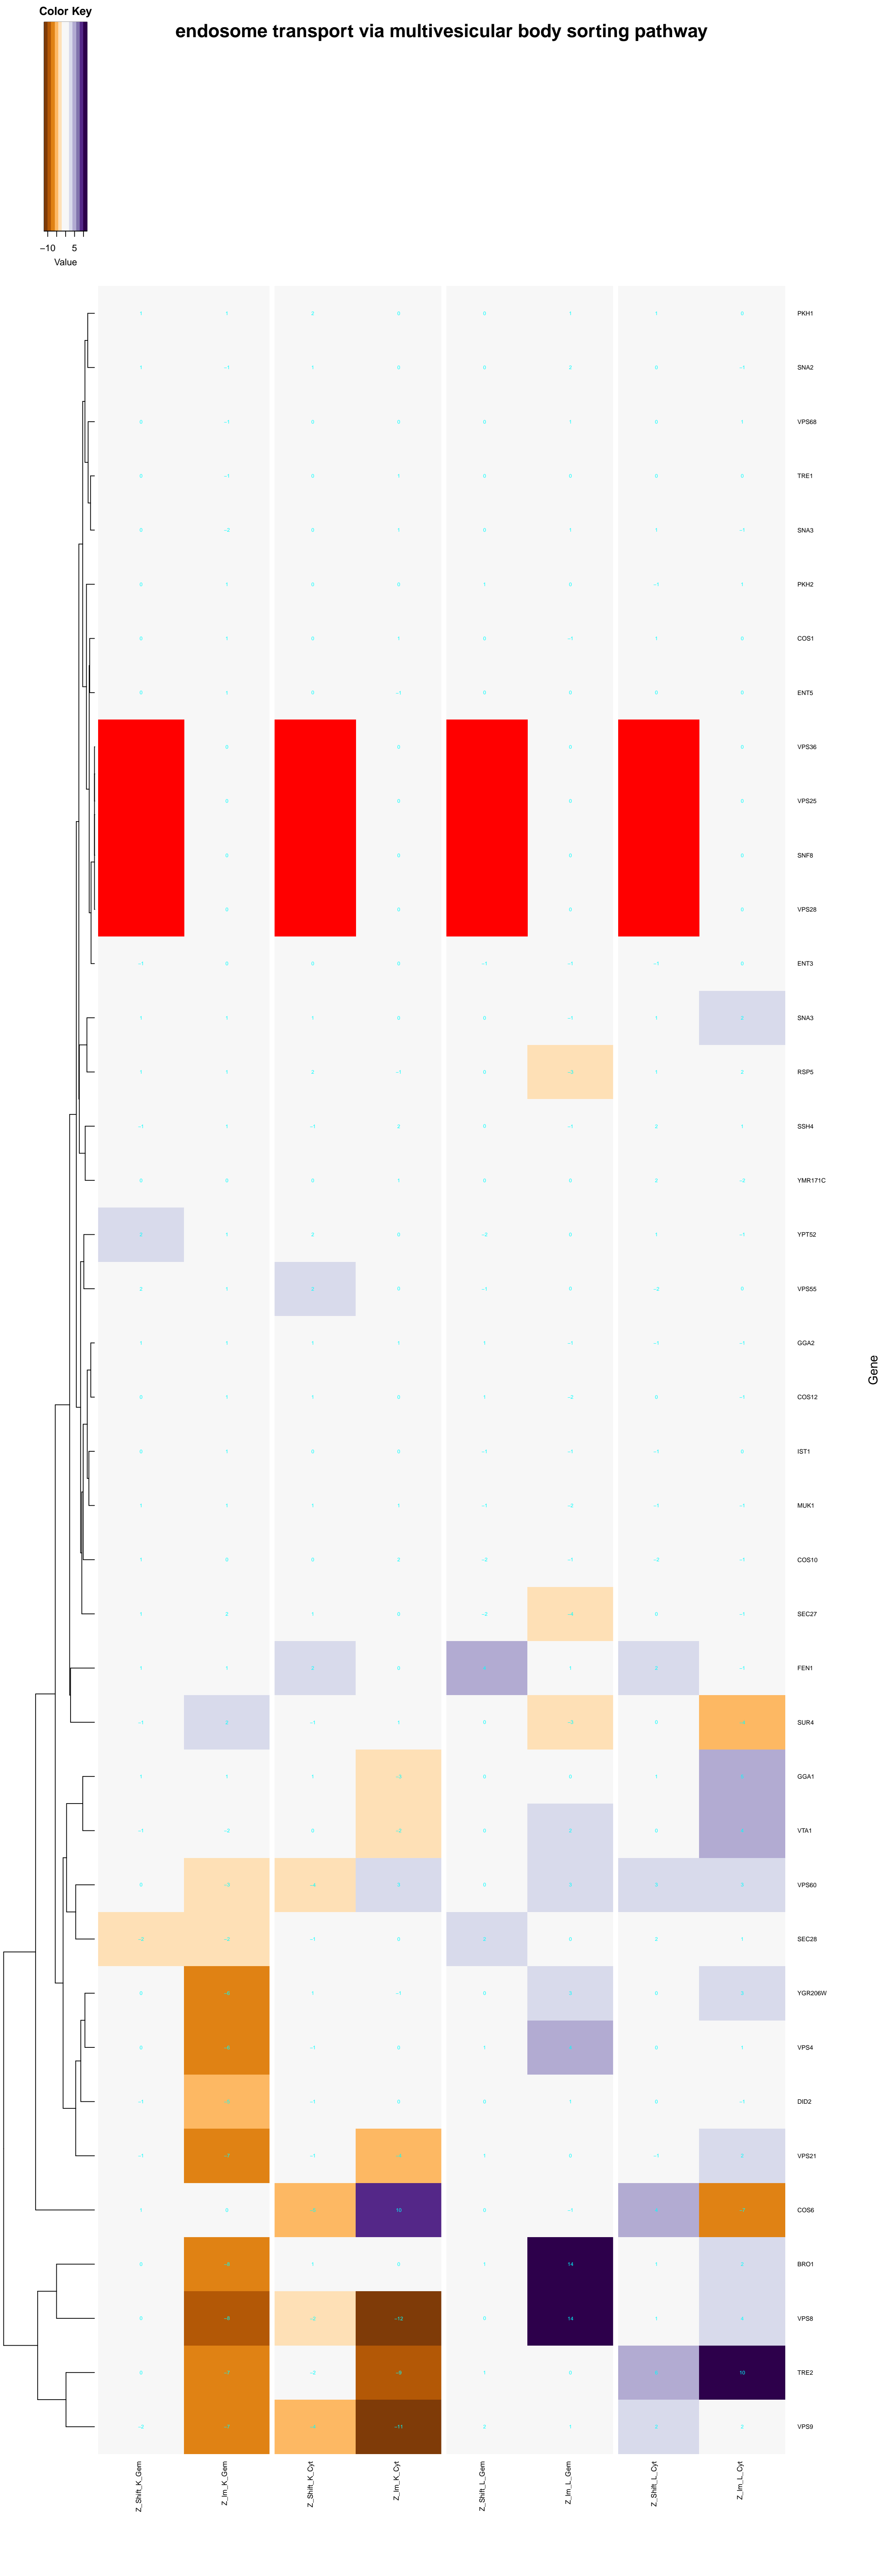

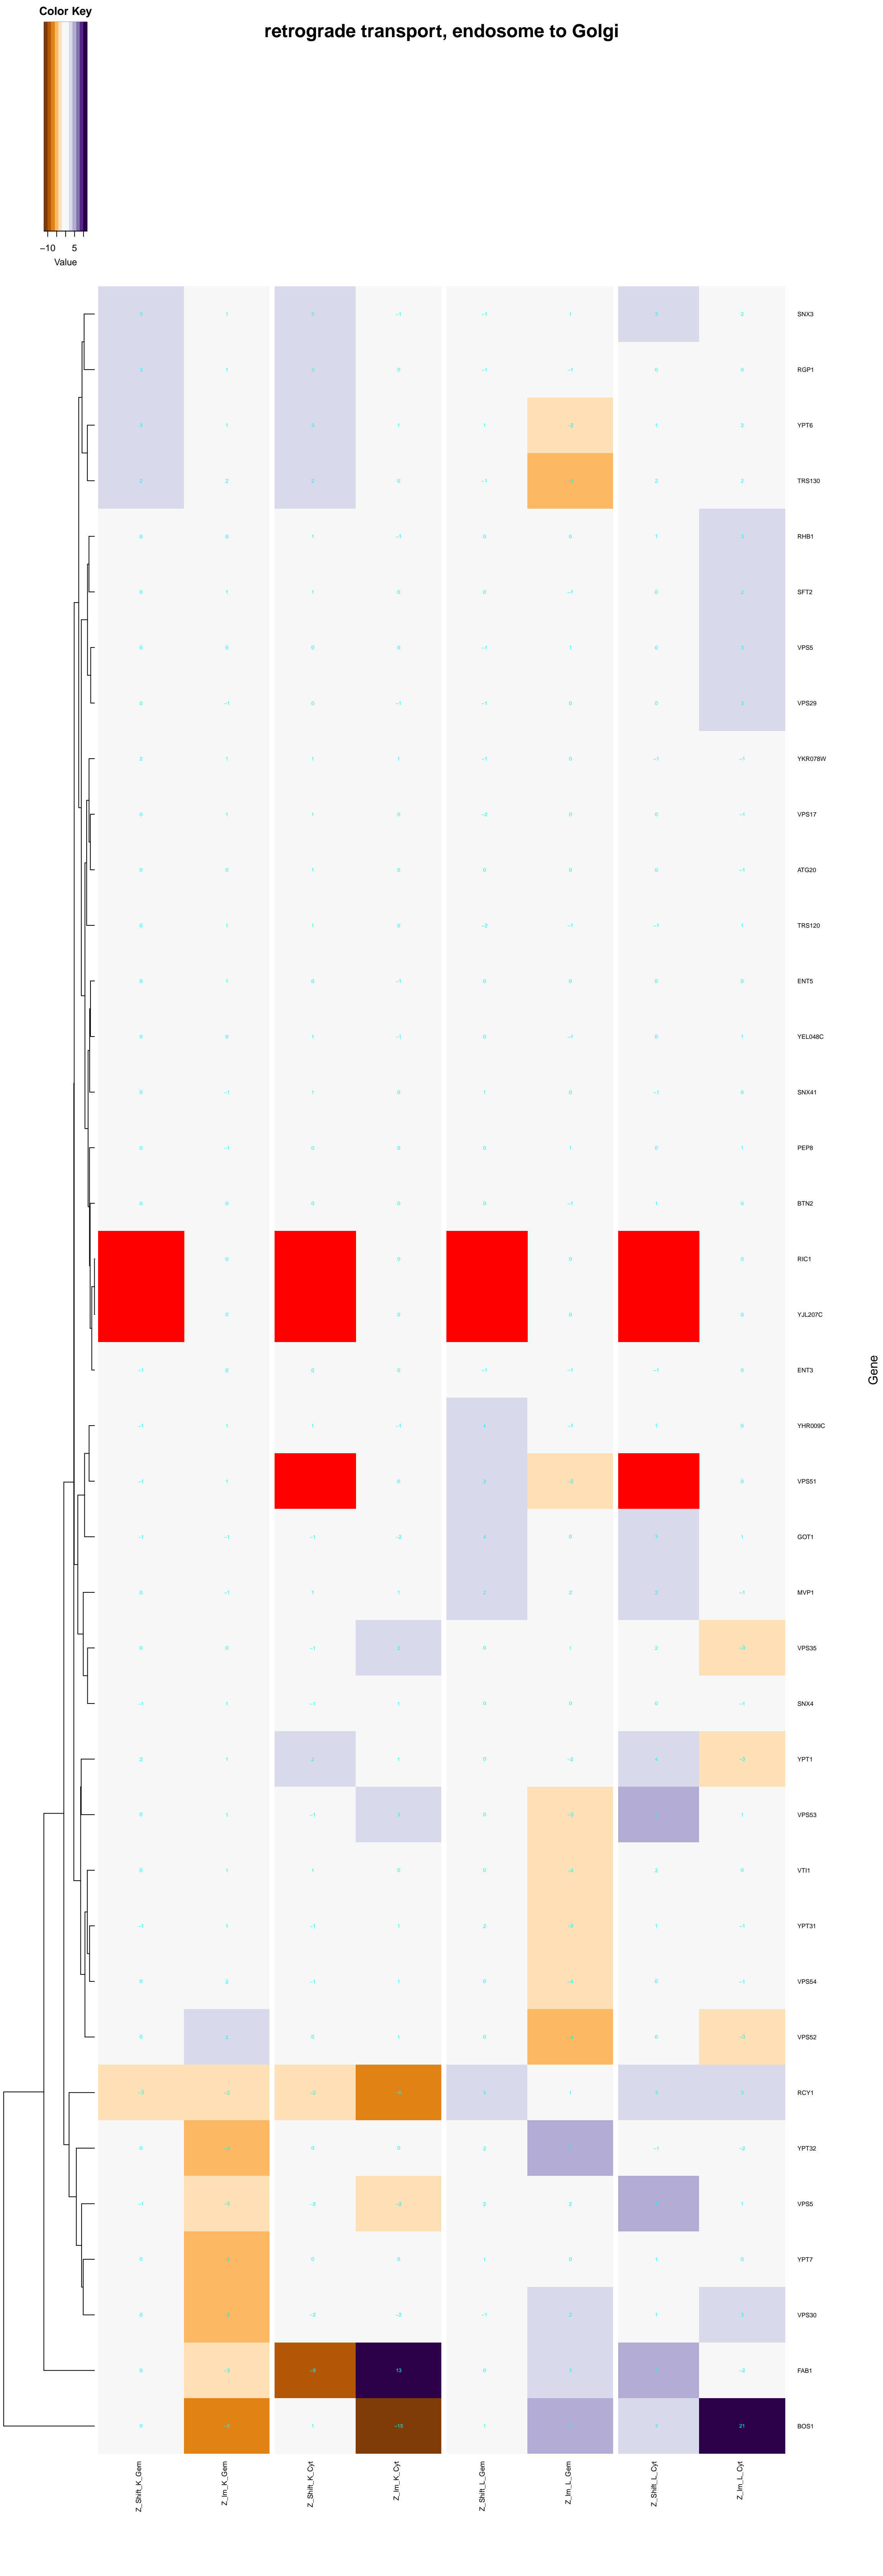

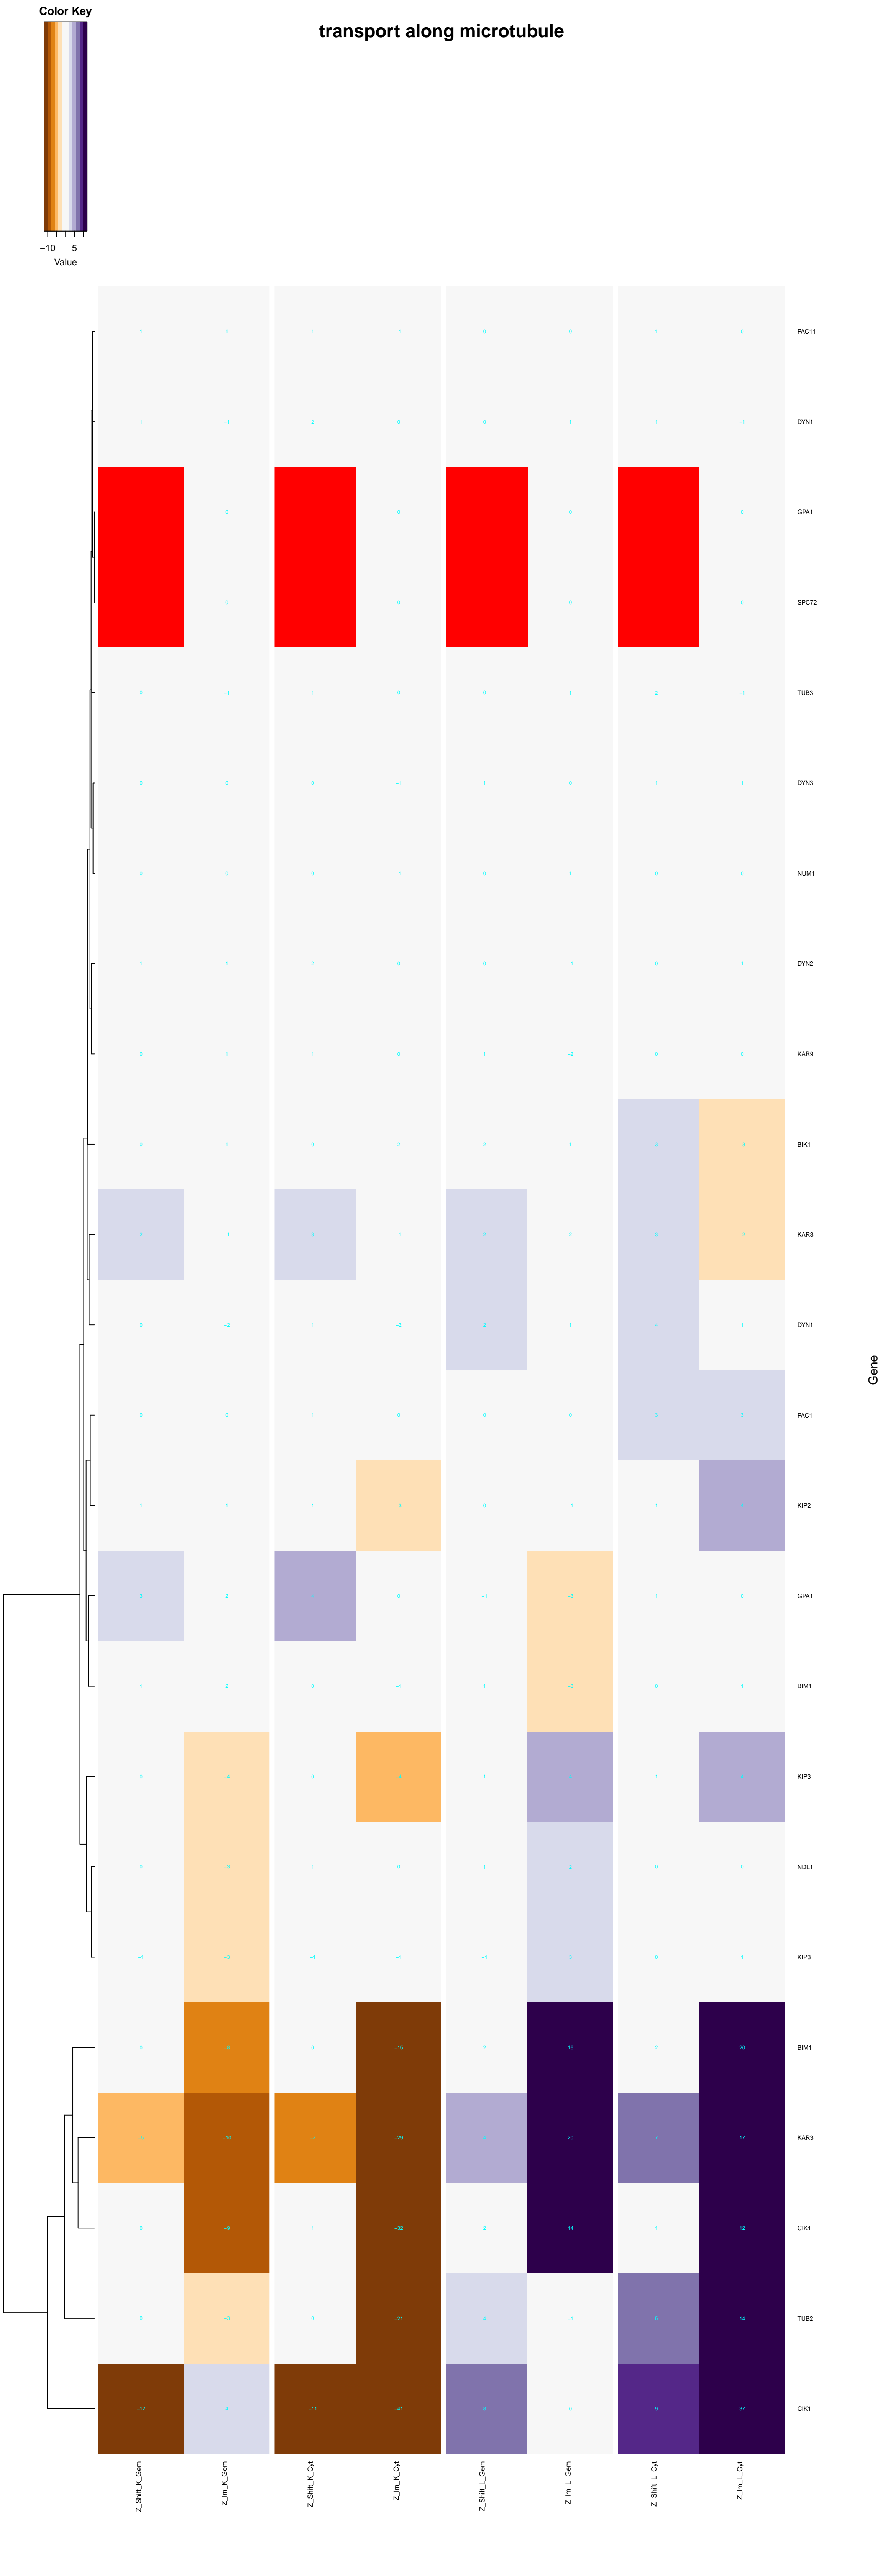

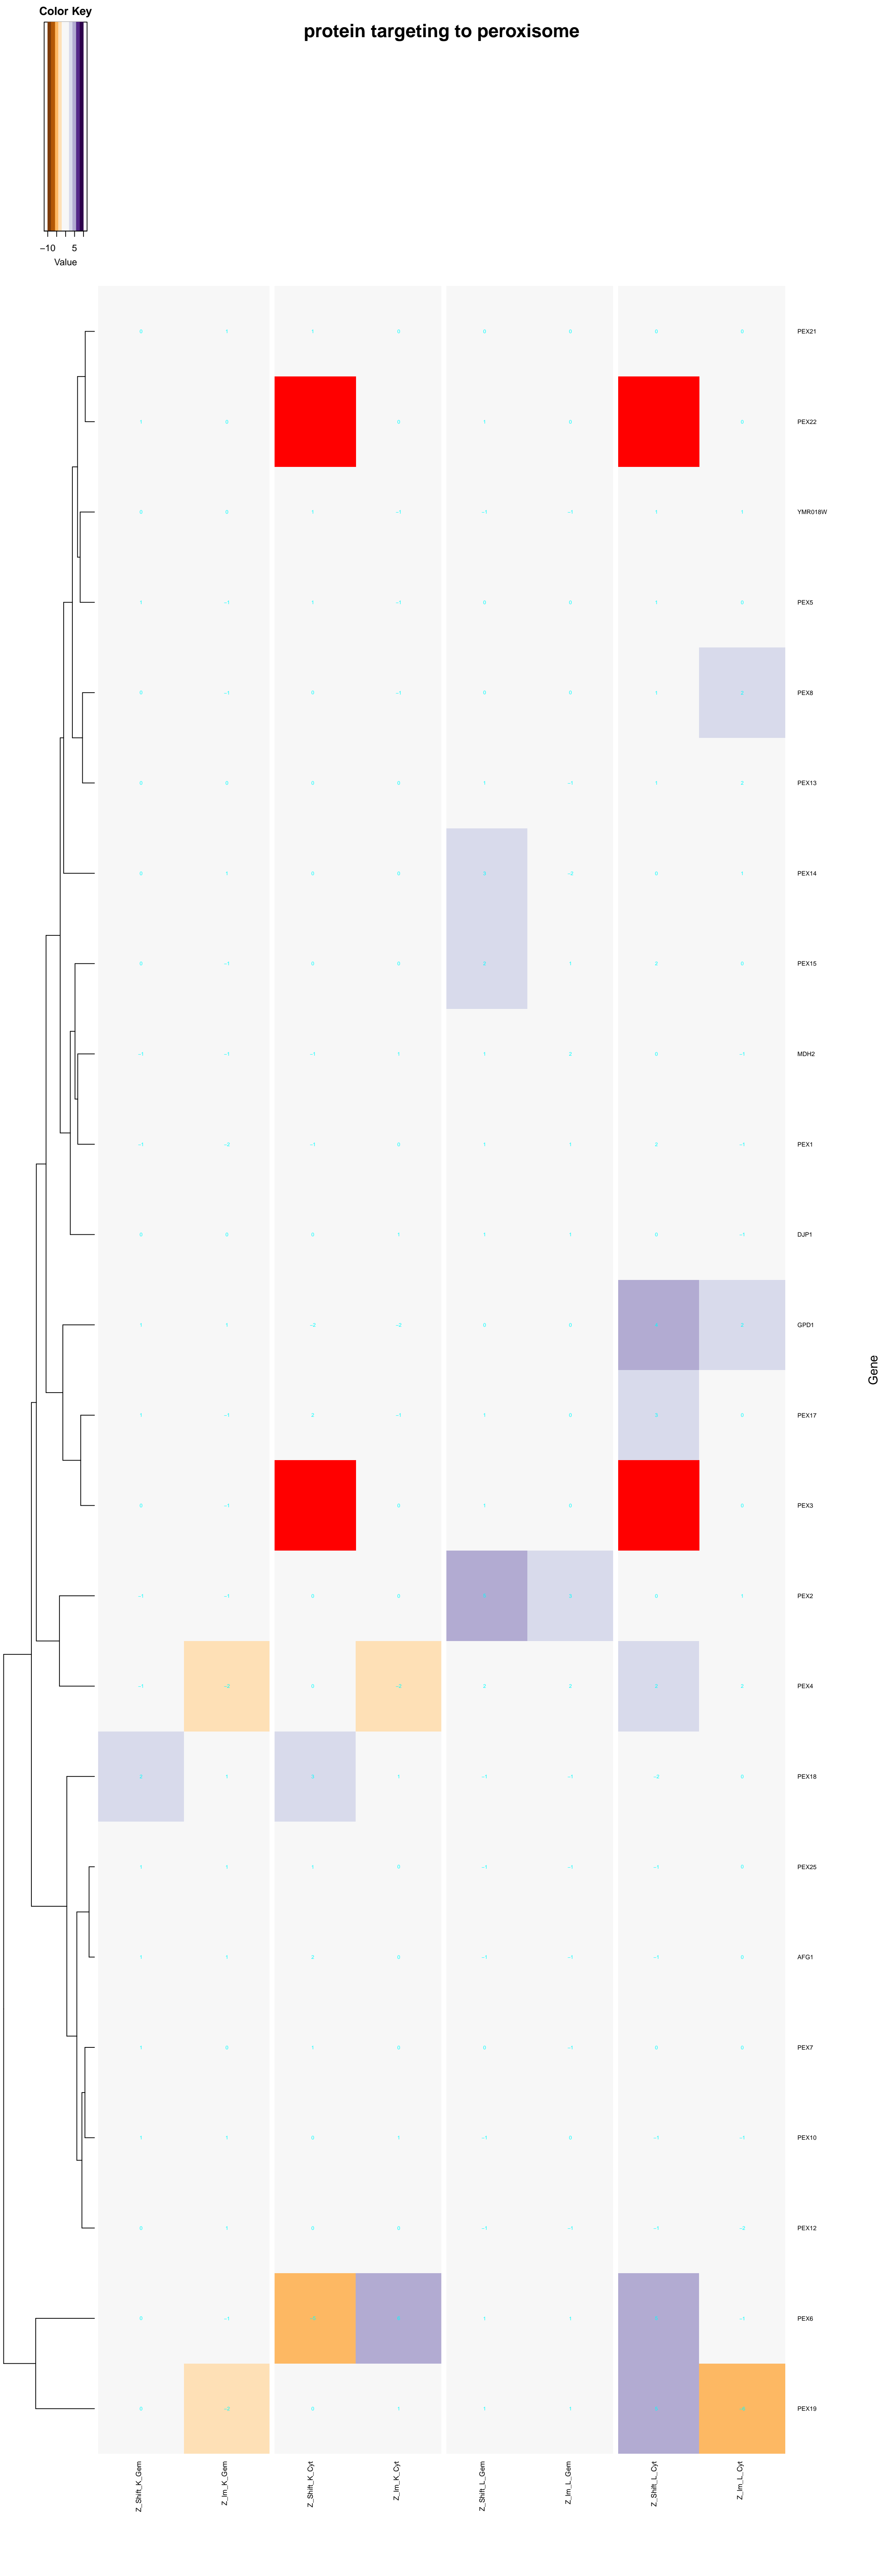

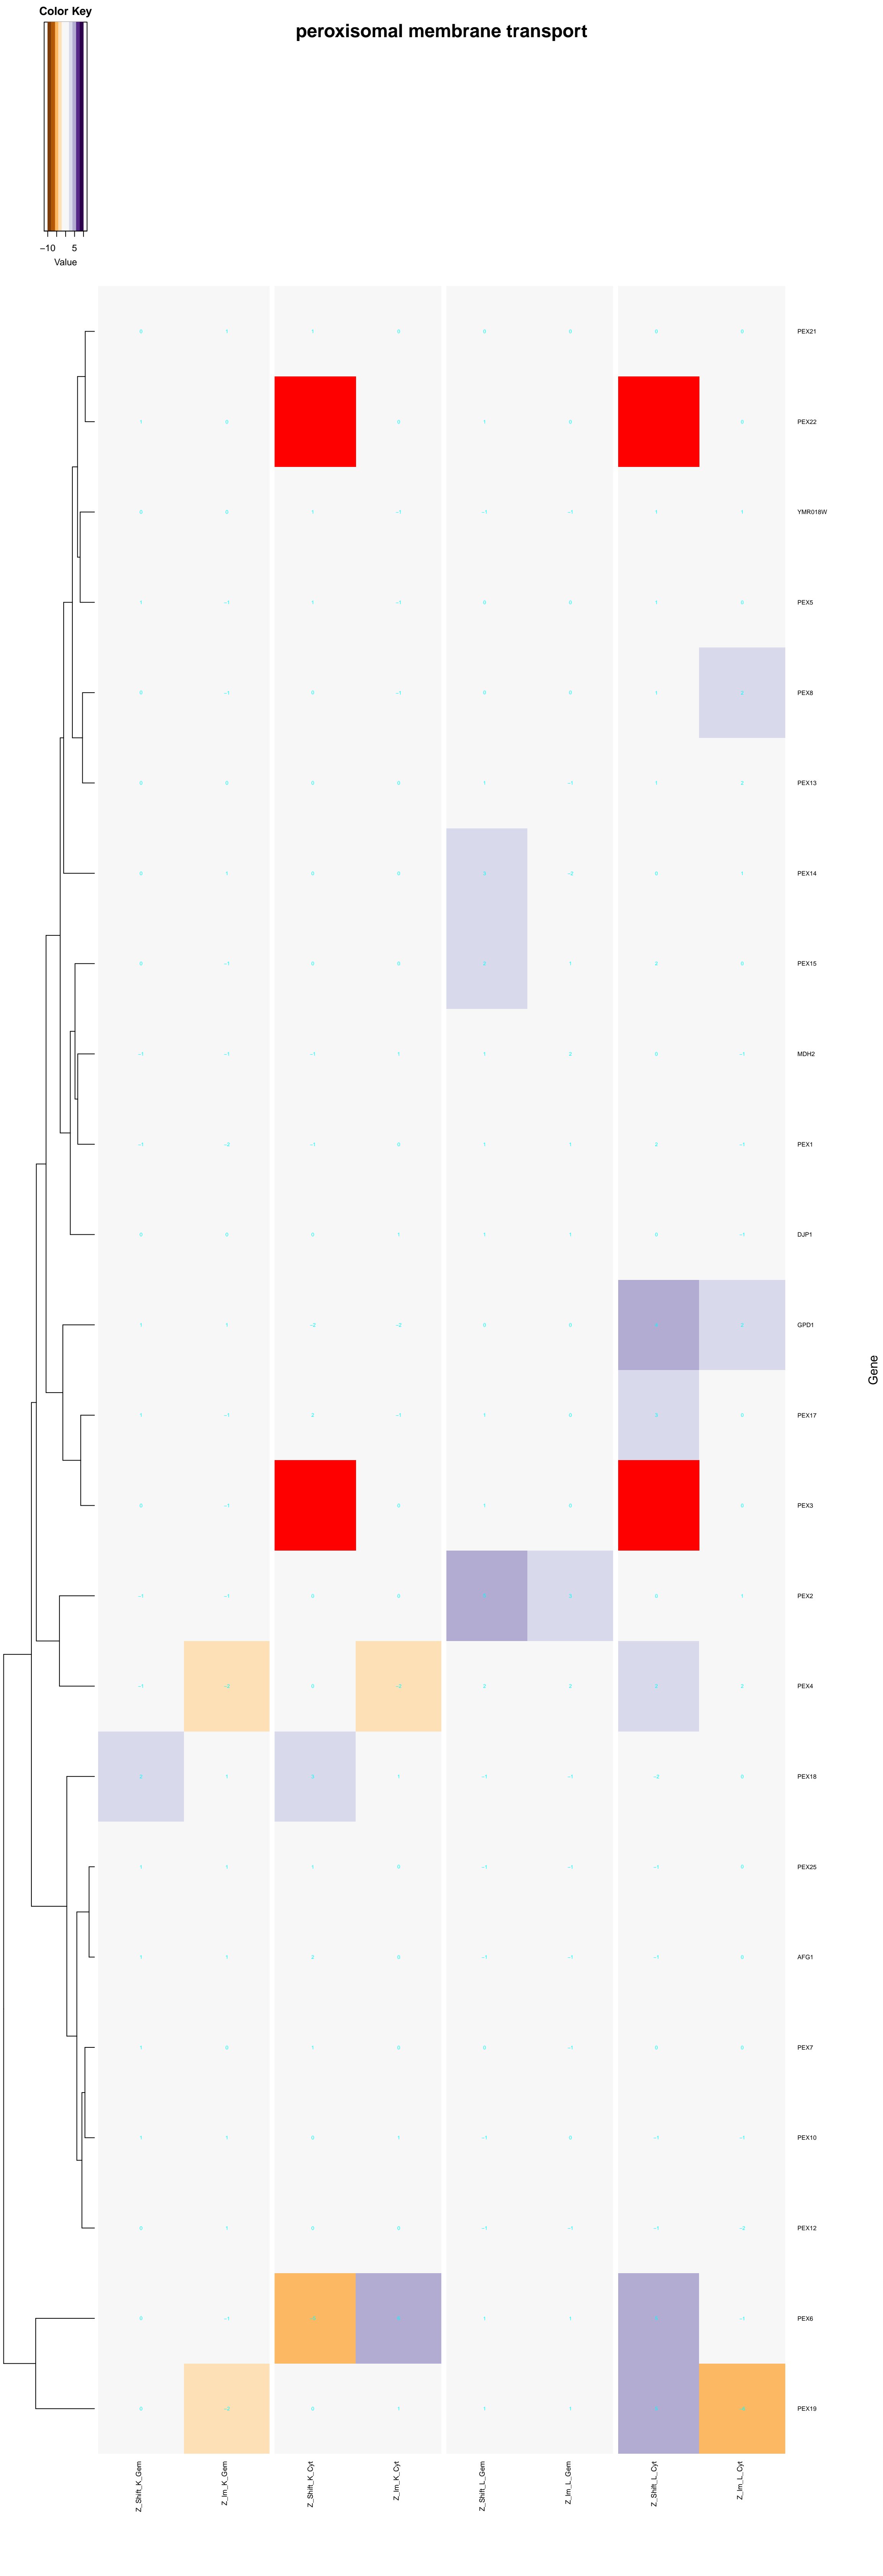

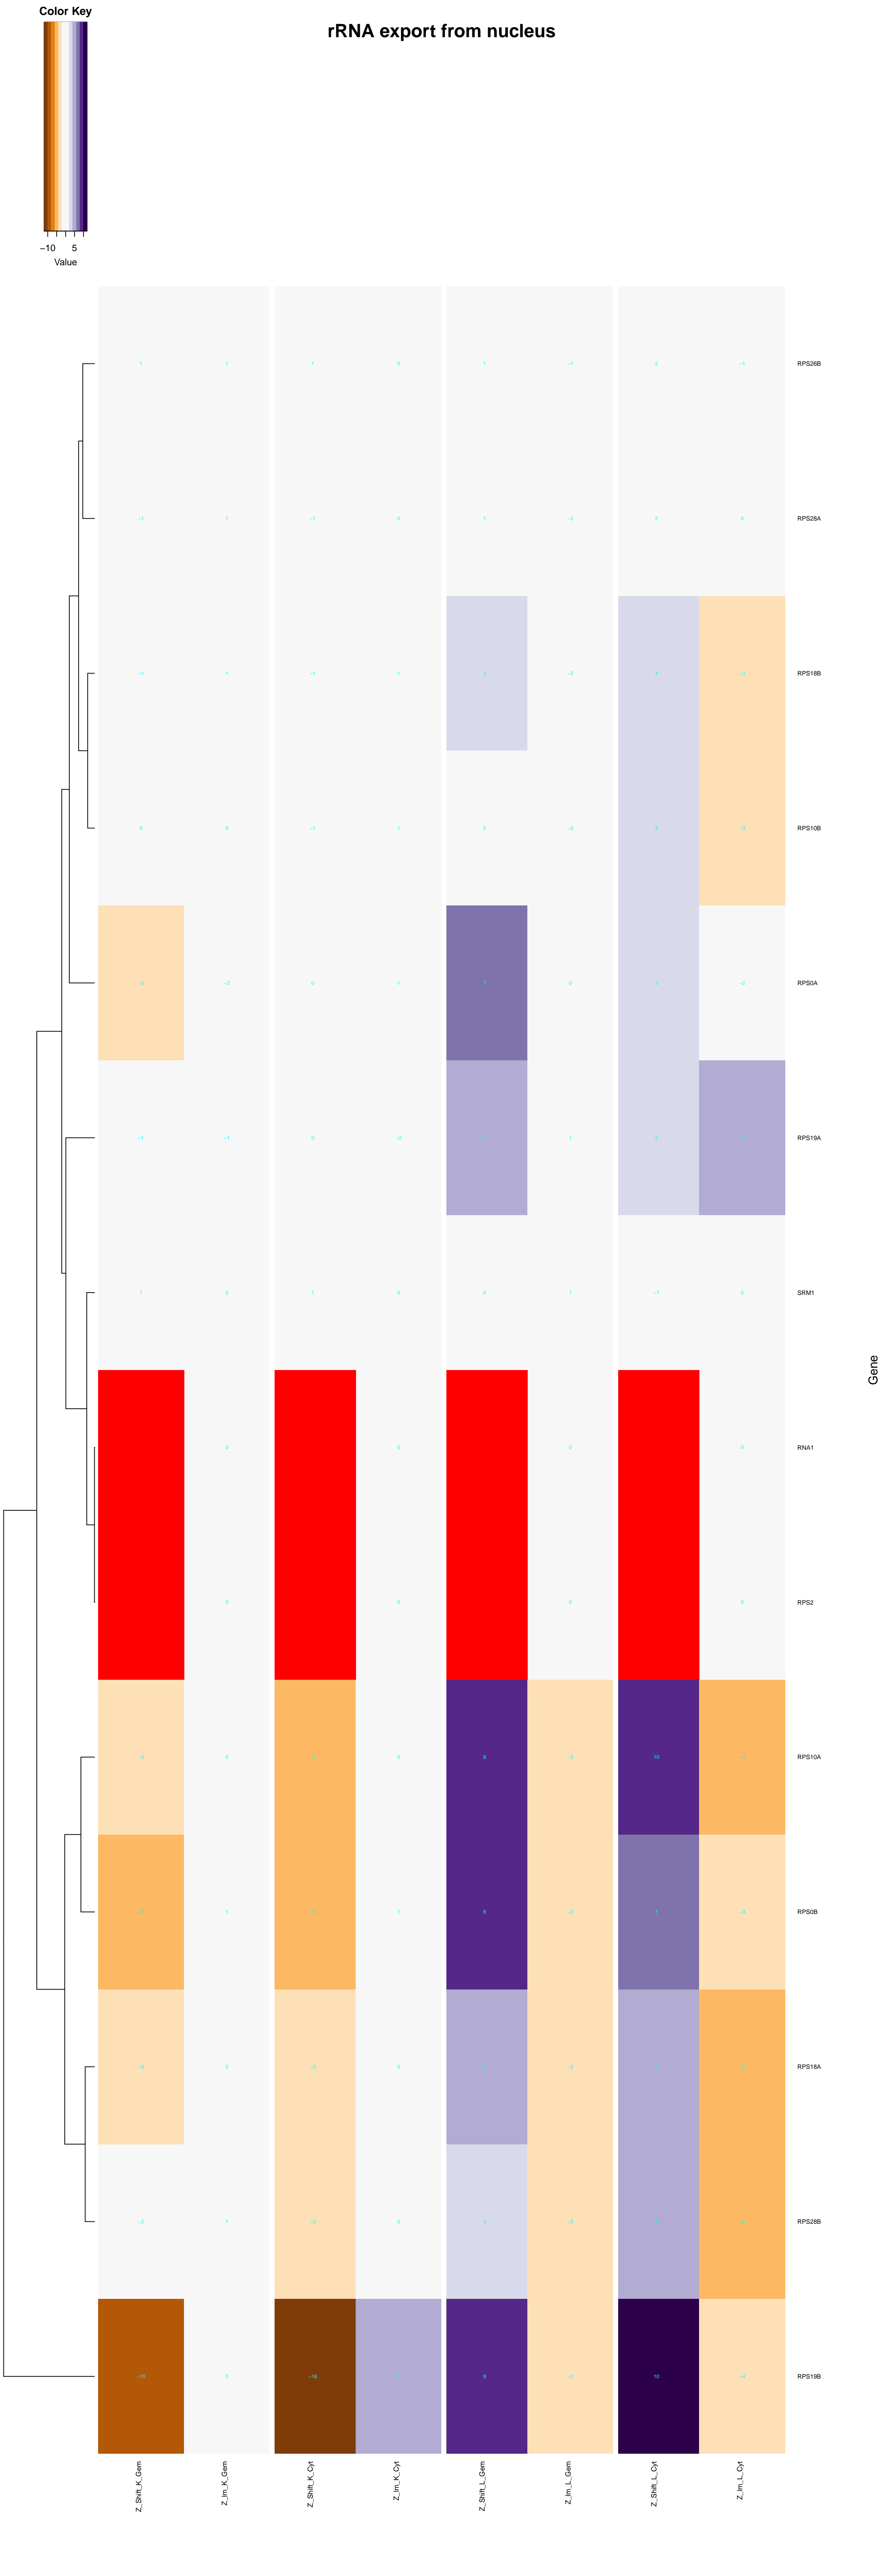

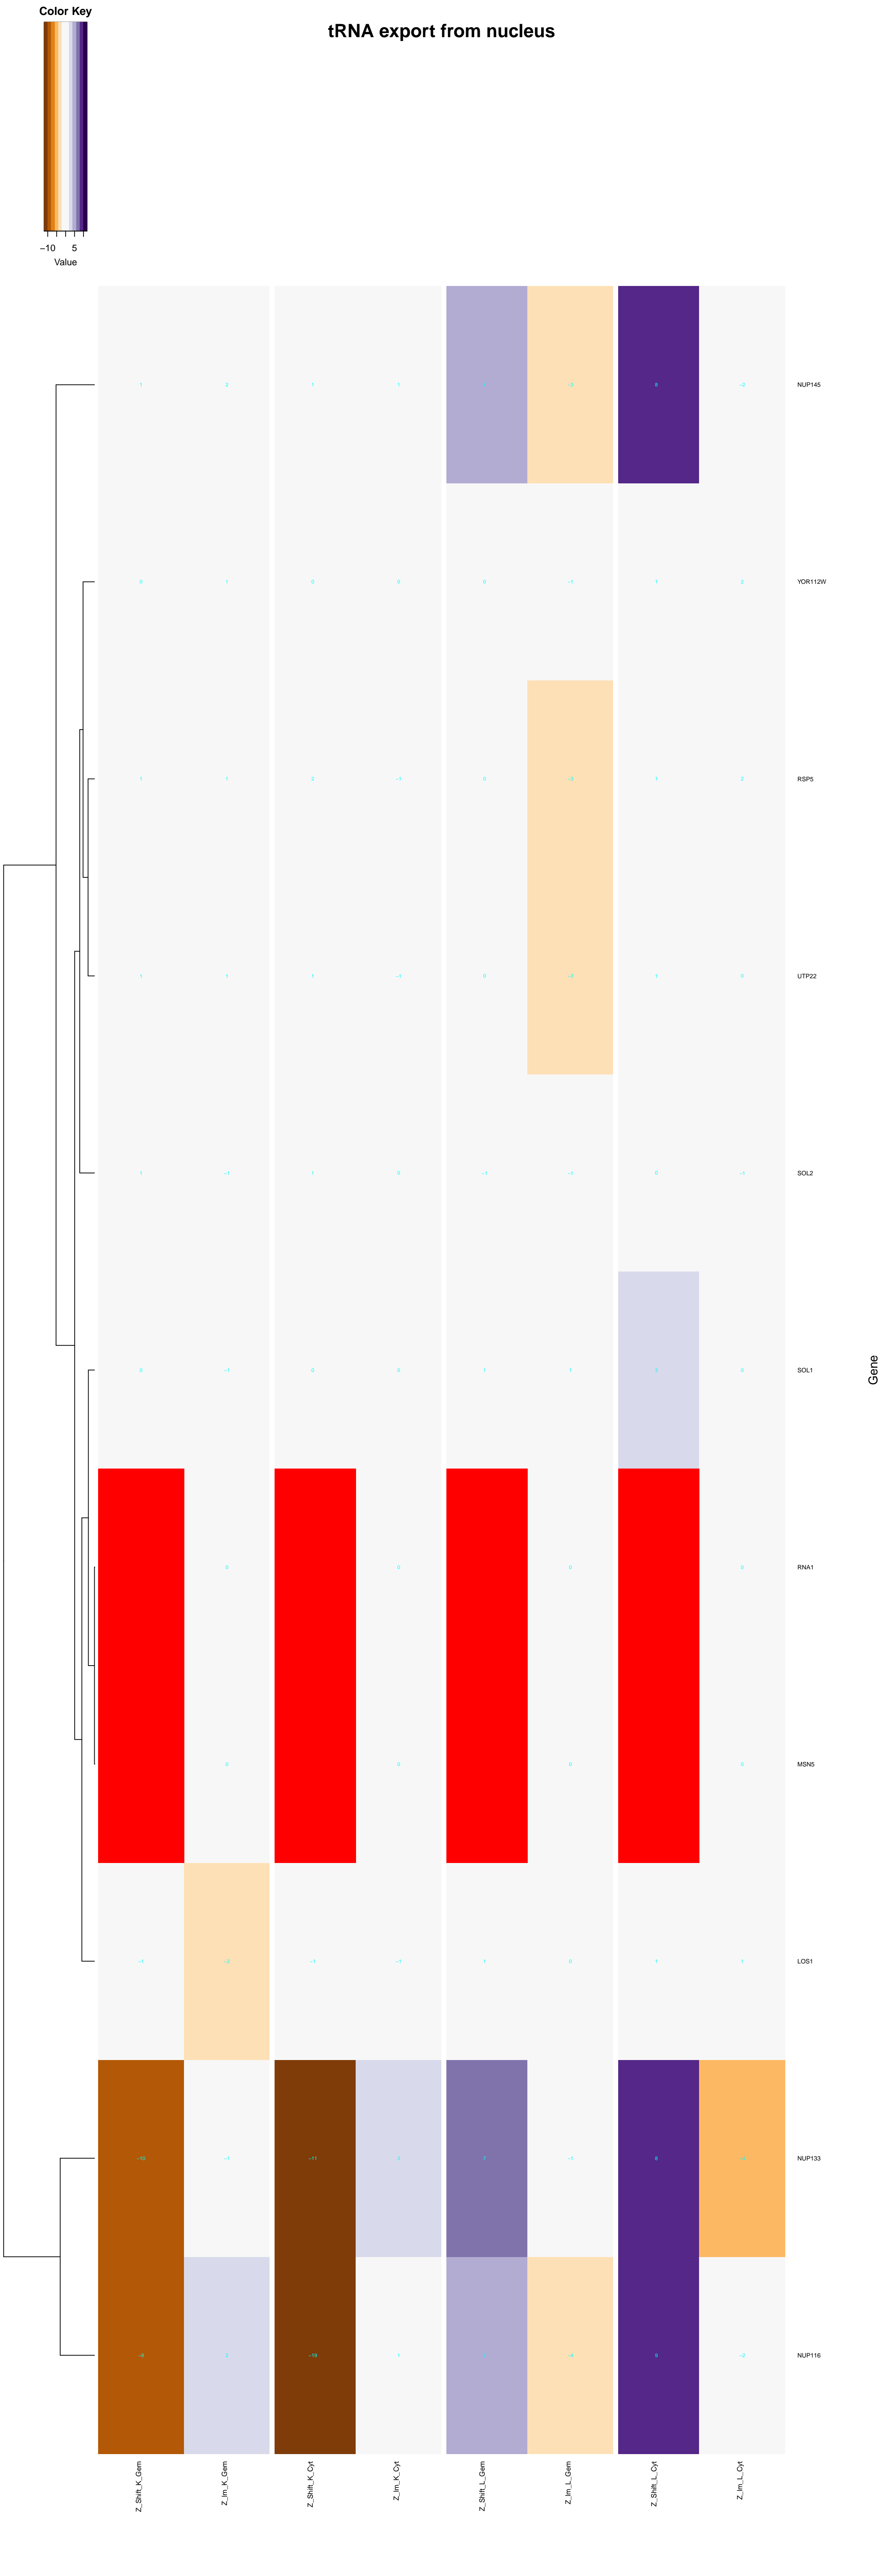

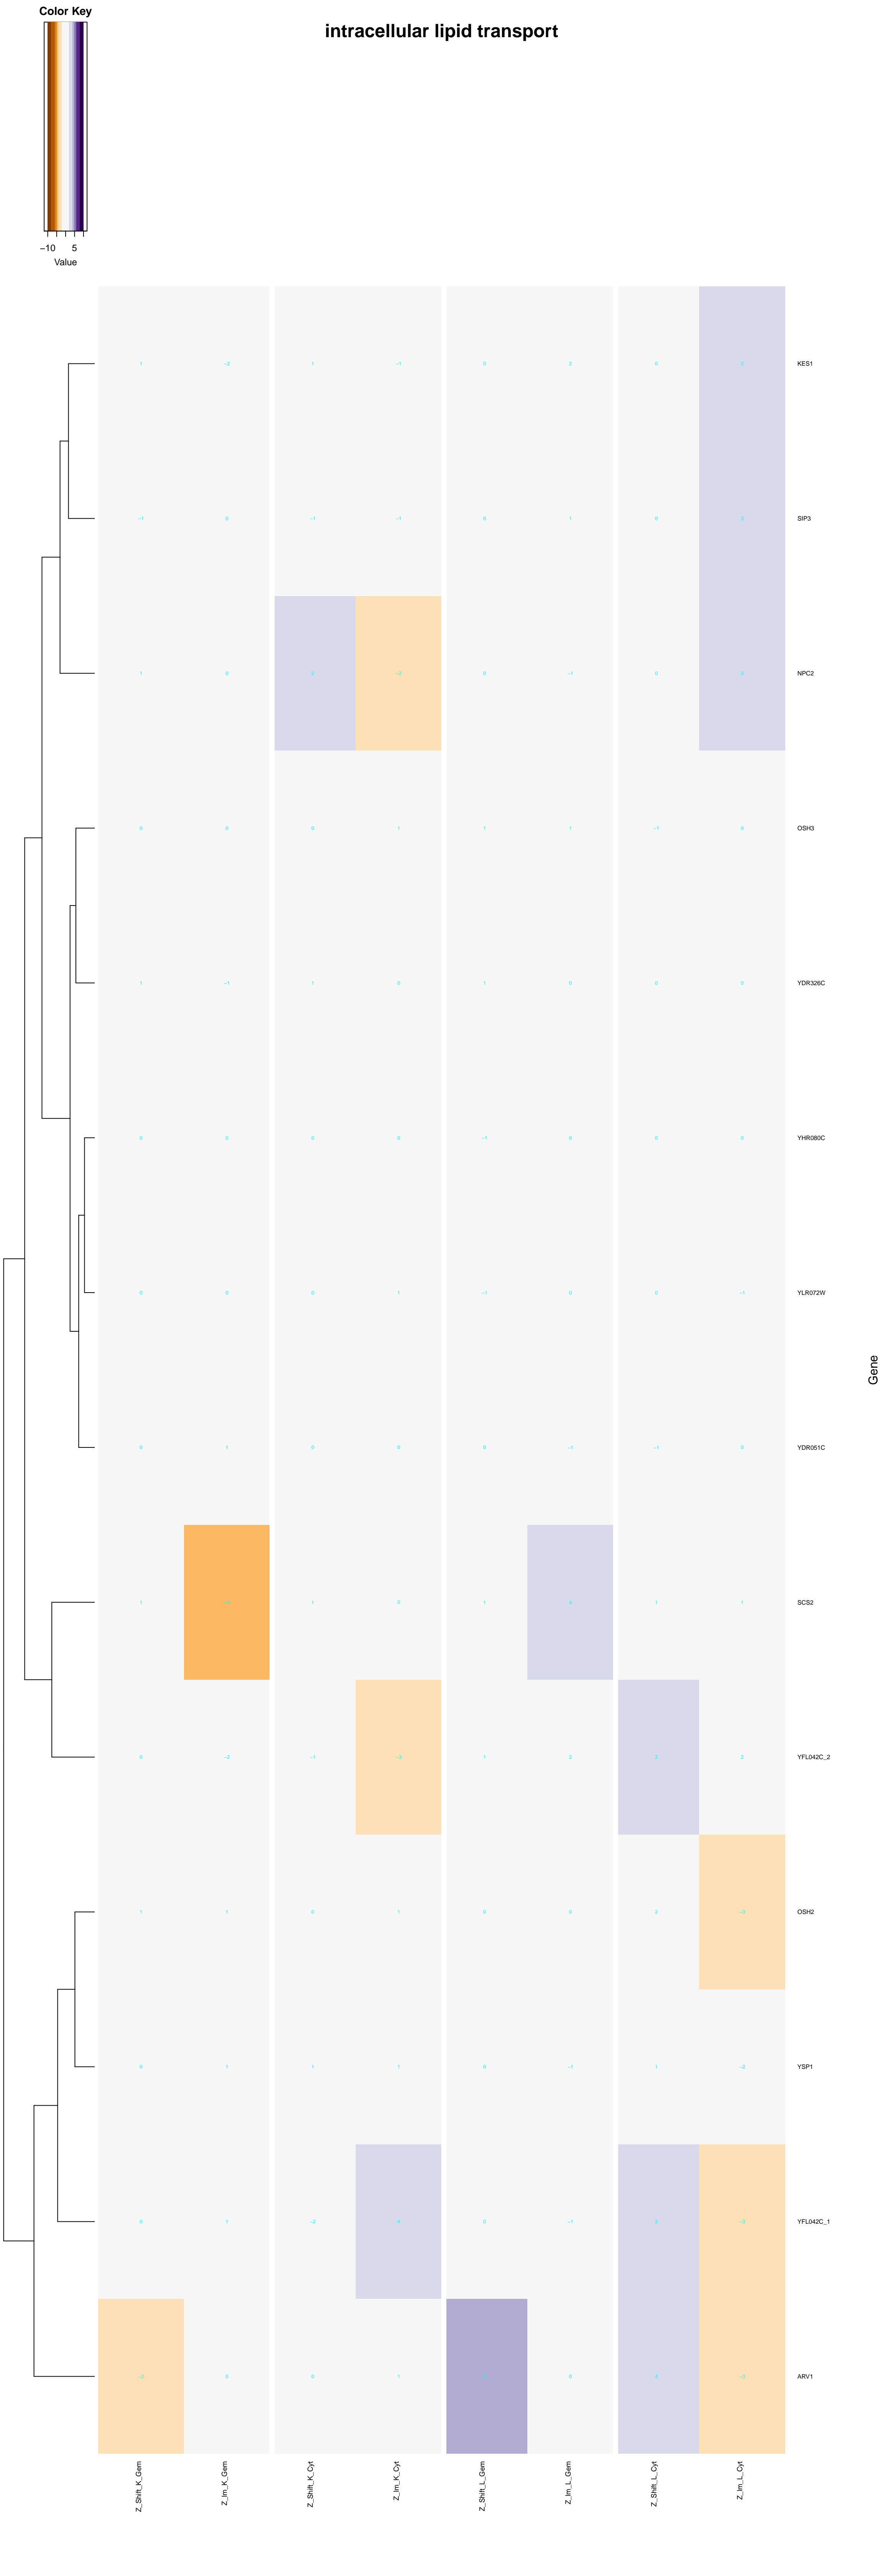

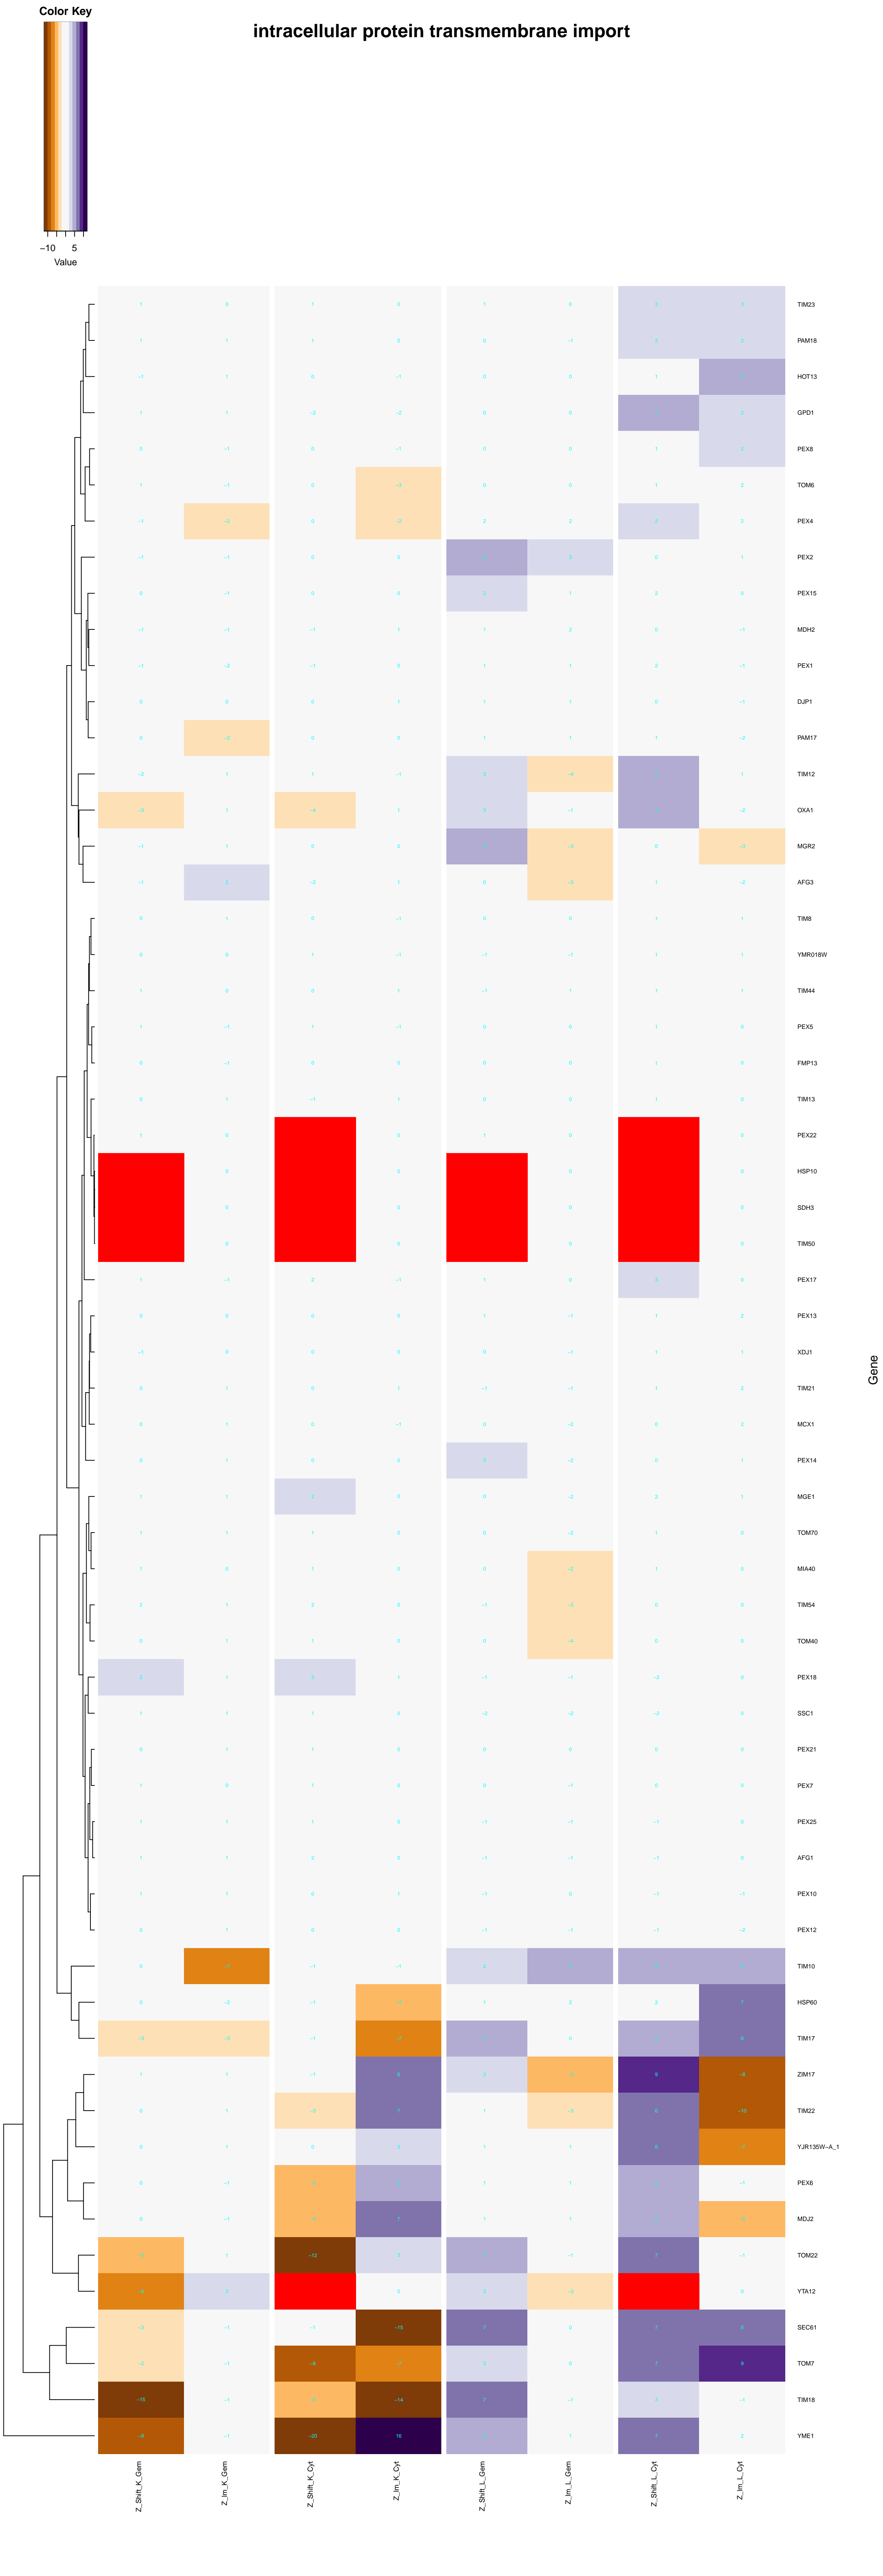

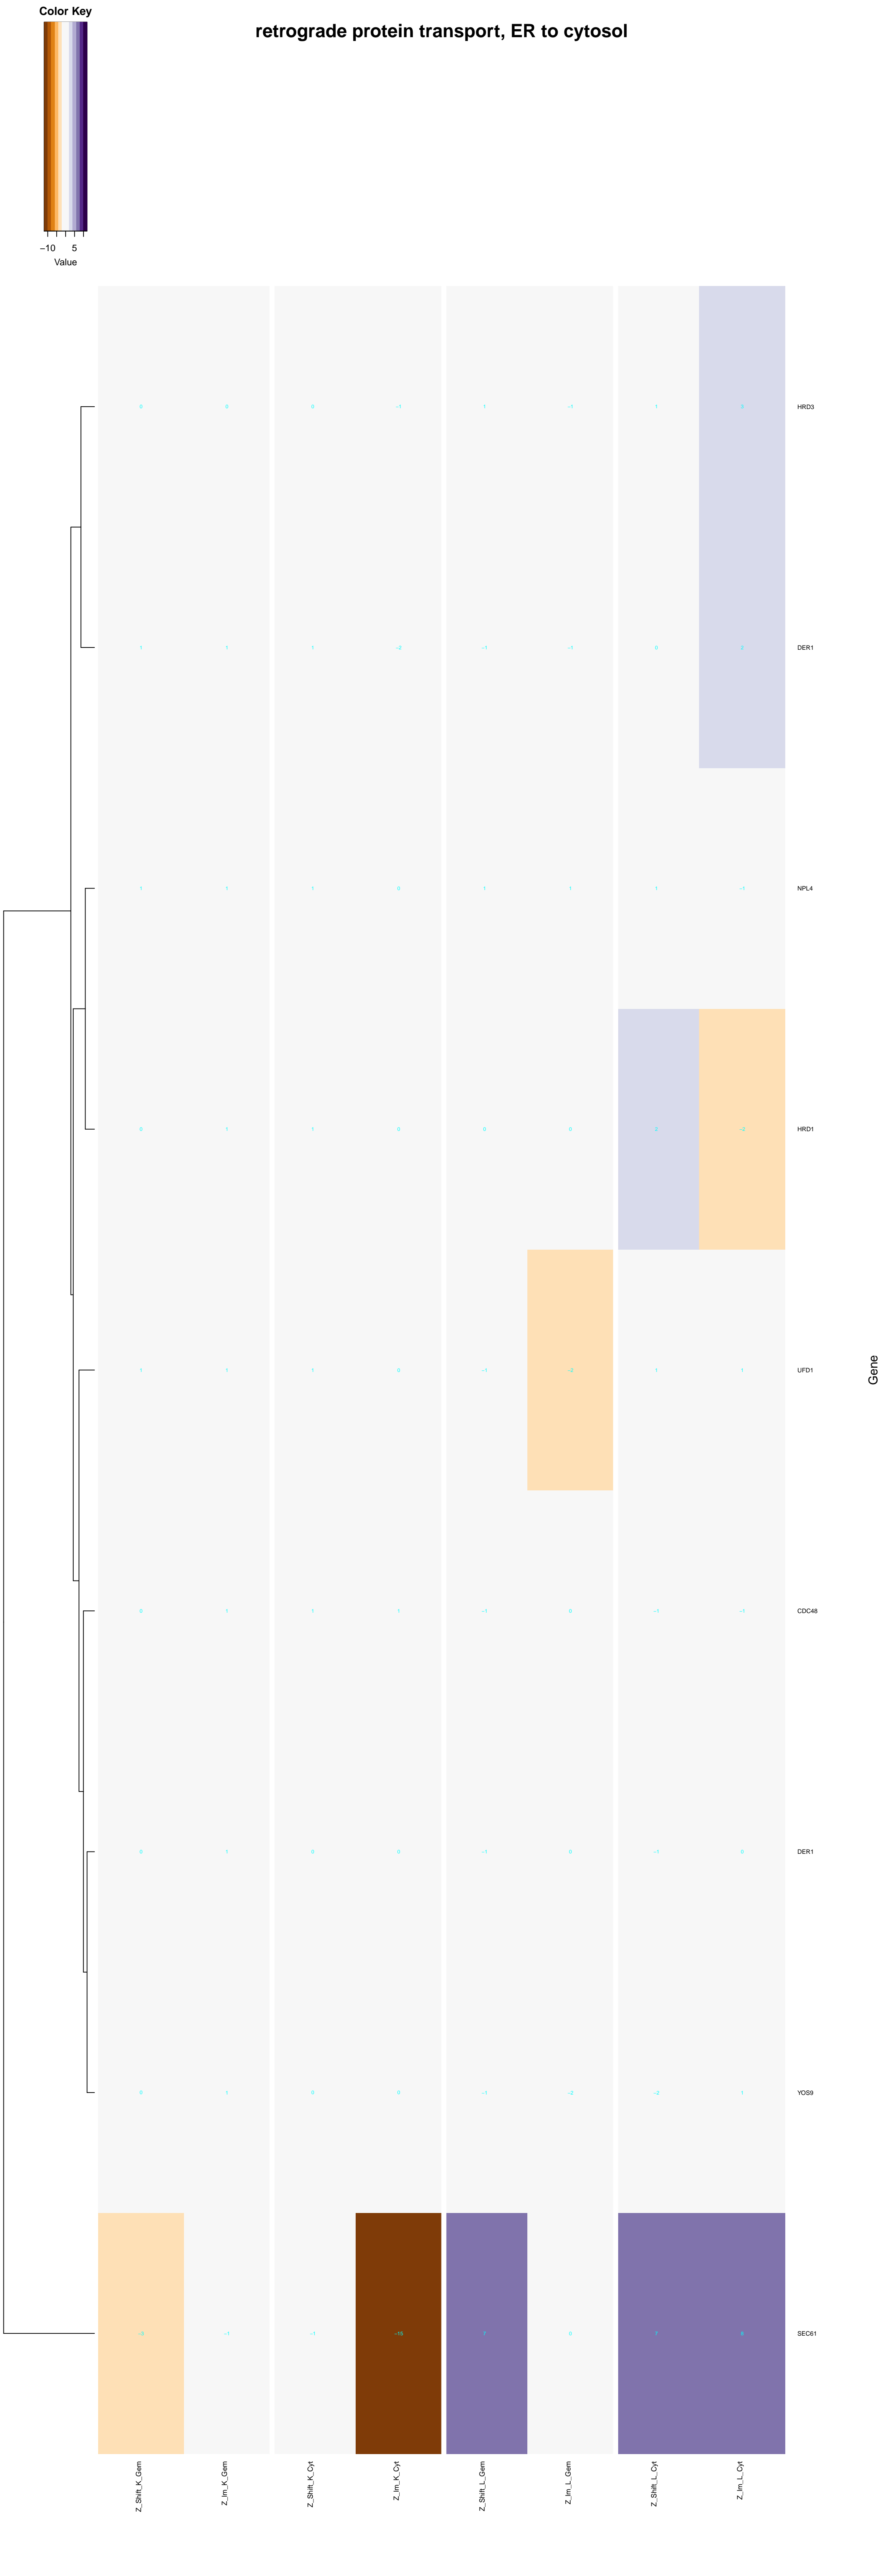

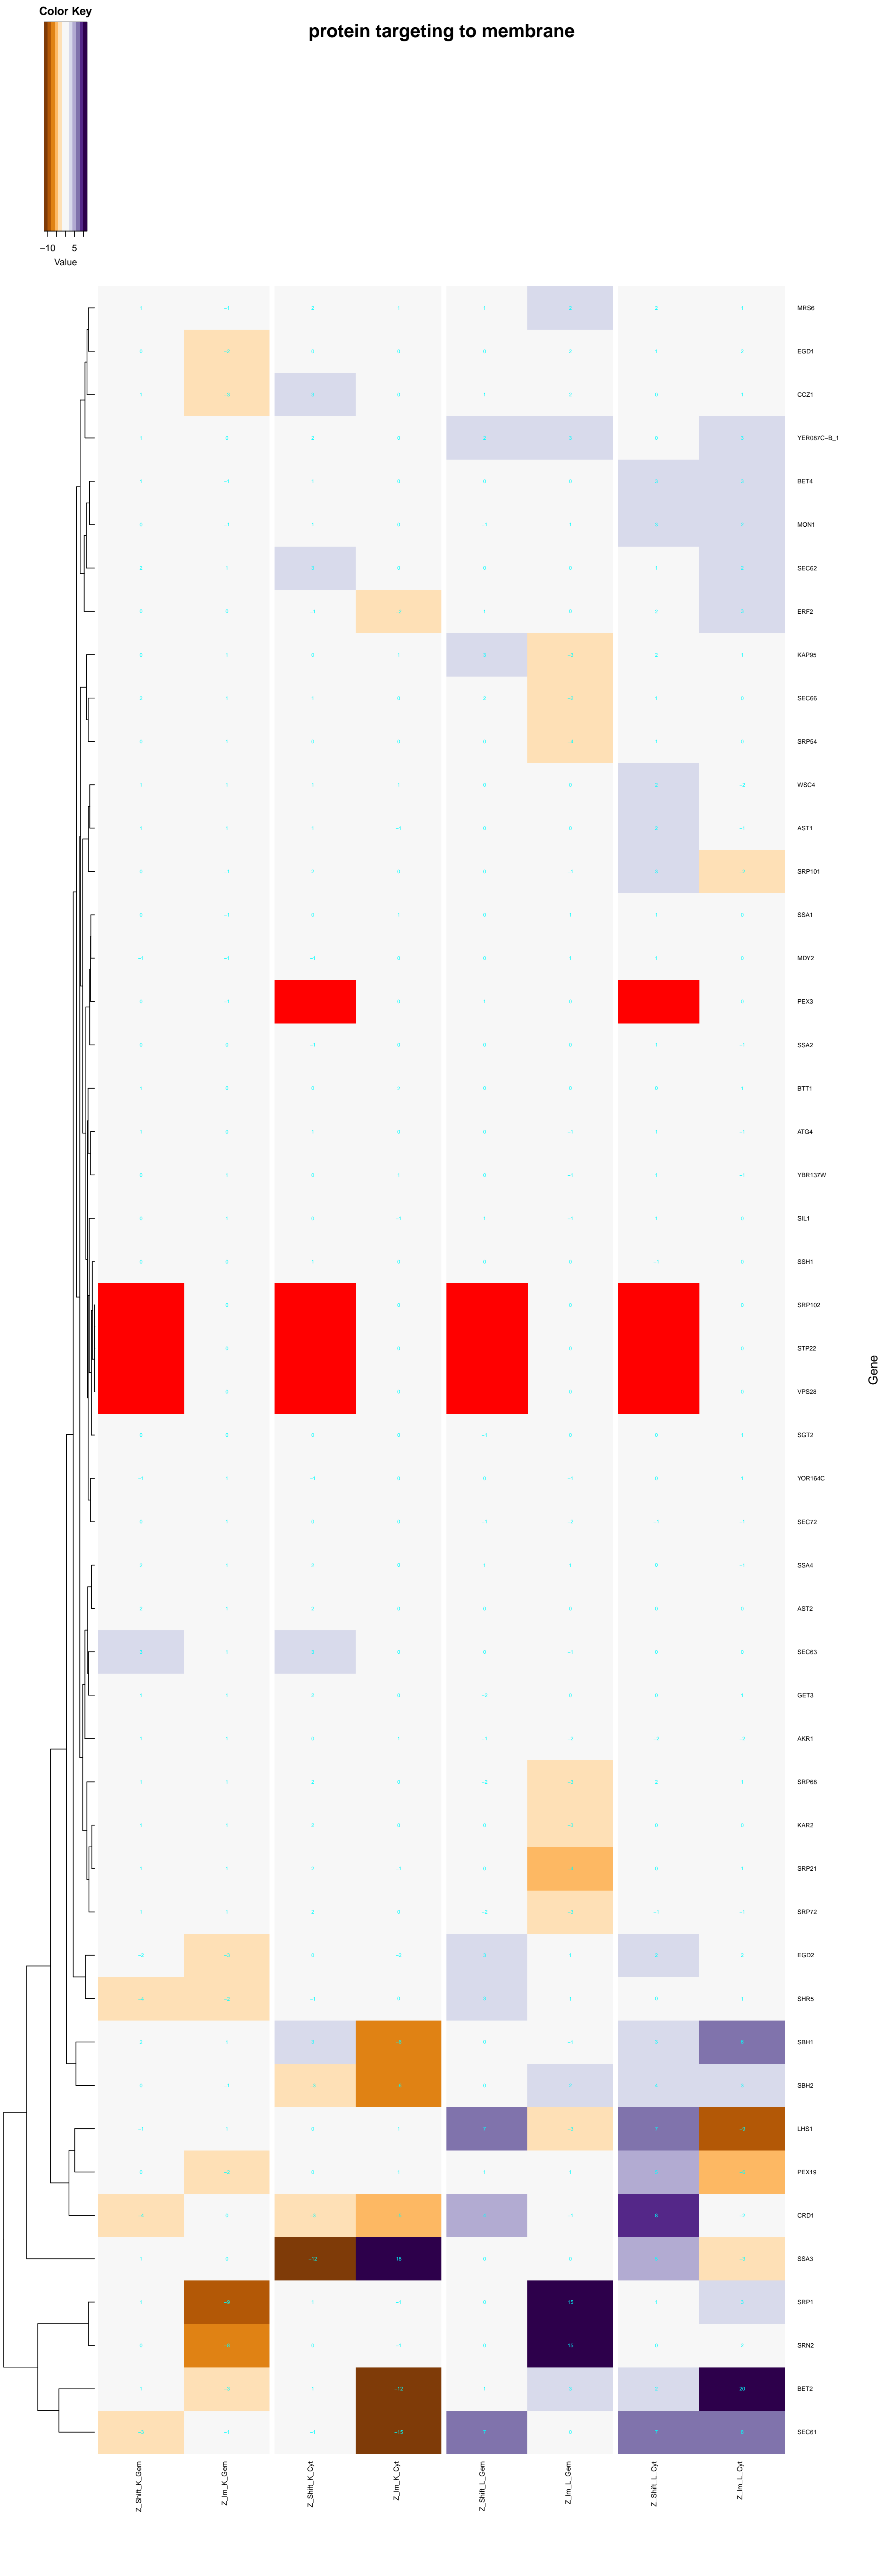

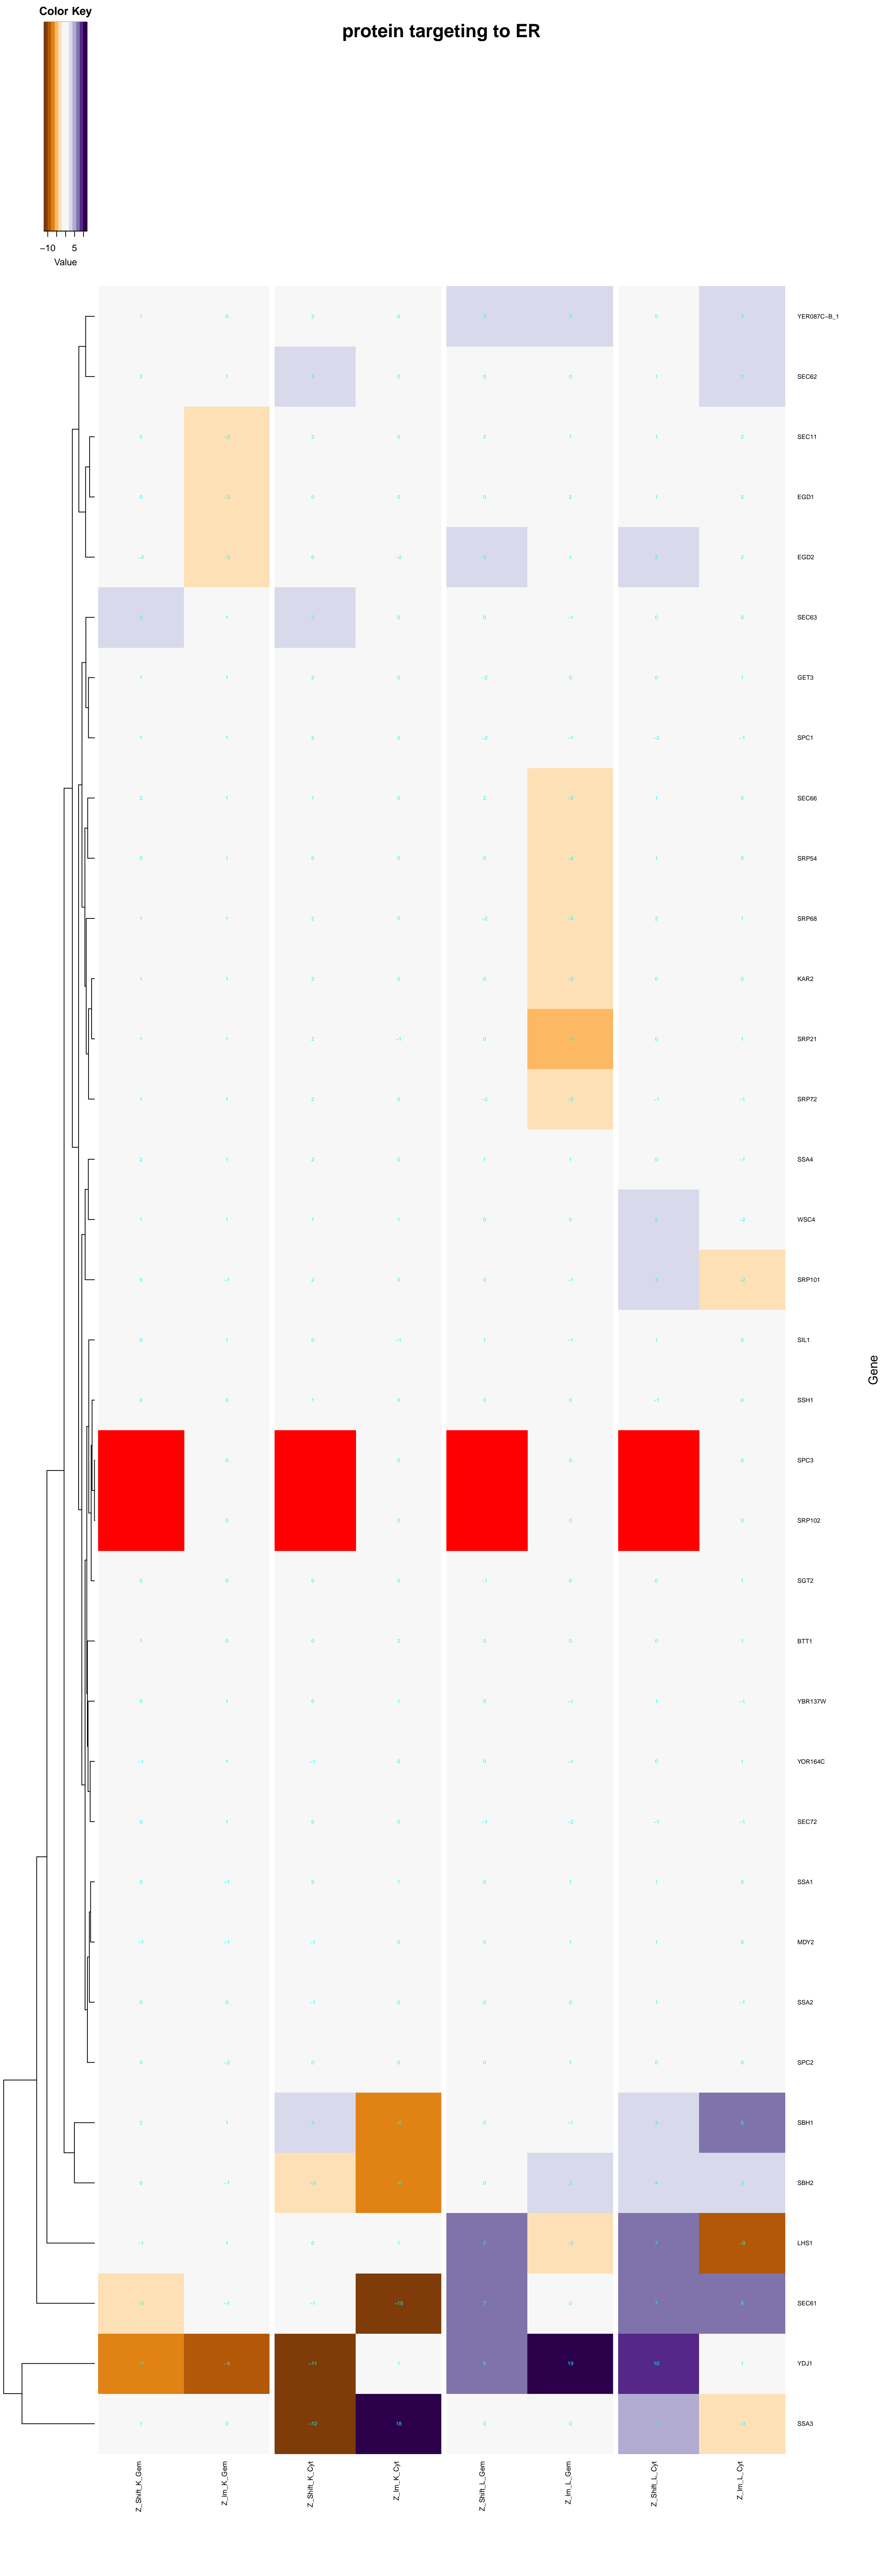

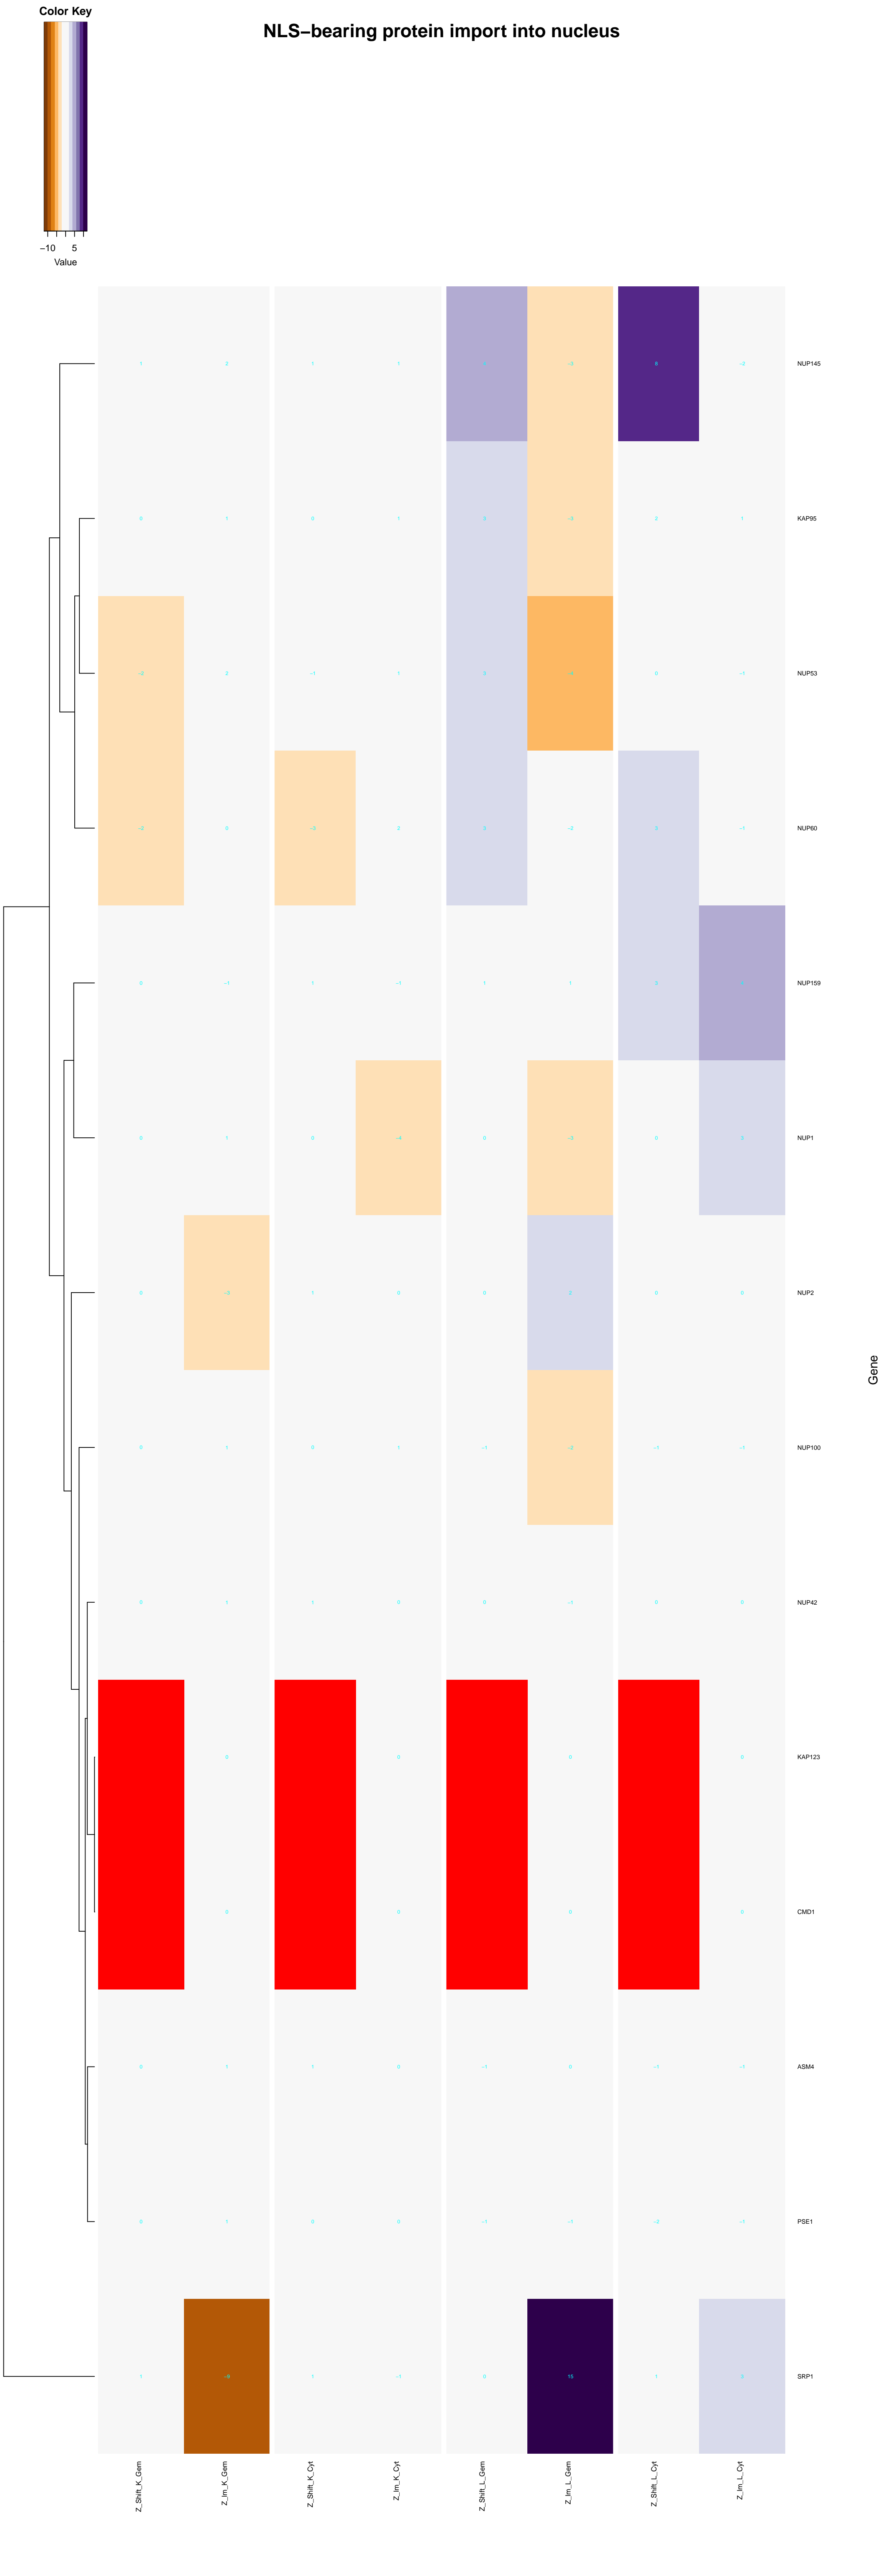

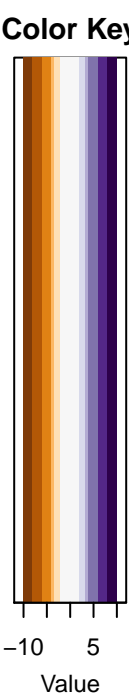

ribosomal protein import into nucleus

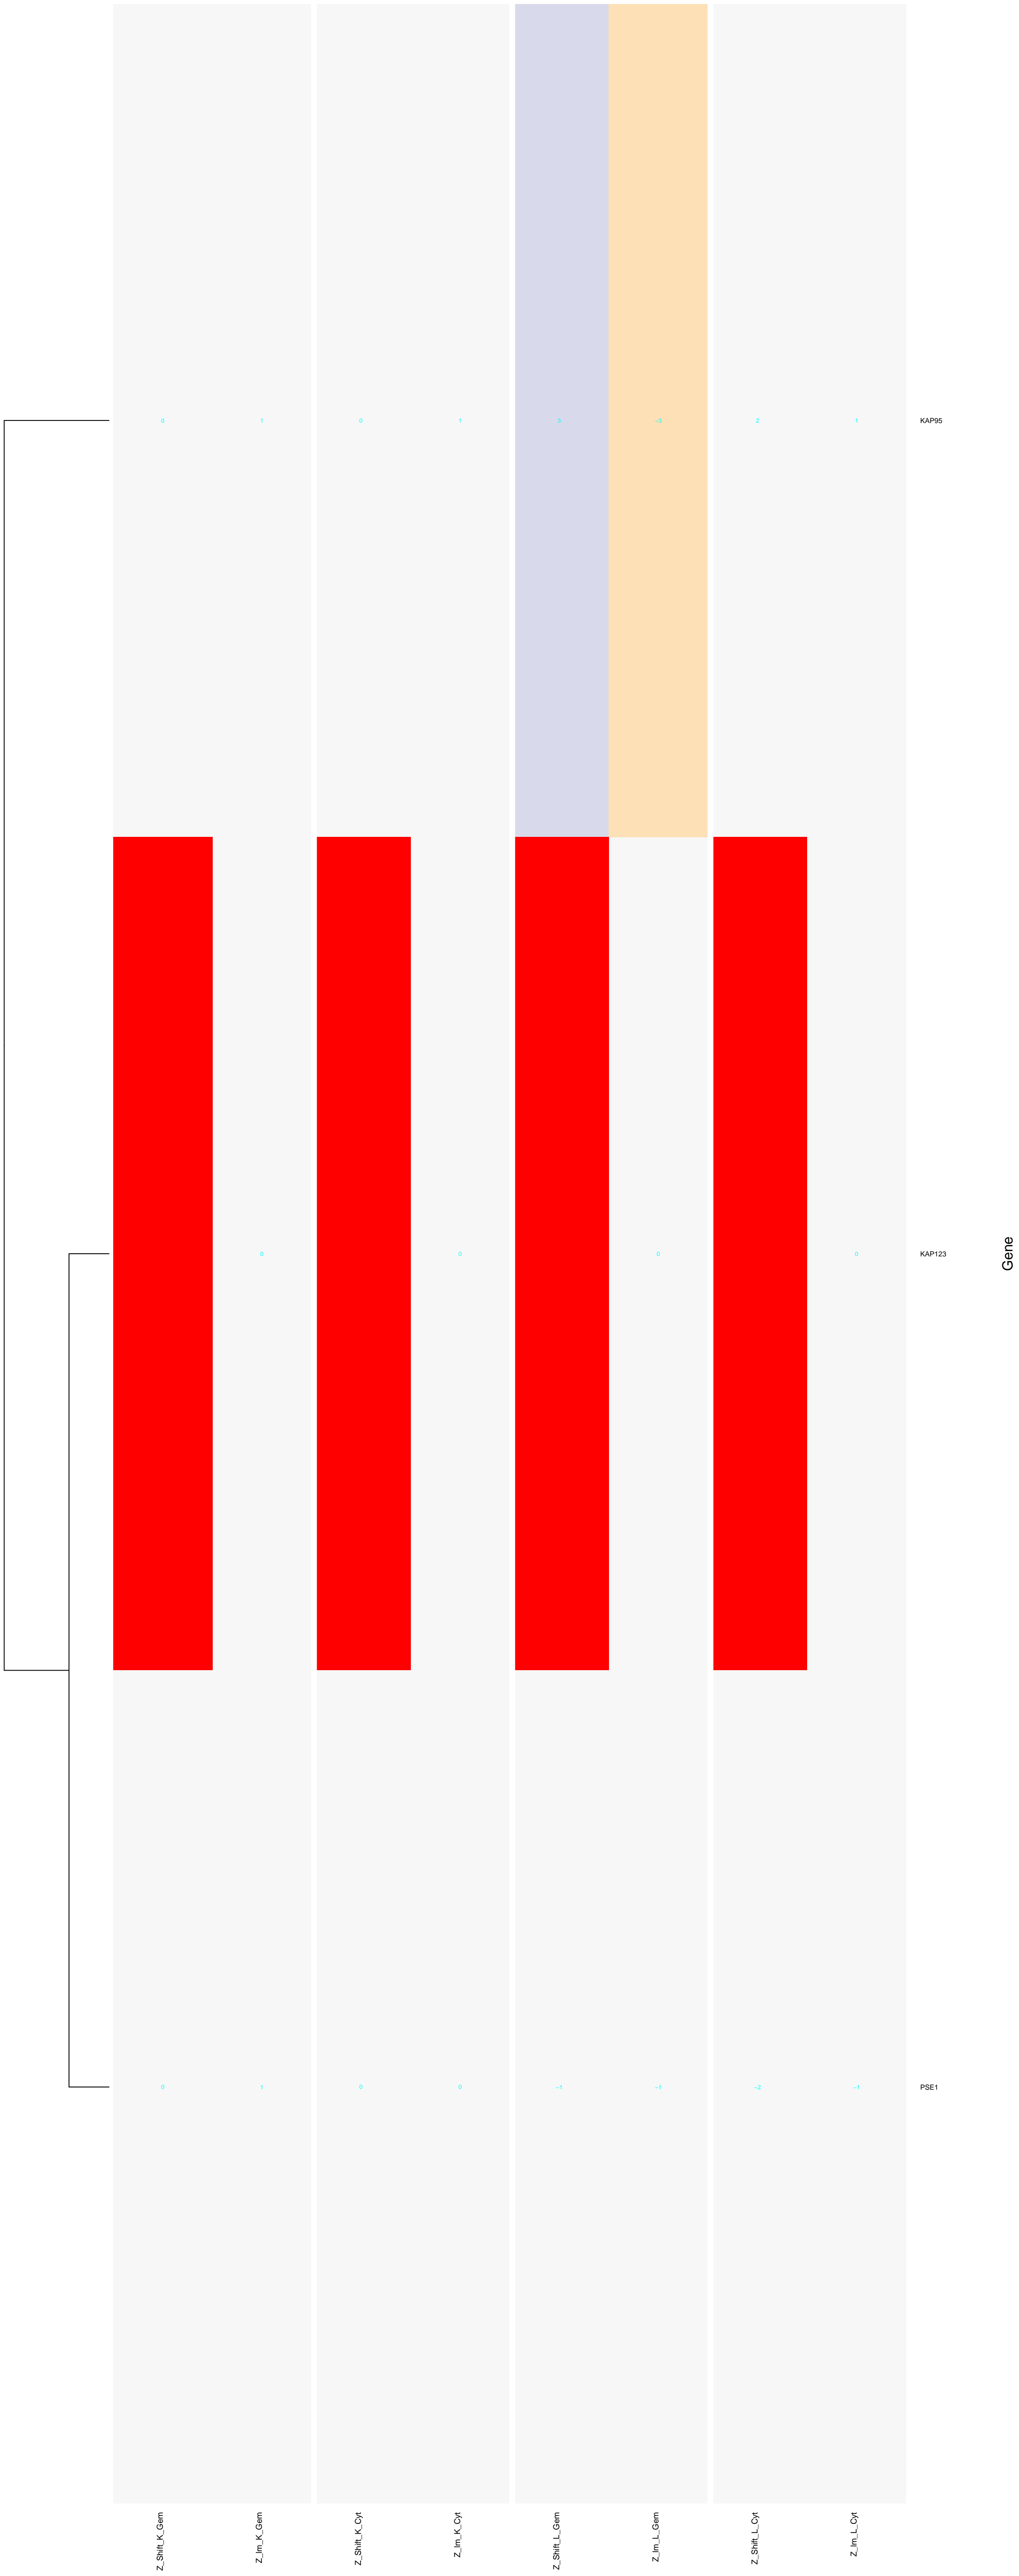

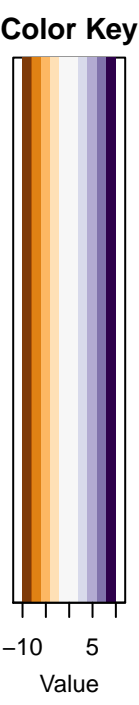

transcription factor import into nucleus

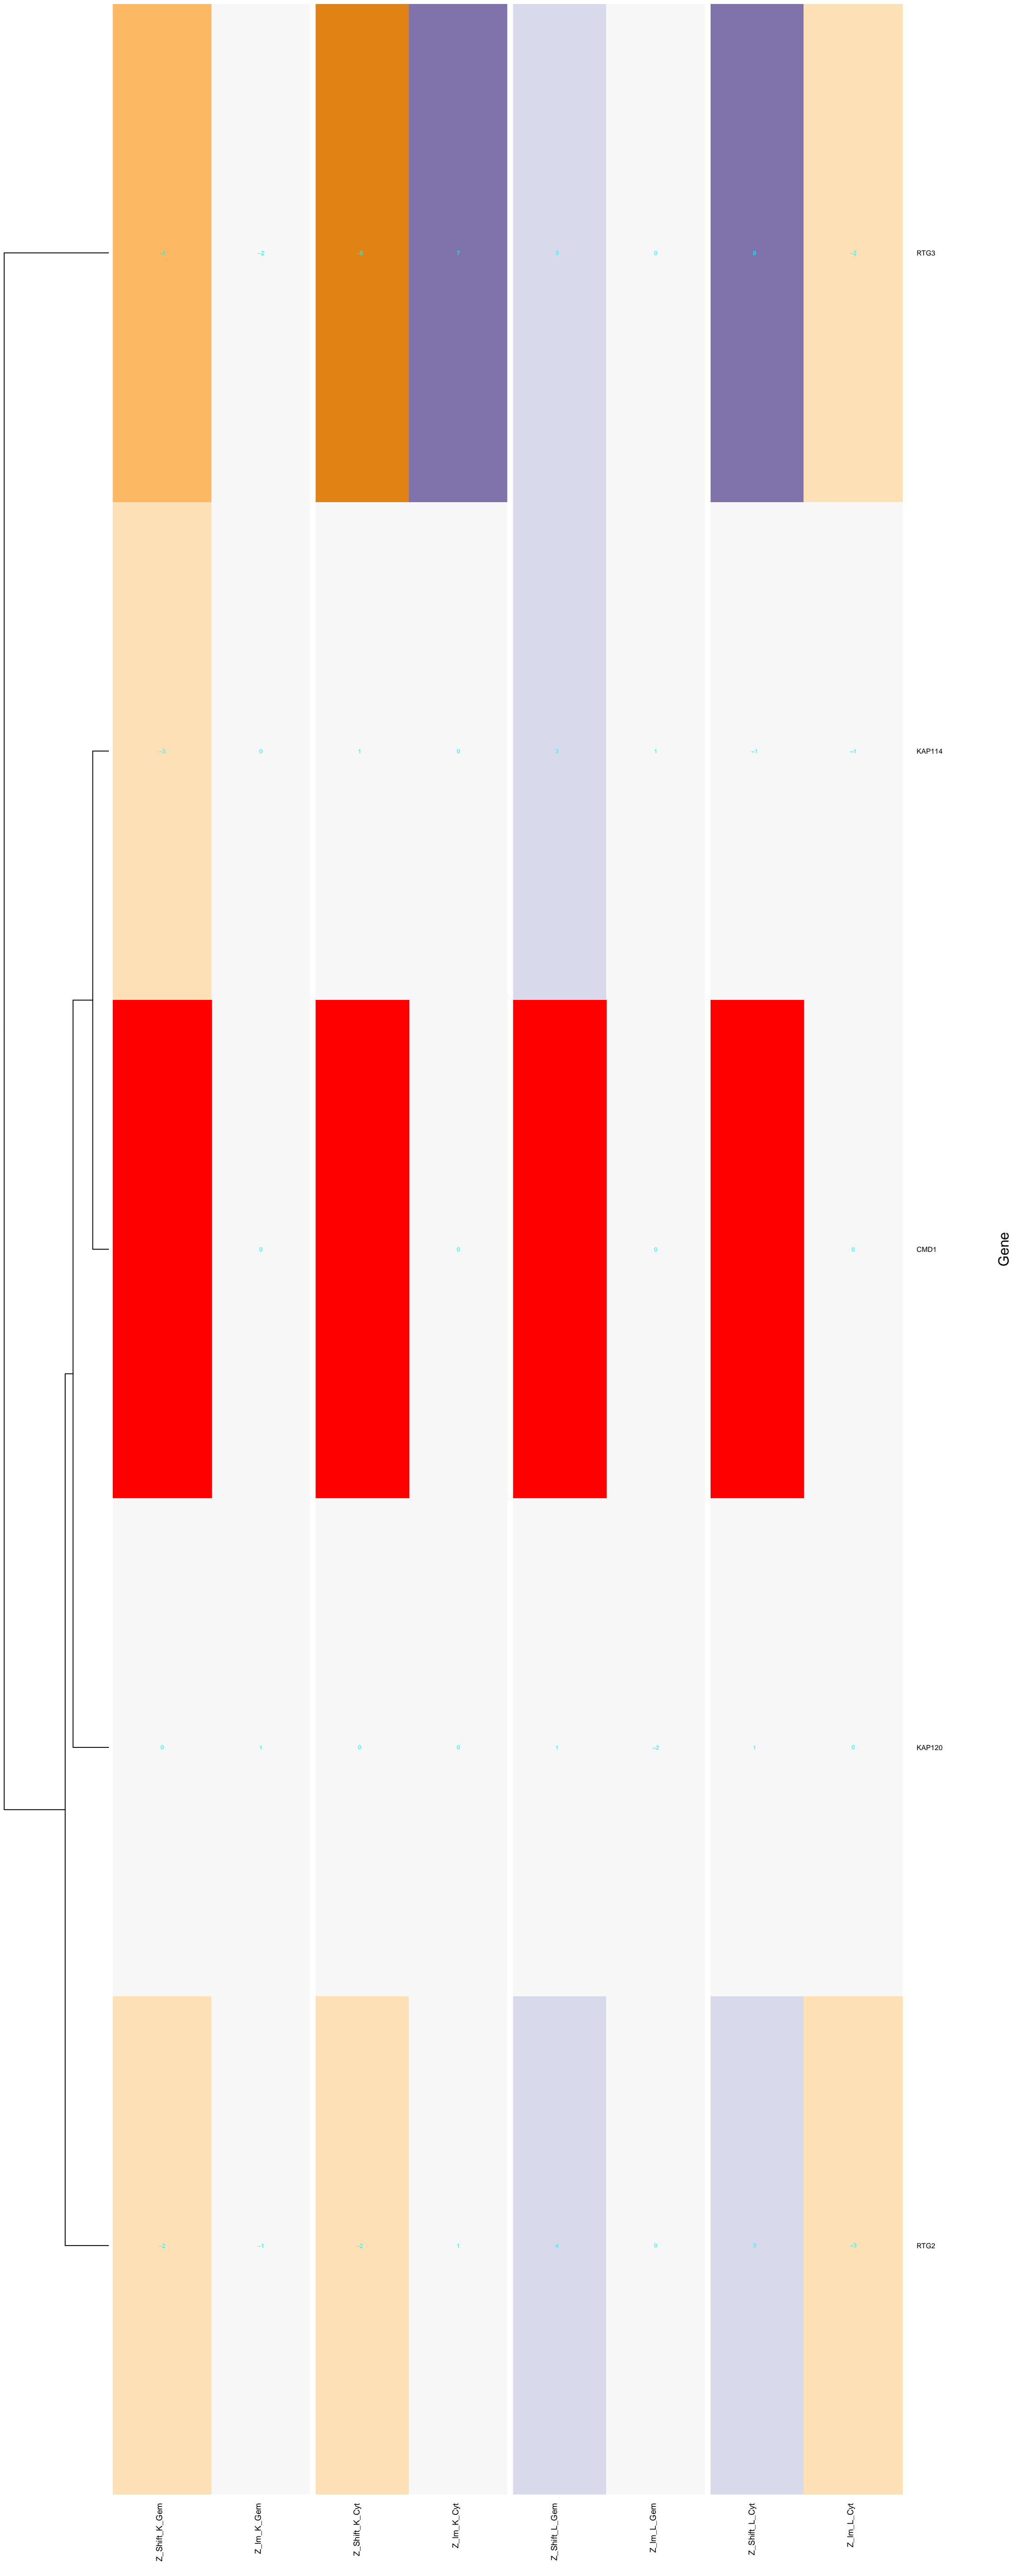

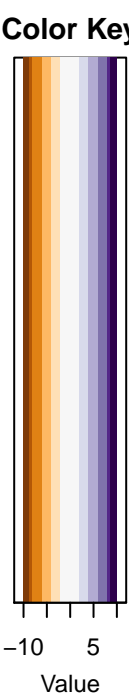

RNA polymerase II complex import to nucleus

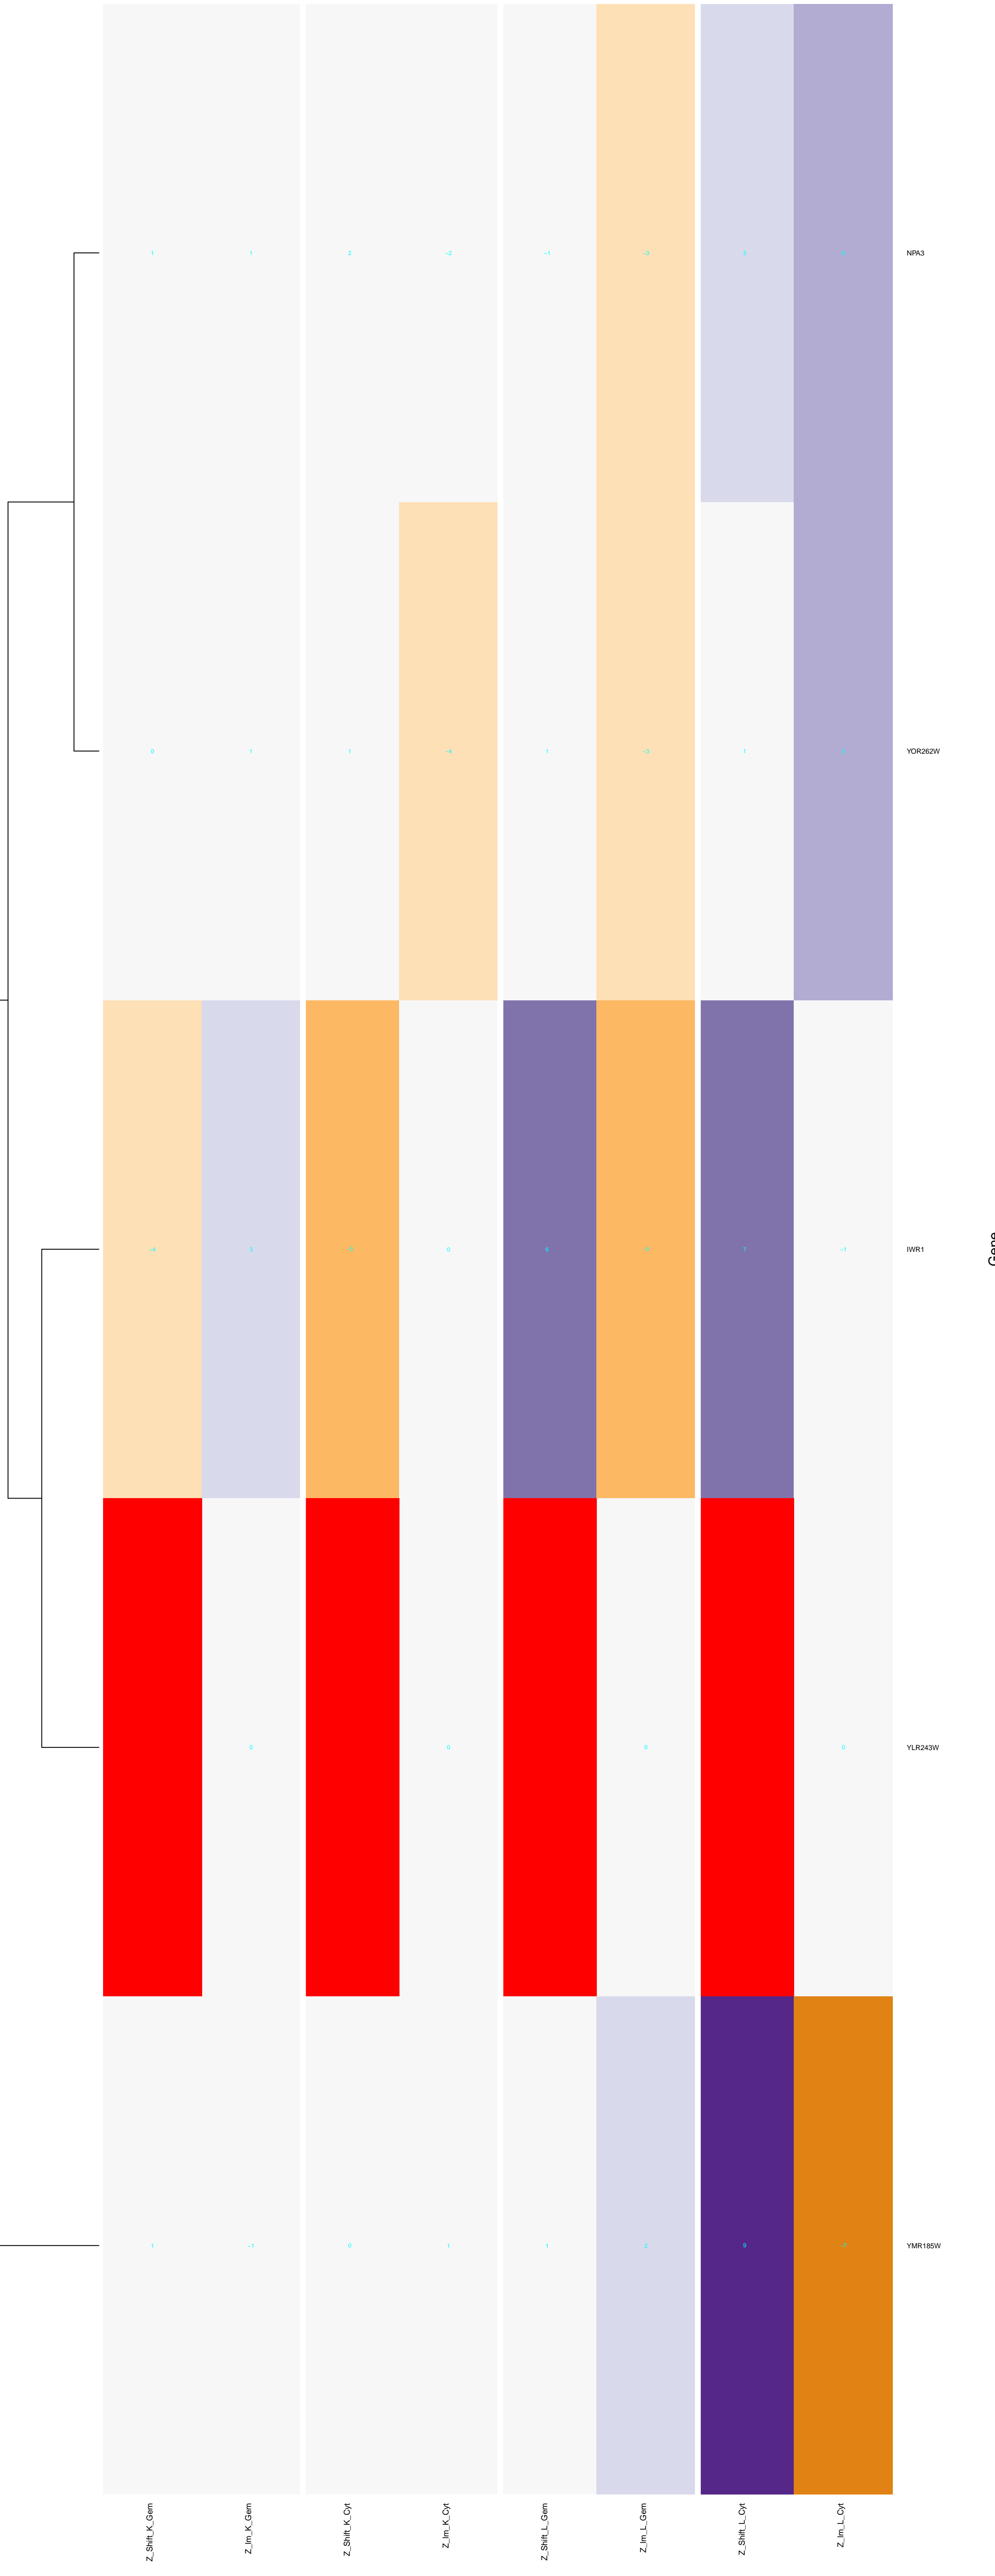



SRP-dependent cotranslational protein targeting to membrane, translocation

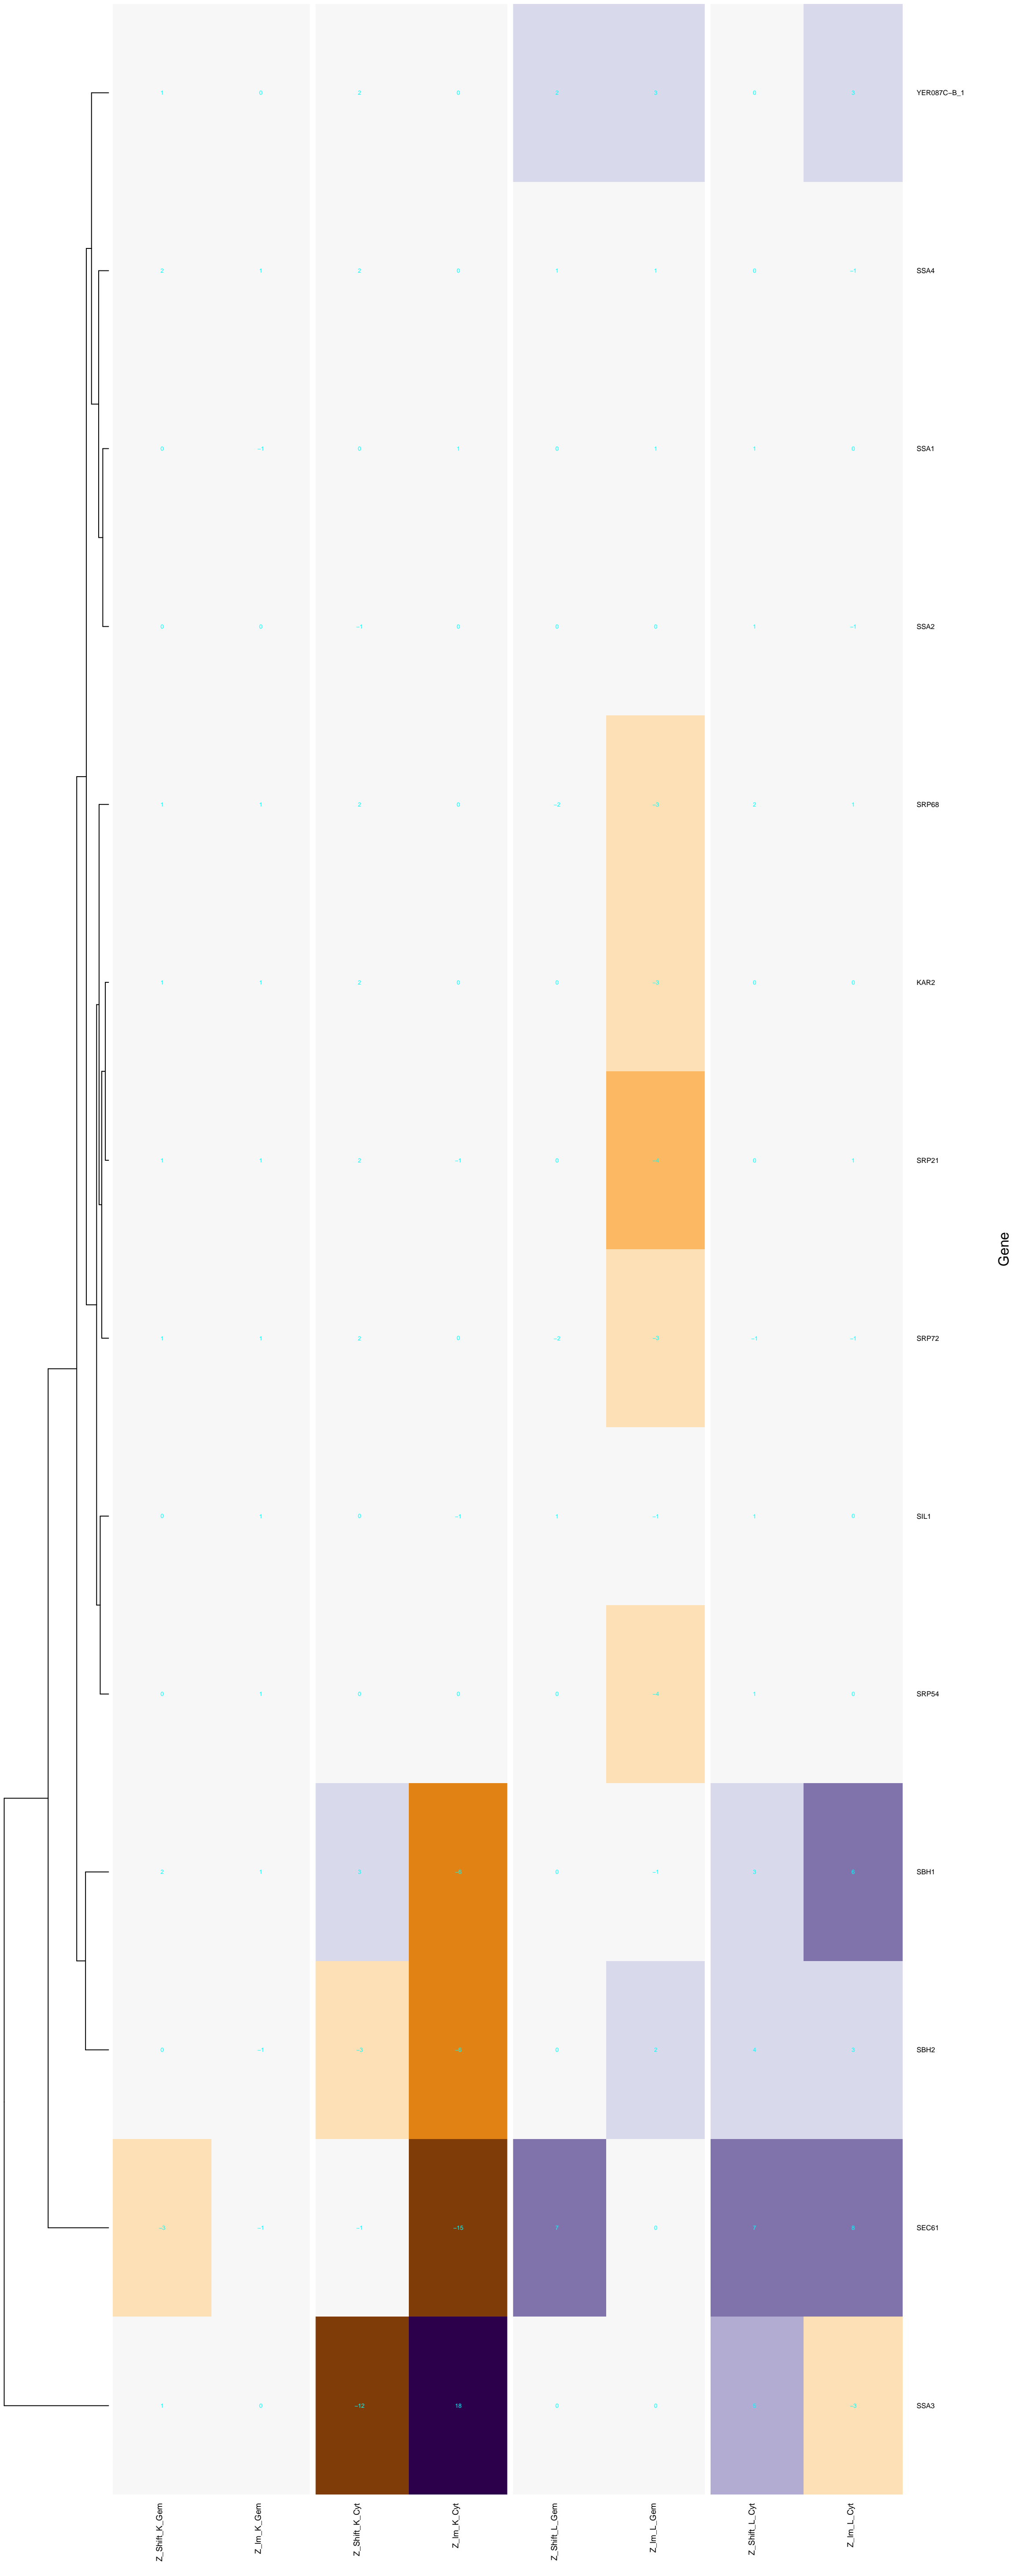



posttranslational protein targeting to membrane, translocation

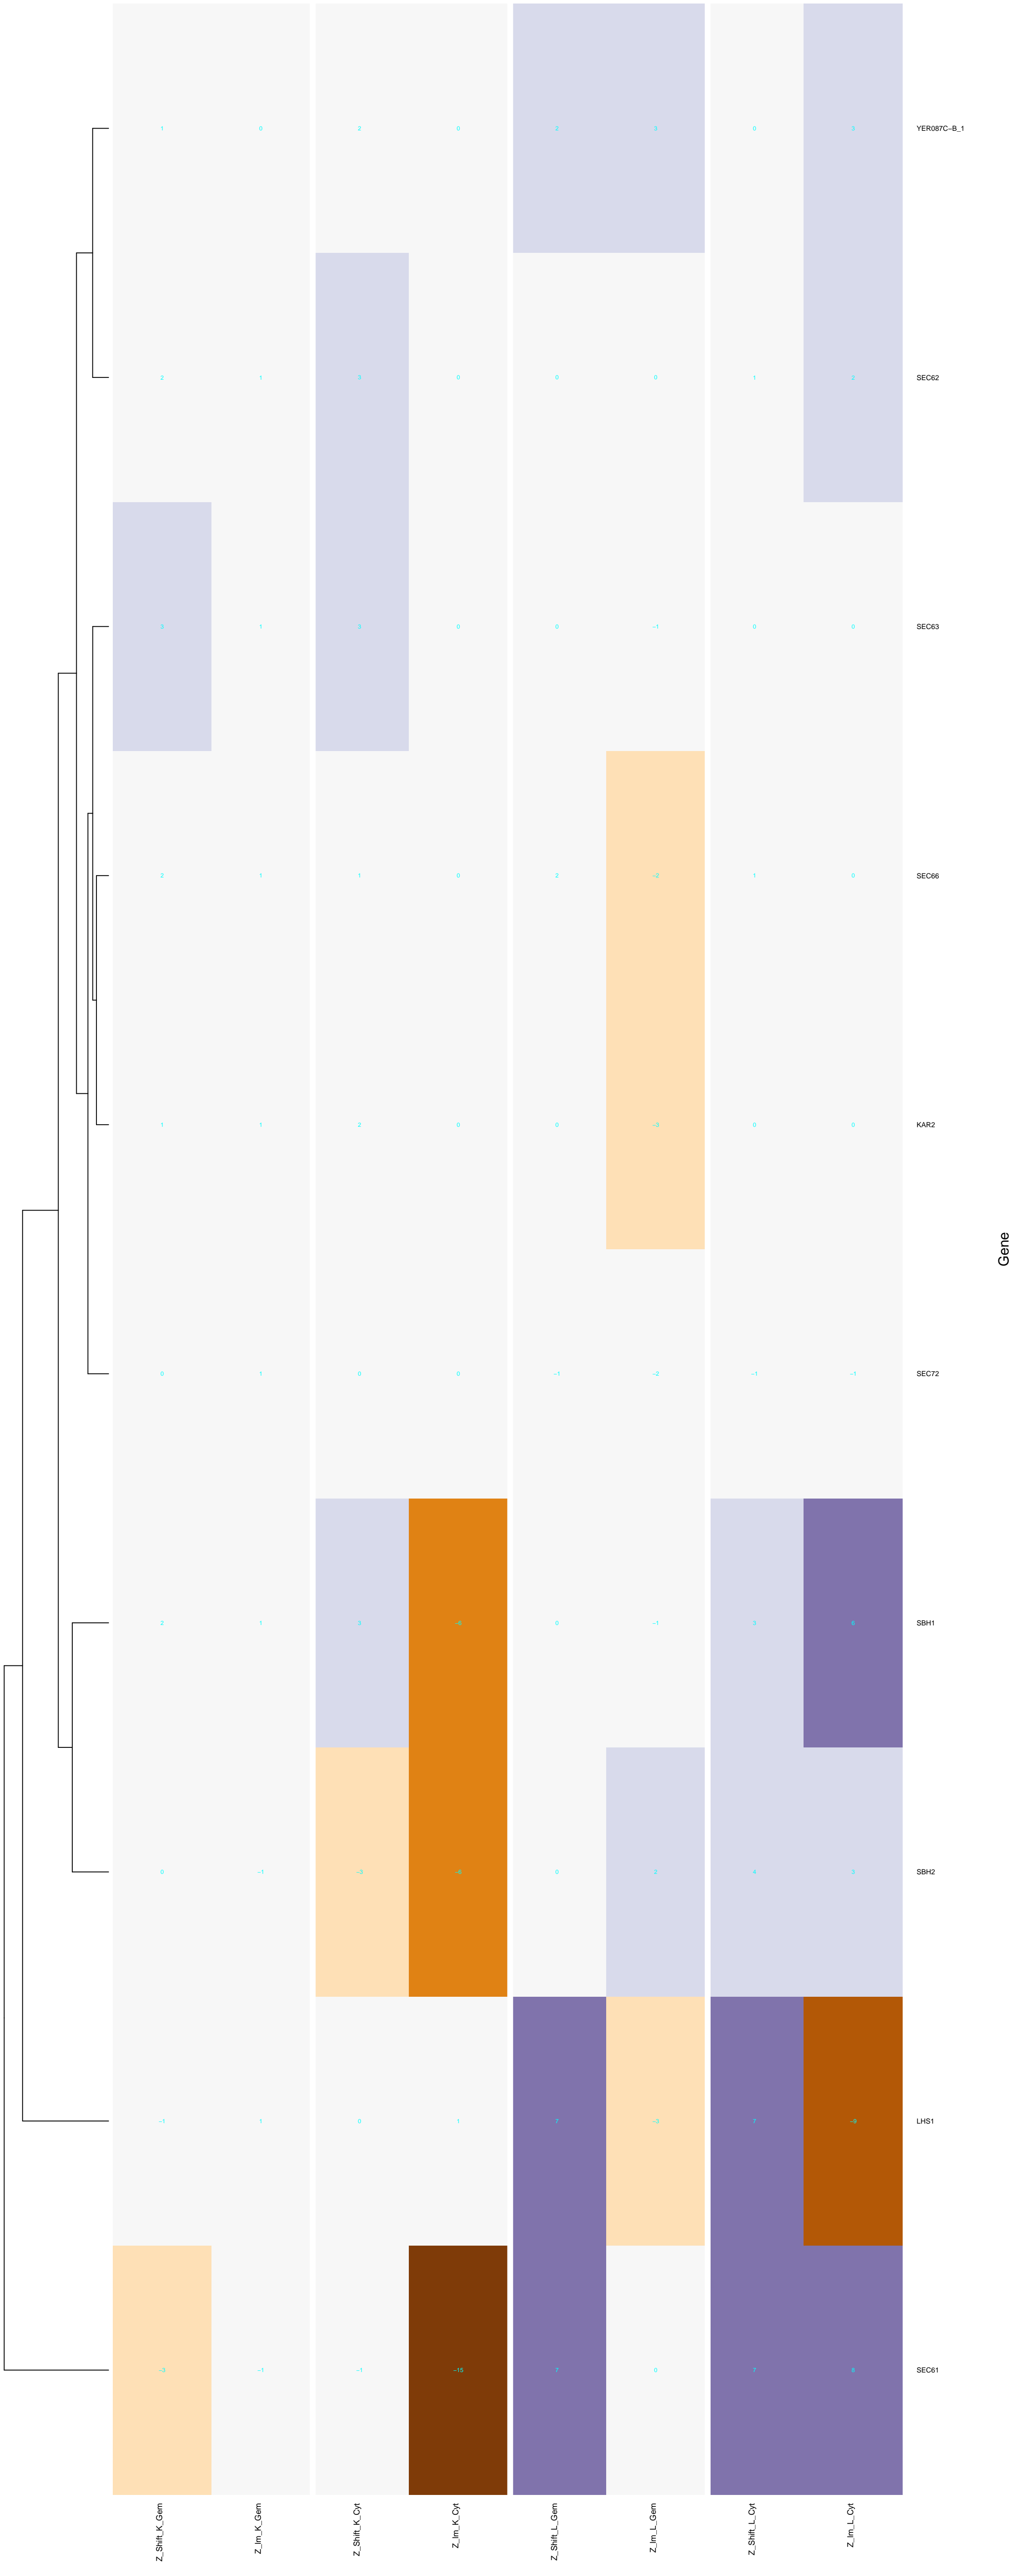

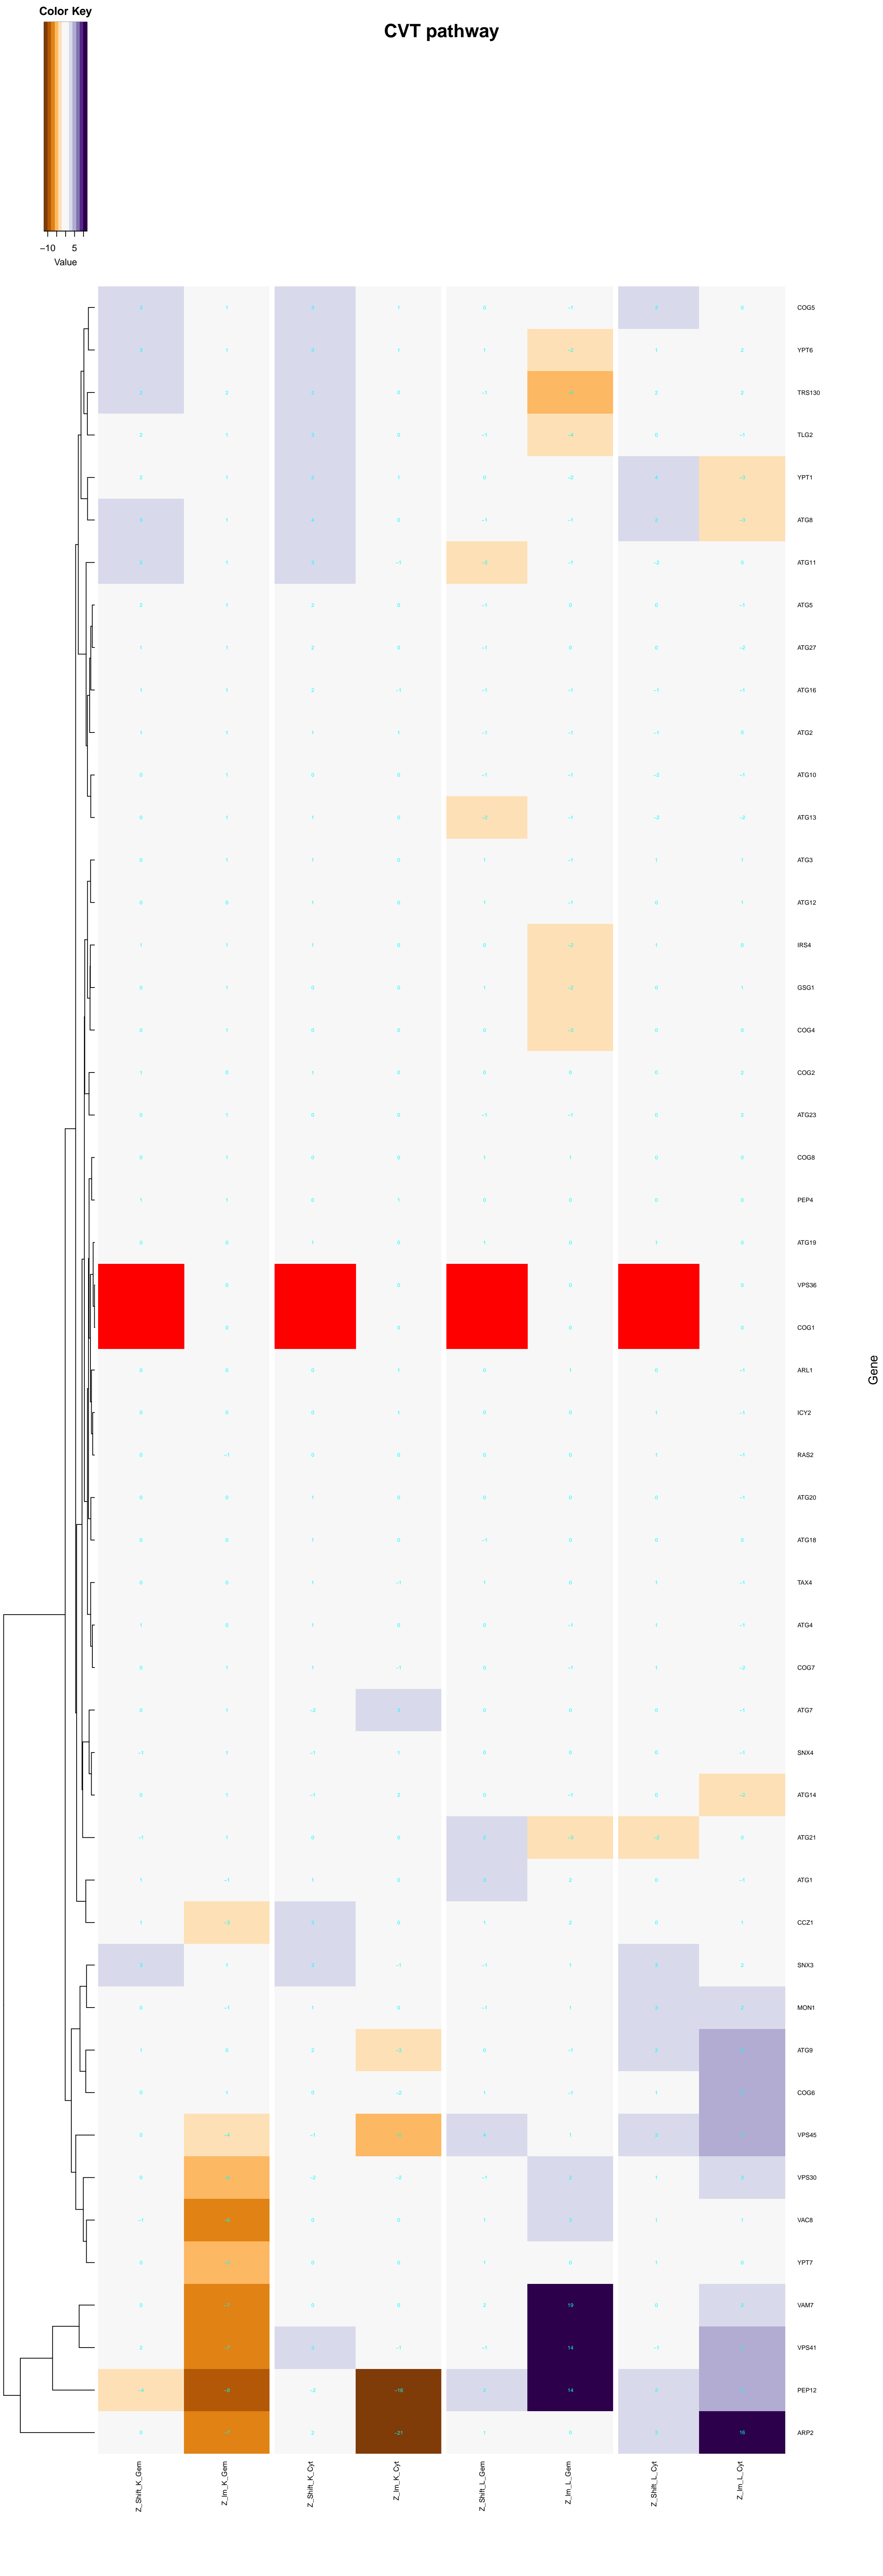

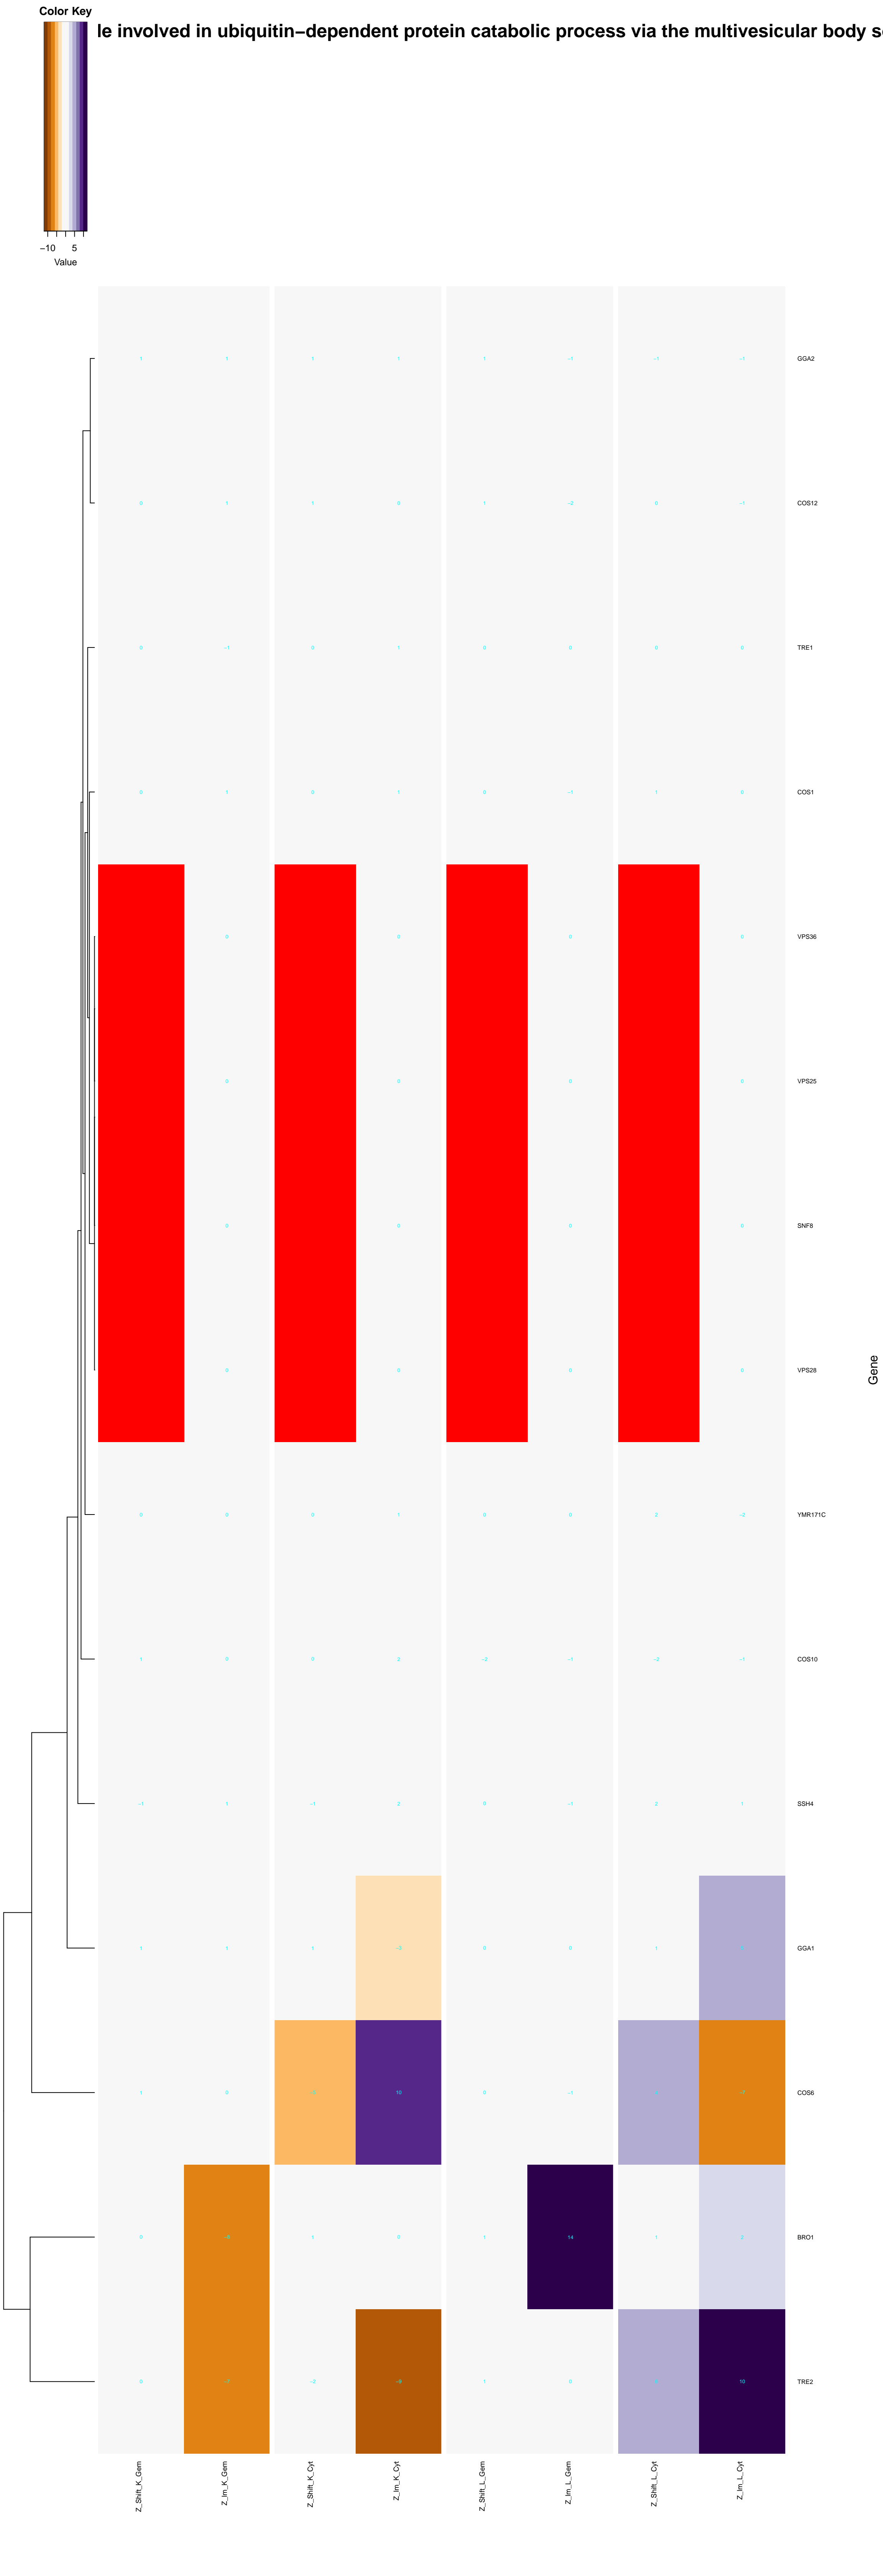

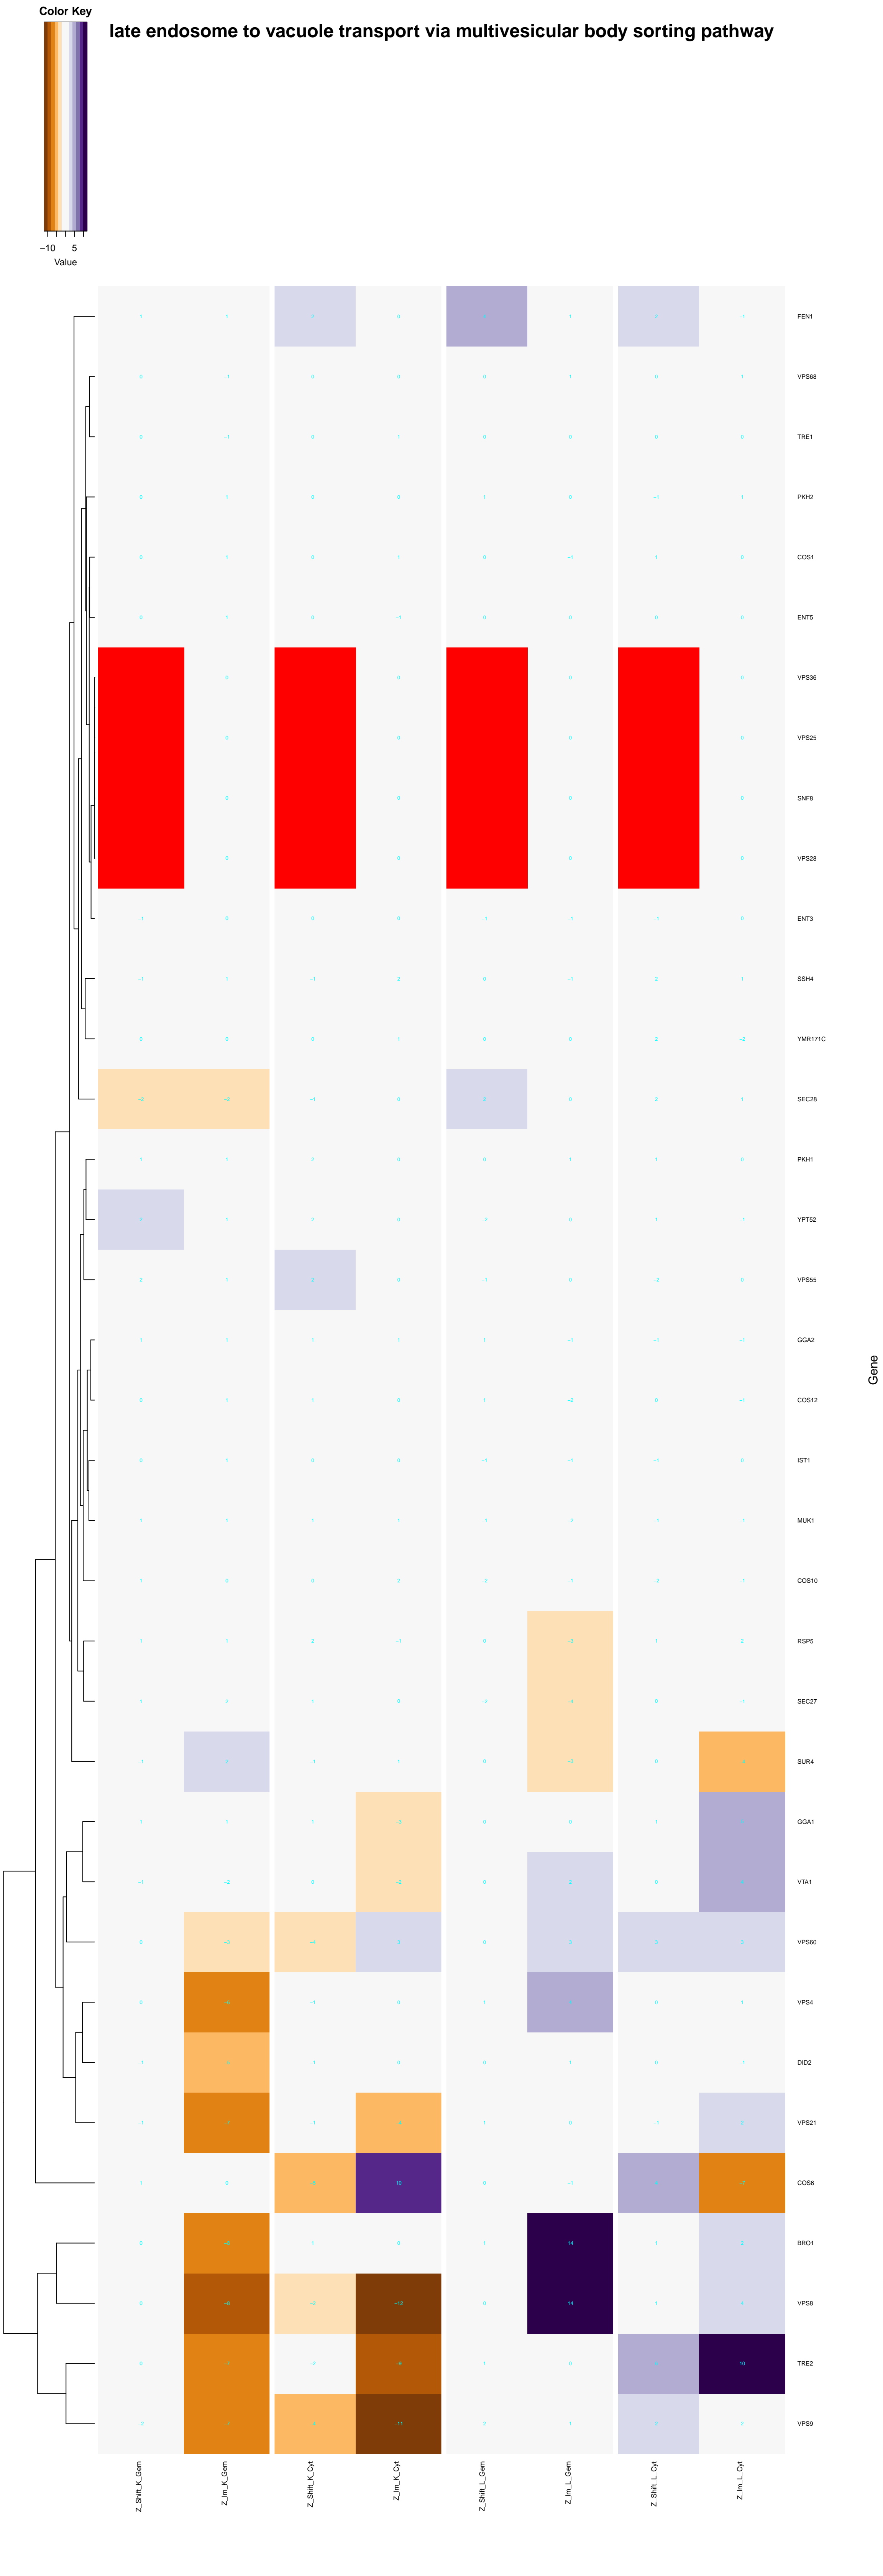

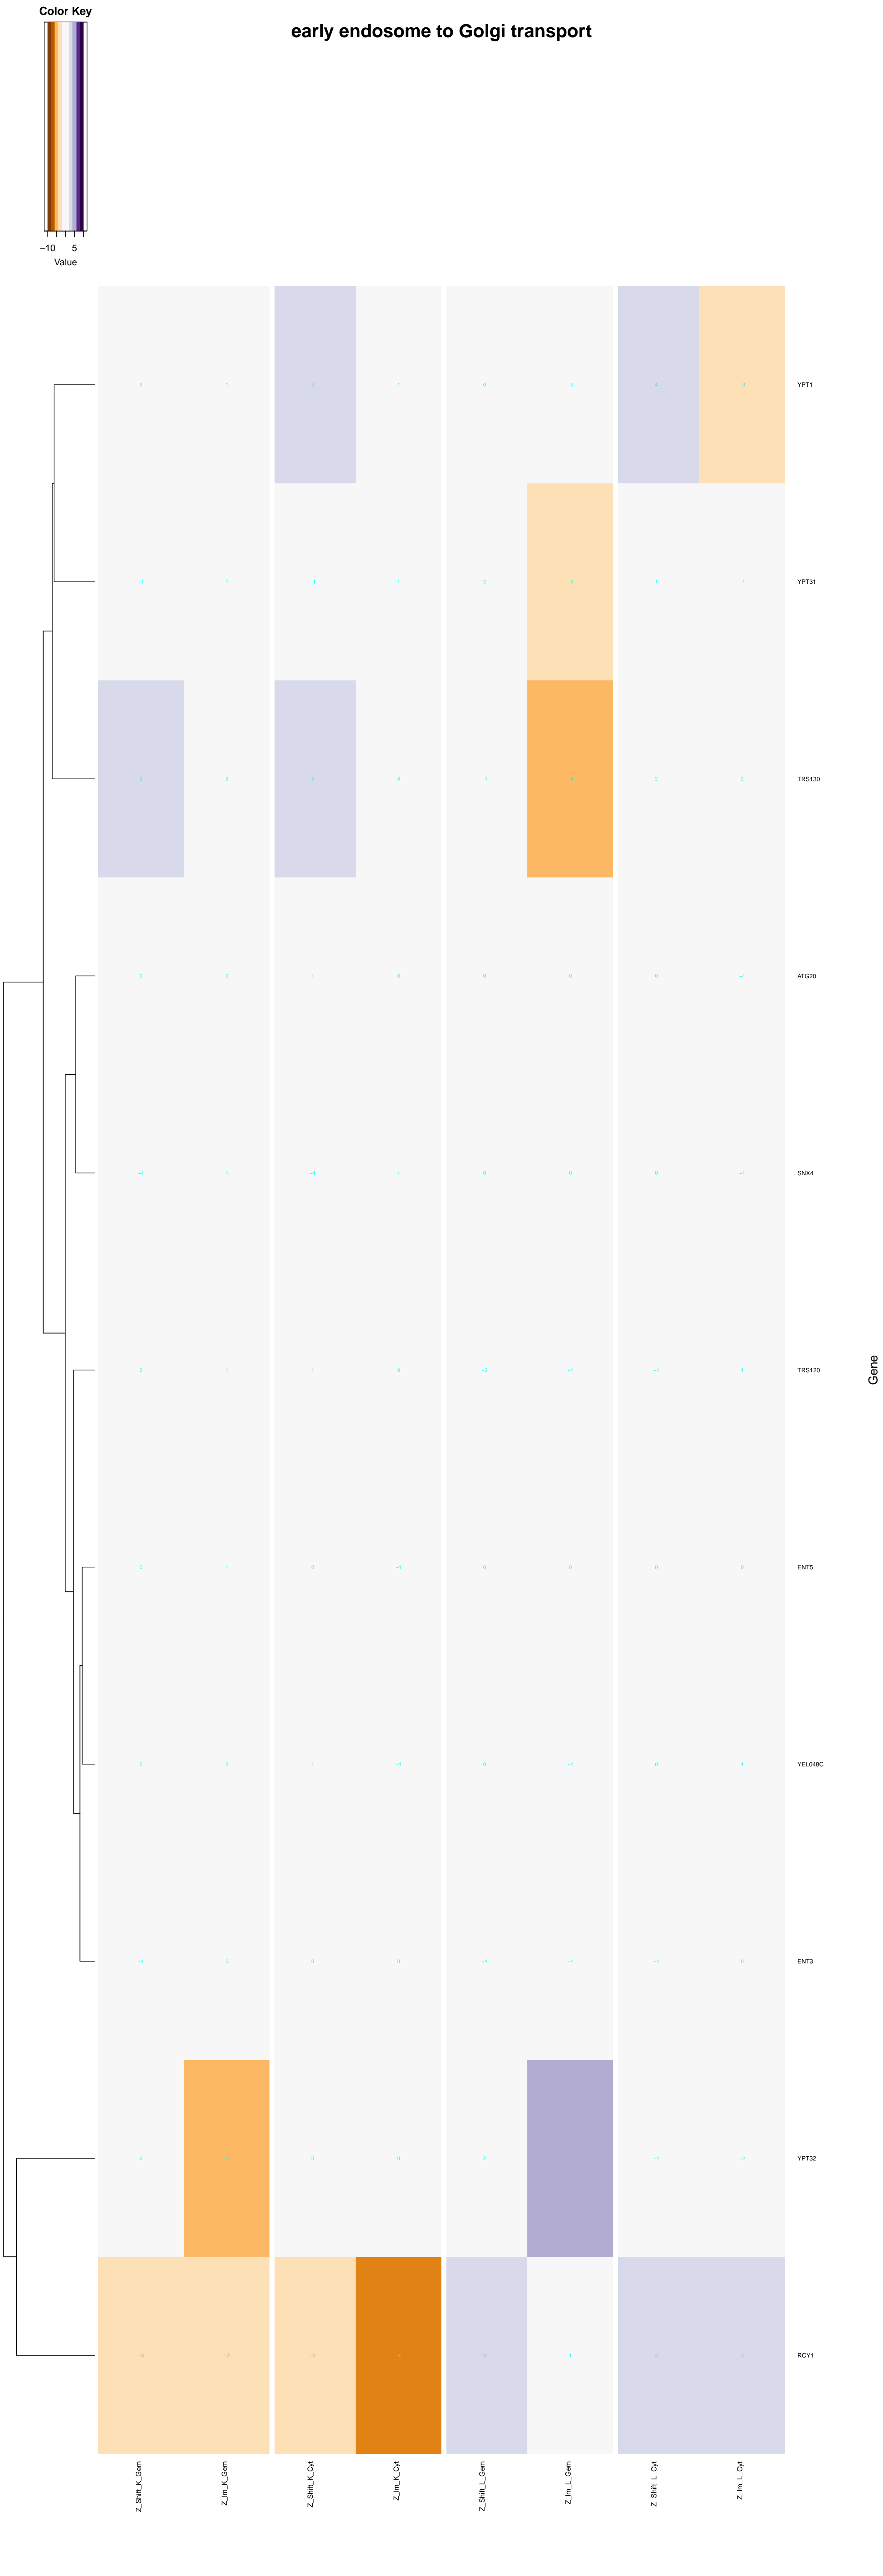

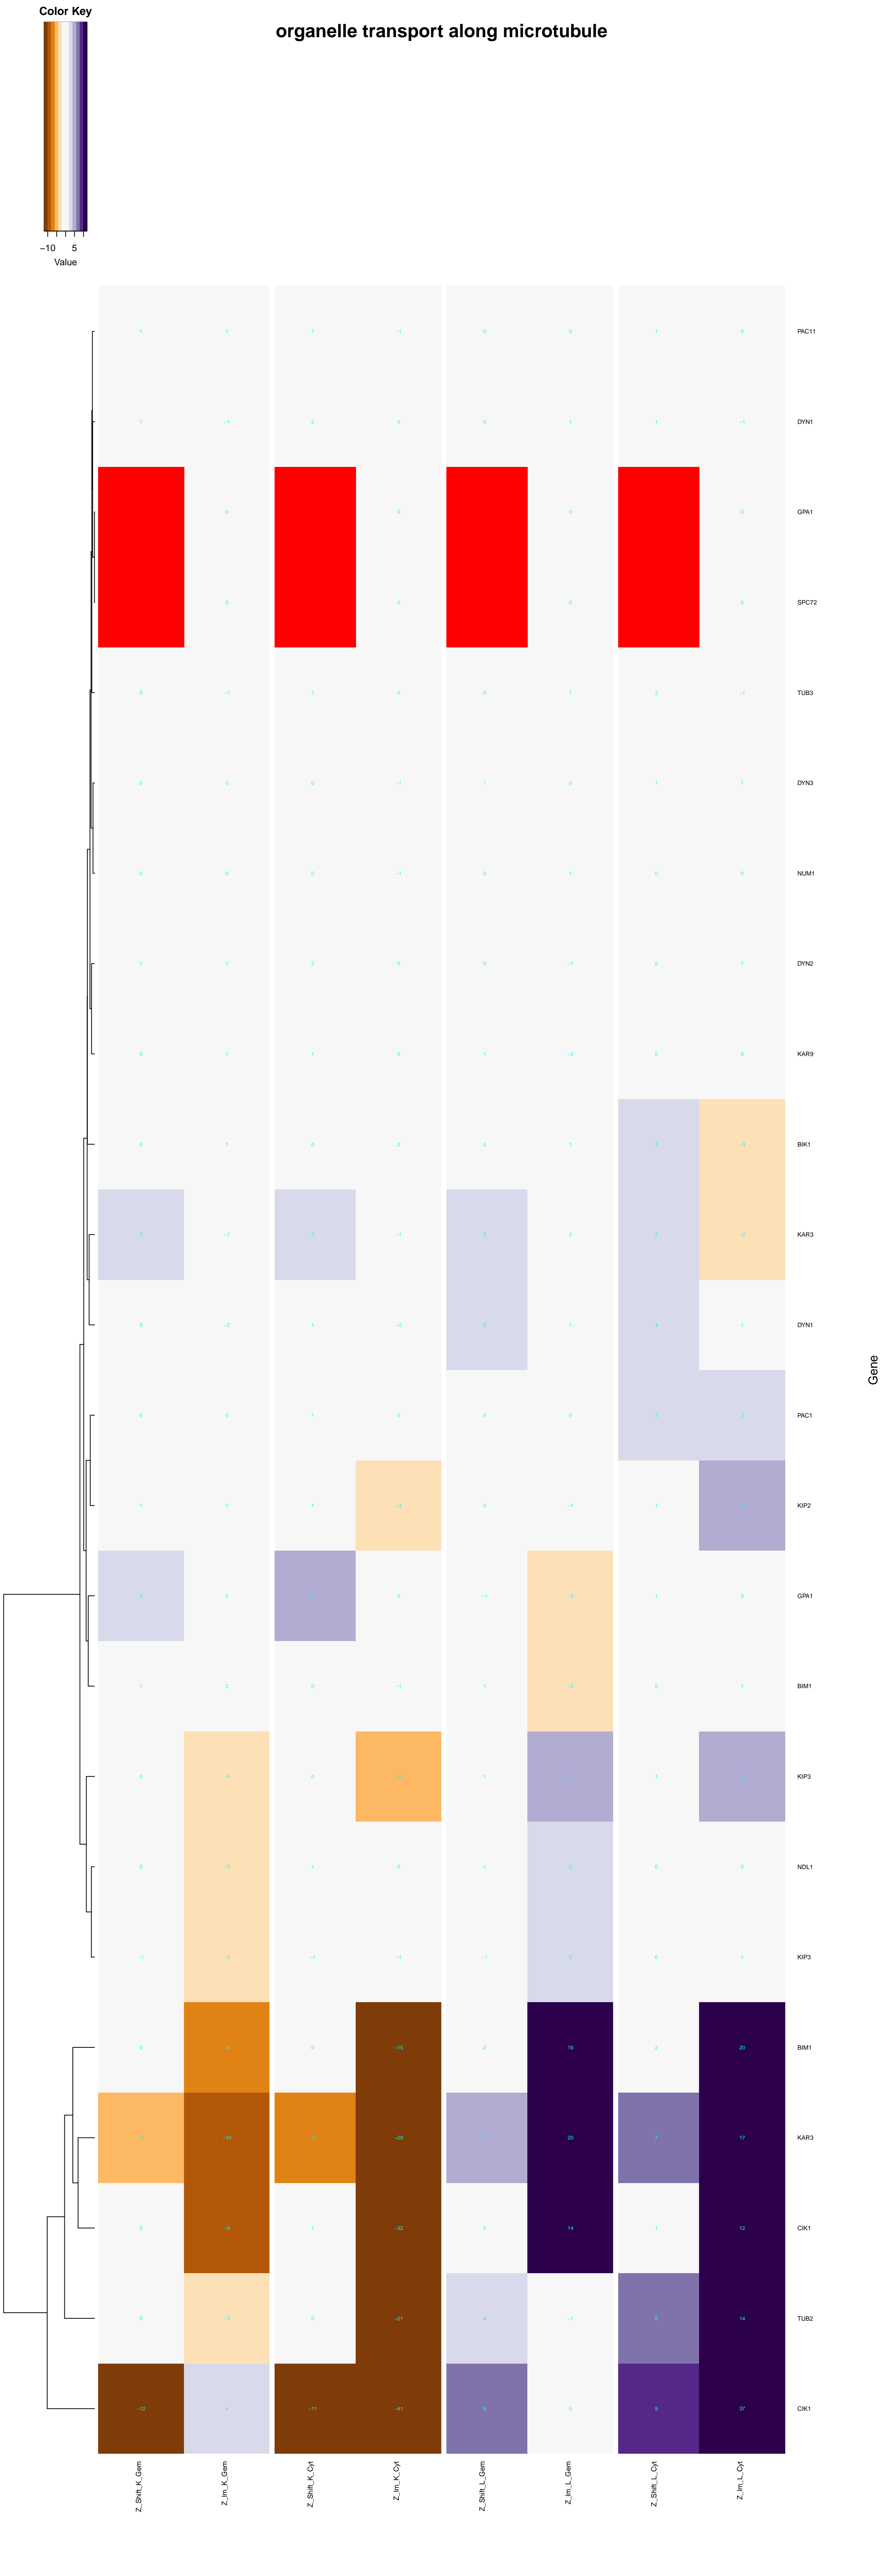

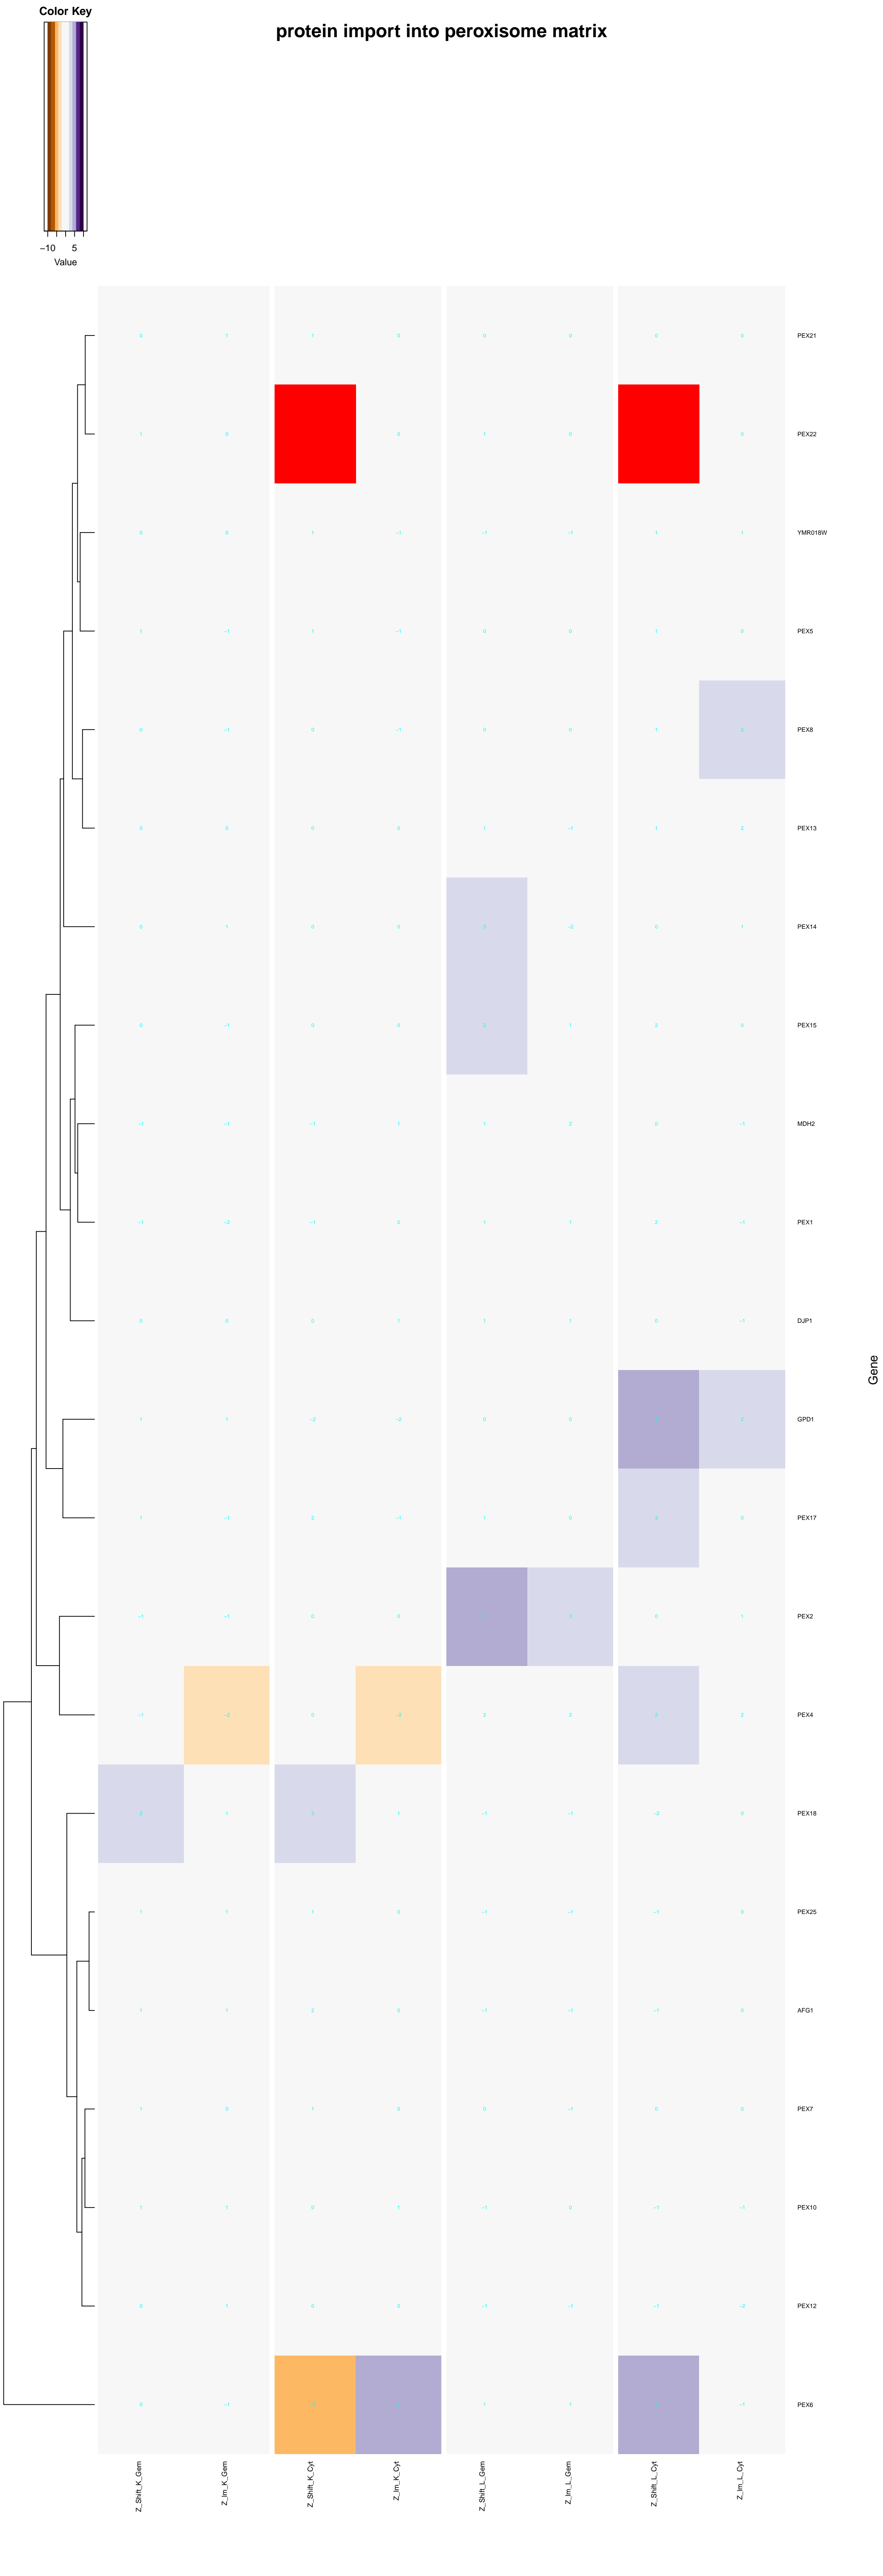

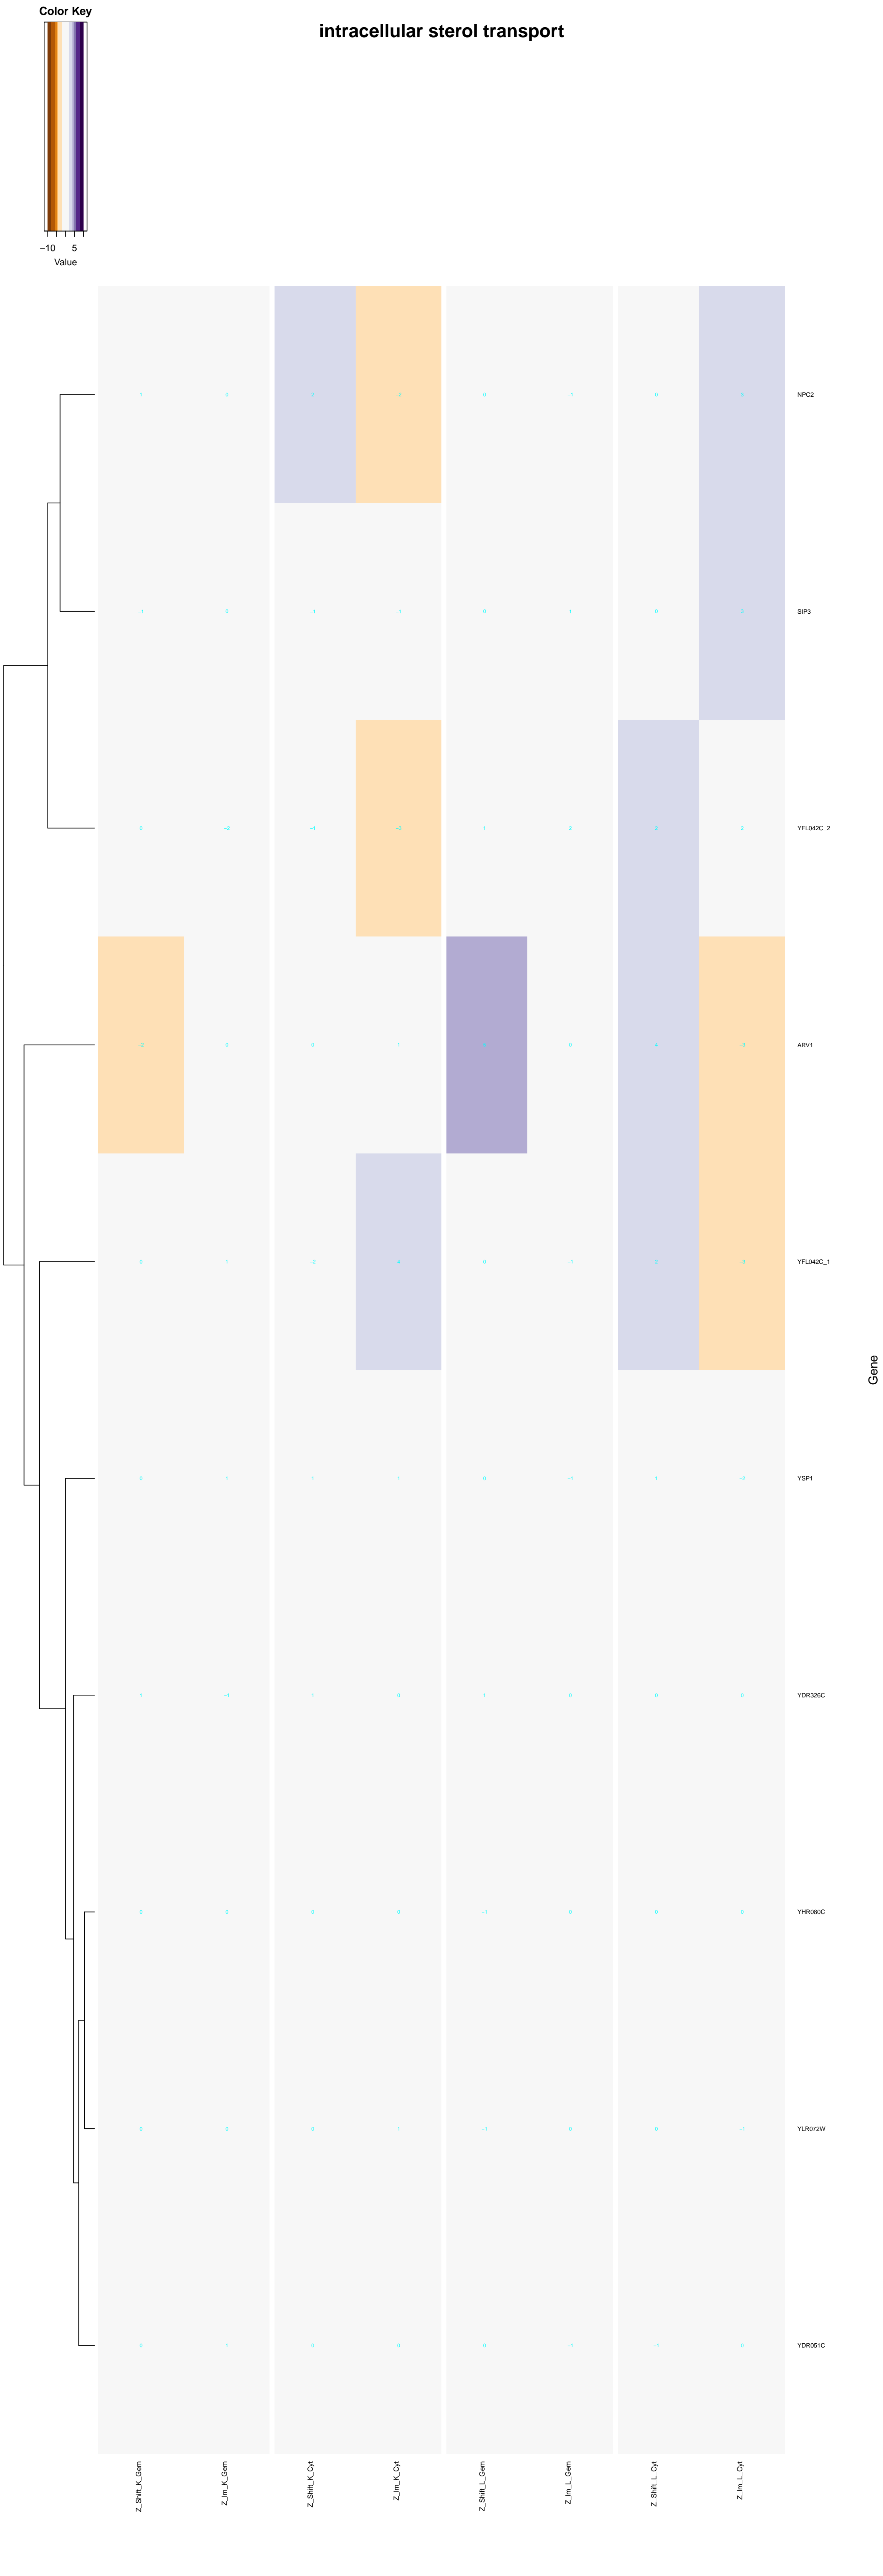

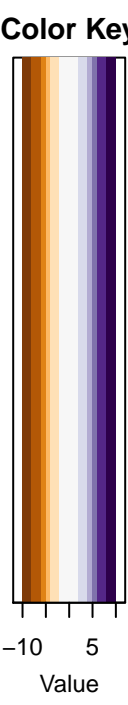

ER to Golgi ceramide transport

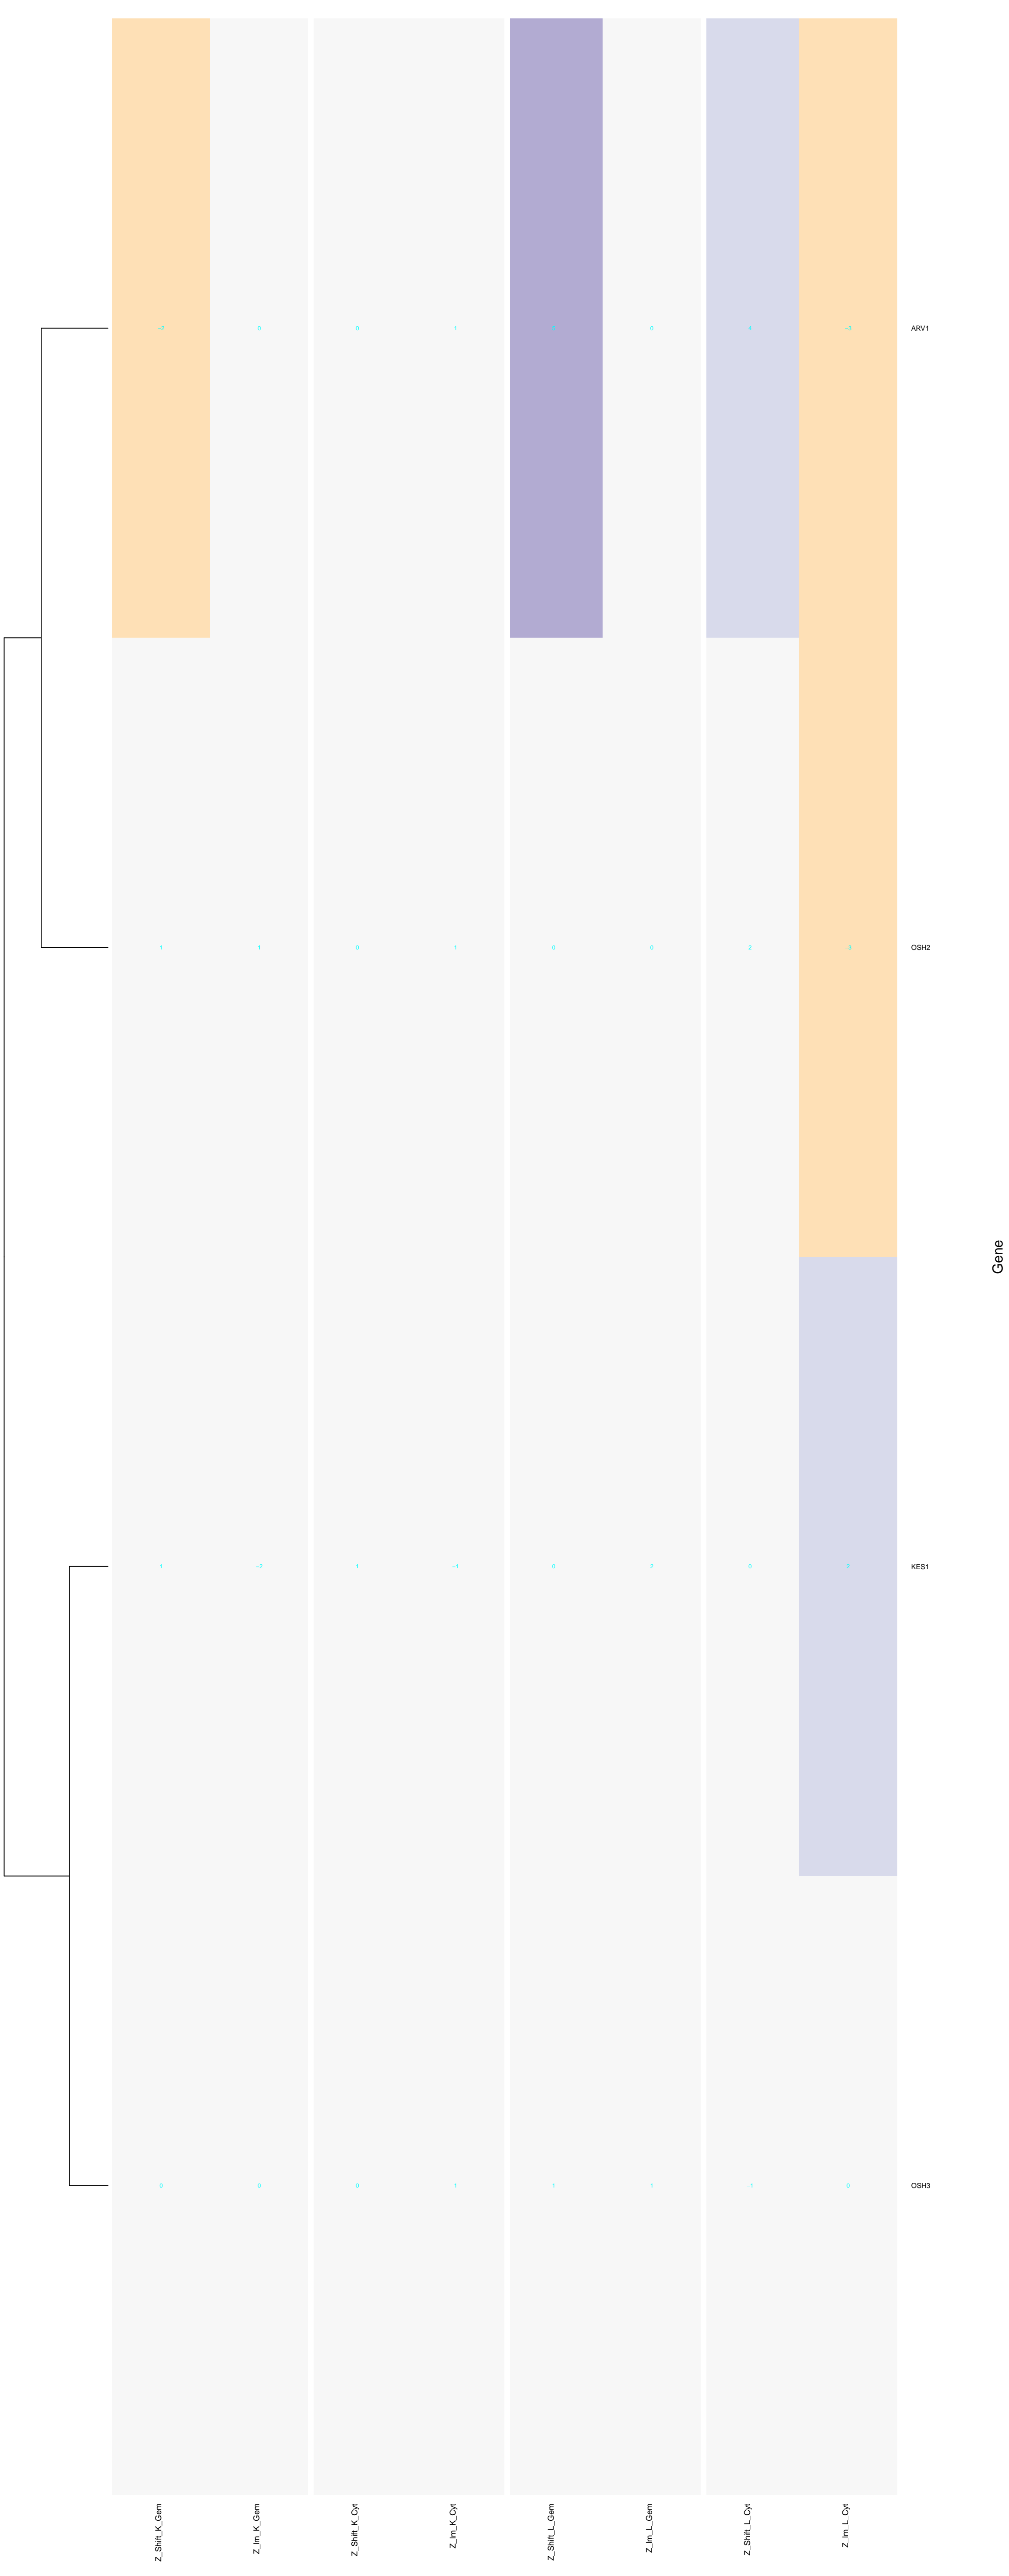

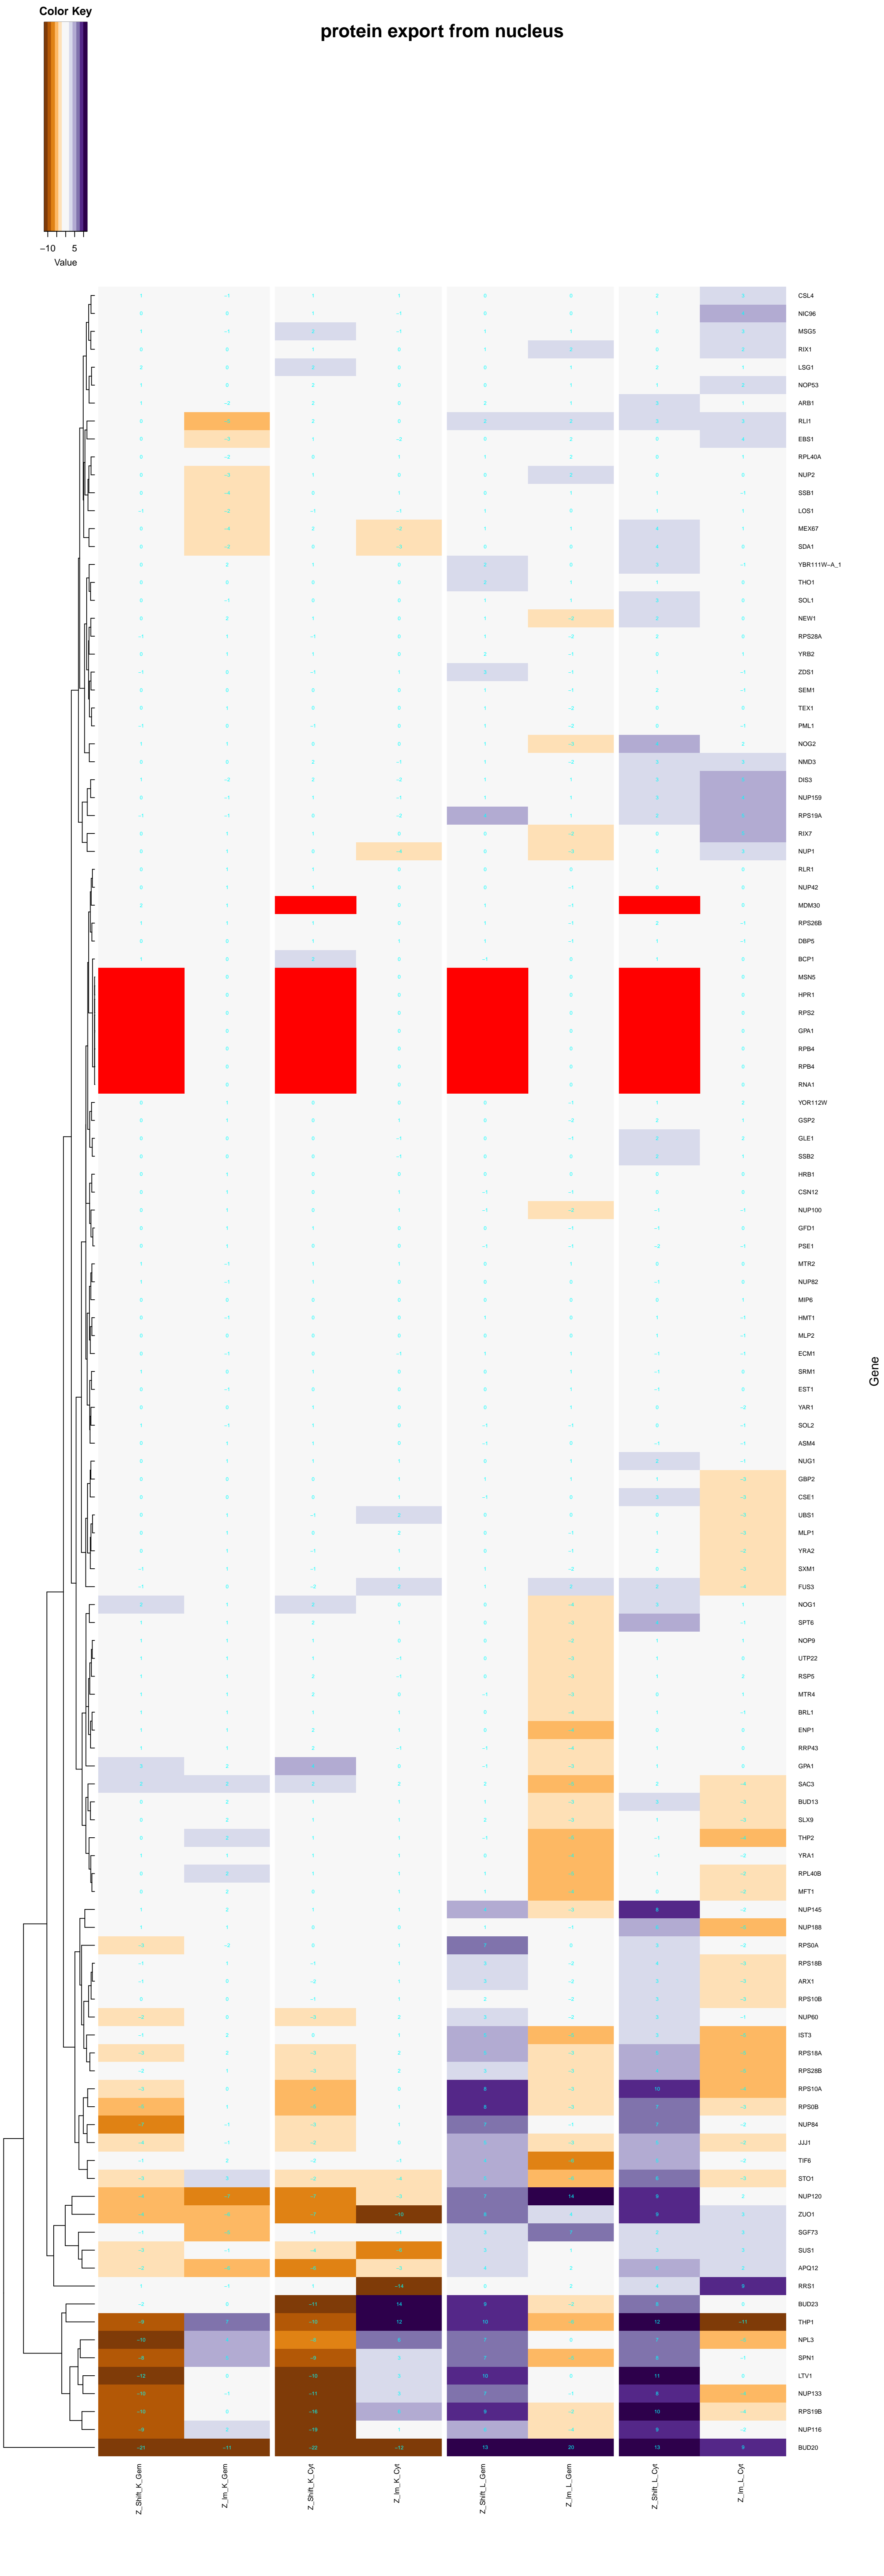

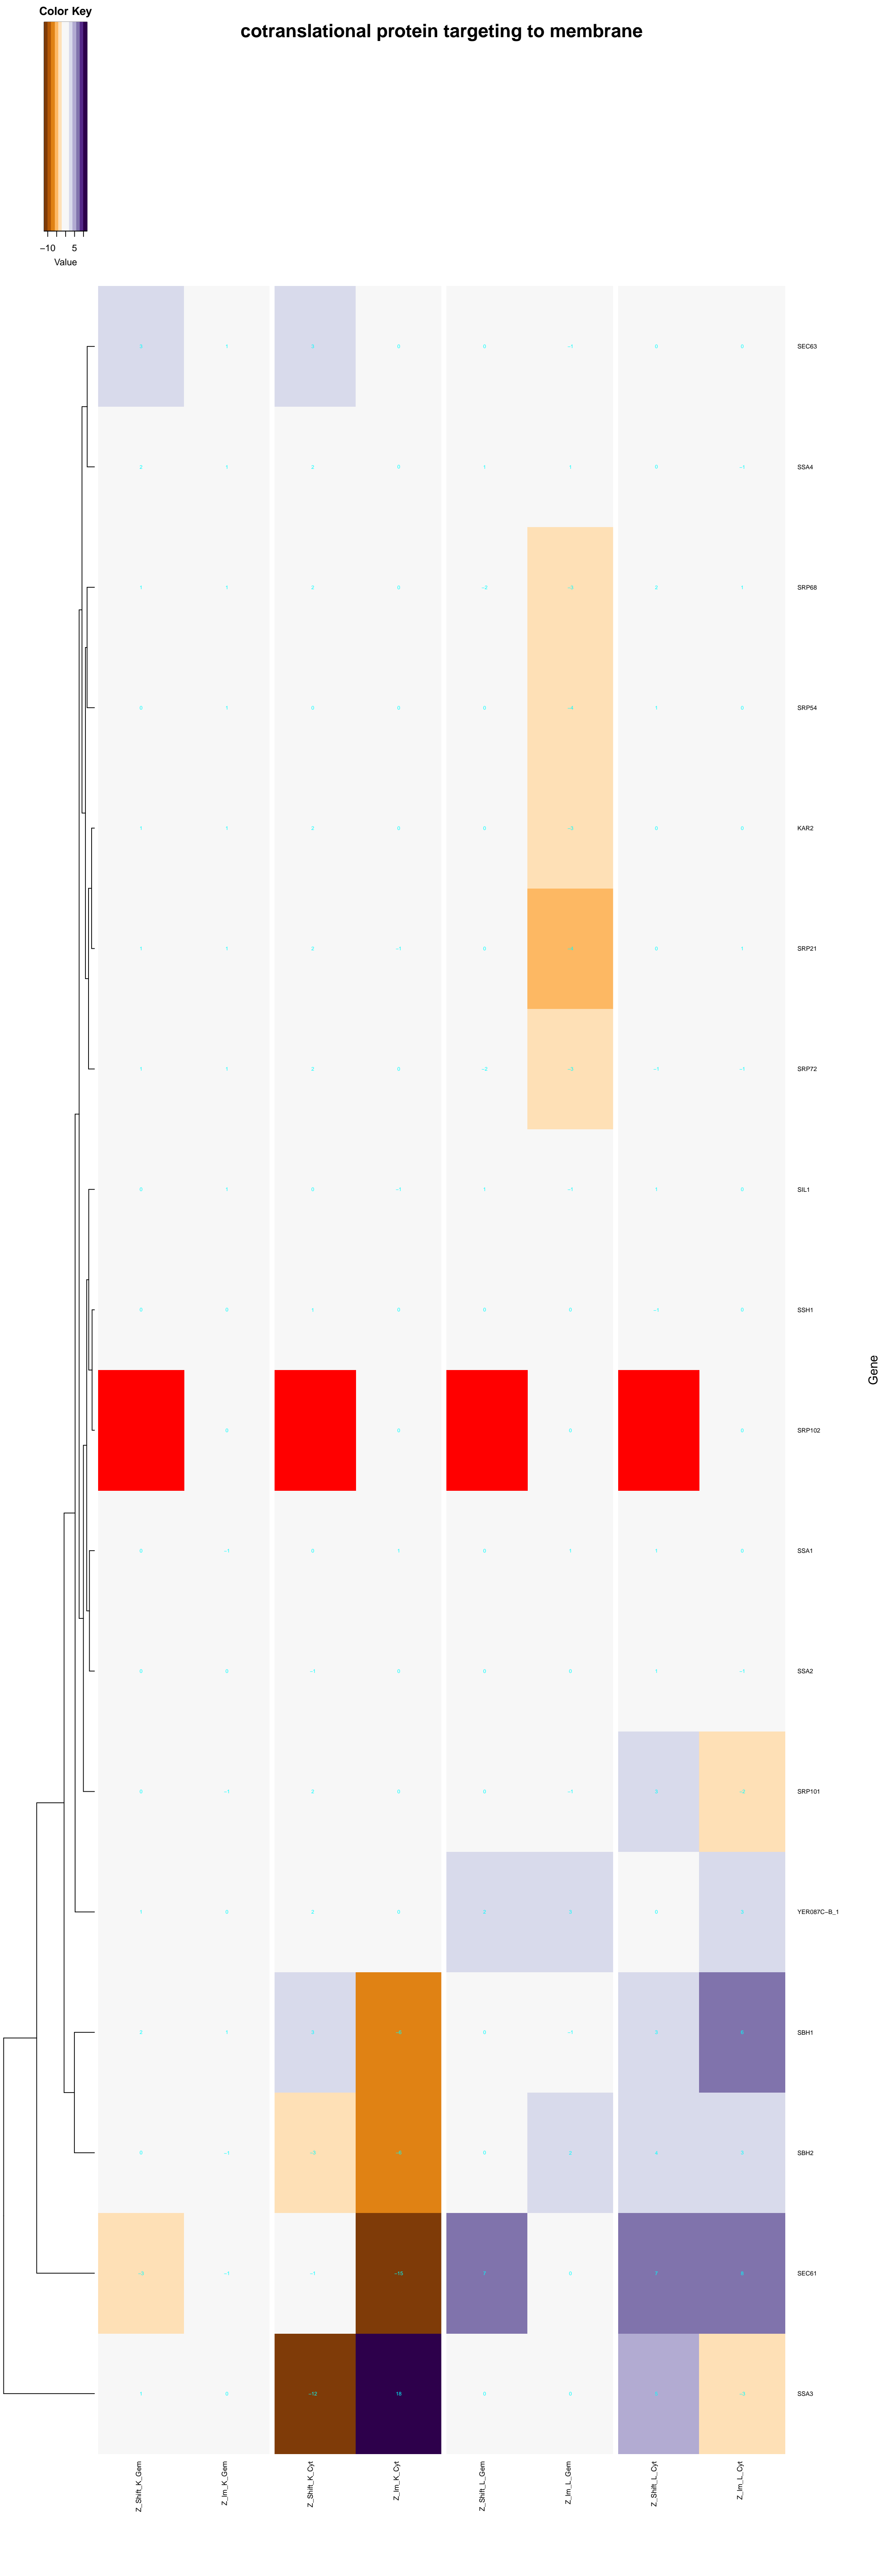

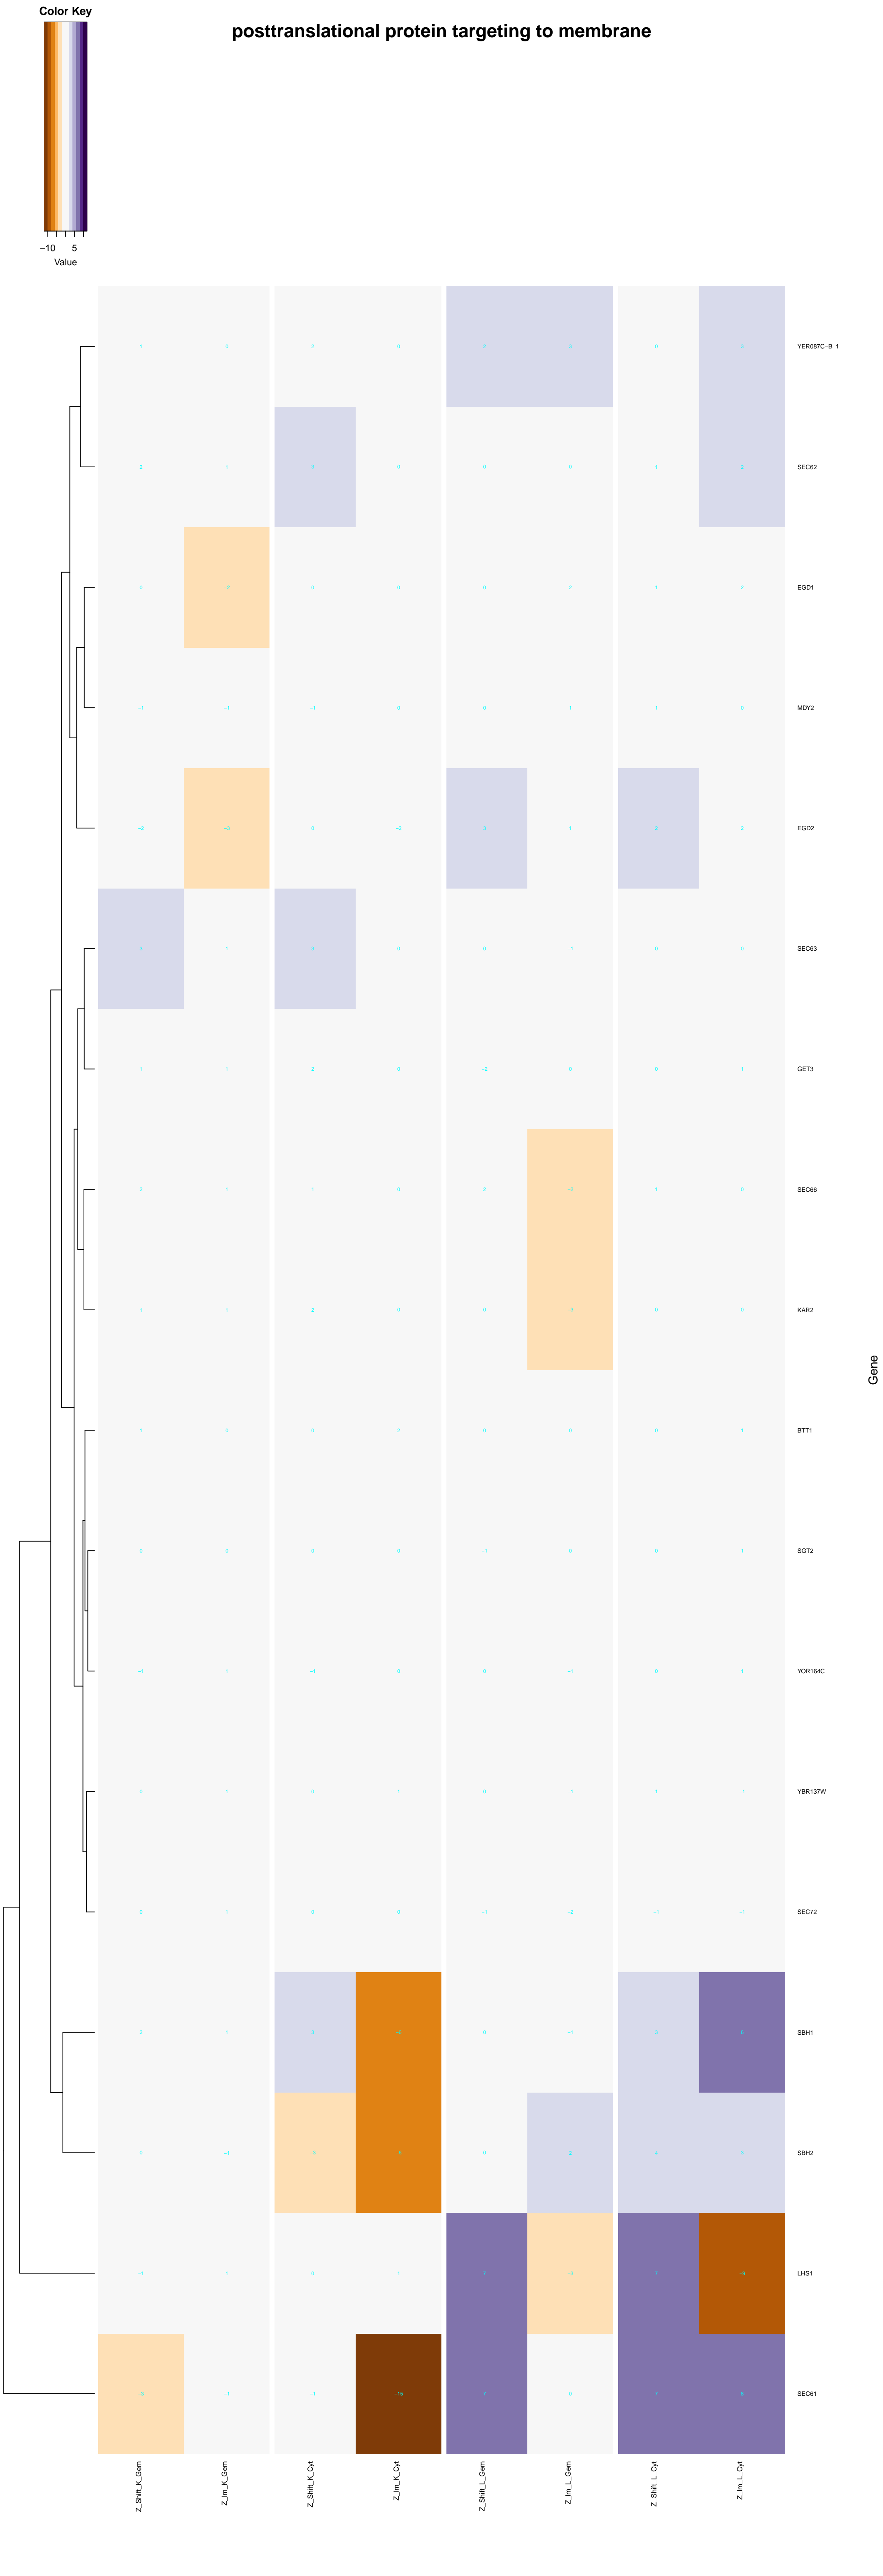

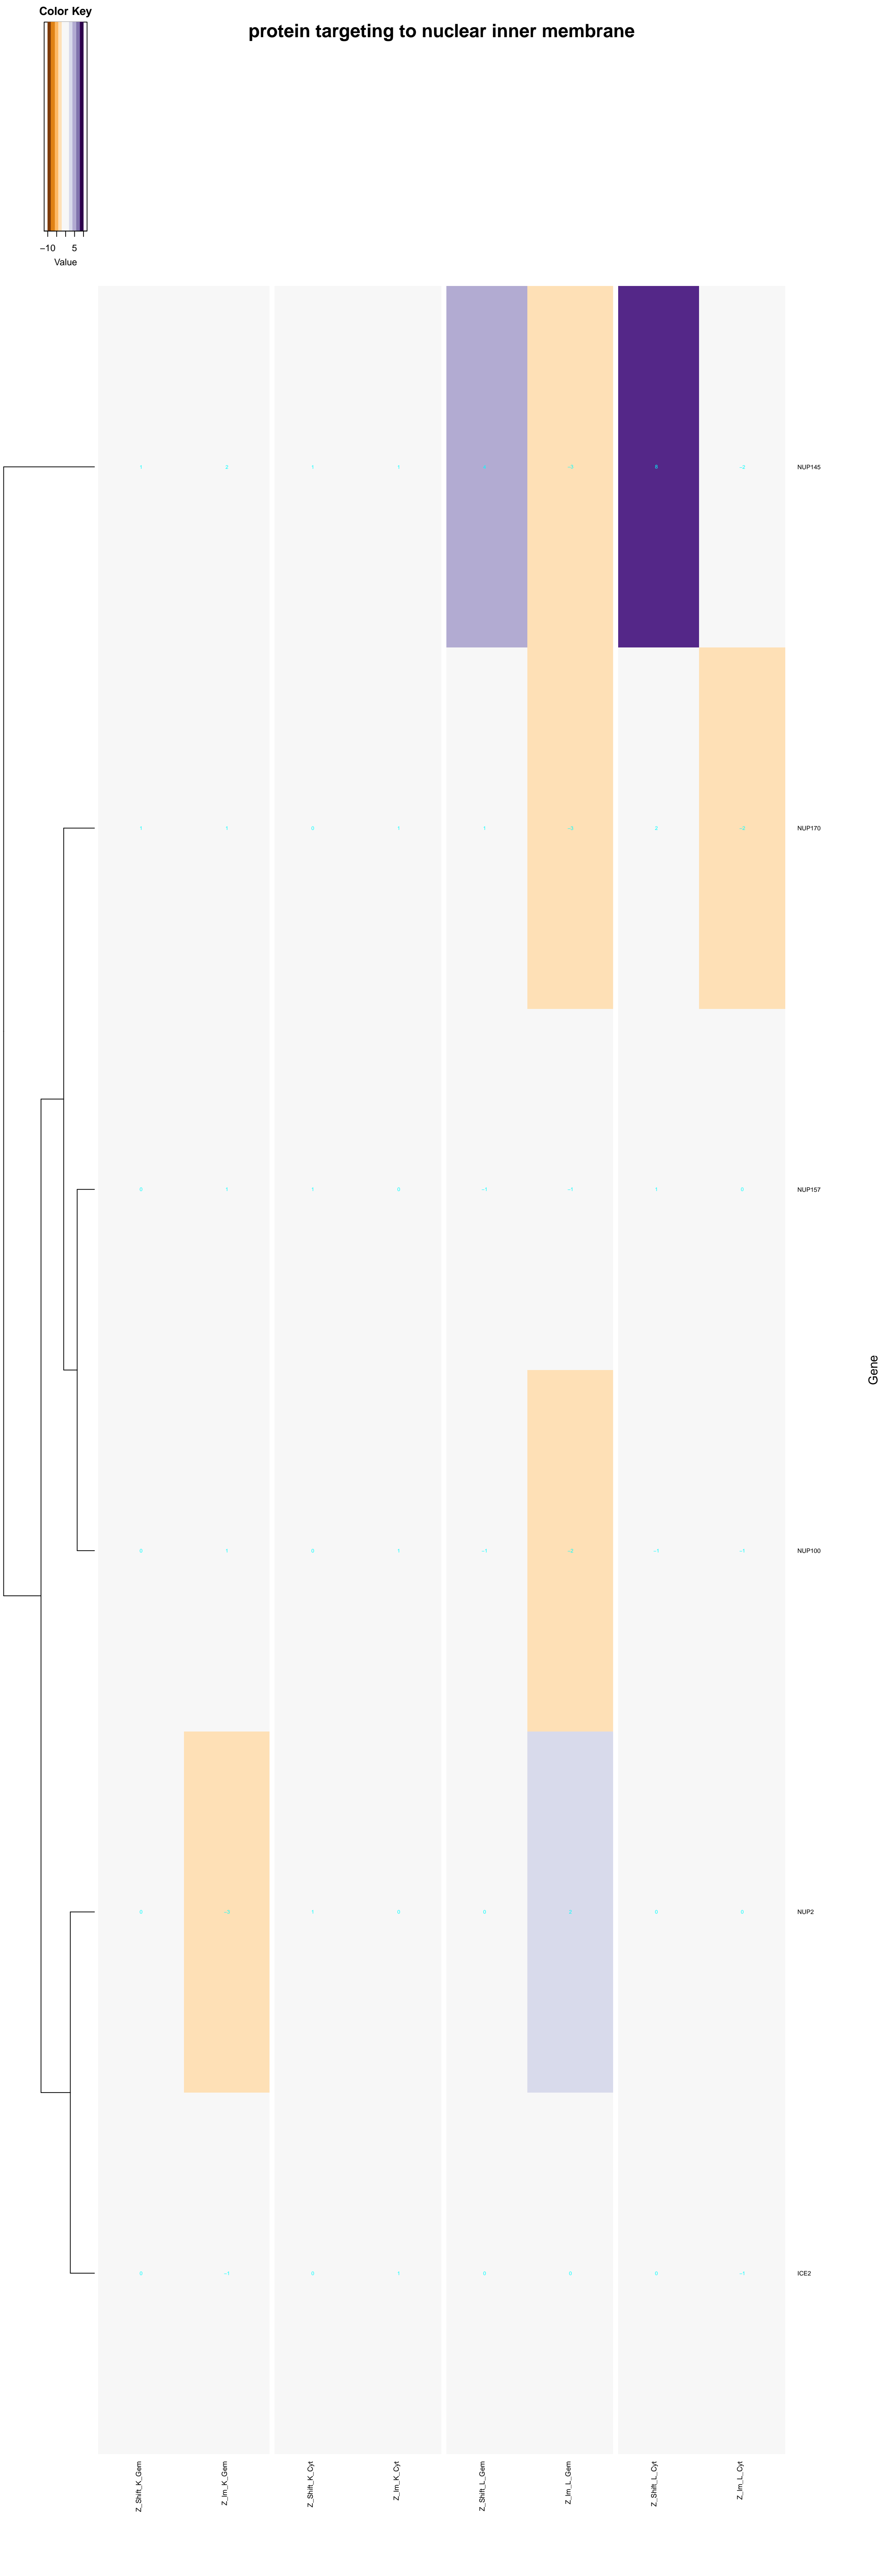

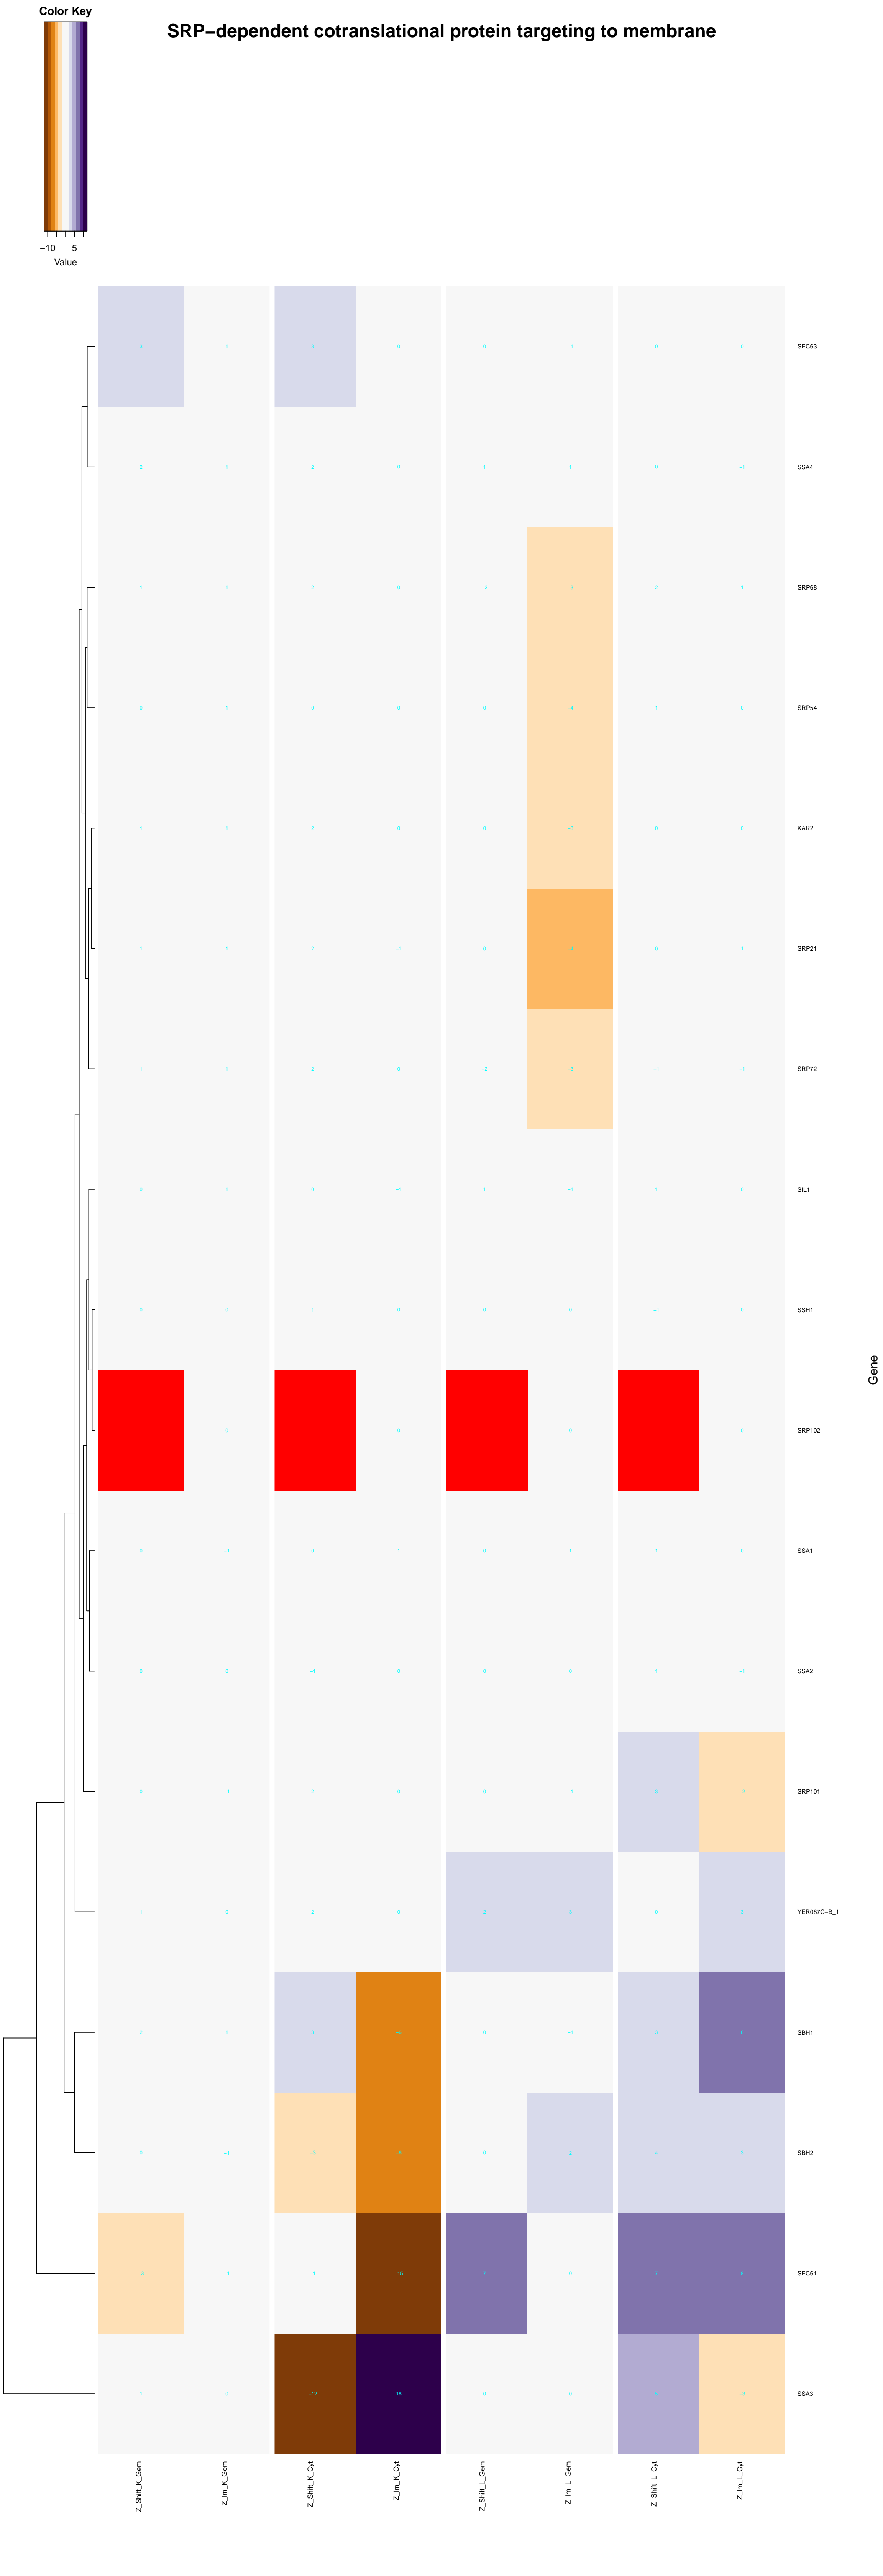

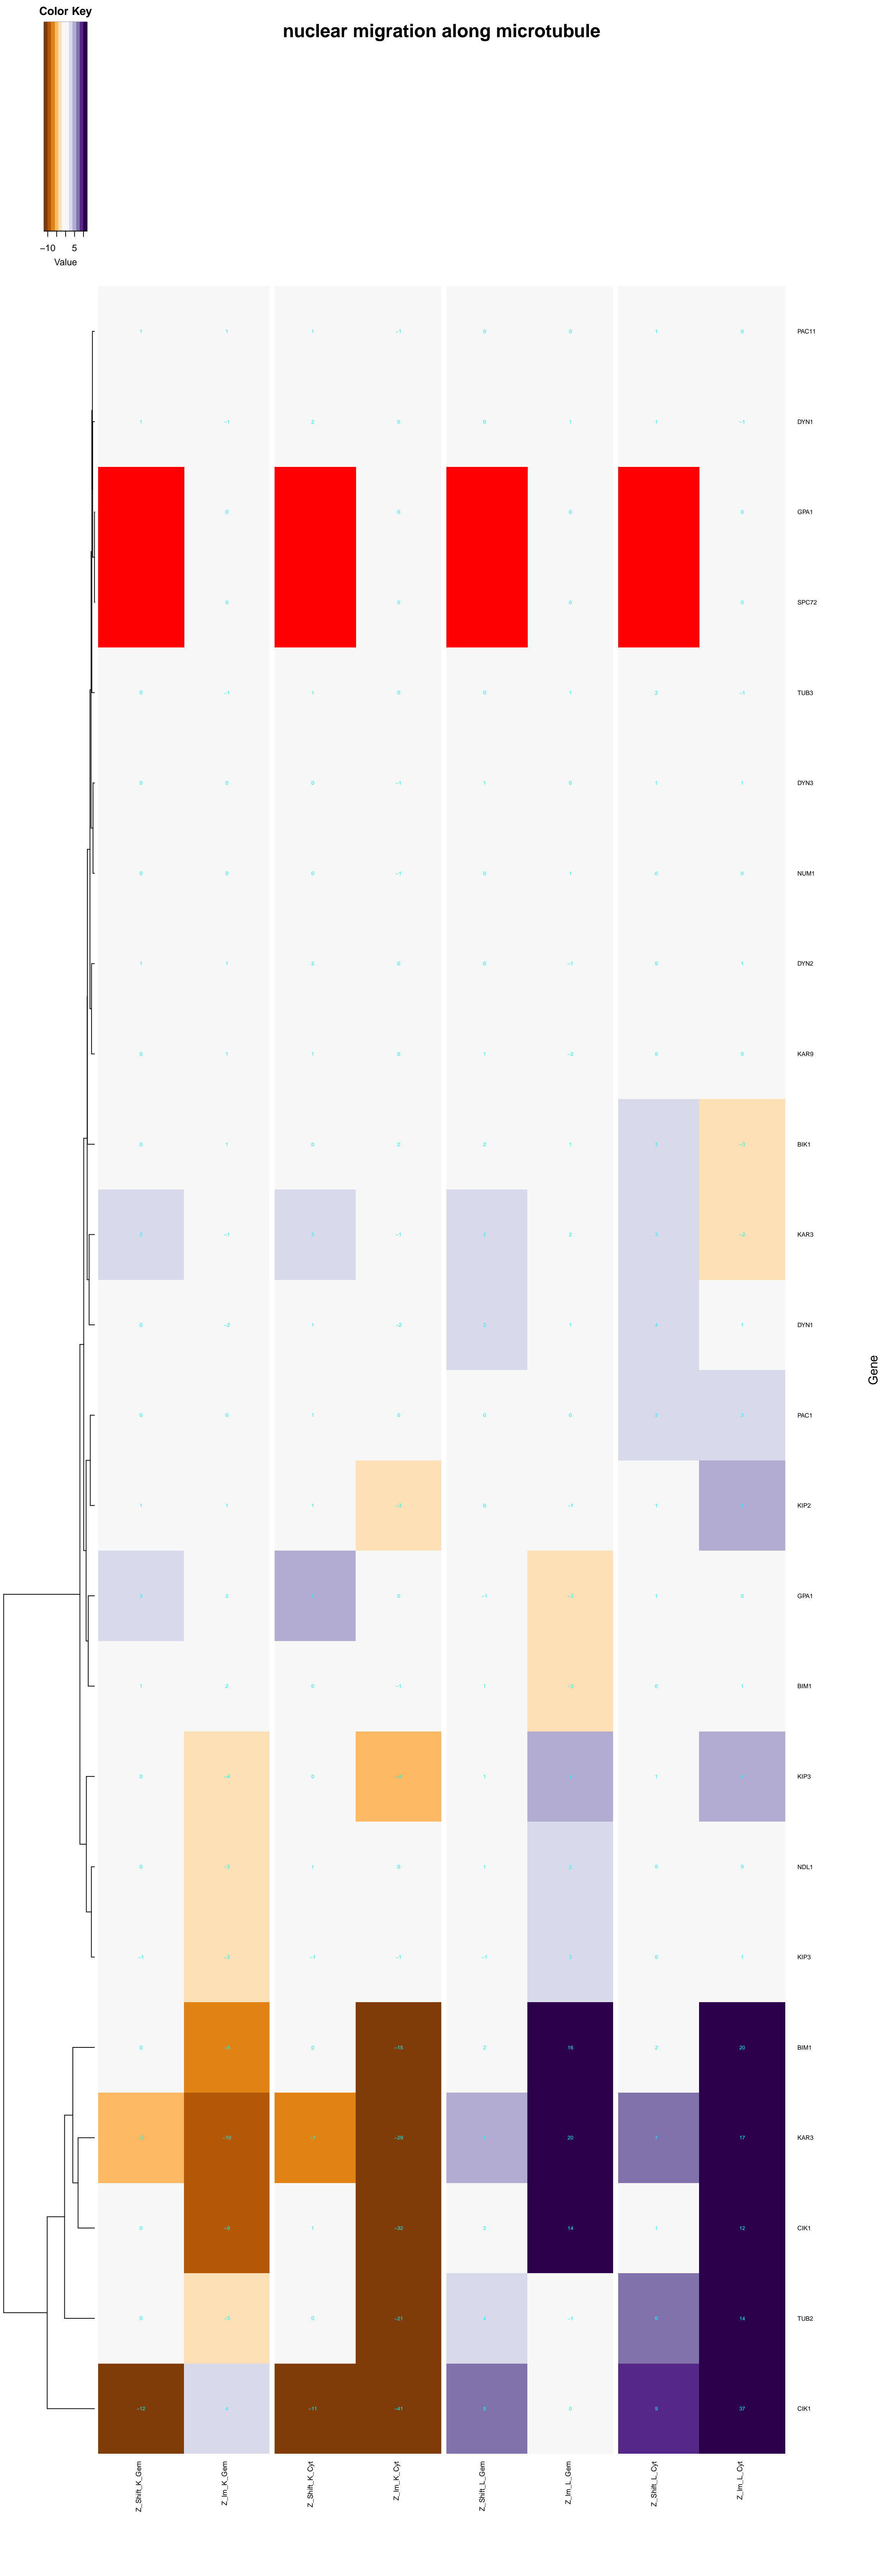

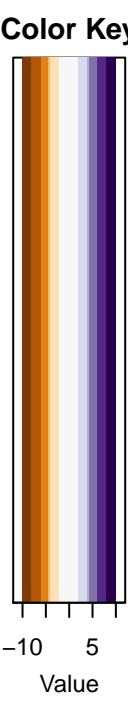

MAPK export from nucleus

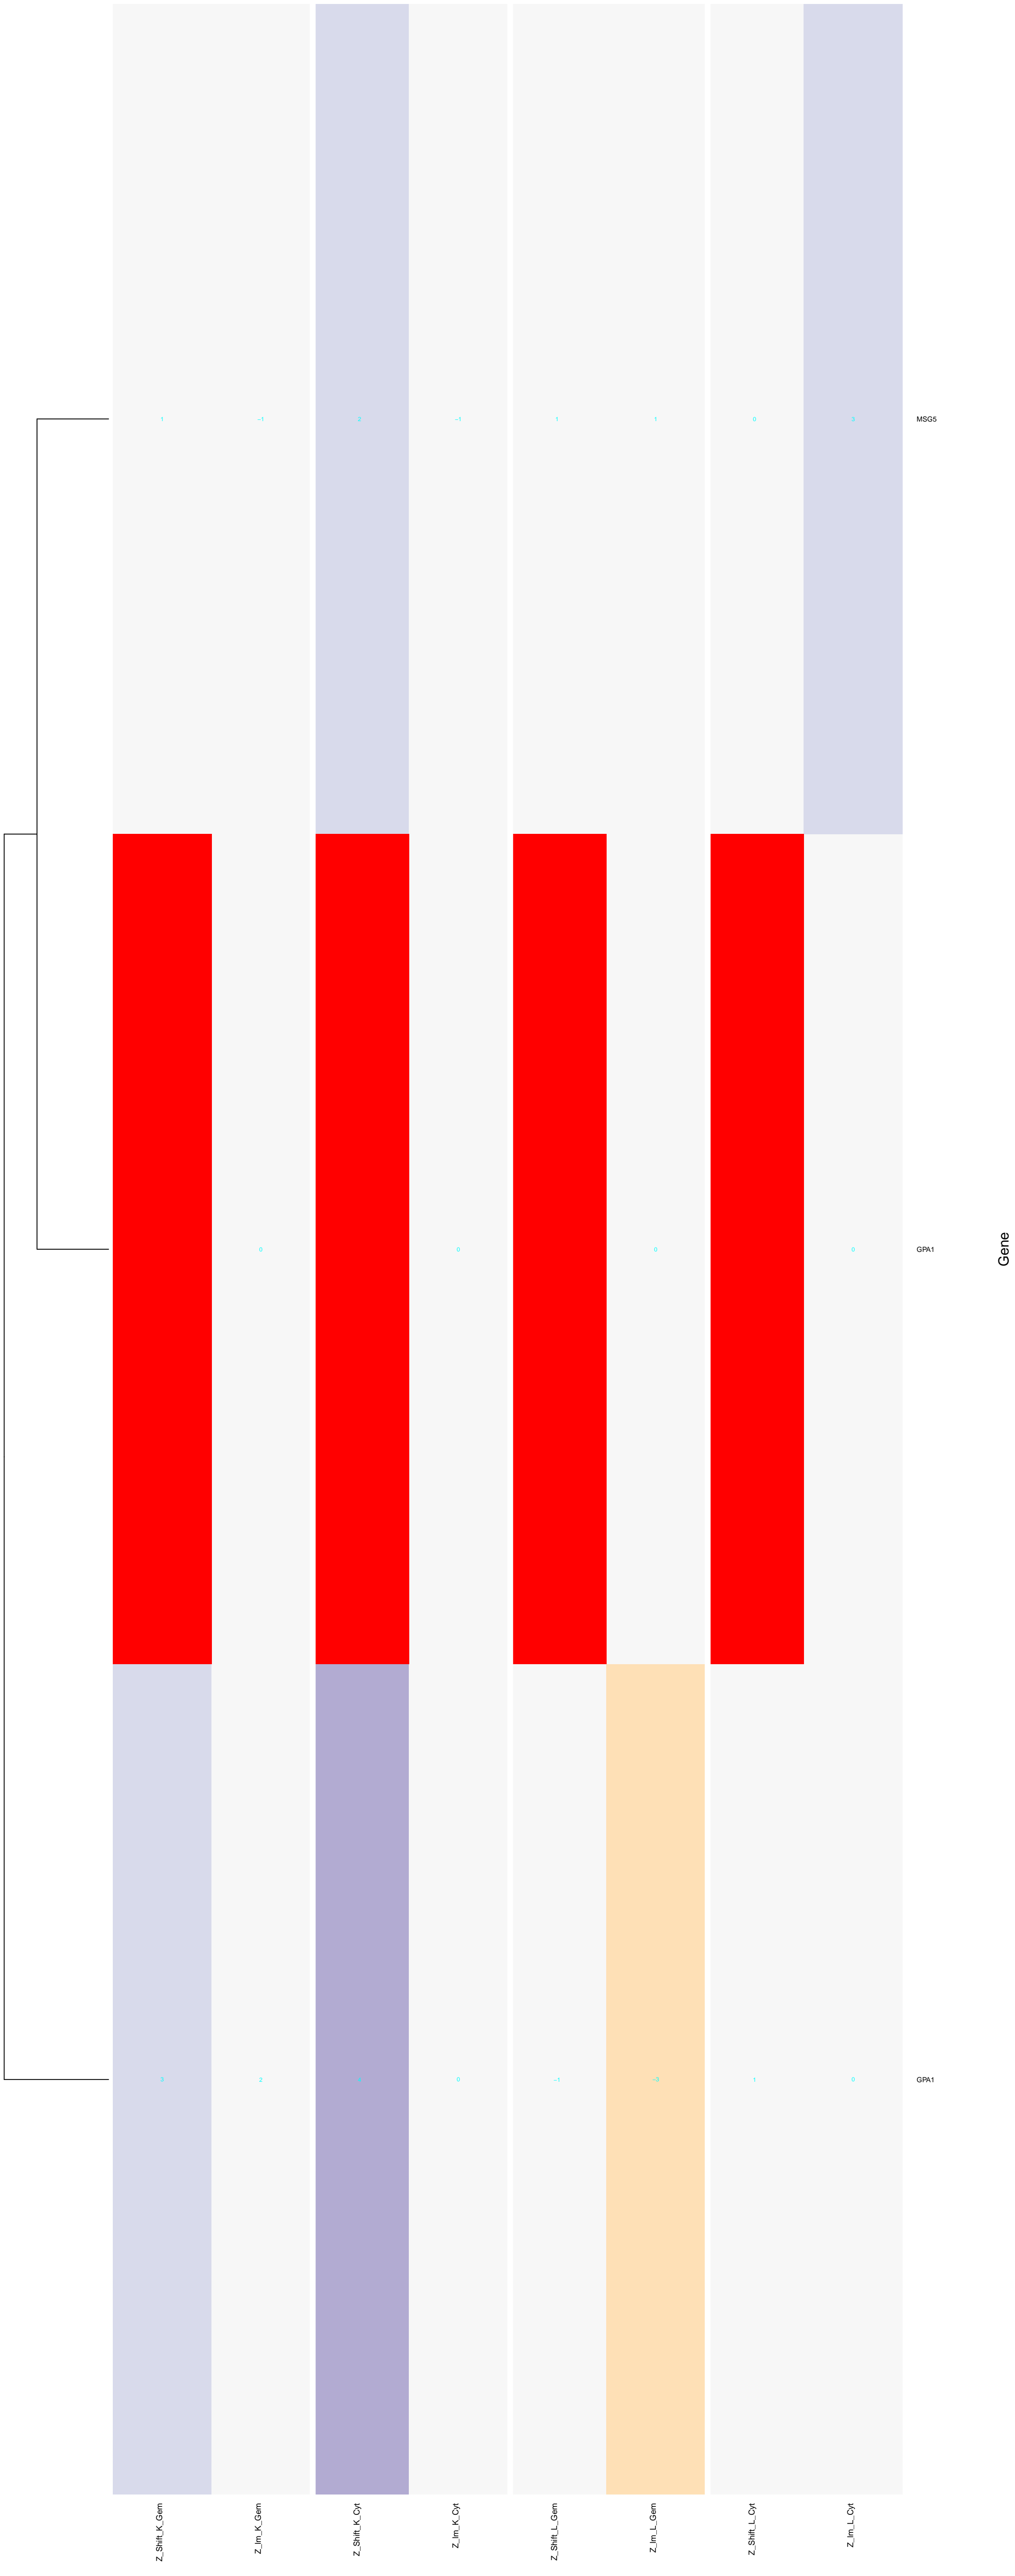

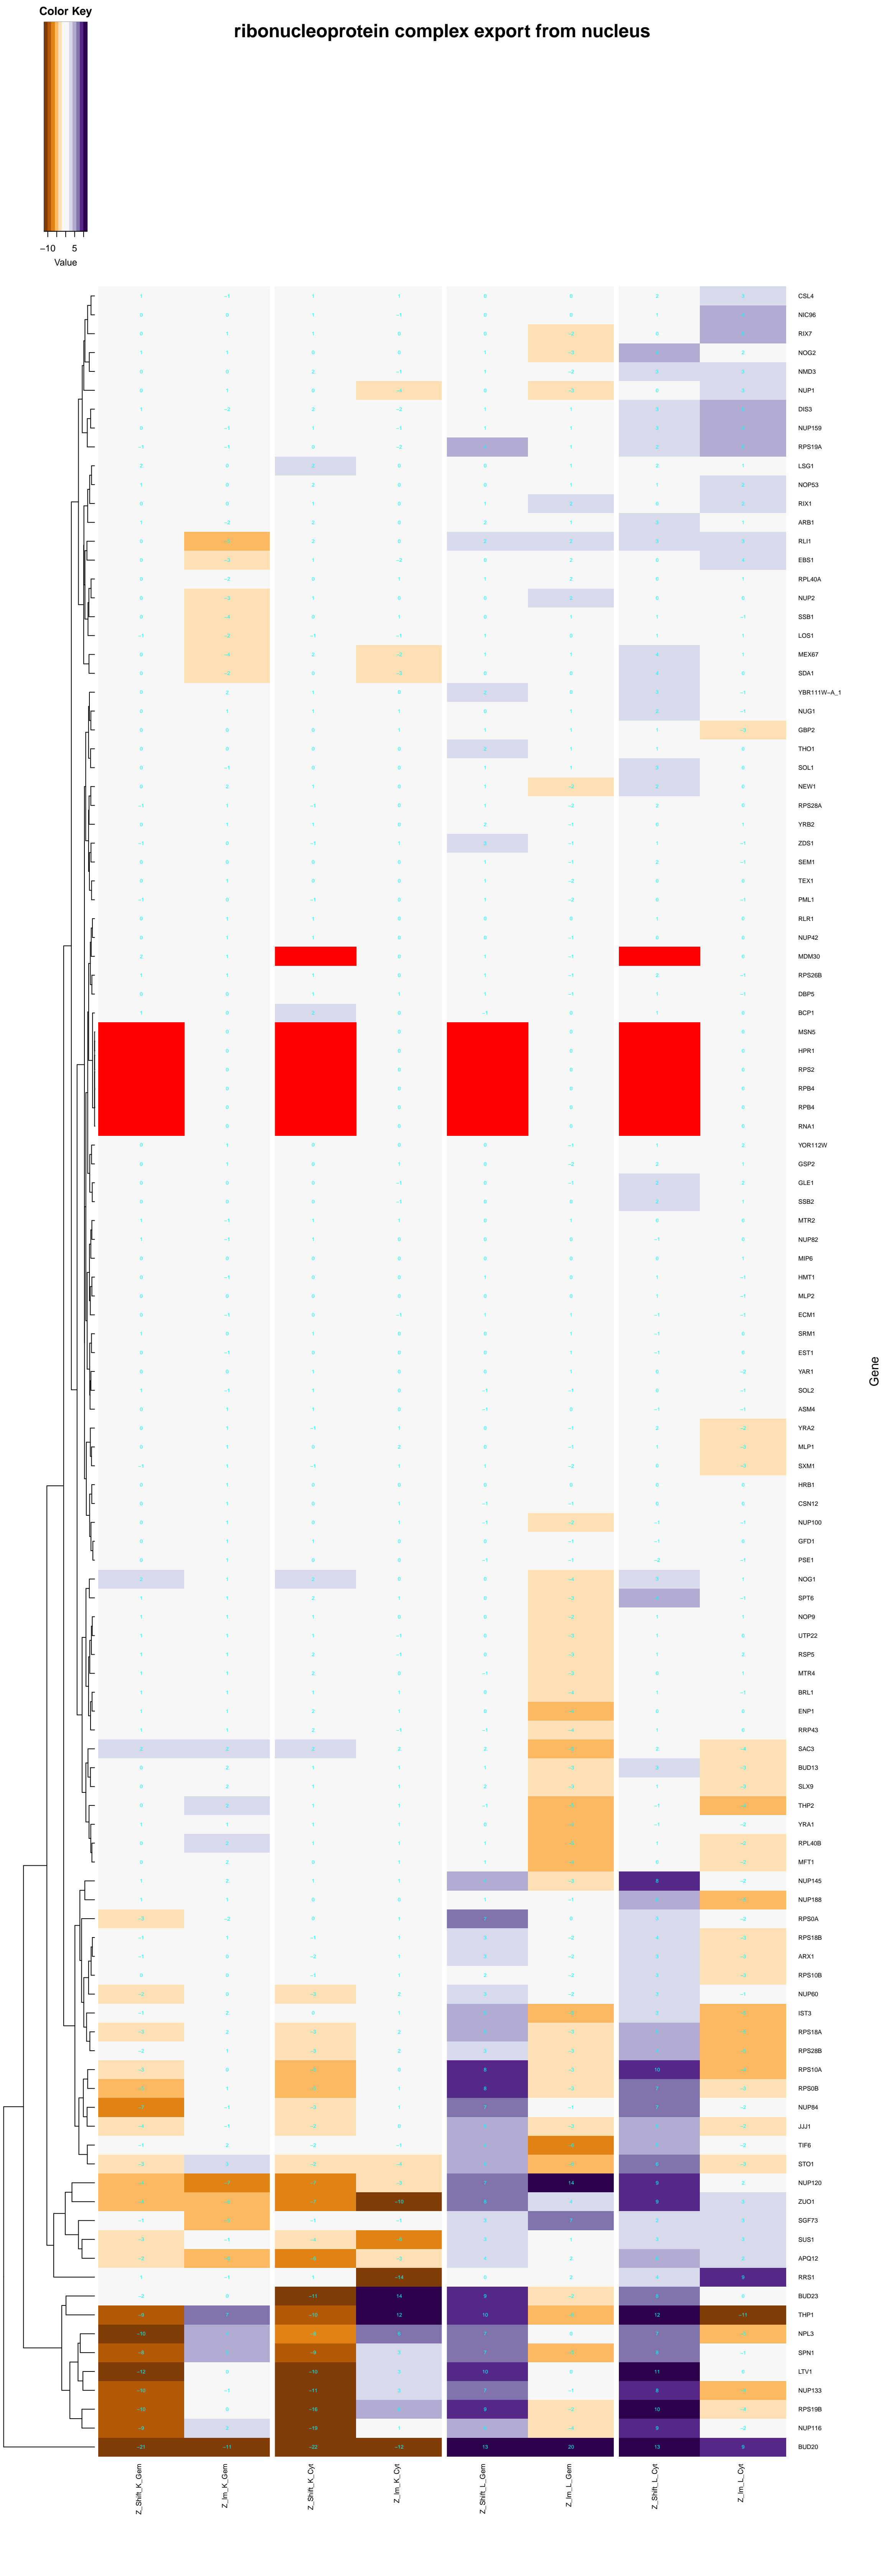



nuclear migration involved in conjugation with cellular fusion

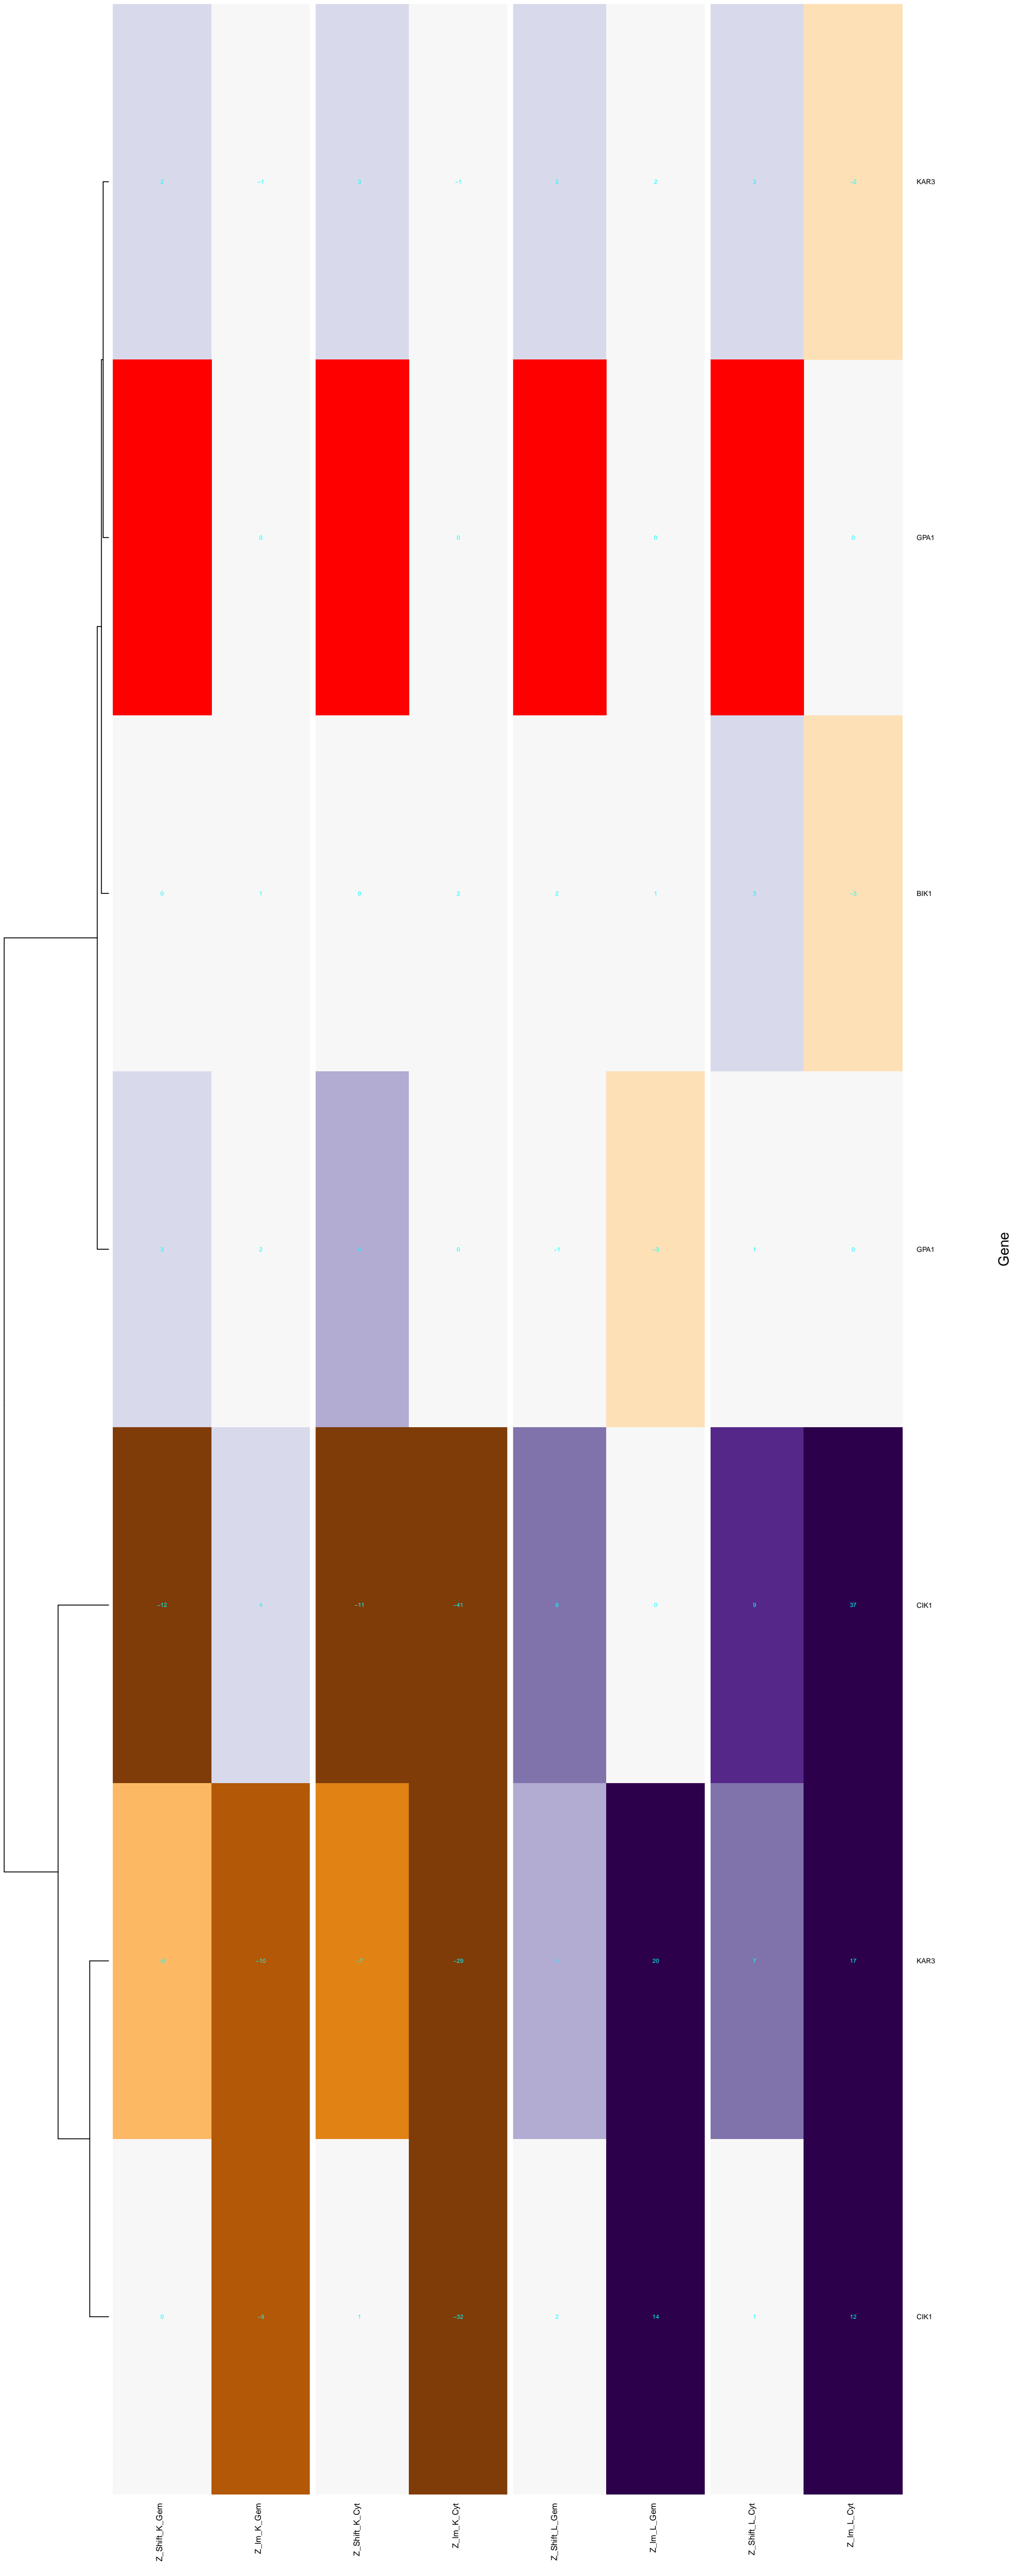

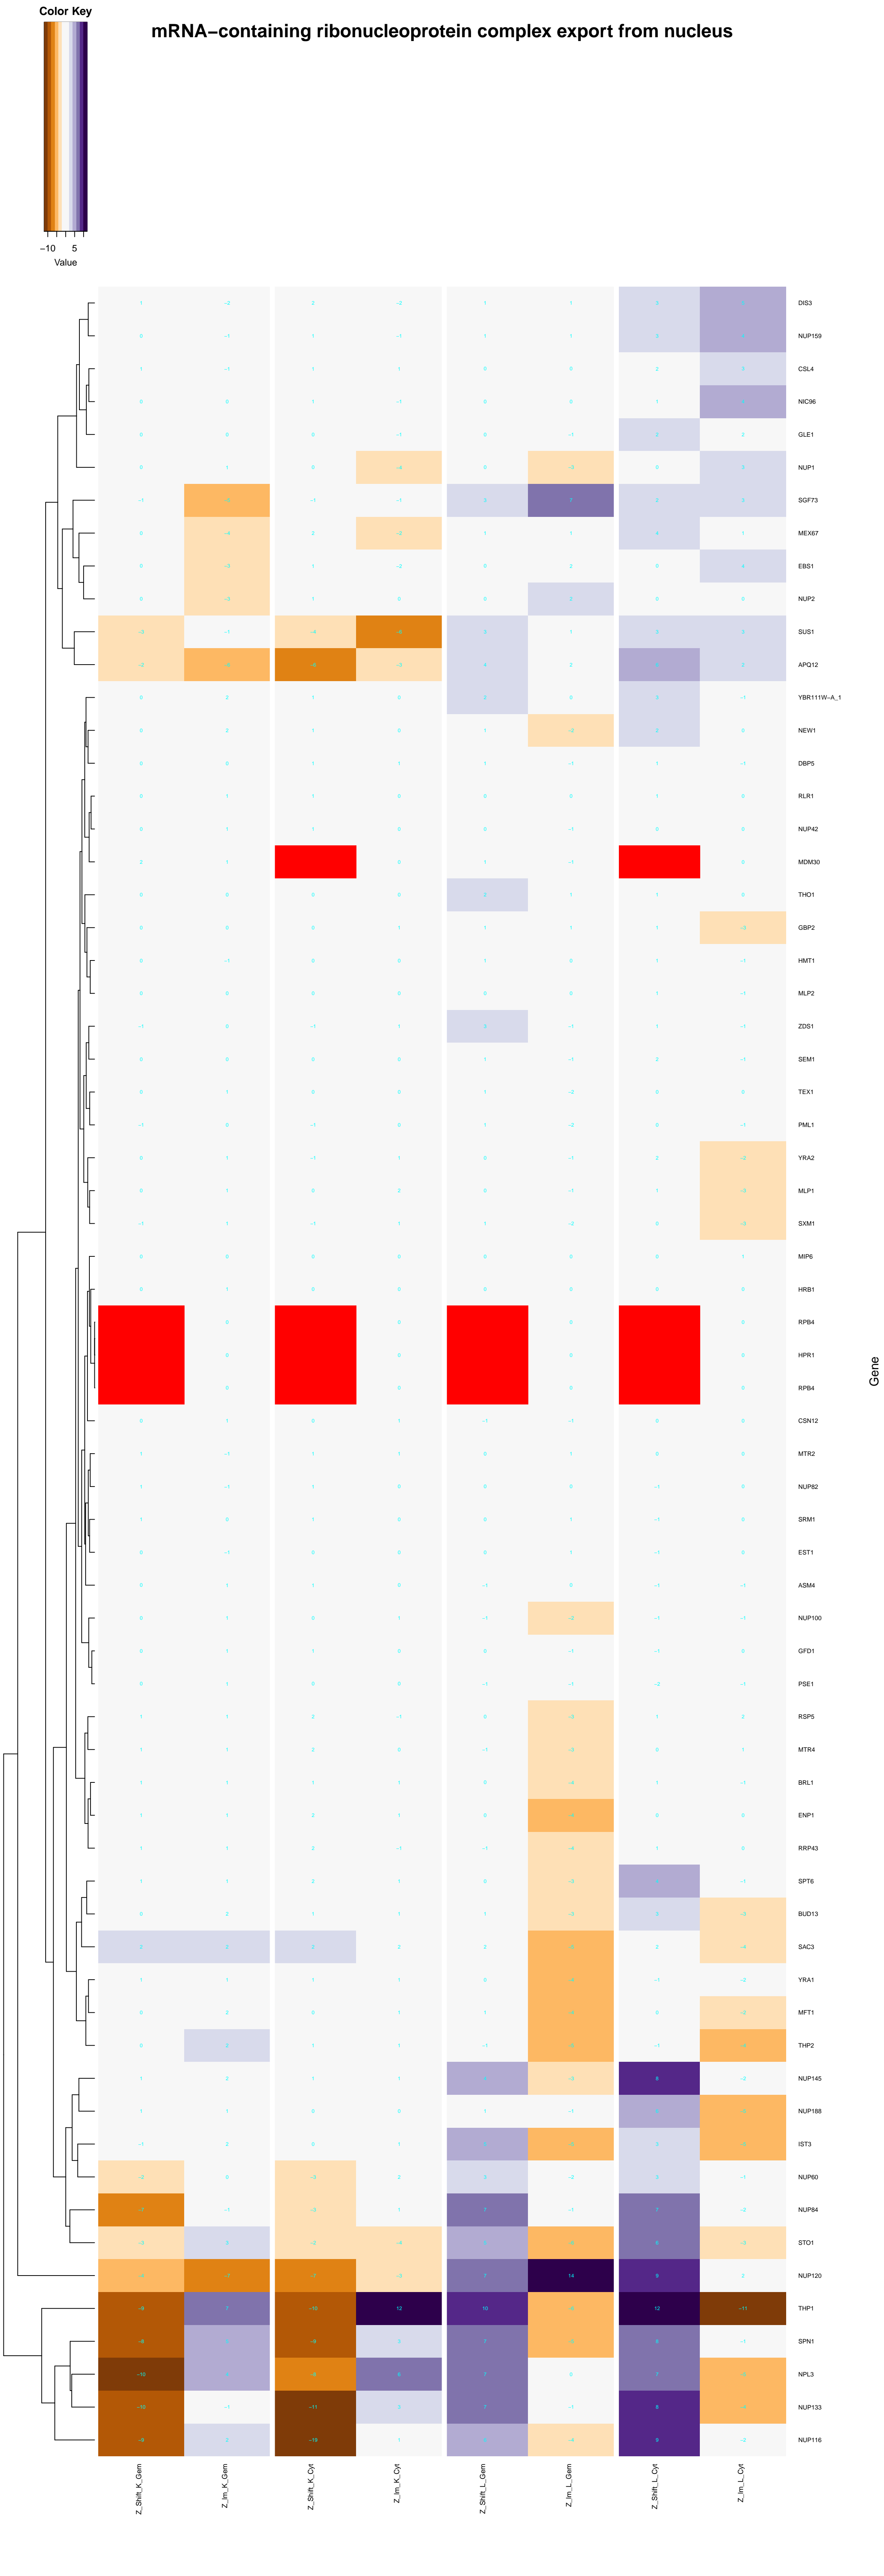

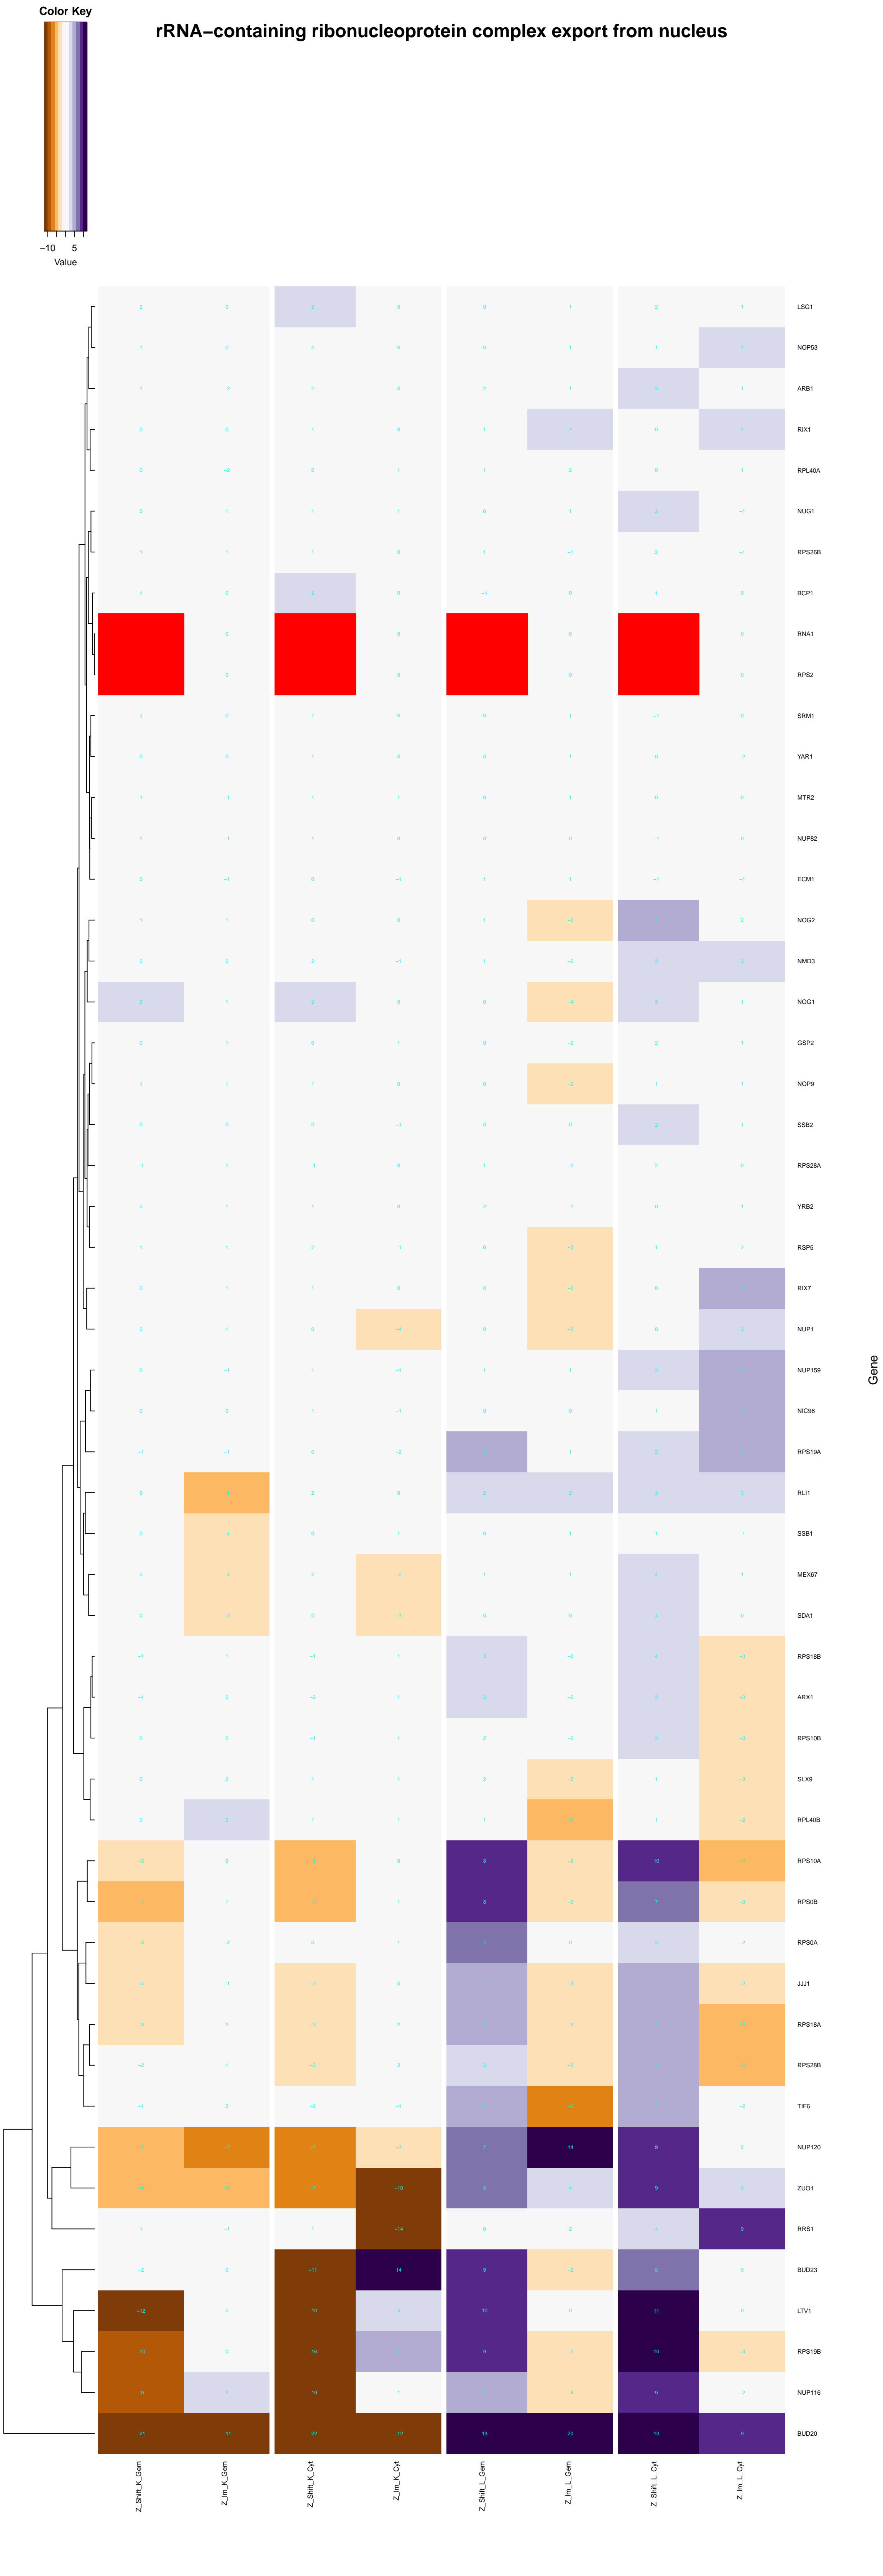



tRNA-containing ribonucleoprotein complex export from nucleus

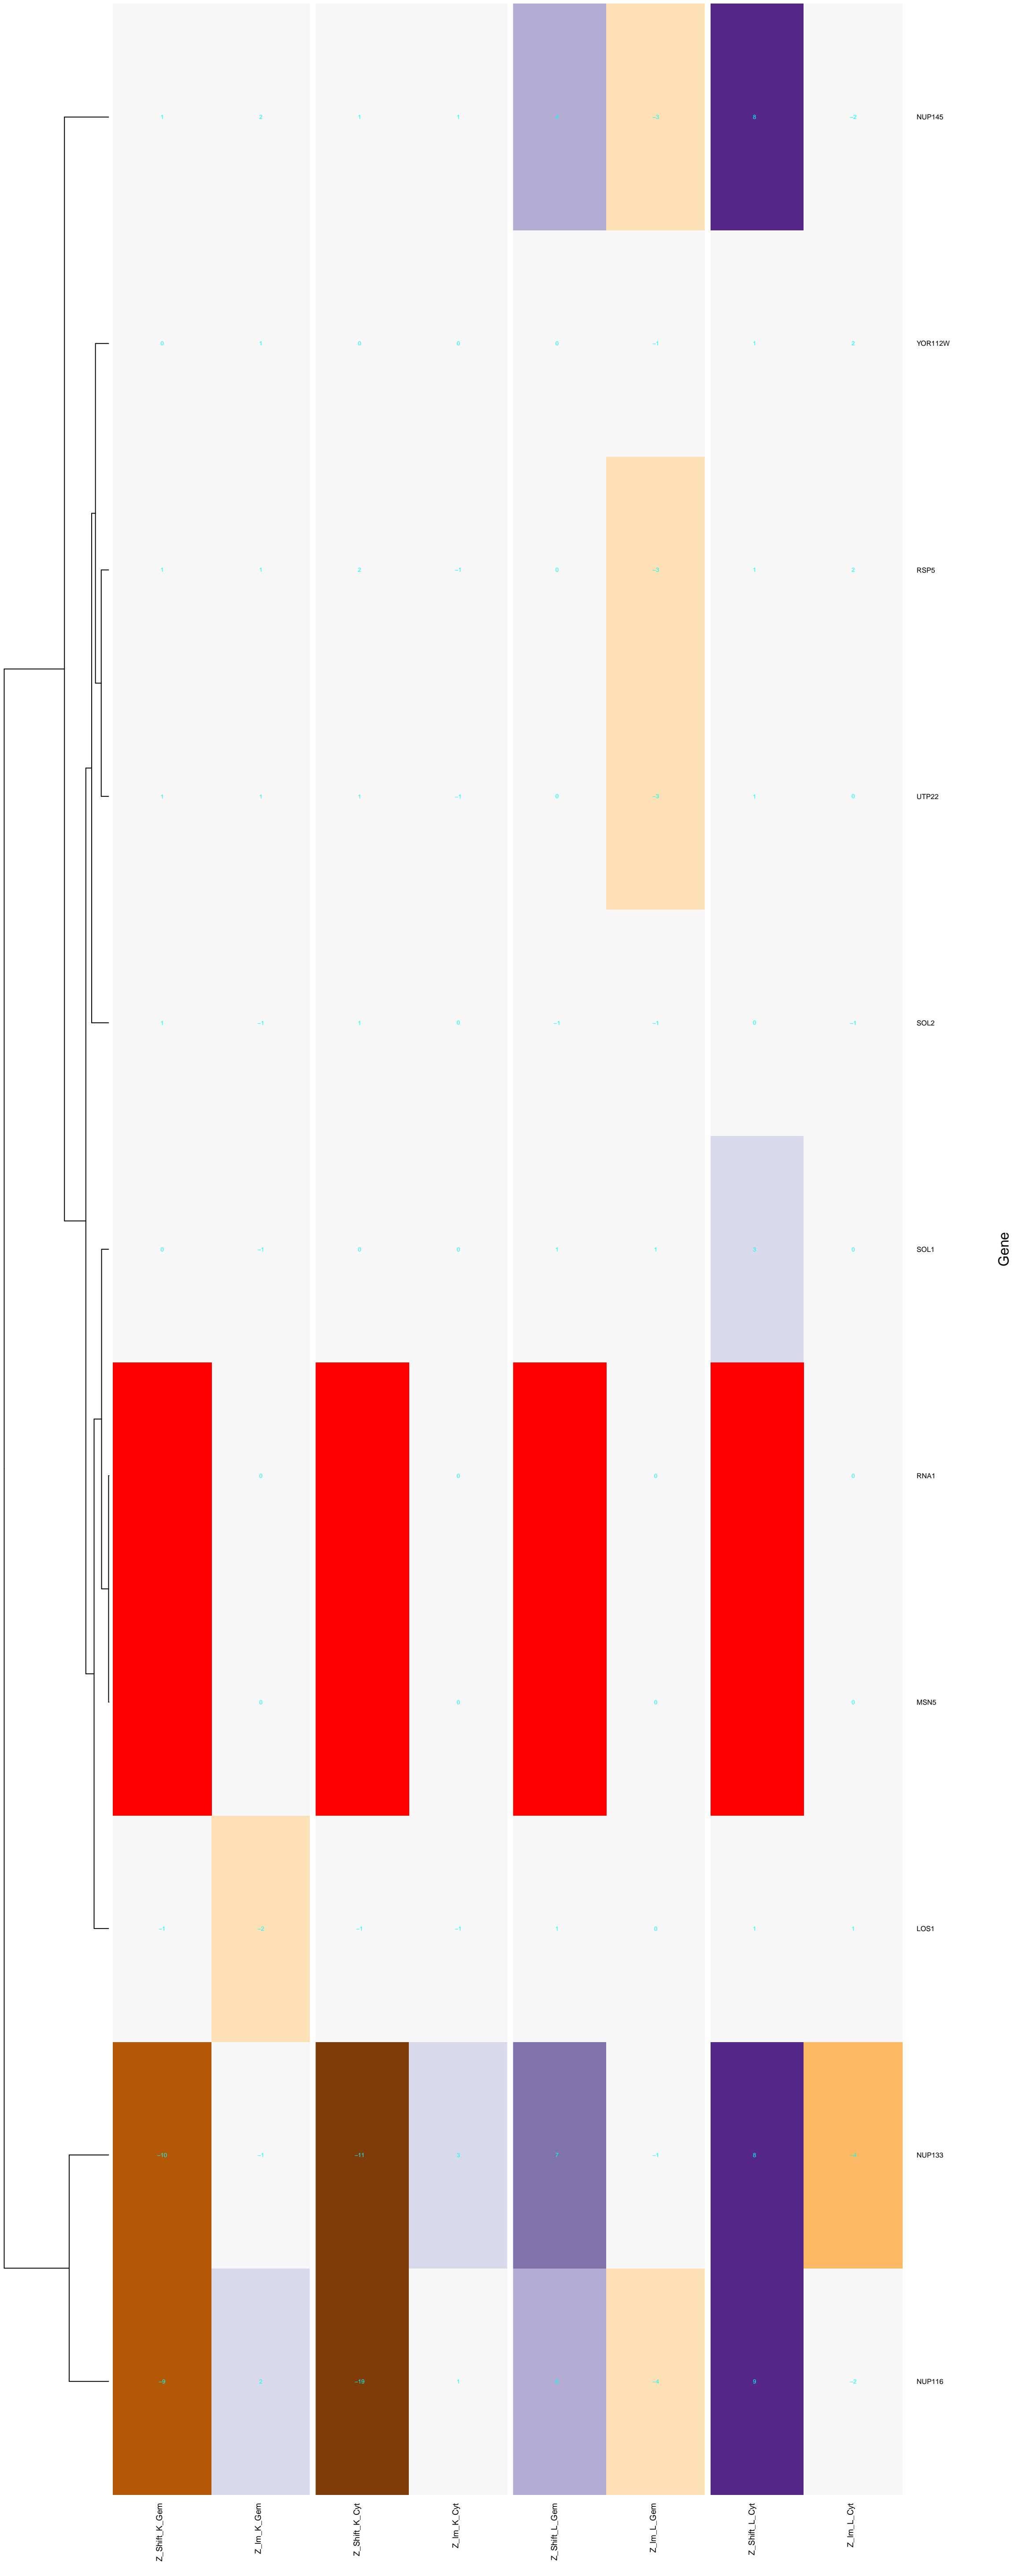

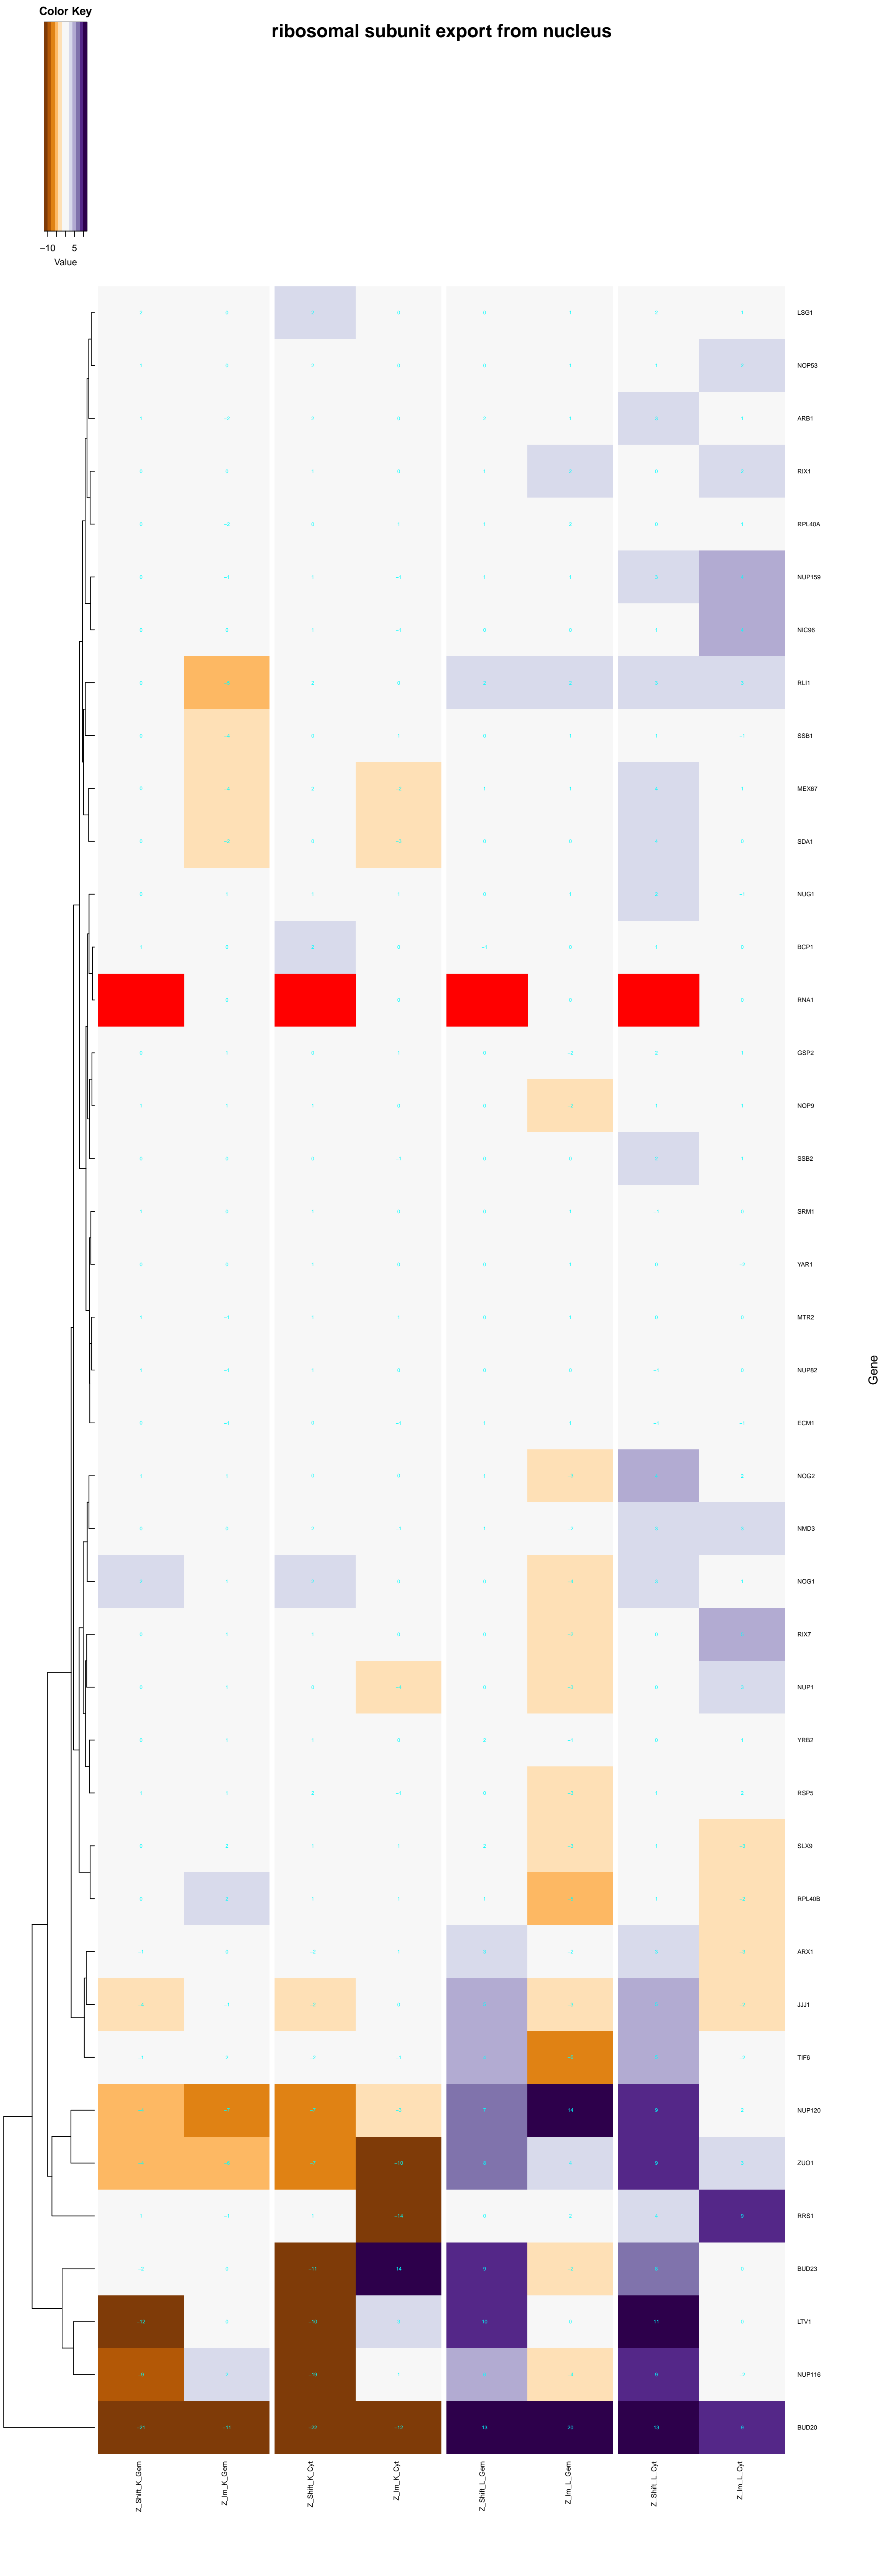

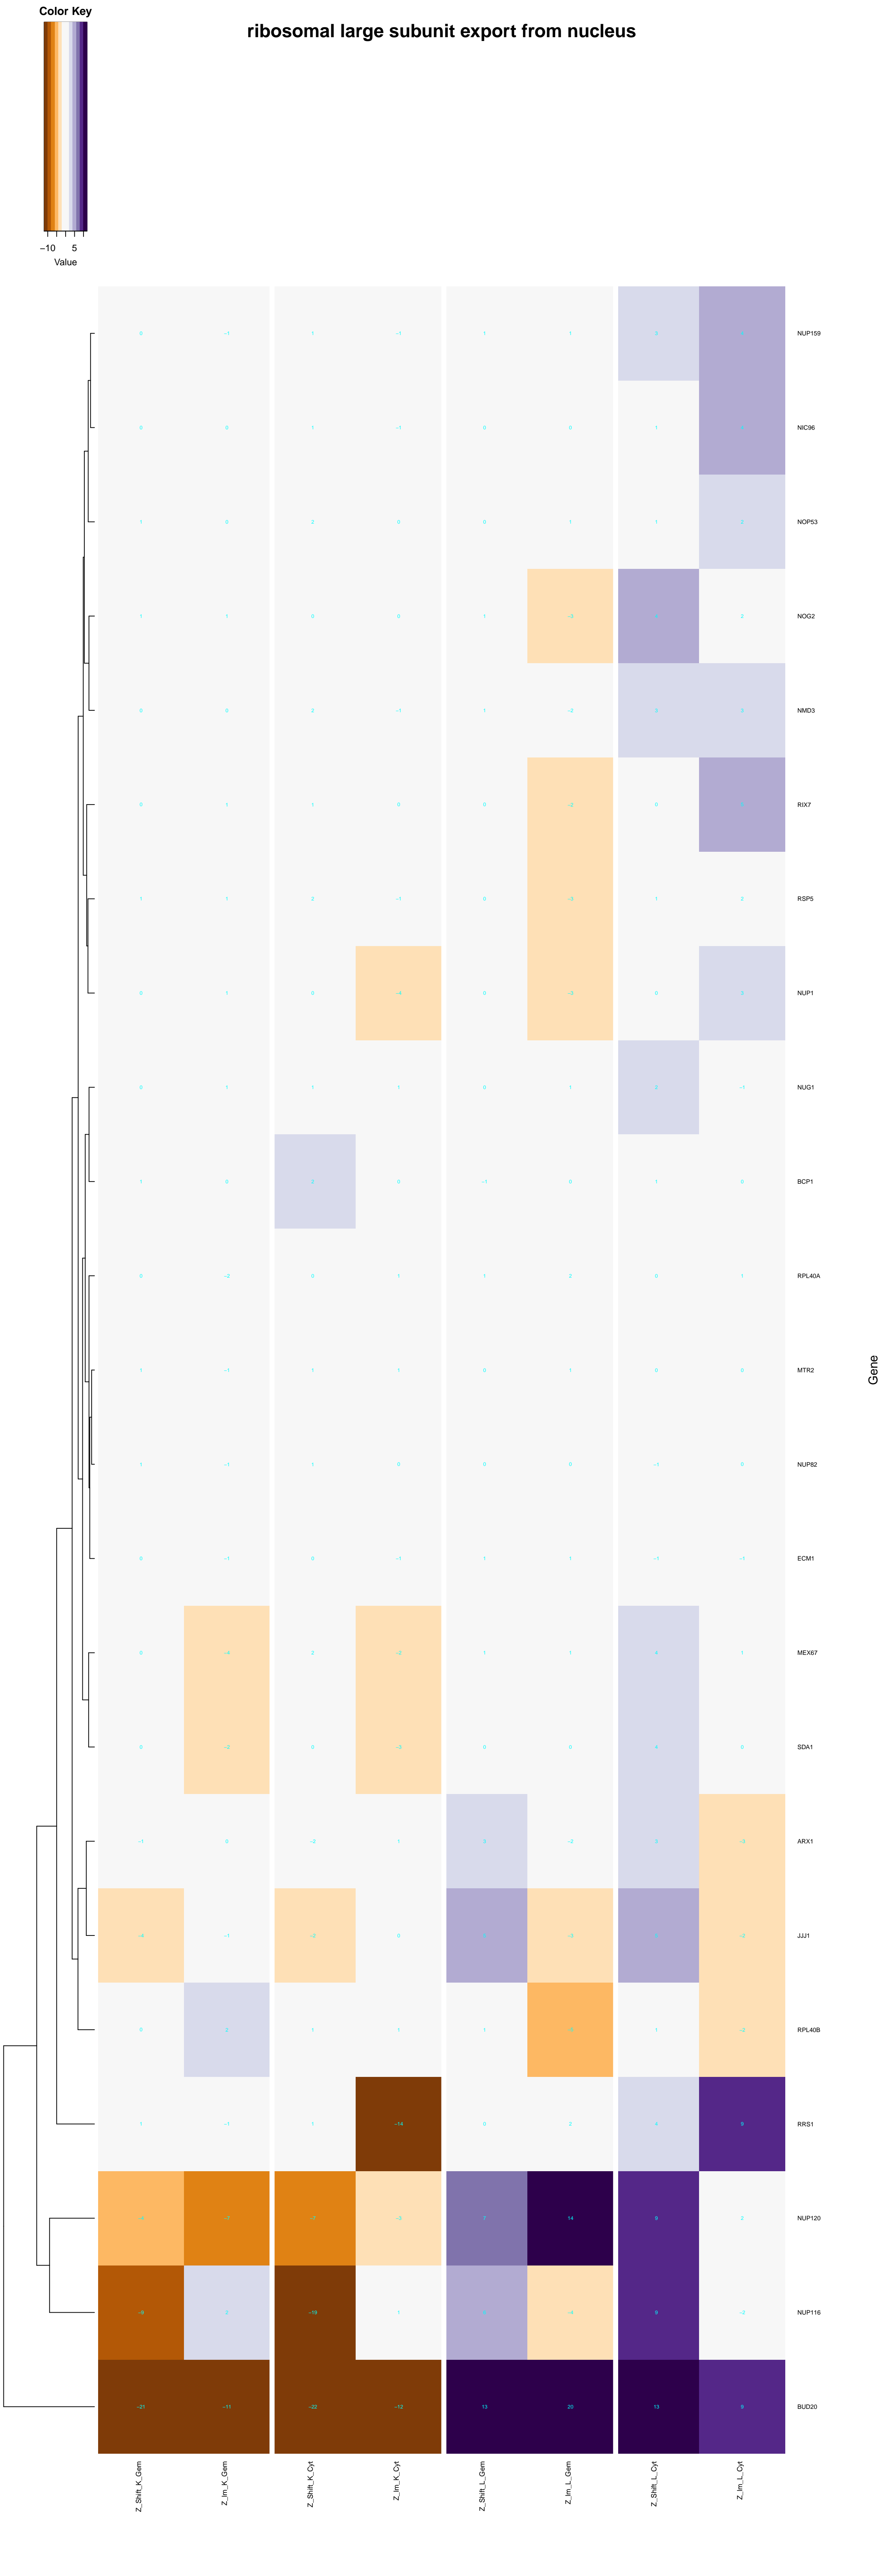

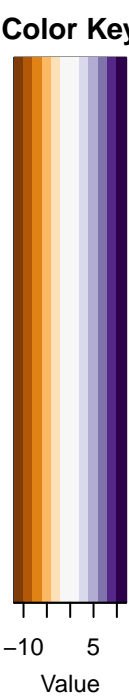

ribosomal small subunit export from nucleus

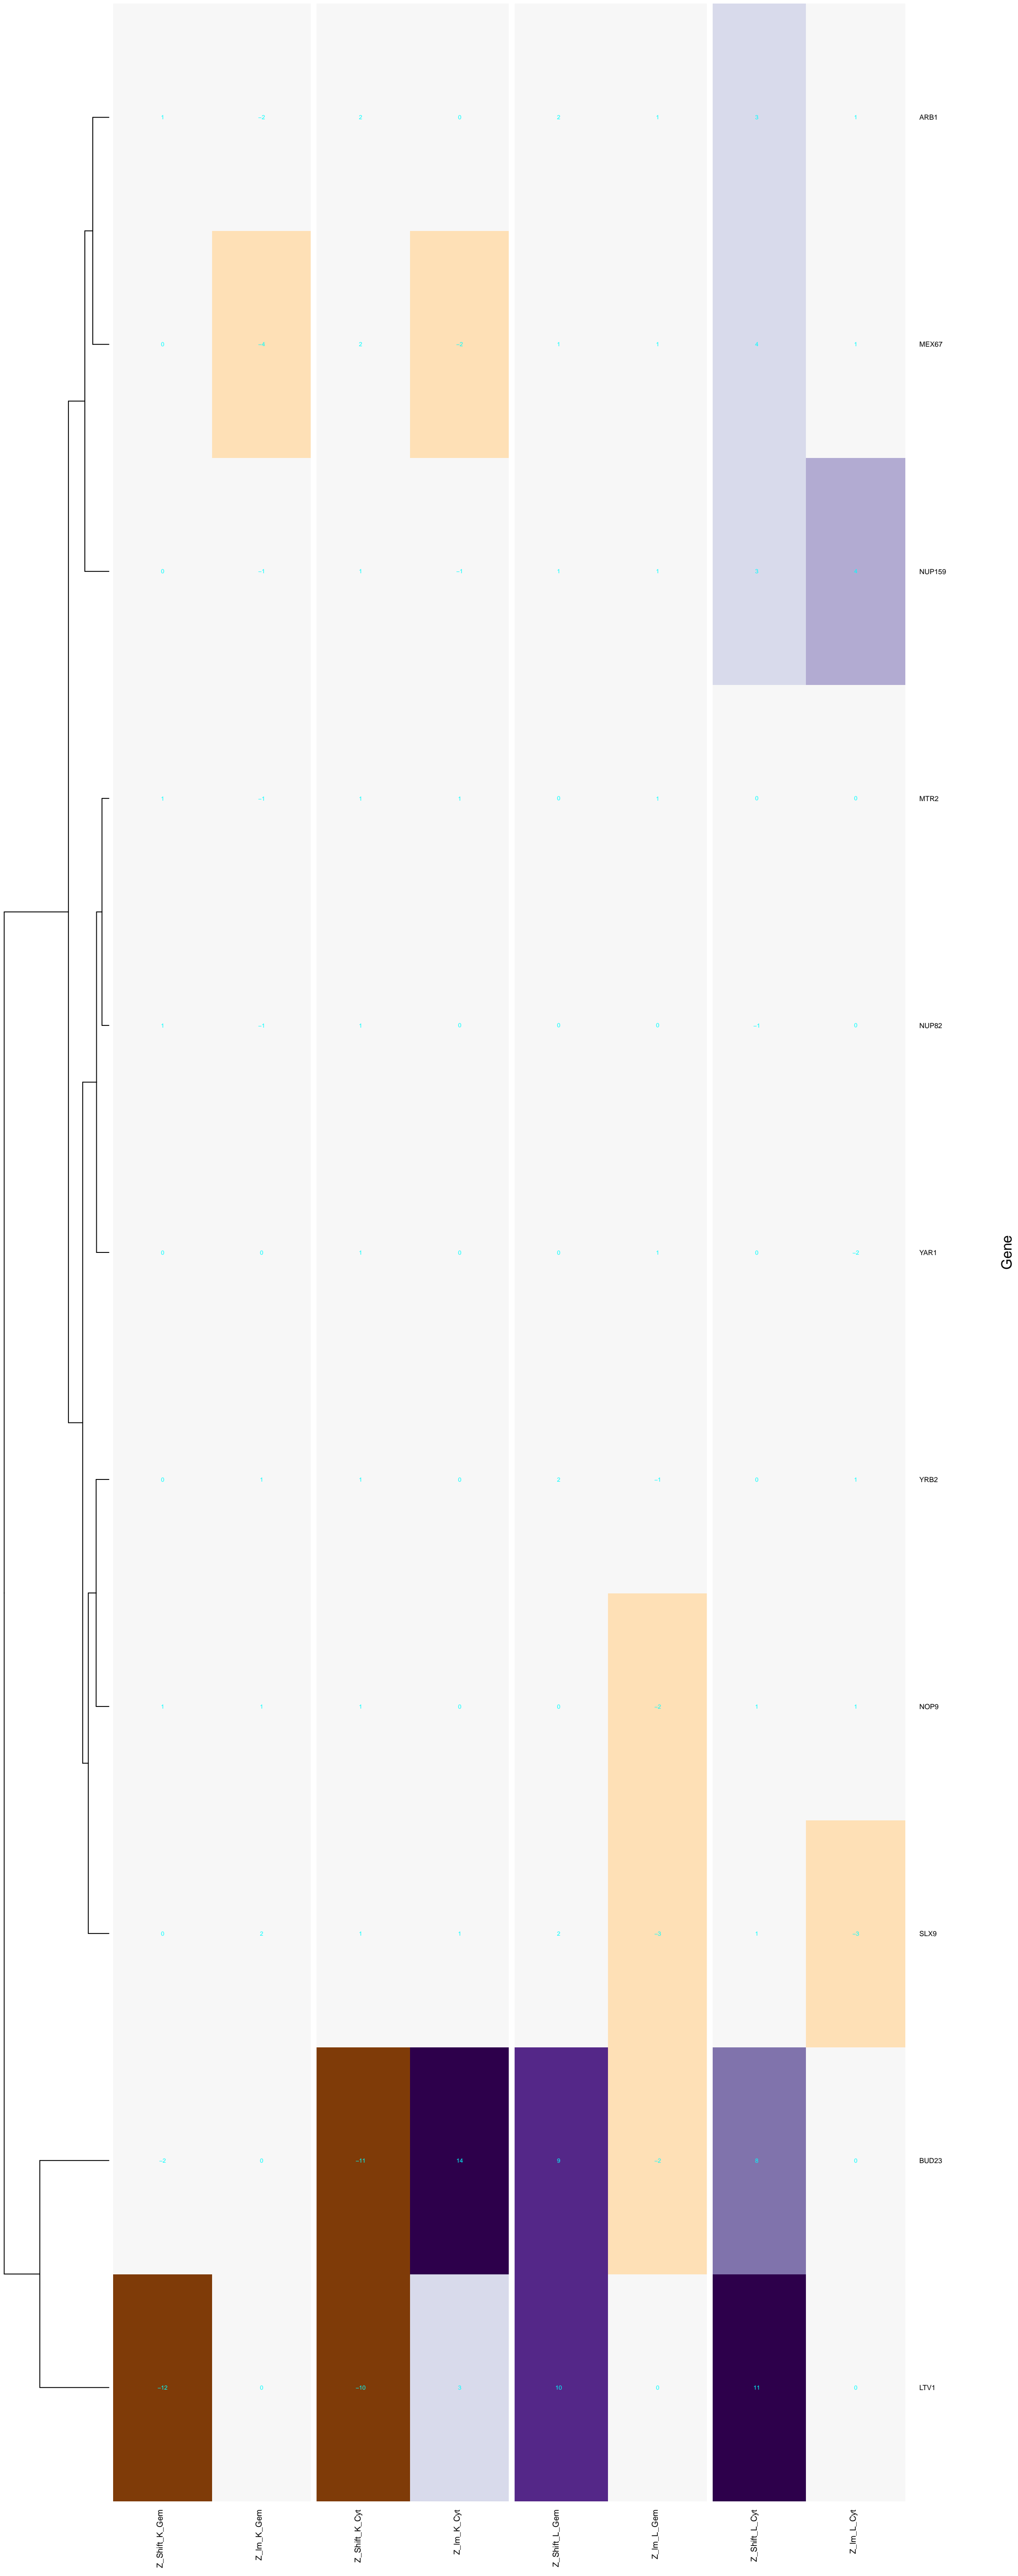

Supplement: s1 [file s1]
