# Supplementary material for: A Humanized Yeast Phenomic Model of Deoxycytidine Kinase to Predict Genetic Buffering of Nucleoside Analog Cytotoxicity
Source: MDPI journal article supplement (doi:10.3390/genes10100770), 2019-09-30

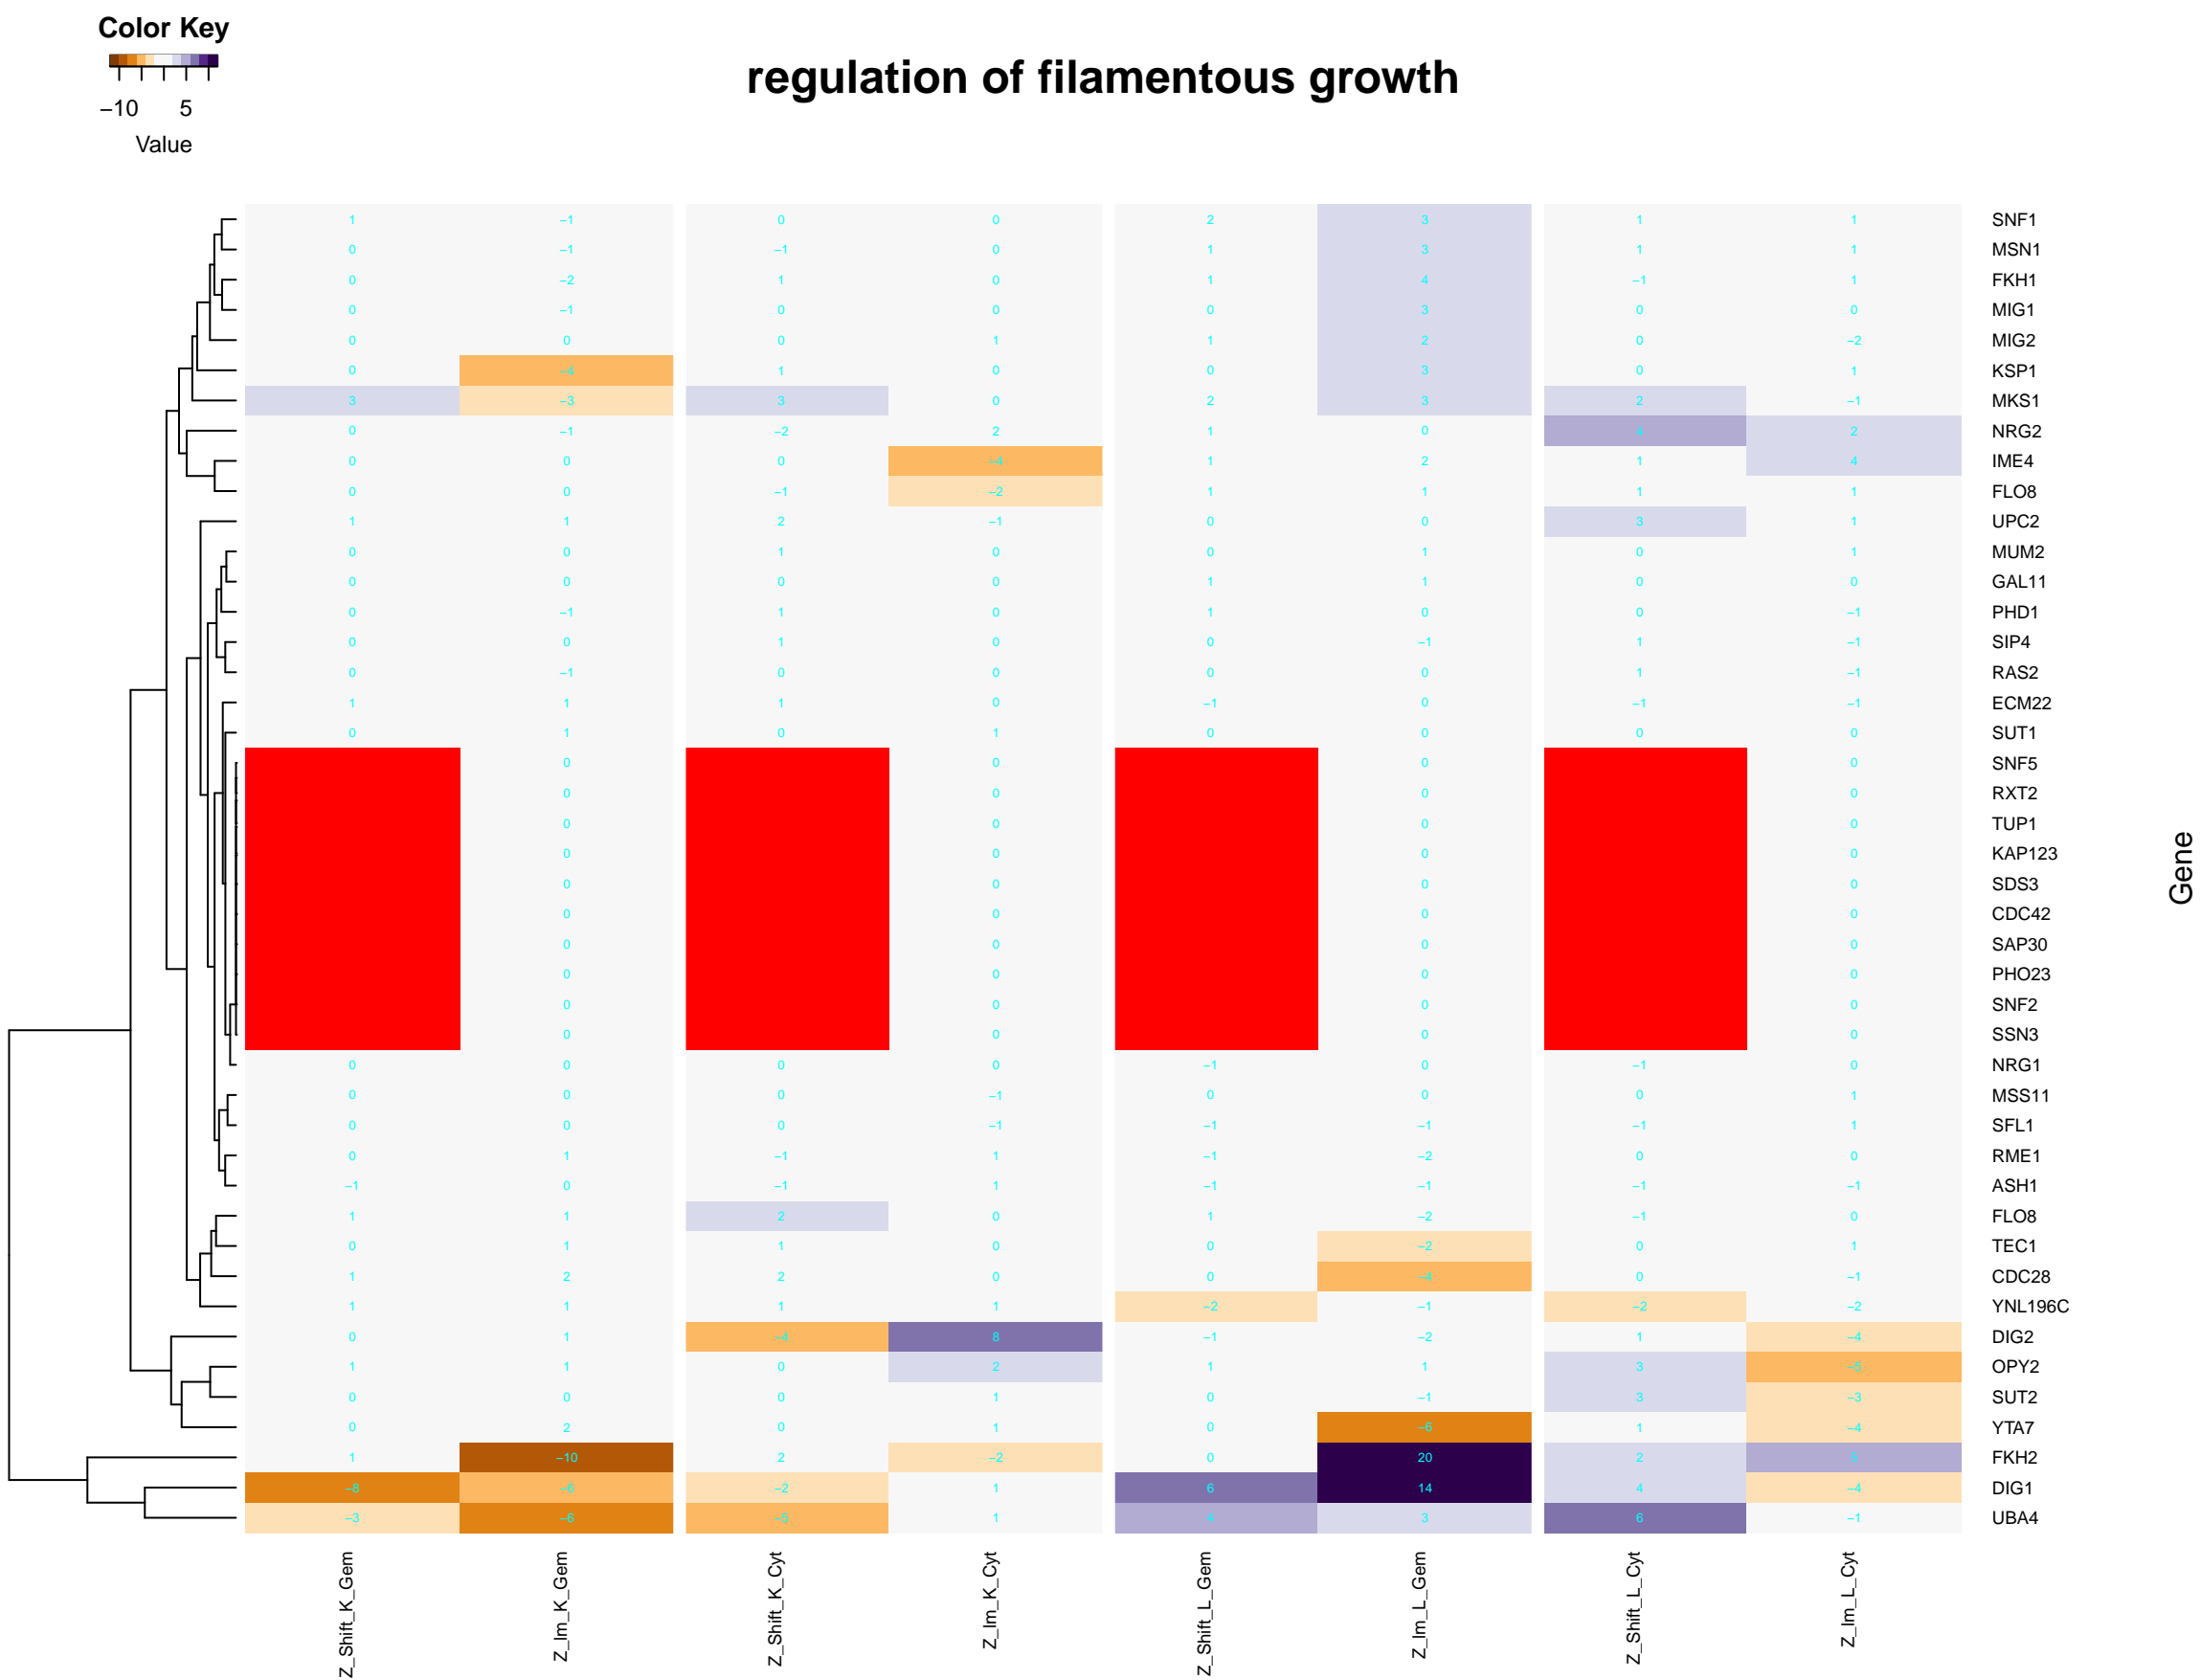

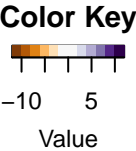

negative regulation of filamentous growth

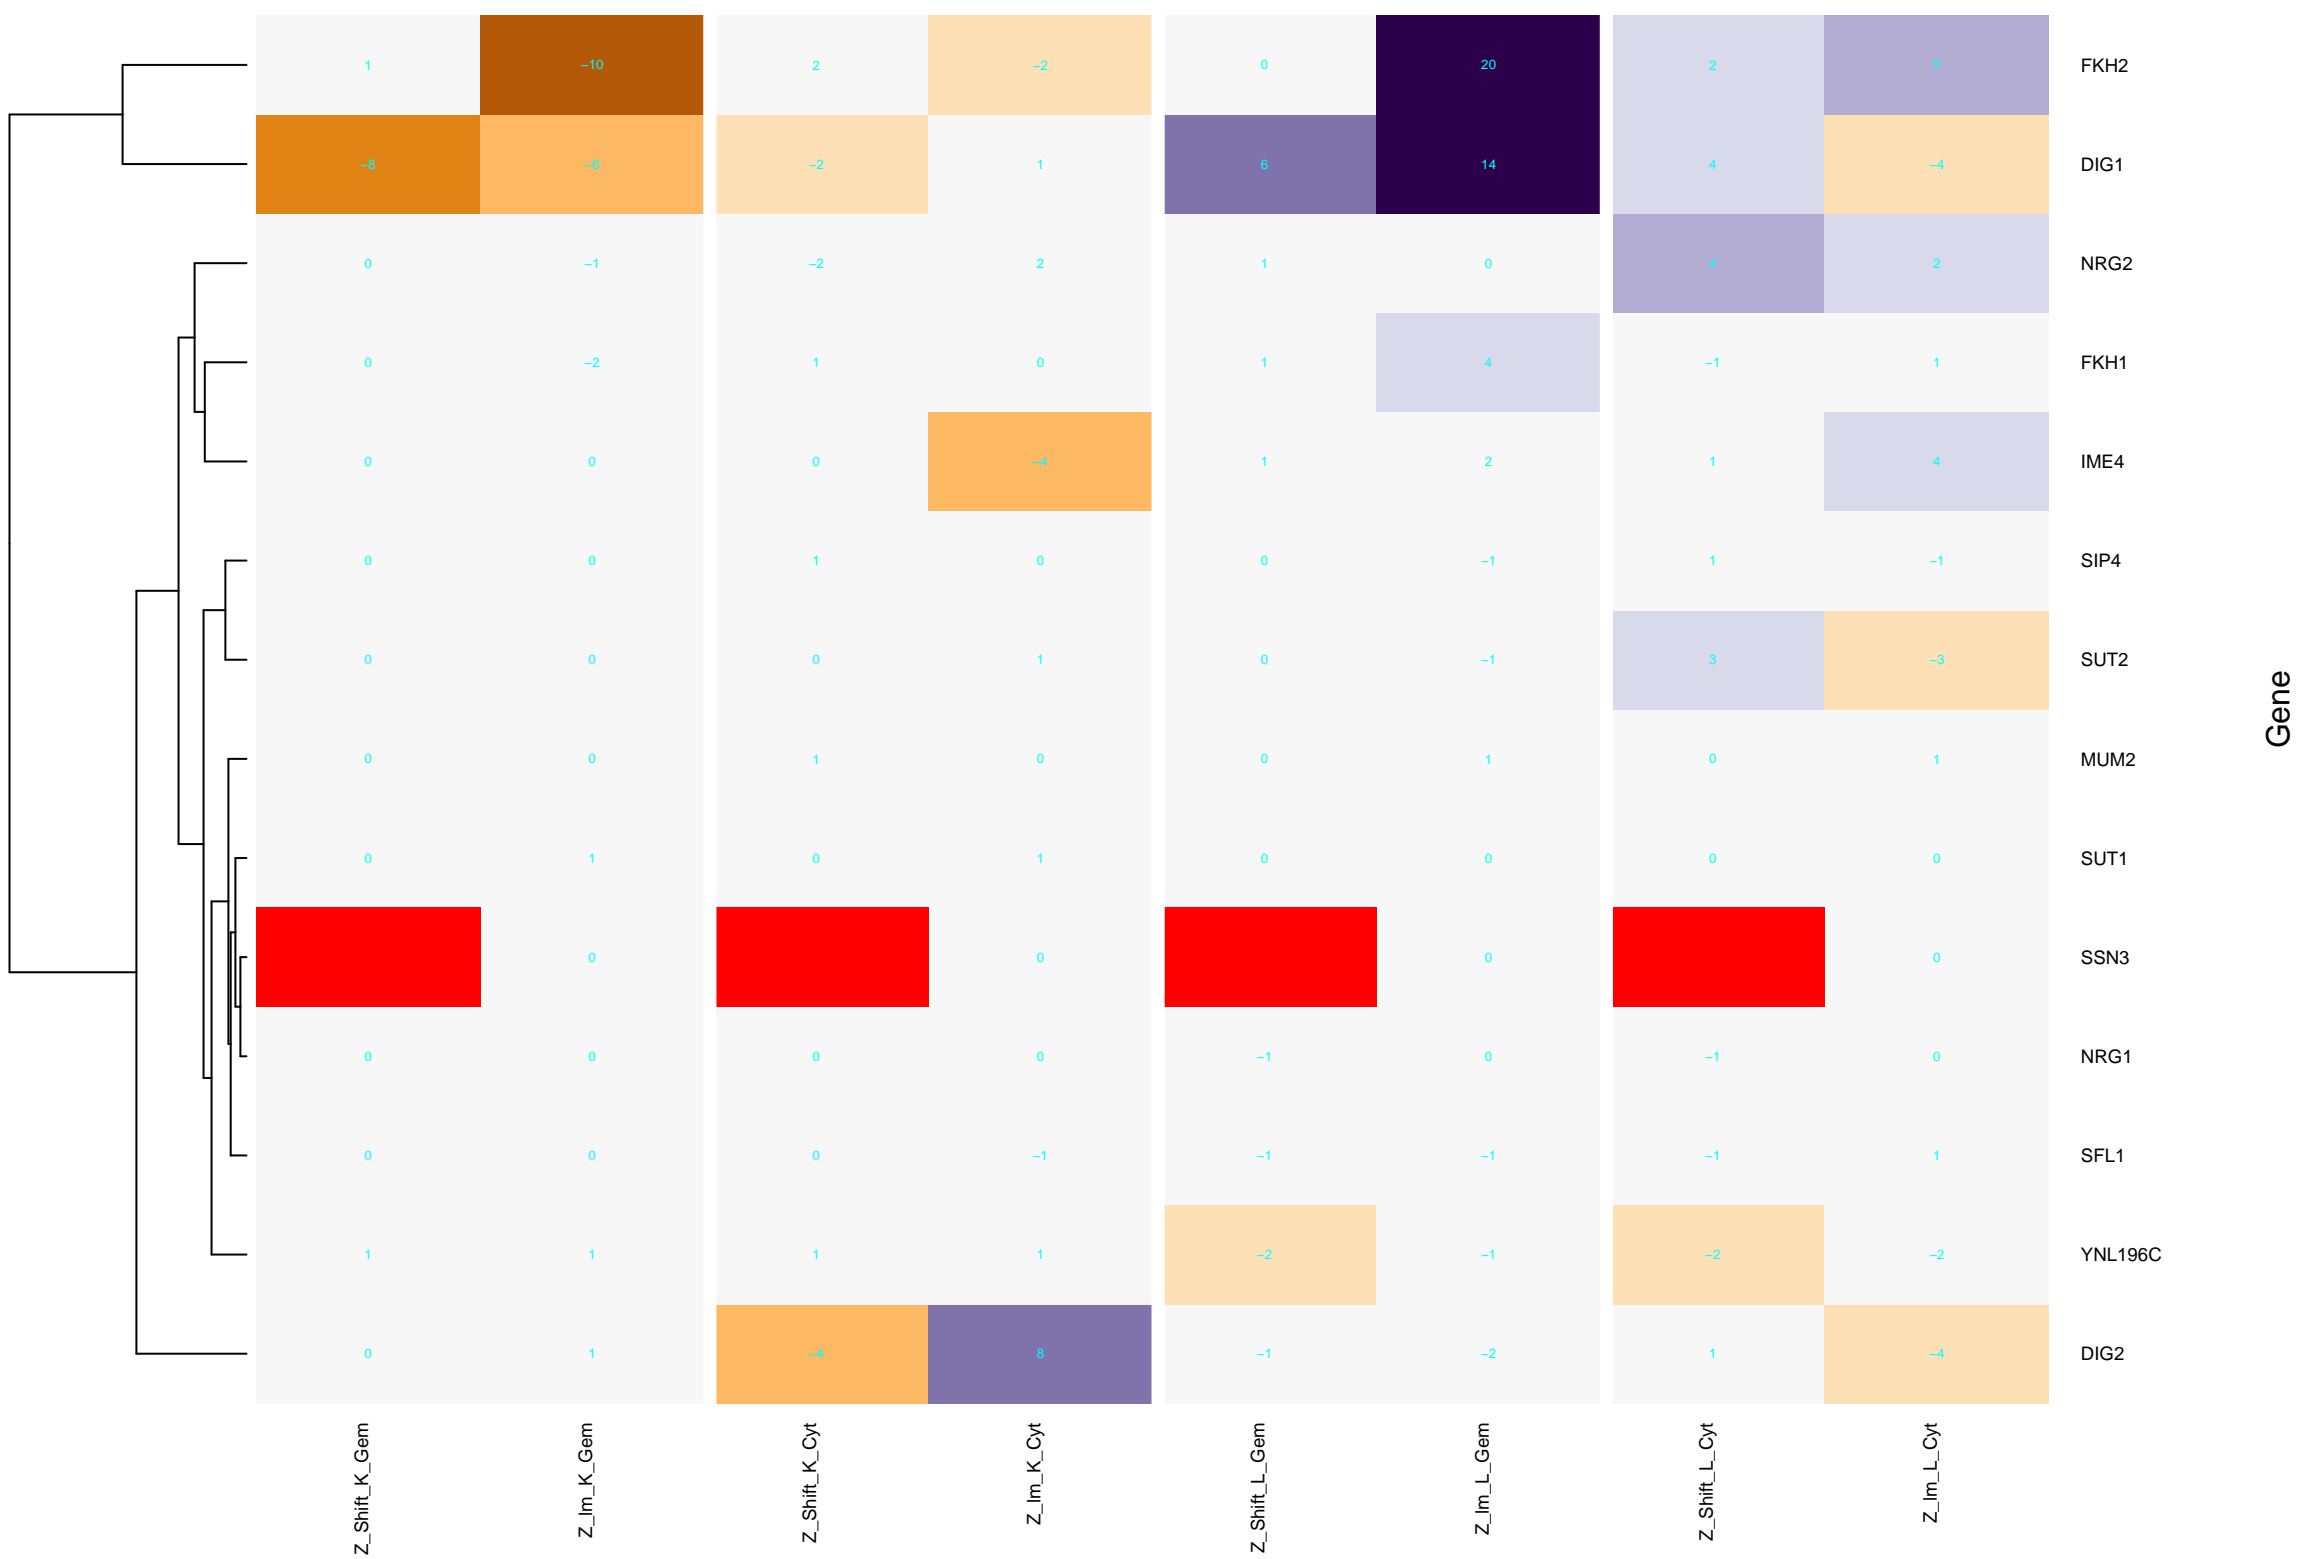

Color Key

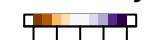

-10

5

Value

## positive regulation of filamentous growth

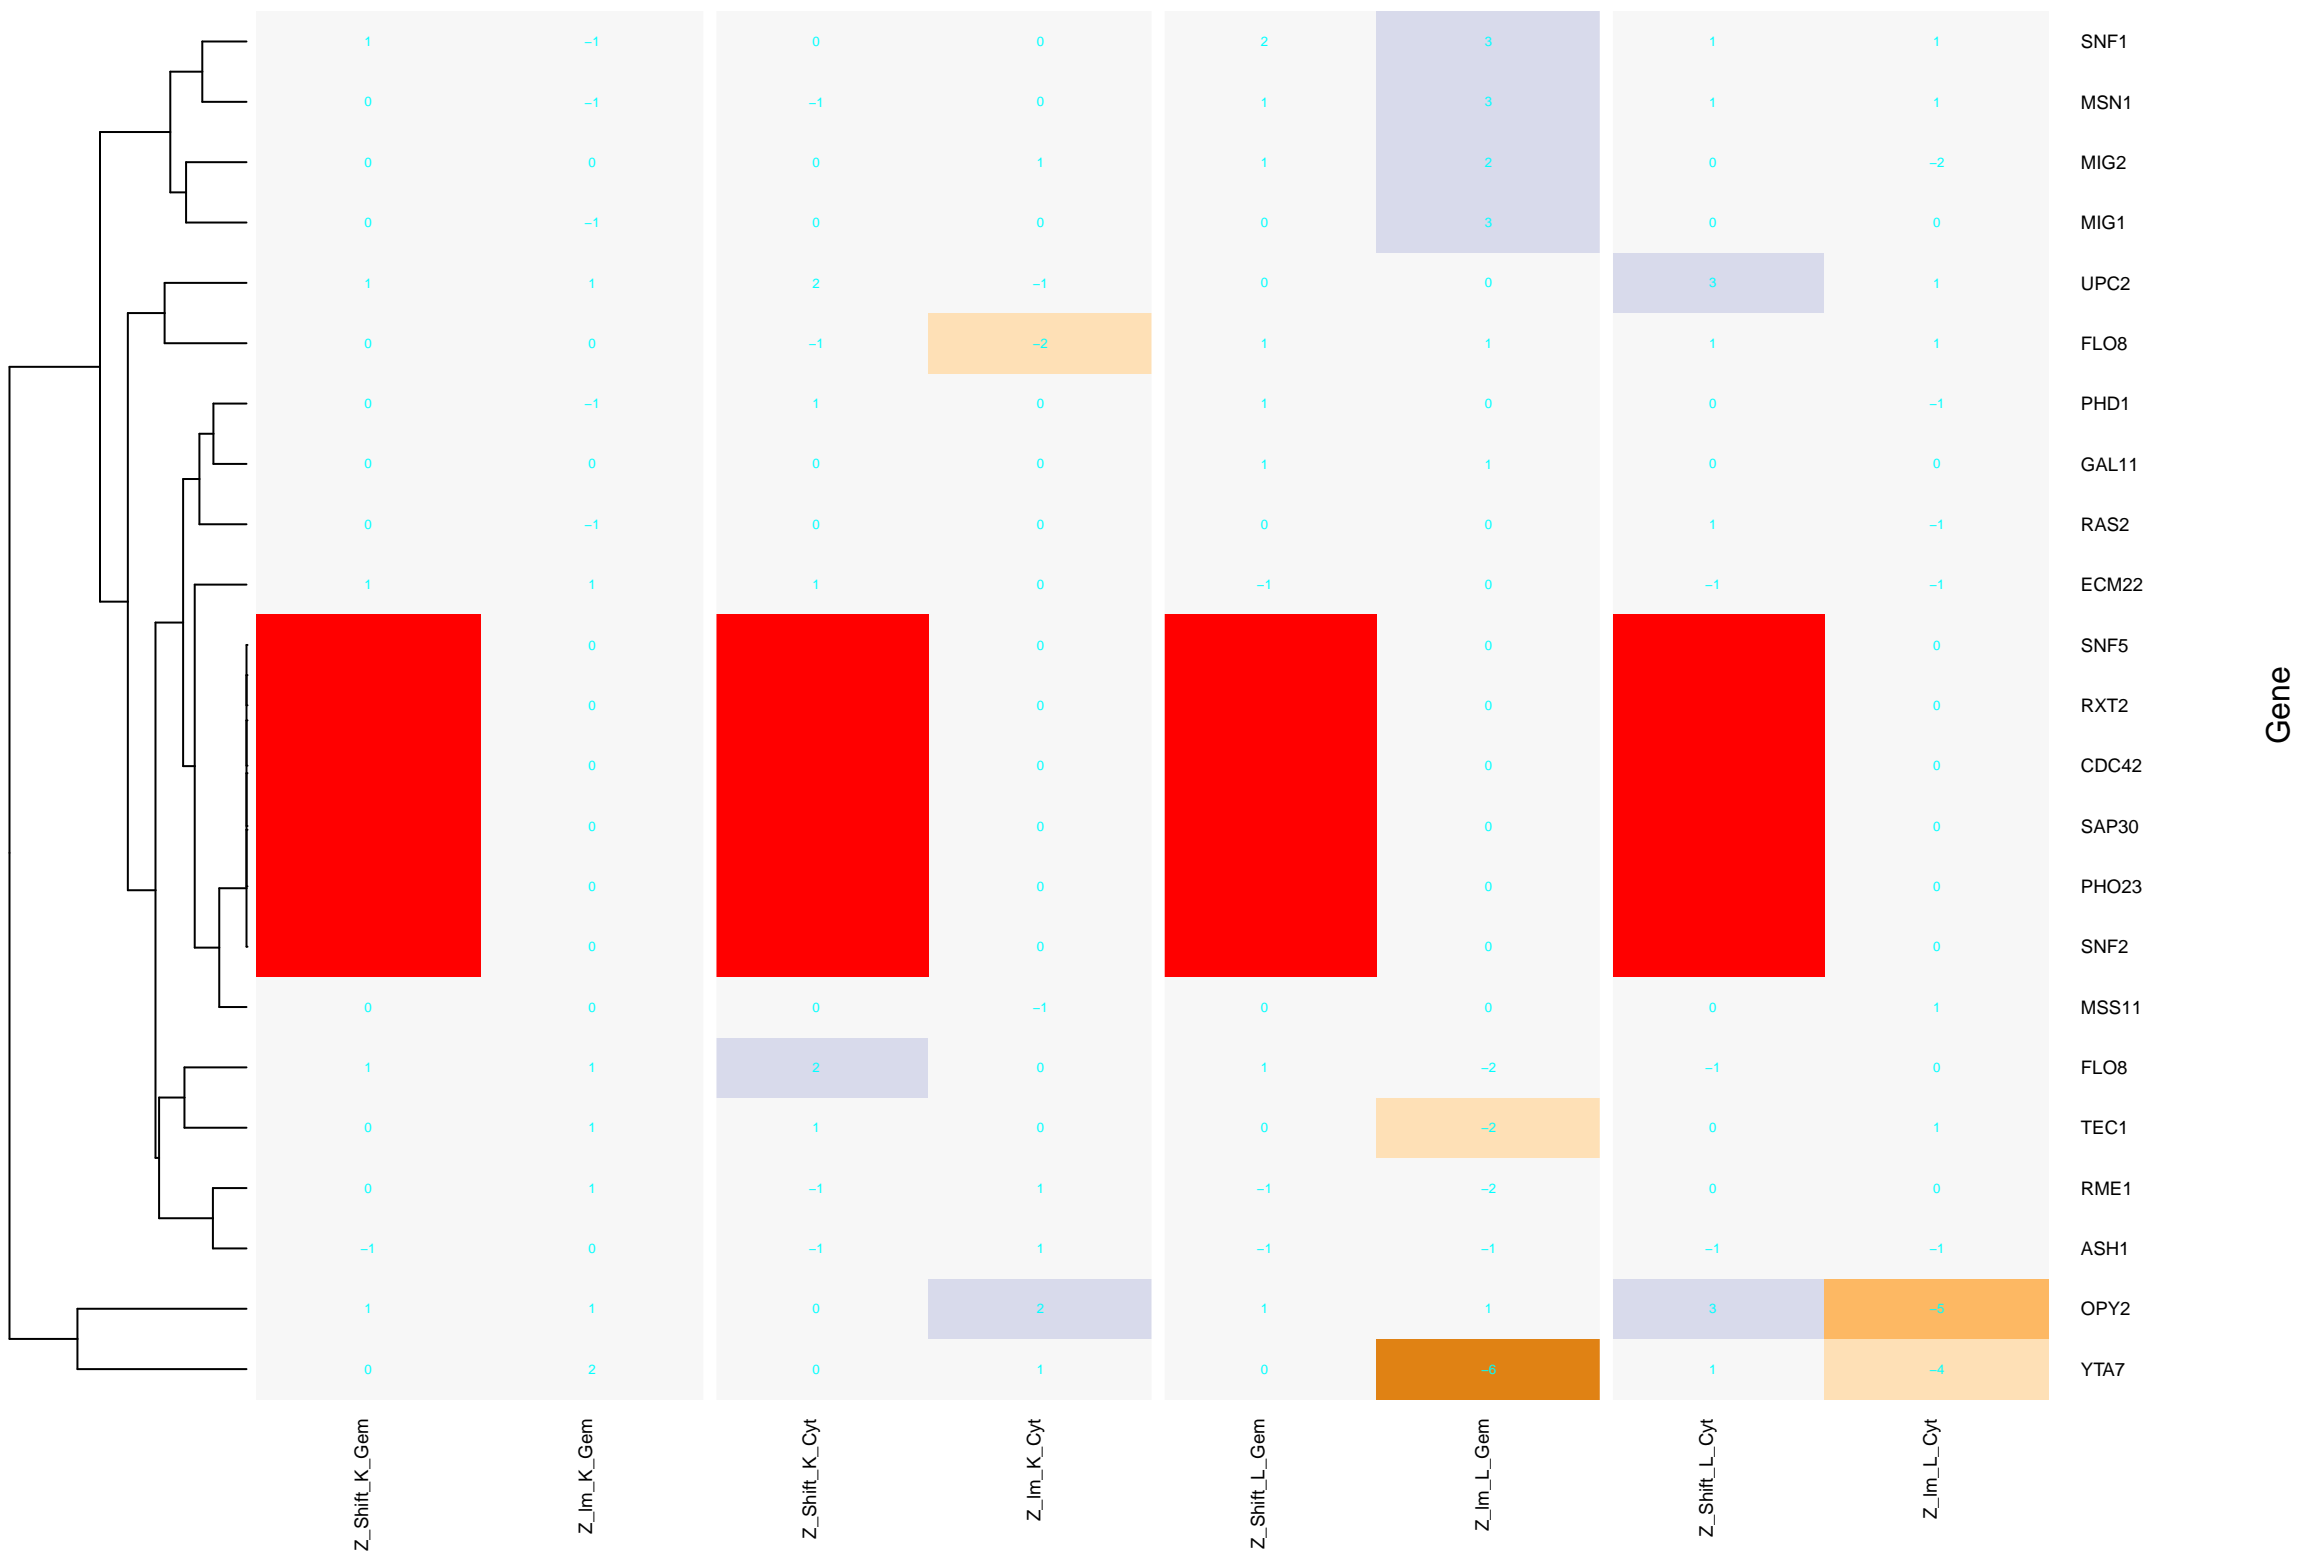

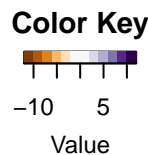

# regulation of filamentous growth of a population of unicellular organisms

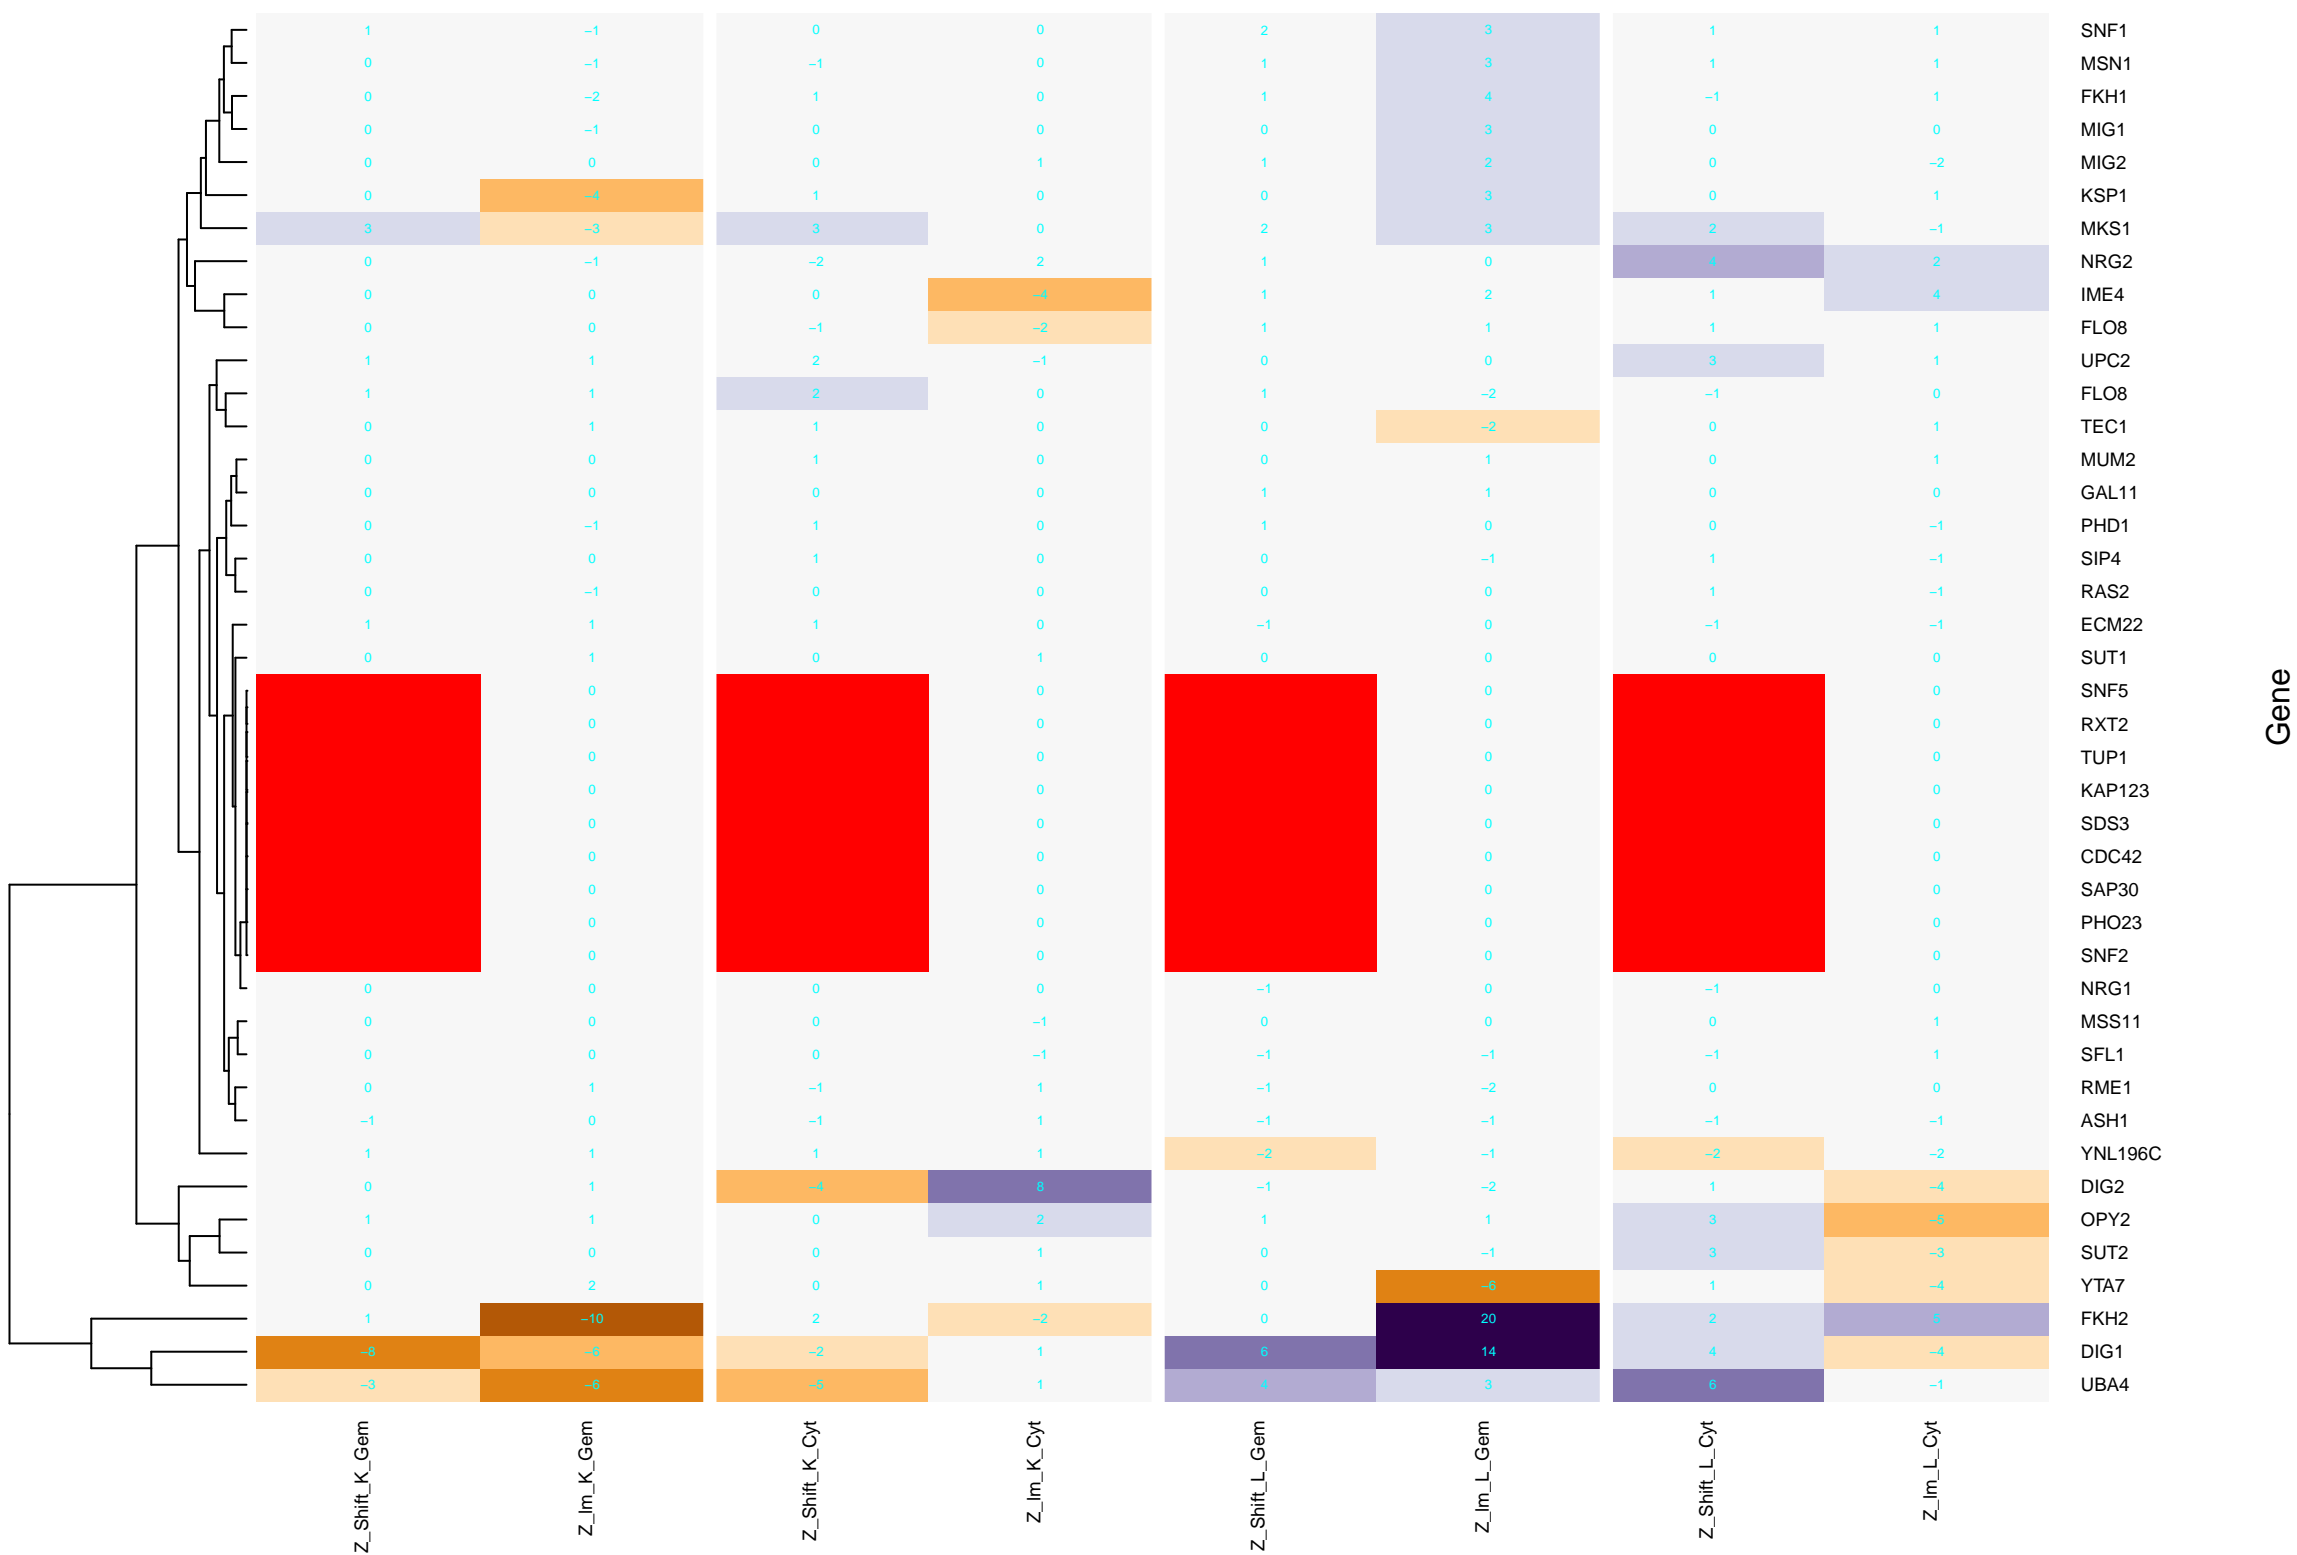

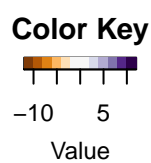

# negative regulation of filamentous growth of a population of unicellular organisms

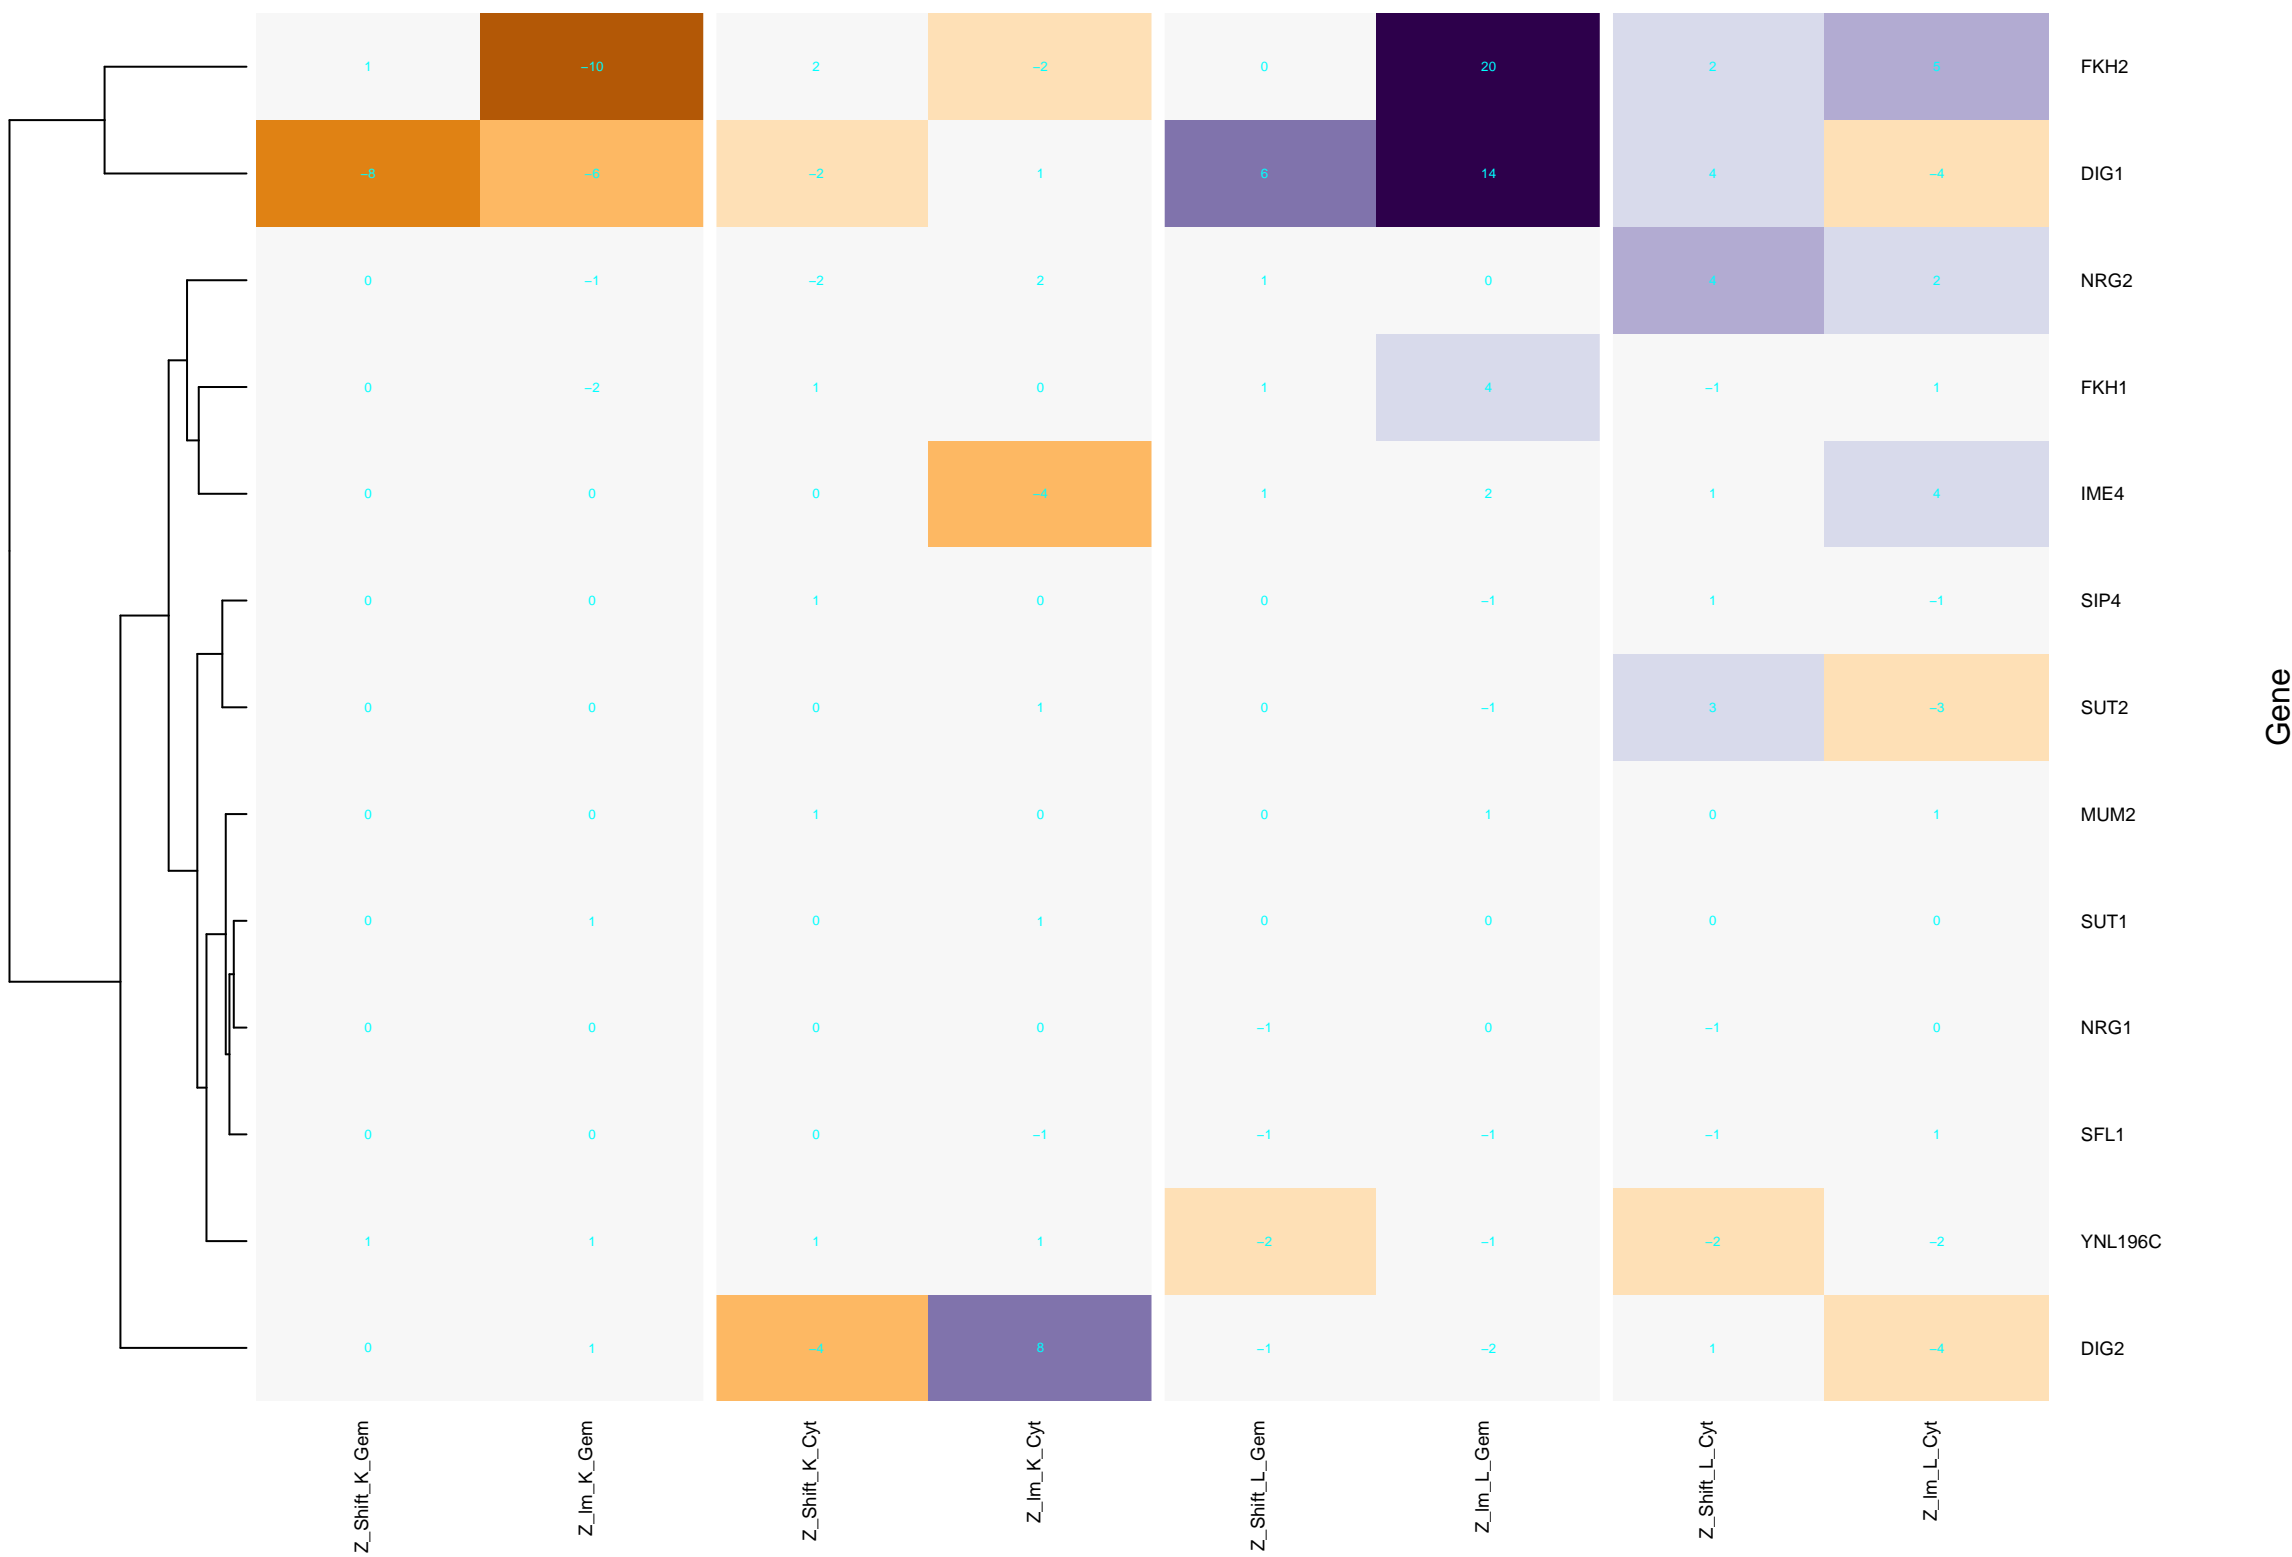

Color Key

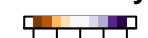

-10 5

Value

## positive regulation of filamentous growth of a population of unicellular organisms

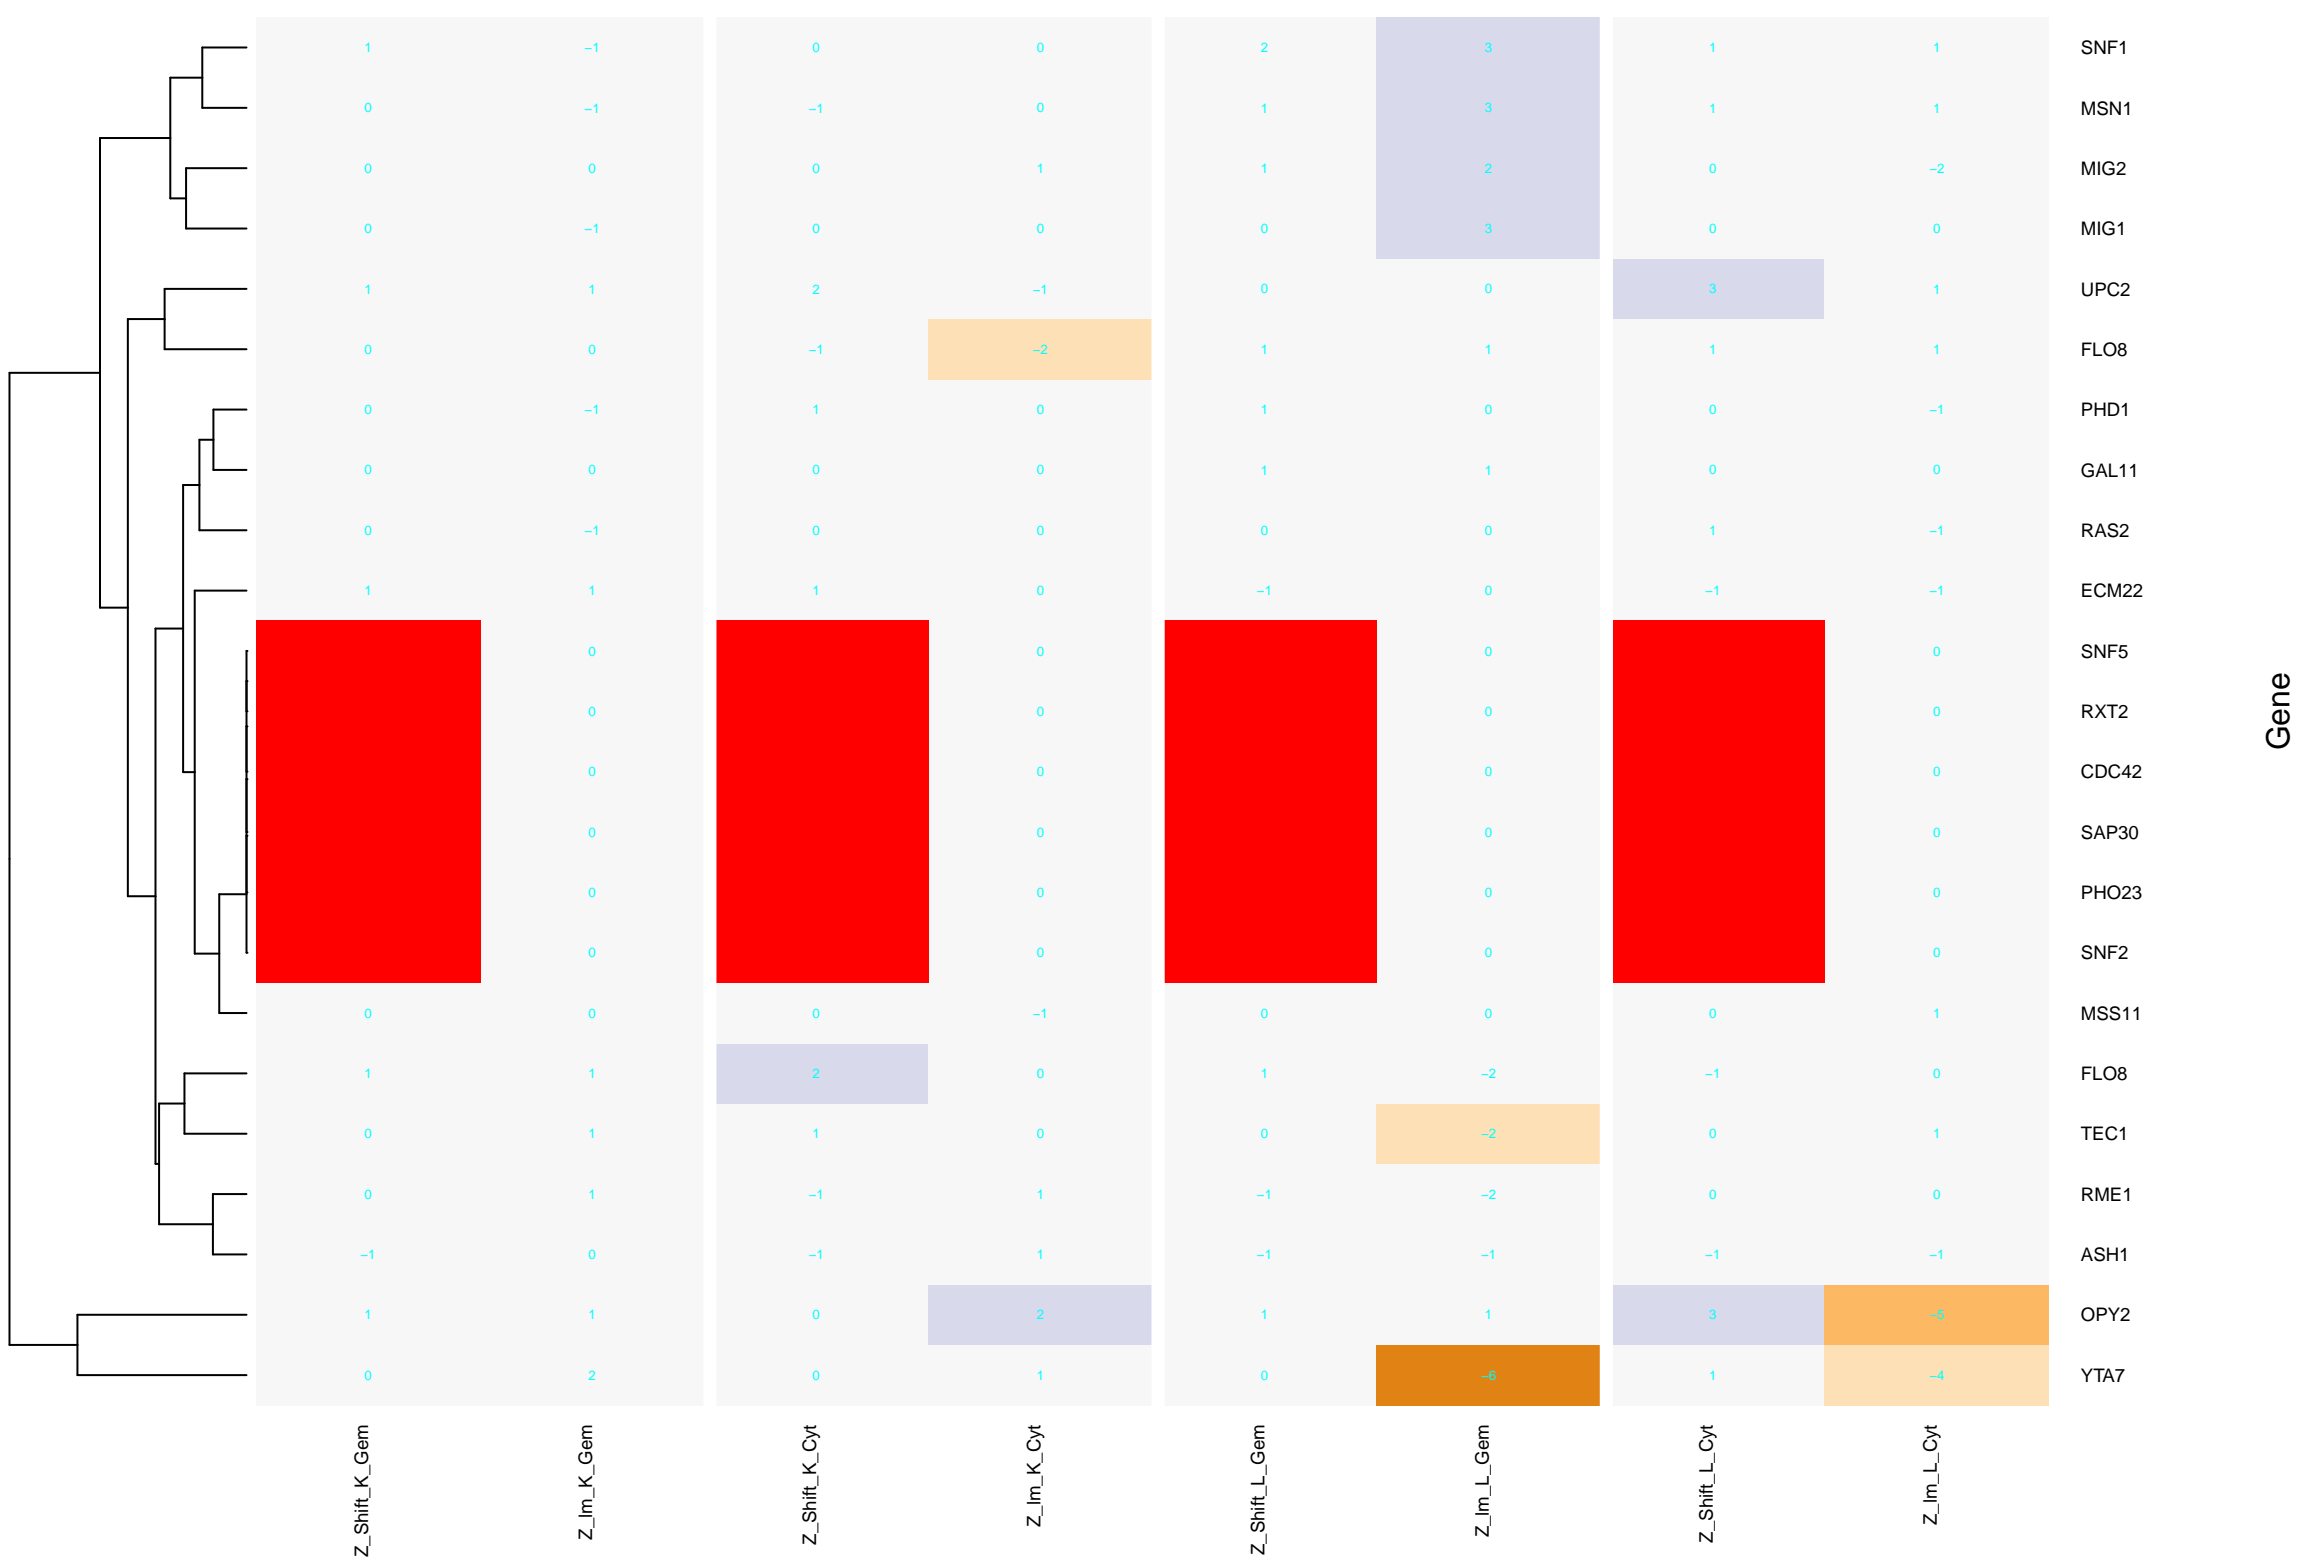



# regulation of growth of unicellular organism as a thread of attached cells

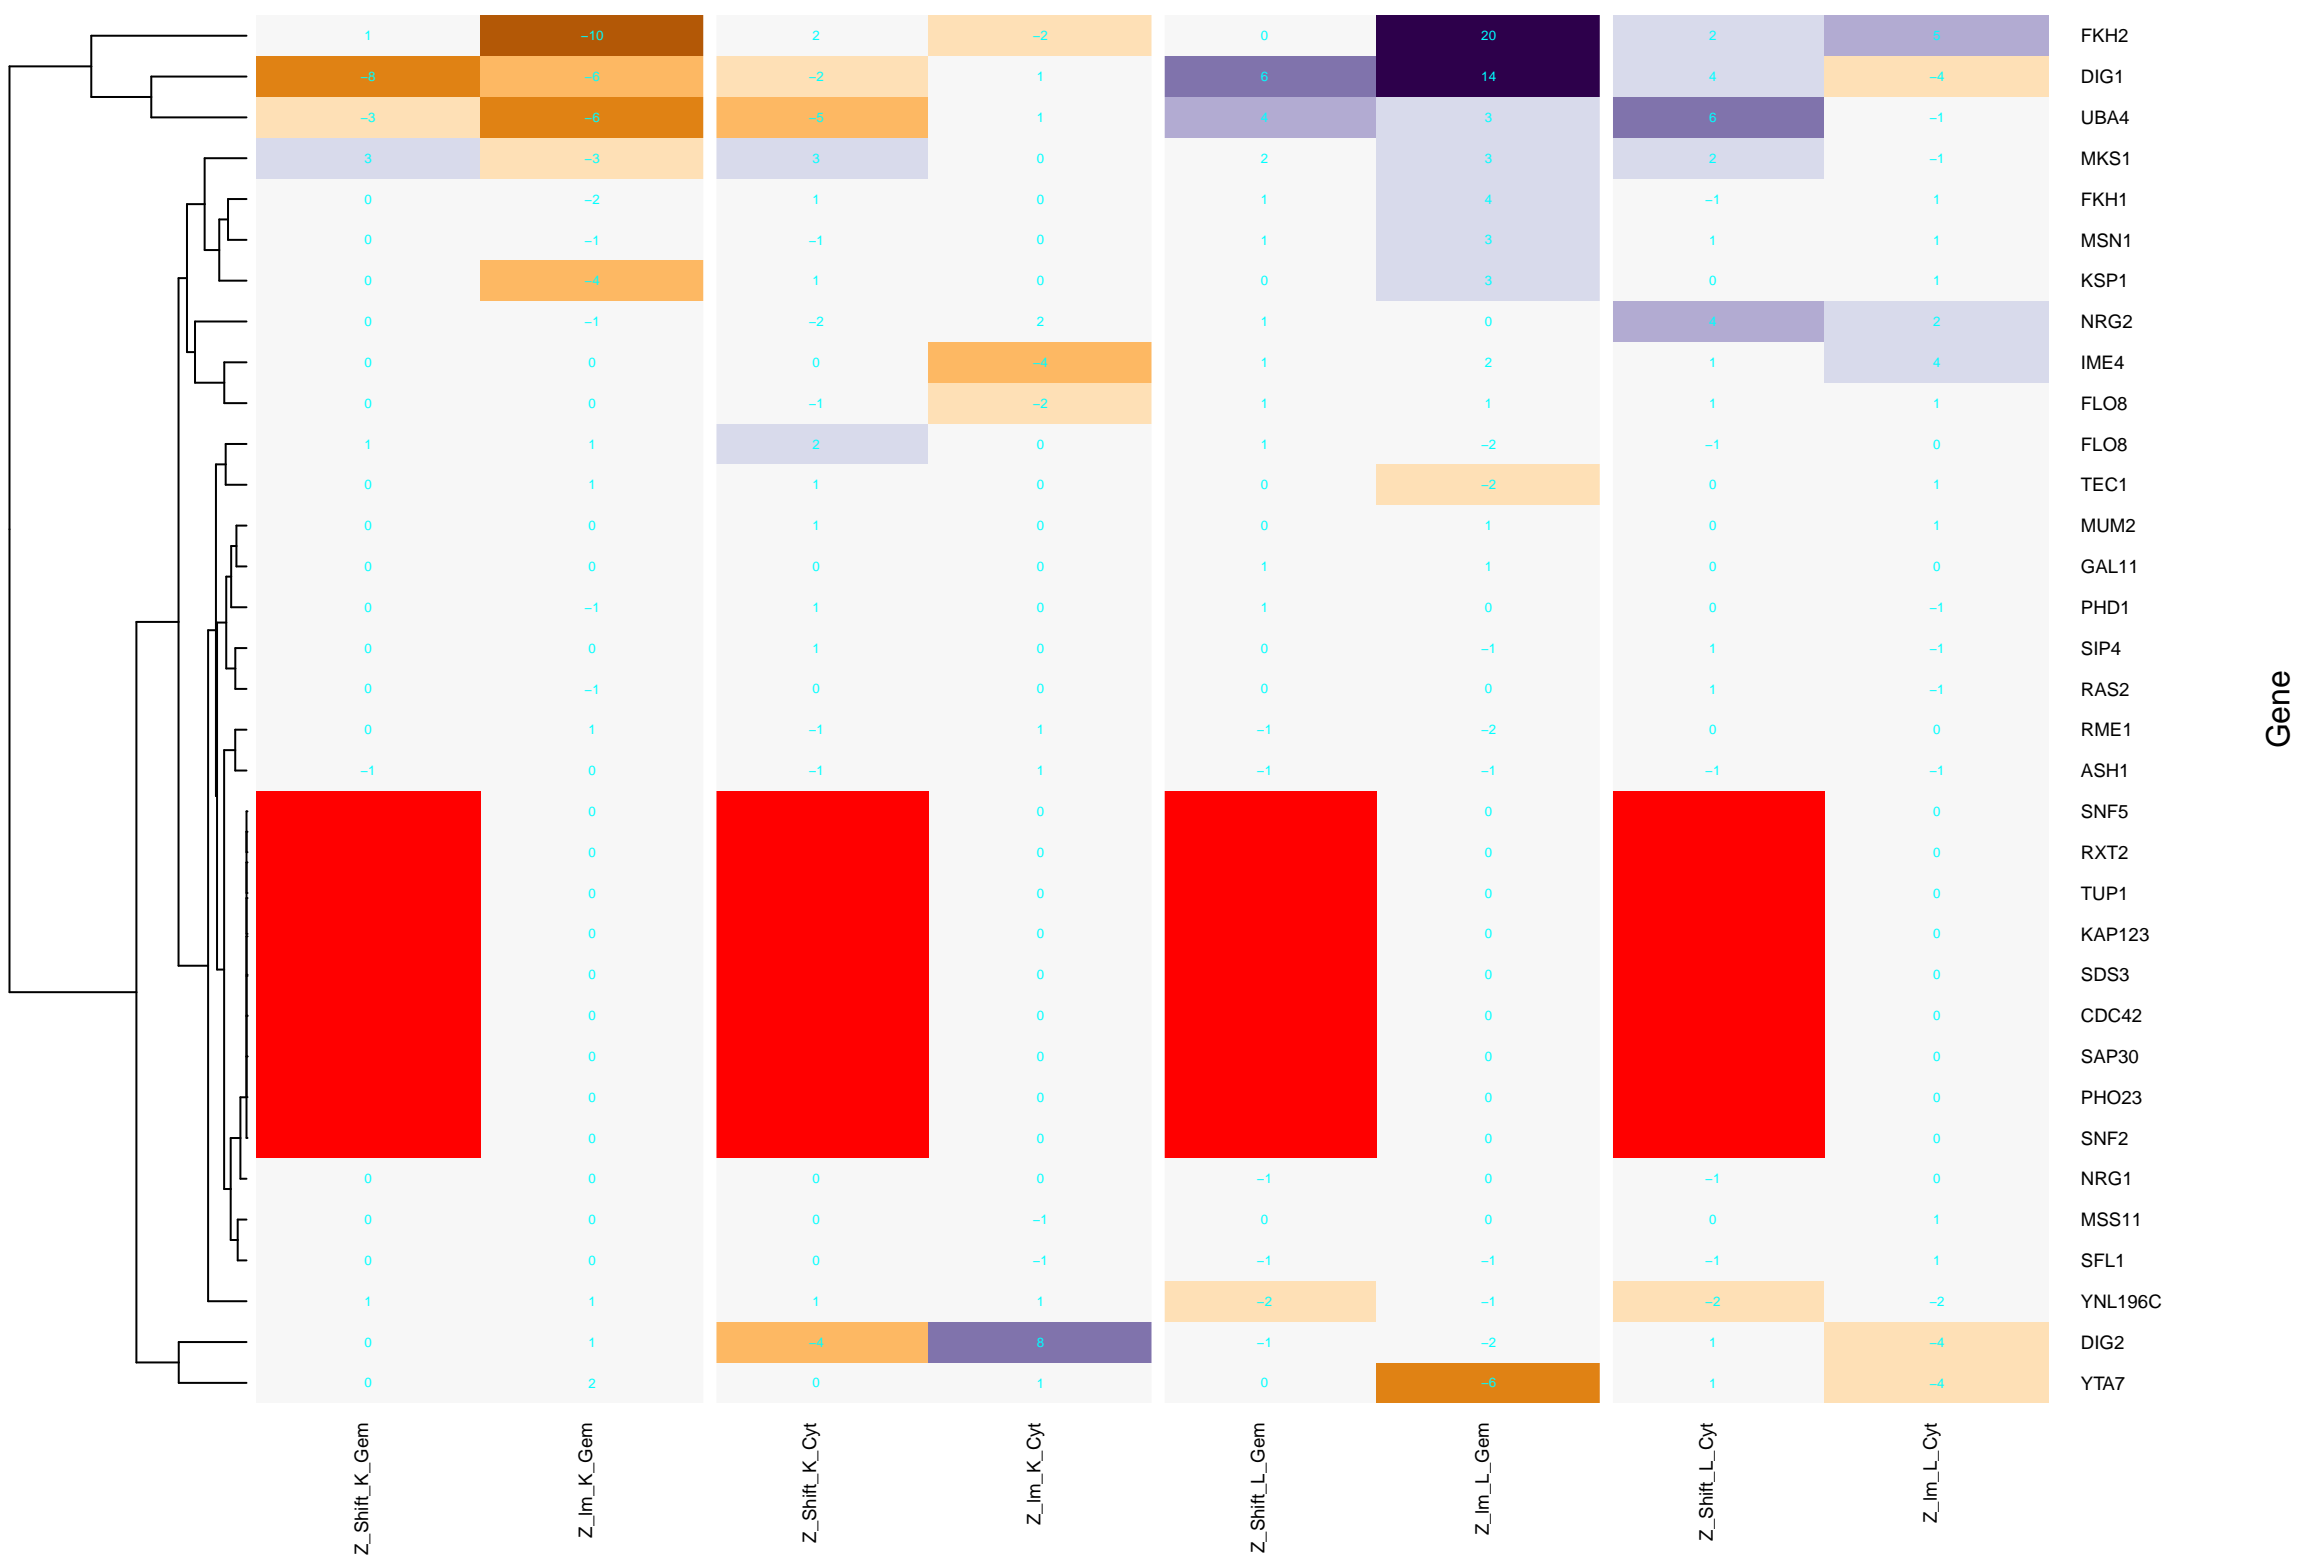

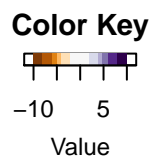

# of filamentous growth of a population of unicellular organisms in response to starvation

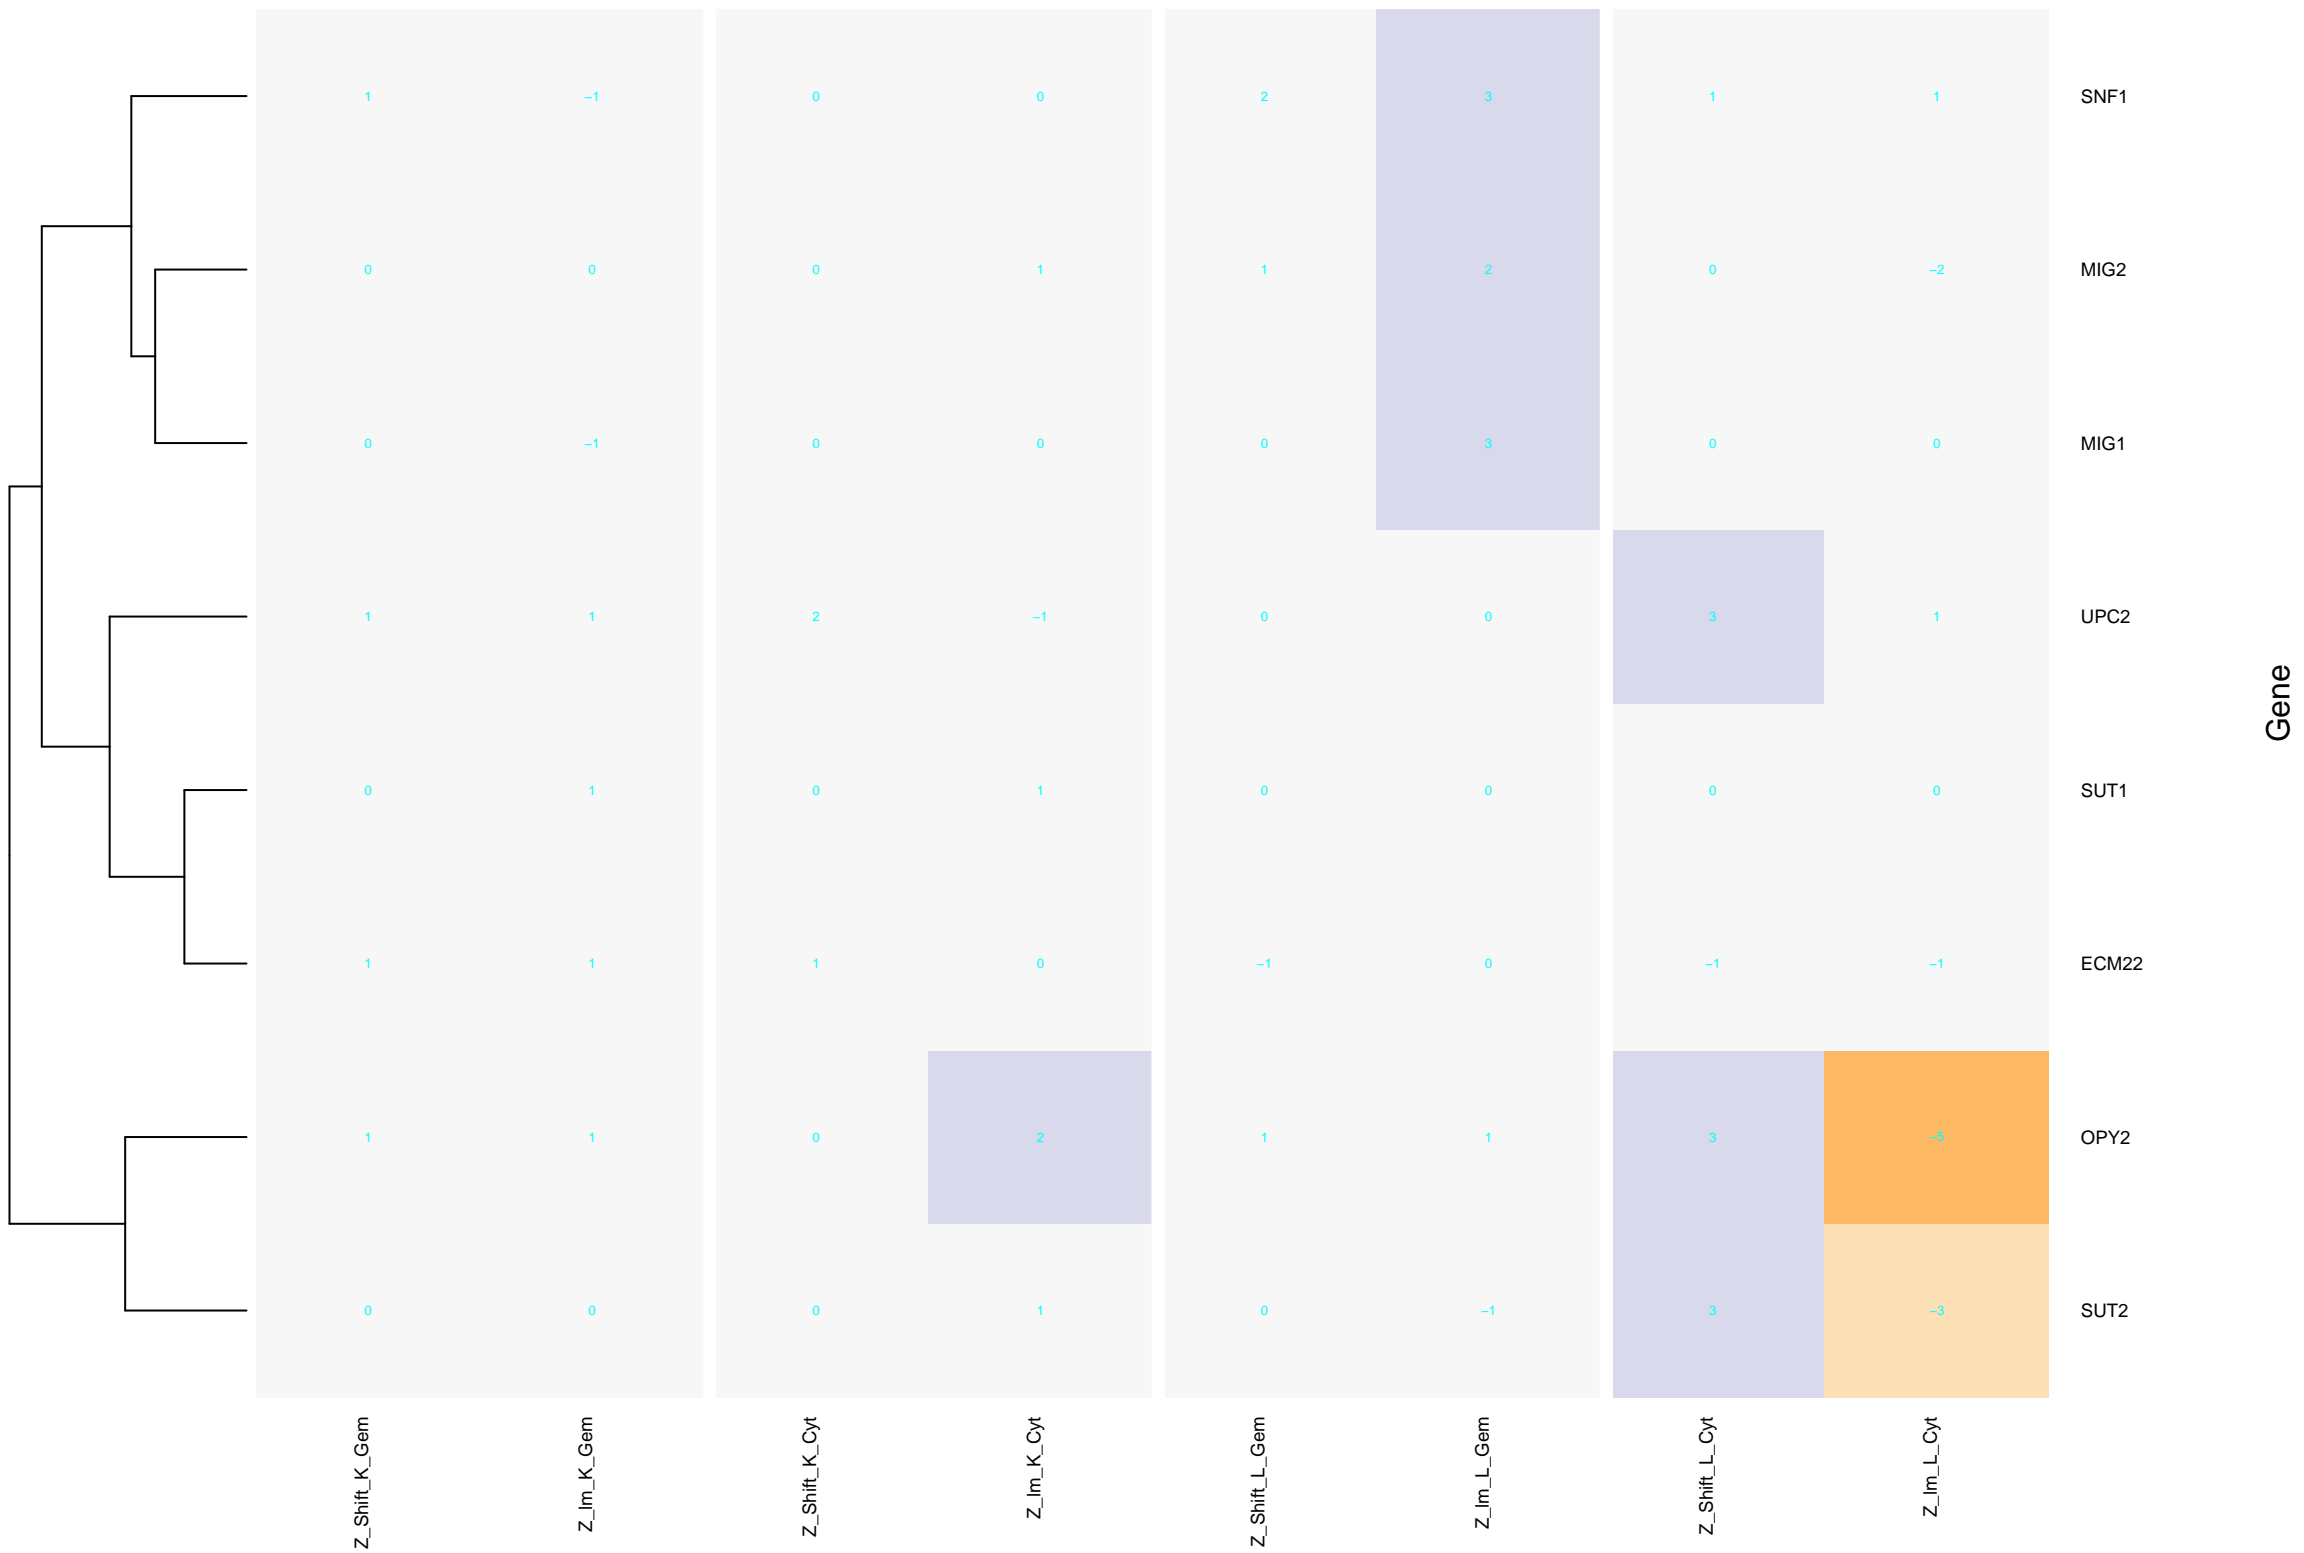

Color Key

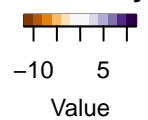

# egative regulation of growth of unicellular organism as a thread of attached cells

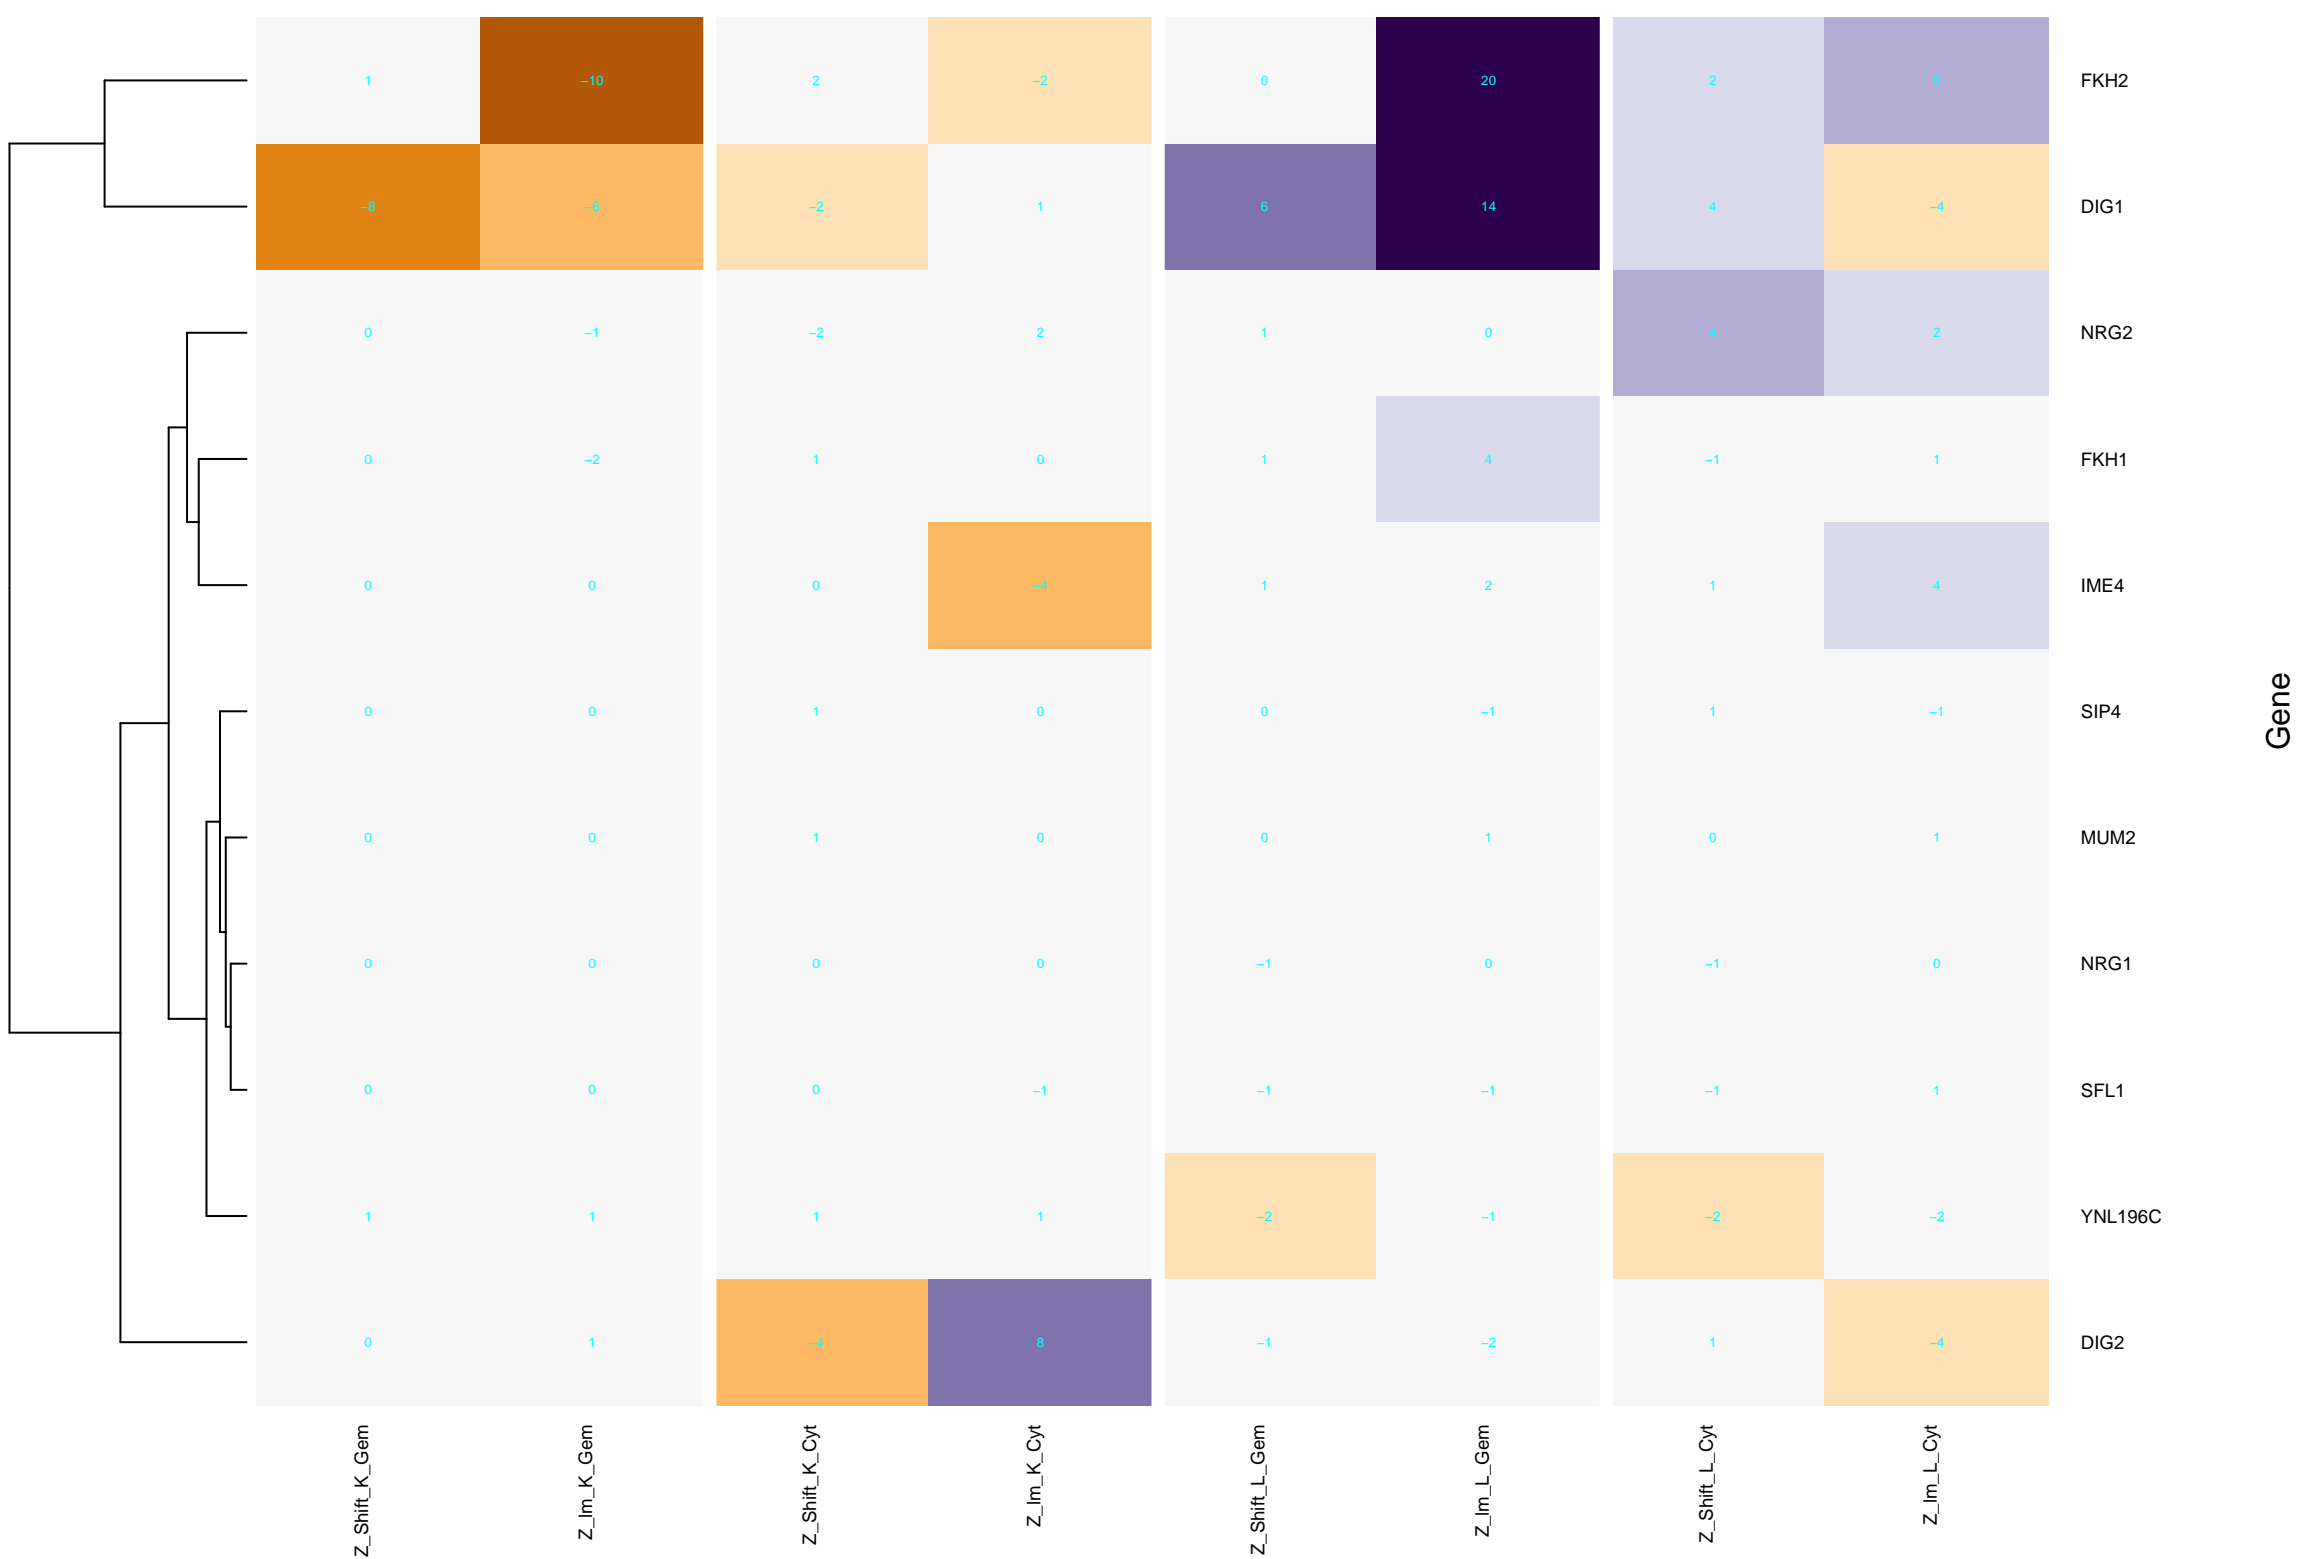

Color Key



-10 5

Value

## positive regulation of growth of unicellular organism as a thread of attached cells

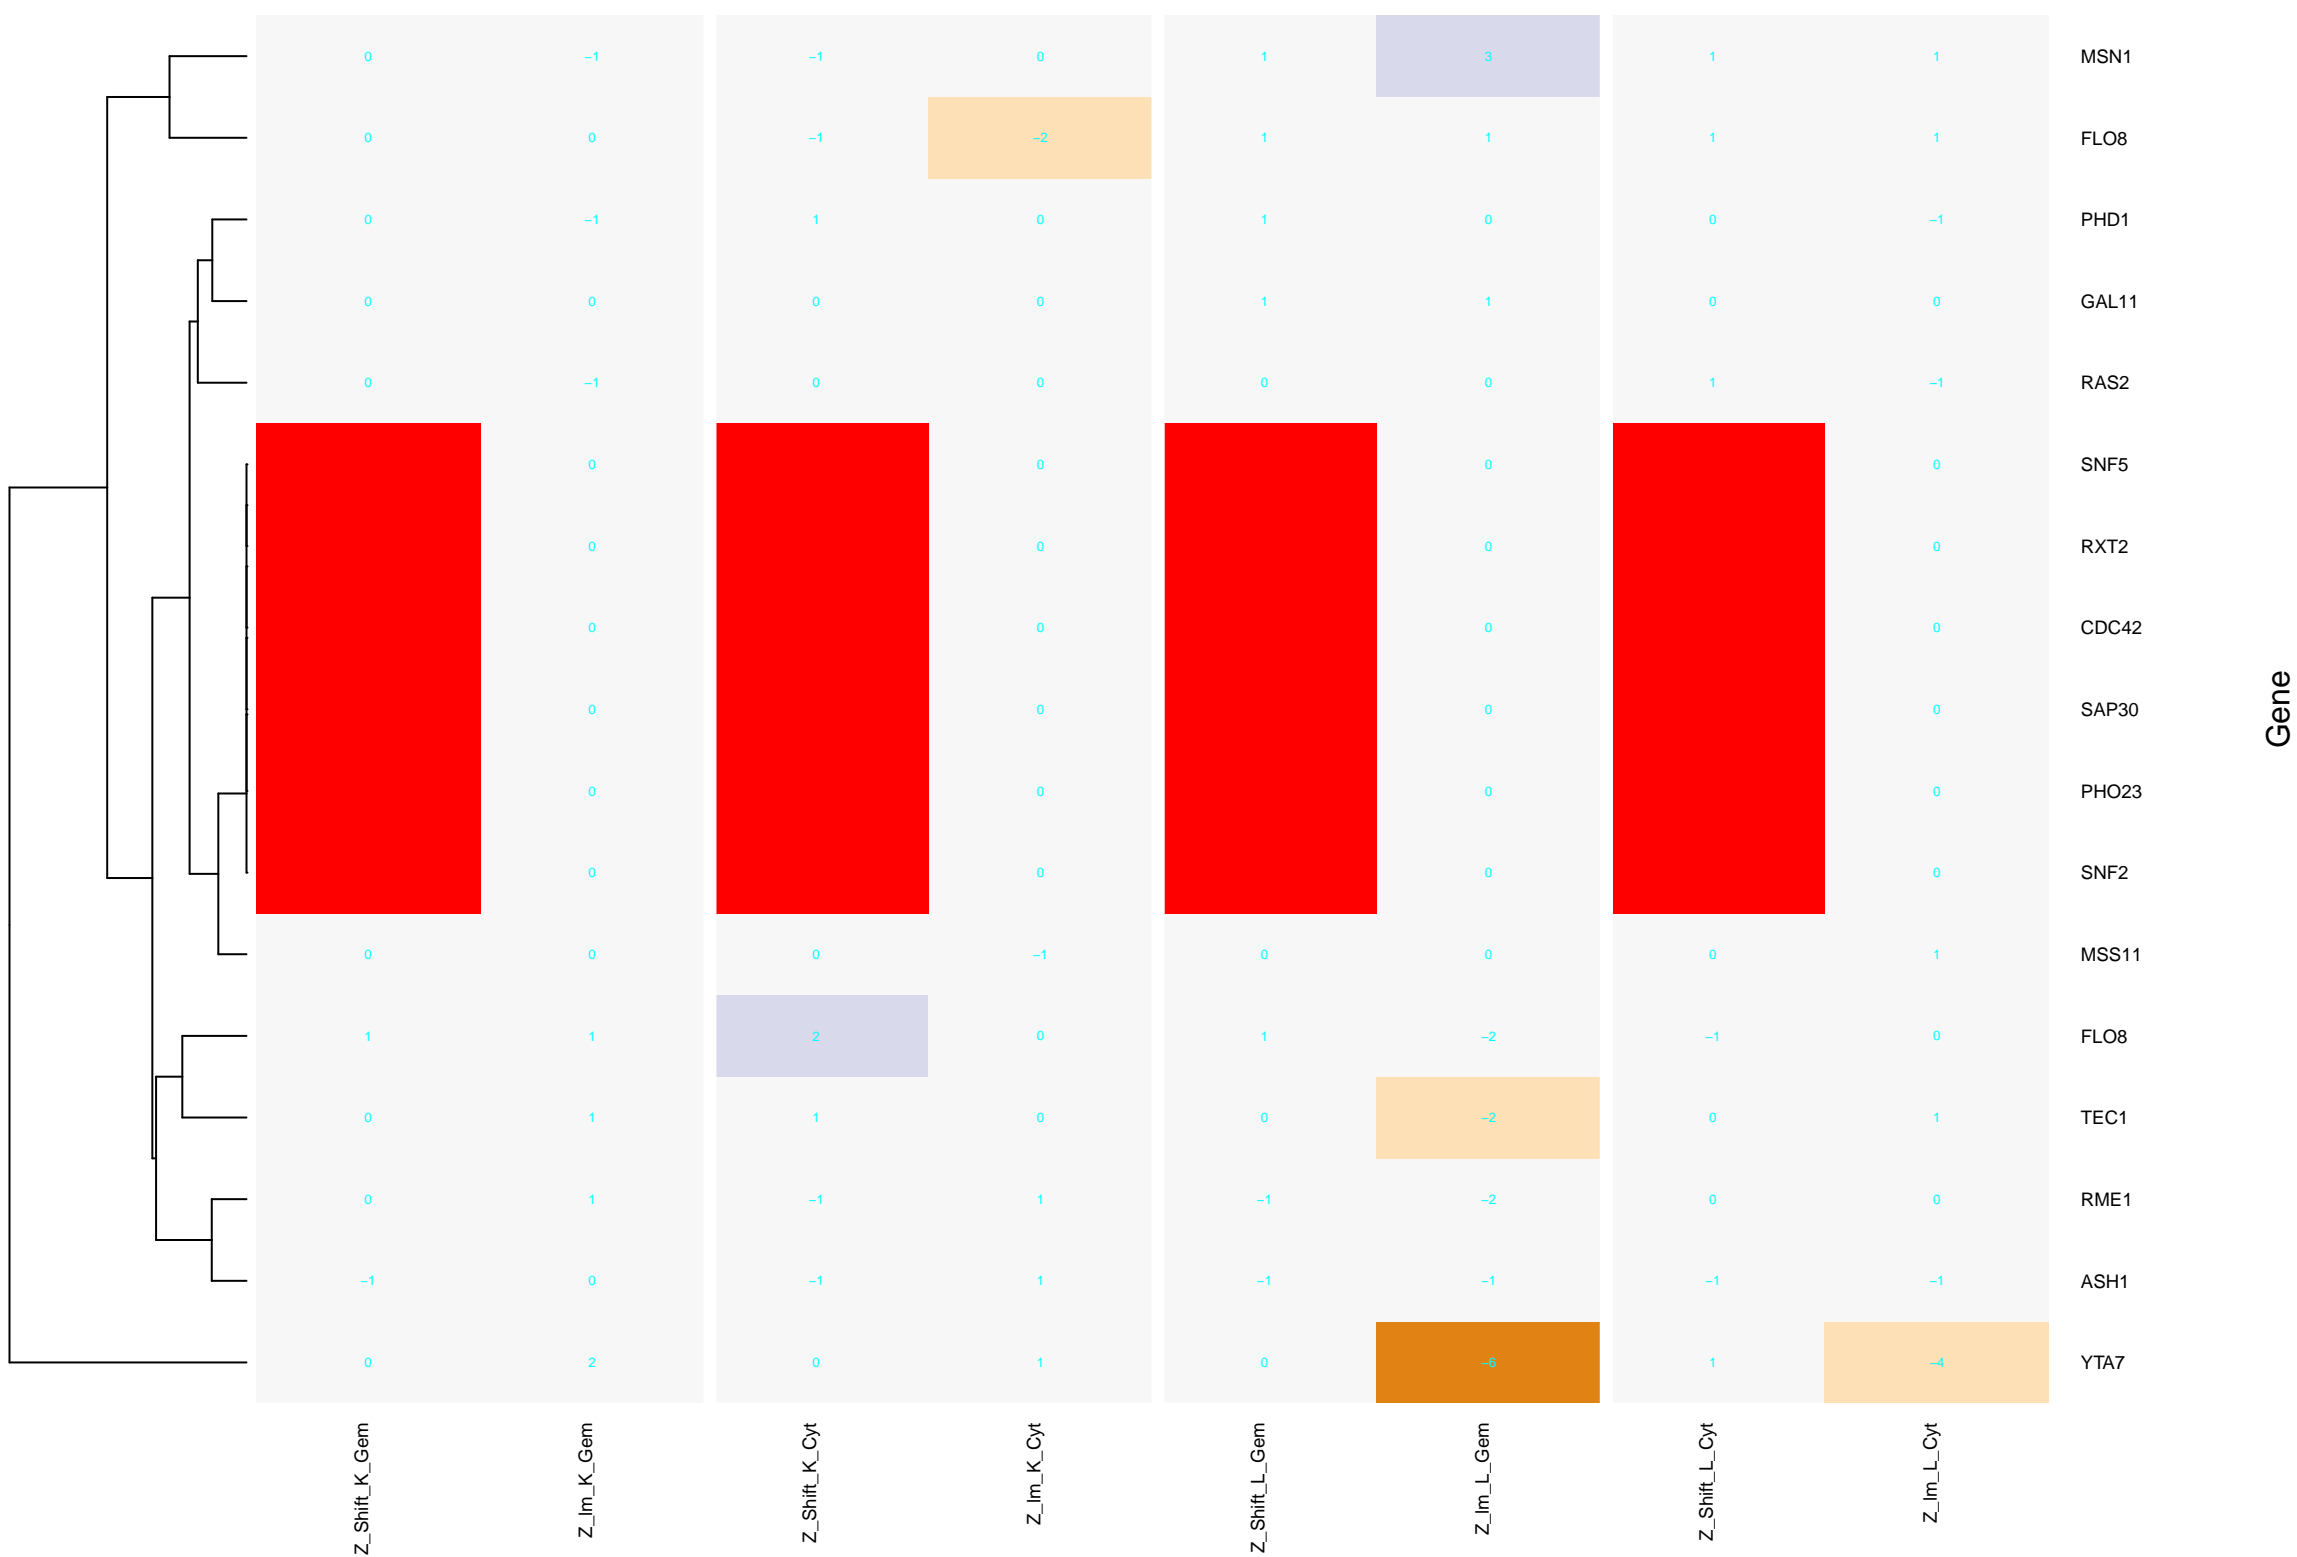

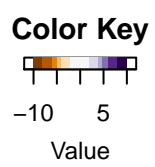

# ation of filamentous growth of a population of unicellular organisms in response to starvation

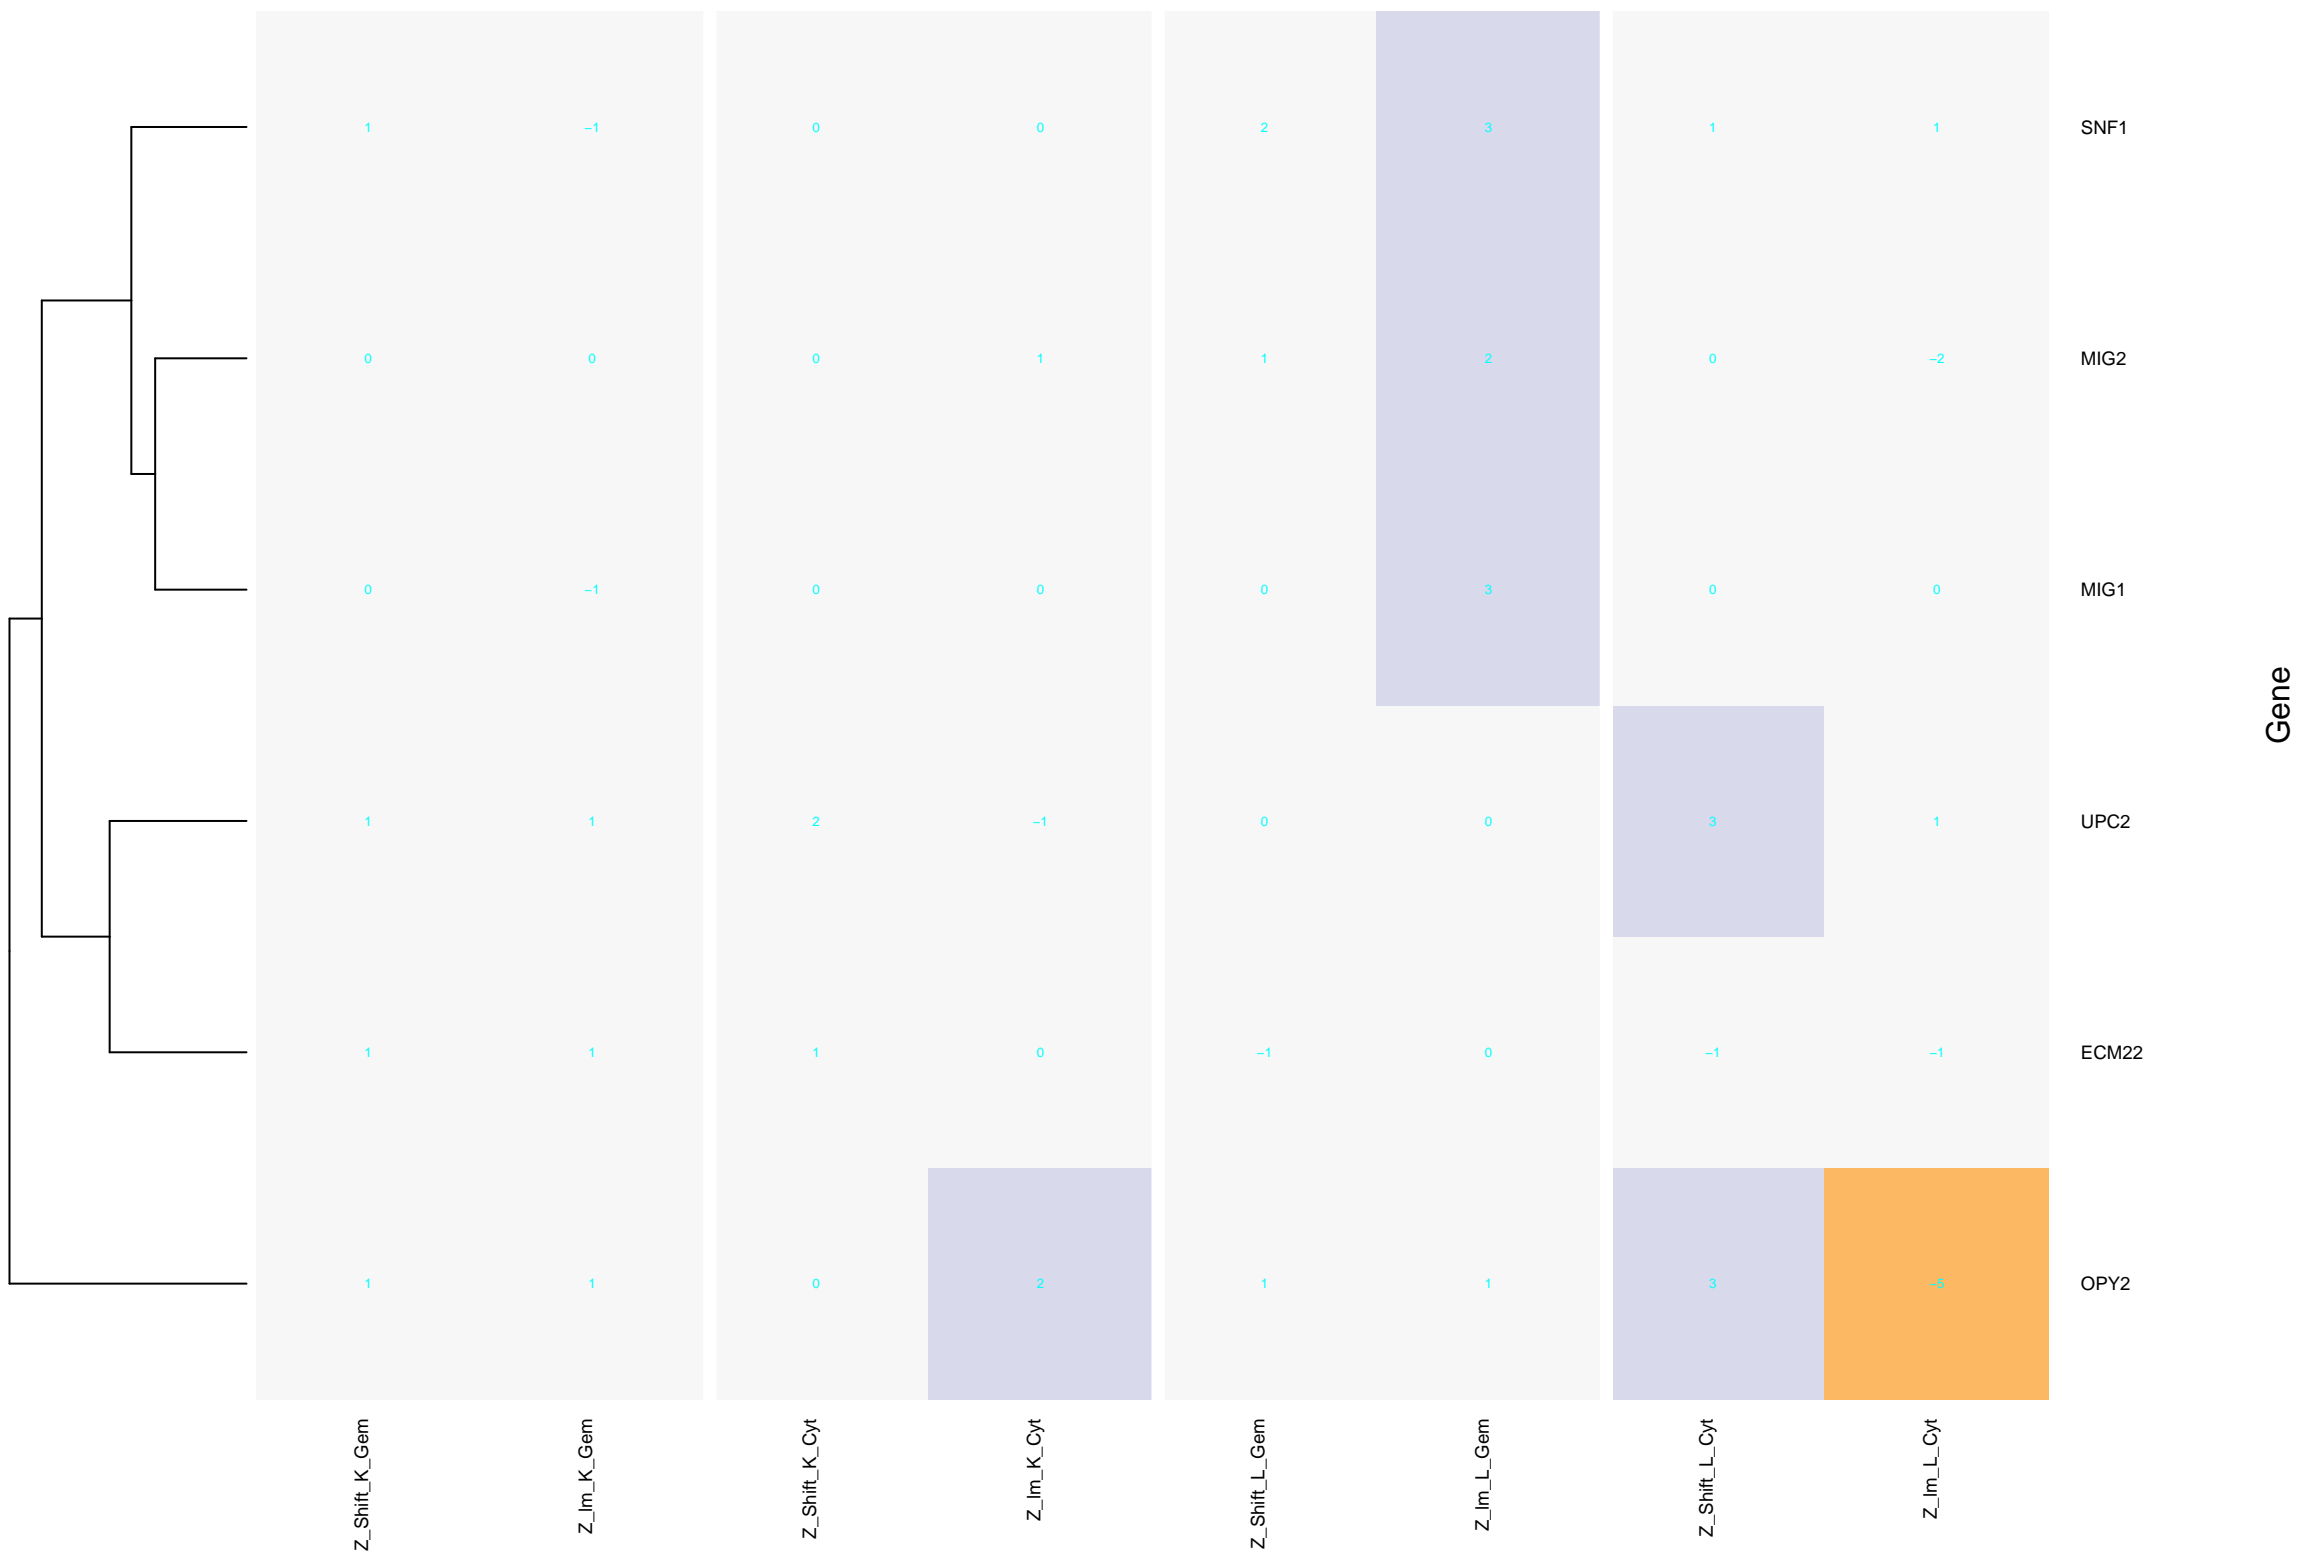

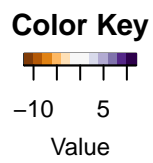

# regulation of invasive growth in response to glucose limitation

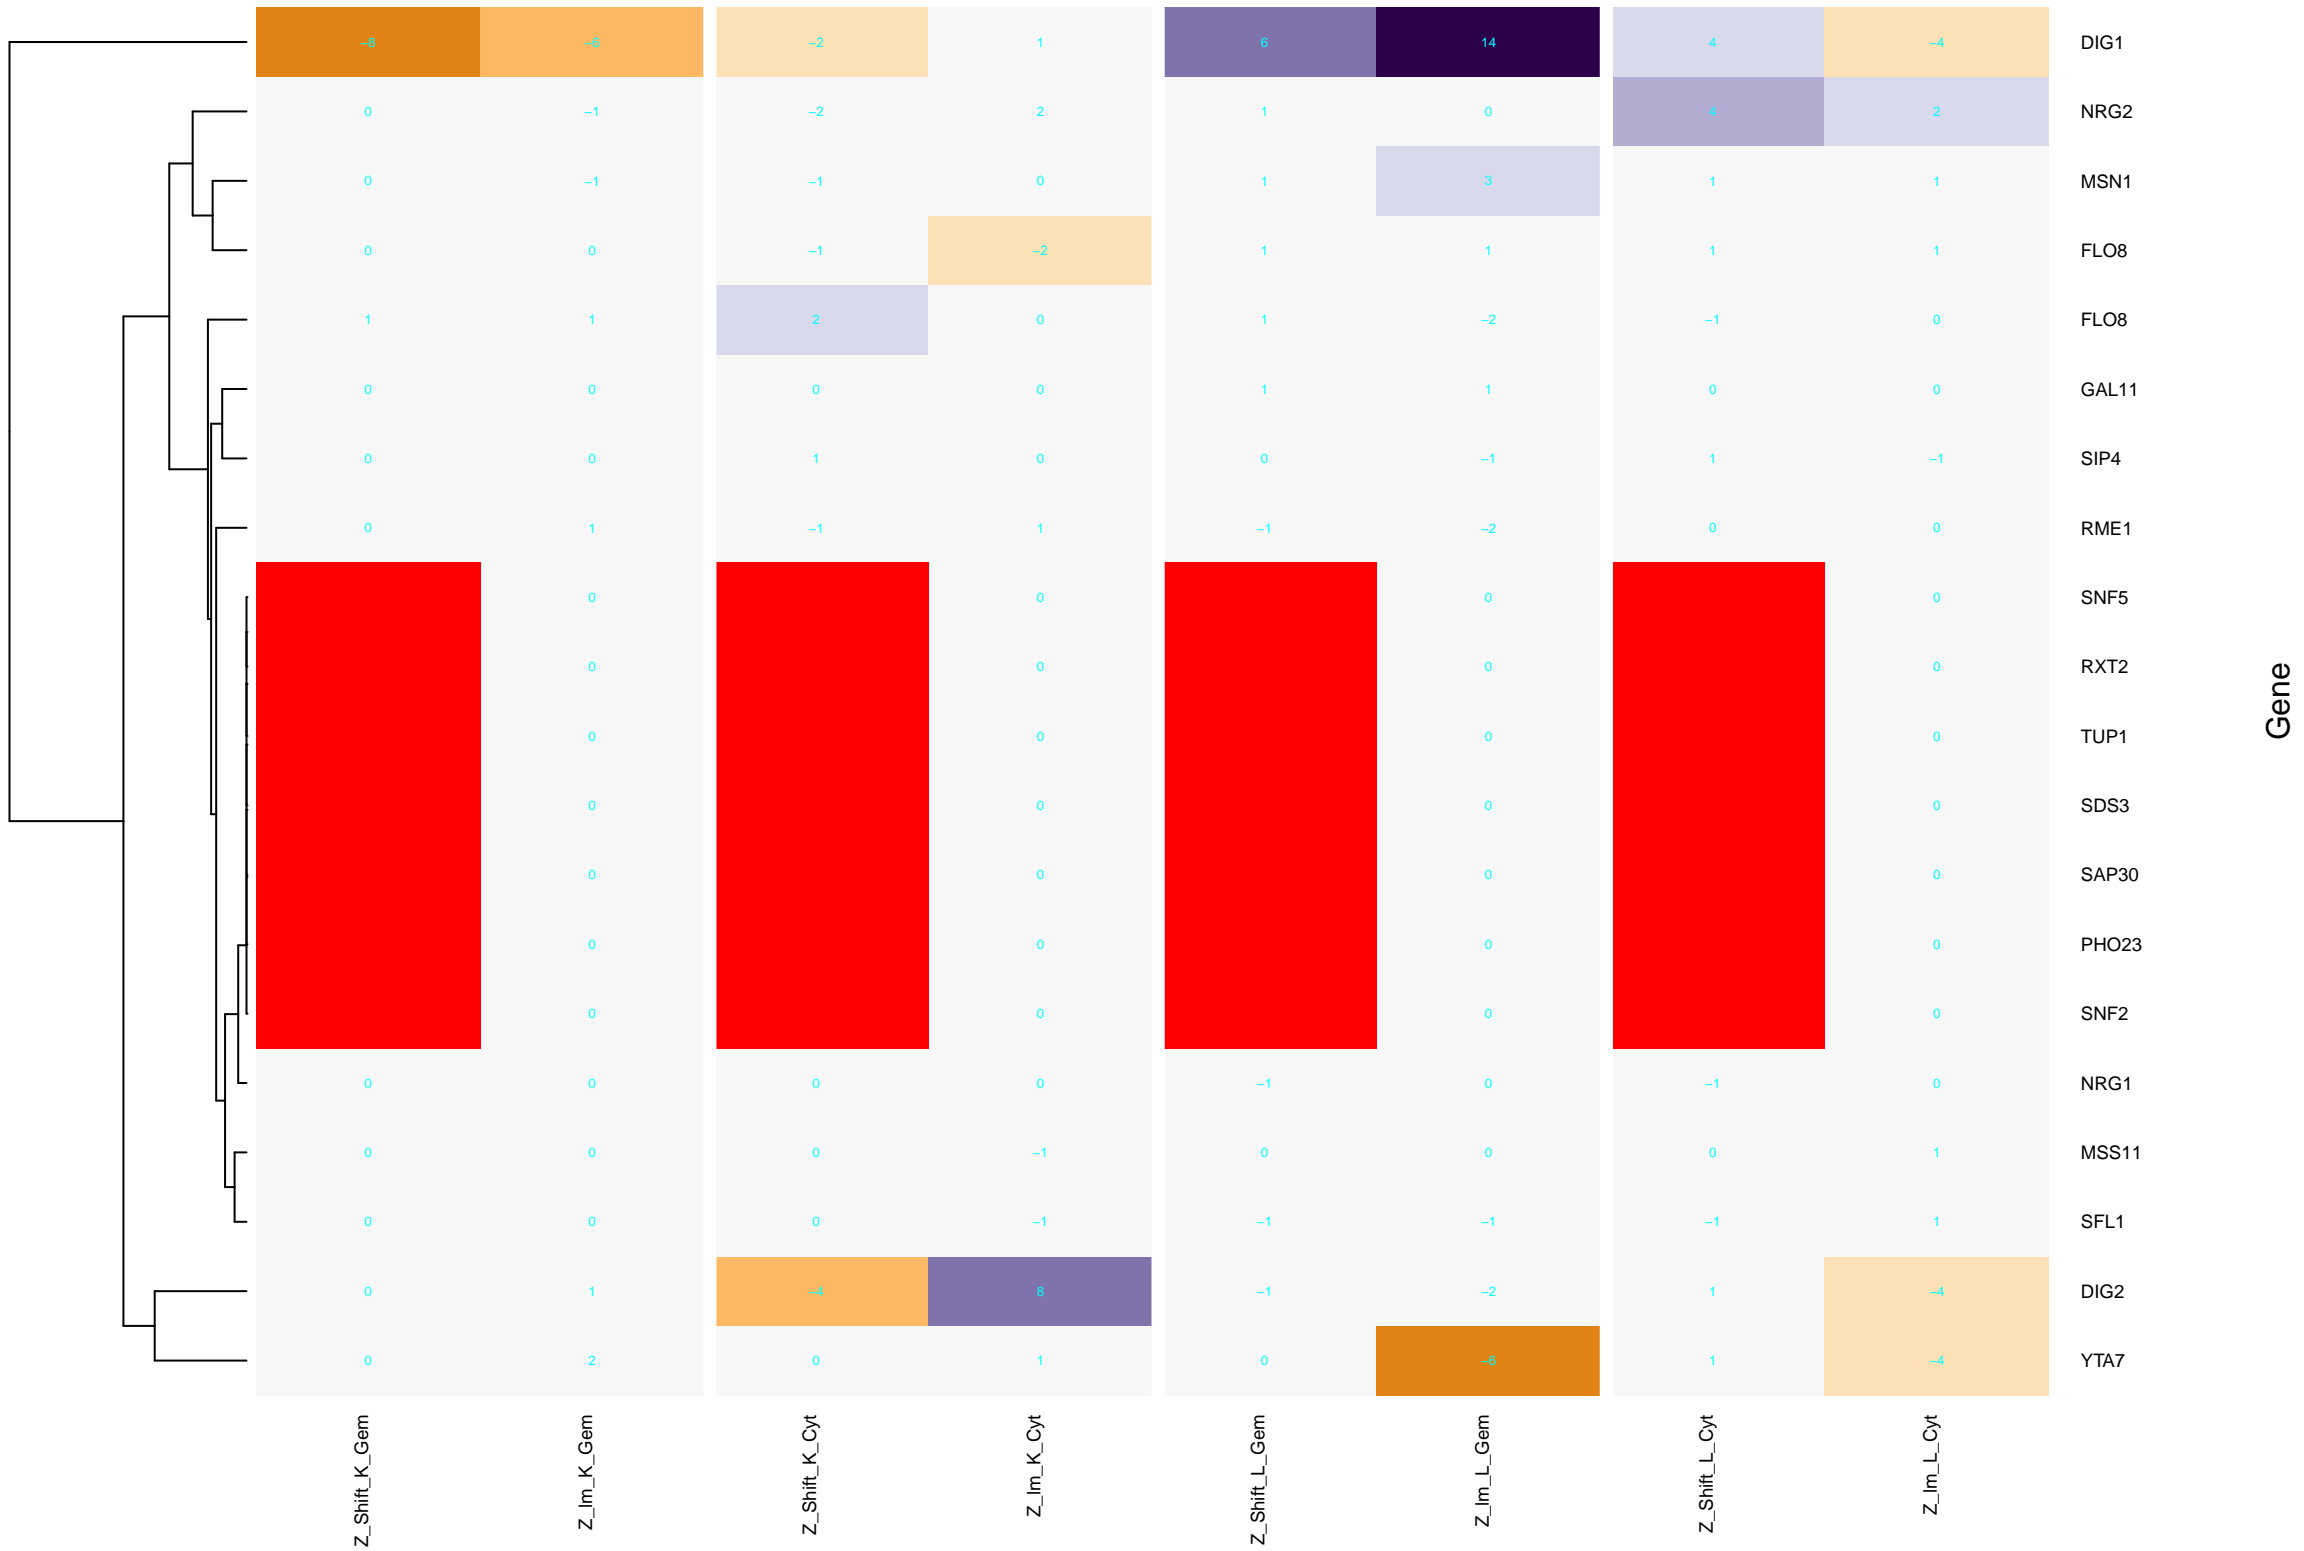

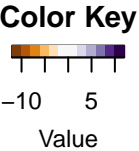

# regulation of pseudohyphal growth

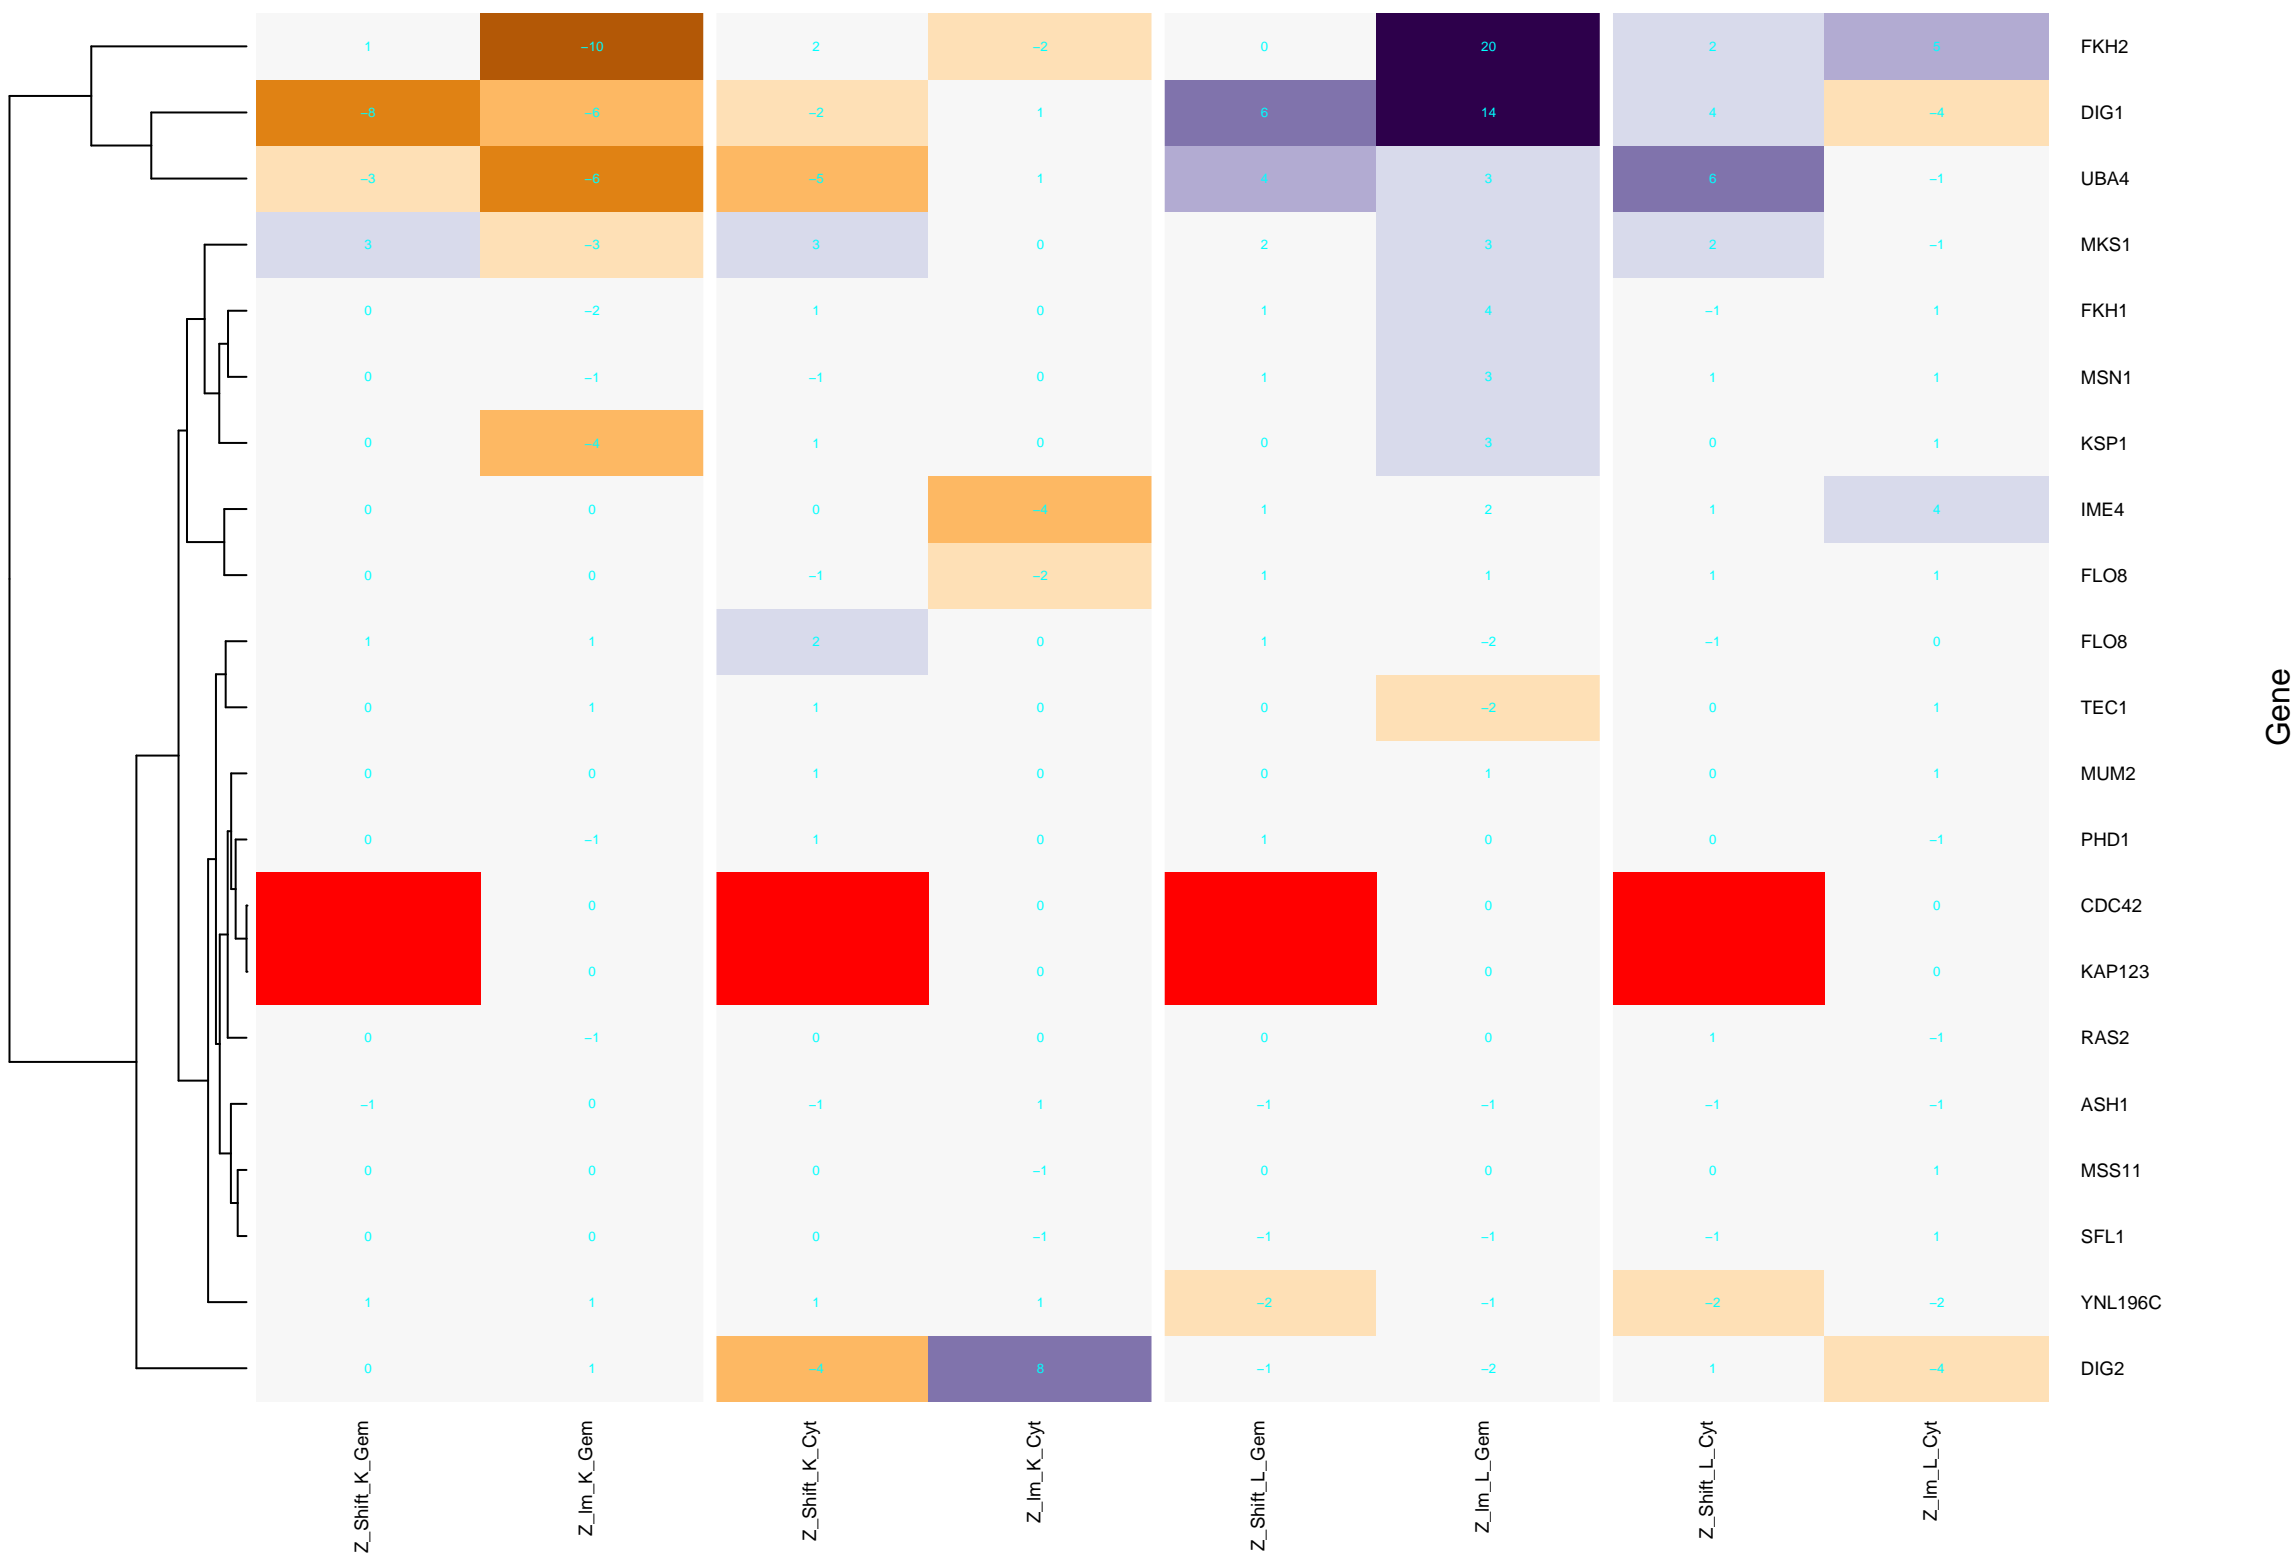



# negative regulation of invasive growth in response to glucose limitation

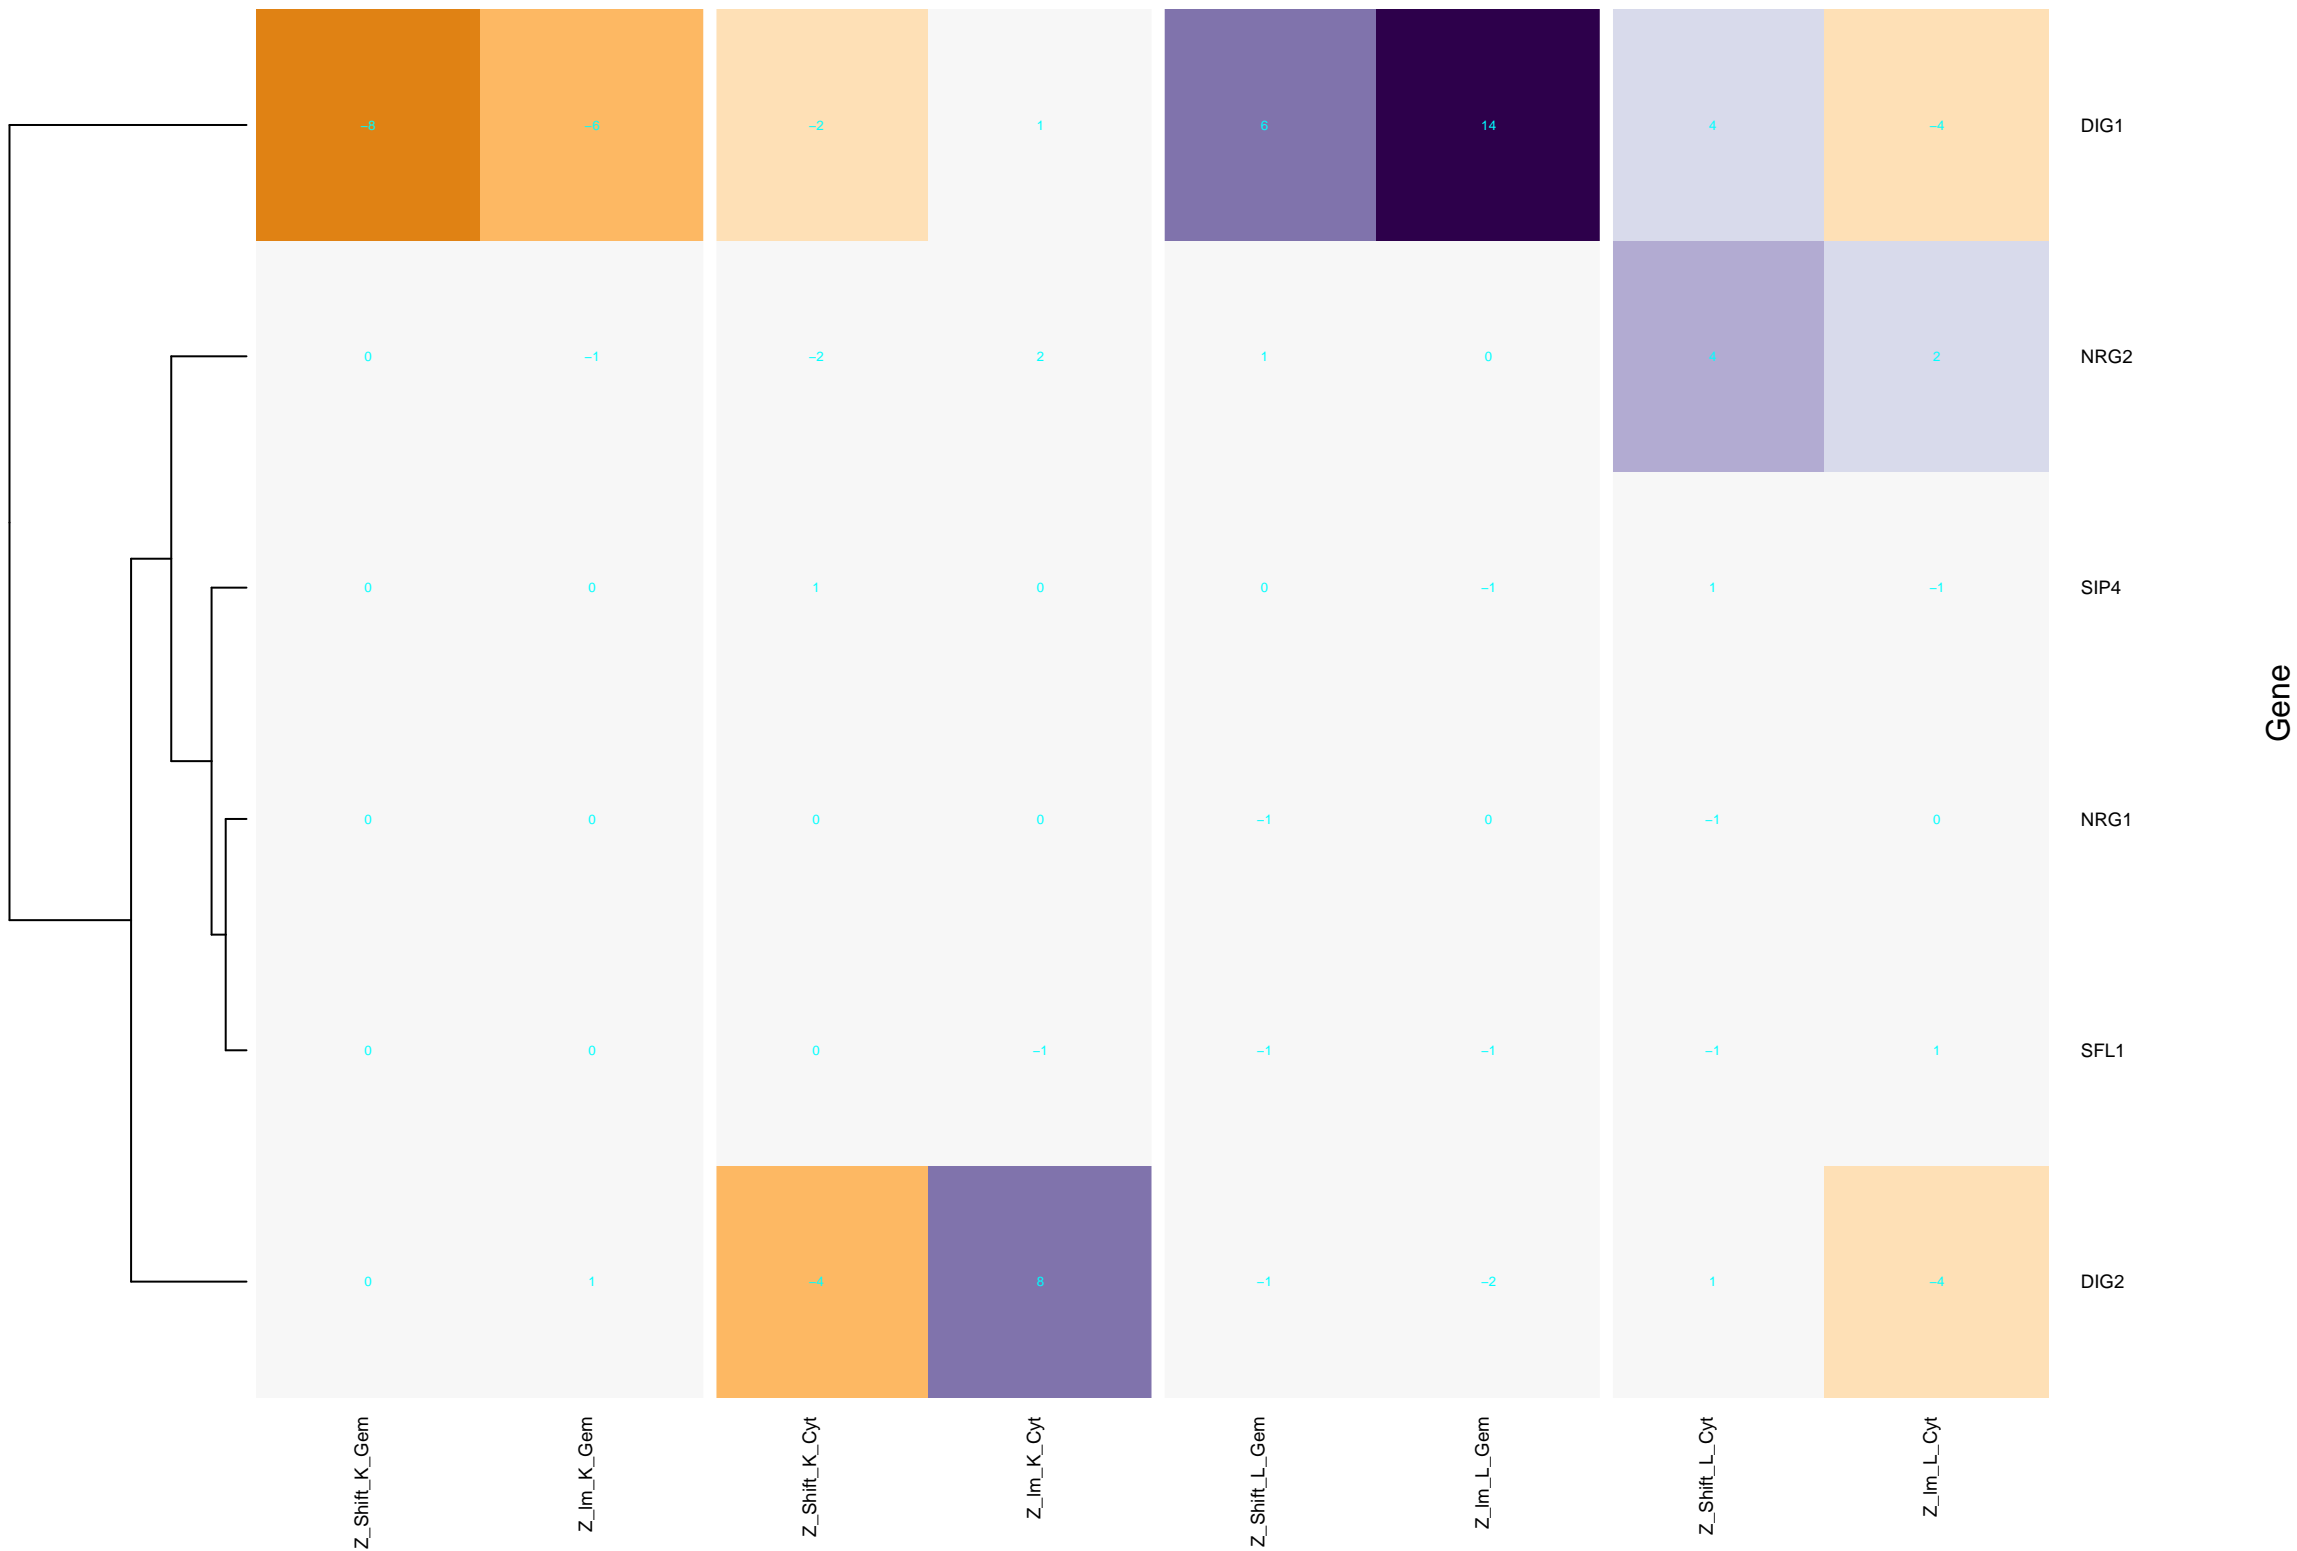

Color Key

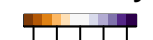

-10 5

Value

# negative regulation of pseudohyphal growth

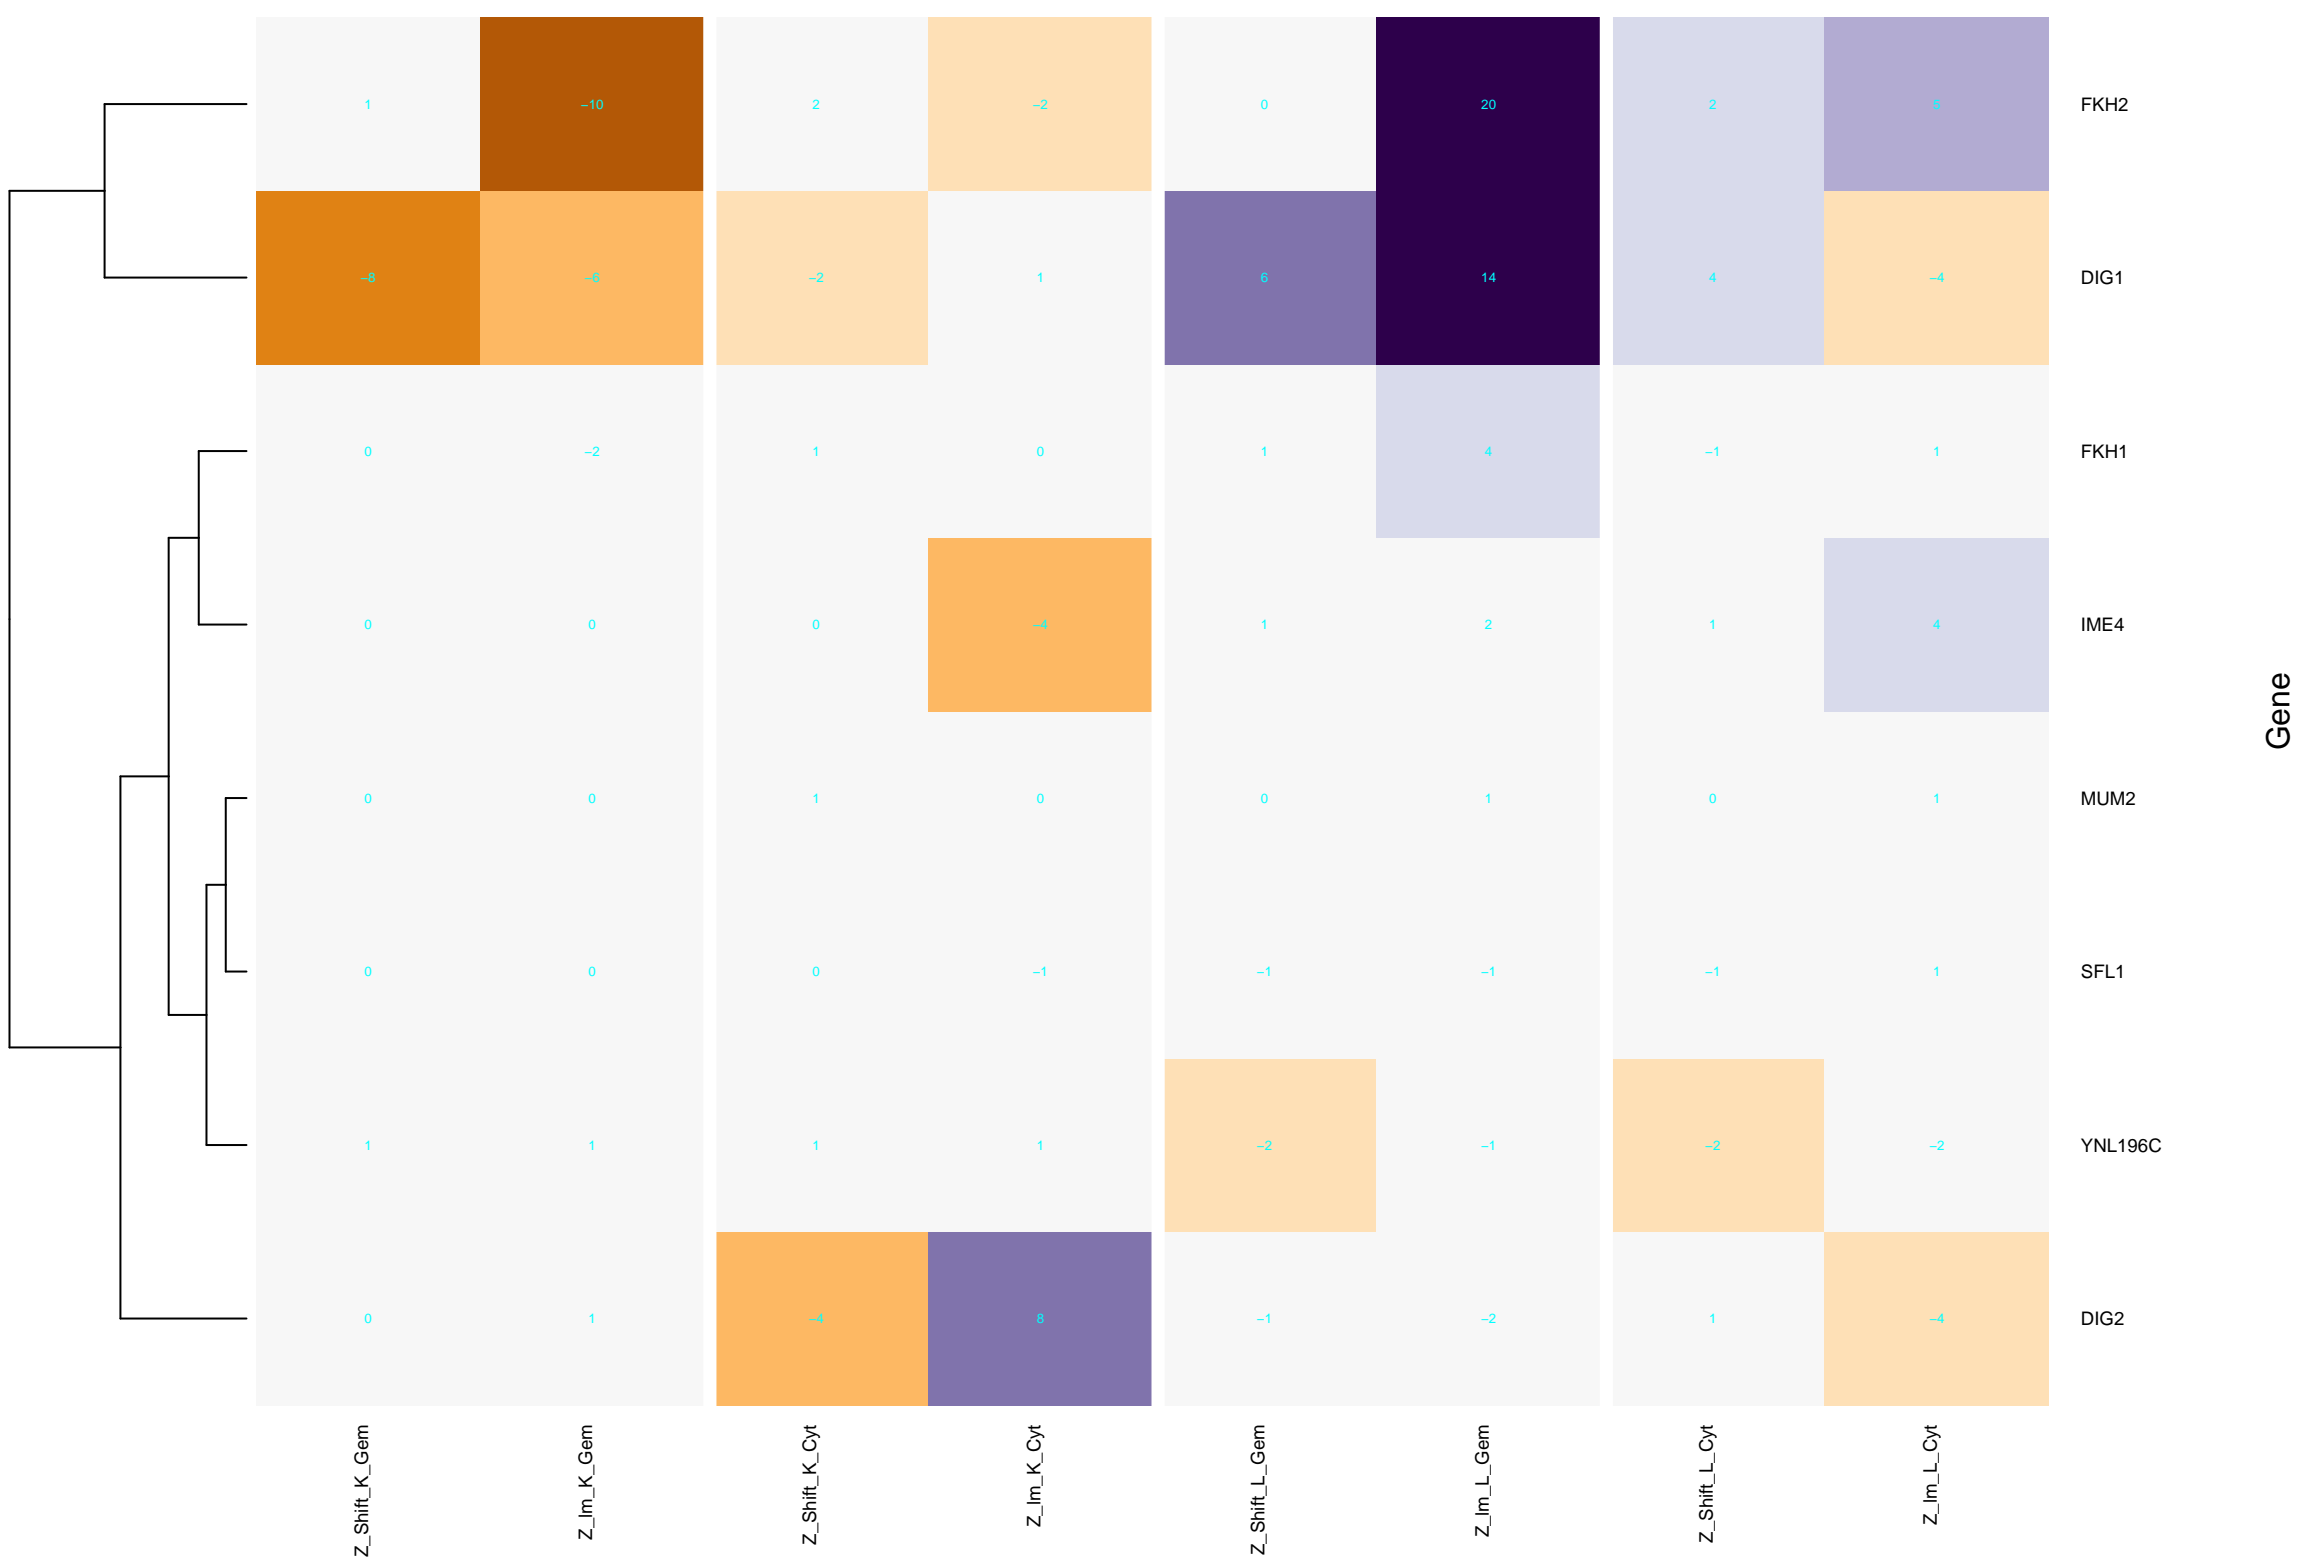

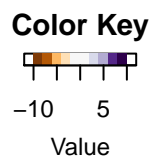

# positive regulation of invasive growth in response to glucose limitation

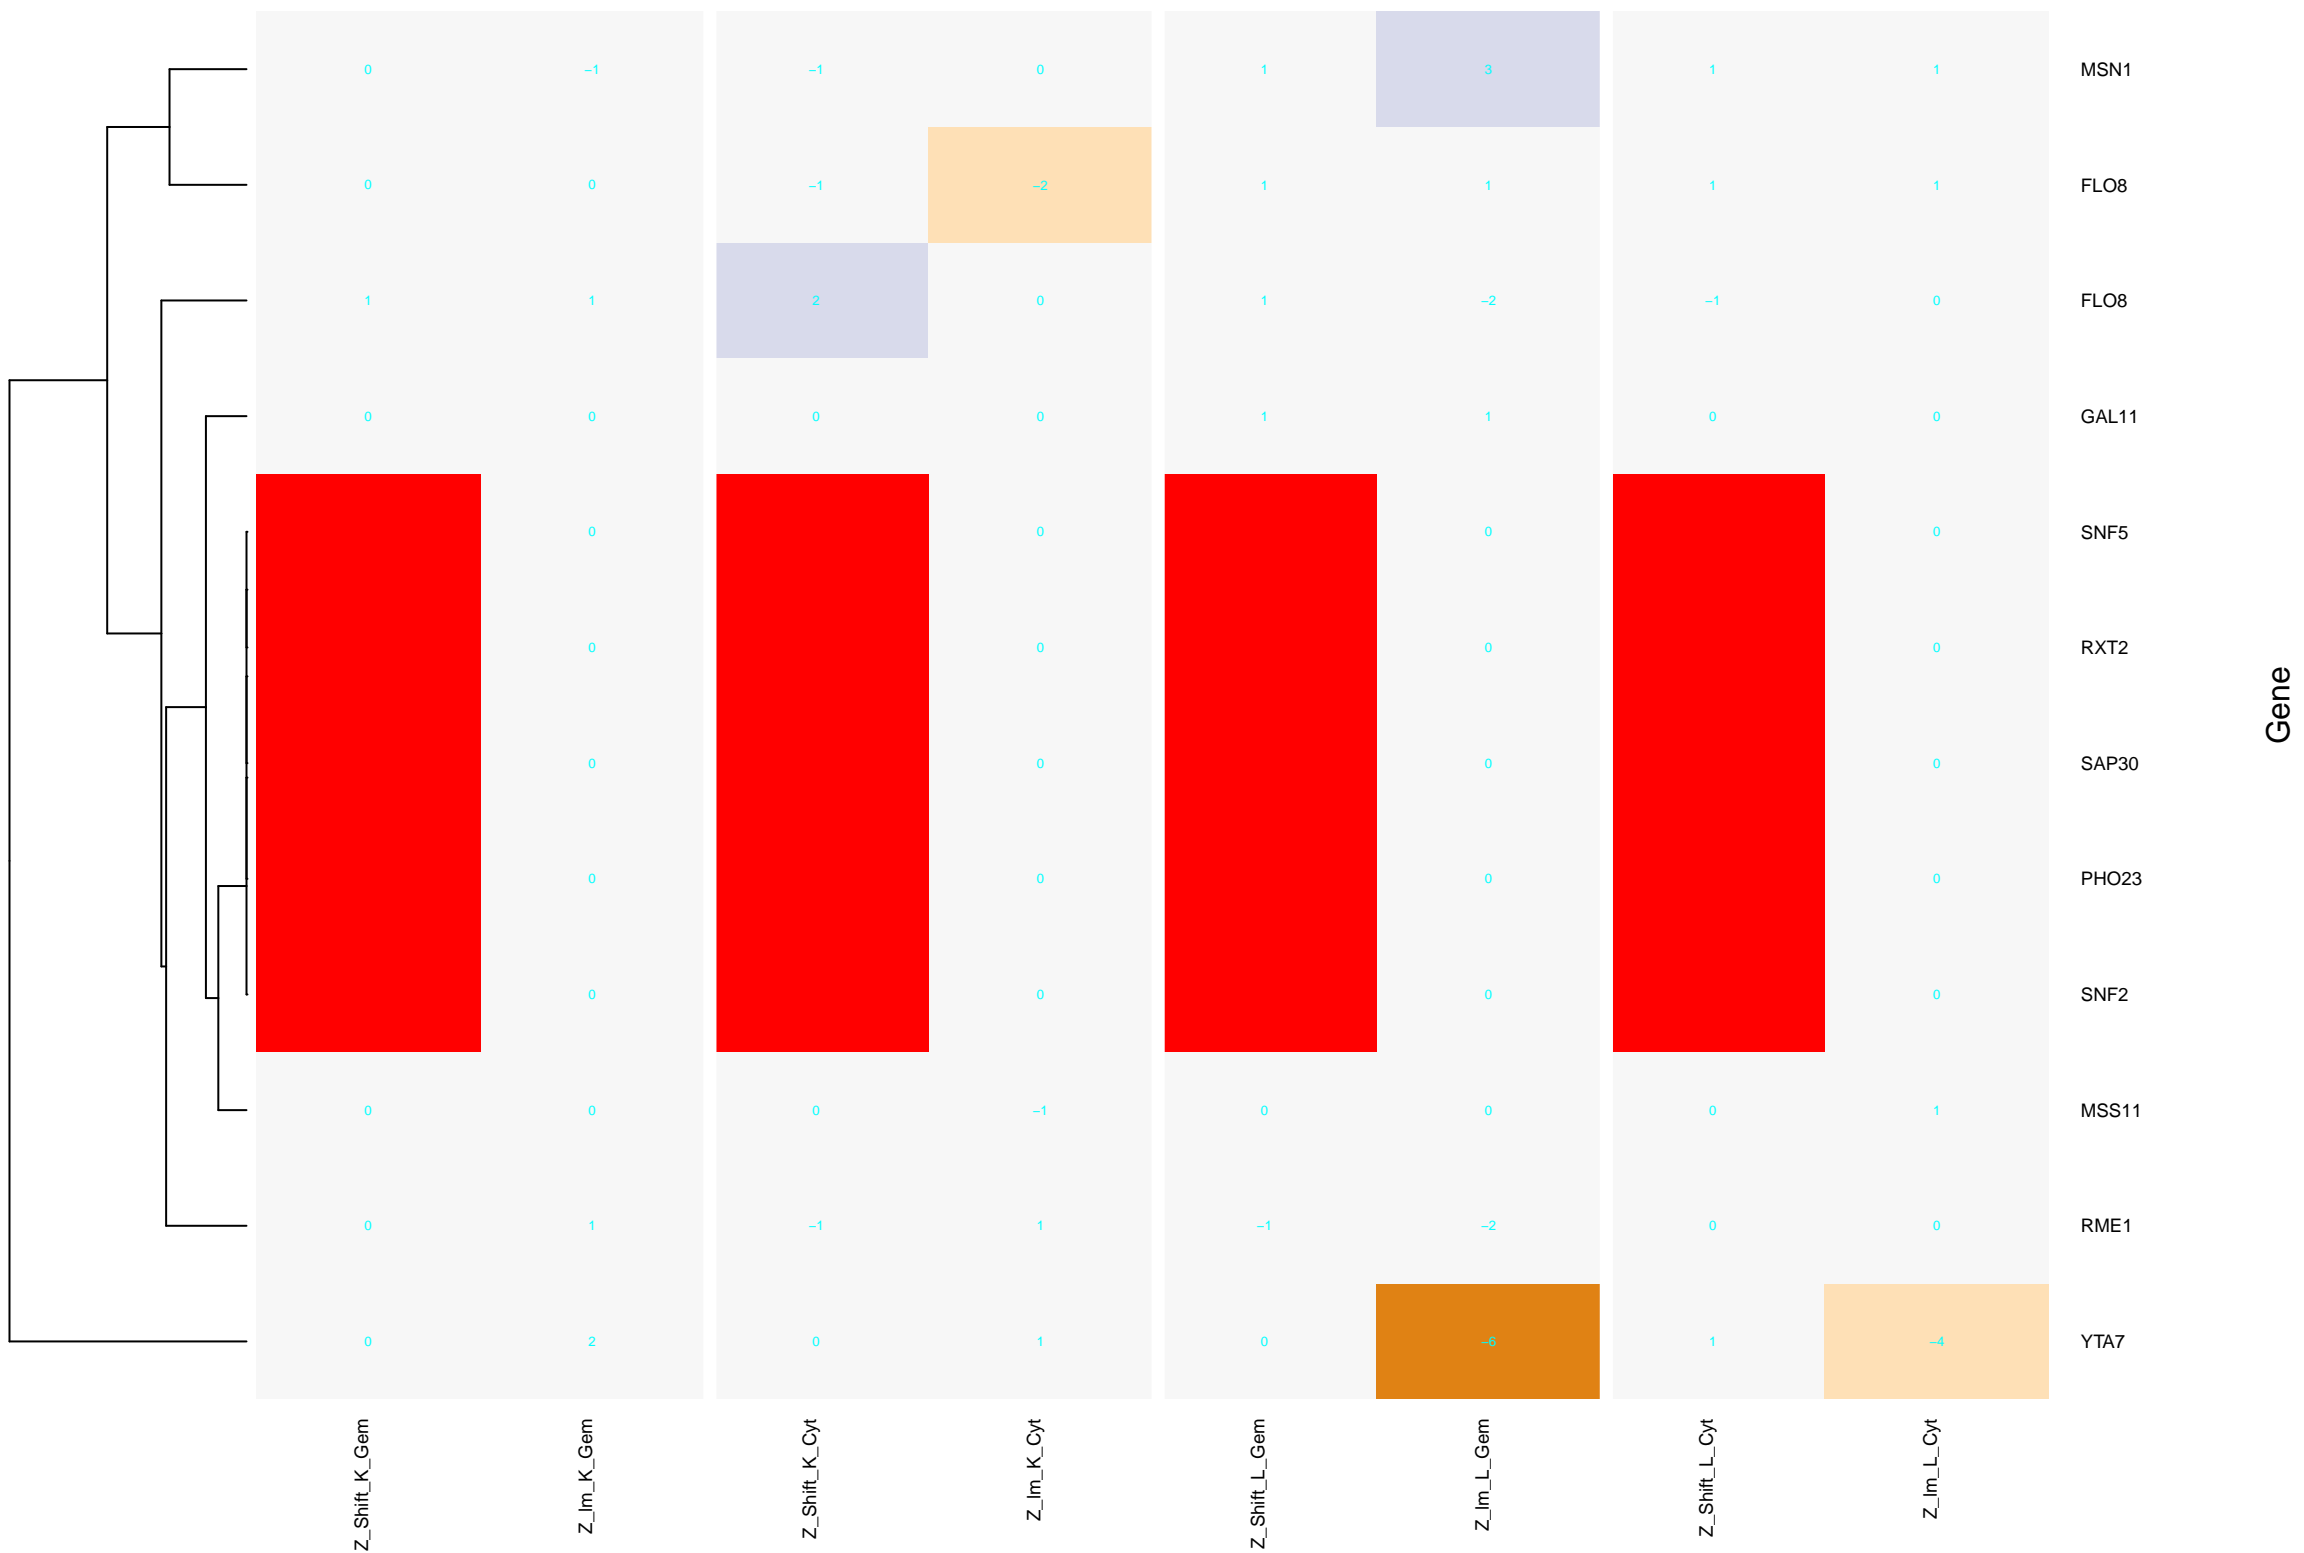

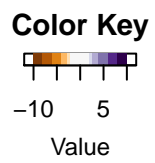

# positive regulation of pseudohyphal growth

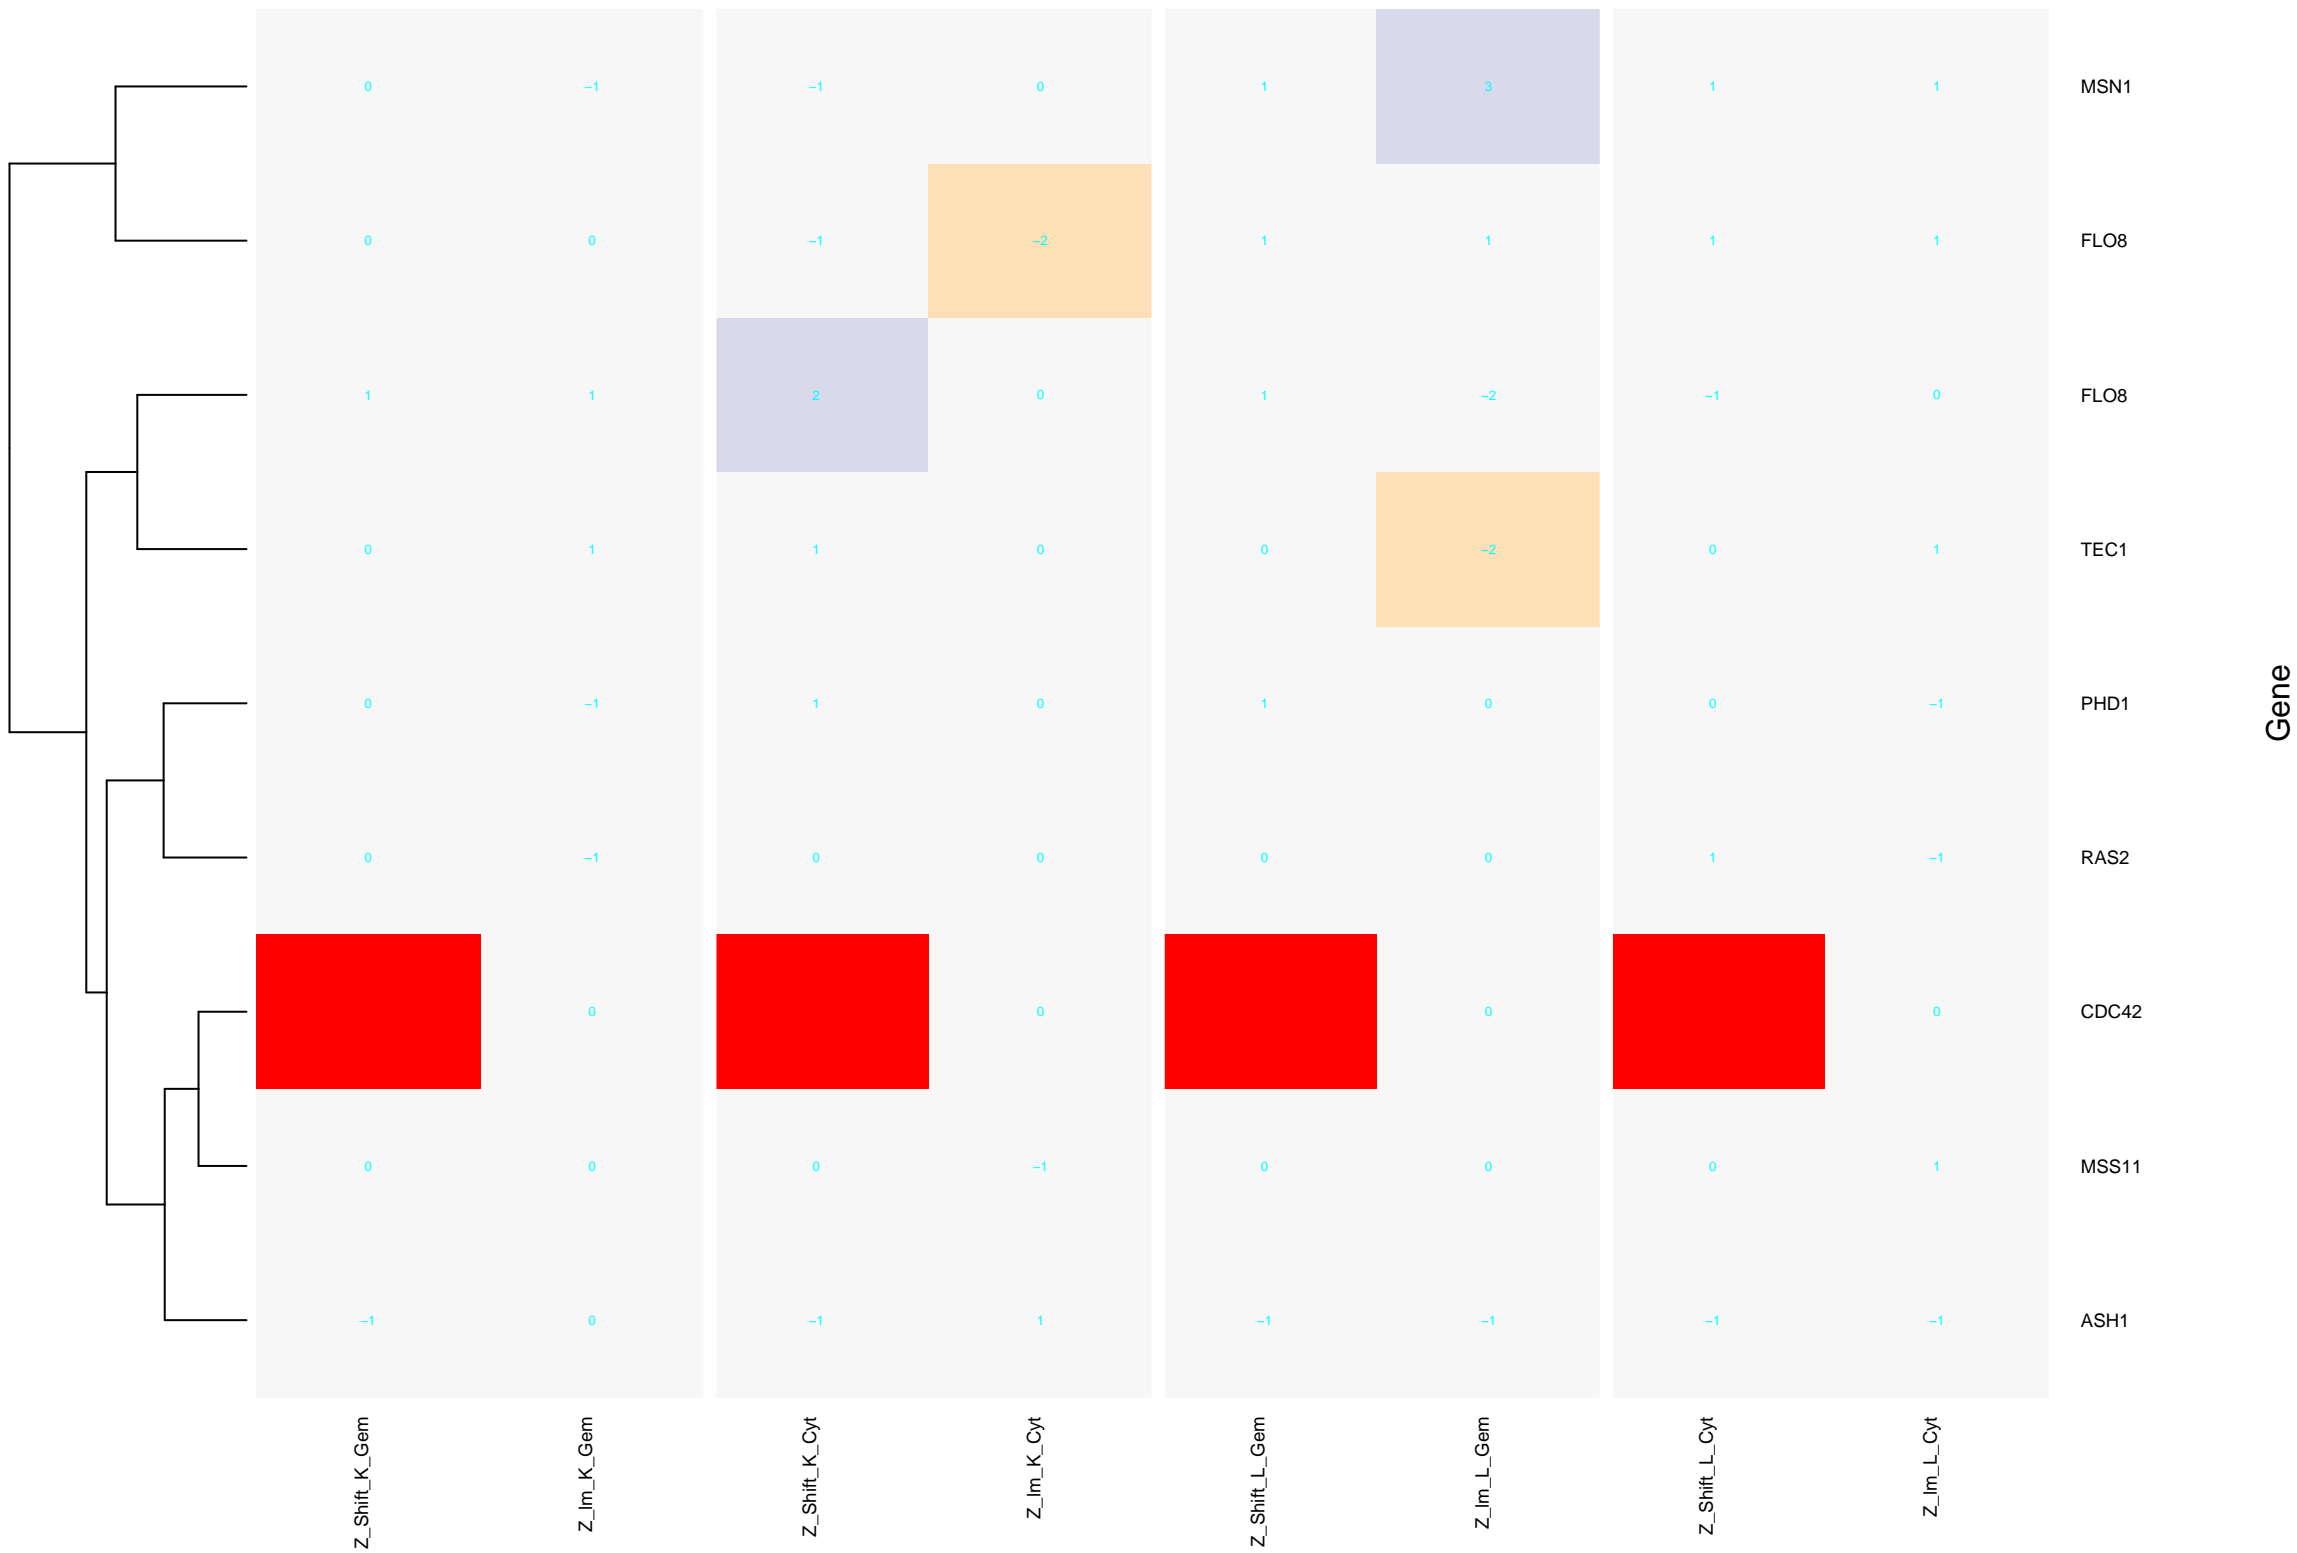

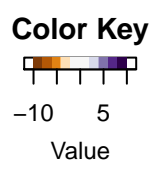

# Growth in response to glucose limitation by negative regulation of transcription from RNA p

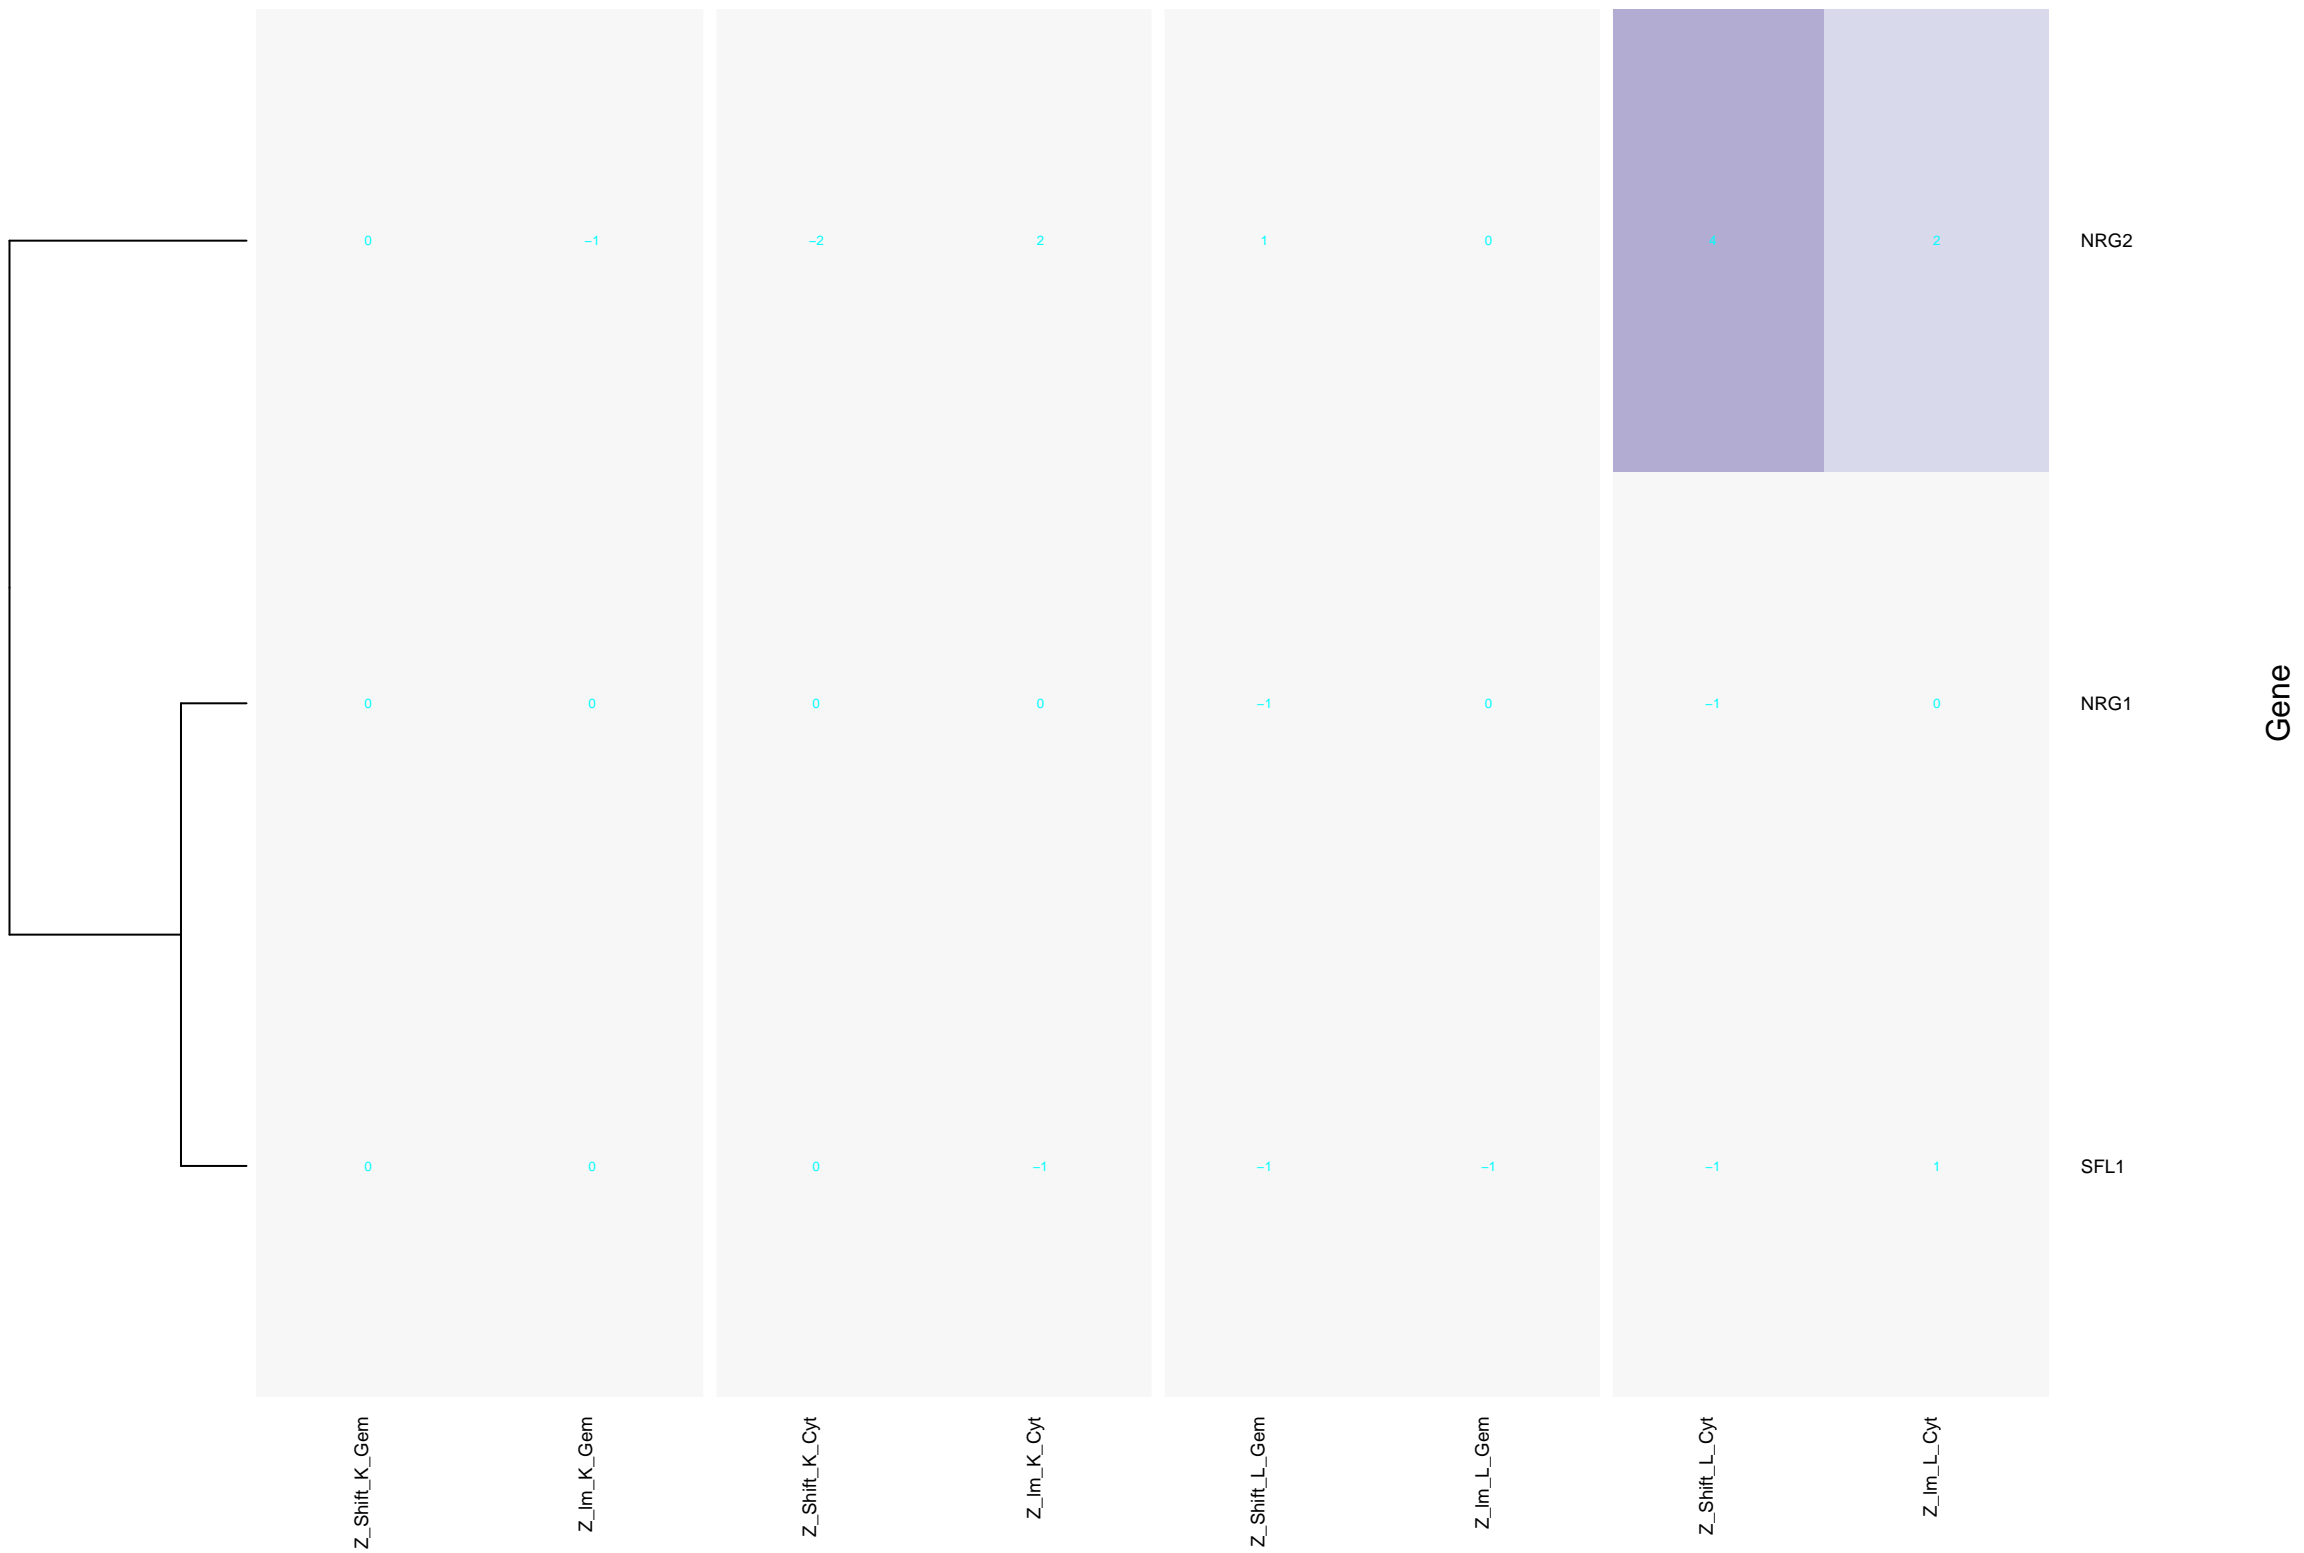

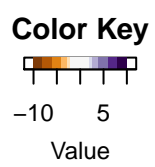

rowth in response to glucose limitation by positive regulation of transcription from RNA po

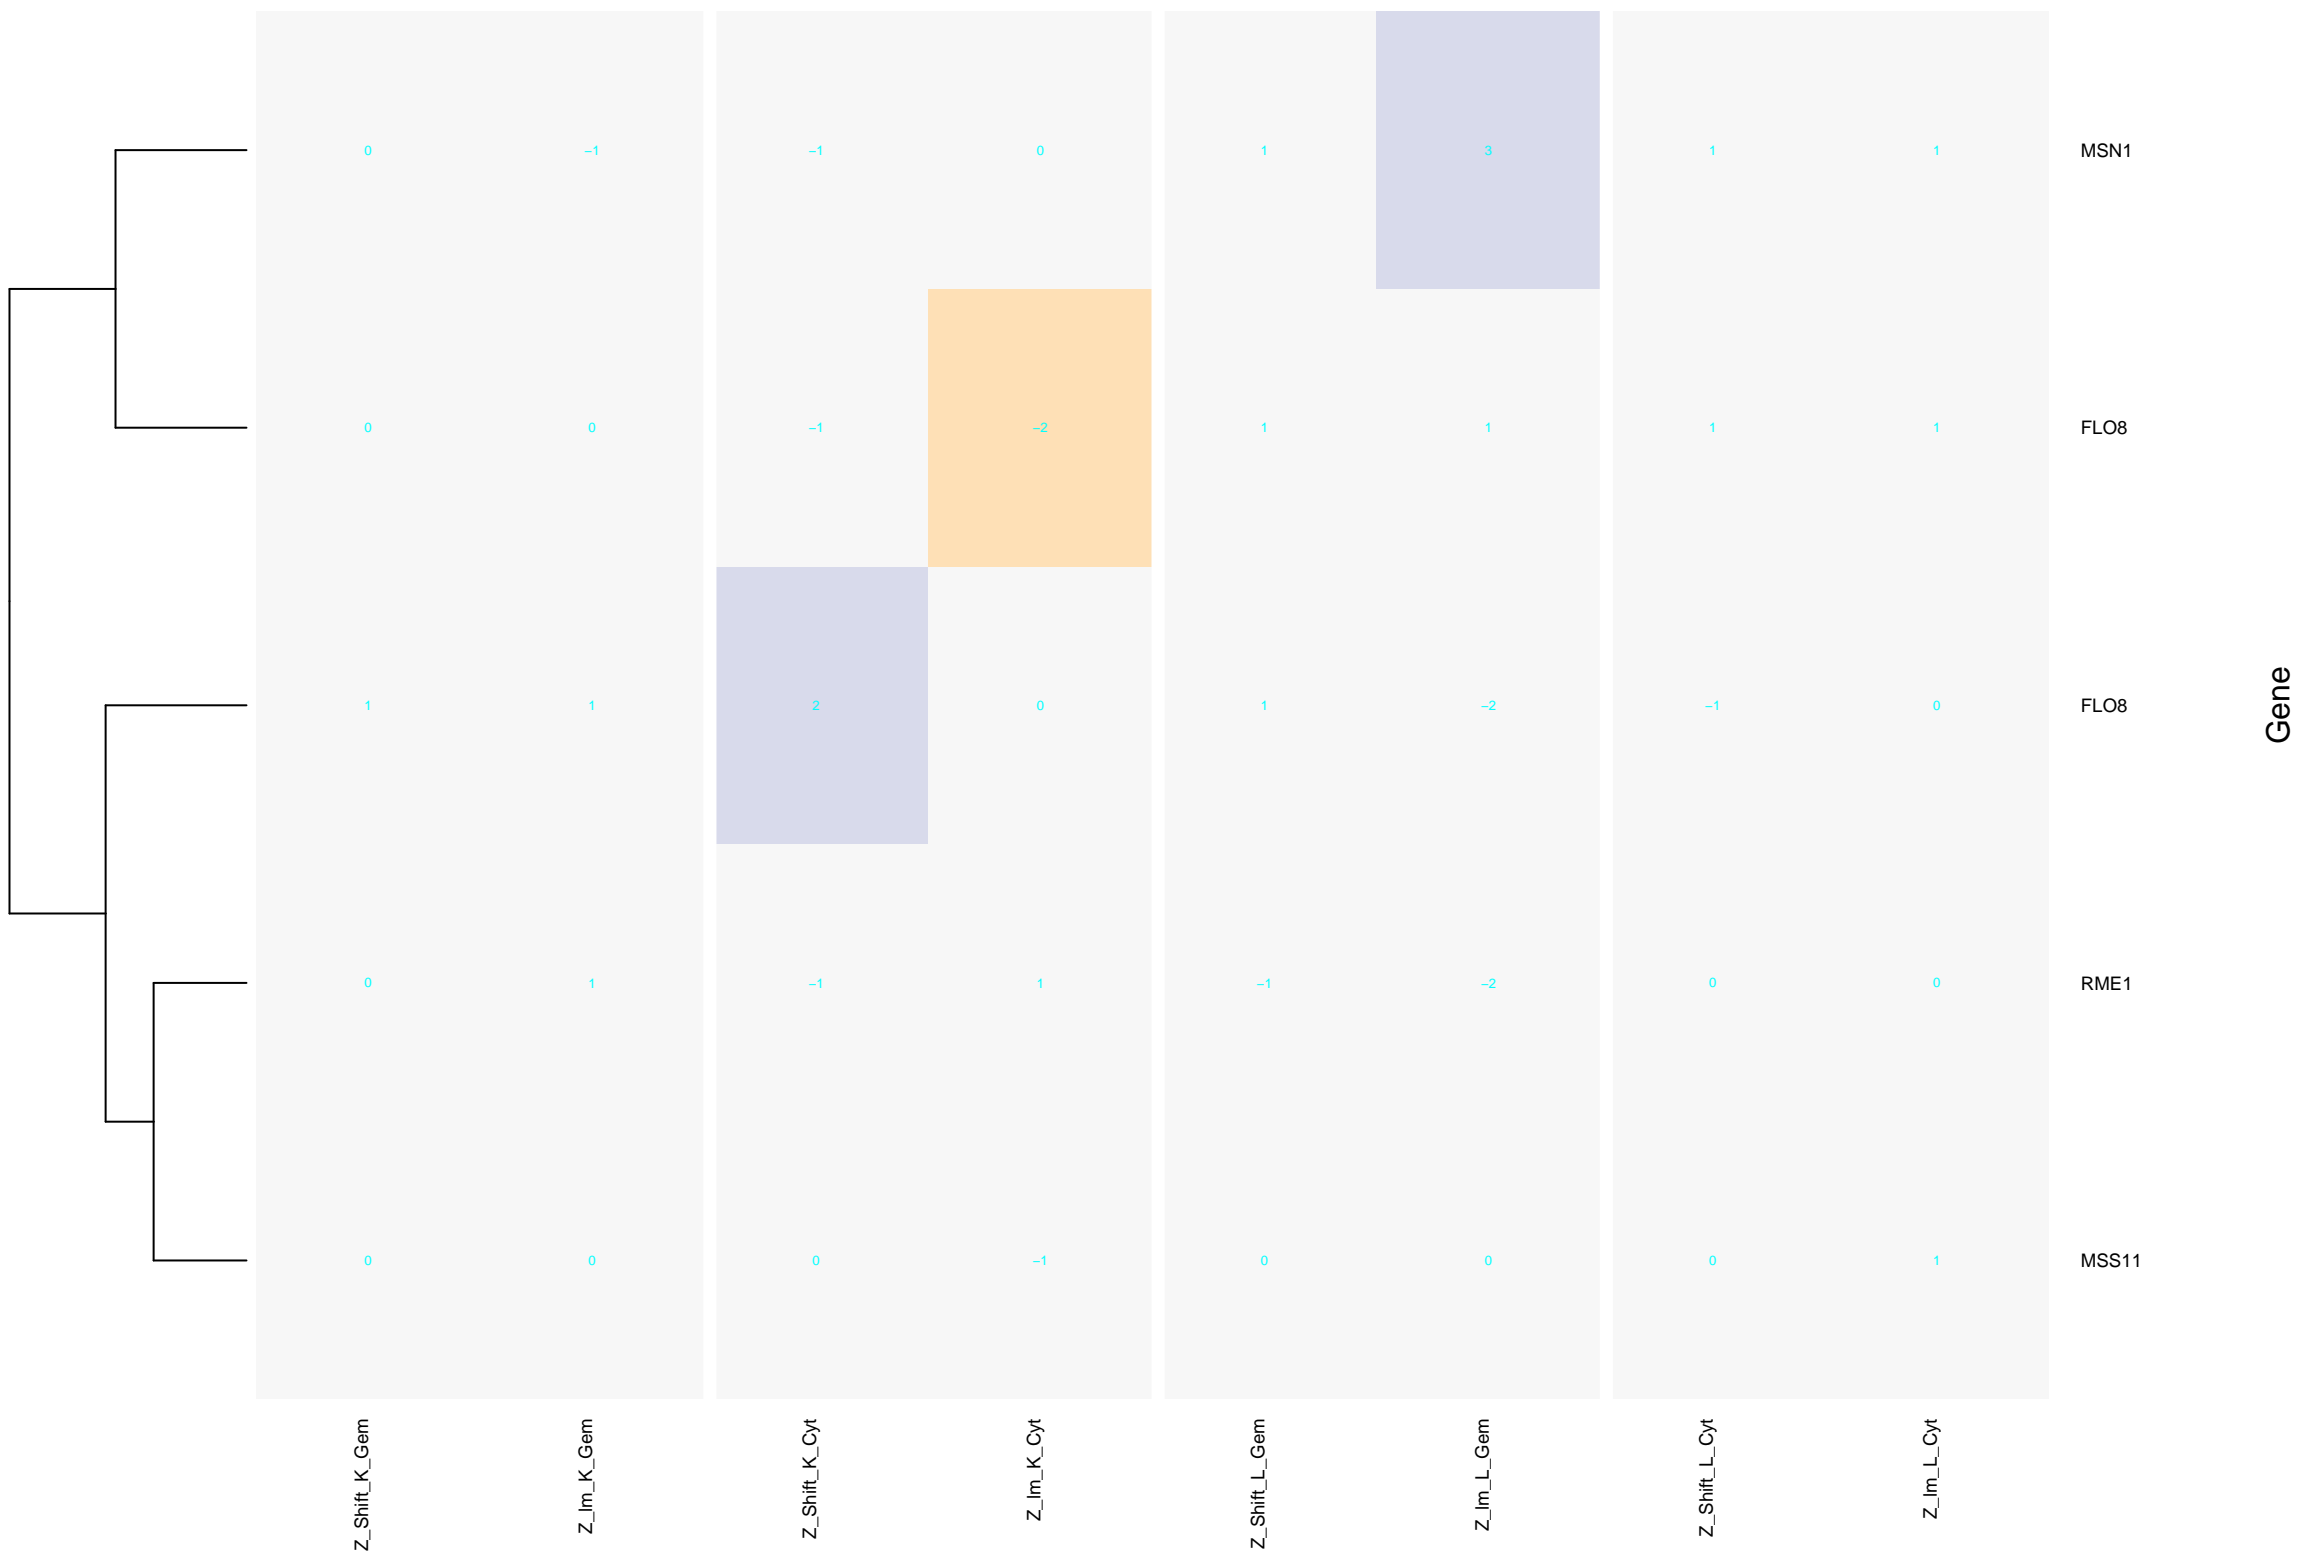

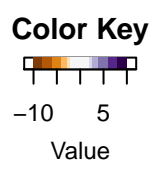

# of pseudohyphal growth by positive regulation of transcription from RNA polymerase II pr

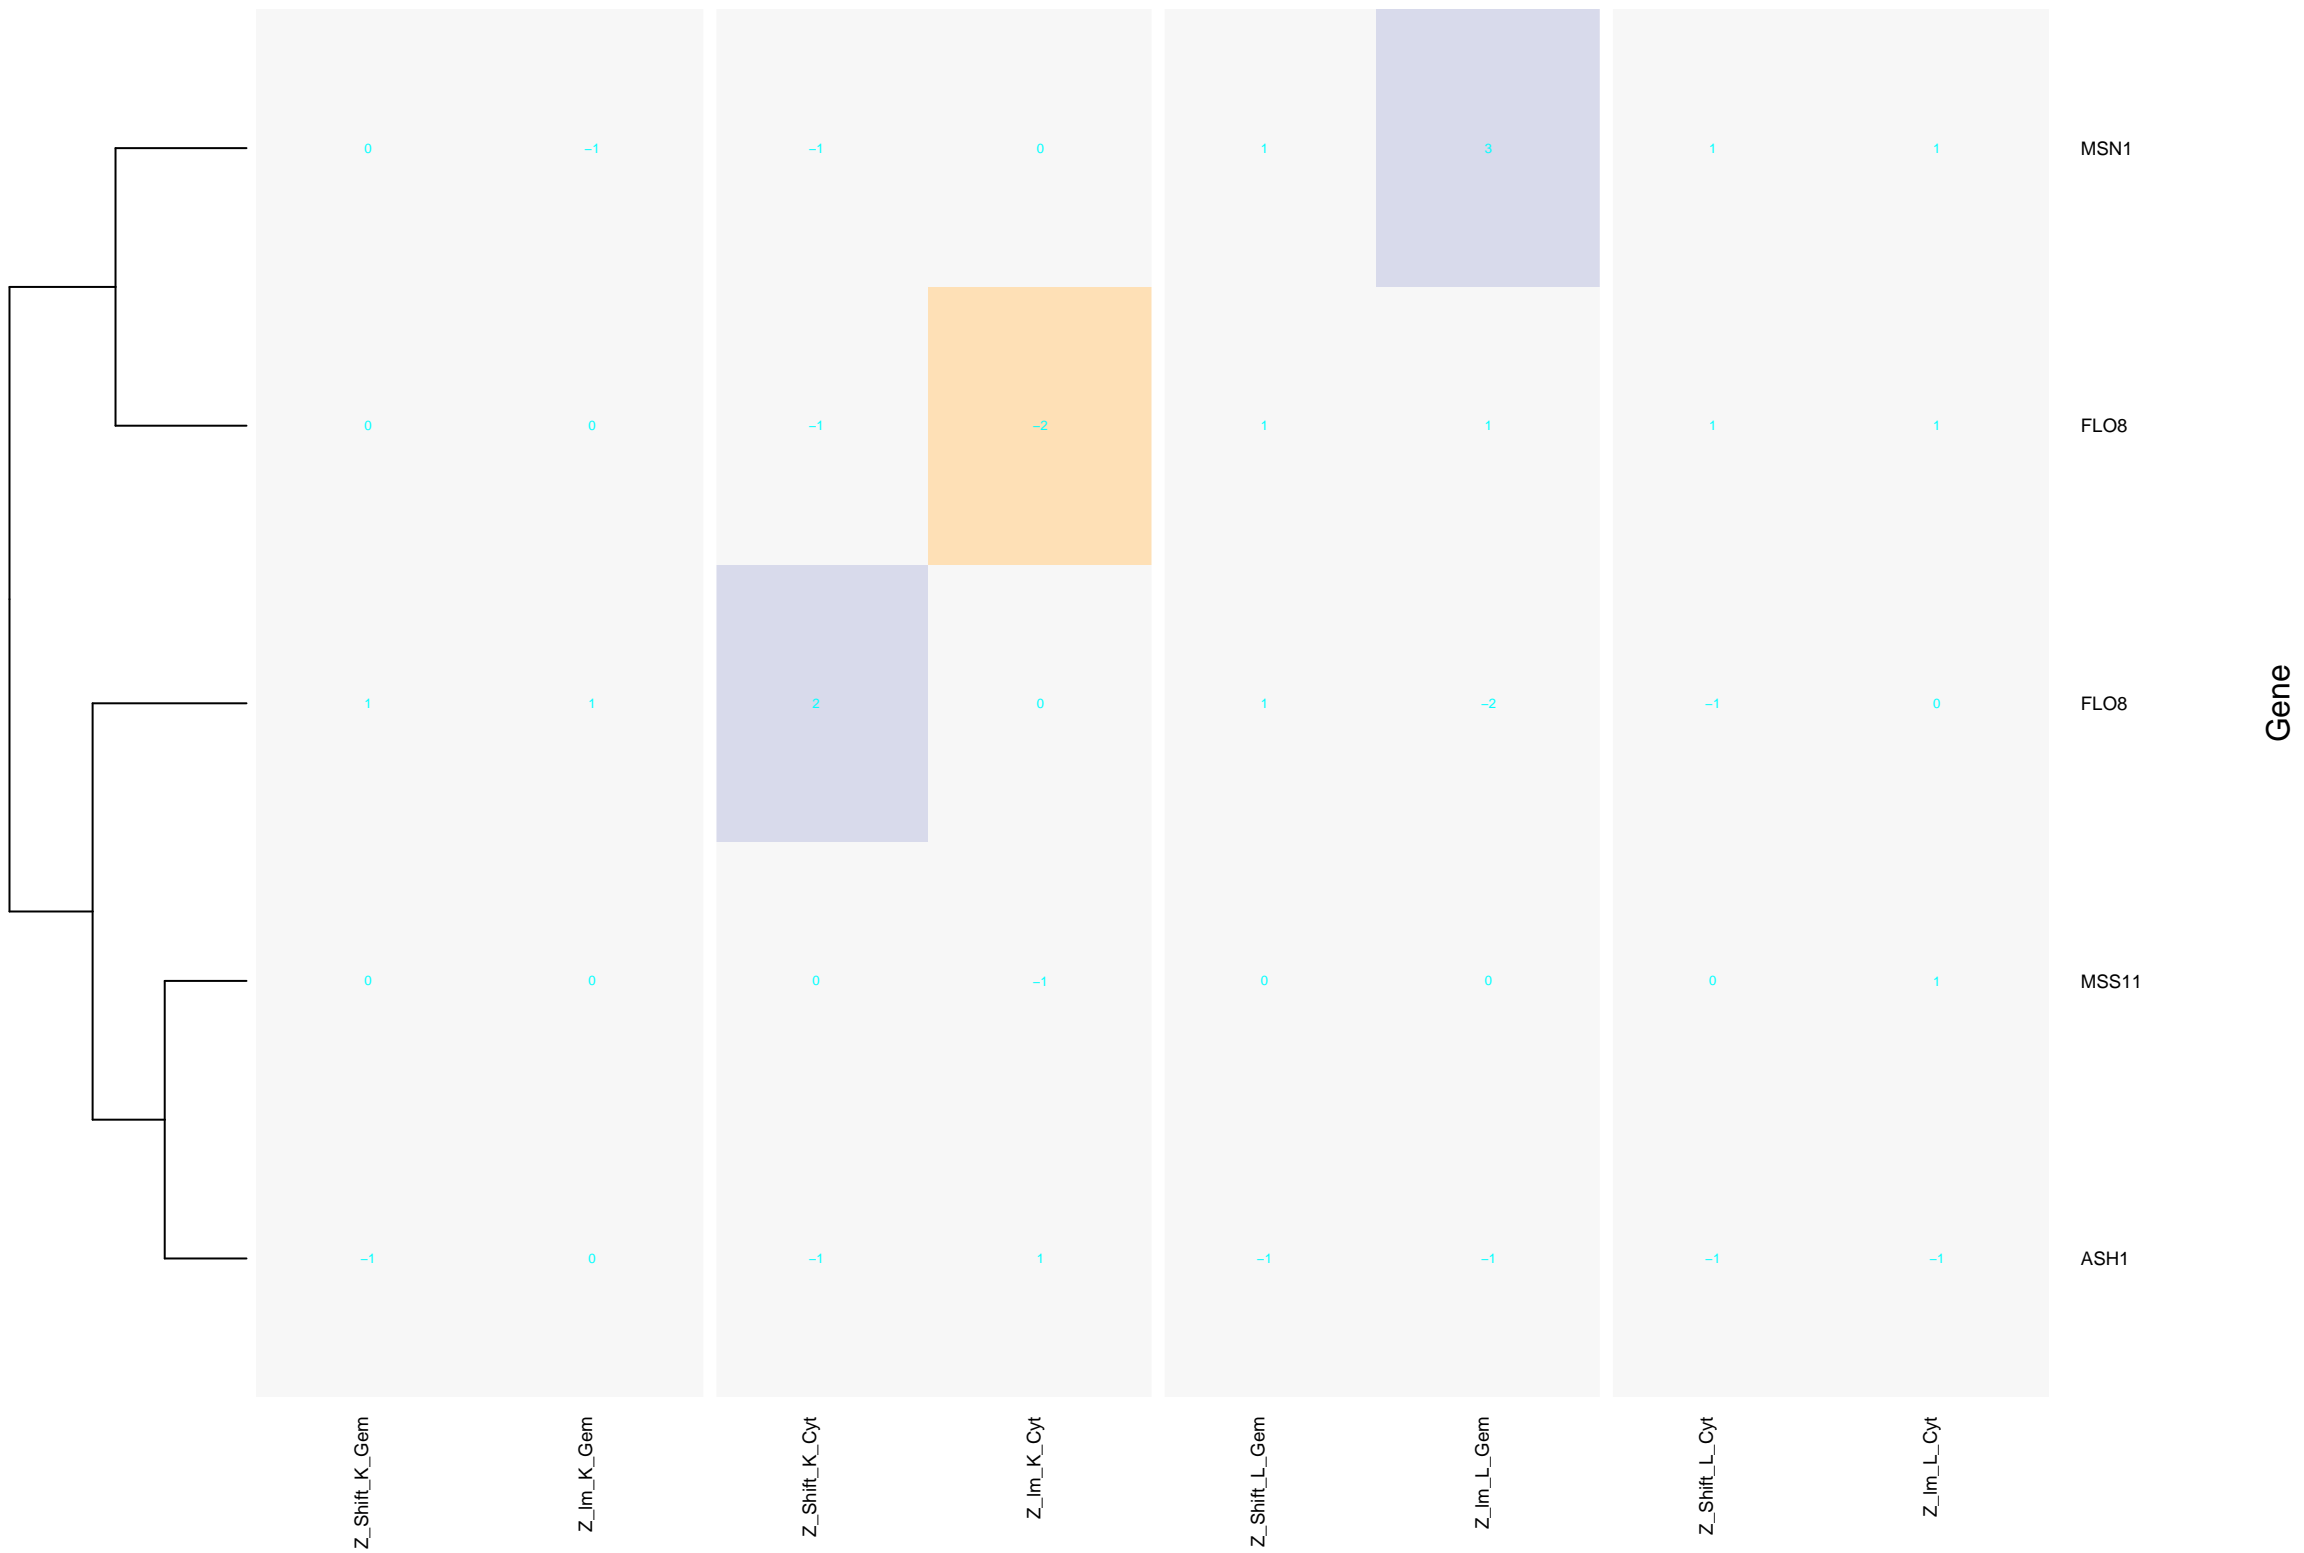

Supplement: s1 [file s1]
