# Supplementary material for: A Humanized Yeast Phenomic Model of Deoxycytidine Kinase to Predict Genetic Buffering of Nucleoside Analog Cytotoxicity
Source: MDPI journal article supplement (doi:10.3390/genes10100770), 2019-09-30

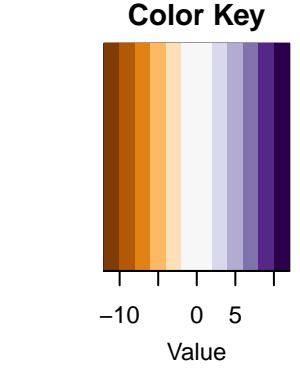

0-0-0

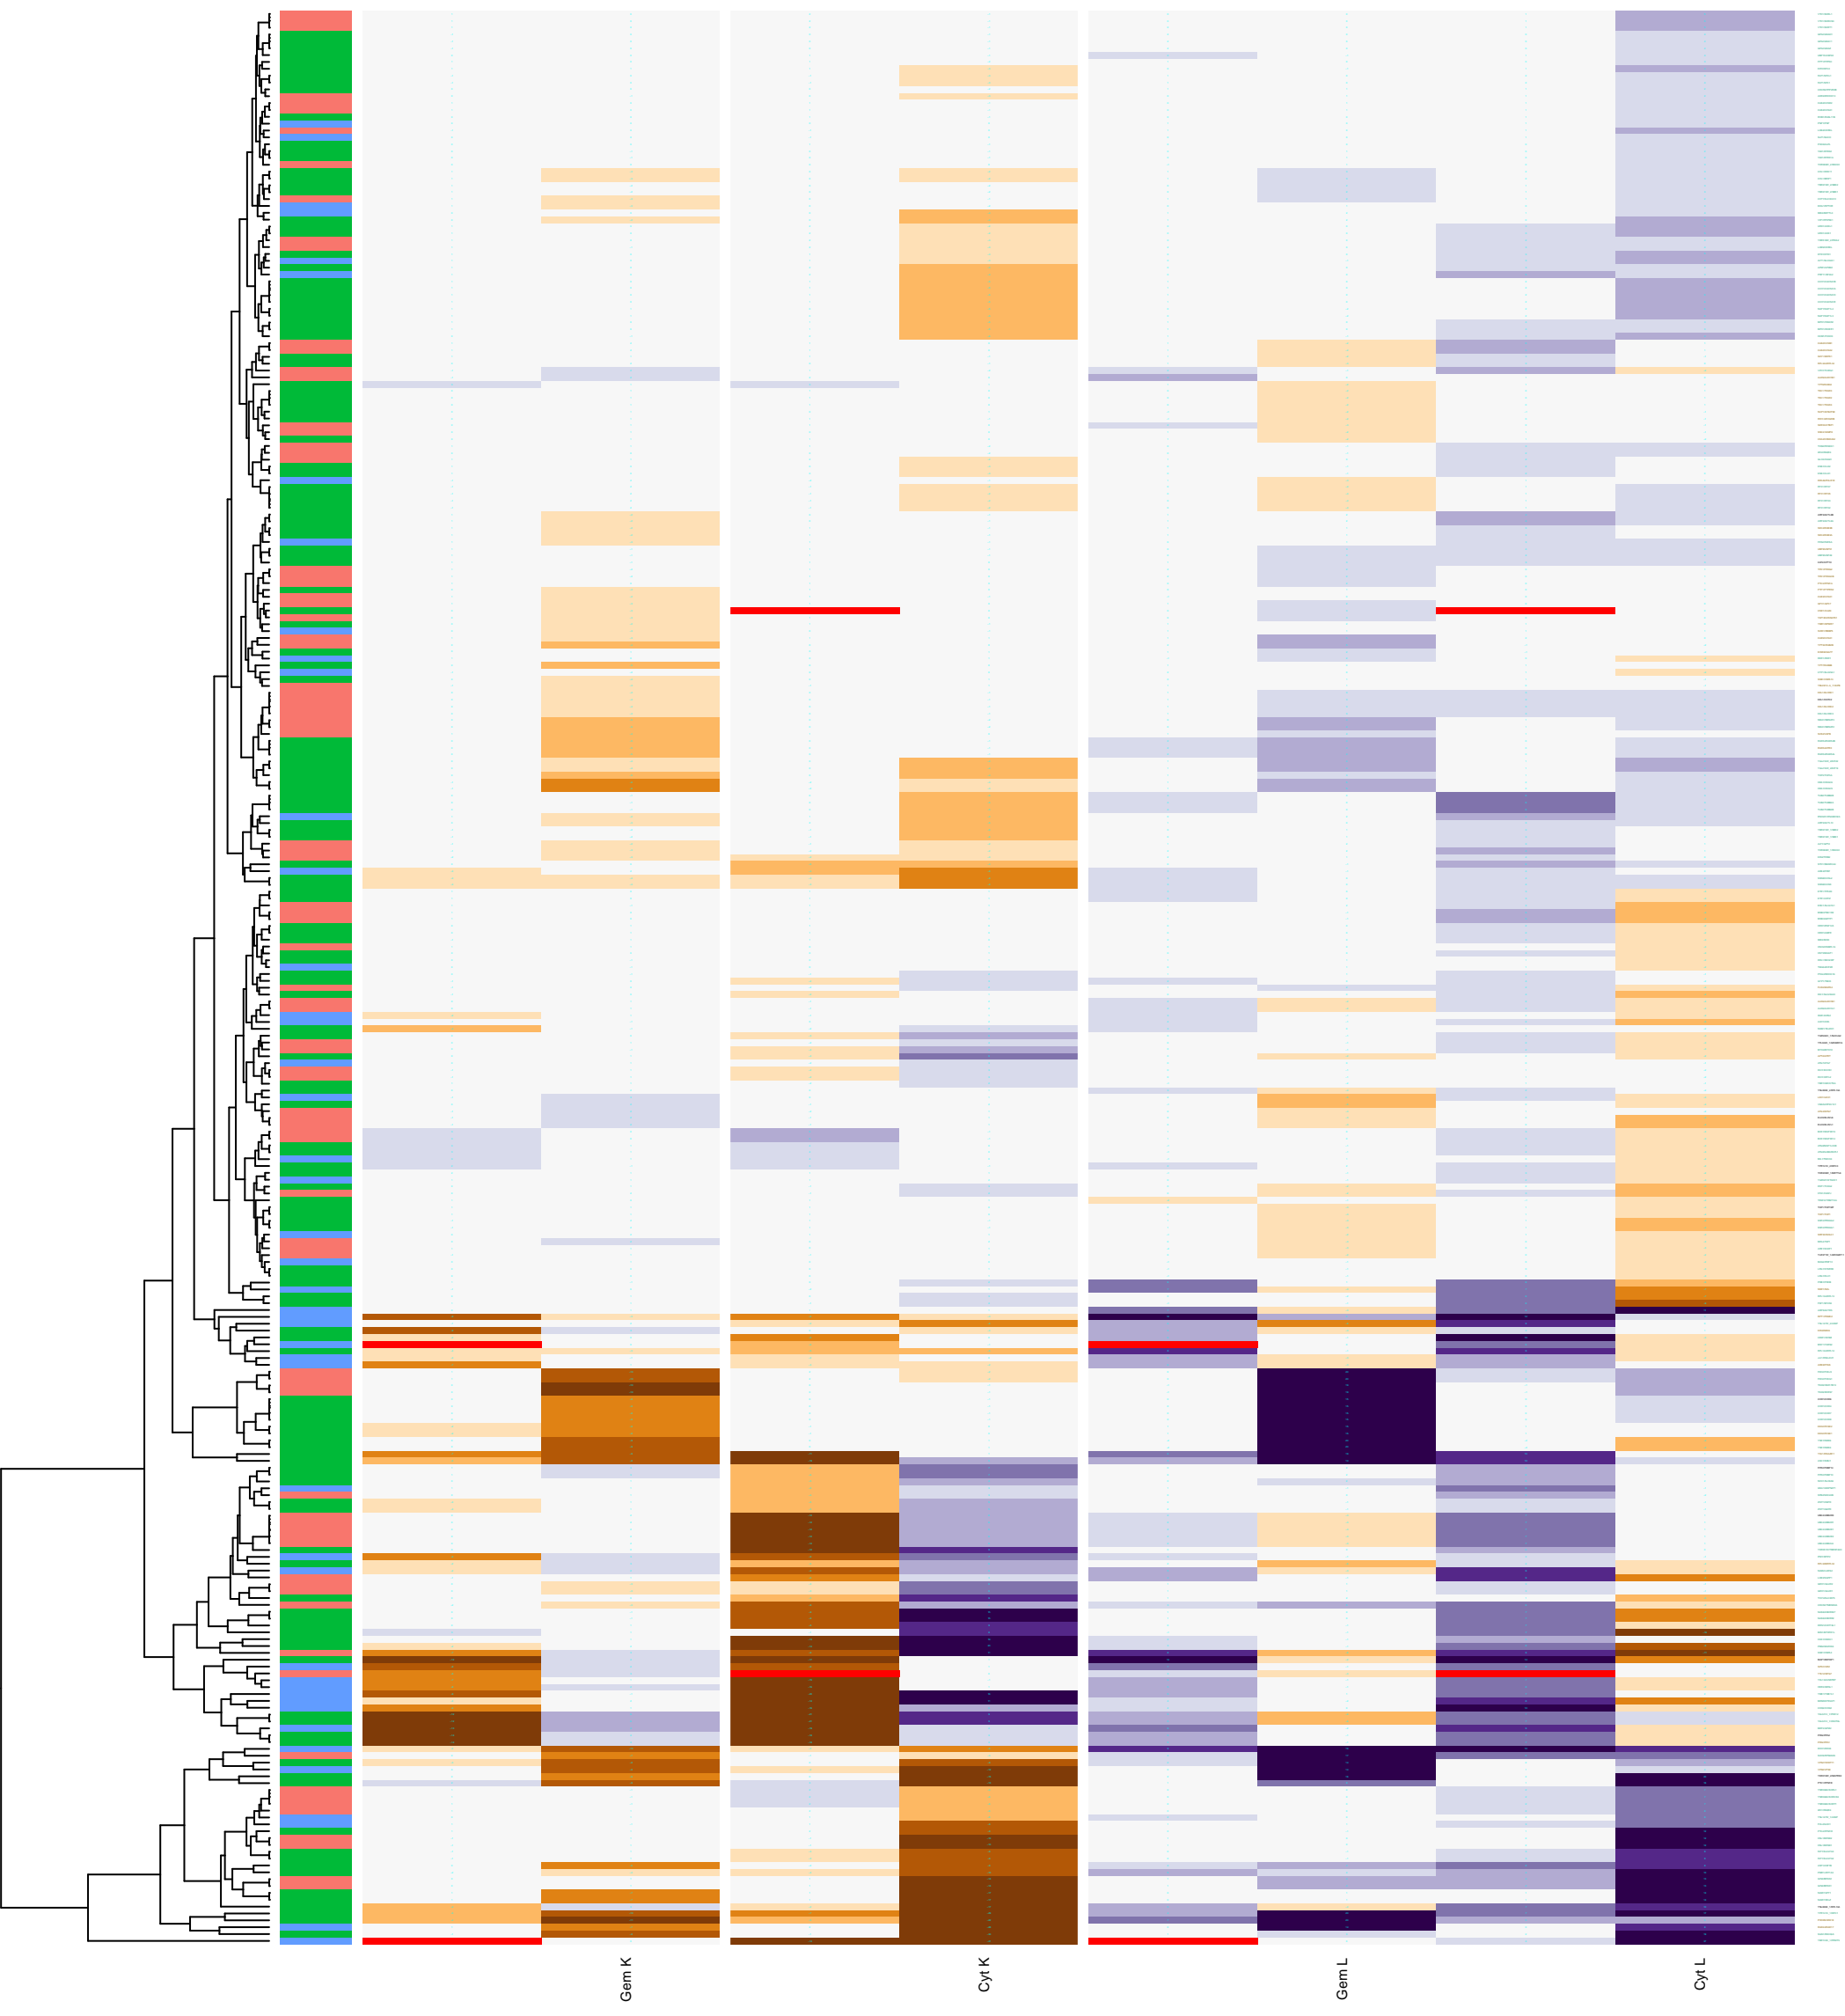

Color Key

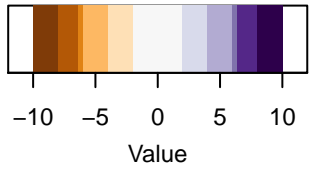

1-0-0

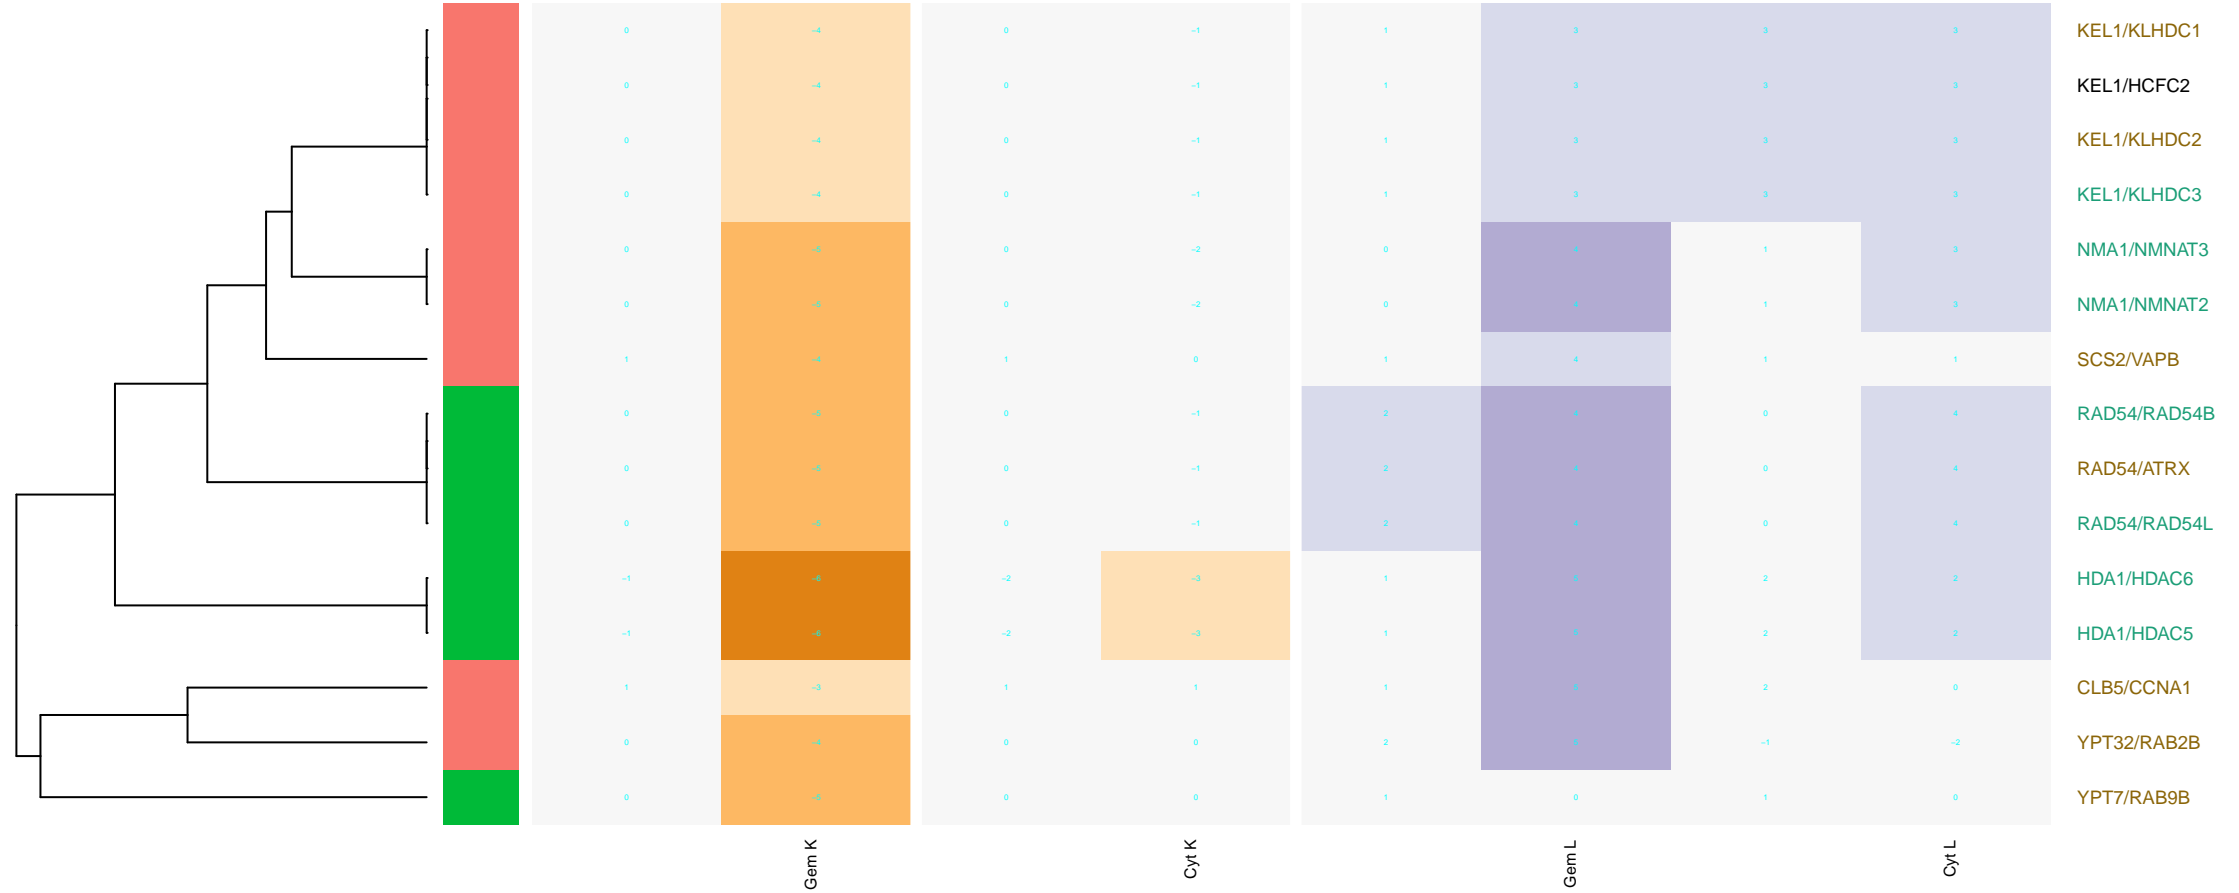

Color Key

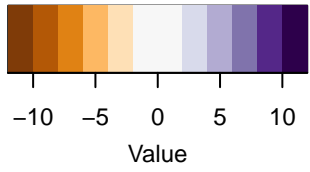

1-0-1

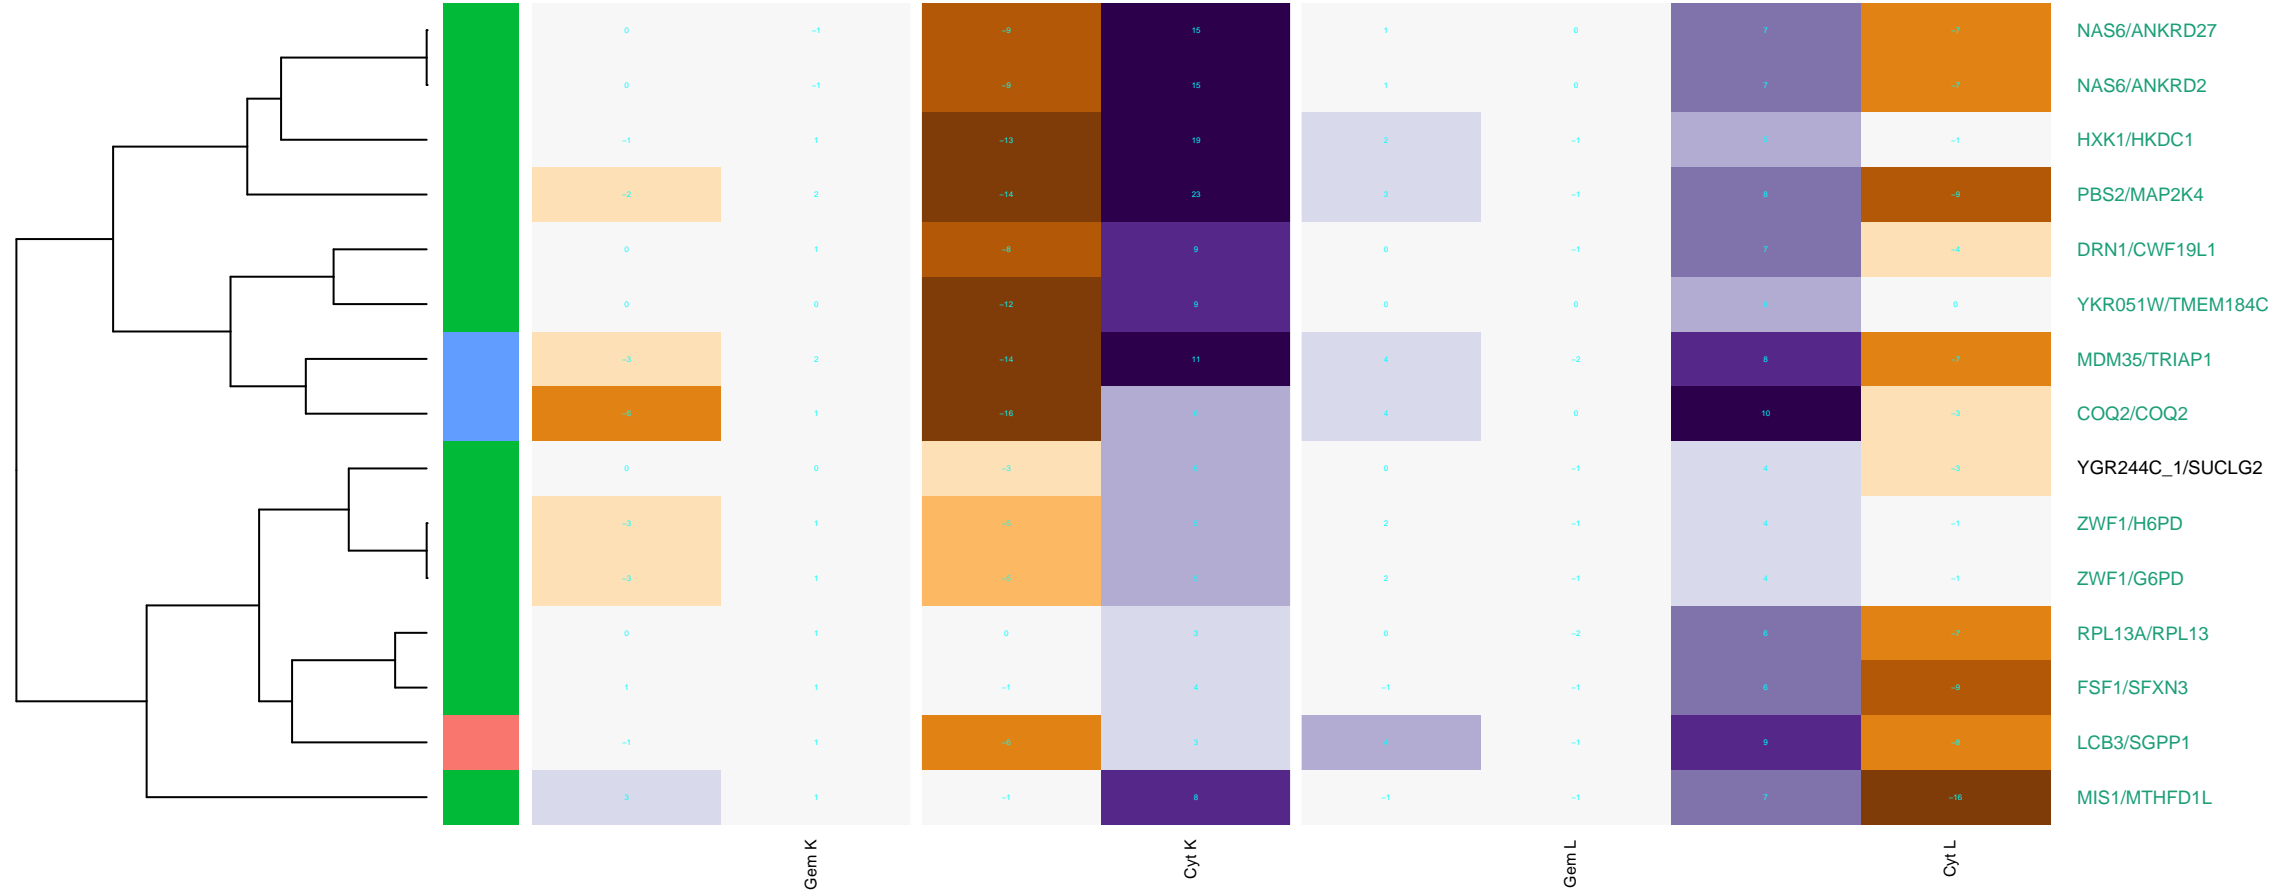

Color Key



1-0-10

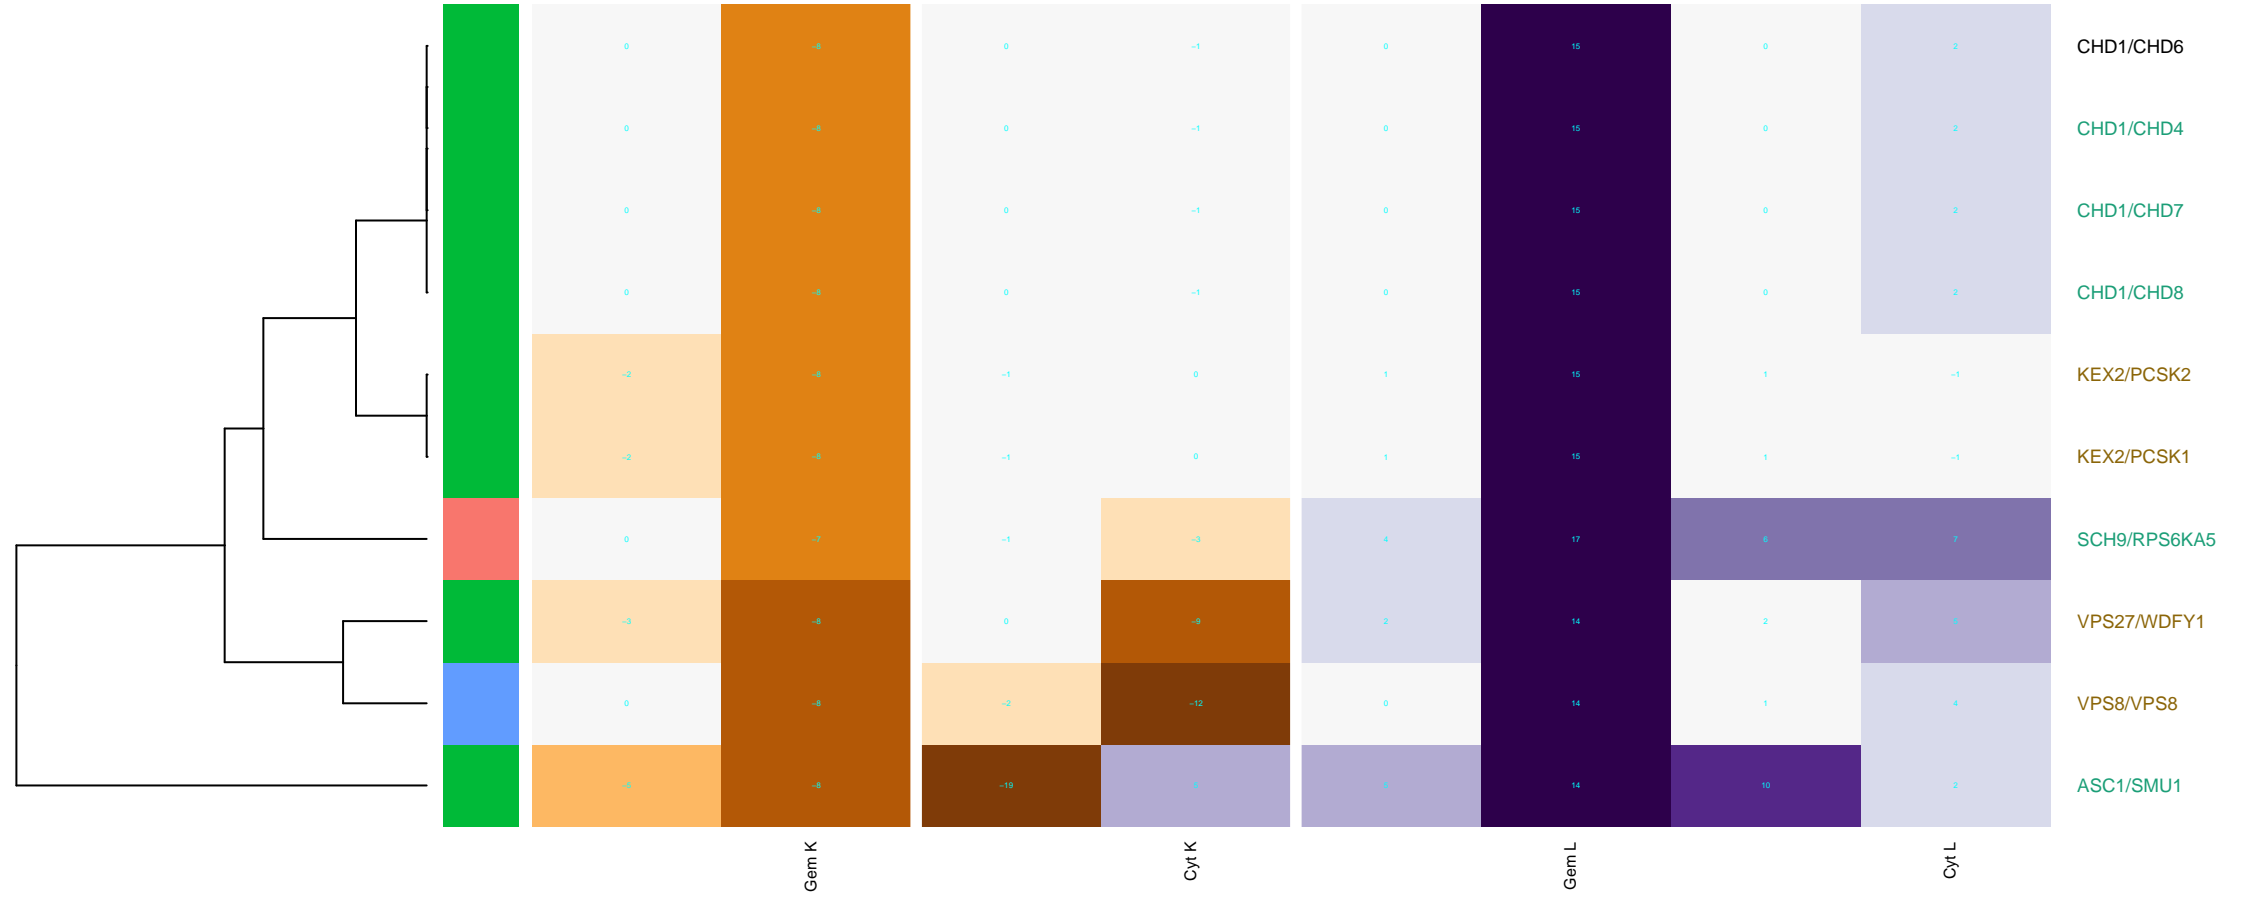

Color Key

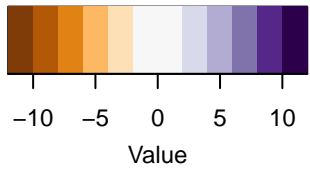

1-0-11

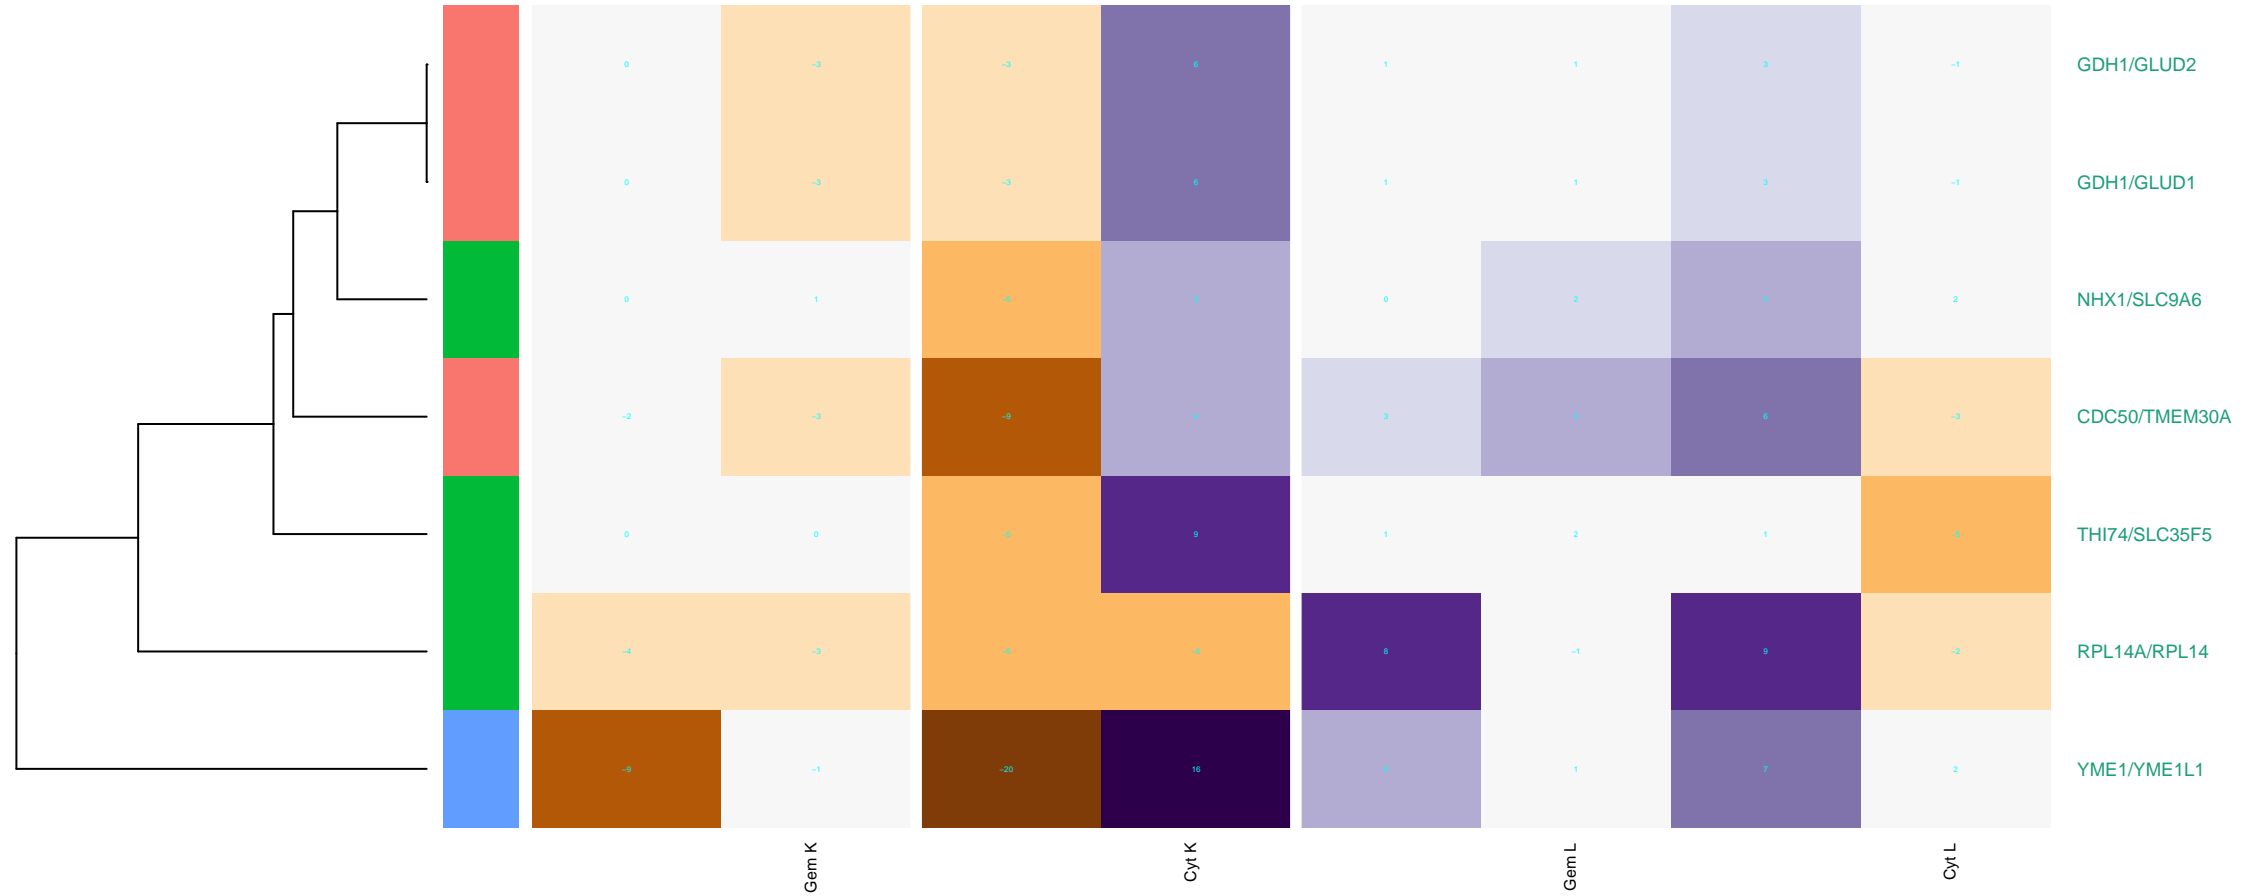

# Color Key

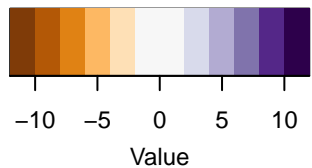

1-0-12

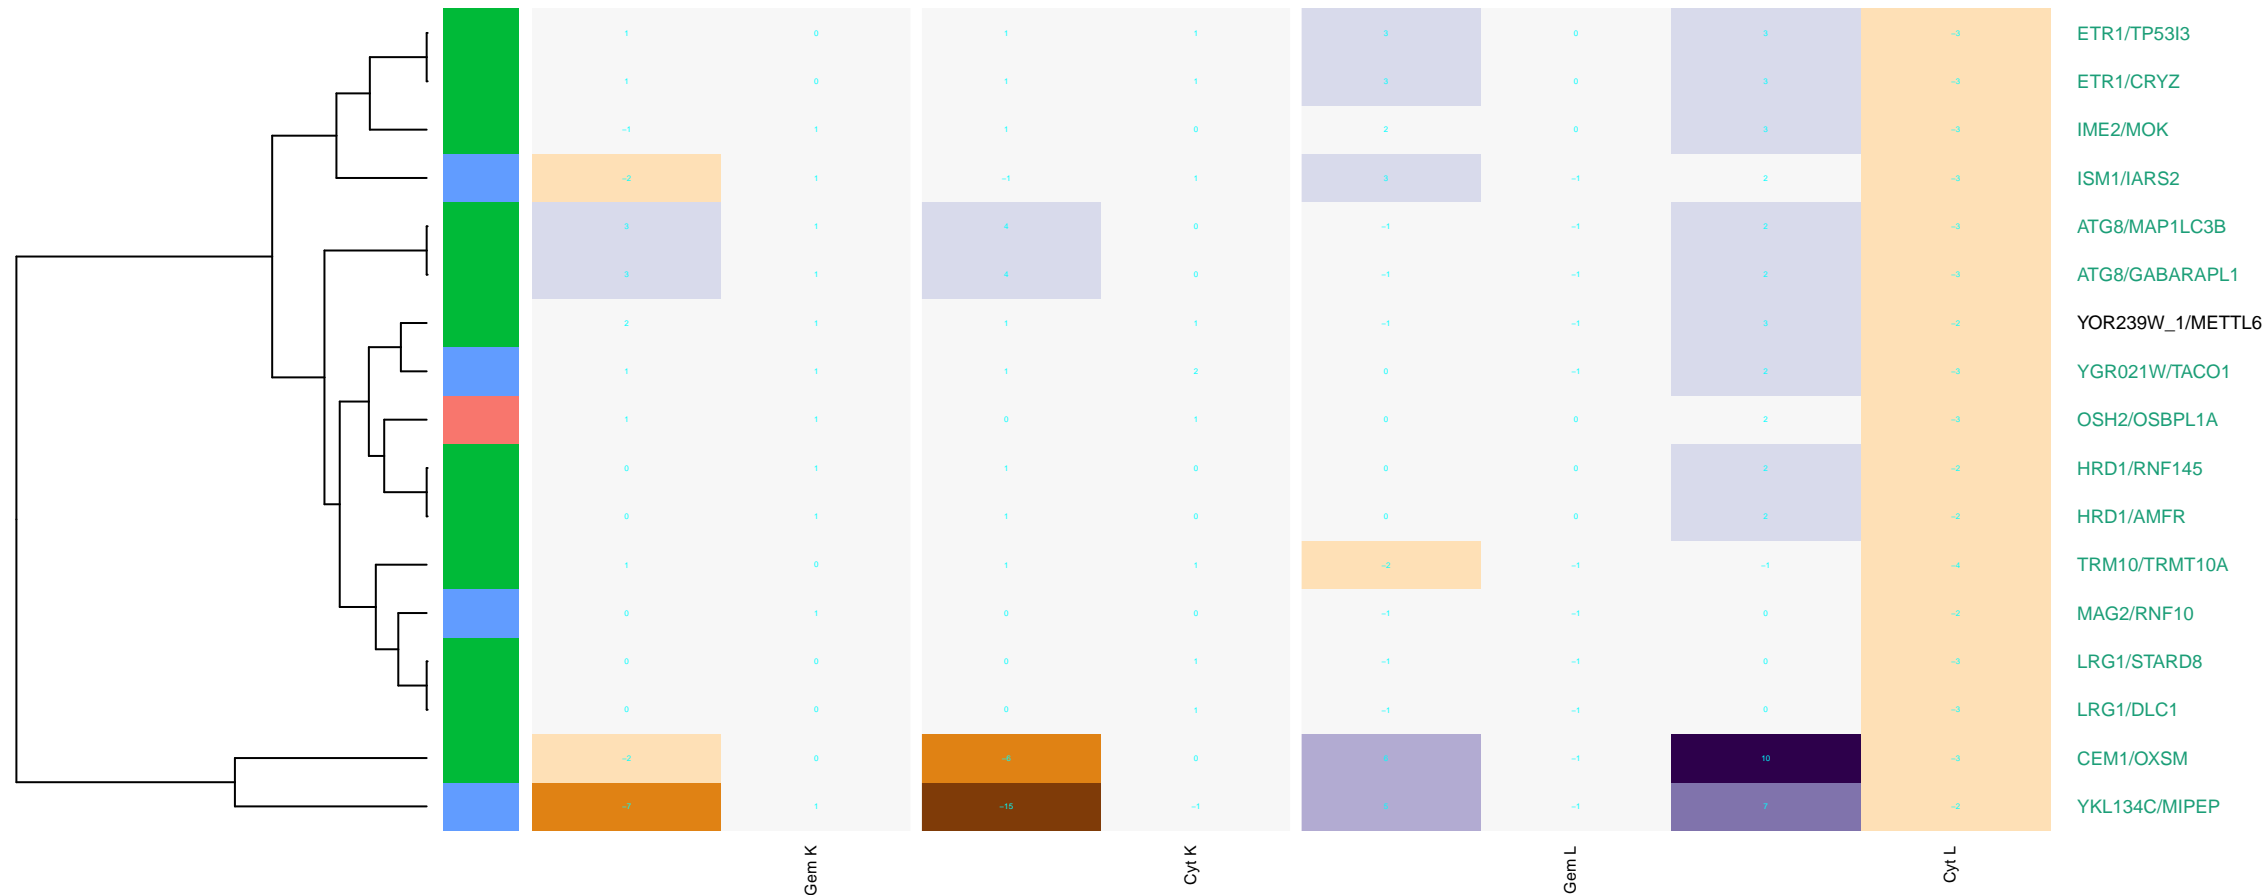

Color Key



1-0-13

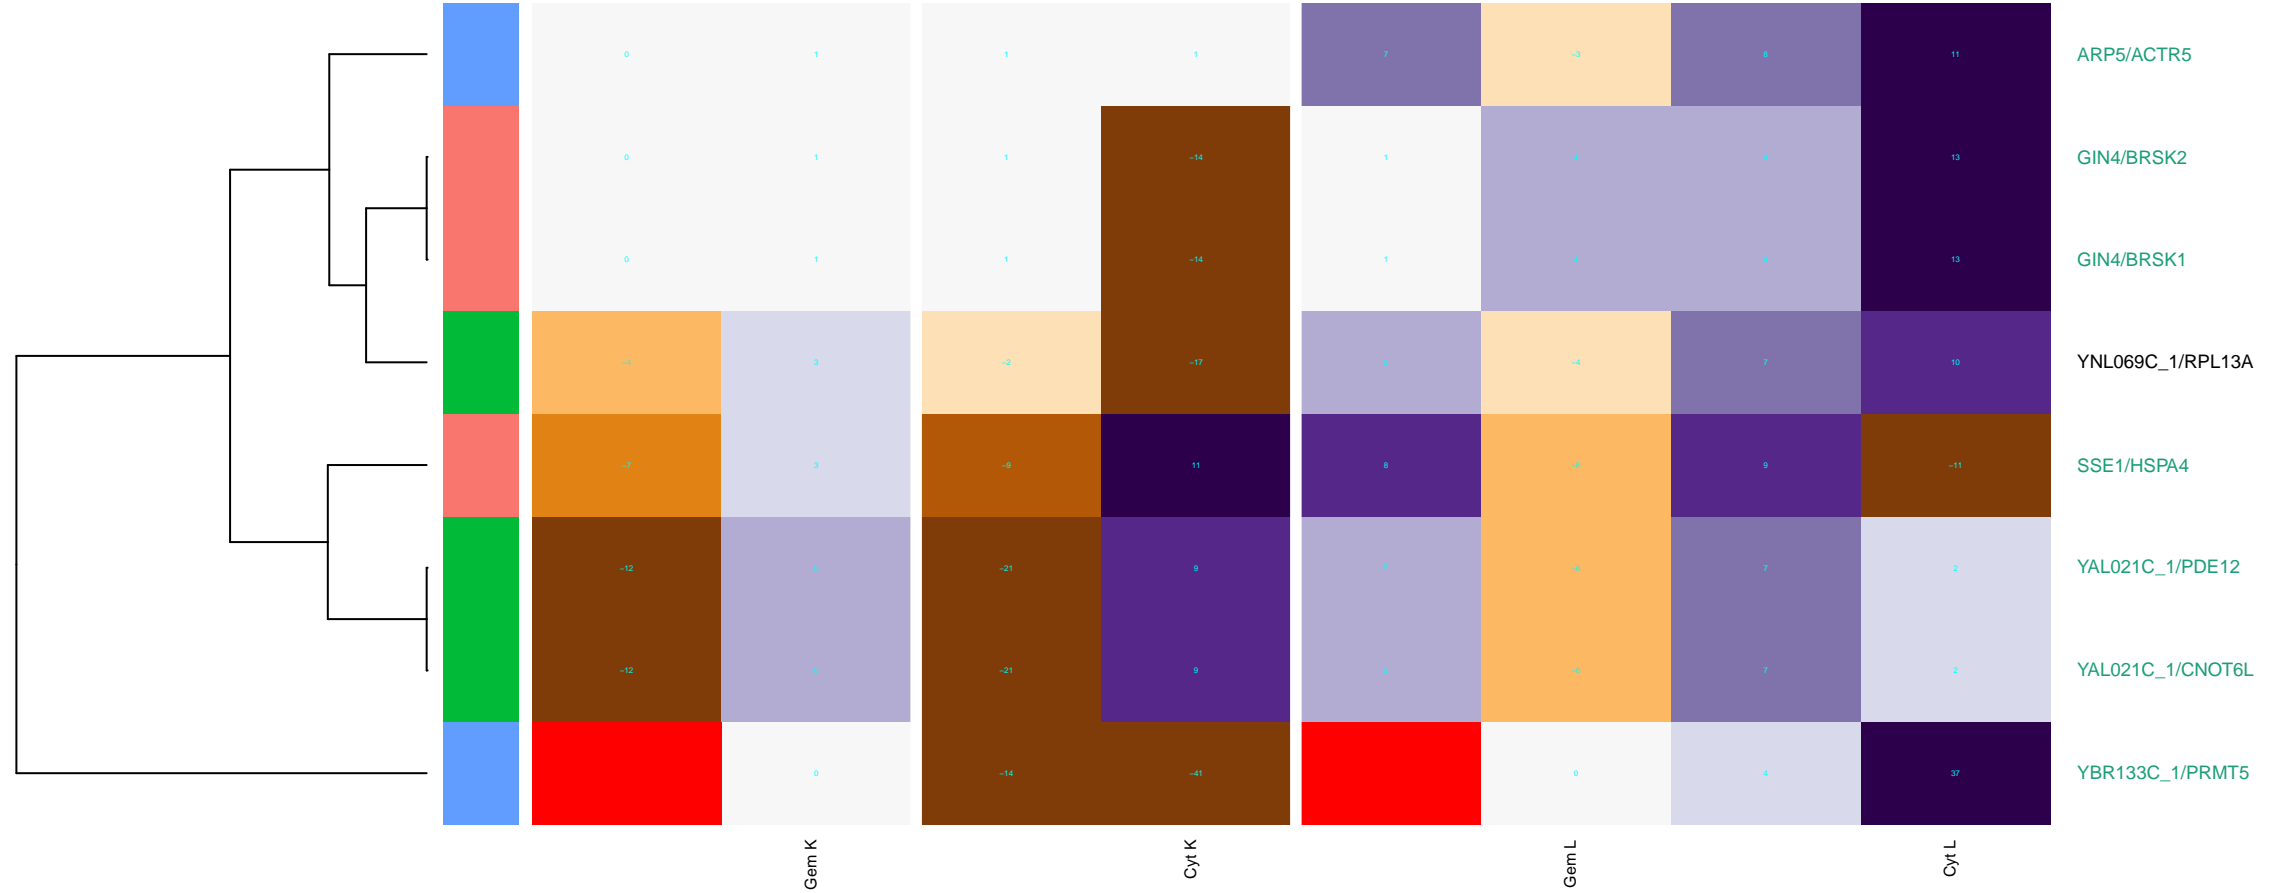

Color Key



1-0-14

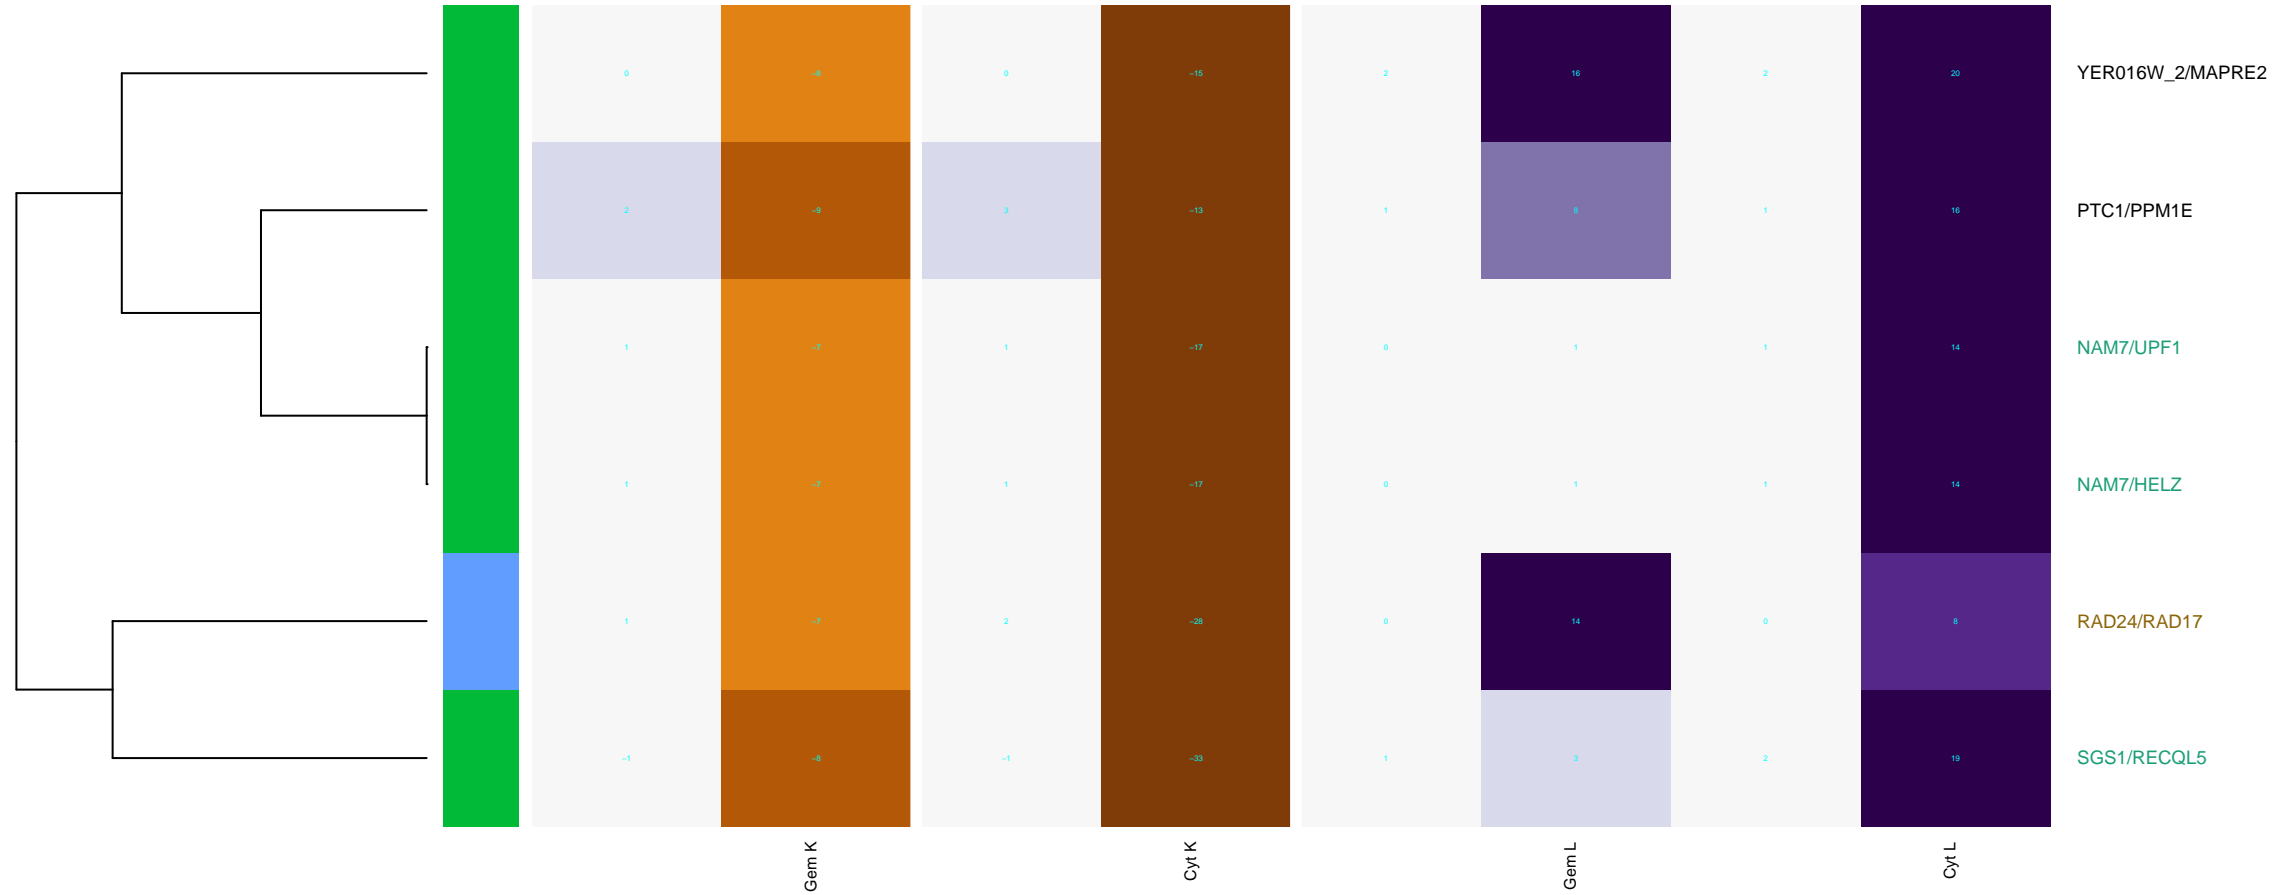





Color Key



1-0-16

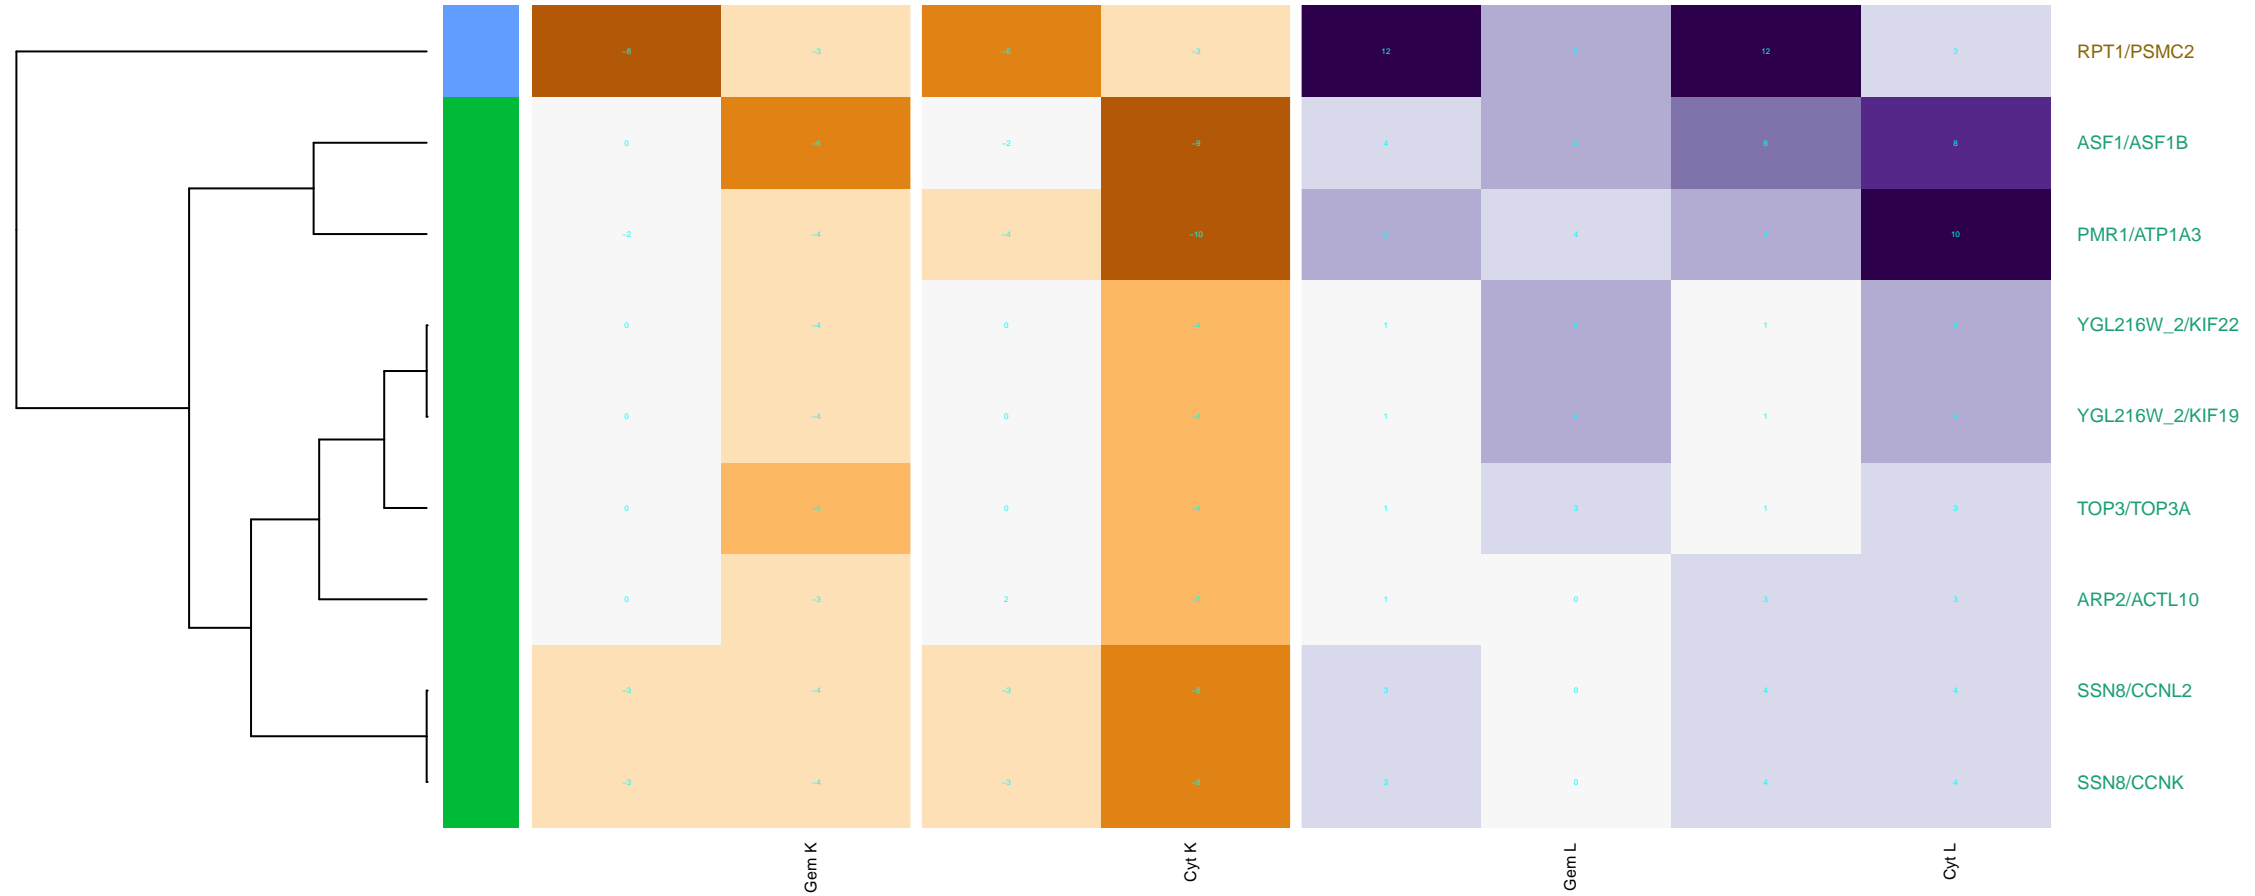

Color Key

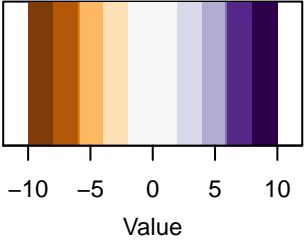

1-0-17

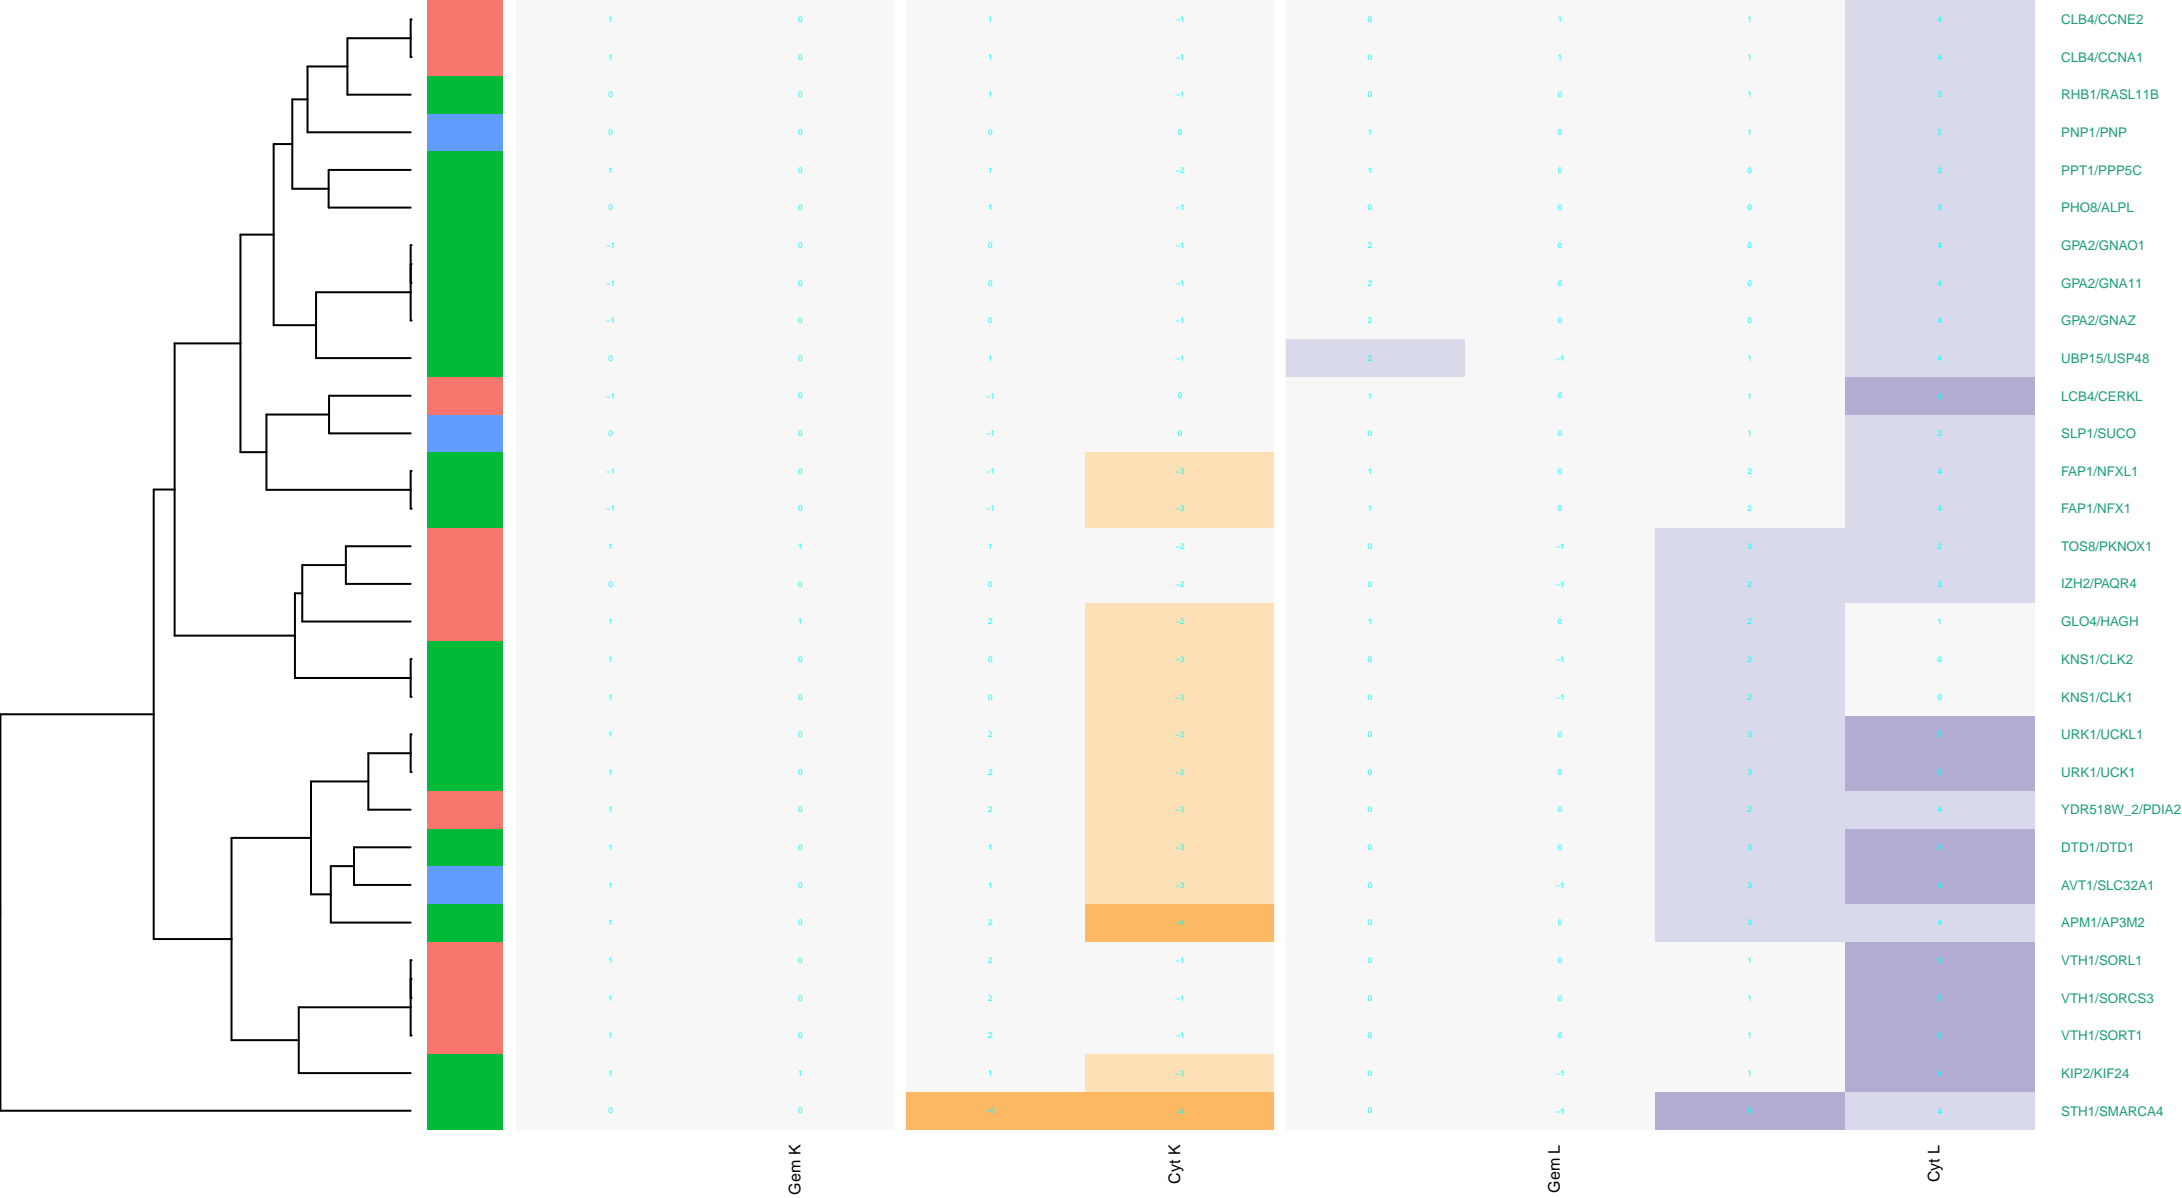

Color Key



1-0-2

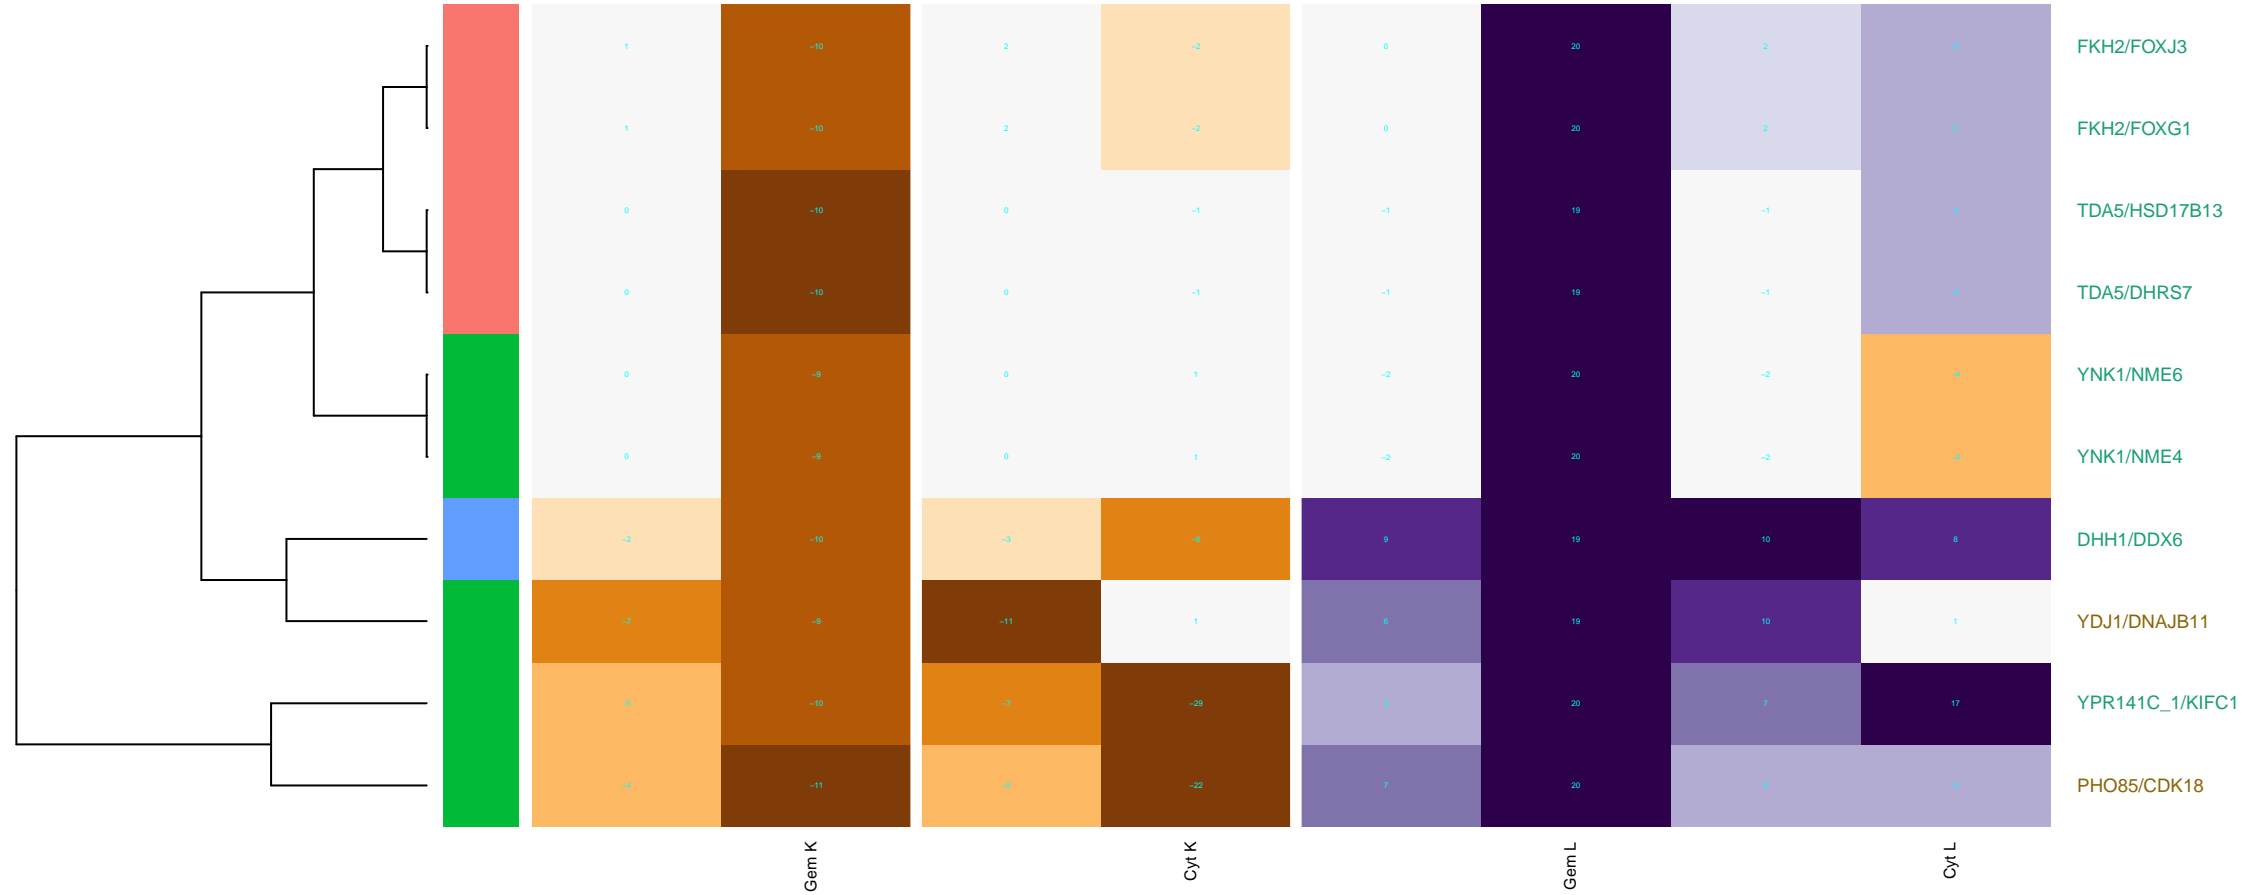

Color Key

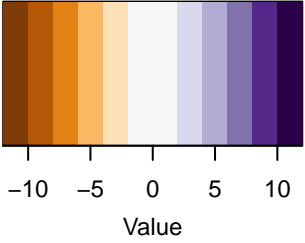

1-0-3

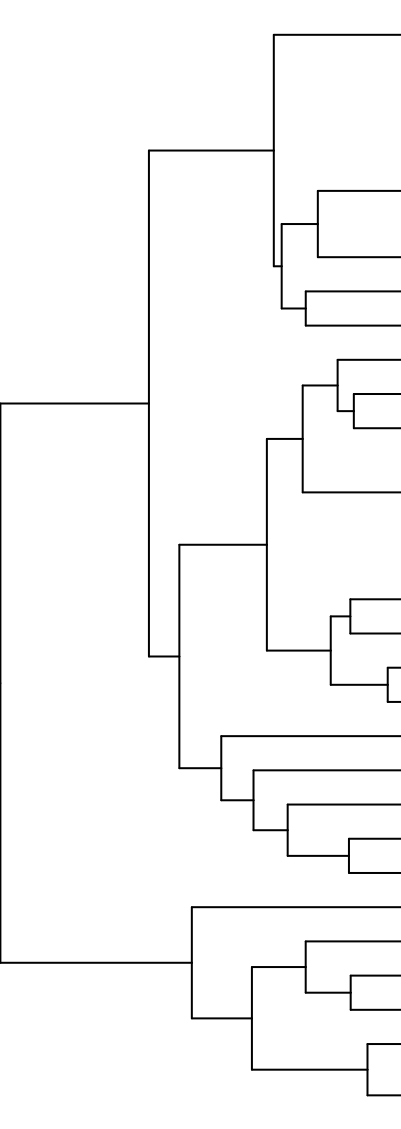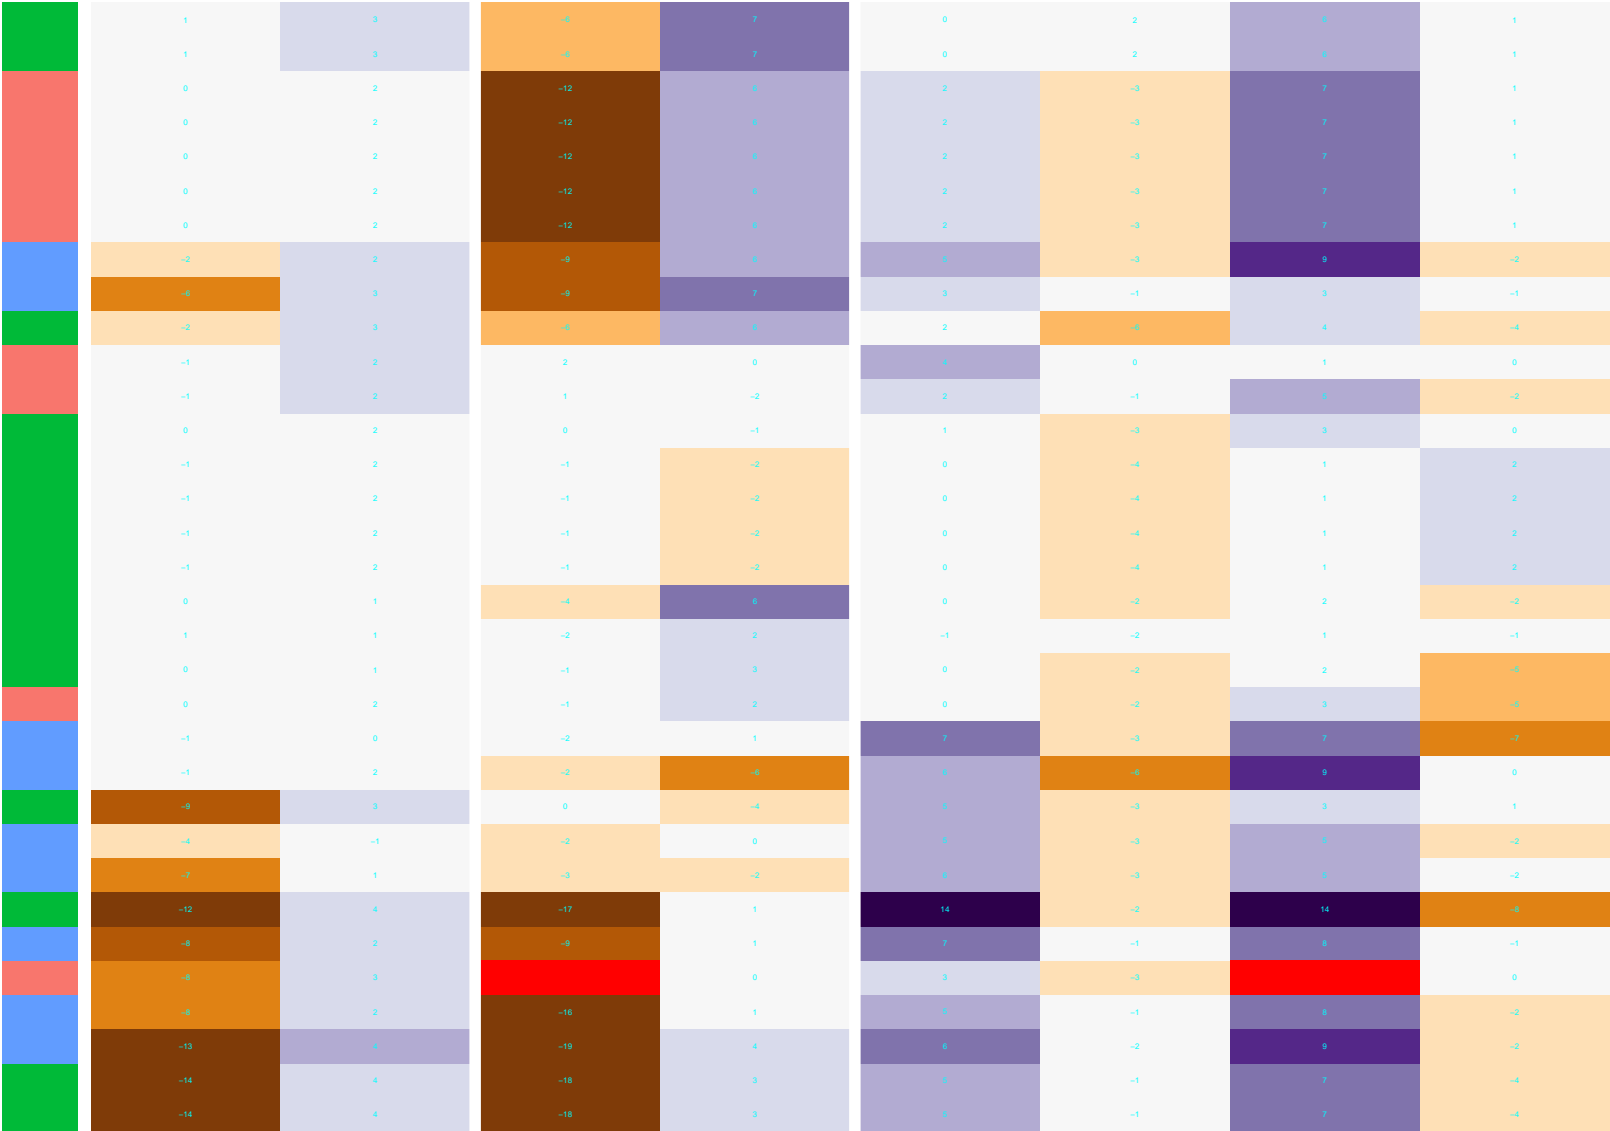

Gem K

Cyt K

Gem L

Cyt L

FPR2/FKBP14  
FPR2/FKBP10  
UBC4/UBE2D3  
UBC4/UBE2D1  
UBC4/UBE2E1  
UBC4/UBE2E2  
UBC4/UBE2L6  
NAM2/LARS2  
IFM1/MTIF2  
RPL34B/RPL34  
ALD5/ALDH1B1  
VPH1/TCIRG1  
RPL34A/RPL34  
RFX1/RFX7  
RFX1/RFX5  
RFX1/RFX3  
RFX1/RFX2  
APT2/APRT  
YBR139W/CTSA  
DST1/TCEA2  
HTA1/H2AFJ  
NSR1/NCL  
YNL147W\_2/LSM7  
KIN3/NEK6  
JJJ1/DNAJC21  
ADE6/PFAS  
MAP1/METAP1  
SPN1/IWS1  
YTA12/SPG7  
HER2/QRSL1  
MEF2/GFM2  
PPA2/PPA2  
PPA2/PPA1

Color Key

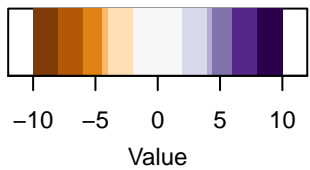

1-0-4

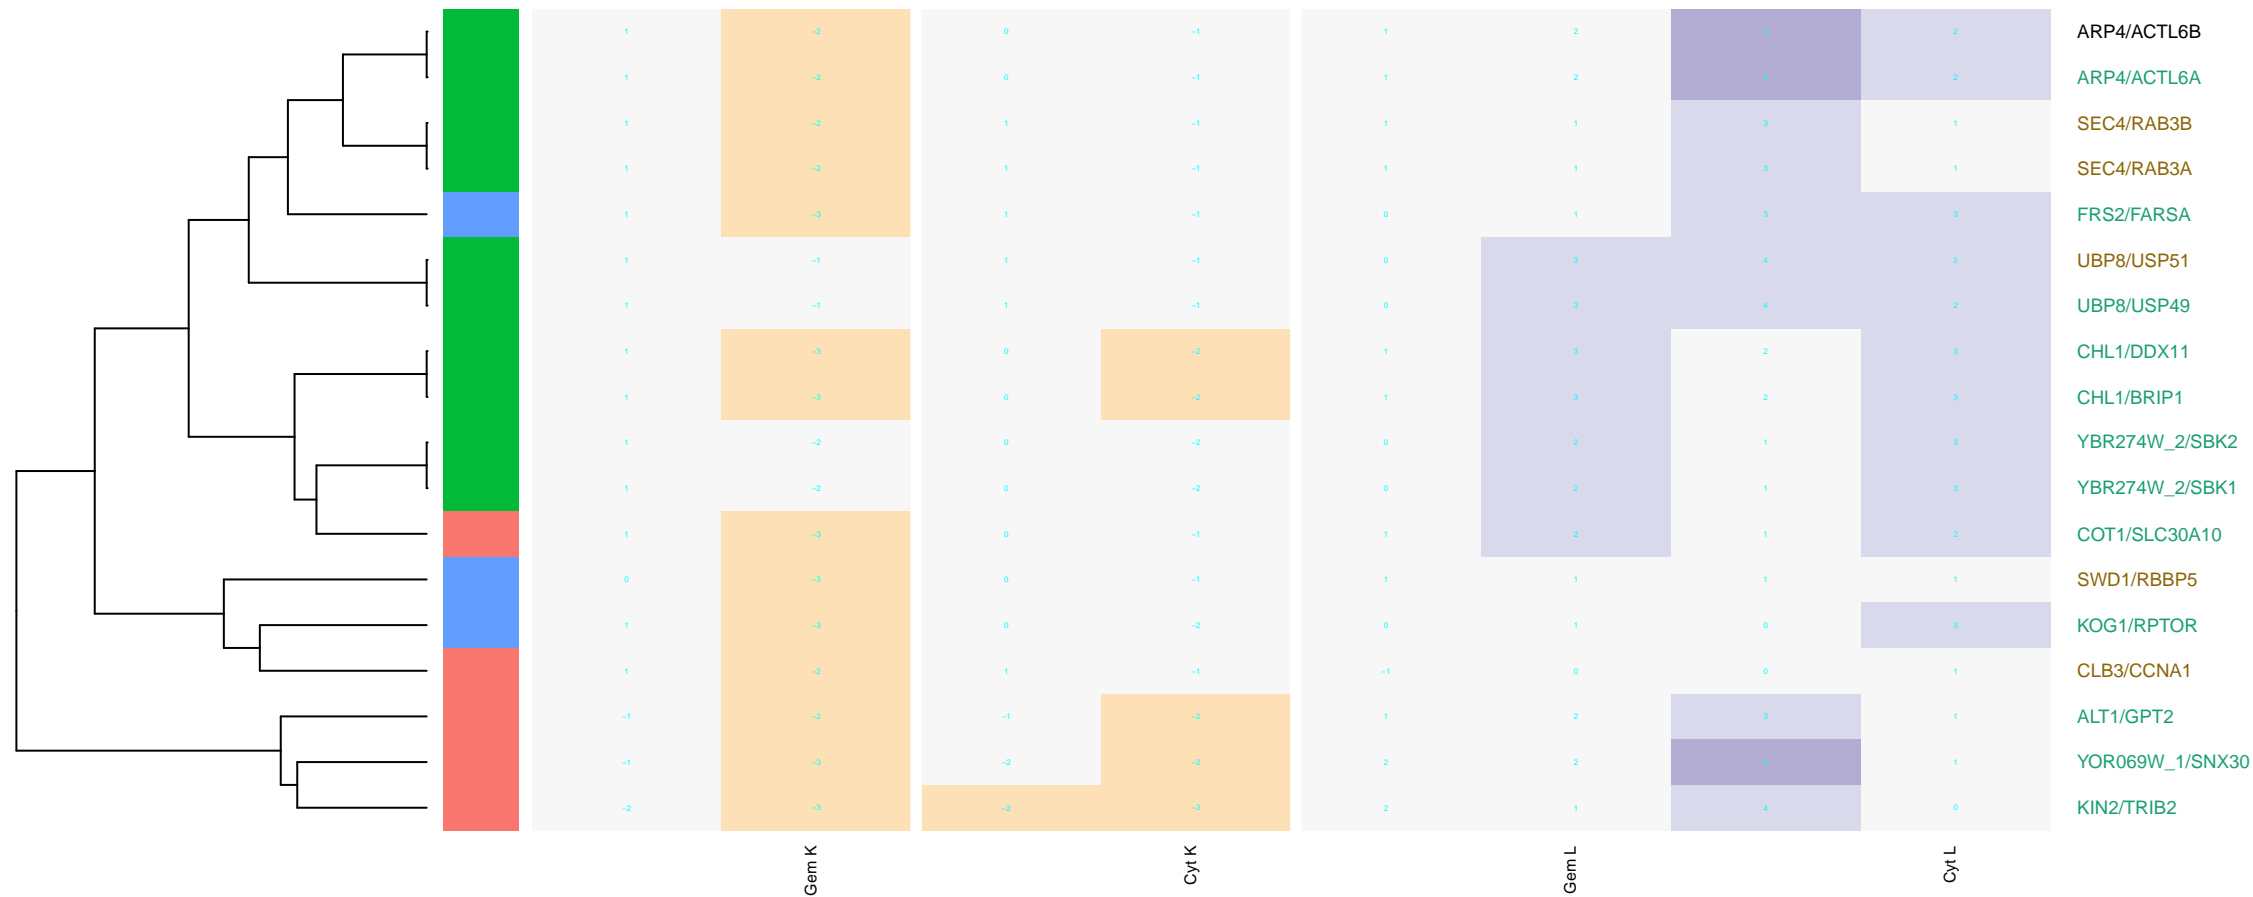

Color Key

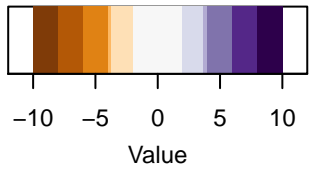

1-0-5

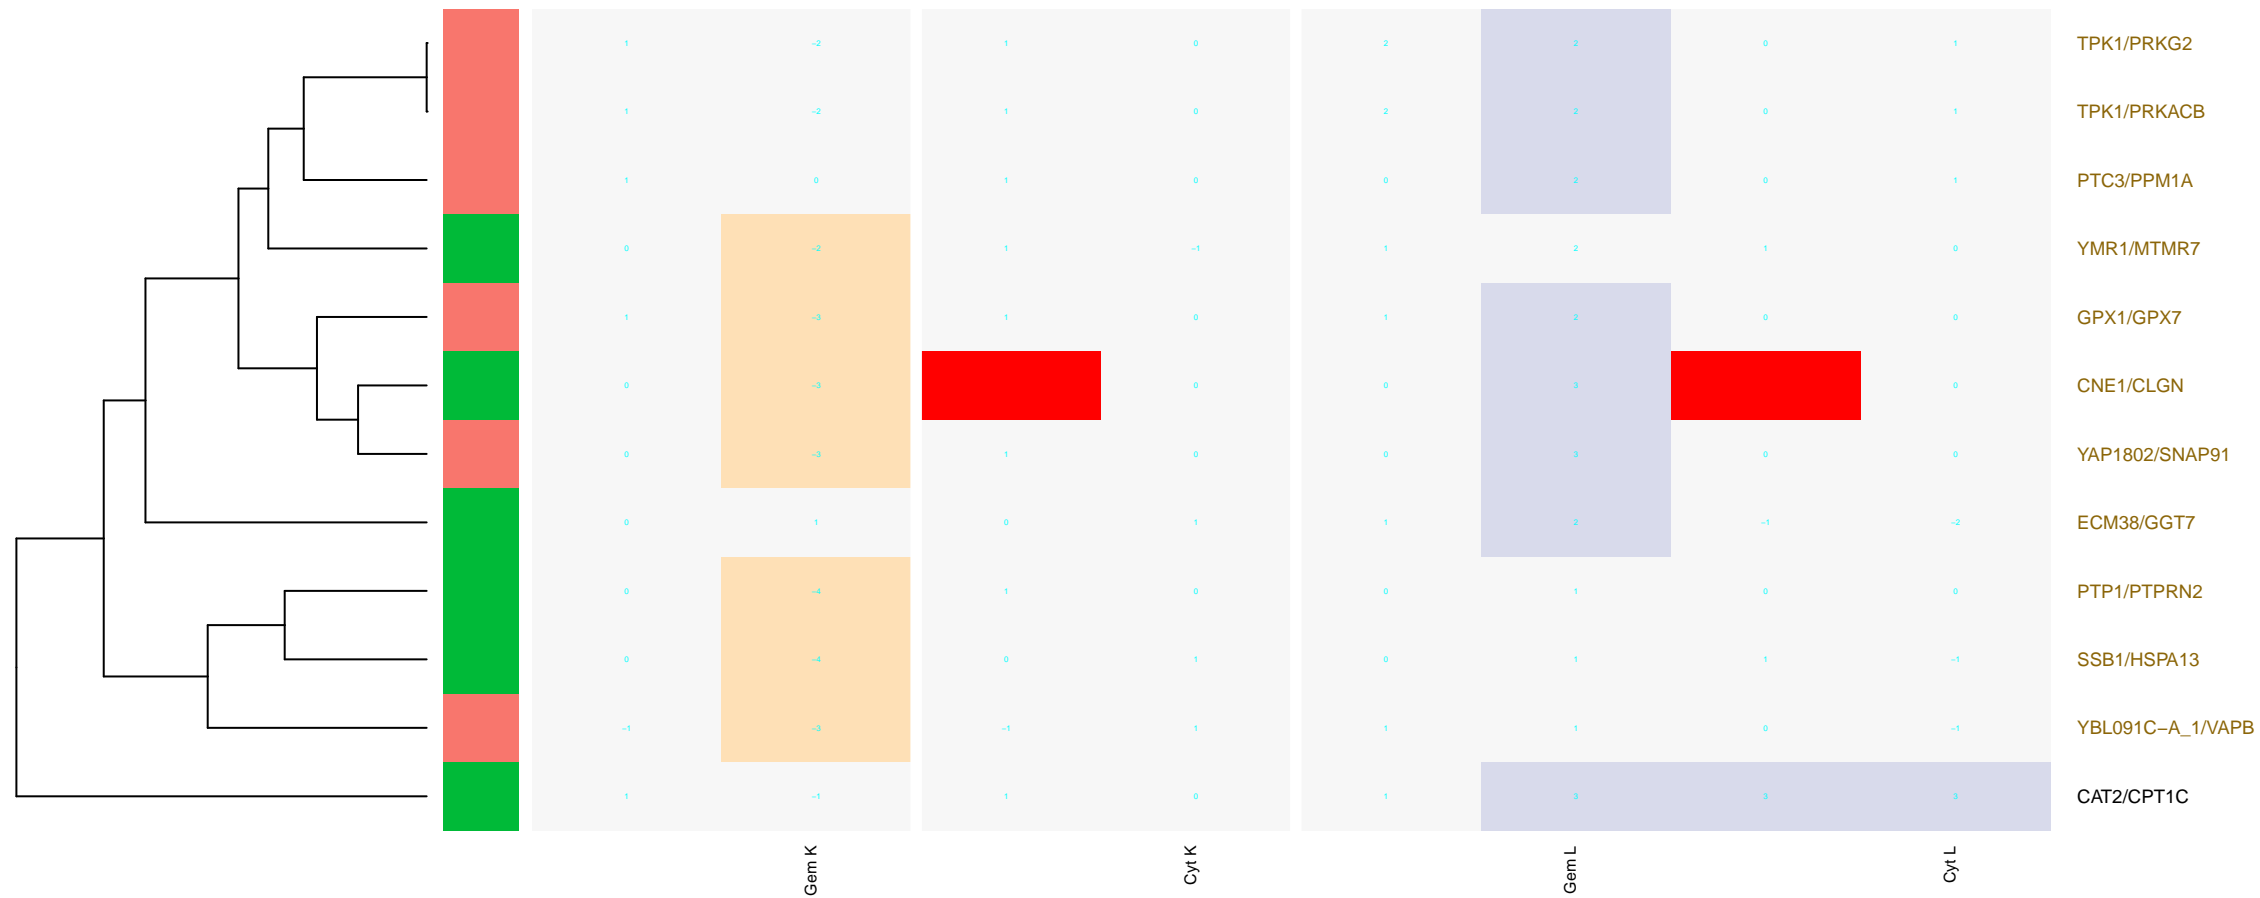

Color Key

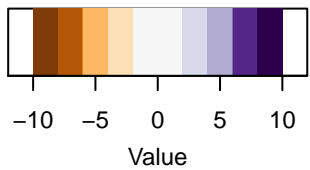

1-0-6

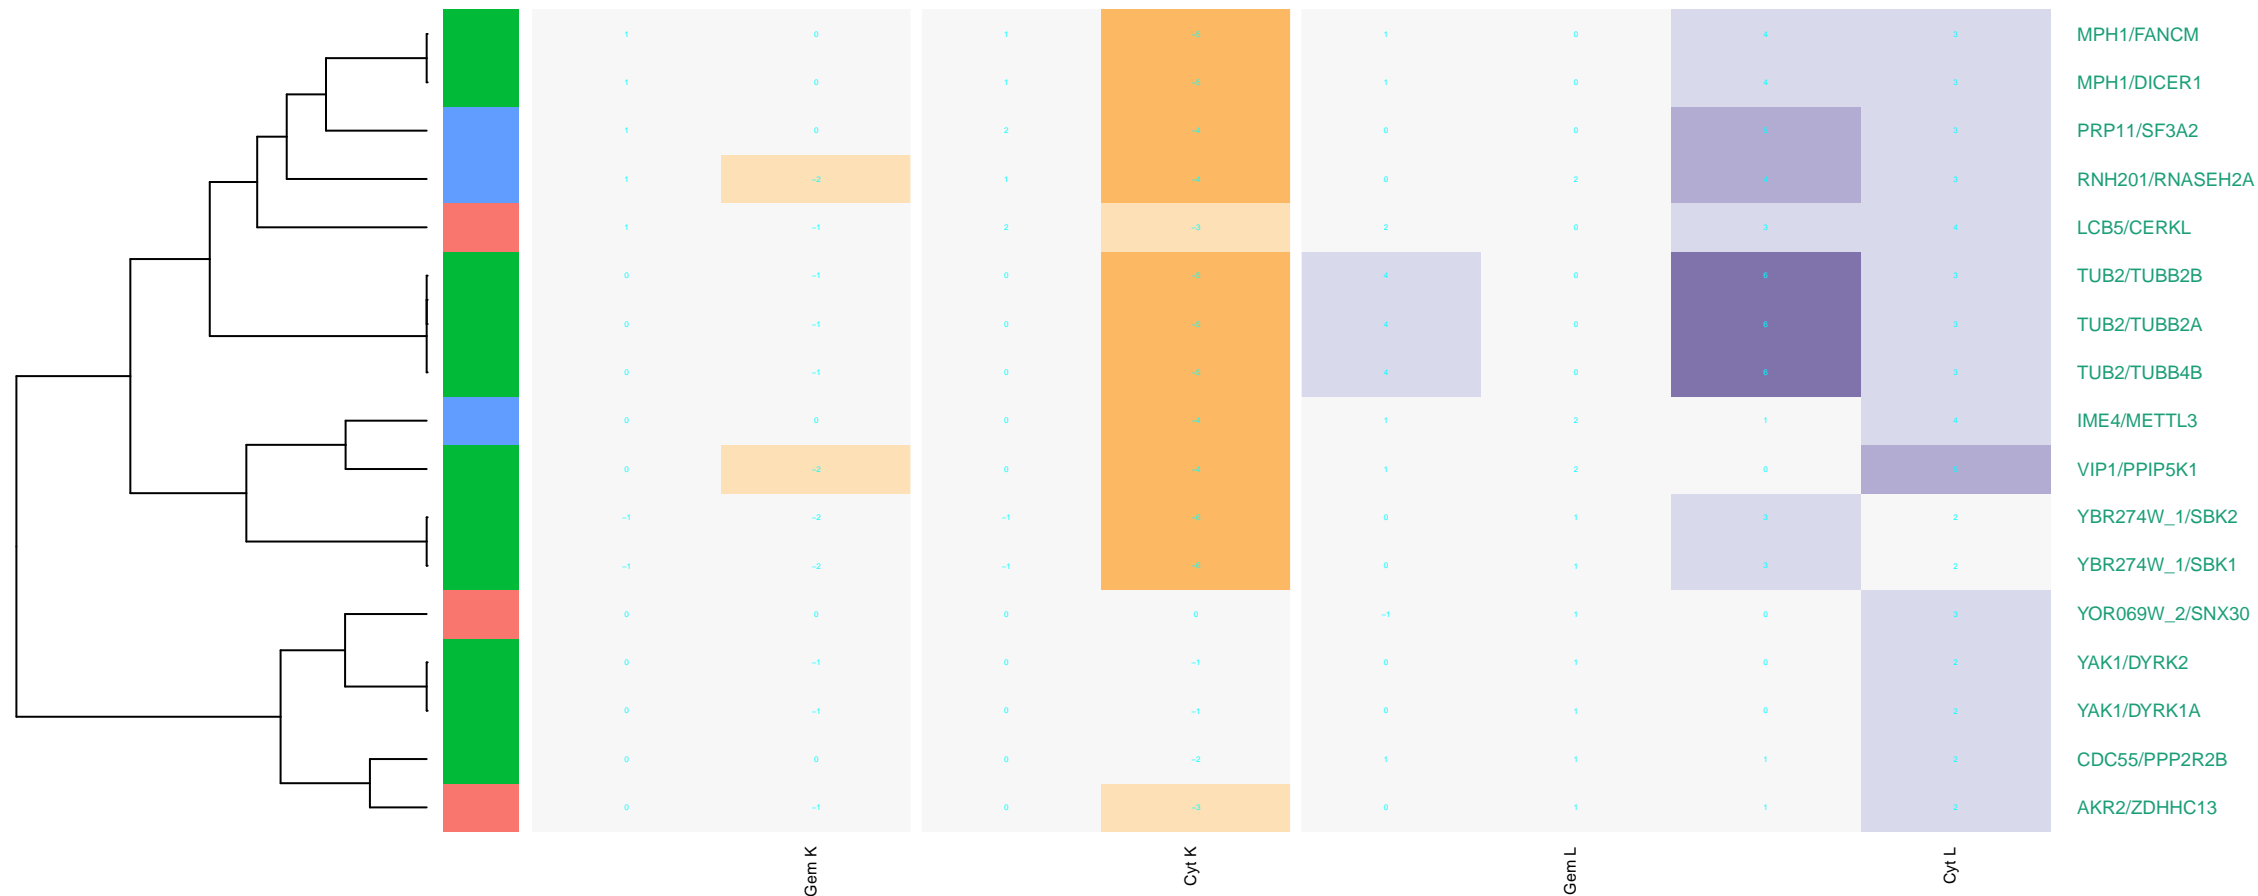



# Color Key

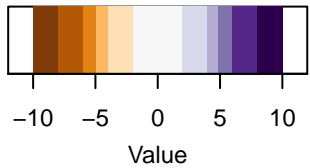

1-0-7

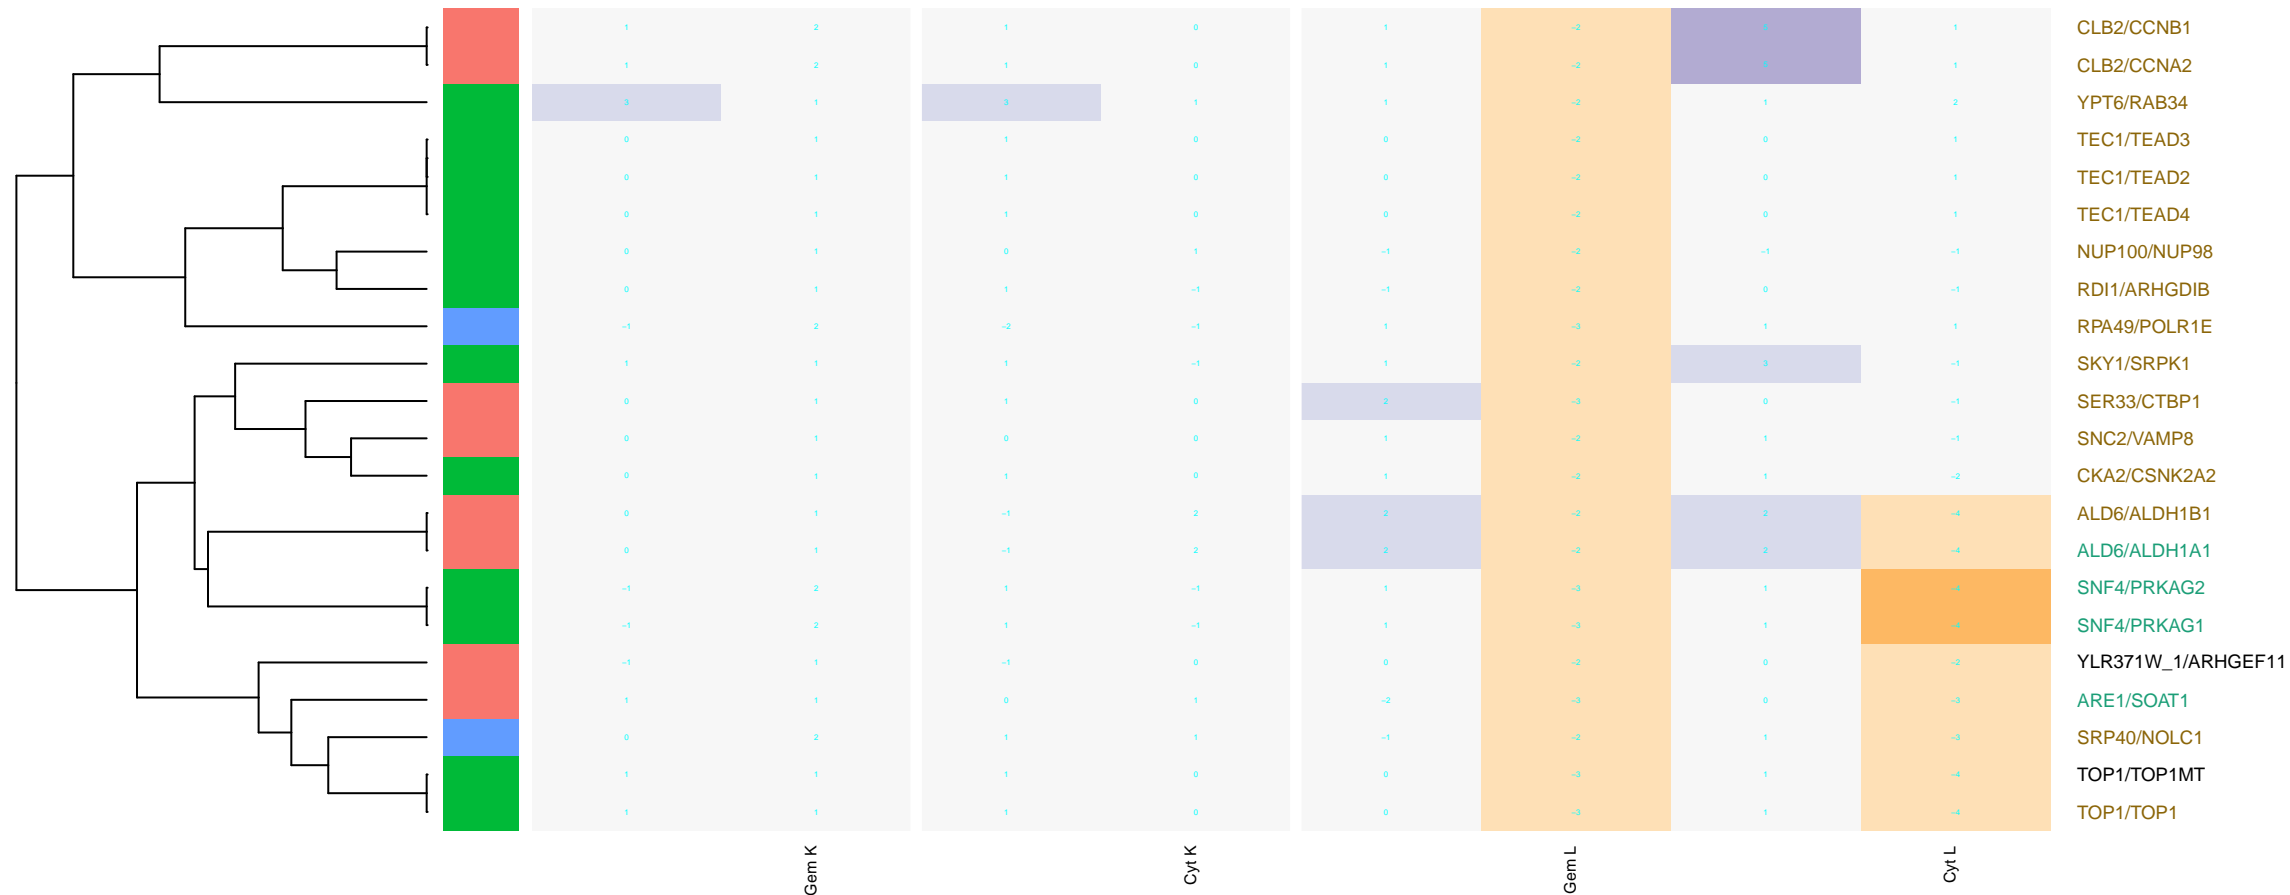

Color Key

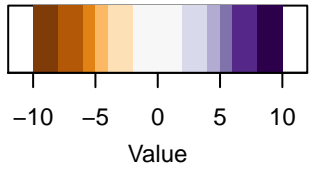

1-0-8

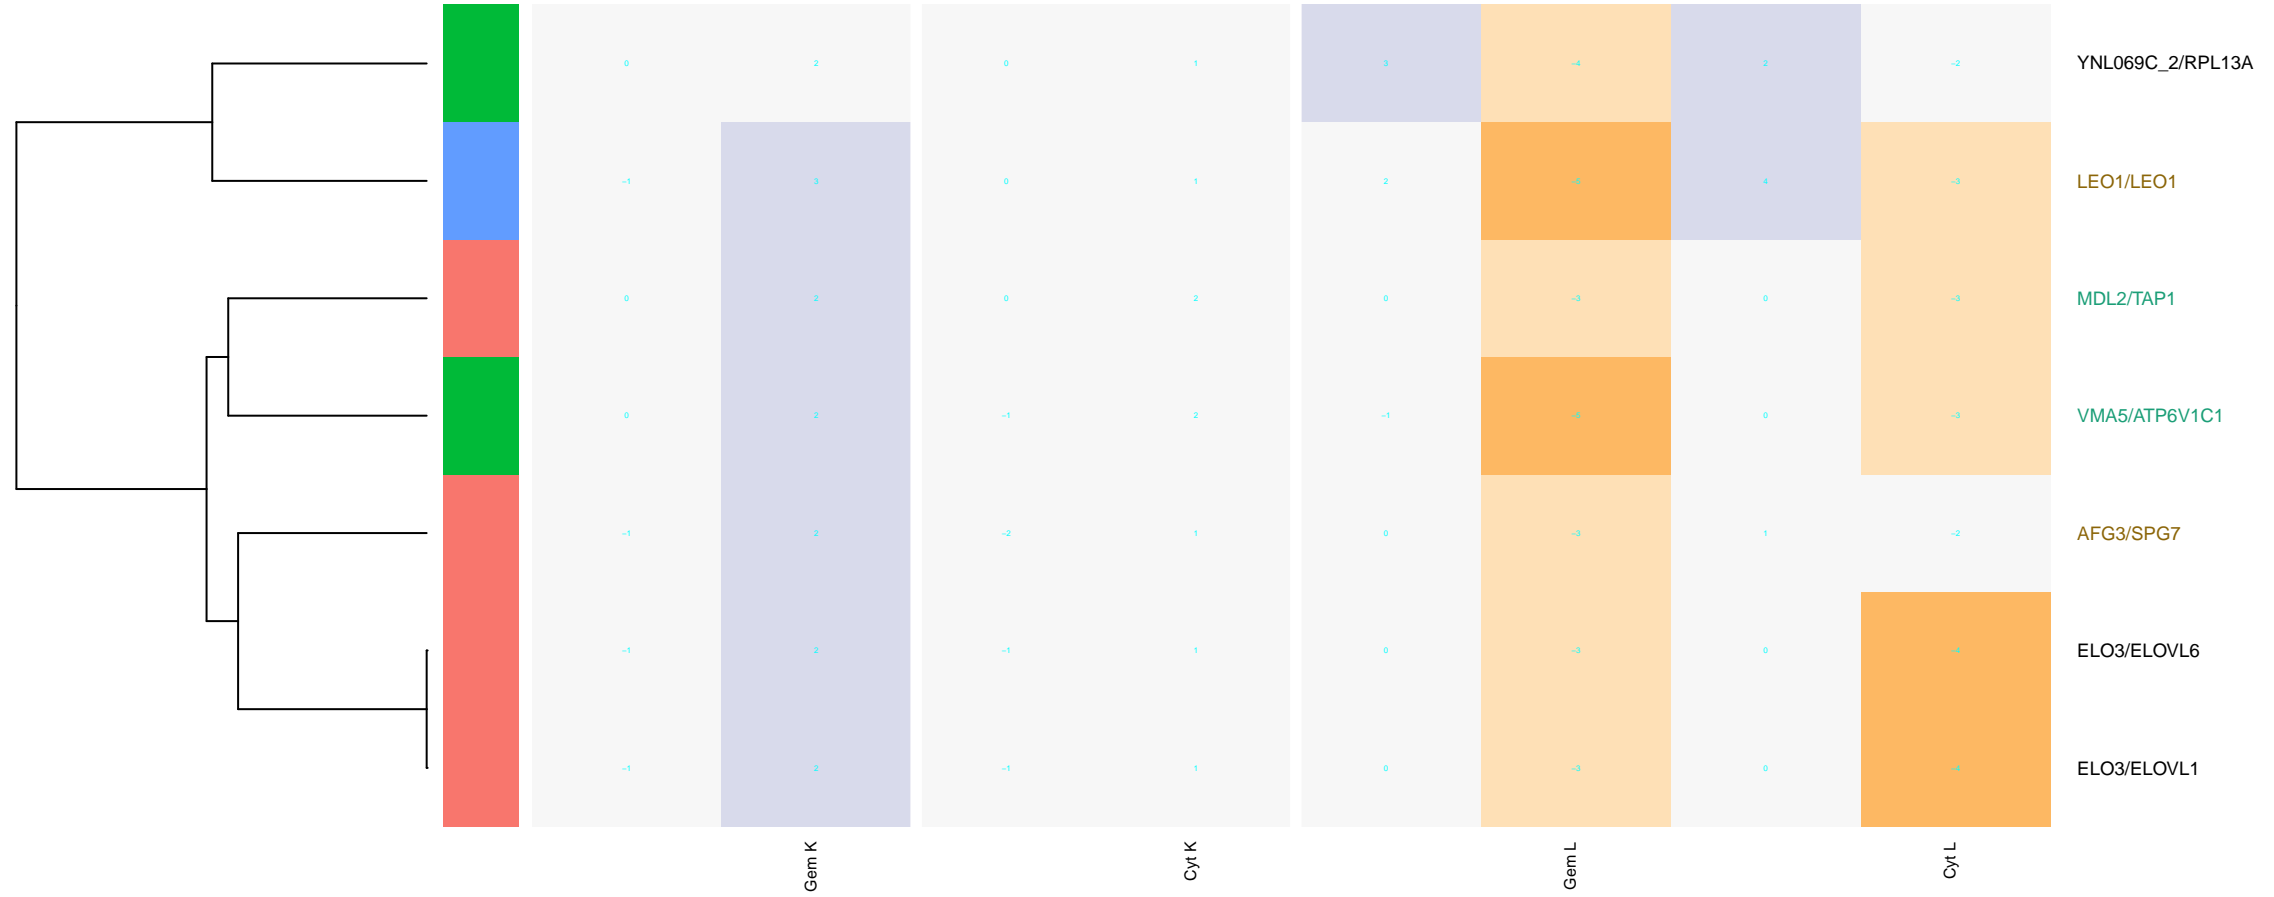

Color Key

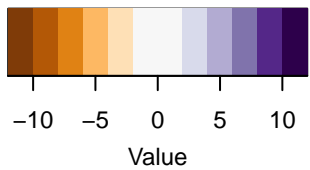

1-0-9

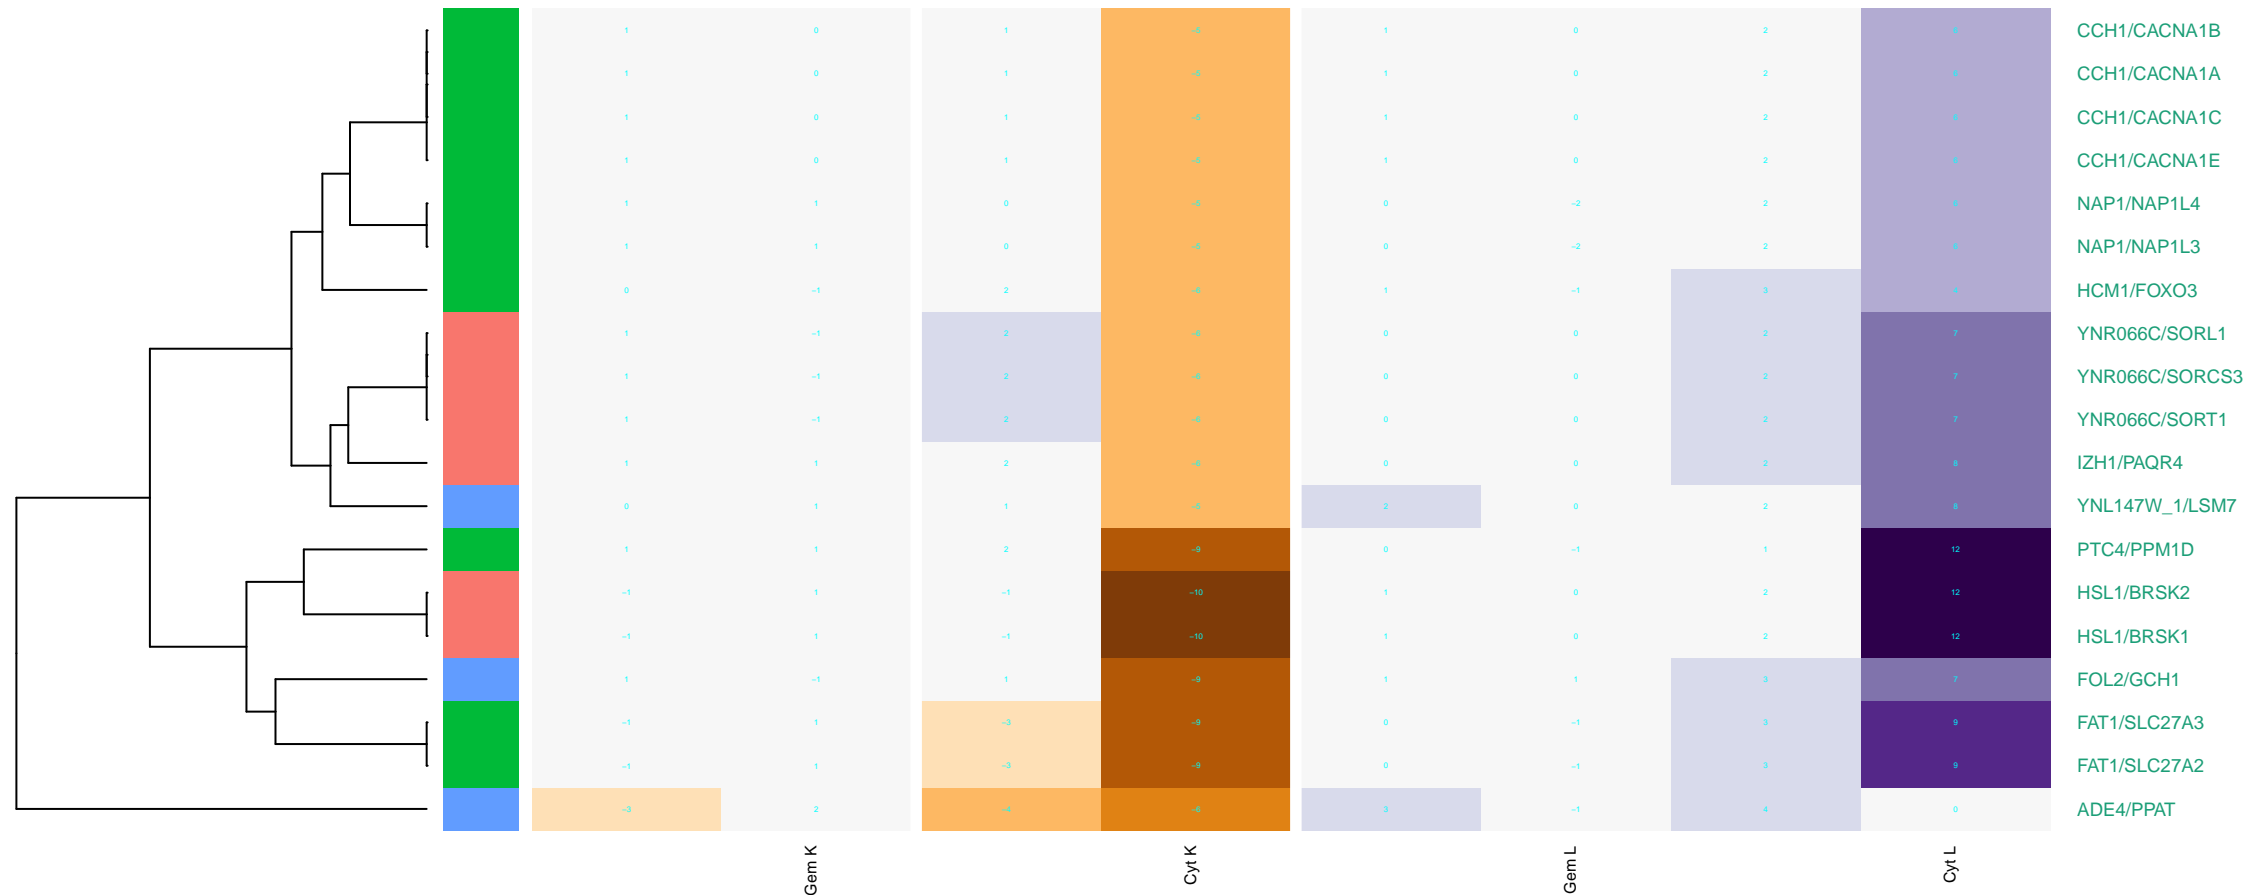

Color Key



2-0.1-0

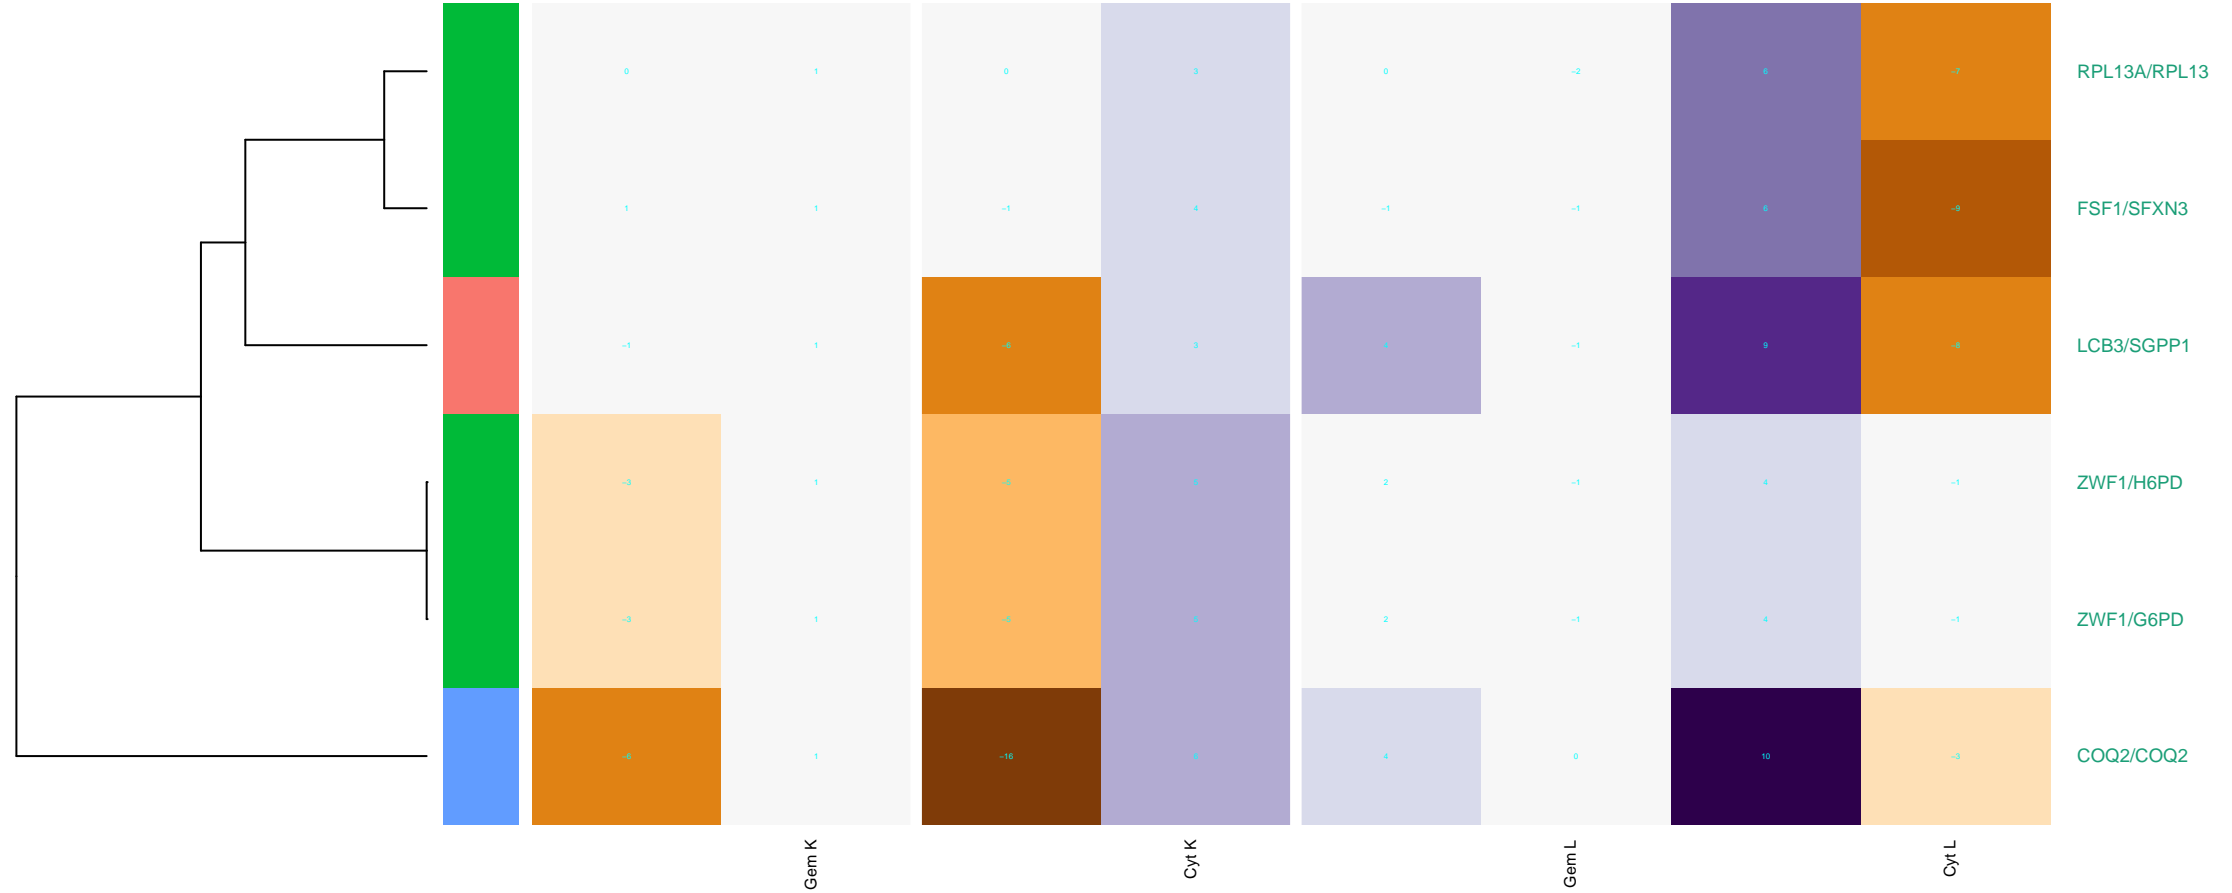

2-0.1-1

Color Key

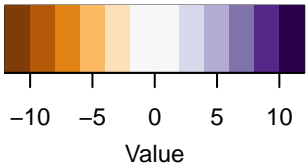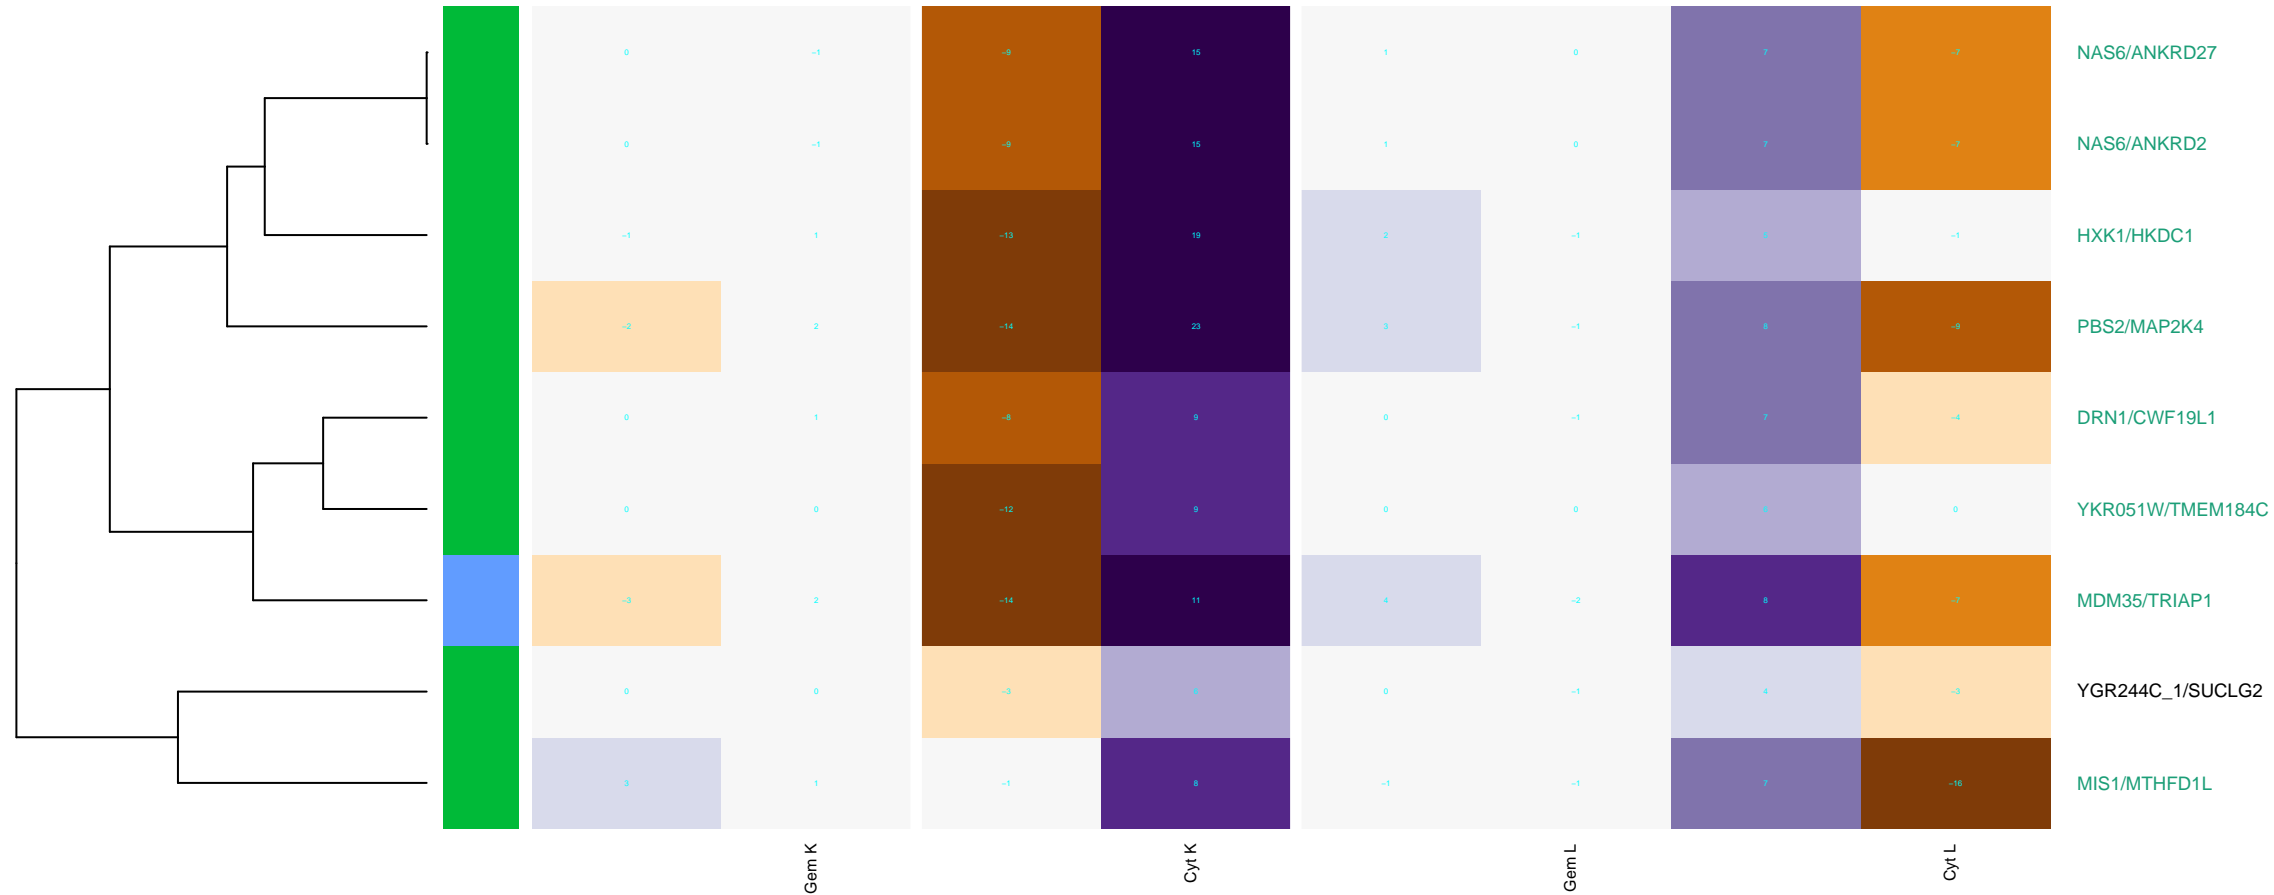

Color Key



2-0.13-0

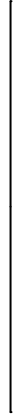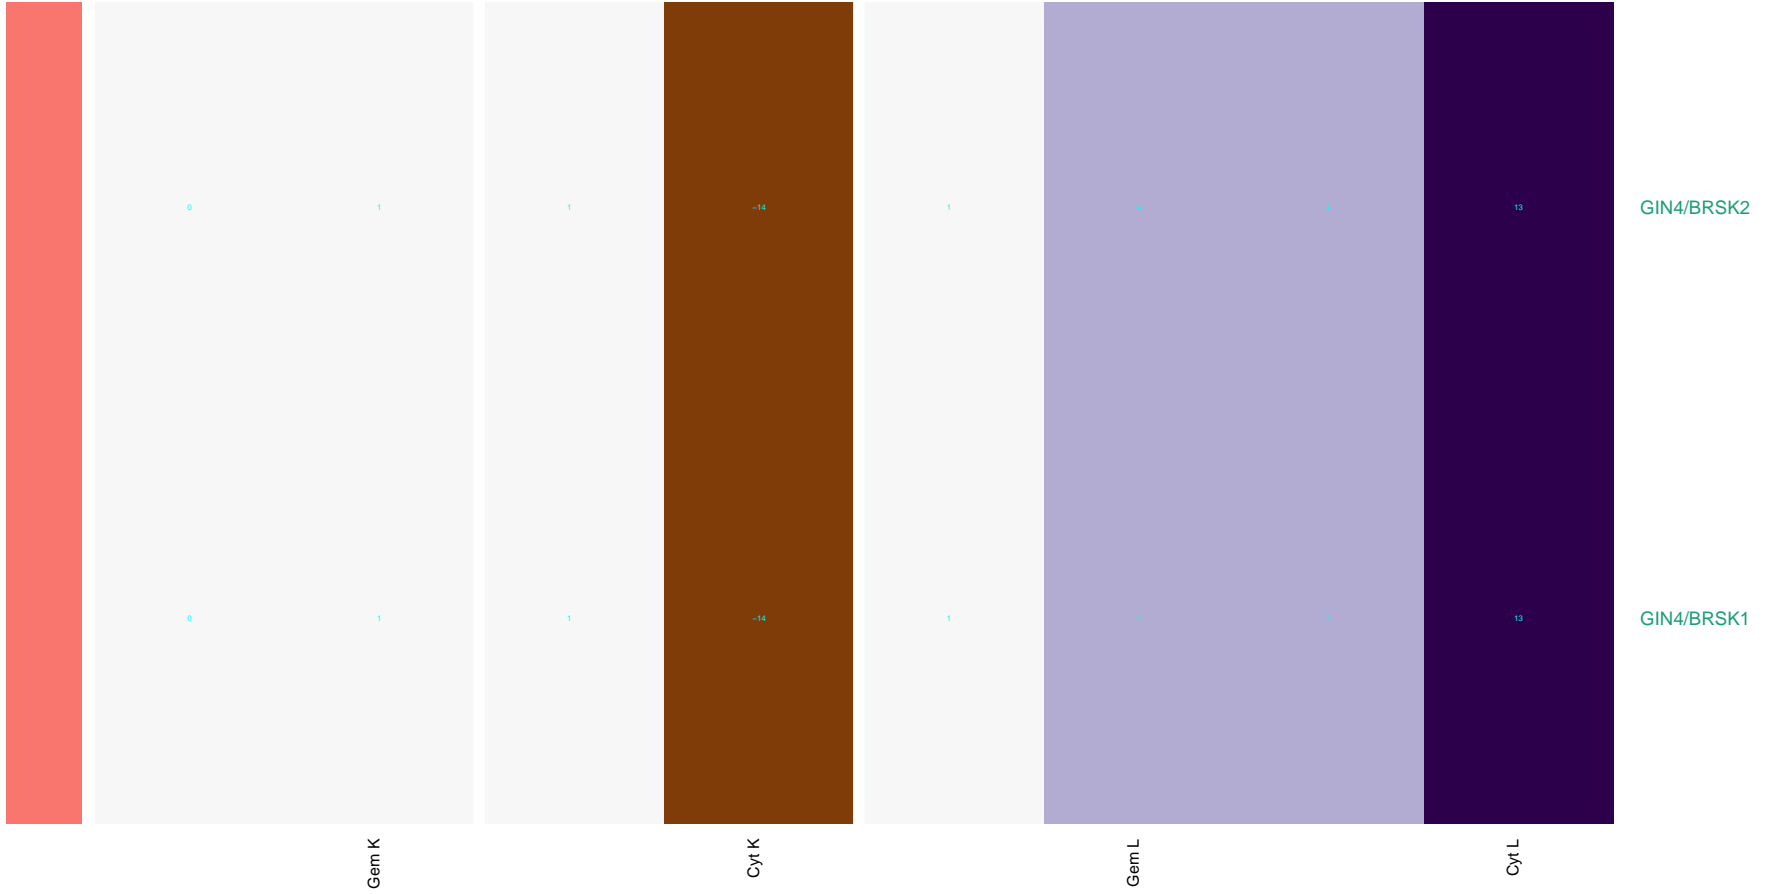

Color Key

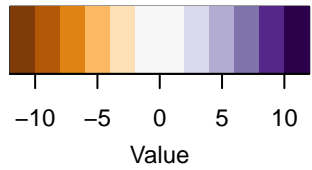

2-0.13-2

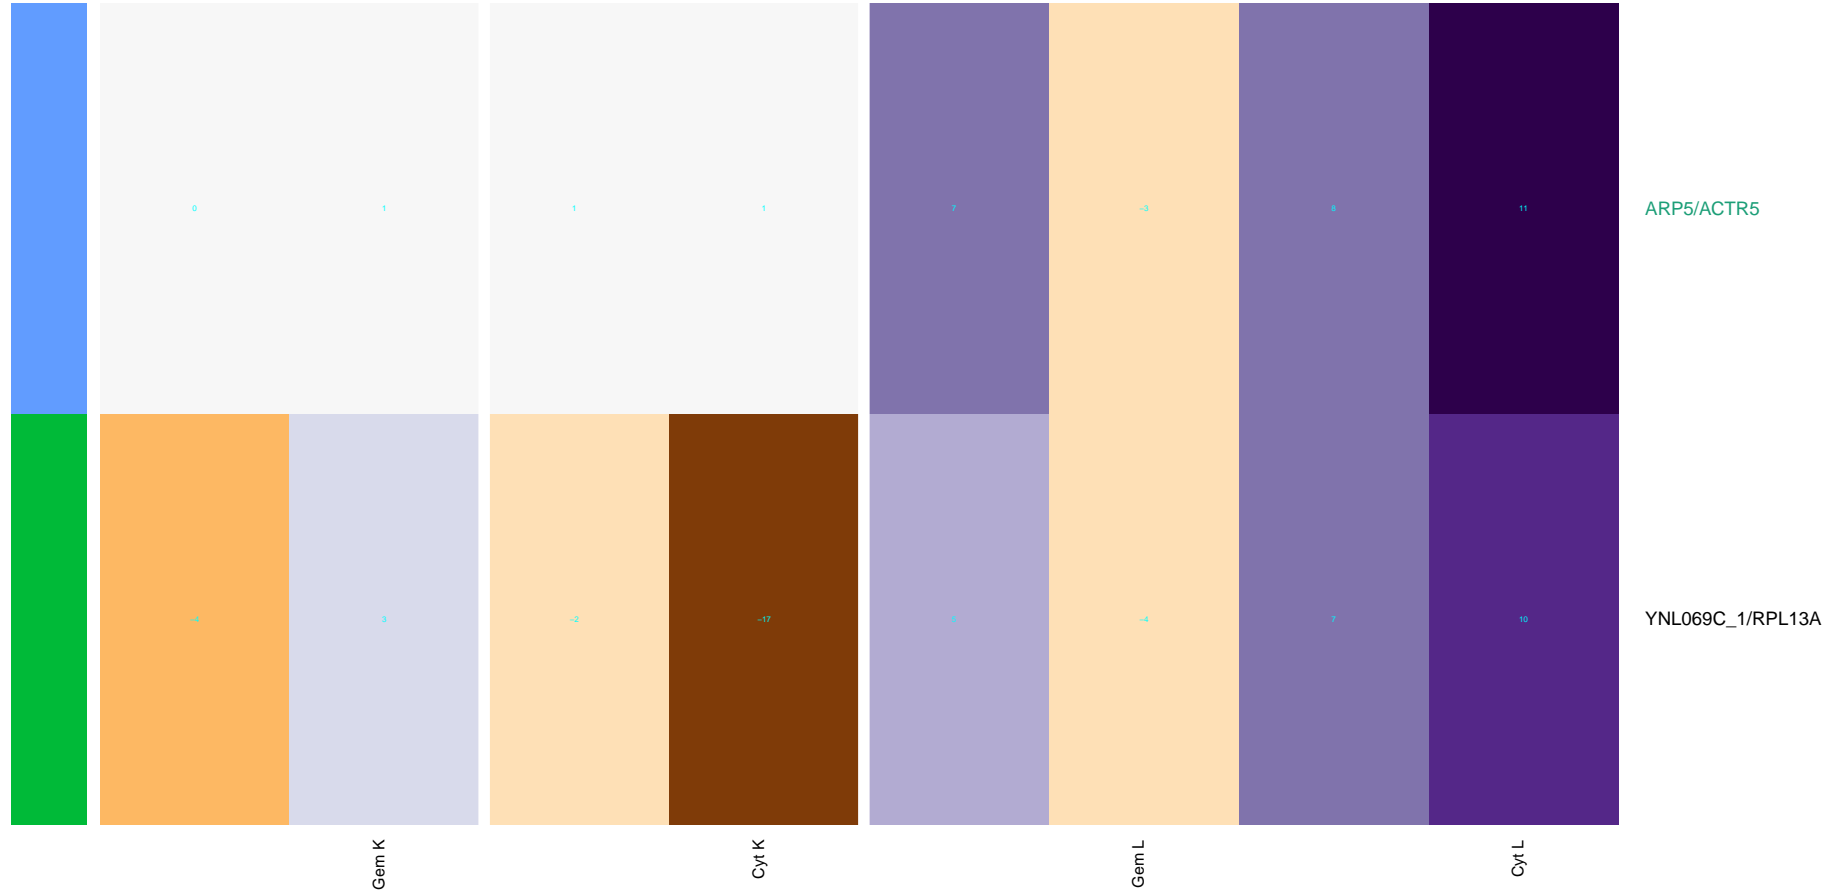

Color Key

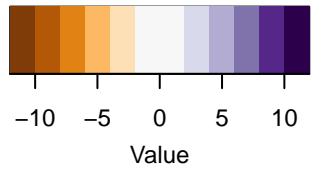

2-0.13-3

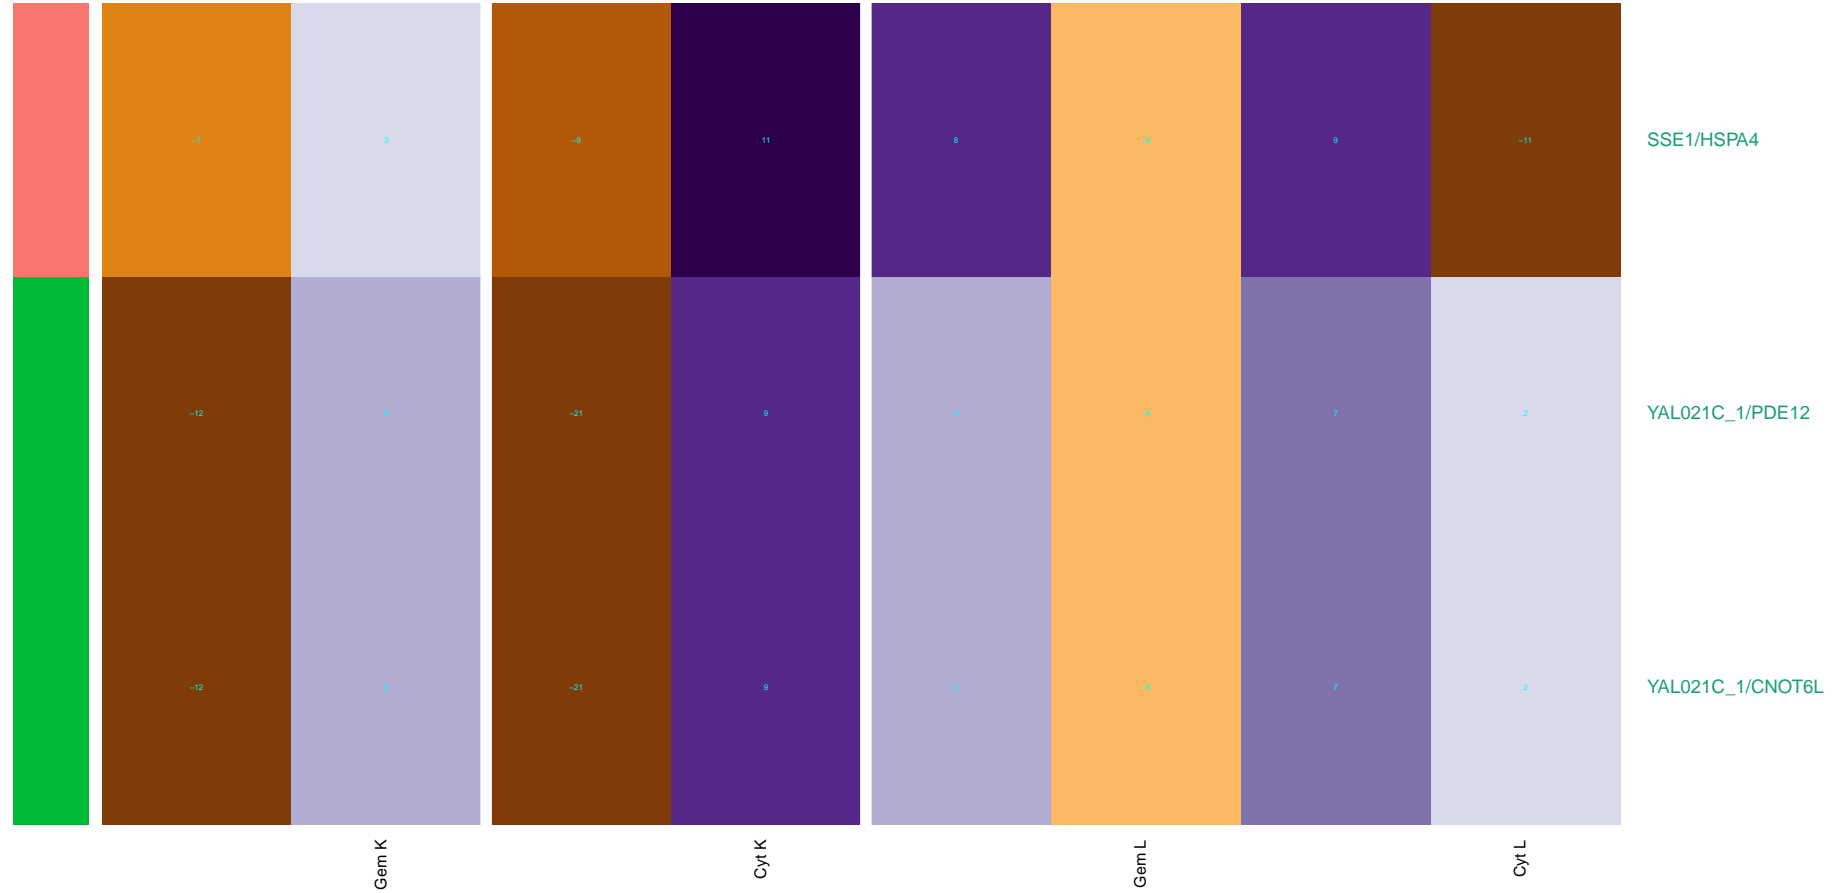



Color Key



2-0.14-0

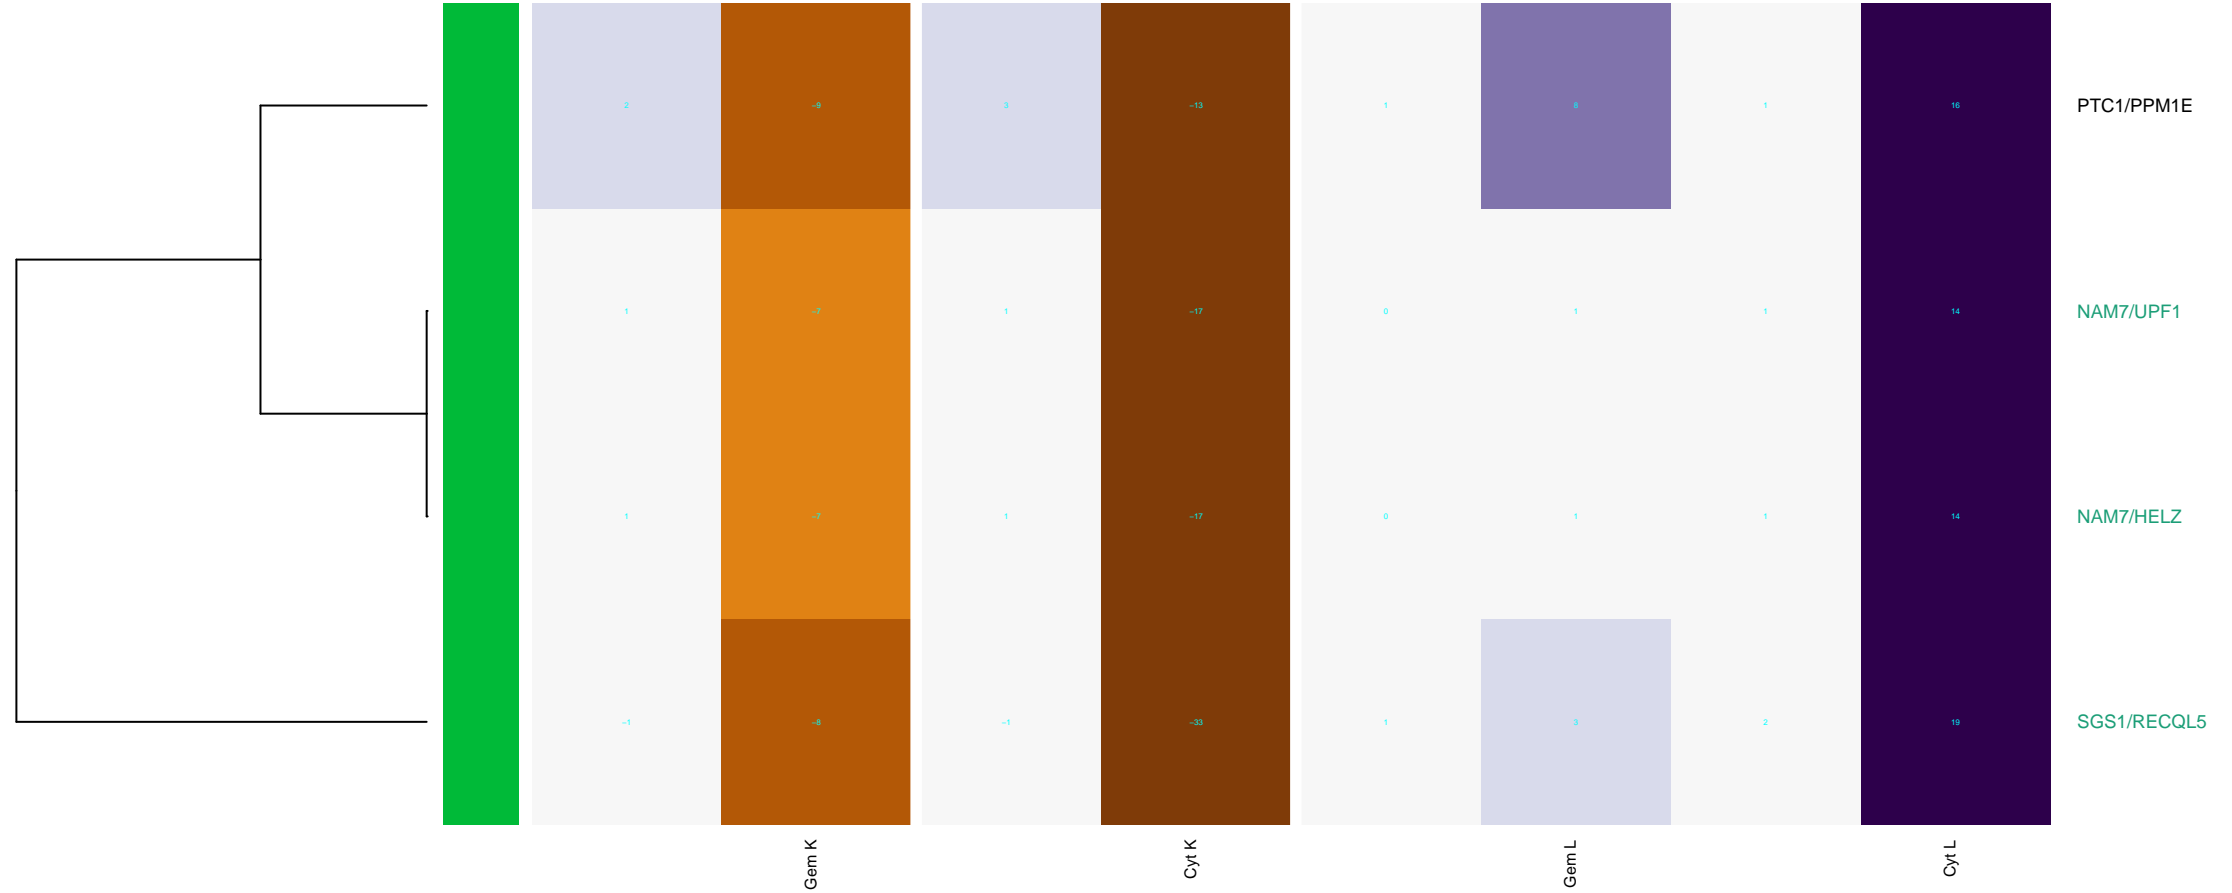

Color Key



2-0.14-1

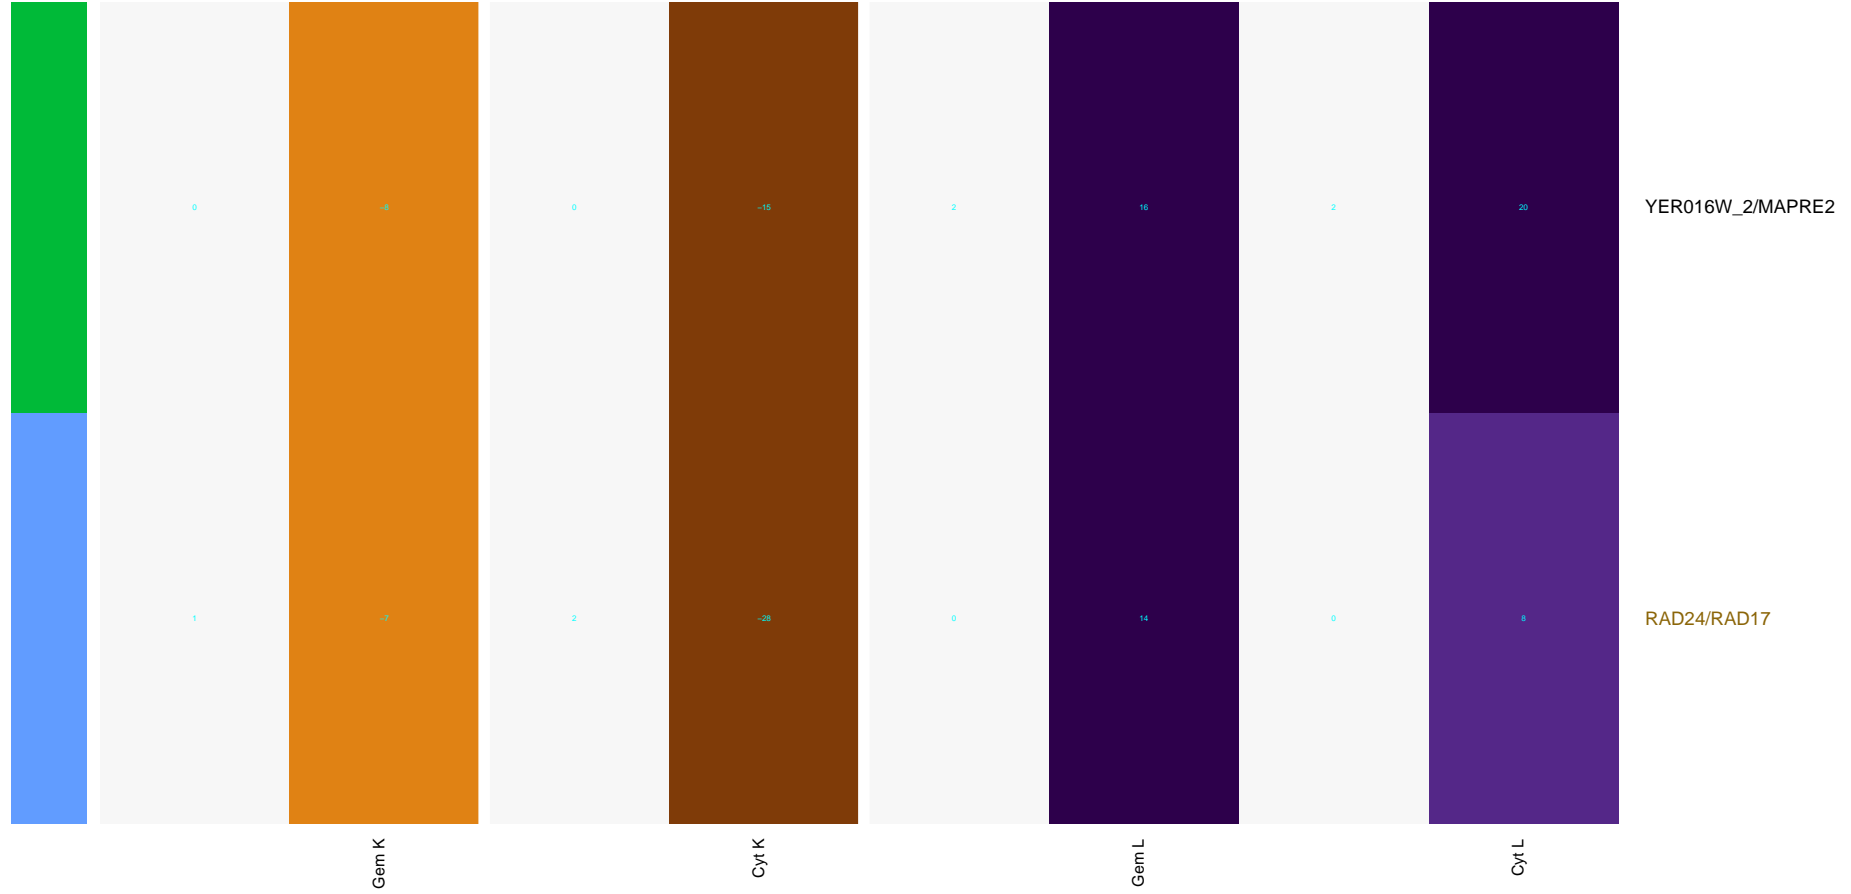

Color Key



2-0.16-1

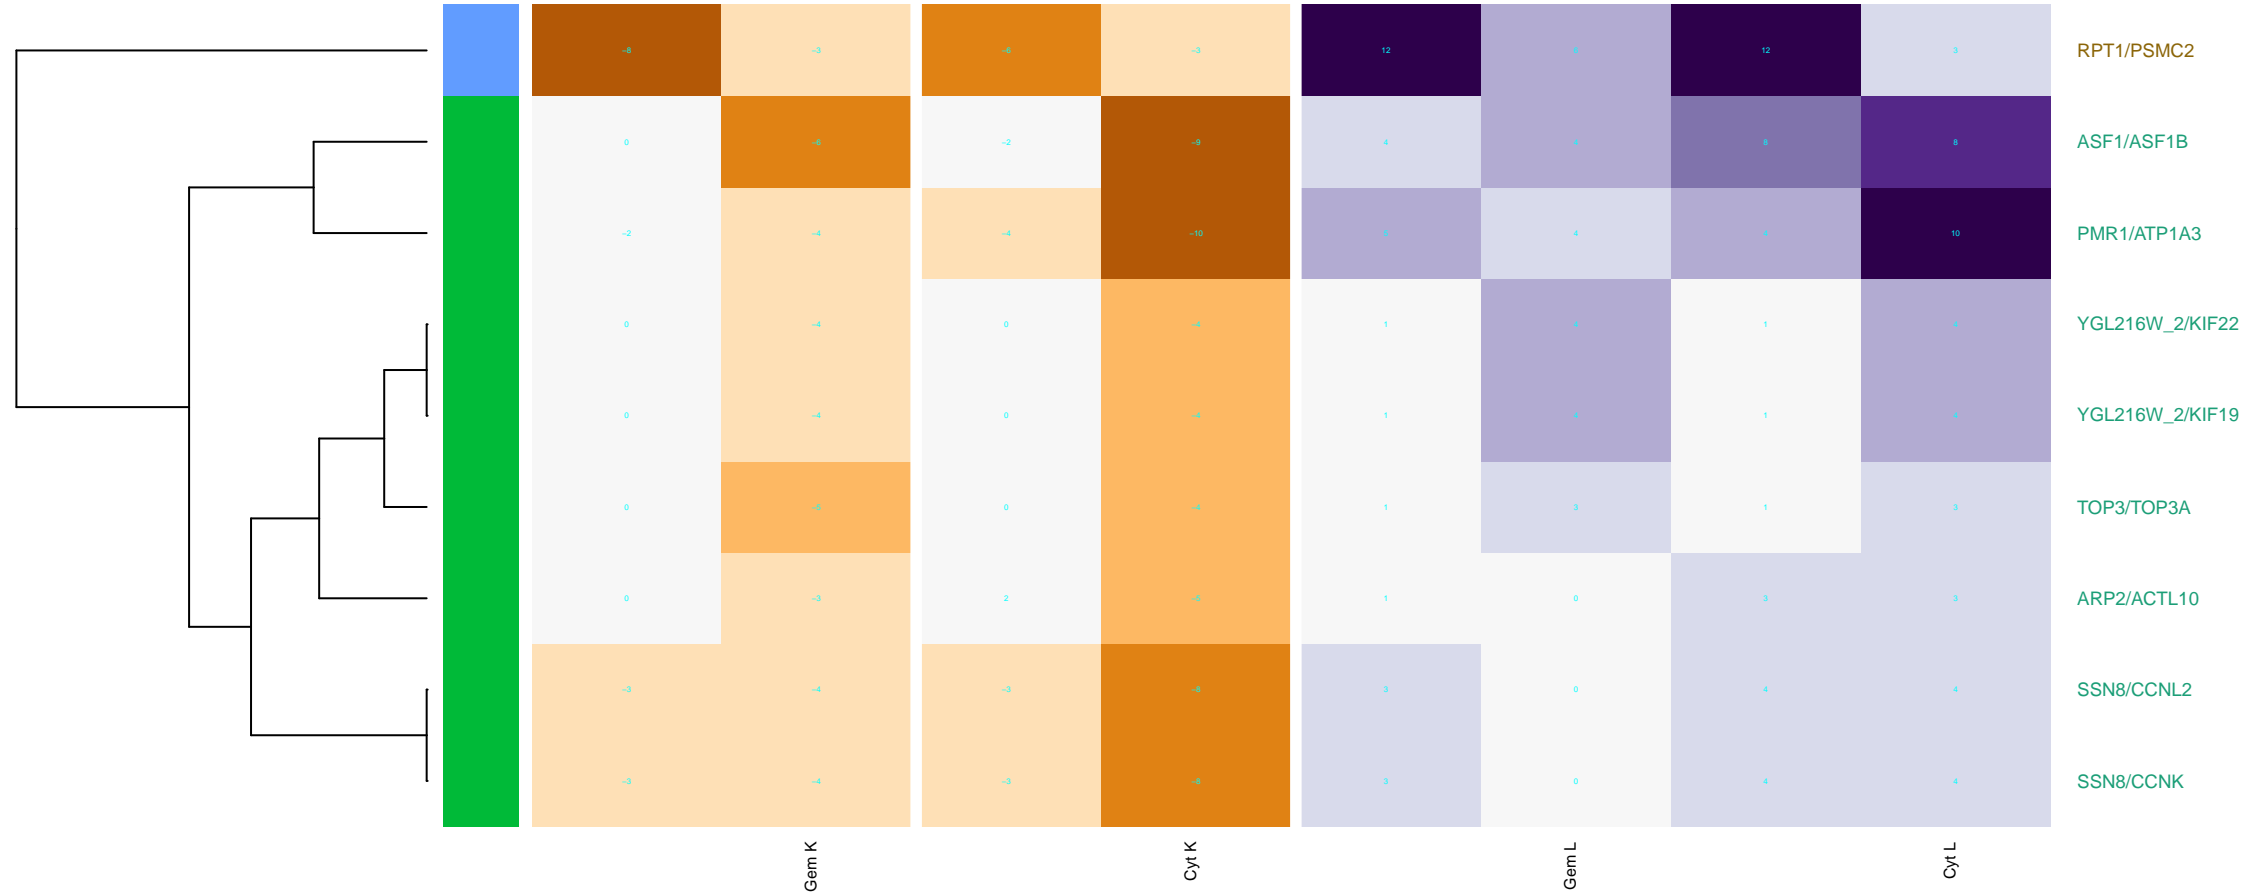

# Color Key

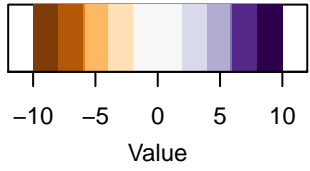

2-0.17-0

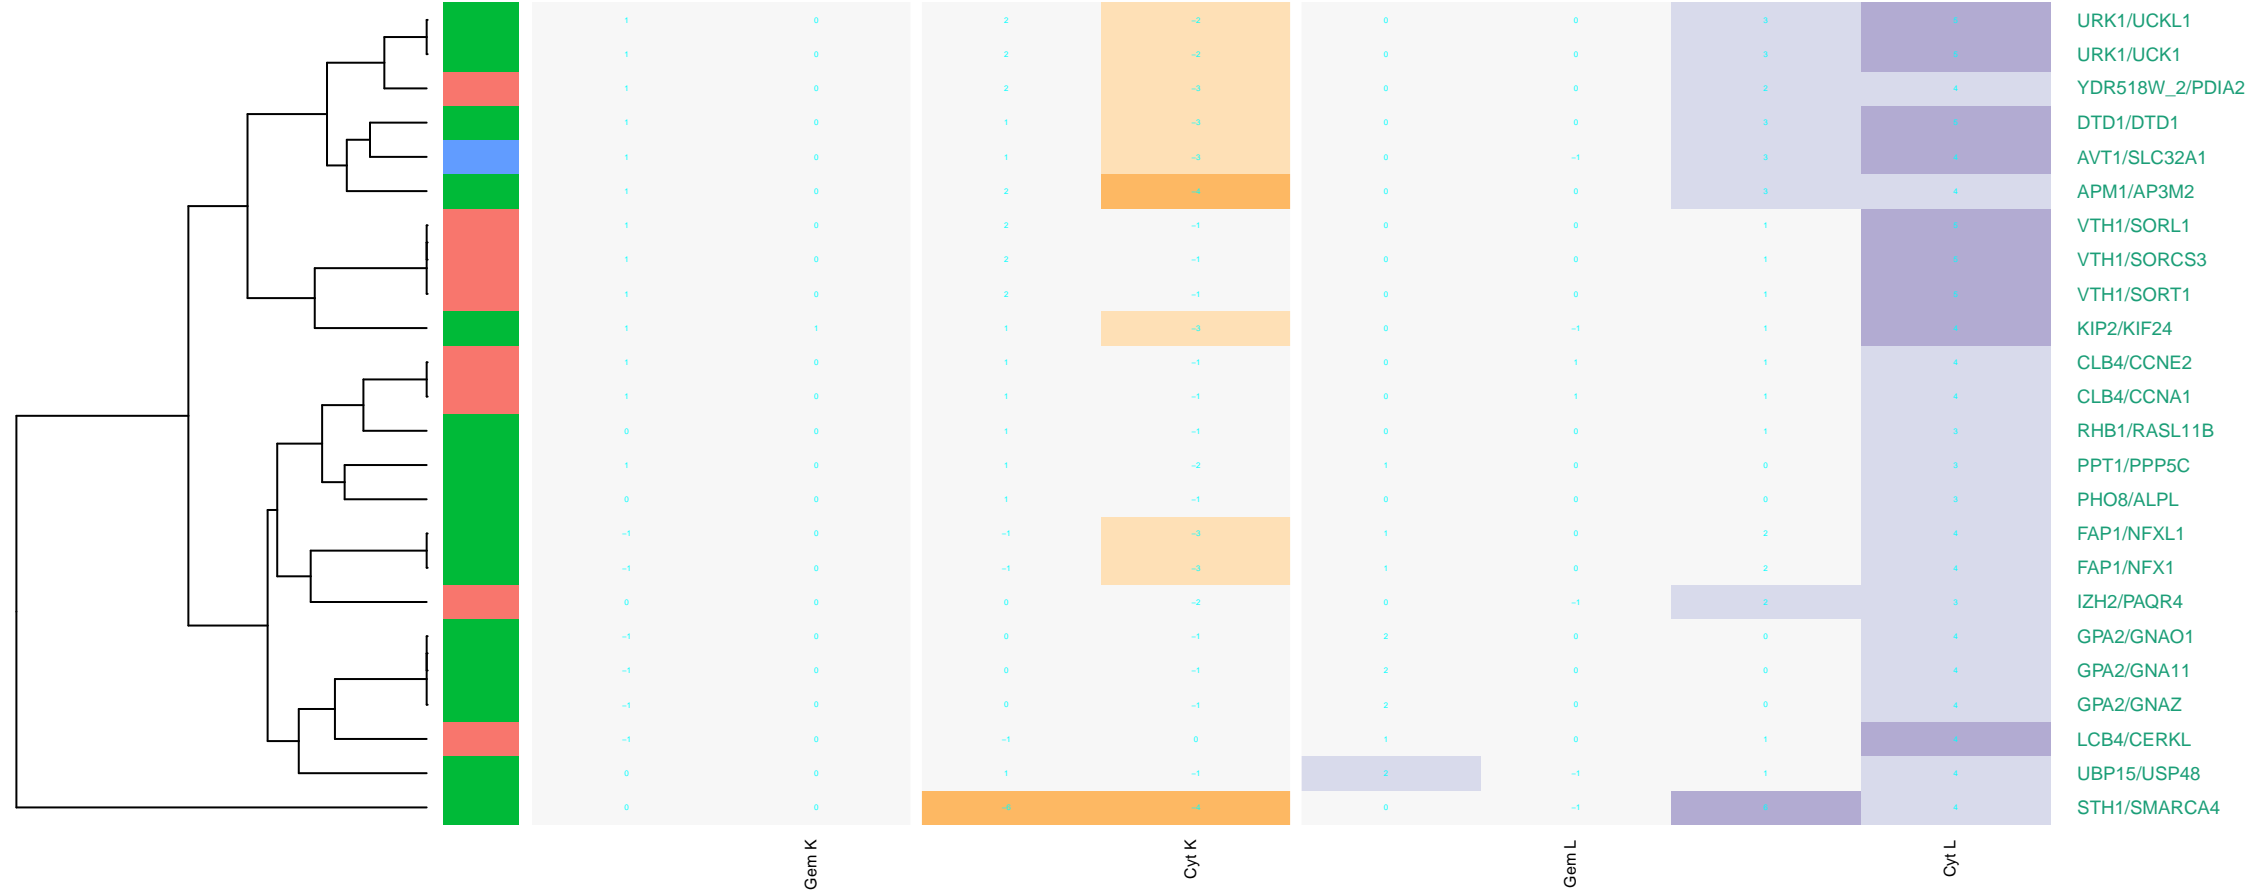

Color Key

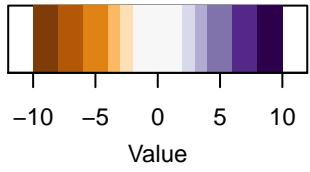

2-0.17-1

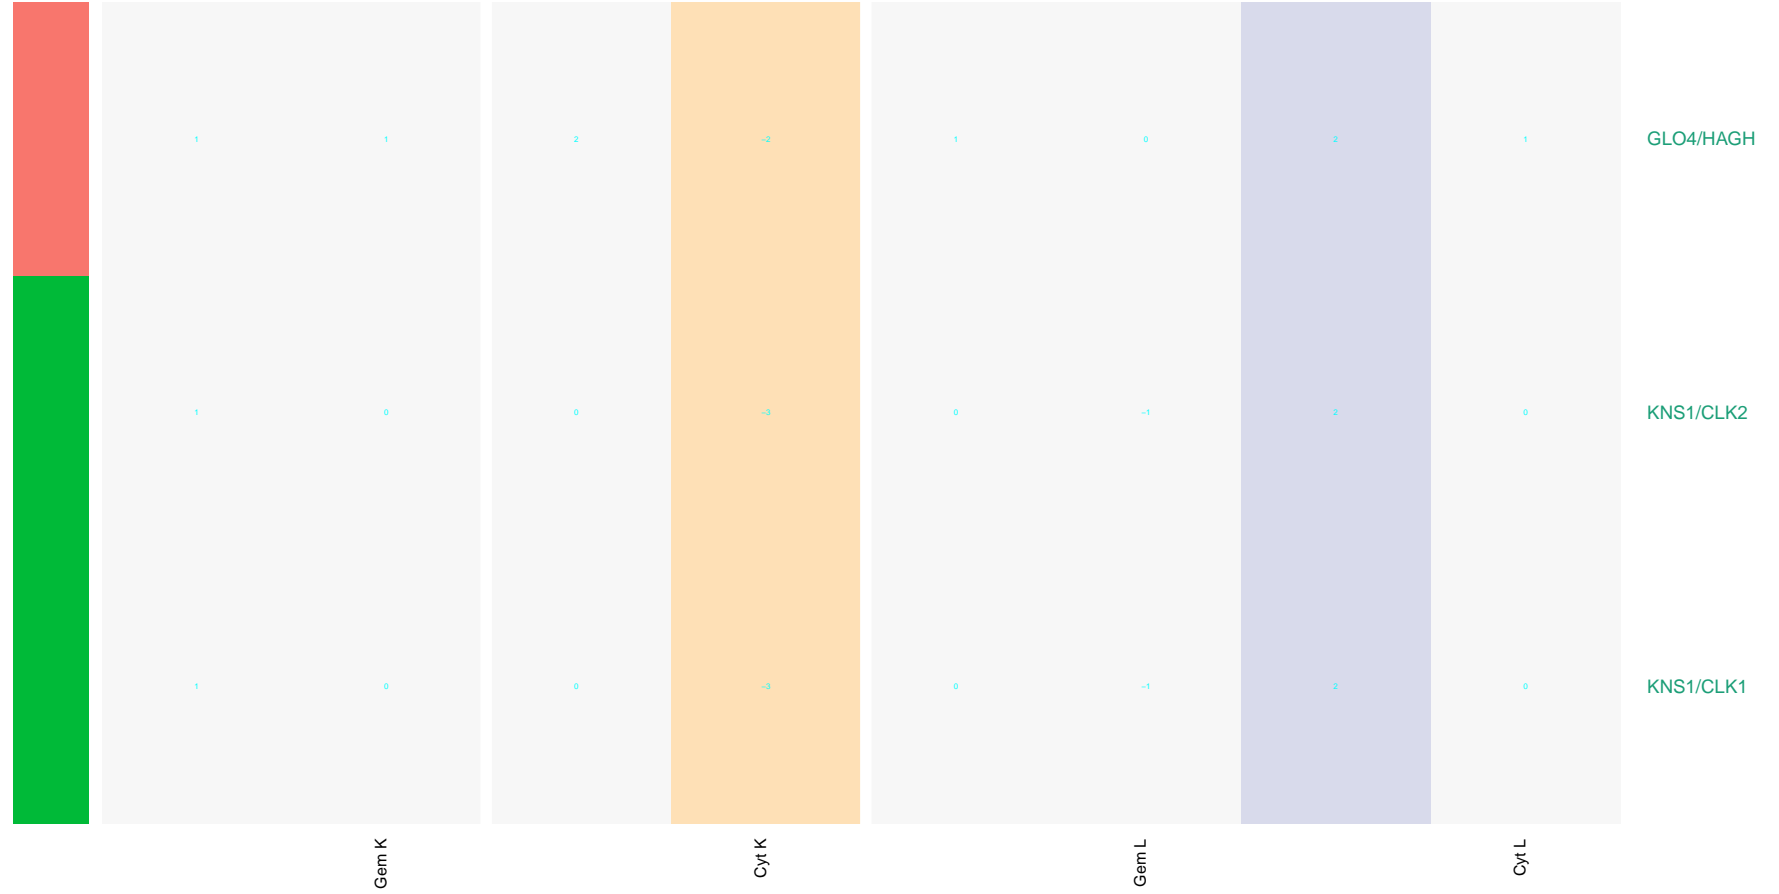

Color Key

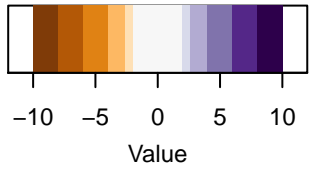

2-0.17-3

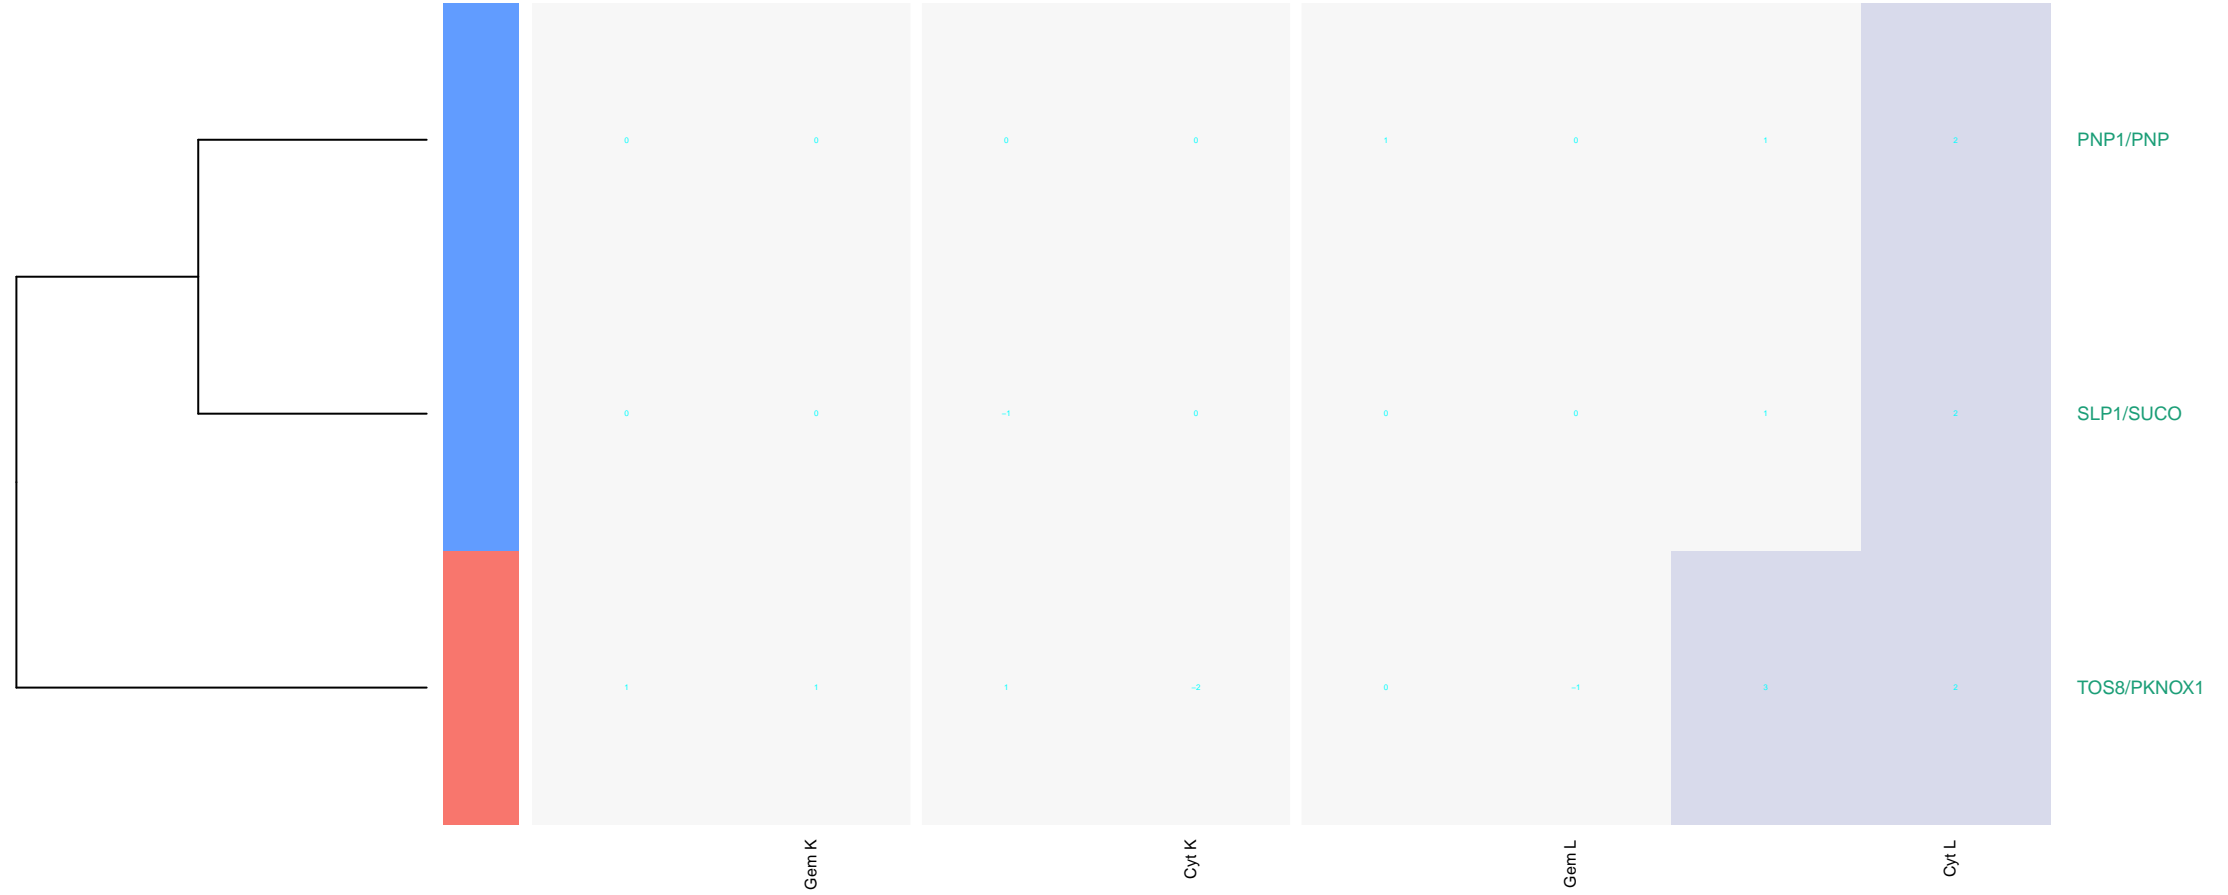

Color Key



2-0.2-1

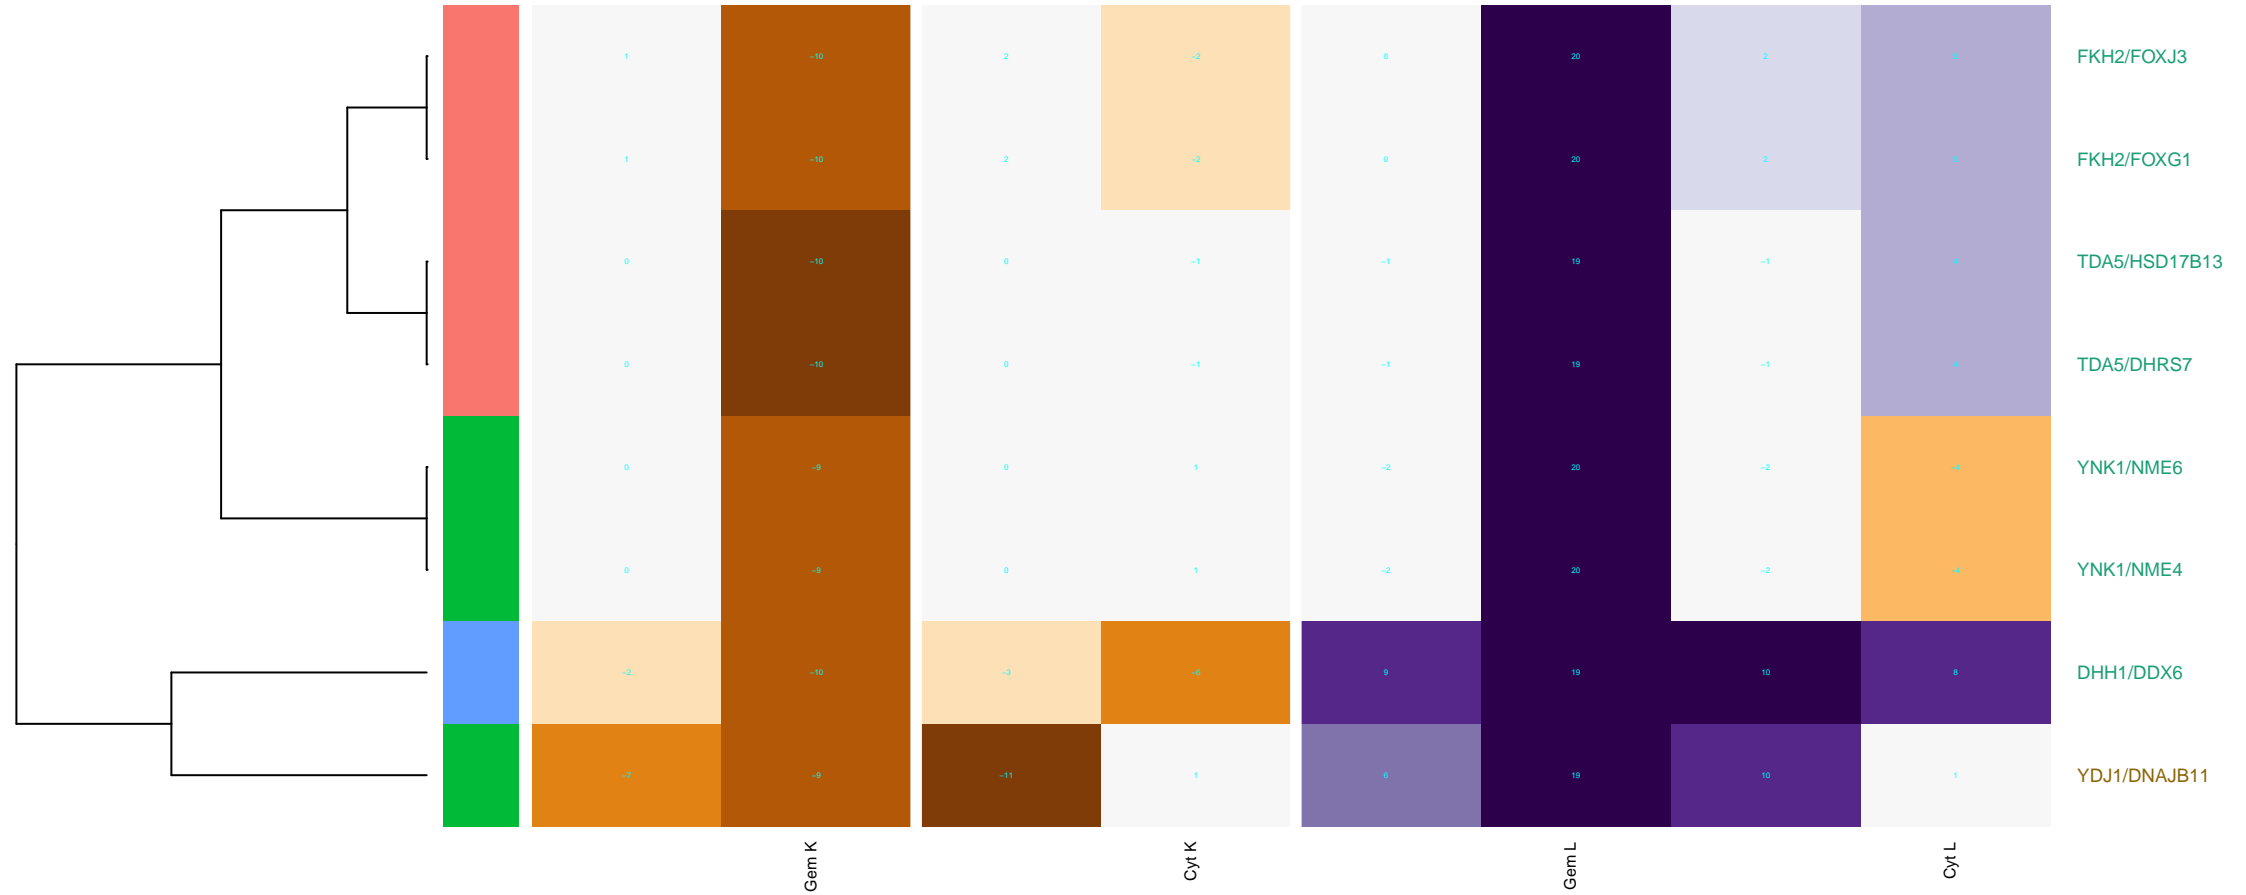

Color Key



2-0.8-1

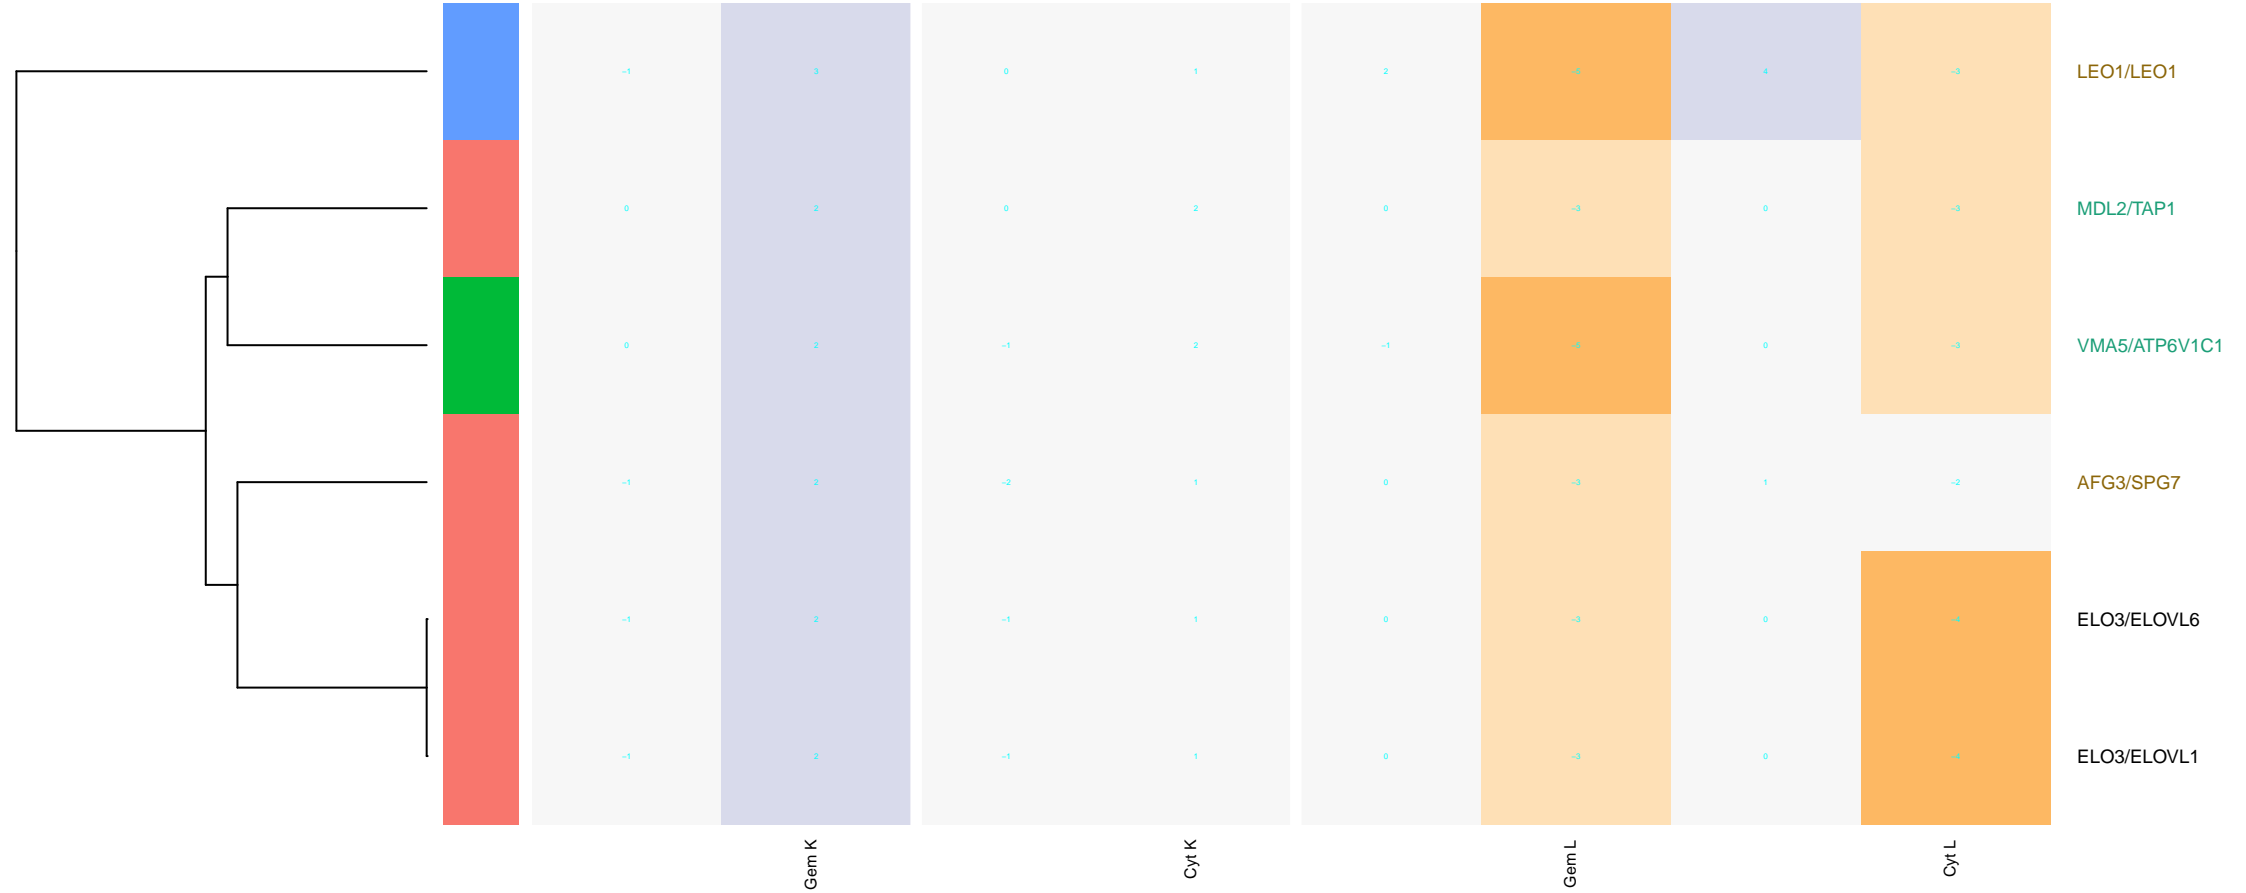



Color Key

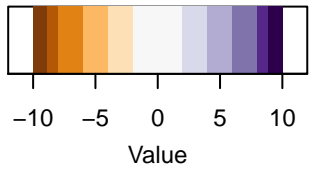

2-0.9-0

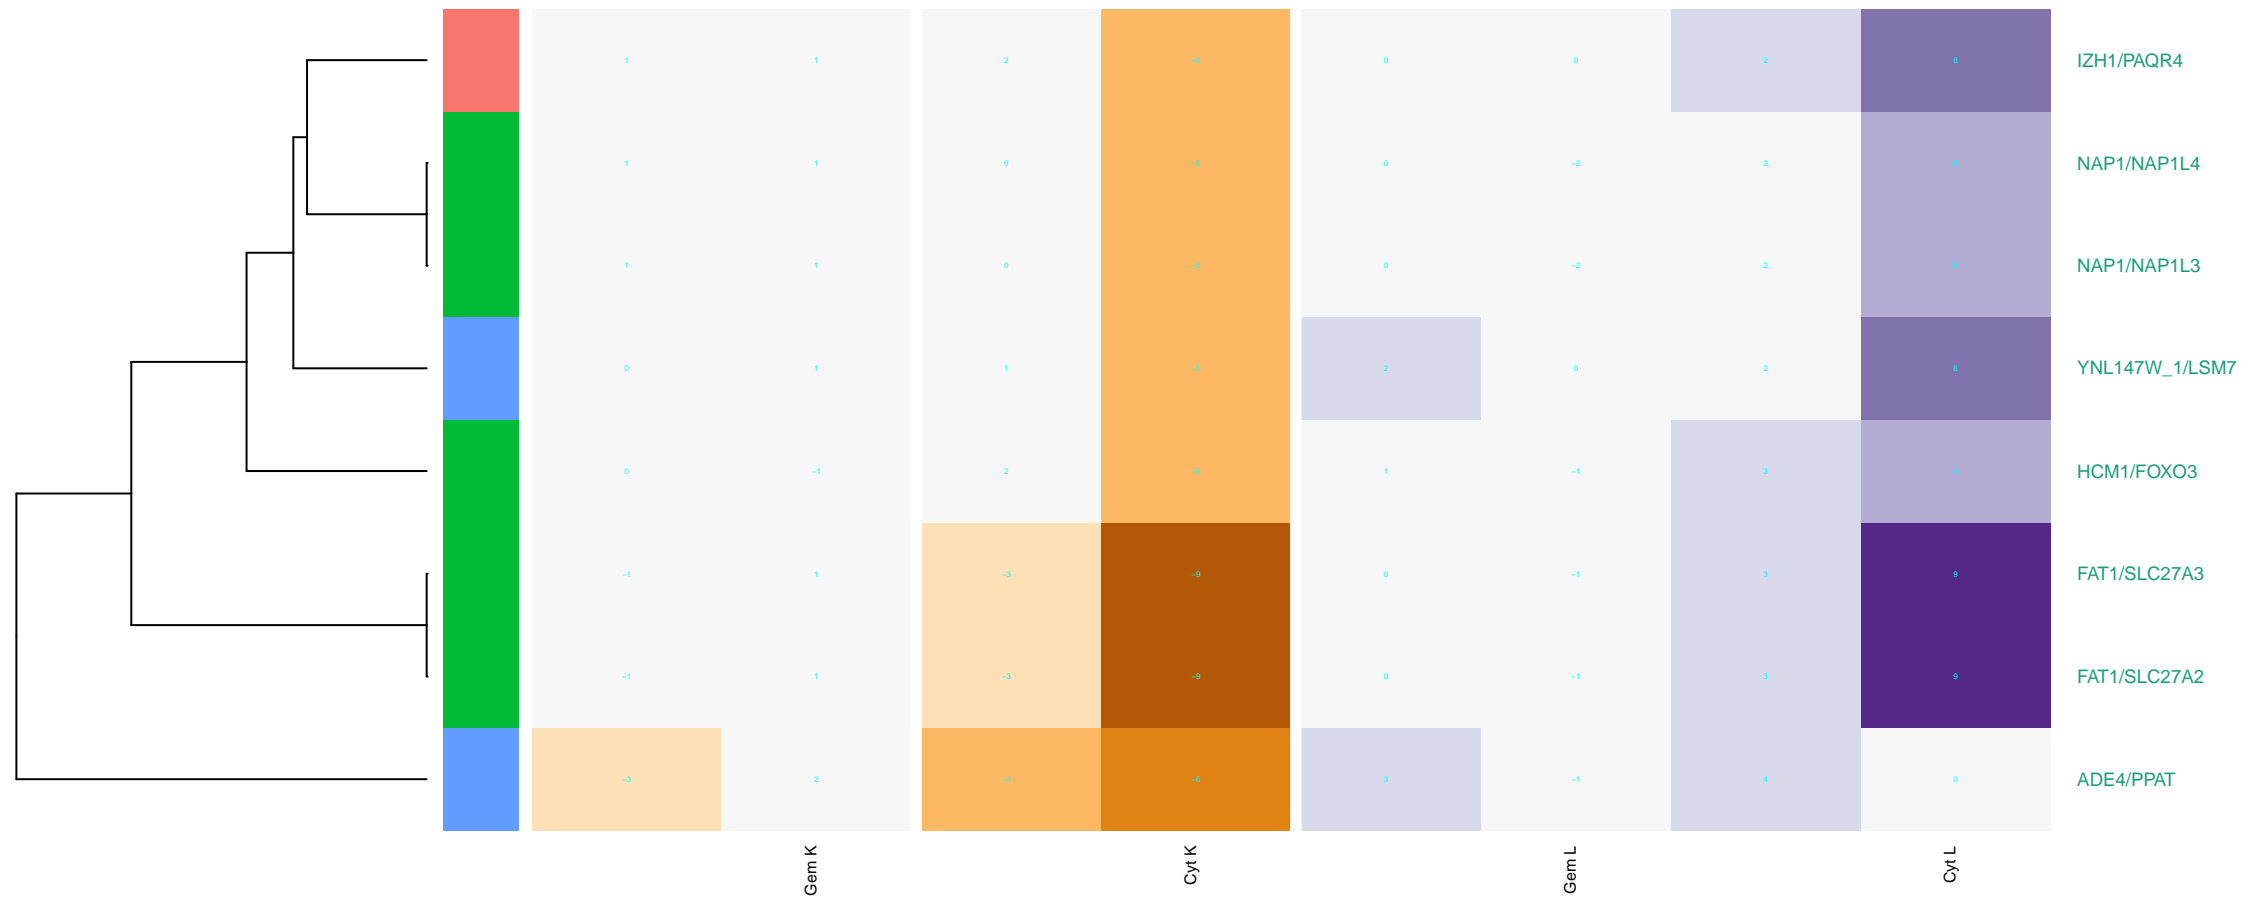

2-0.9-1

Color Key

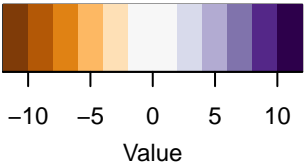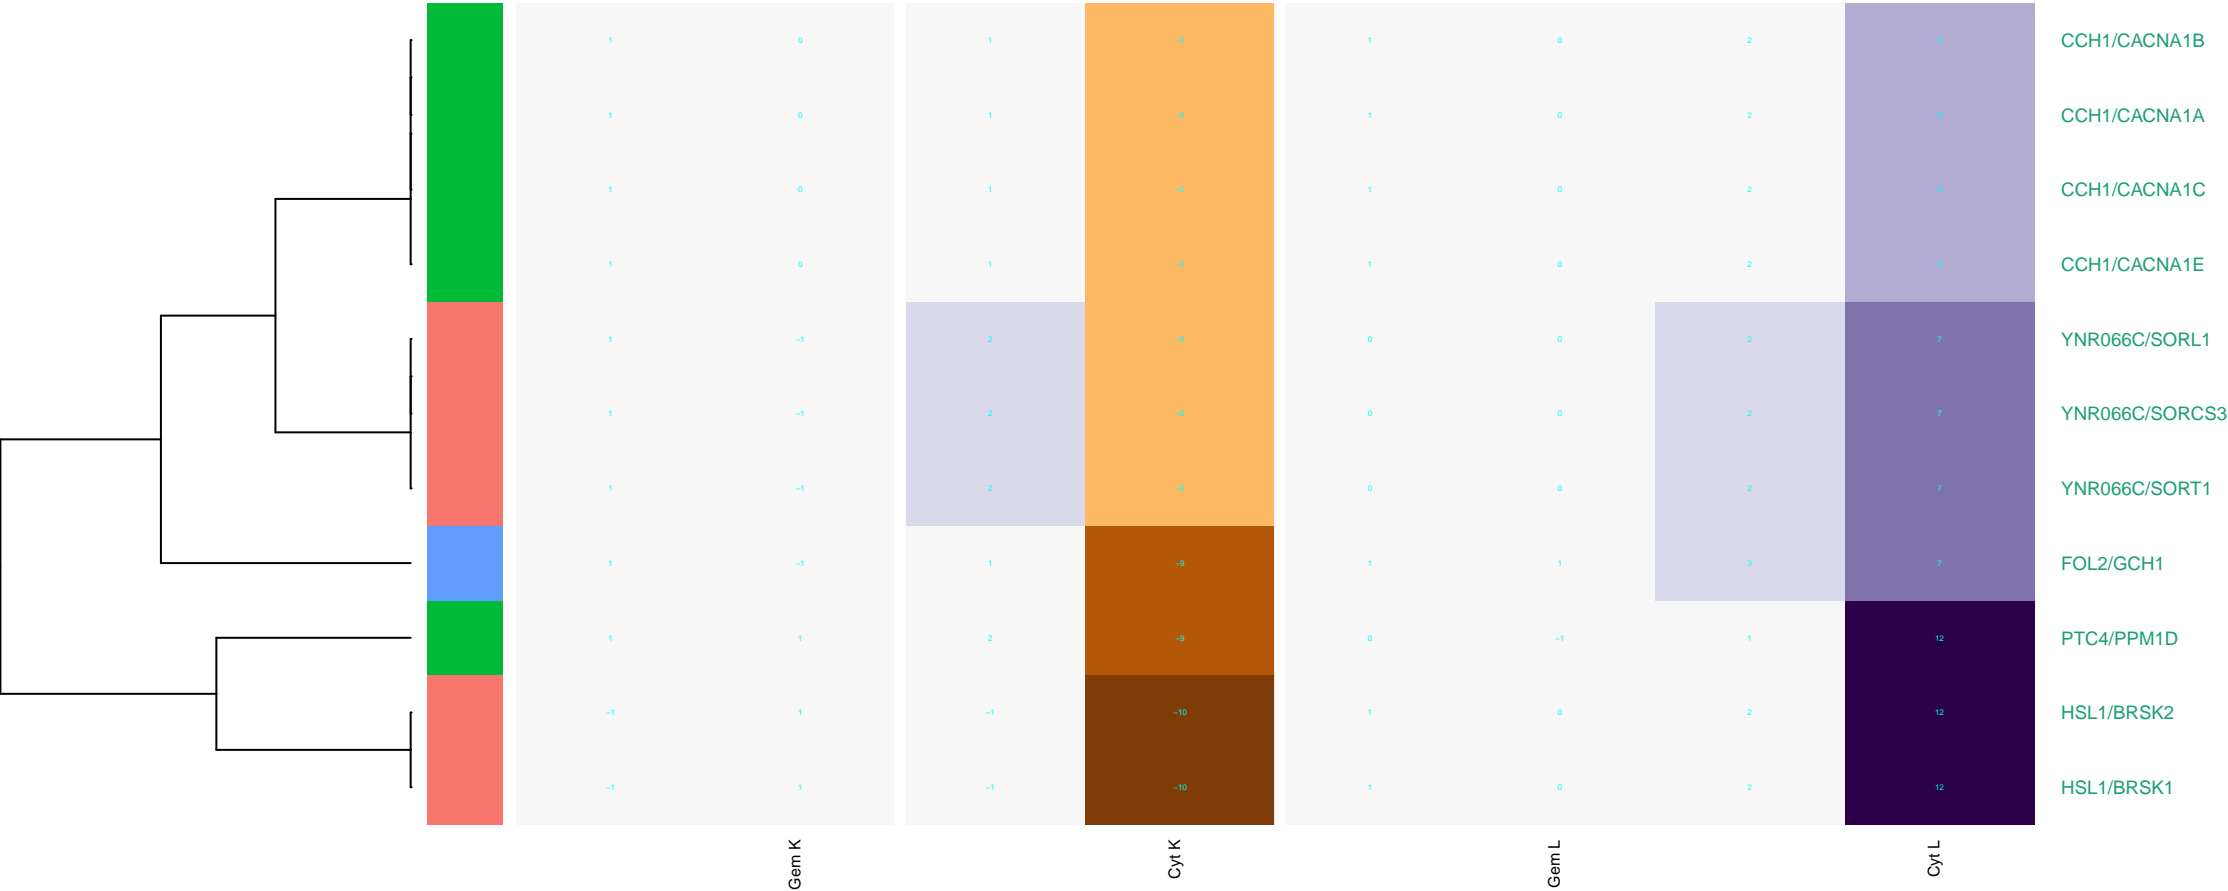

Supplement: s1 [file s1]
