# Supplementary material for: A Humanized Yeast Phenomic Model of Deoxycytidine Kinase to Predict Genetic Buffering of Nucleoside Analog Cytotoxicity
Source: MDPI journal article supplement (doi:10.3390/genes10100770), 2019-09-30

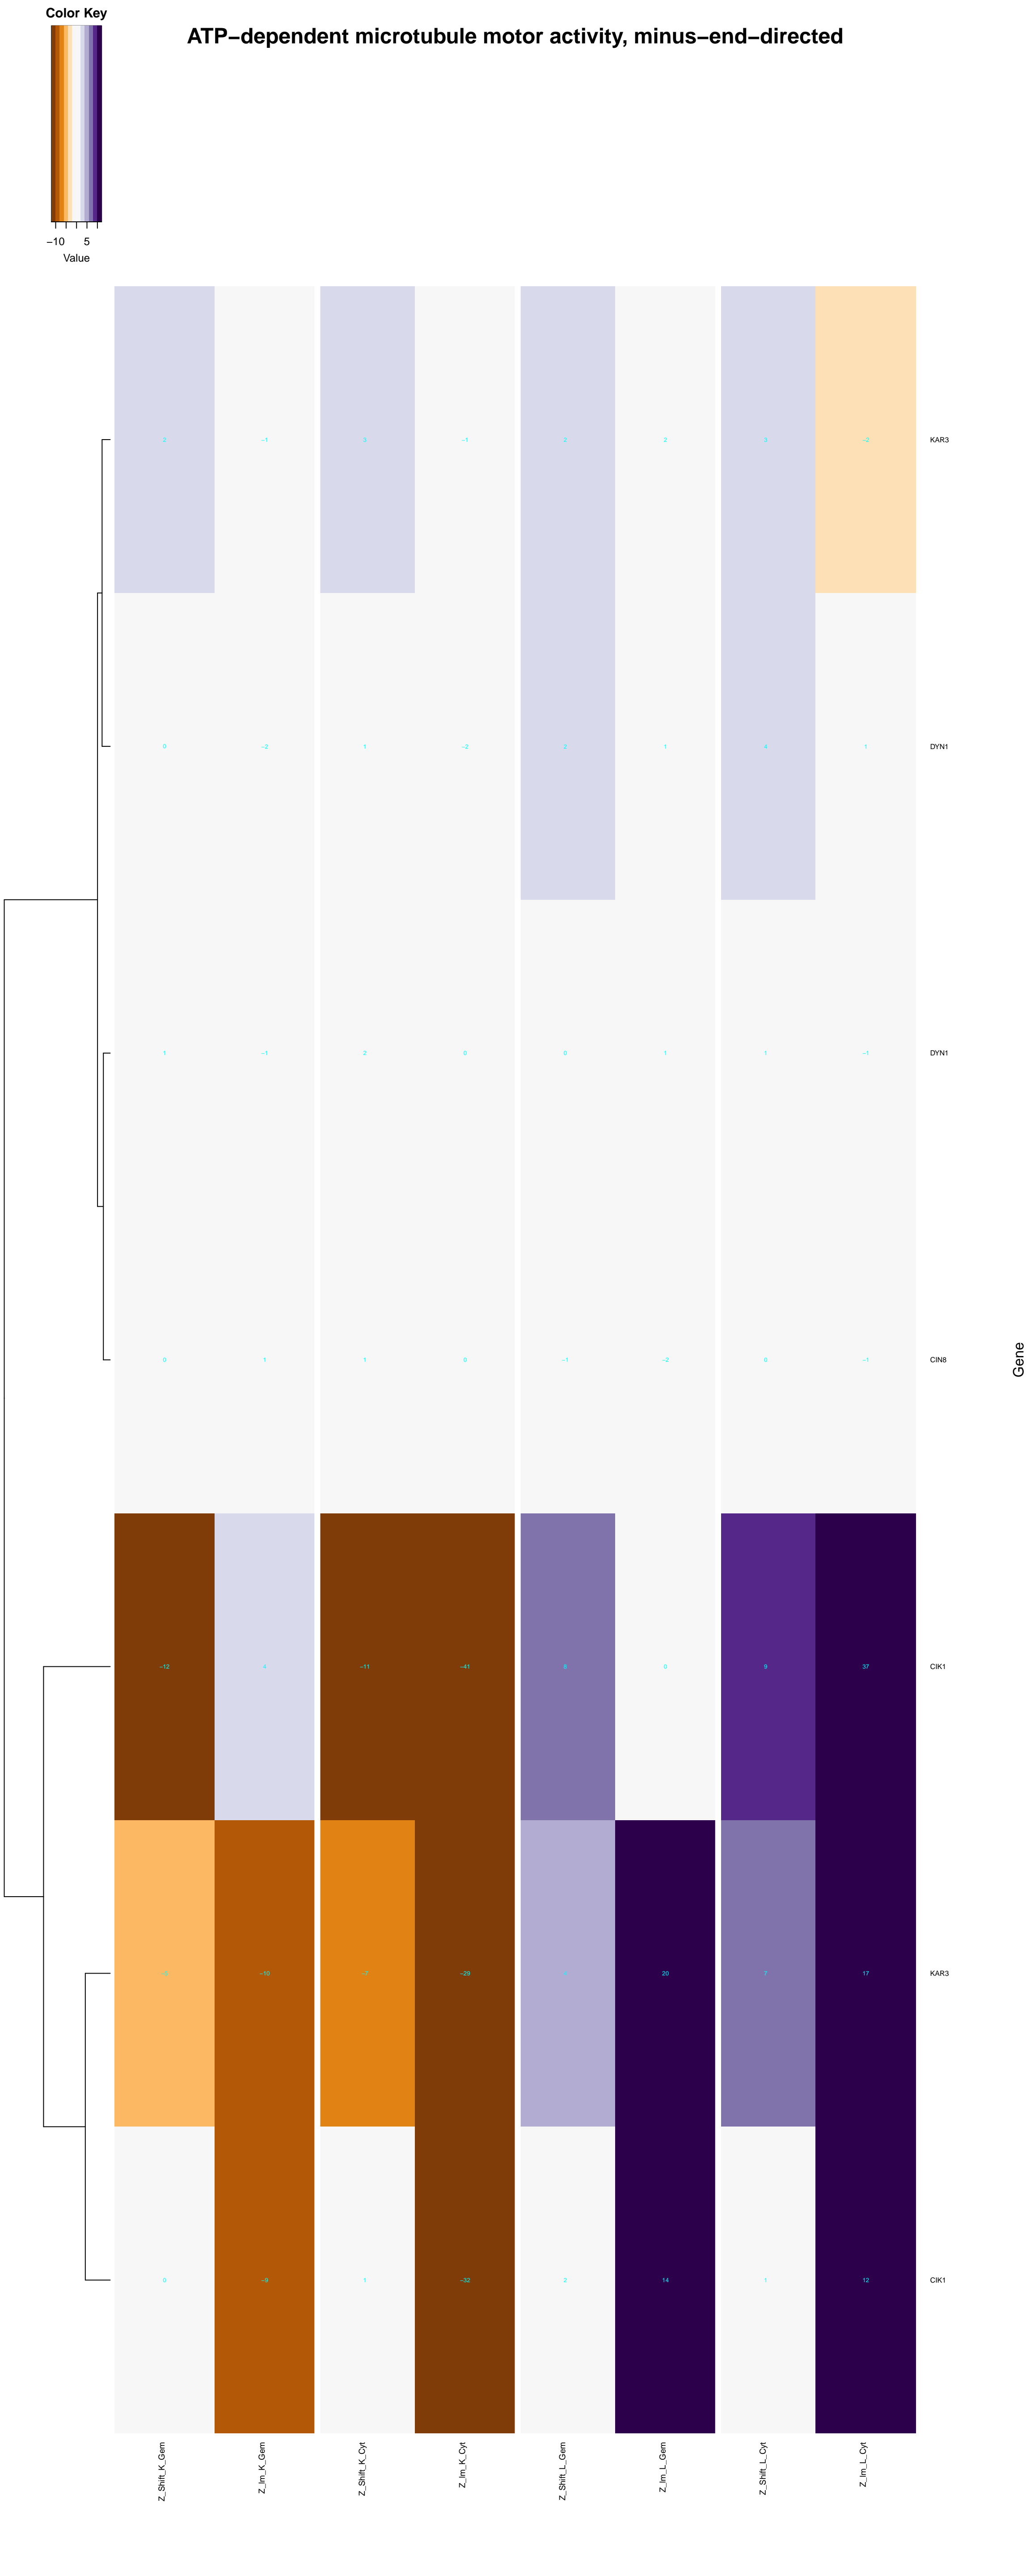

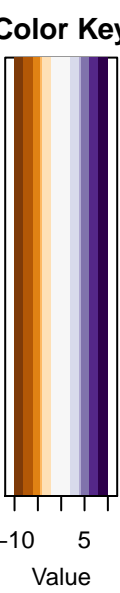

ATP-dependent microtubule motor activity, plus-end-directed

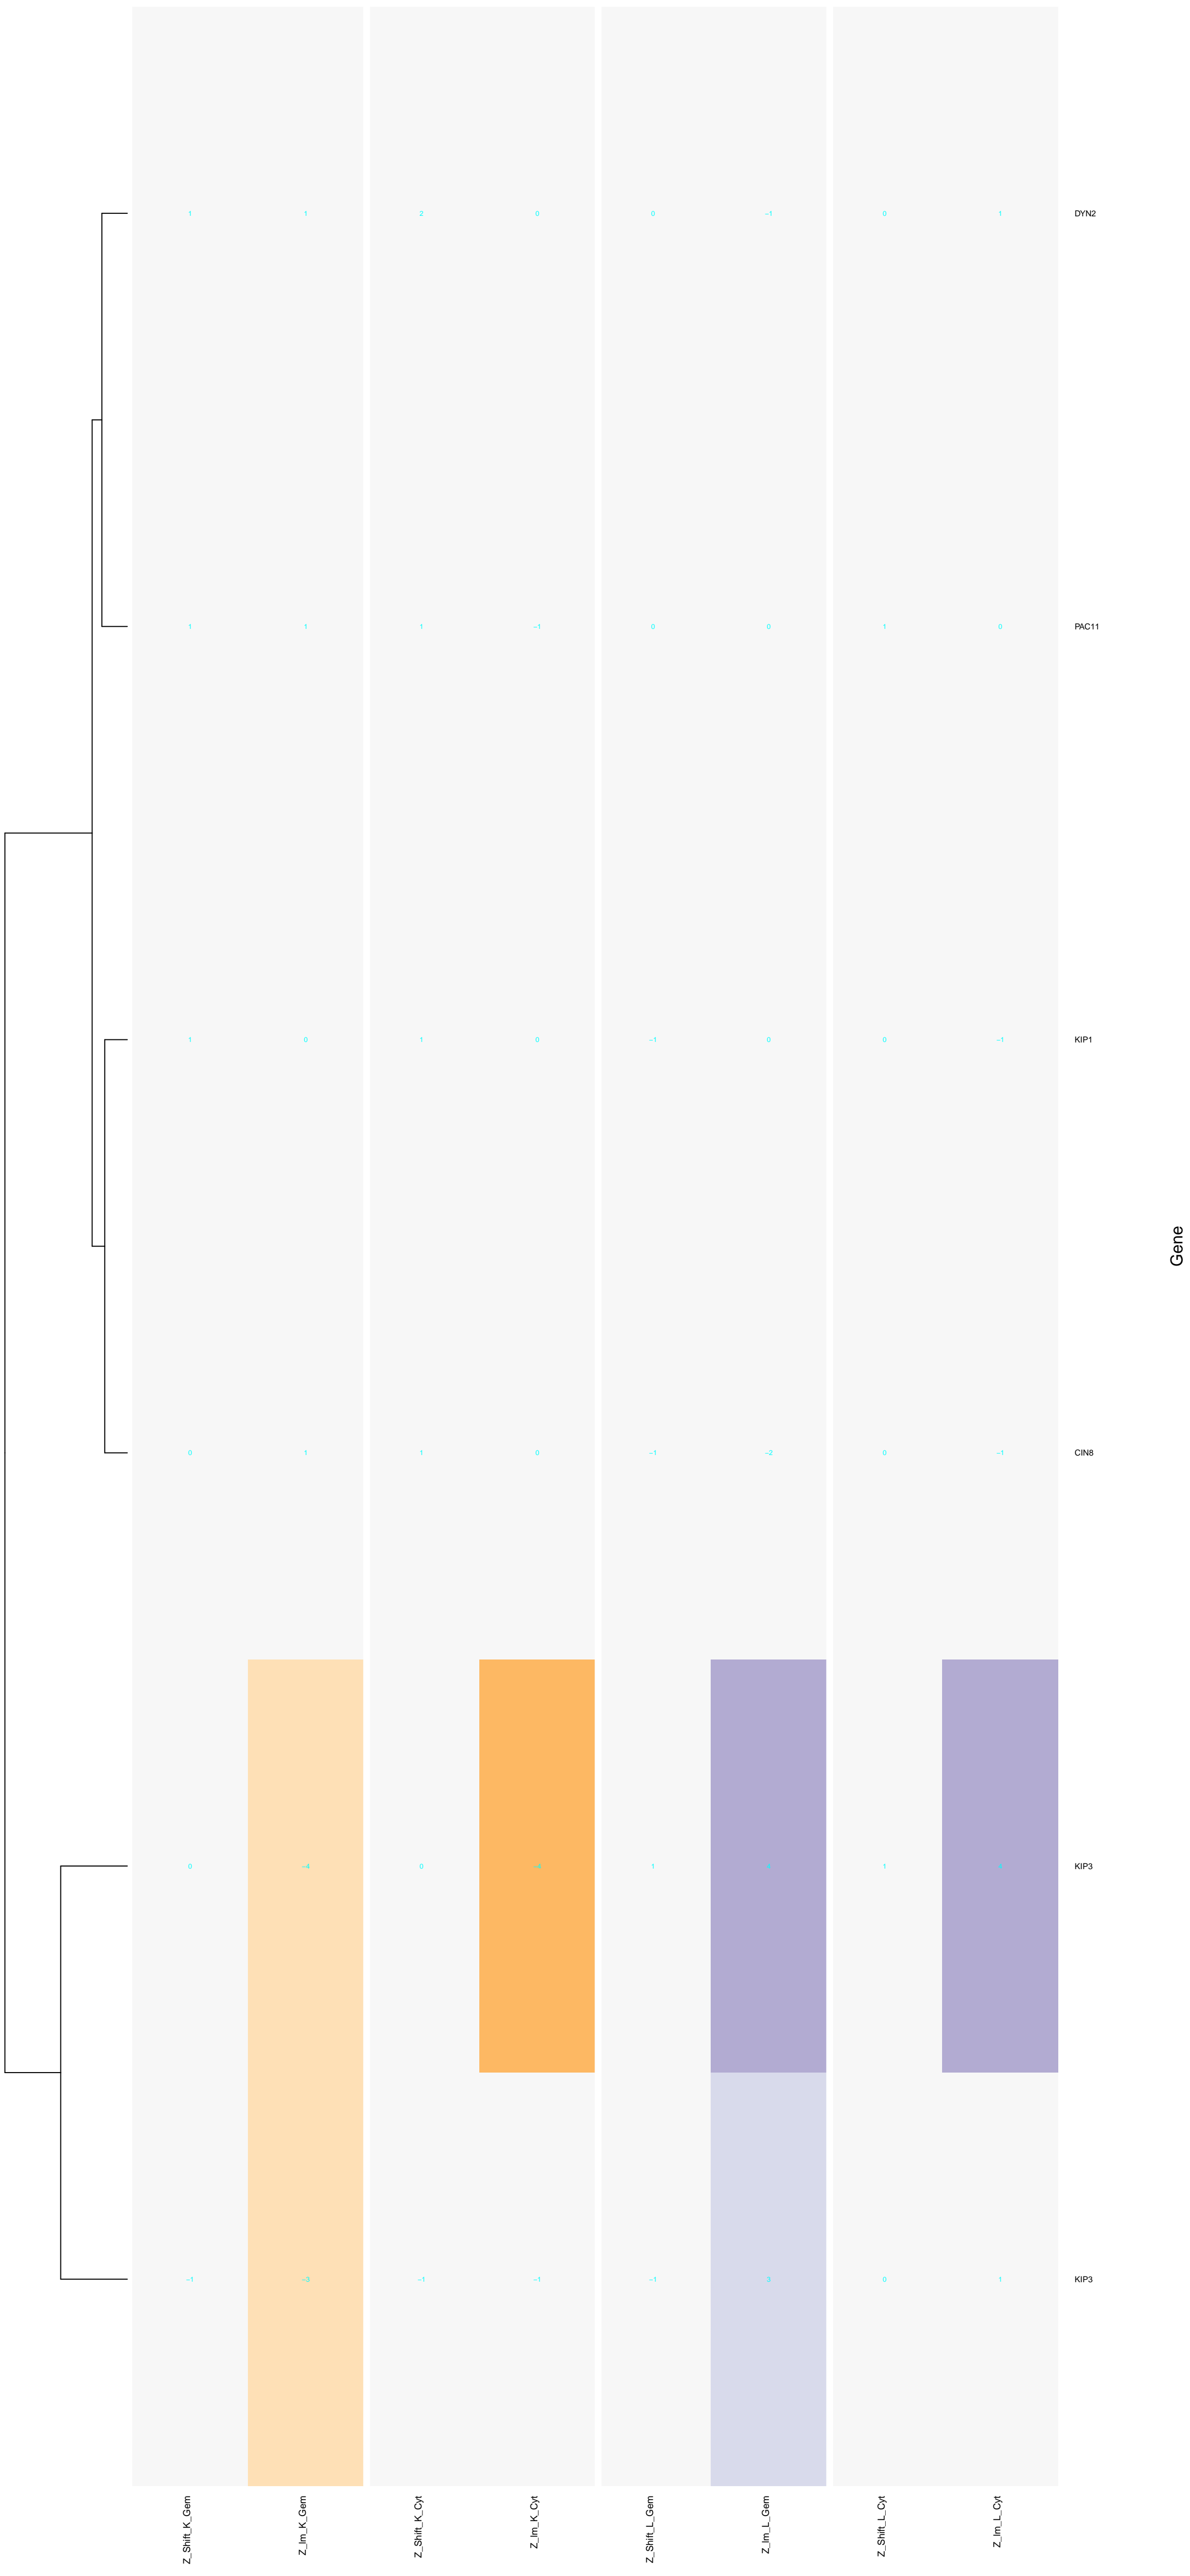



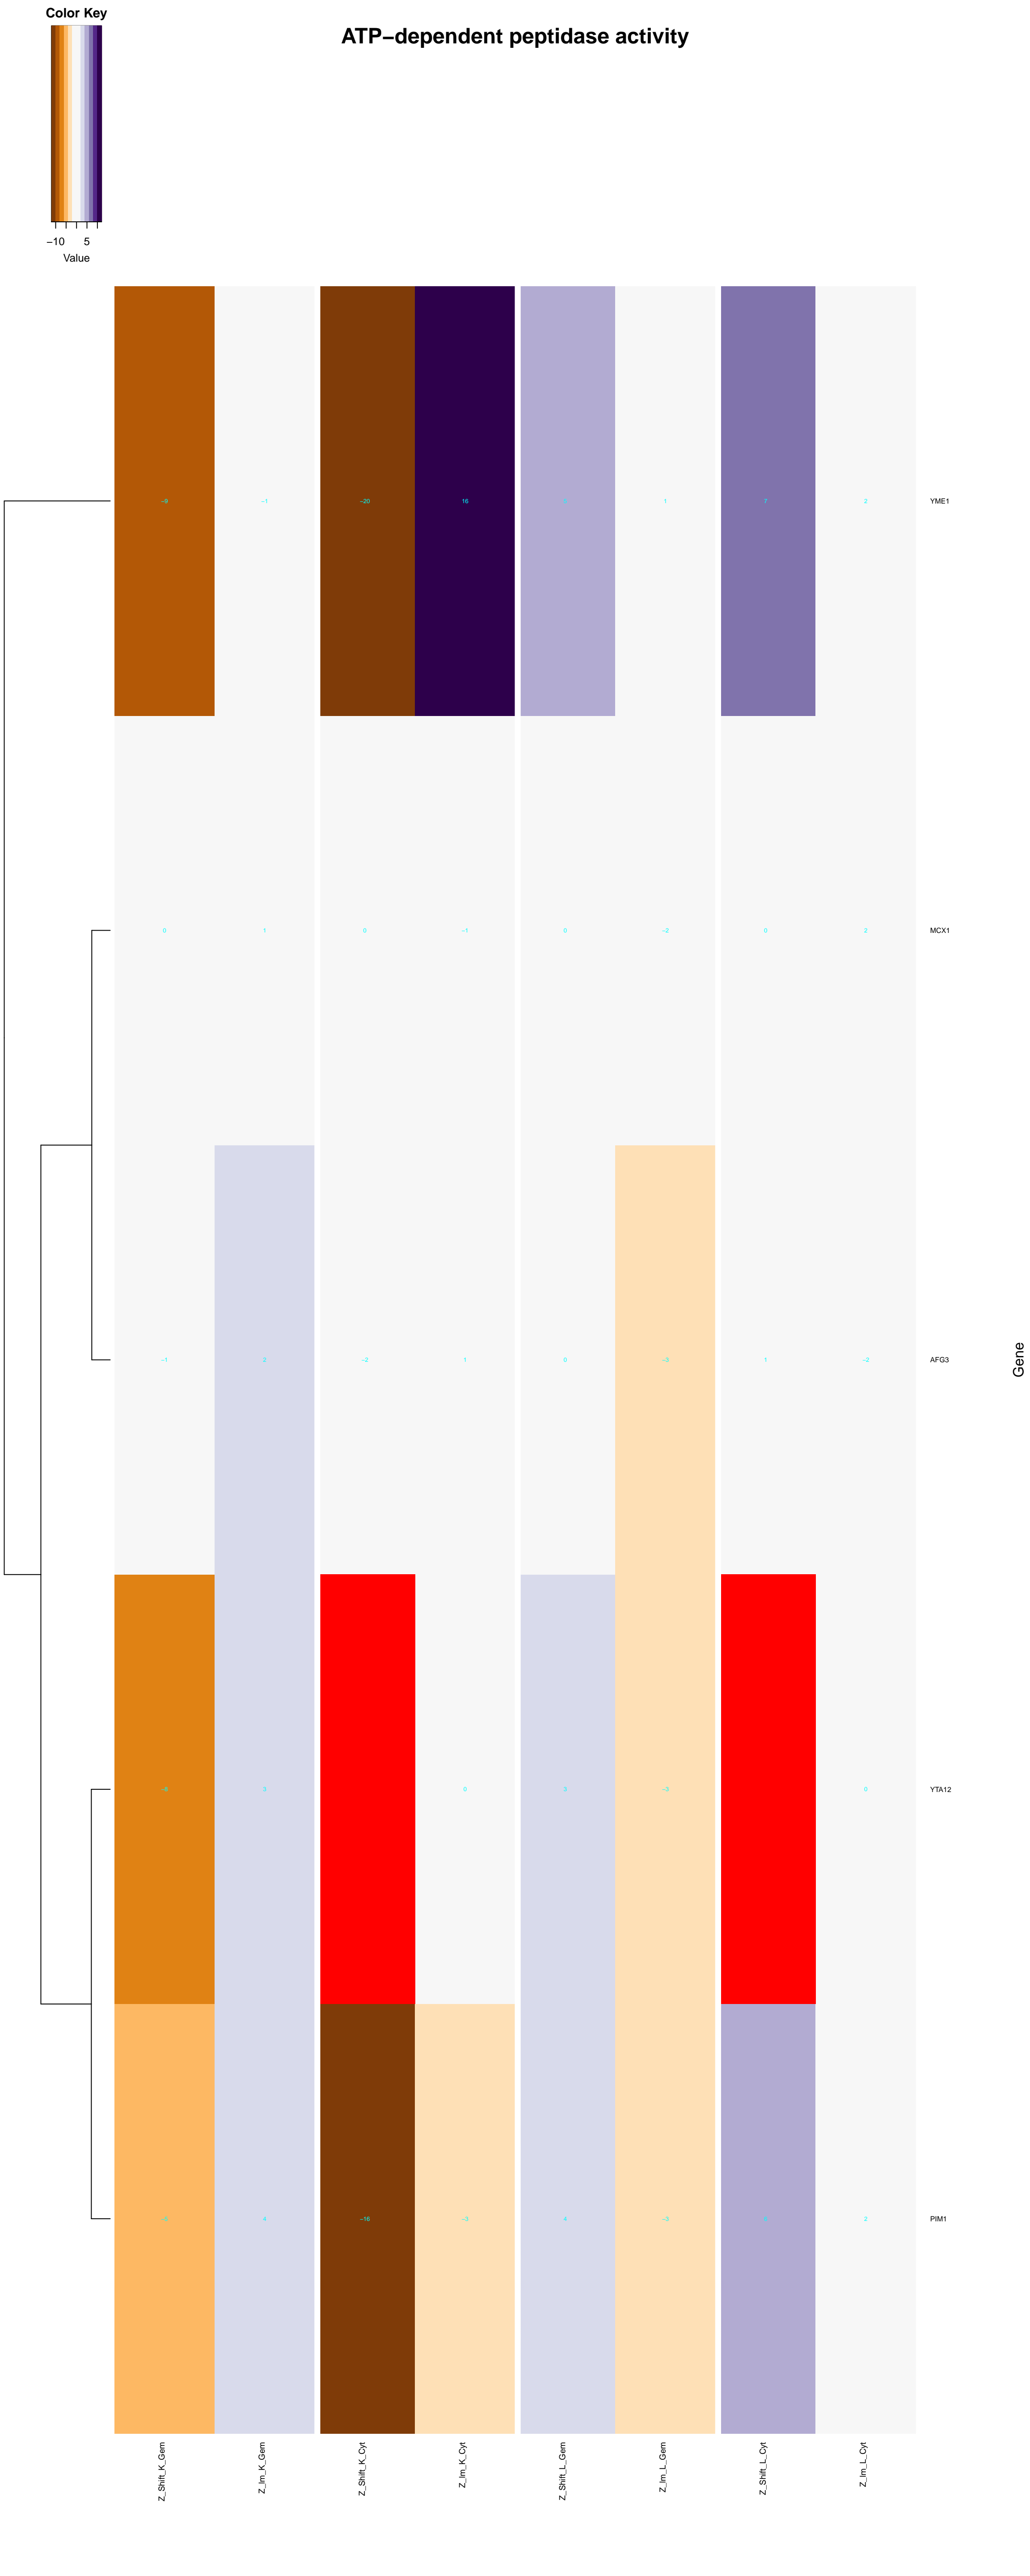

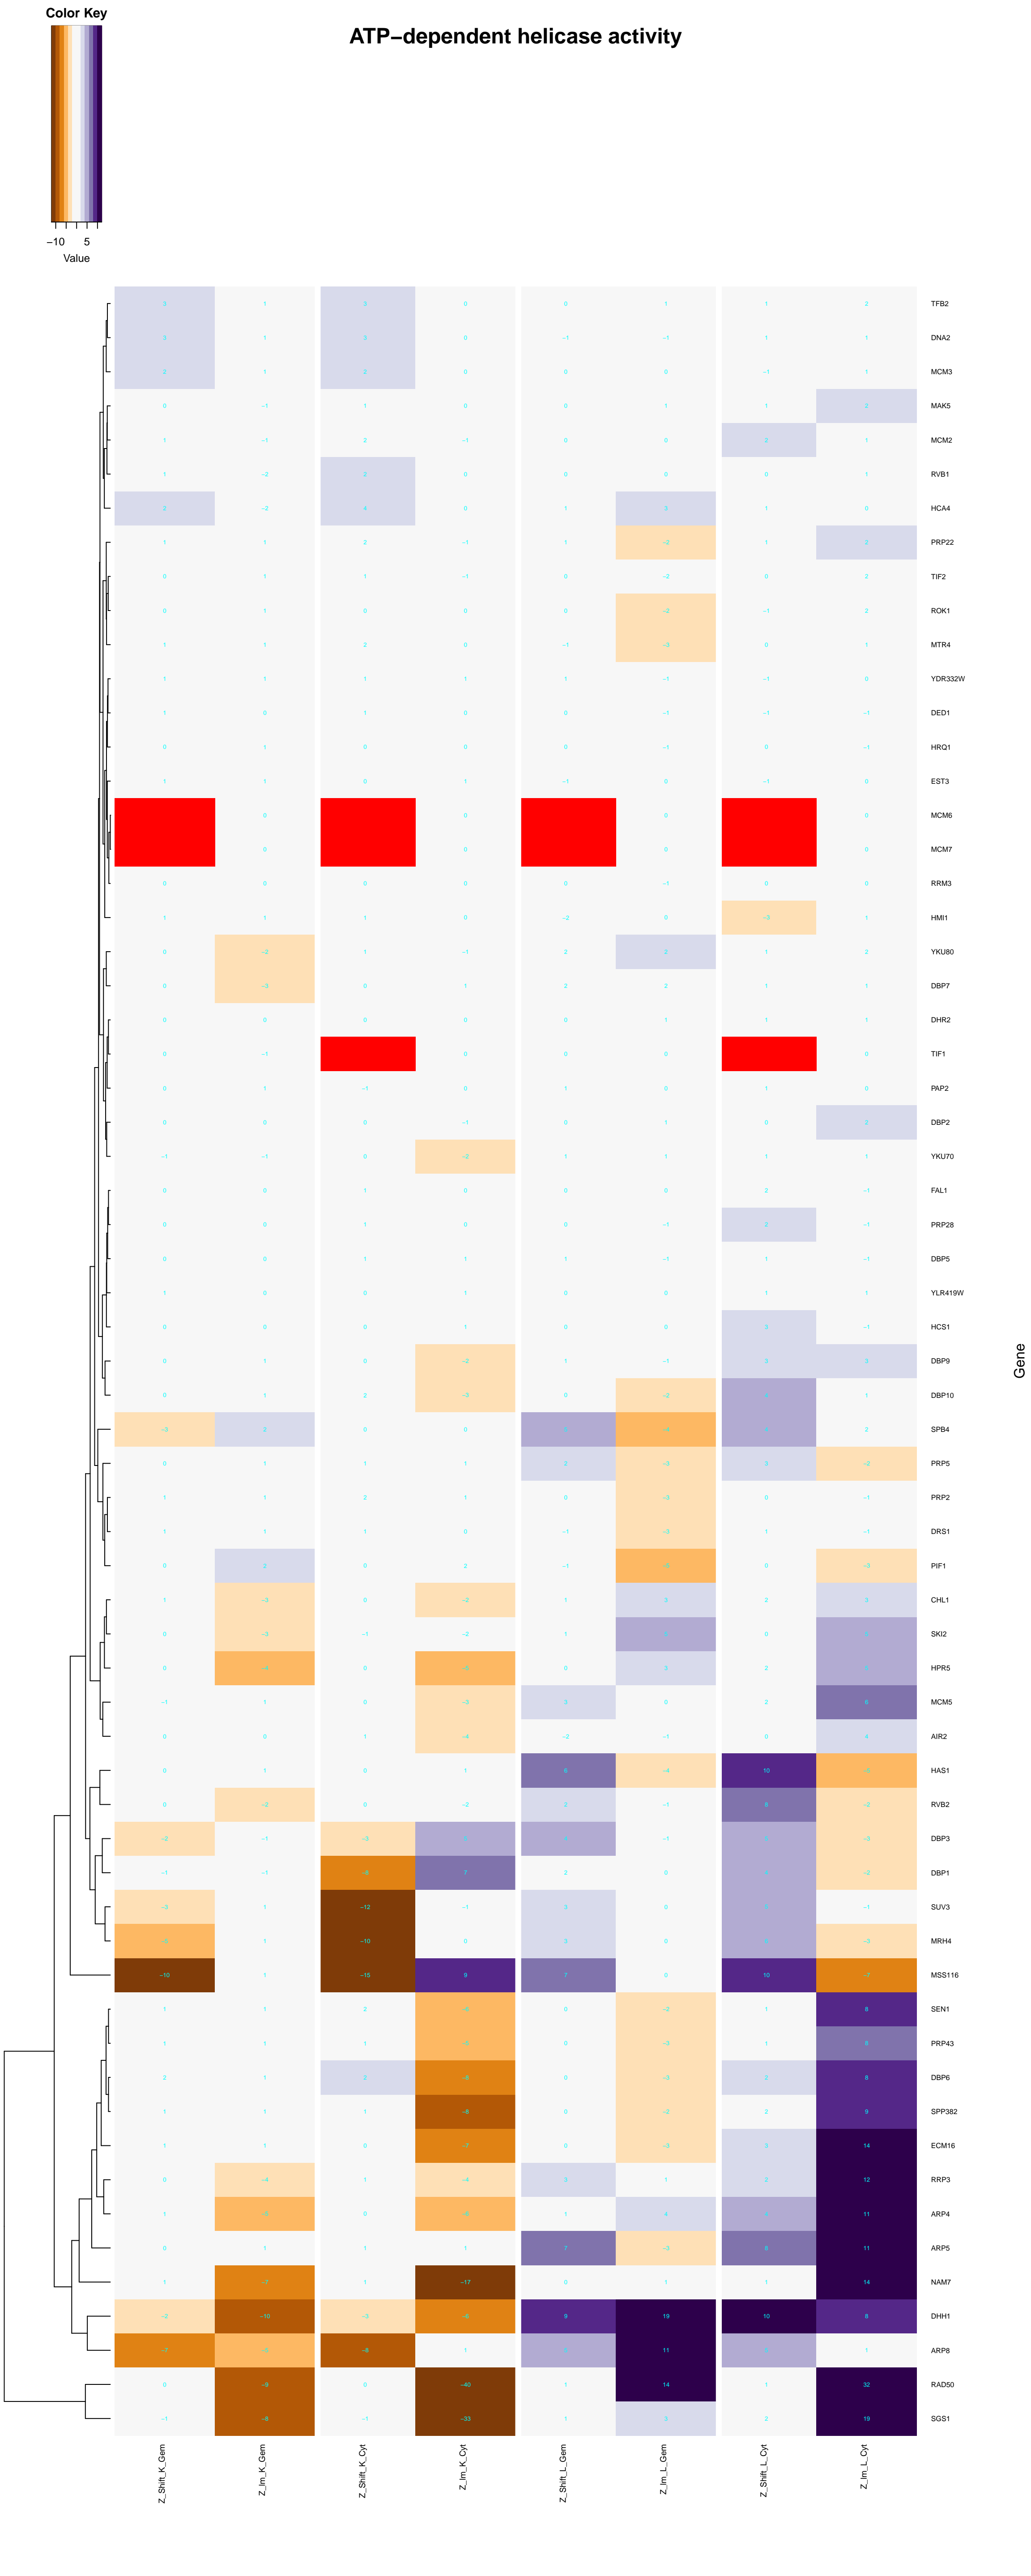

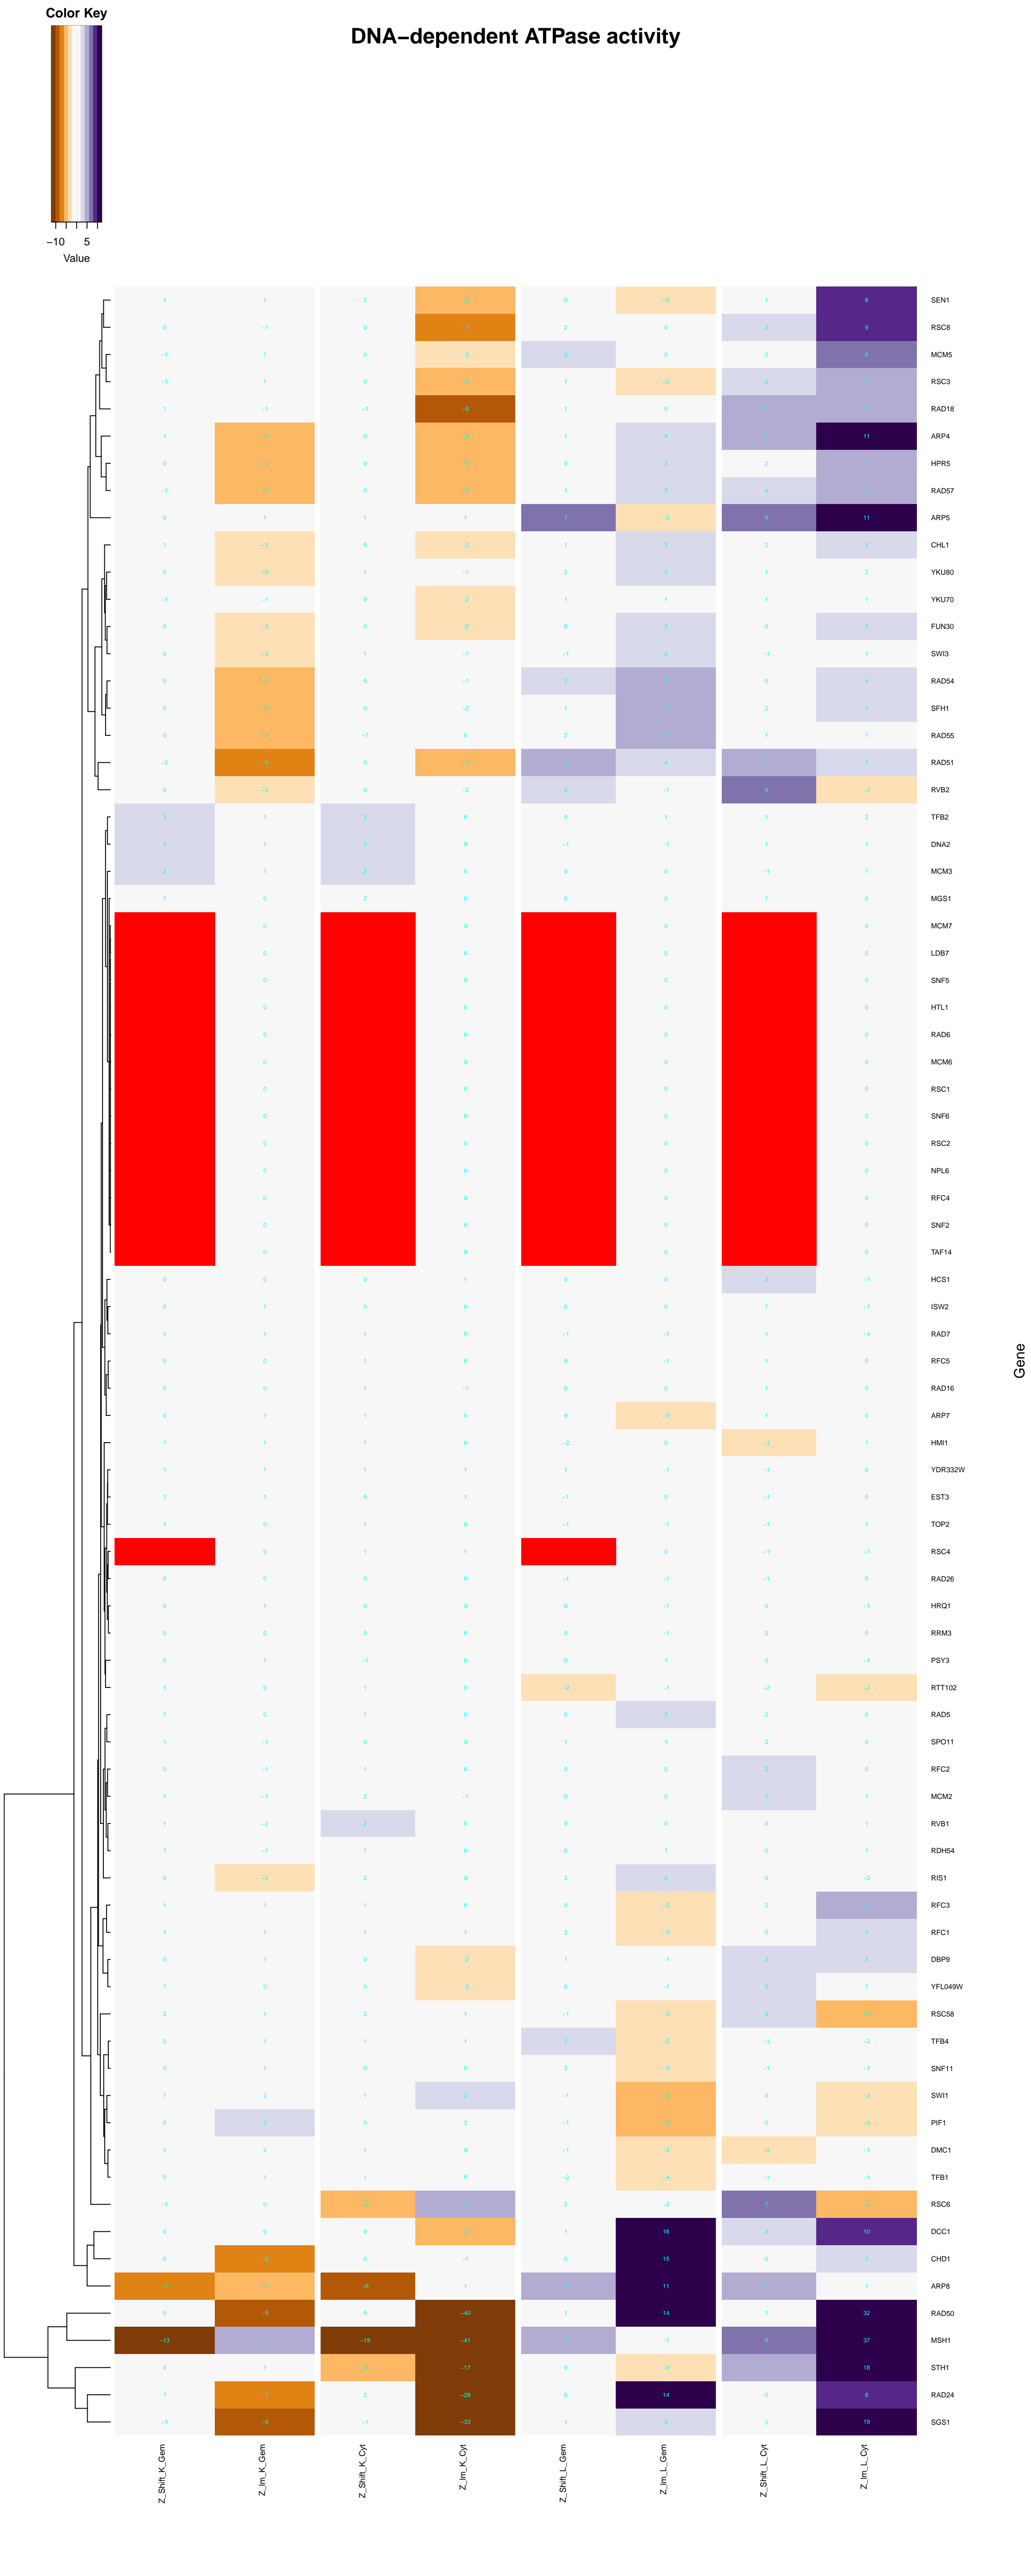

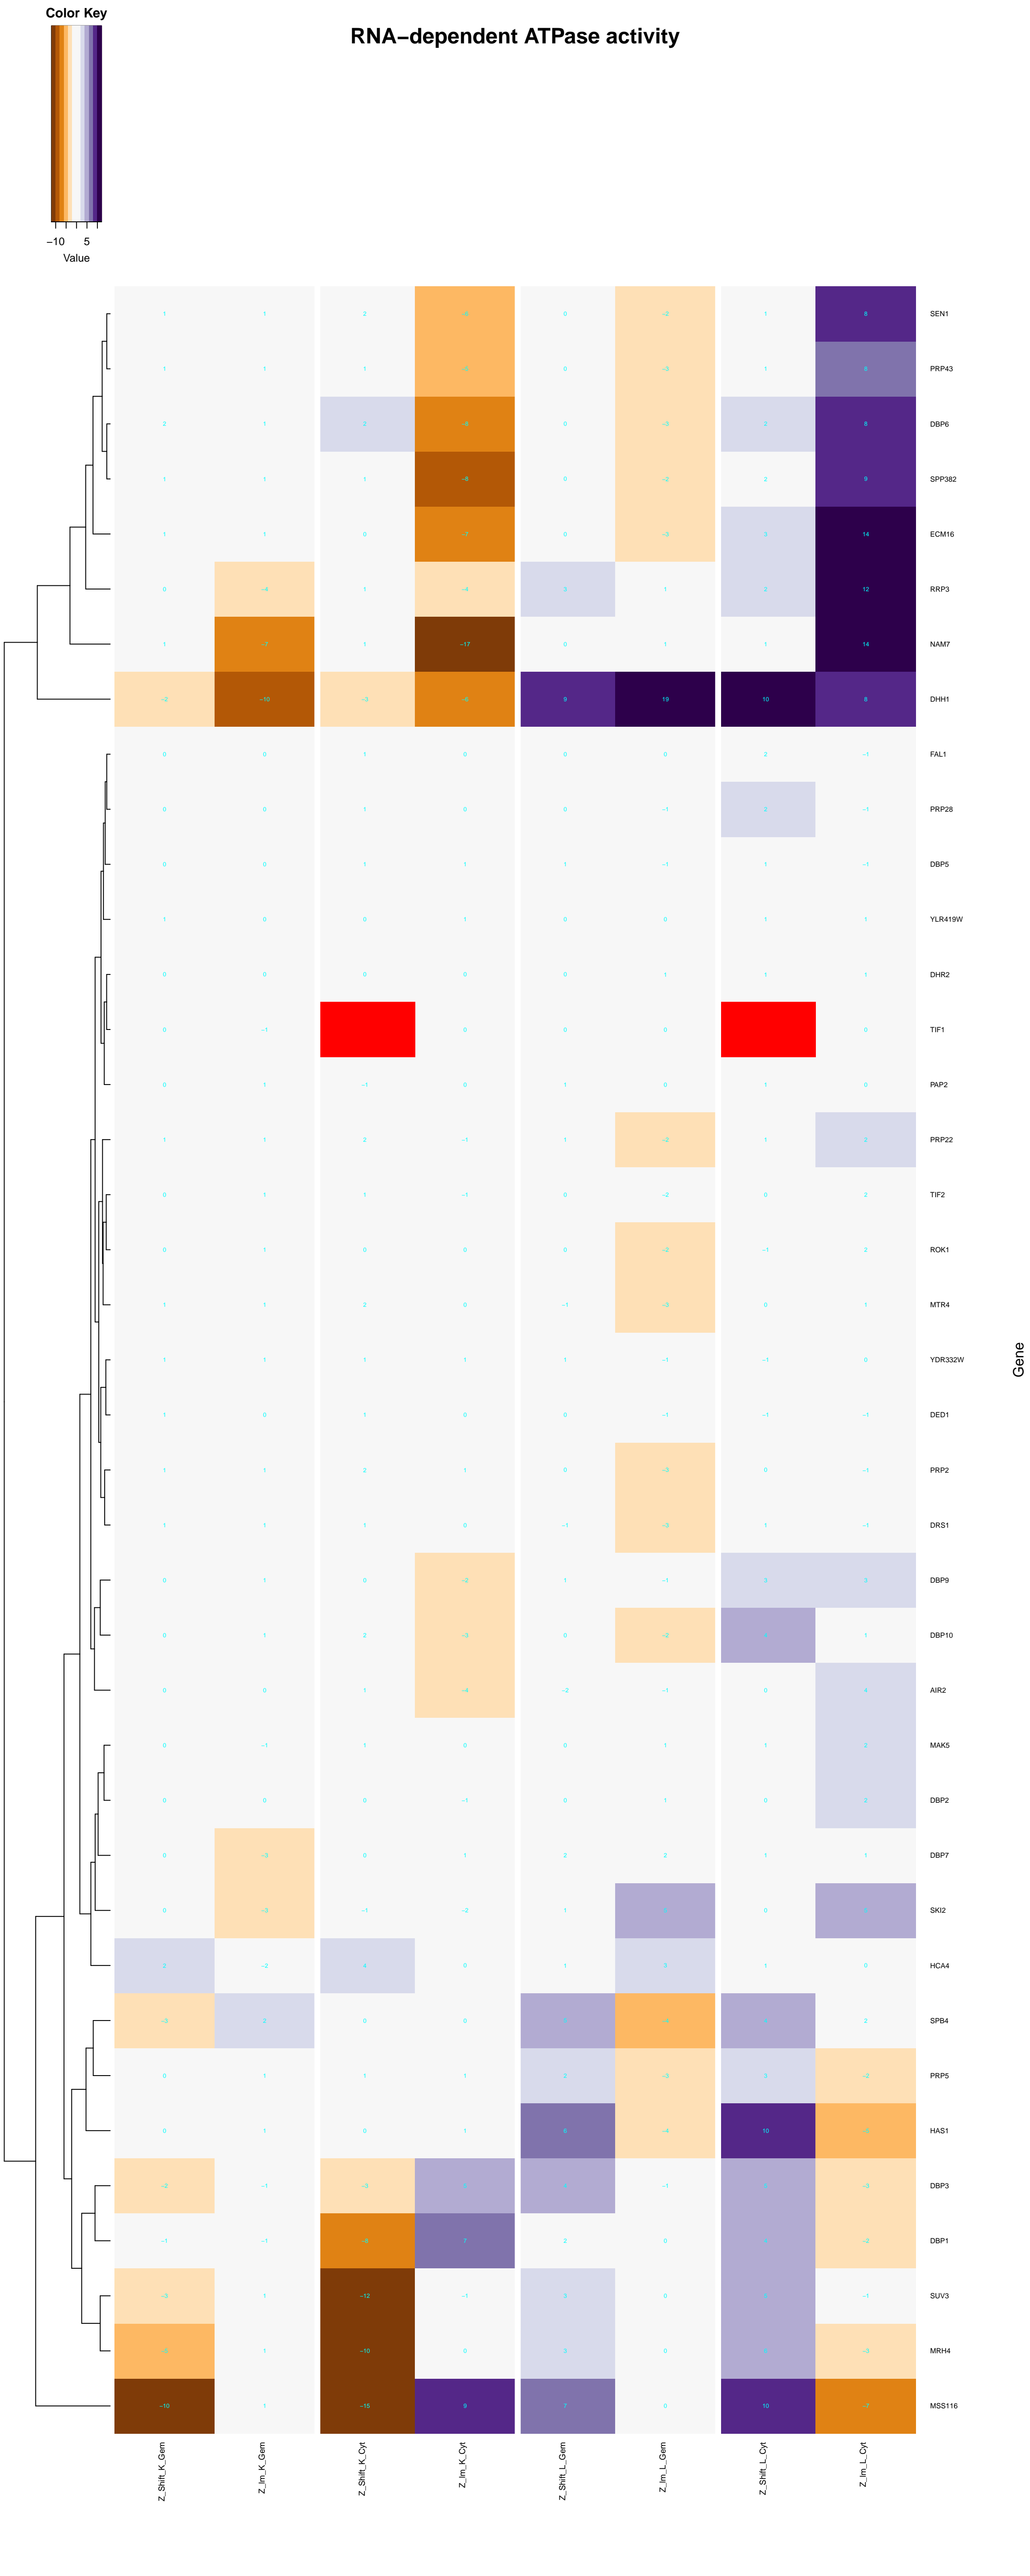

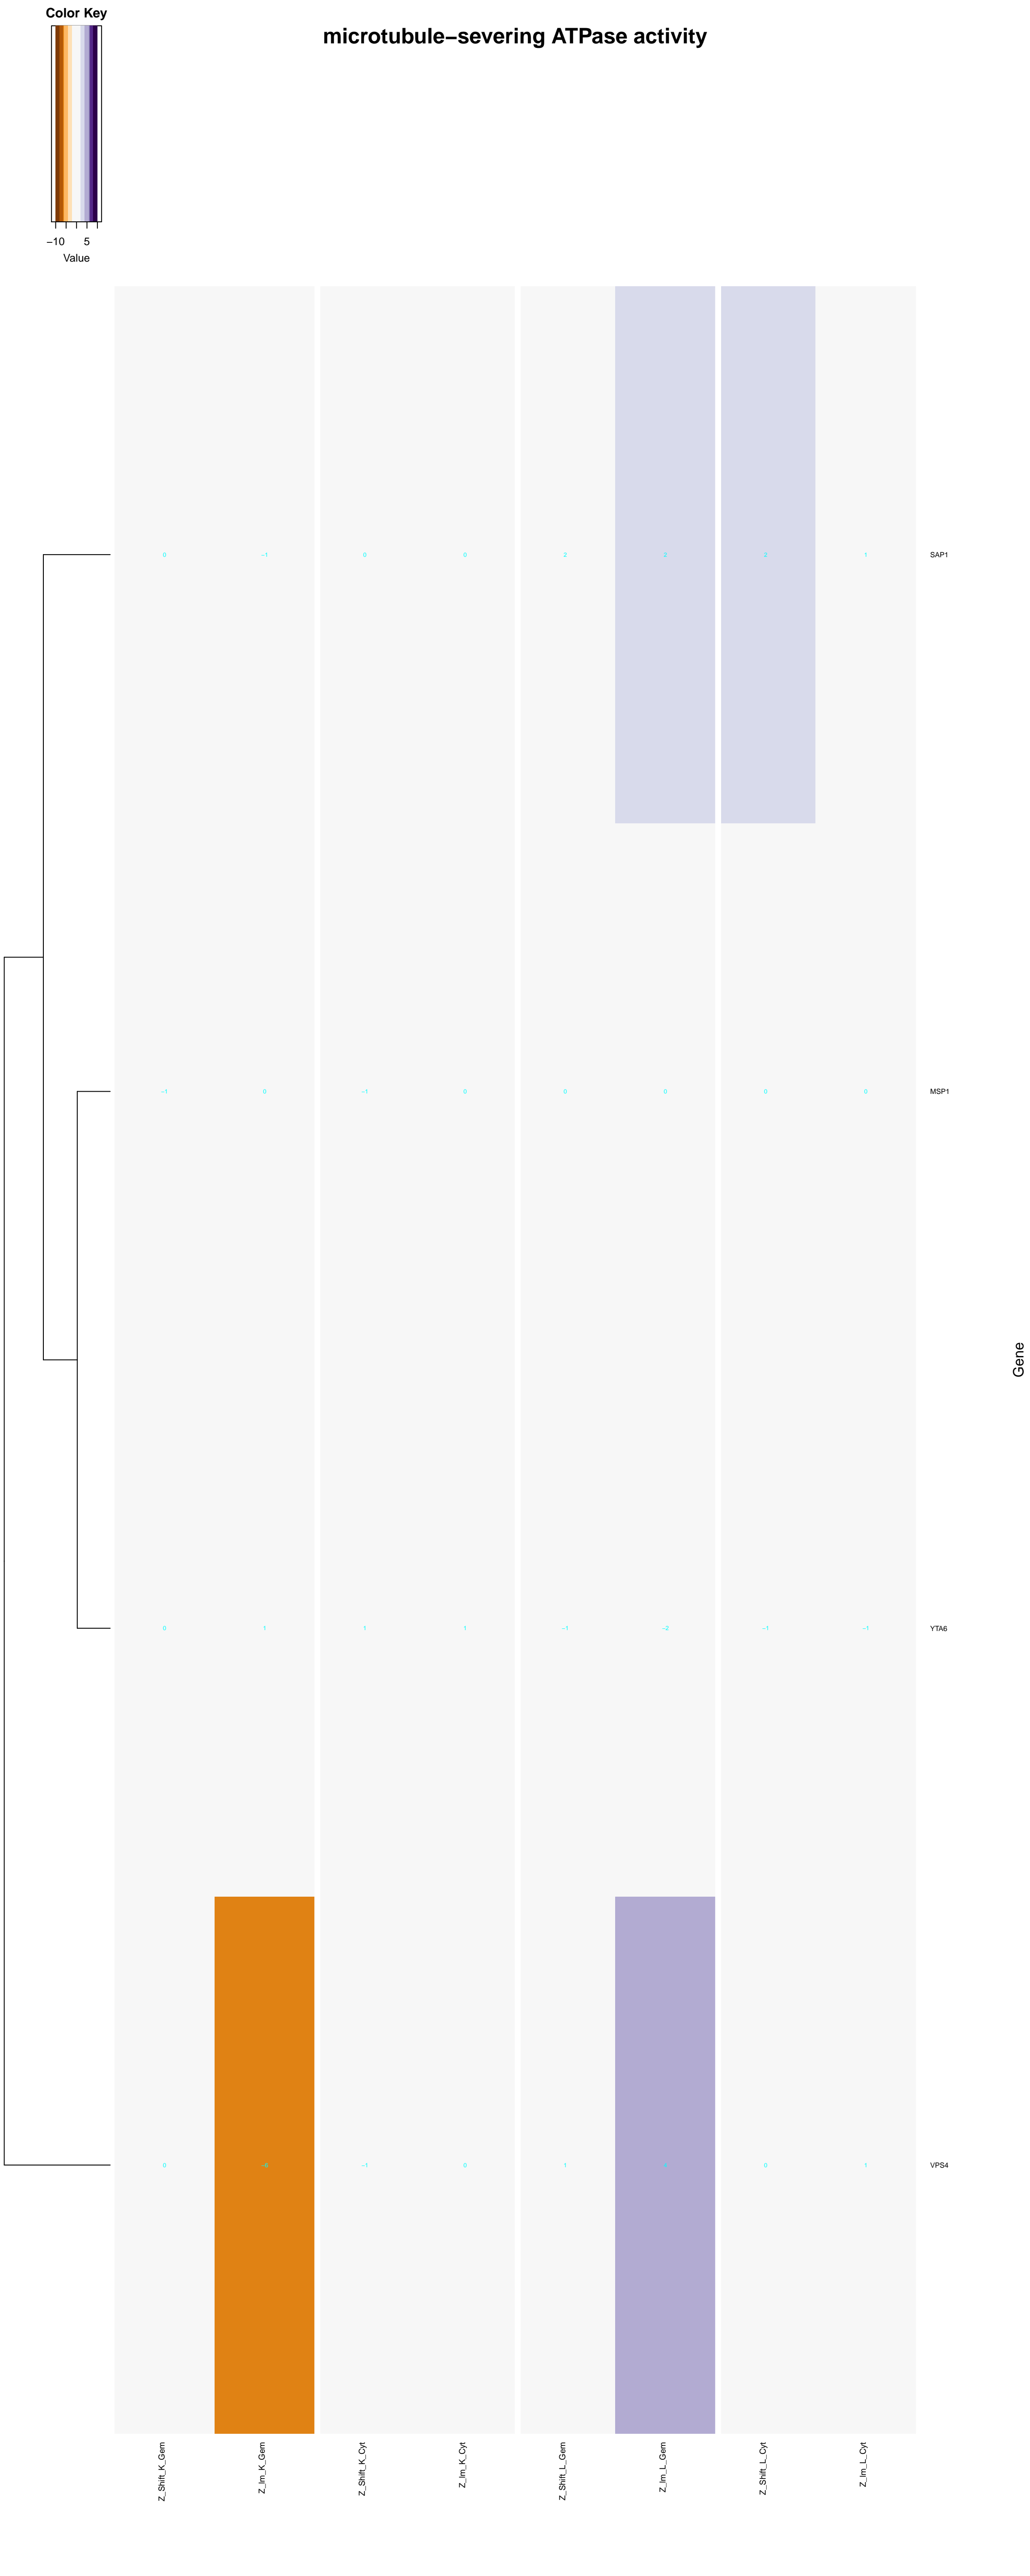

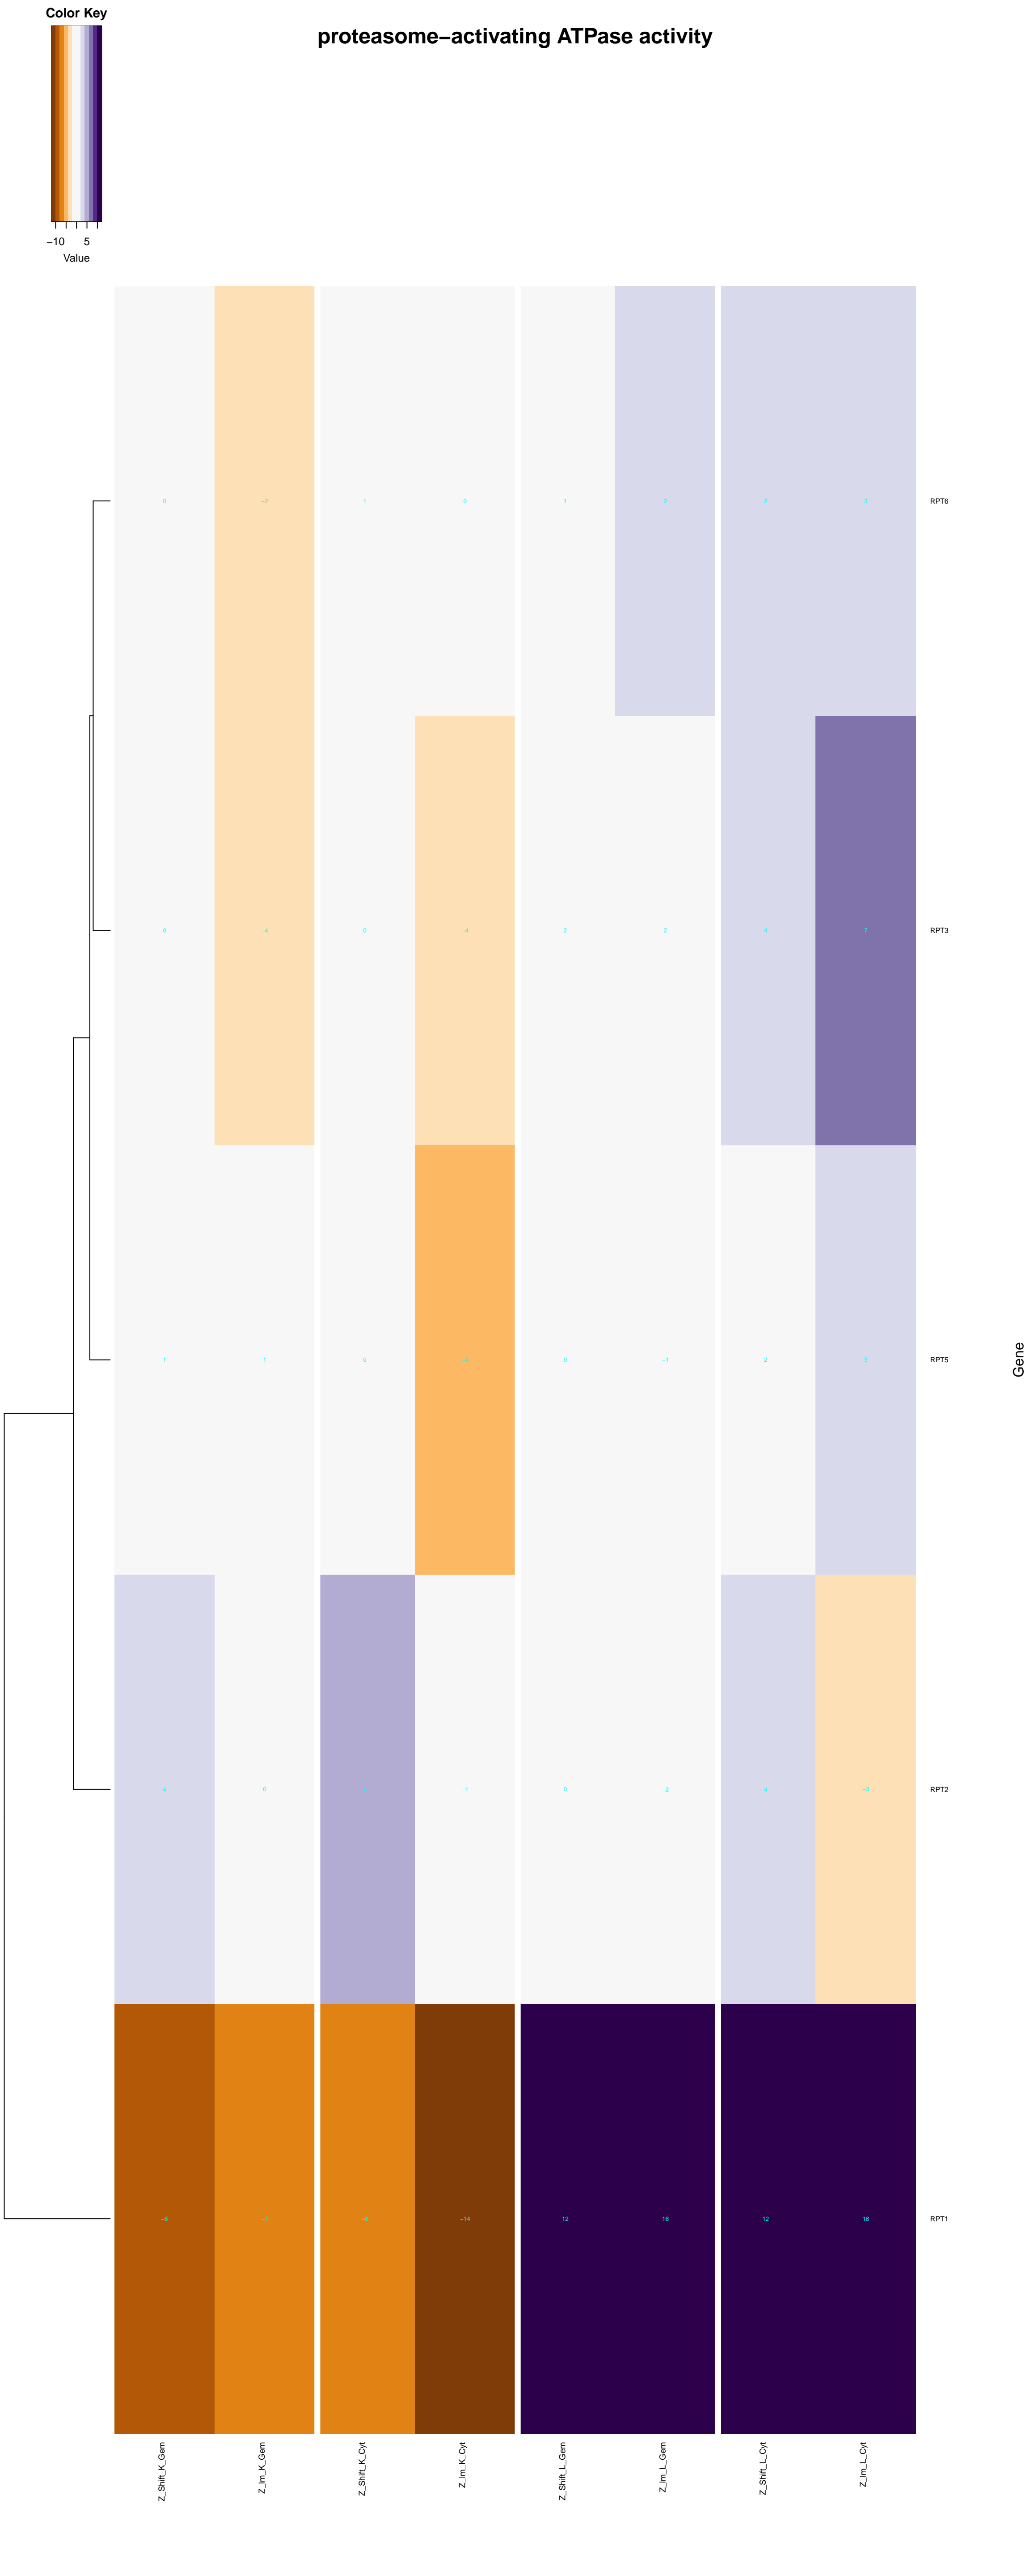

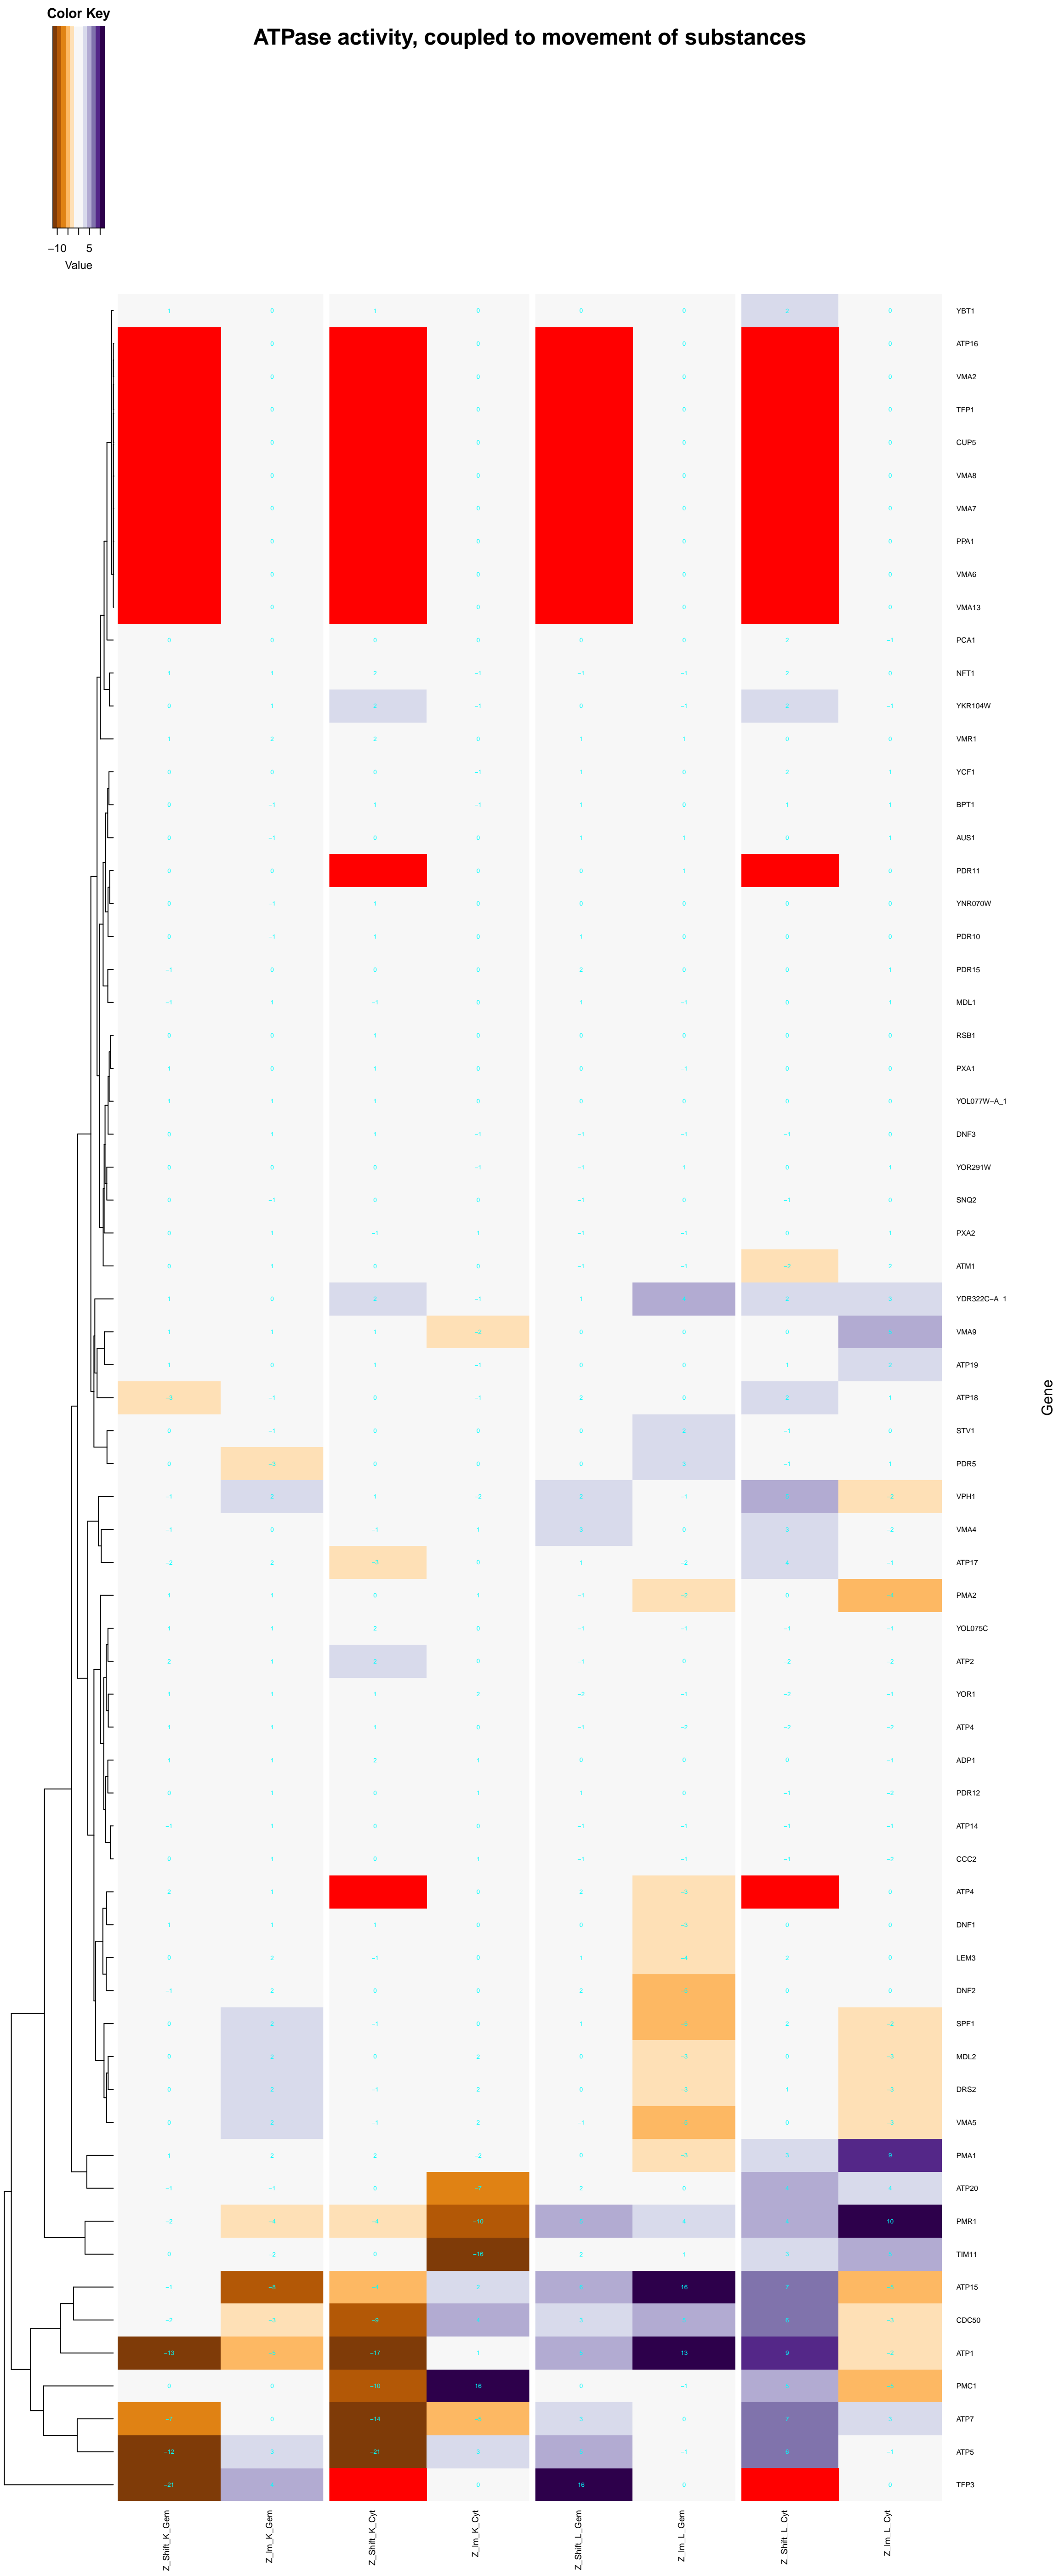

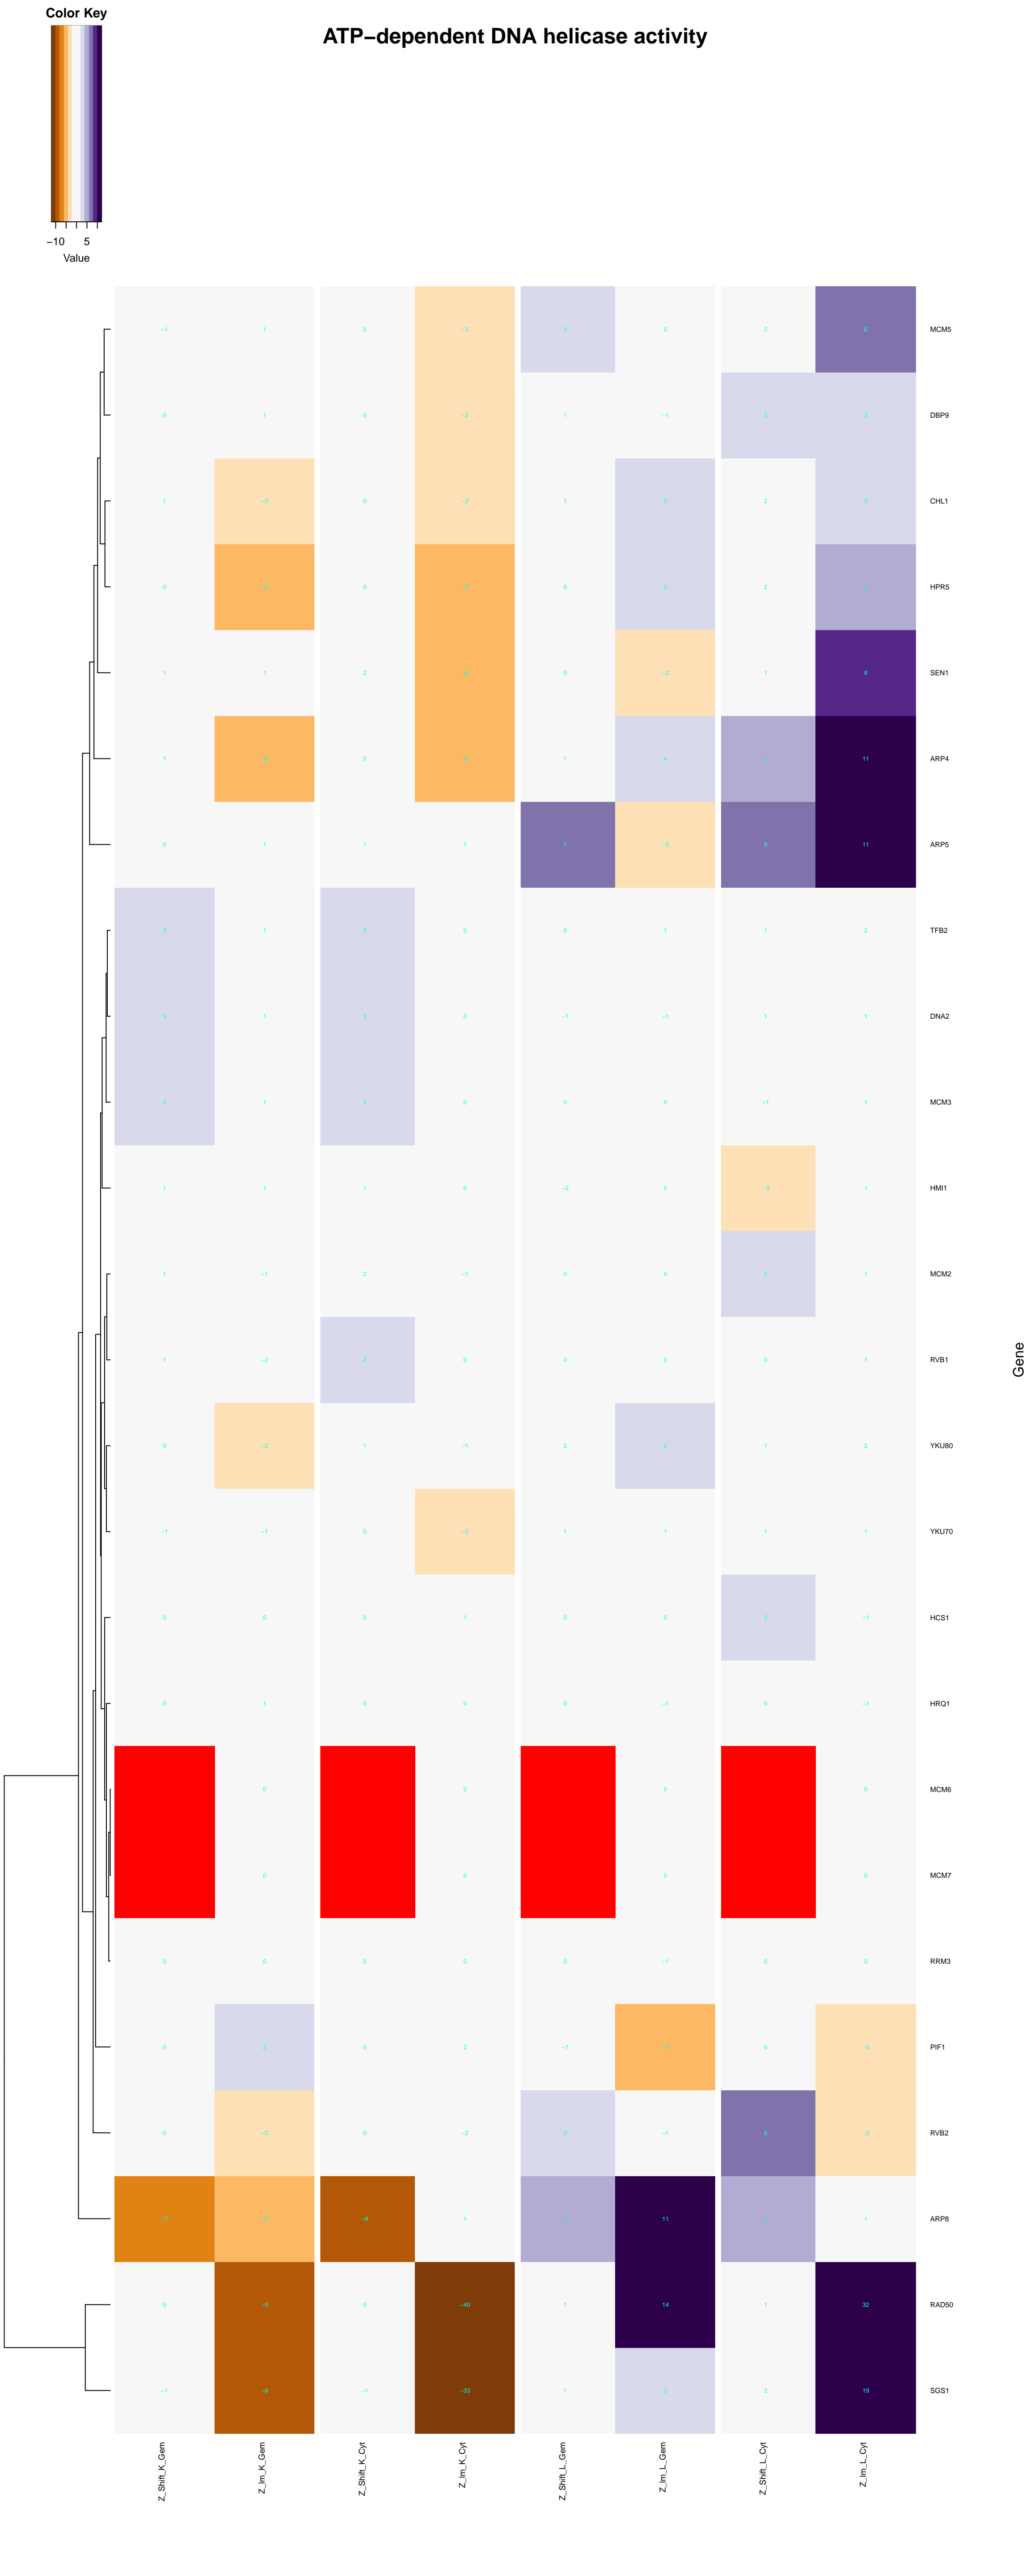

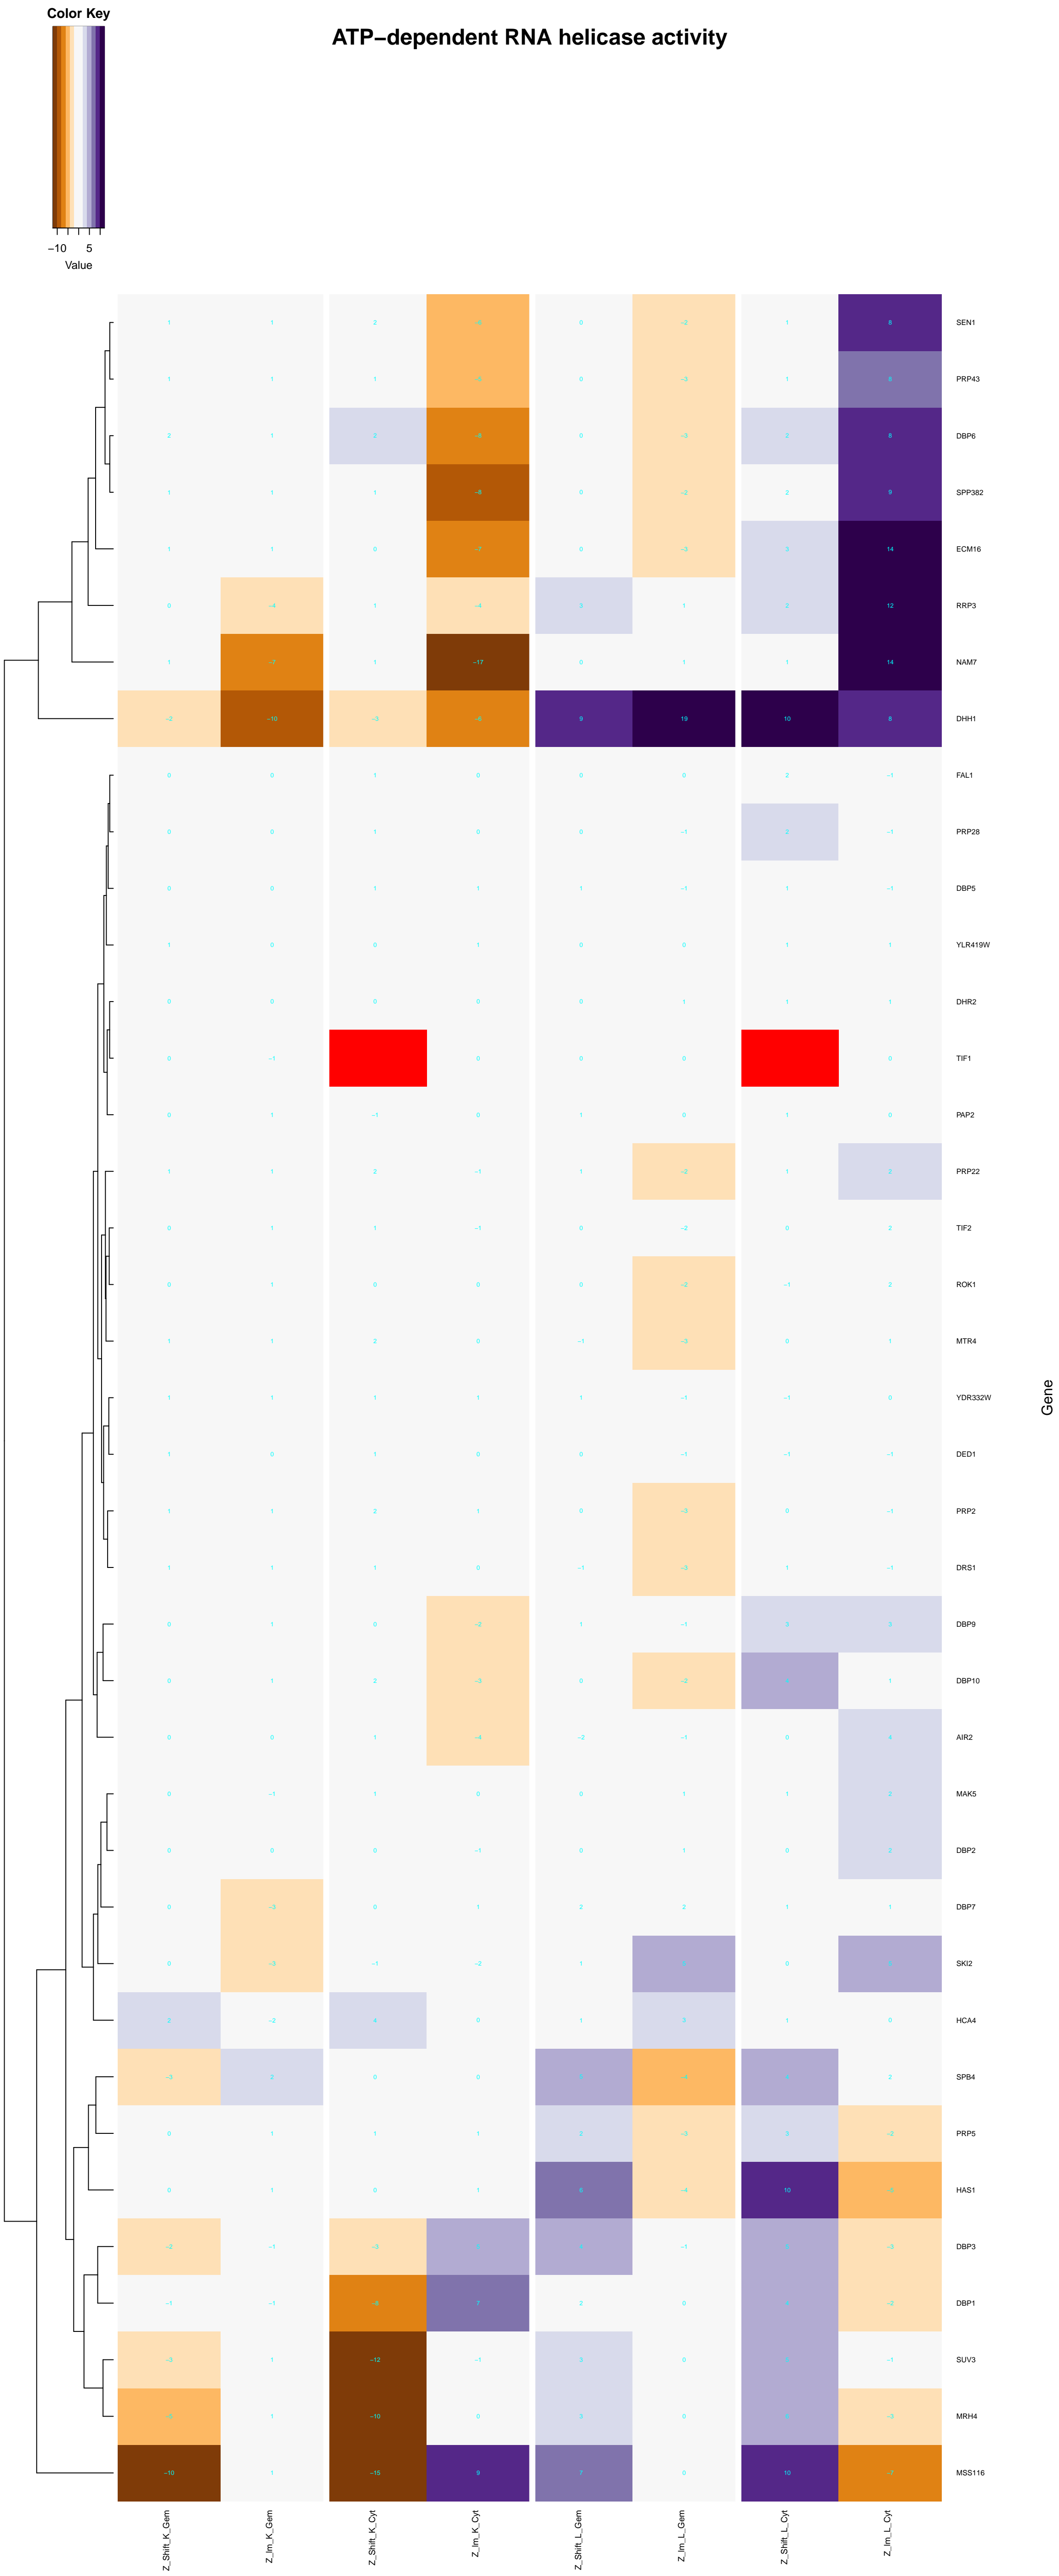

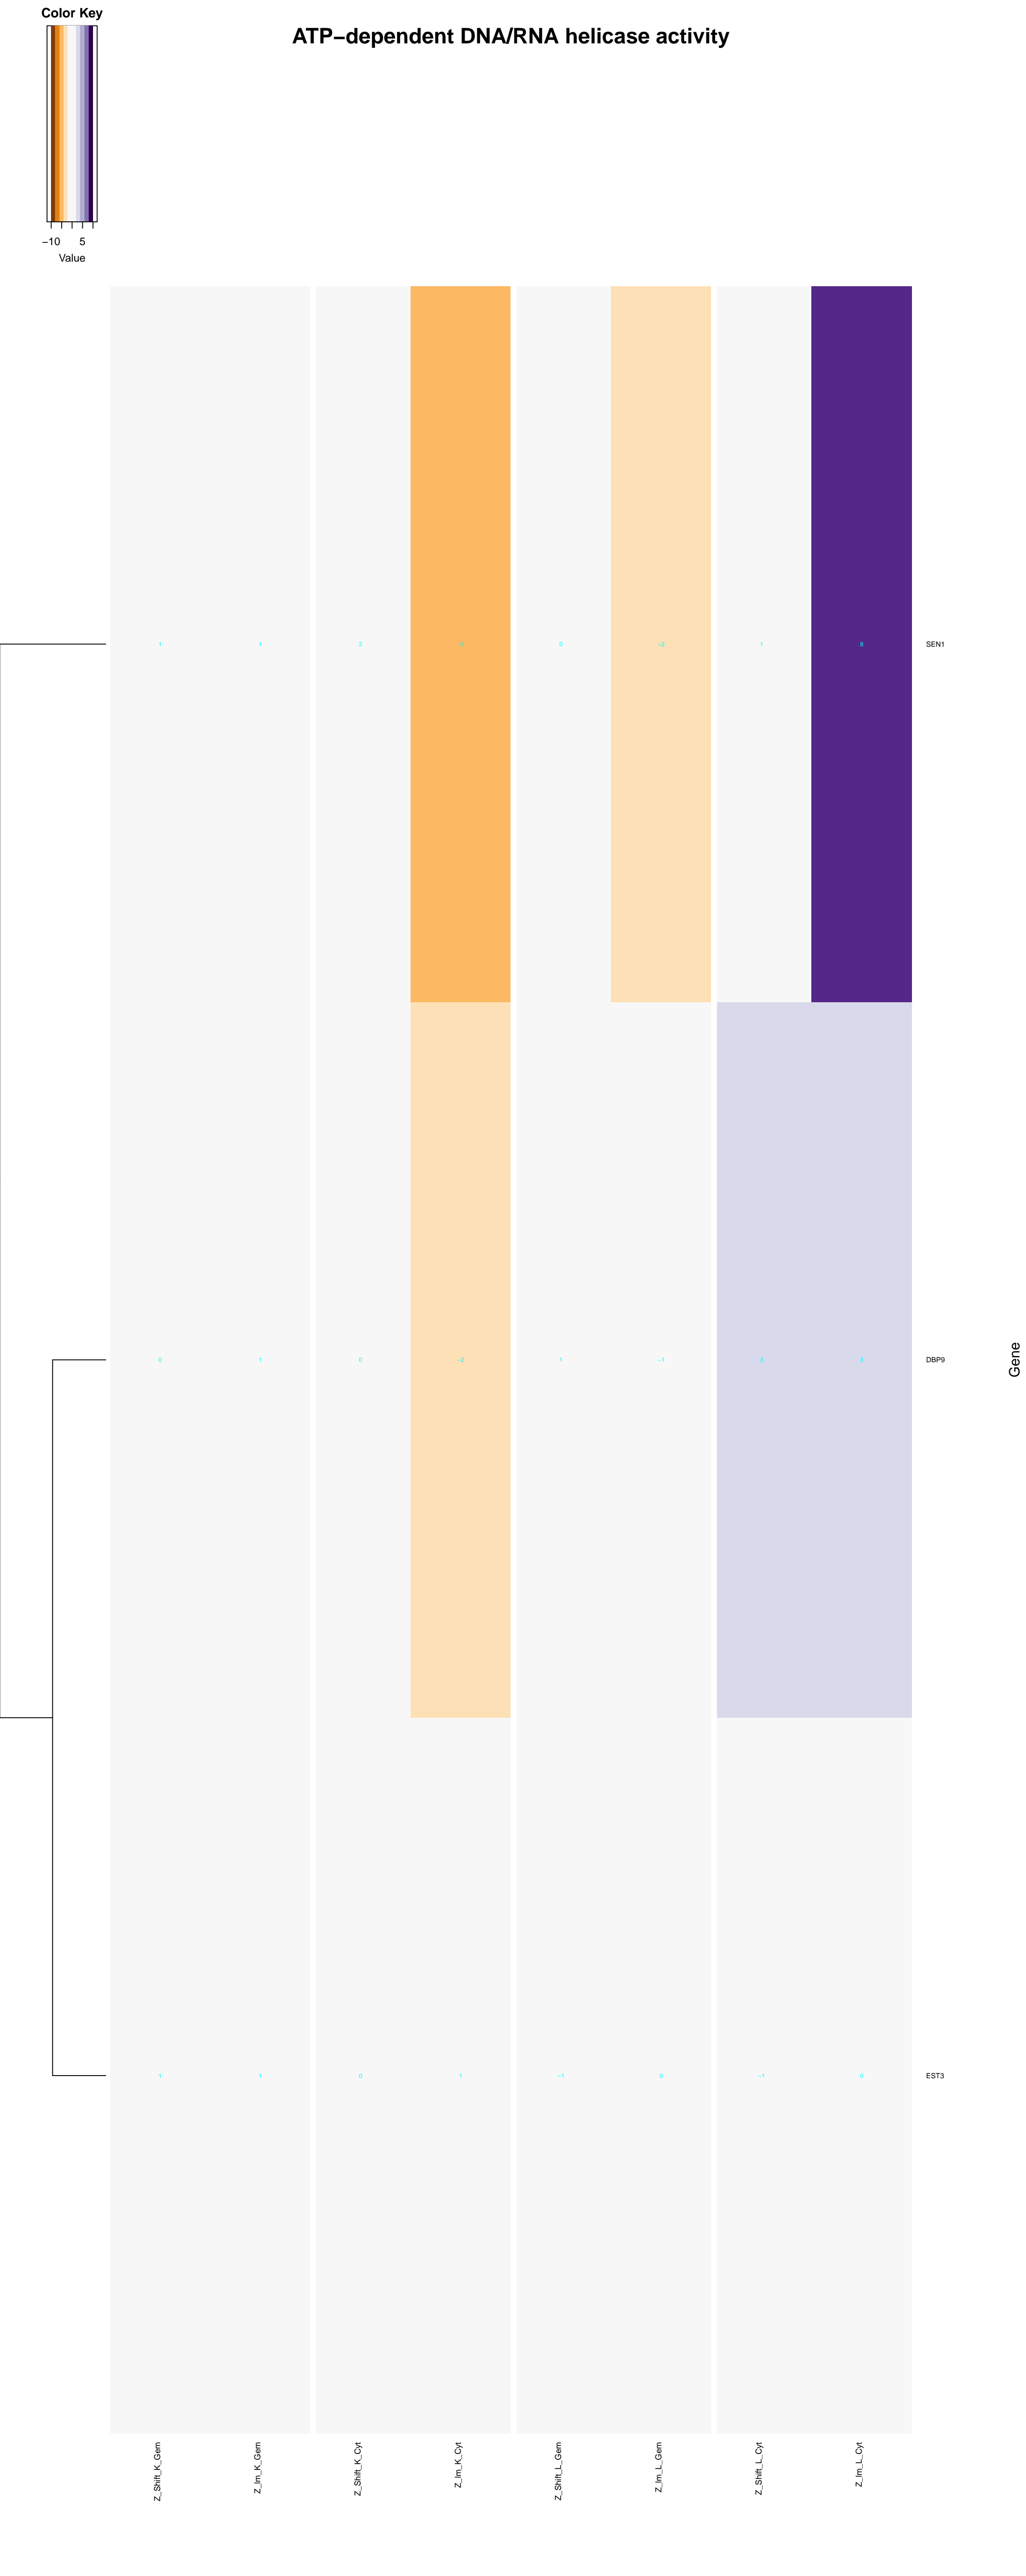

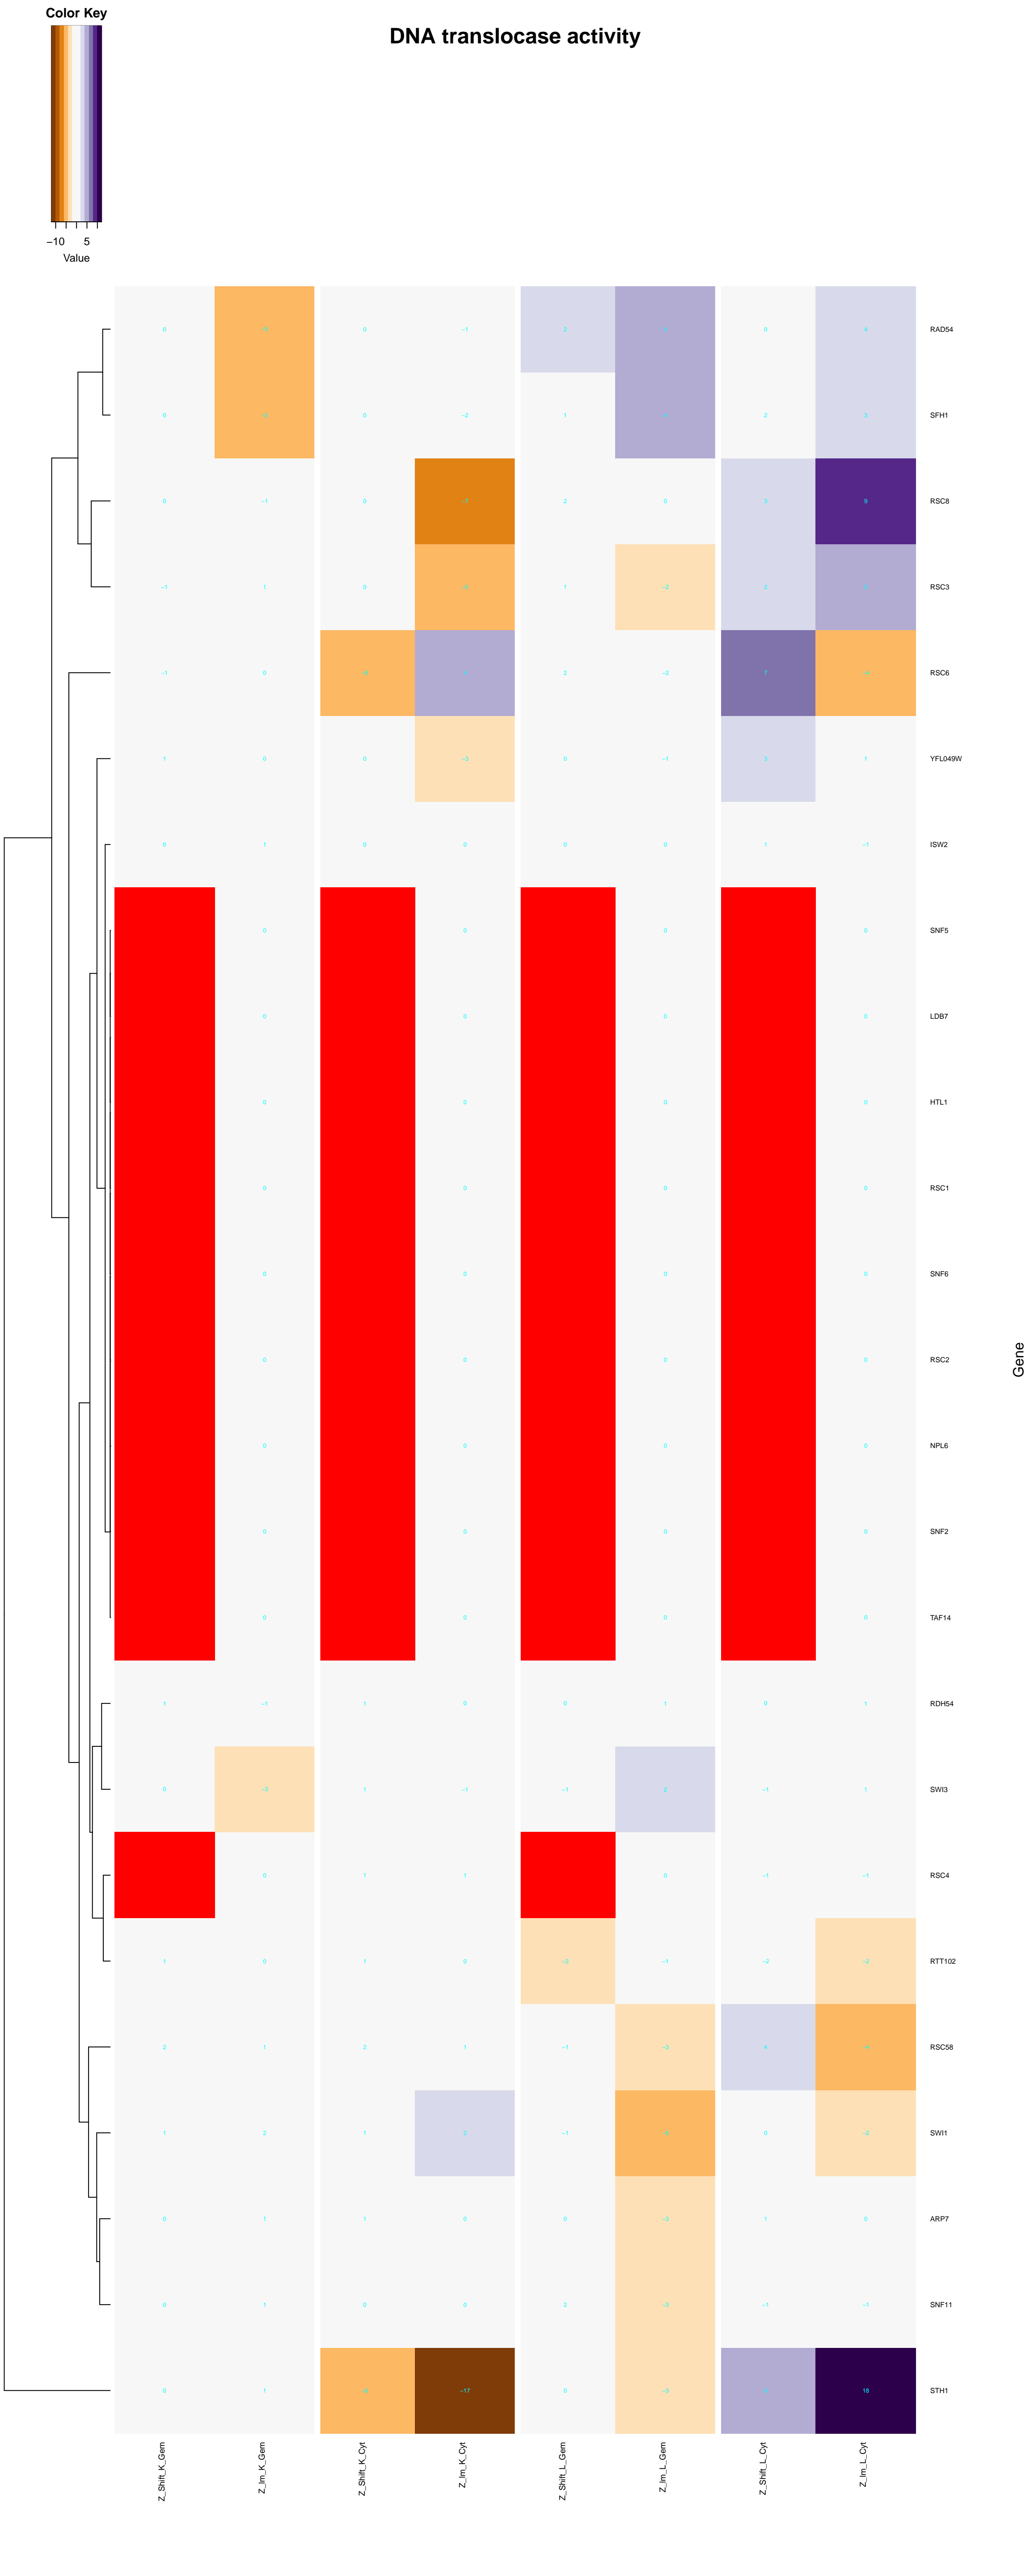

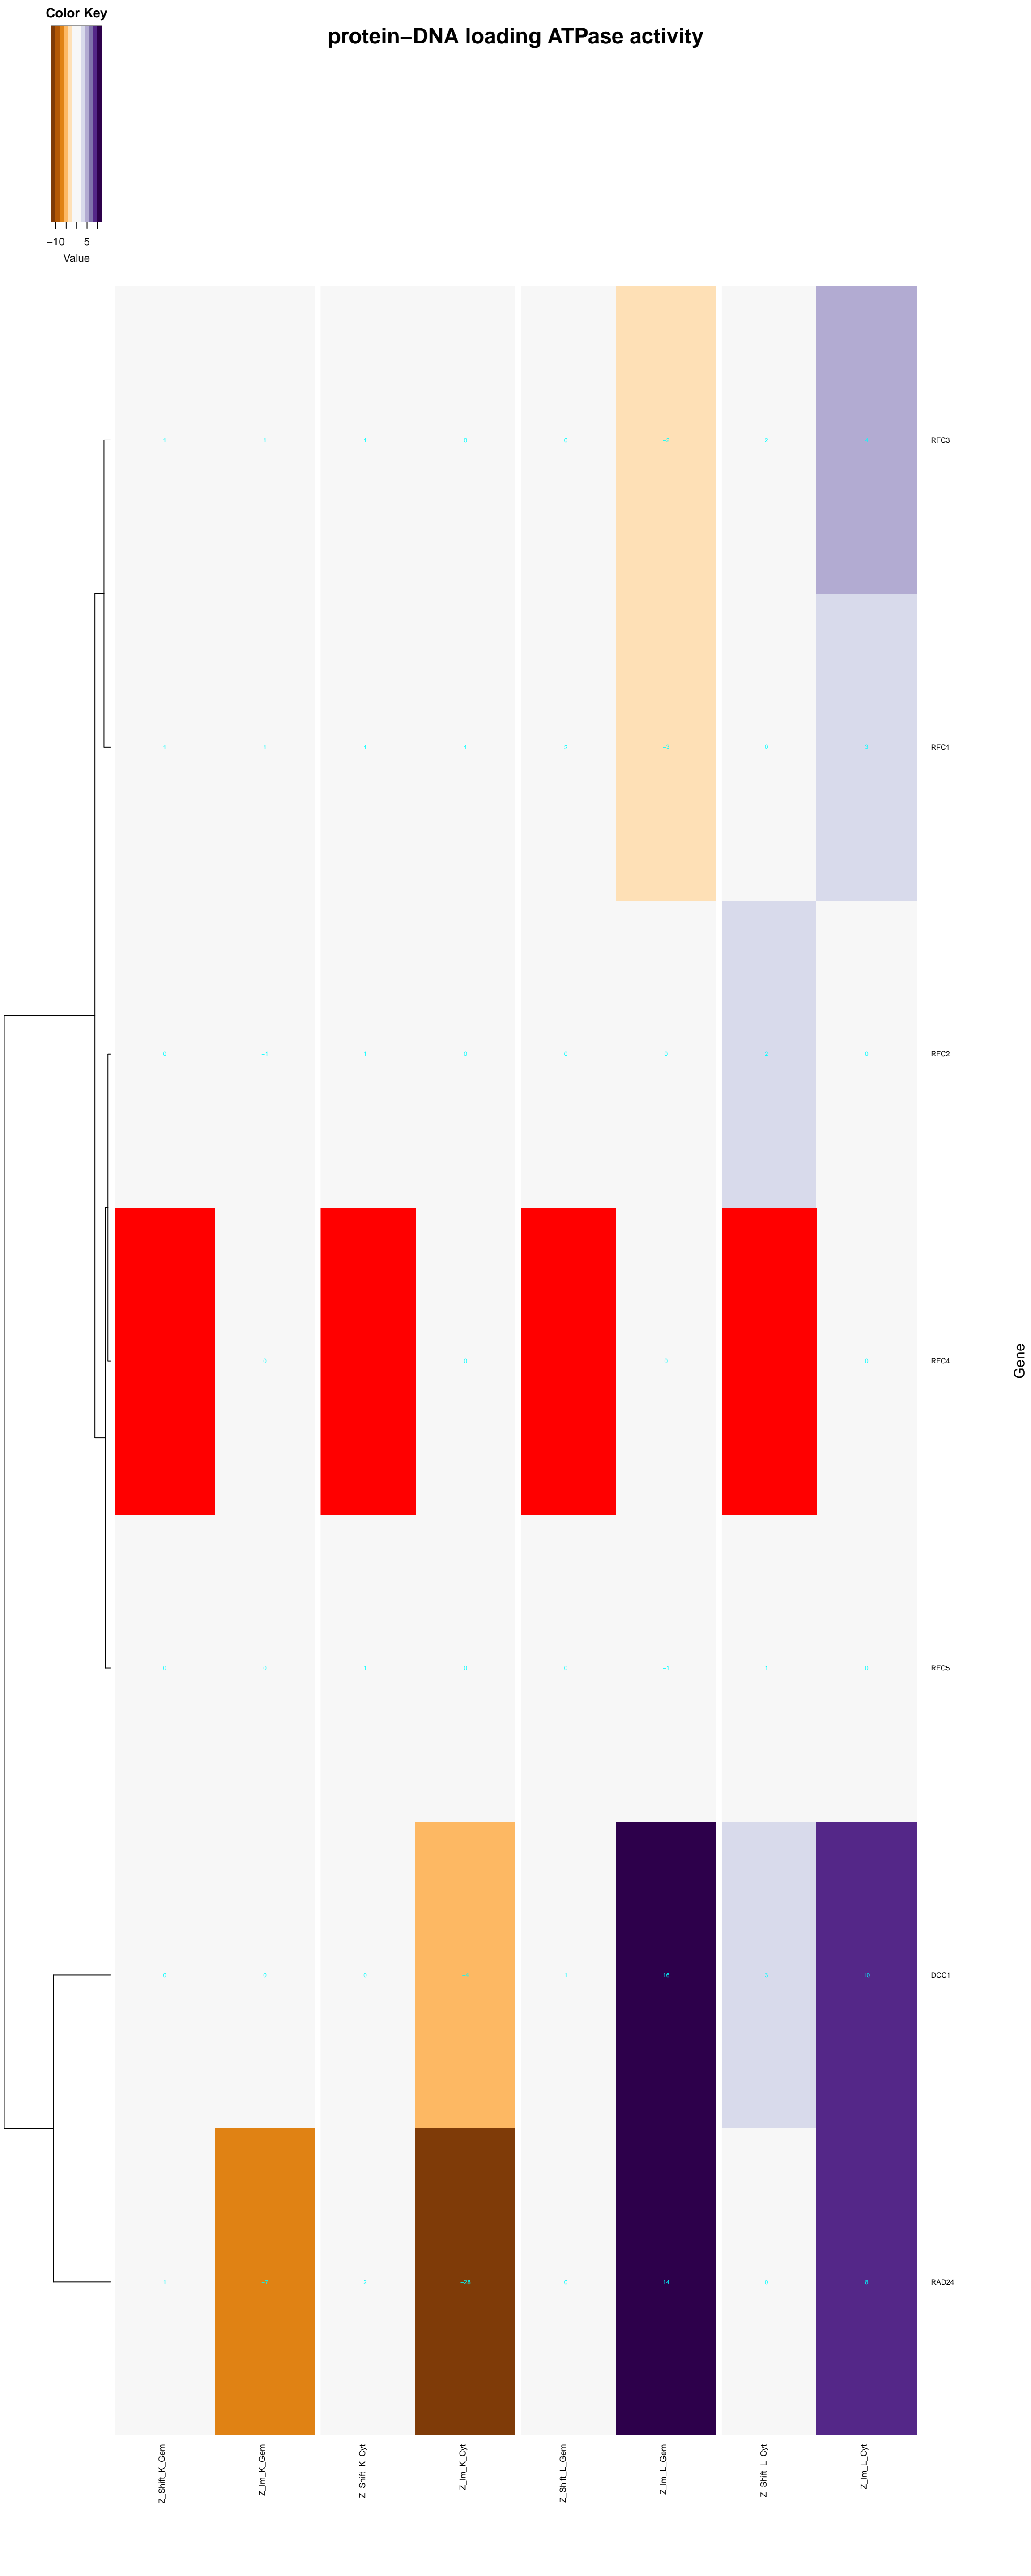

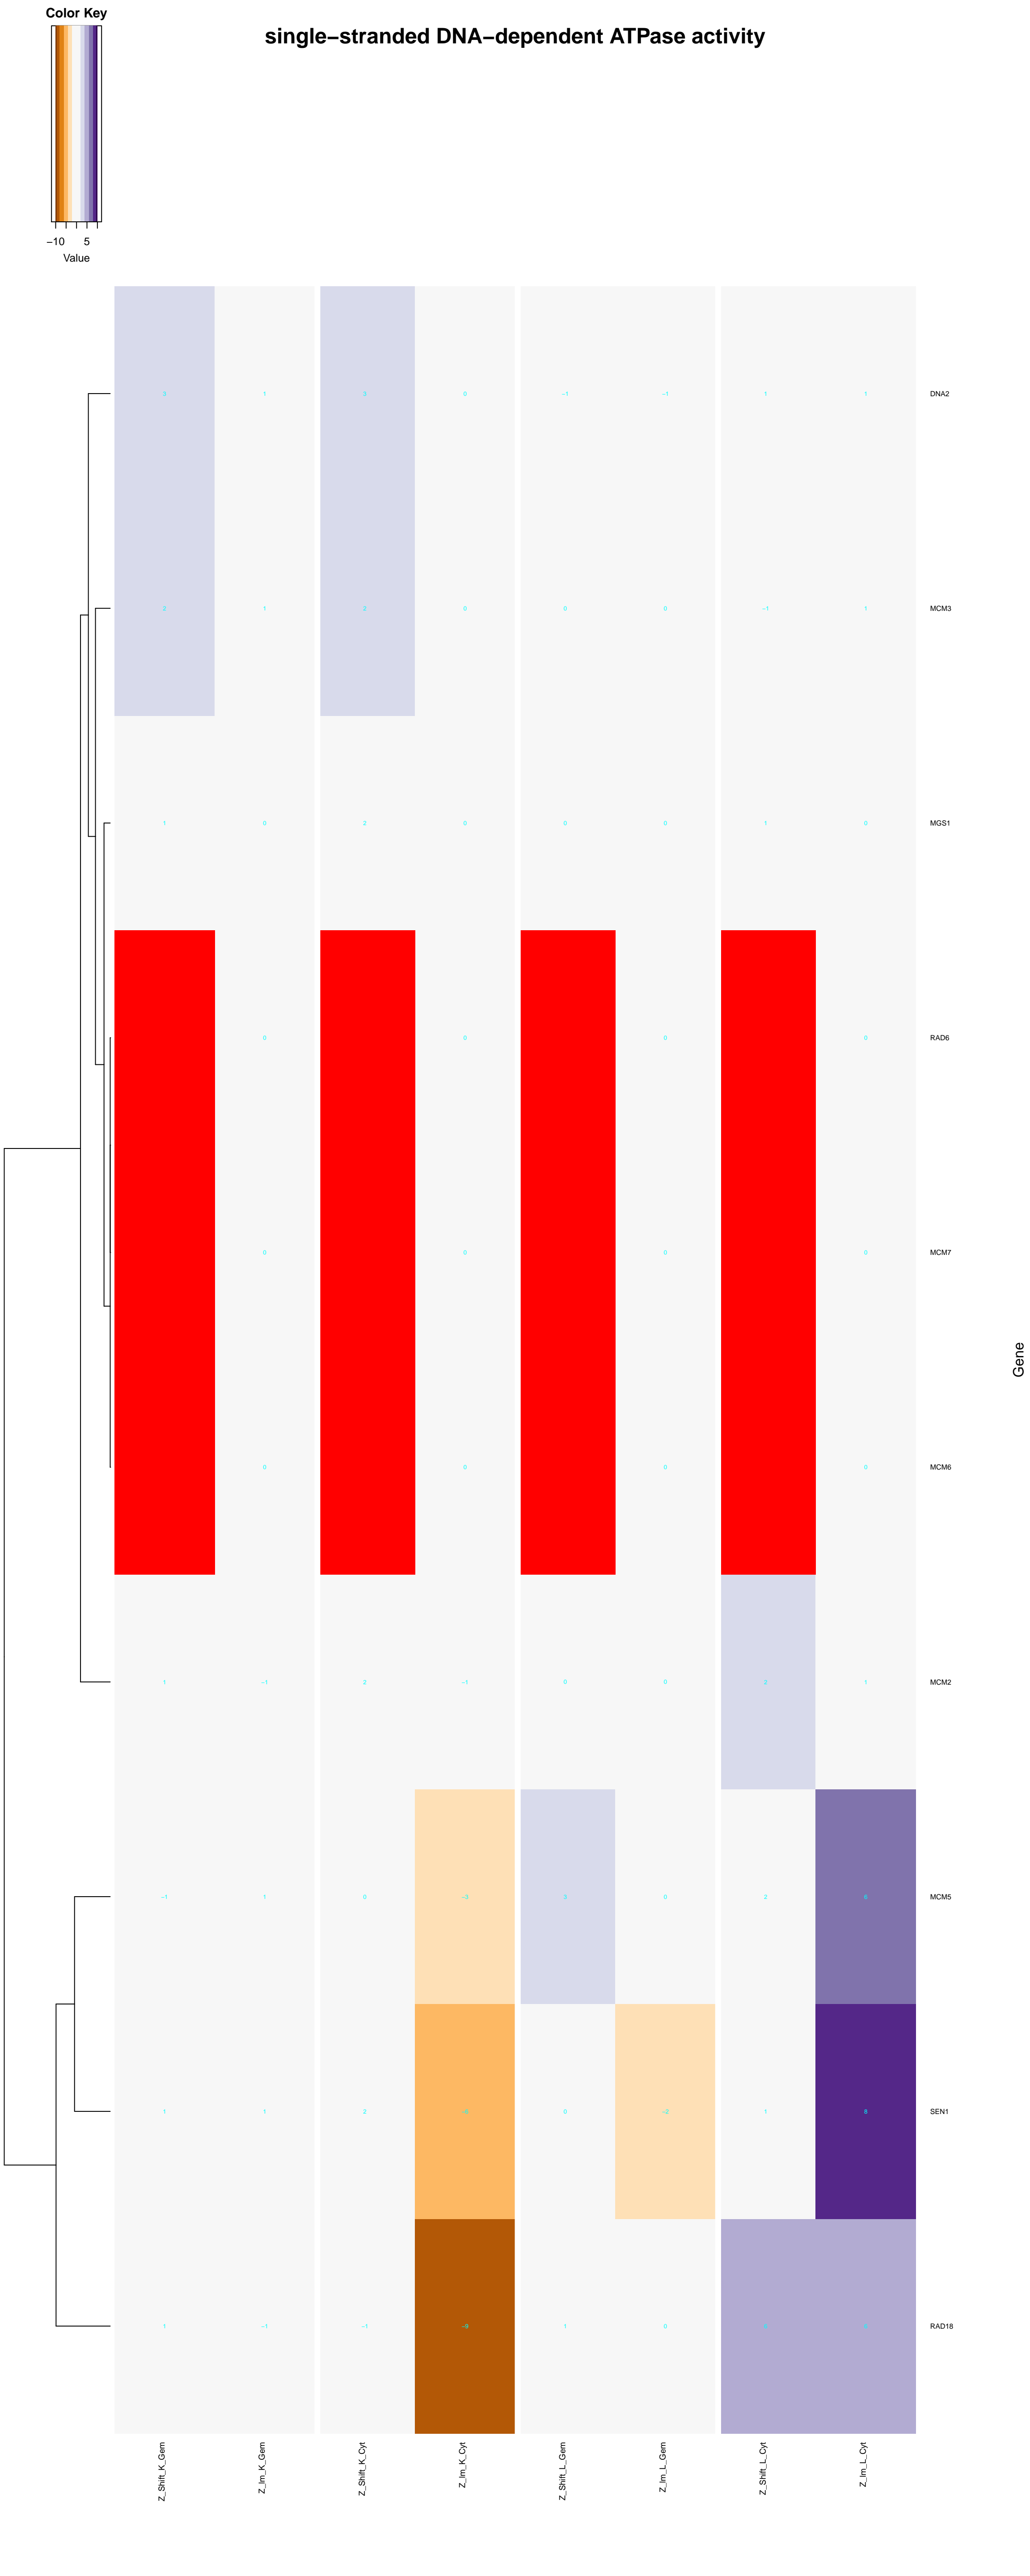

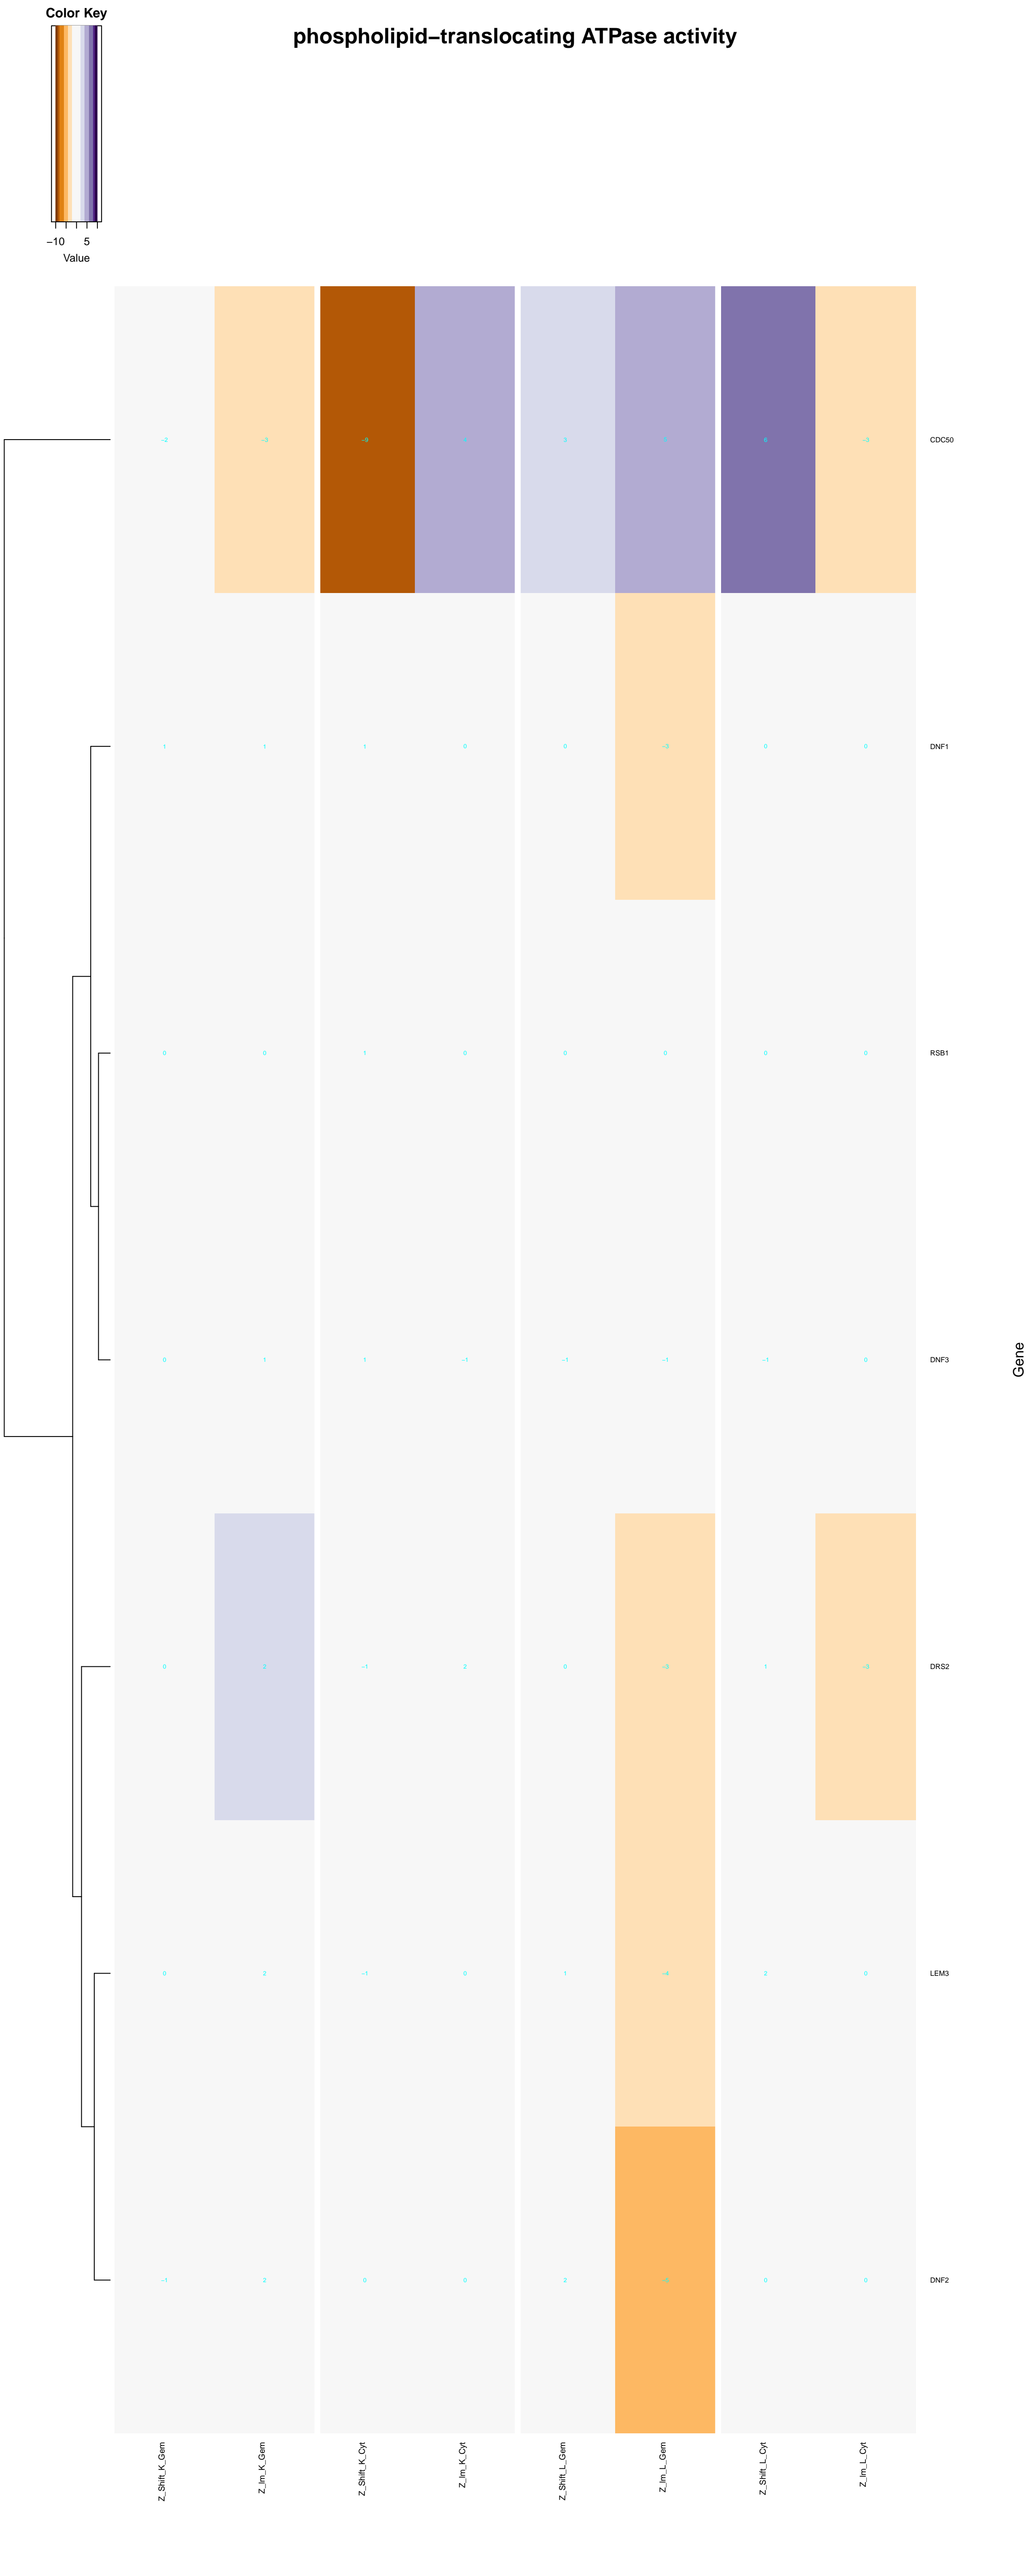

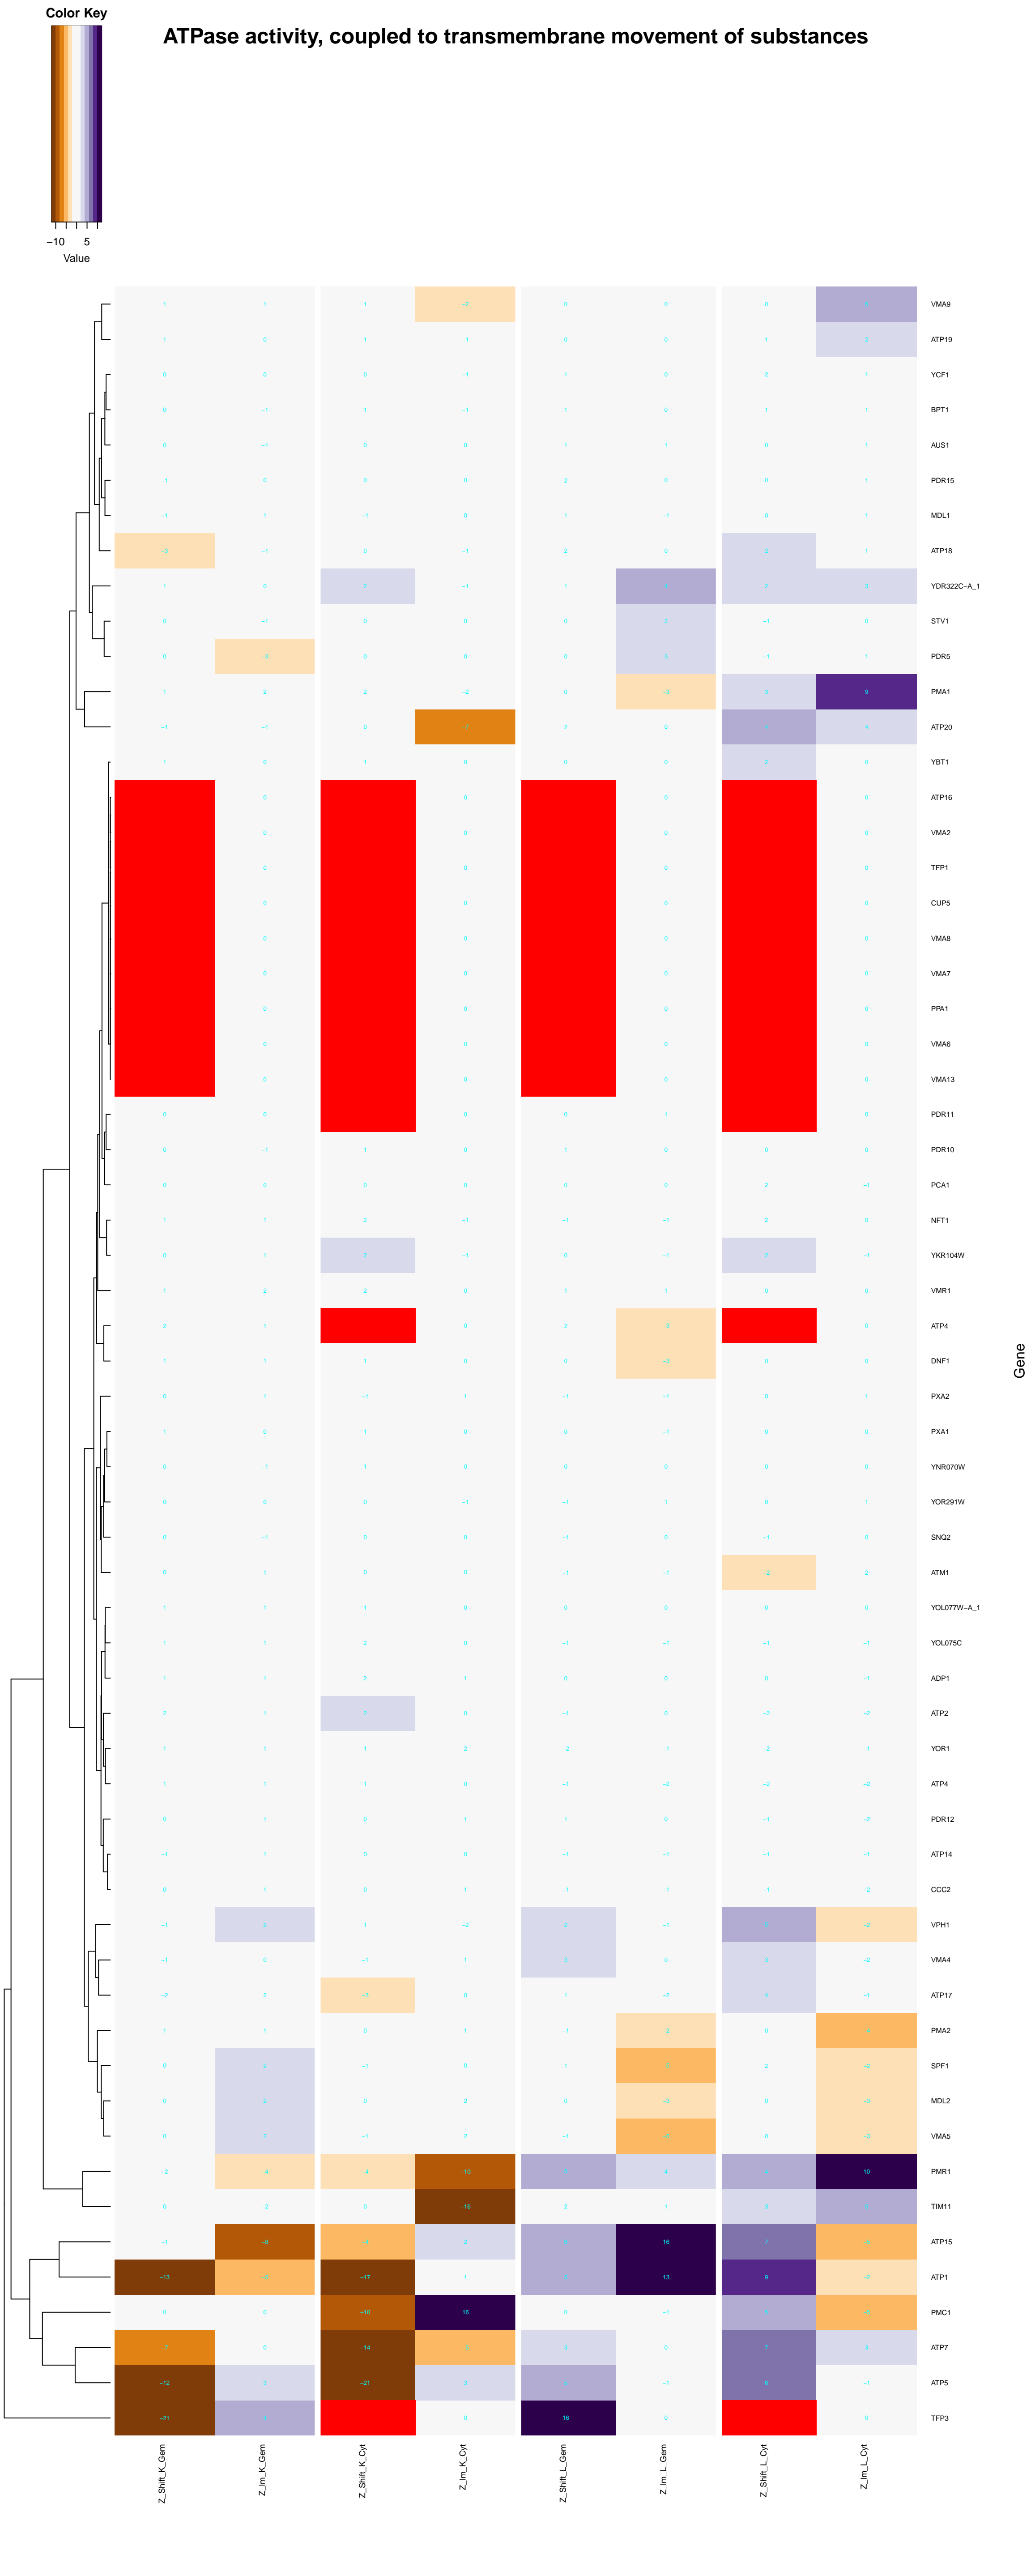

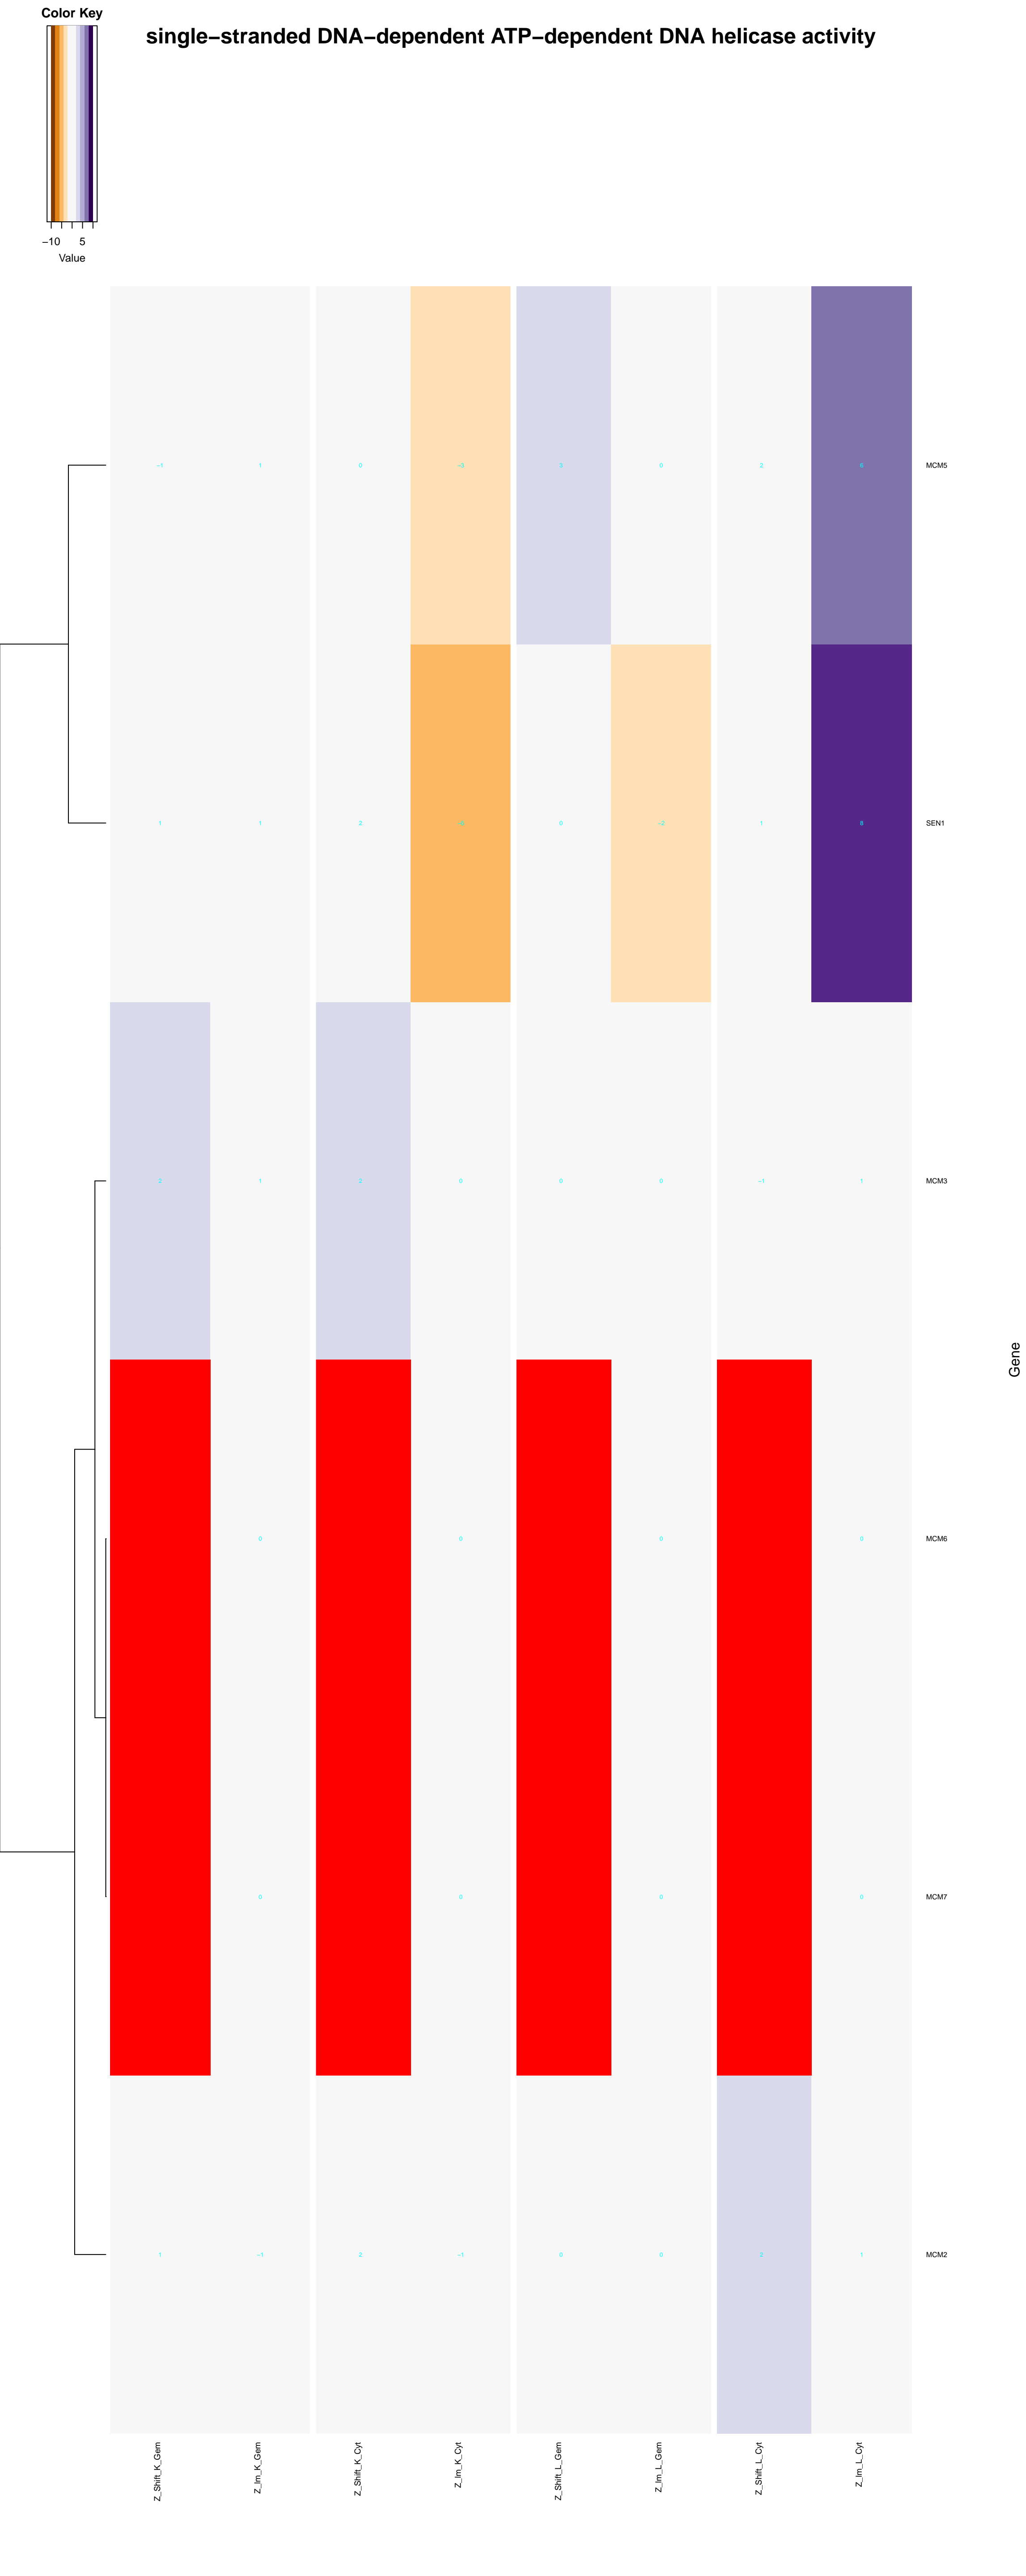

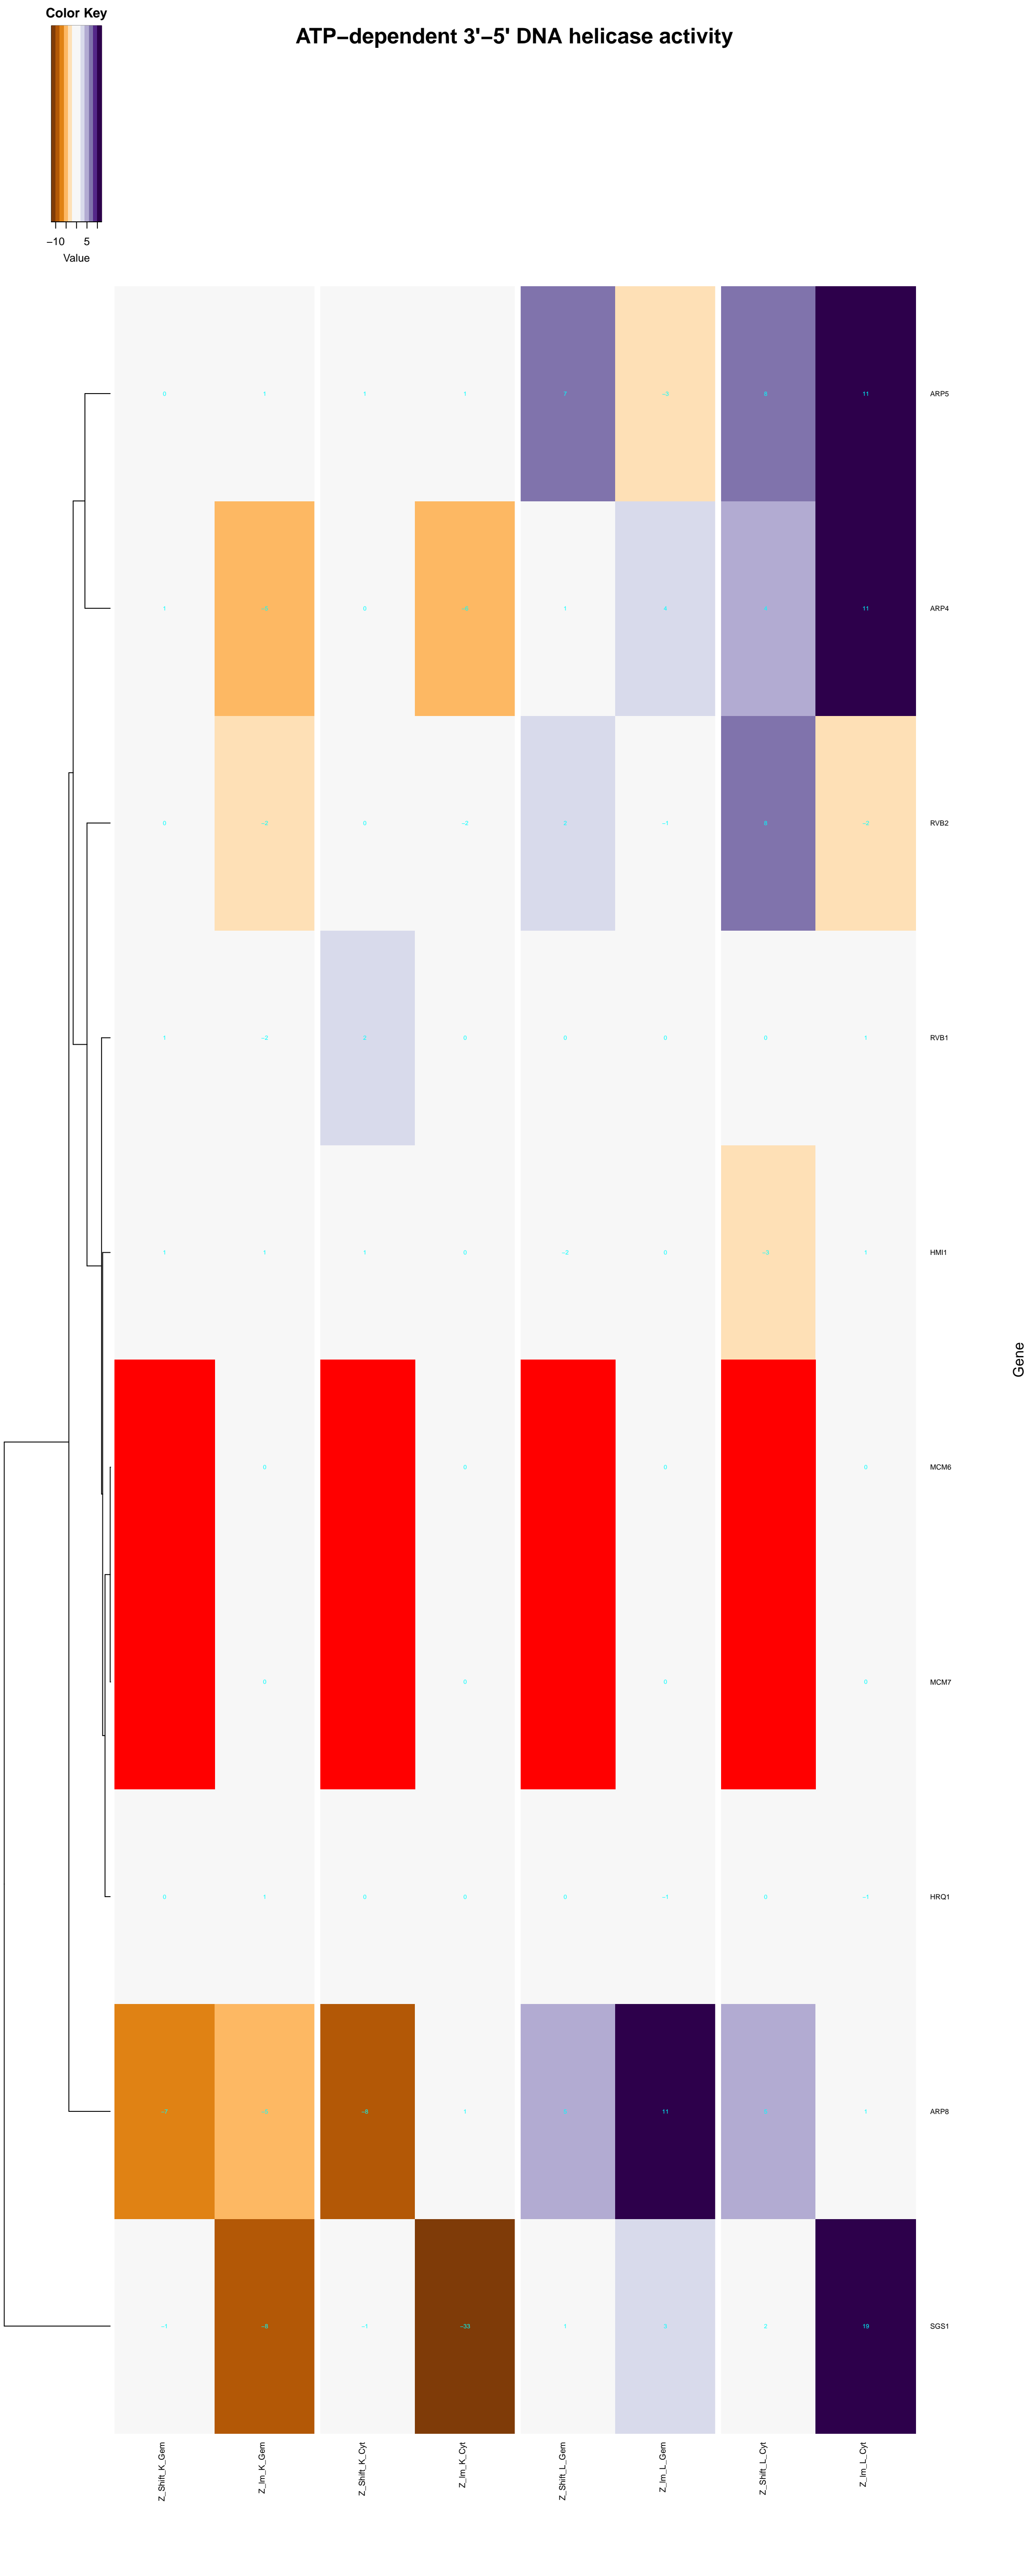

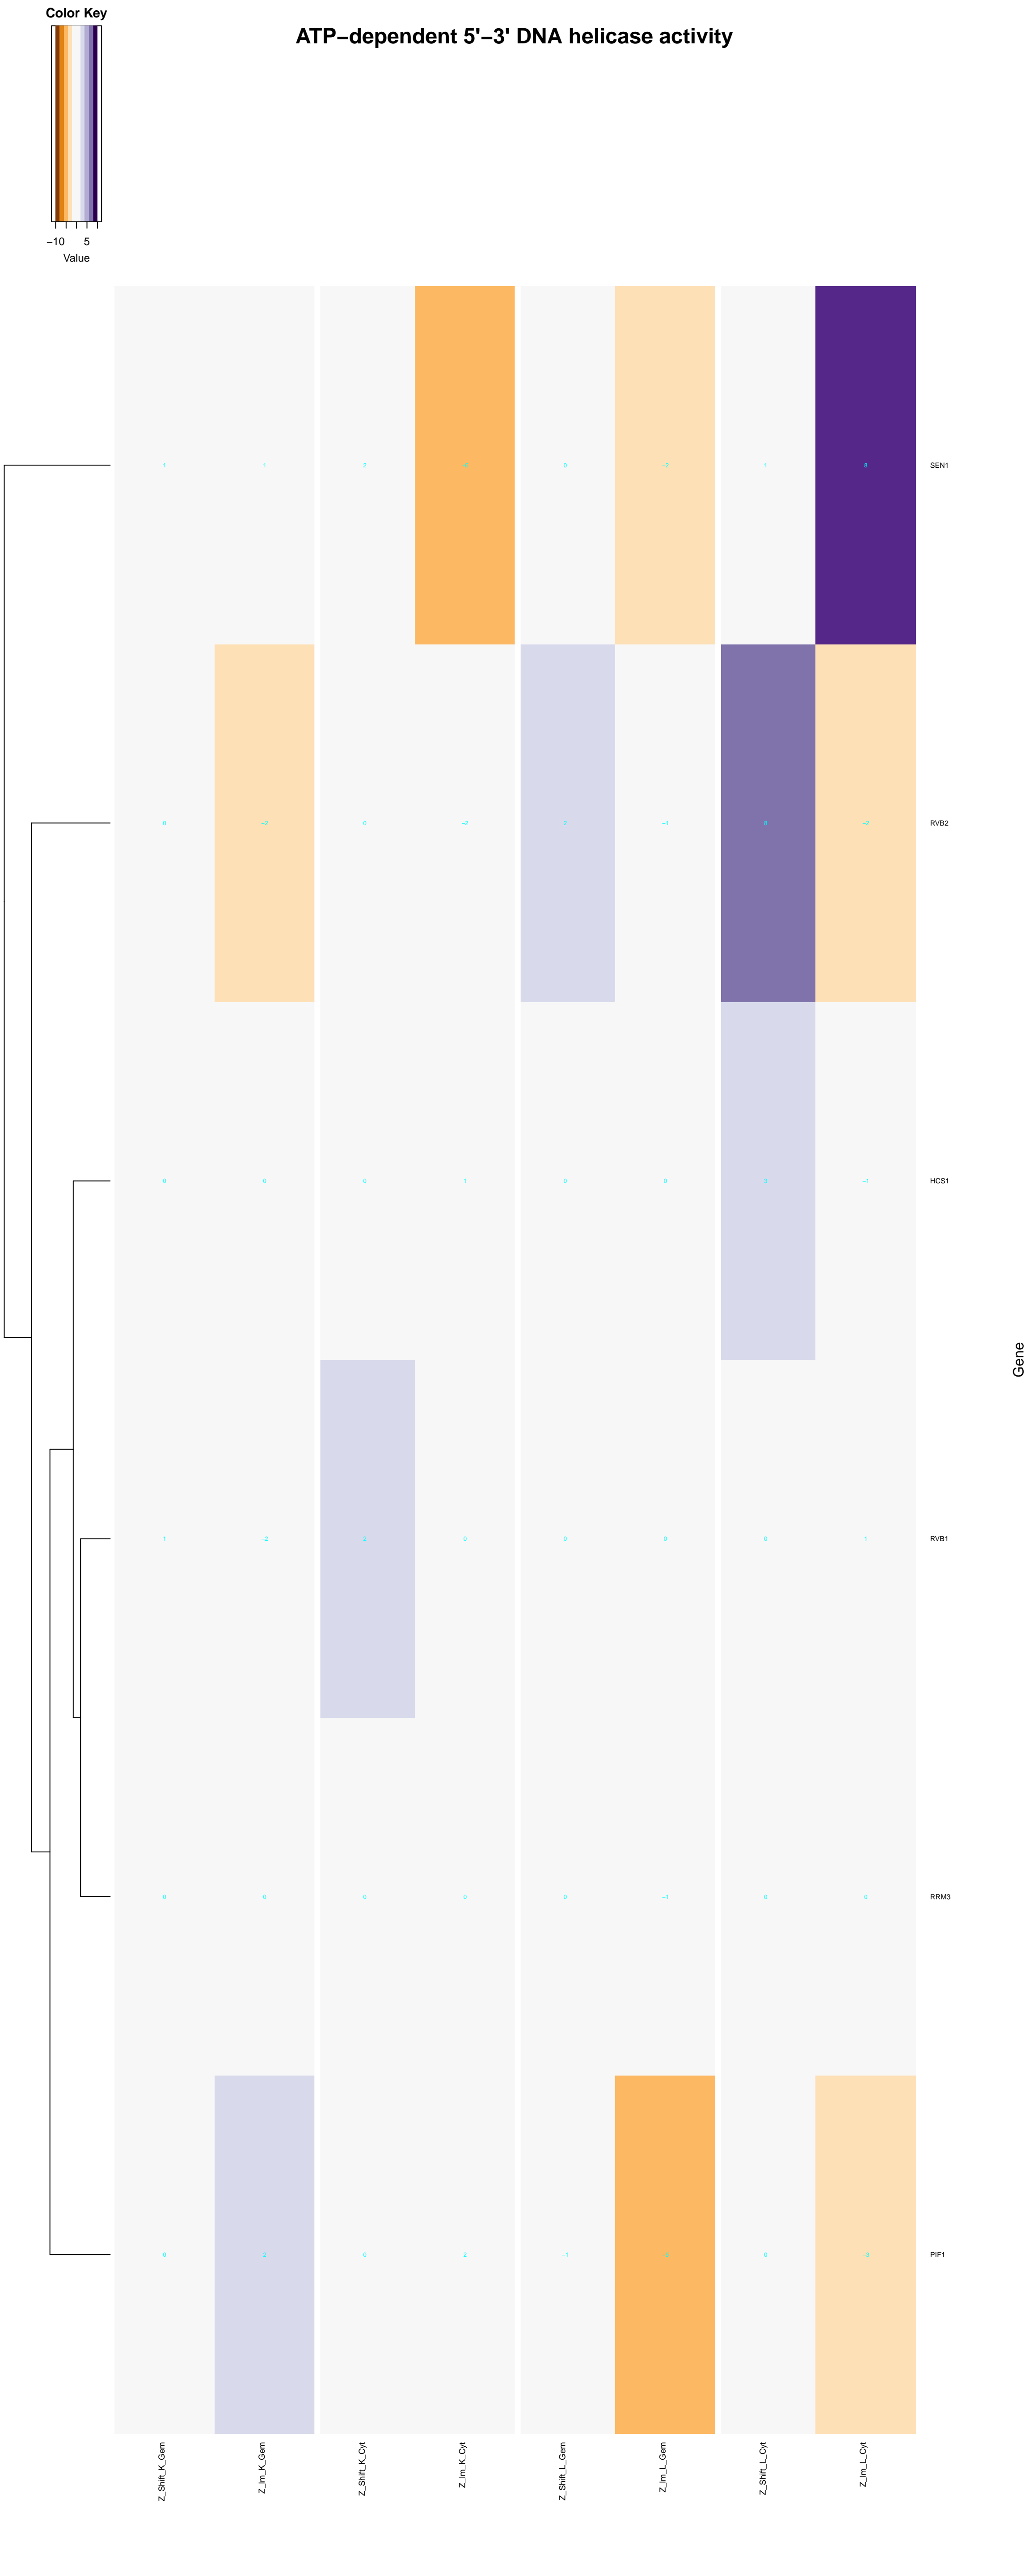

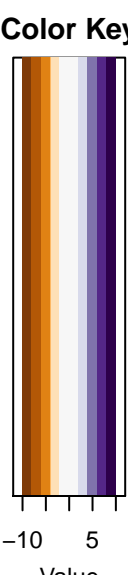

ATP-dependent 3'-5' RNA helicase activity

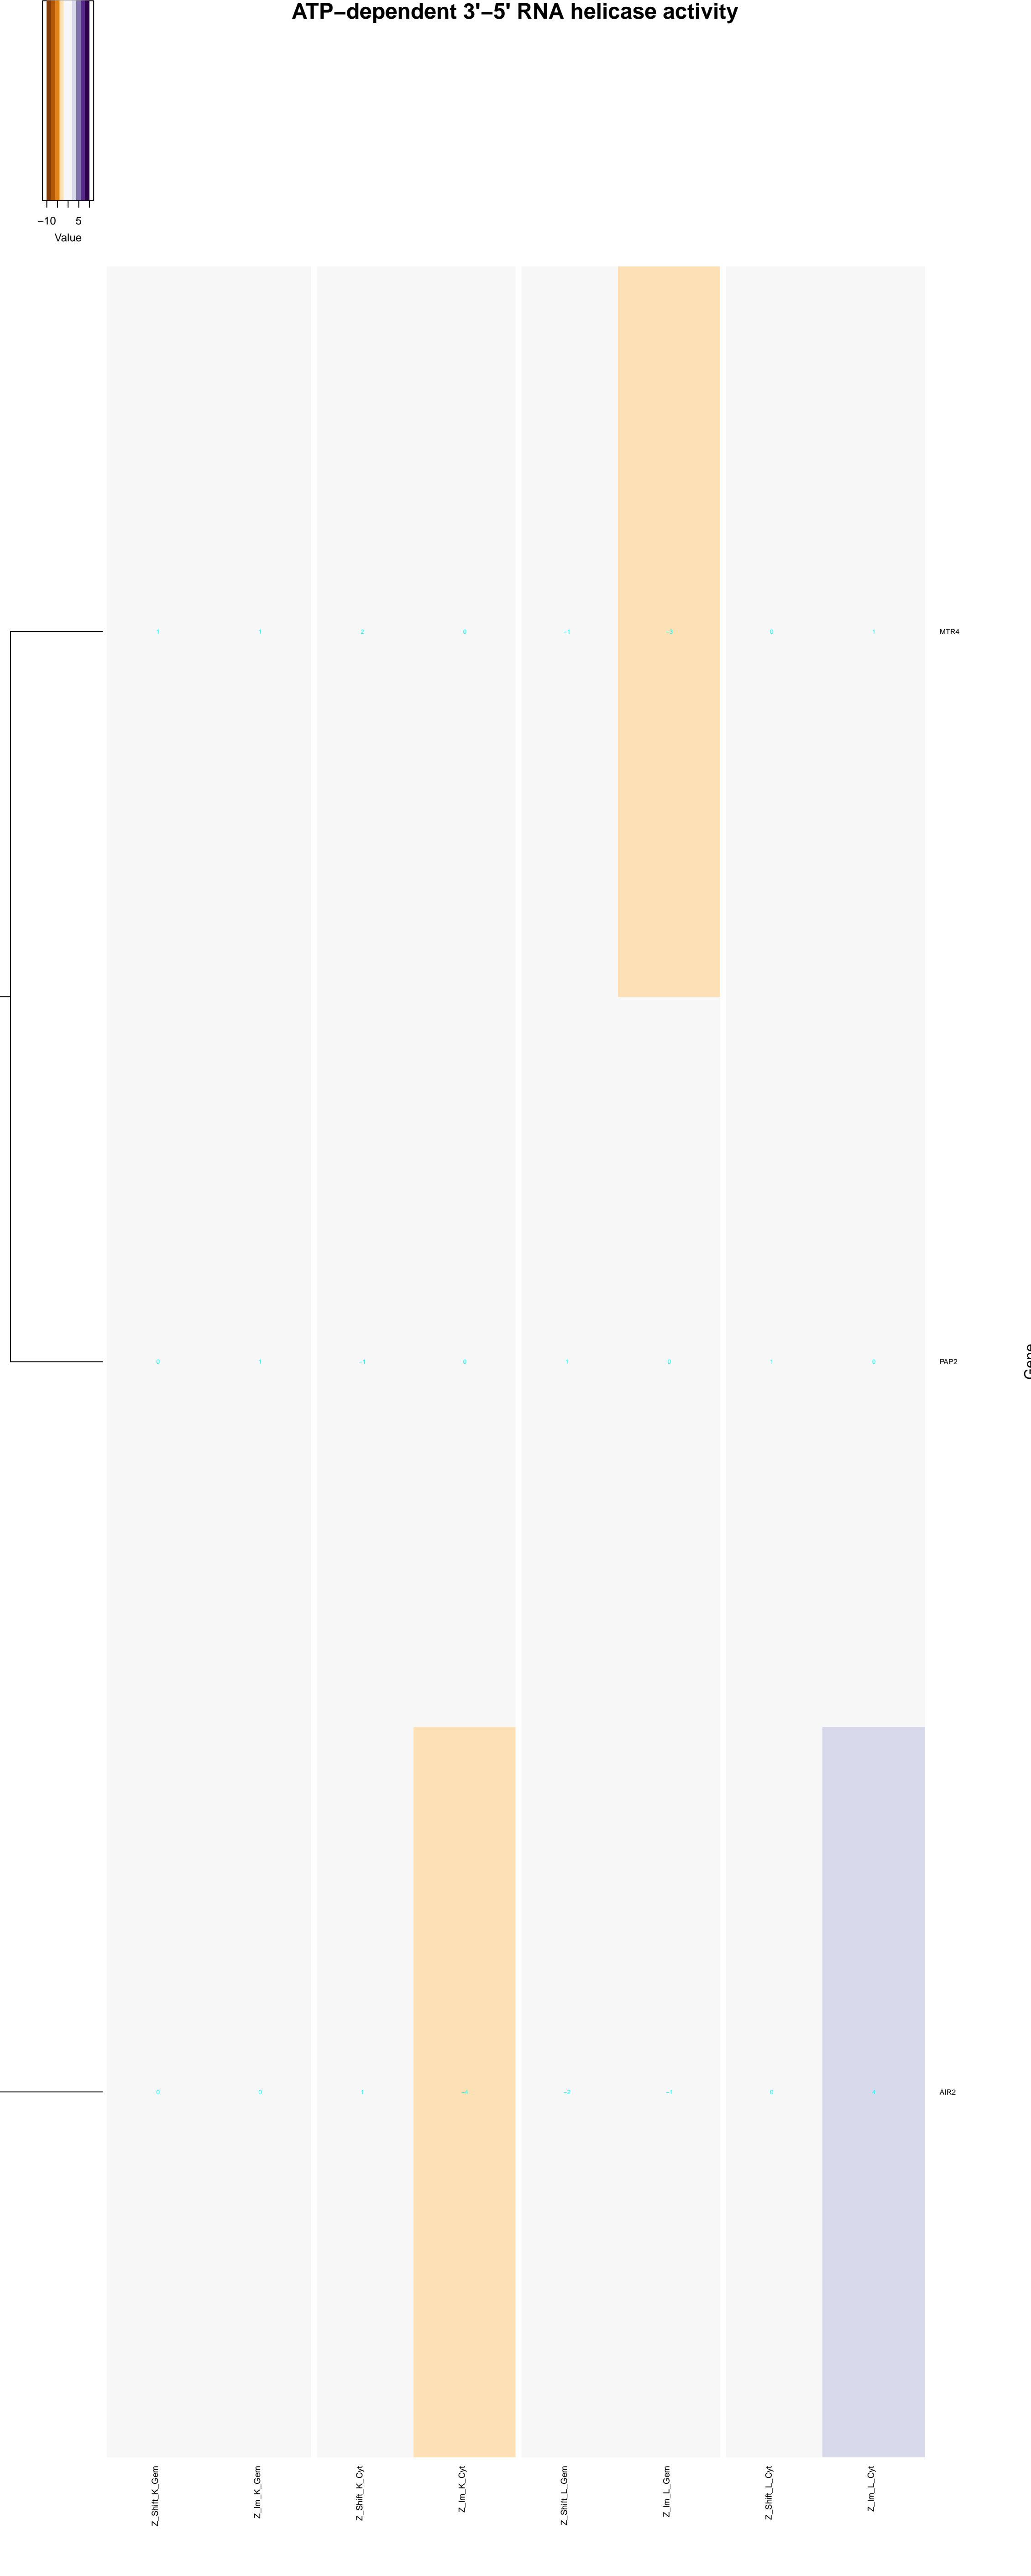

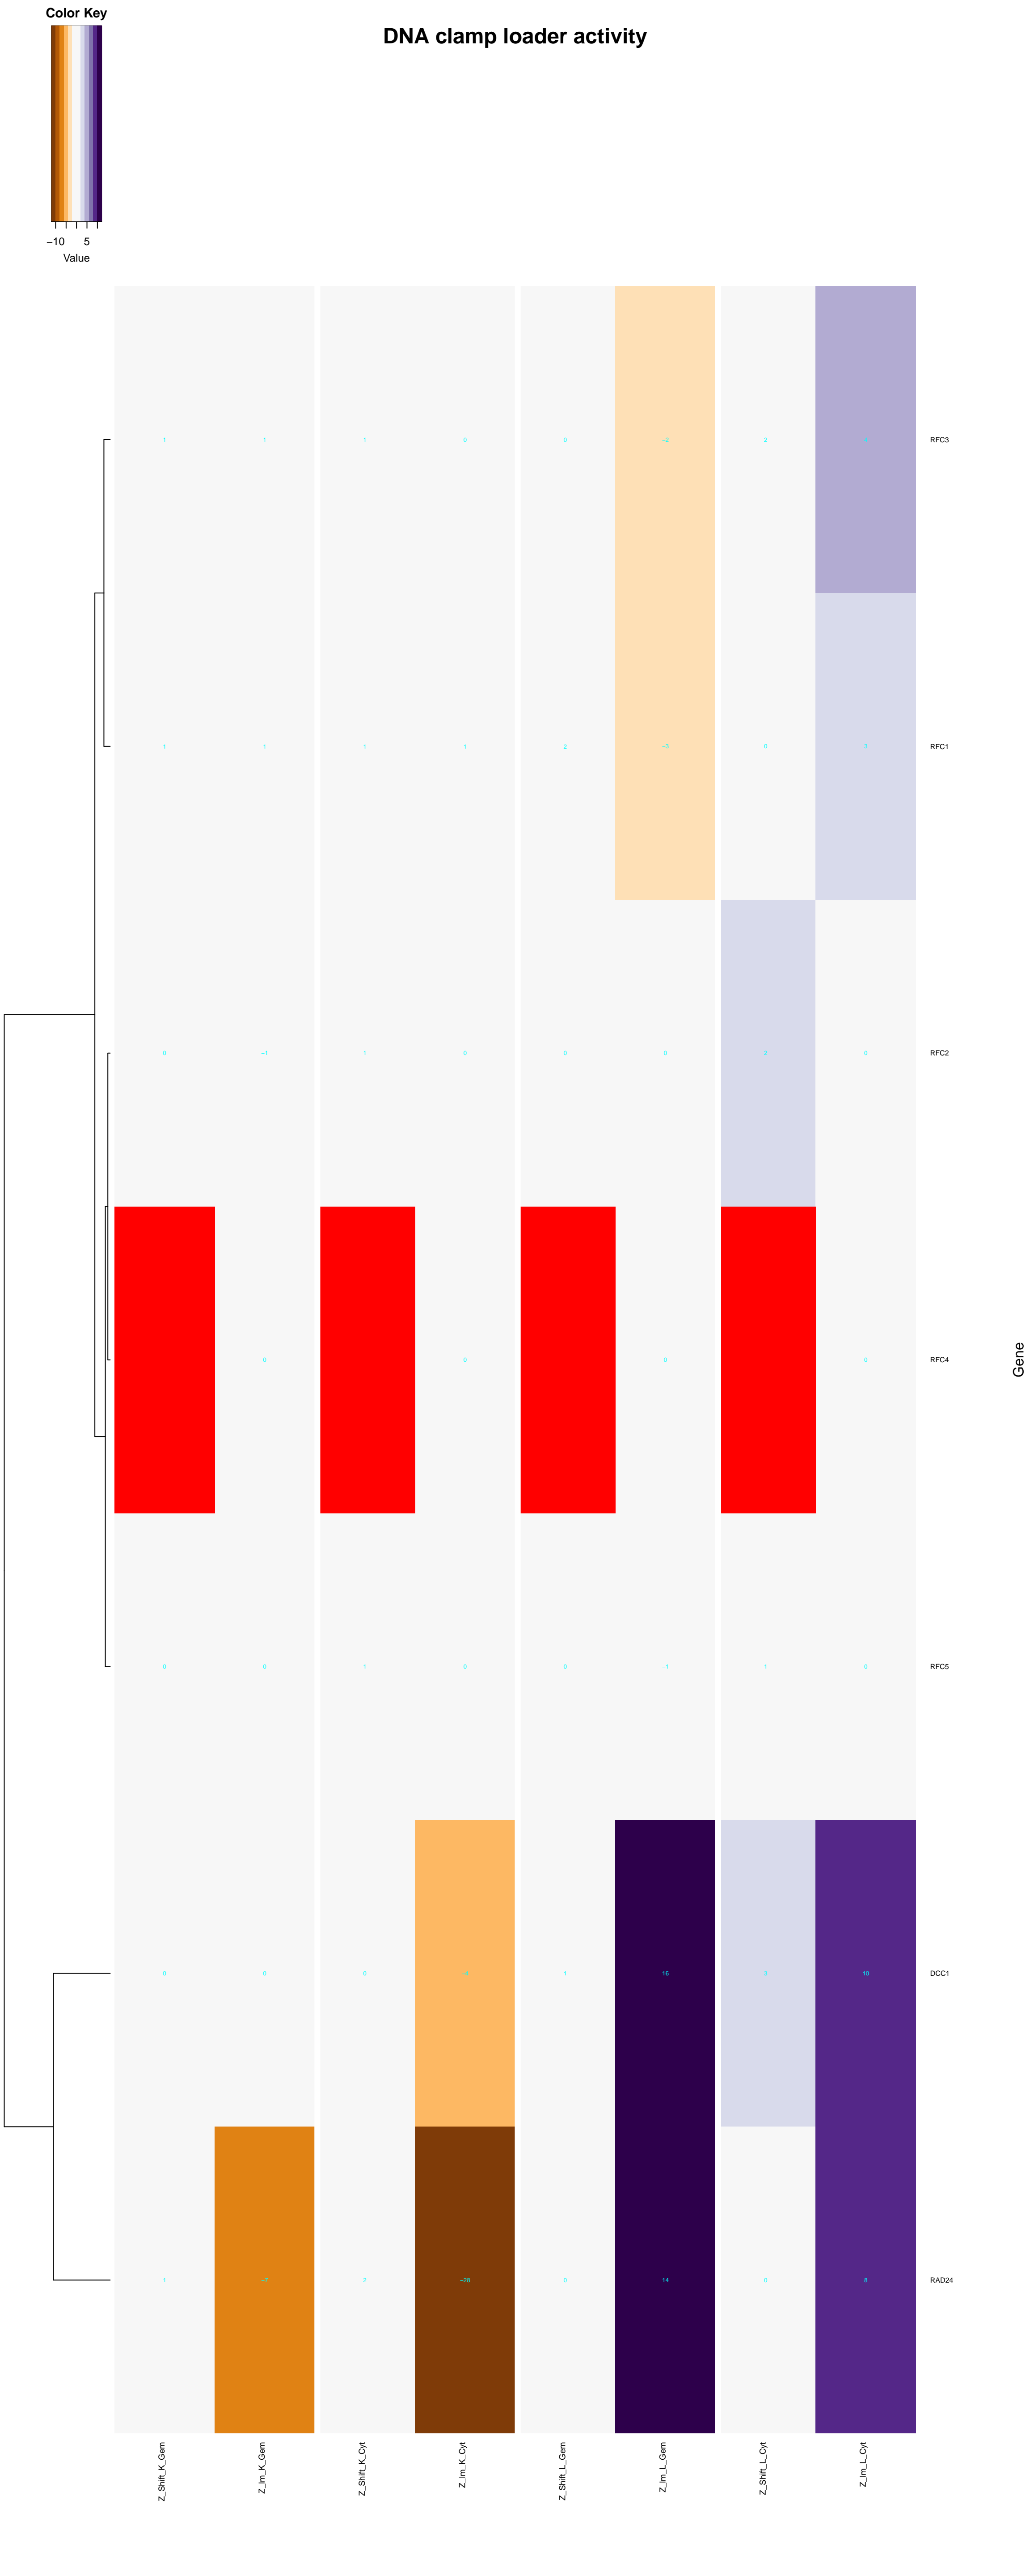

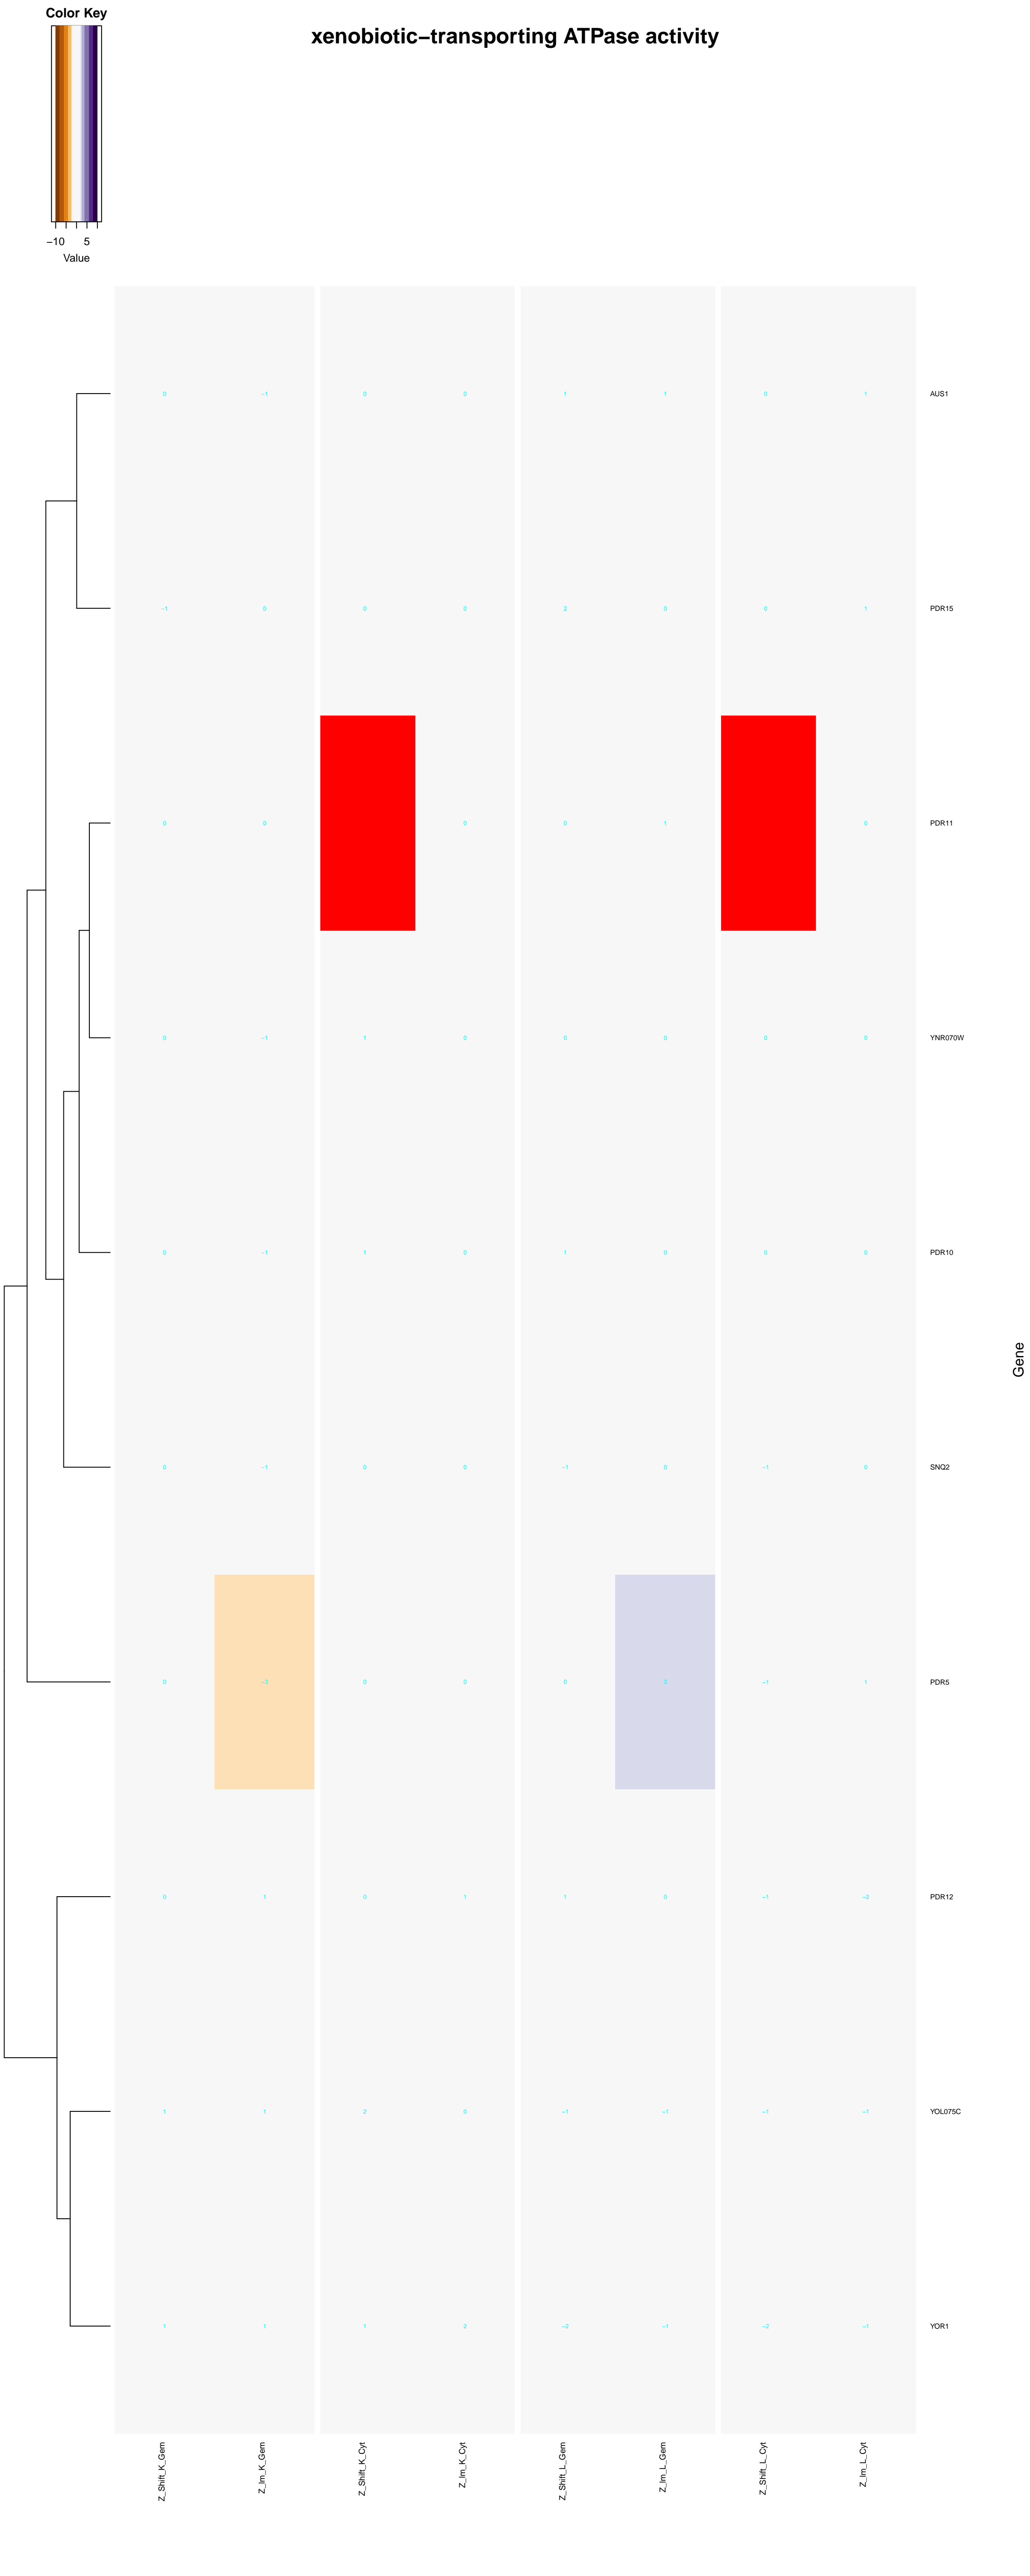

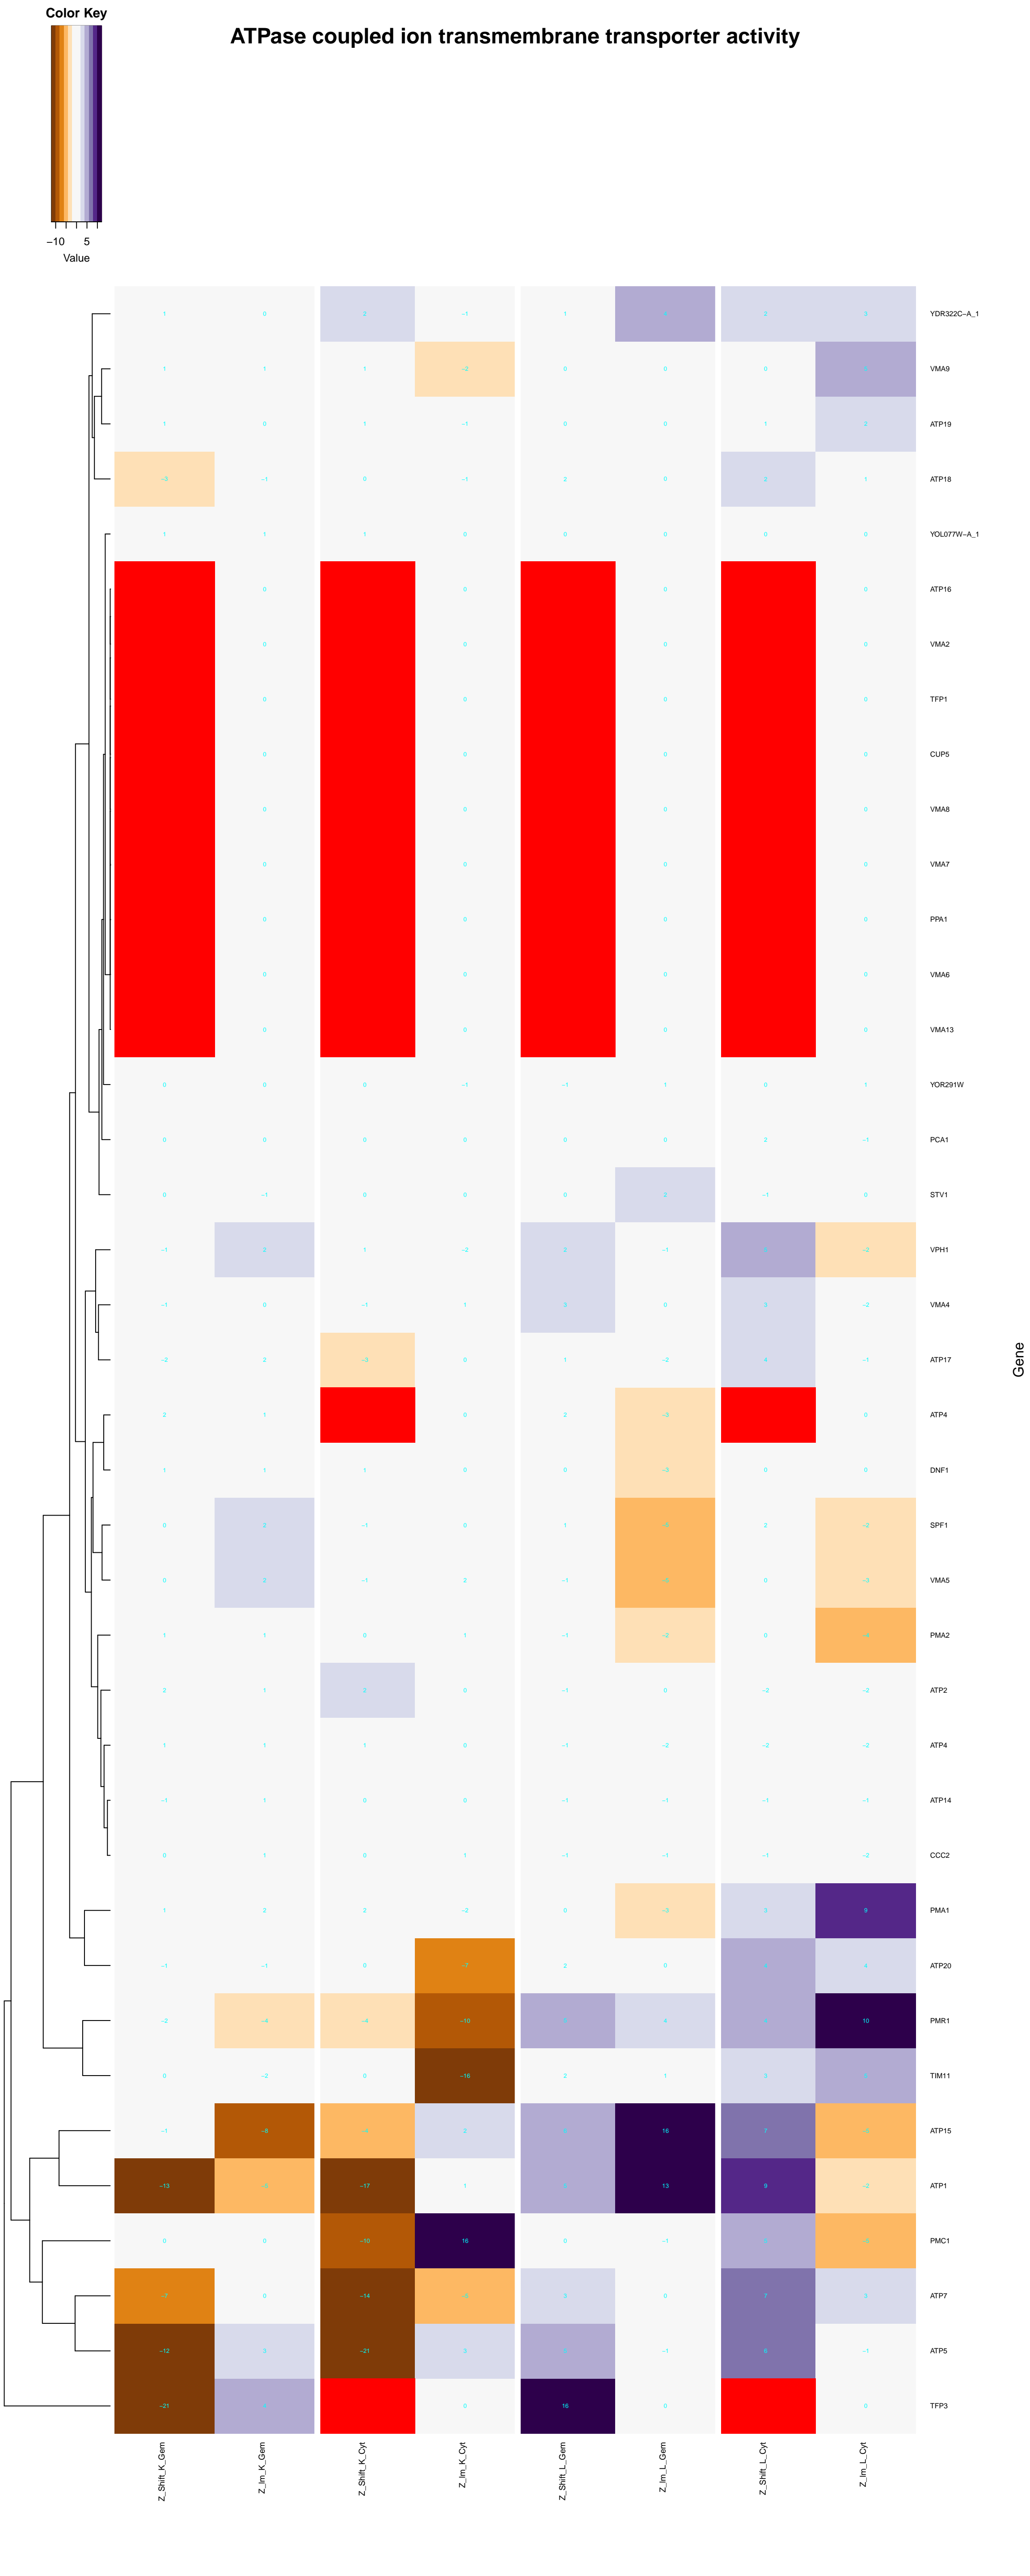

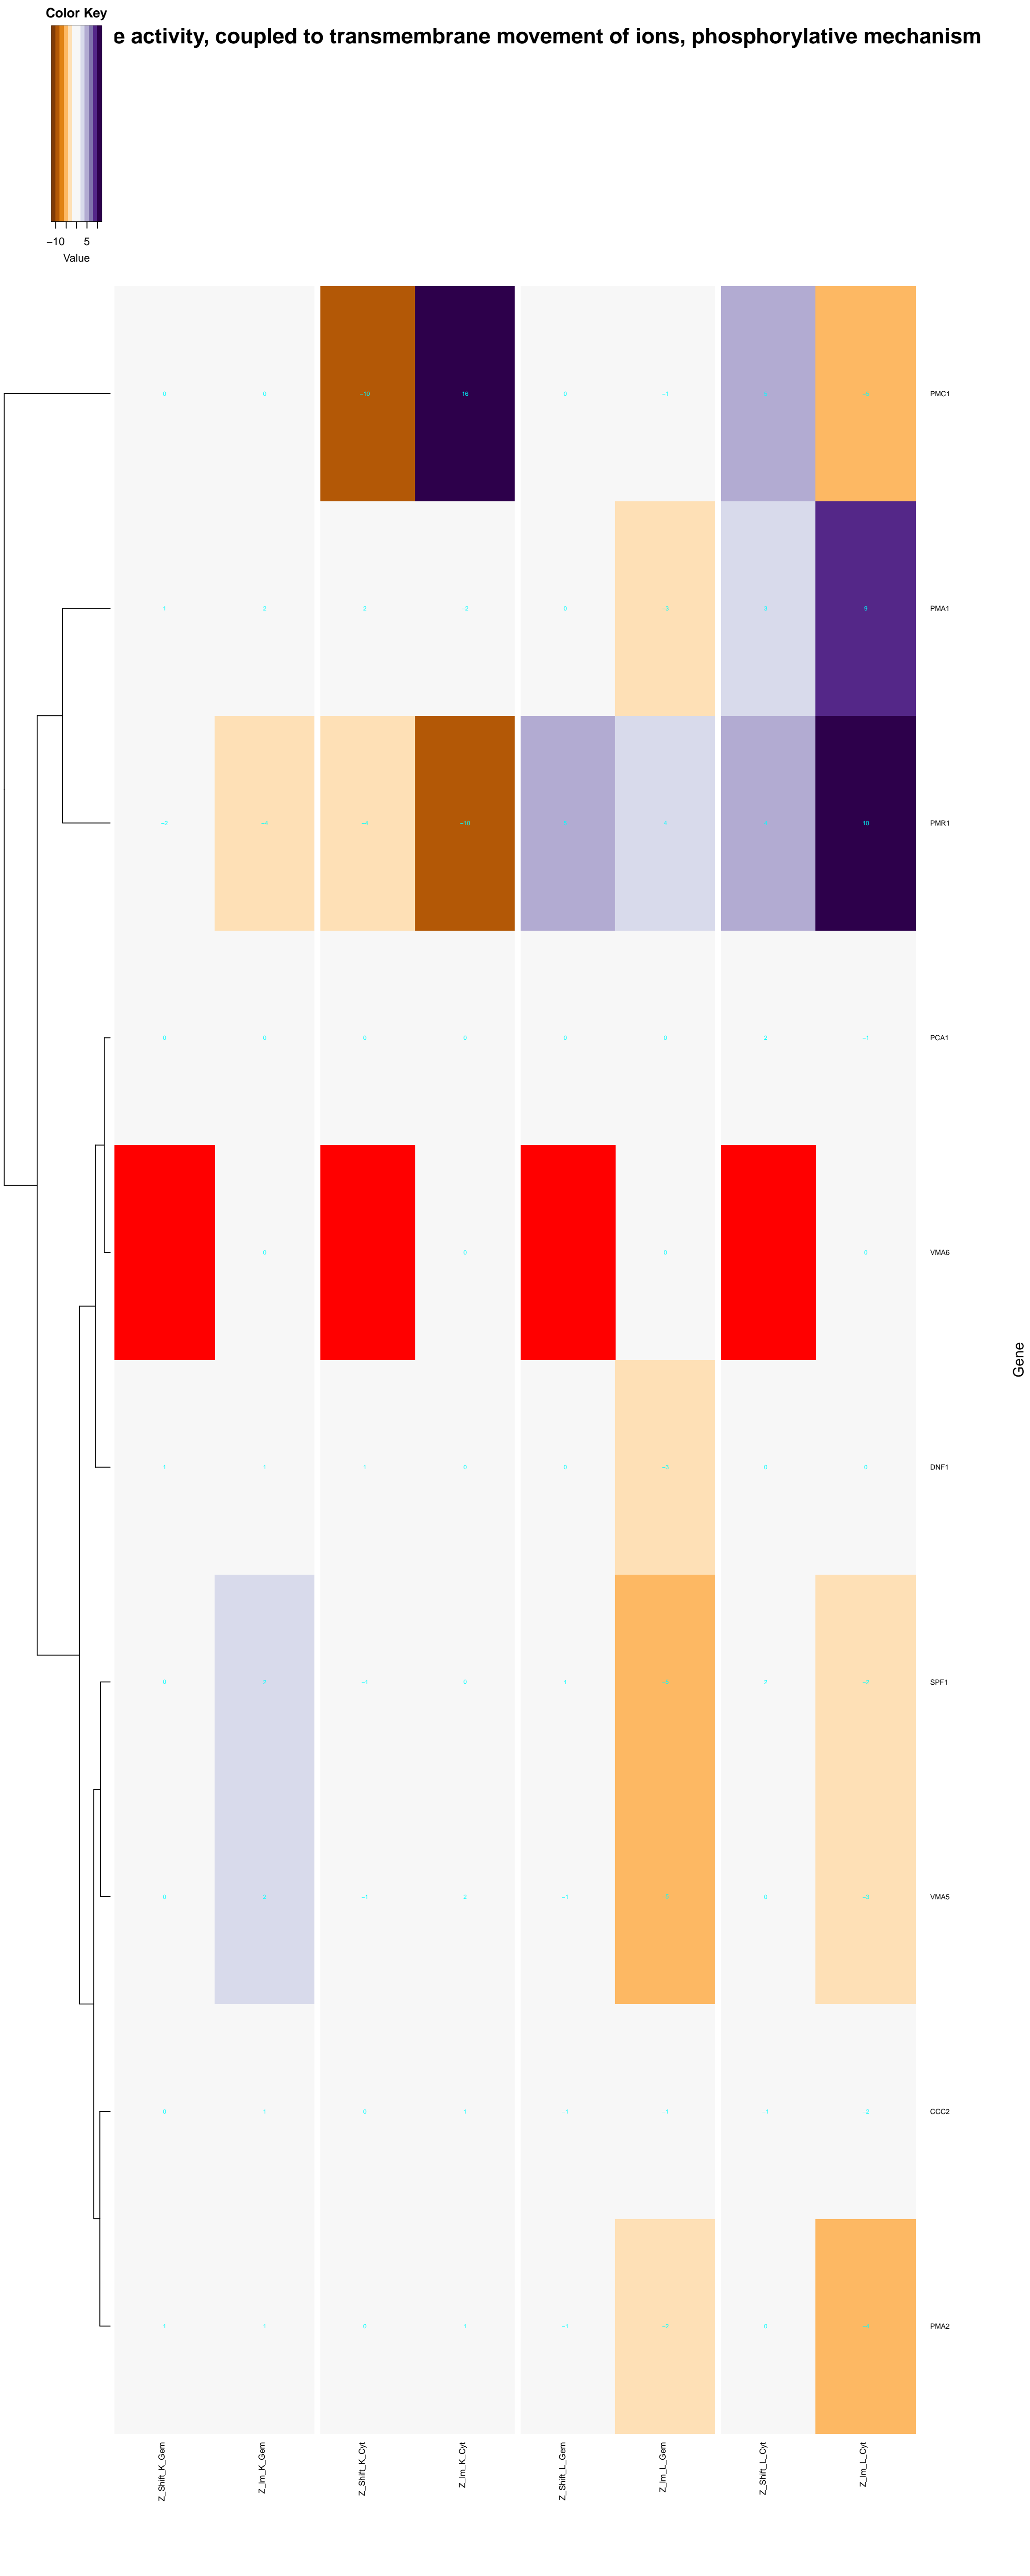

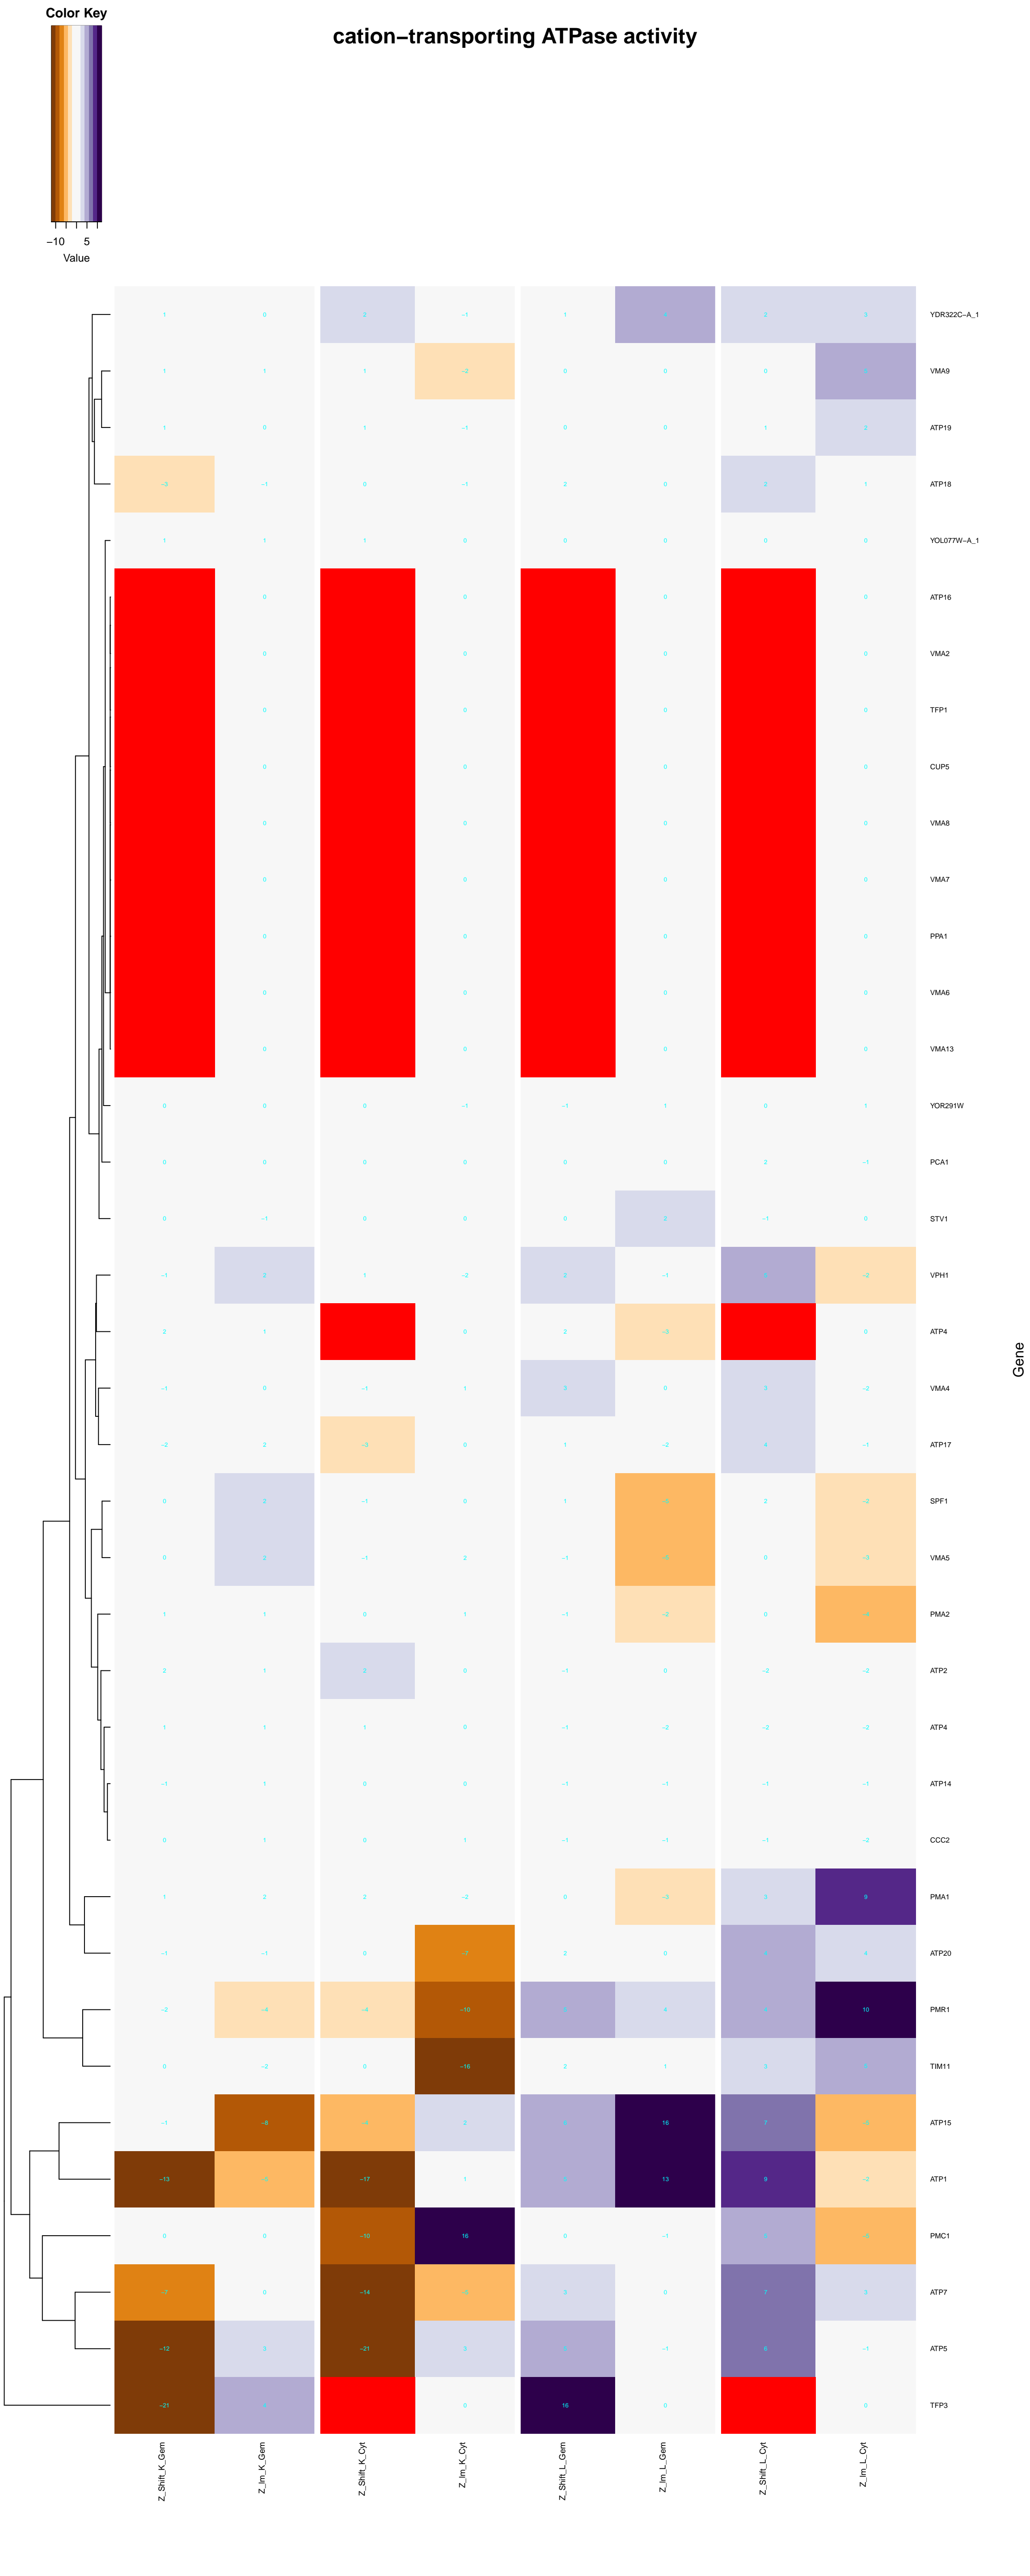

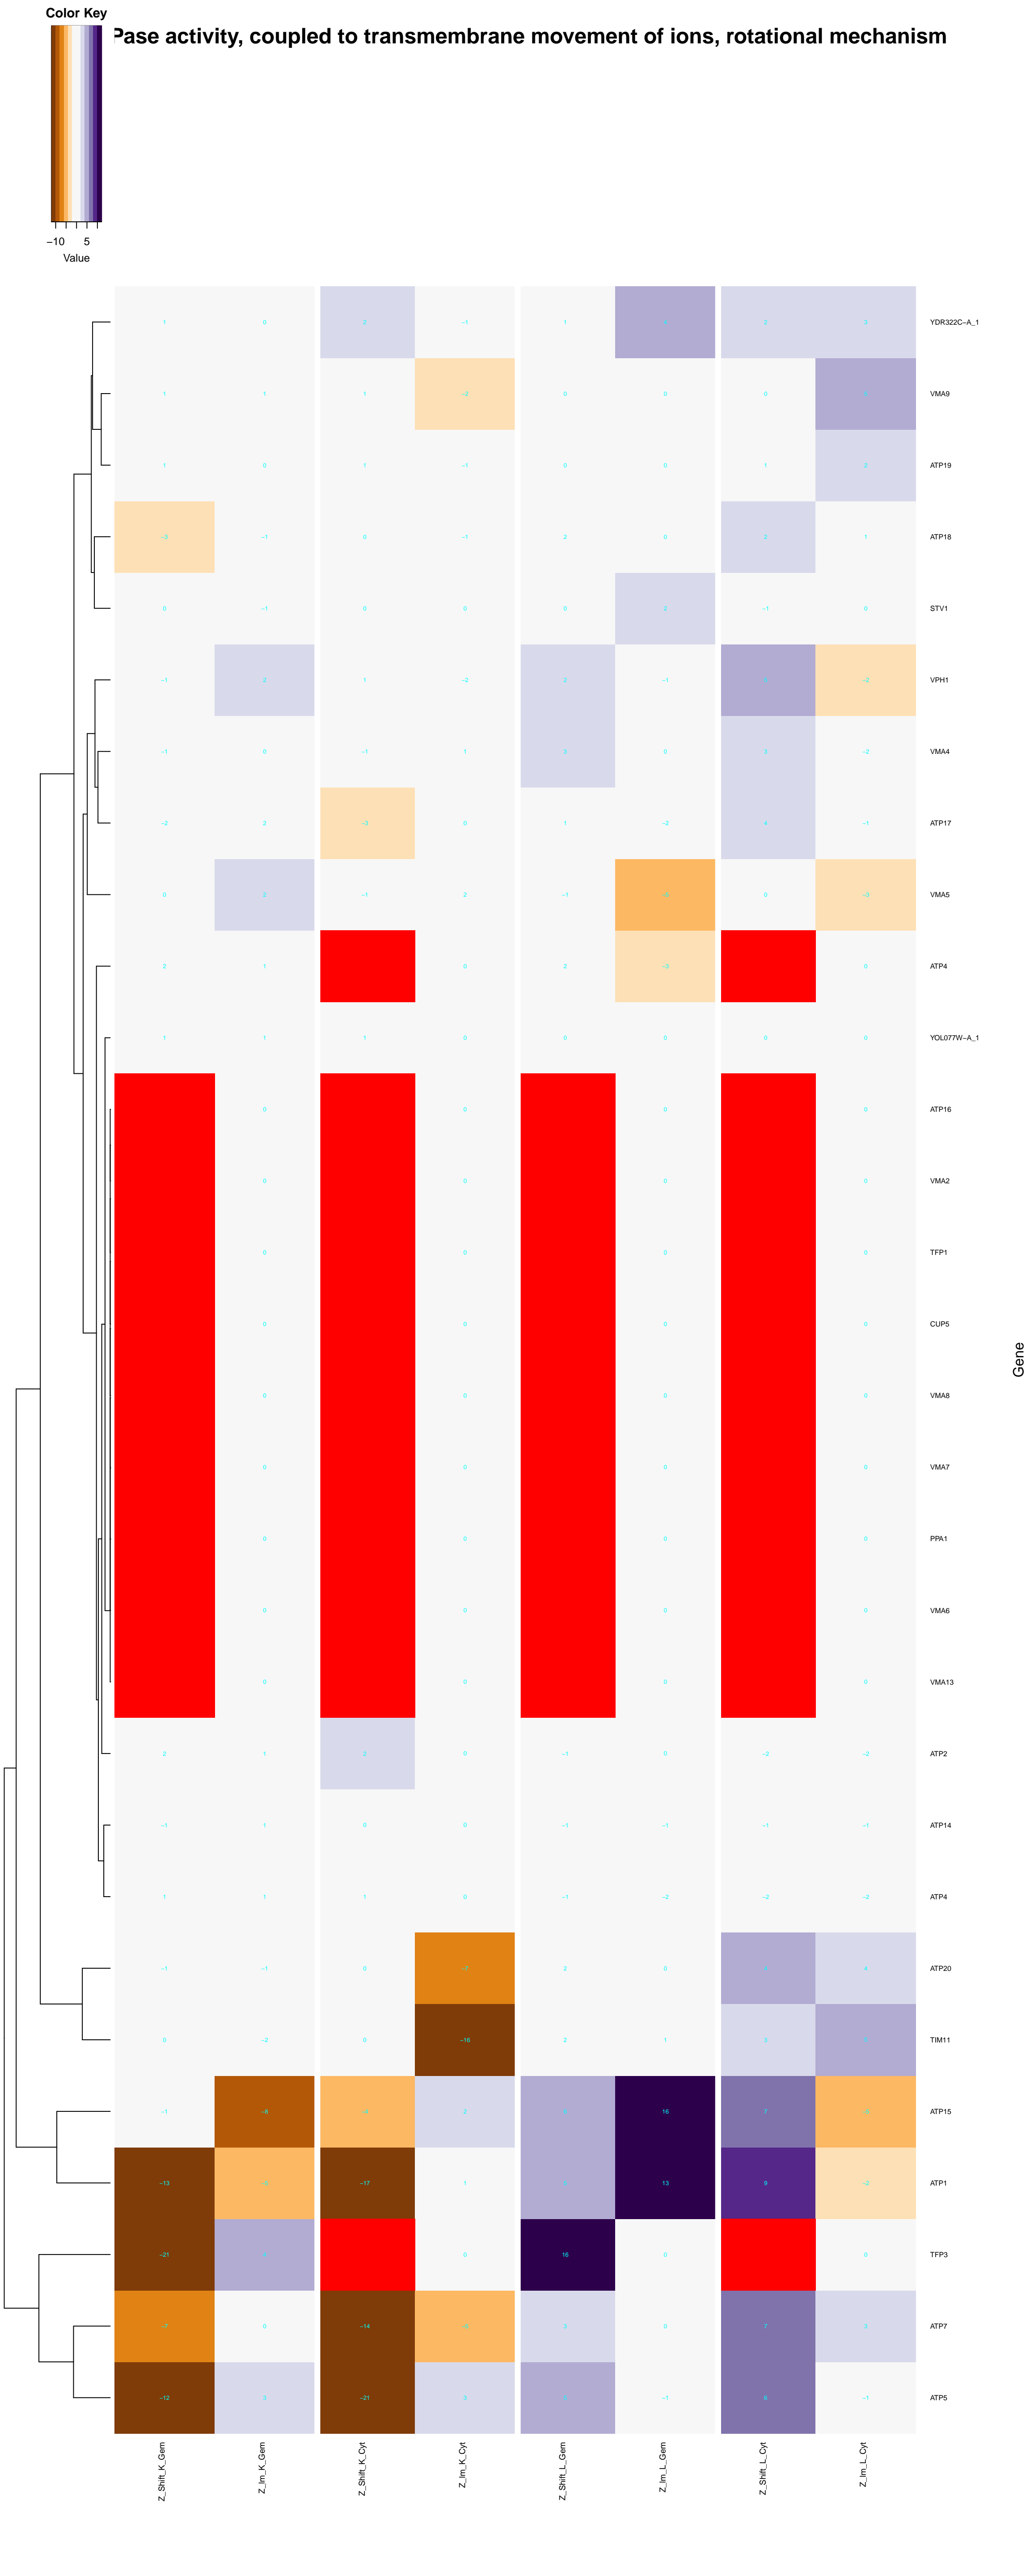

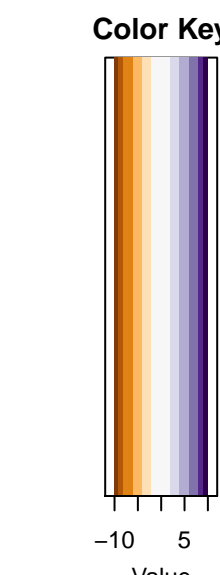

hydrogen-exporting ATPase activity, phosphorylative mechanism

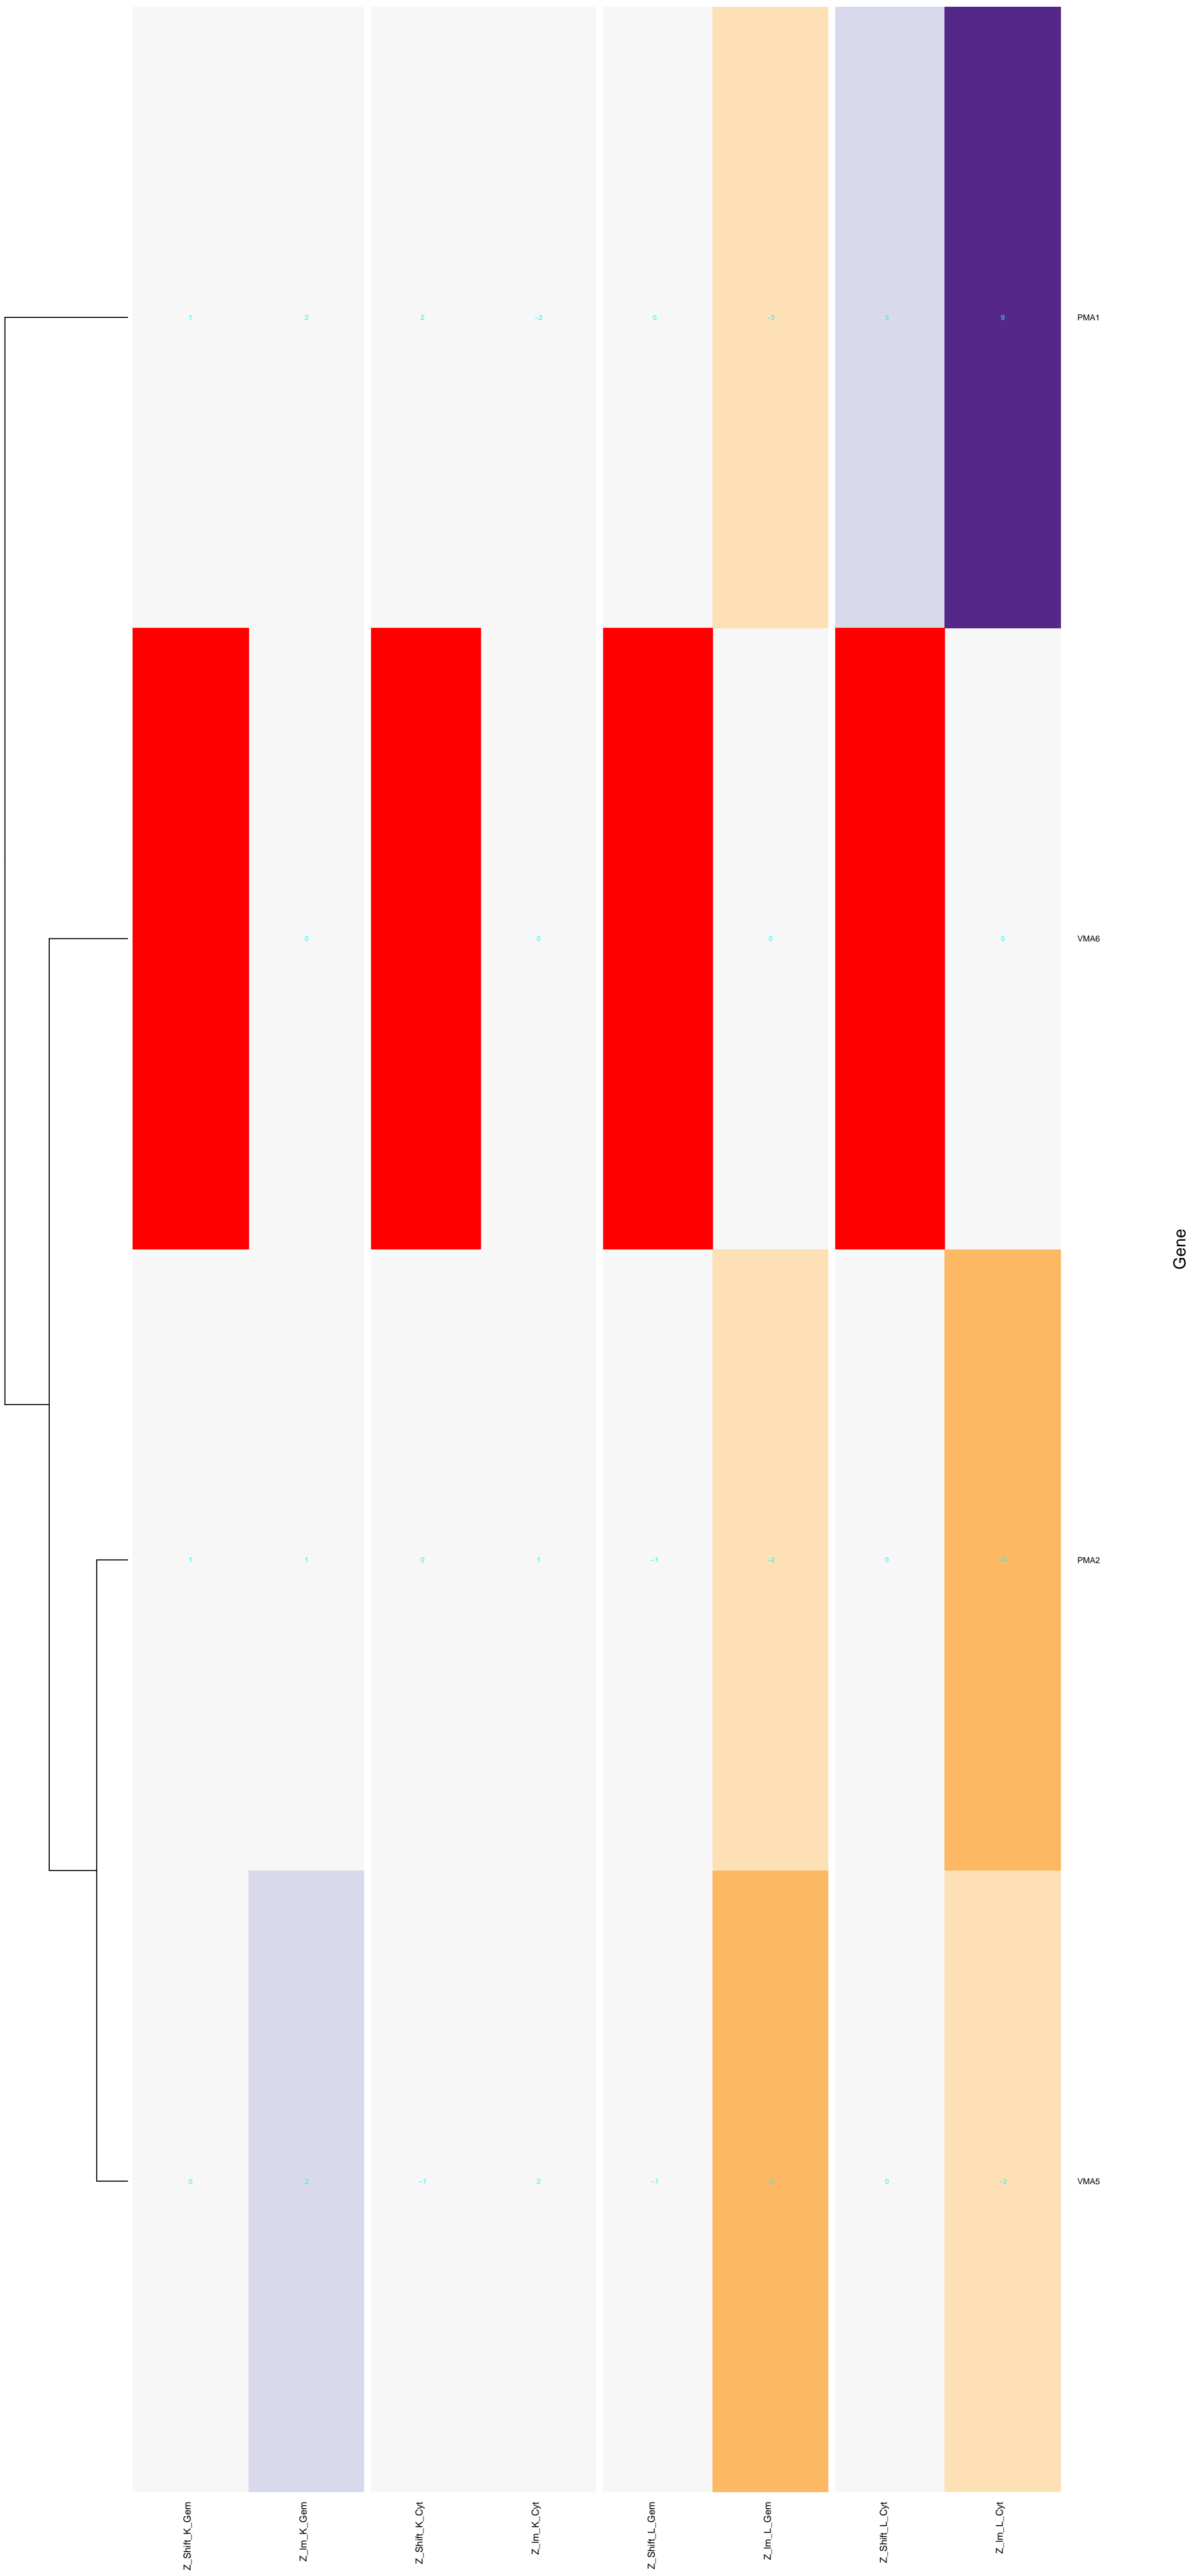

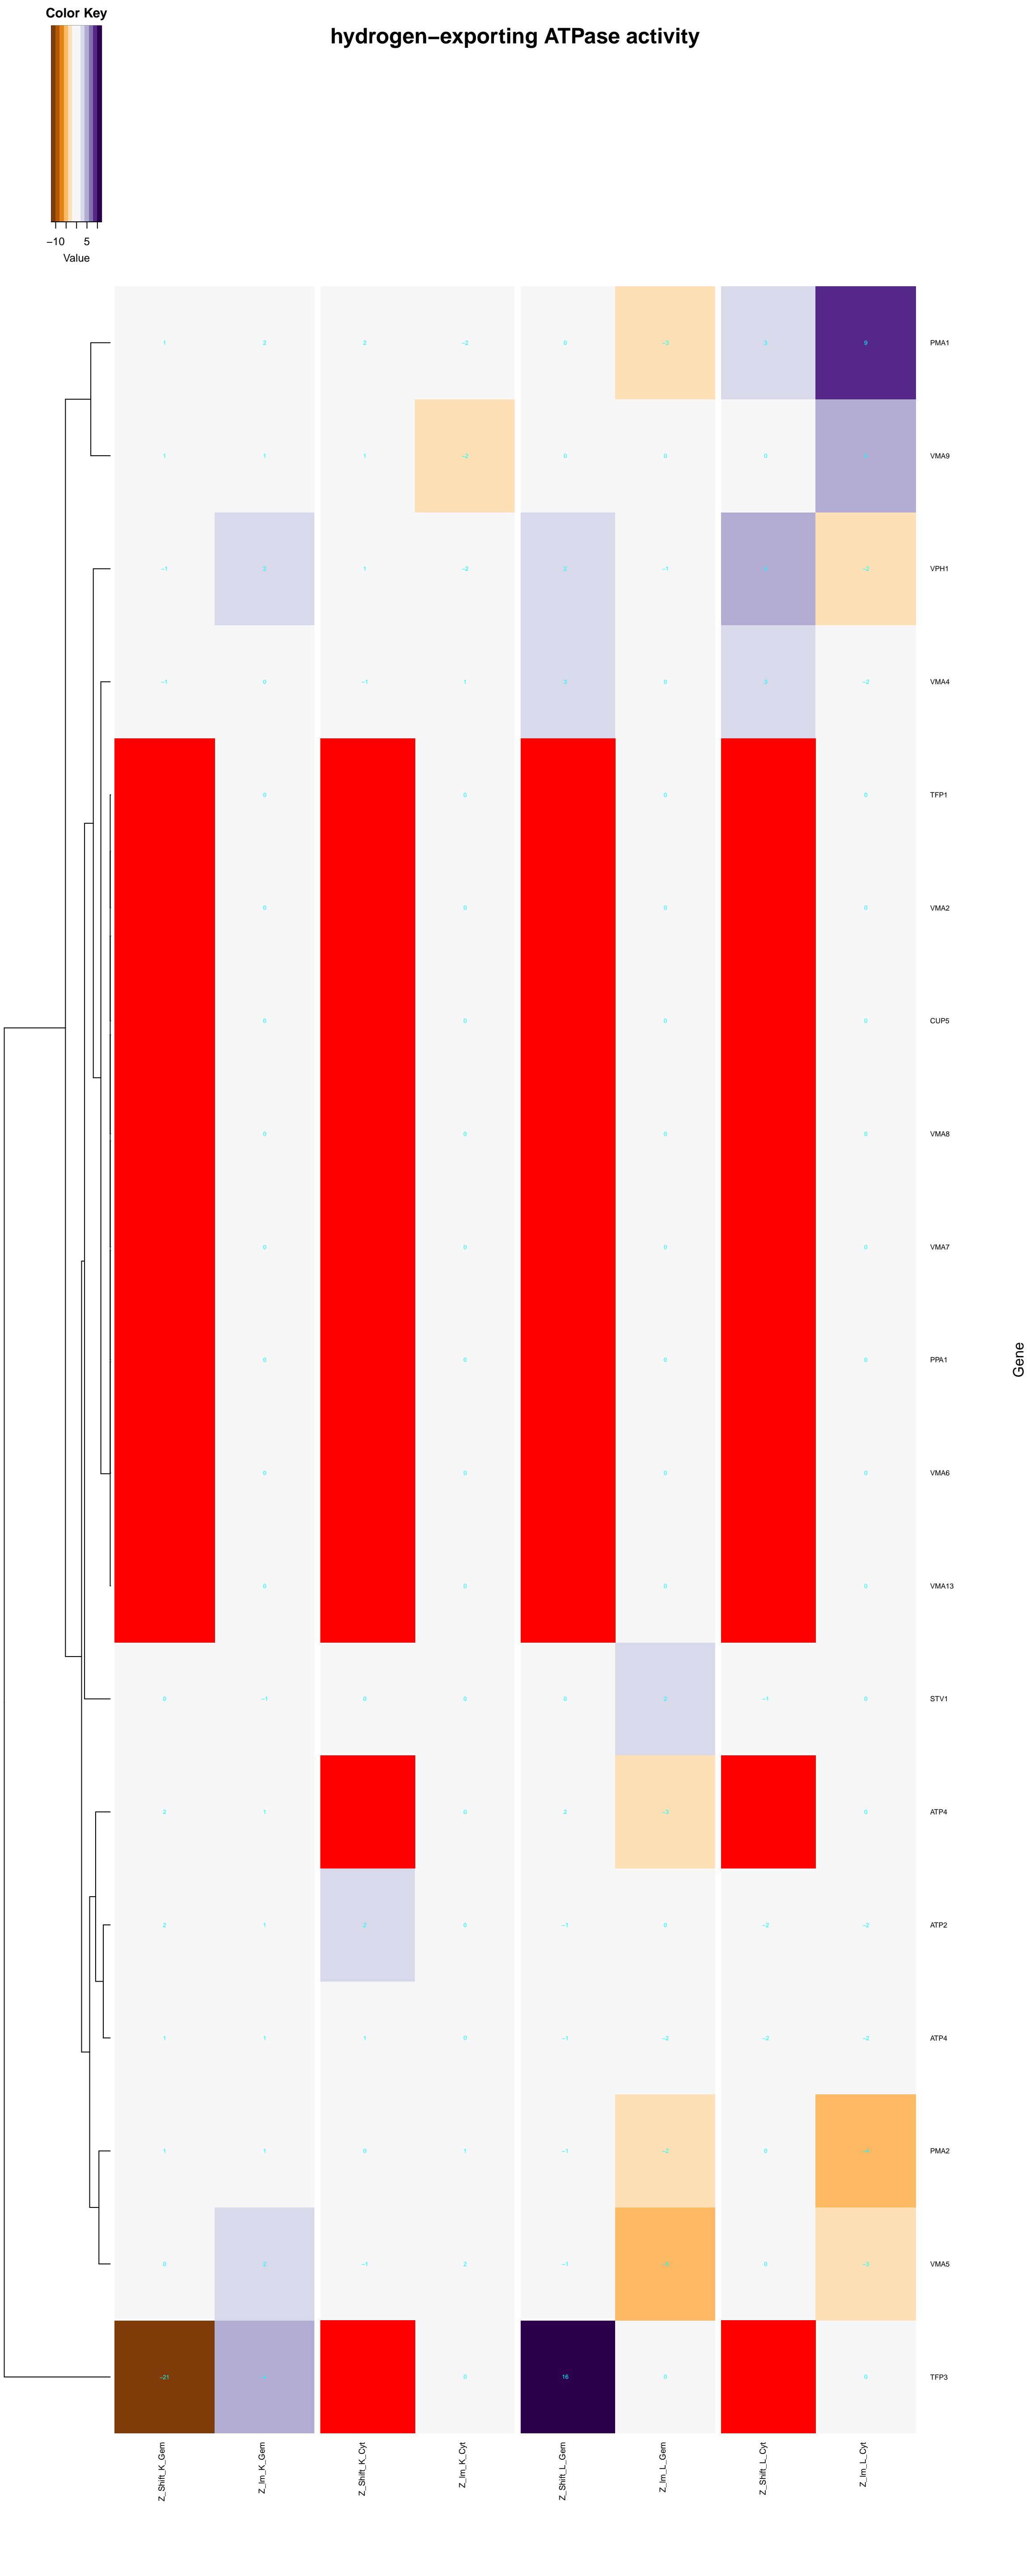

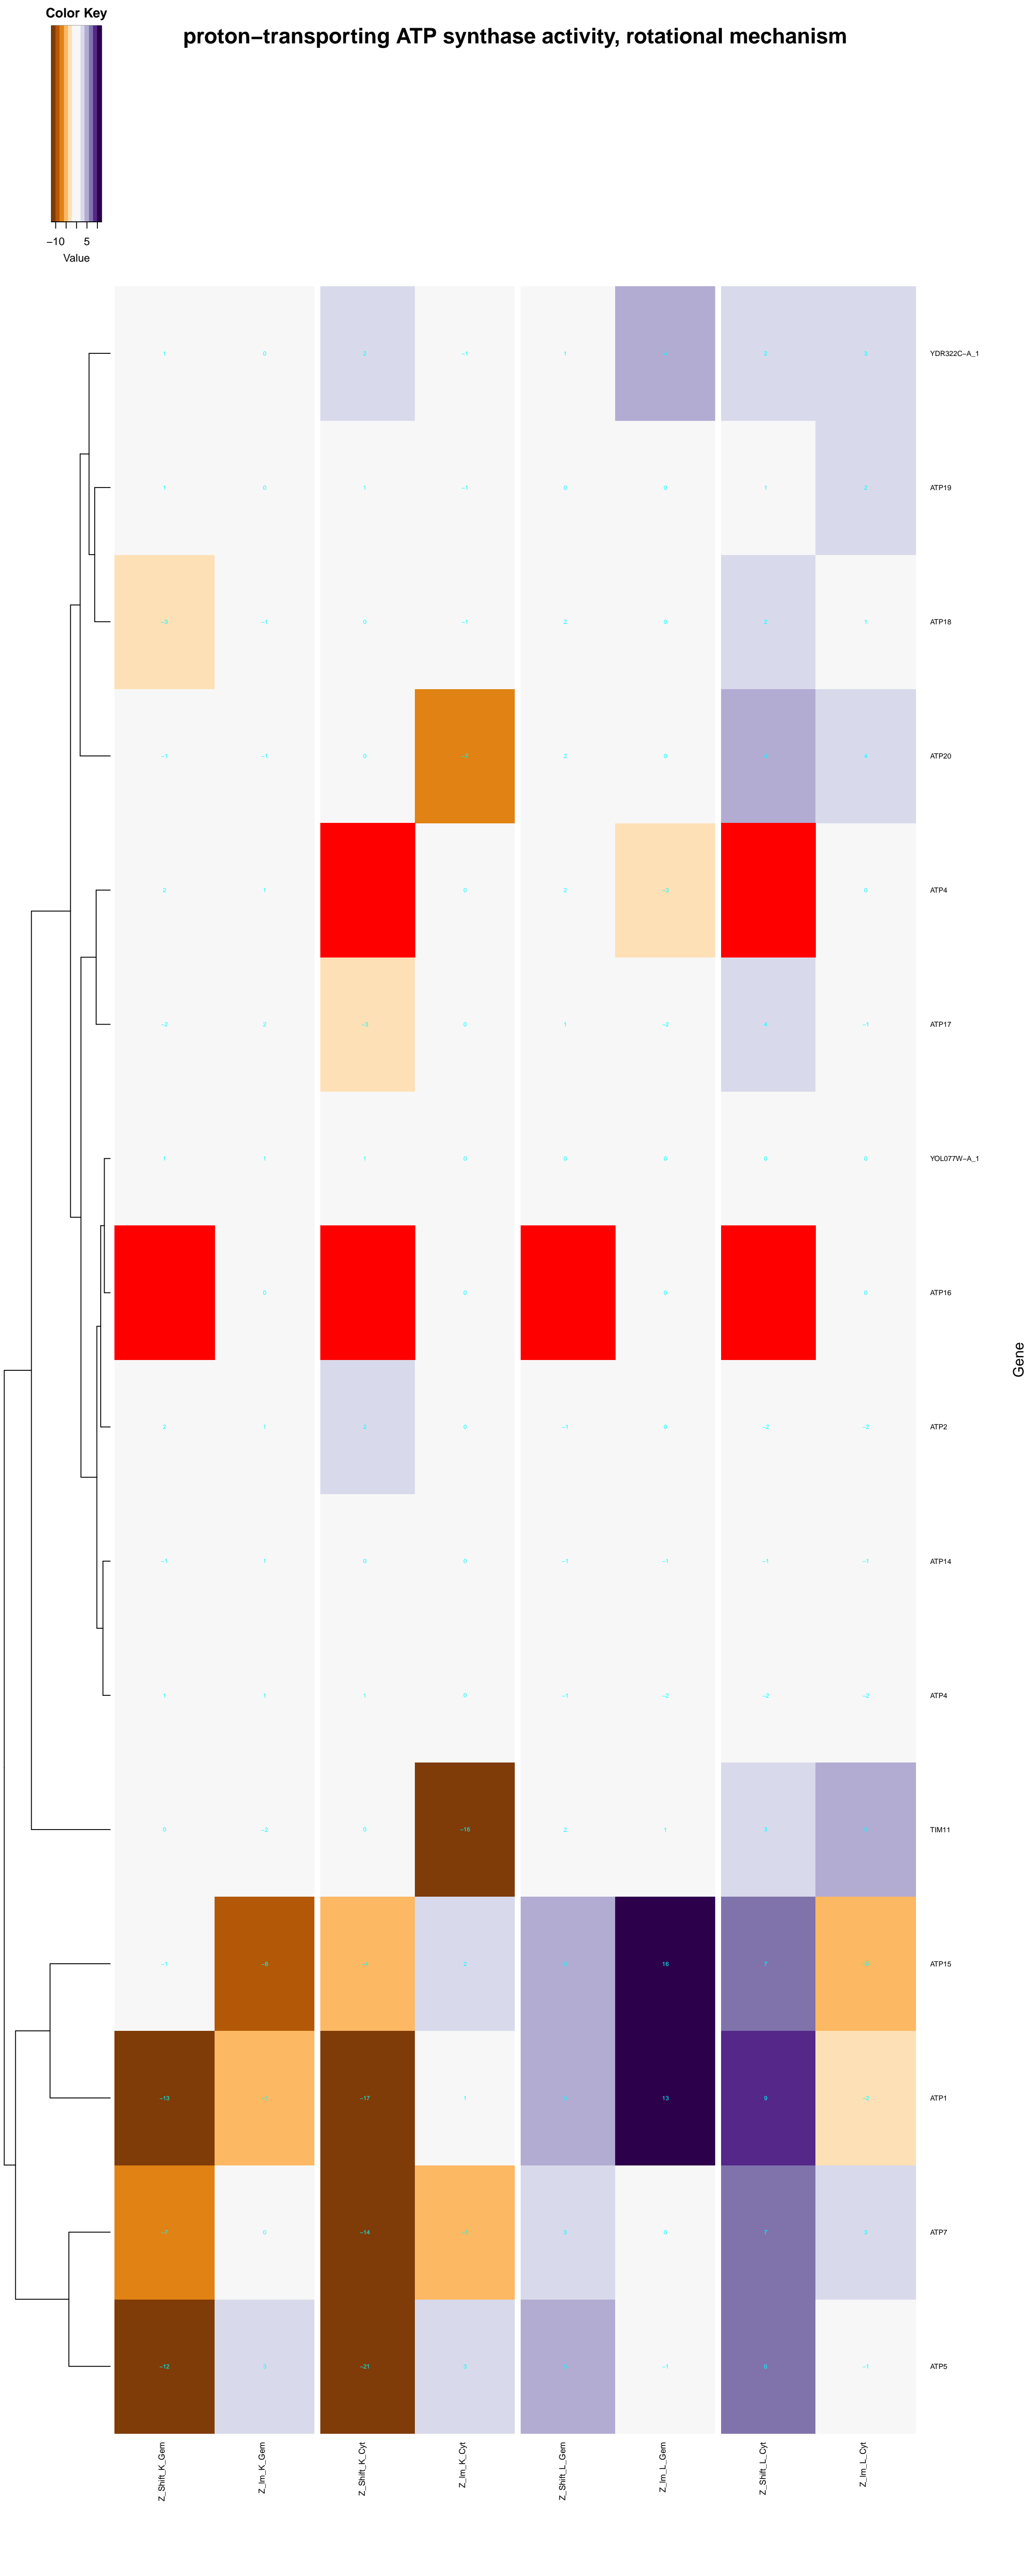

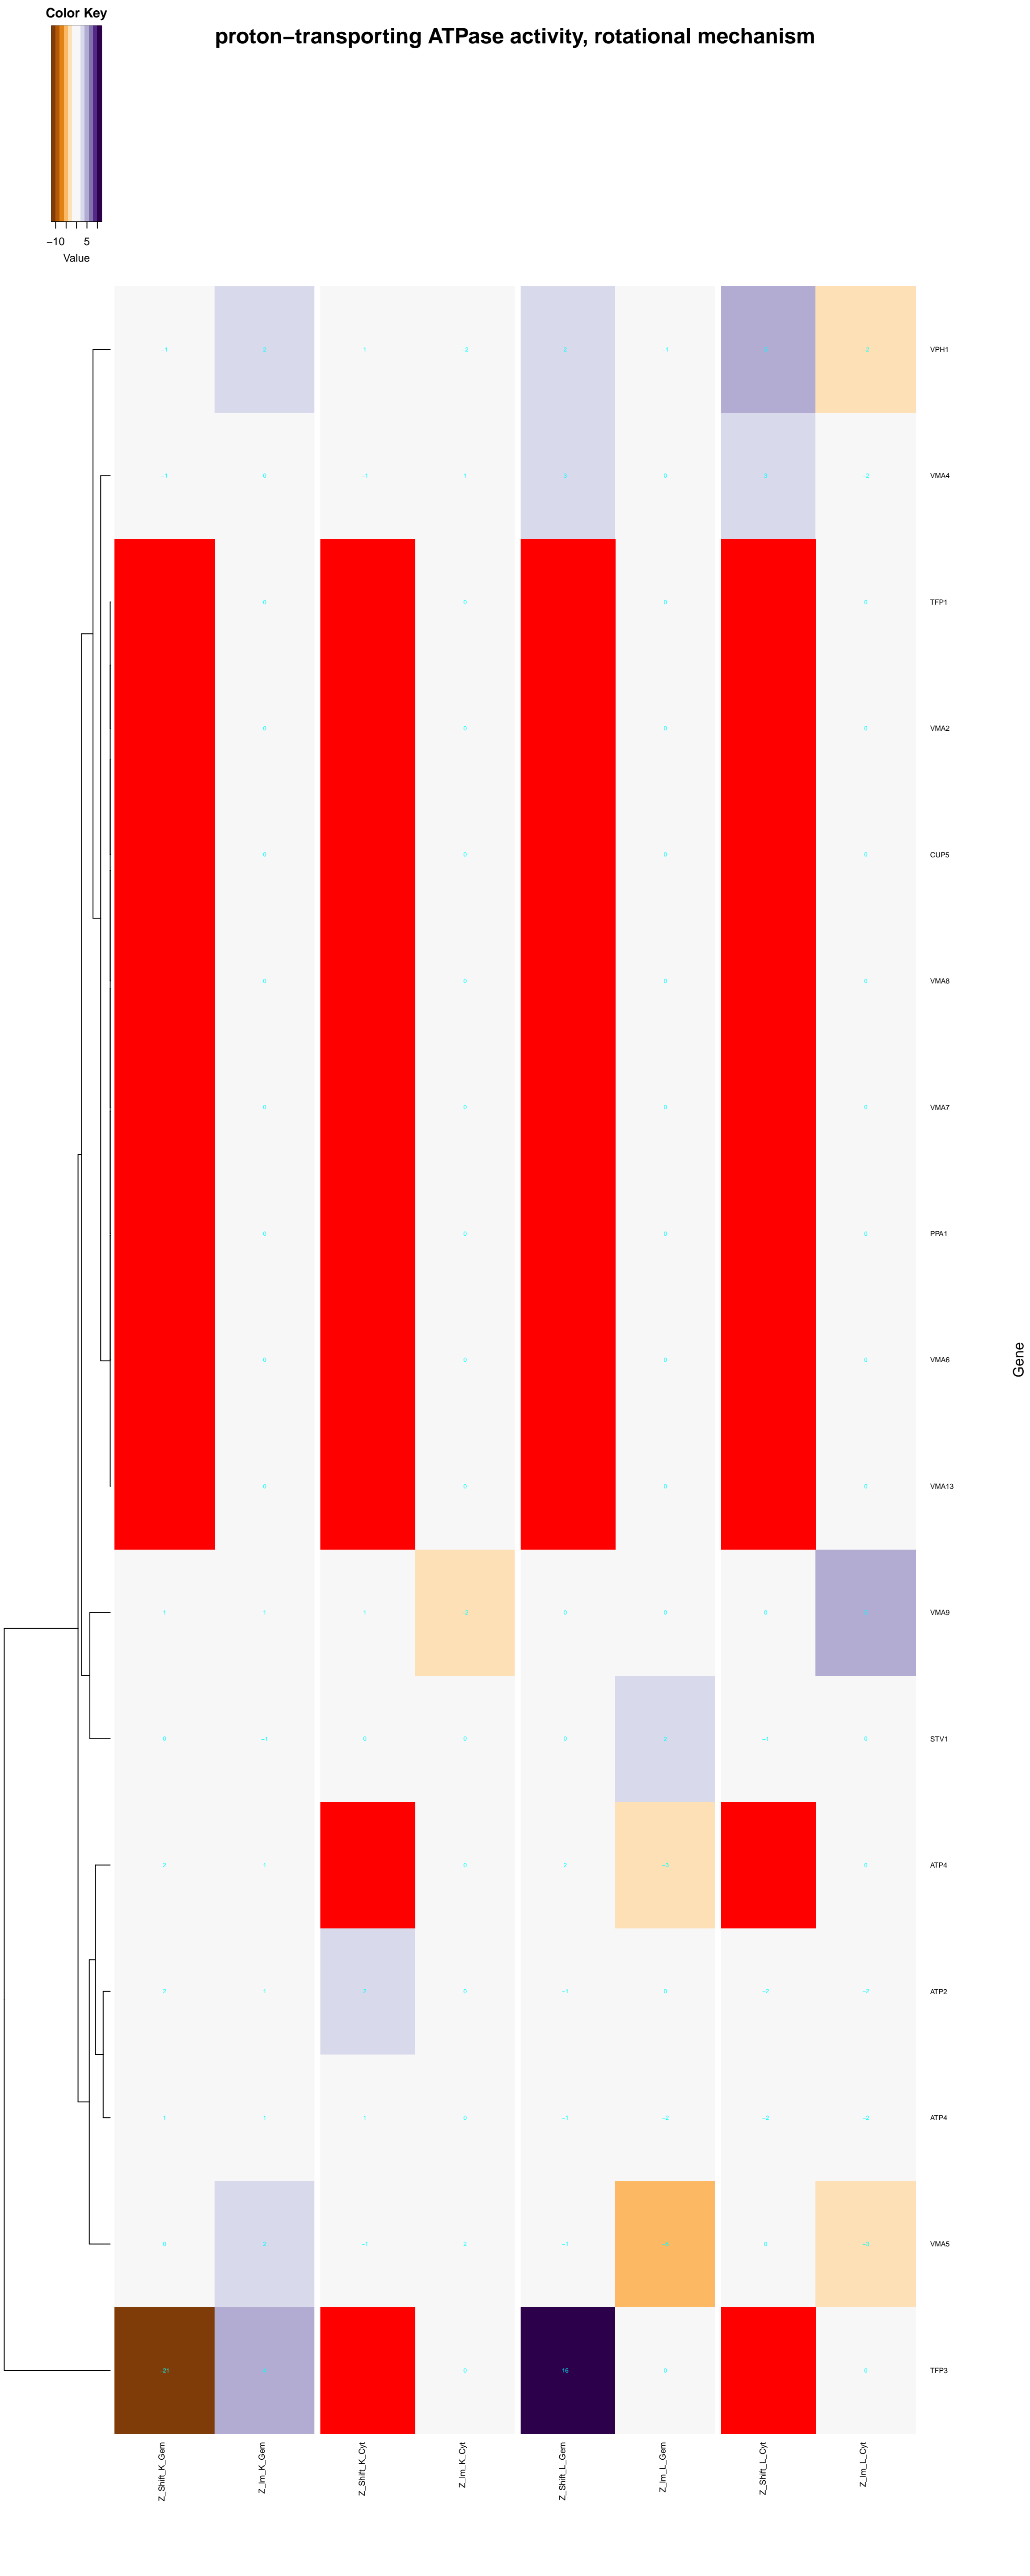

Supplement: s1 [file s1]
