# Supplementary material for: A Humanized Yeast Phenomic Model of Deoxycytidine Kinase to Predict Genetic Buffering of Nucleoside Analog Cytotoxicity
Source: MDPI journal article supplement (doi:10.3390/genes10100770), 2019-09-30

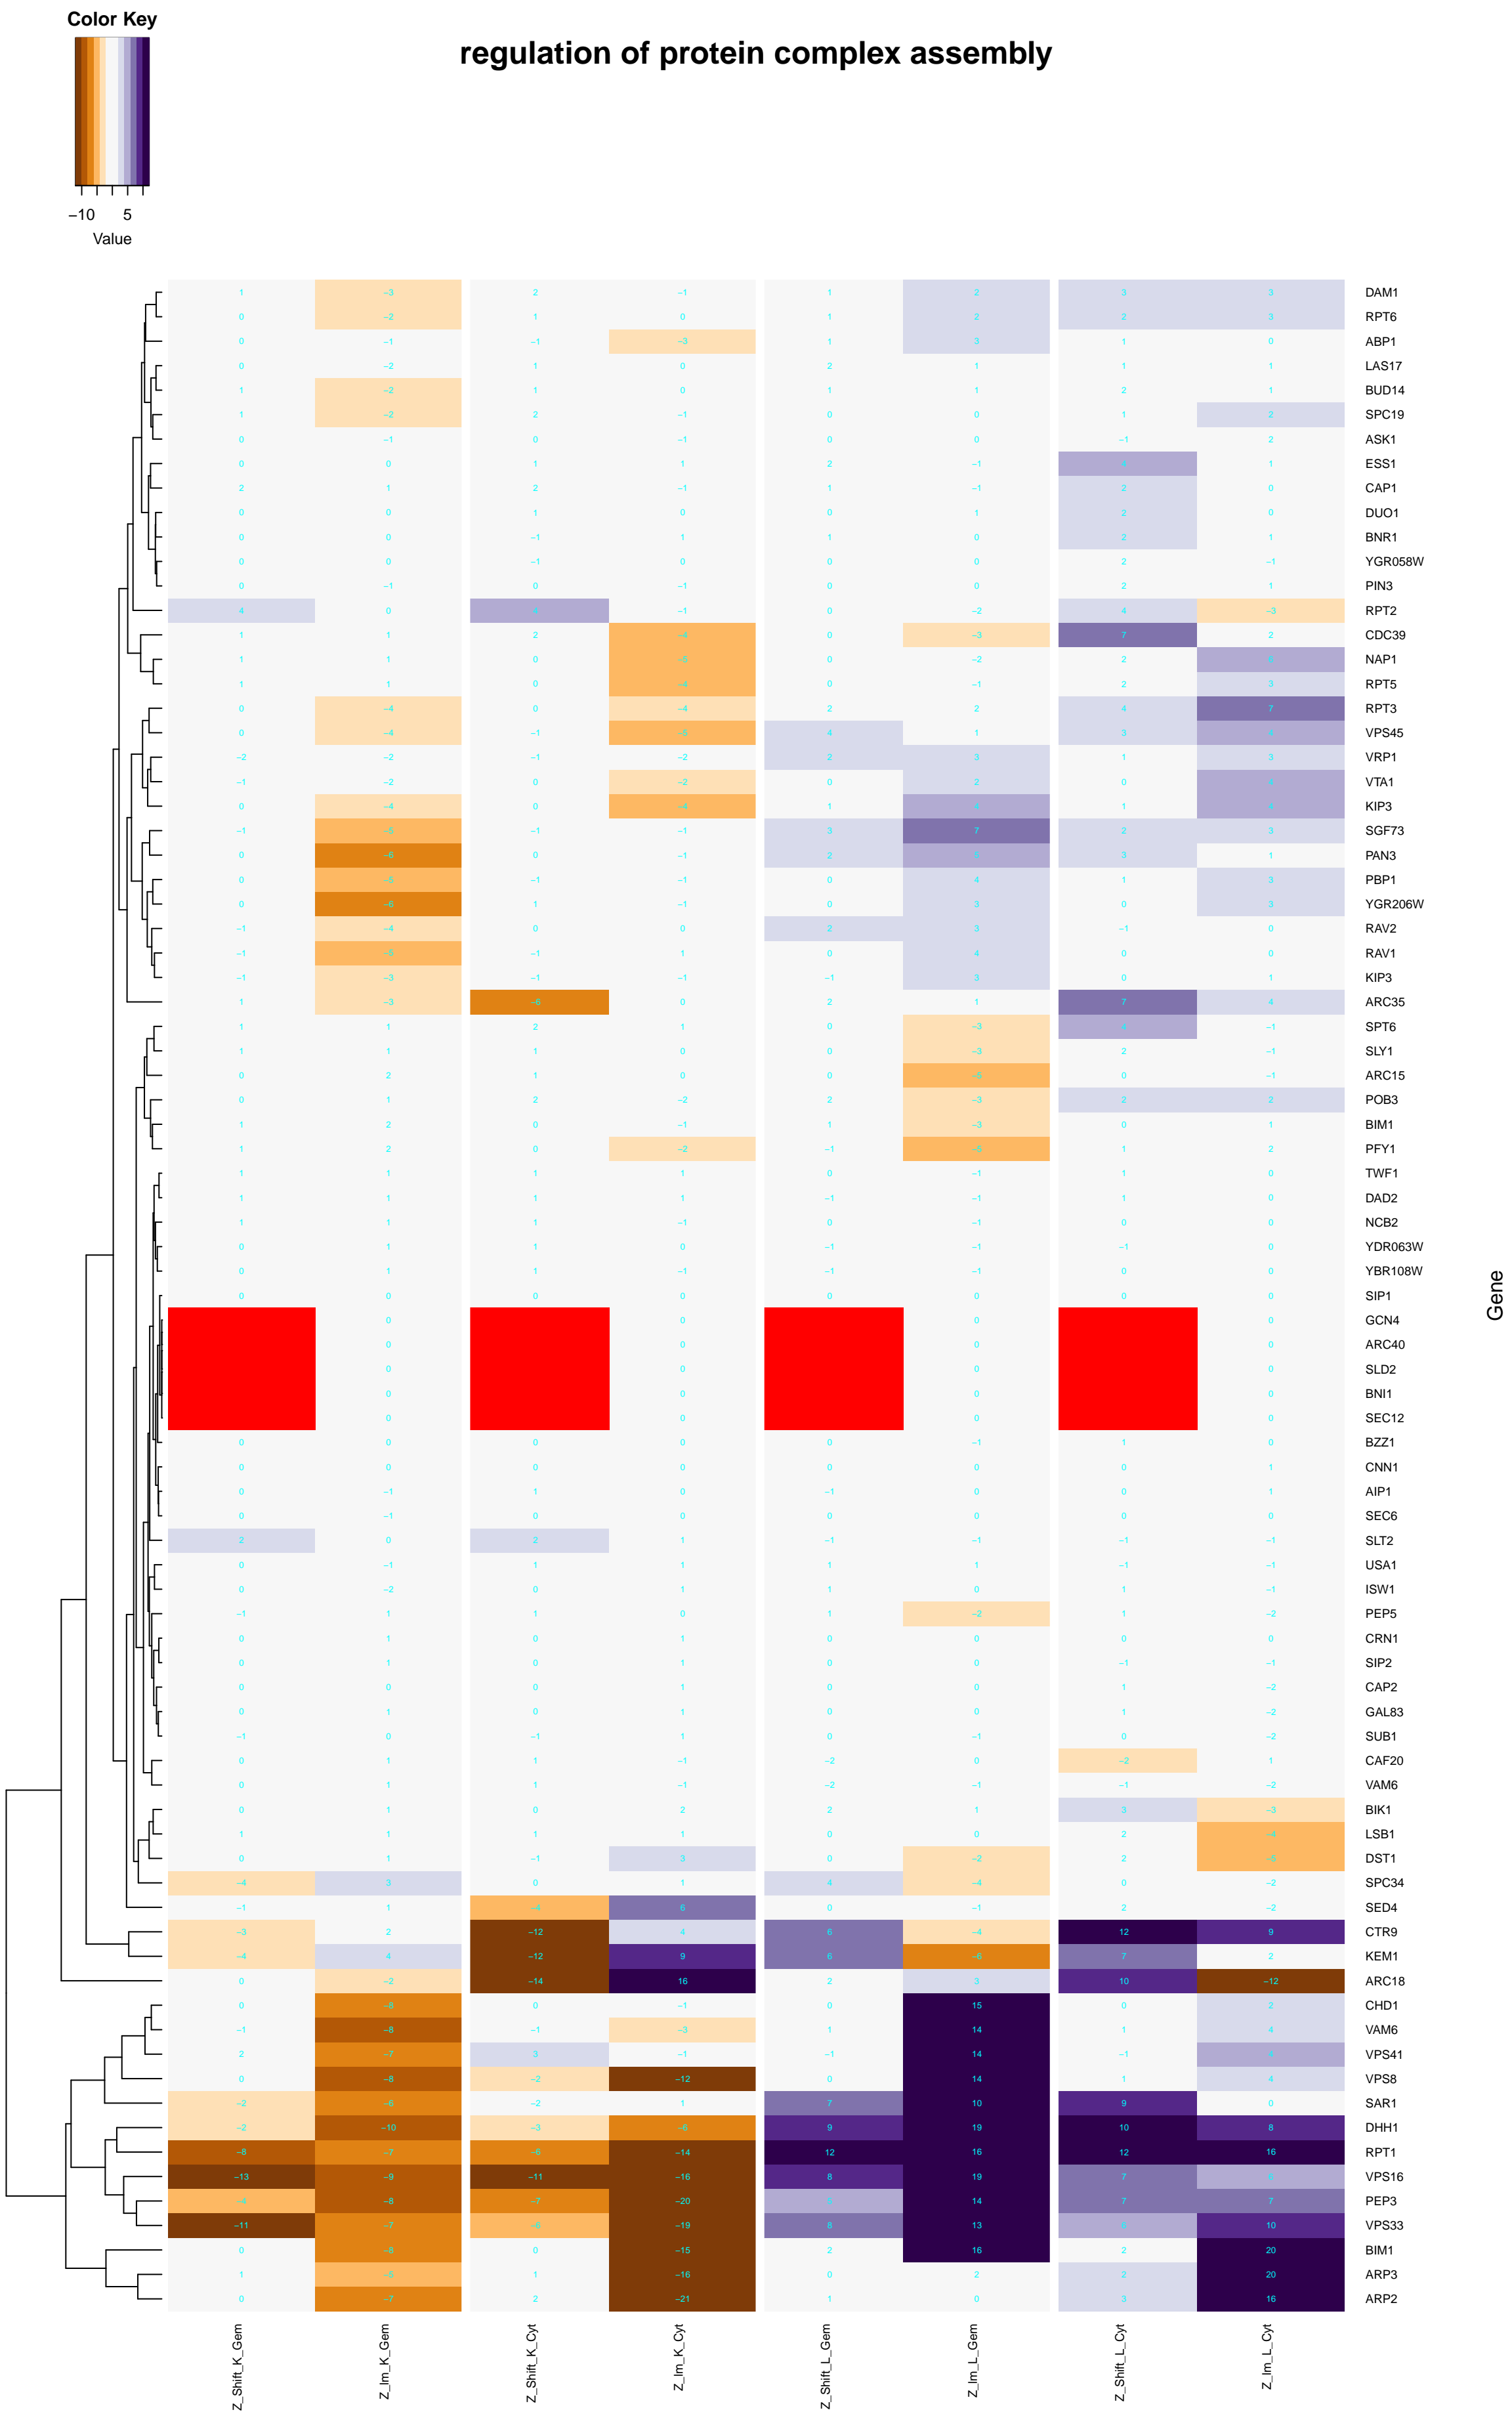

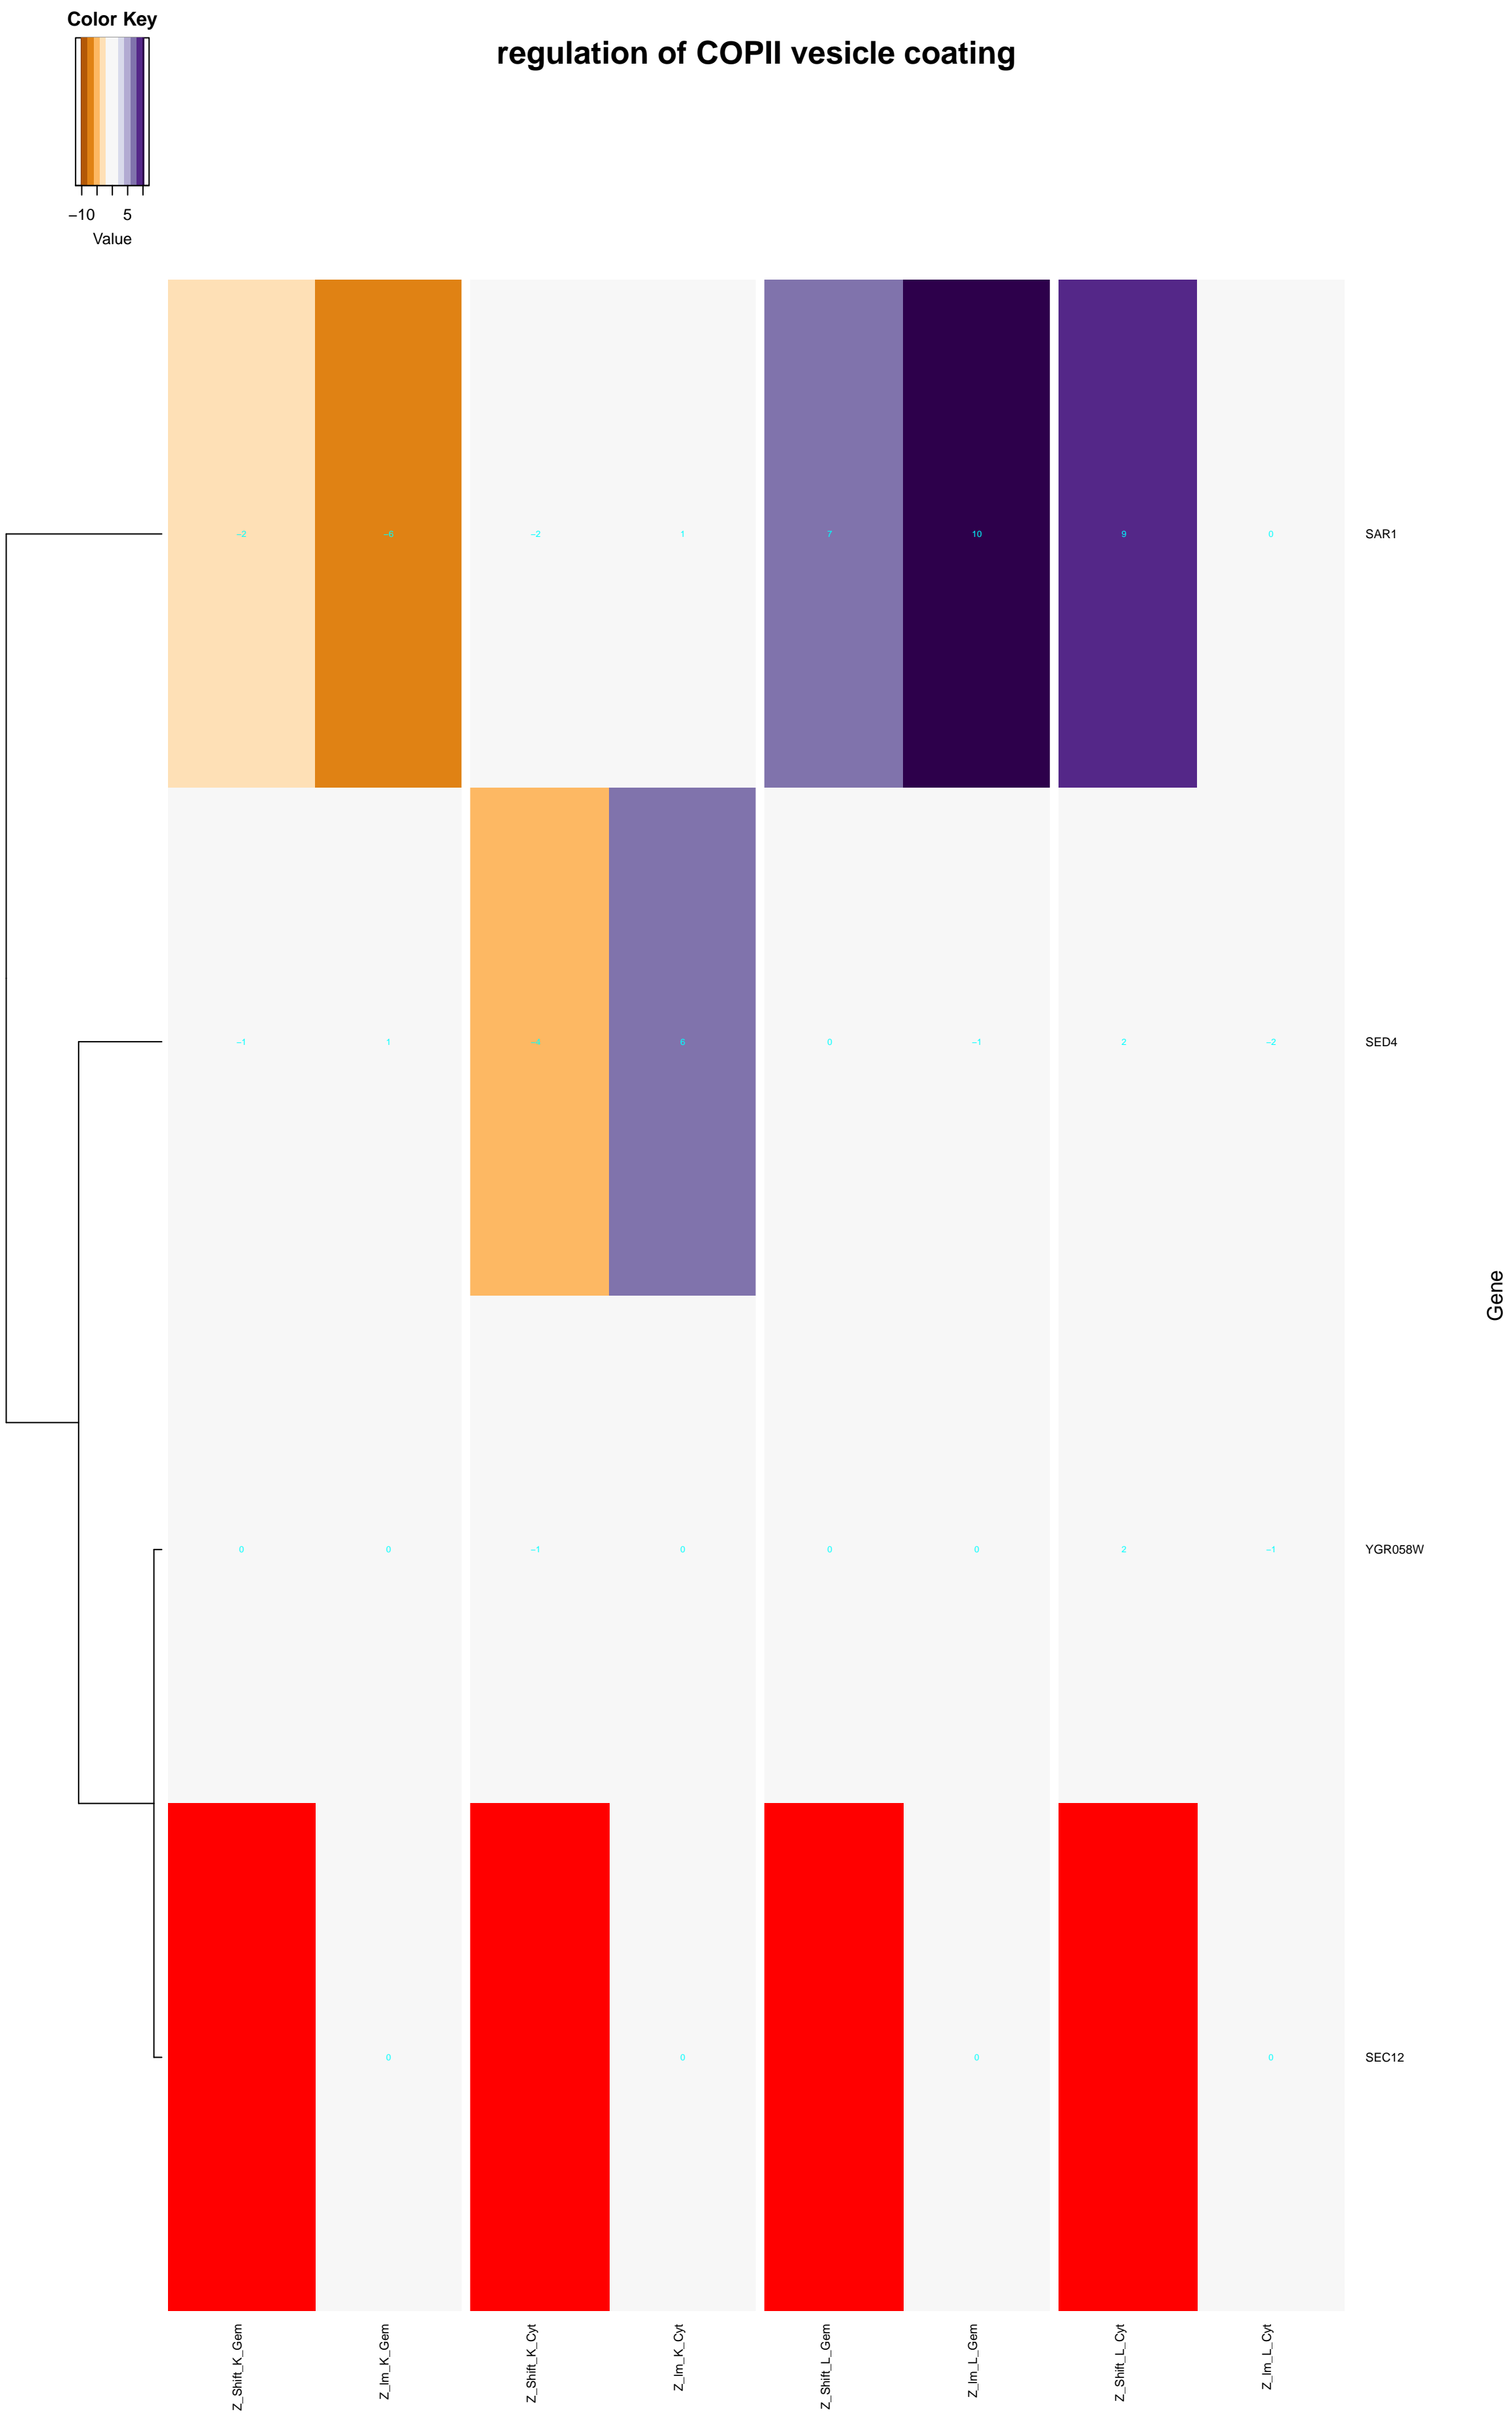

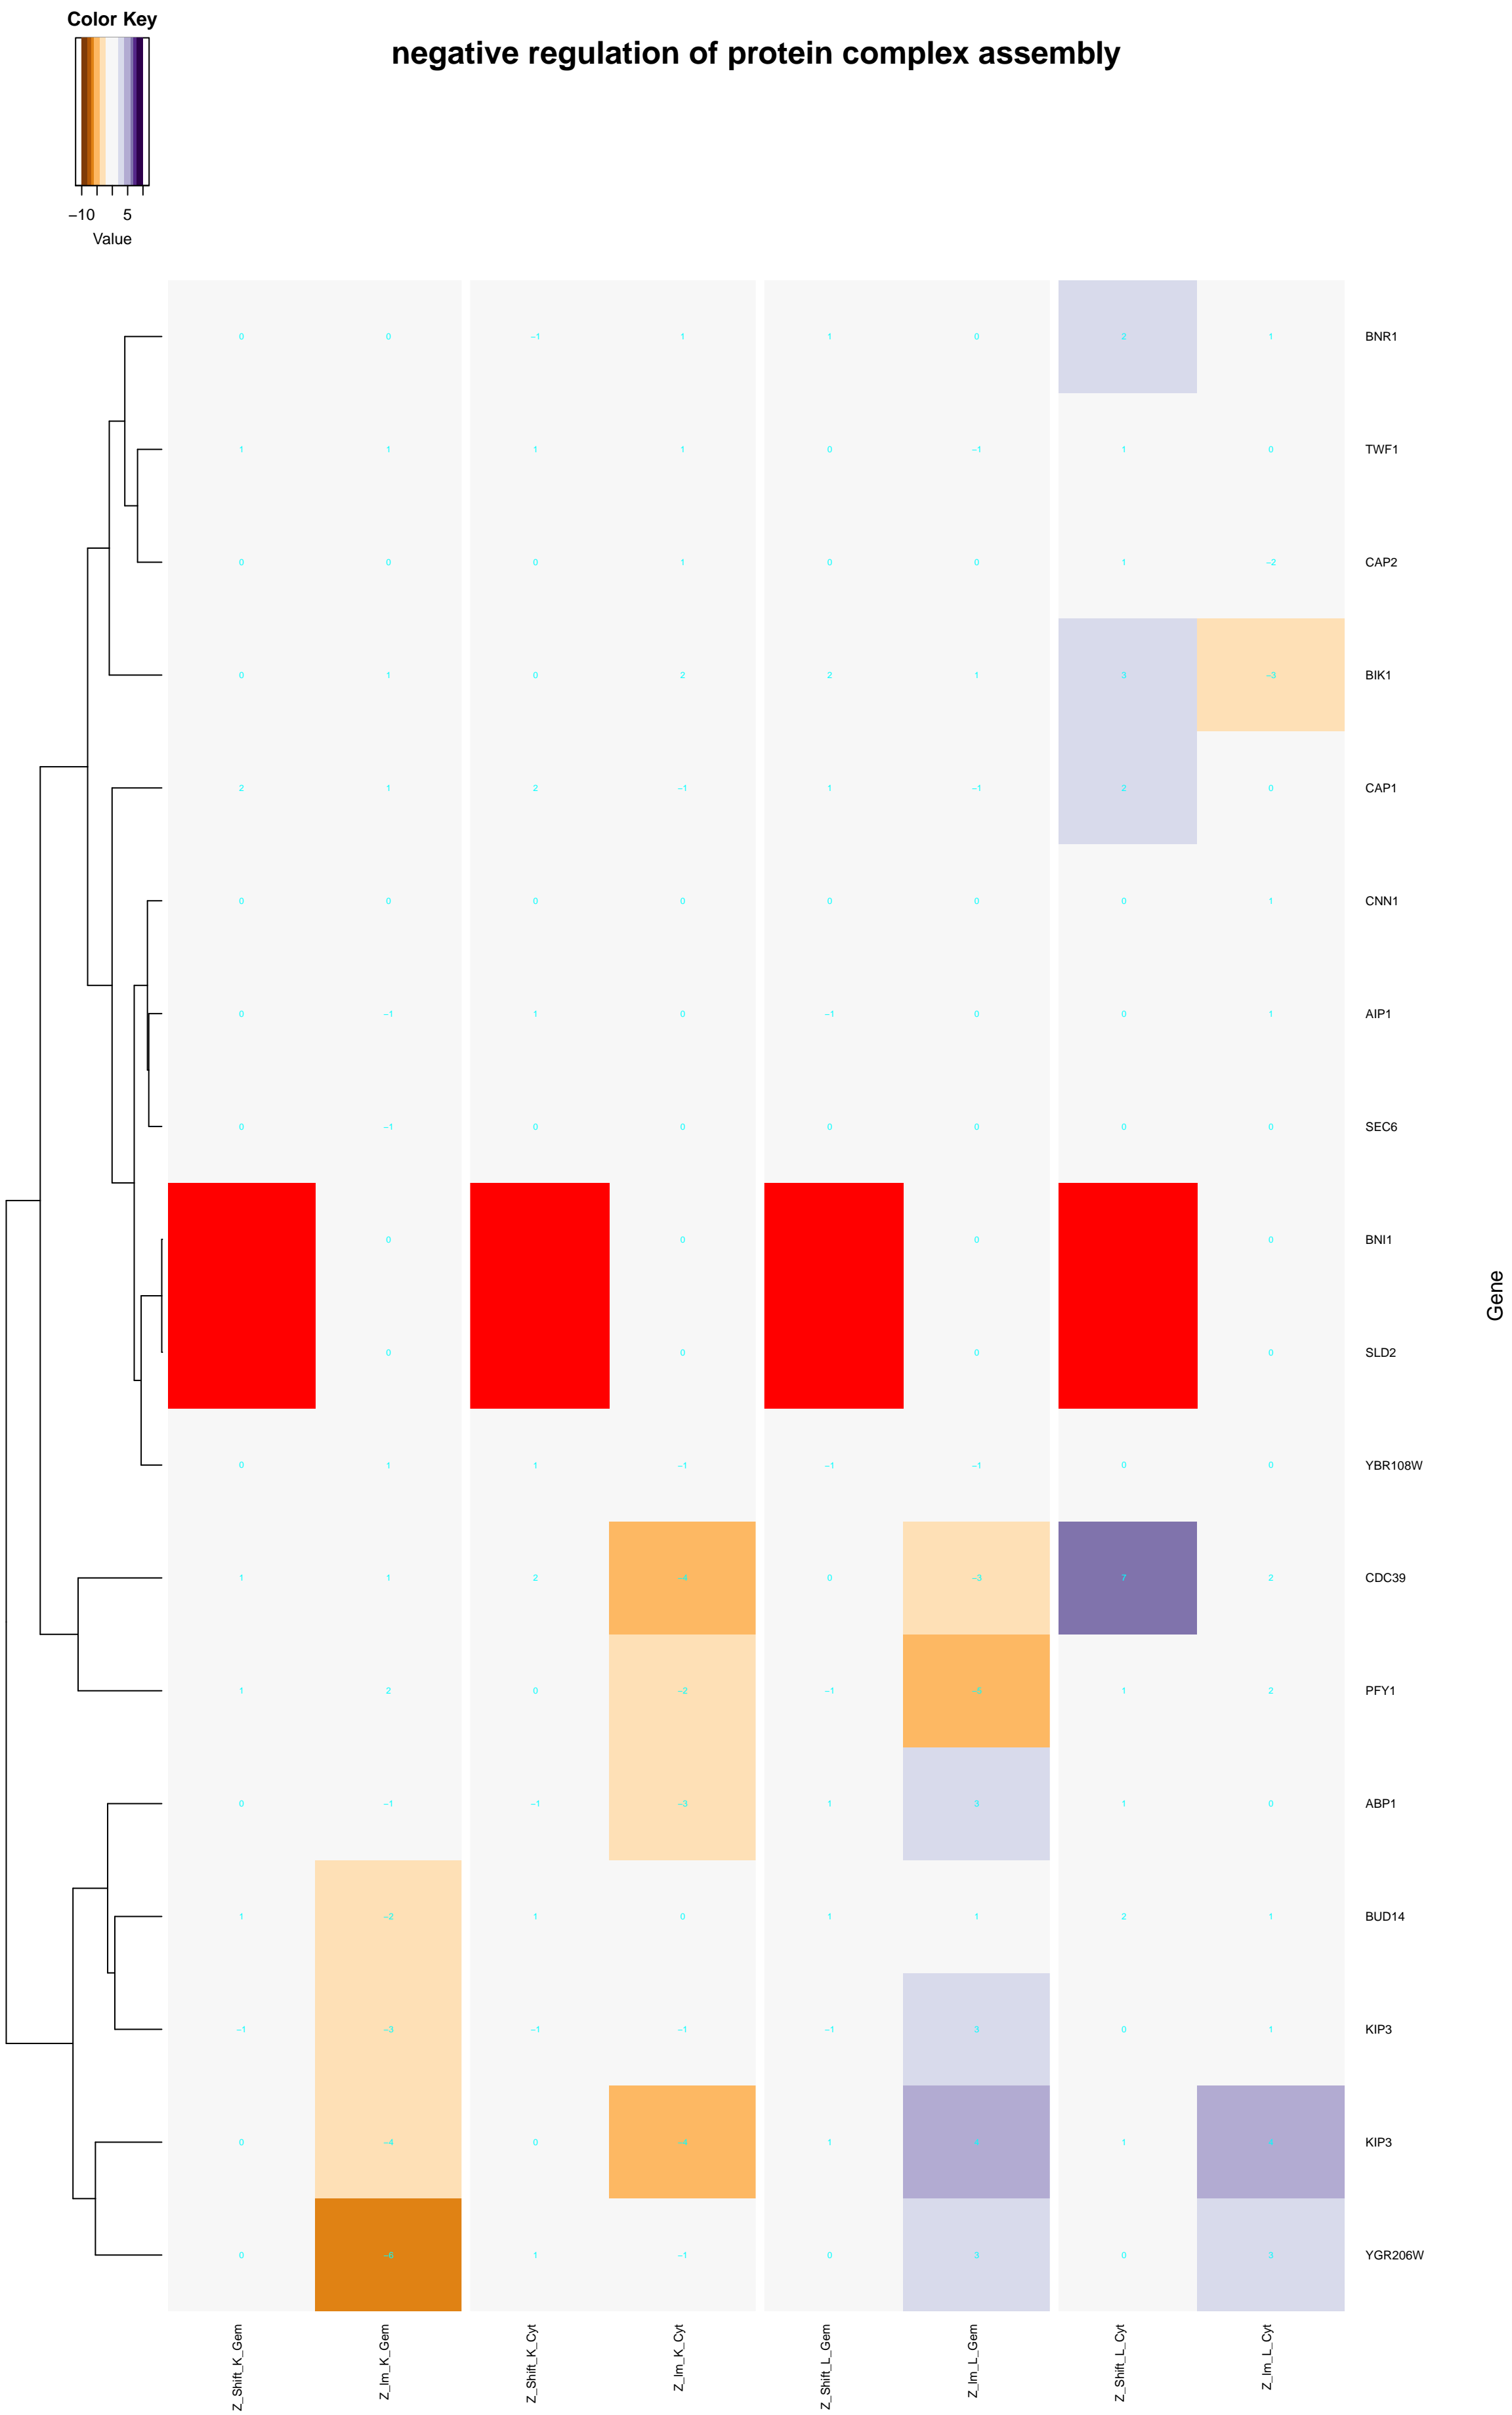

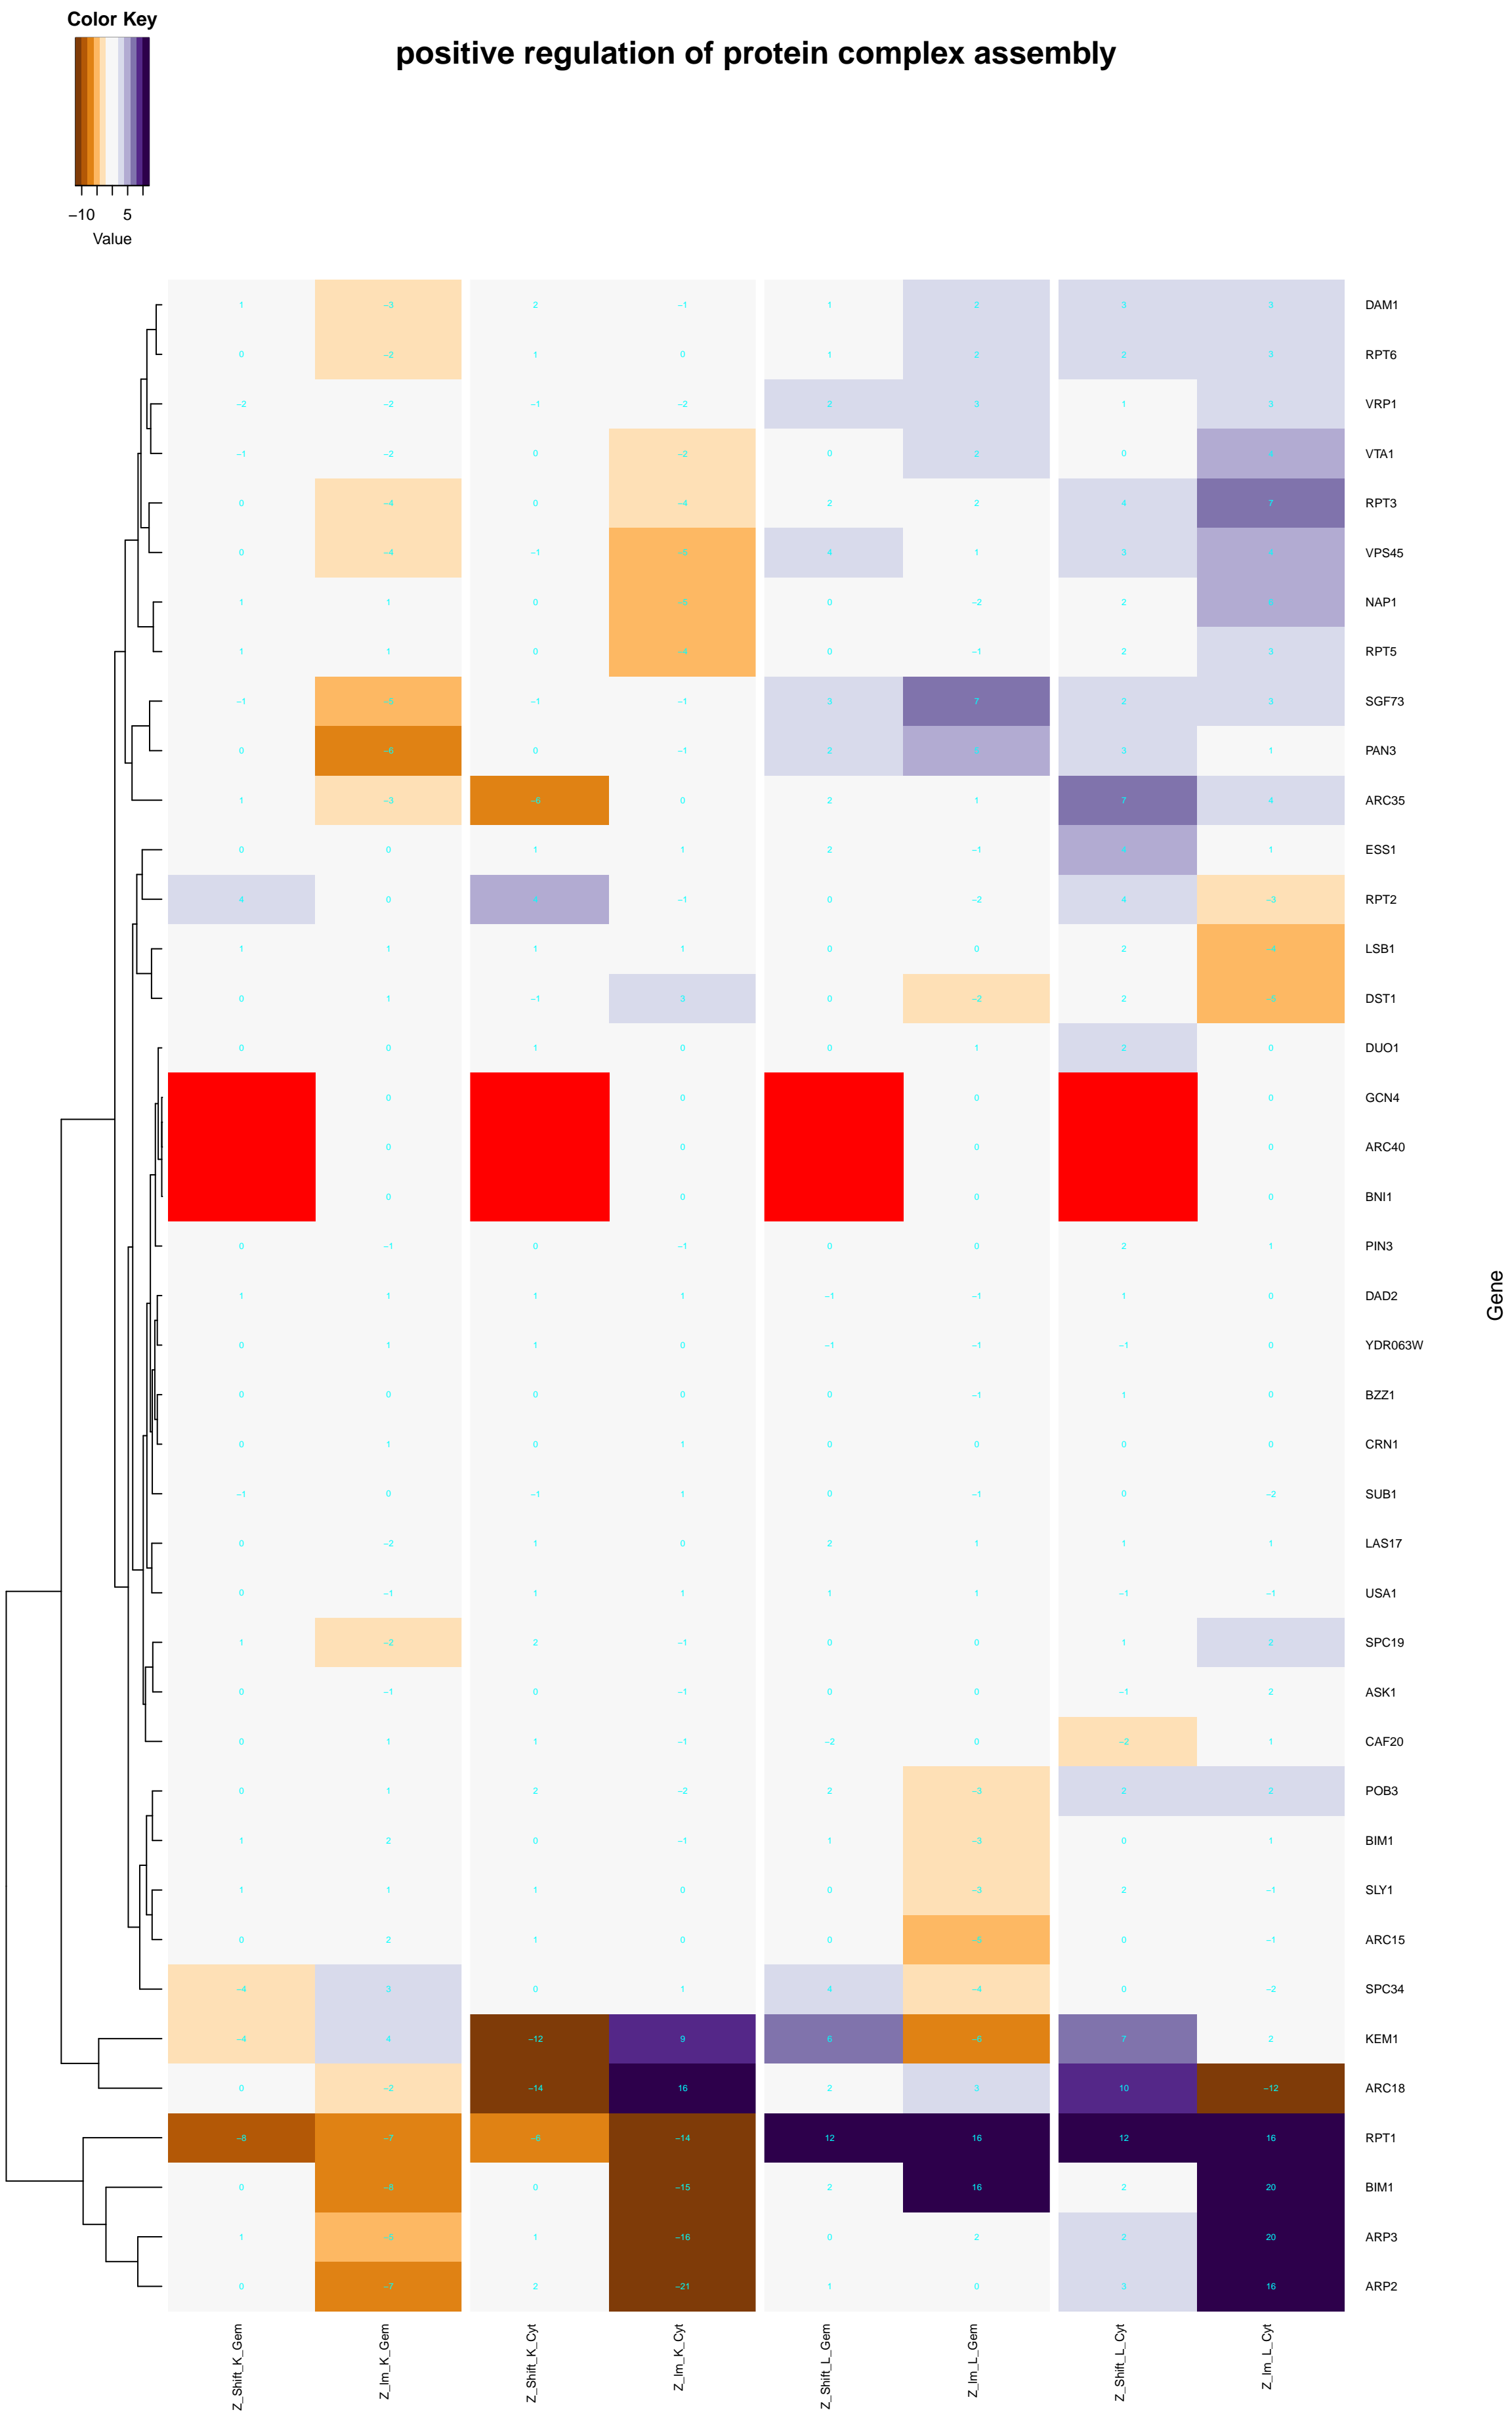

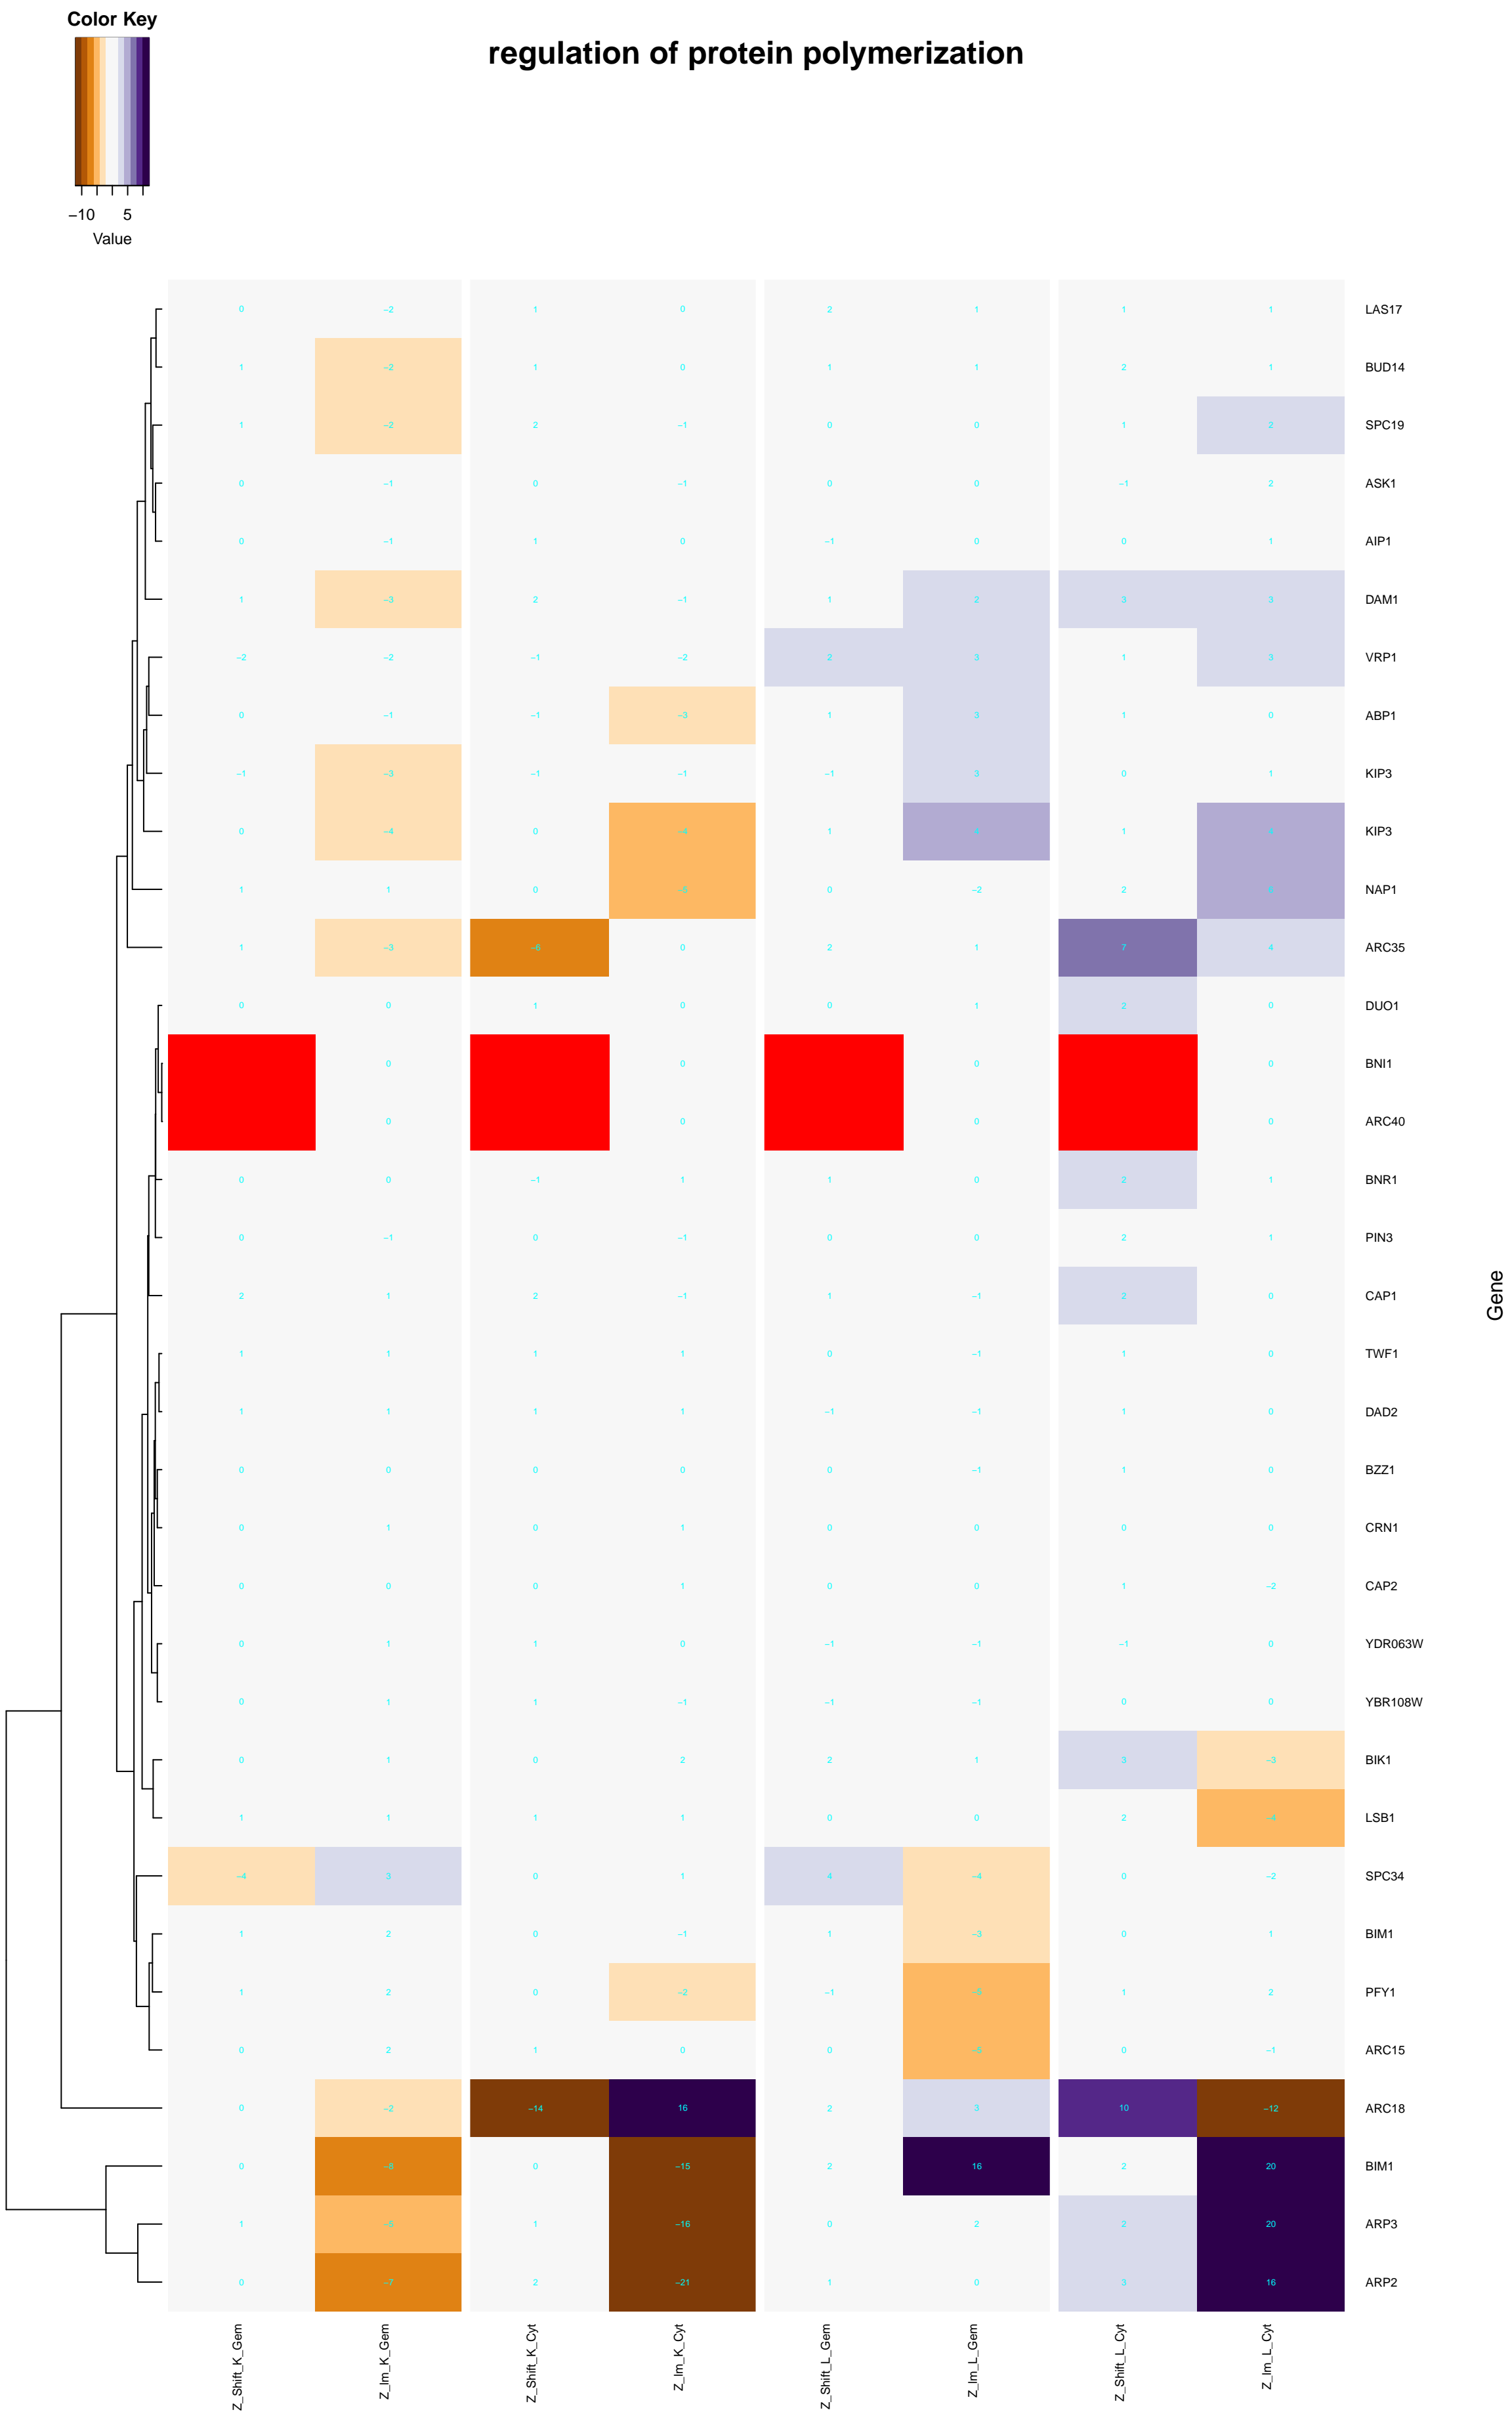

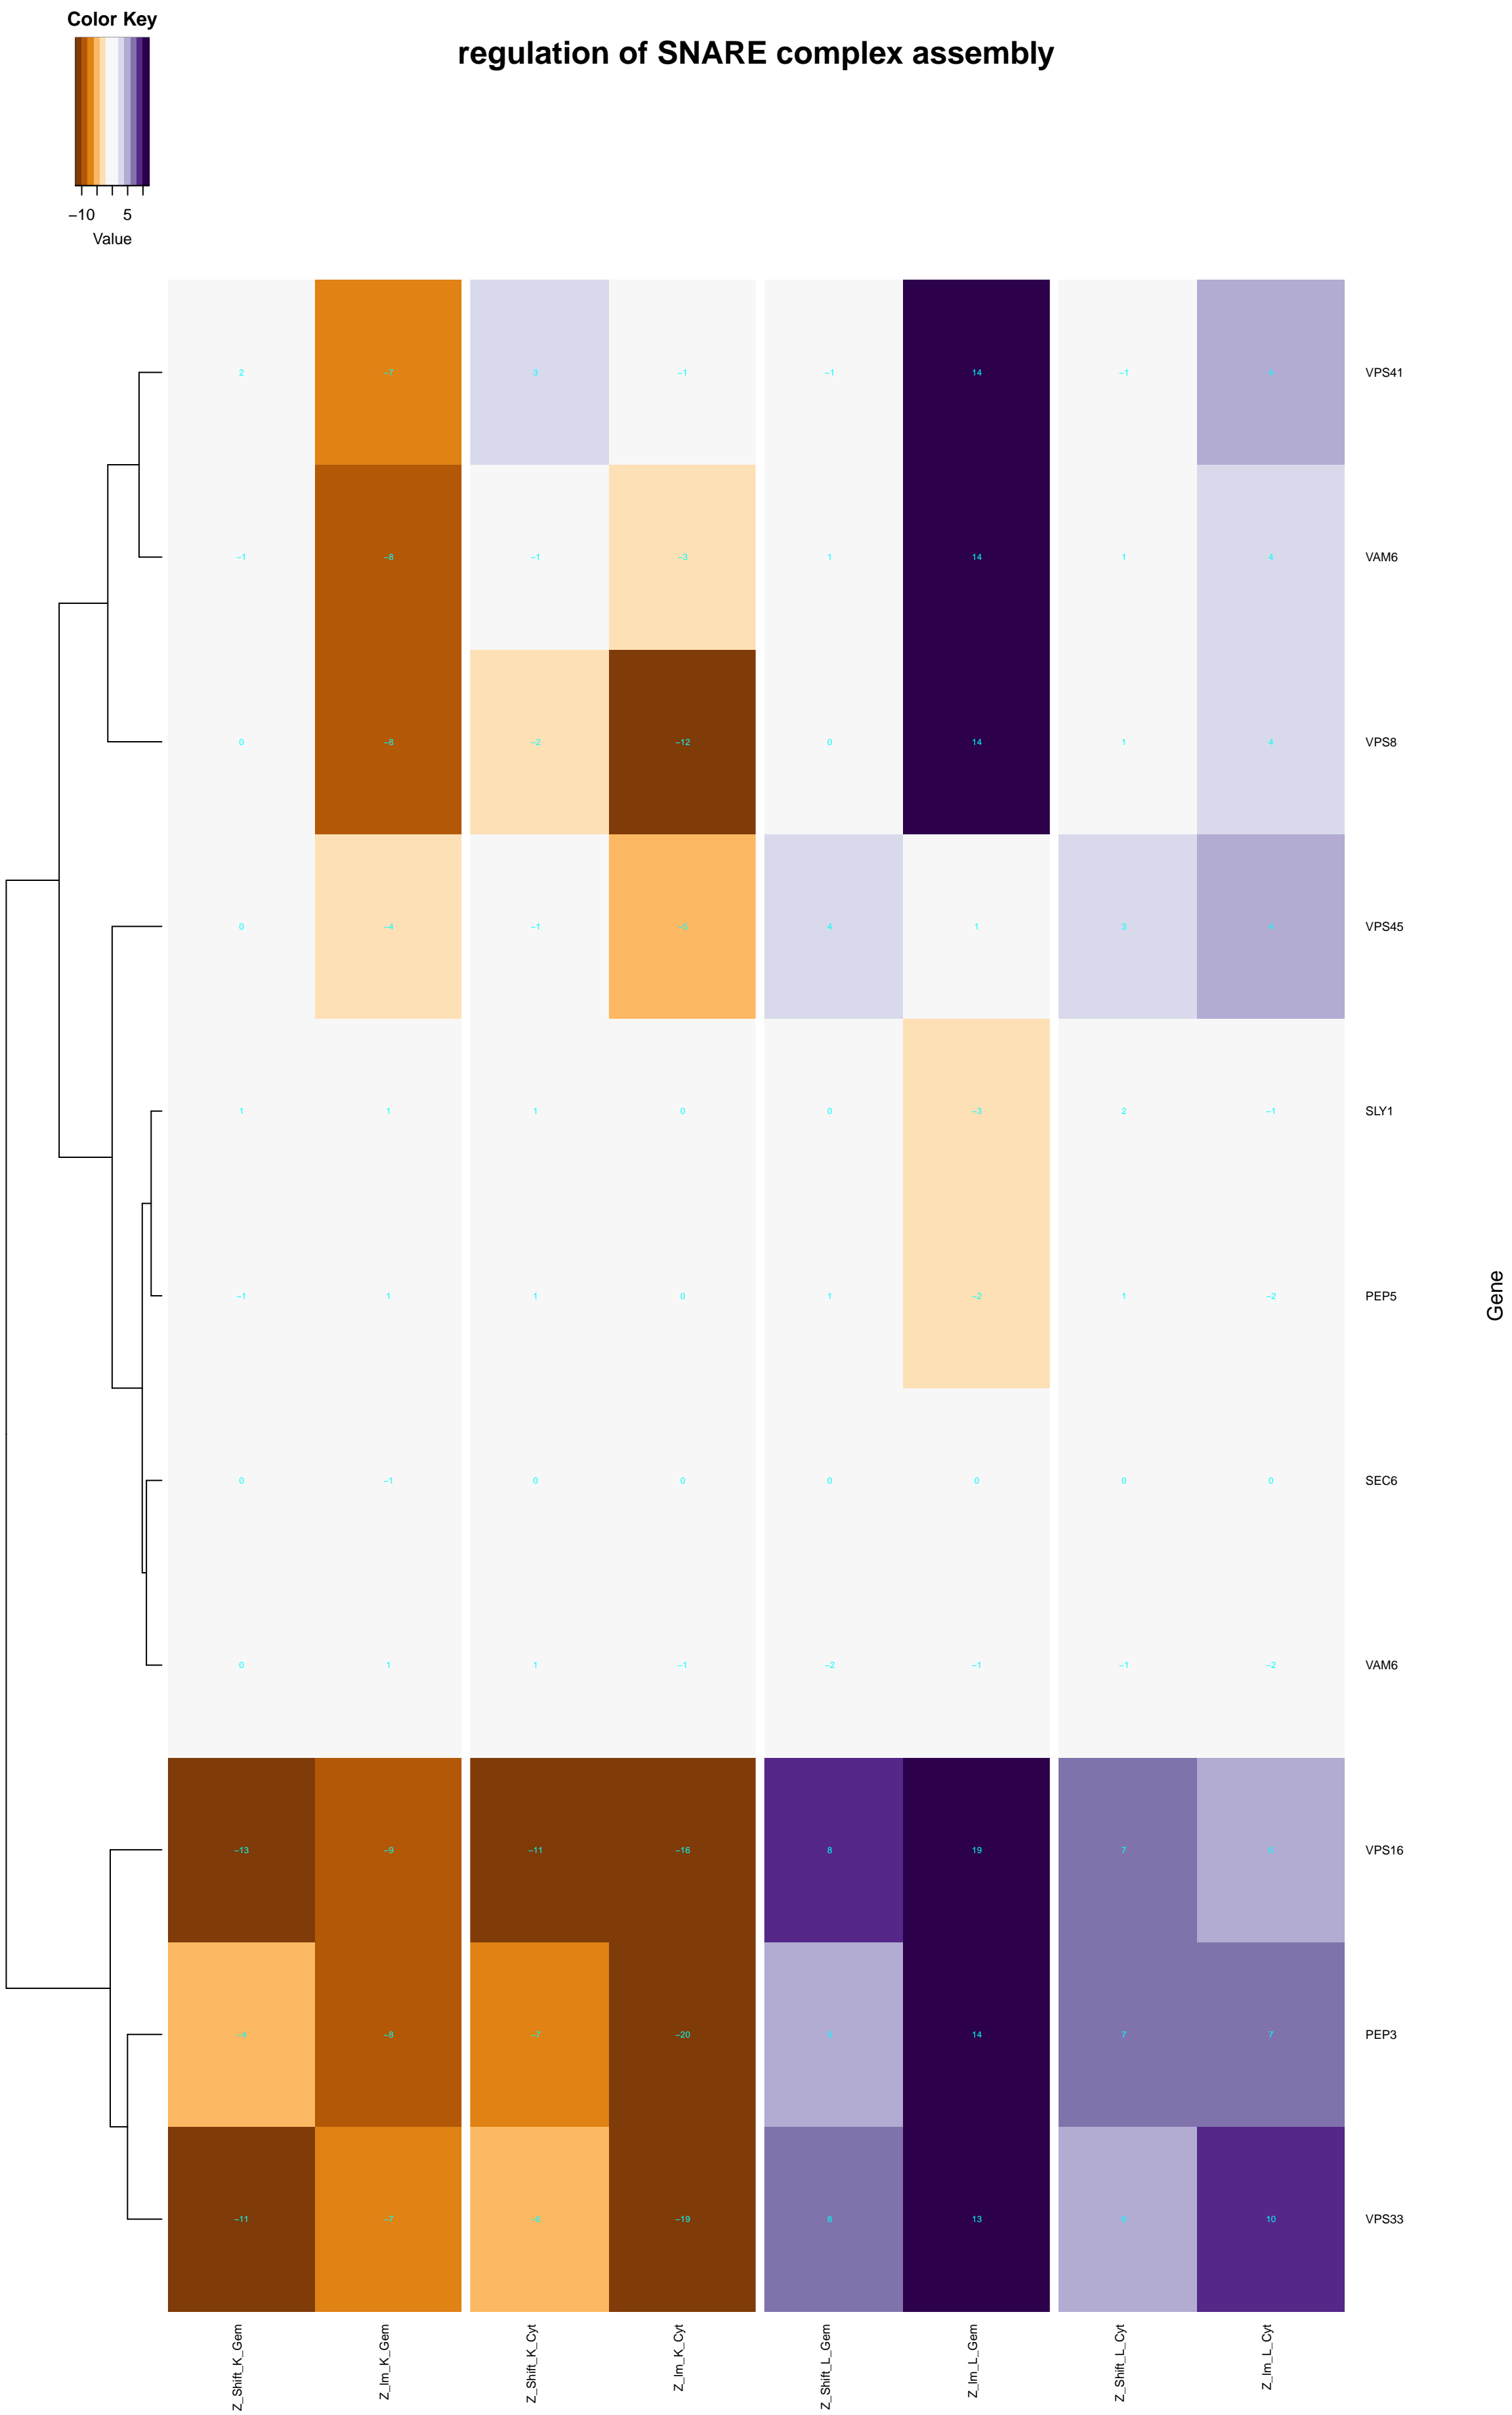

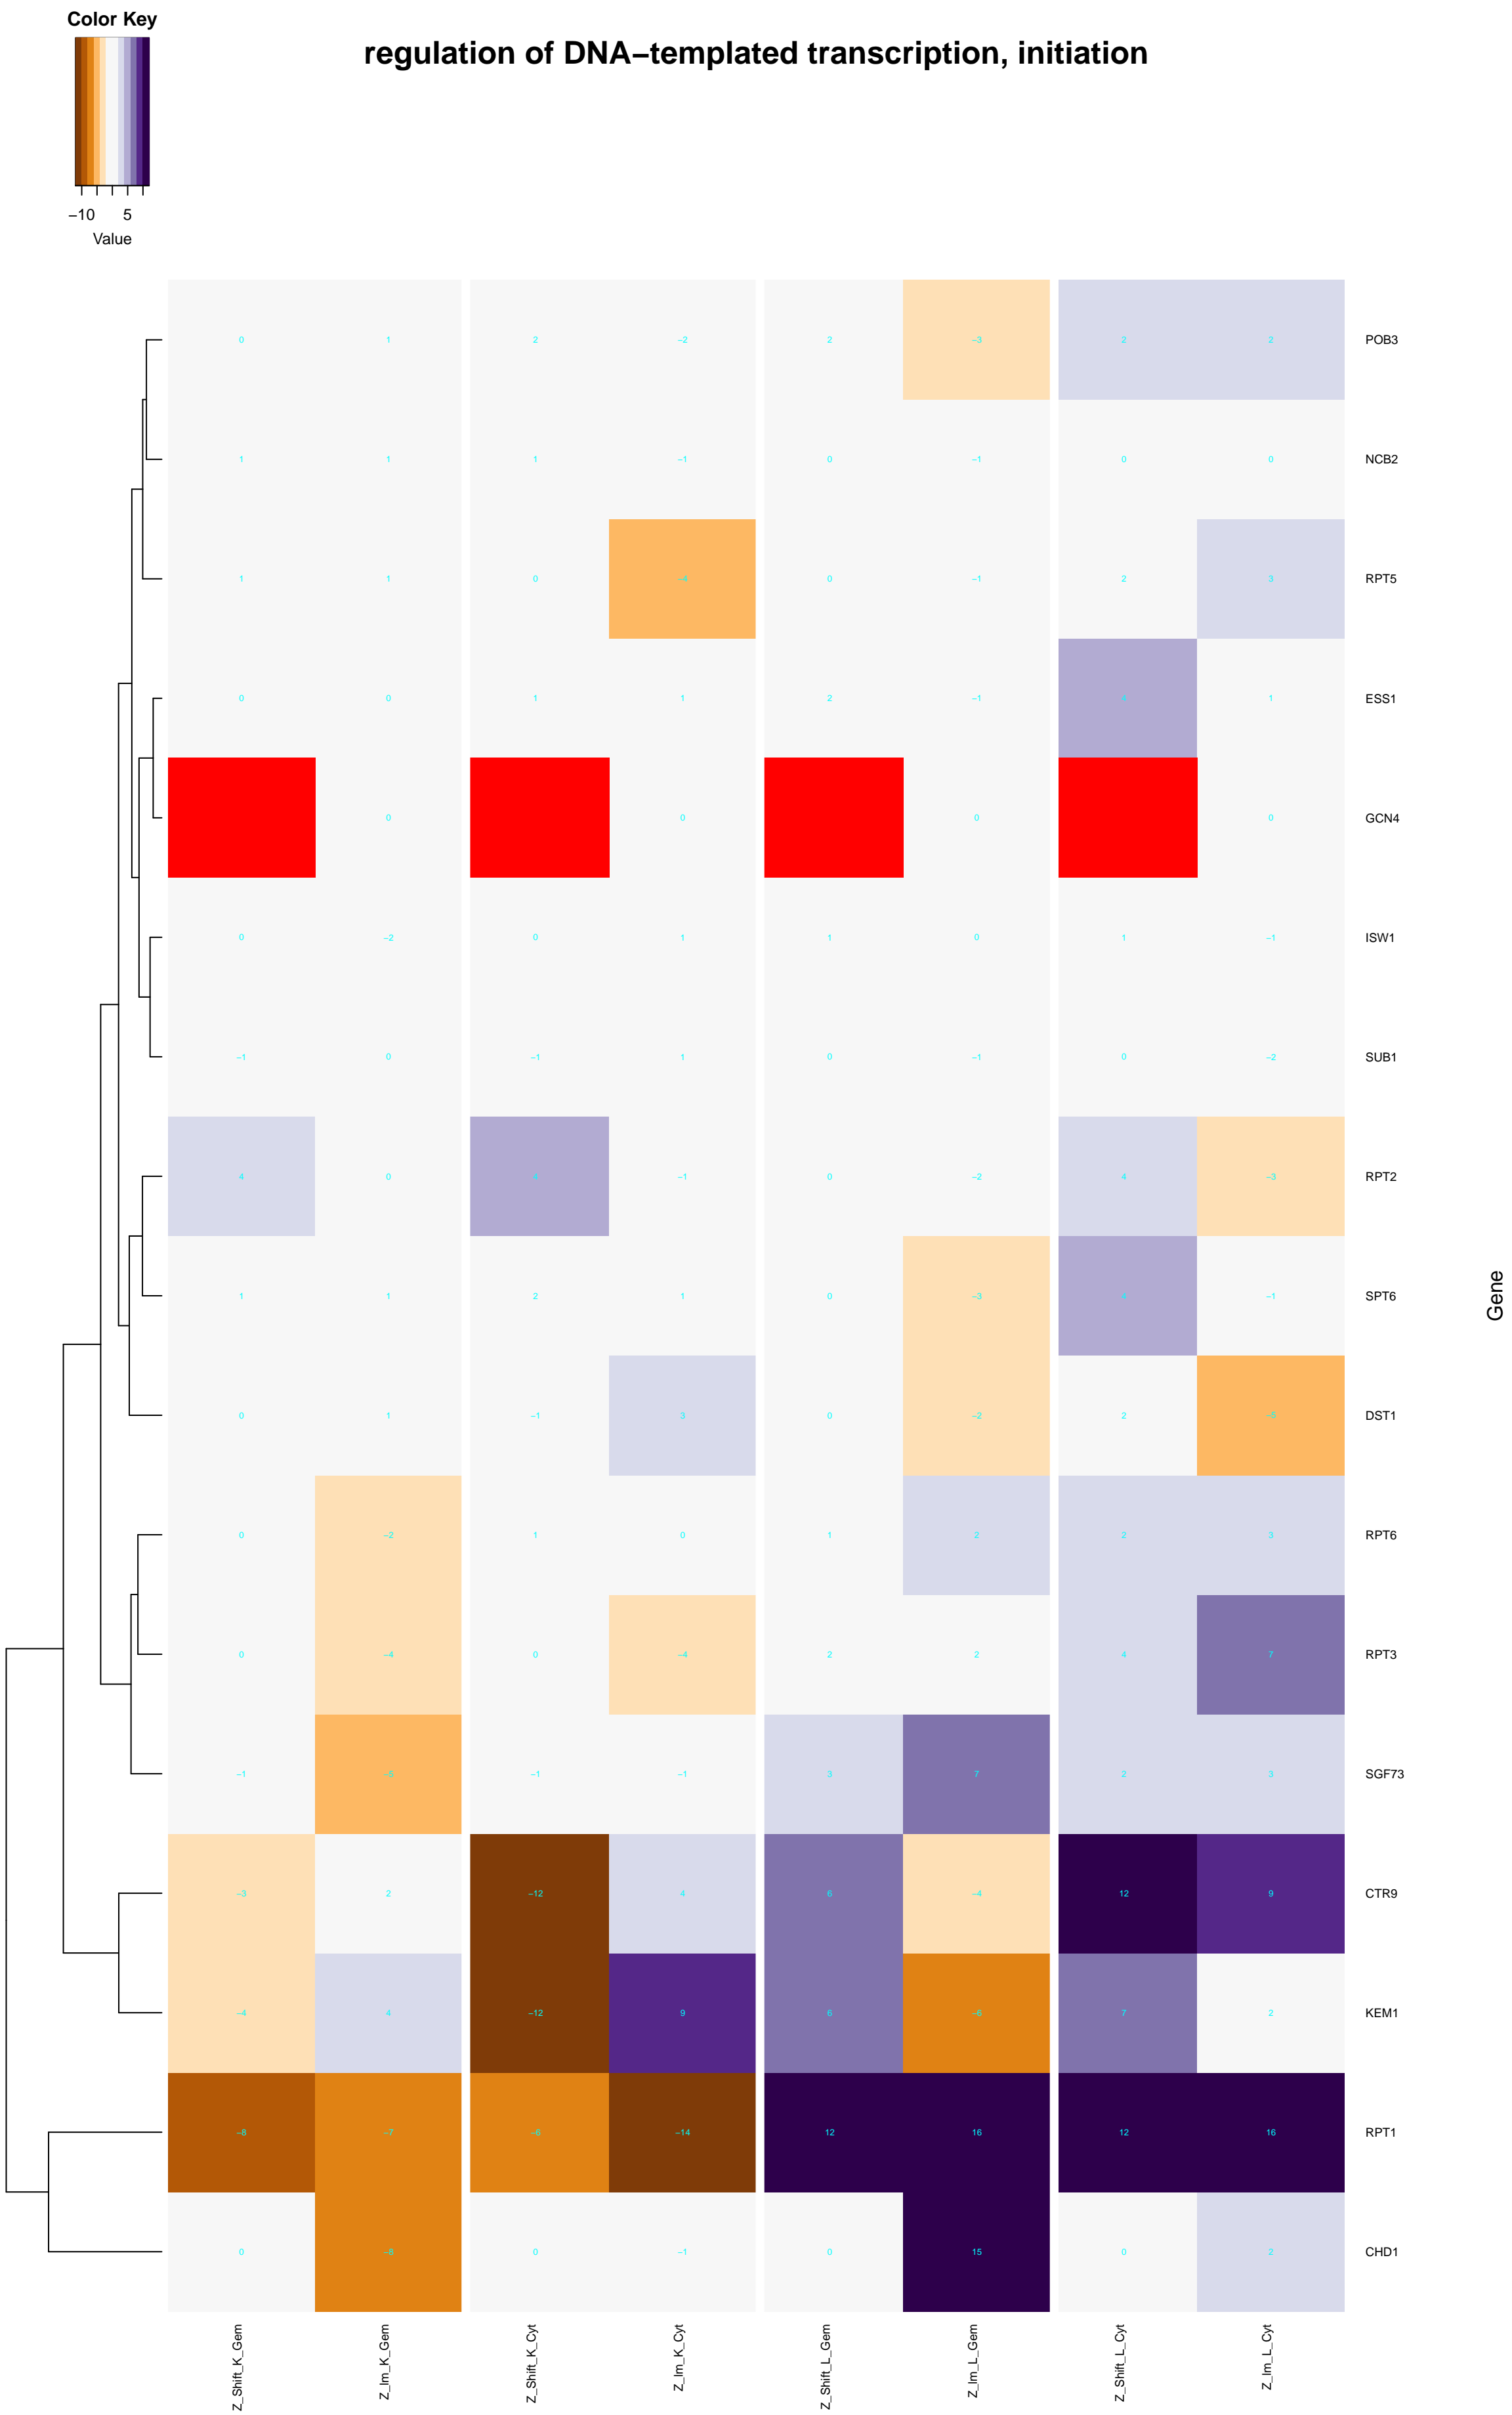

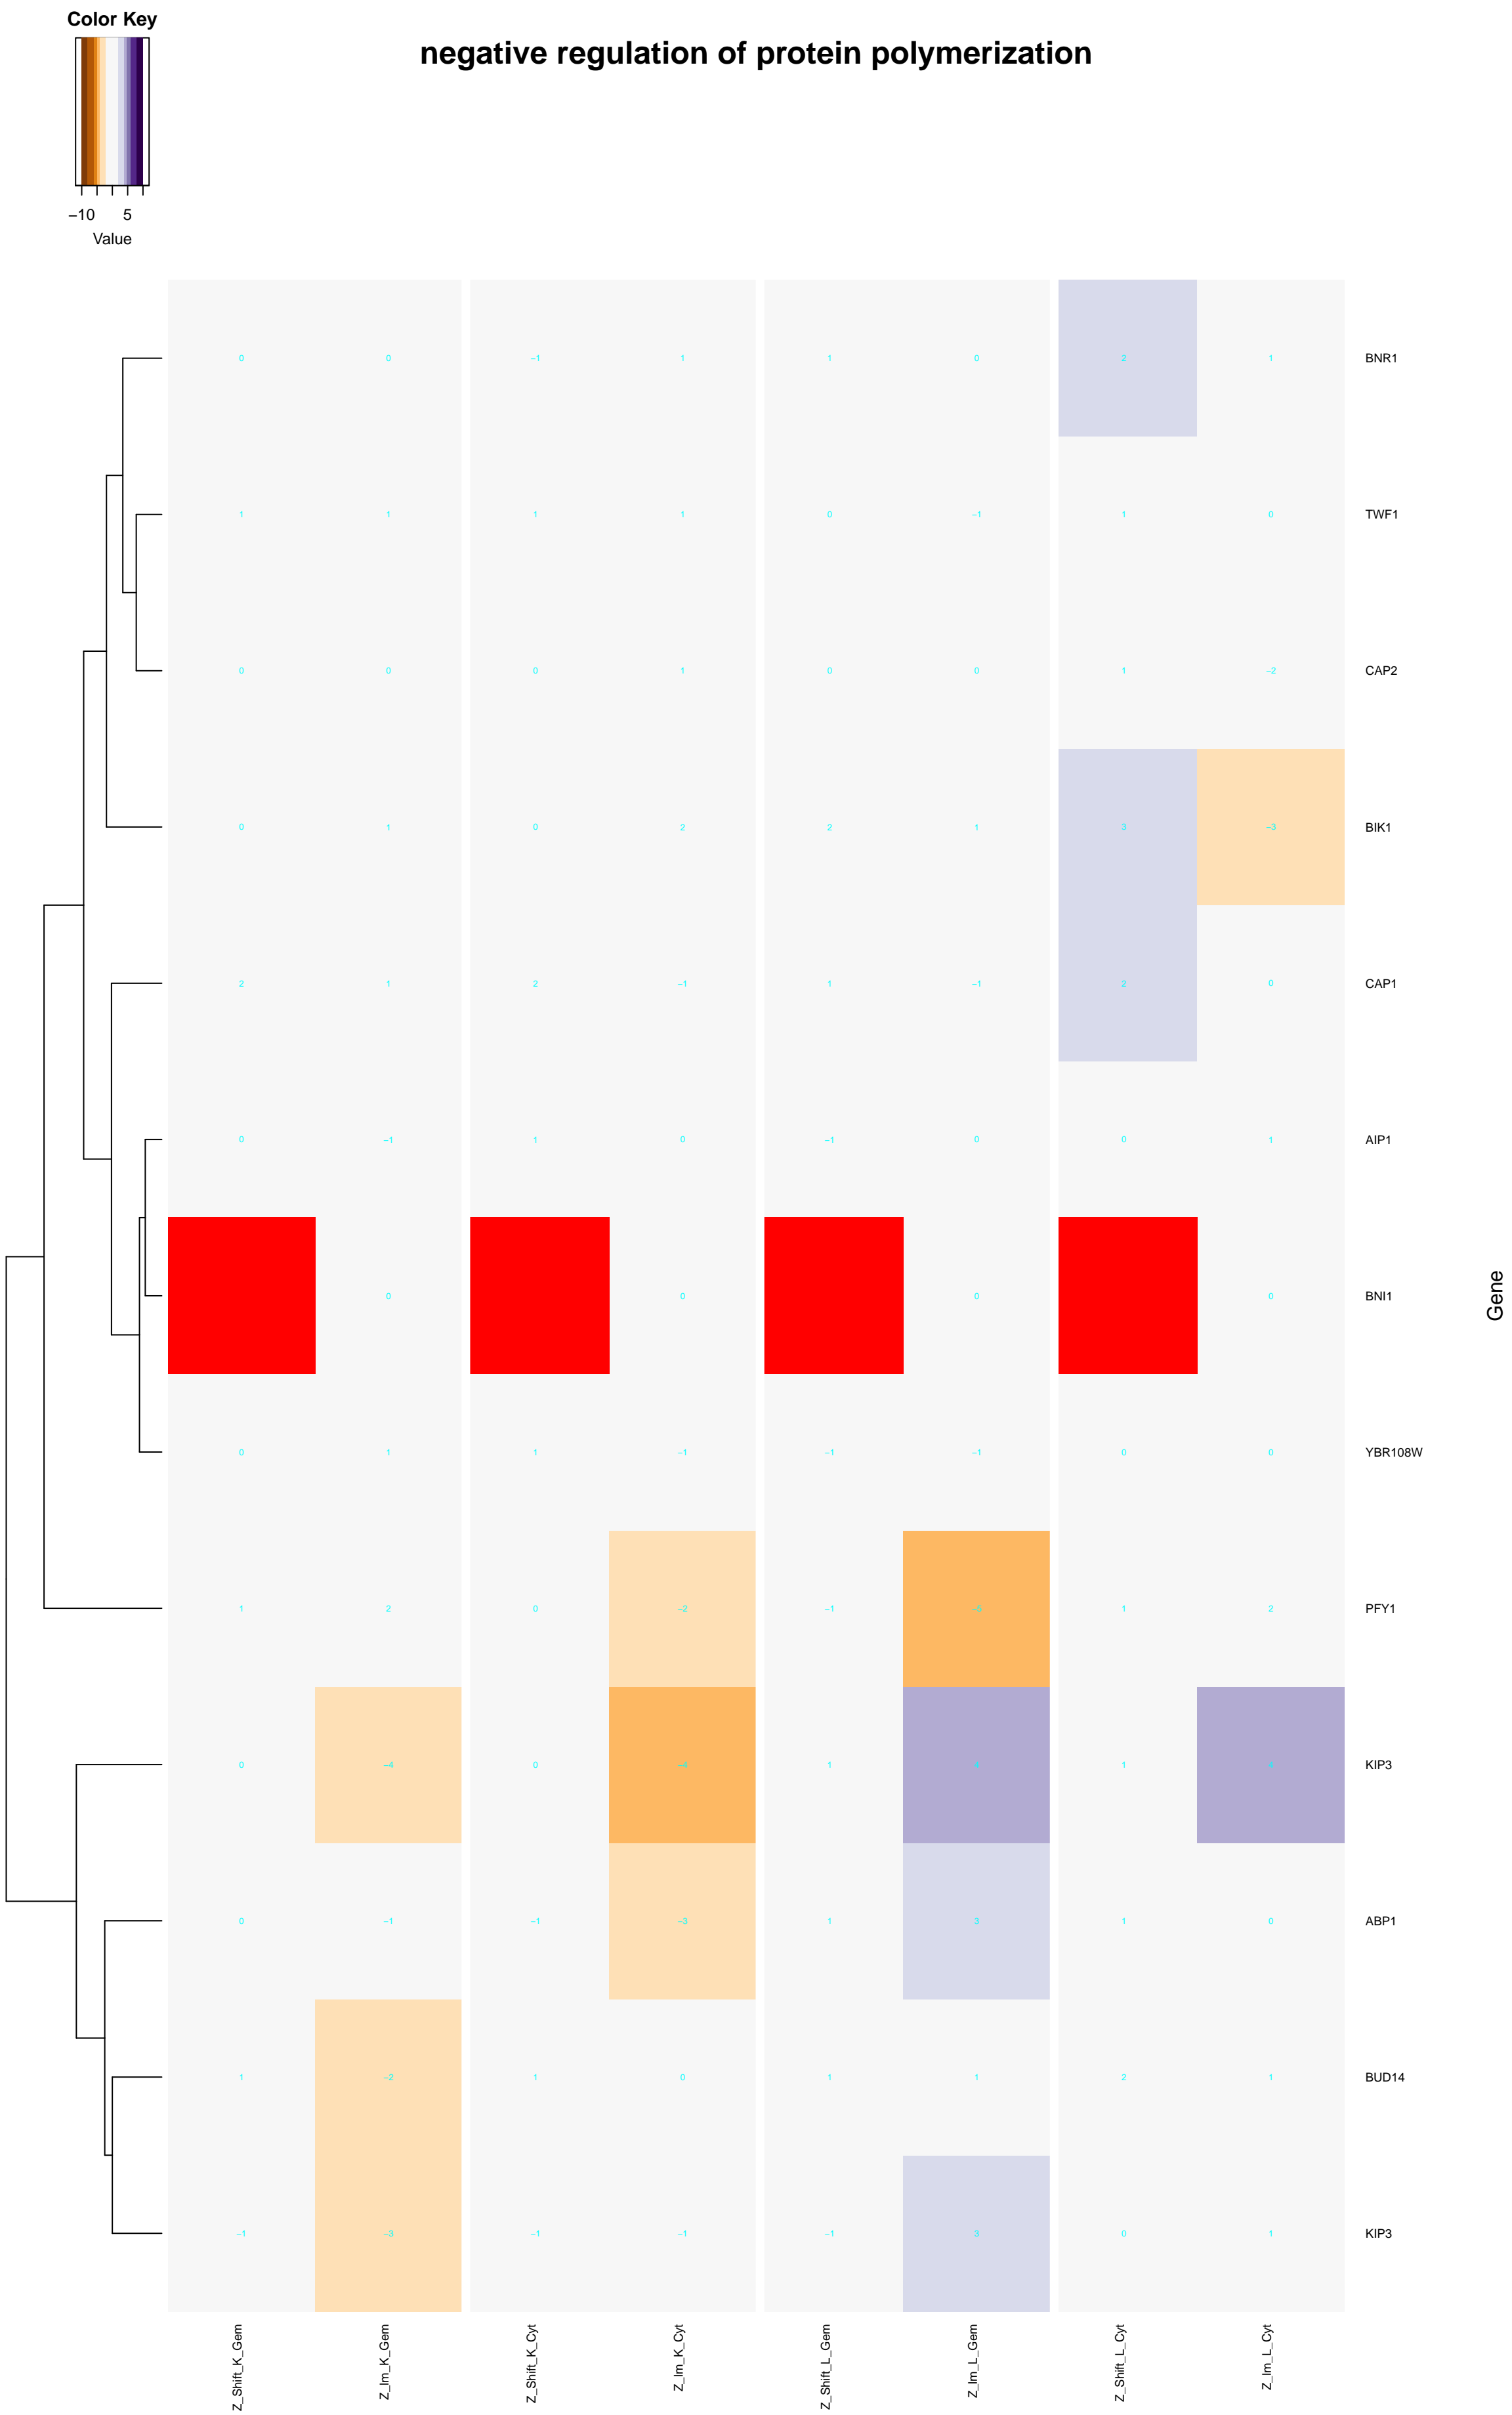

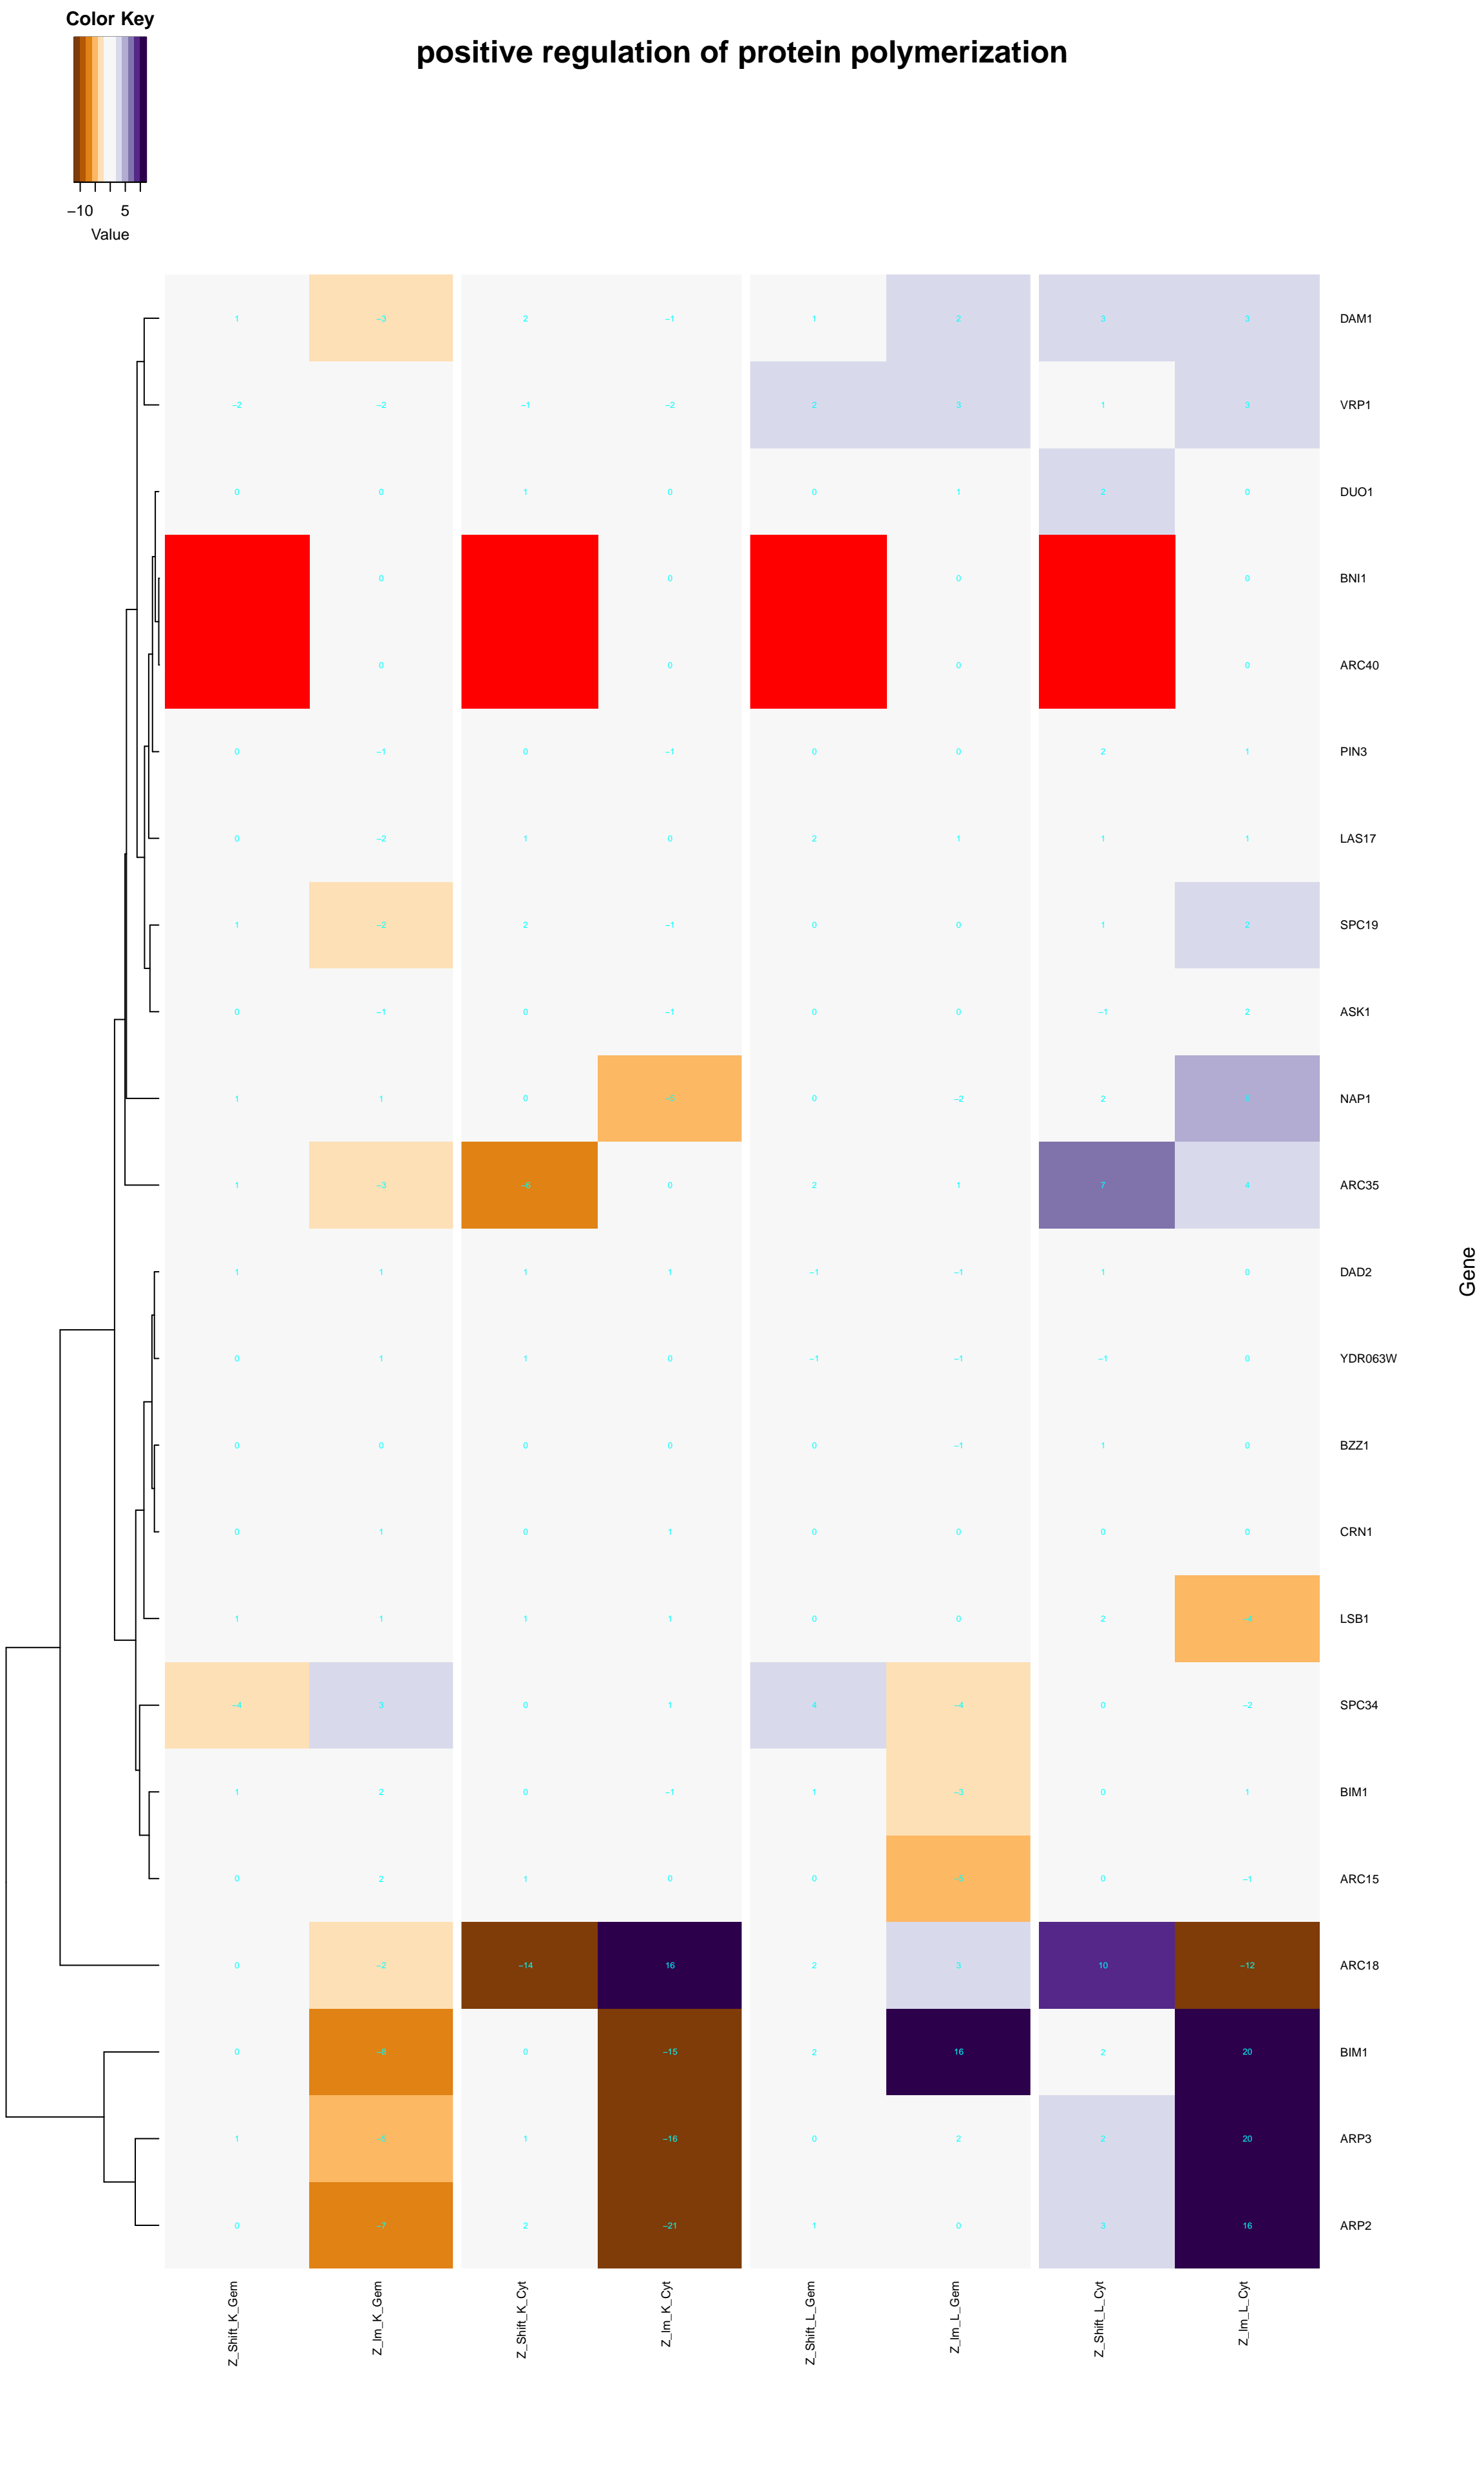

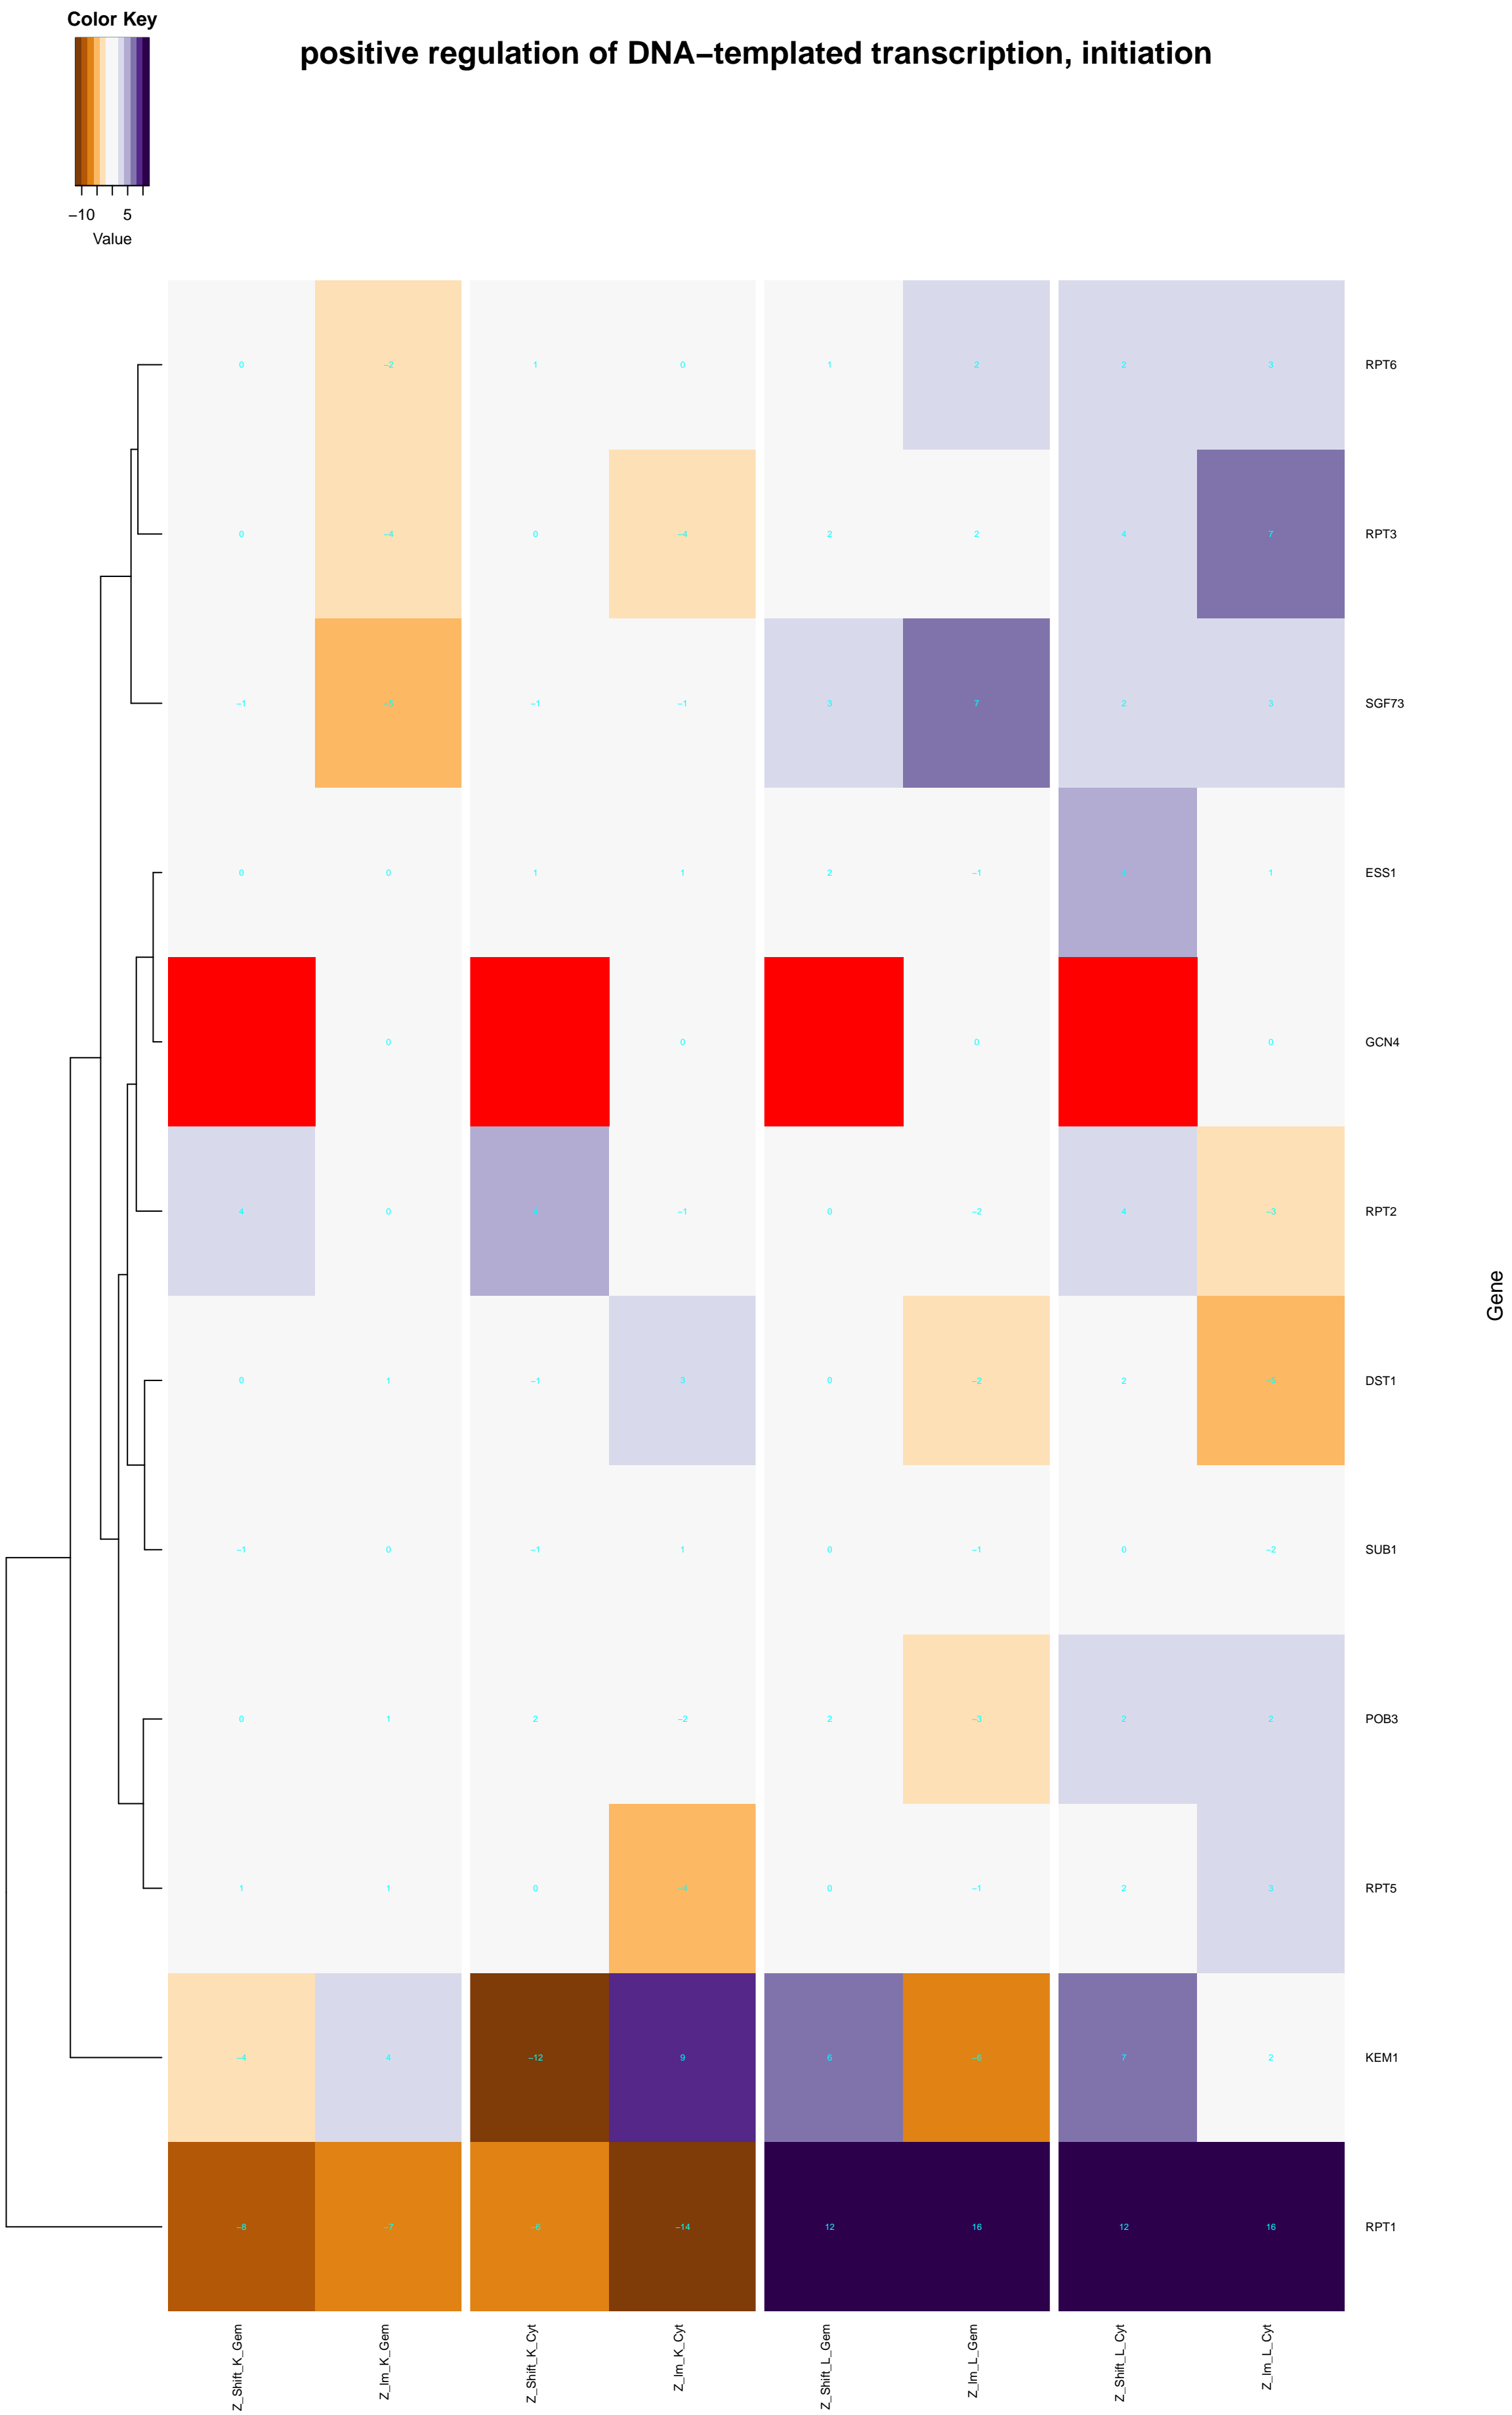

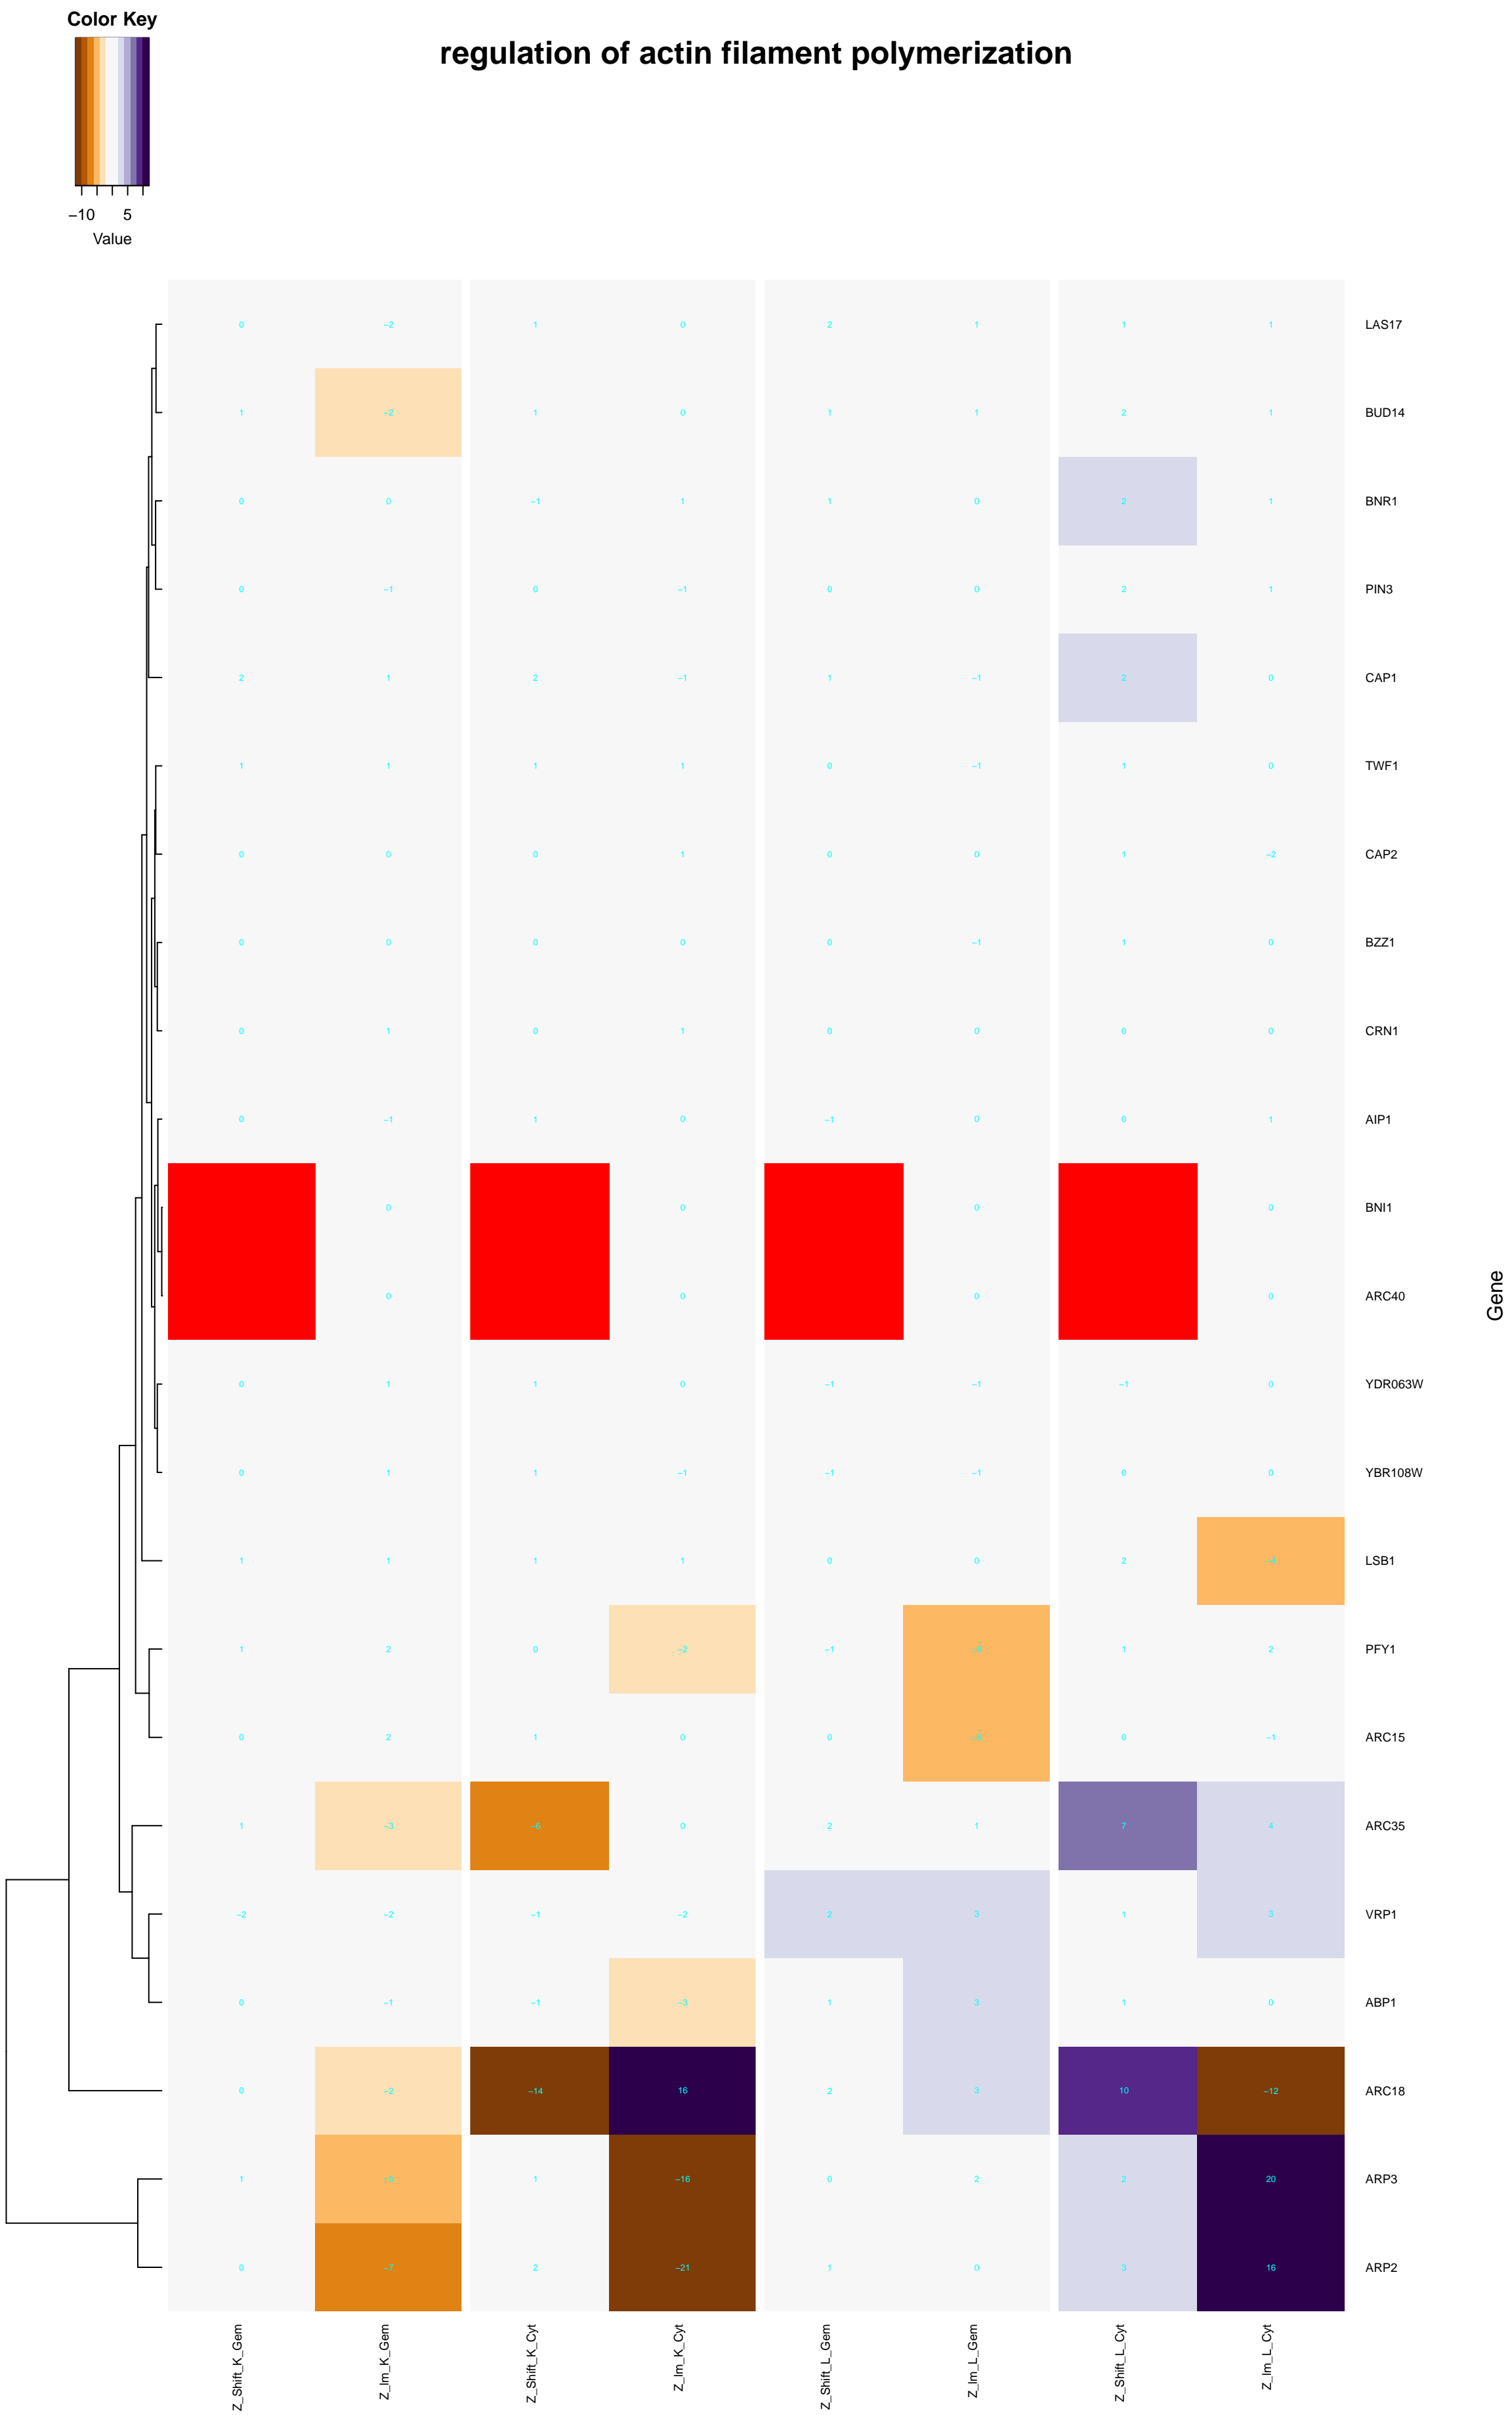

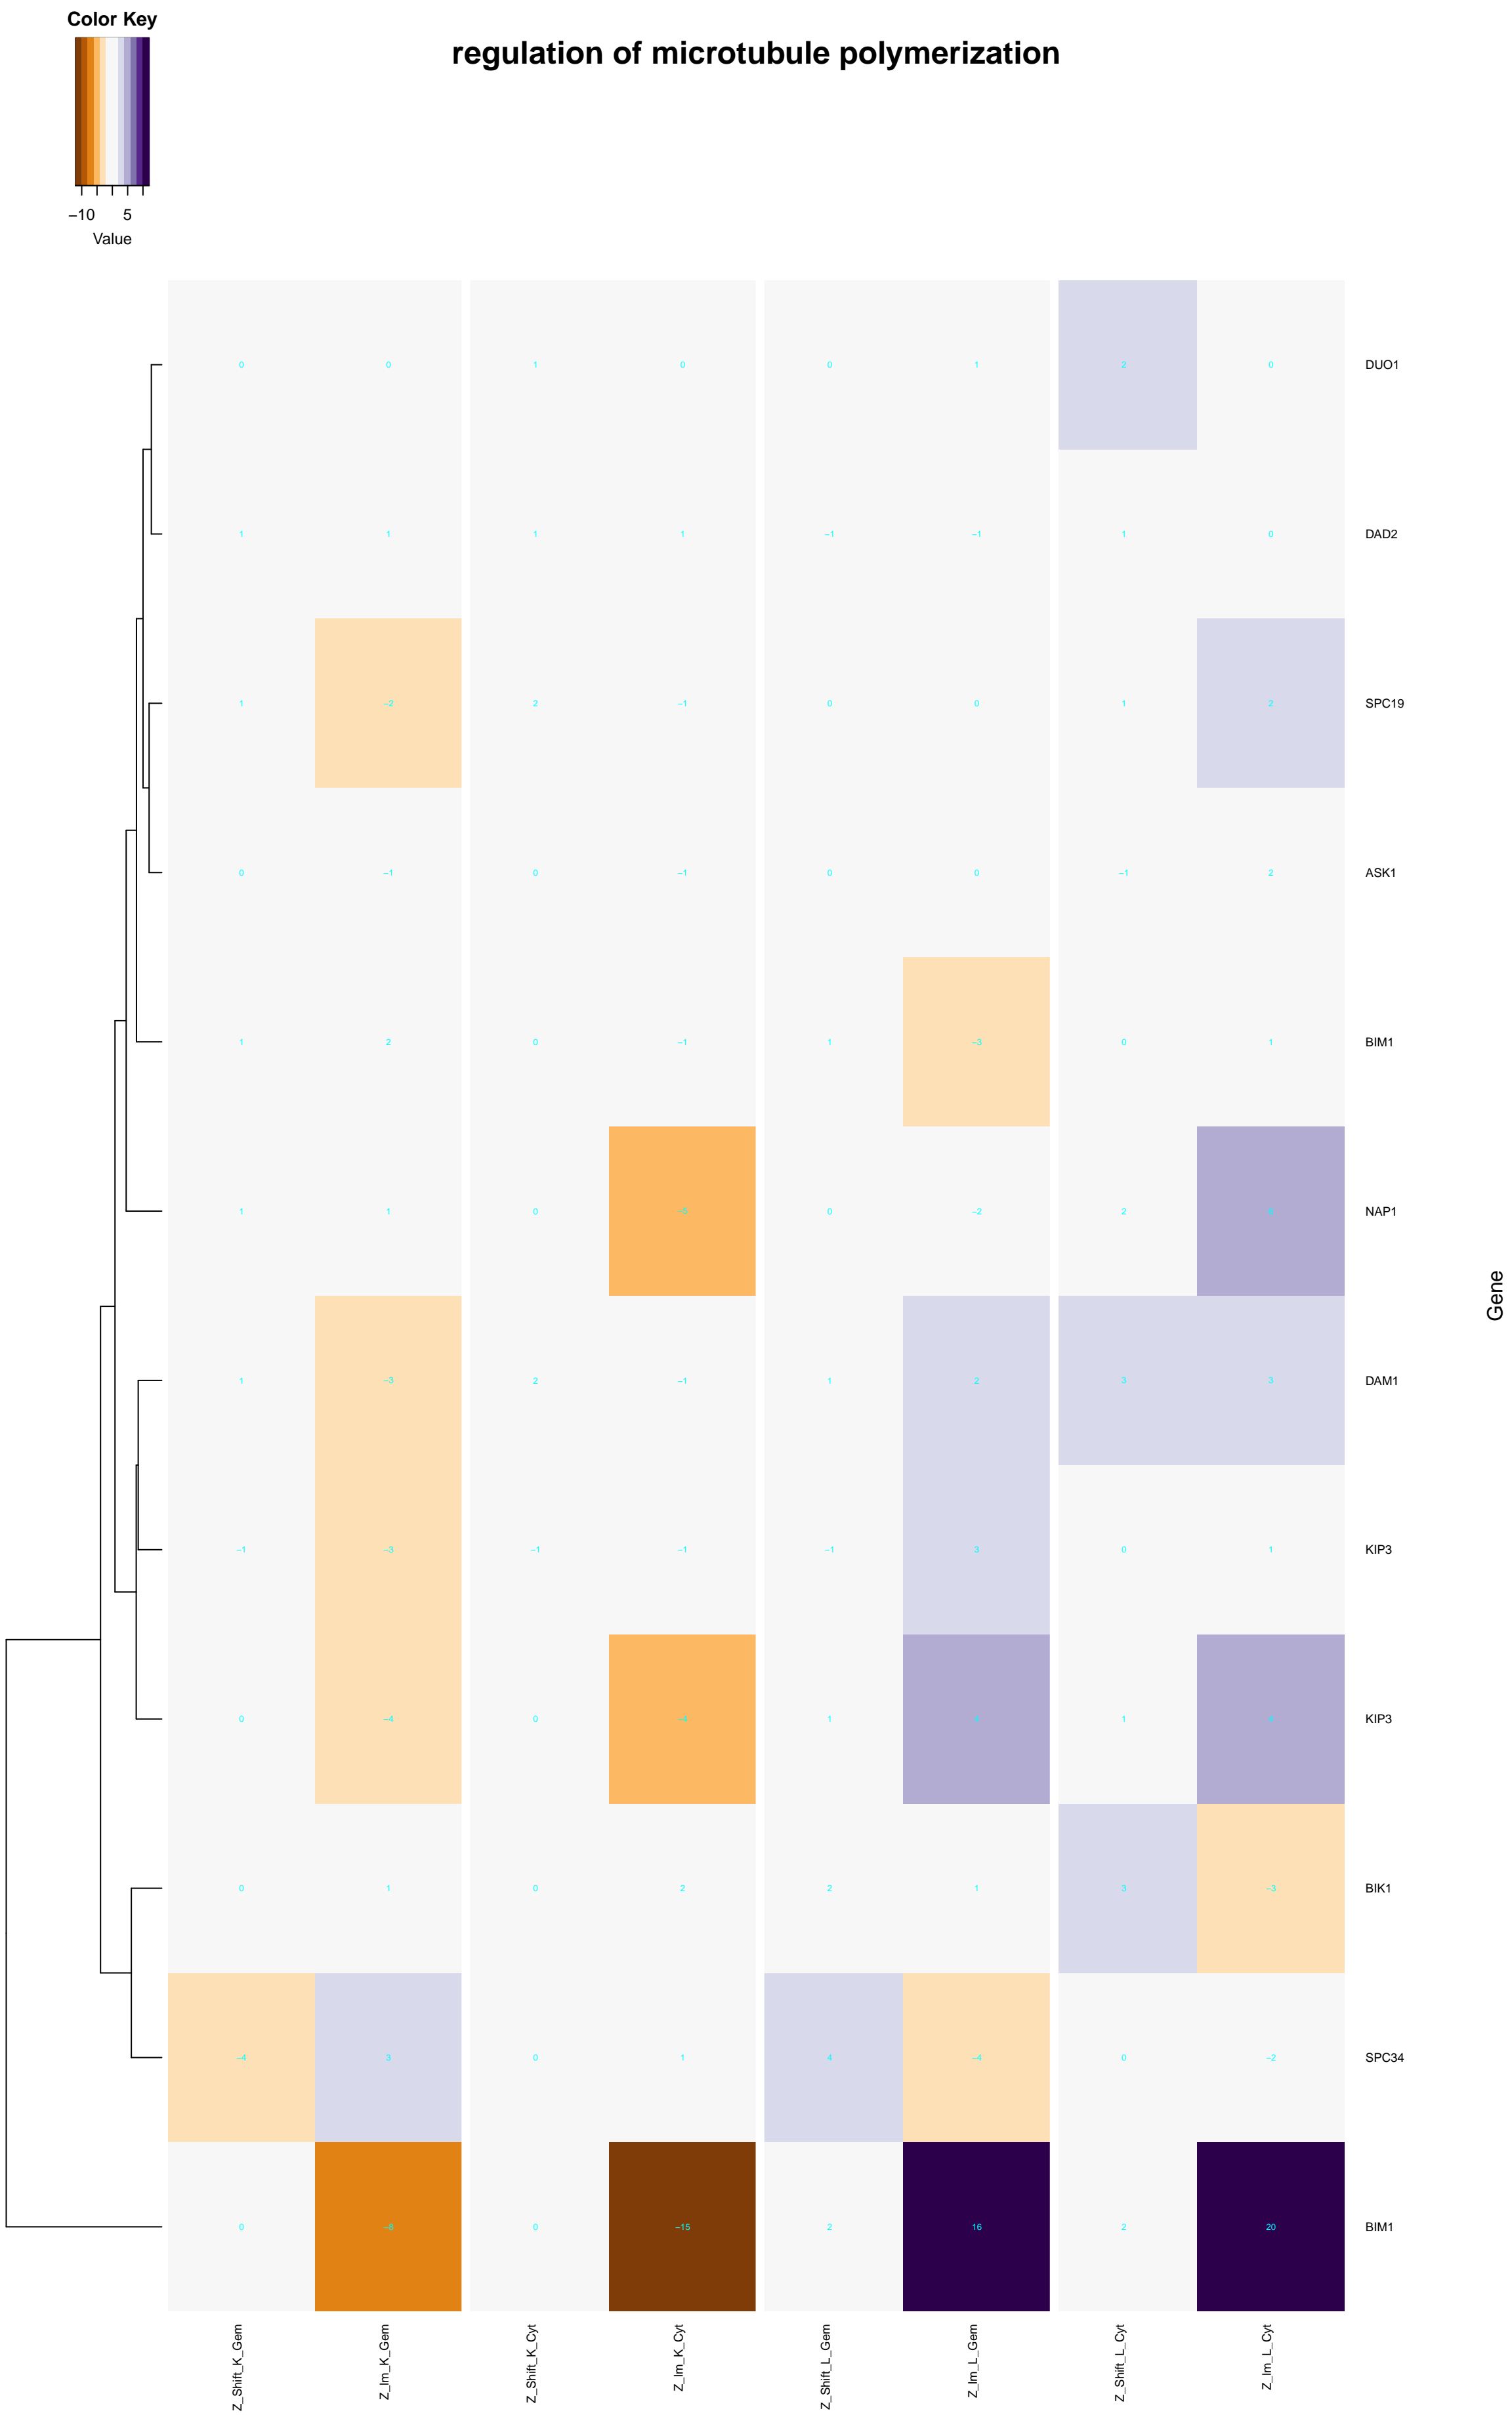

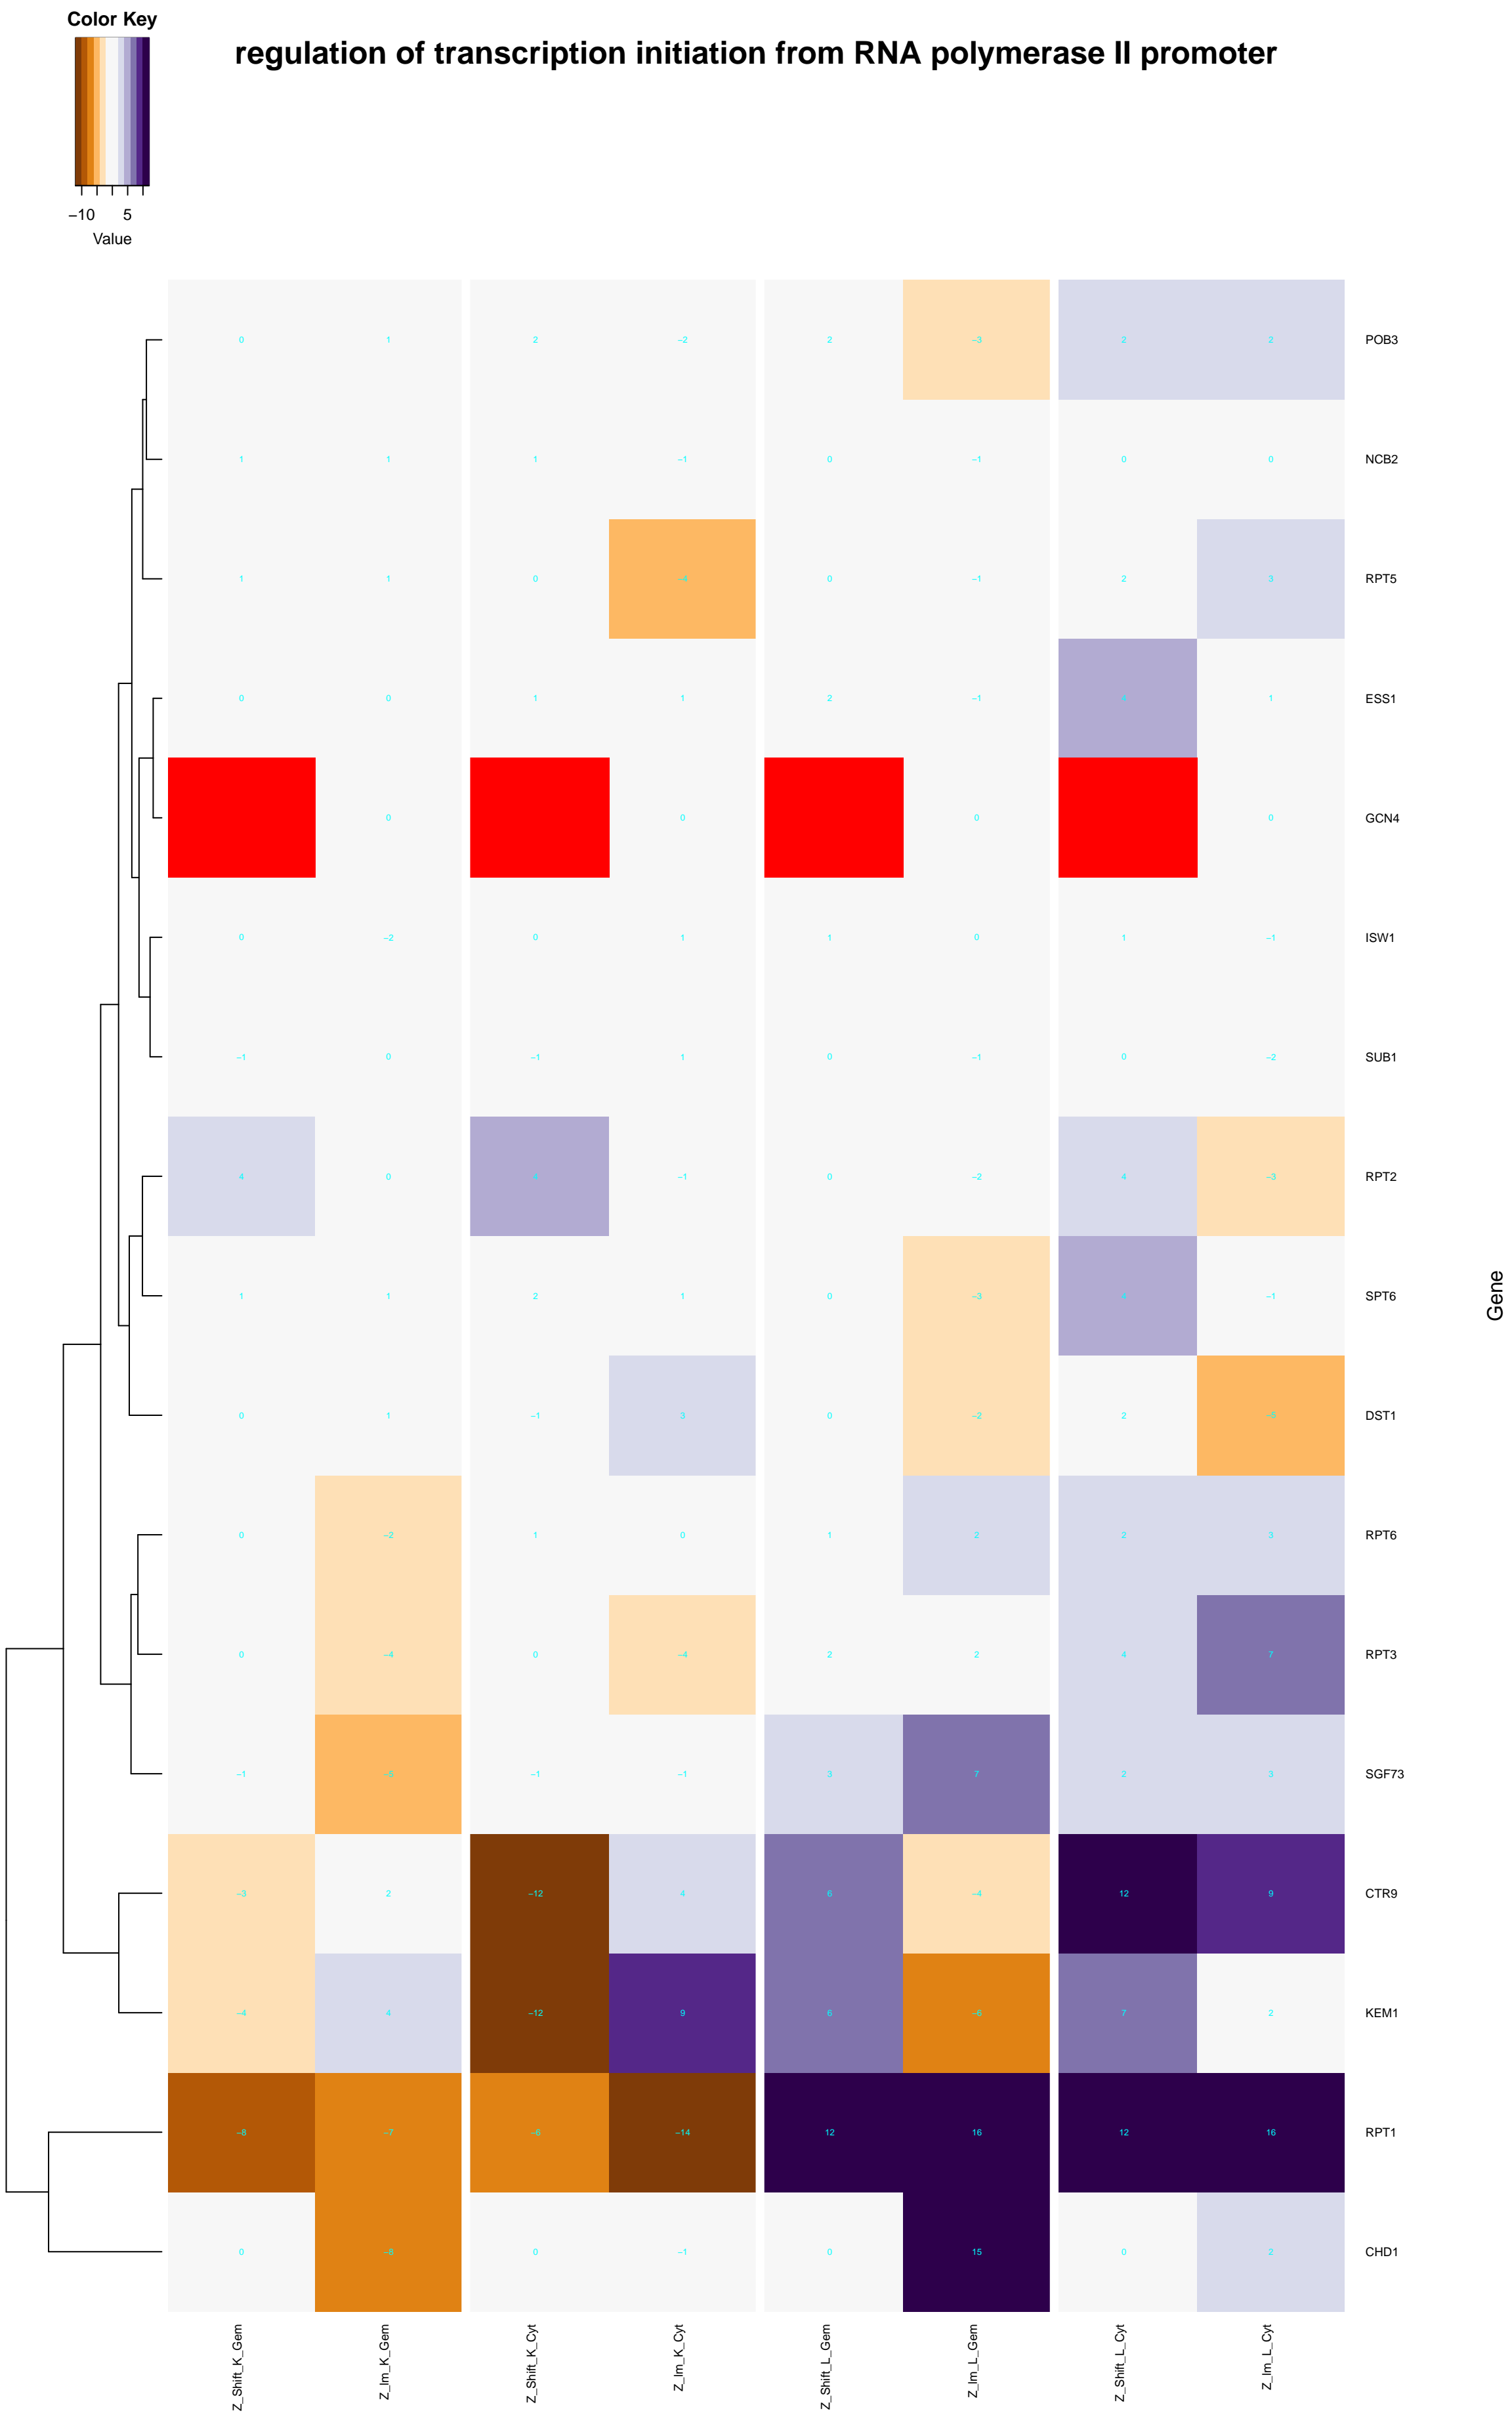

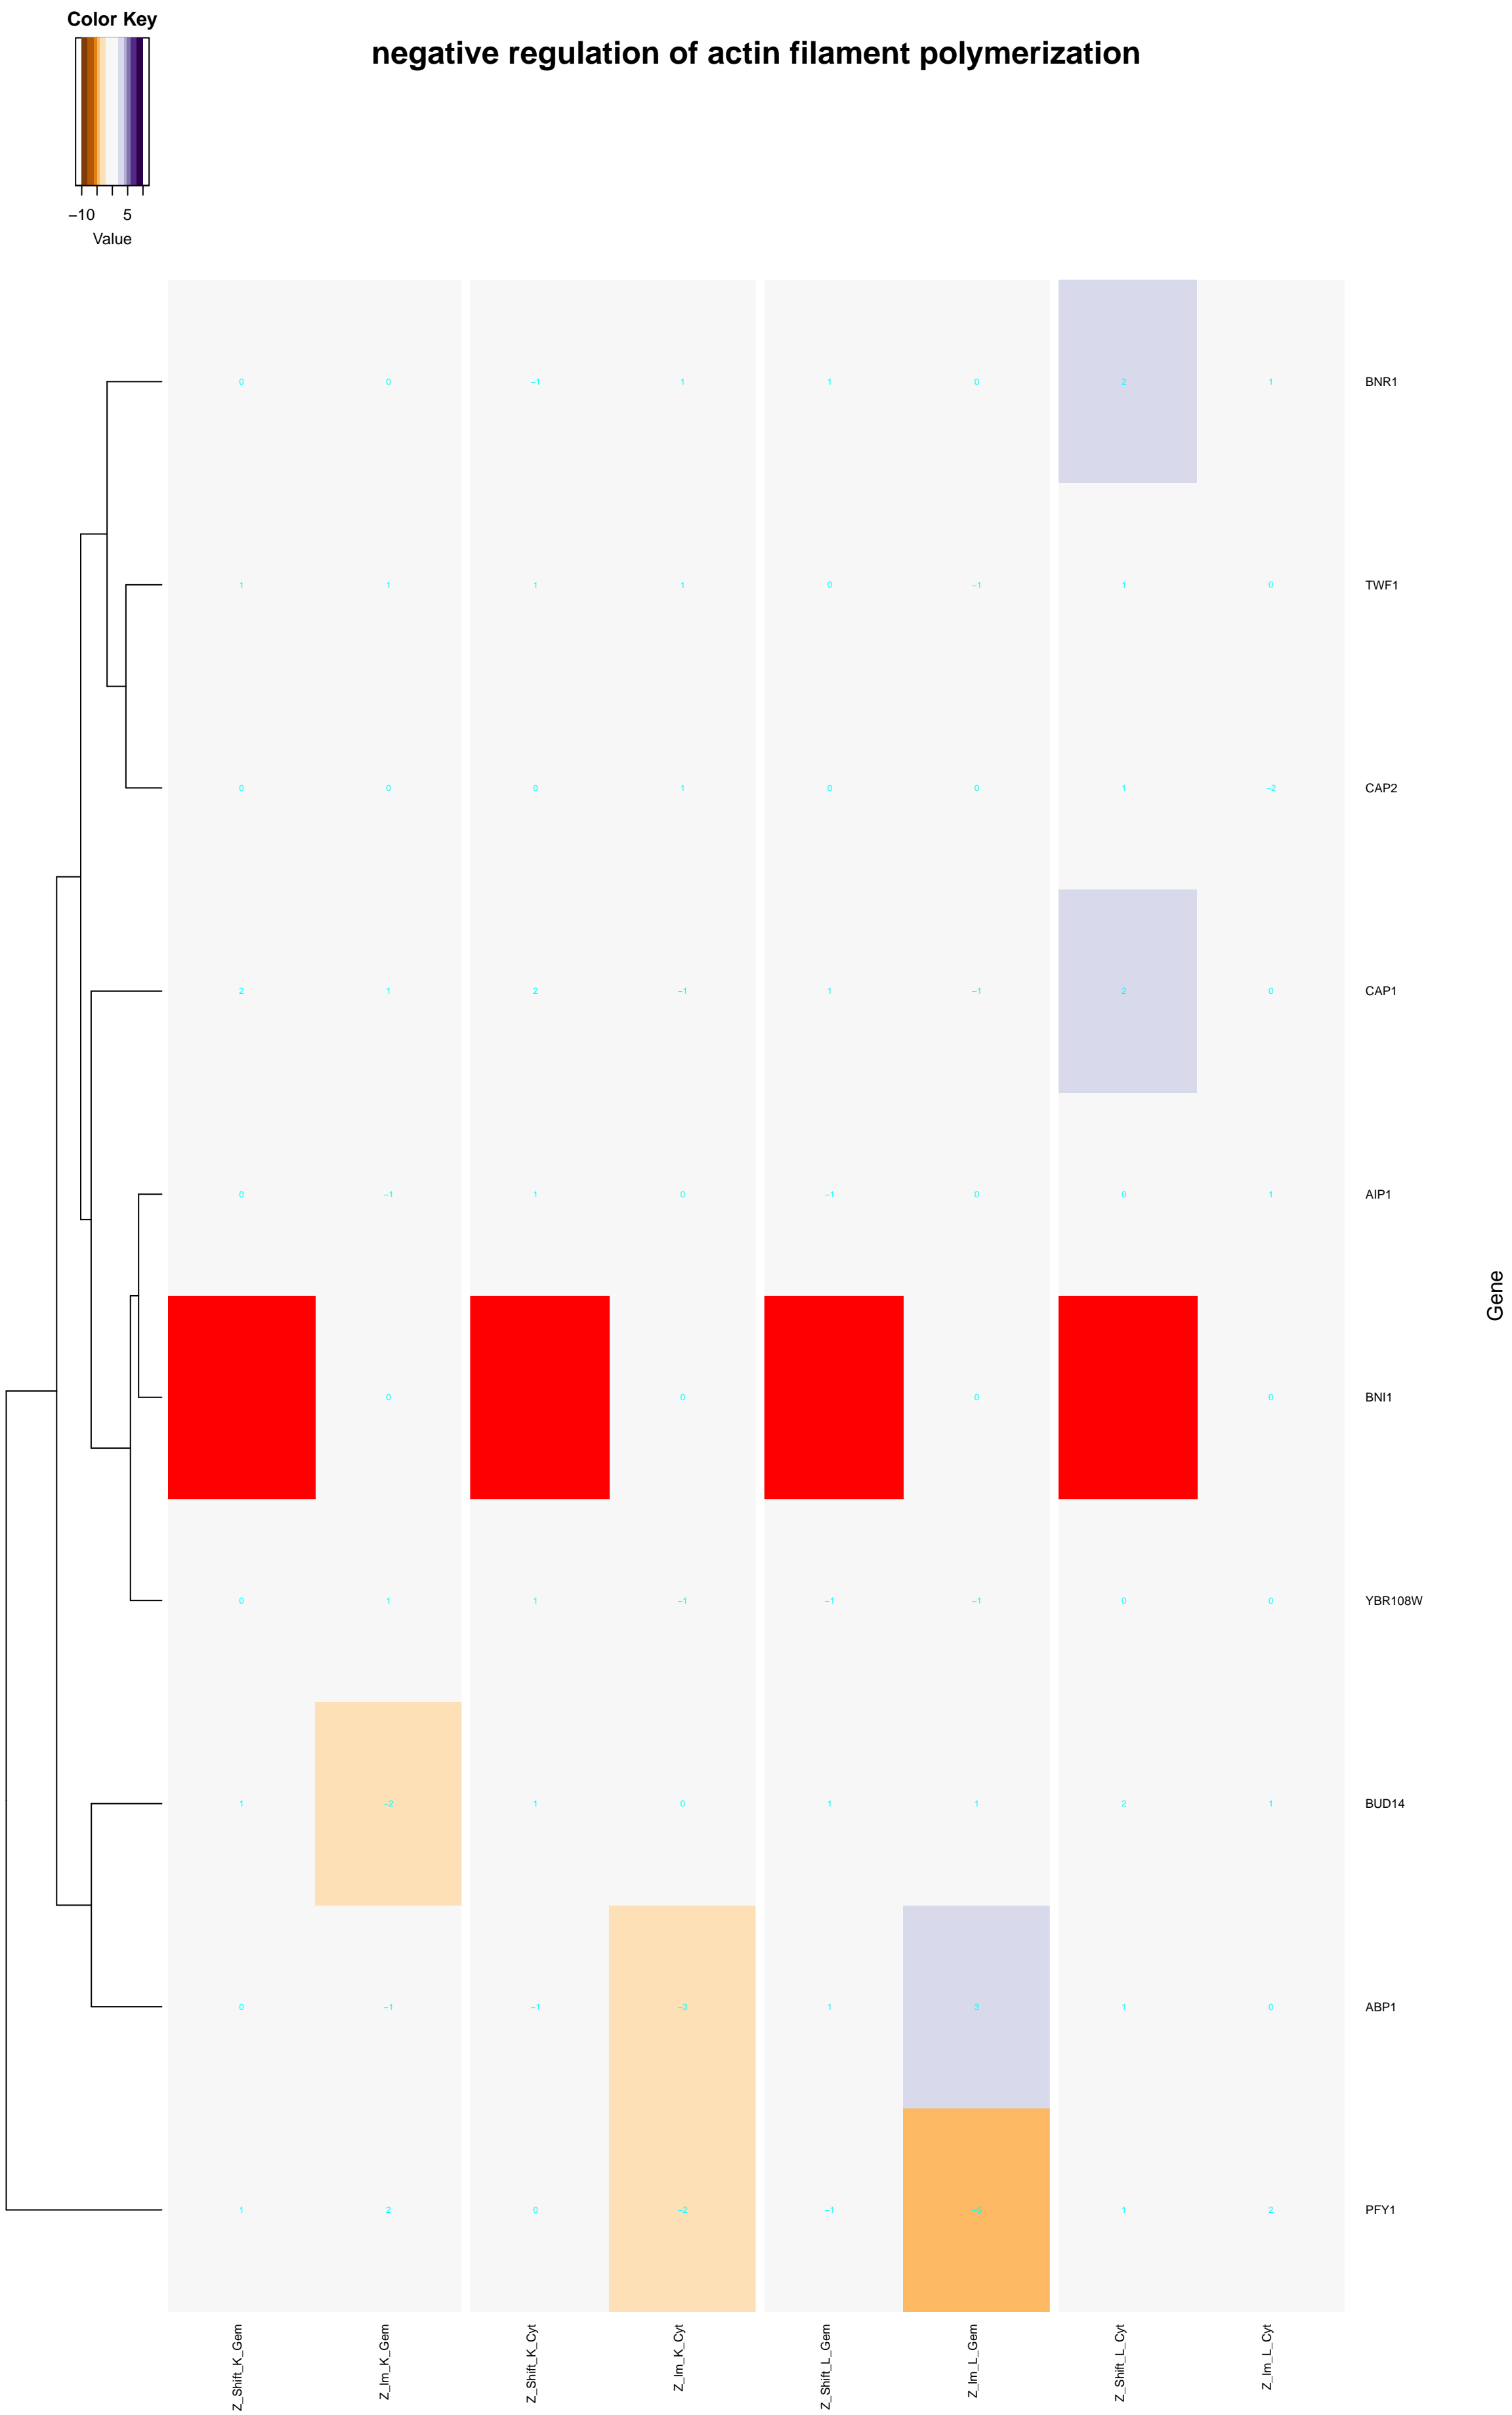

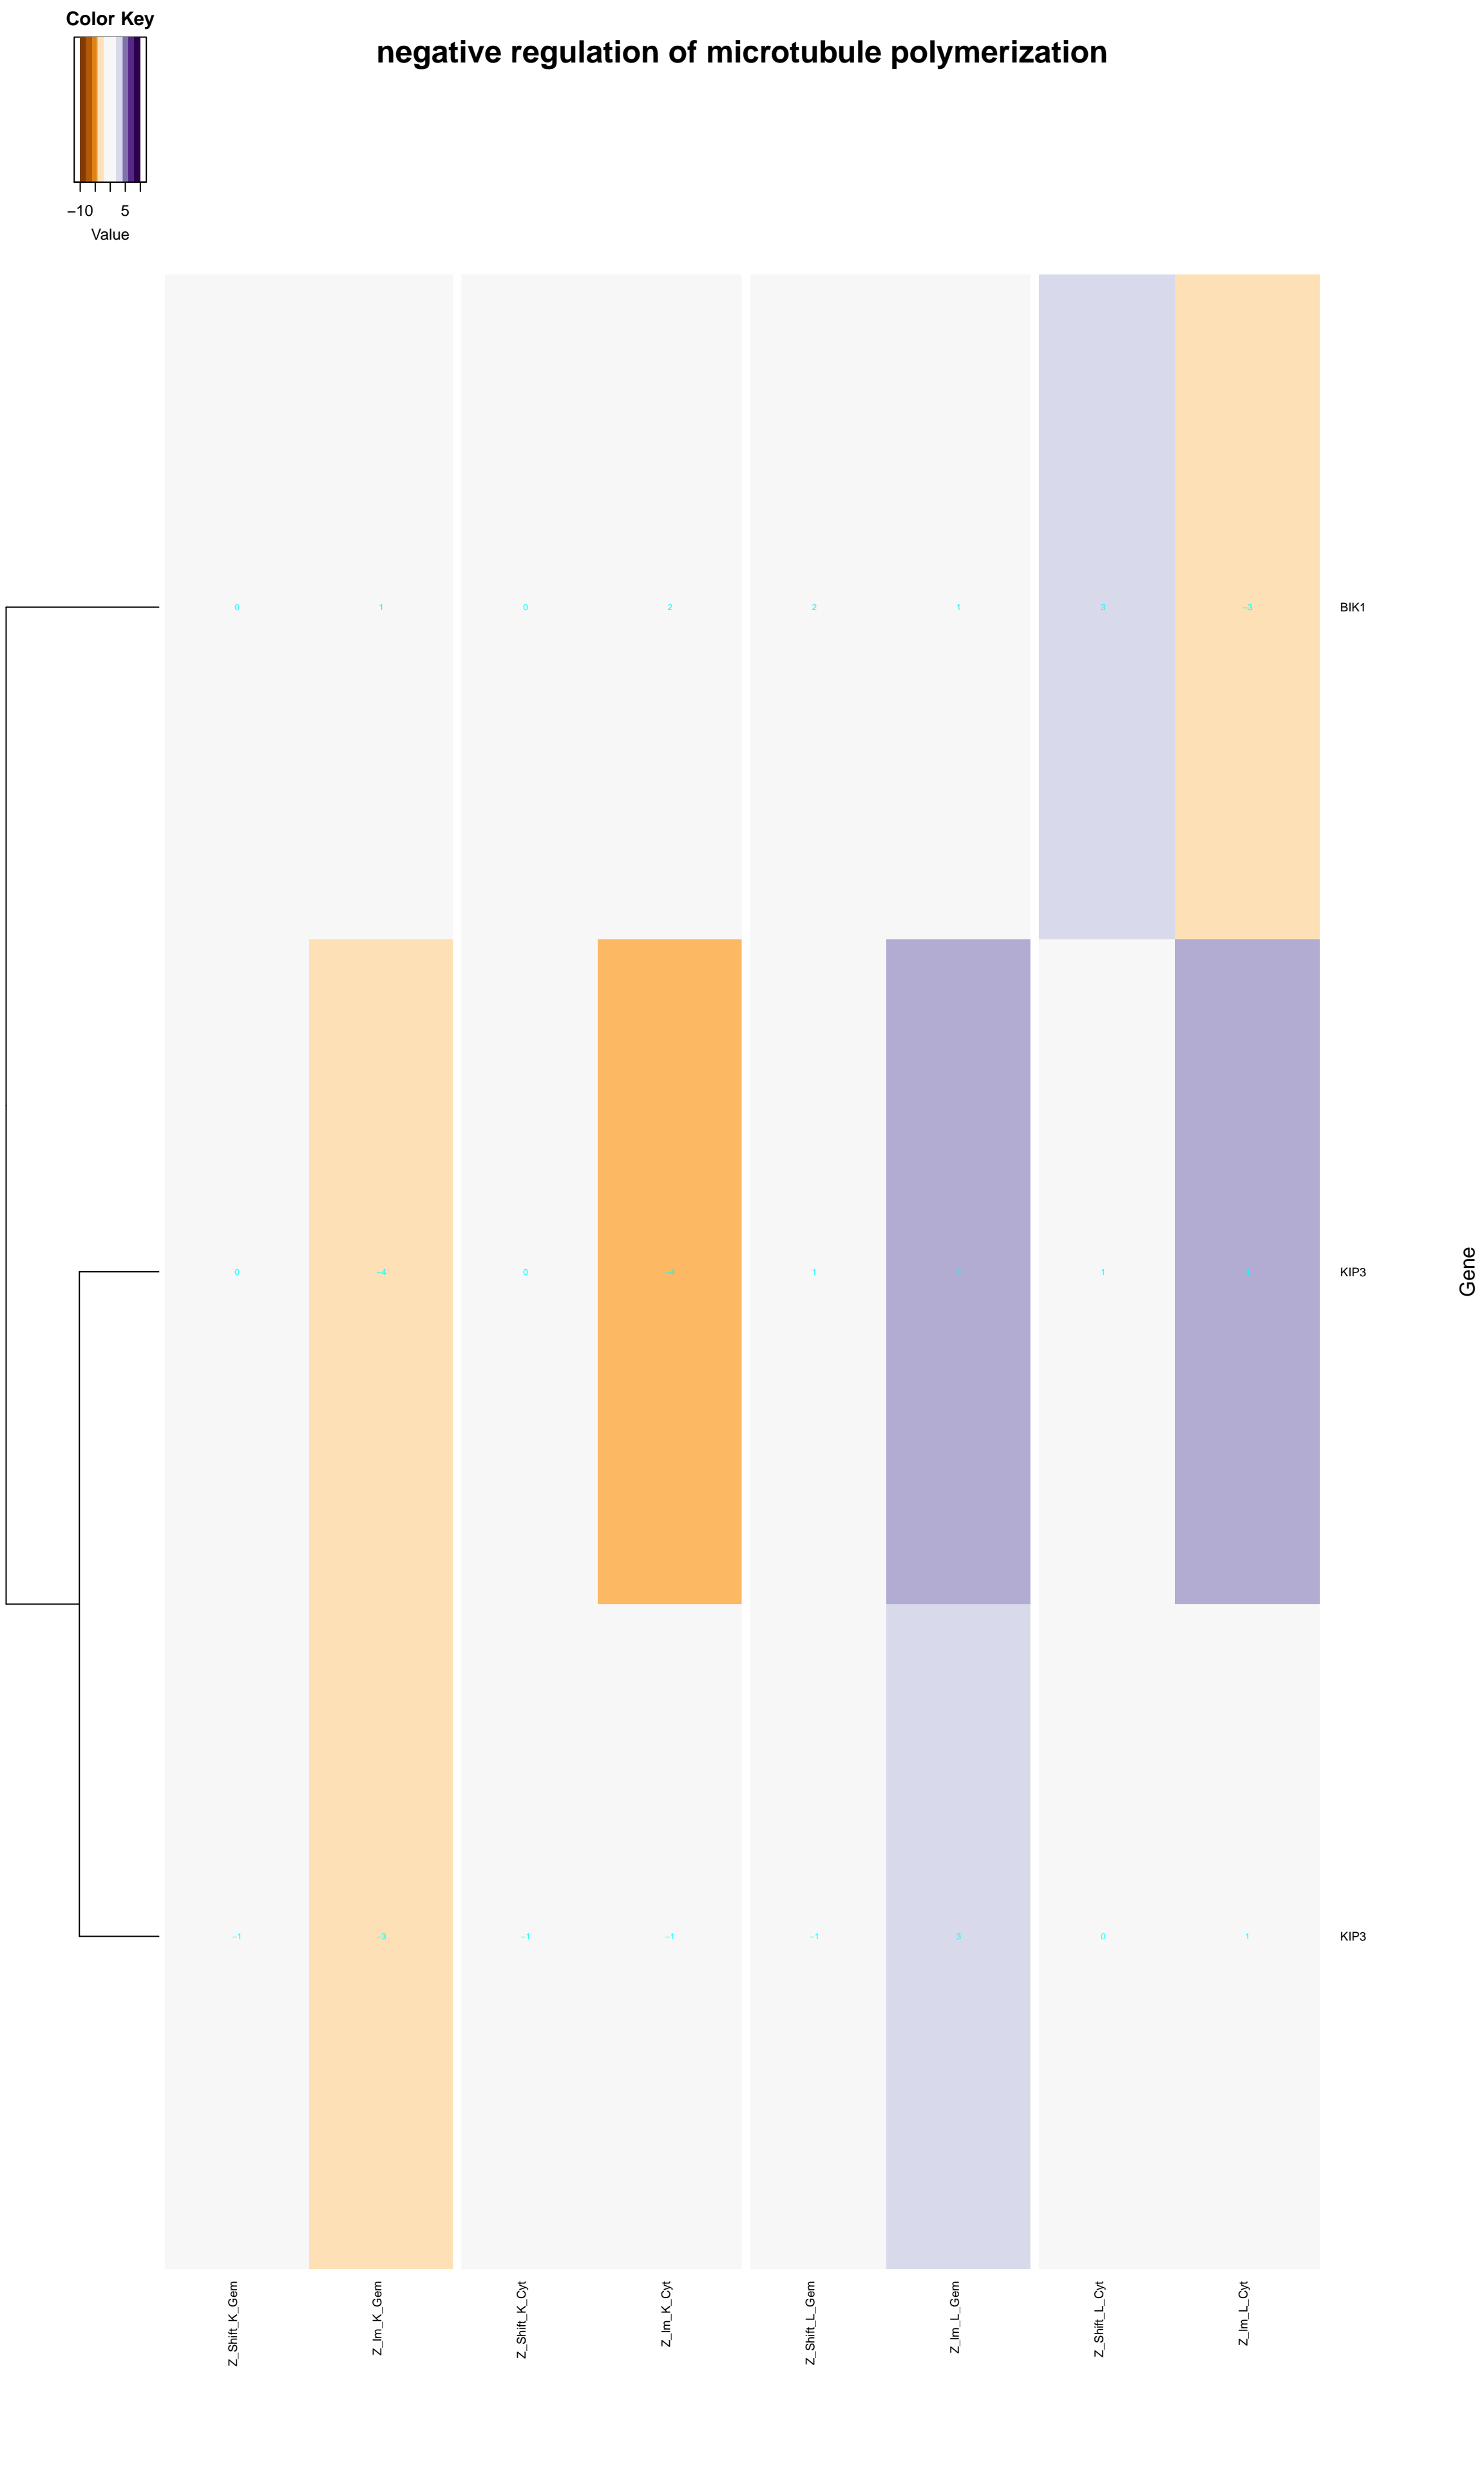

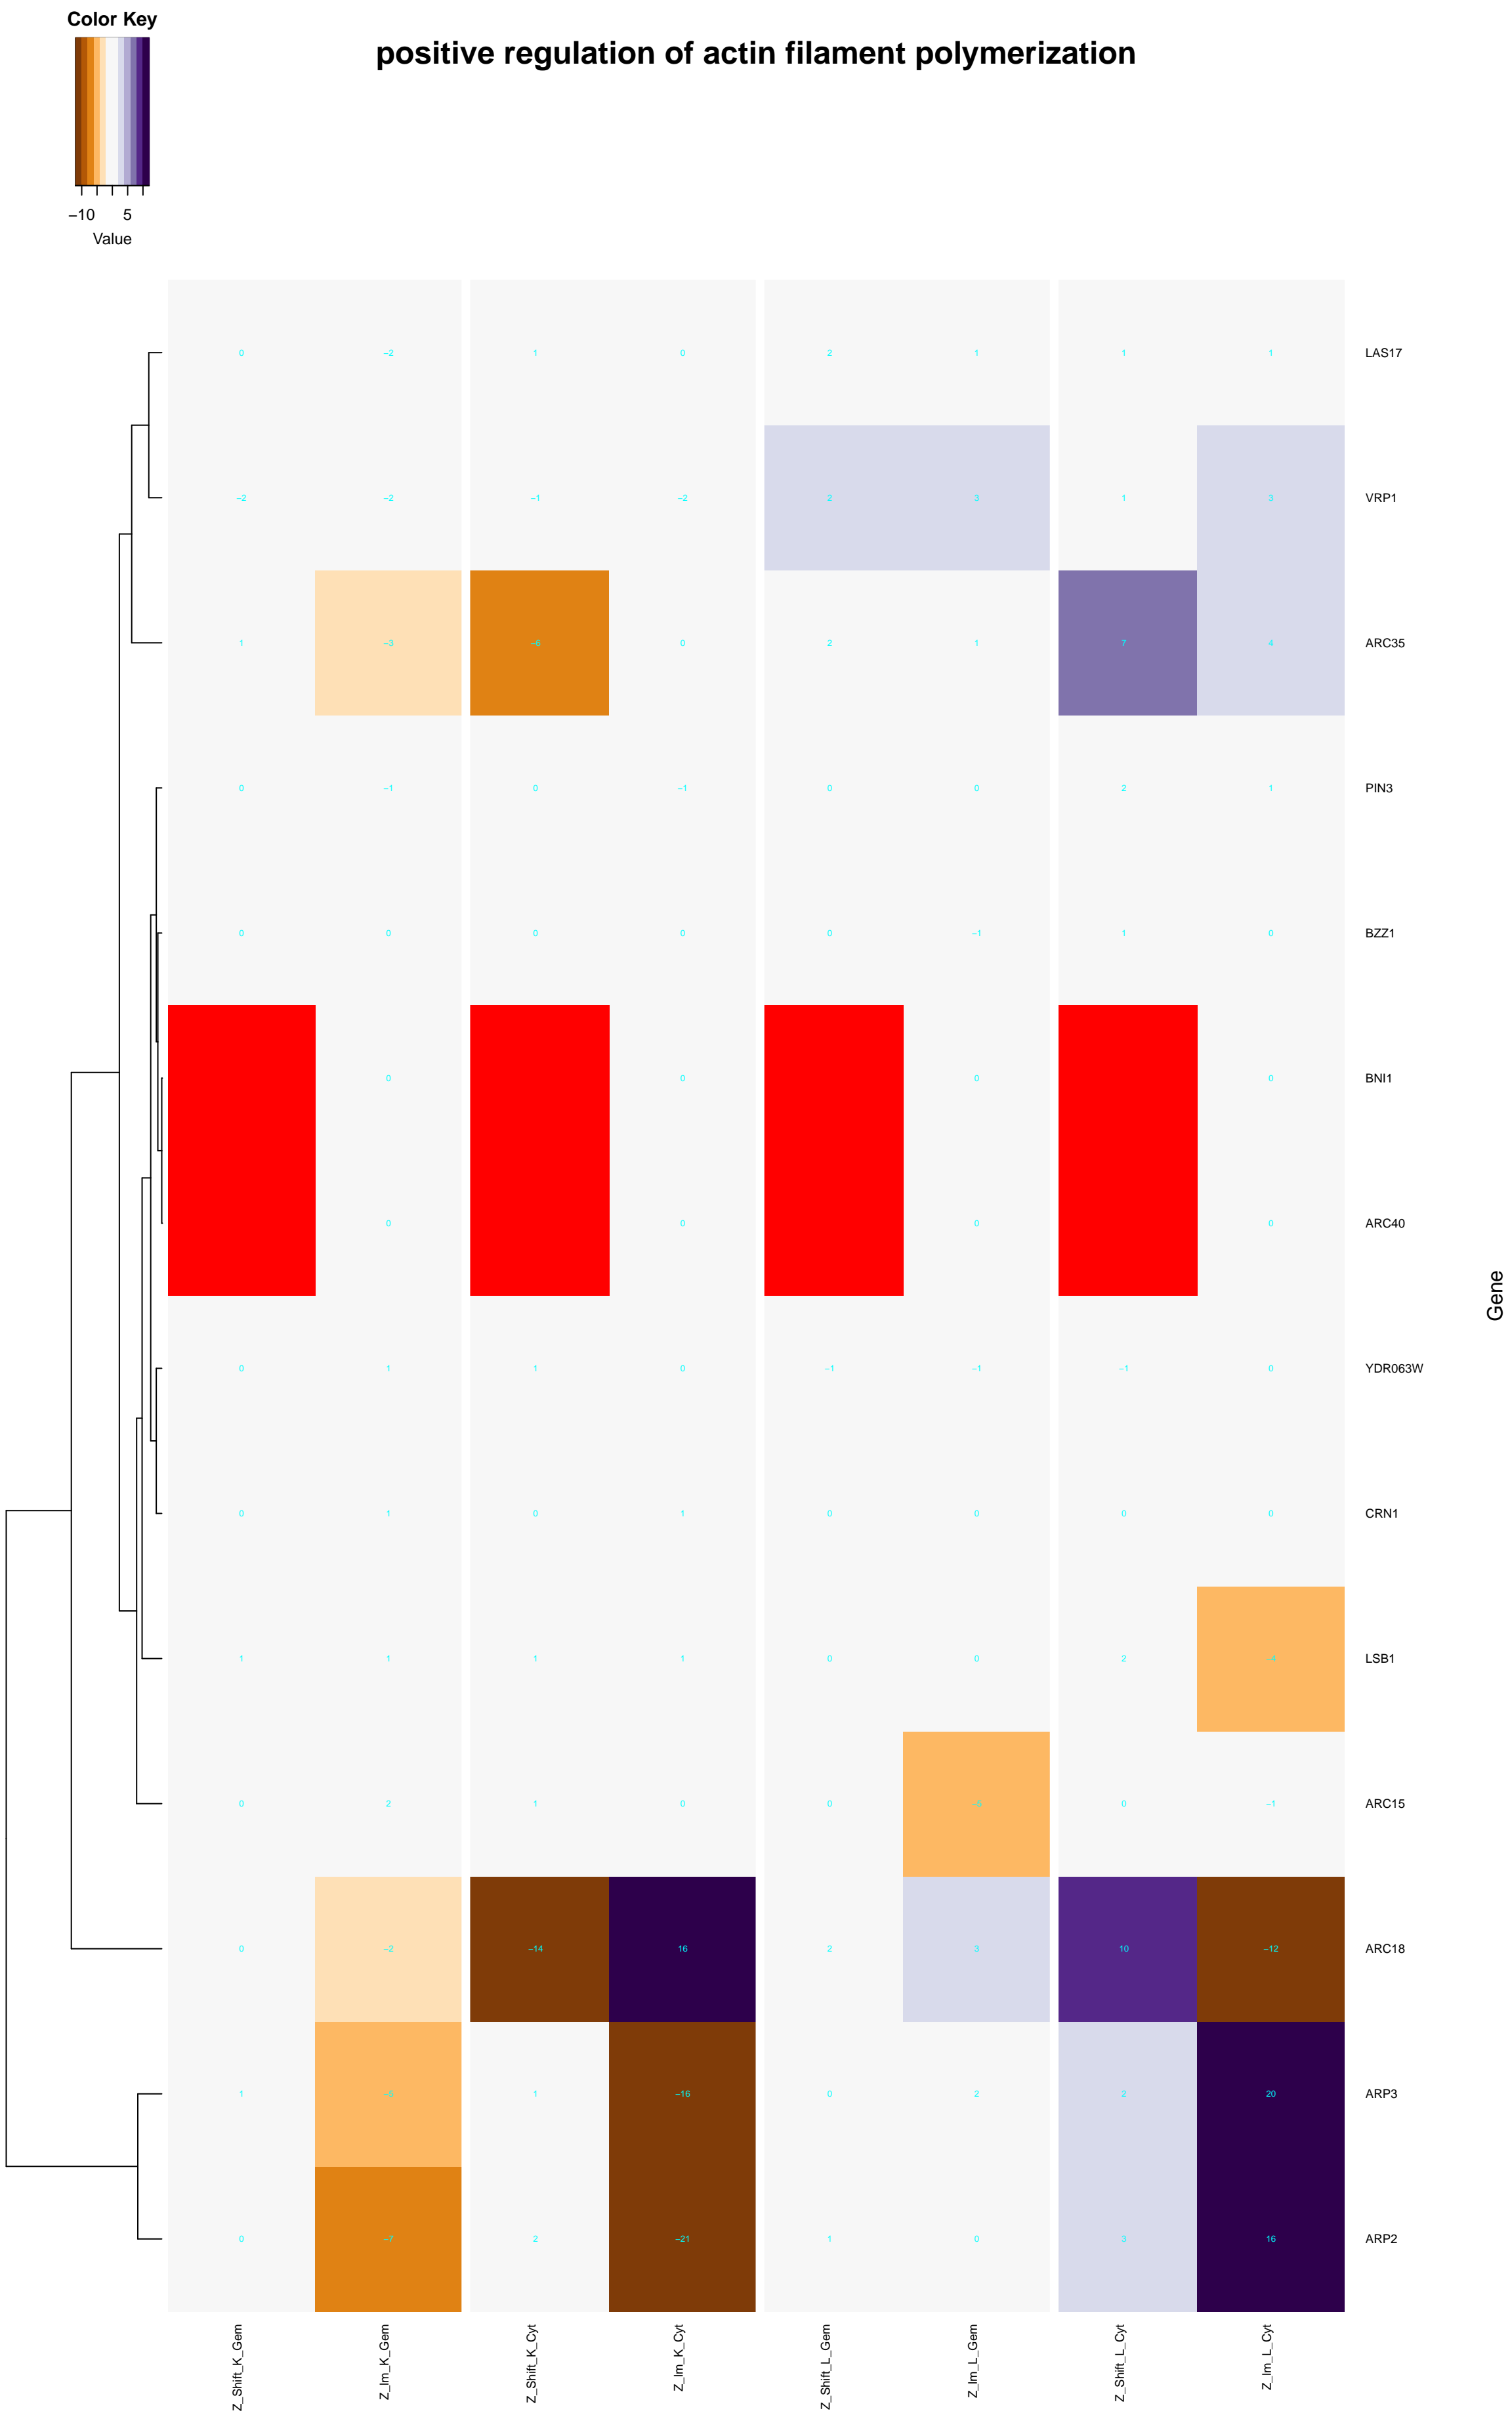

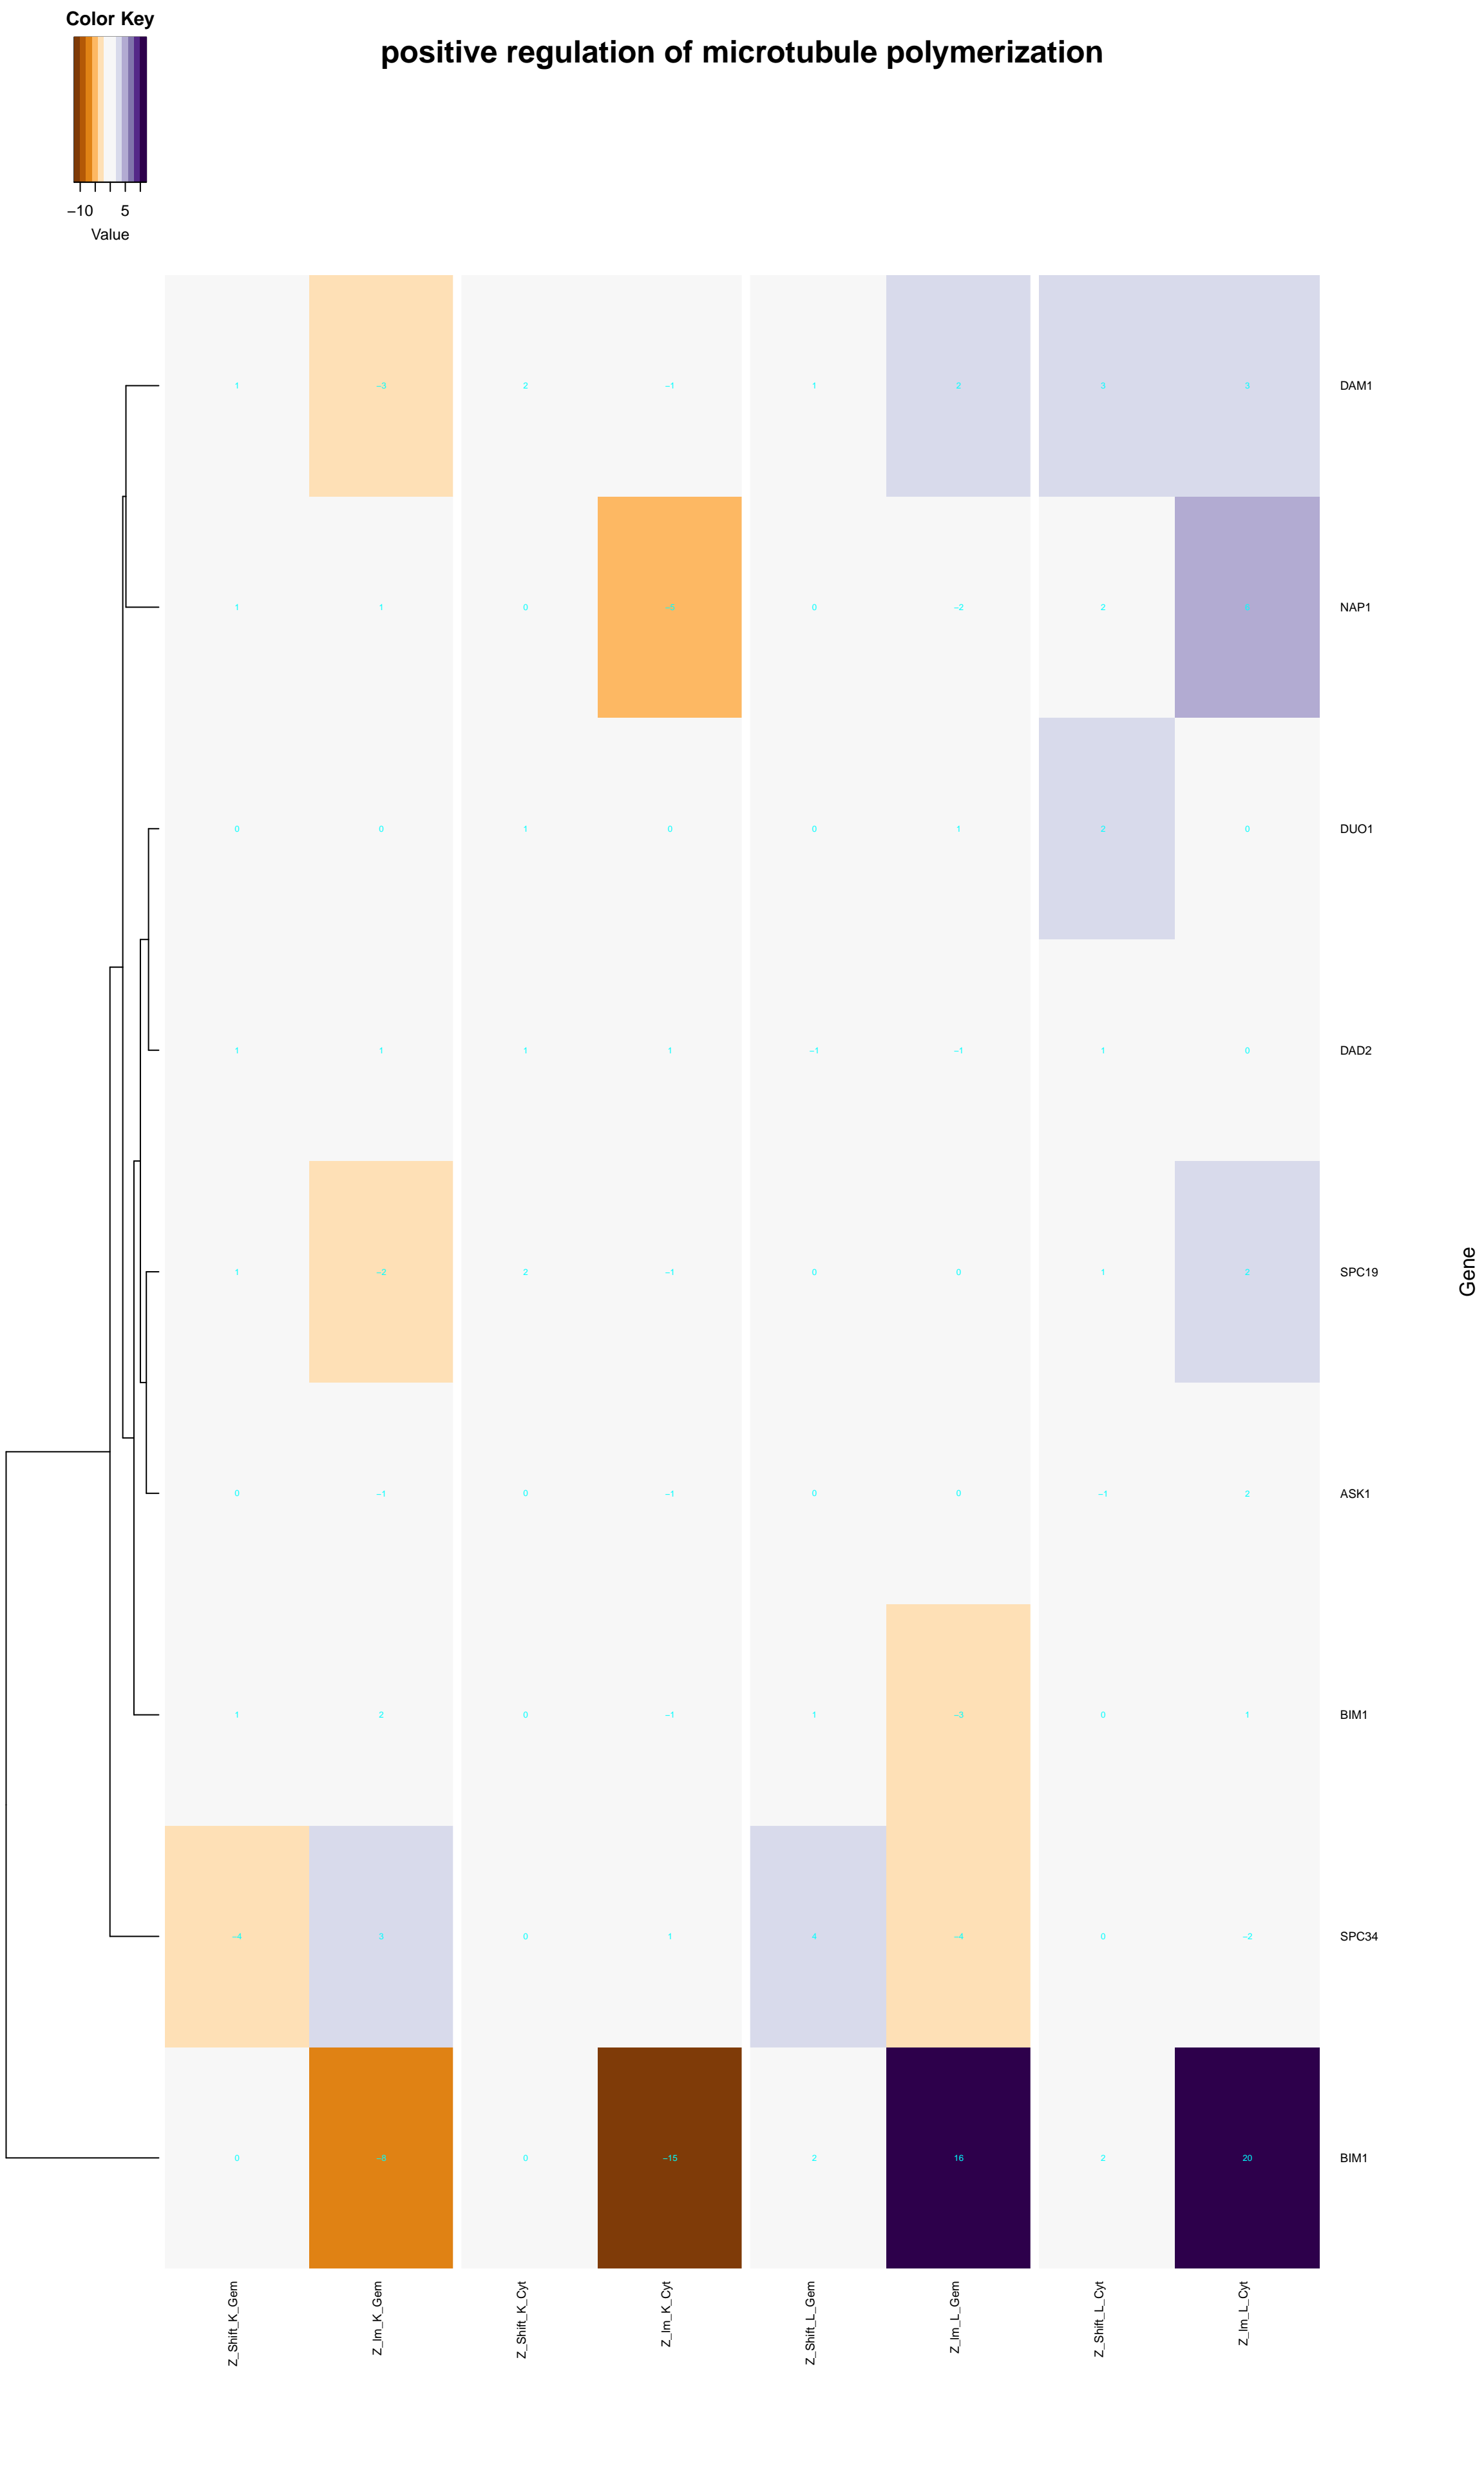

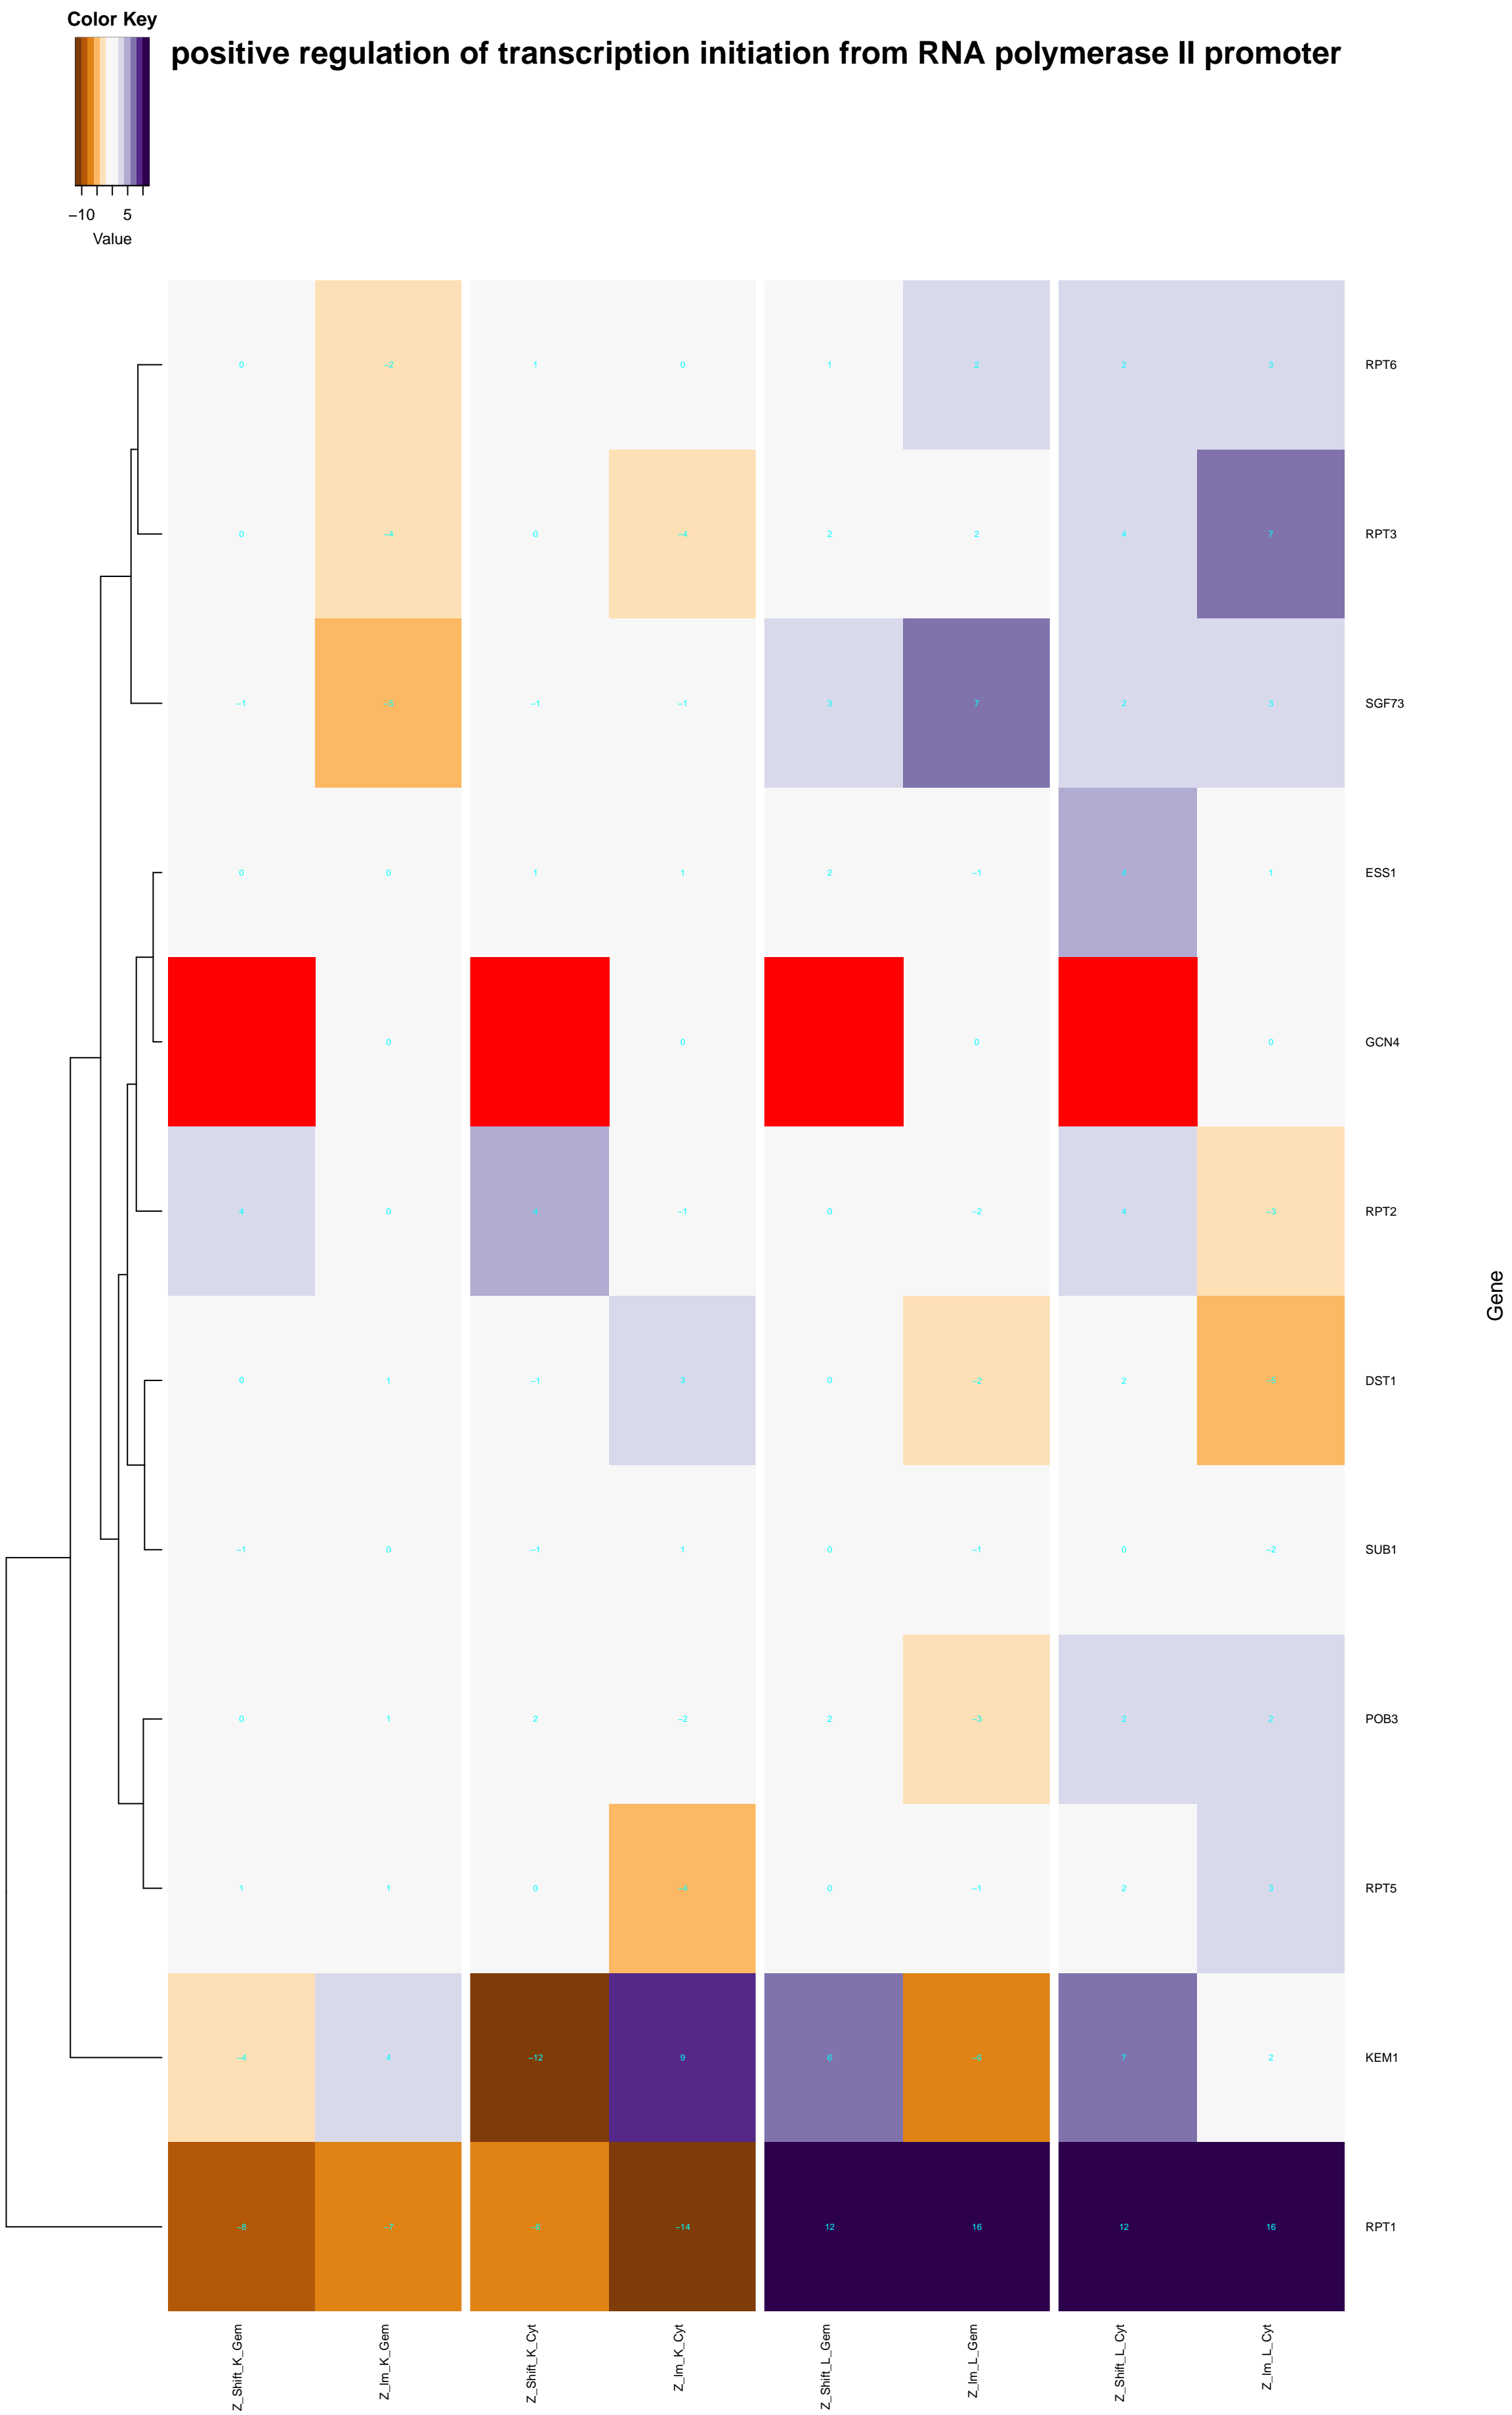

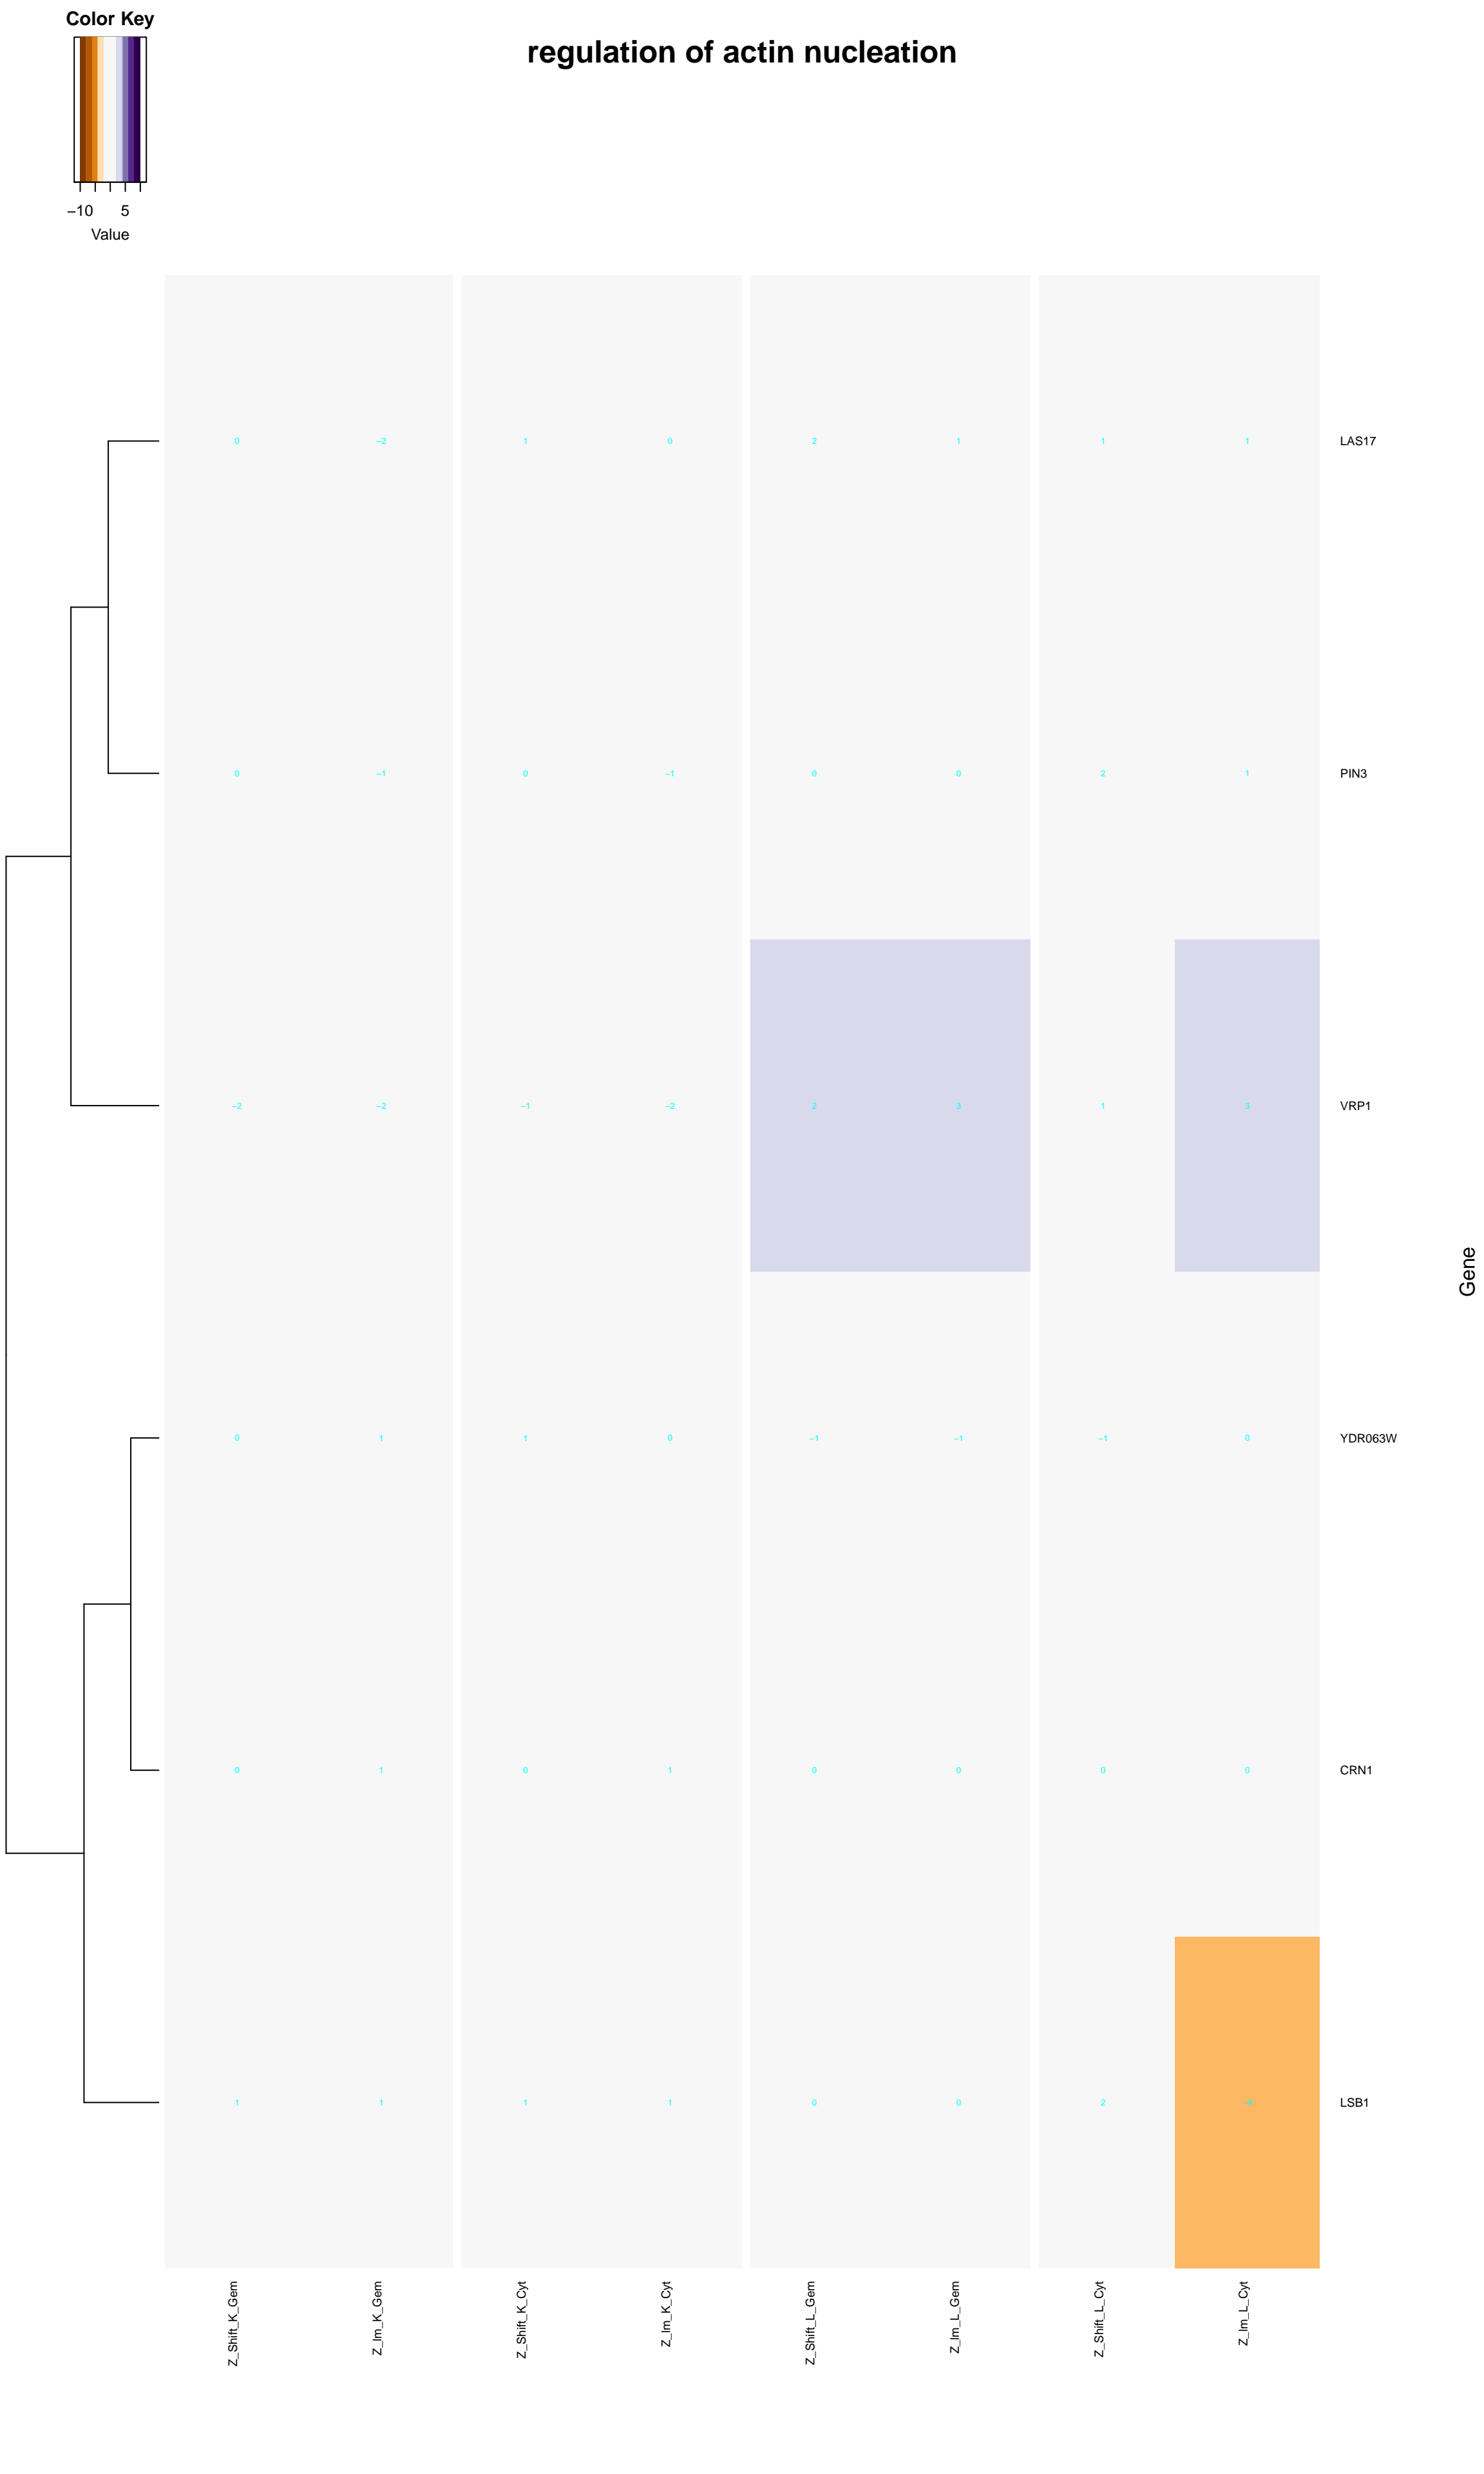

Color Key

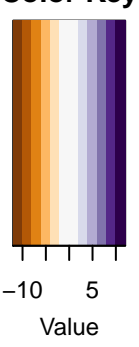

regulation of transcriptional start site selection at RNA polymerase II promoter

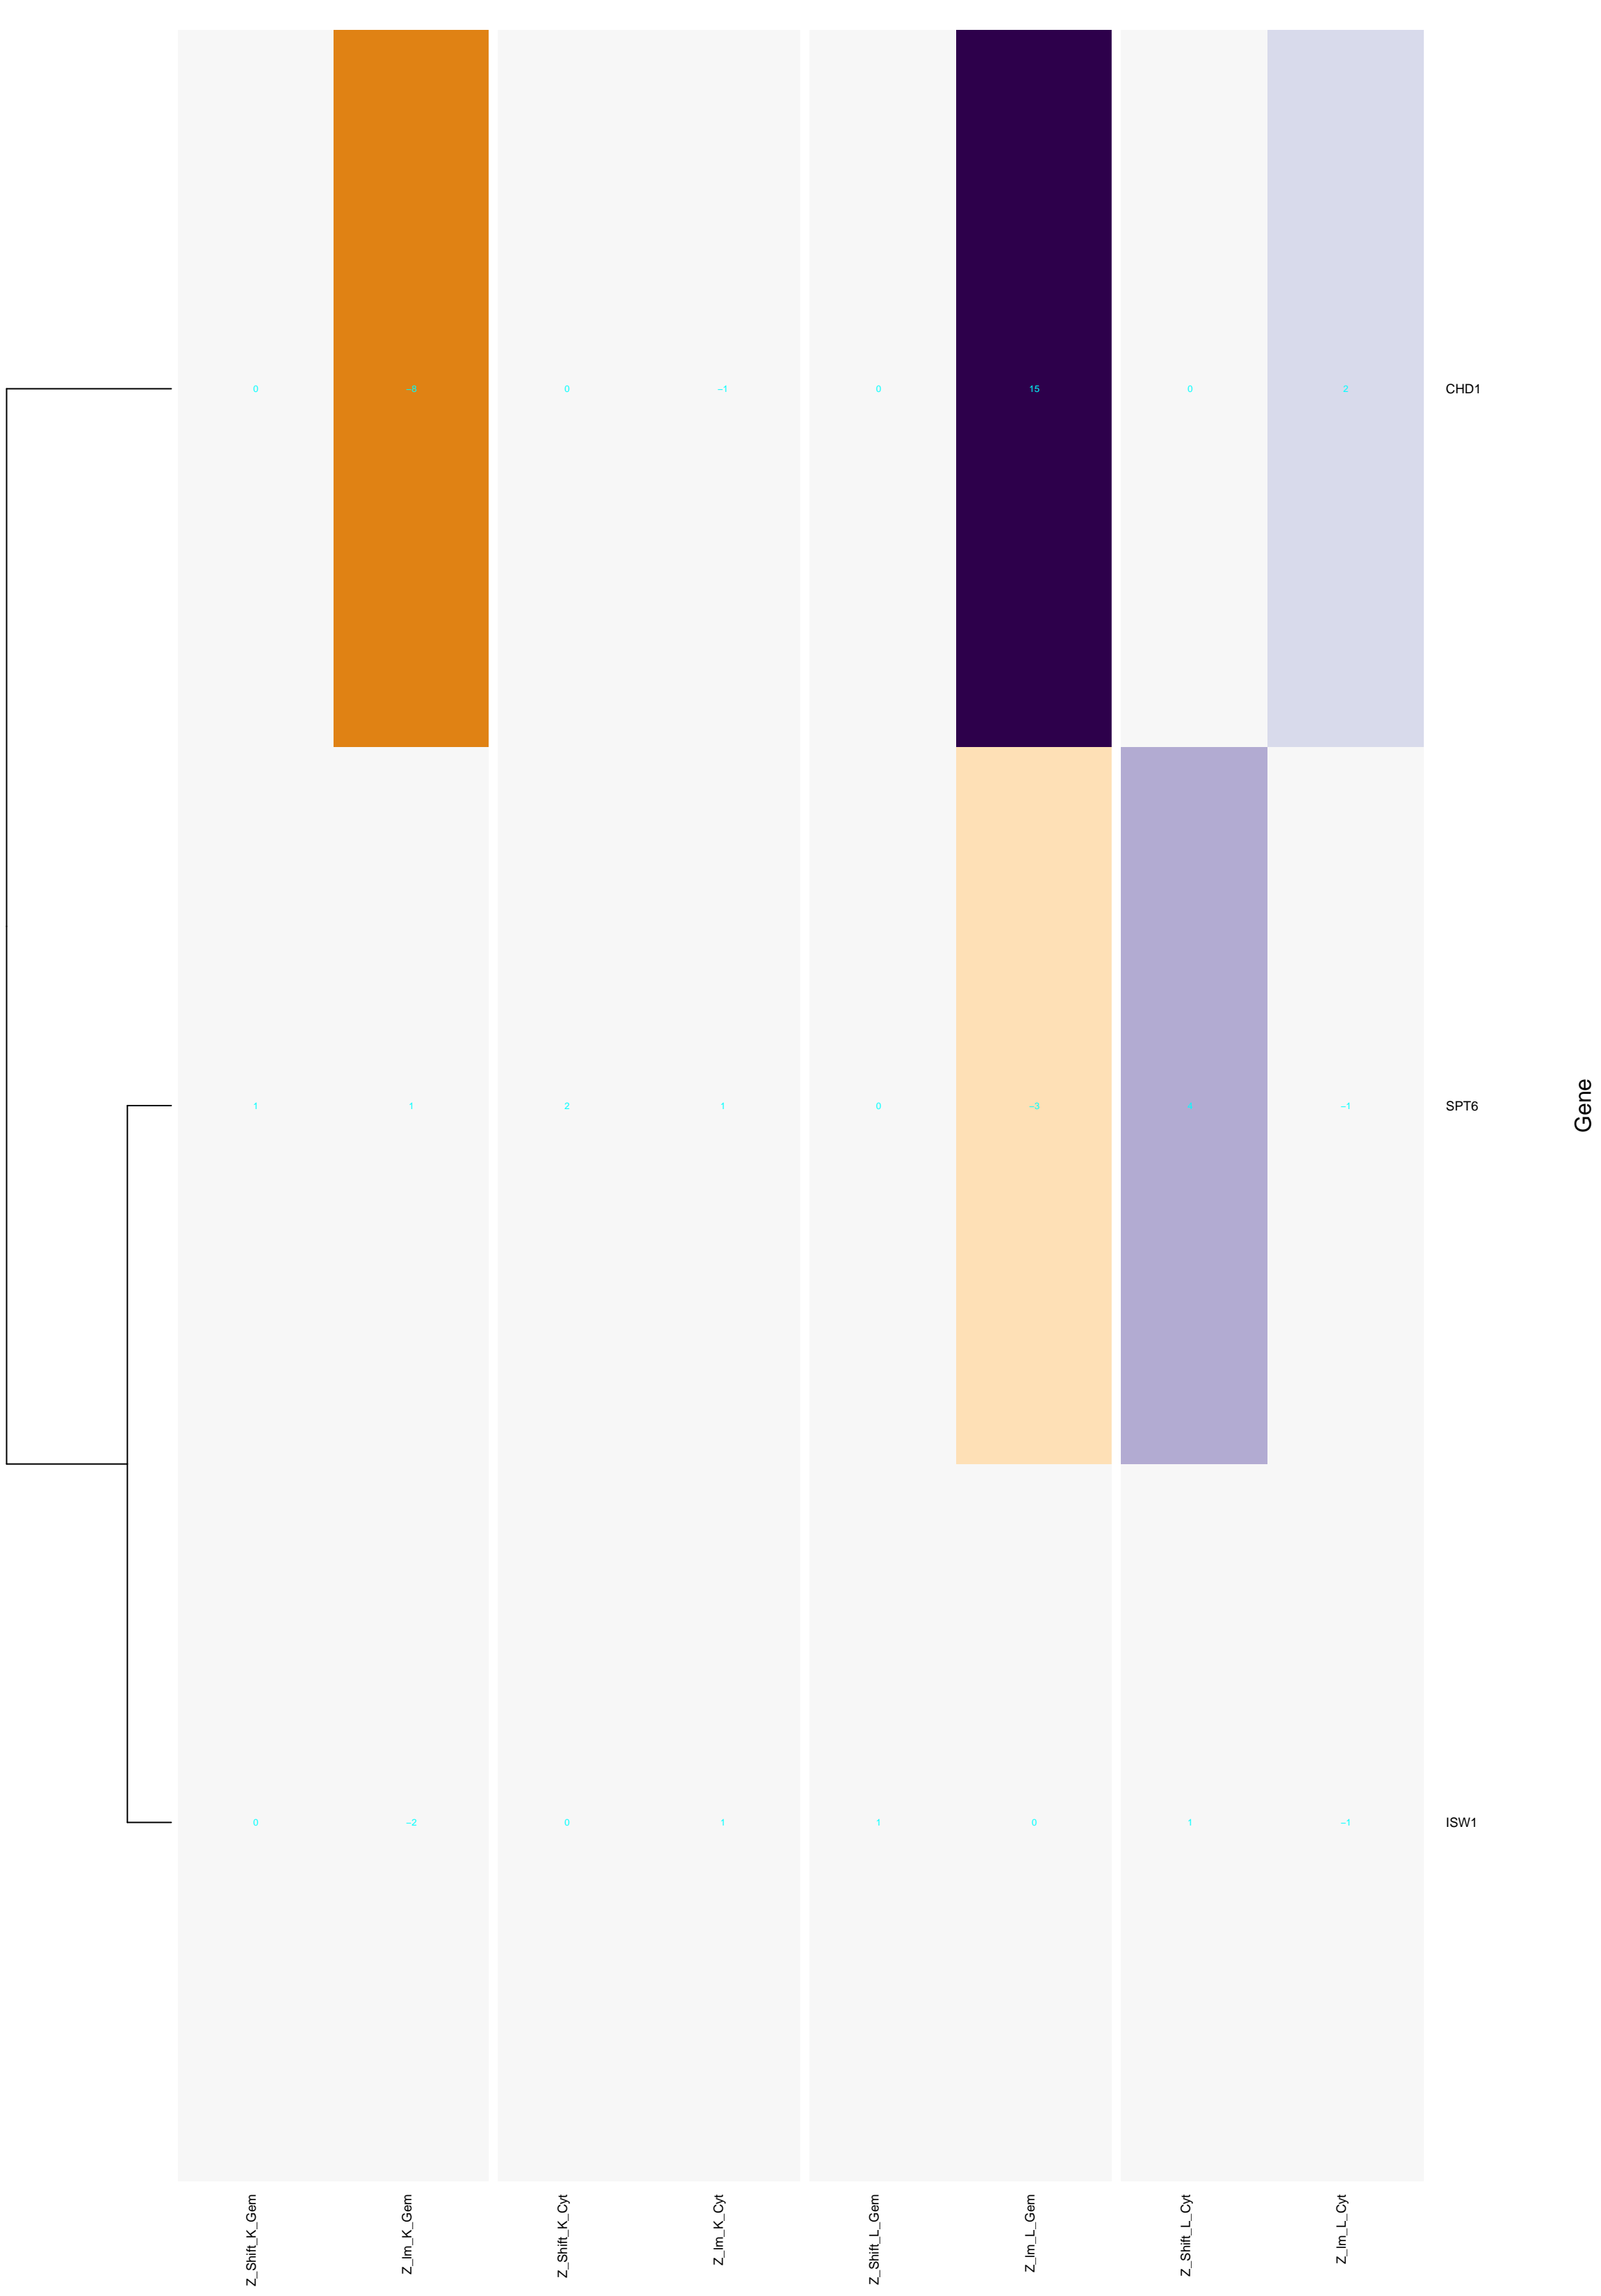

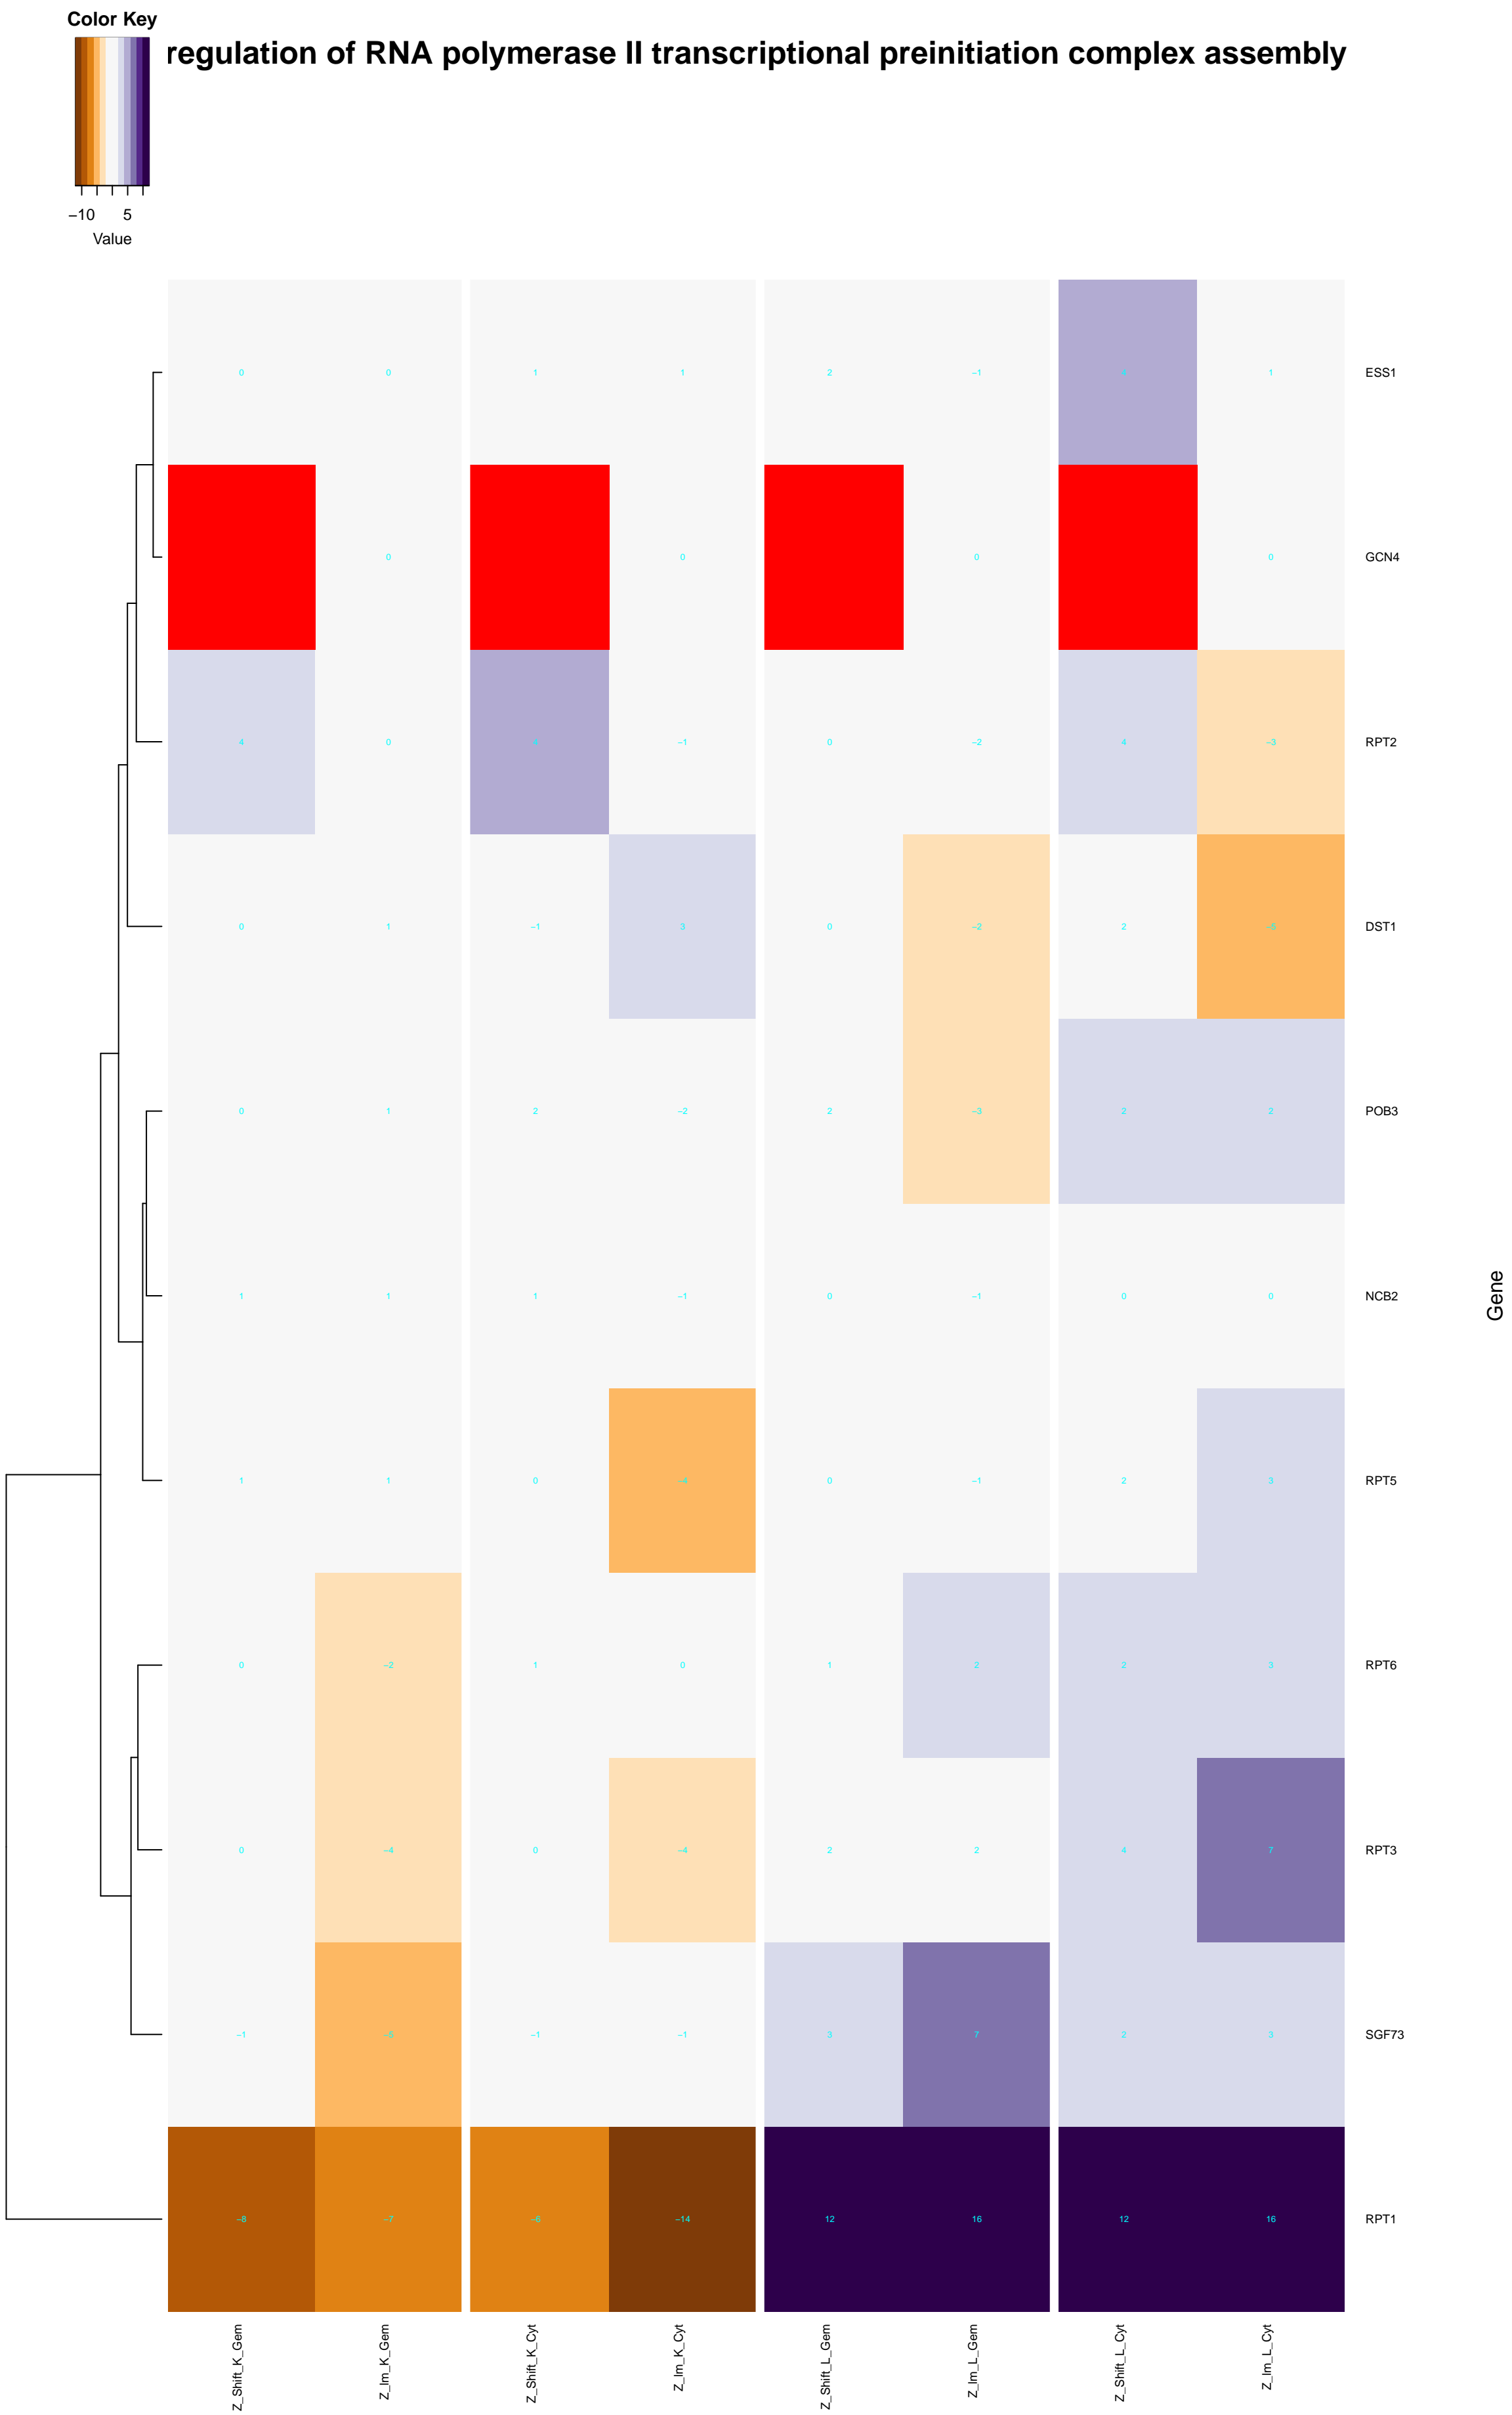

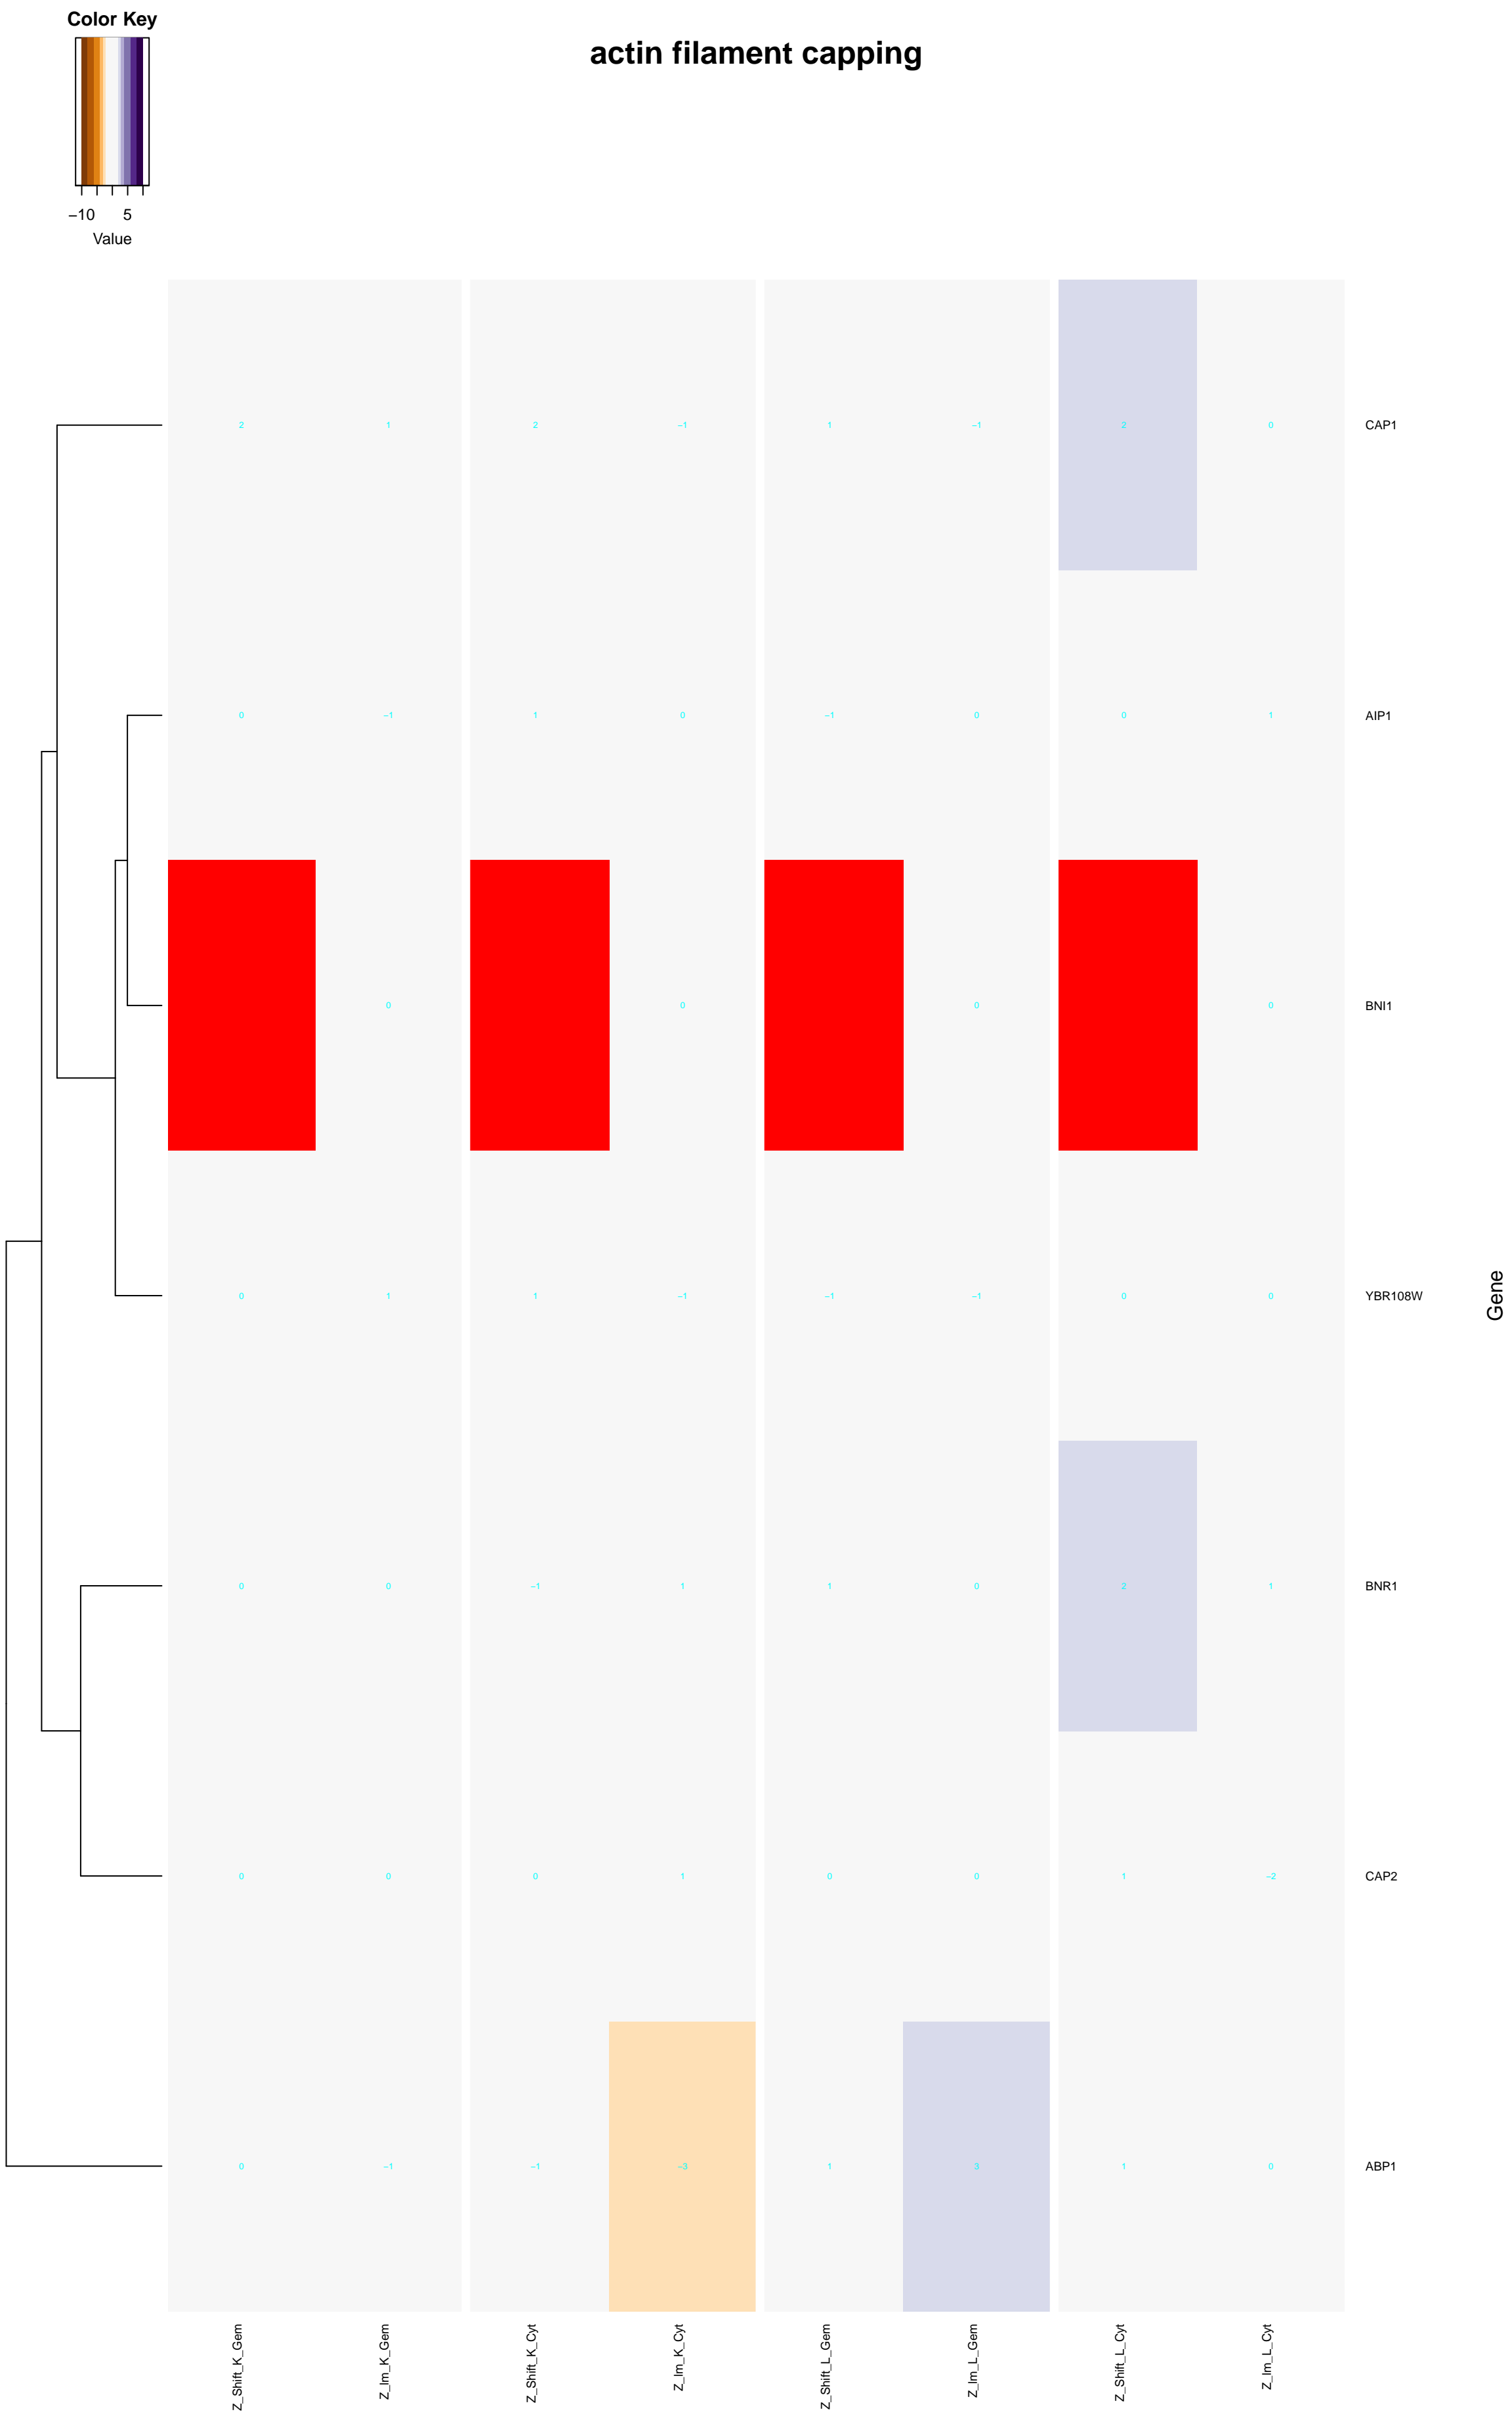

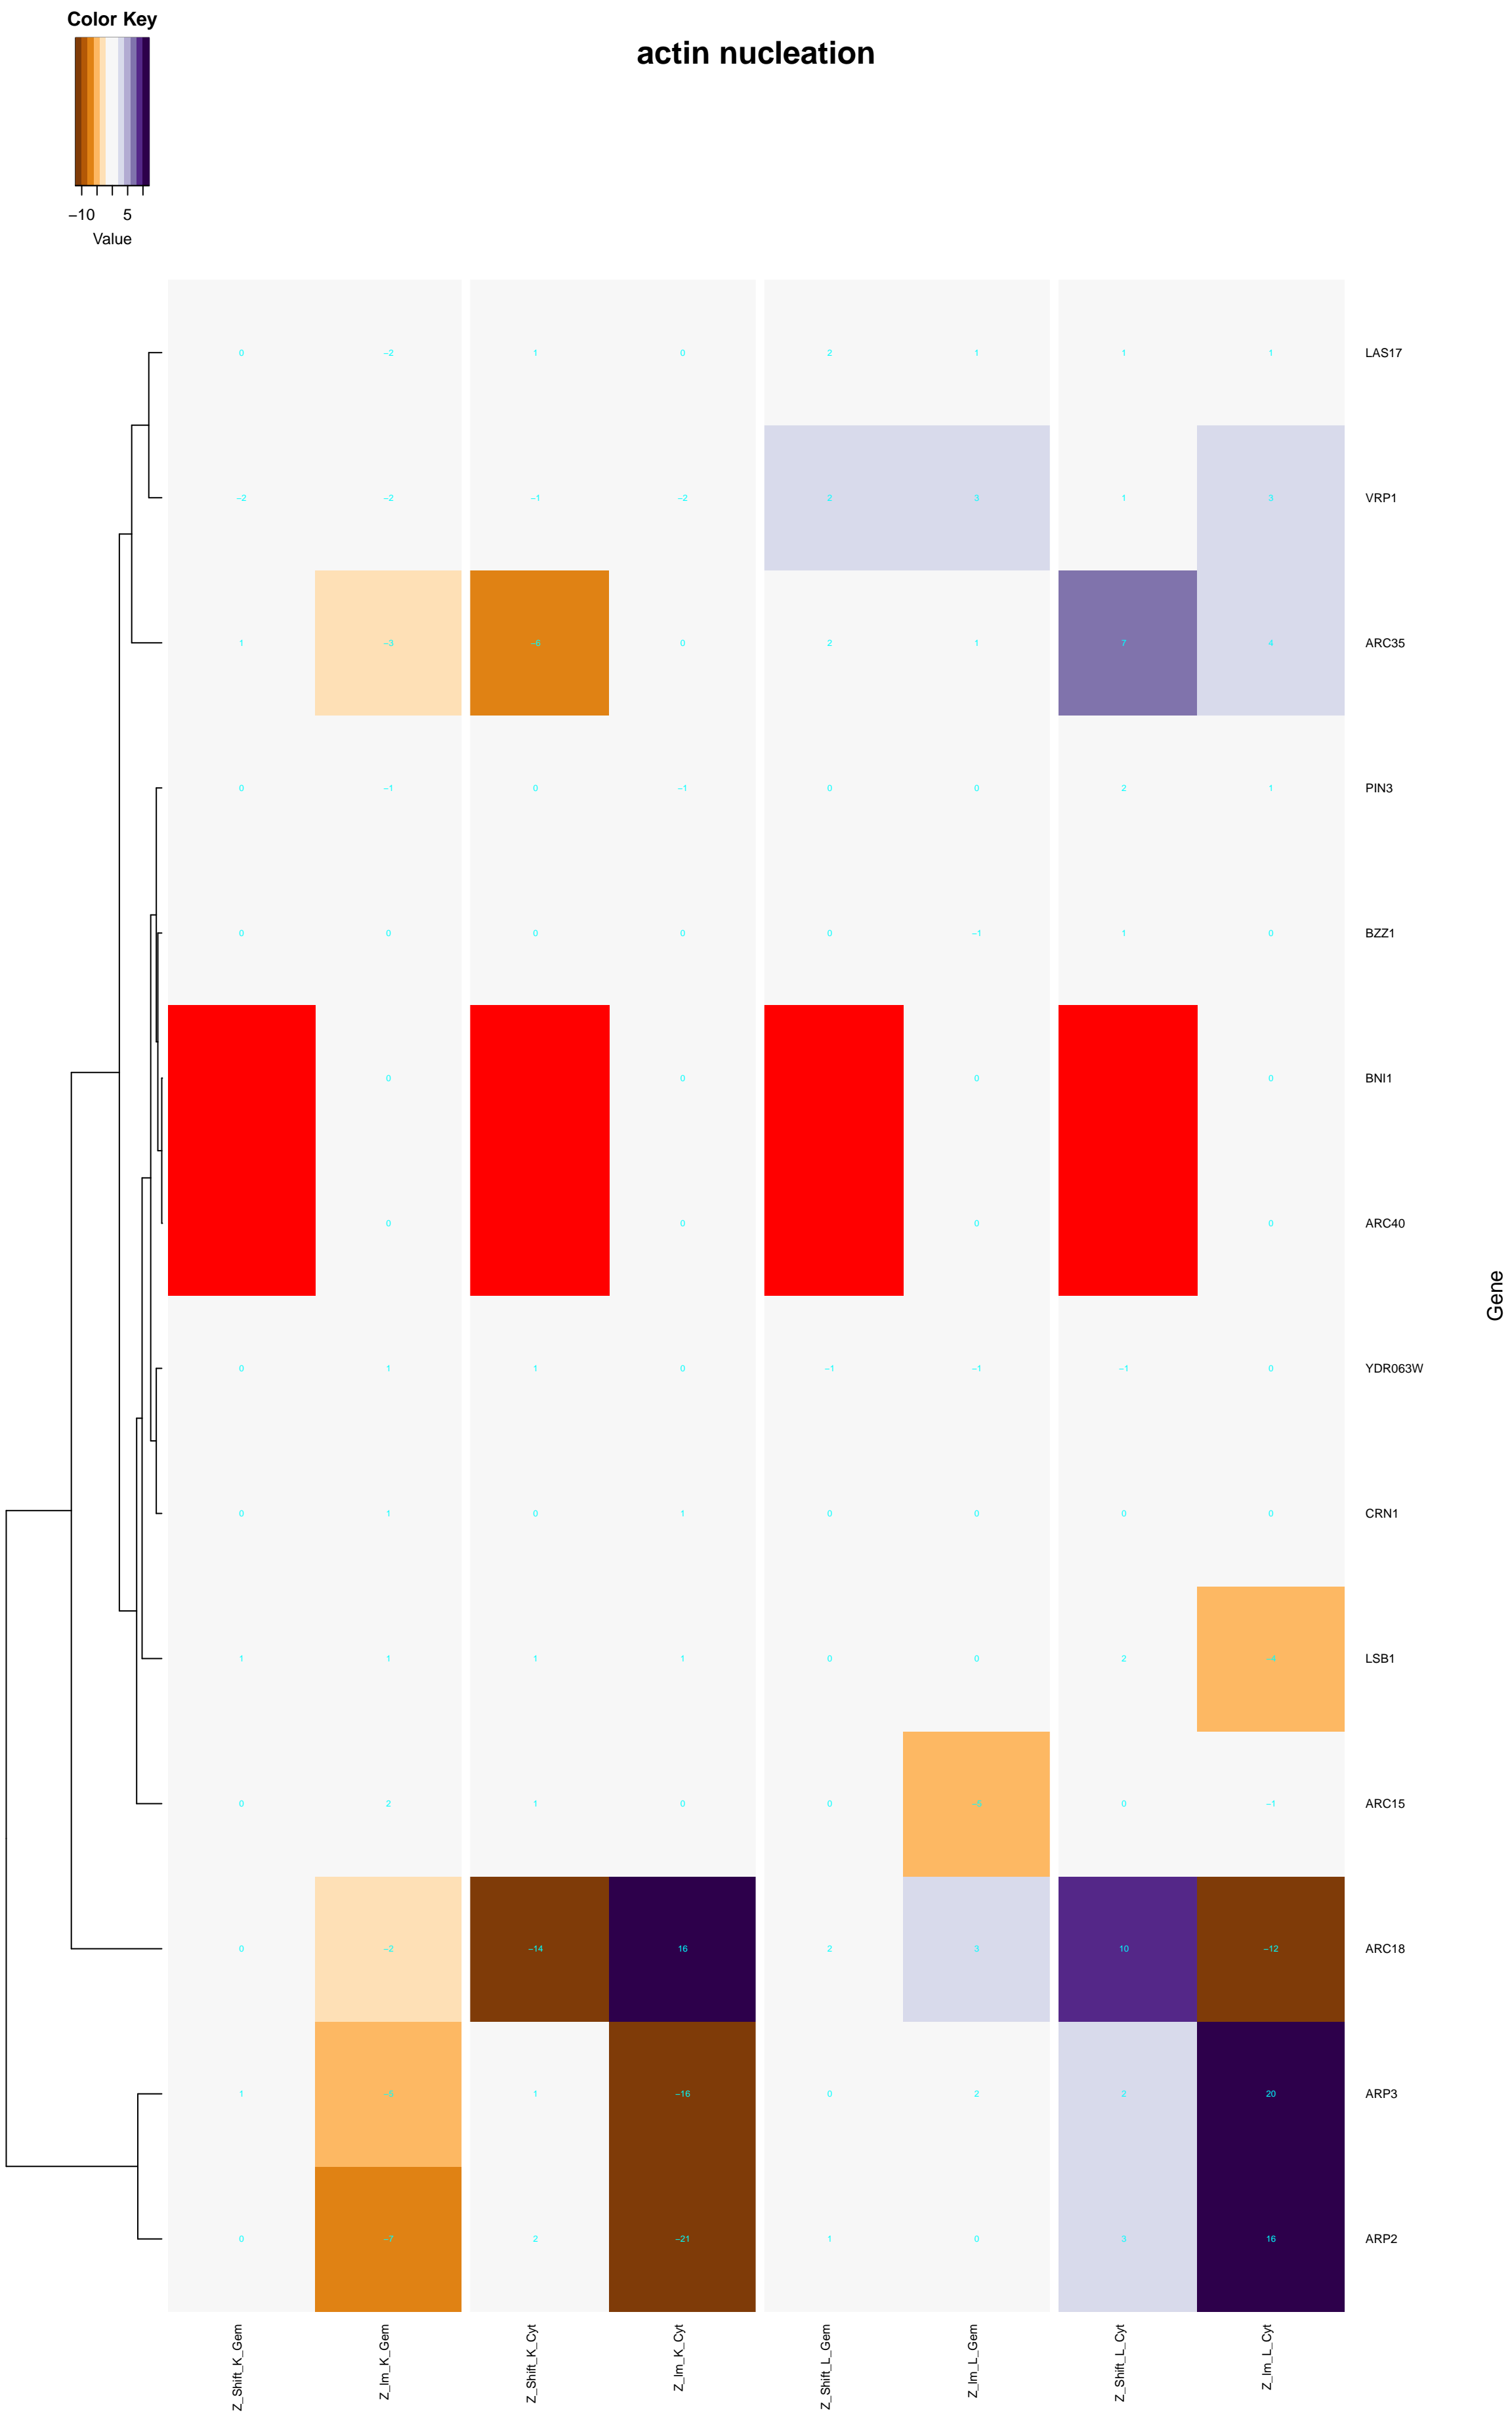

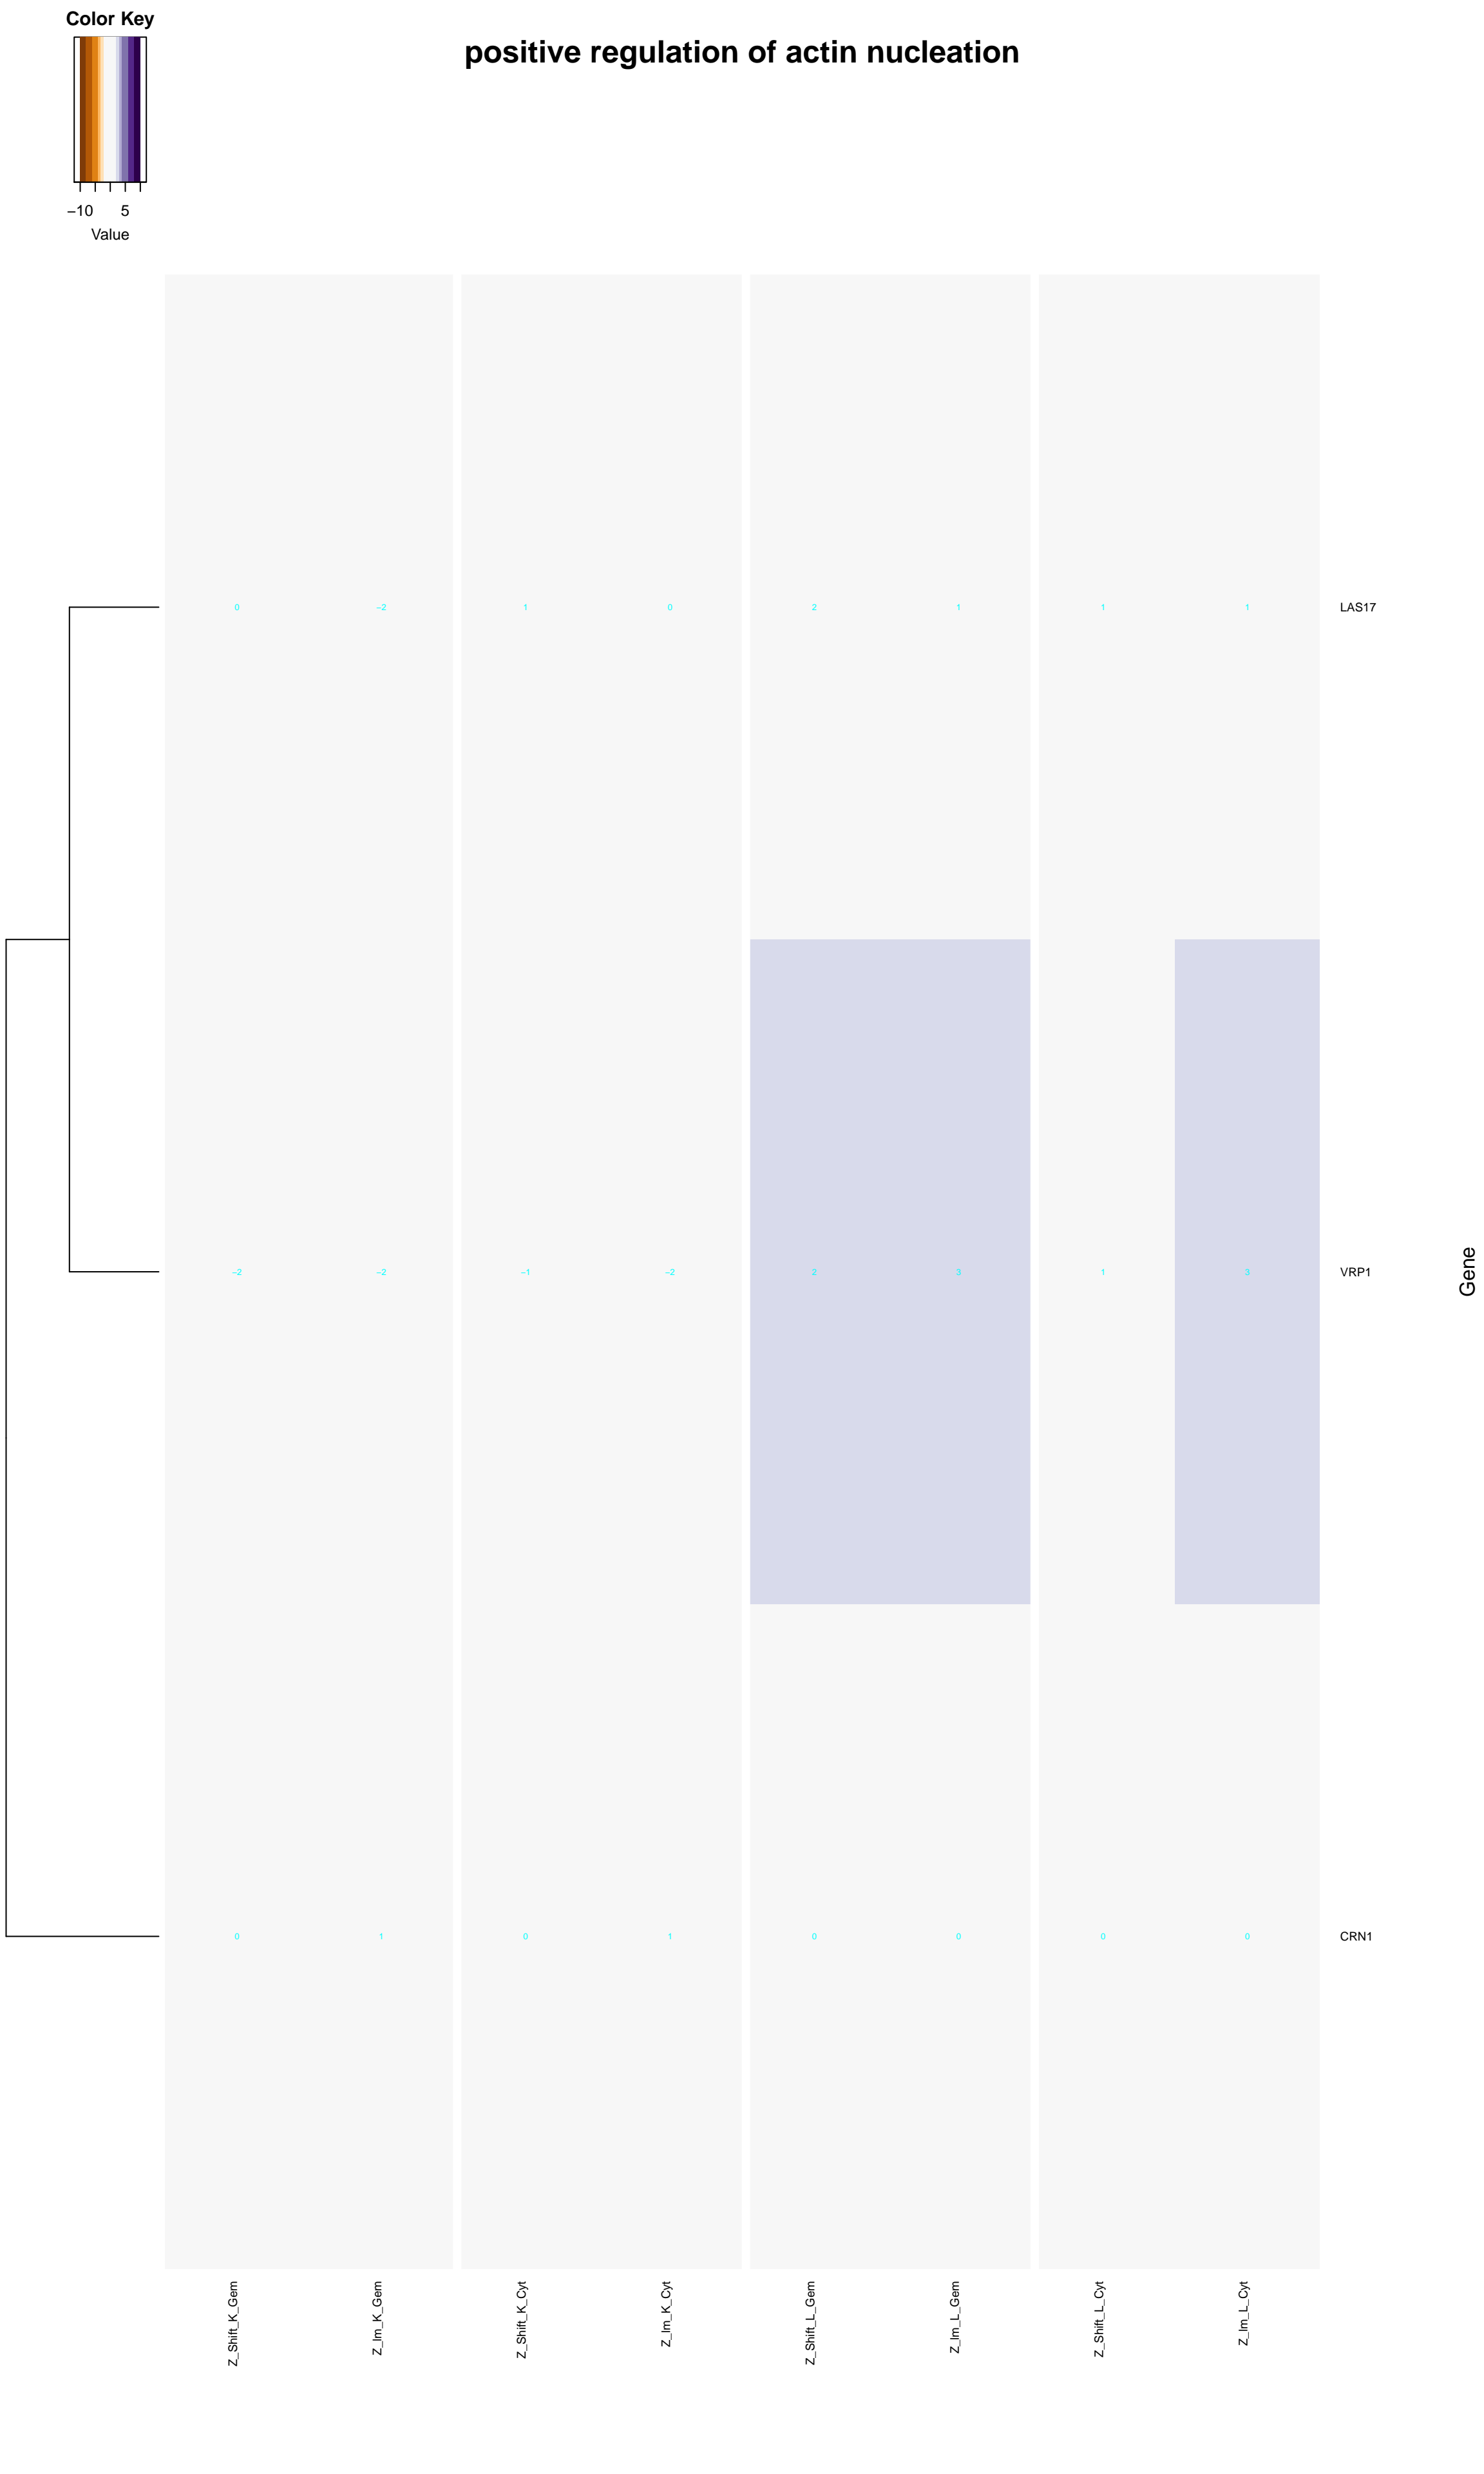

Color Key



tive regulation of RNA polymerase II transcriptional preinitiation complex assembly

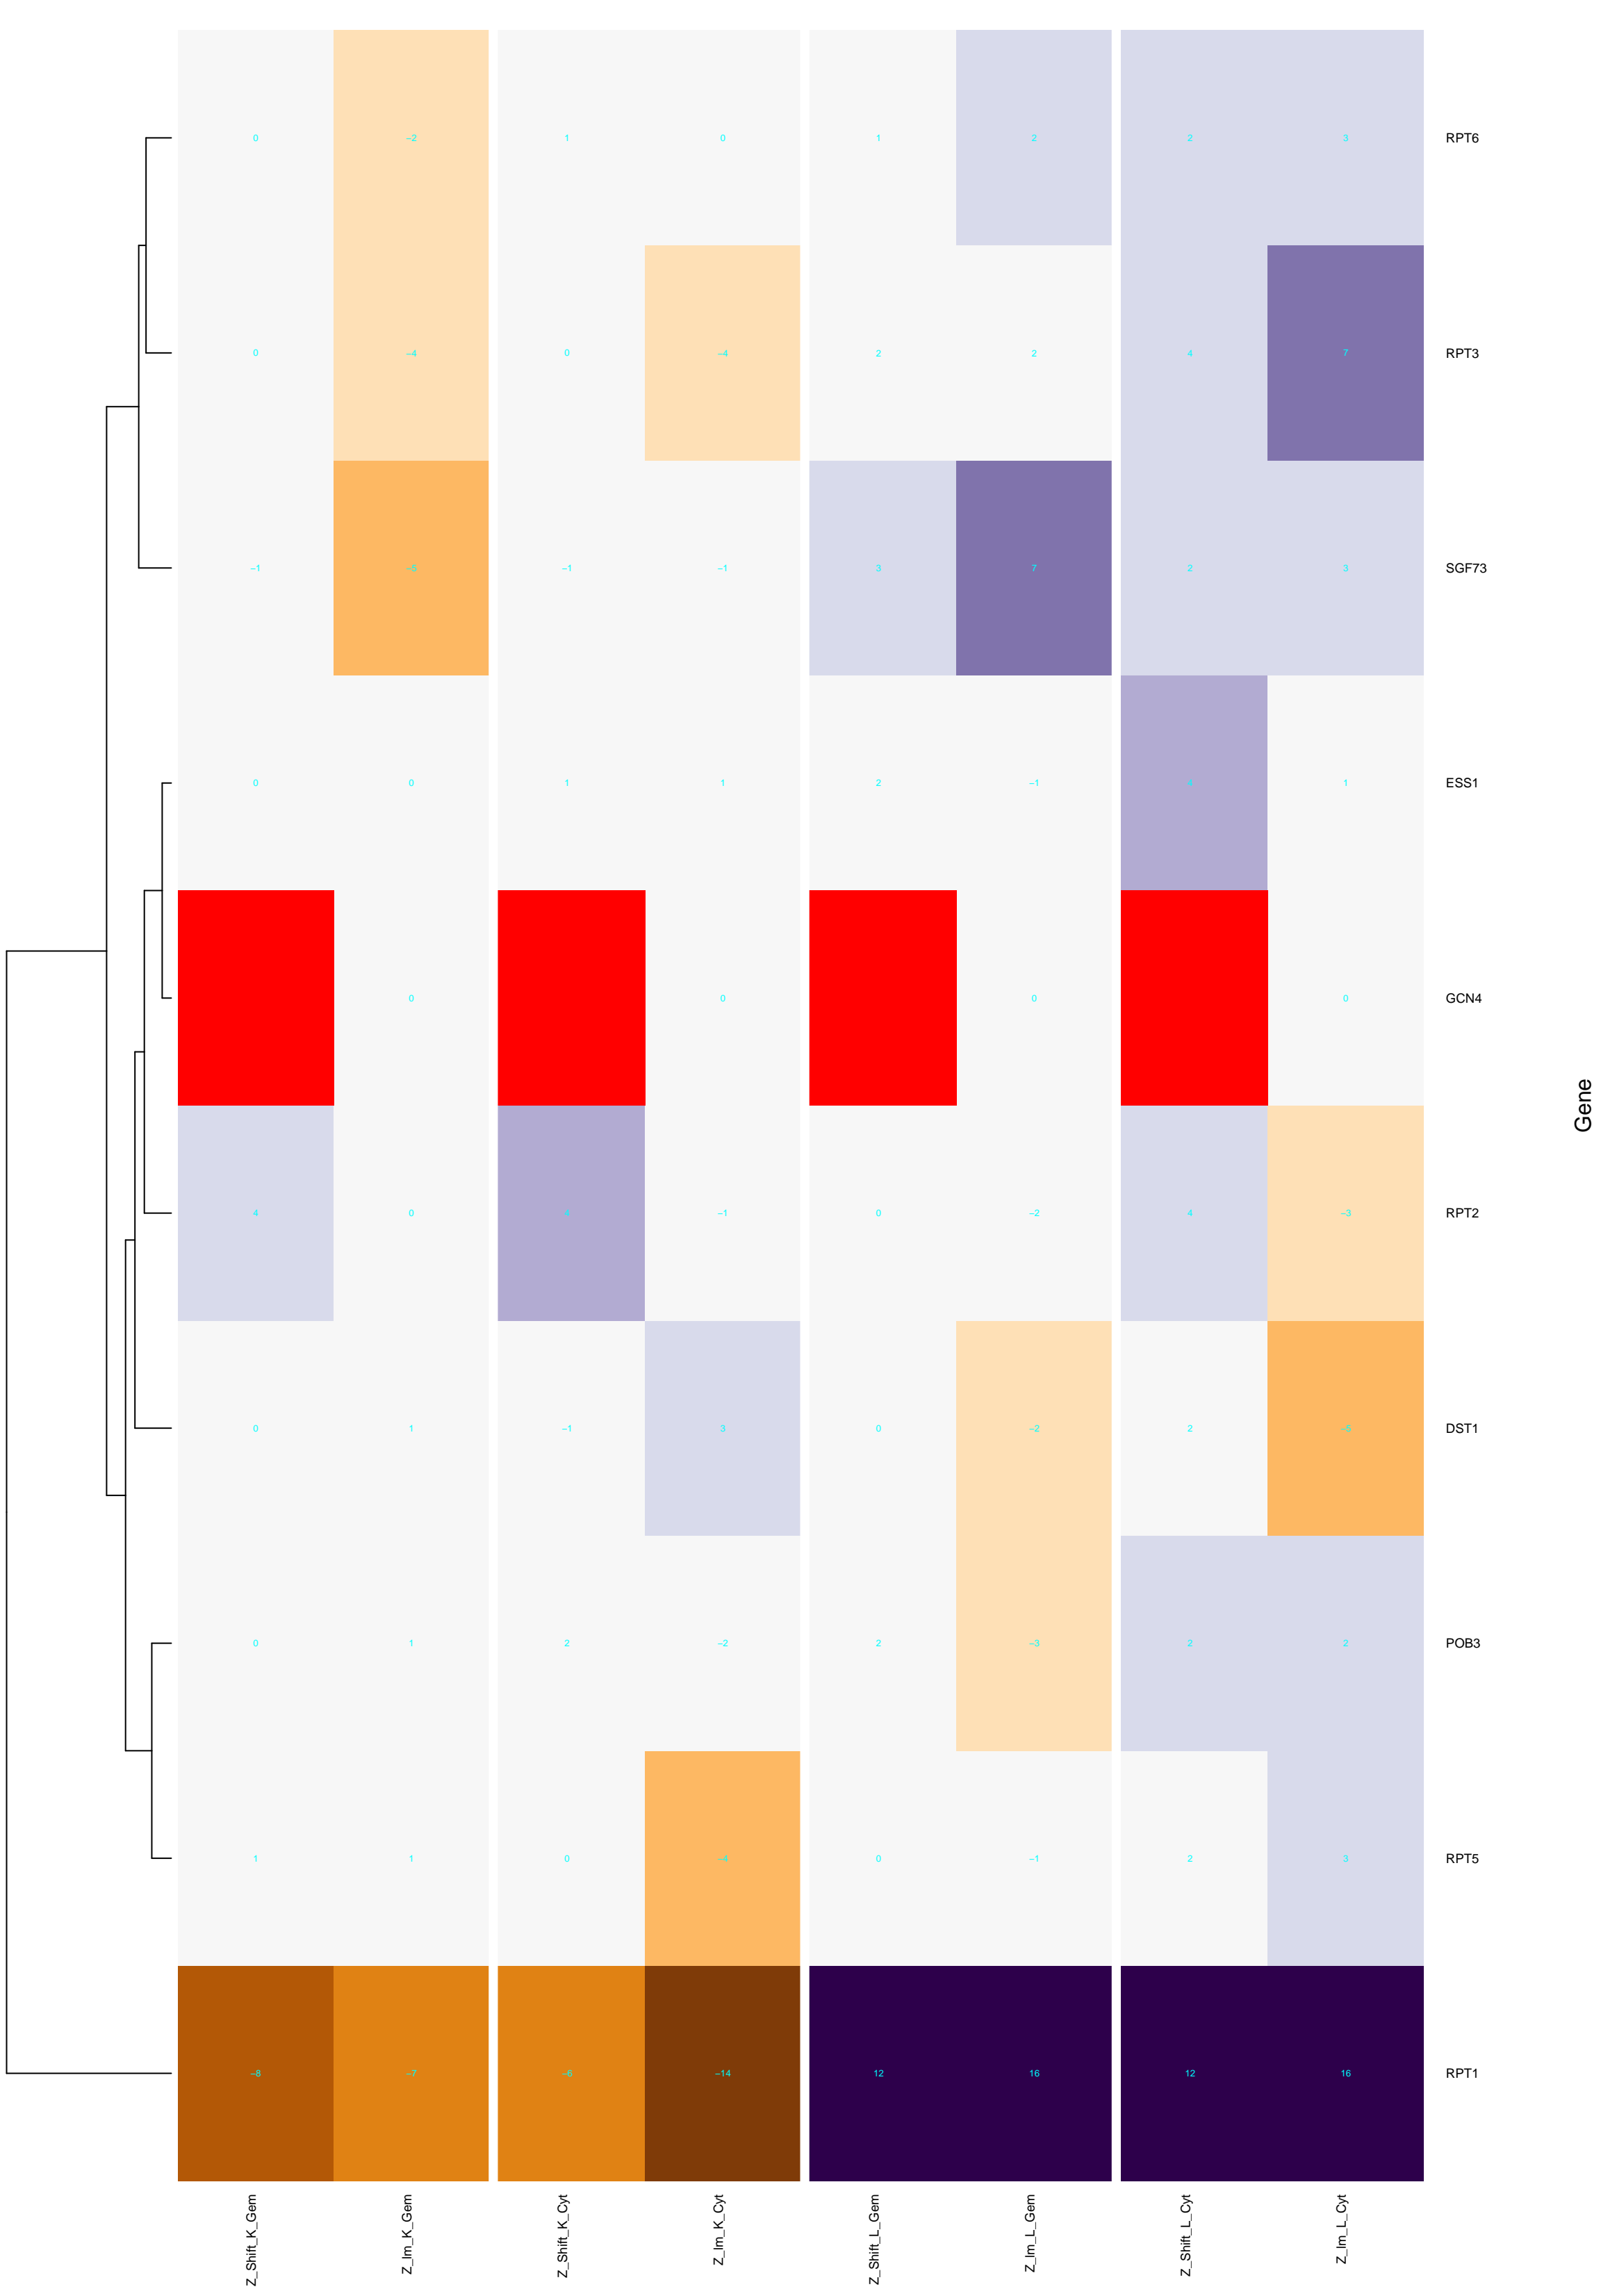

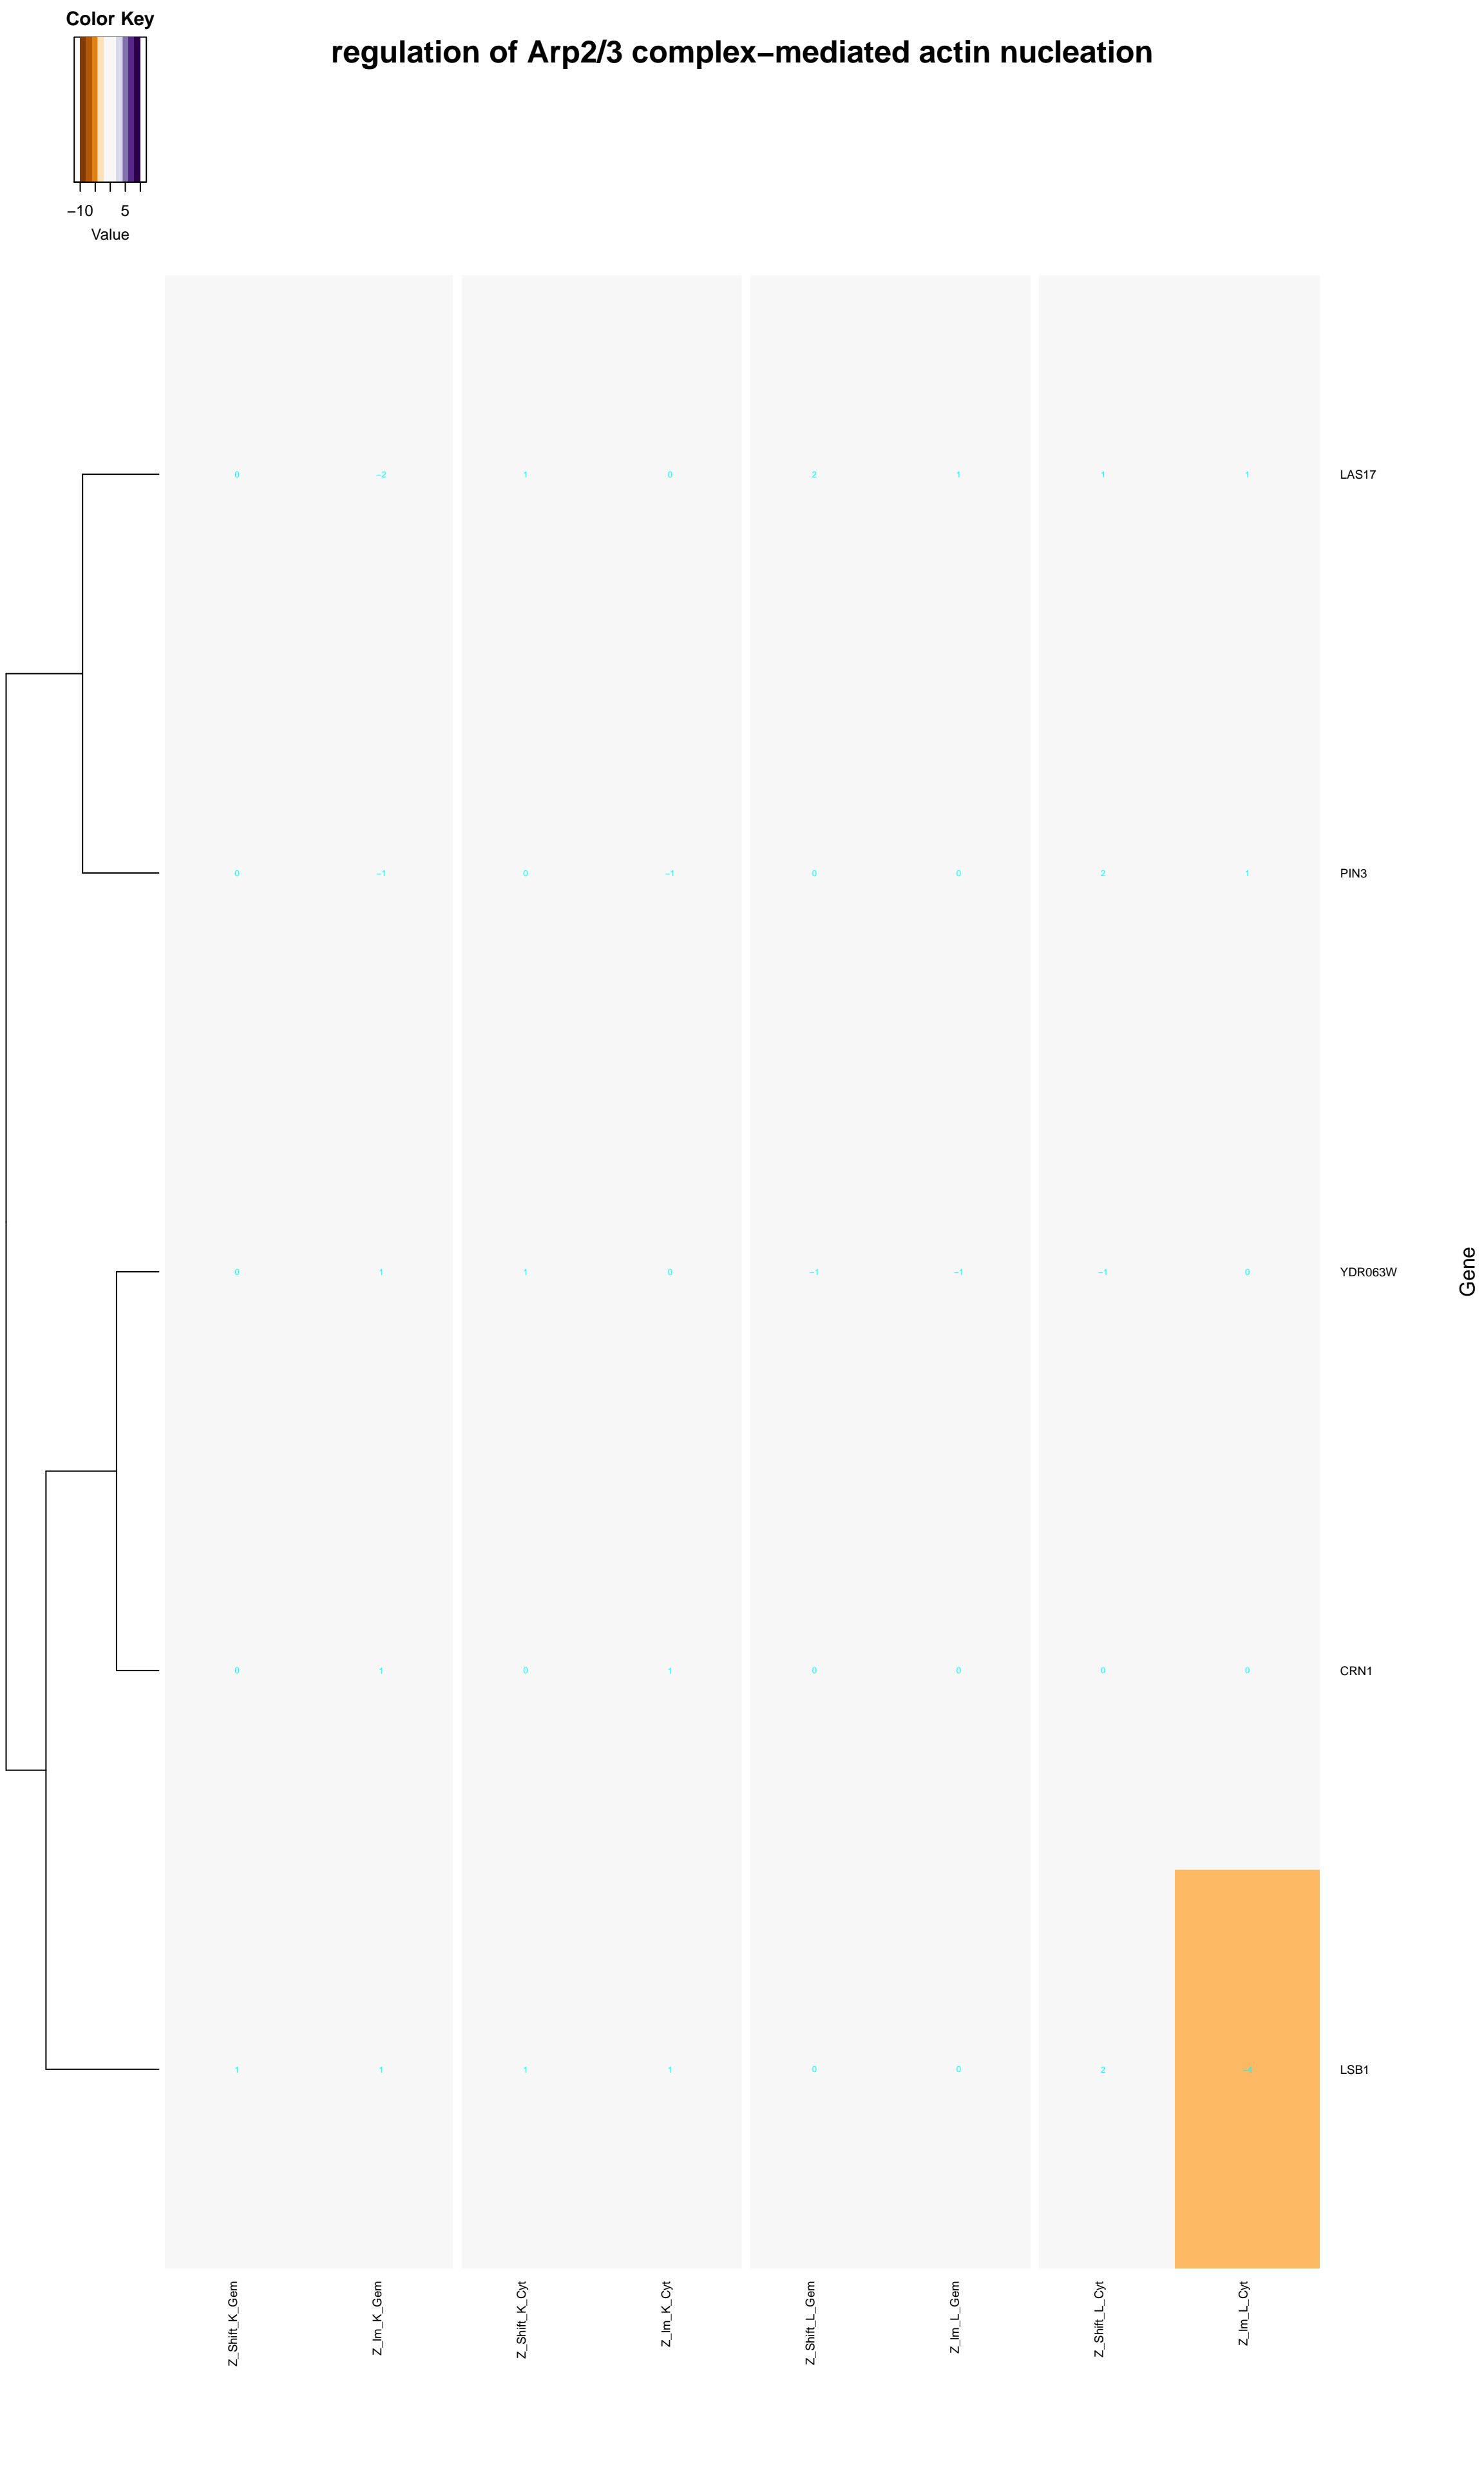

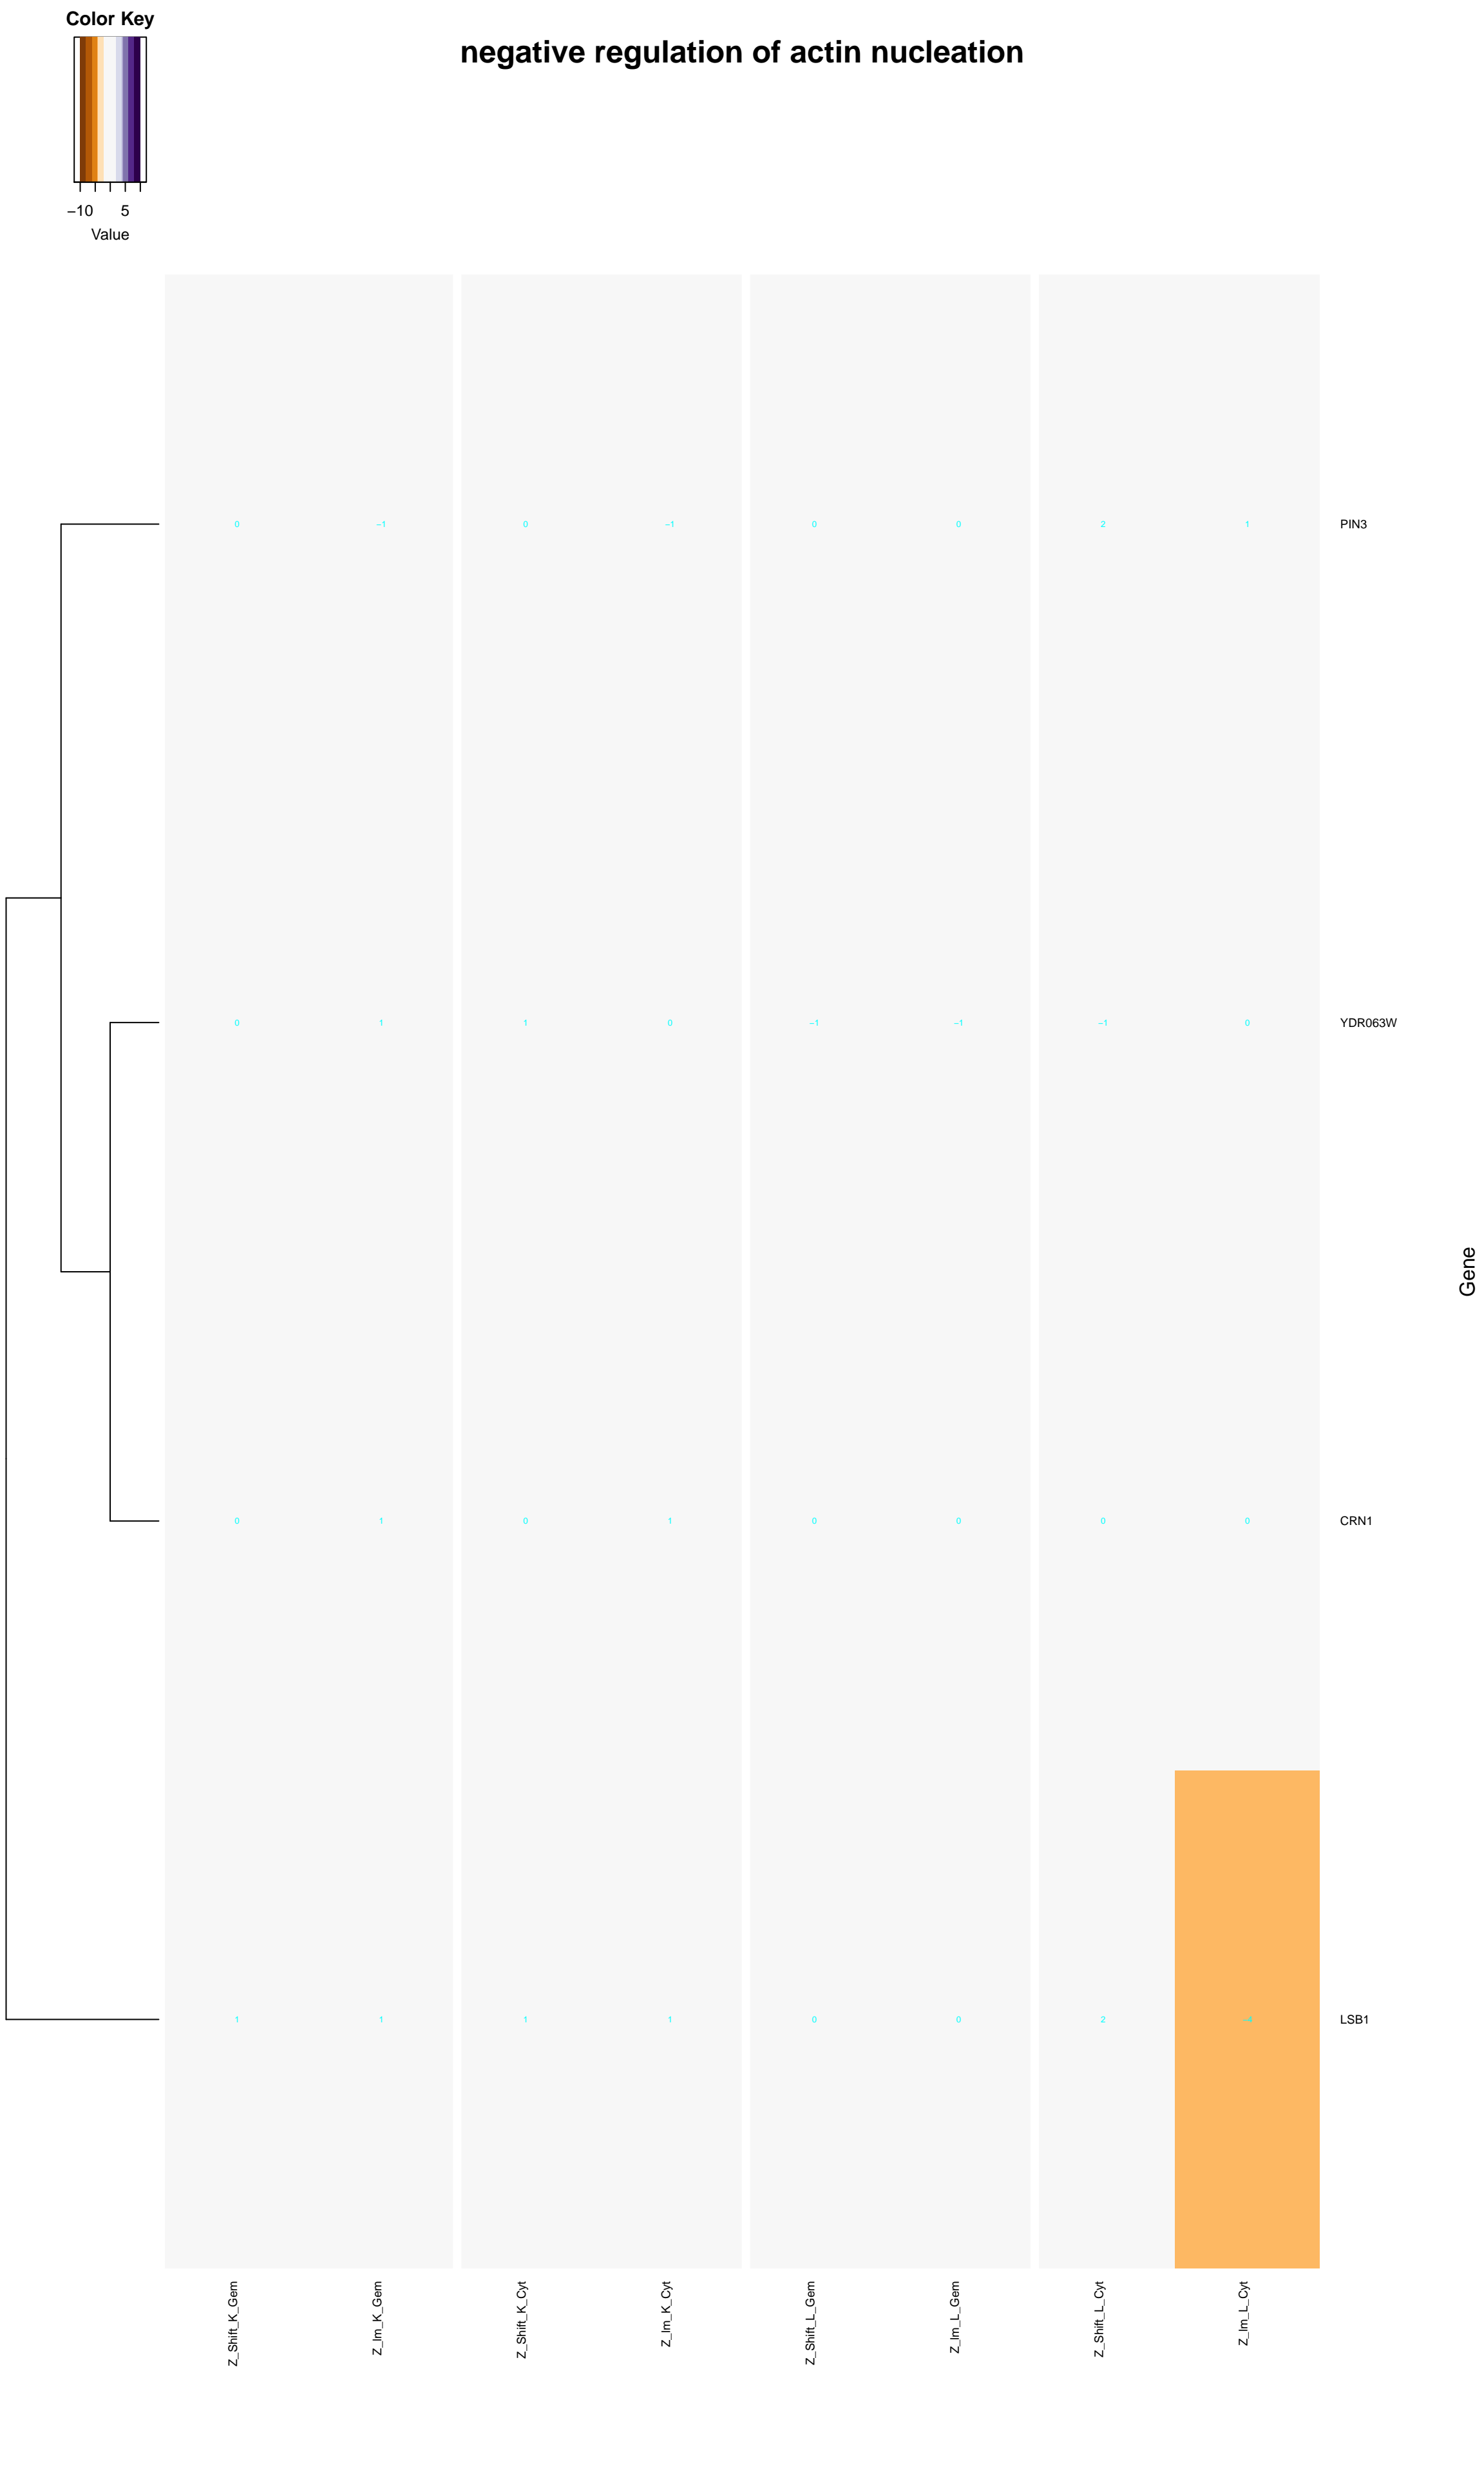

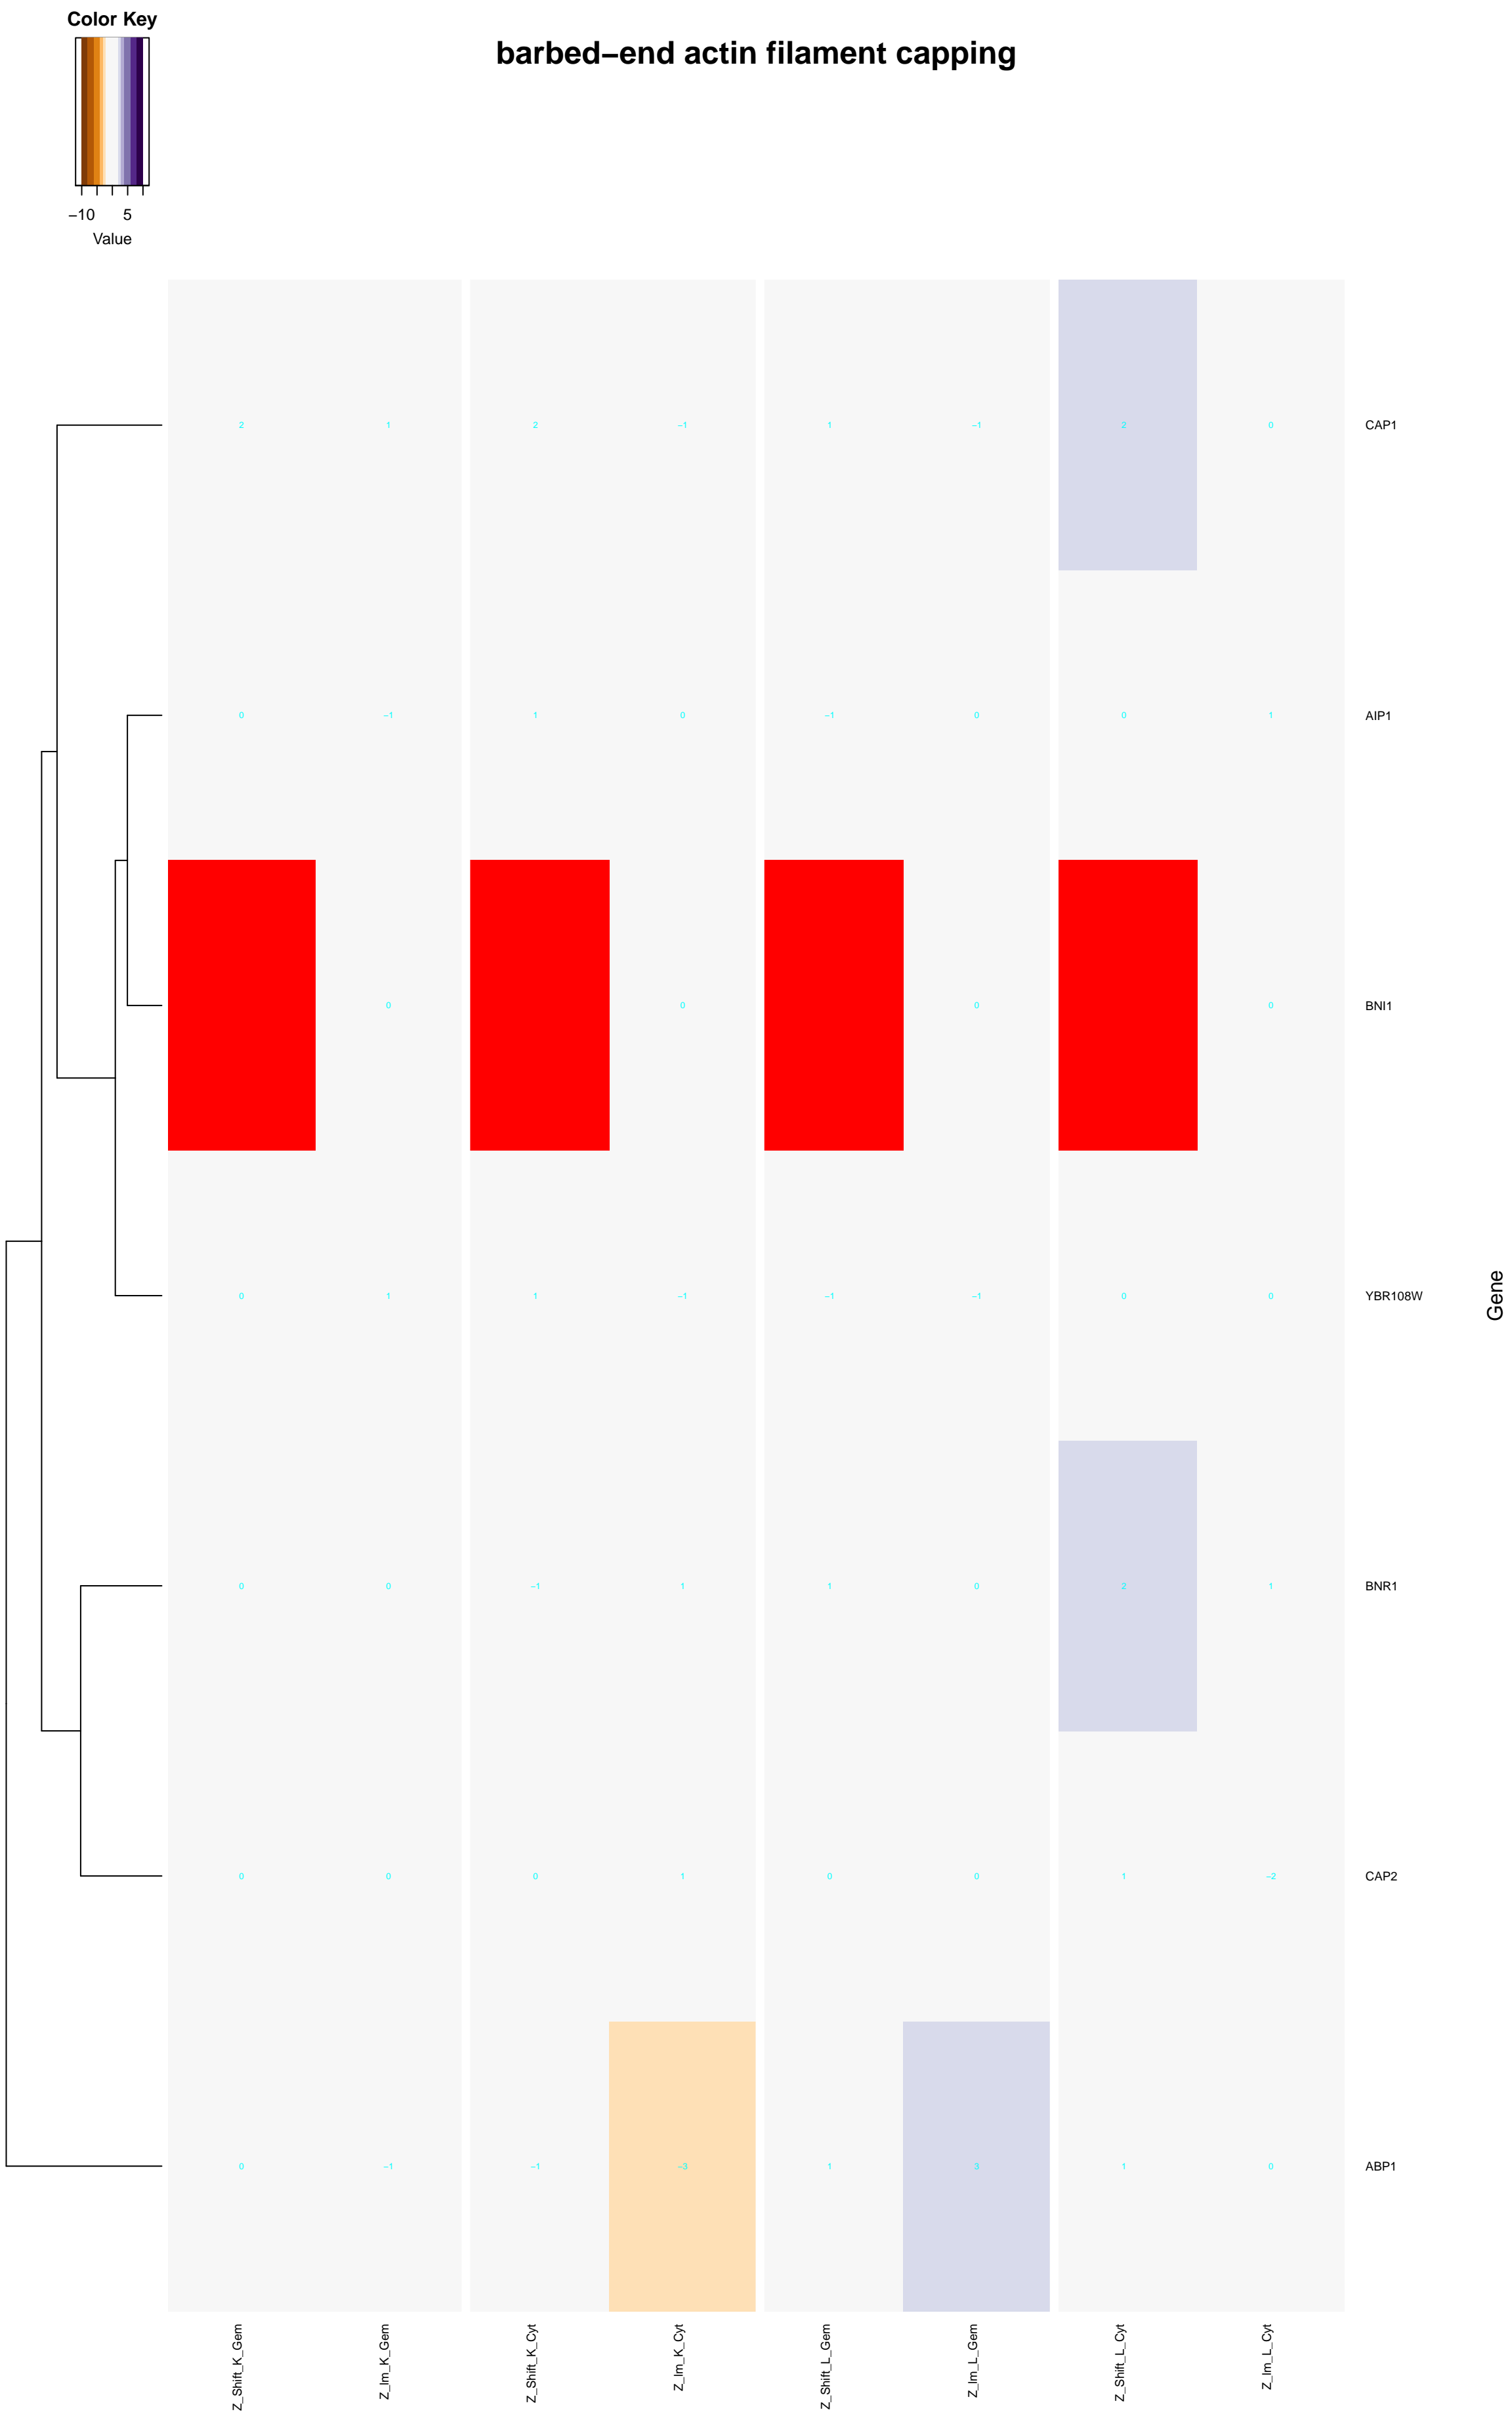

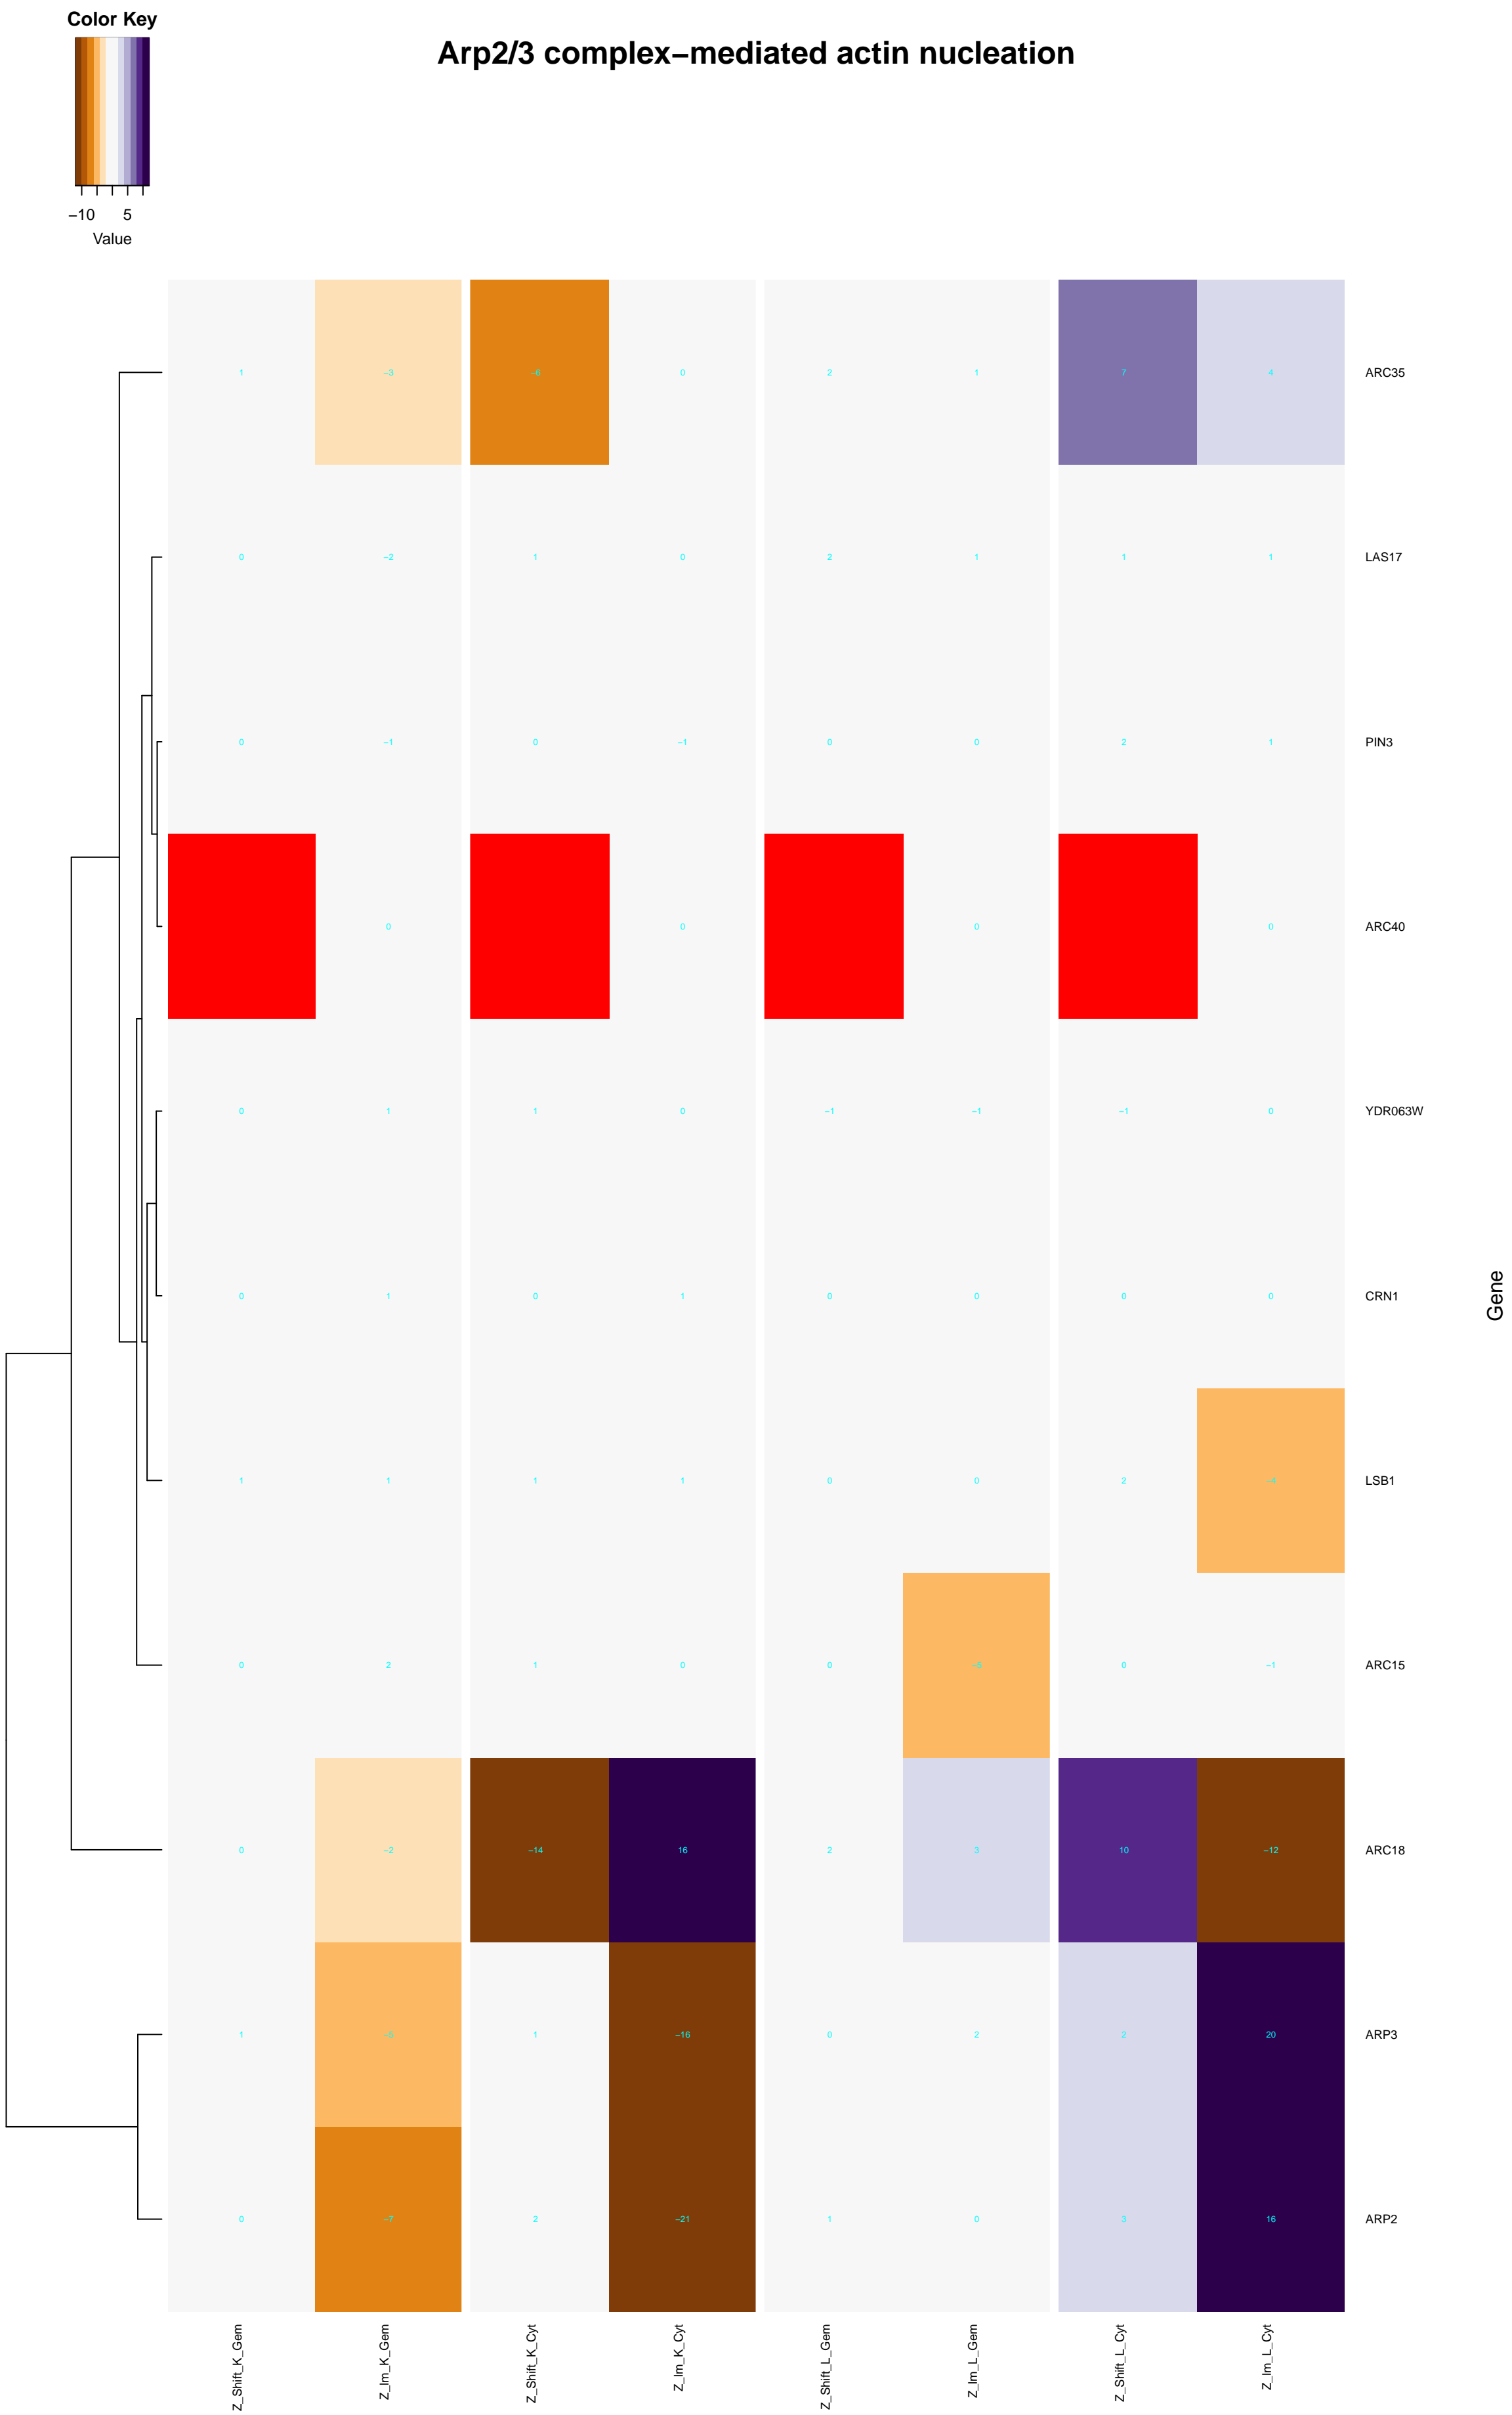

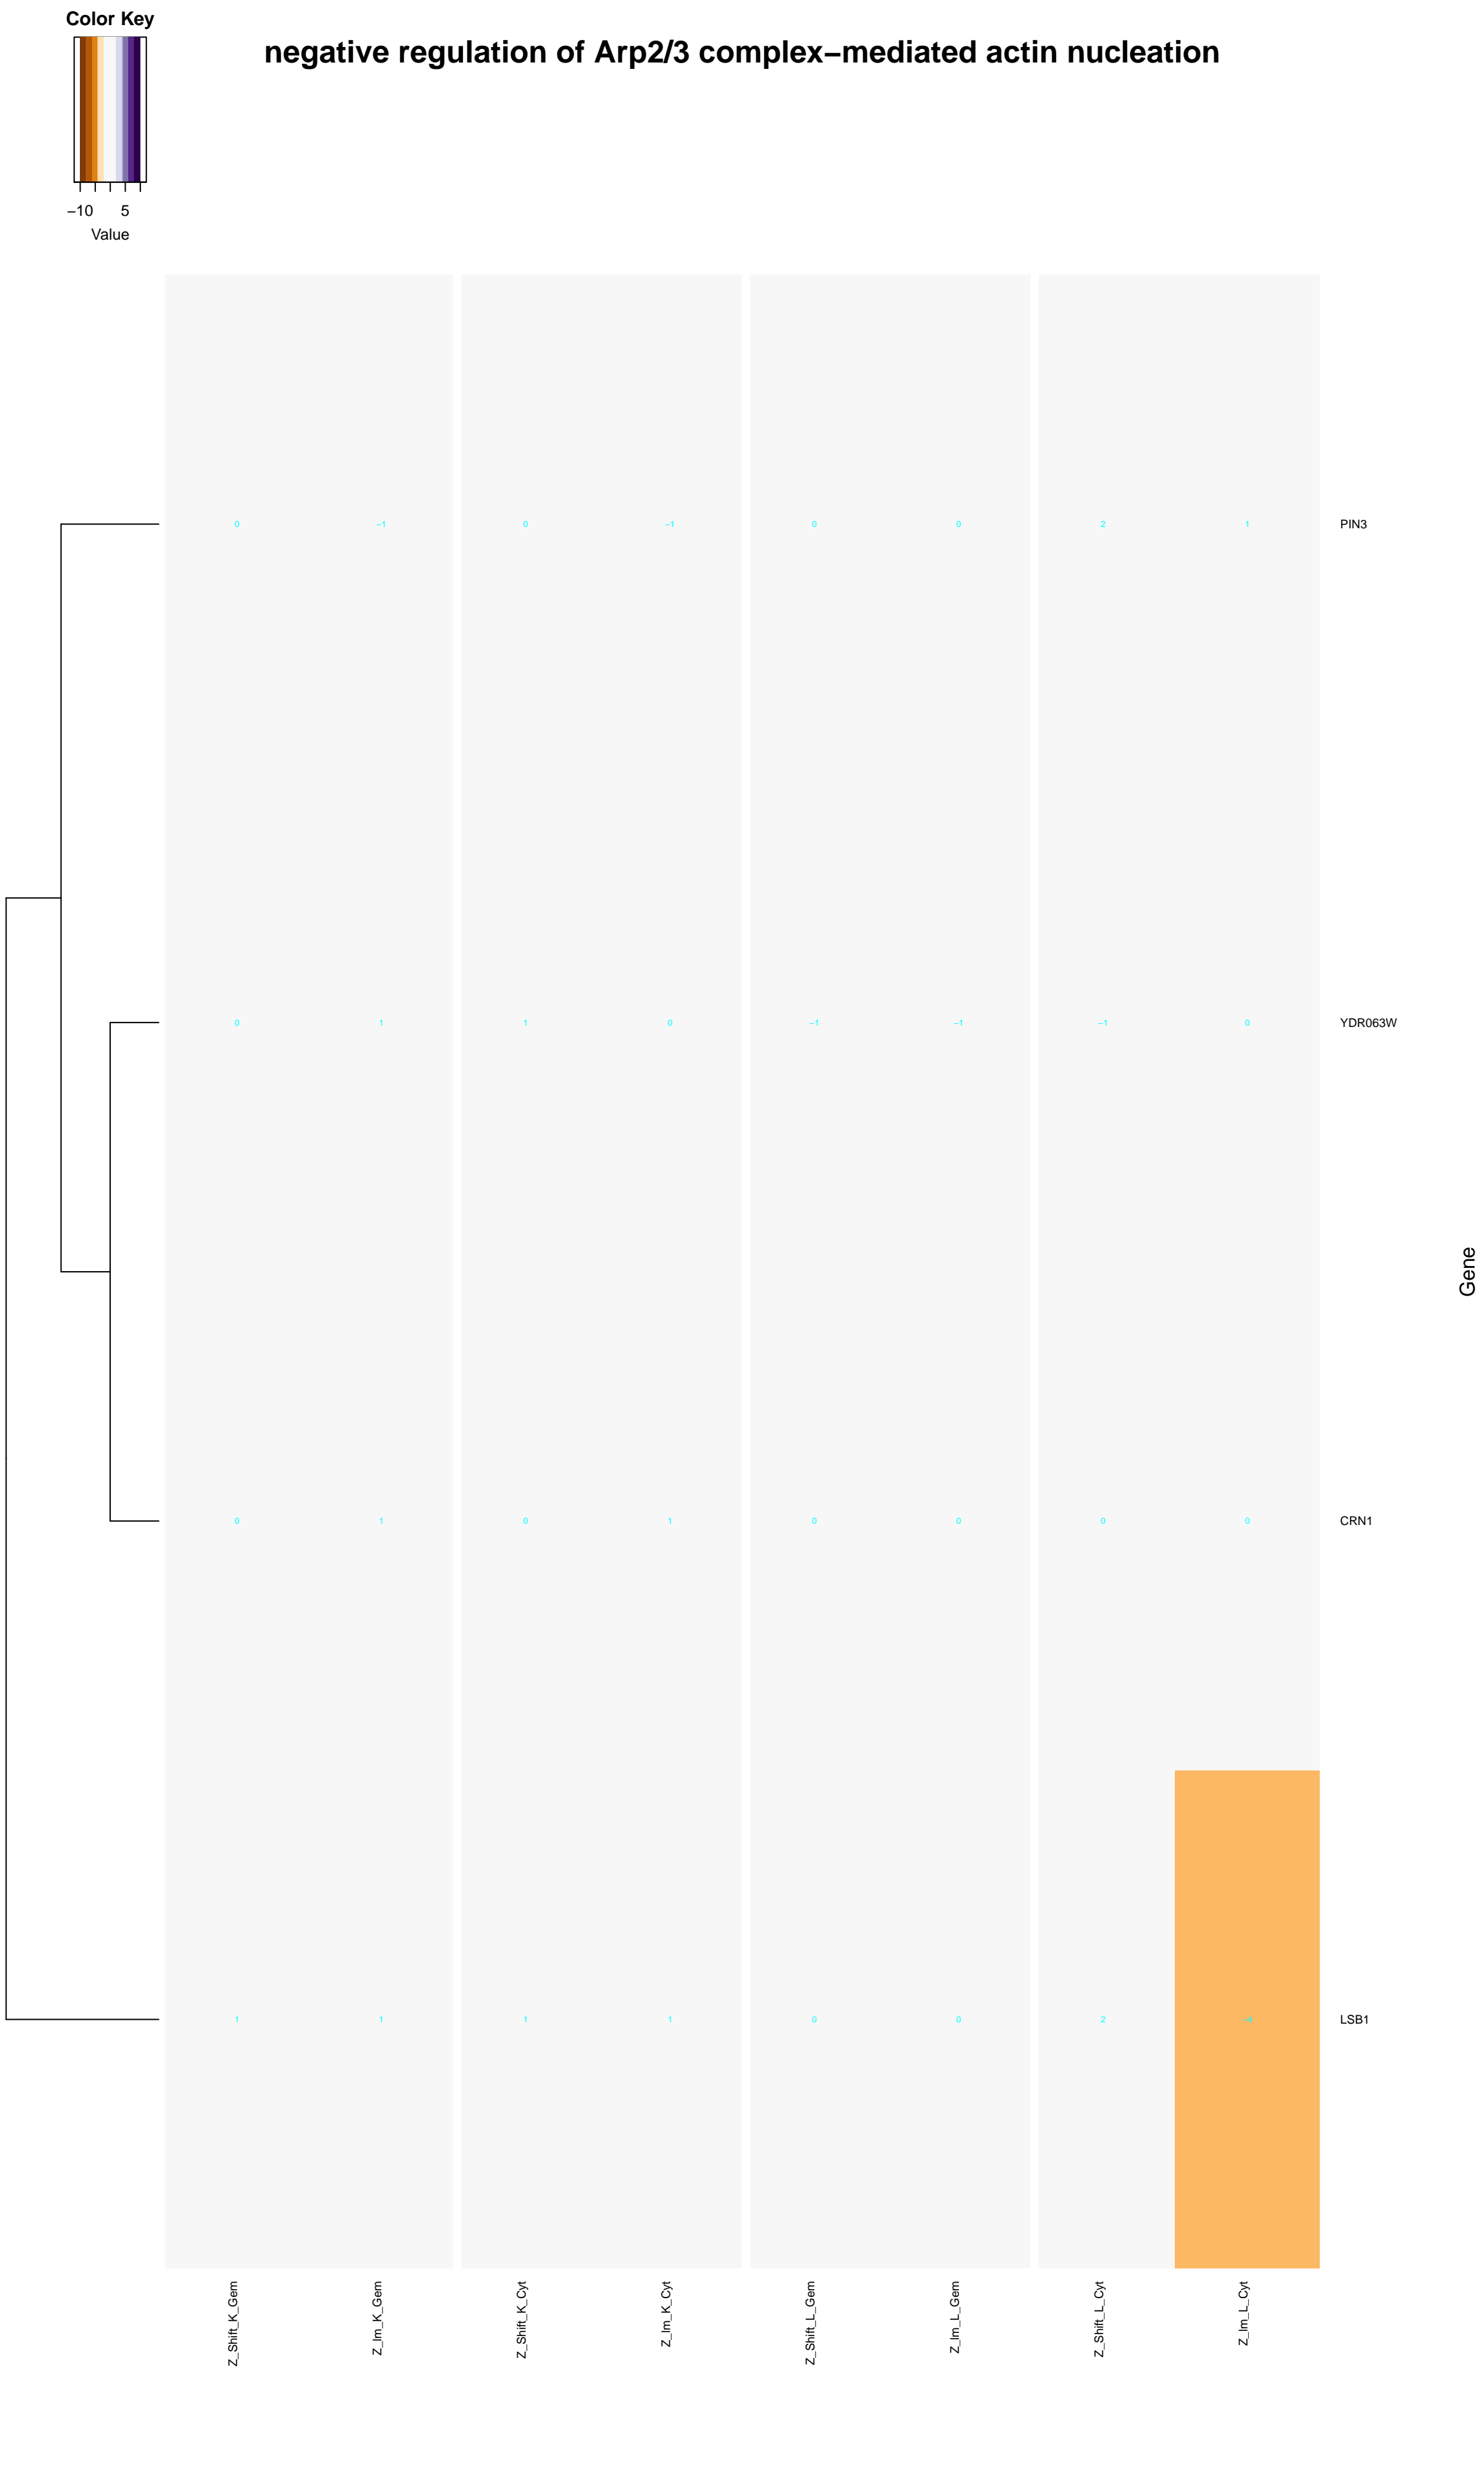

Supplement: s1 [file s1]
