# Supplementary material for: A Humanized Yeast Phenomic Model of Deoxycytidine Kinase to Predict Genetic Buffering of Nucleoside Analog Cytotoxicity
Source: MDPI journal article supplement (doi:10.3390/genes10100770), 2019-09-30

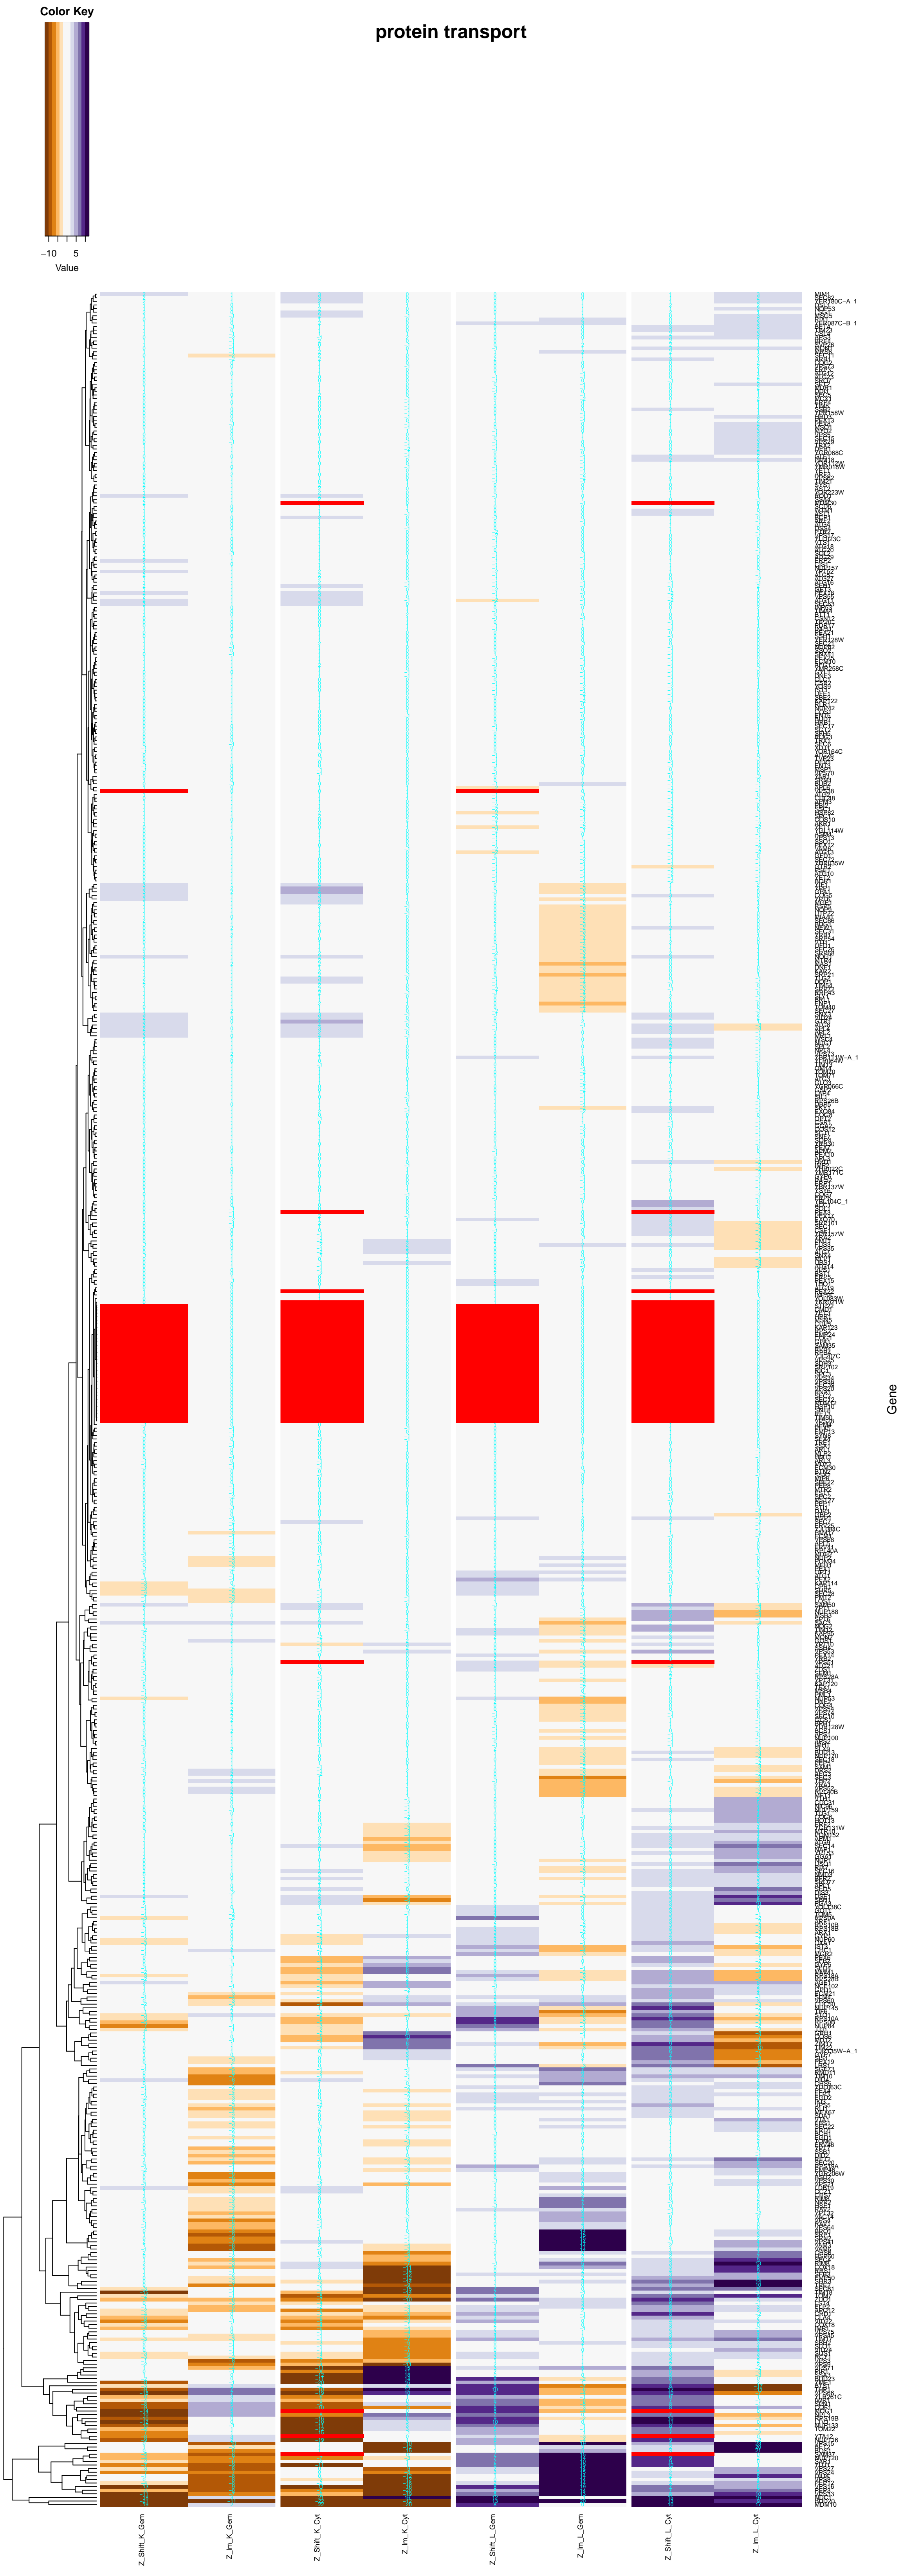

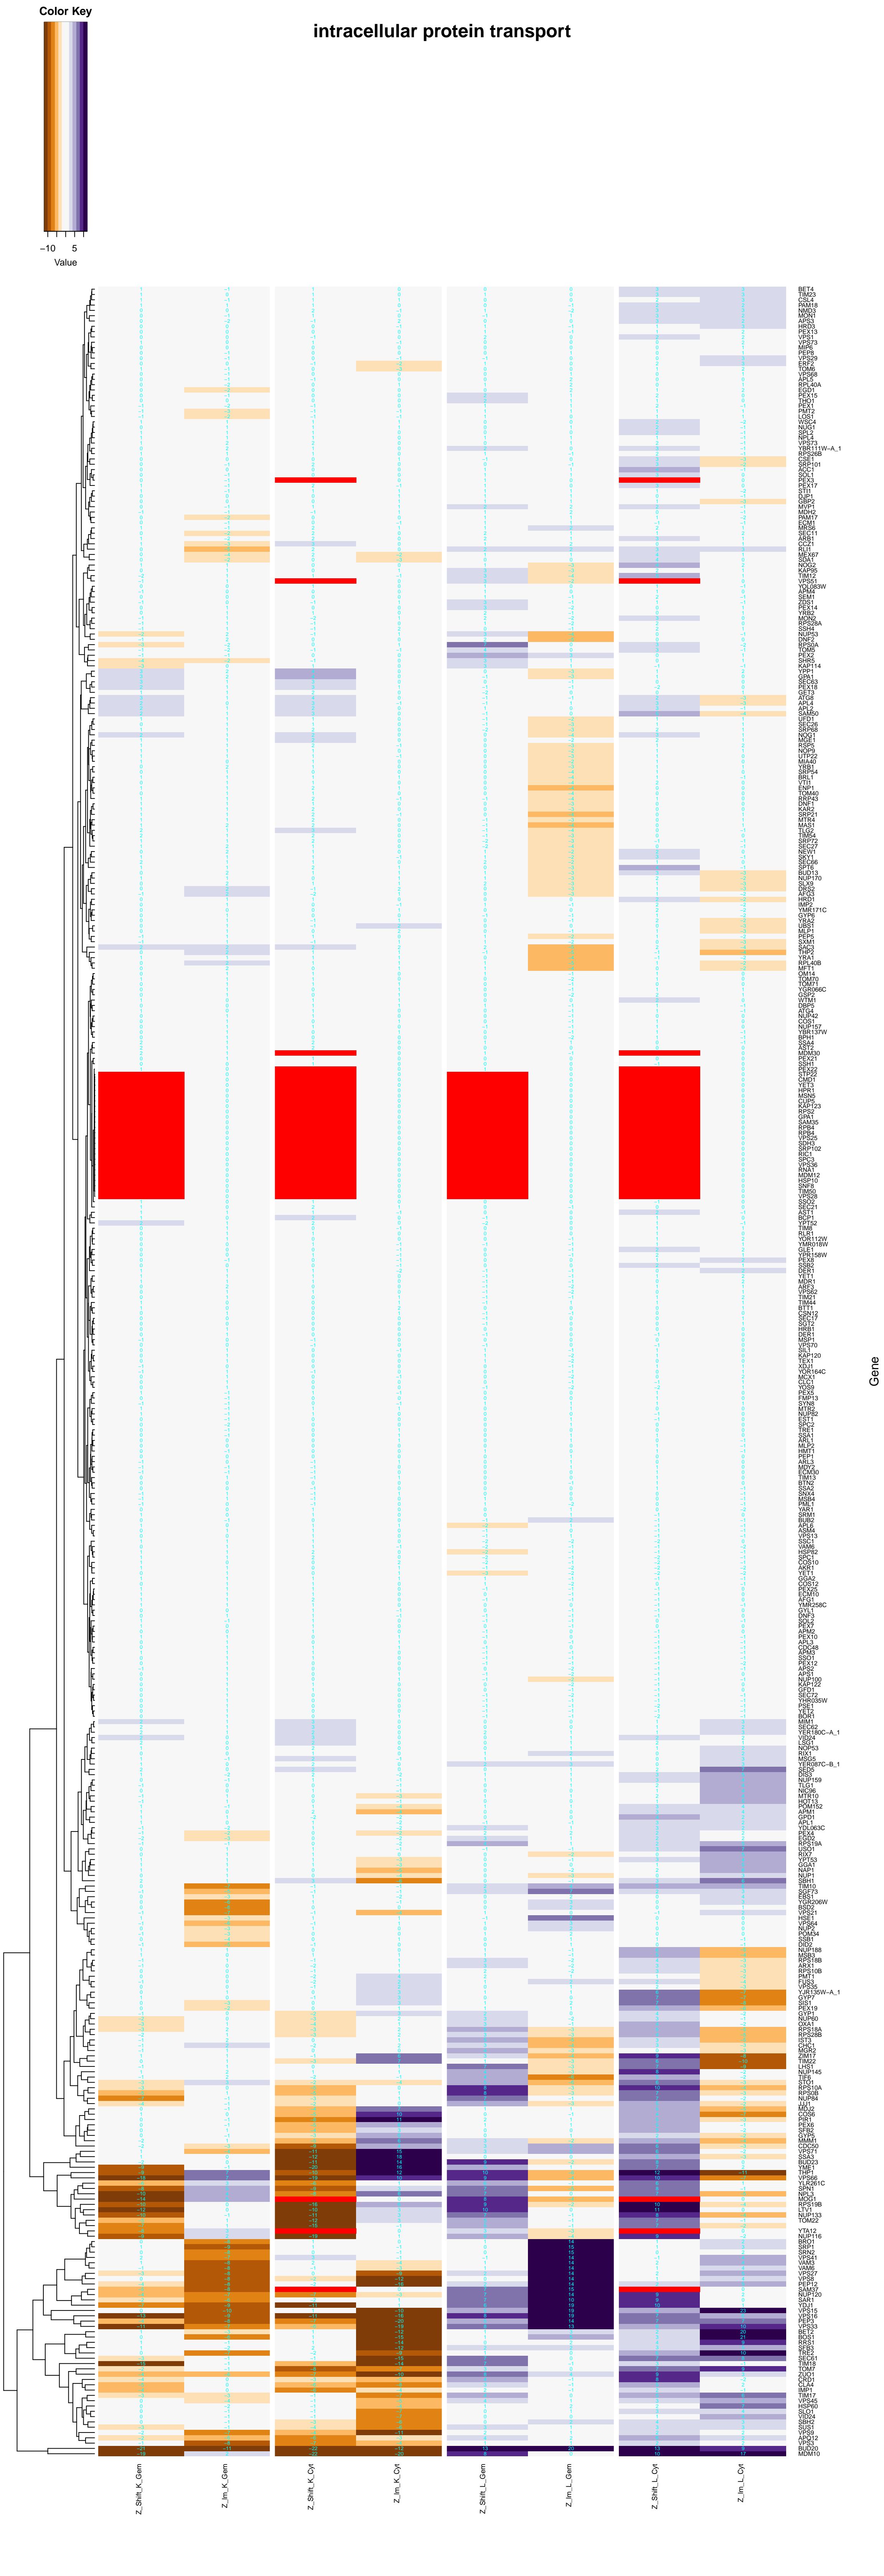

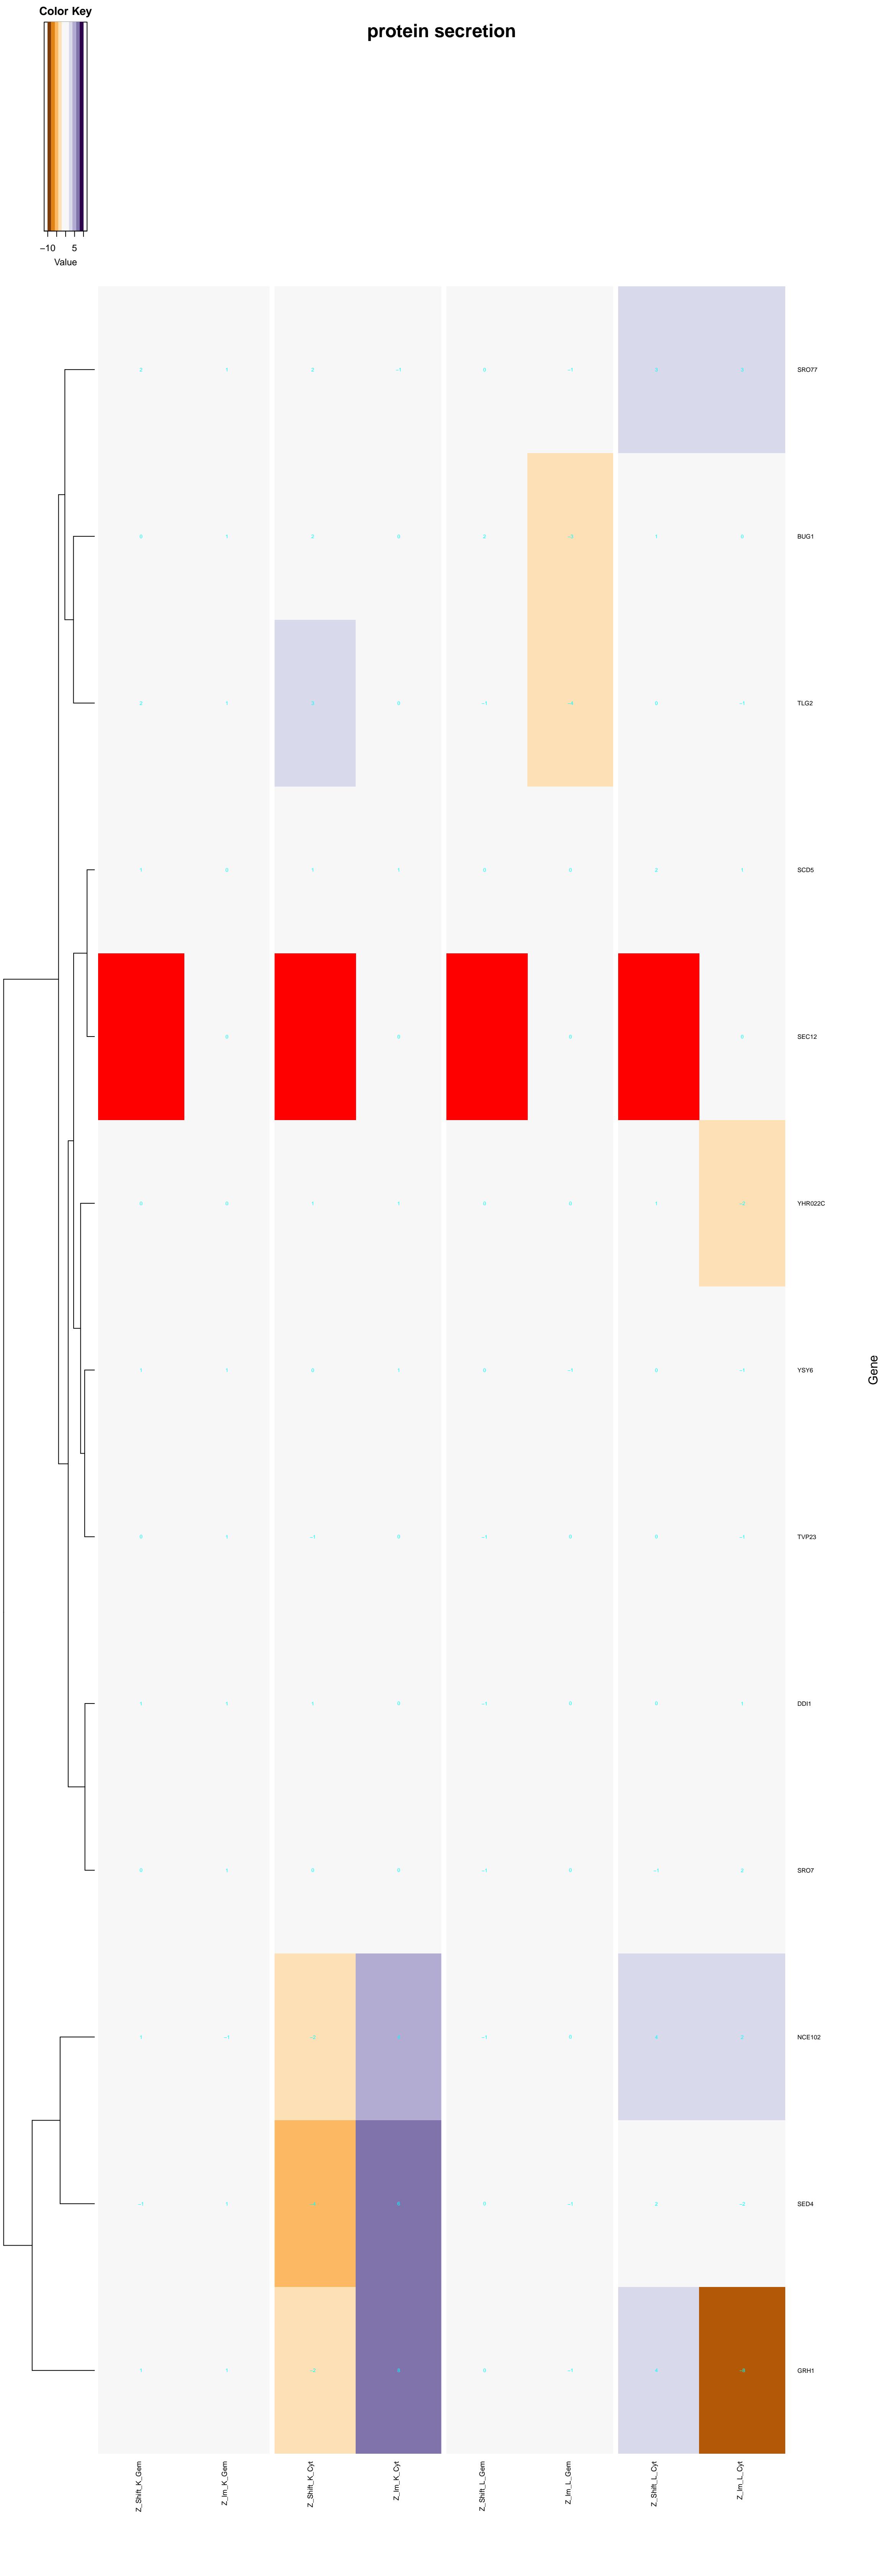

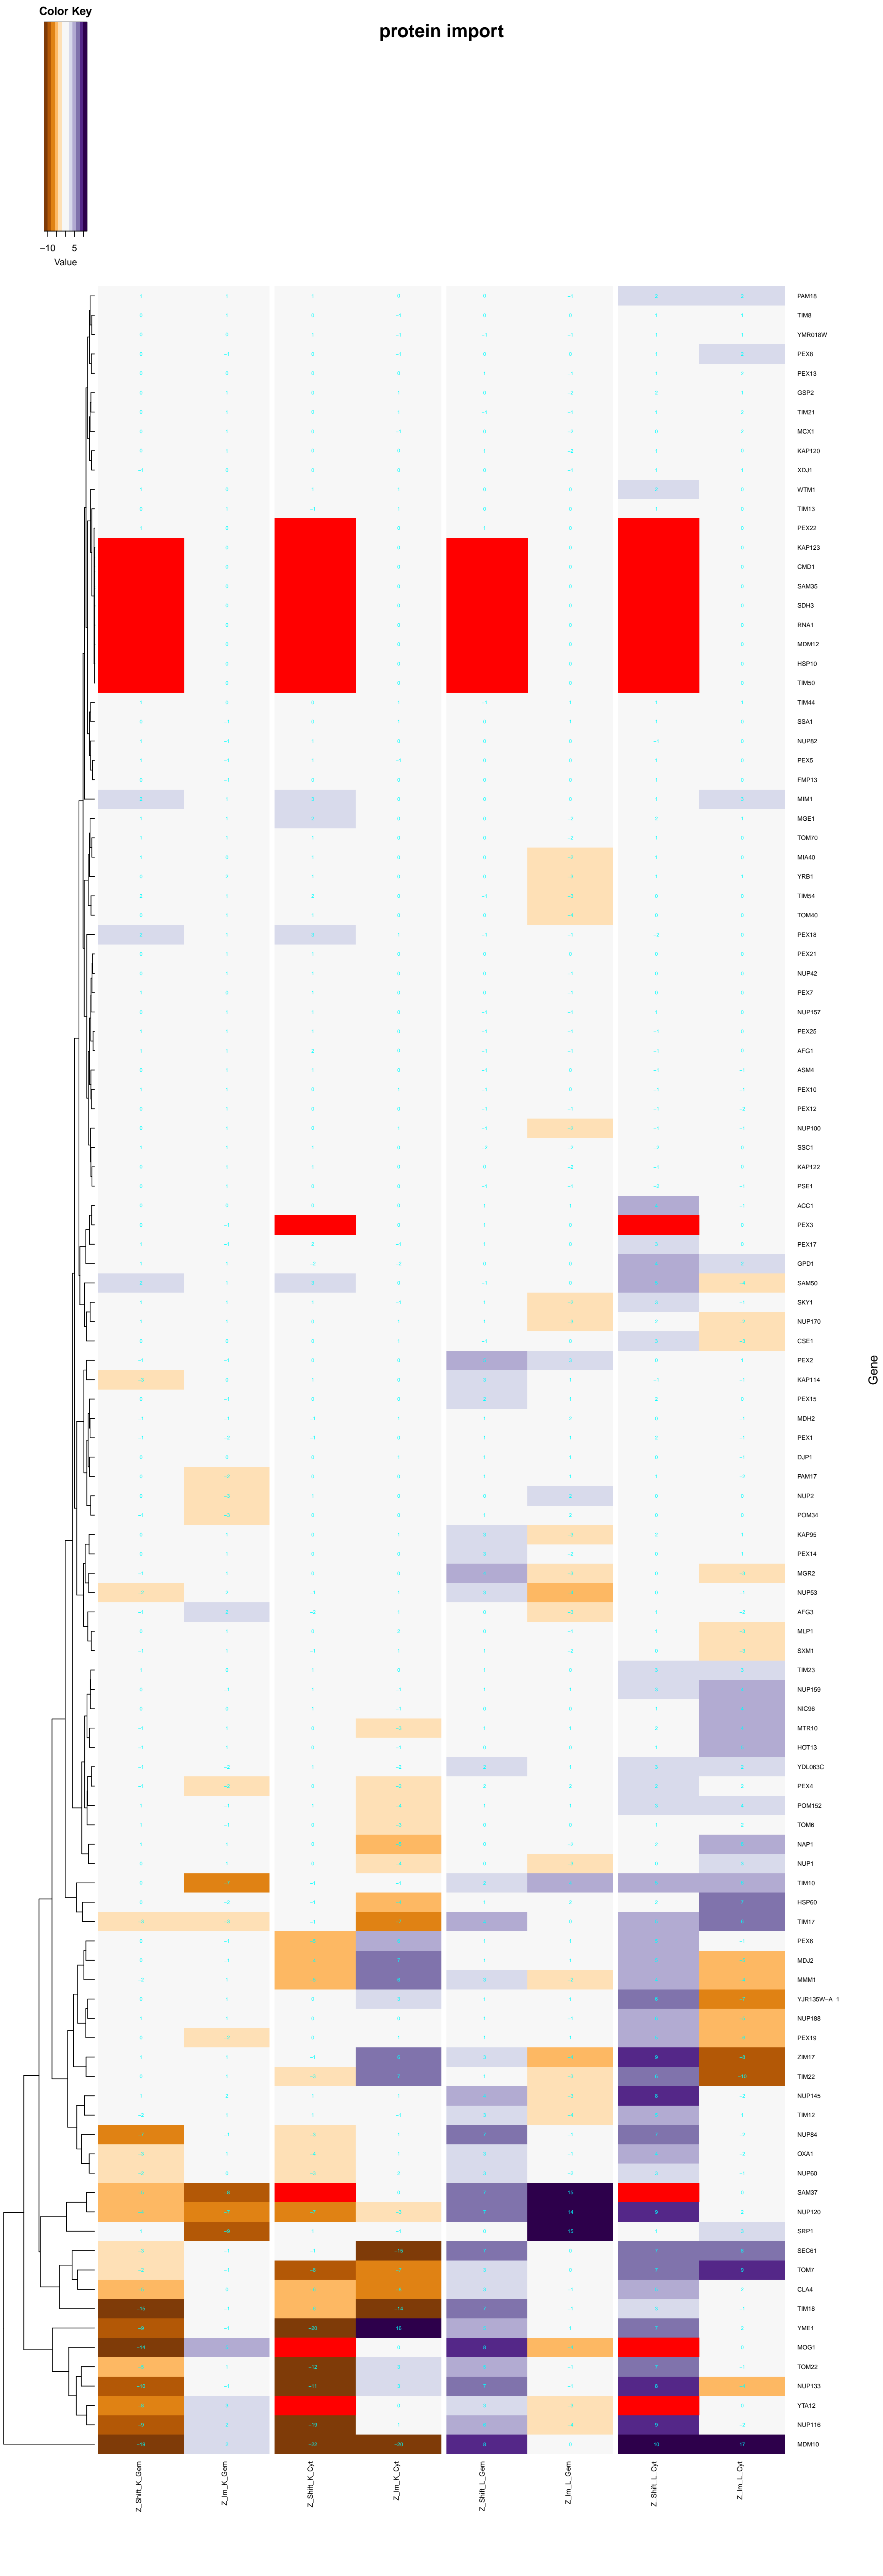

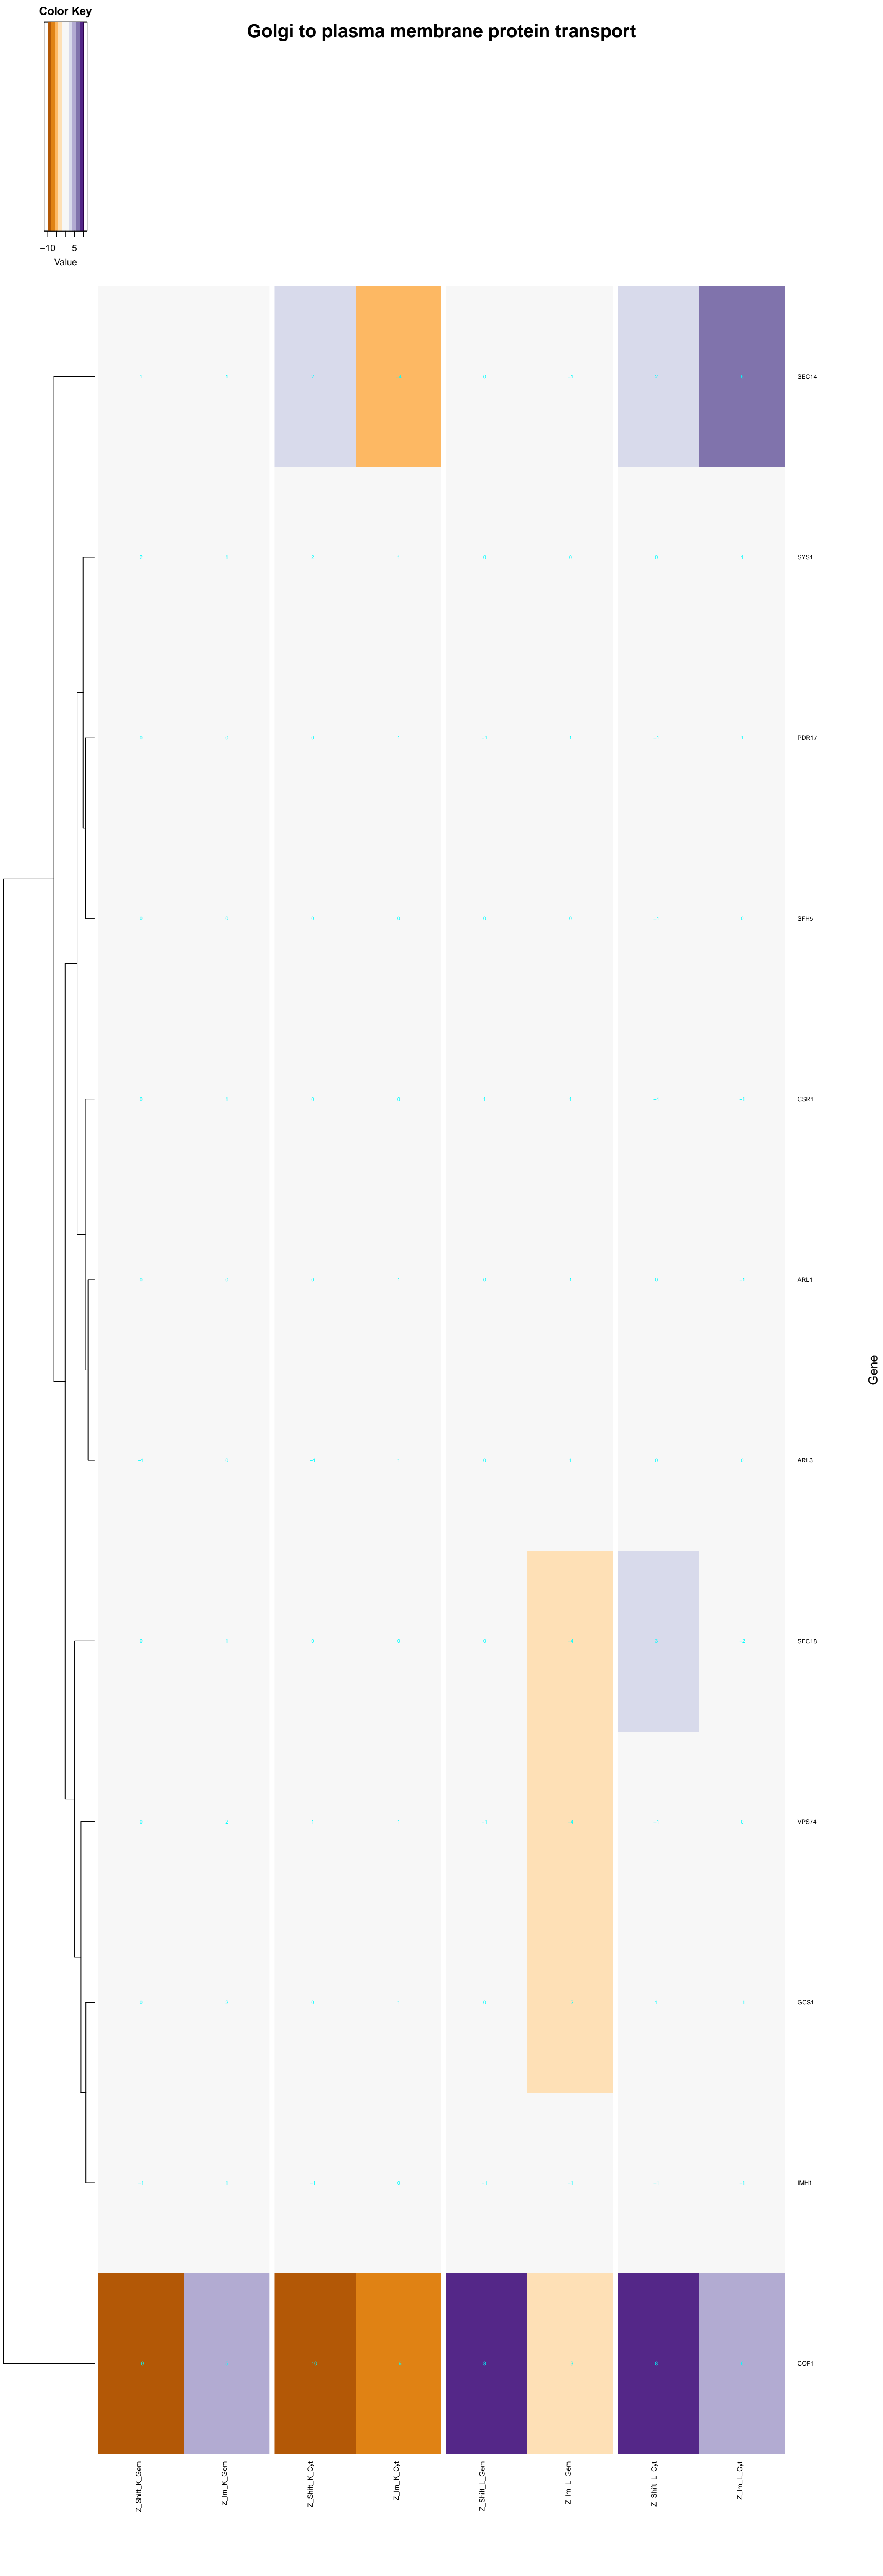

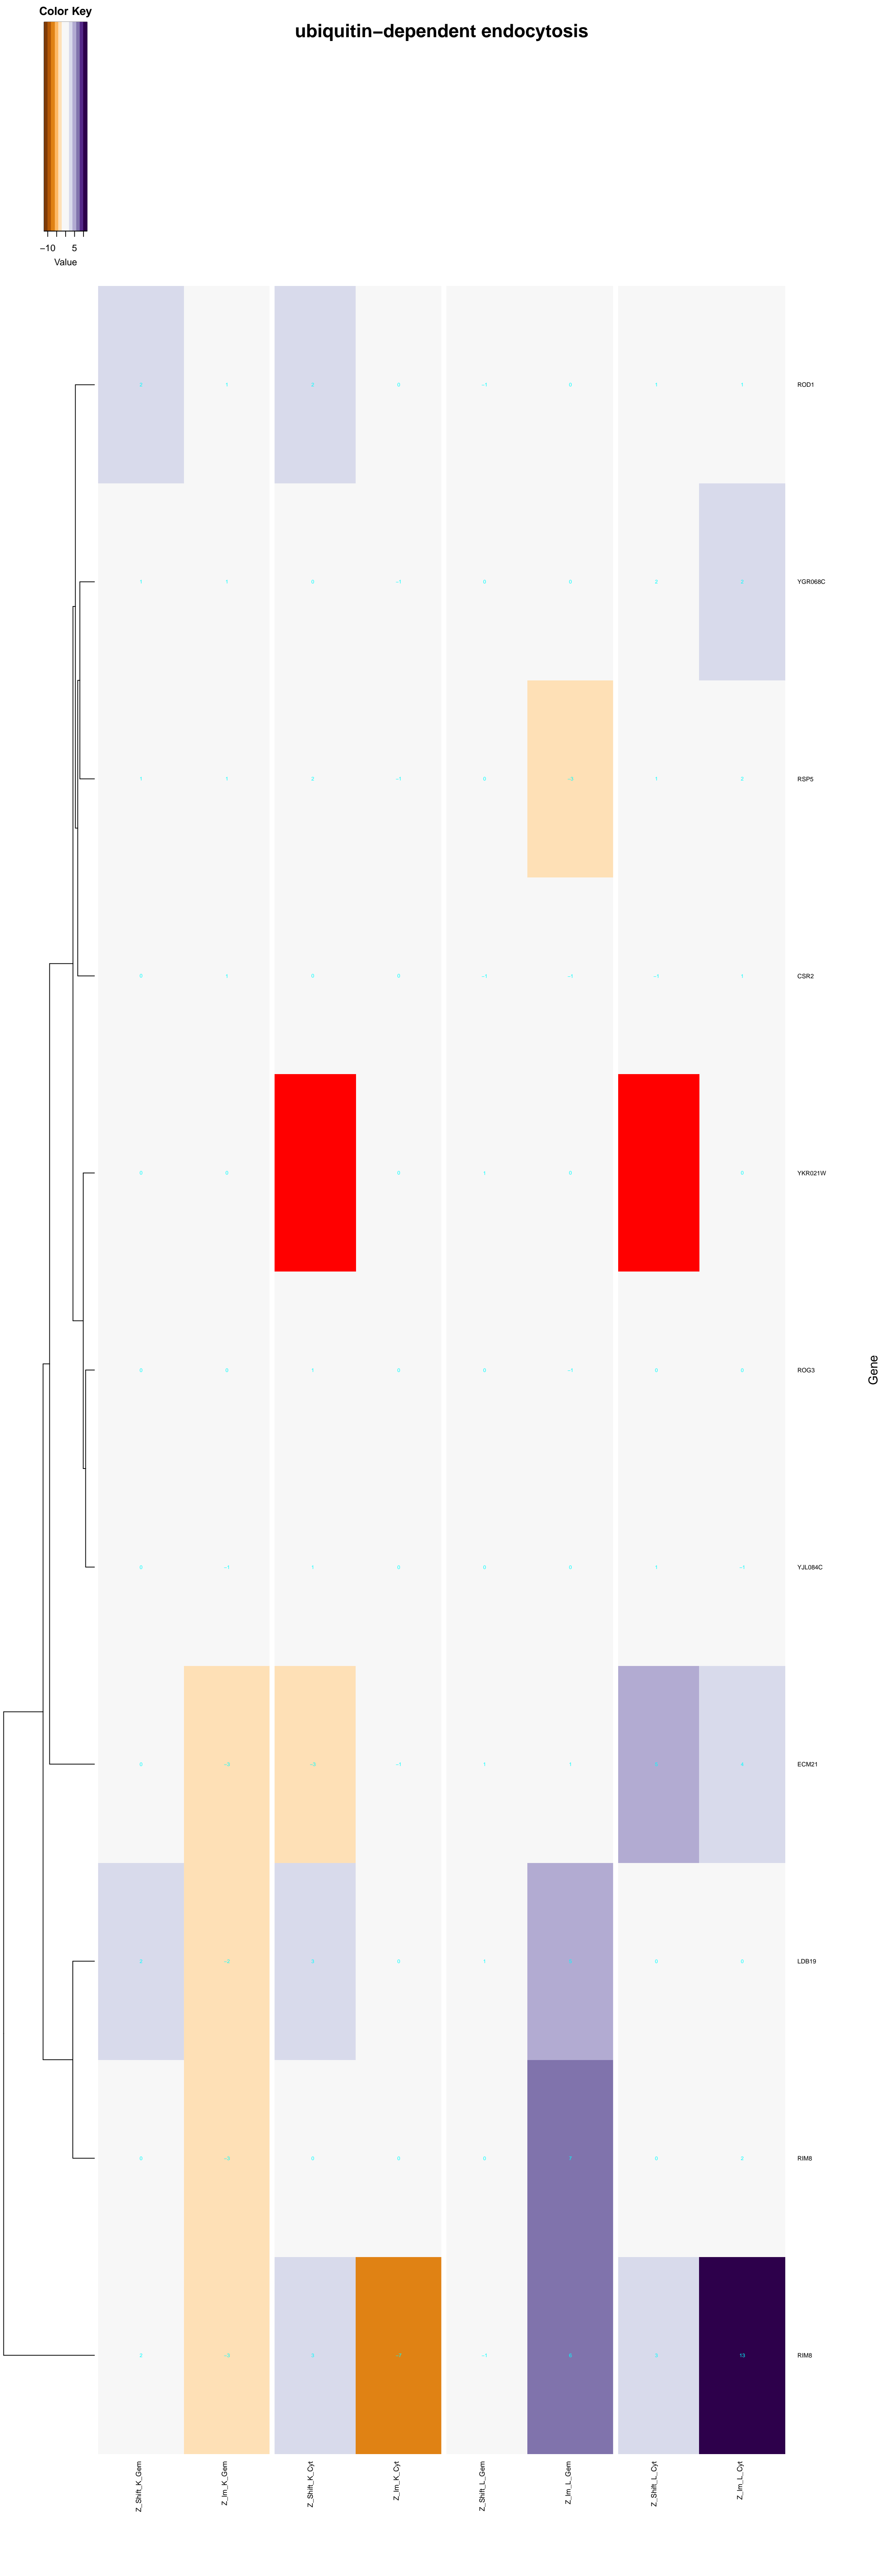

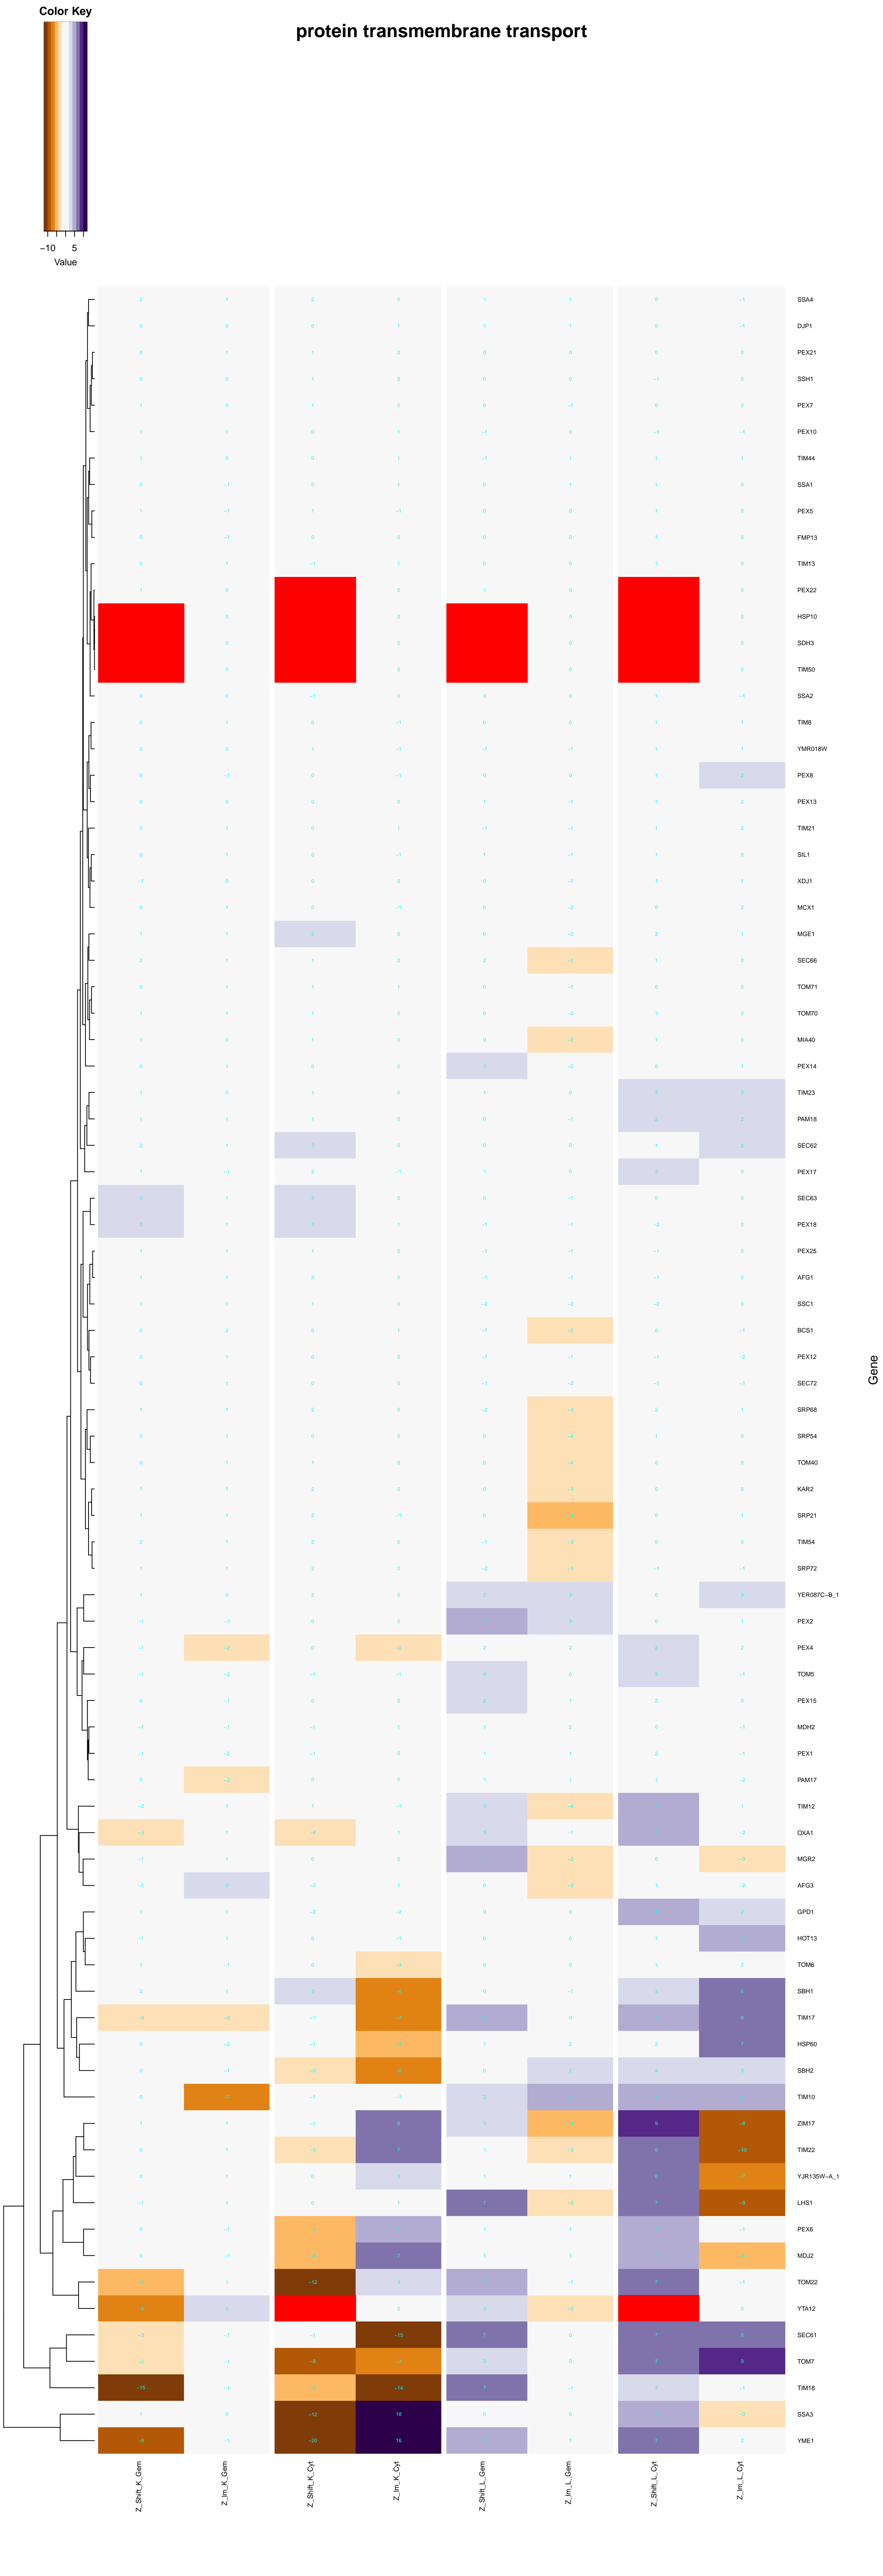

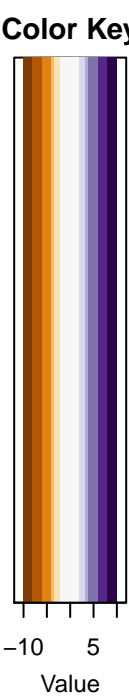

protein import into nucleus, translocation

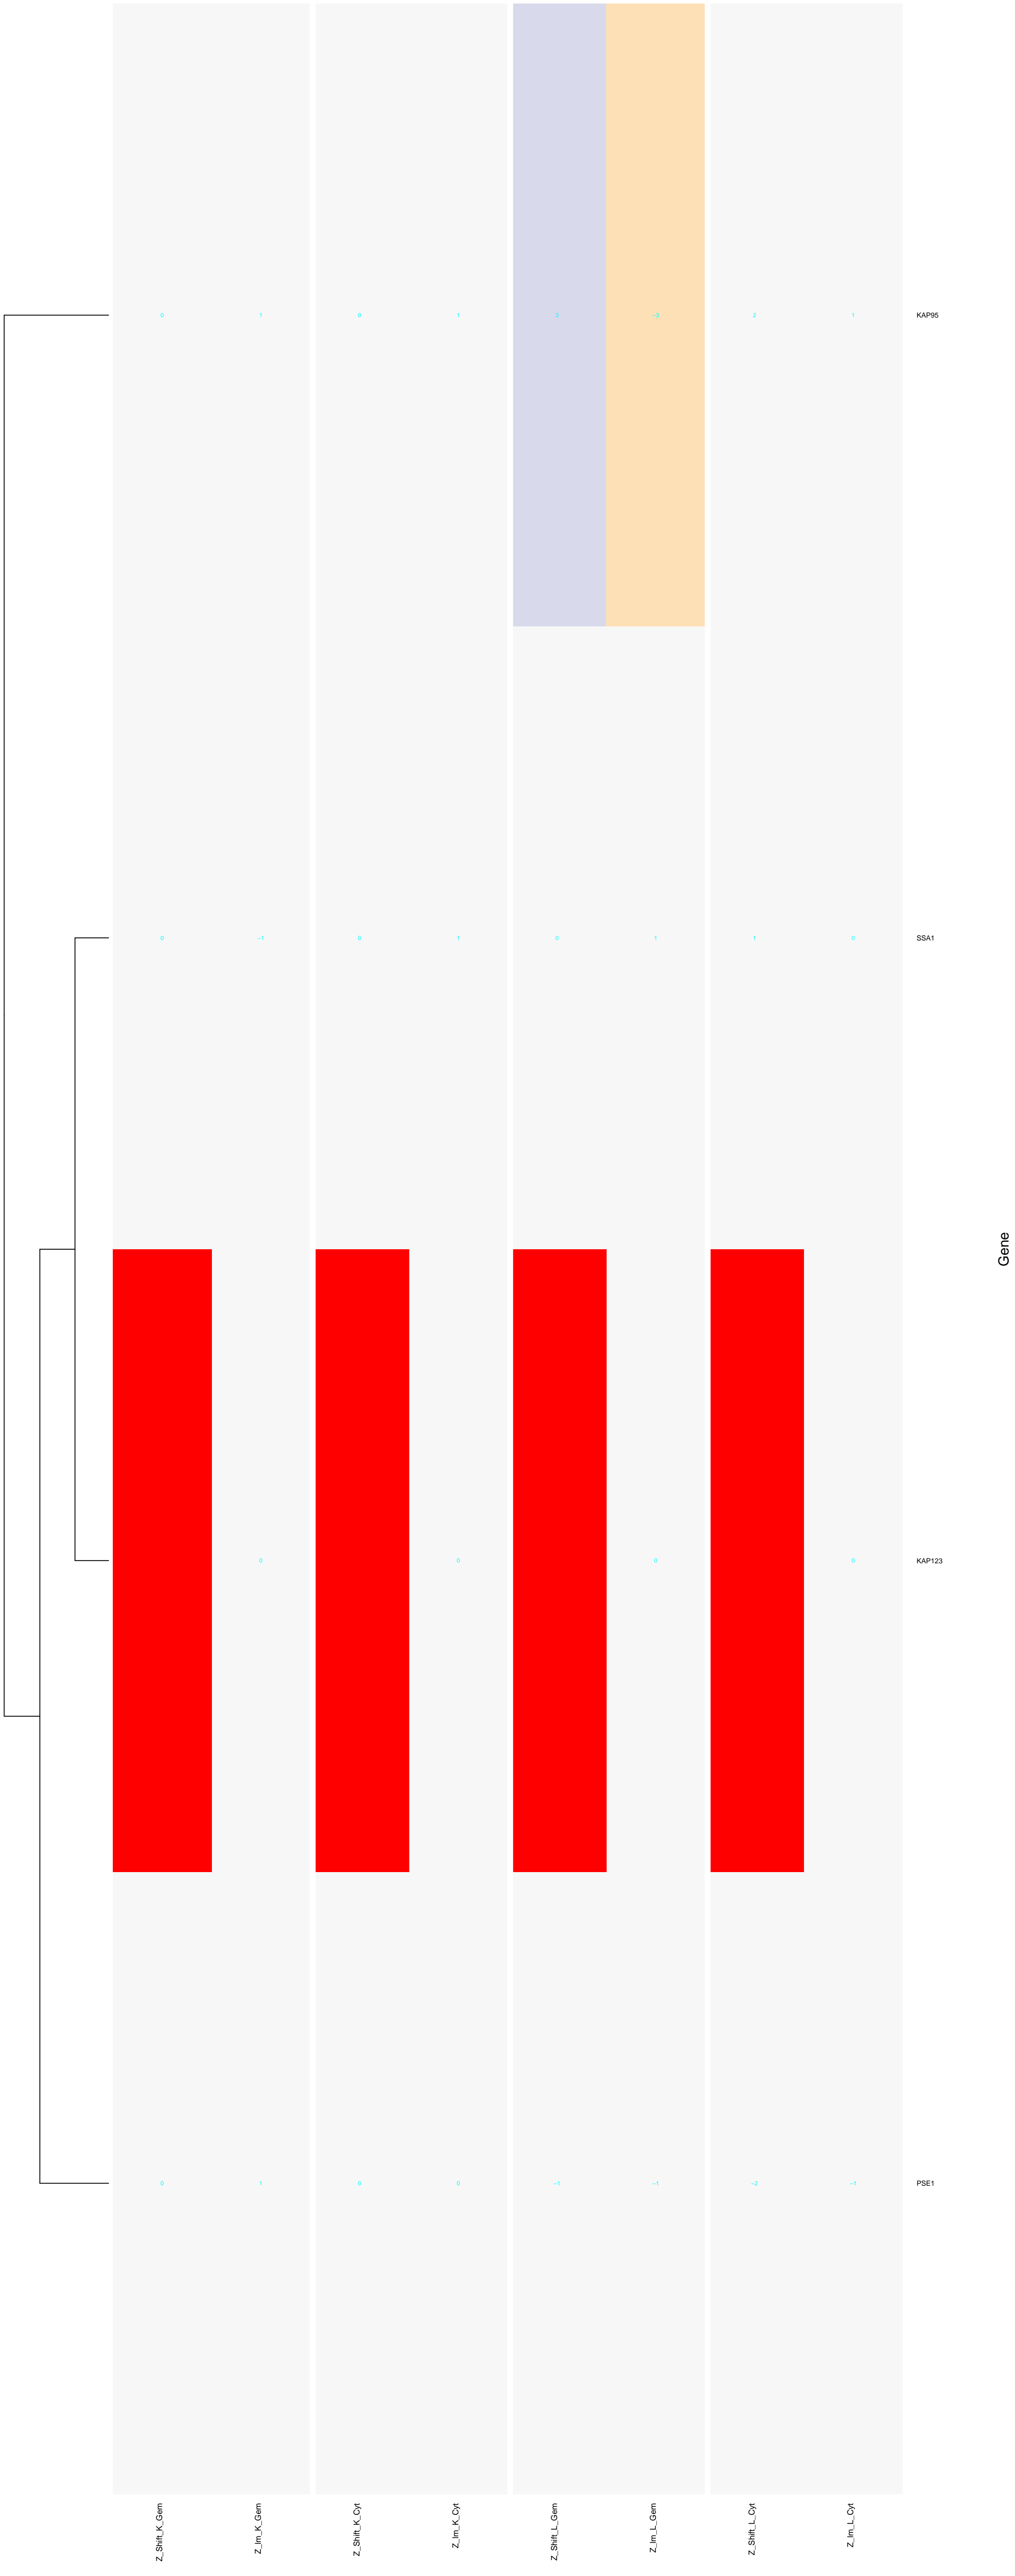



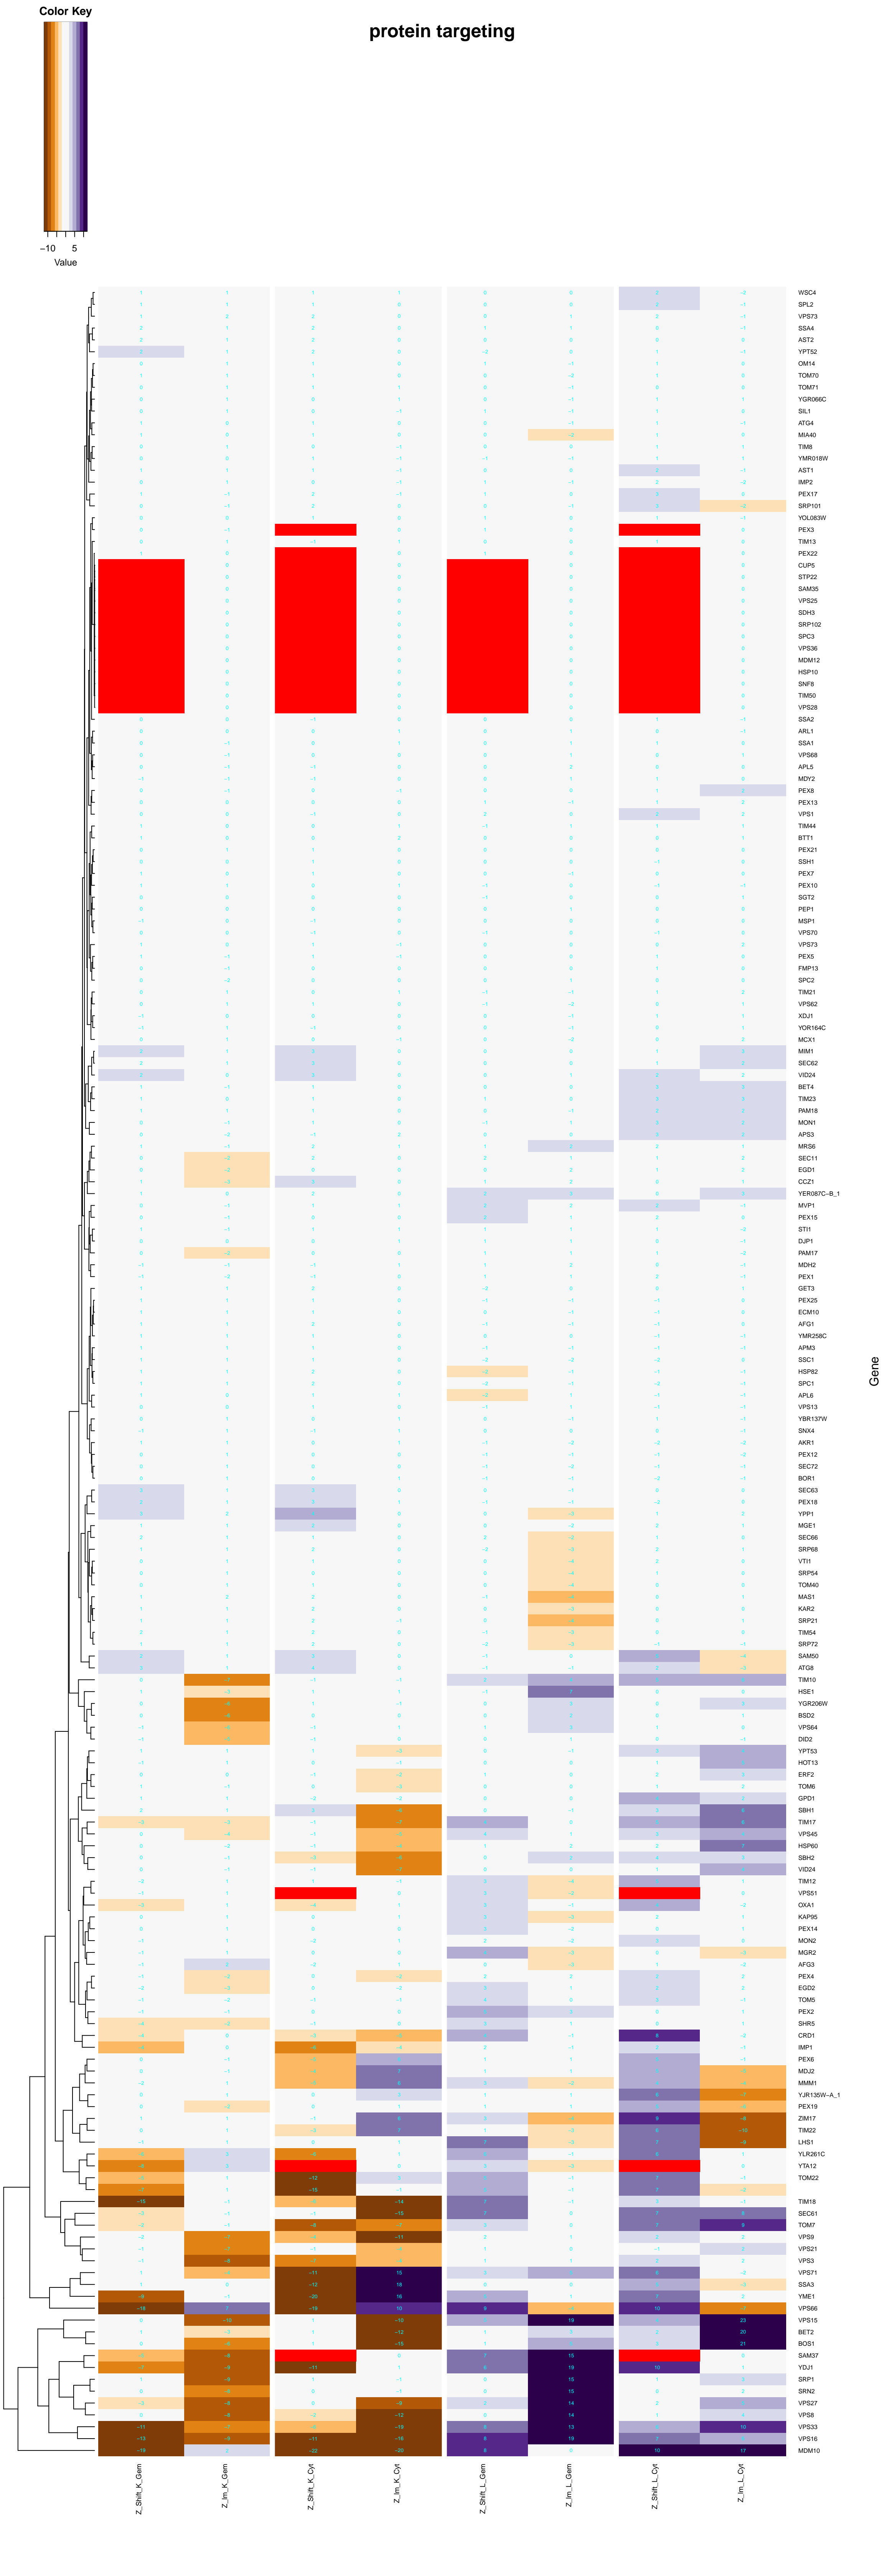

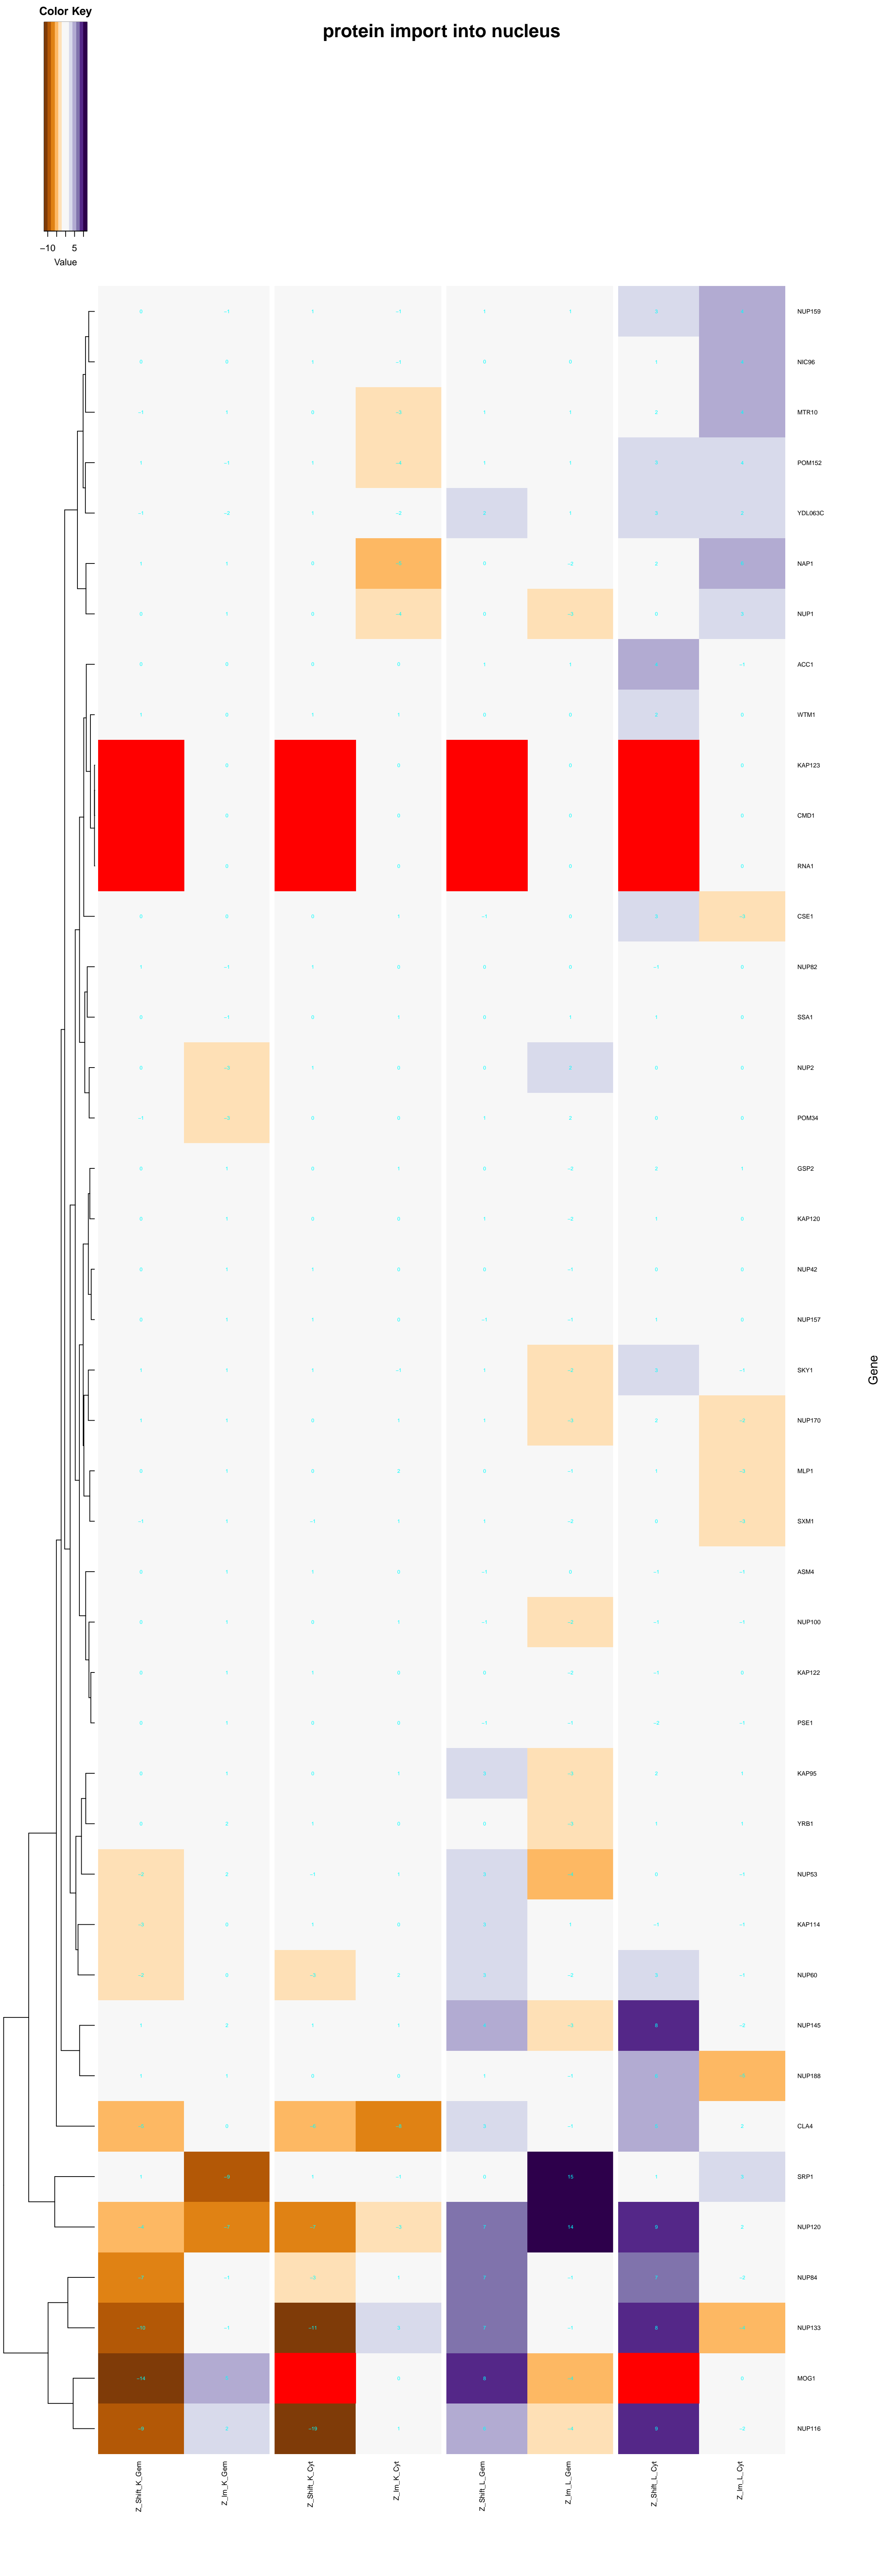

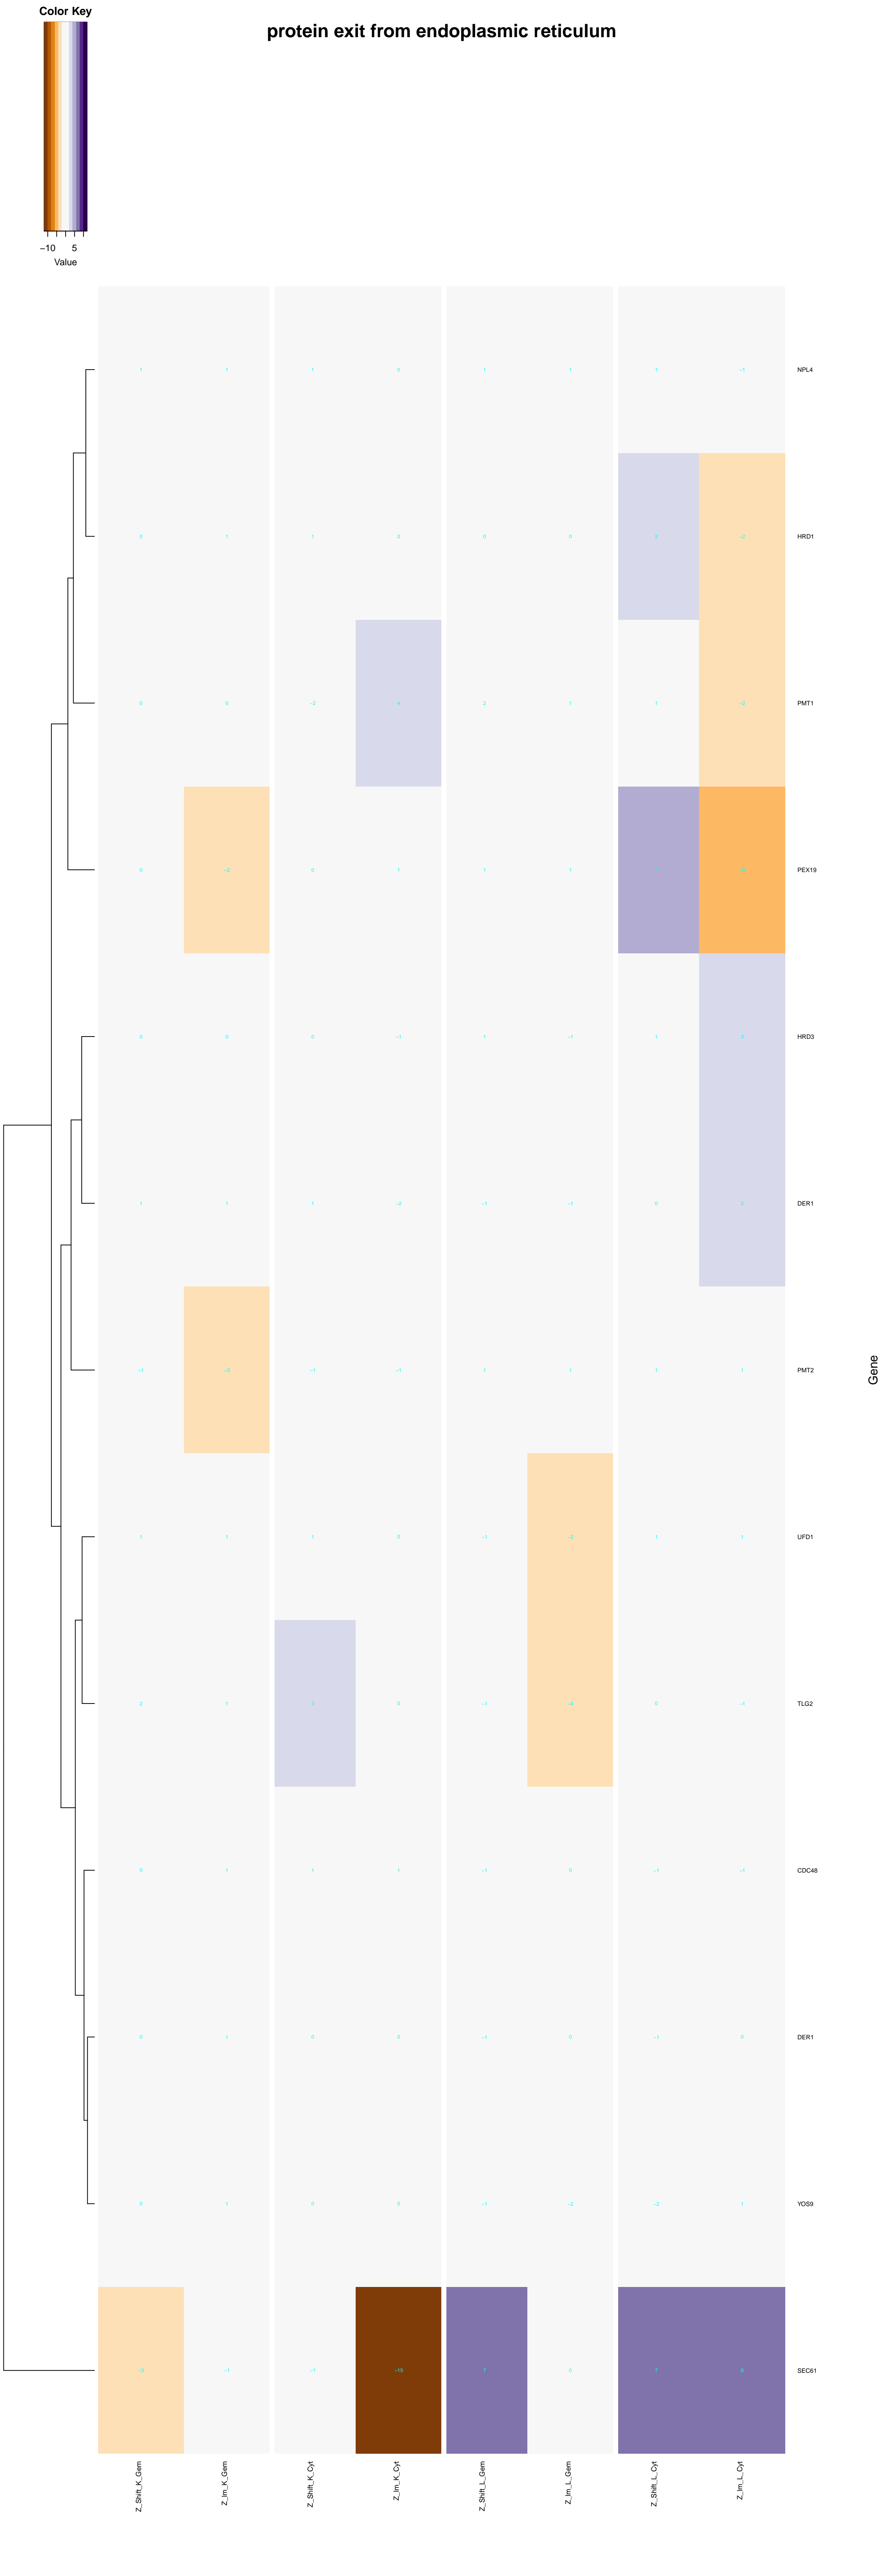

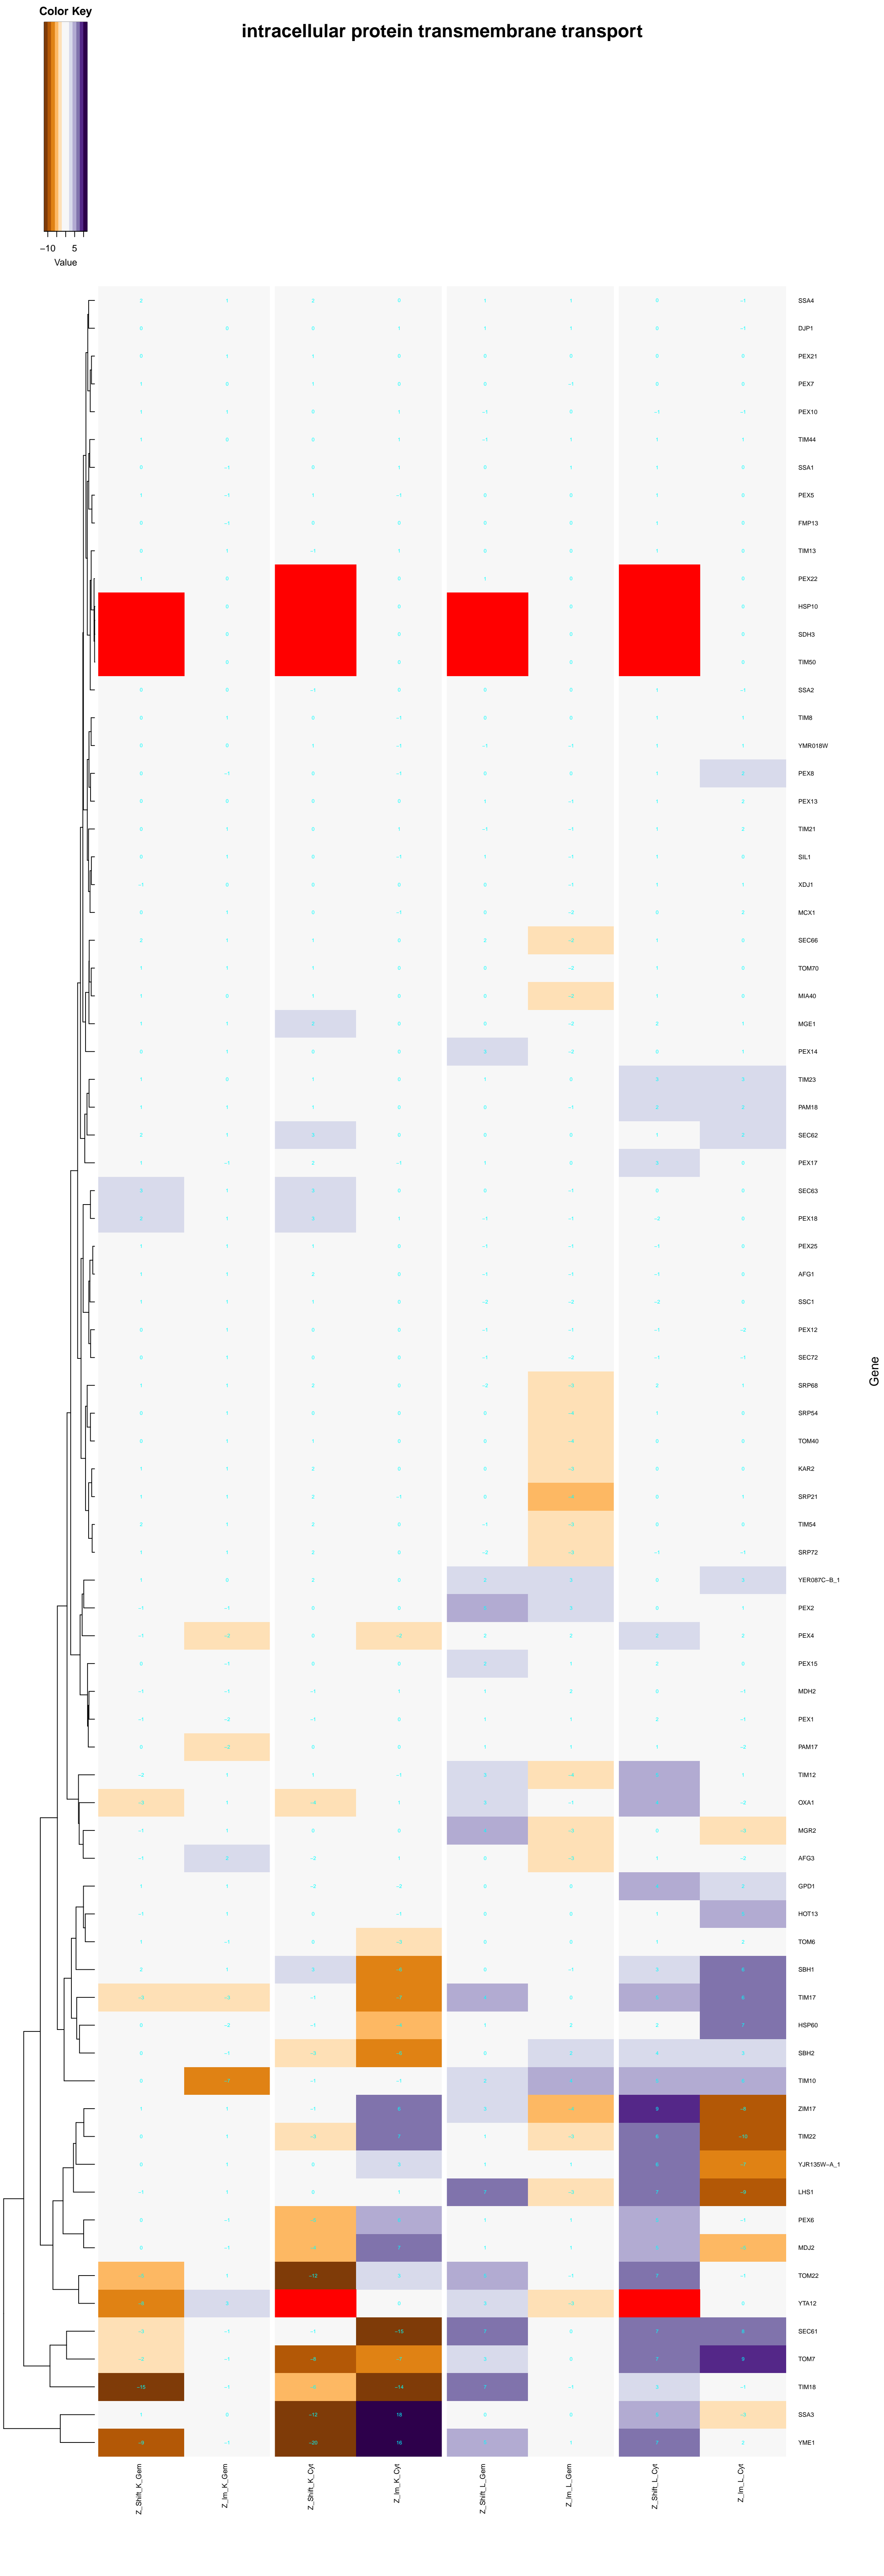

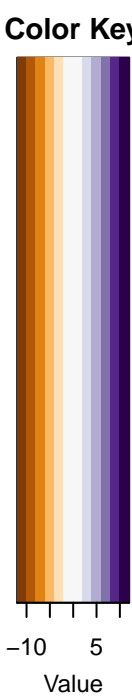

misfolded protein transport

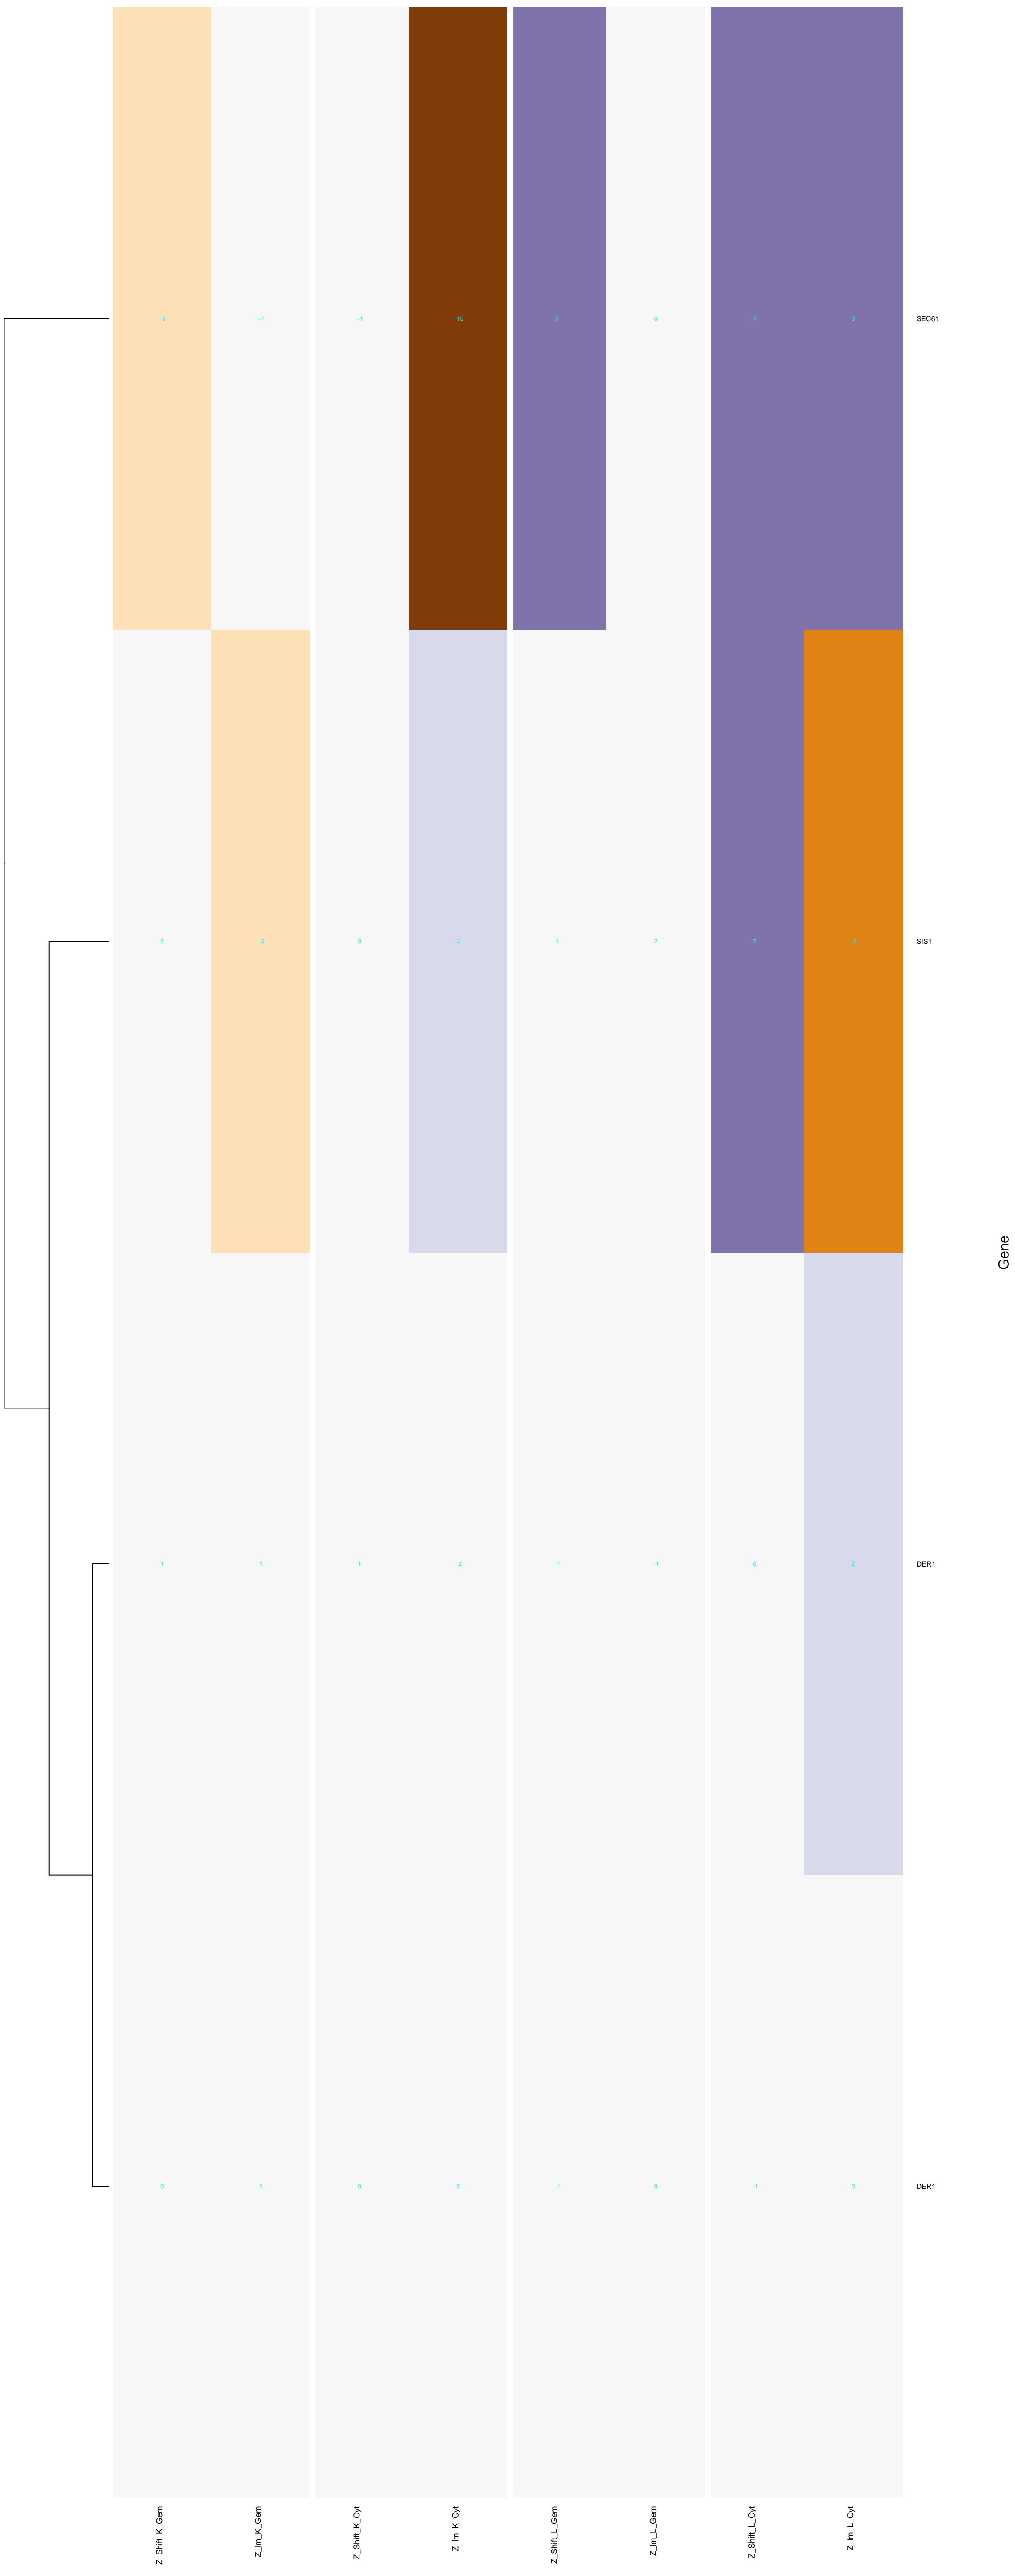

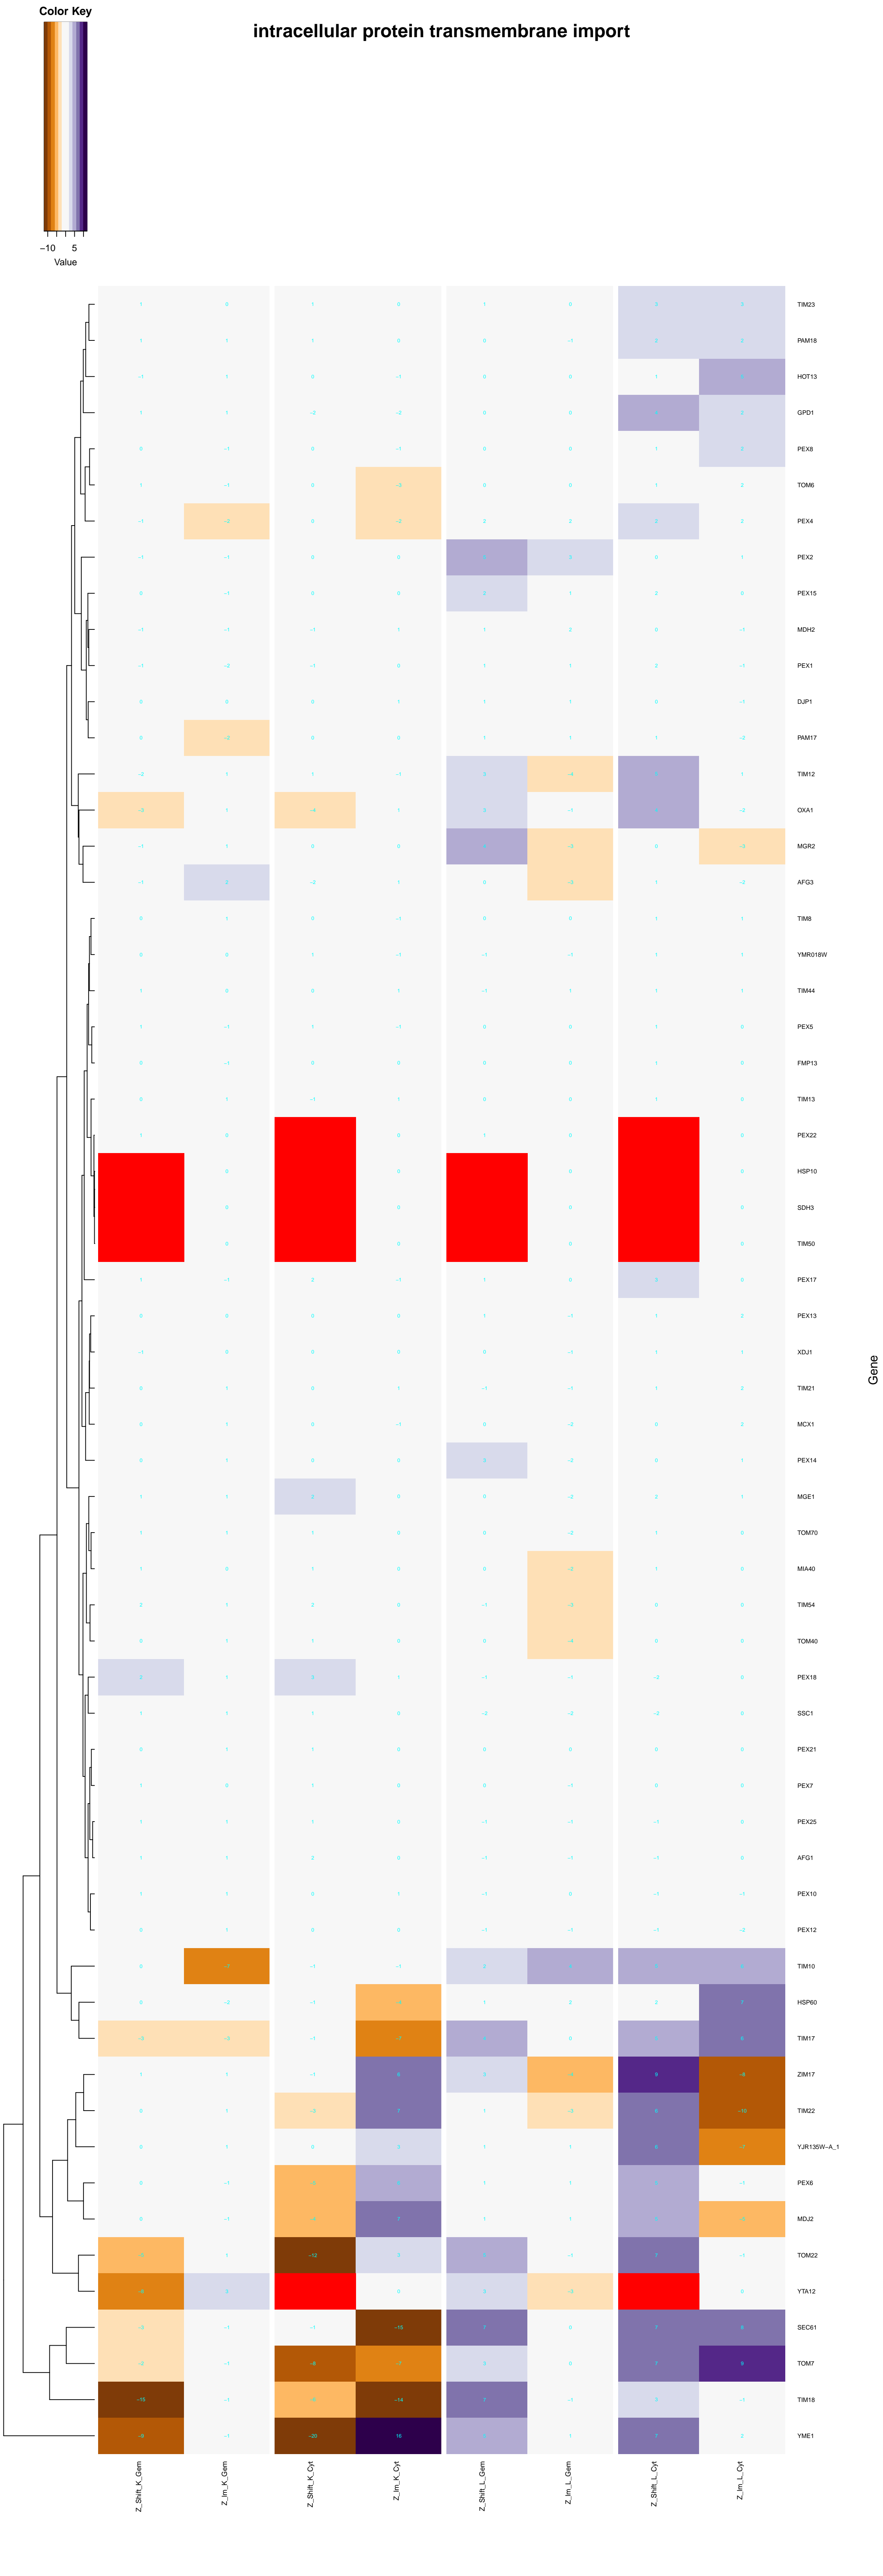

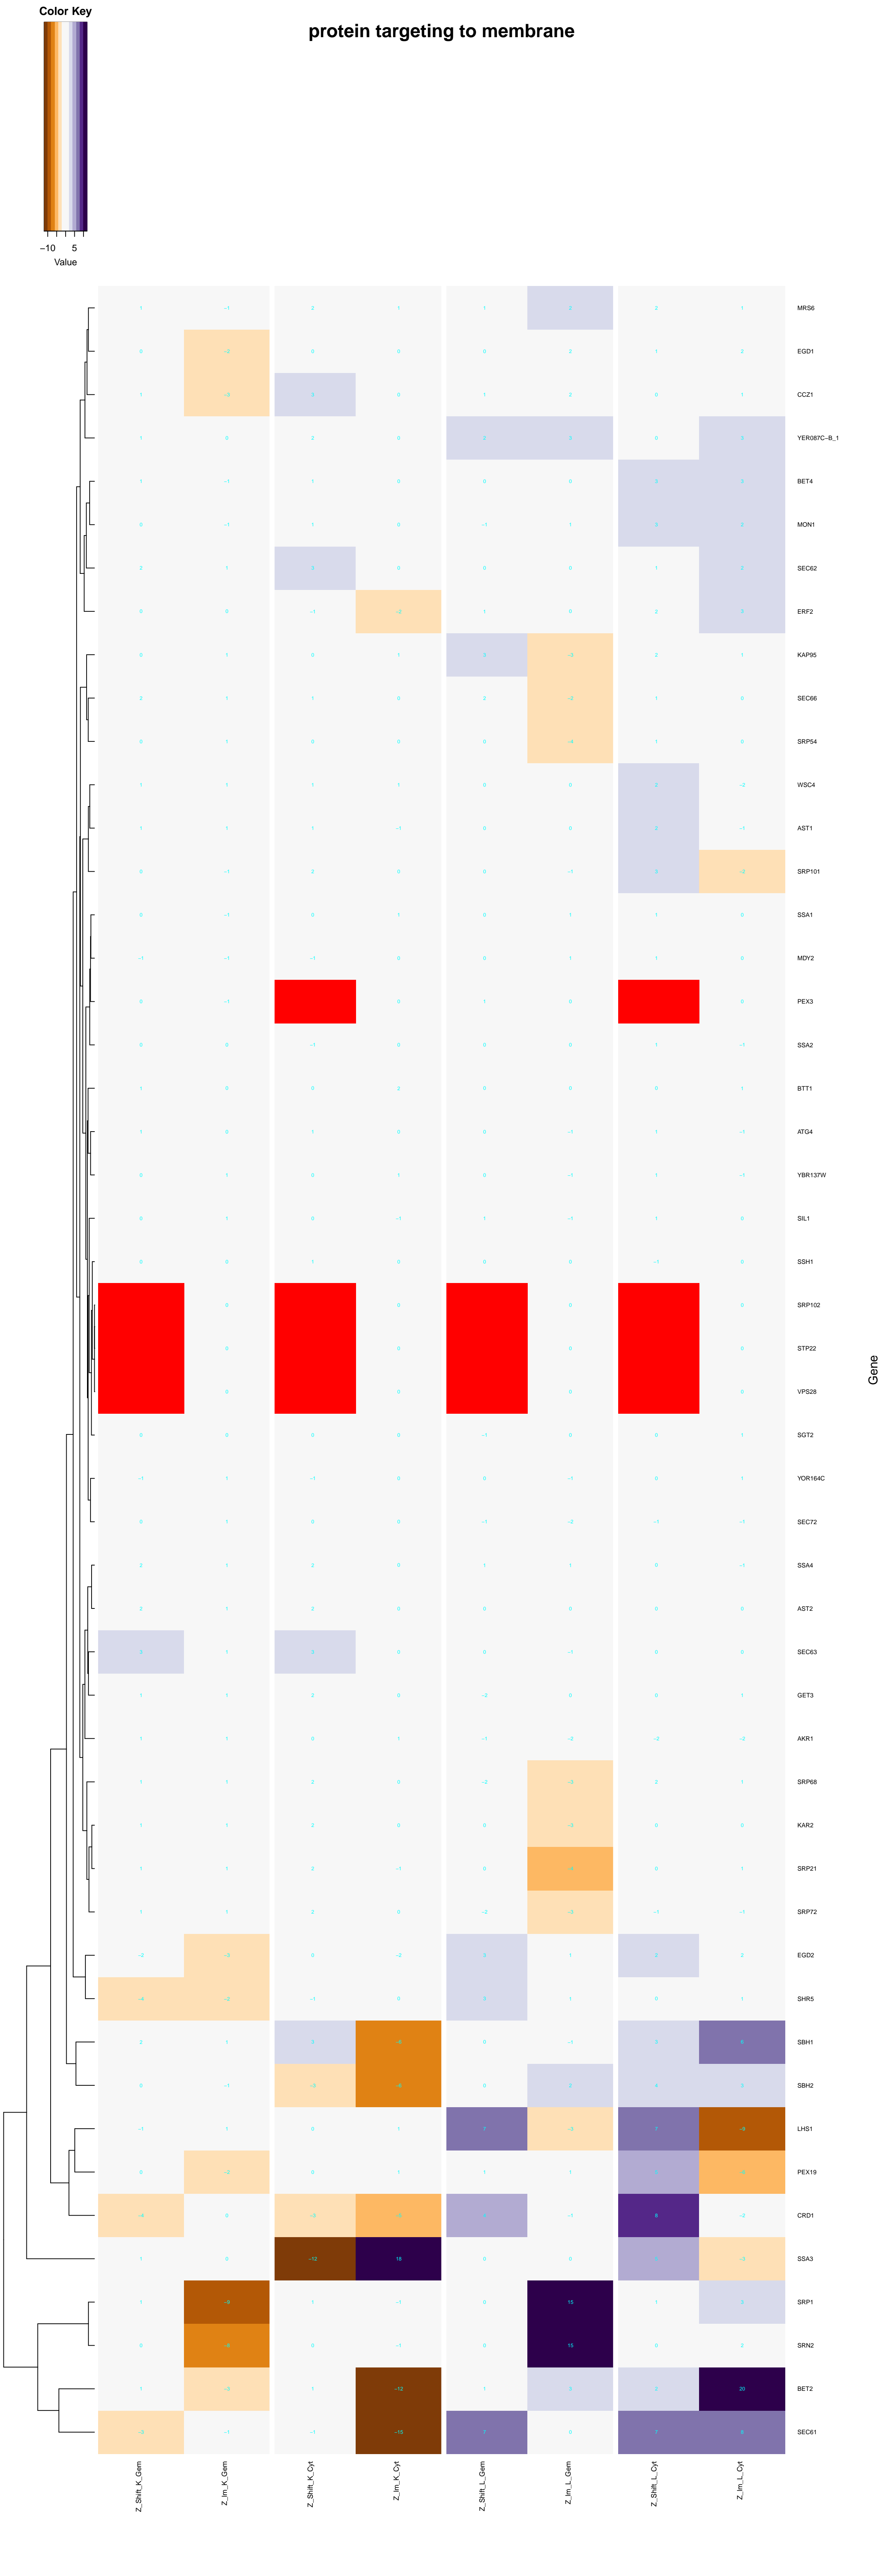

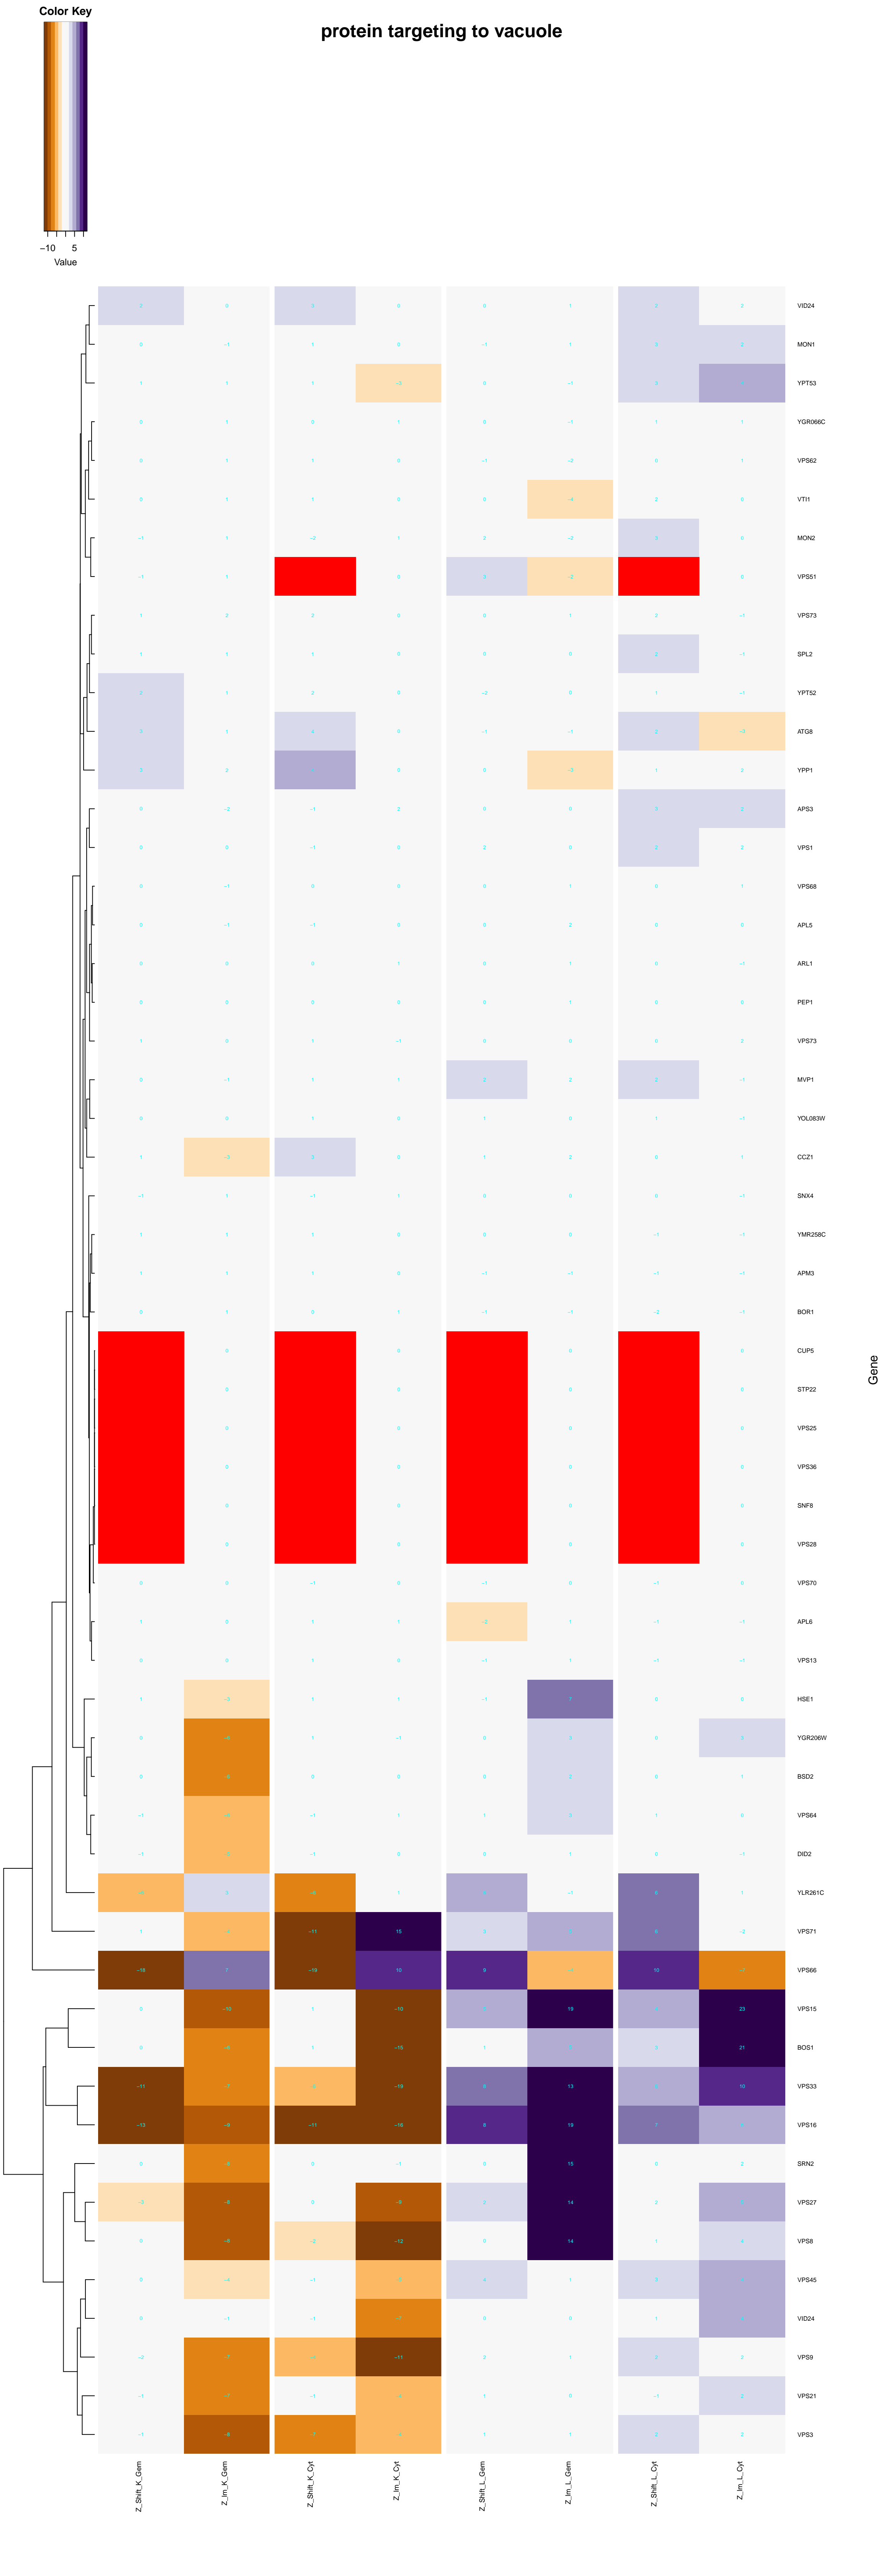



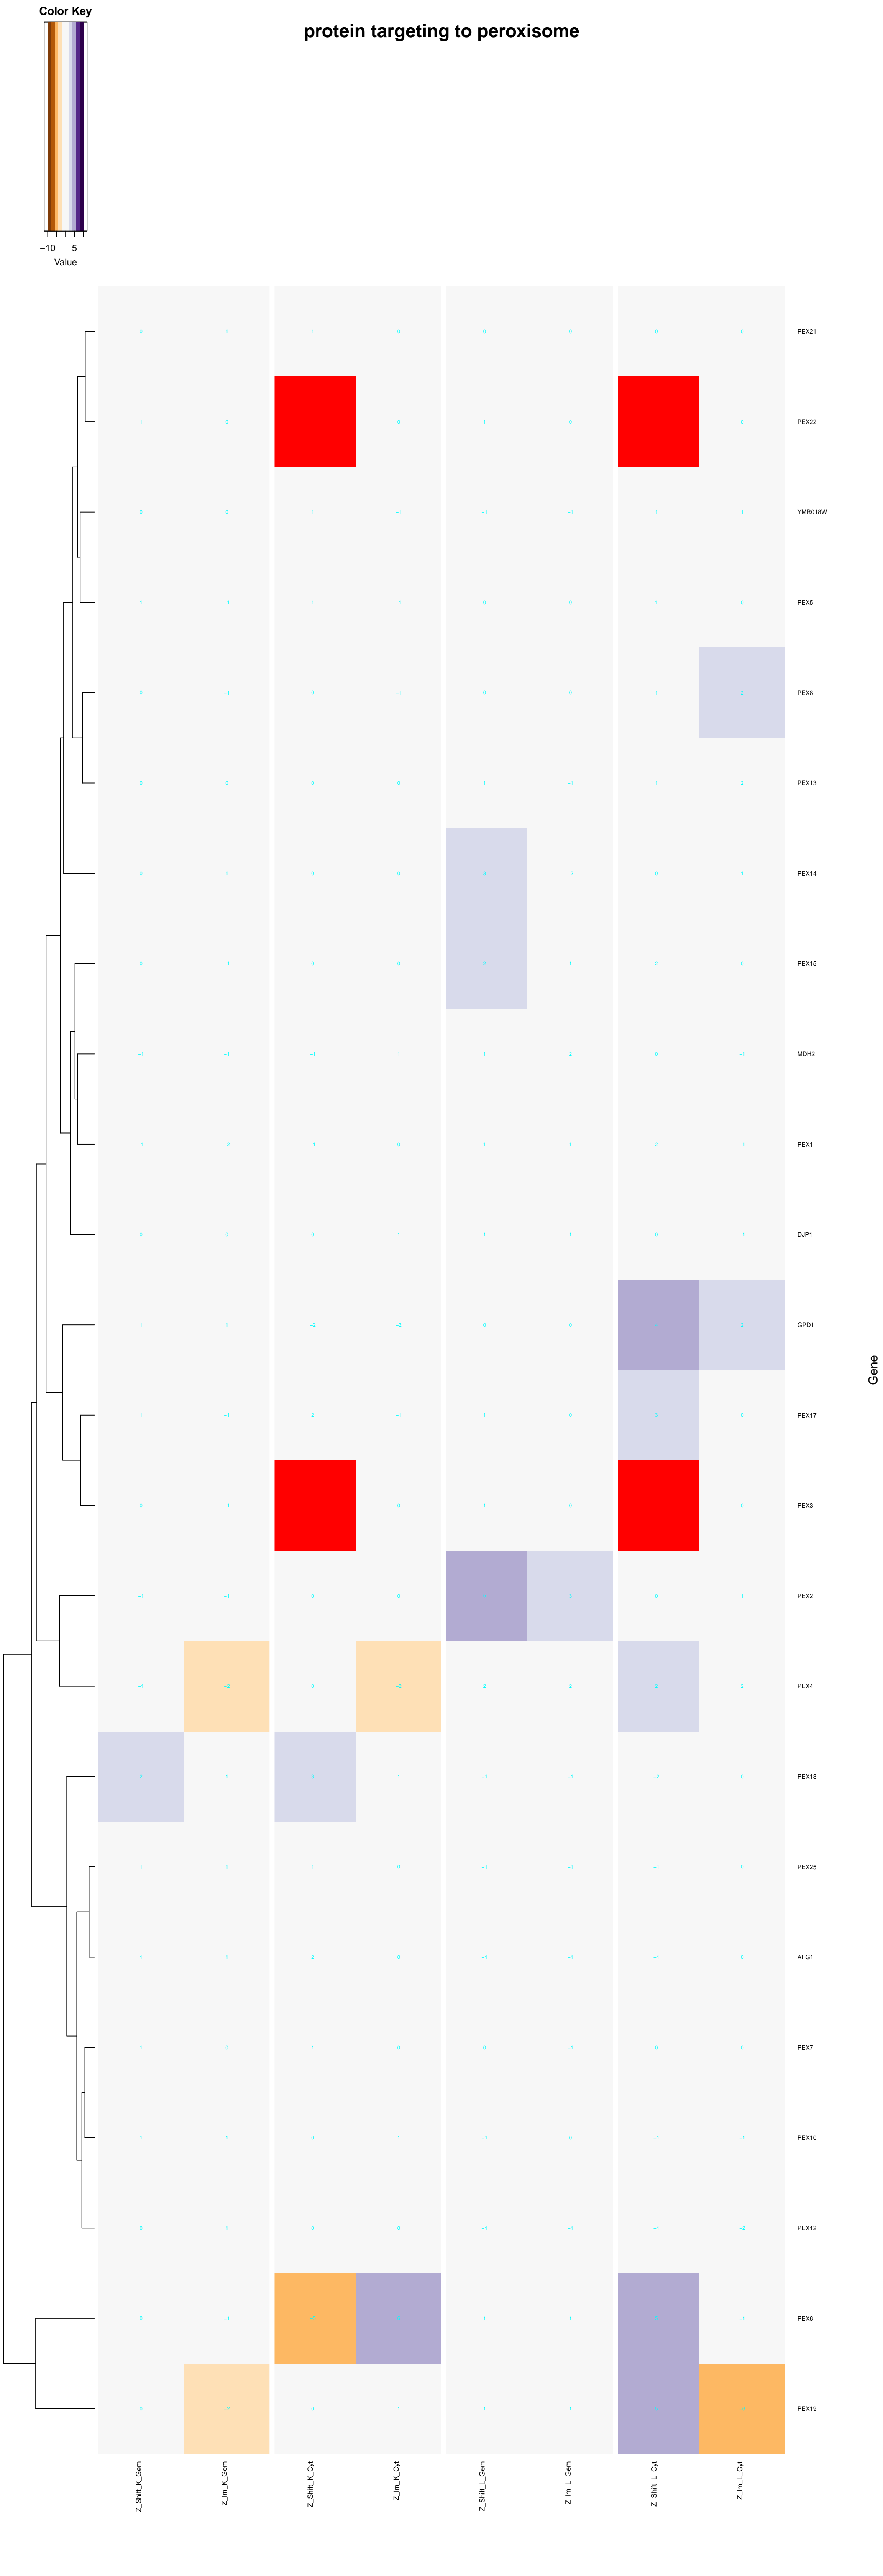

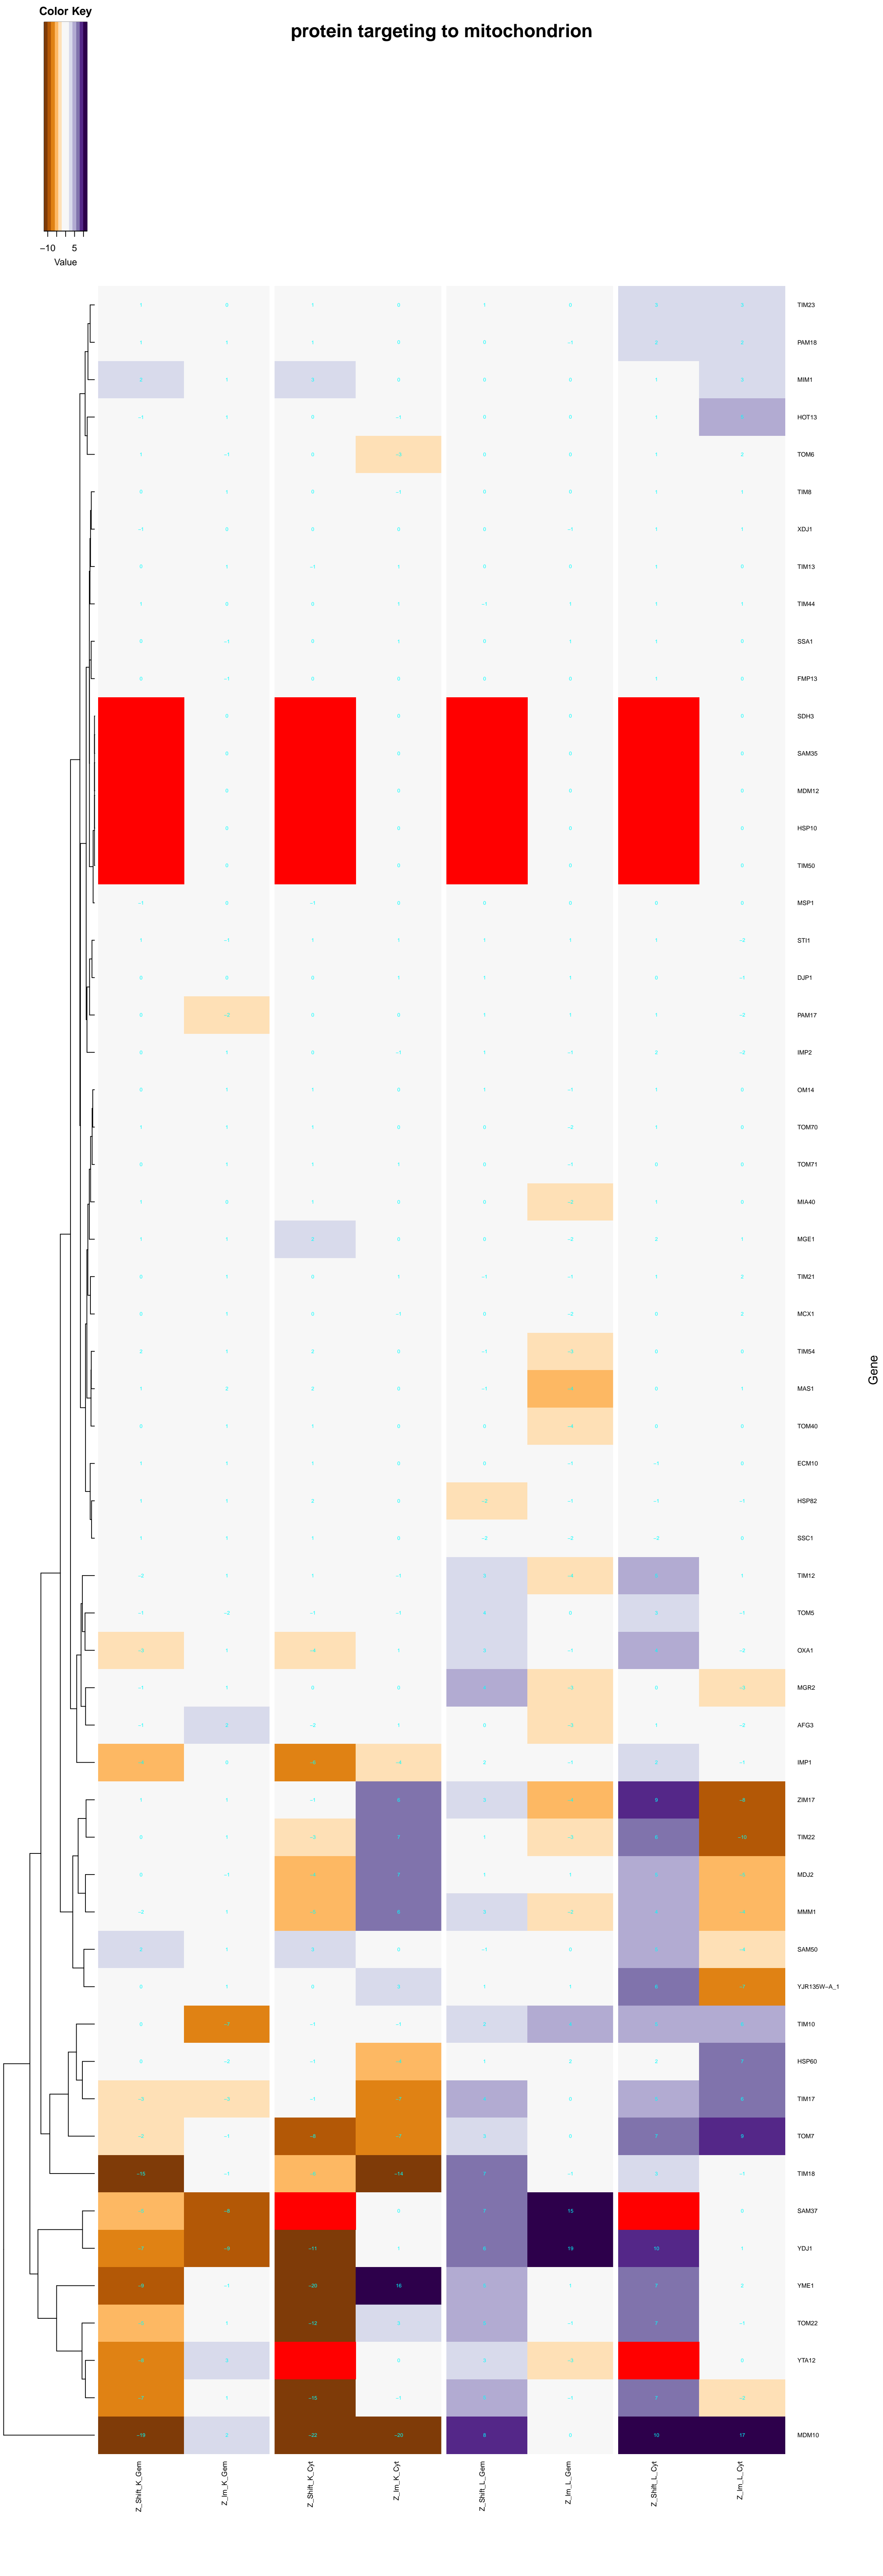

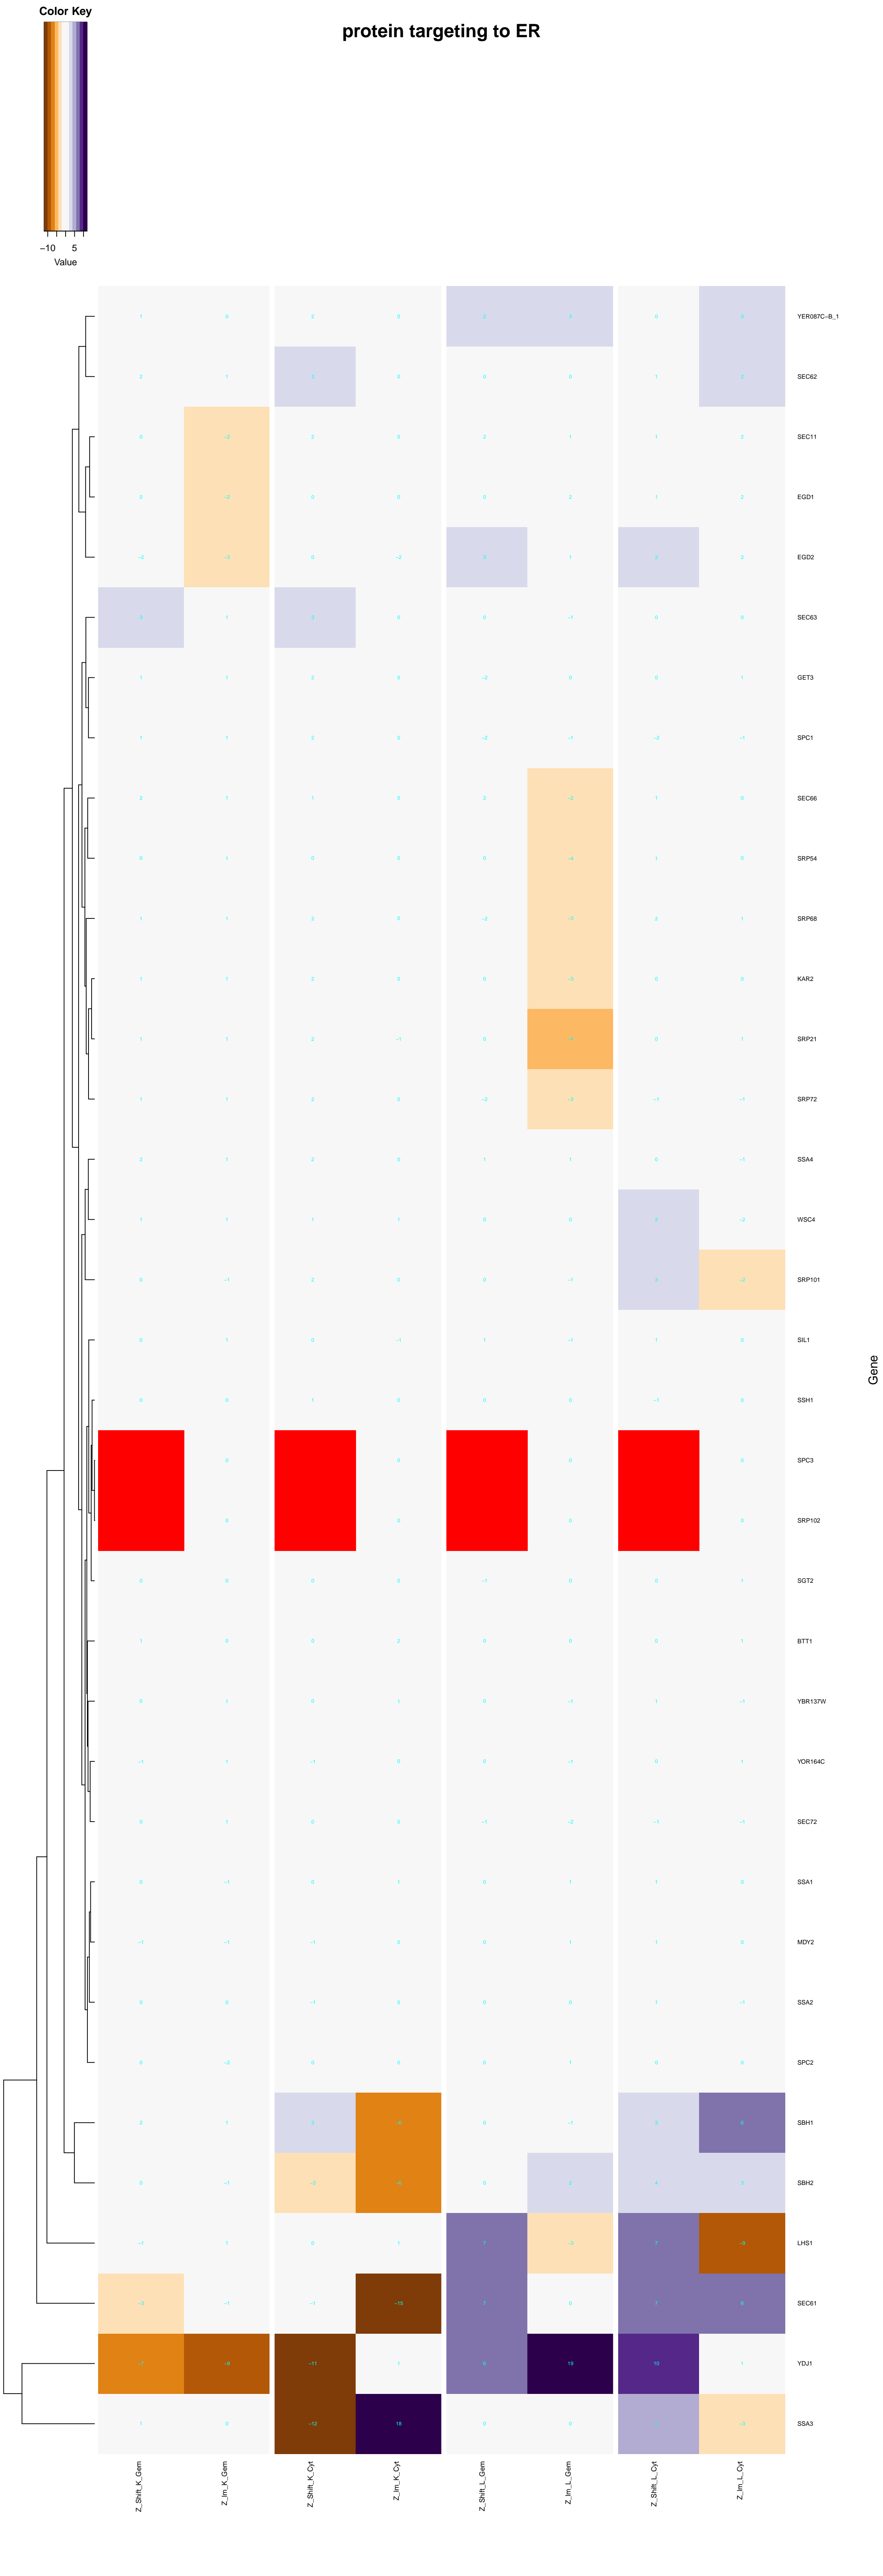

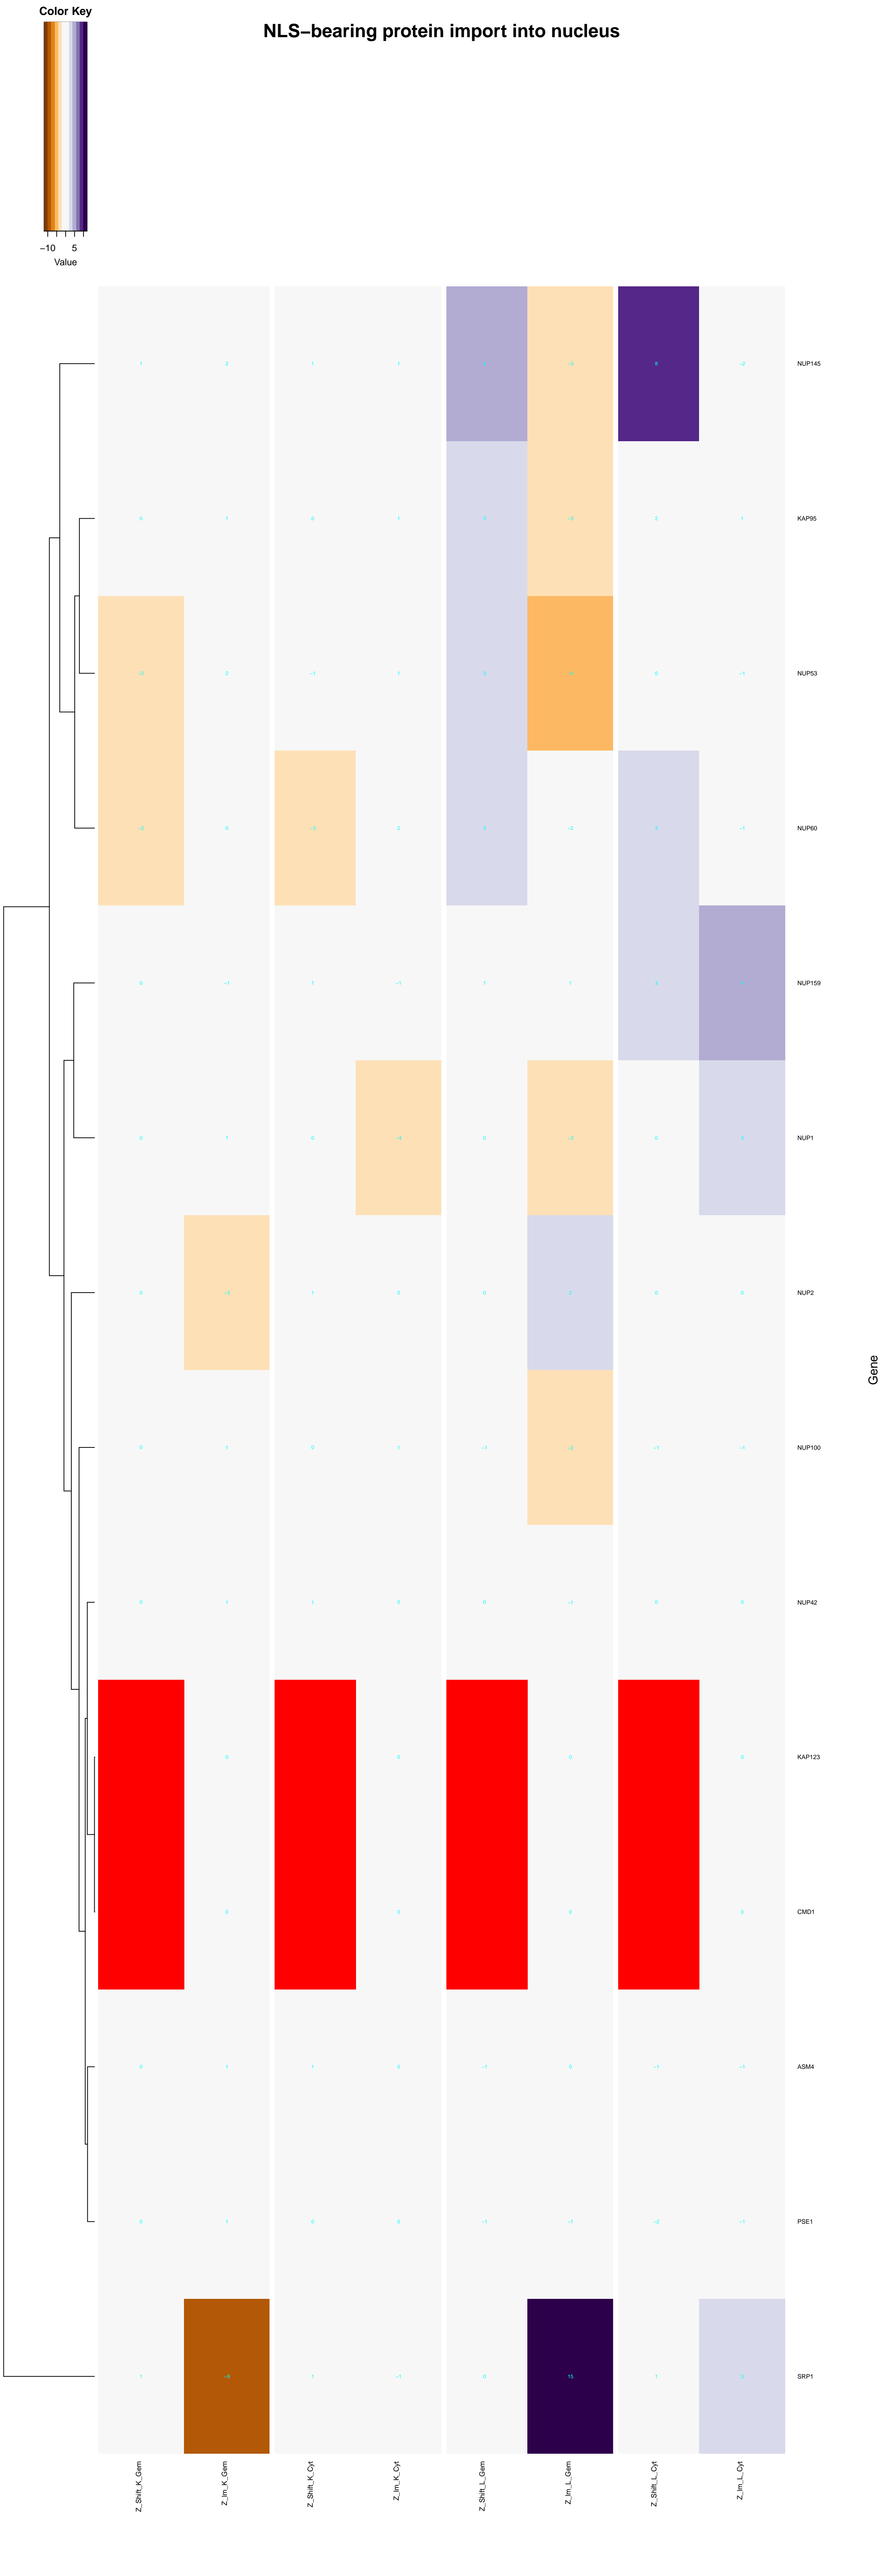



ribosomal protein import into nucleus

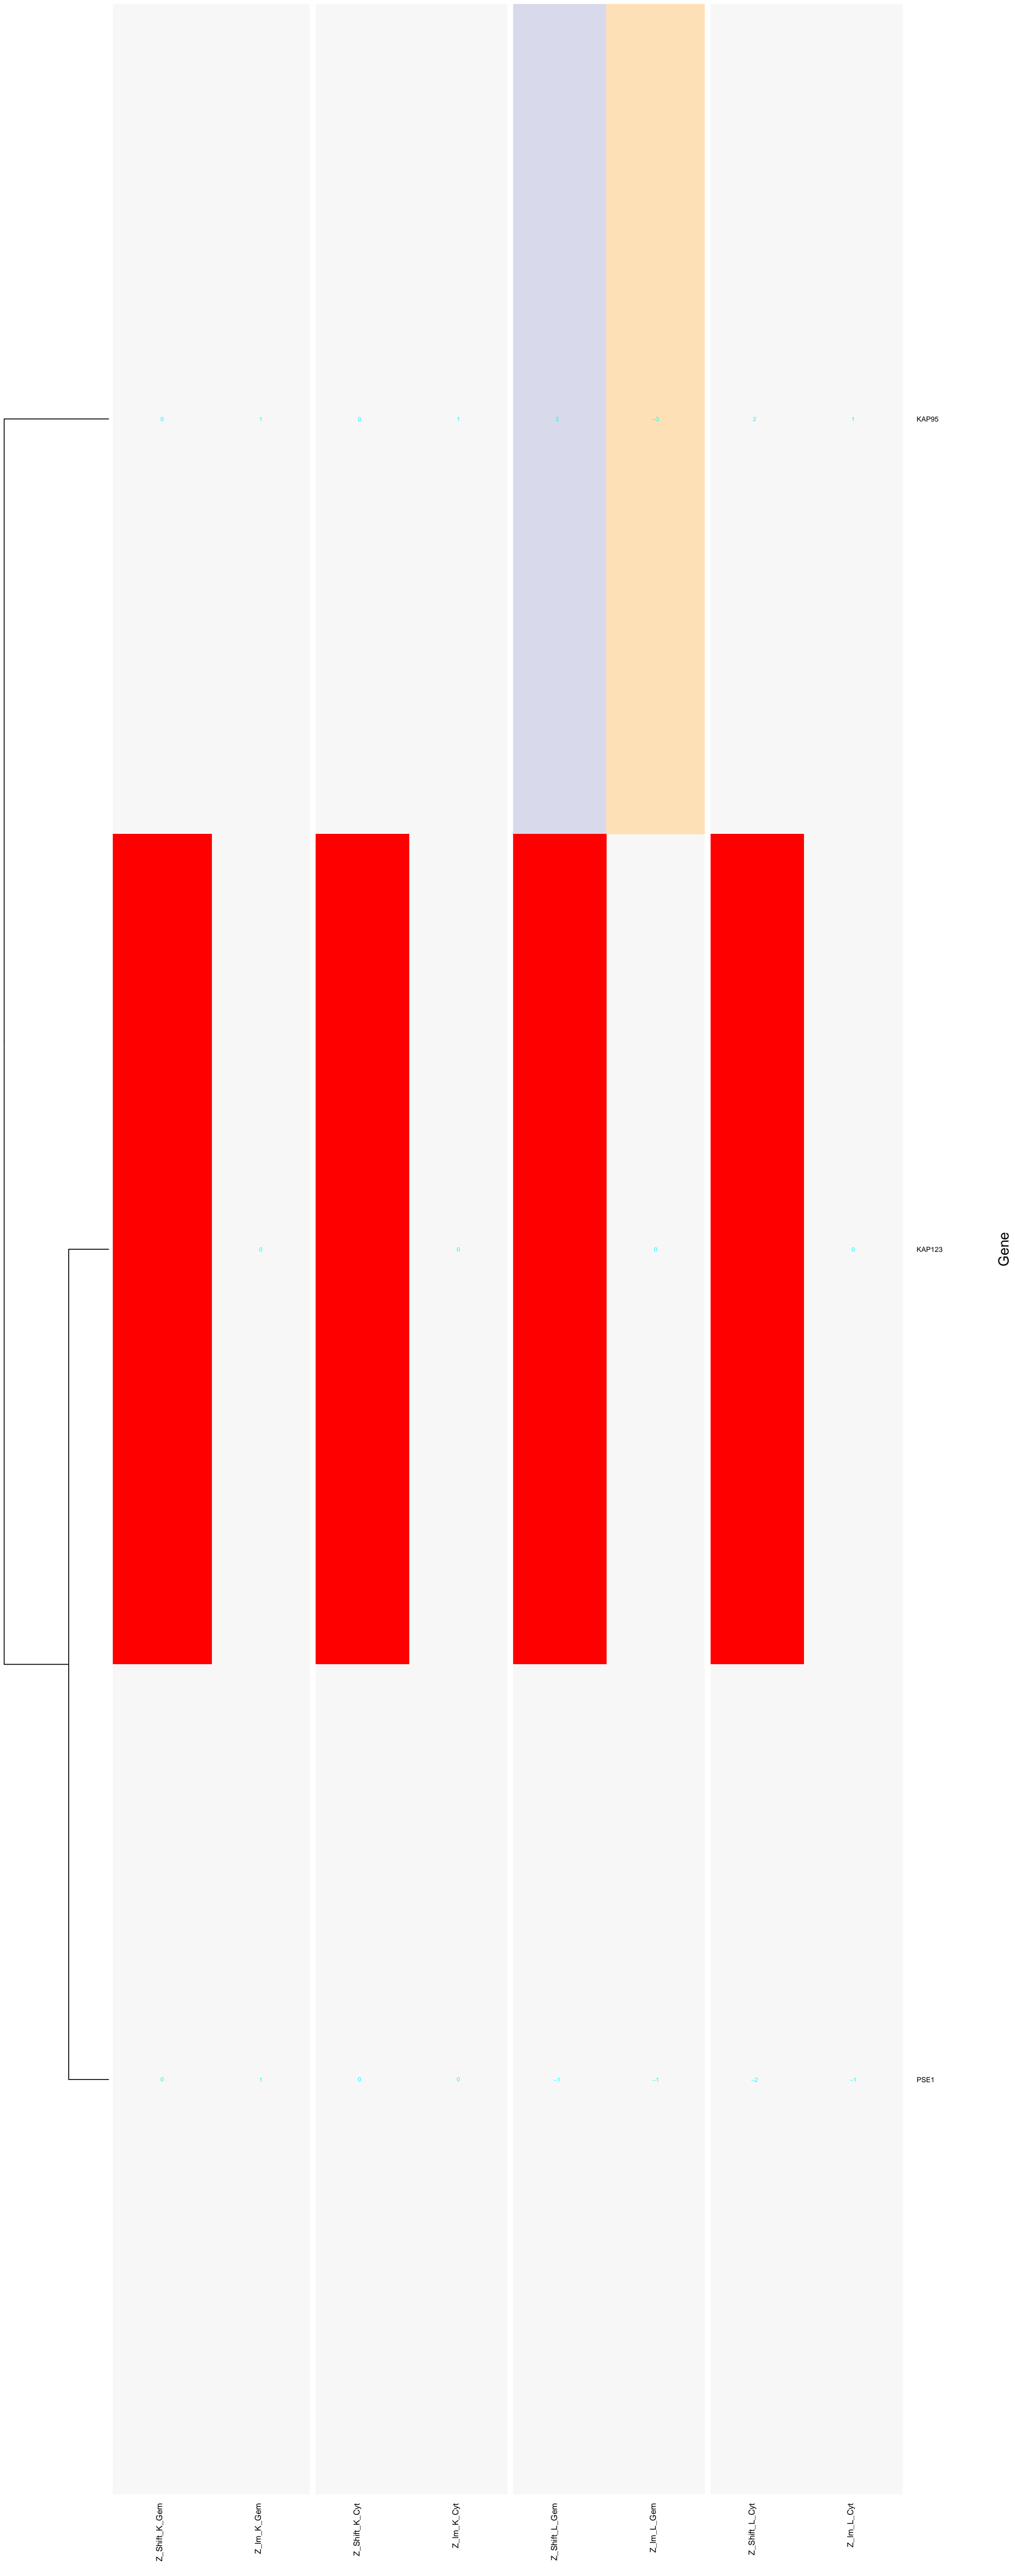

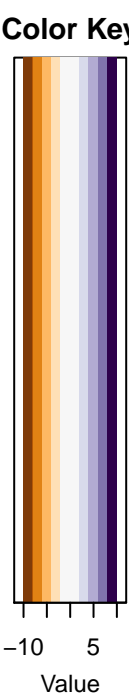

transcription factor import into nucleus

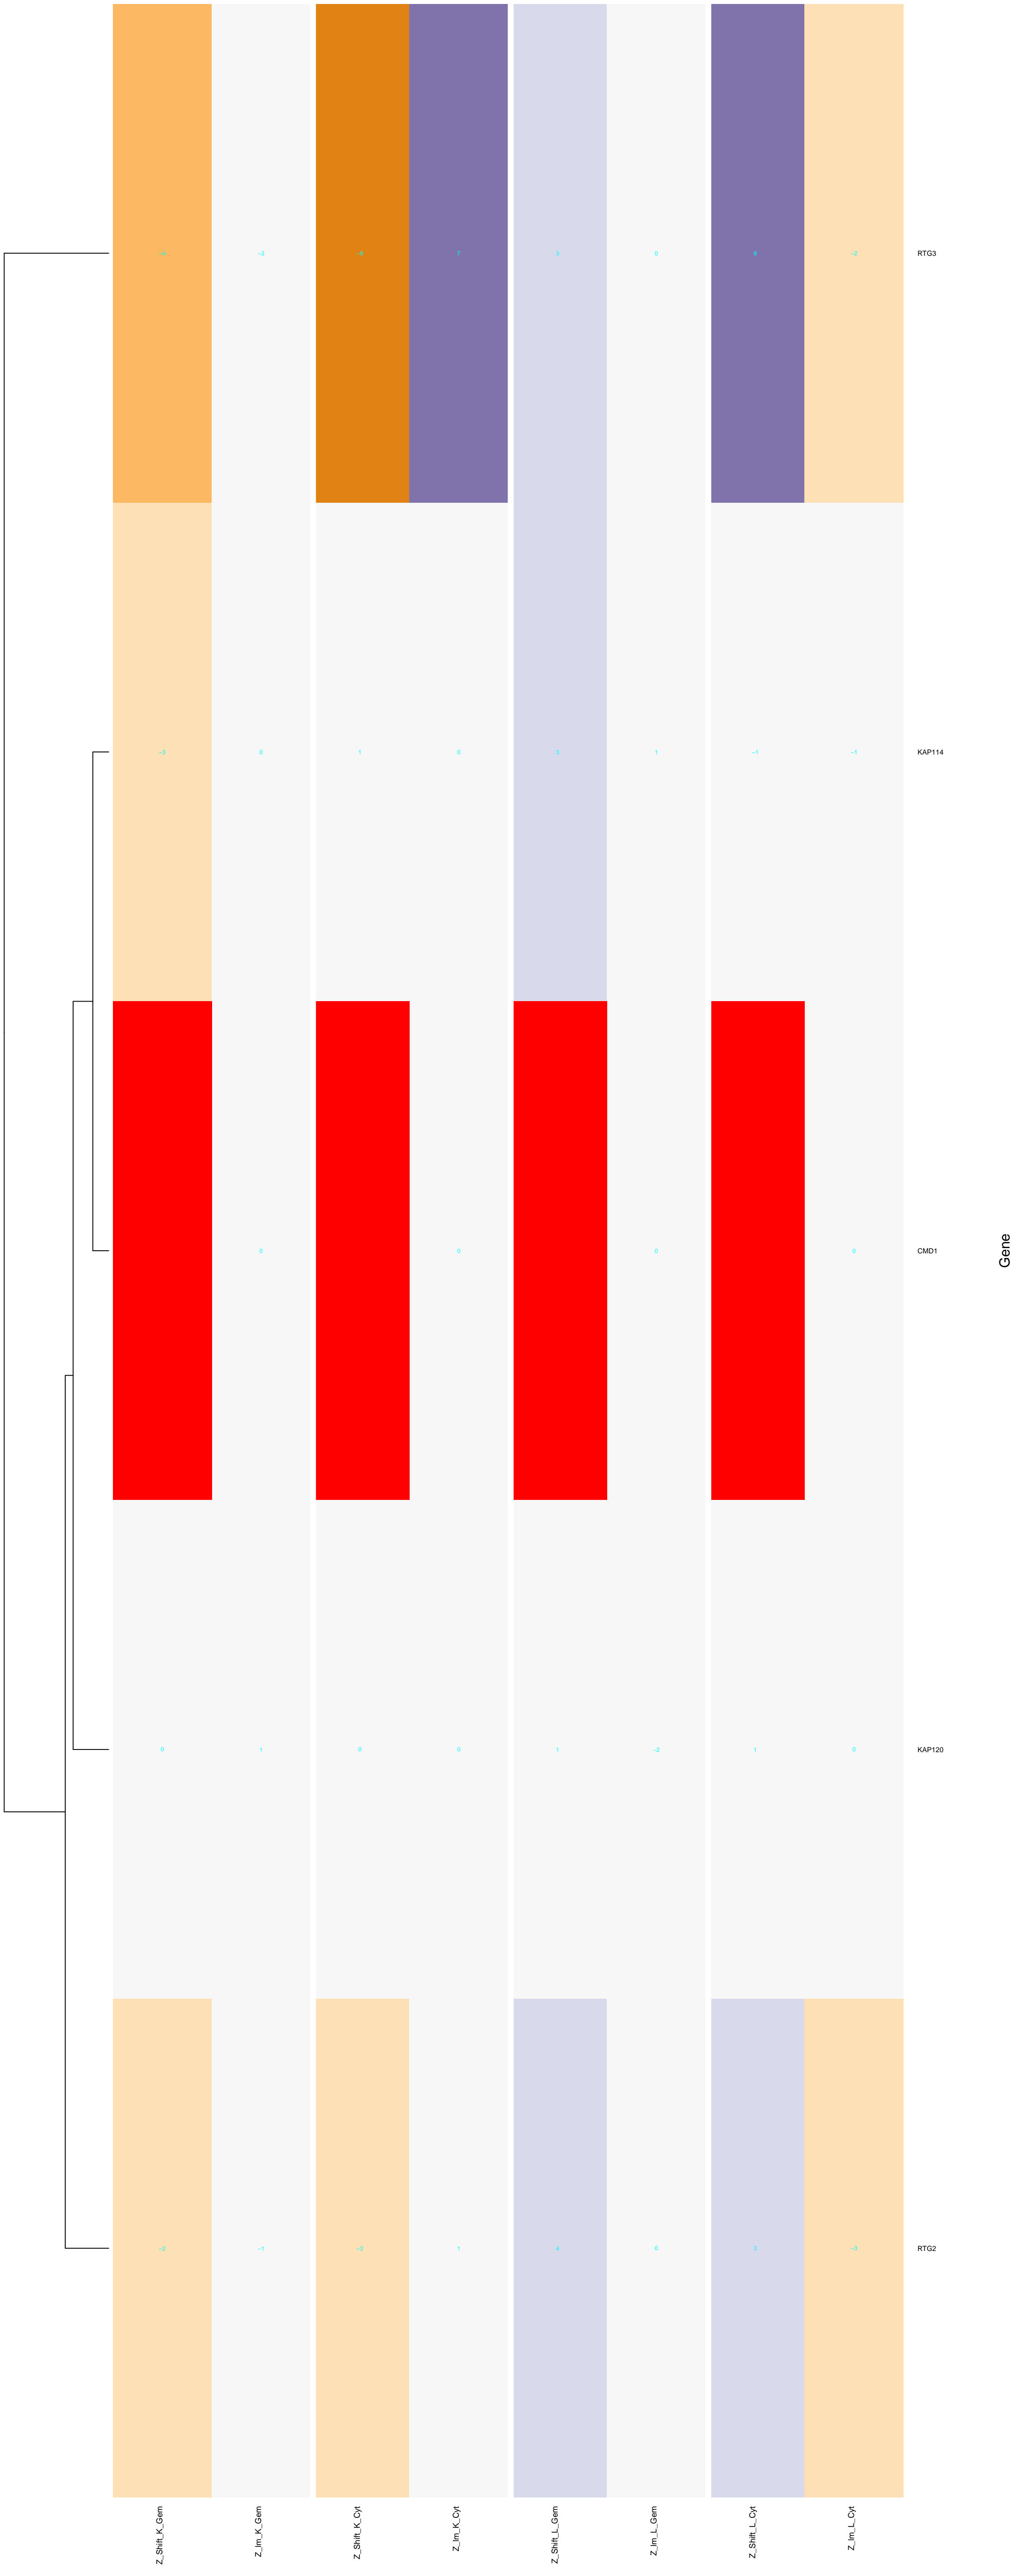

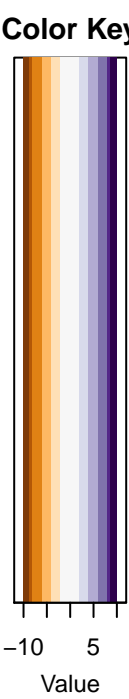

RNA polymerase II complex import to nucleus

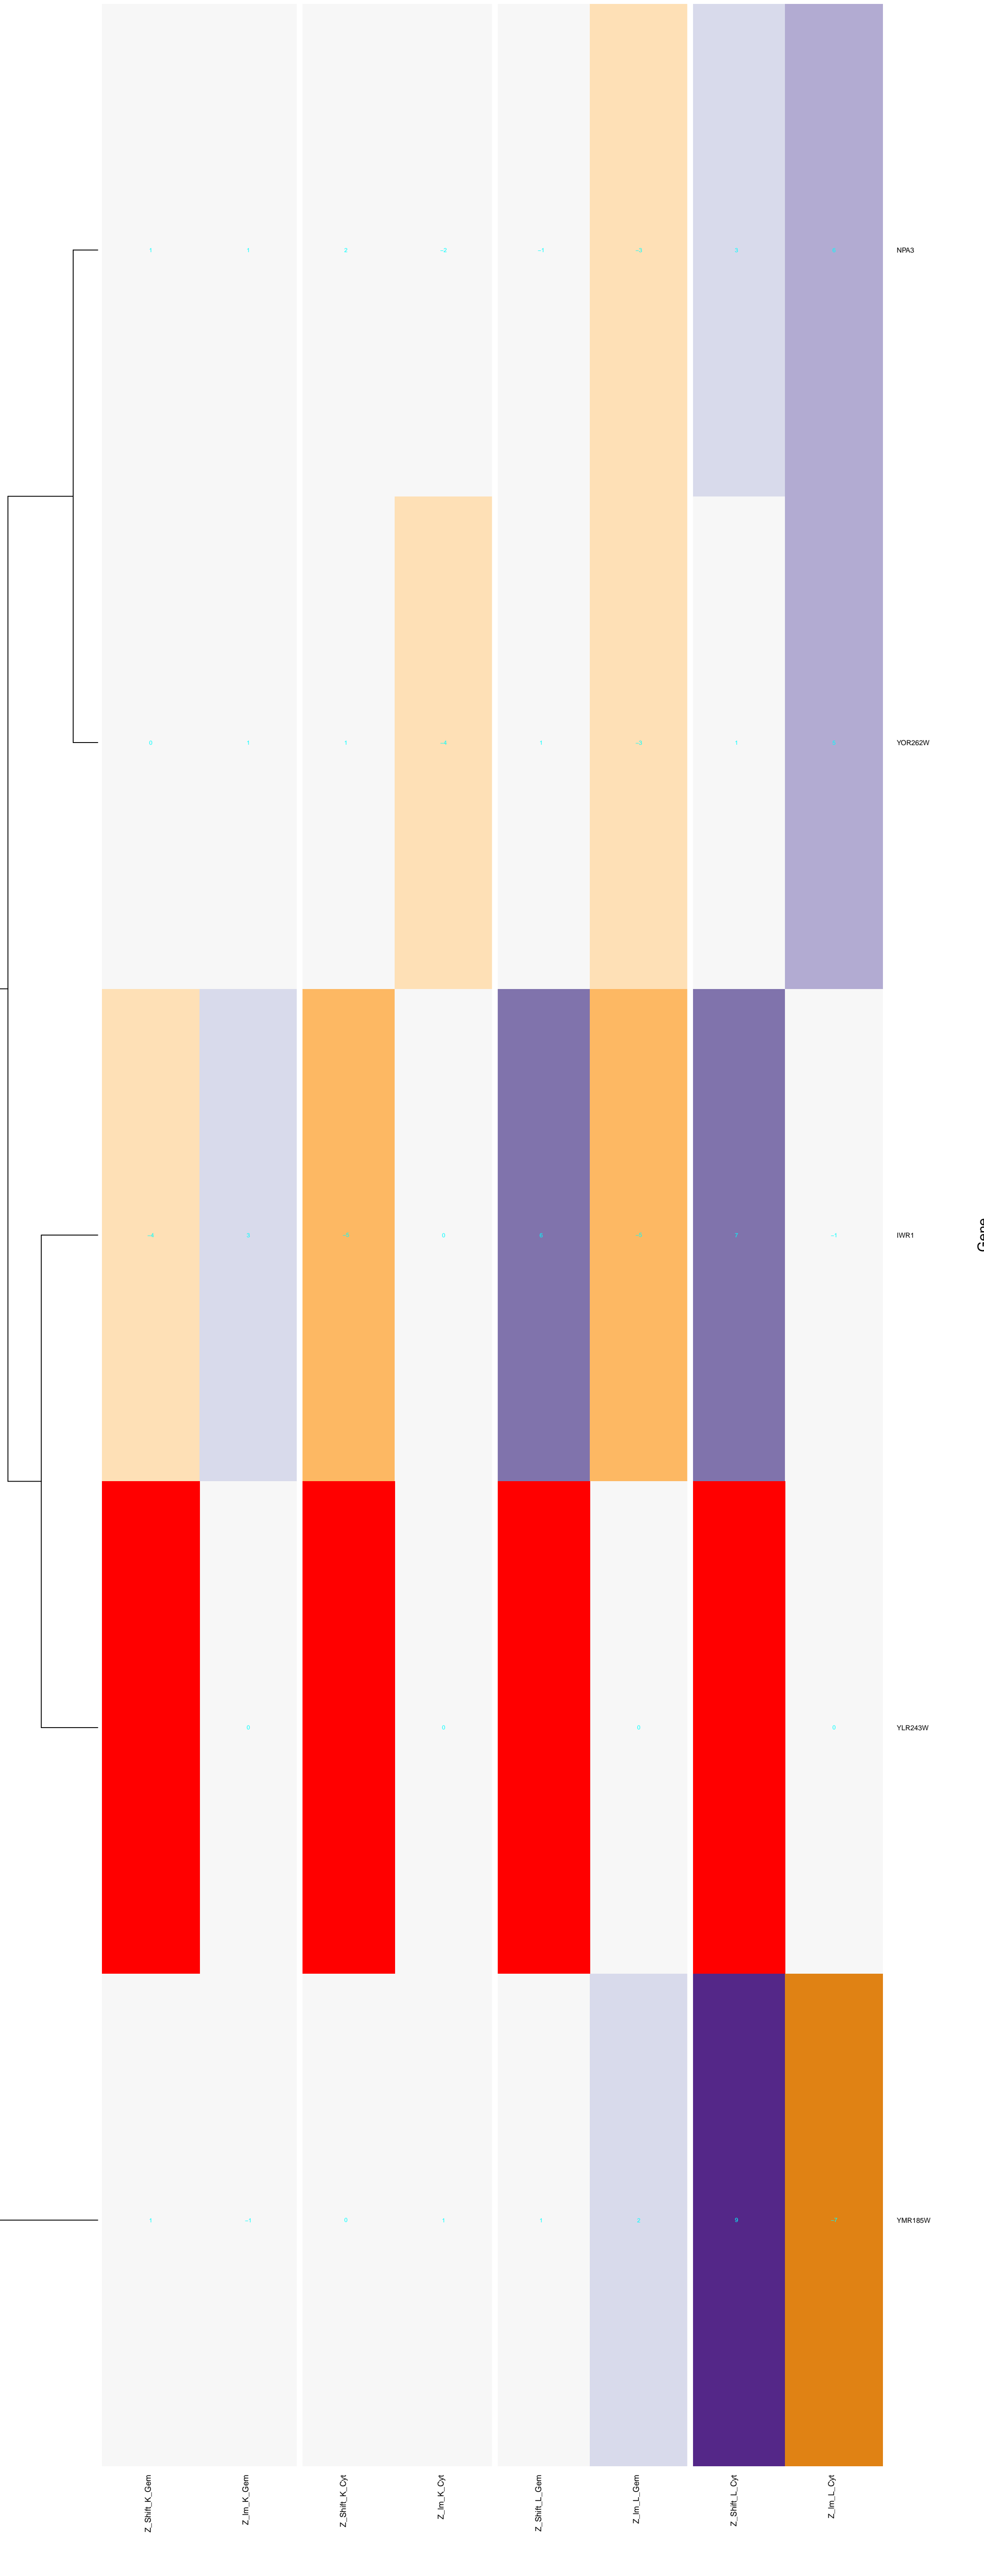

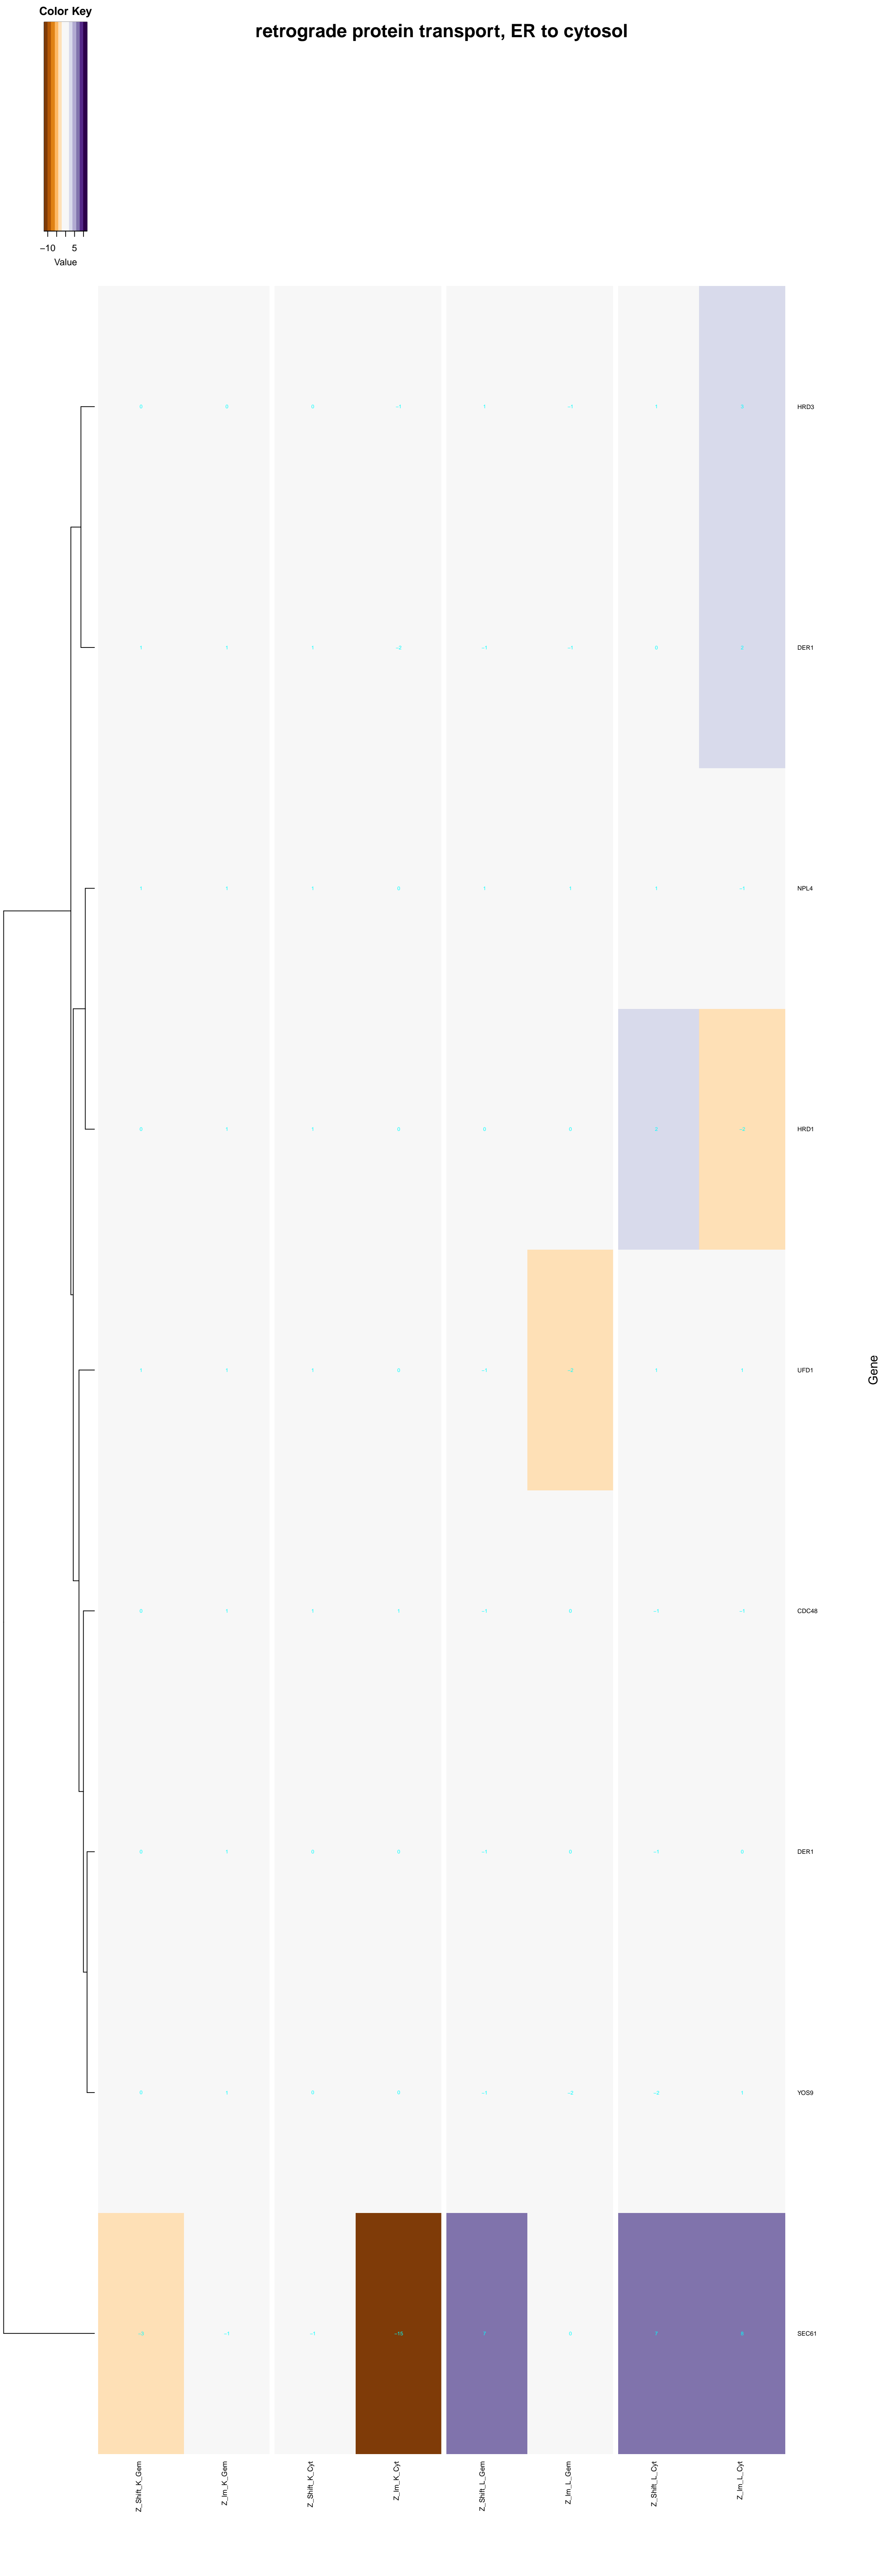



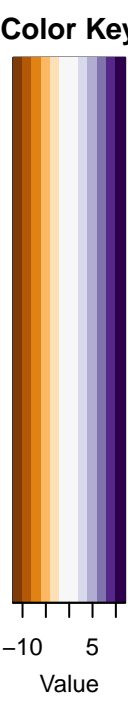

SRP-dependent cotranslational protein targeting to membrane, translocation

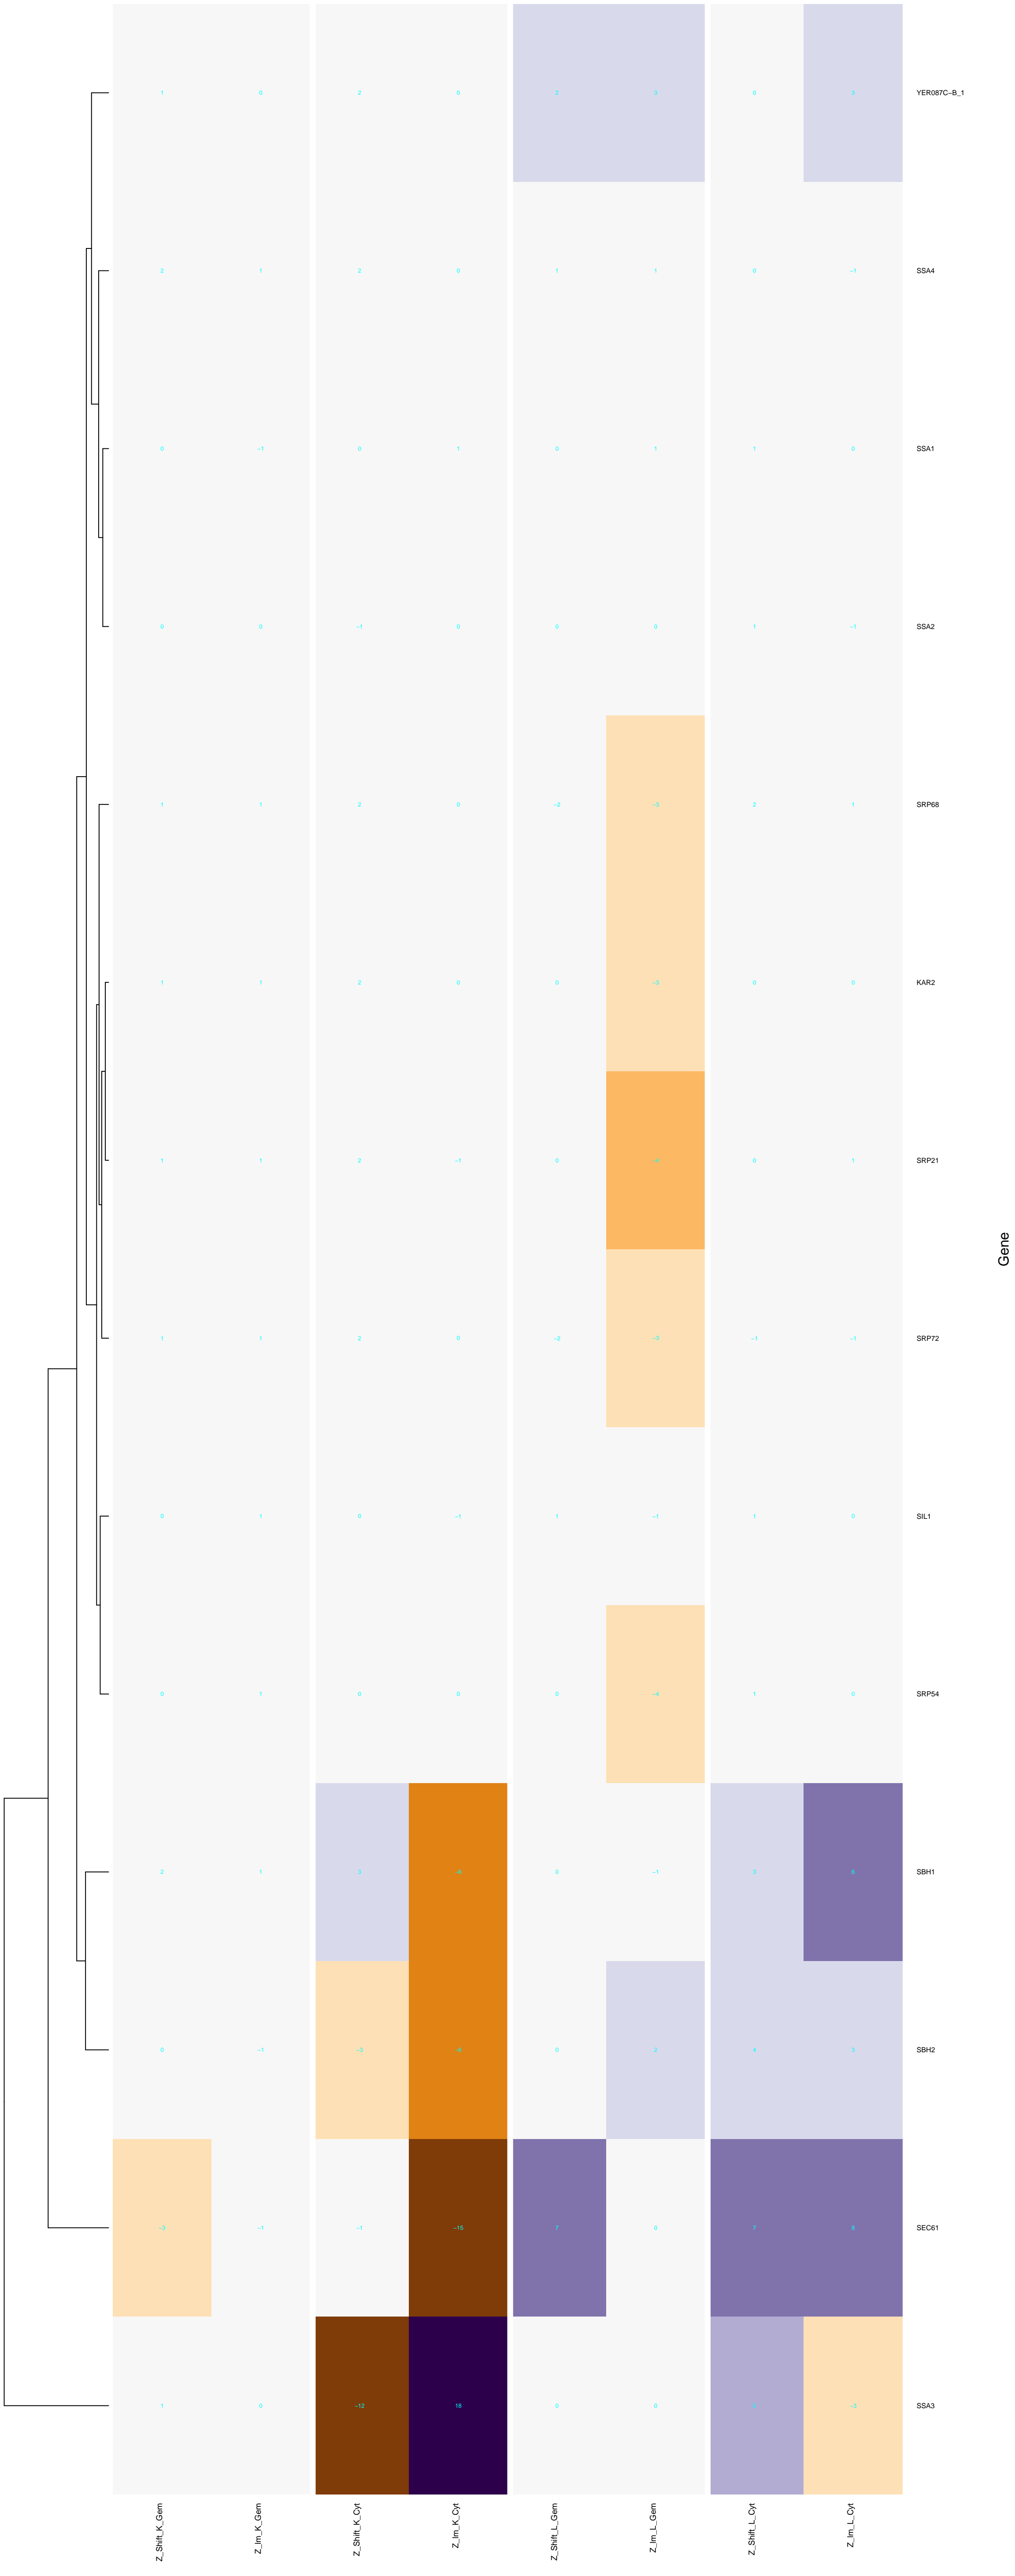



posttranslational protein targeting to membrane, translocation

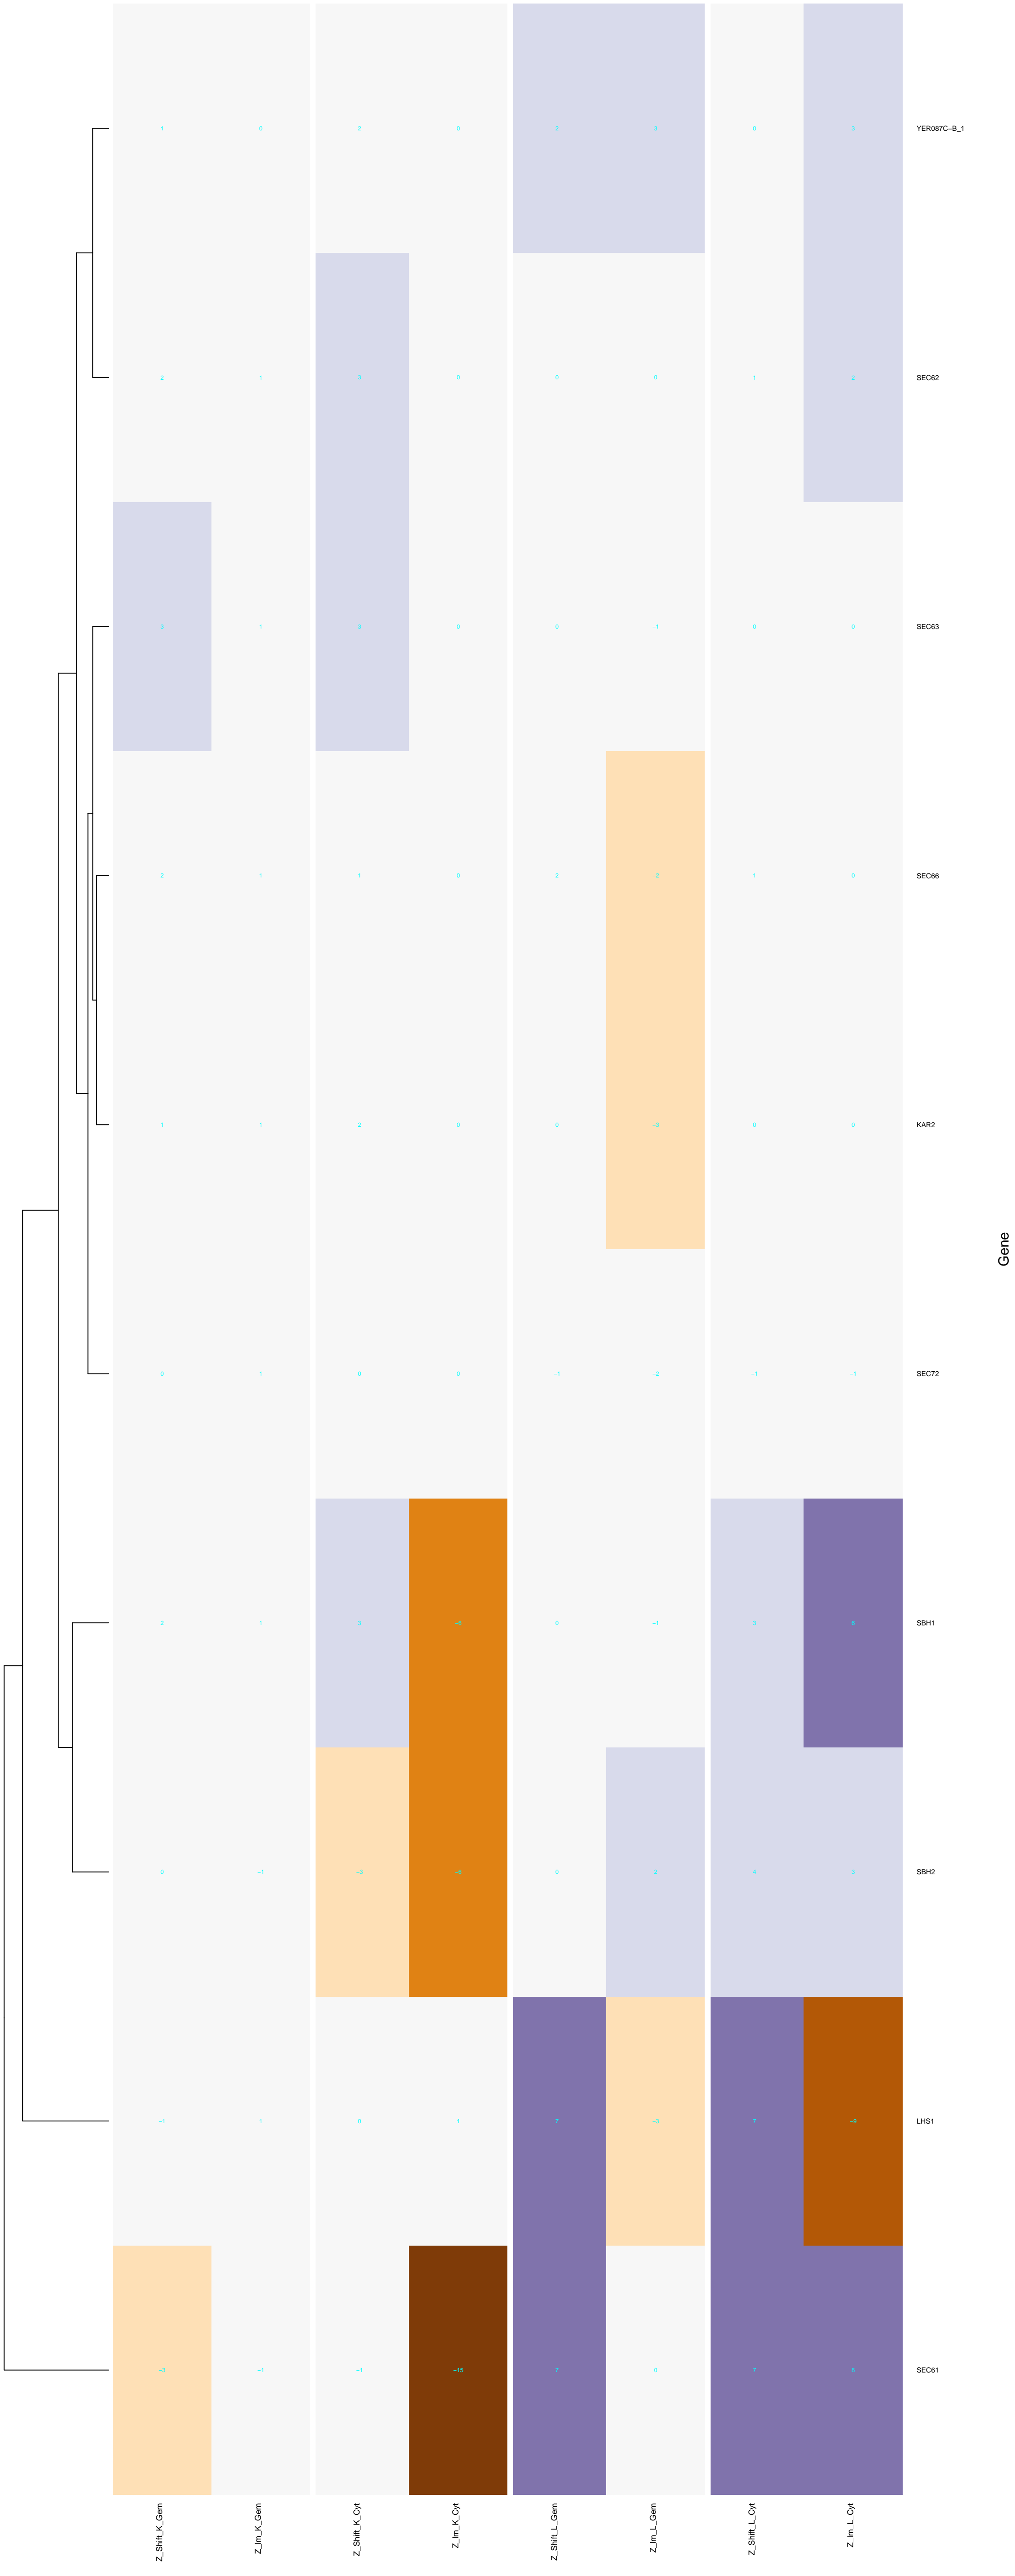

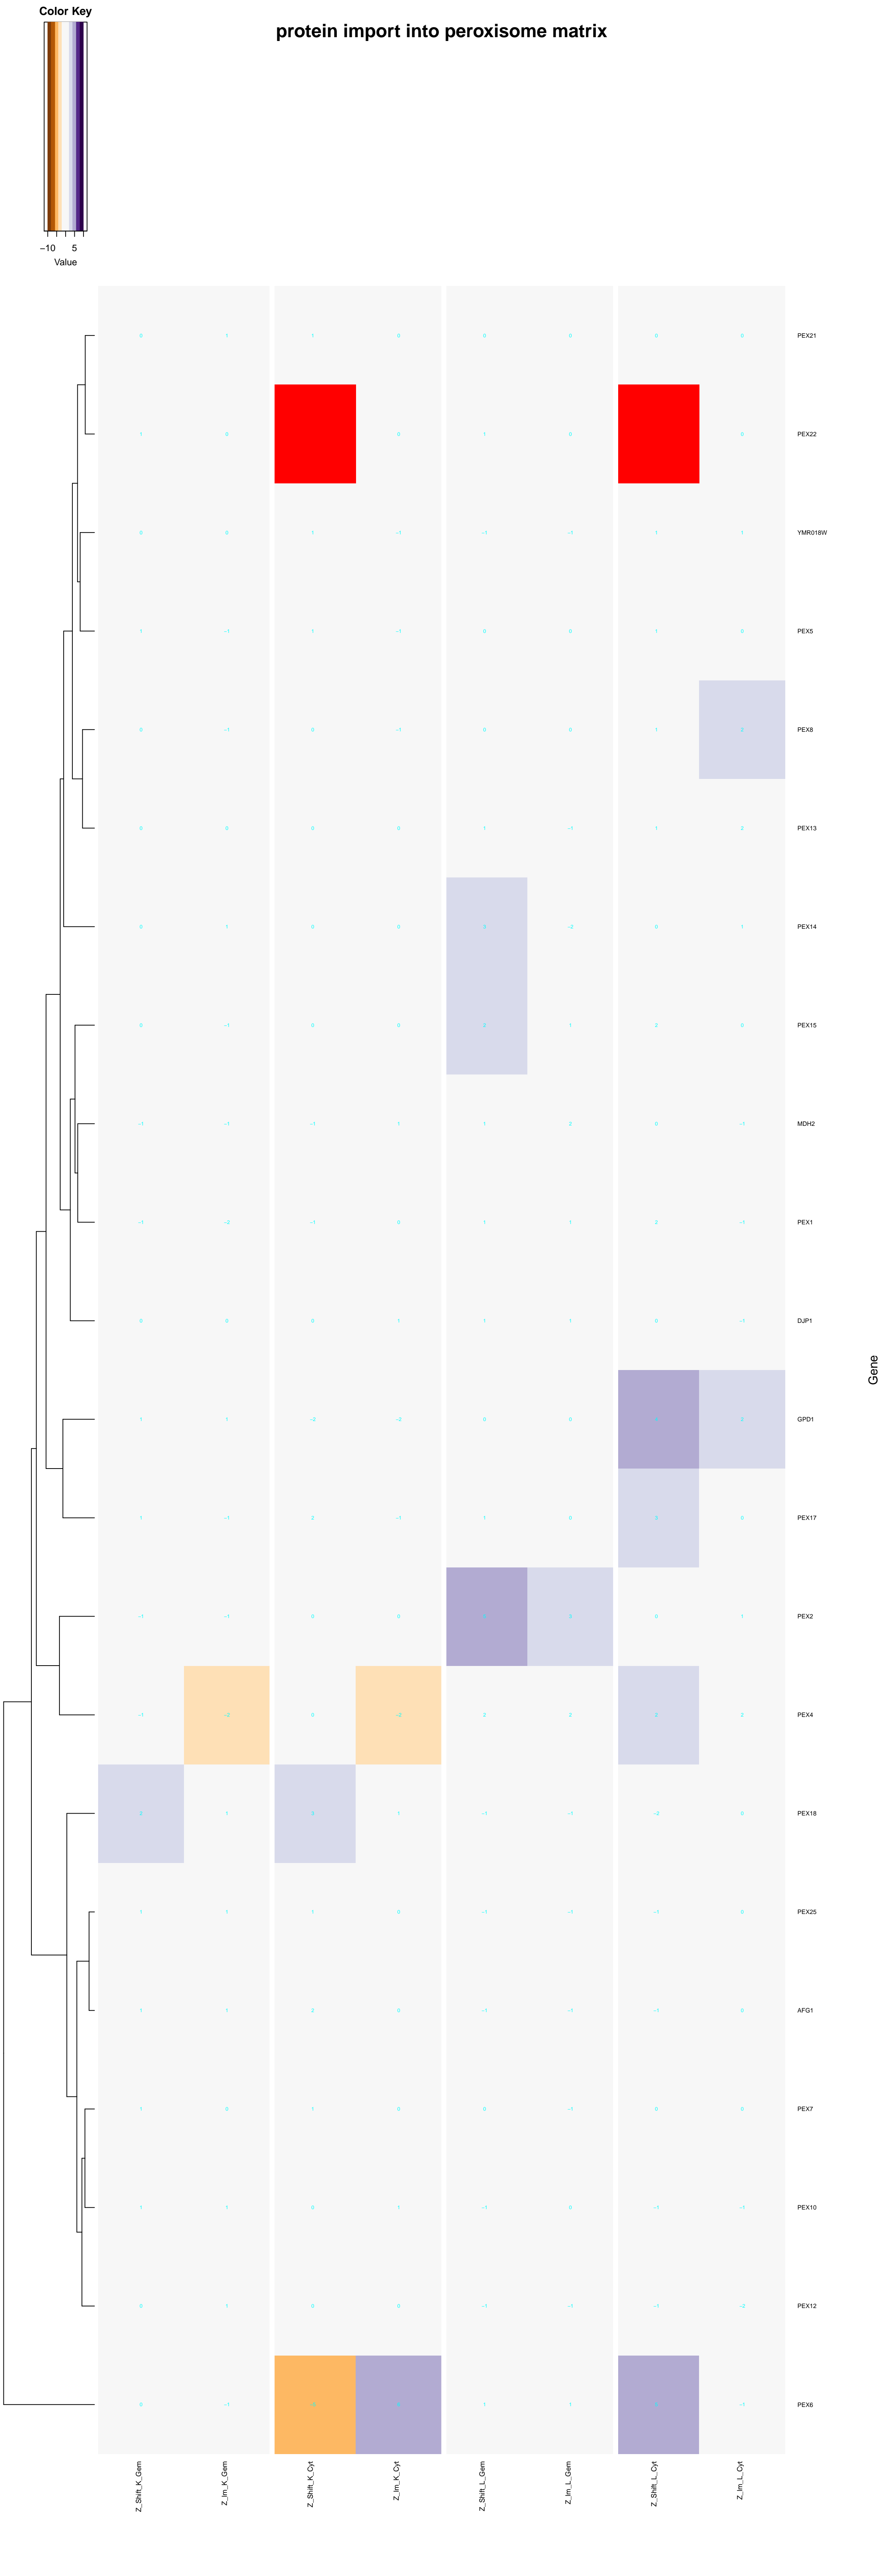

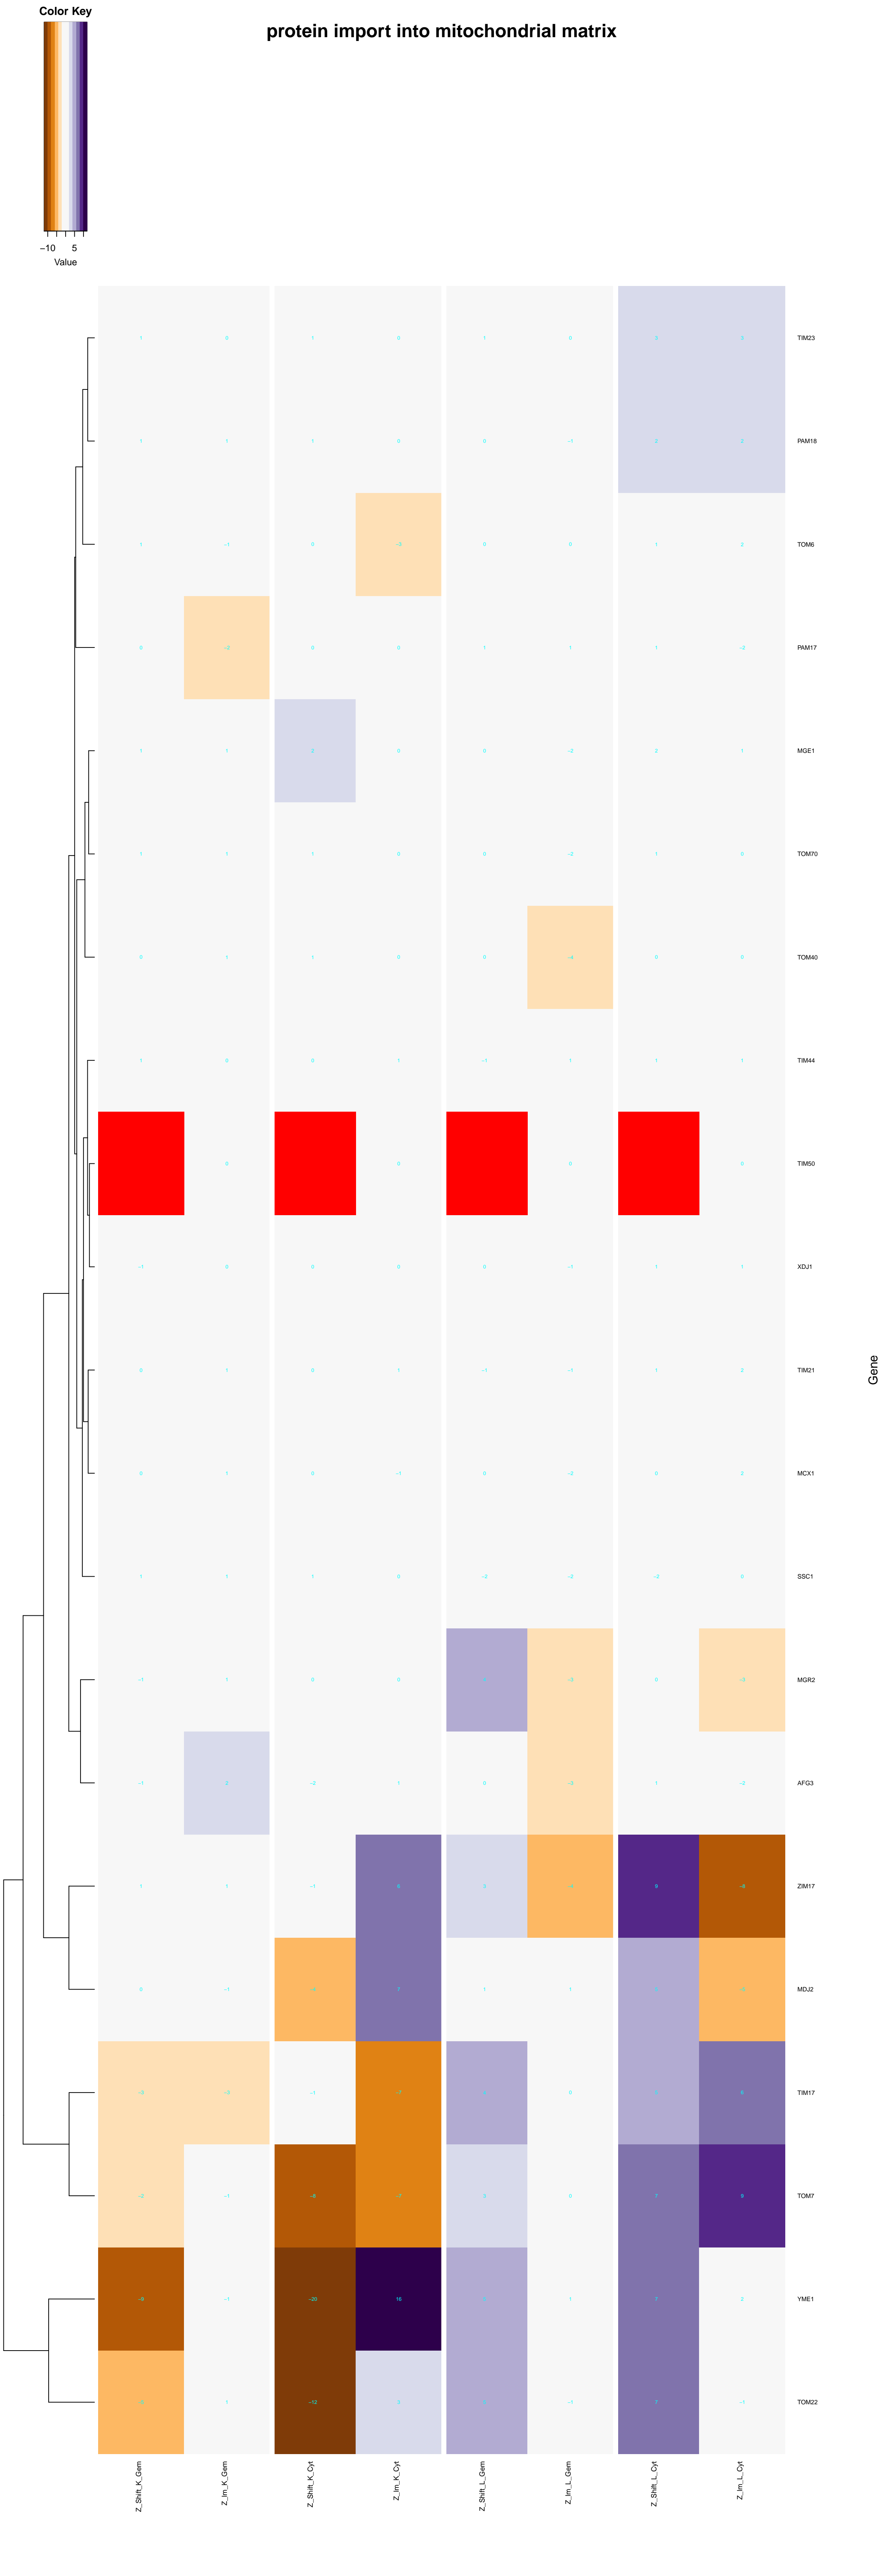

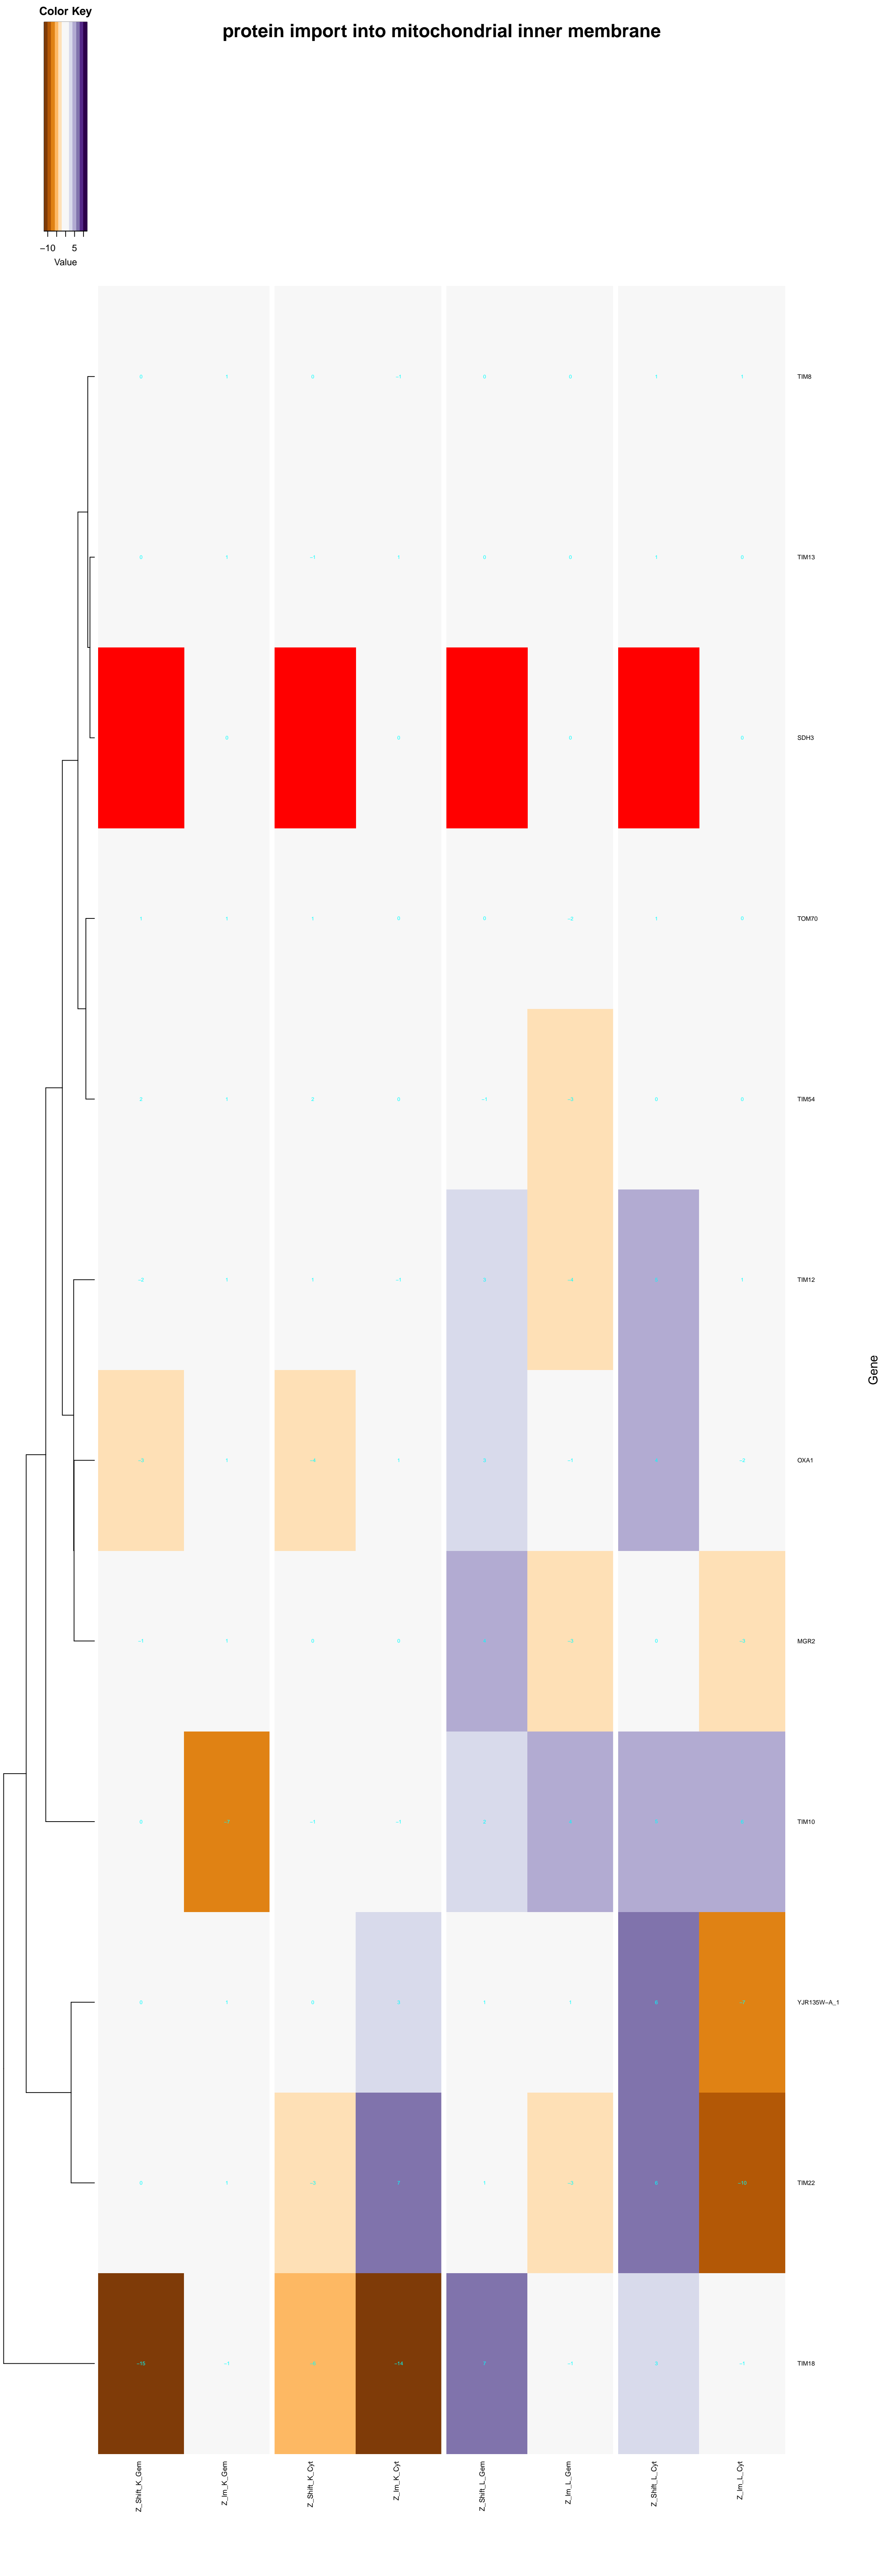

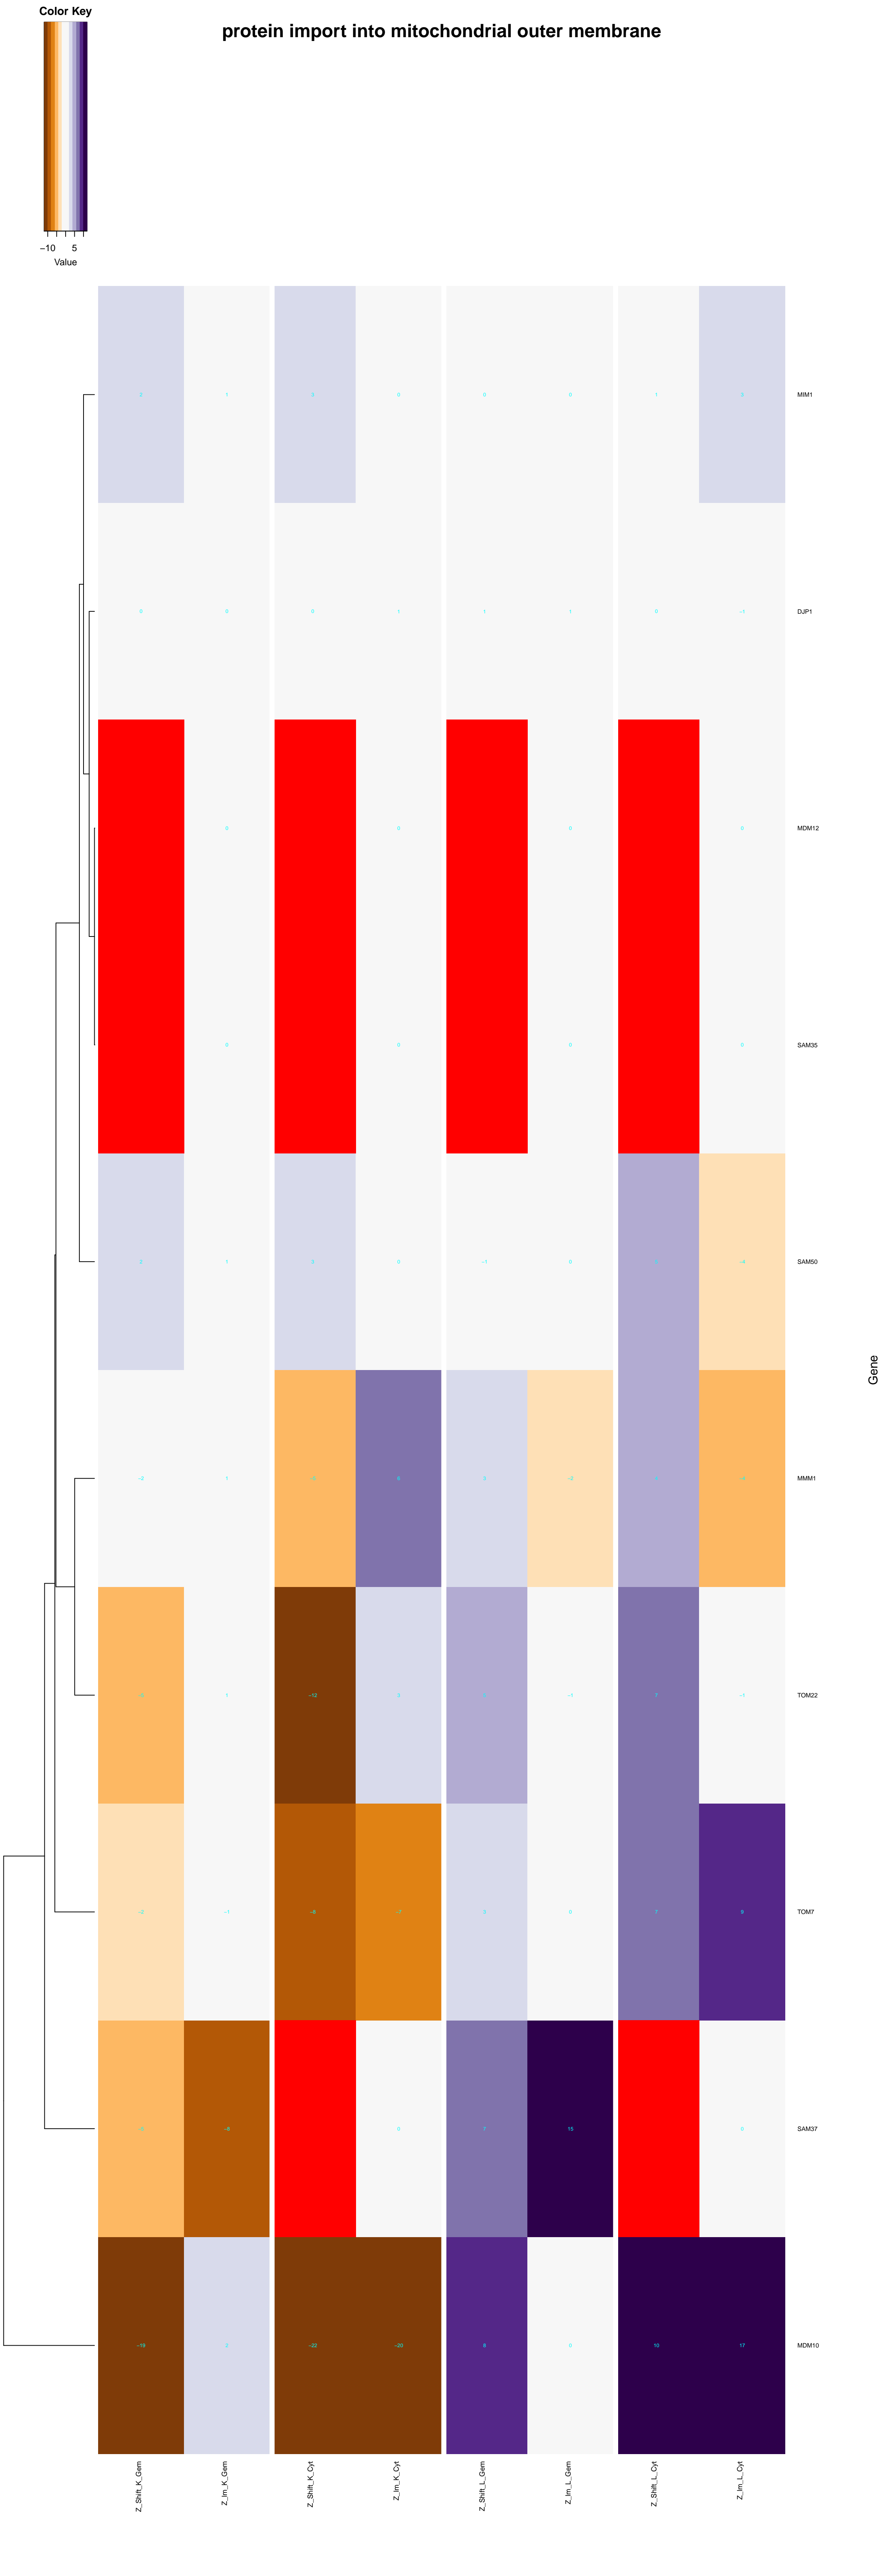

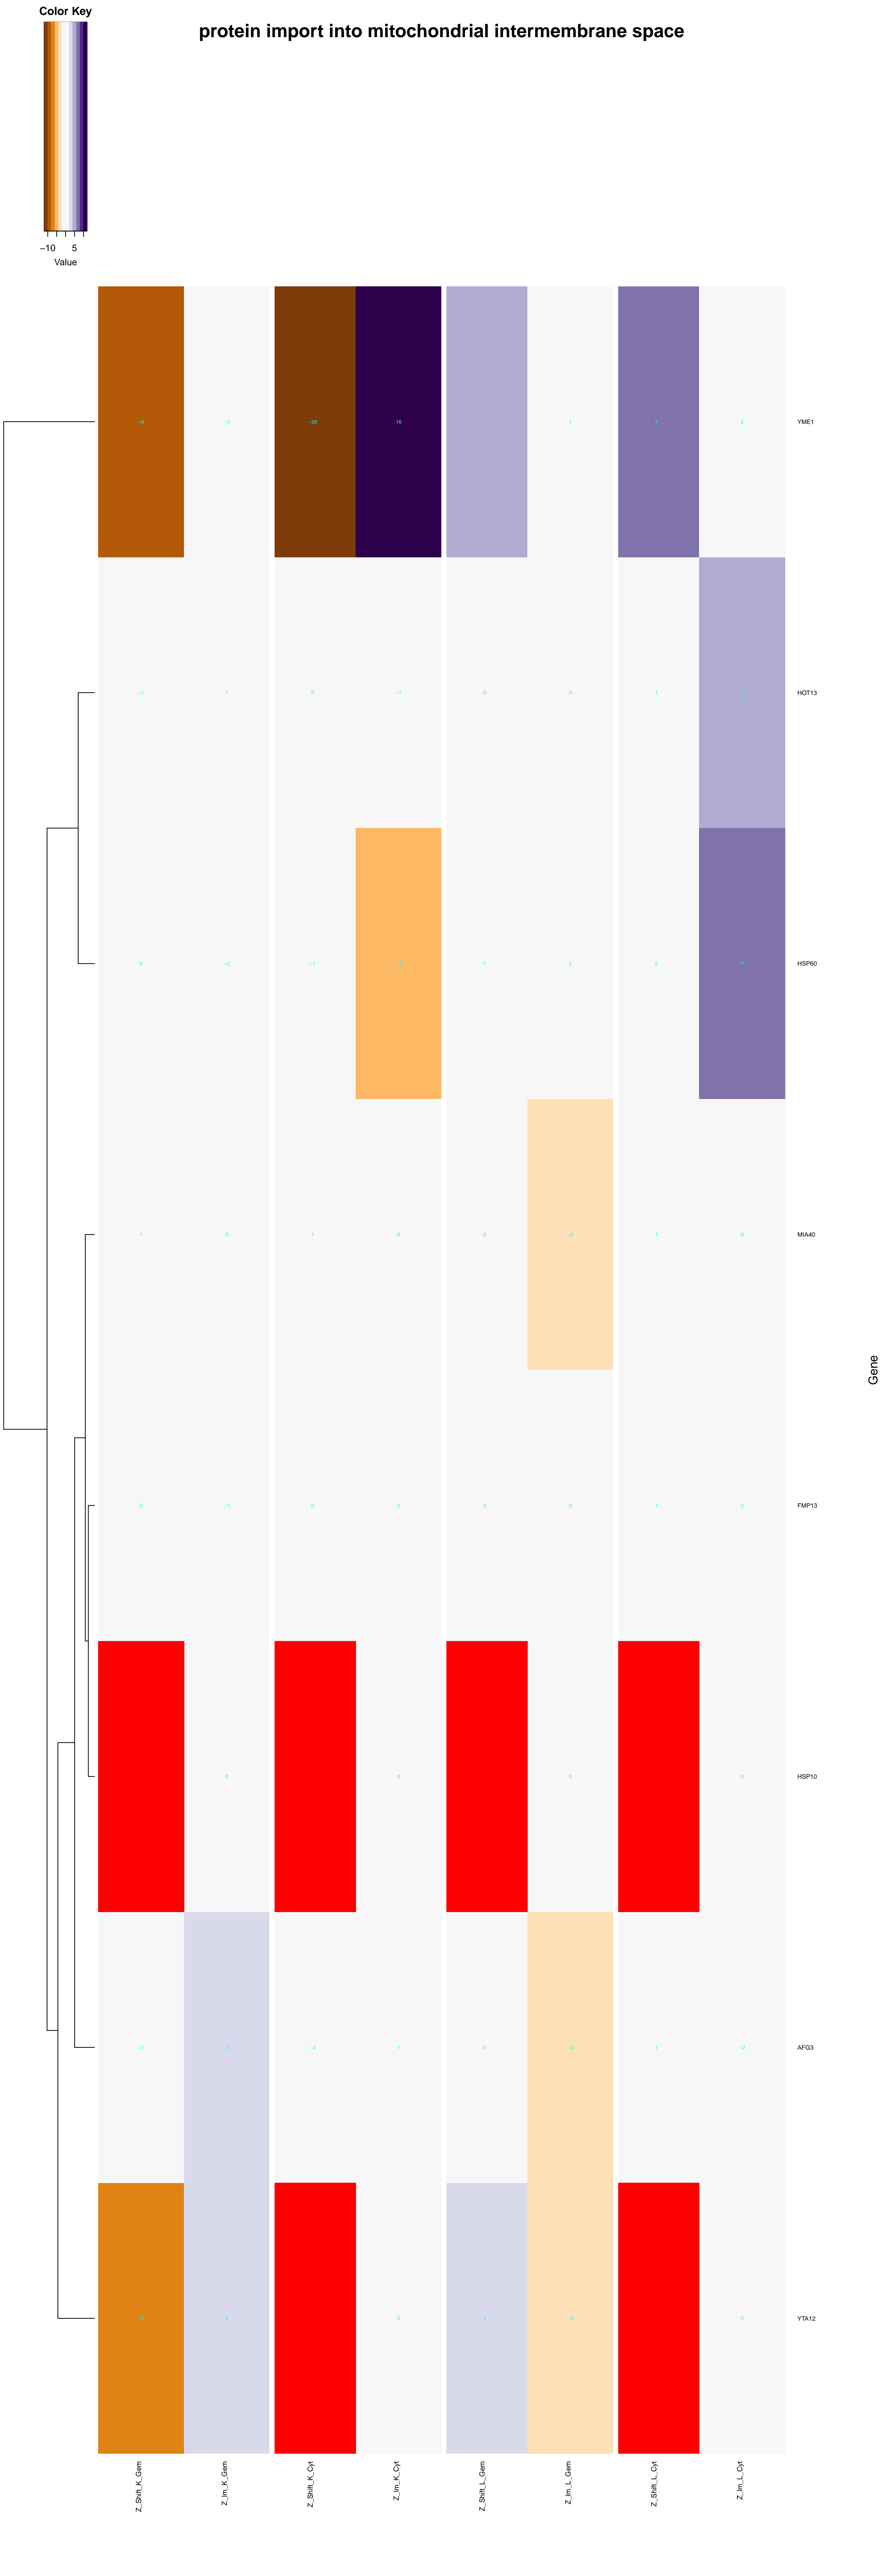

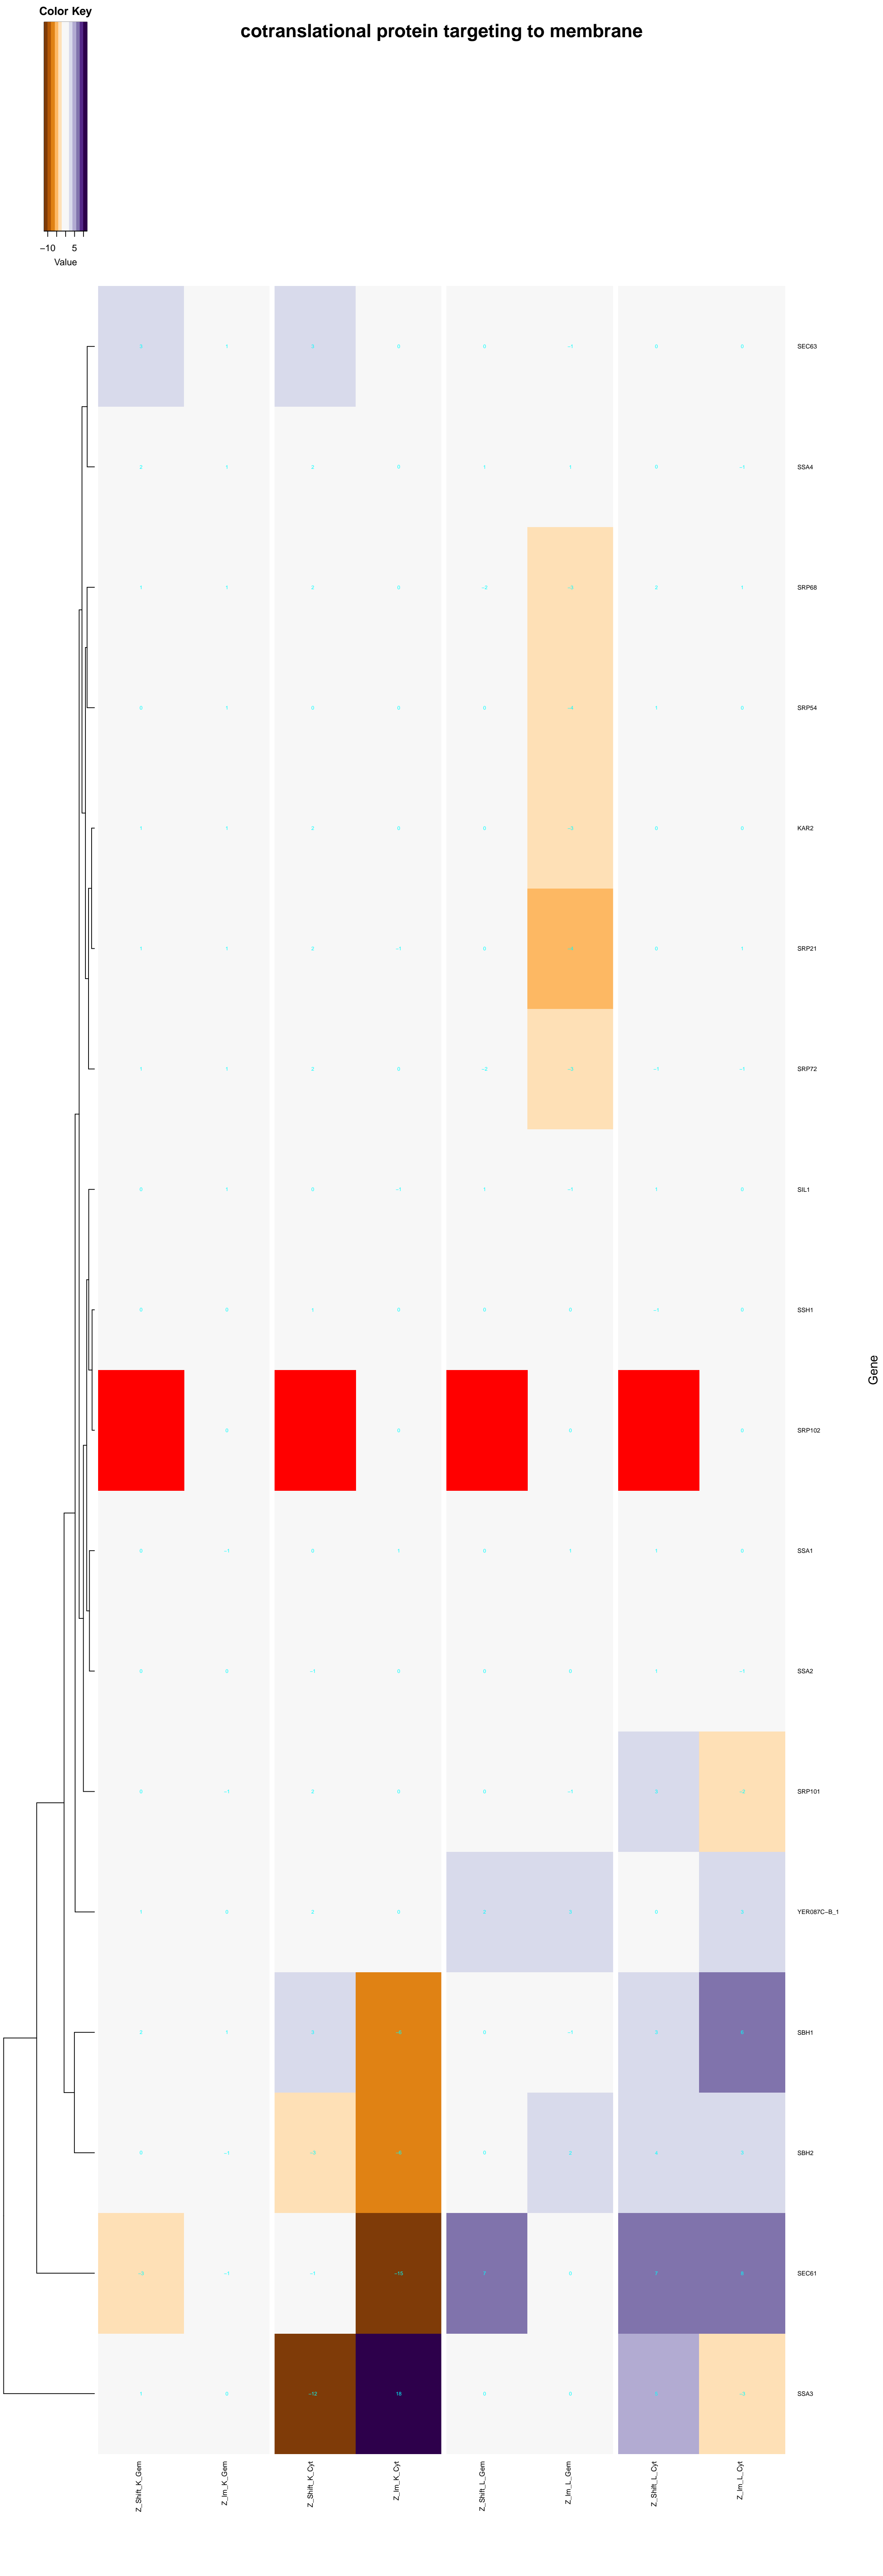





posttranslational protein targeting to membrane

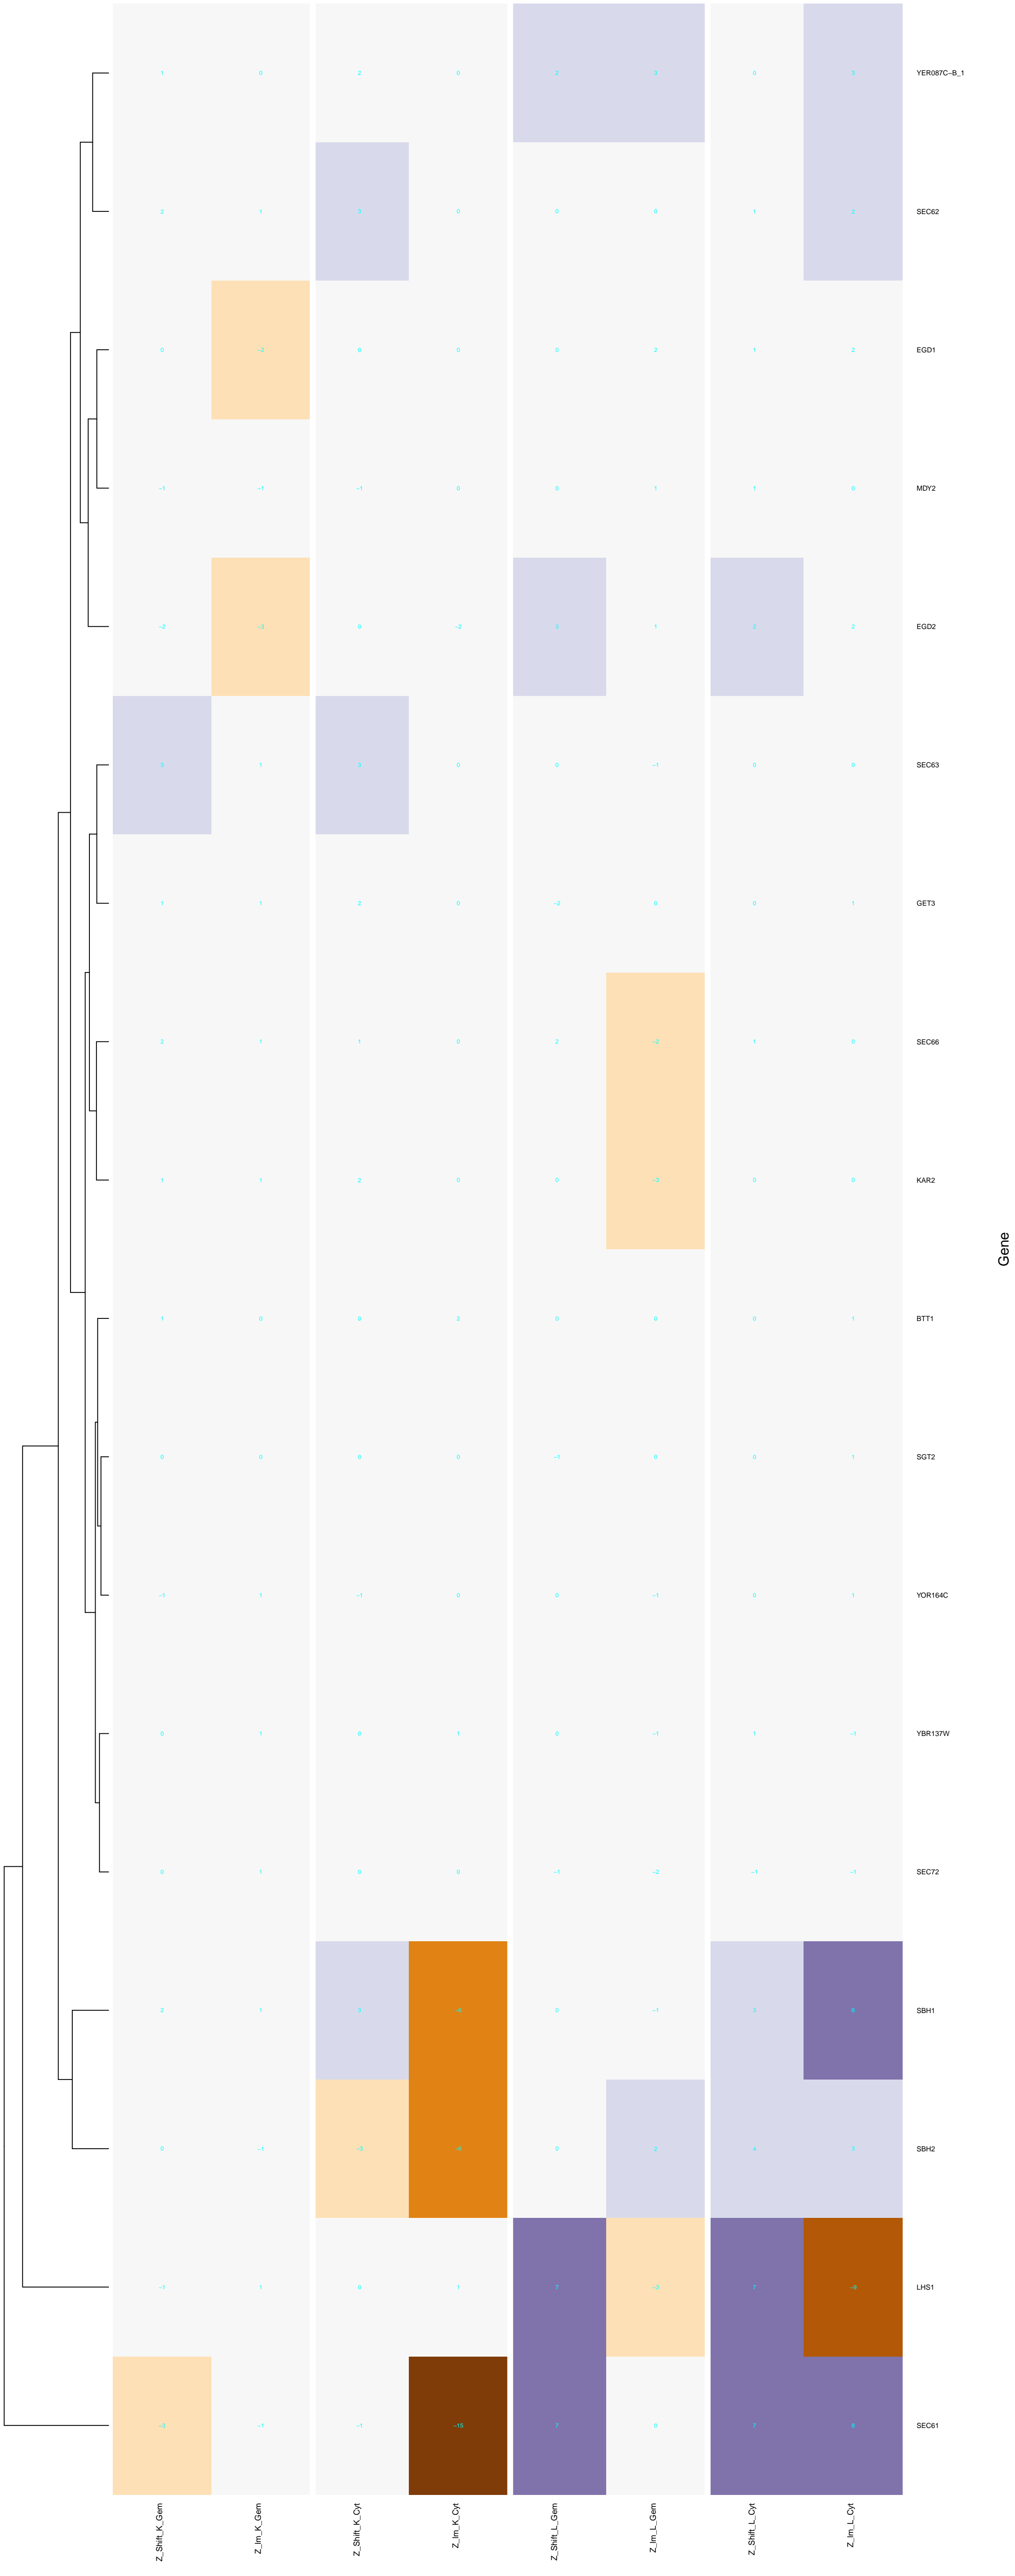

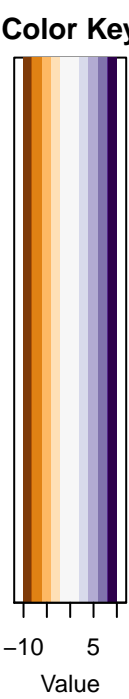

protein targeting to nuclear inner membrane

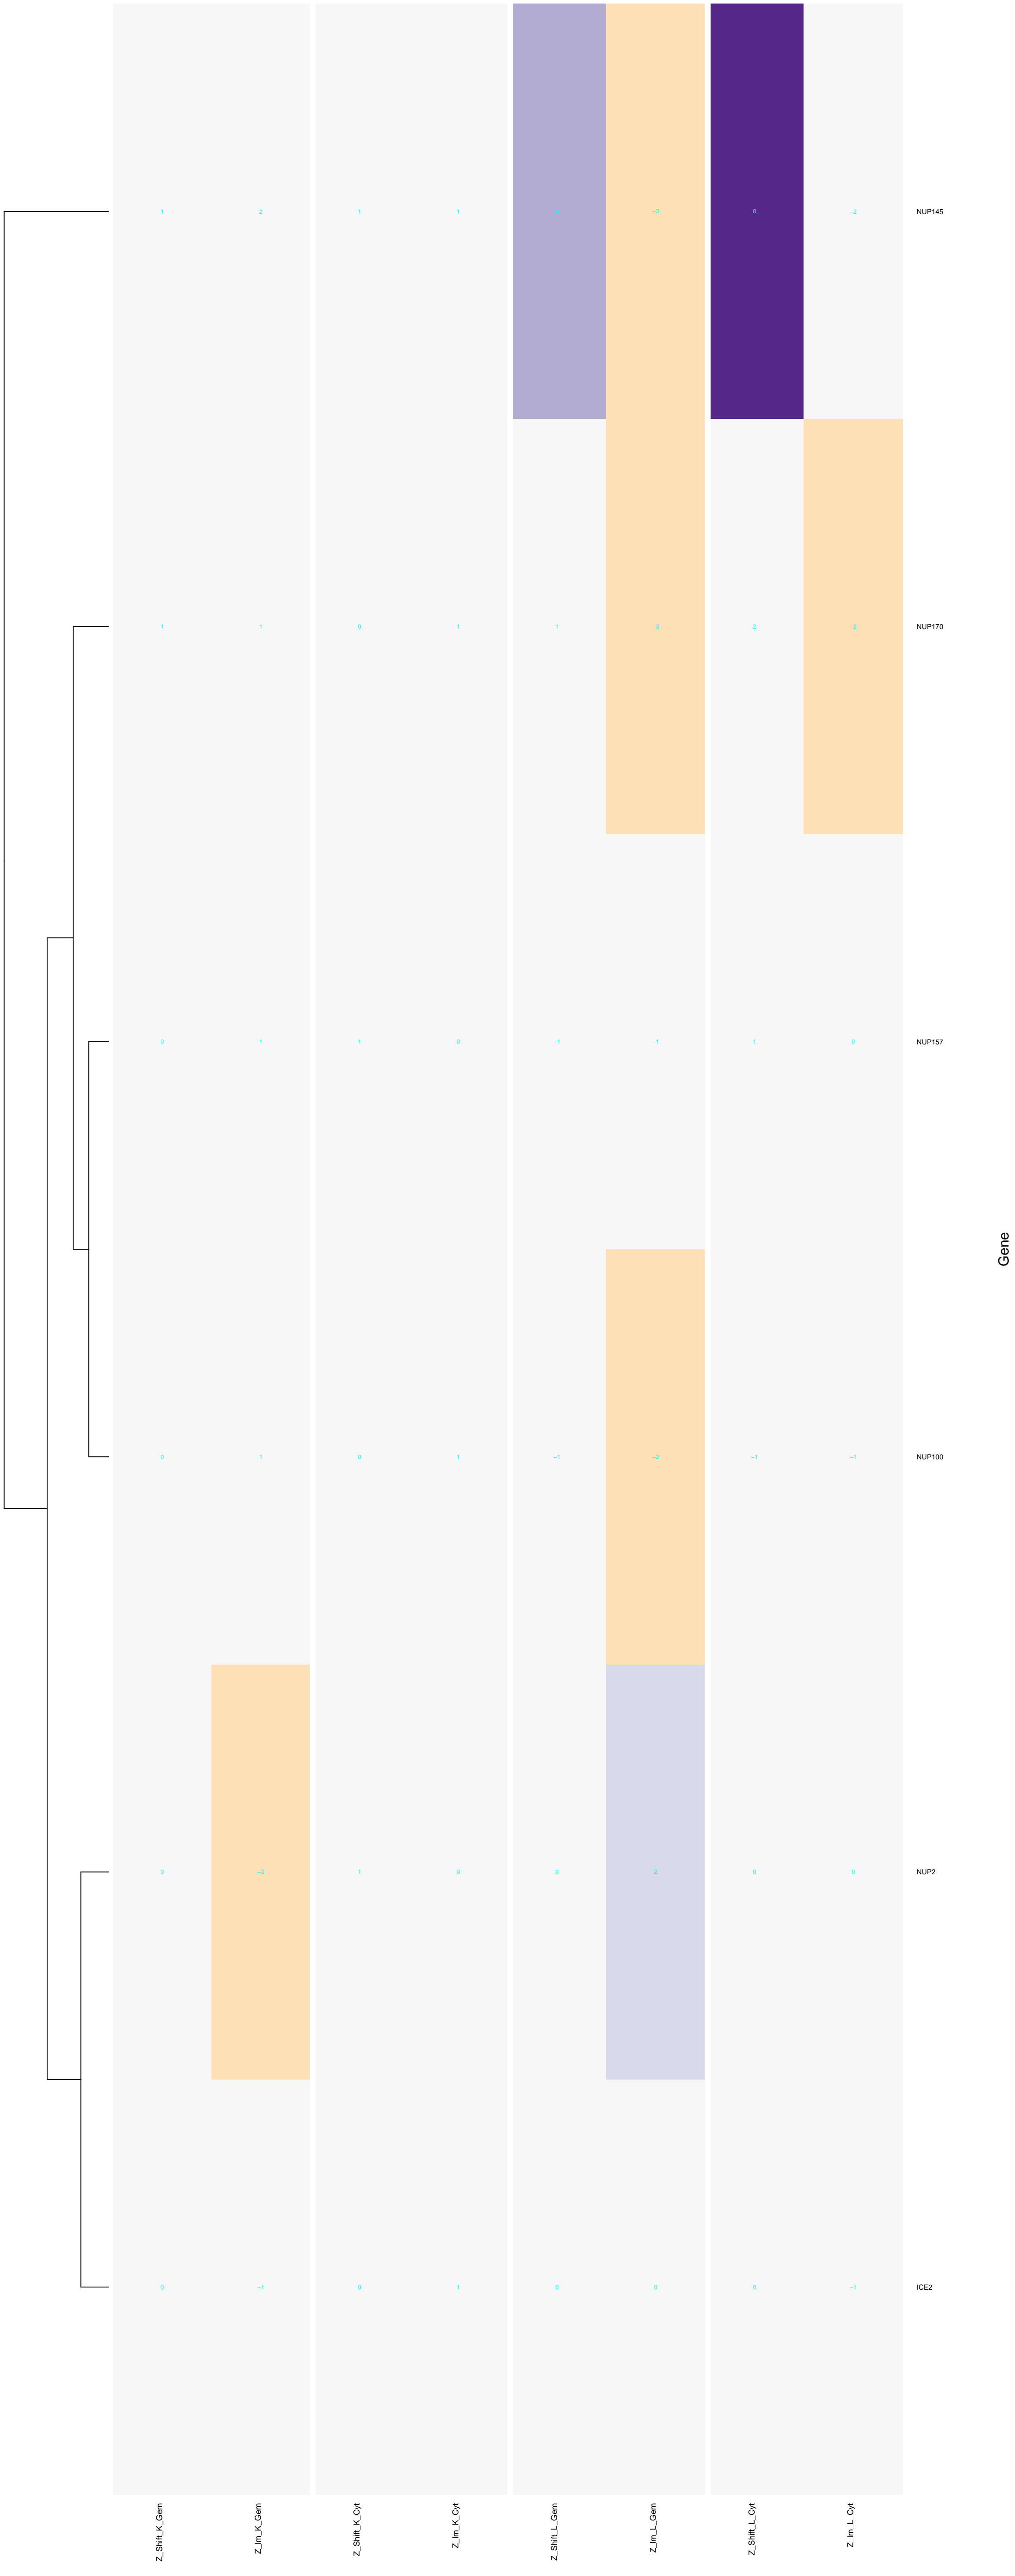

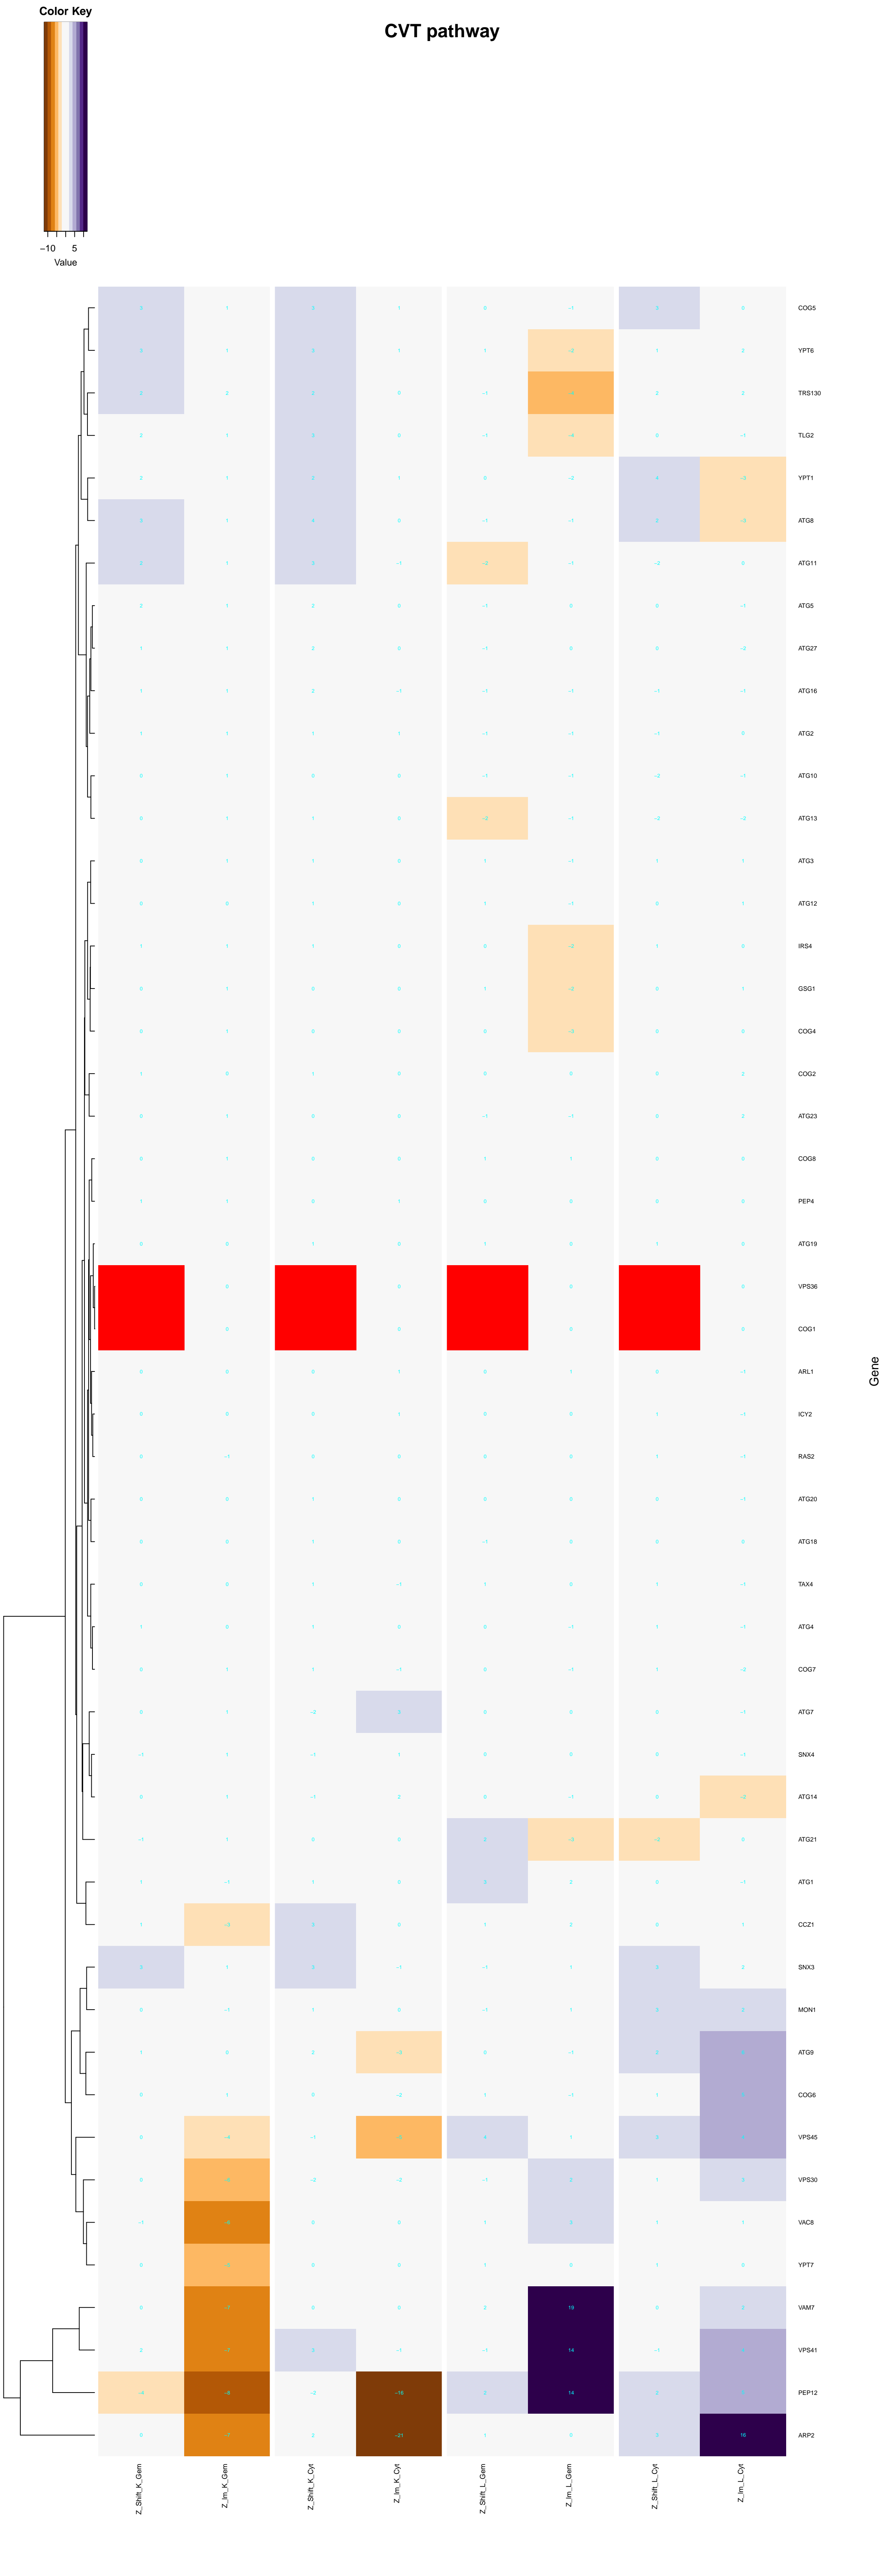

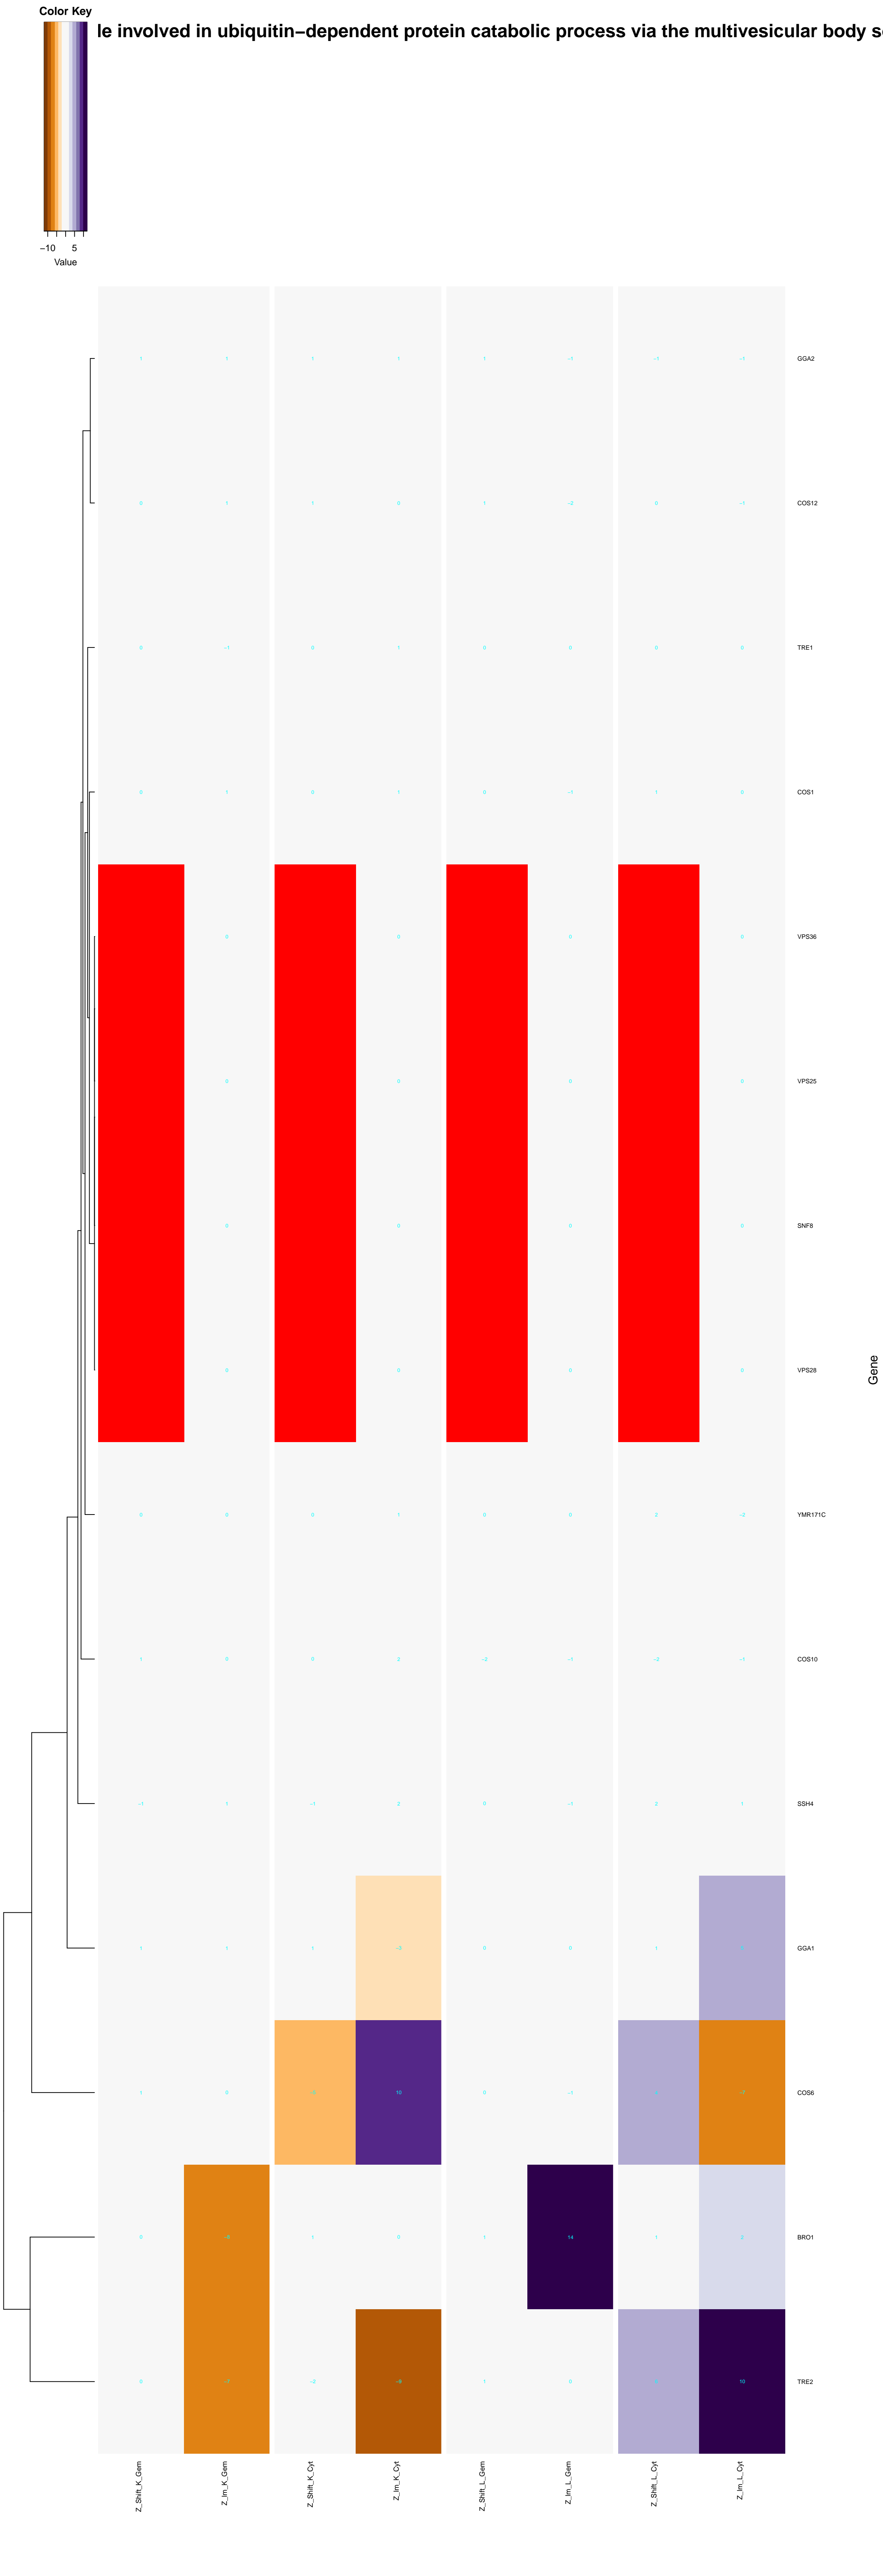

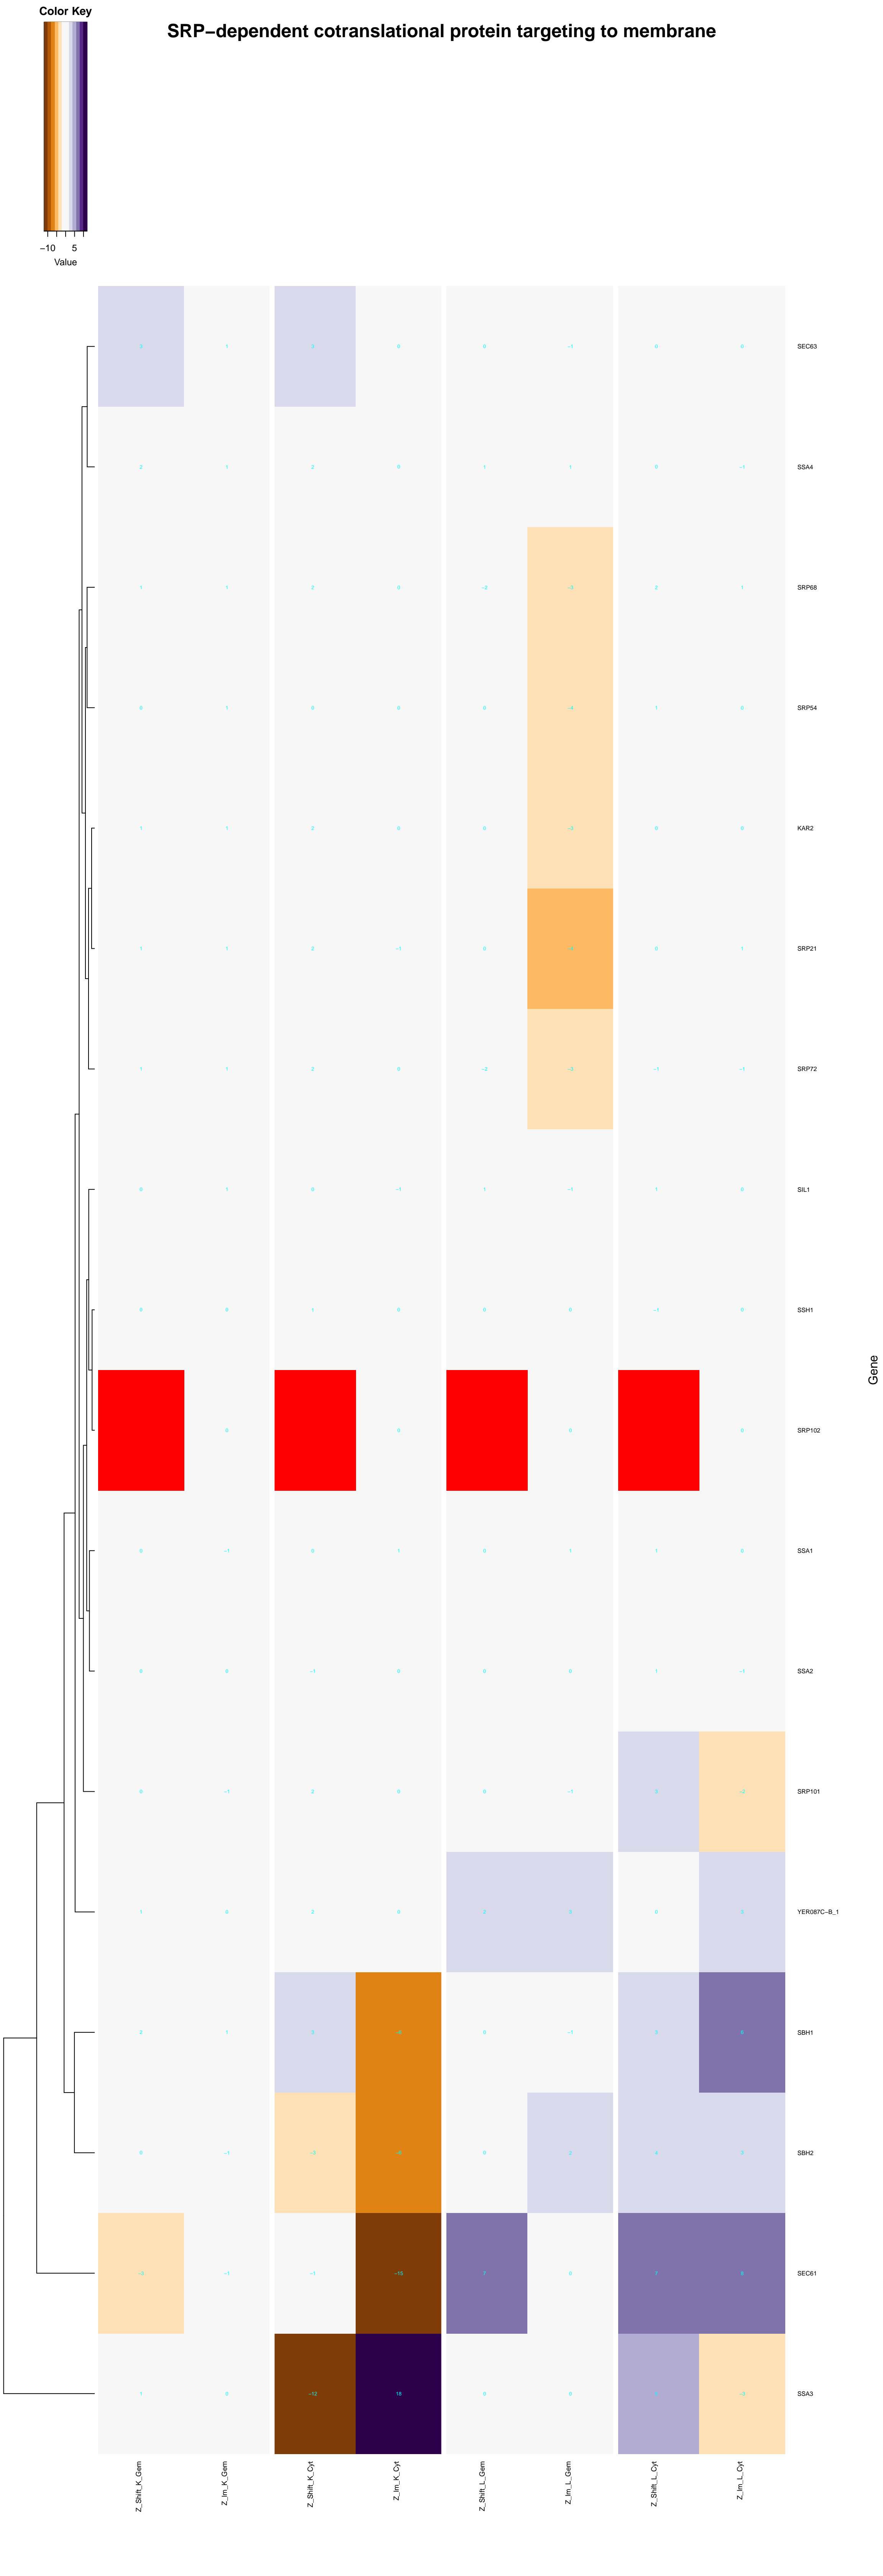

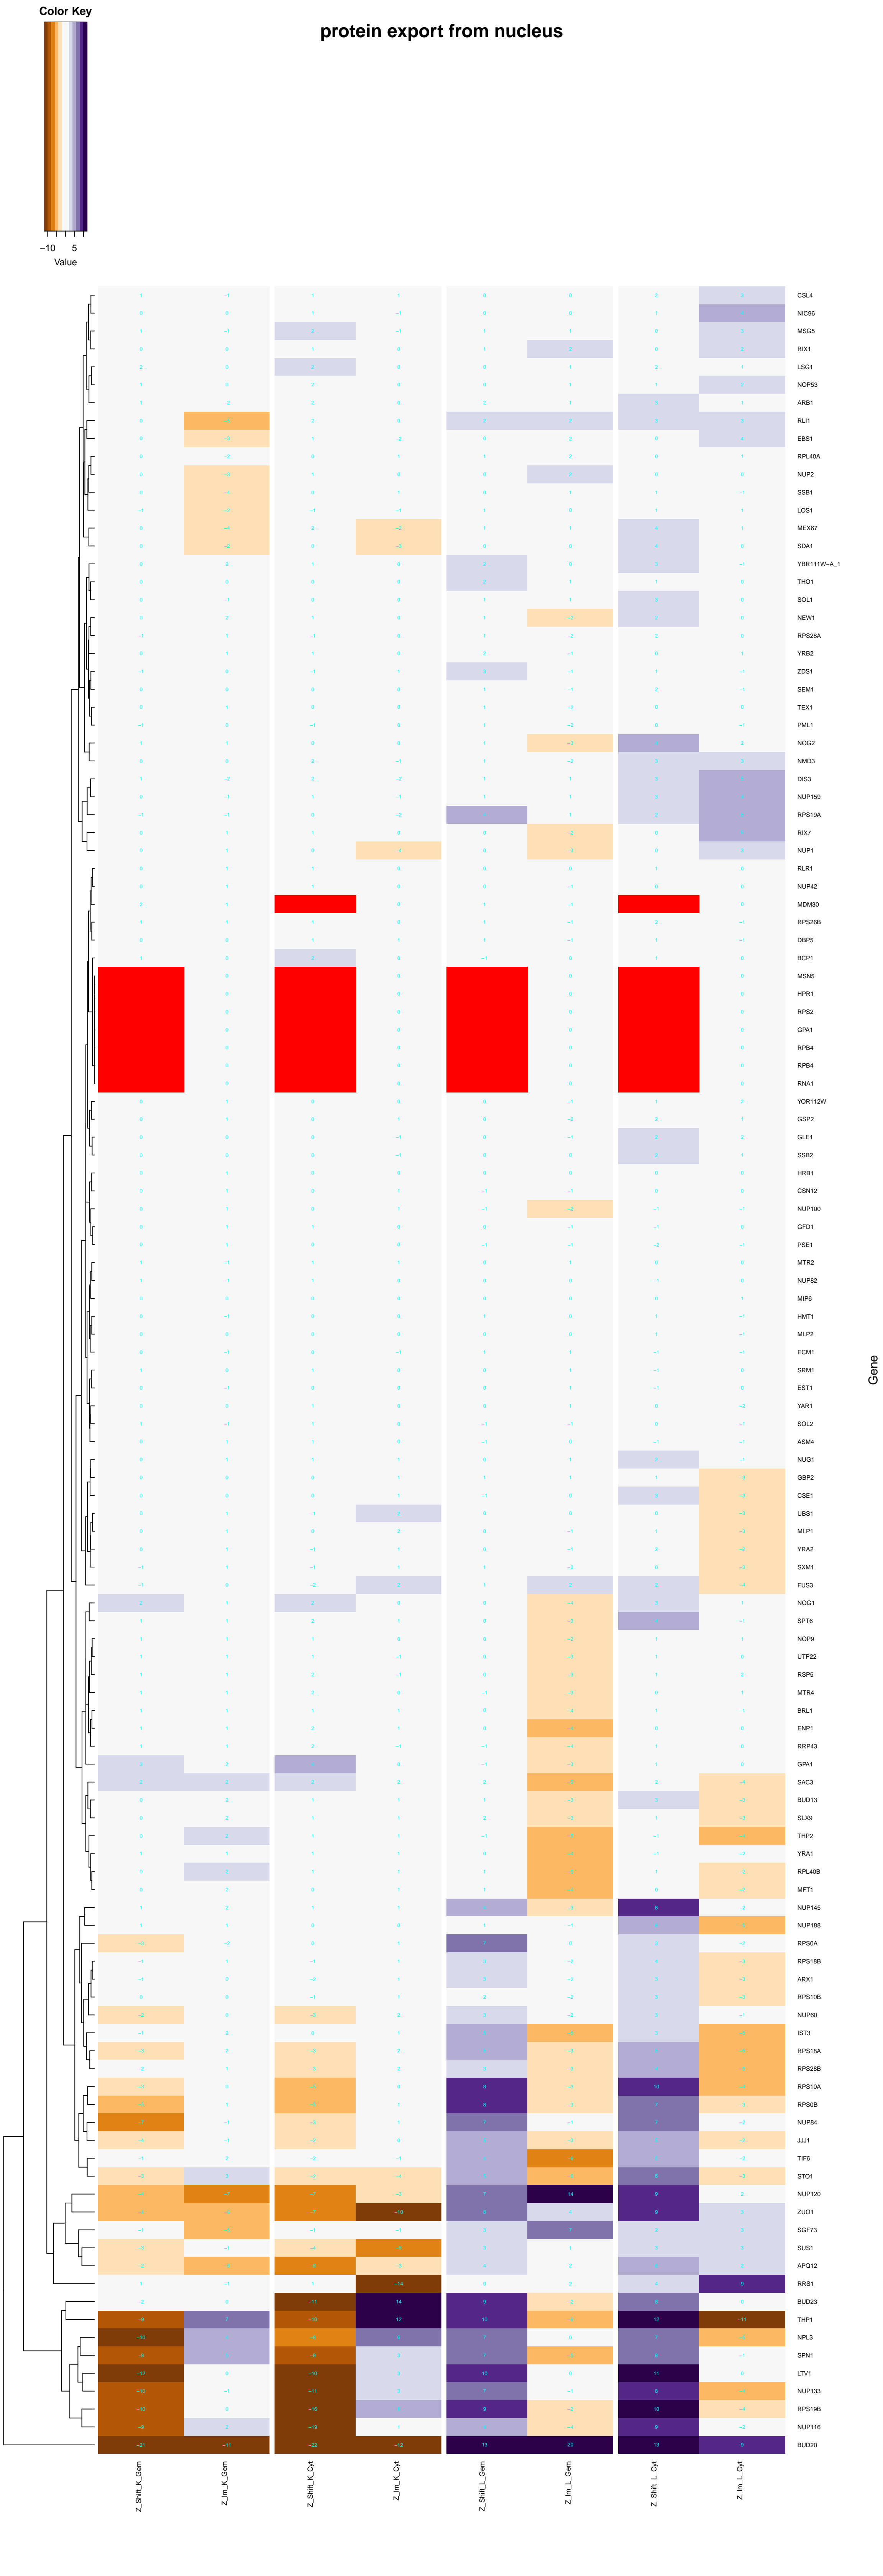

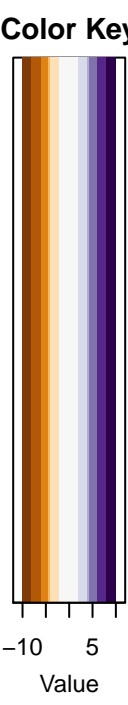

MAPK export from nucleus

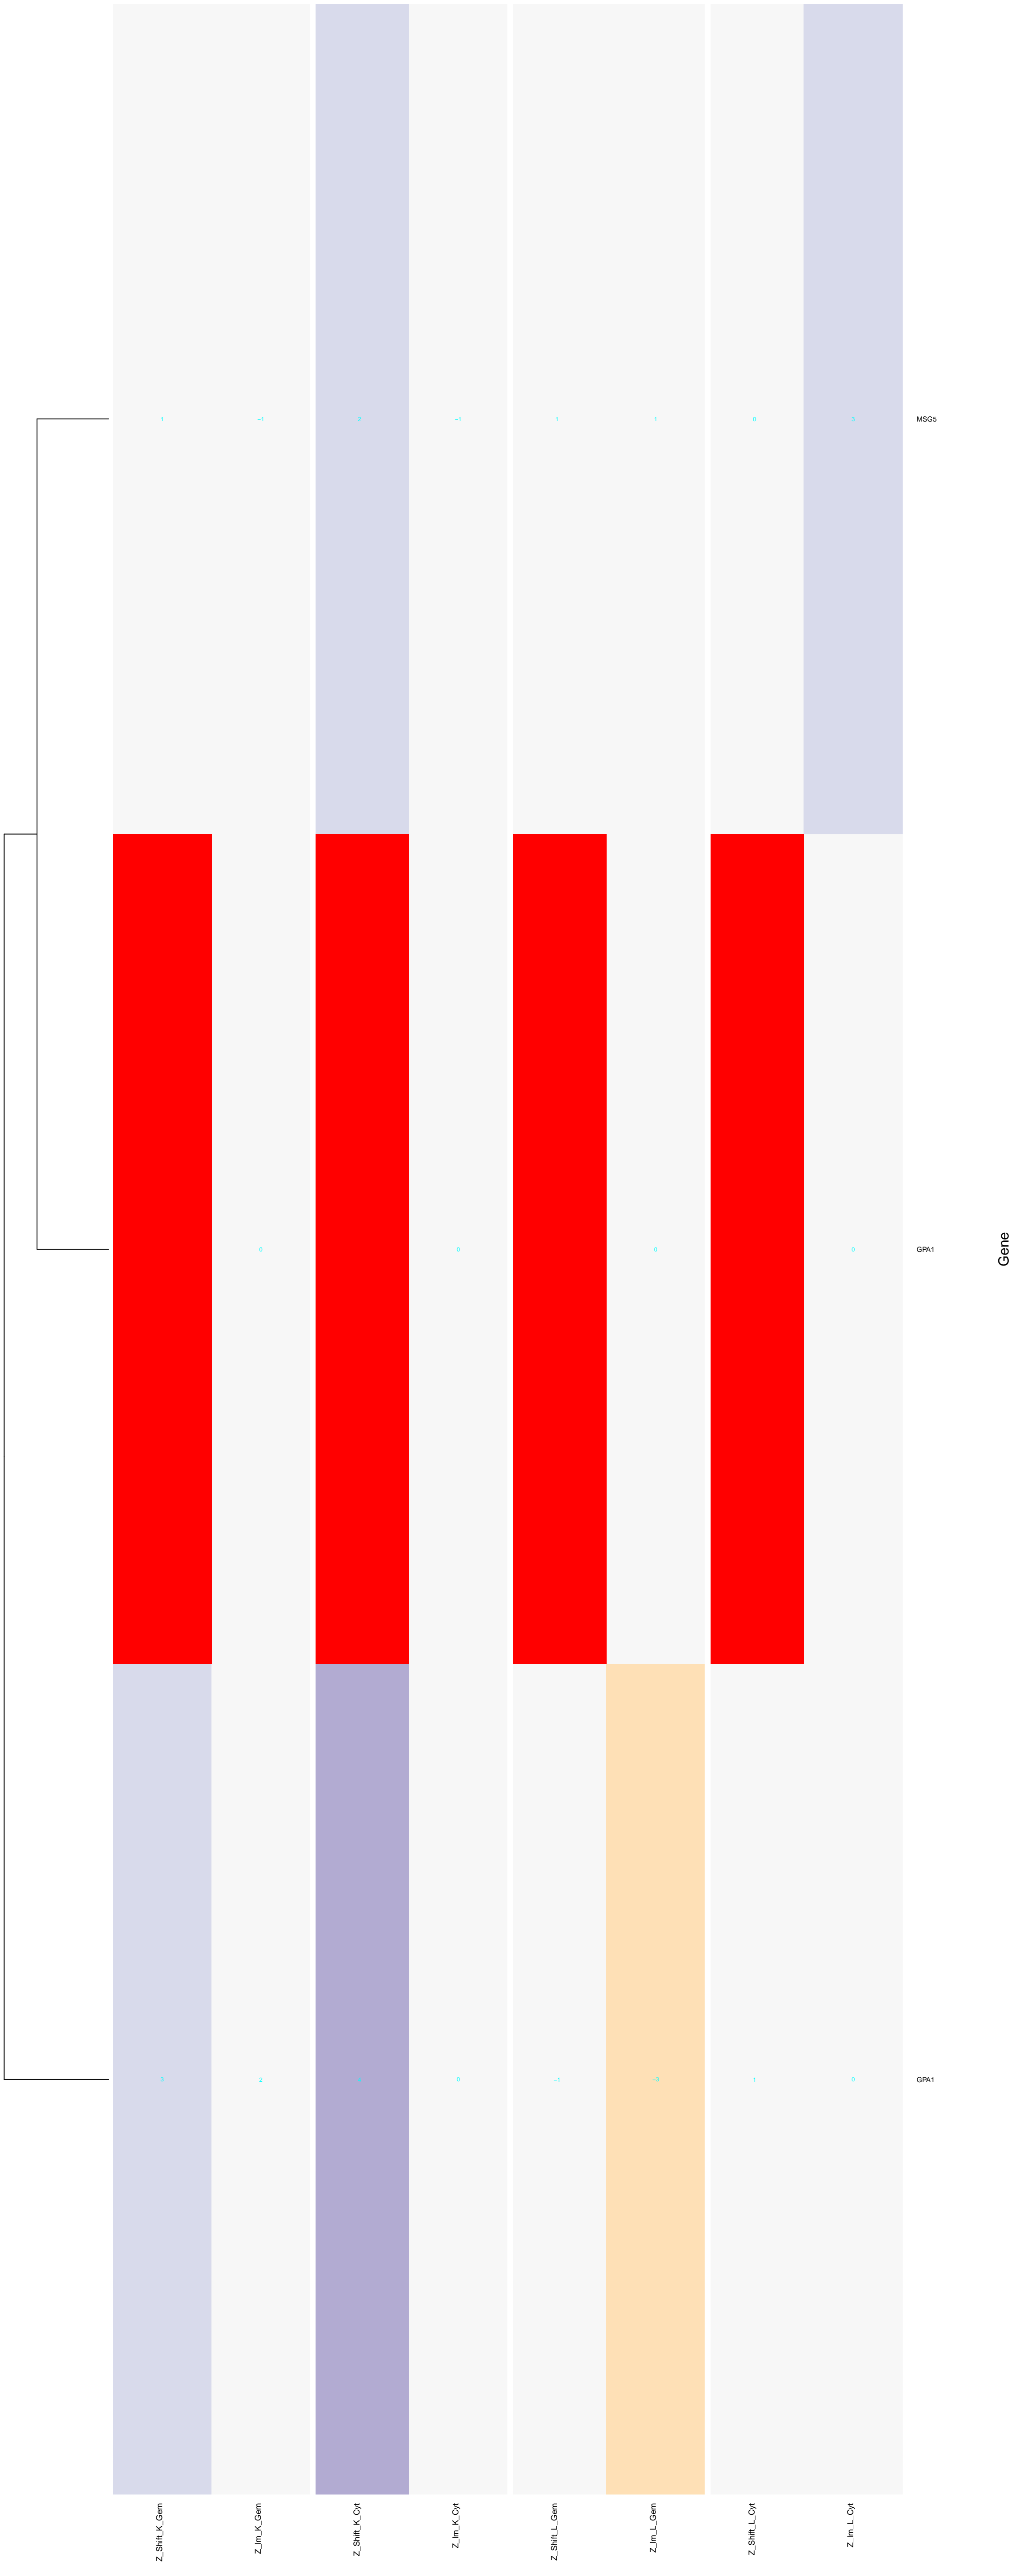

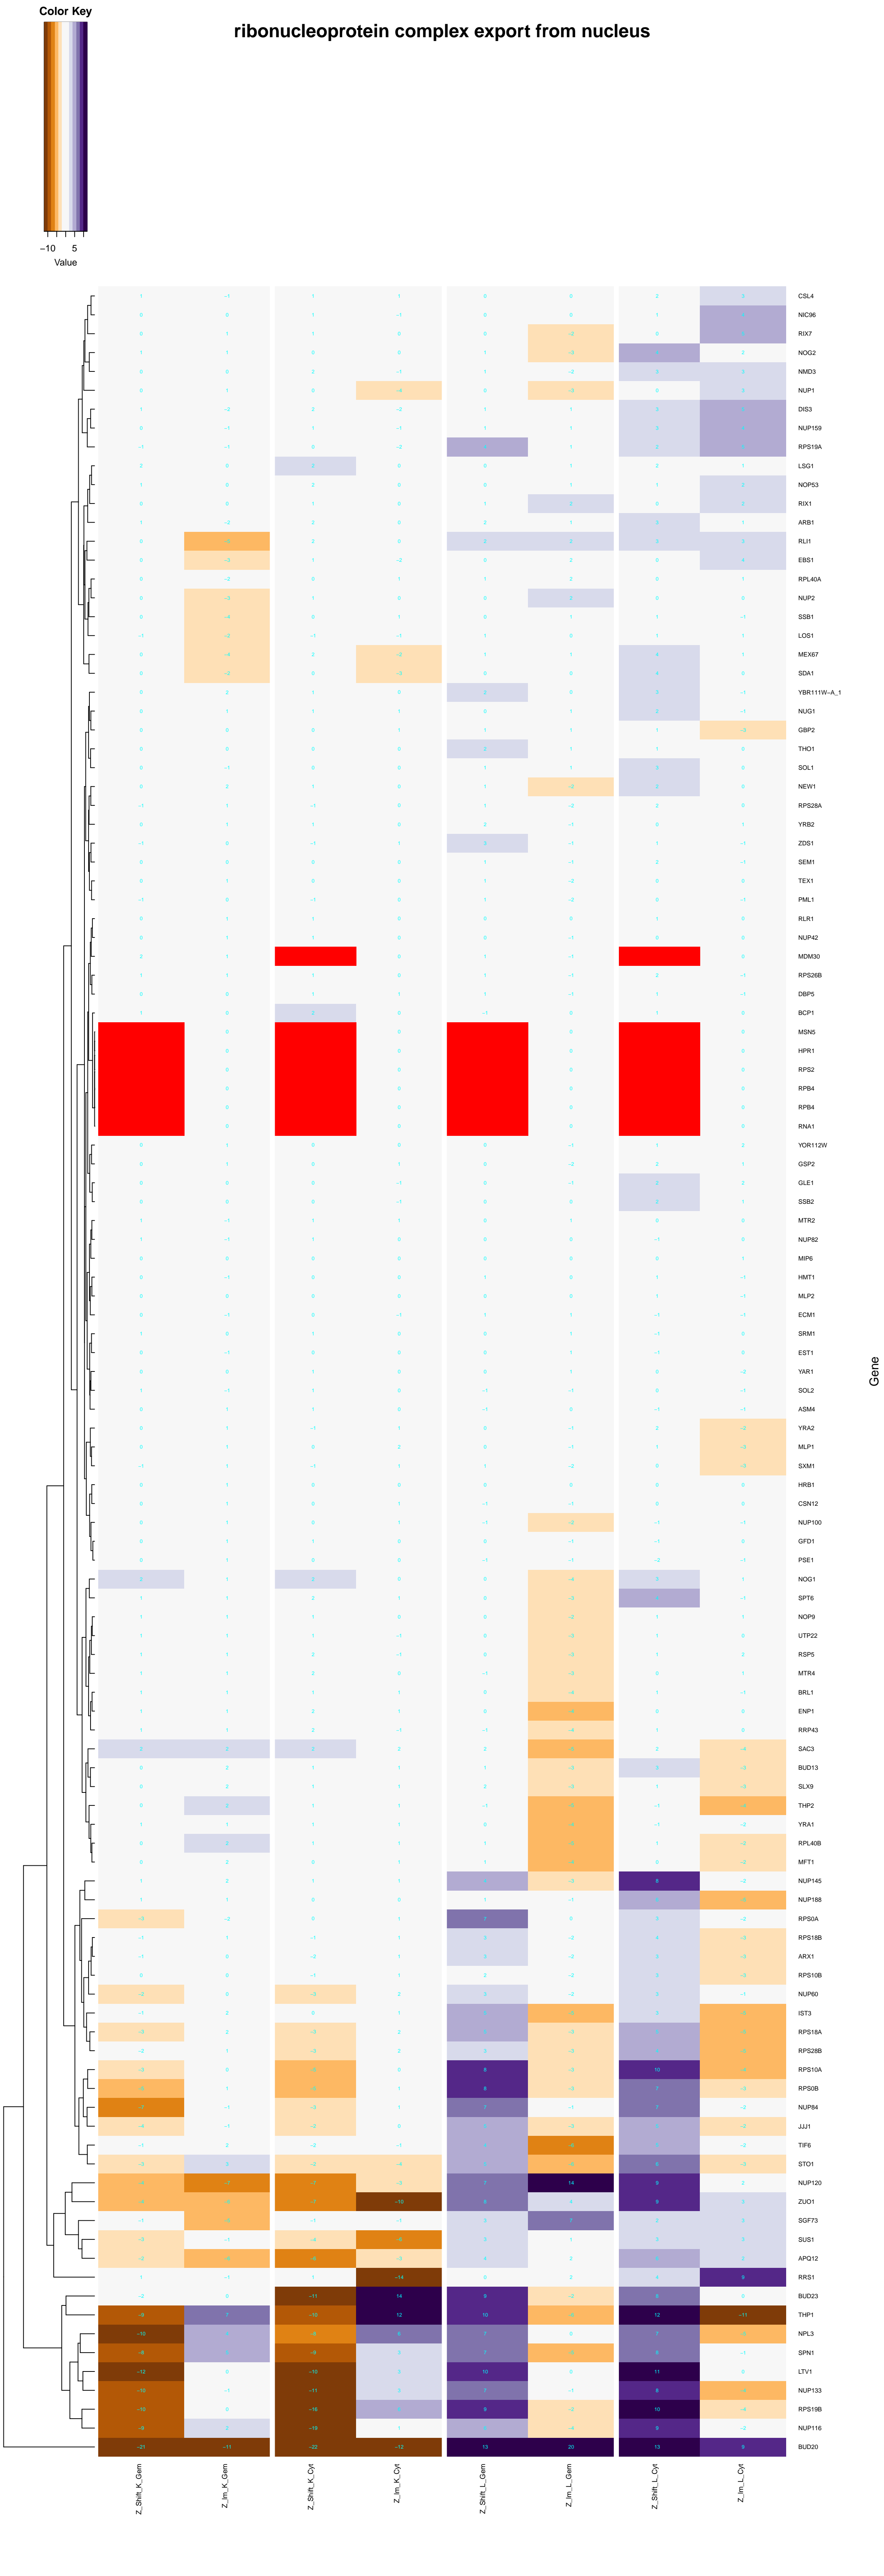



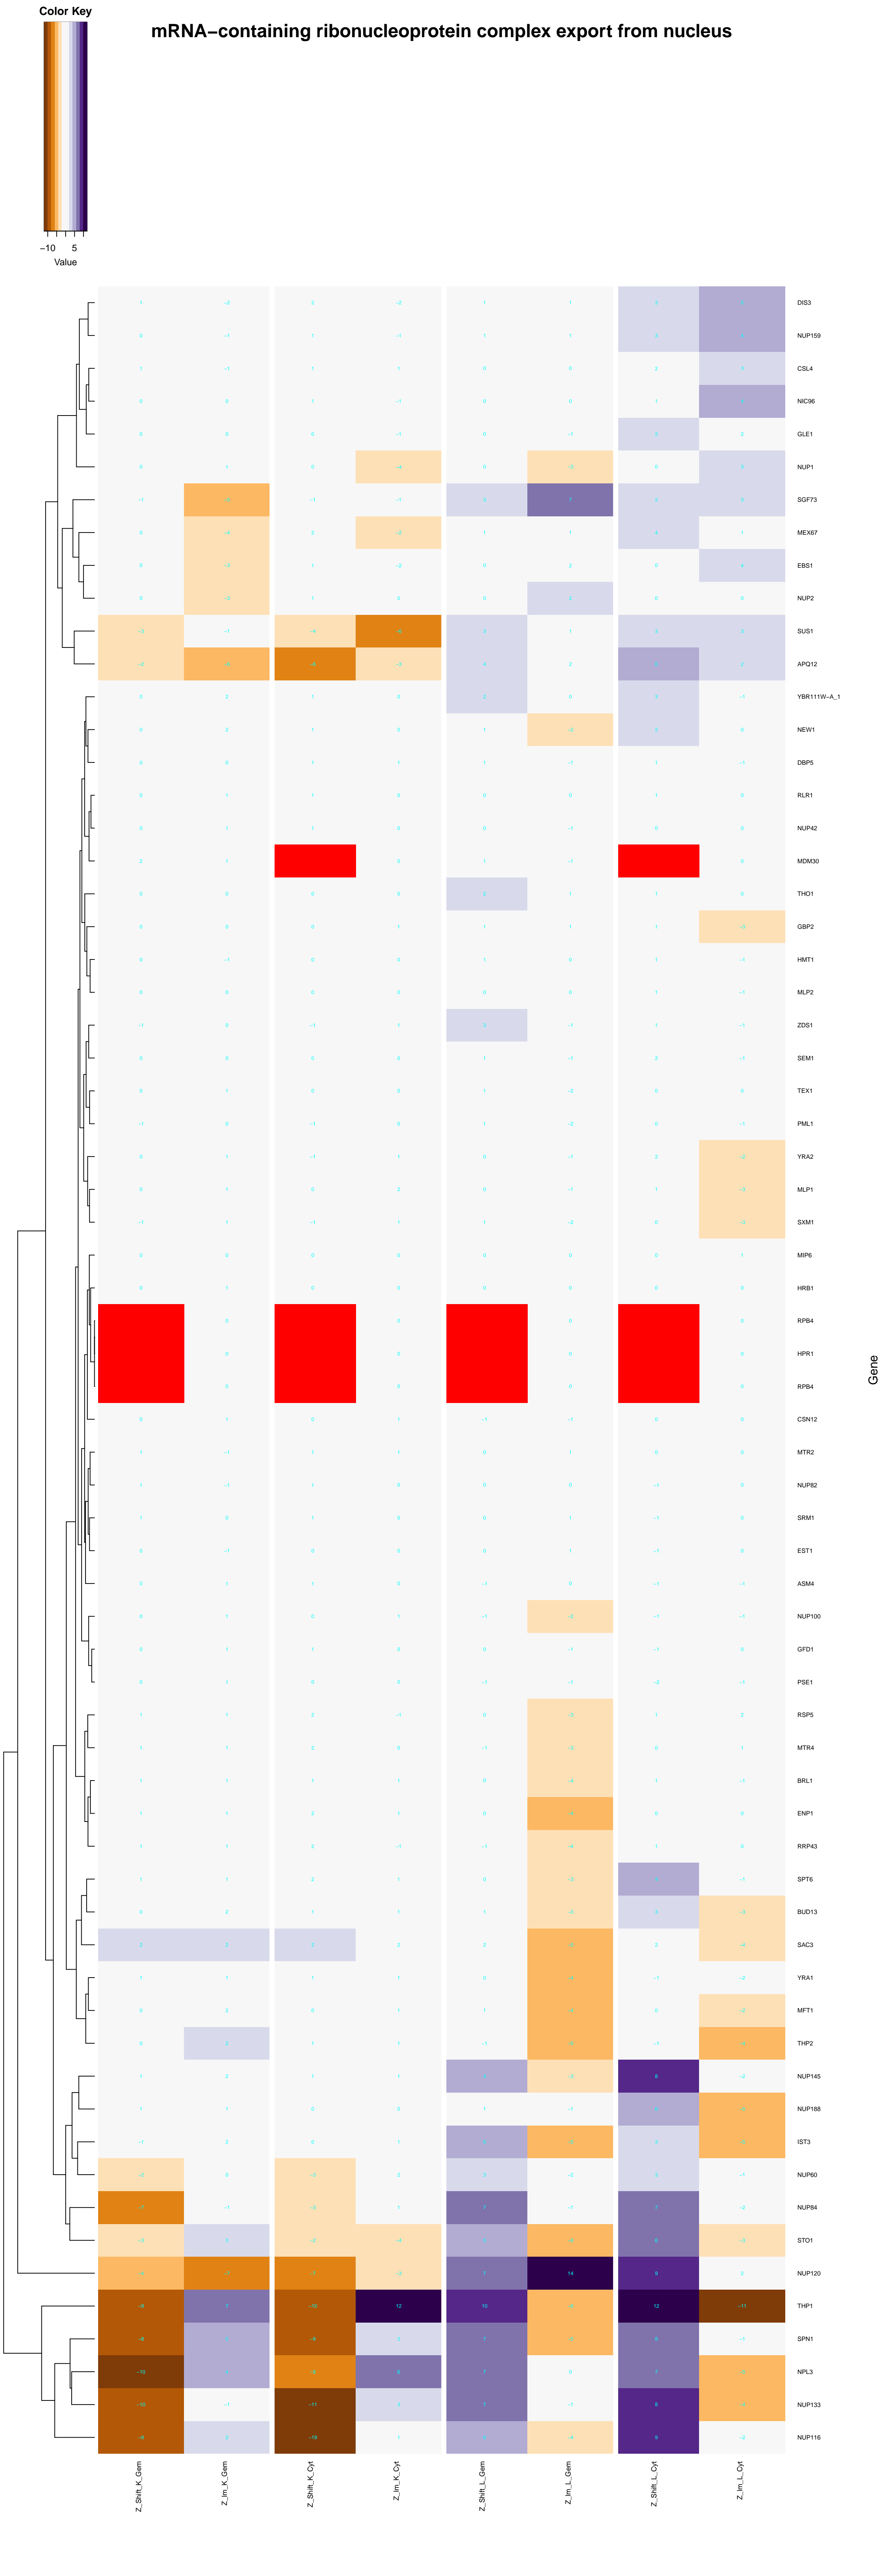

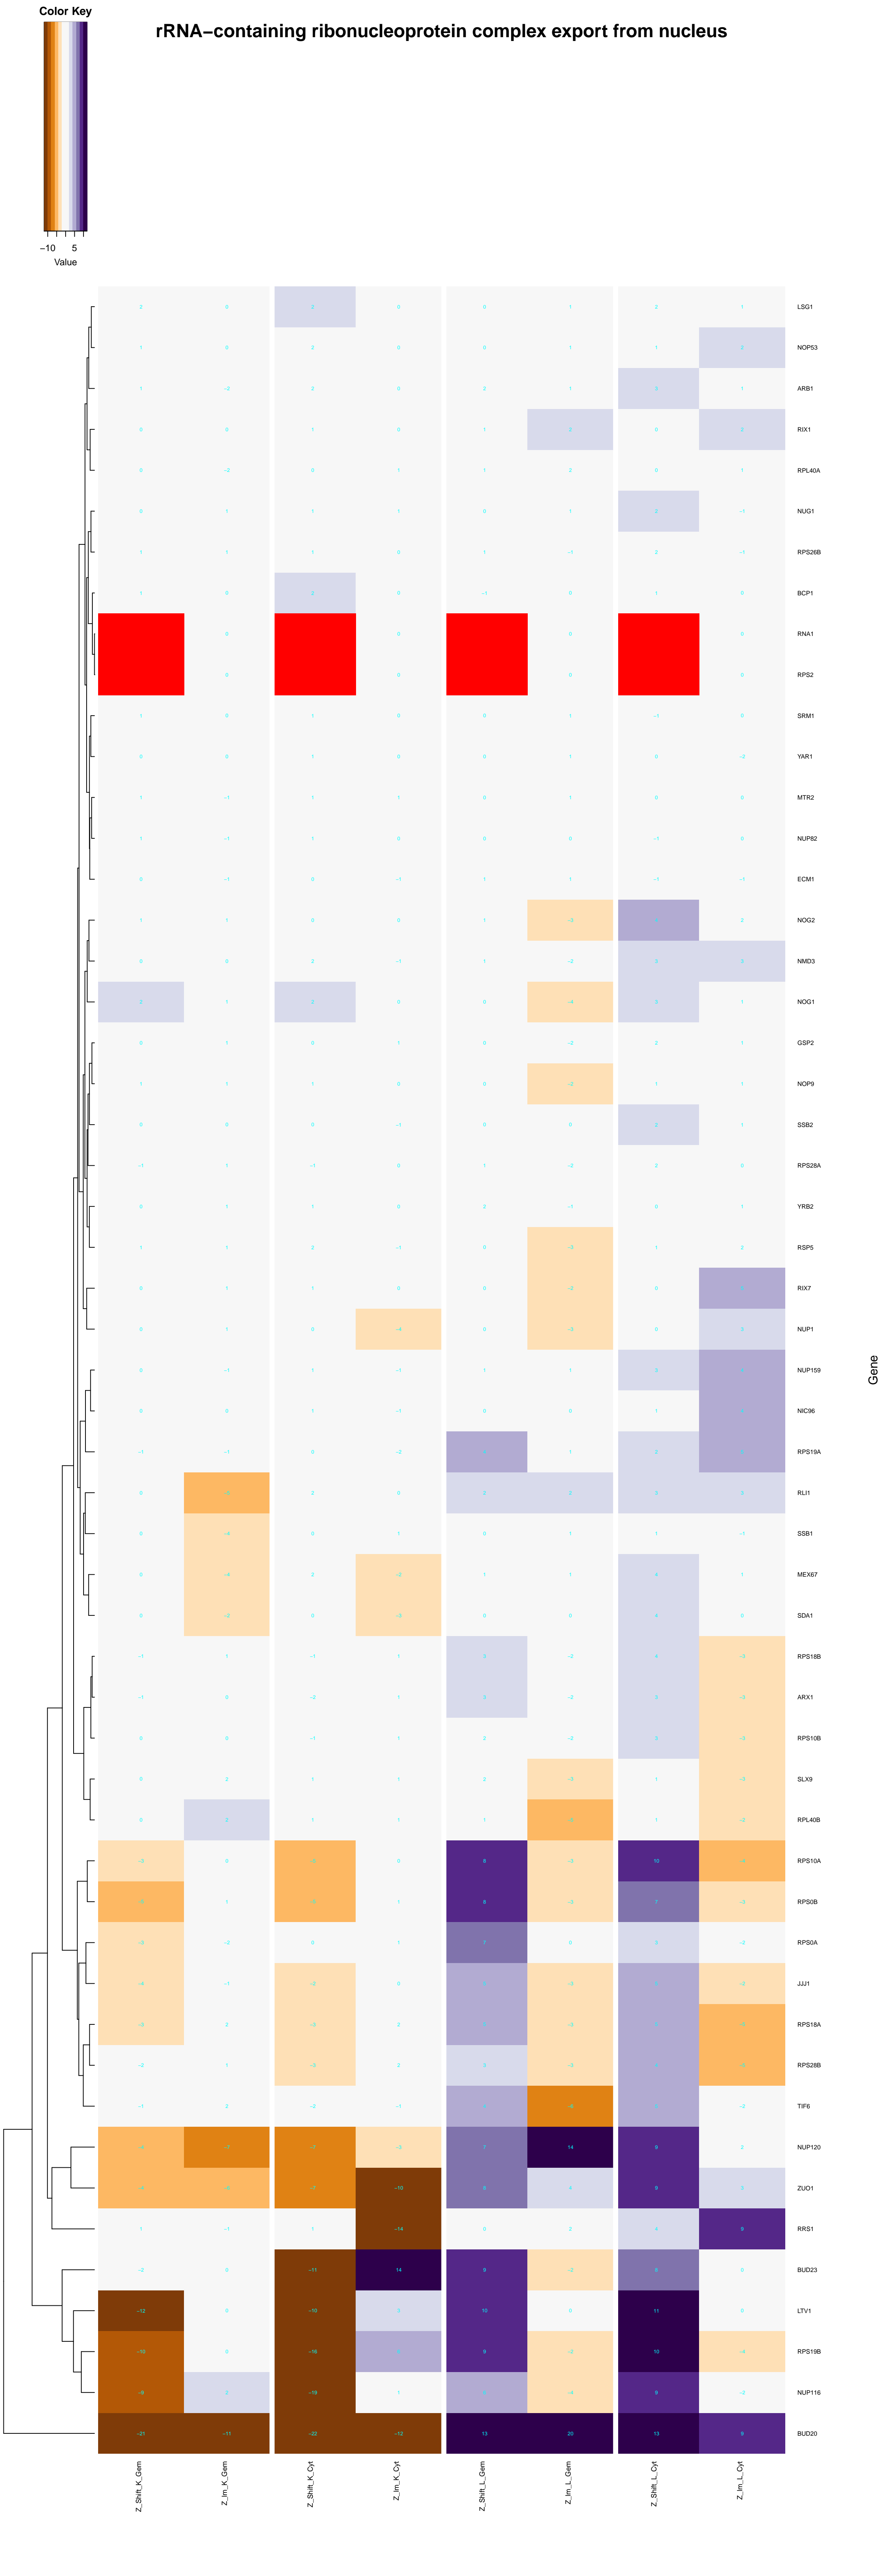



tRNA-containing ribonucleoprotein complex export from nucleus

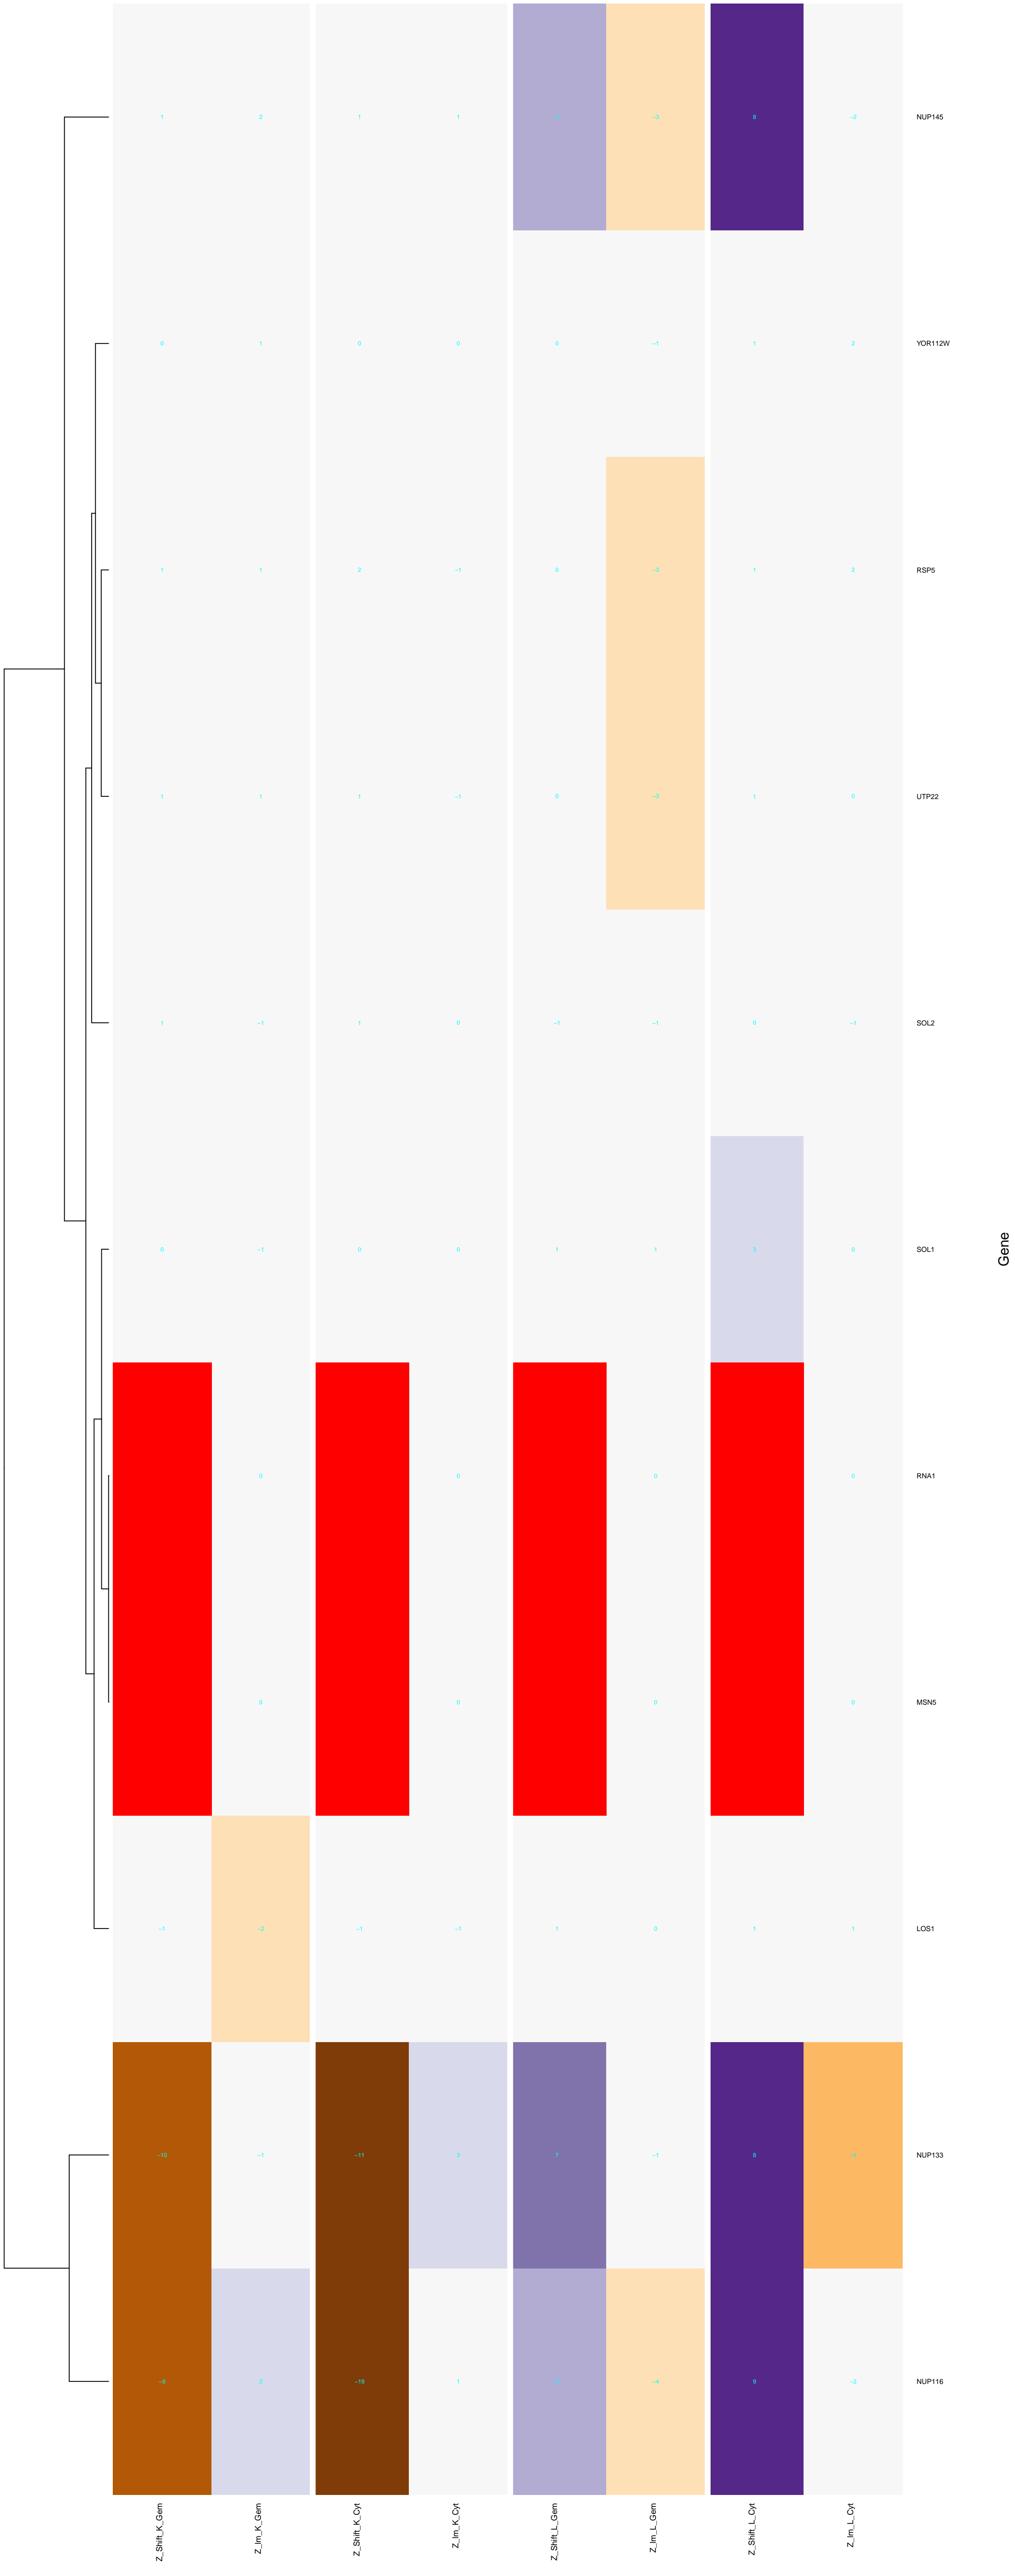

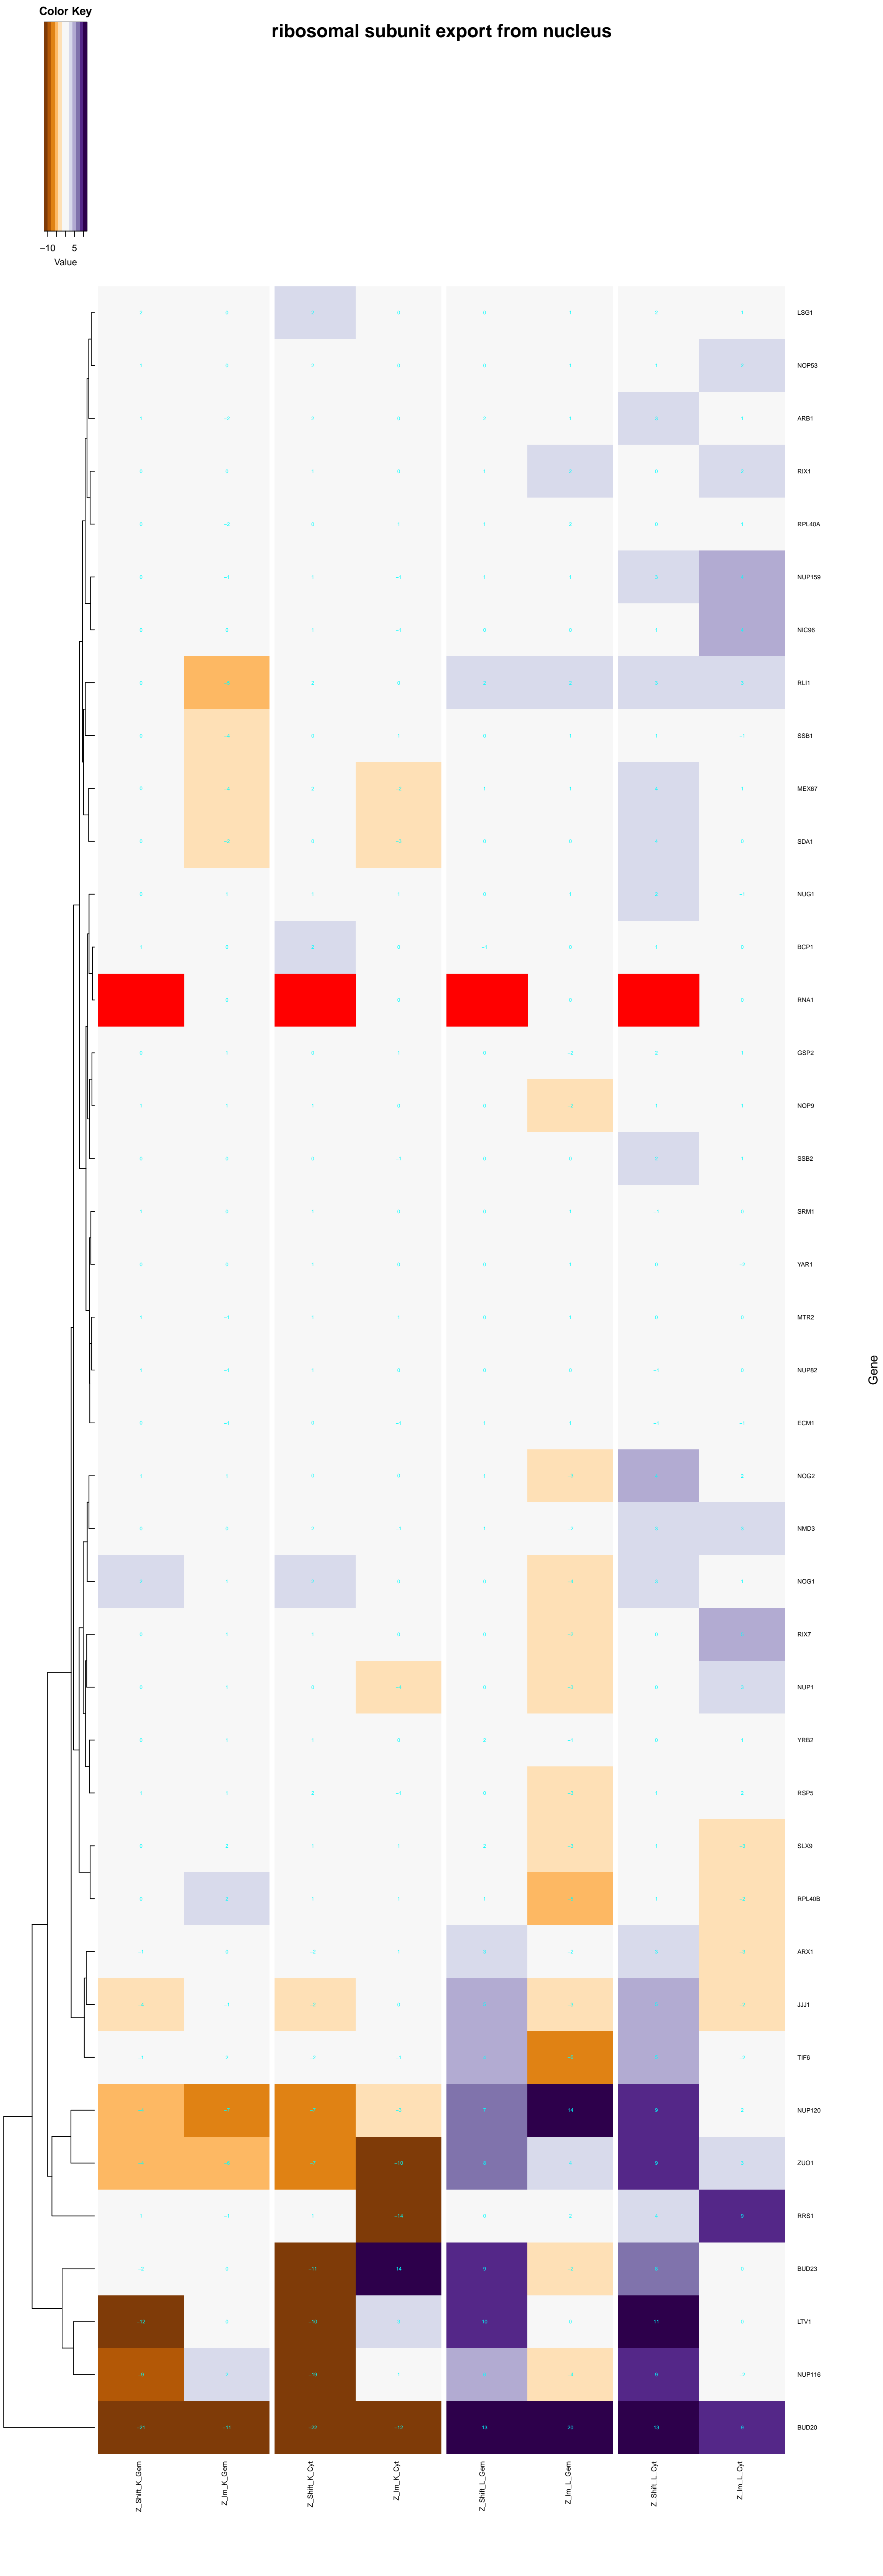

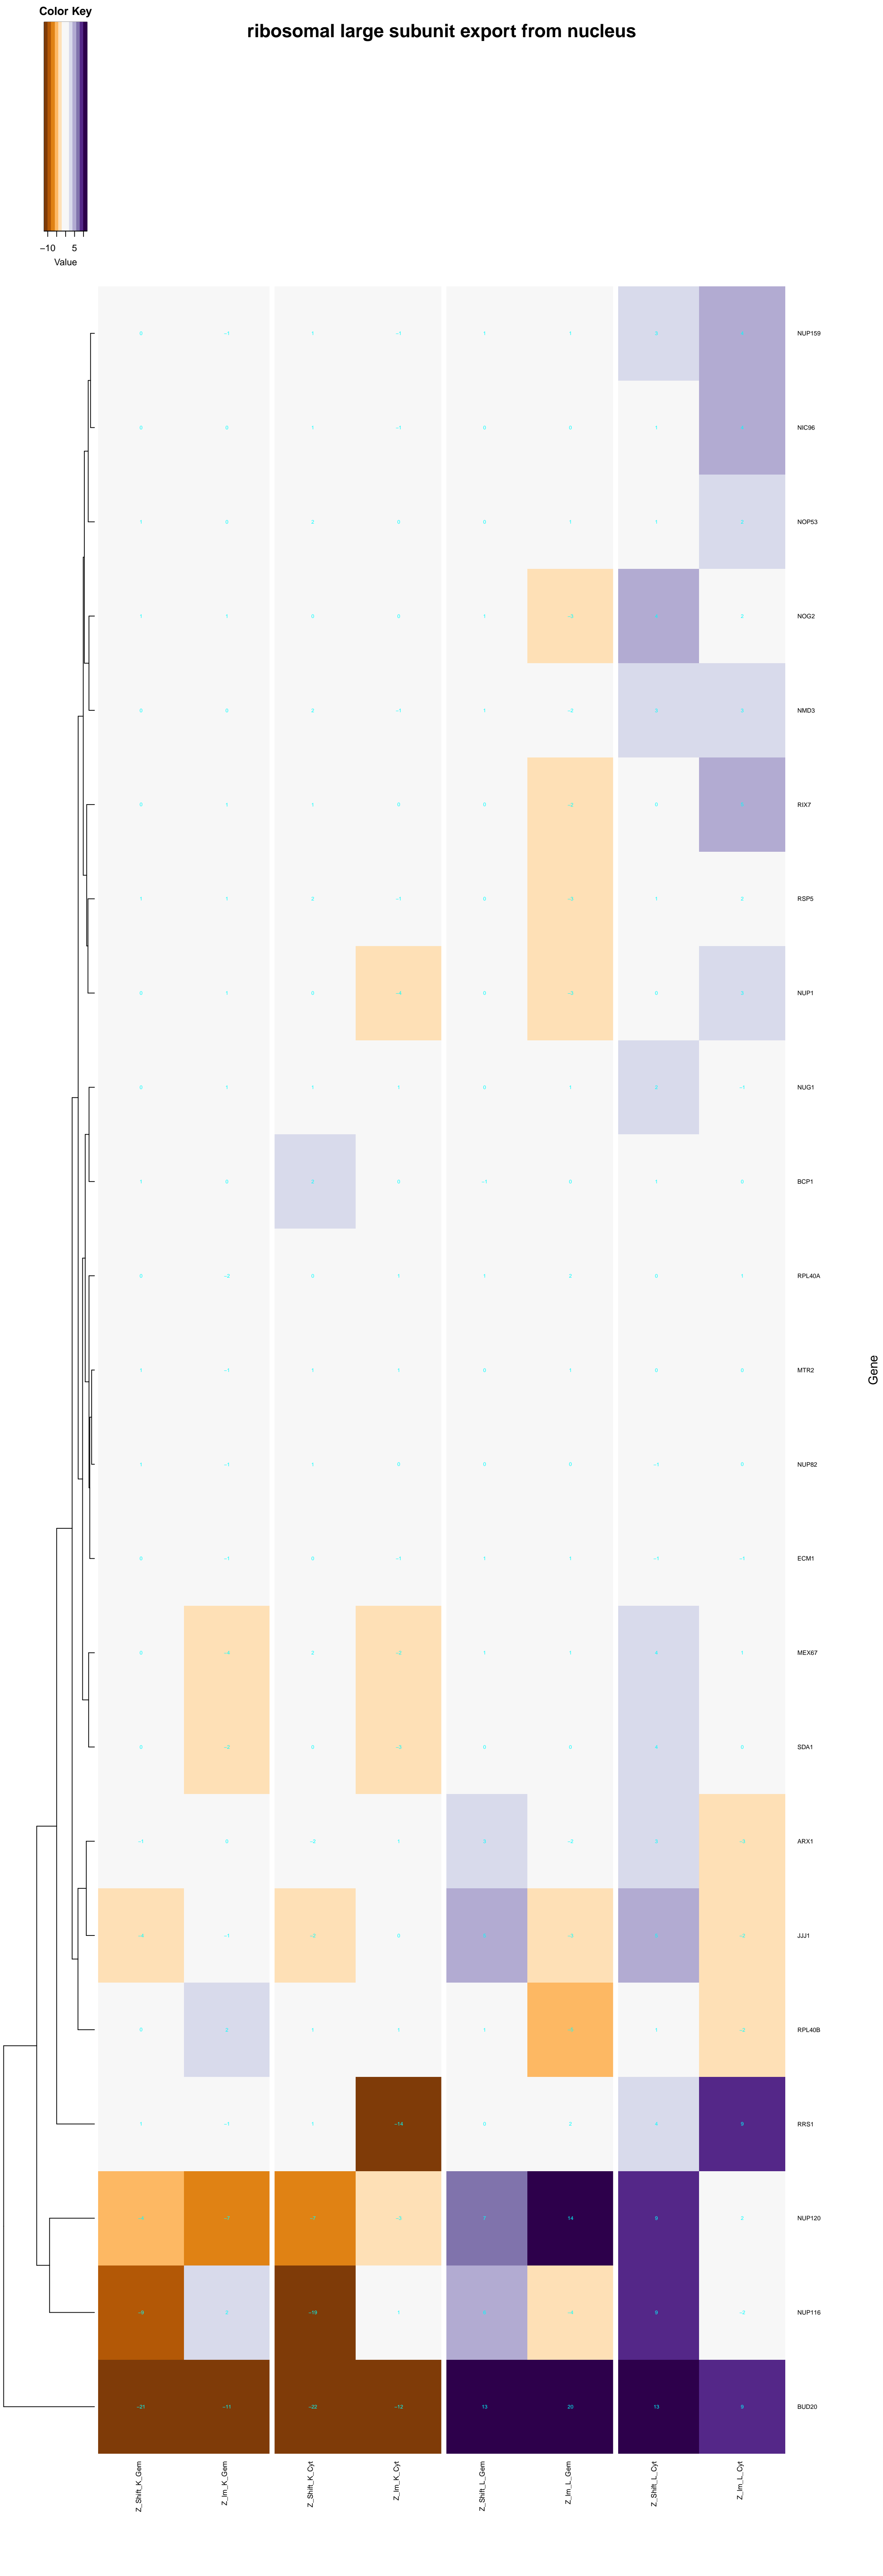

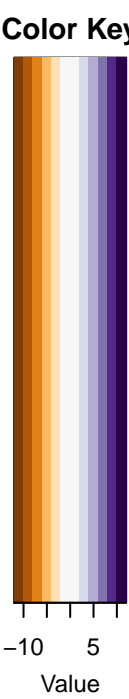

ribosomal small subunit export from nucleus

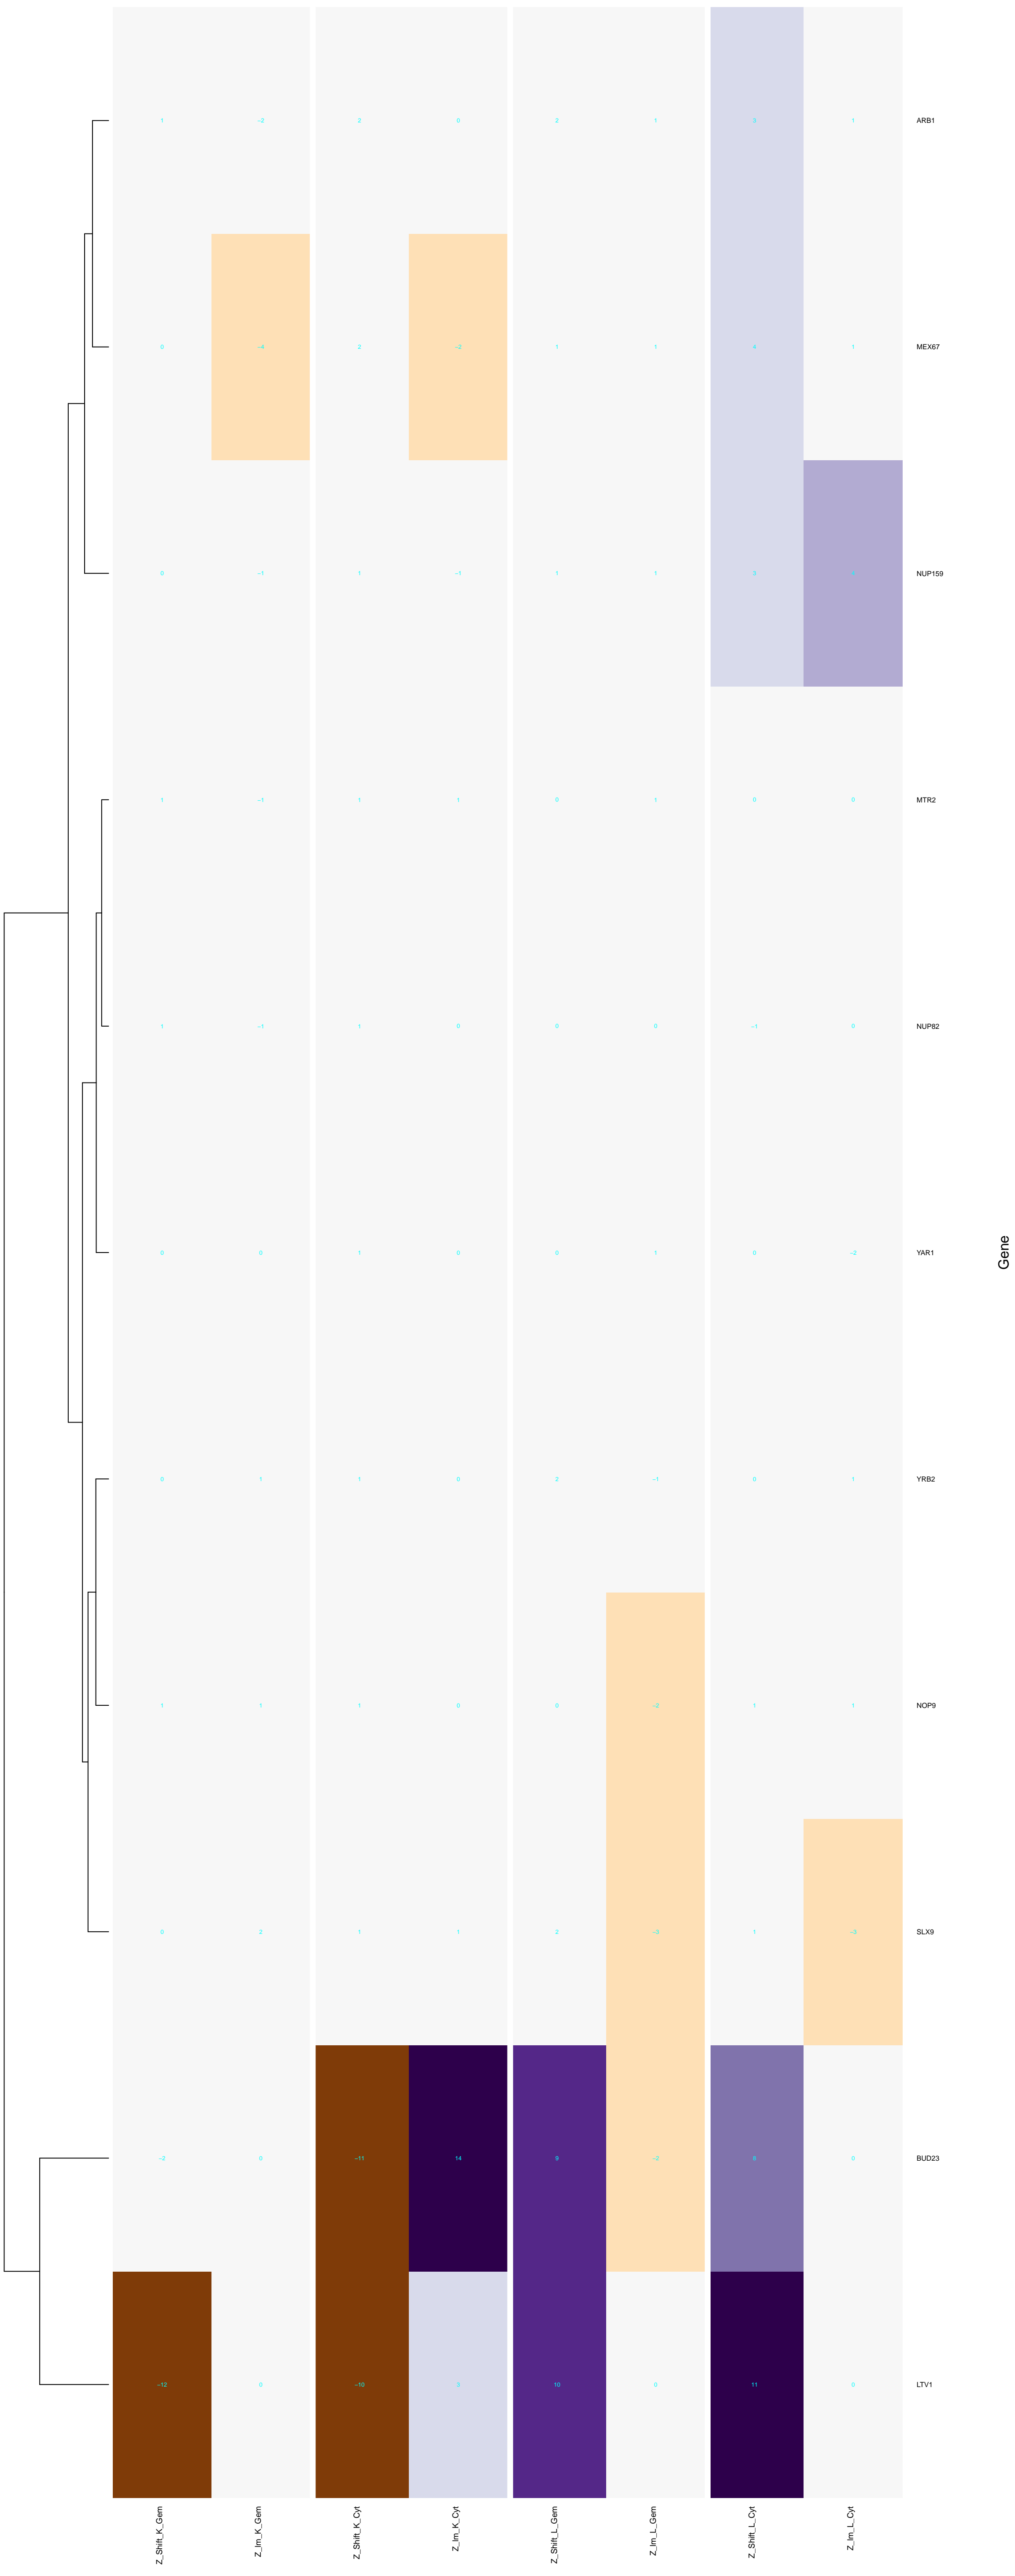

Supplement: s1 [file s1]
