# Supplementary material for: A Humanized Yeast Phenomic Model of Deoxycytidine Kinase to Predict Genetic Buffering of Nucleoside Analog Cytotoxicity
Source: MDPI journal article supplement (doi:10.3390/genes10100770), 2019-09-30

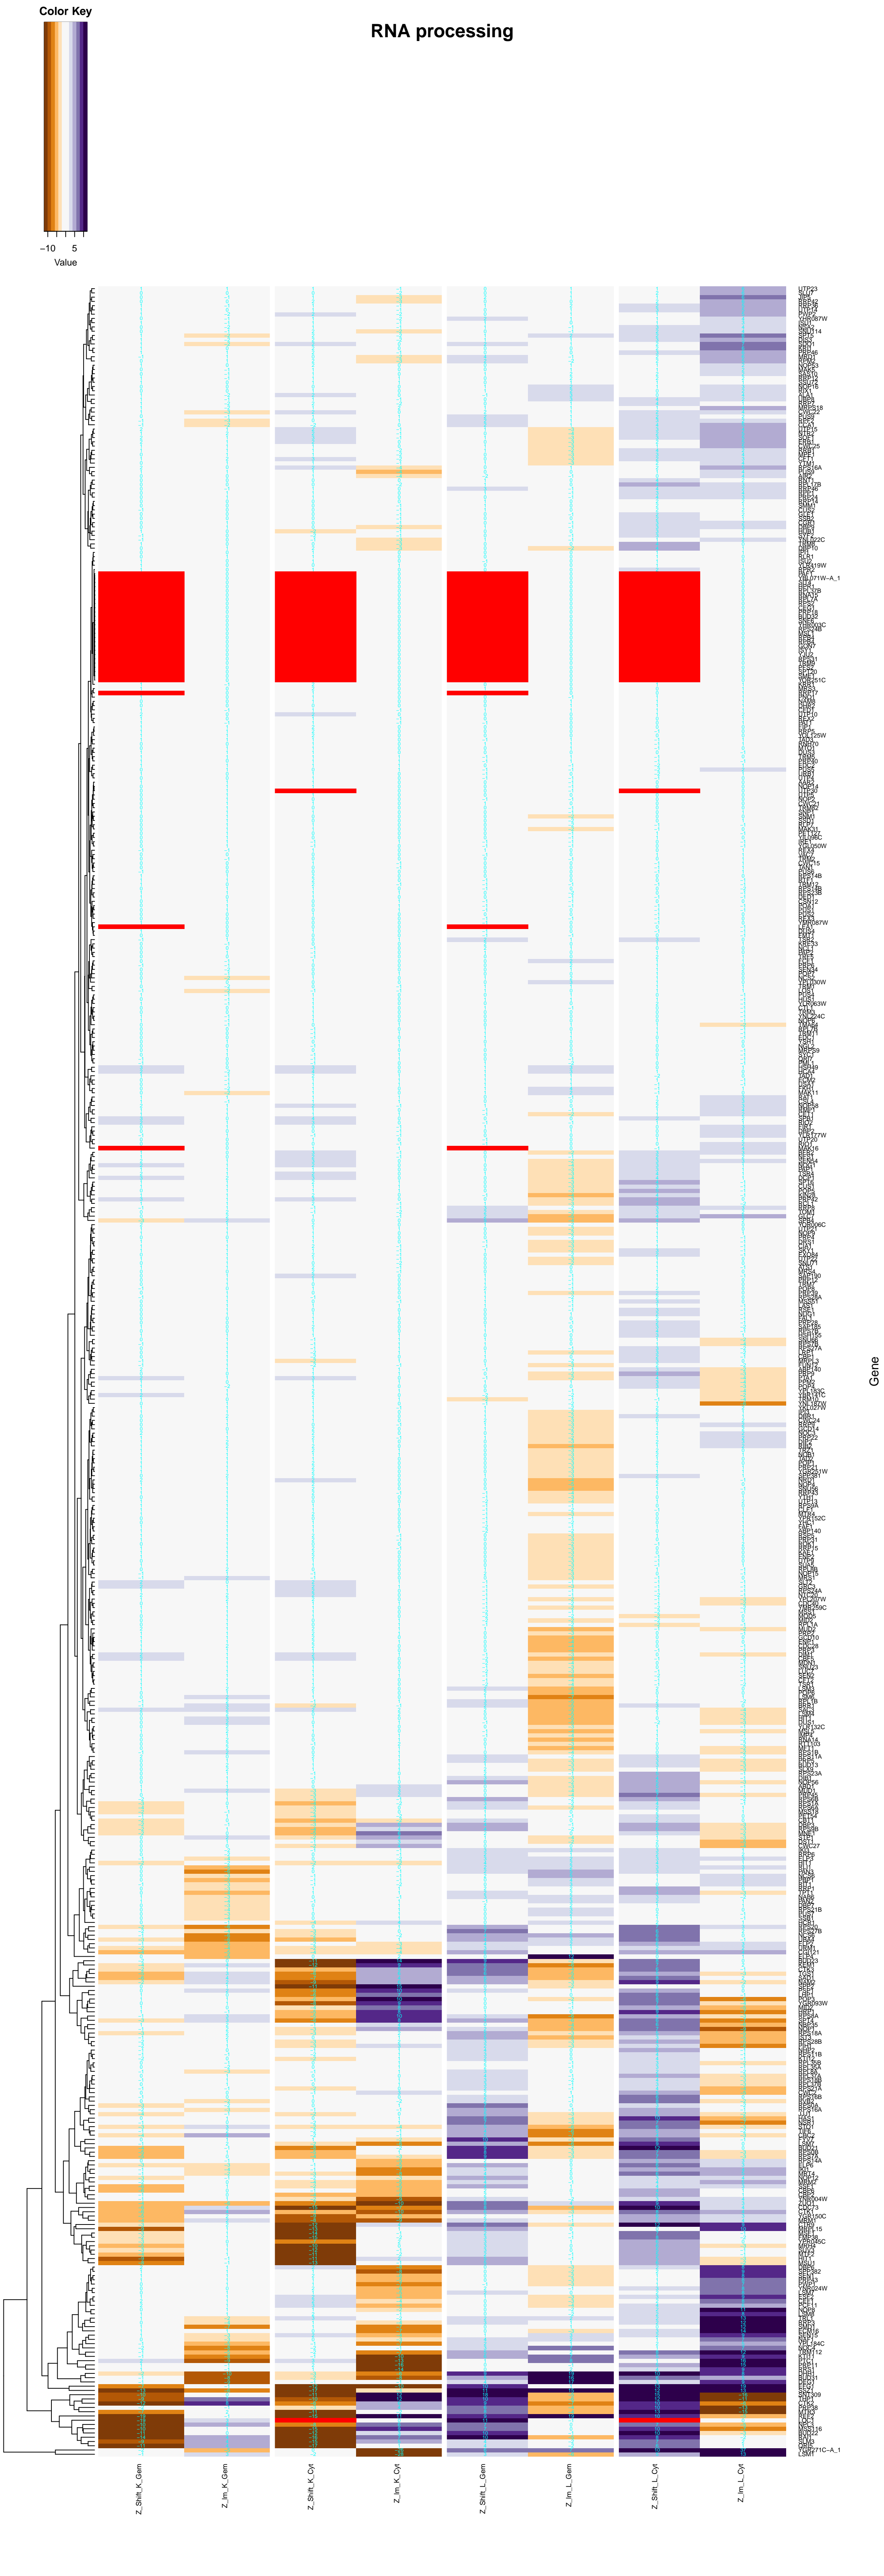

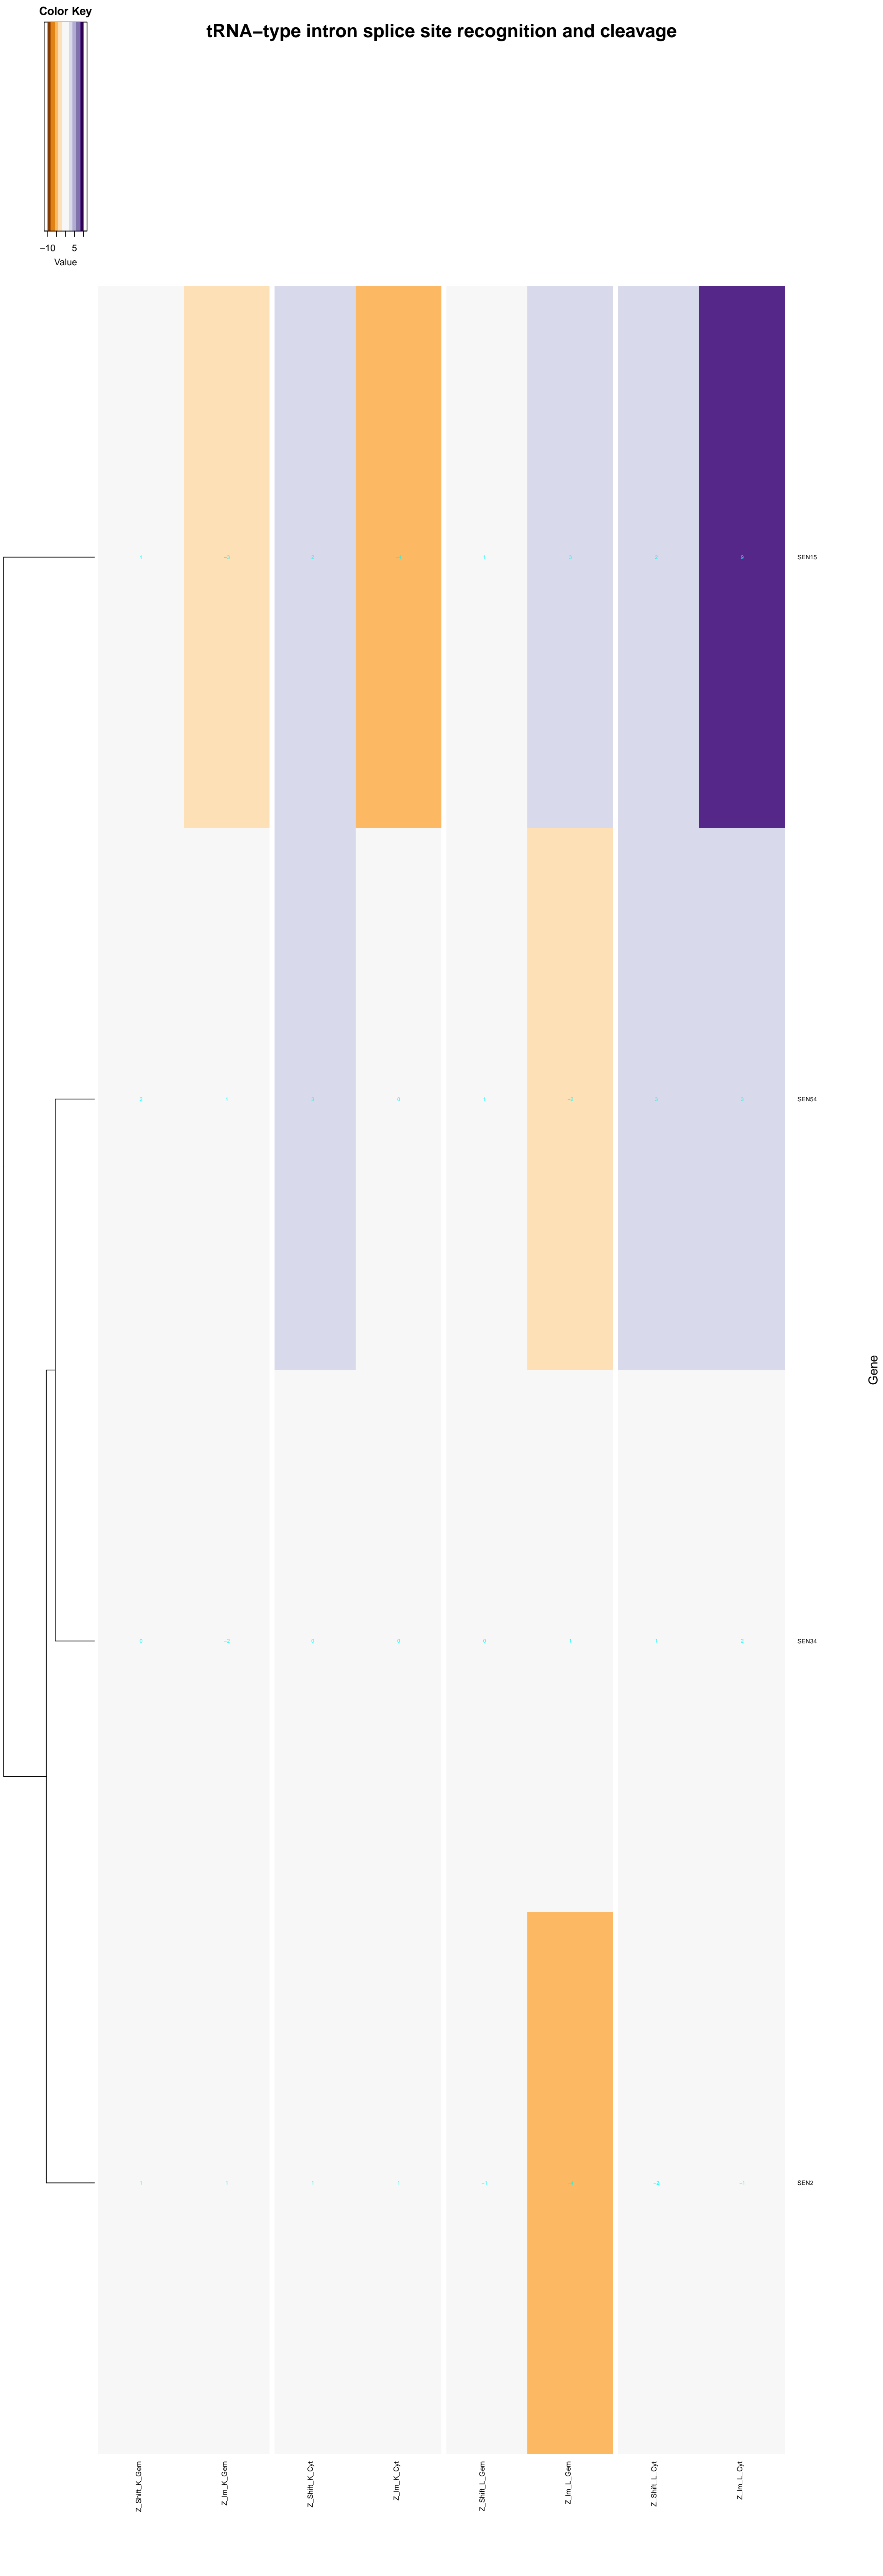

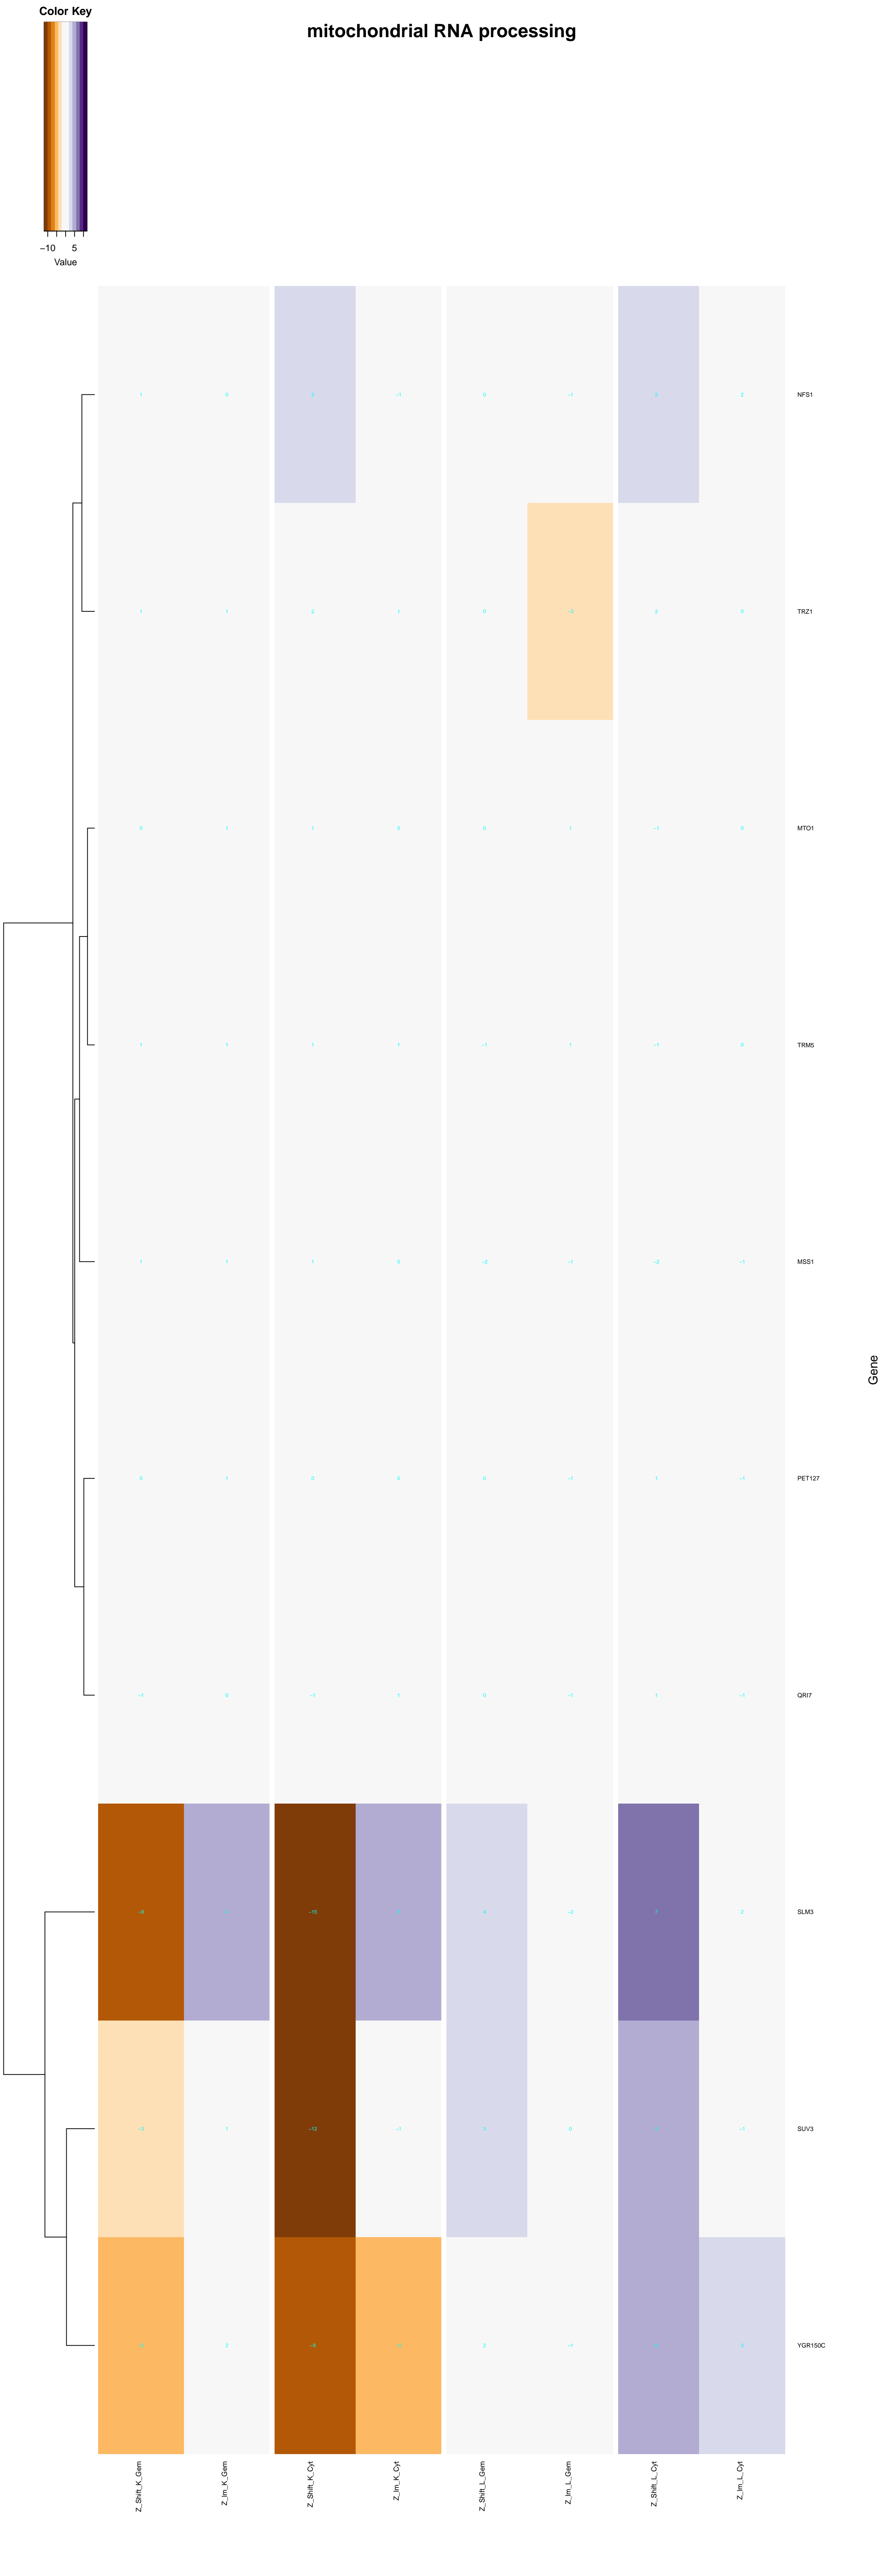

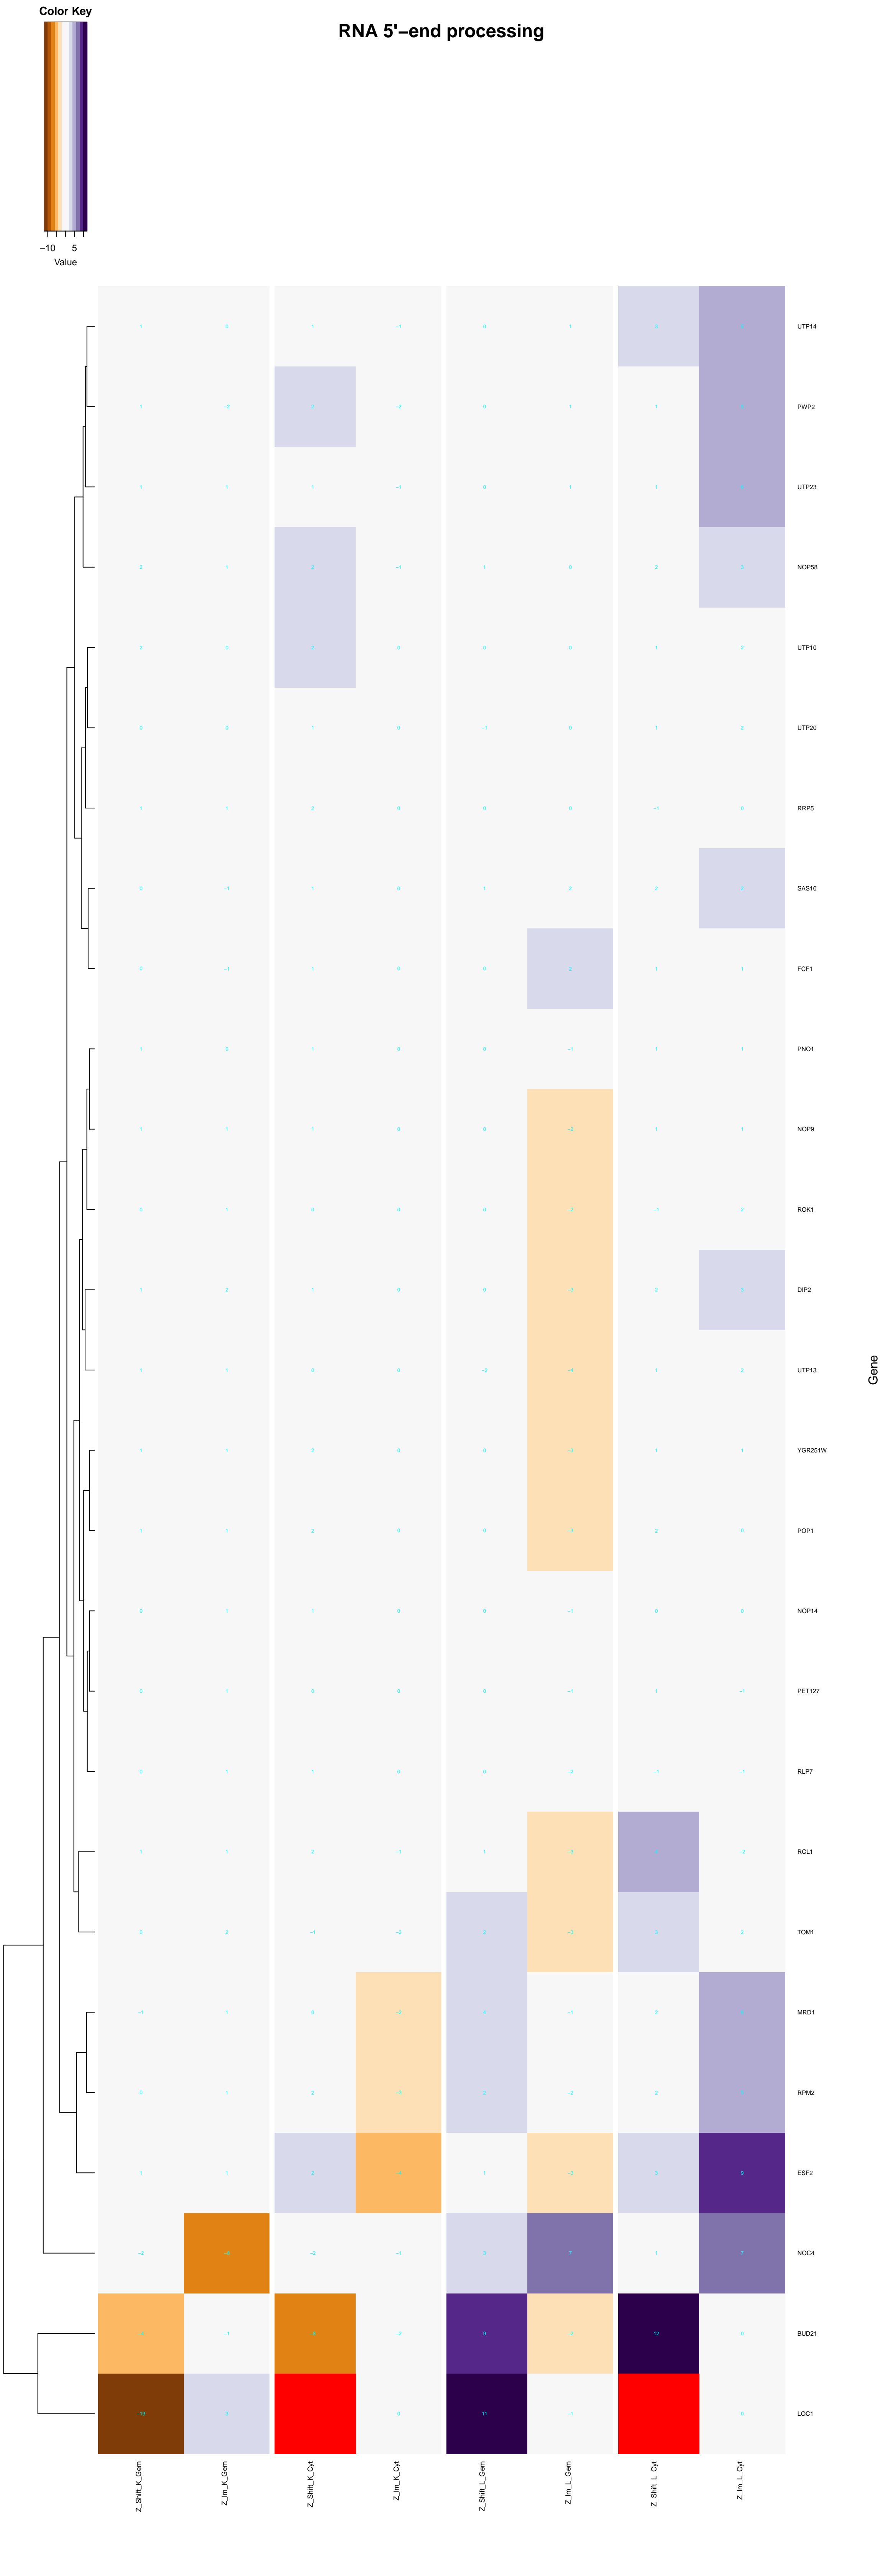

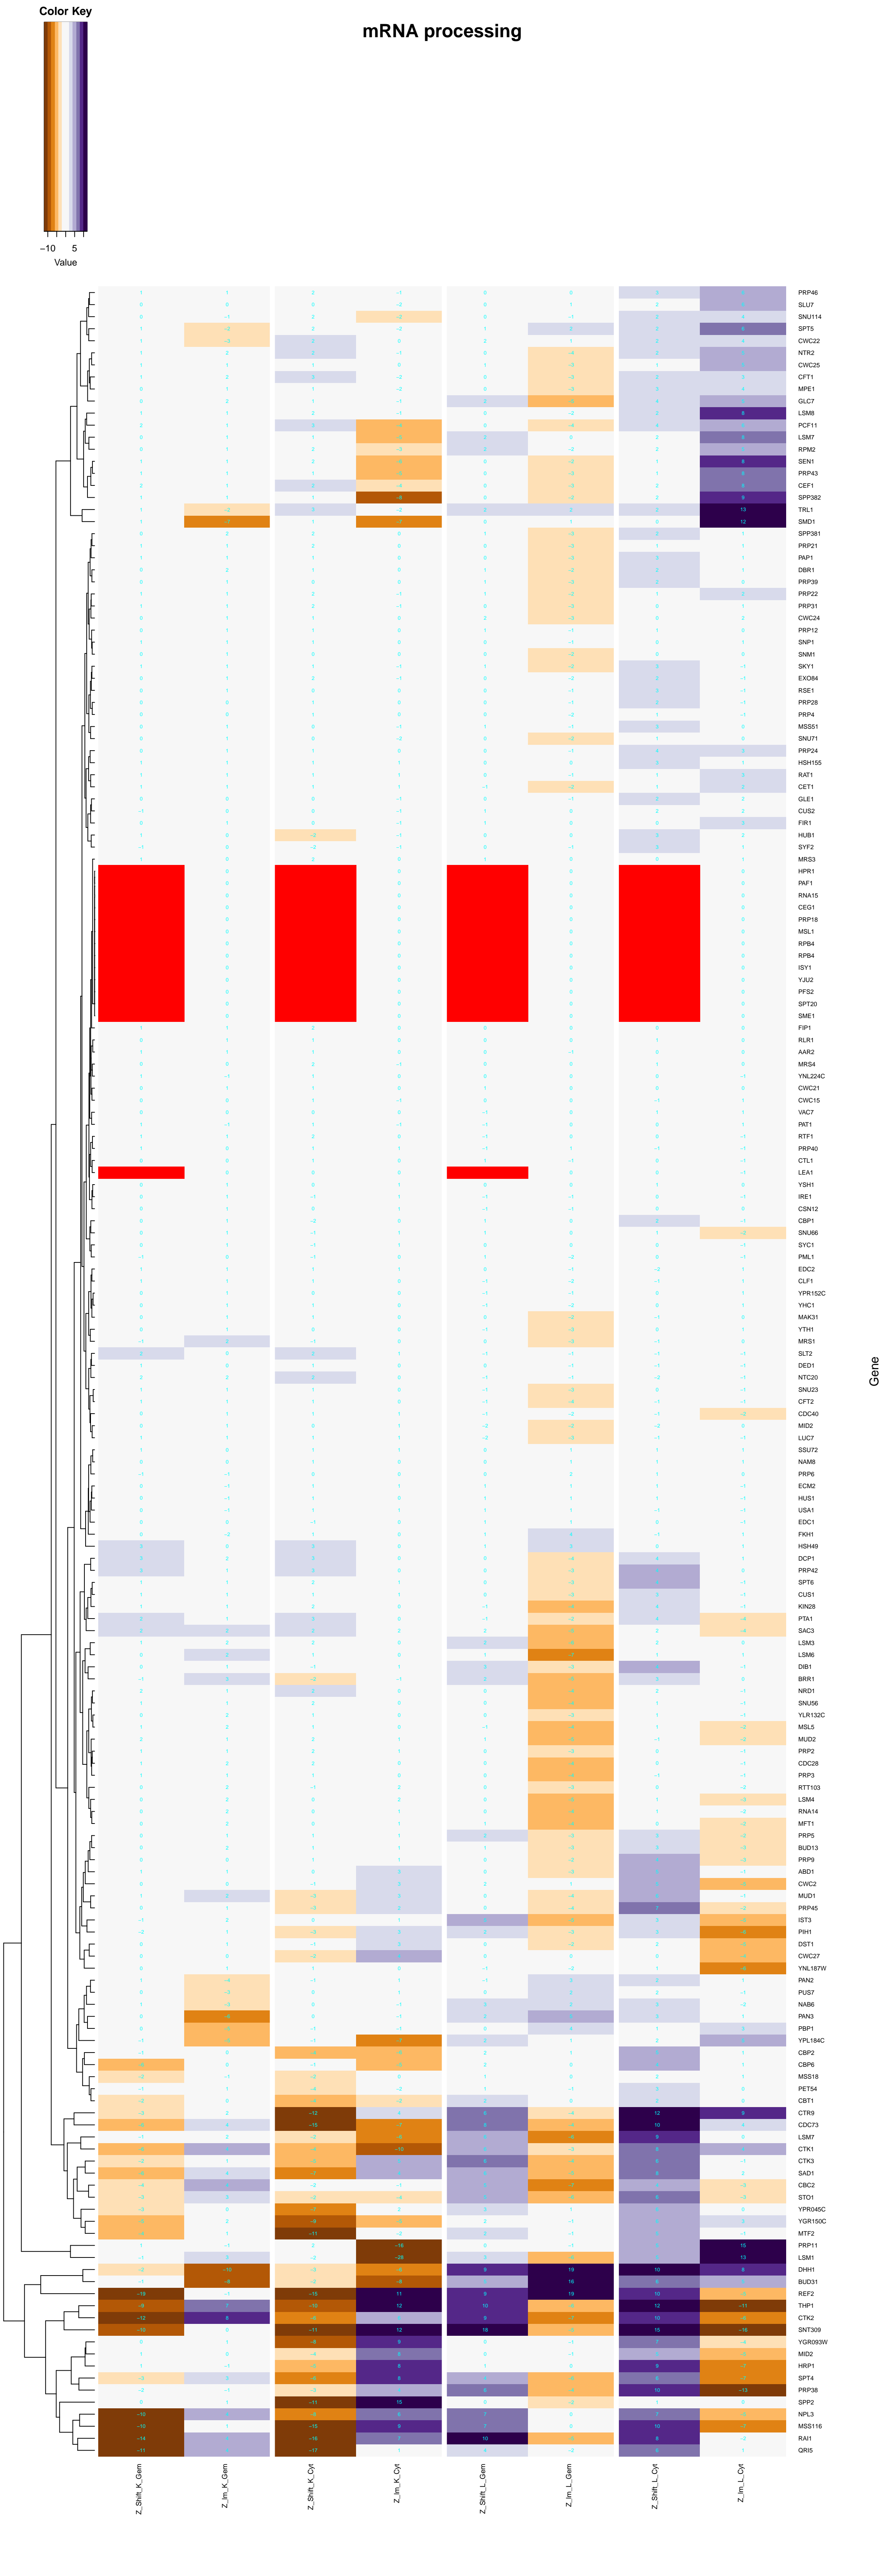

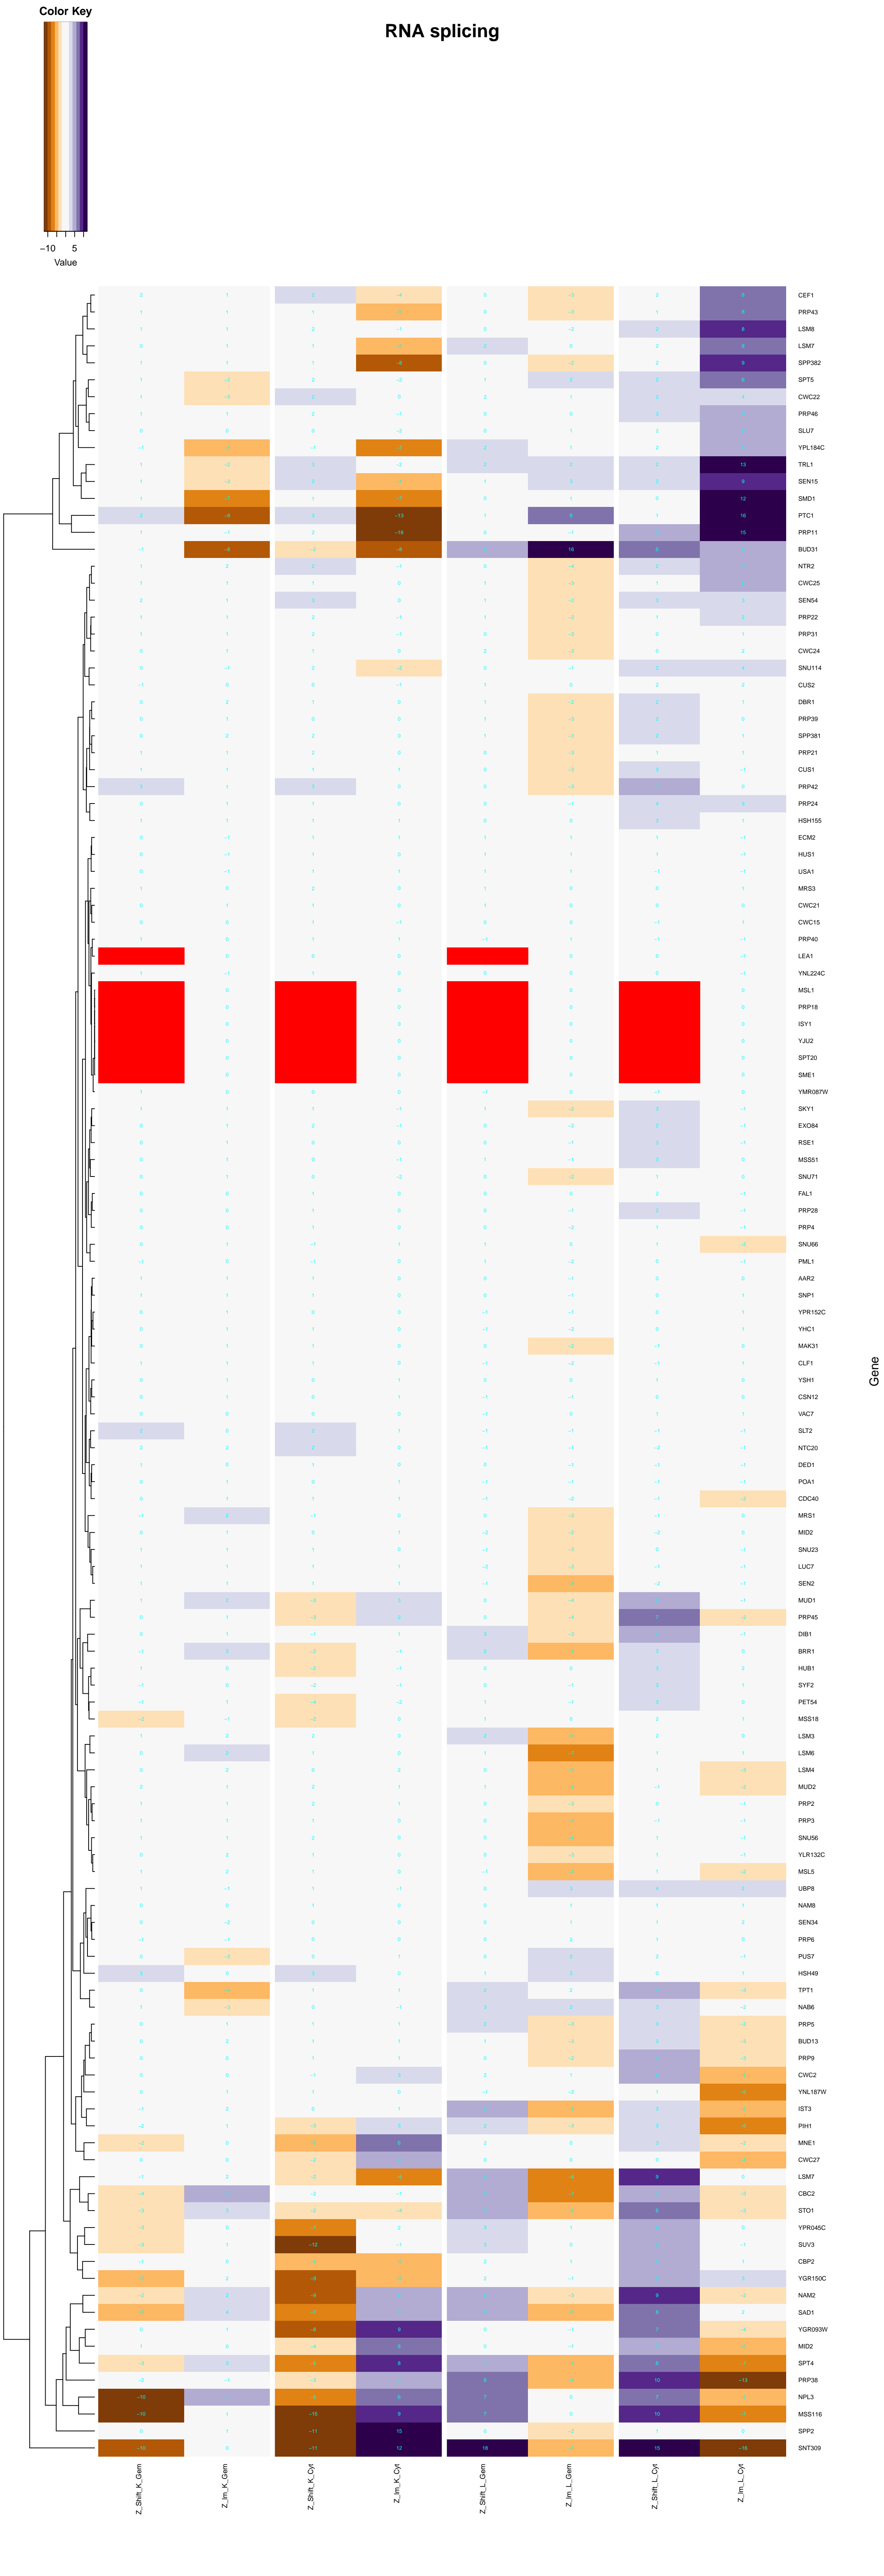

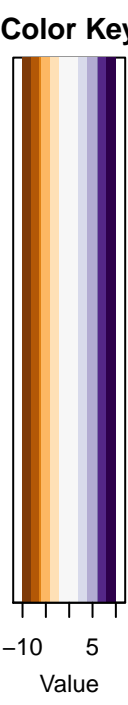

dsRNA fragmentation

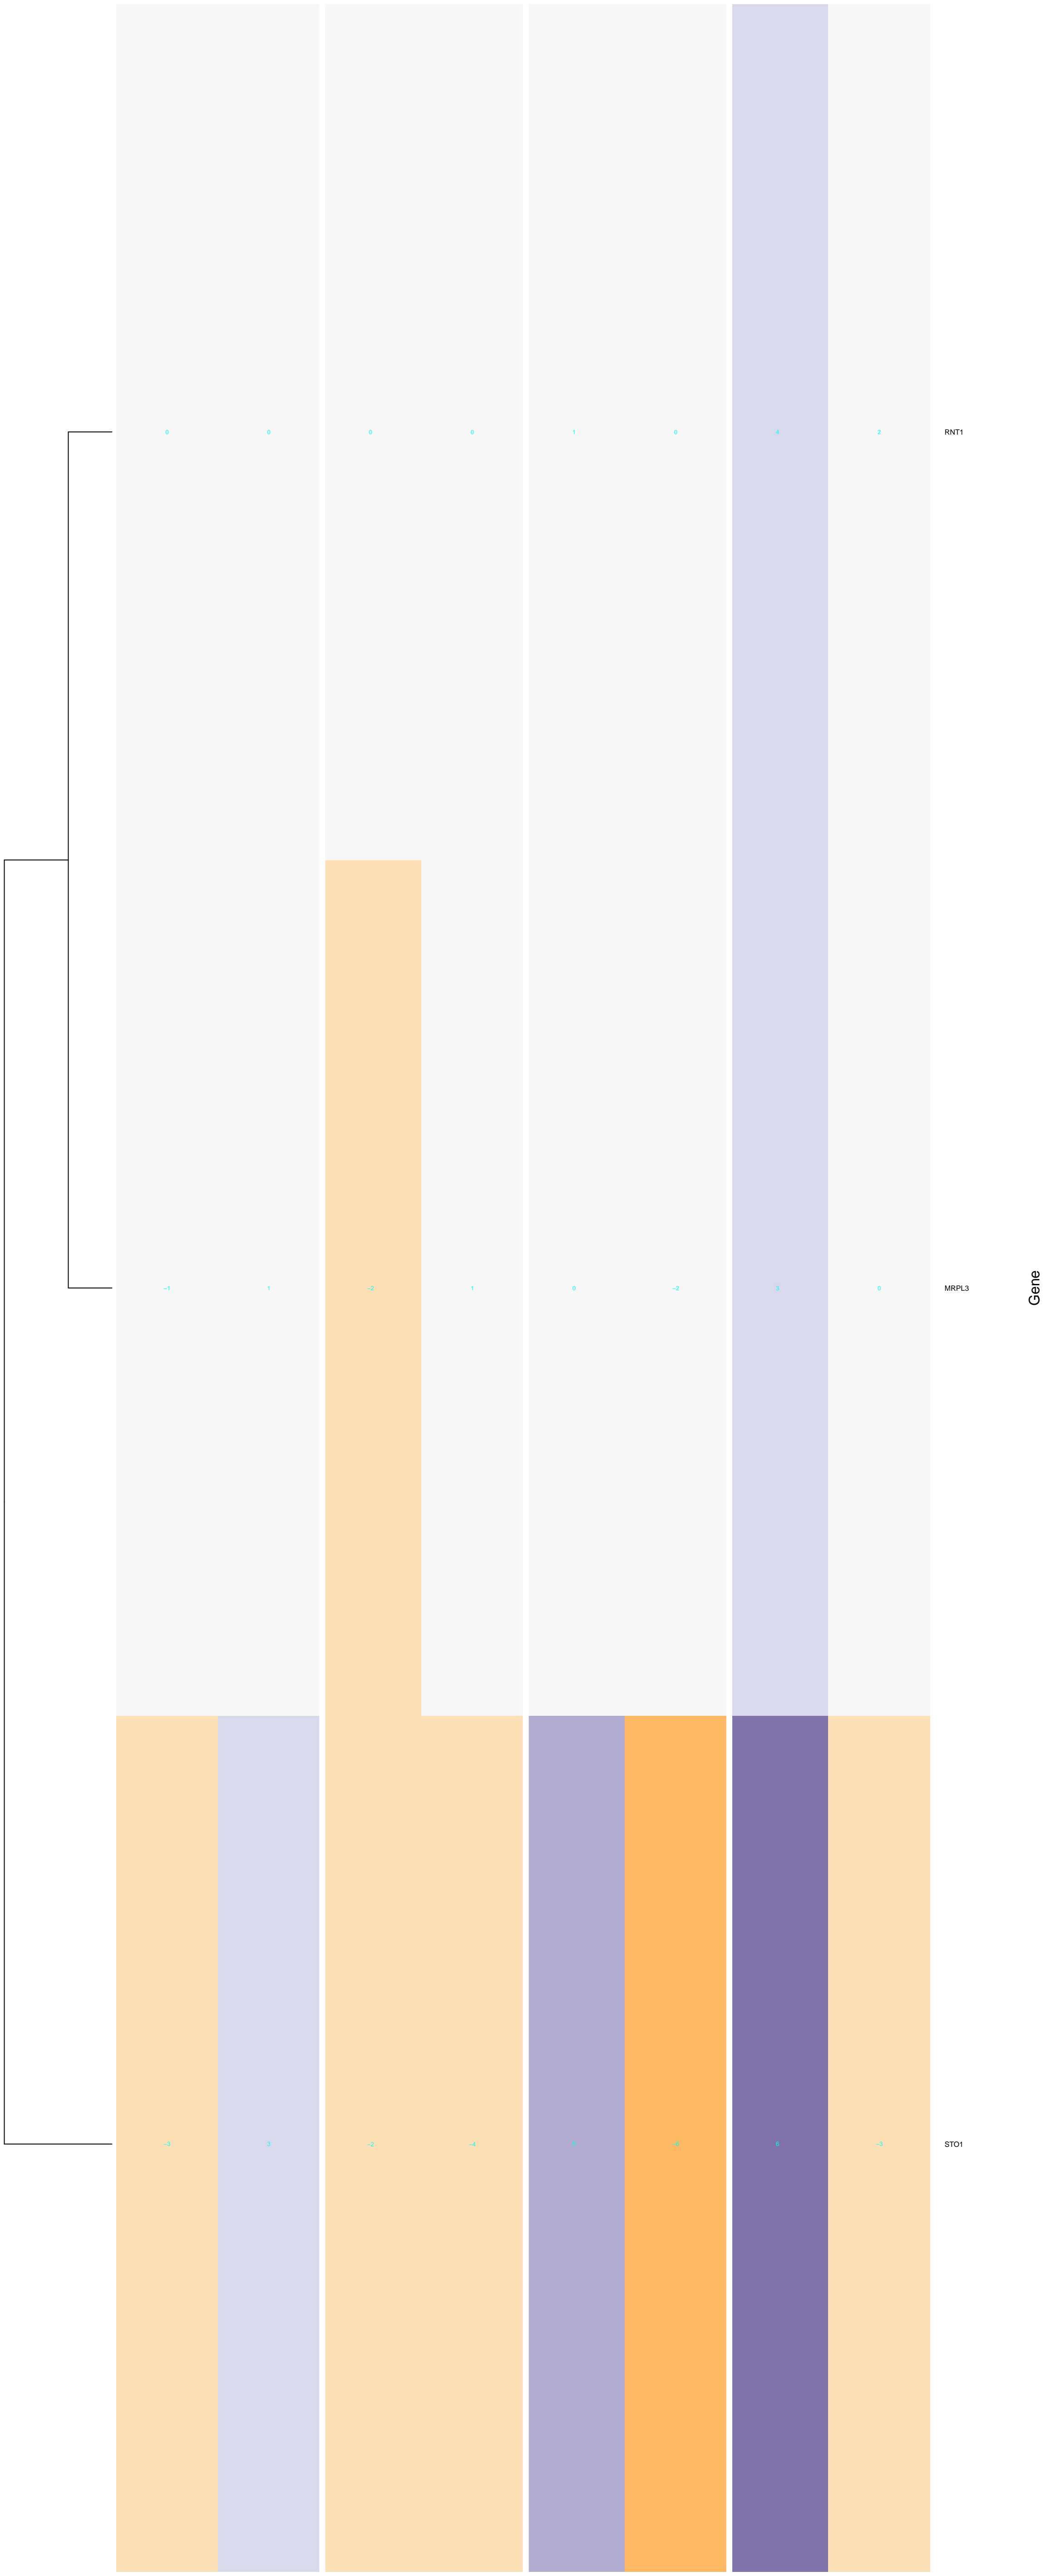

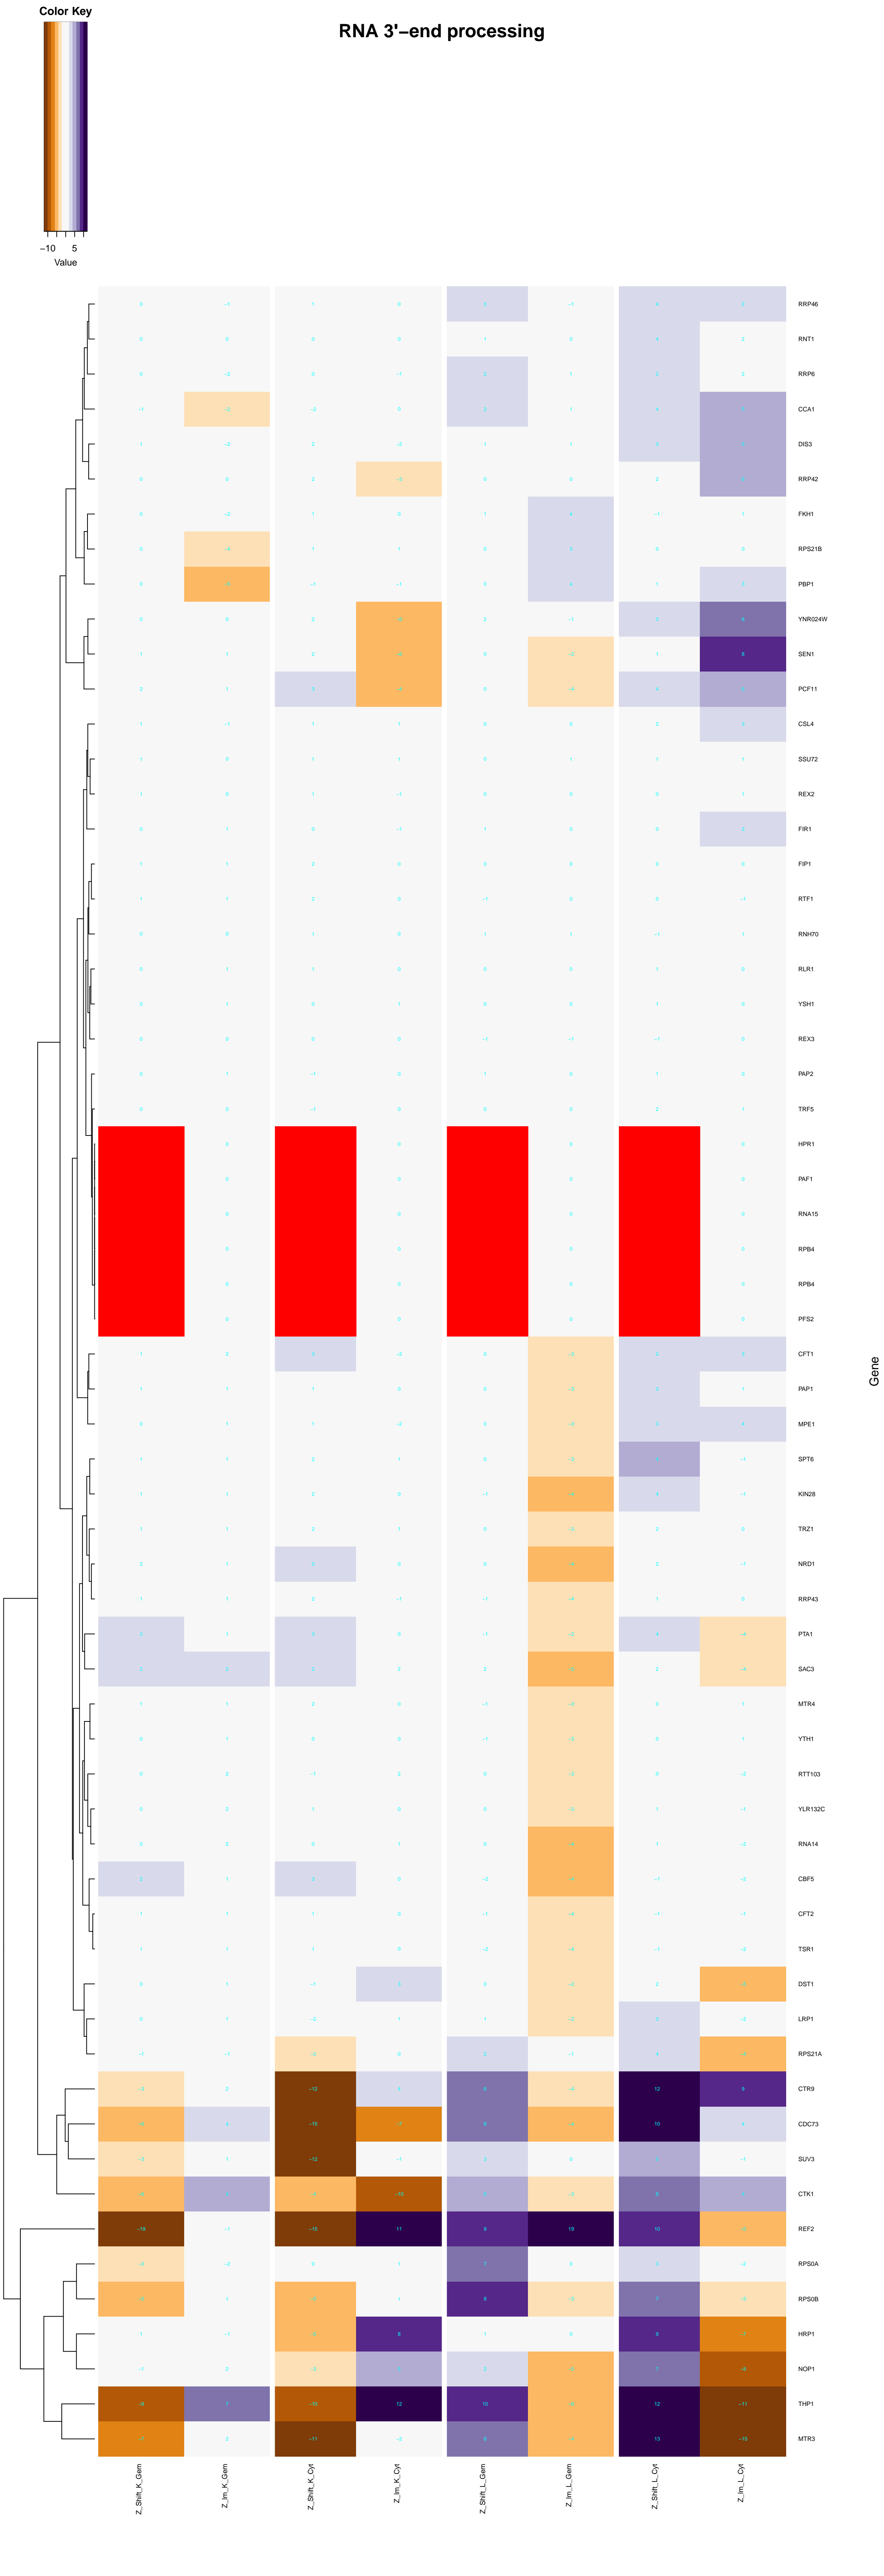



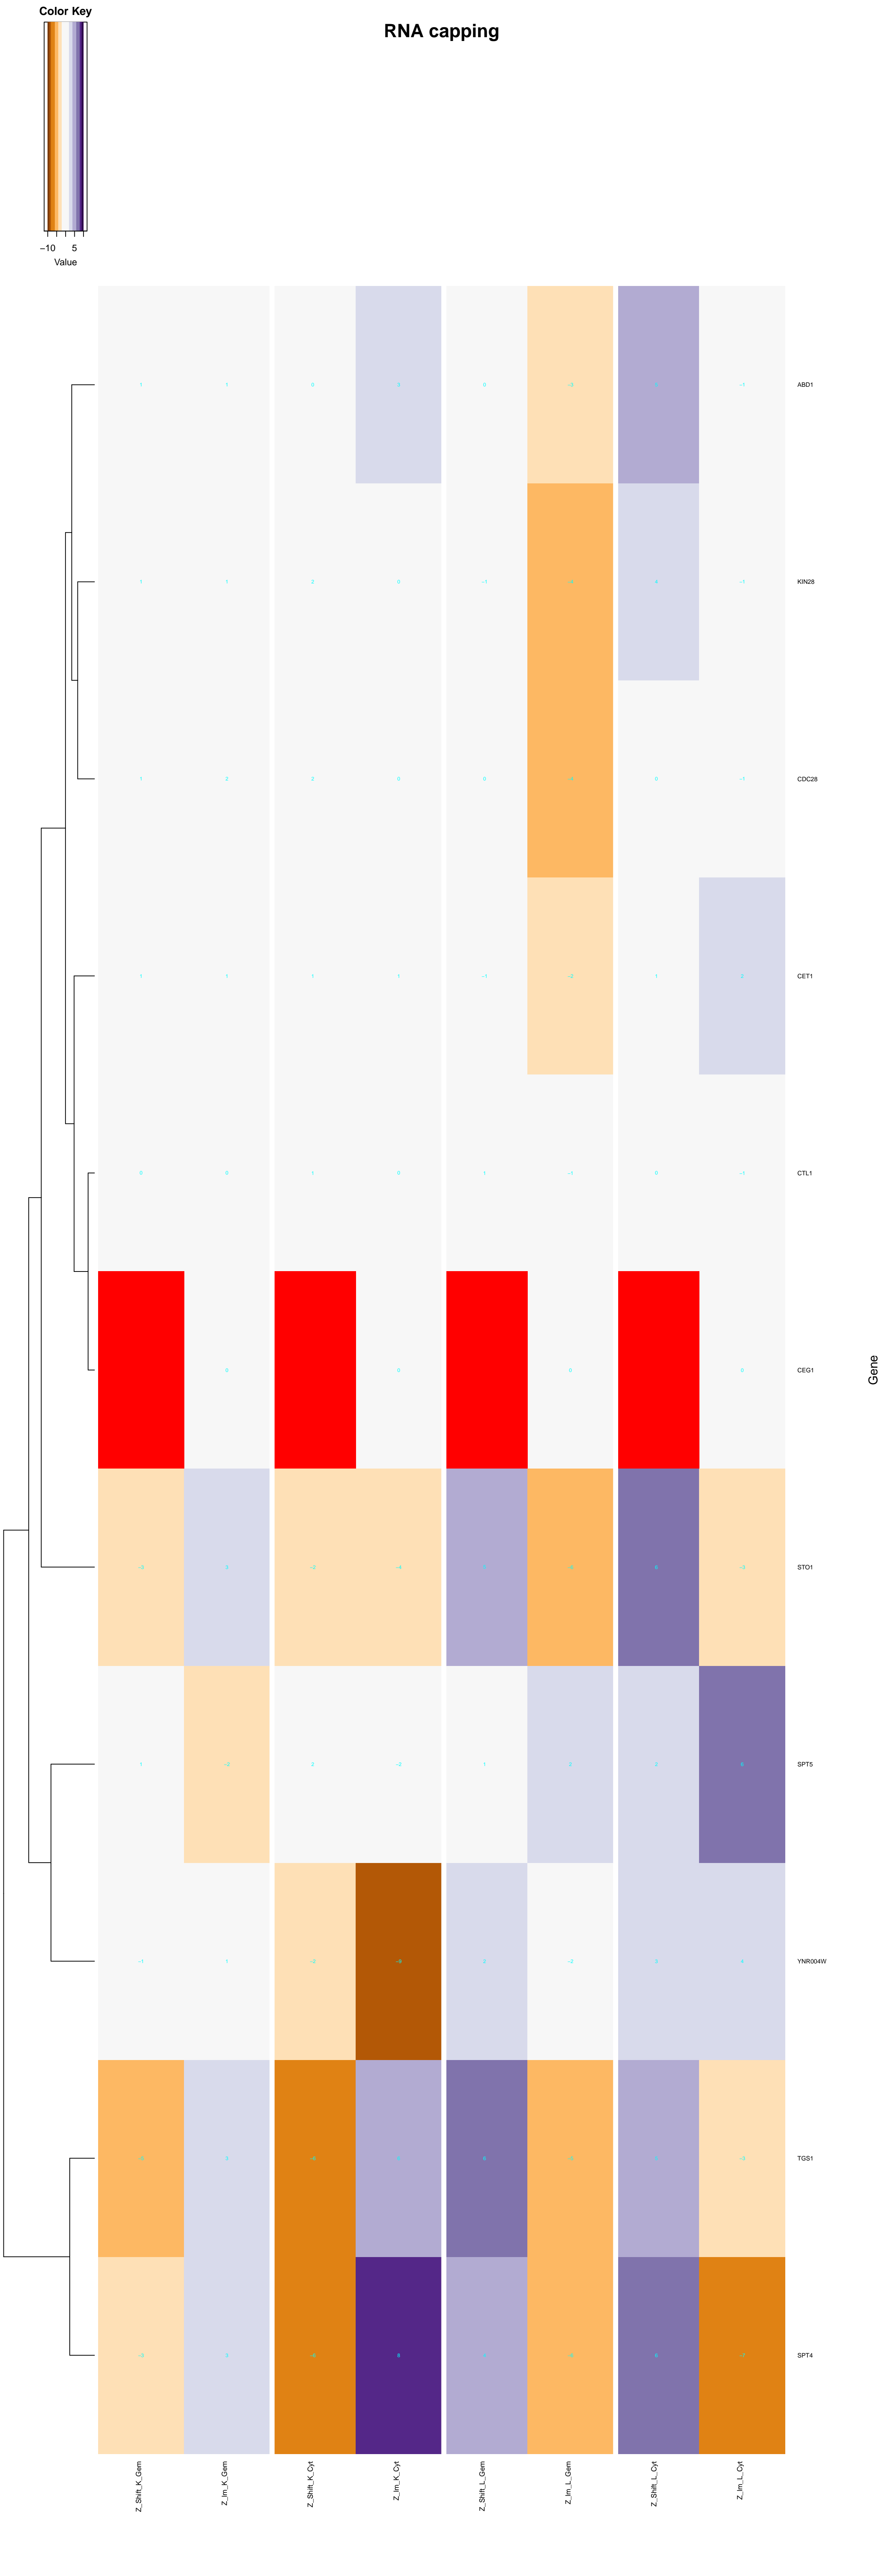

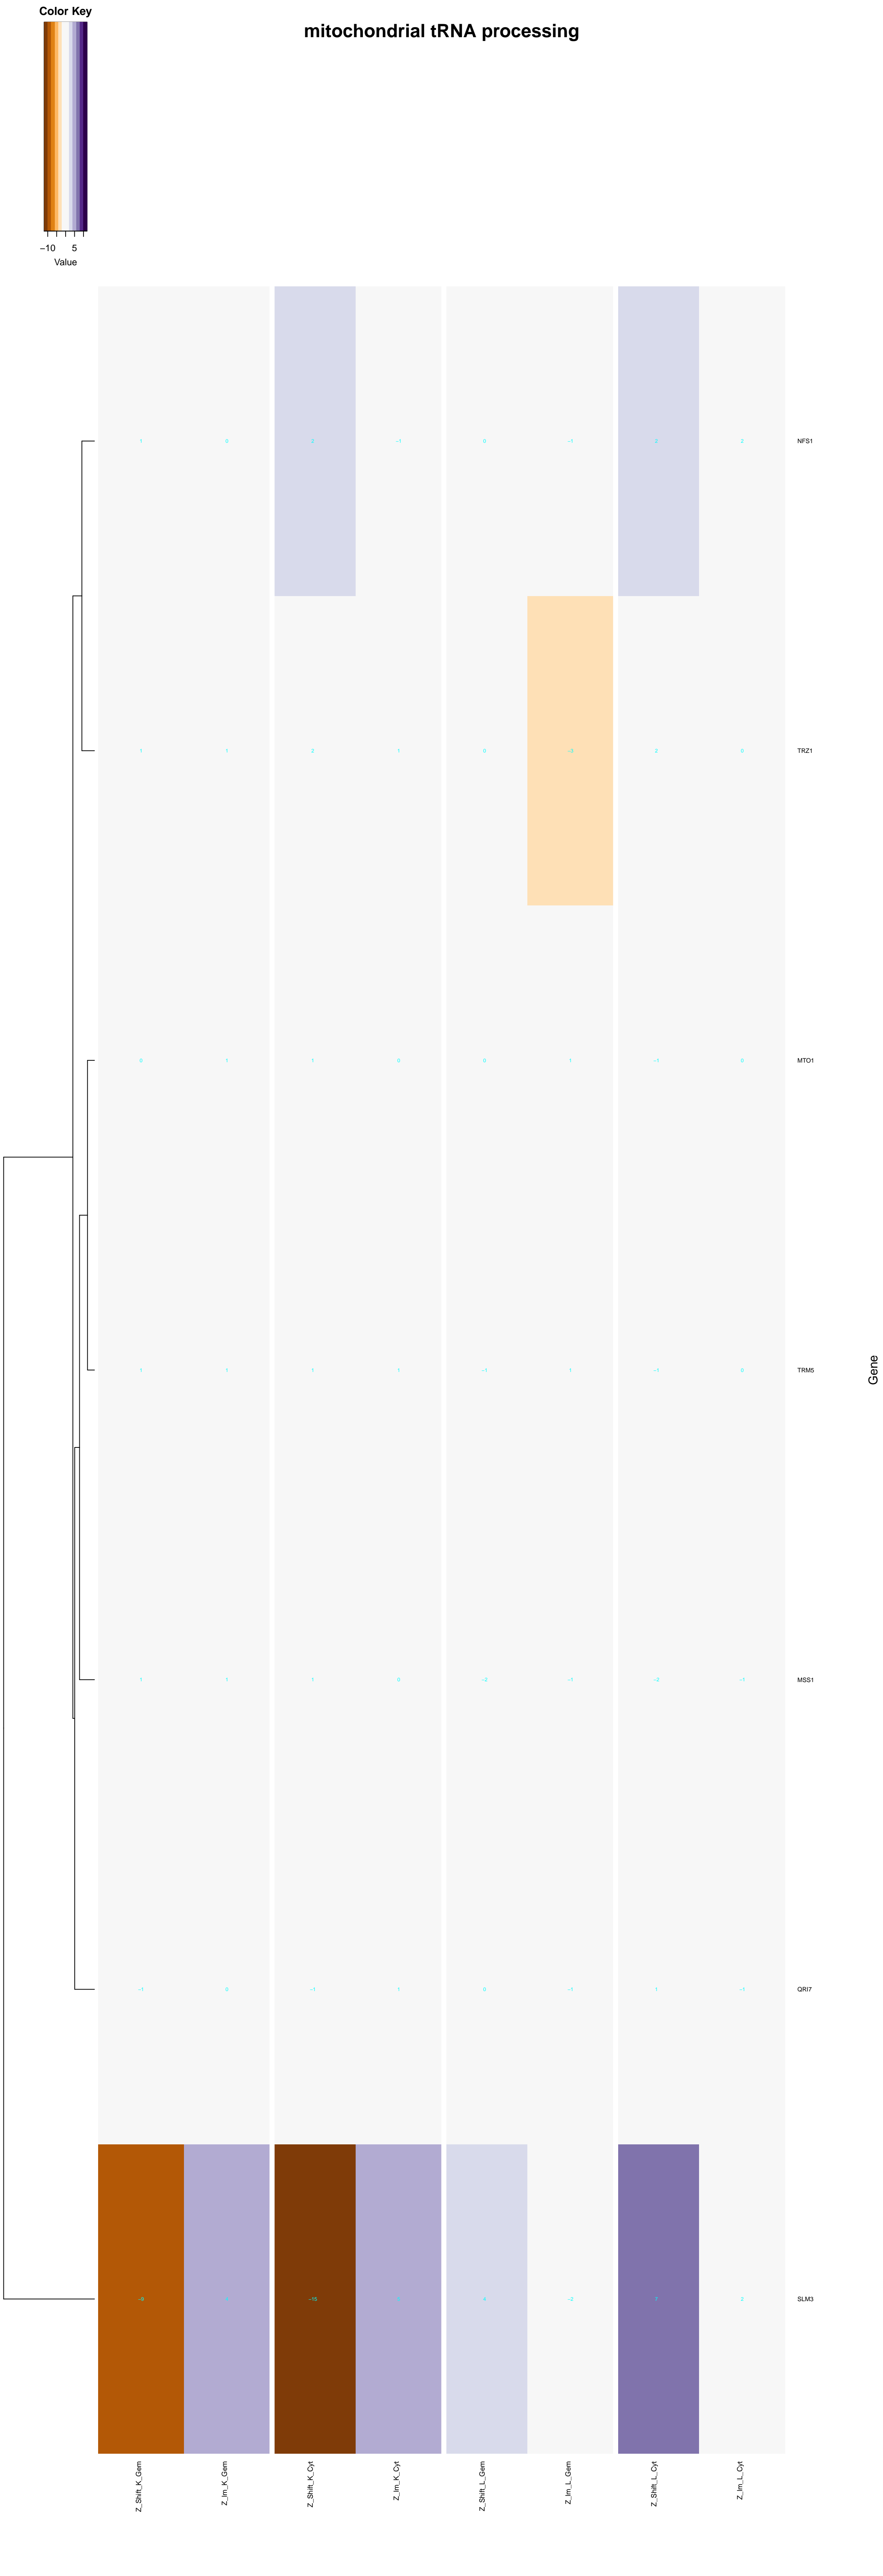

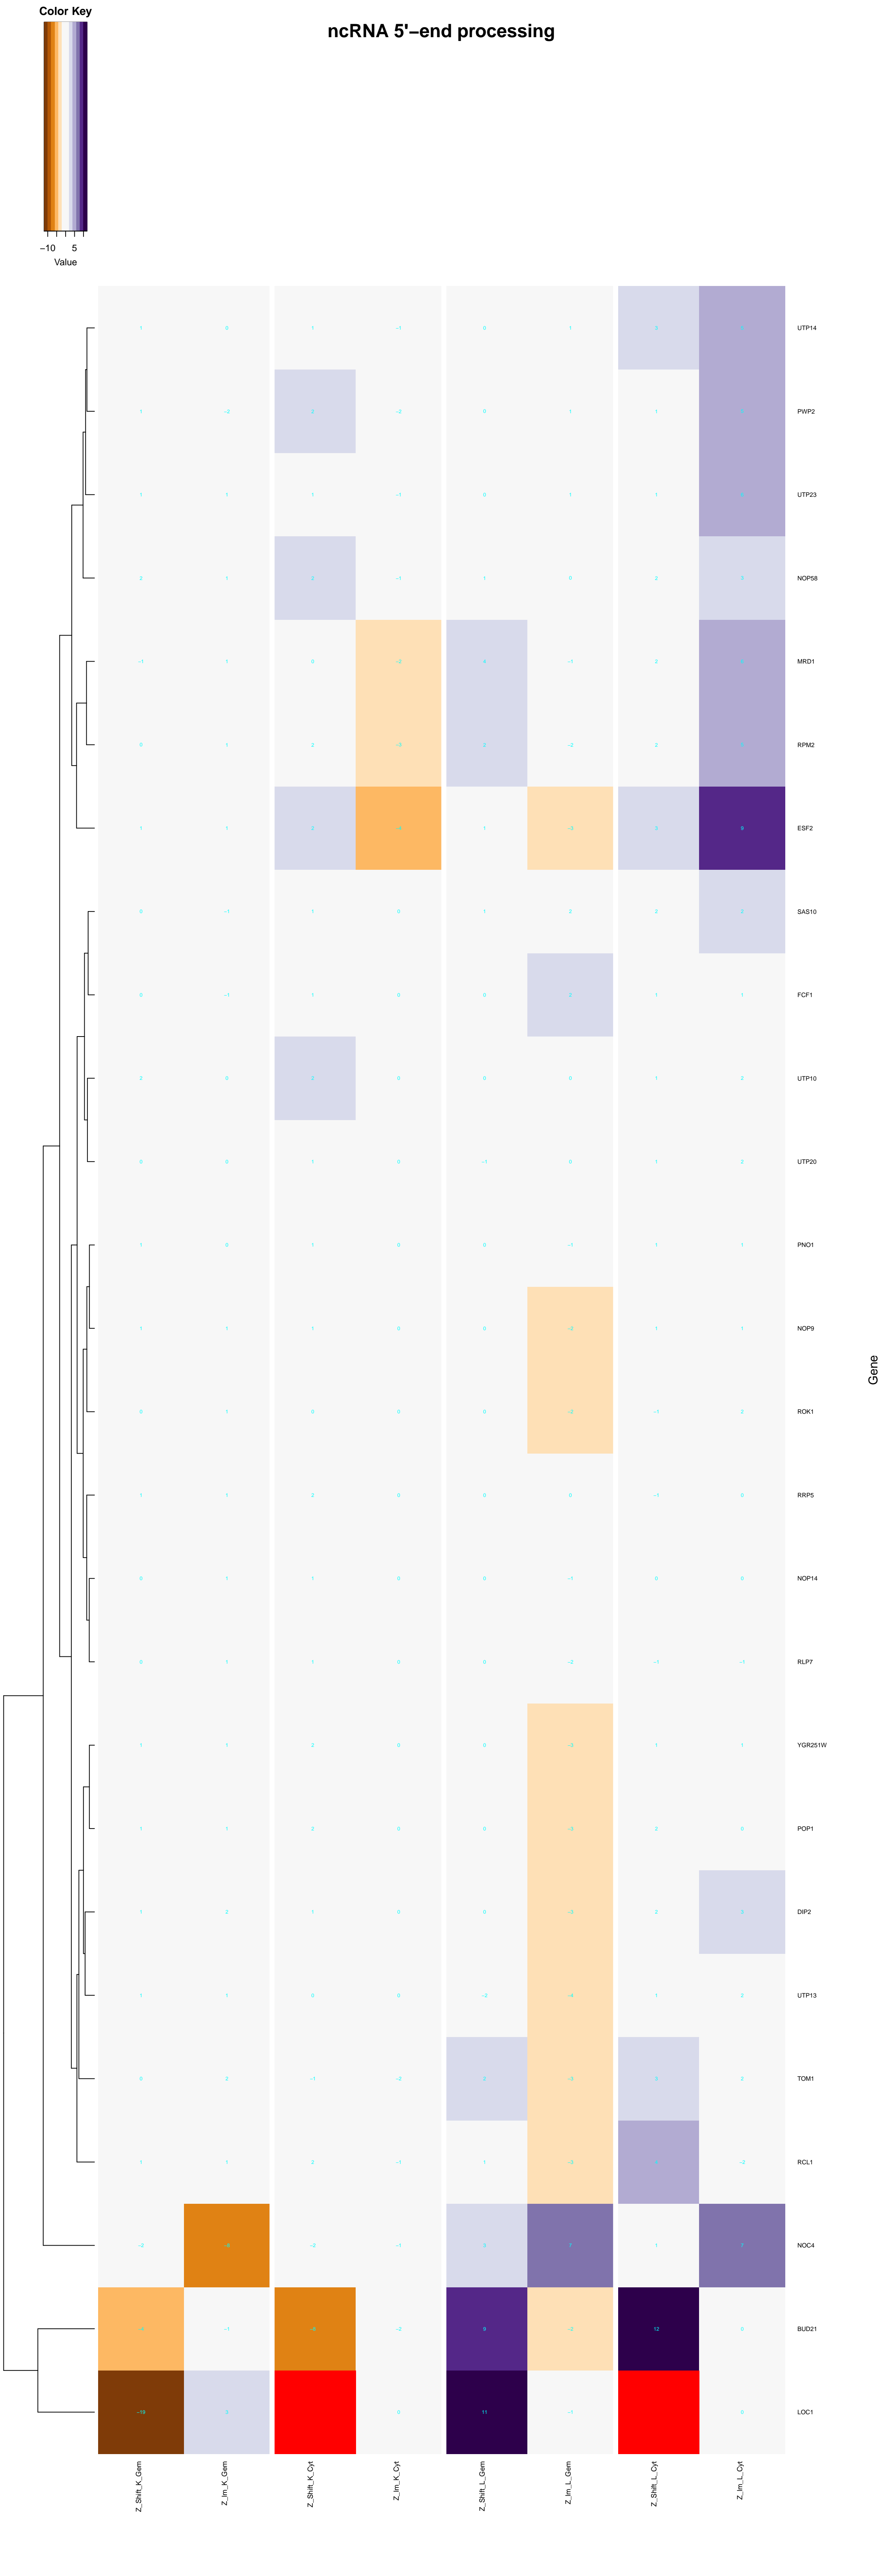

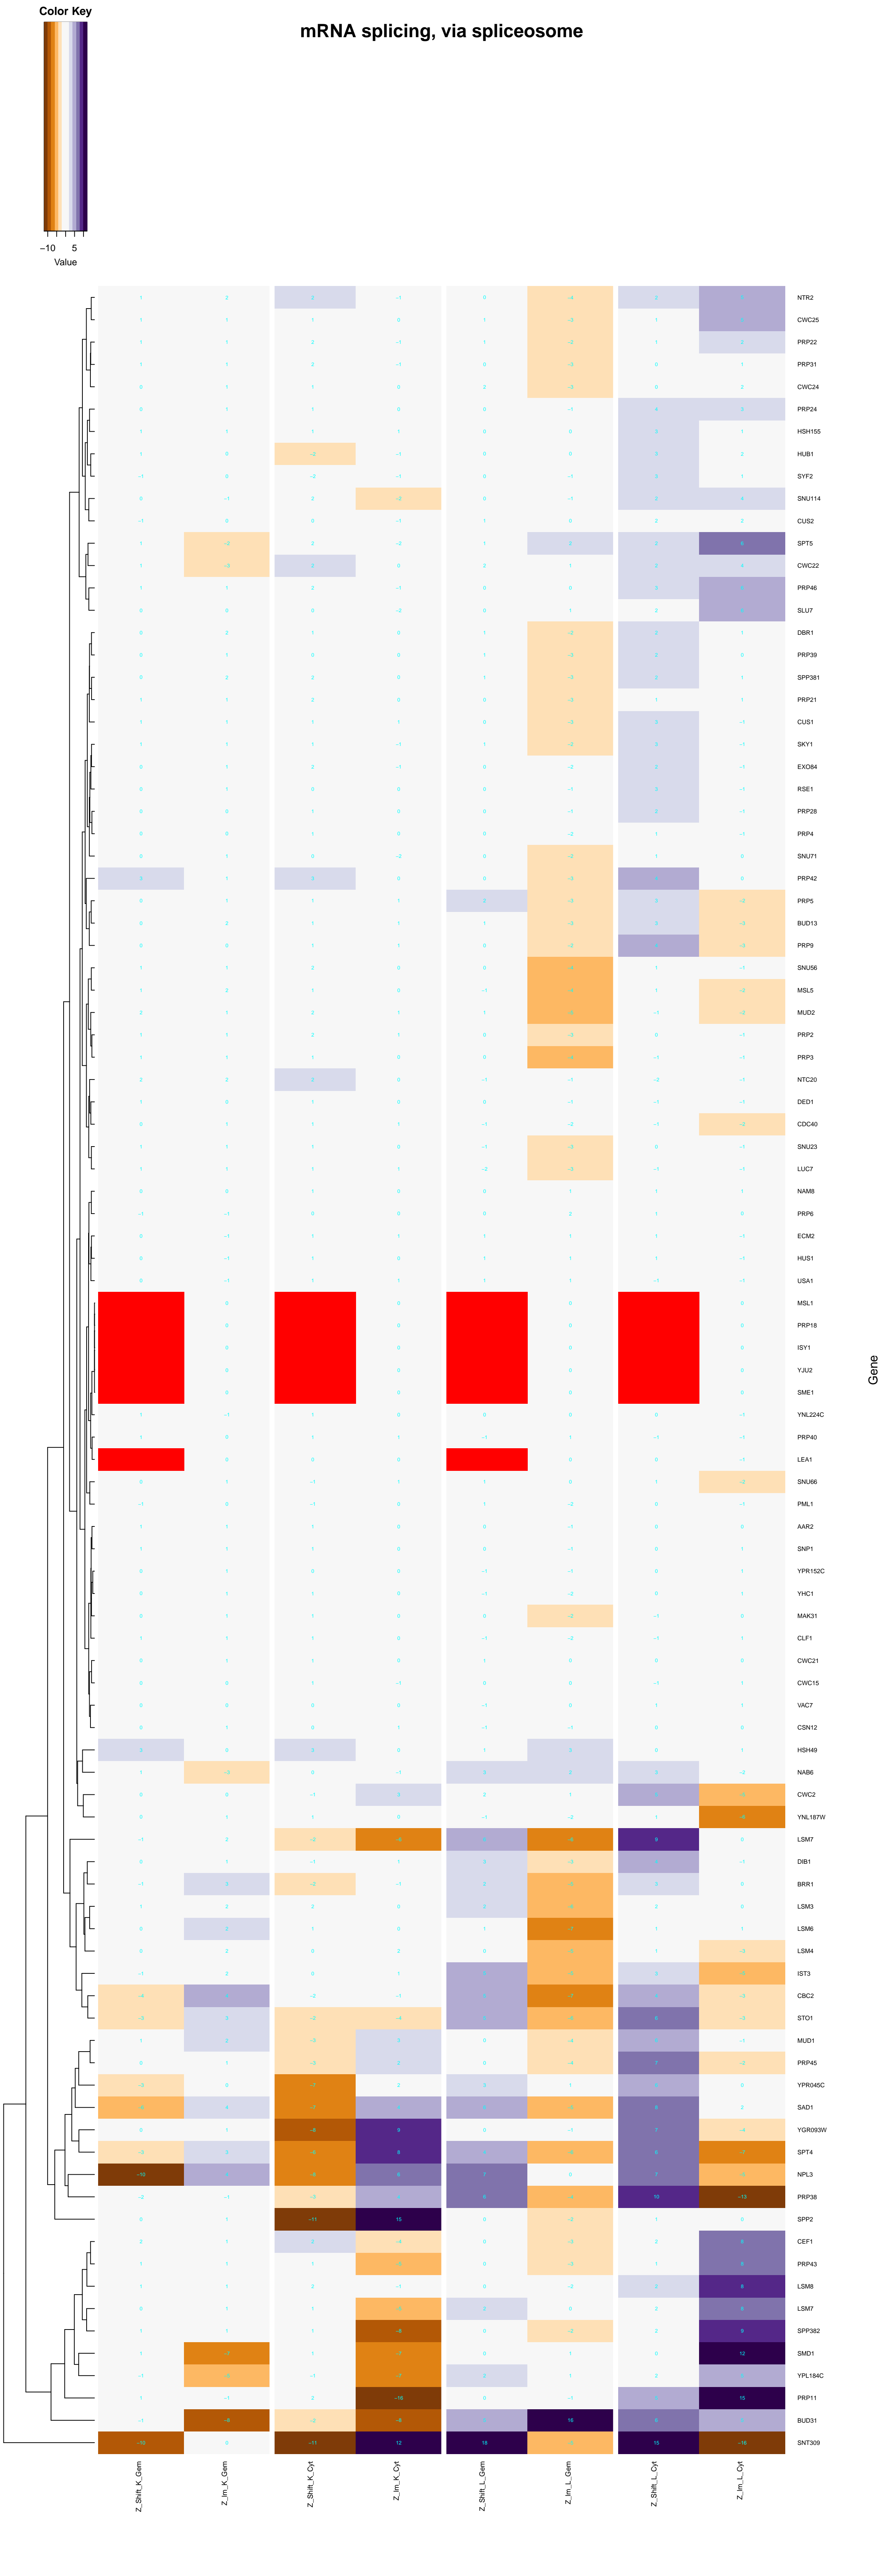

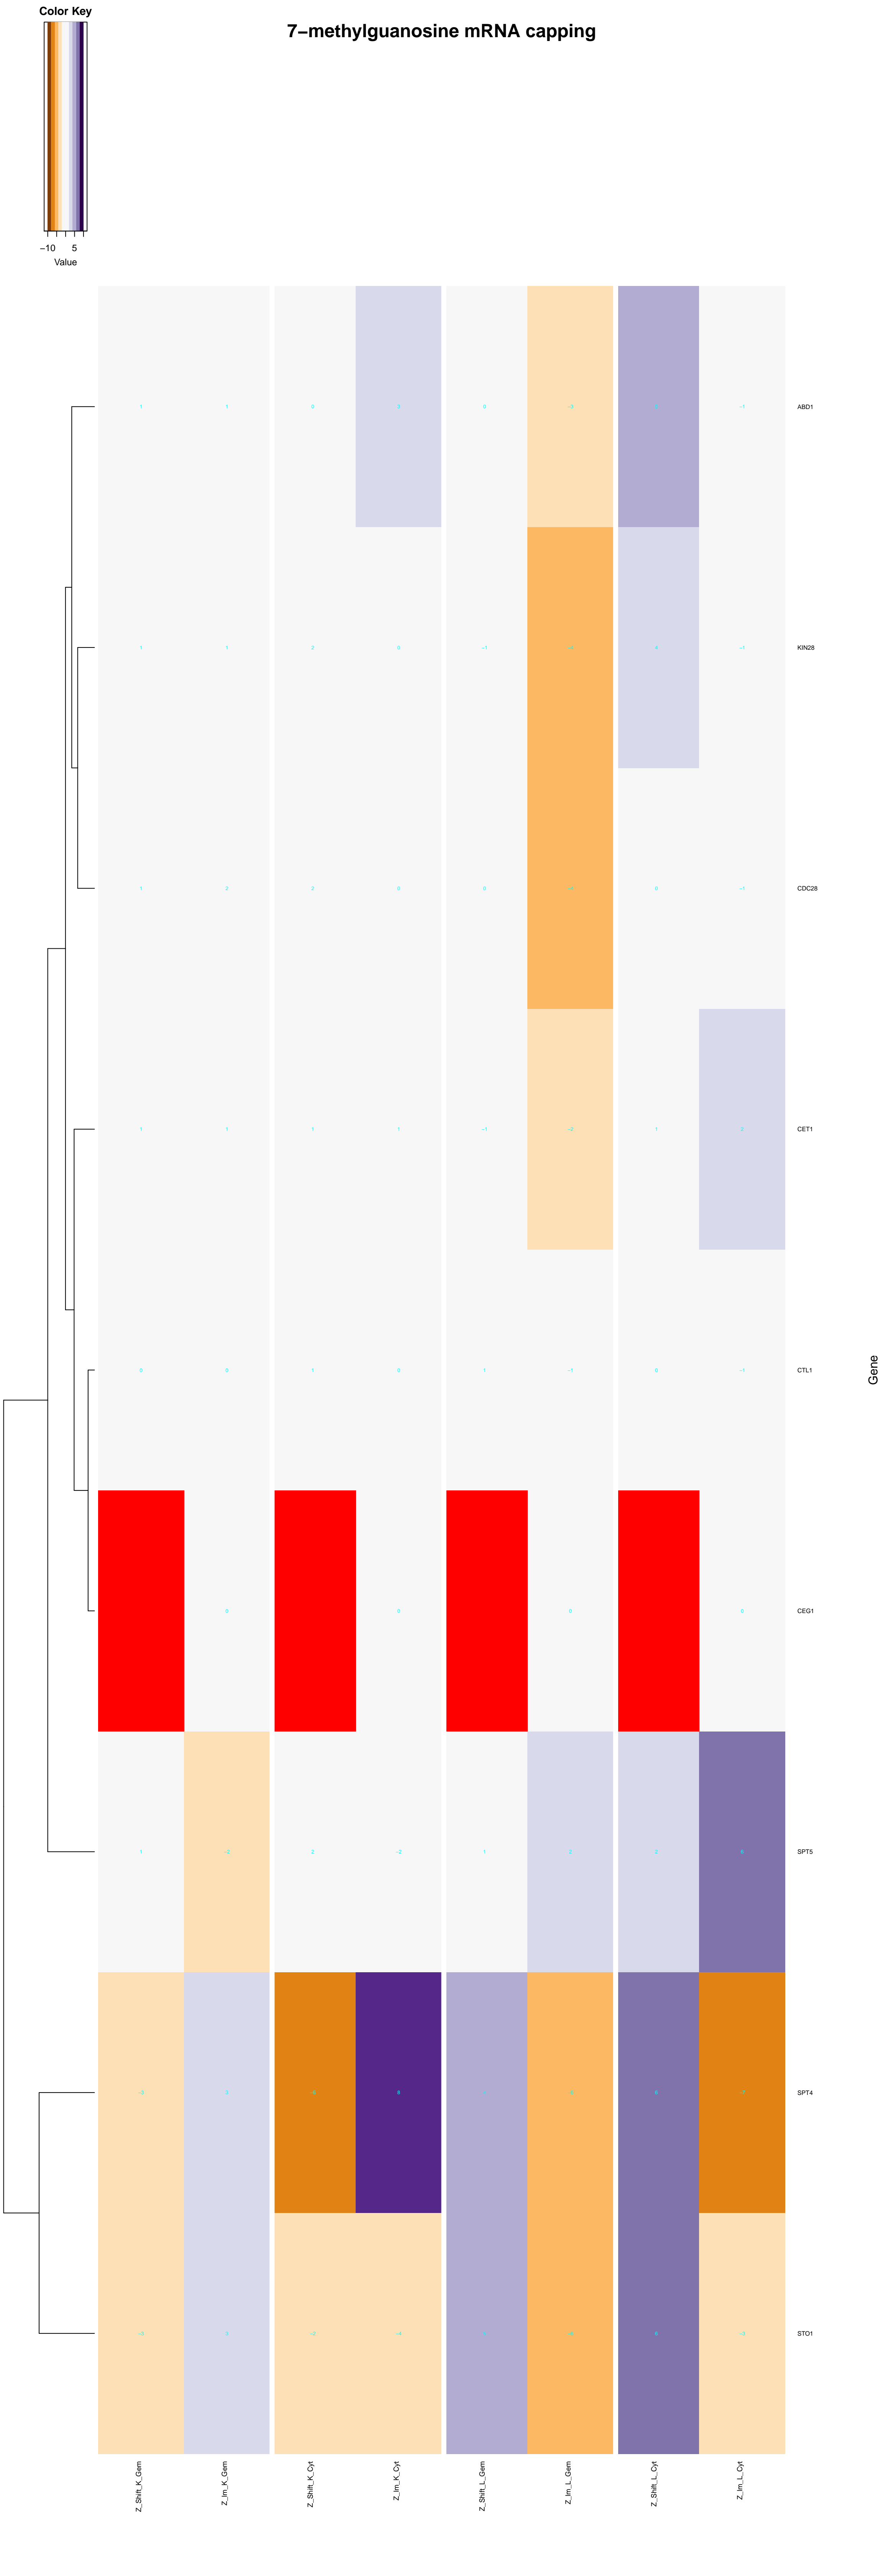

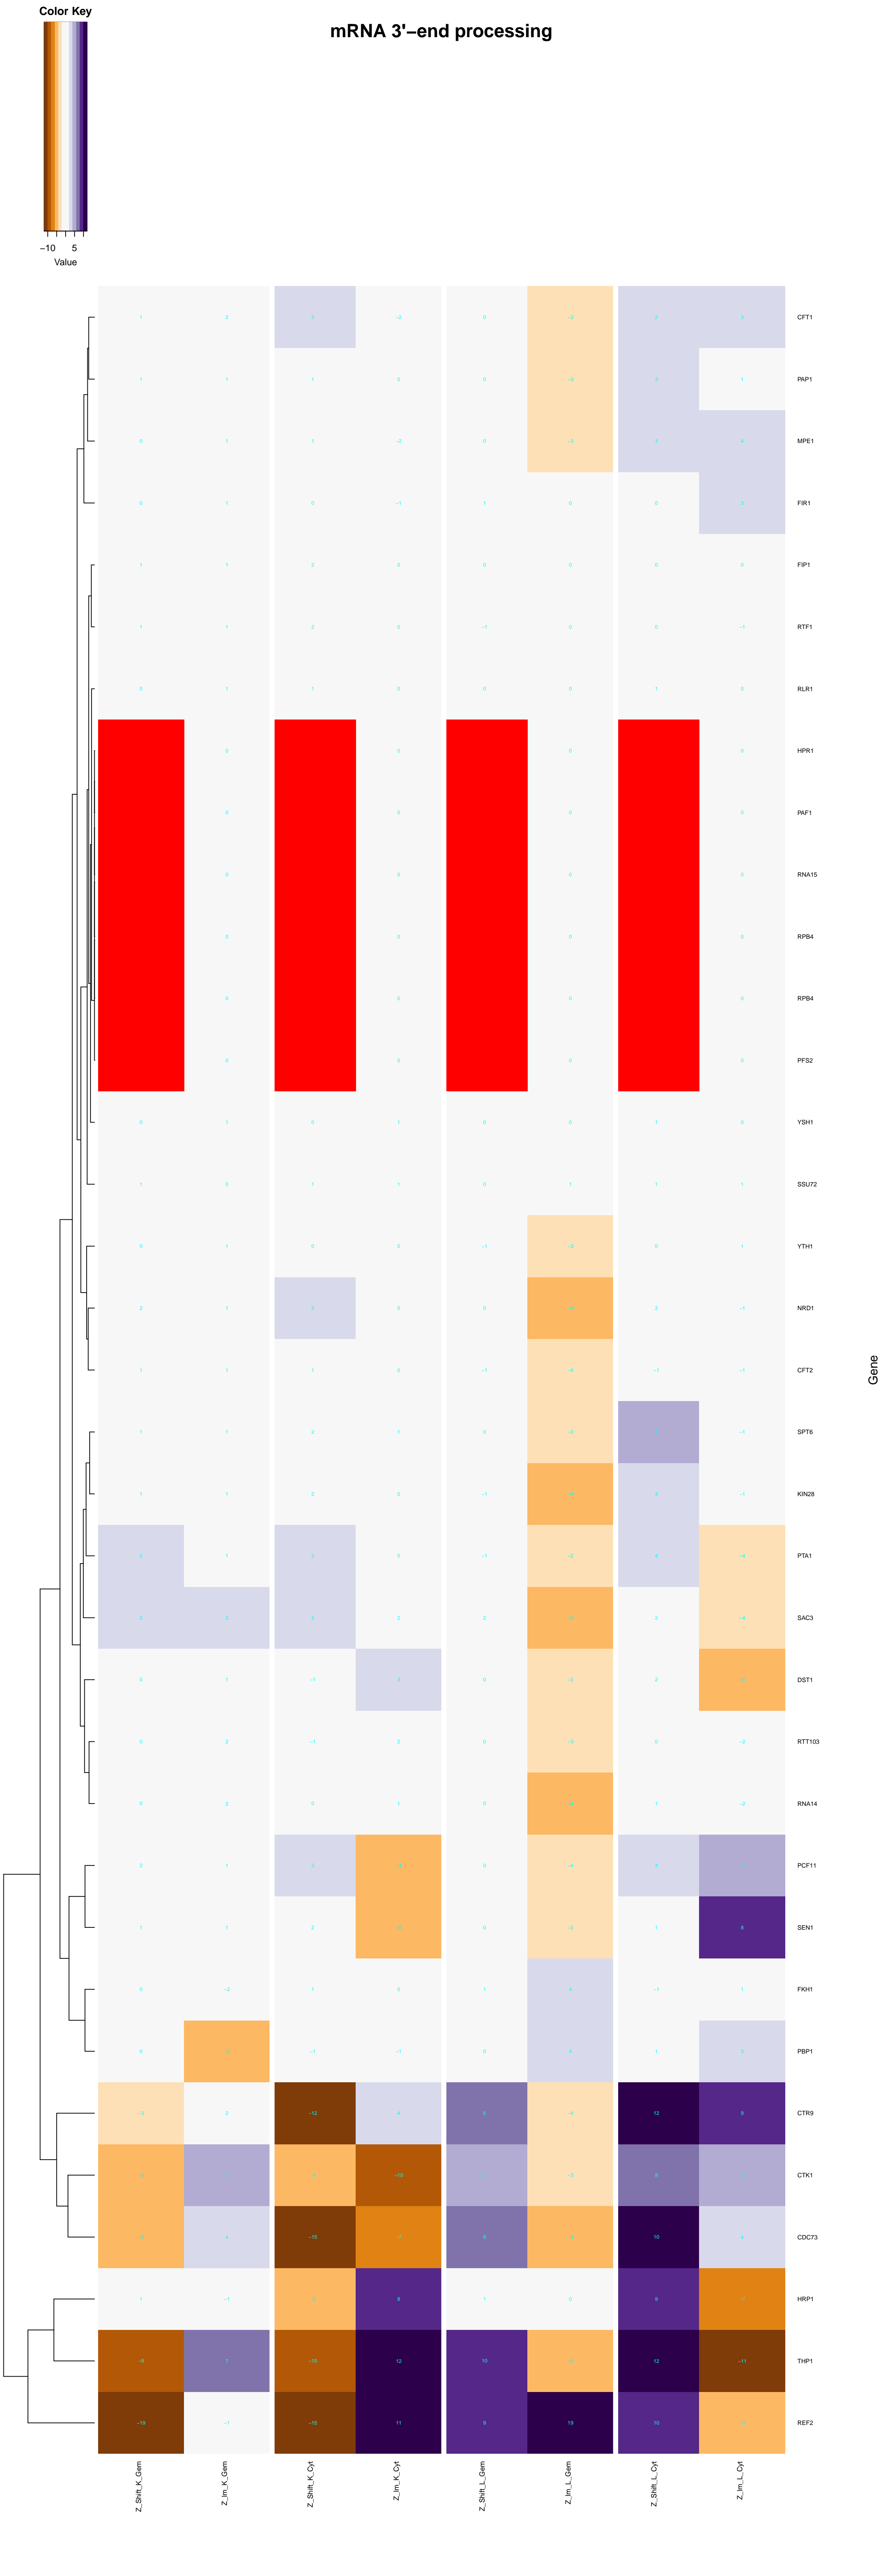

### mRNA splicing, via endonucleolytic cleavage and ligation

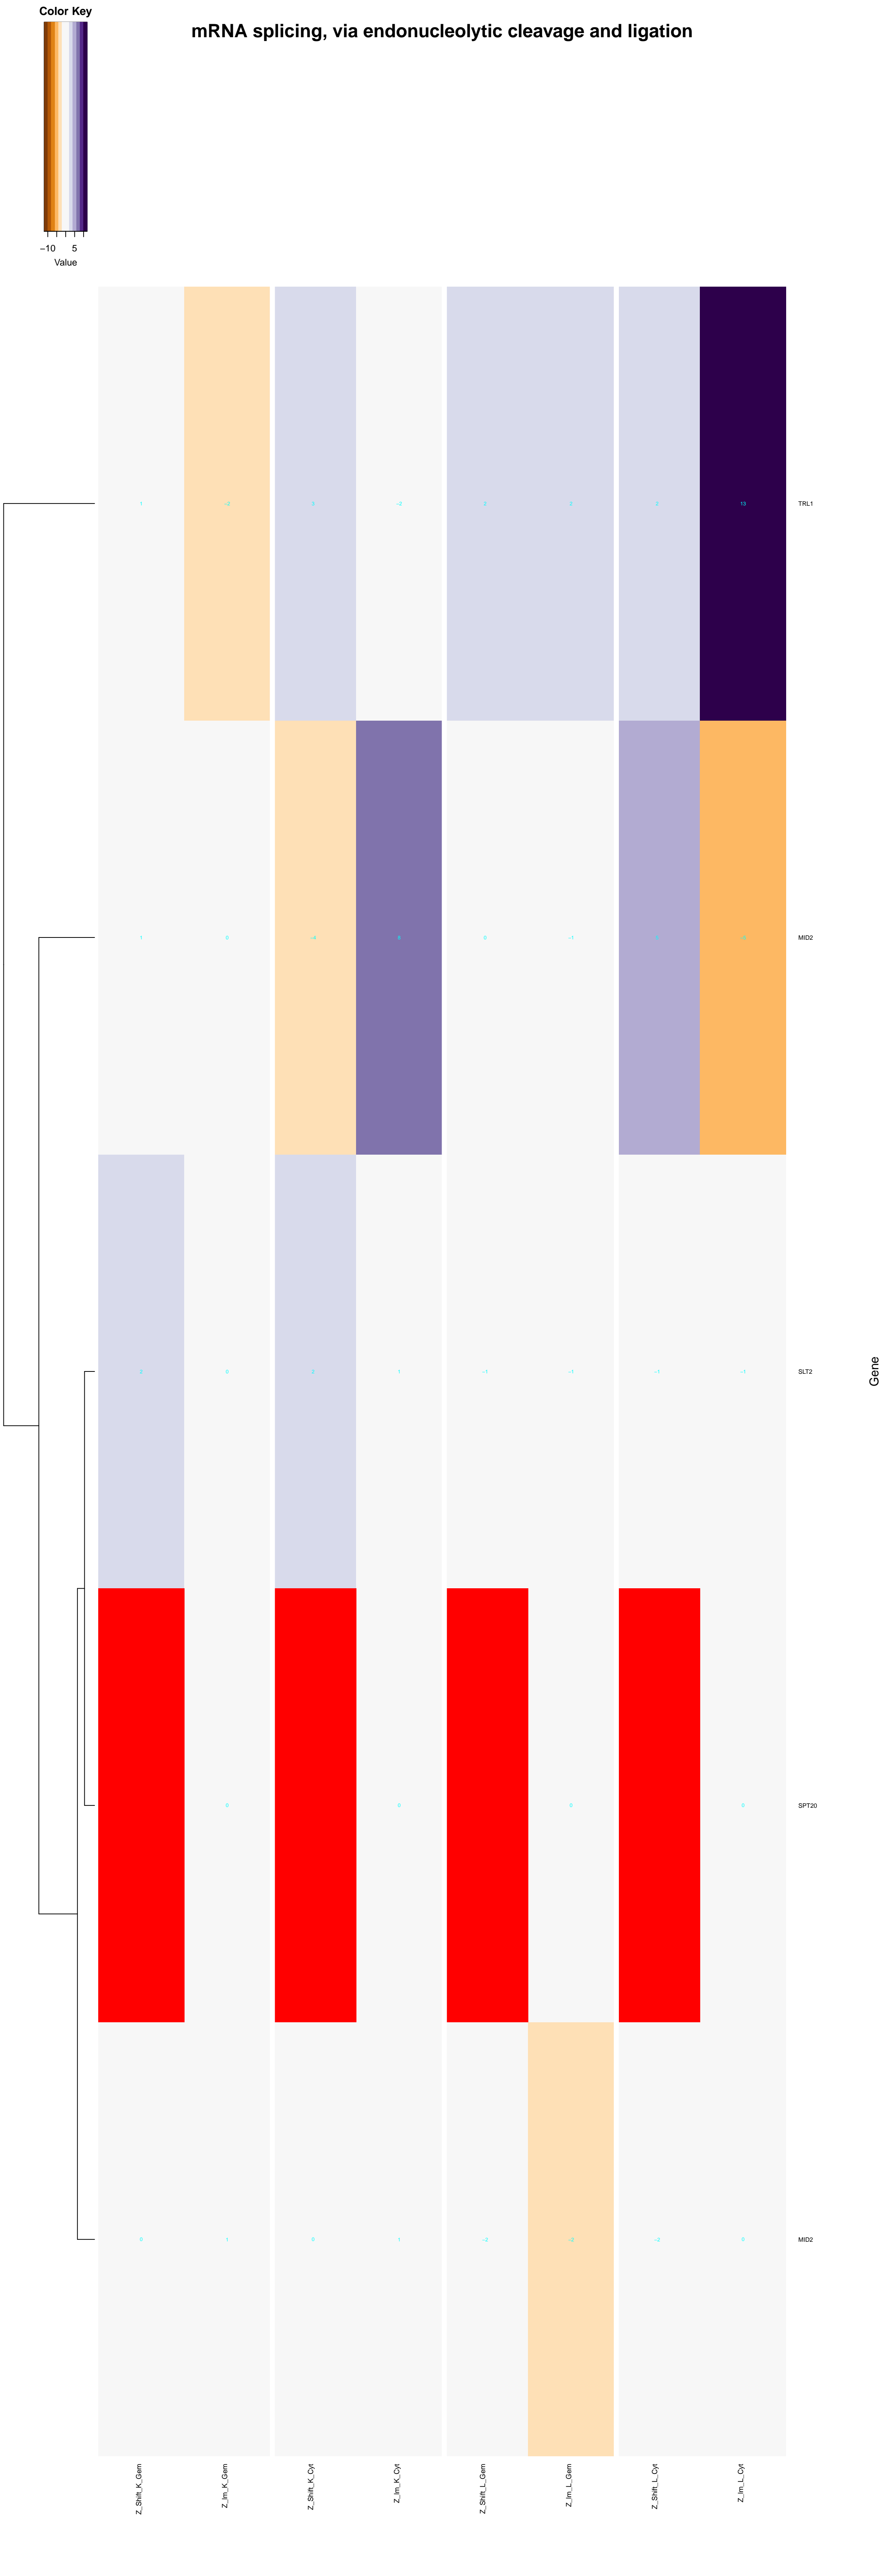

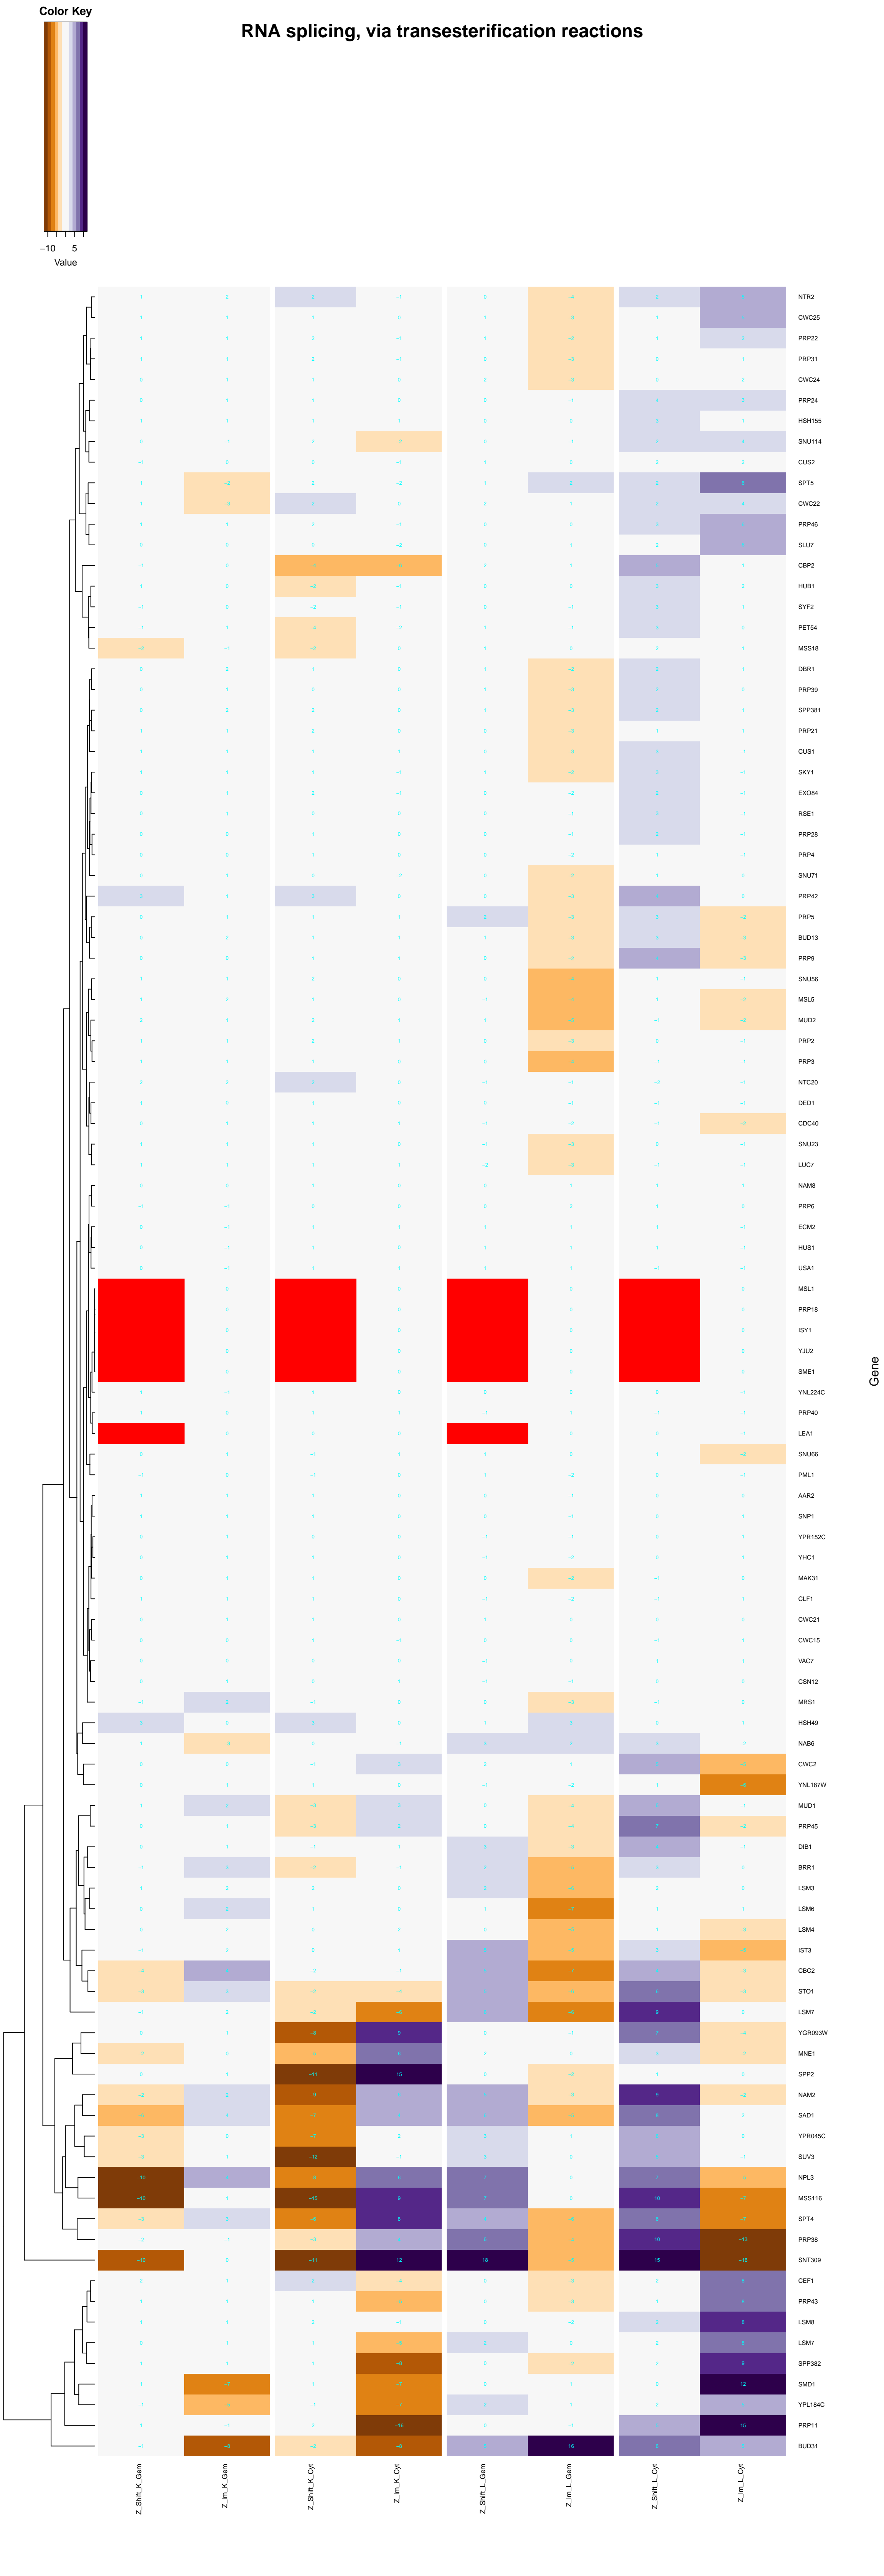

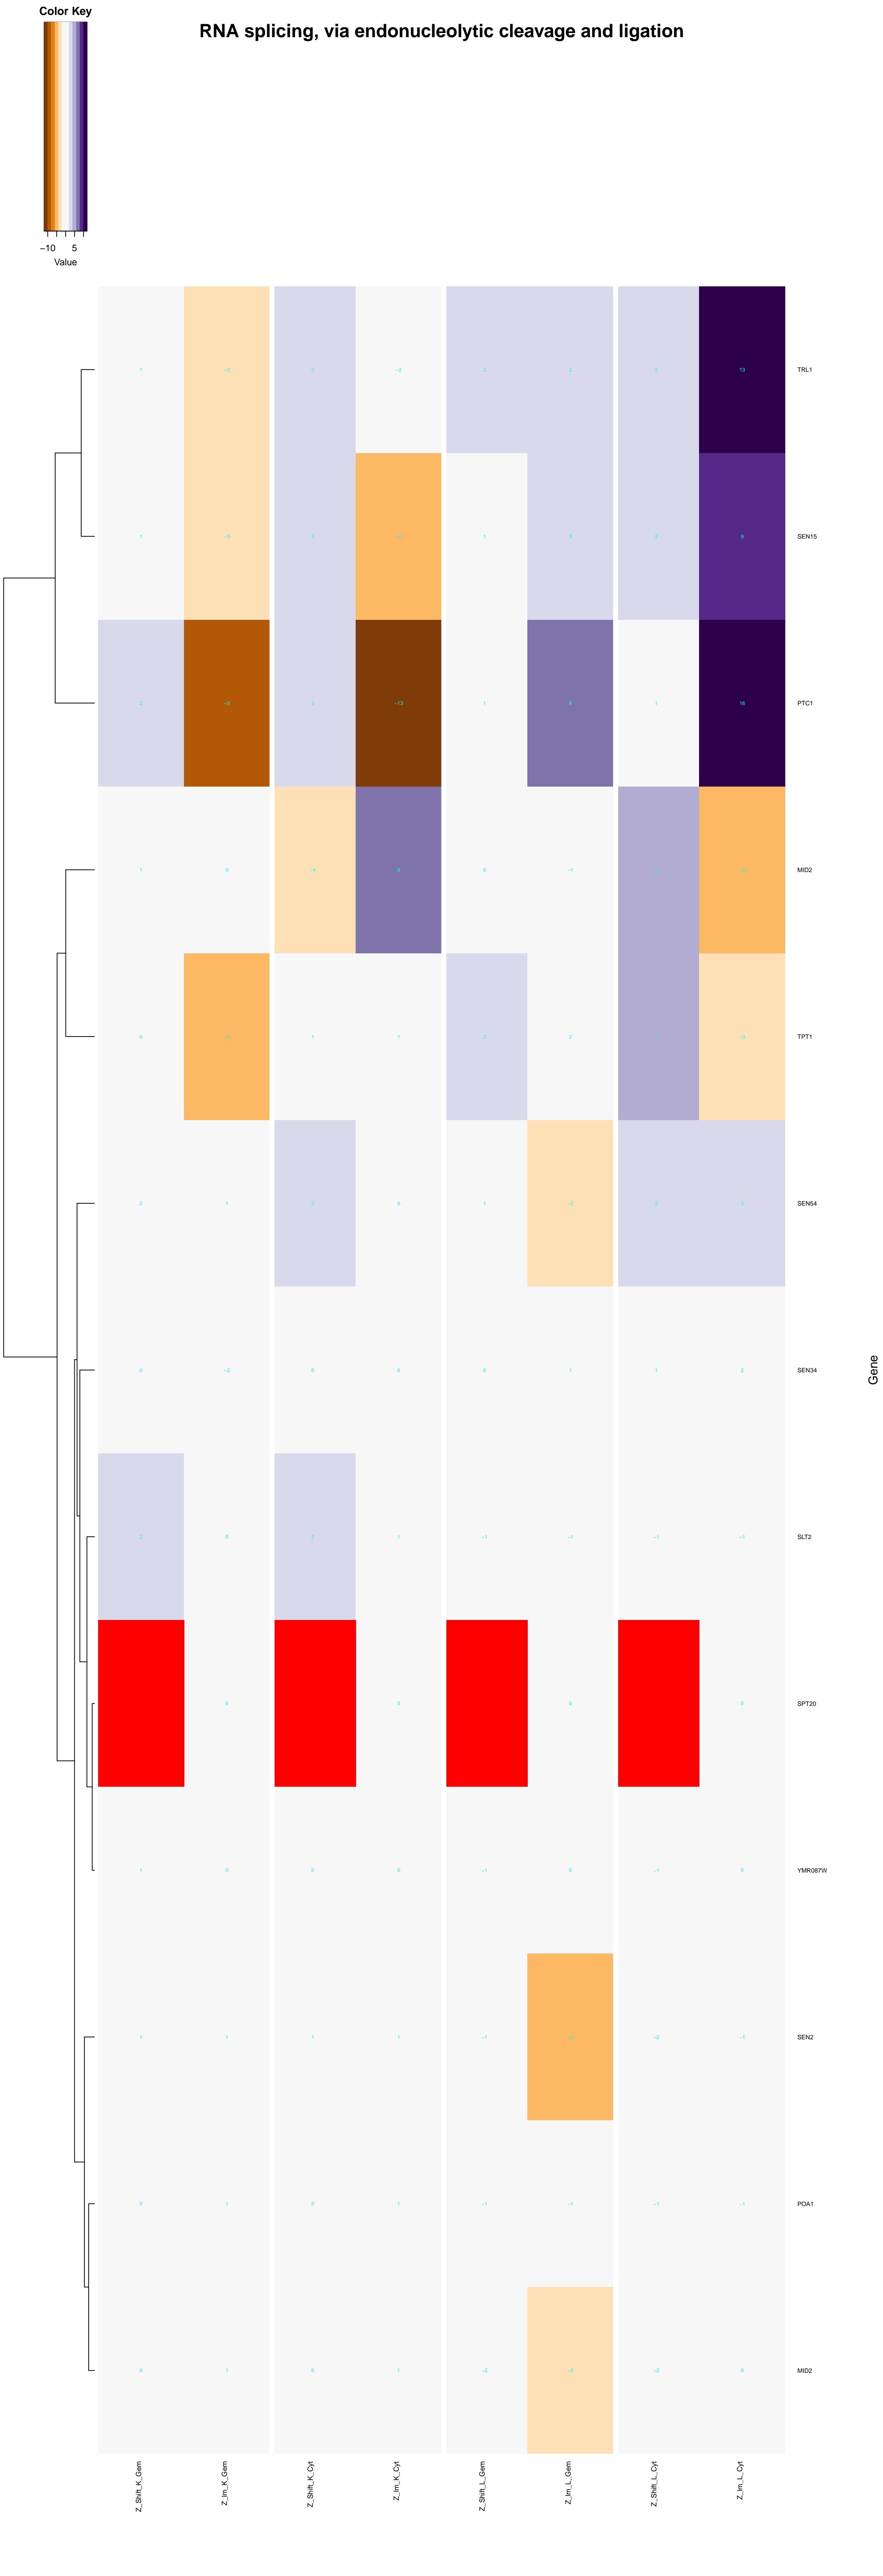

snoRNA splicing

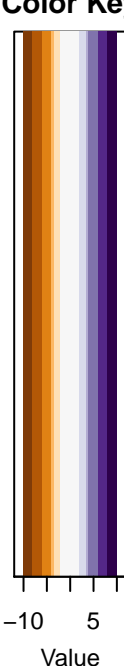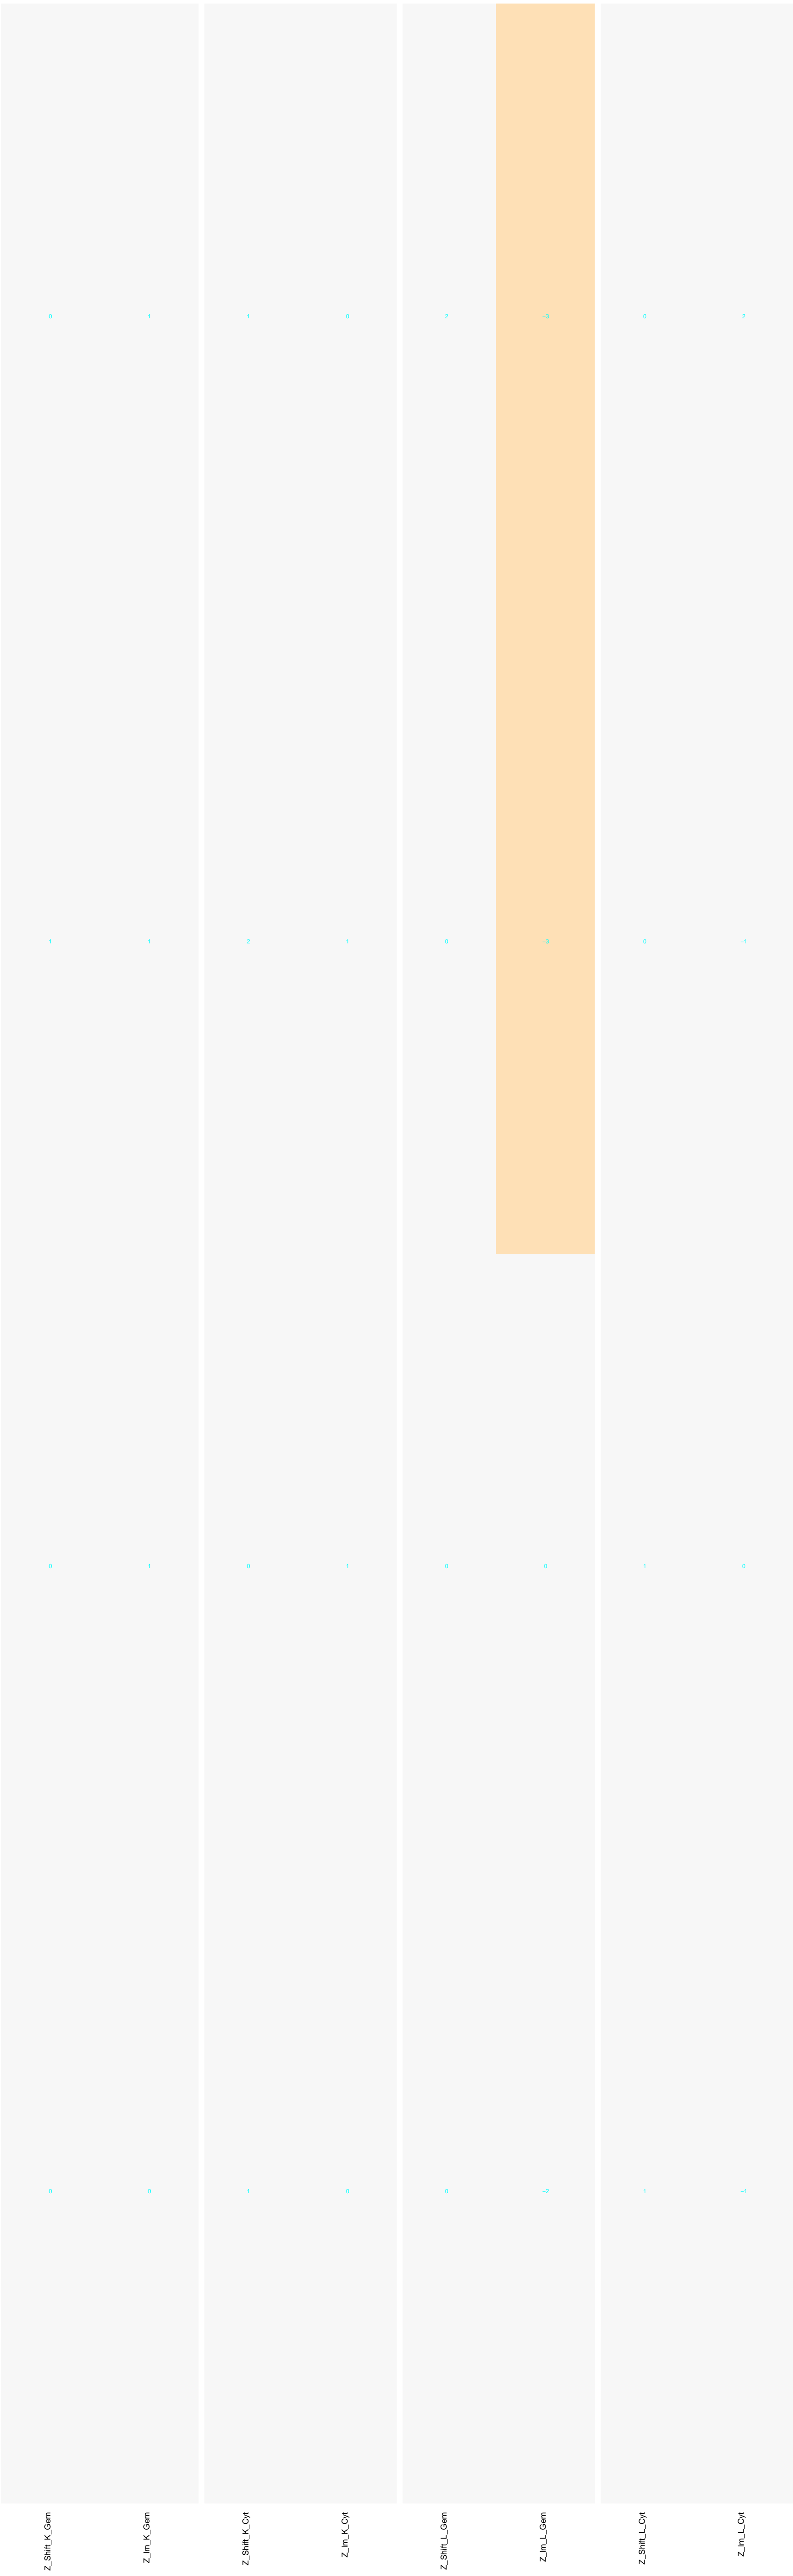

Gene

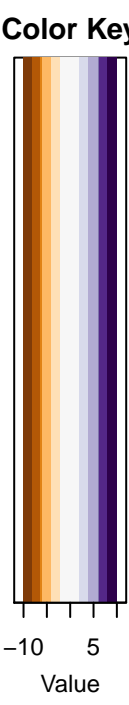

production of small RNA involved in gene silencing by RNA

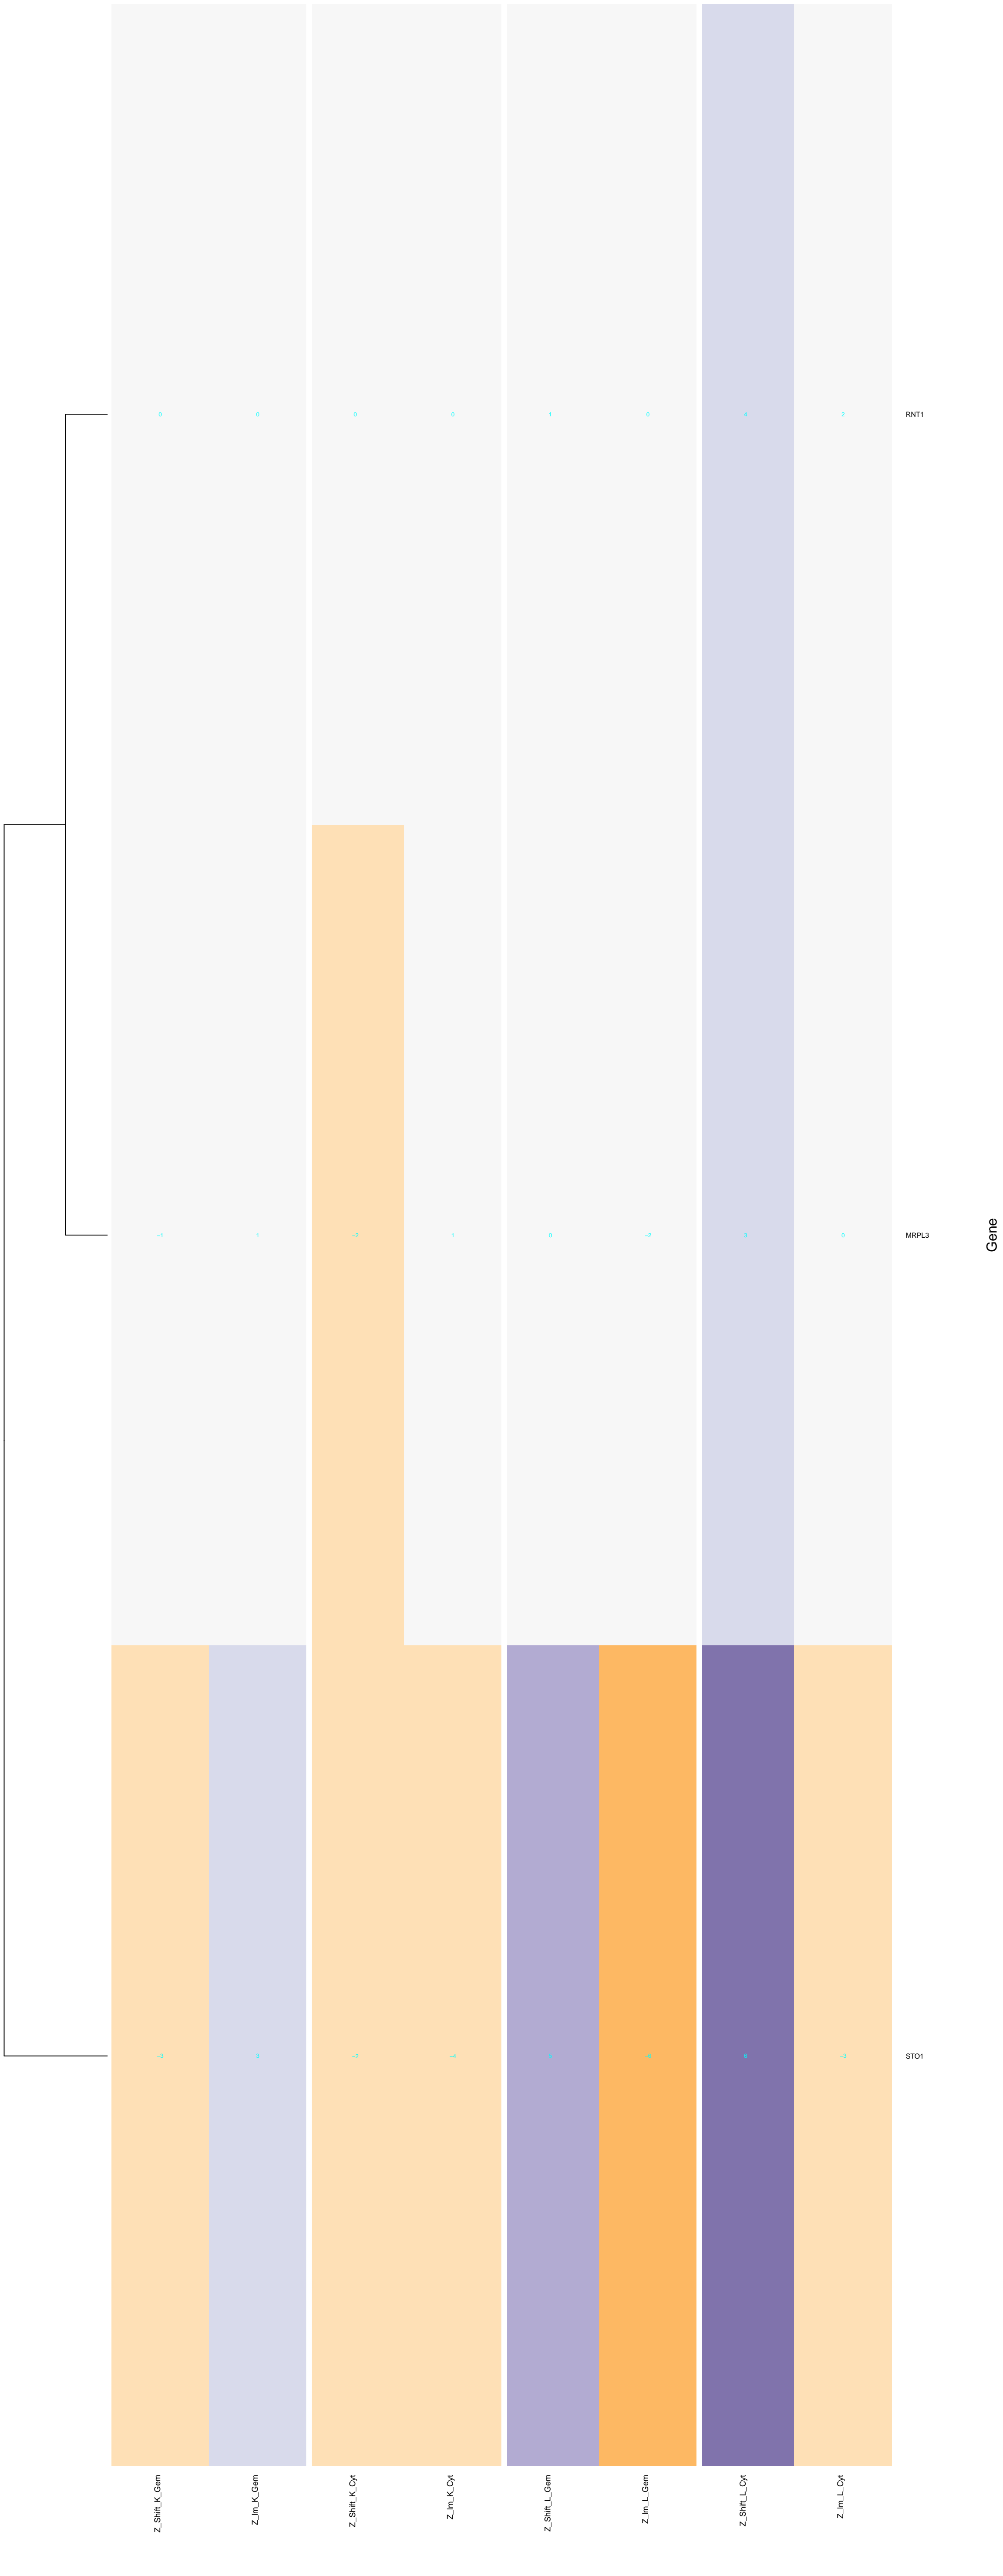

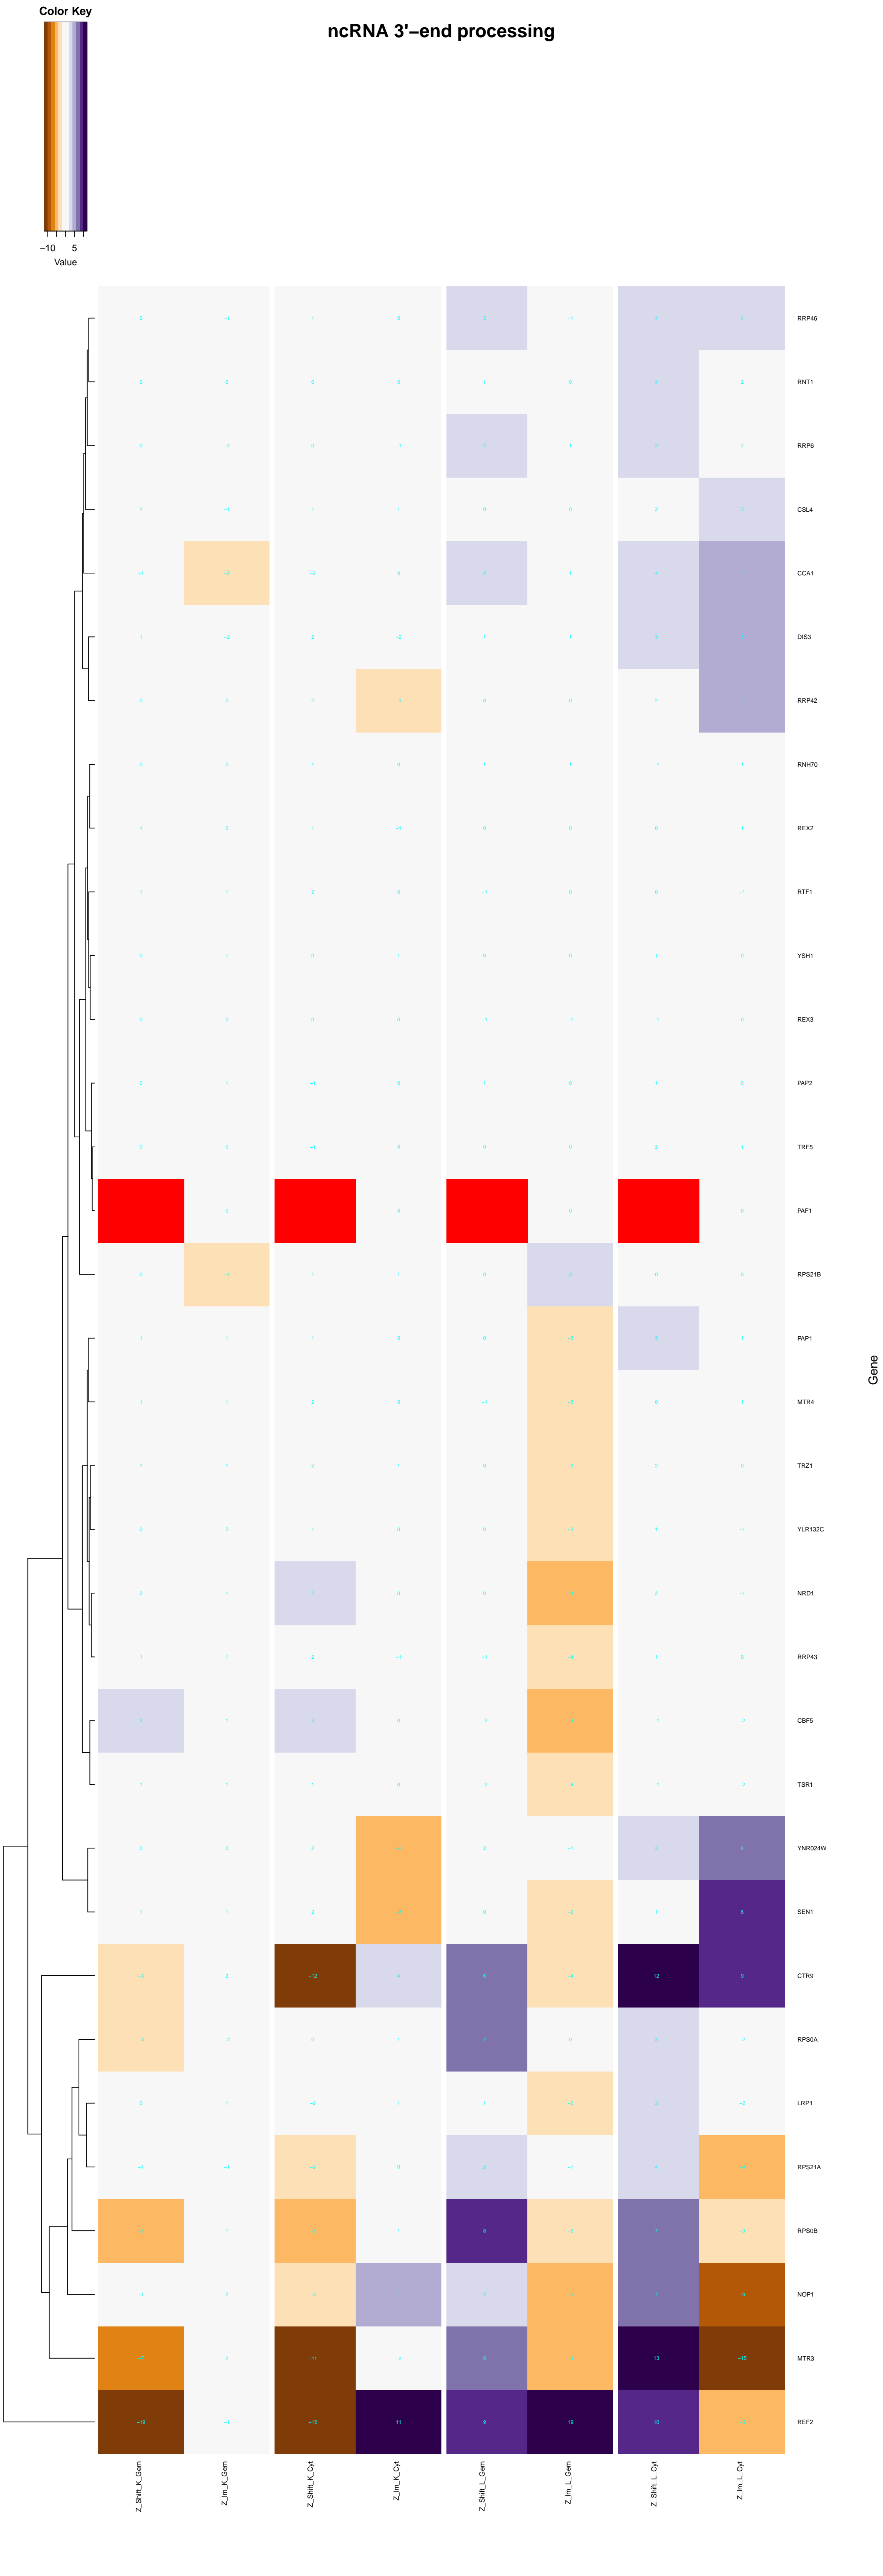

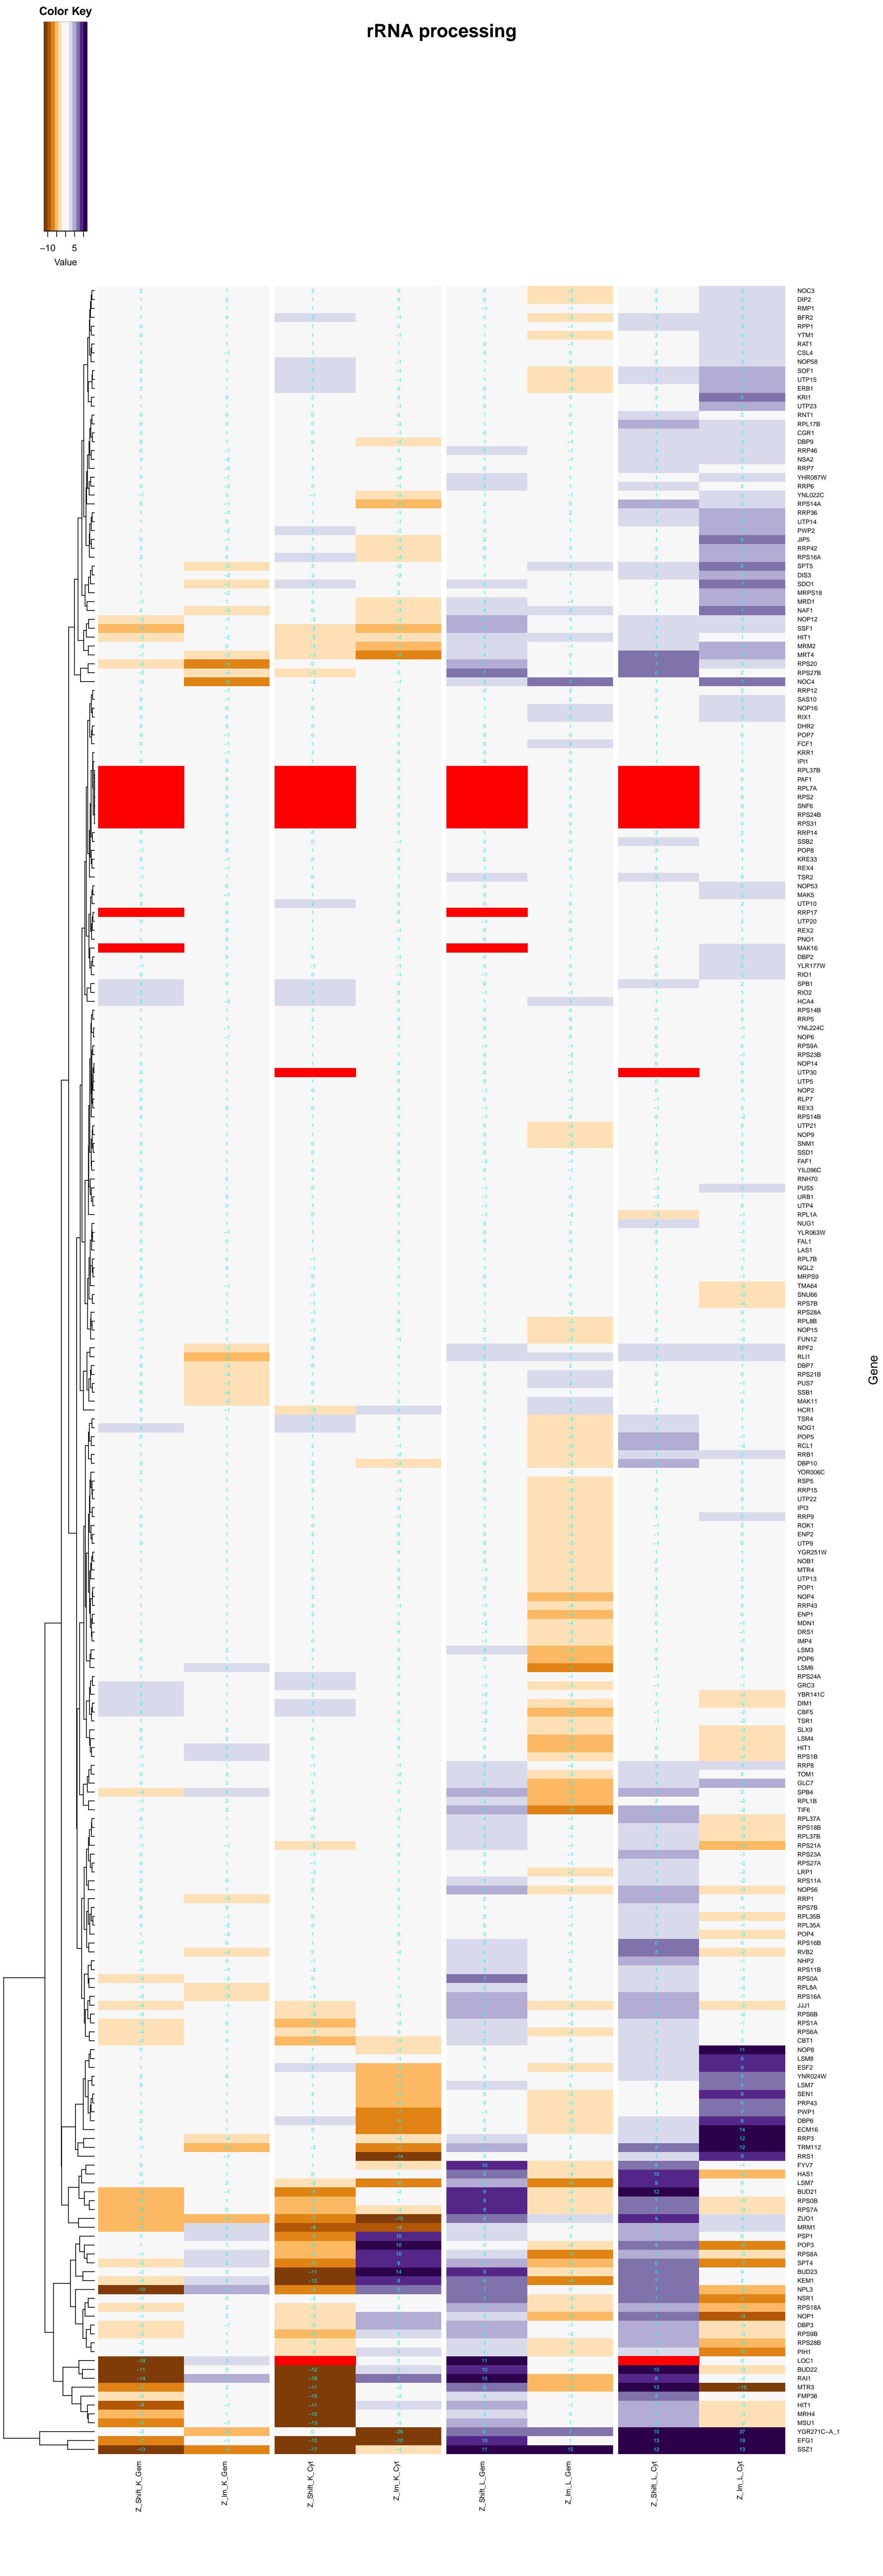

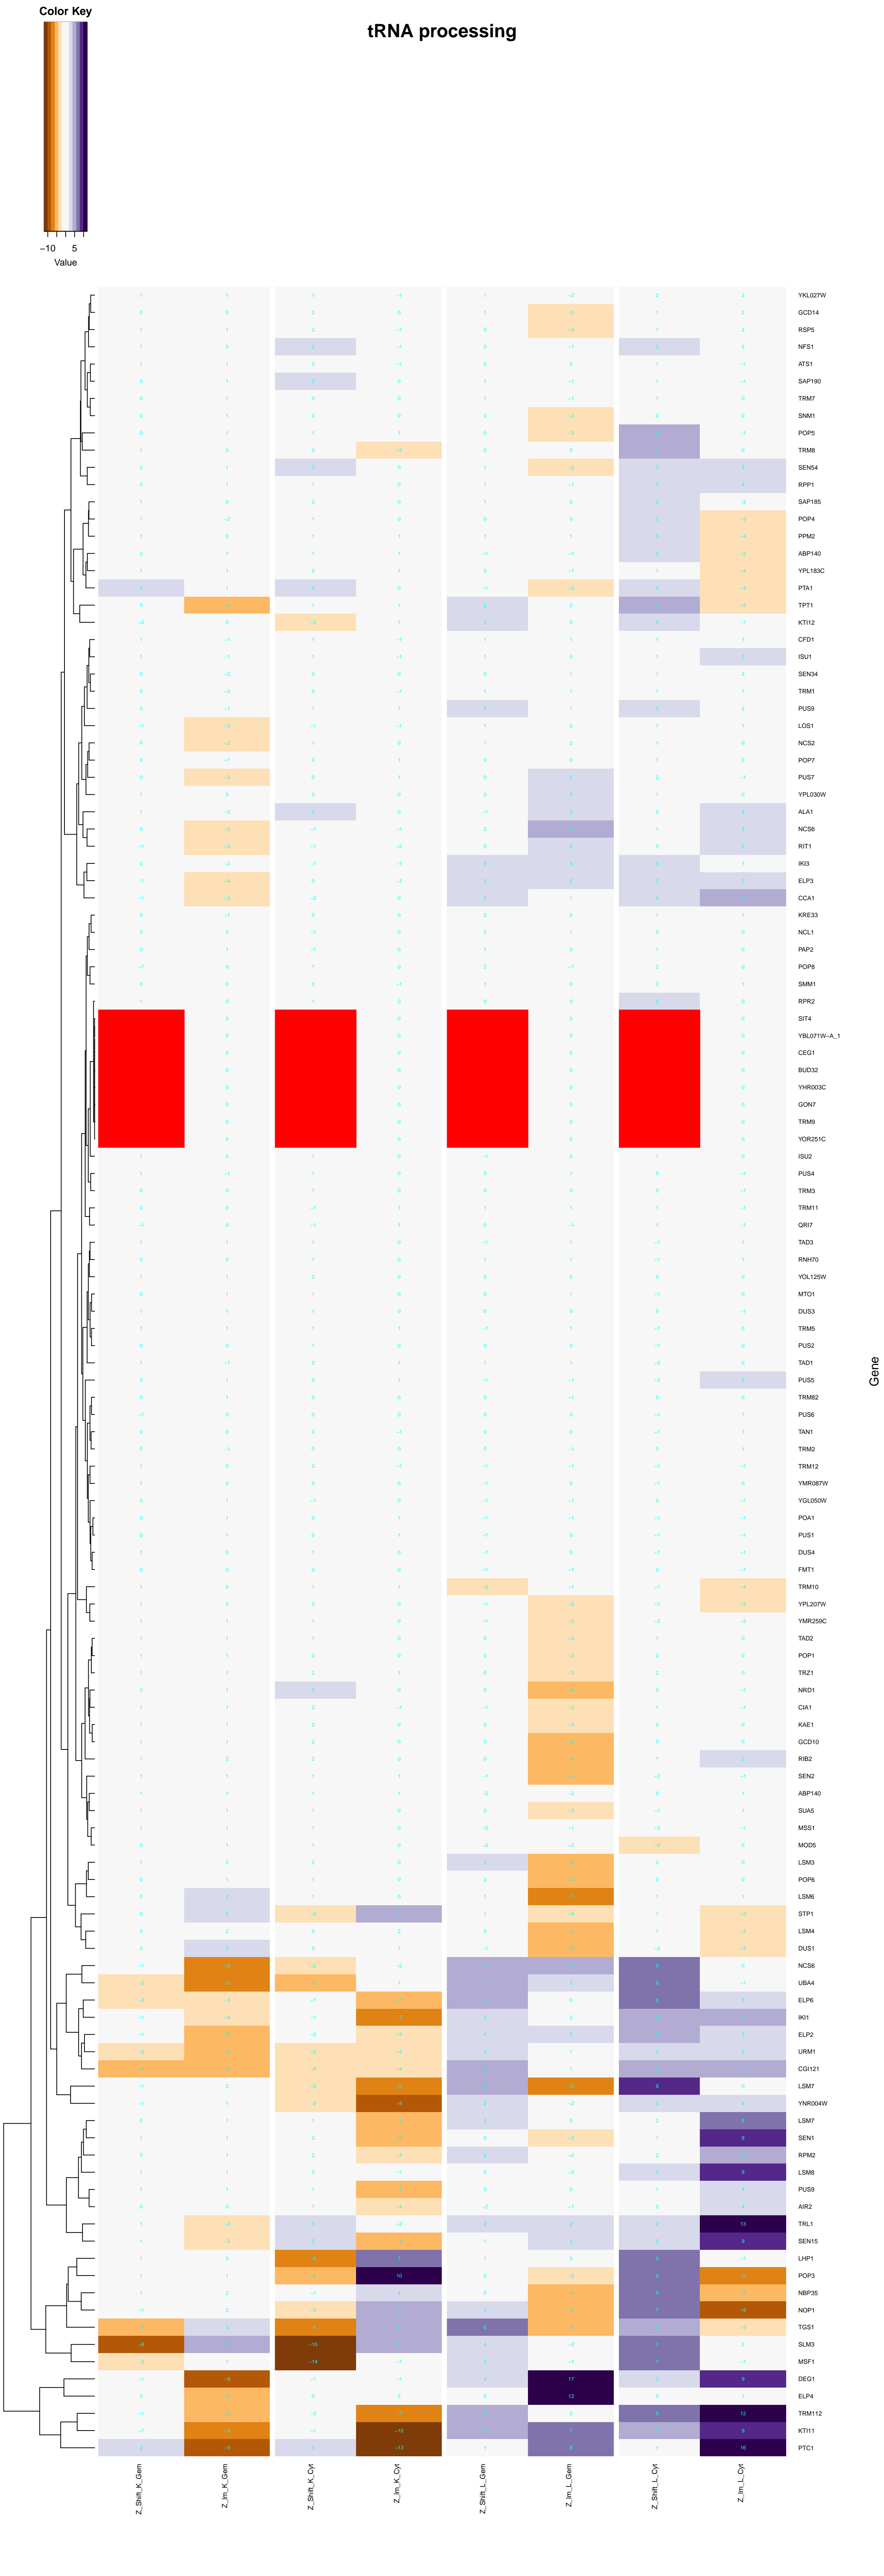

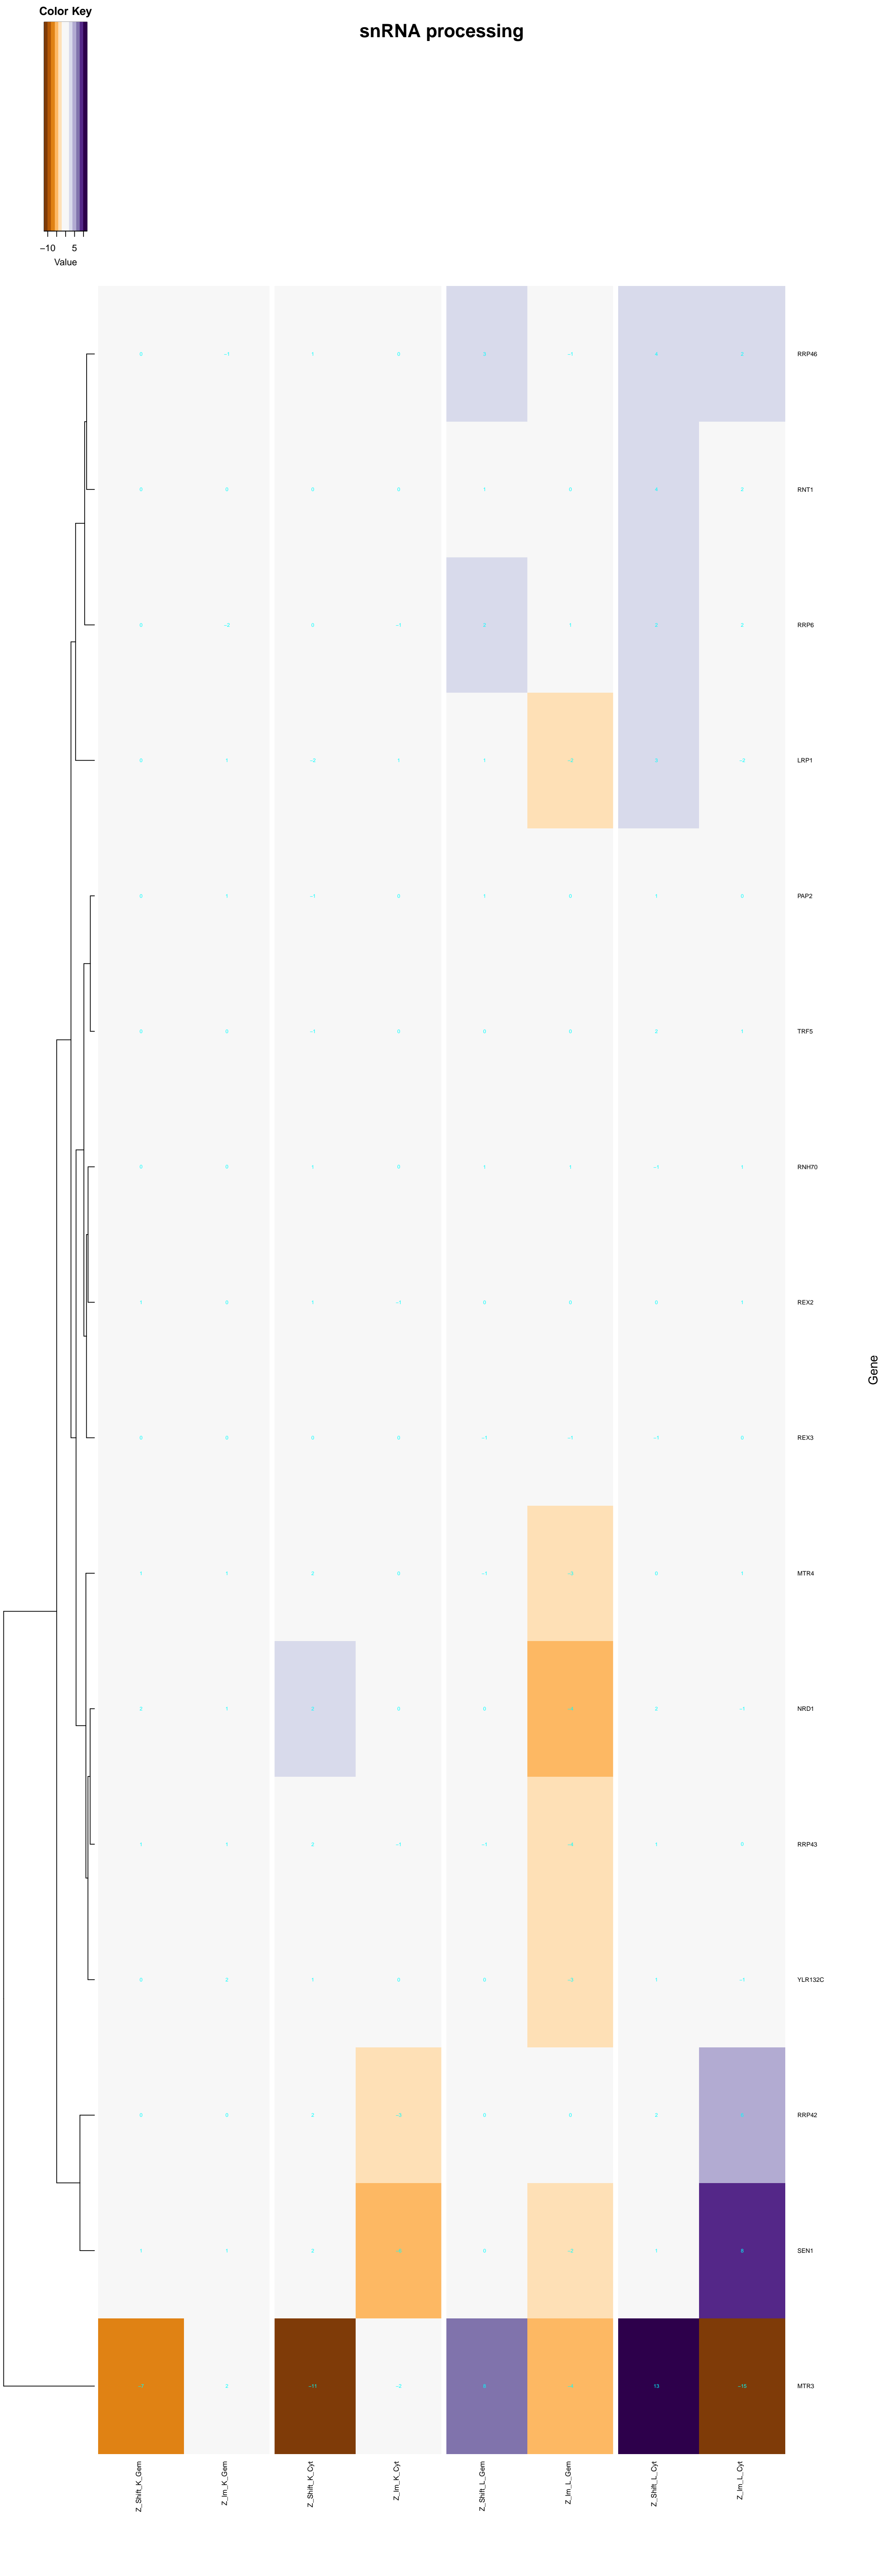

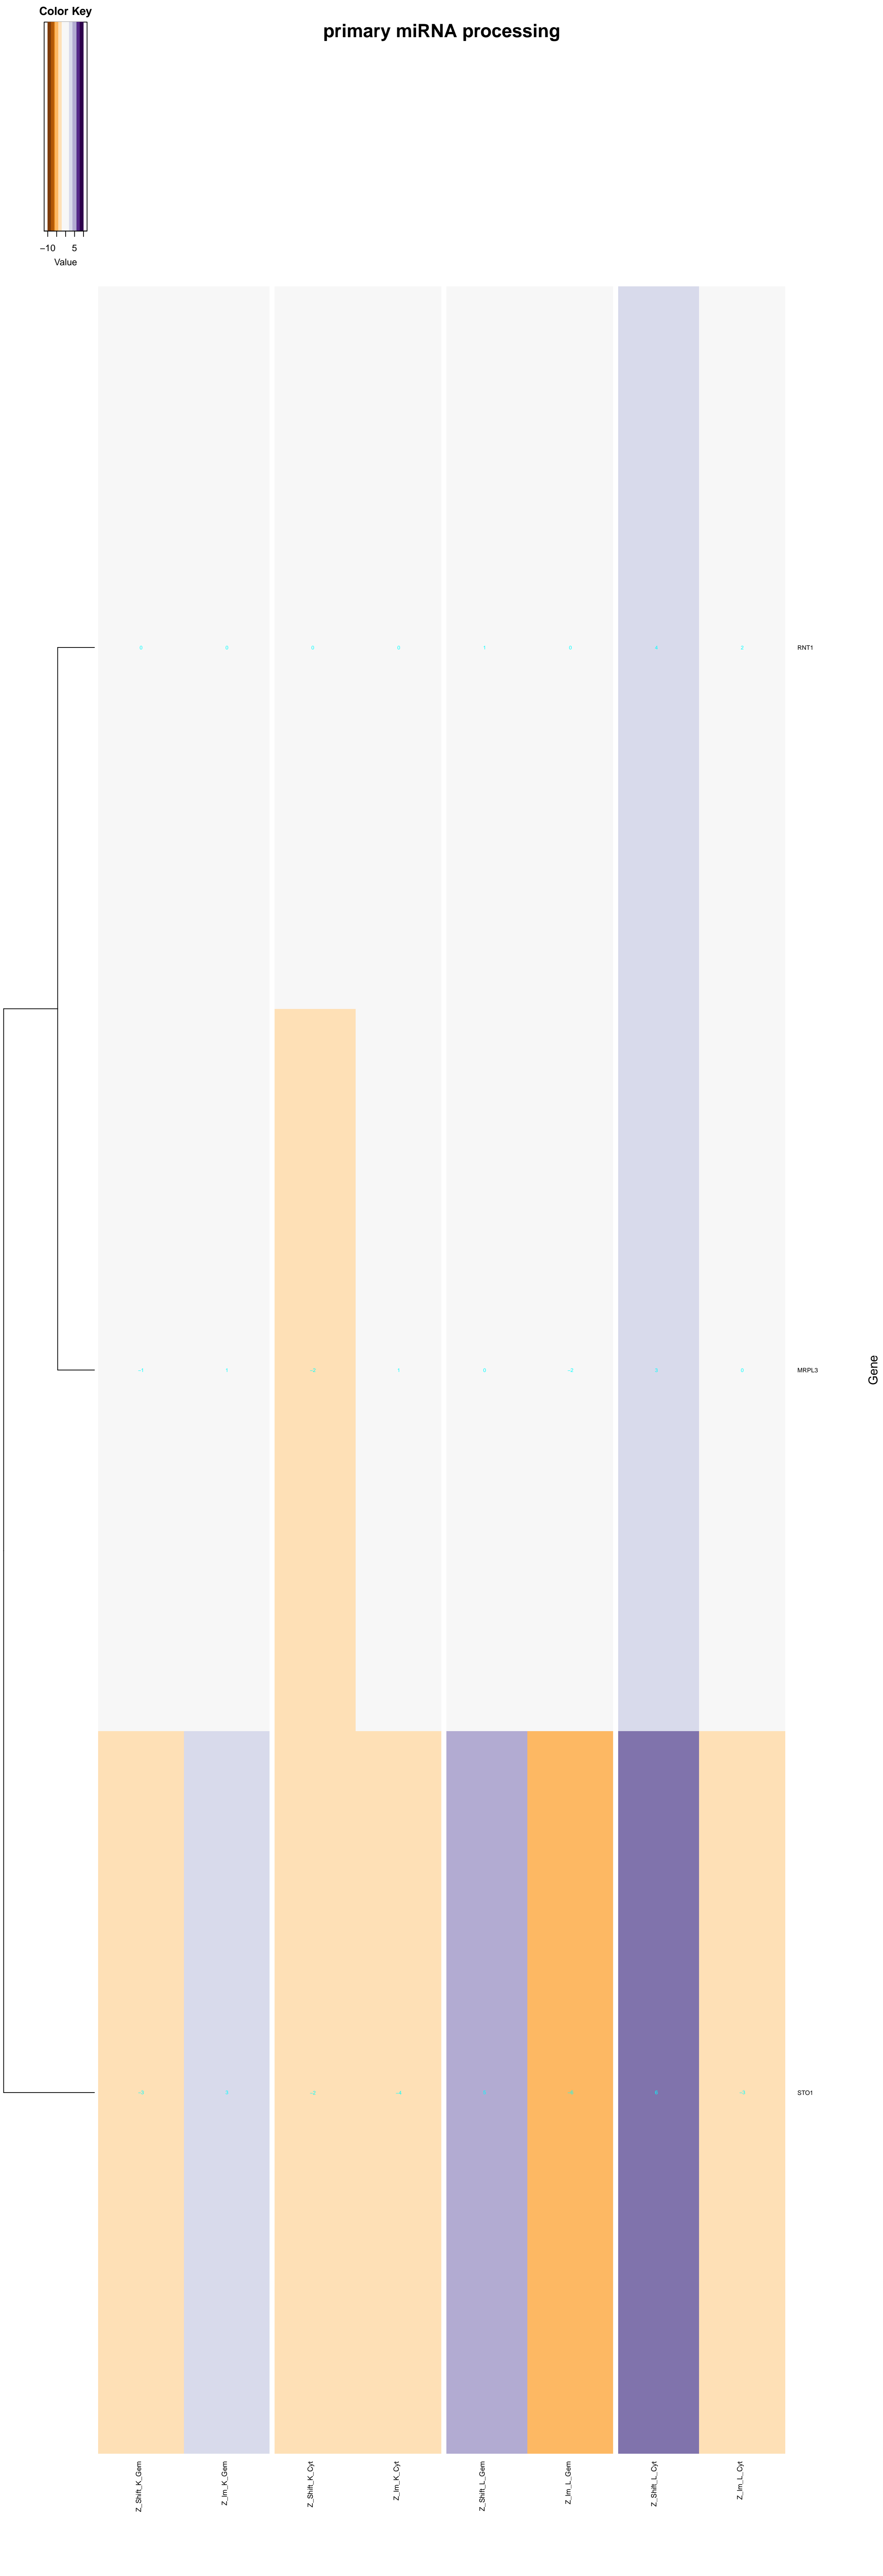

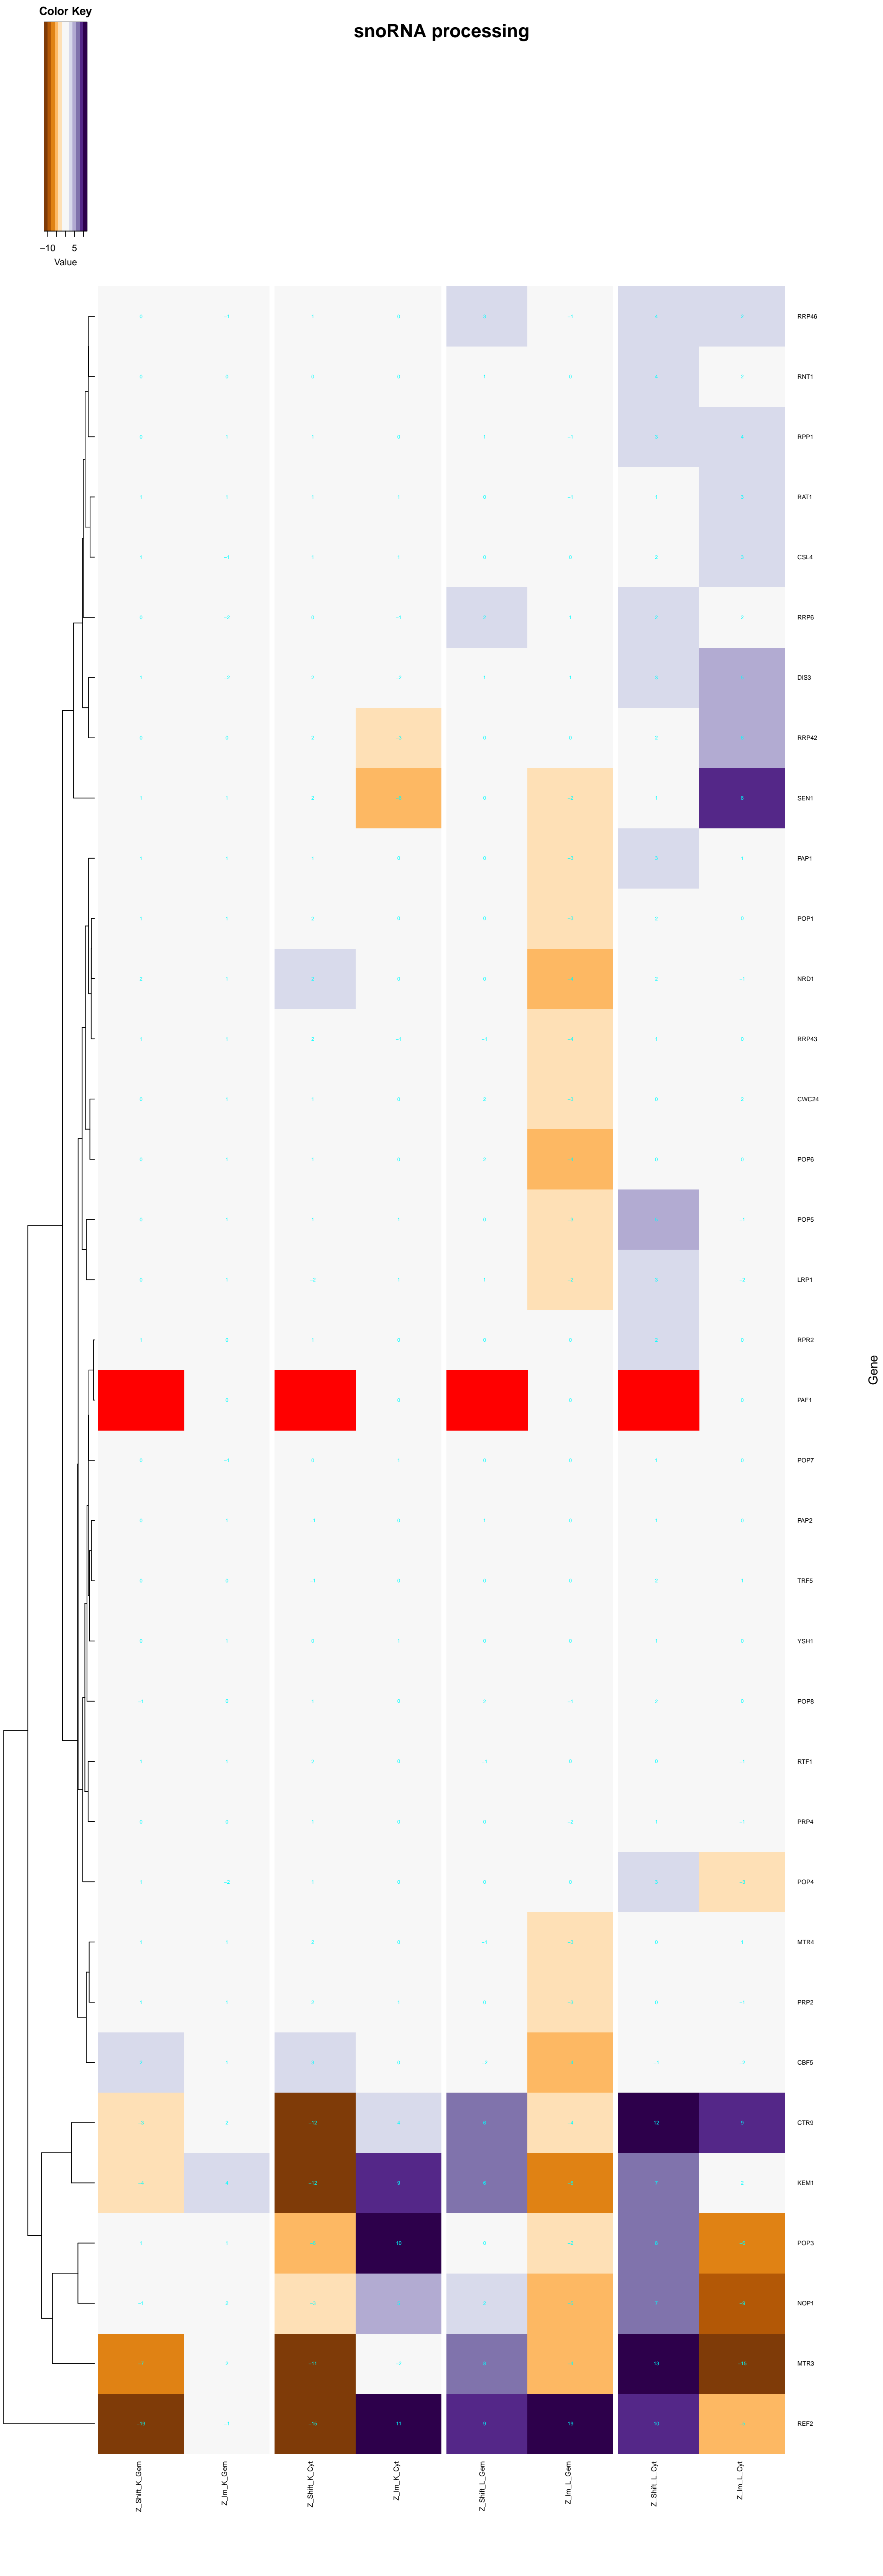

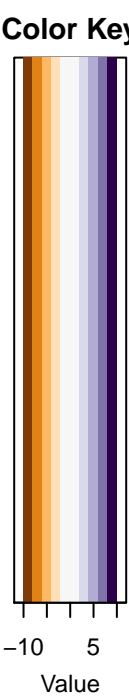

7-methylguanosine RNA capping

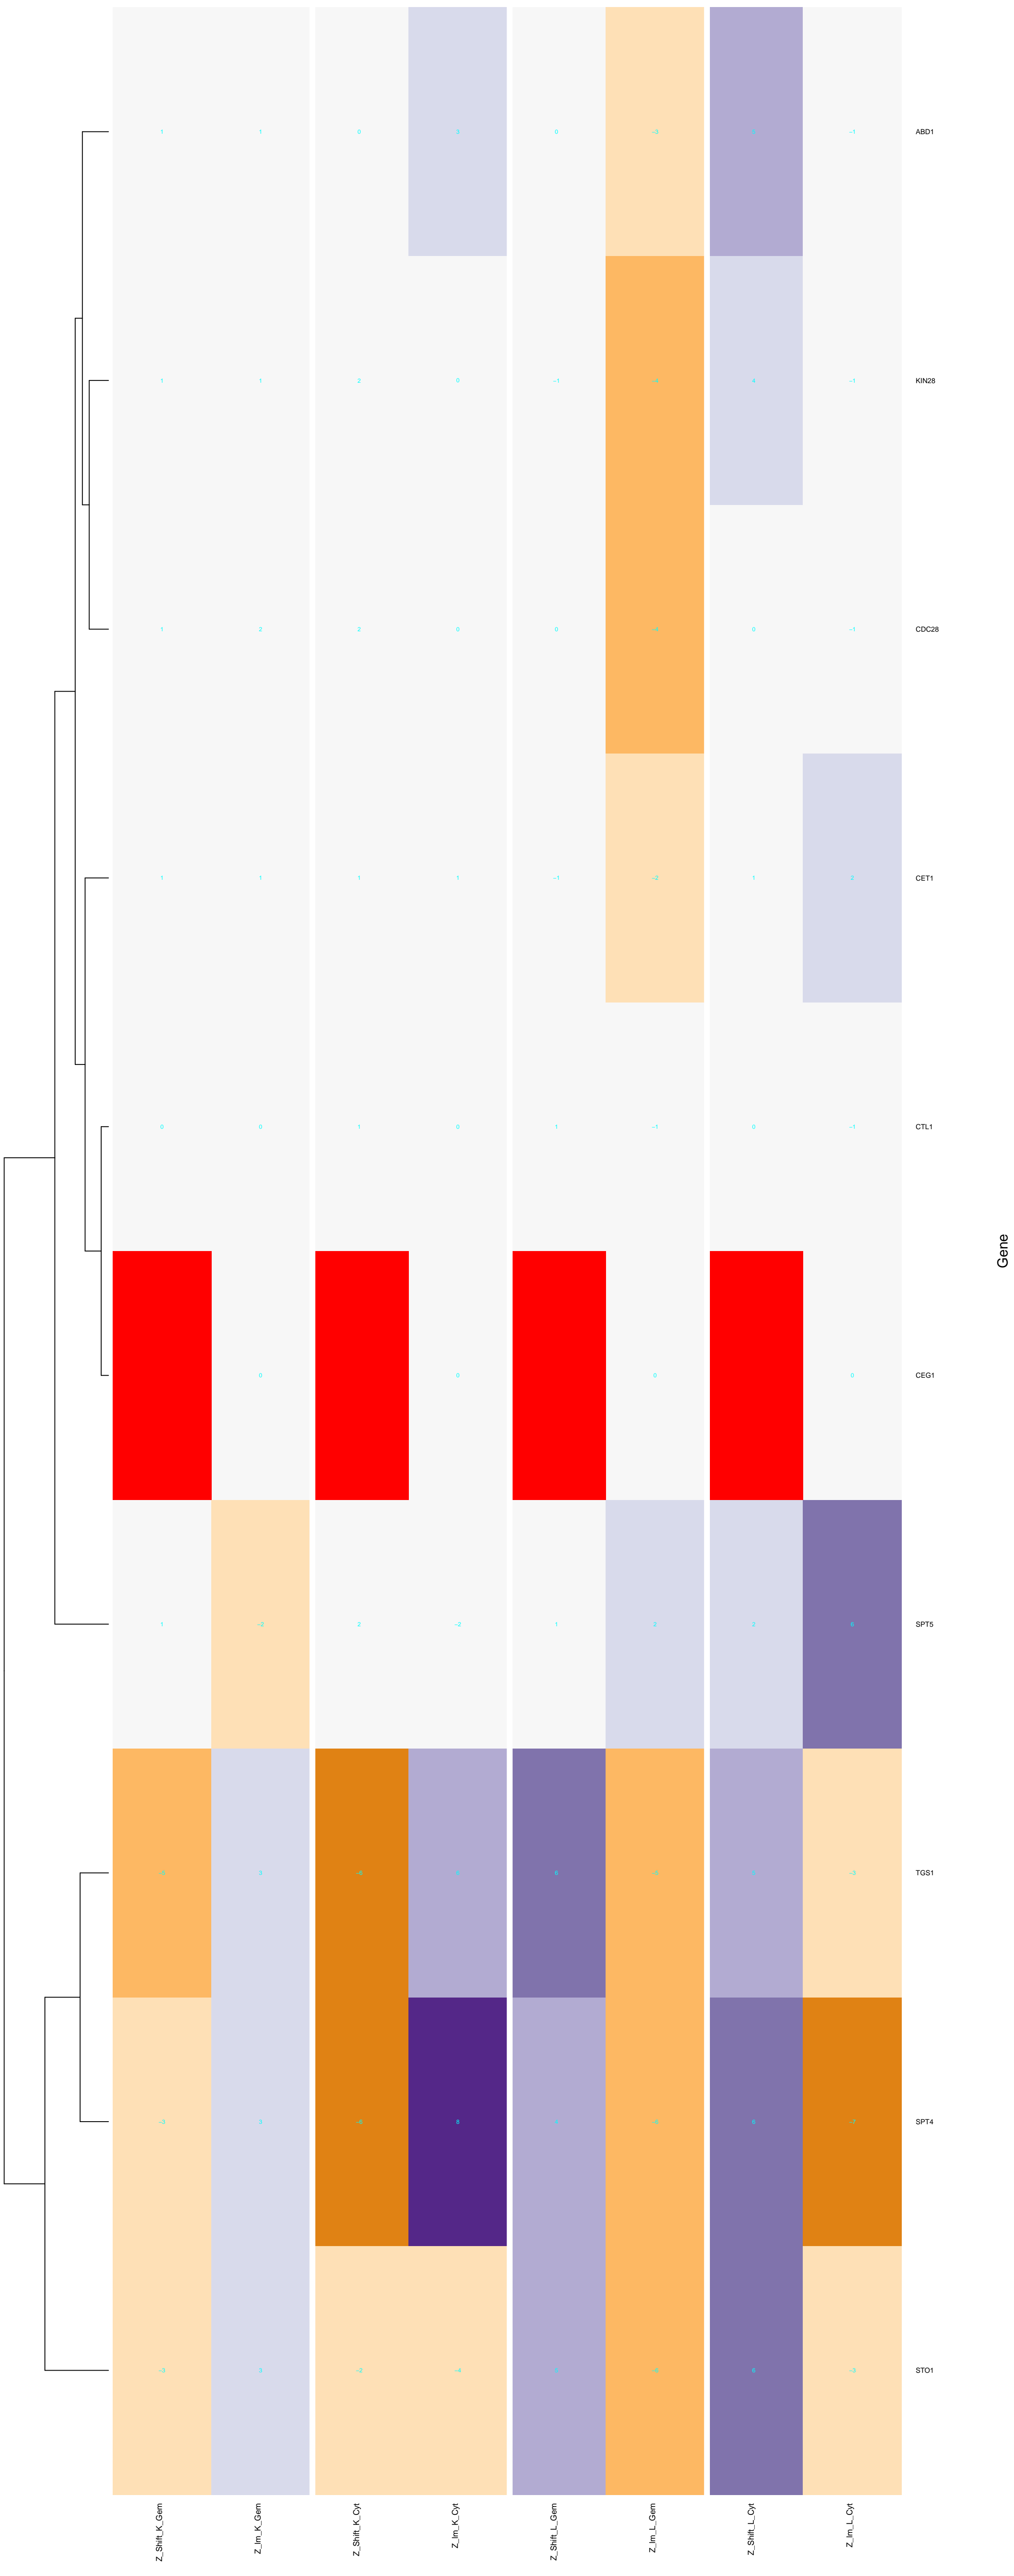

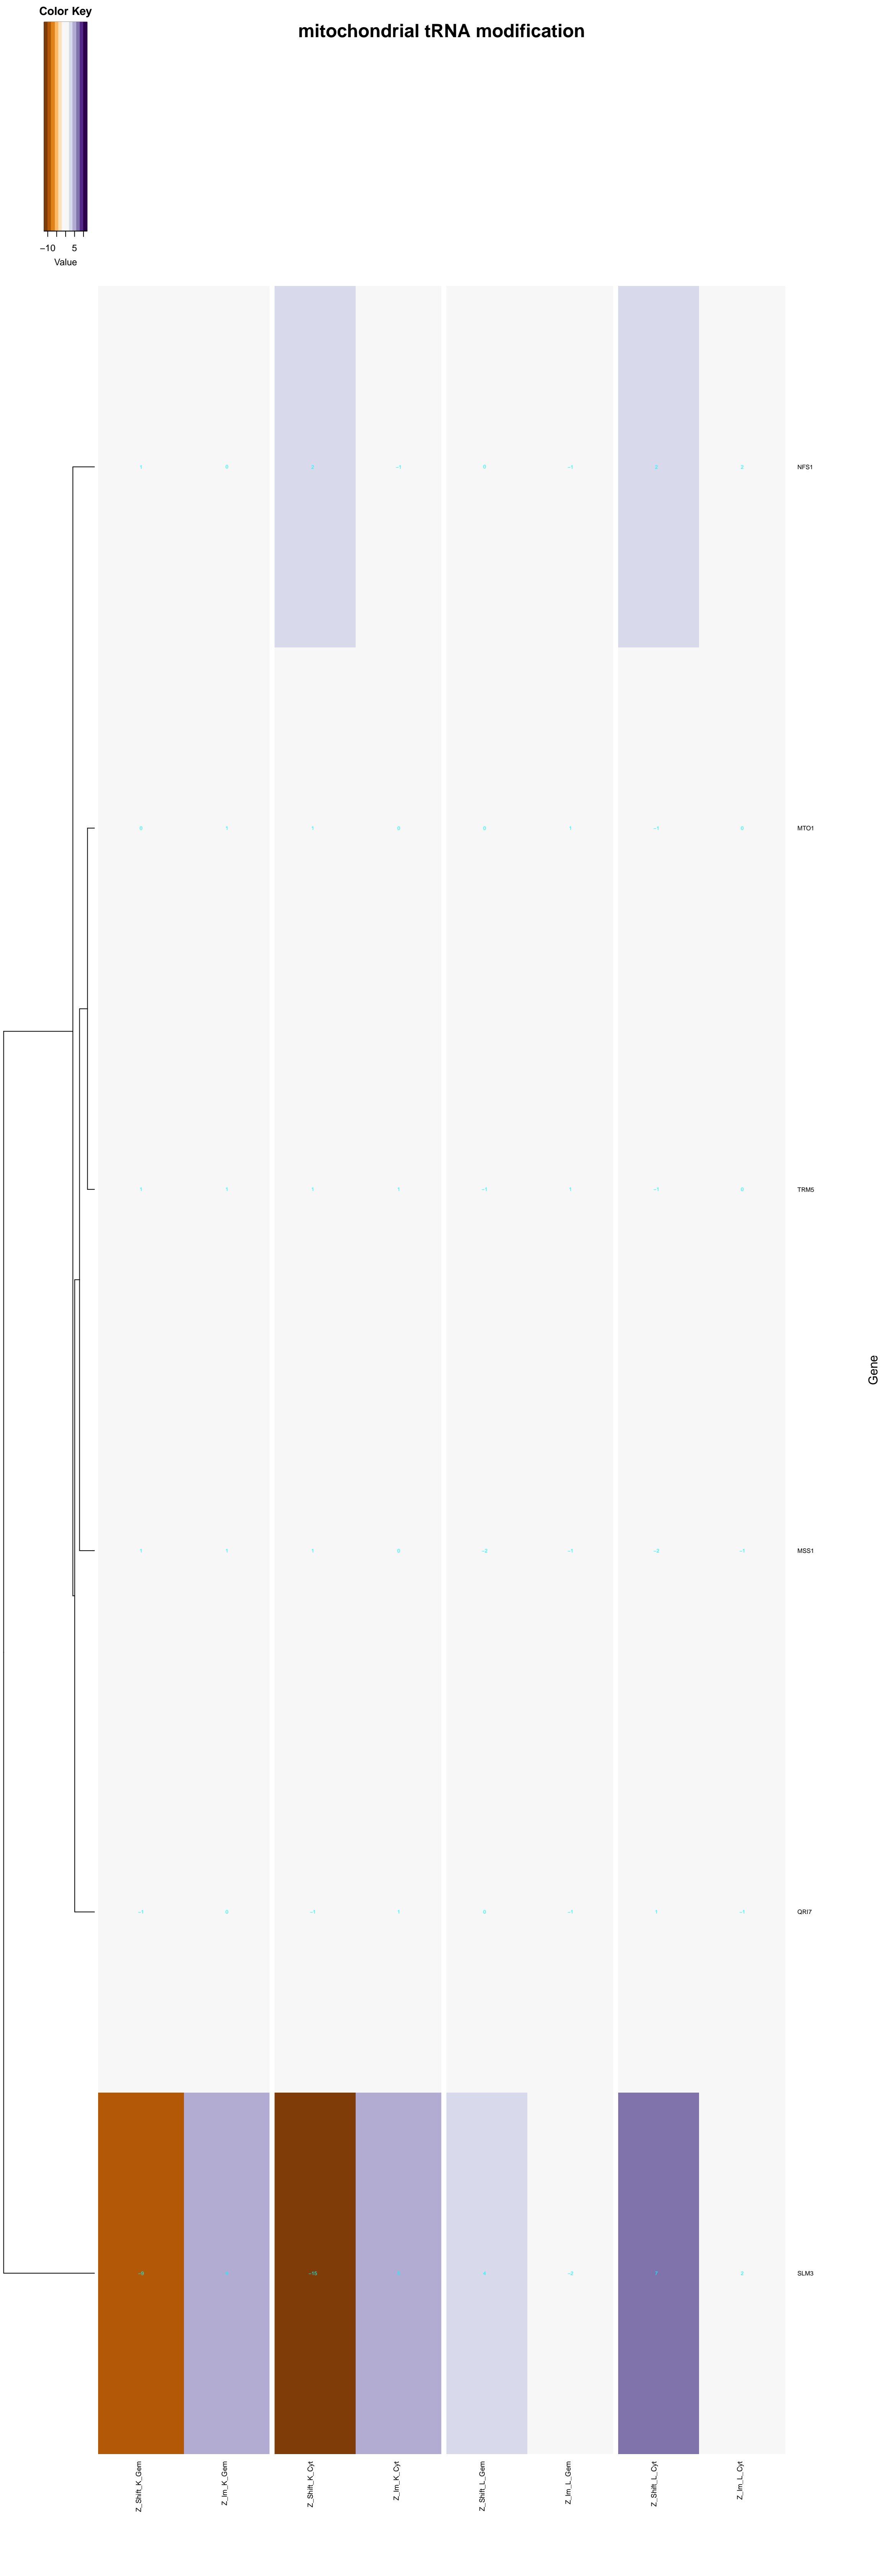

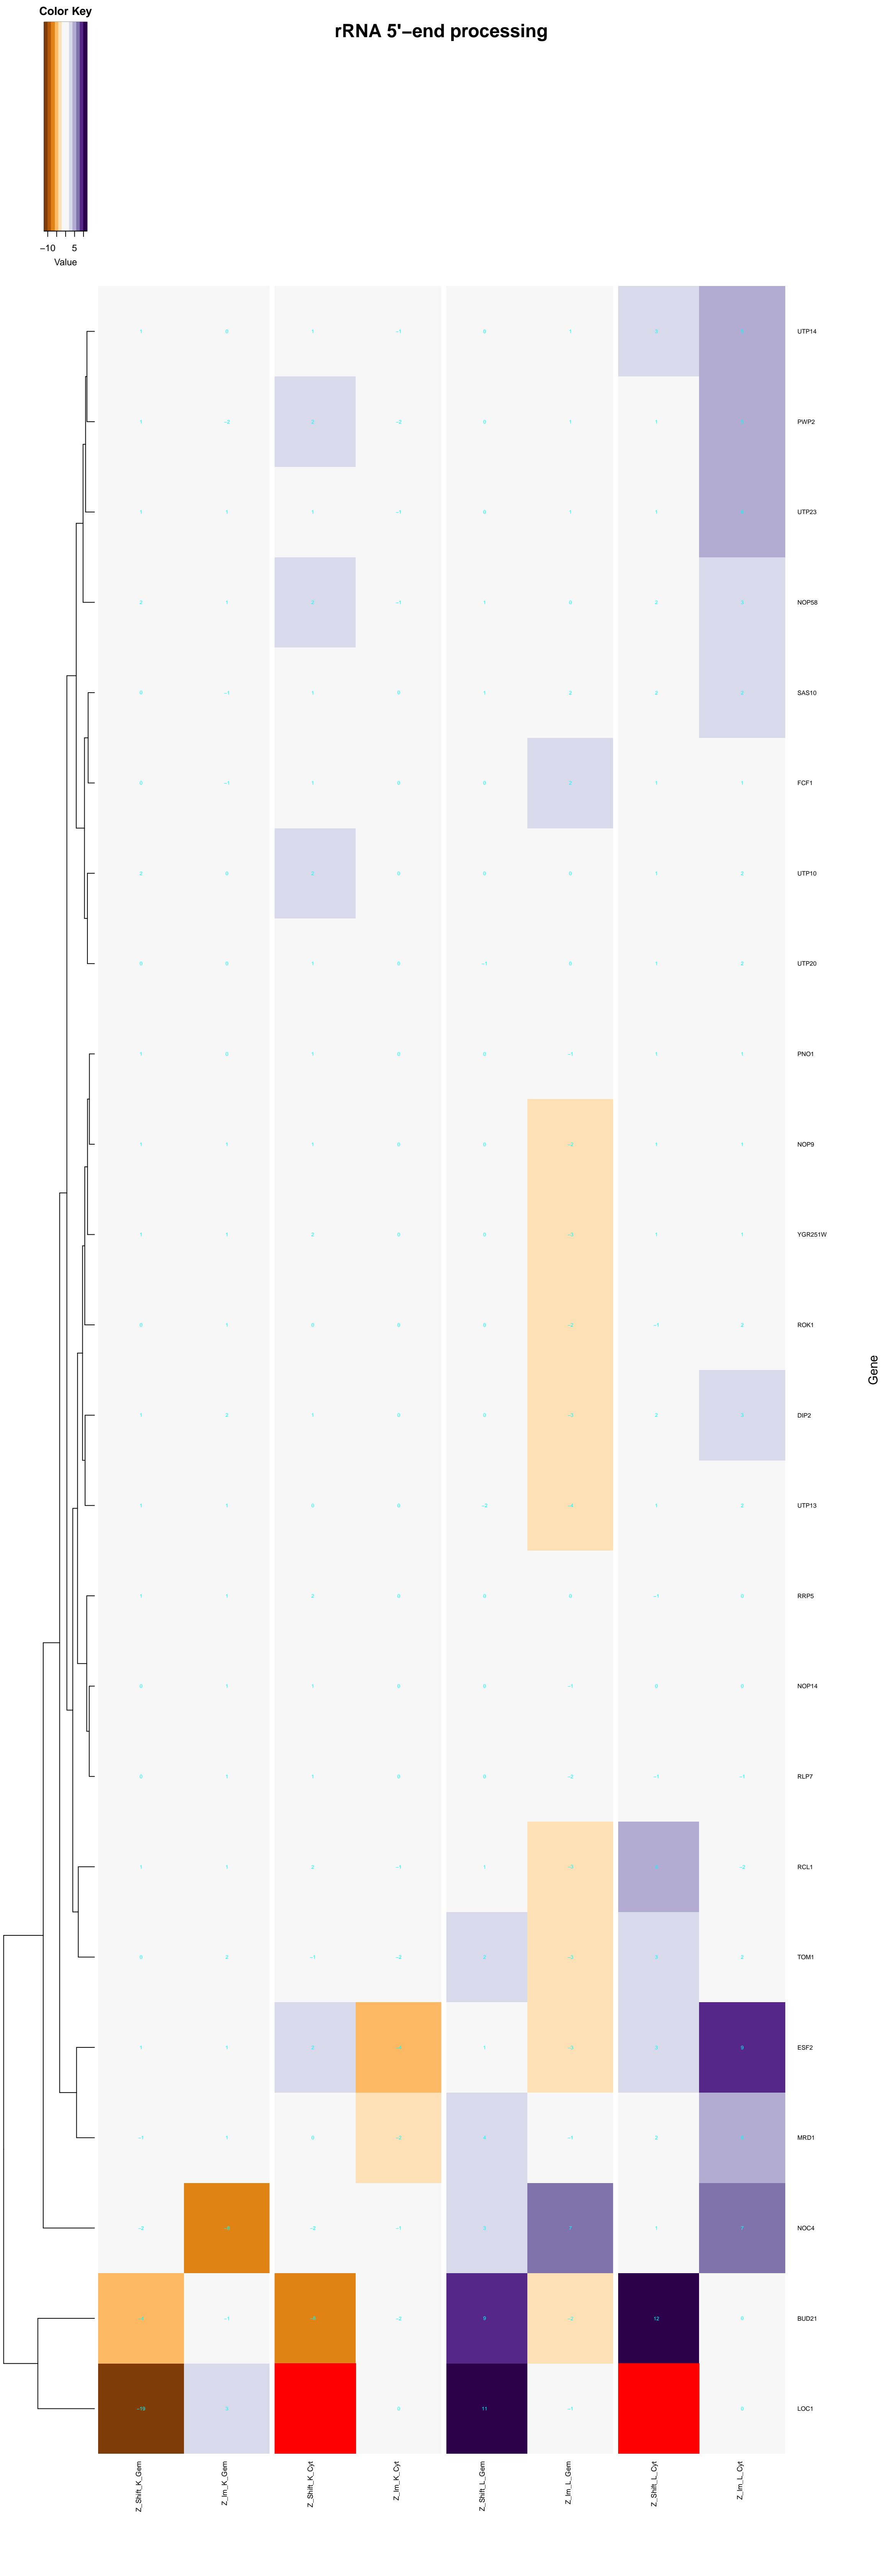

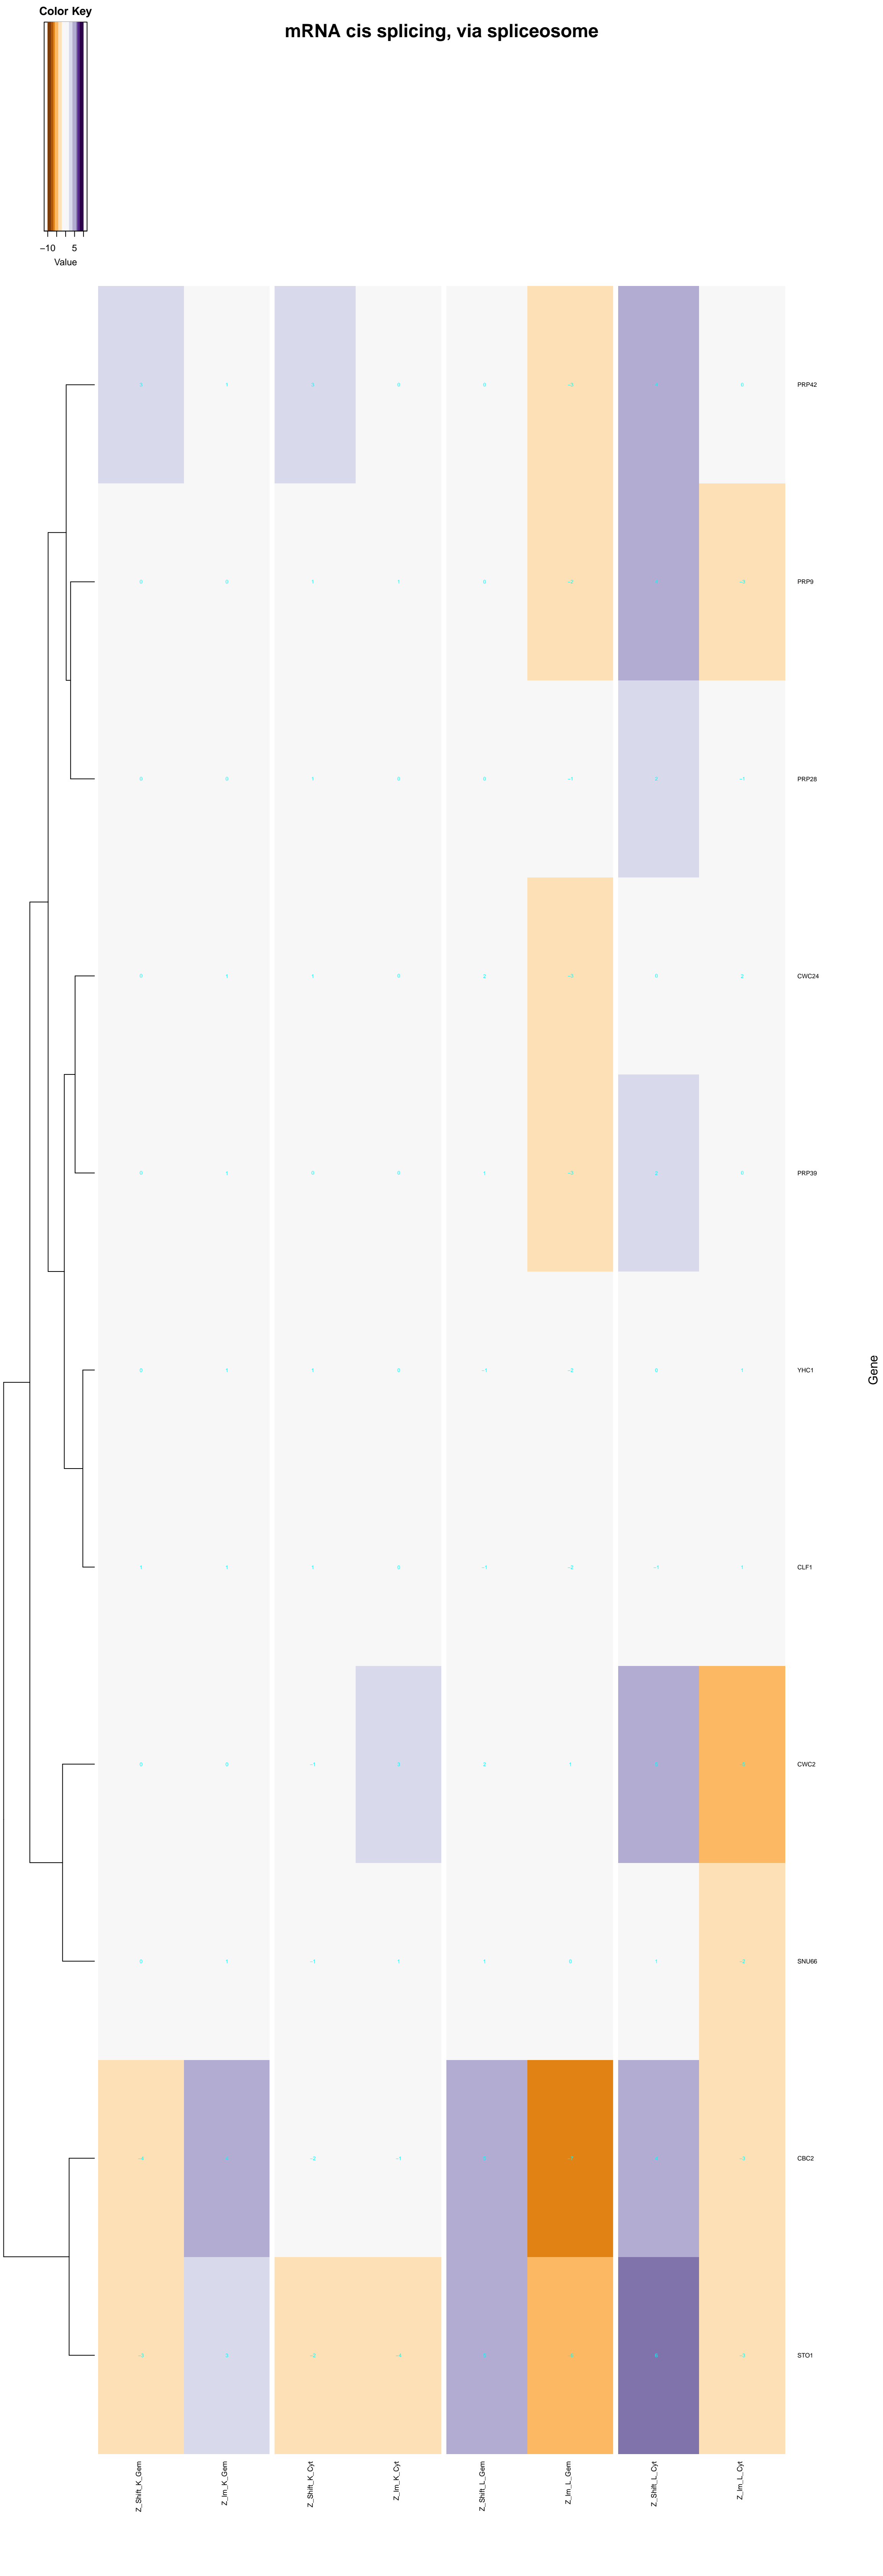

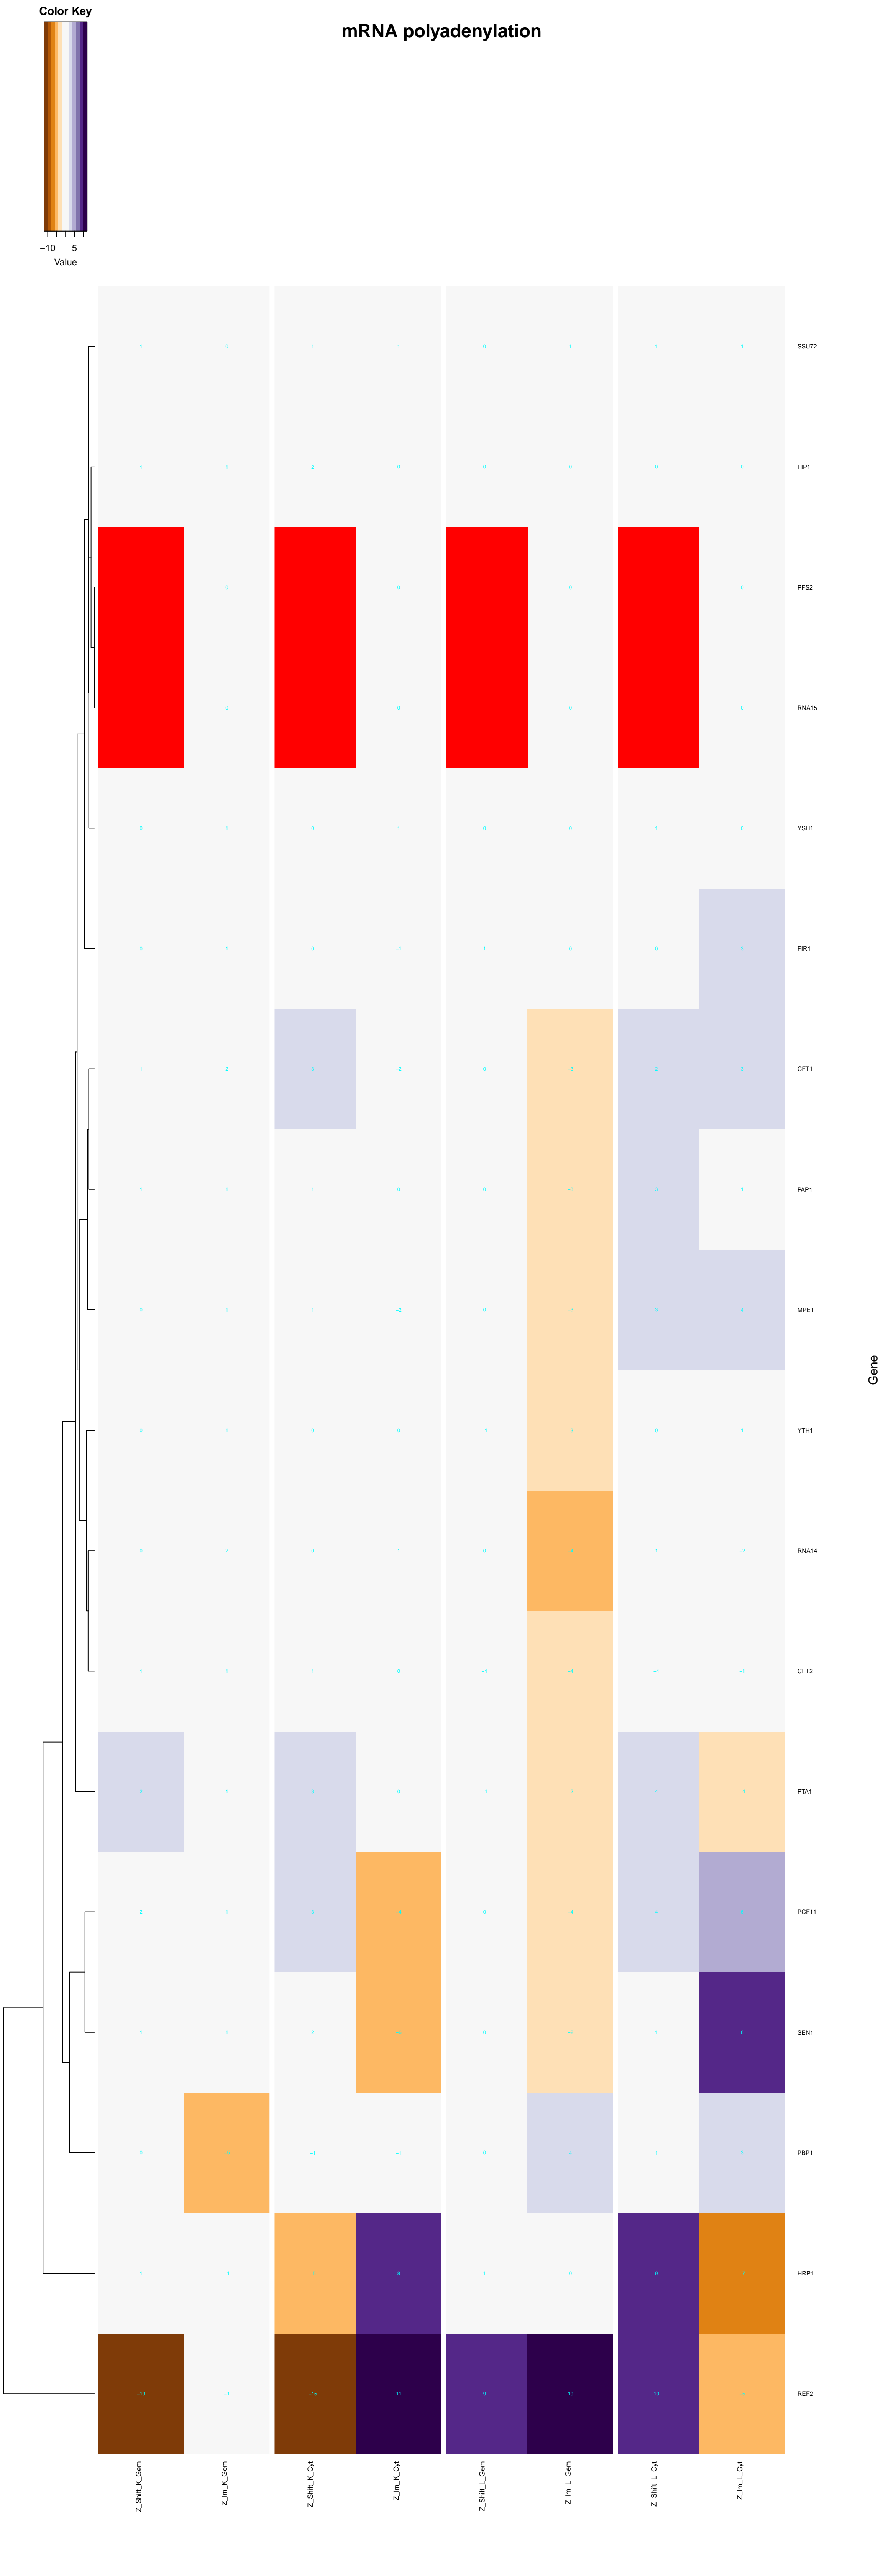

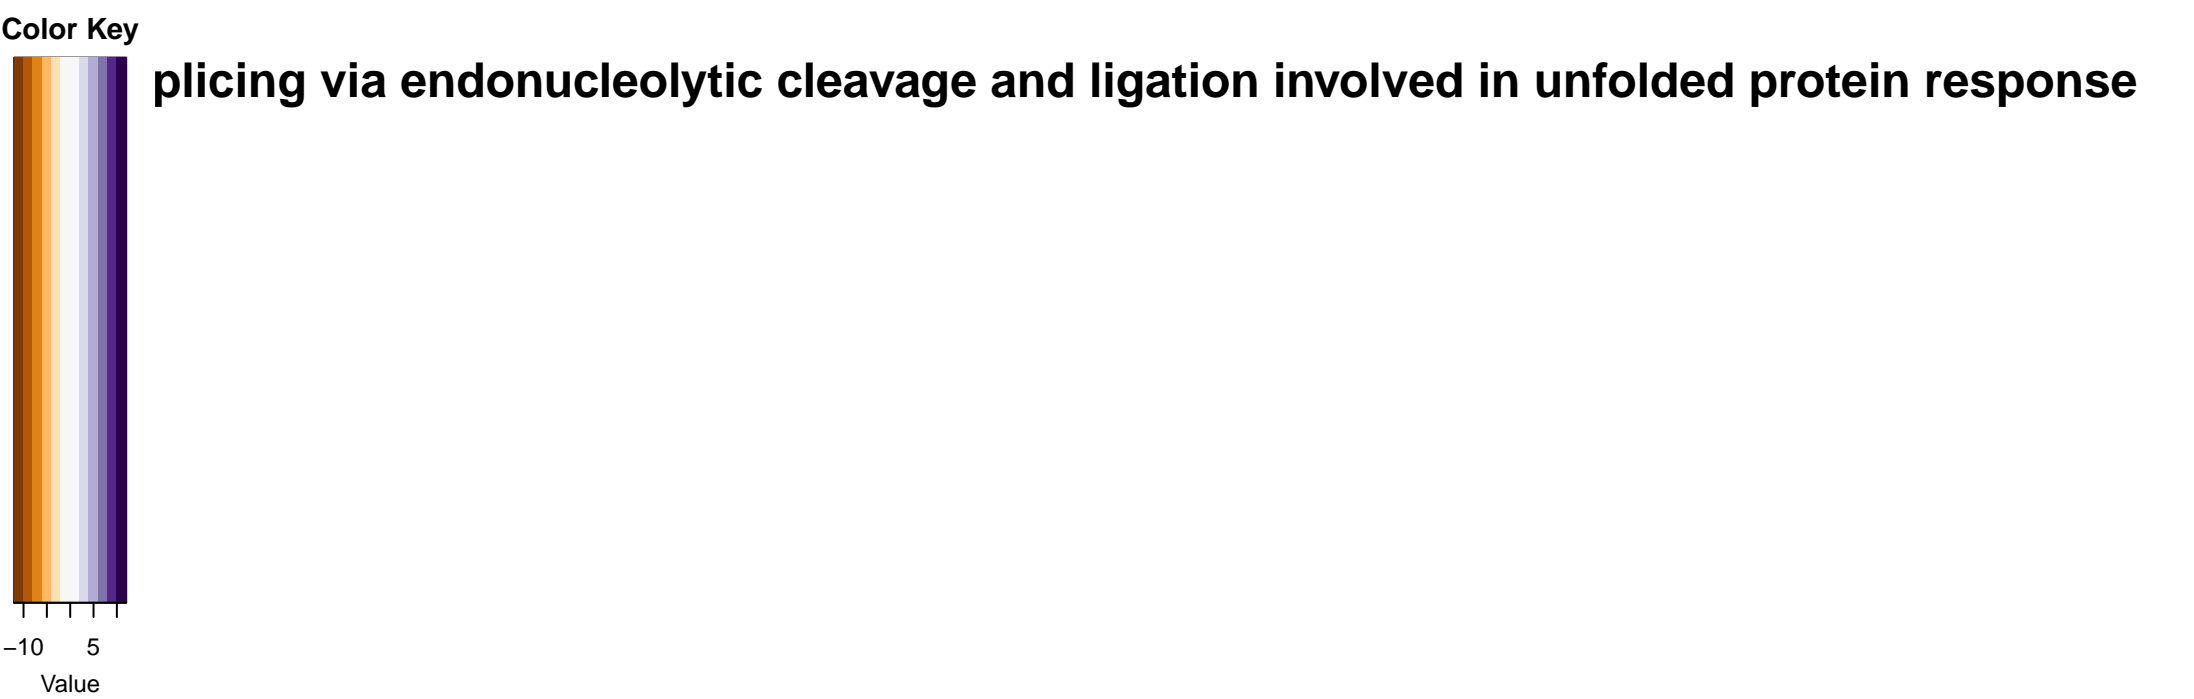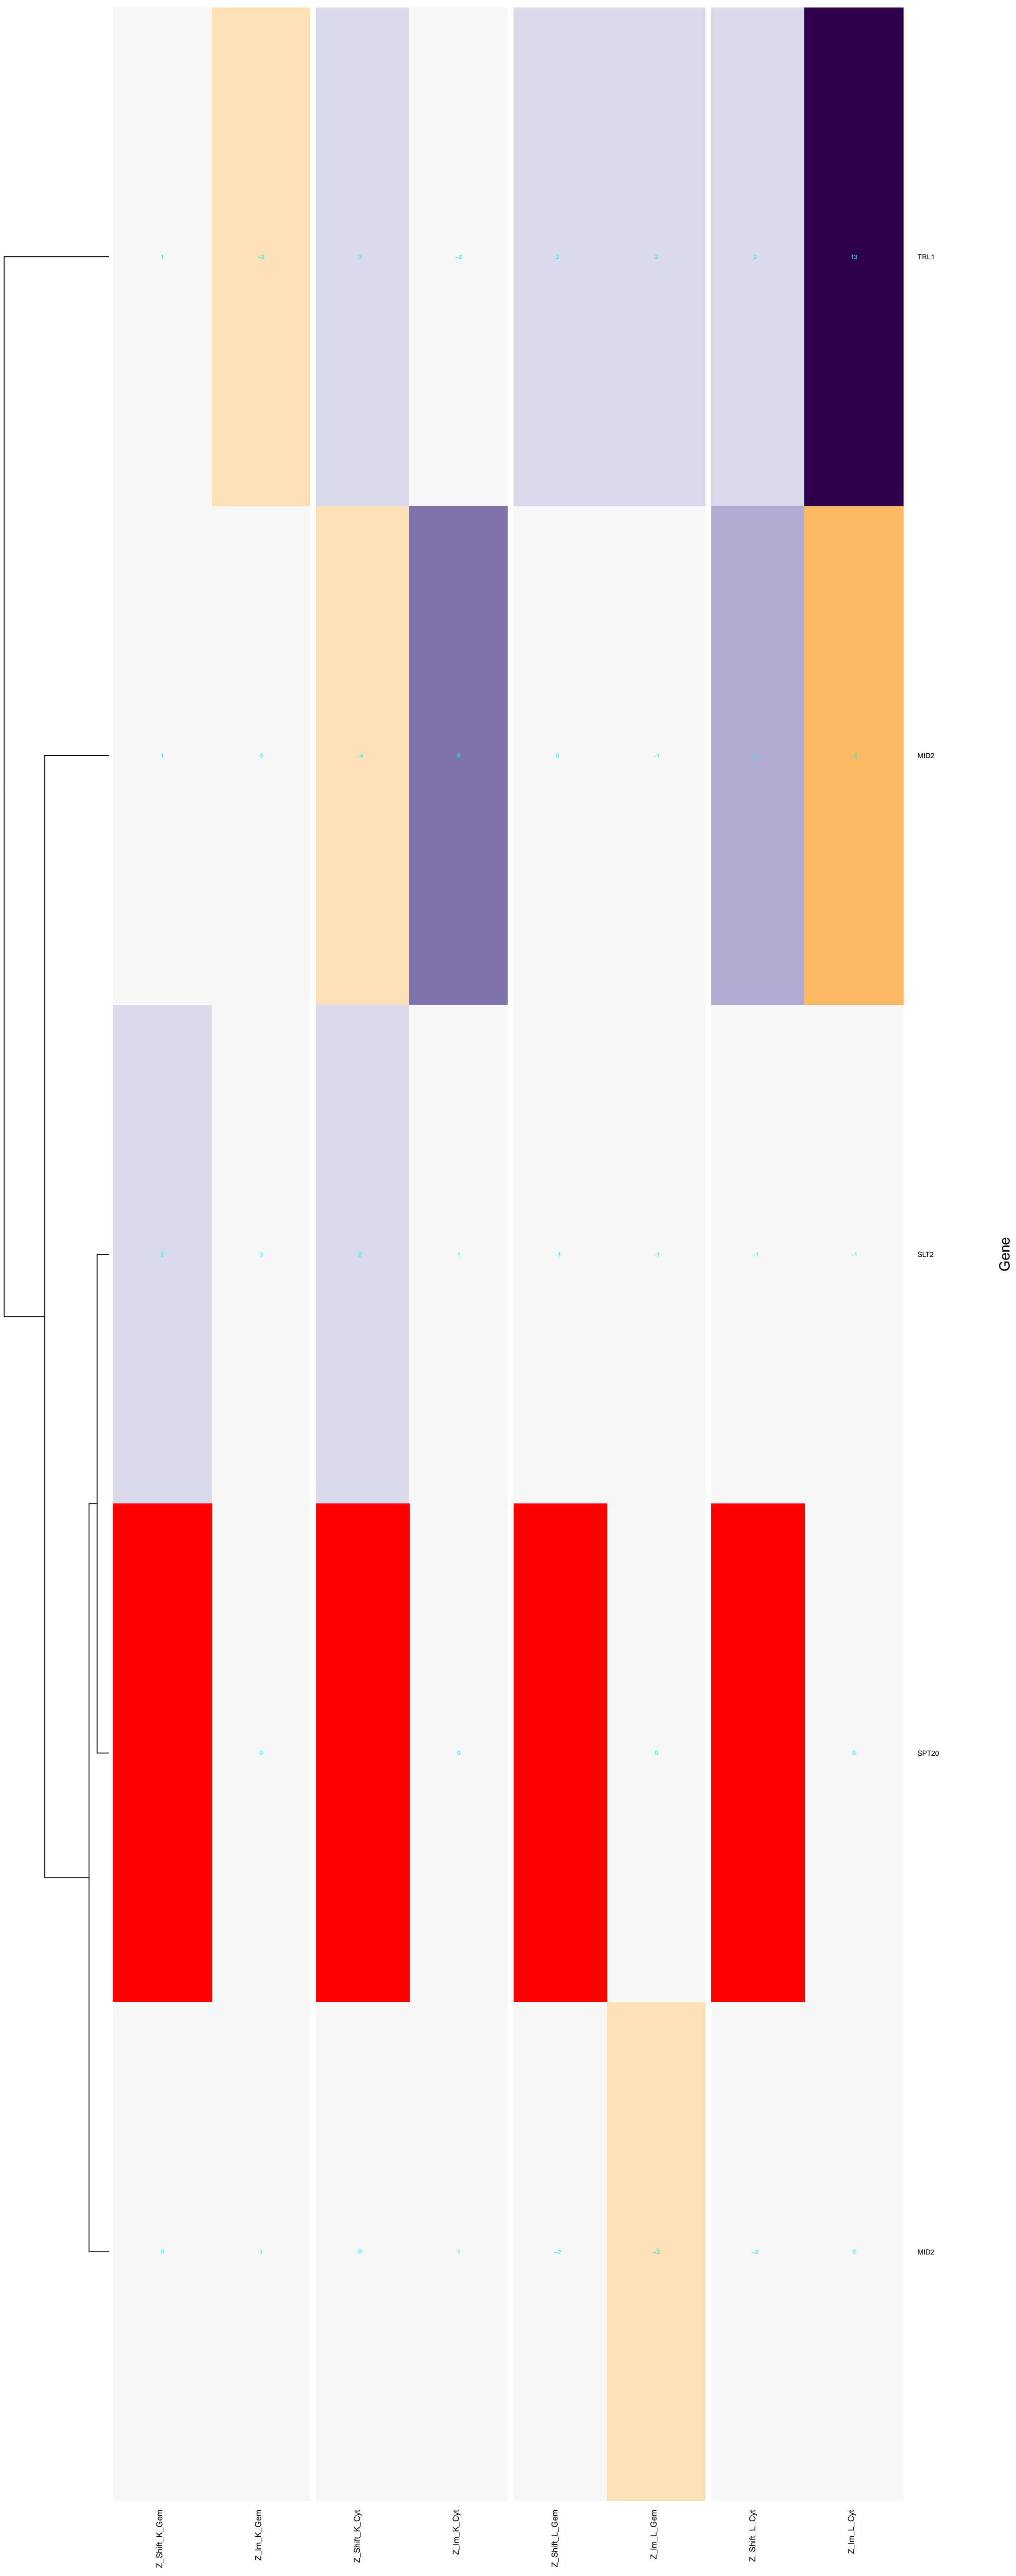

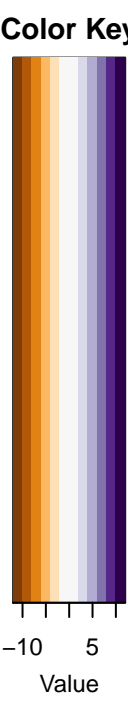

RNA splicing, via transesterification reactions with guanosine as nucleophile

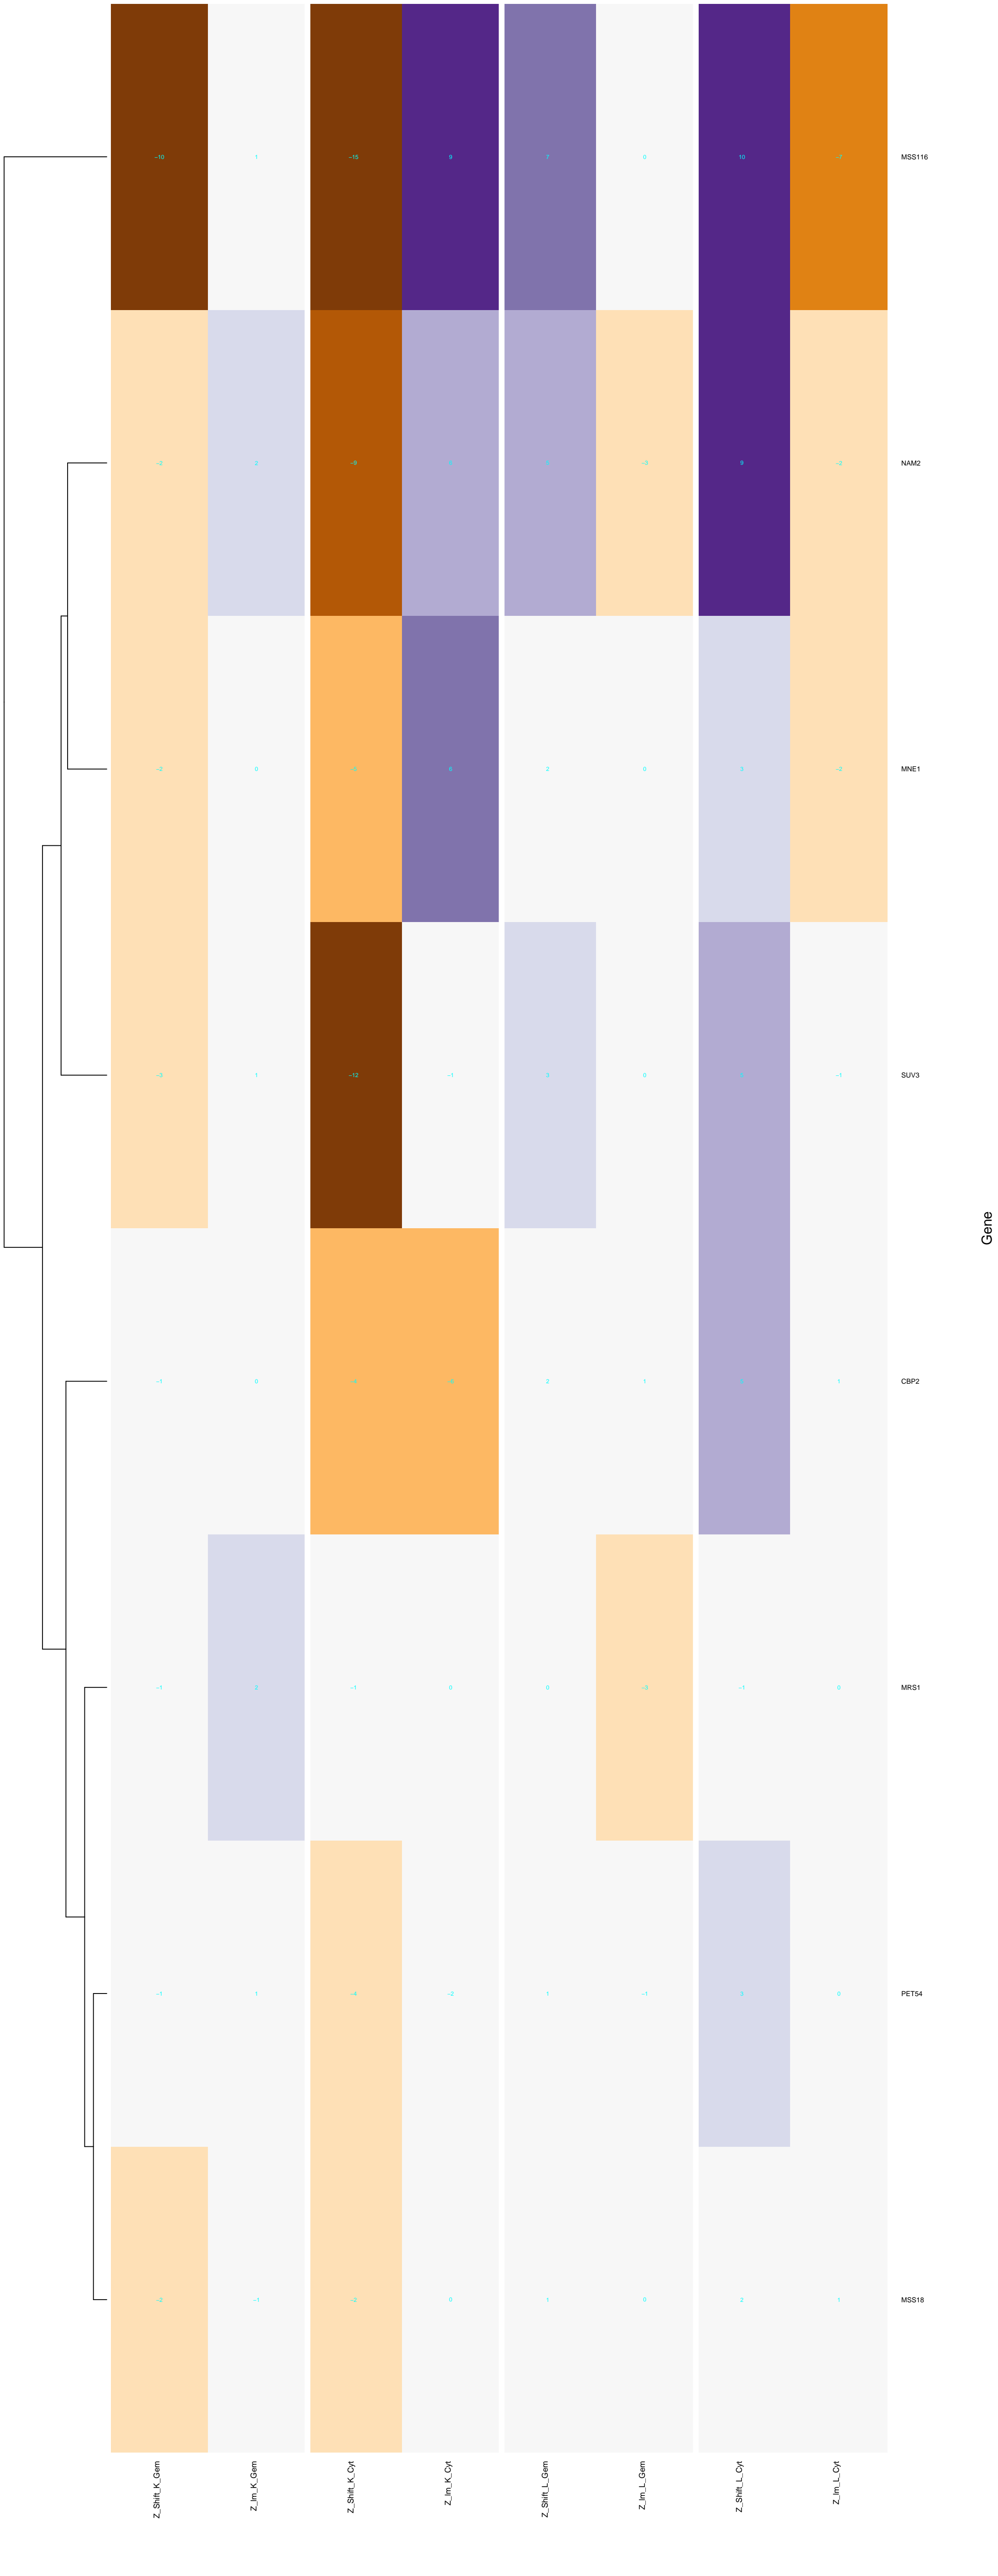

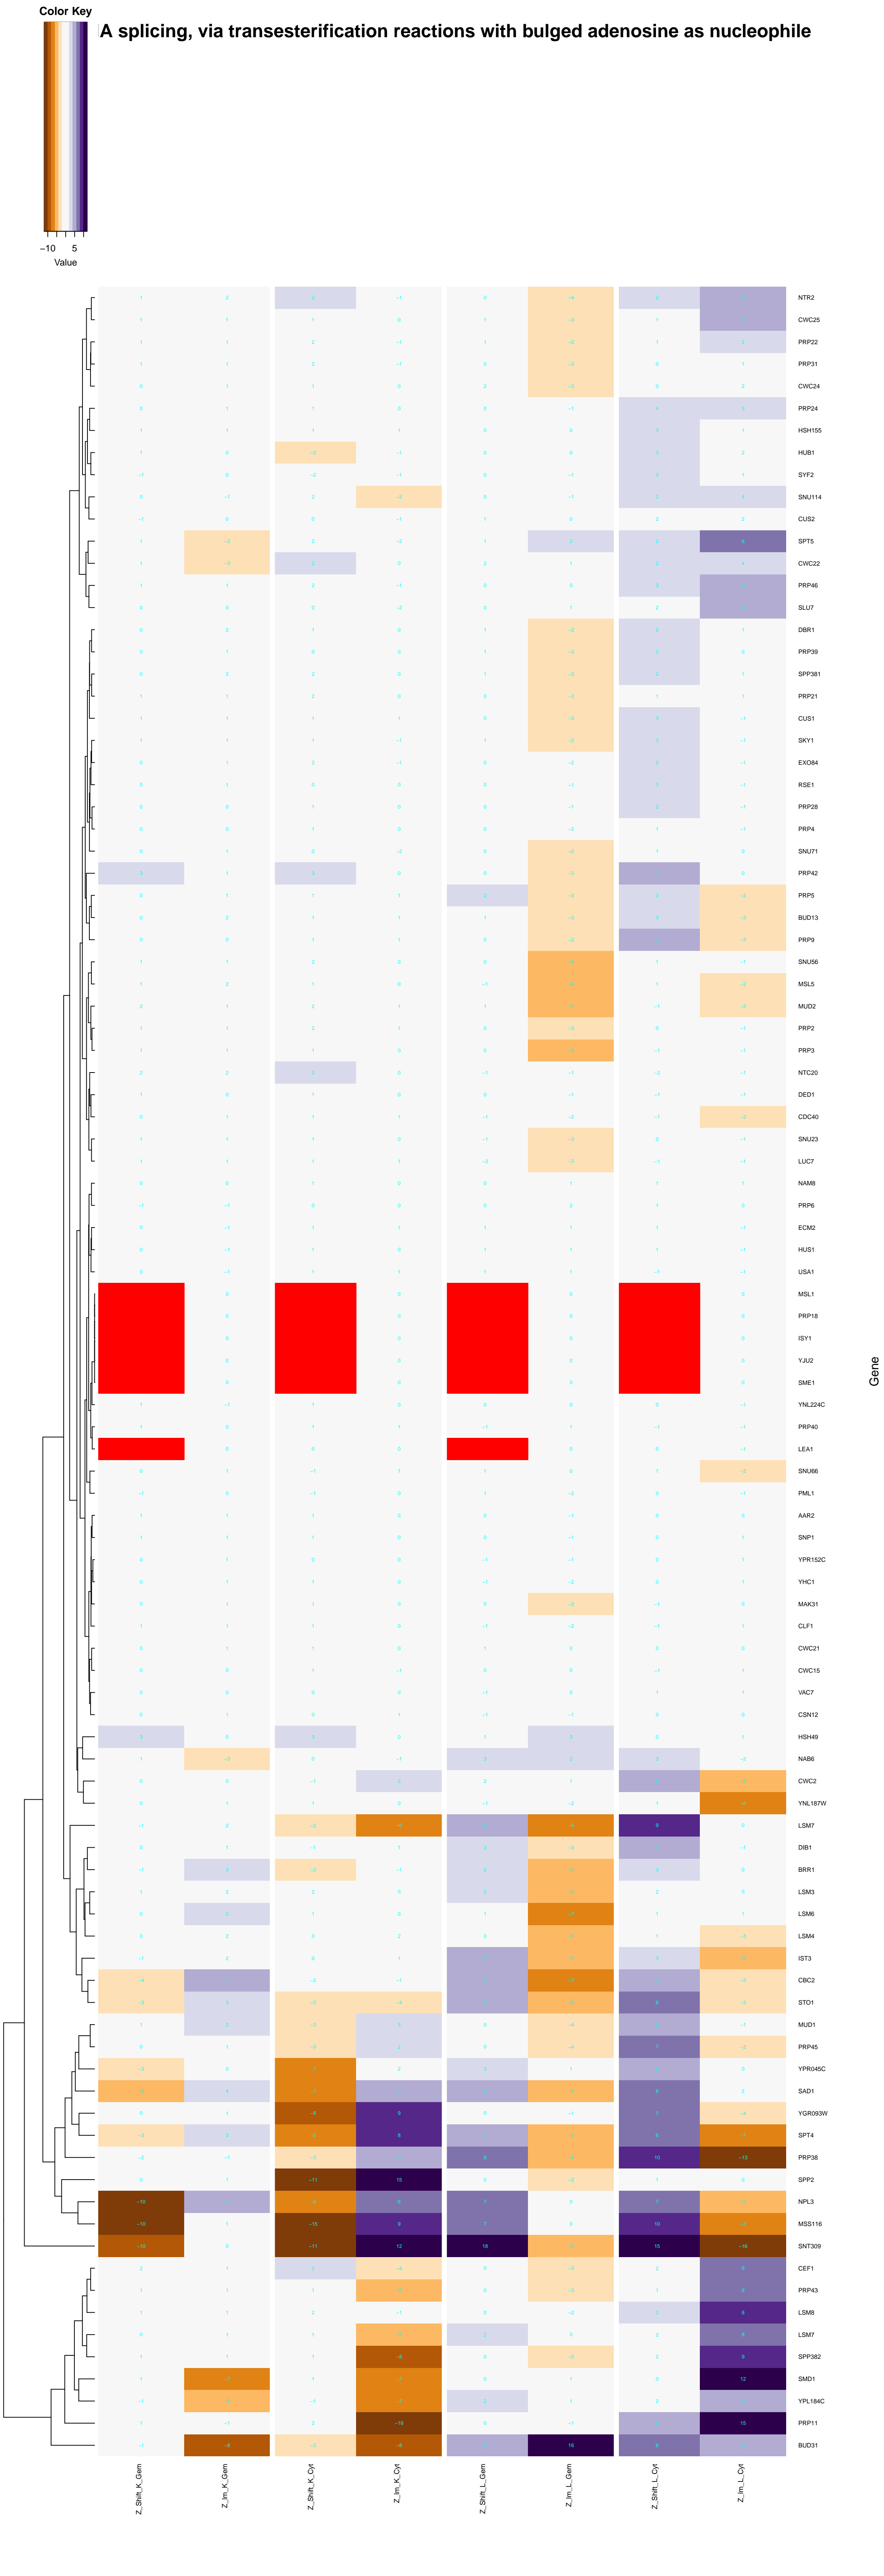

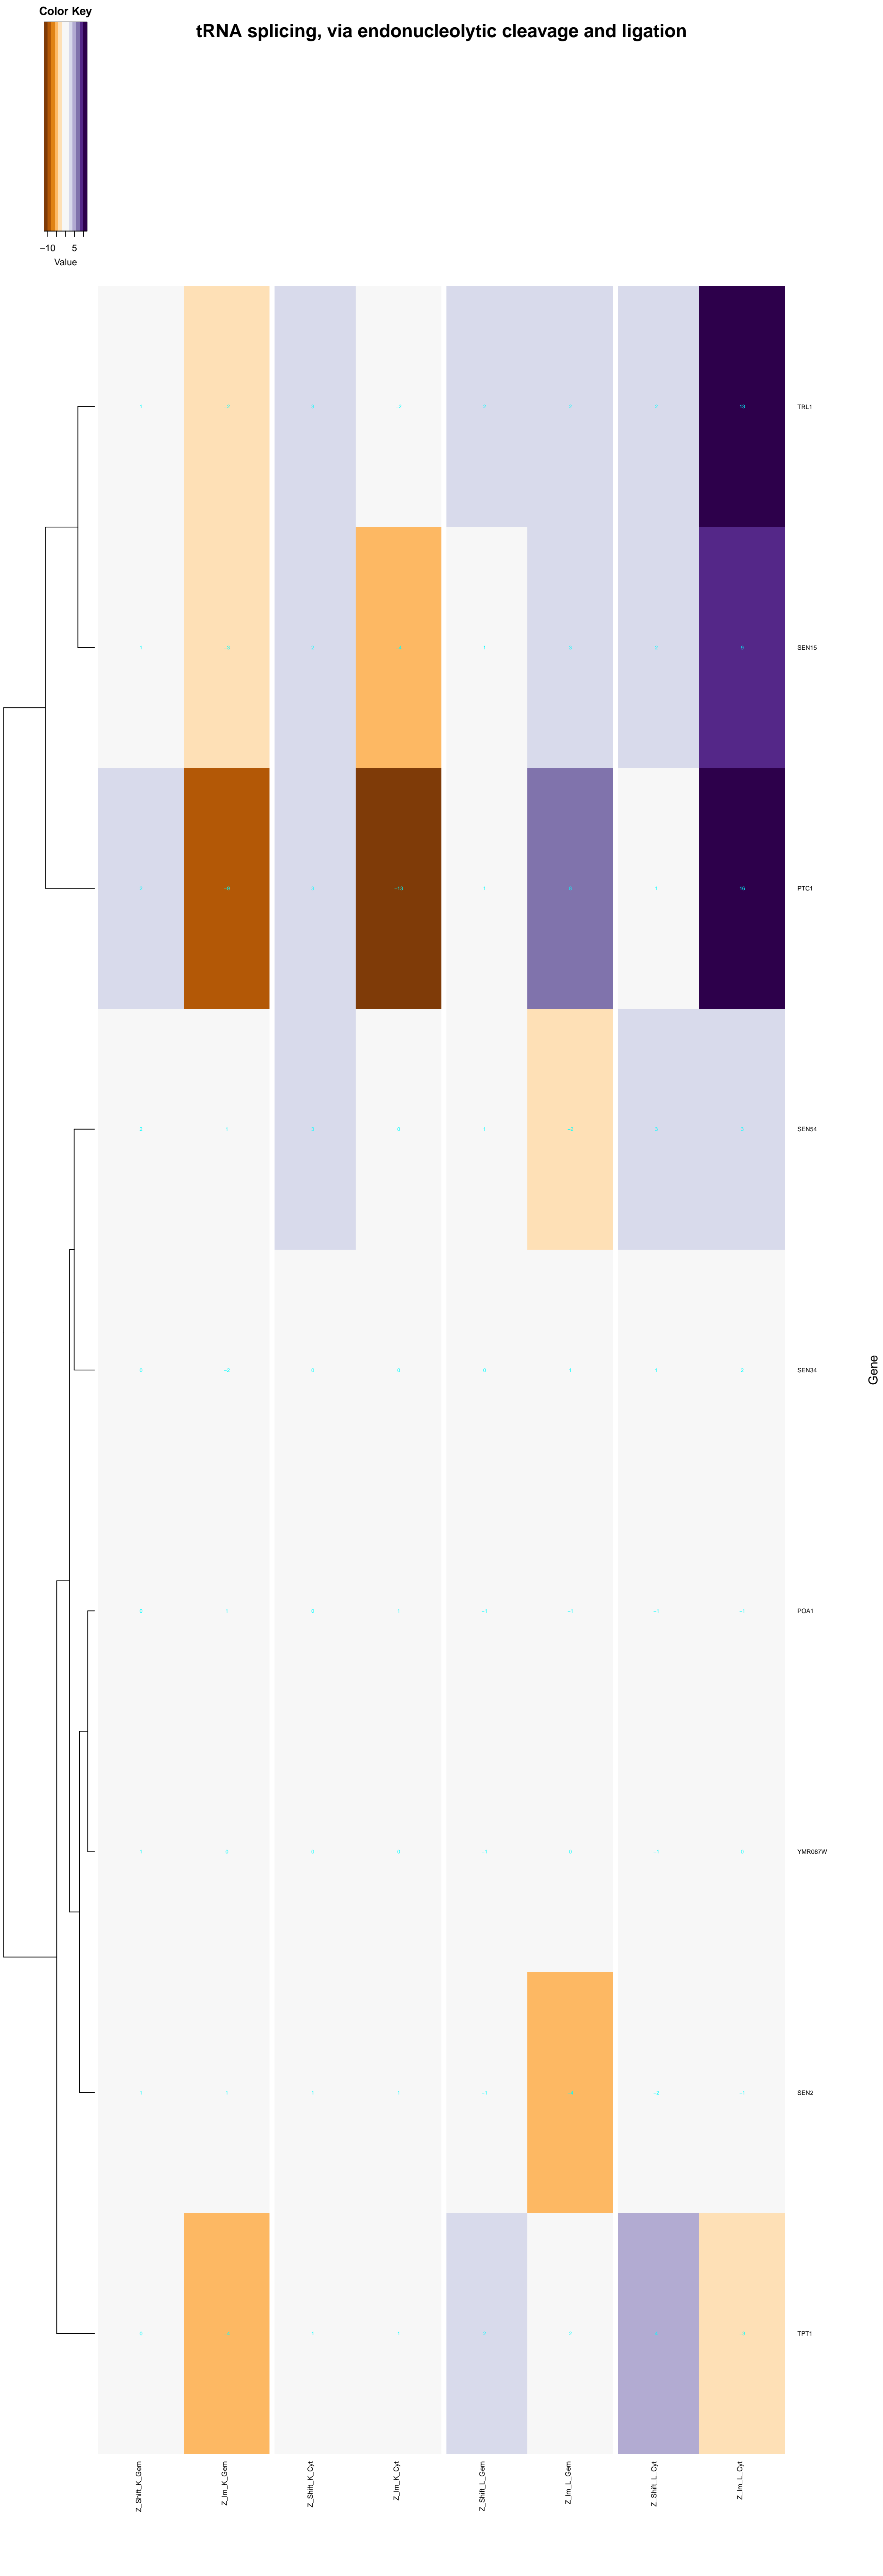



production of miRNAs involved in gene silencing by miRNA

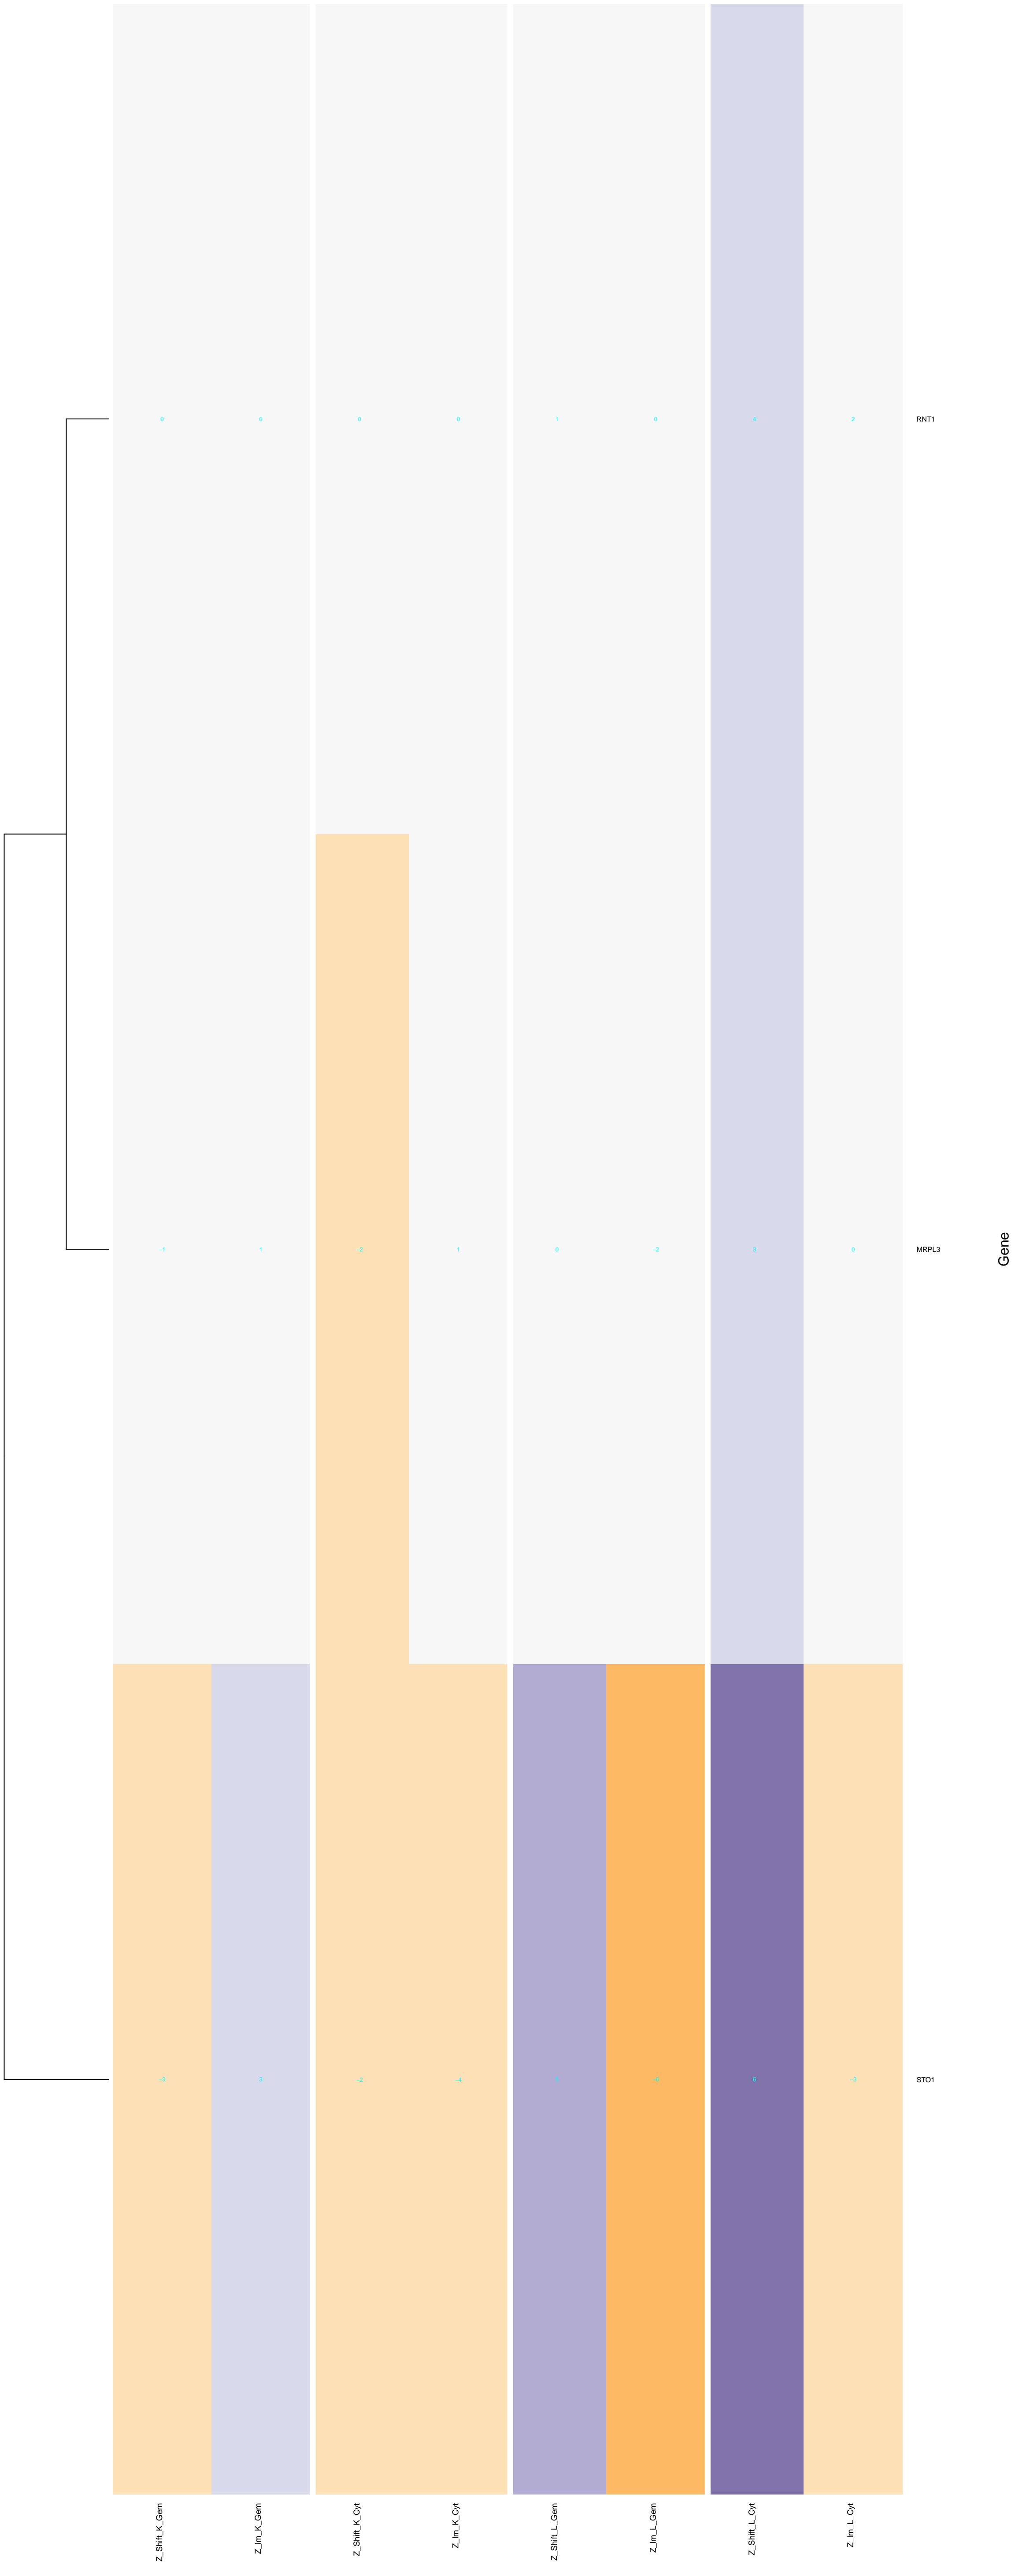

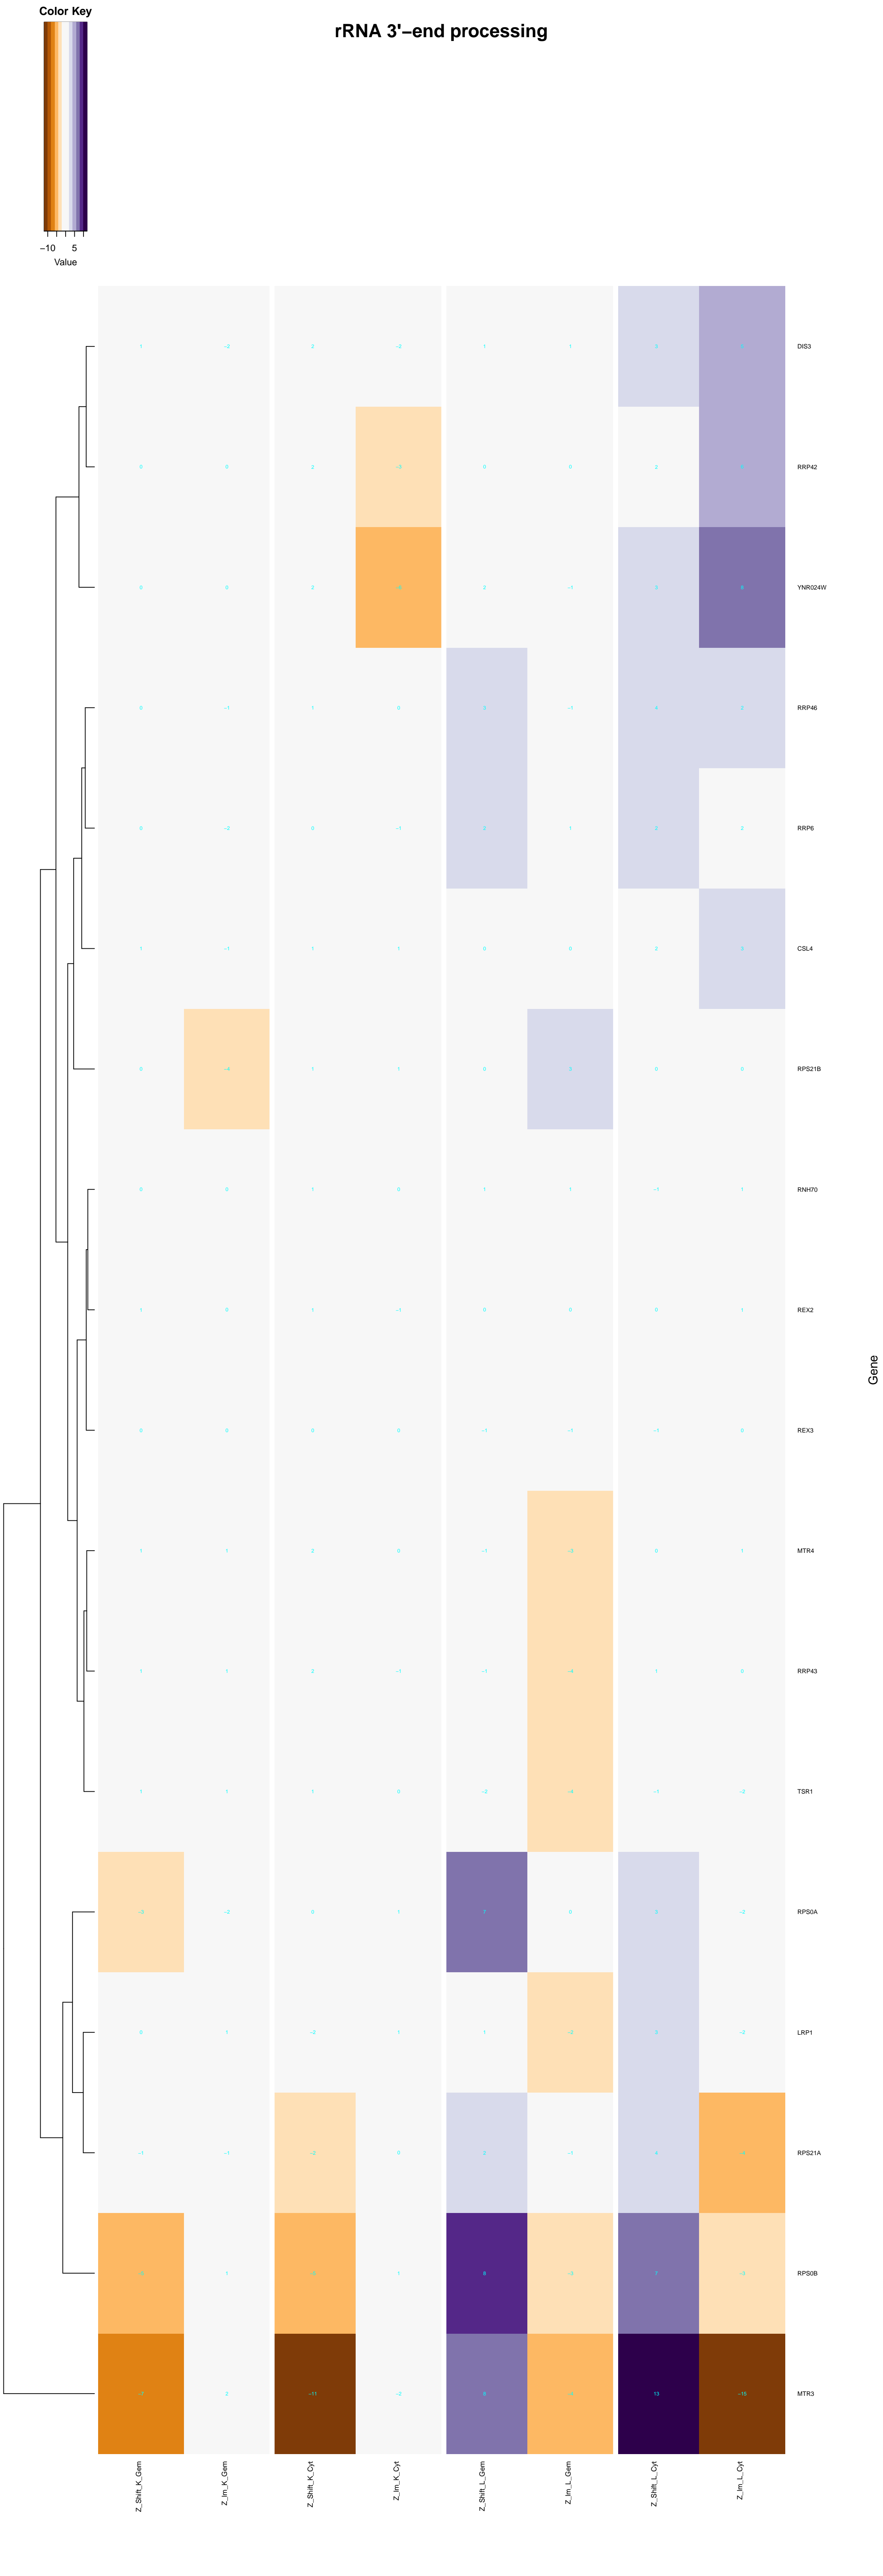

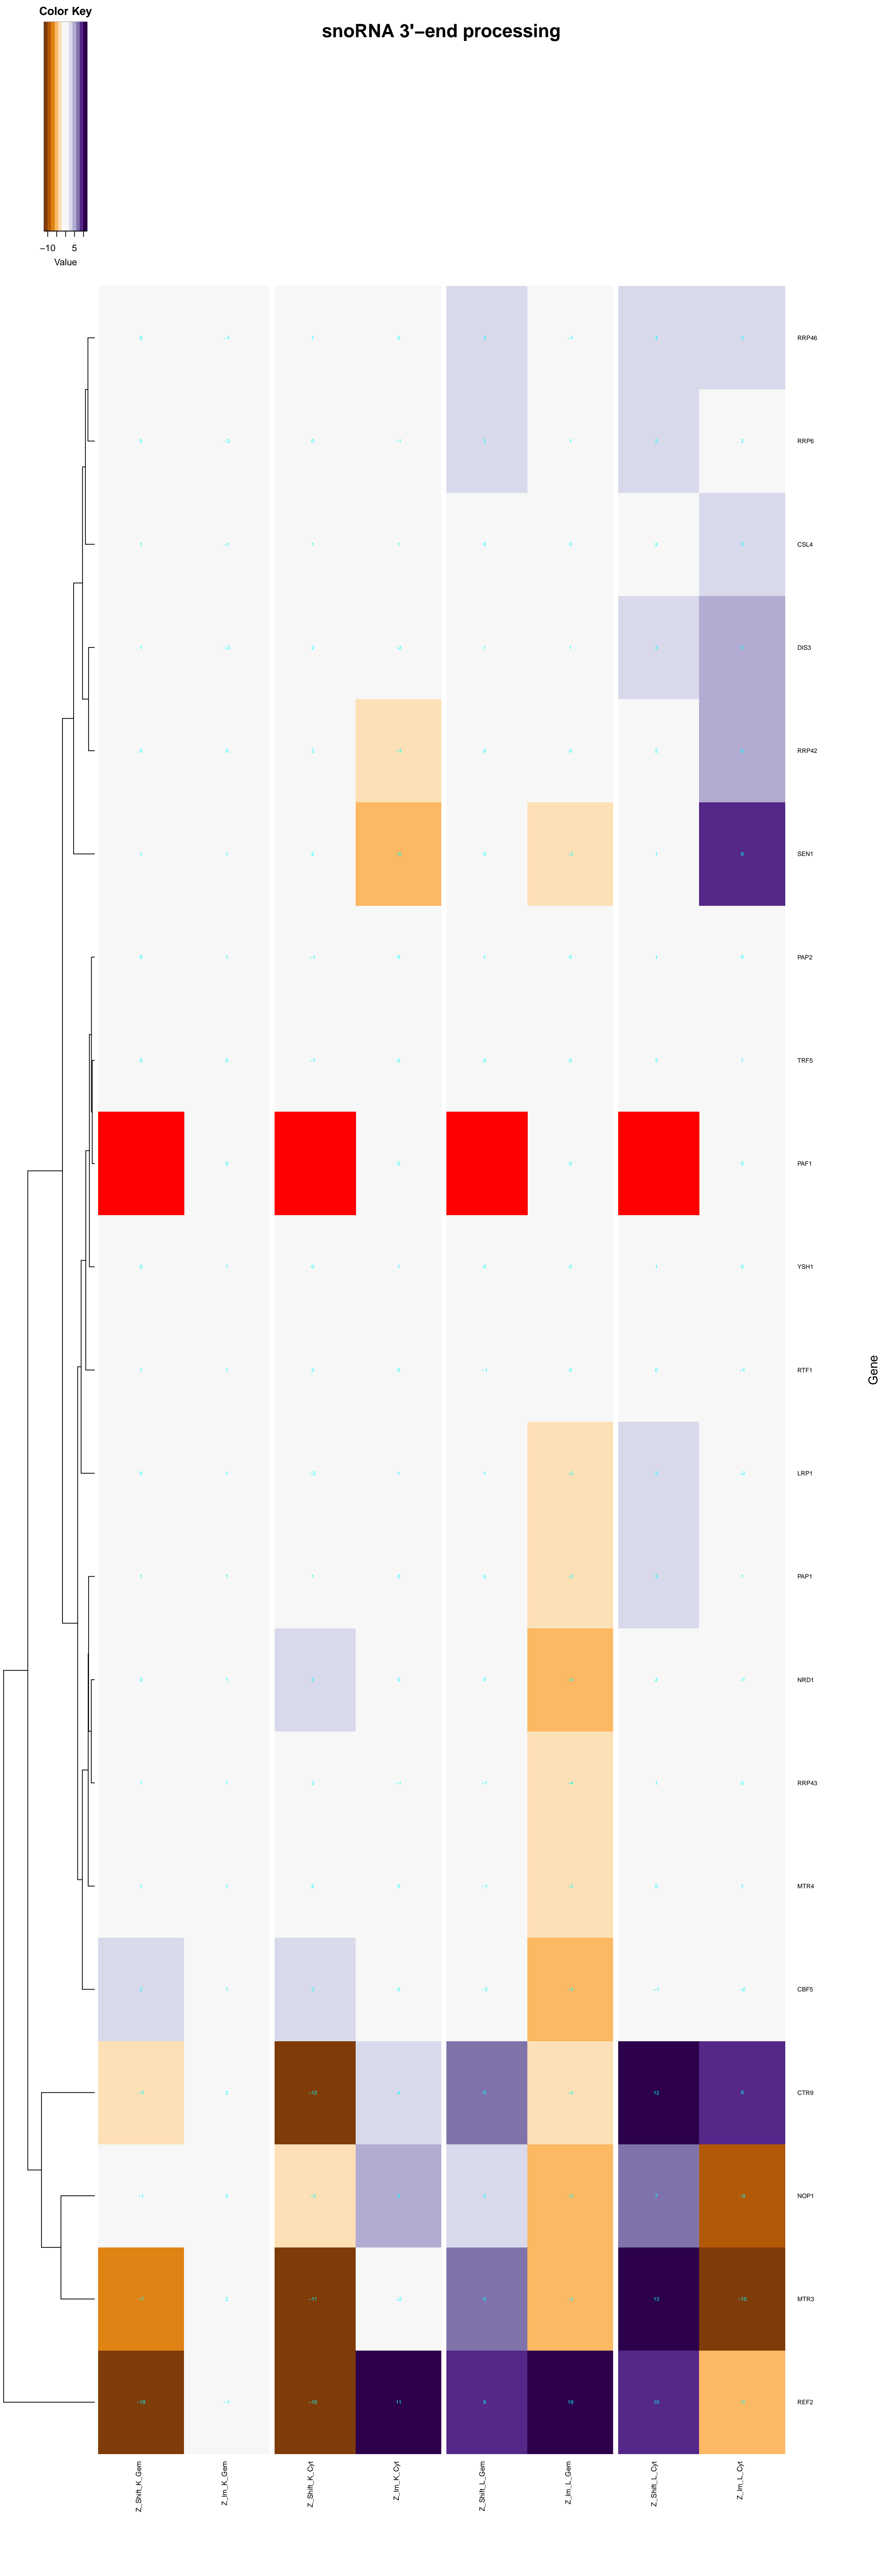

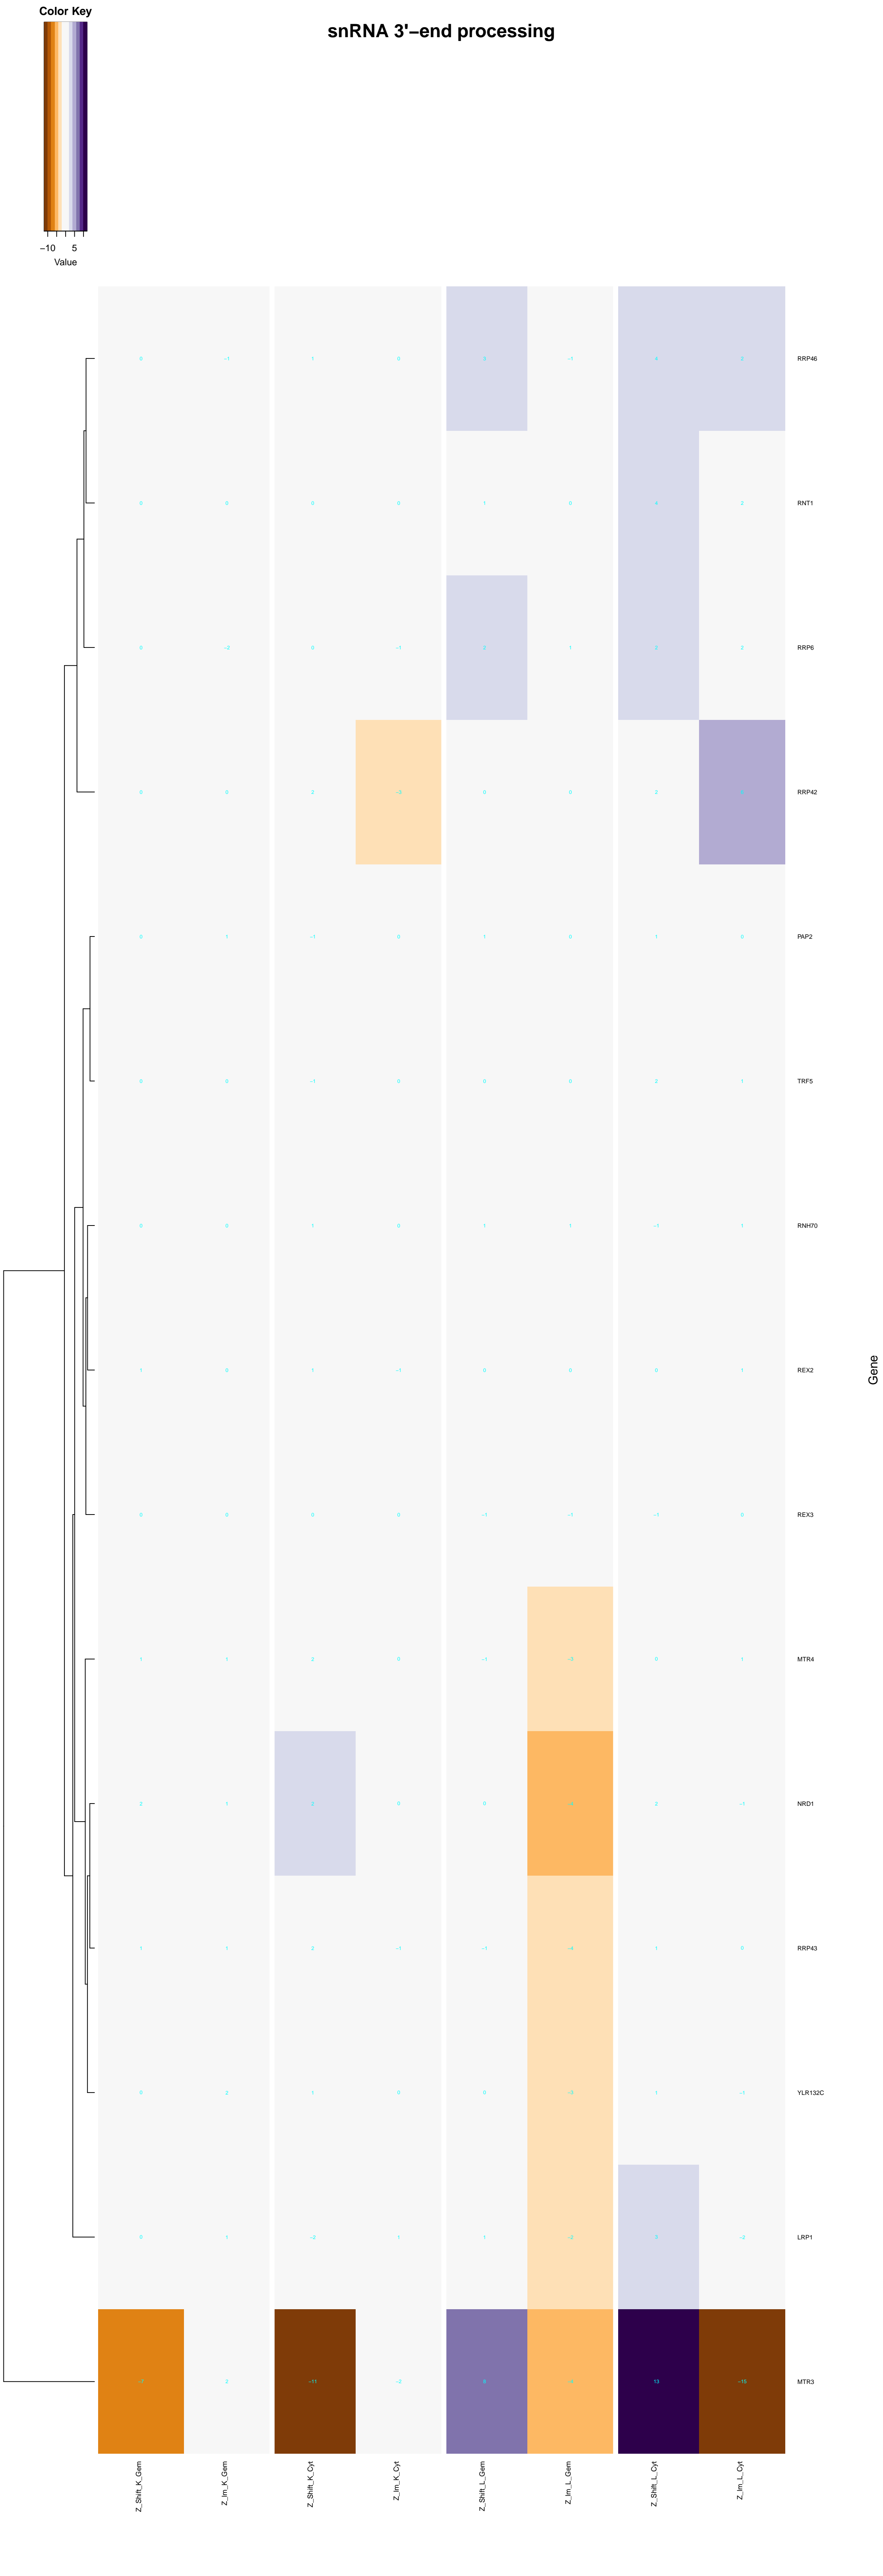

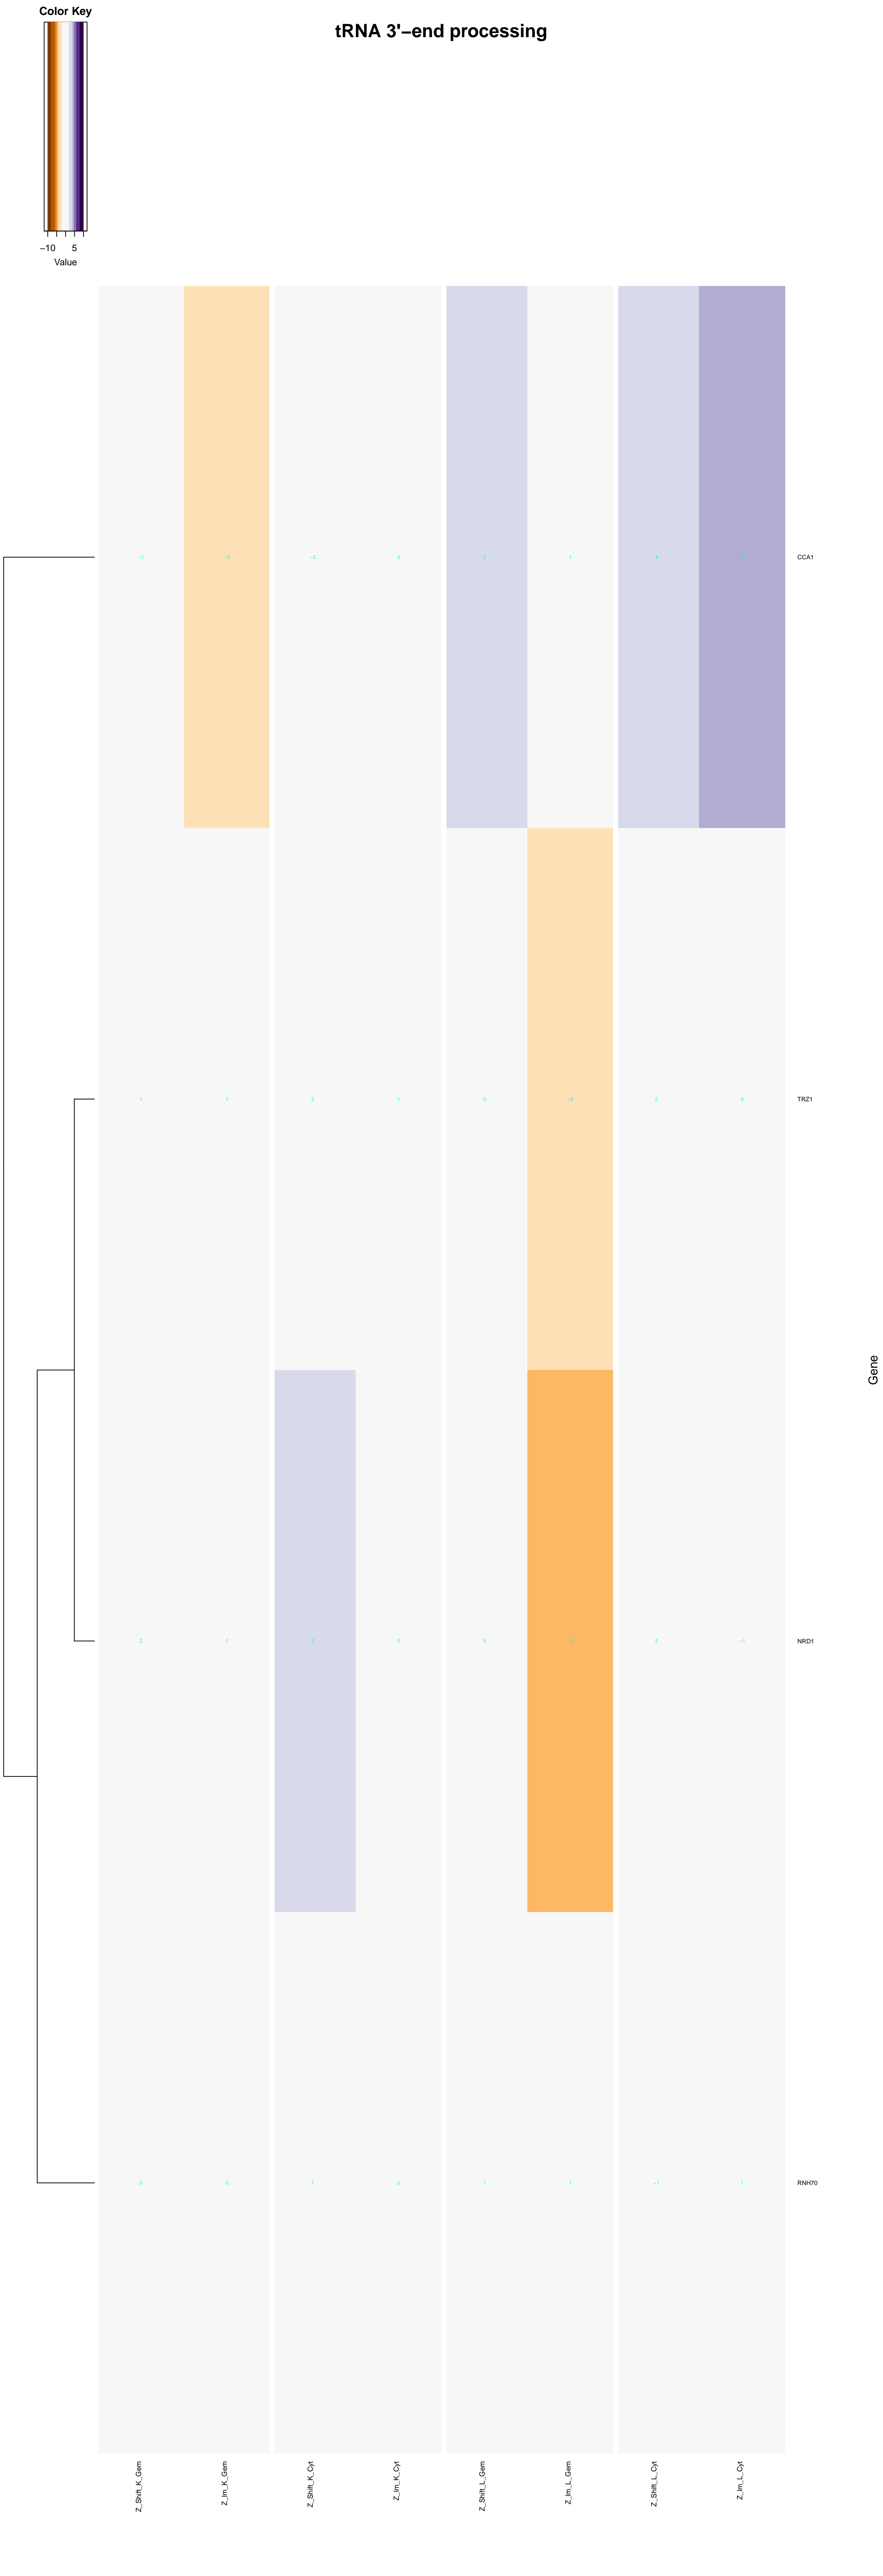

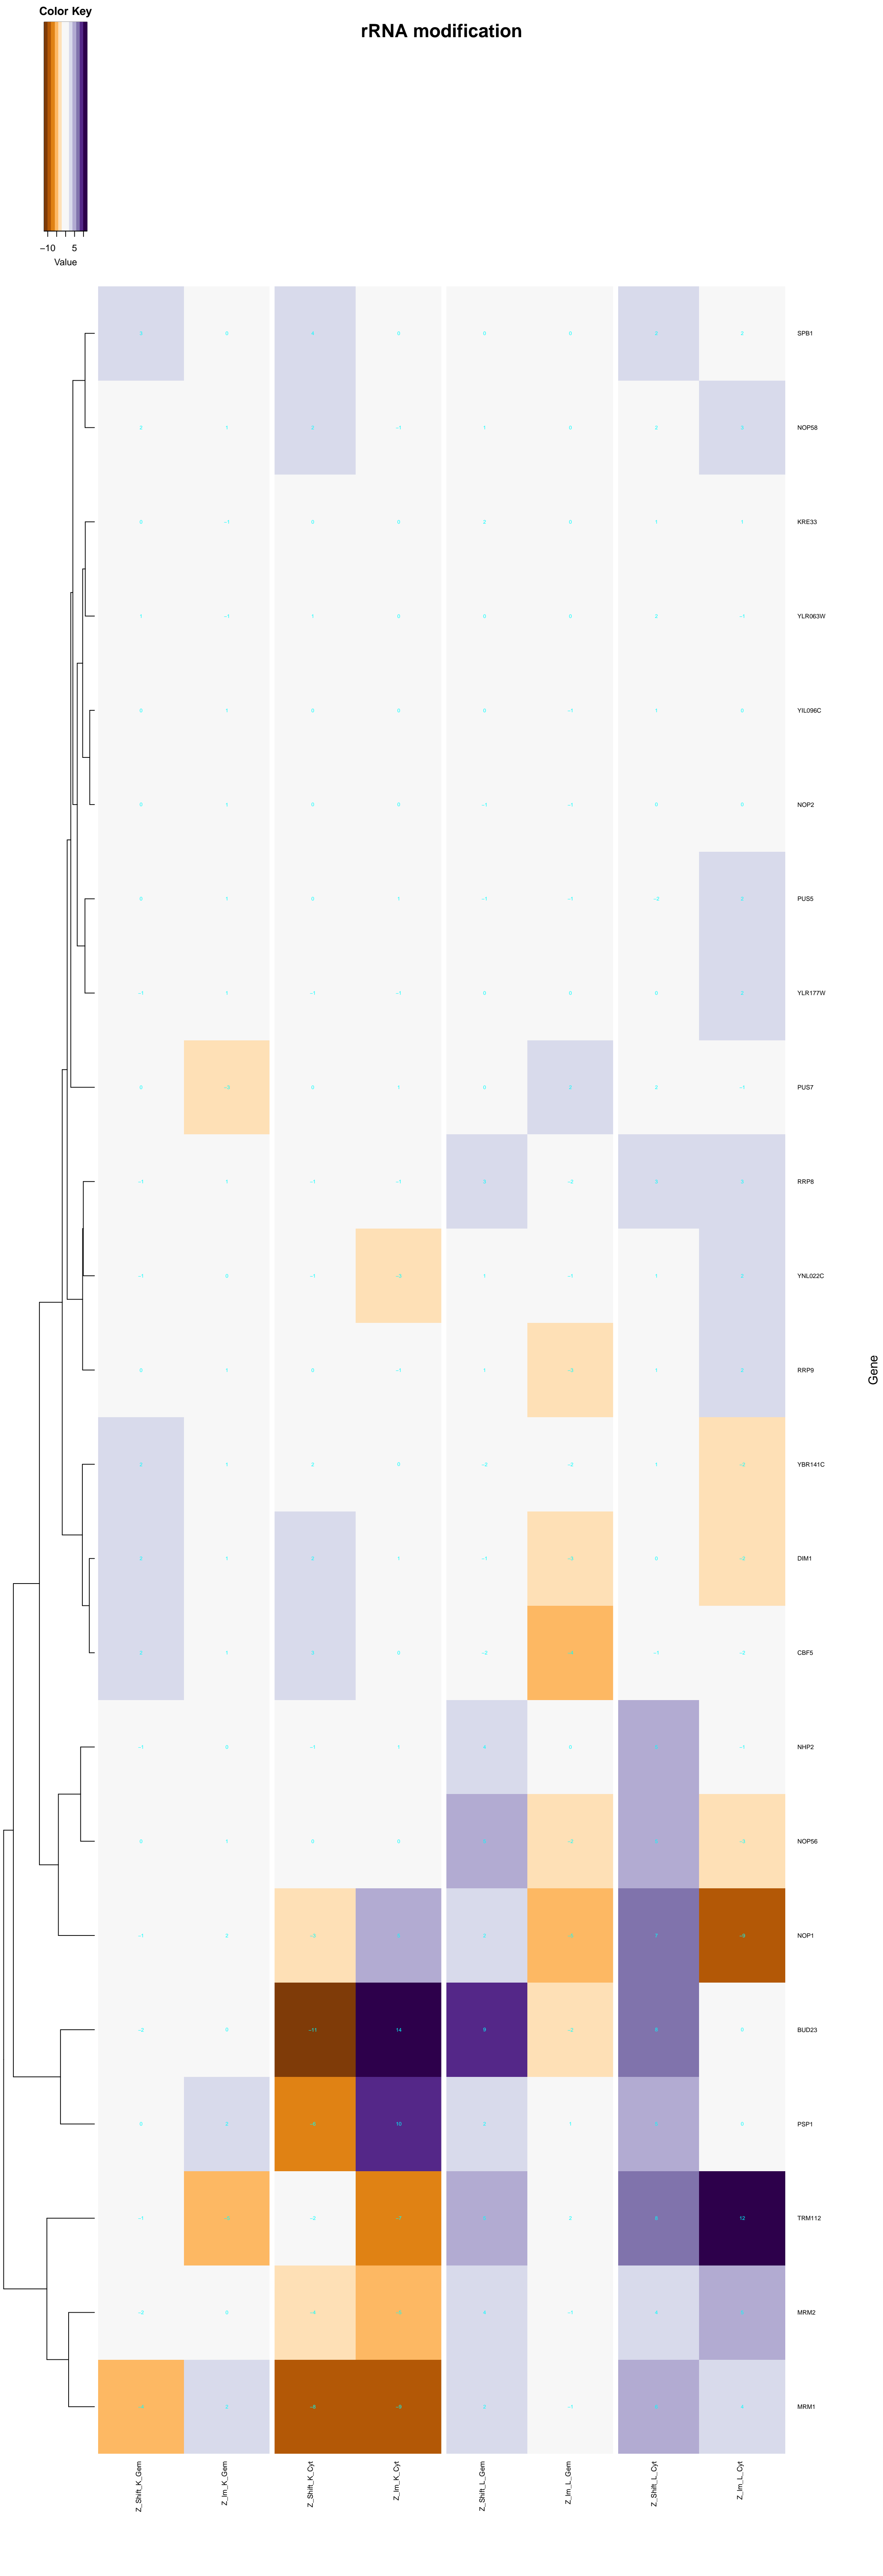

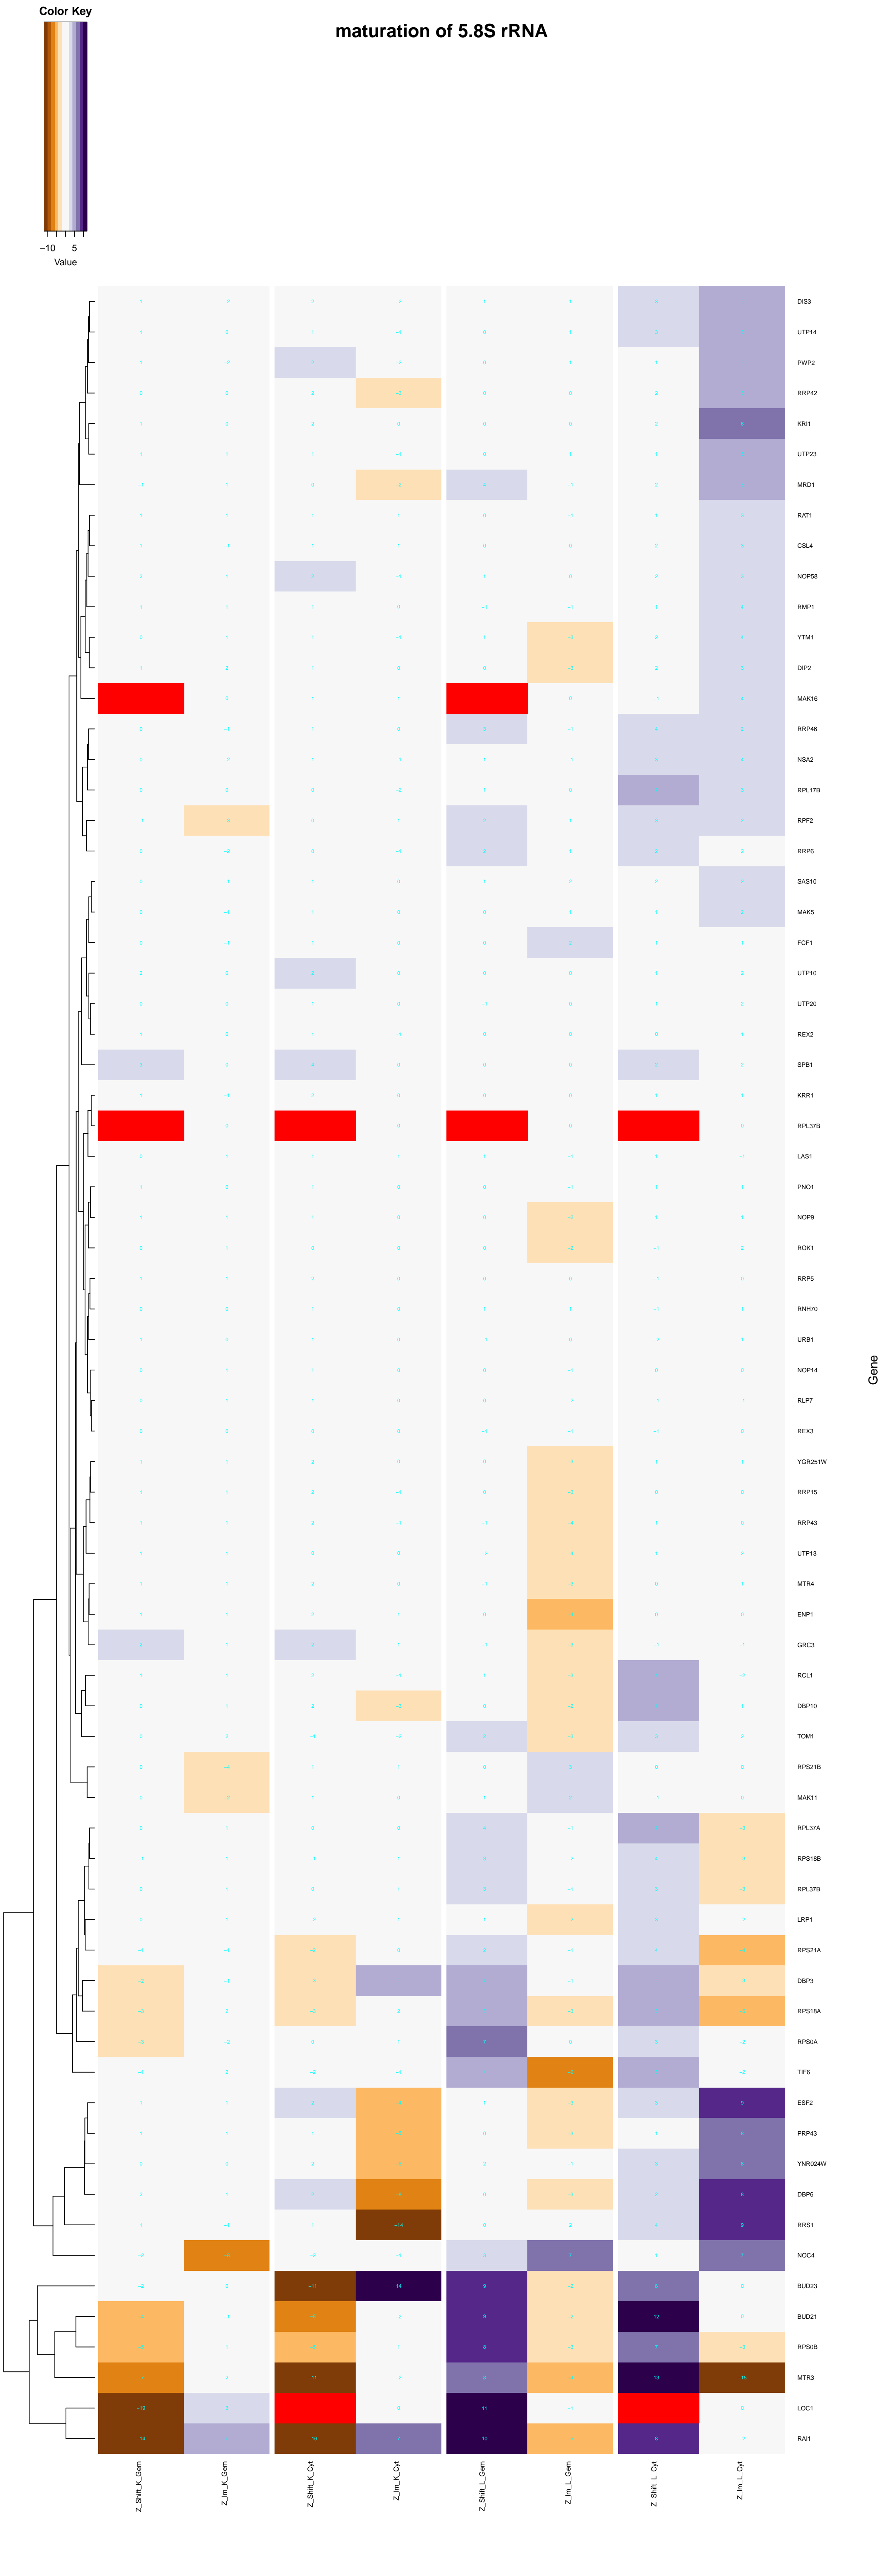

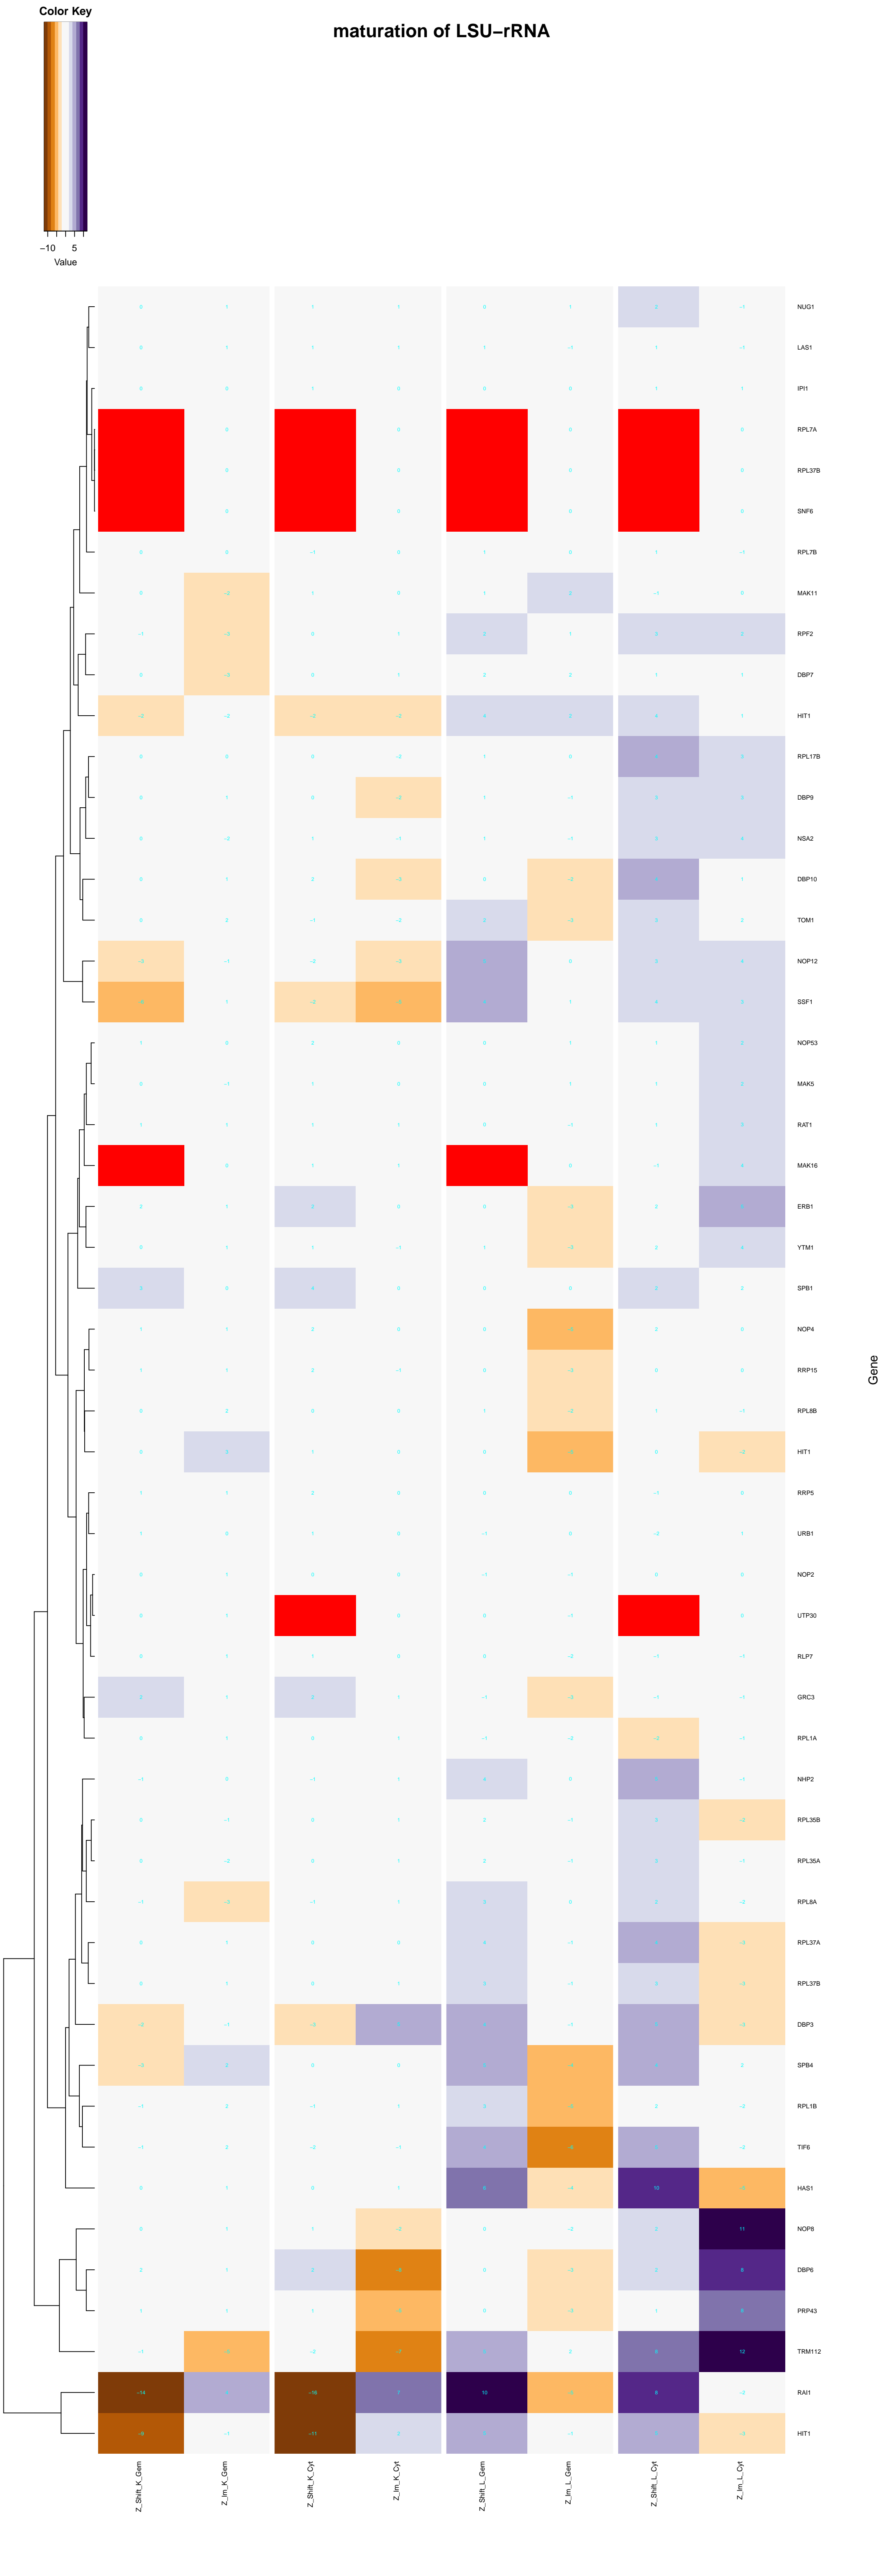

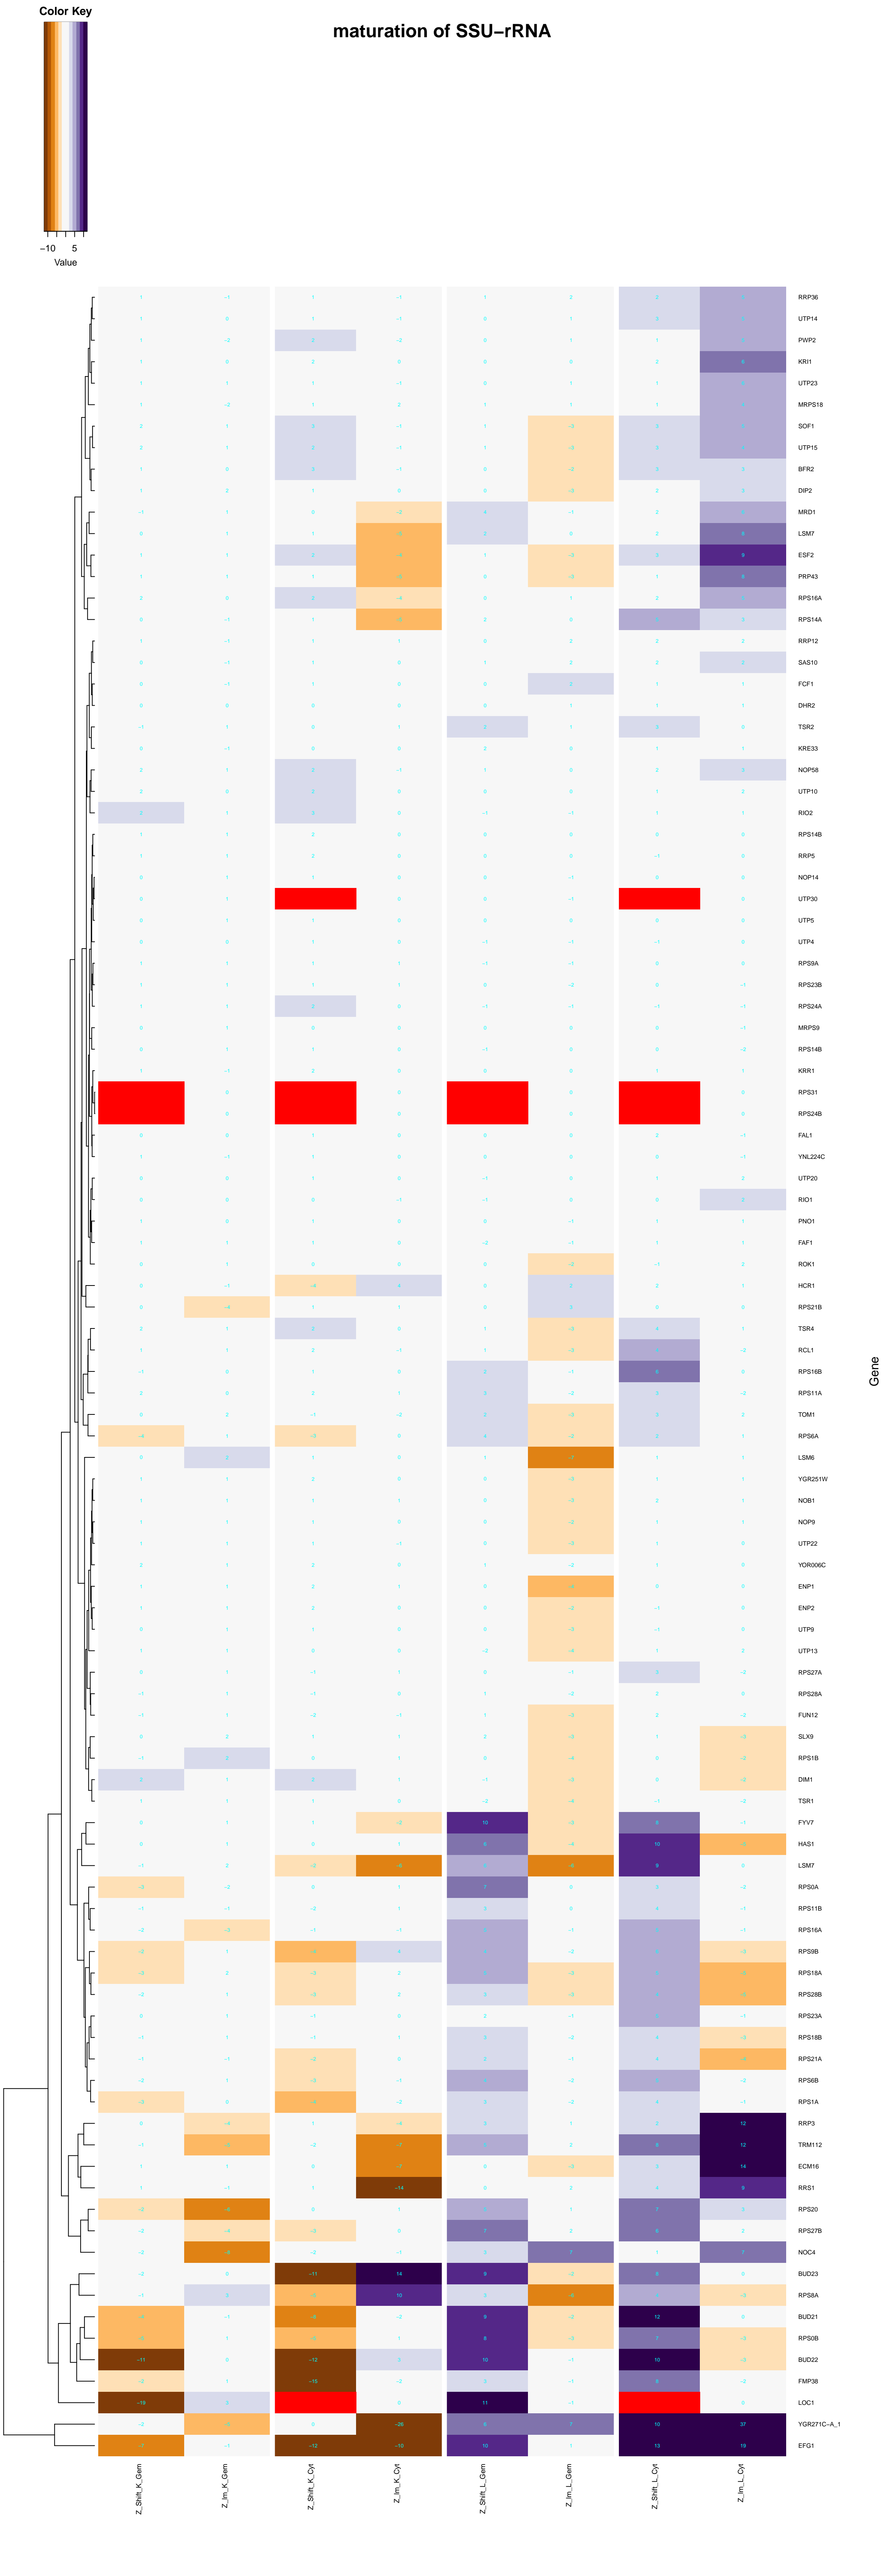

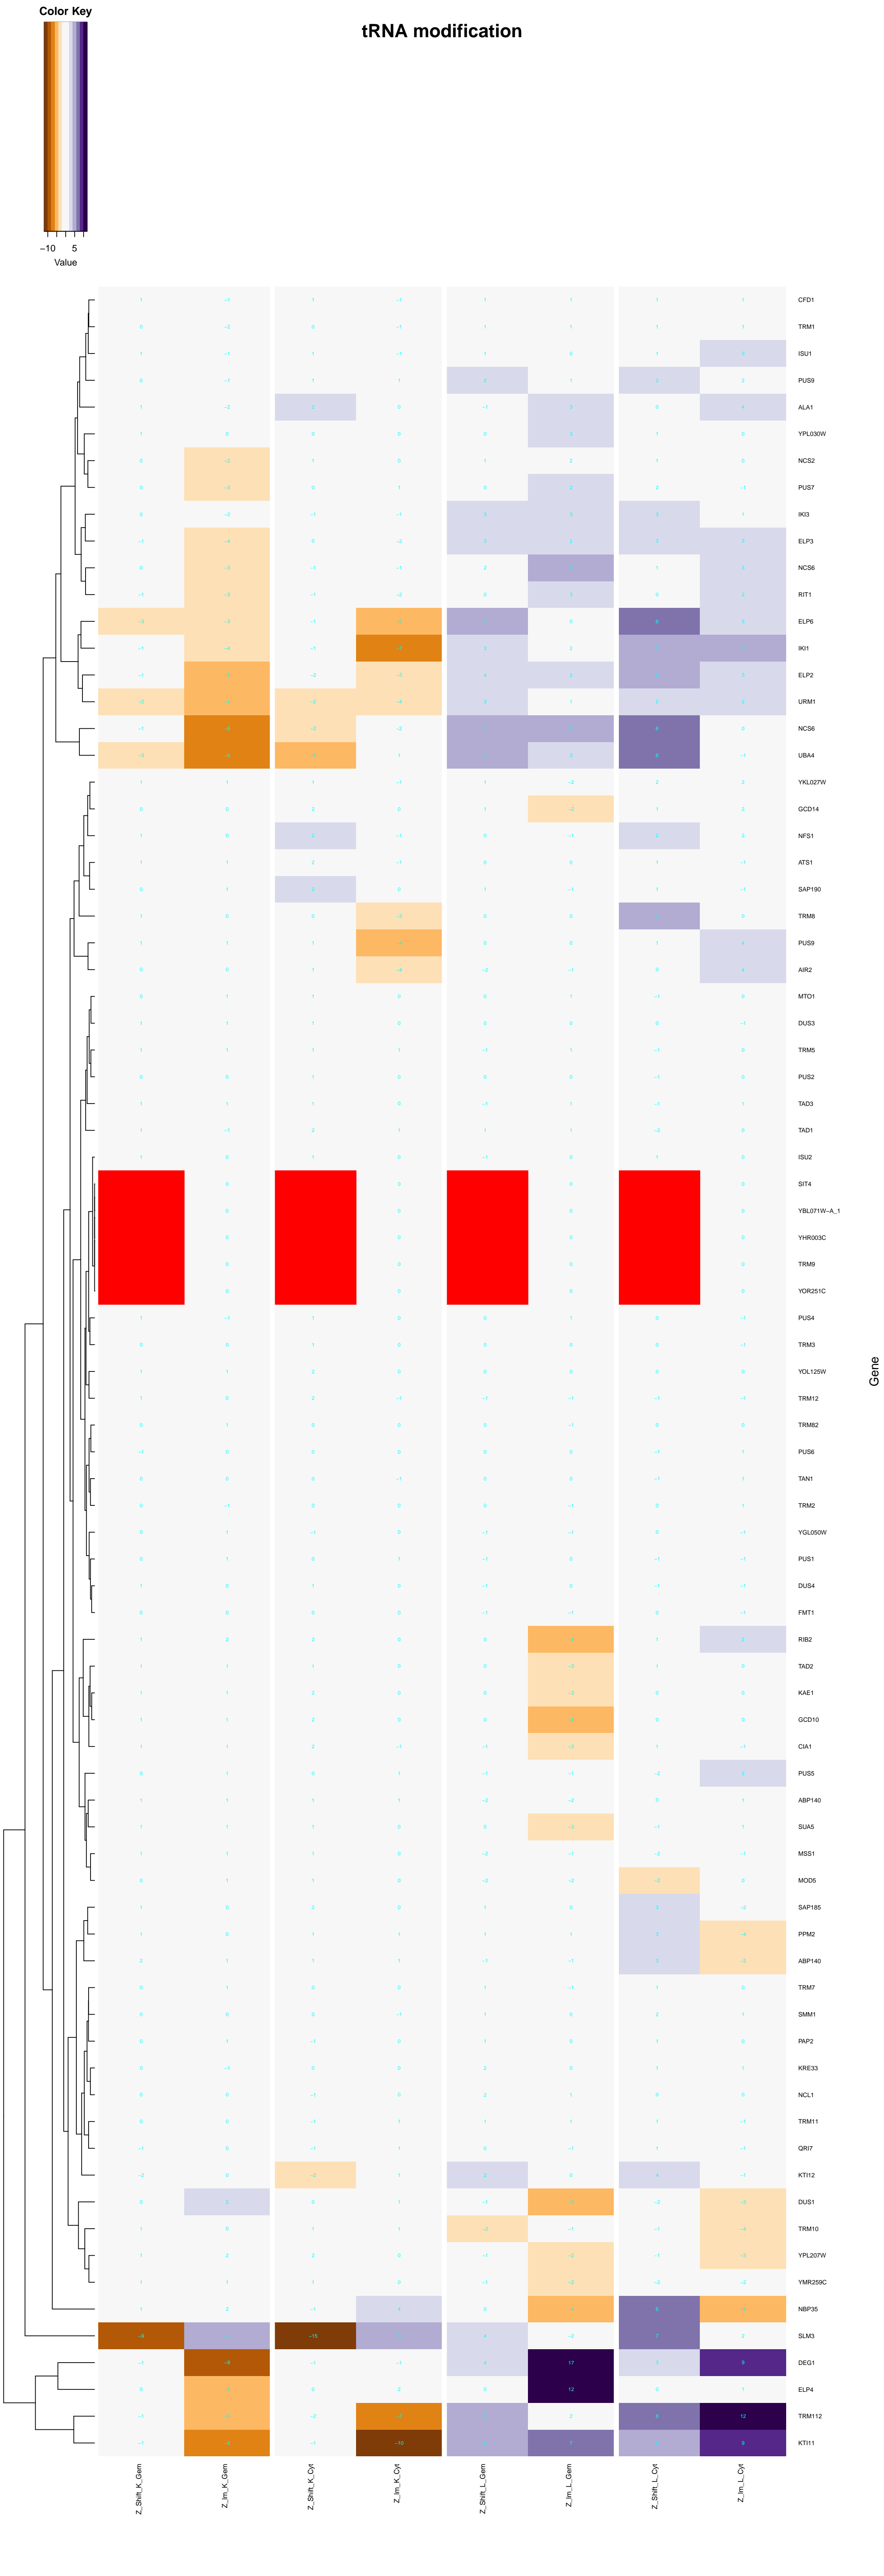

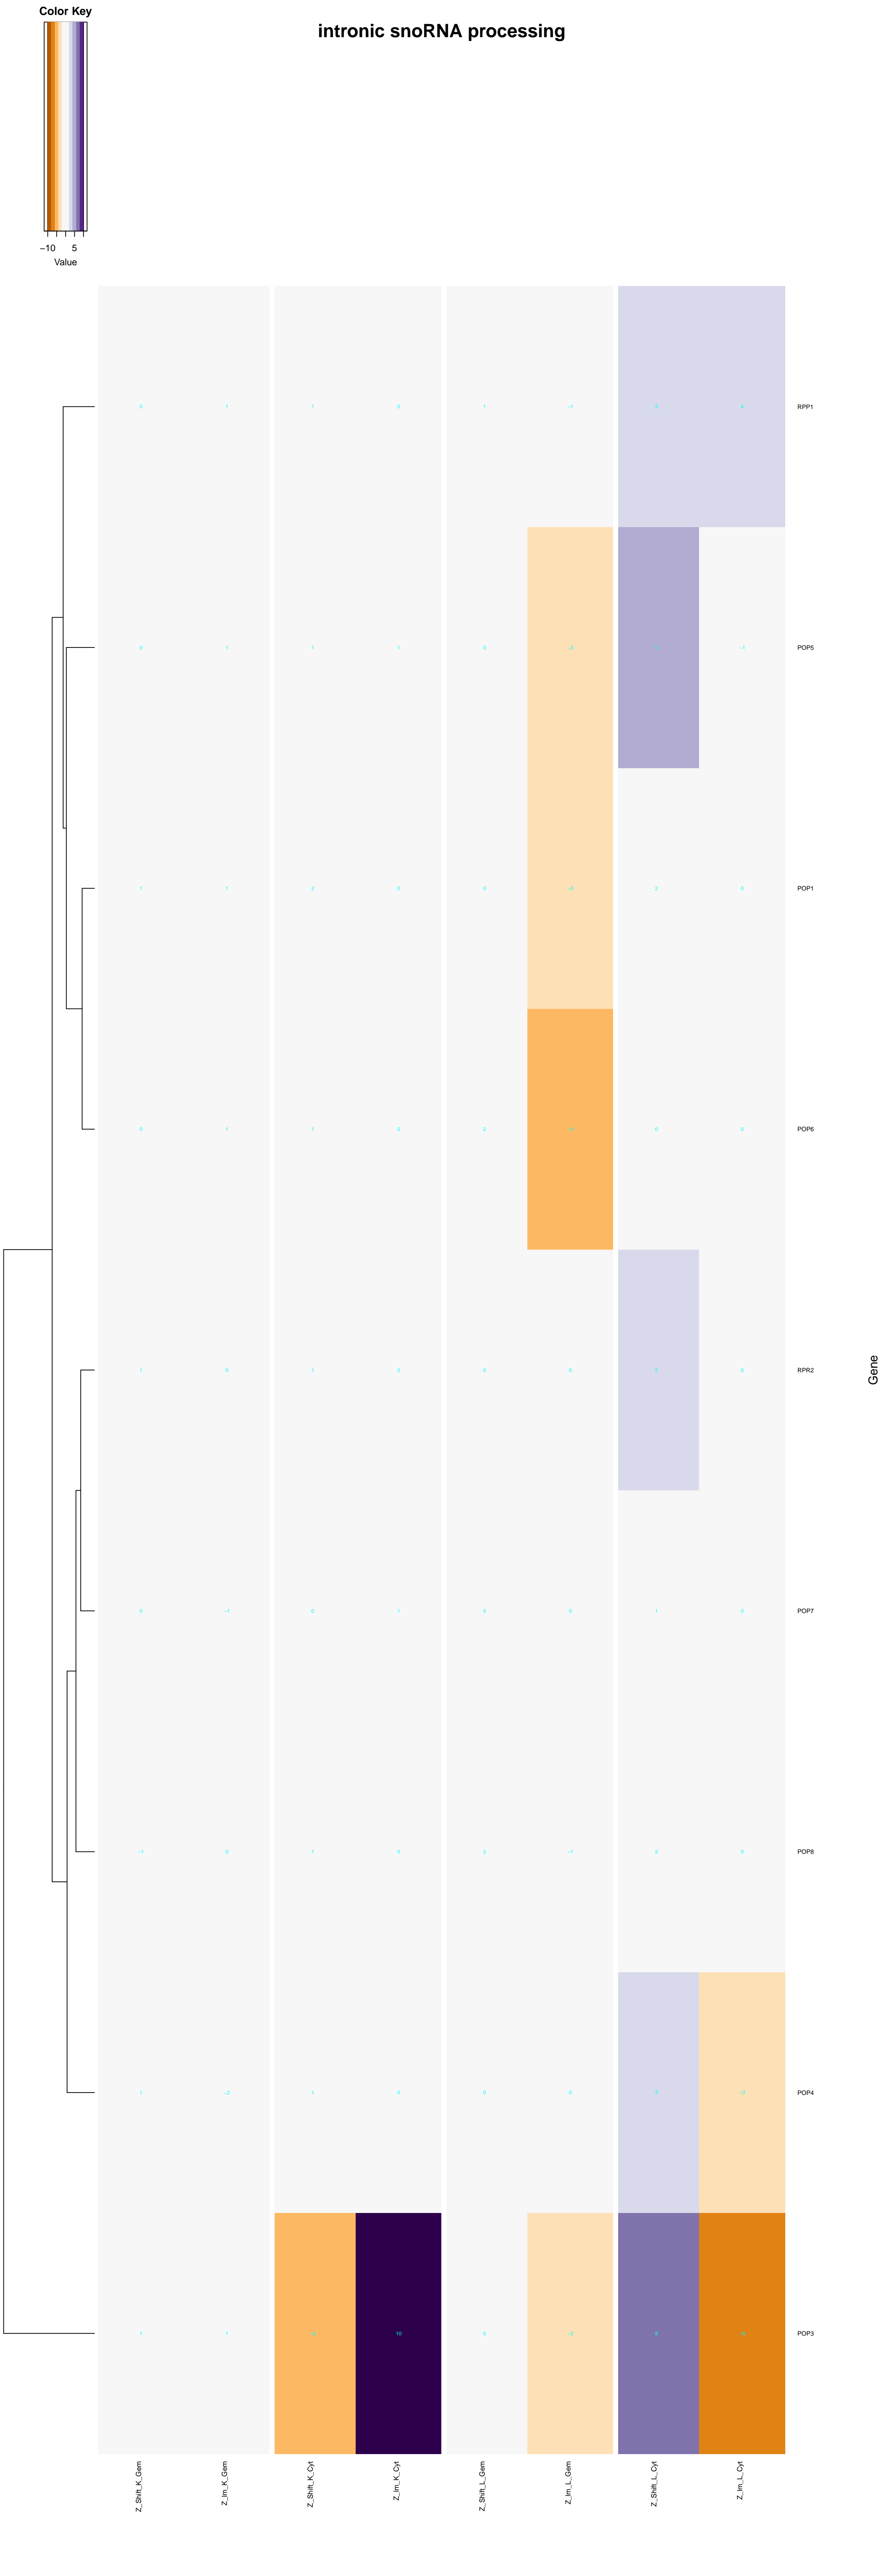

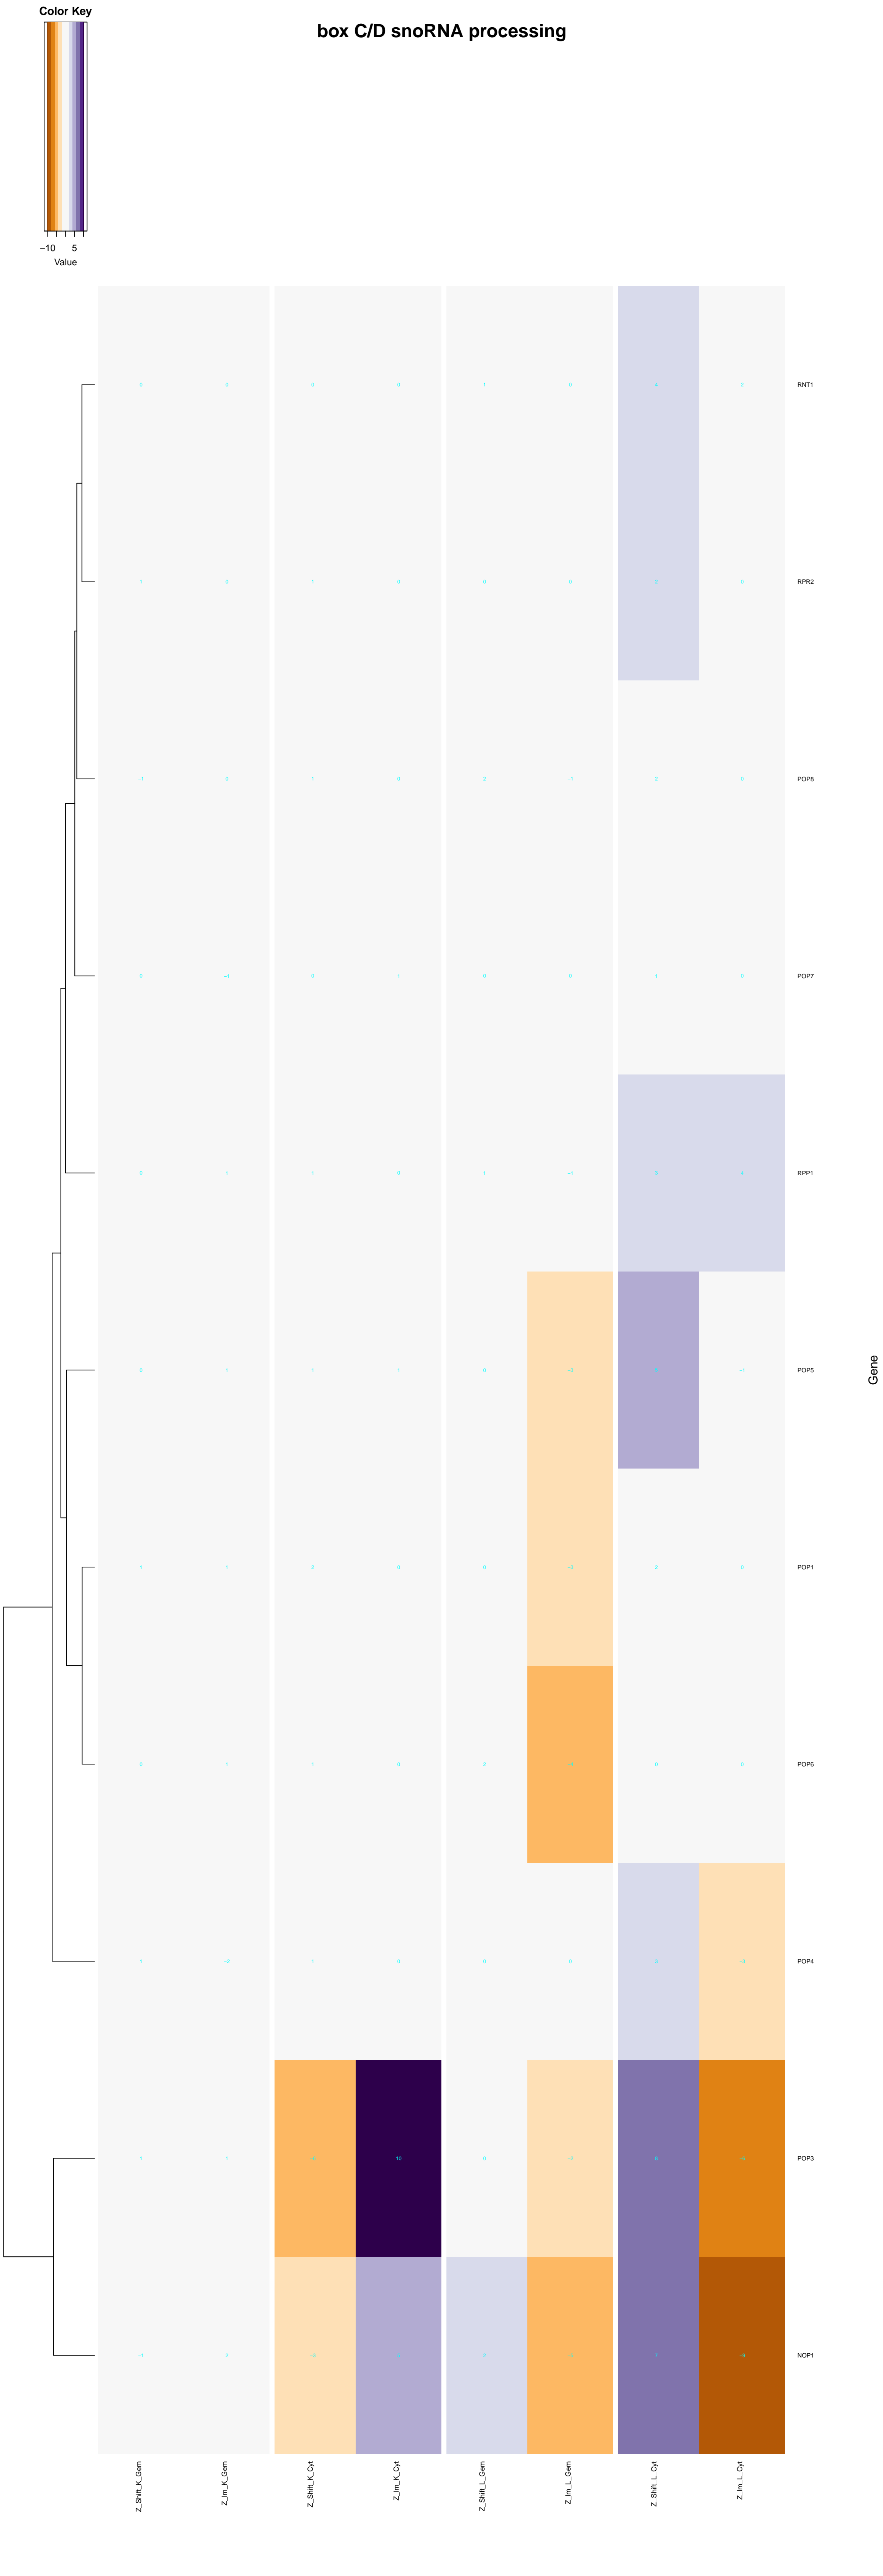



mitochondrial tRNA wobble uridine modification

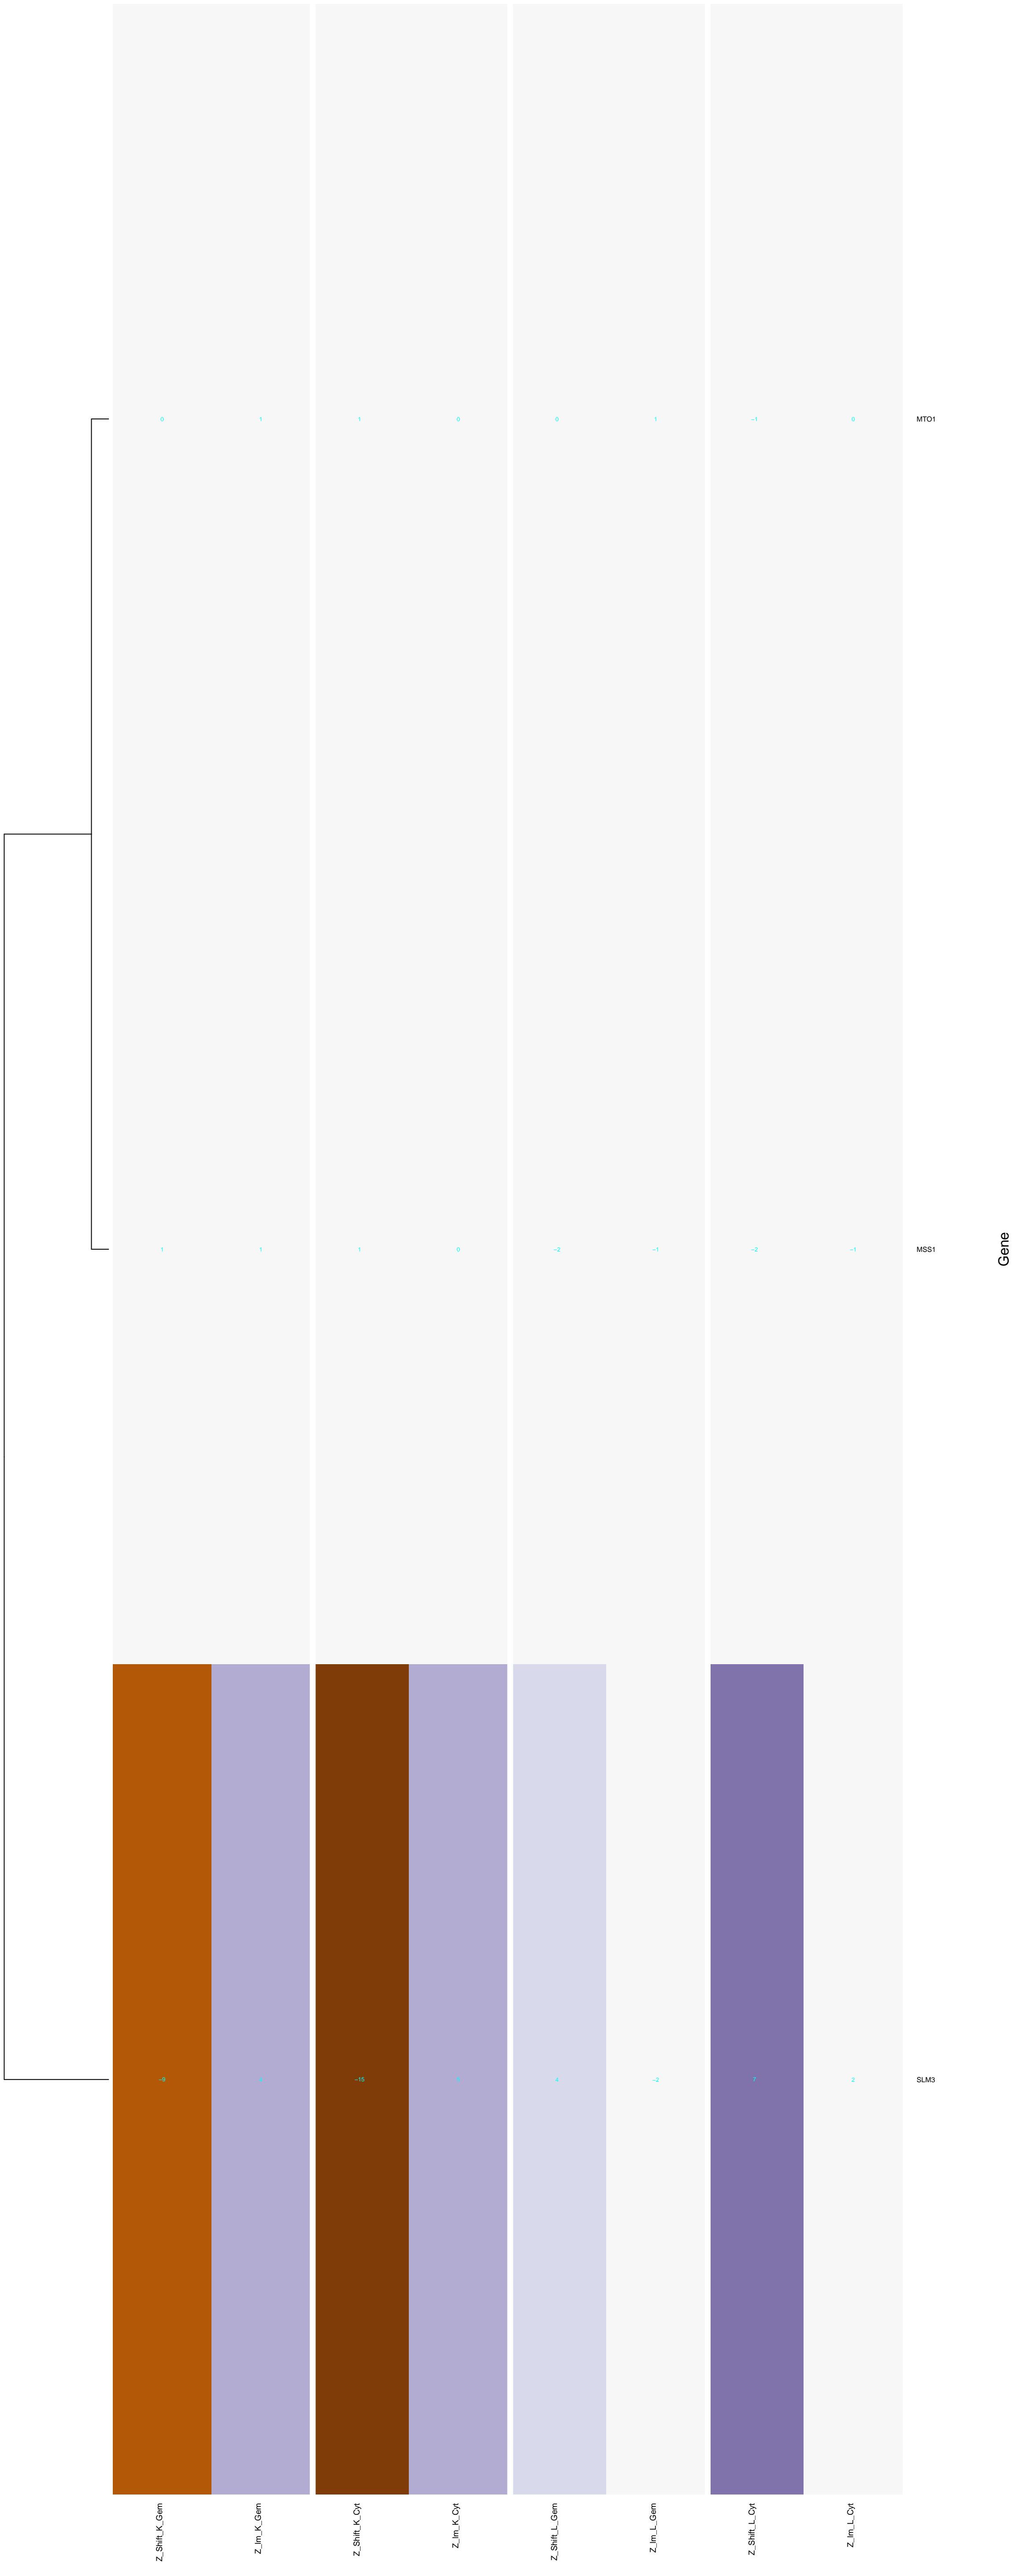

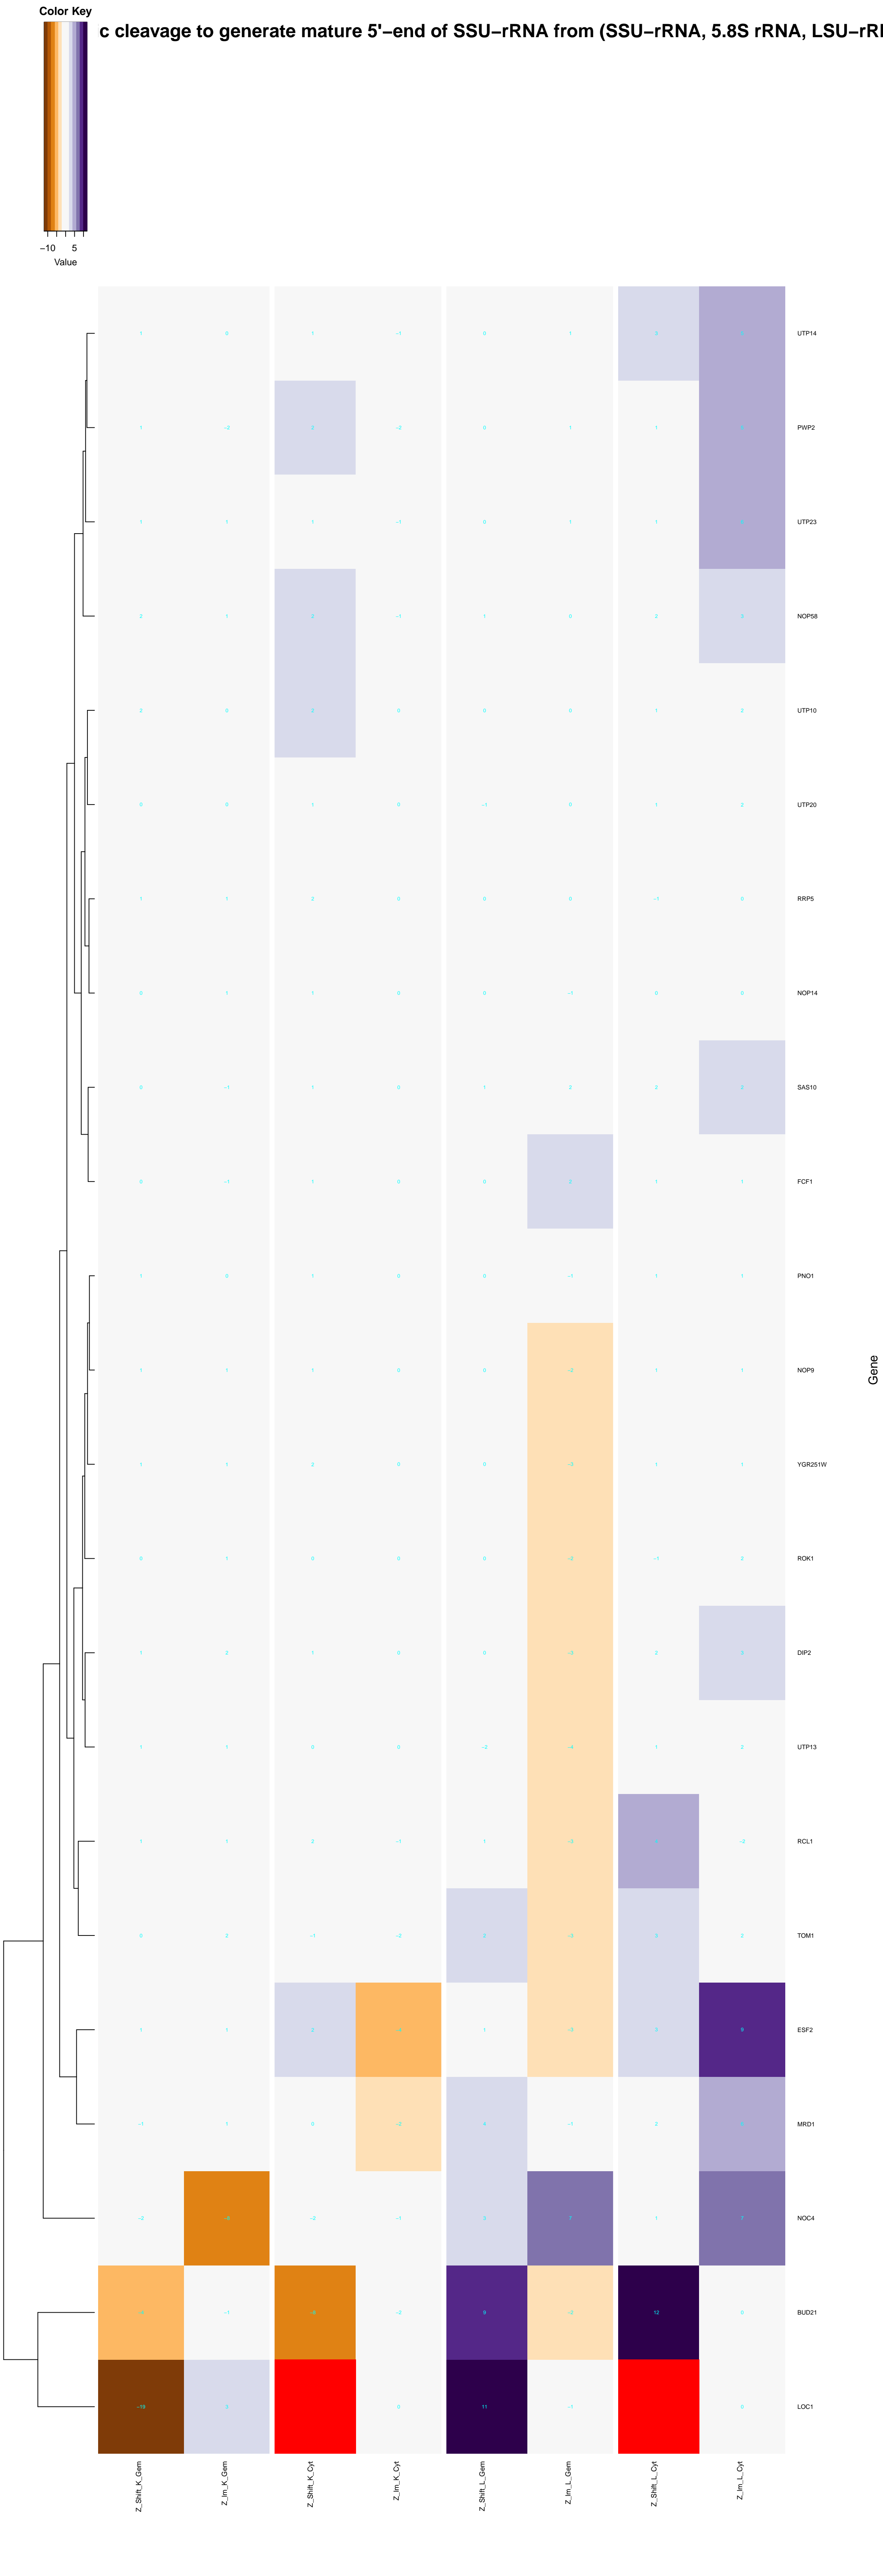

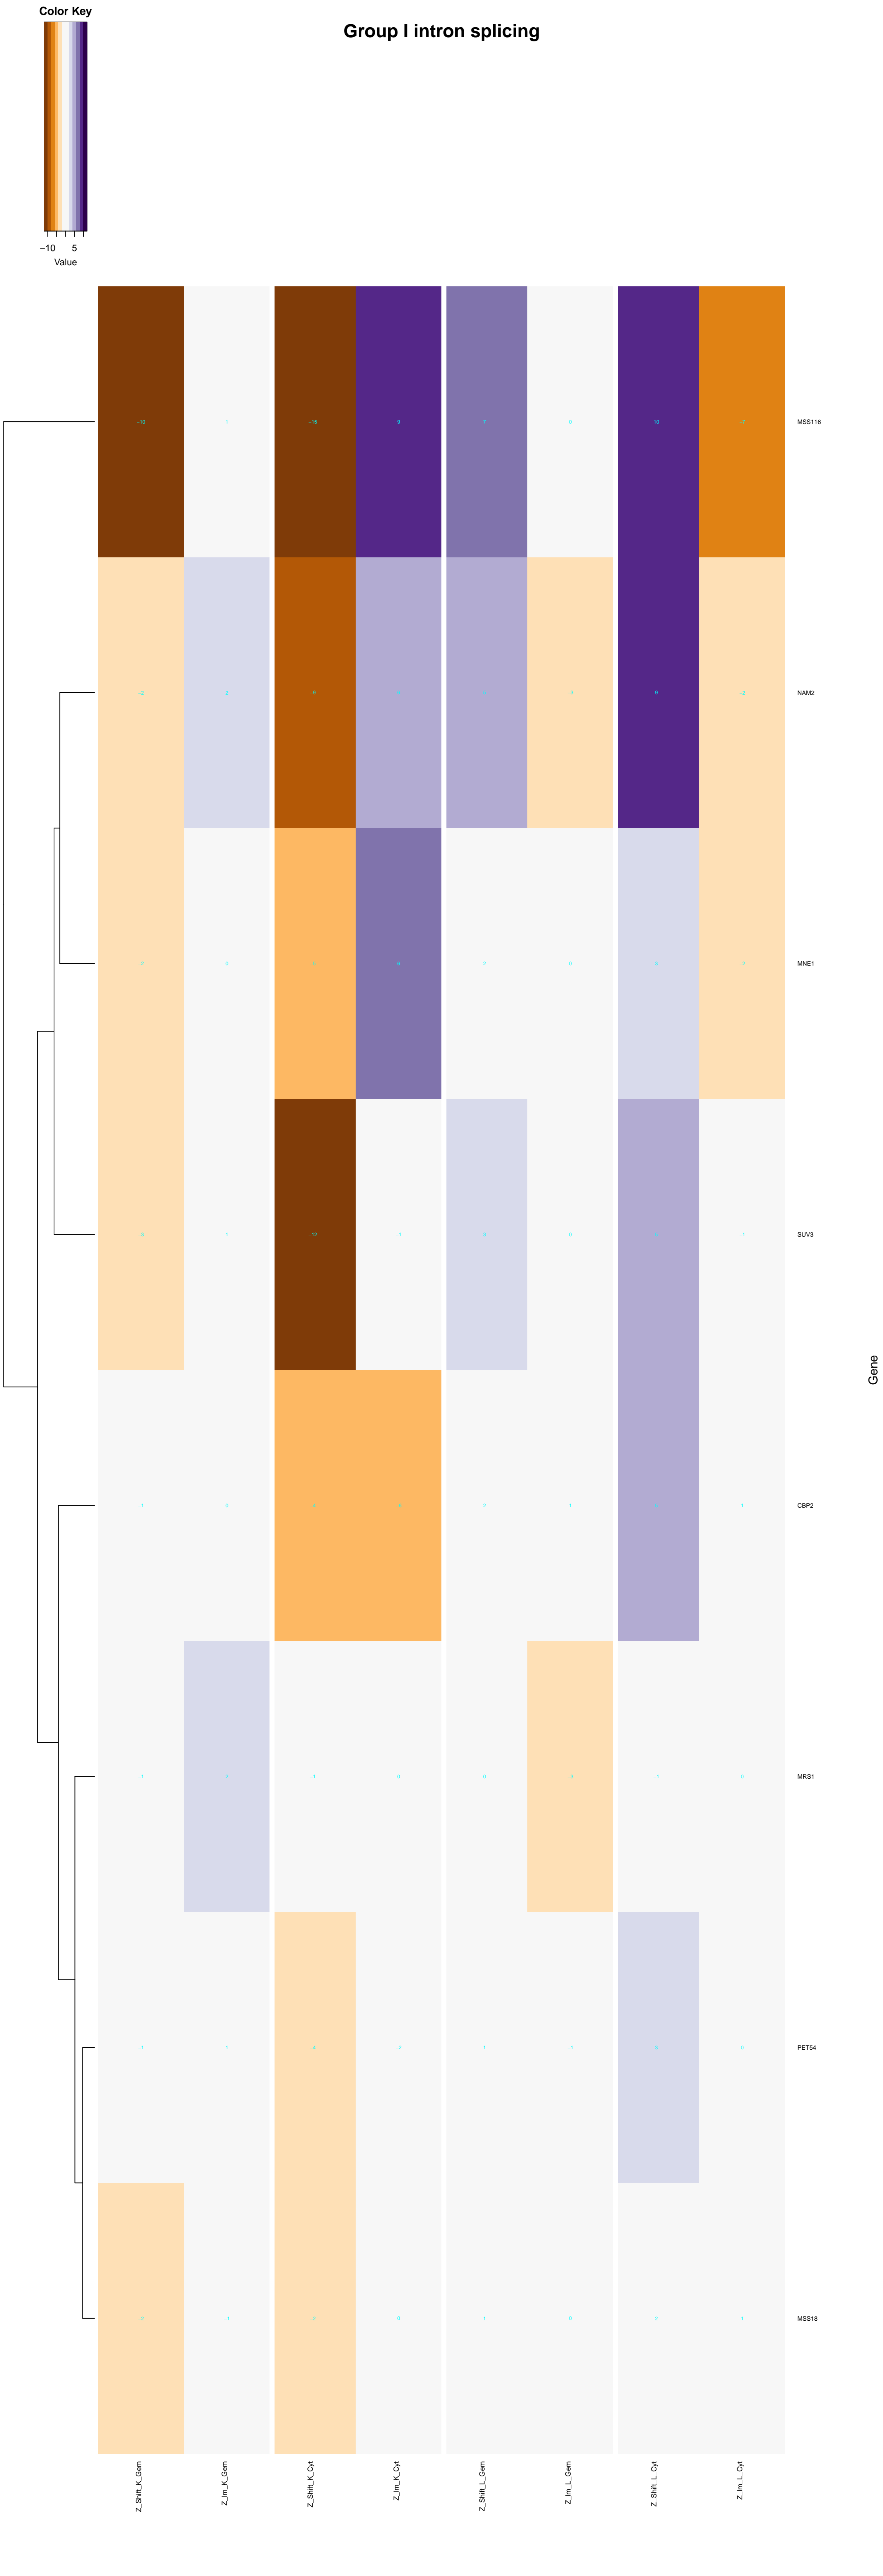

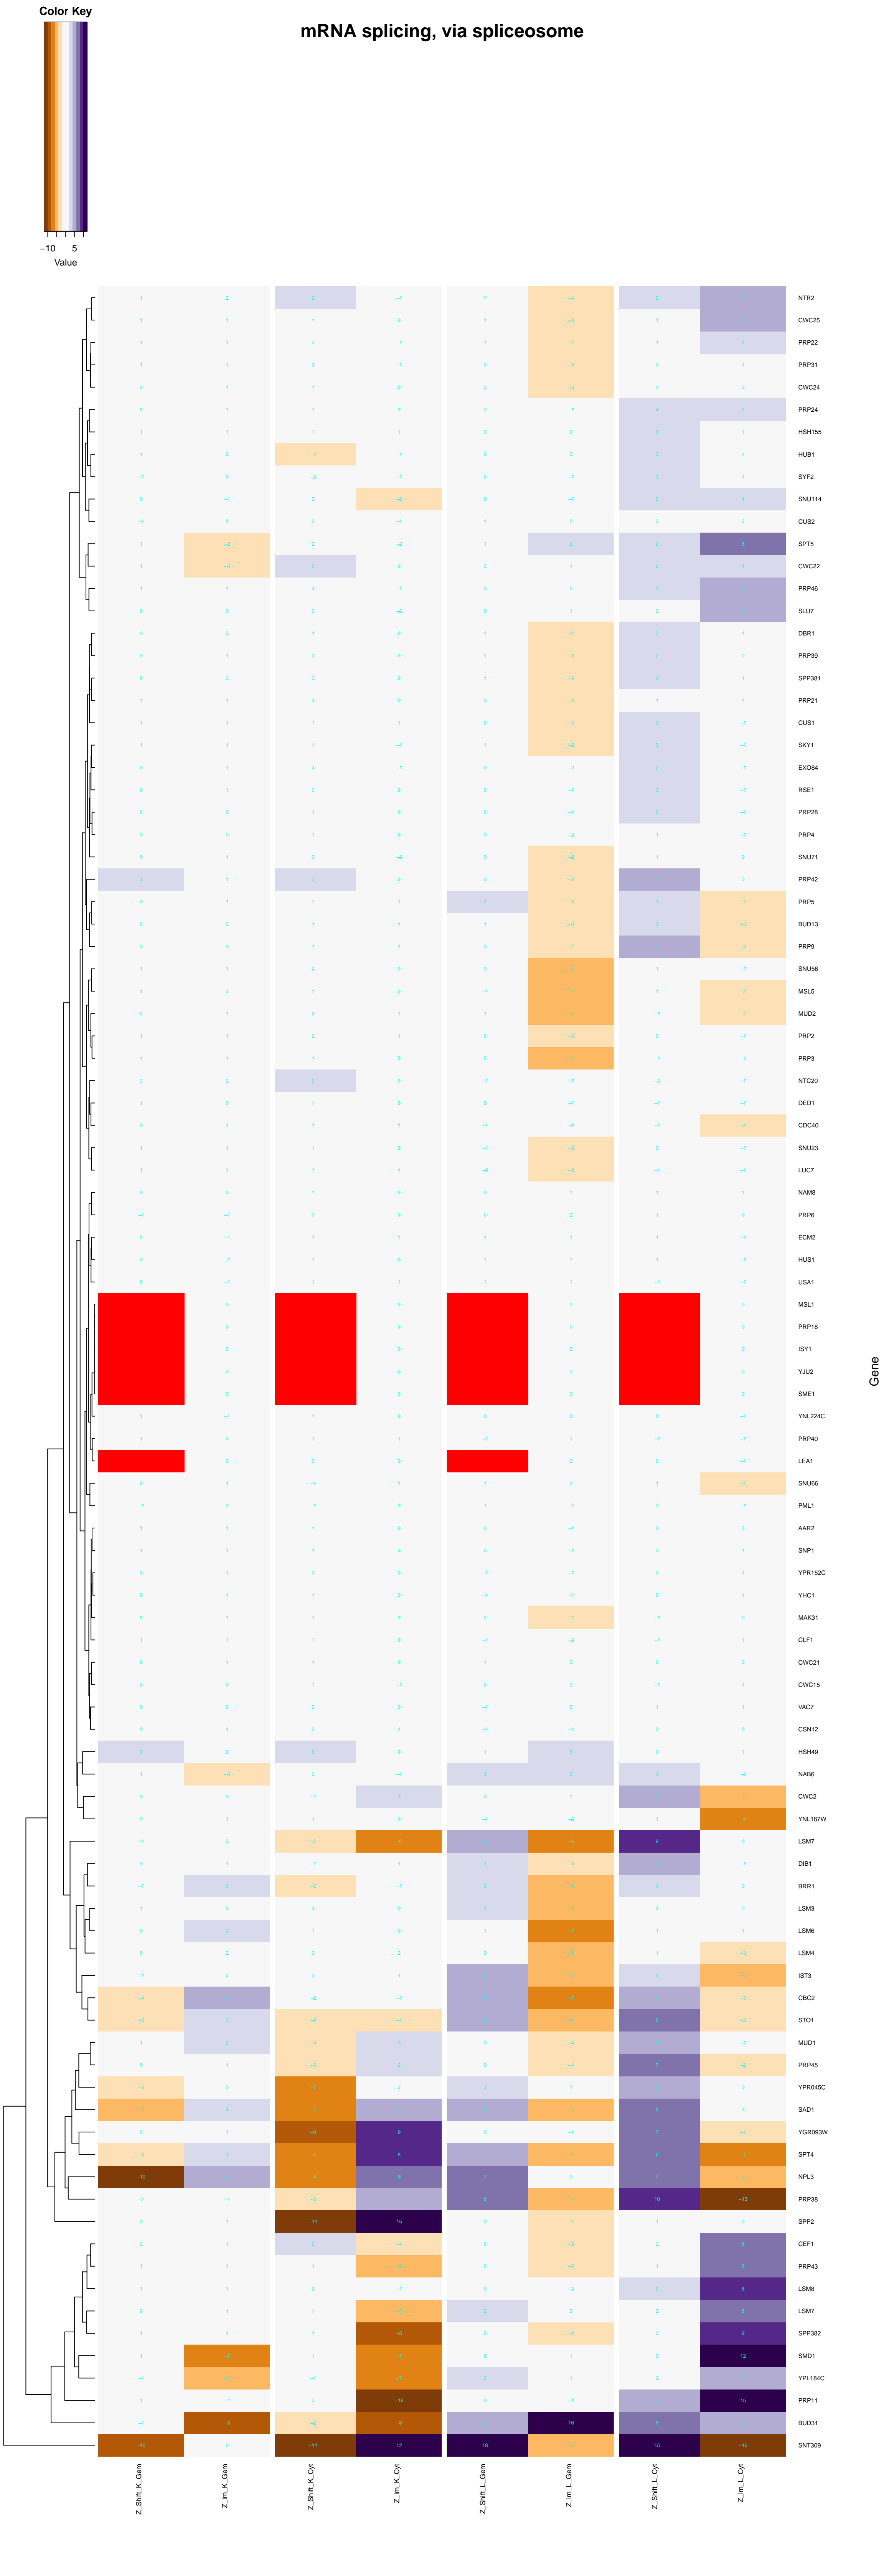

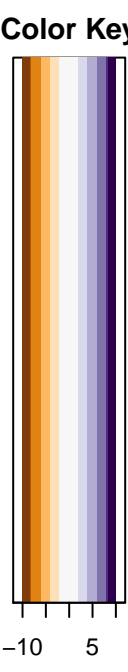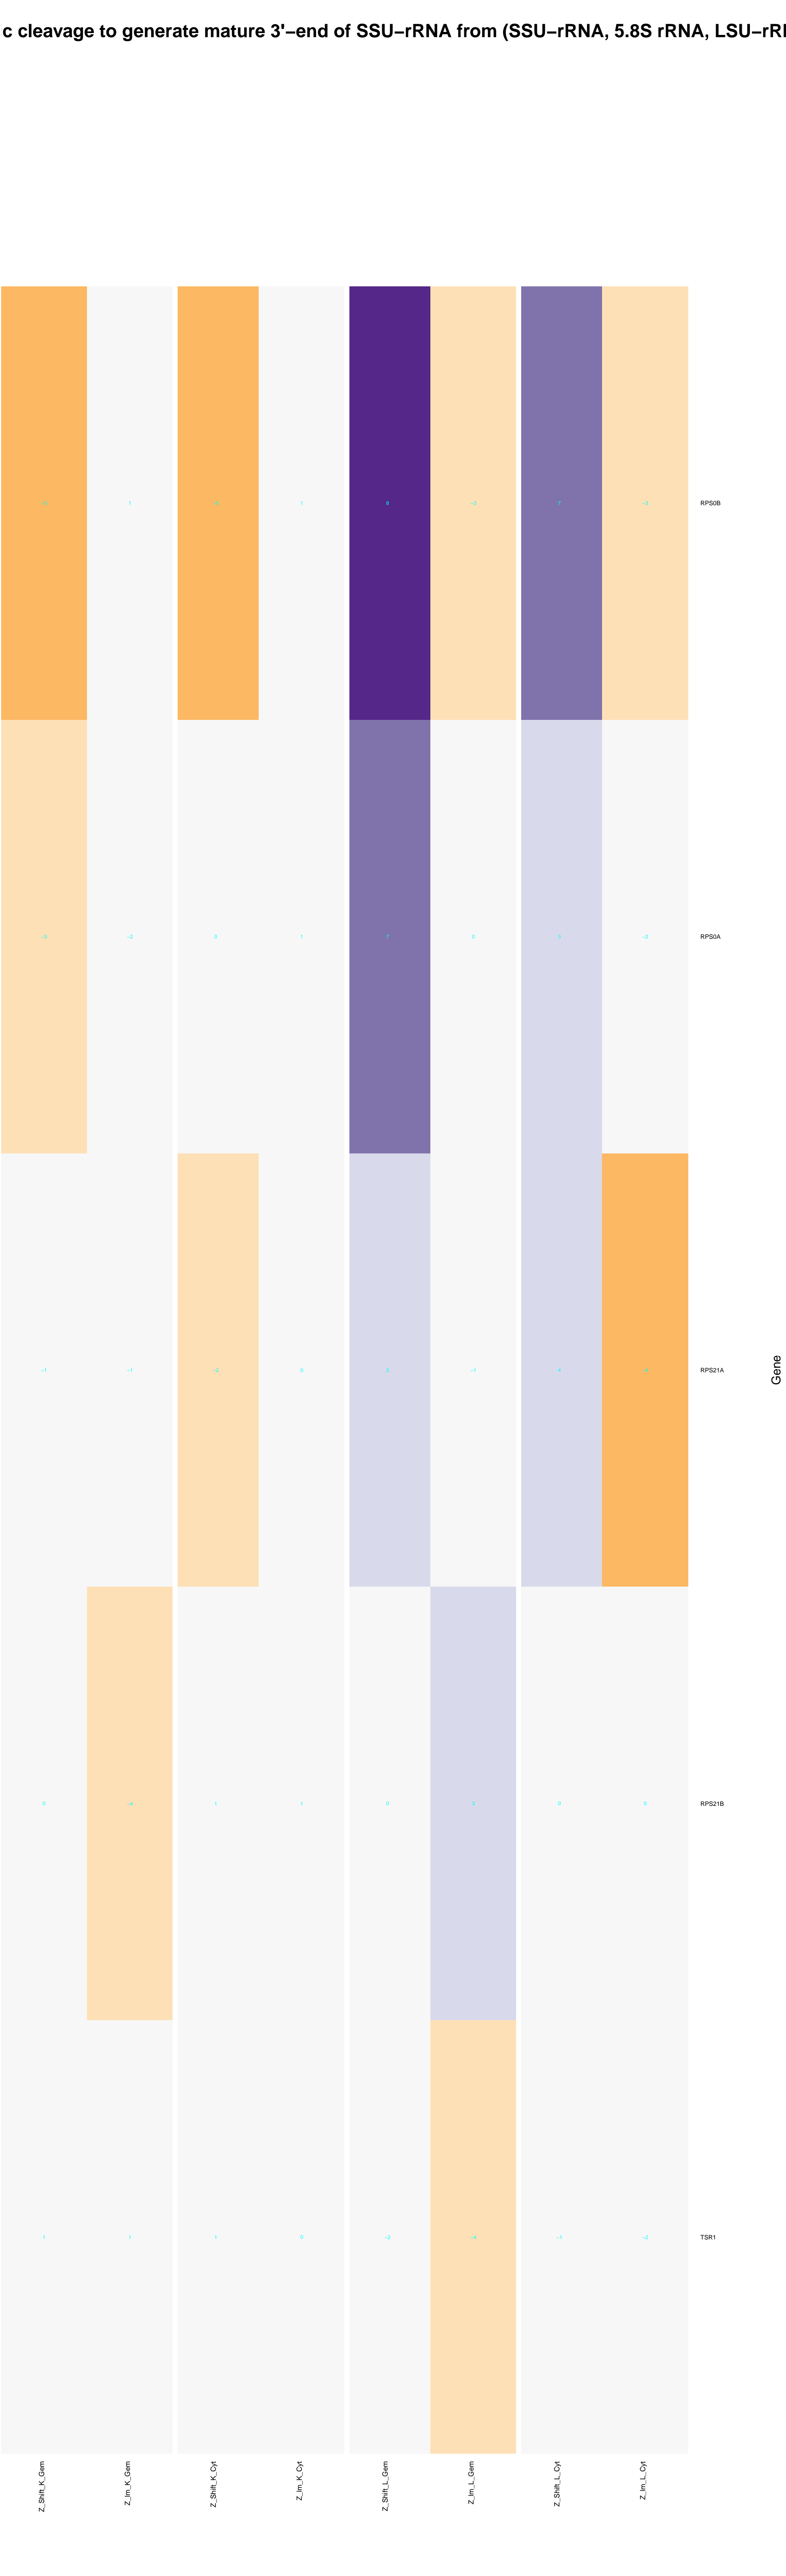



generate mature 3'-end of 5.8S rRNA from tricistronic rRNA transcript (SSU-rRNA, 5.8S rRNA, 5S rRNA)

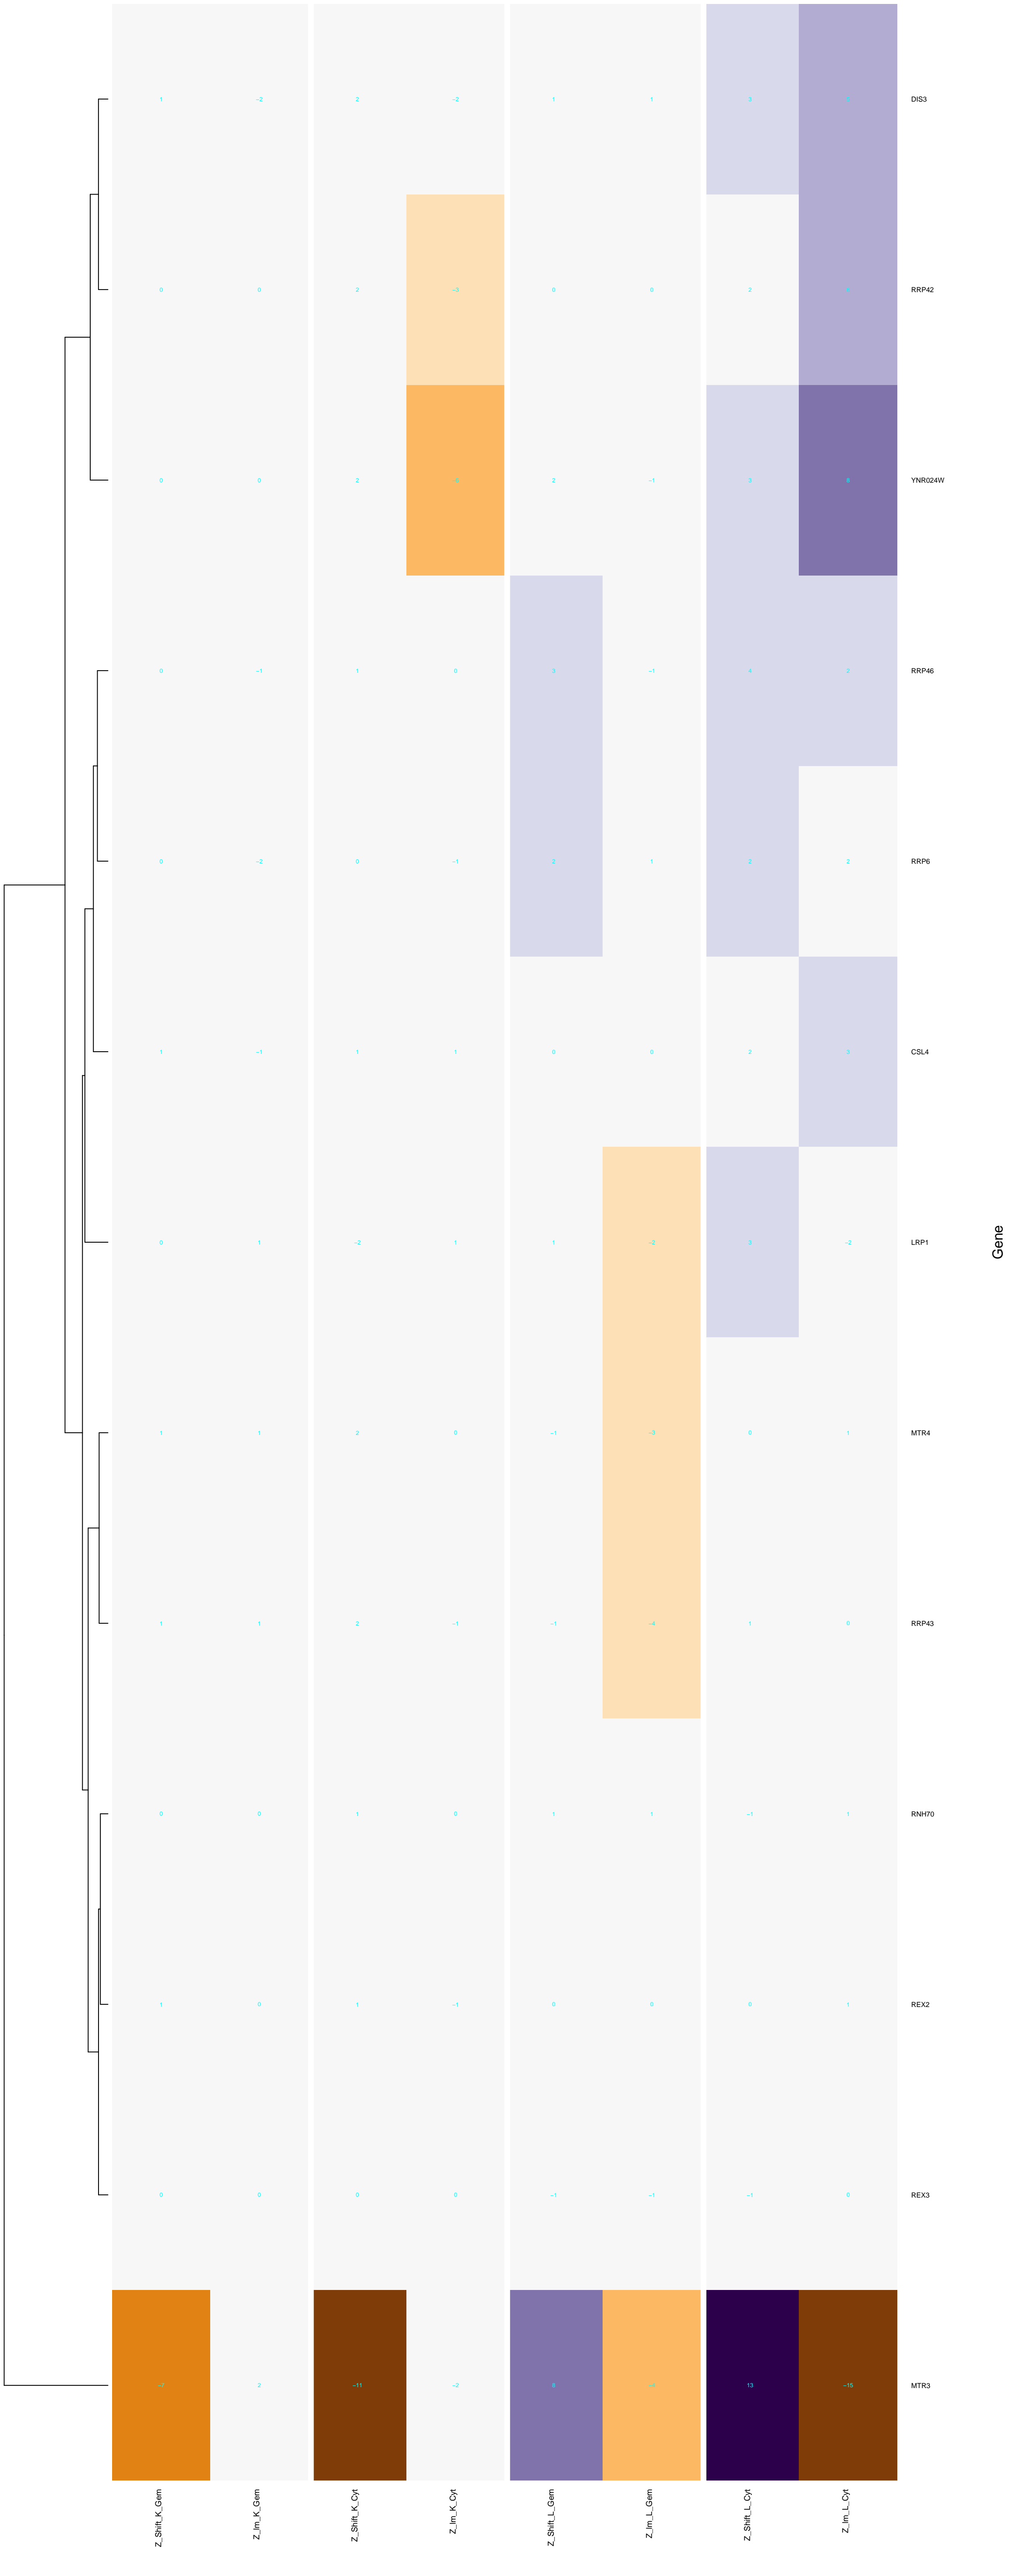

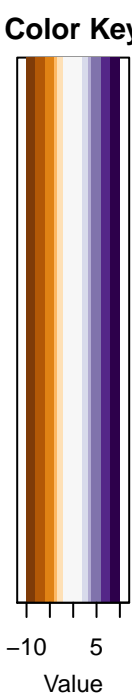

snoRNA polyadenylation

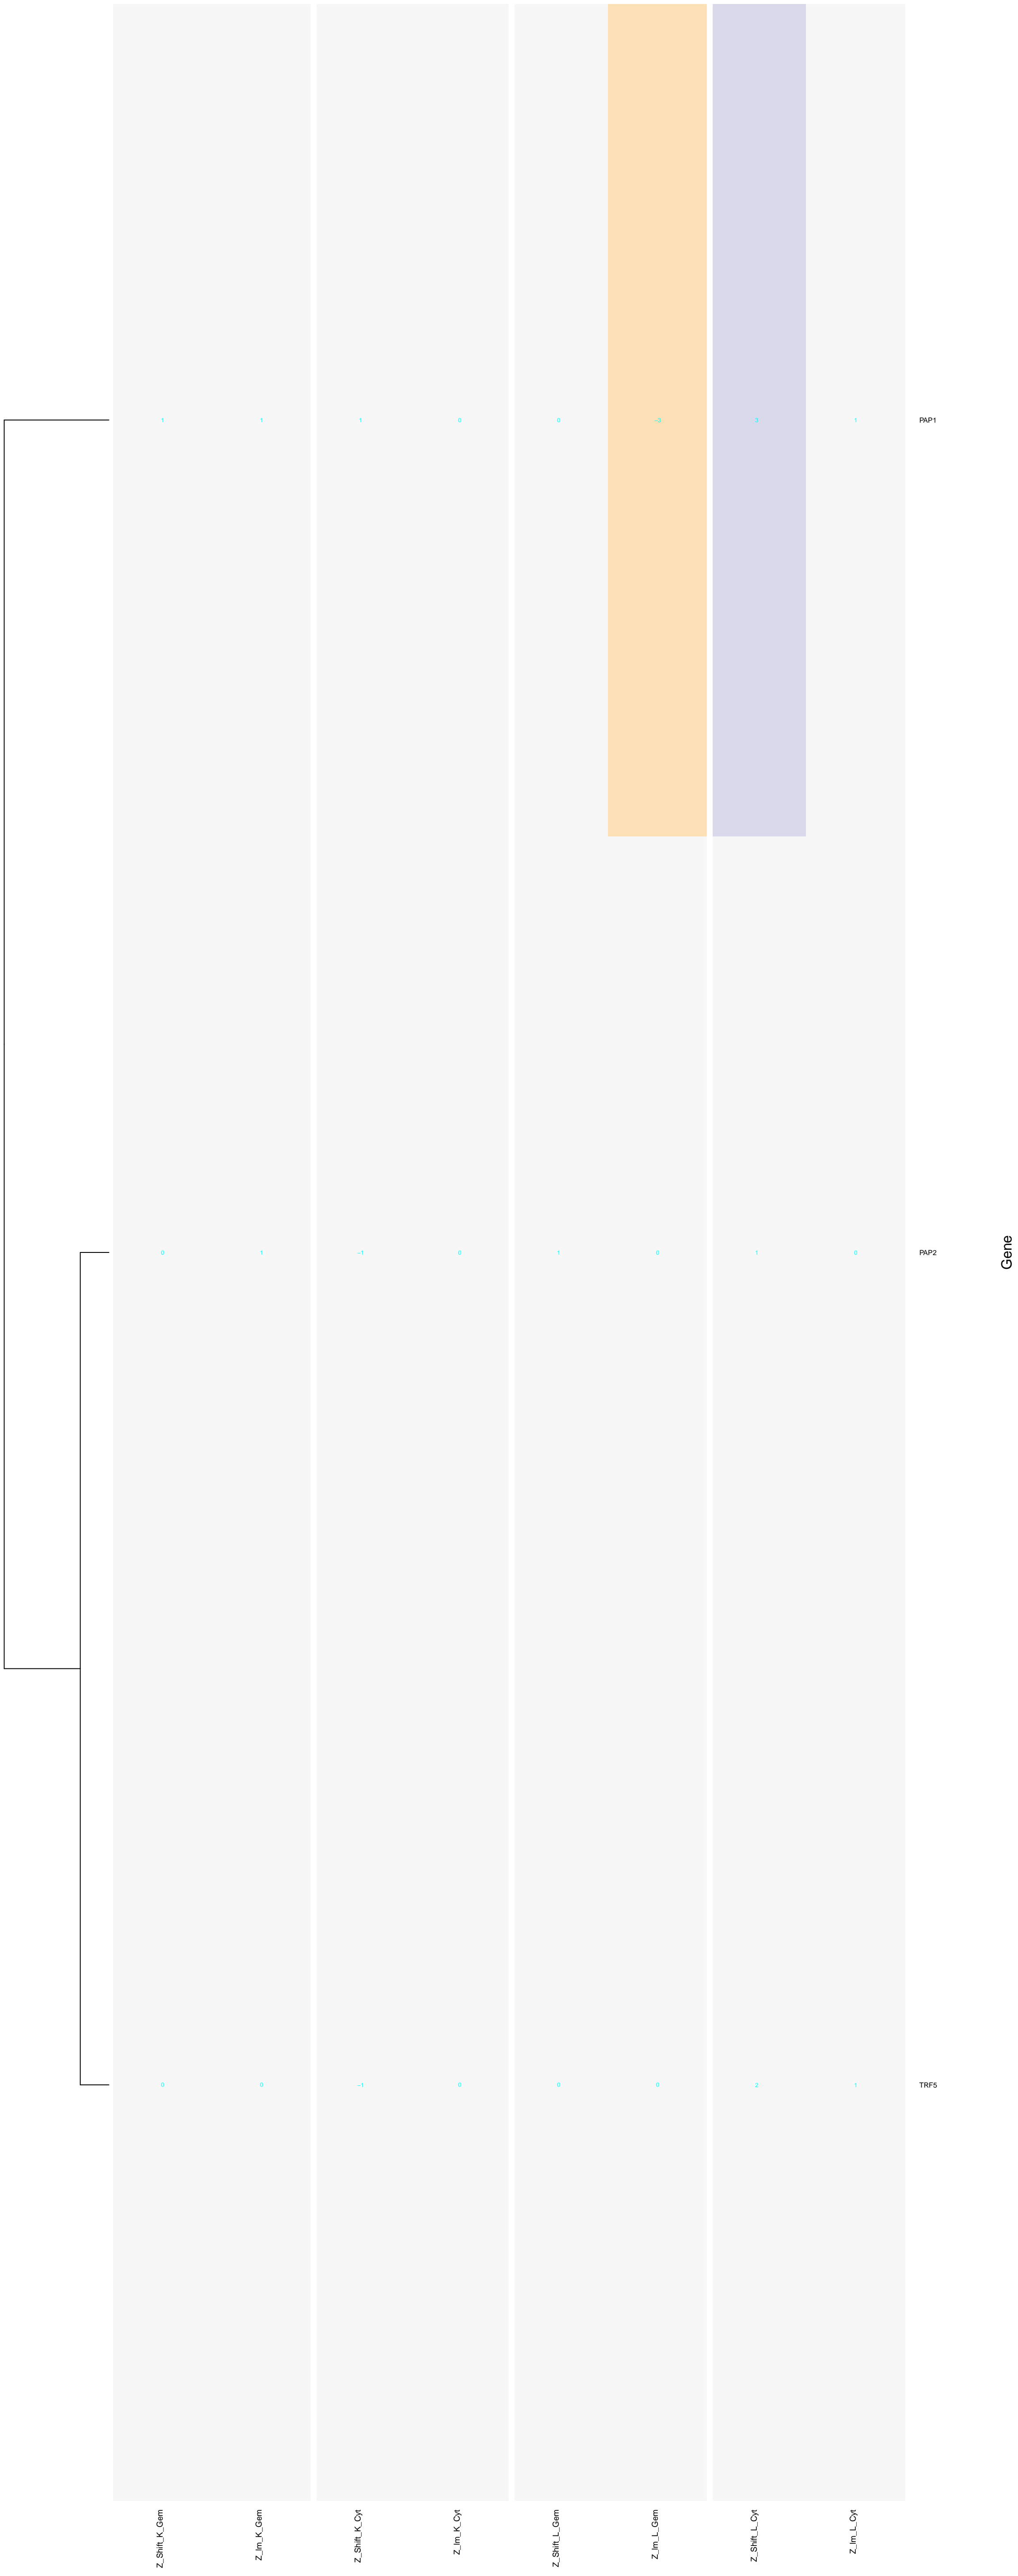

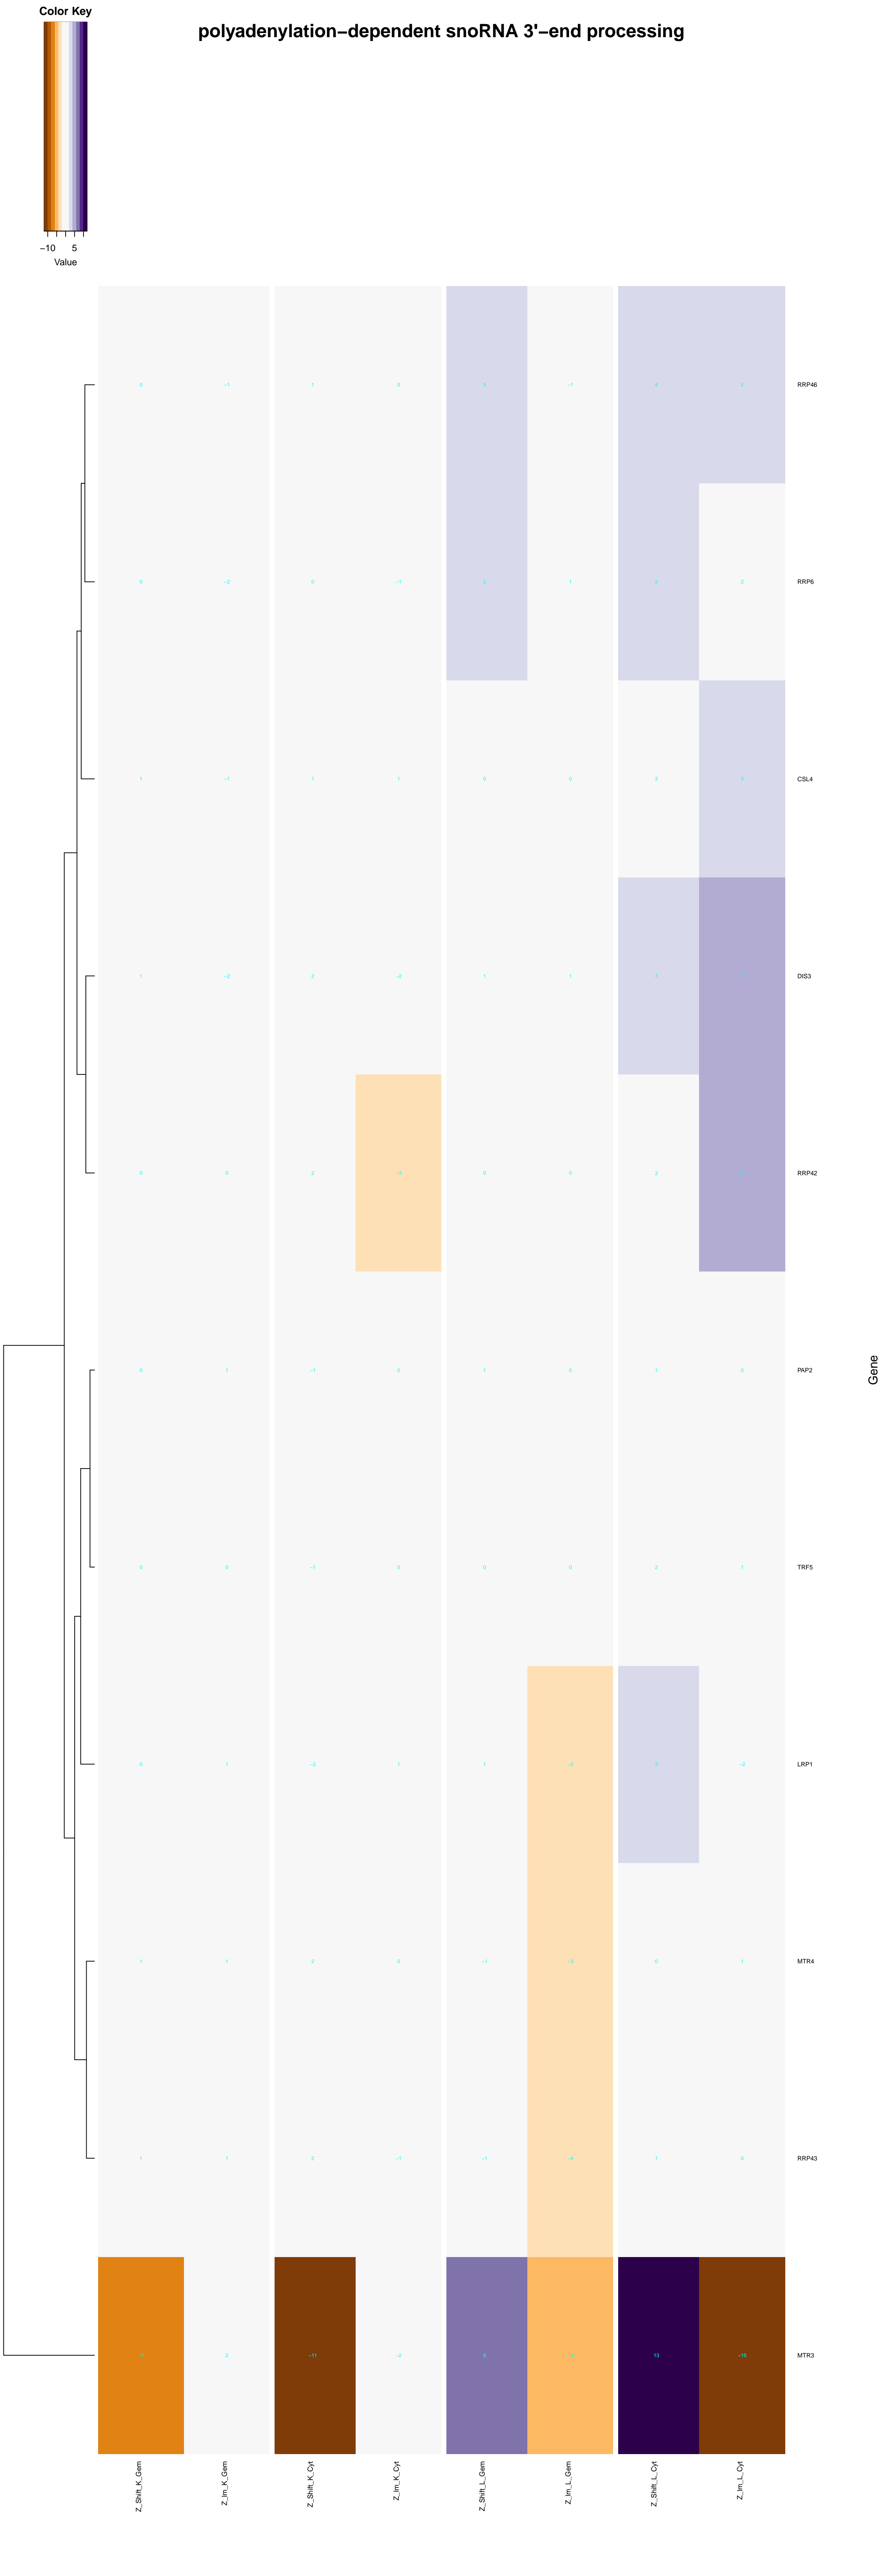

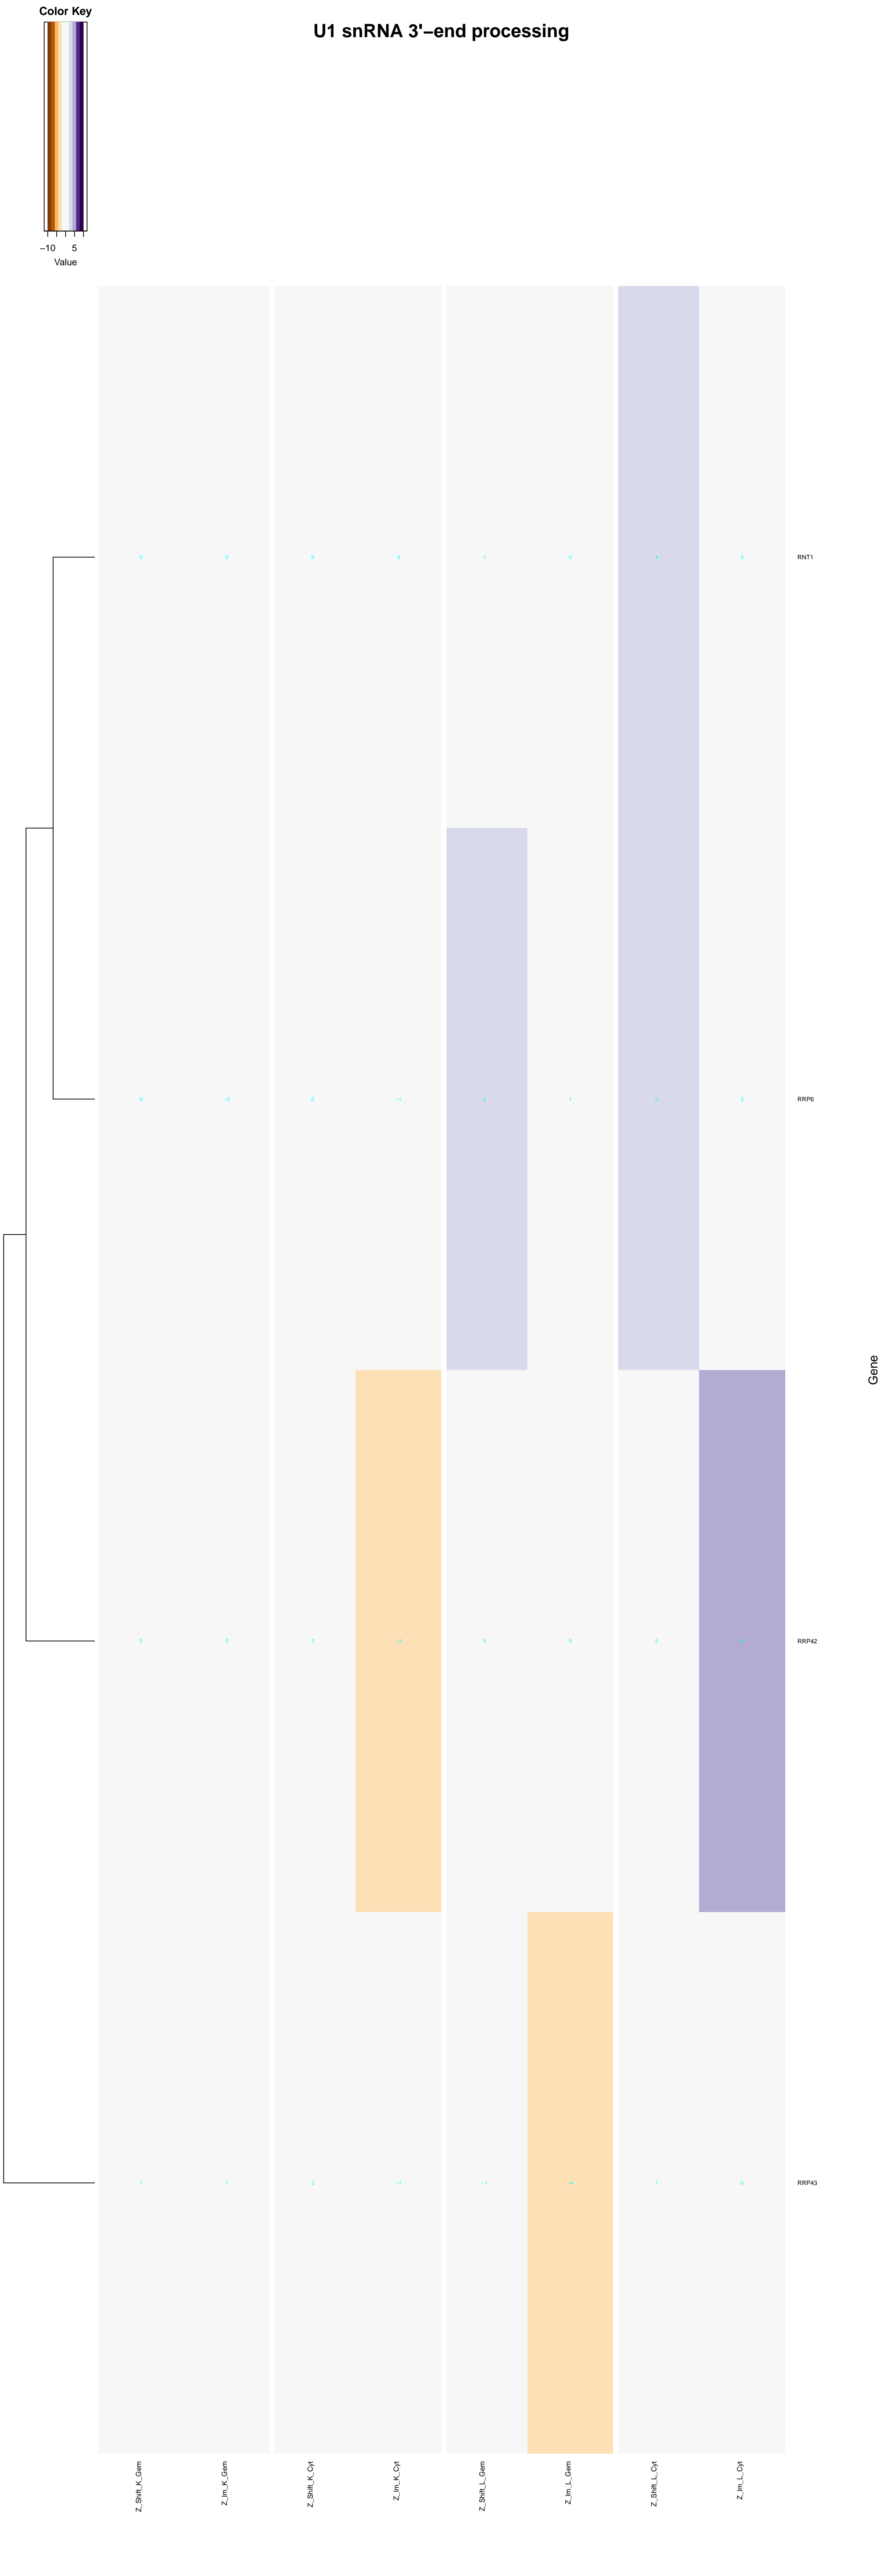

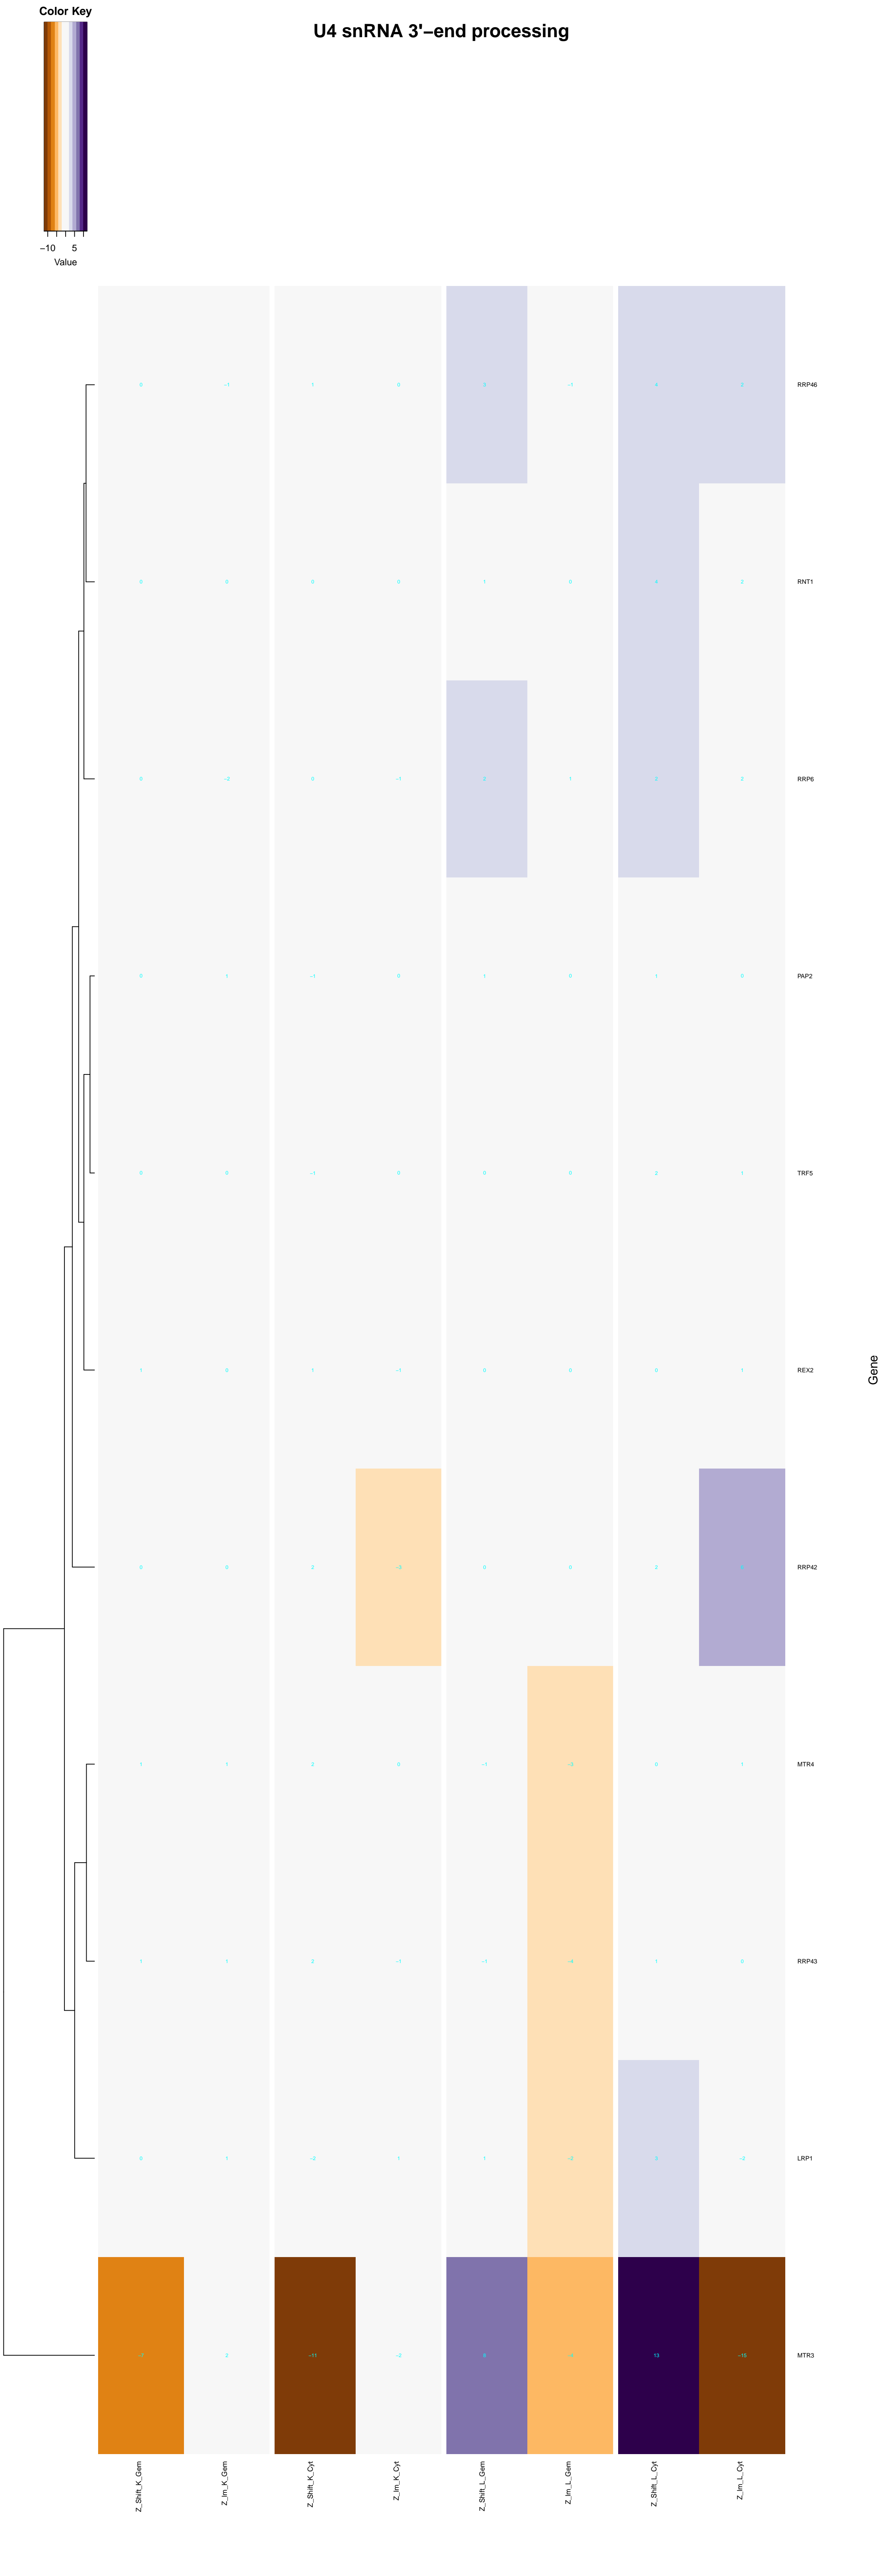

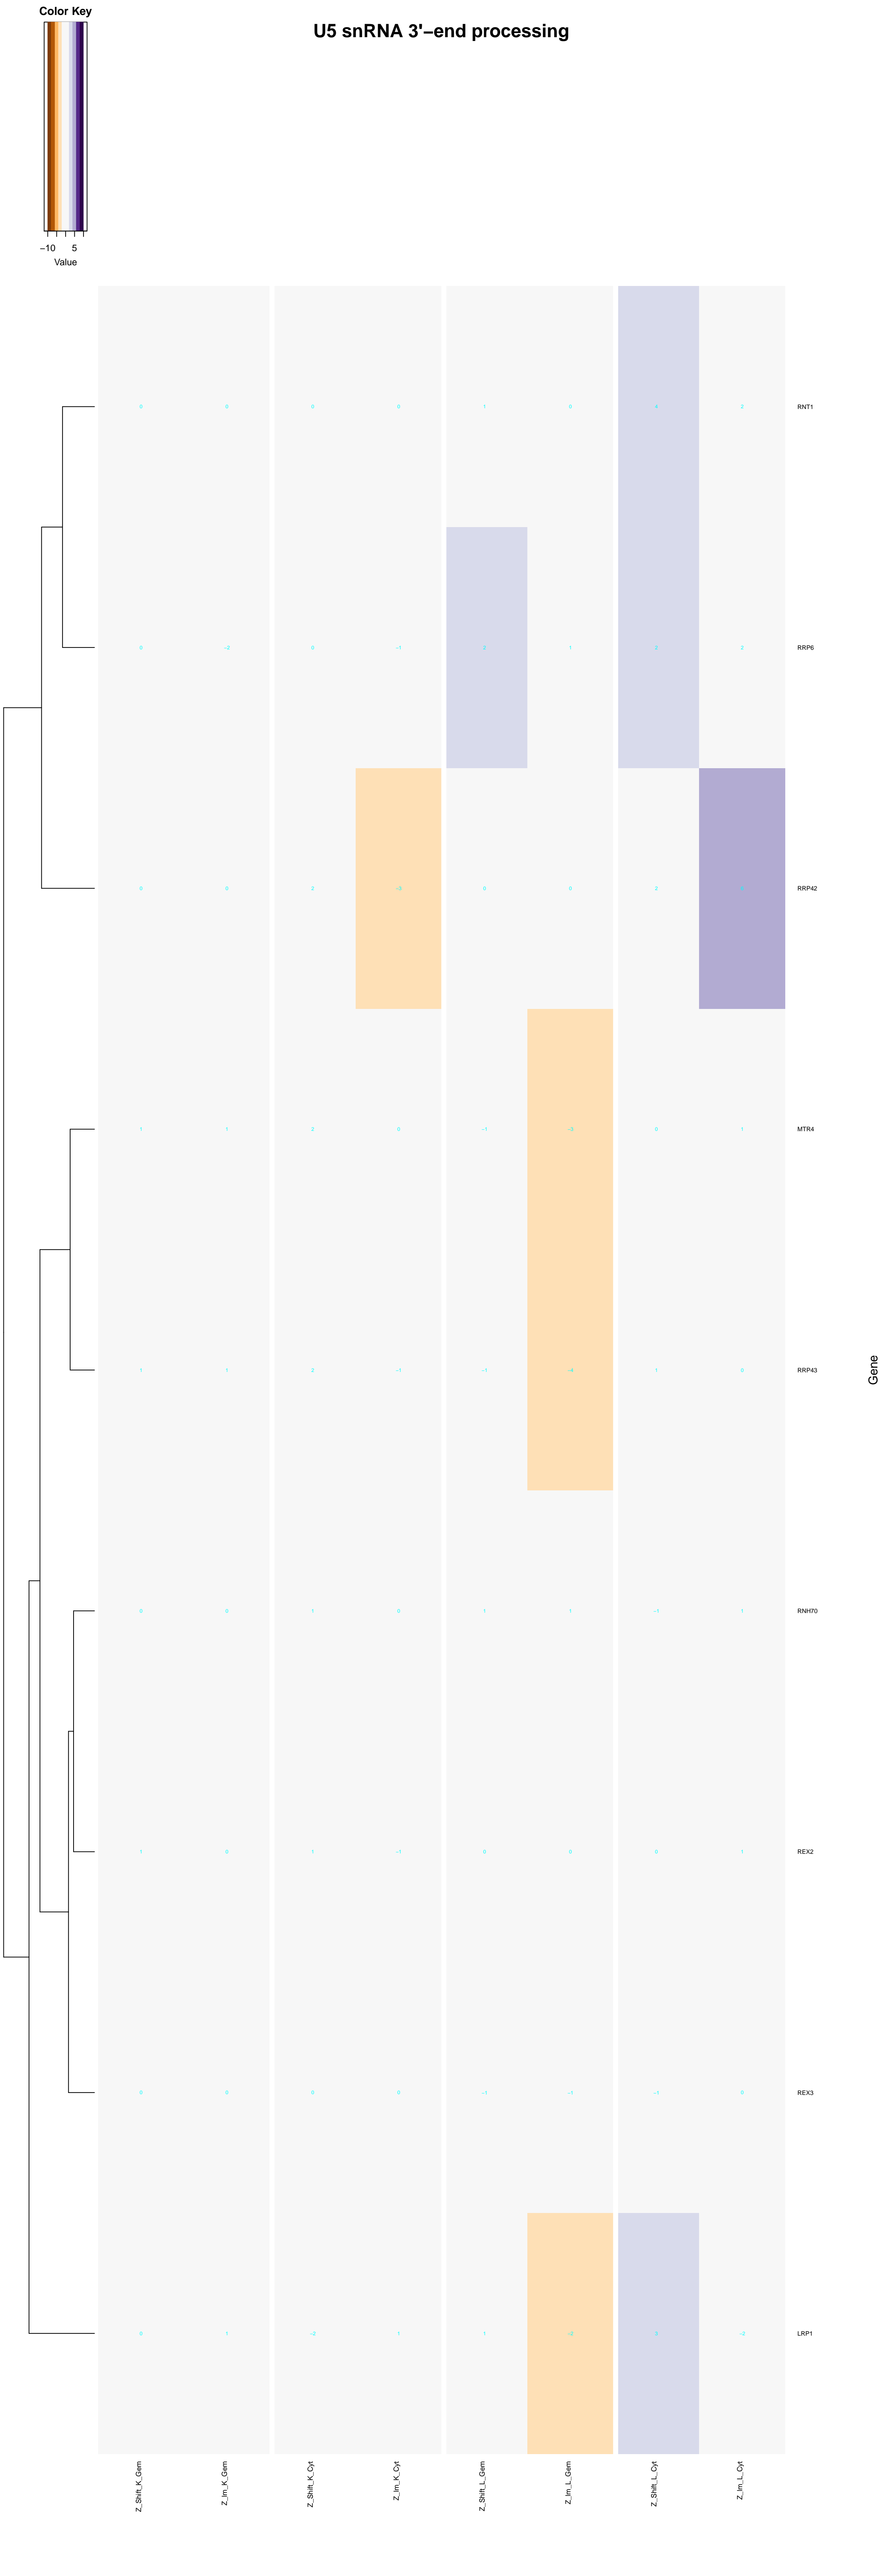

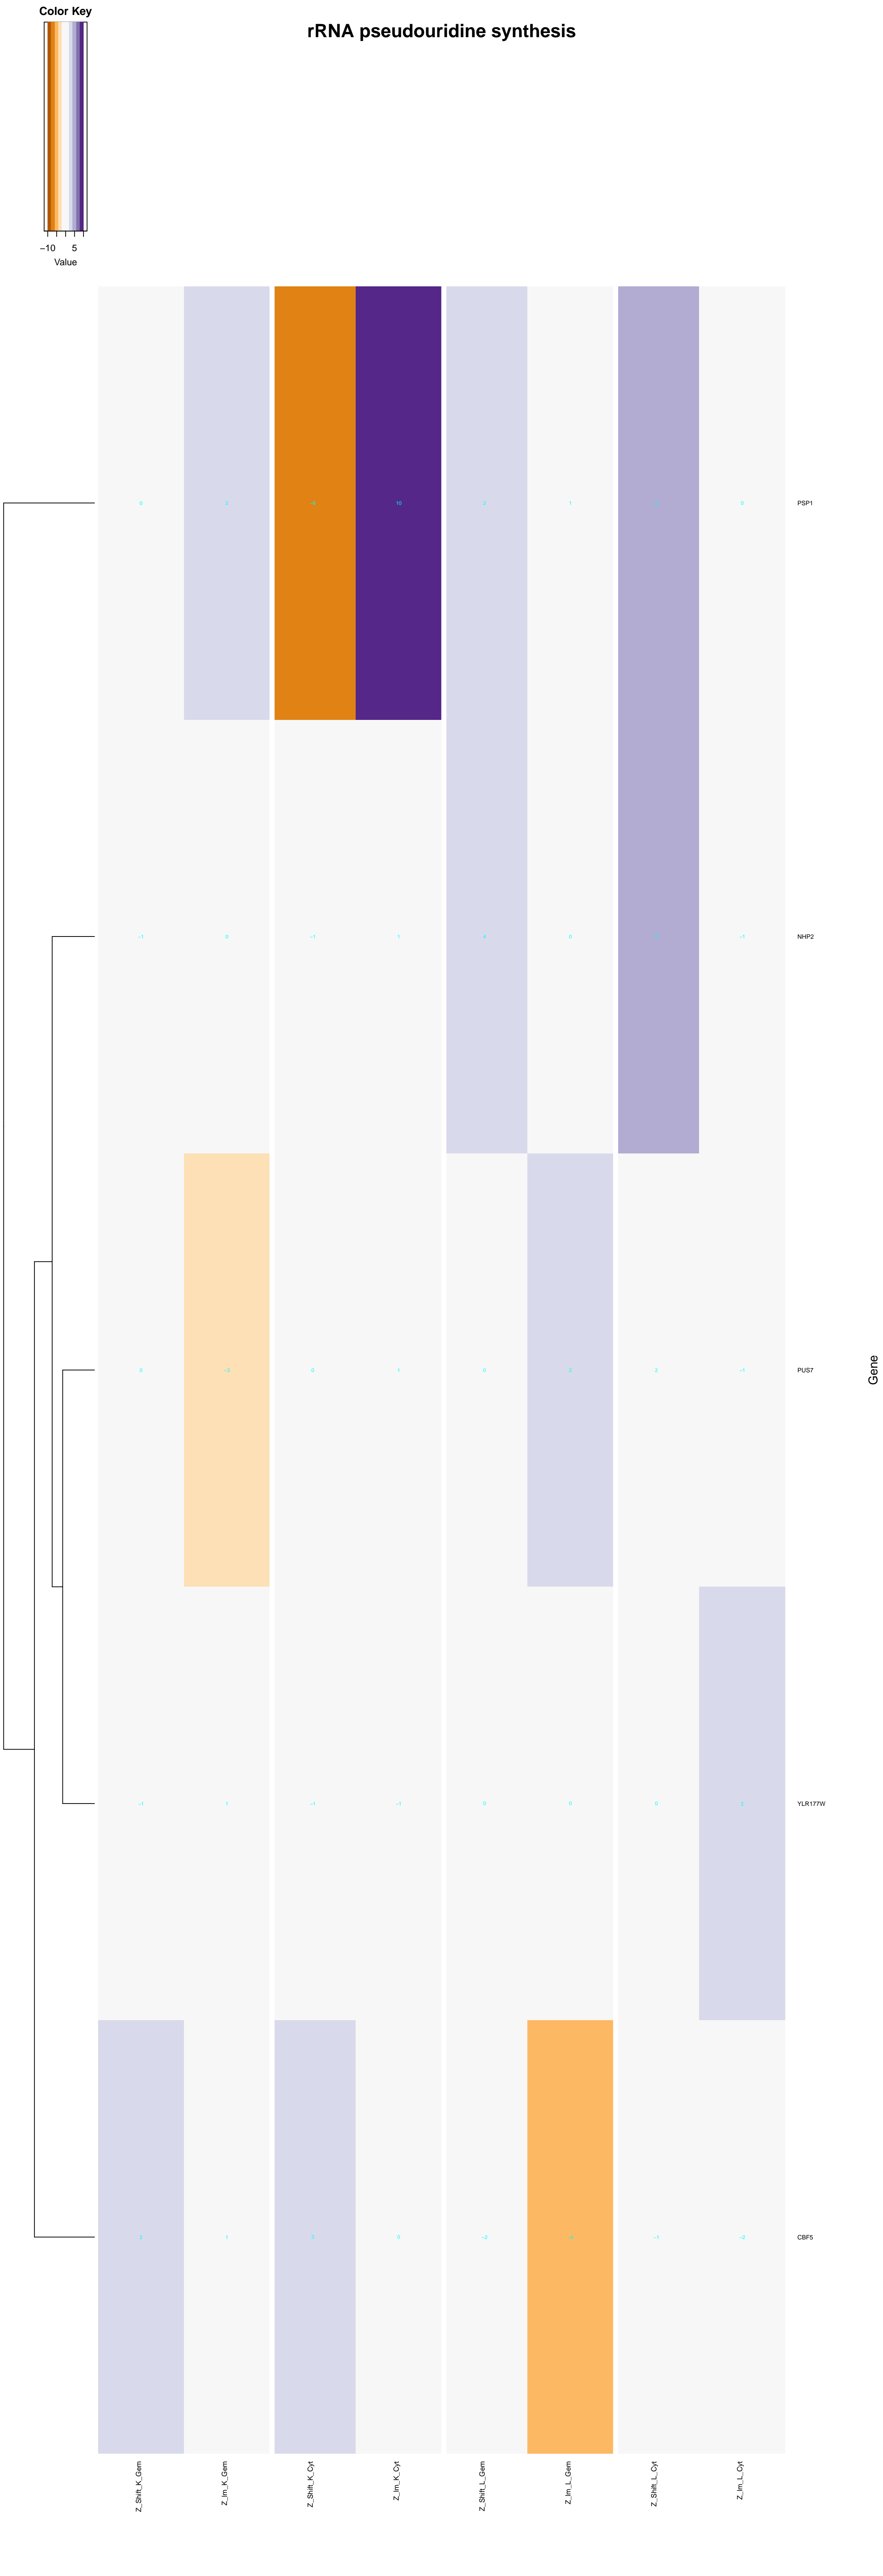

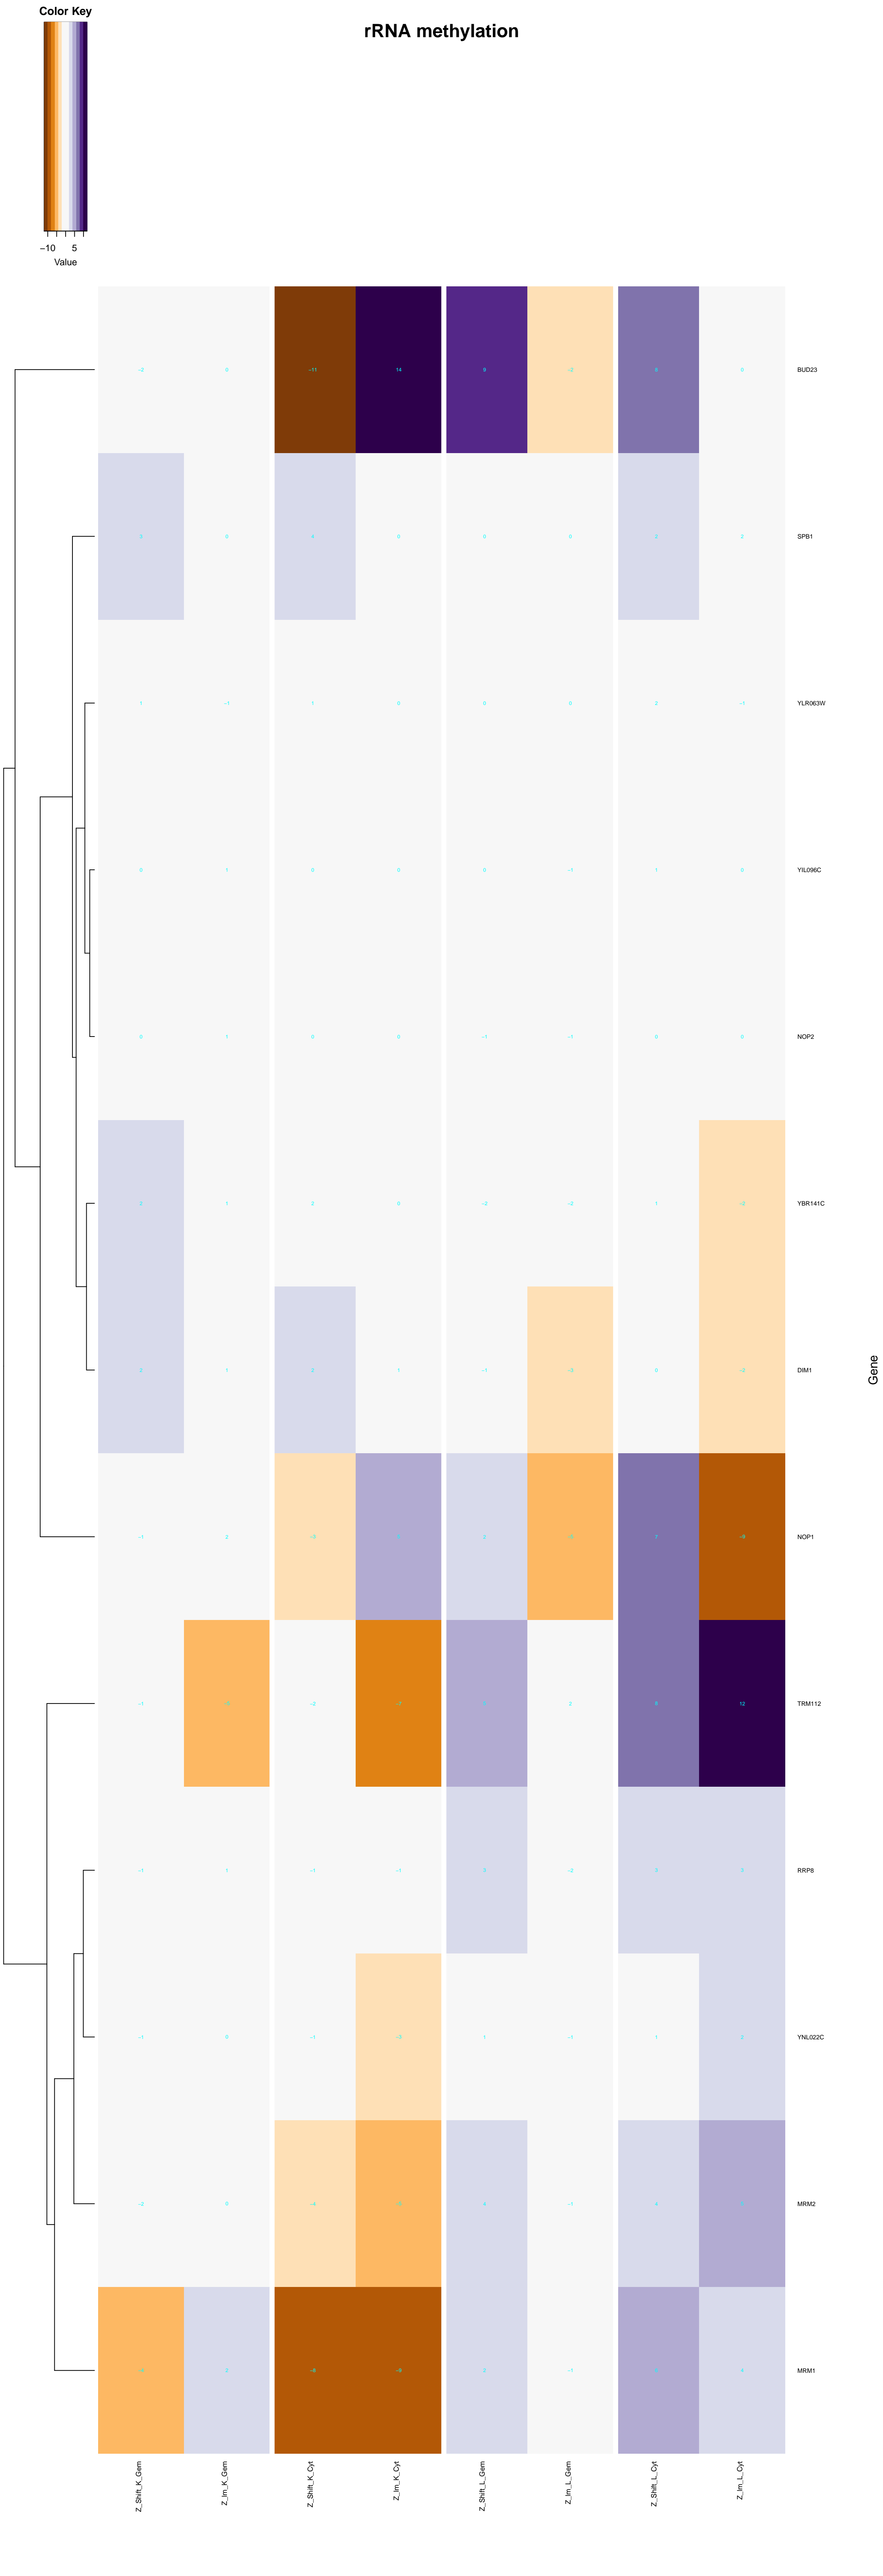

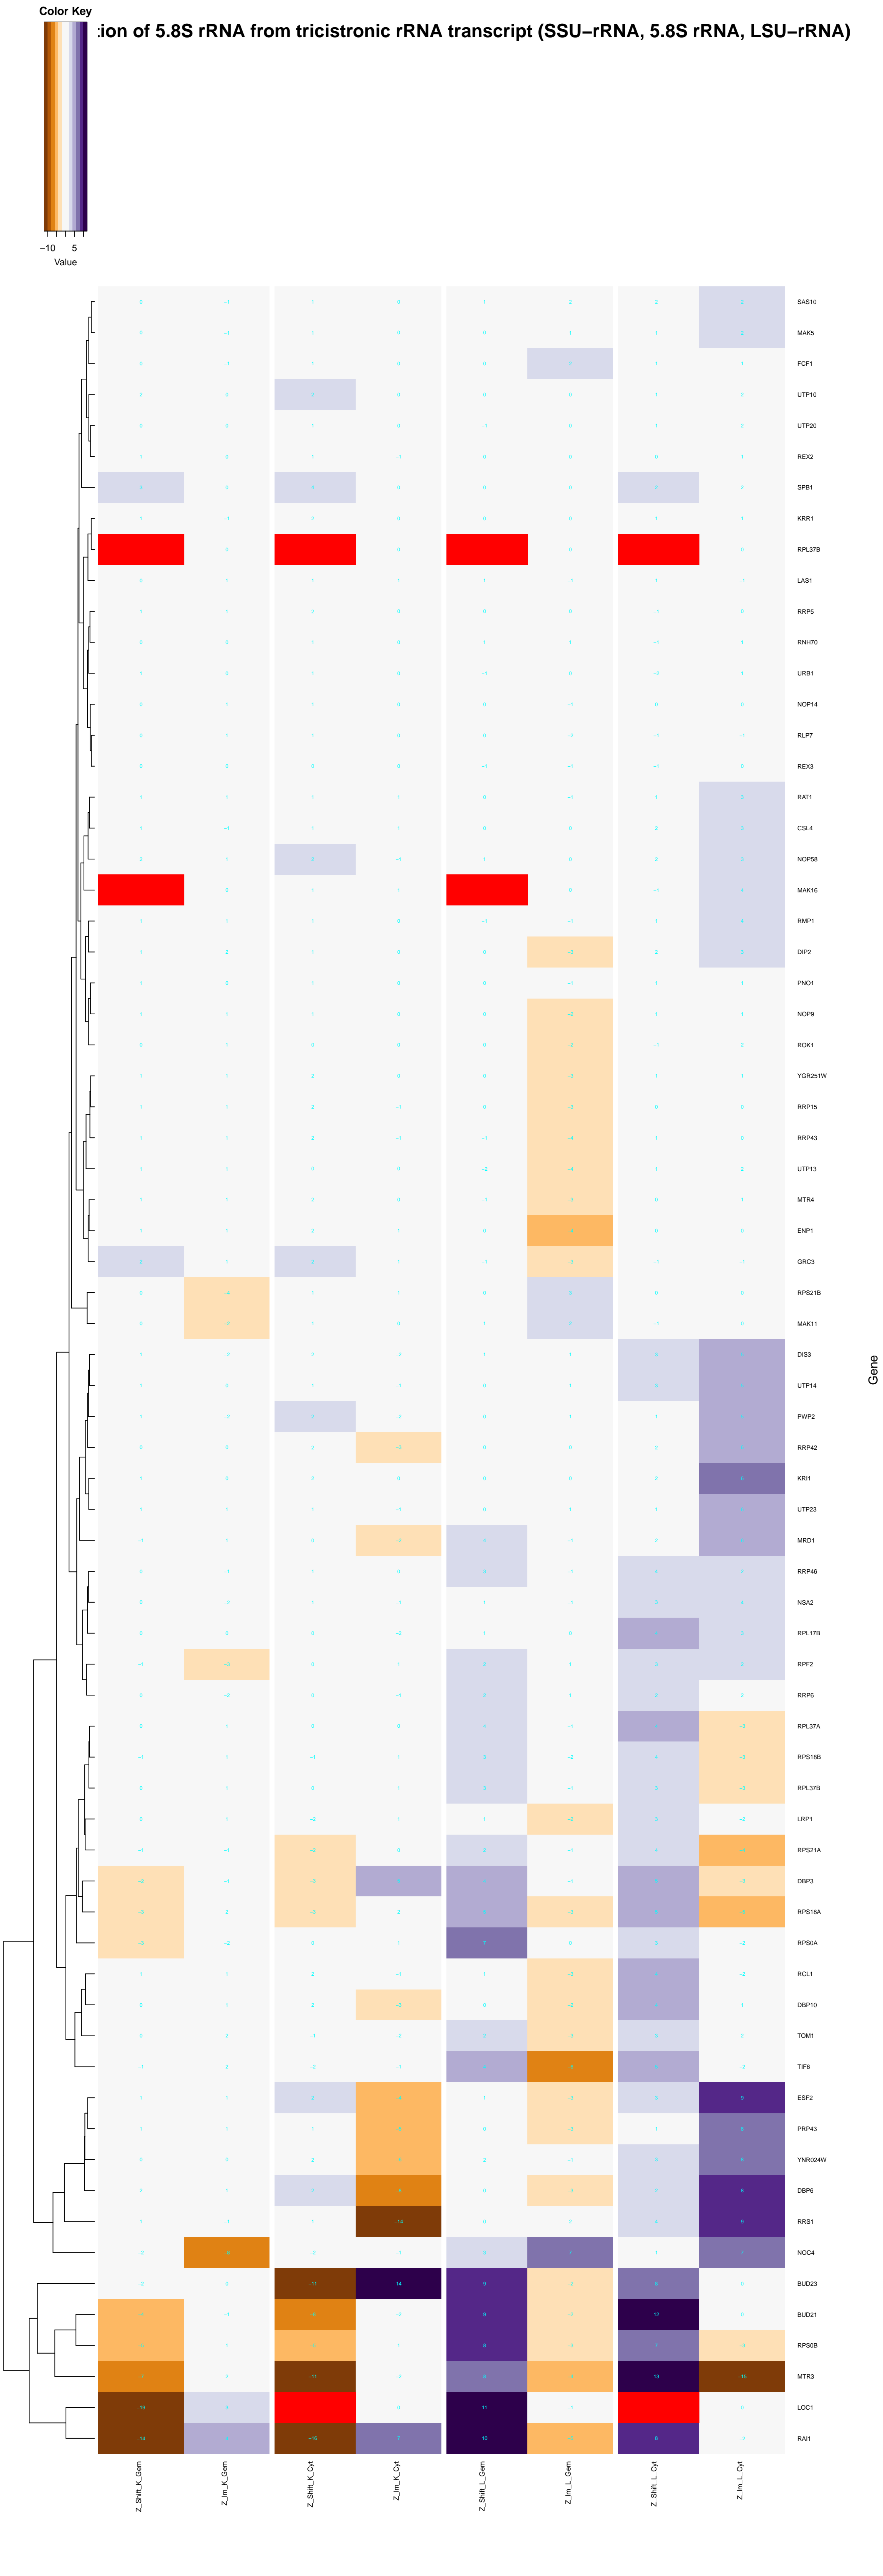

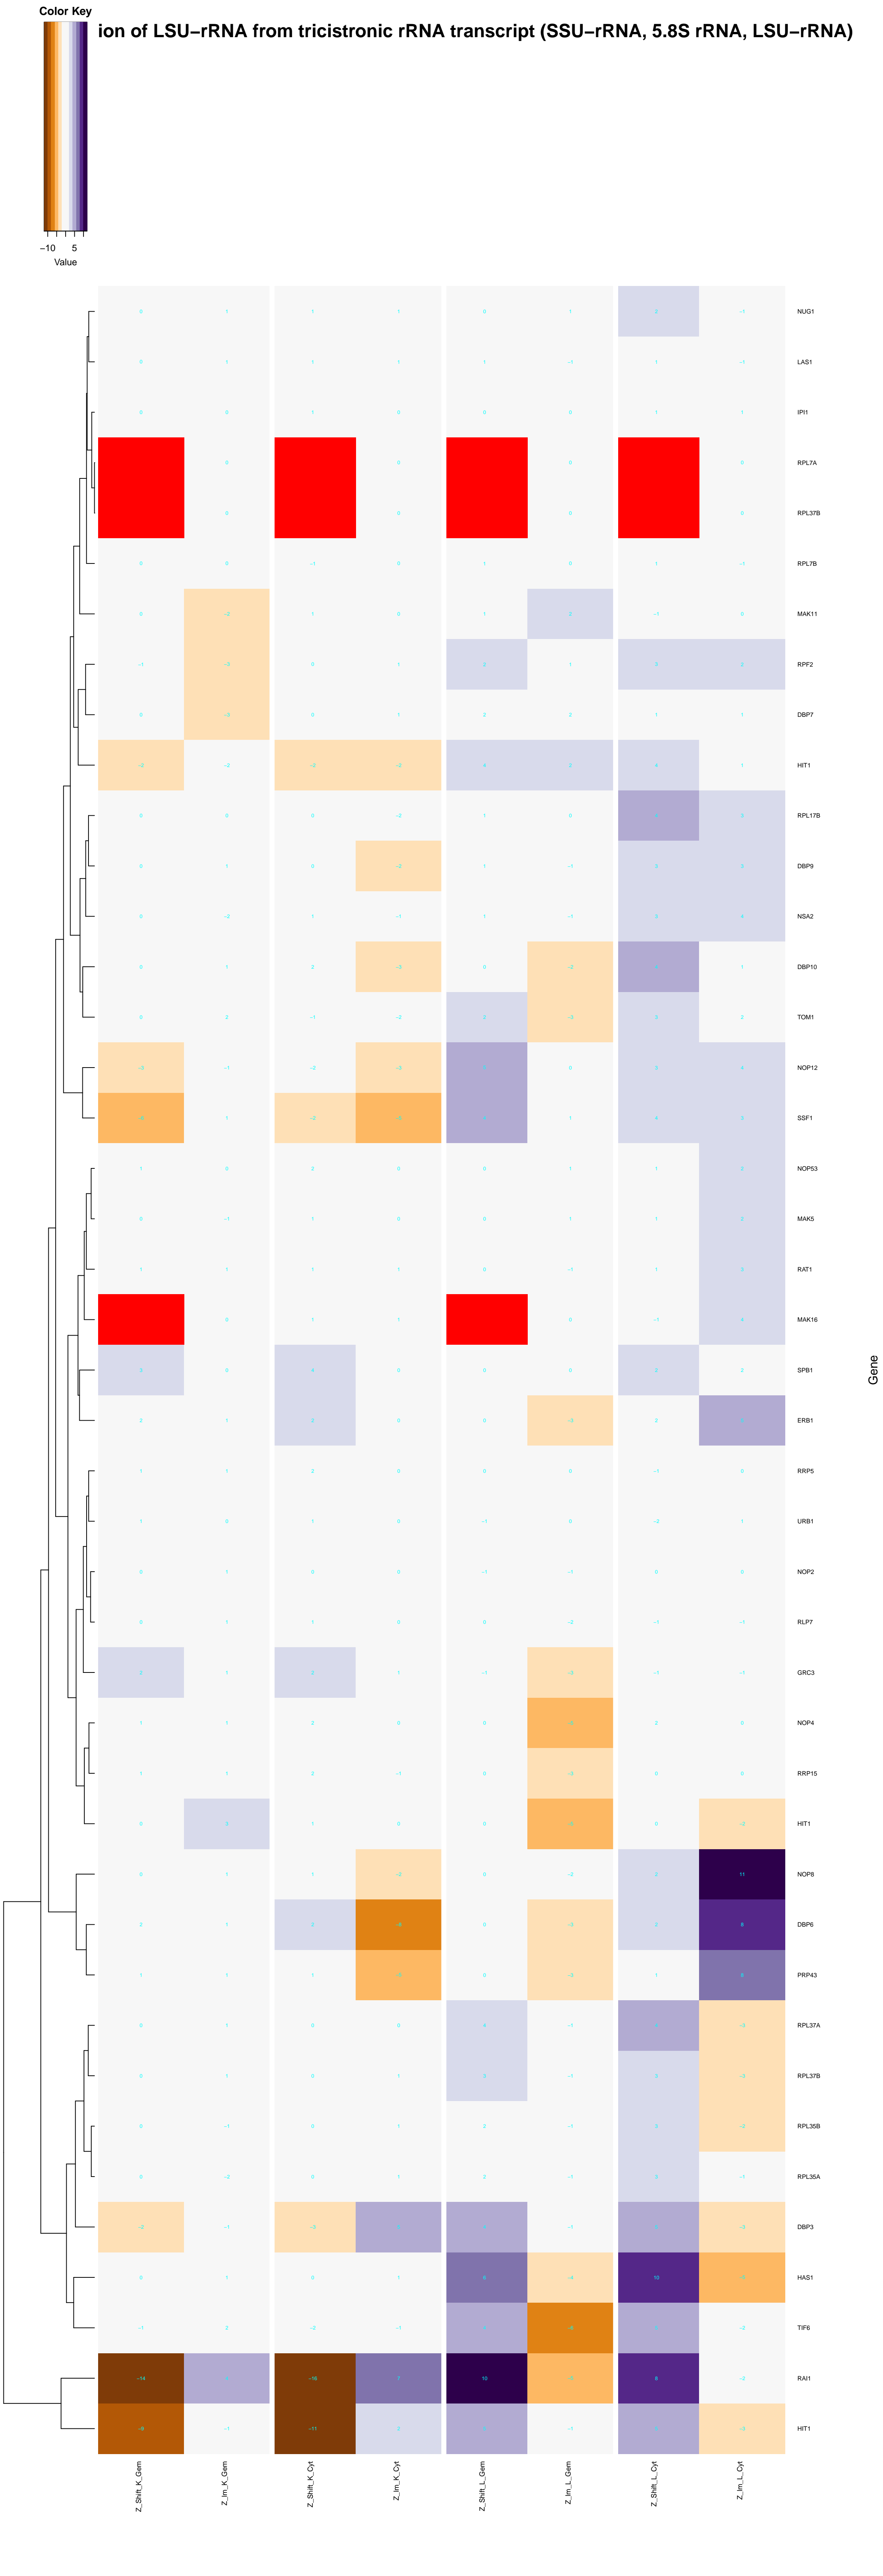

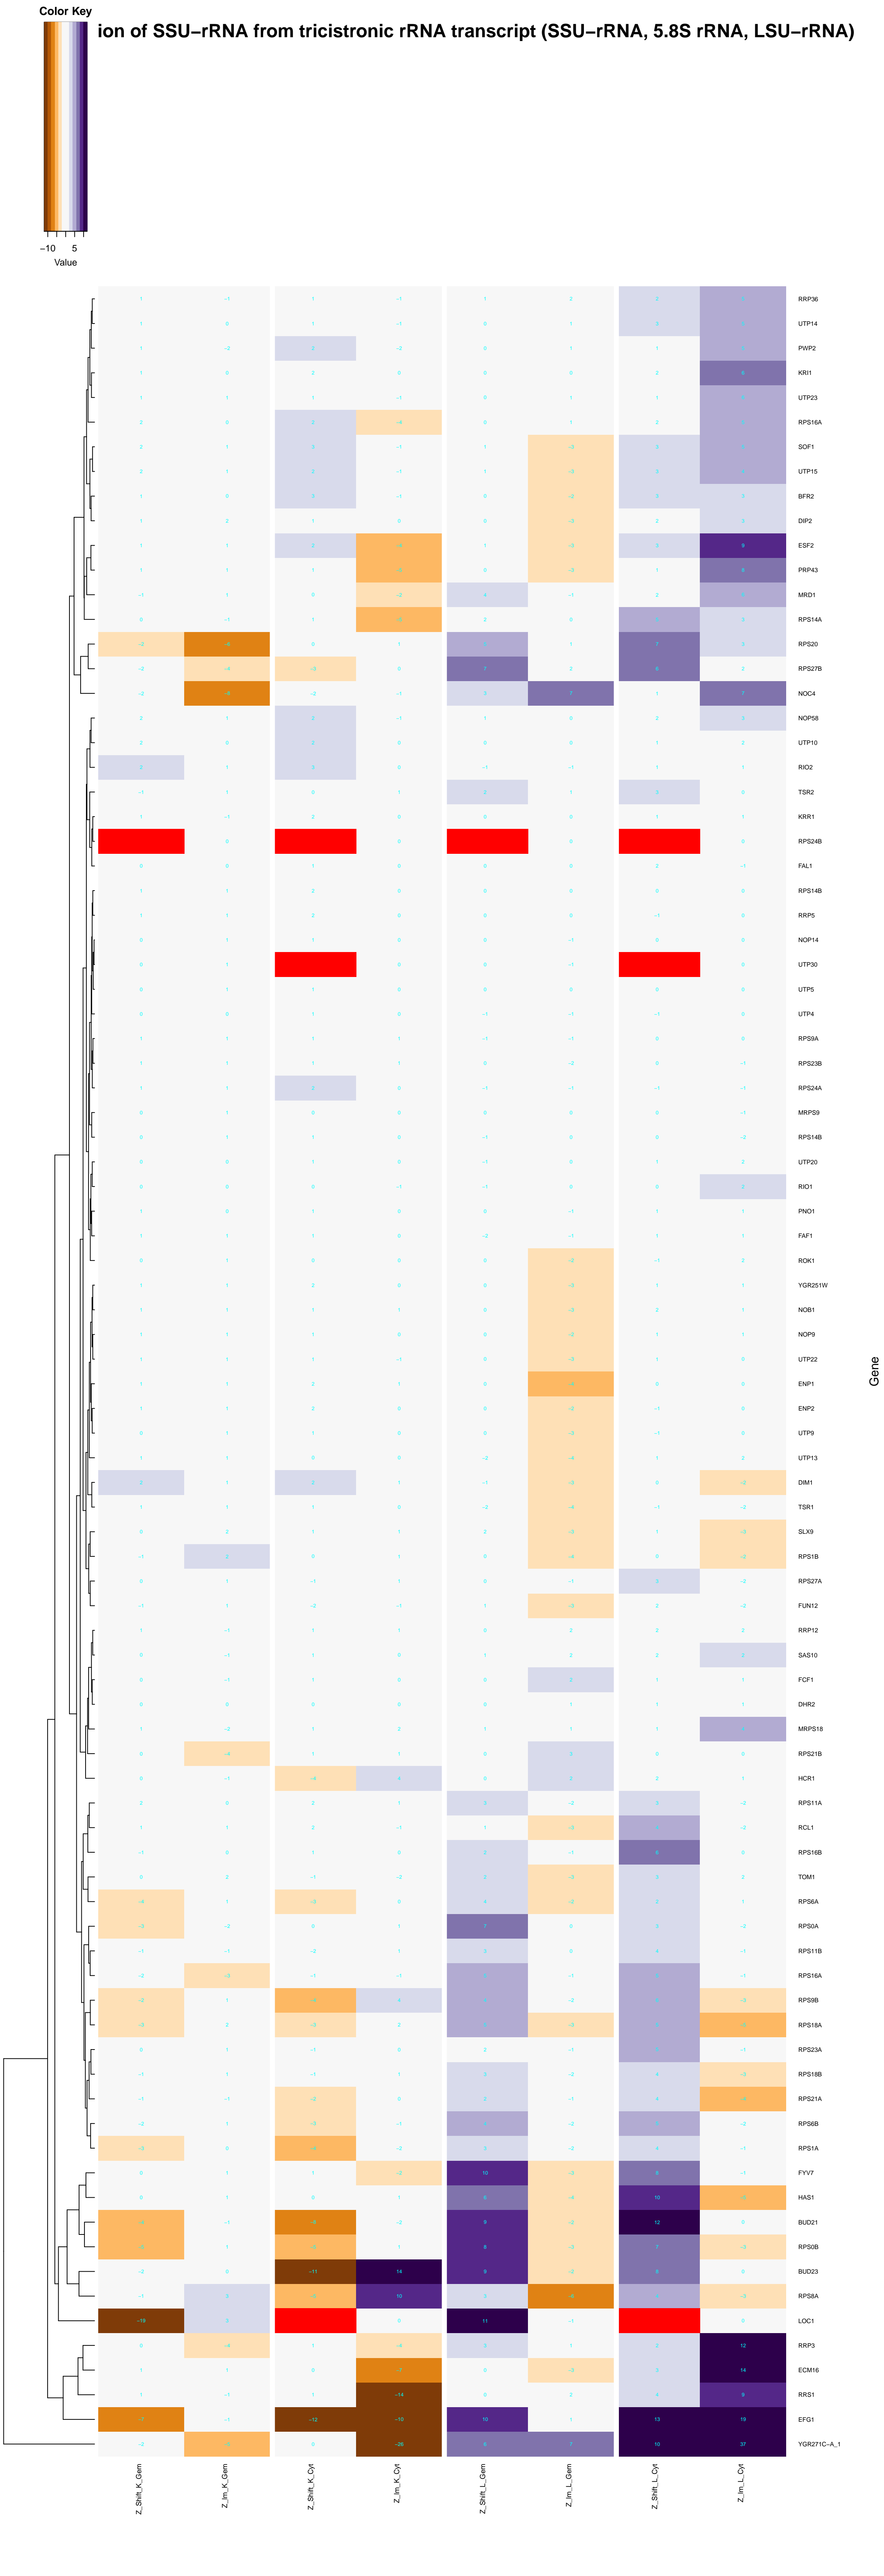

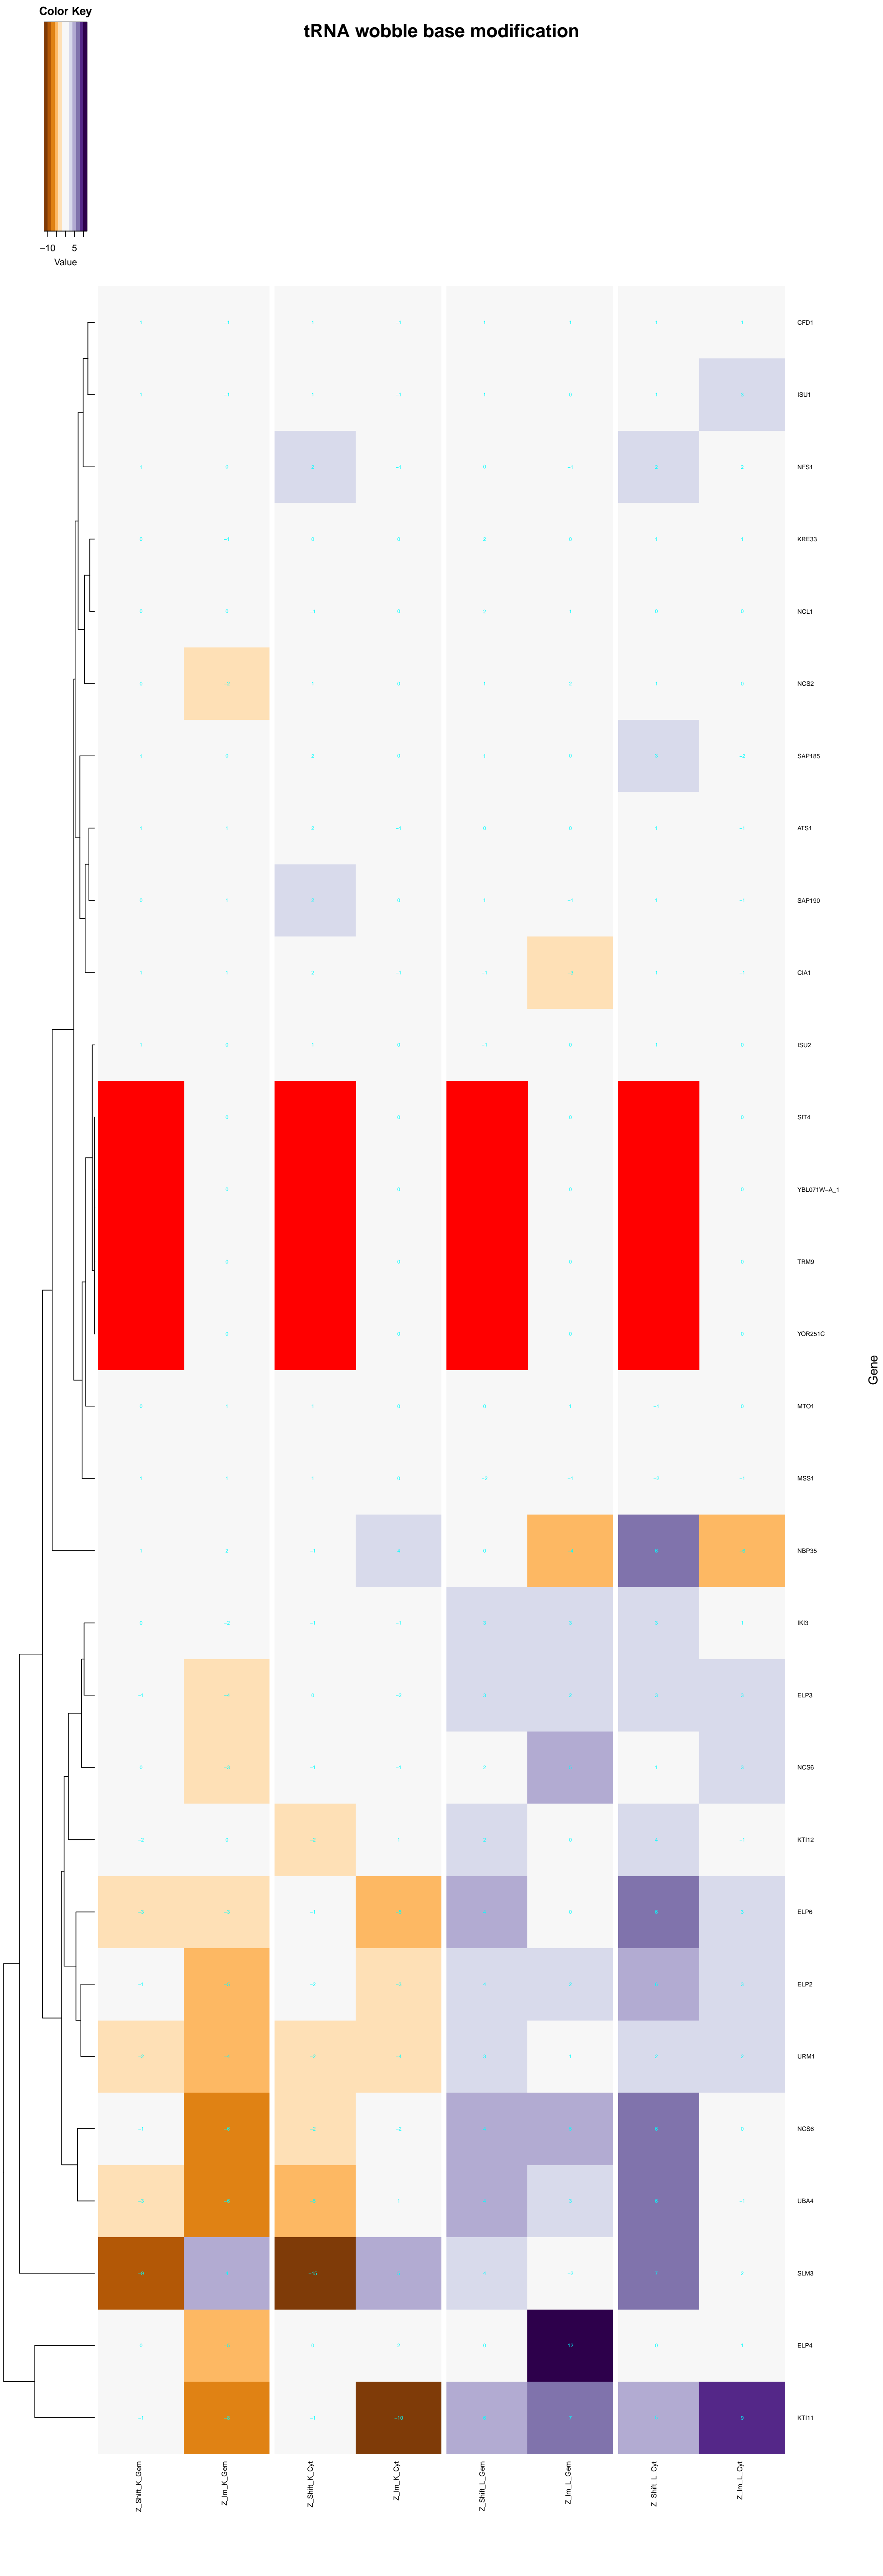

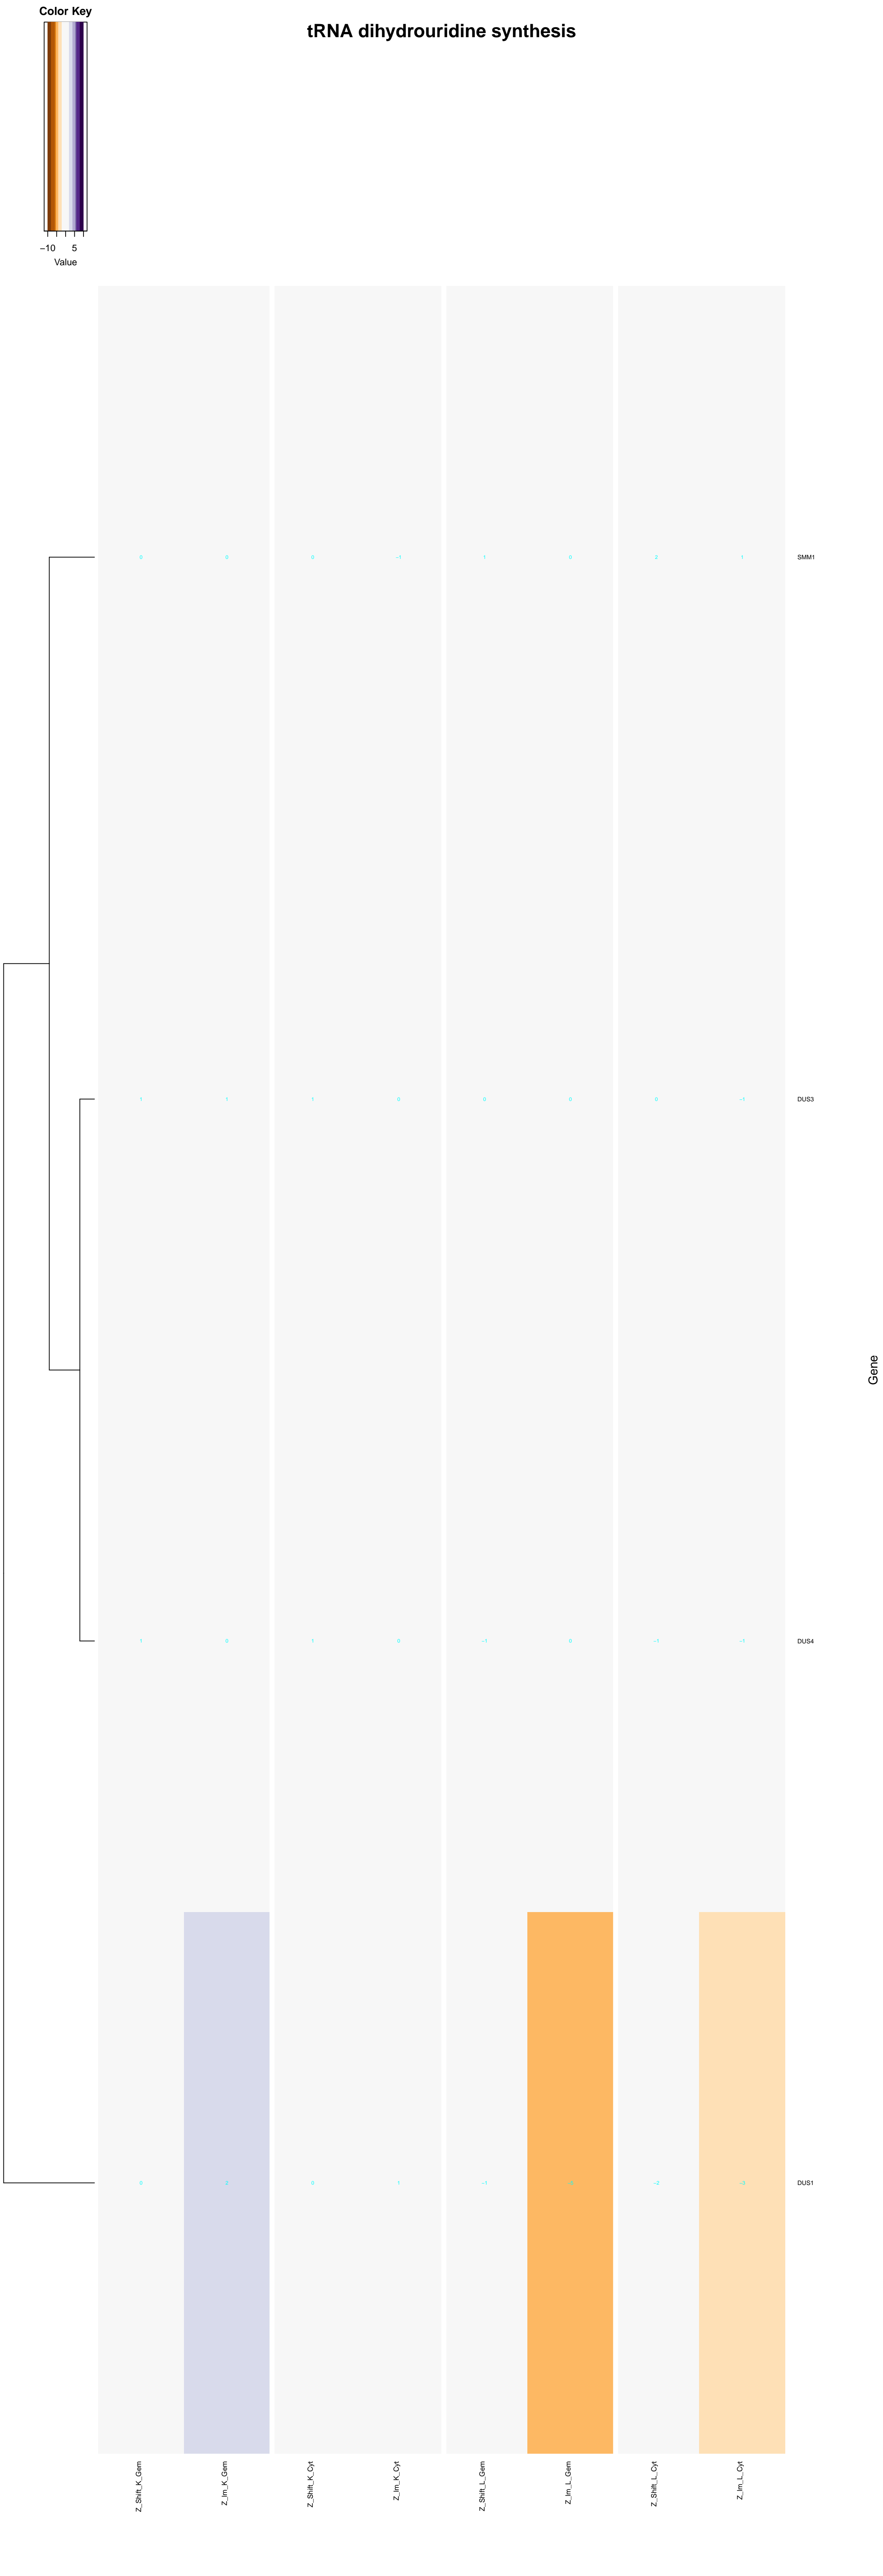

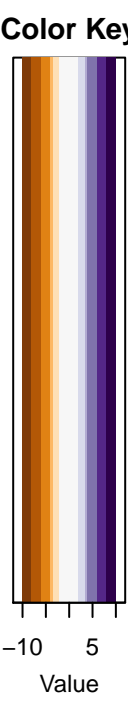

tRNA threonylcarbamoyladenine modification

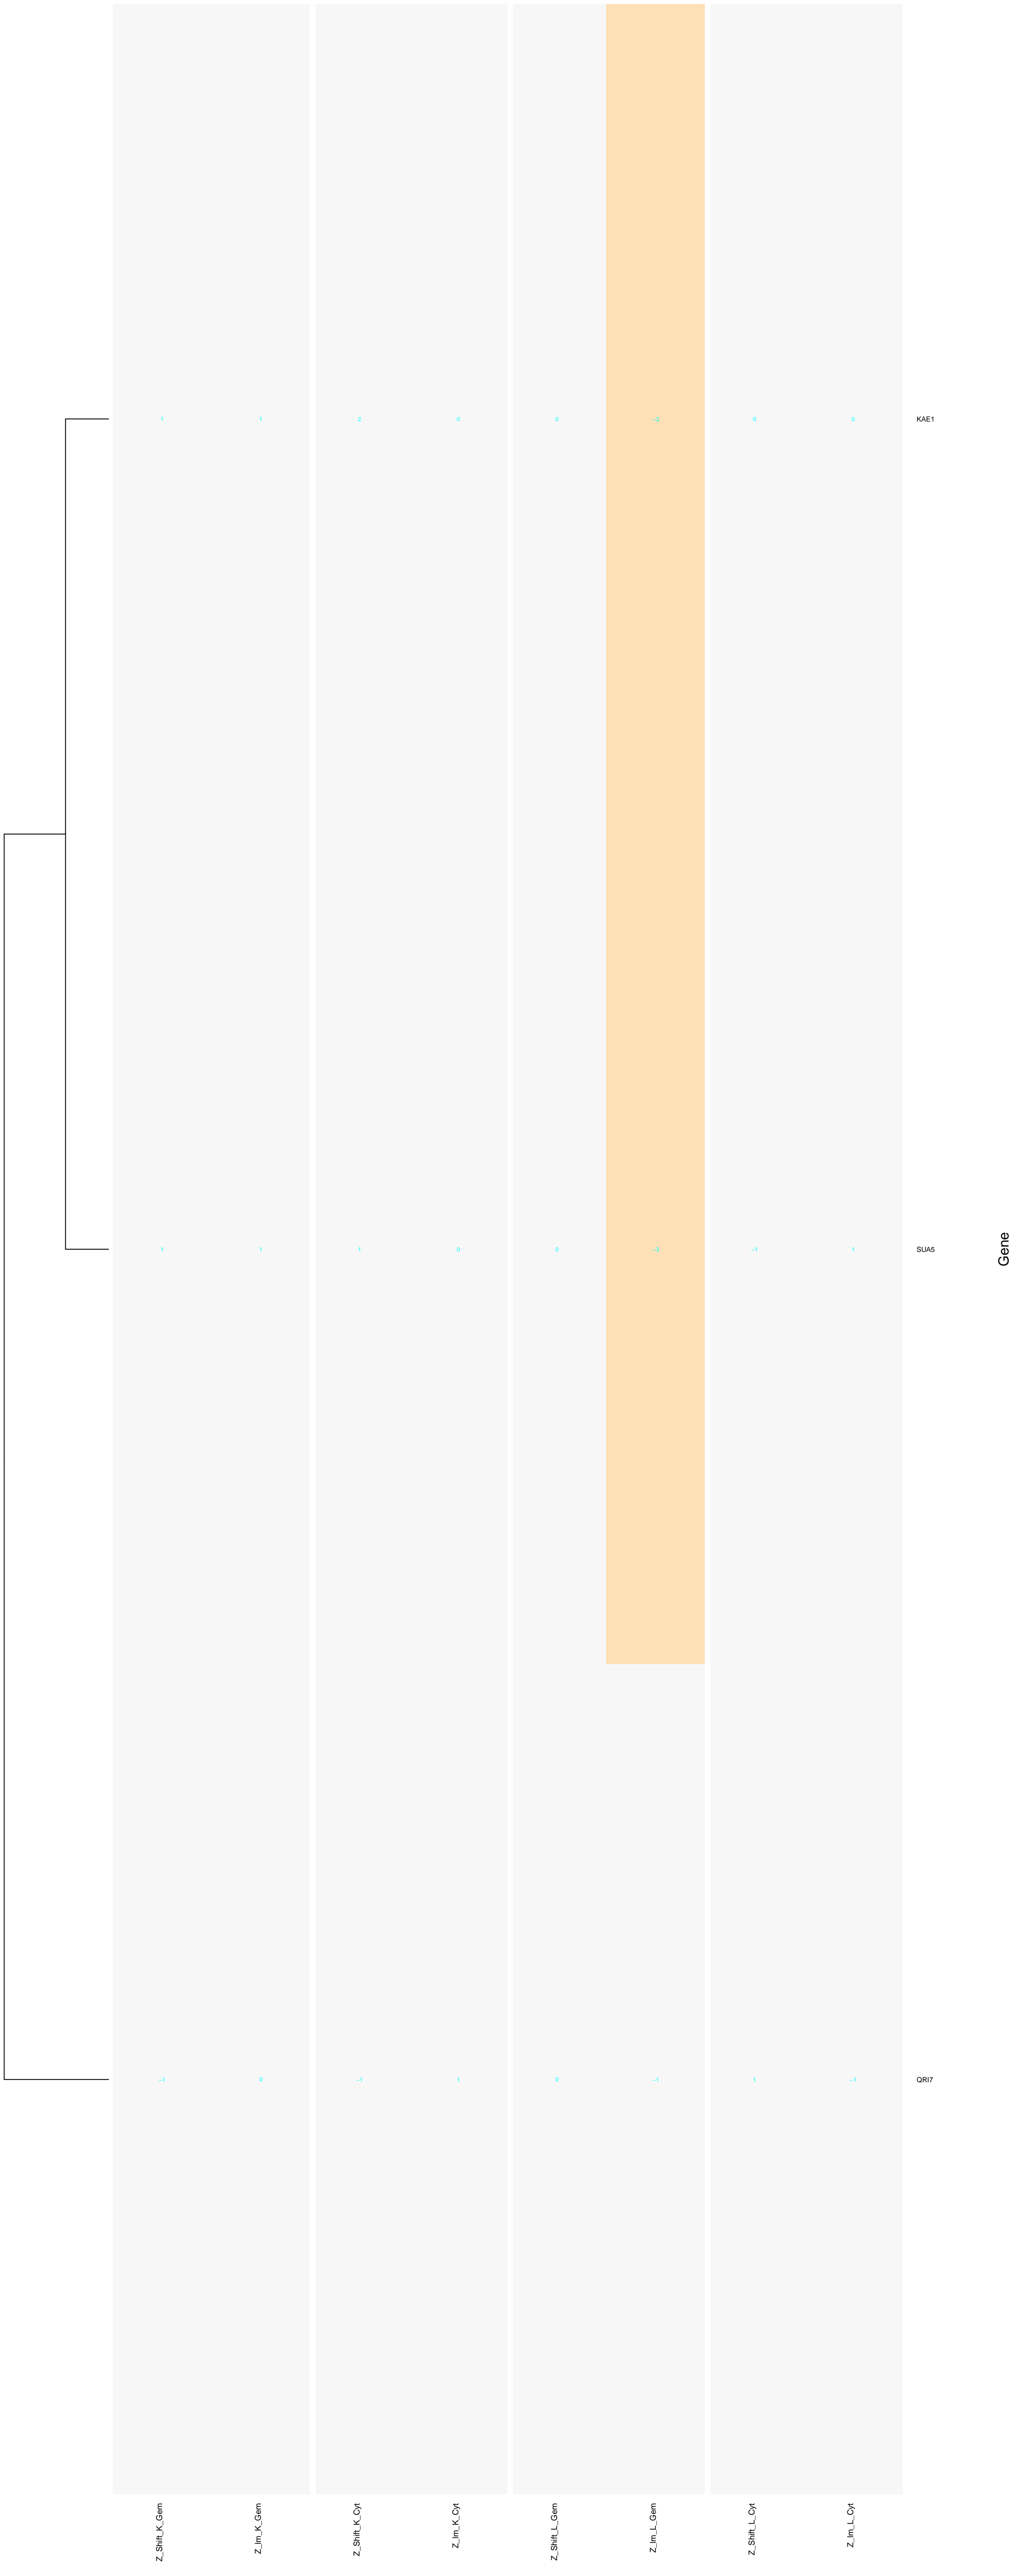

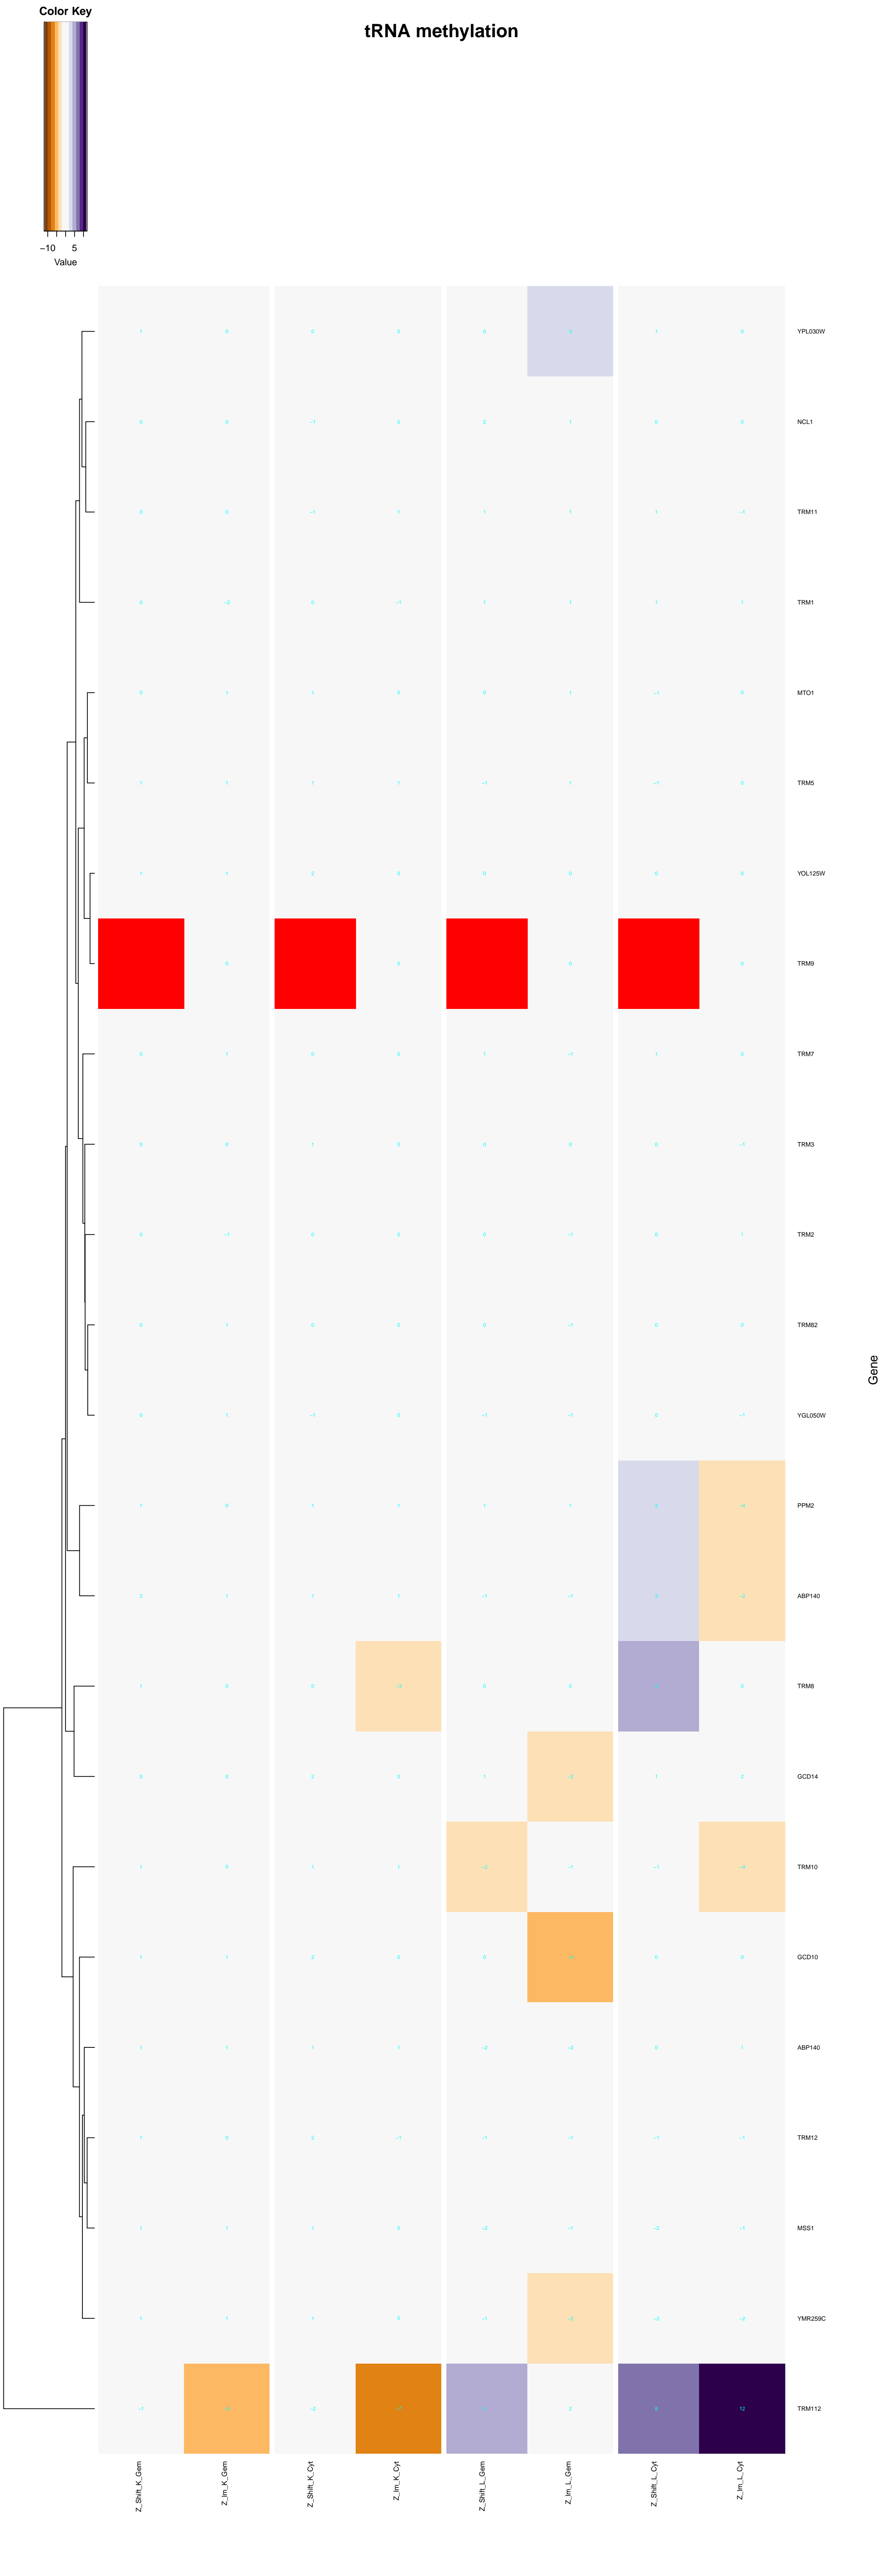

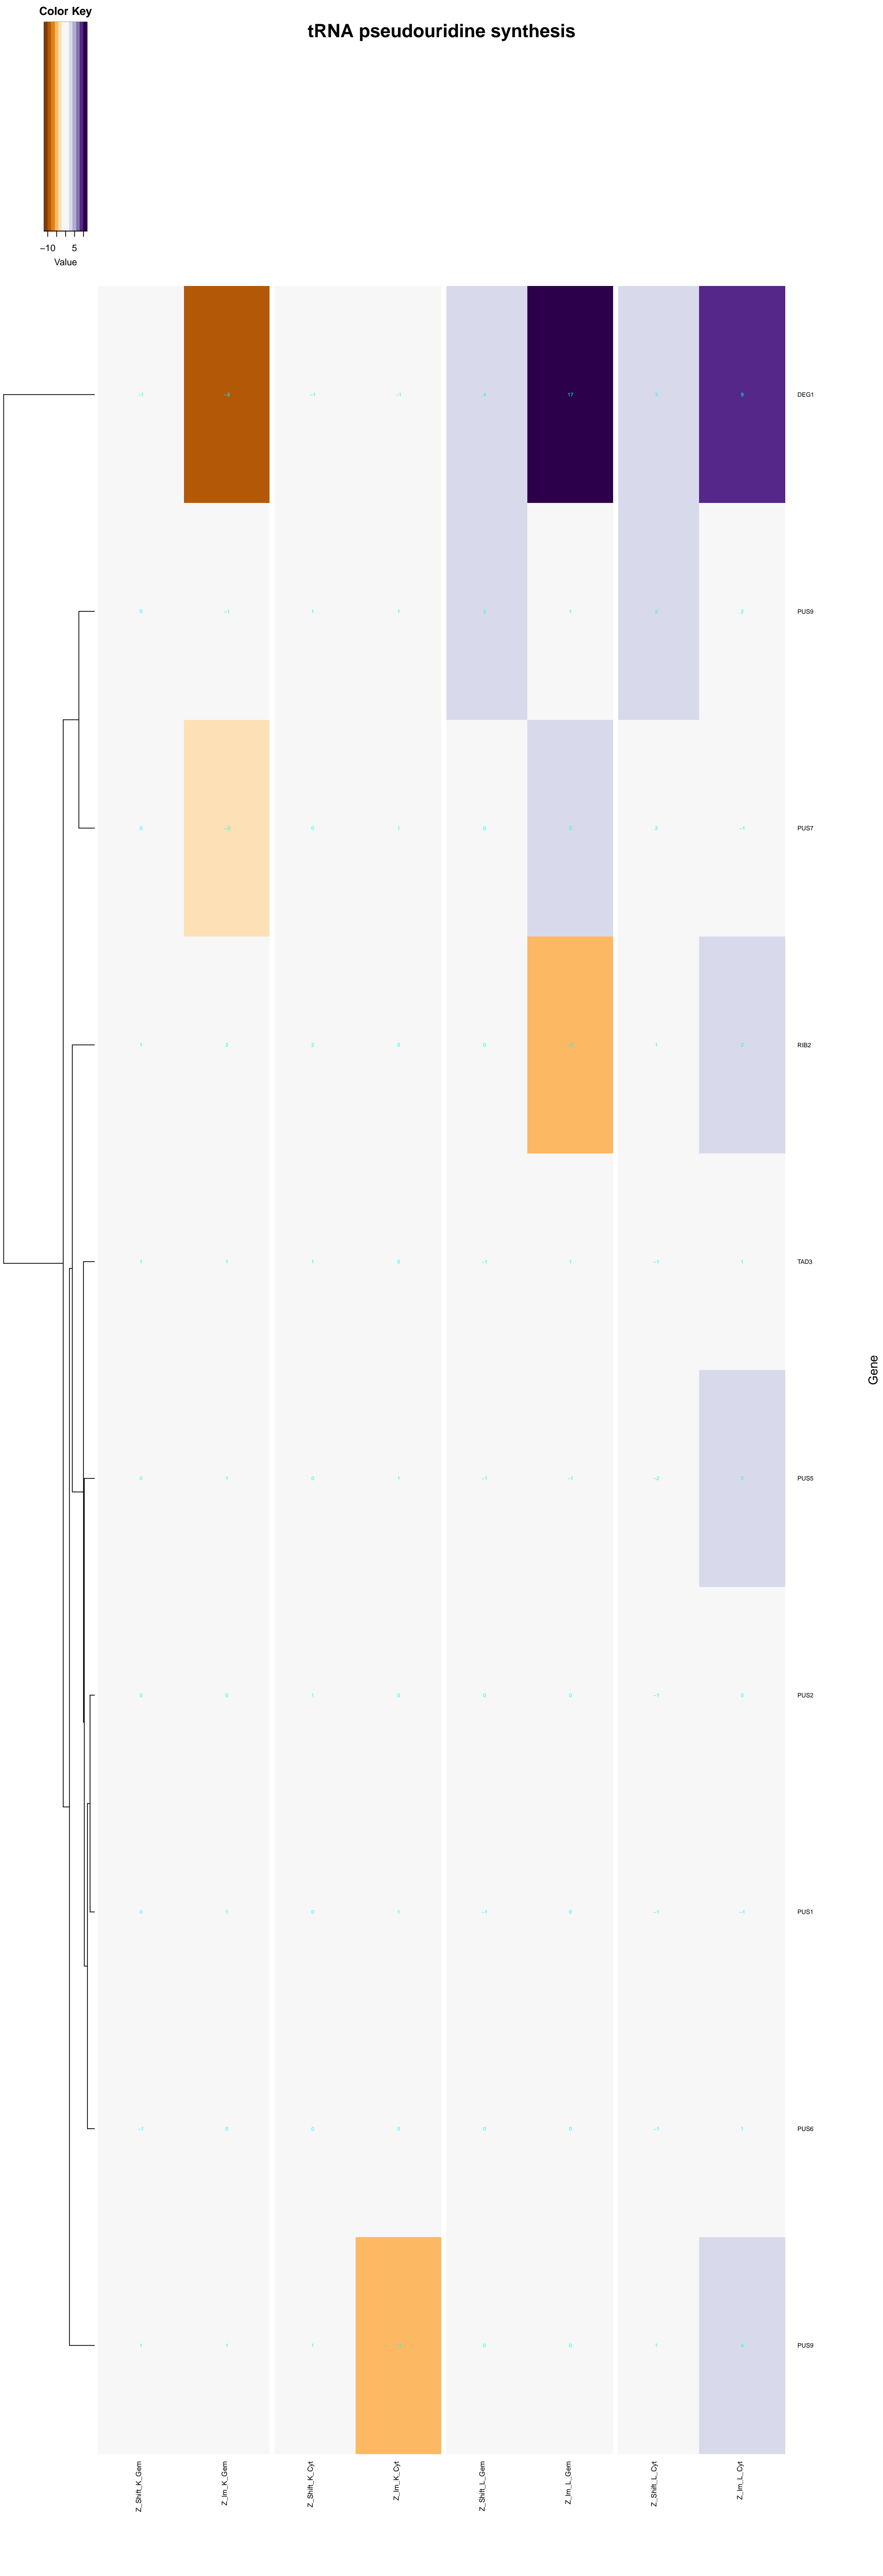

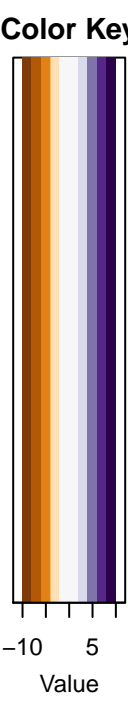

wybutosine biosynthetic process

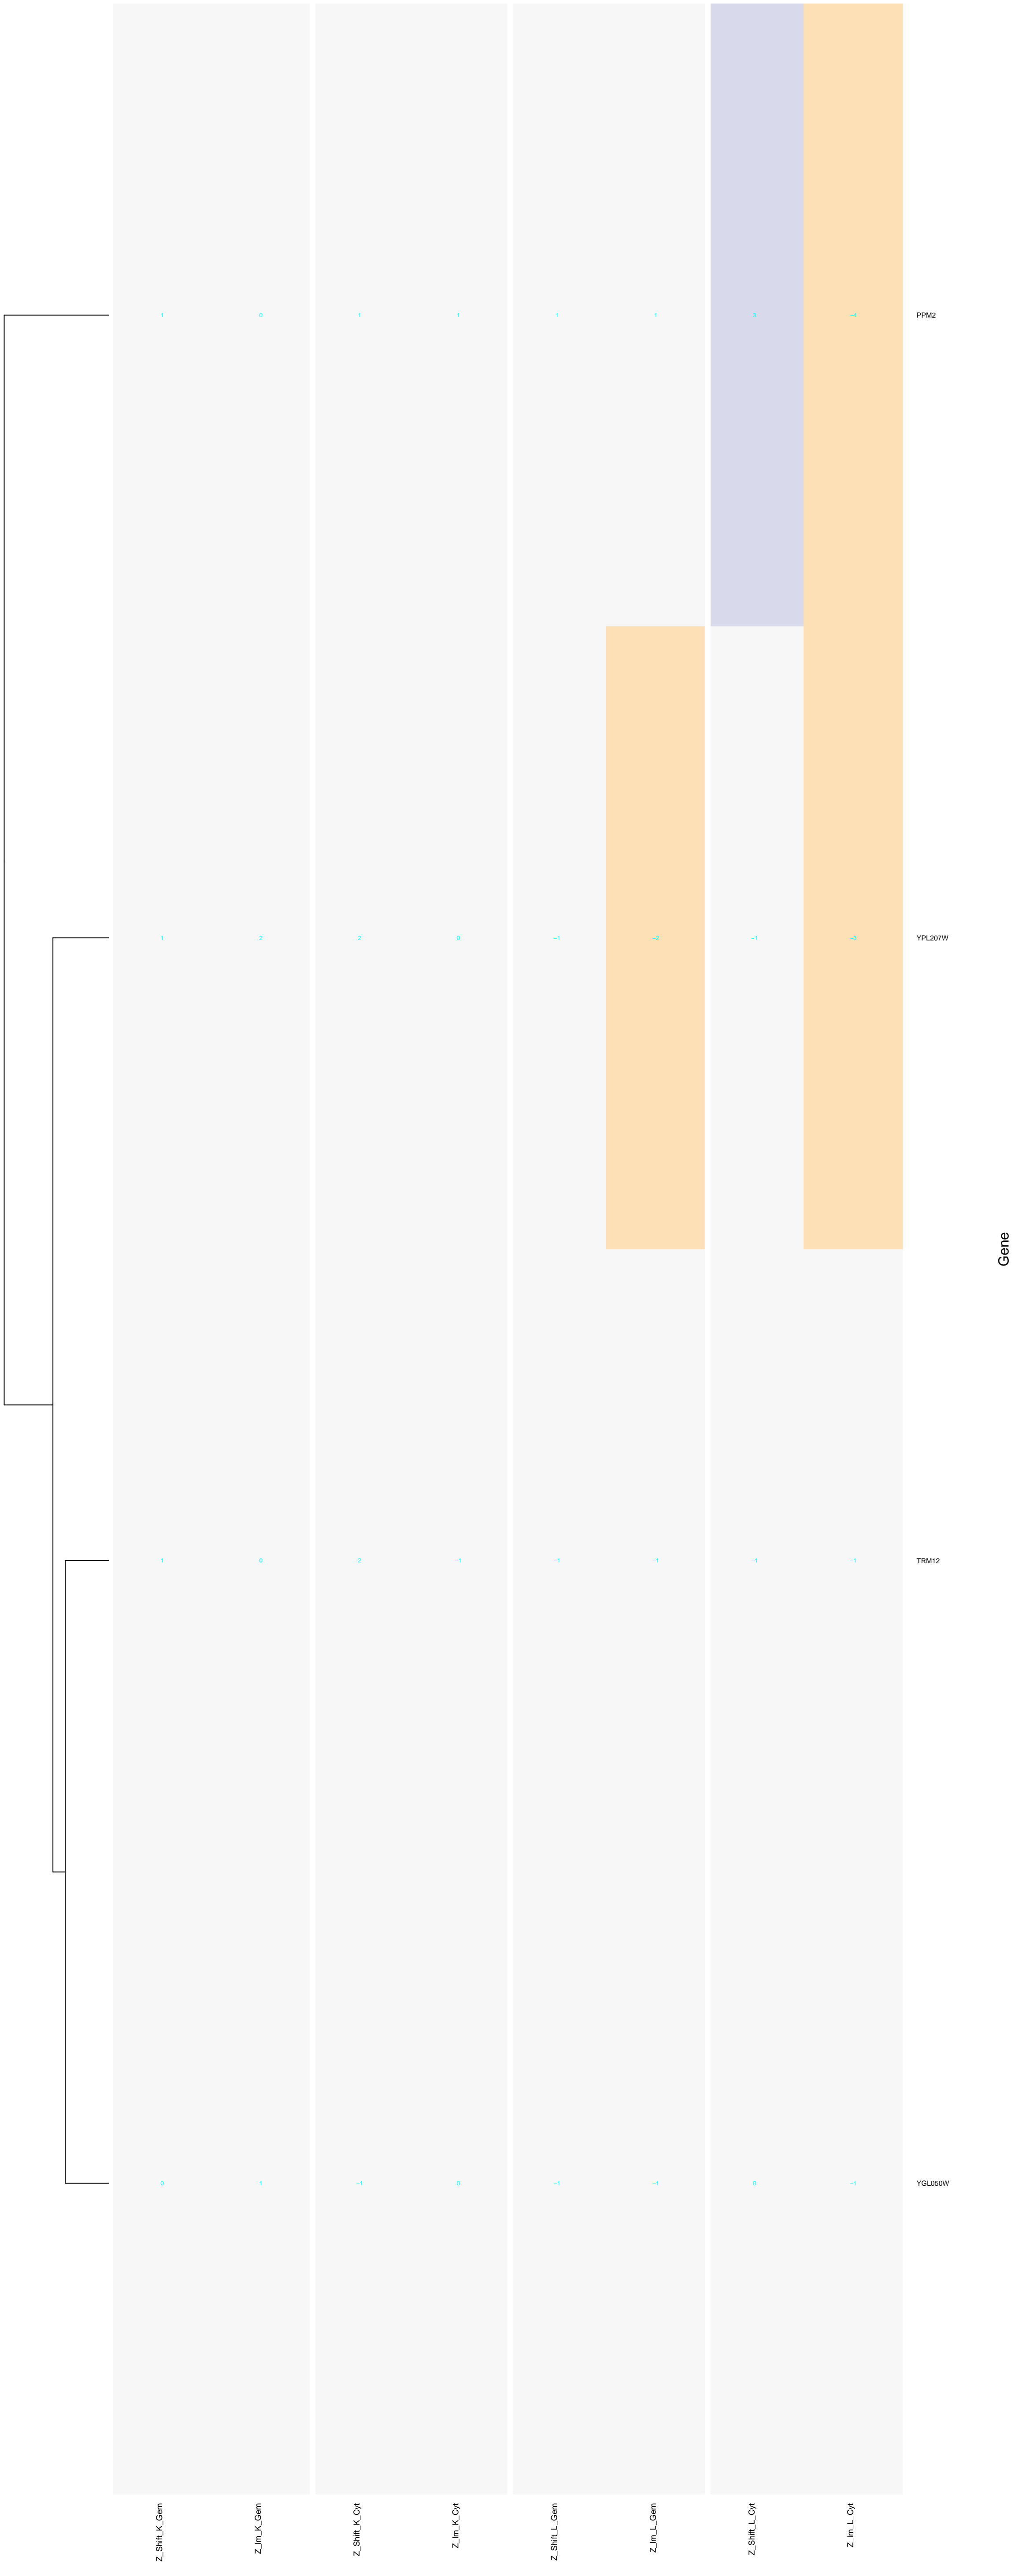

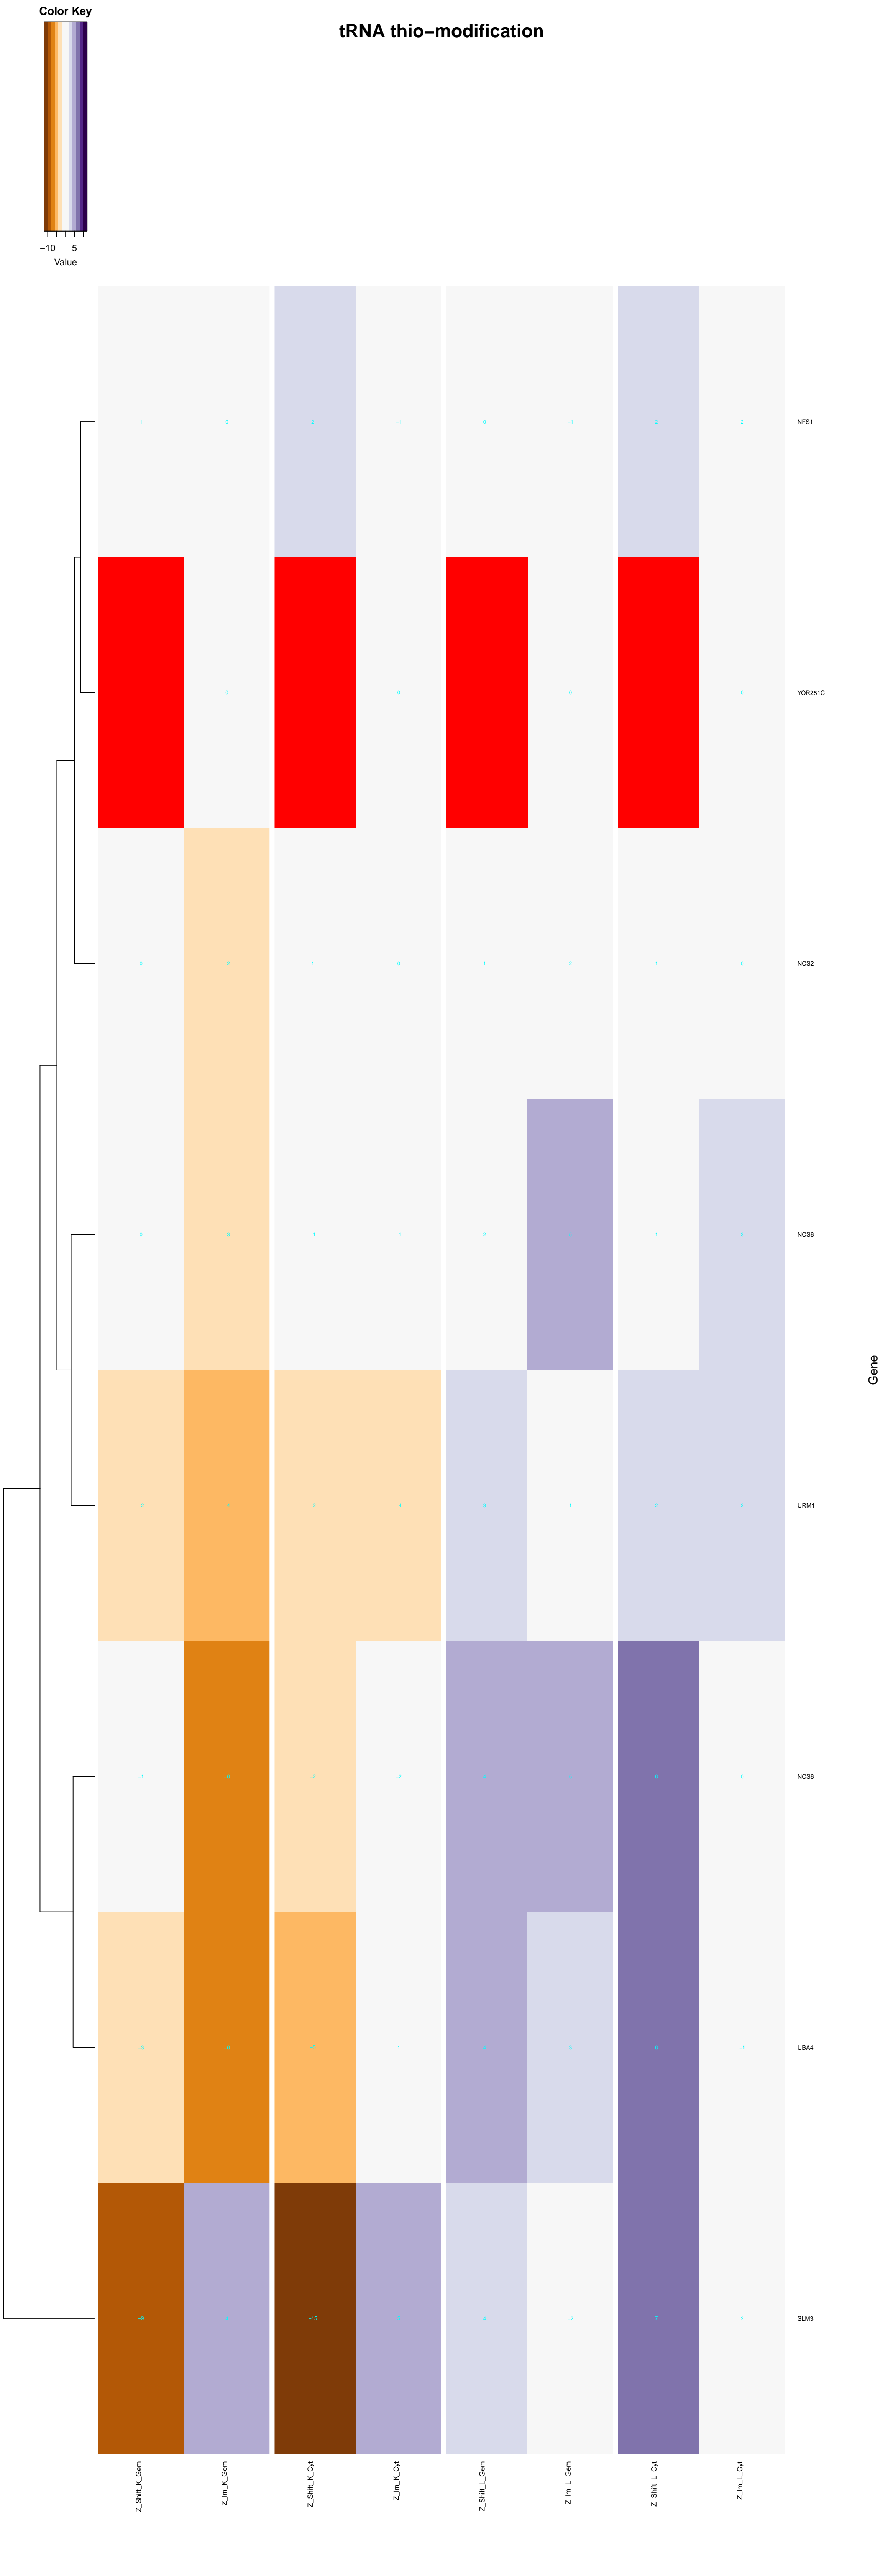

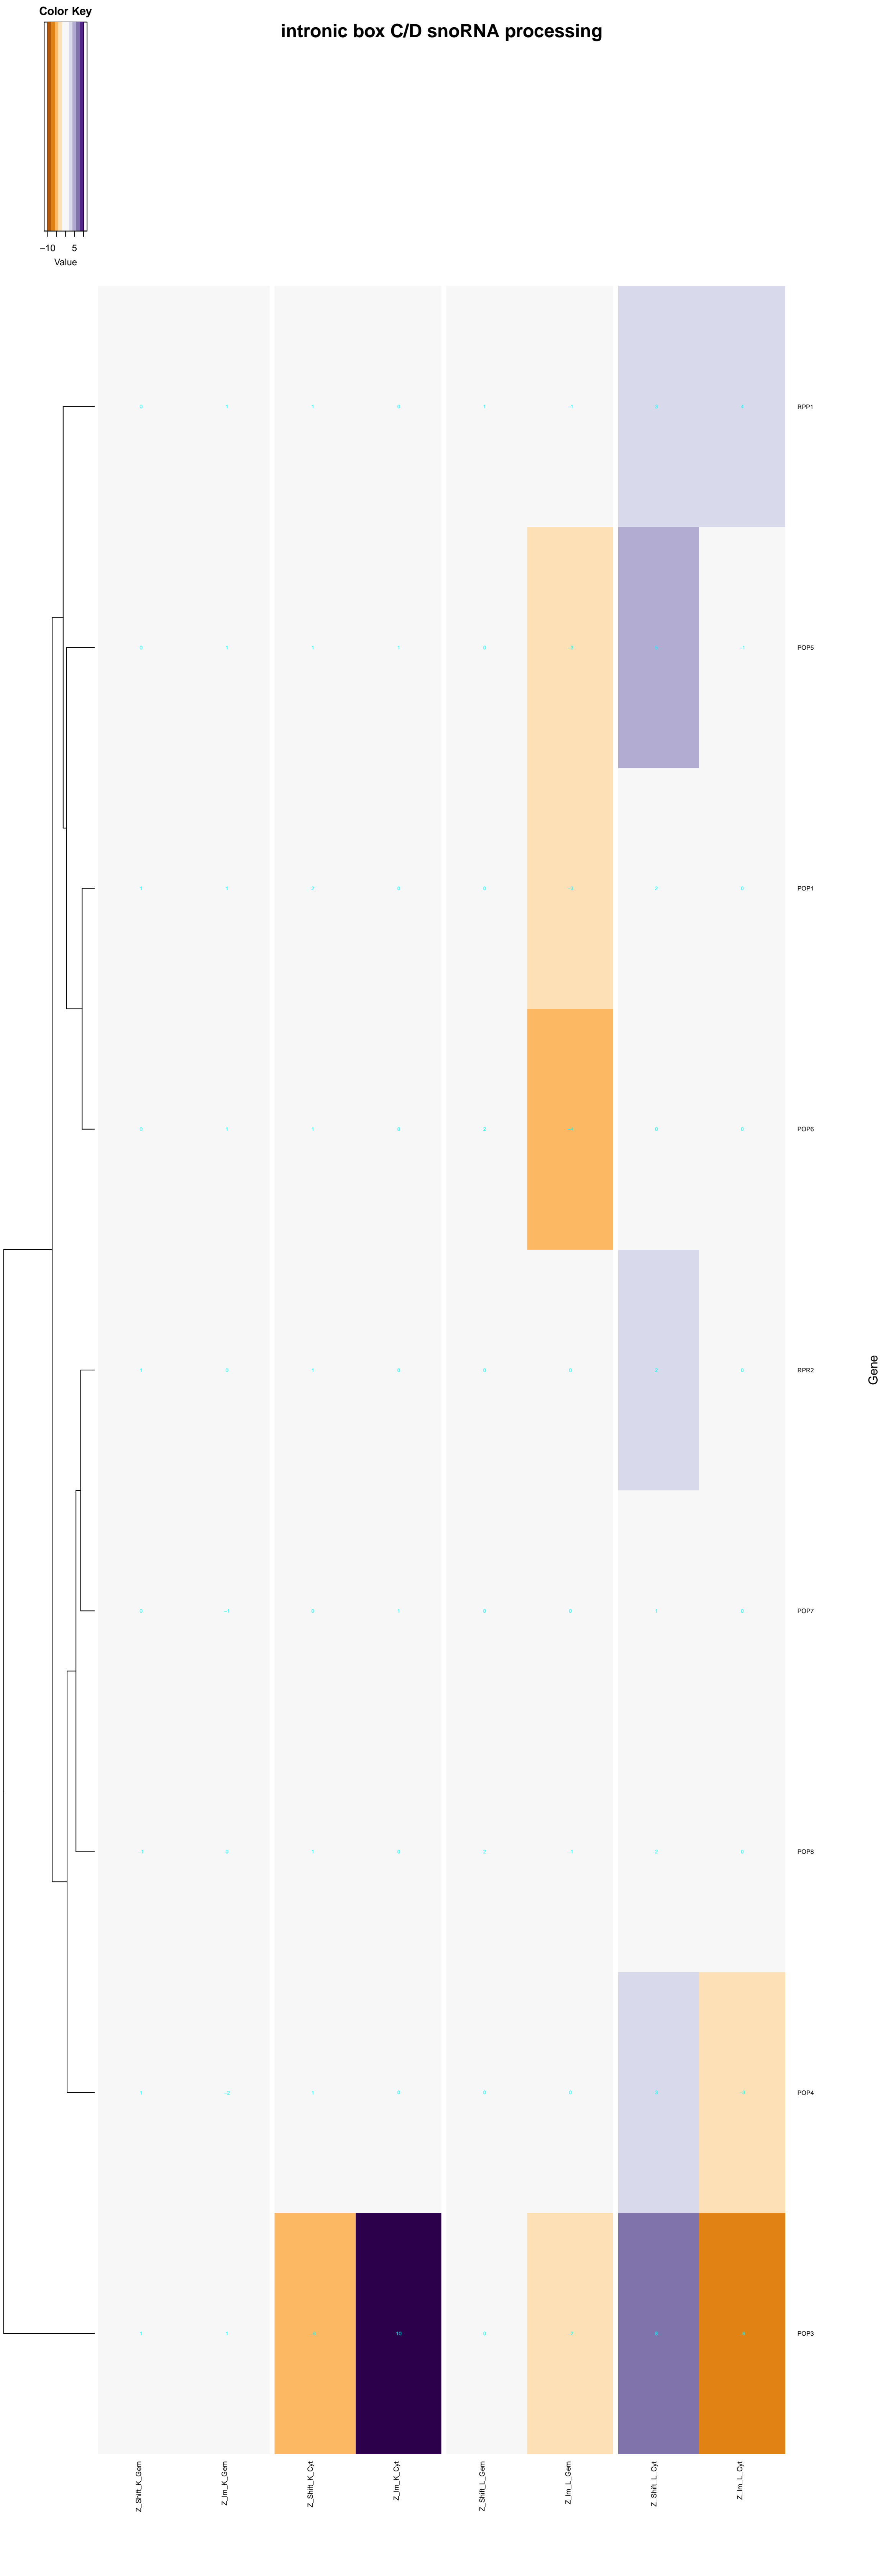



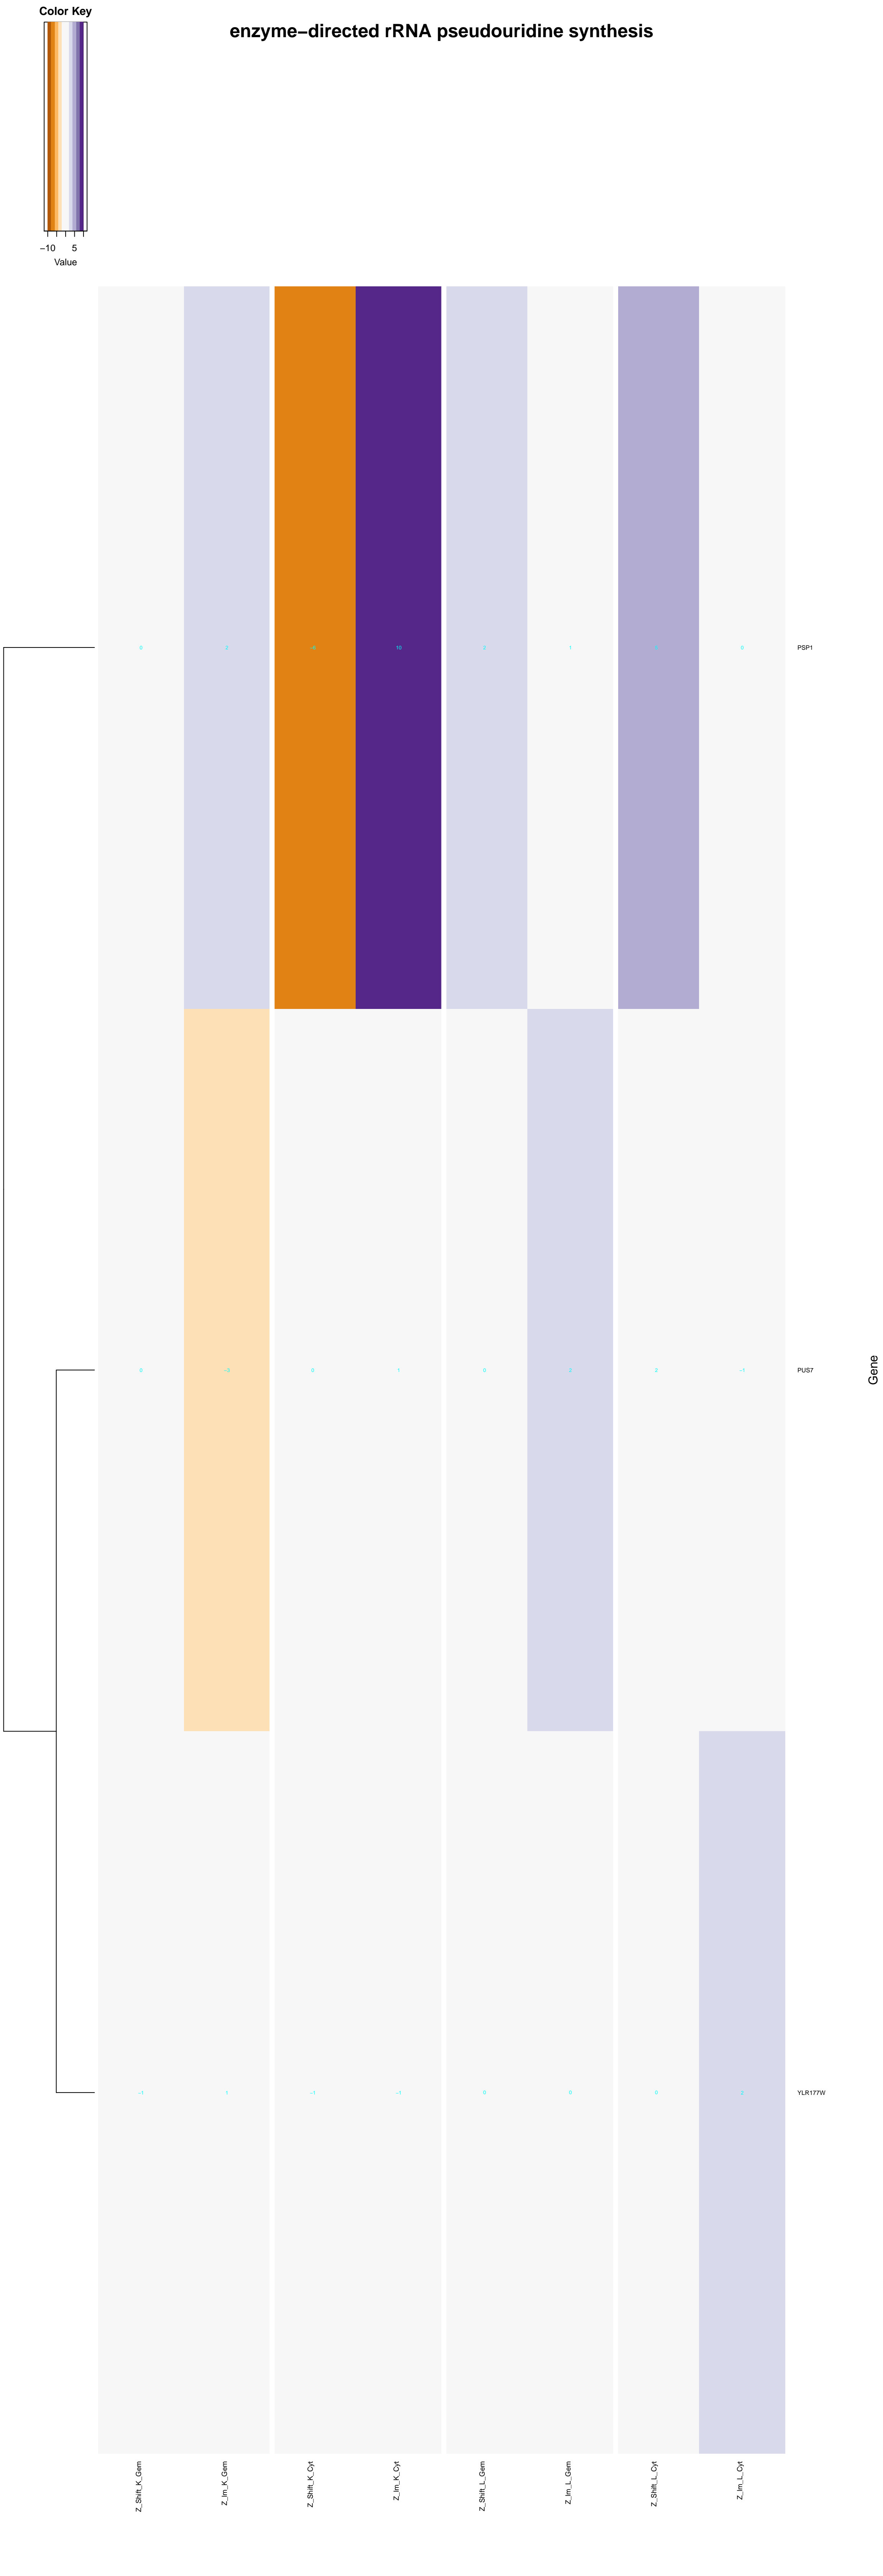

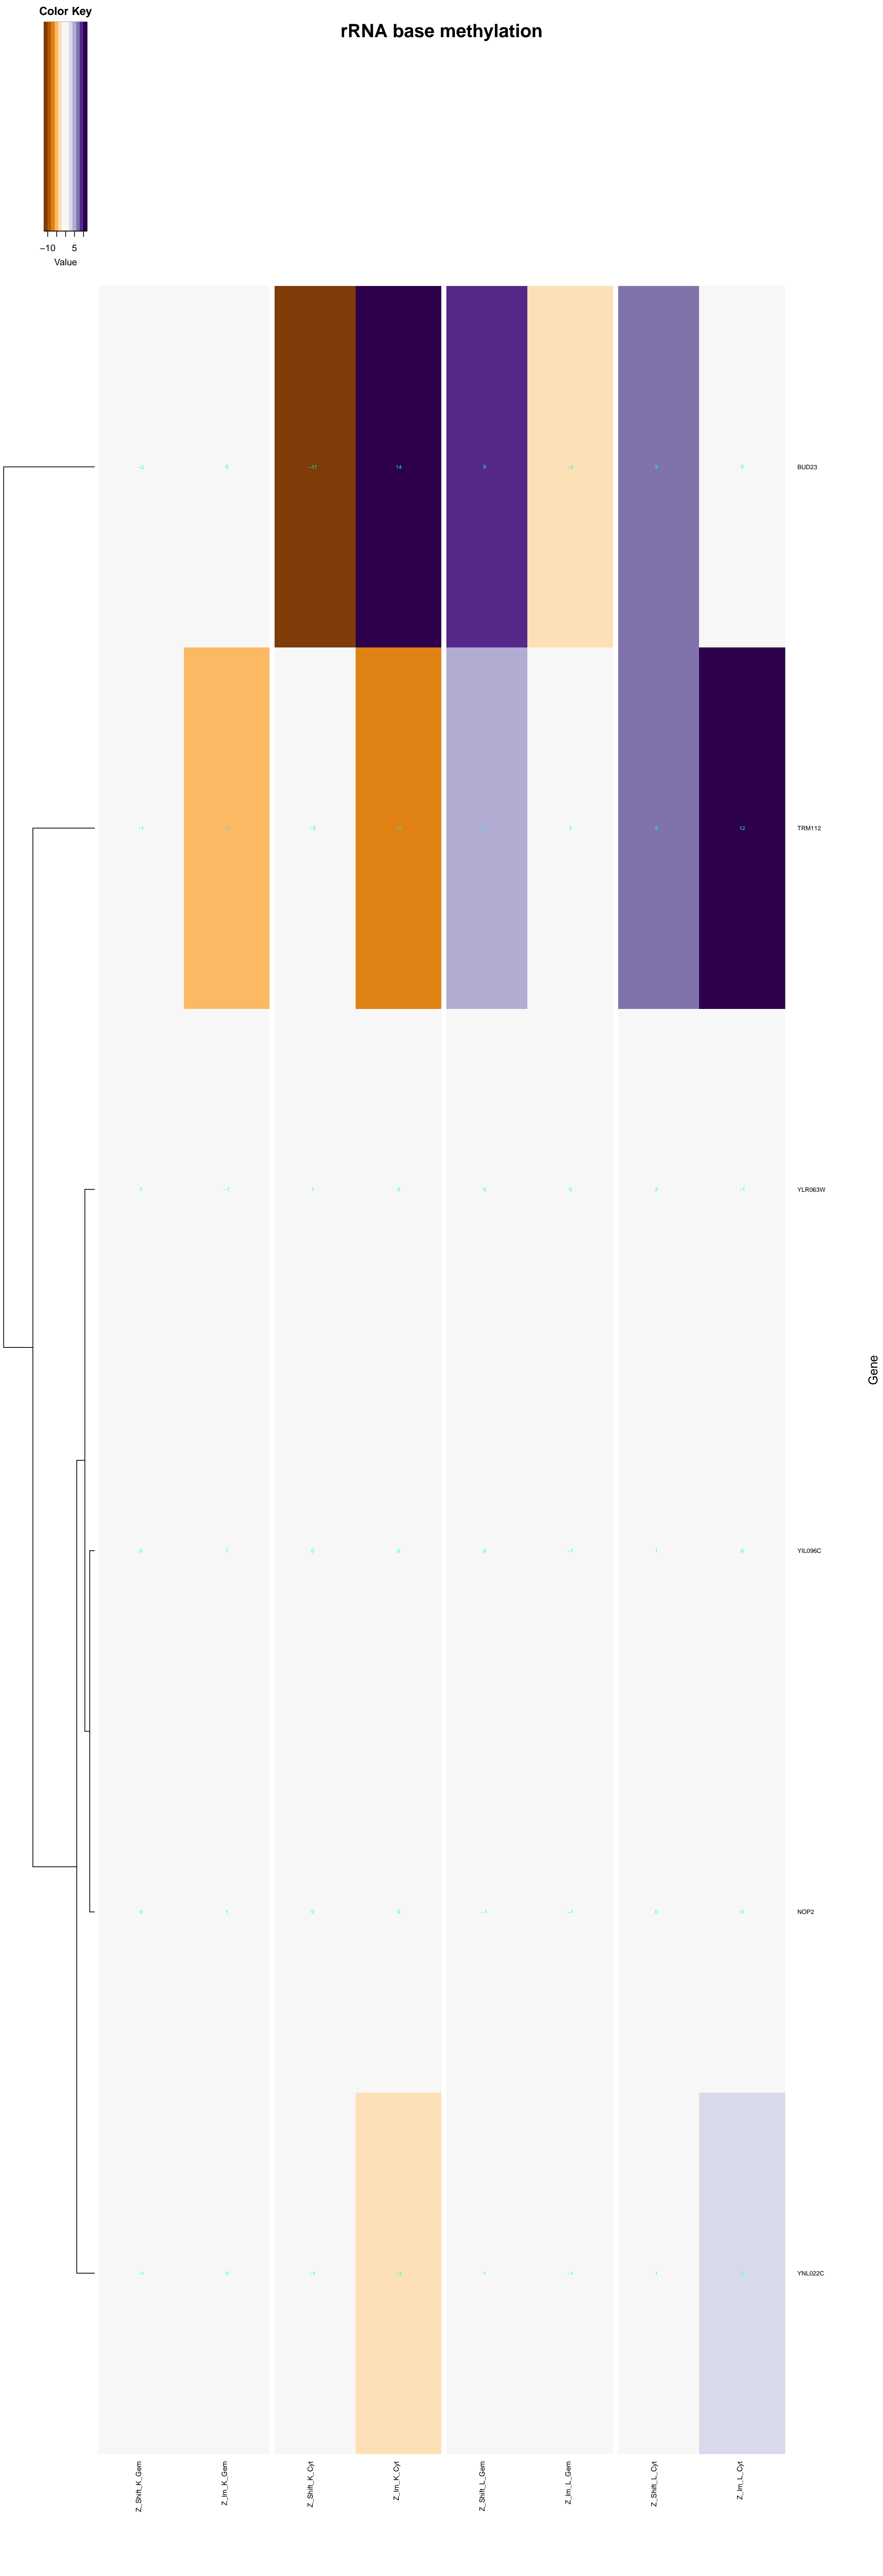

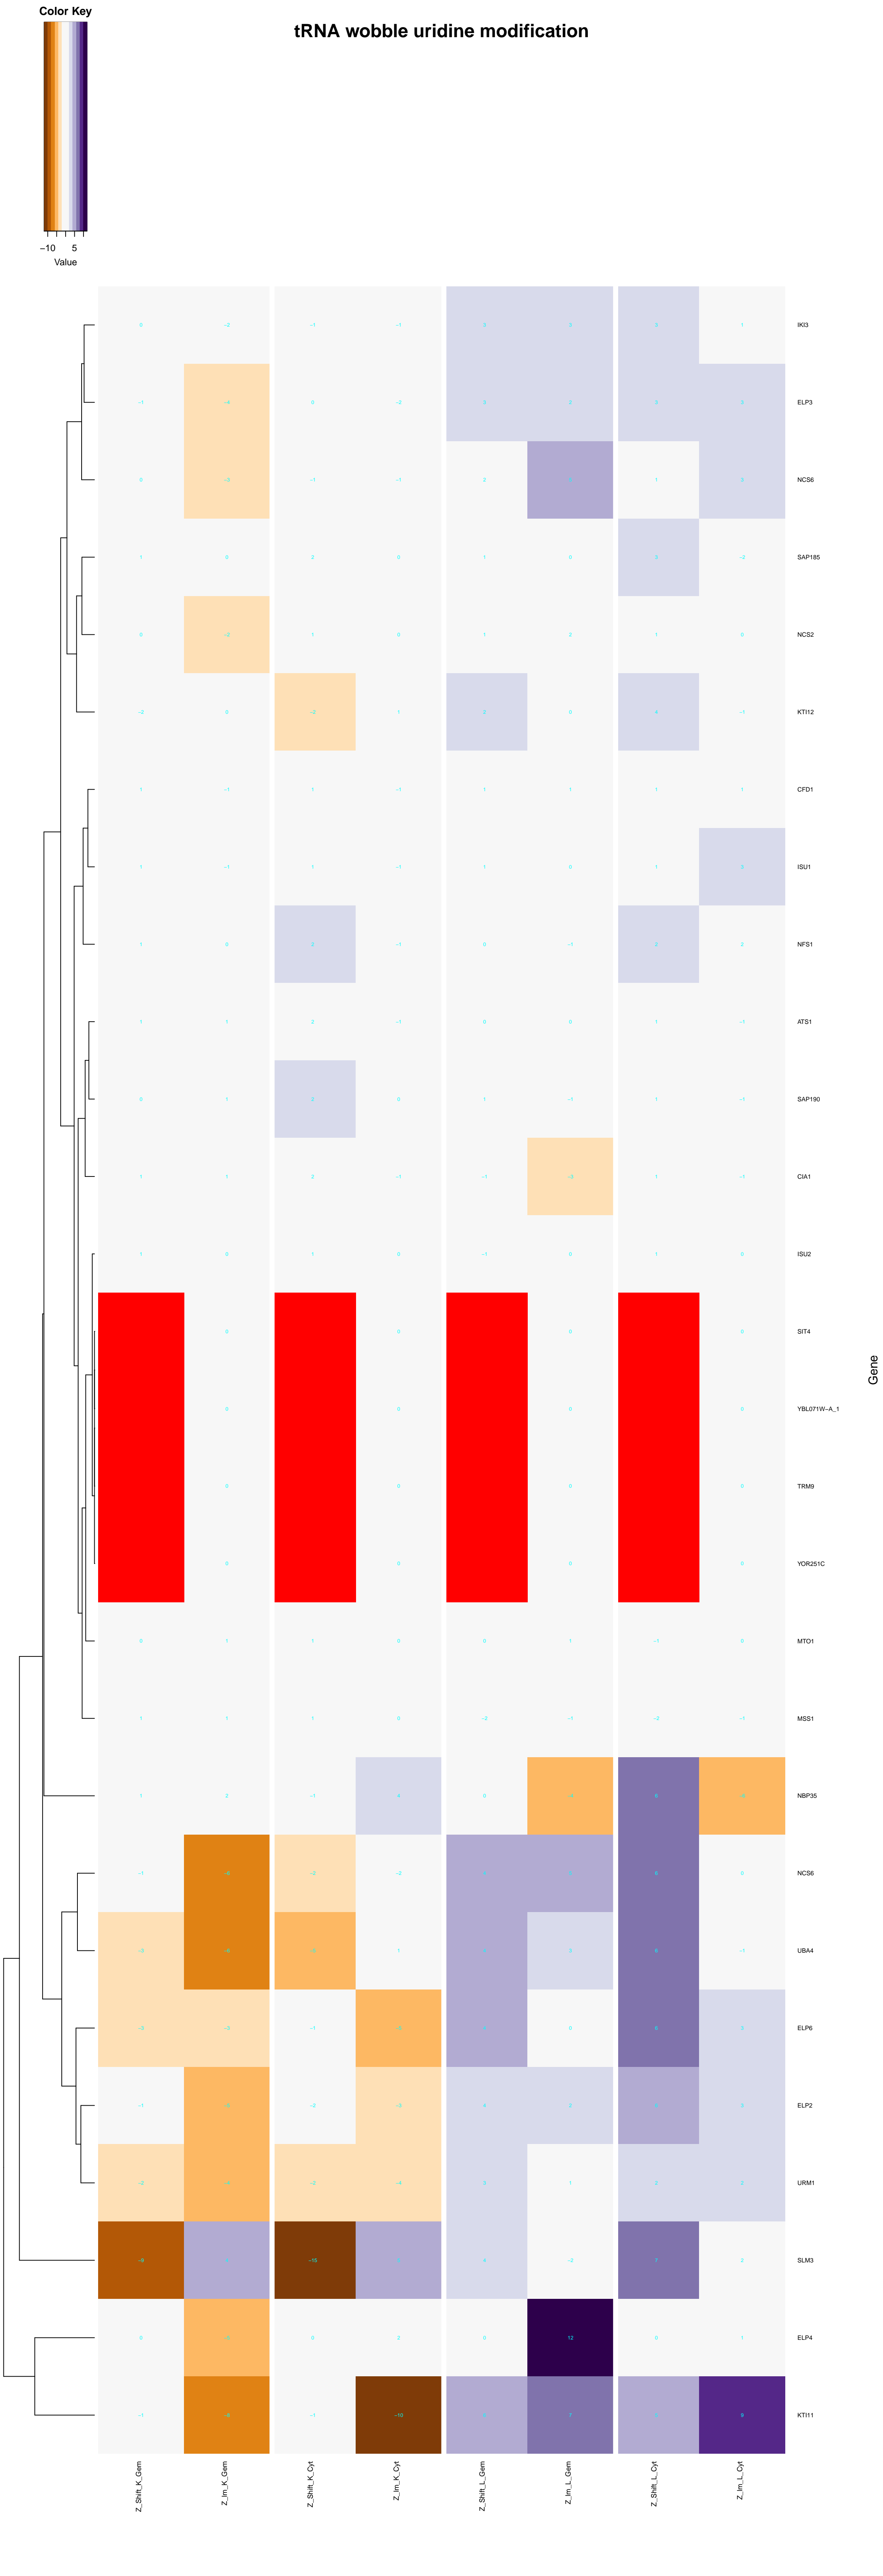



tRNA wobble position uridine thiolation

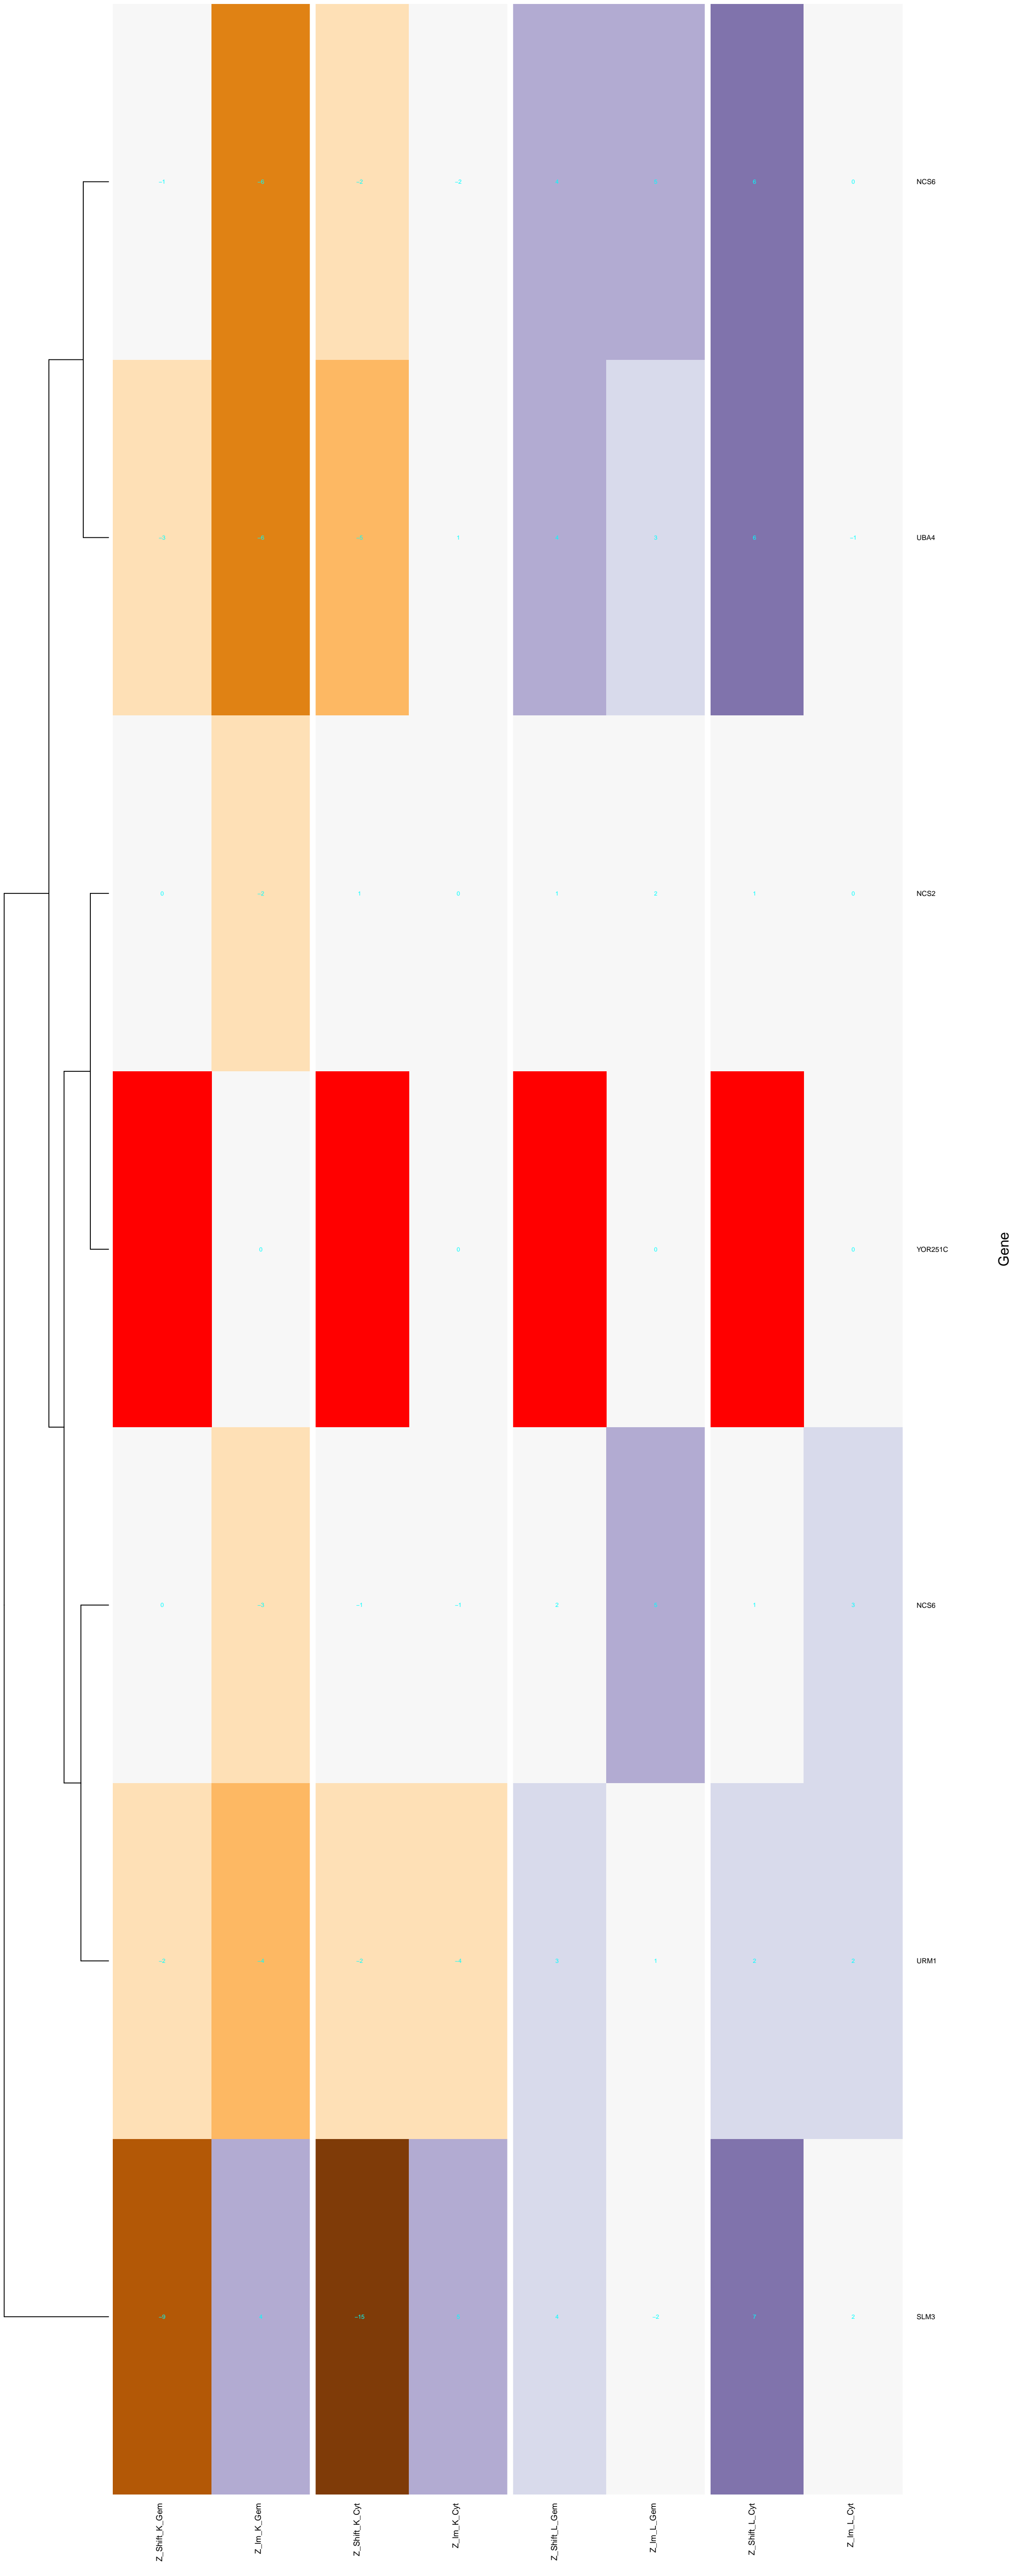



mitochondrial tRNA wobble uridine modification



Supplement: s1 [file s1]
