# Supplementary material for: A Humanized Yeast Phenomic Model of Deoxycytidine Kinase to Predict Genetic Buffering of Nucleoside Analog Cytotoxicity
Source: MDPI journal article supplement (doi:10.3390/genes10100770), 2019-09-30

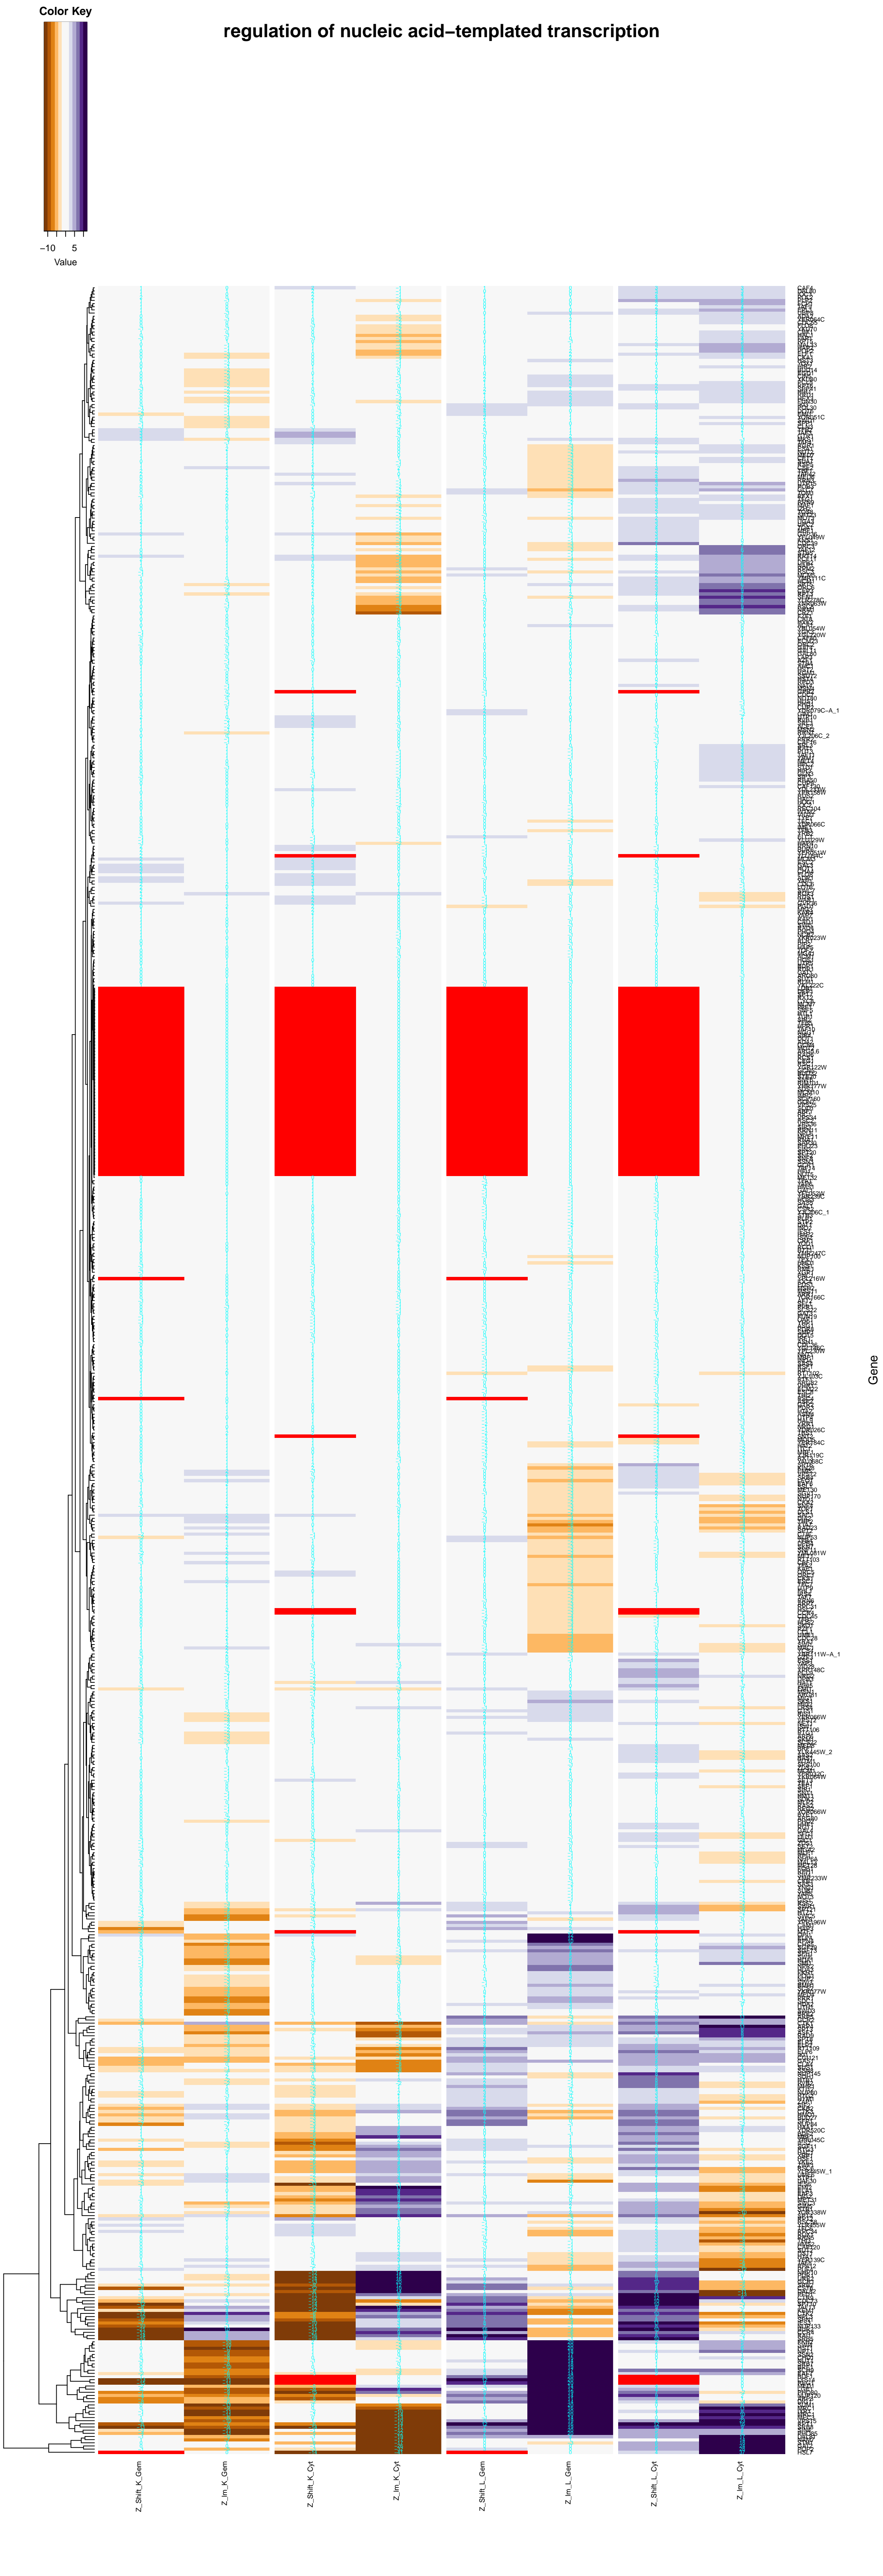

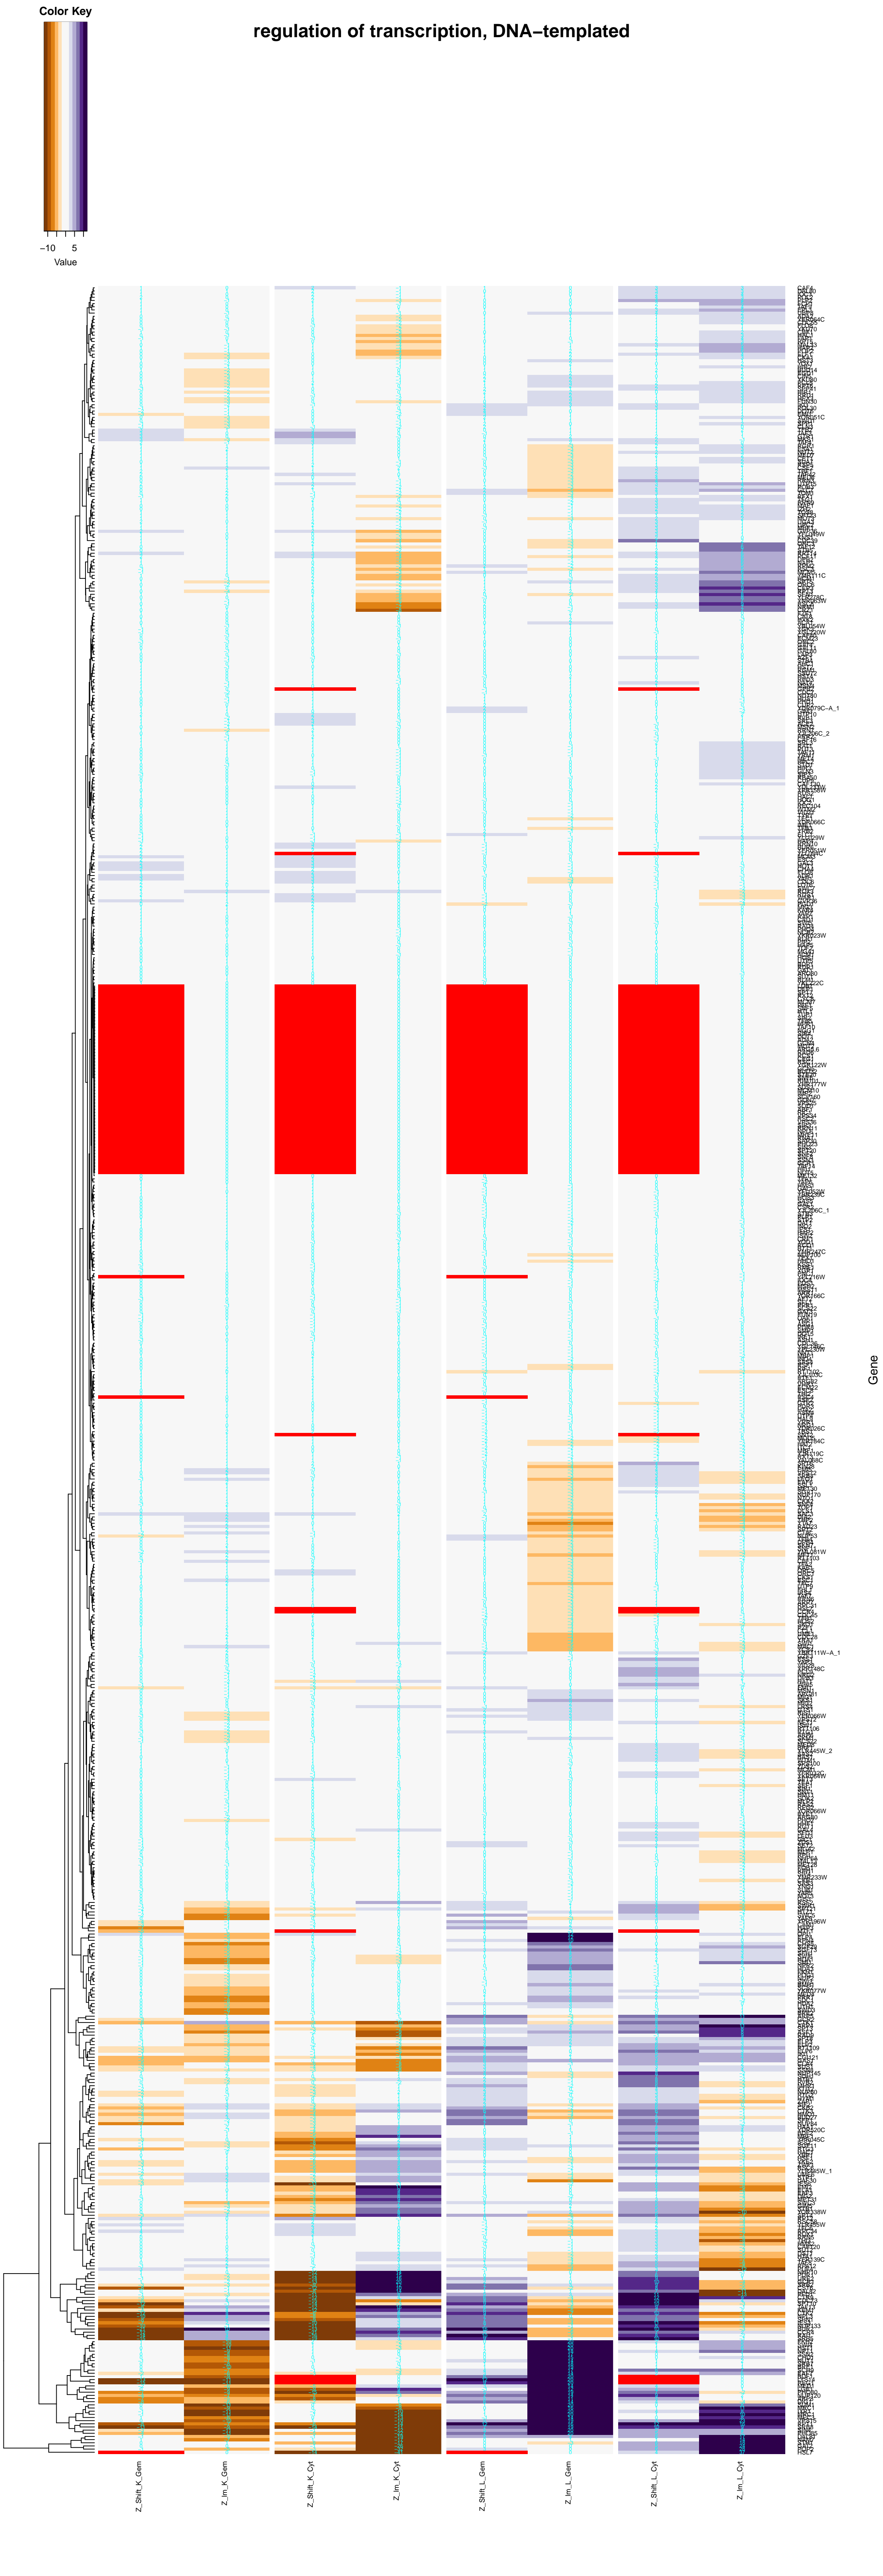



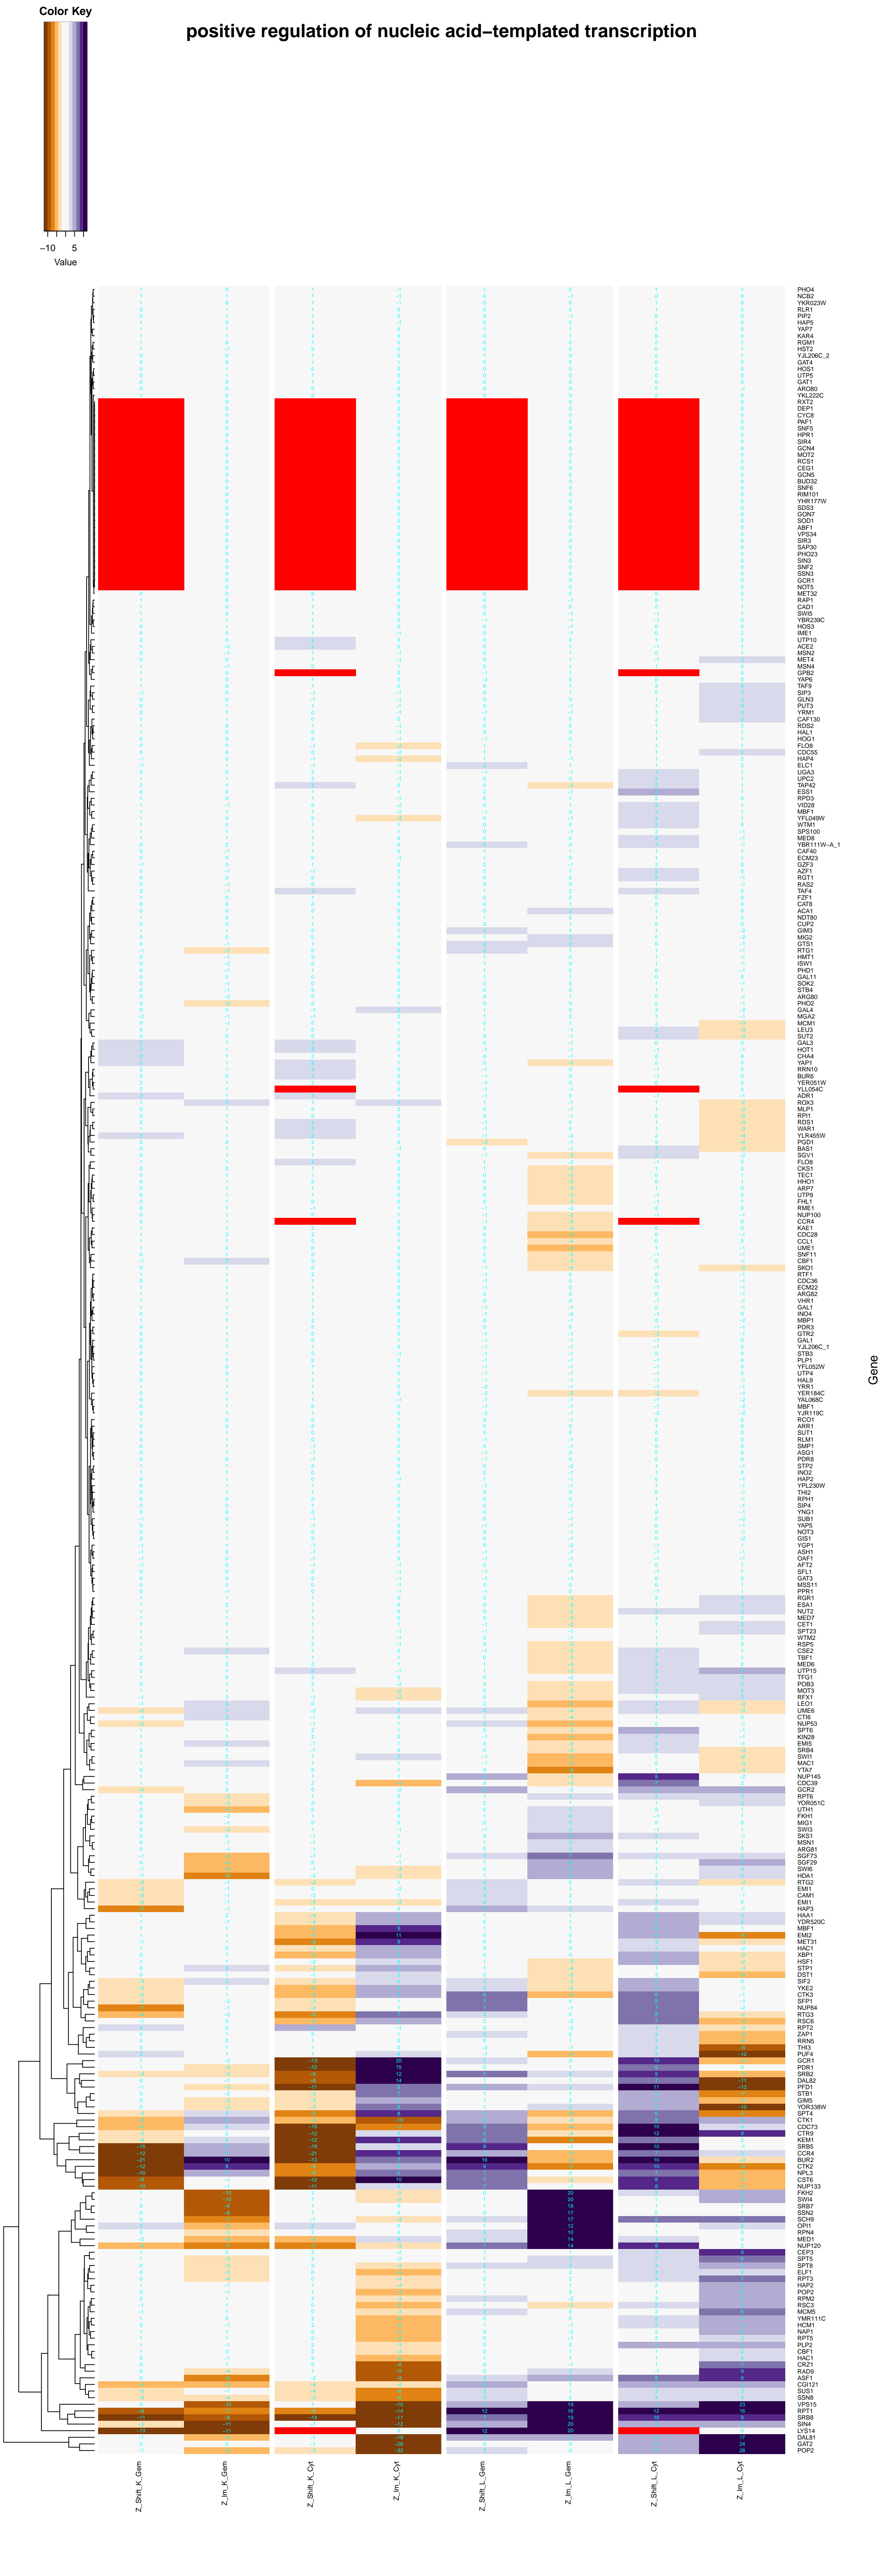

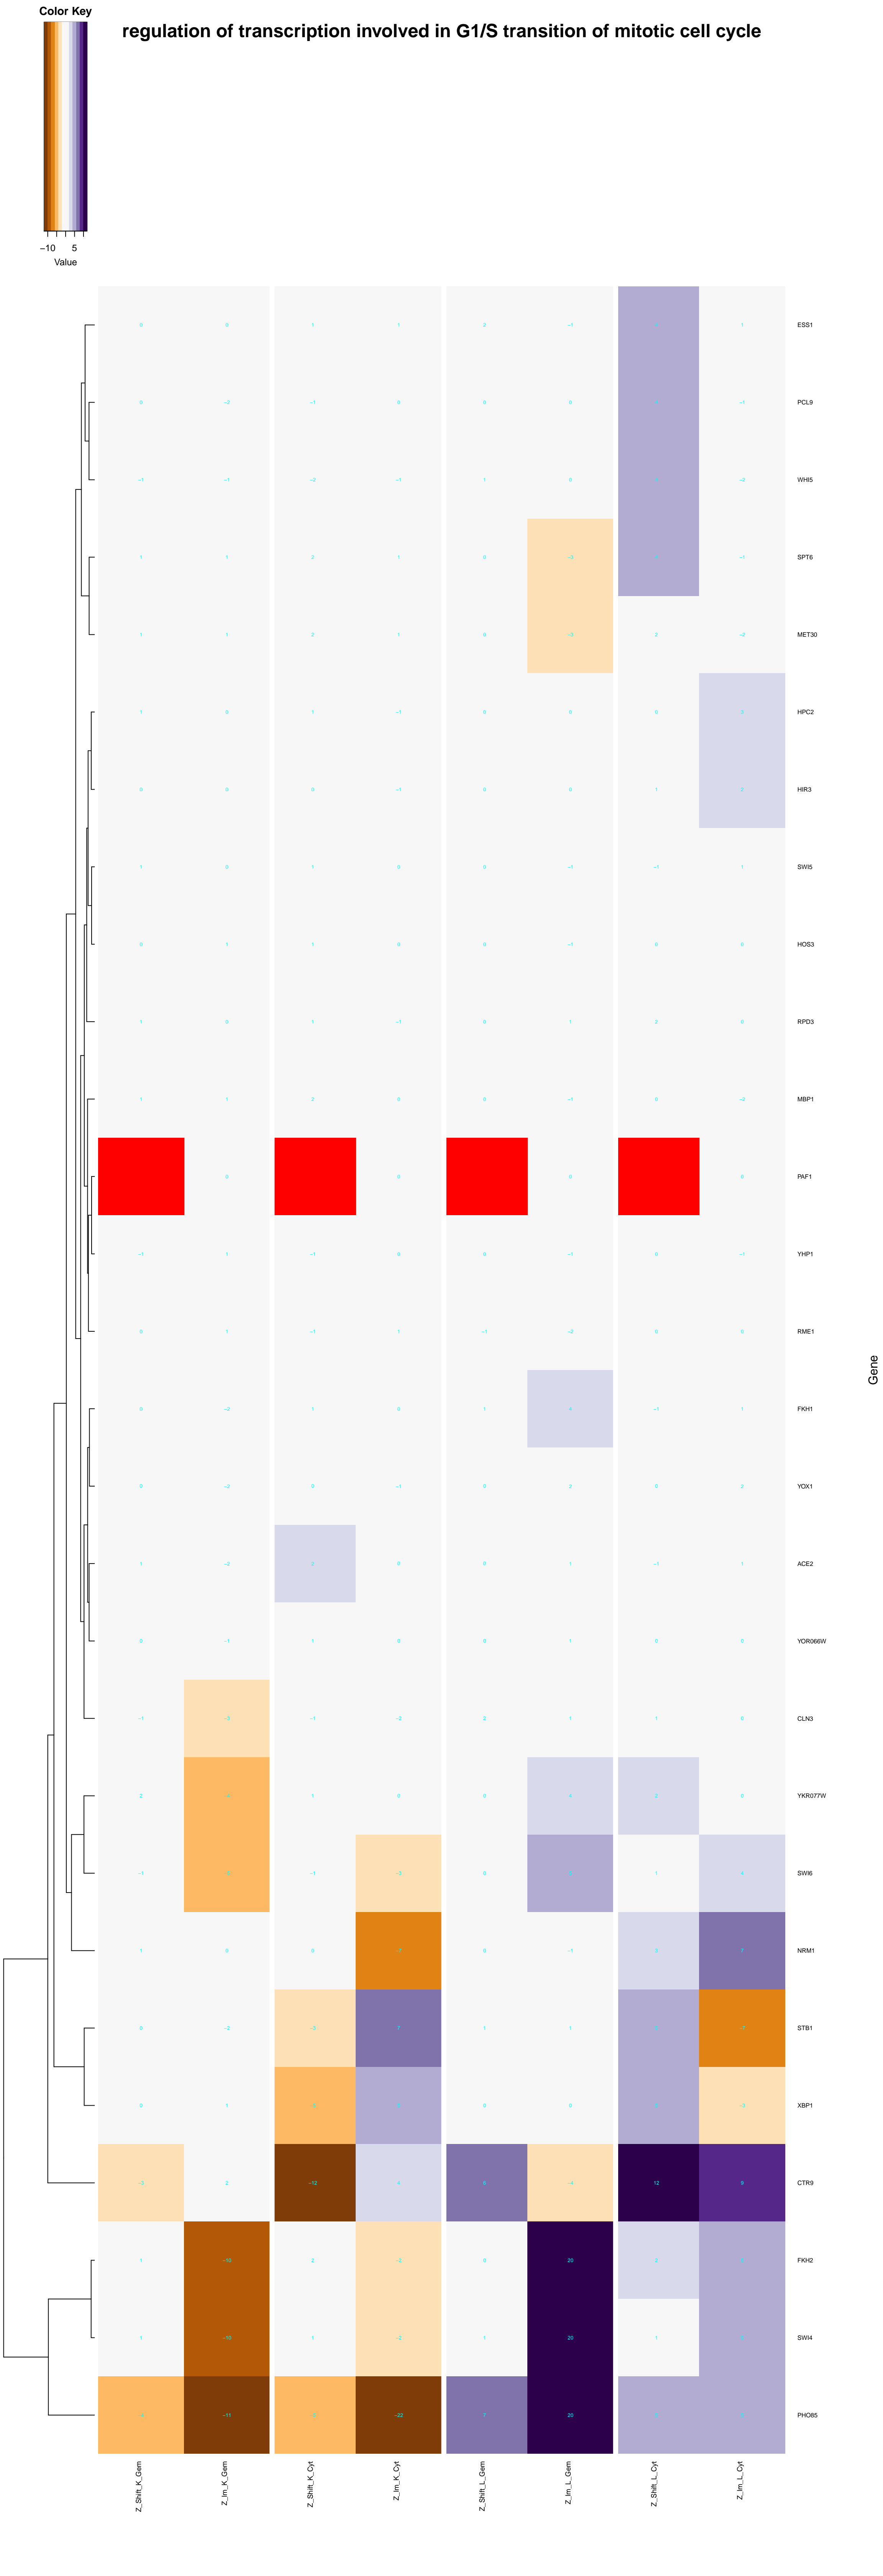

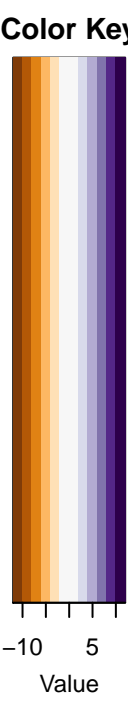

regulation of transcription involved in G2/M transition of mitotic cell cycle

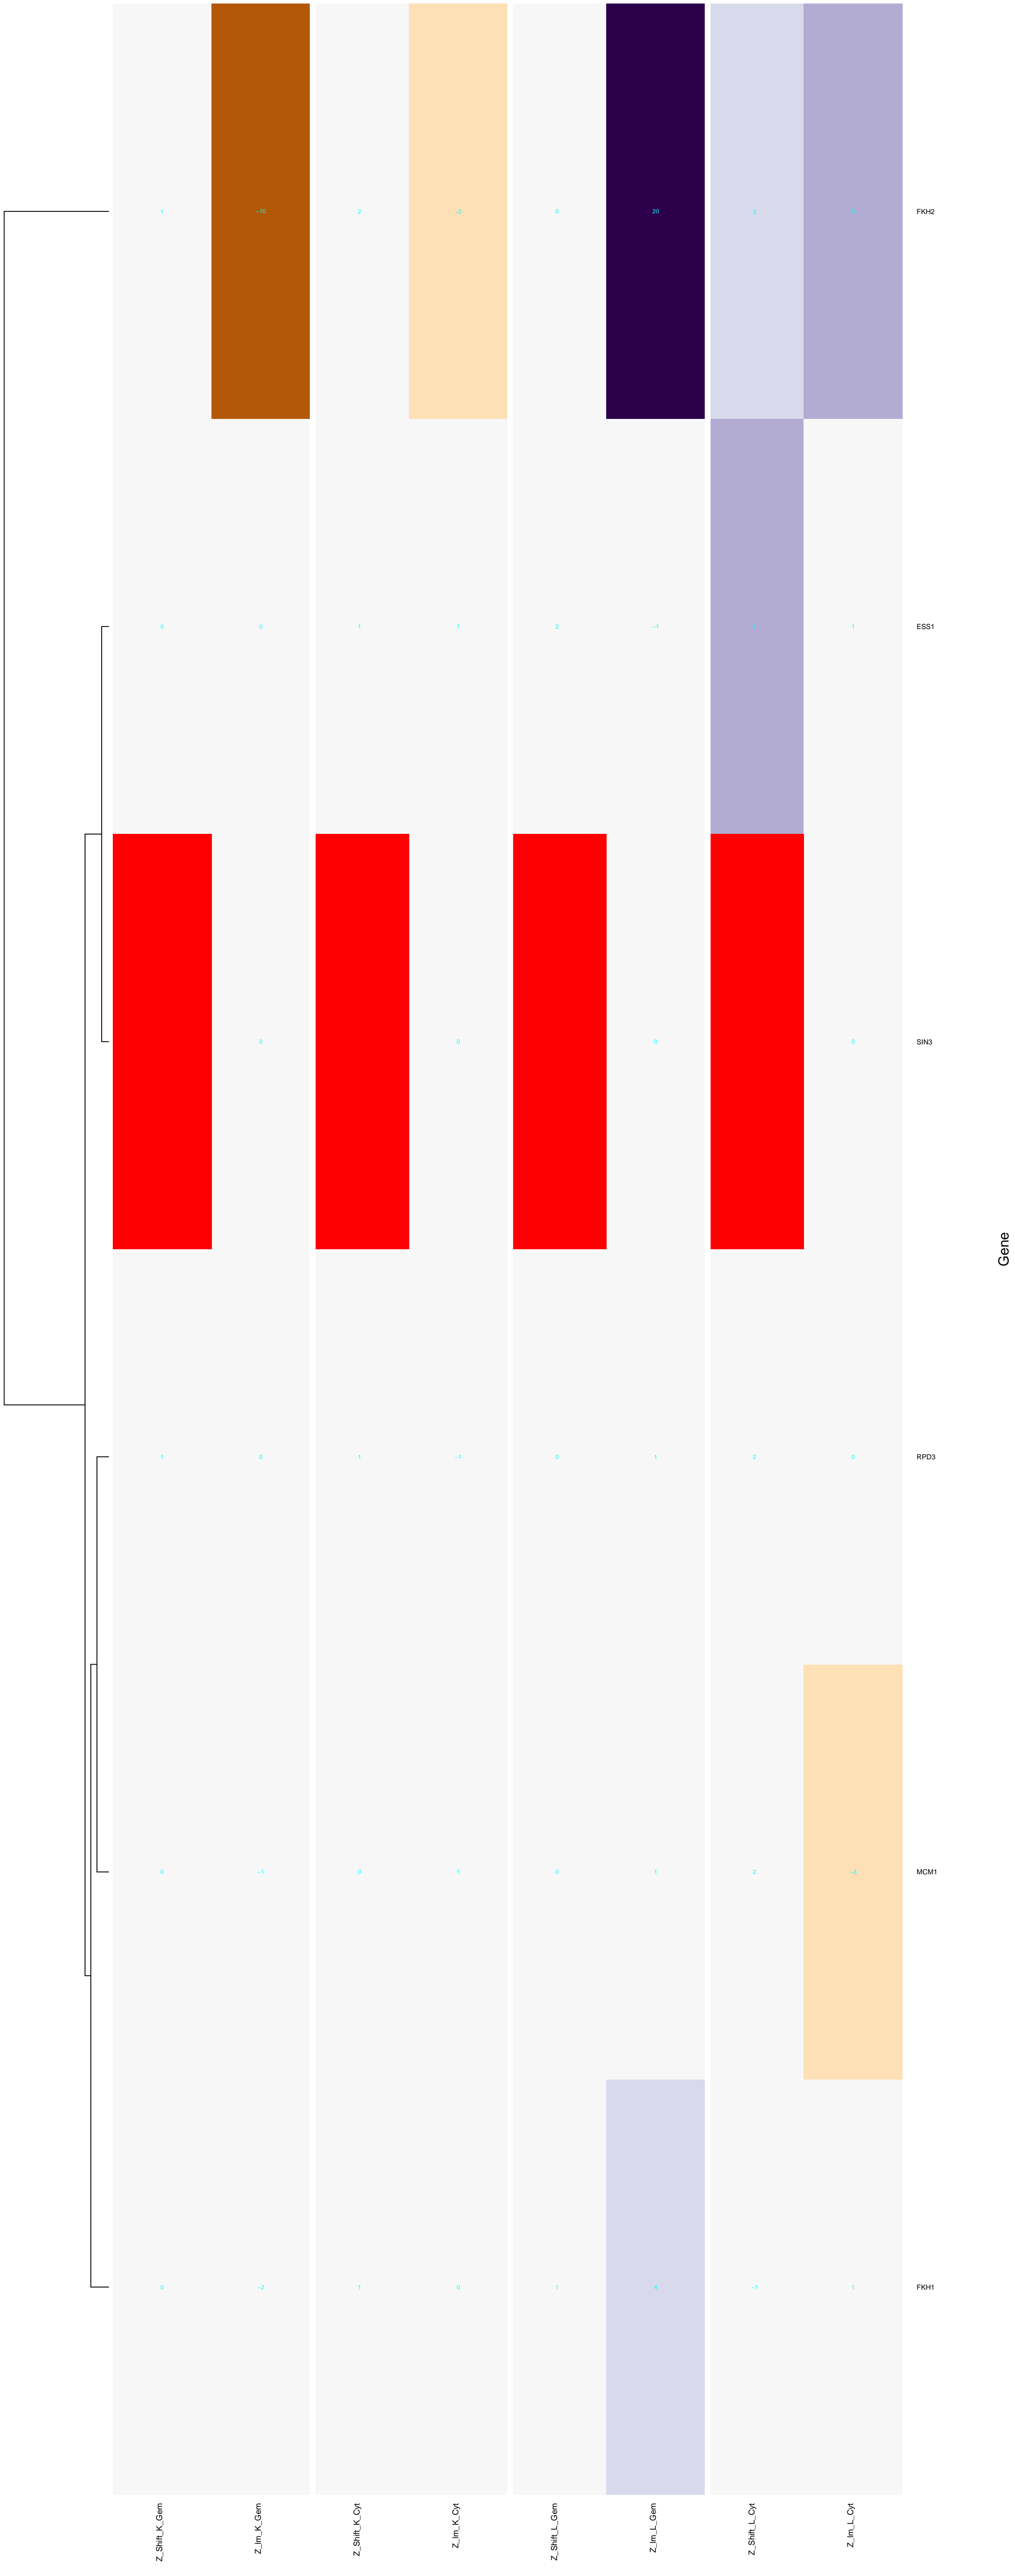

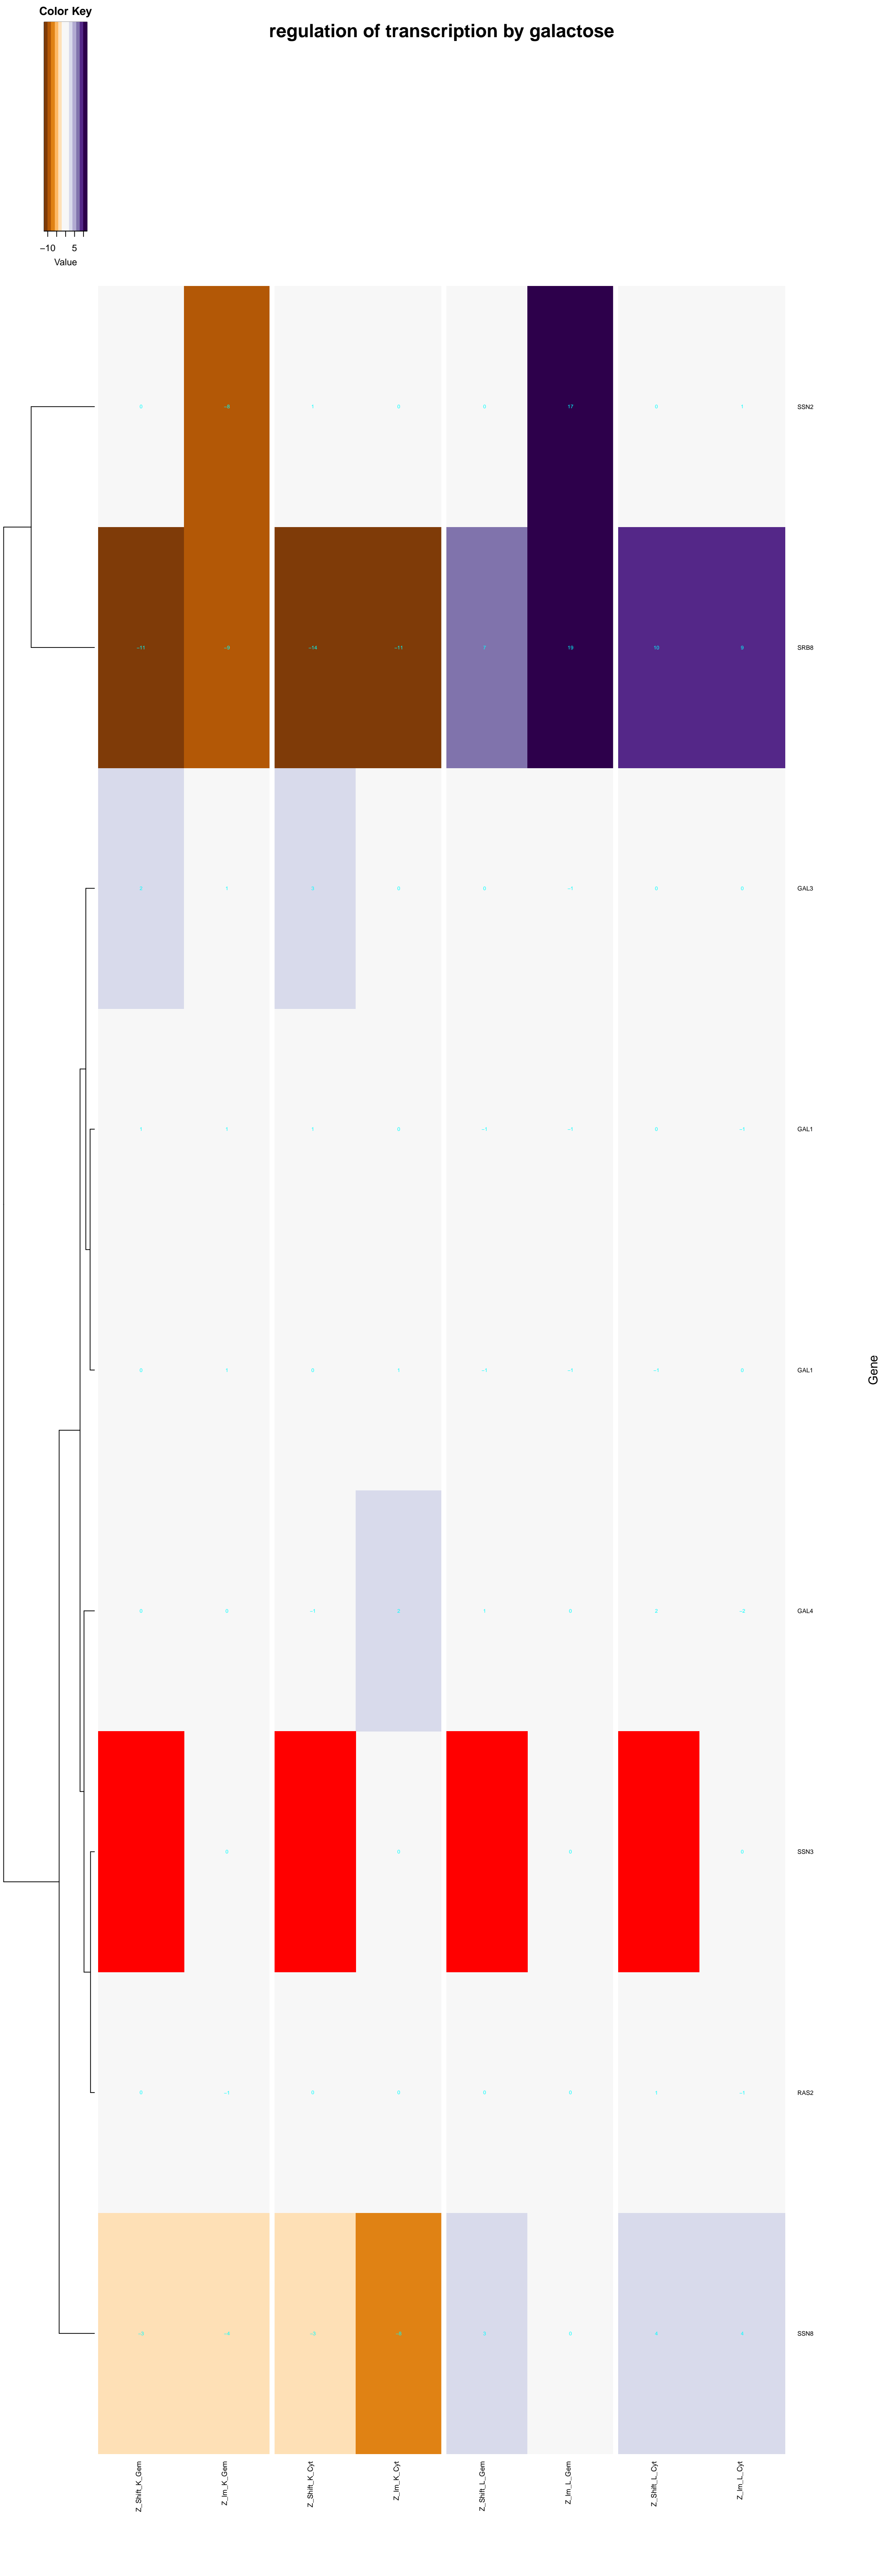

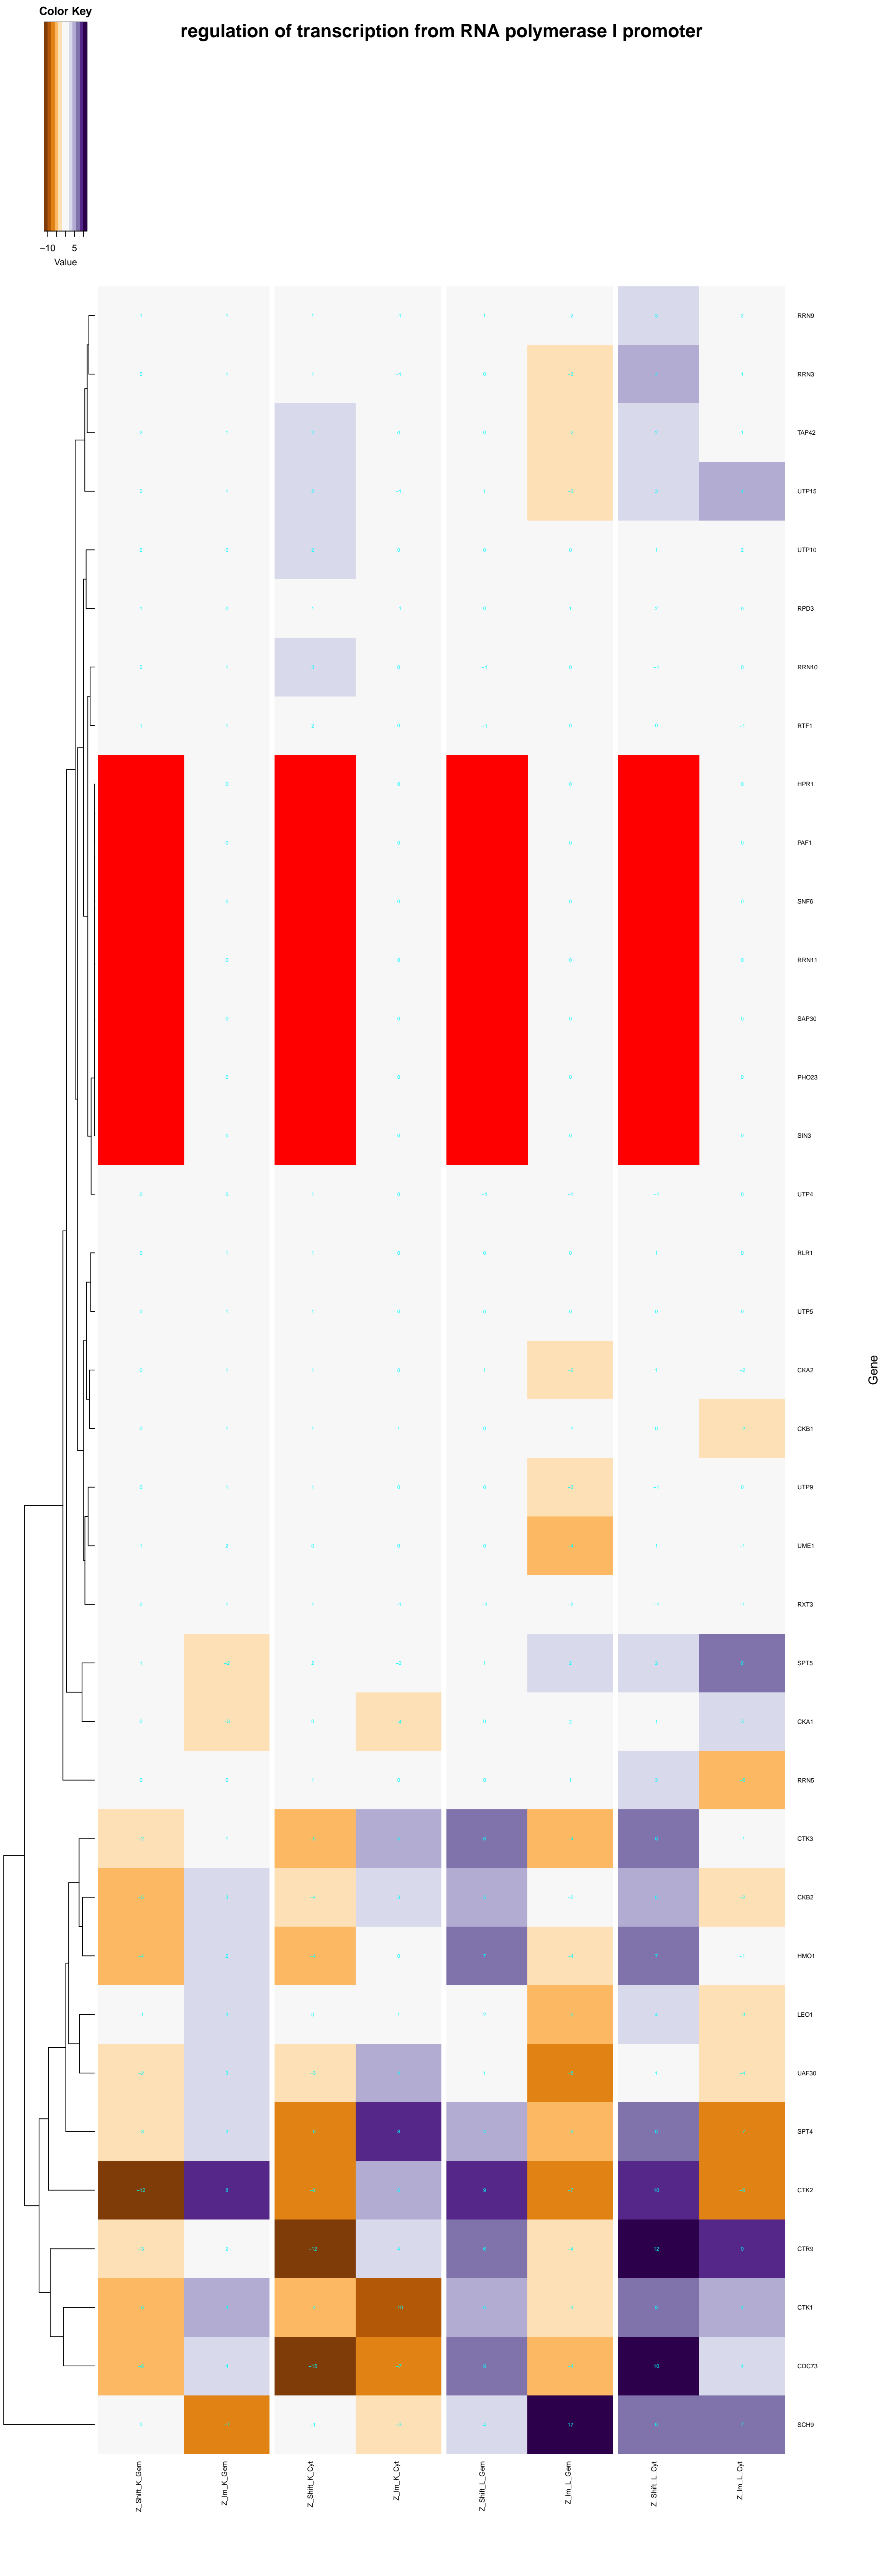



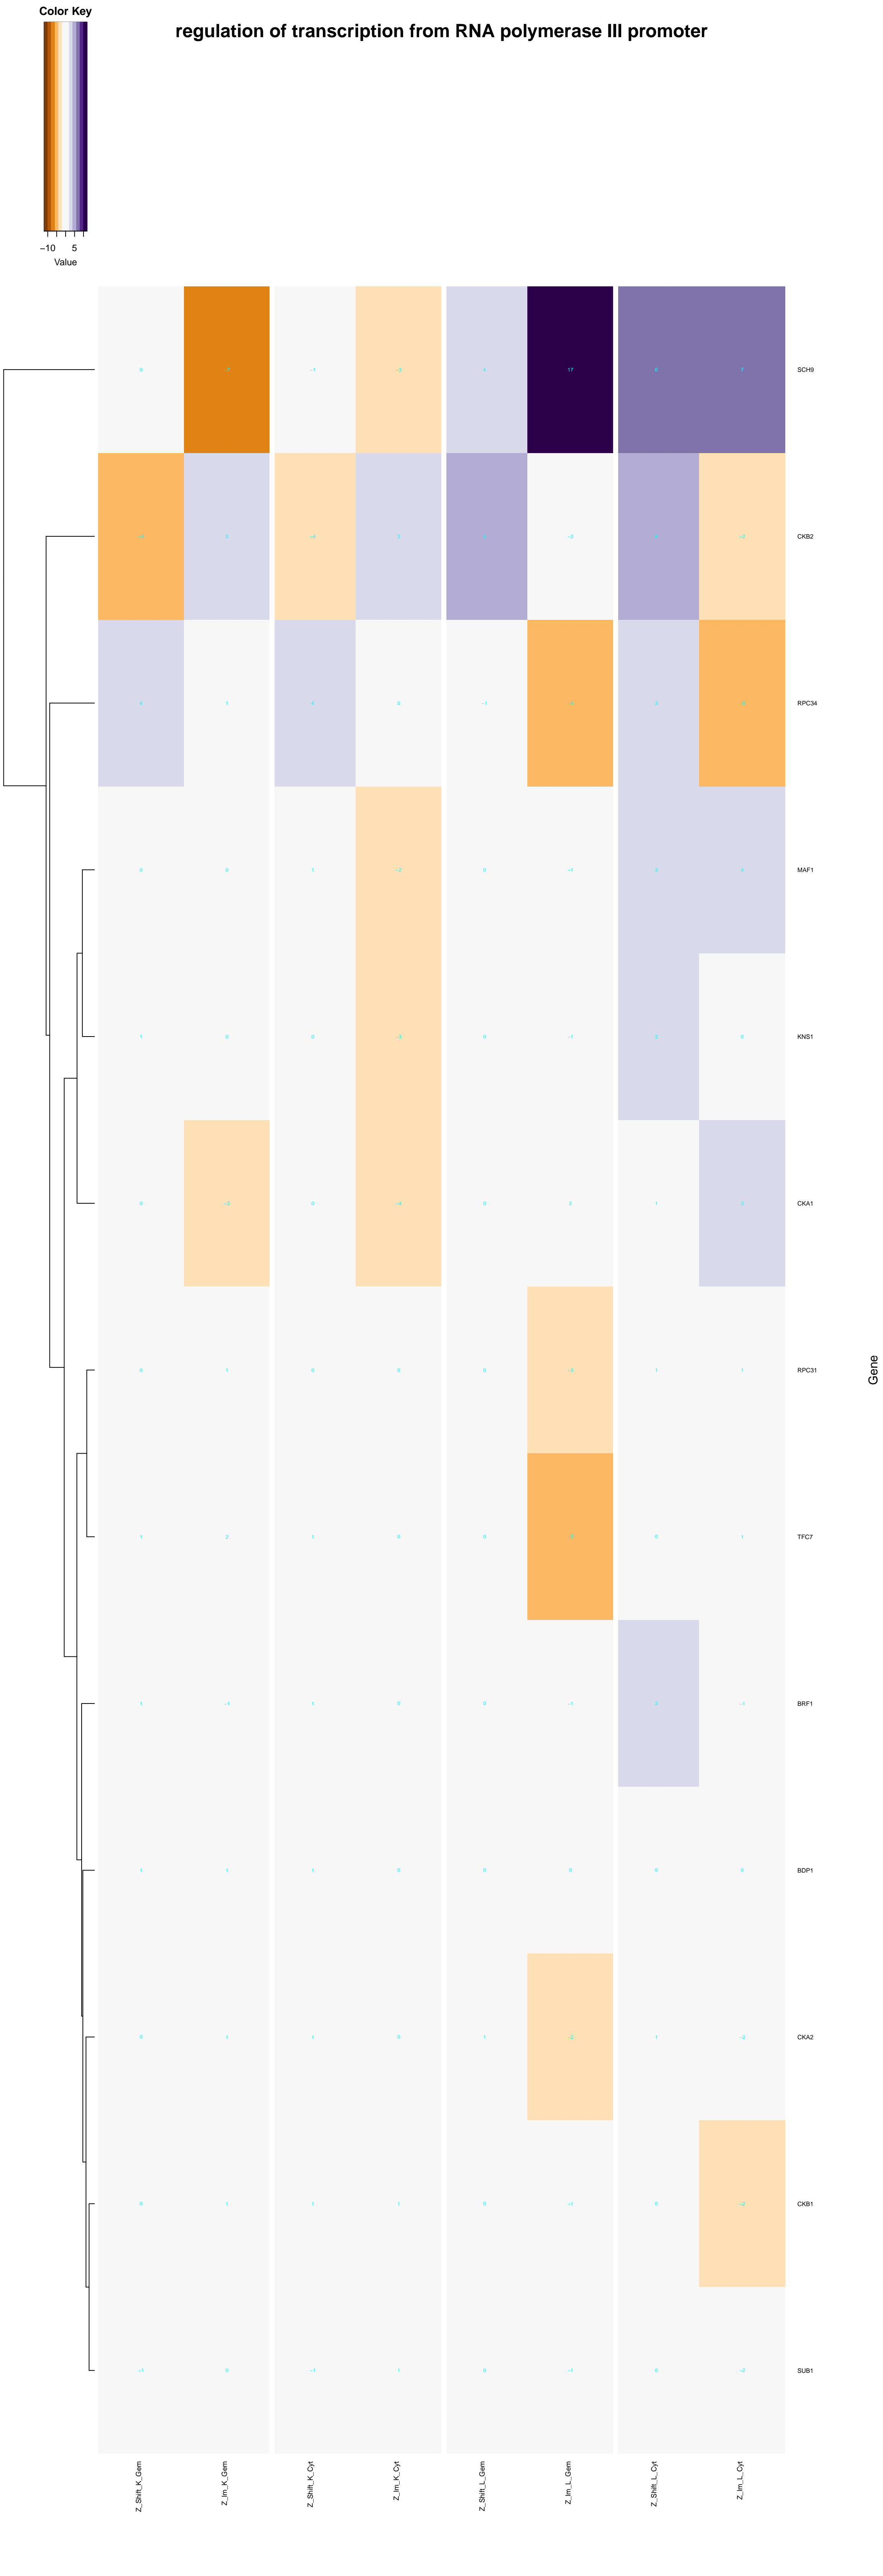

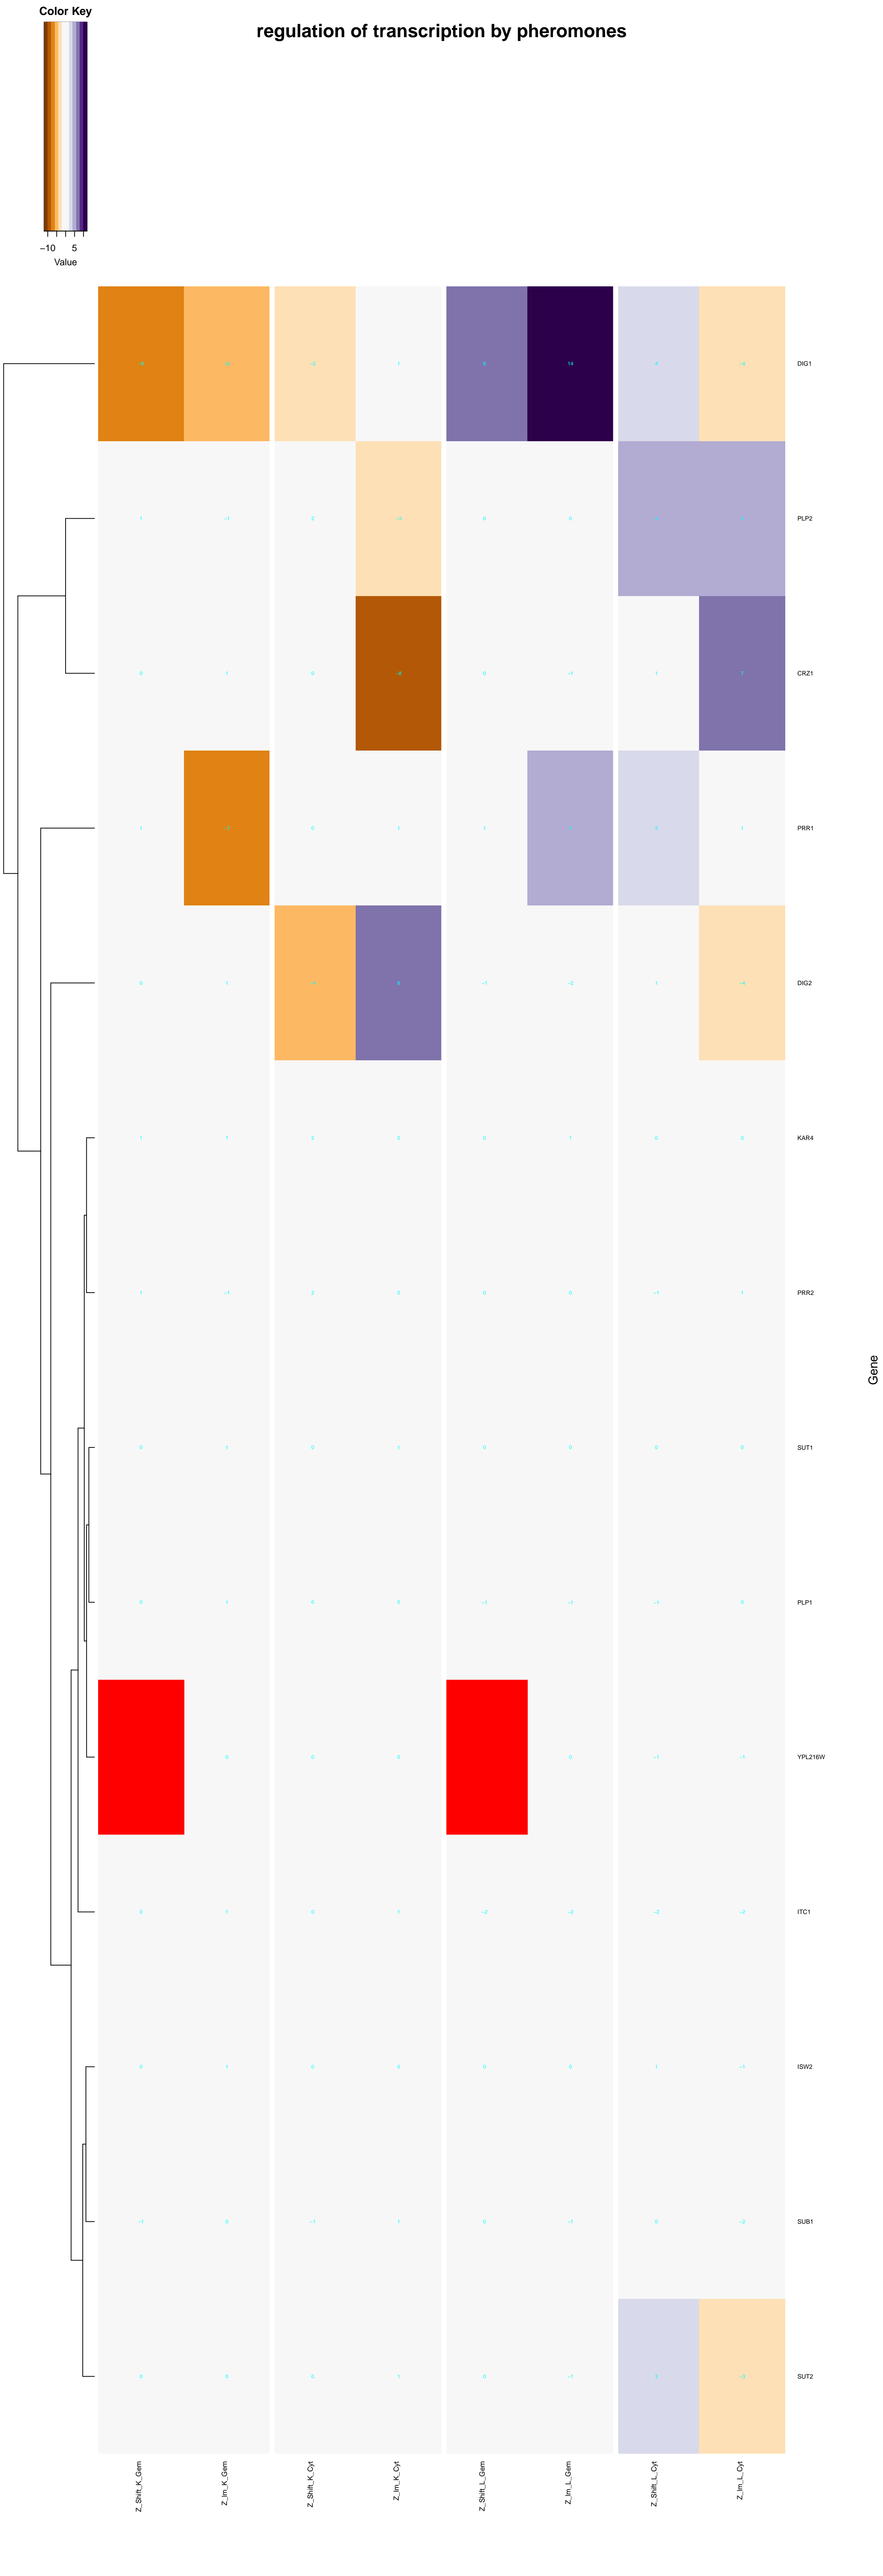

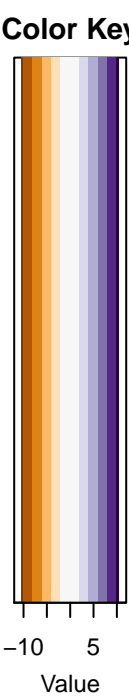

regulation of DNA-templated transcription, termination

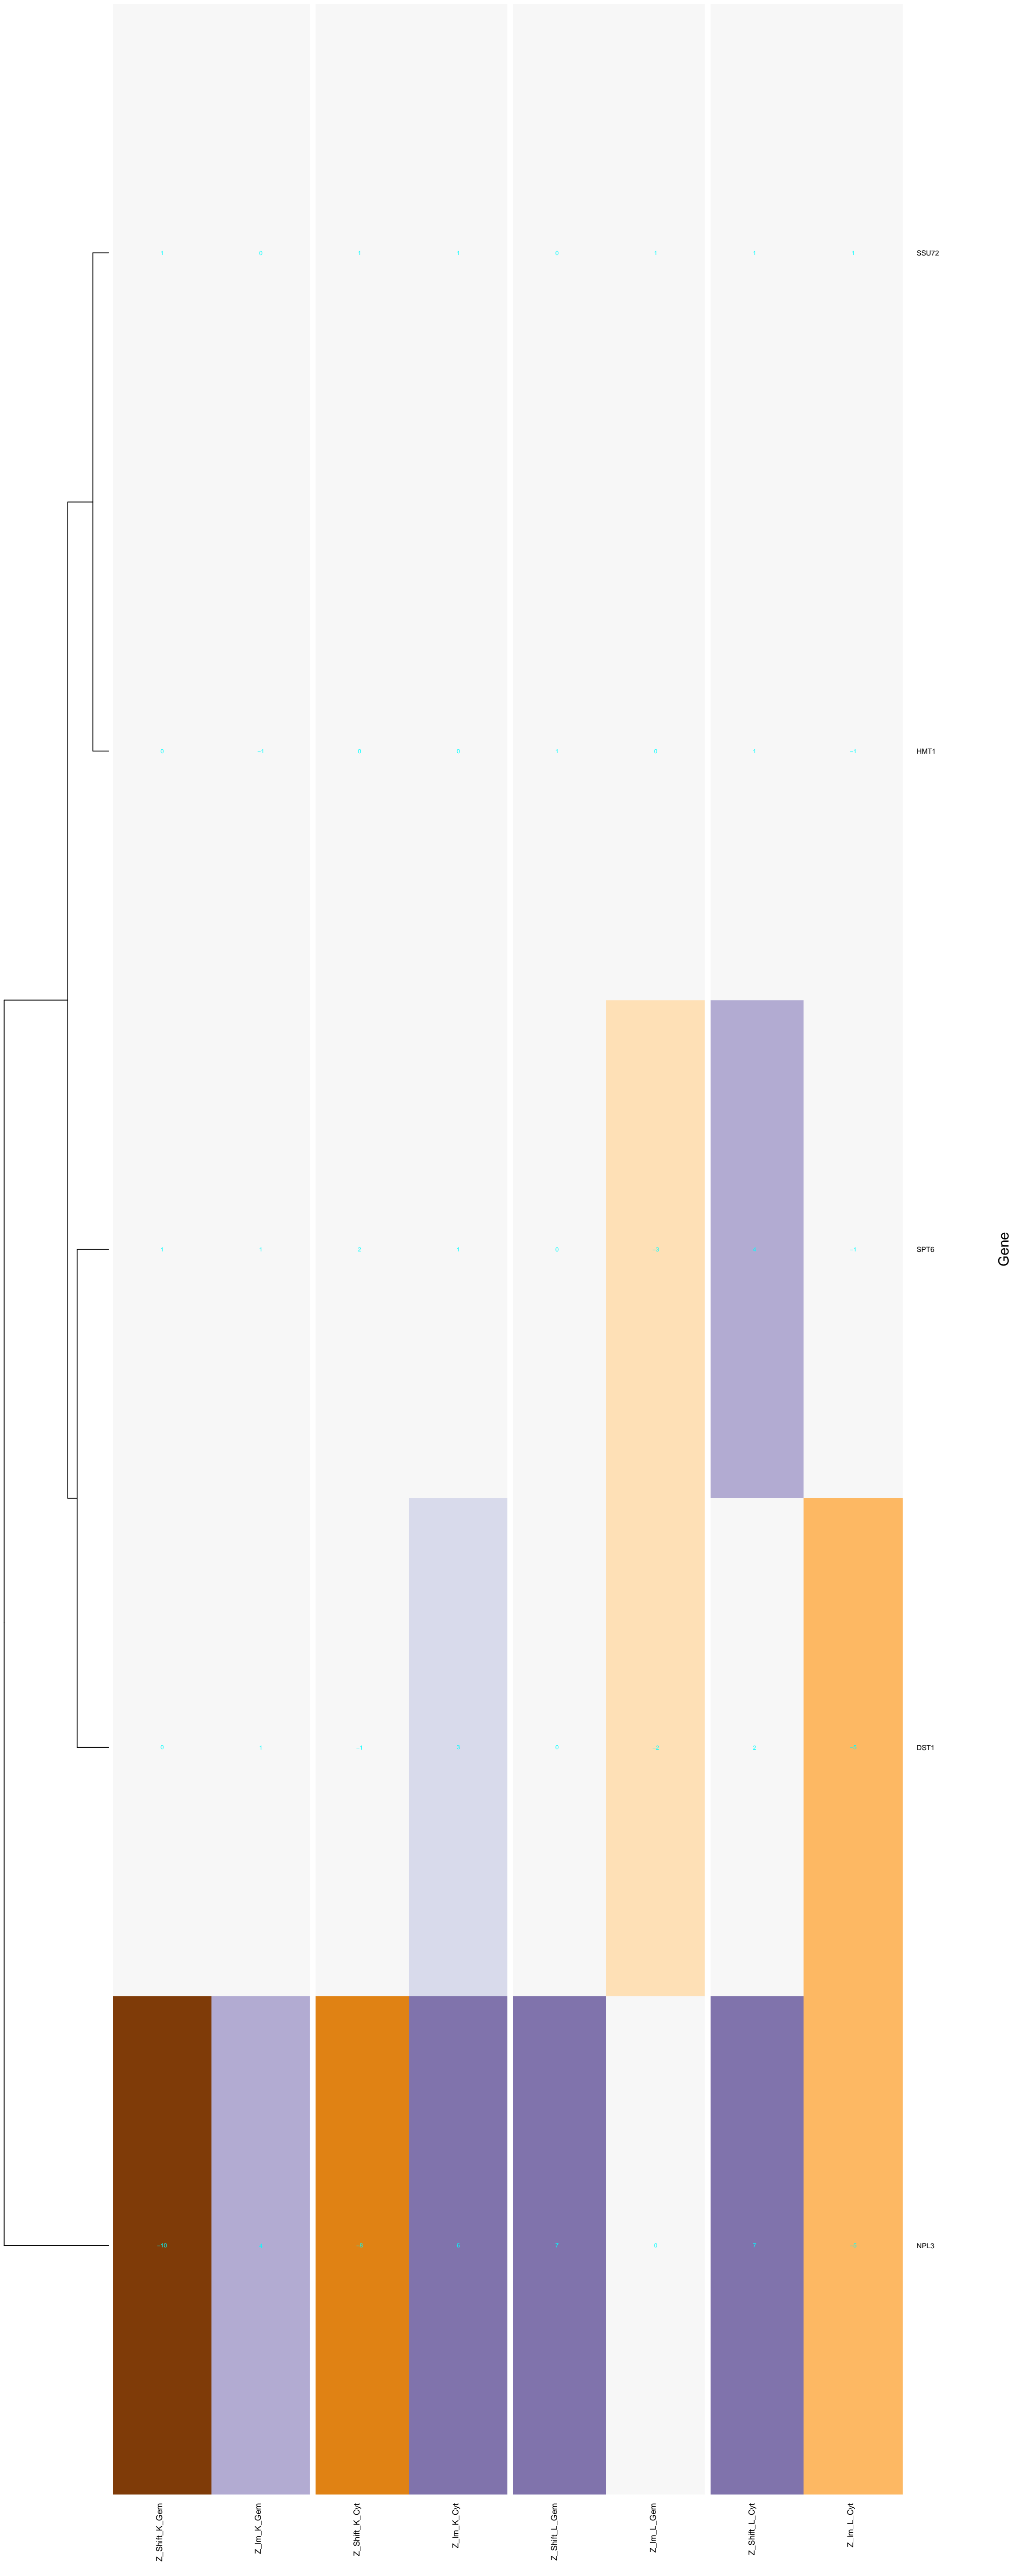

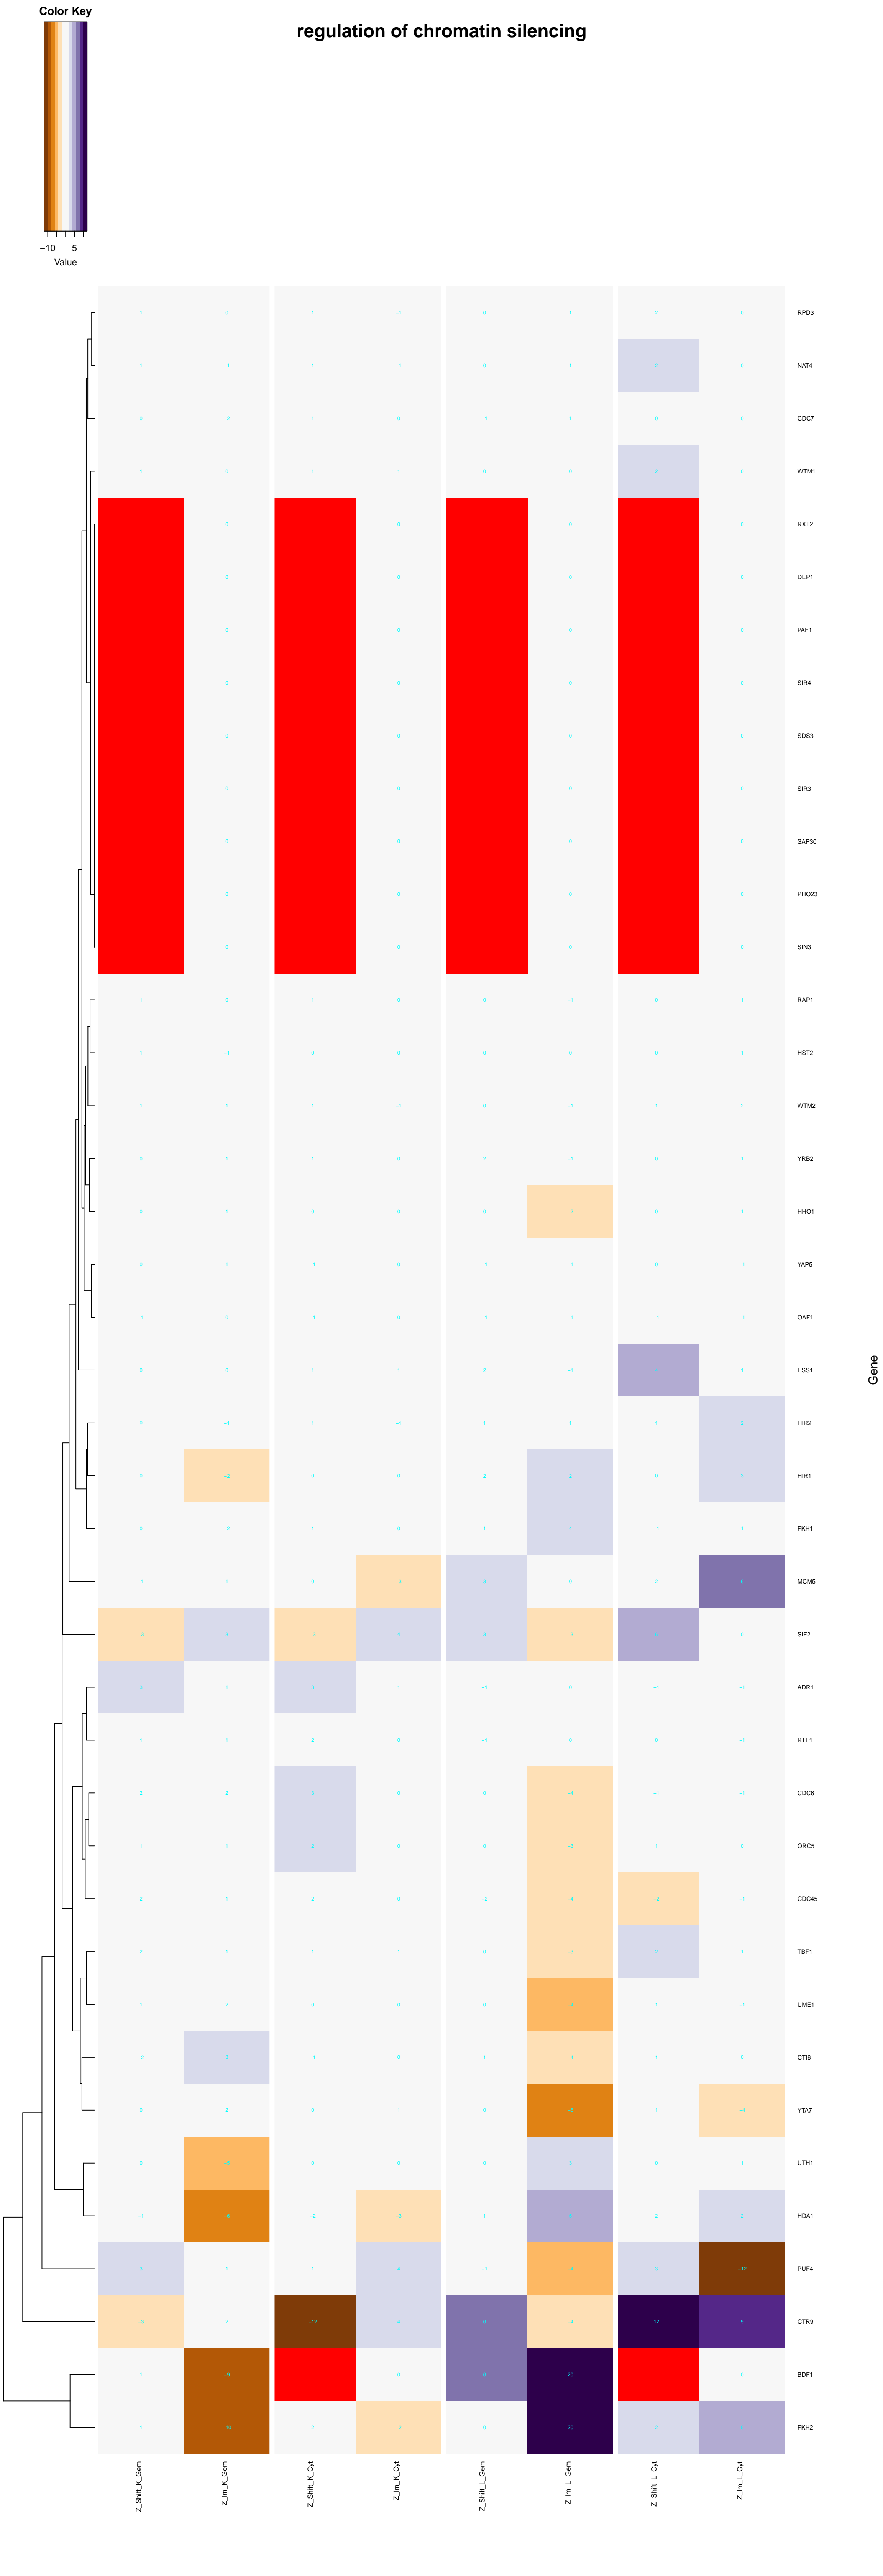

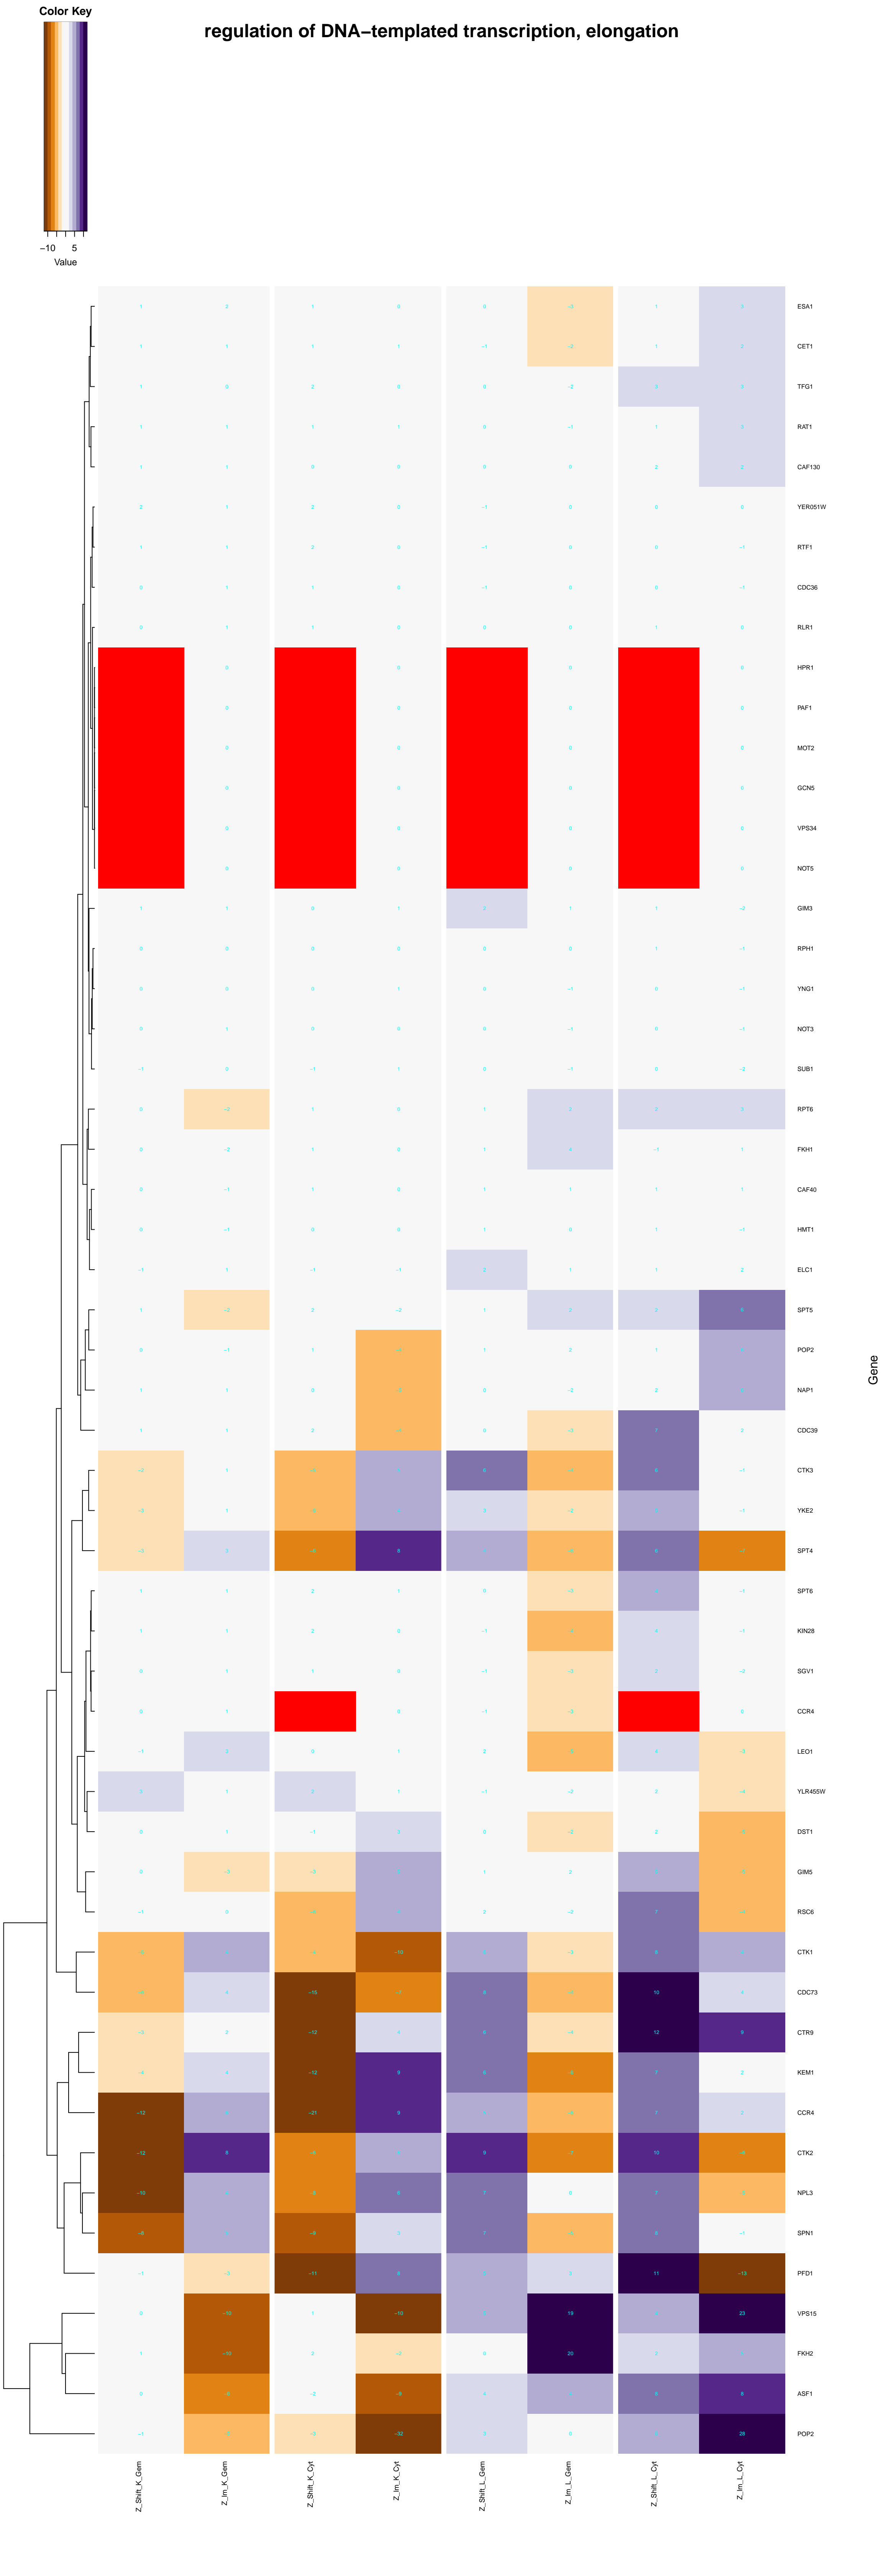

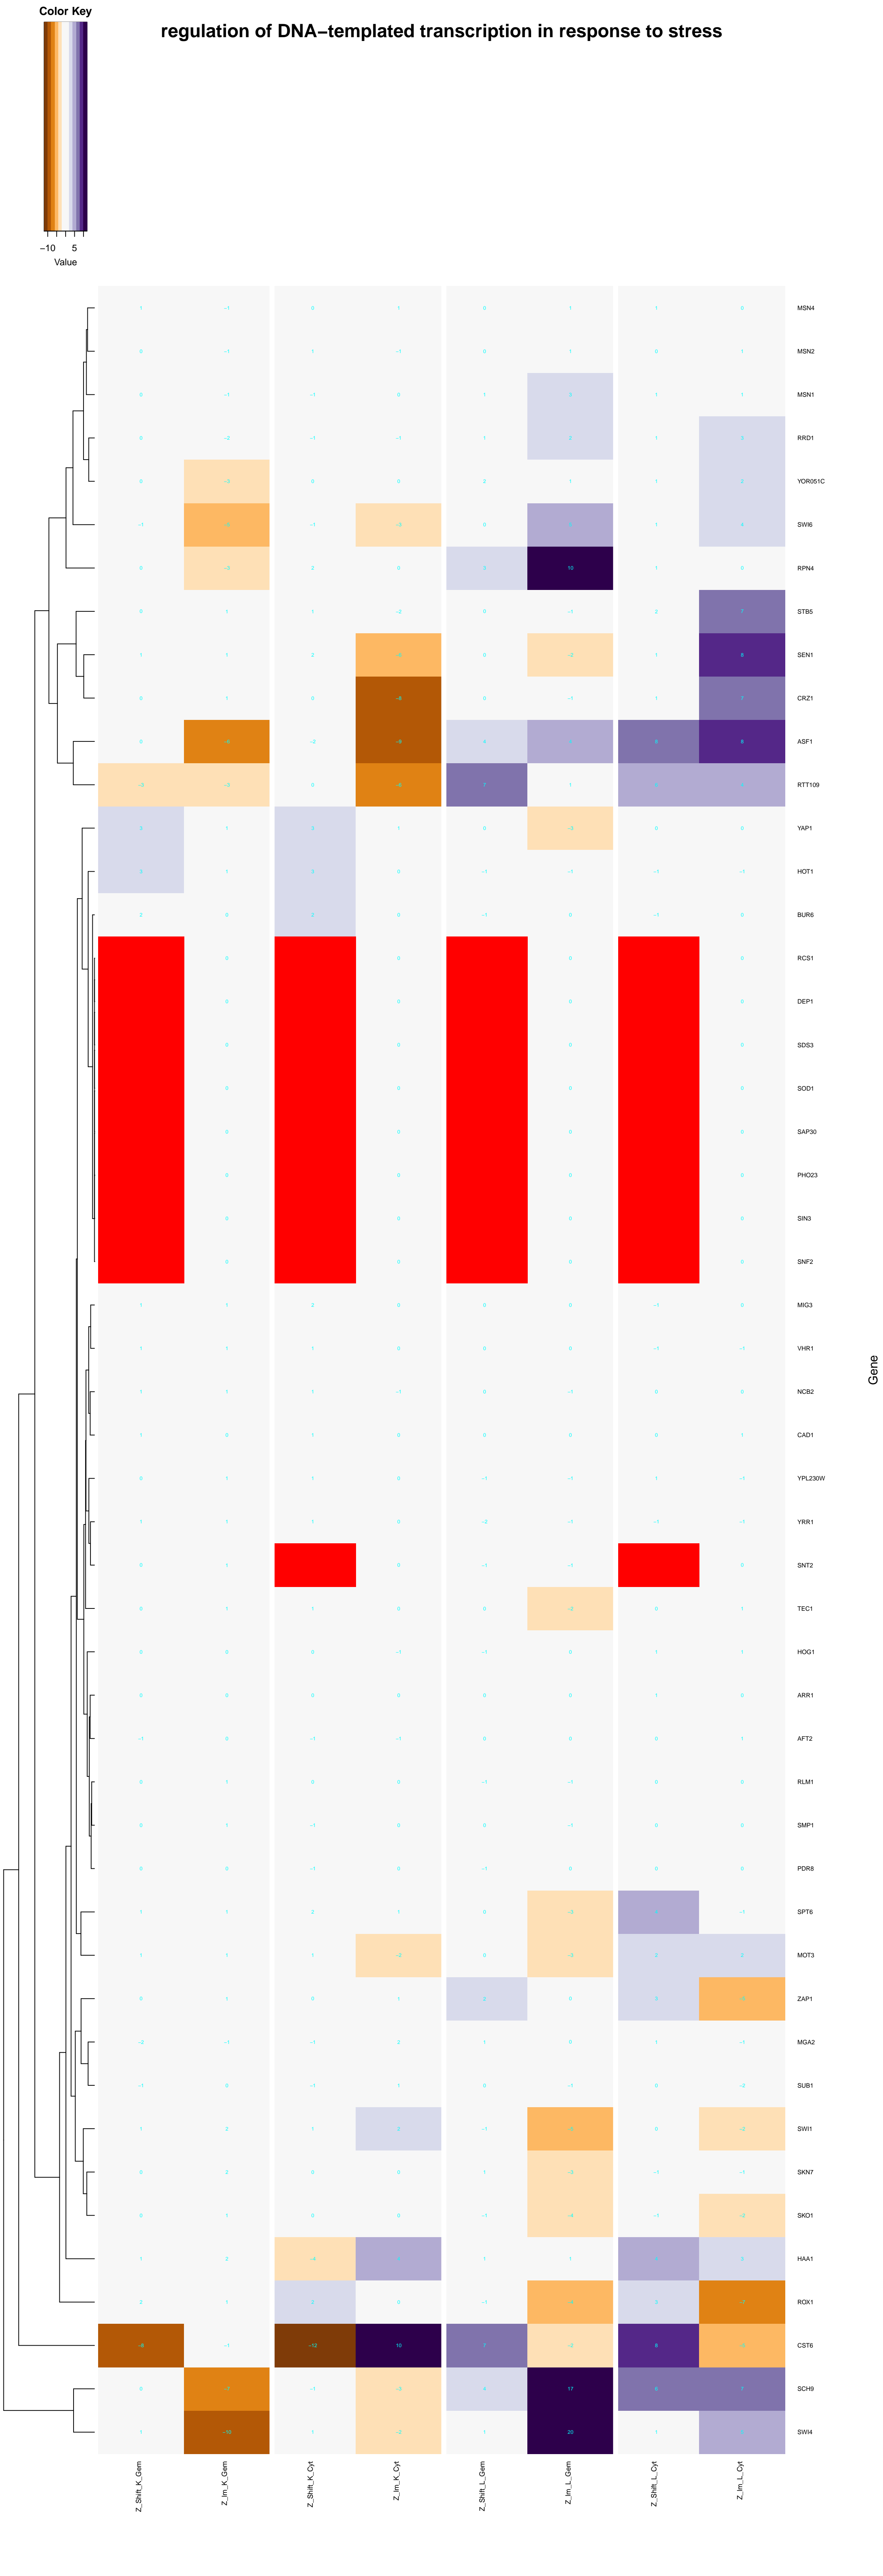

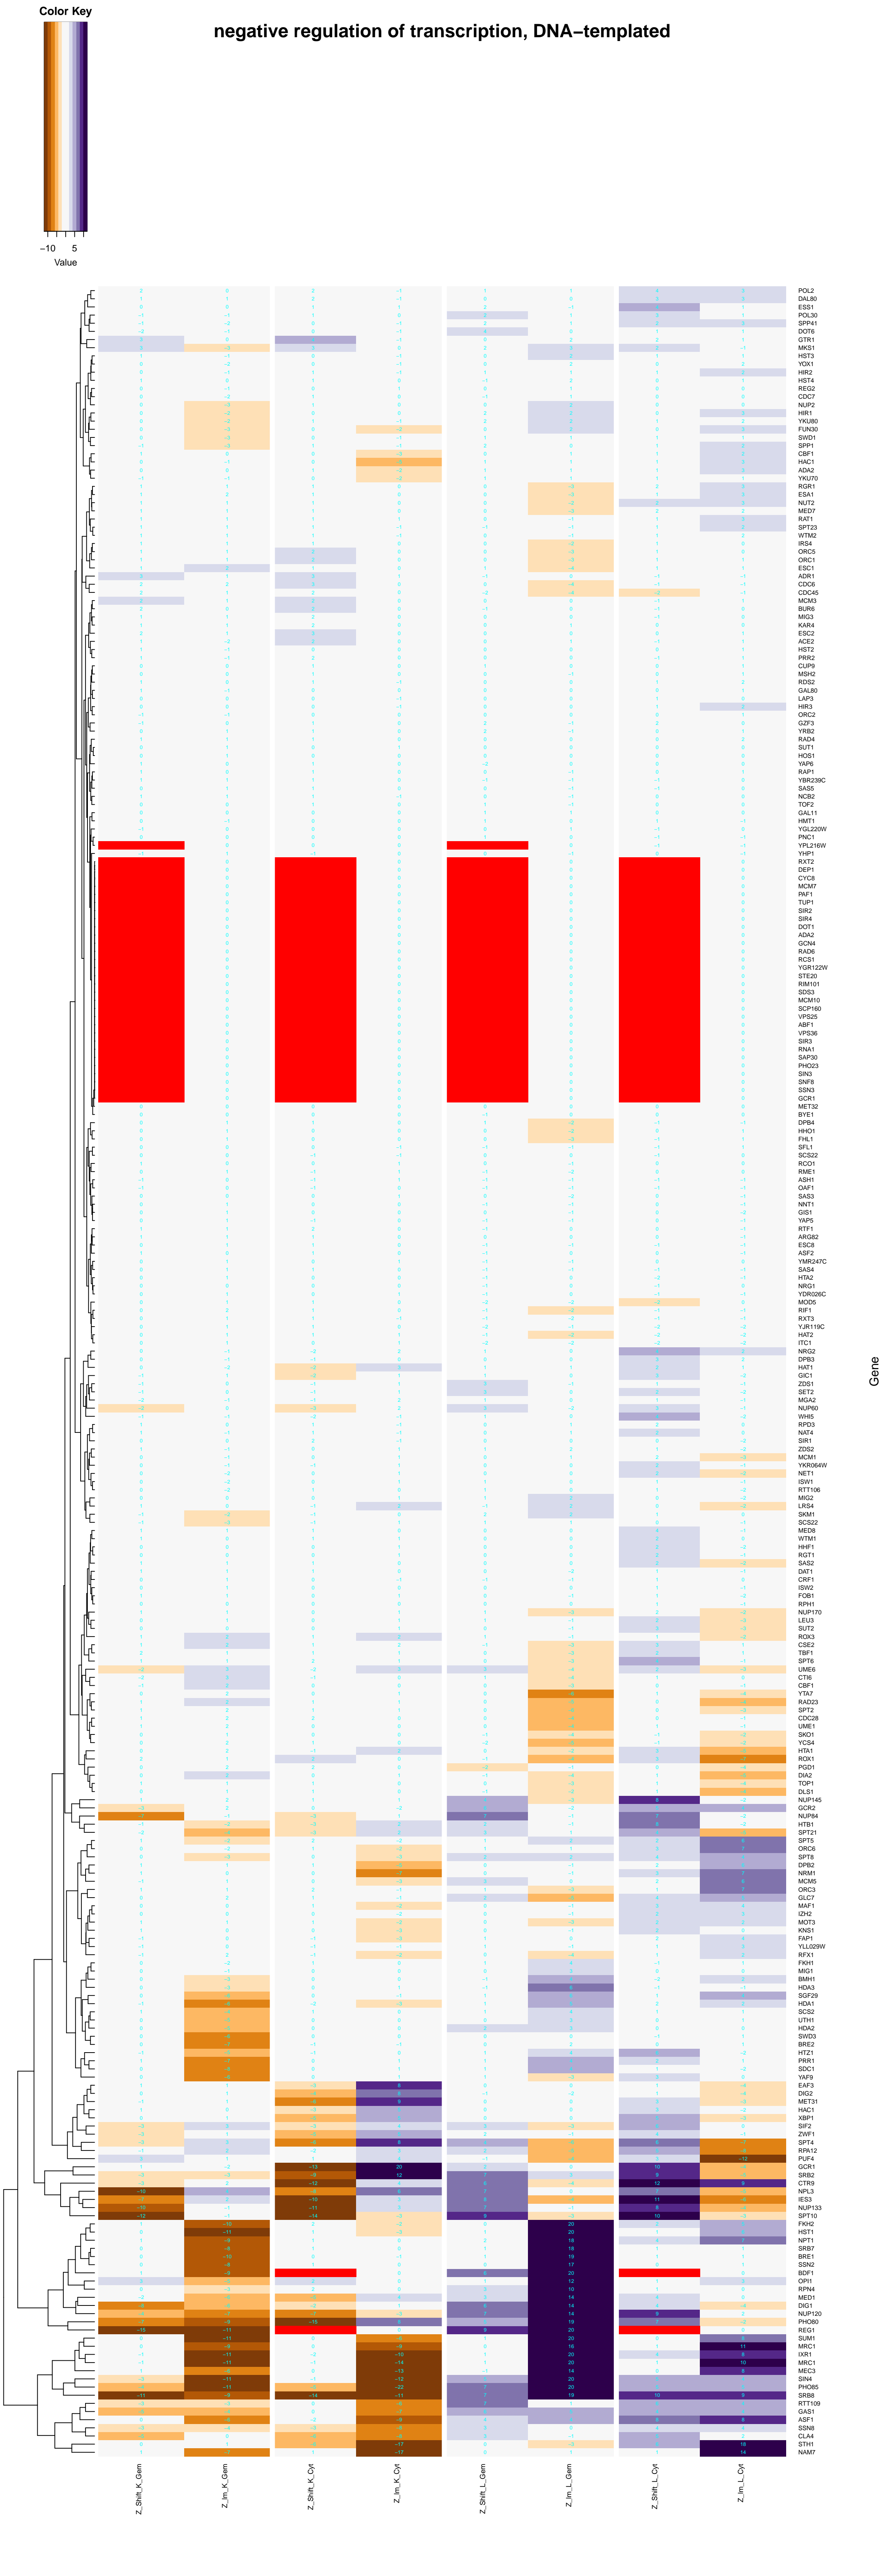

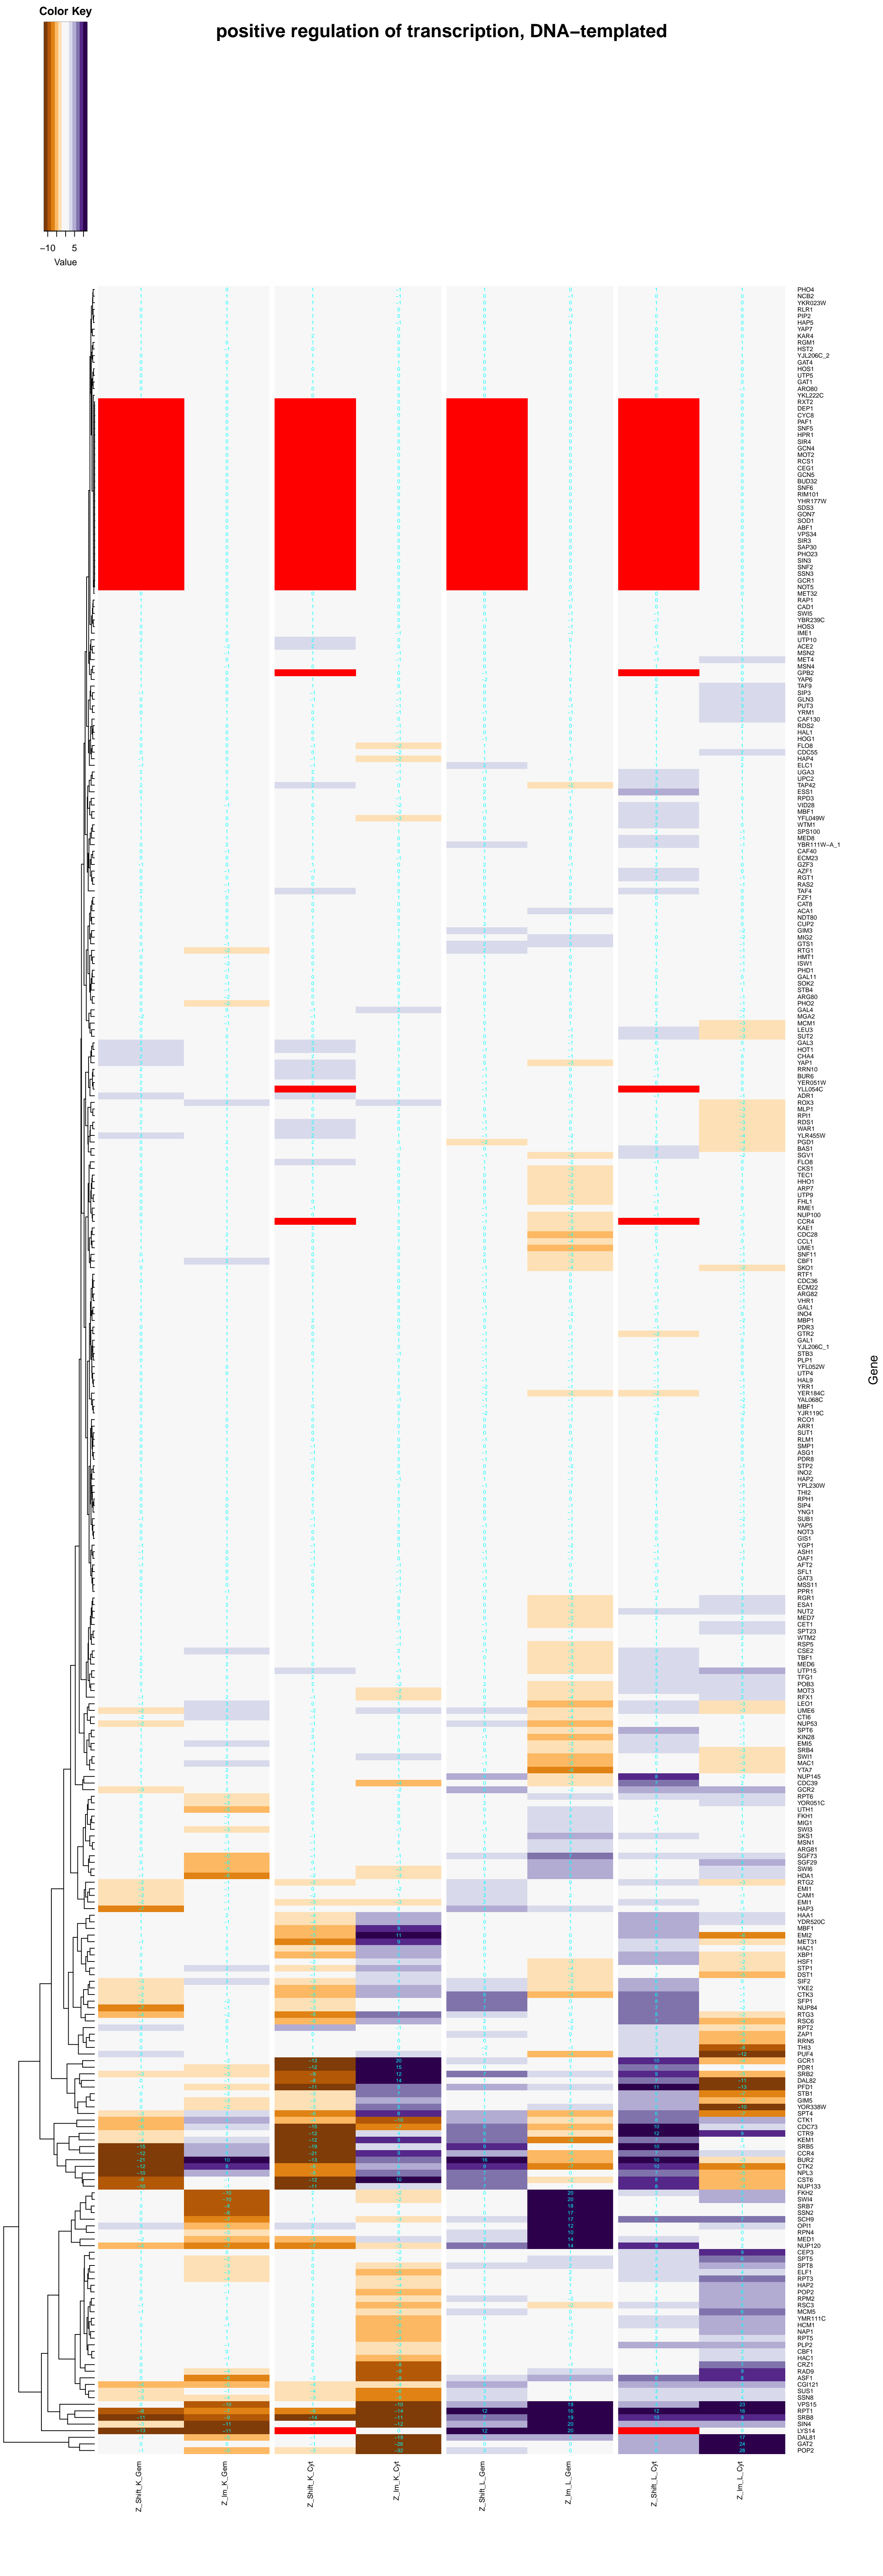

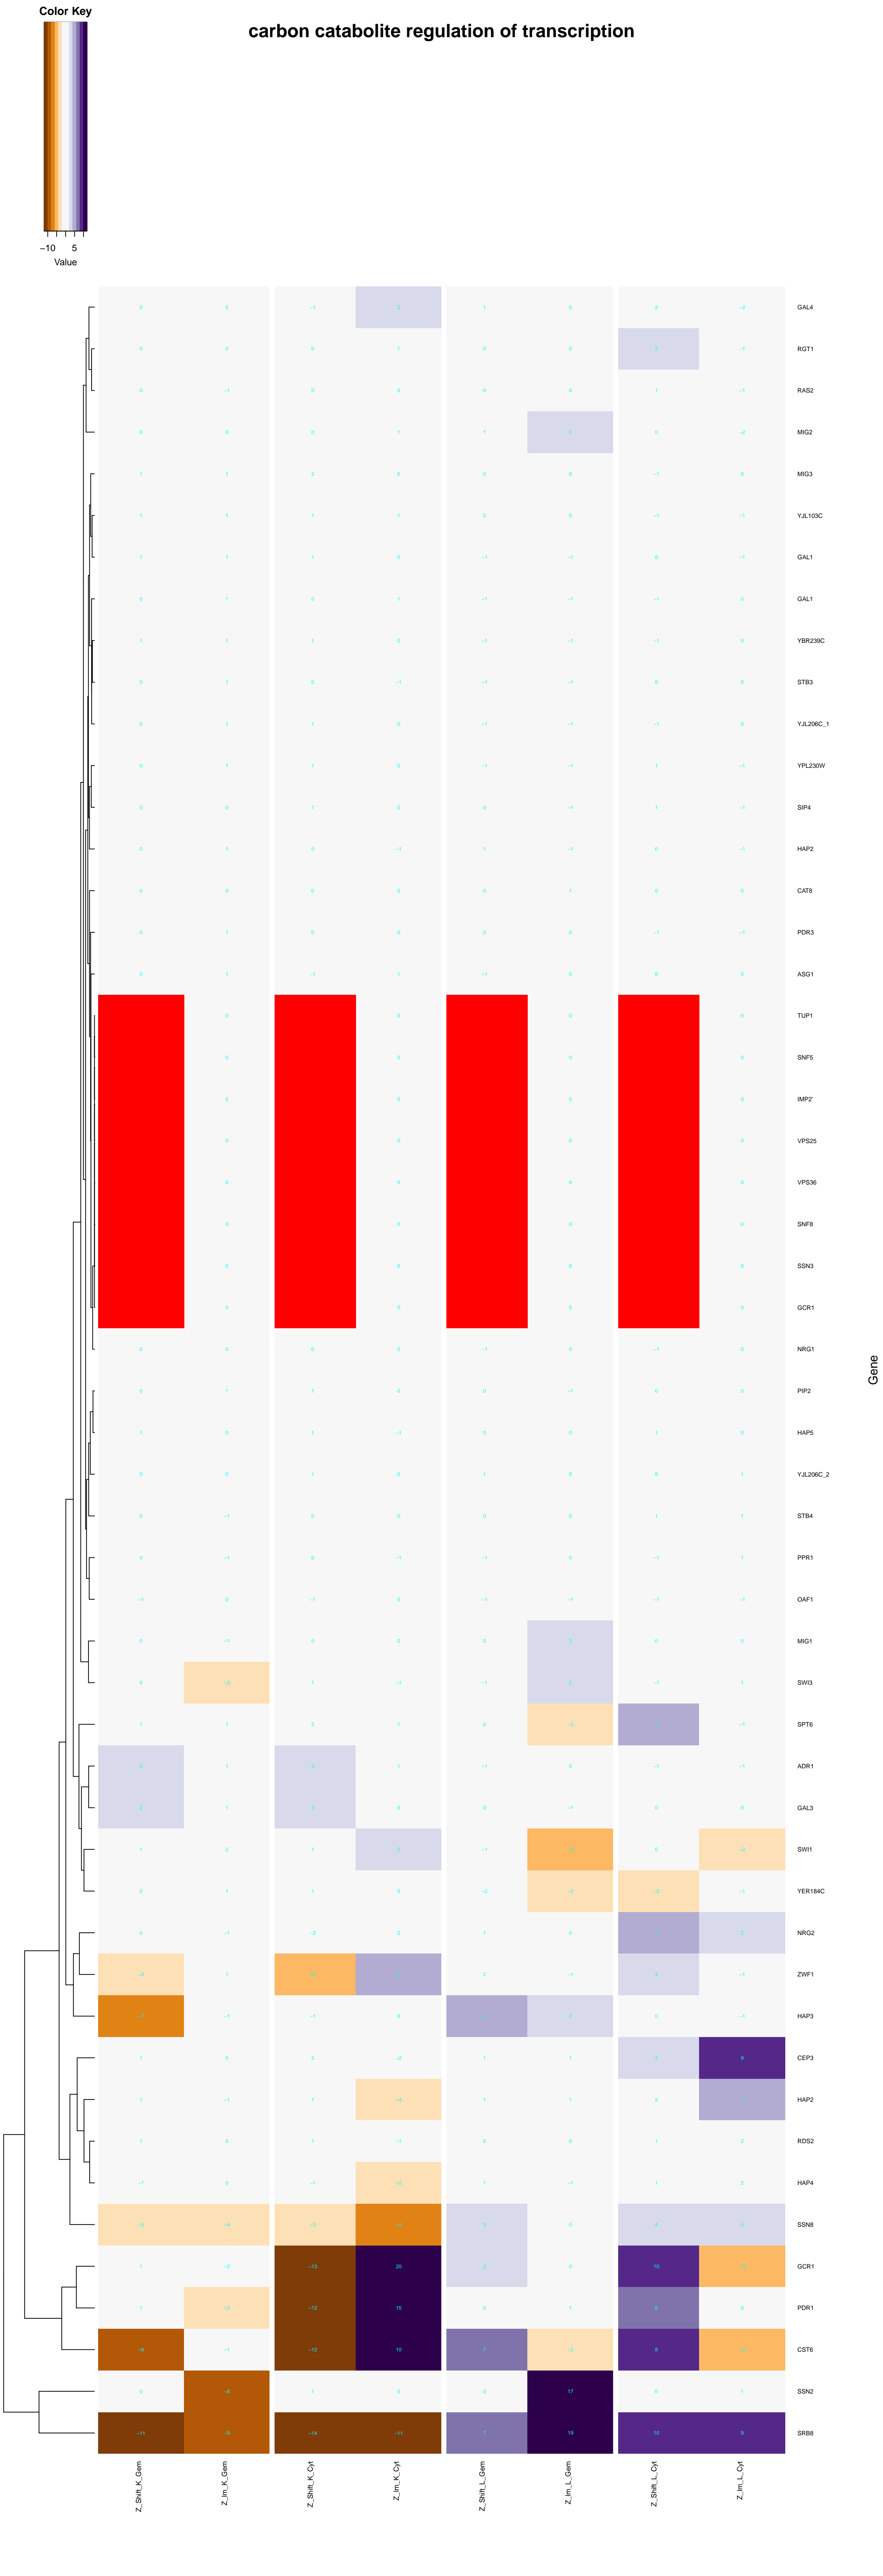

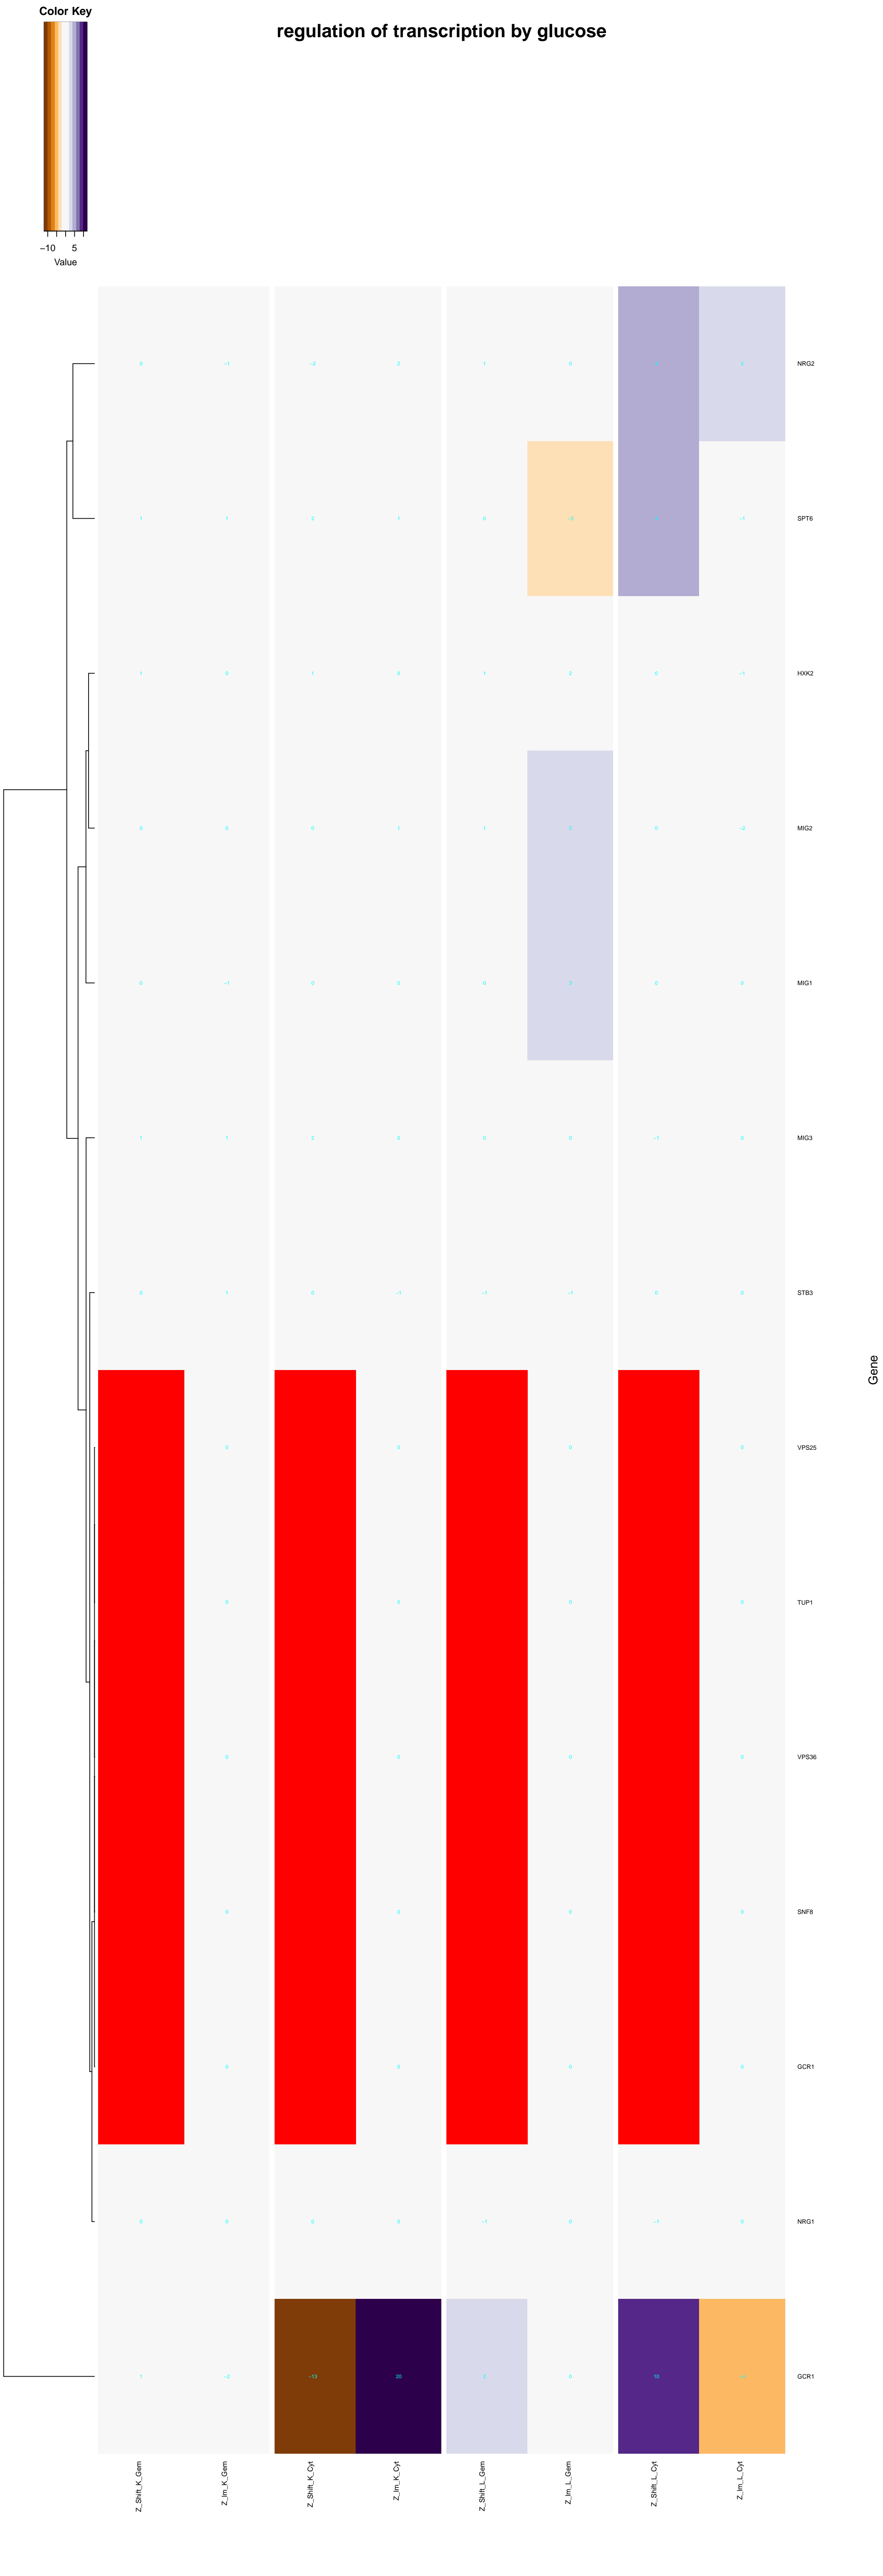

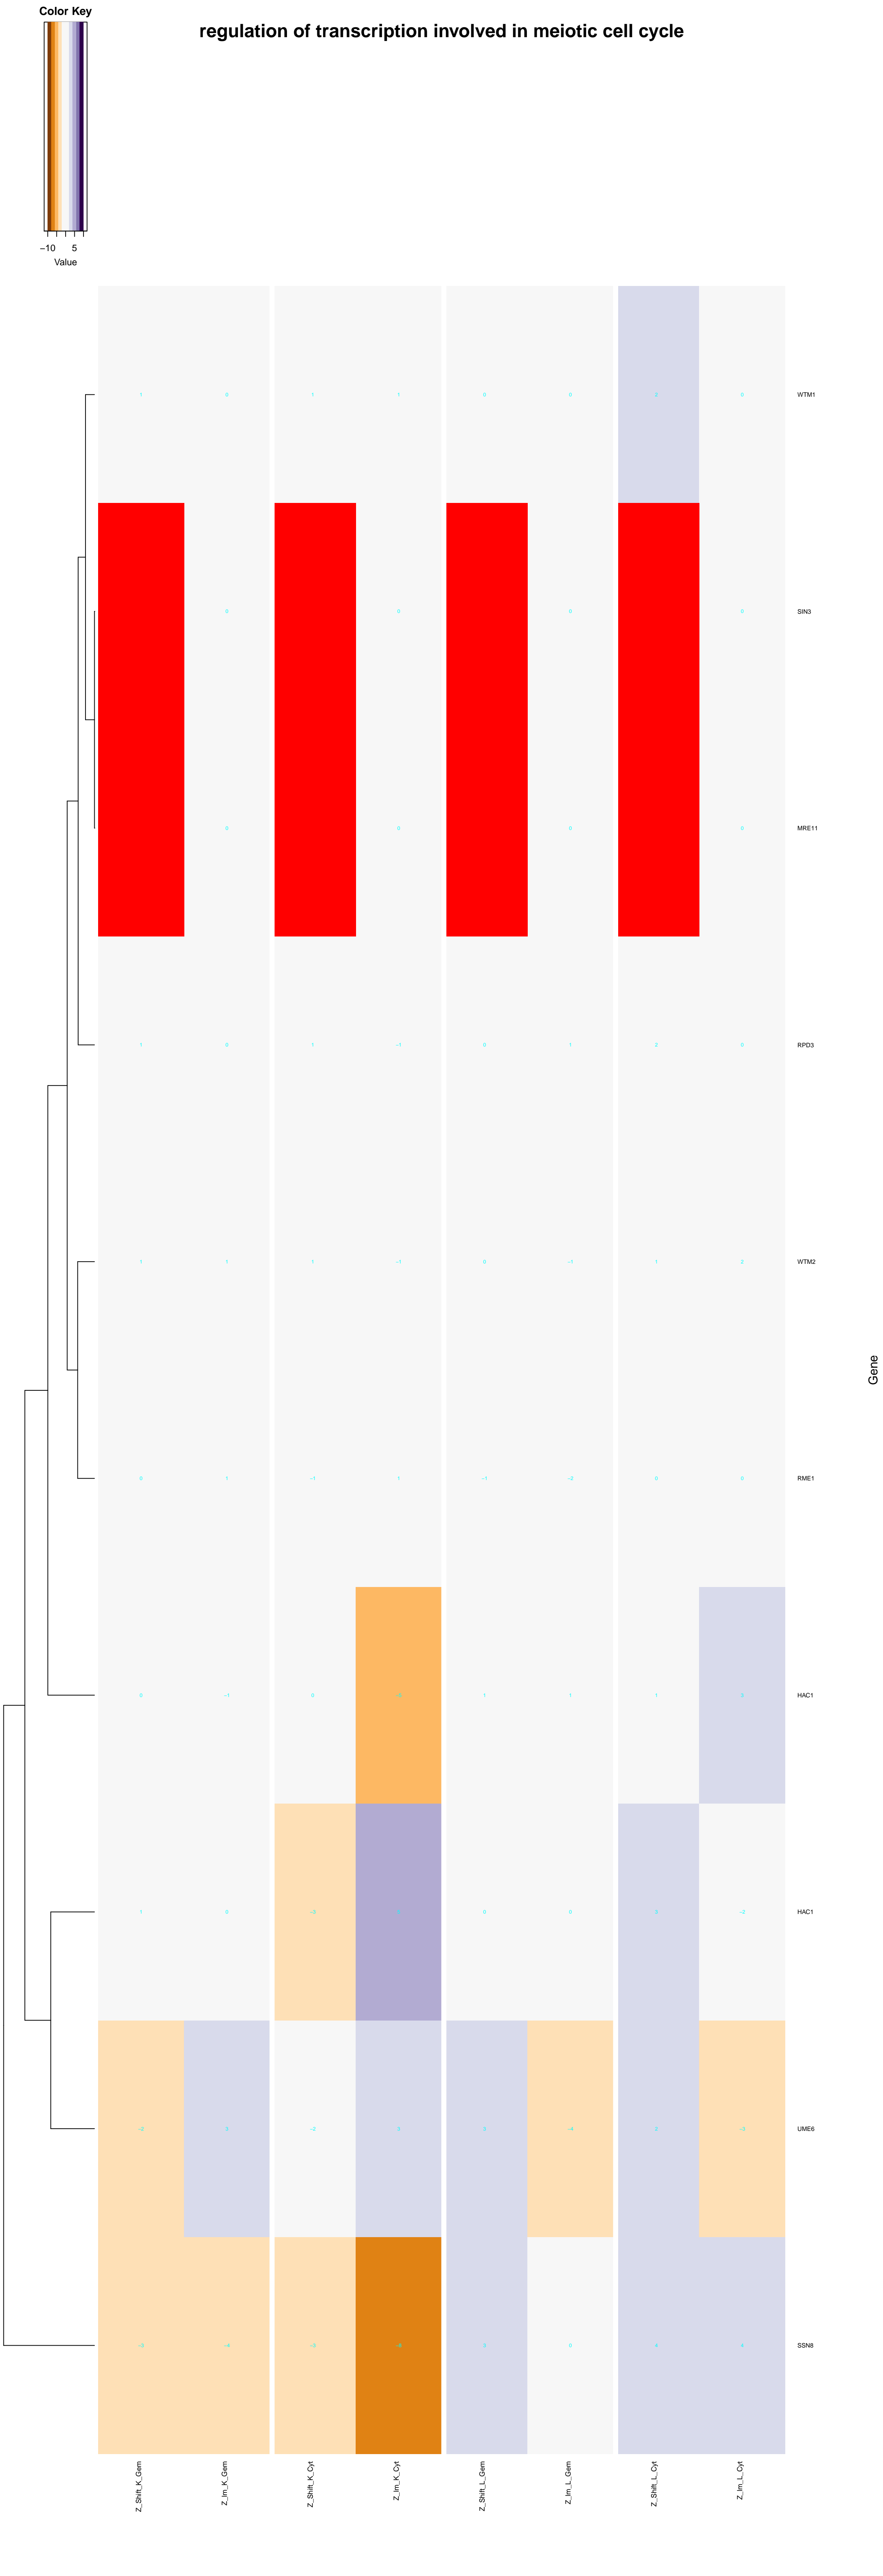



regulation of sequence-specific DNA binding transcription factor activity

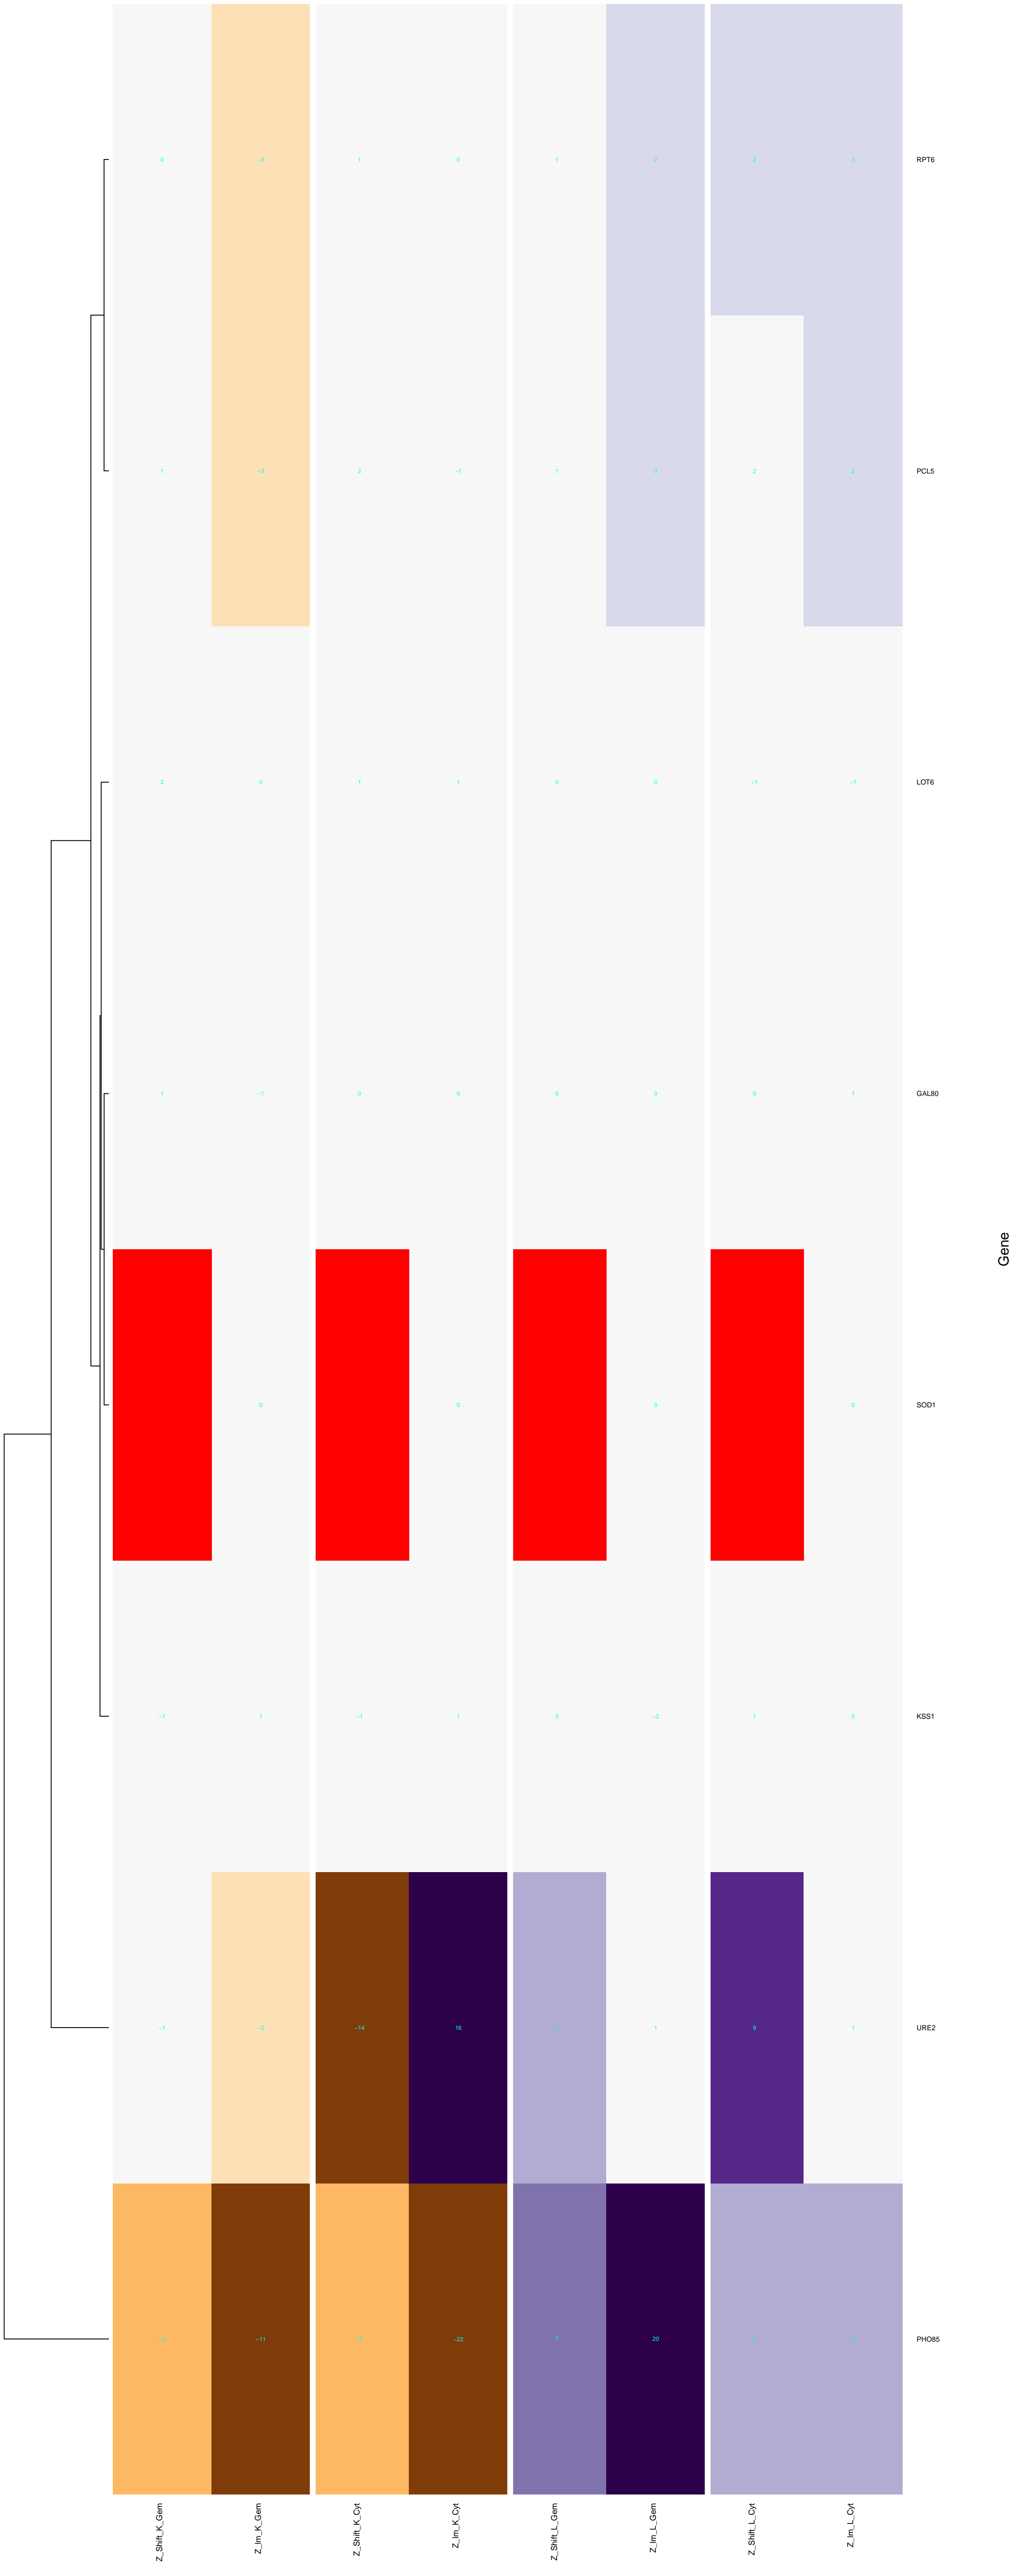

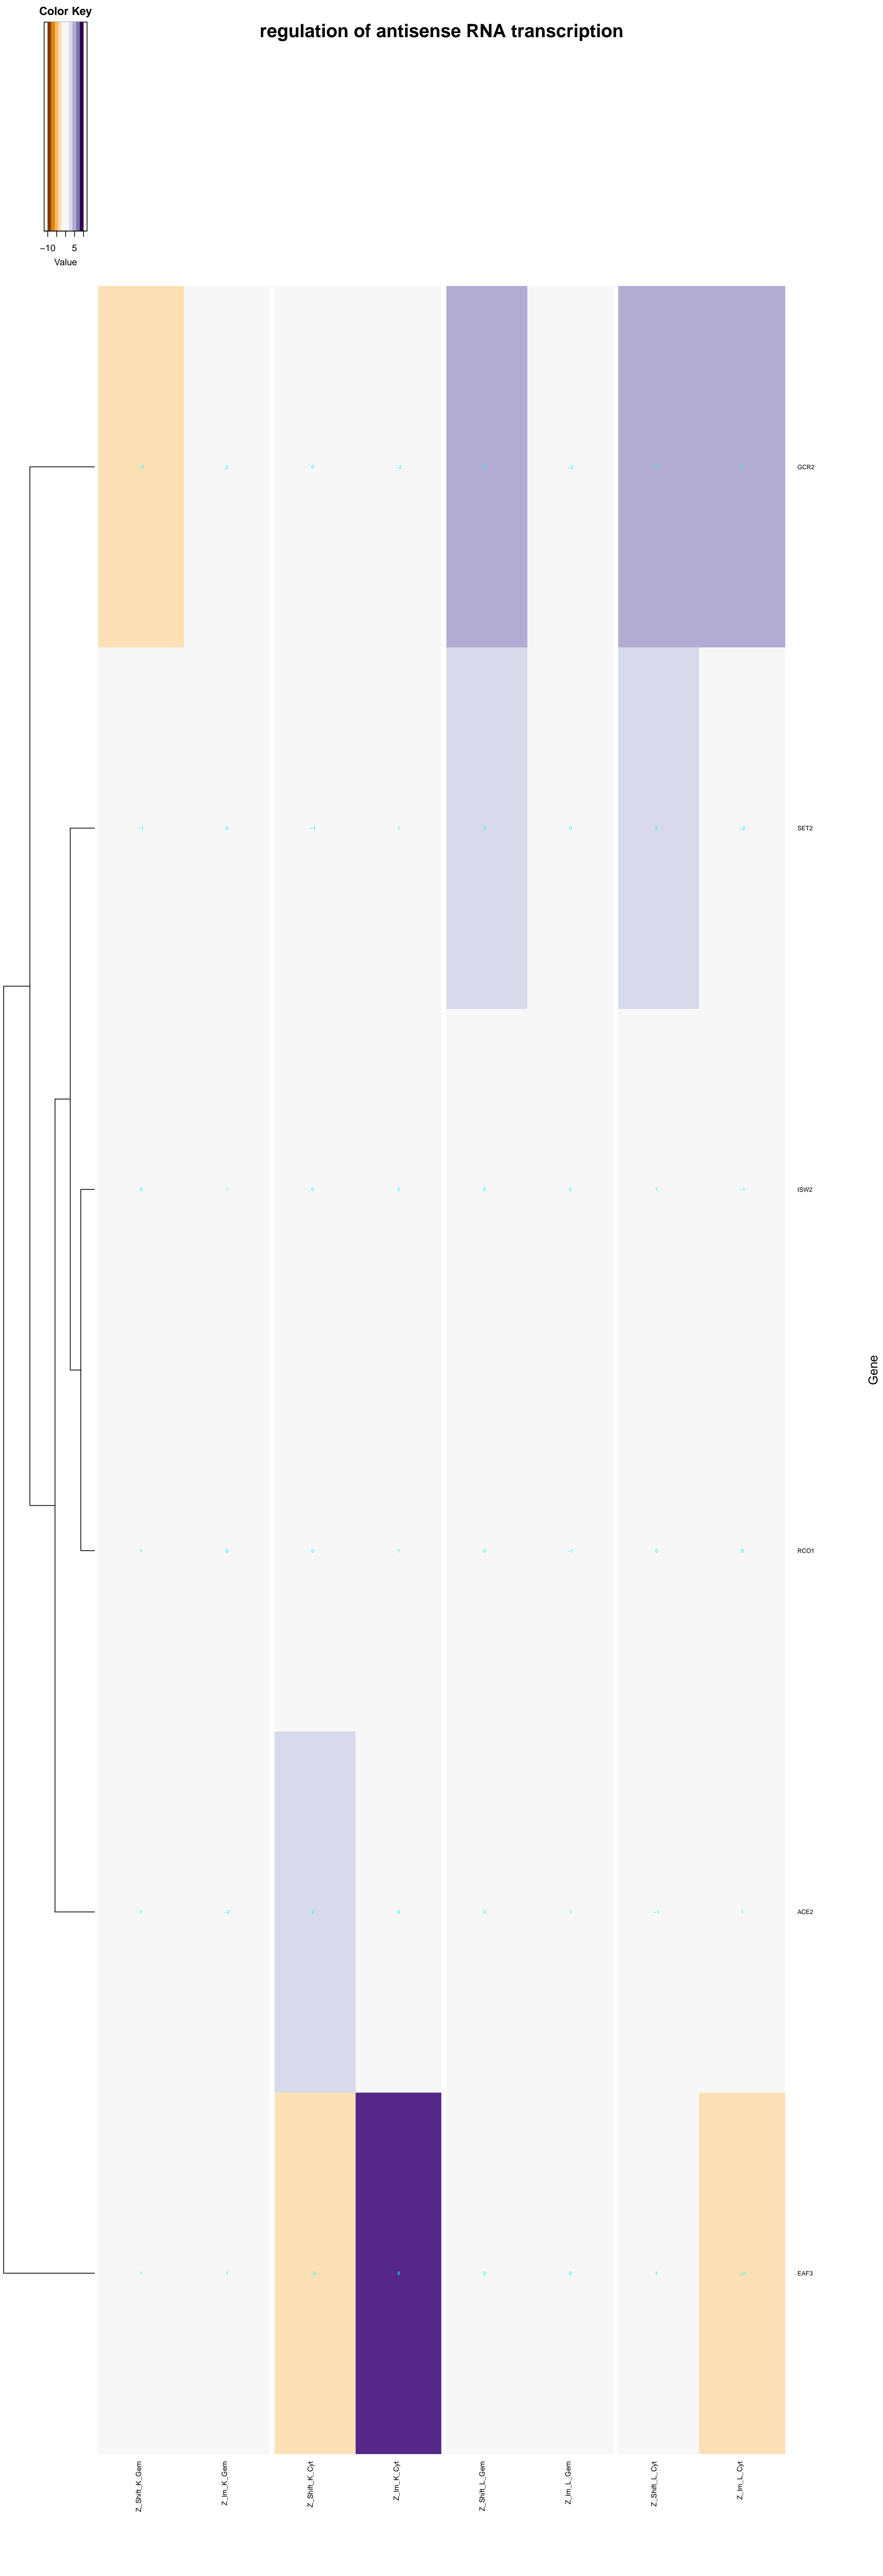

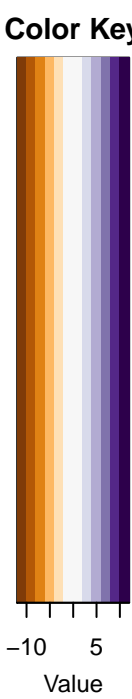

nitrogen catabolite regulation of transcription

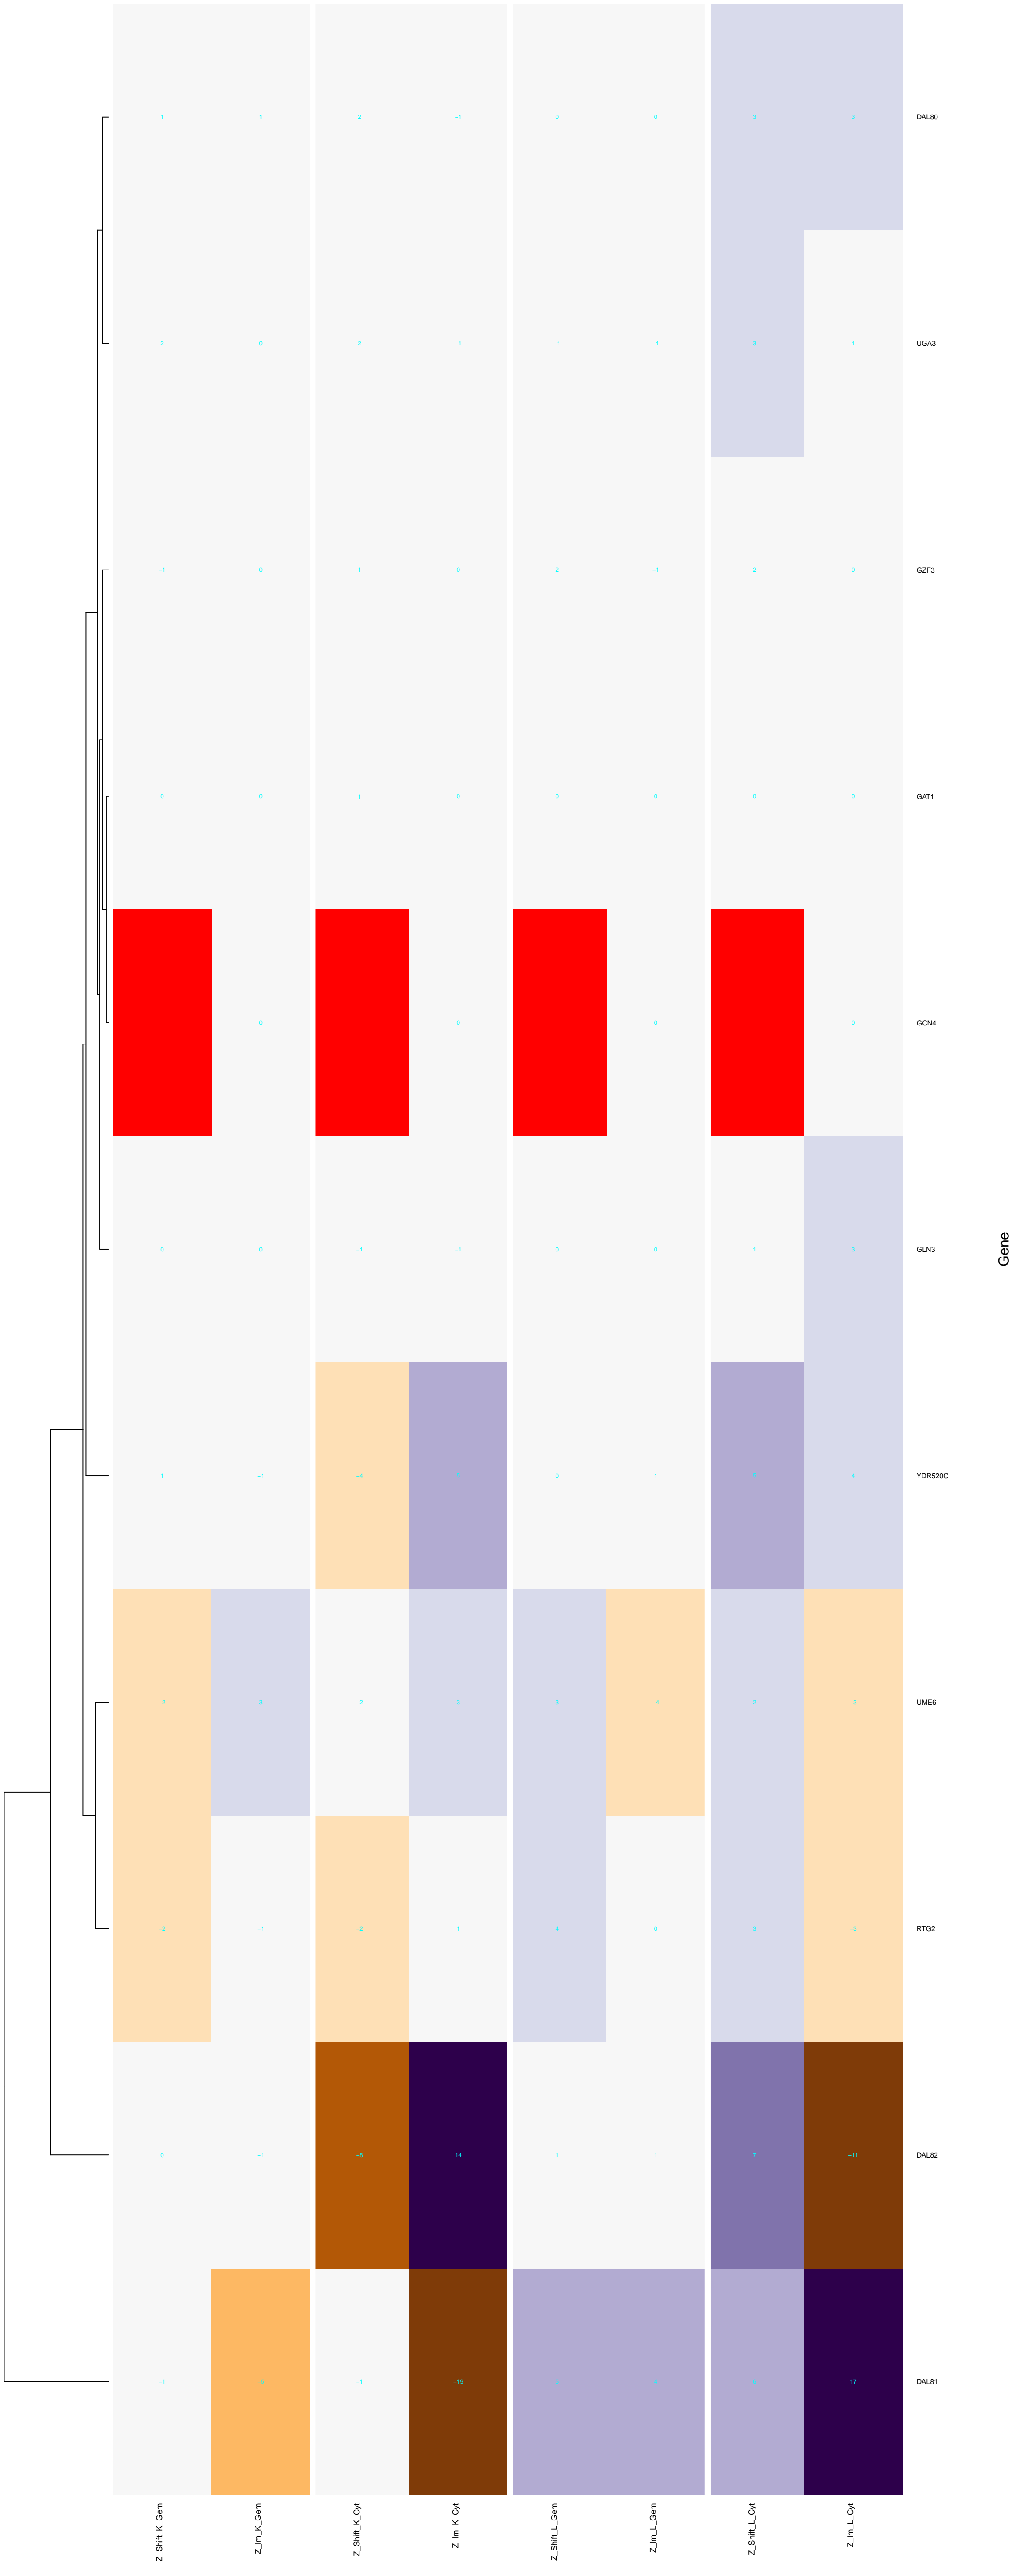

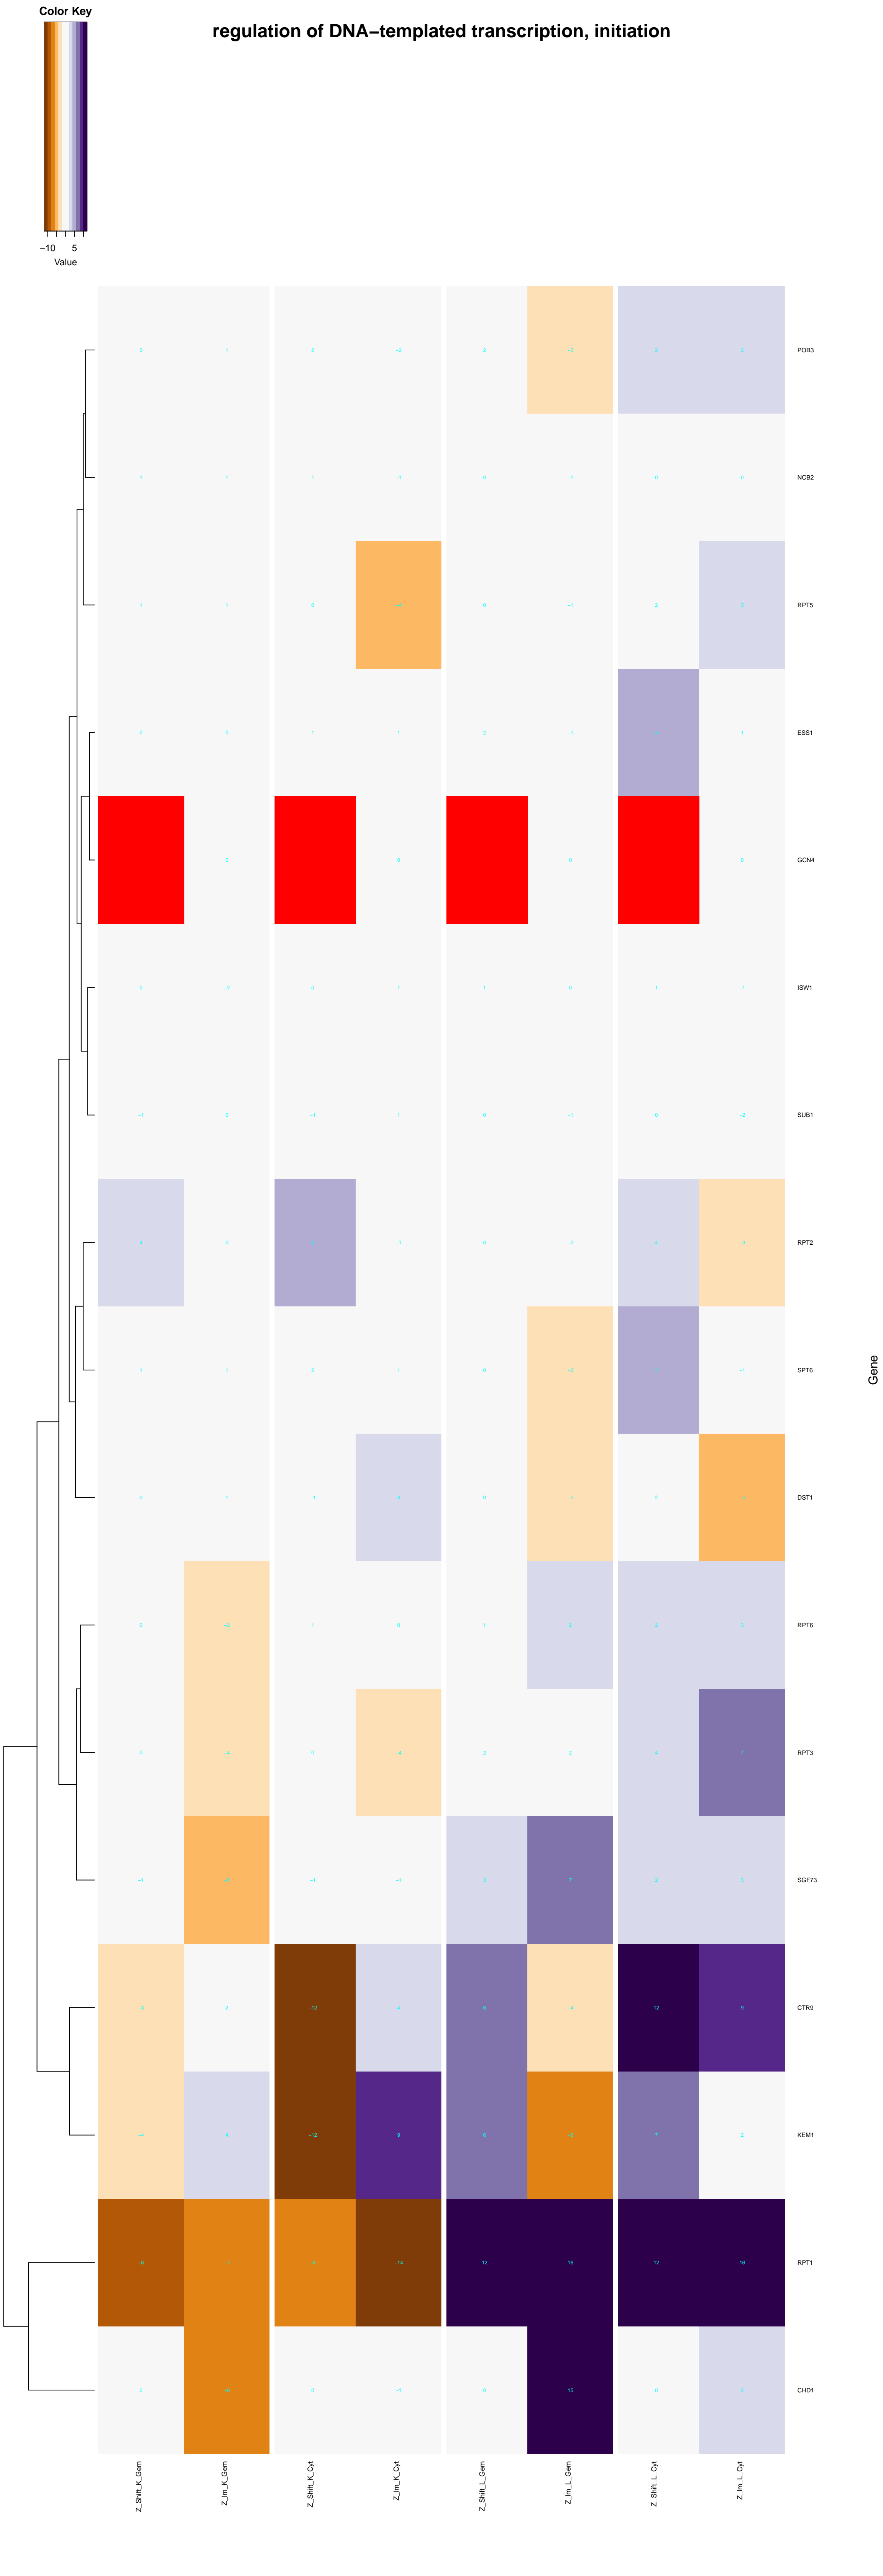



egative regulation of transcription involved in G1/S transition of mitotic cell cycle

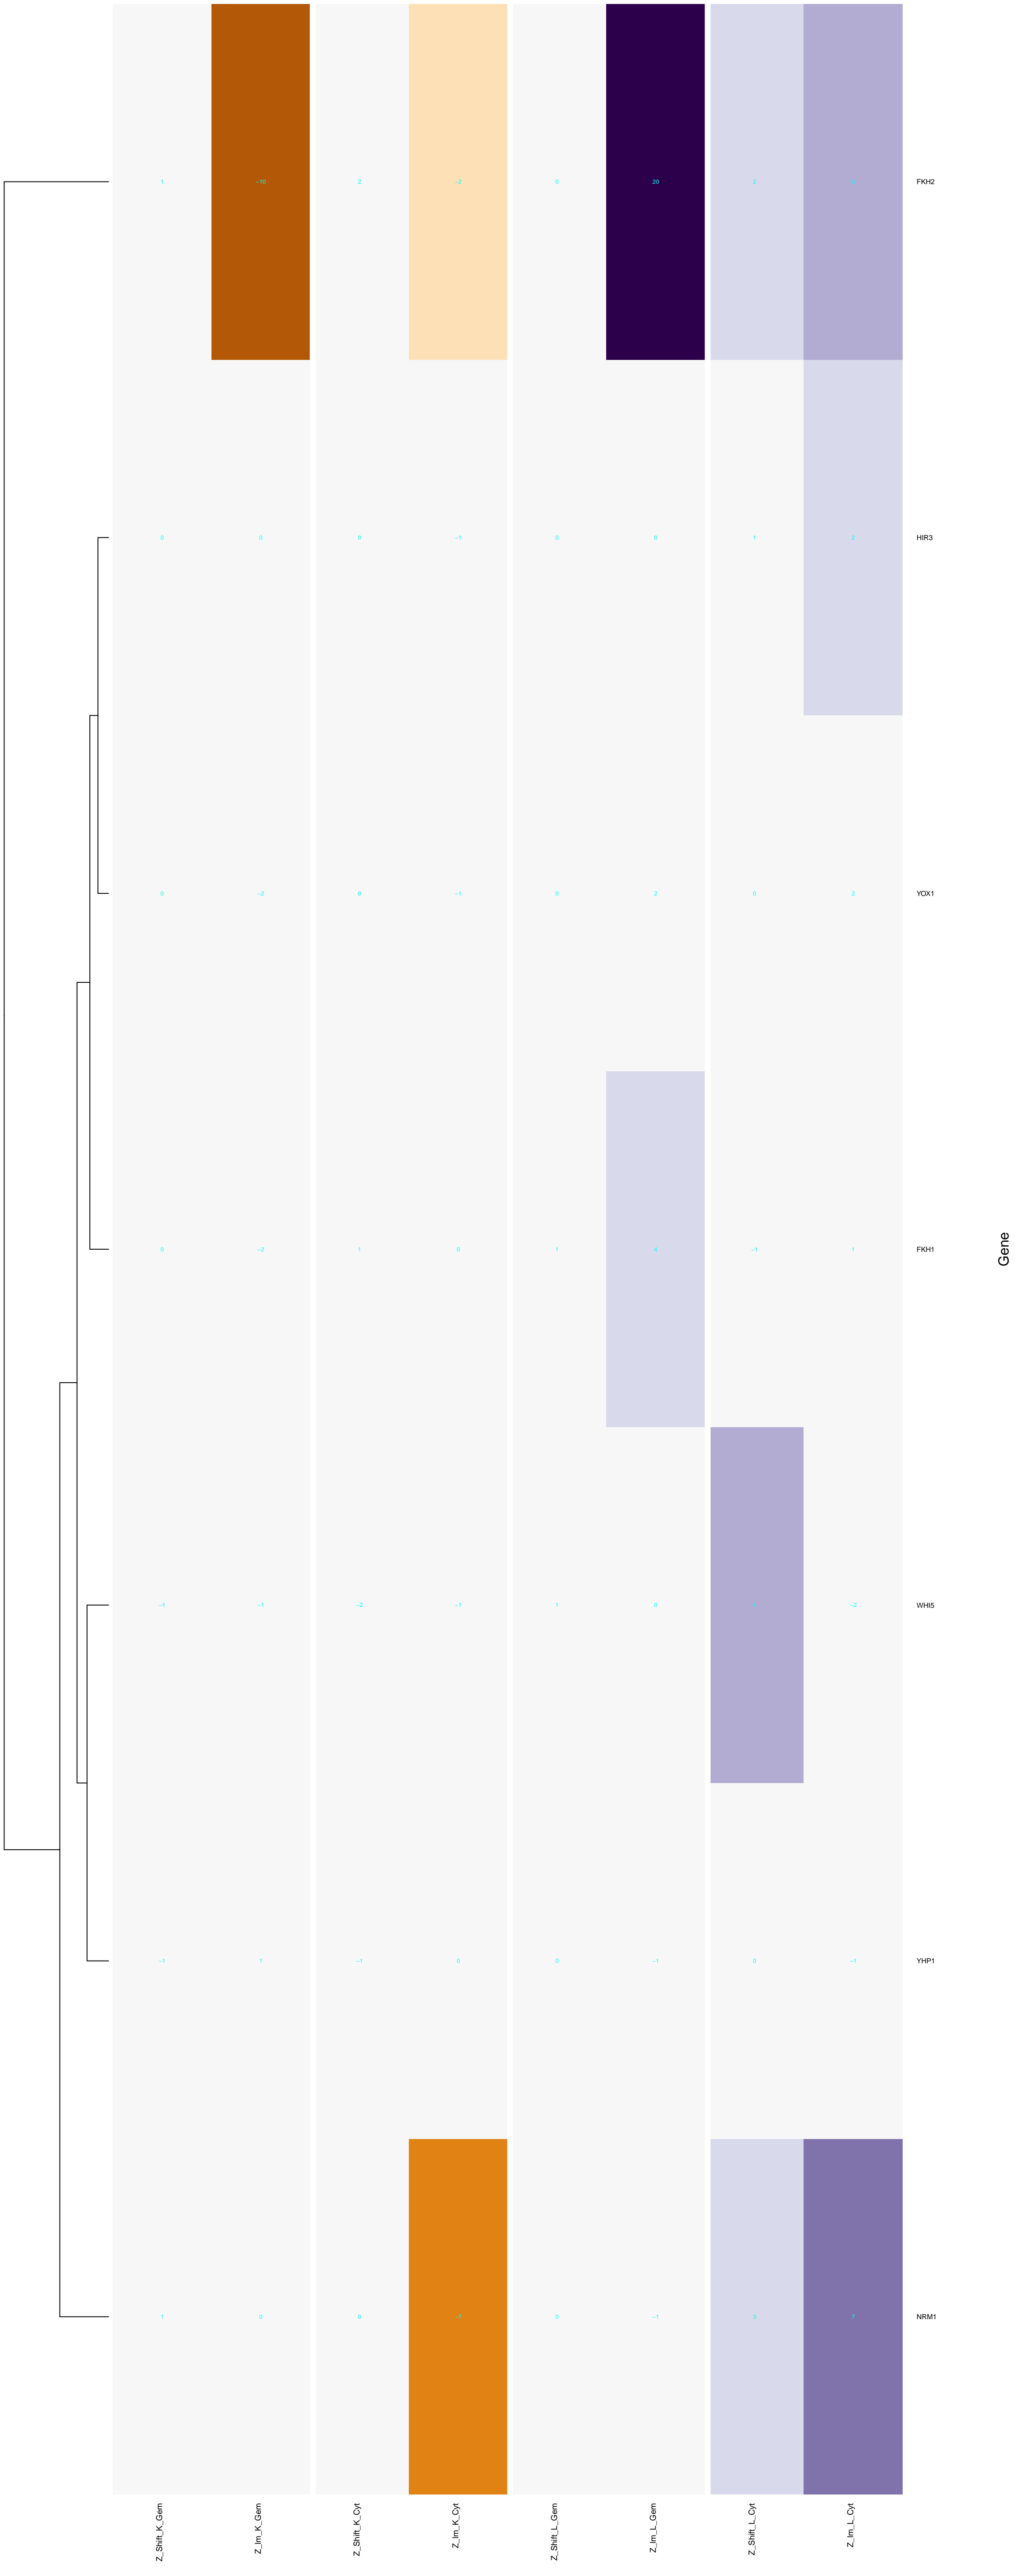



ositive regulation of transcription involved in G1/S transition of mitotic cell cycle

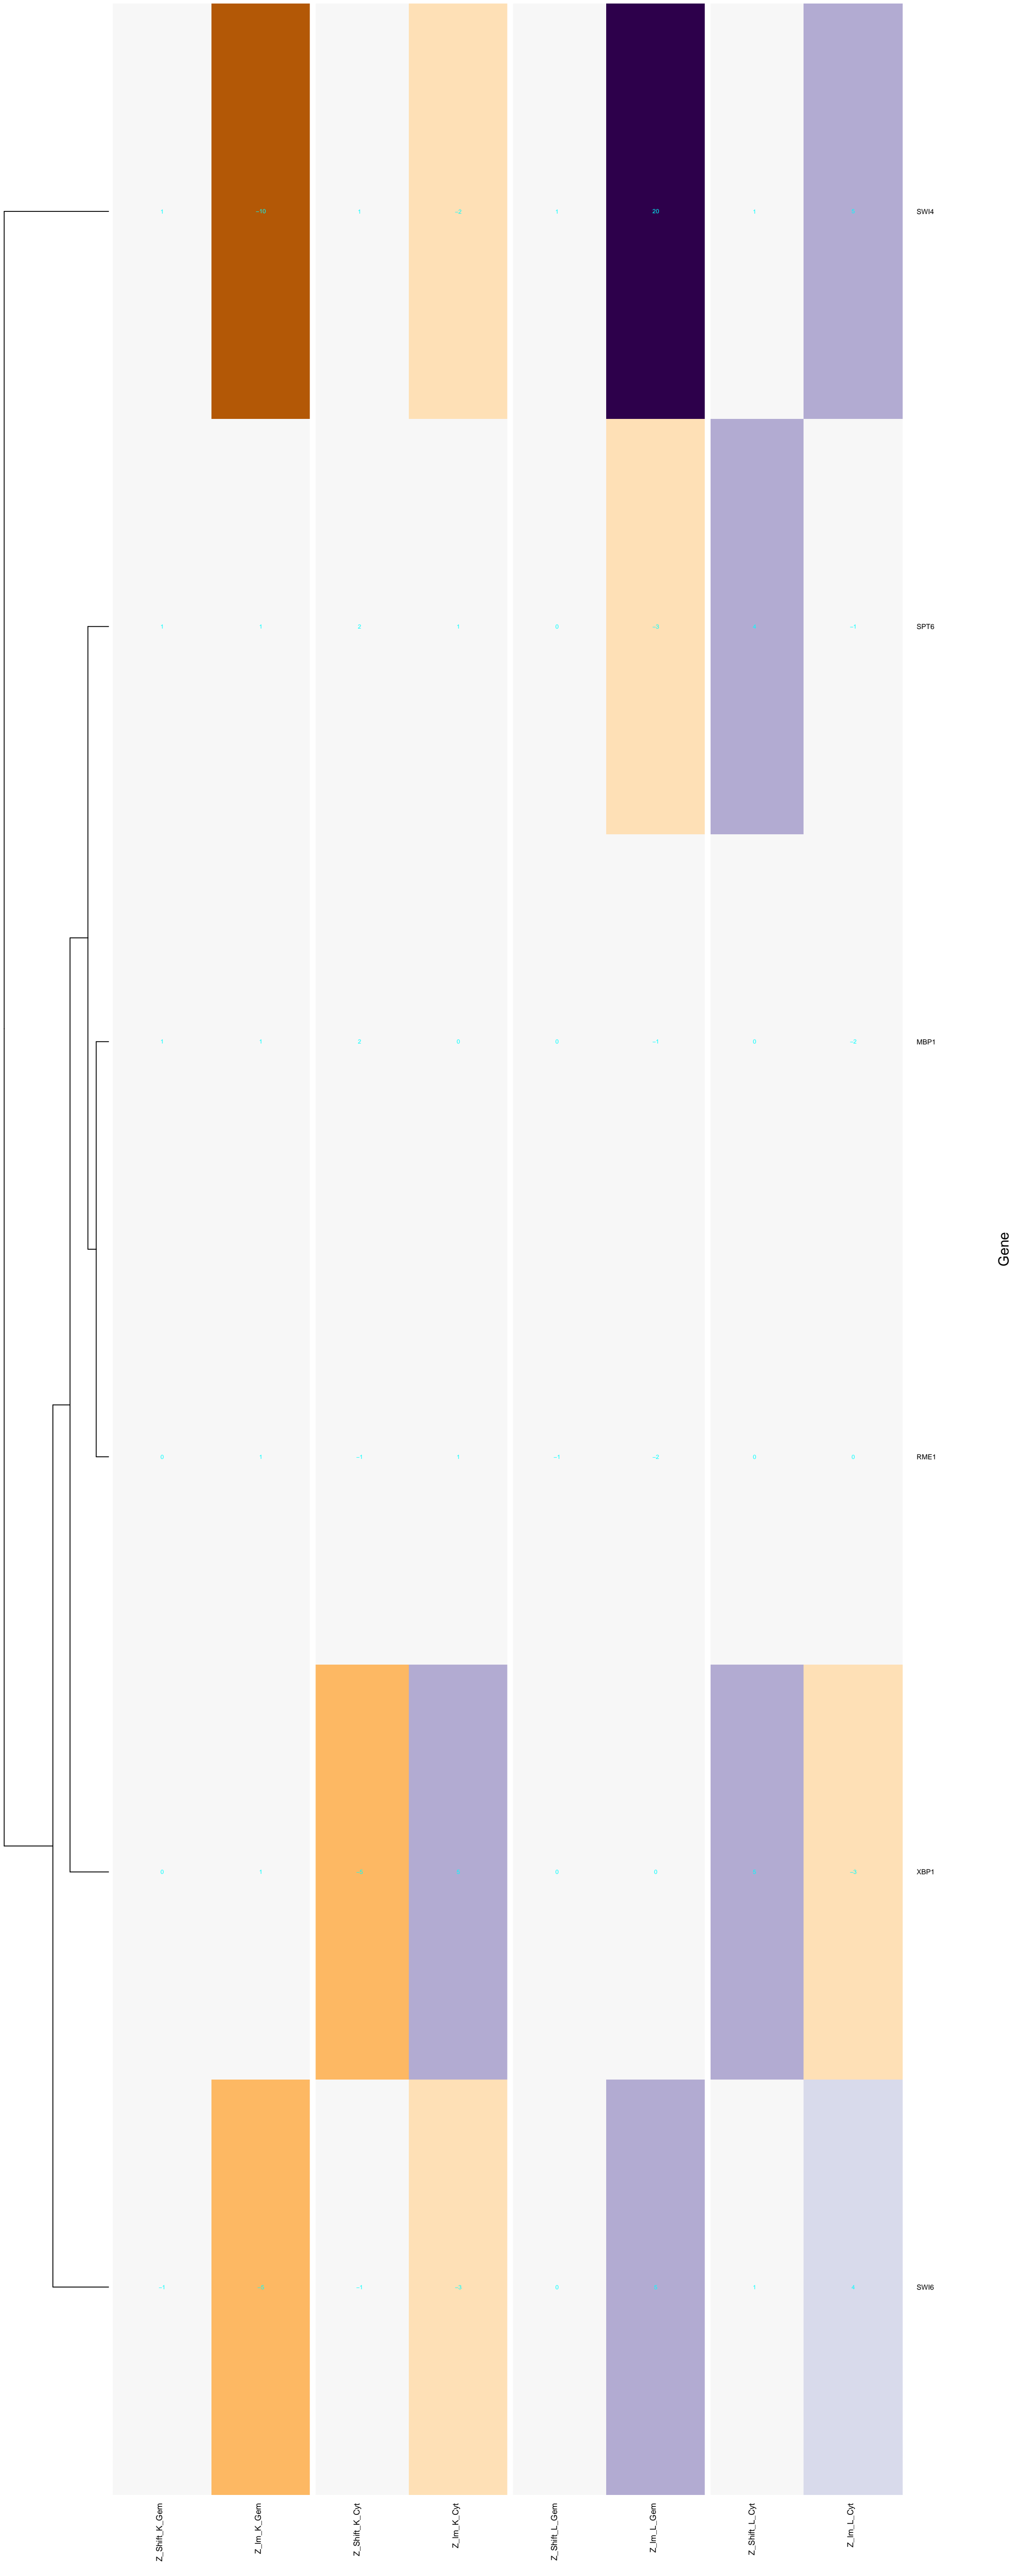



Positive regulation of transcription involved in G2/M transition of mitotic cell cycle

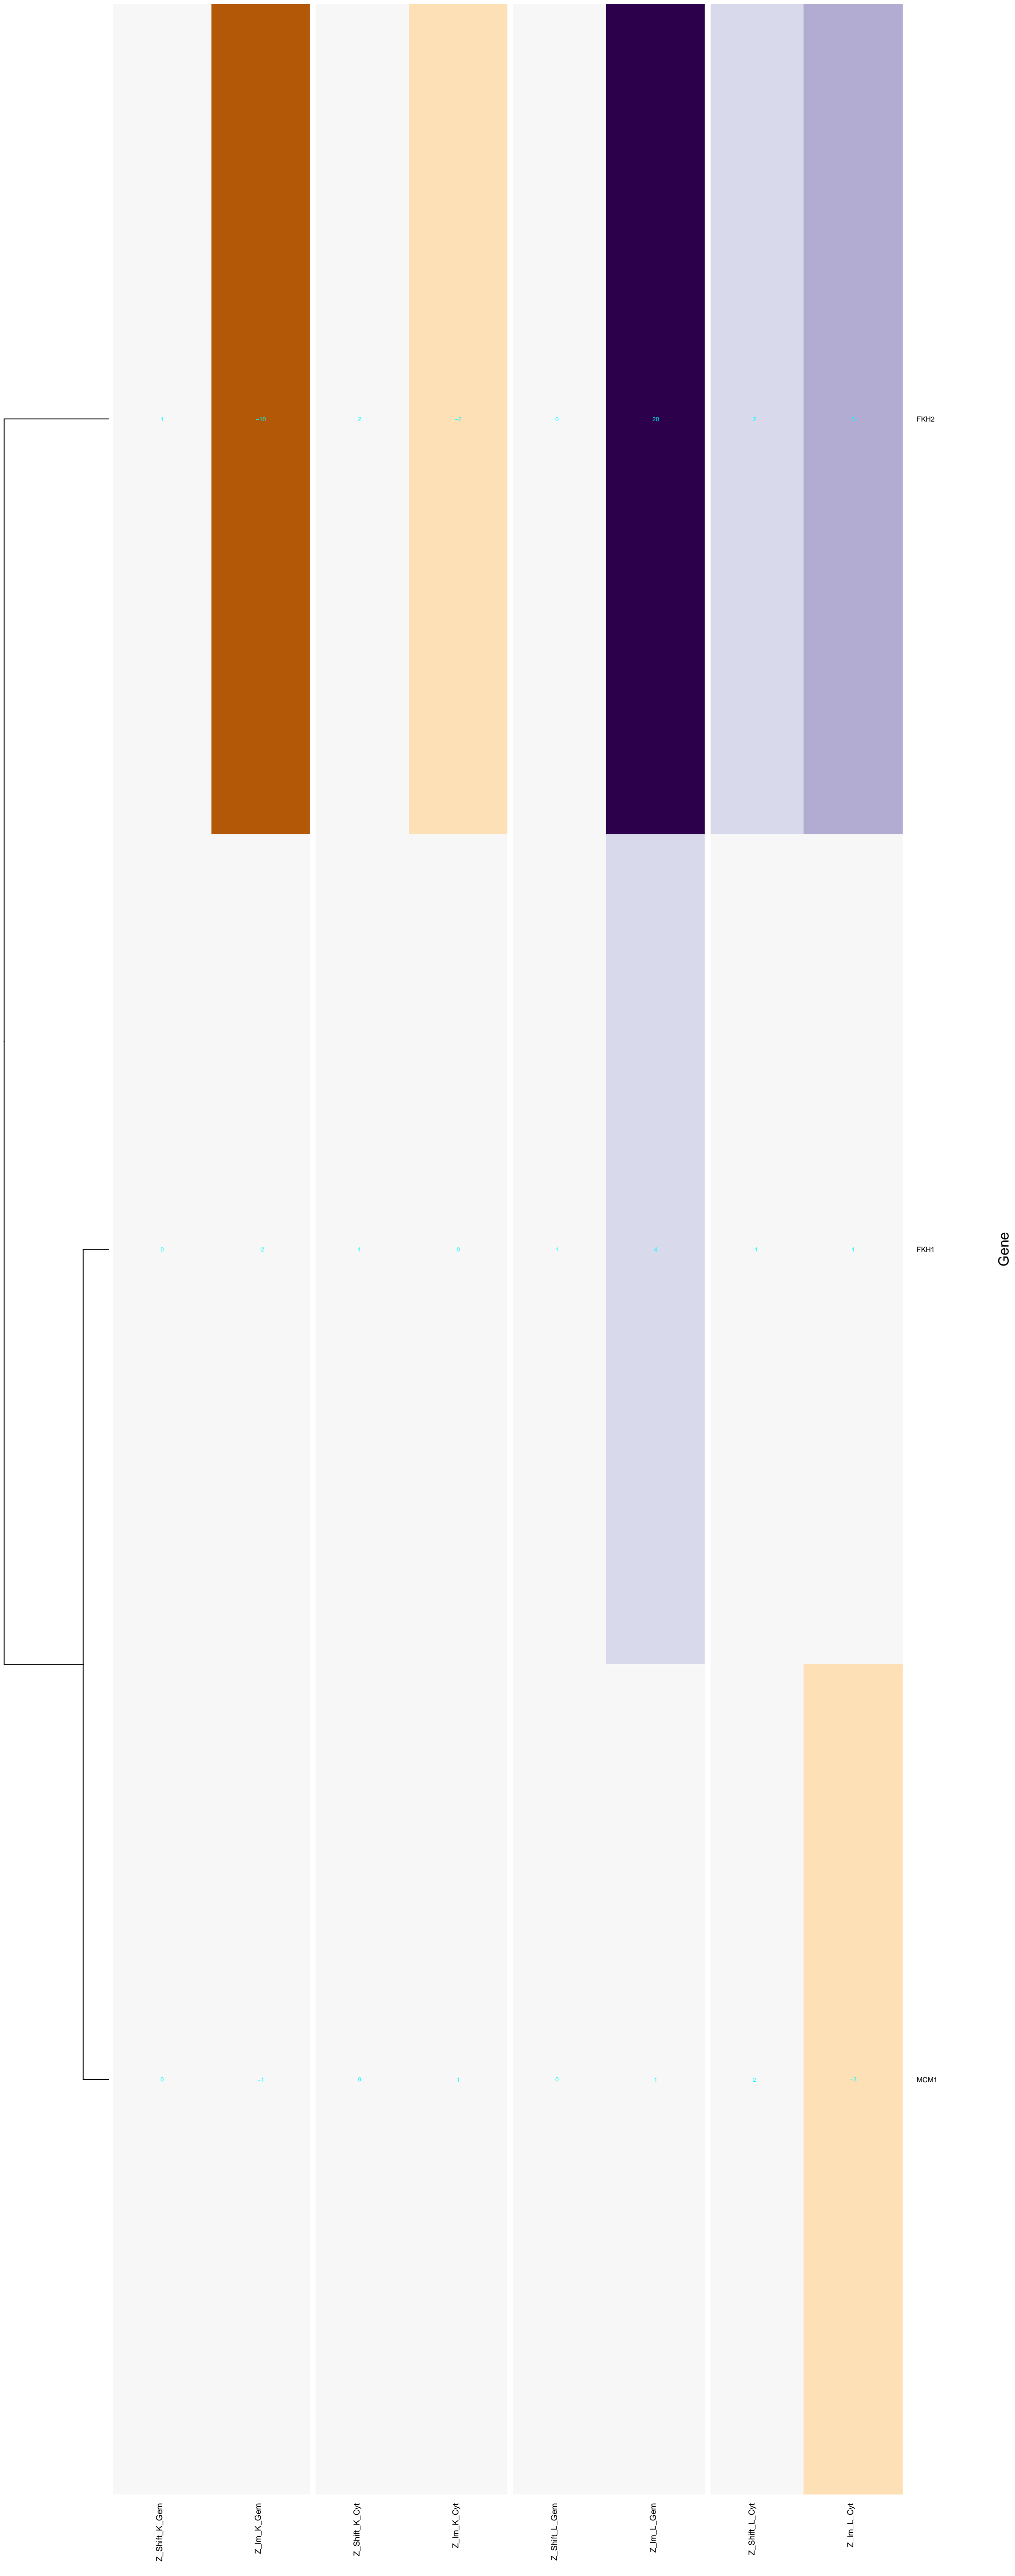

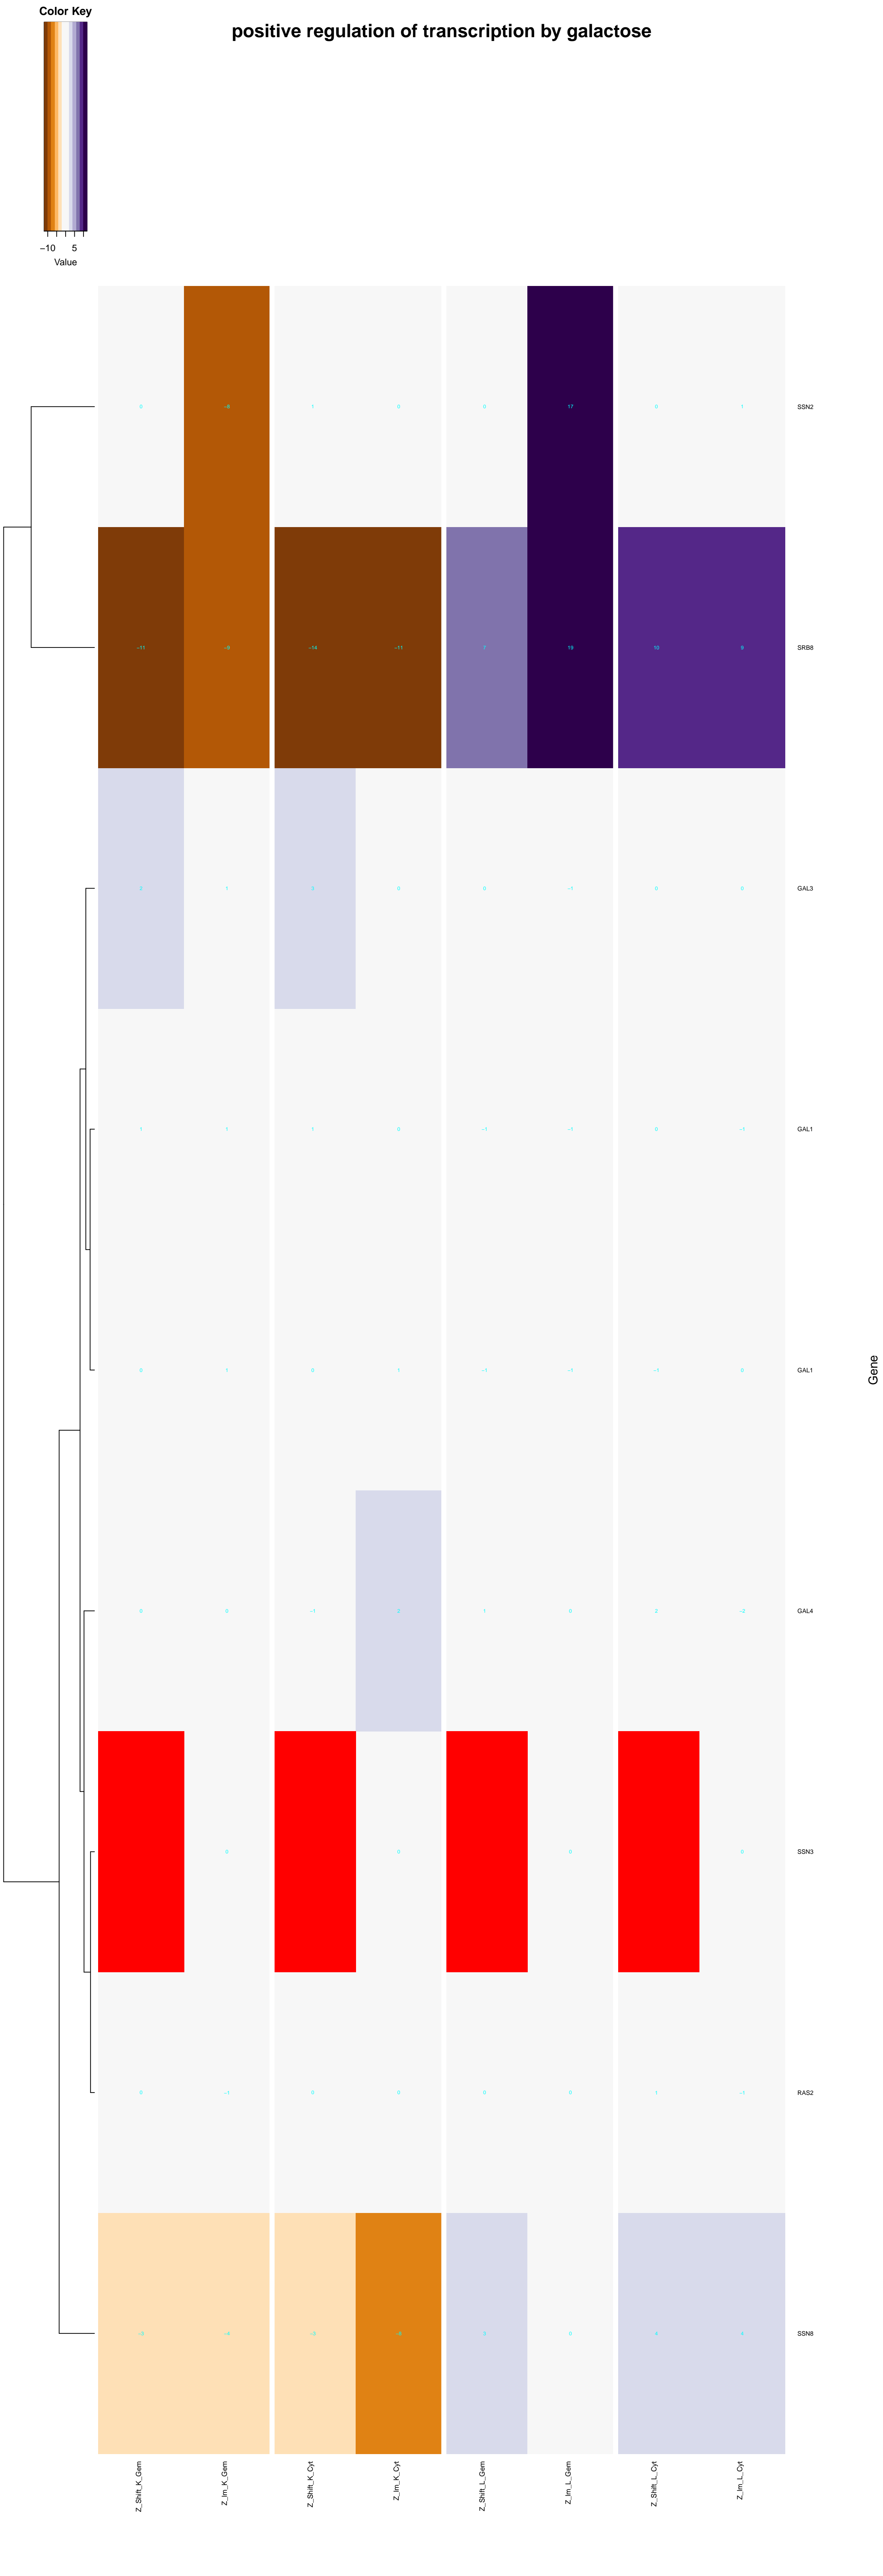

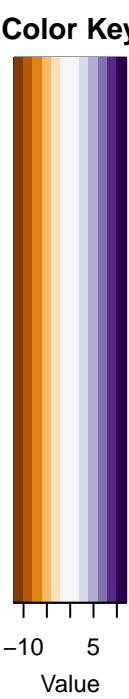

regulation of transcription from RNA polymerase II promoter by galactose

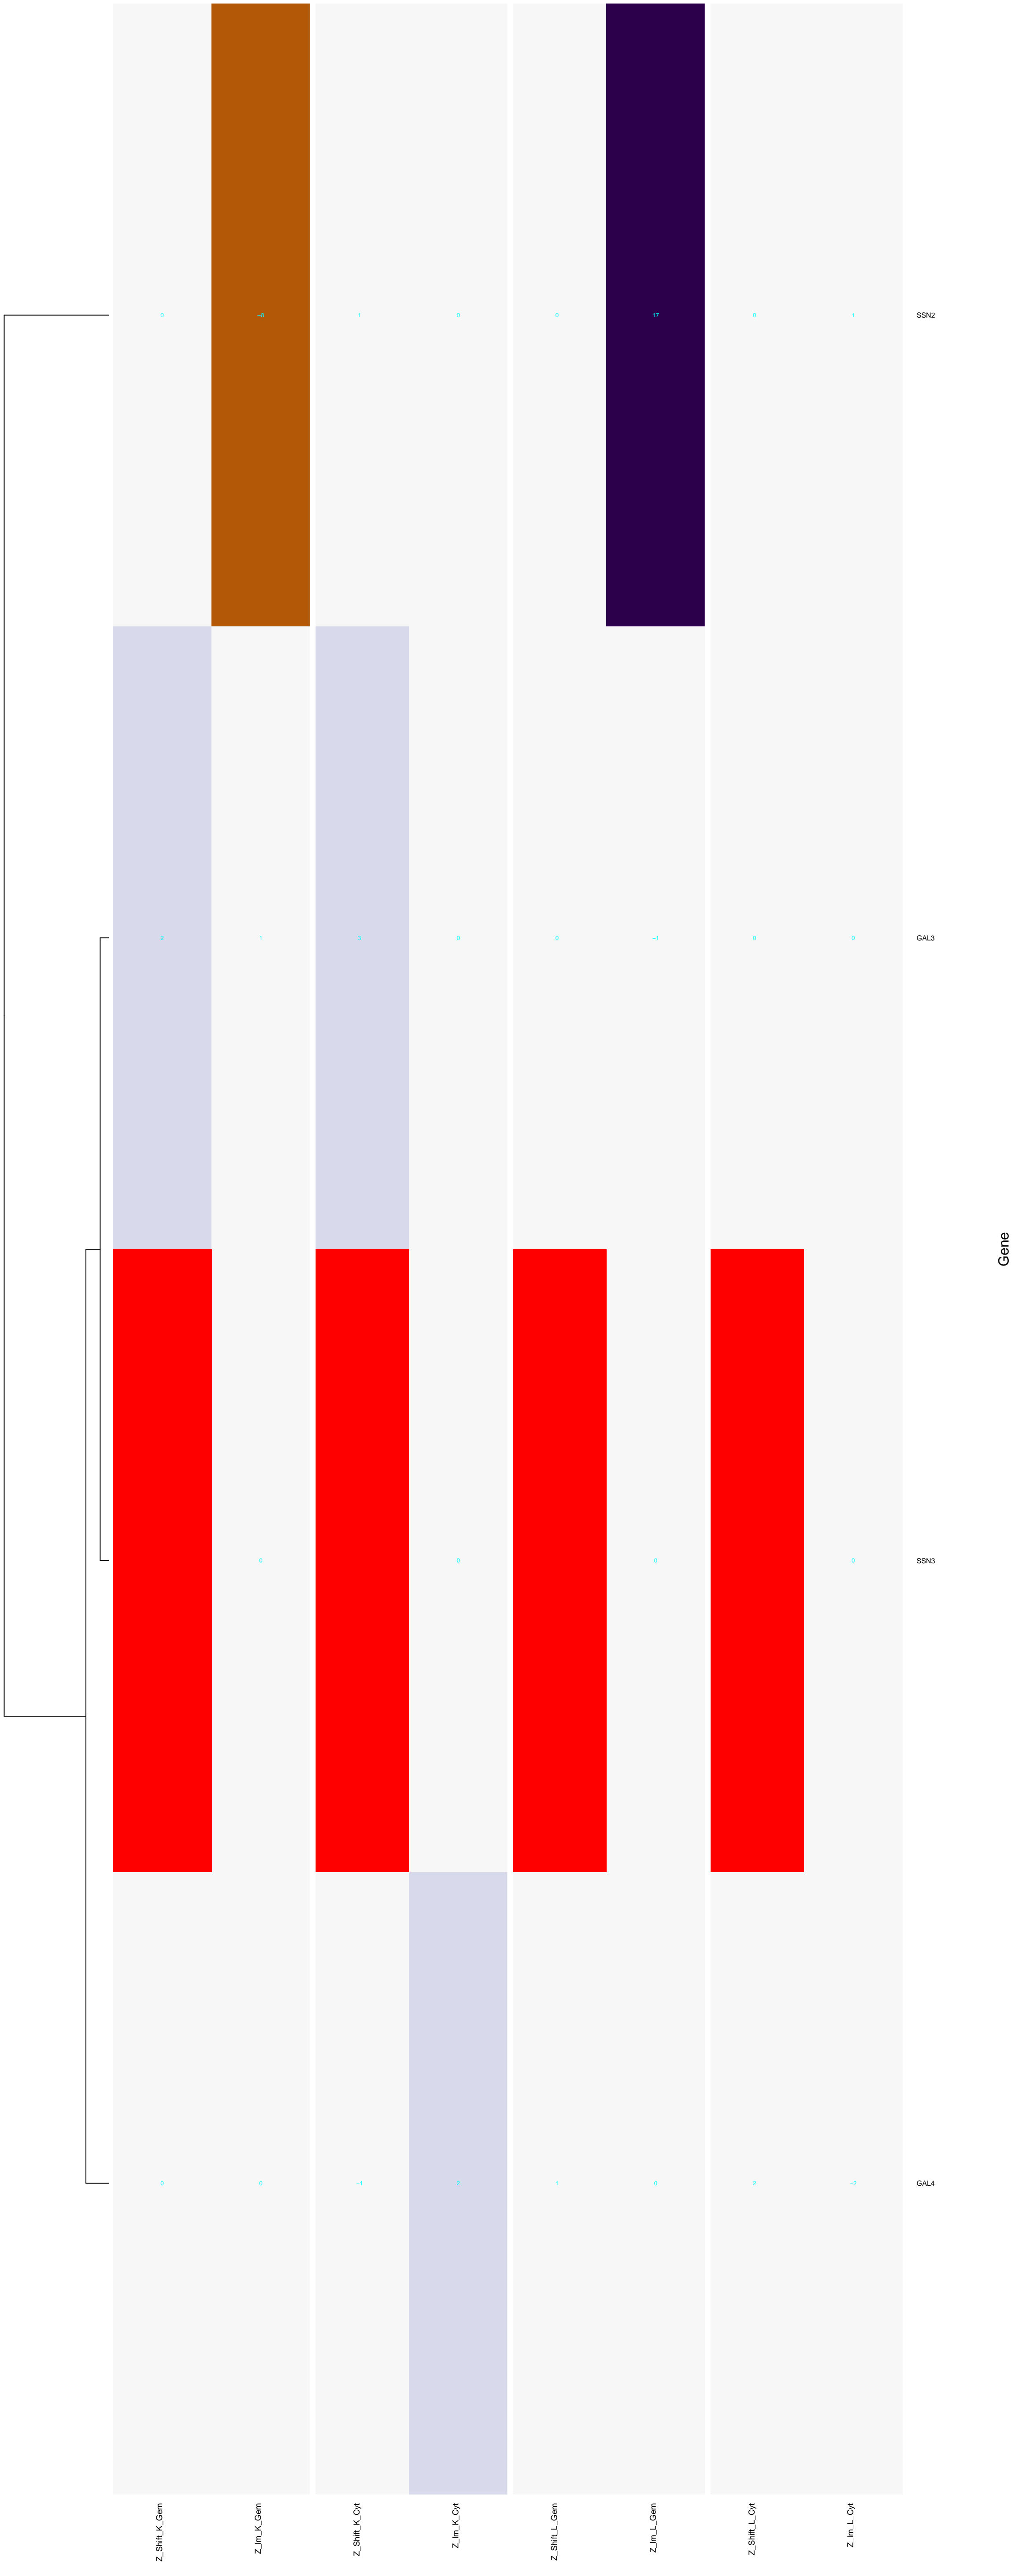

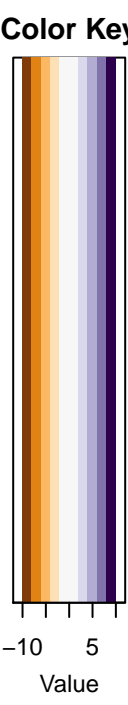

negative regulation of transcription from RNA polymerase I promoter

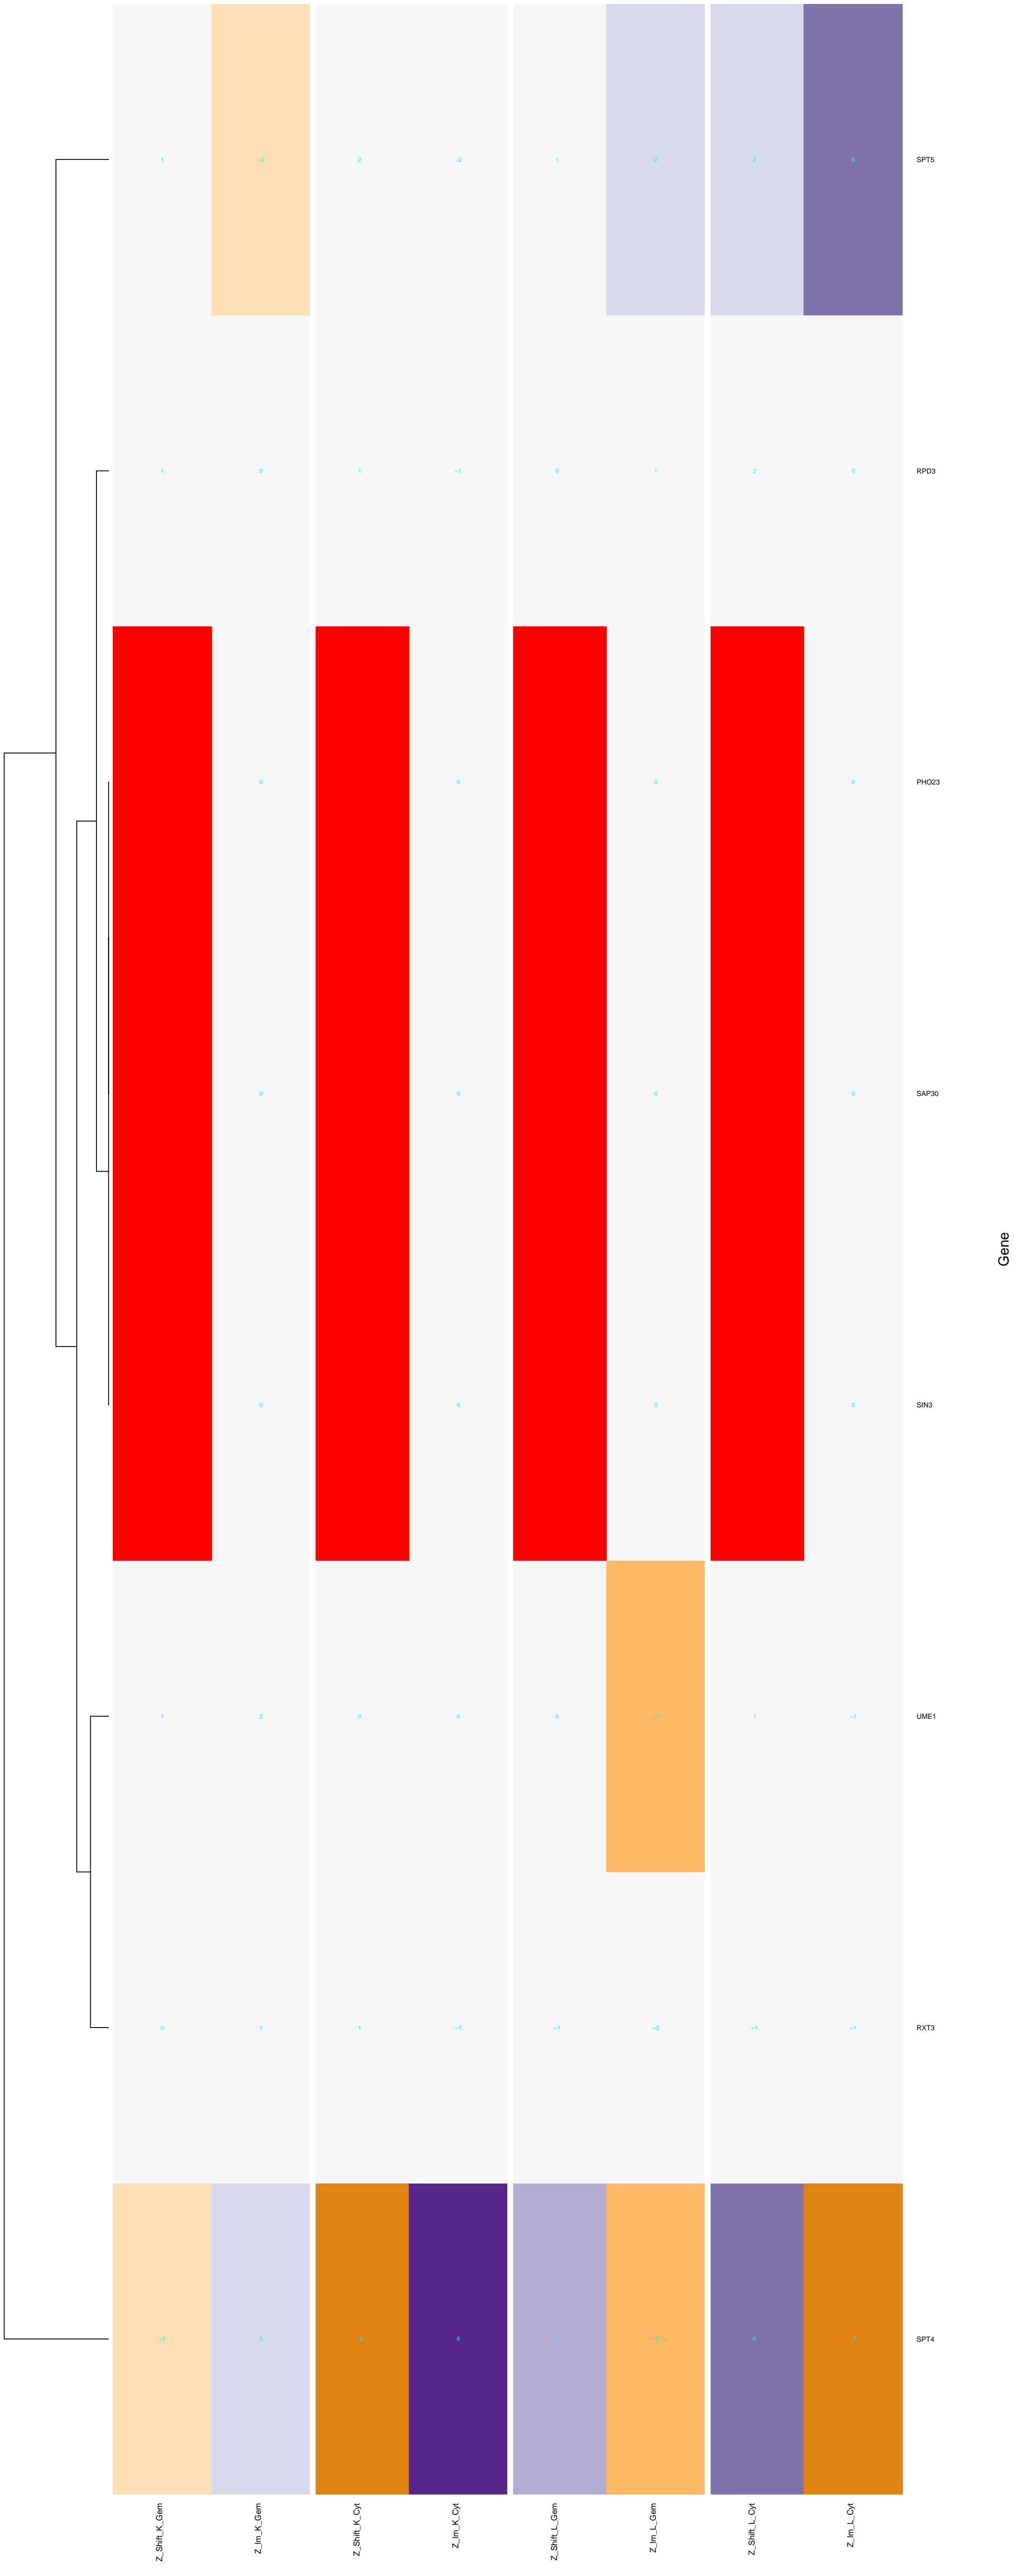

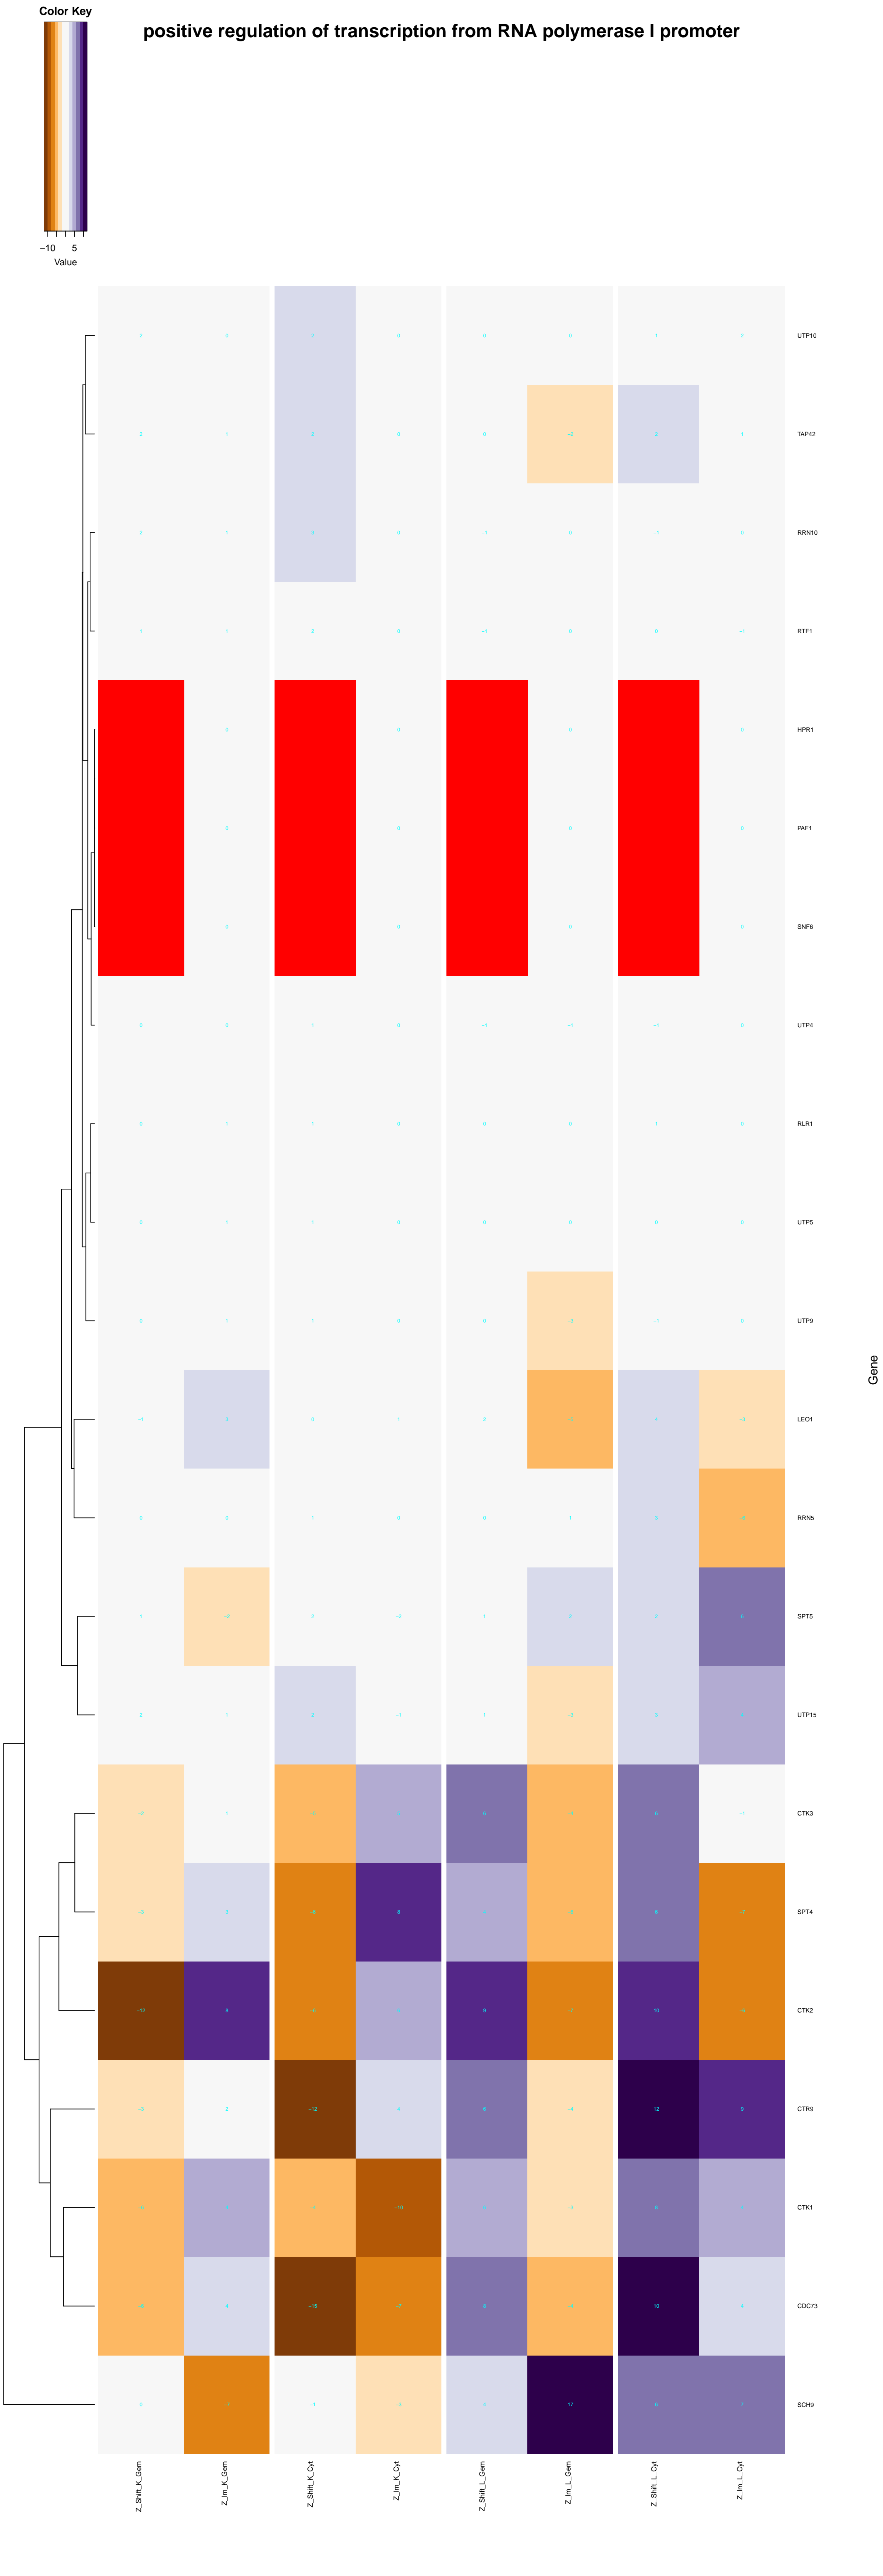



regulation of transcription elongation from RNA polymerase I promoter

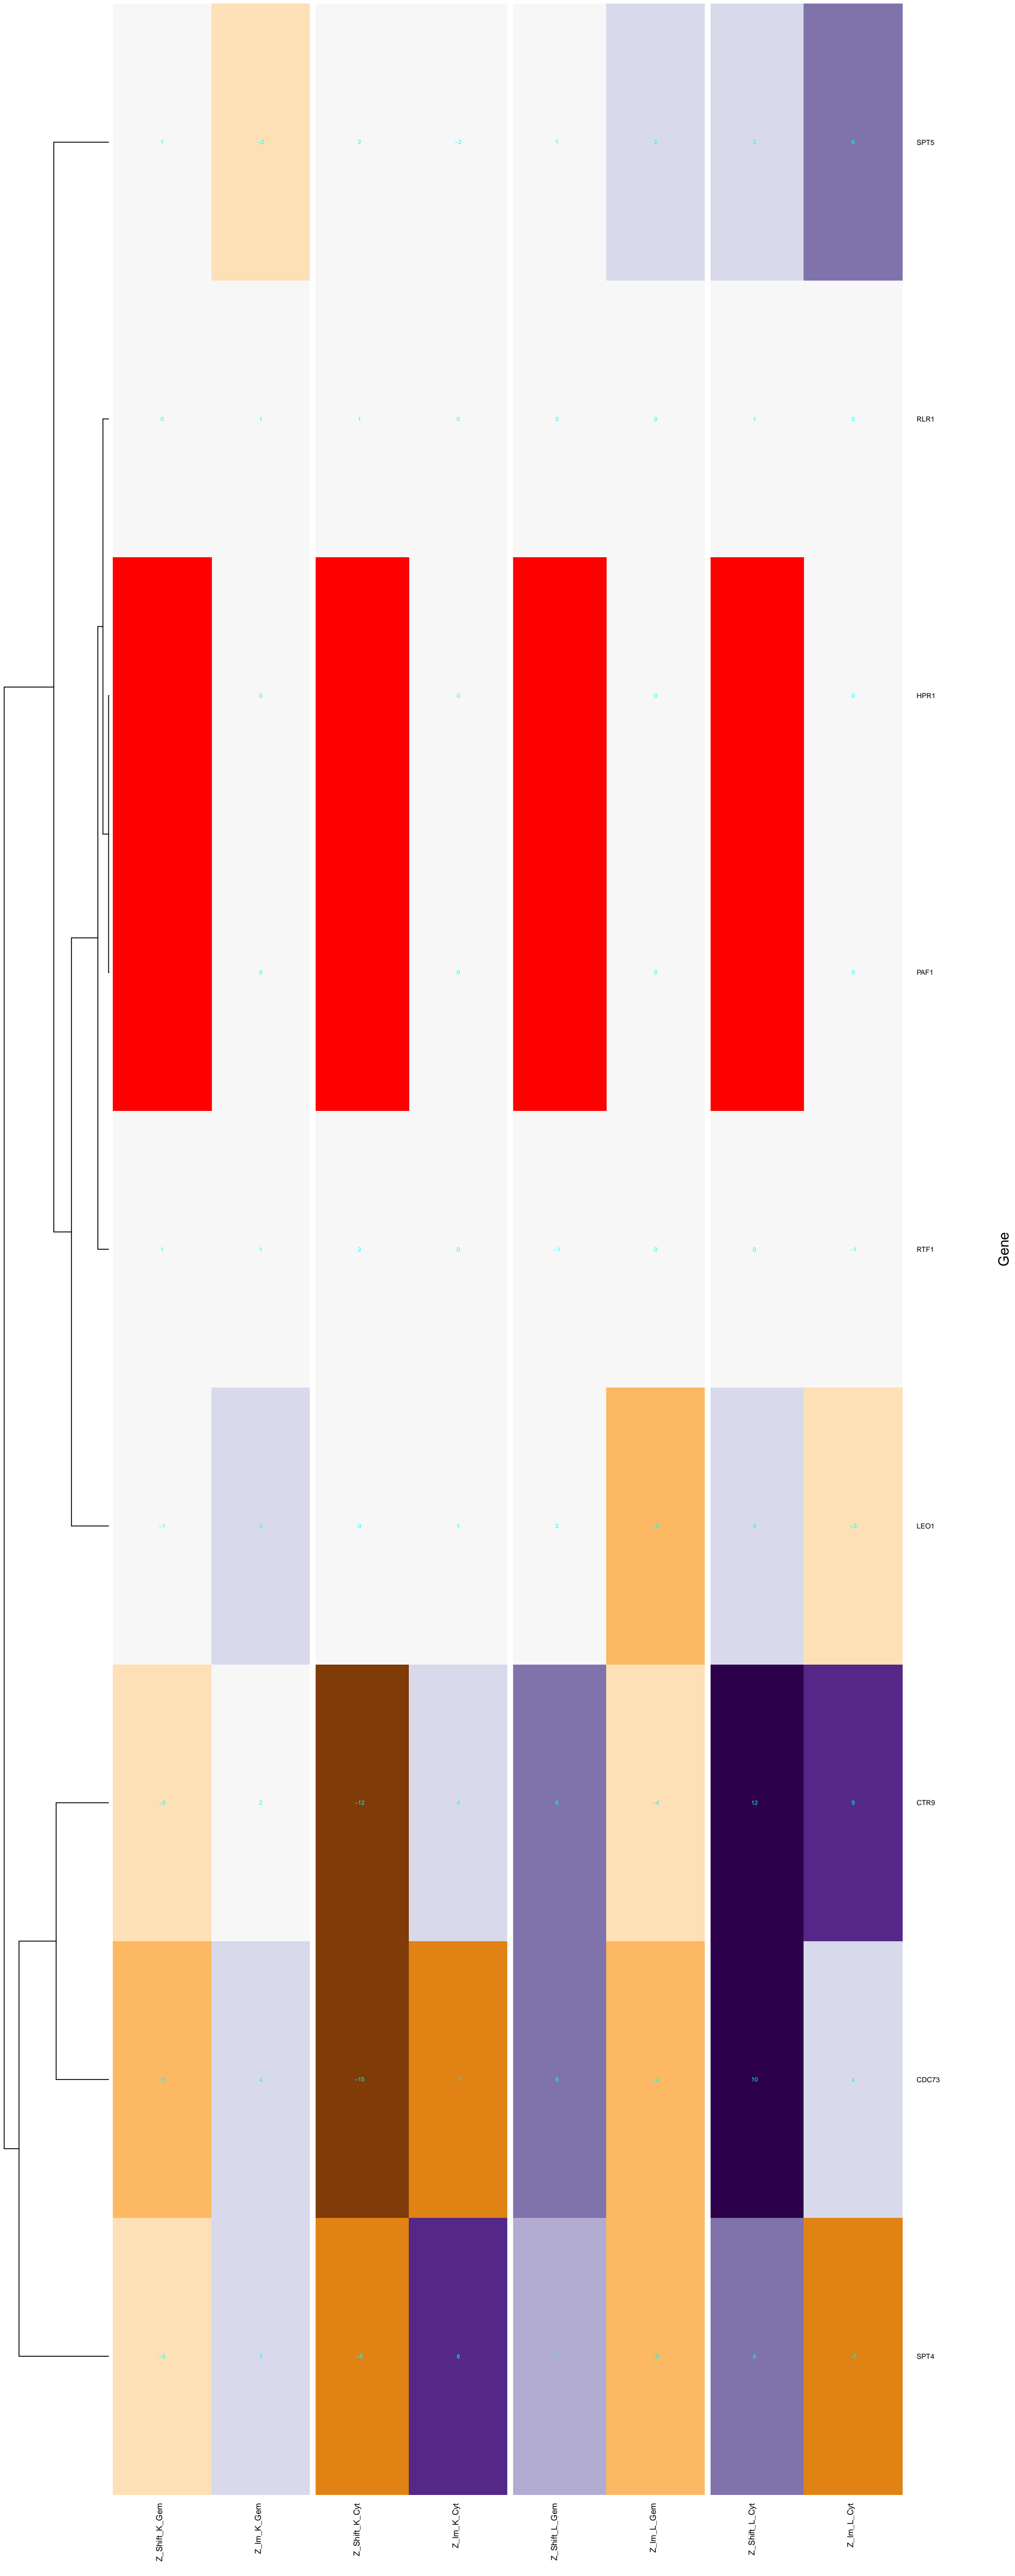

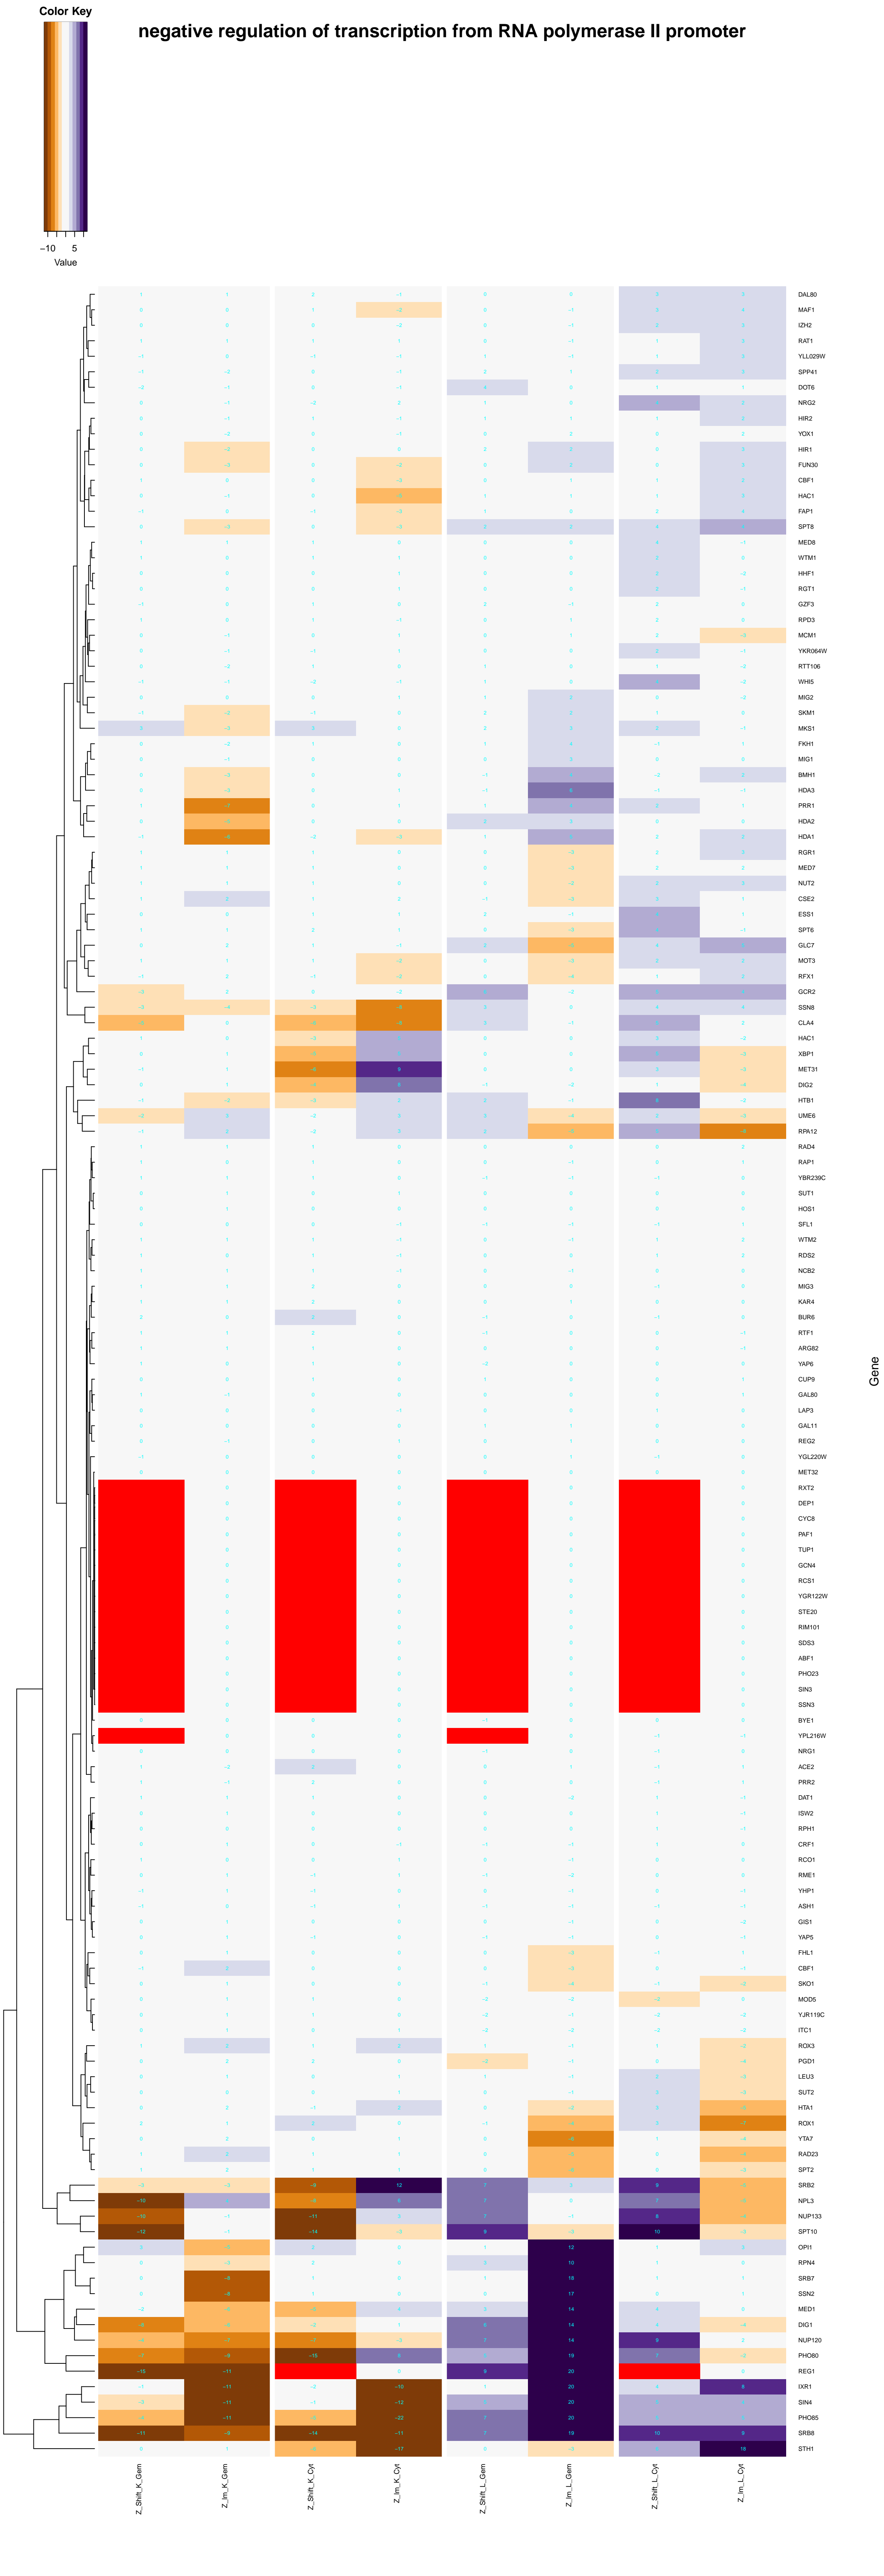

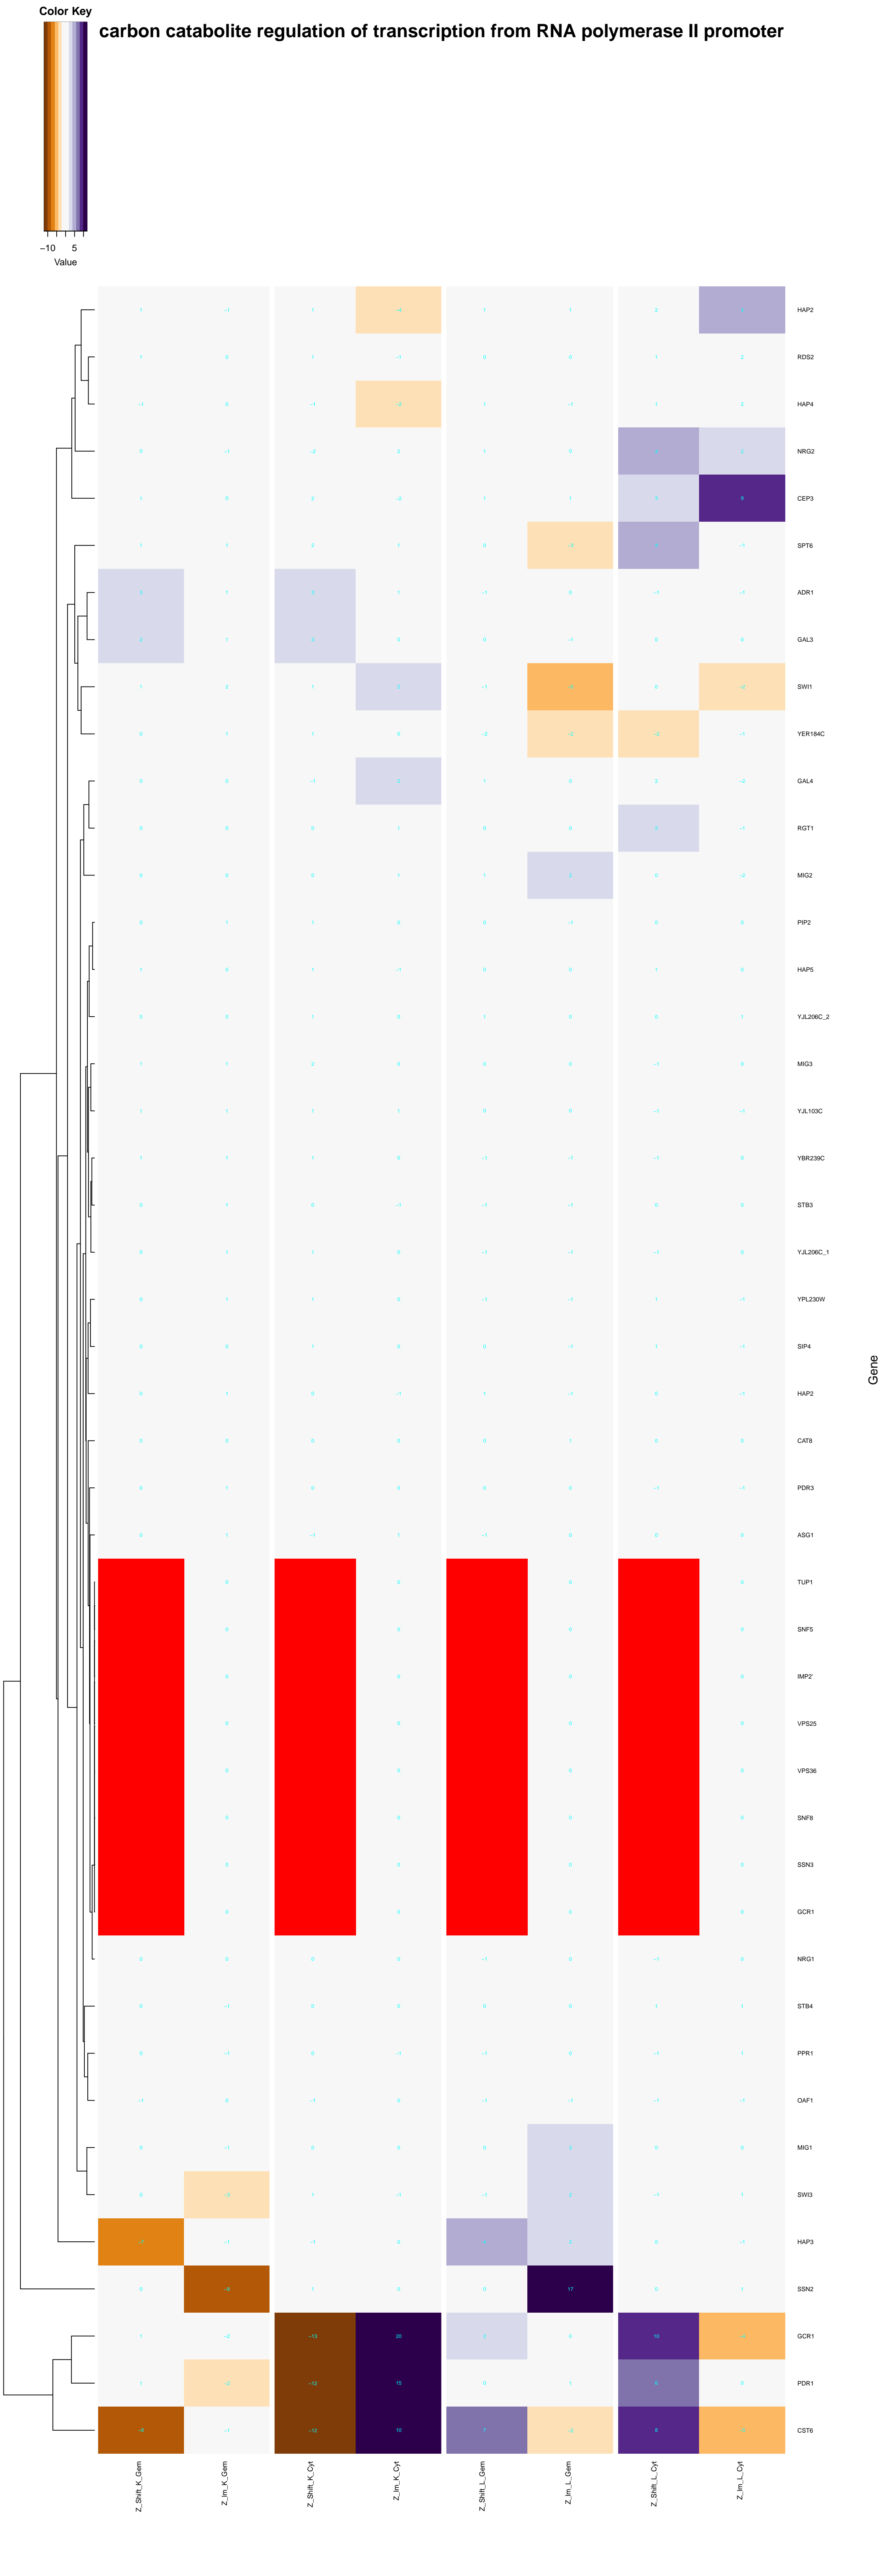



nitrogen catabolite regulation of transcription from RNA polymerase II promoter

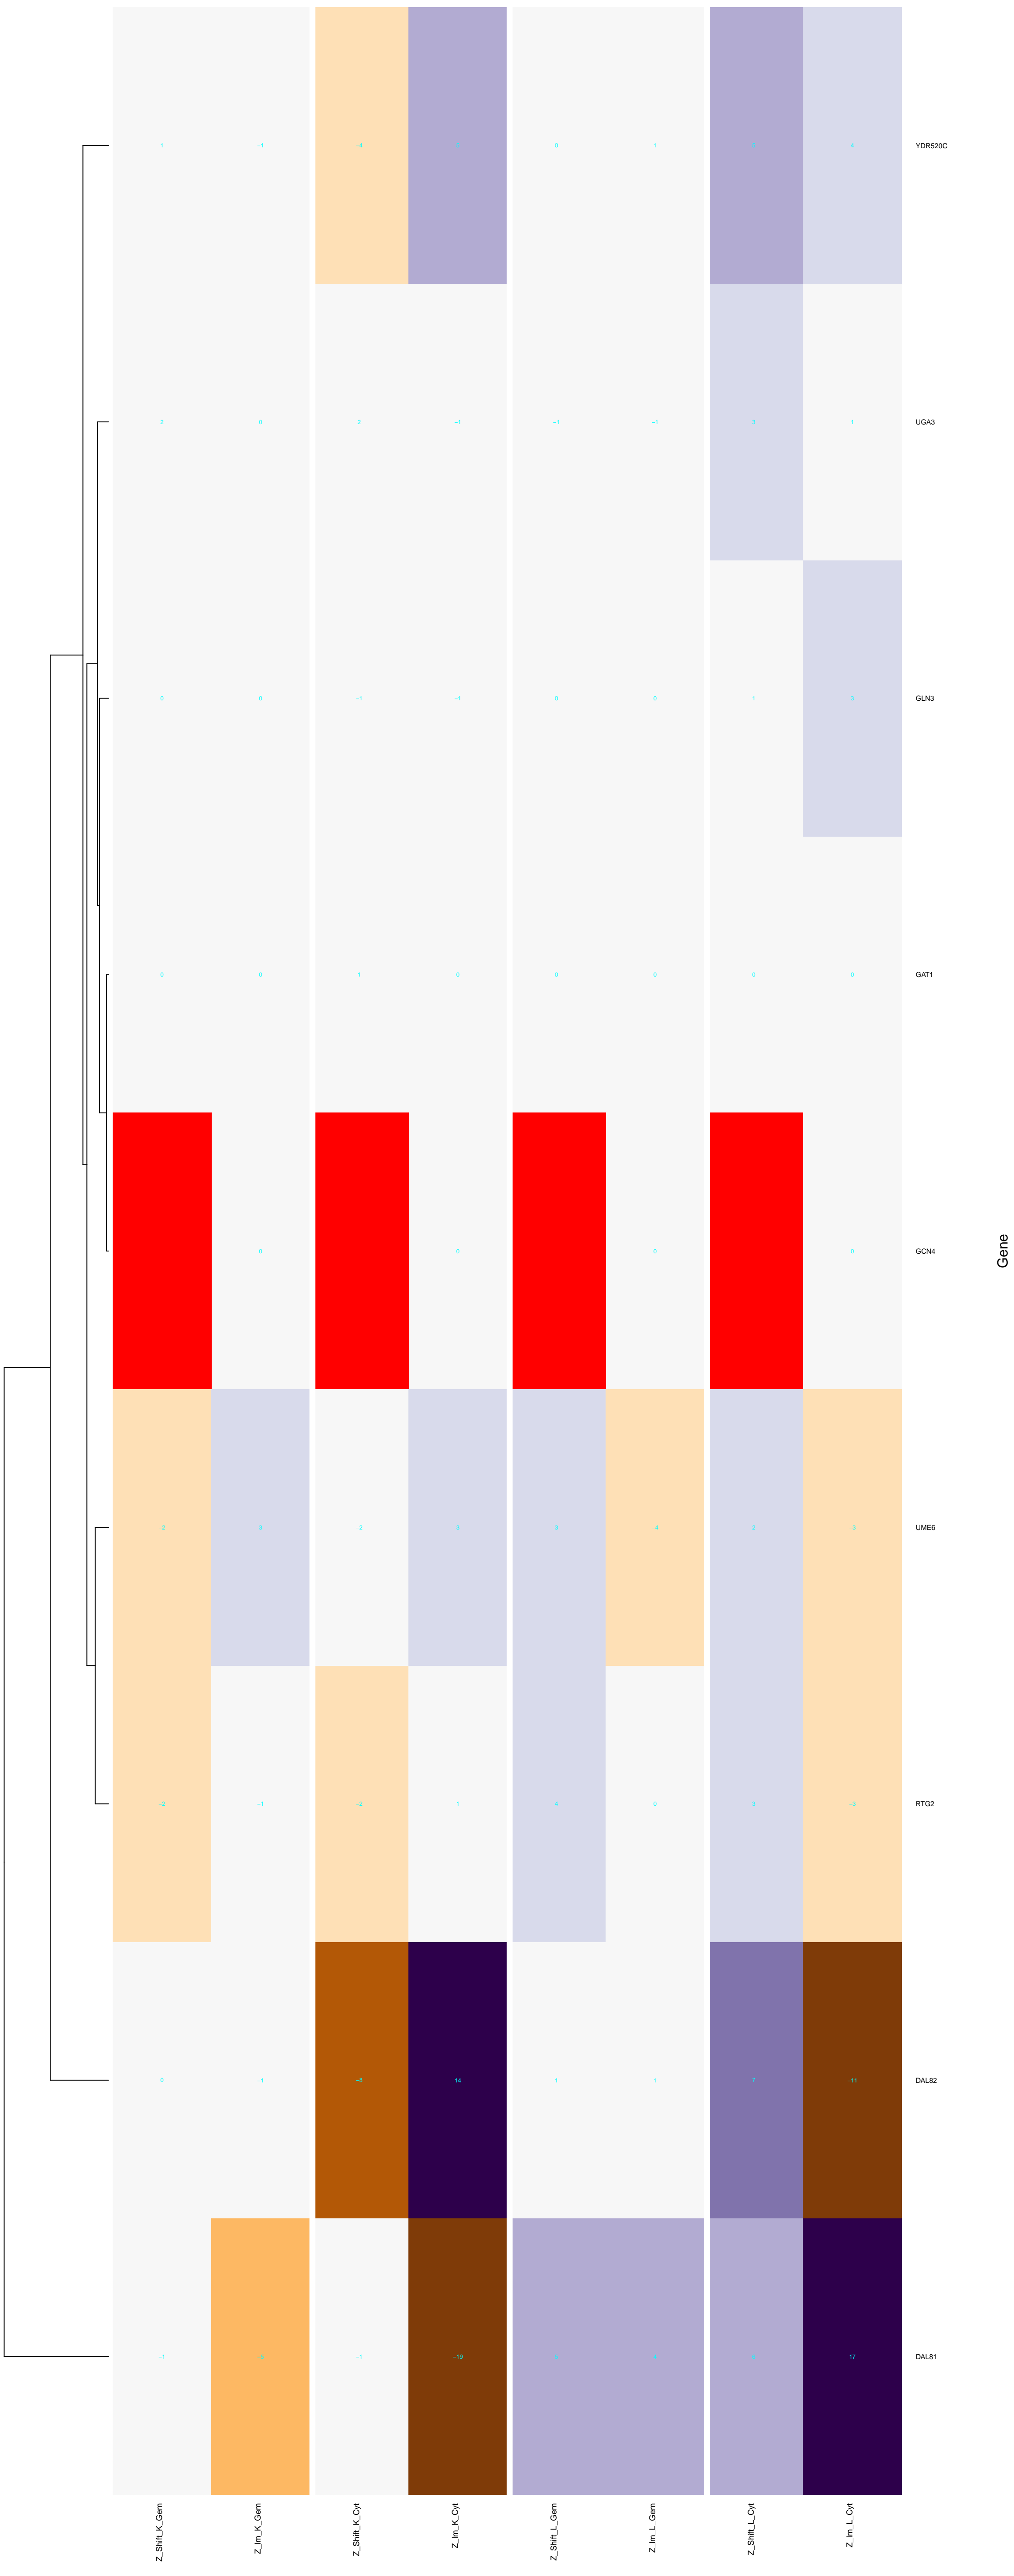

Color Key

ation of transcription from RNA polymerase II promoter involved in meiotic cell cycle

-10 5

Value

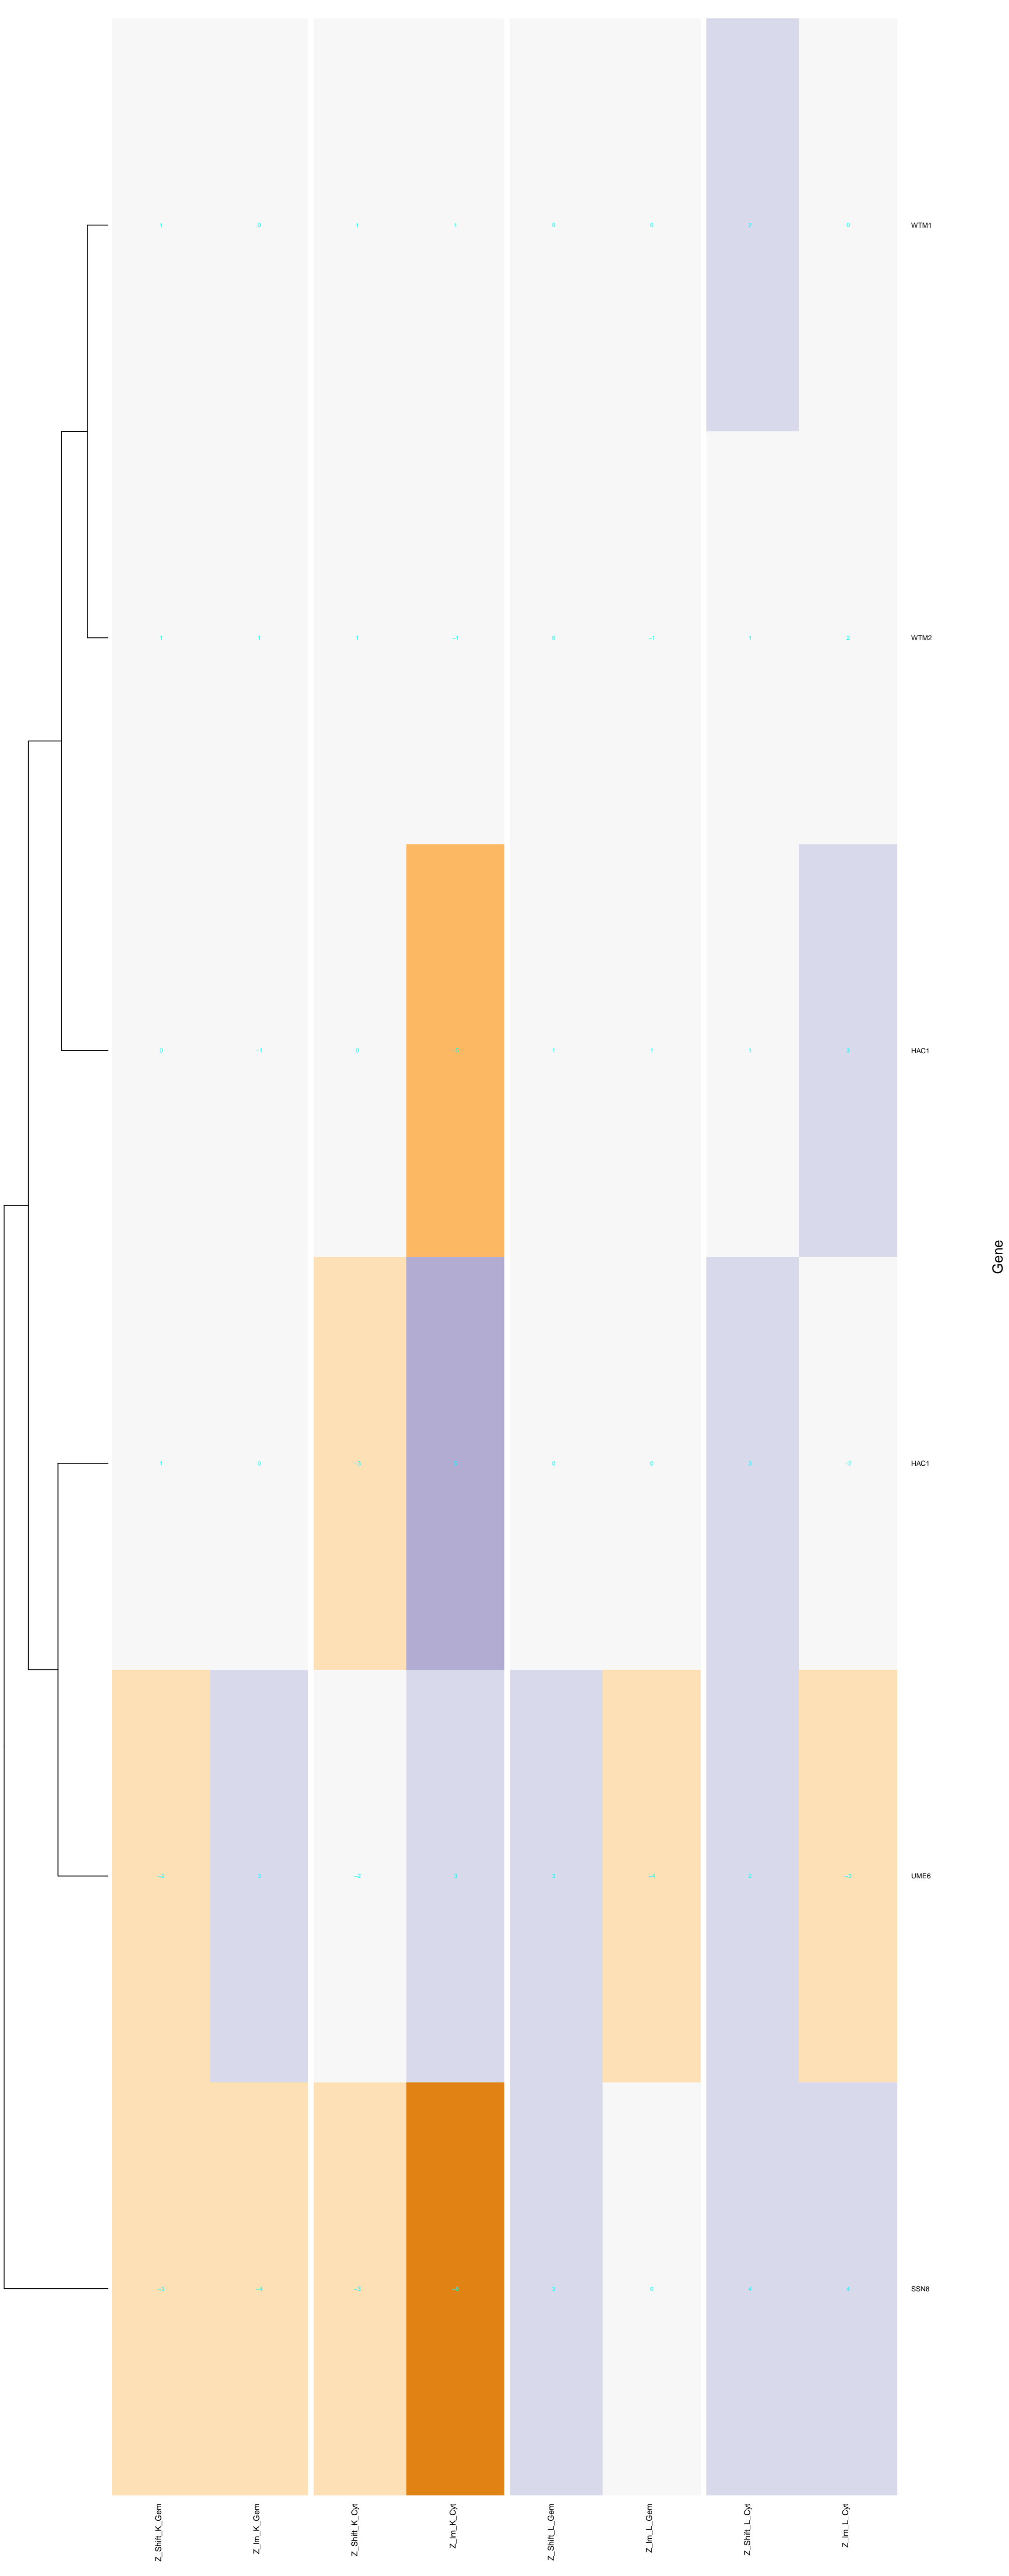

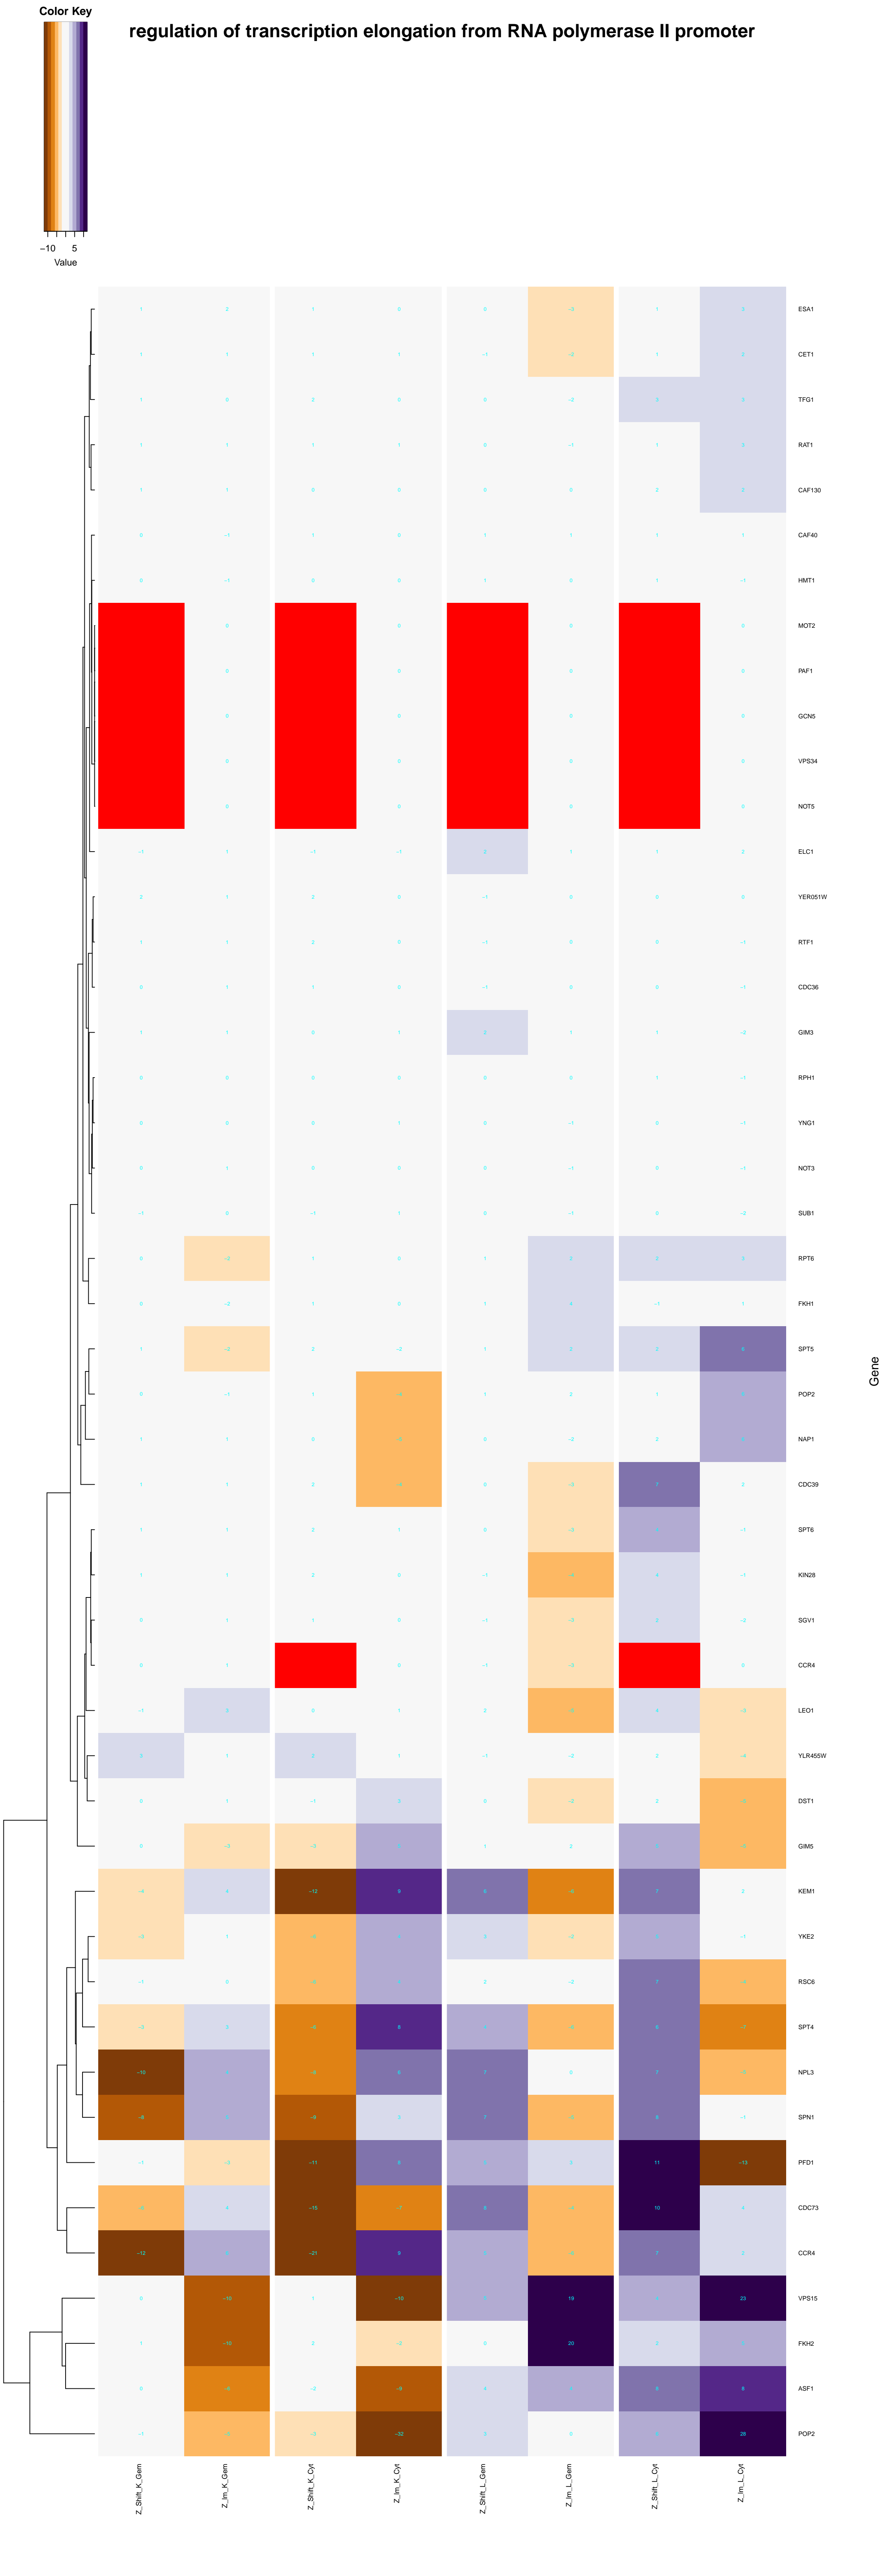

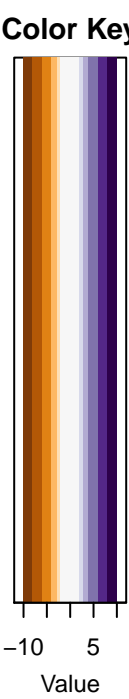

Regulation of transcription from RNA polymerase II promoter in response to iron

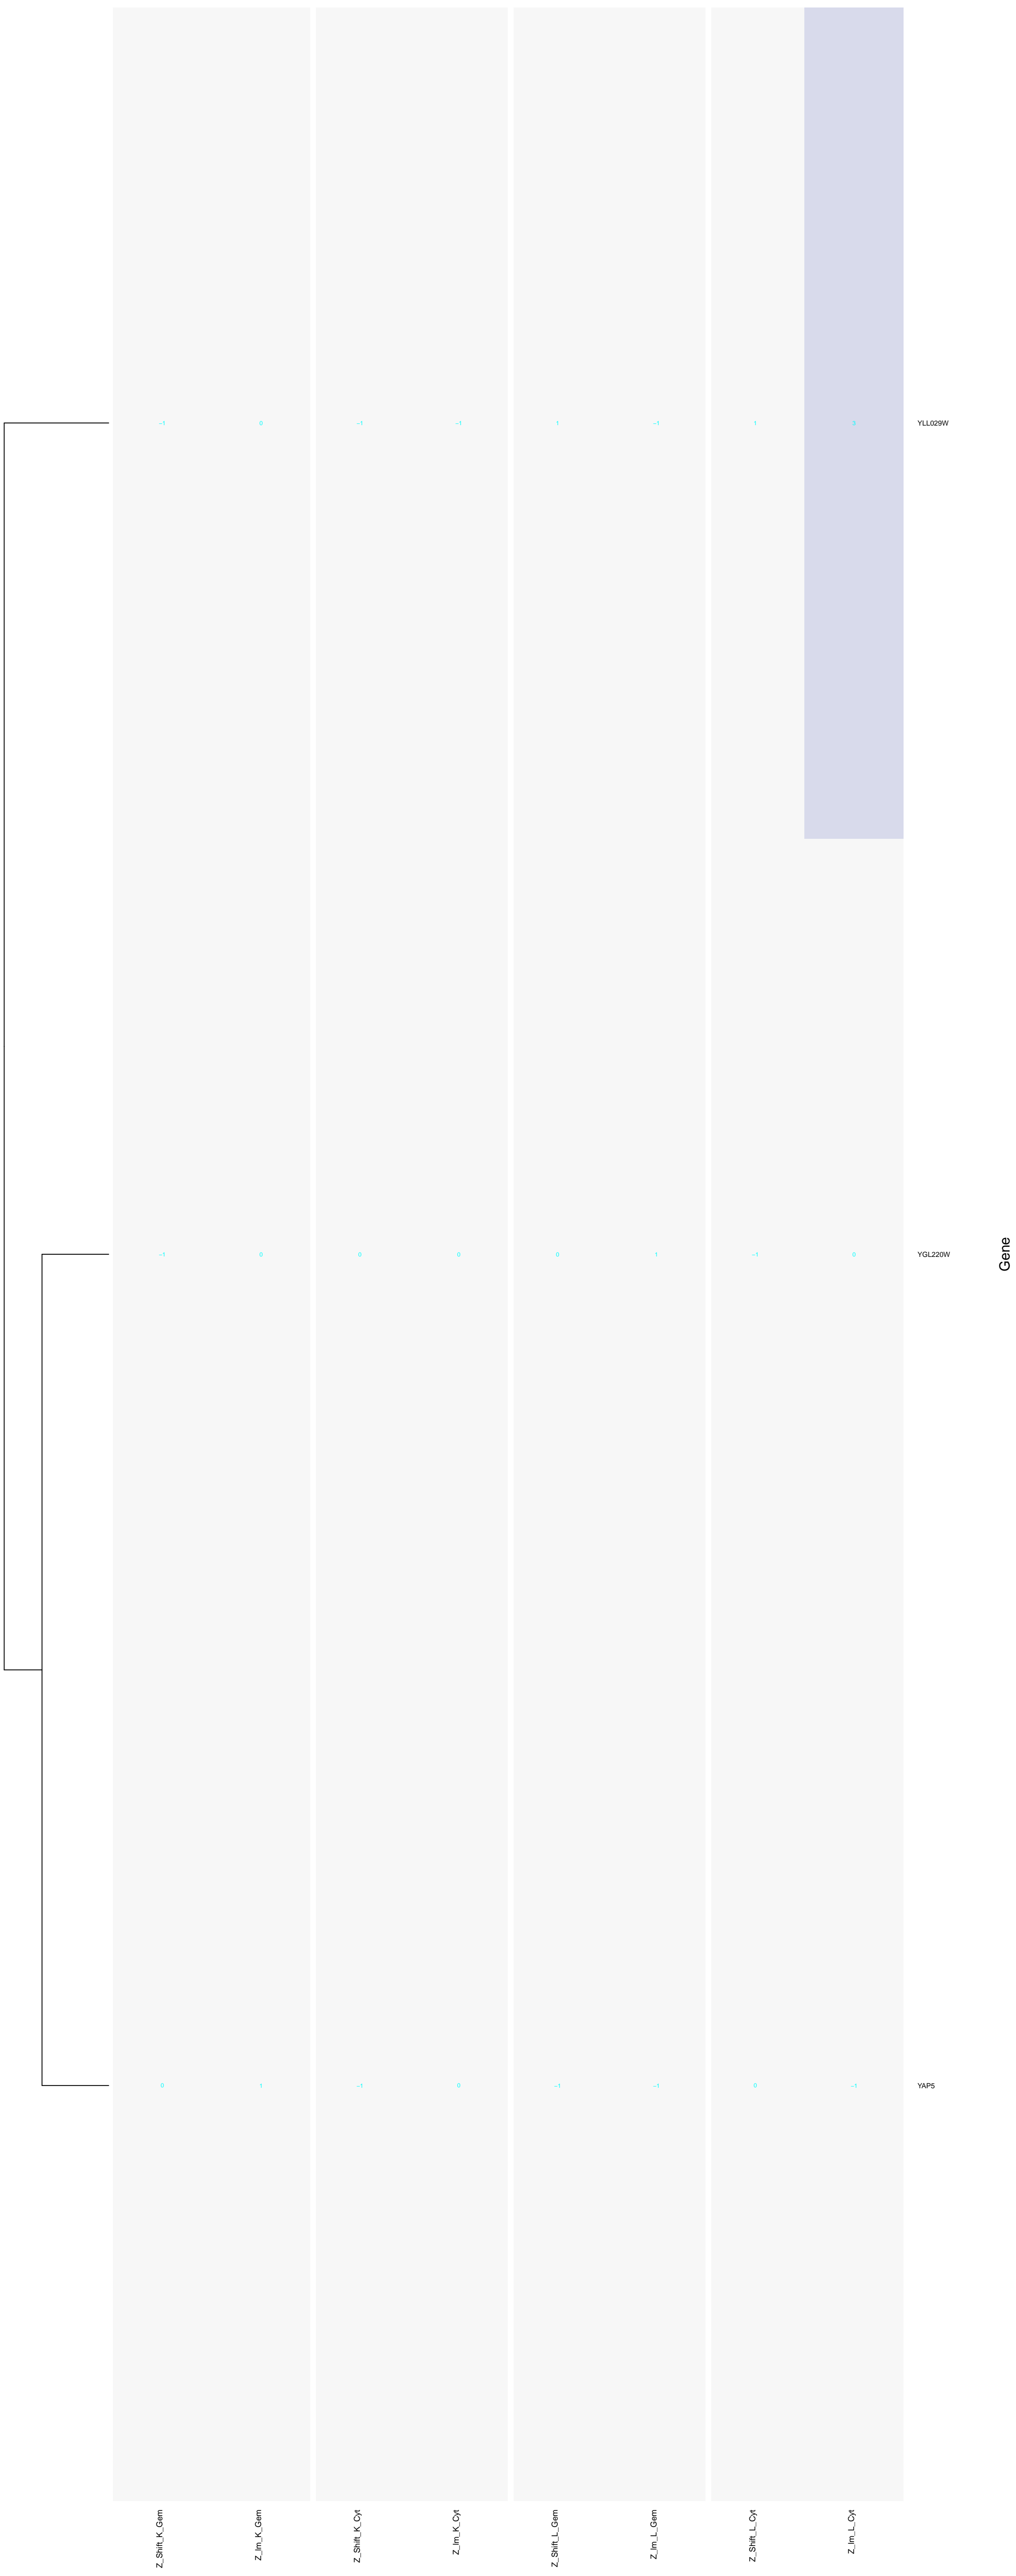

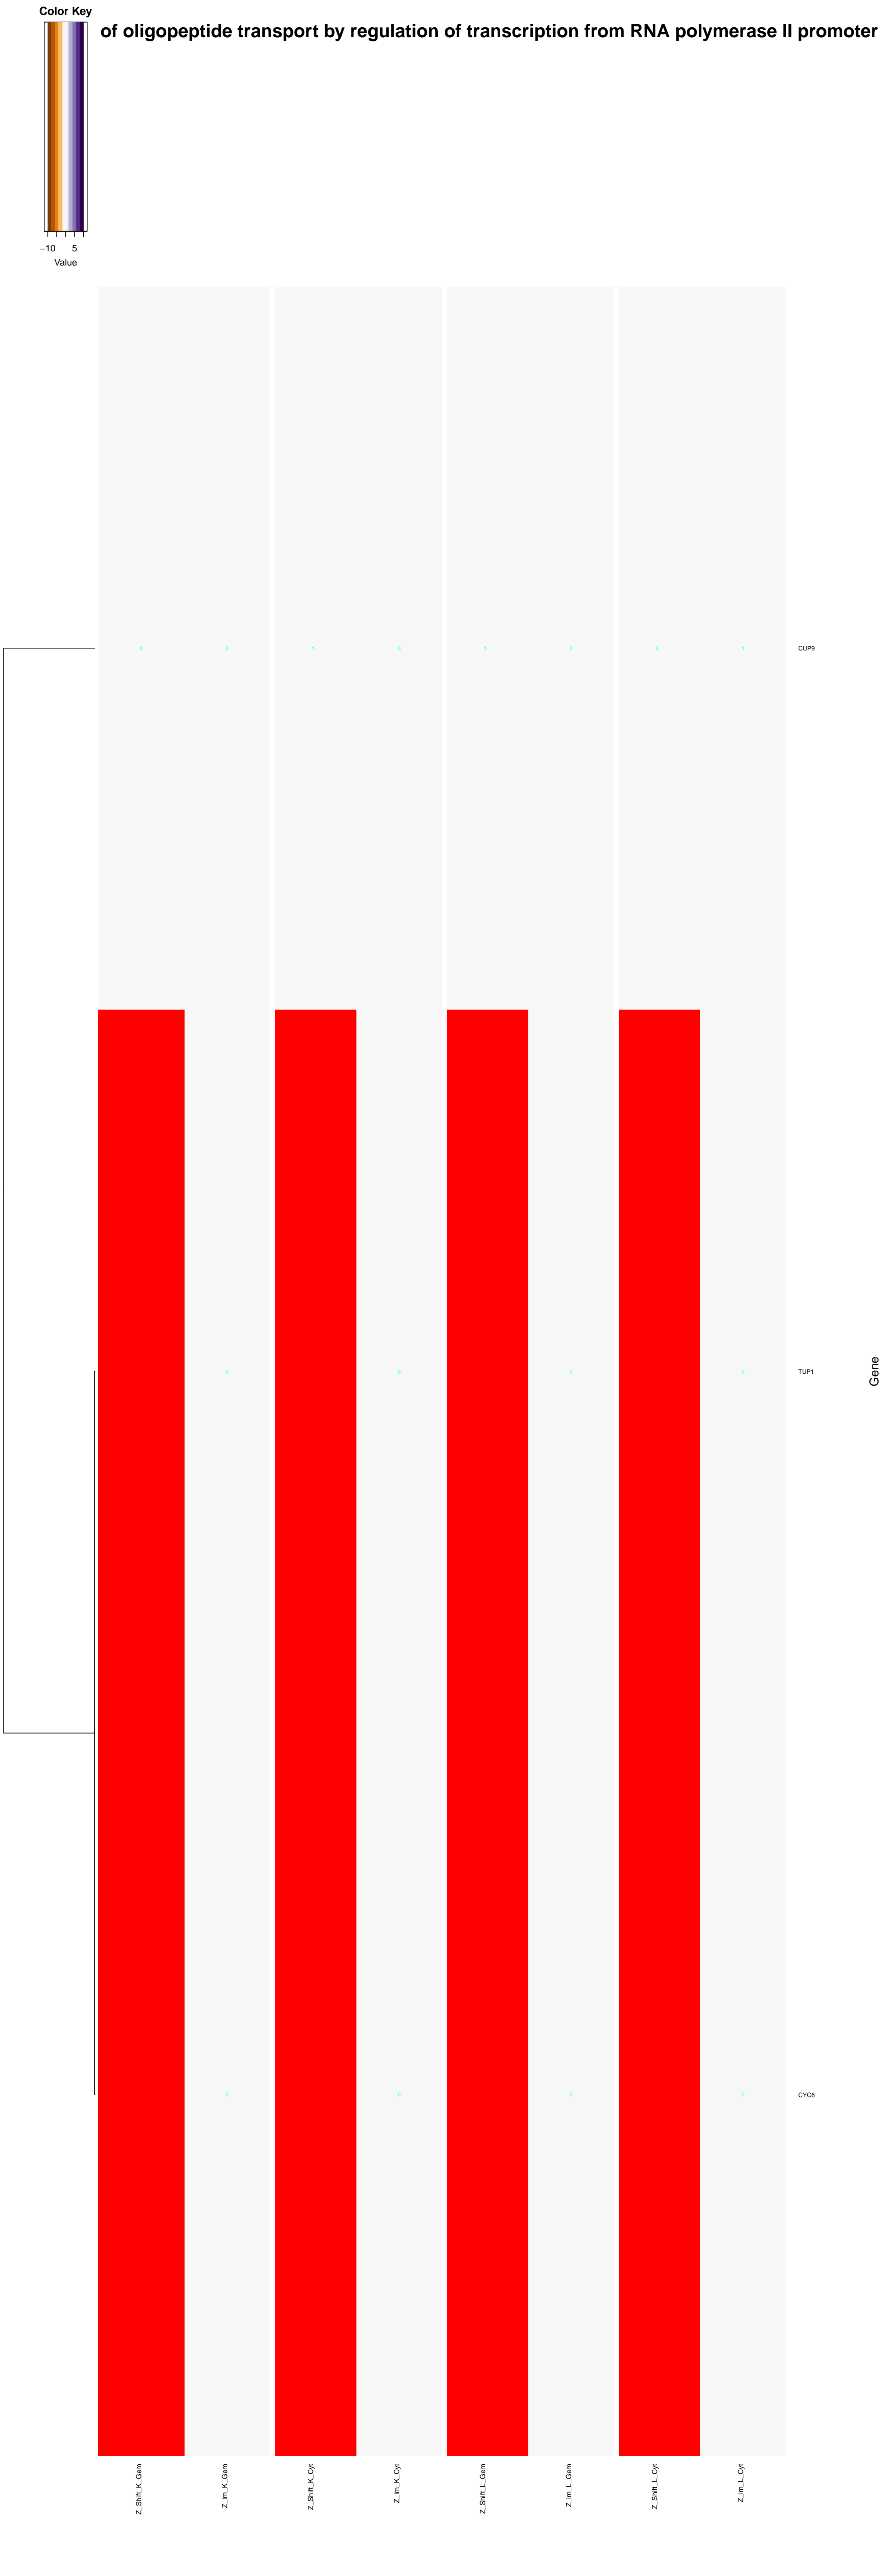

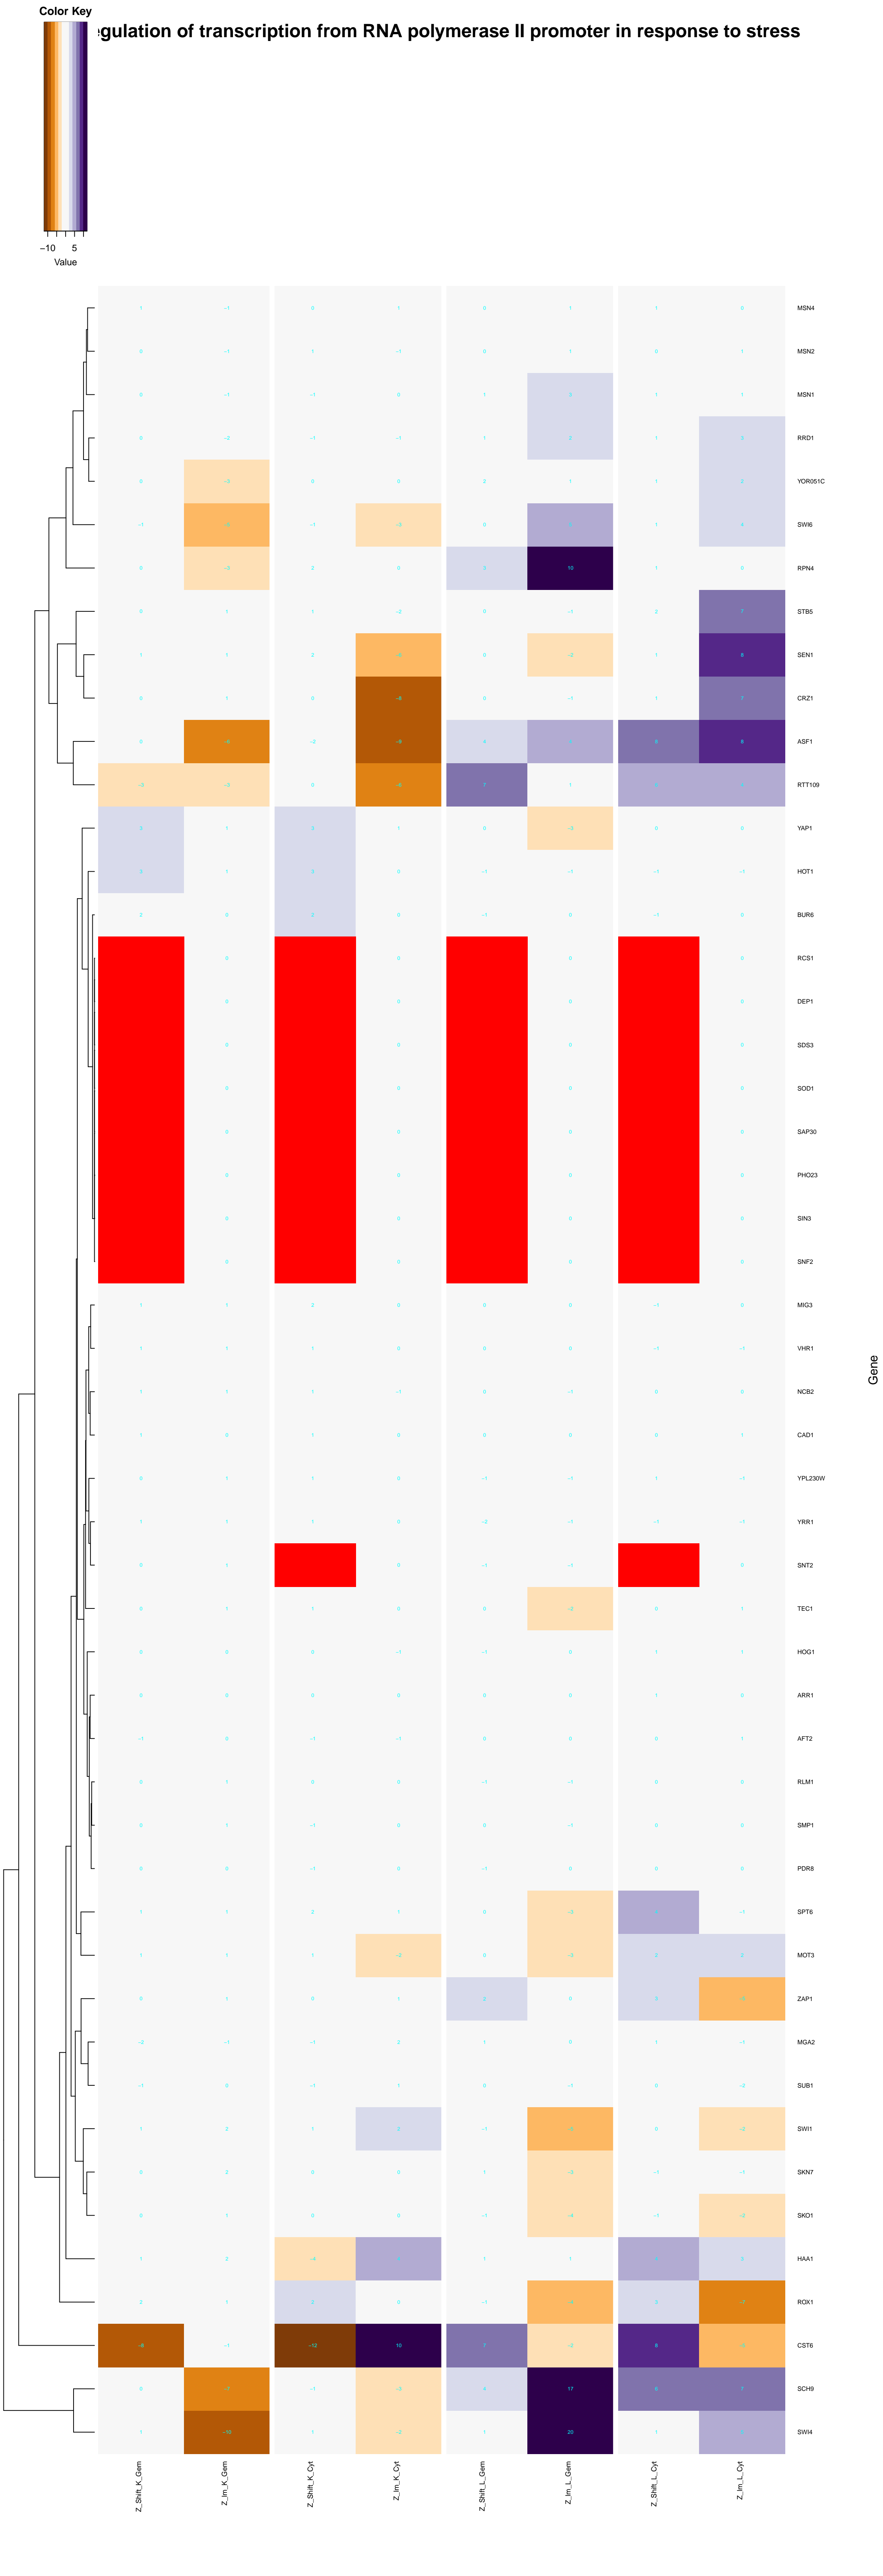





regulation of transcription from RNA polymerase II promoter by pheromones

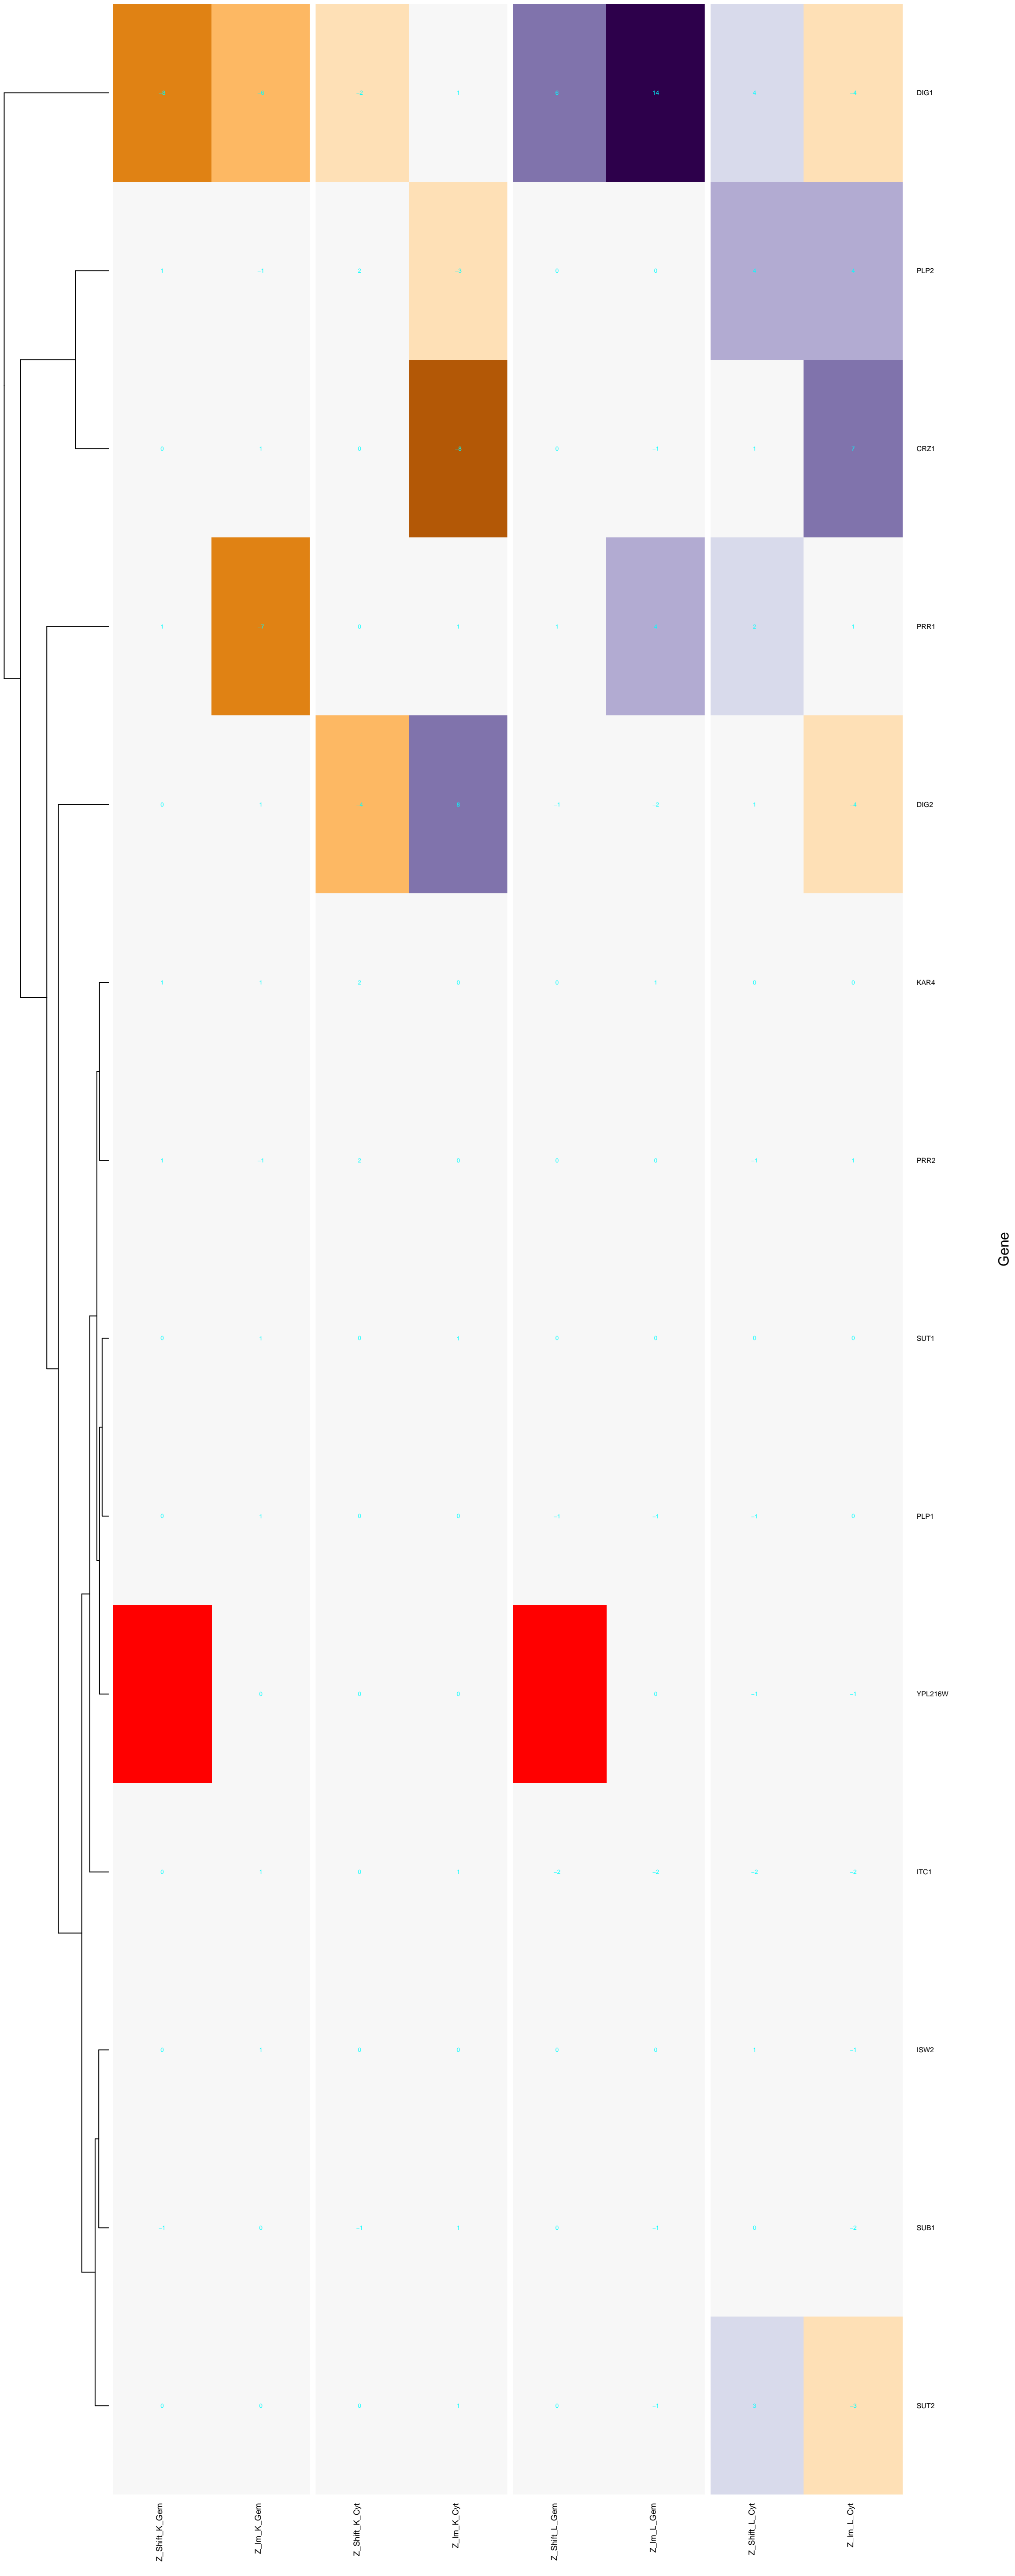



regulation of transcription initiation from RNA polymerase II promoter

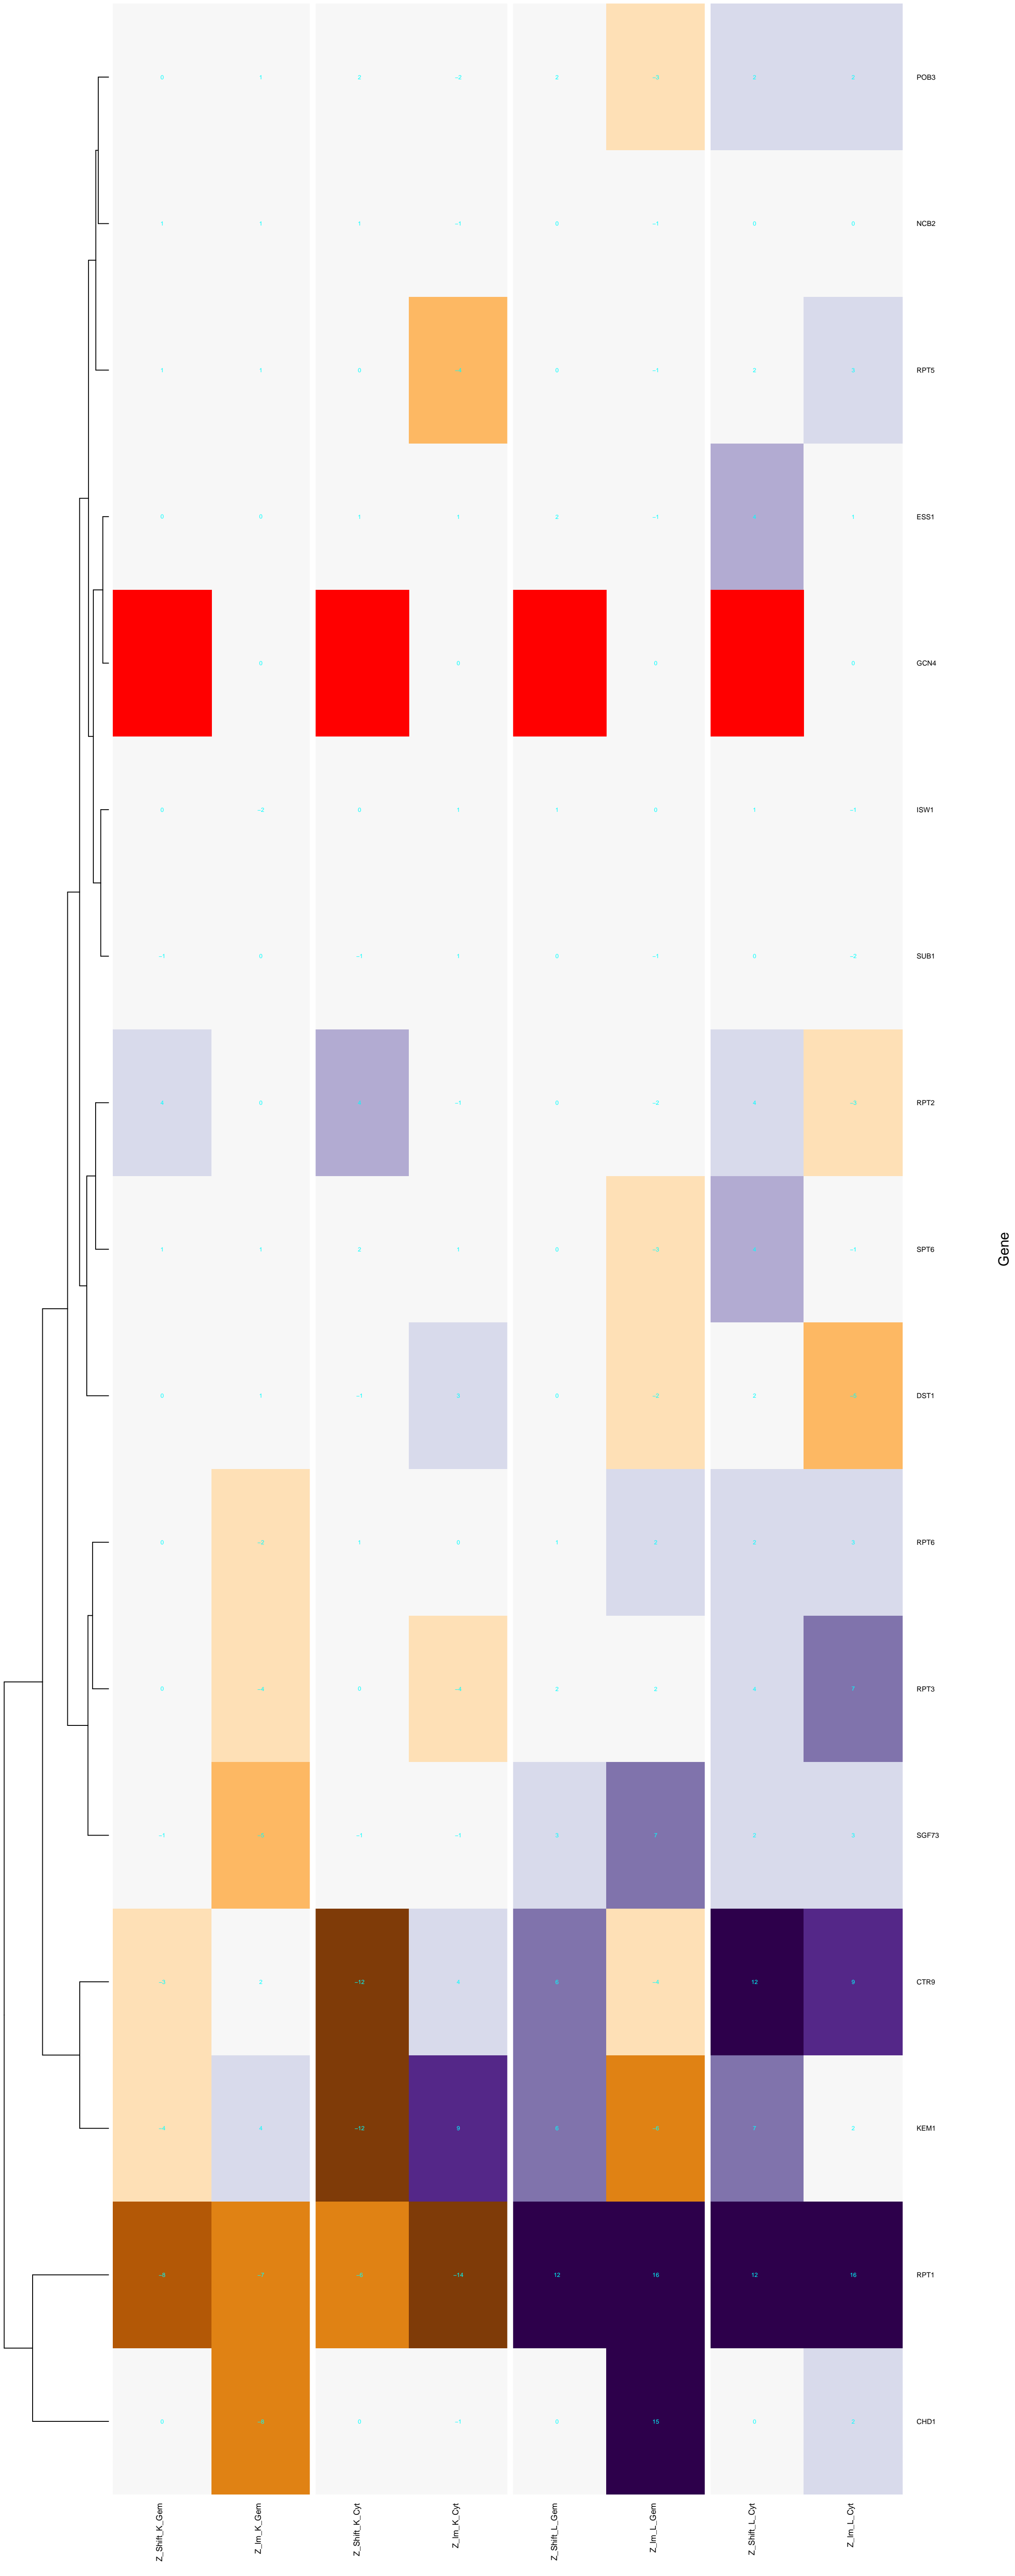



Regulation of ribosomal protein gene transcription from RNA polymerase II promoter

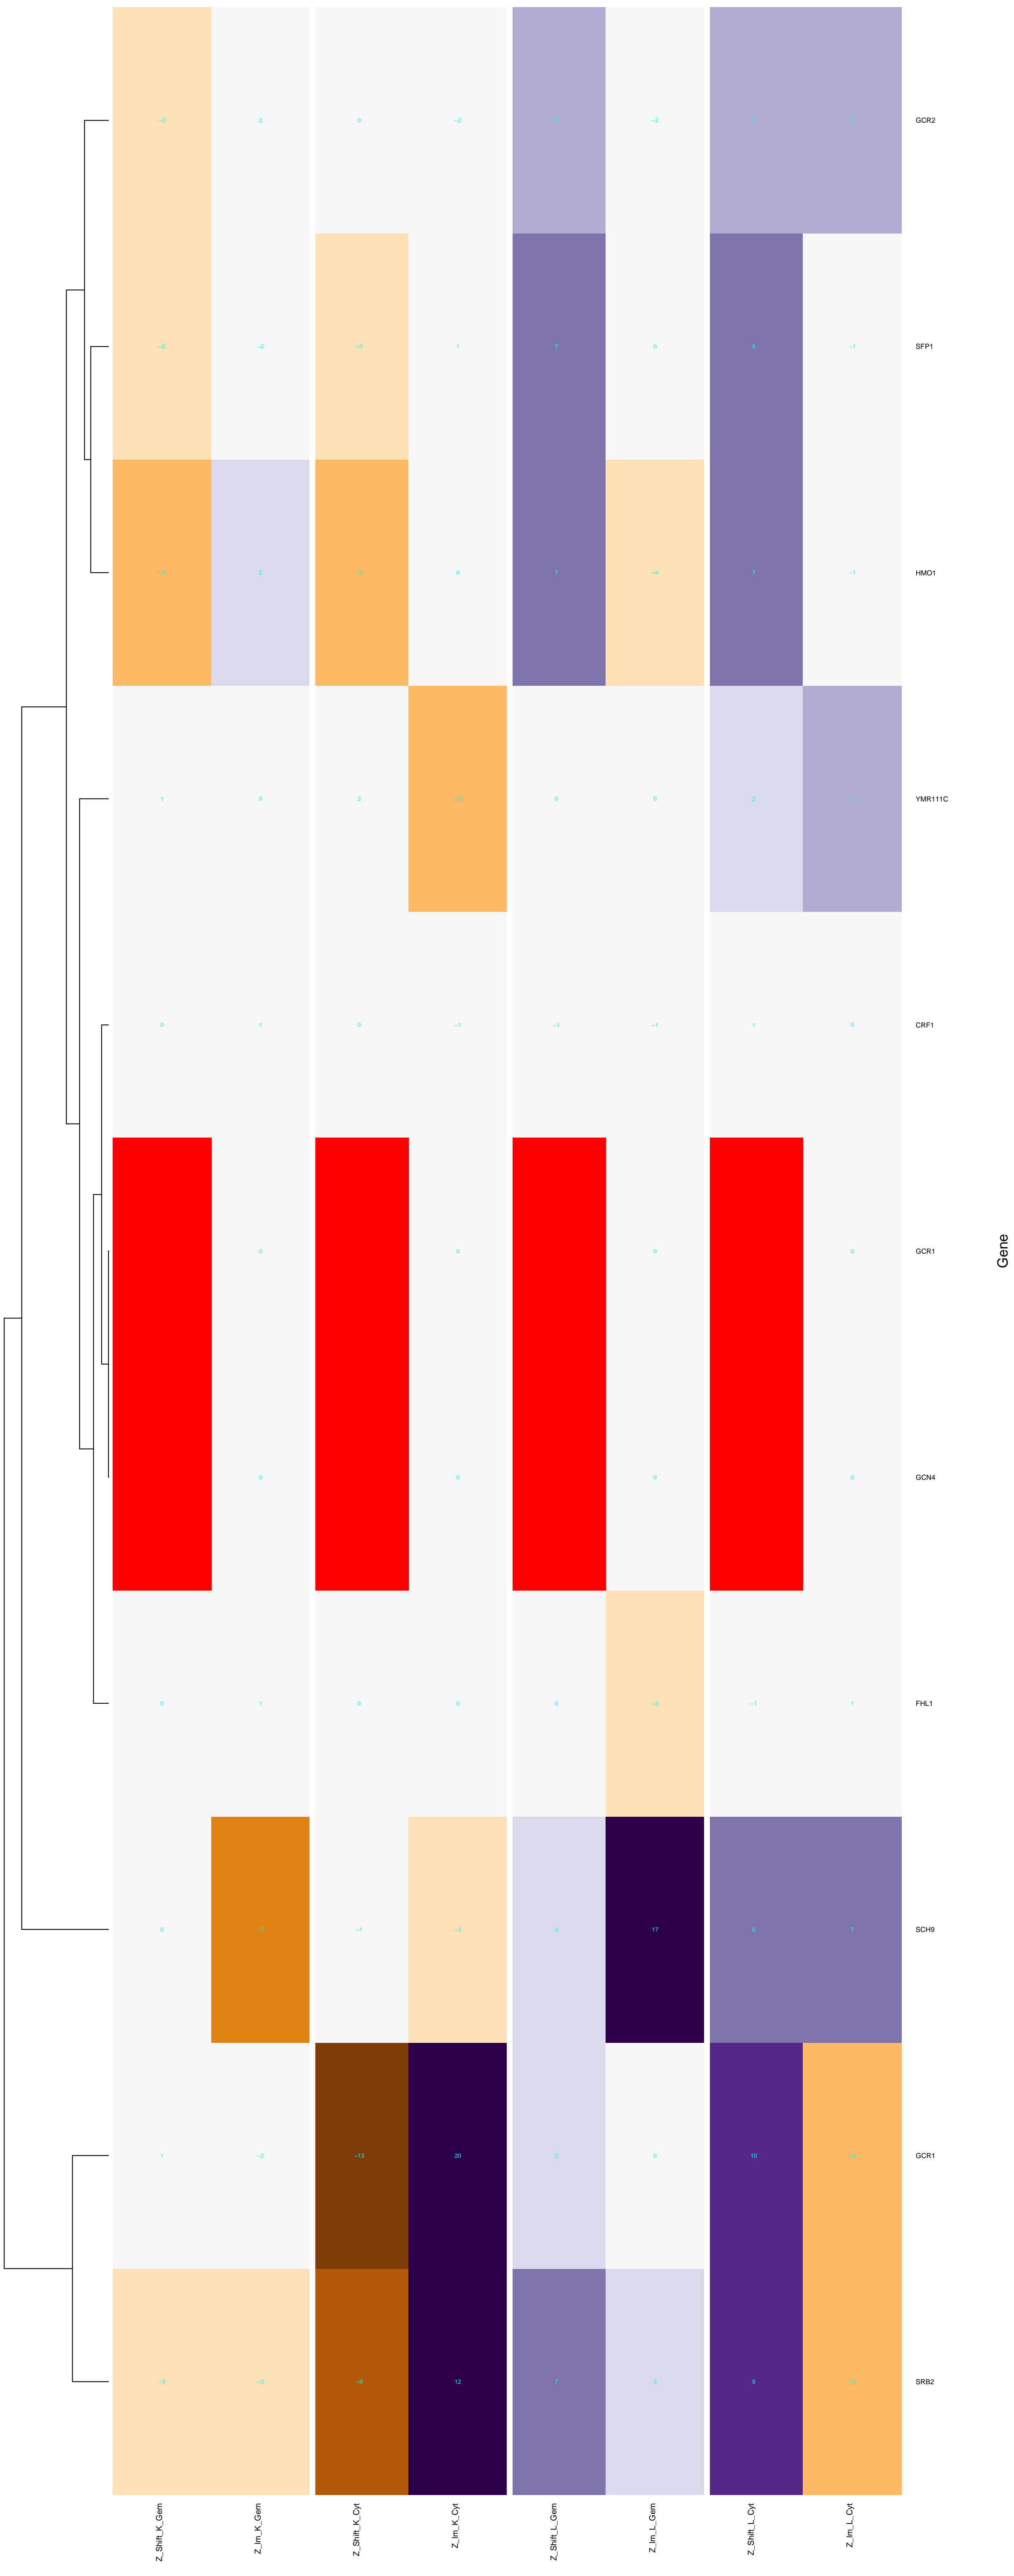

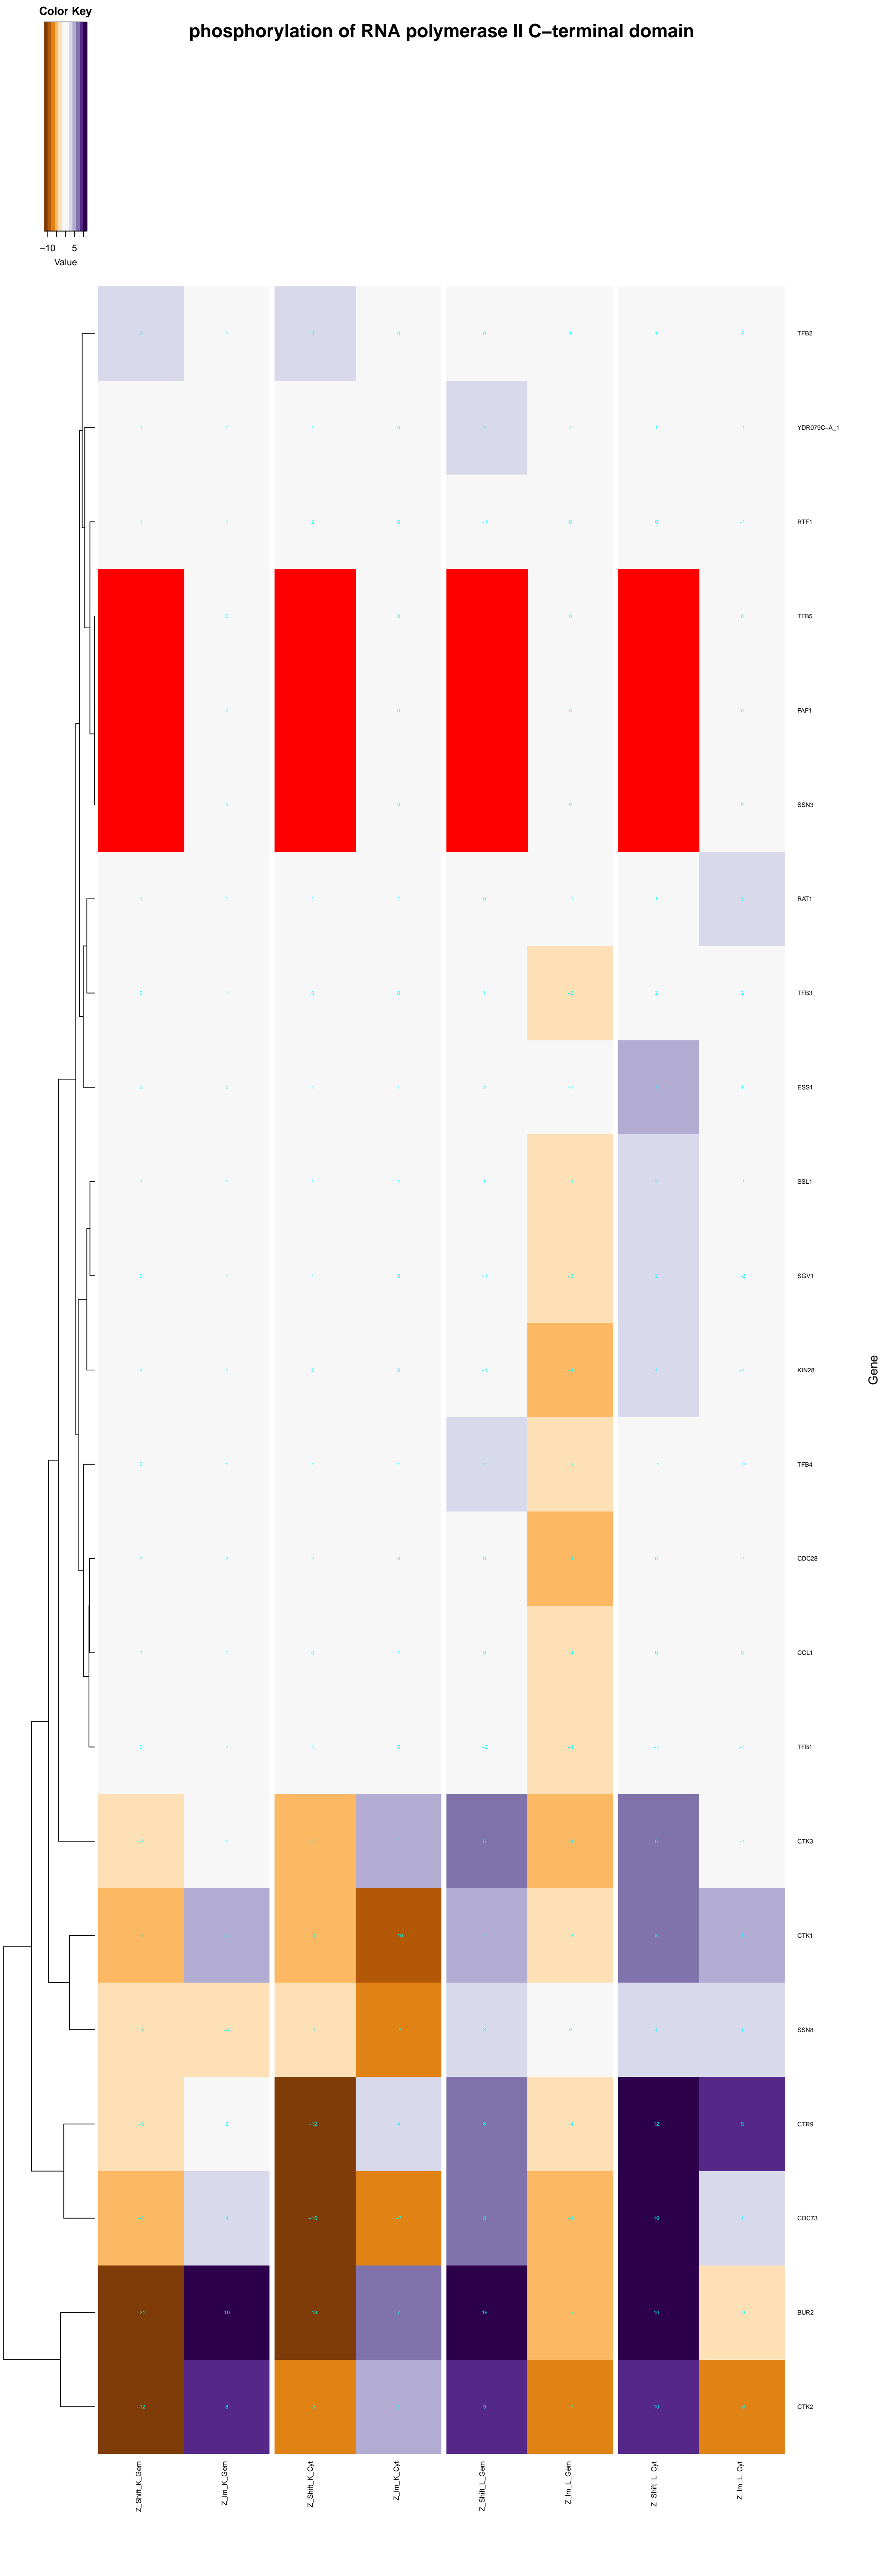

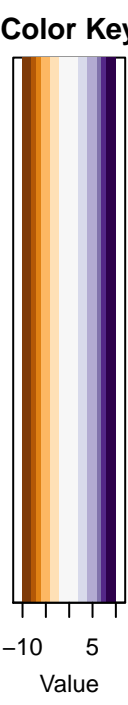

dephosphorylation of RNA polymerase II C-terminal domain

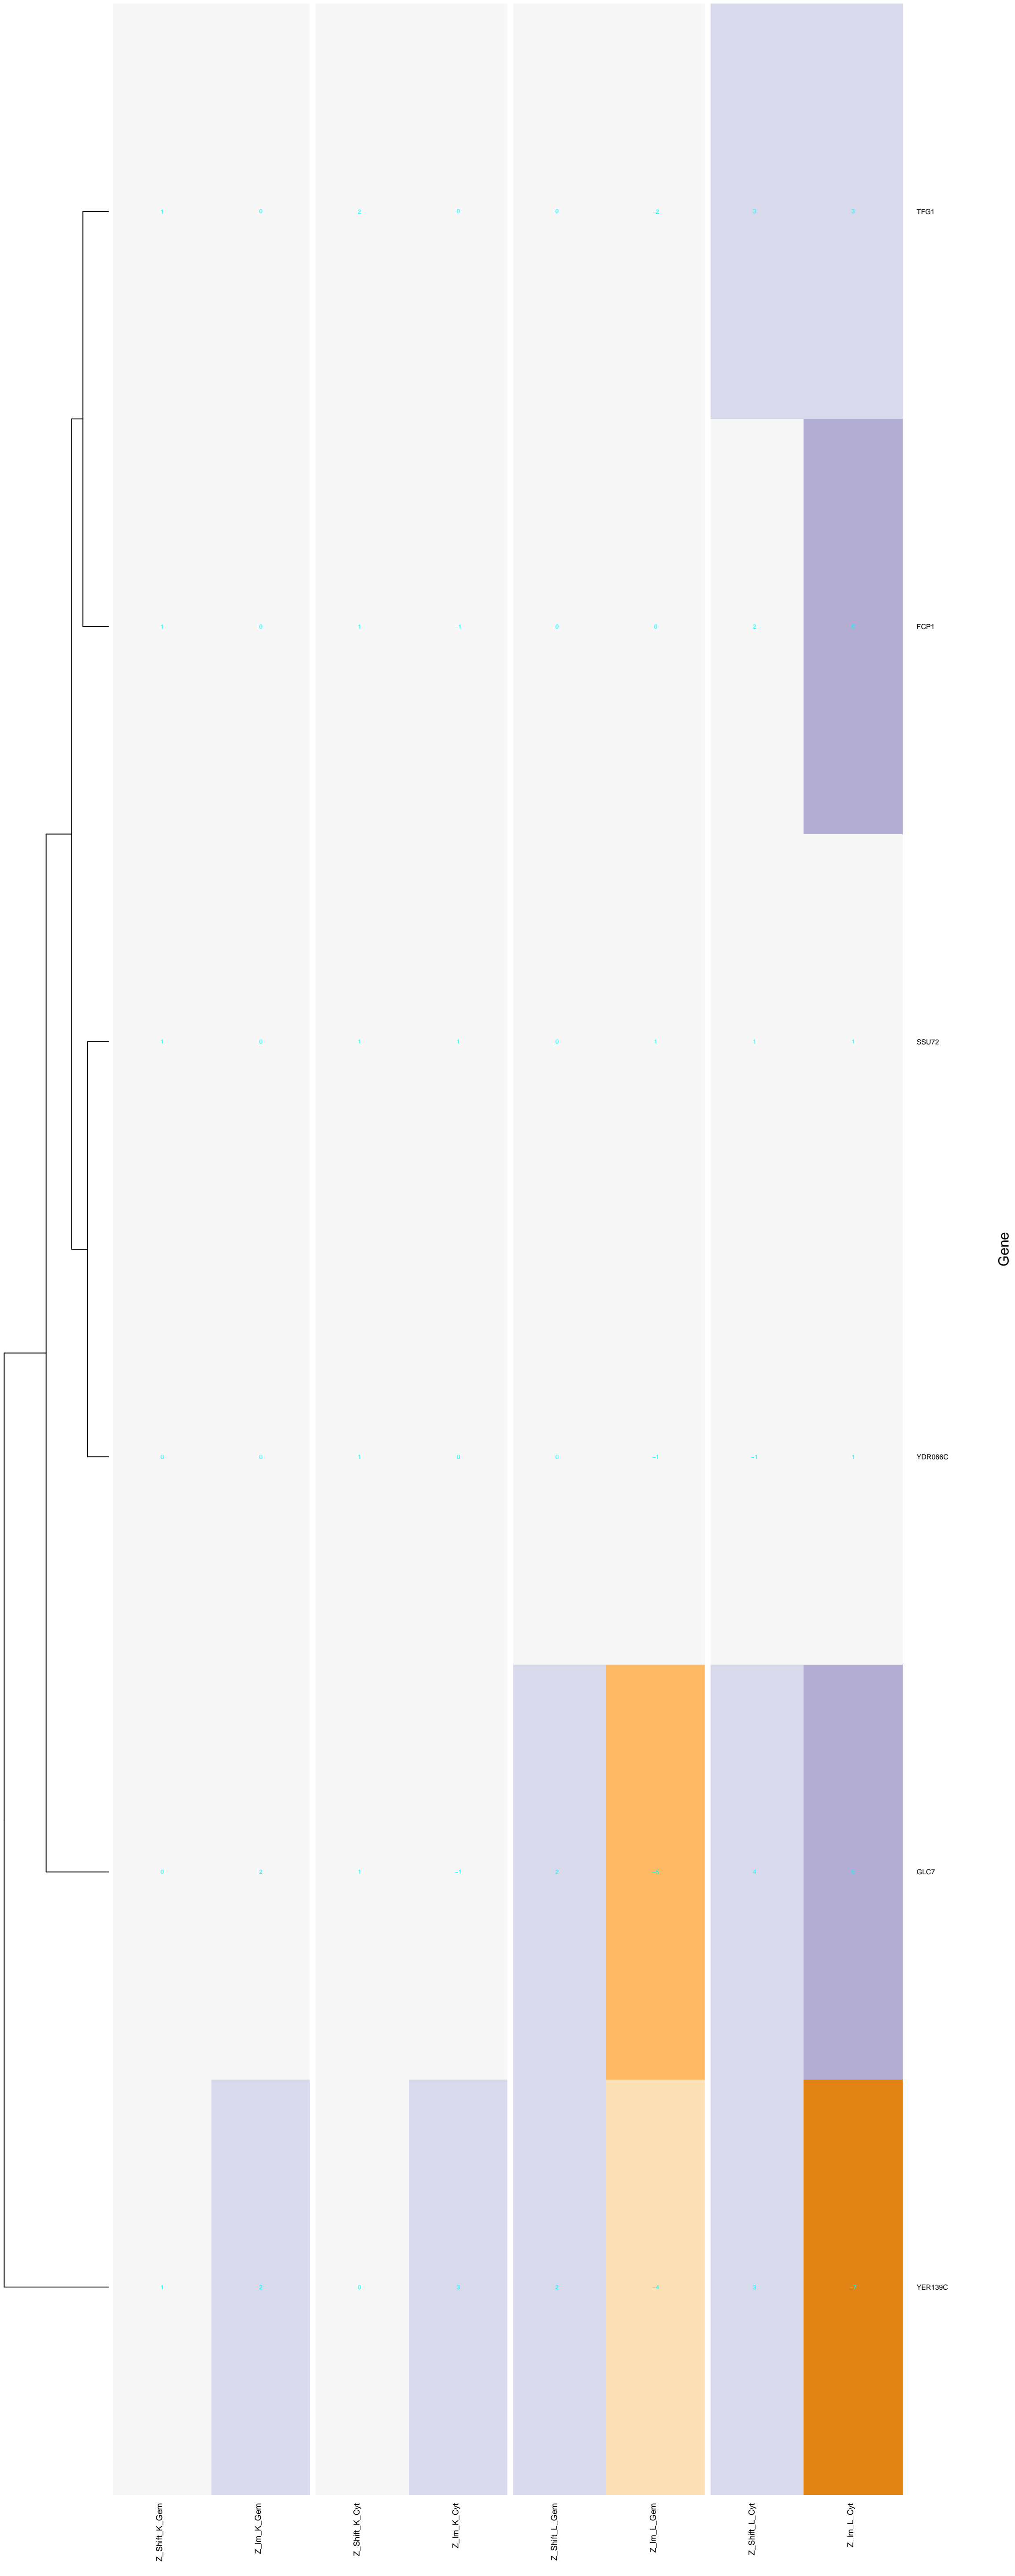

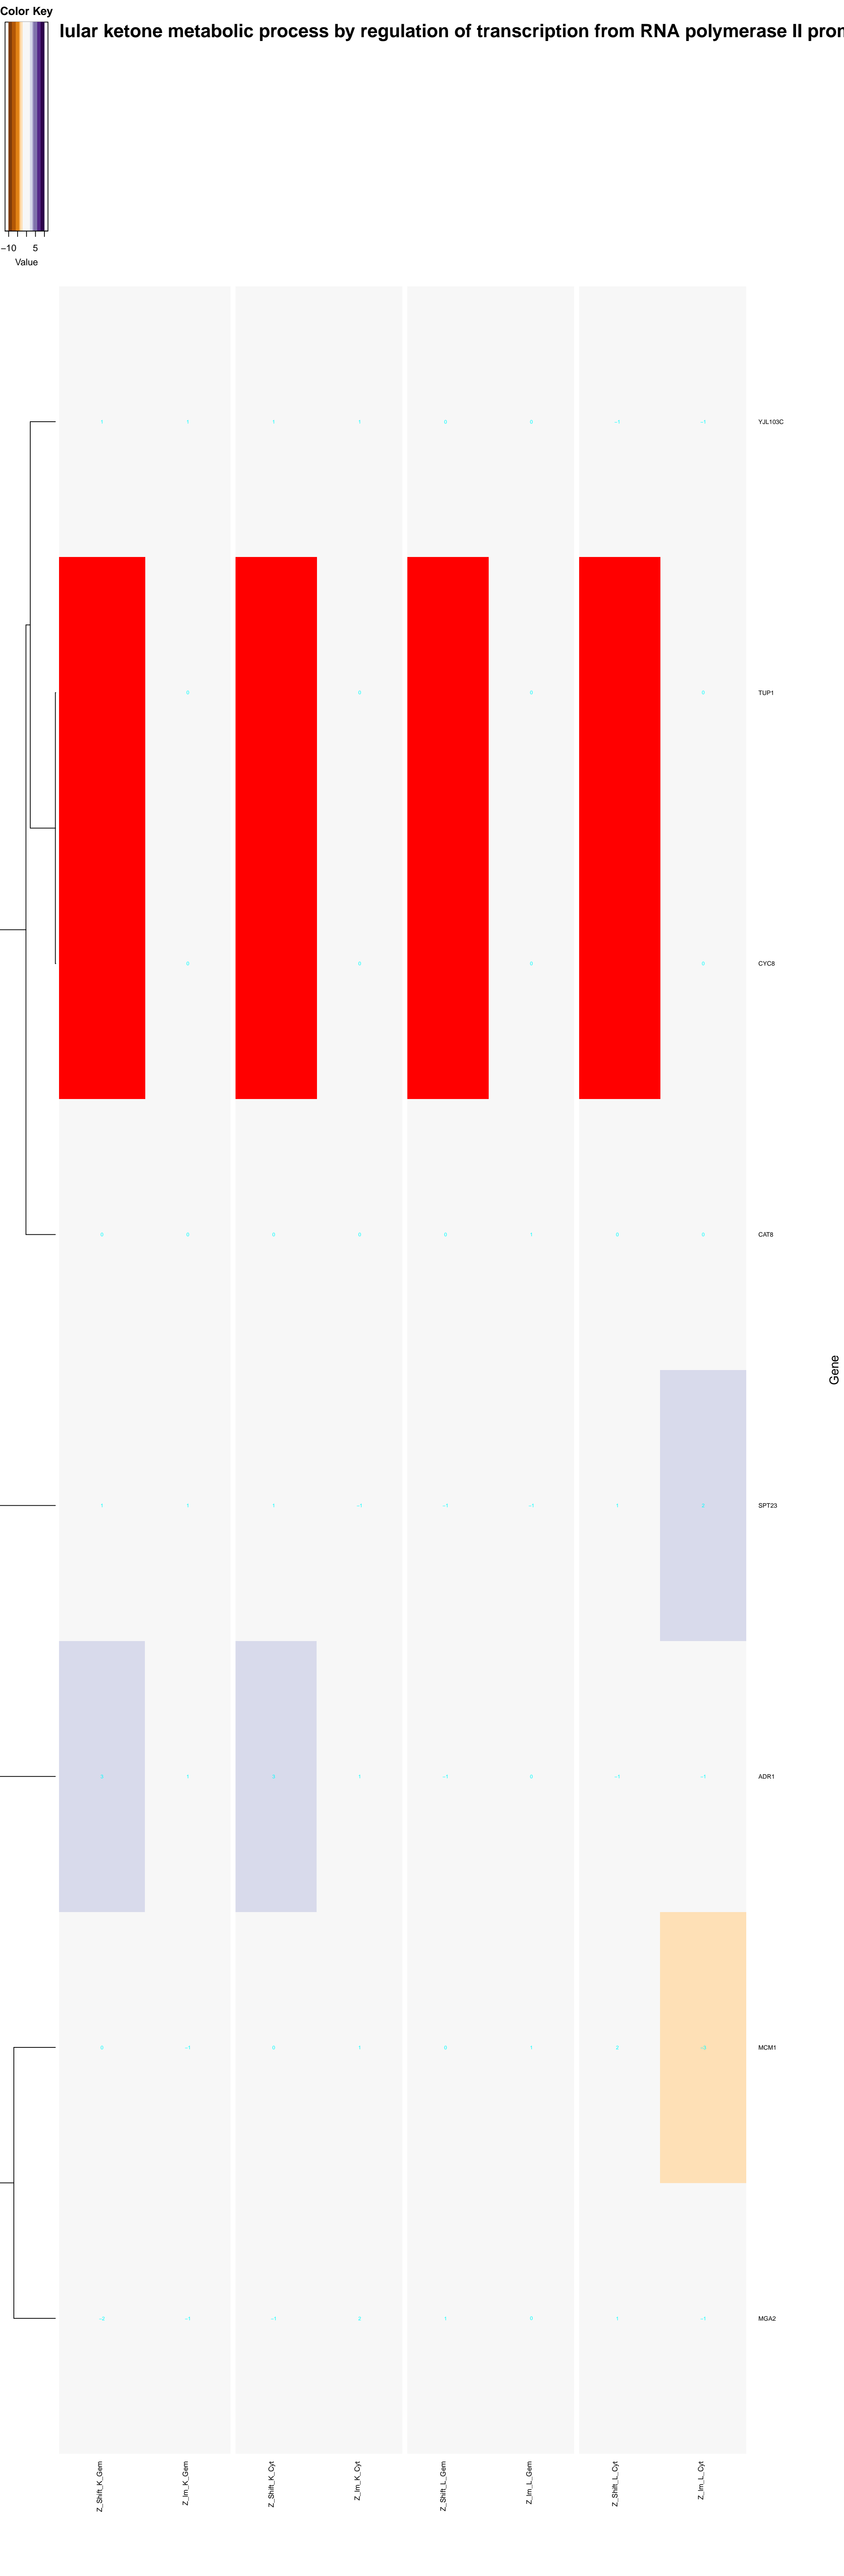

Color Key

tion of lipid transport by regulation of transcription from RNA polymerase II promoter

-10 5

Value

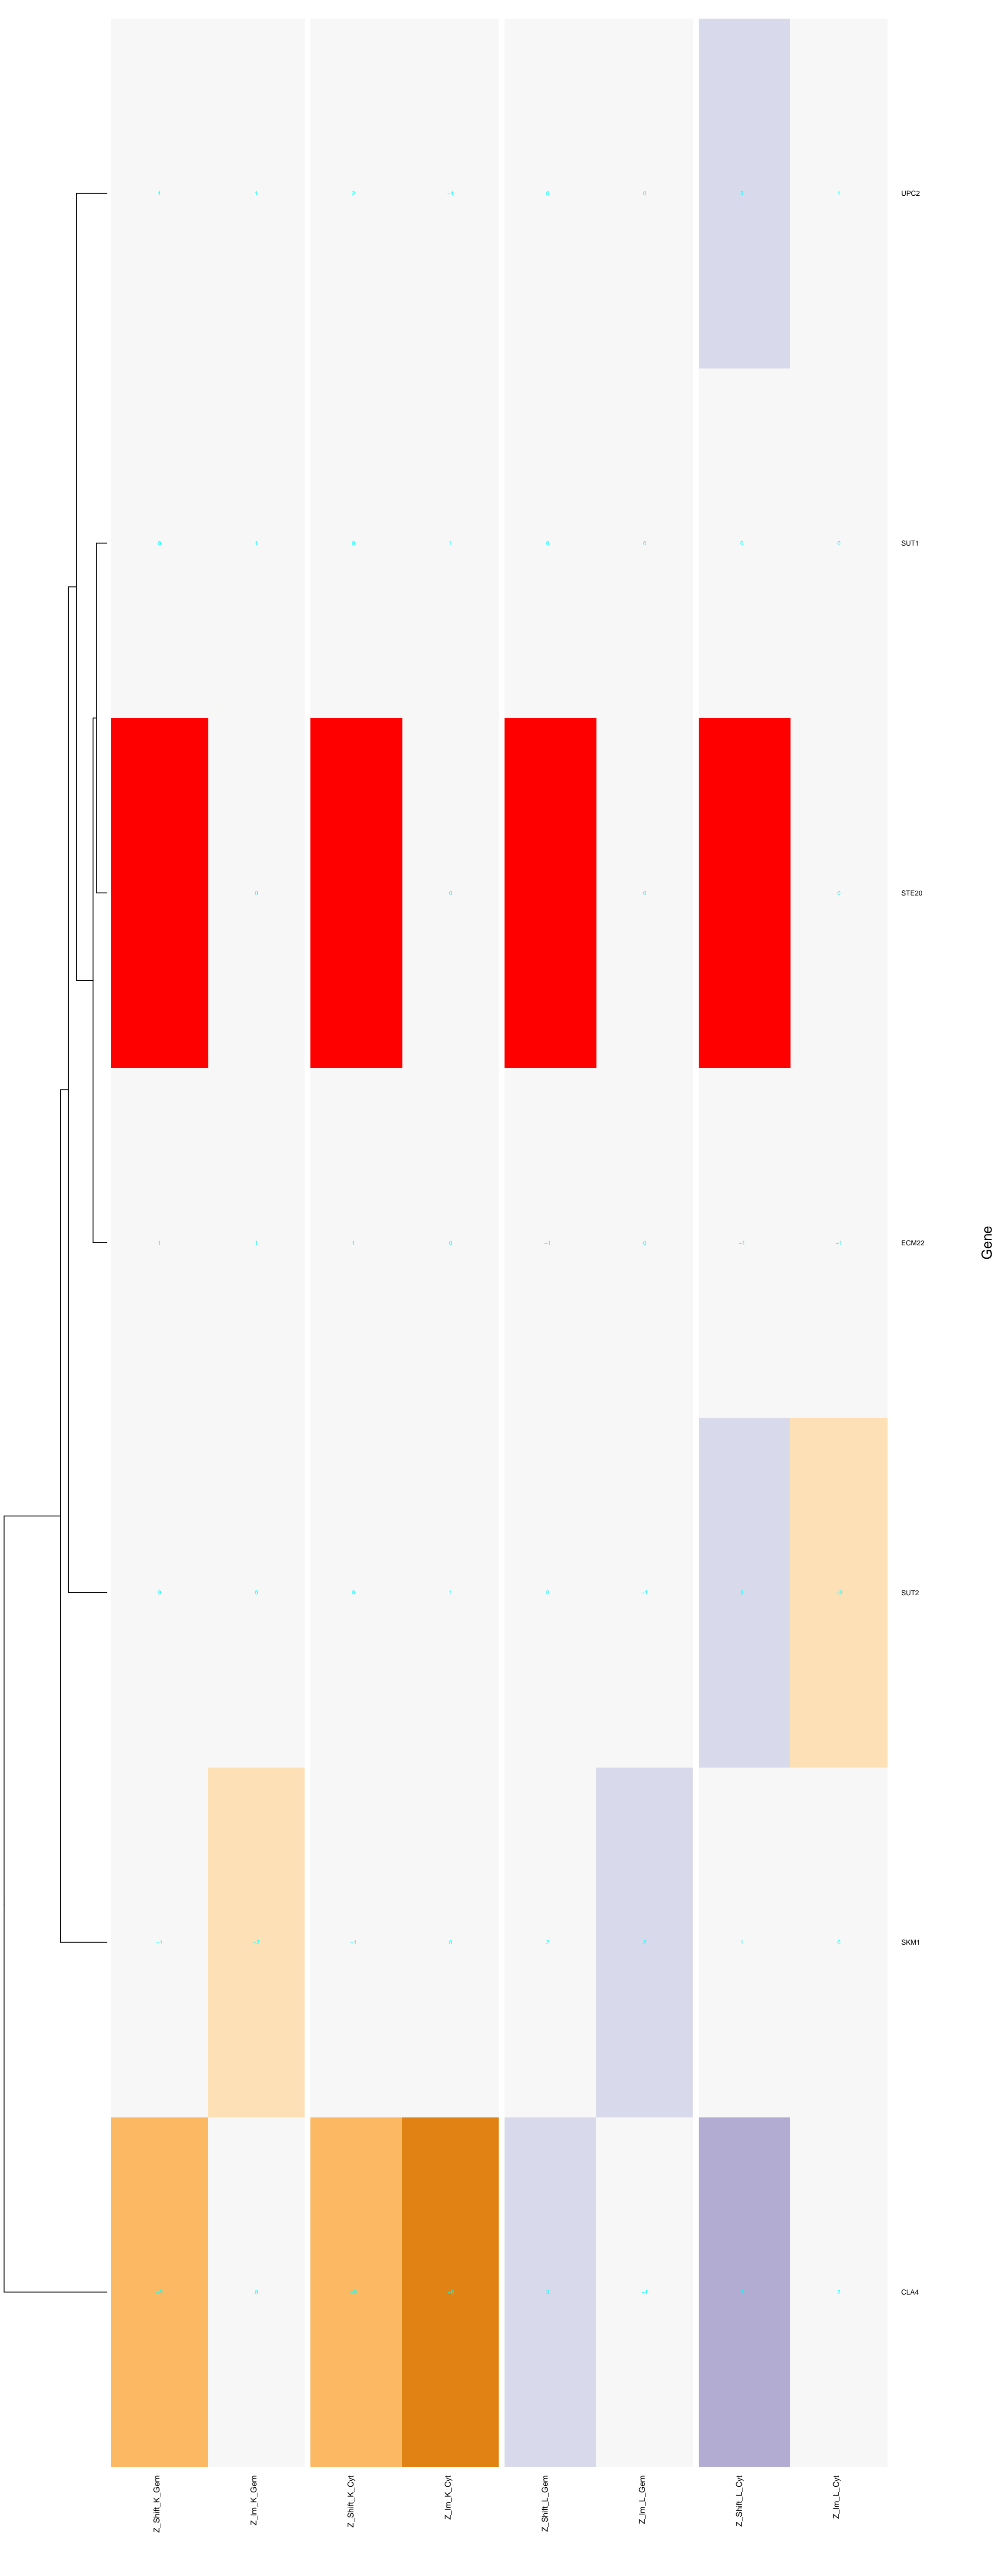

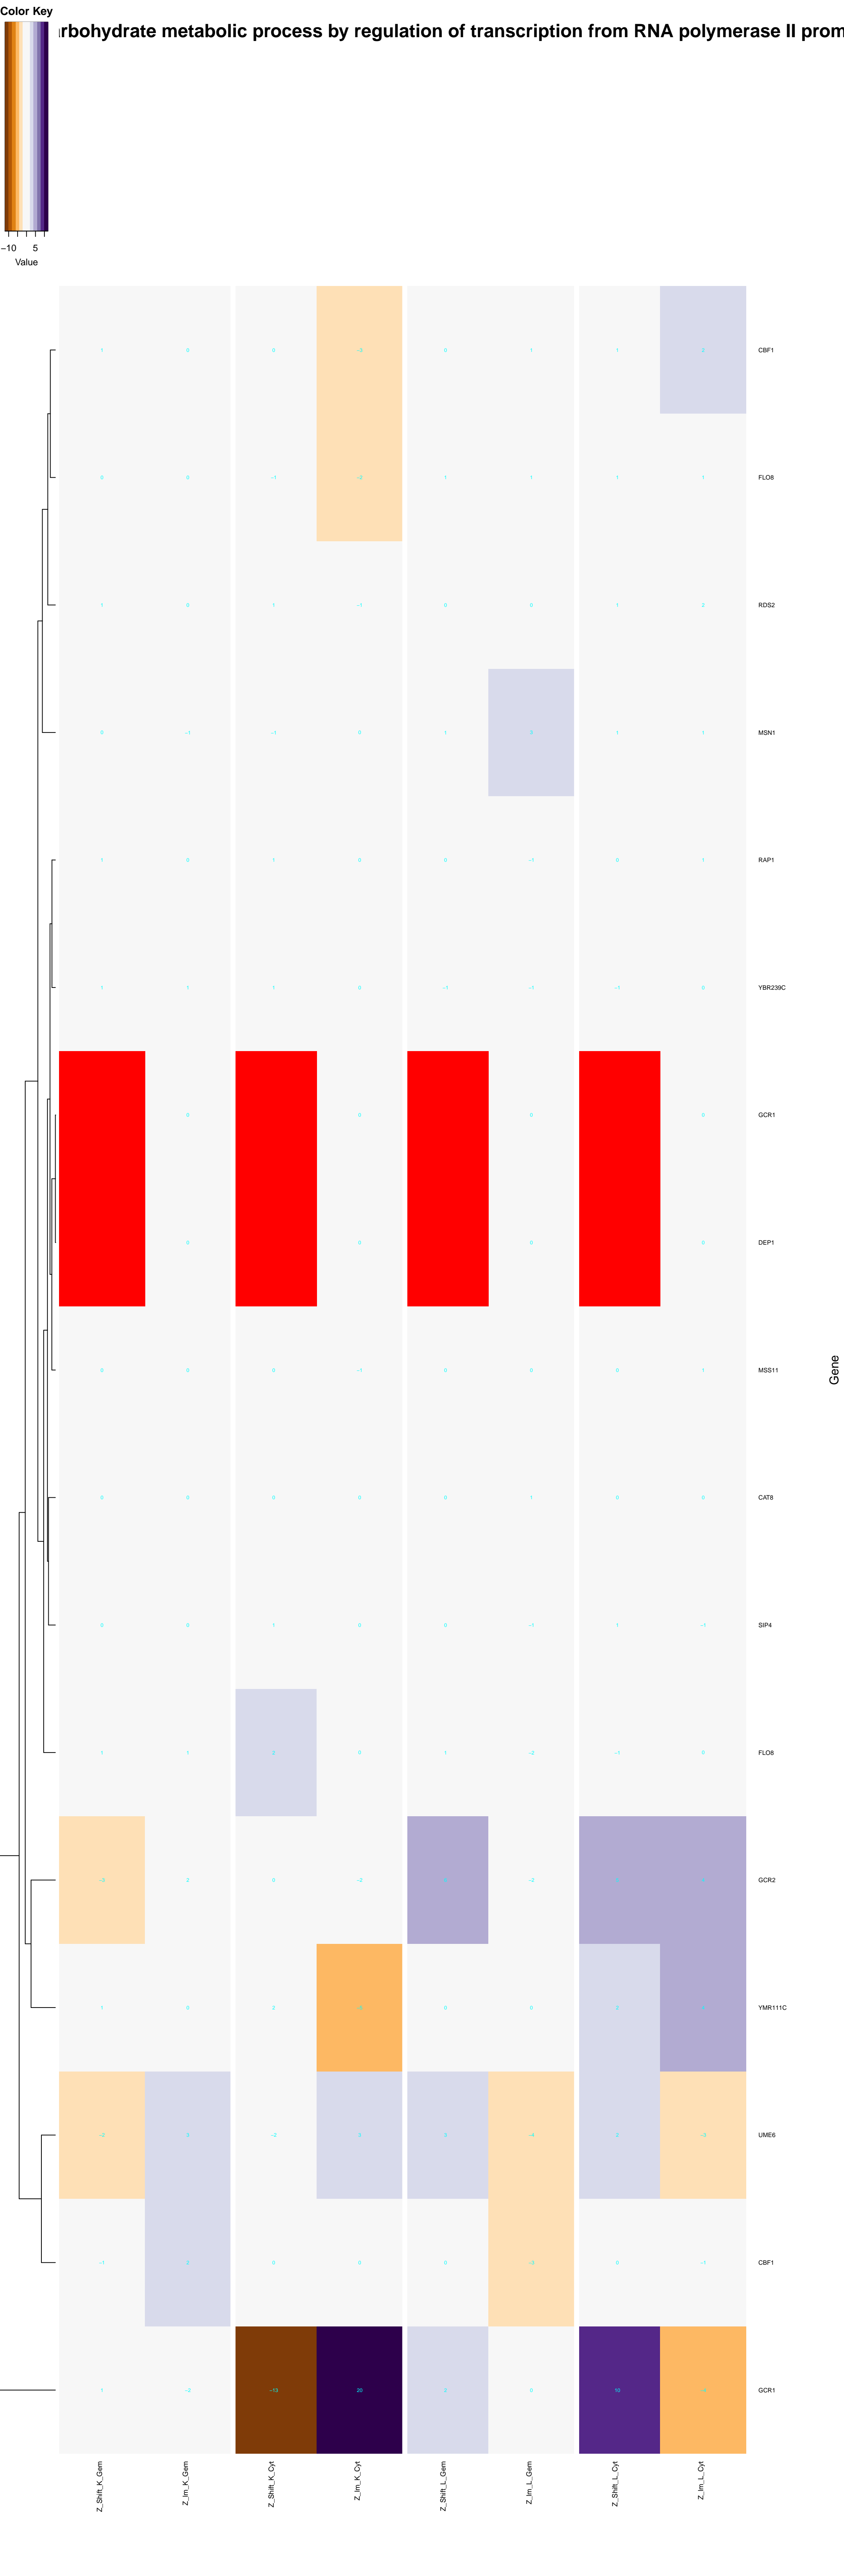



regulation of phosphorylation of RNA polymerase II C-terminal domain

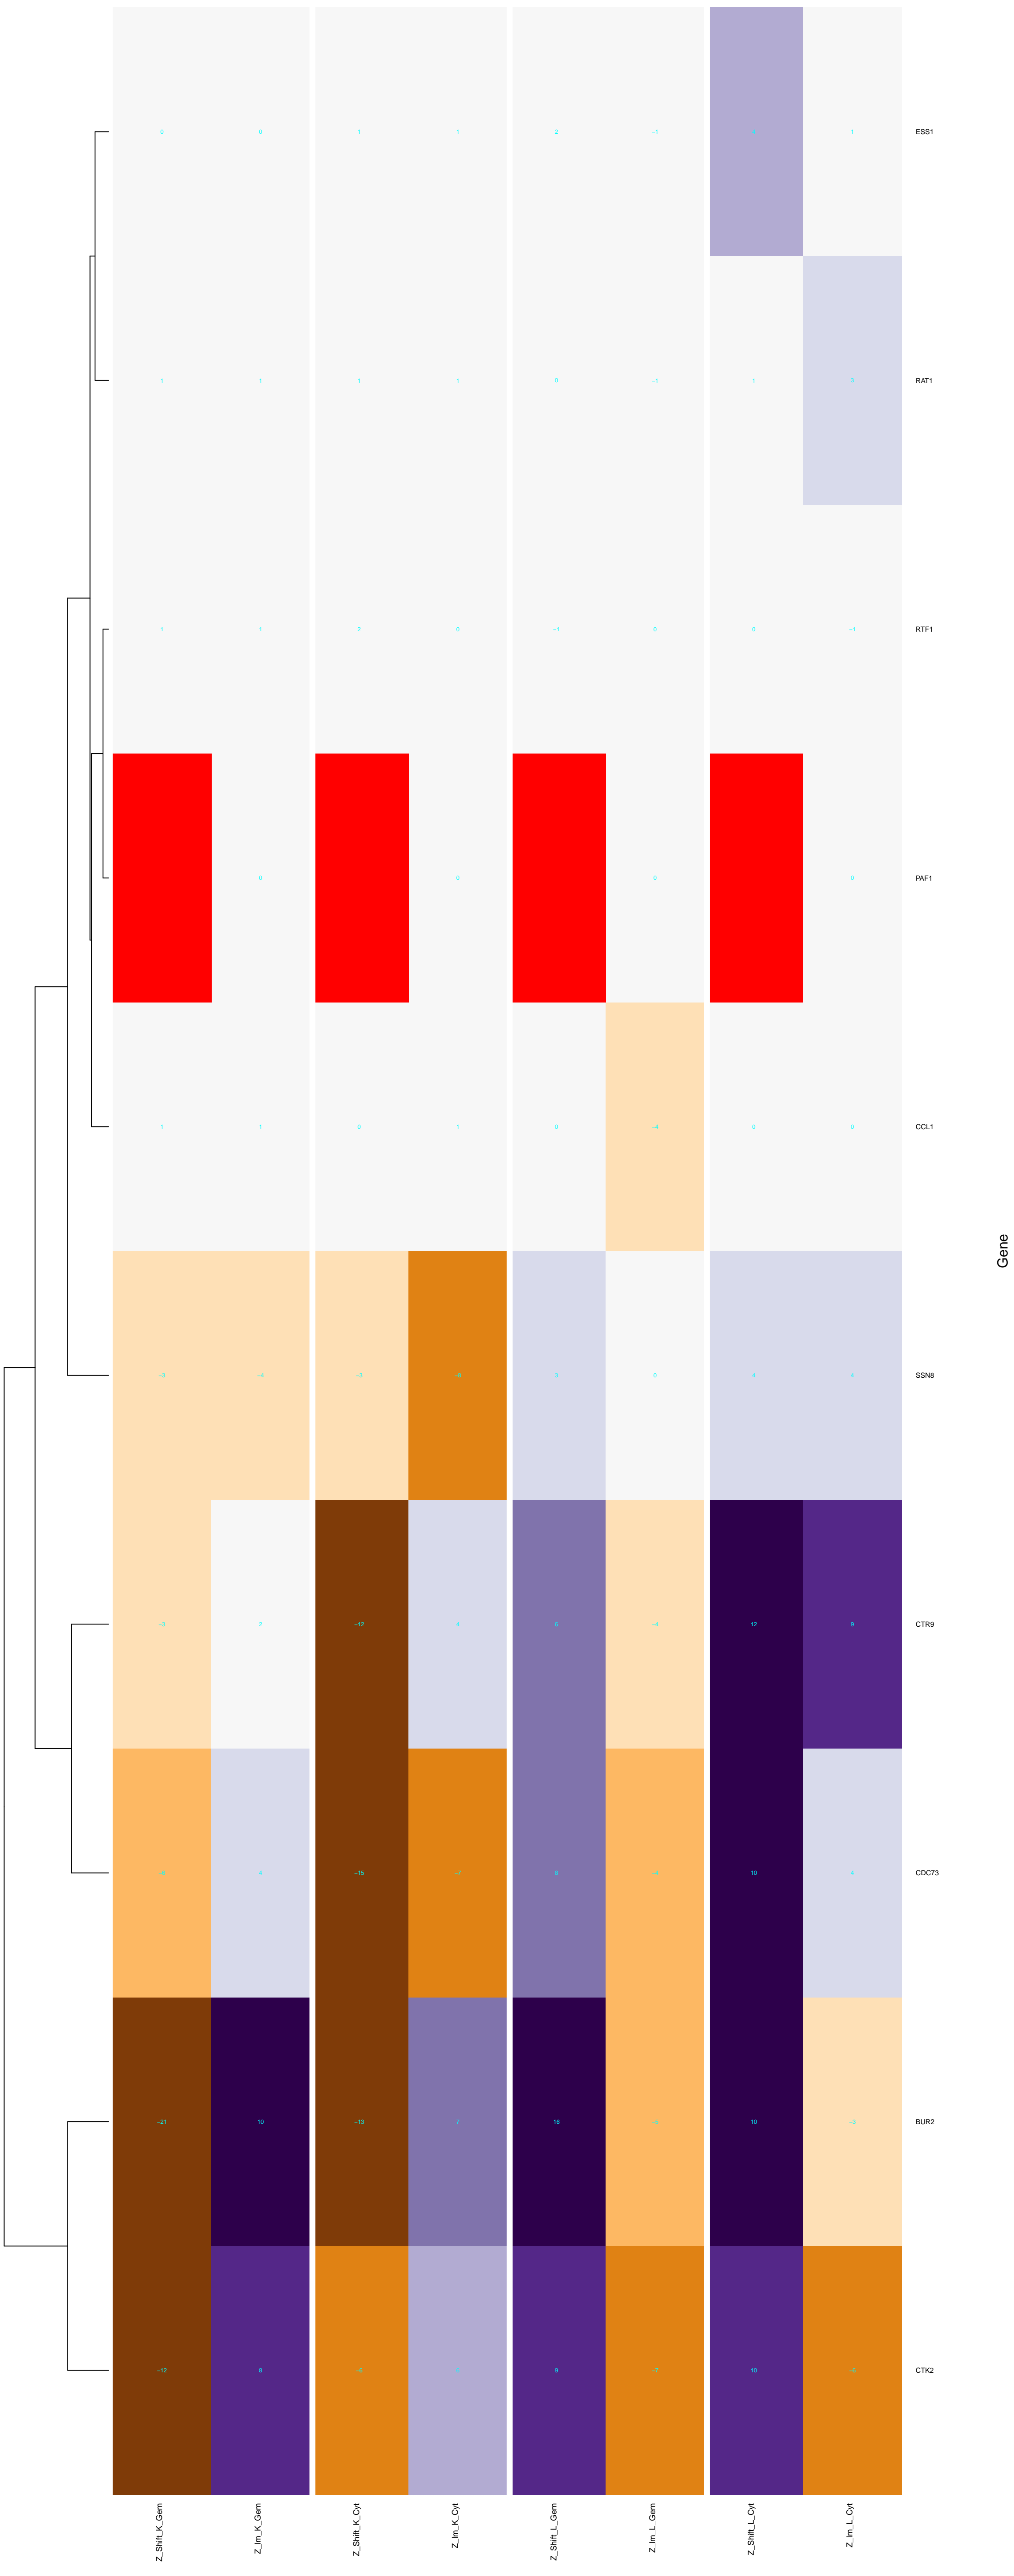

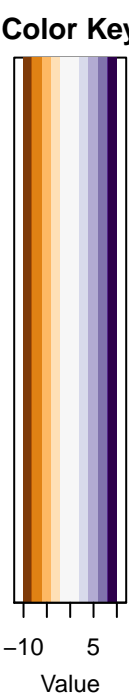

positive regulation of transcription by pheromones

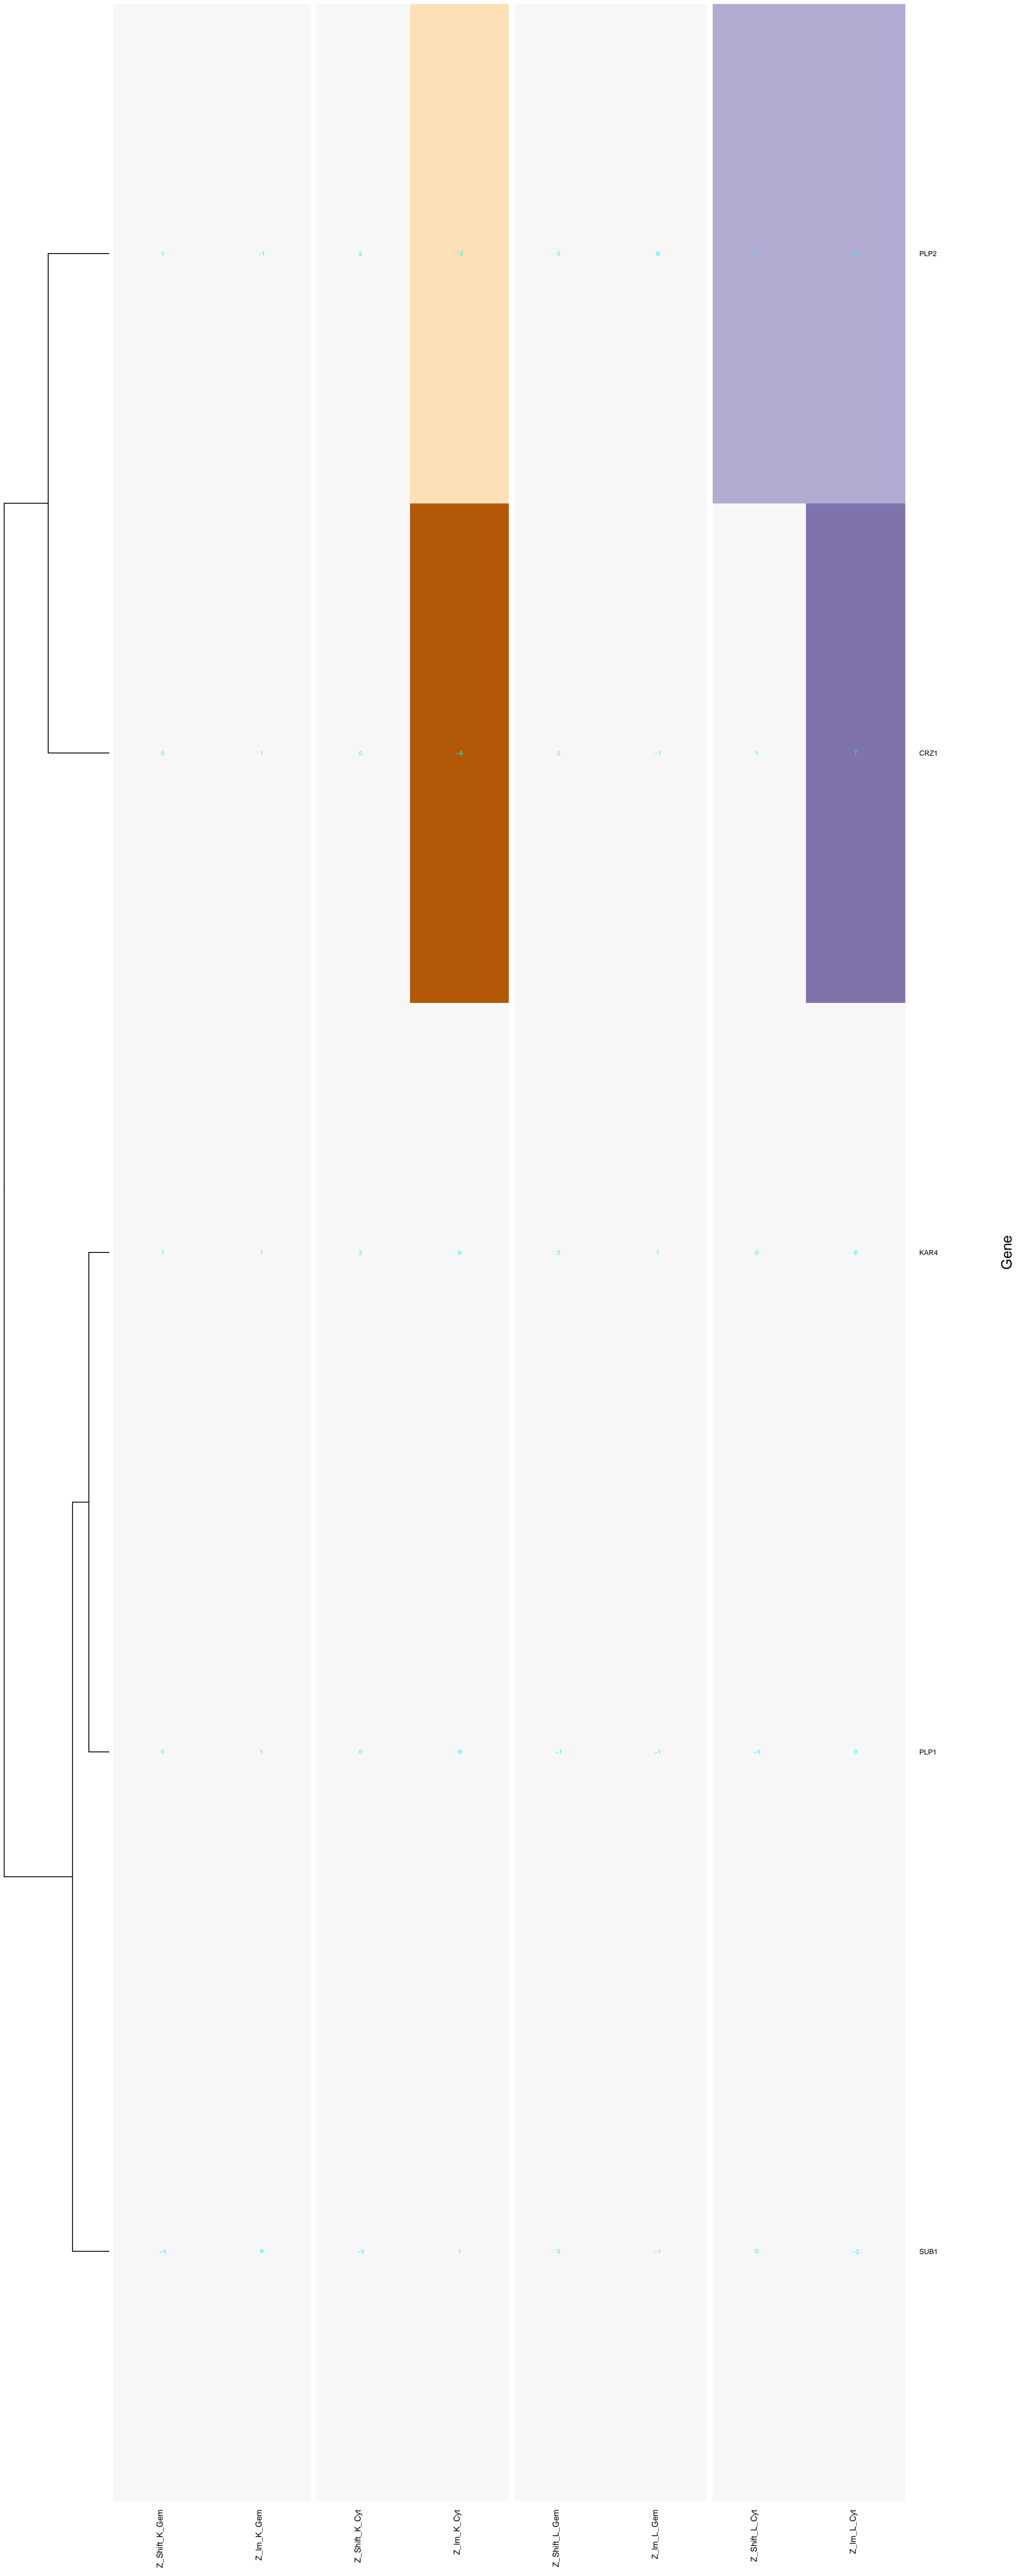

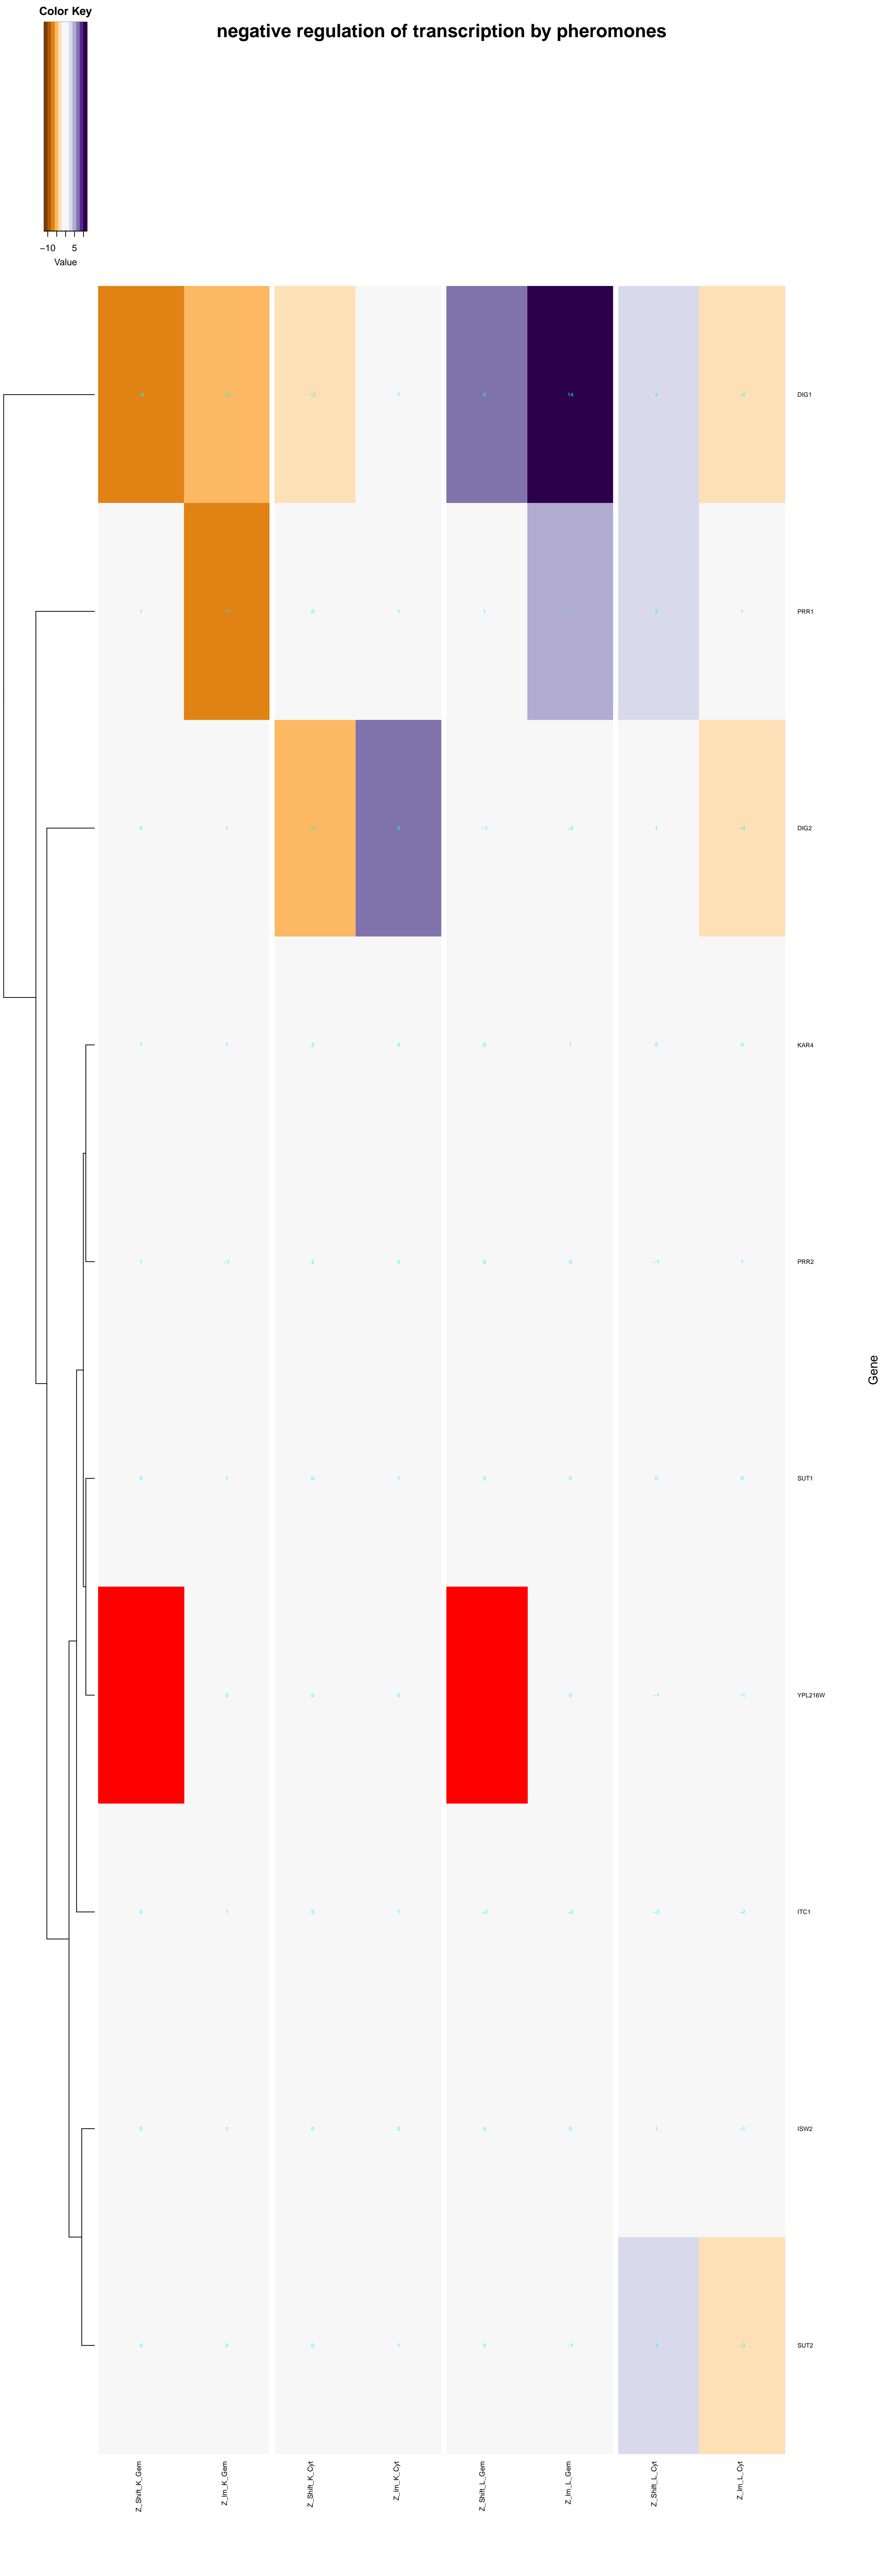

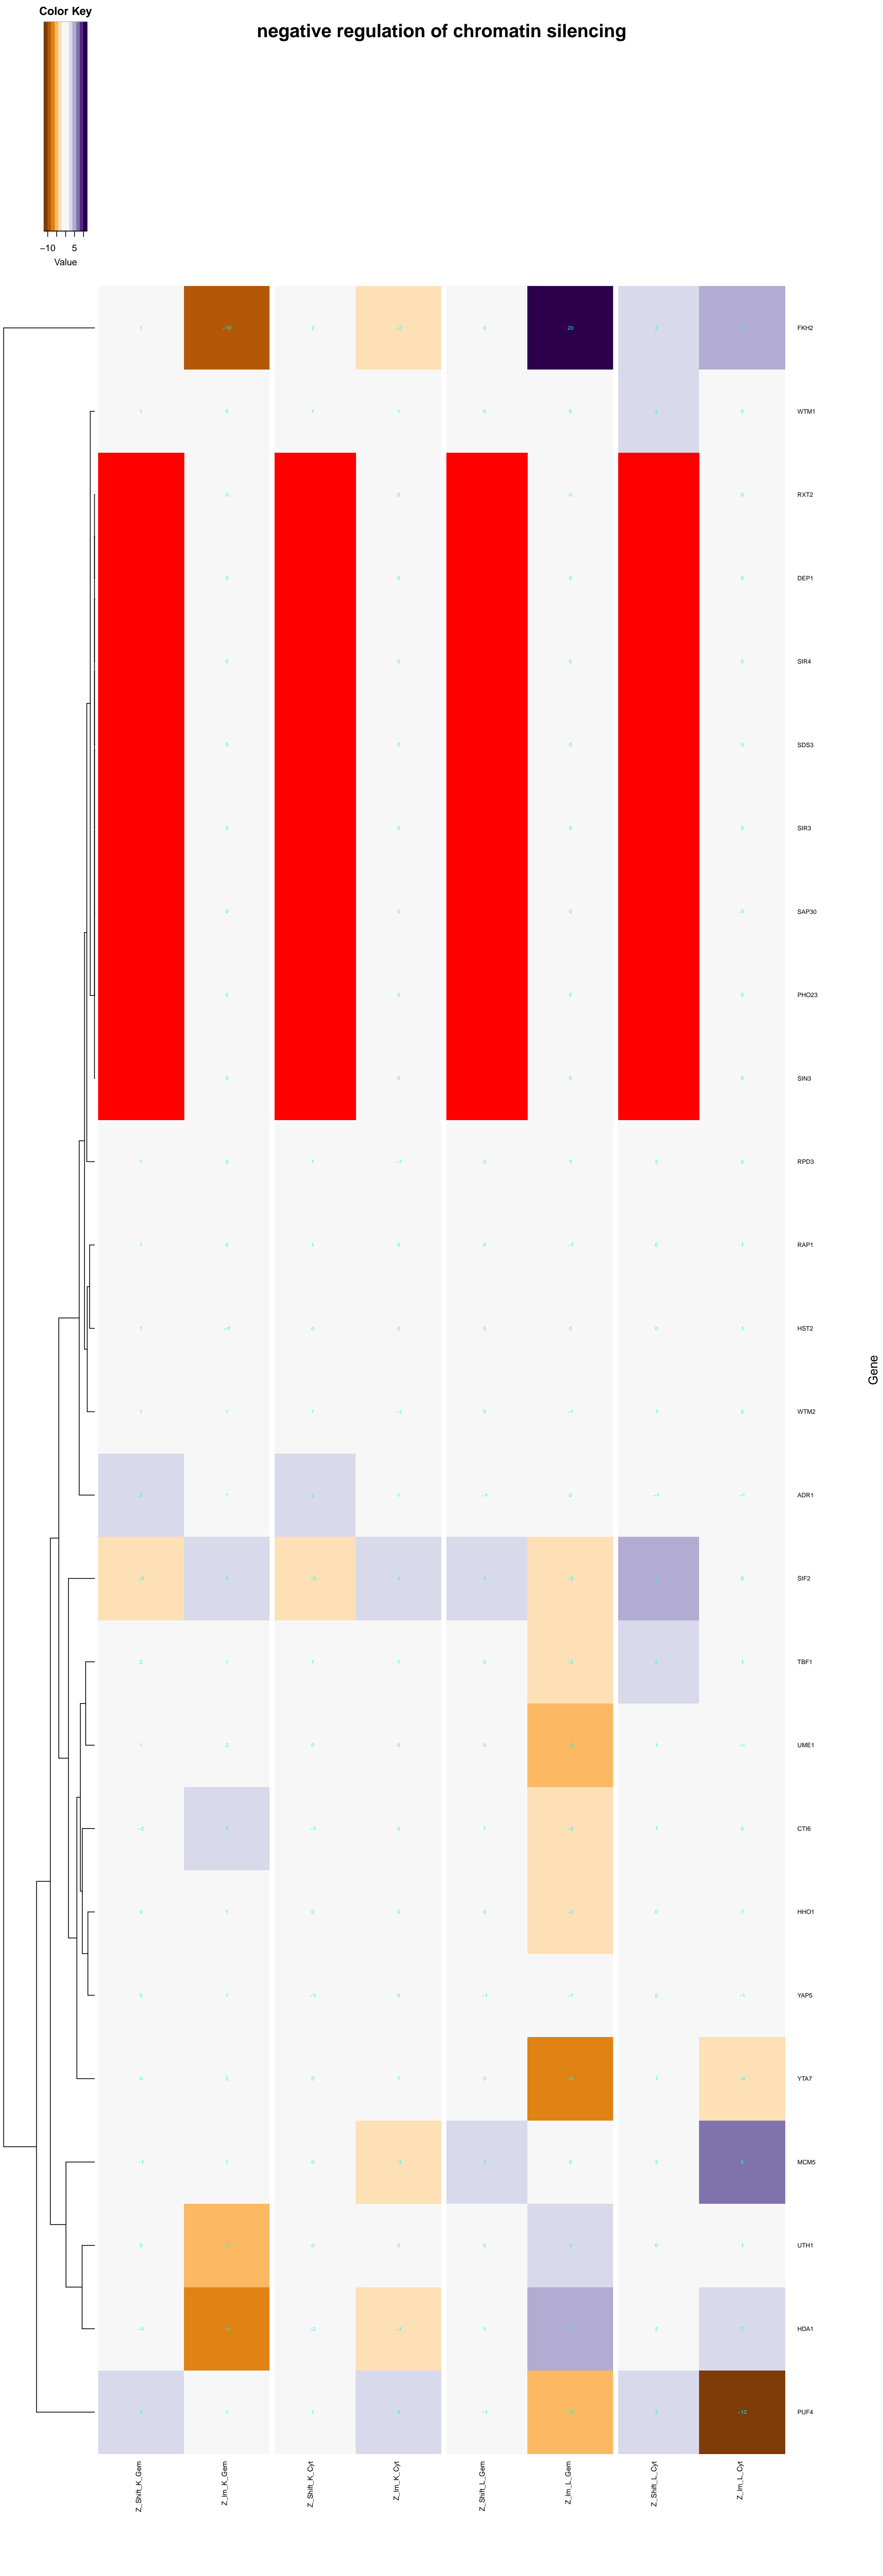

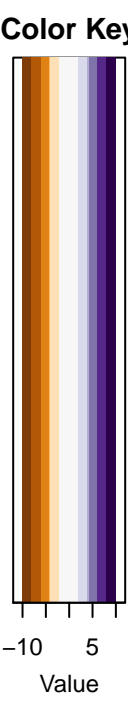

positive regulation of chromatin silencing

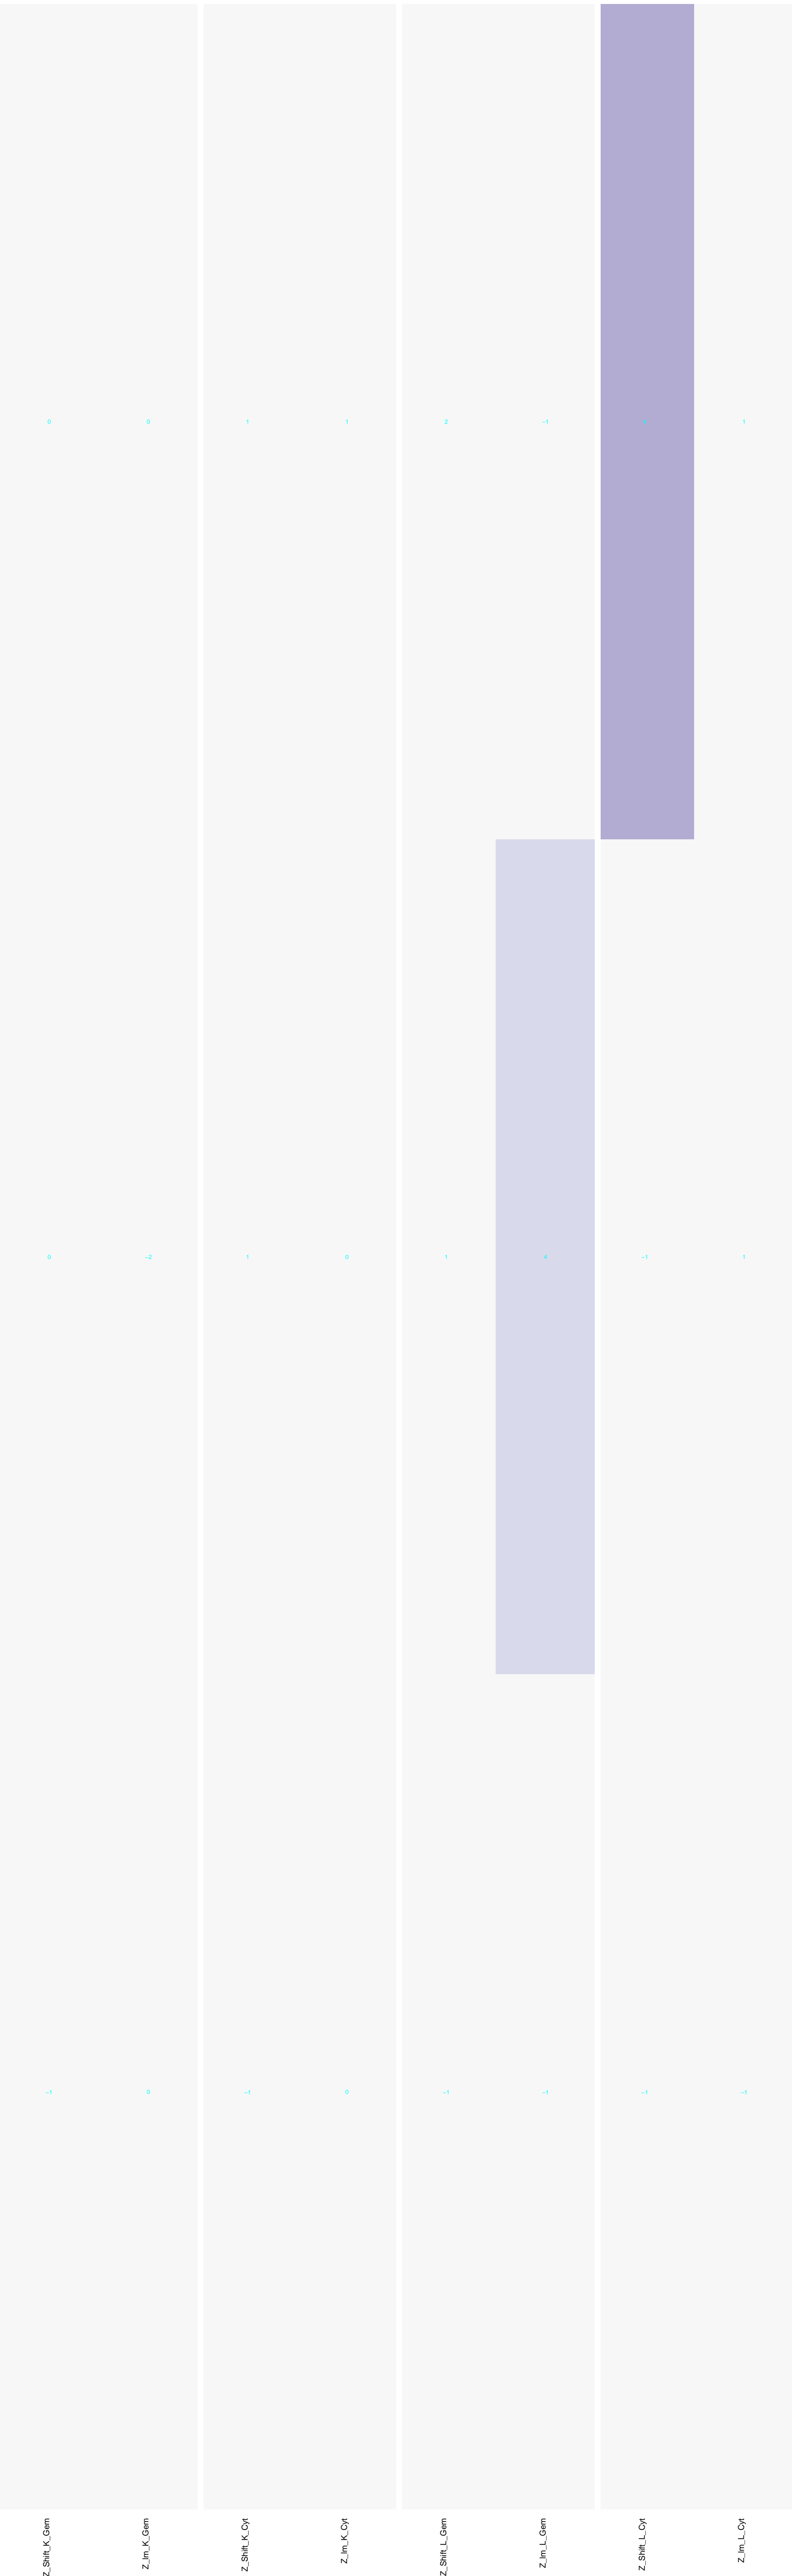

Gene

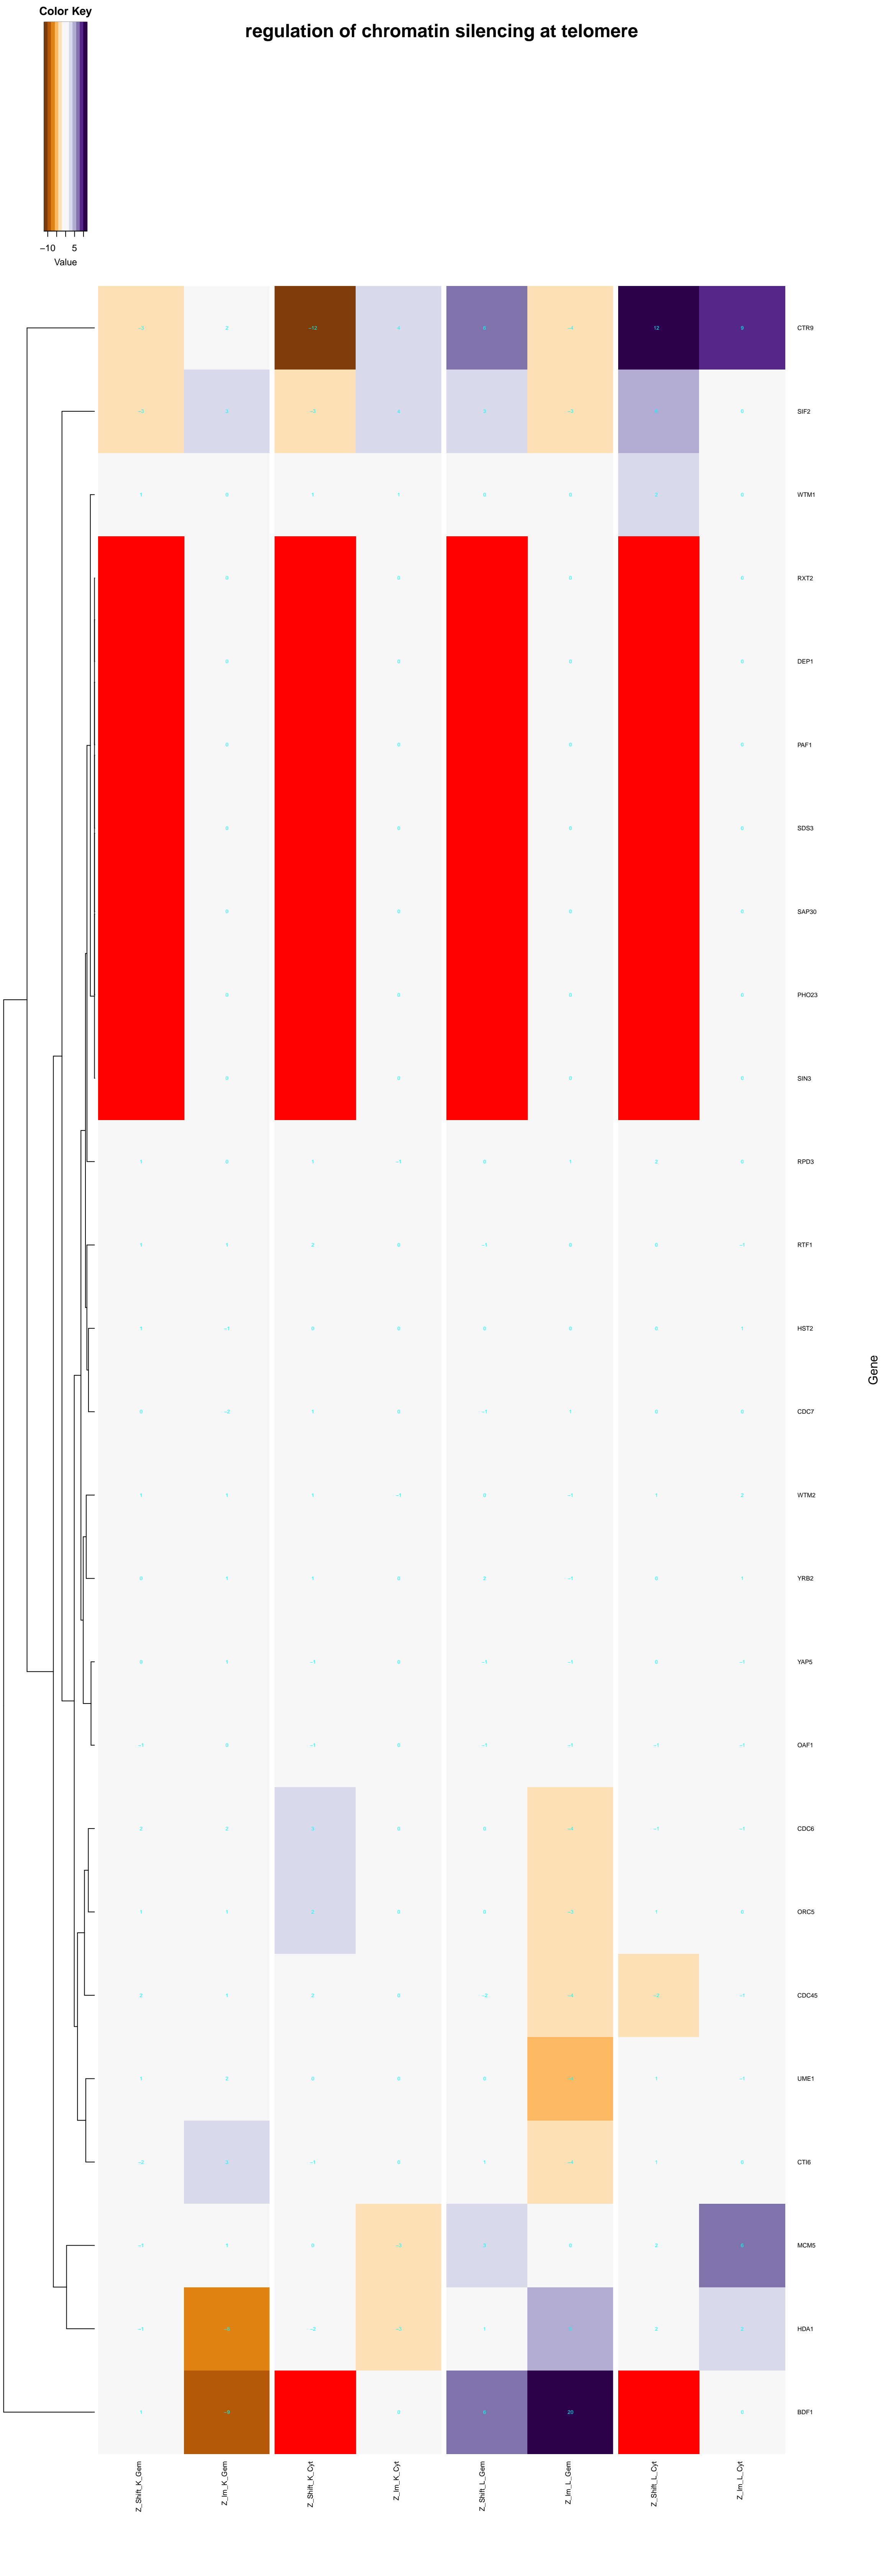

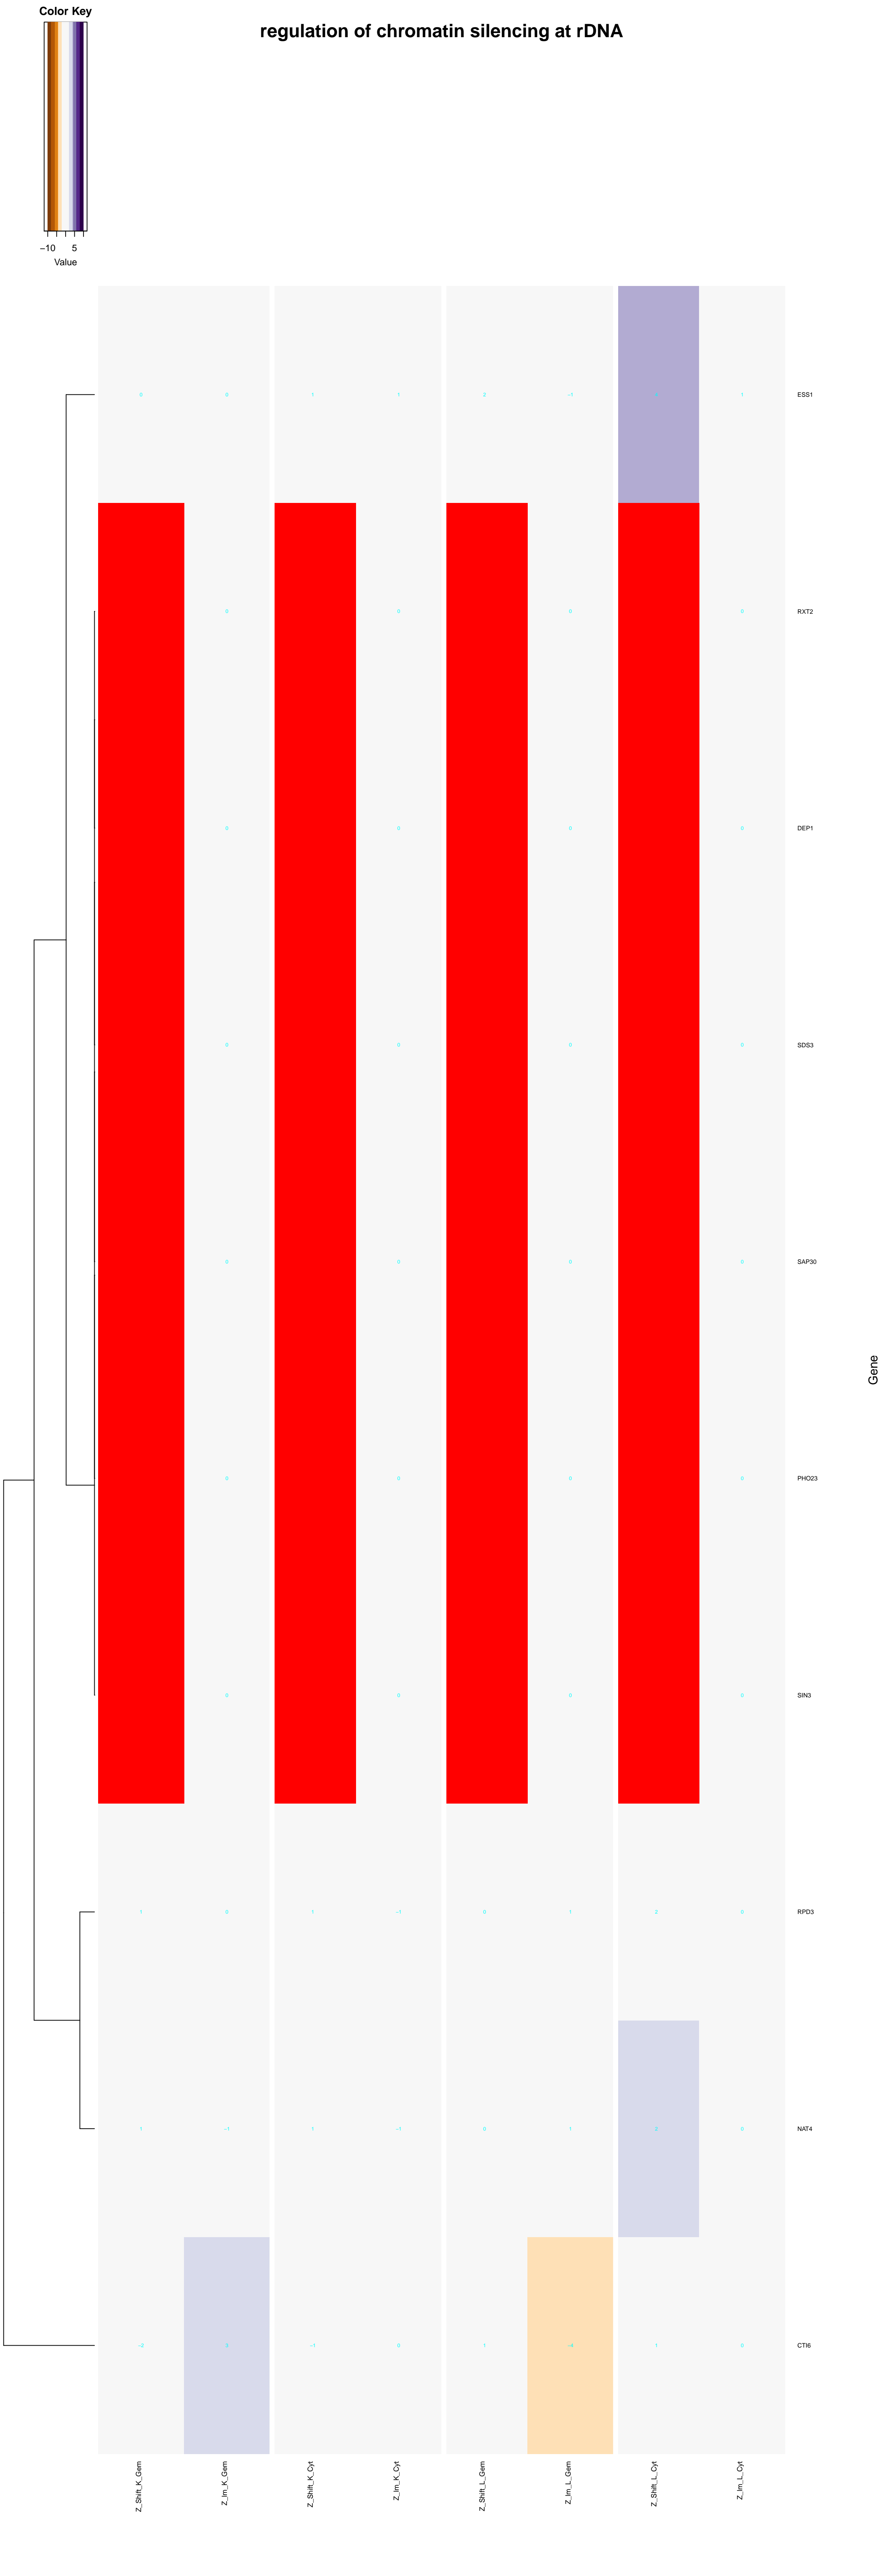

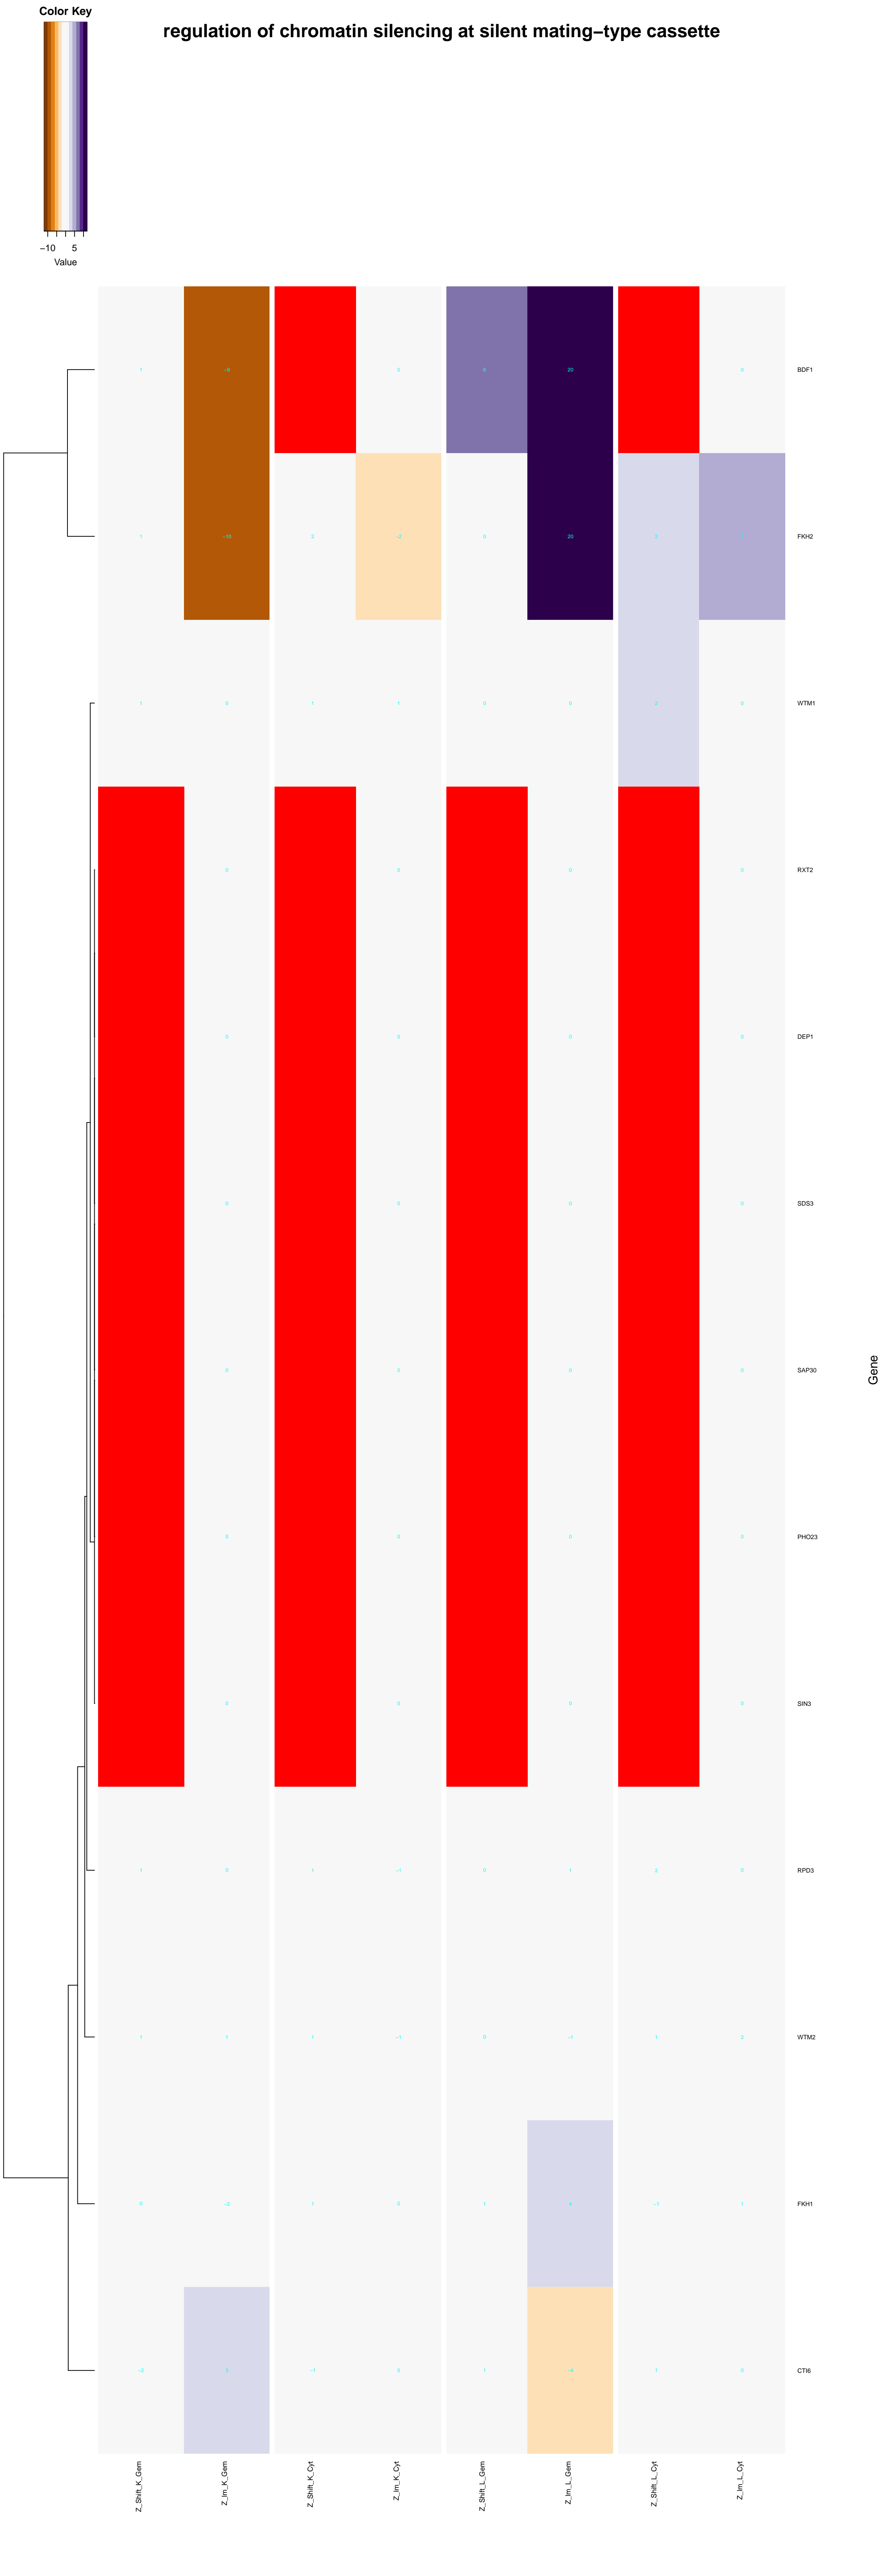

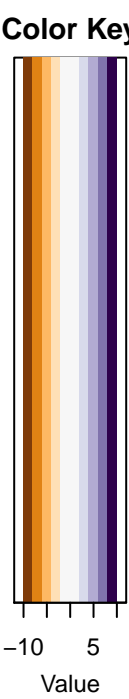

negative regulation of DNA-templated transcription, elongation

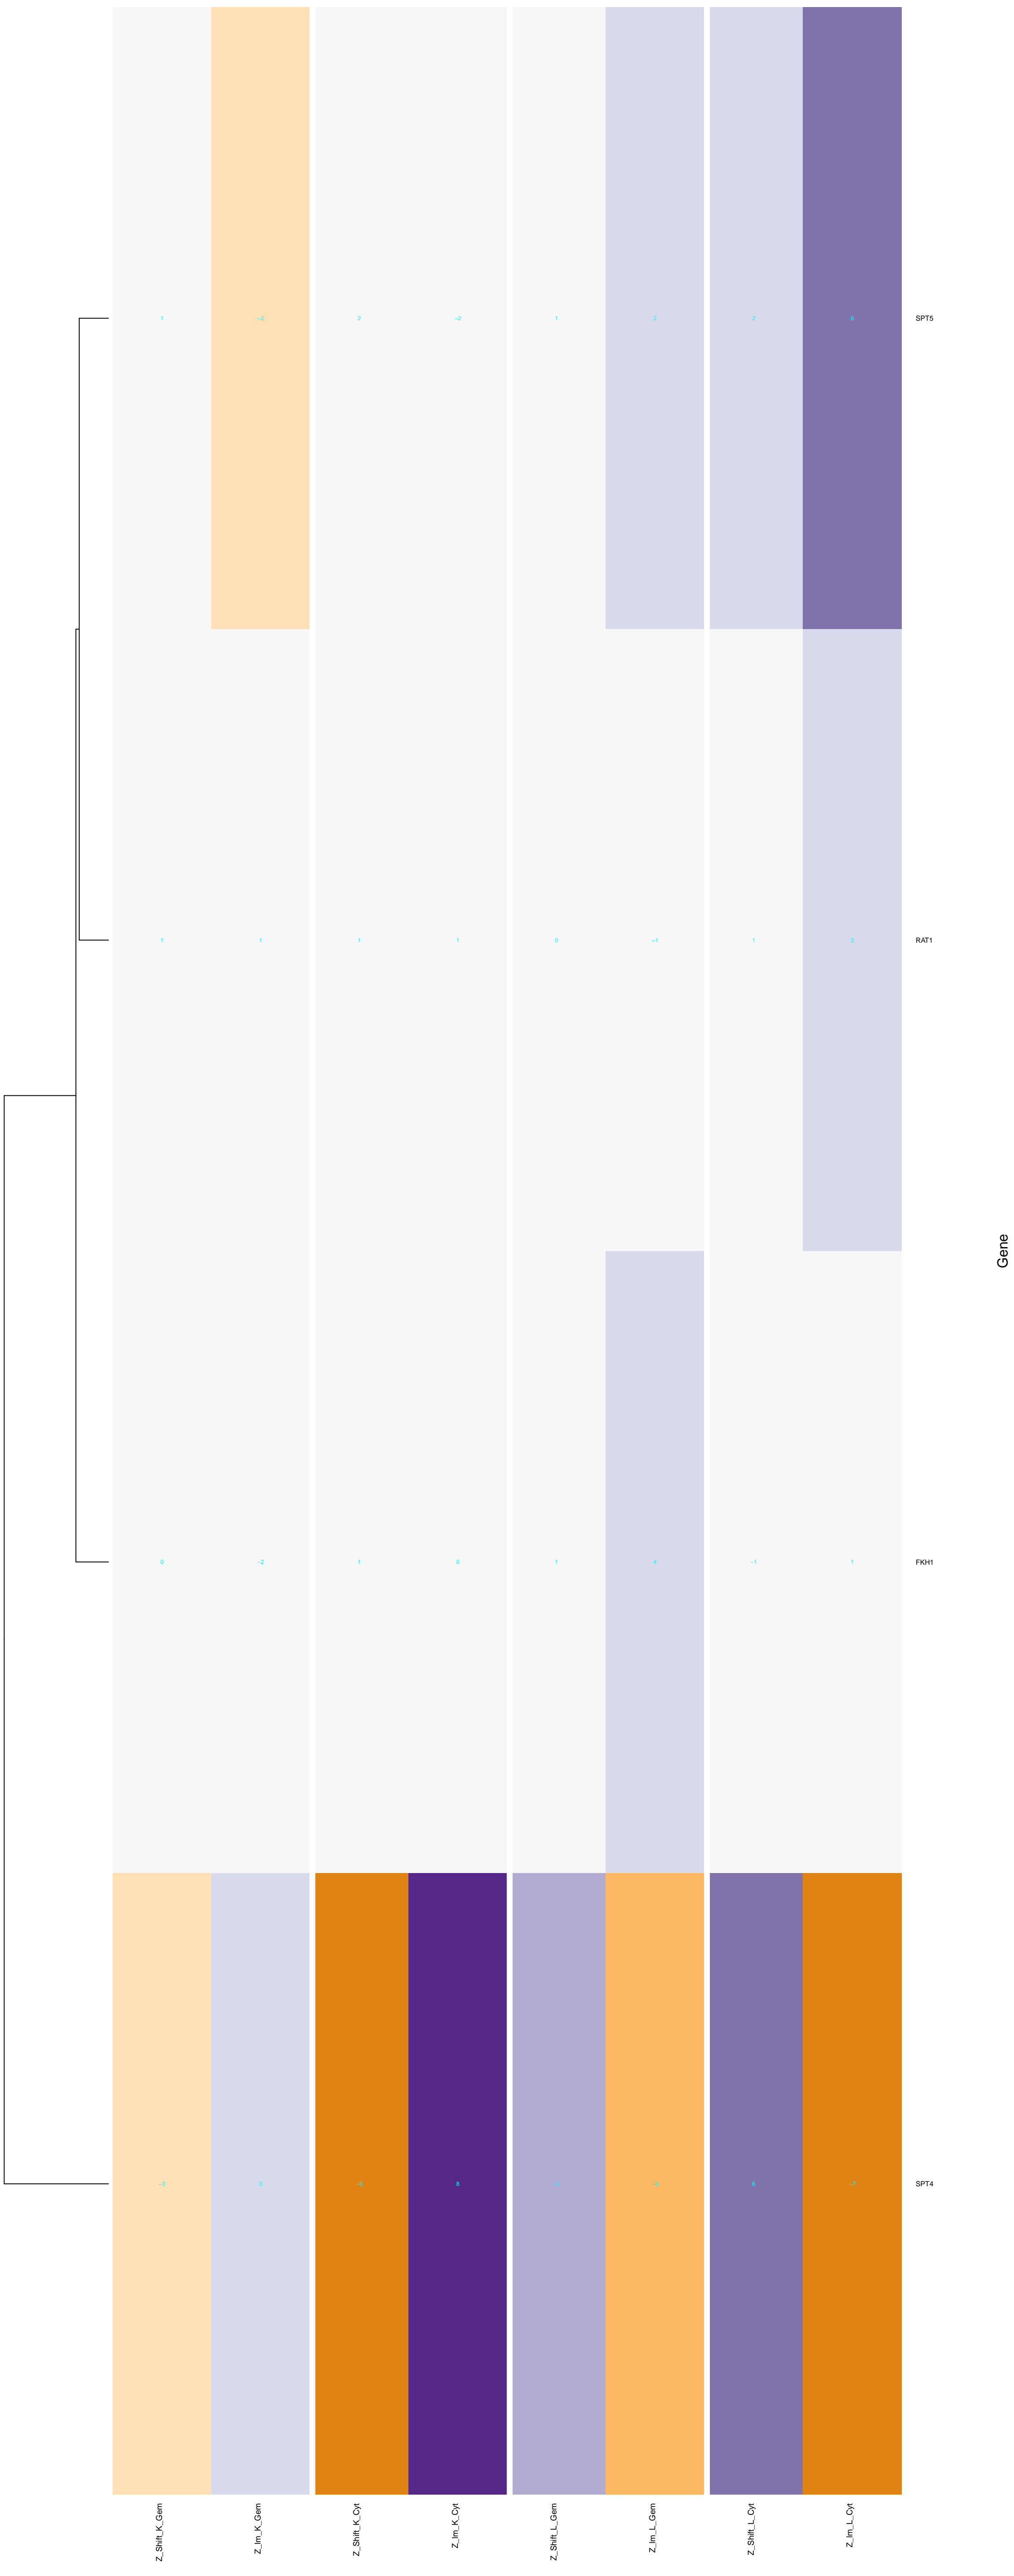

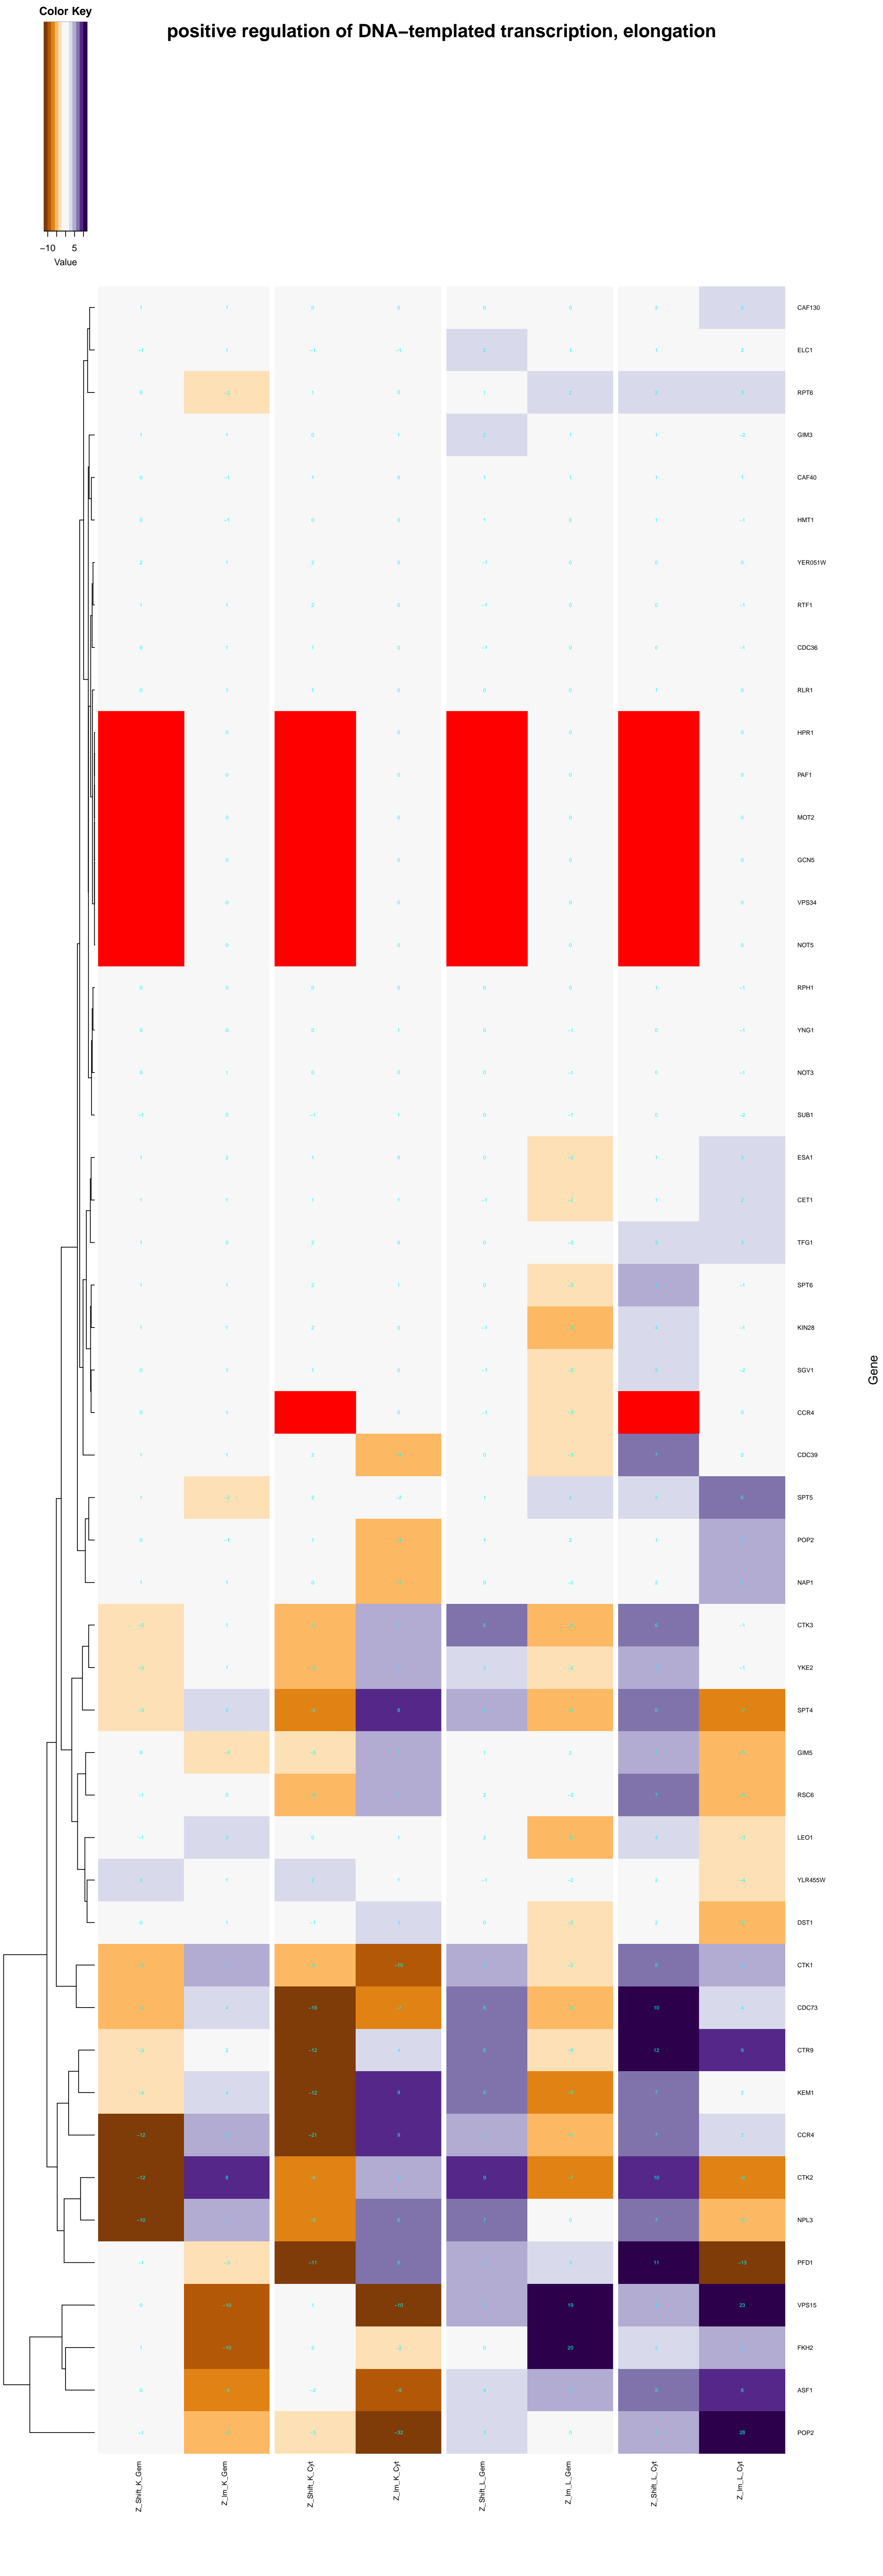

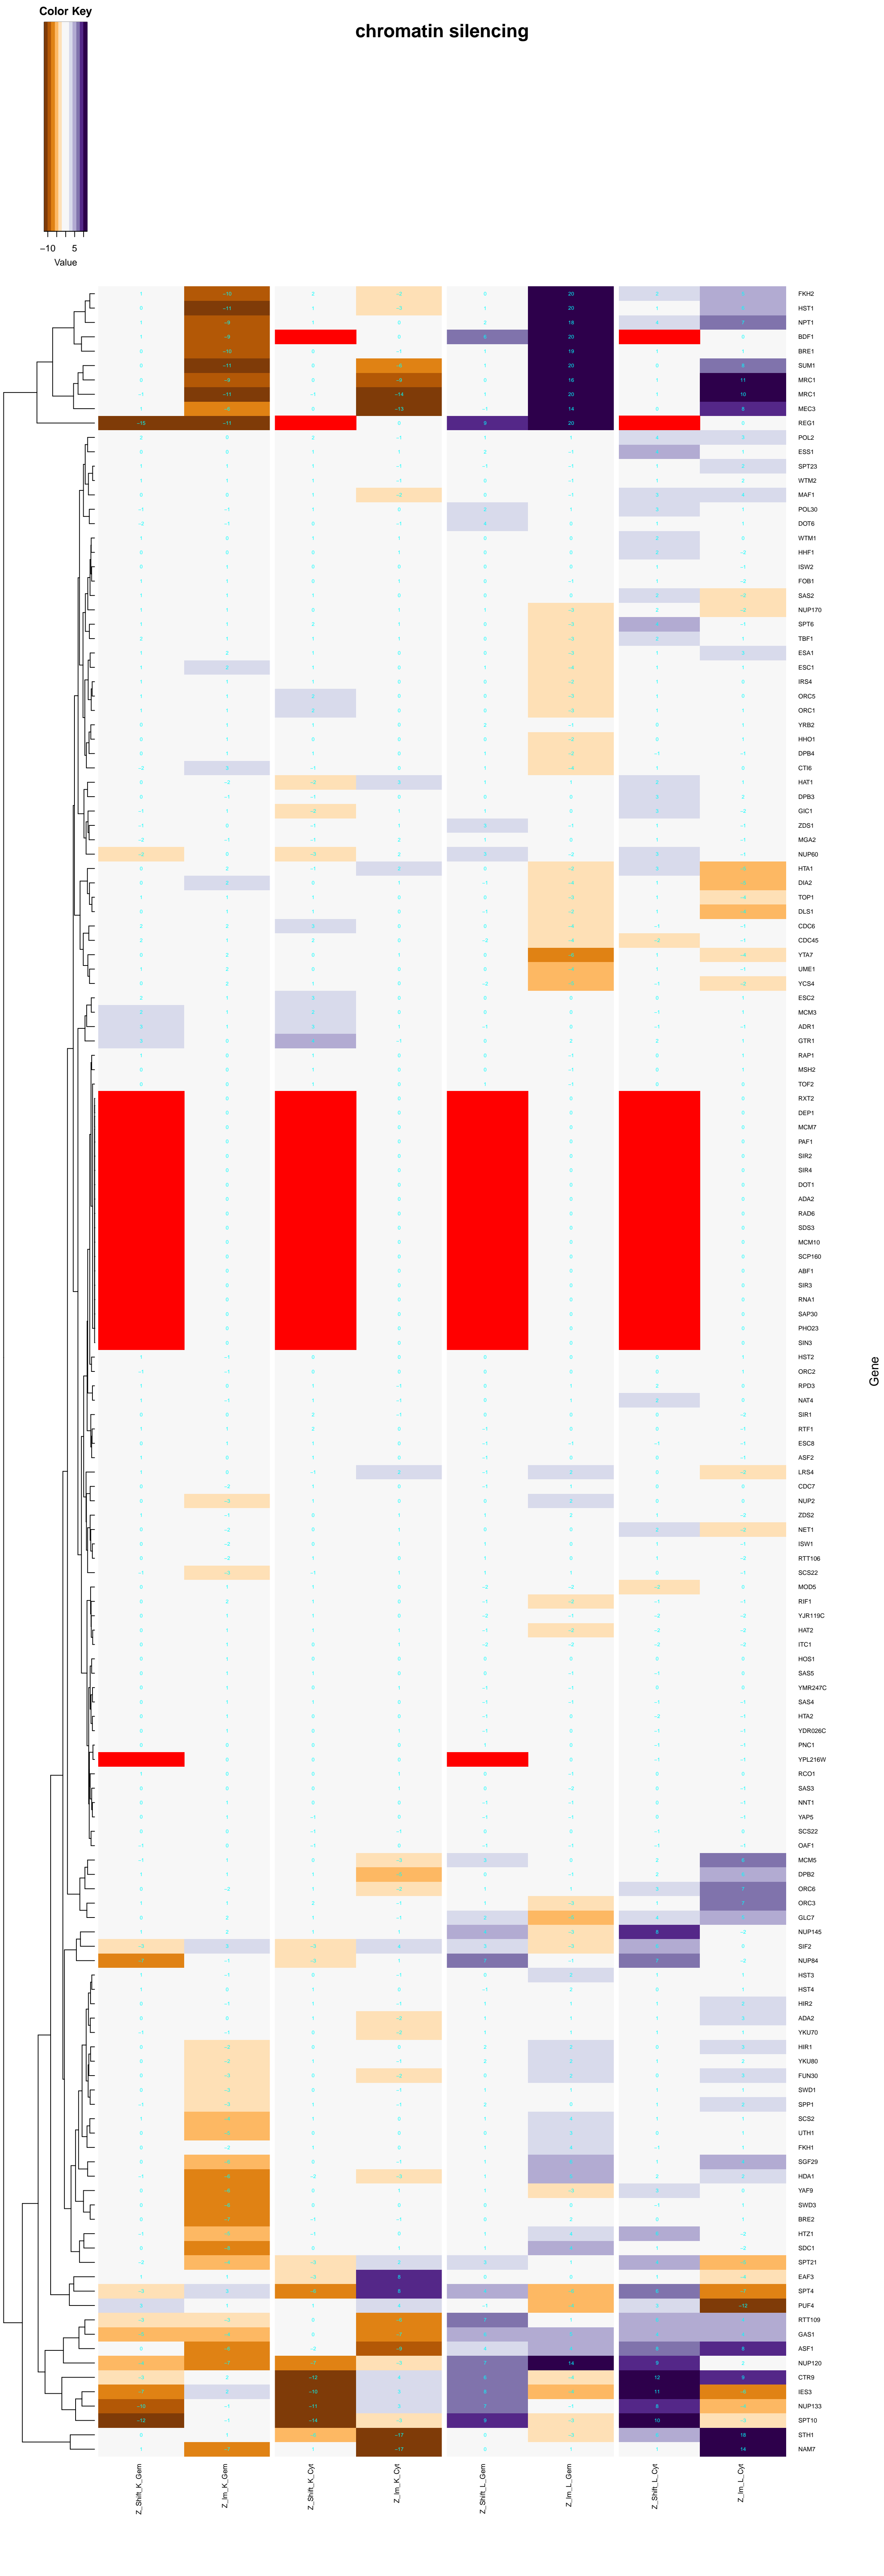

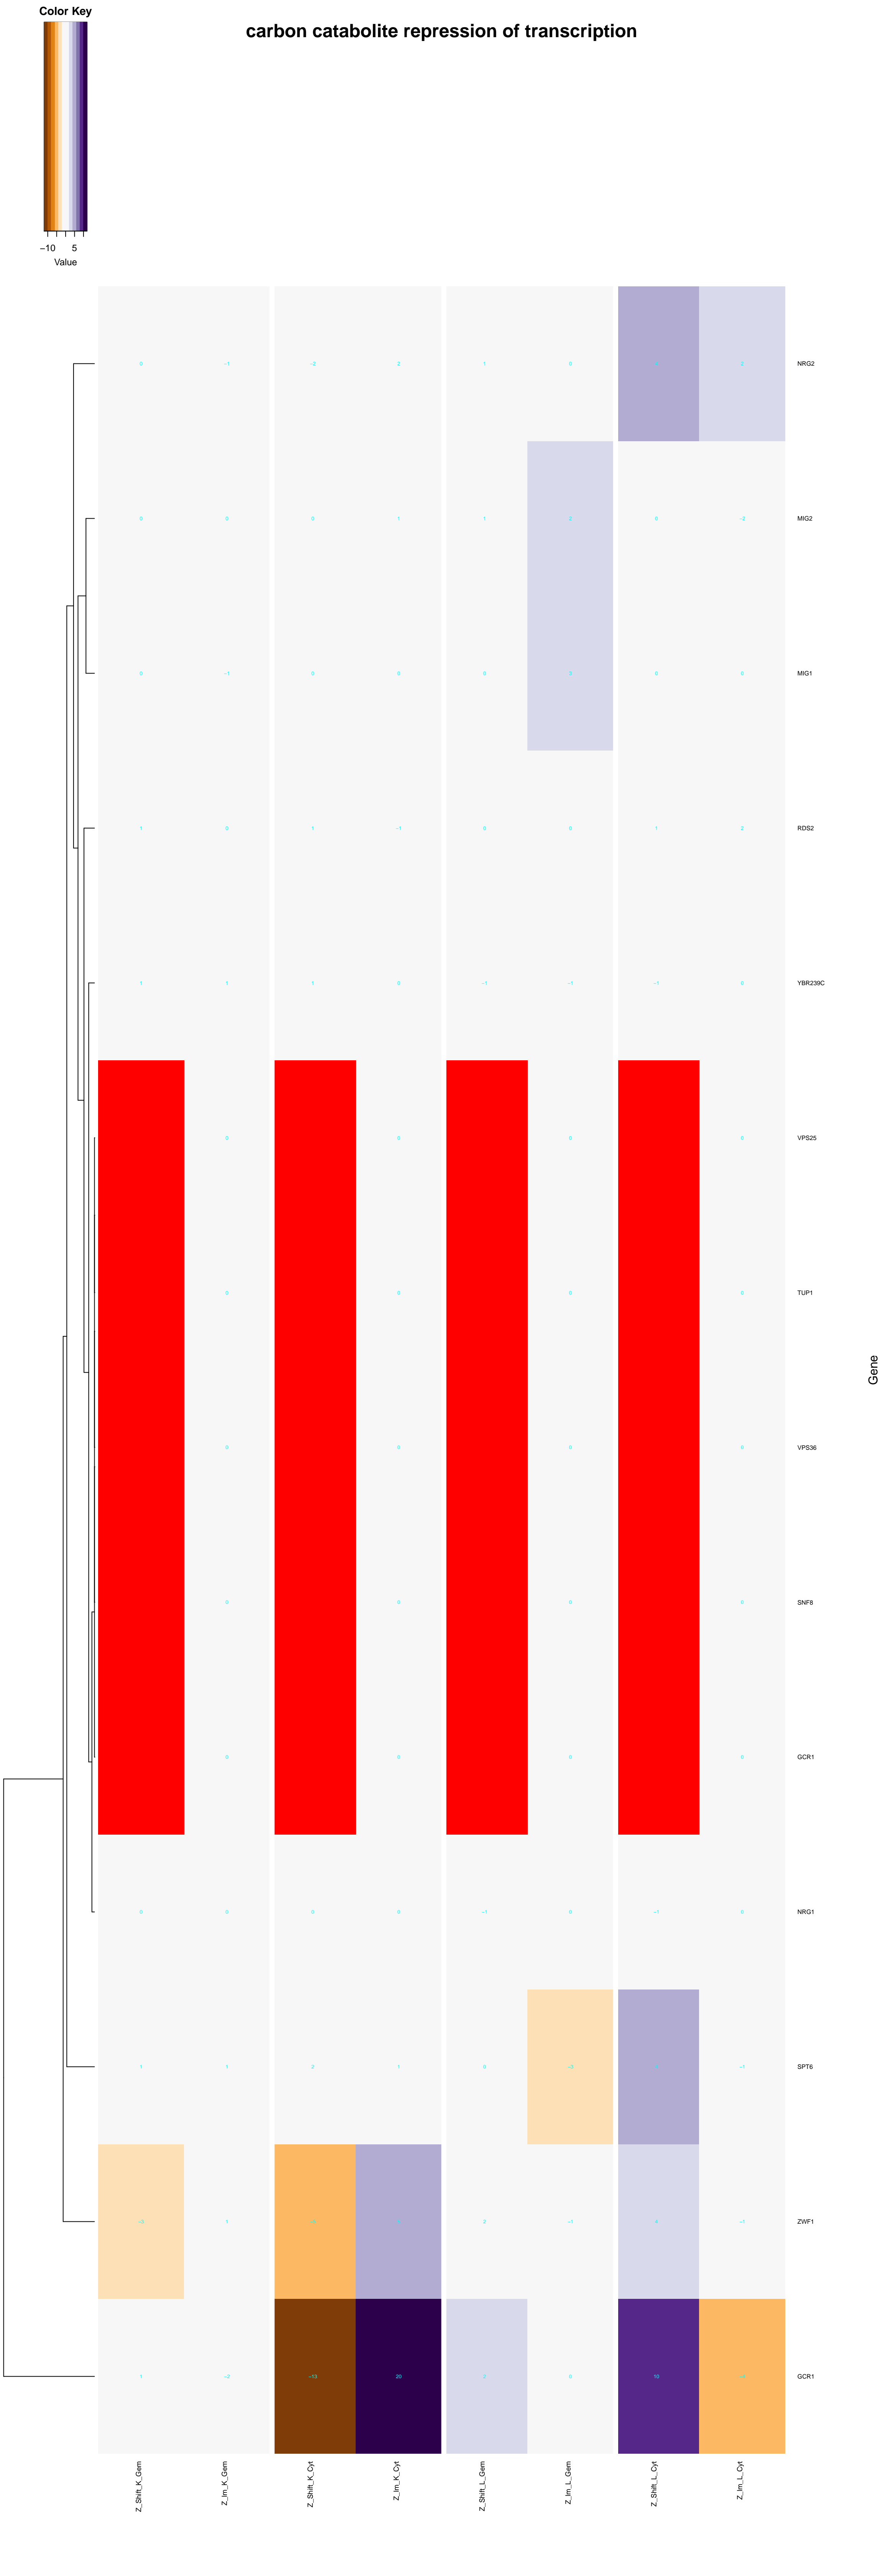

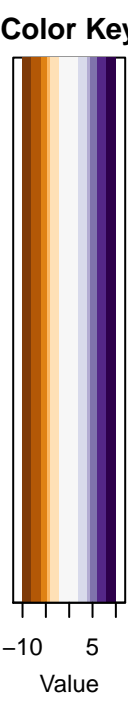

negative regulation of transcription involved in meiotic cell cycle

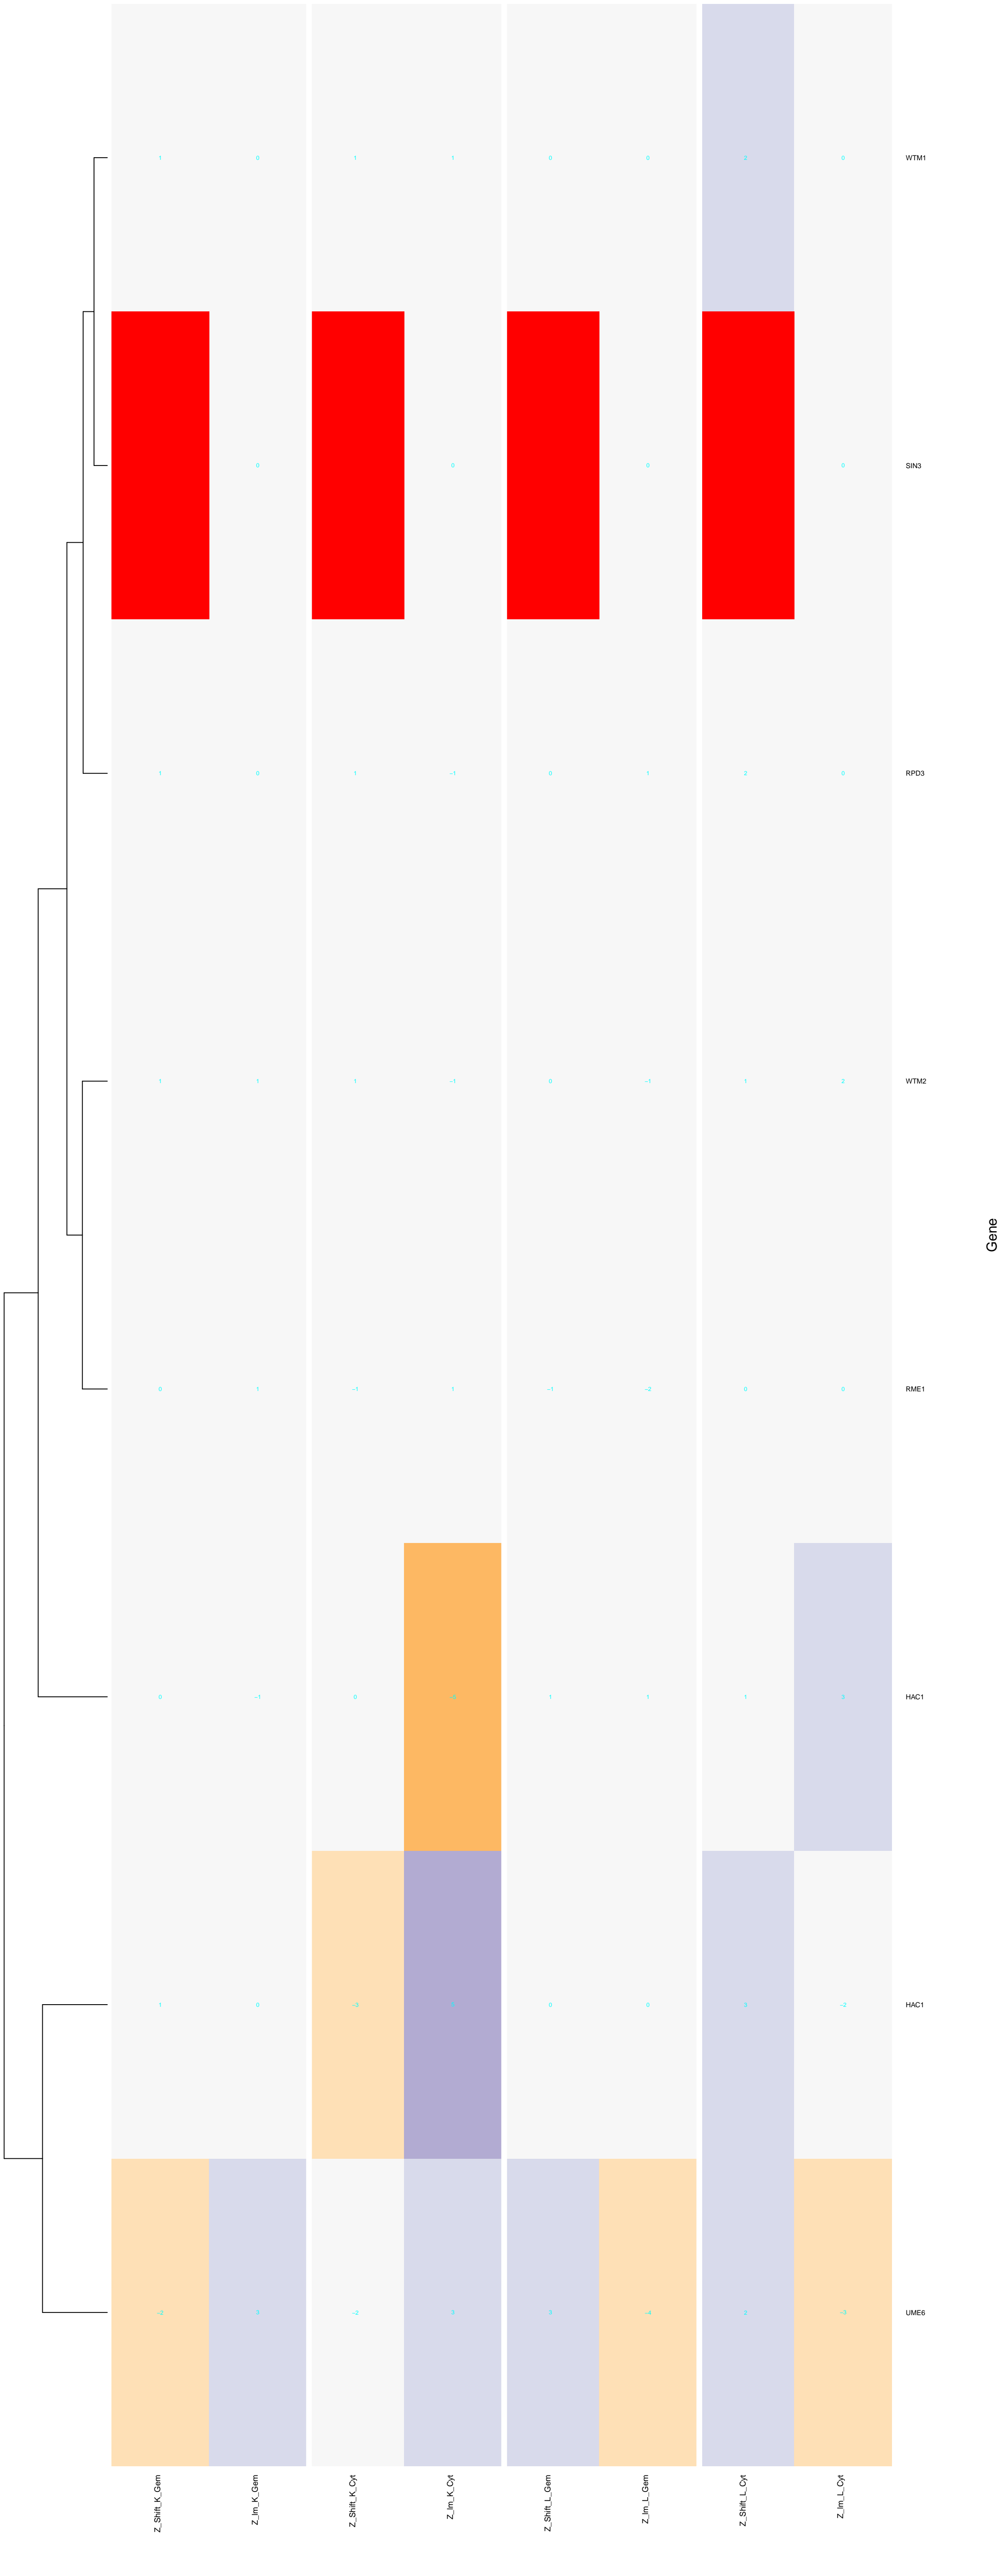

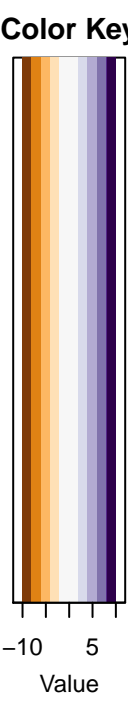

negative regulation of antisense RNA transcription

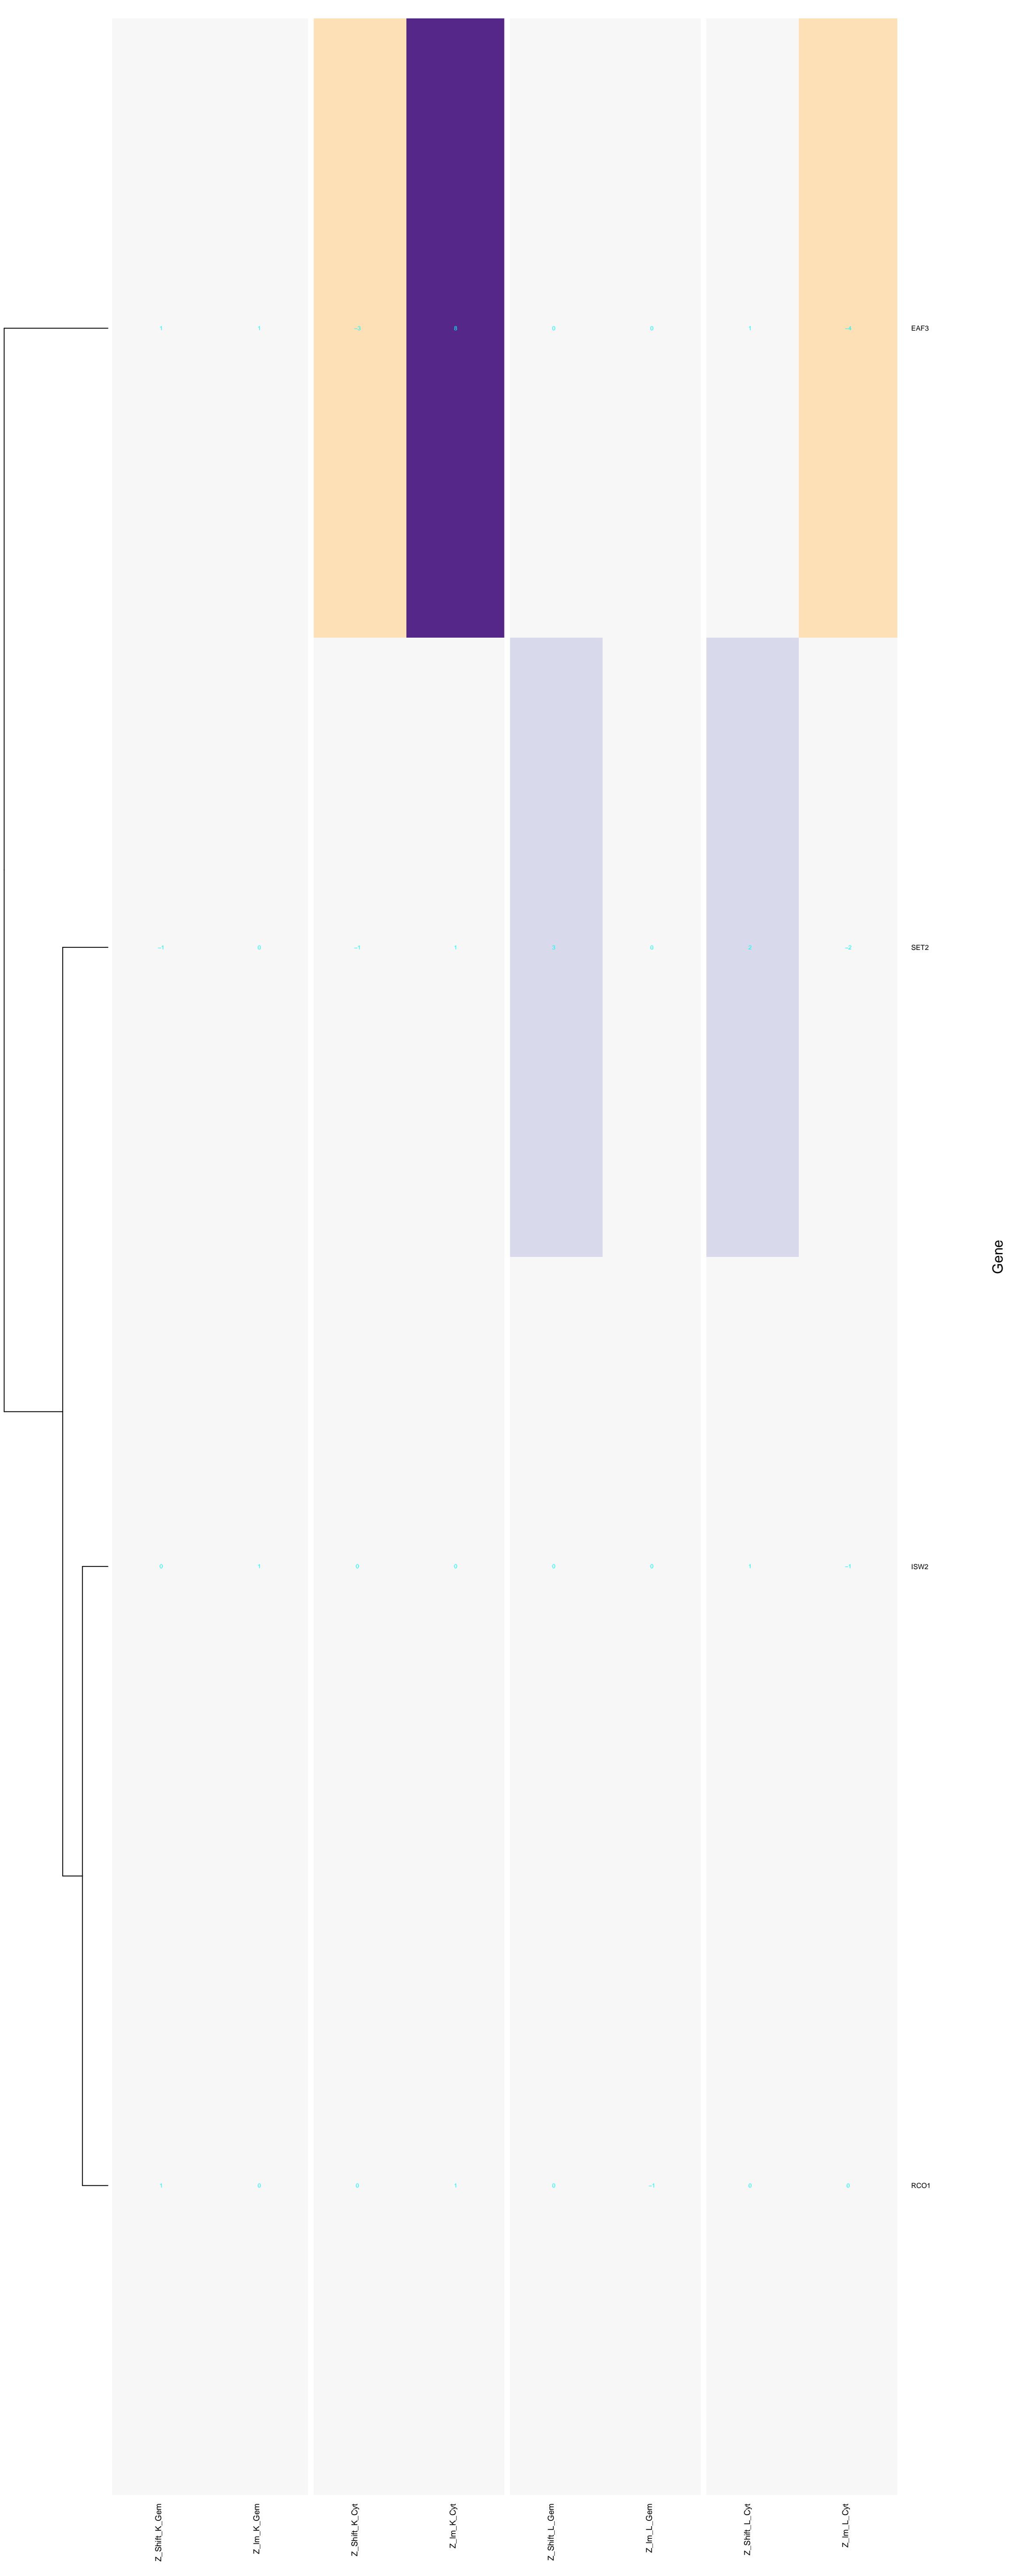

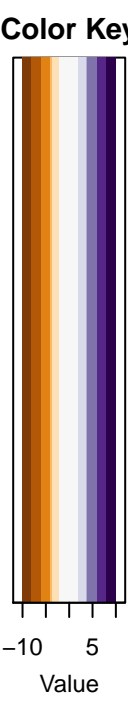

nitrogen catabolite repression of transcription

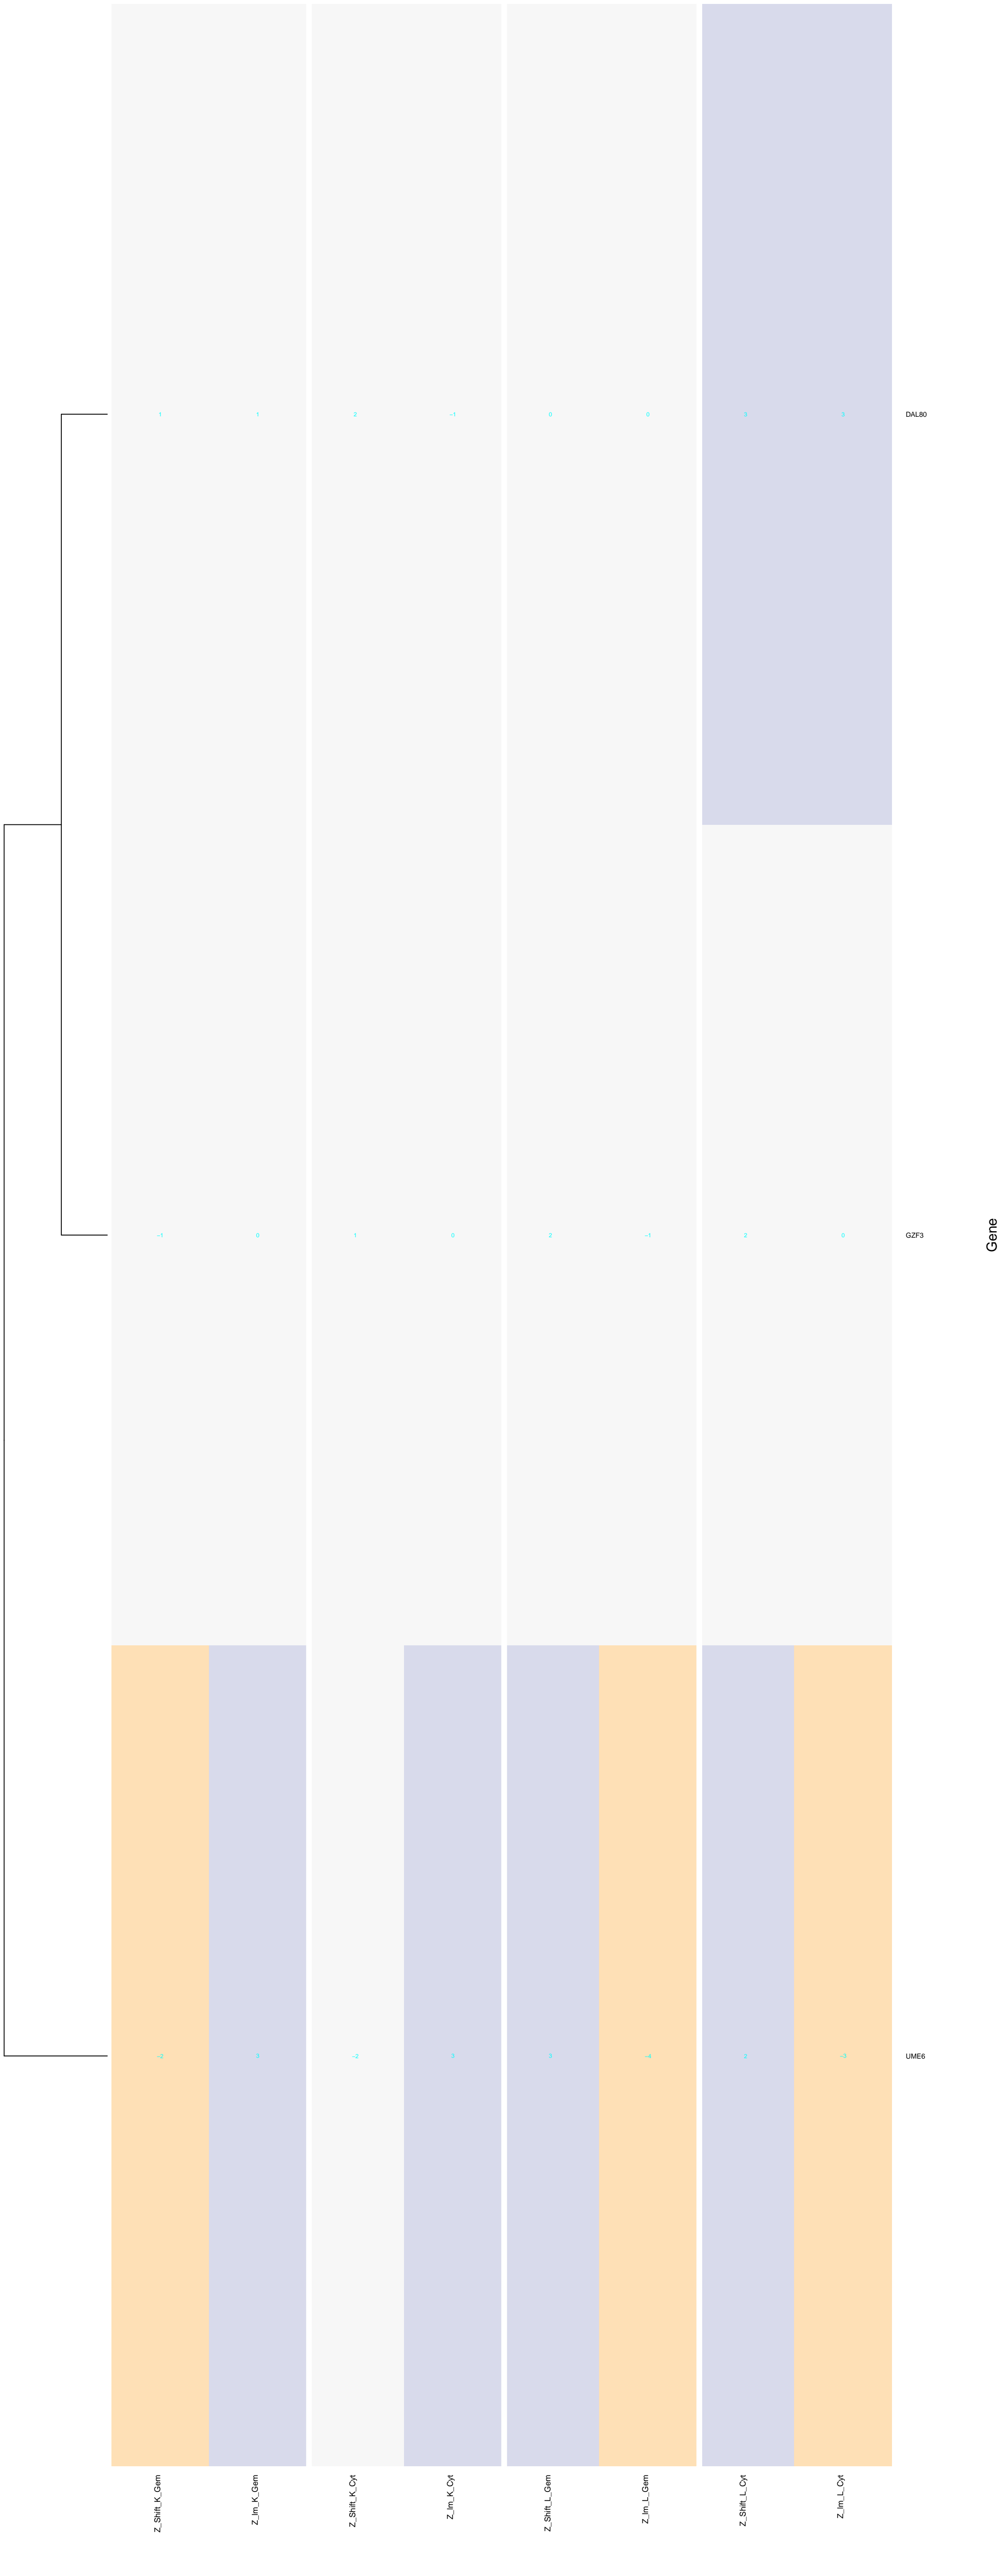

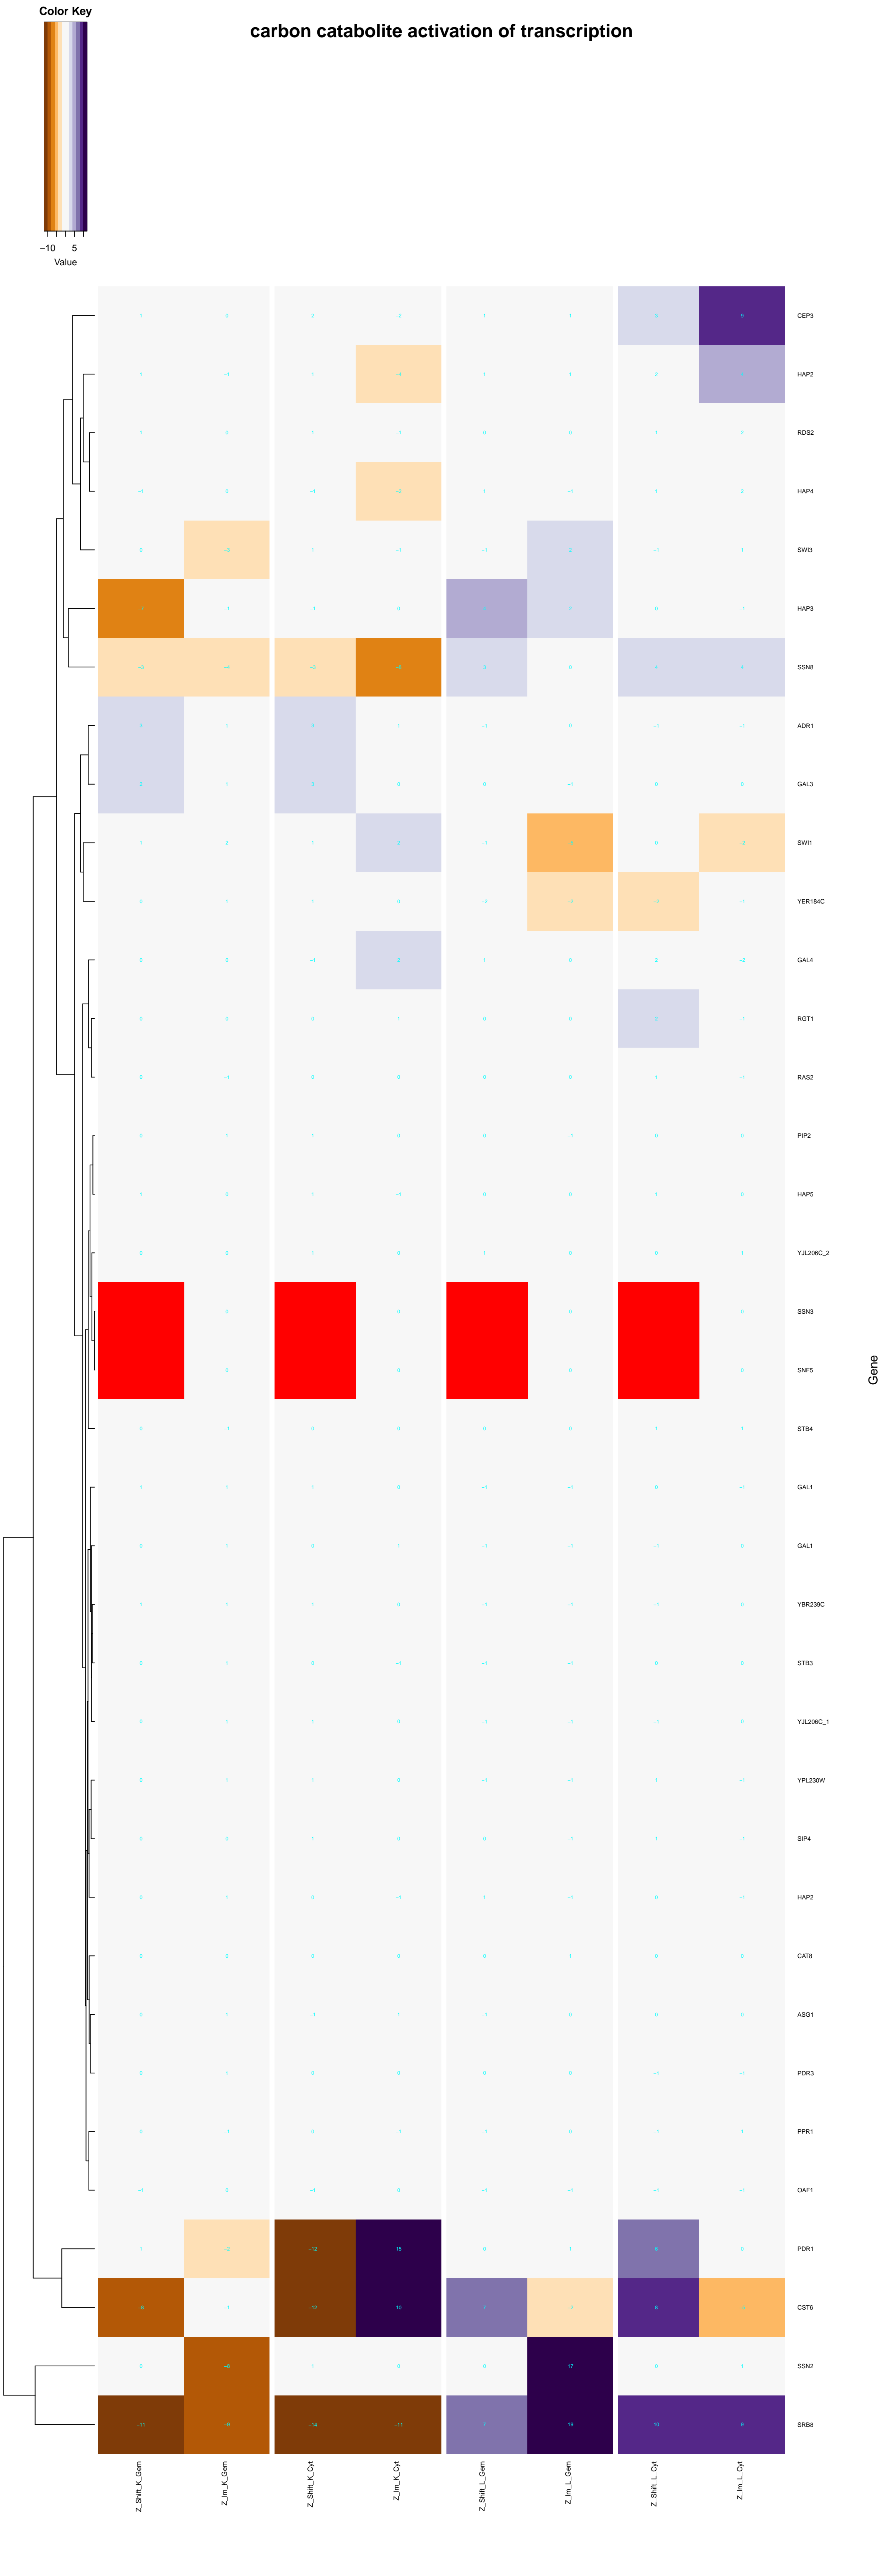

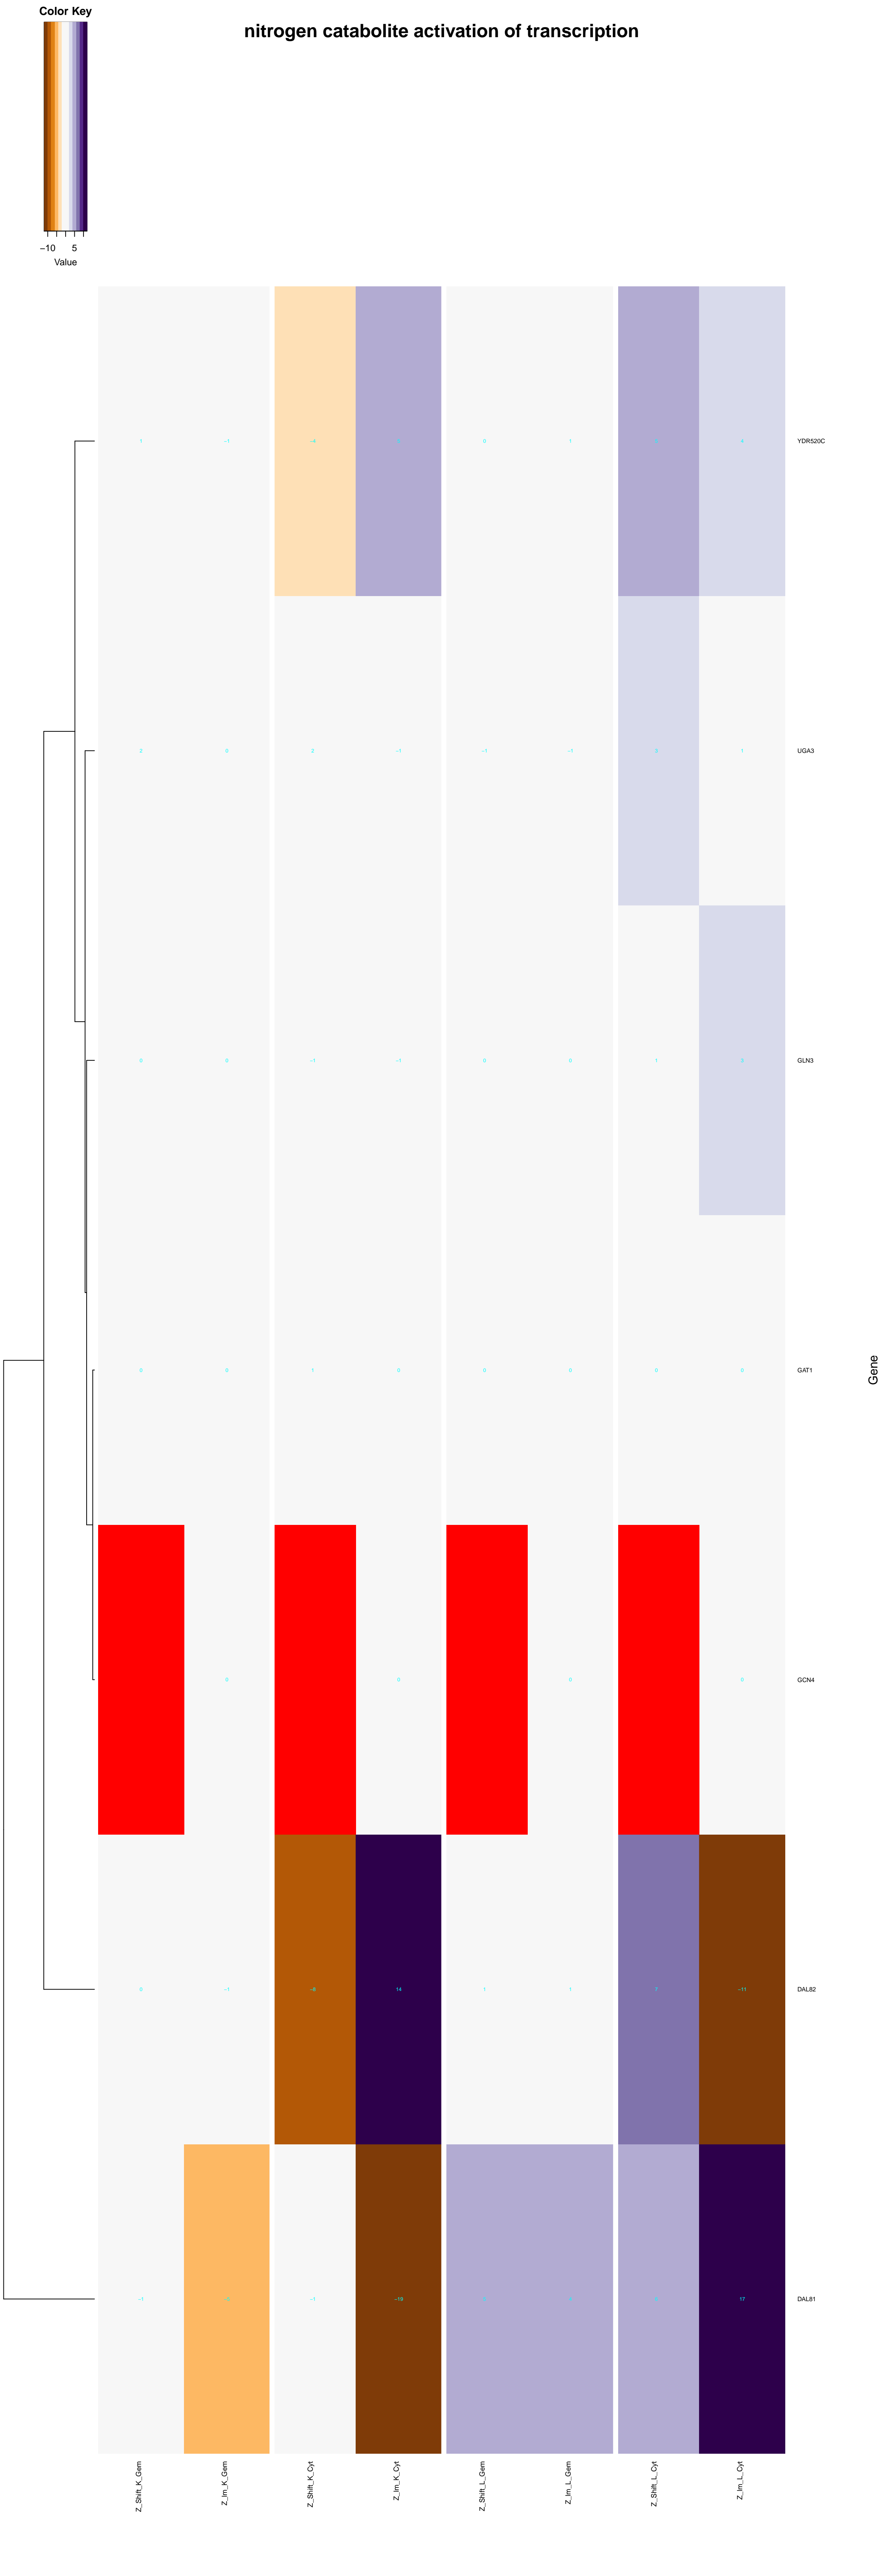



positive regulation of DNA-templated transcription, initiation

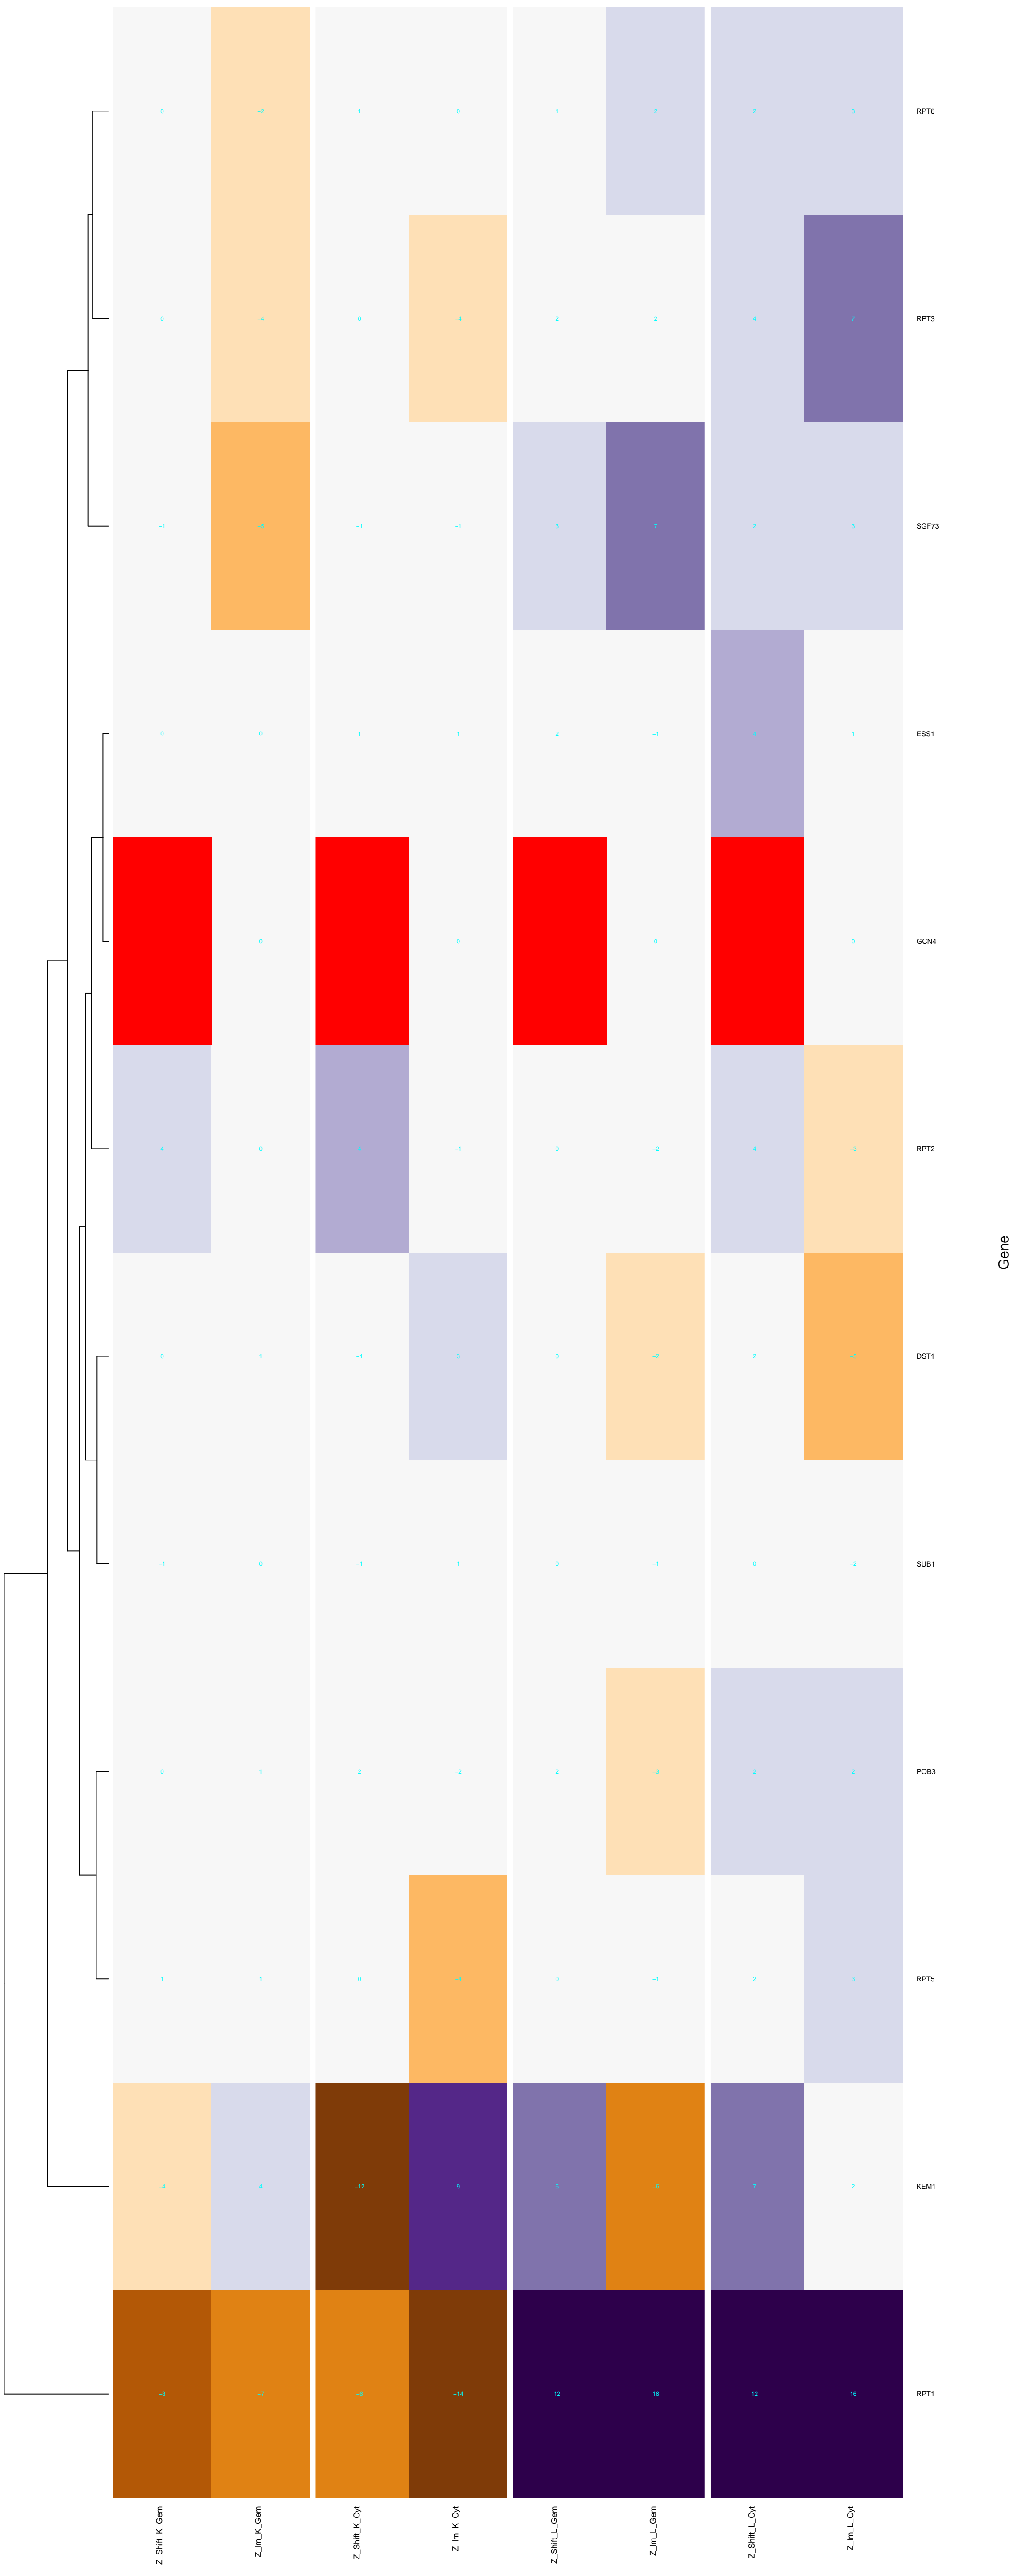



regulation of transcription from RNA polymerase II promoter by glucose

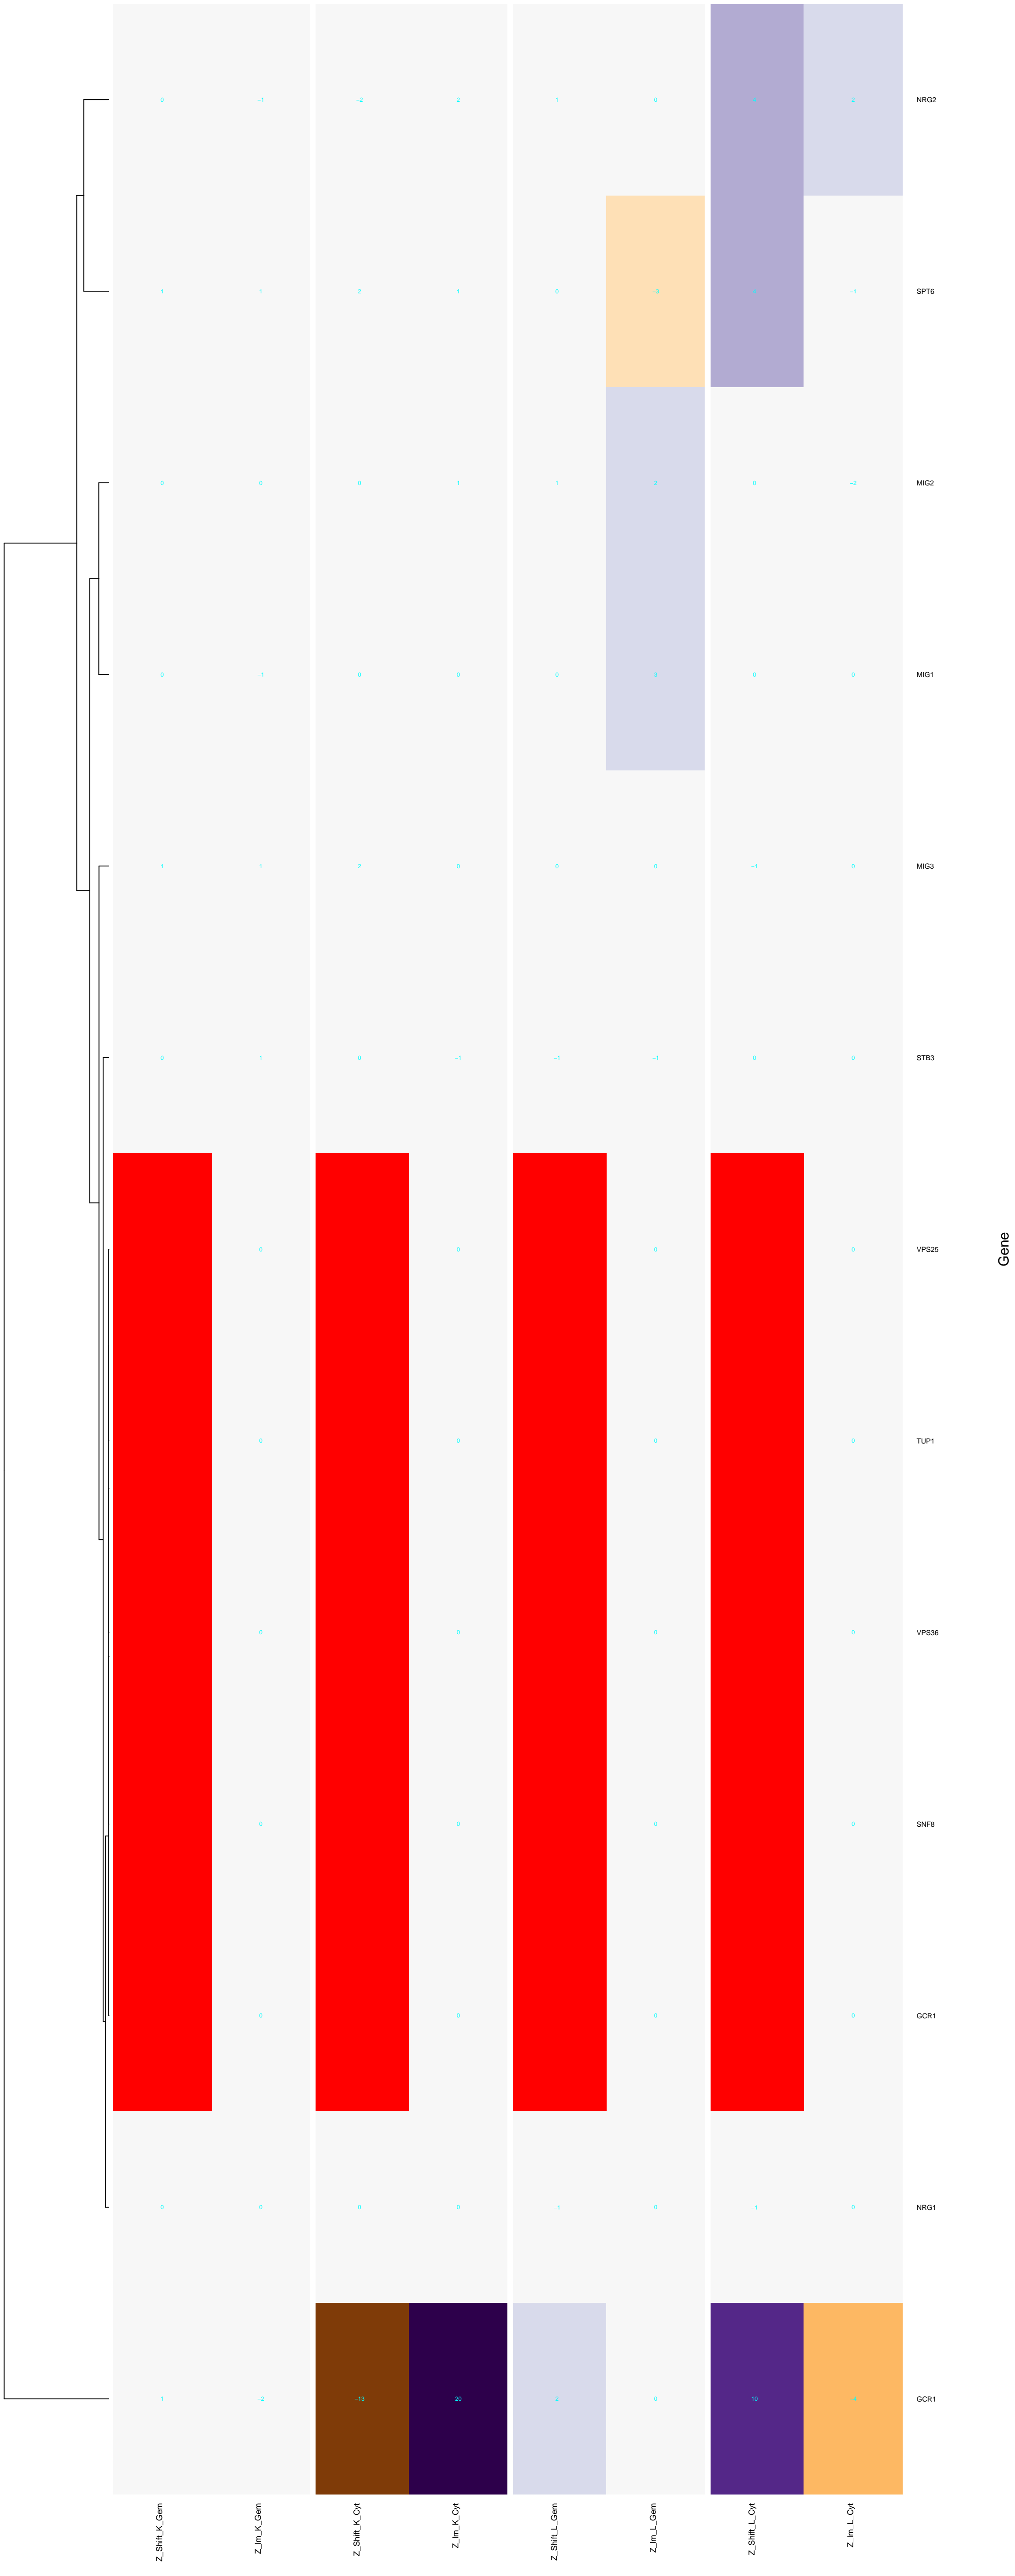

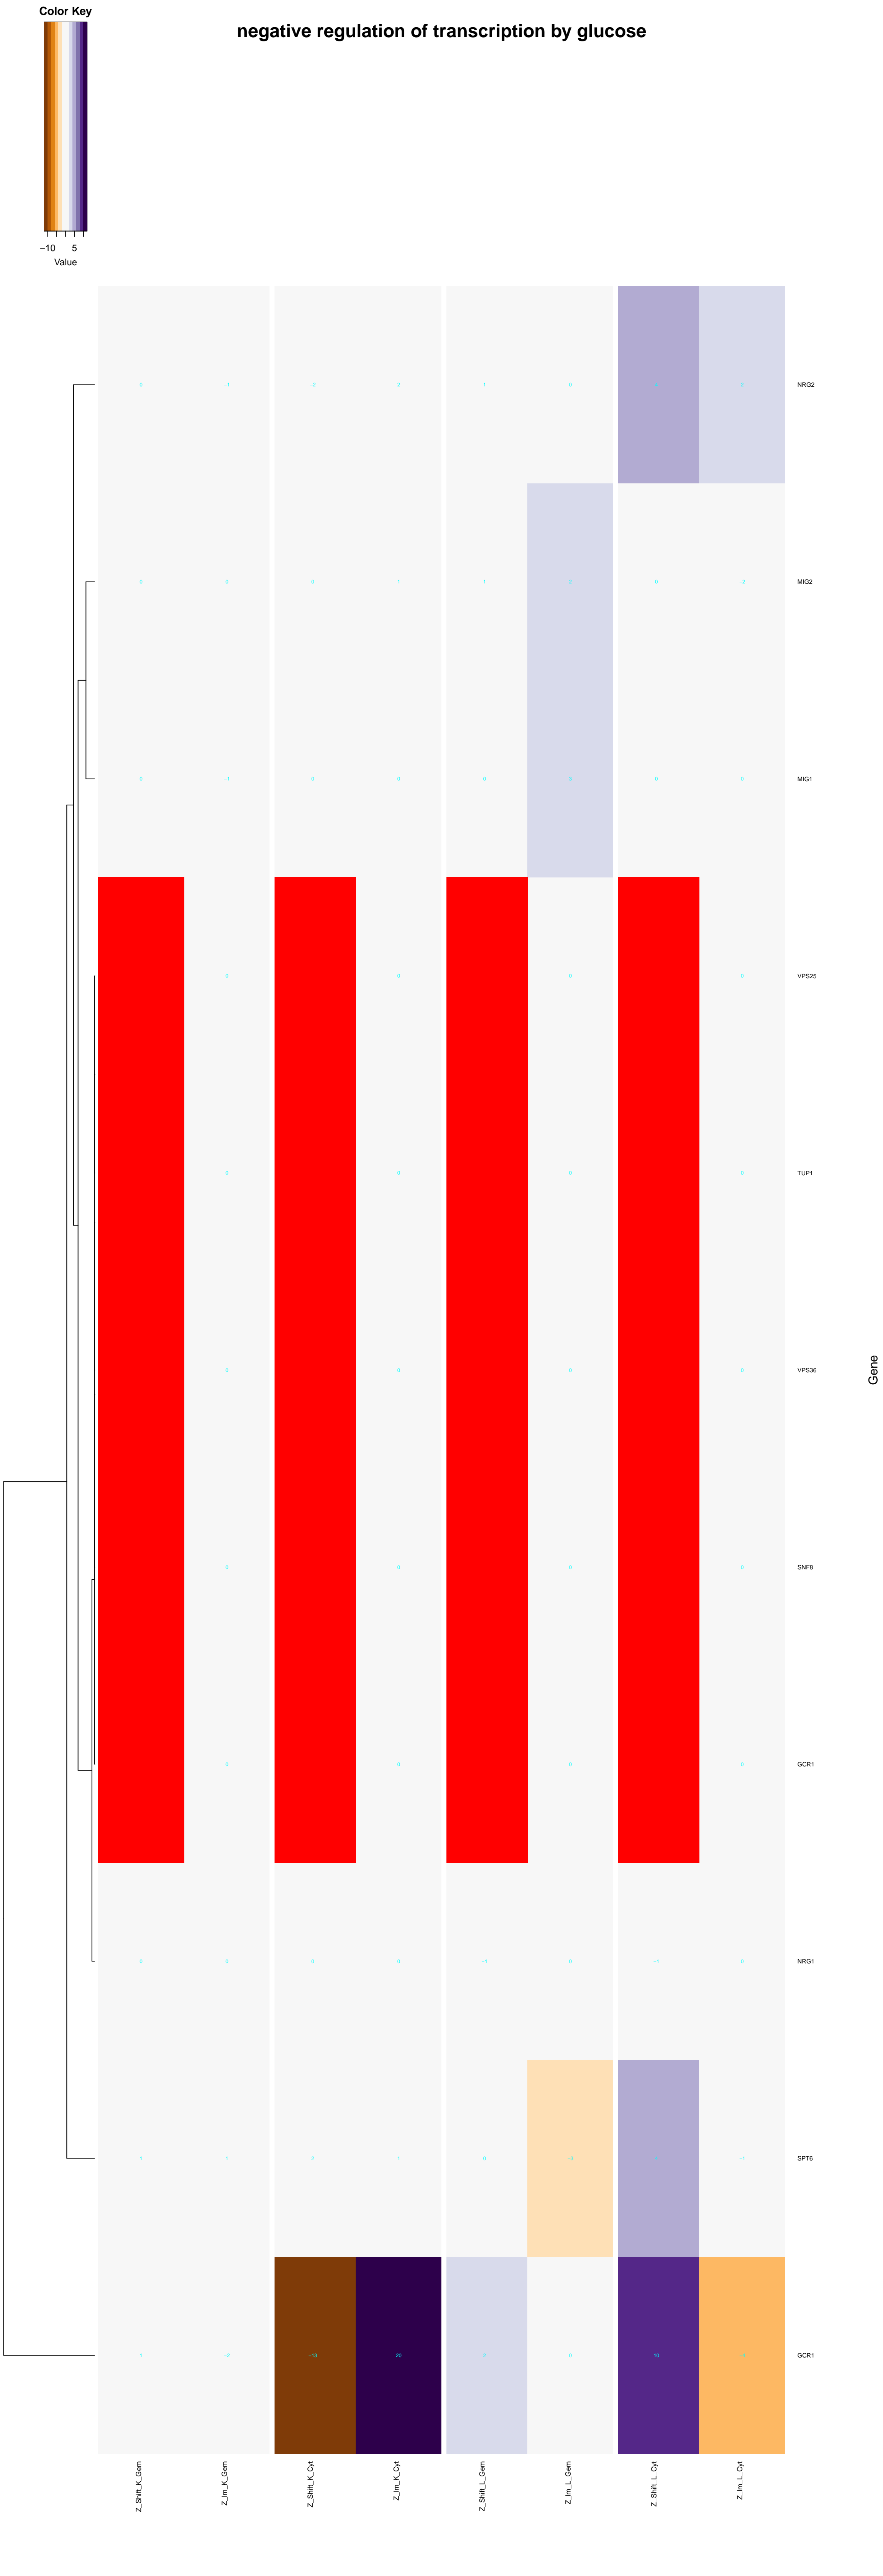

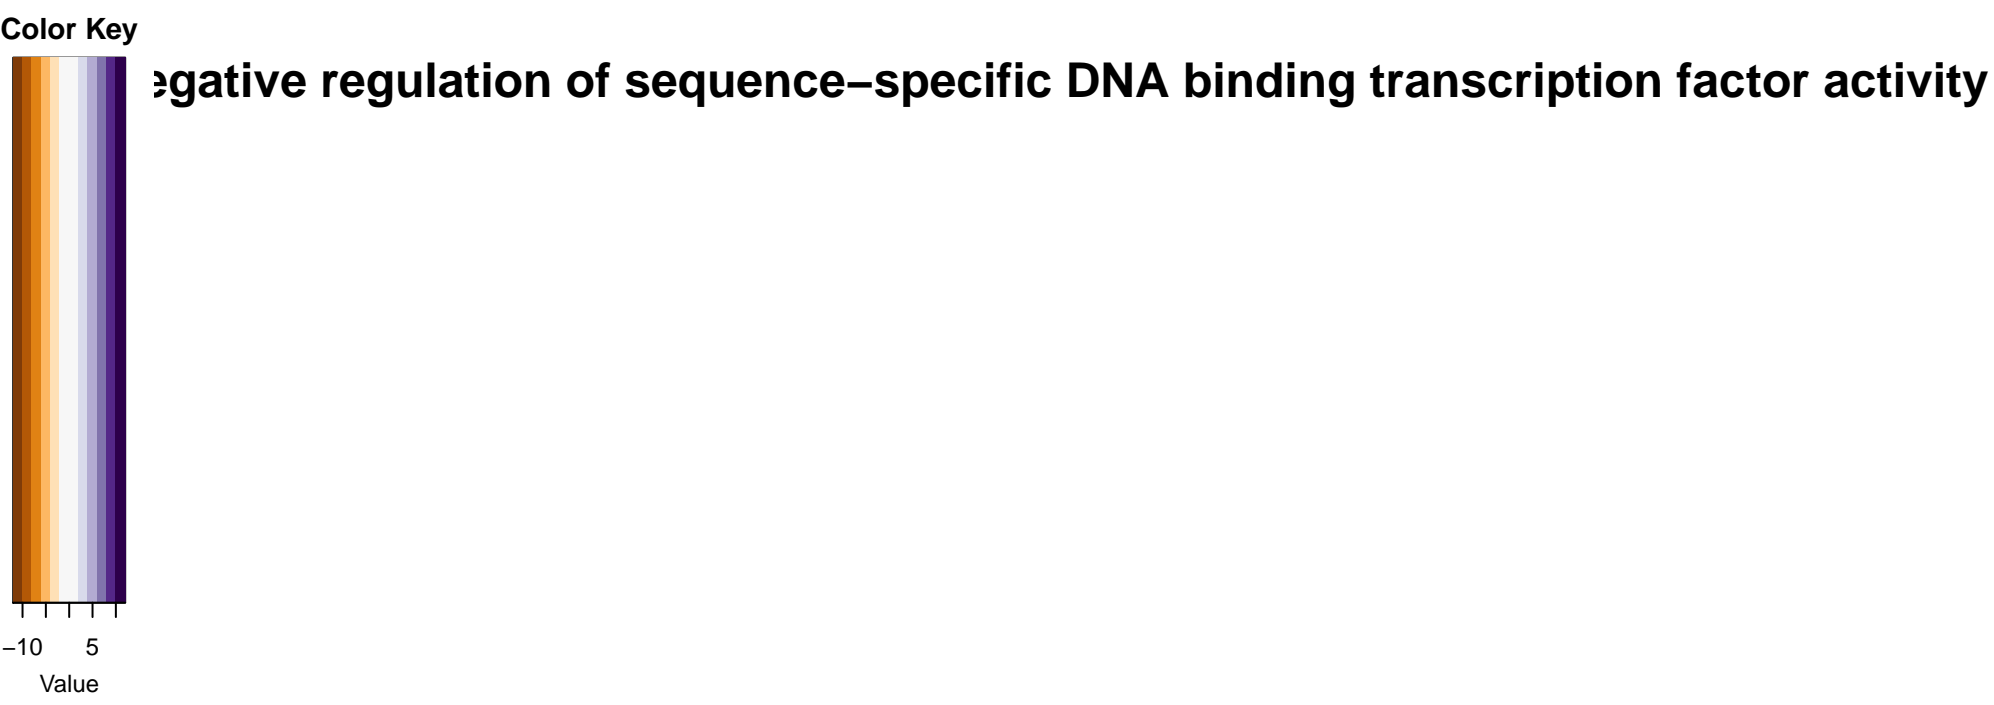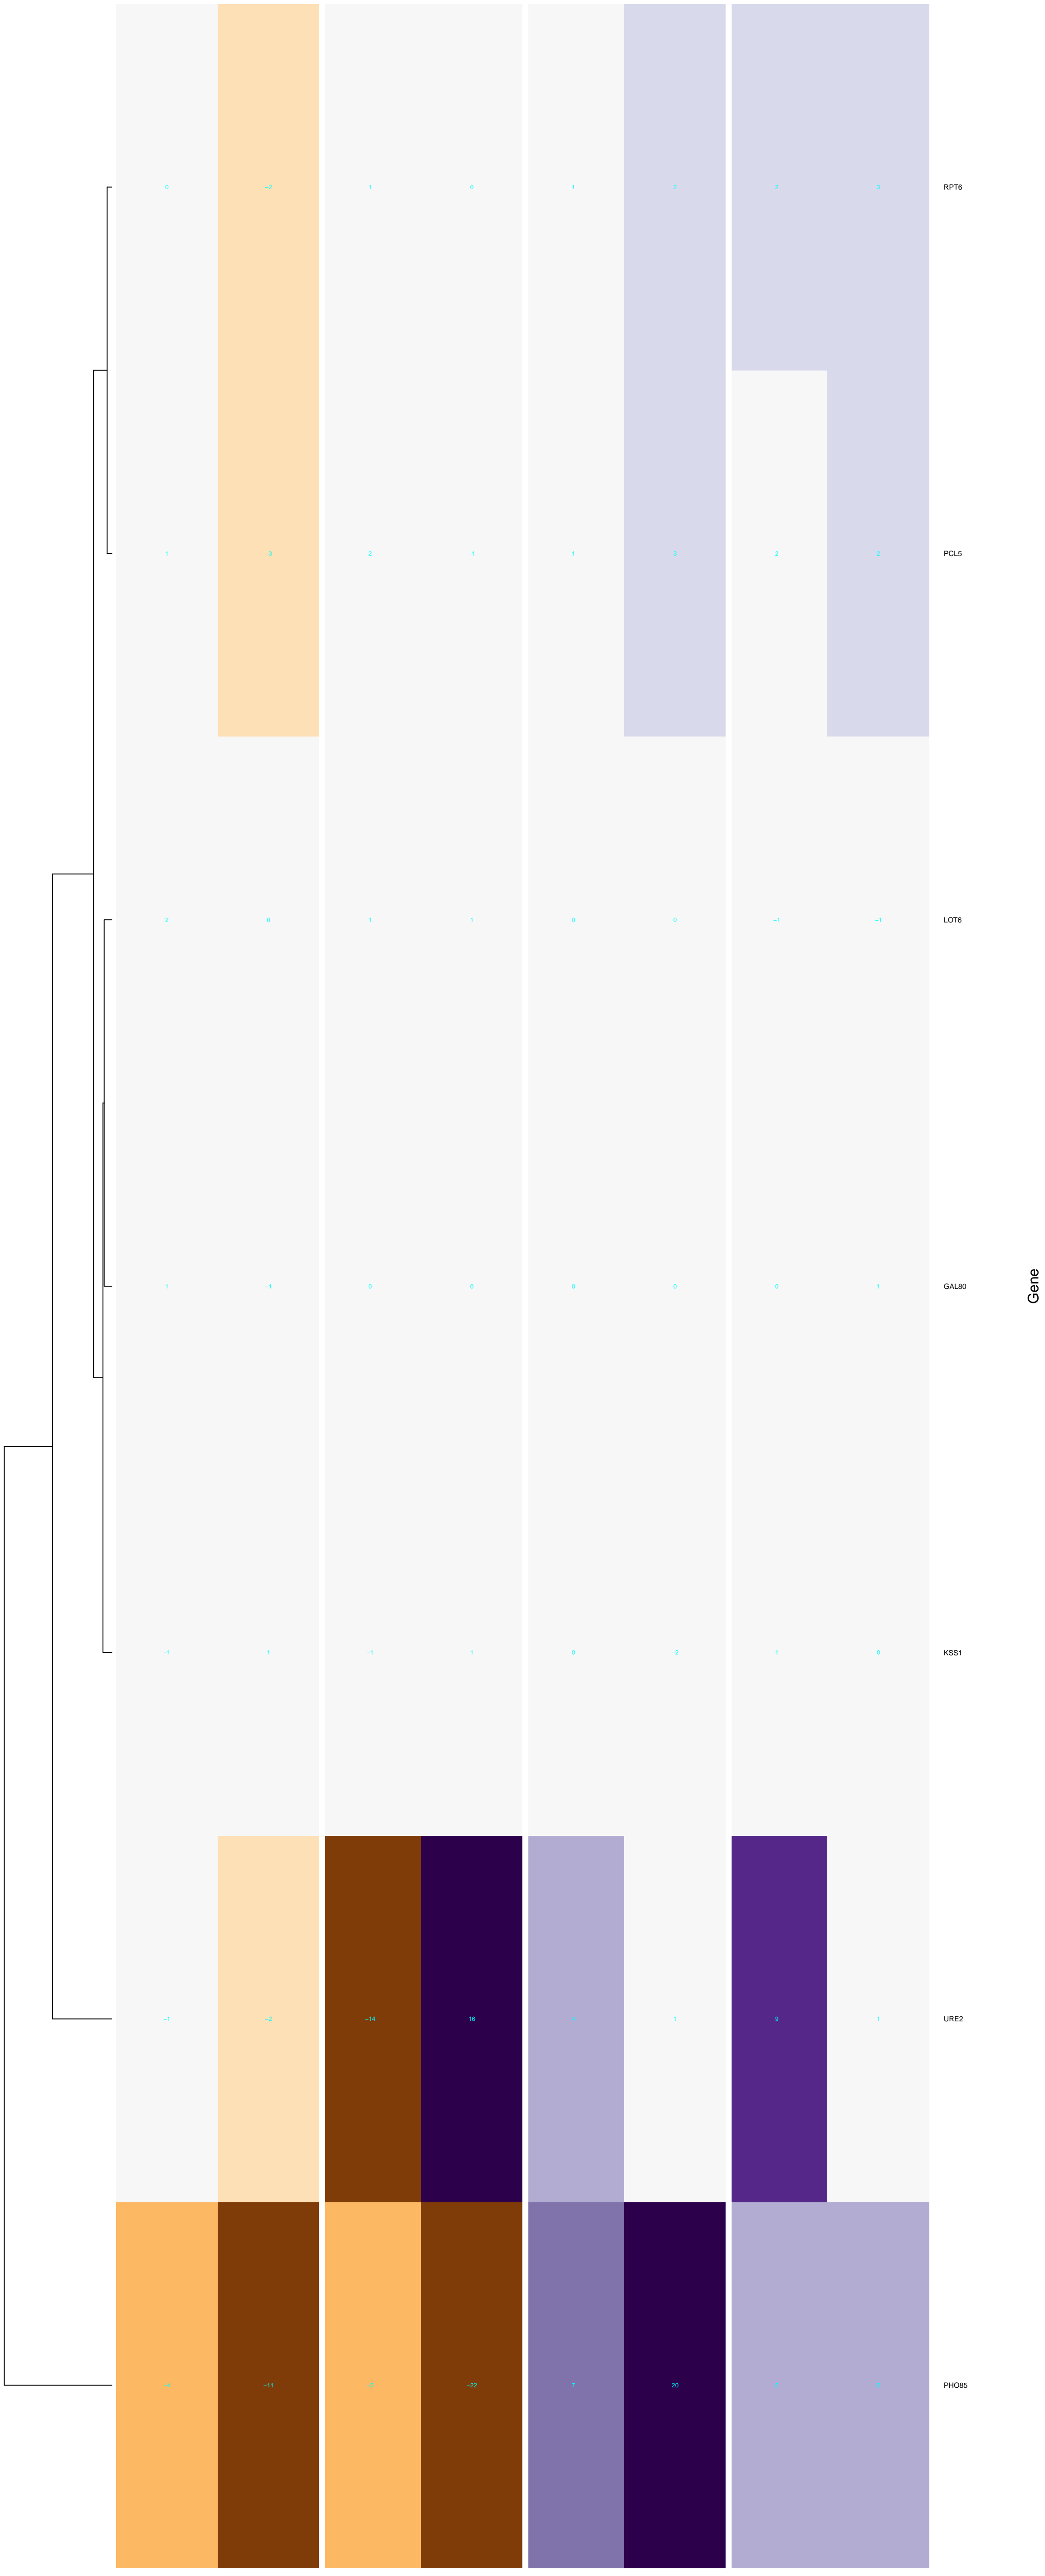



Positive regulation of transcription from RNA polymerase II promoter by galactose





positive regulation of transcription elongation from RNA polymerase I promoter





Regulation of transcription from RNA polymerase II promoter during mitotic cell cycle

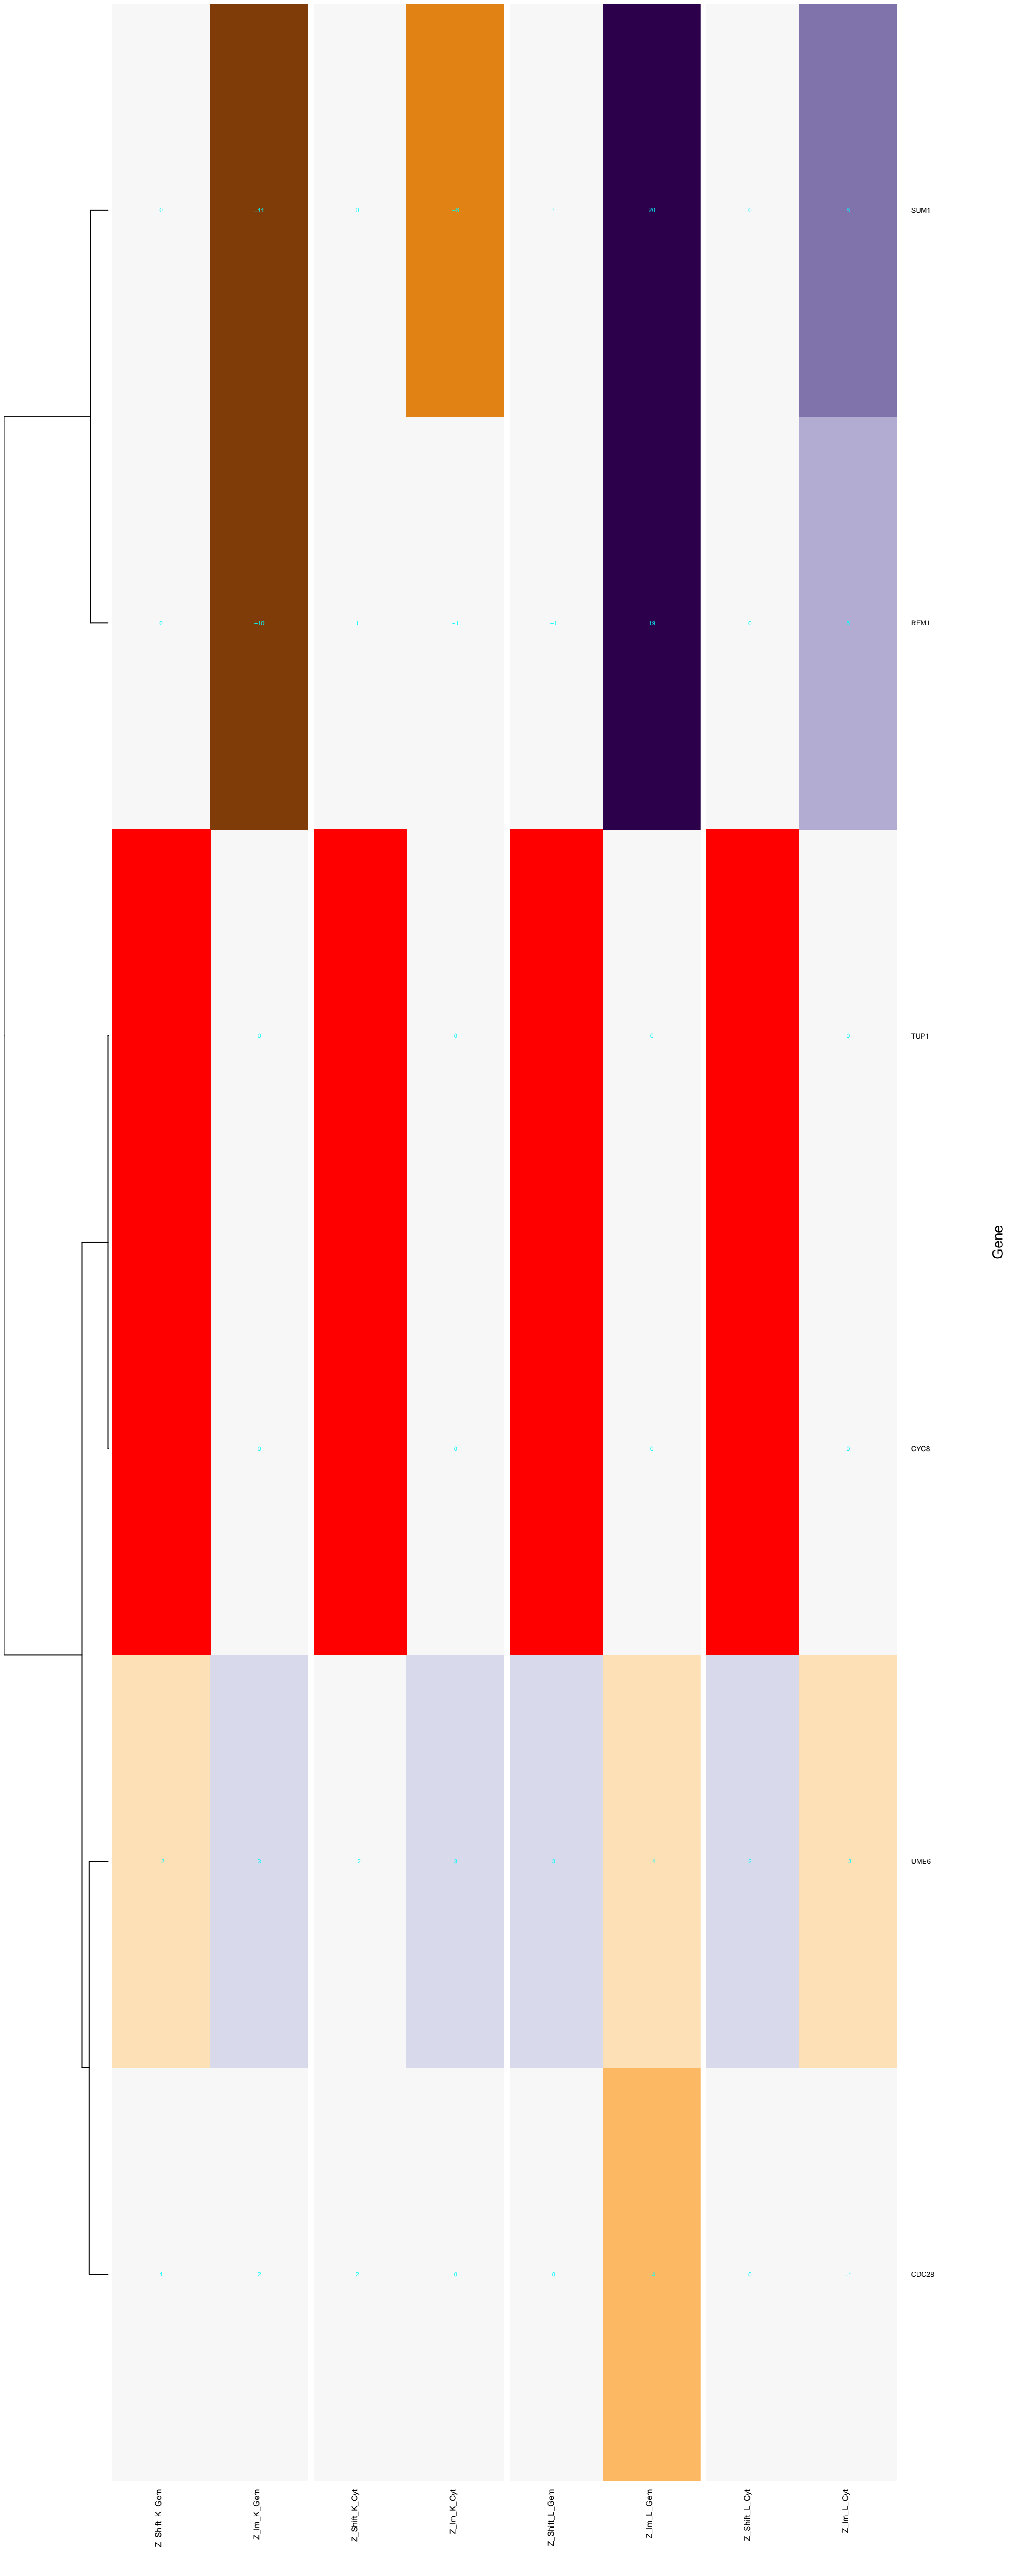



egulation of transcription from RNA polymerase II promoter involved in meiotic cell cycle

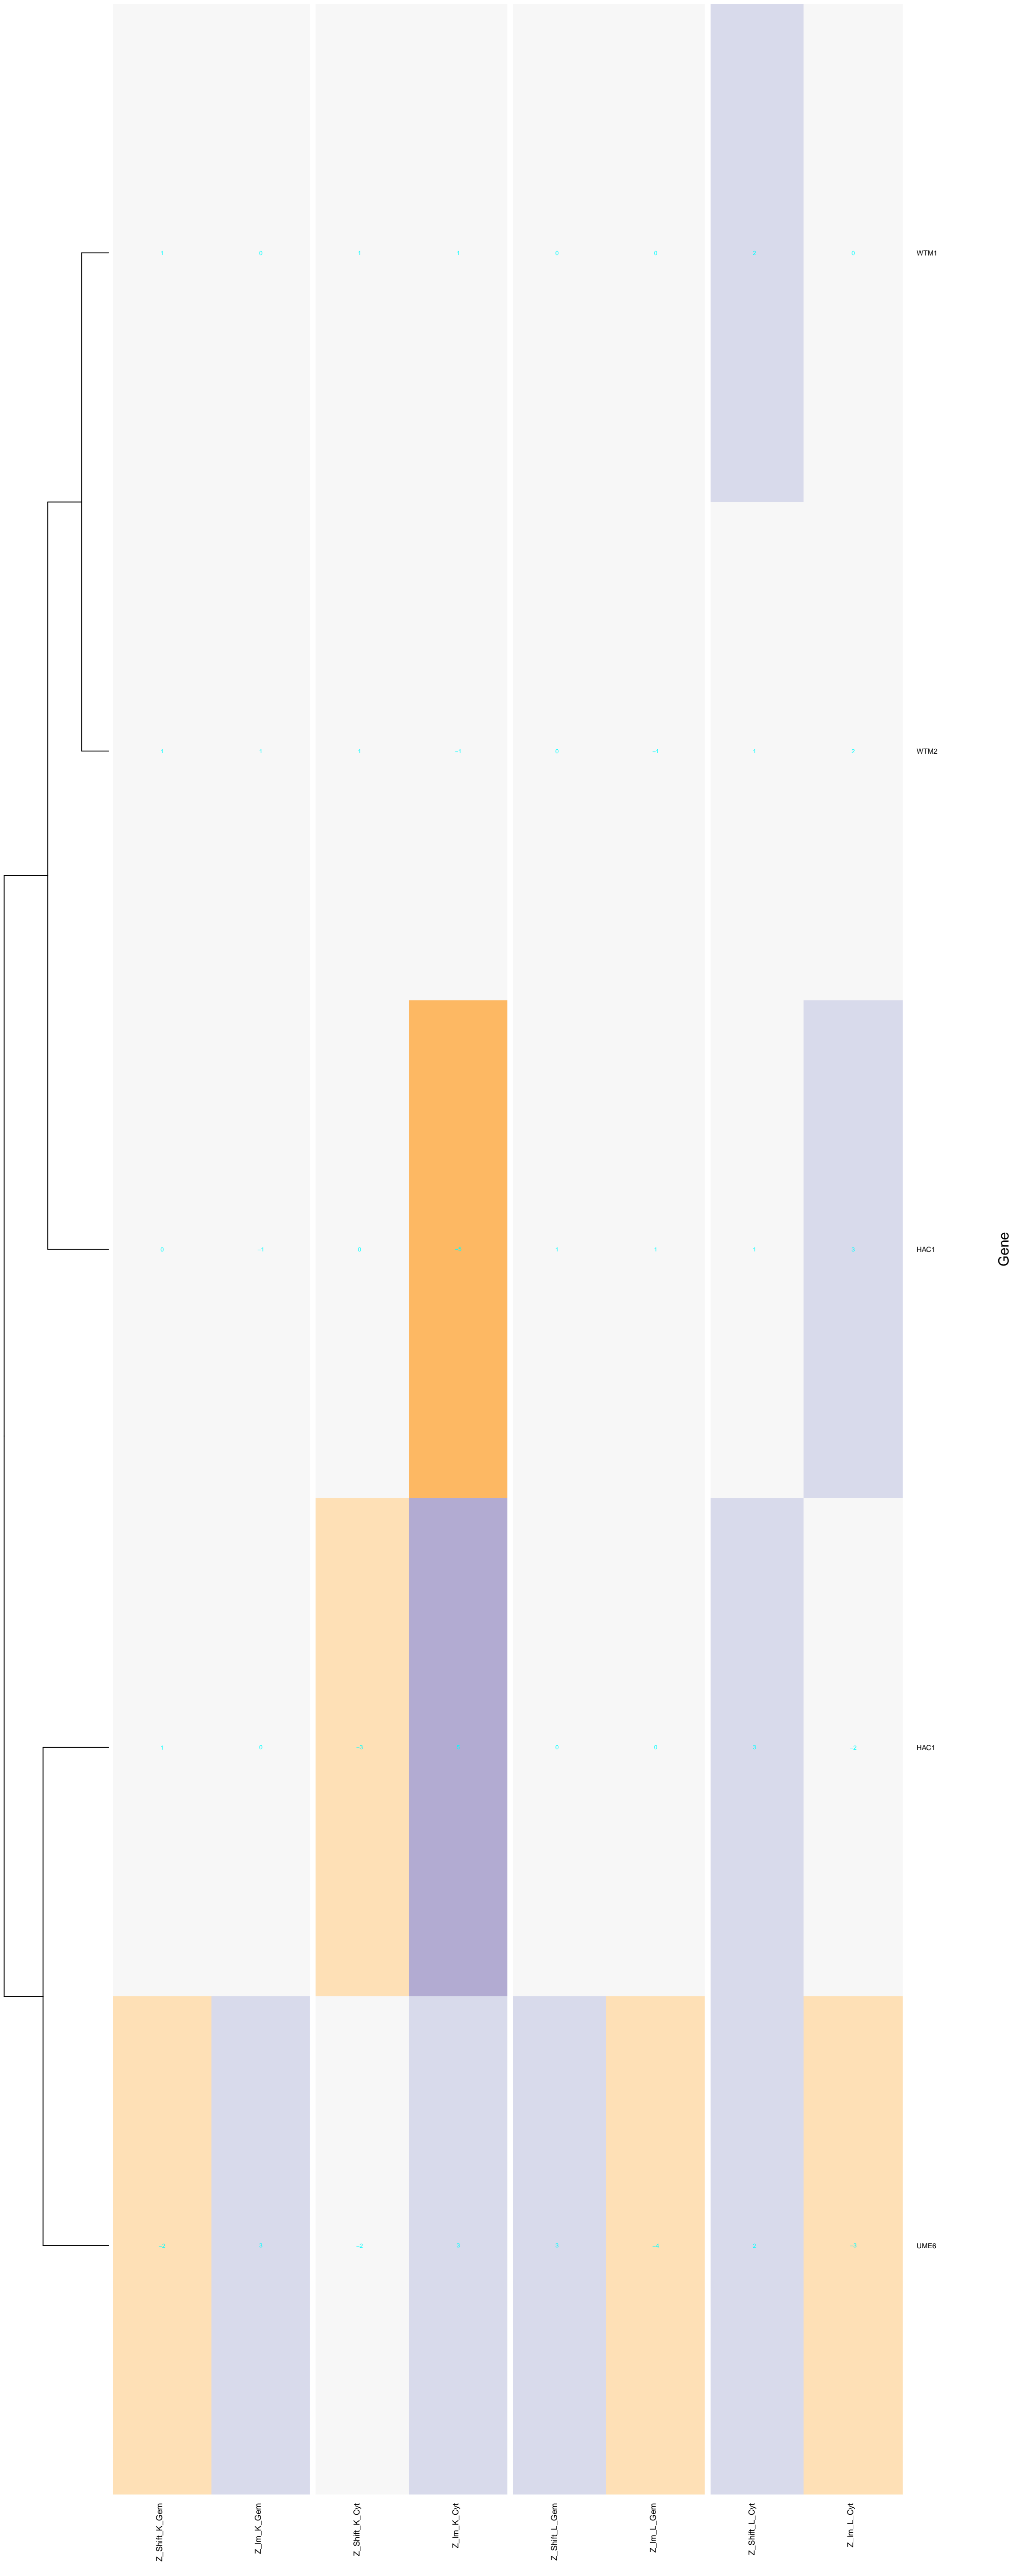

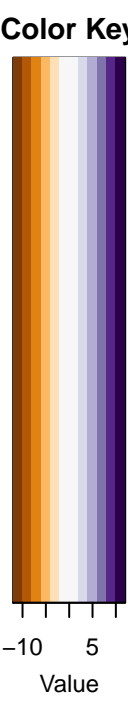

e regulation of ribosomal protein gene transcription from RNA polymerase II promoter

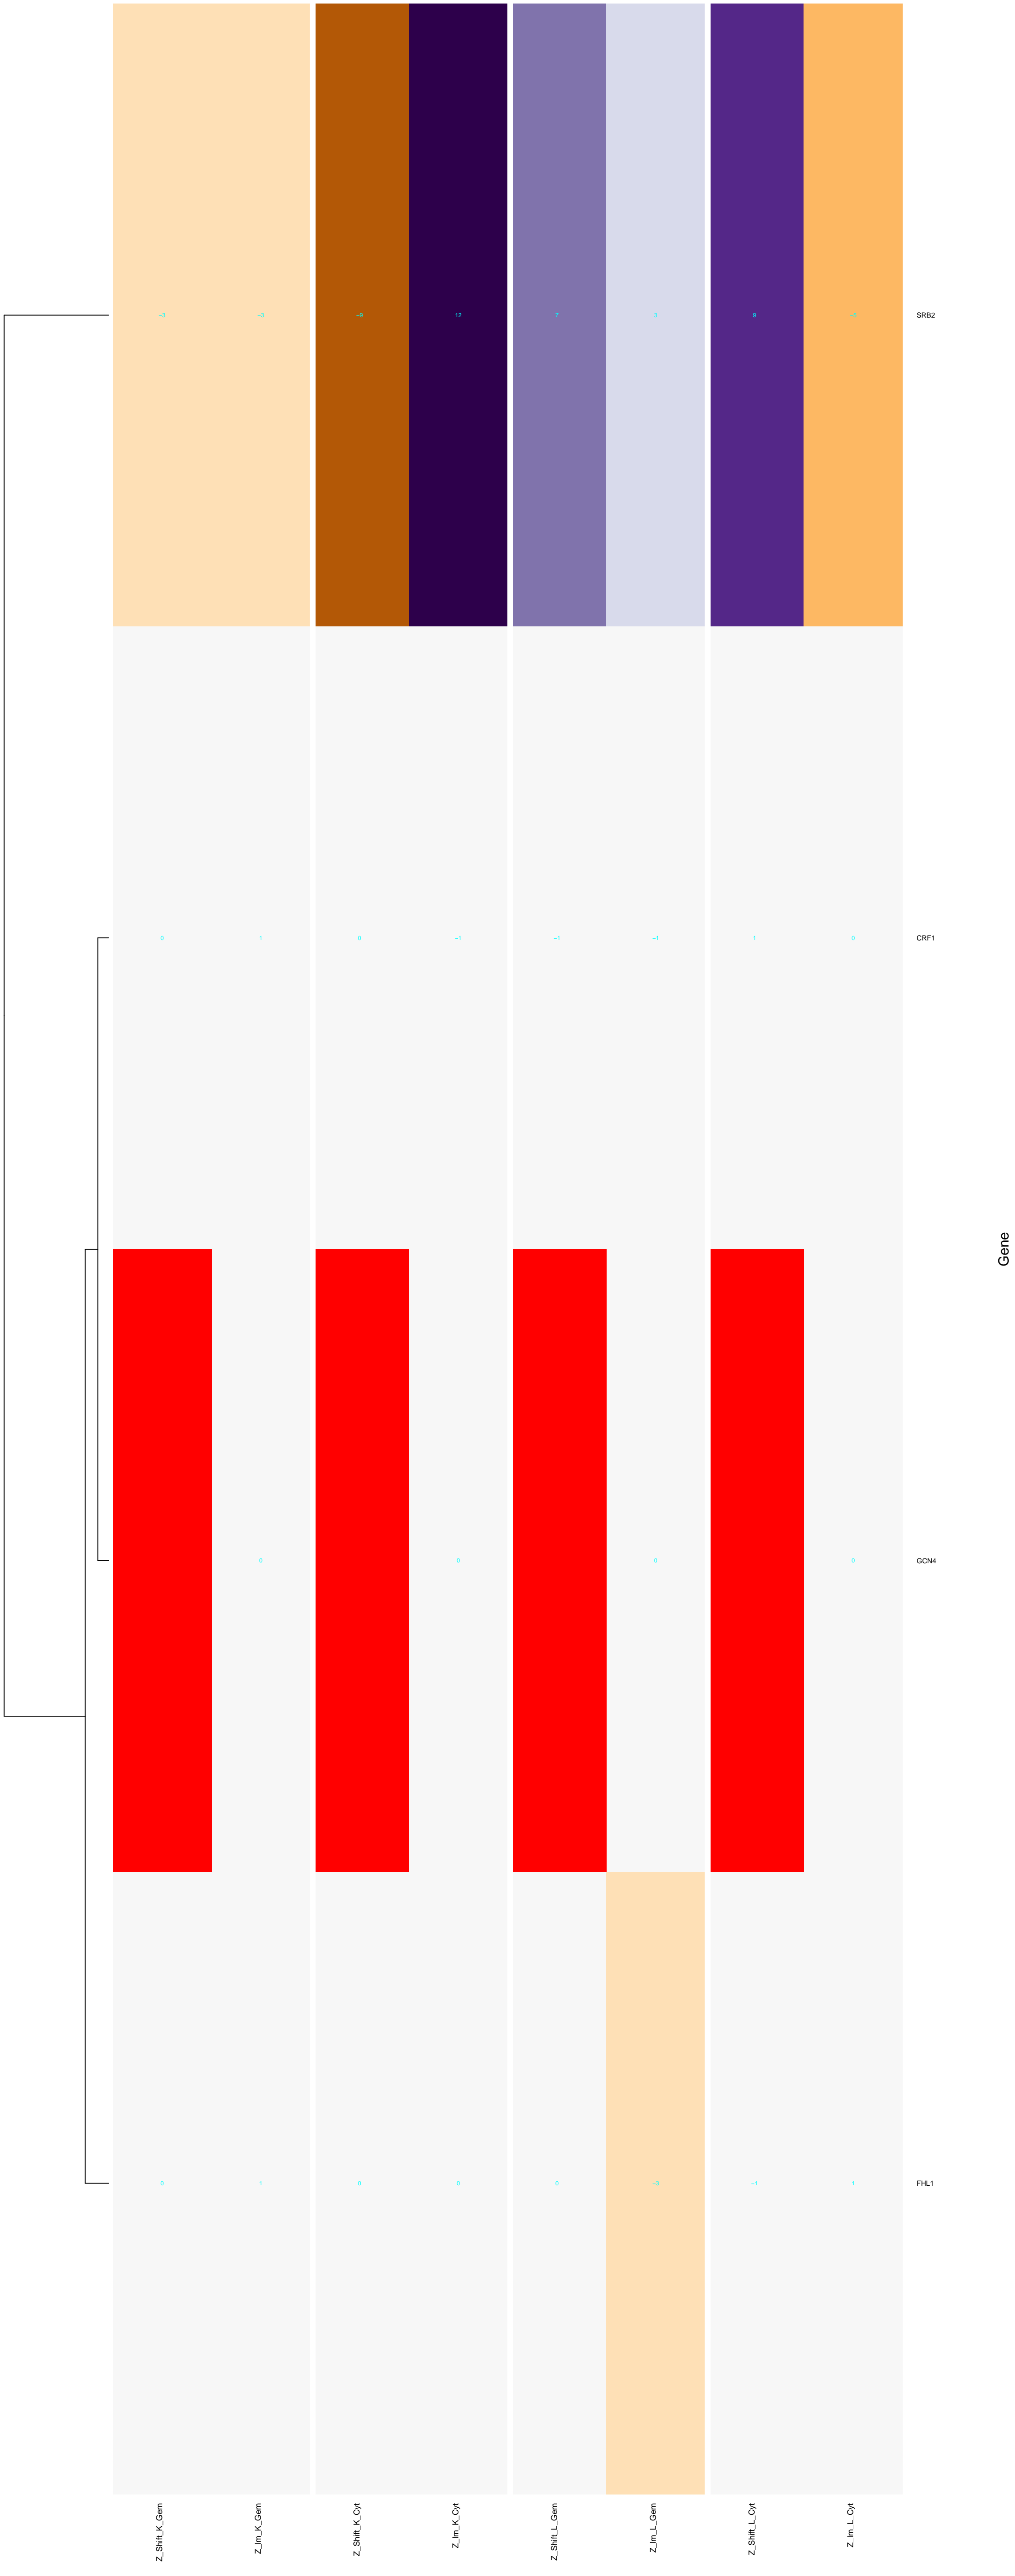

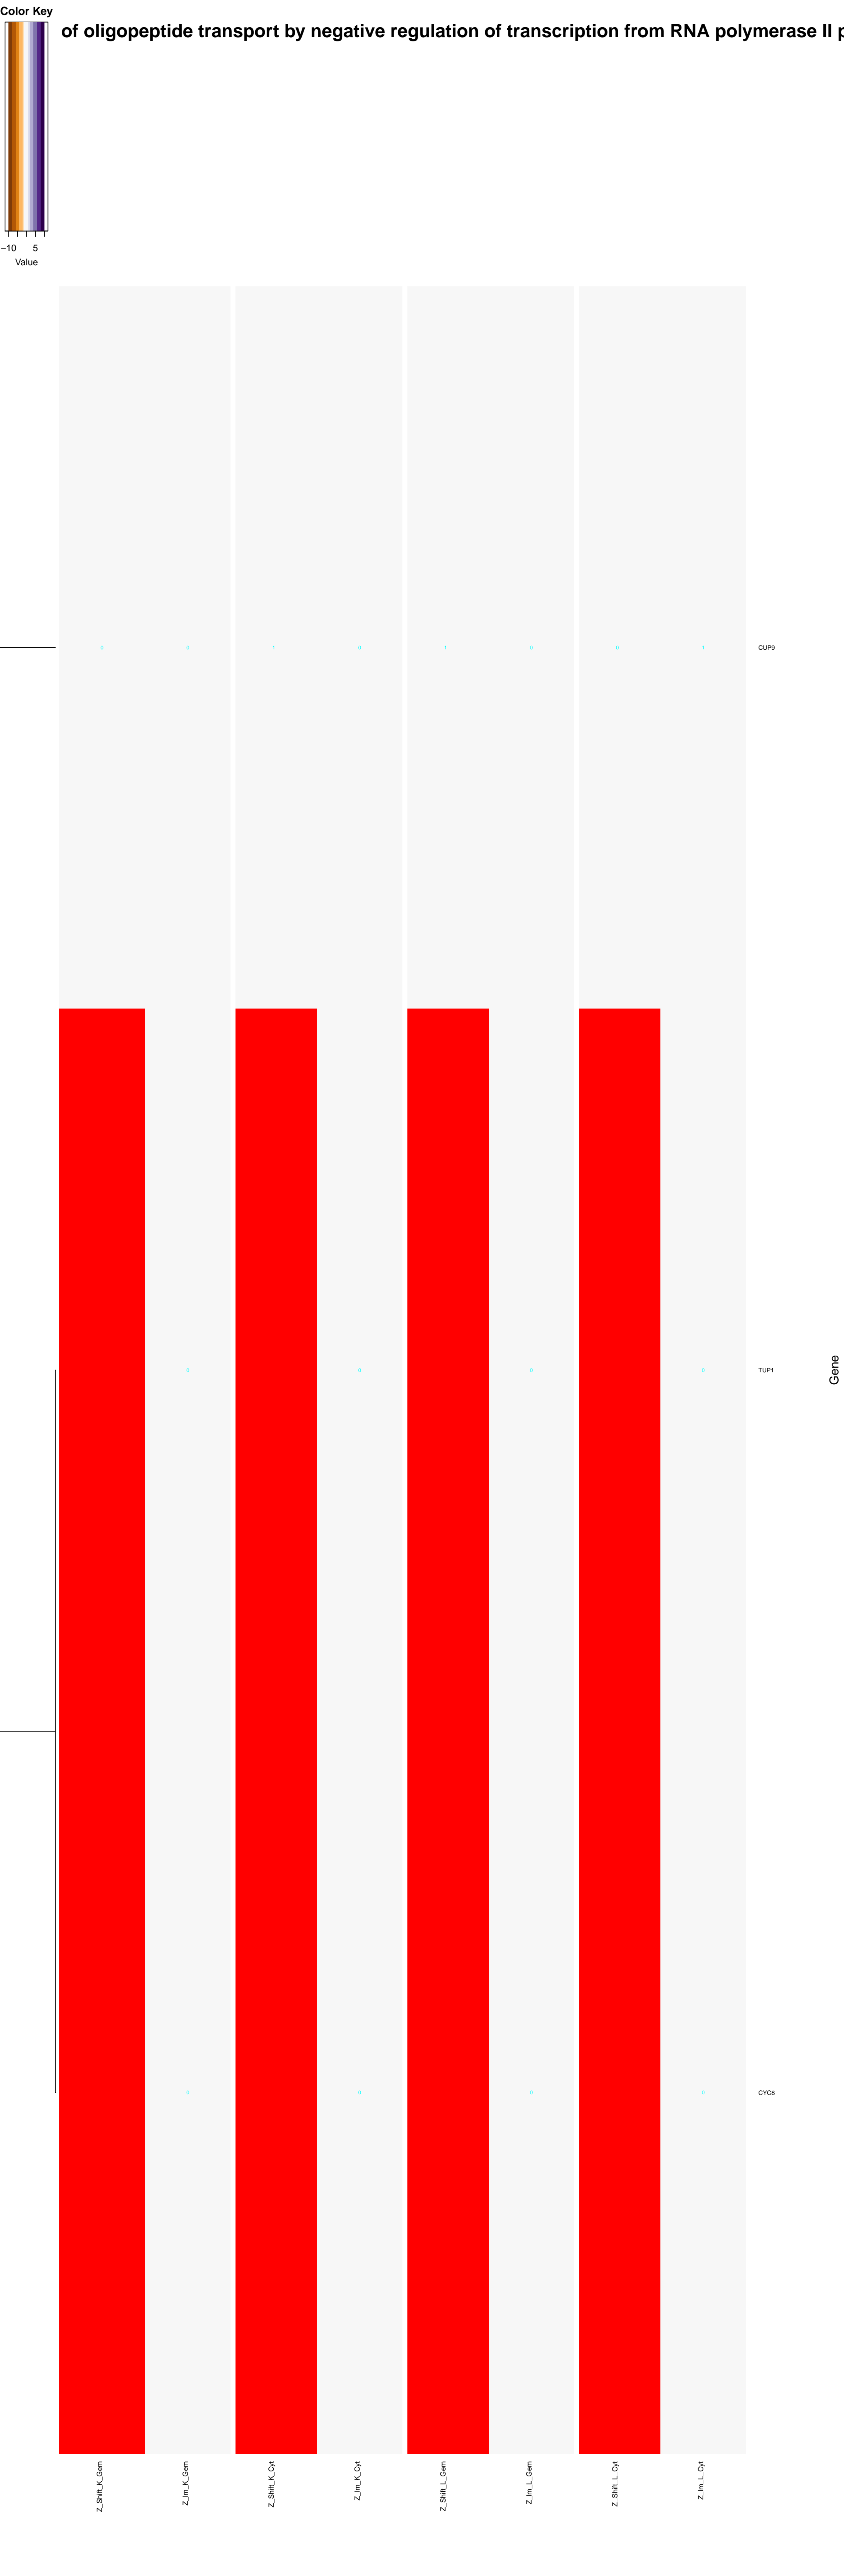

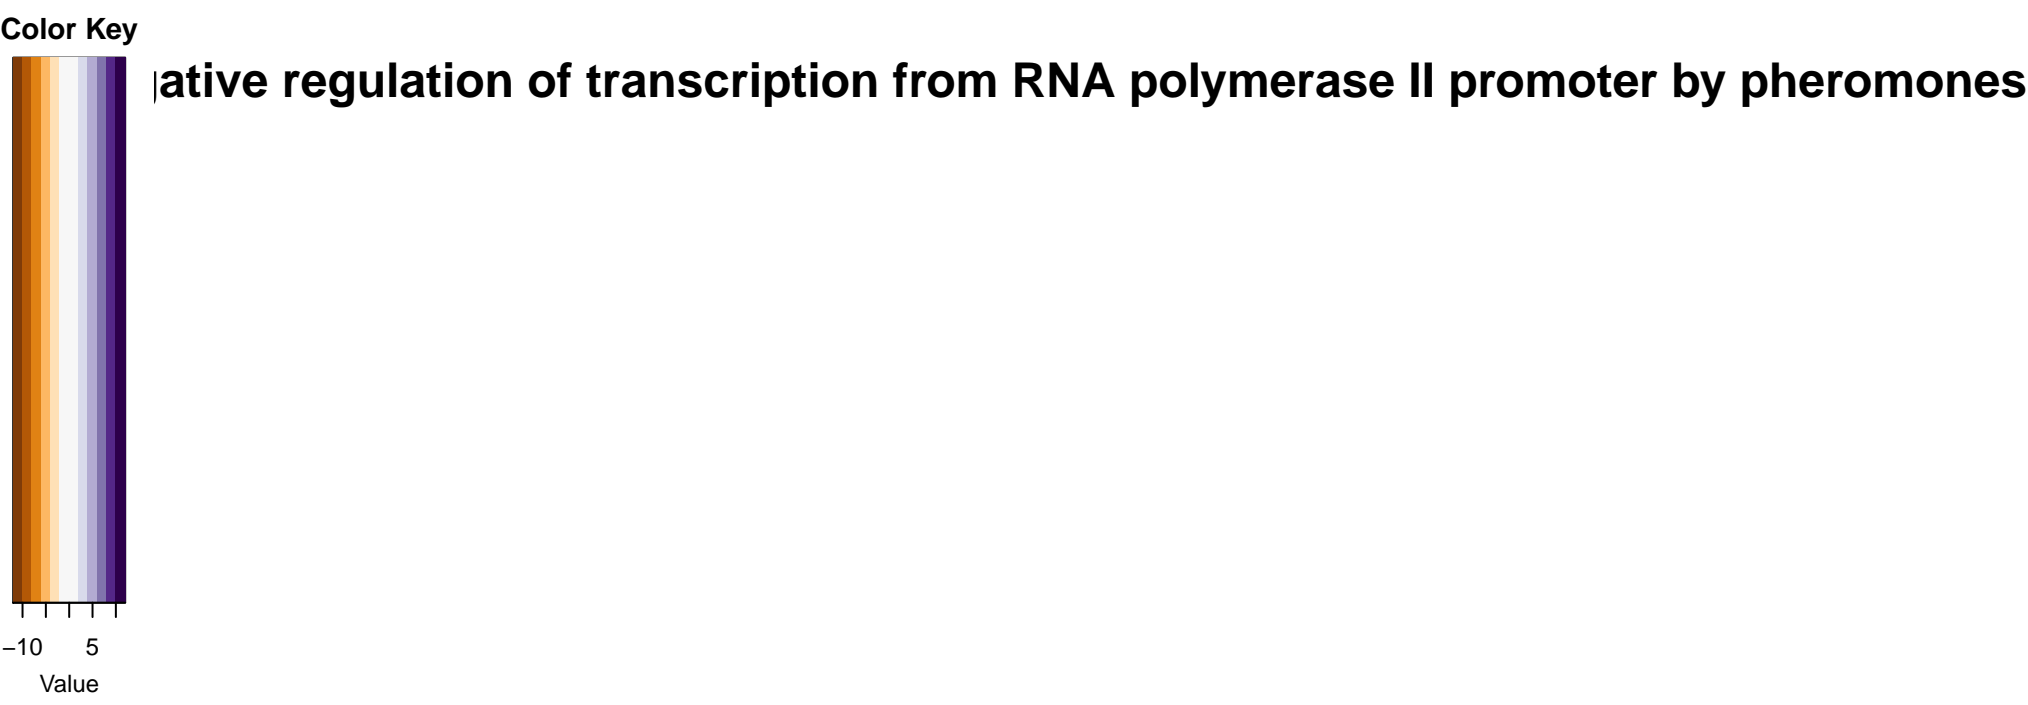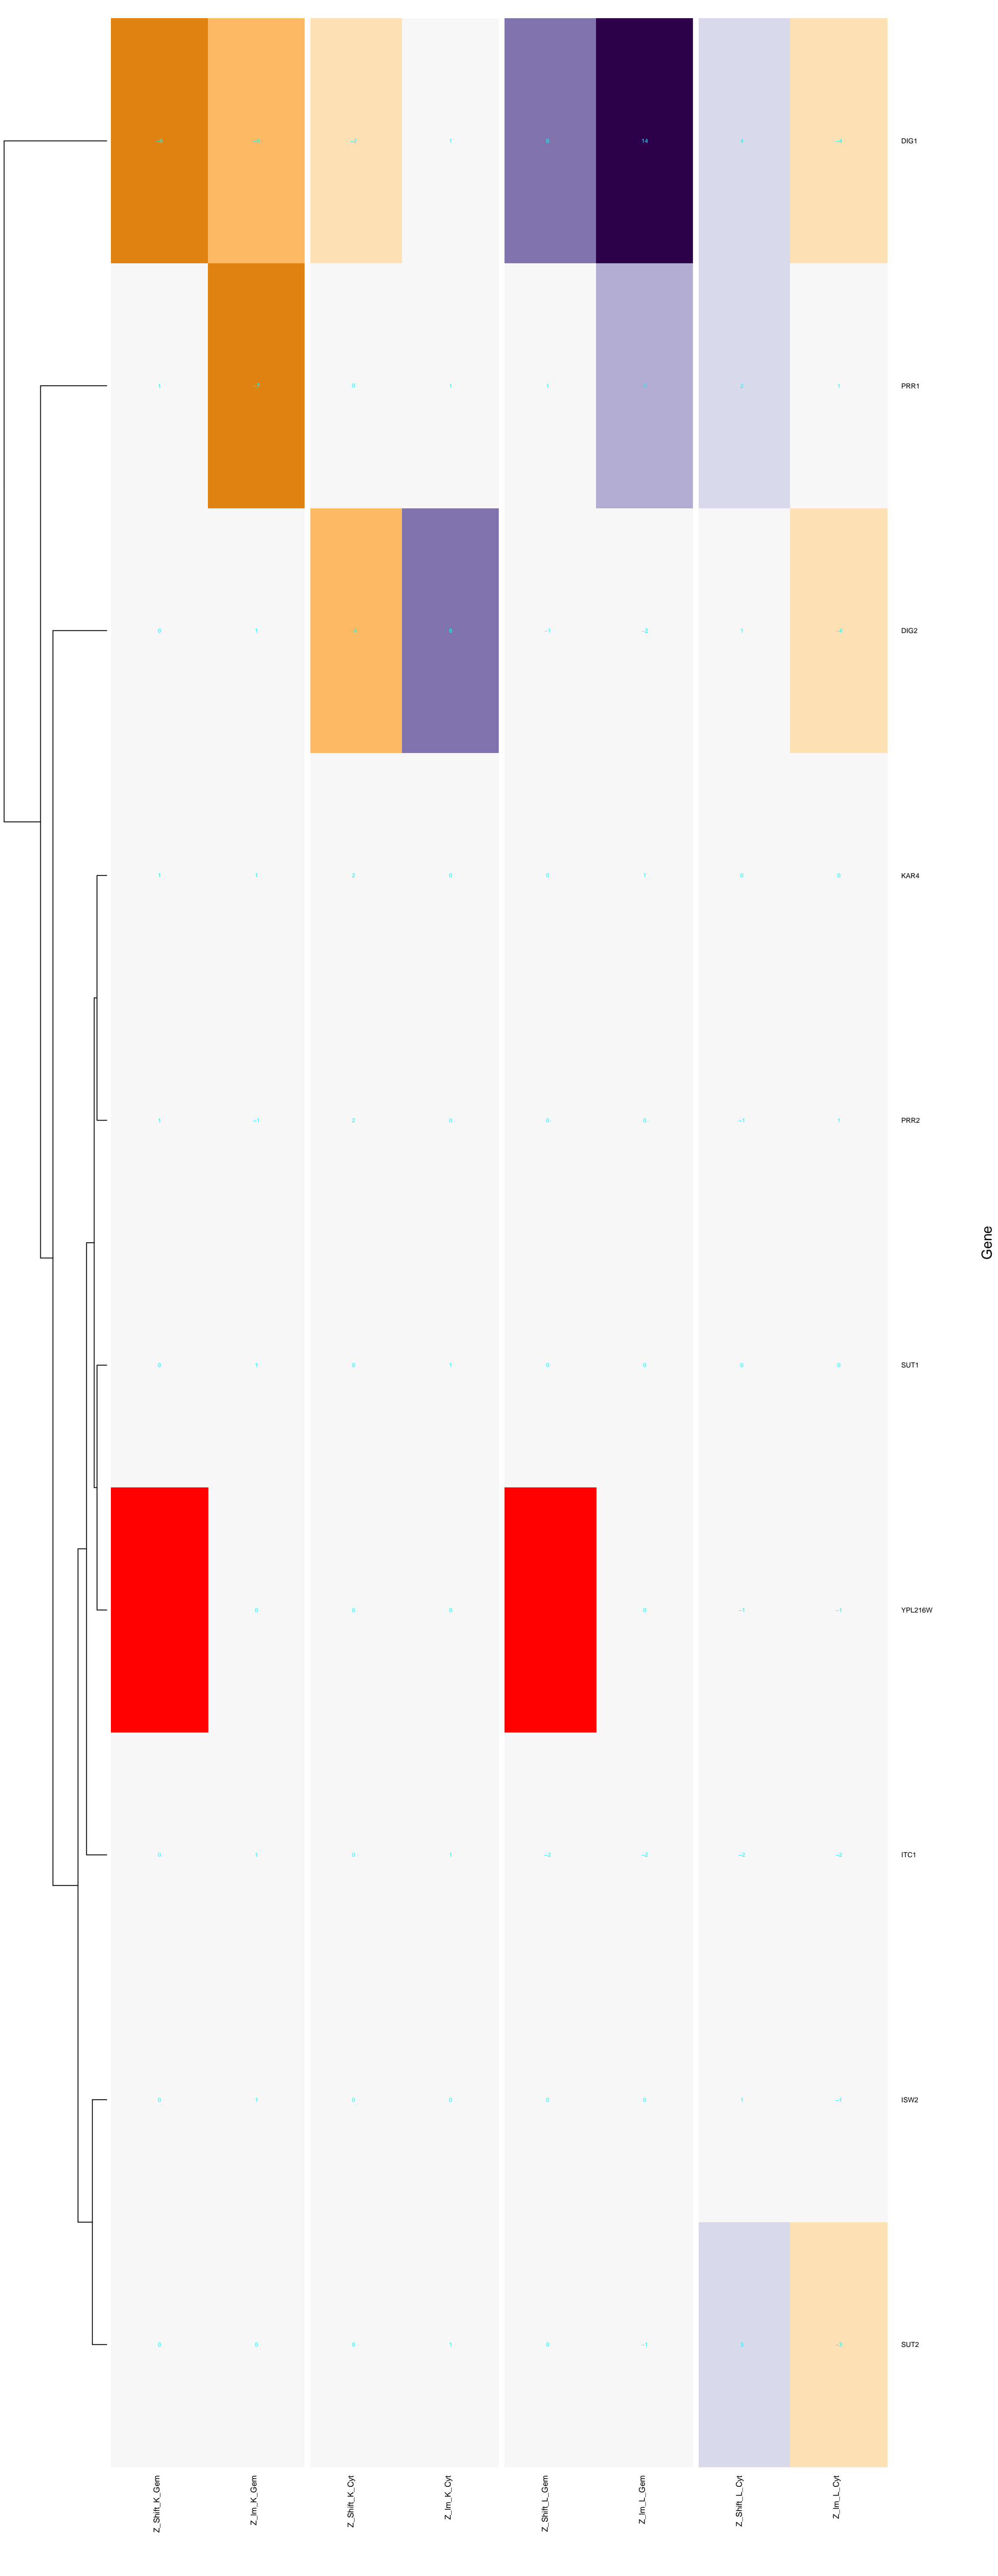

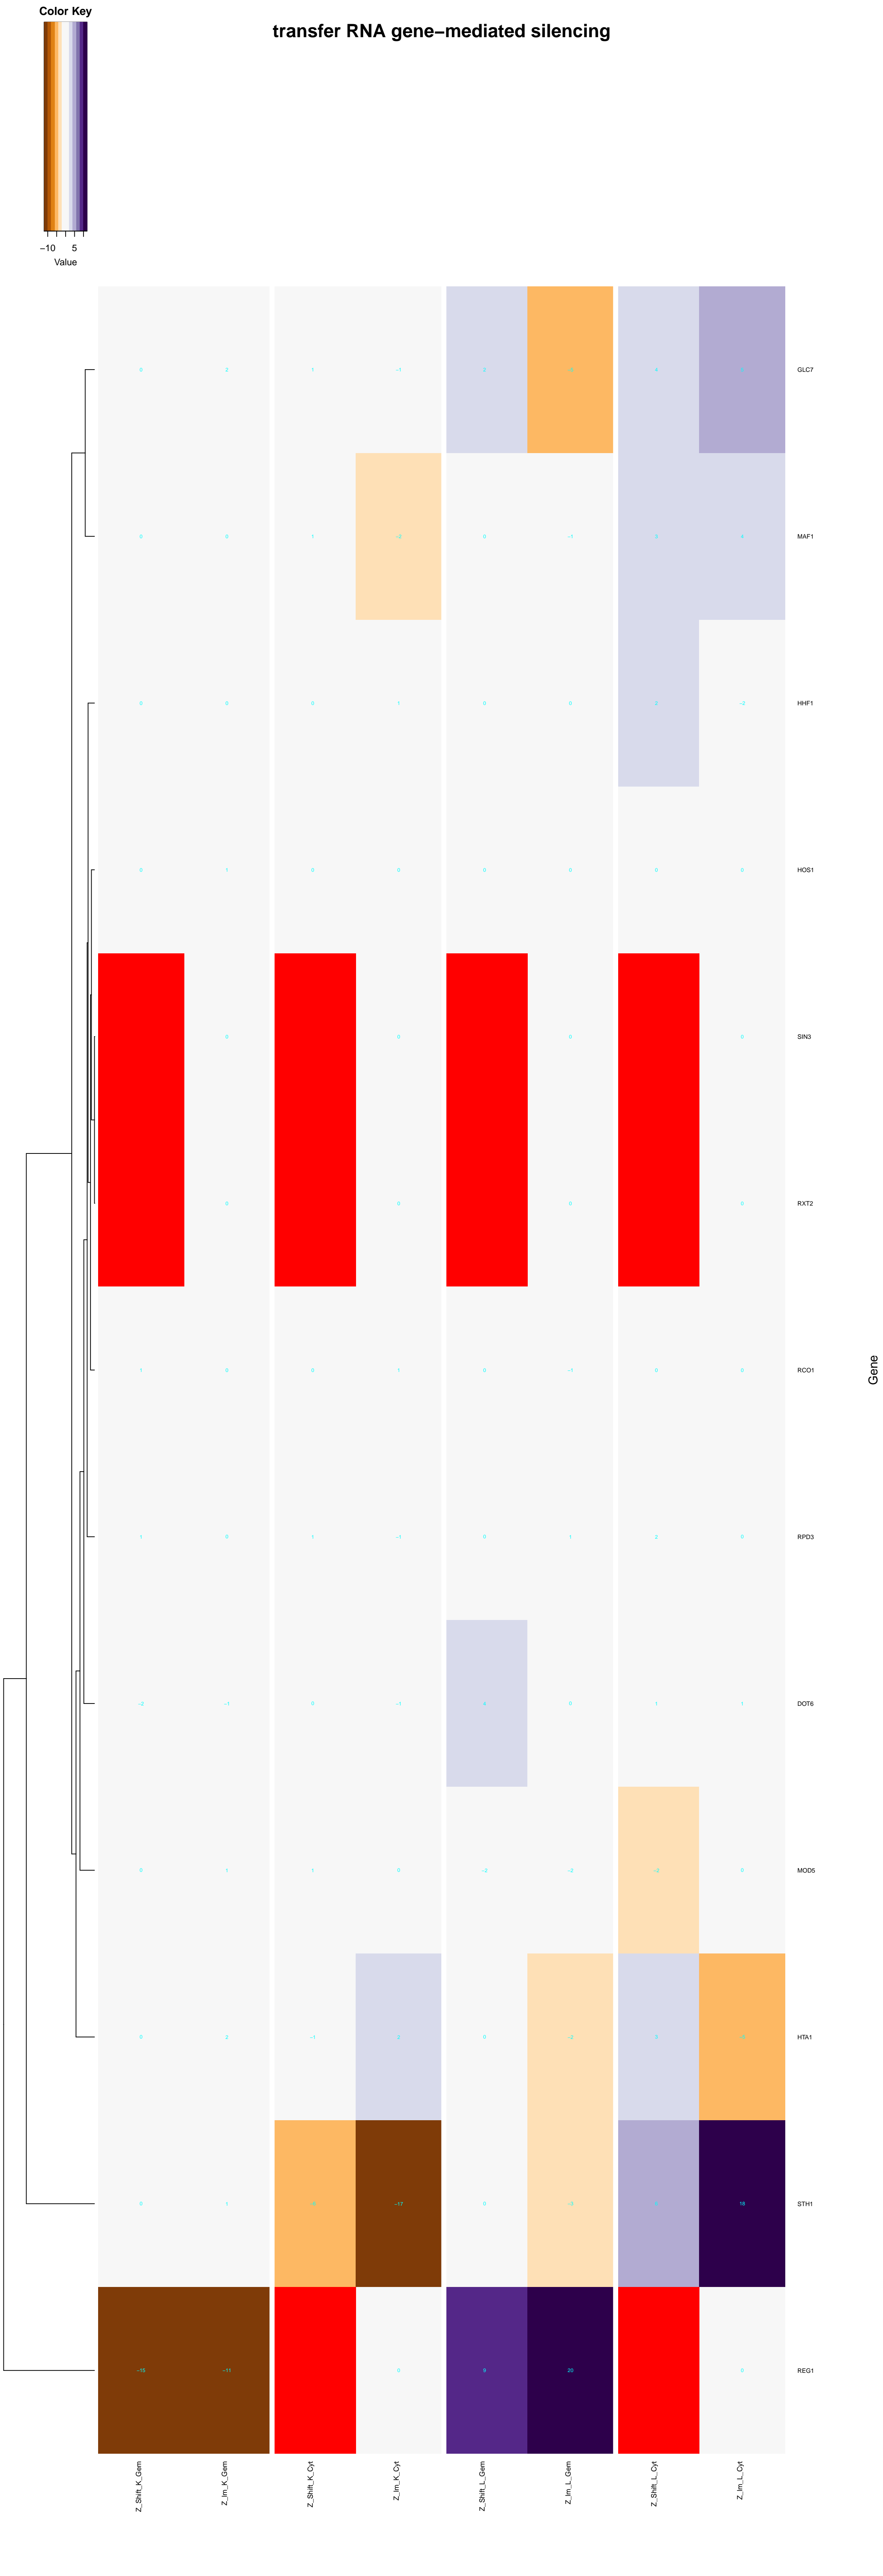

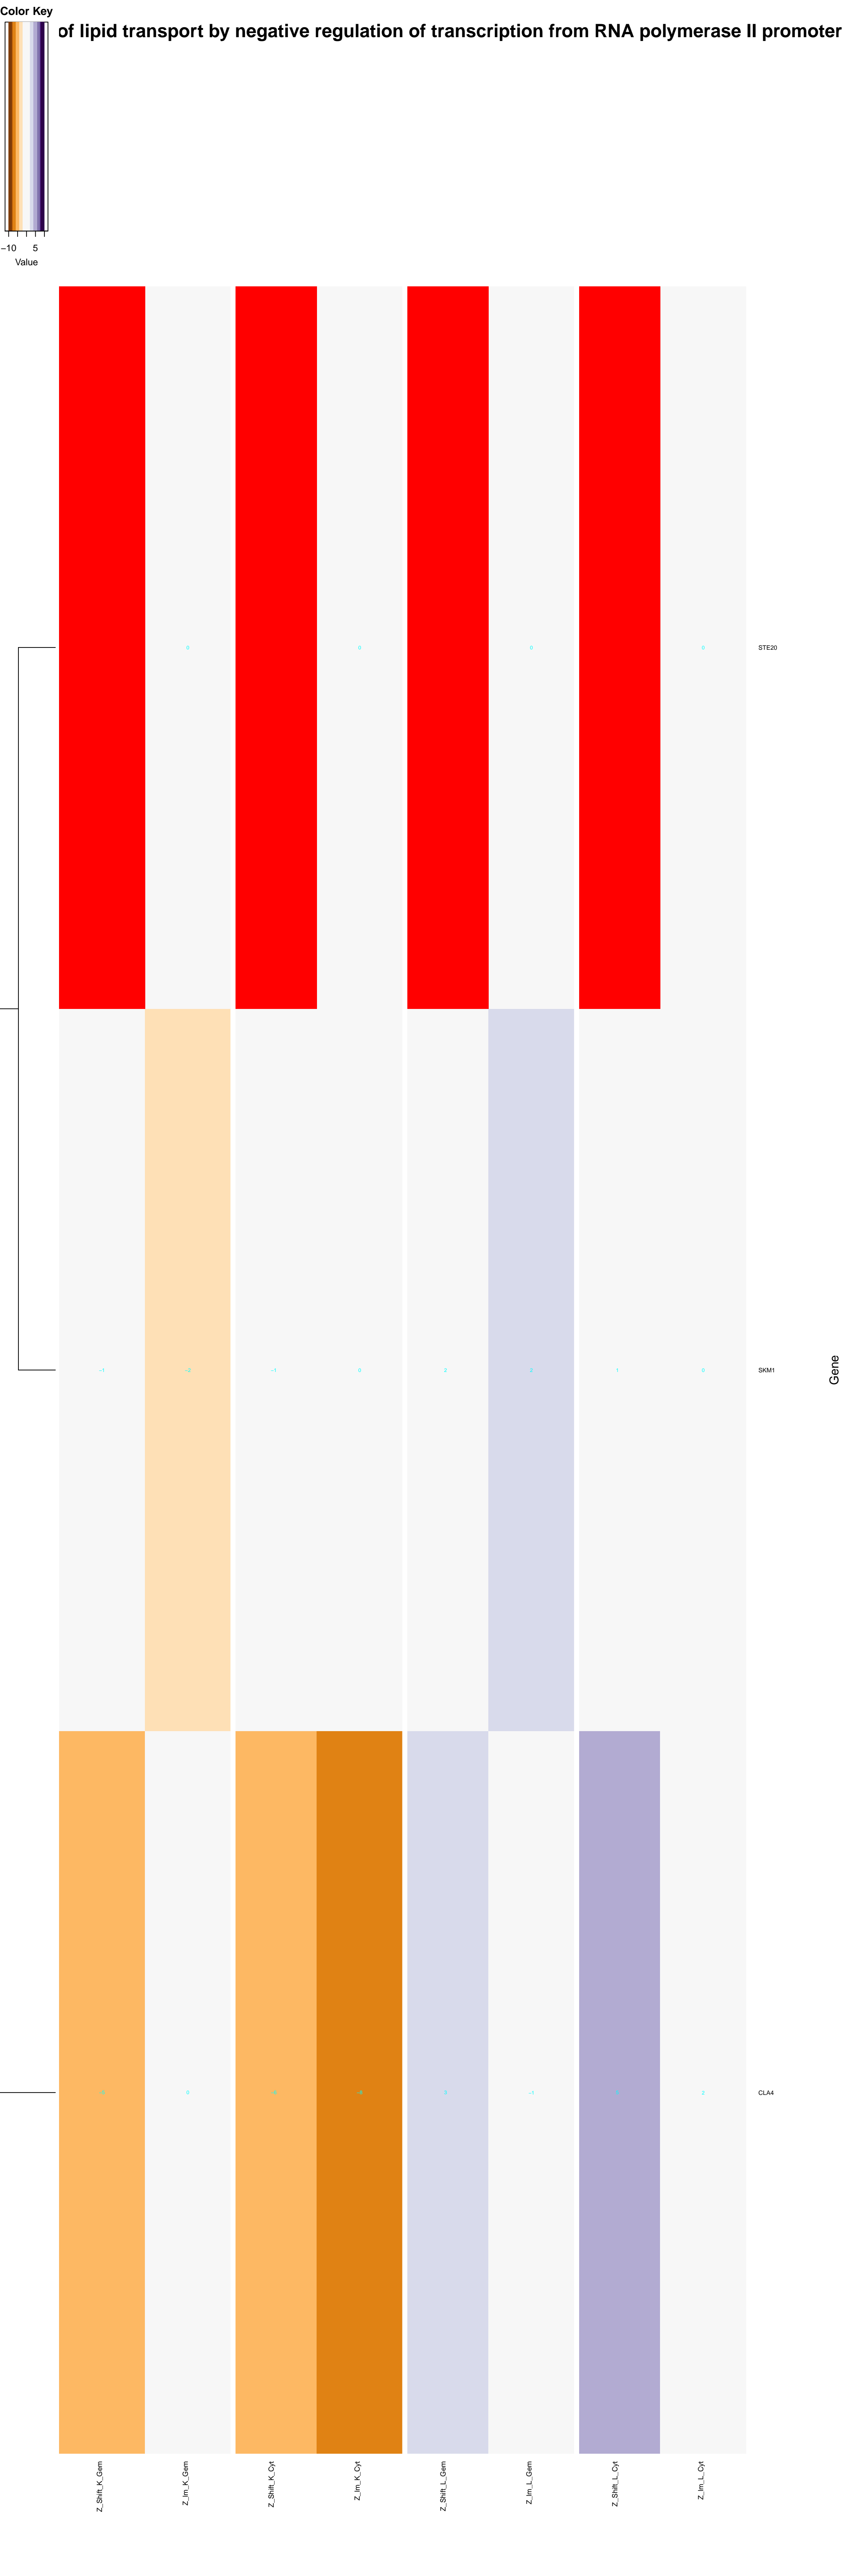

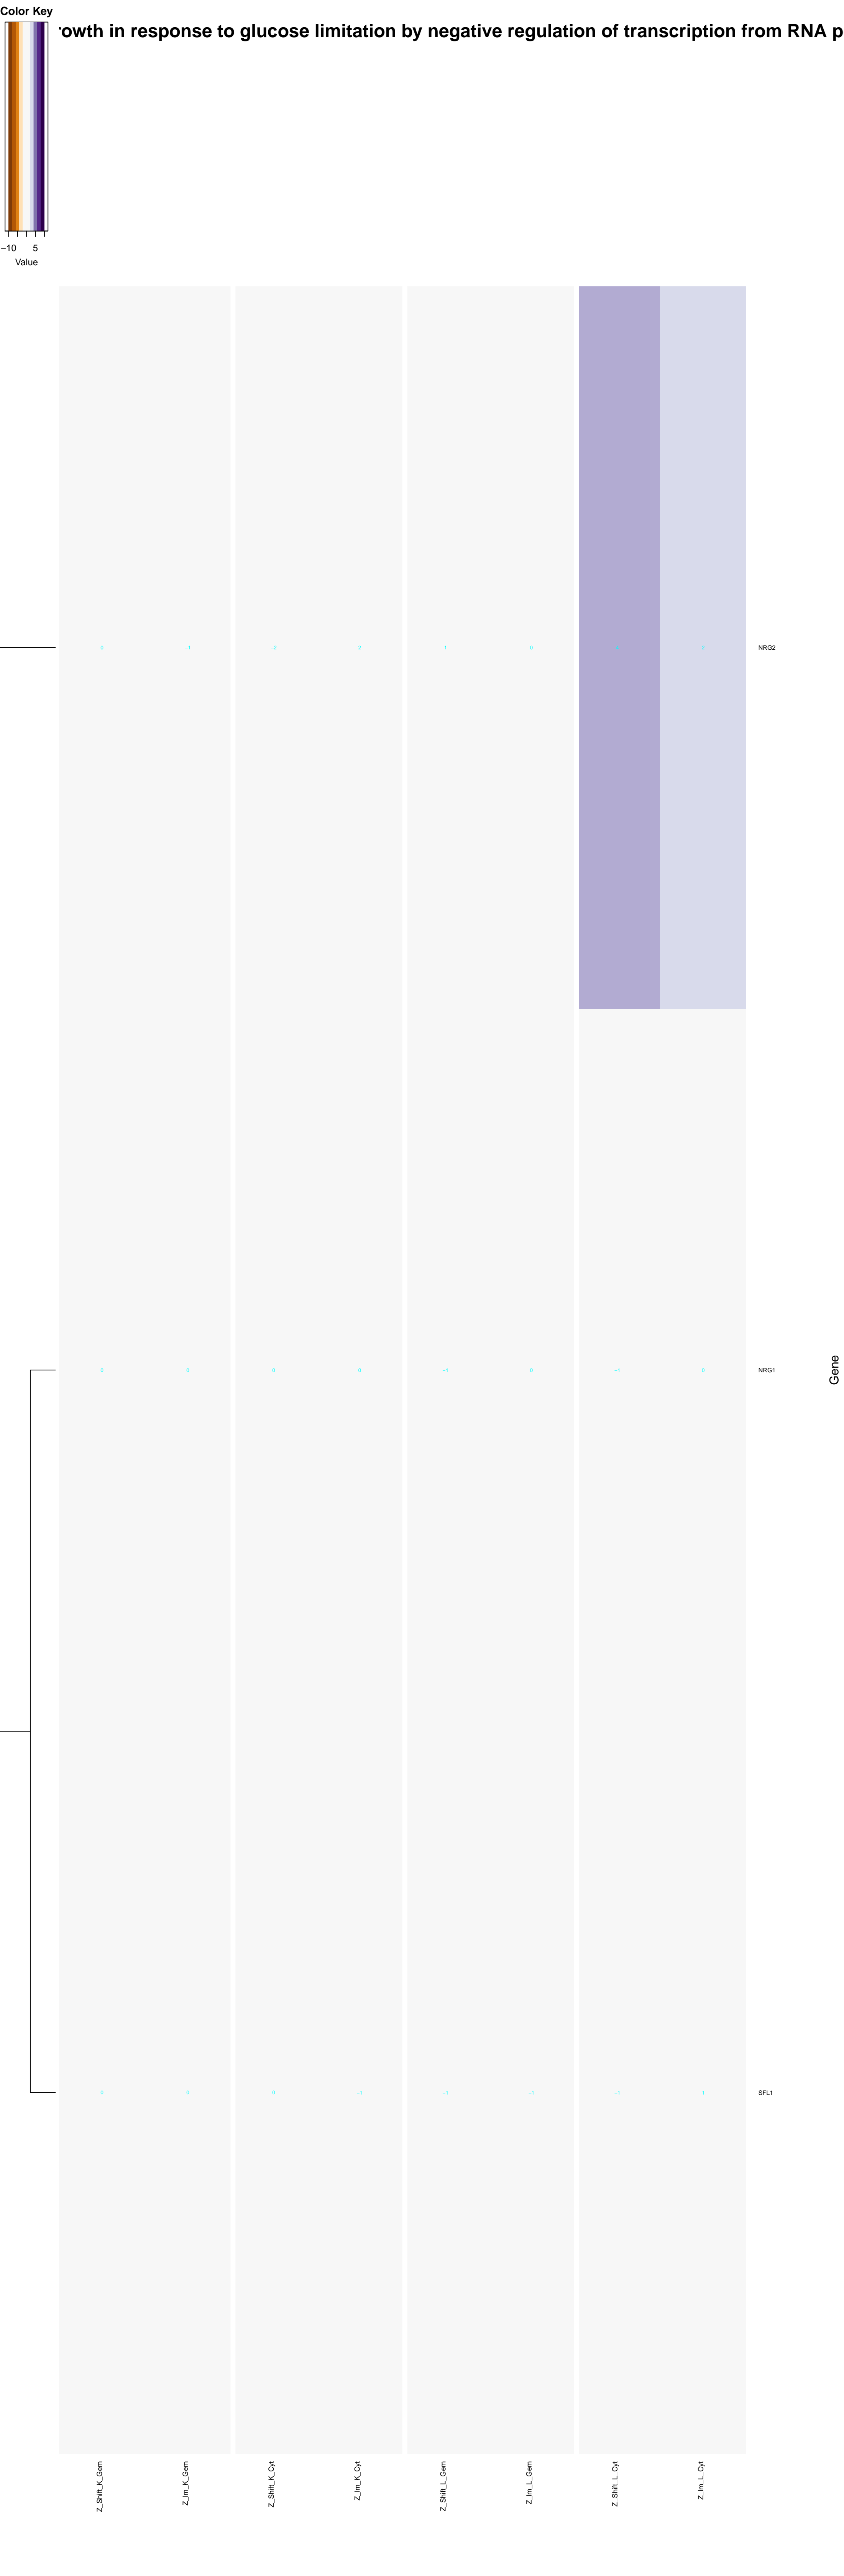

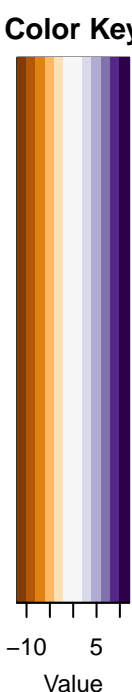

carbon catabolite activation of transcription from RNA polymerase II promoter

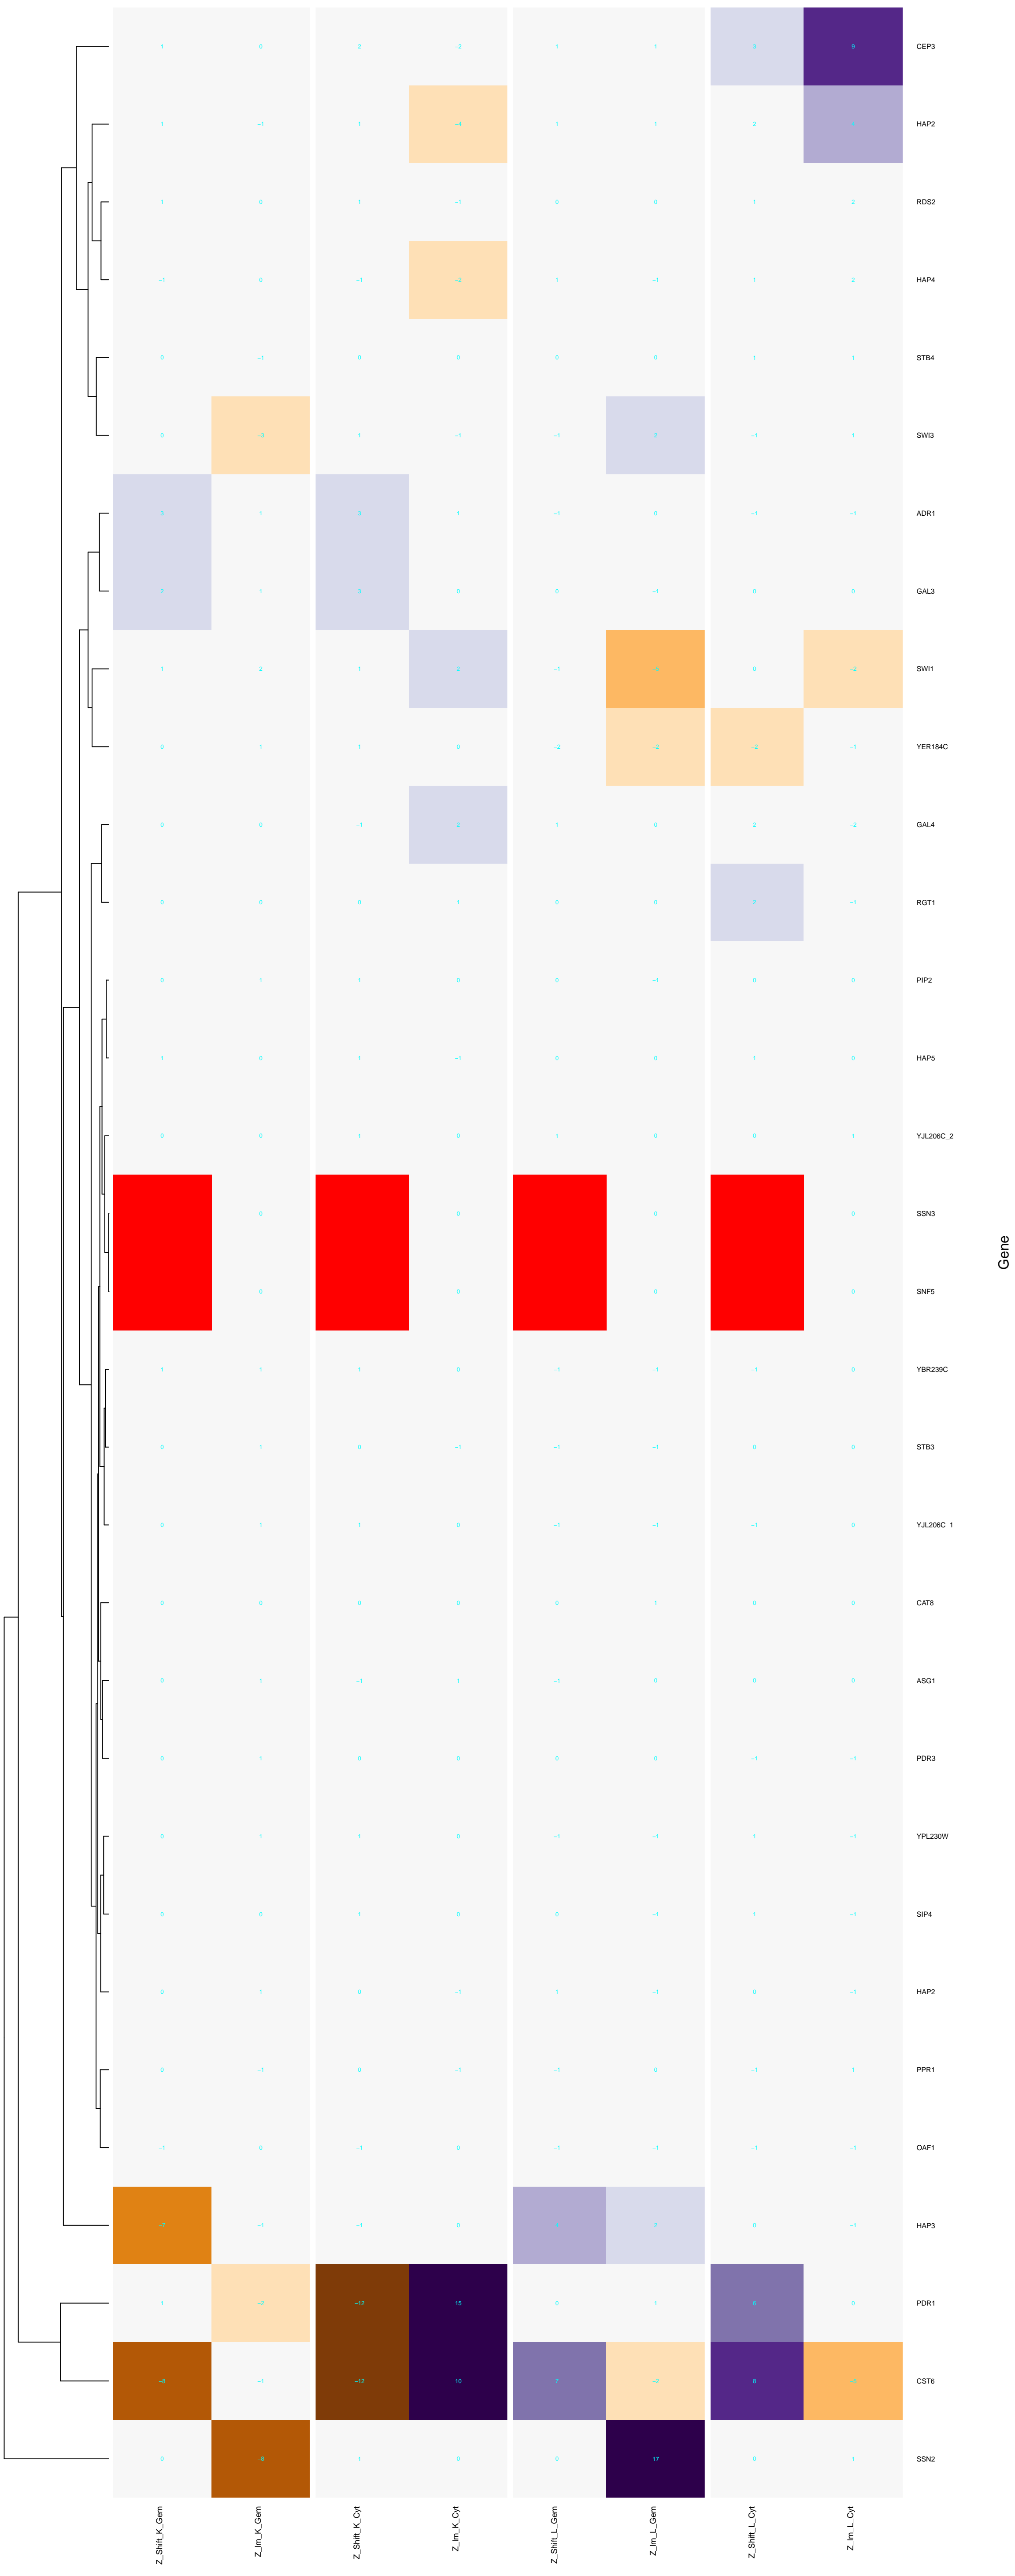

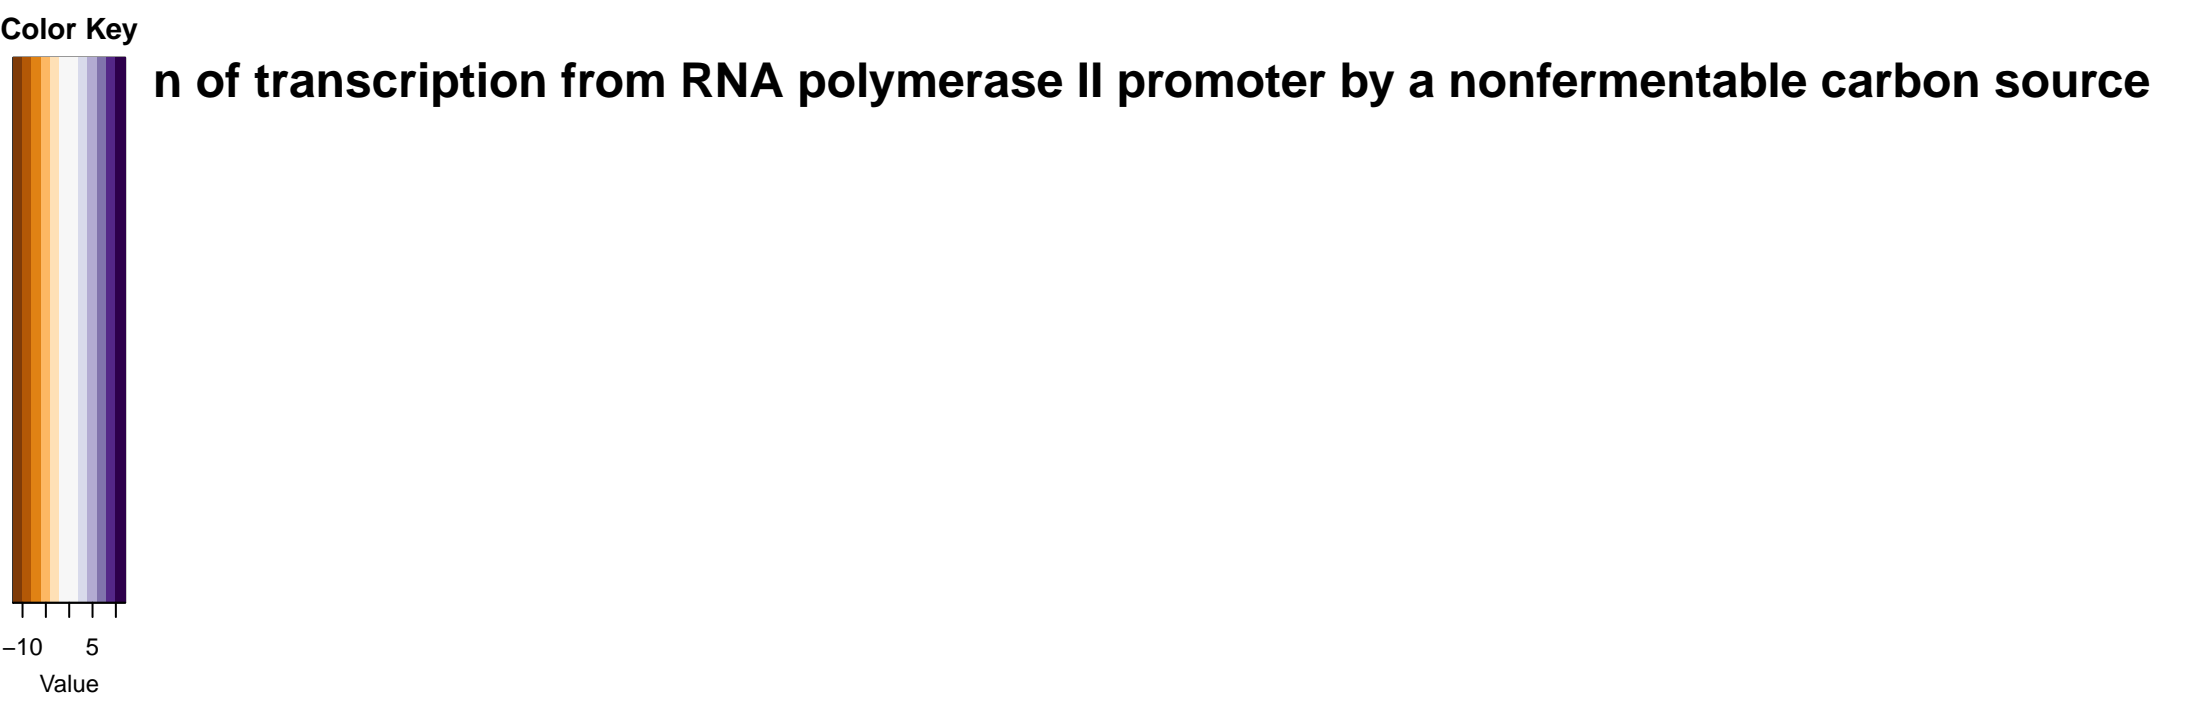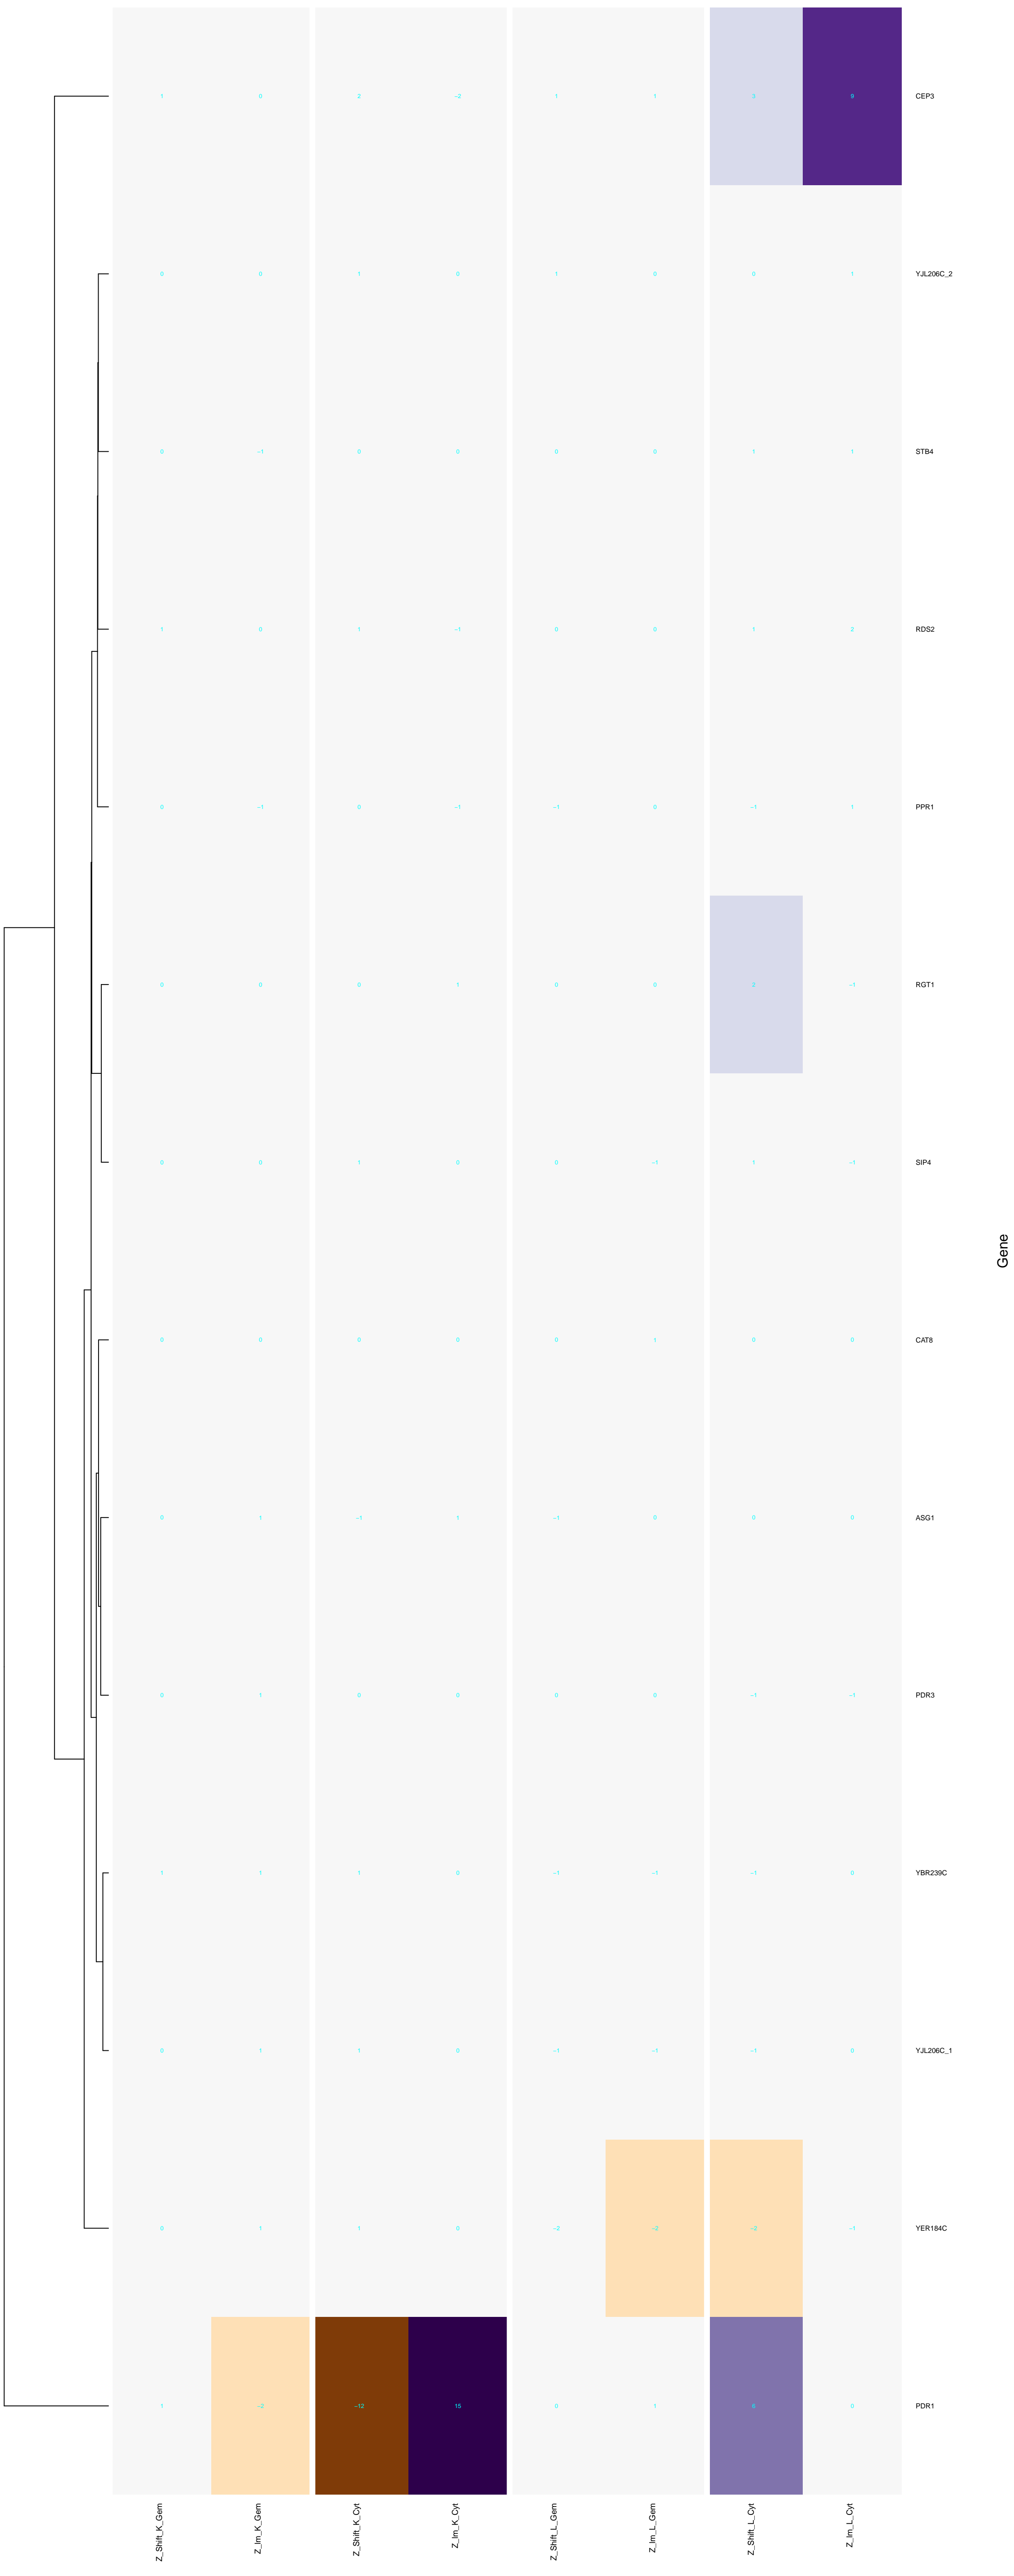



nitrogen catabolite activation of transcription from RNA polymerase II promoter

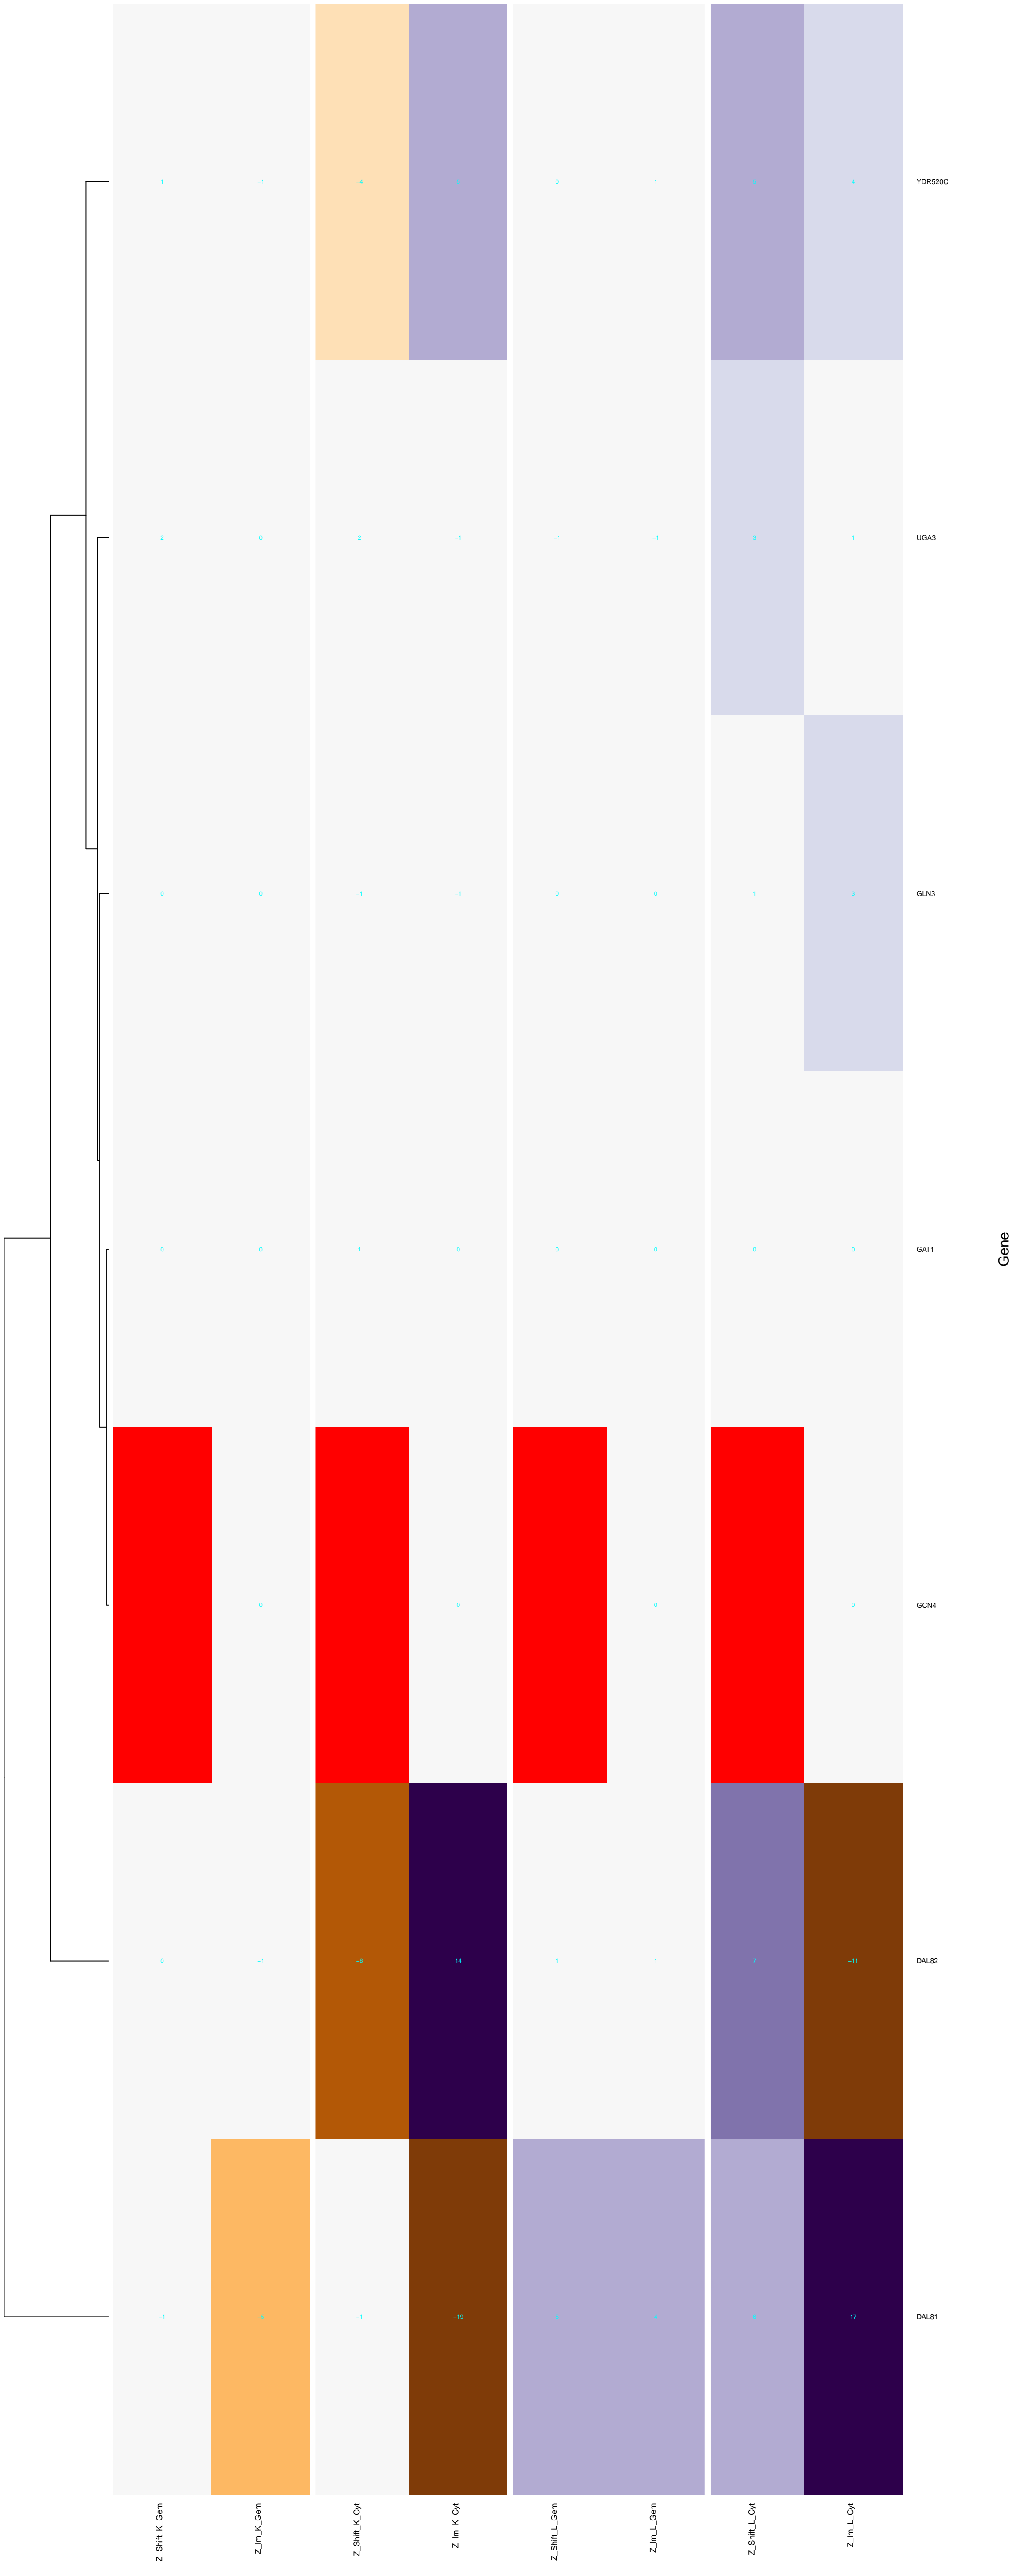

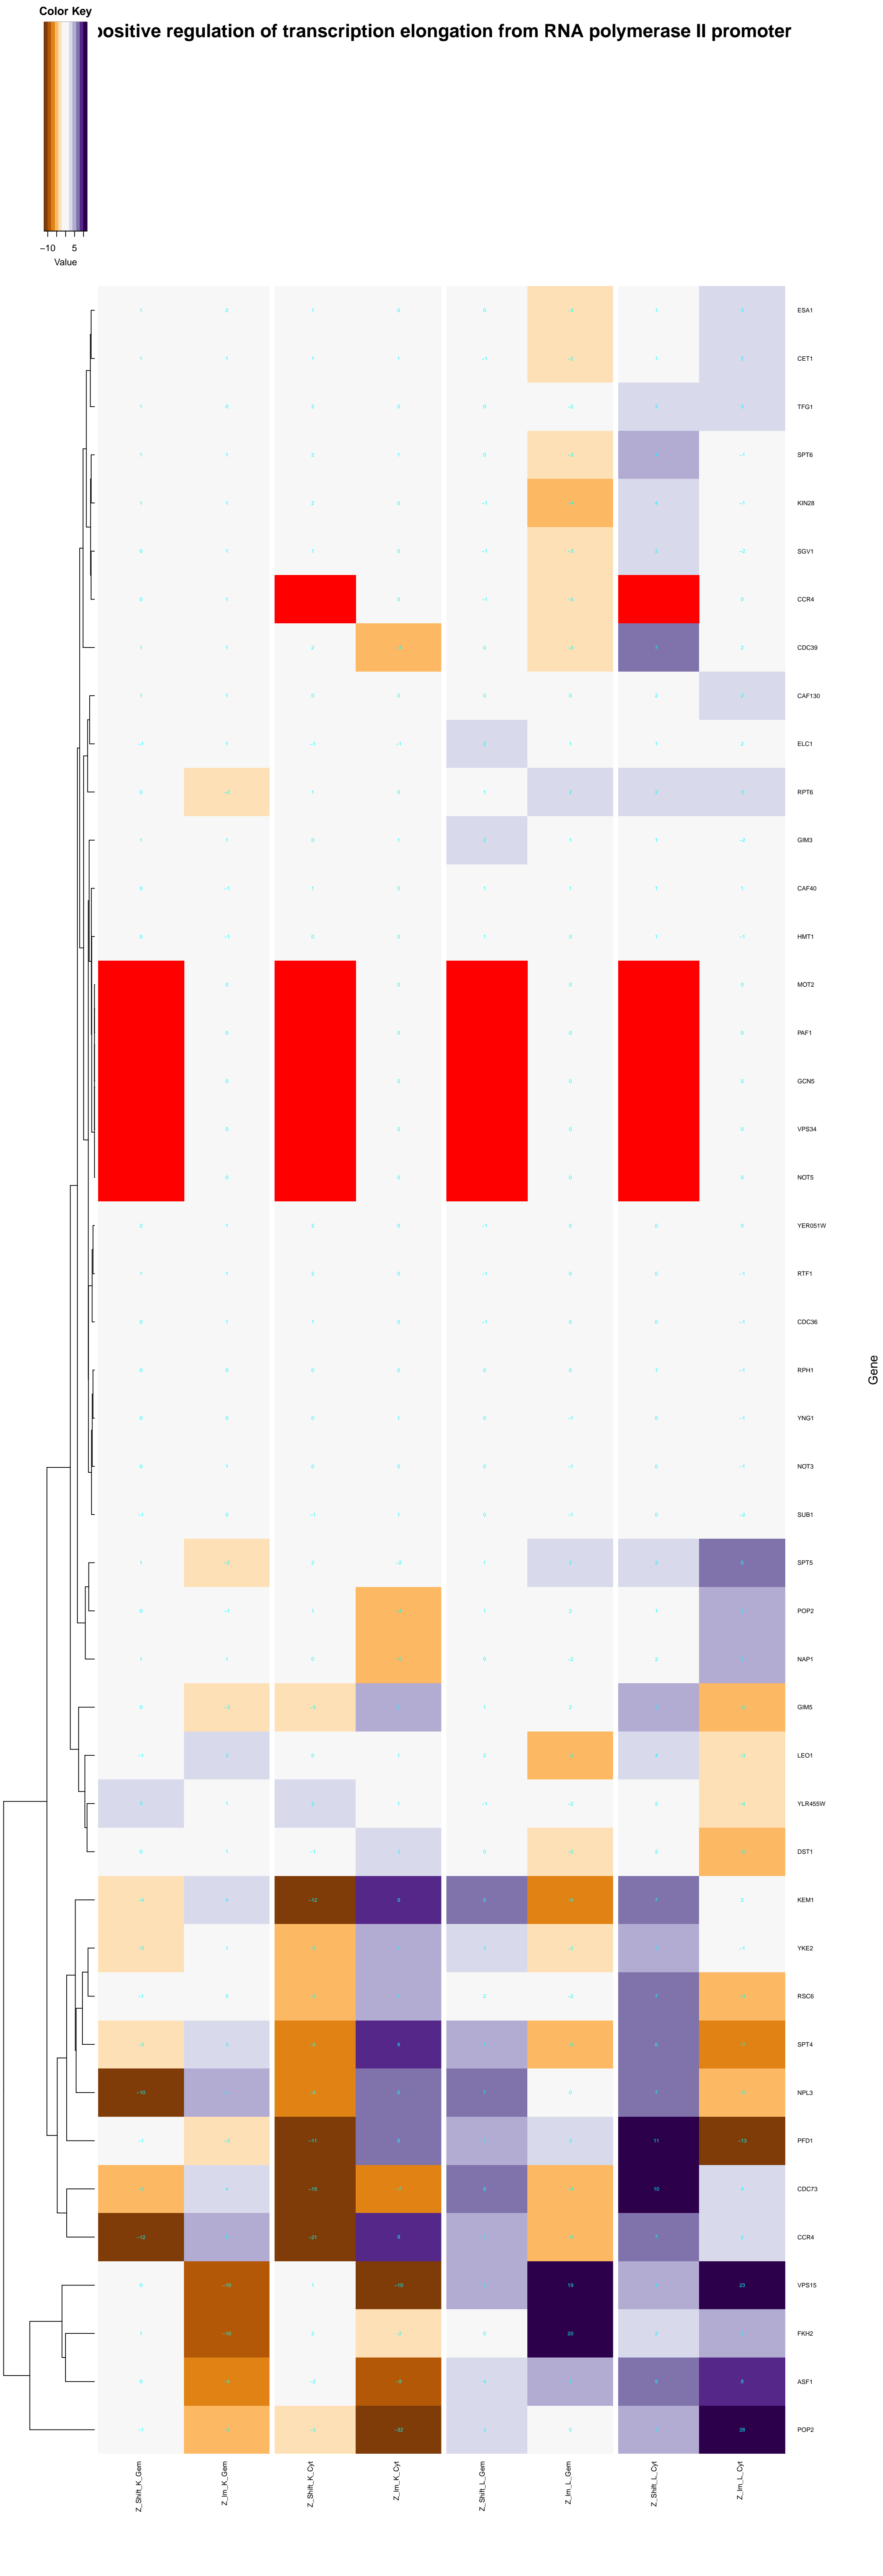

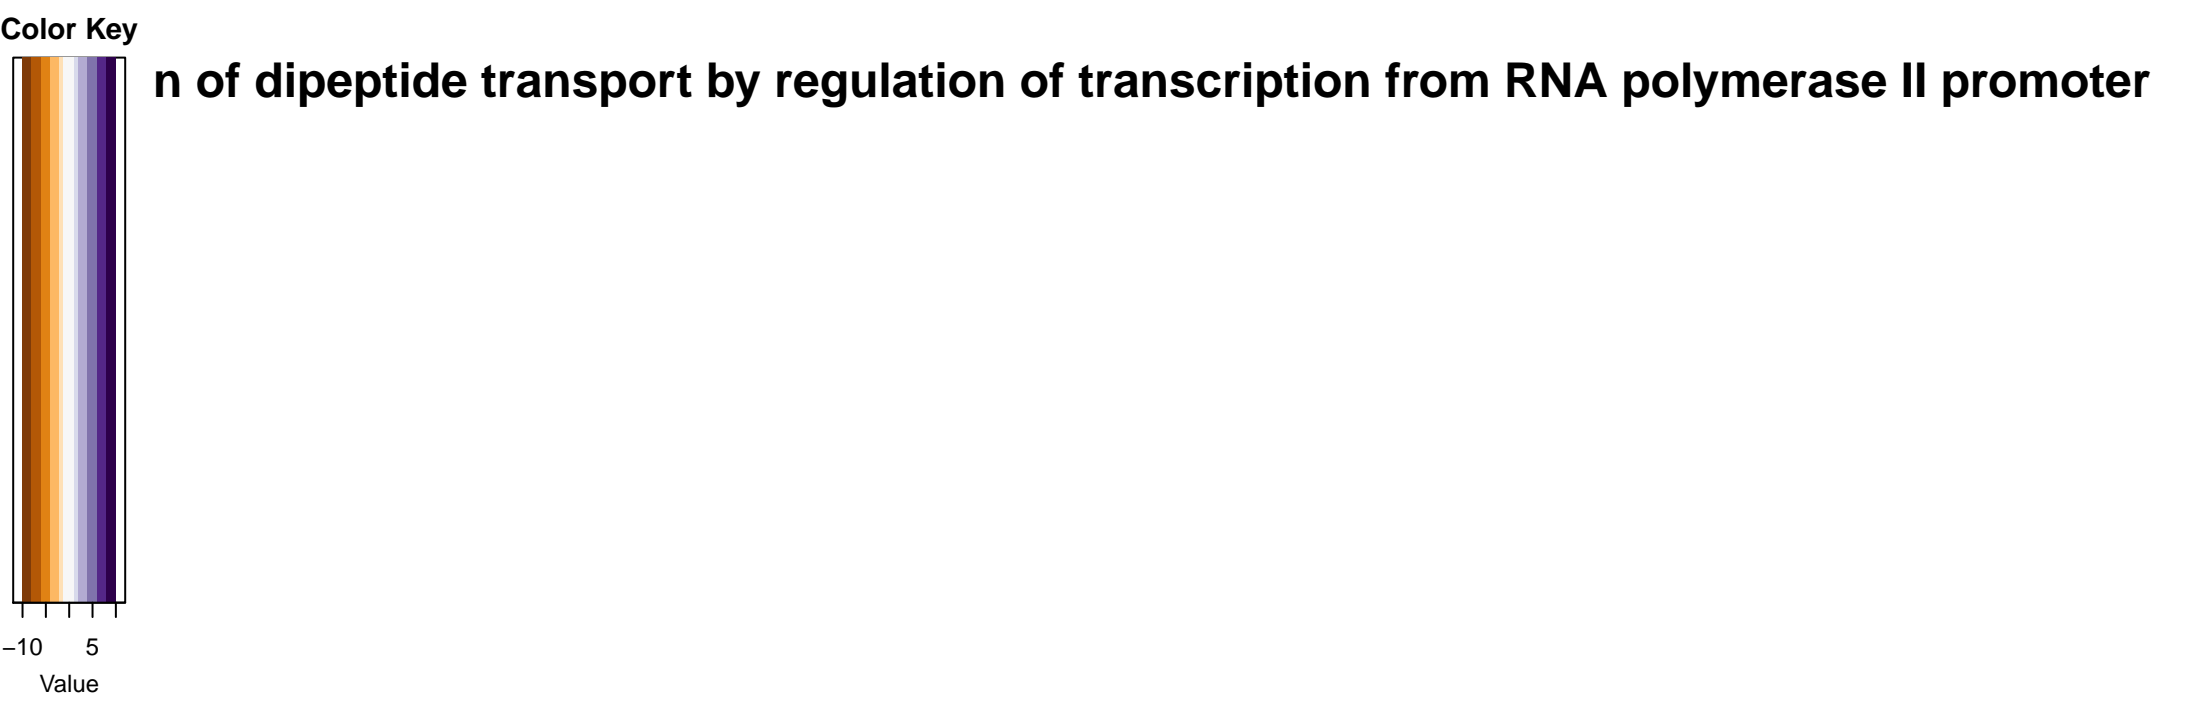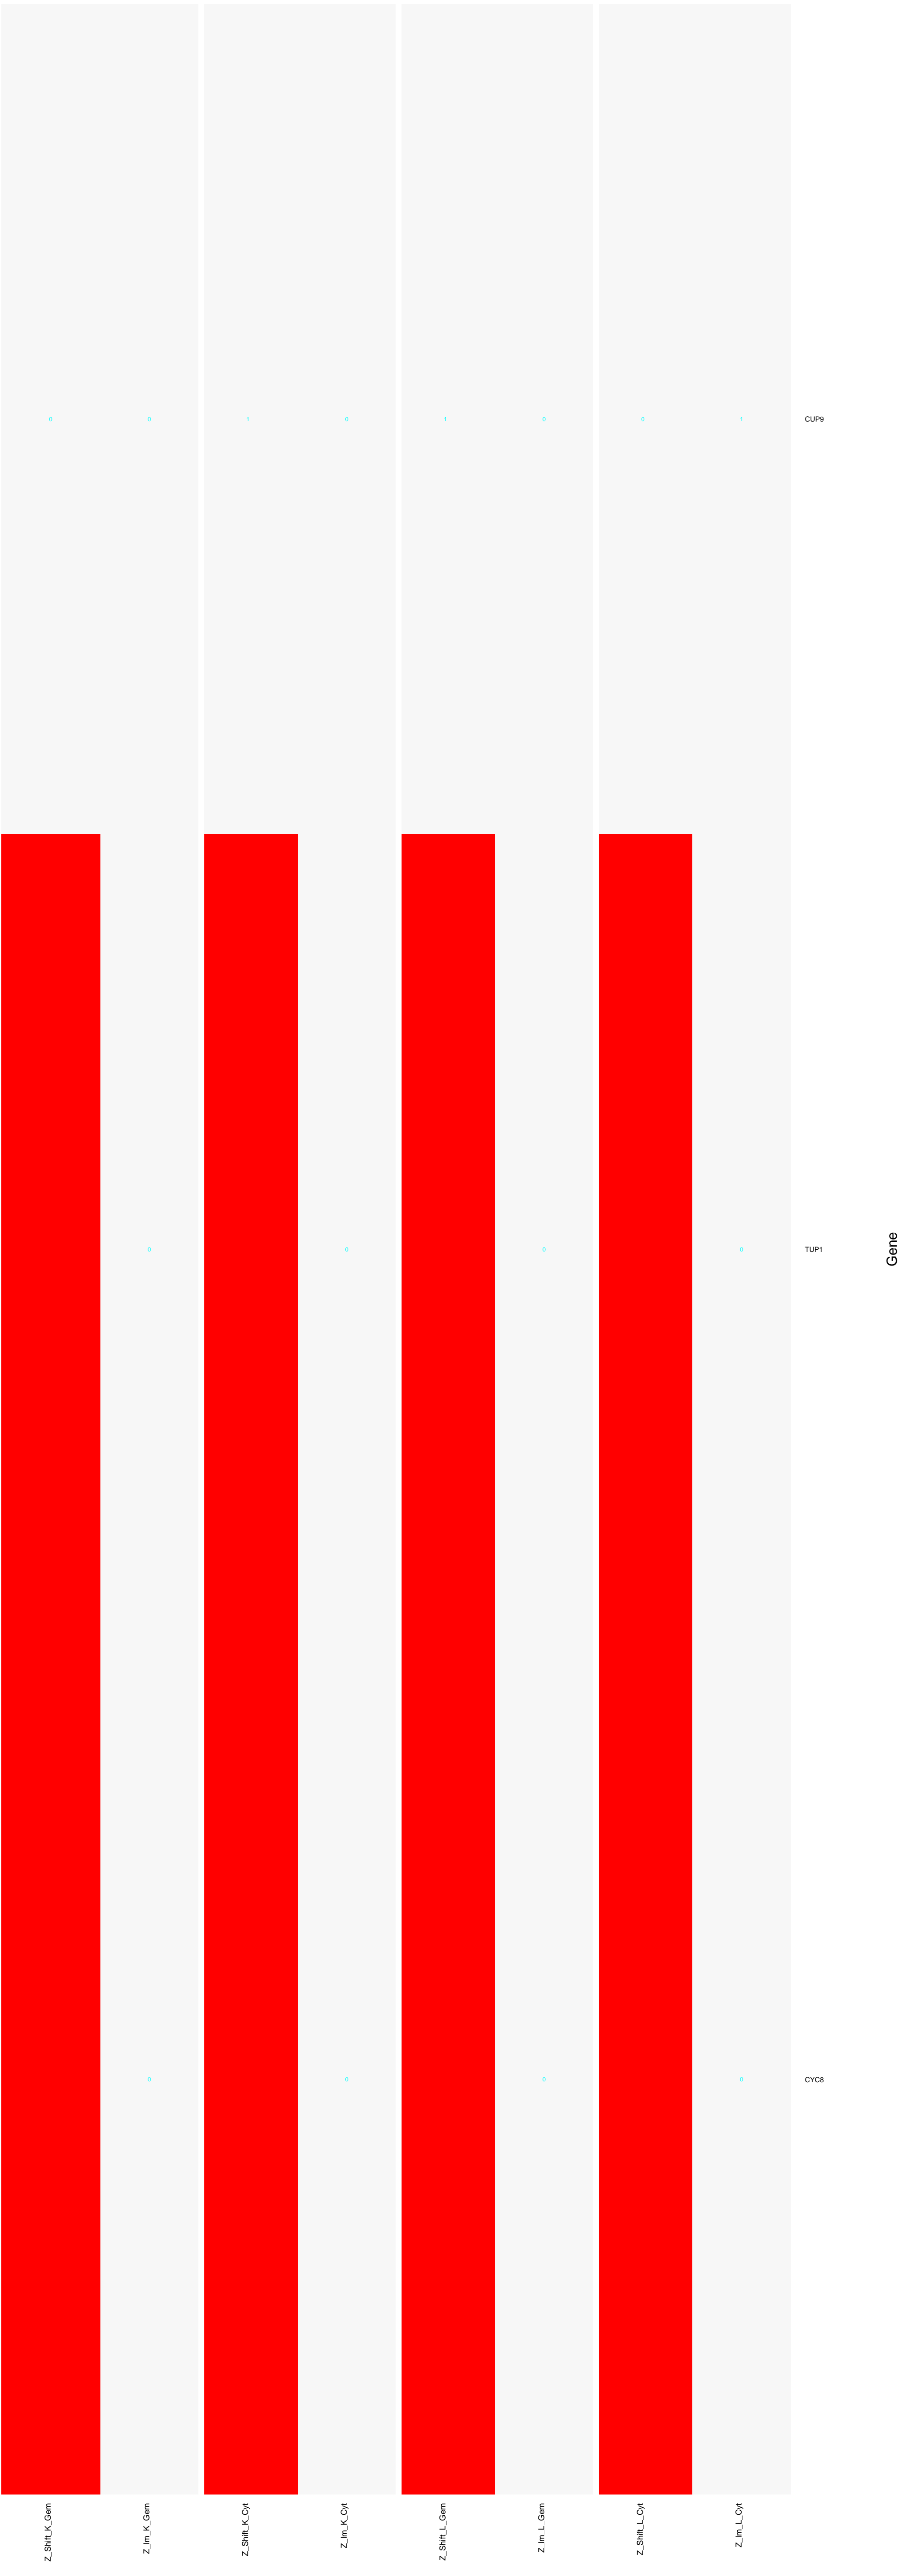

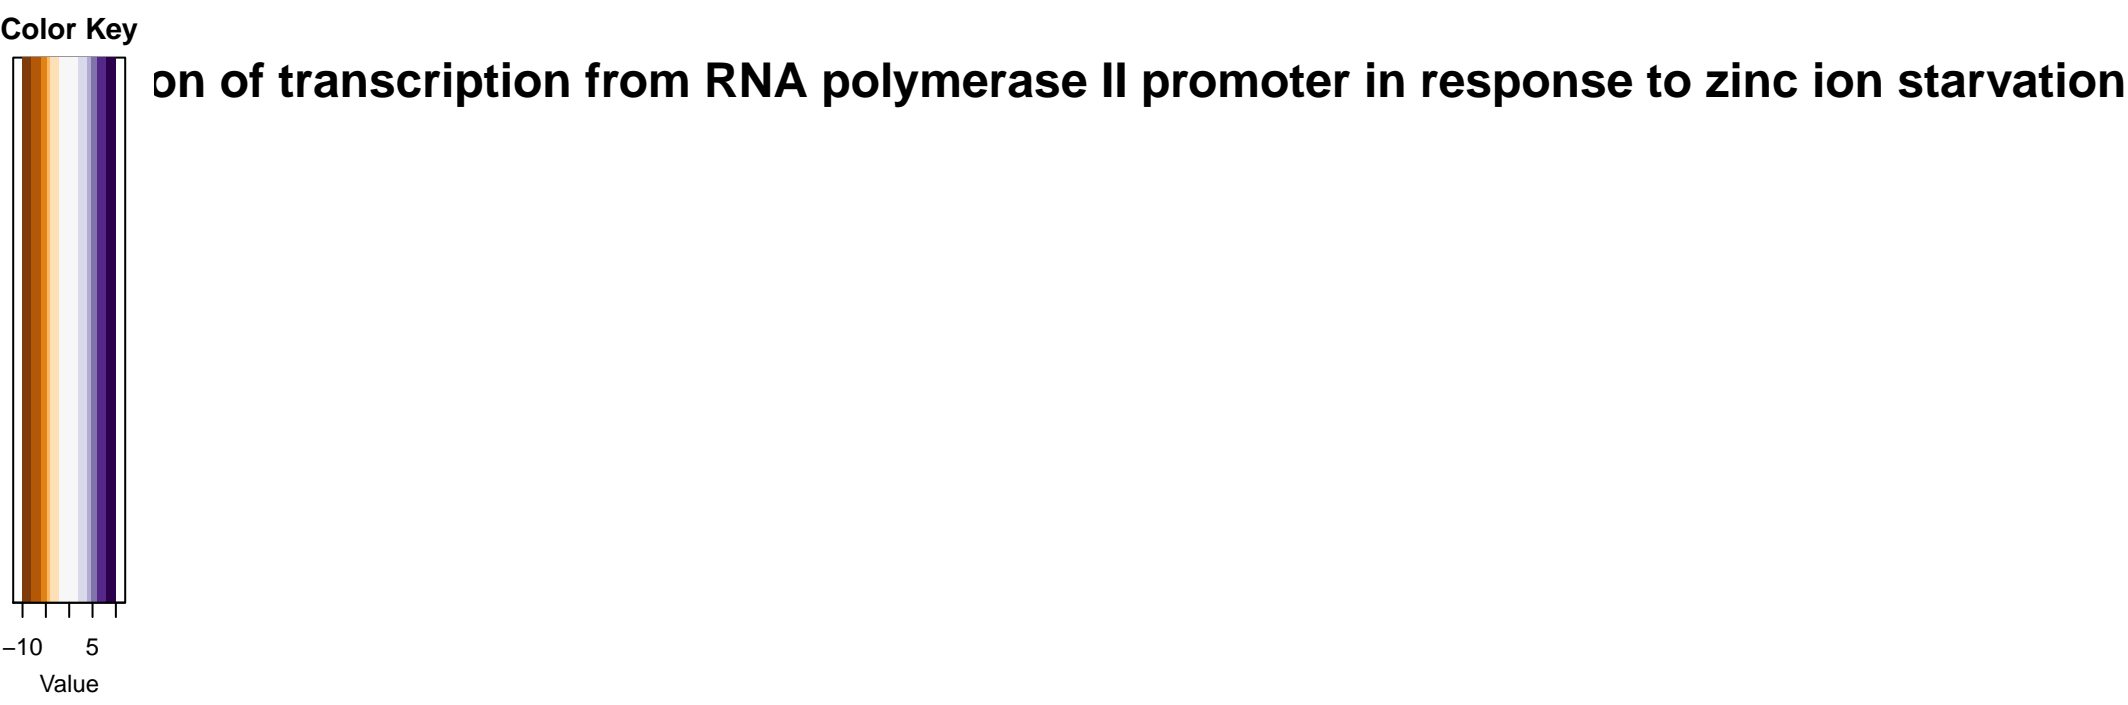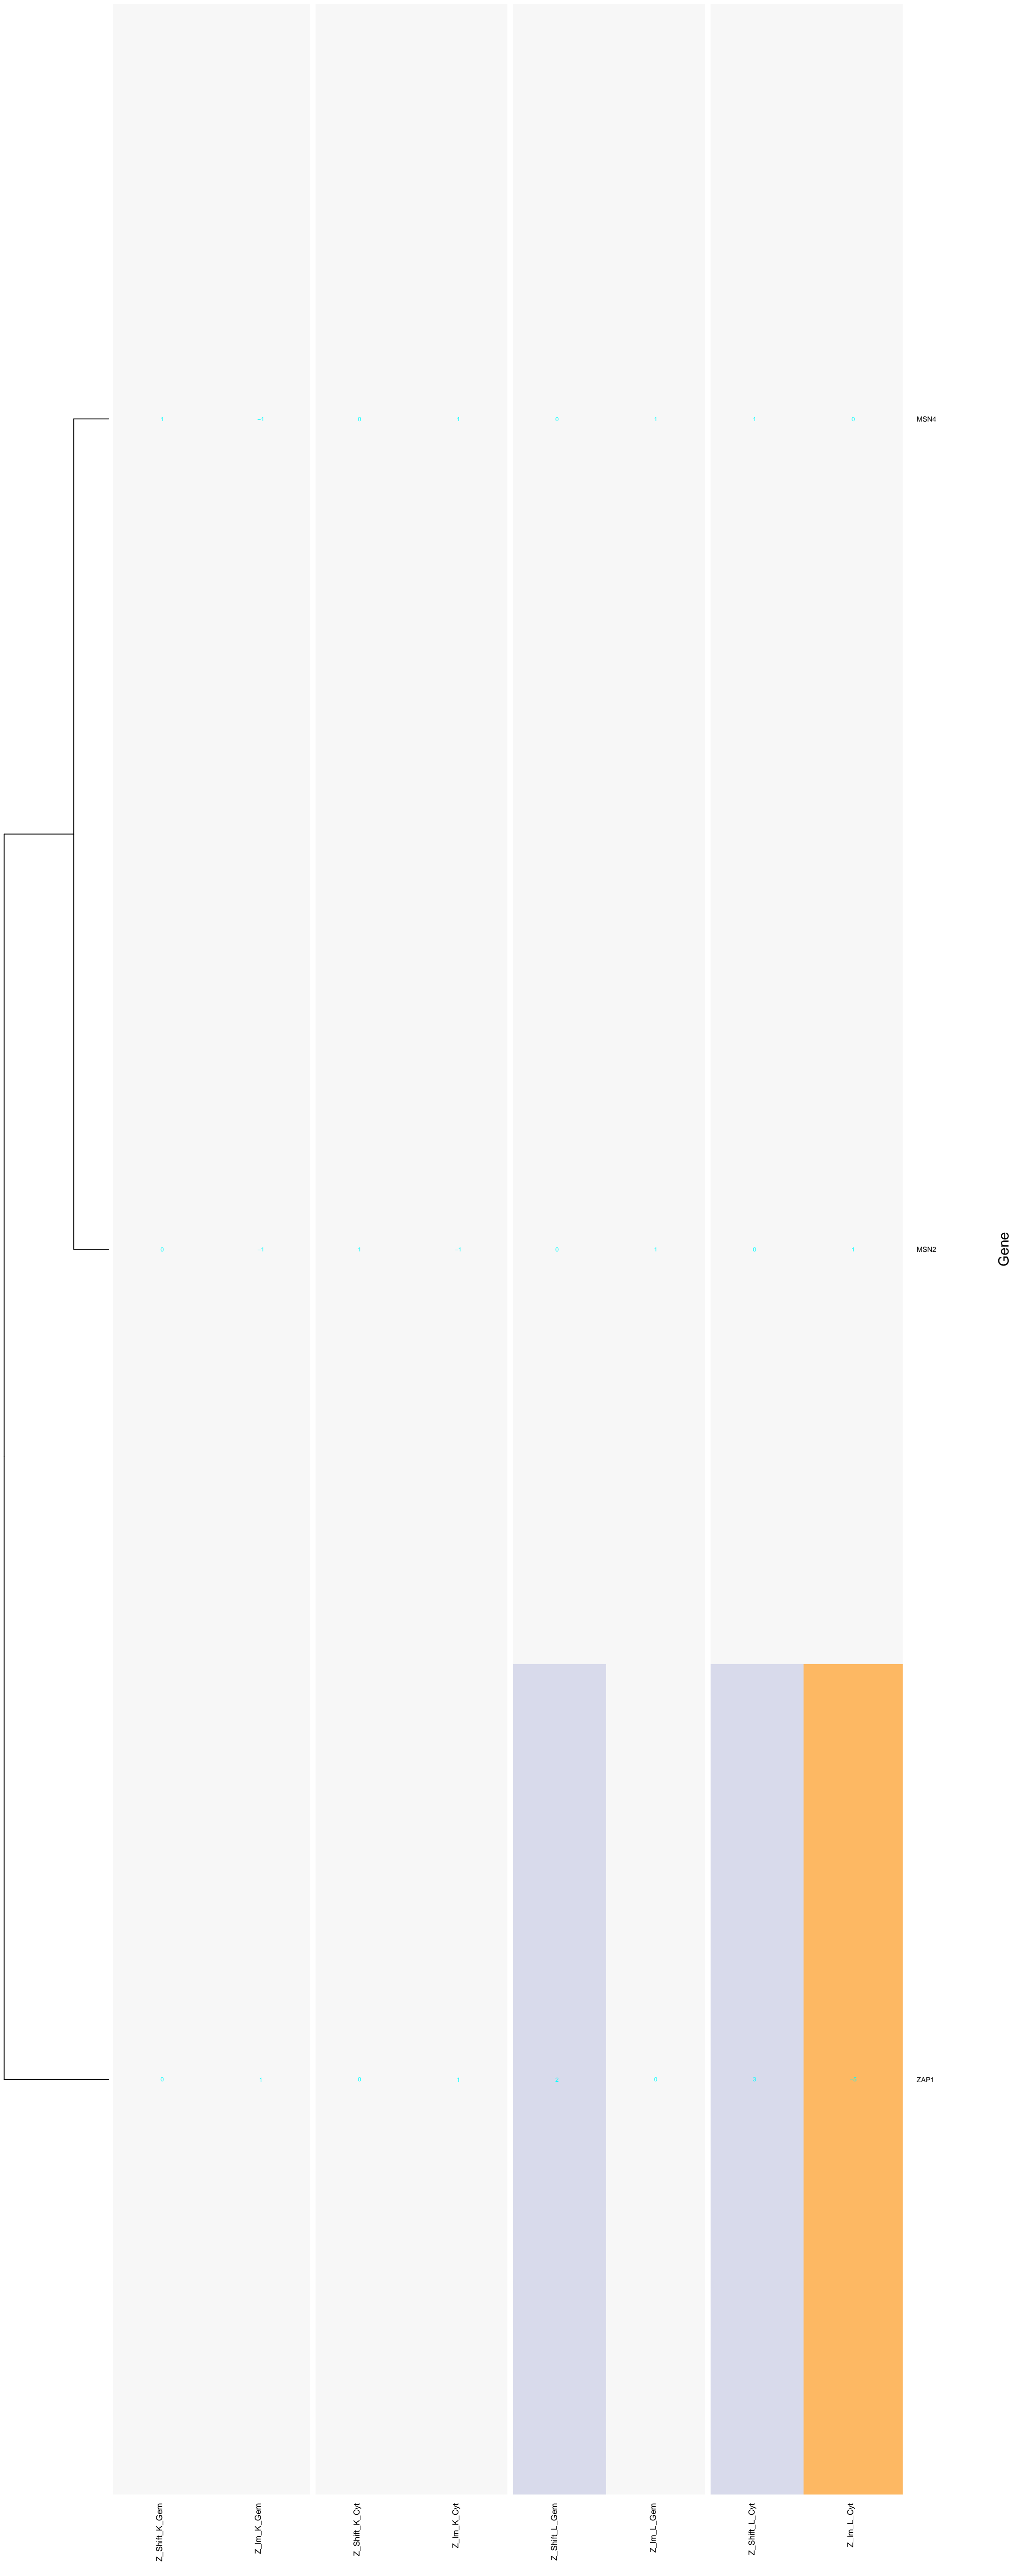

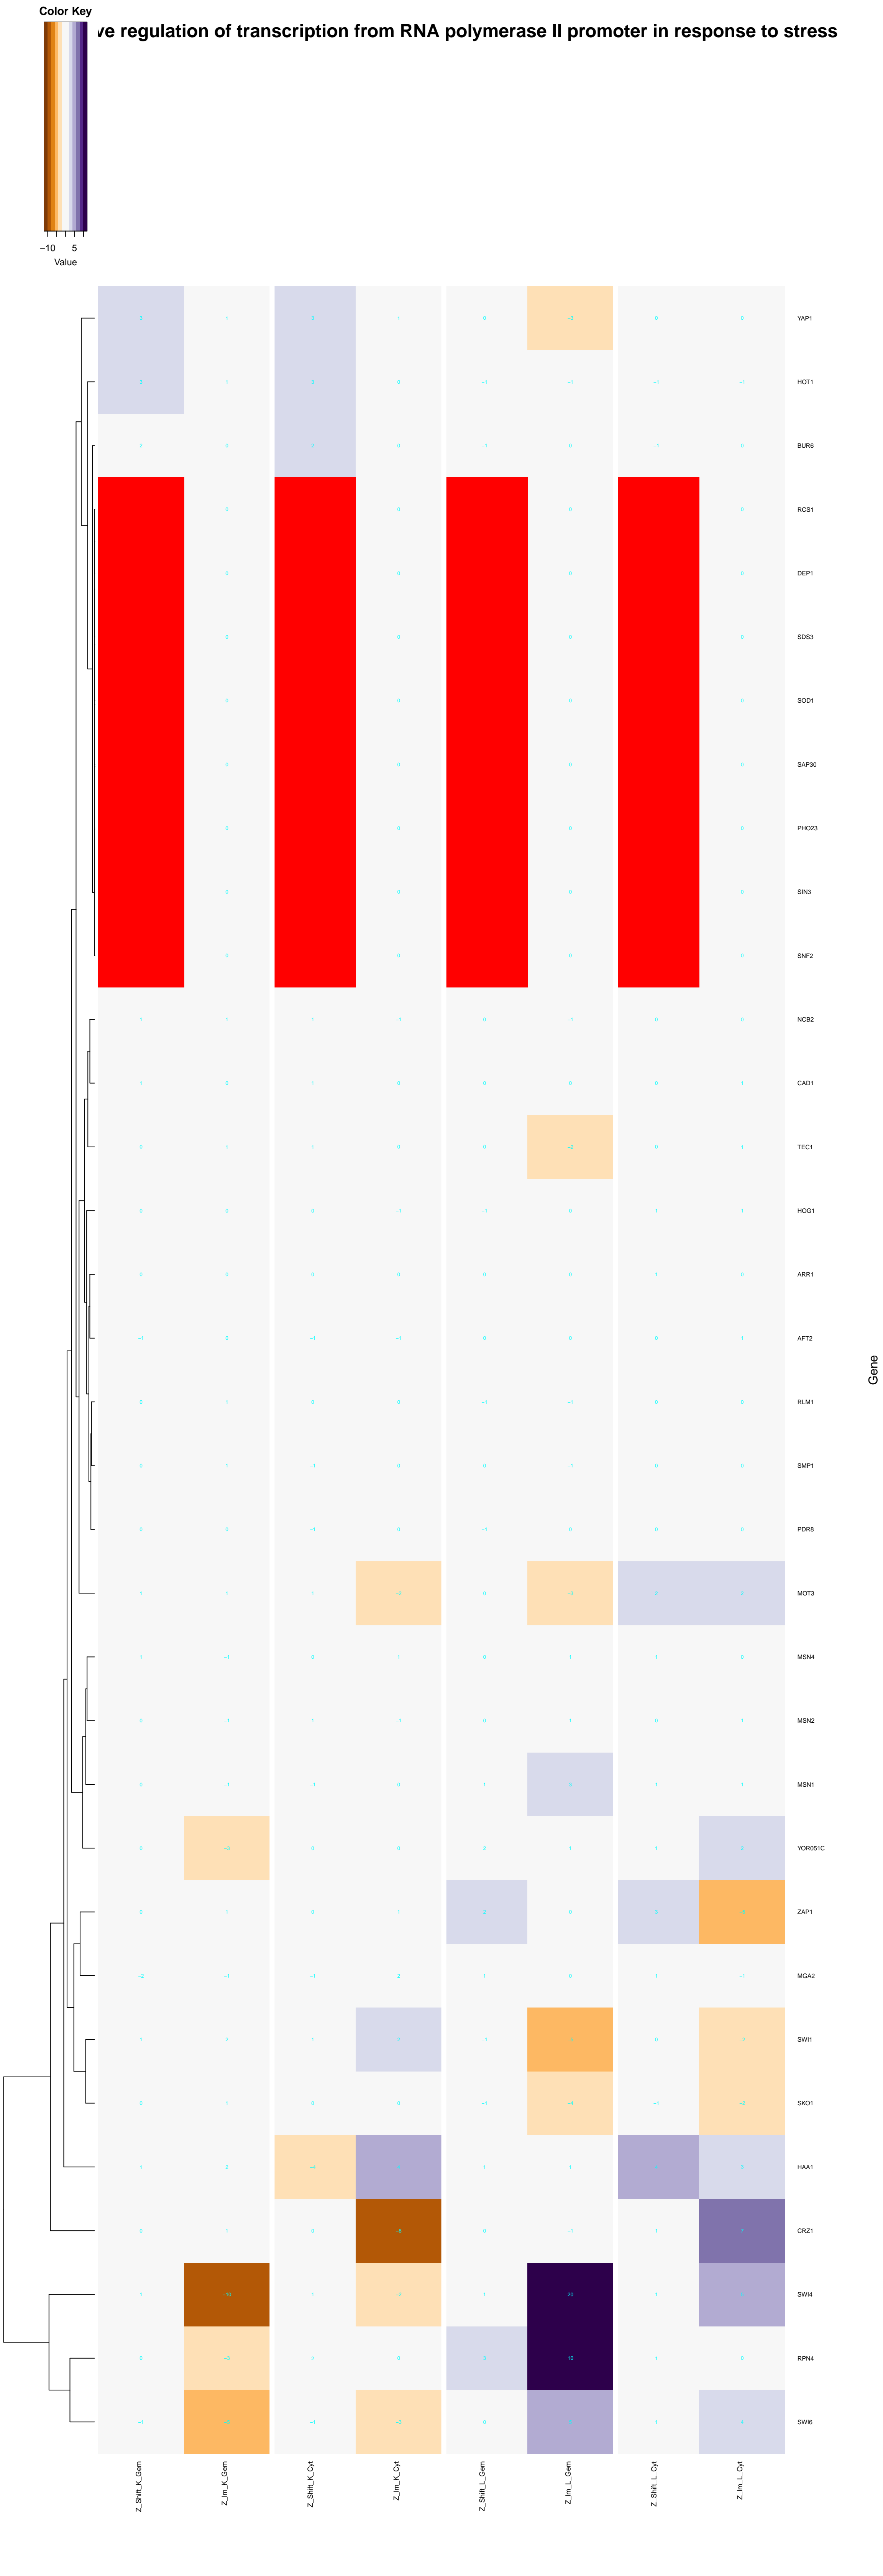

Color Key

tion of transcription from RNA polymerase II promoter in response to oxidative stress

-10 5

Value

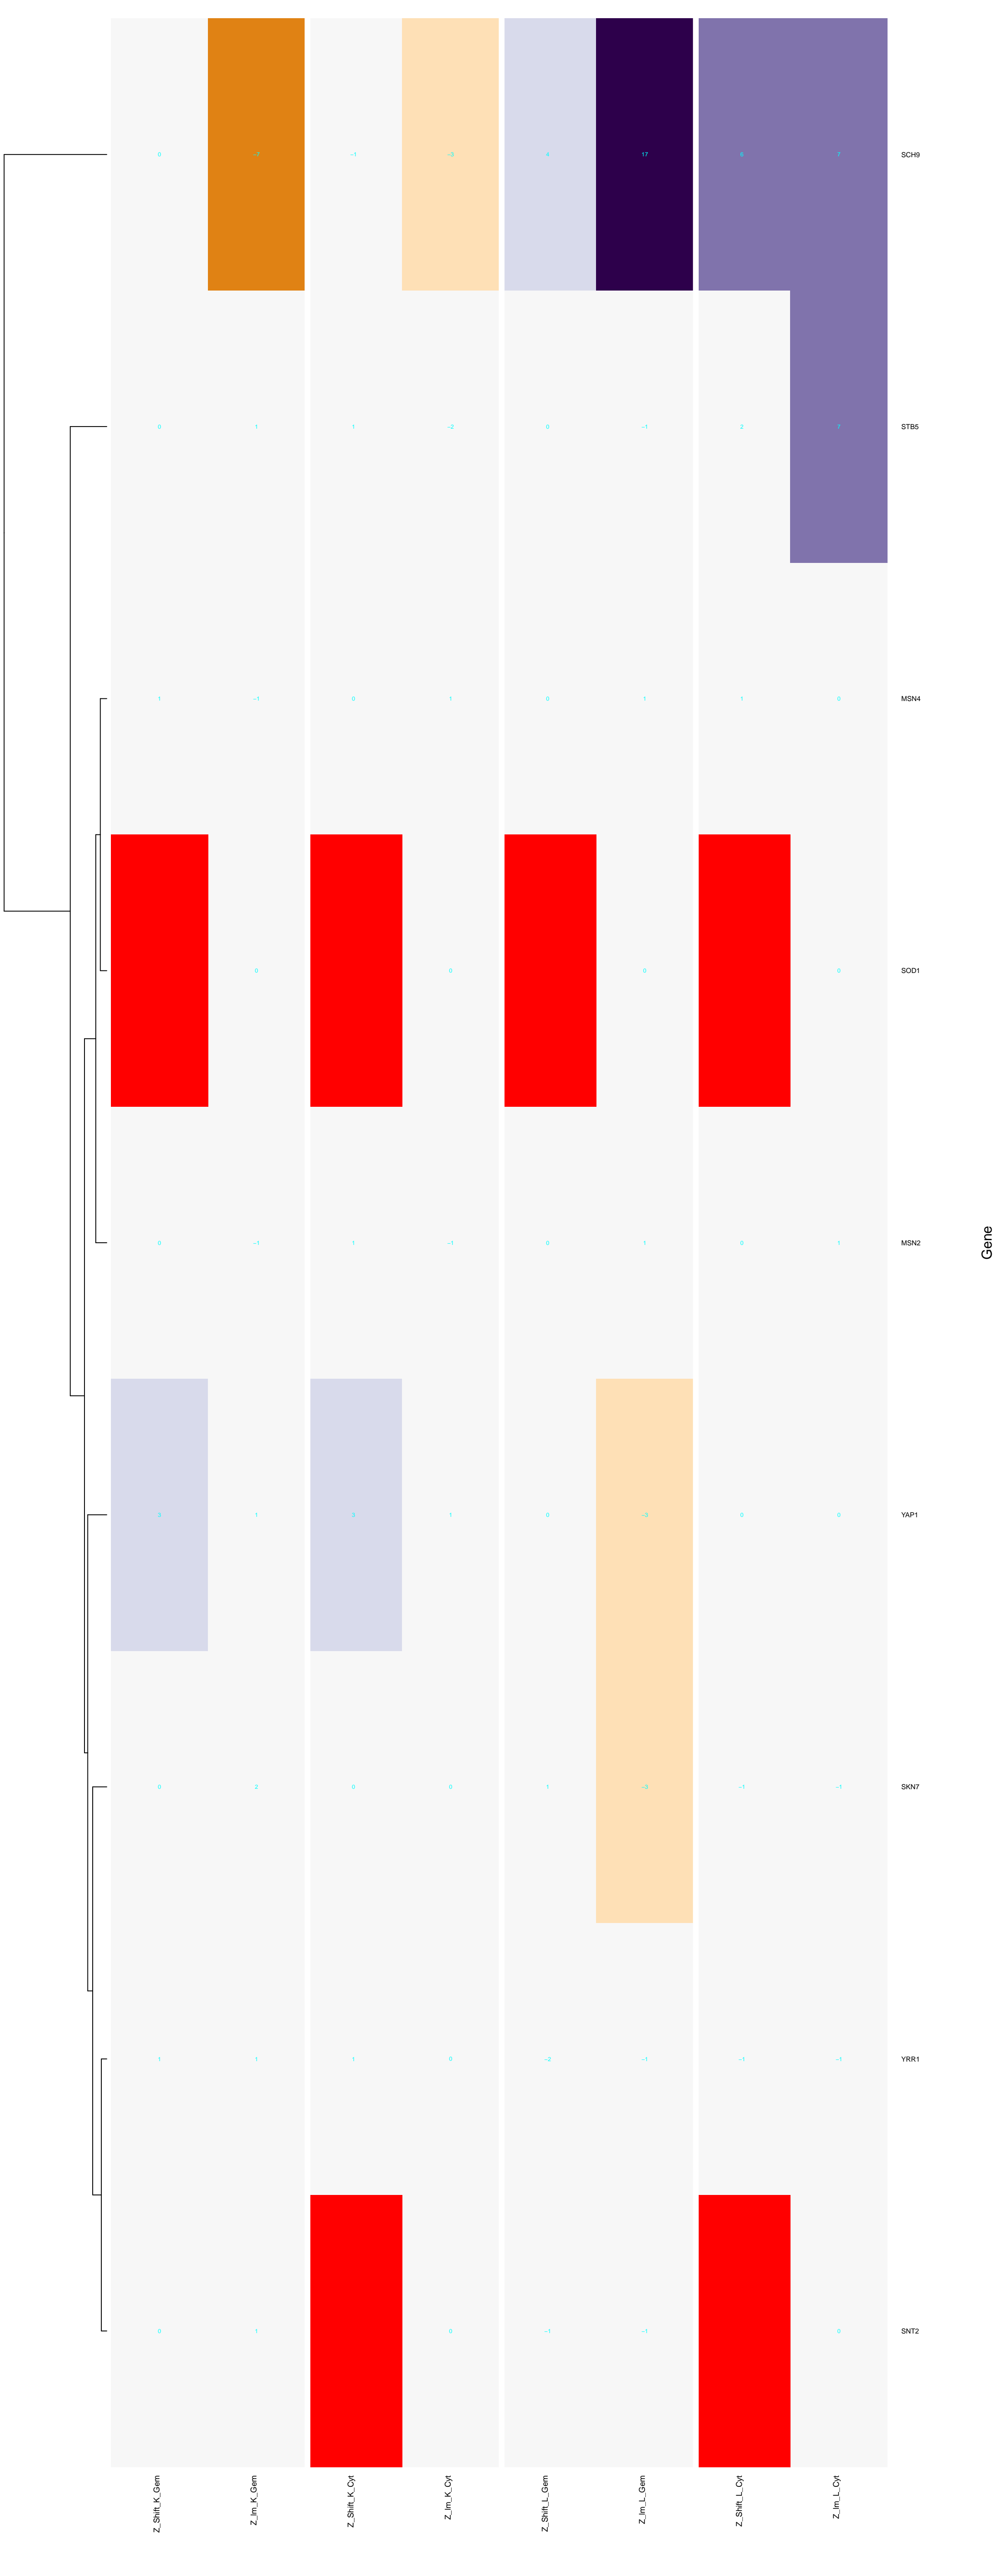

Color Key

Value

10 5

tion of transcription from RNA polymerase II promoter in response to osmotic stress

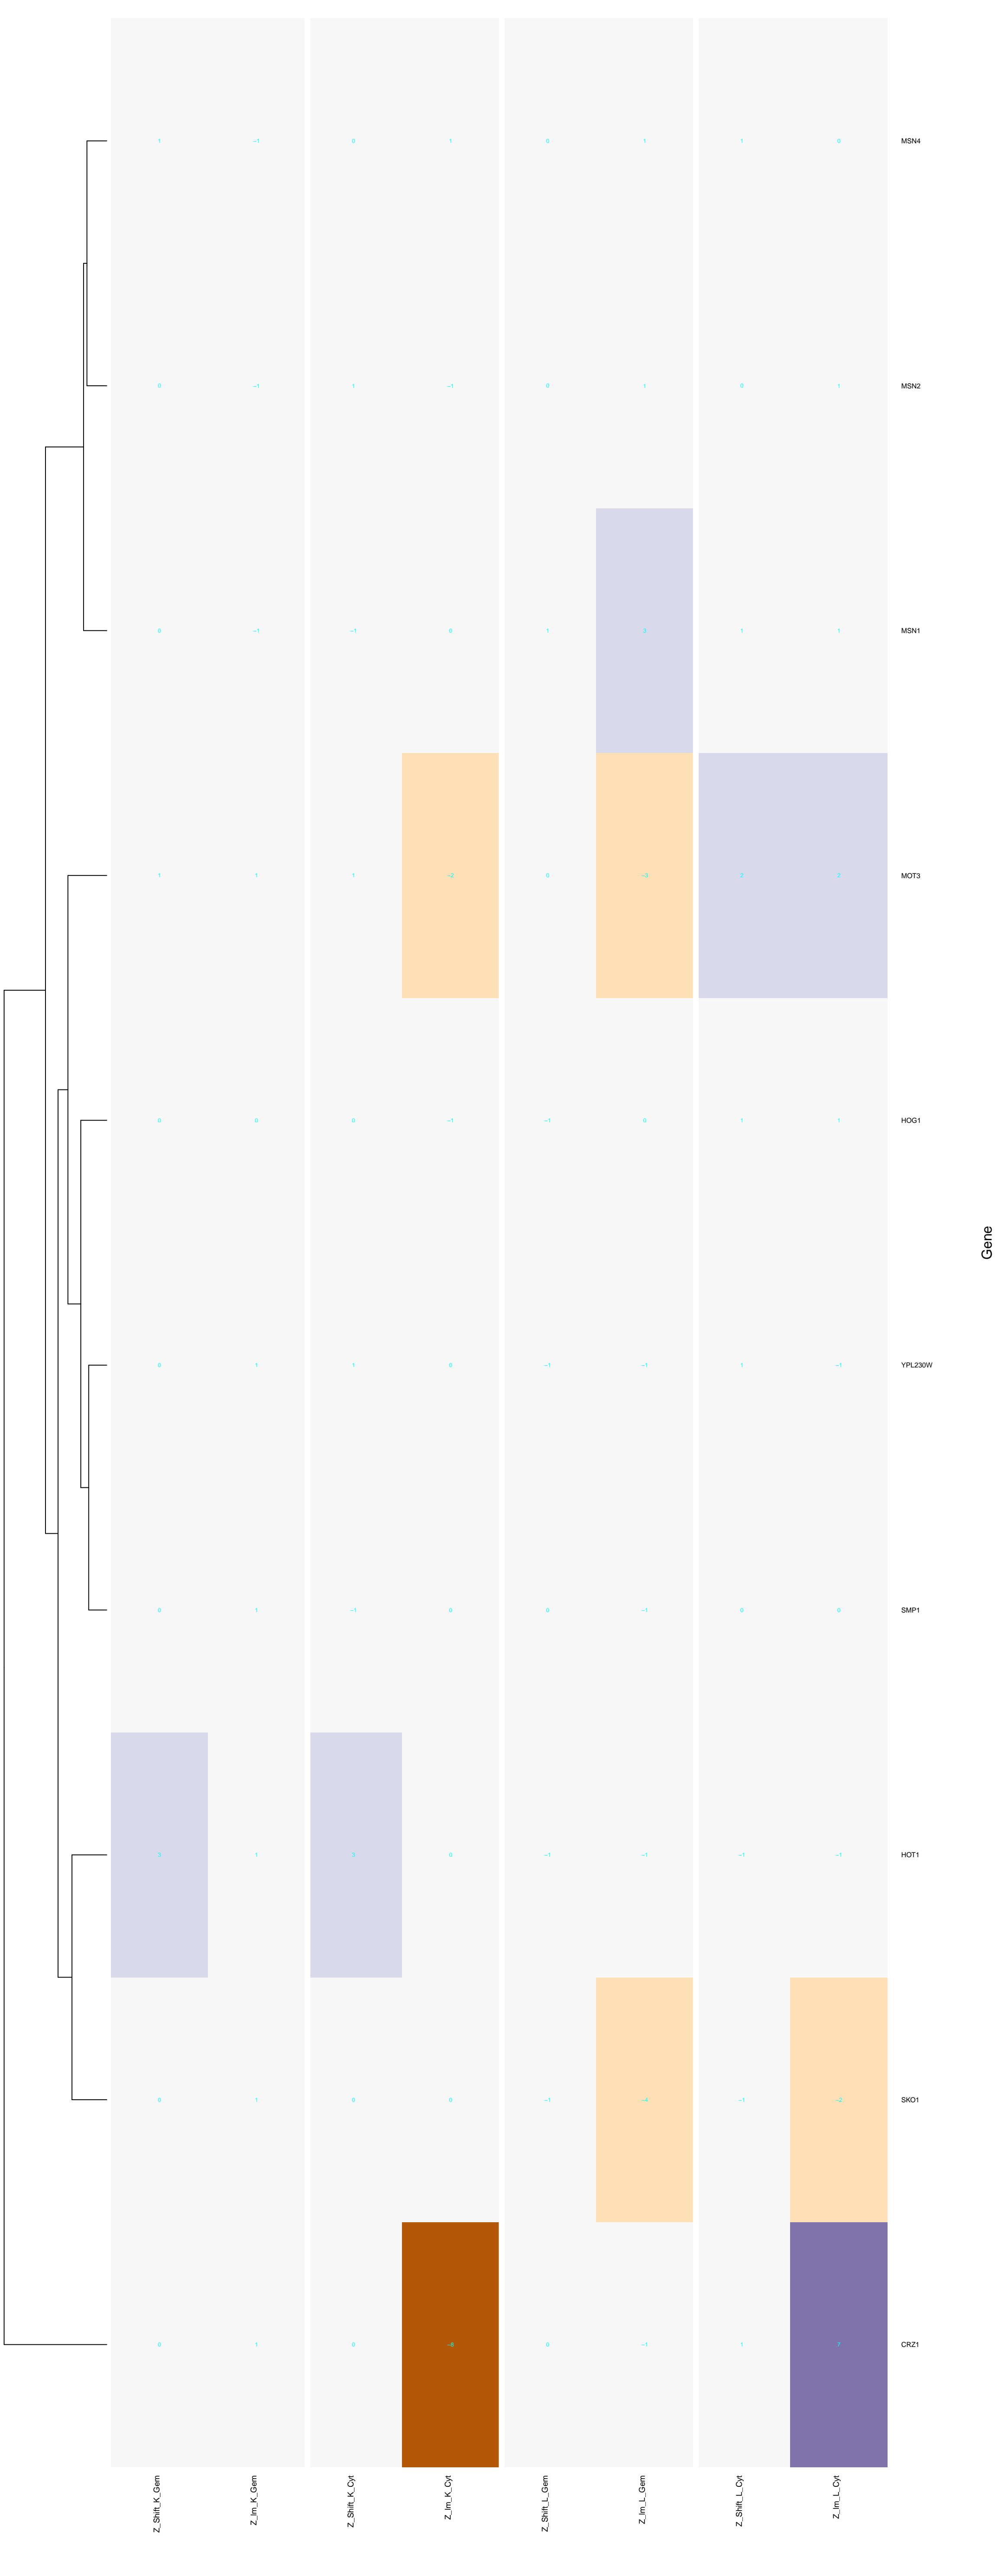

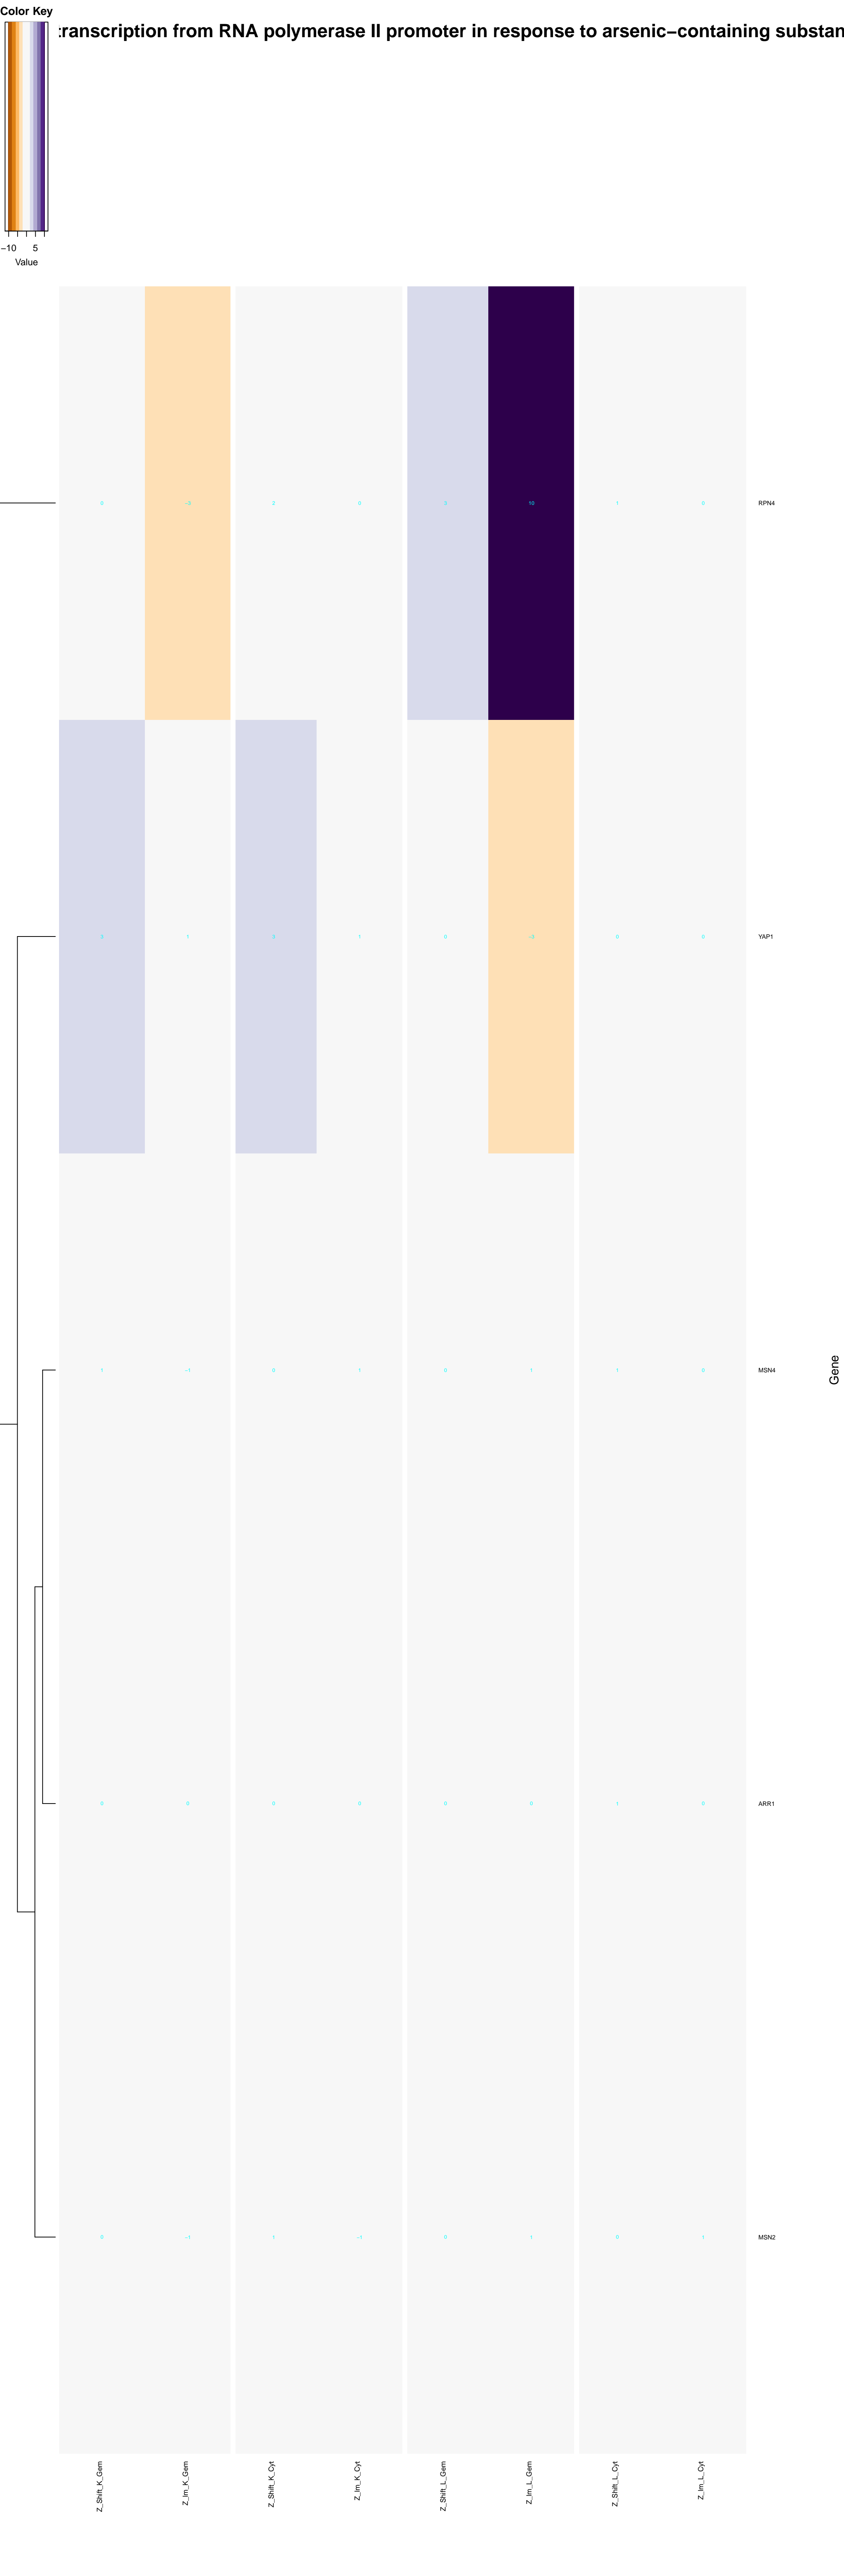

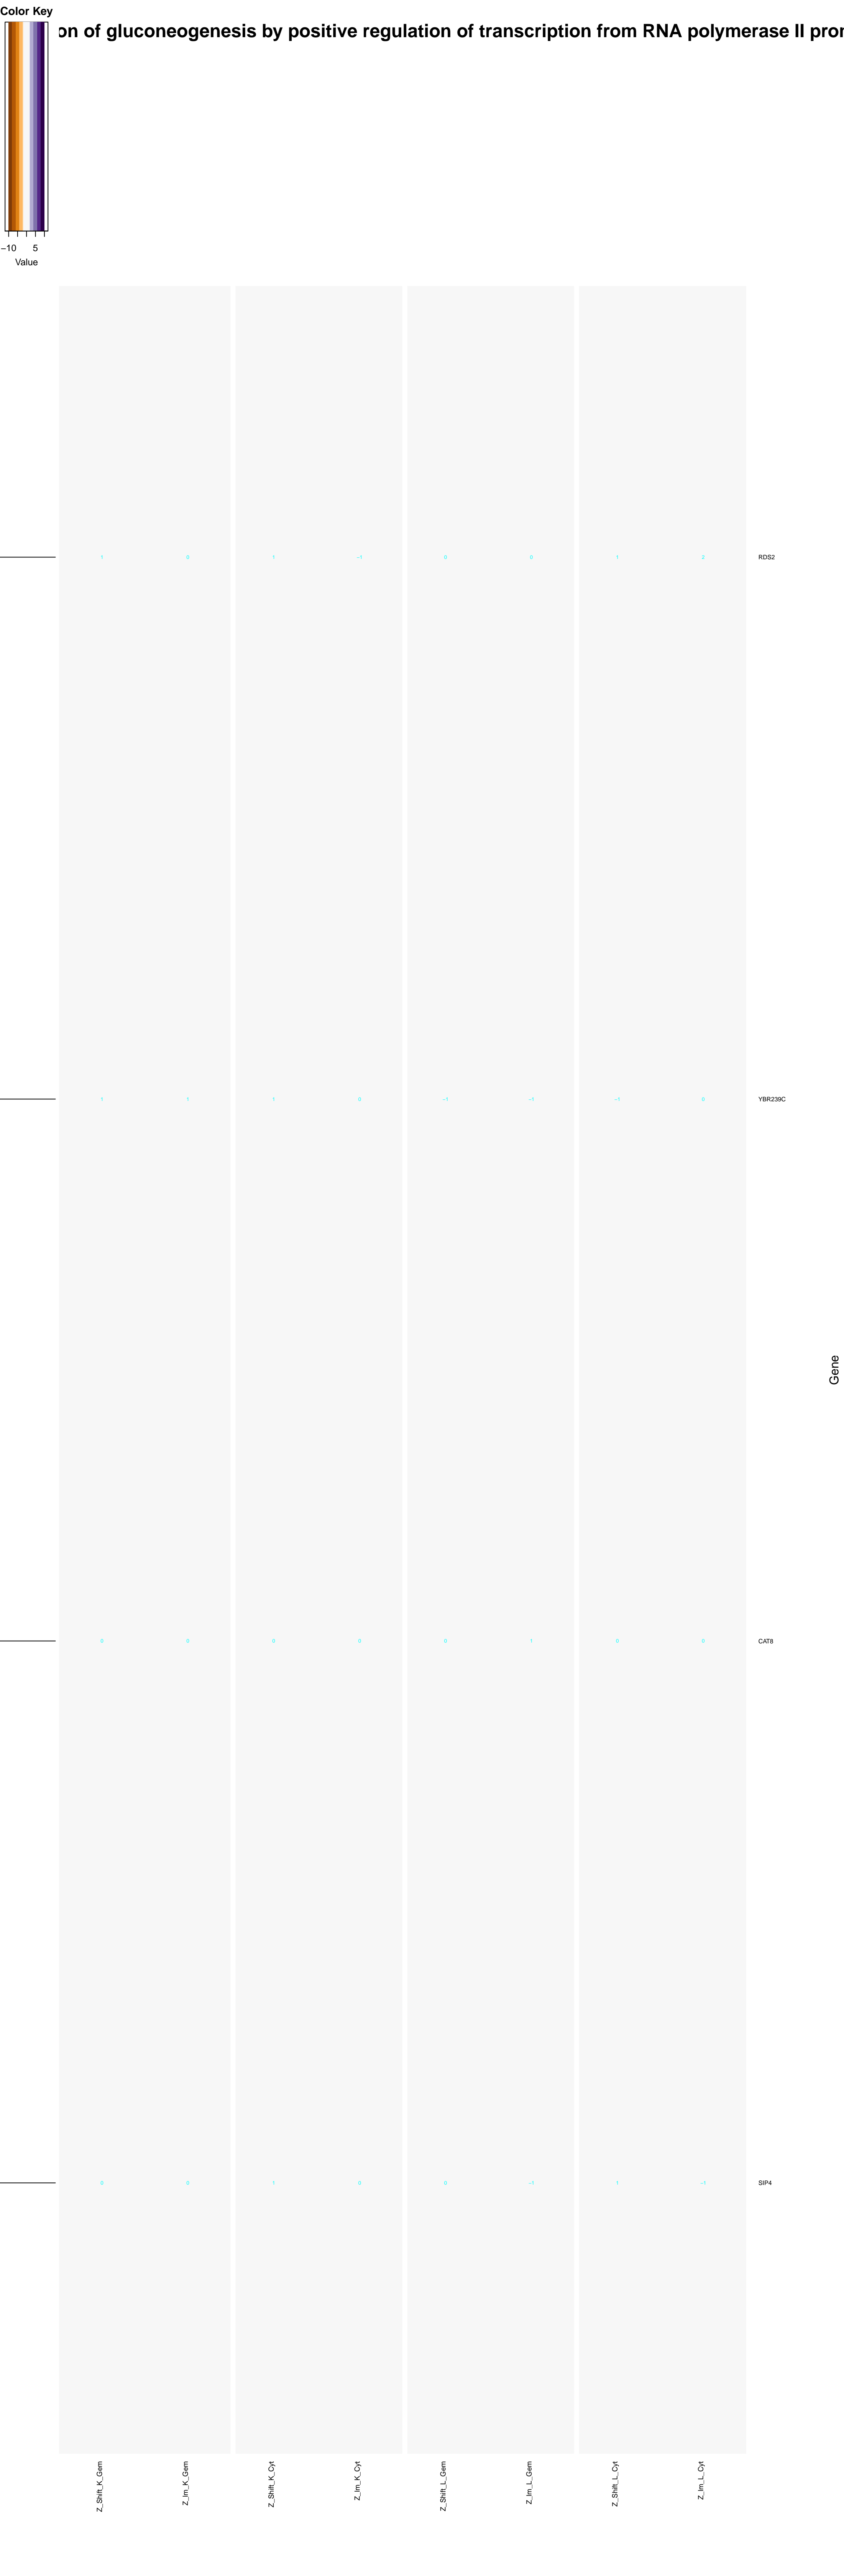



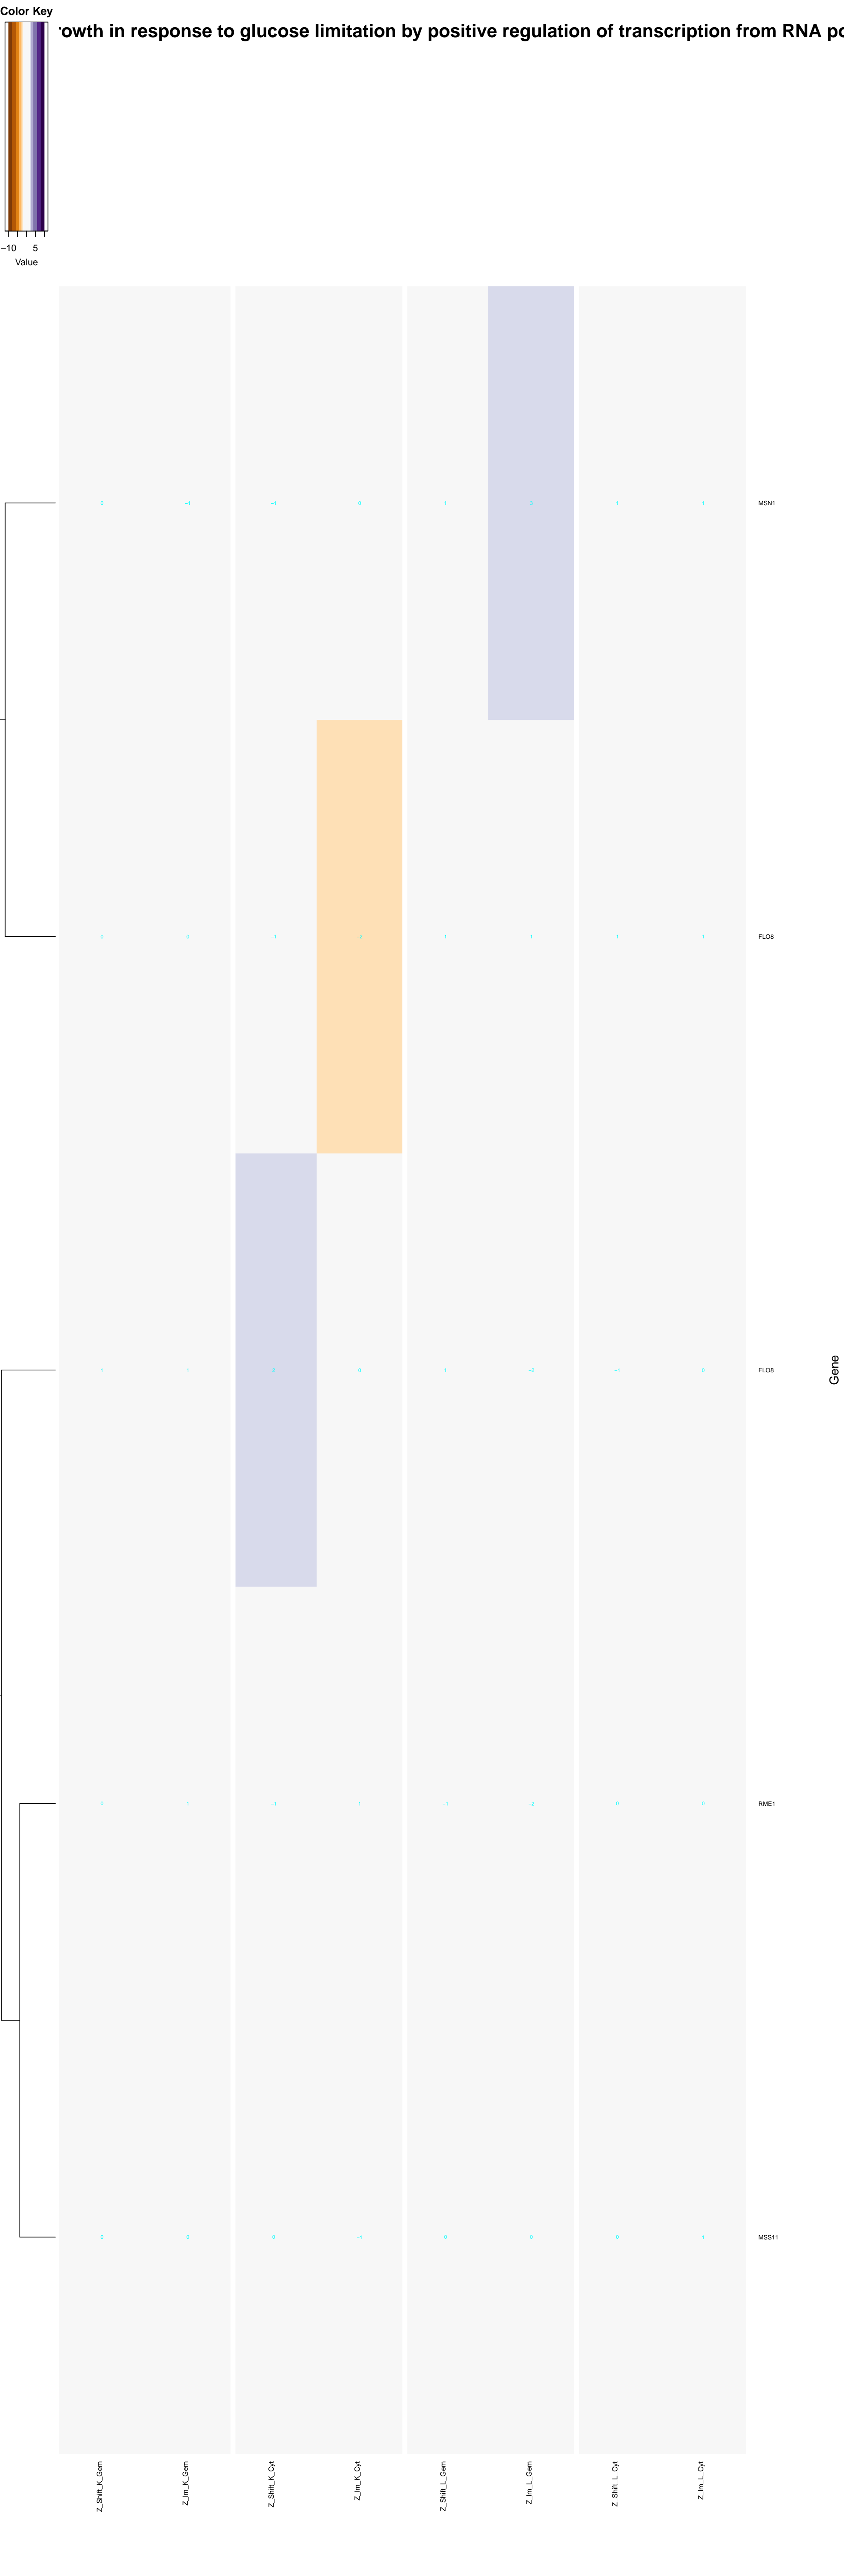



positive regulation of transcription initiation from RNA polymerase II promoter





e regulation of ribosomal protein gene transcription from RNA polymerase II promoter

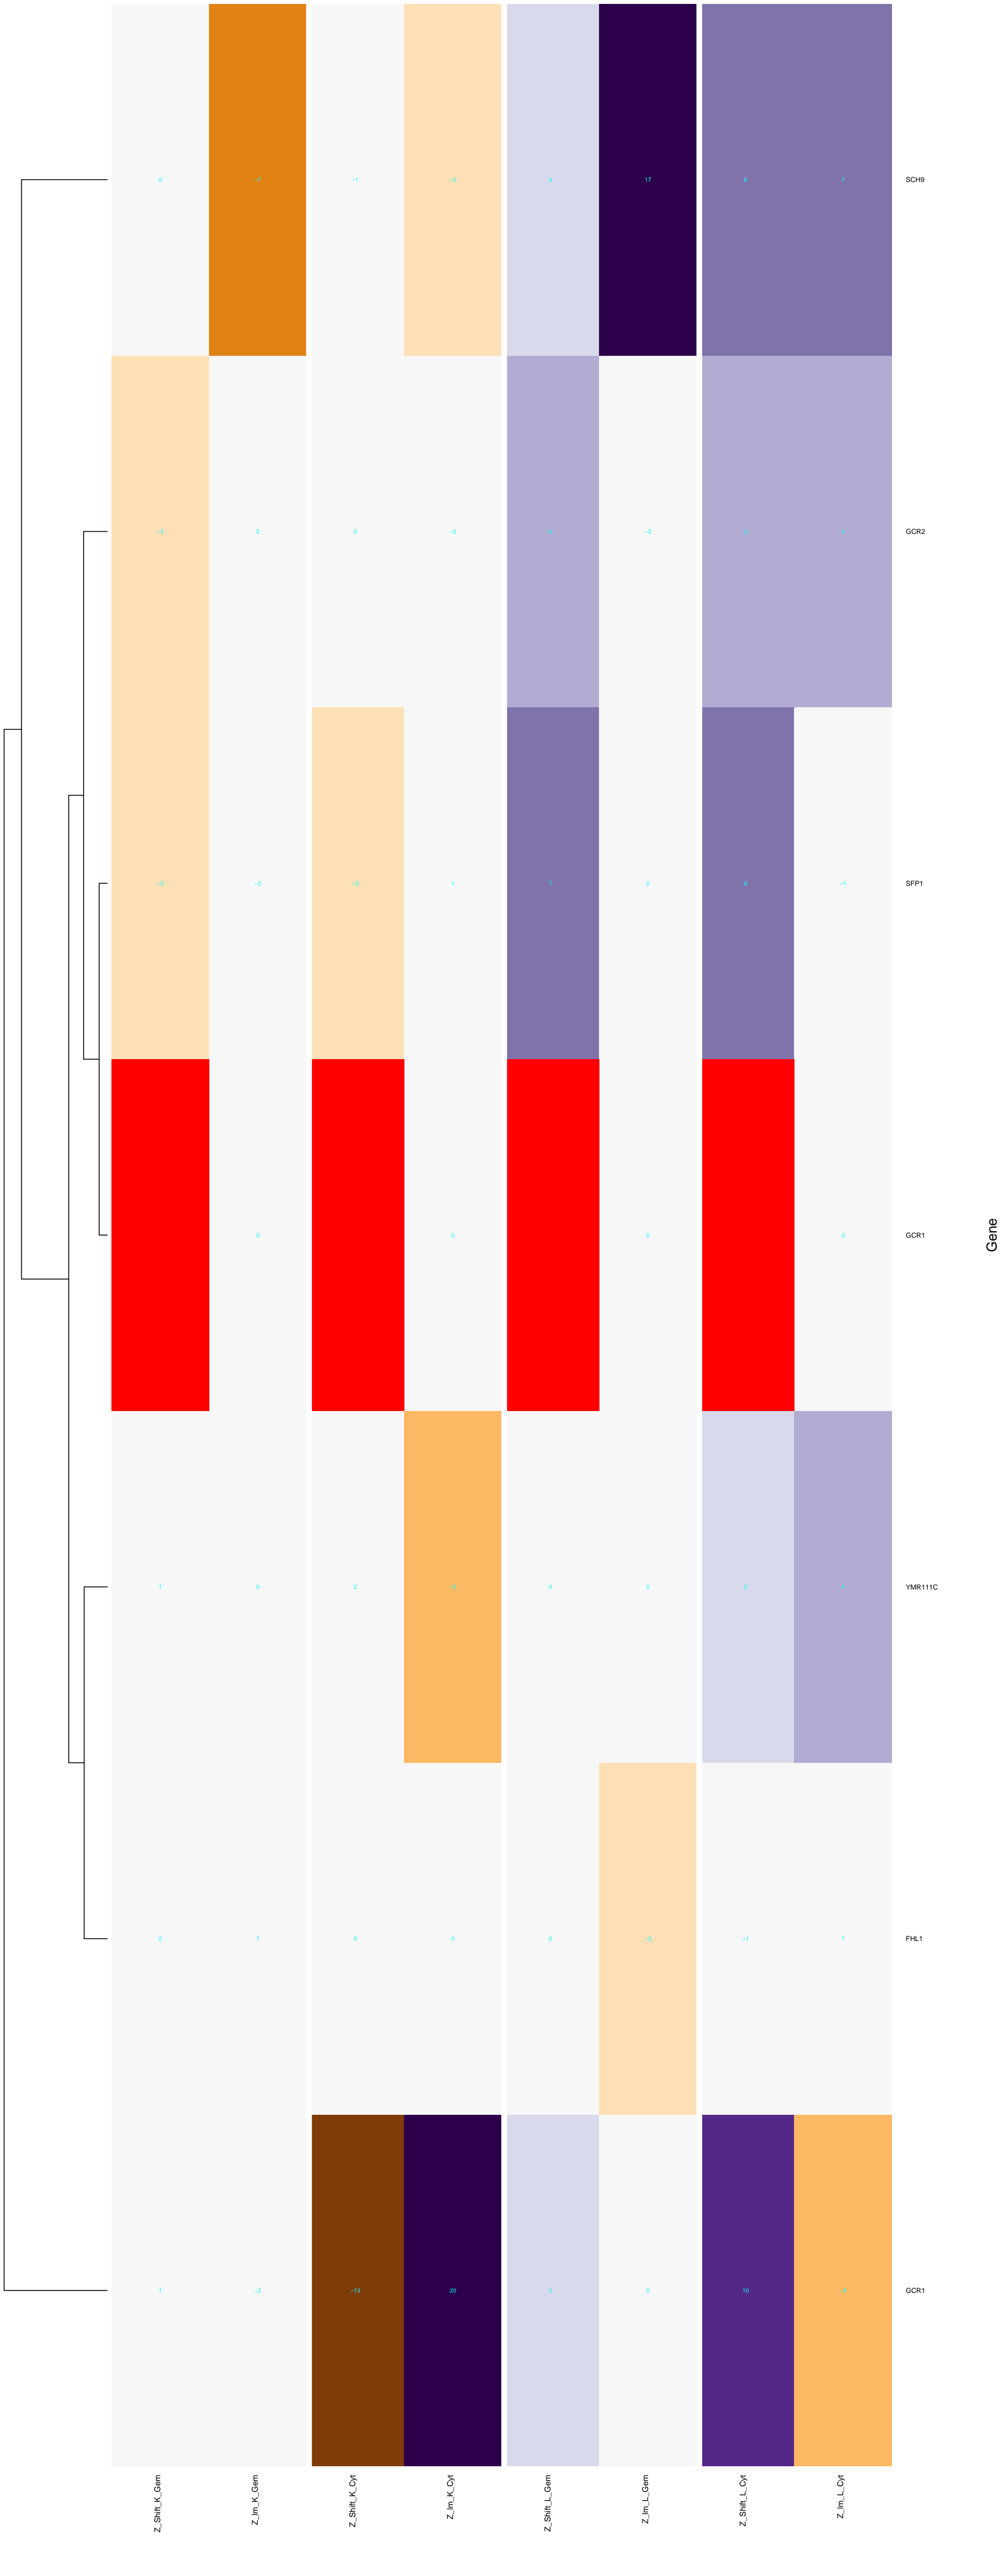

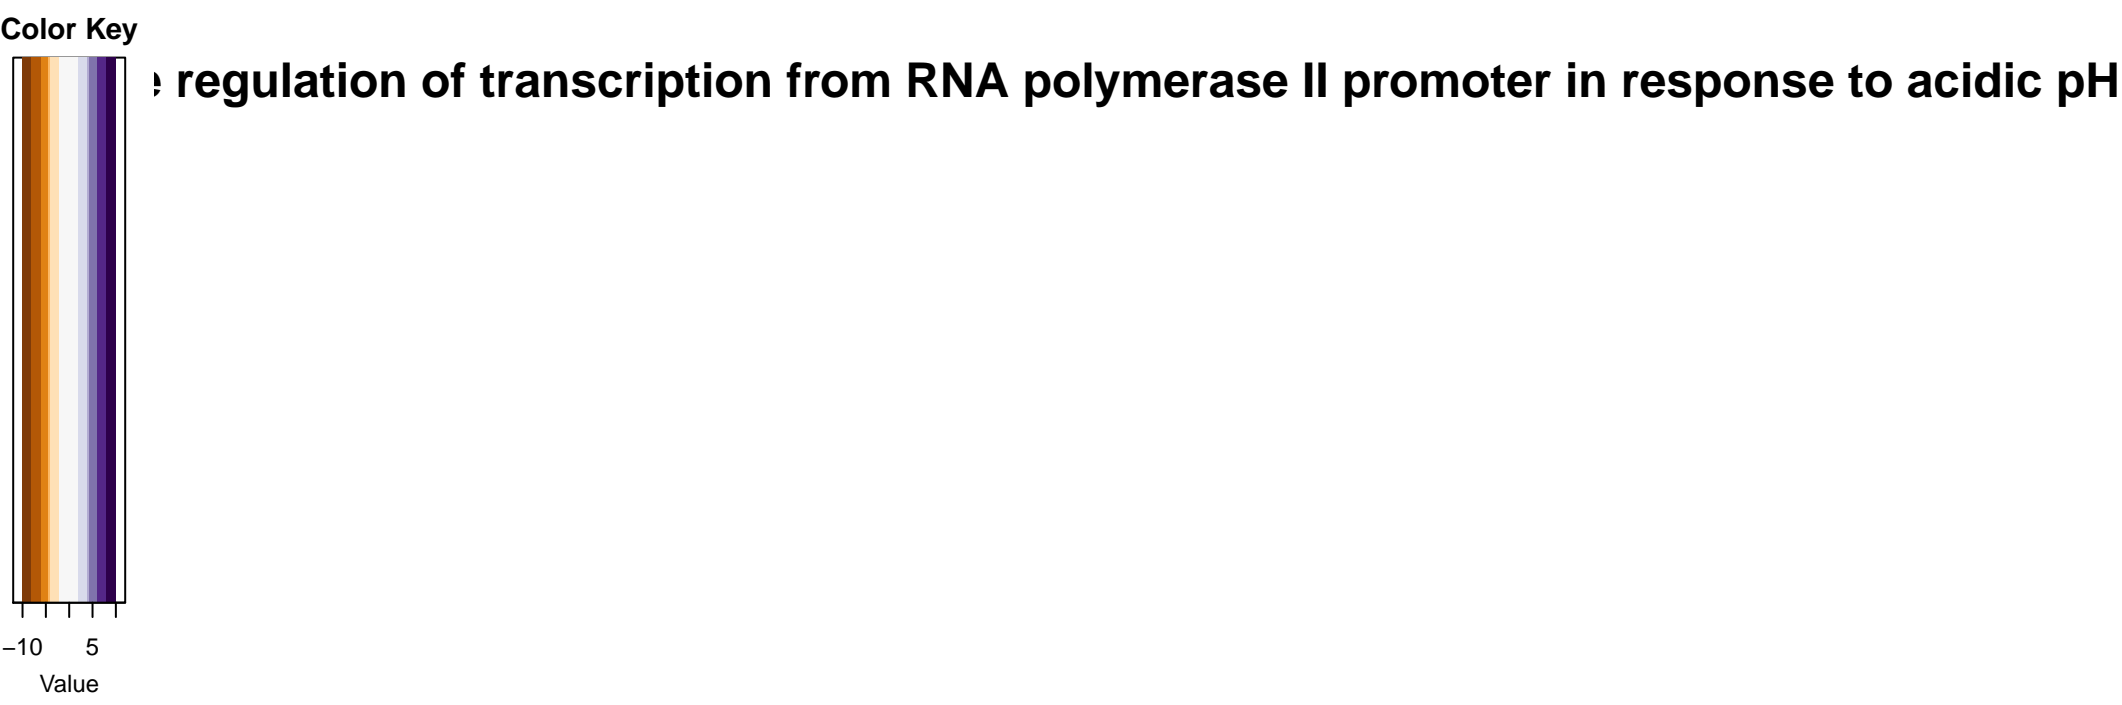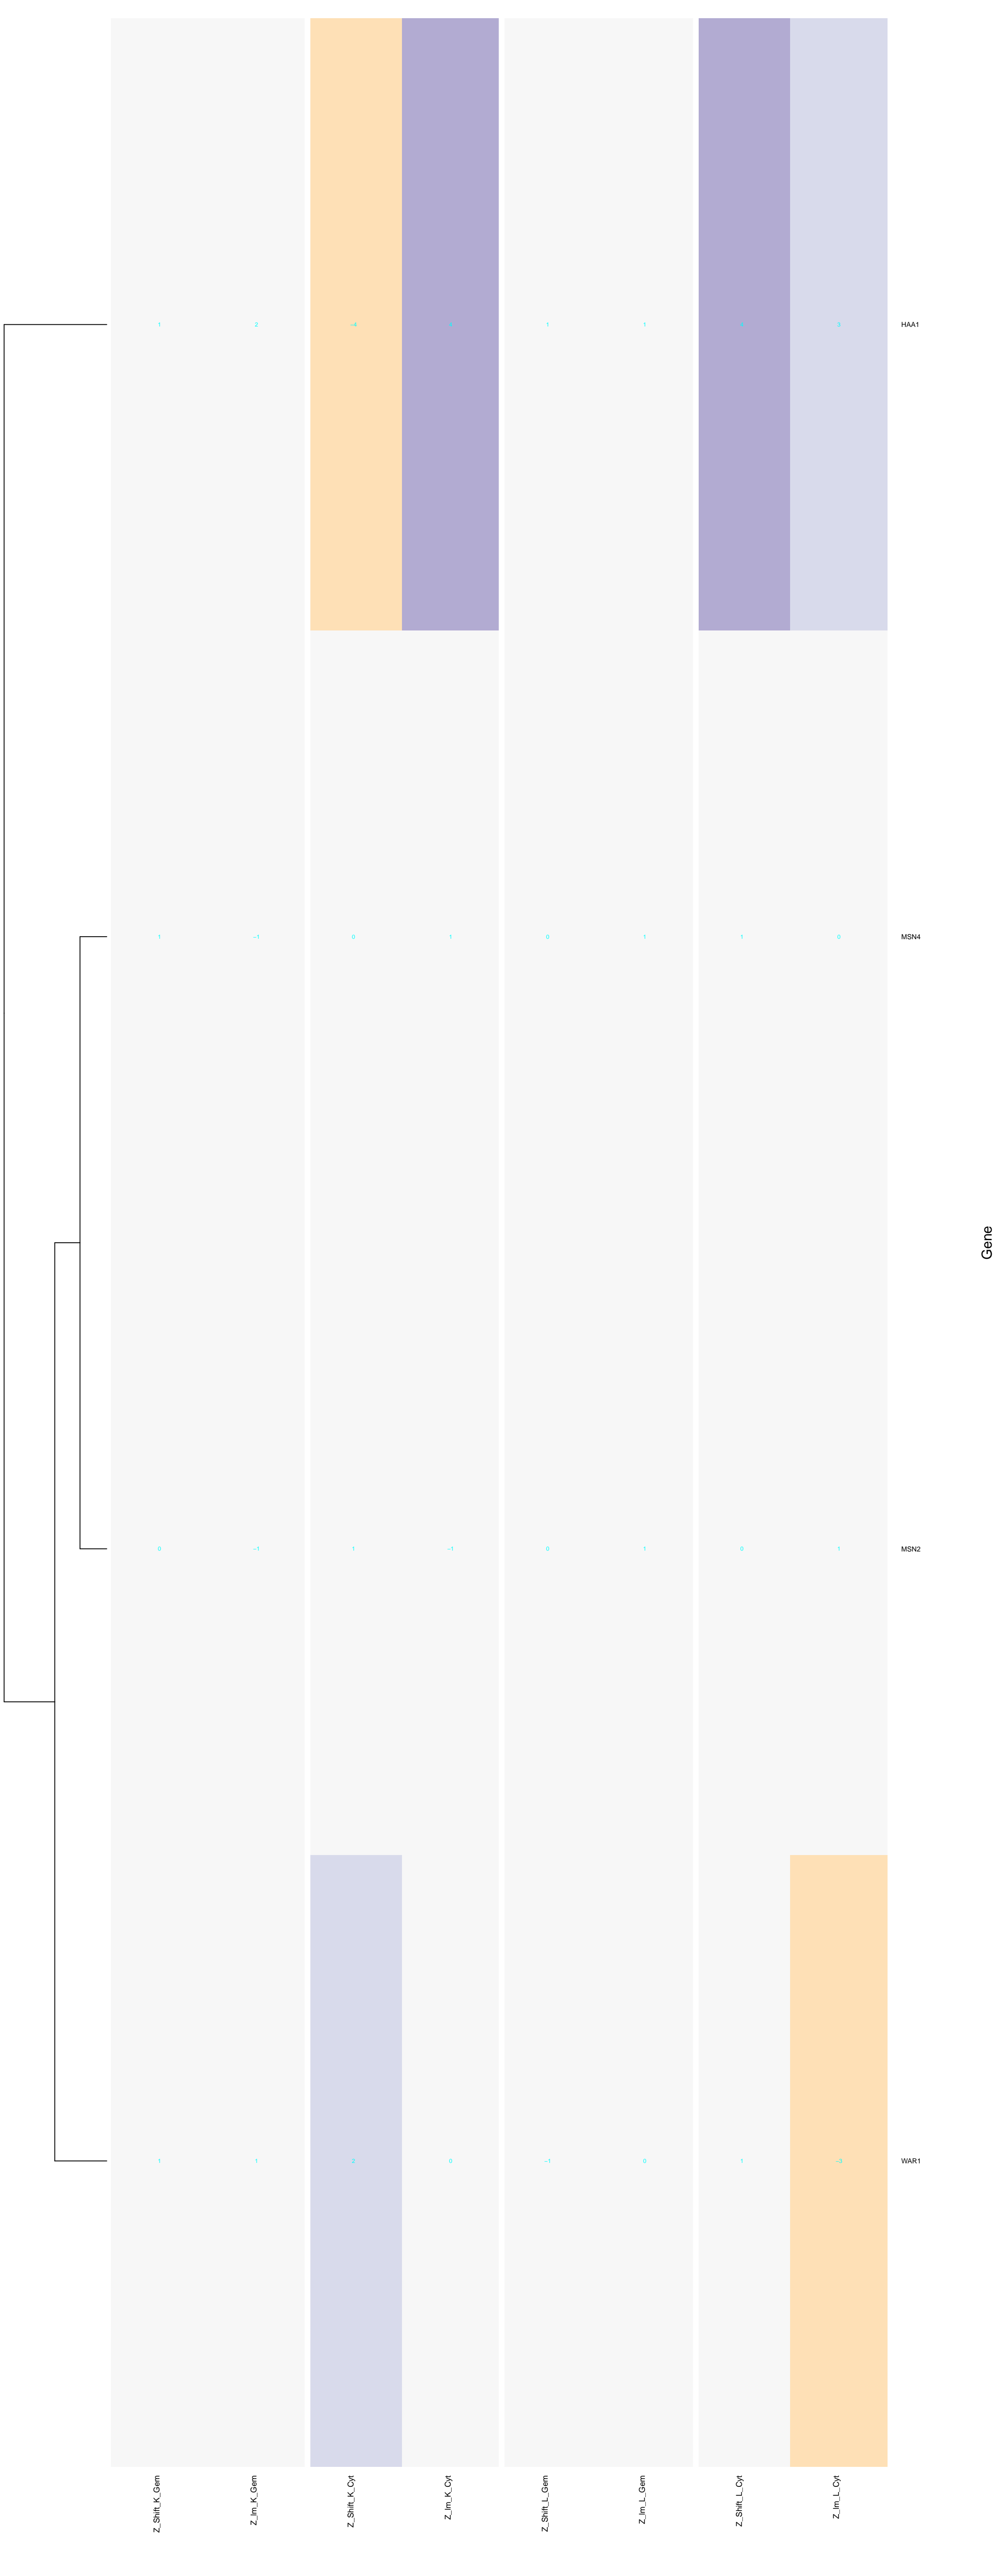

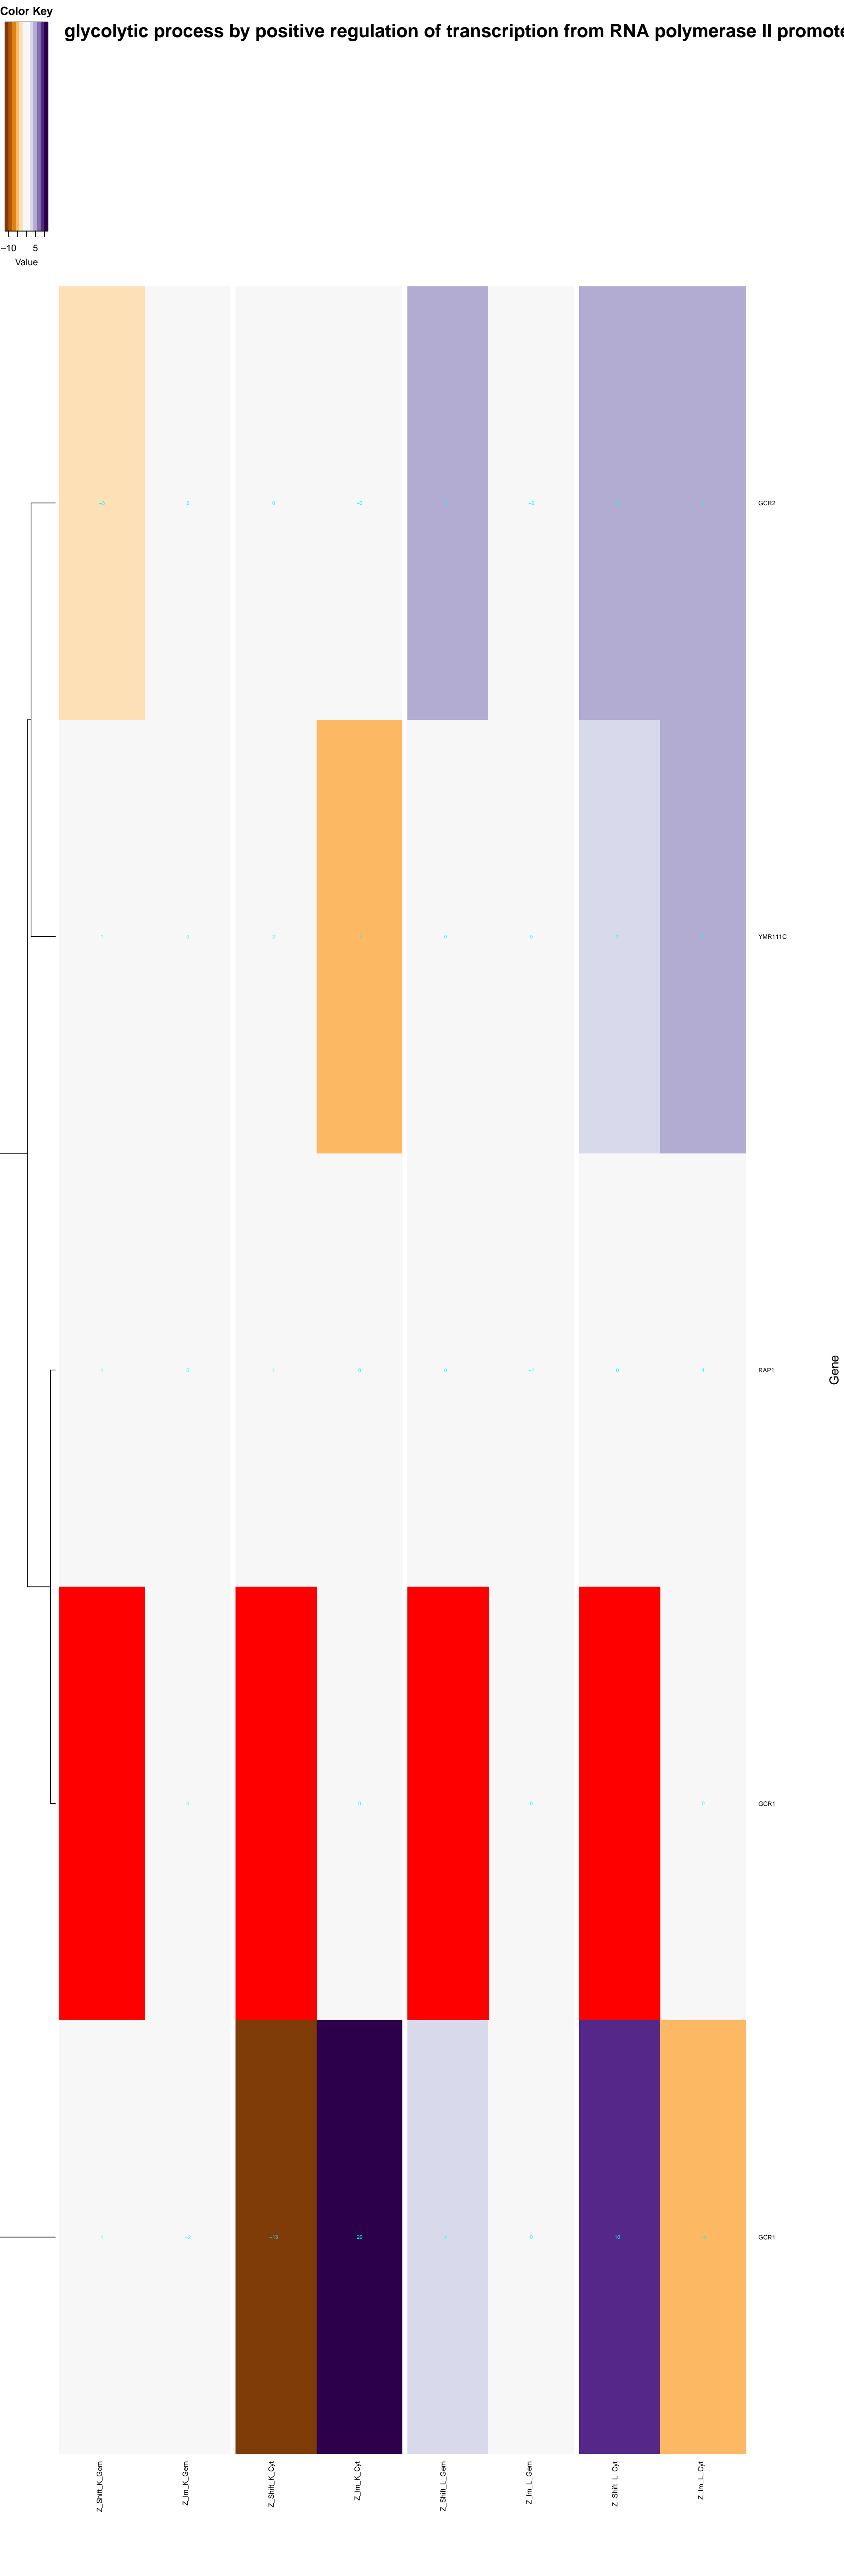

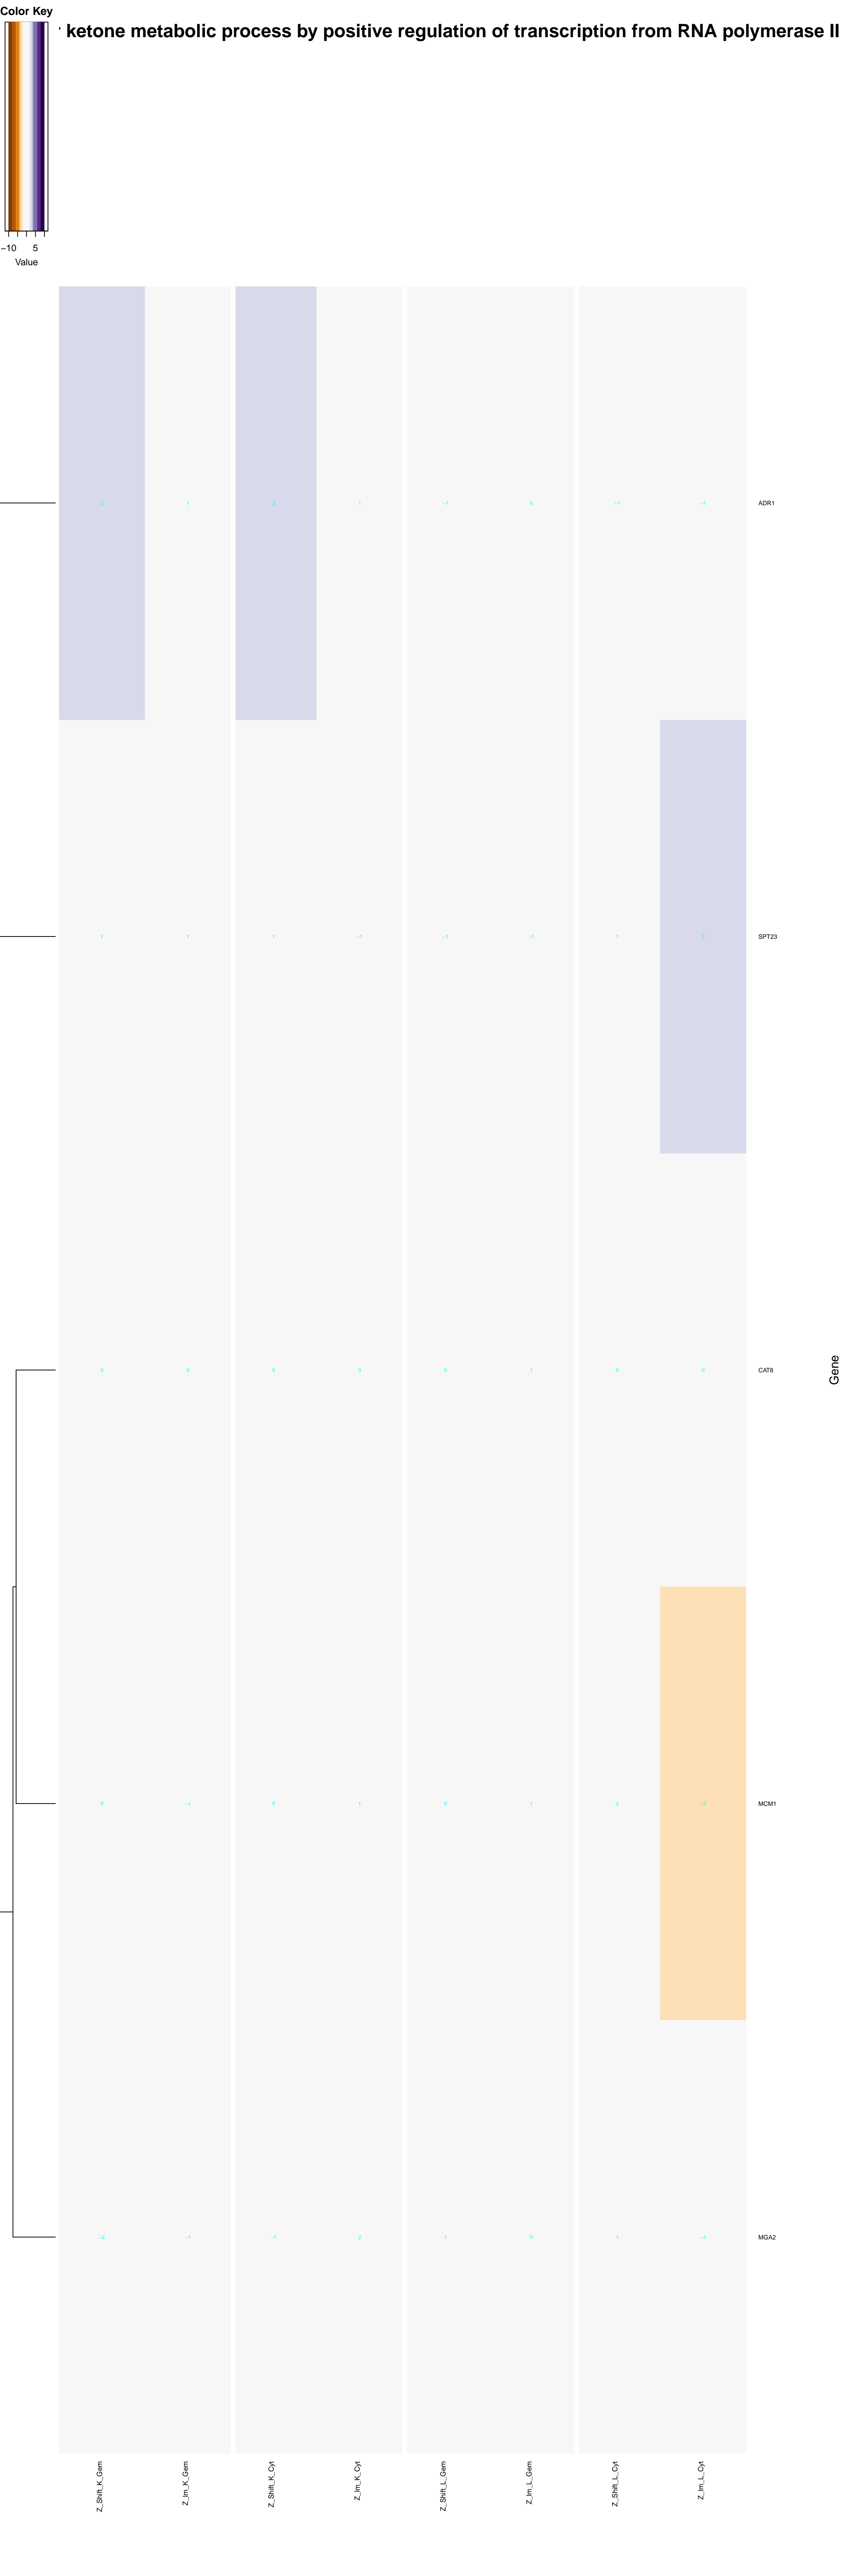

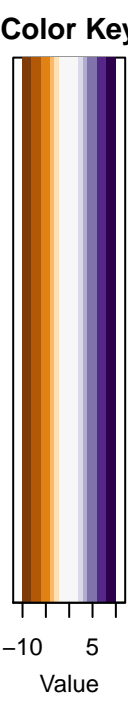

of lipid transport by positive regulation of transcription from RNA polymerase II promoter

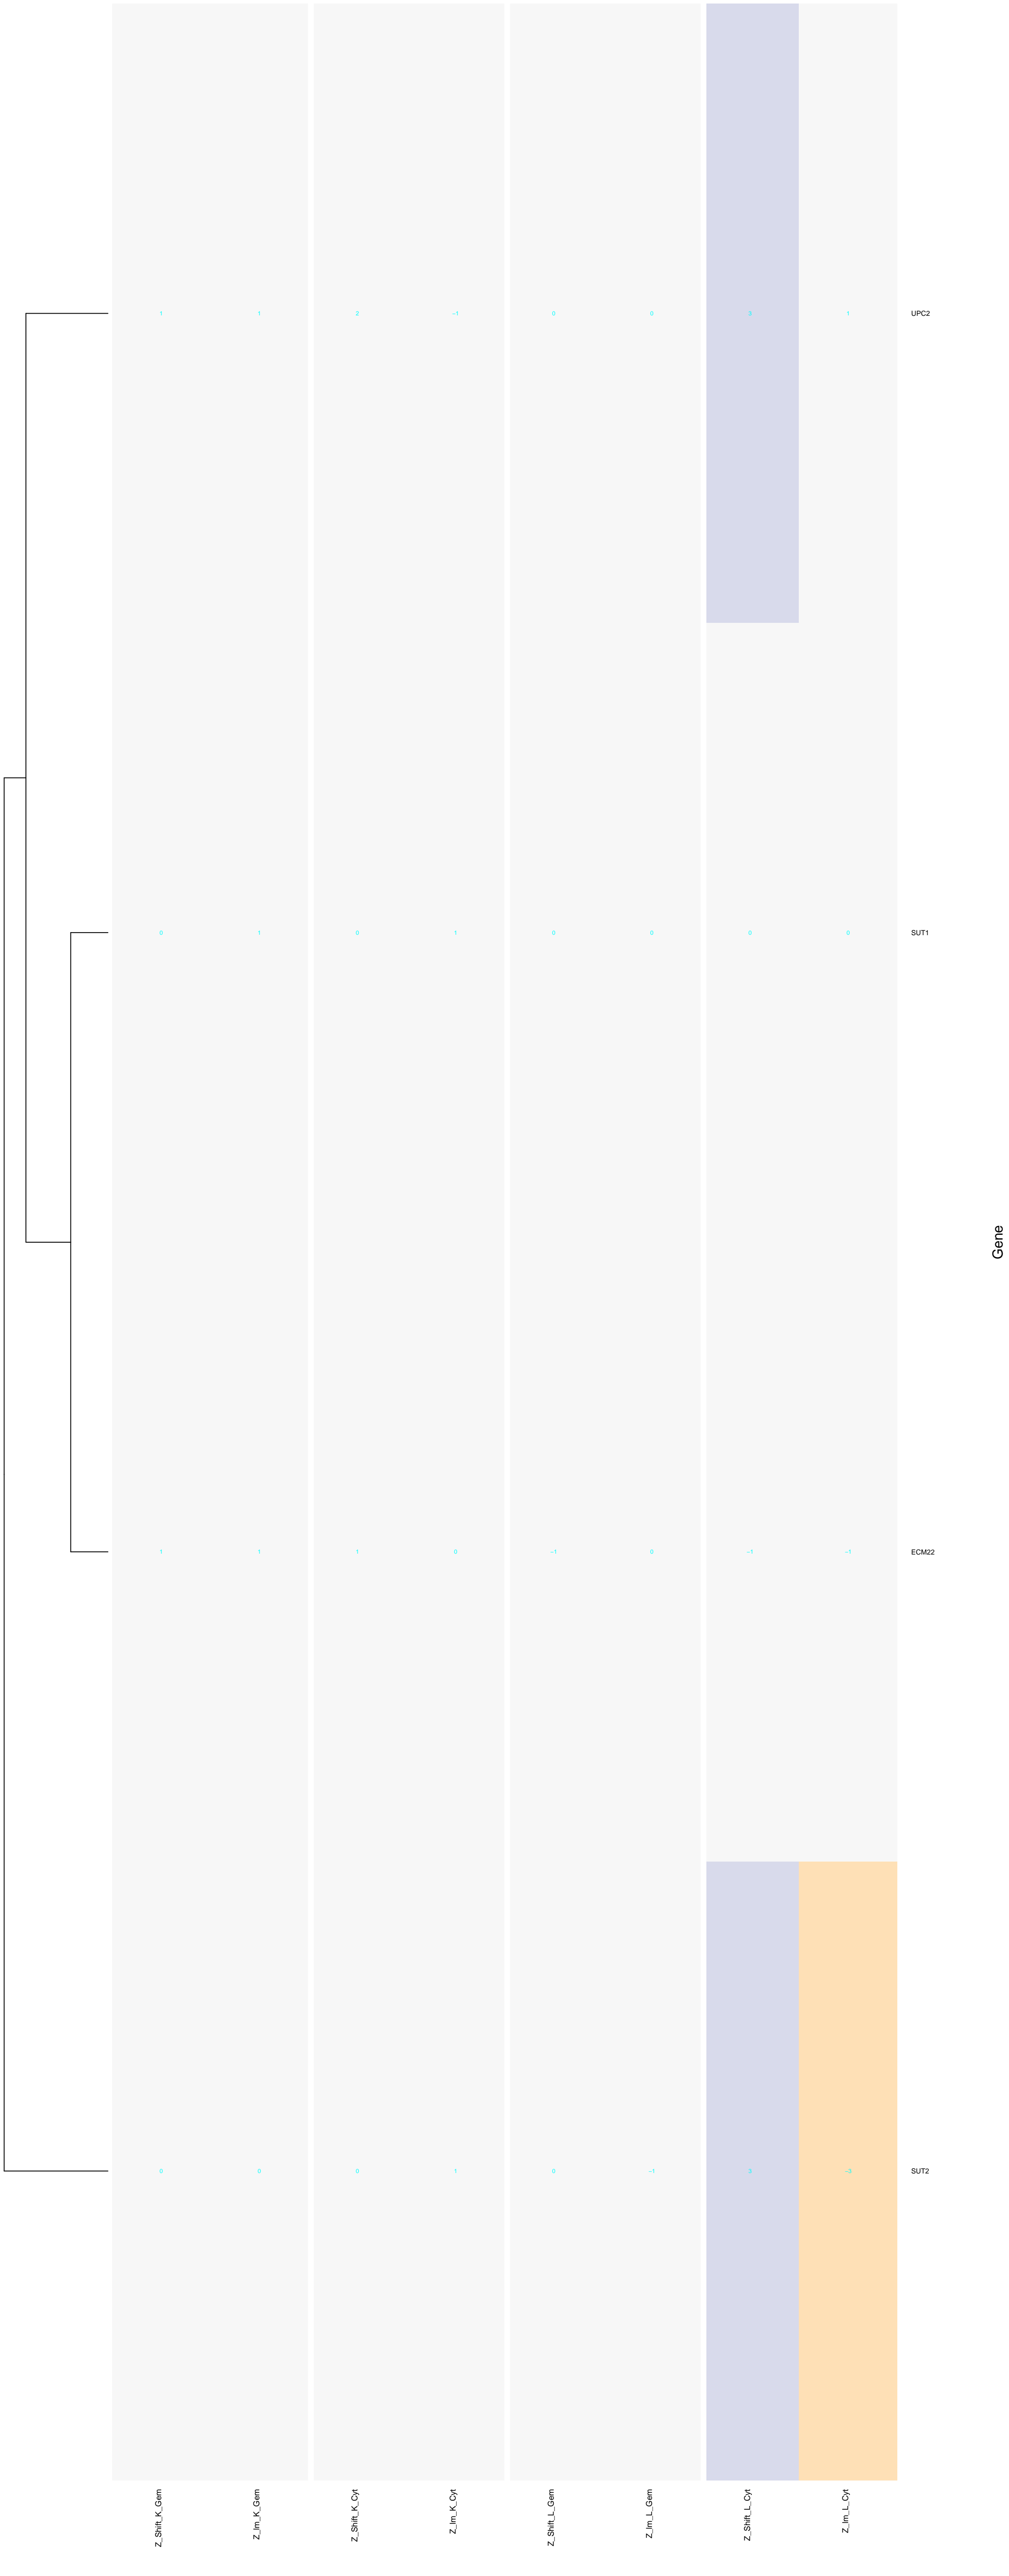

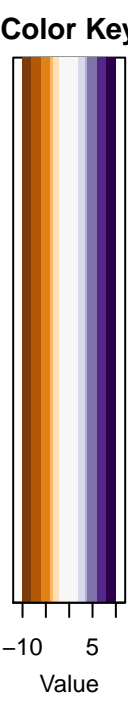

nositol biosynthetic process by positive regulation of transcription from RNA polymerase

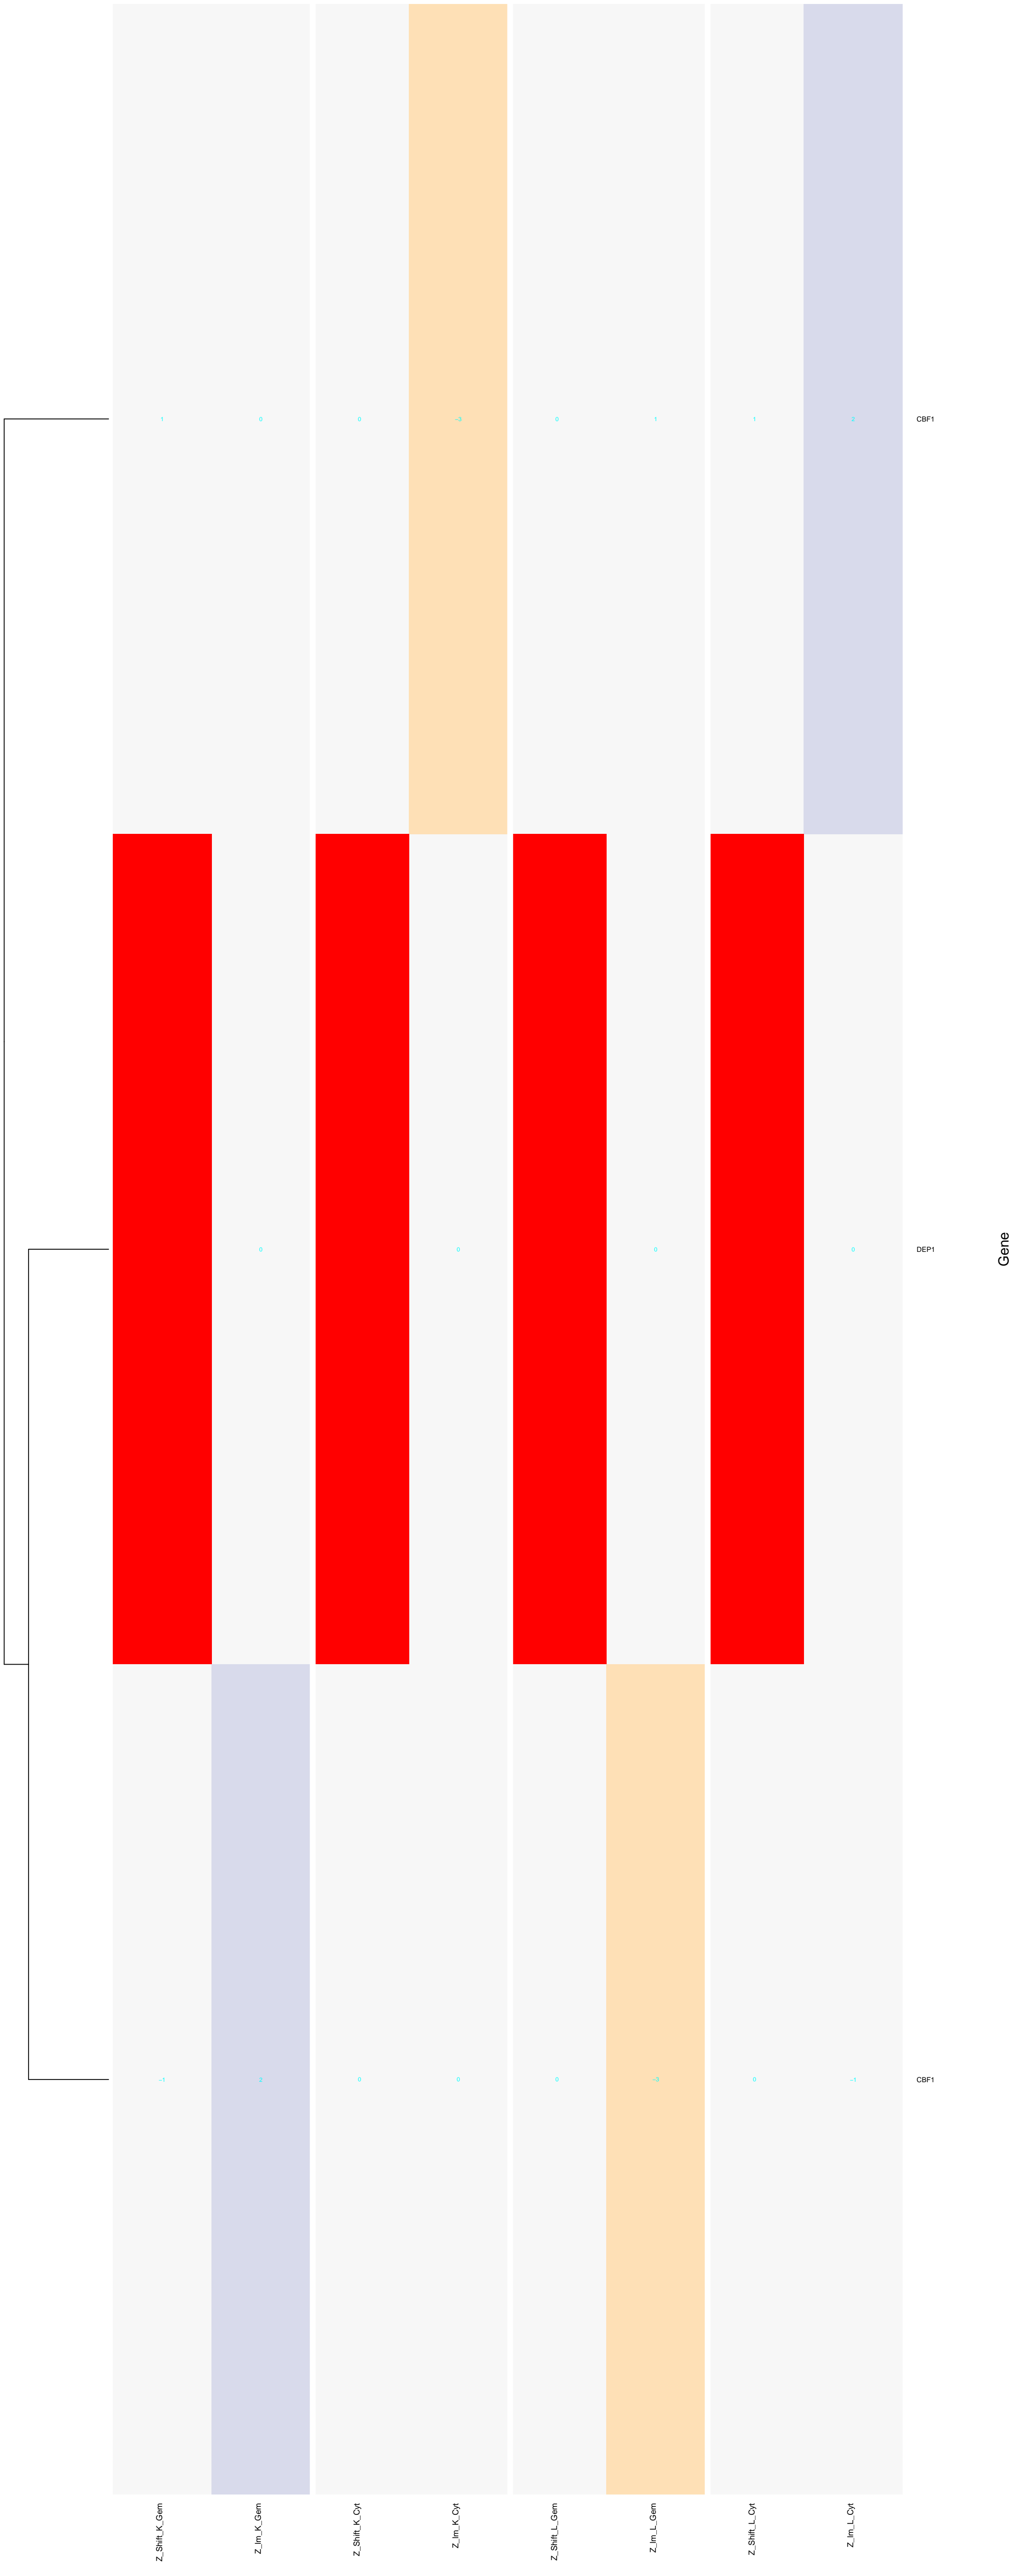

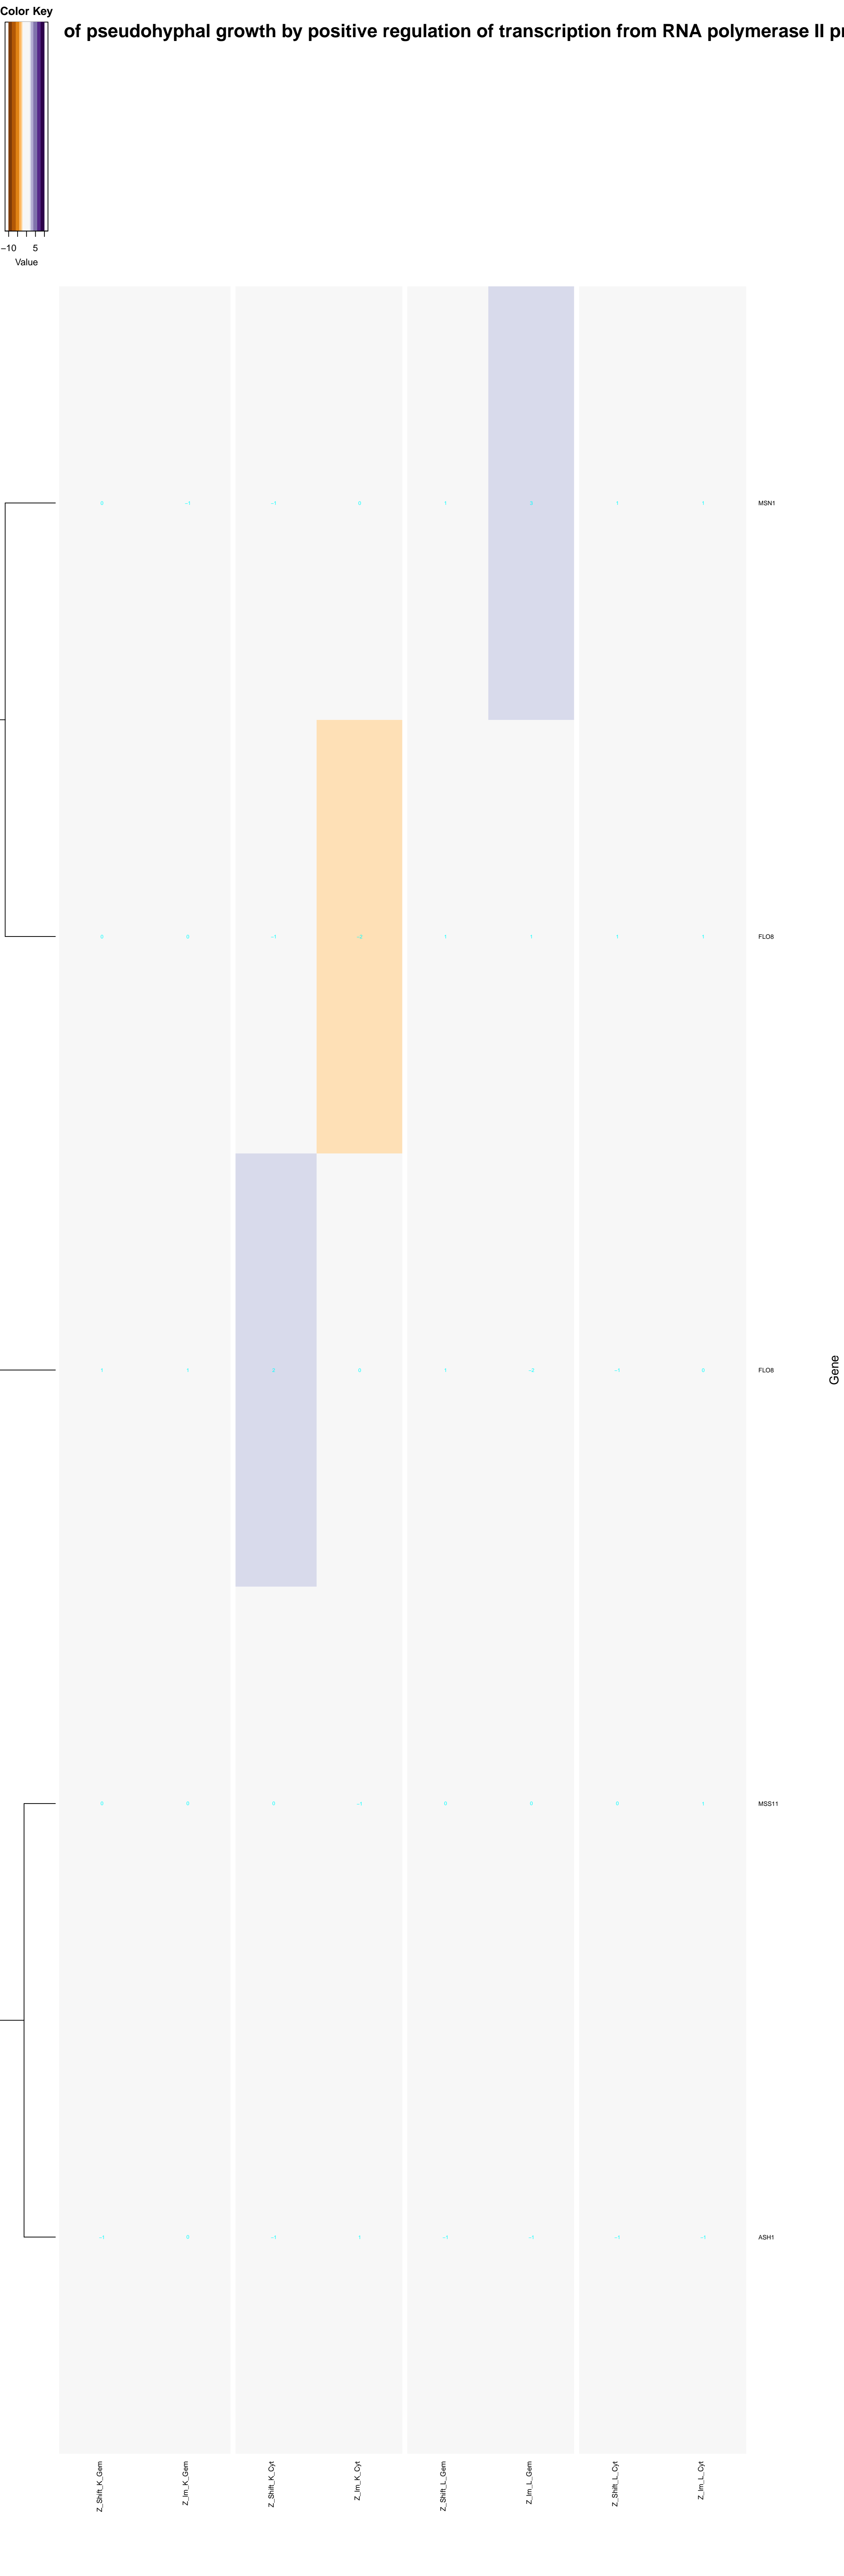

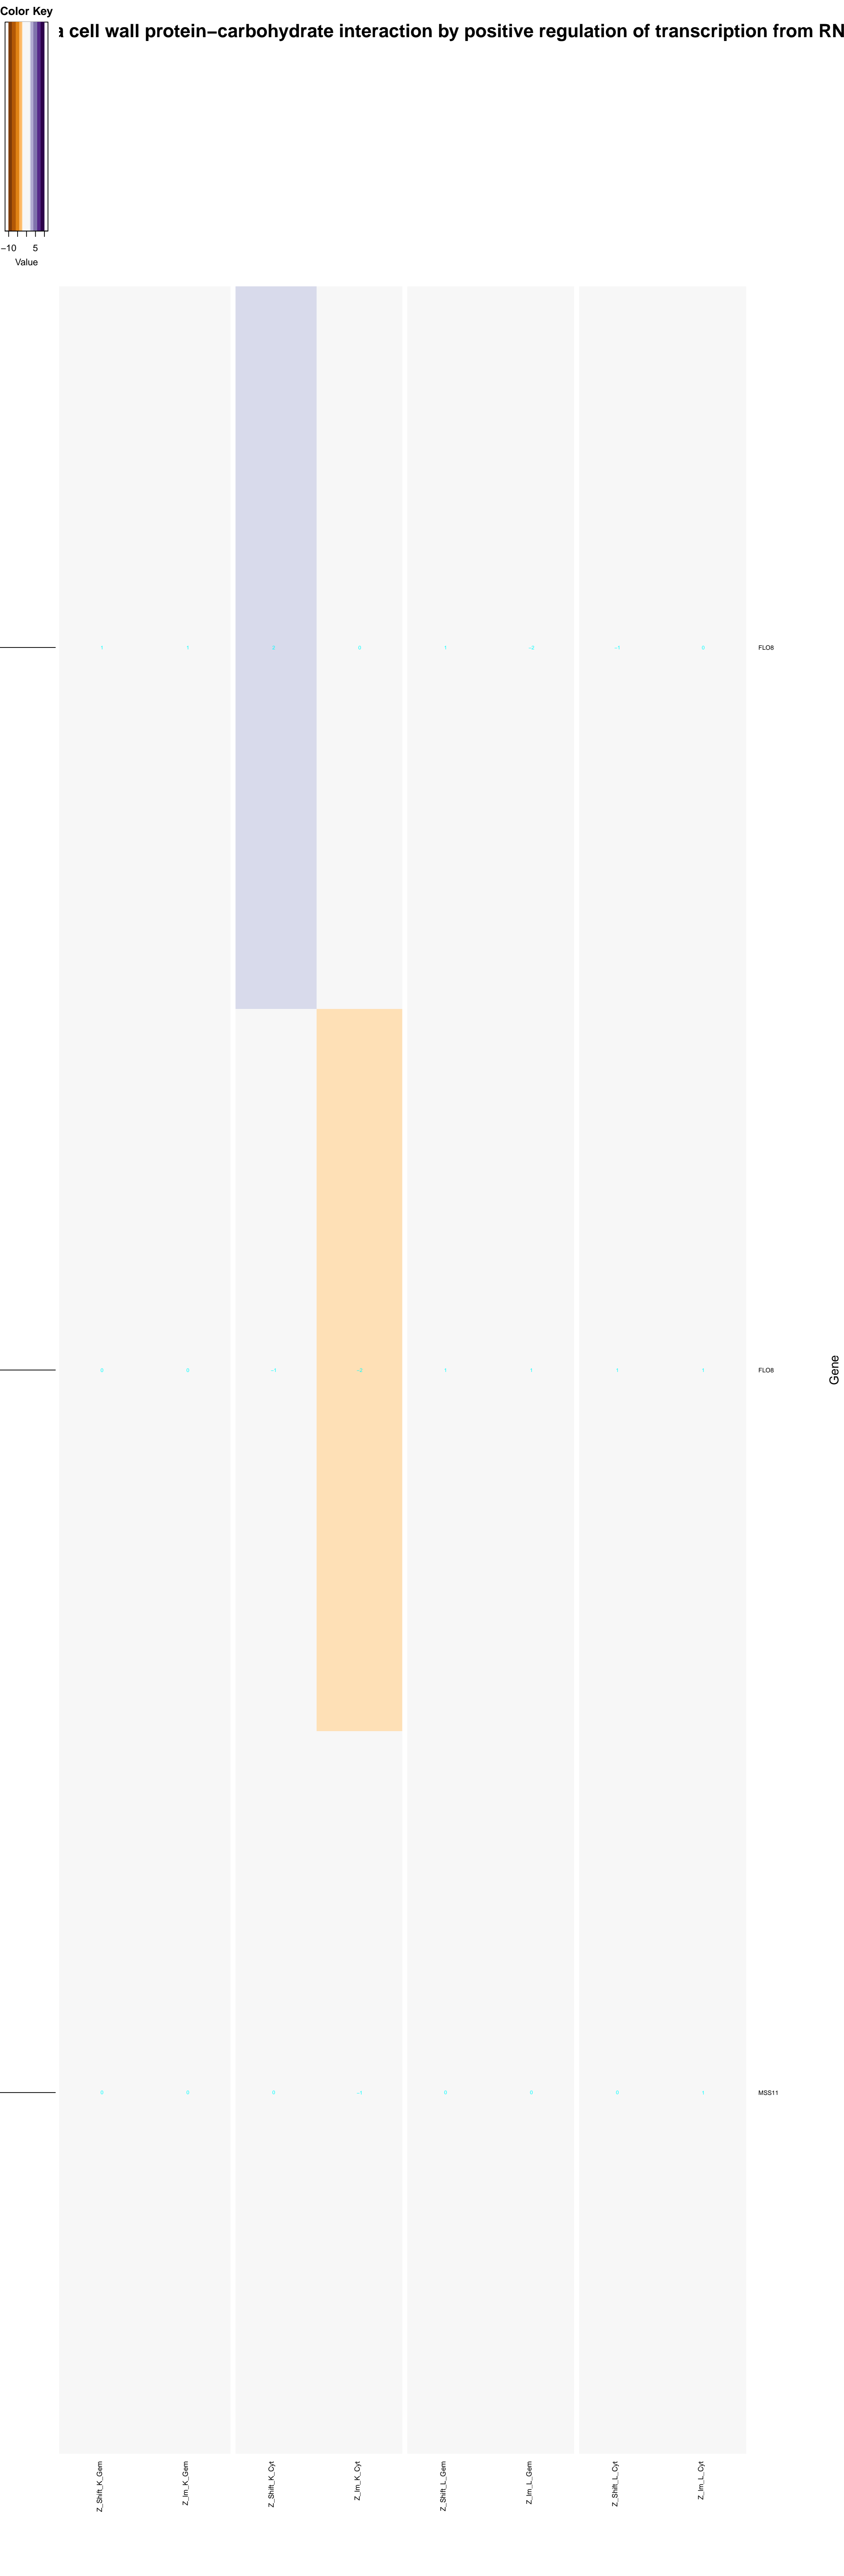

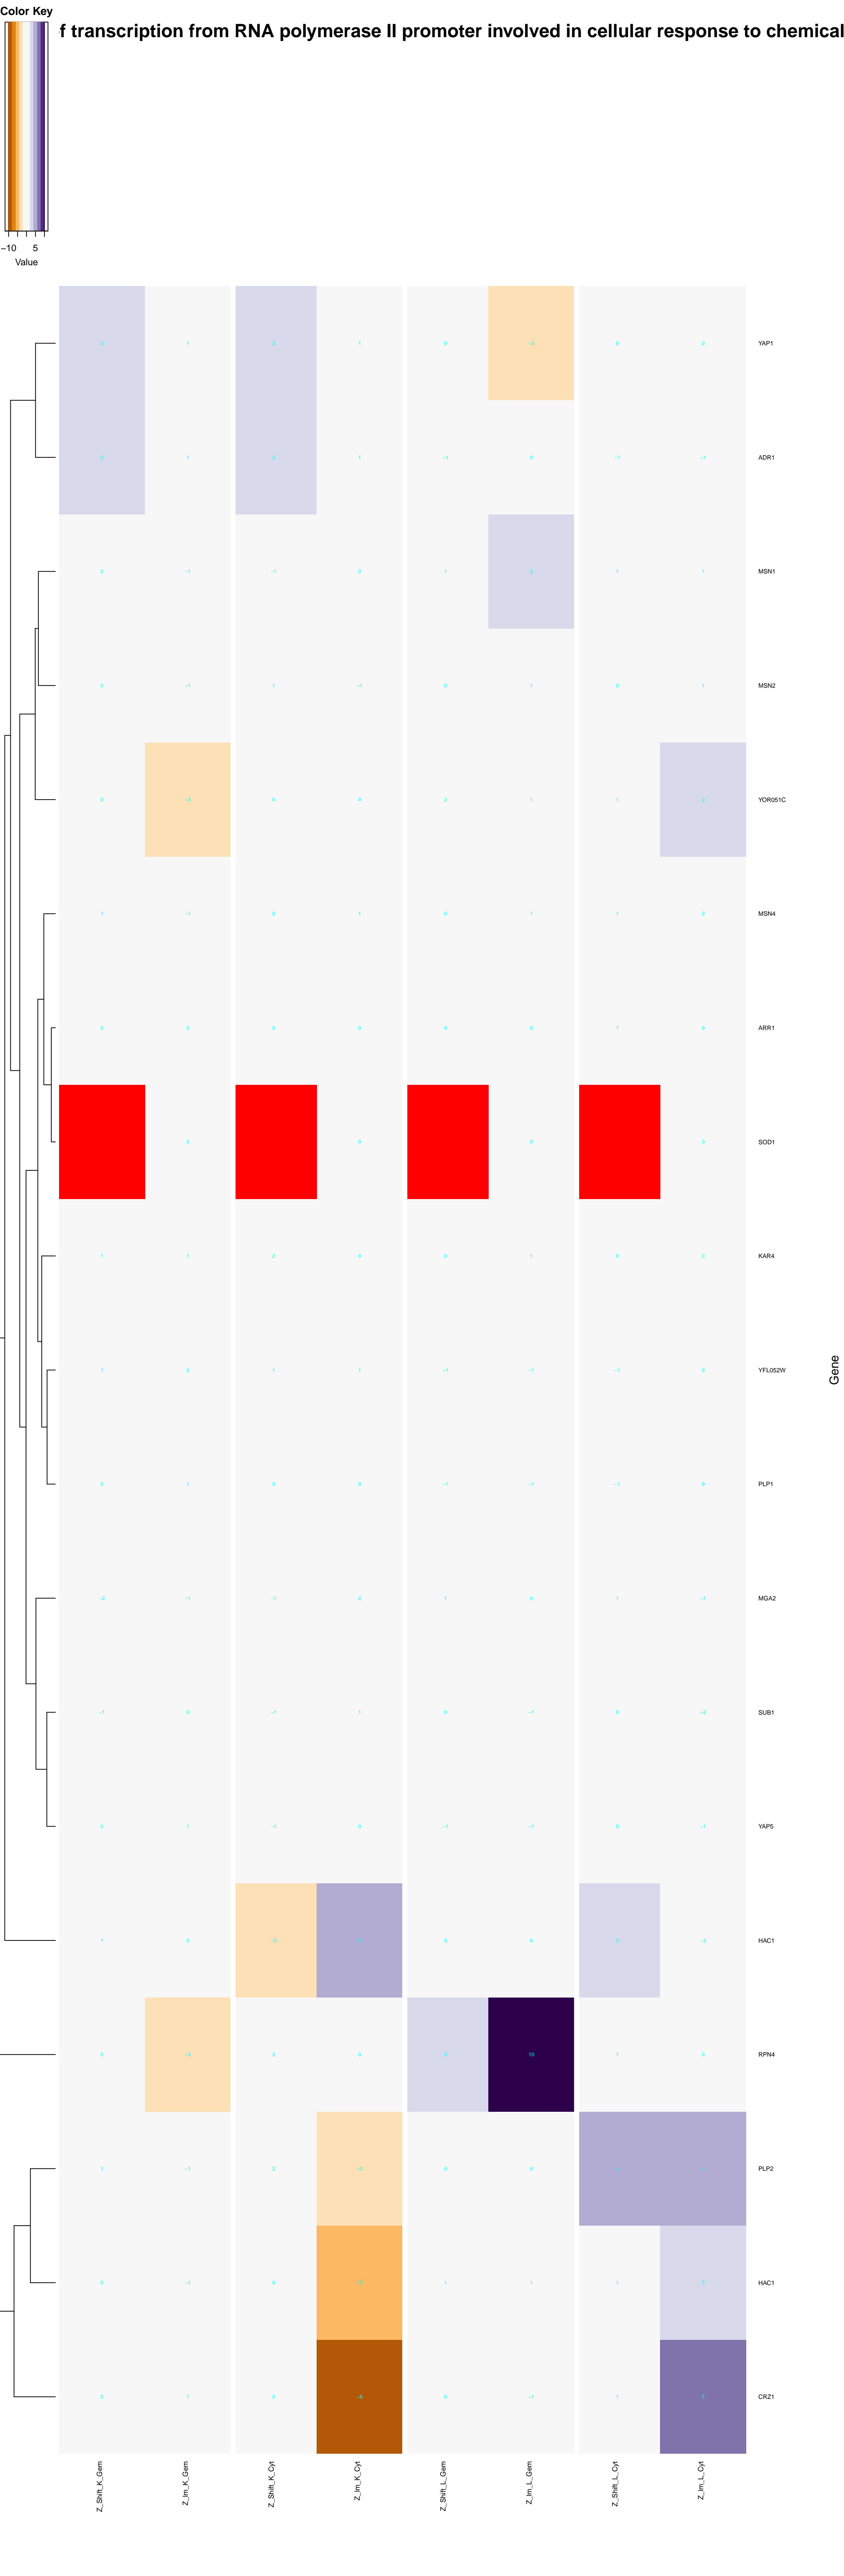

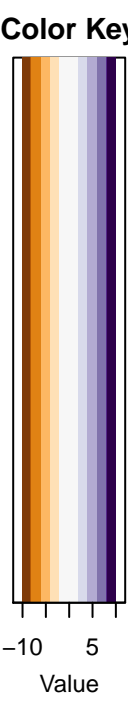

Positive regulation of transcription from RNA polymerase II promoter by pheromones

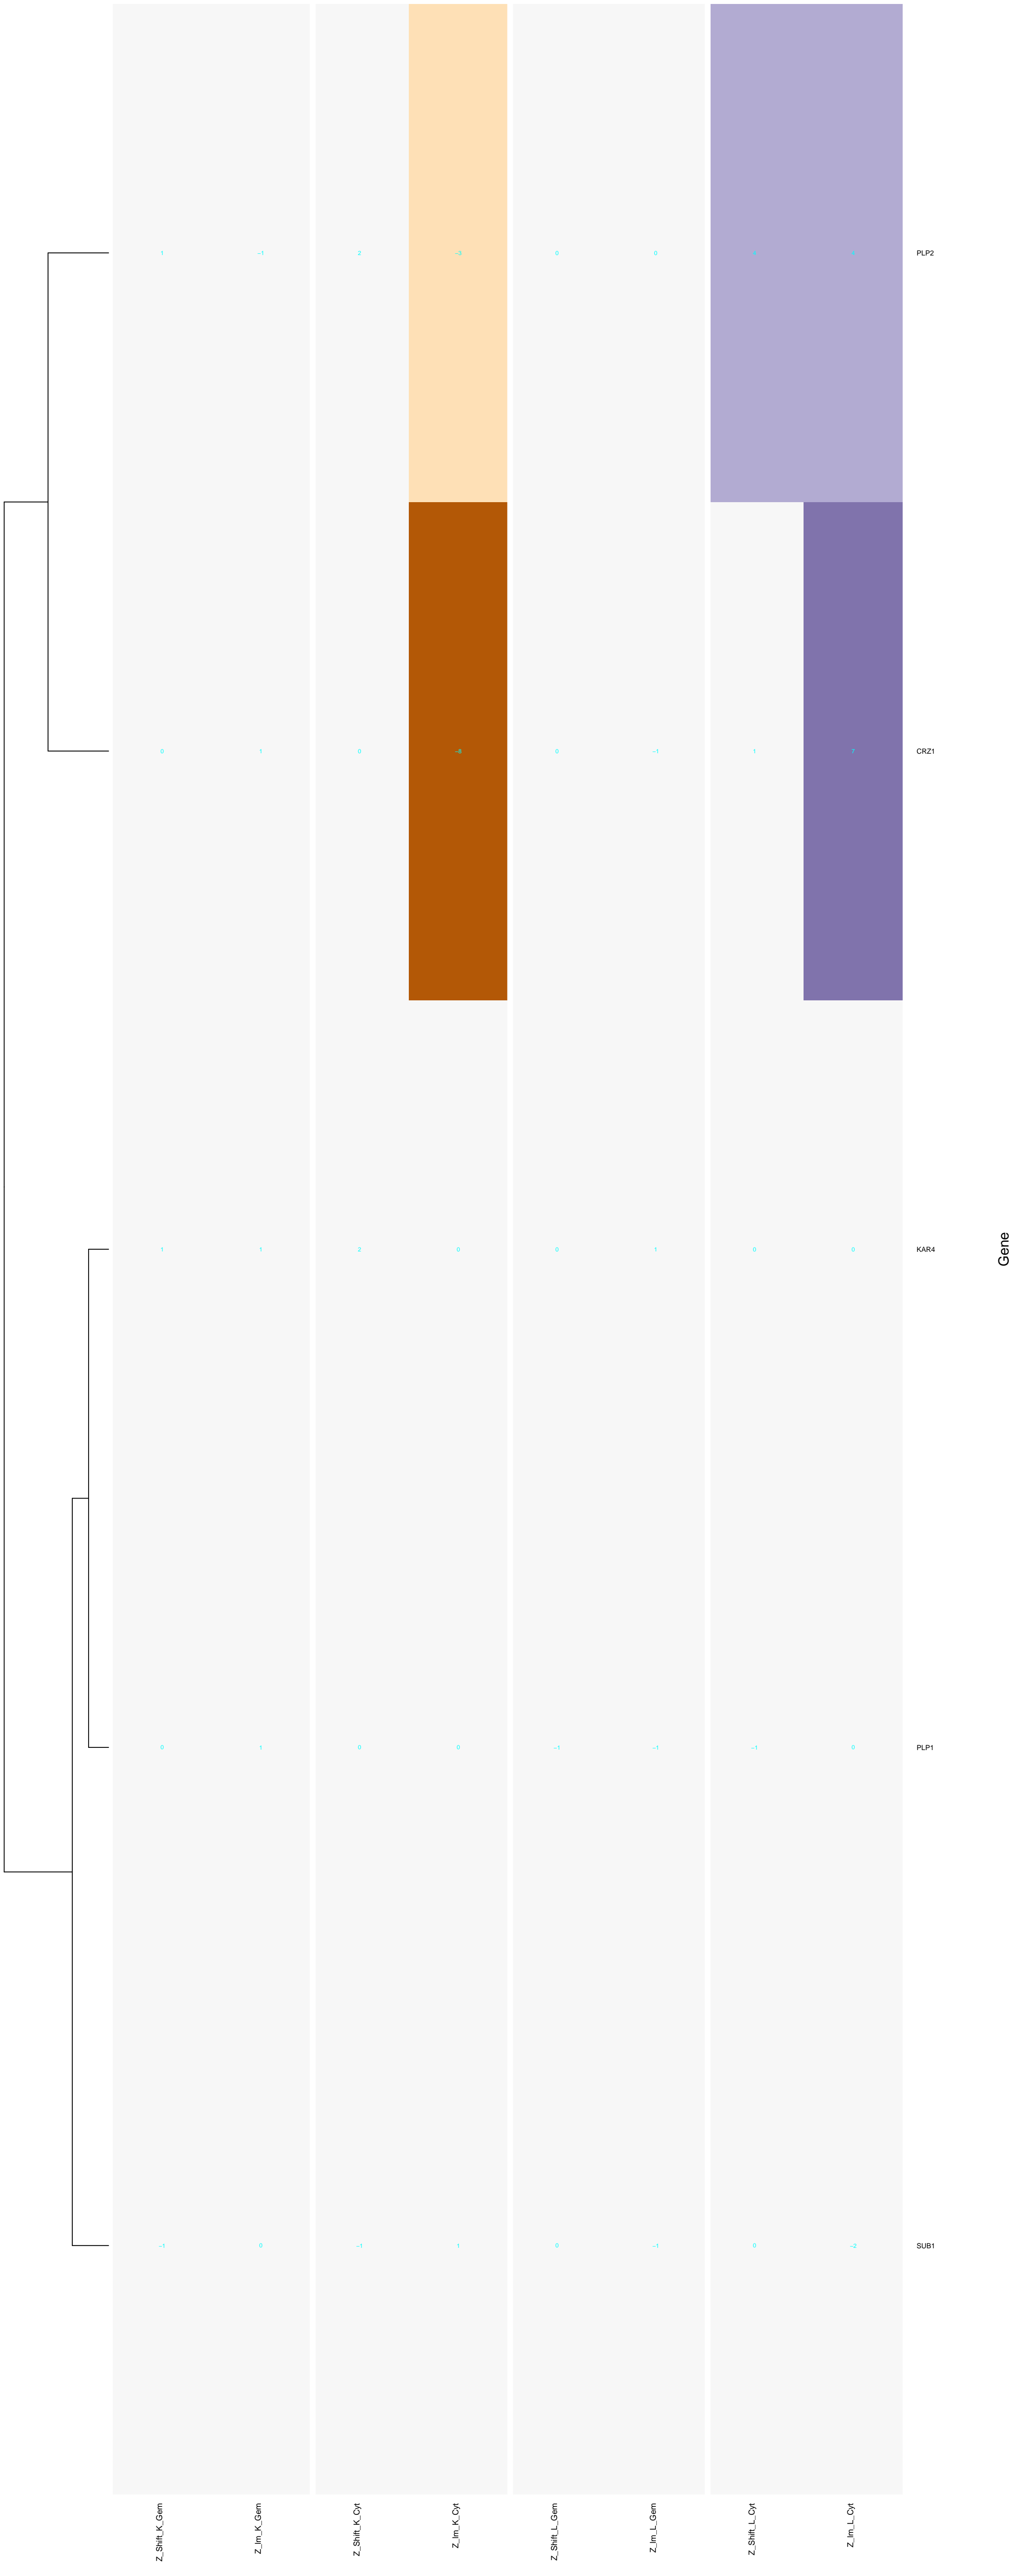



regulation of transcriptional start site selection at RNA polymerase II promoter

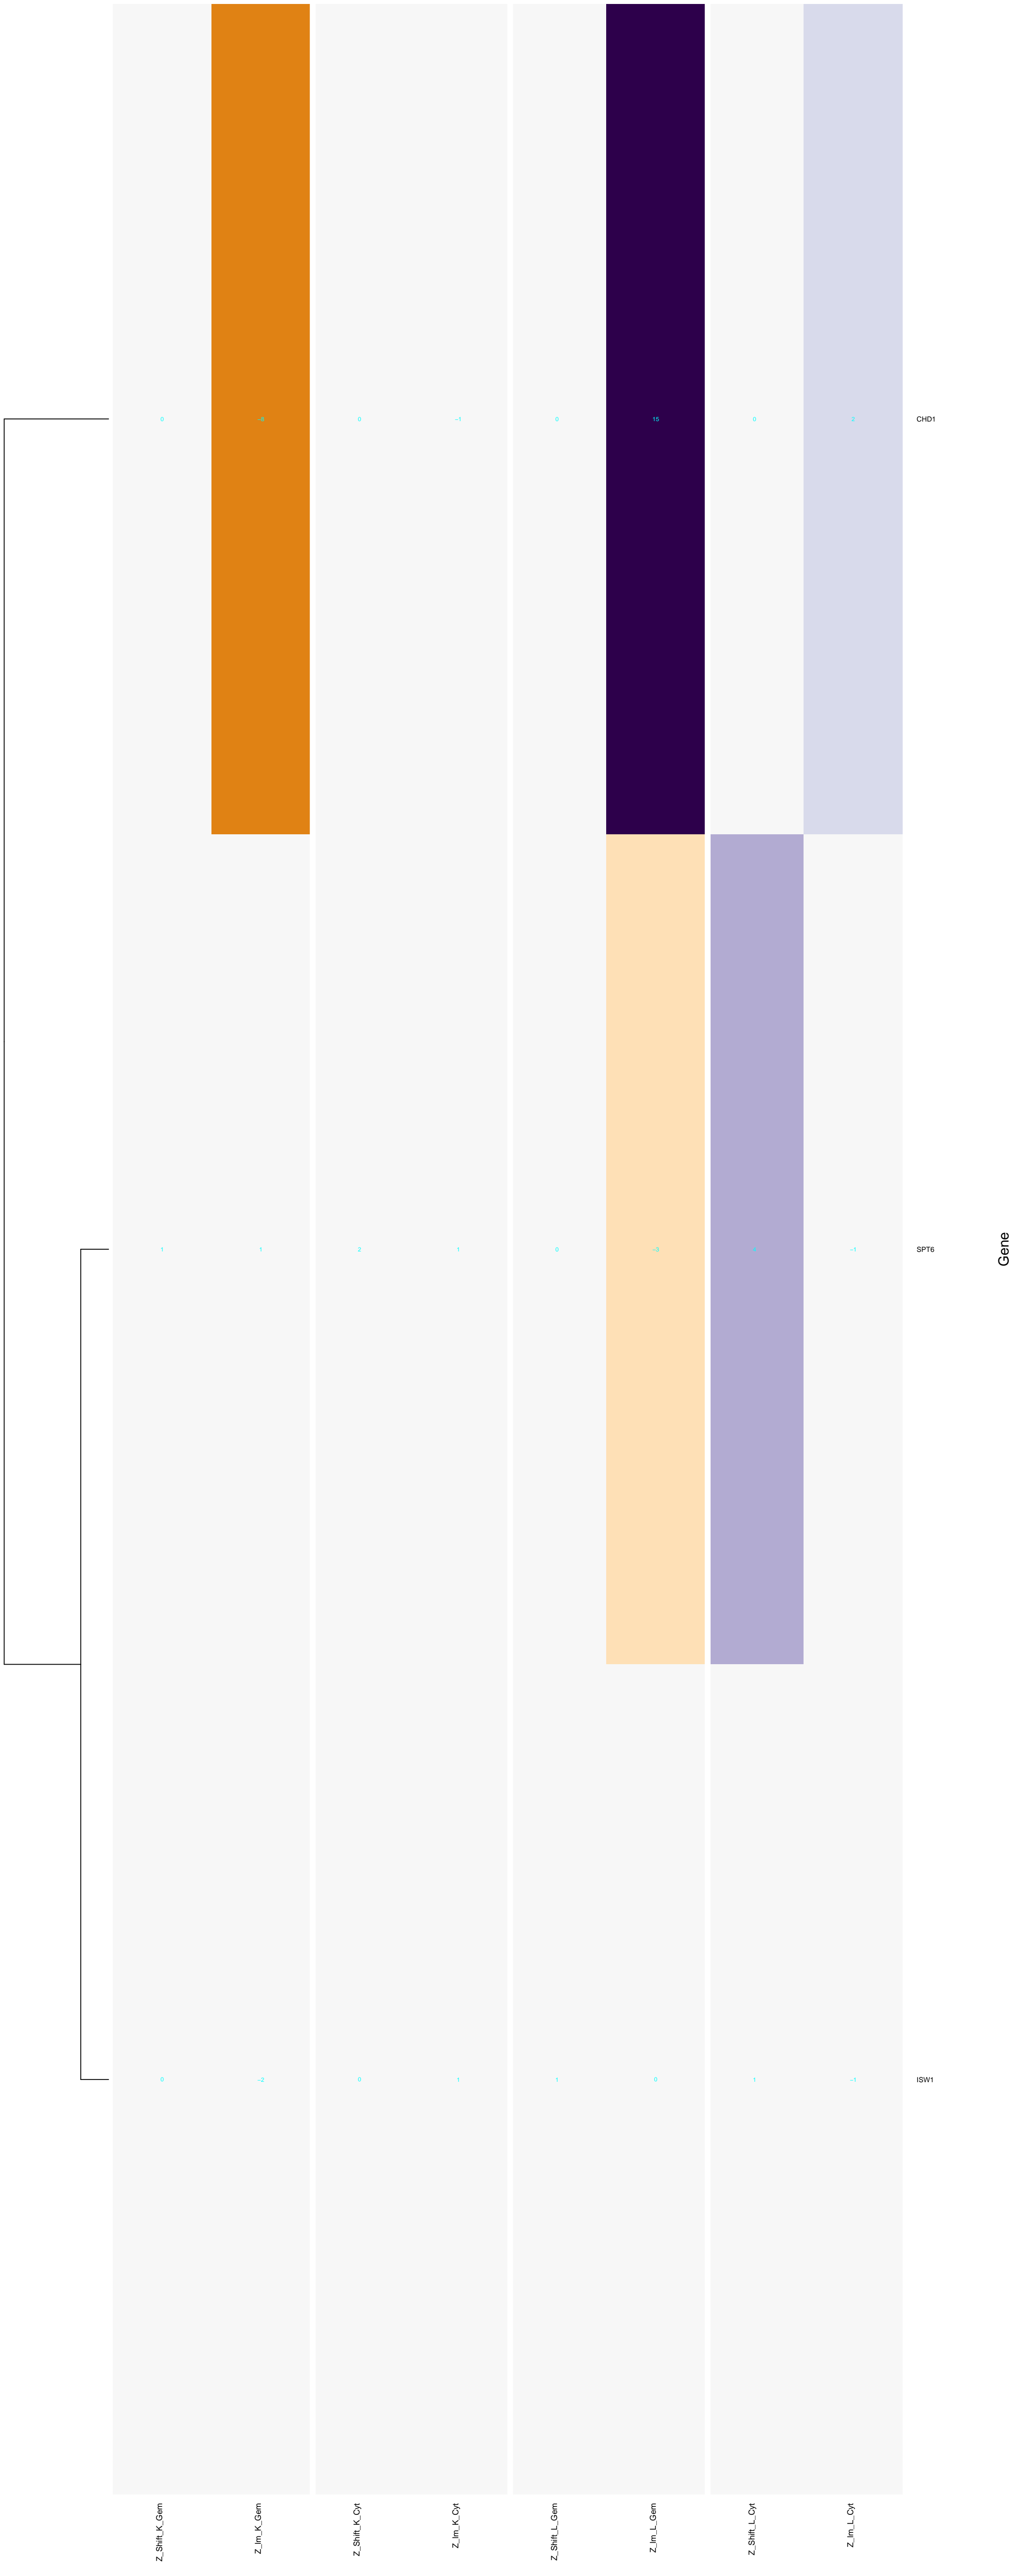



regulation of RNA polymerase II transcriptional preinitiation complex assembly

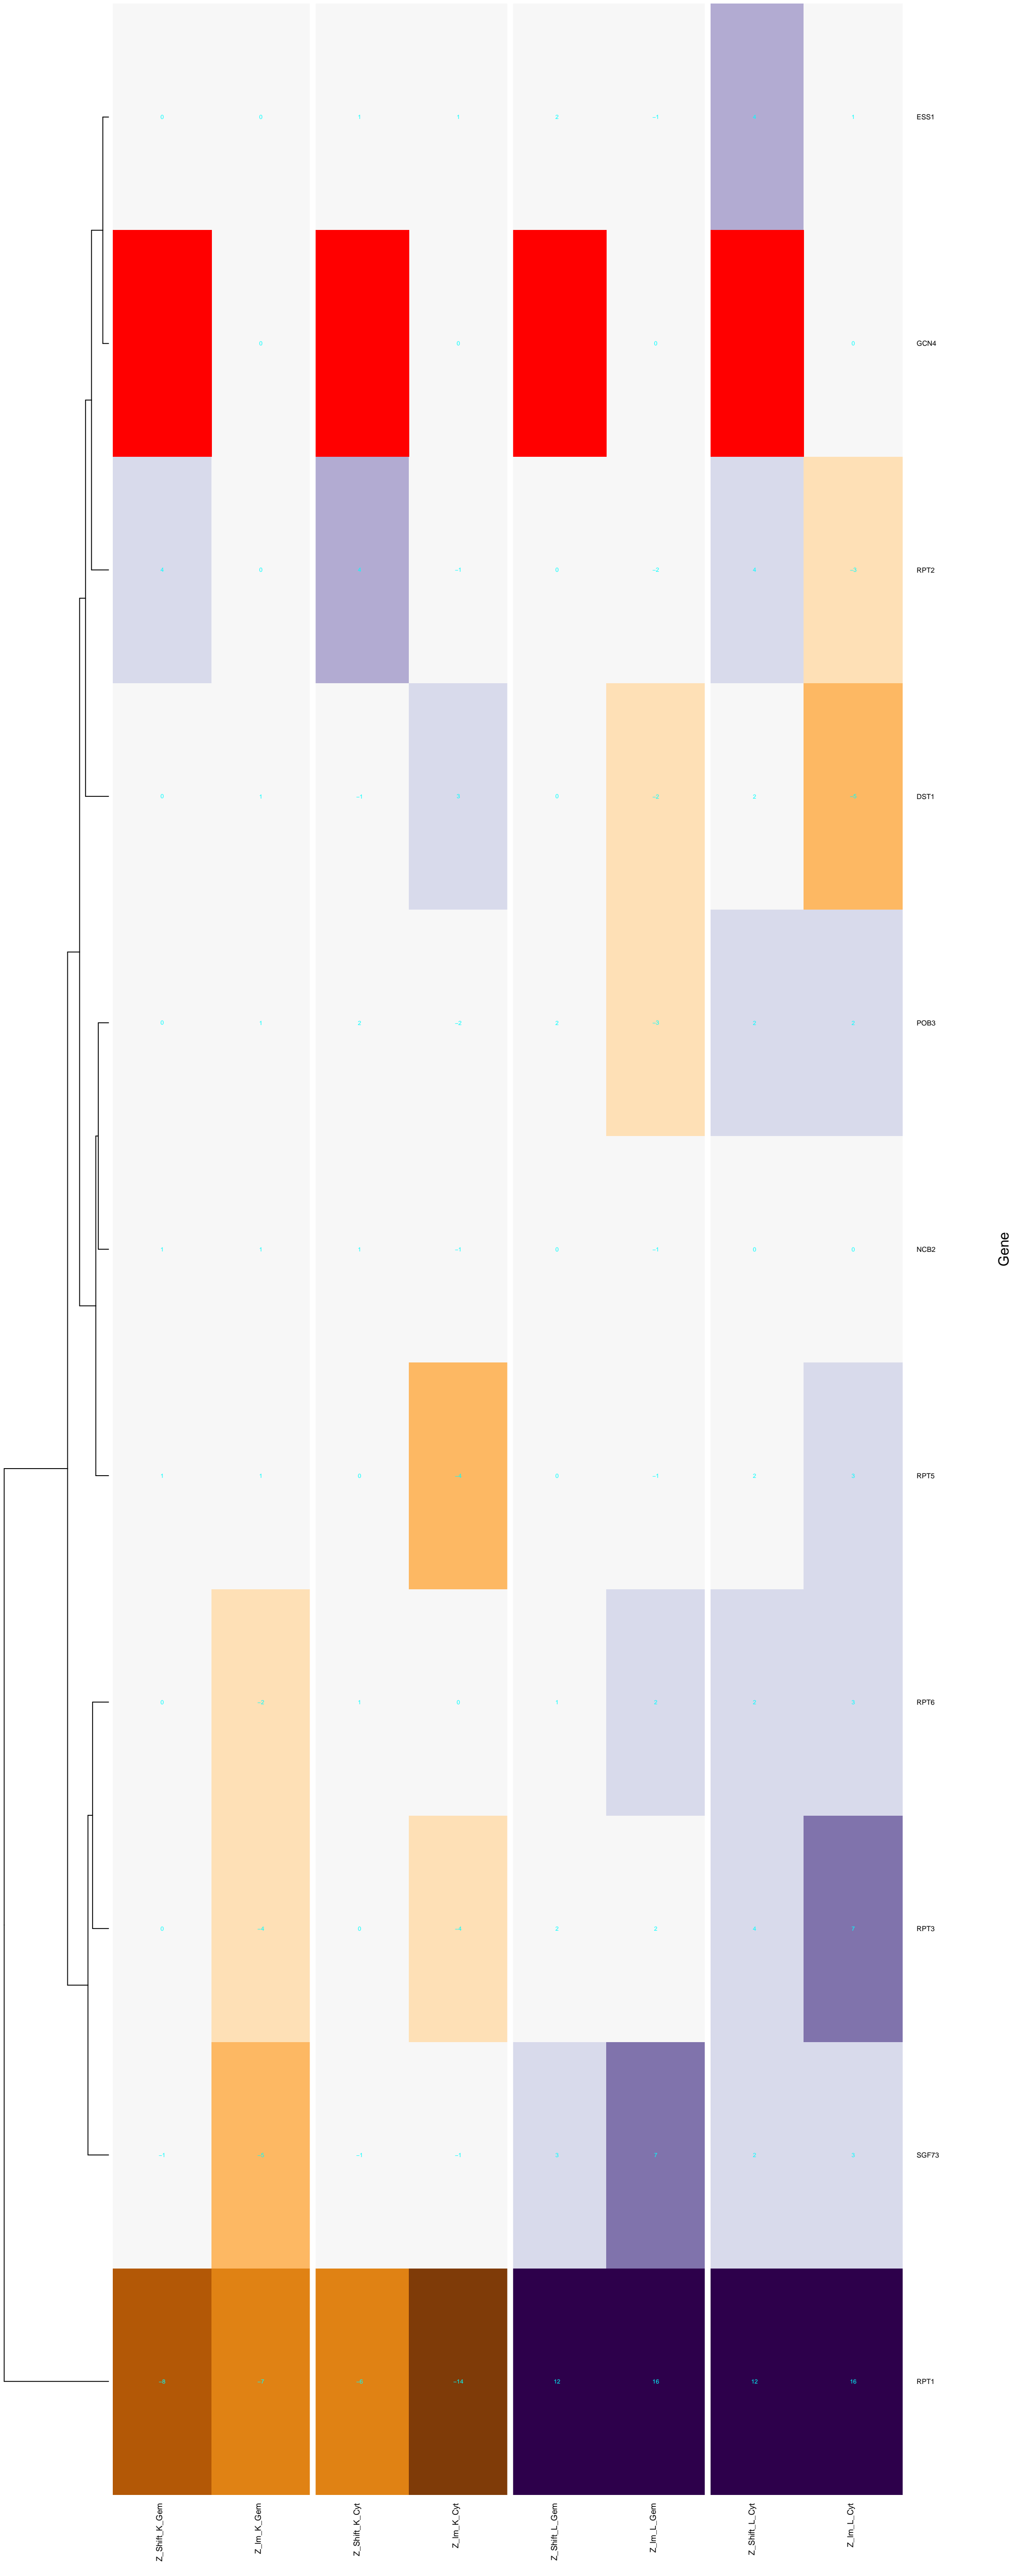



phosphorylation of RNA polymerase II C-terminal domain serine 2 residues

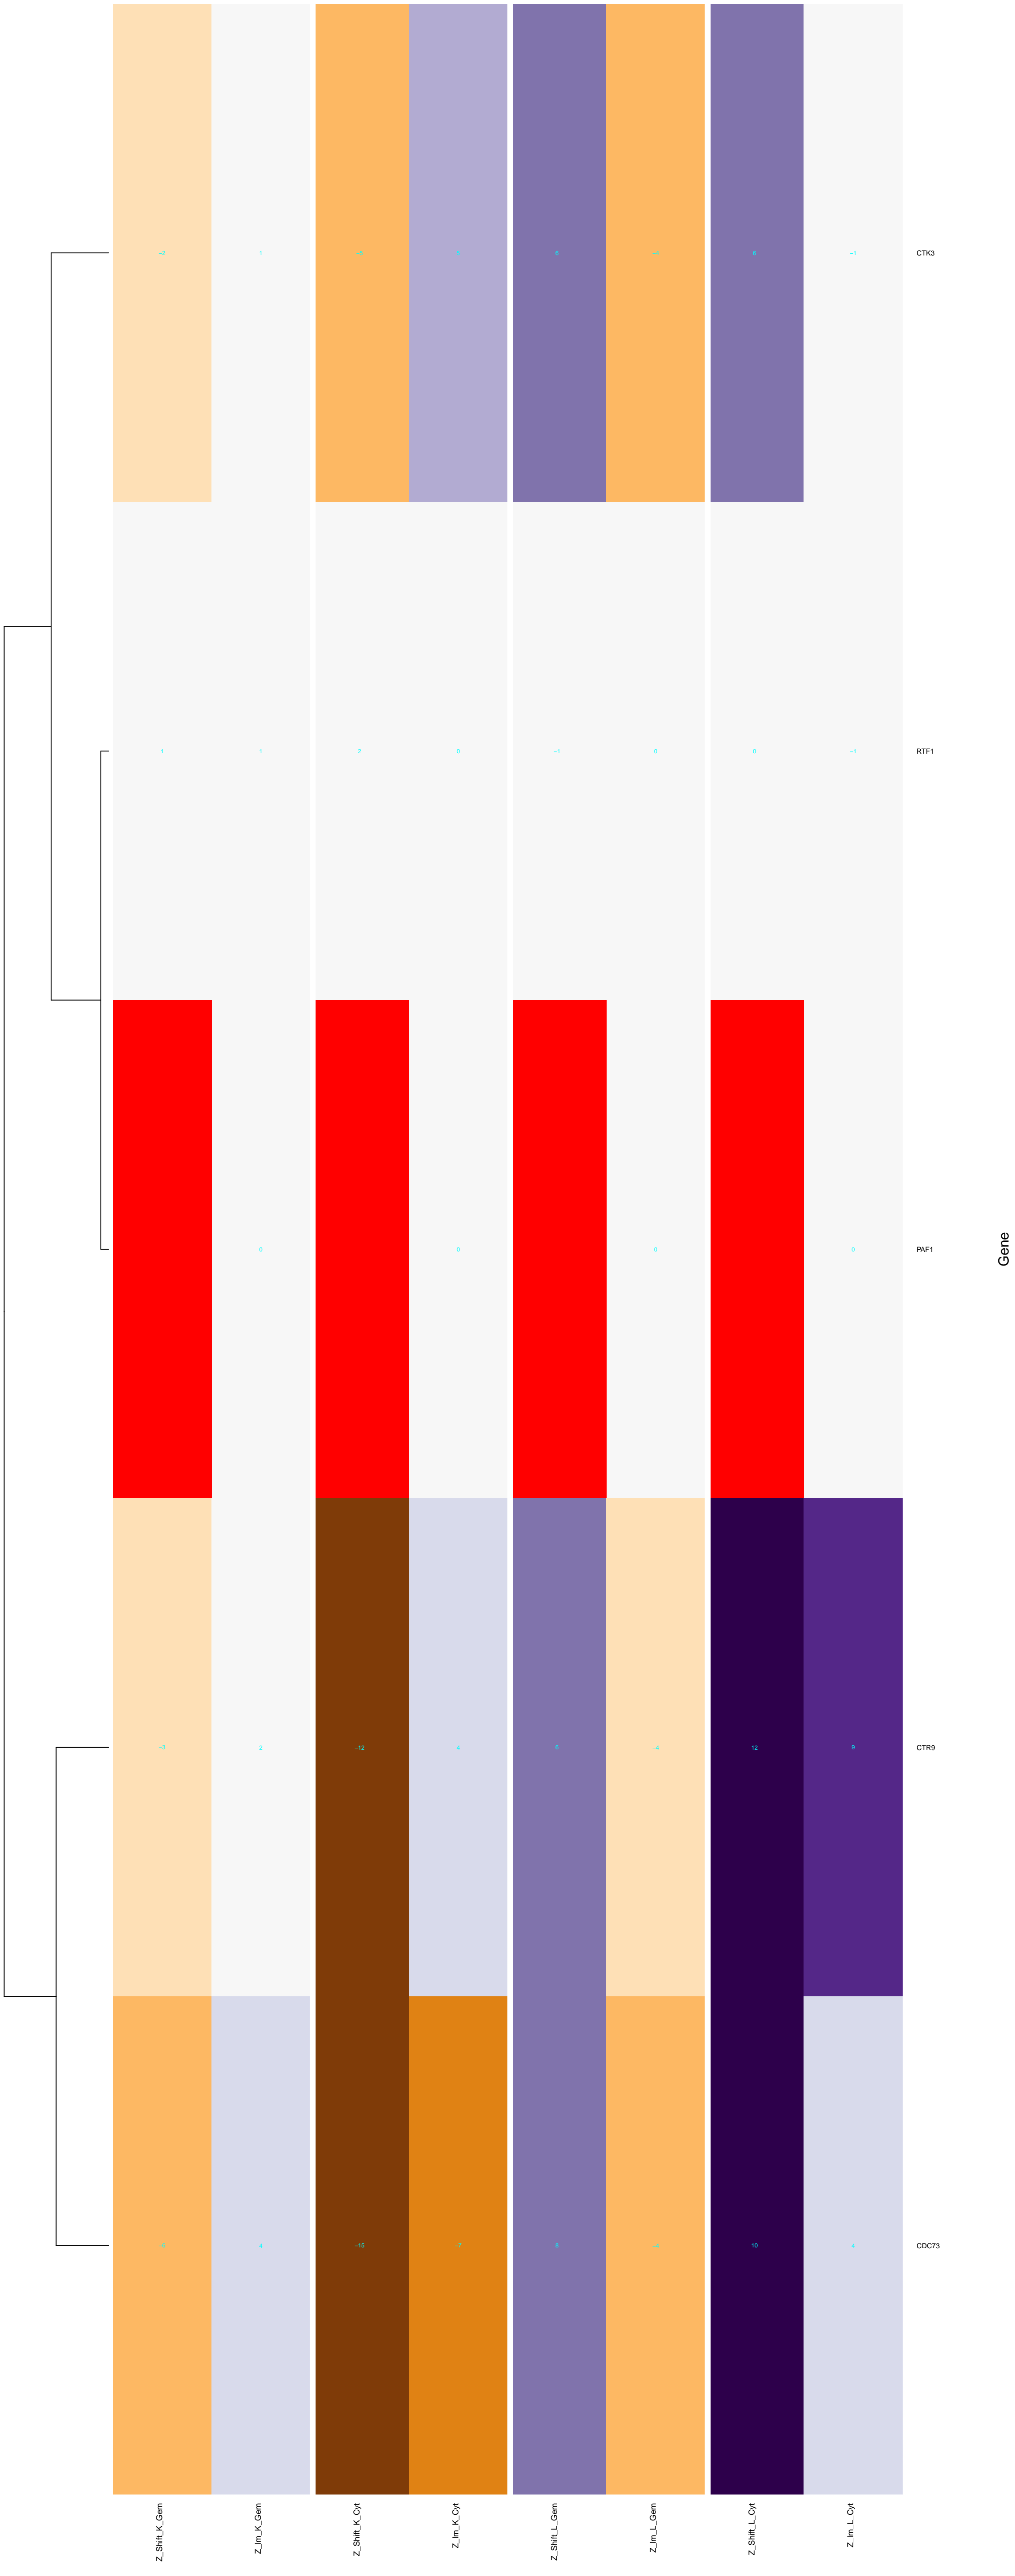

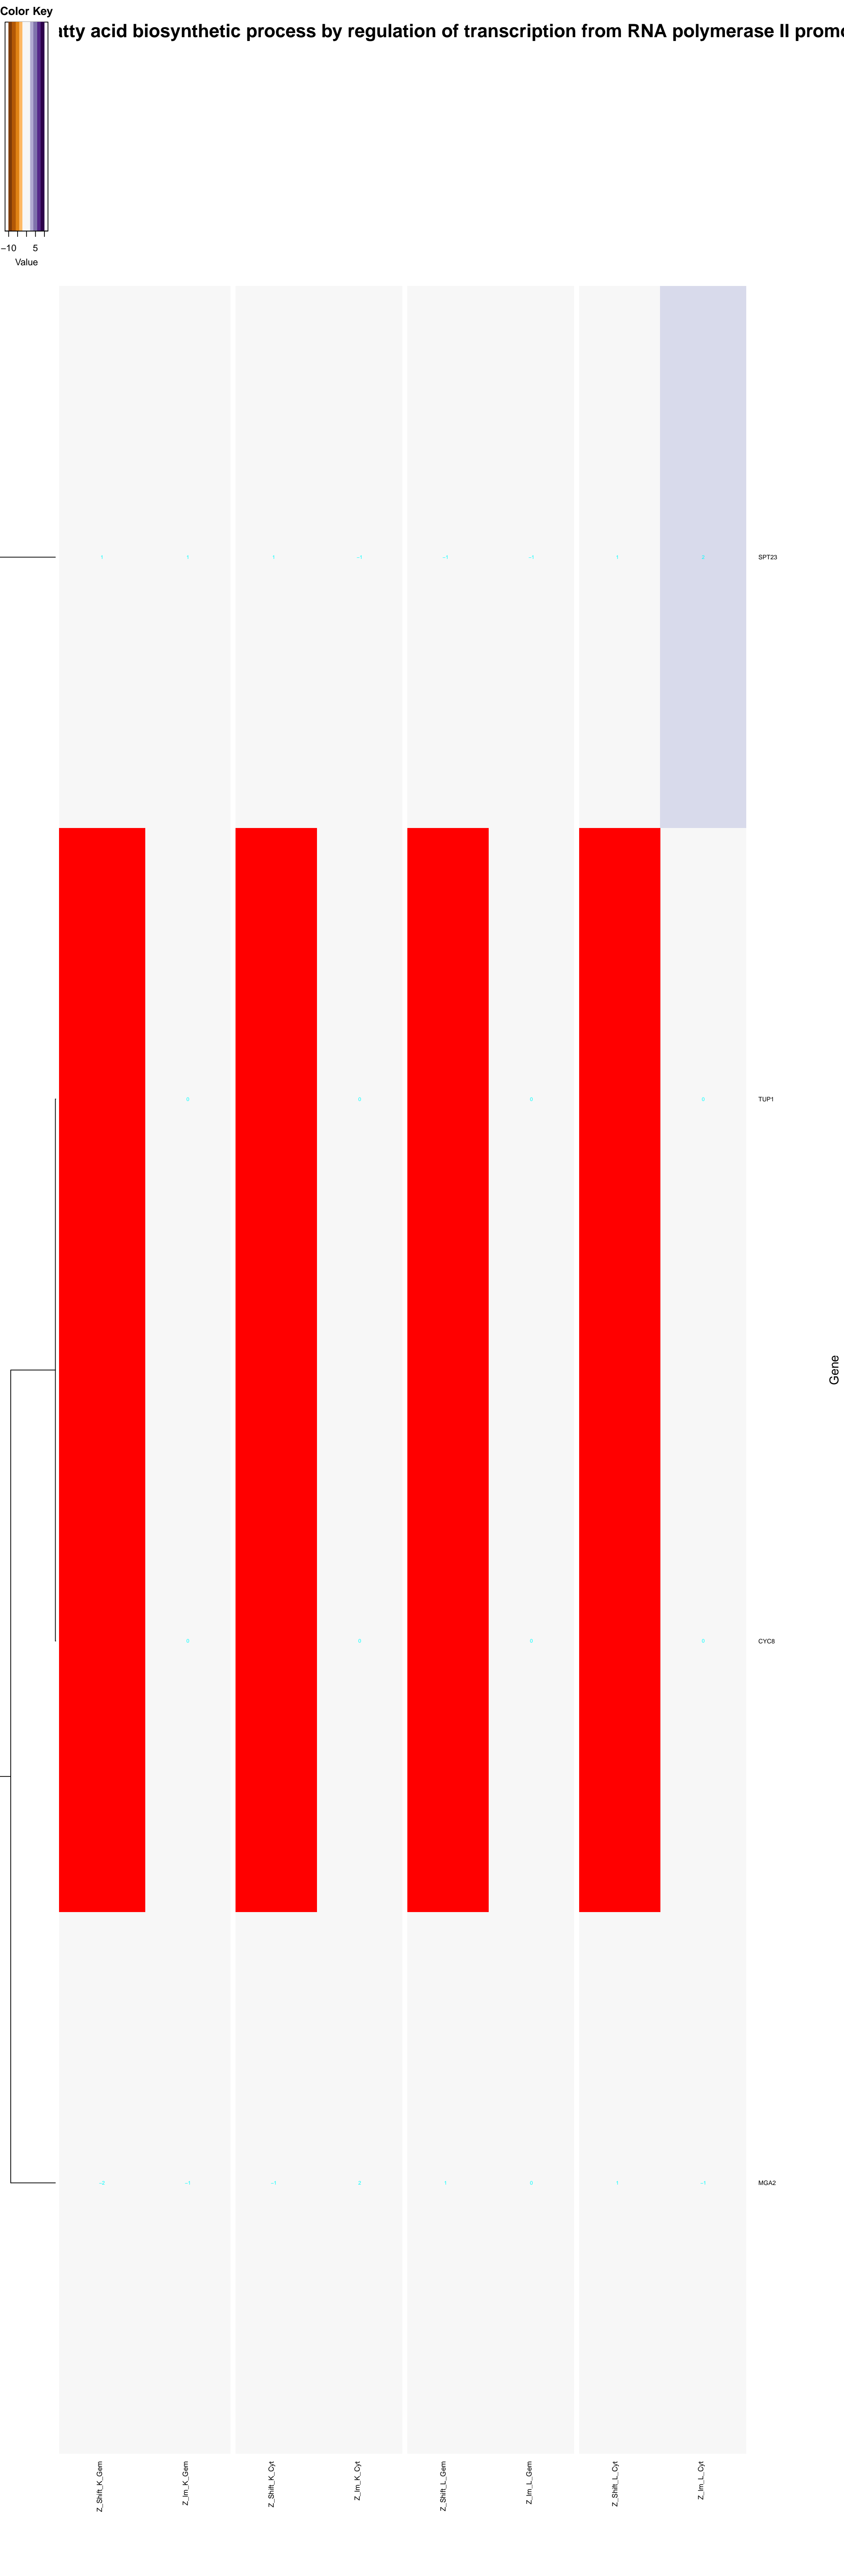

Color Key

ation of sterol import by regulation of transcription from RNA polymerase II promoter

-10 5

Value

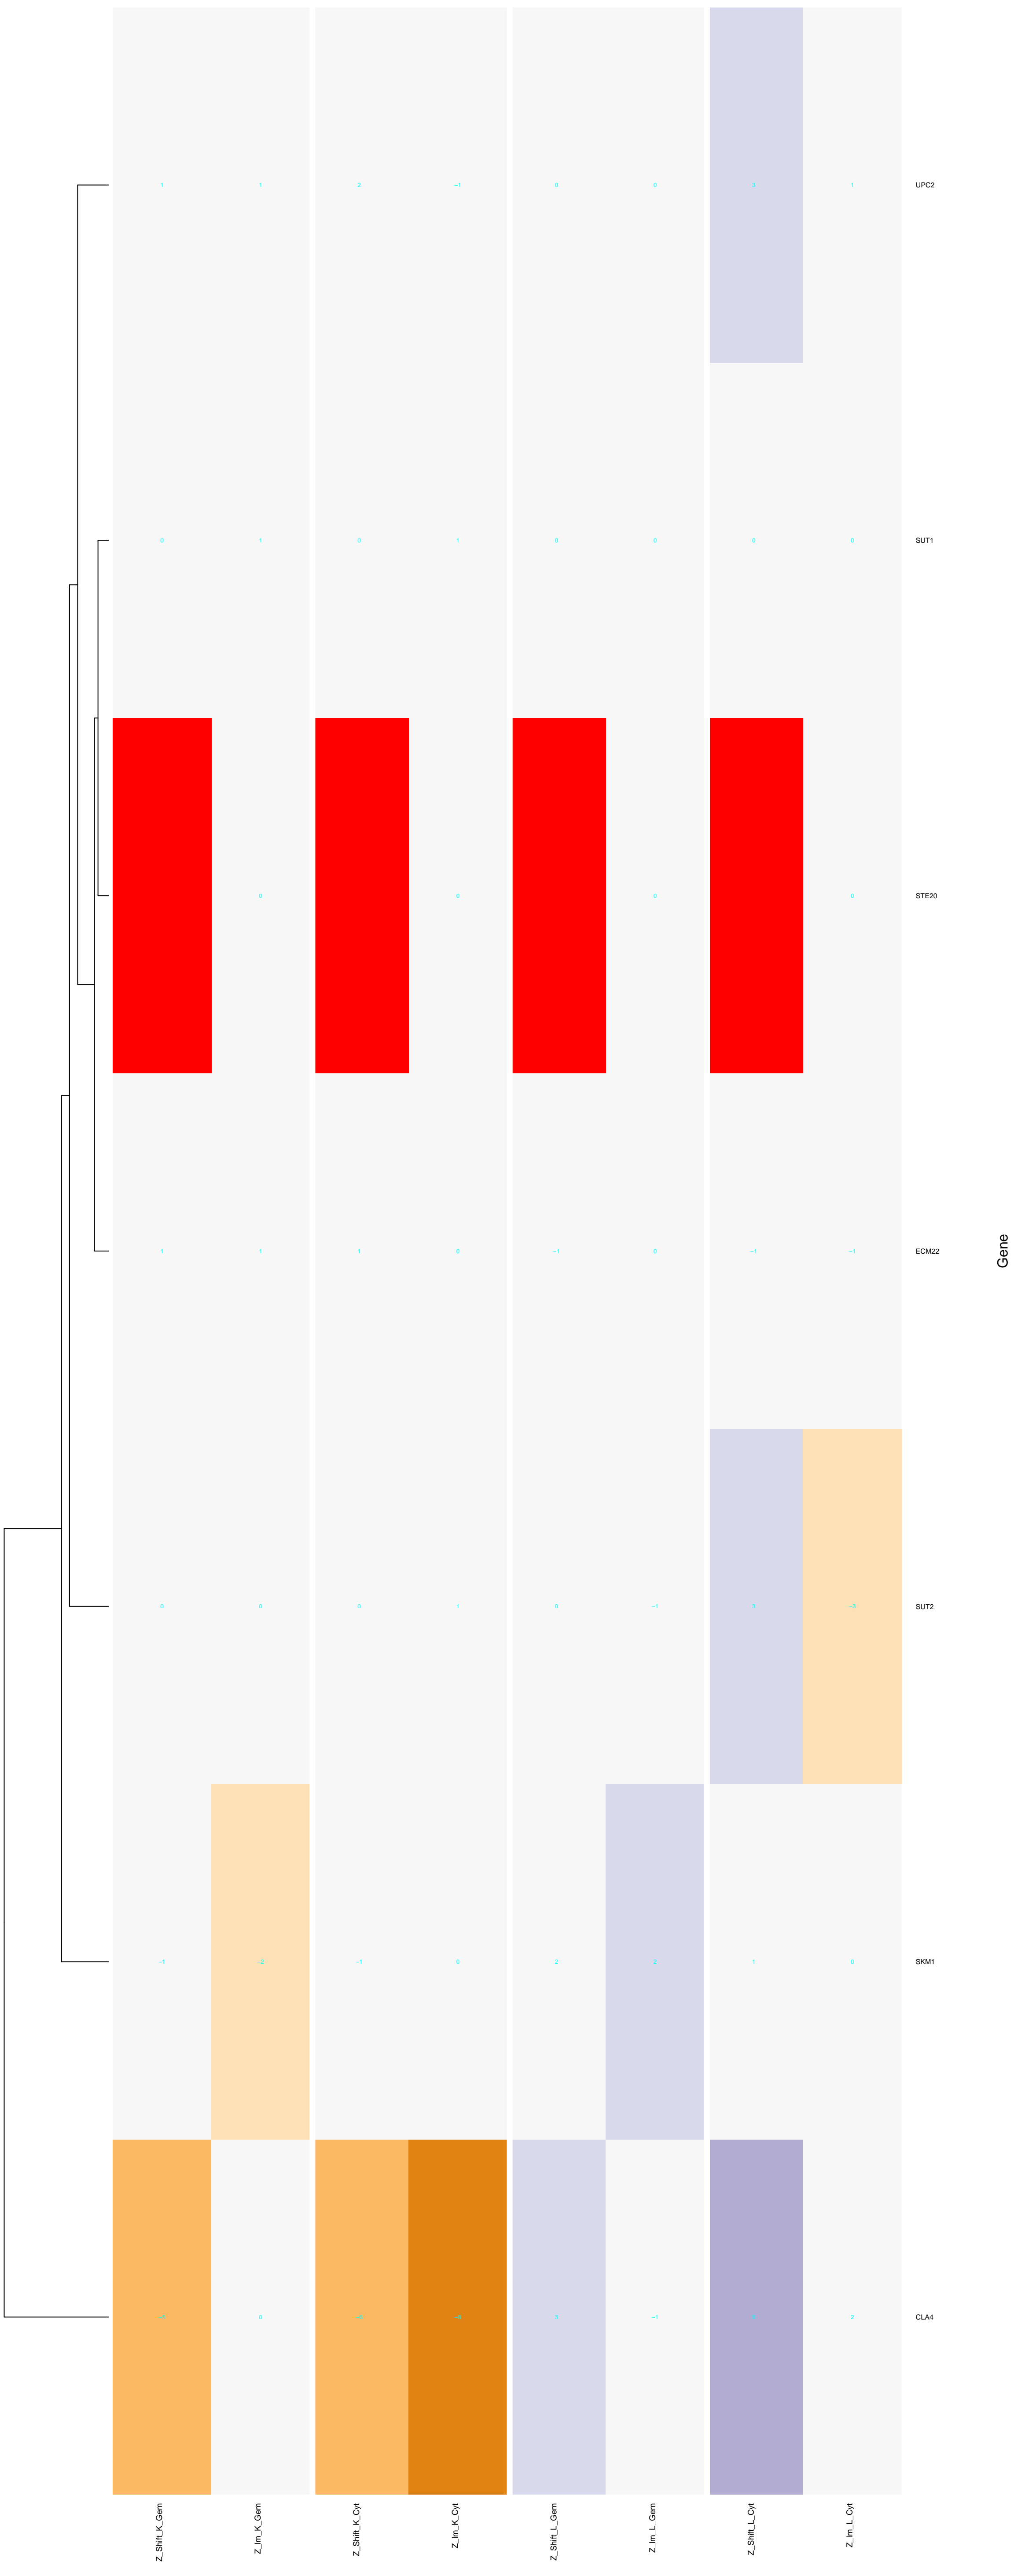

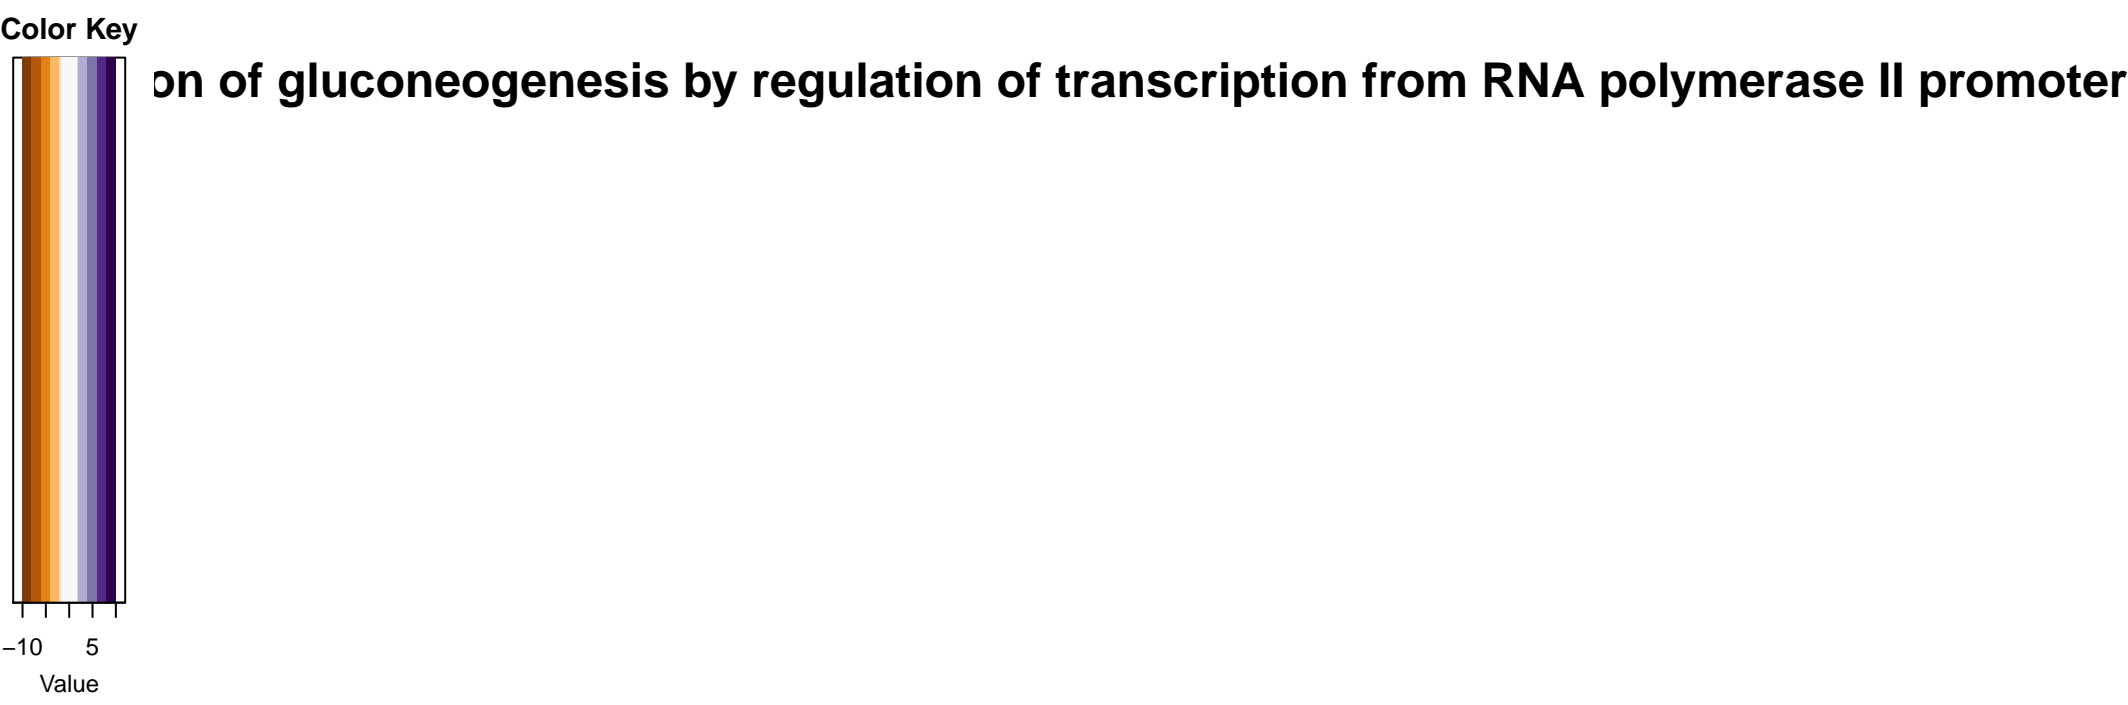

Gene

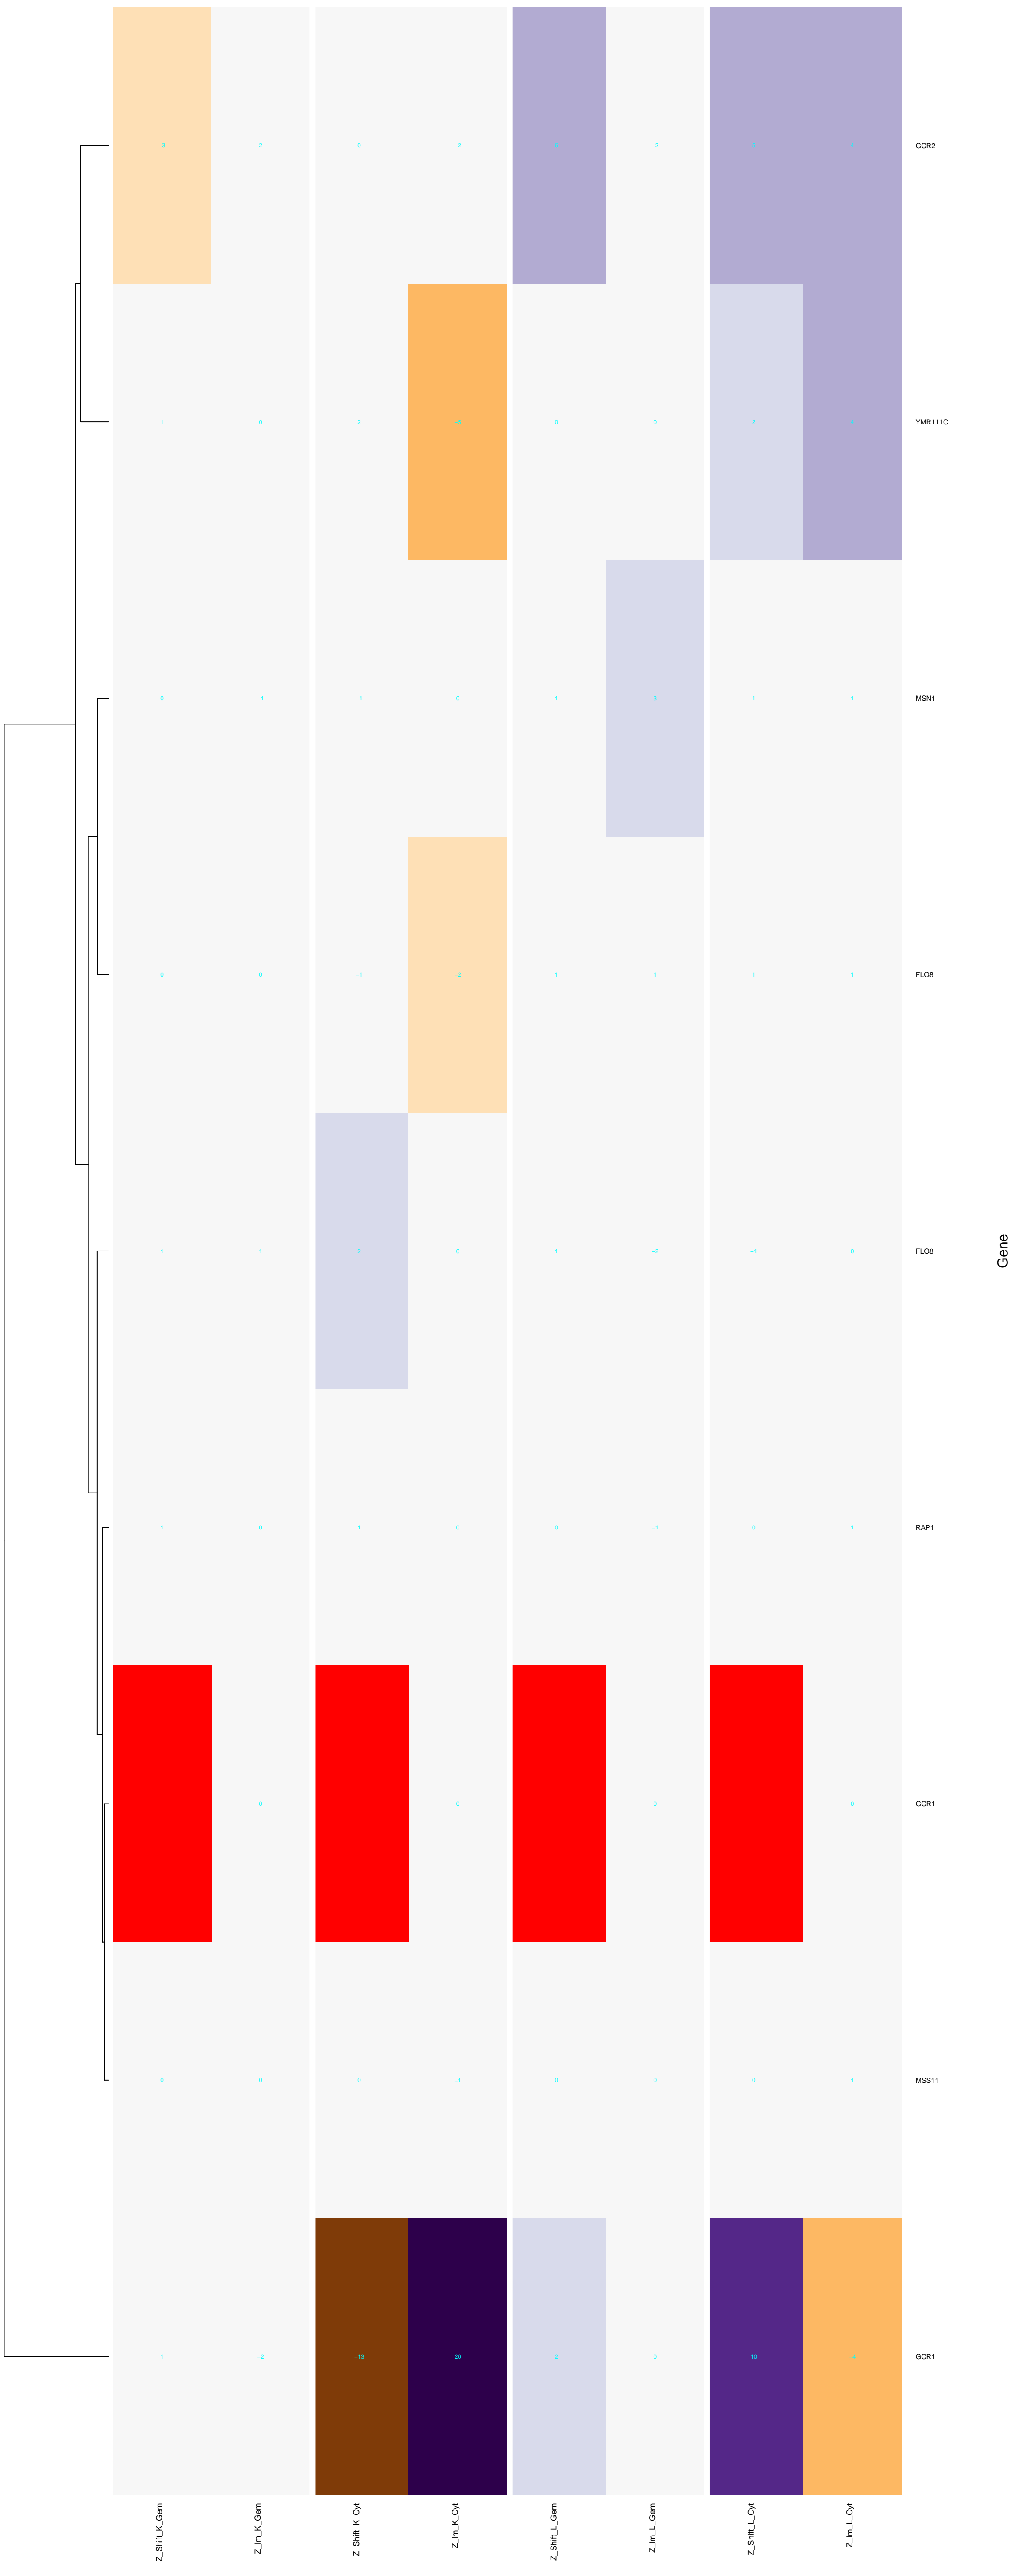



positive regulation of phosphorylation of RNA polymerase II C-terminal domain

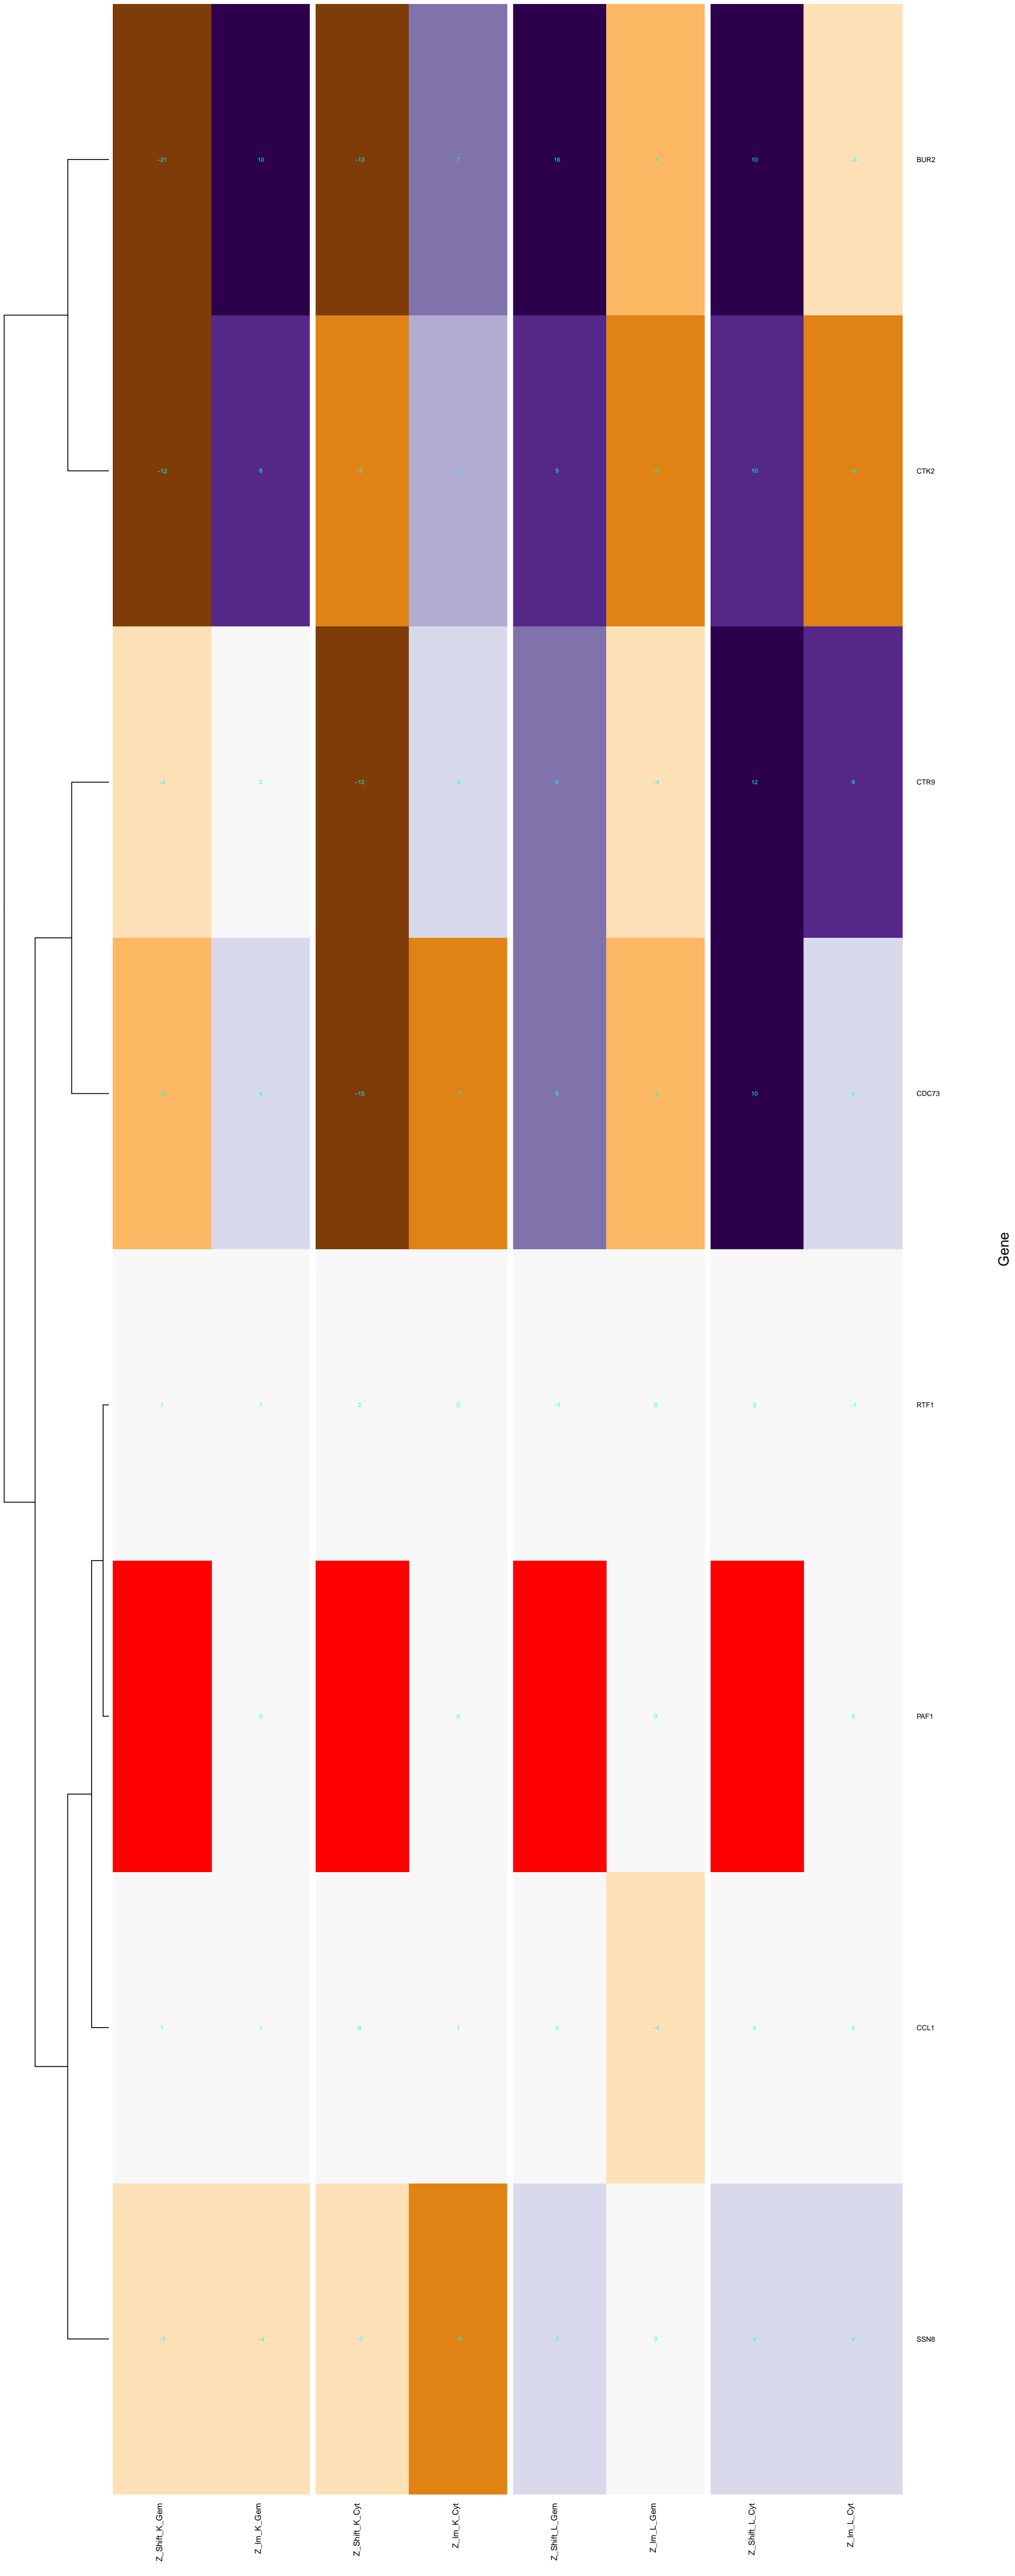



ation of phosphorylation of RNA polymerase II C-terminal domain serine 2 residues

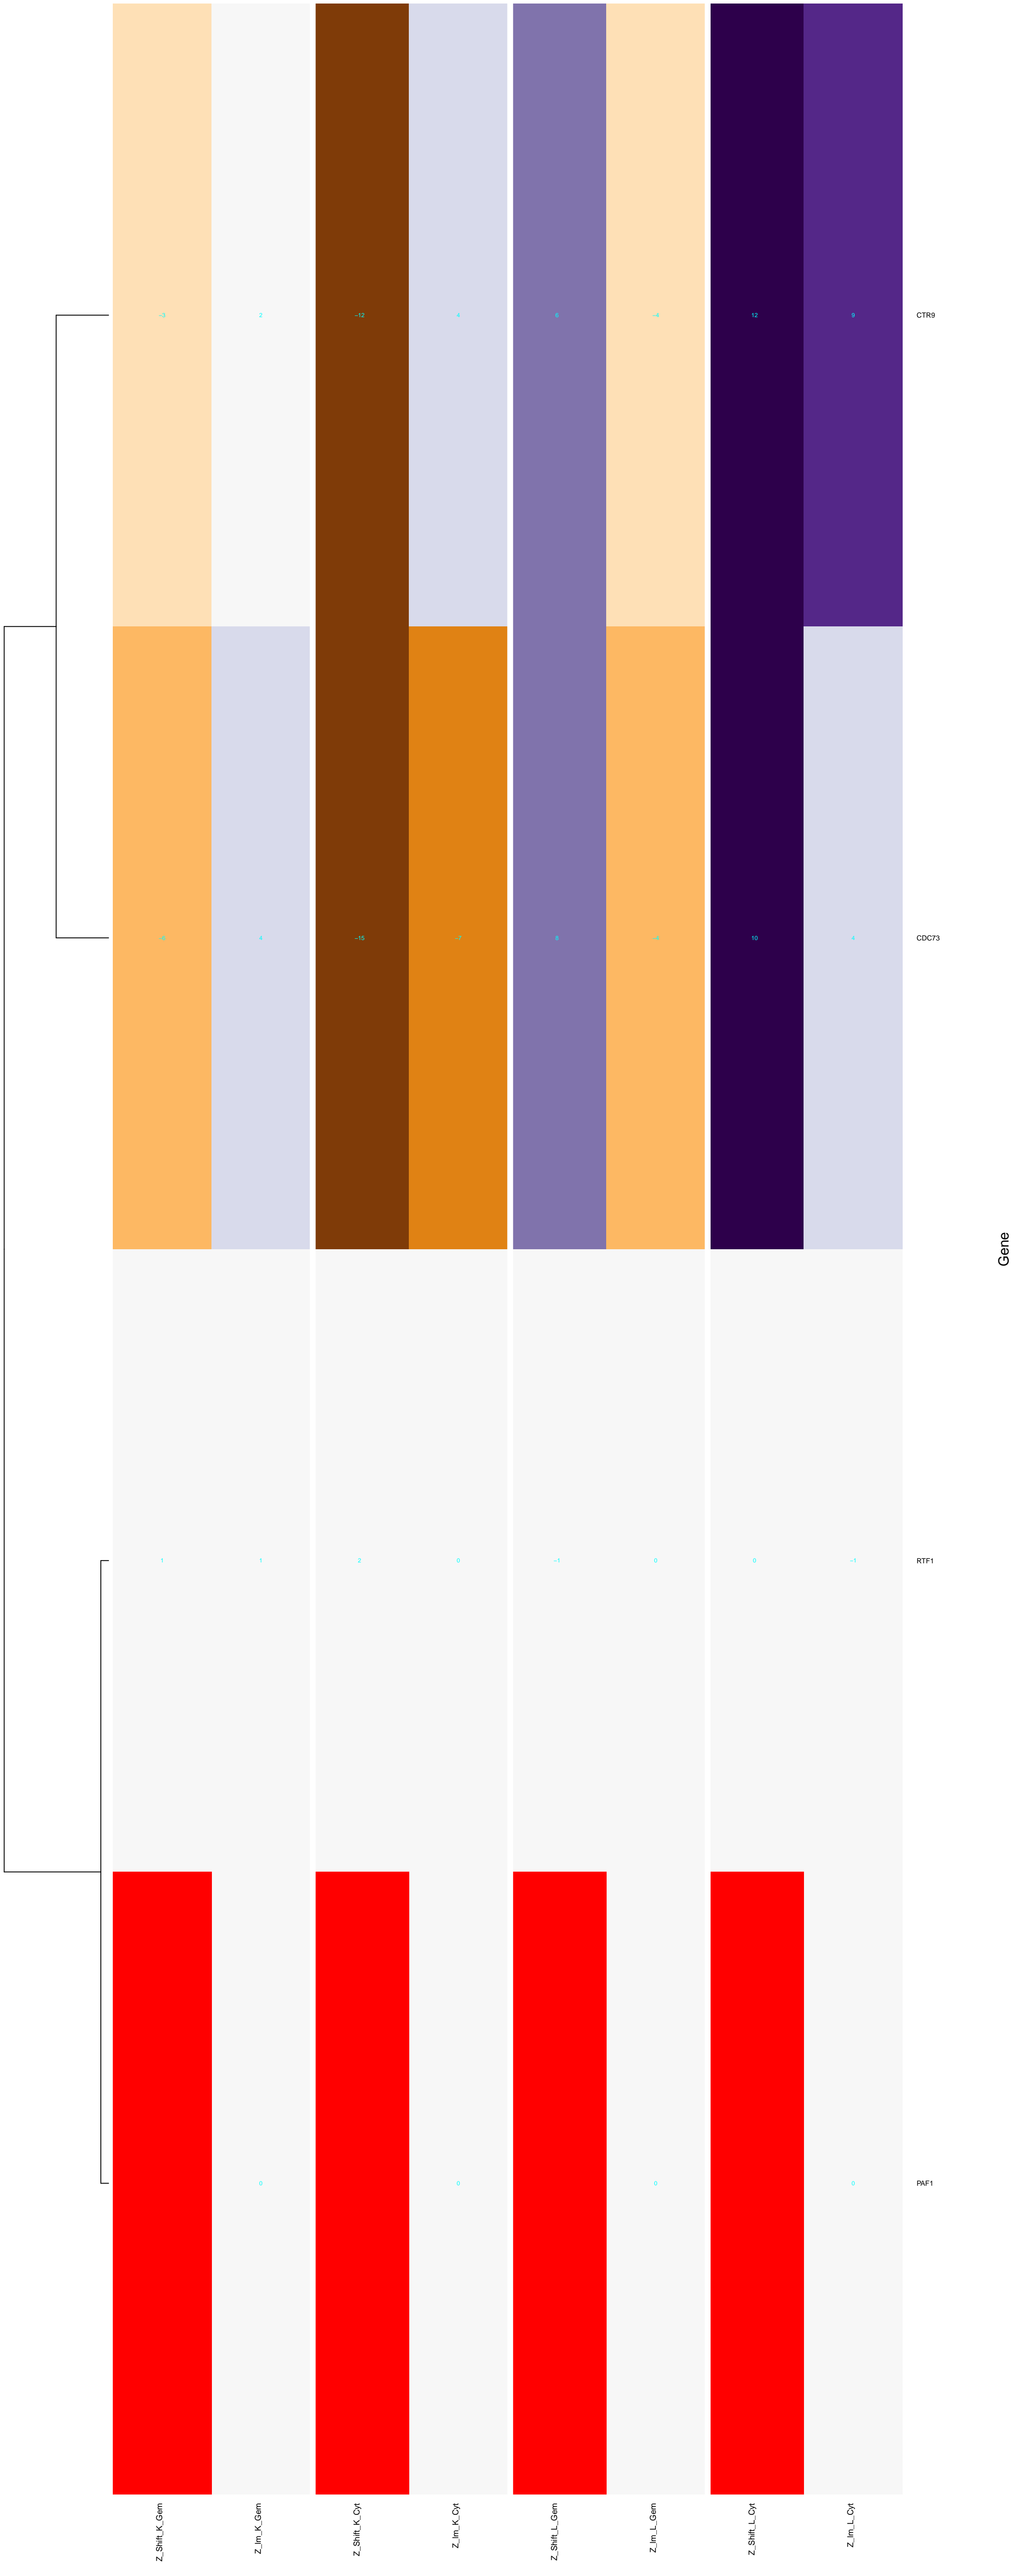

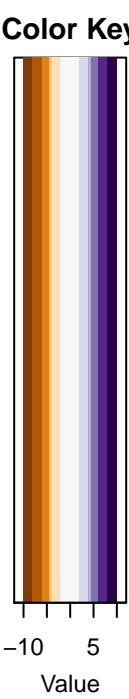

transcription antitermination

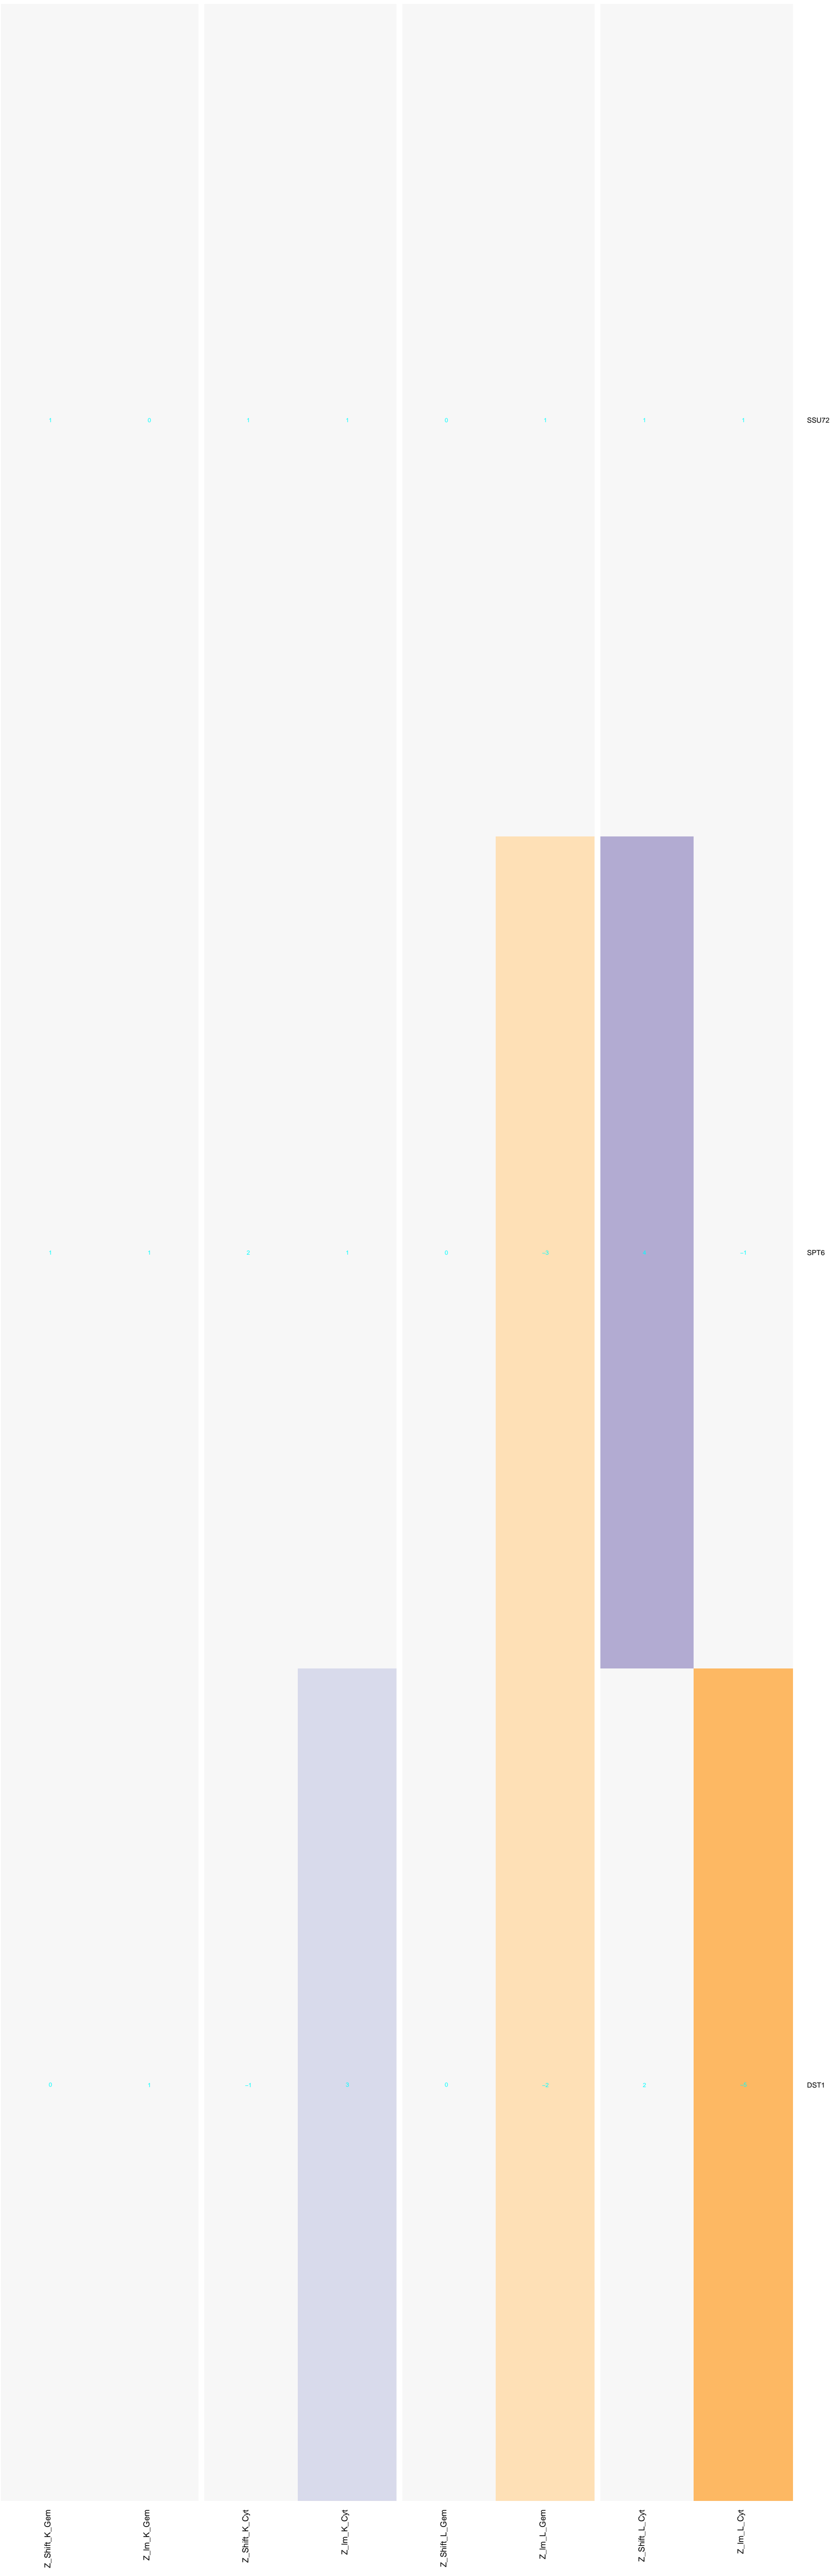

Gene

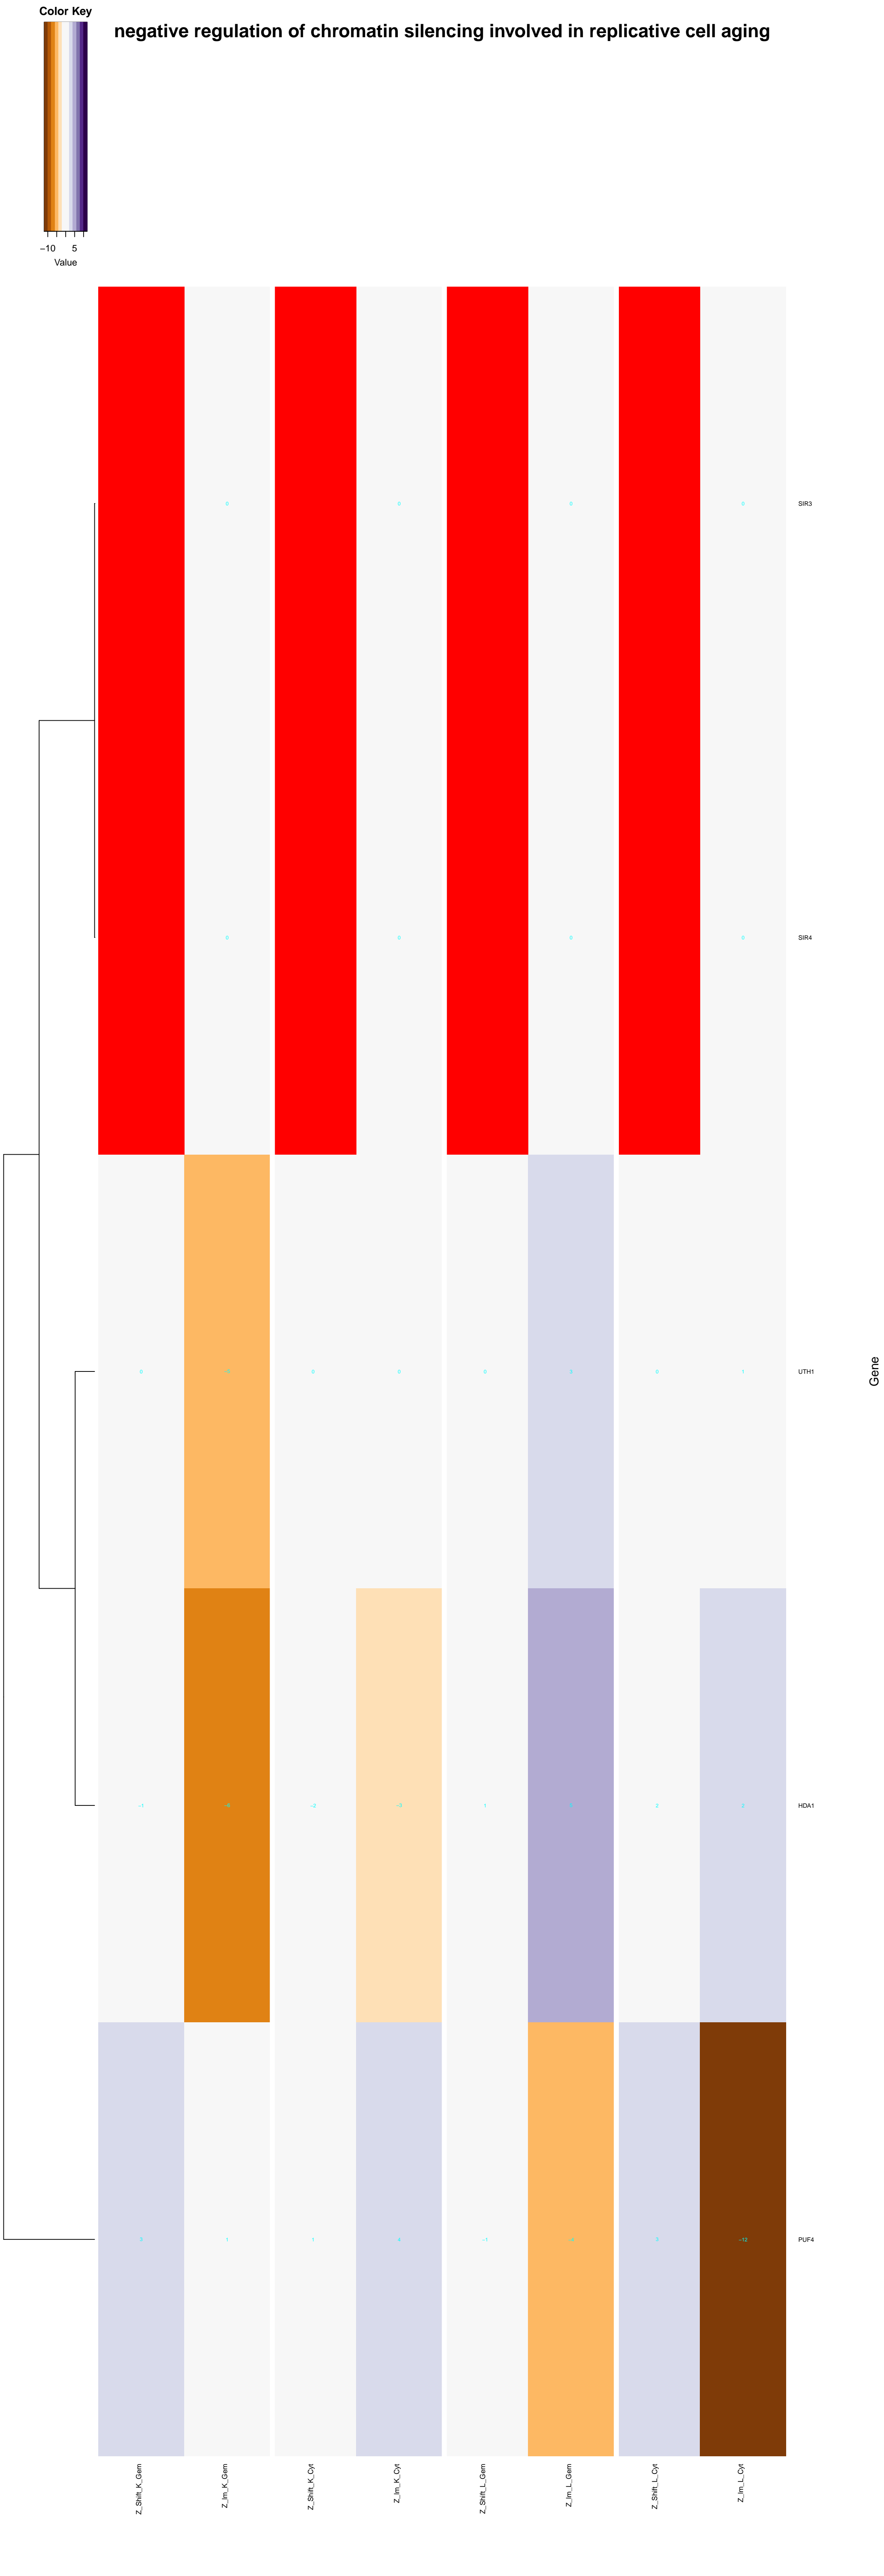

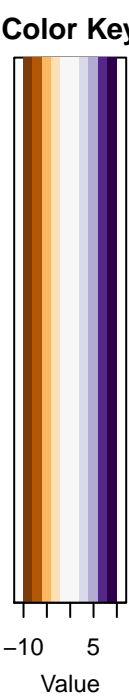

negative regulation of chromatin silencing at telomere

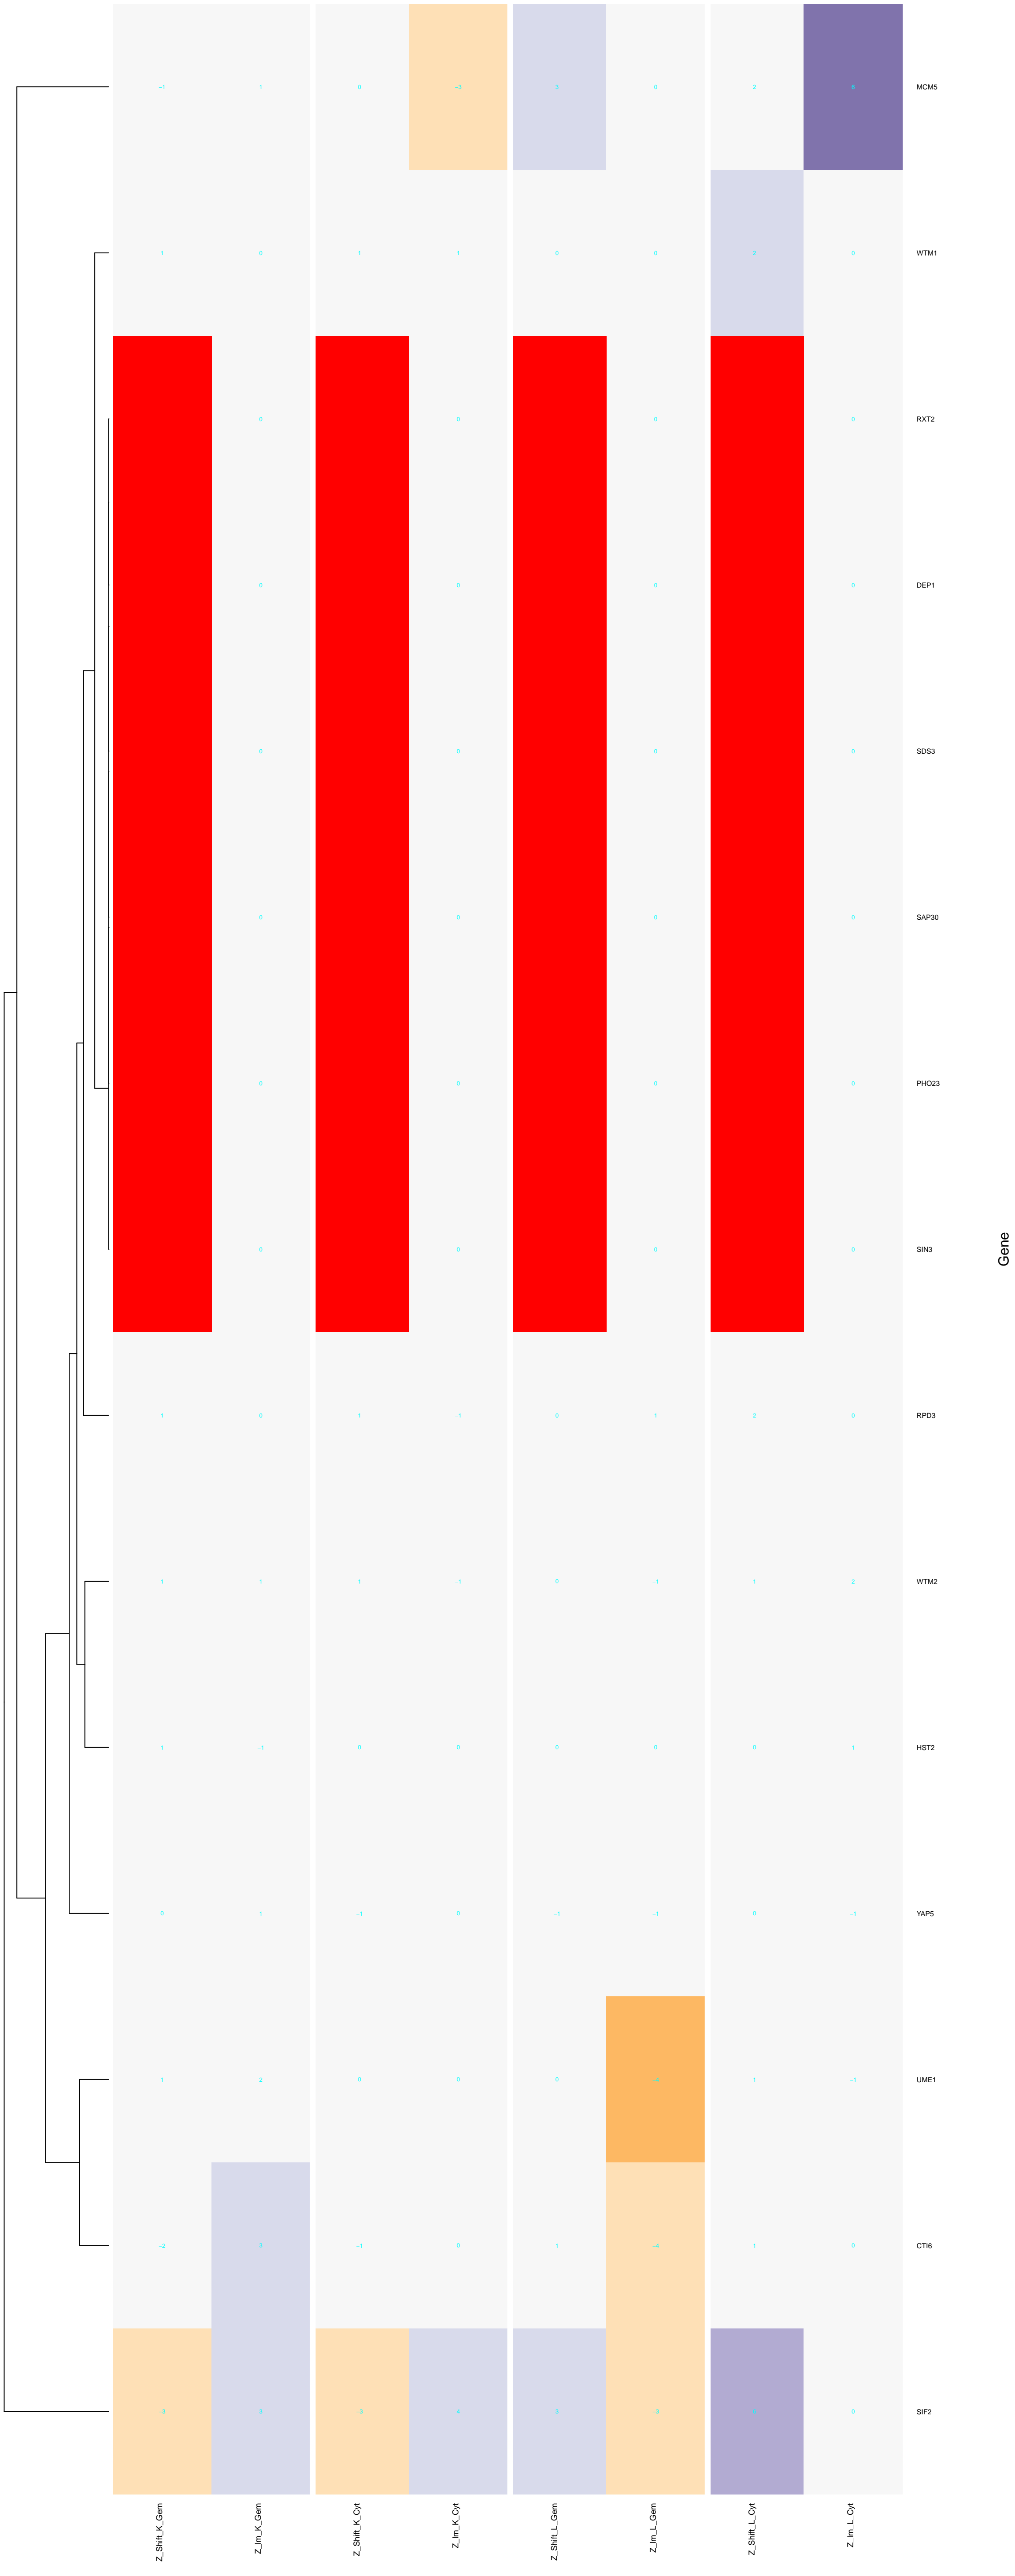



negative regulation of chromatin silencing at silent mating-type cassette

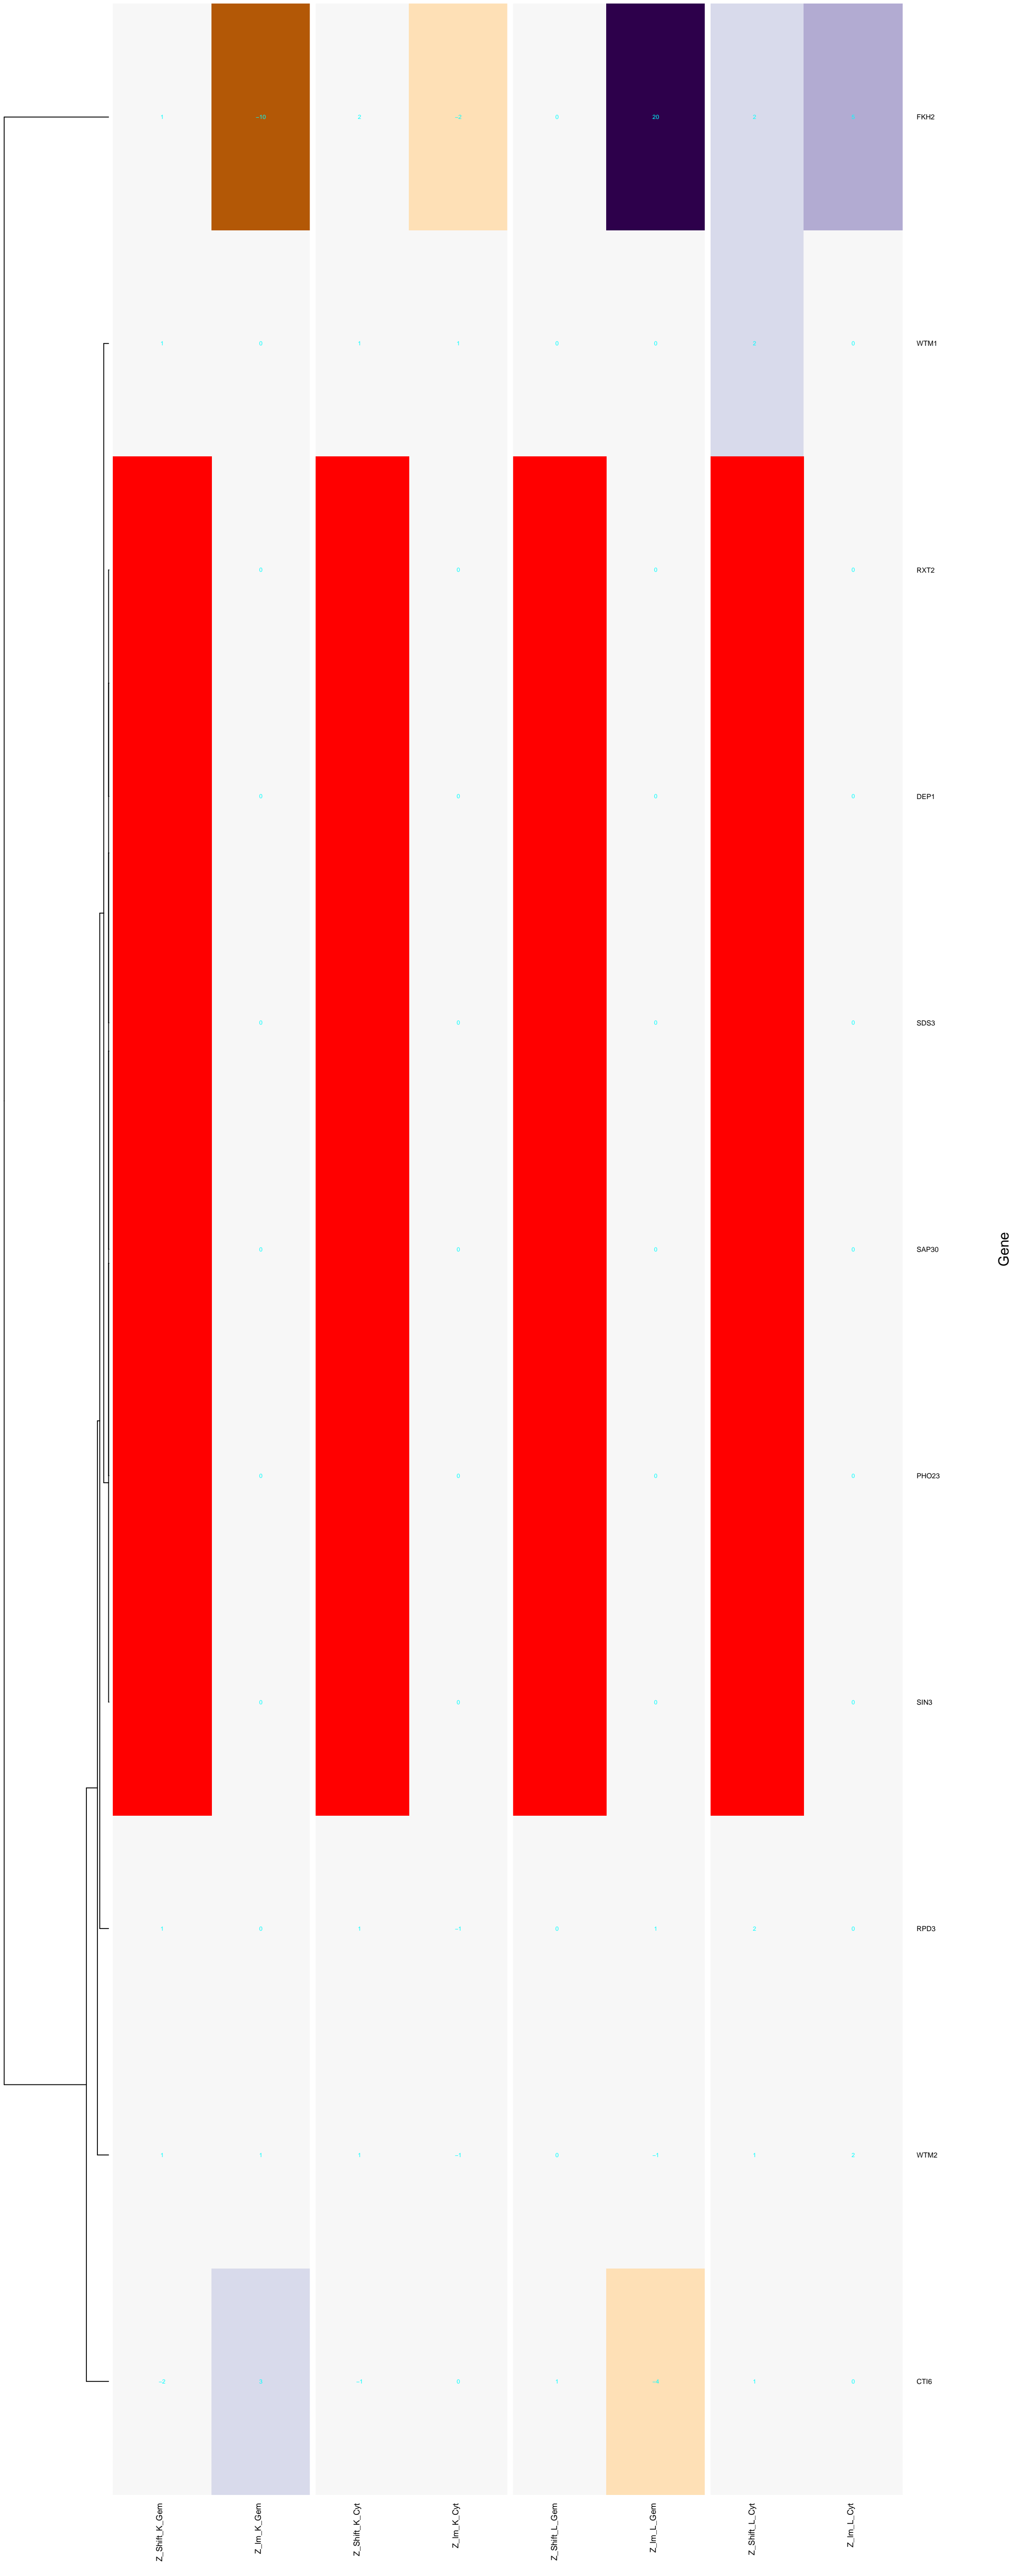

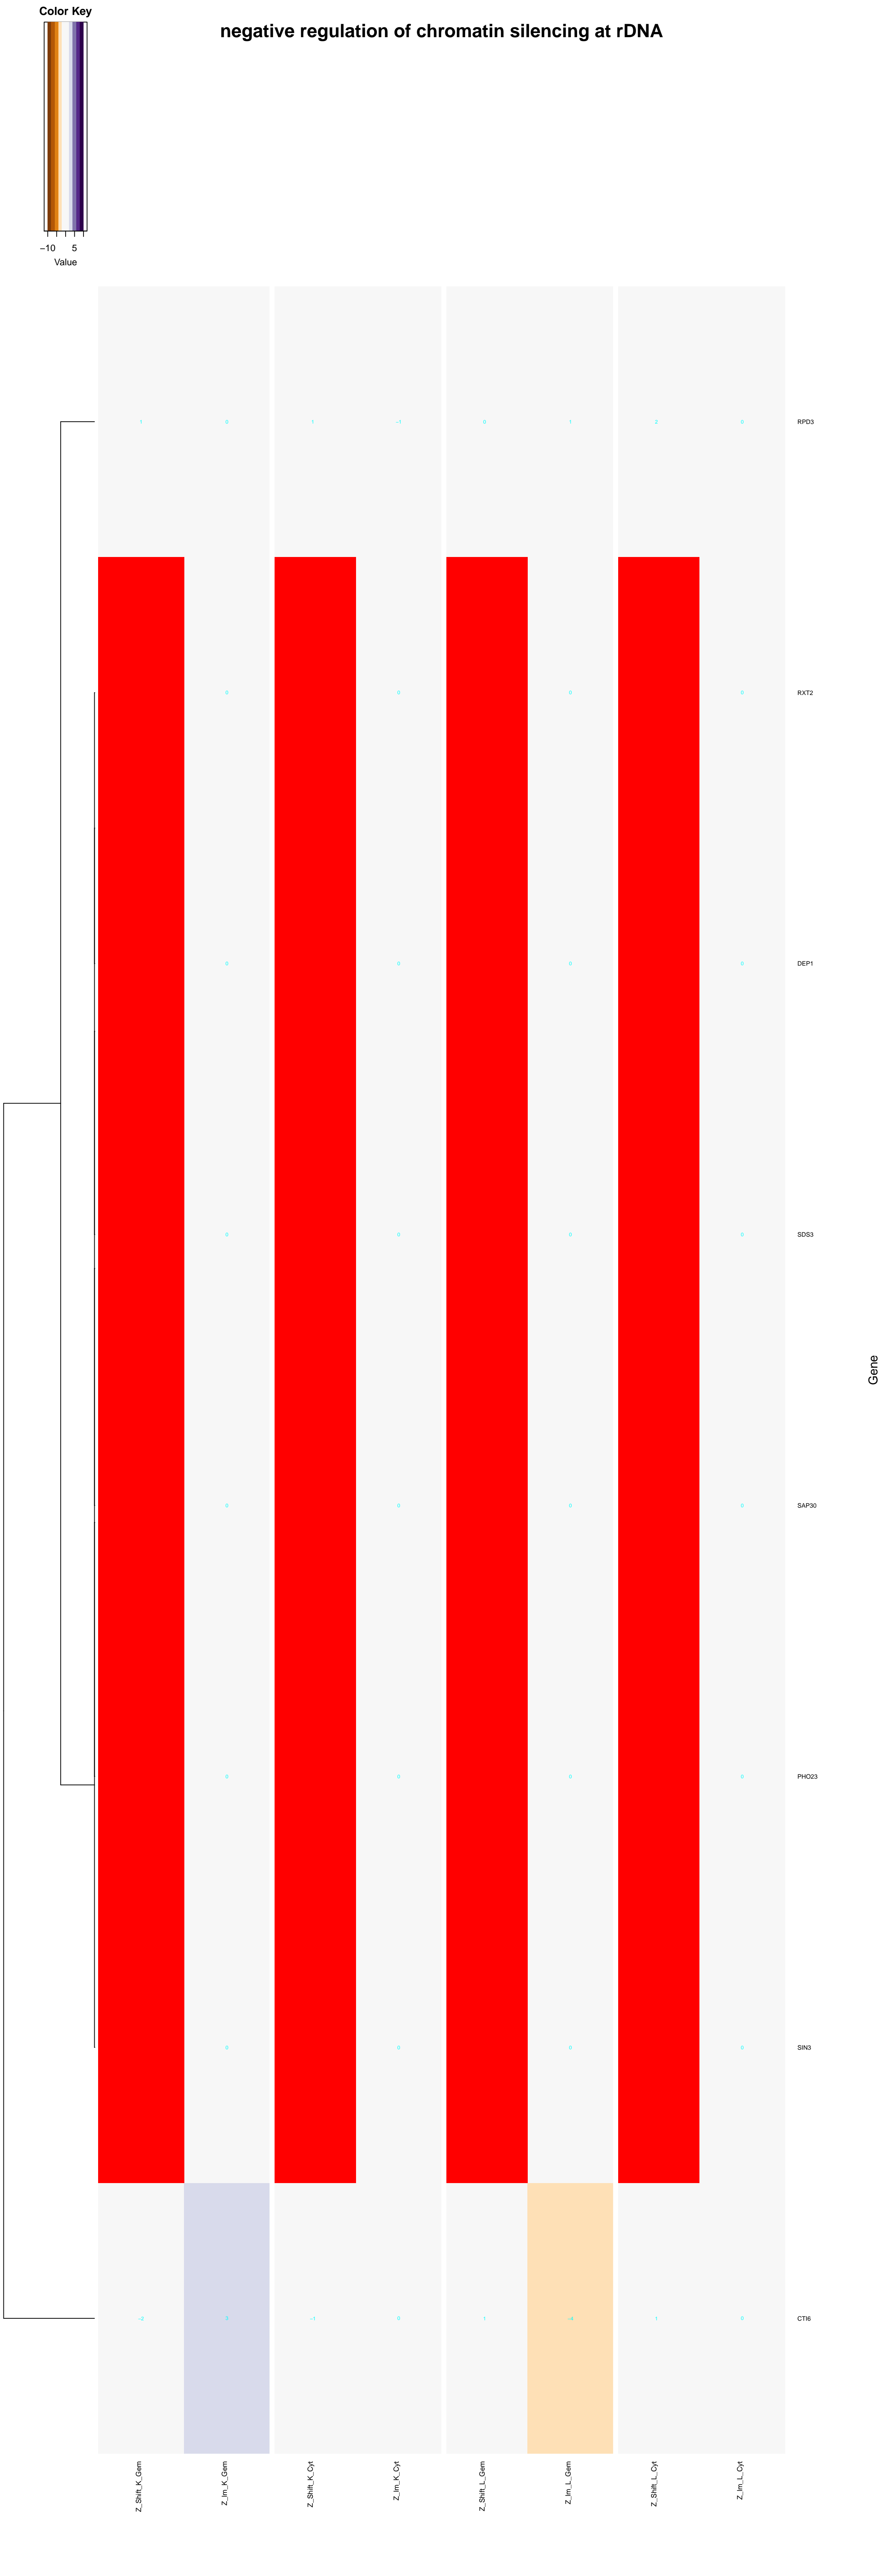

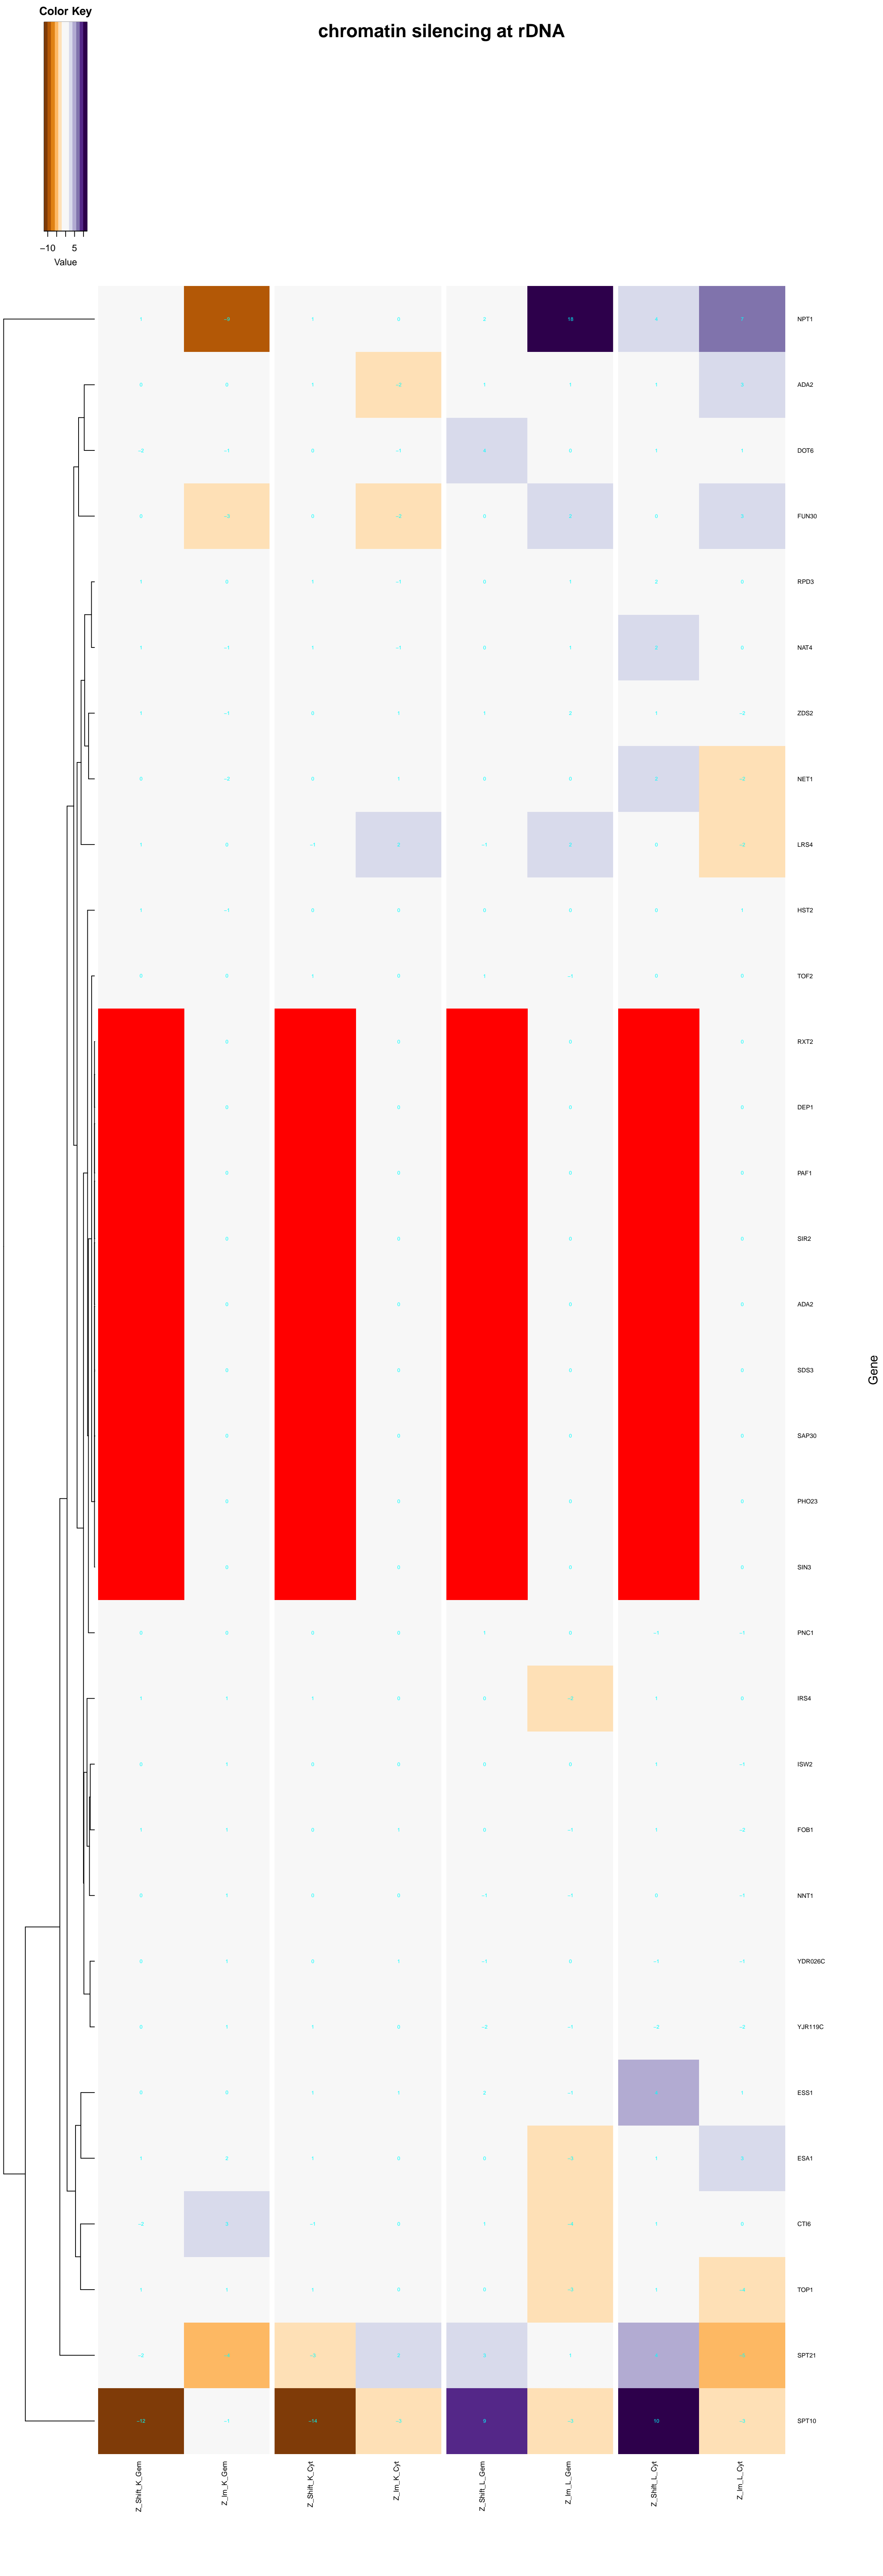

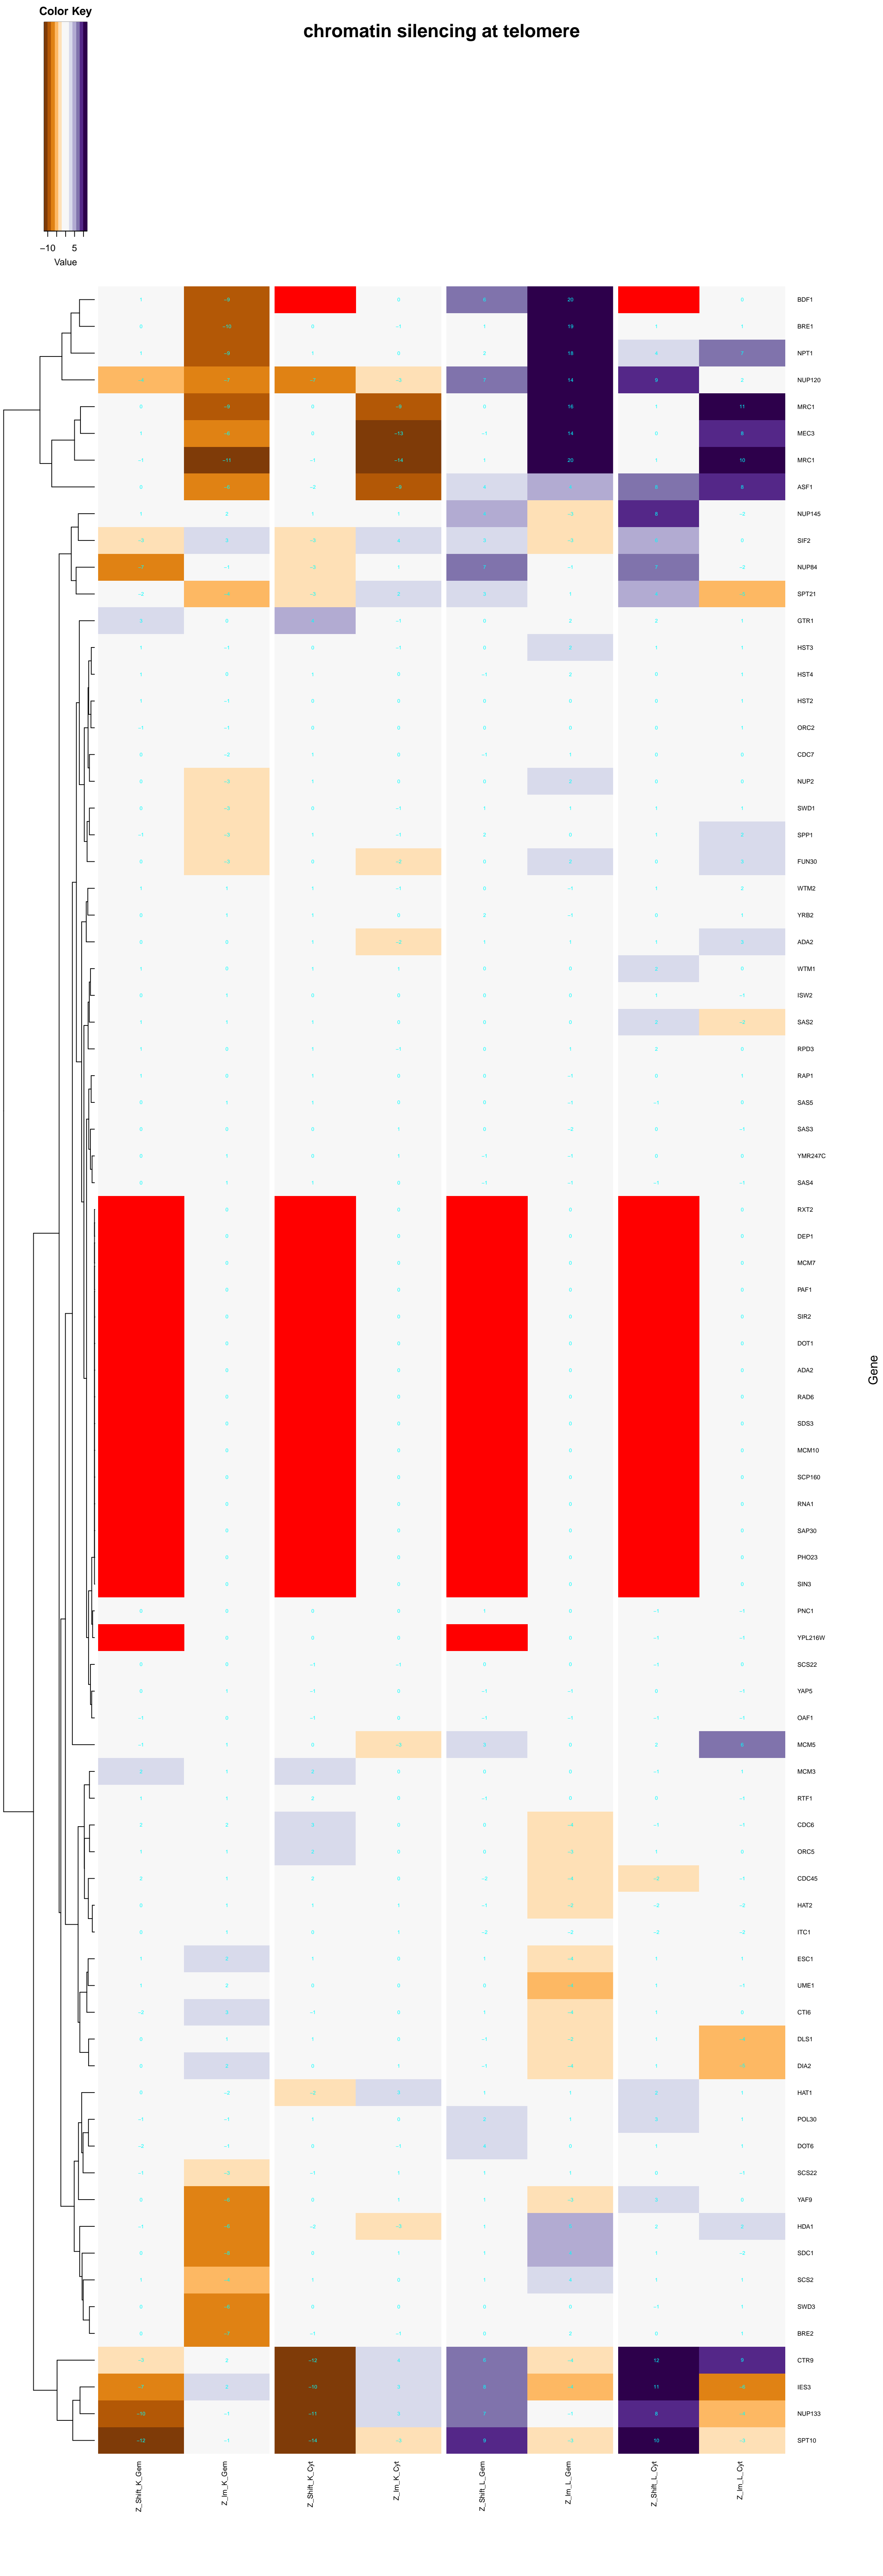

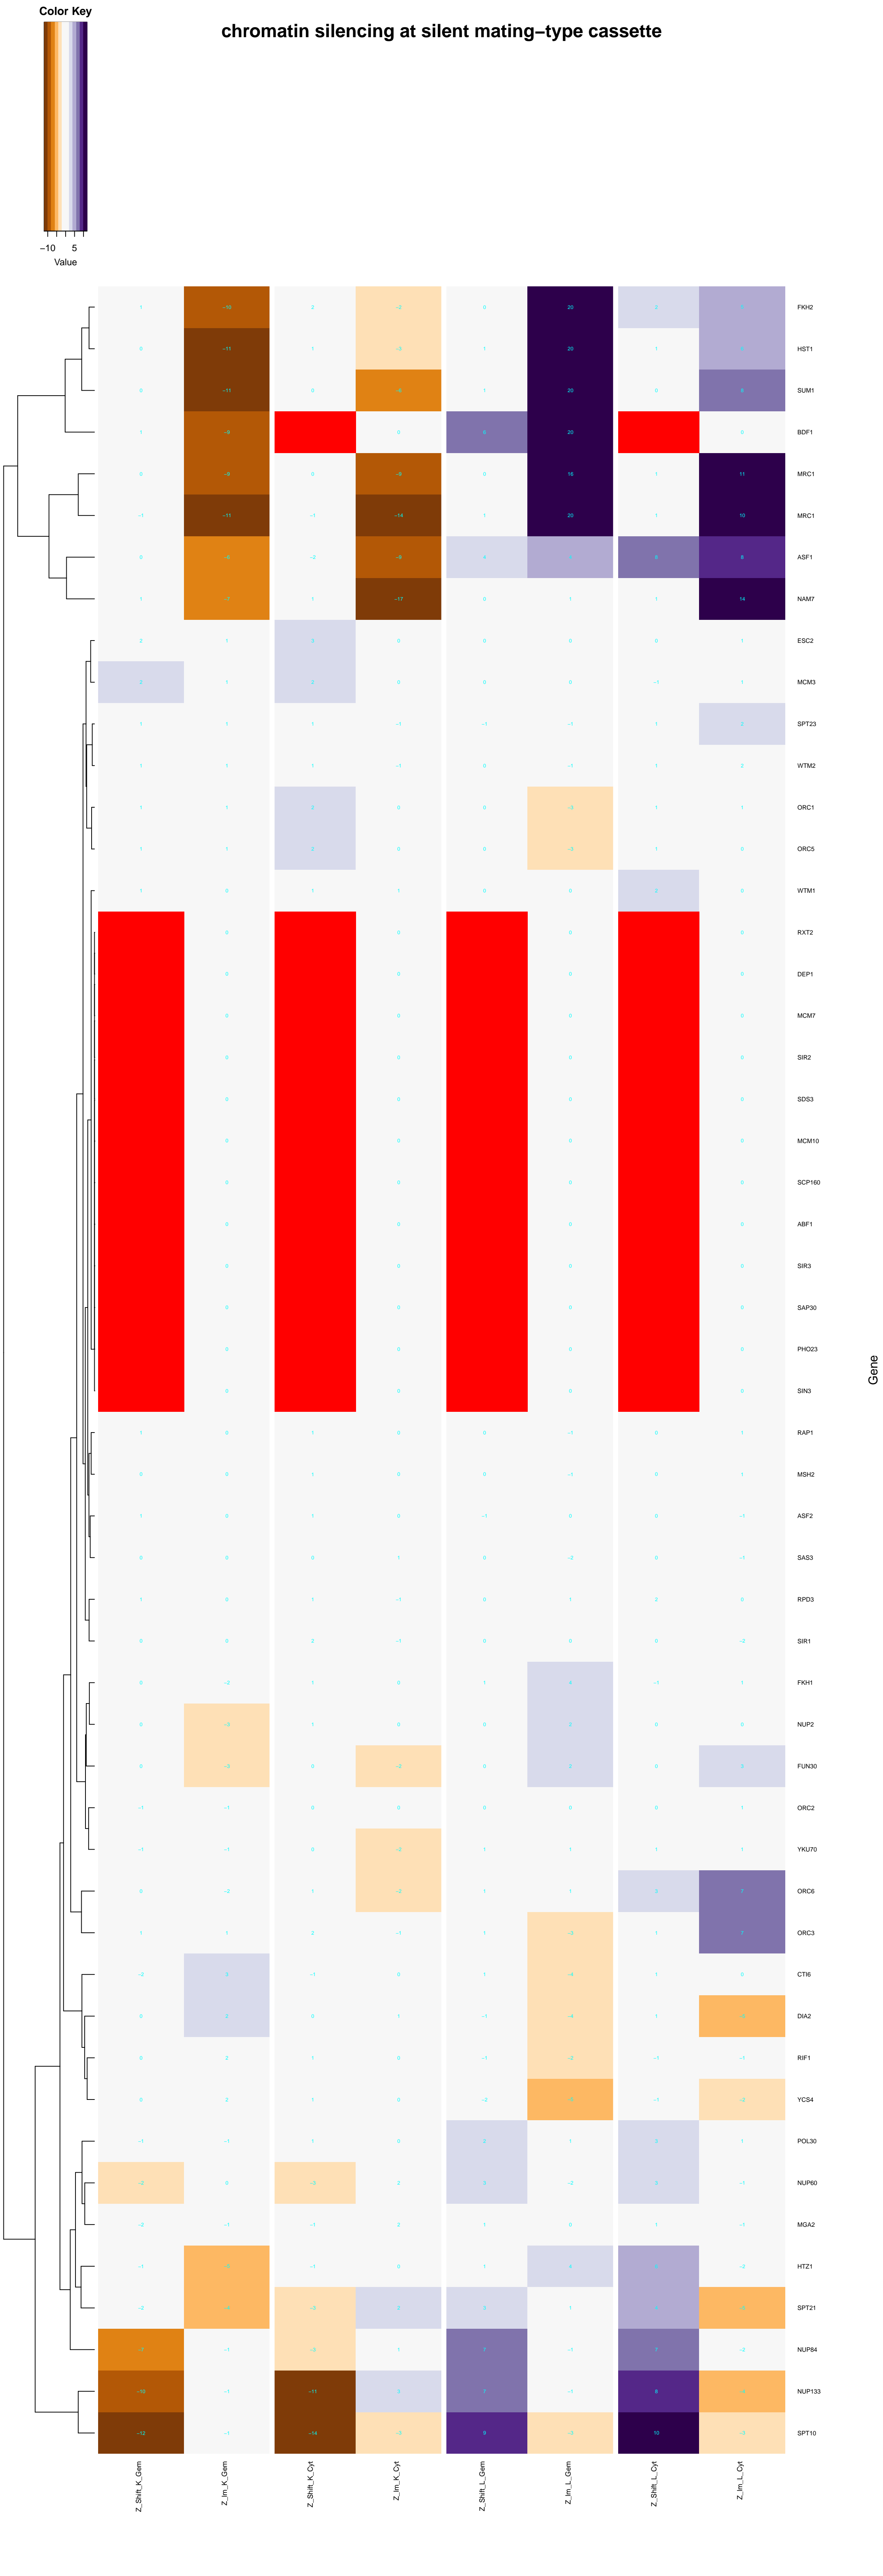

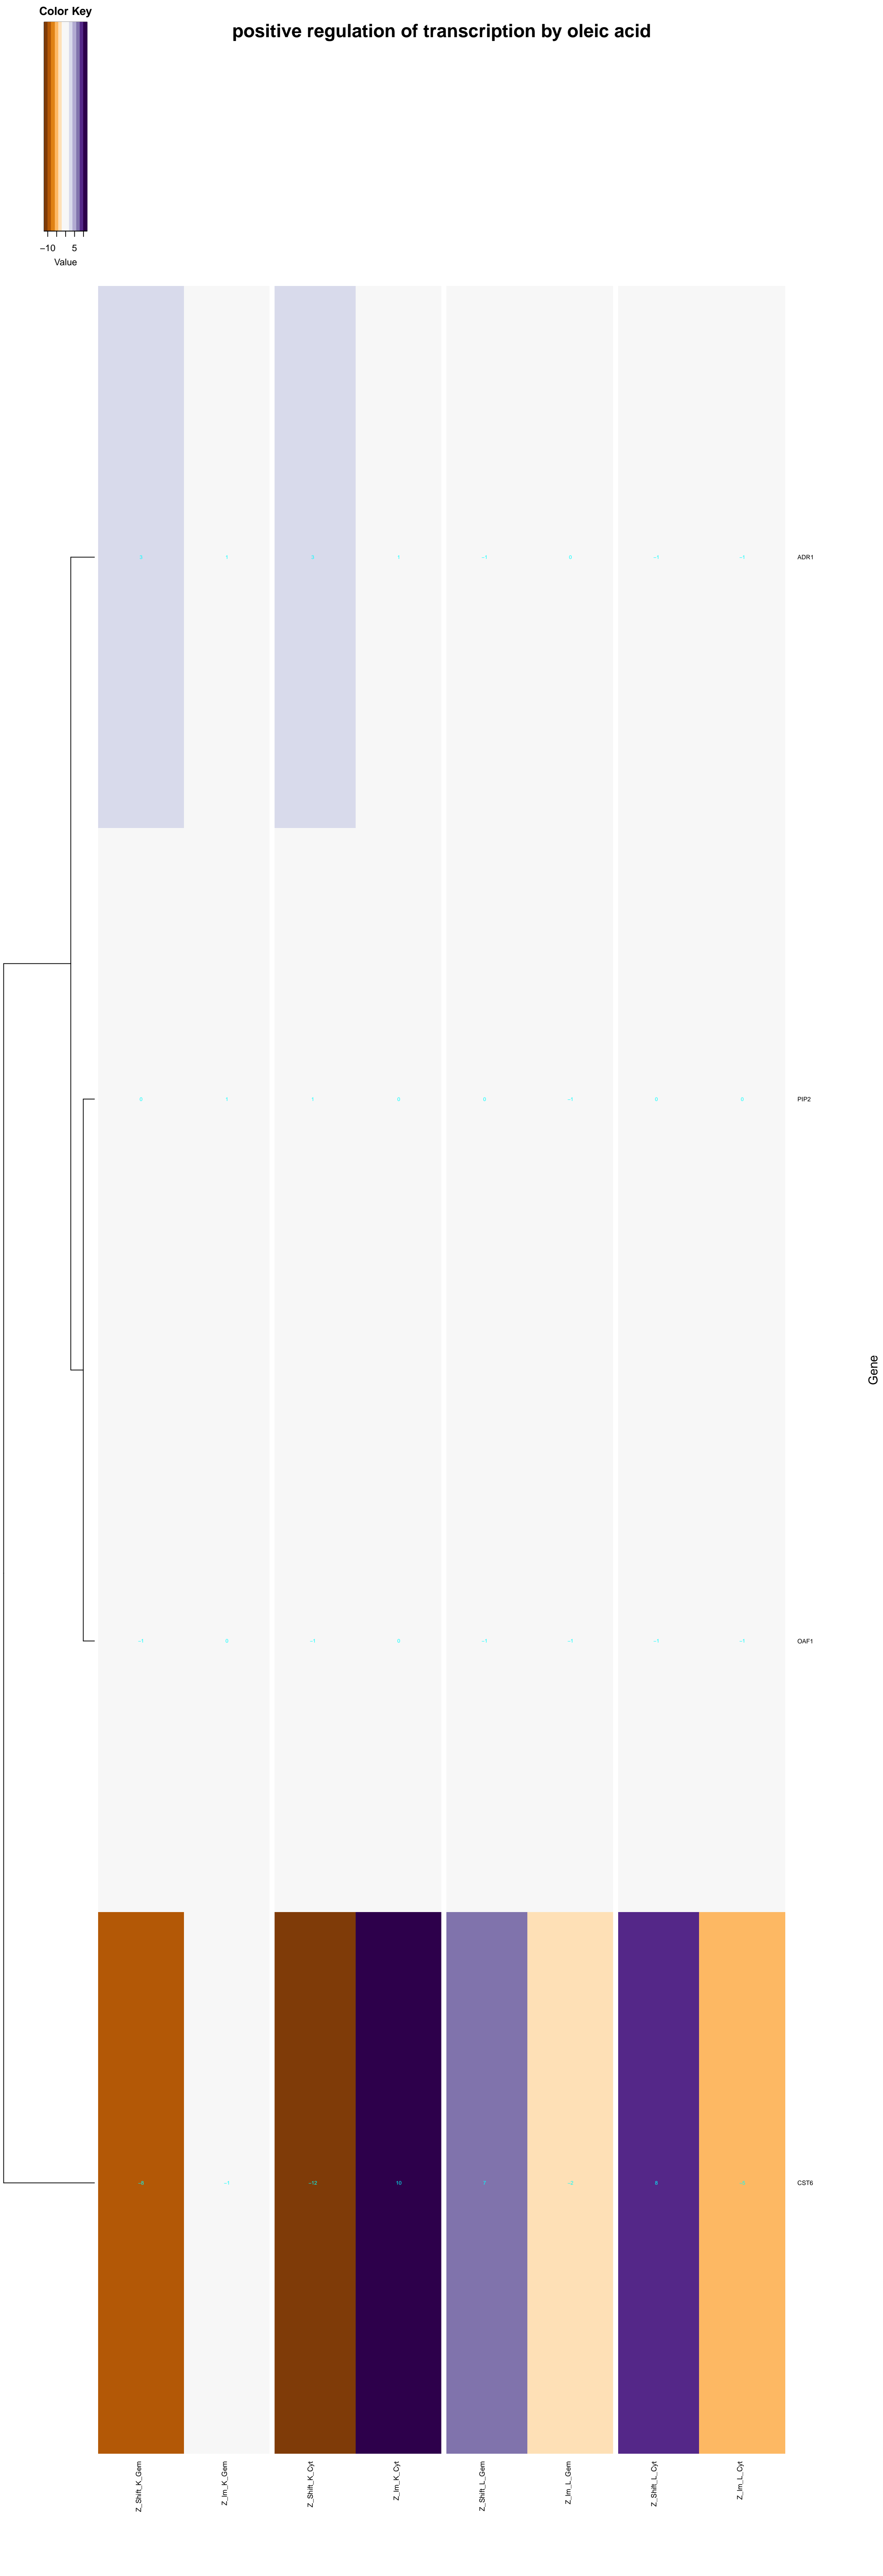



egative regulation of transcription from RNA polymerase II promoter by glucose

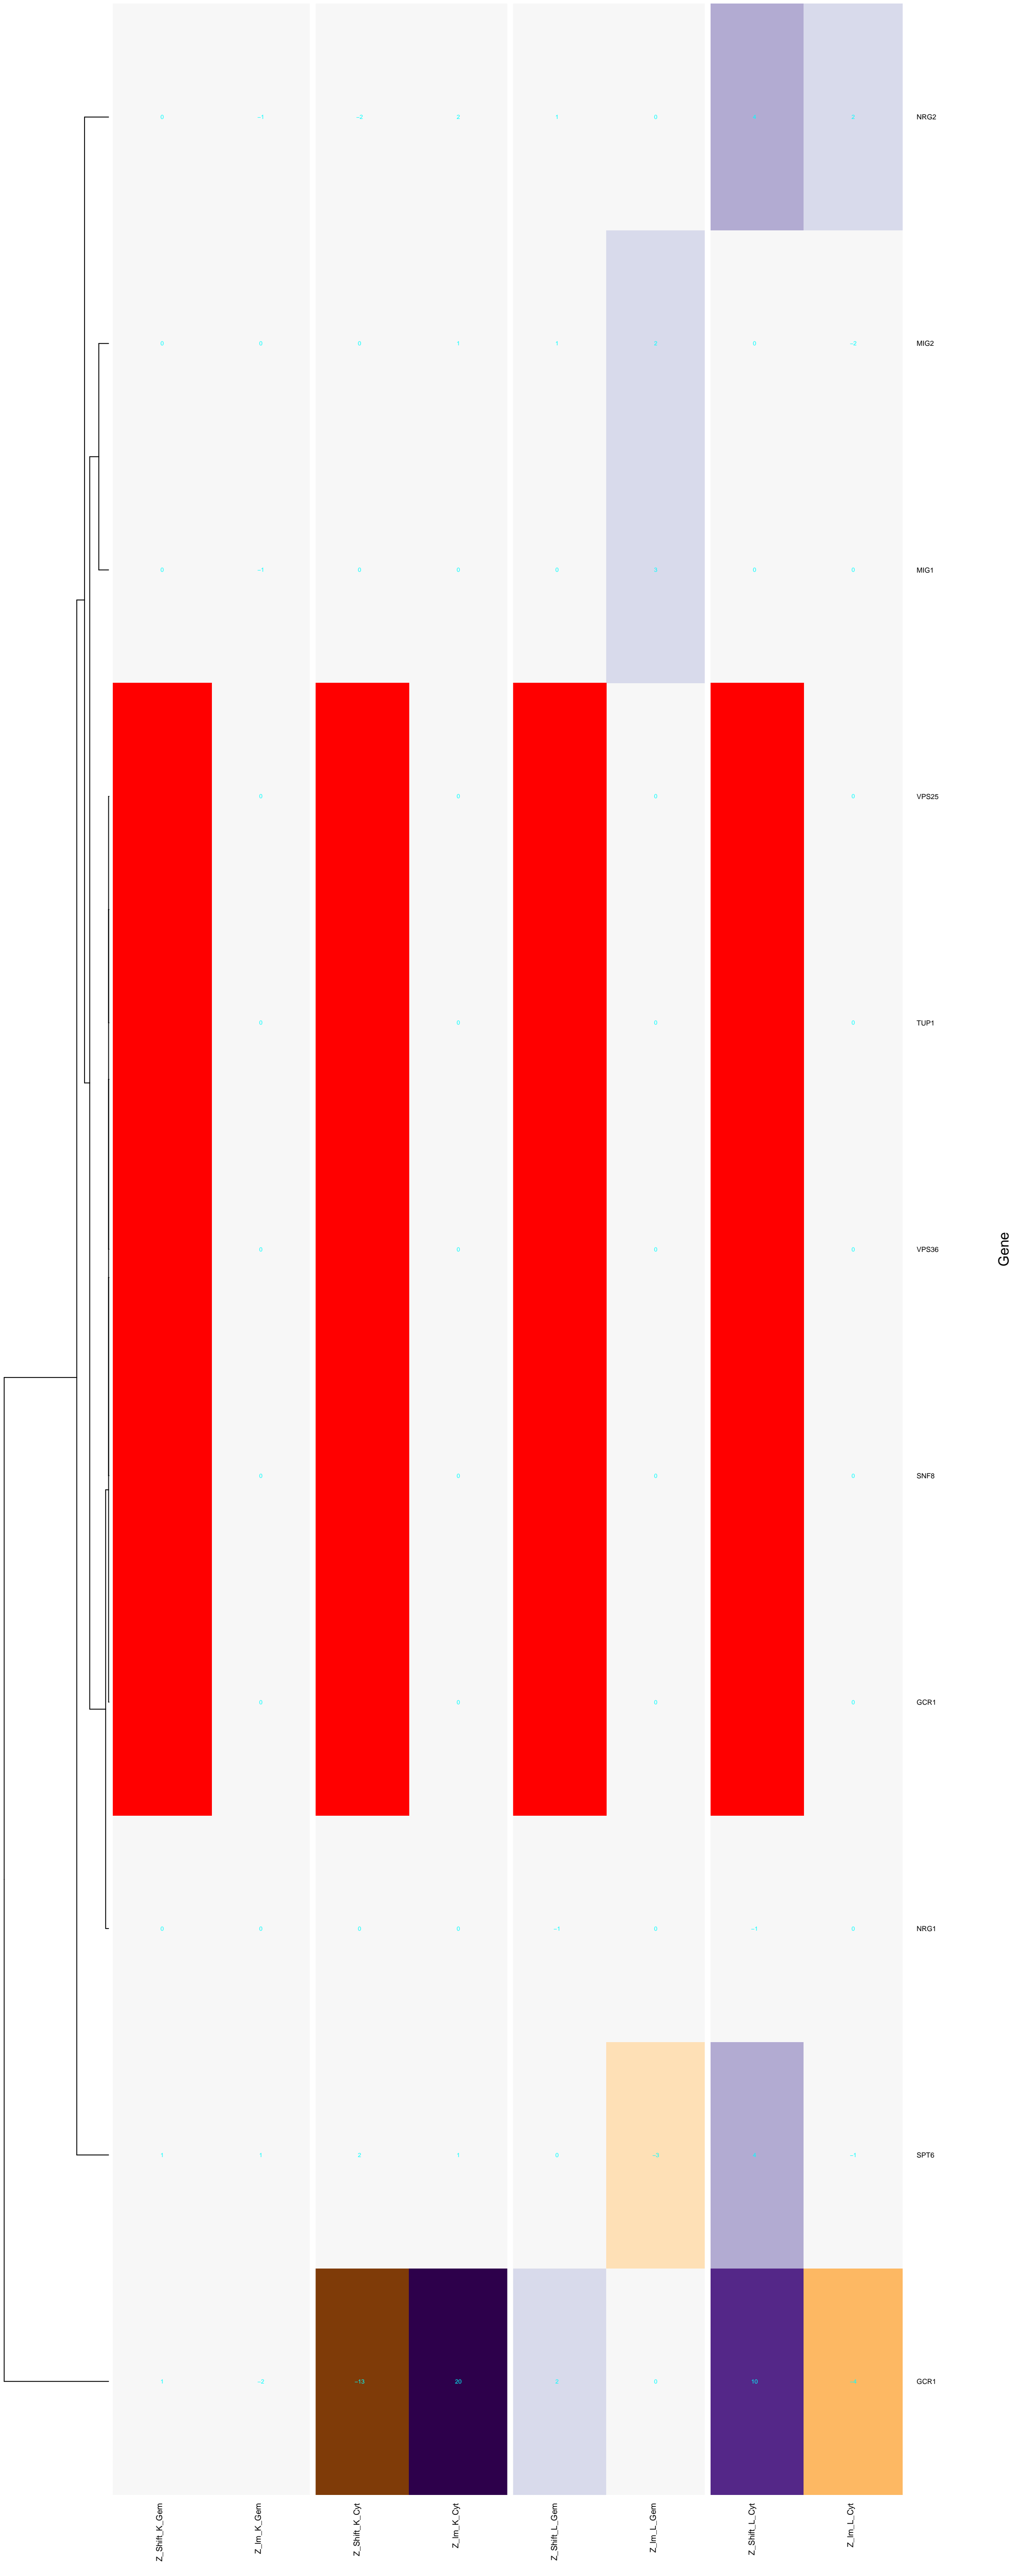

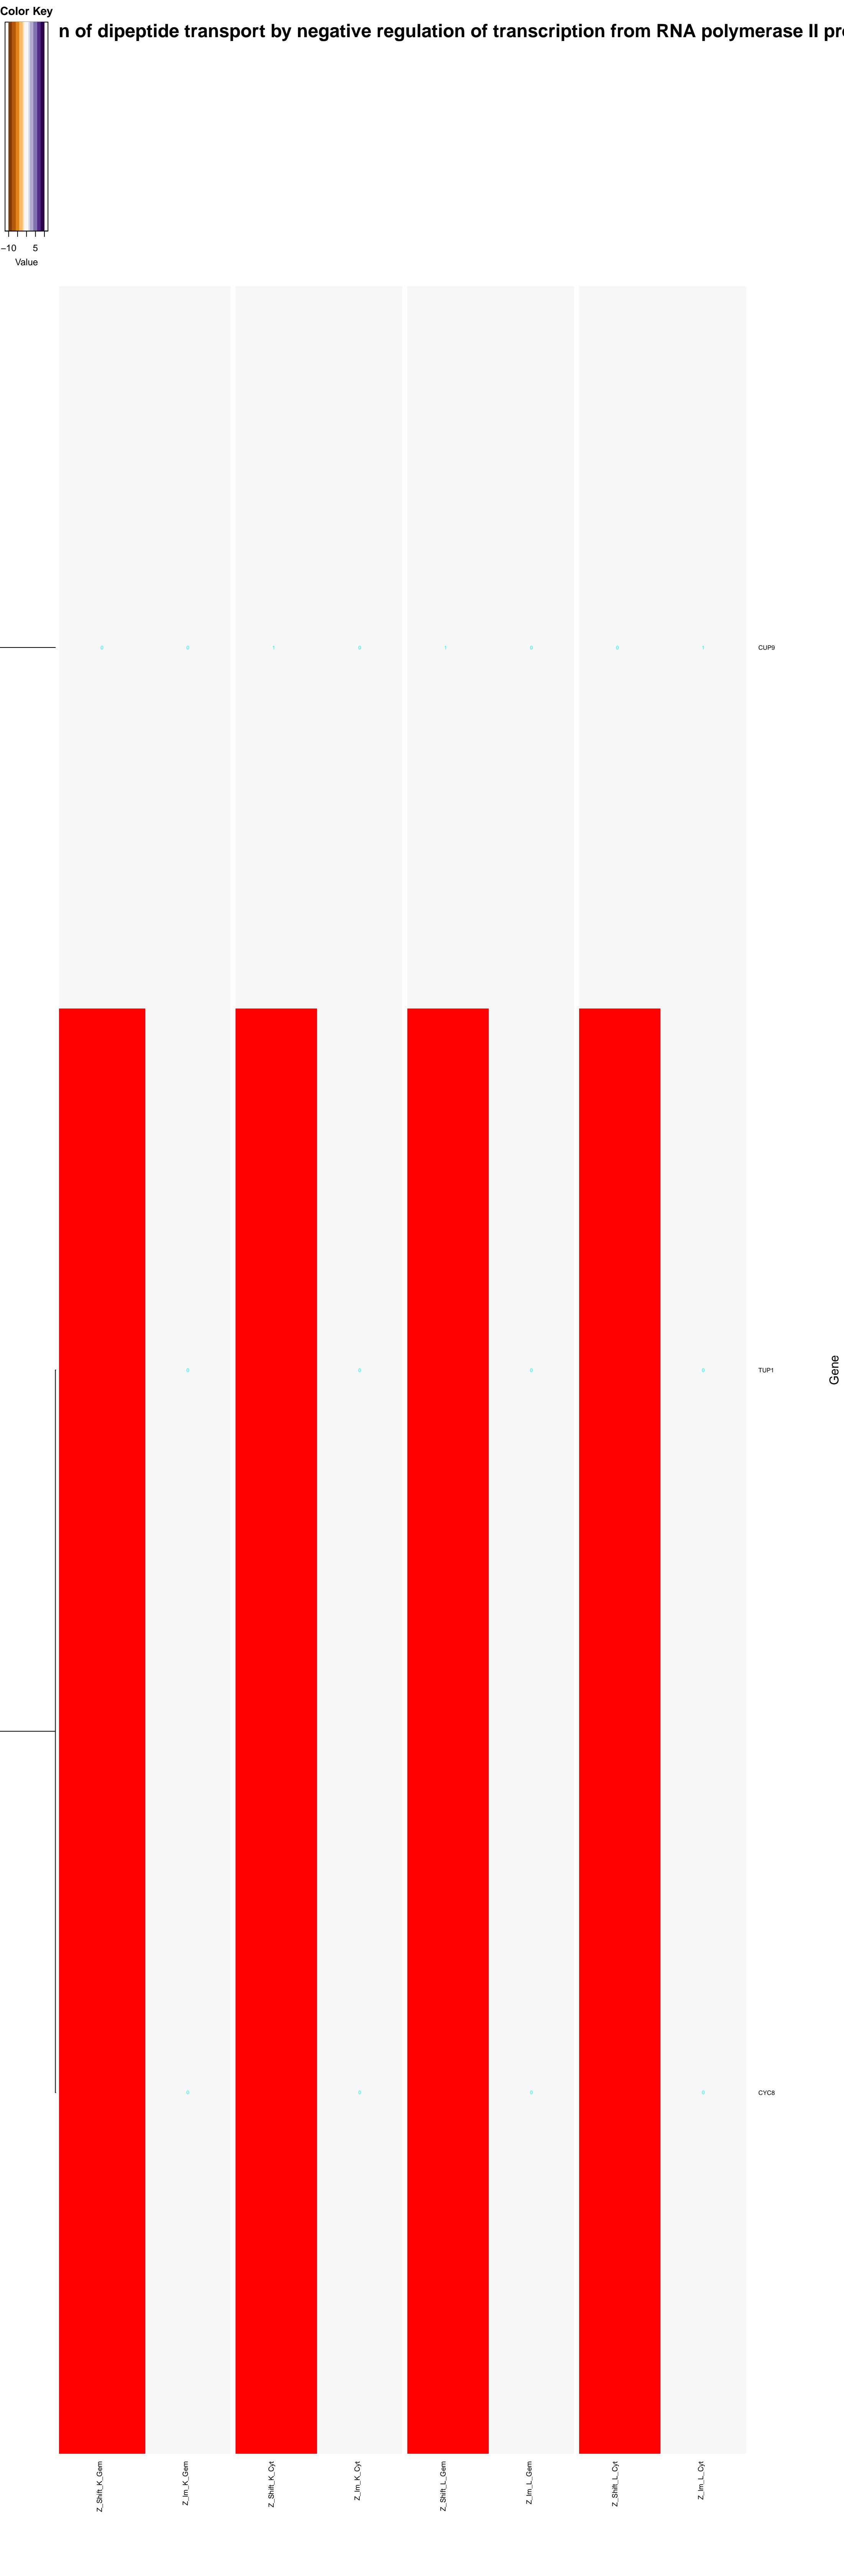

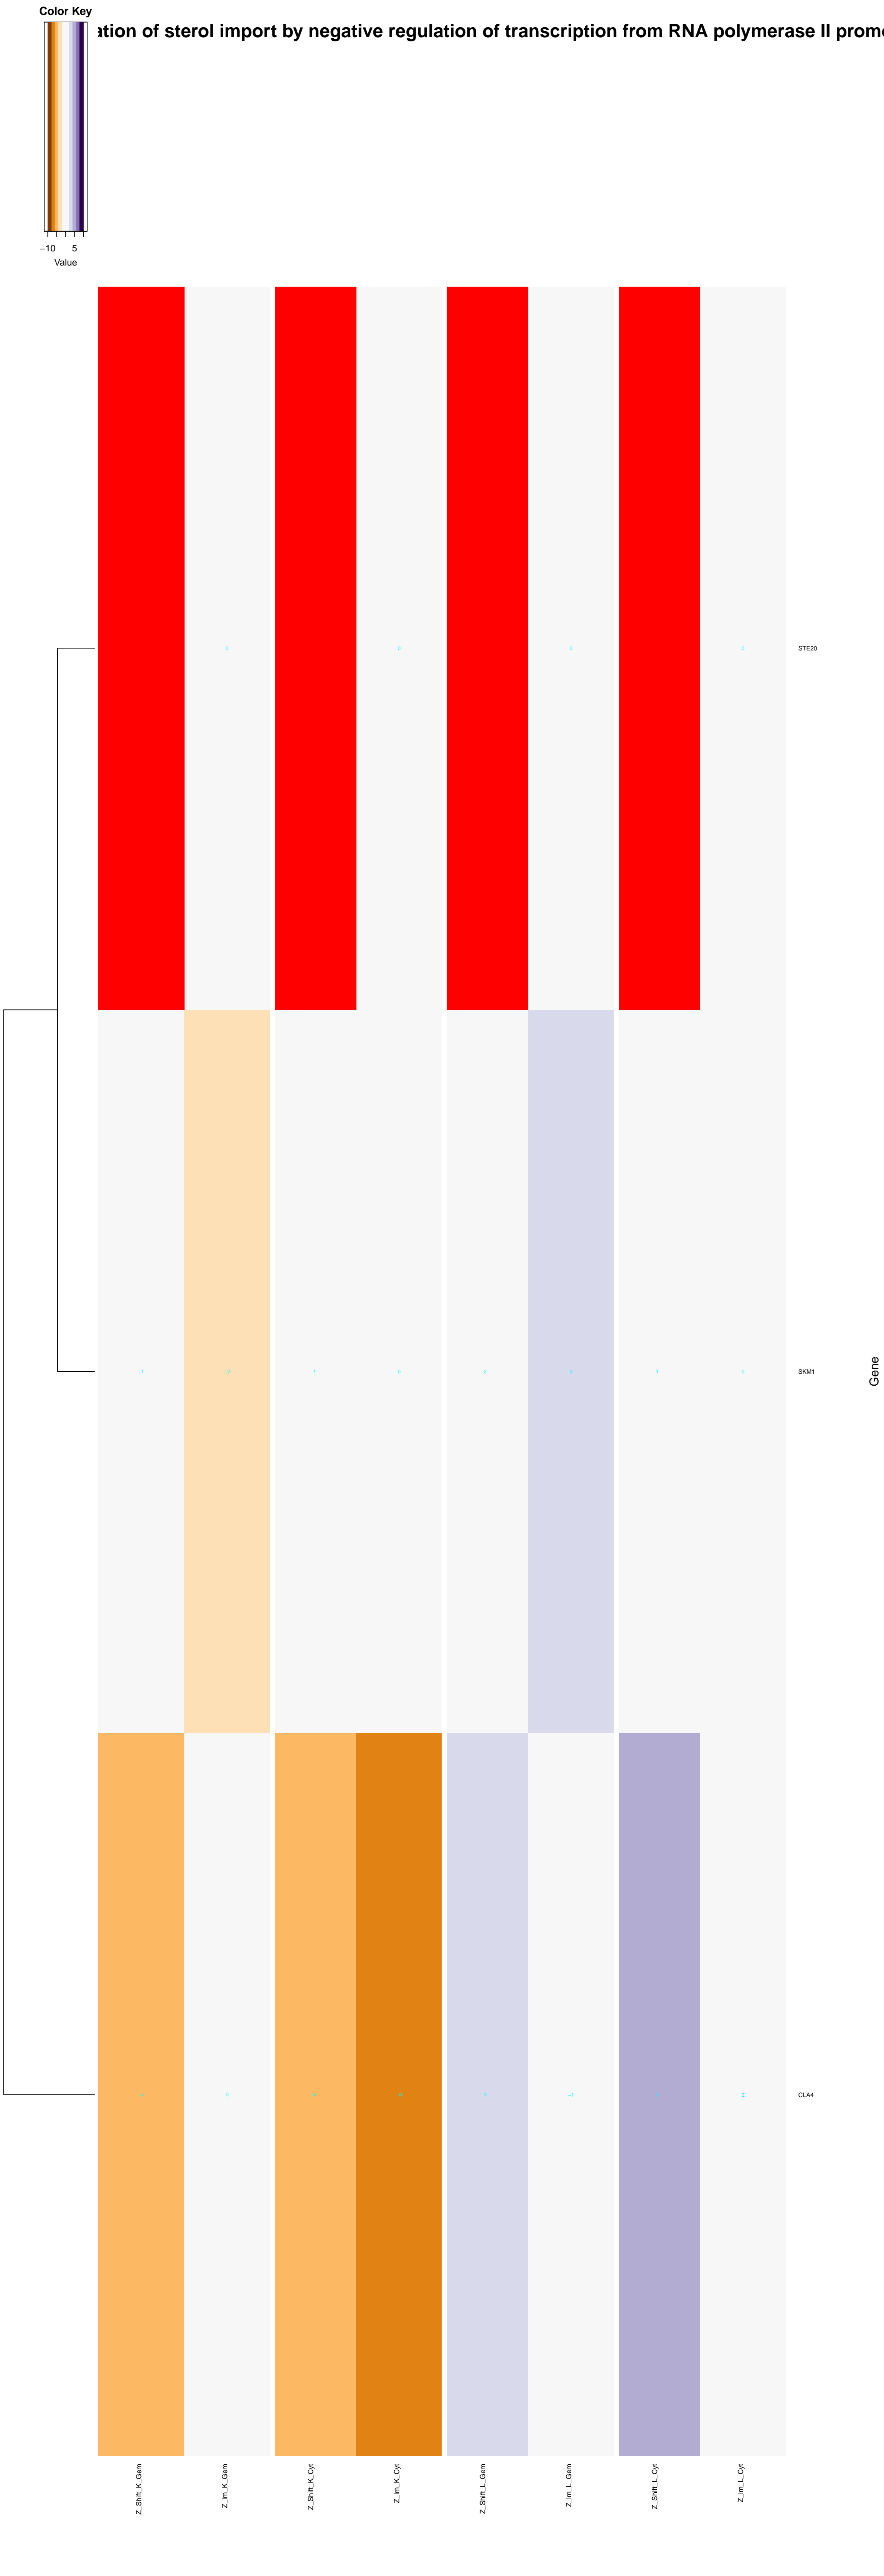

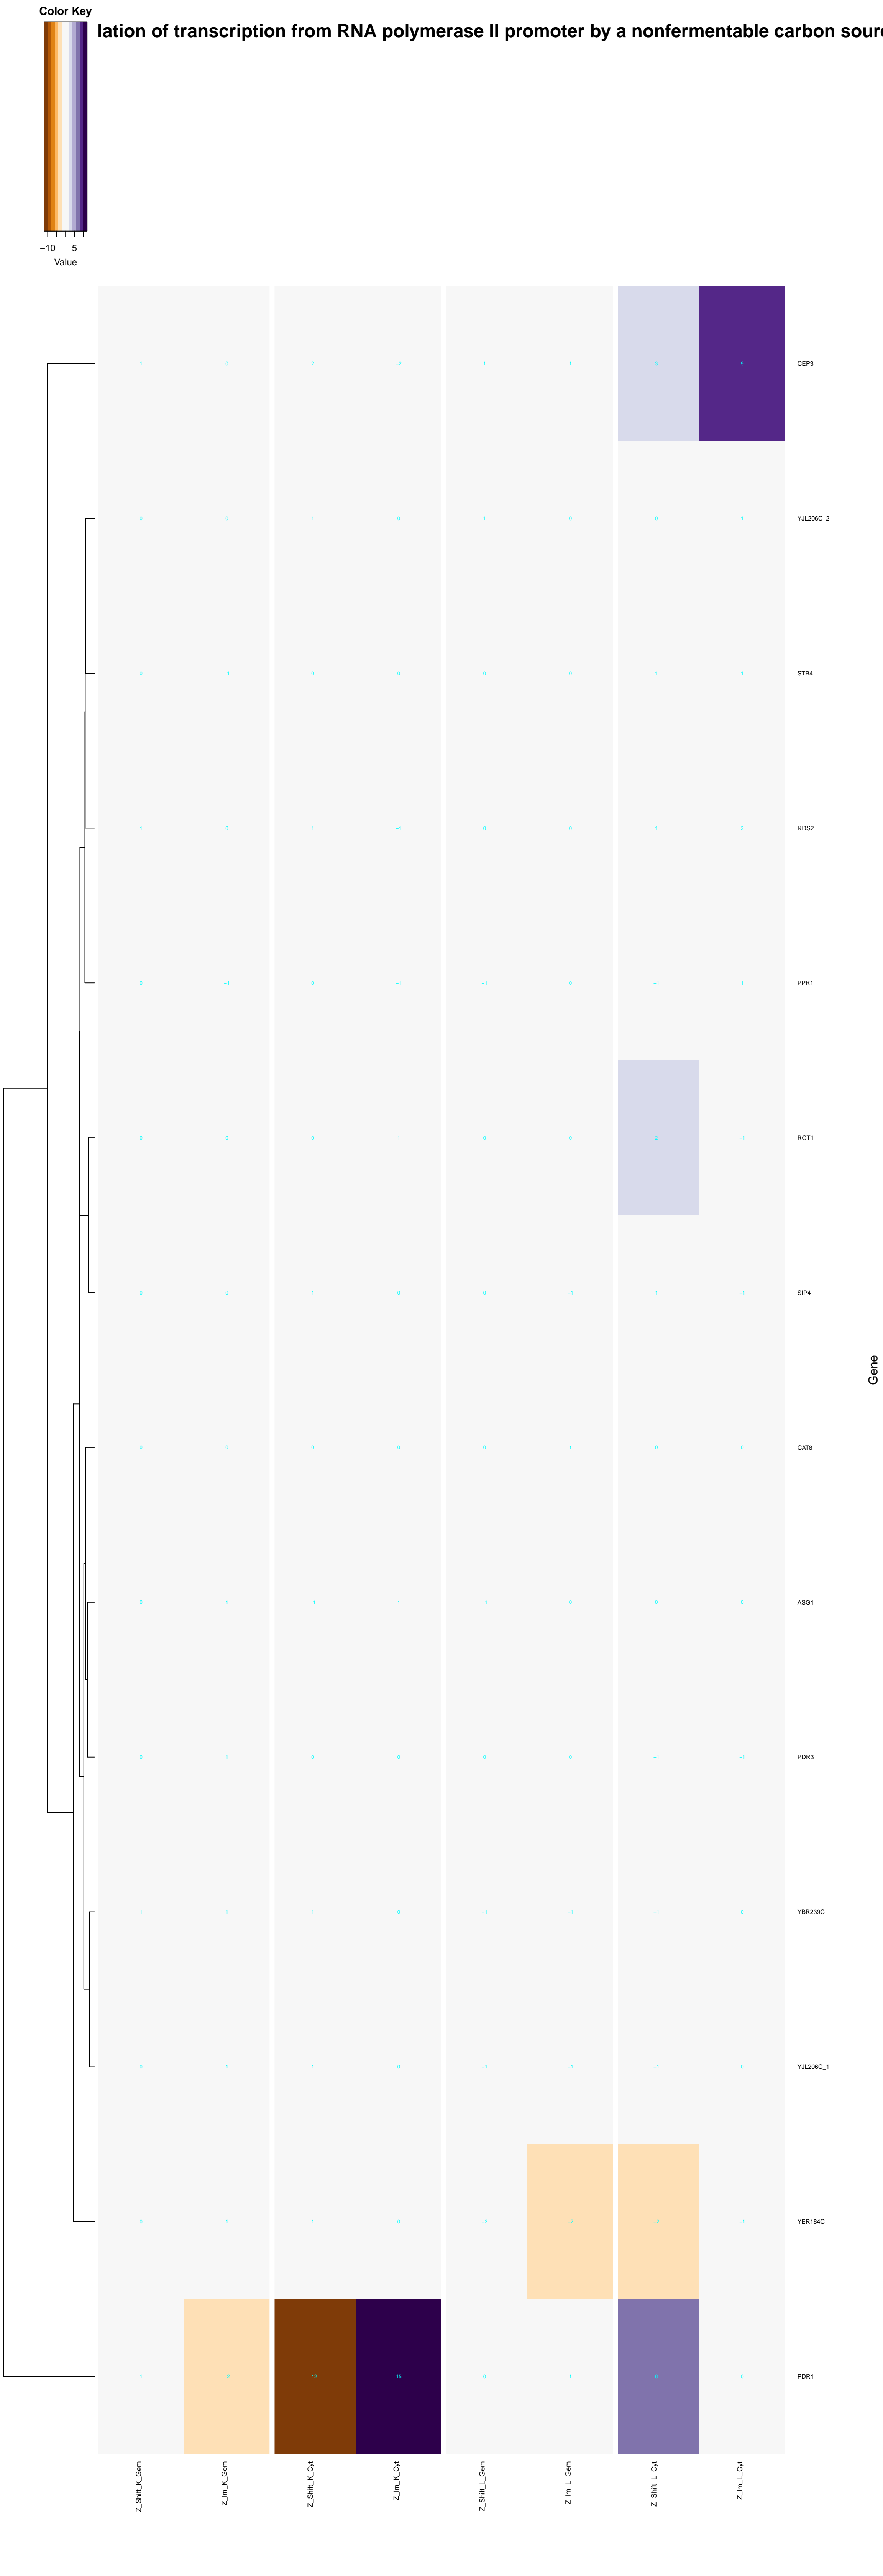



Positive regulation of transcription from RNA polymerase II promoter by oleic acid

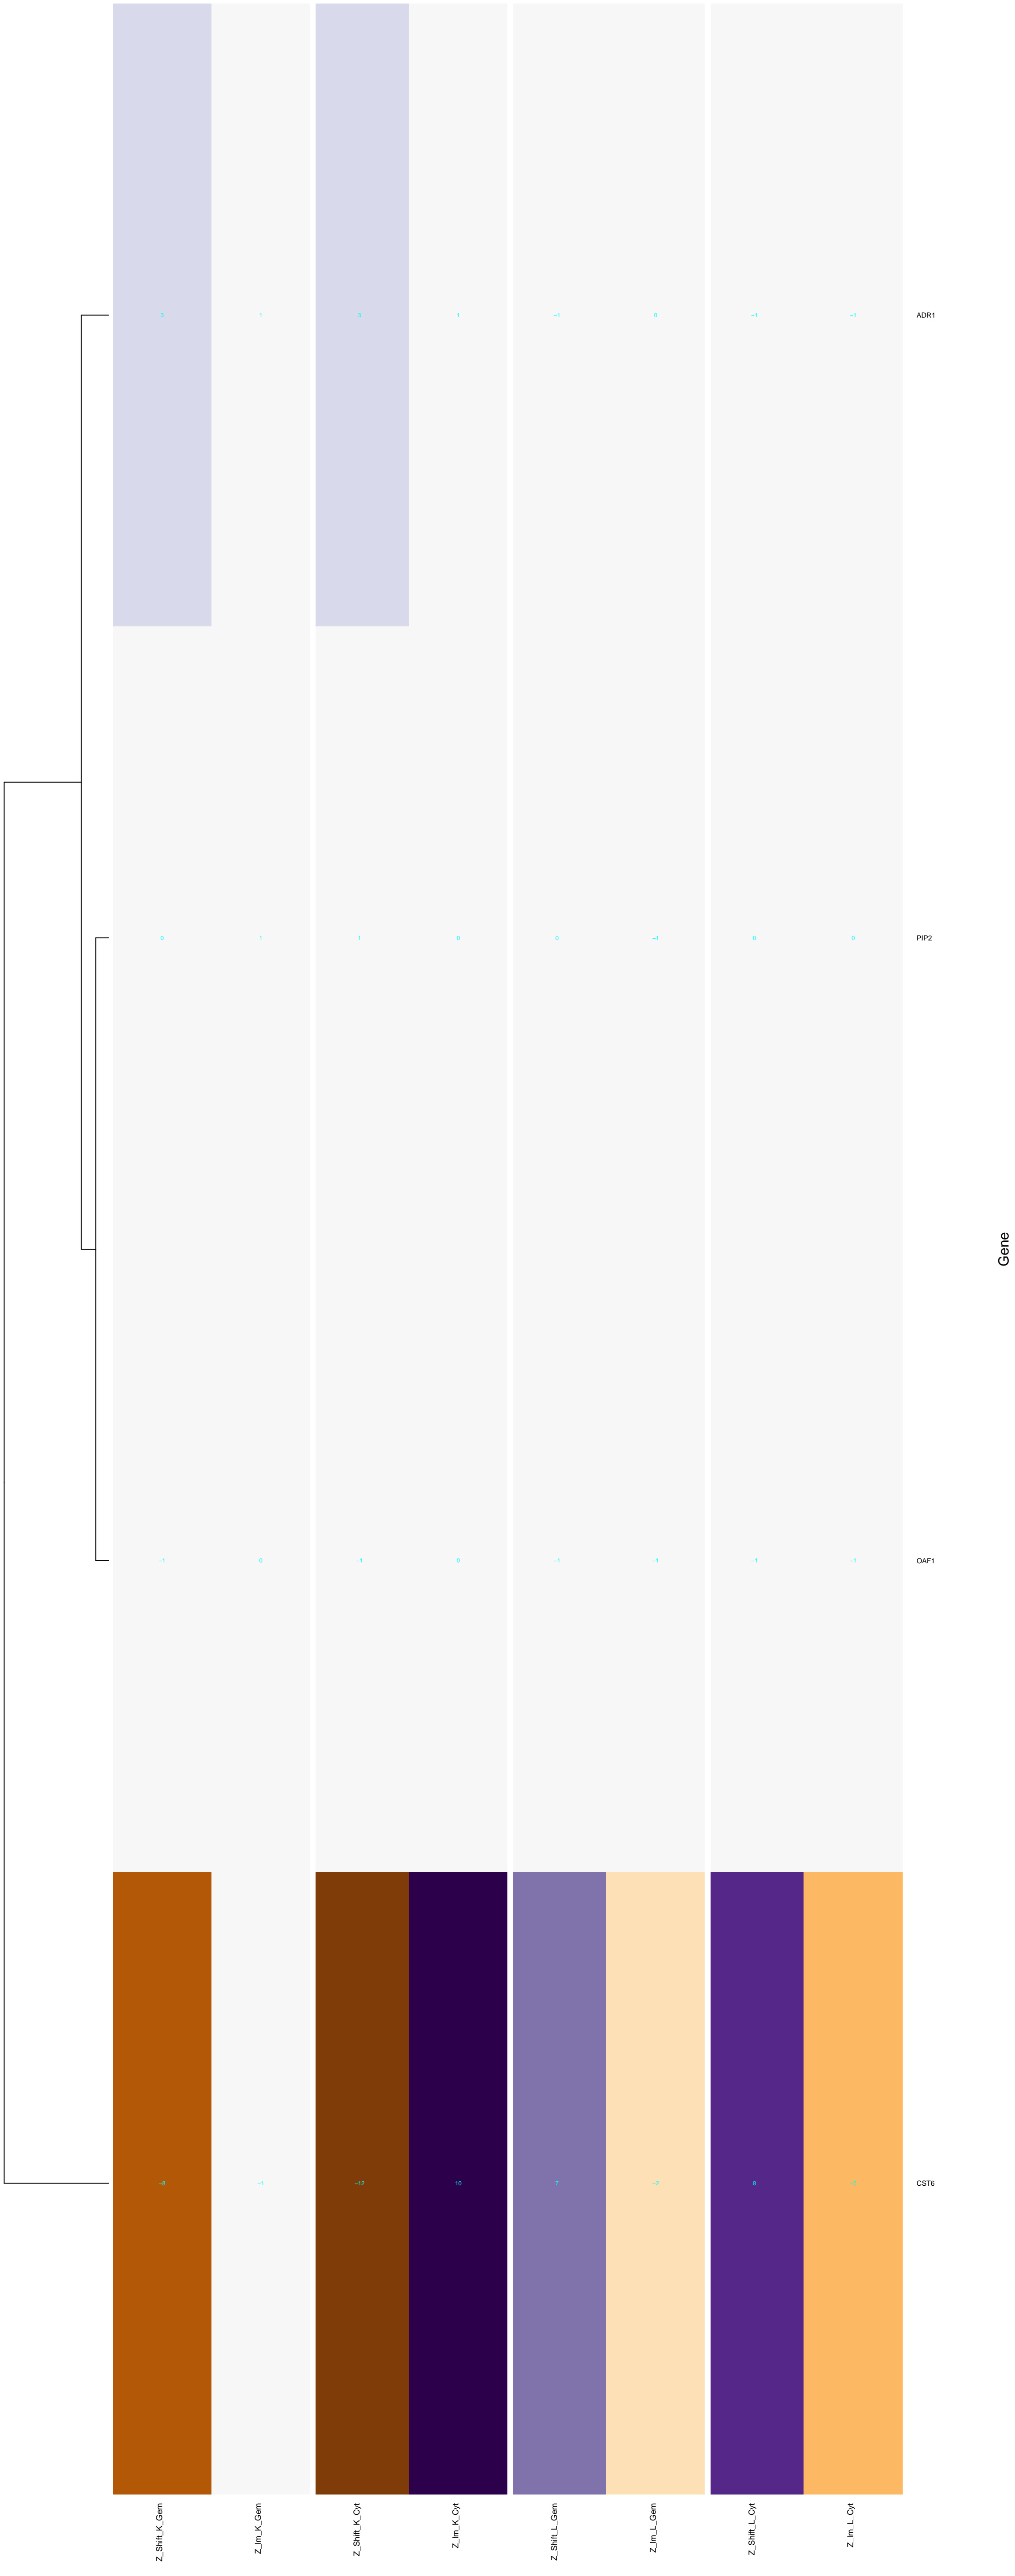

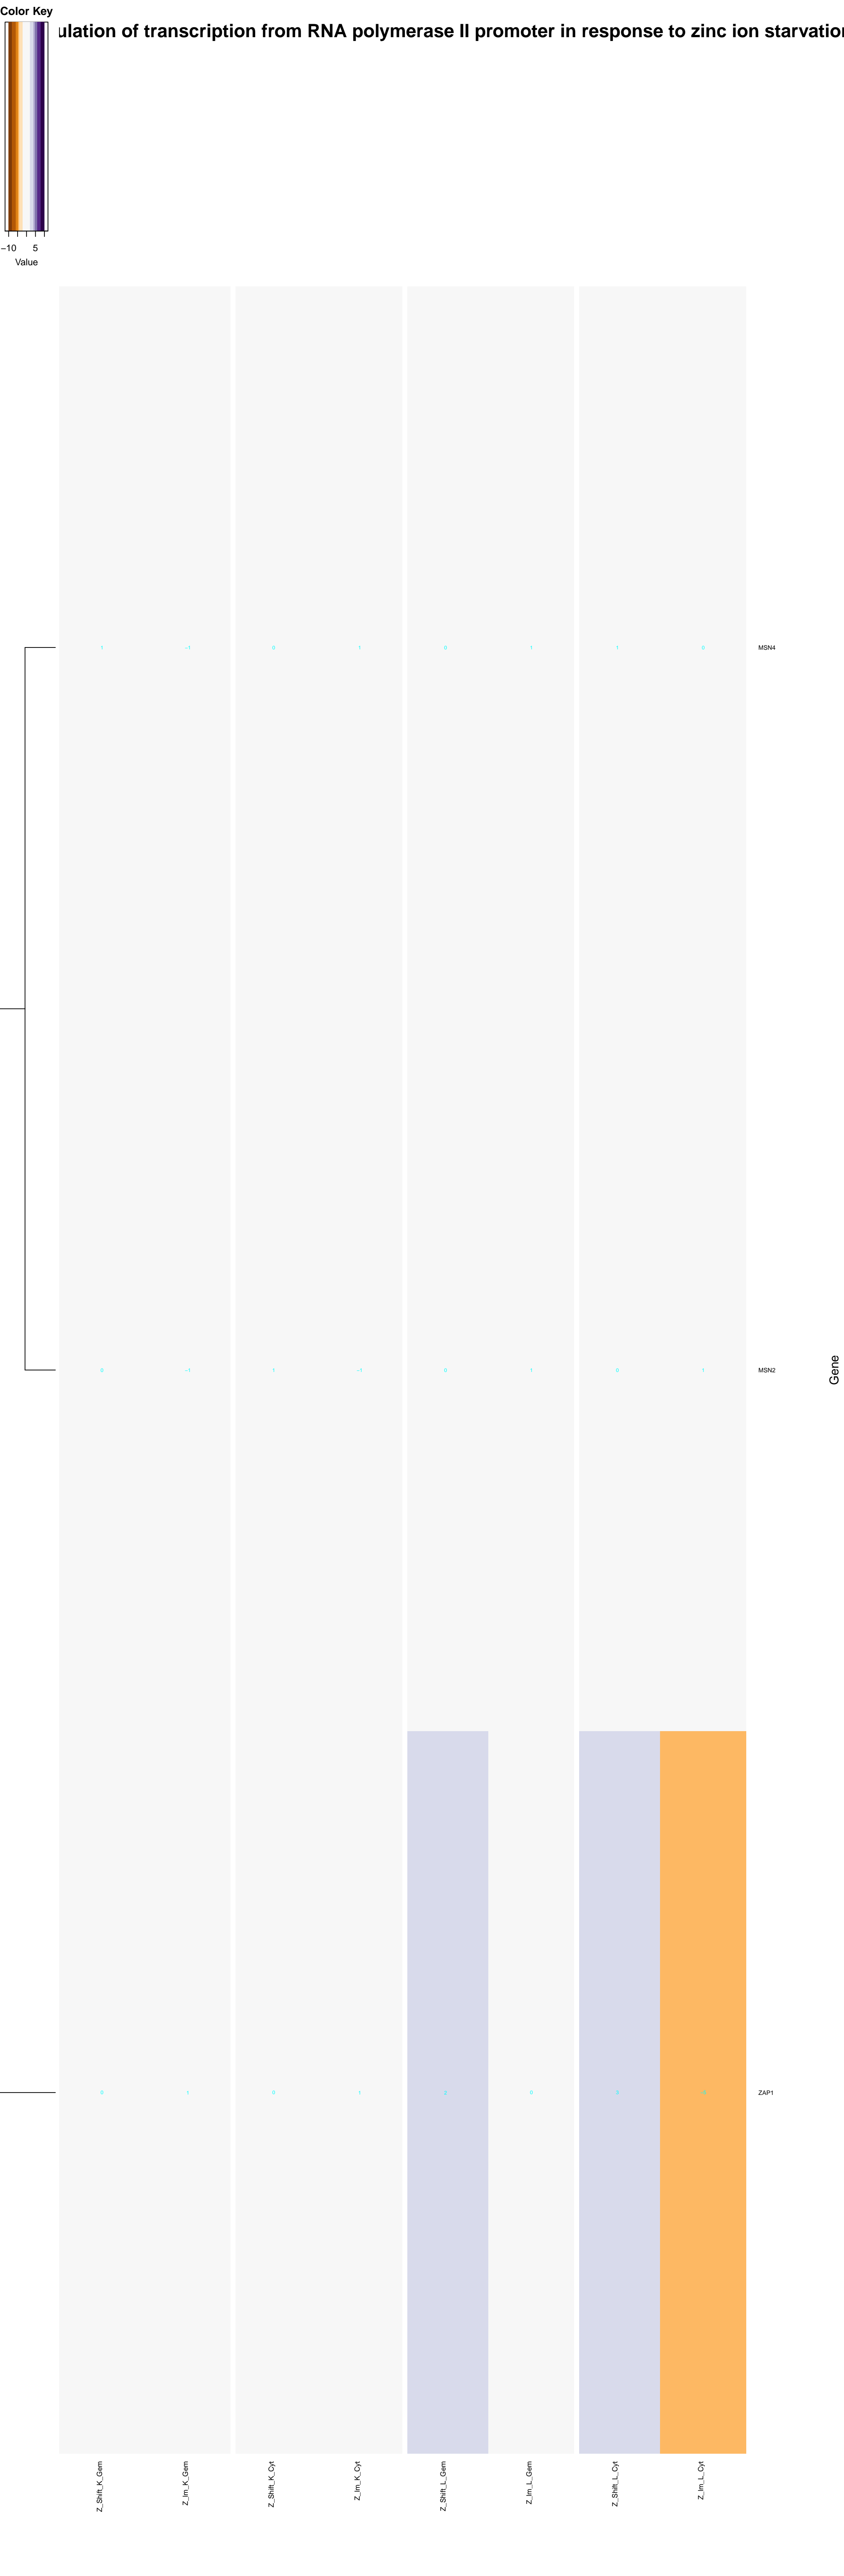

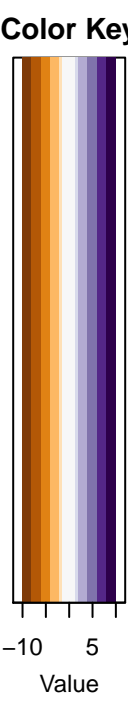

gulation of transcription from RNA polymerase II promoter in response to oxidative stress

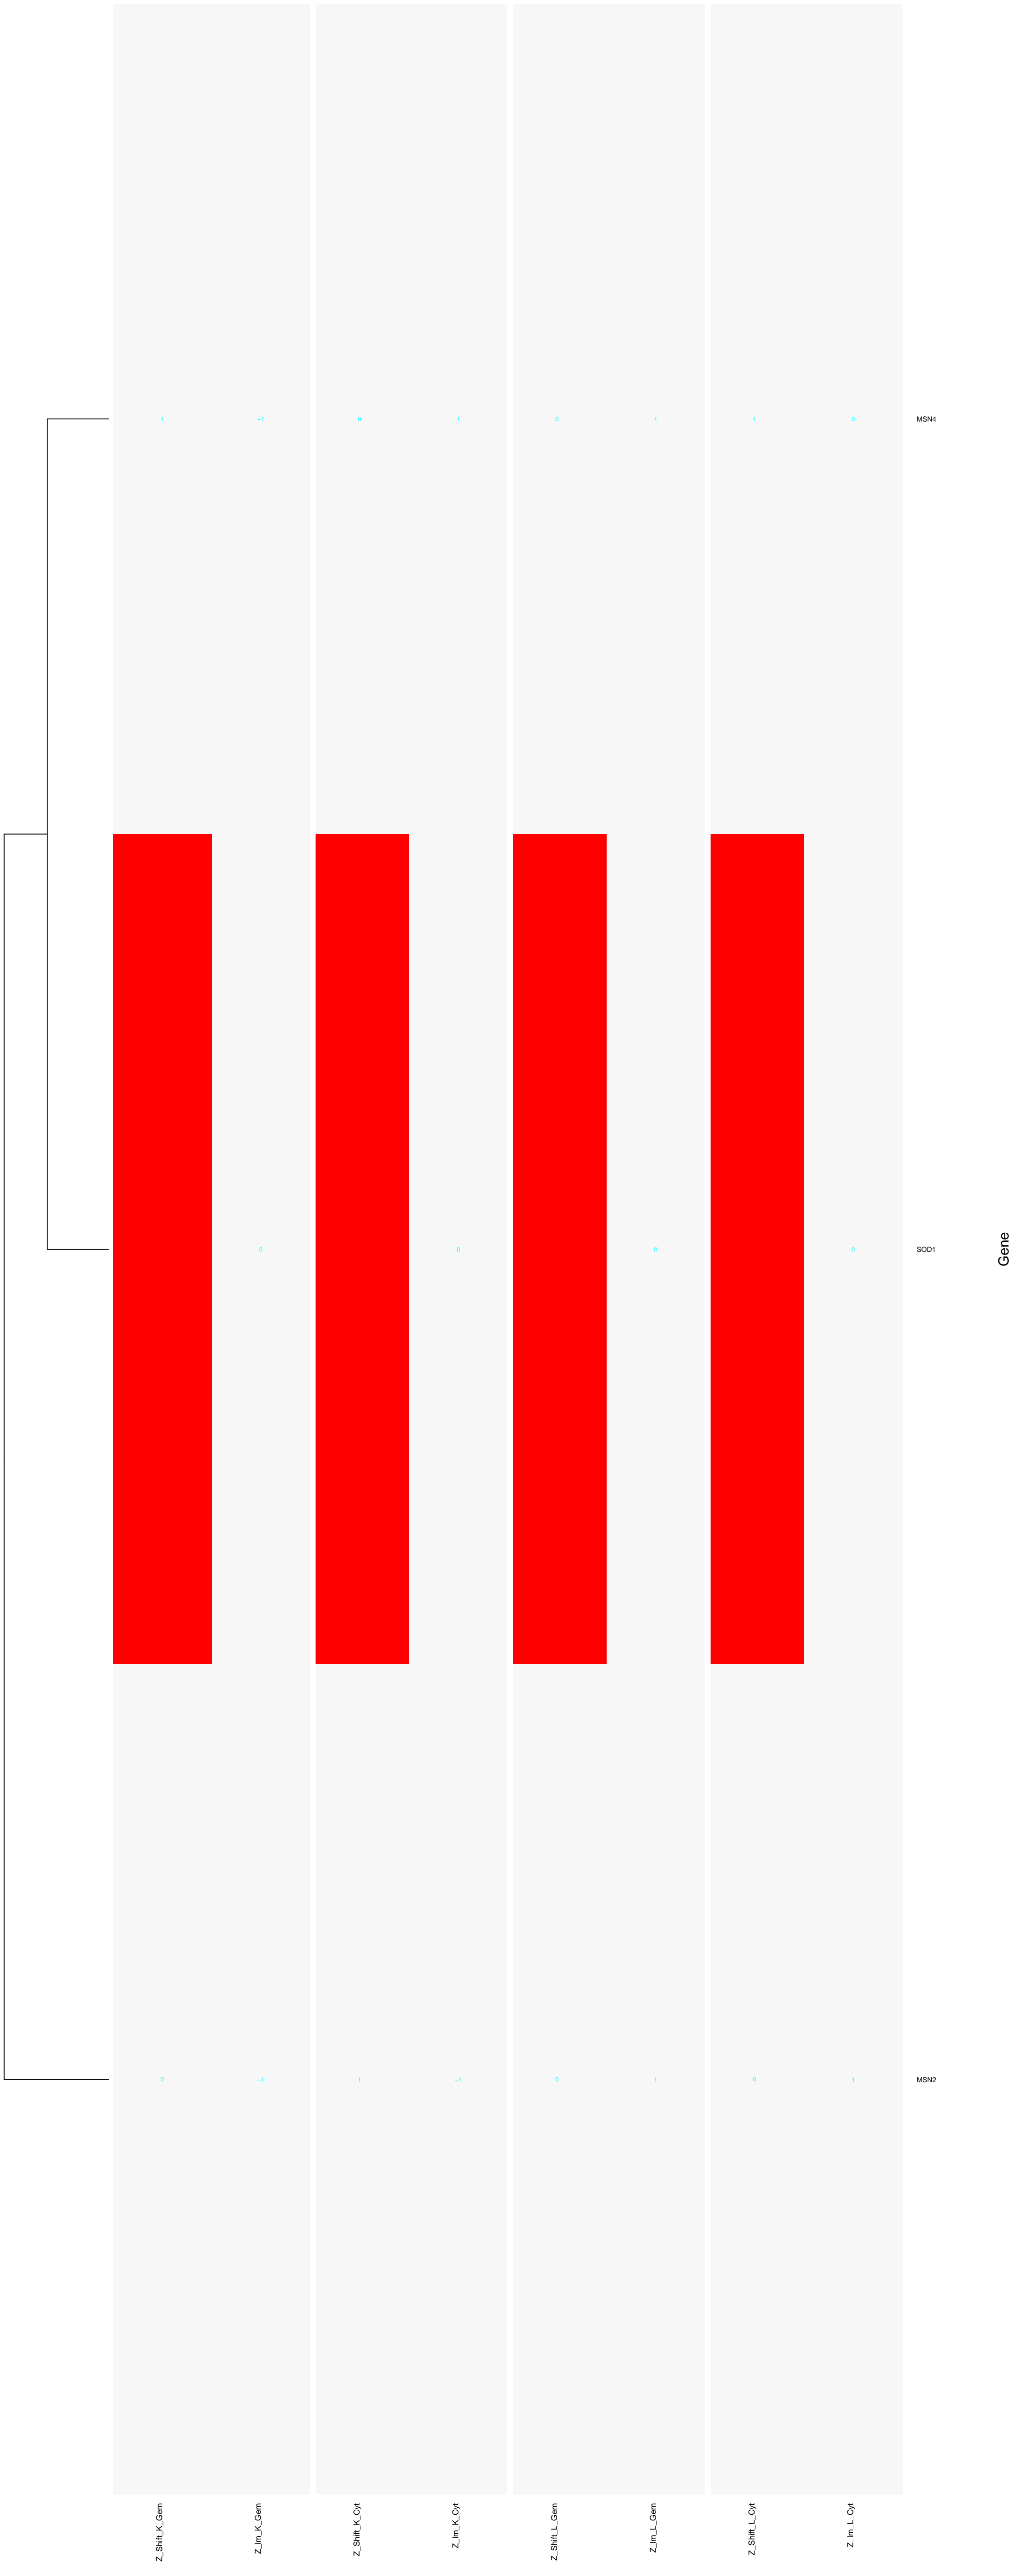



gulation of transcription from RNA polymerase II promoter in response to osmotic stress

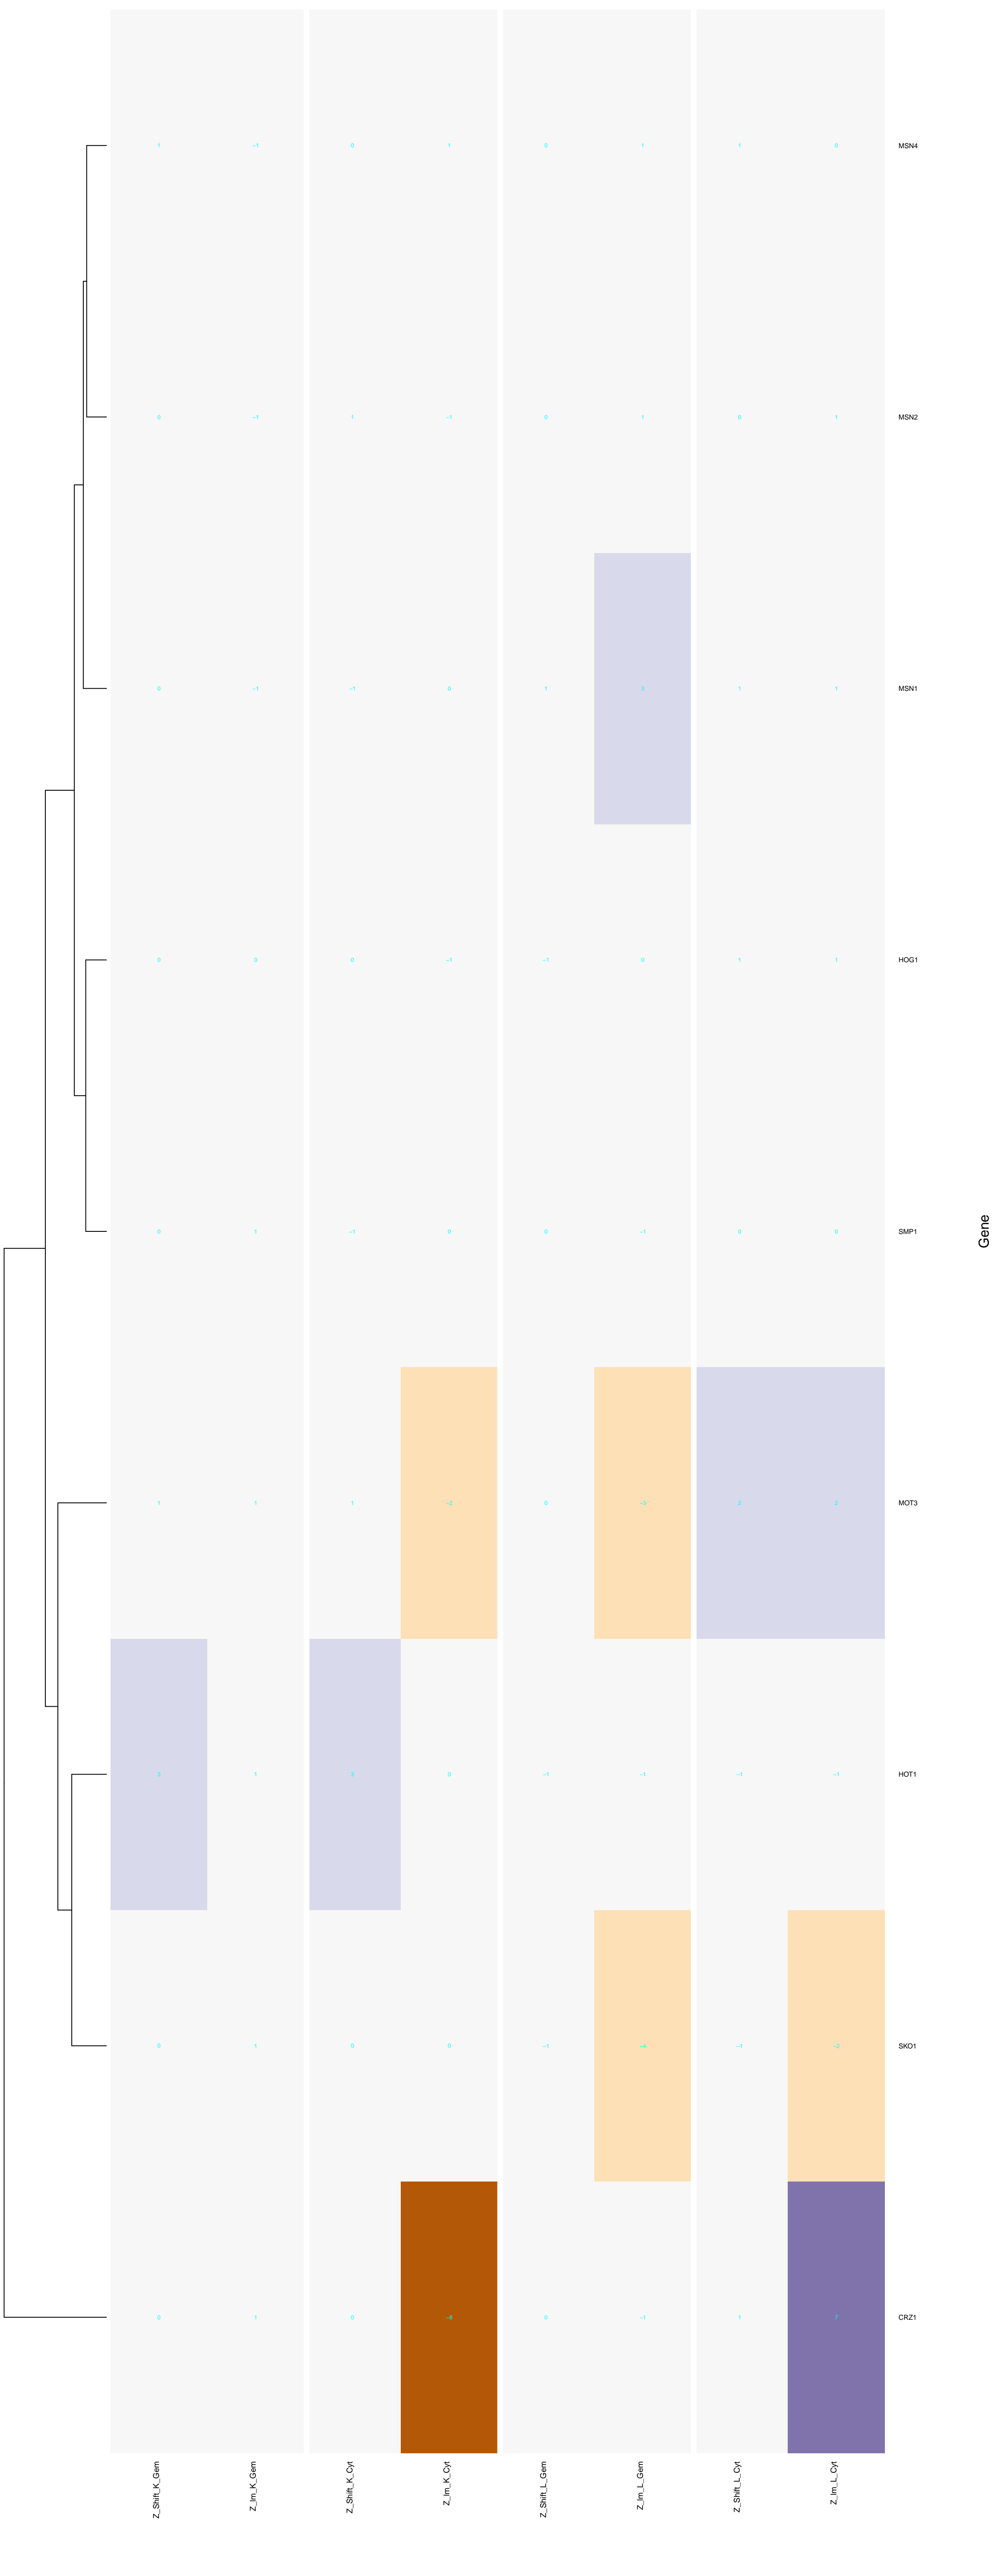

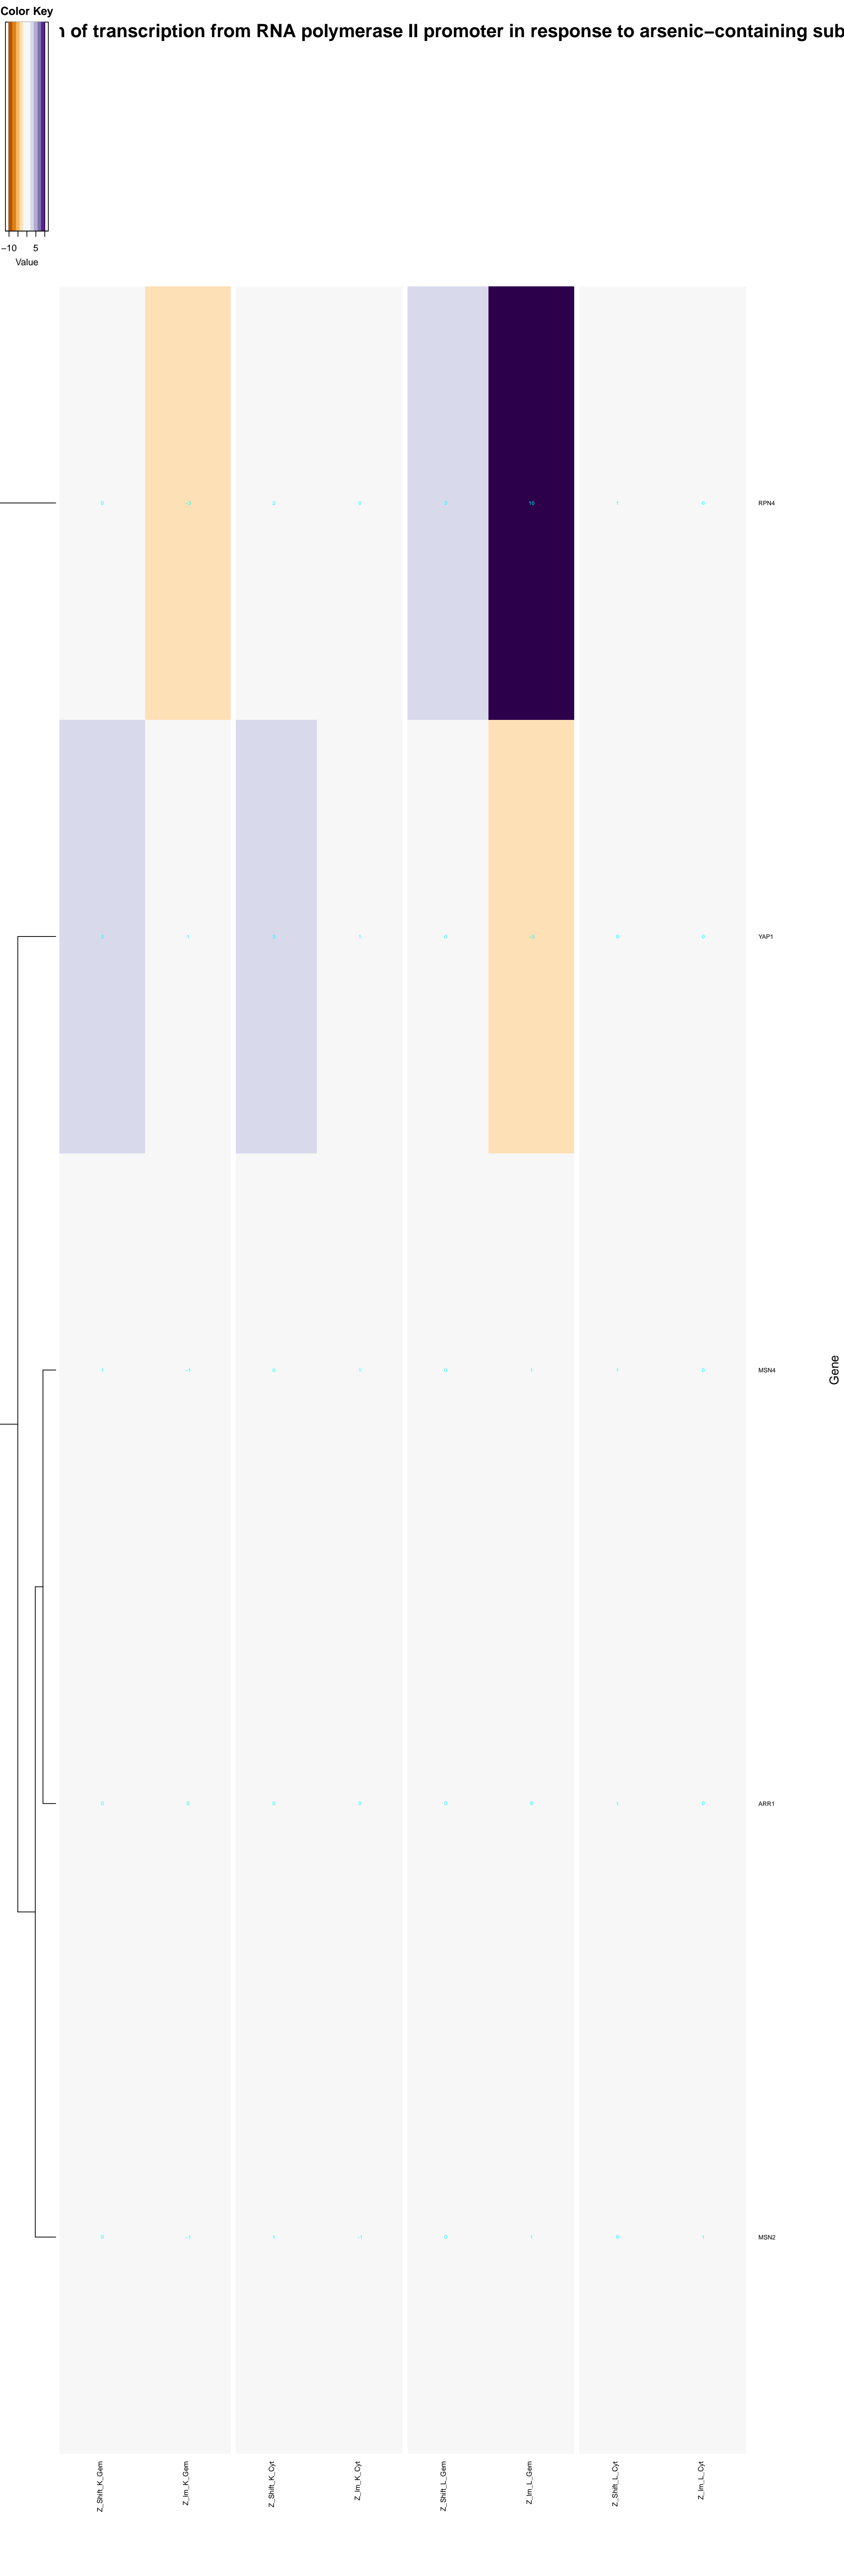

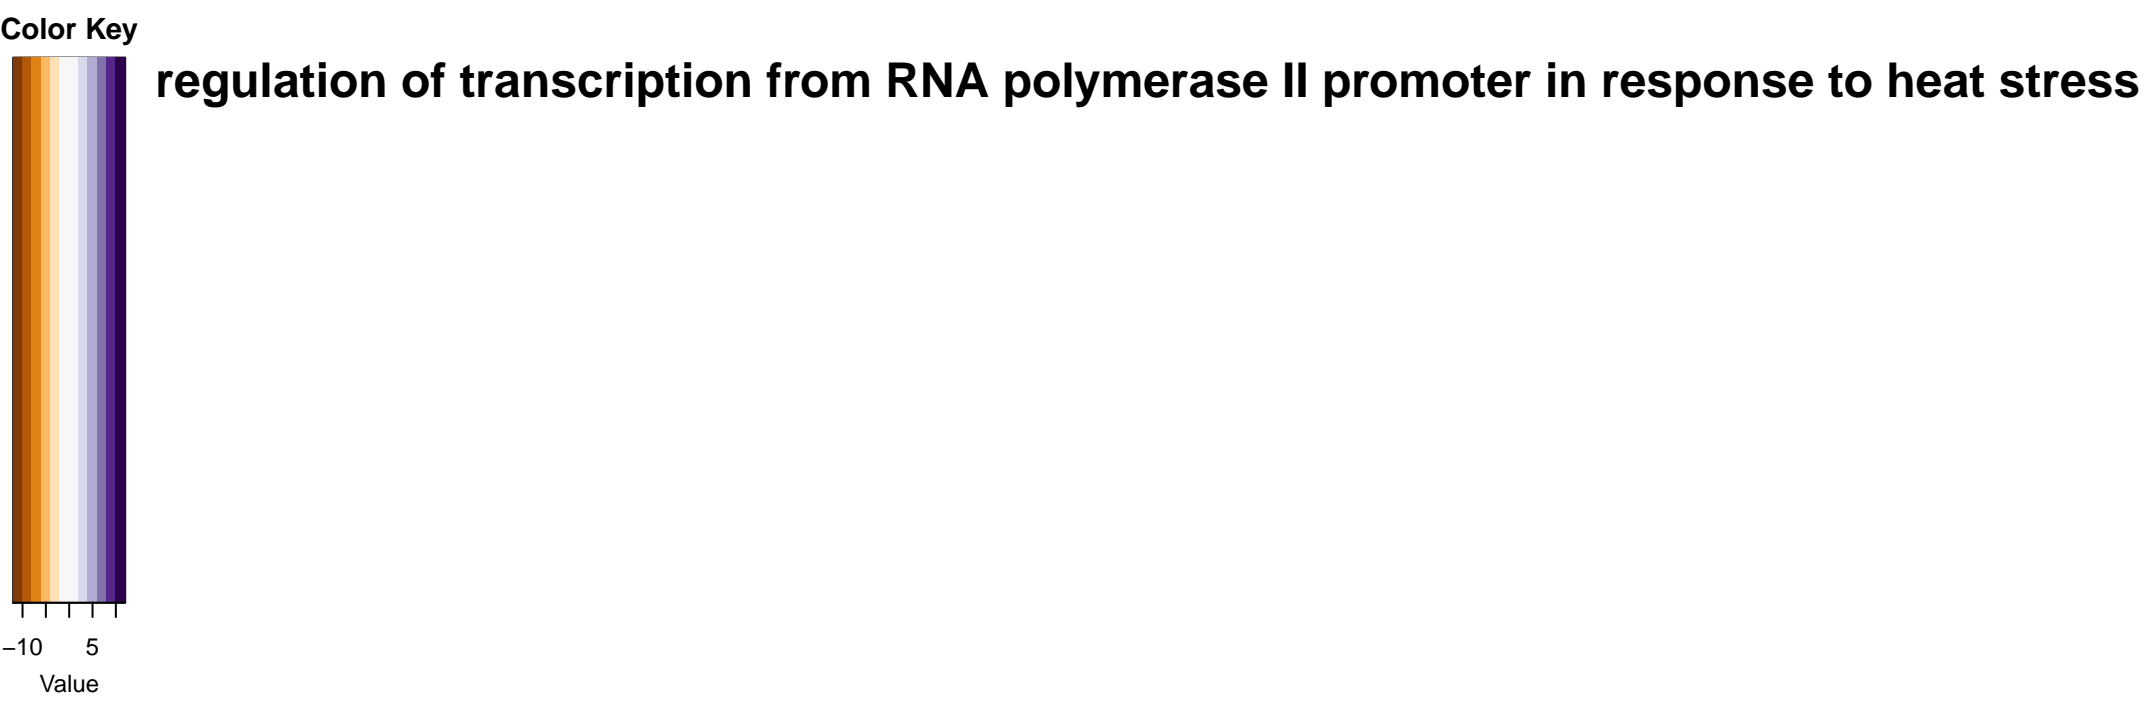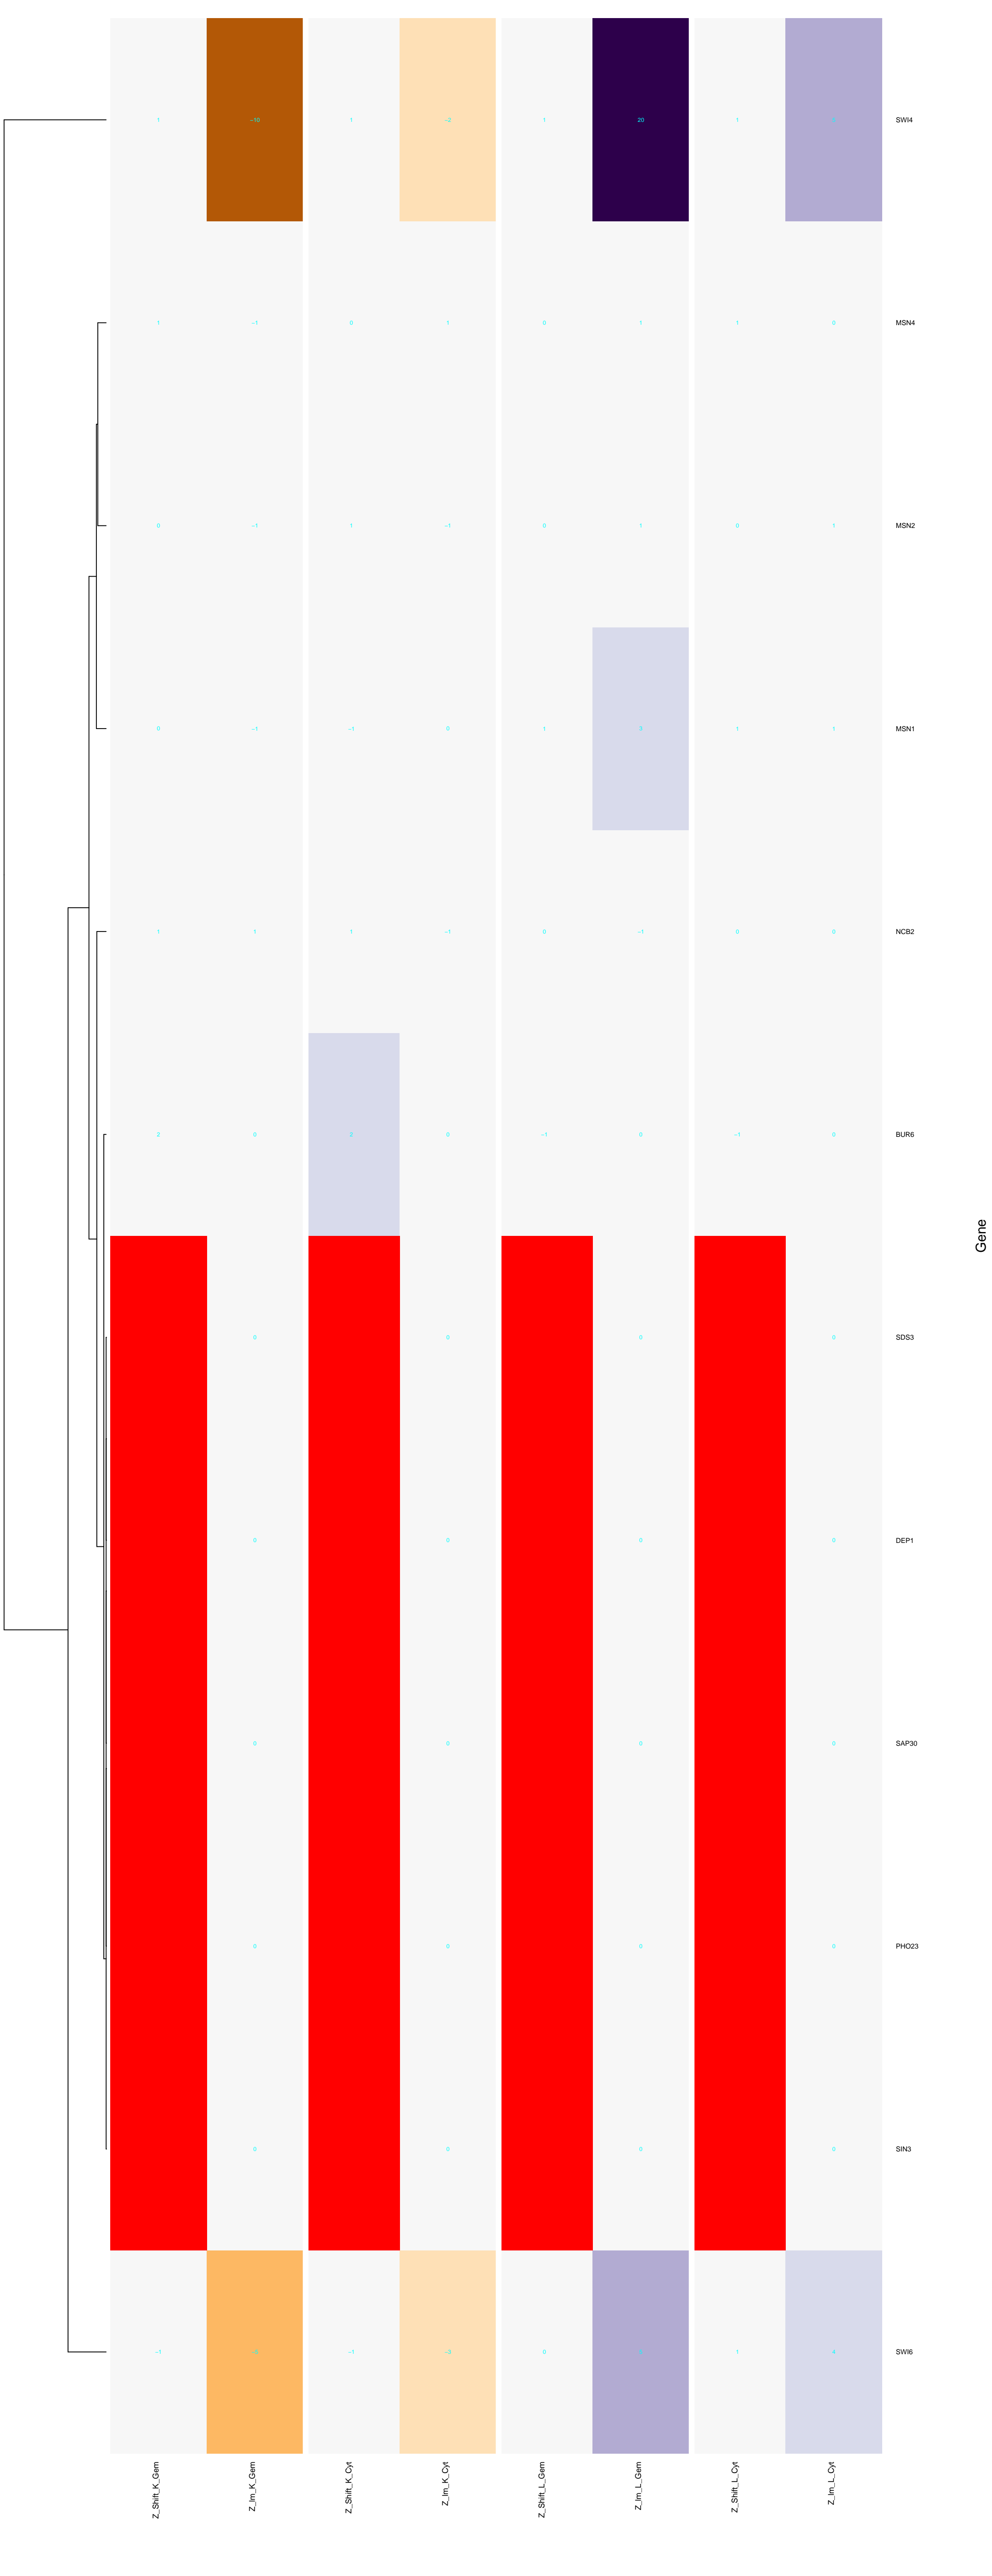

Color Key

ation of transcription from RNA polymerase II promoter in response to amino acid starvation

-10 5

Value

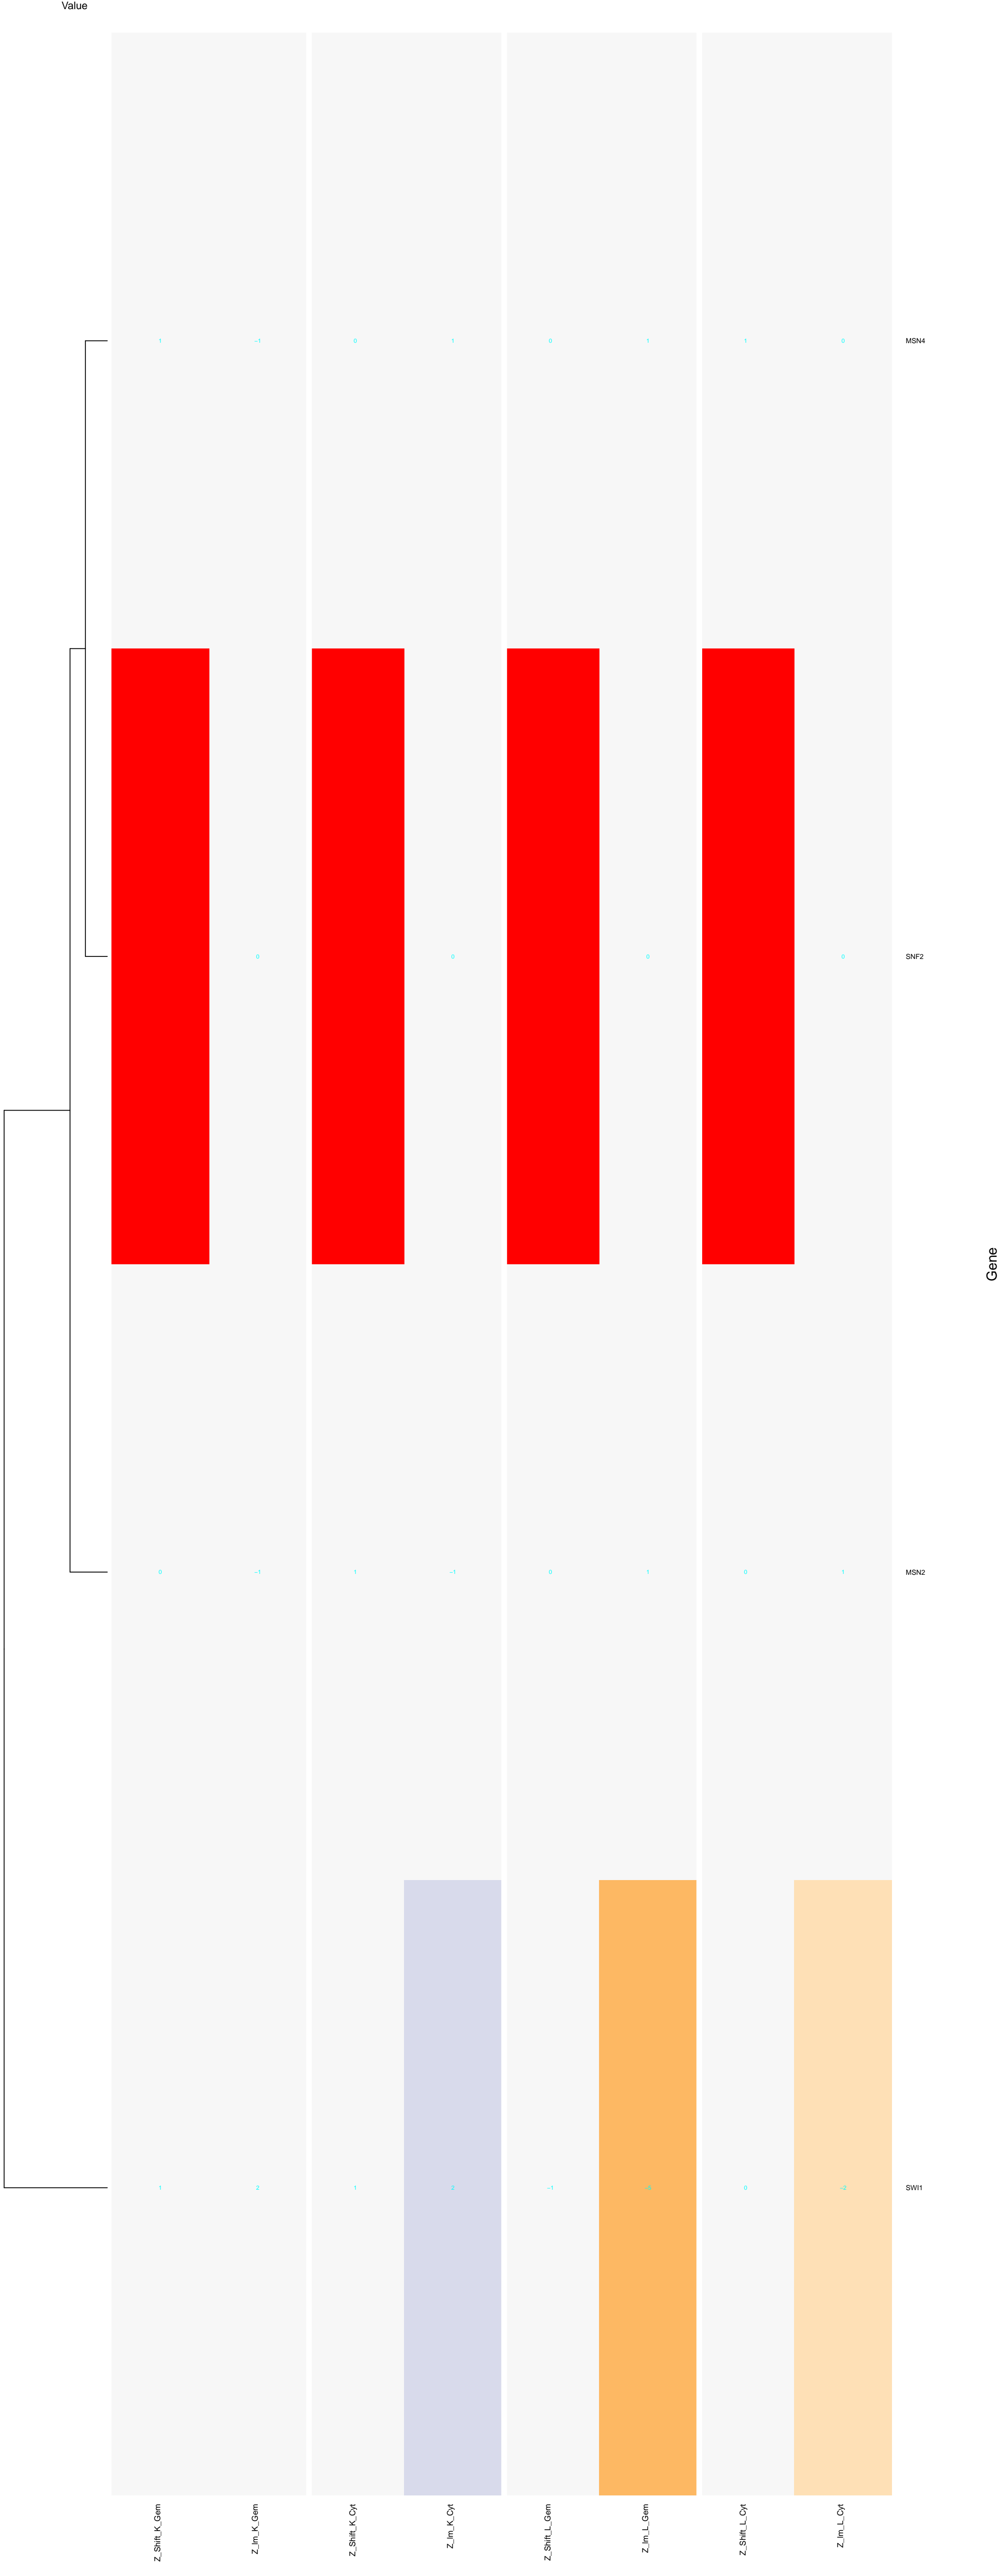

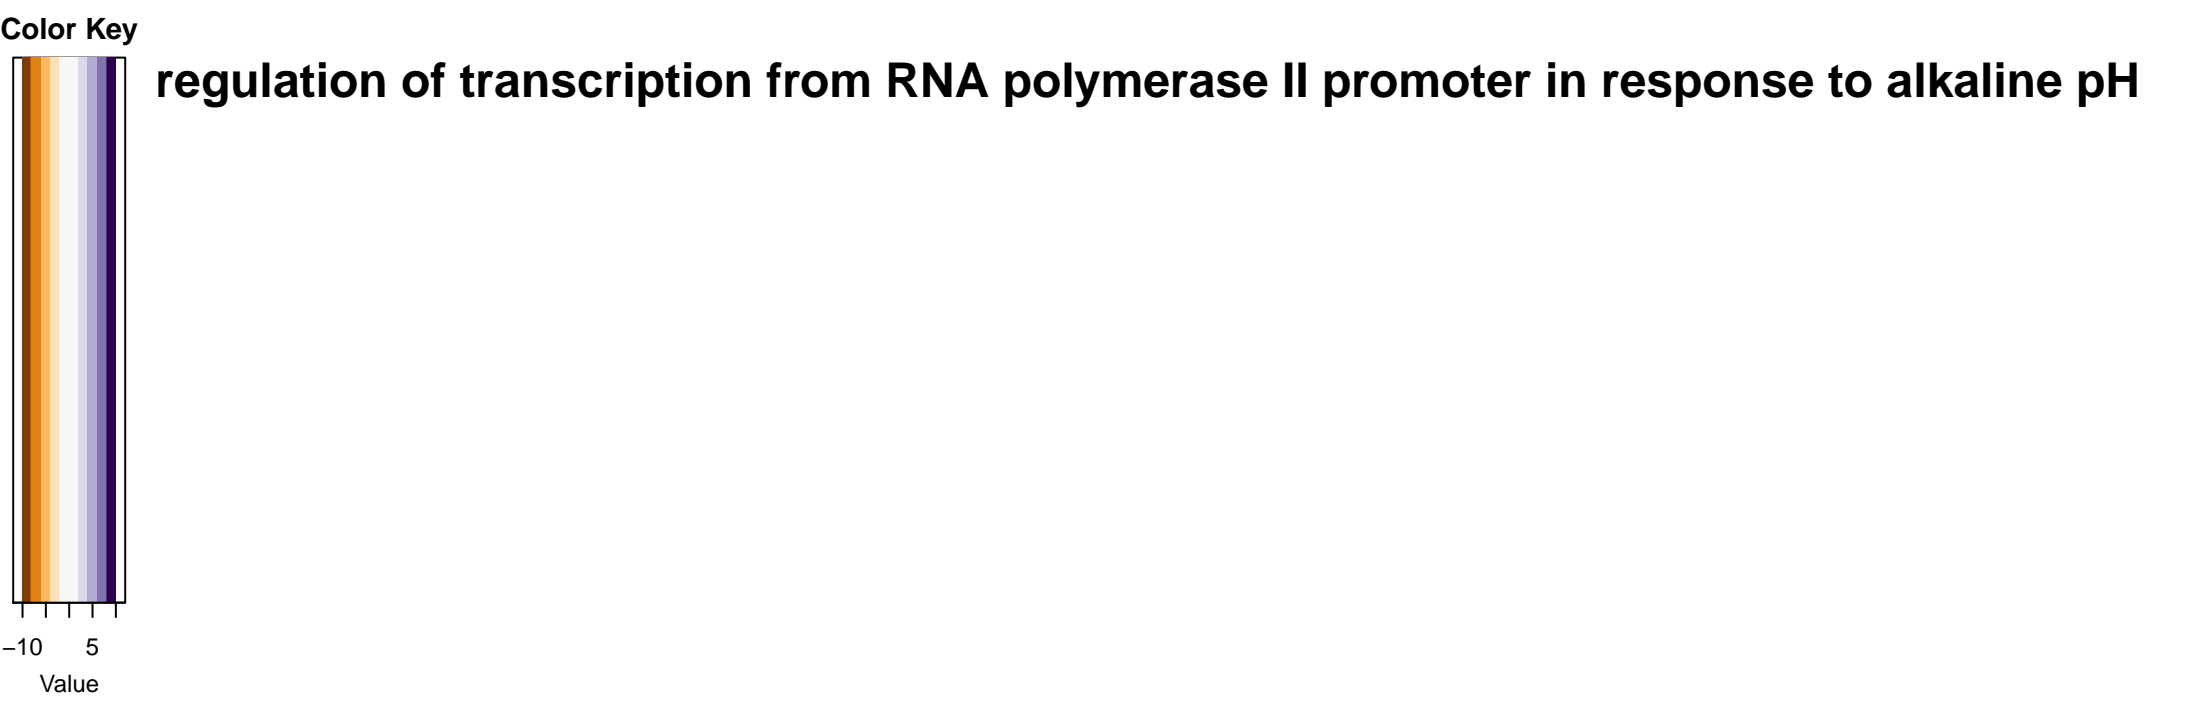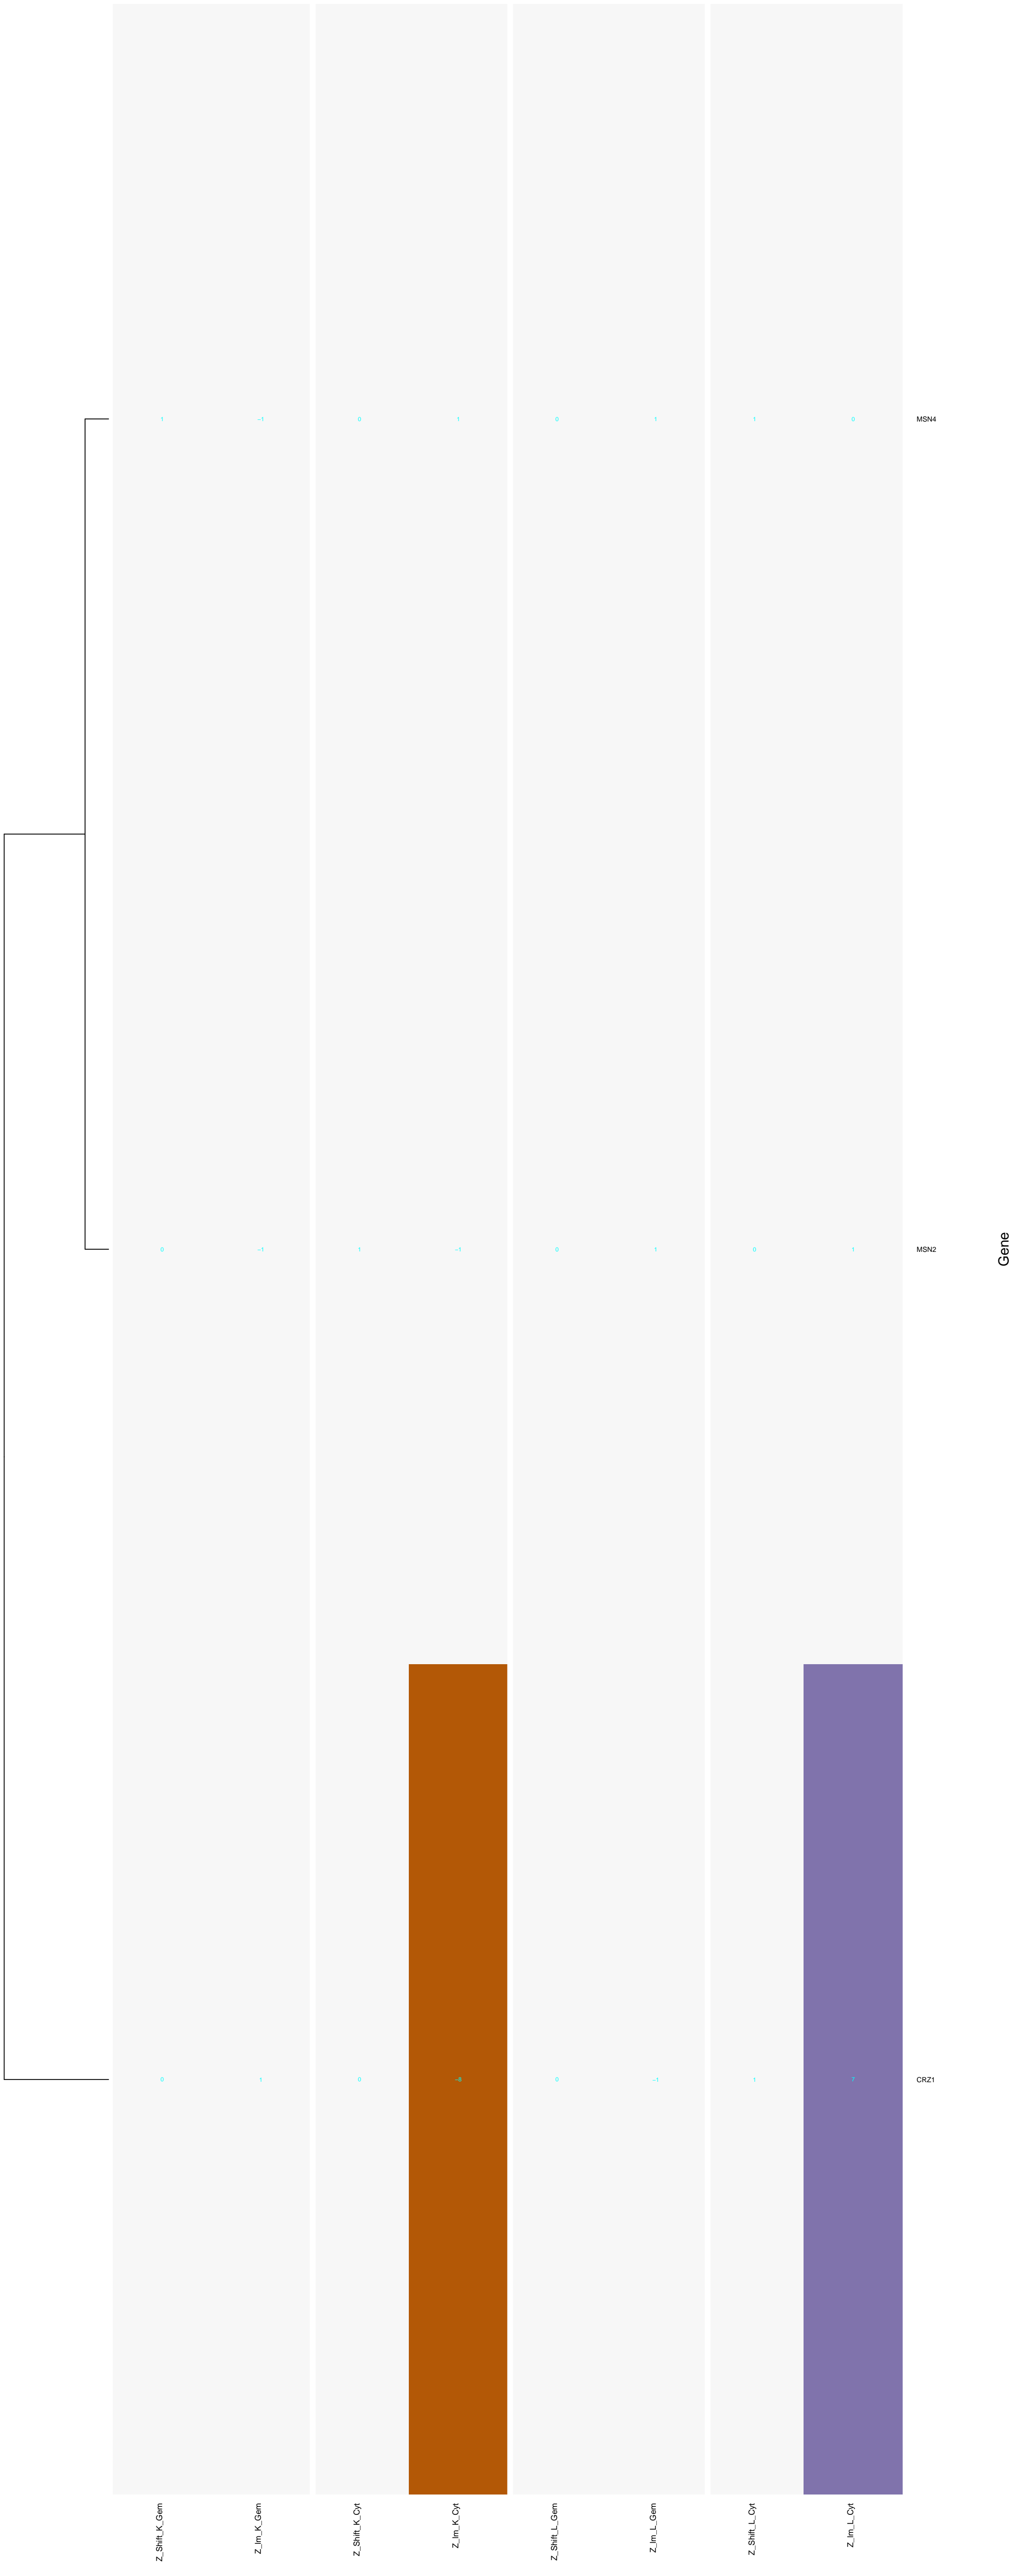

Color Key

Correlation of transcription from RNA polymerase II promoter in response to salt stress

-10 5

Value

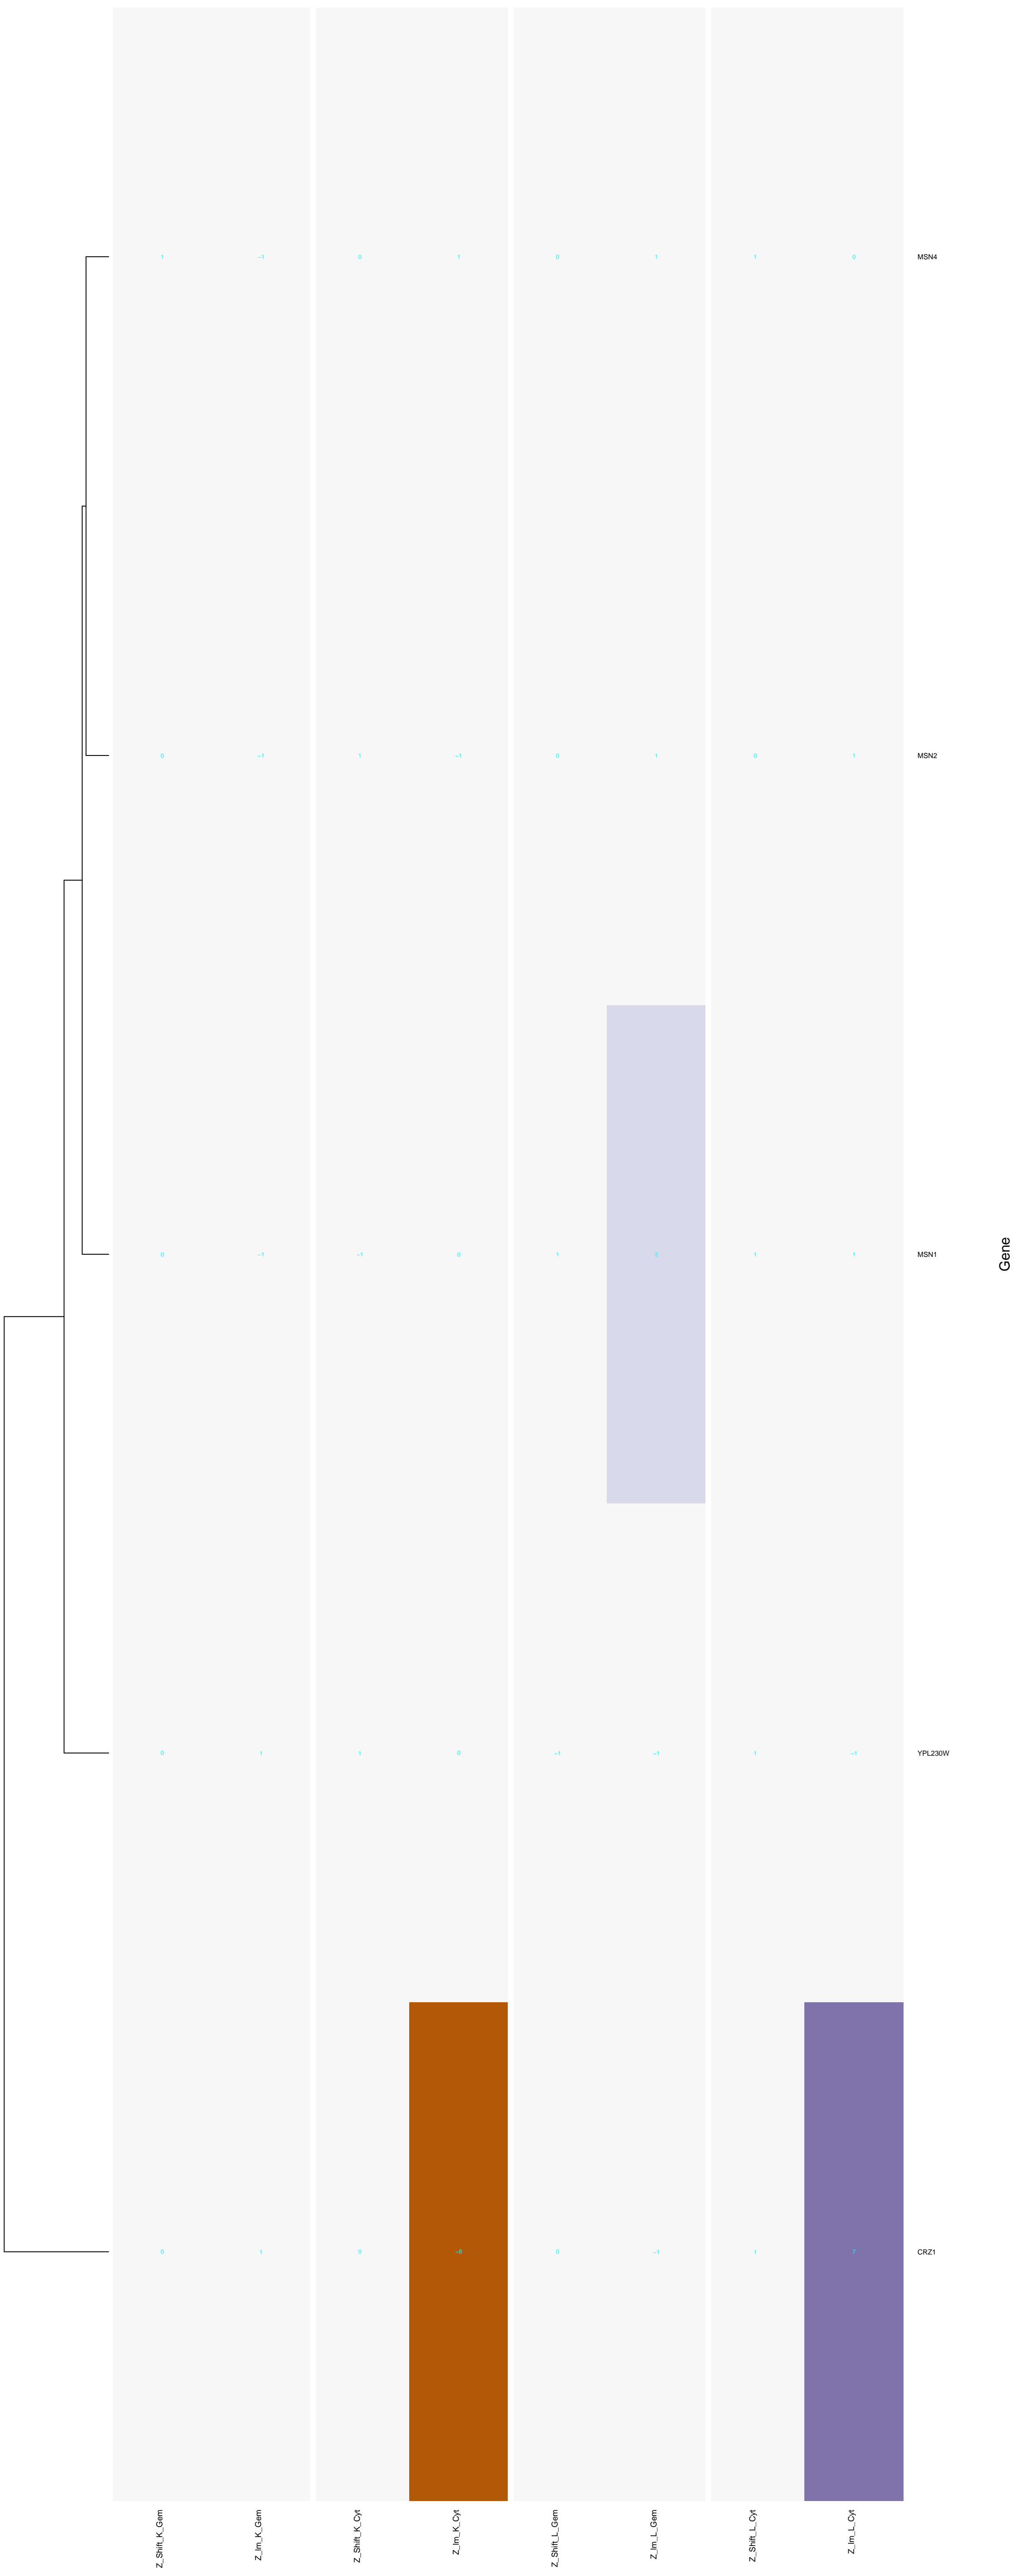

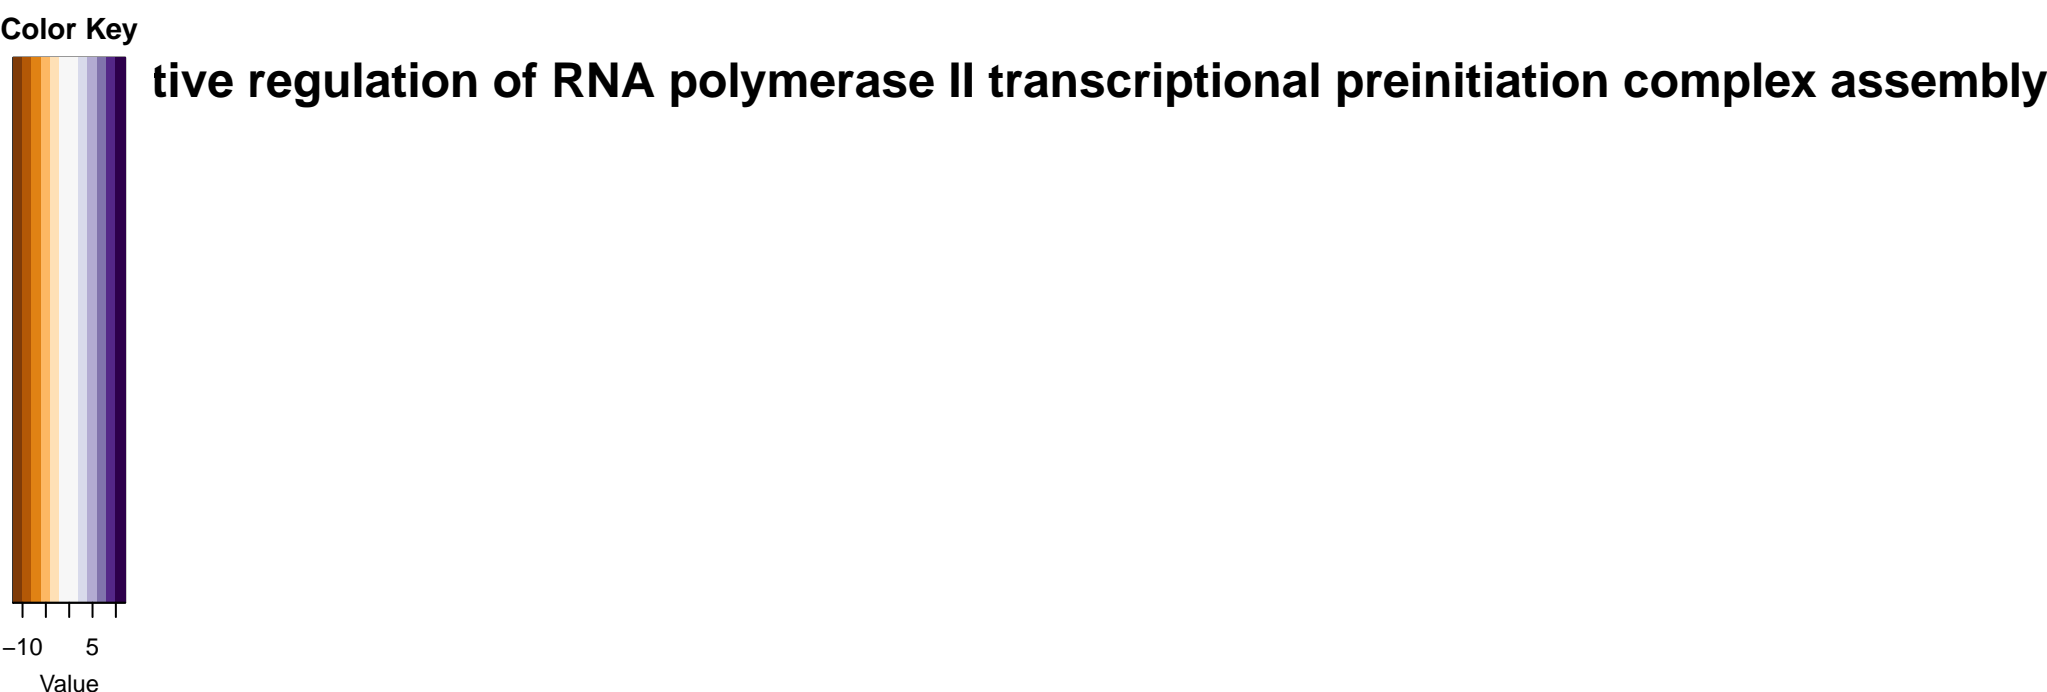

Gene

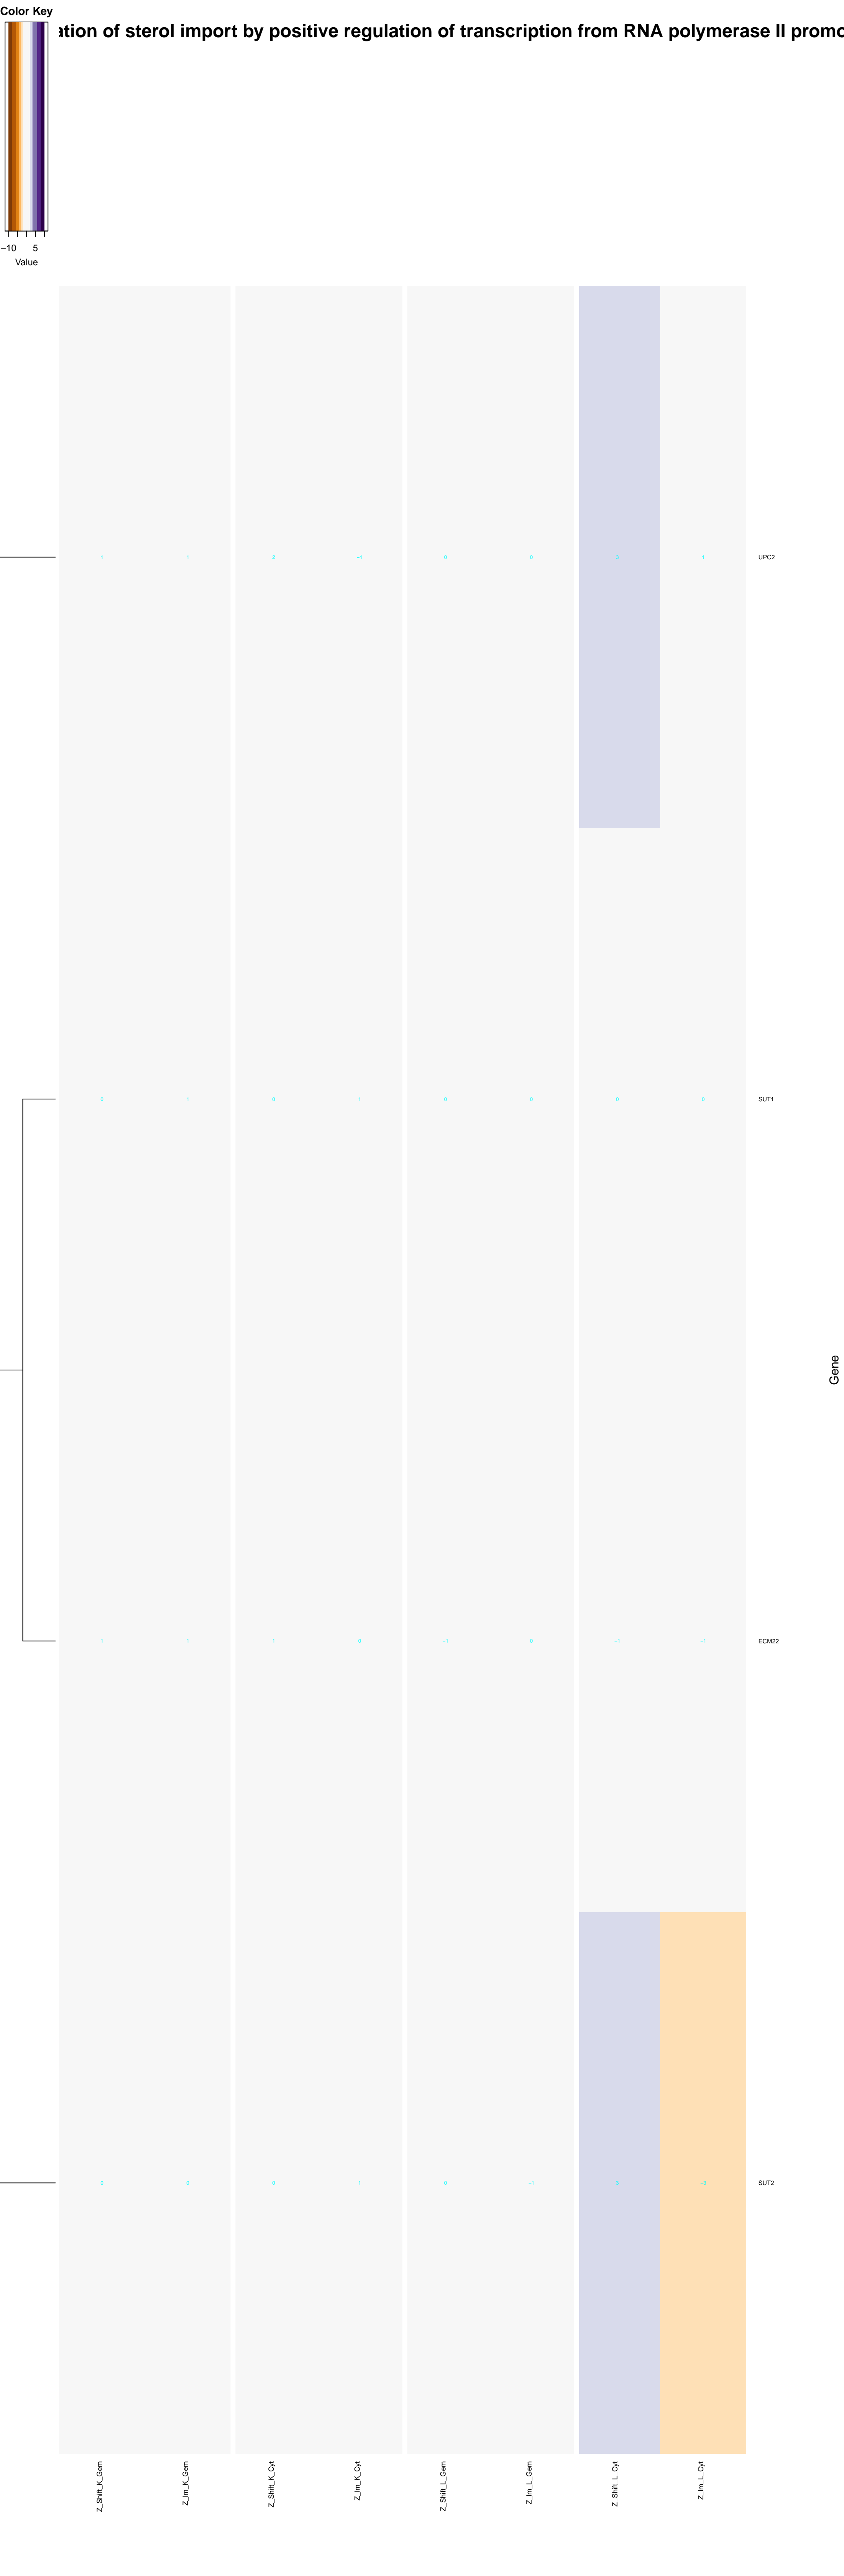

Color Key

Value

the regulation of transcription from RNA polymerase II promoter in response to ethanol

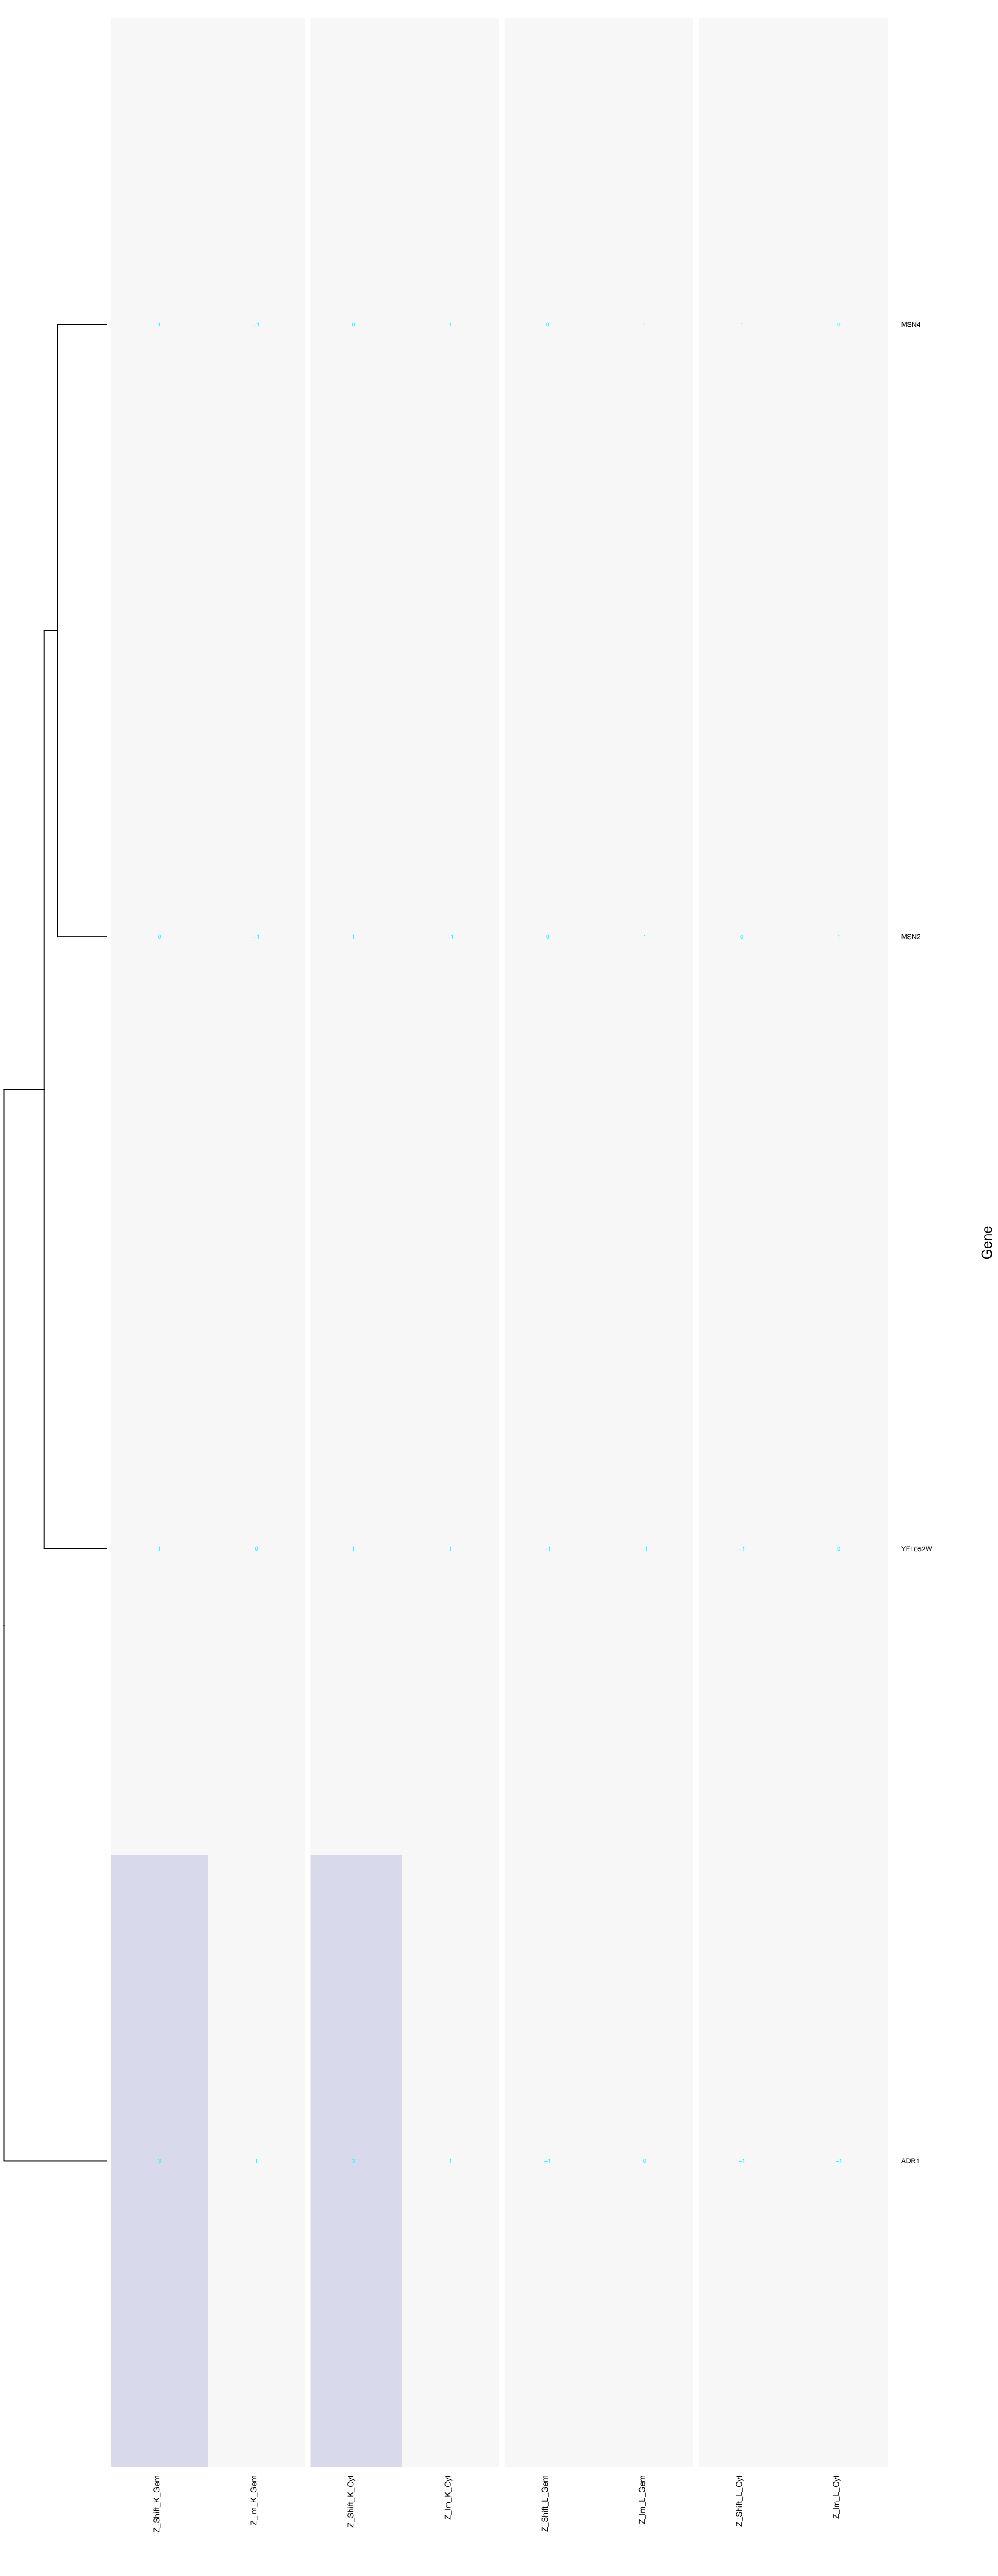

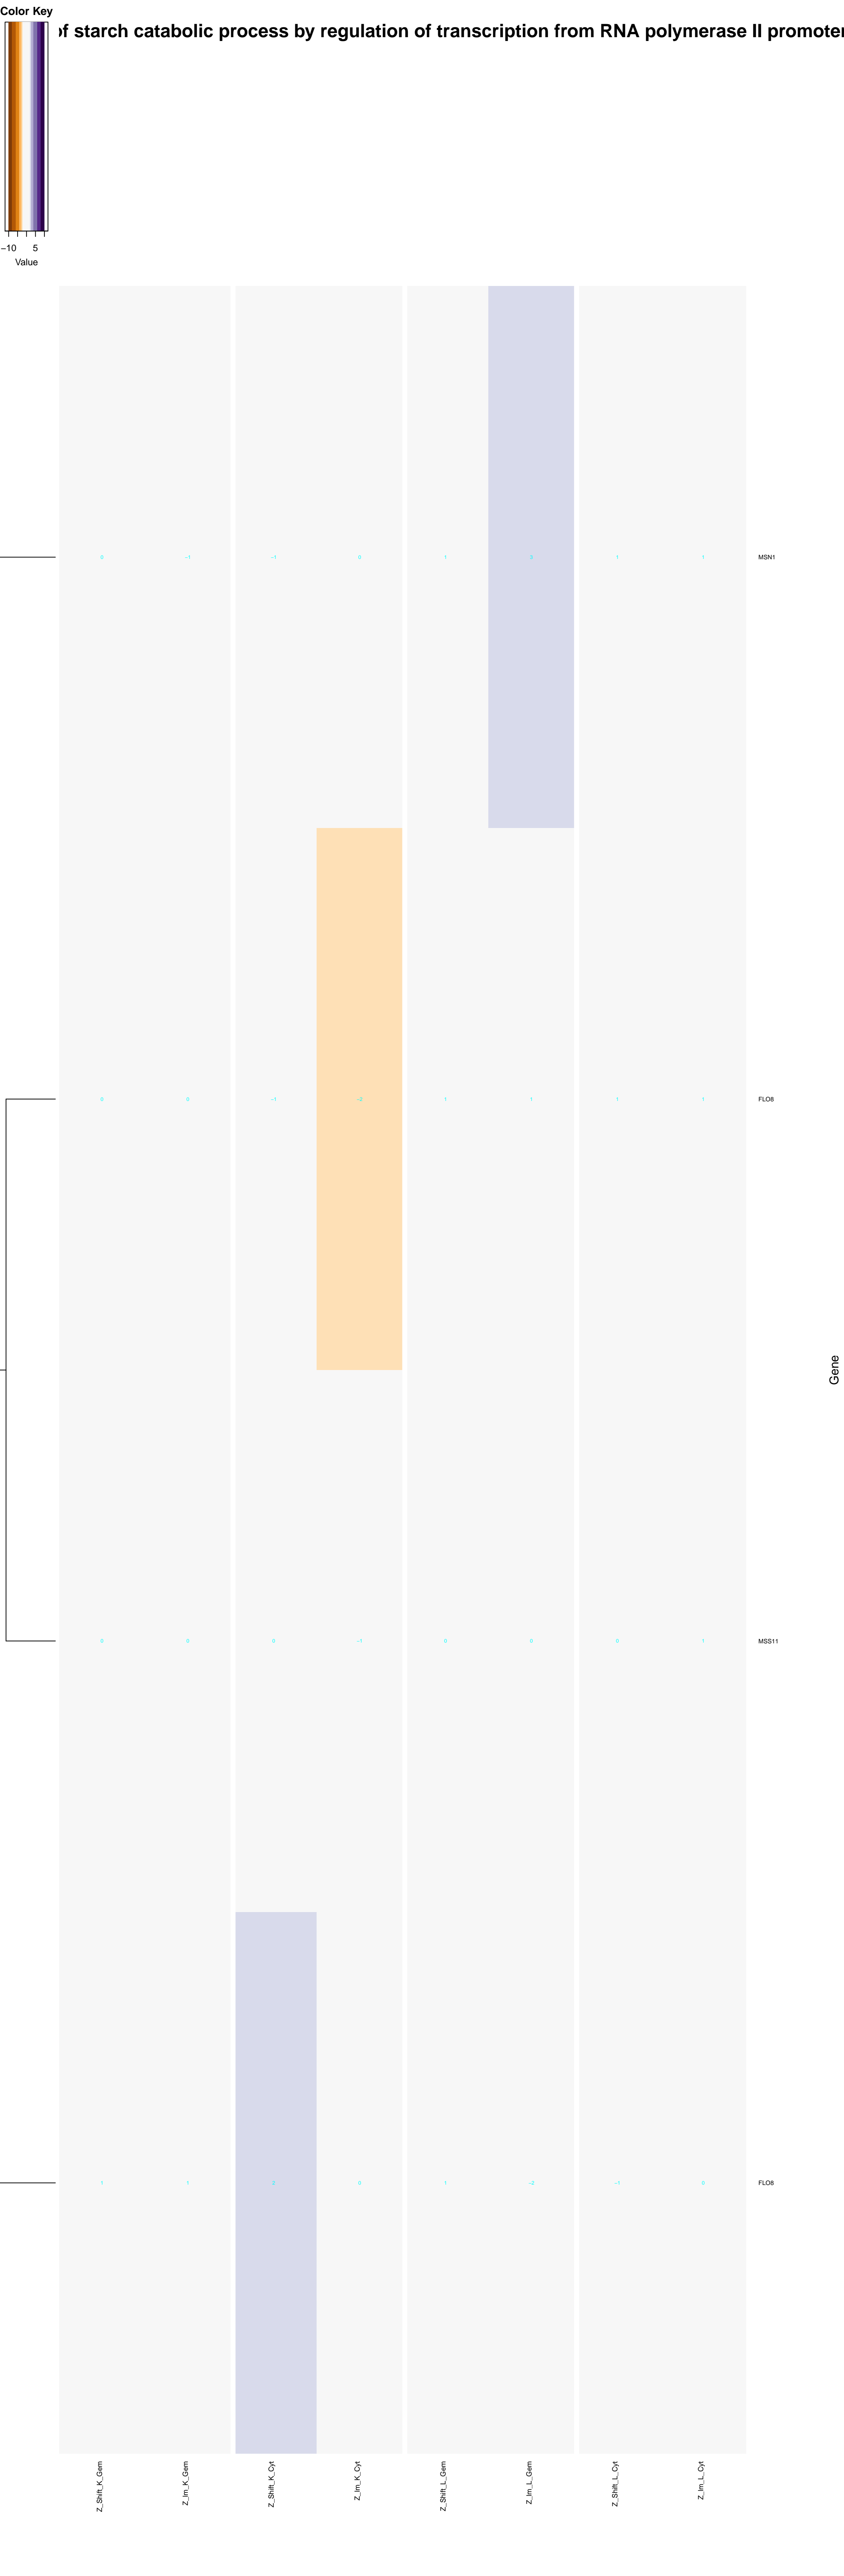

Color Key

on of glycolytic process by regulation of transcription from RNA polymerase II promoter

-10 5

Value

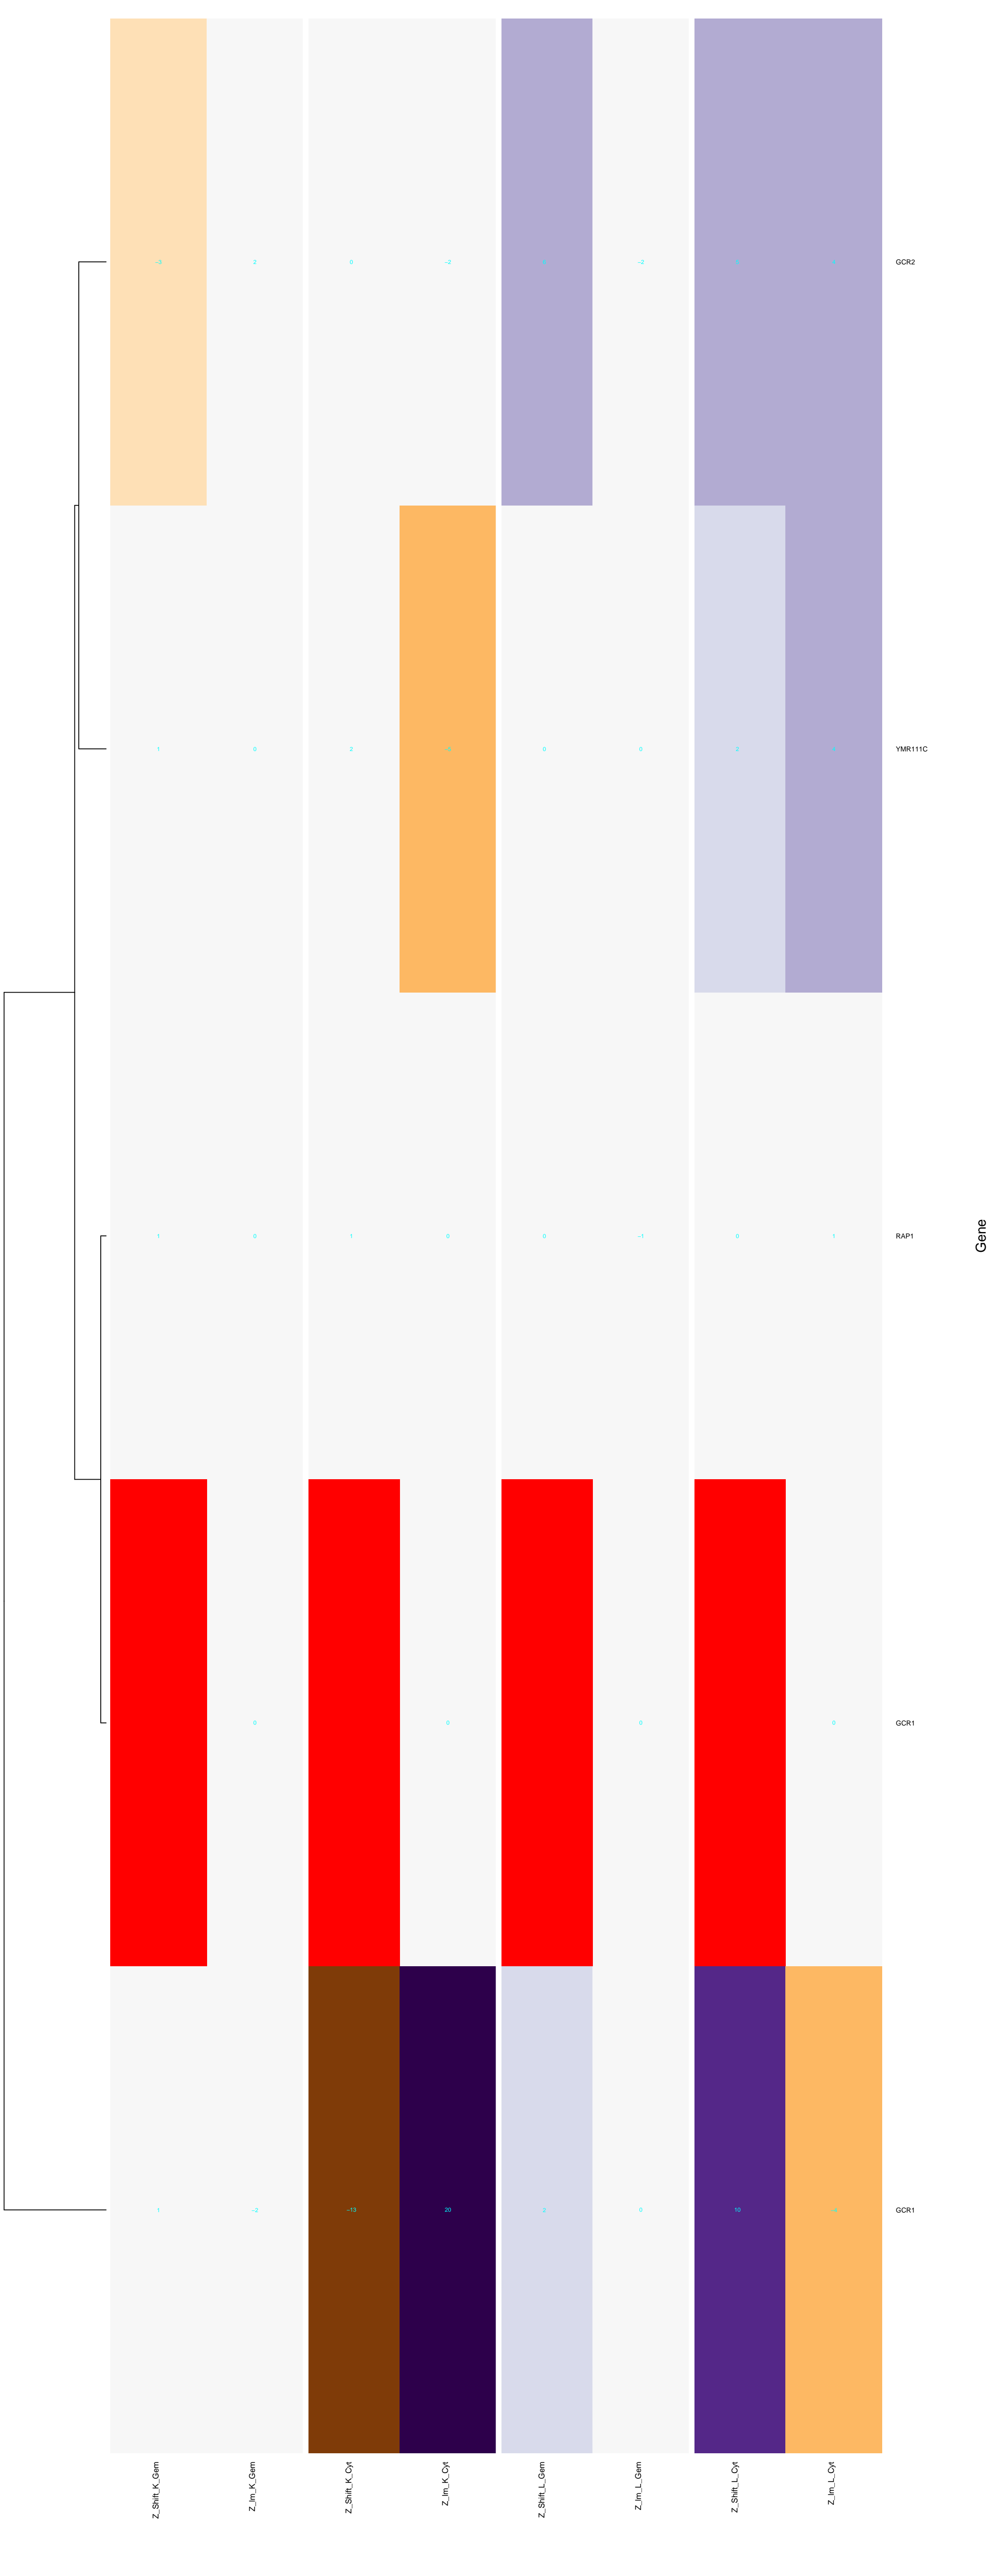



egulation of phosphorylation of RNA polymerase II C-terminal domain serine 2 residues



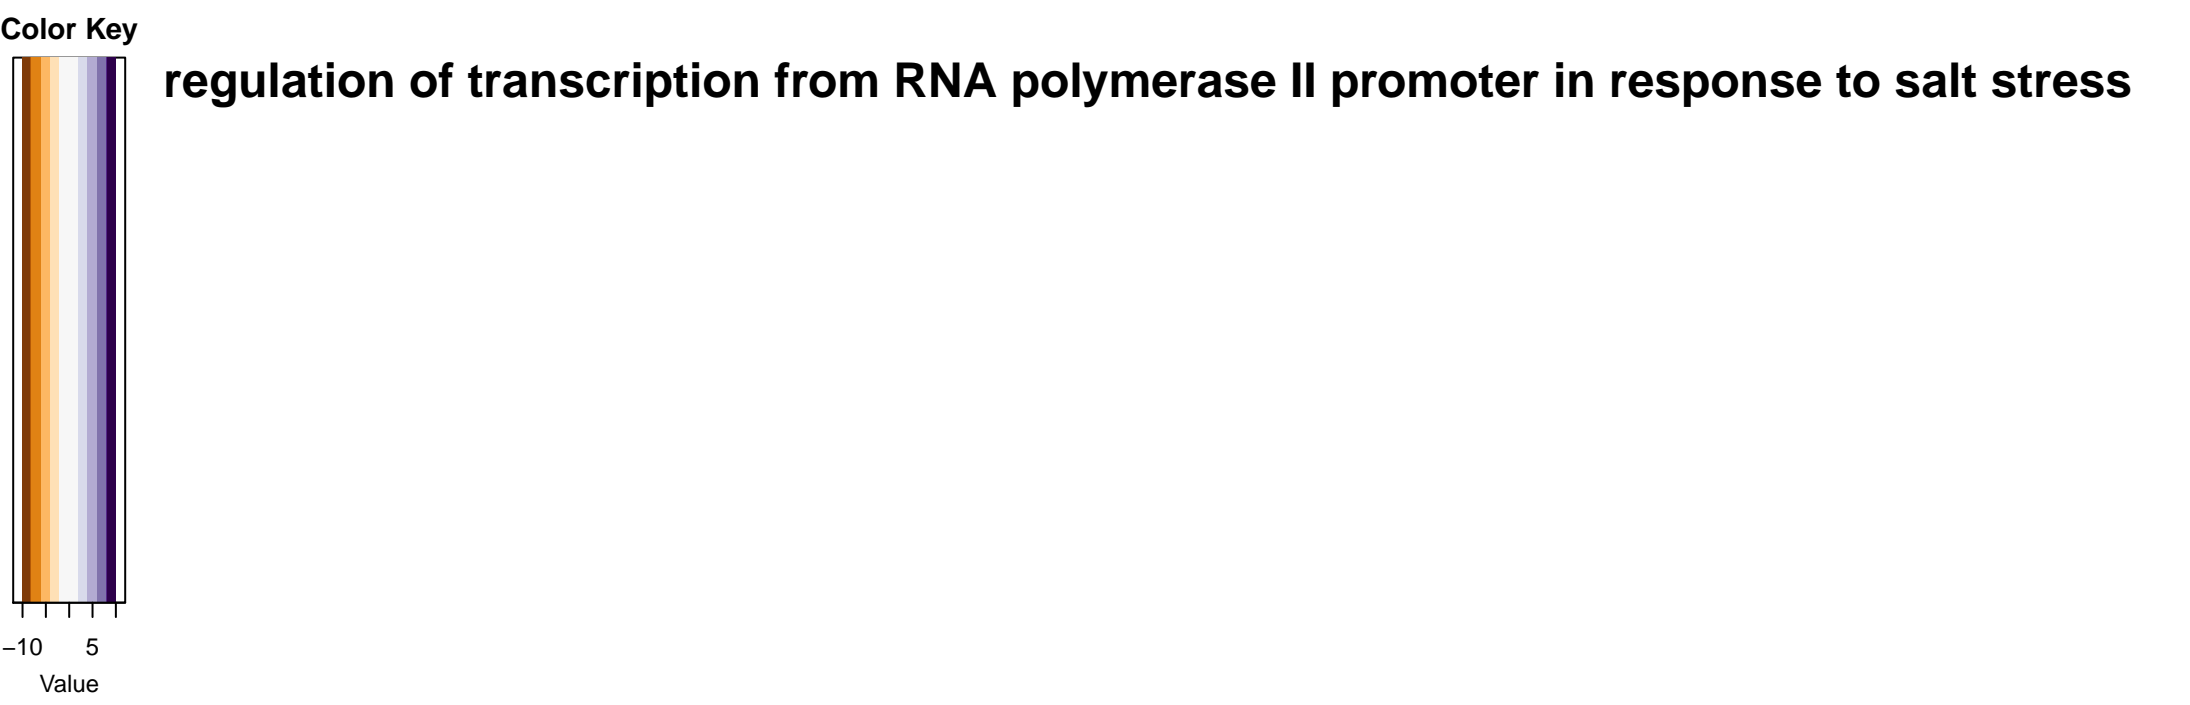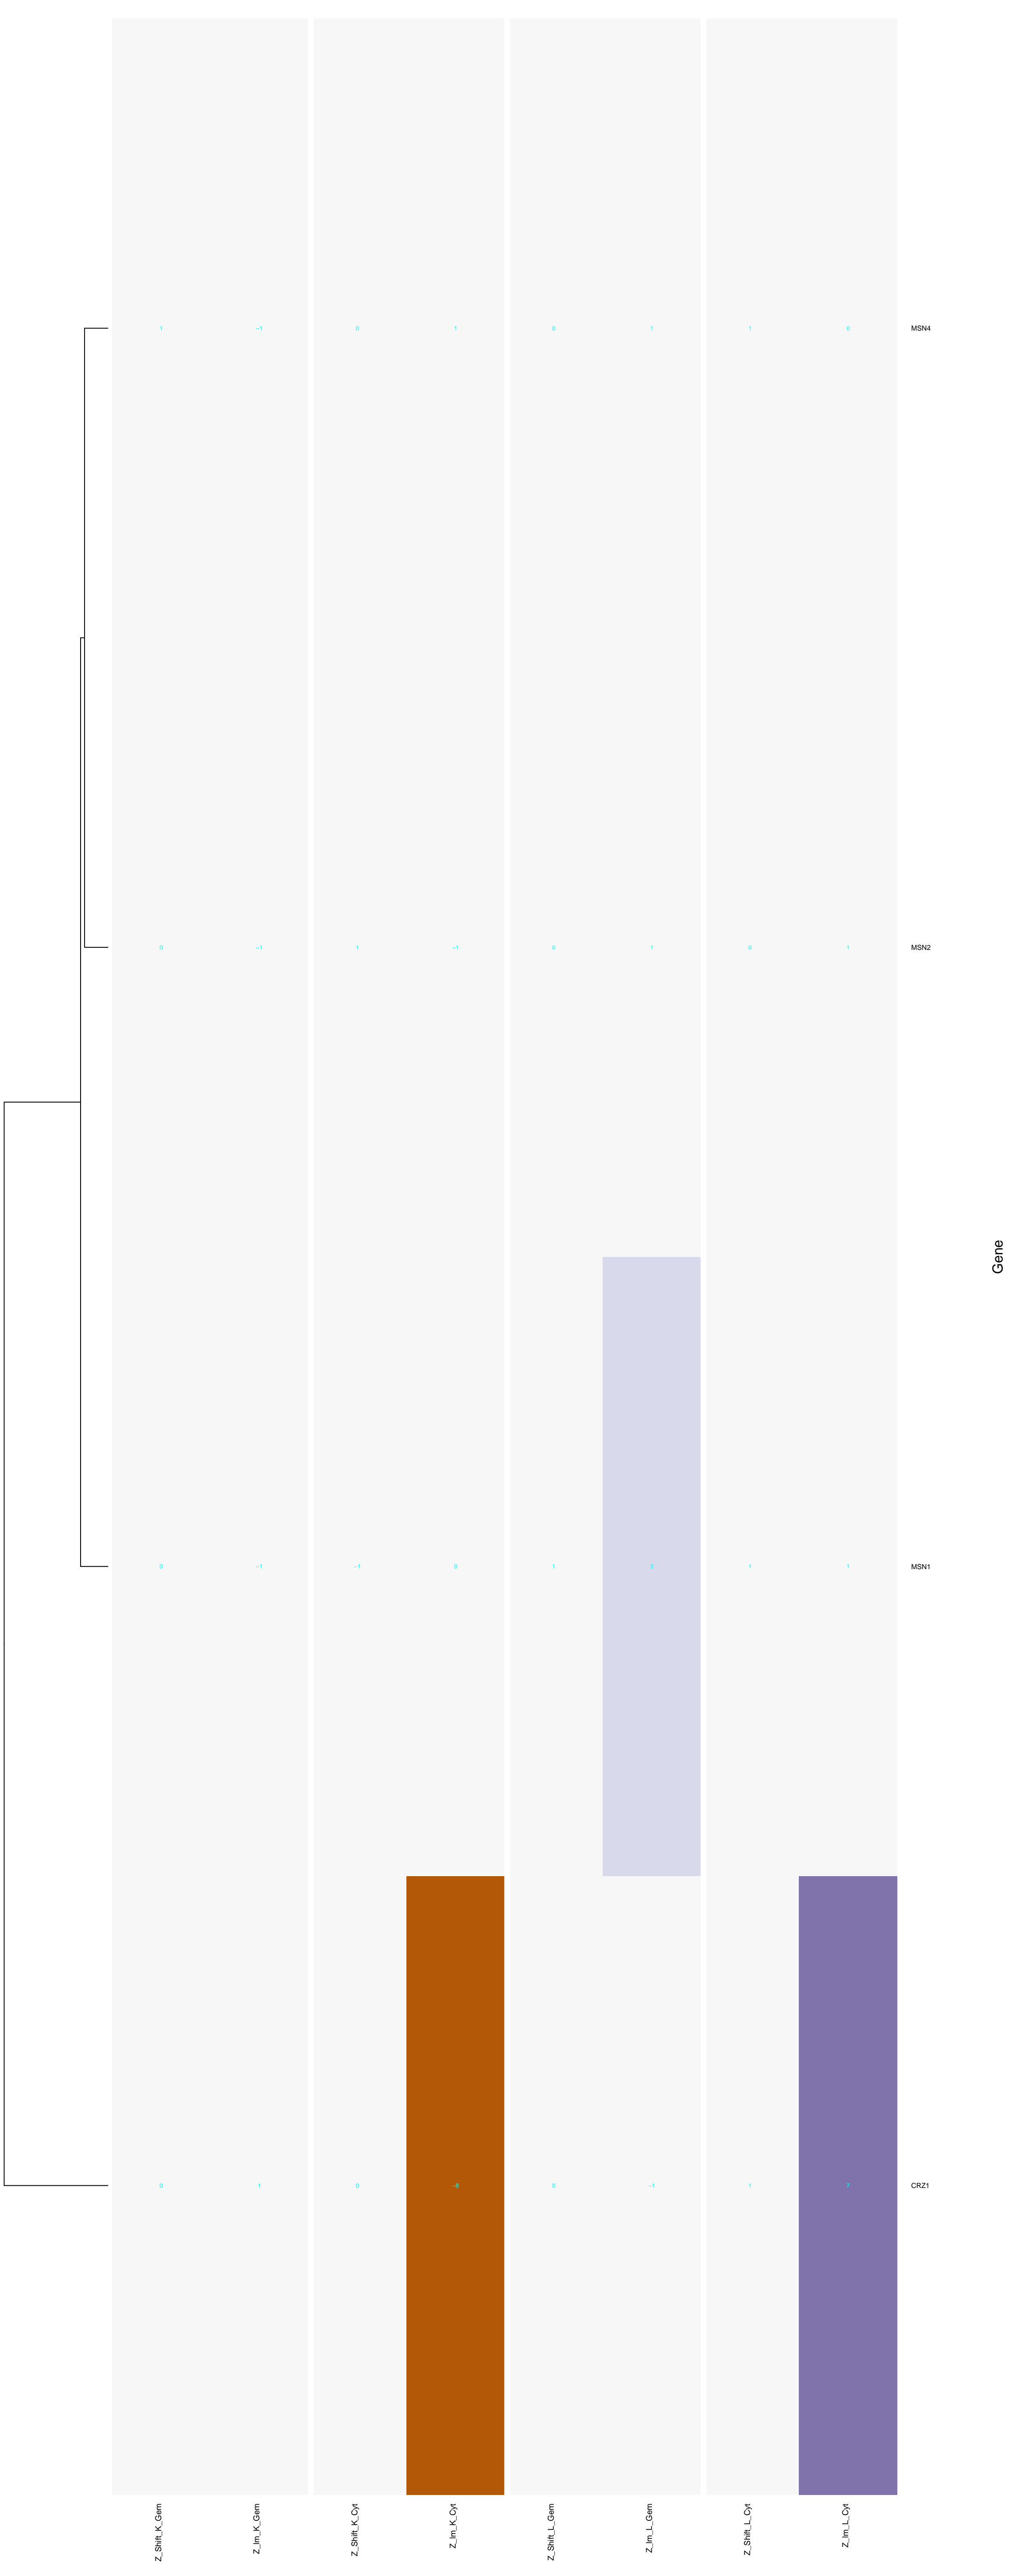







Regulation of transcription from RNA polymerase II promoter in response to increased salt

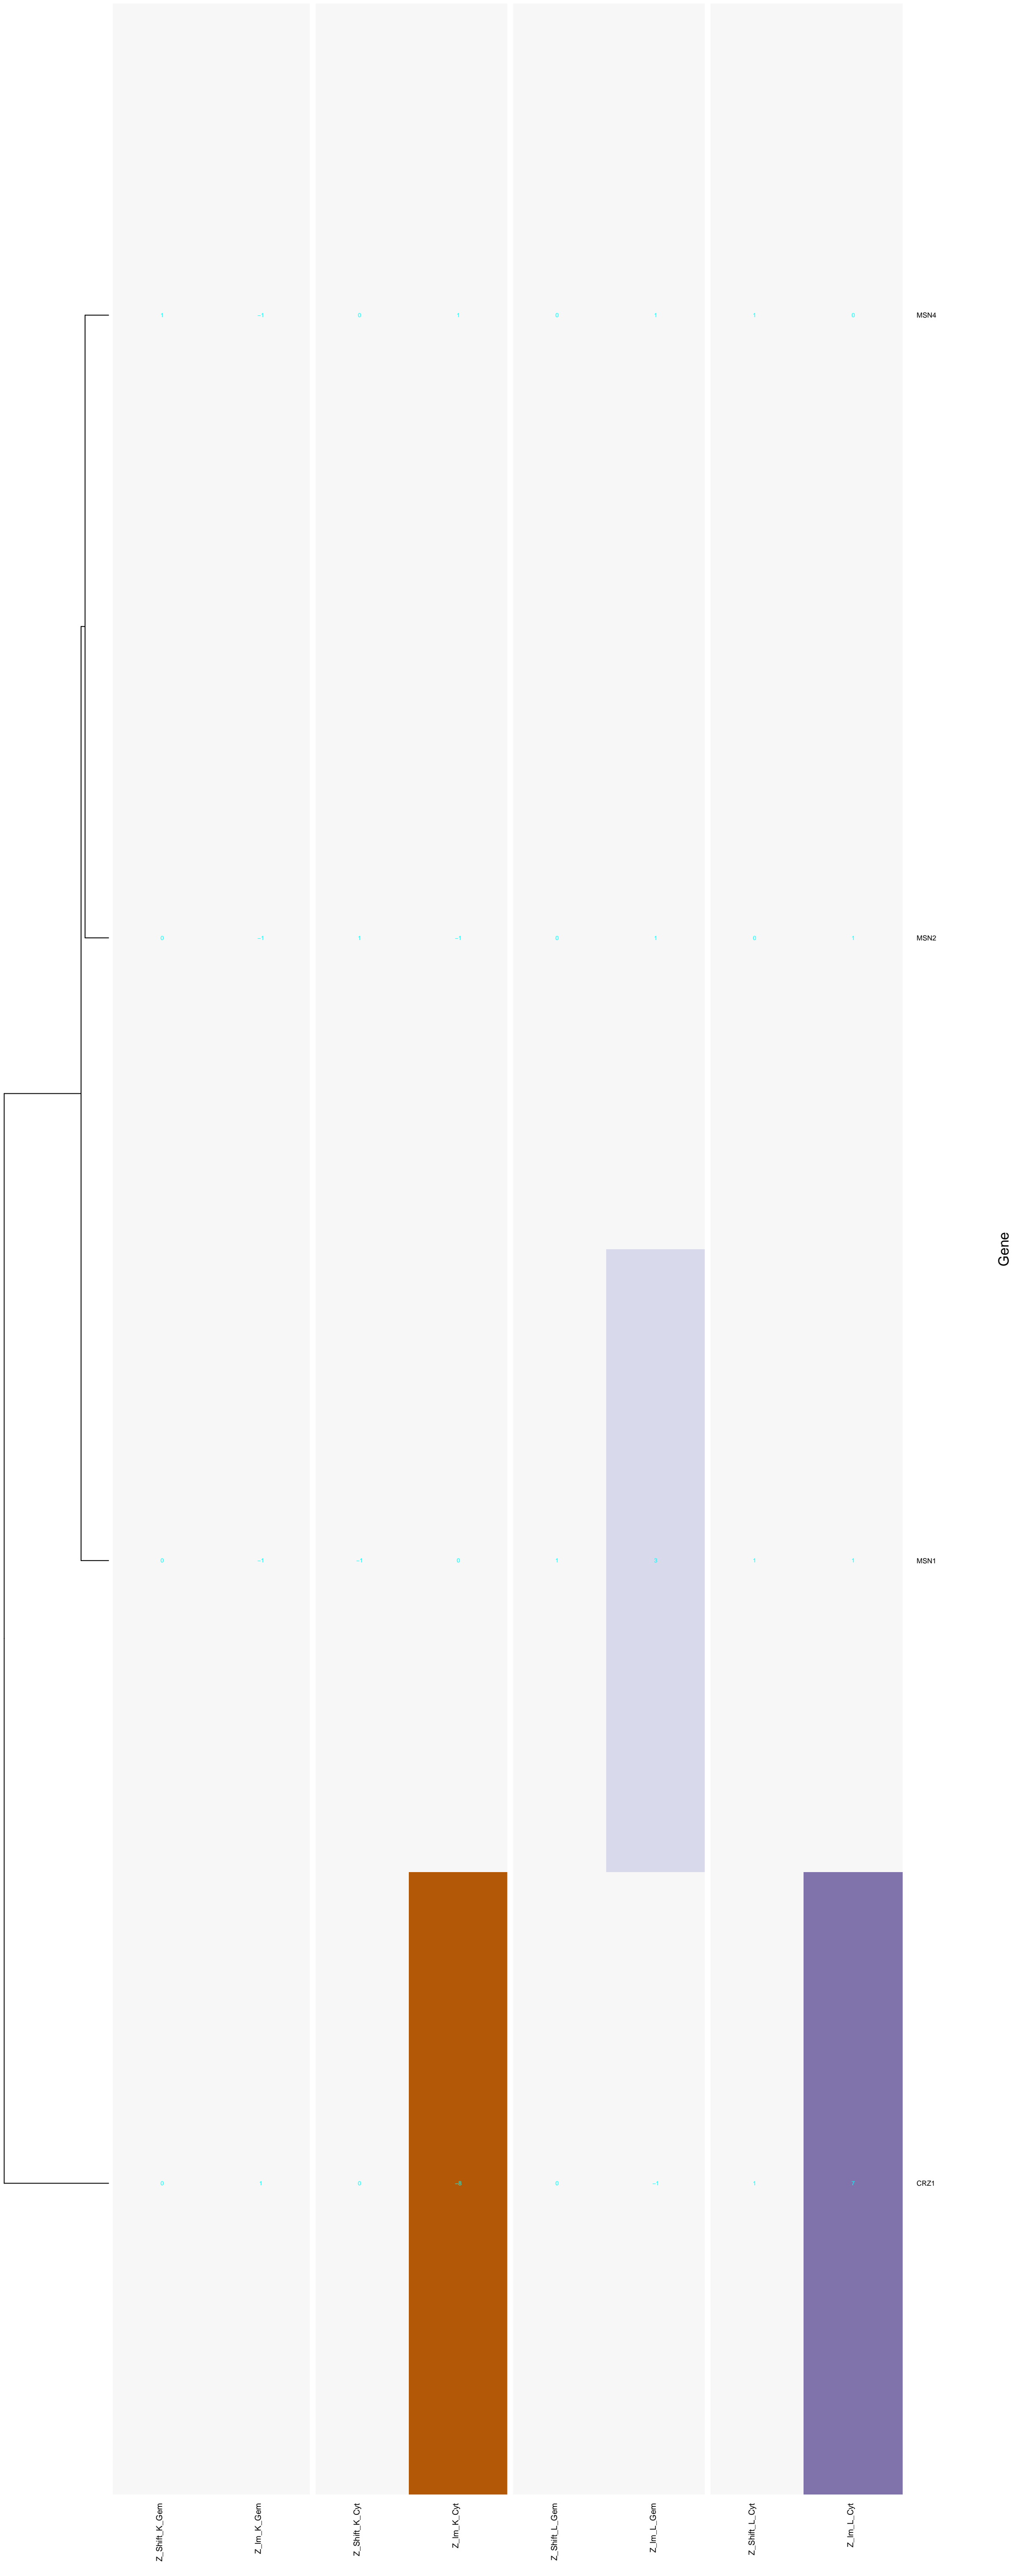

Supplement: s1 [file s1]
