# Supplementary material for: A Humanized Yeast Phenomic Model of Deoxycytidine Kinase to Predict Genetic Buffering of Nucleoside Analog Cytotoxicity
Source: MDPI journal article supplement (doi:10.3390/genes10100770), 2019-09-30

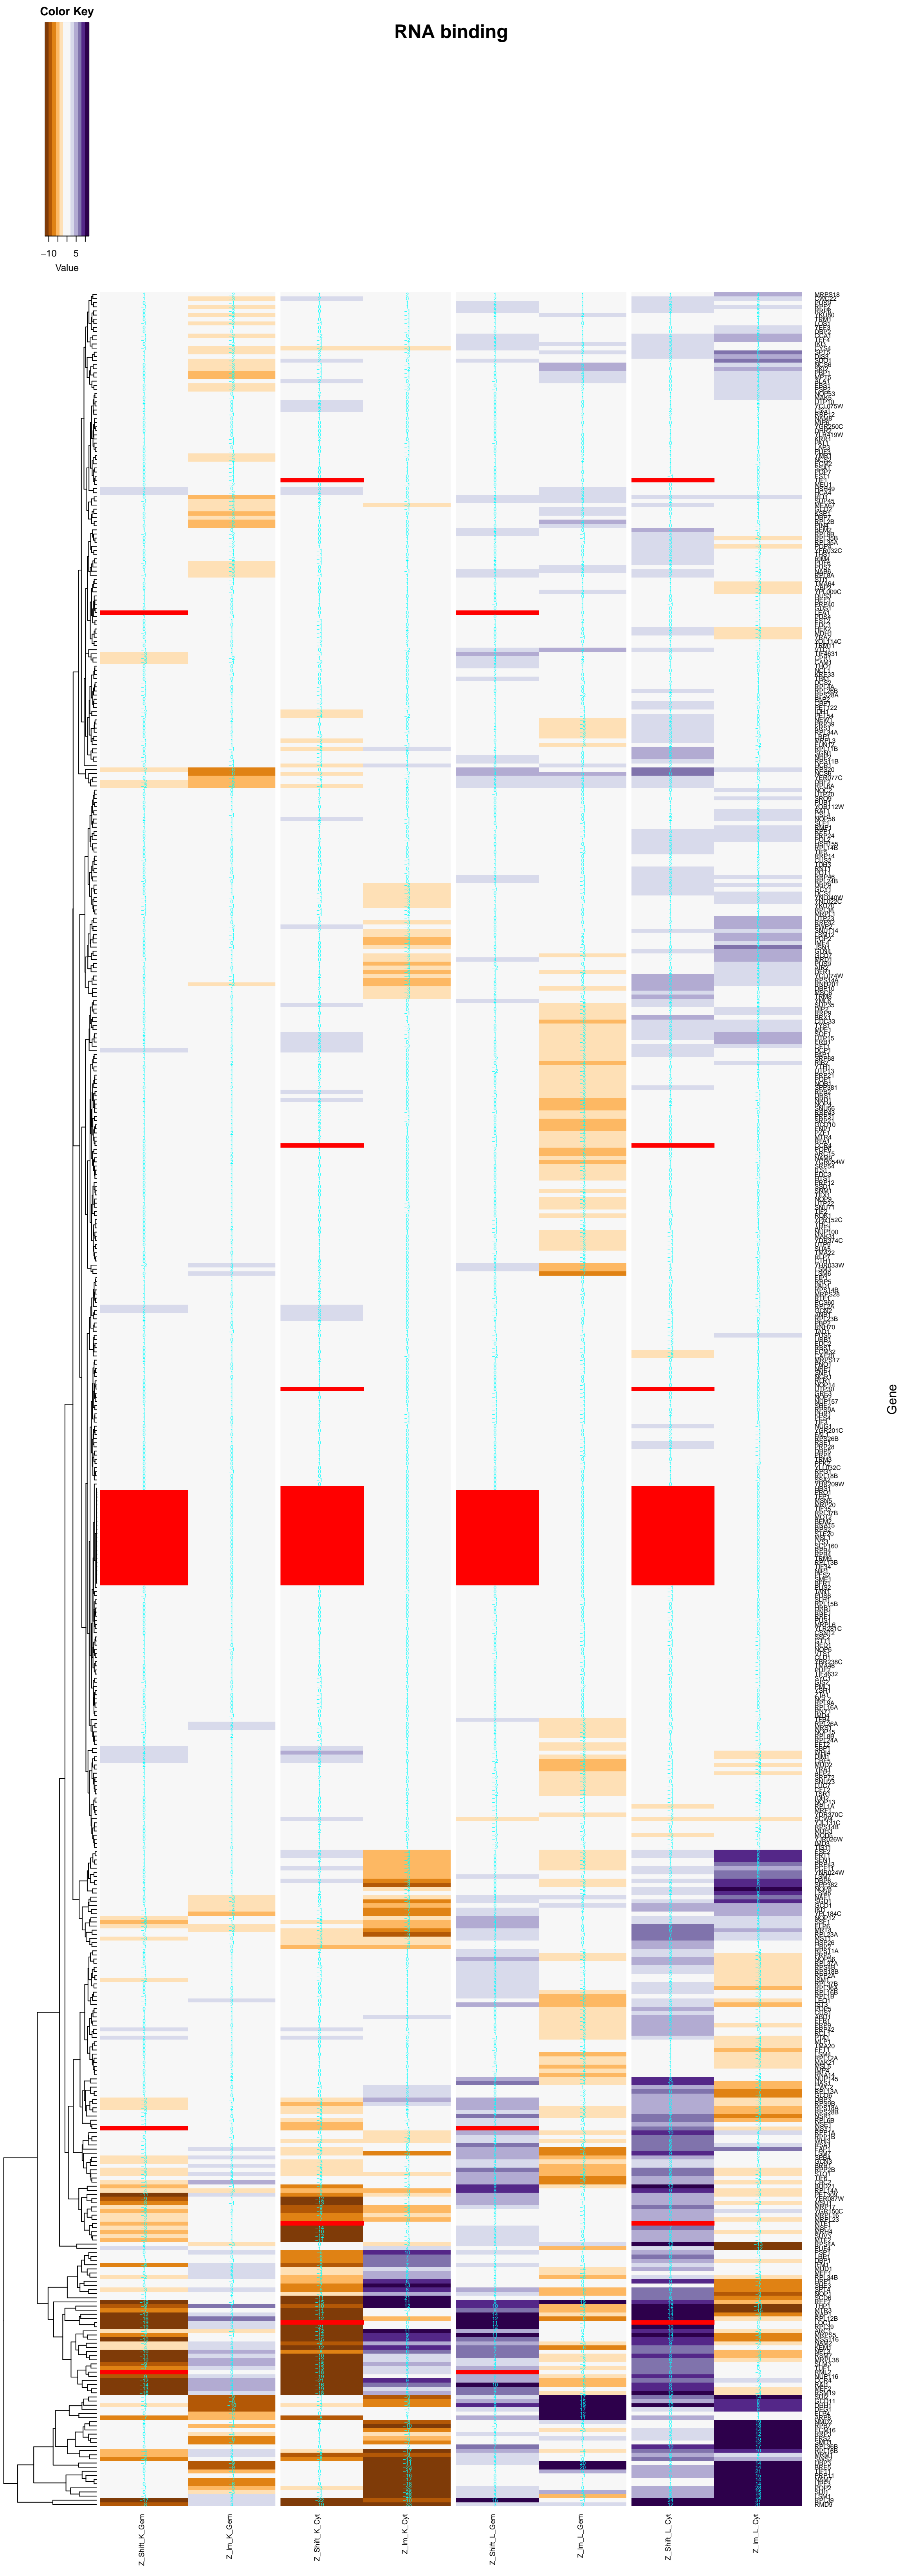

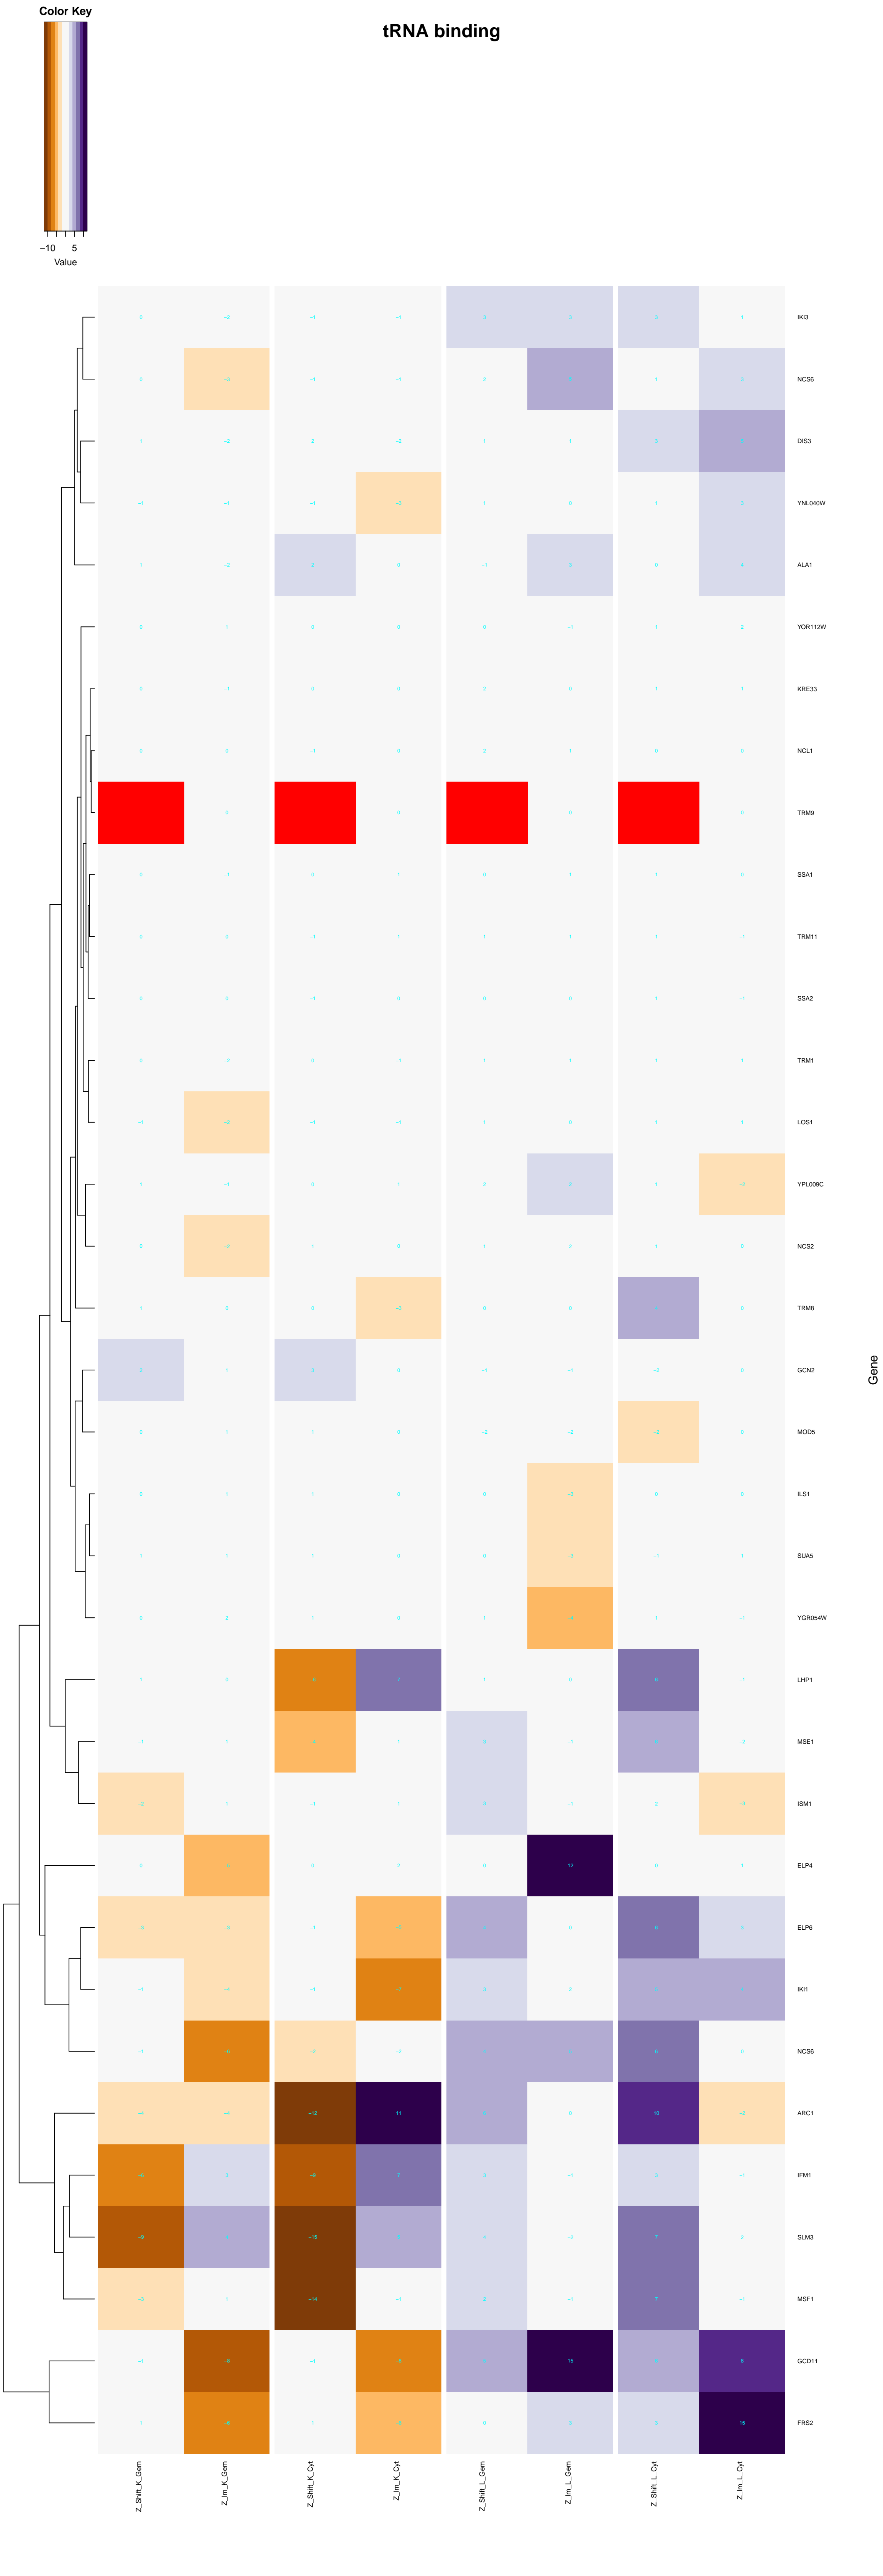

RNA cap binding

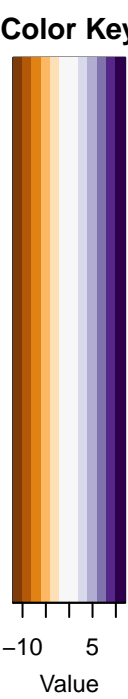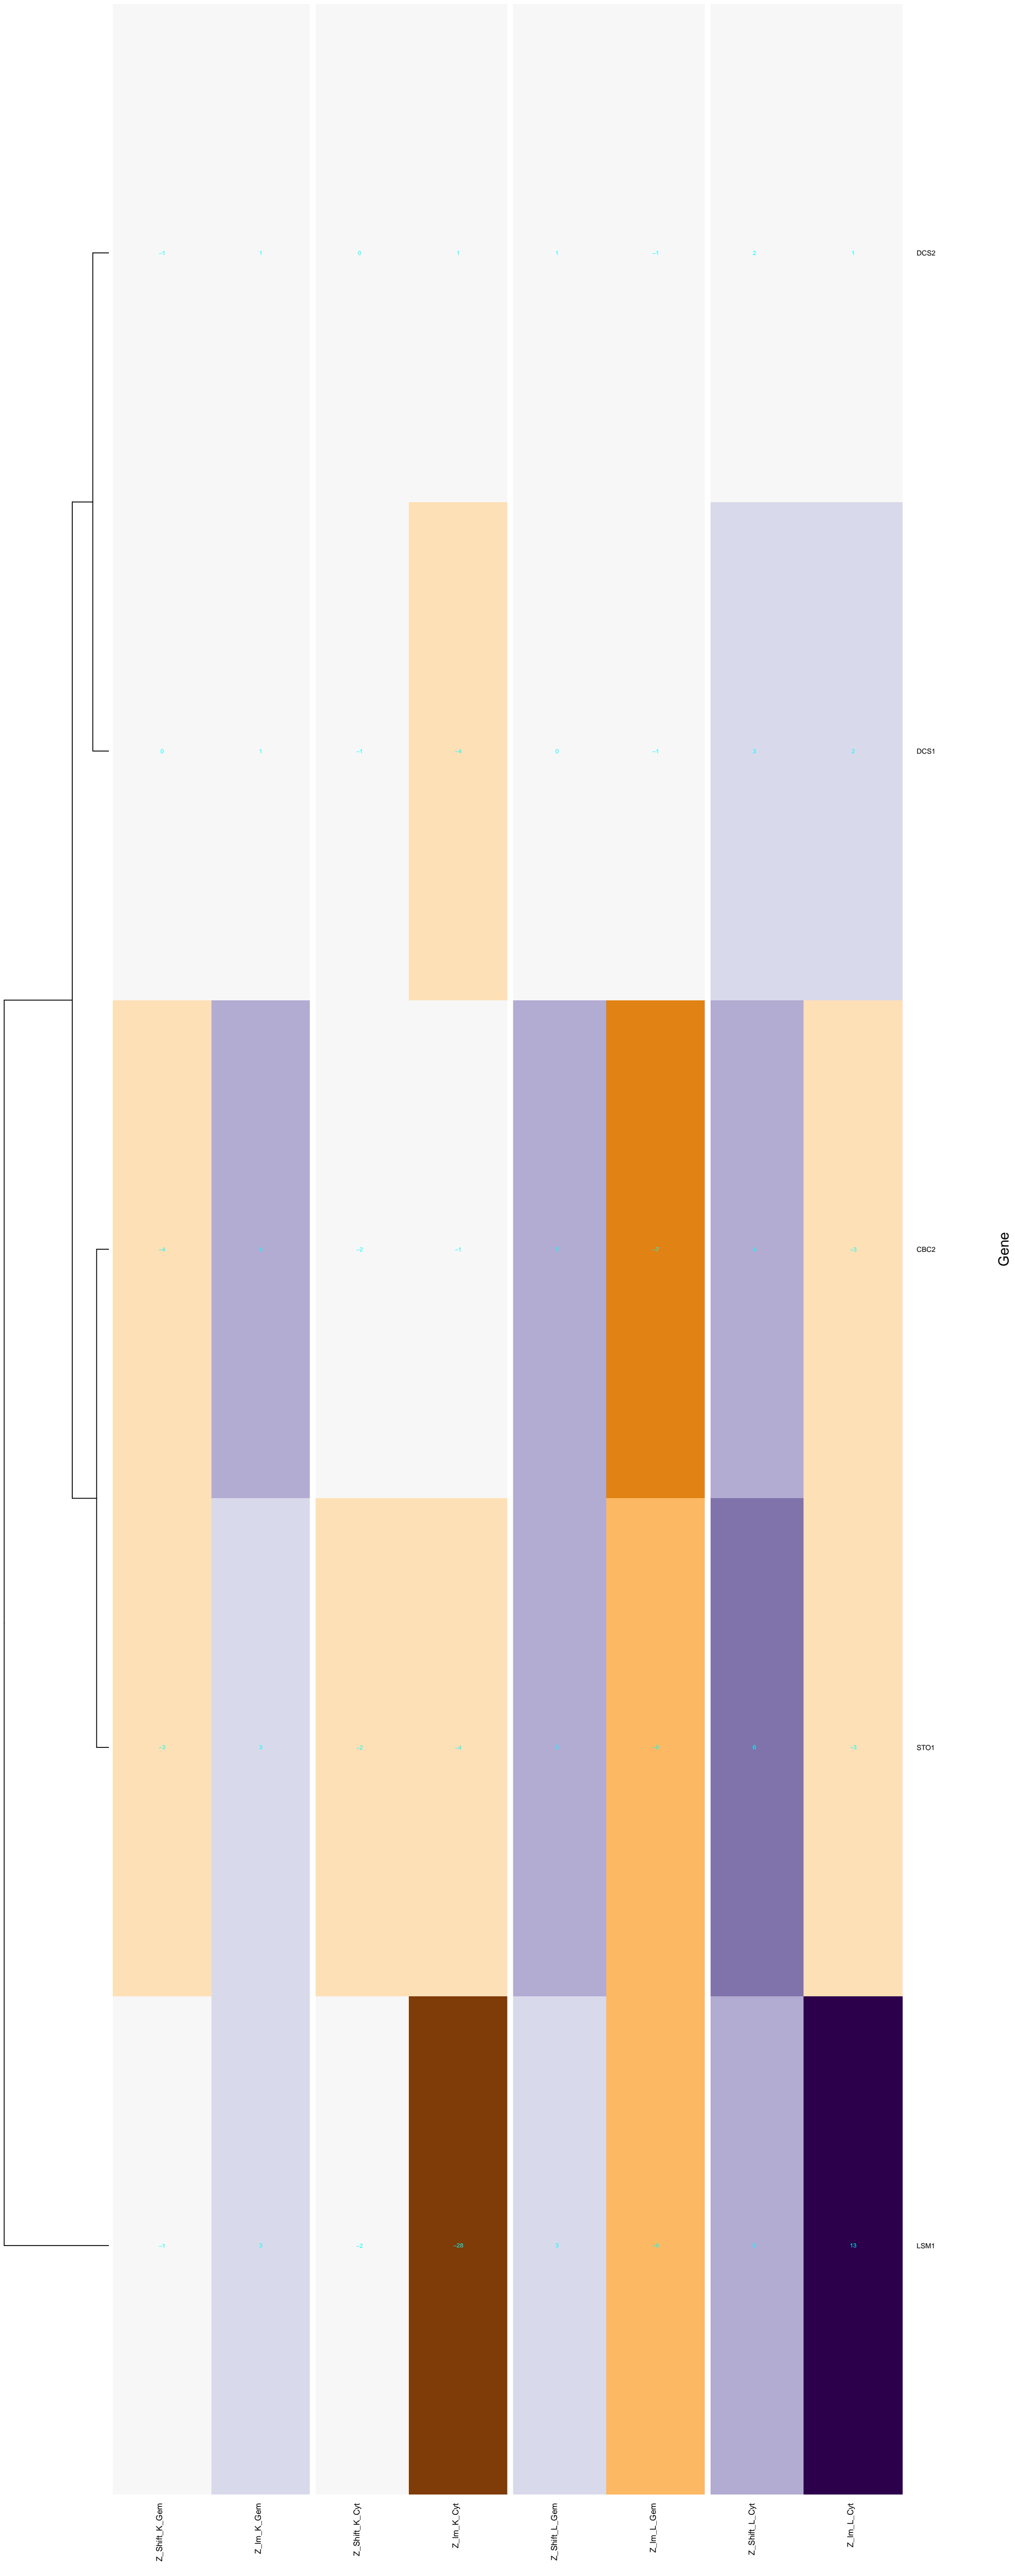

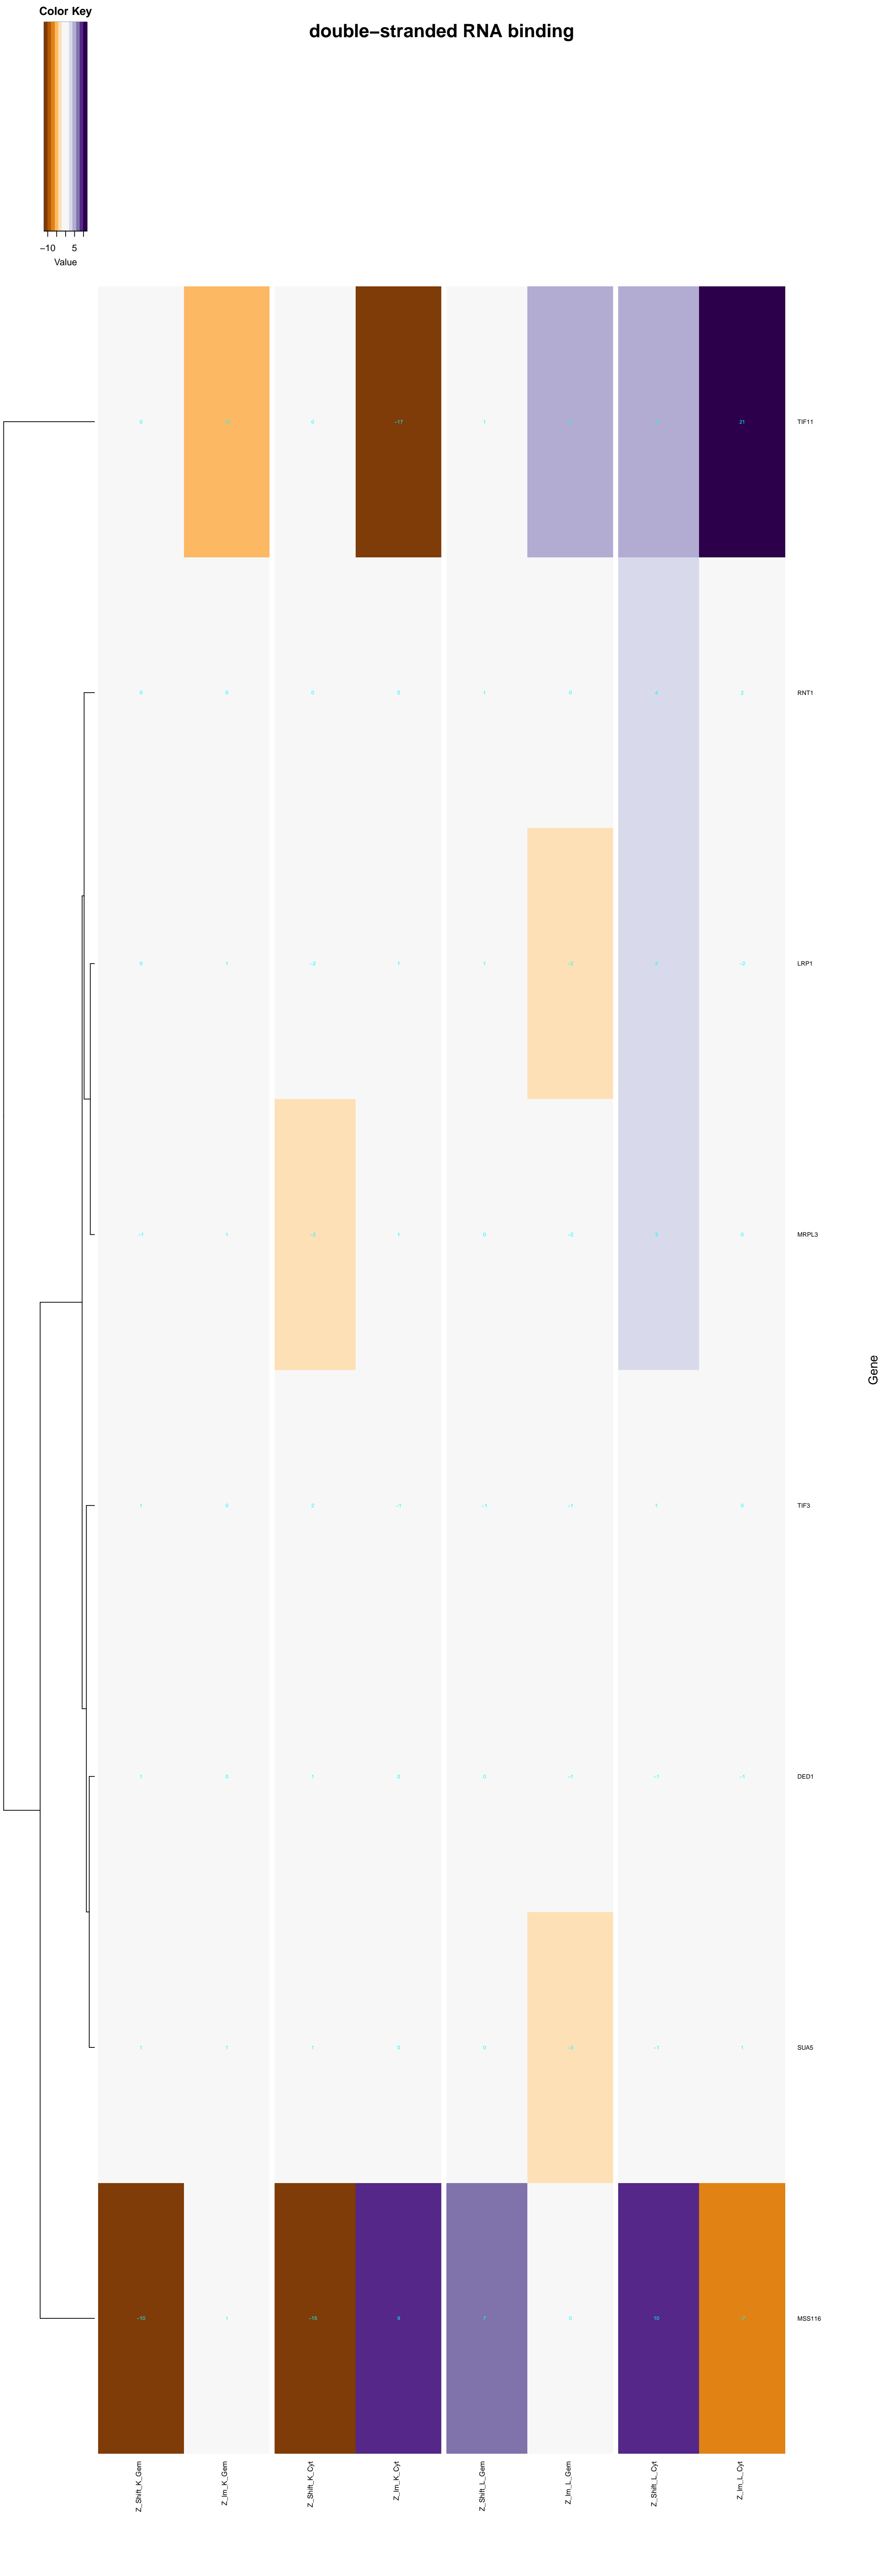

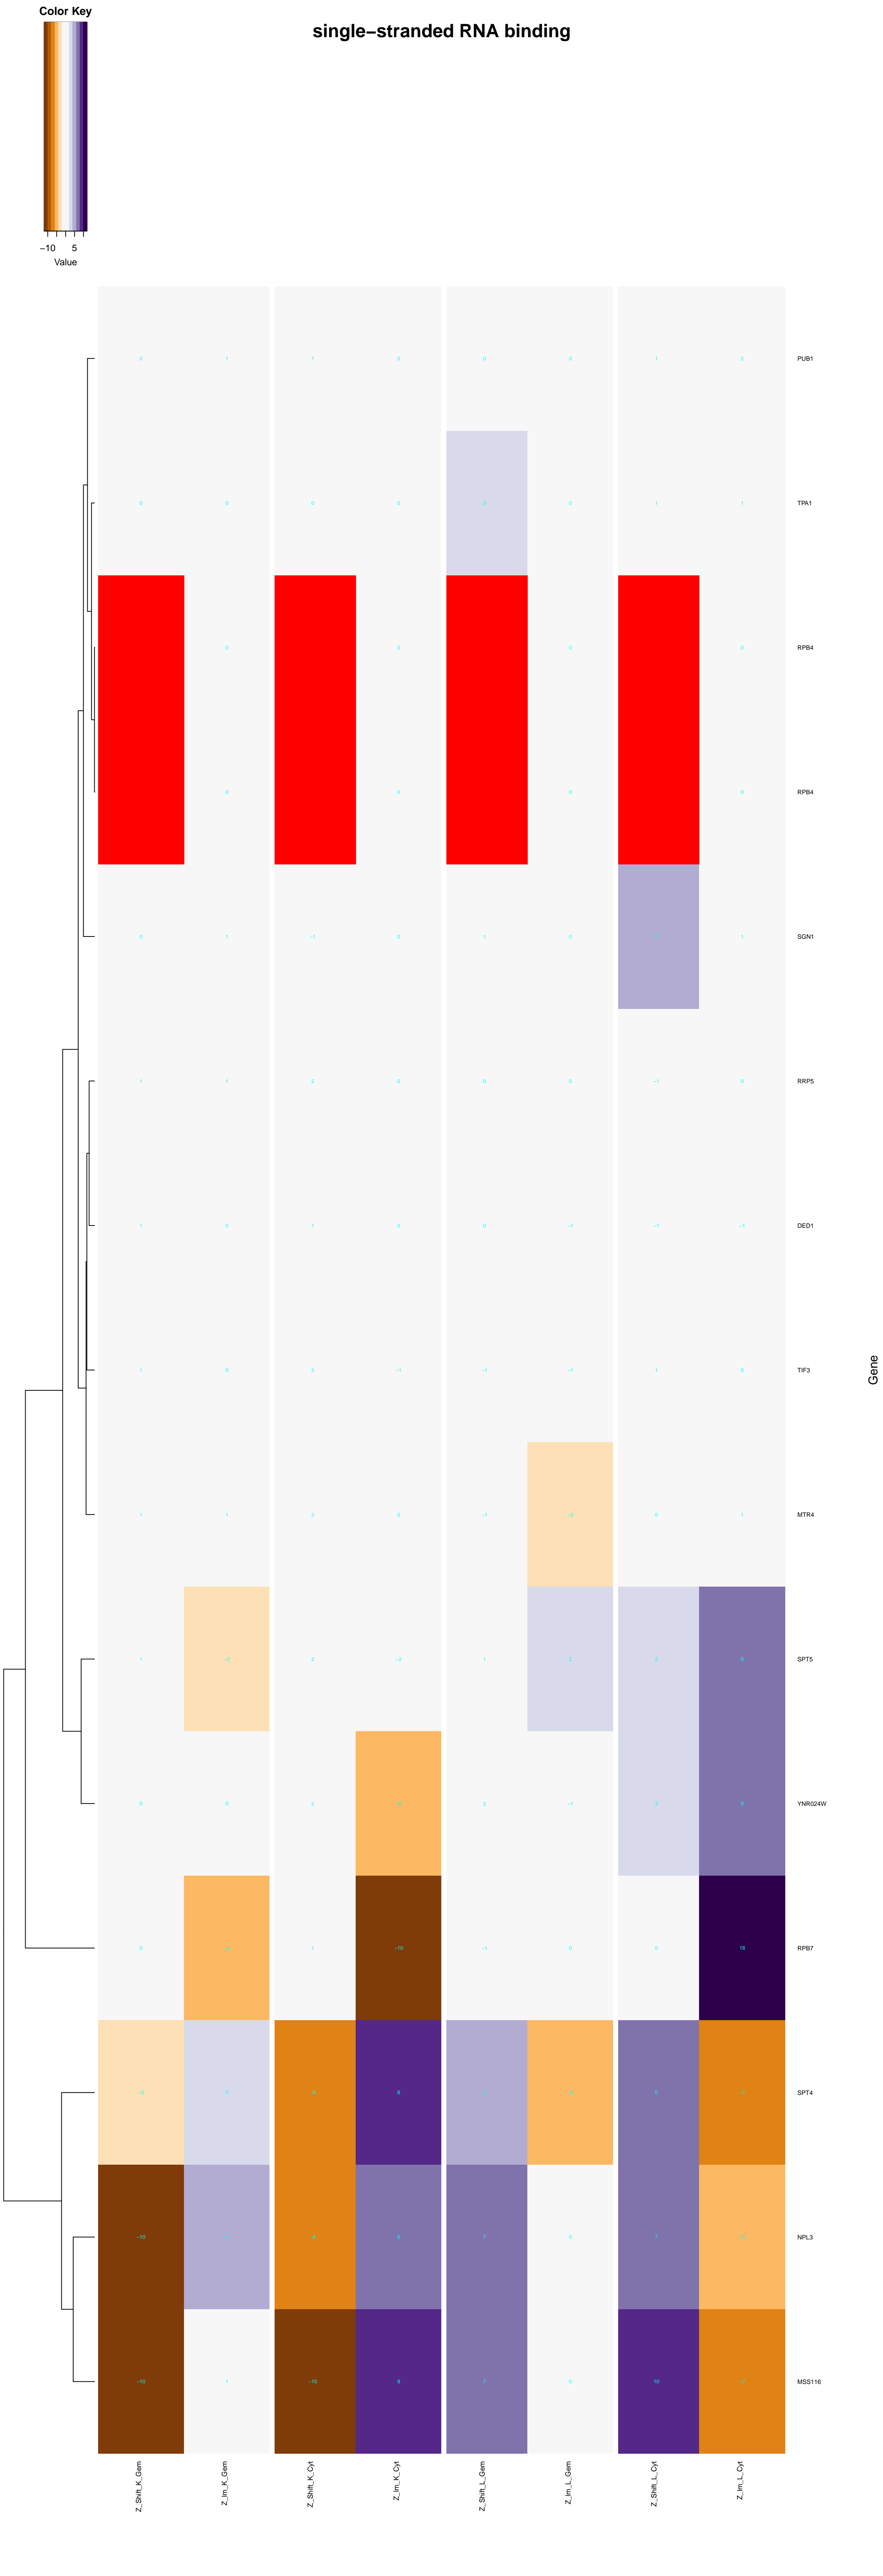

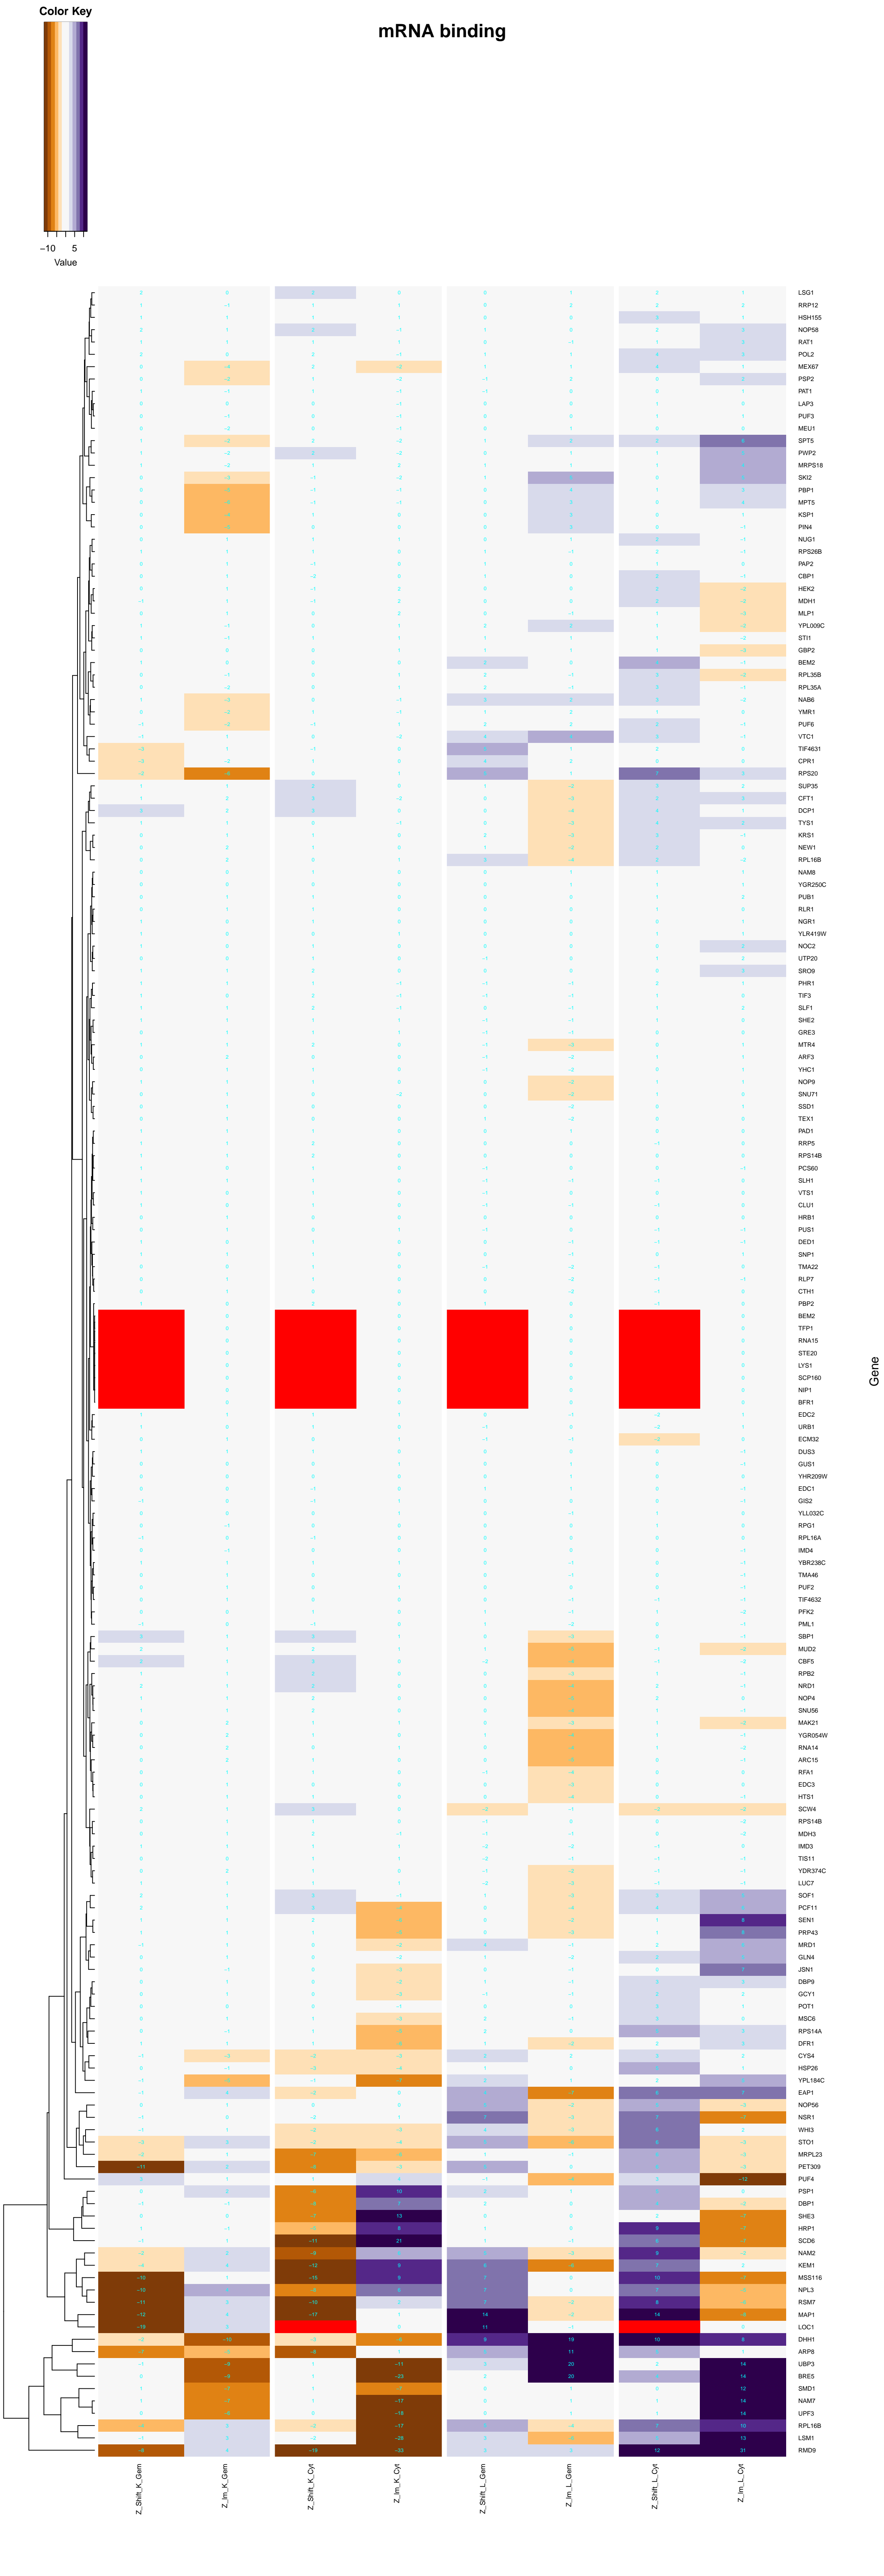

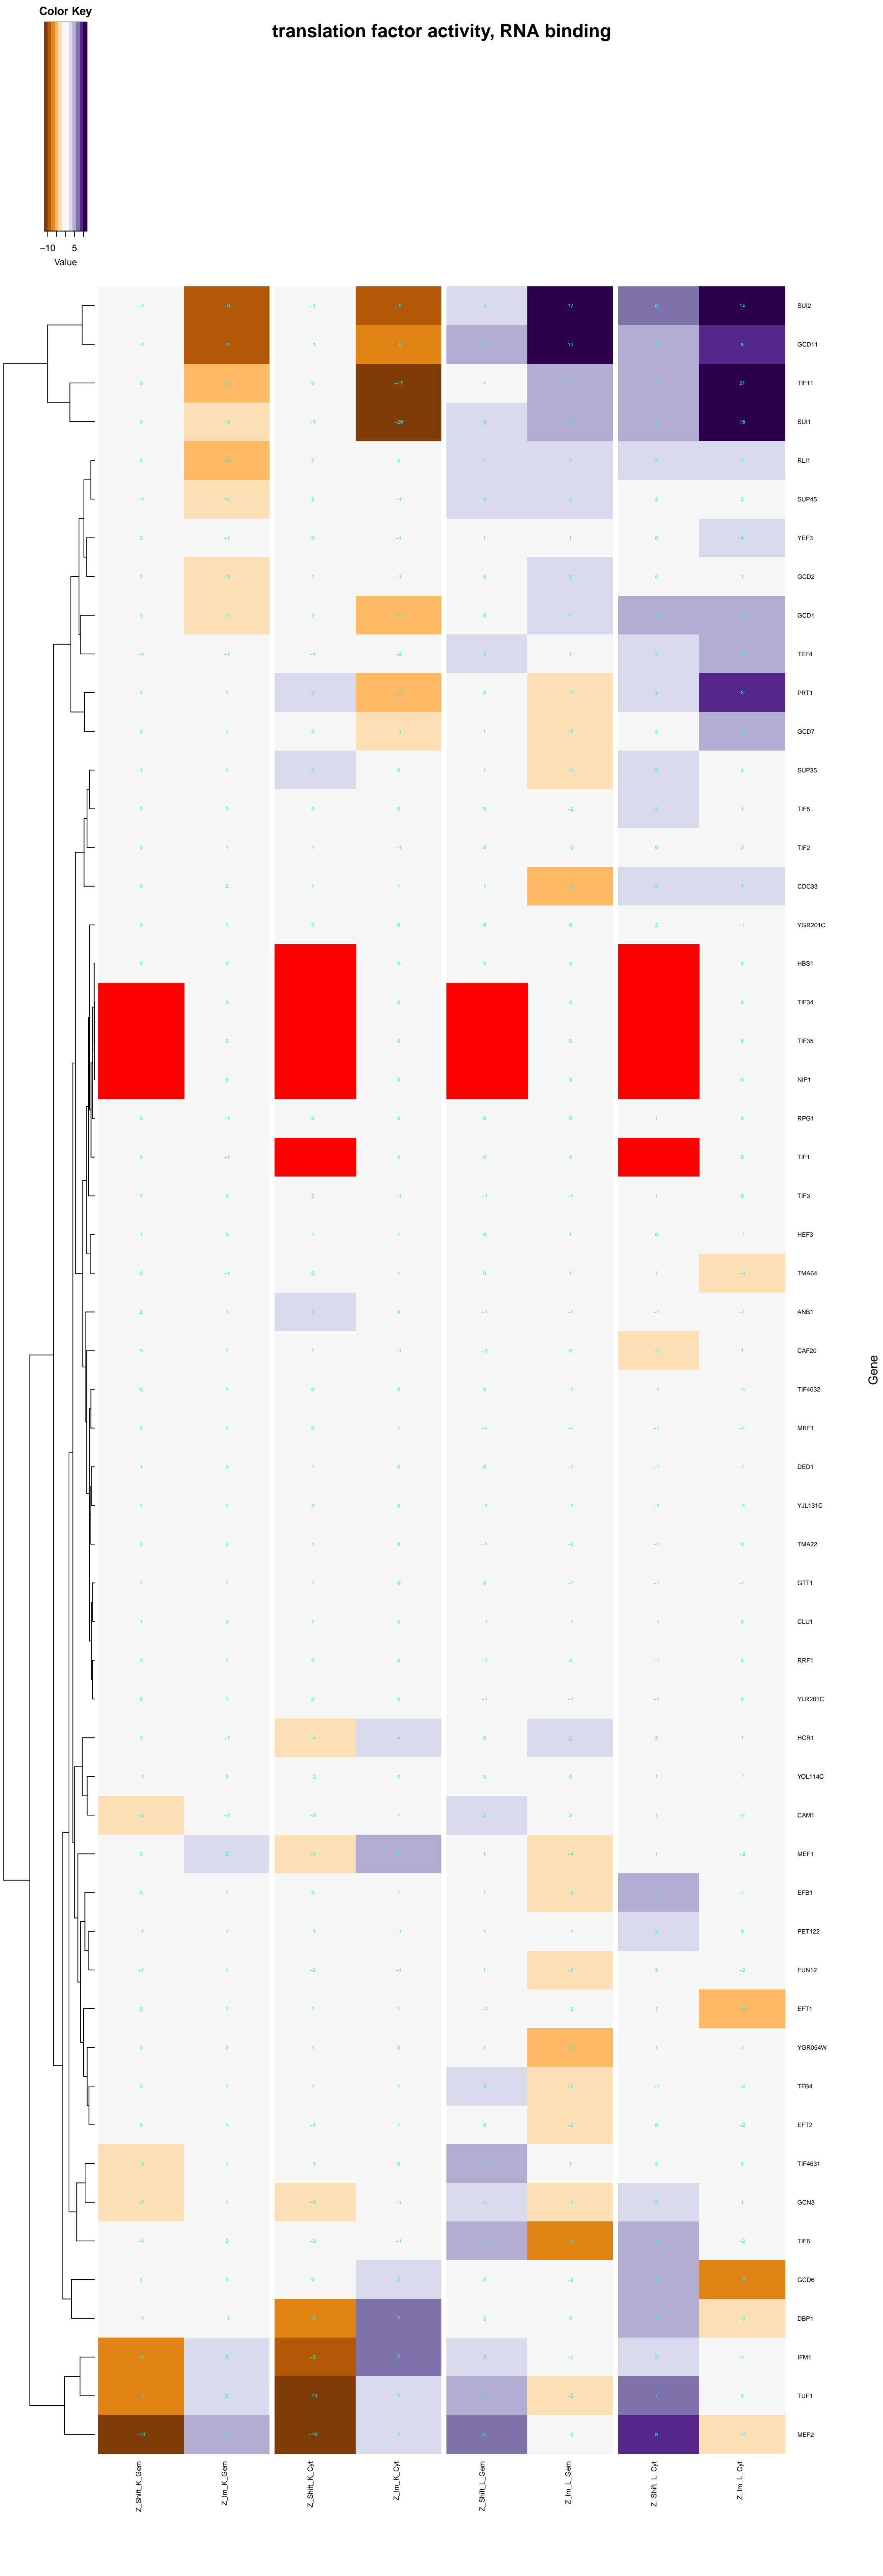

7S RNA binding

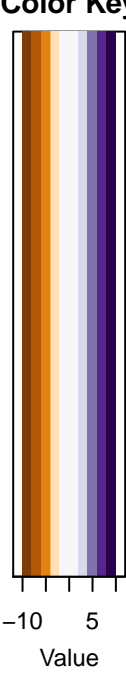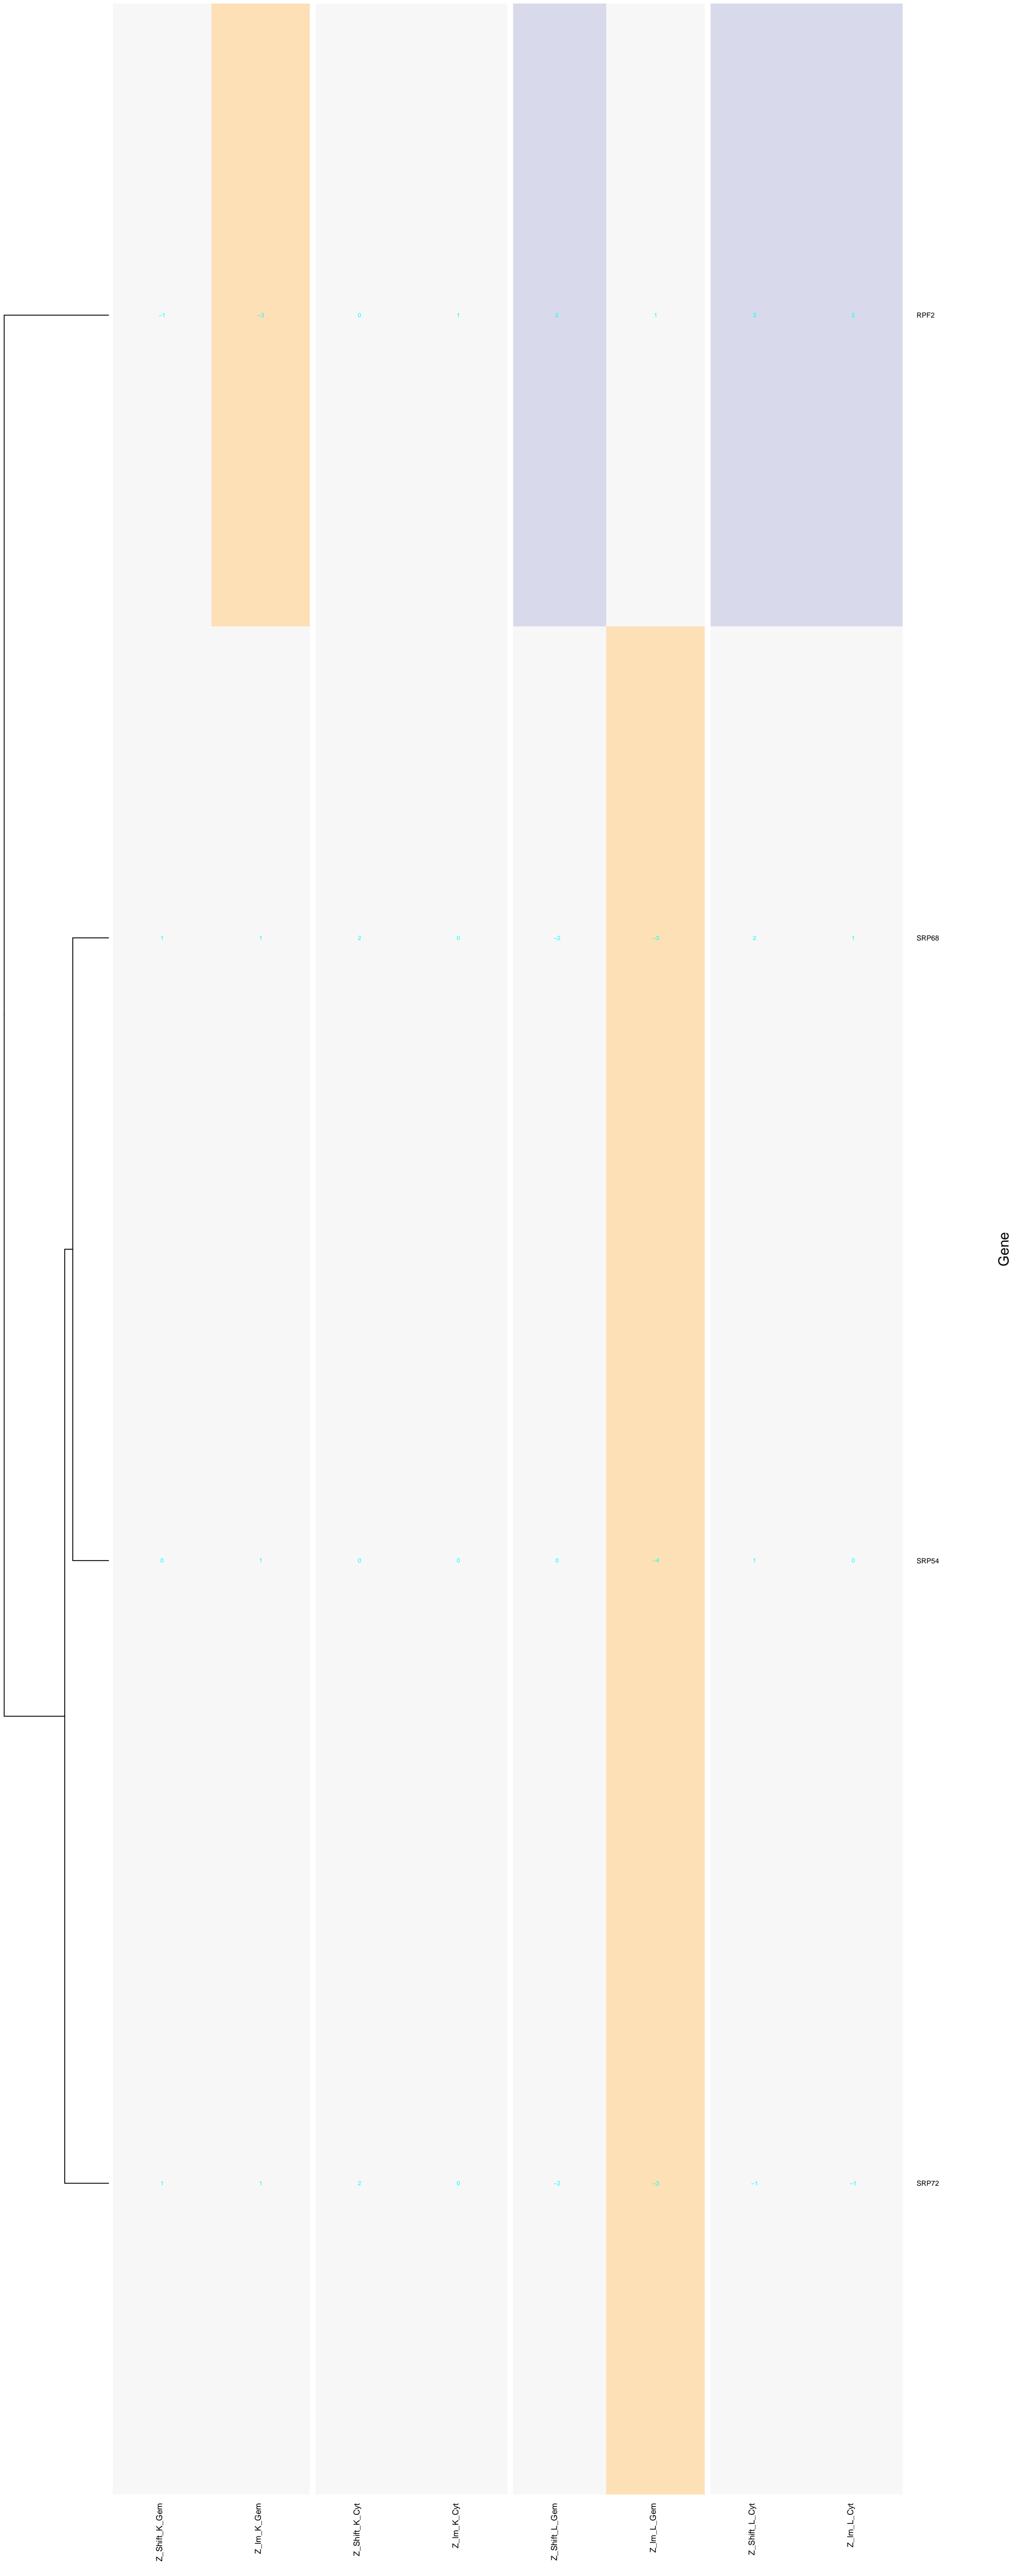

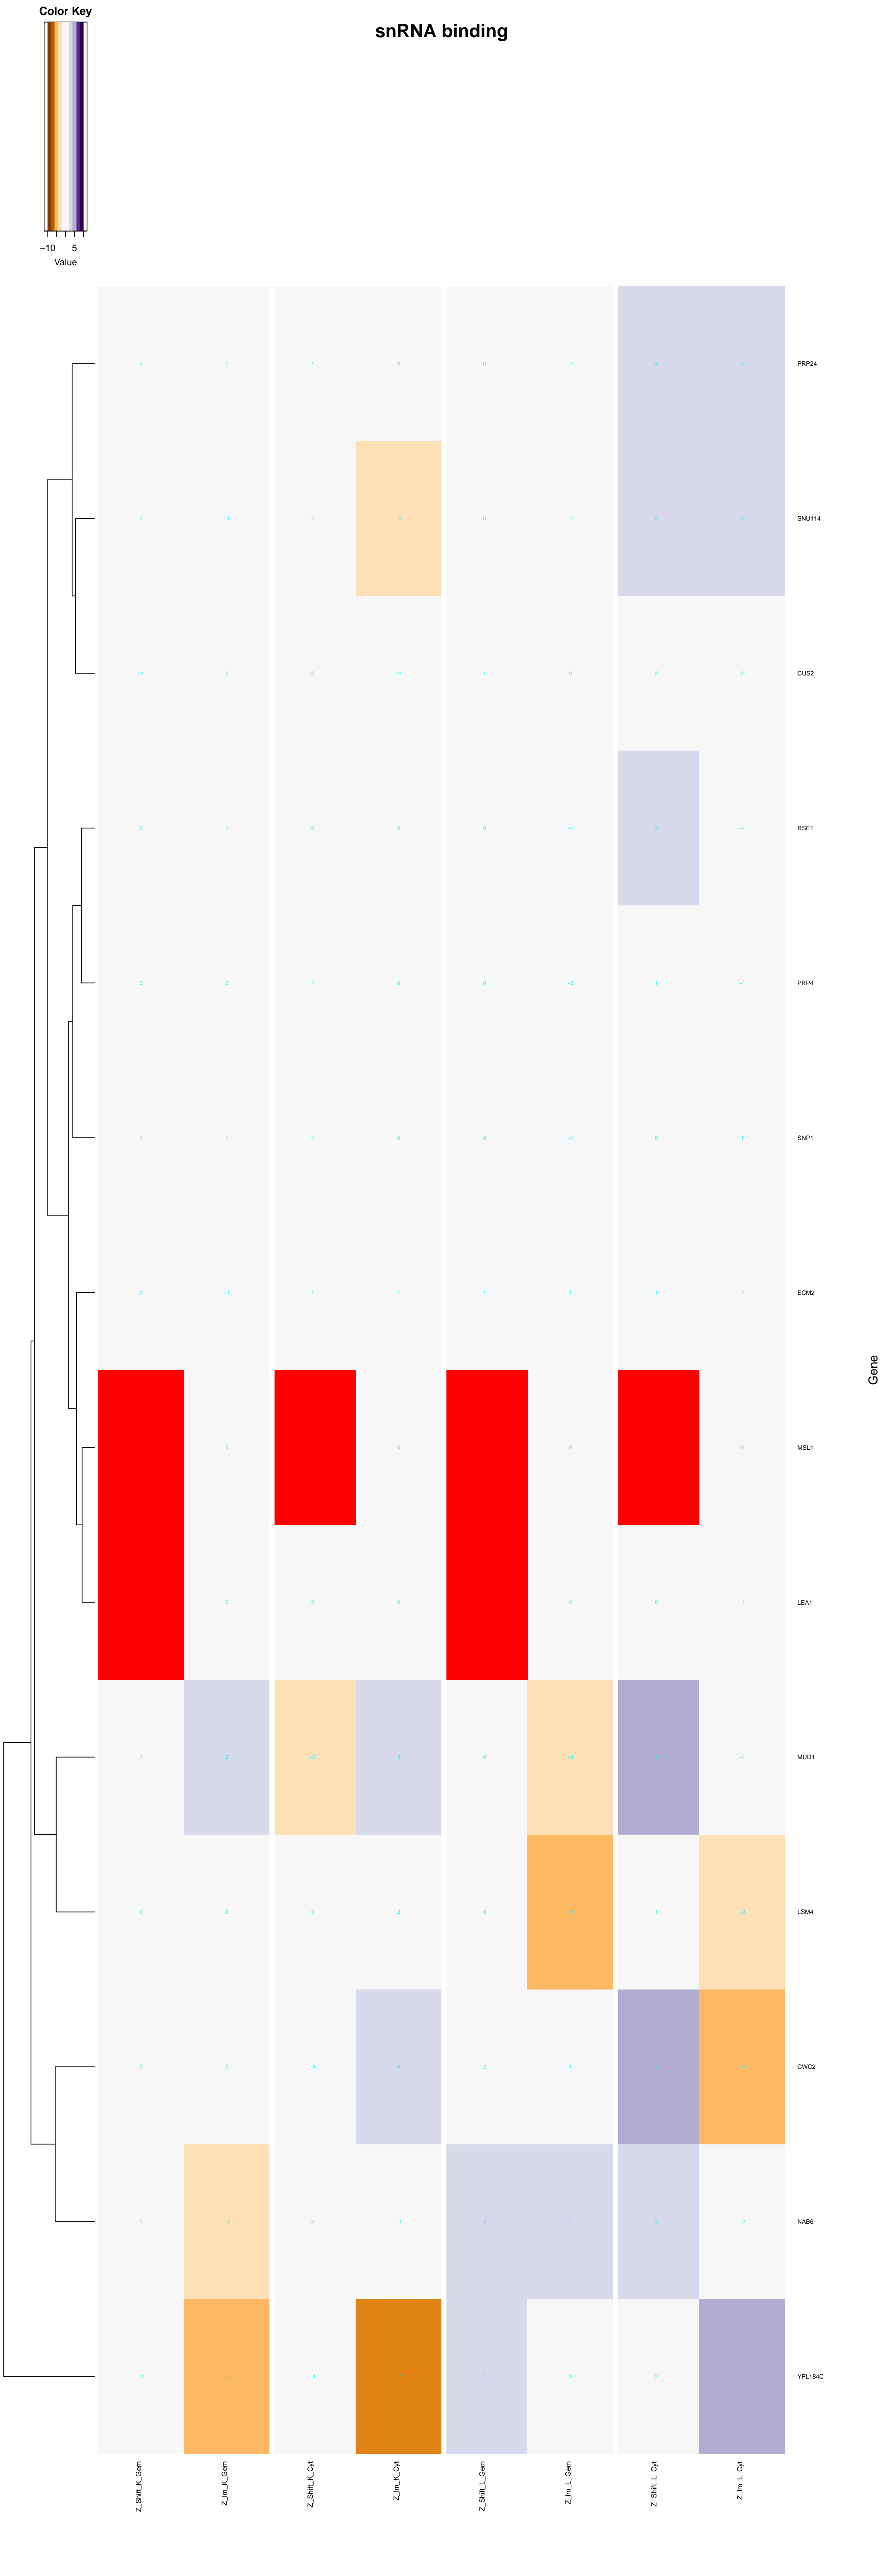

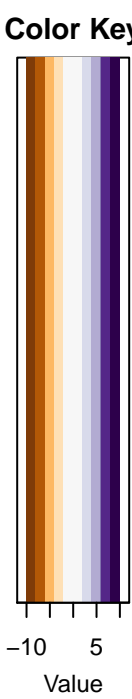

AU-rich element binding

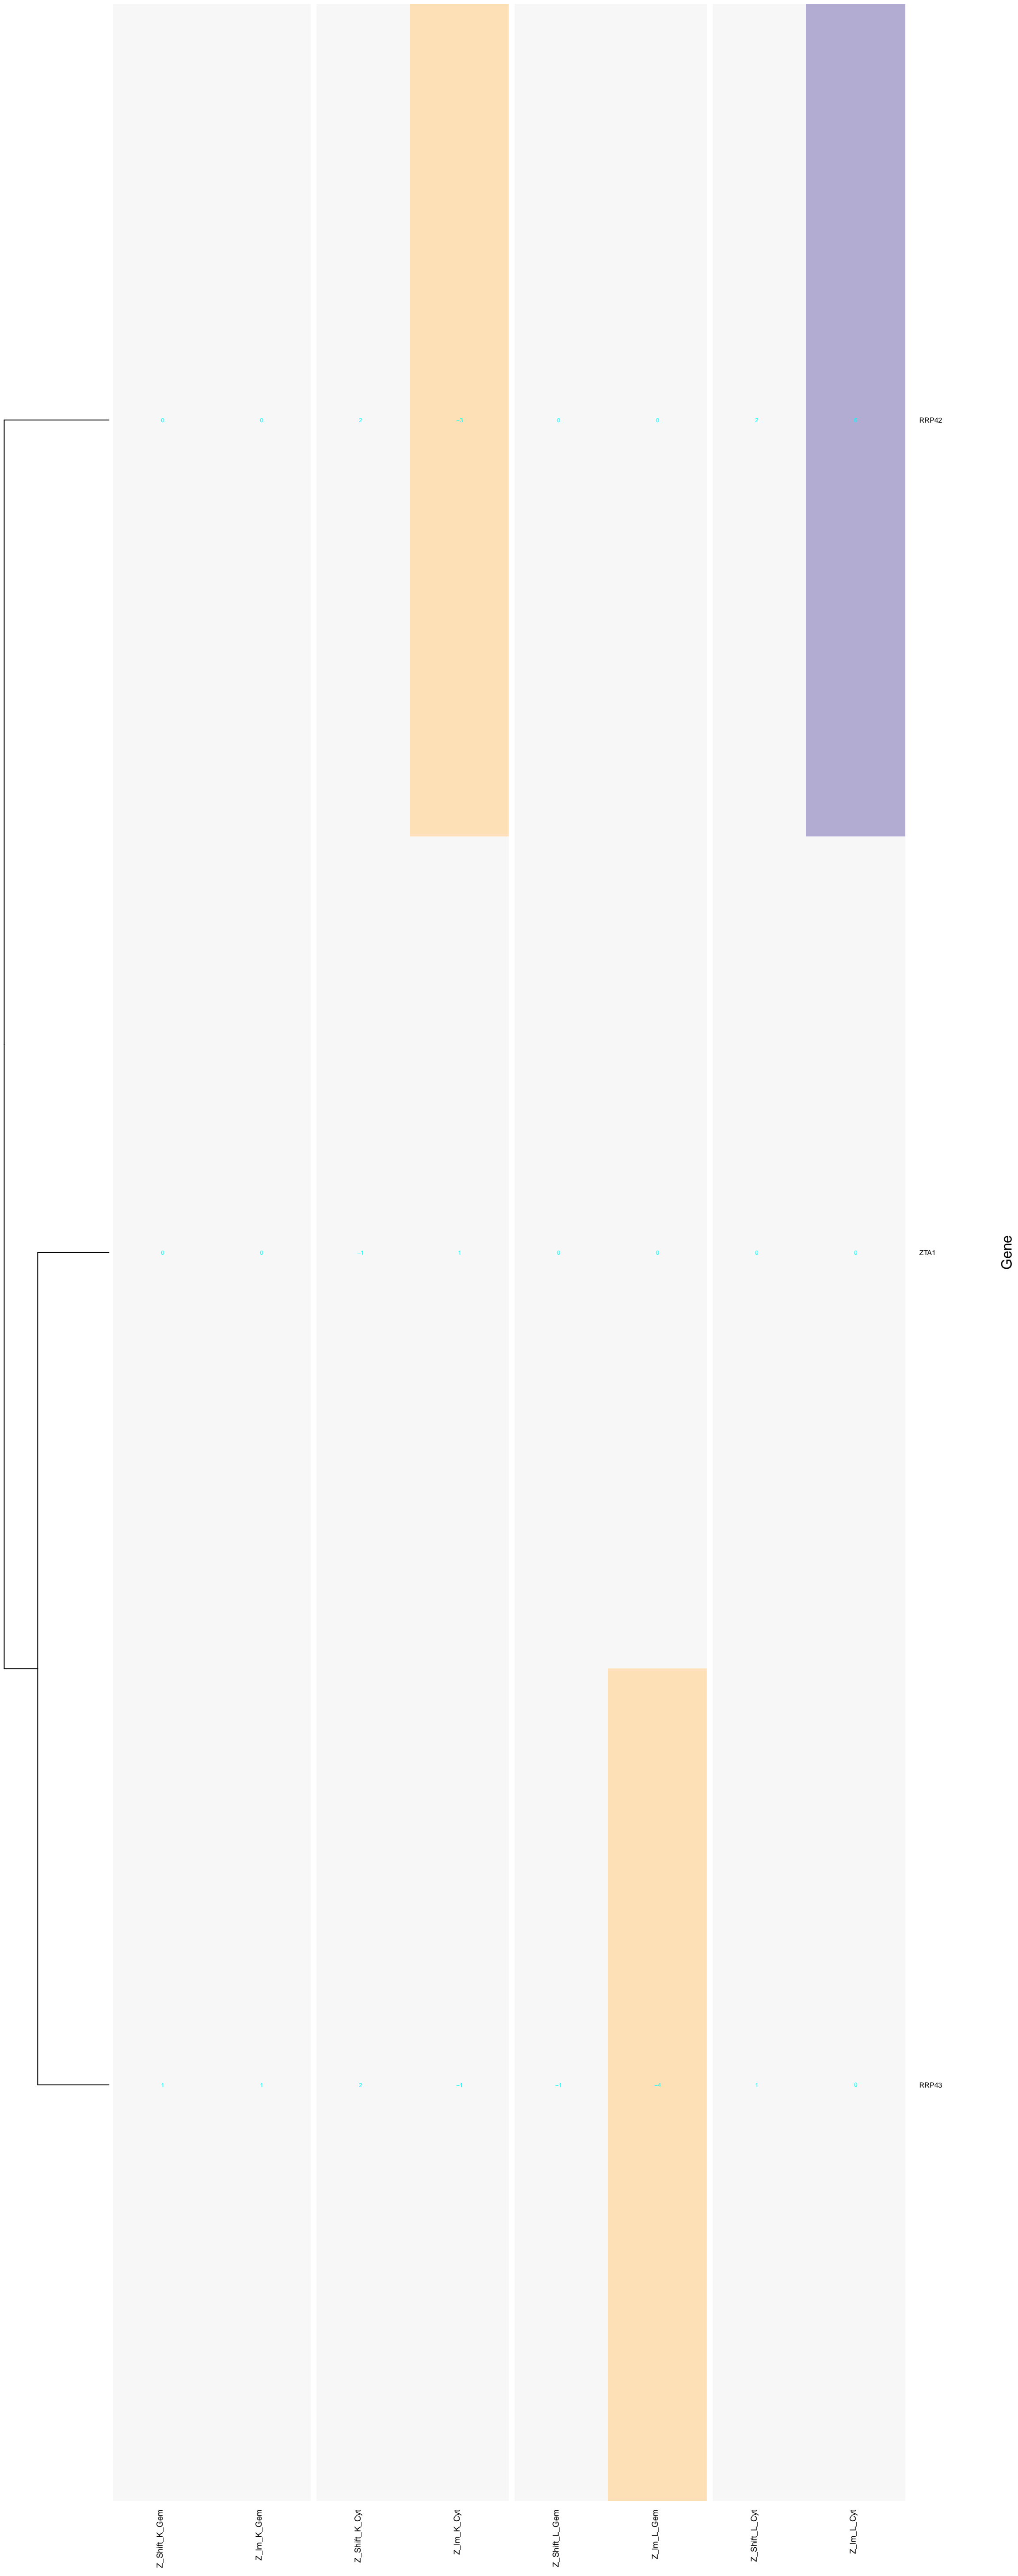

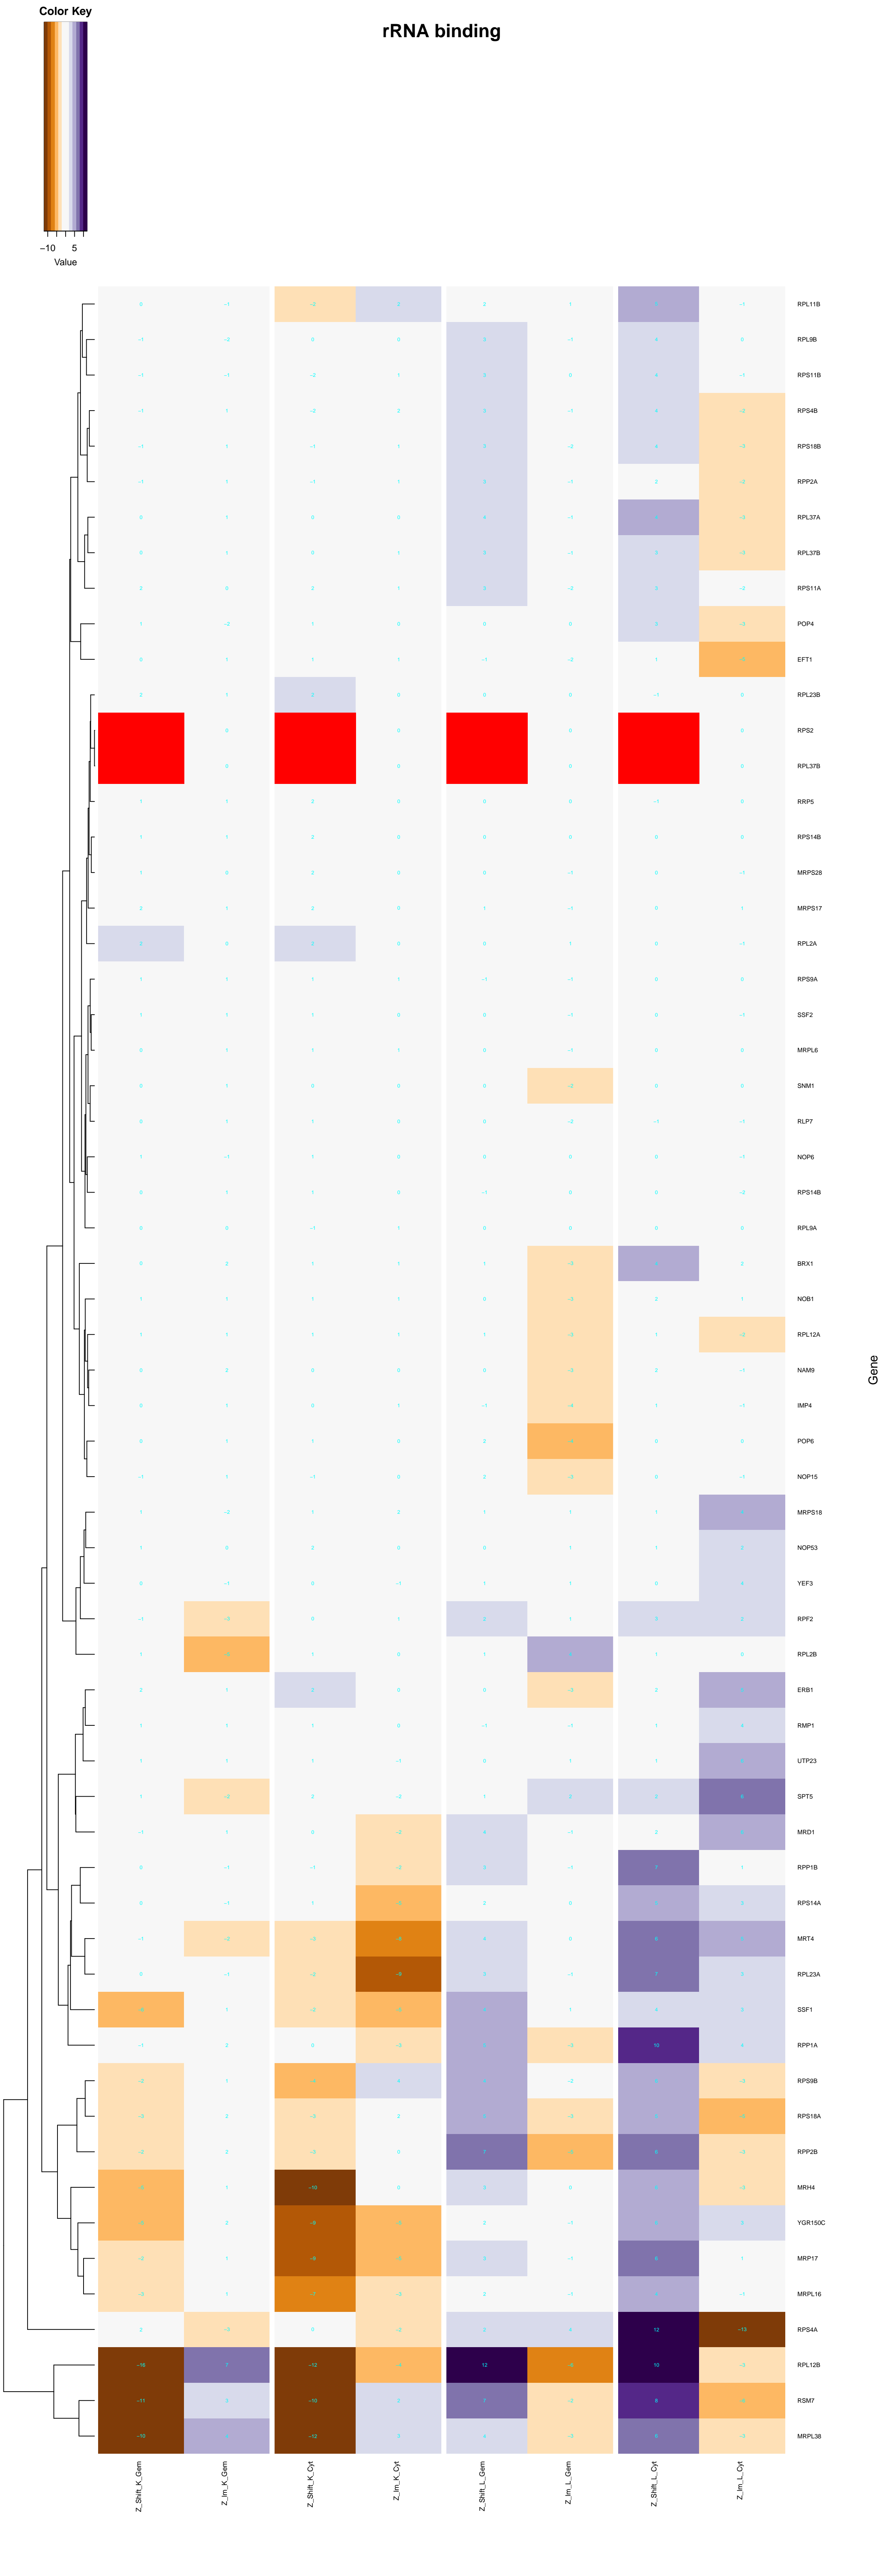

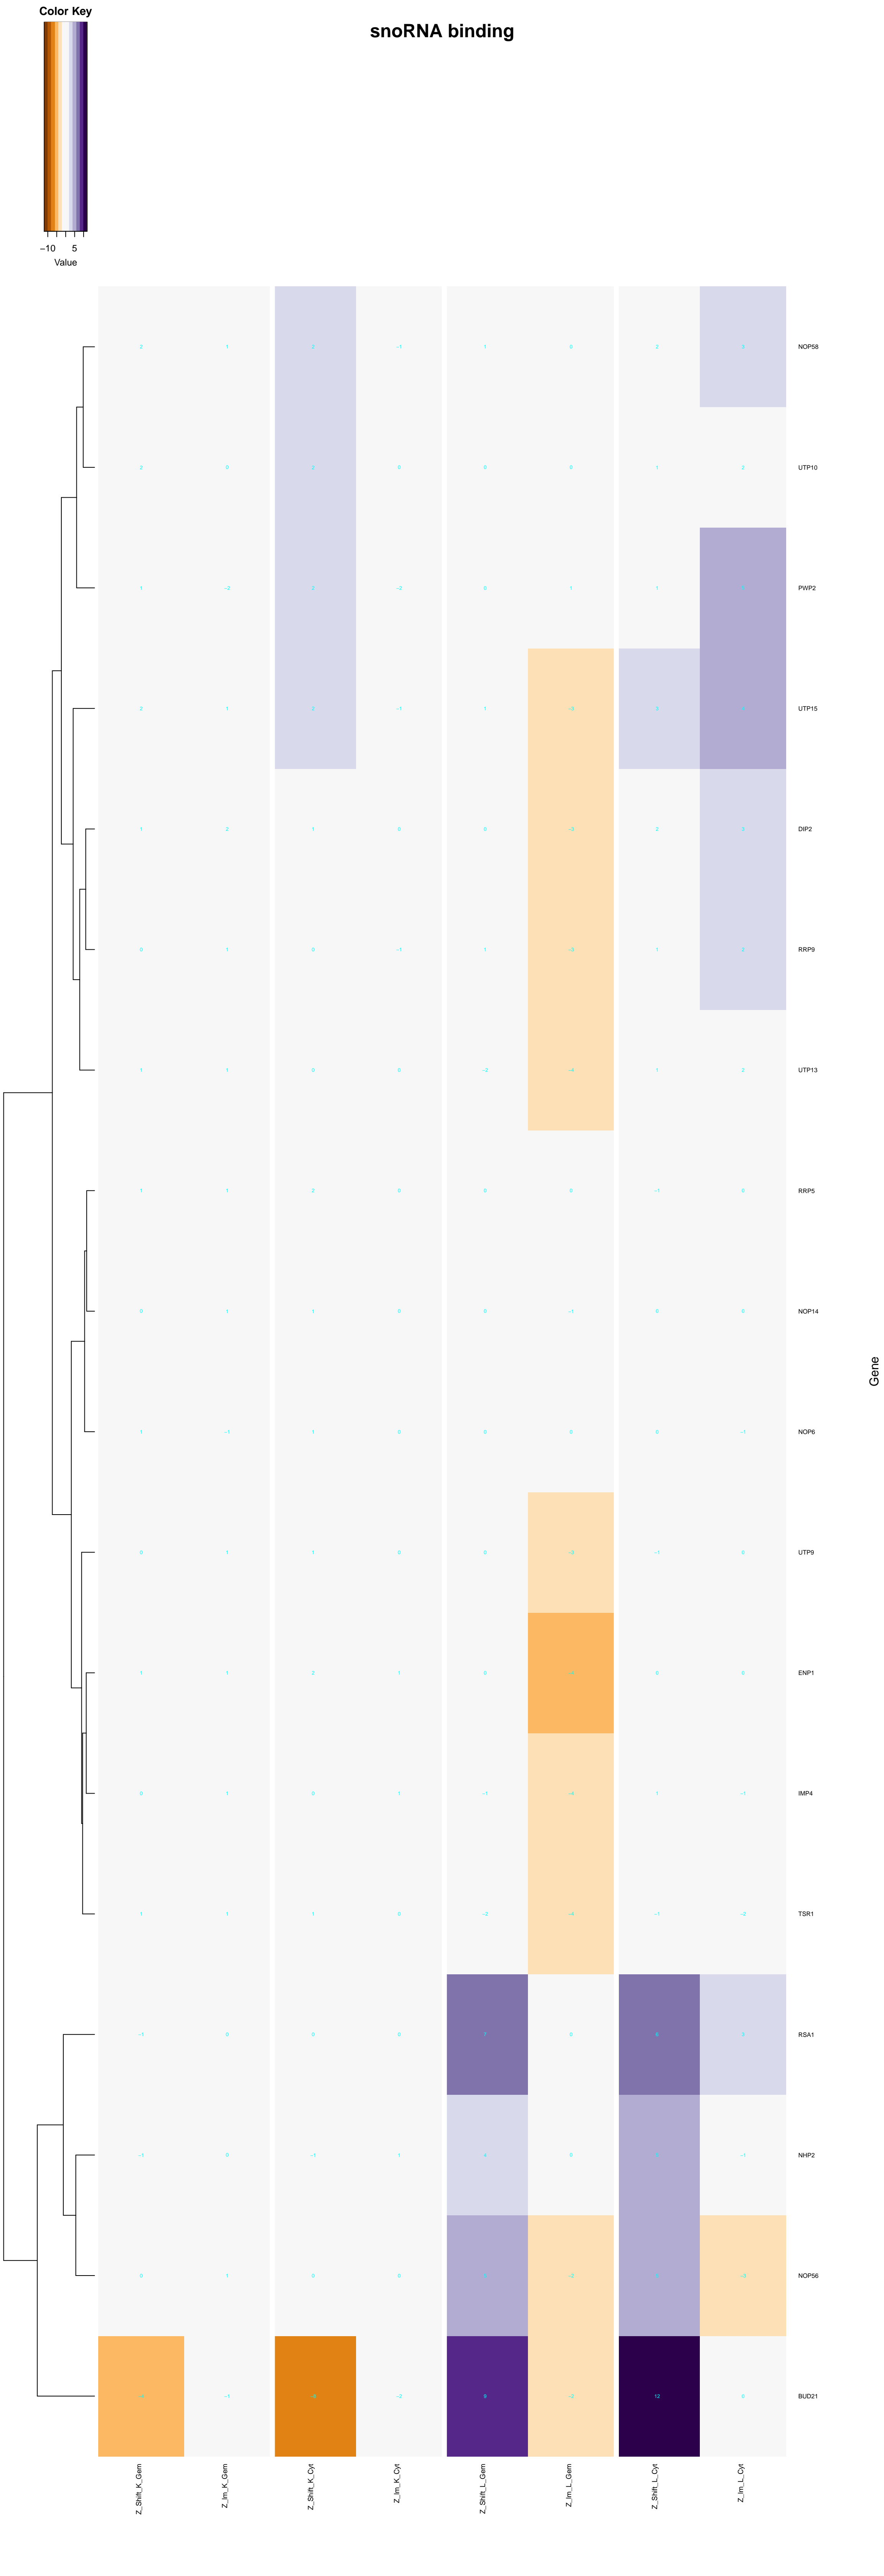

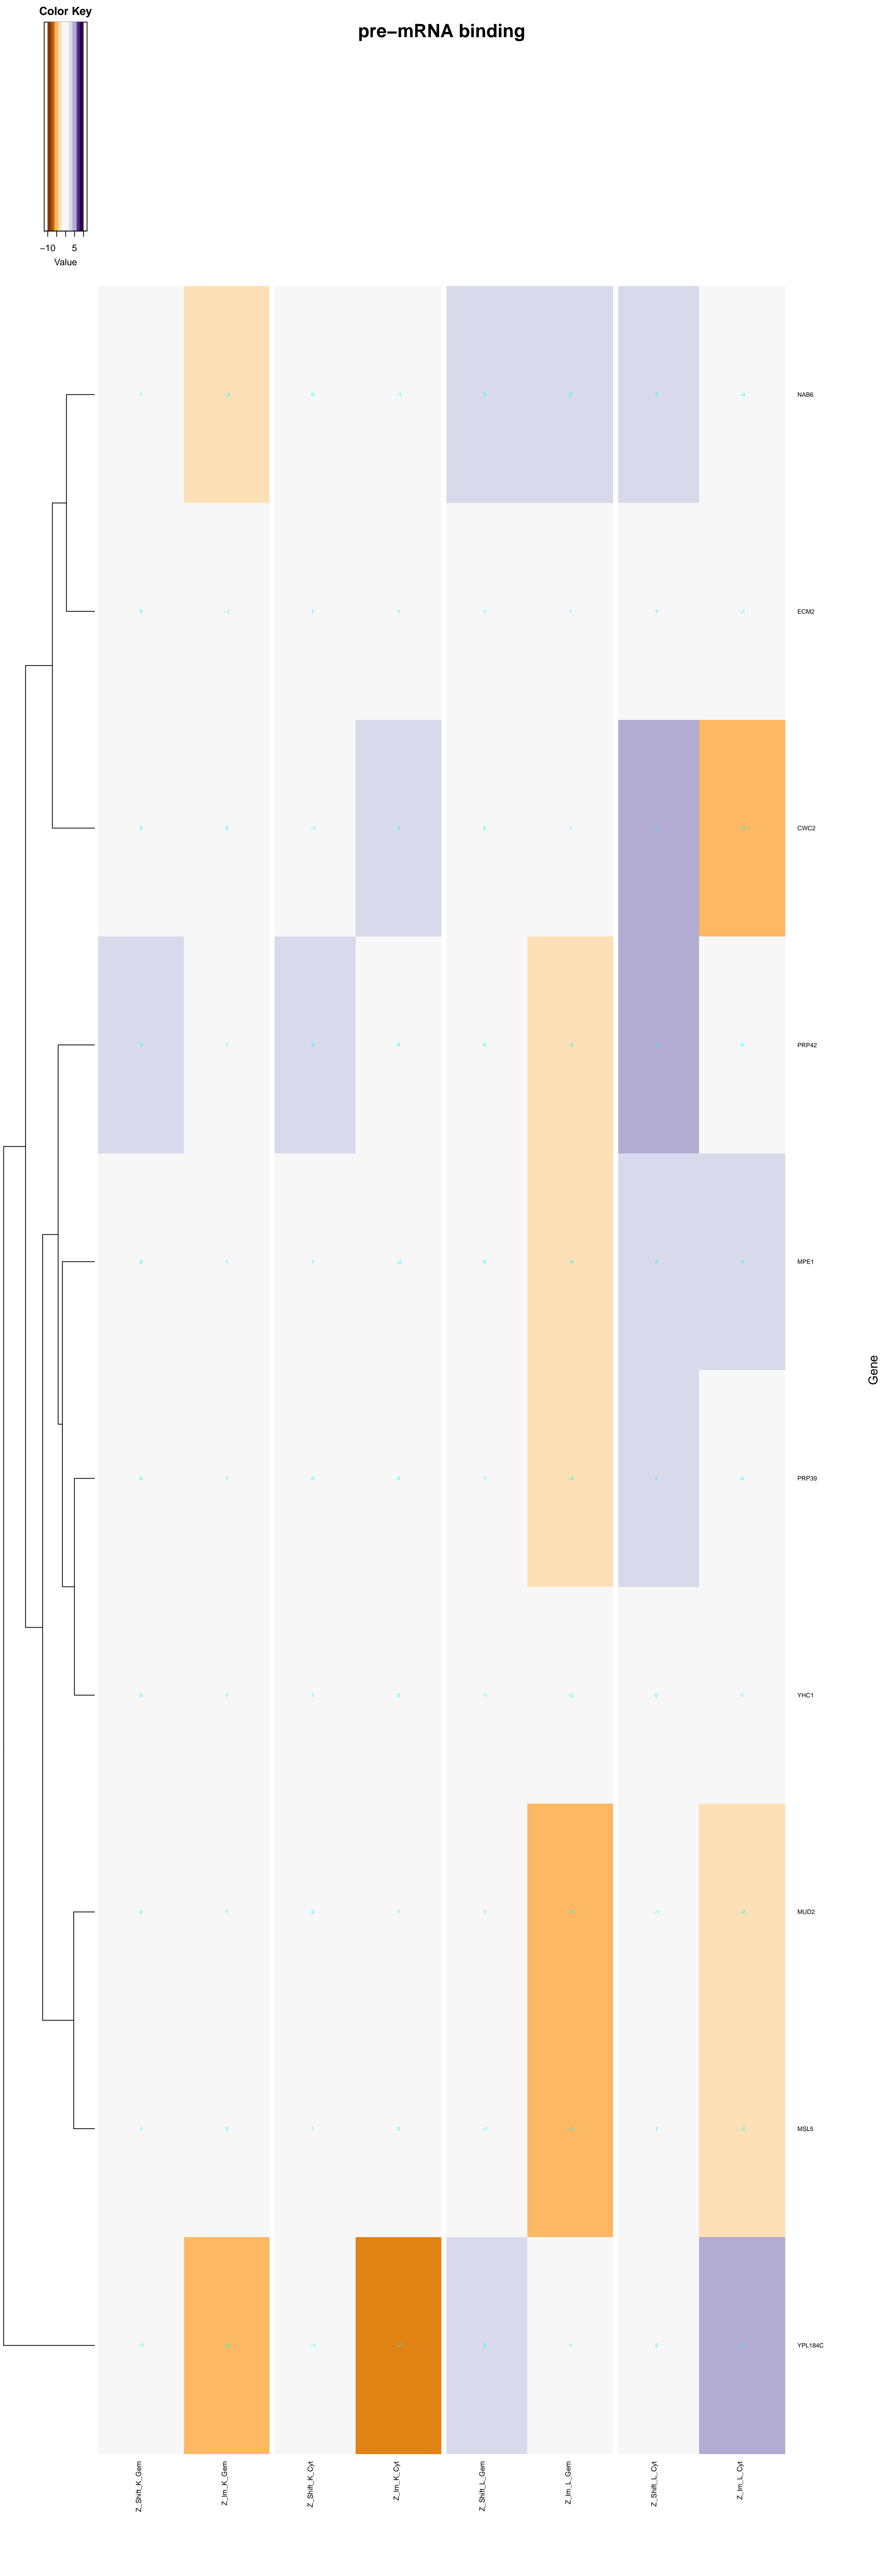

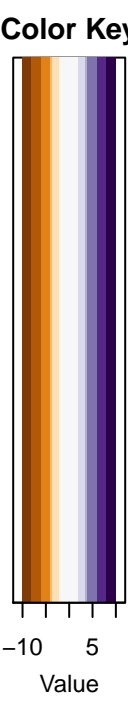

telomerase RNA binding

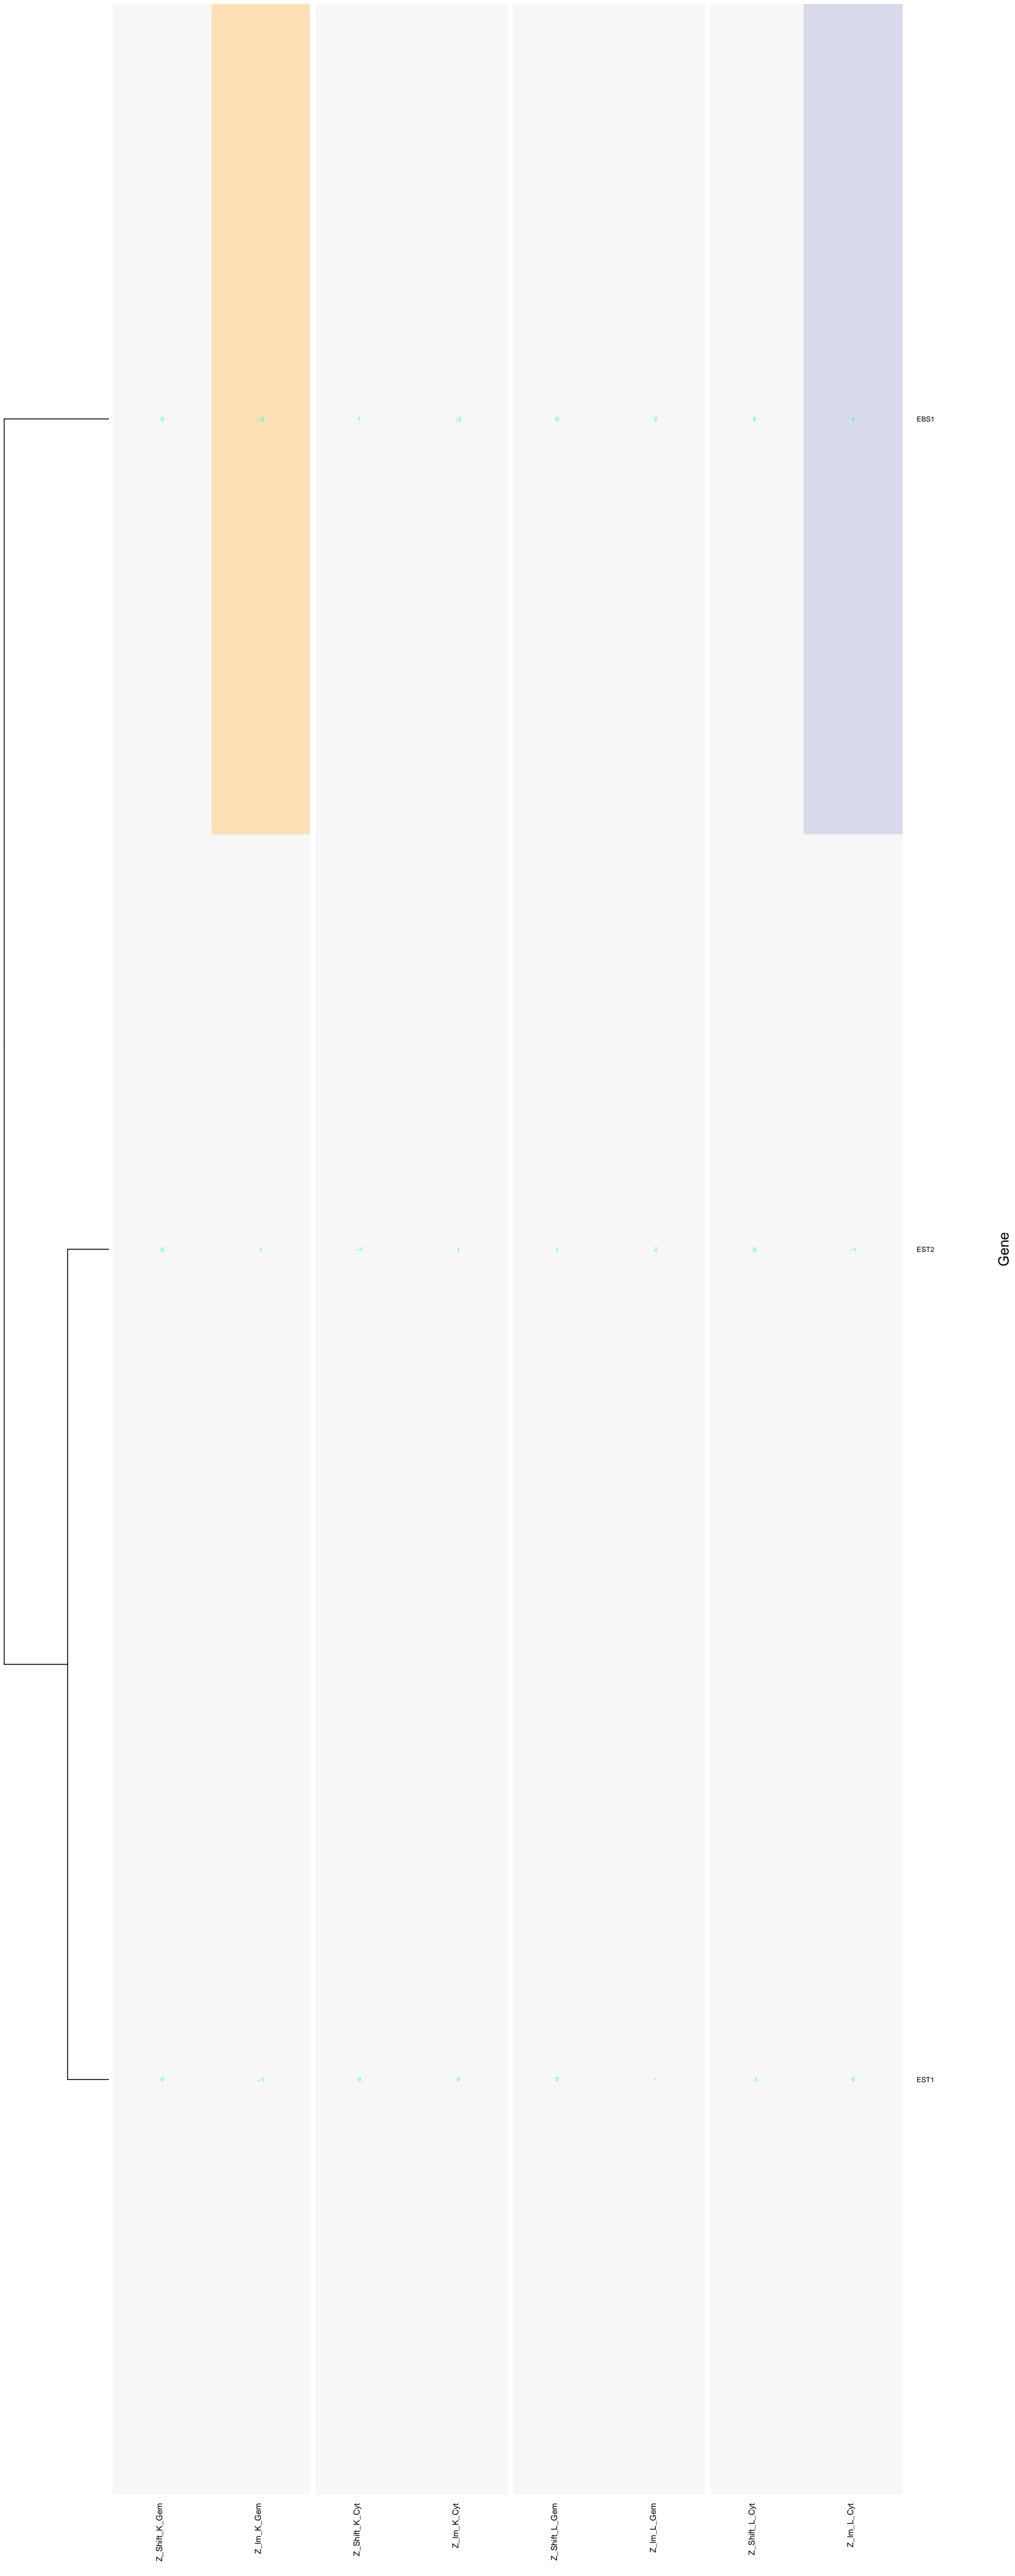

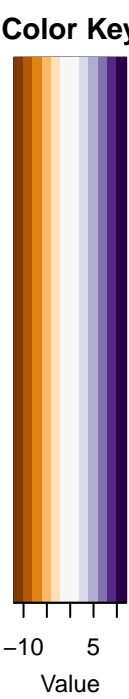

RNA strand annealing activity

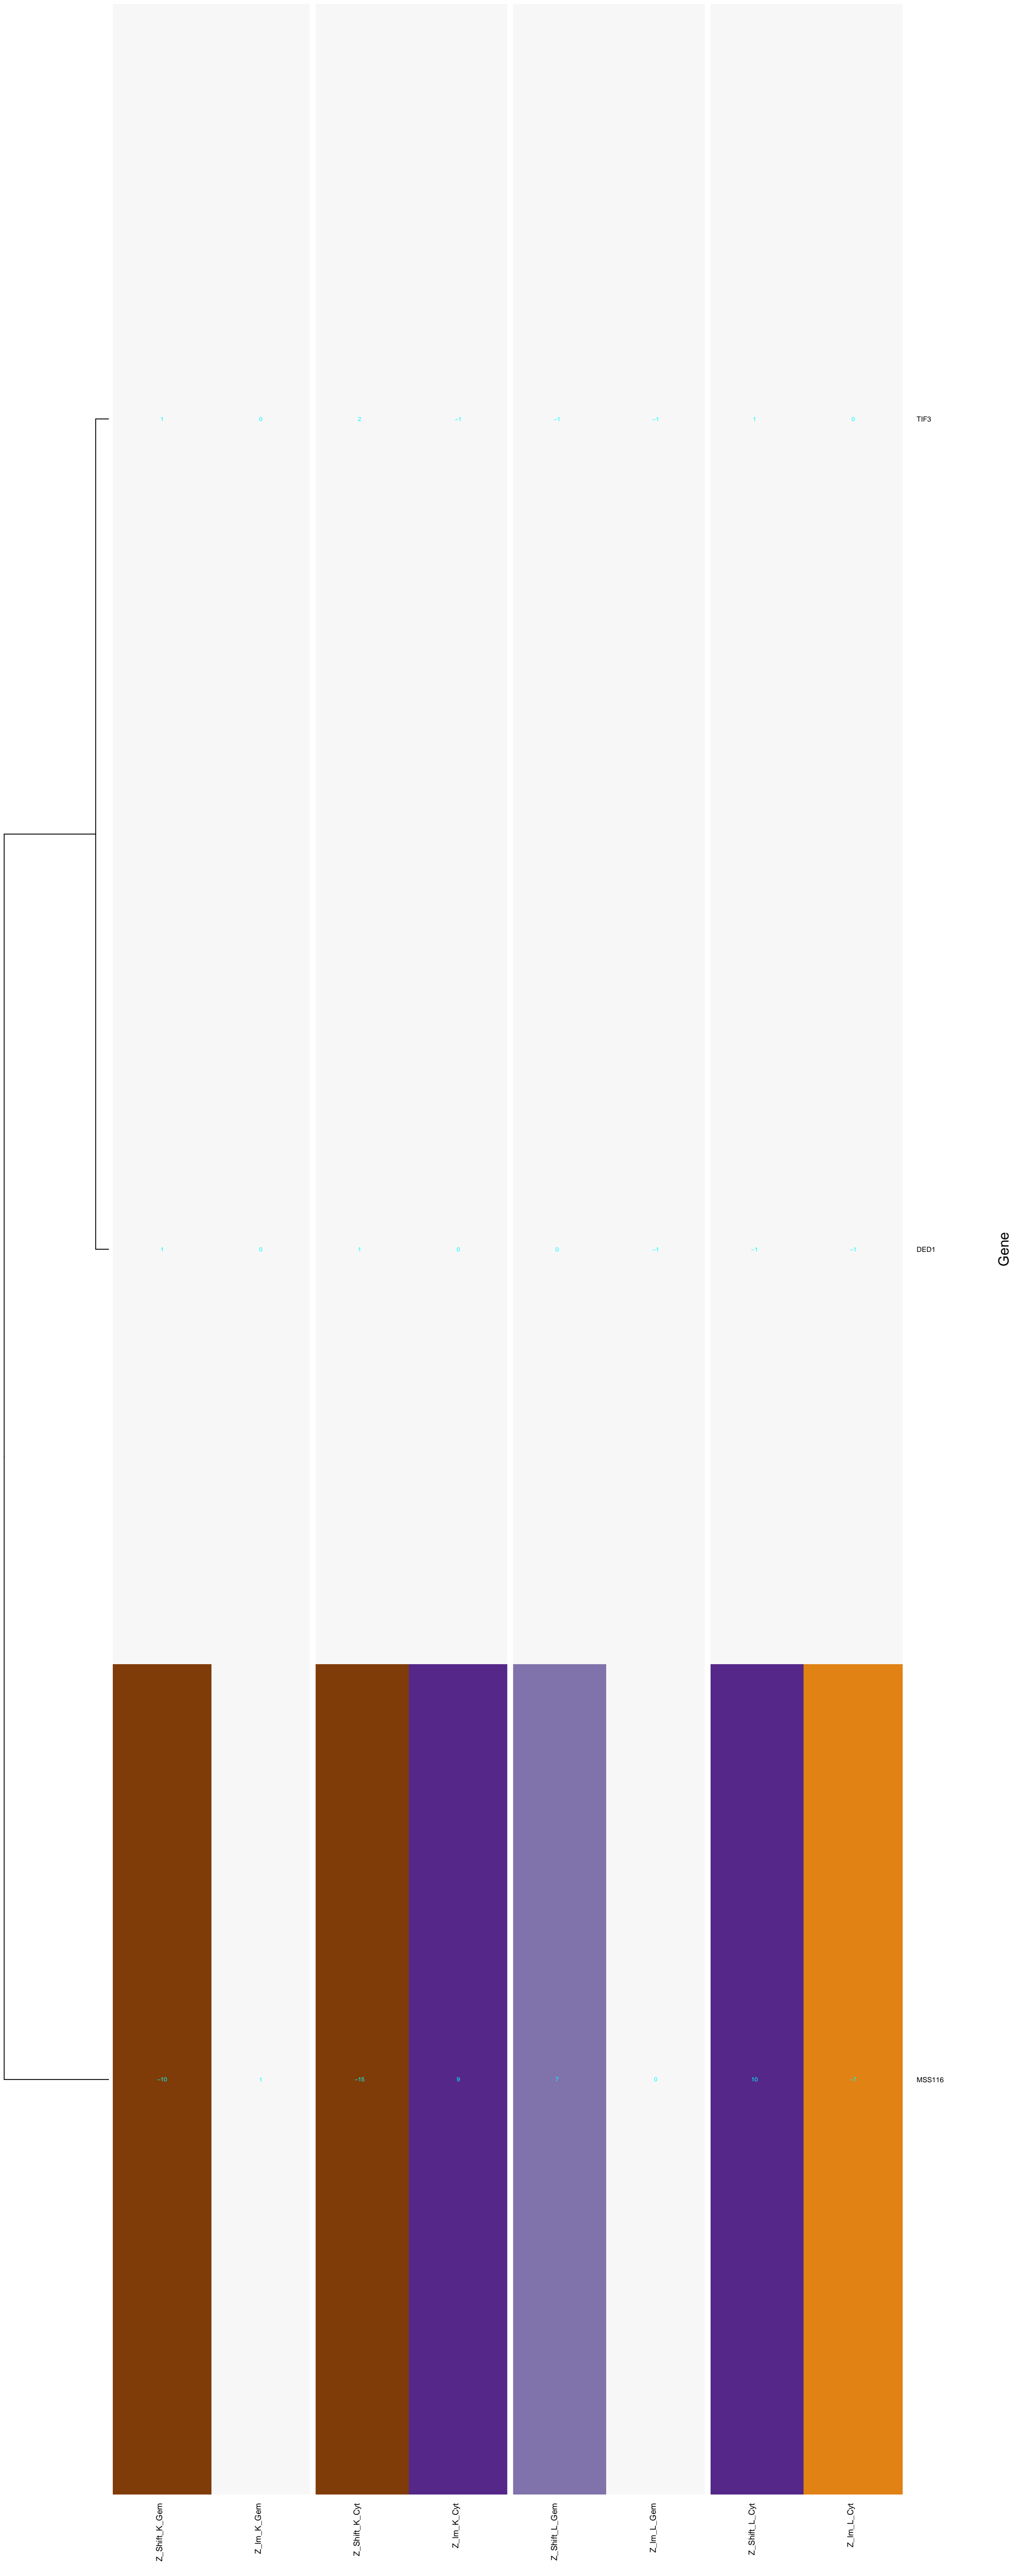

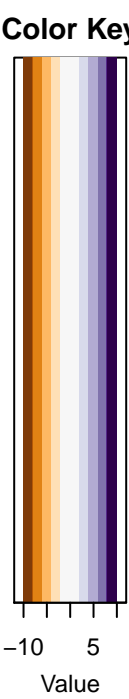

poly-pyrimidine tract binding

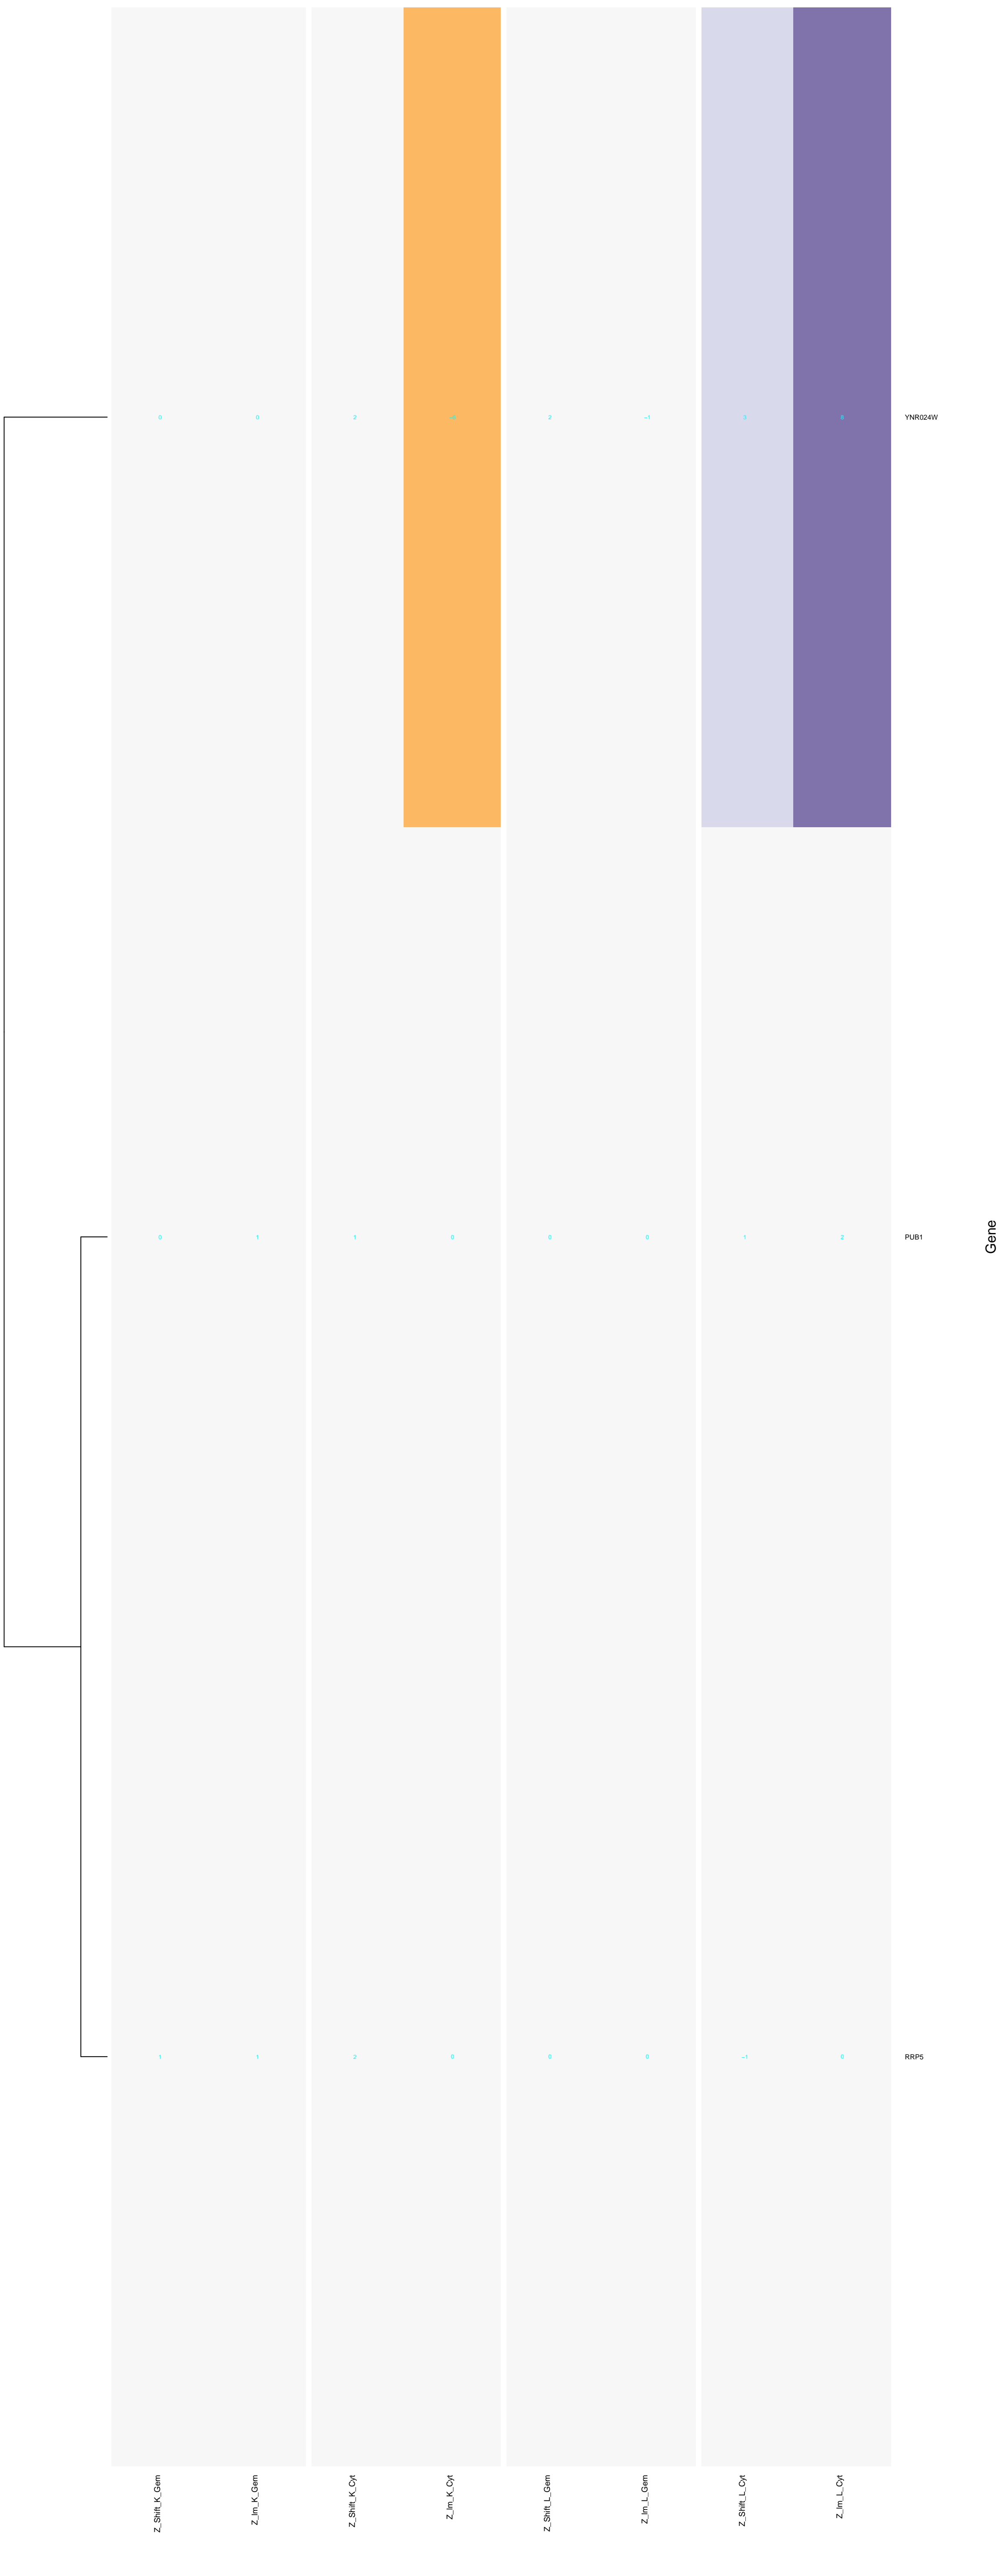

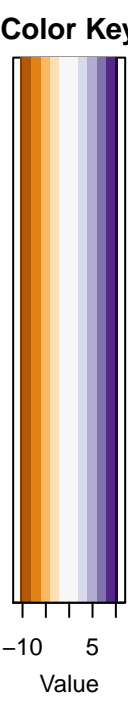

poly-purine tract binding

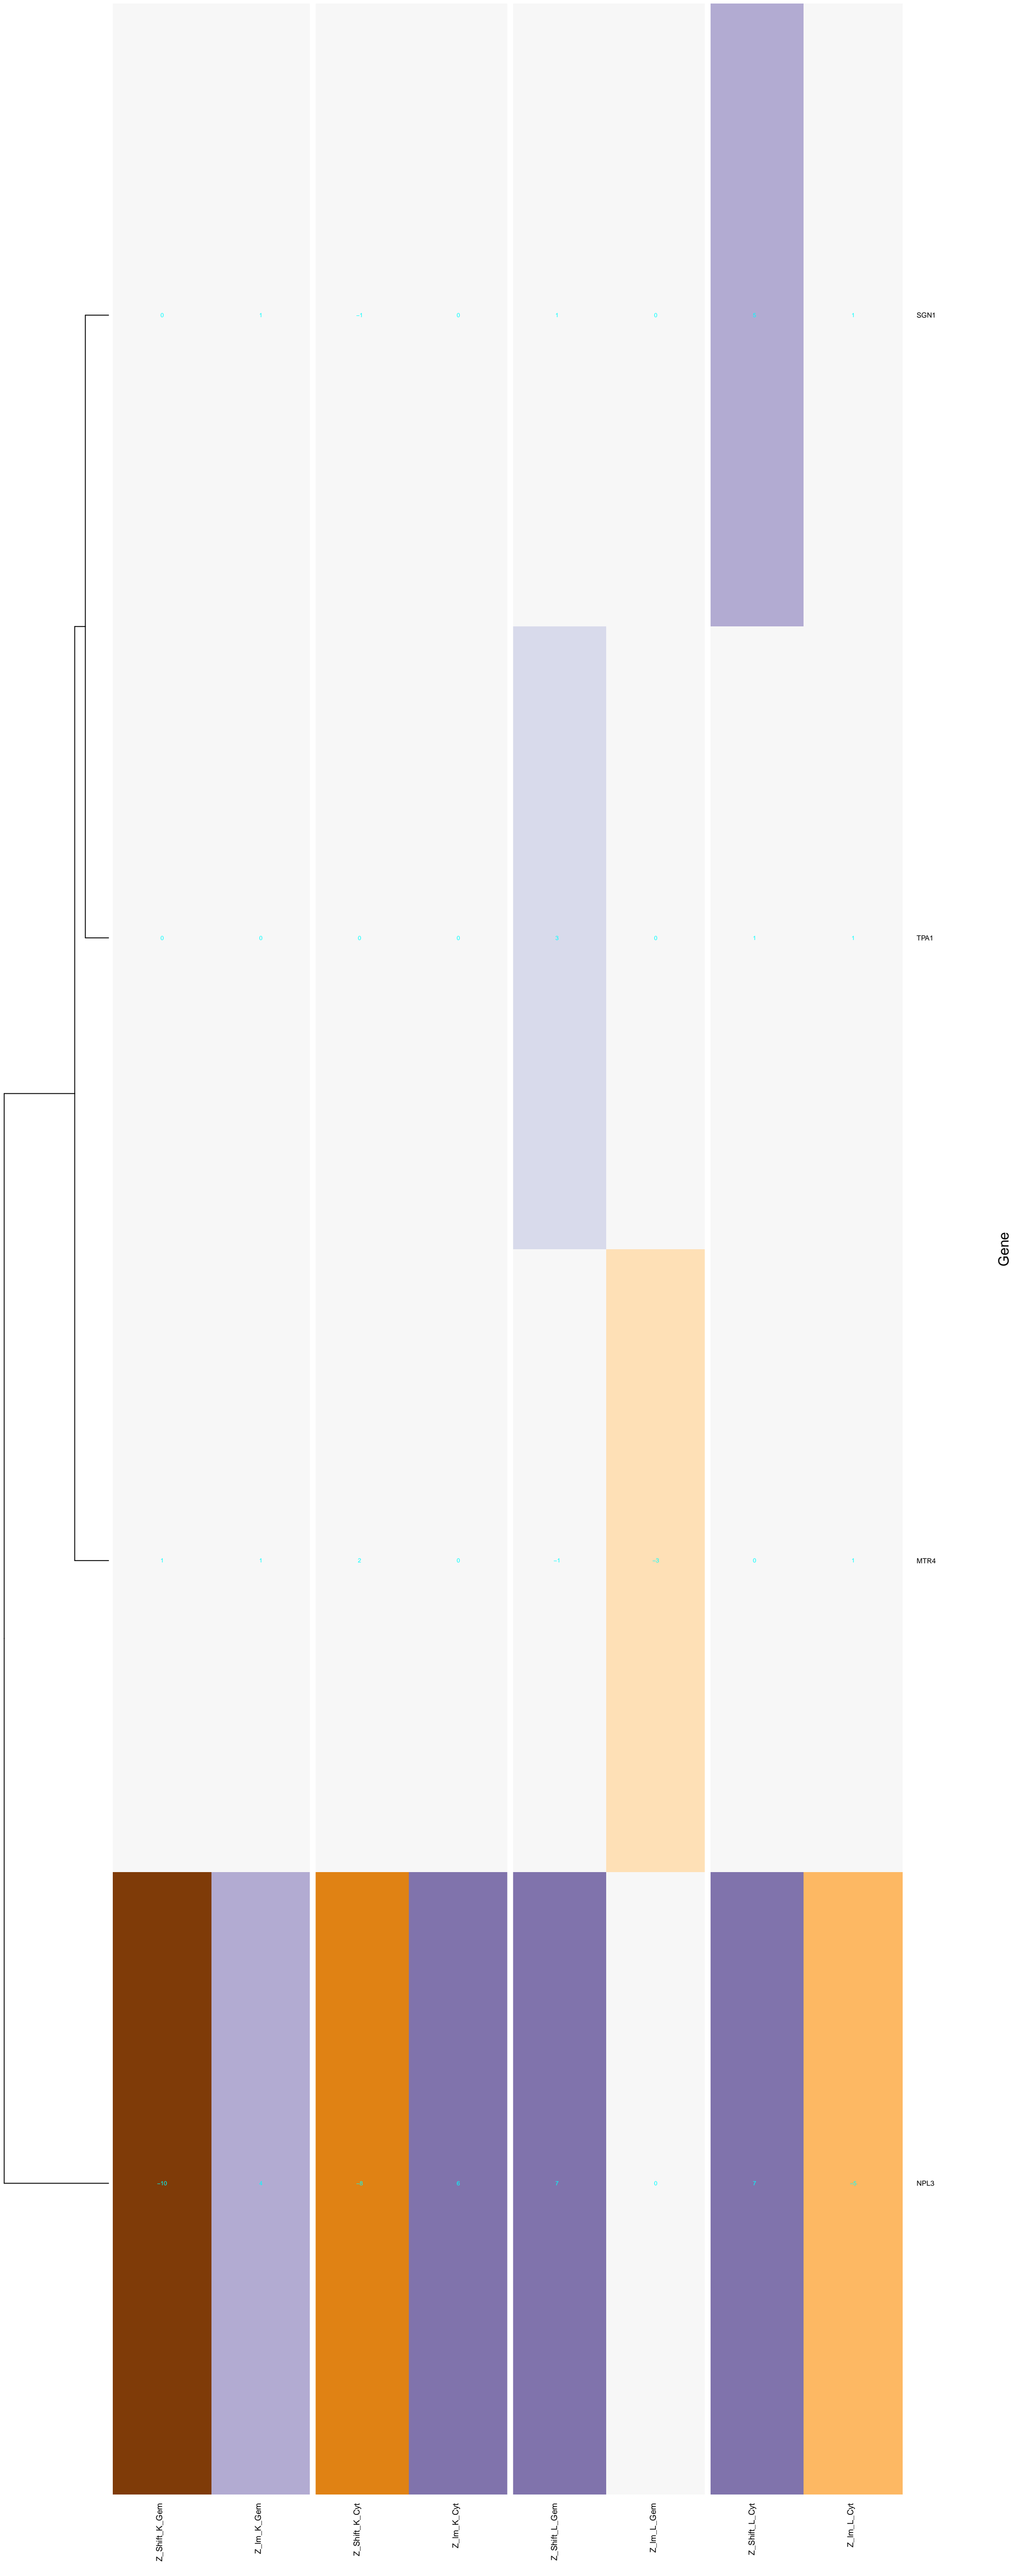

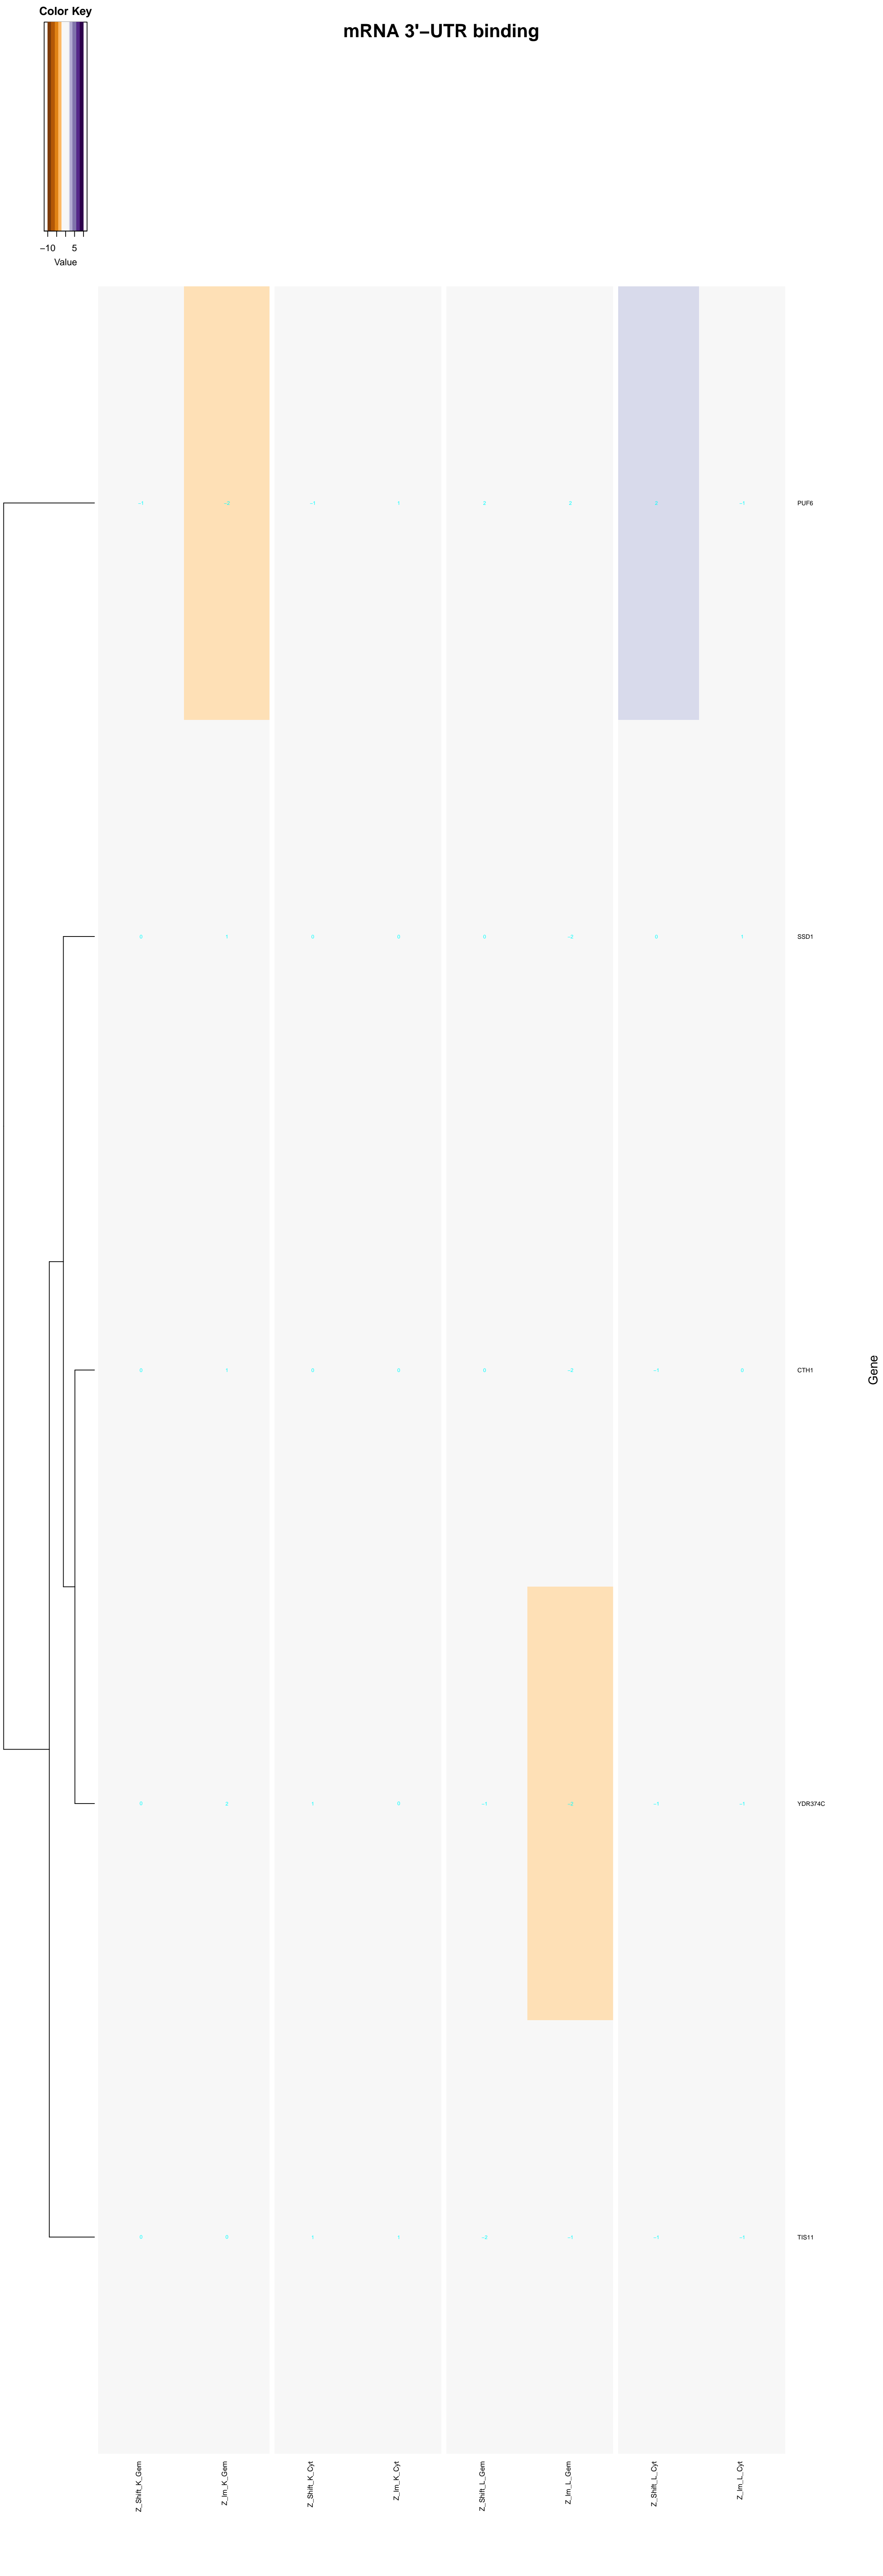

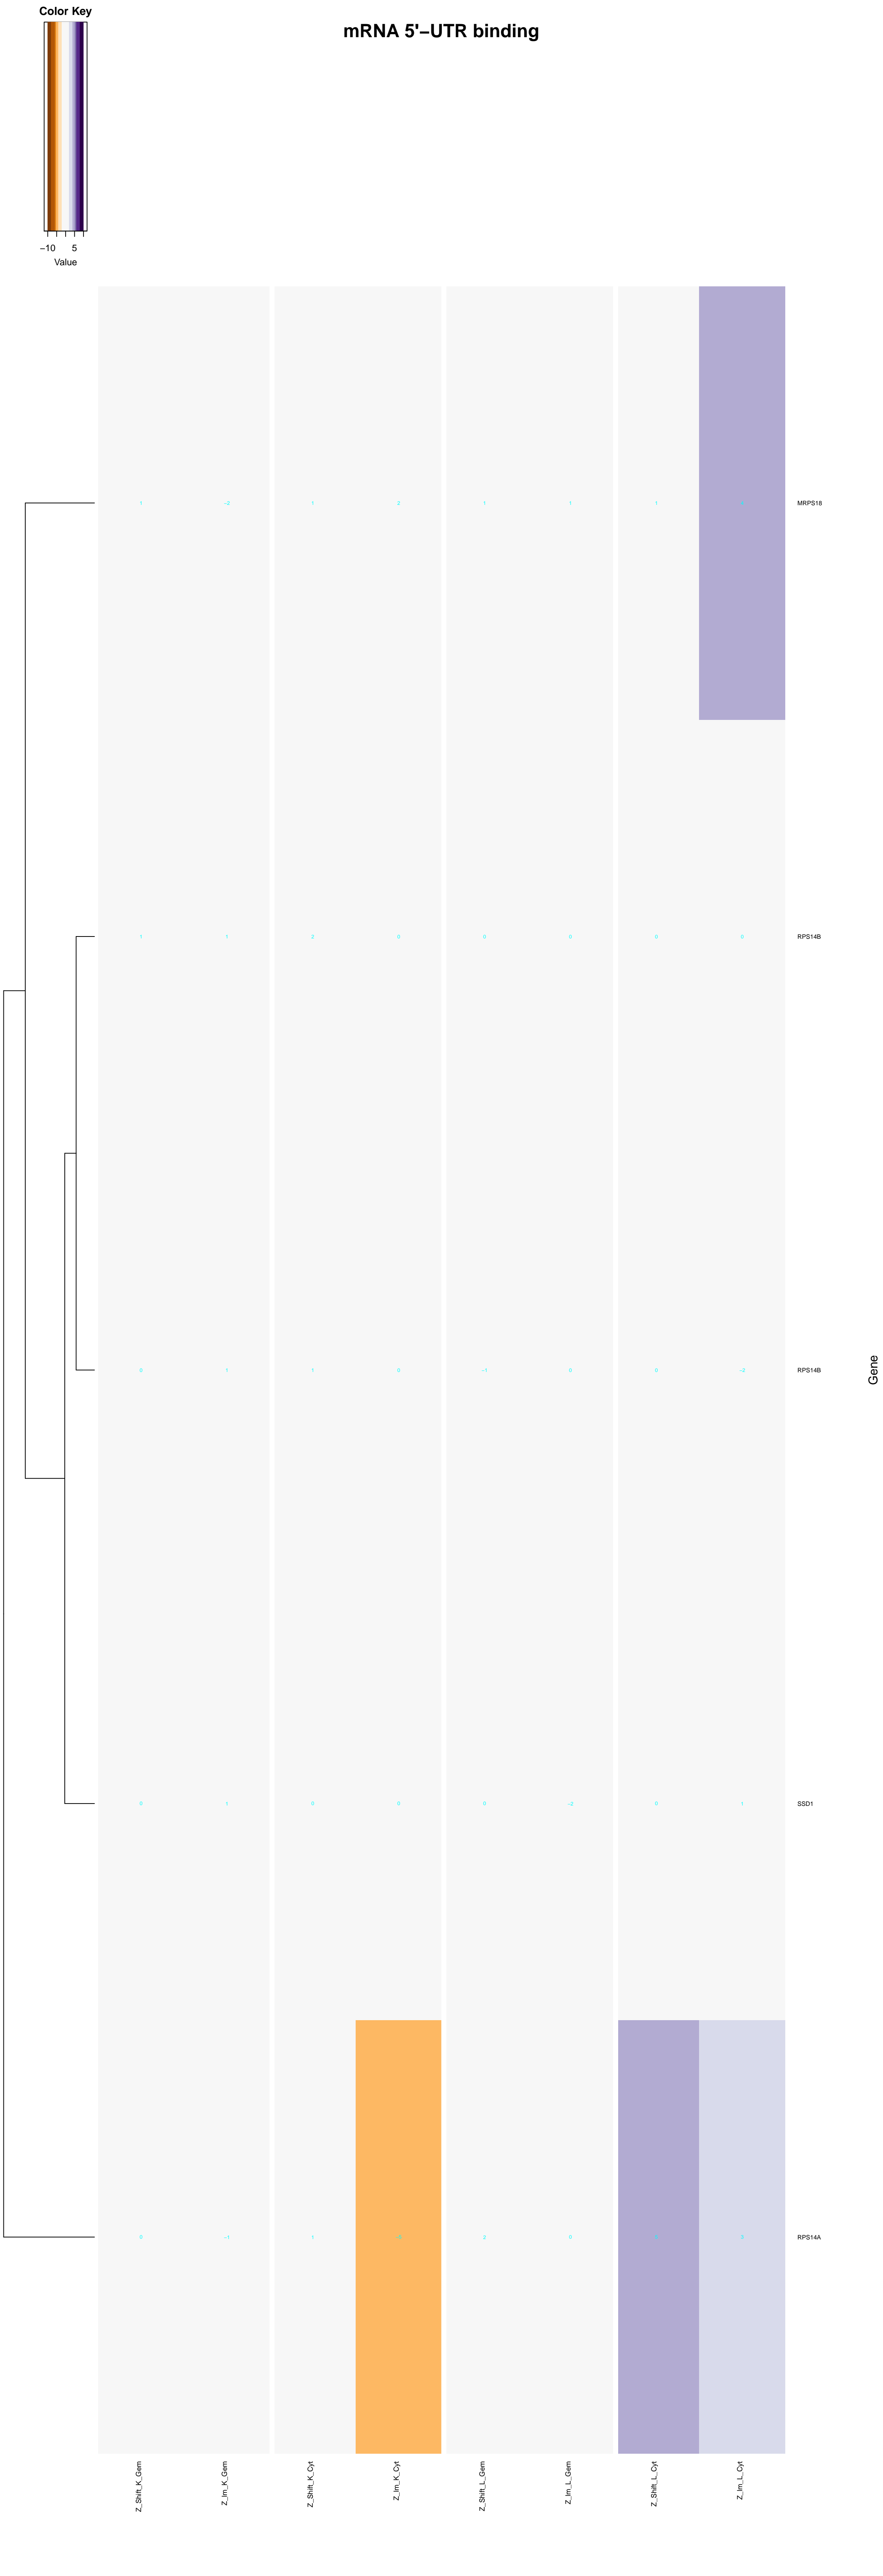

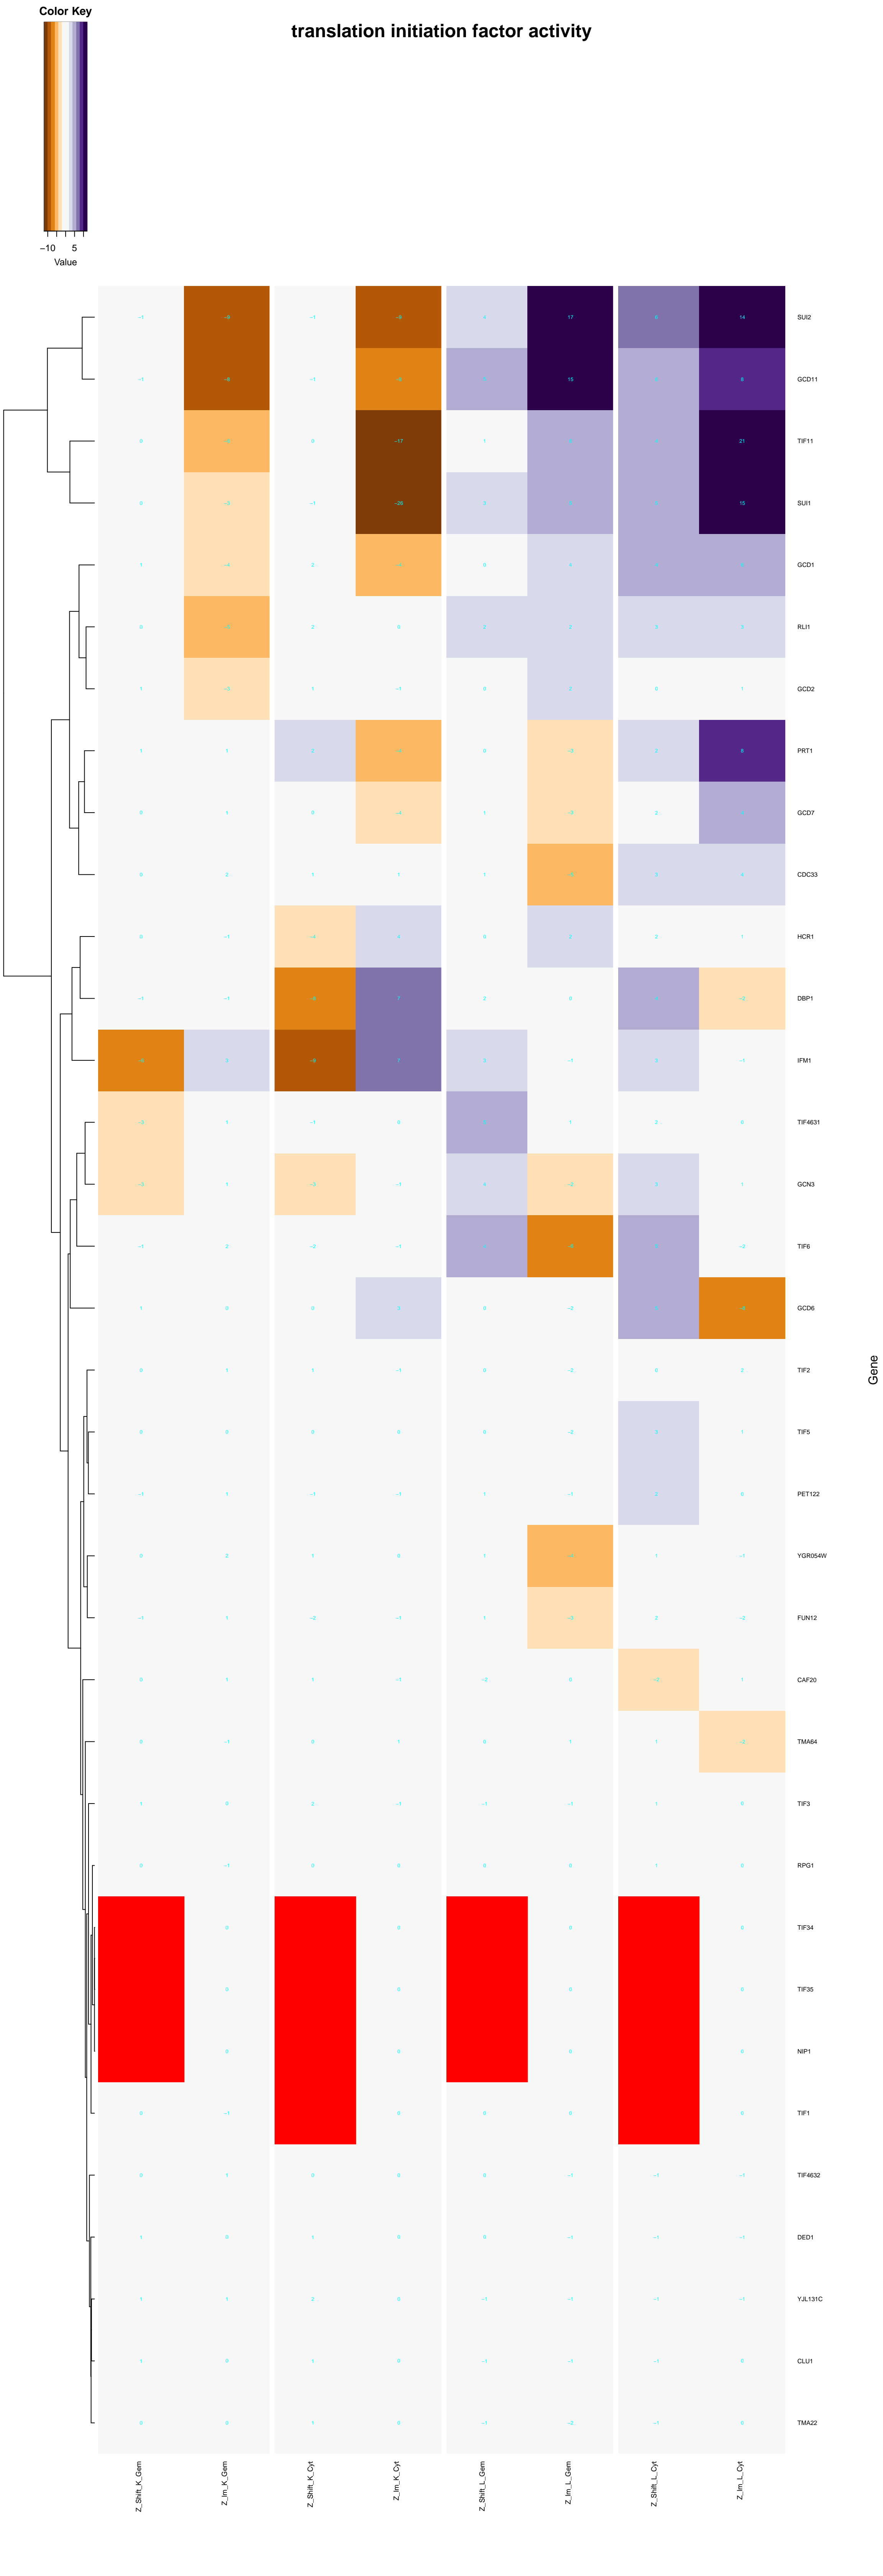

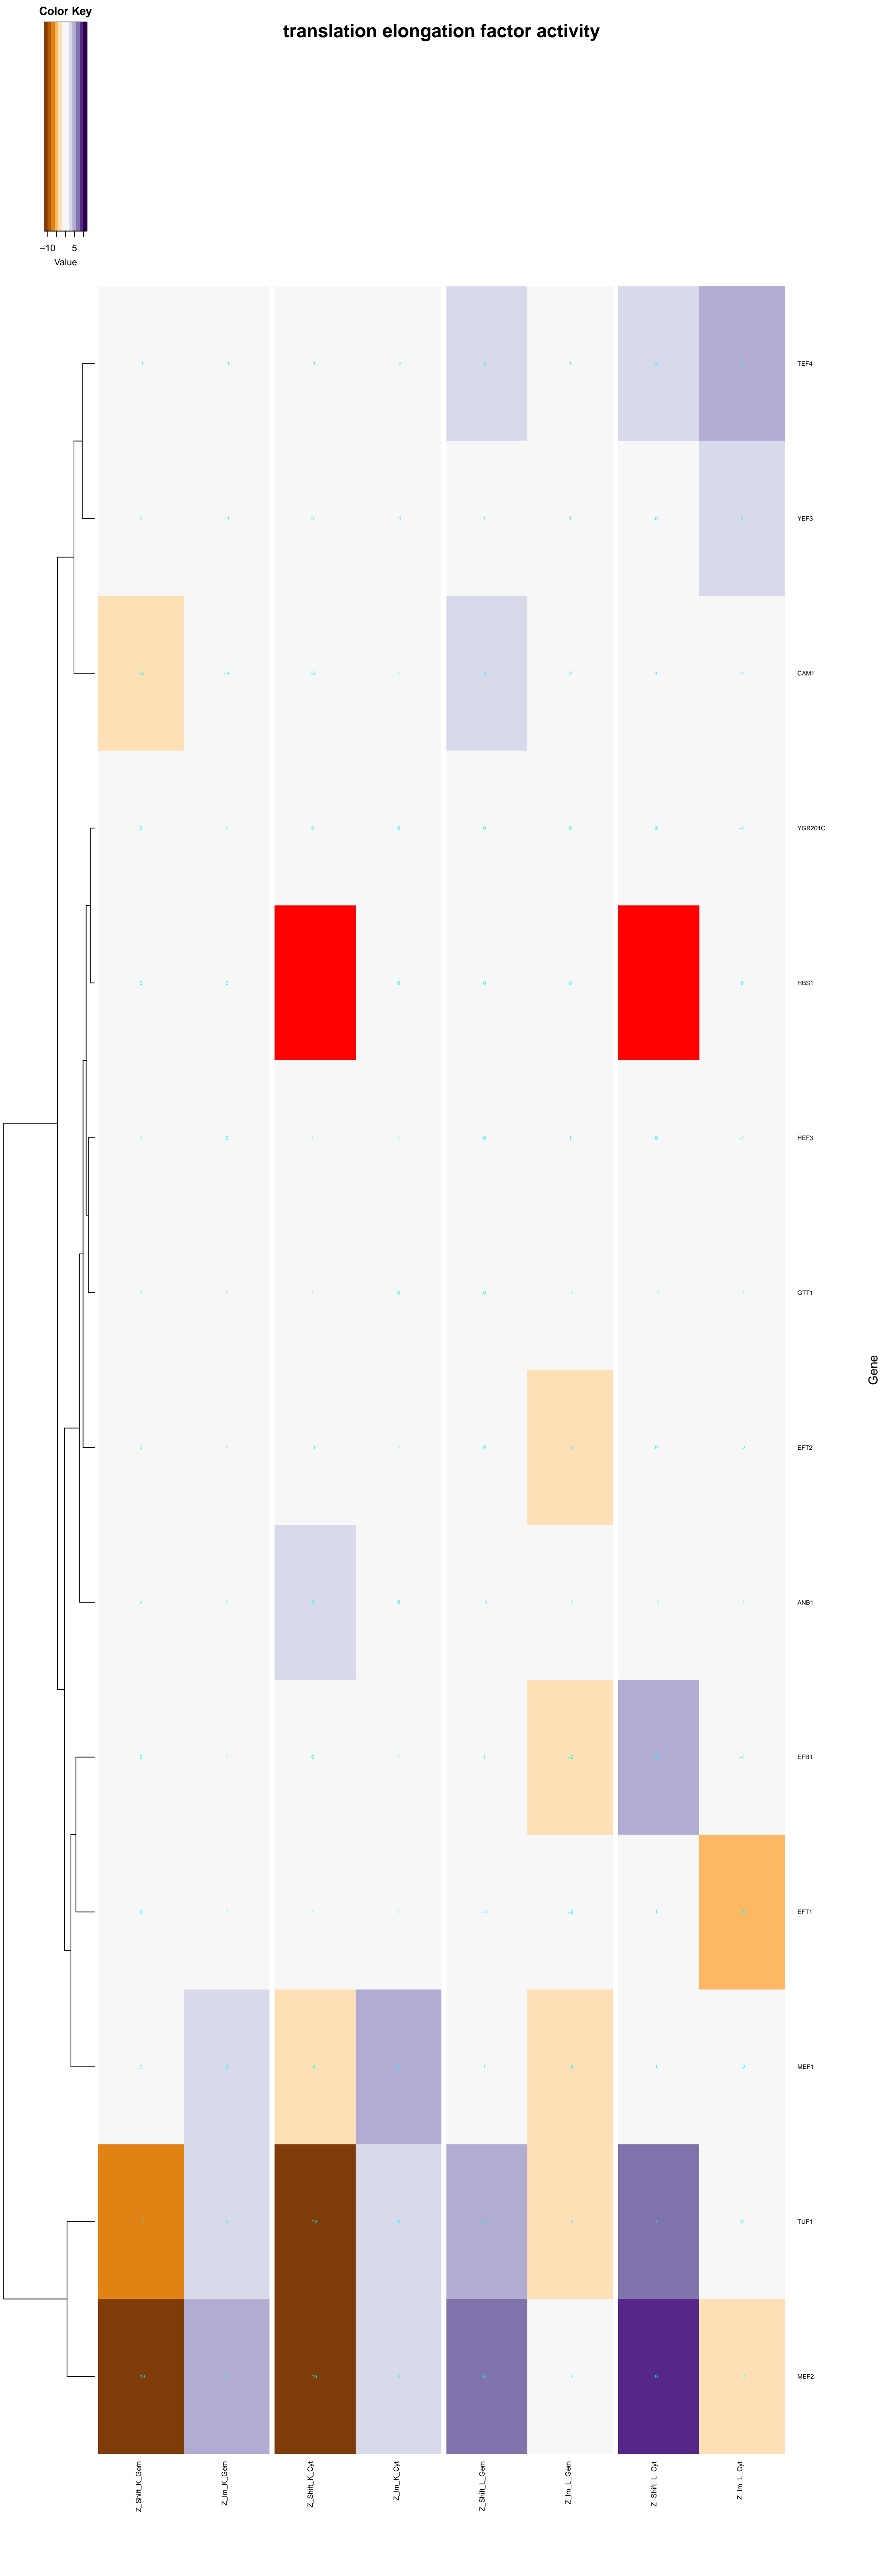

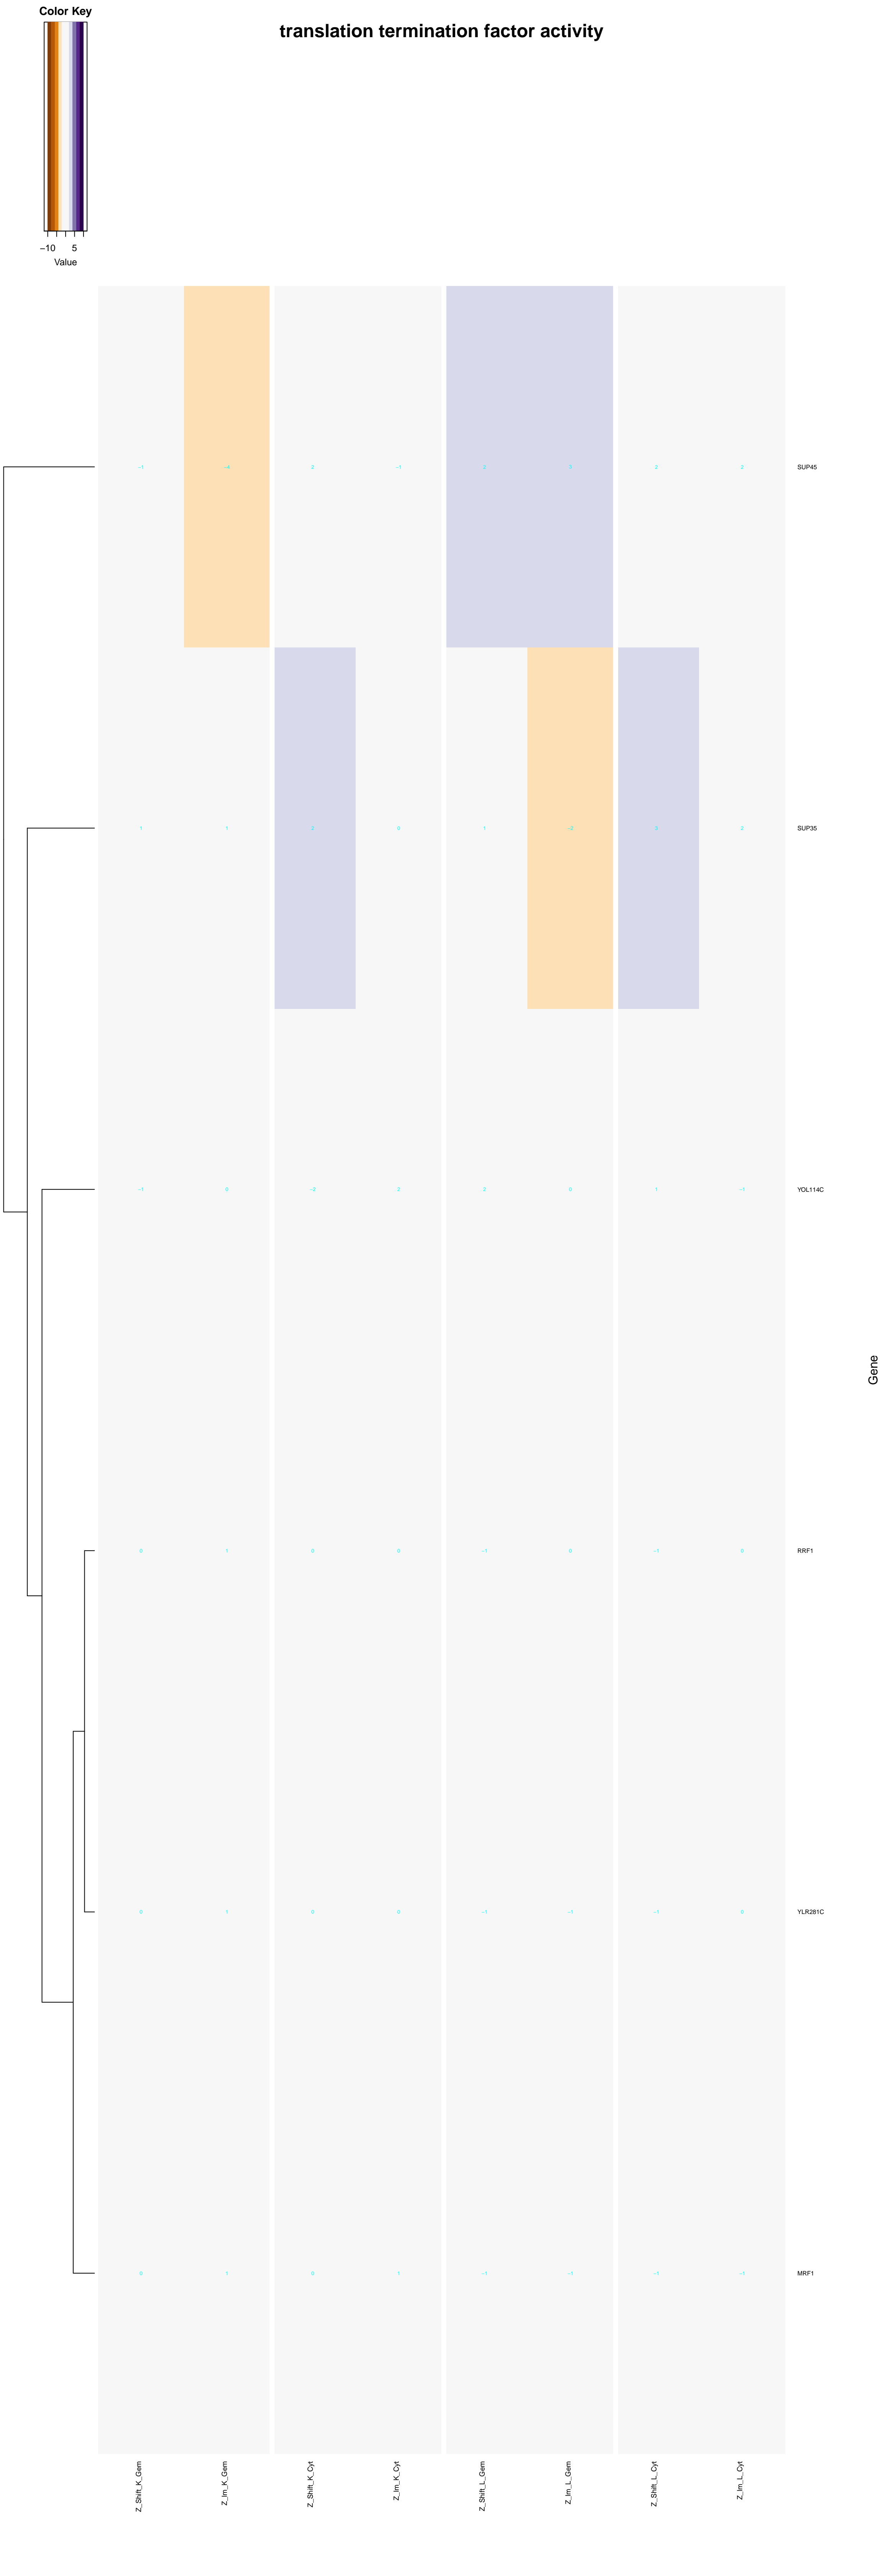

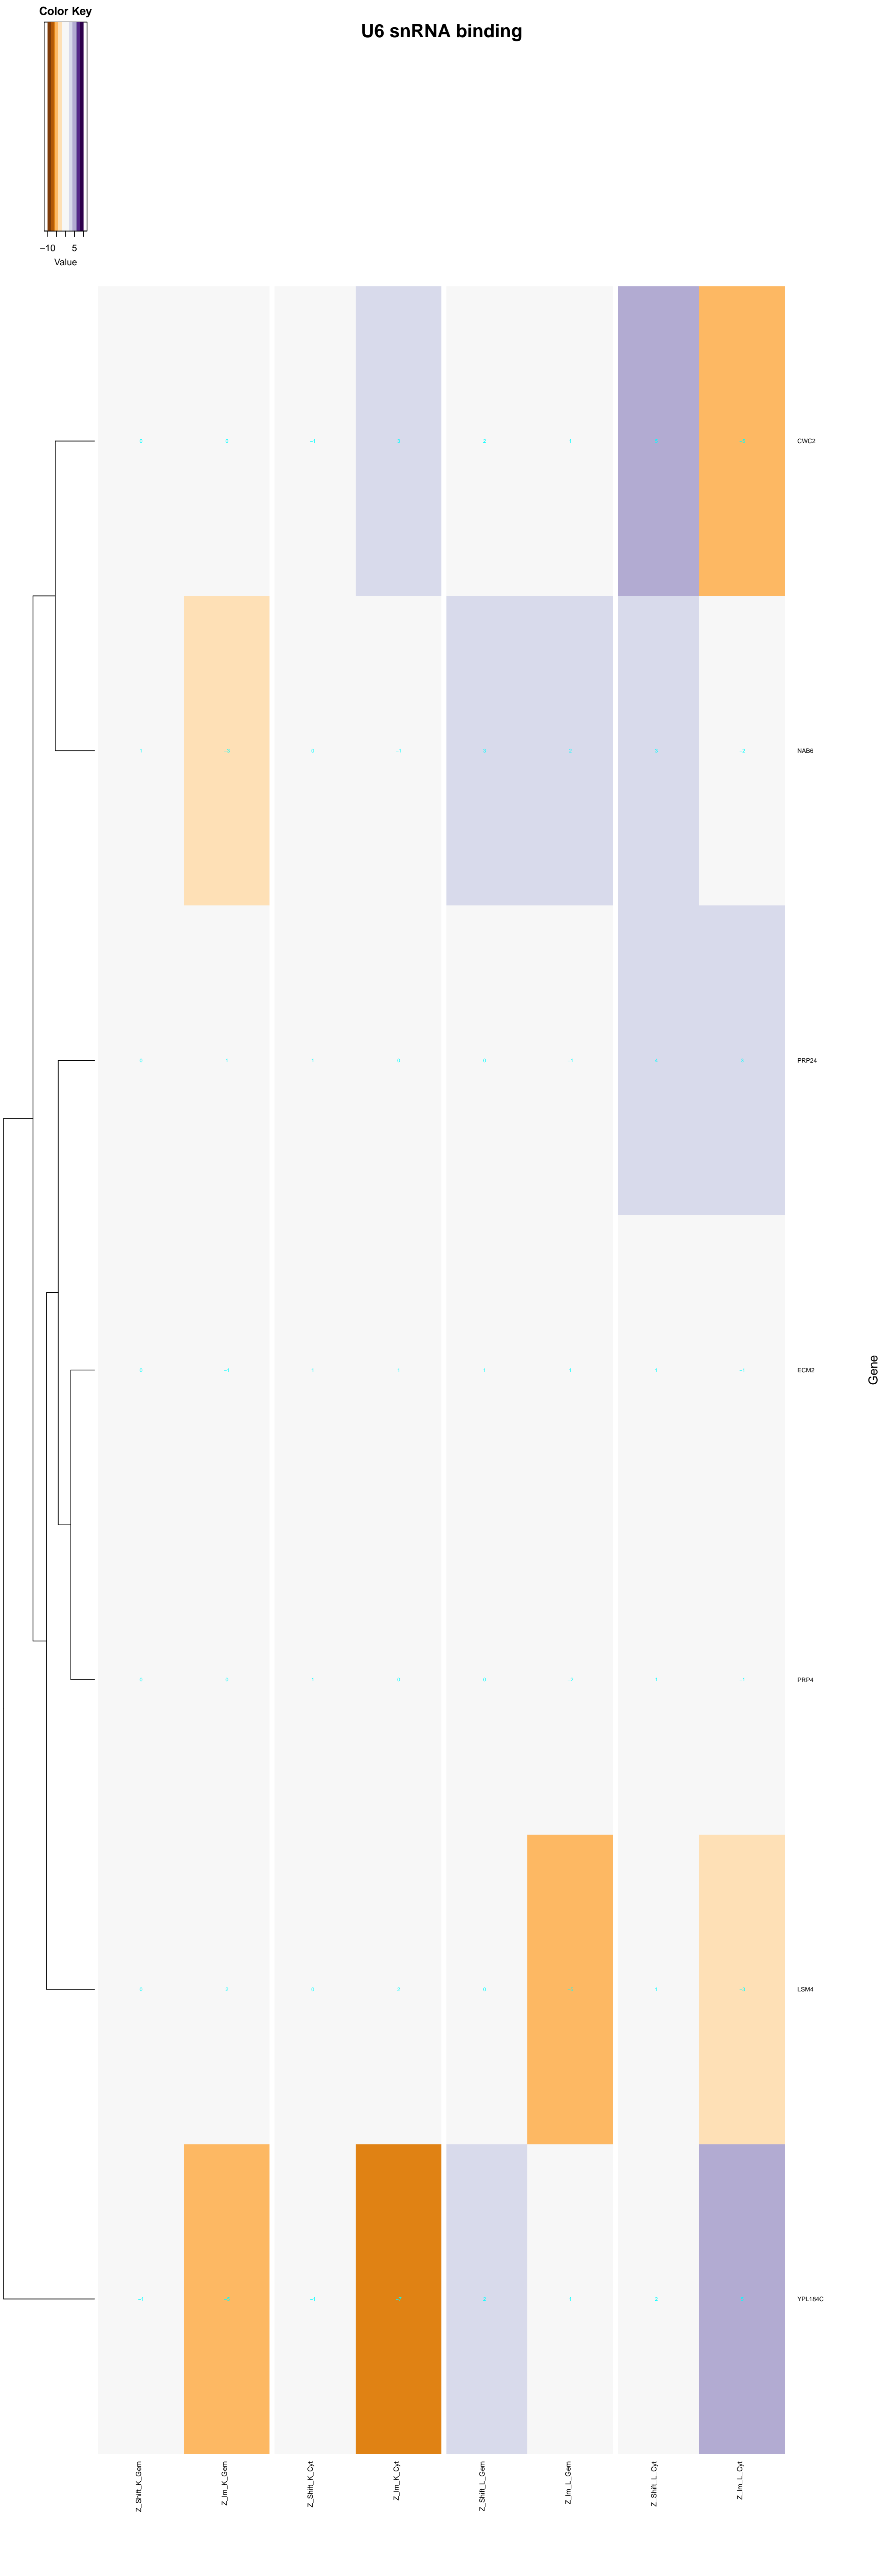

U2 snRNA binding

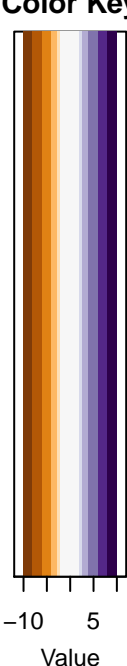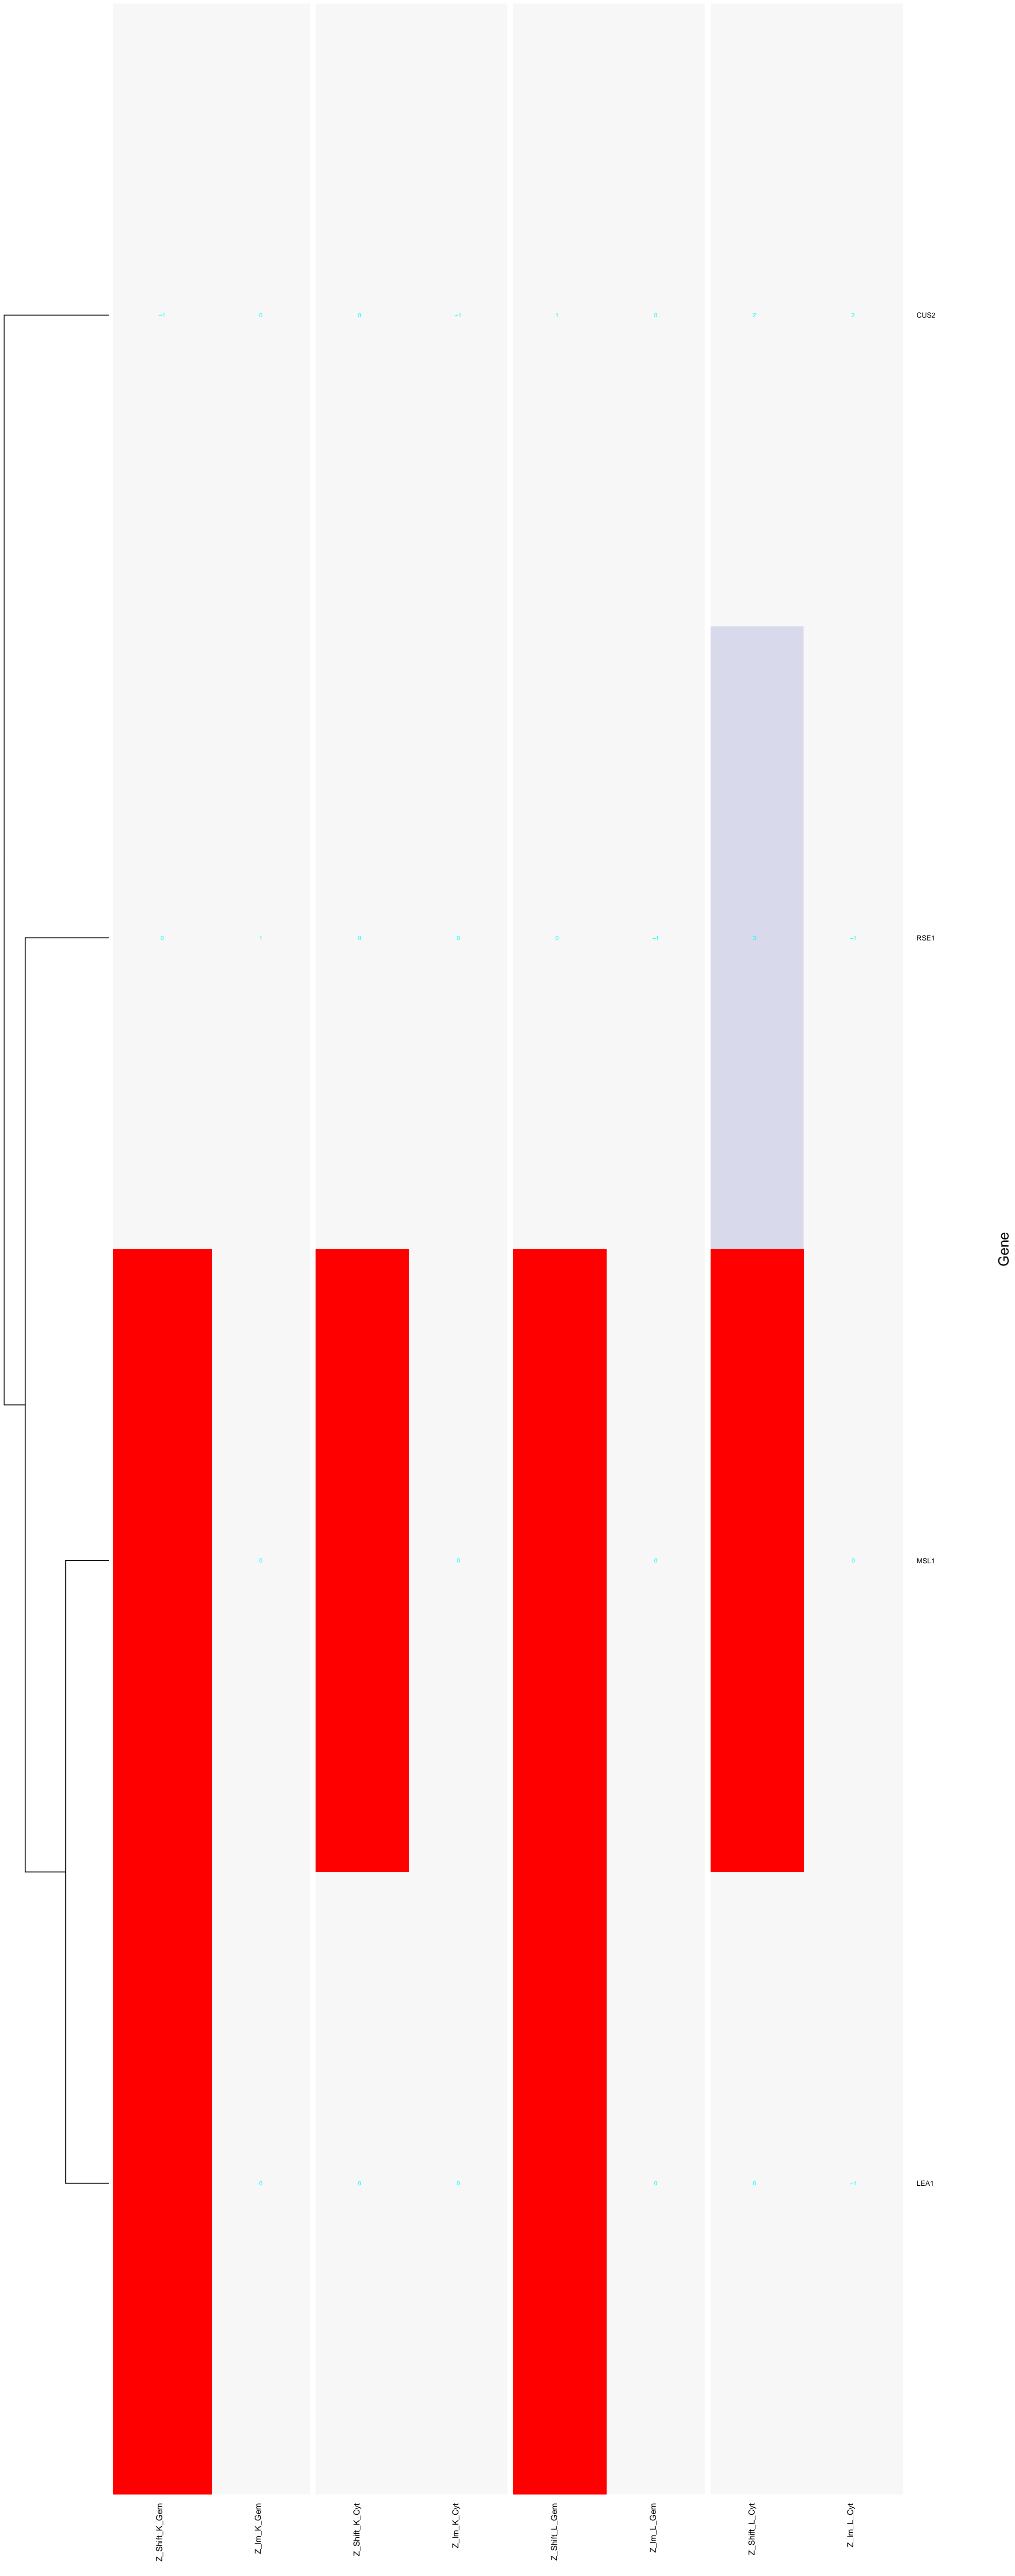

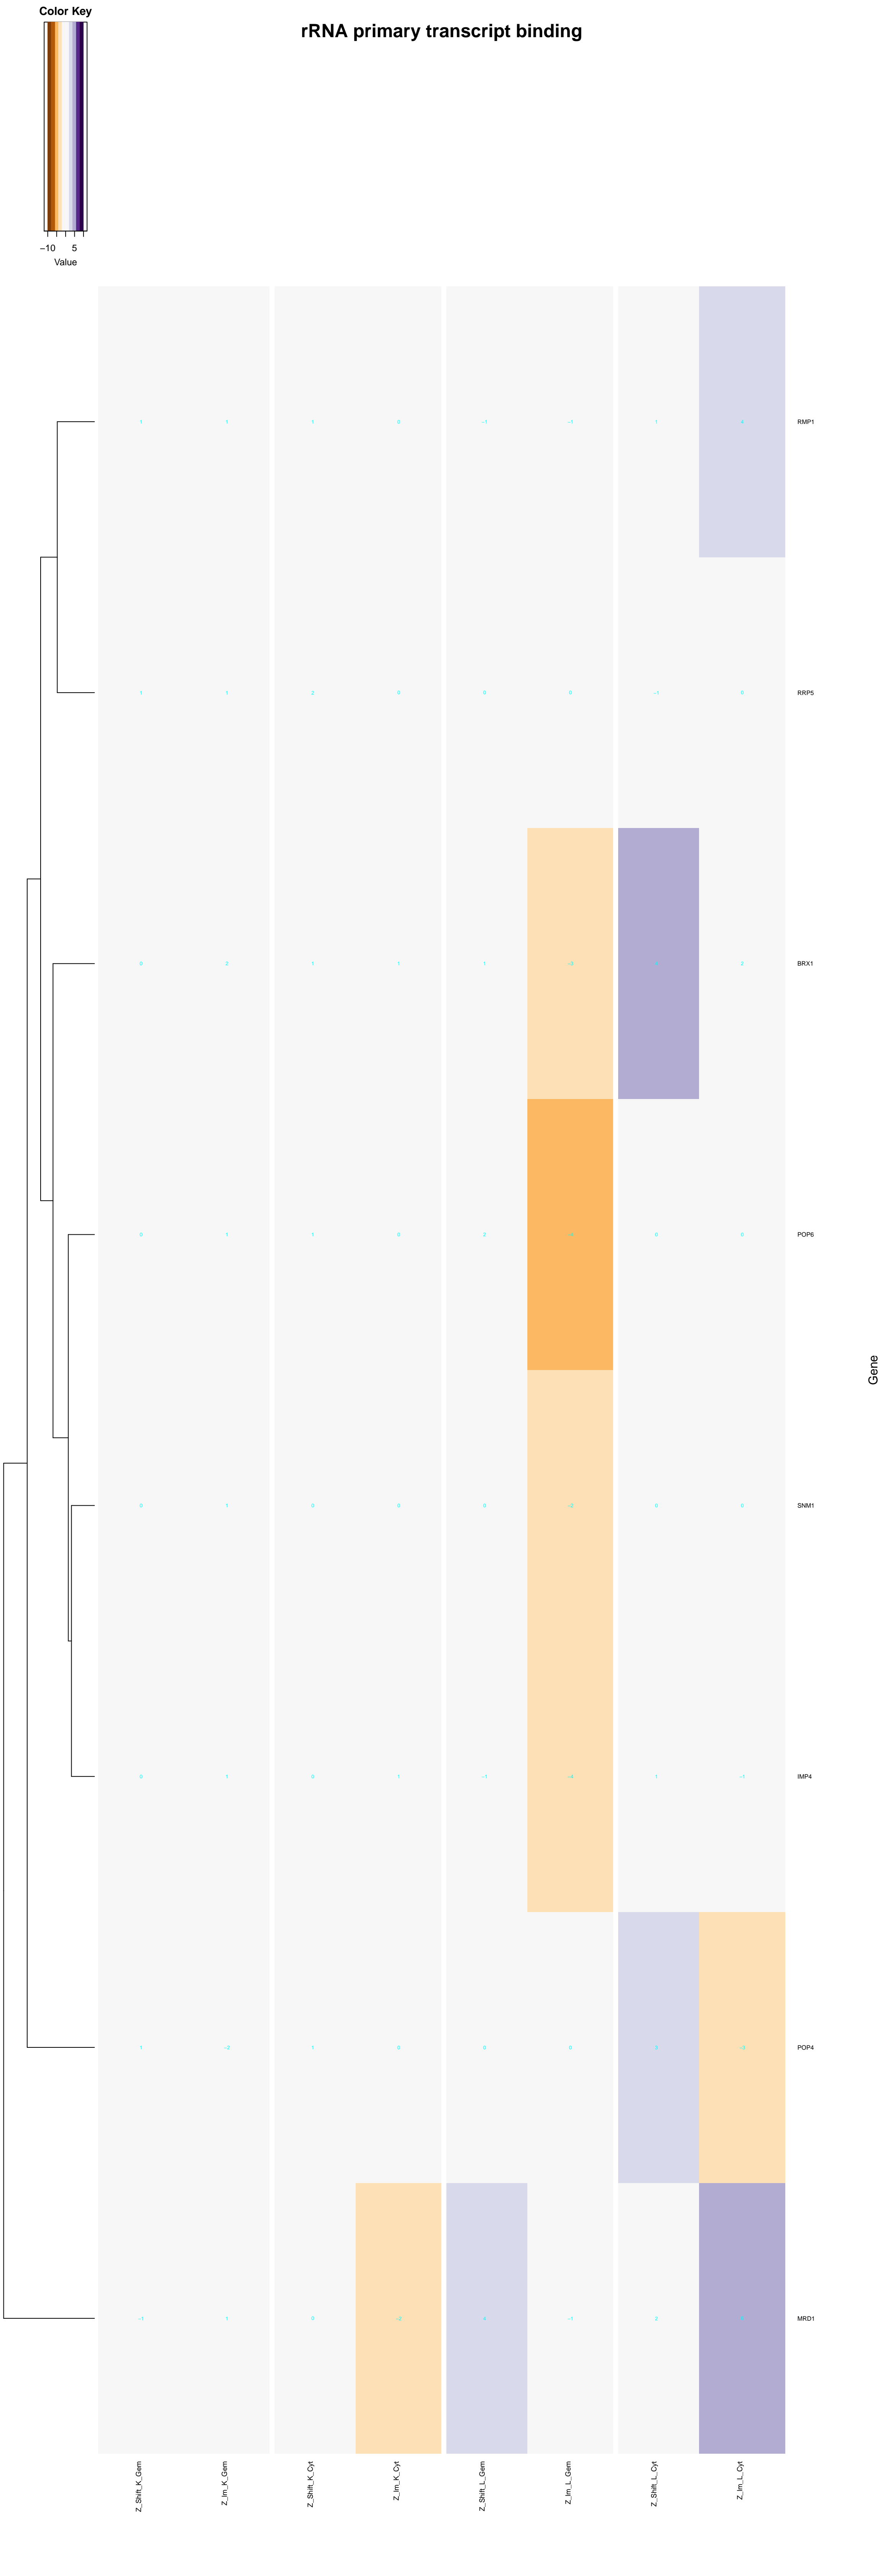

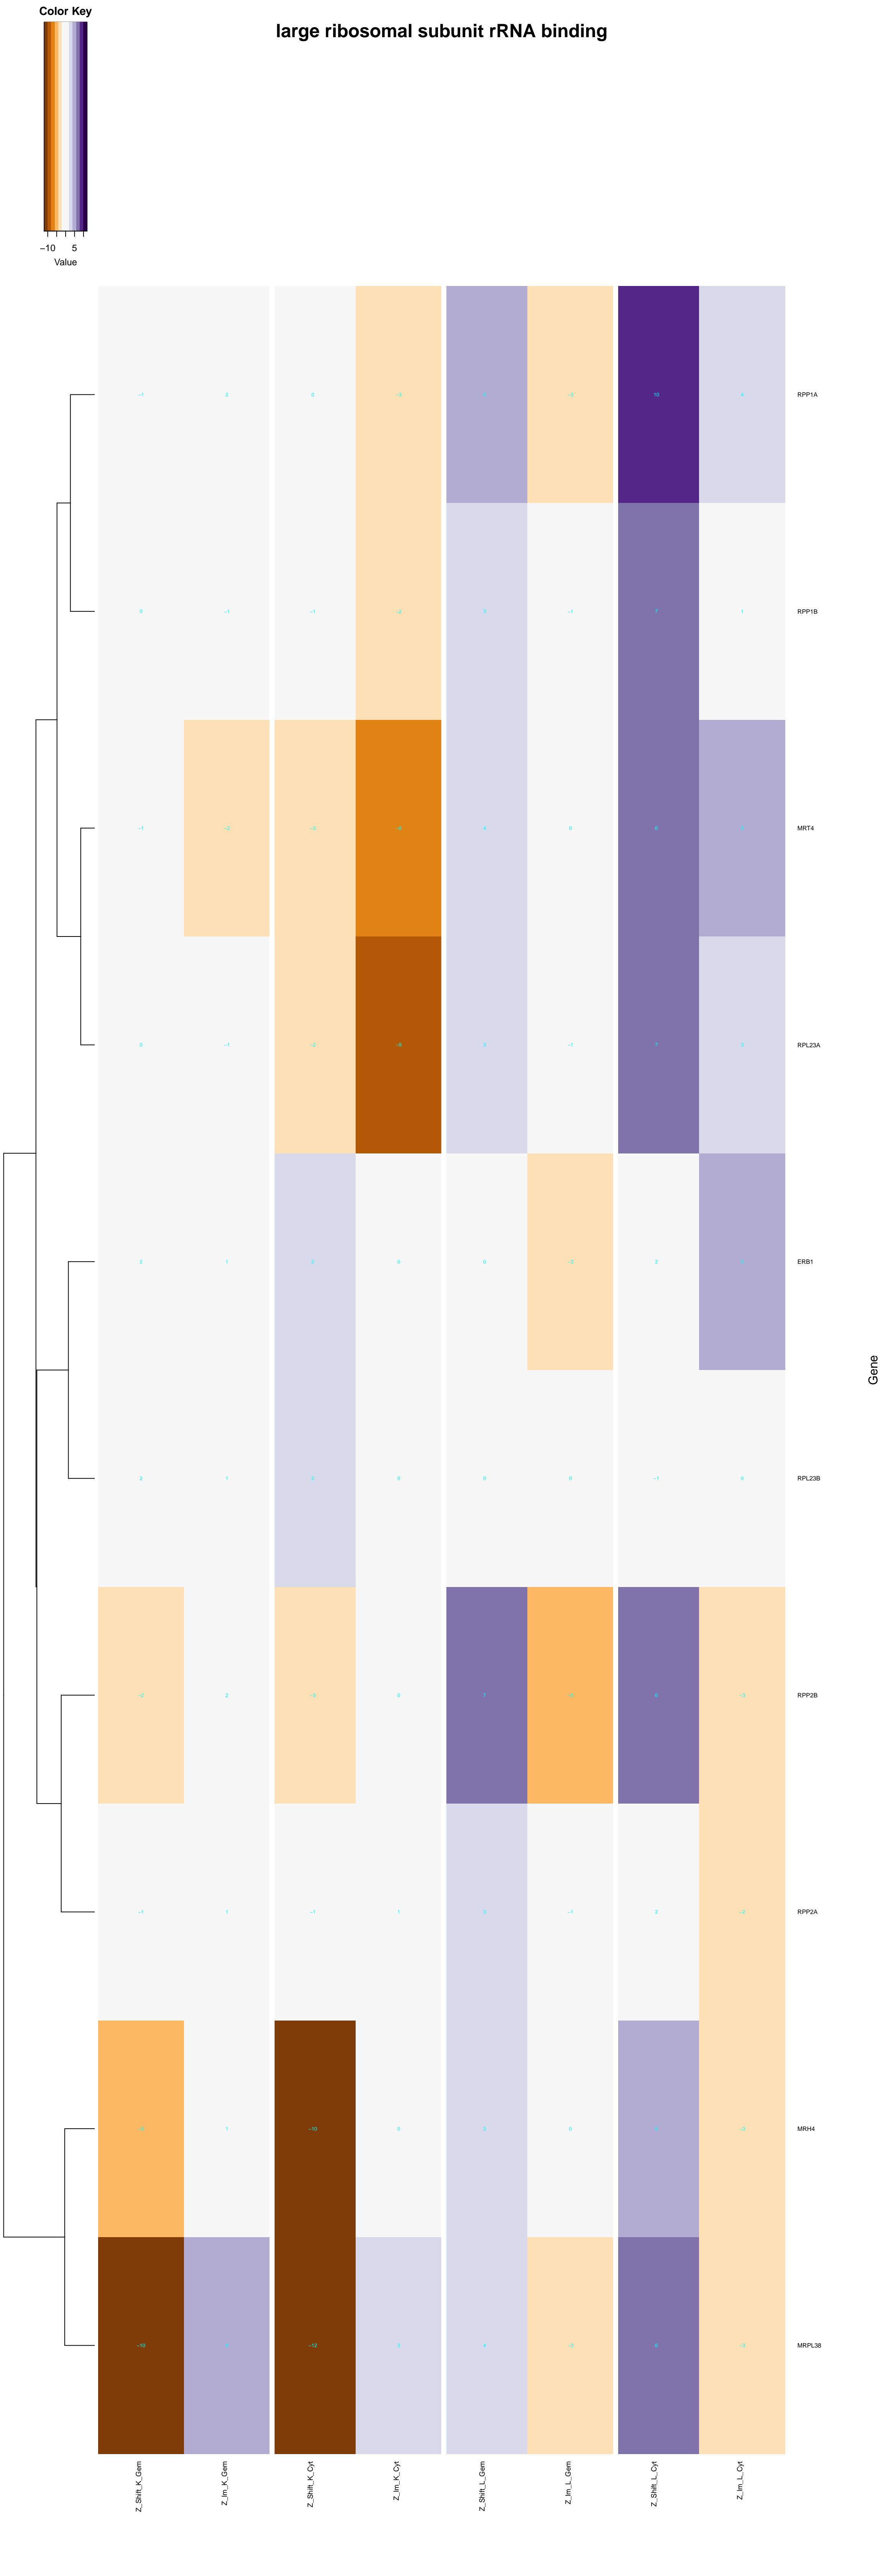

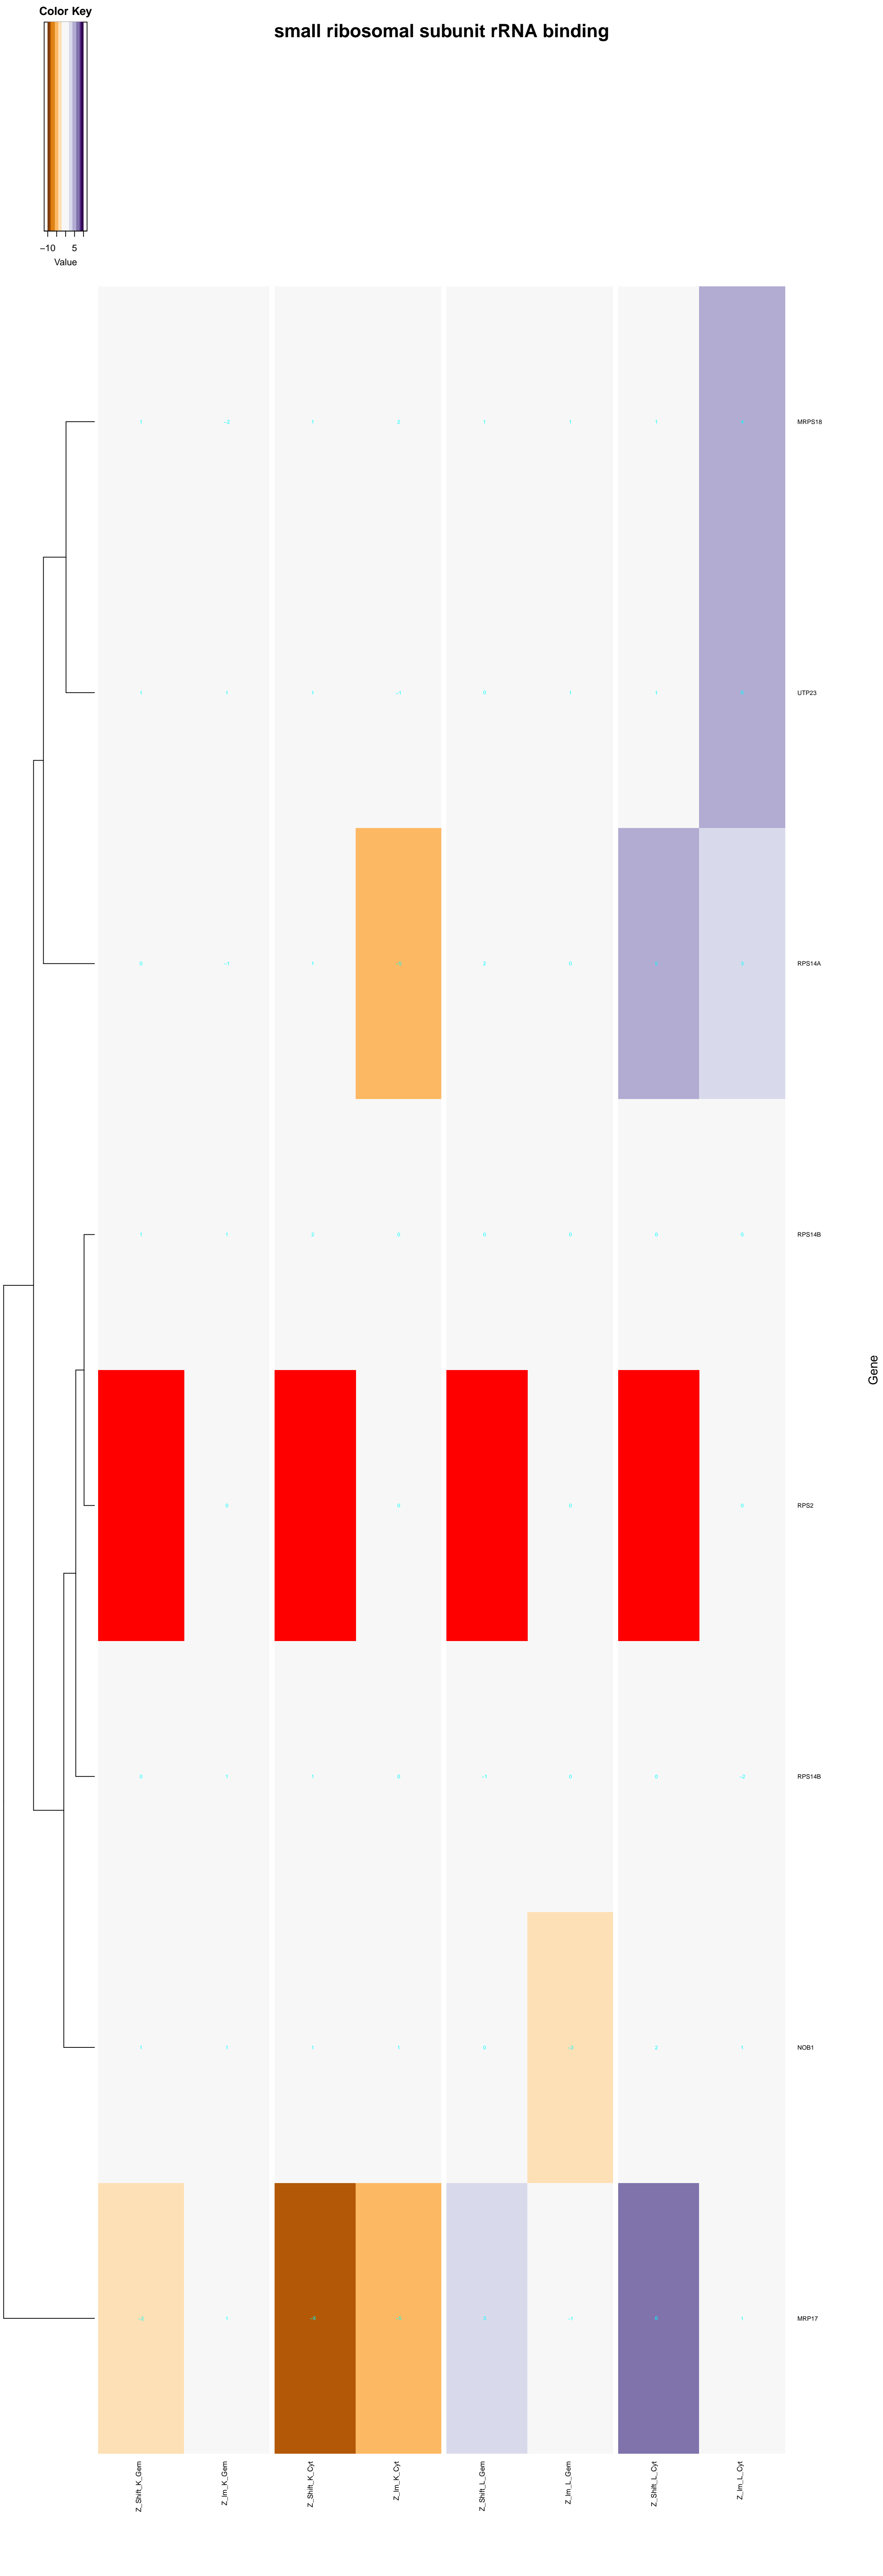

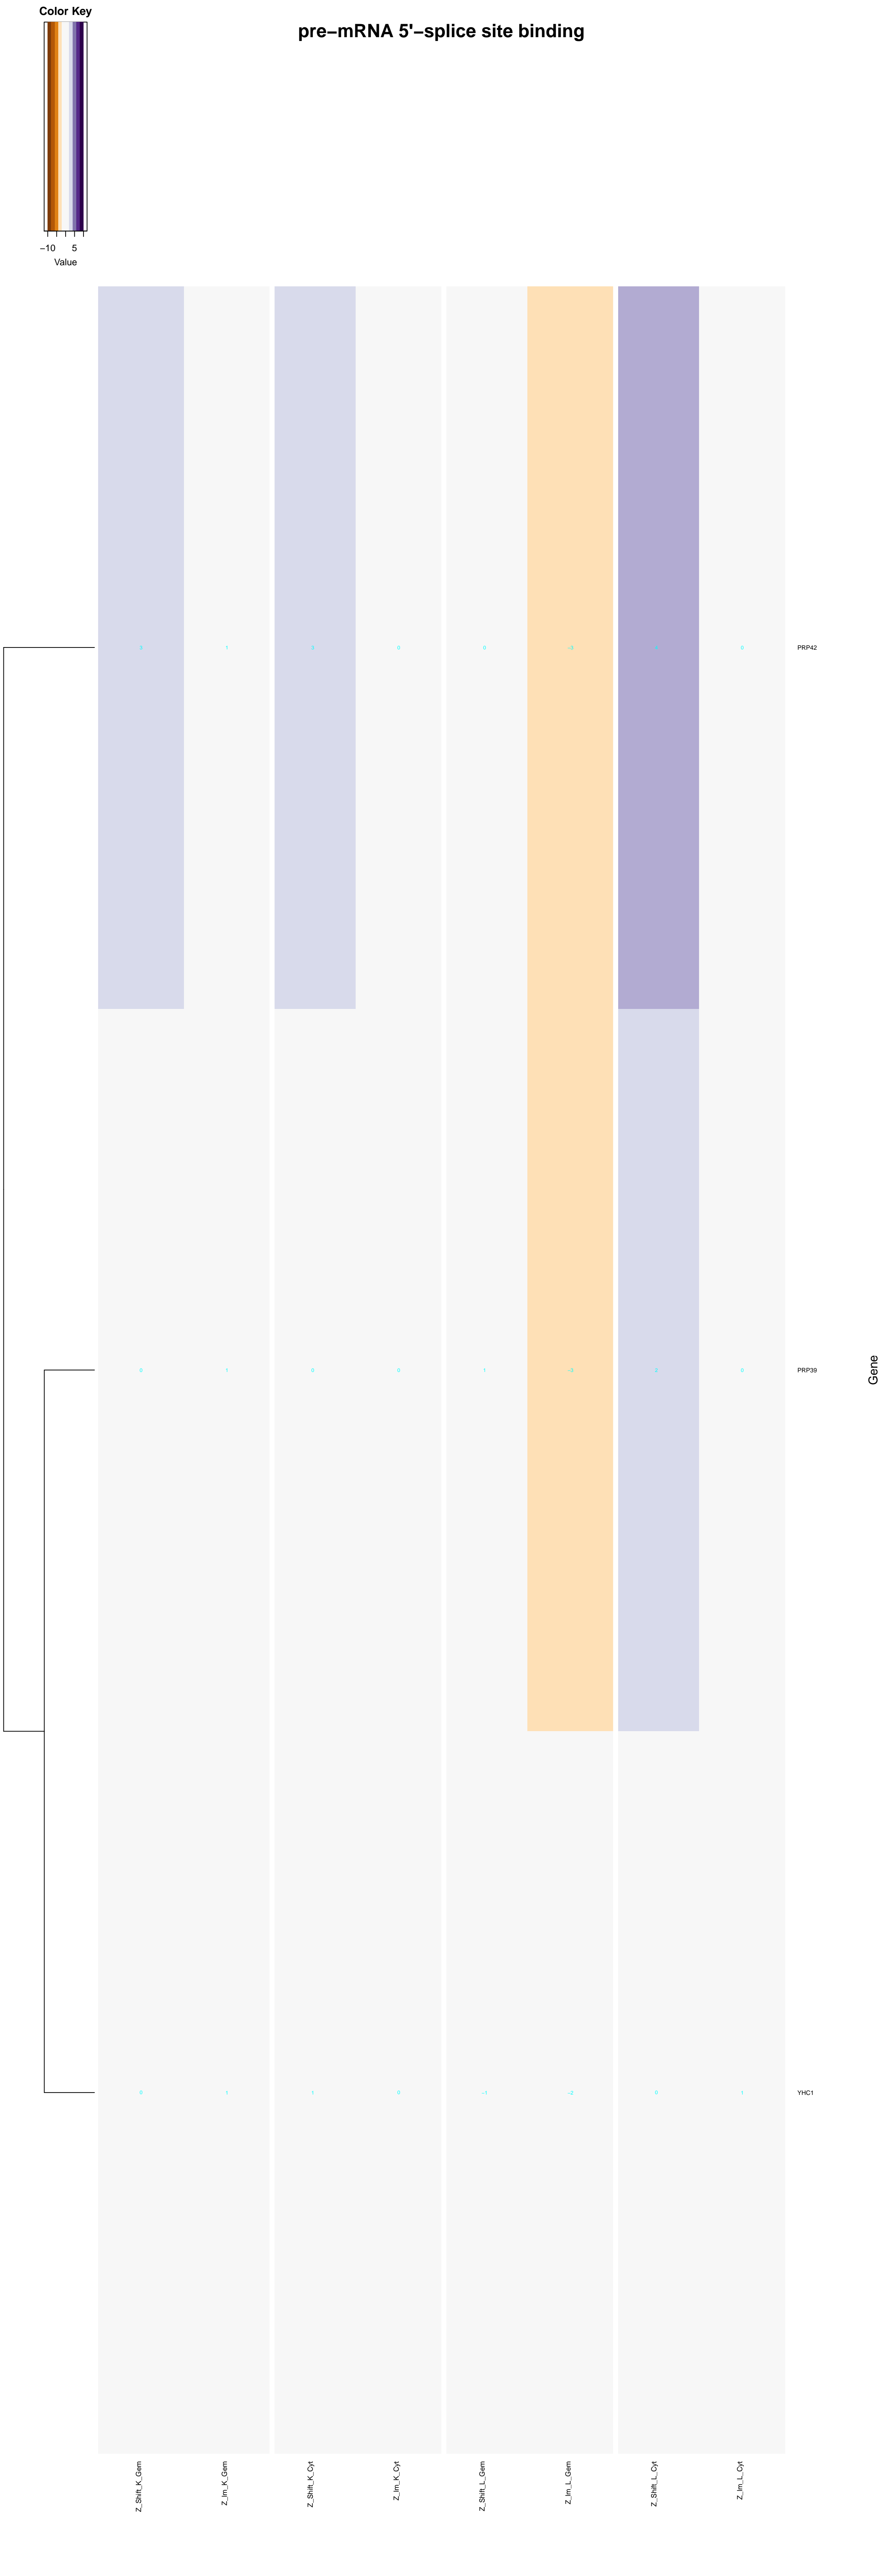

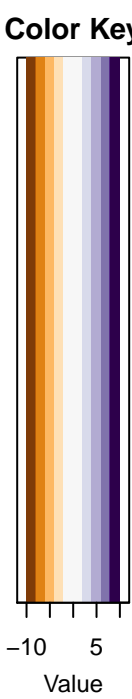

poly(U) RNA binding

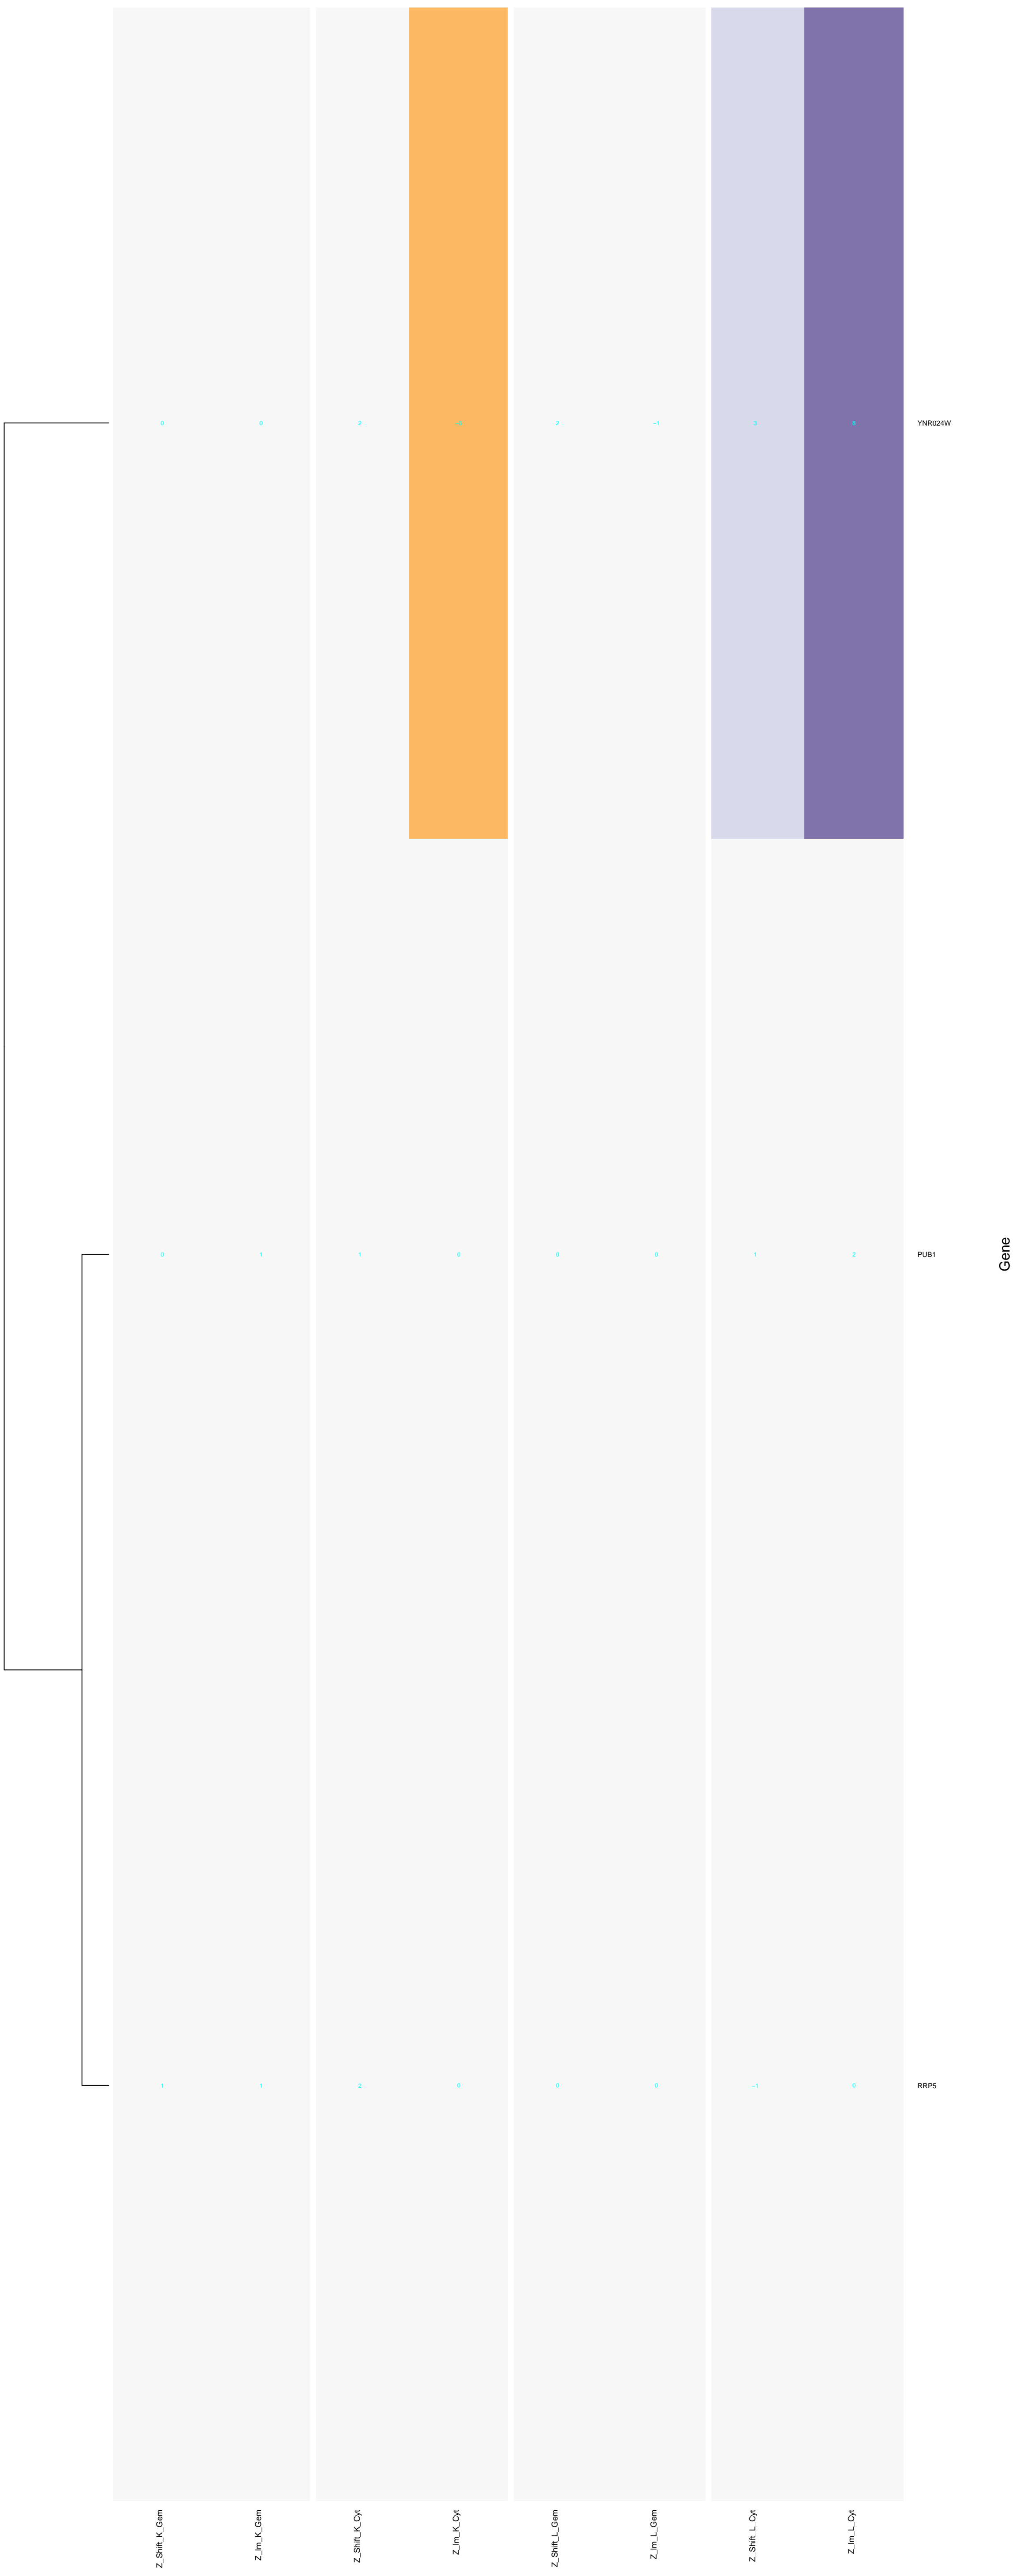

poly(A) binding

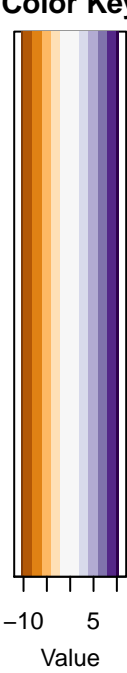

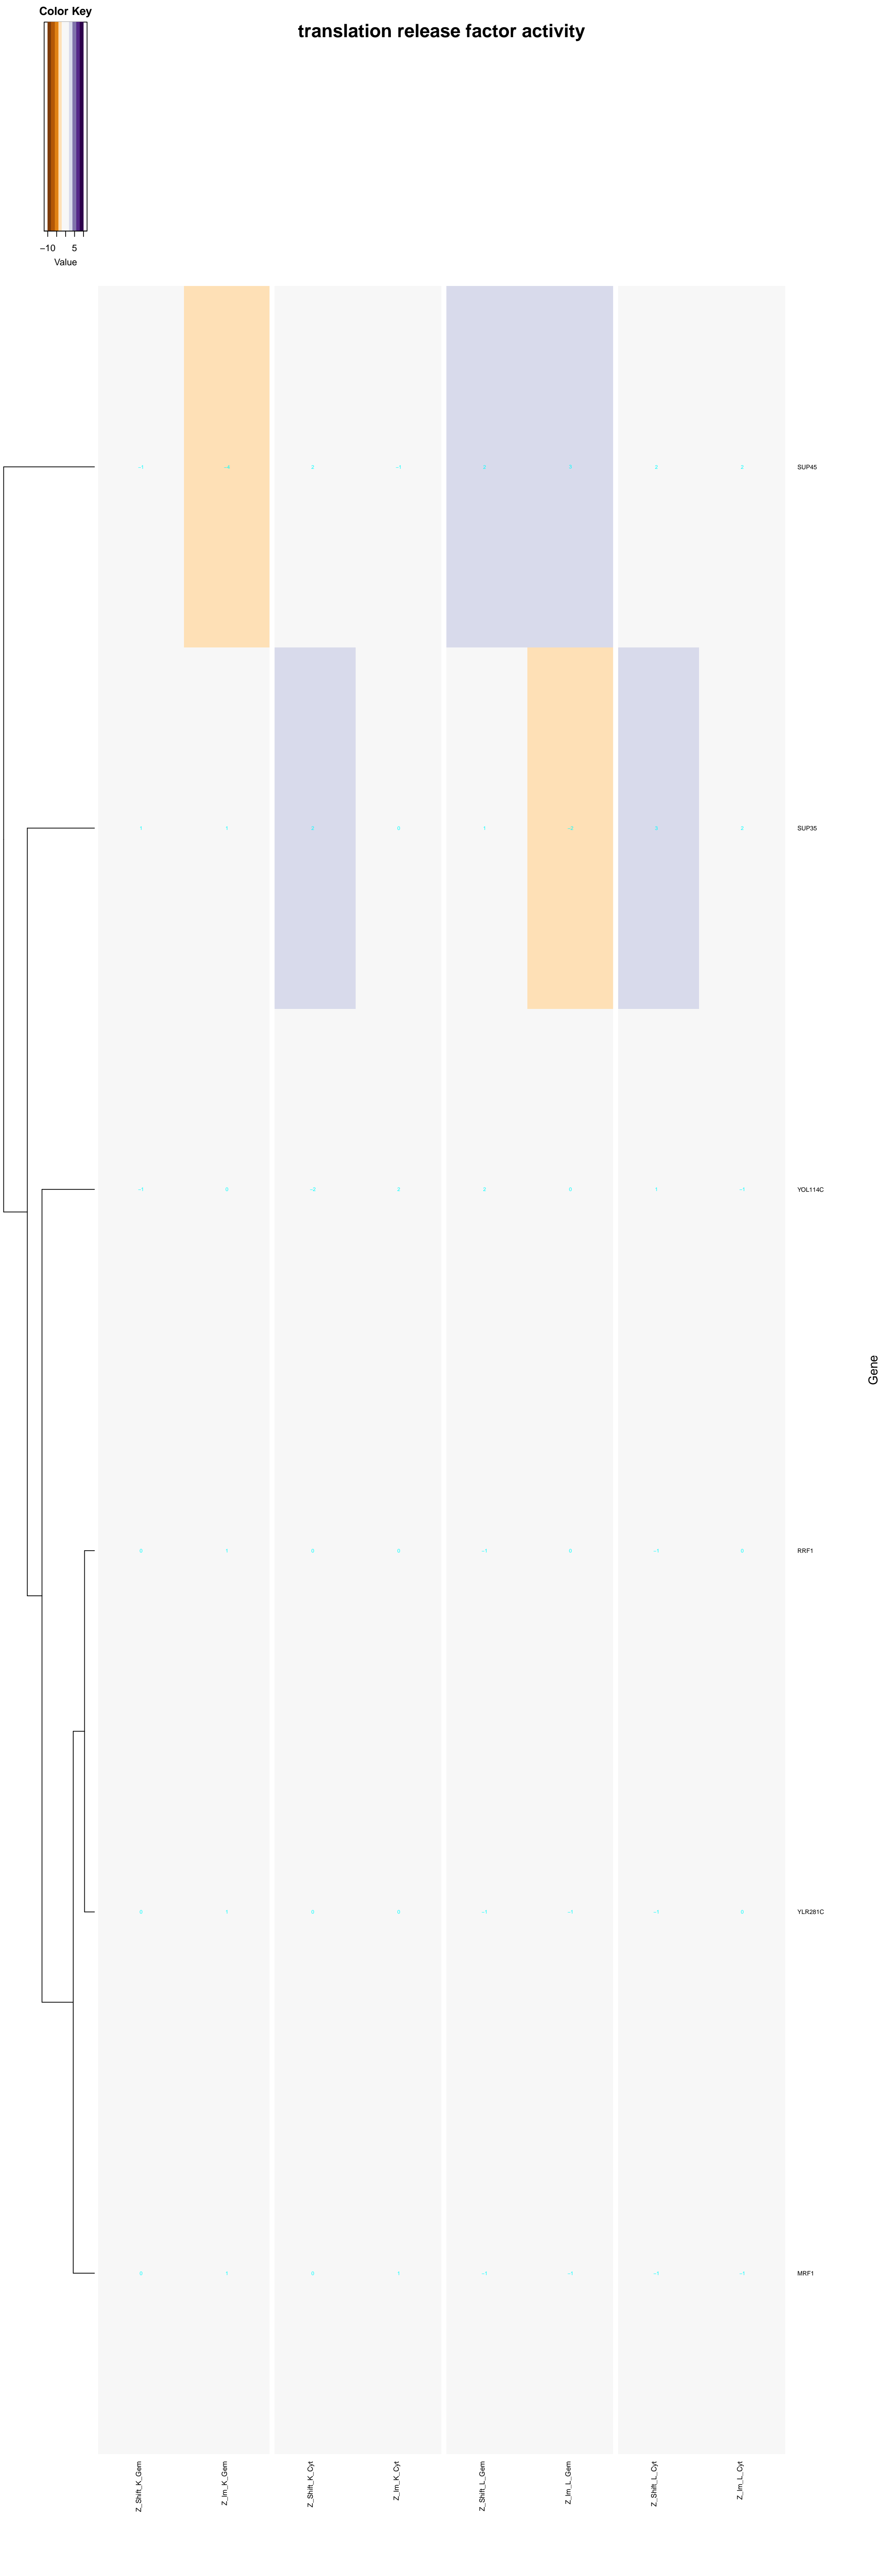

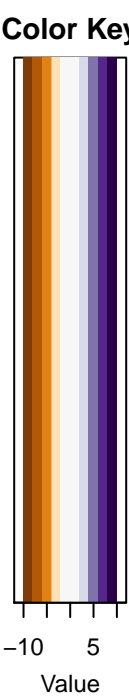

translation release factor activity, codon specific

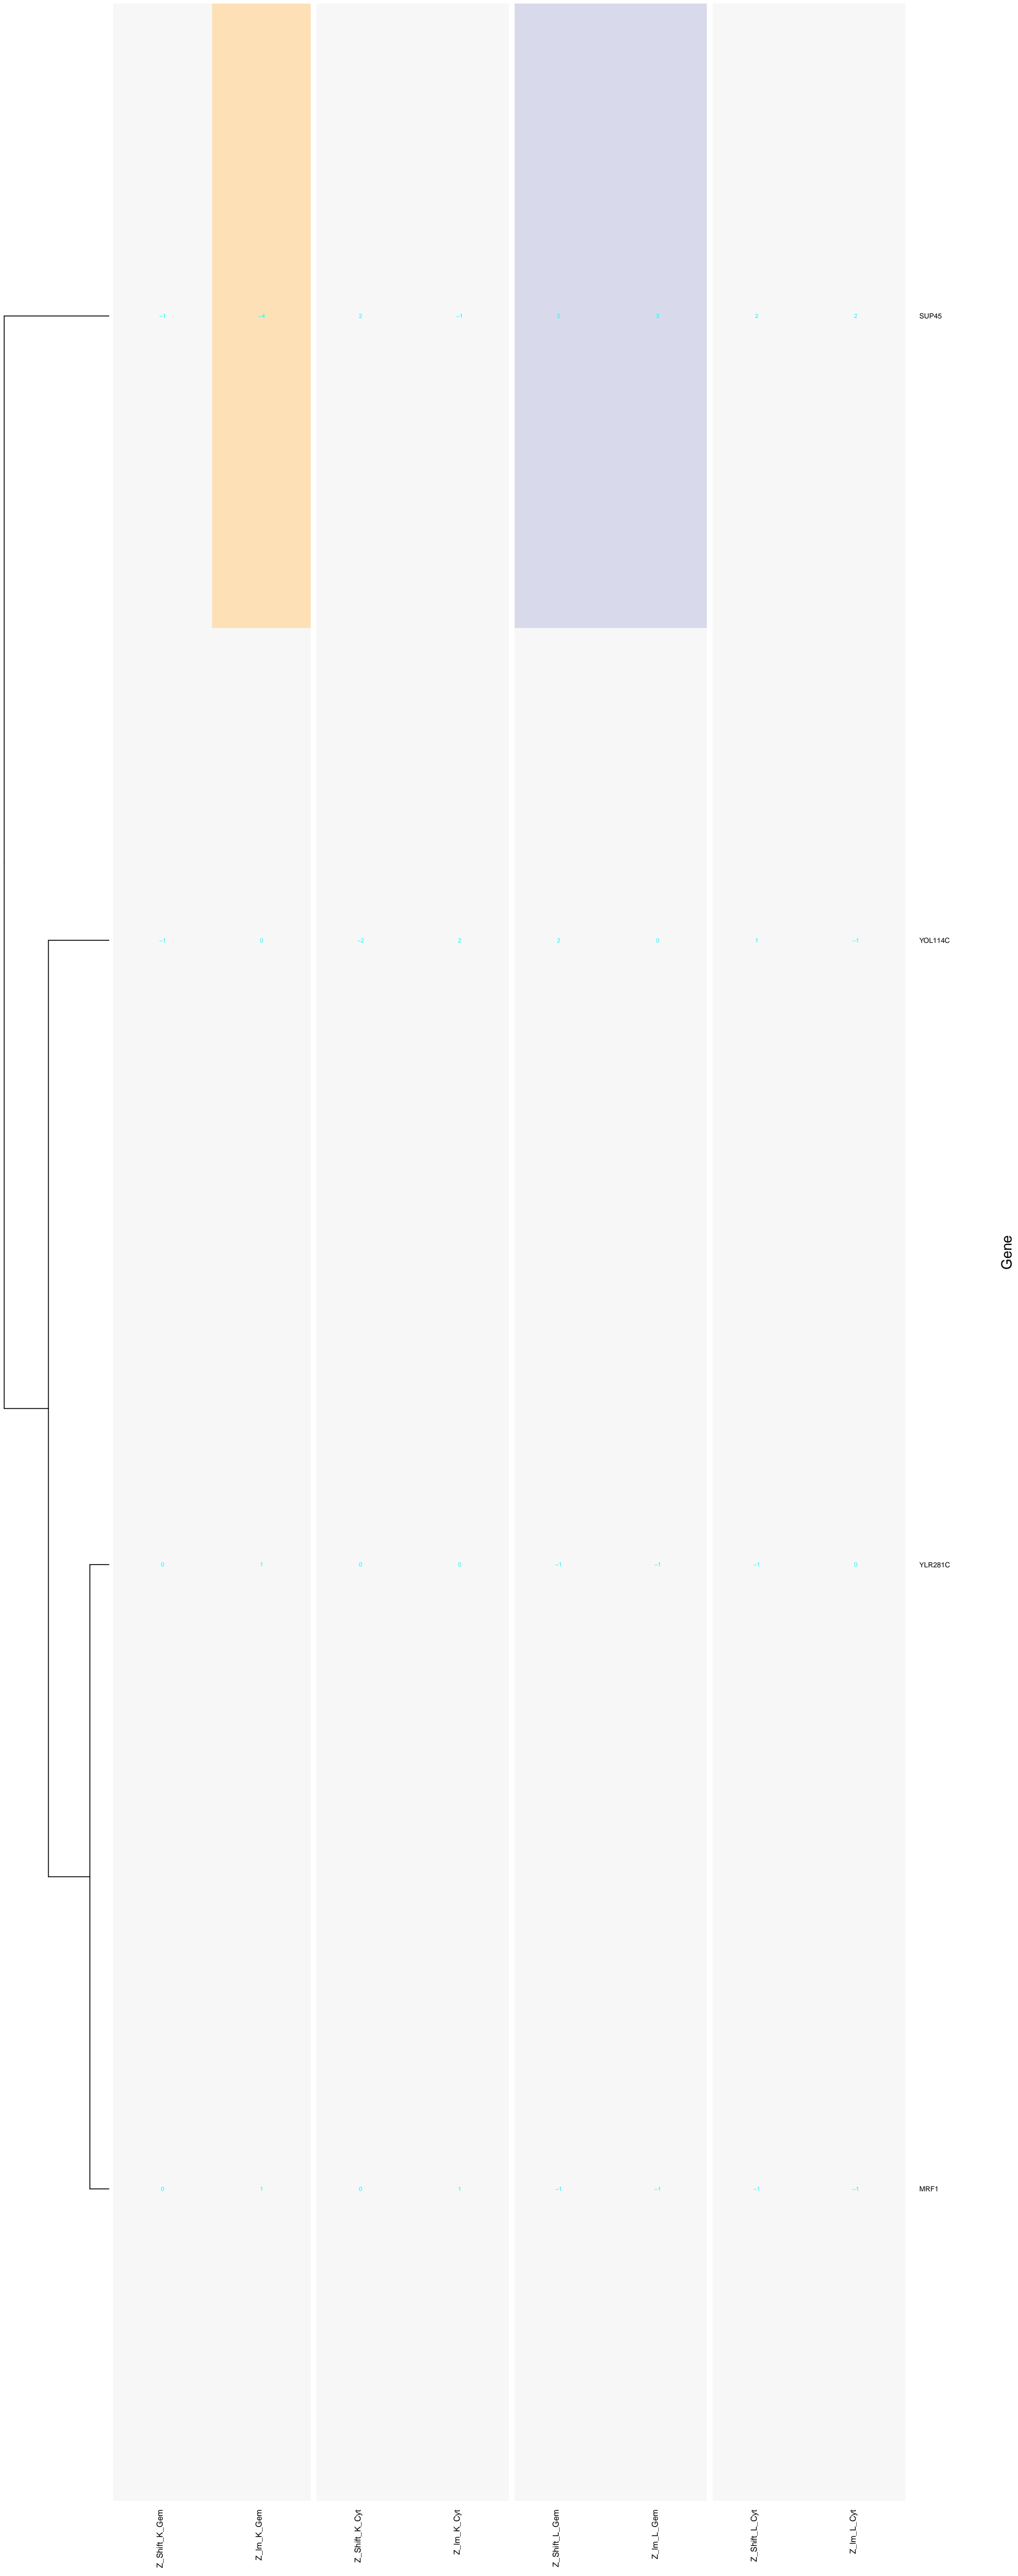

Supplement: s1 [file s1]
