# Supplementary material for: A Humanized Yeast Phenomic Model of Deoxycytidine Kinase to Predict Genetic Buffering of Nucleoside Analog Cytotoxicity
Source: MDPI journal article supplement (doi:10.3390/genes10100770), 2019-09-30

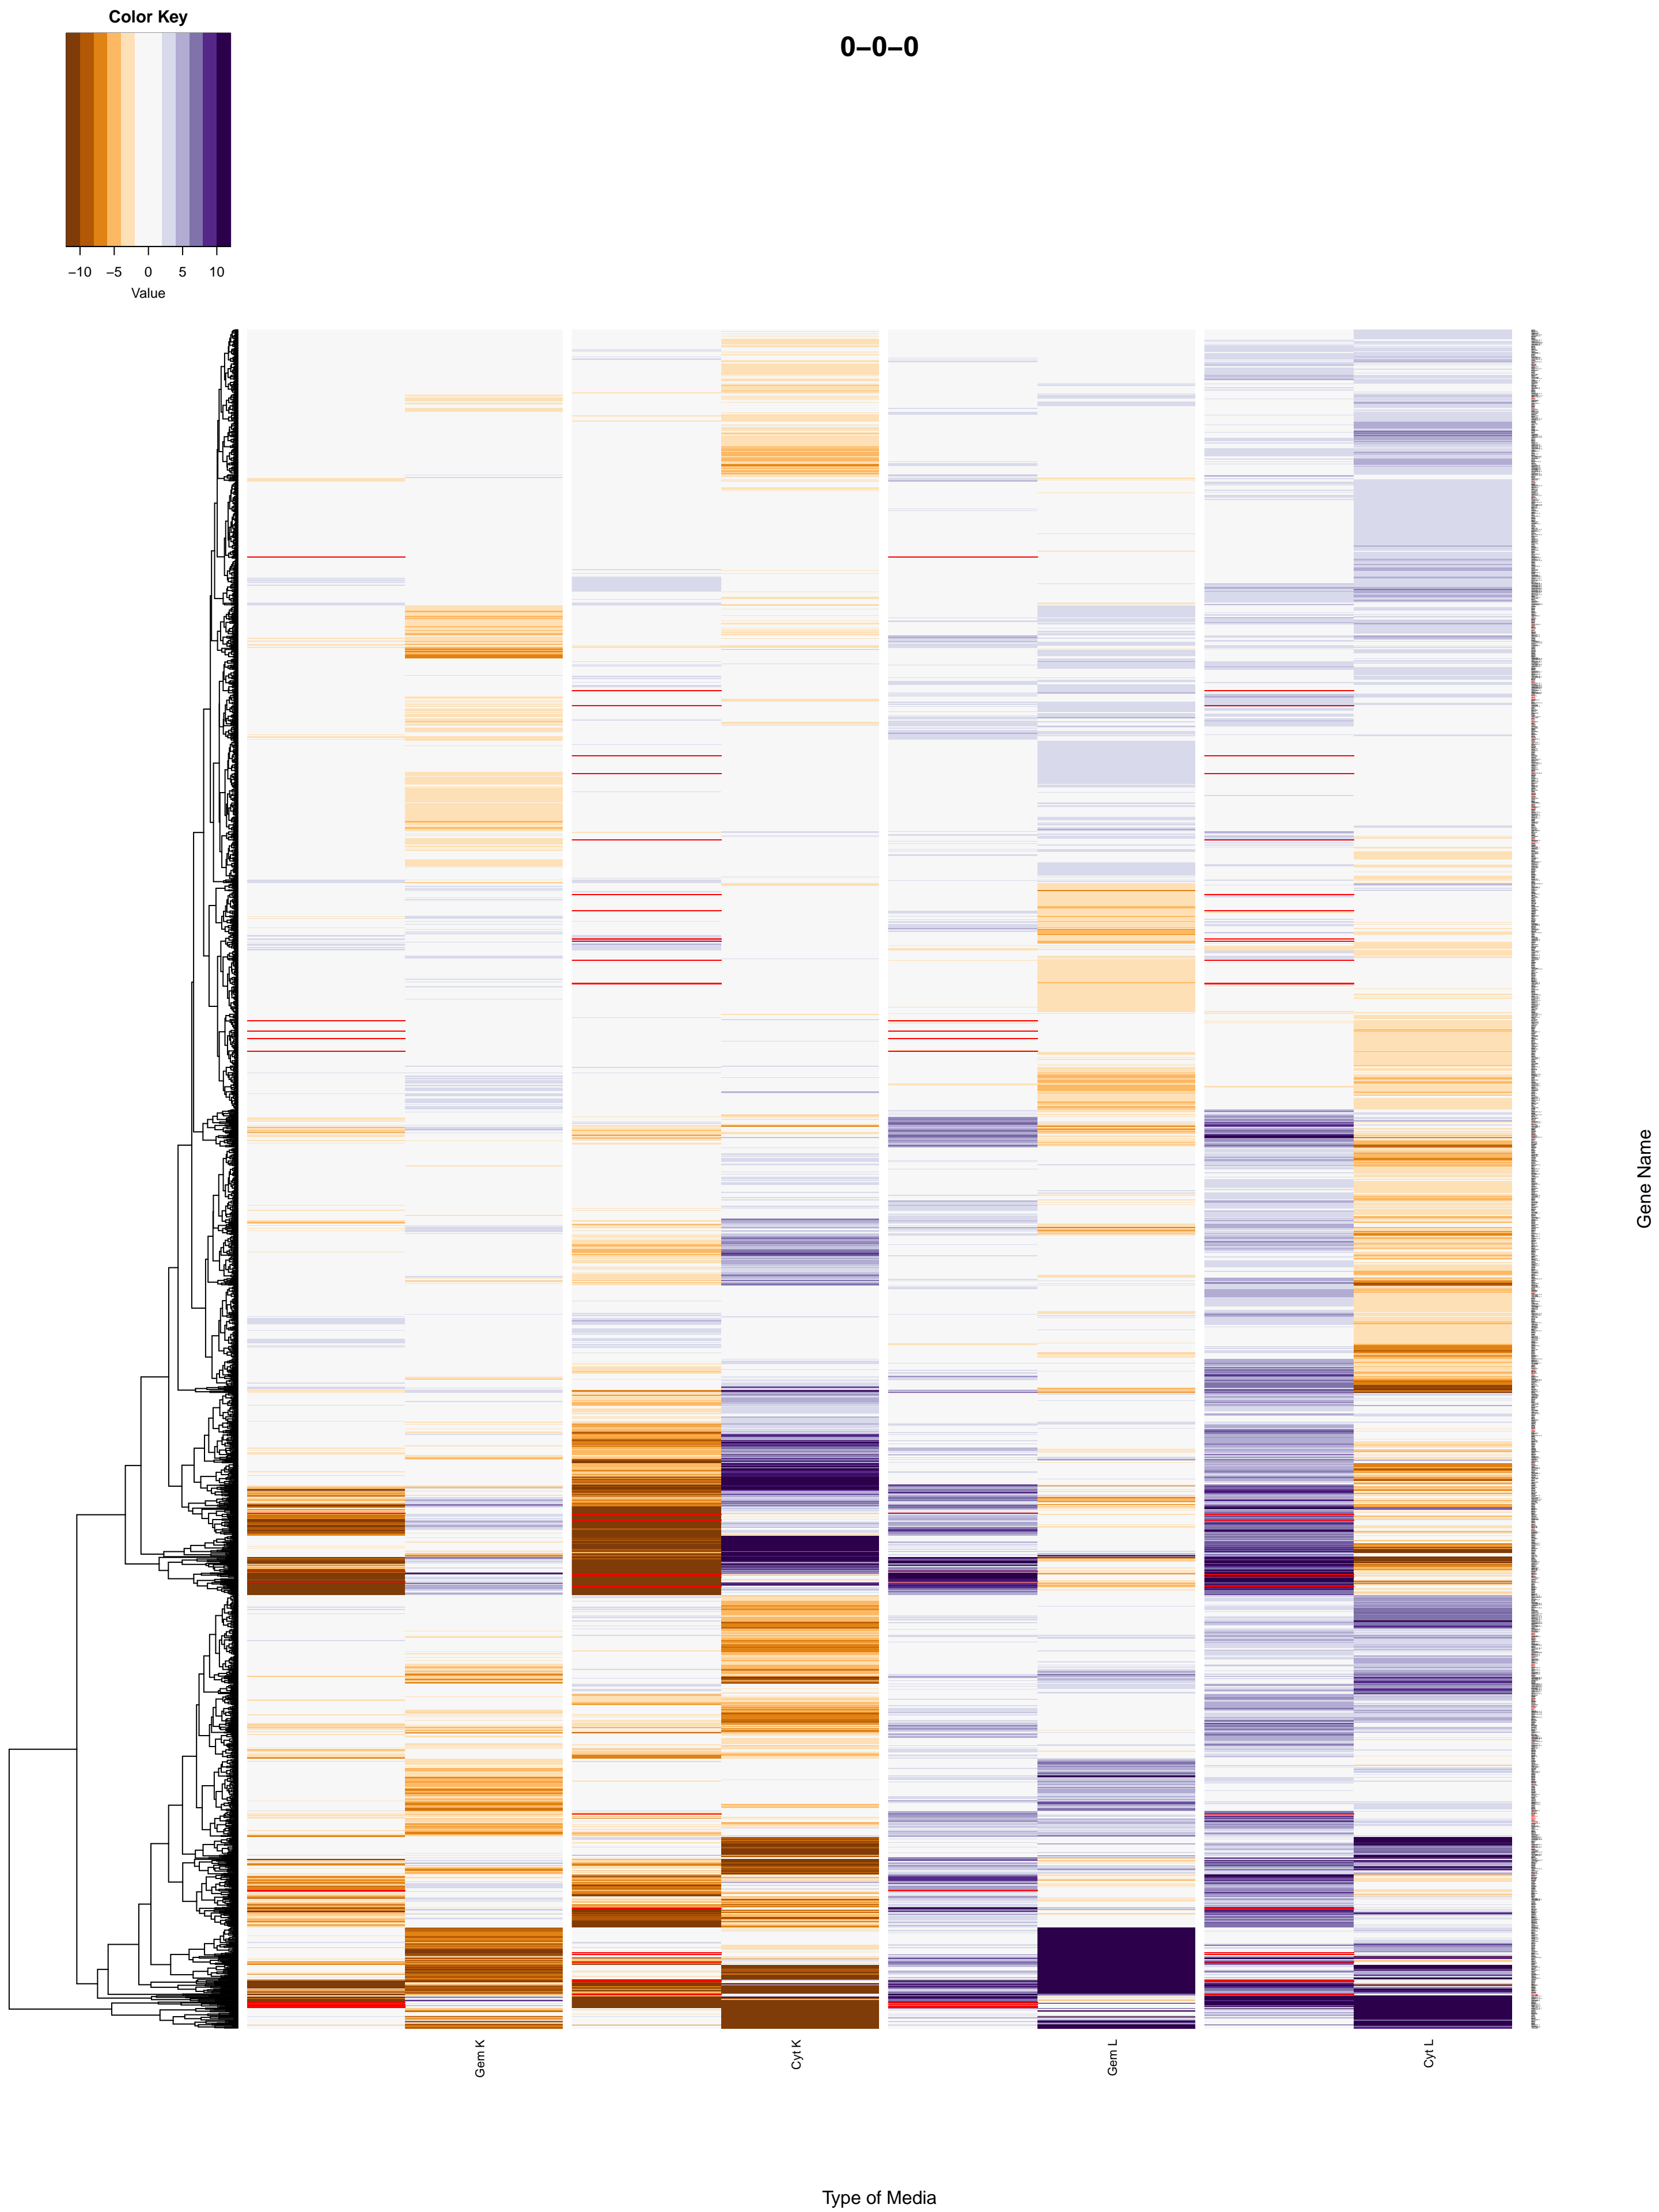





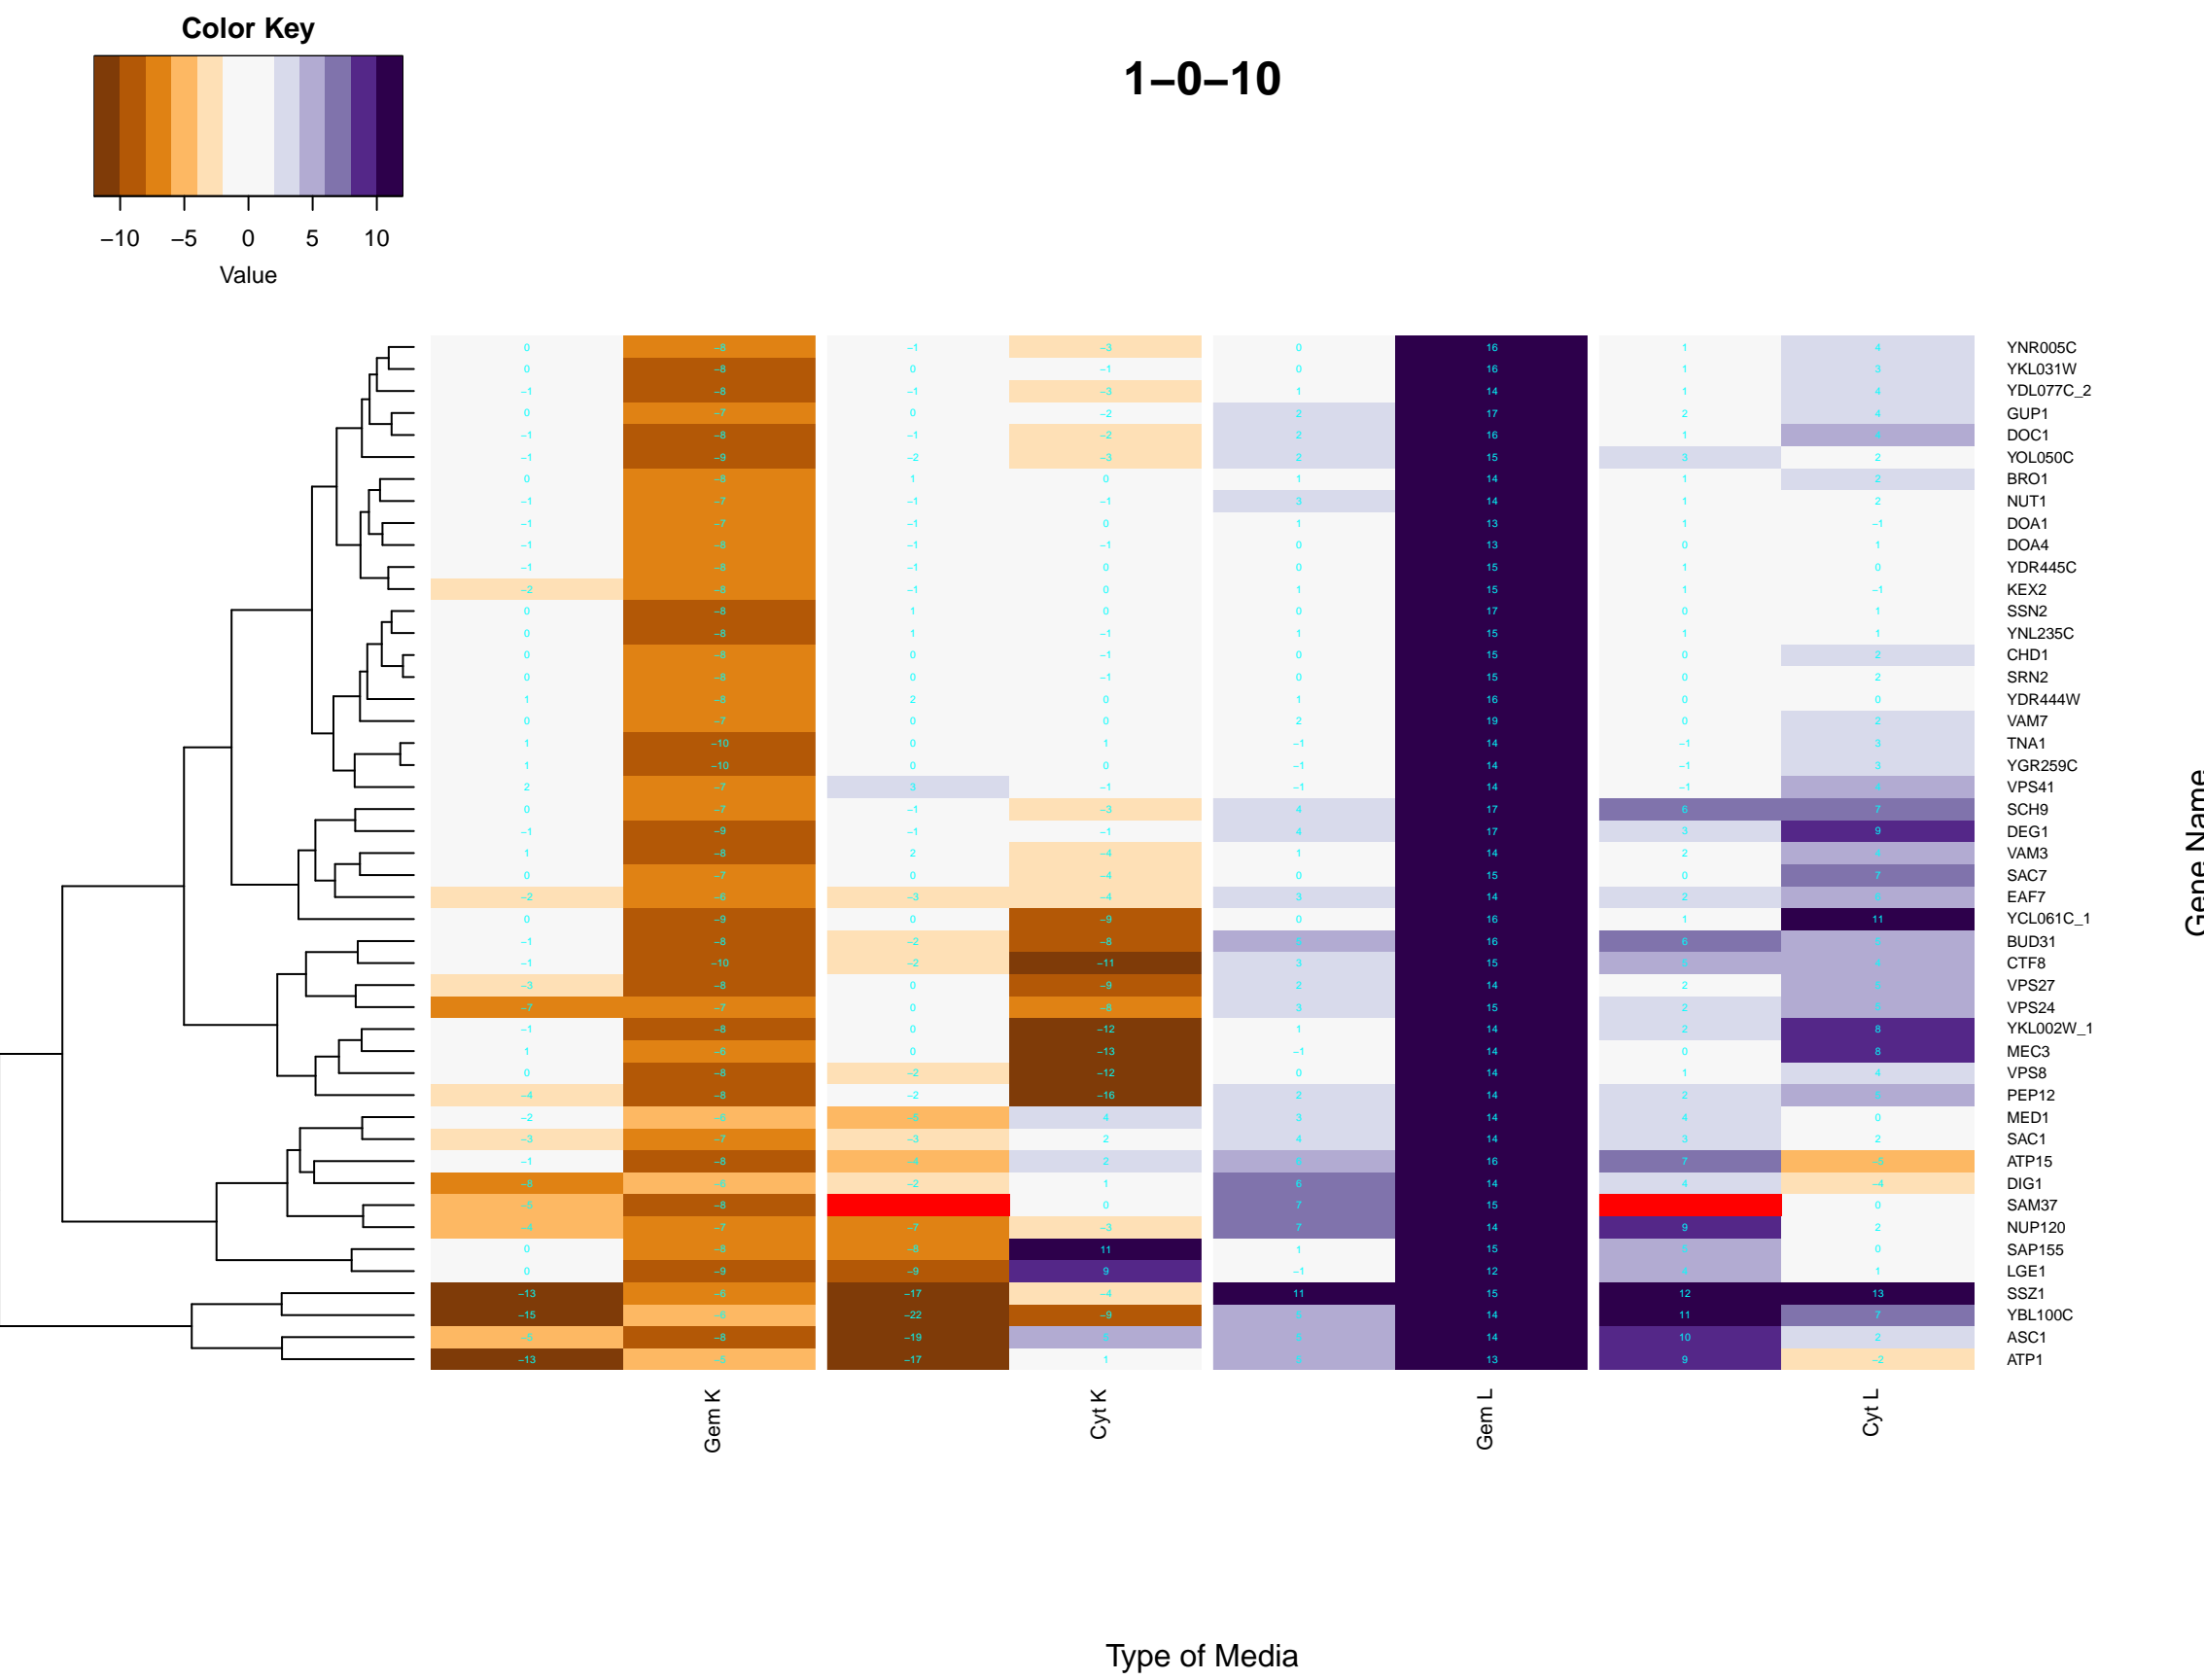

1-0-11

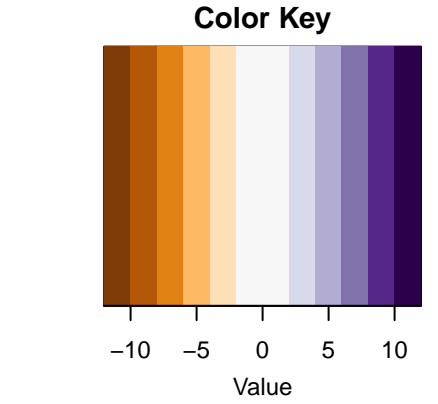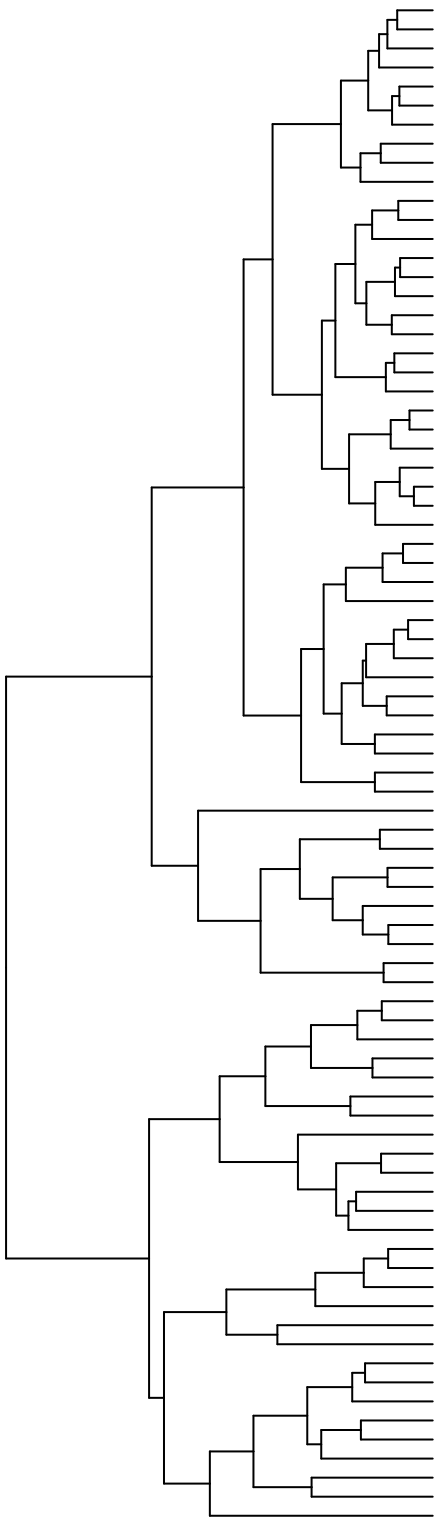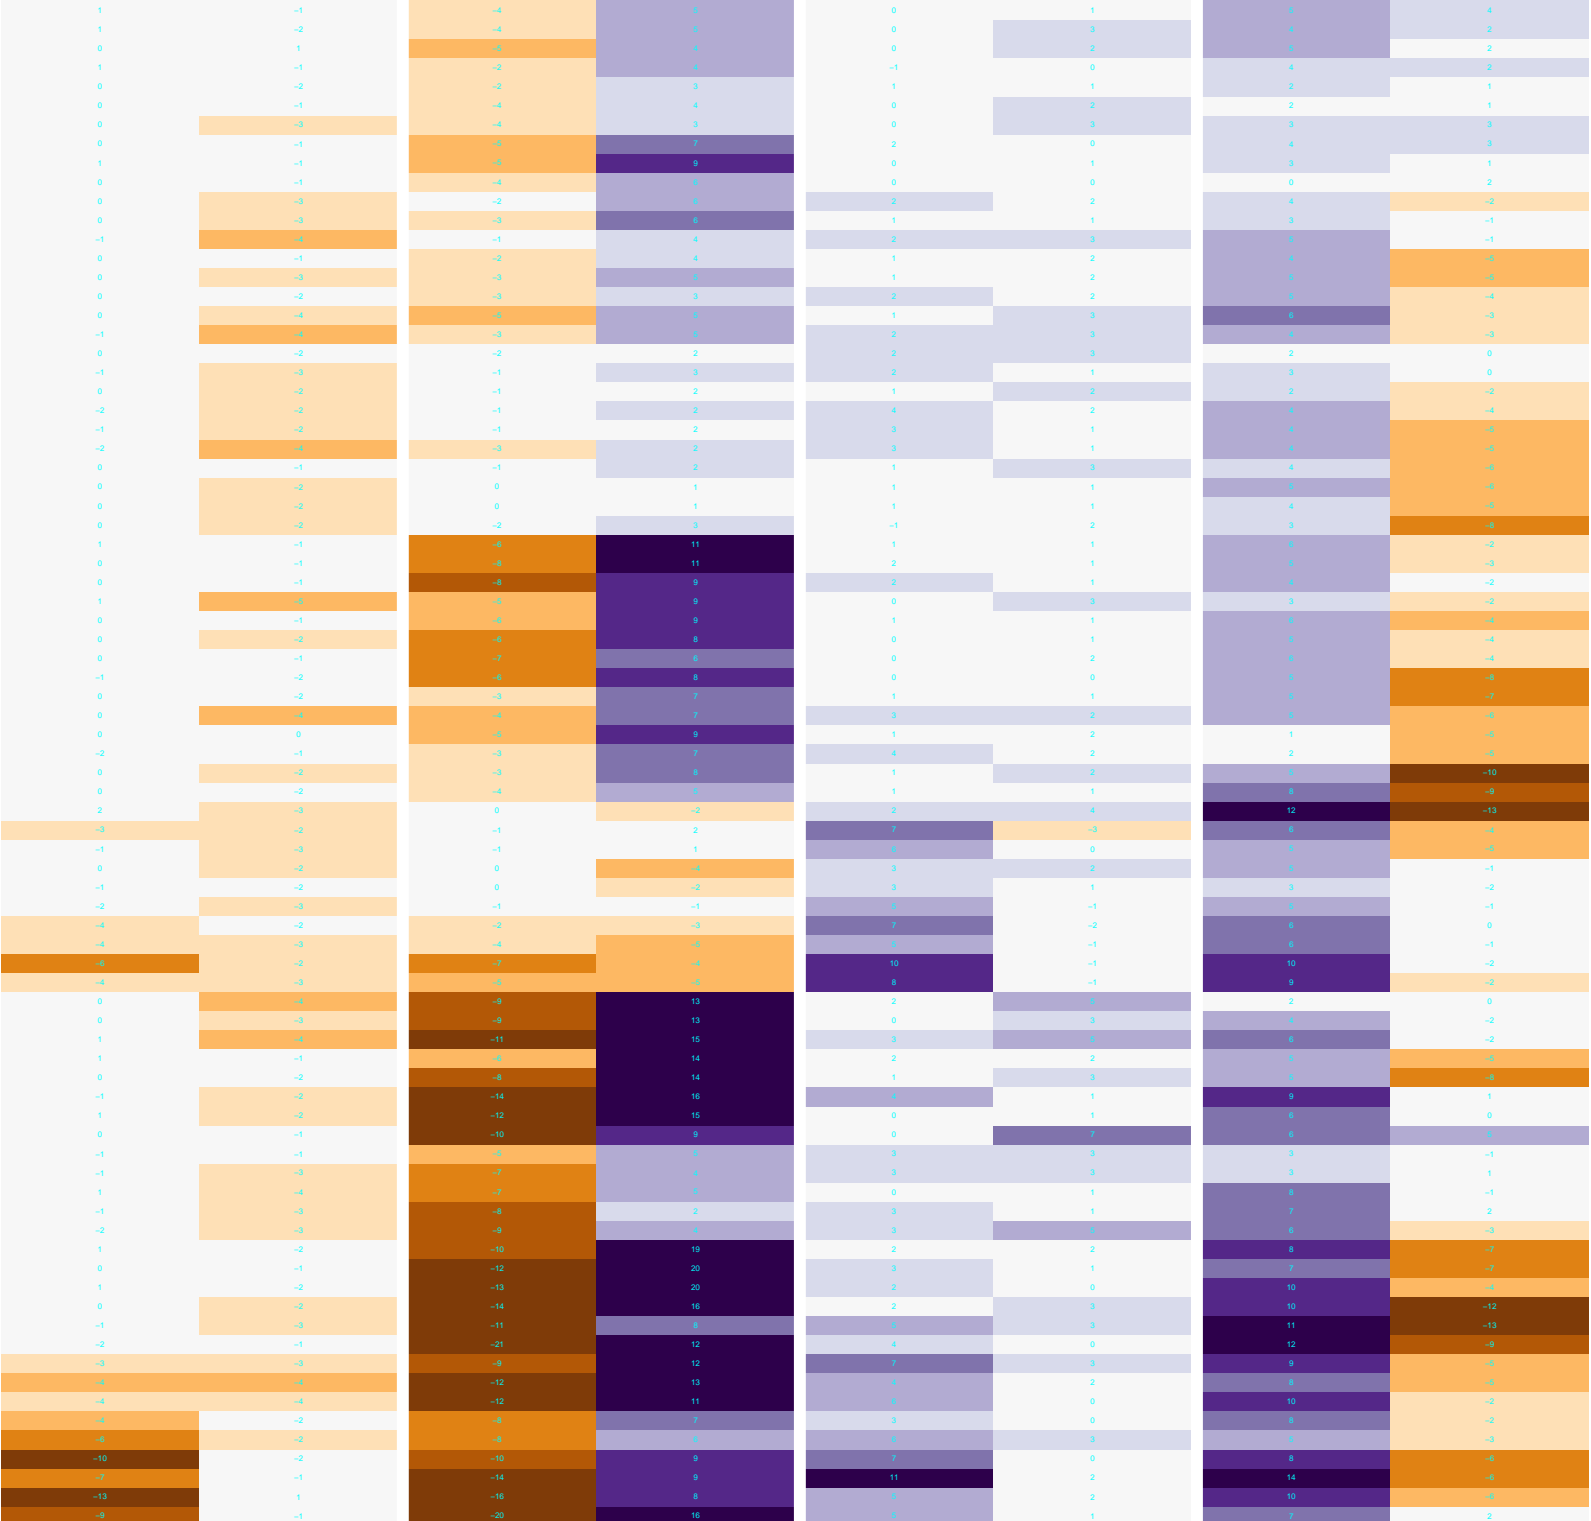

Gene Name

Type of Media

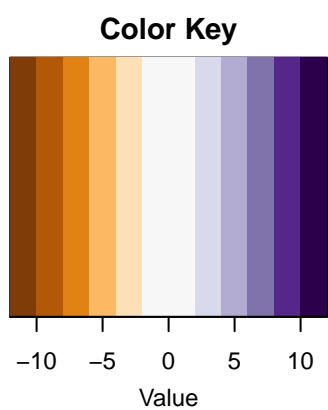

**1-0-12**

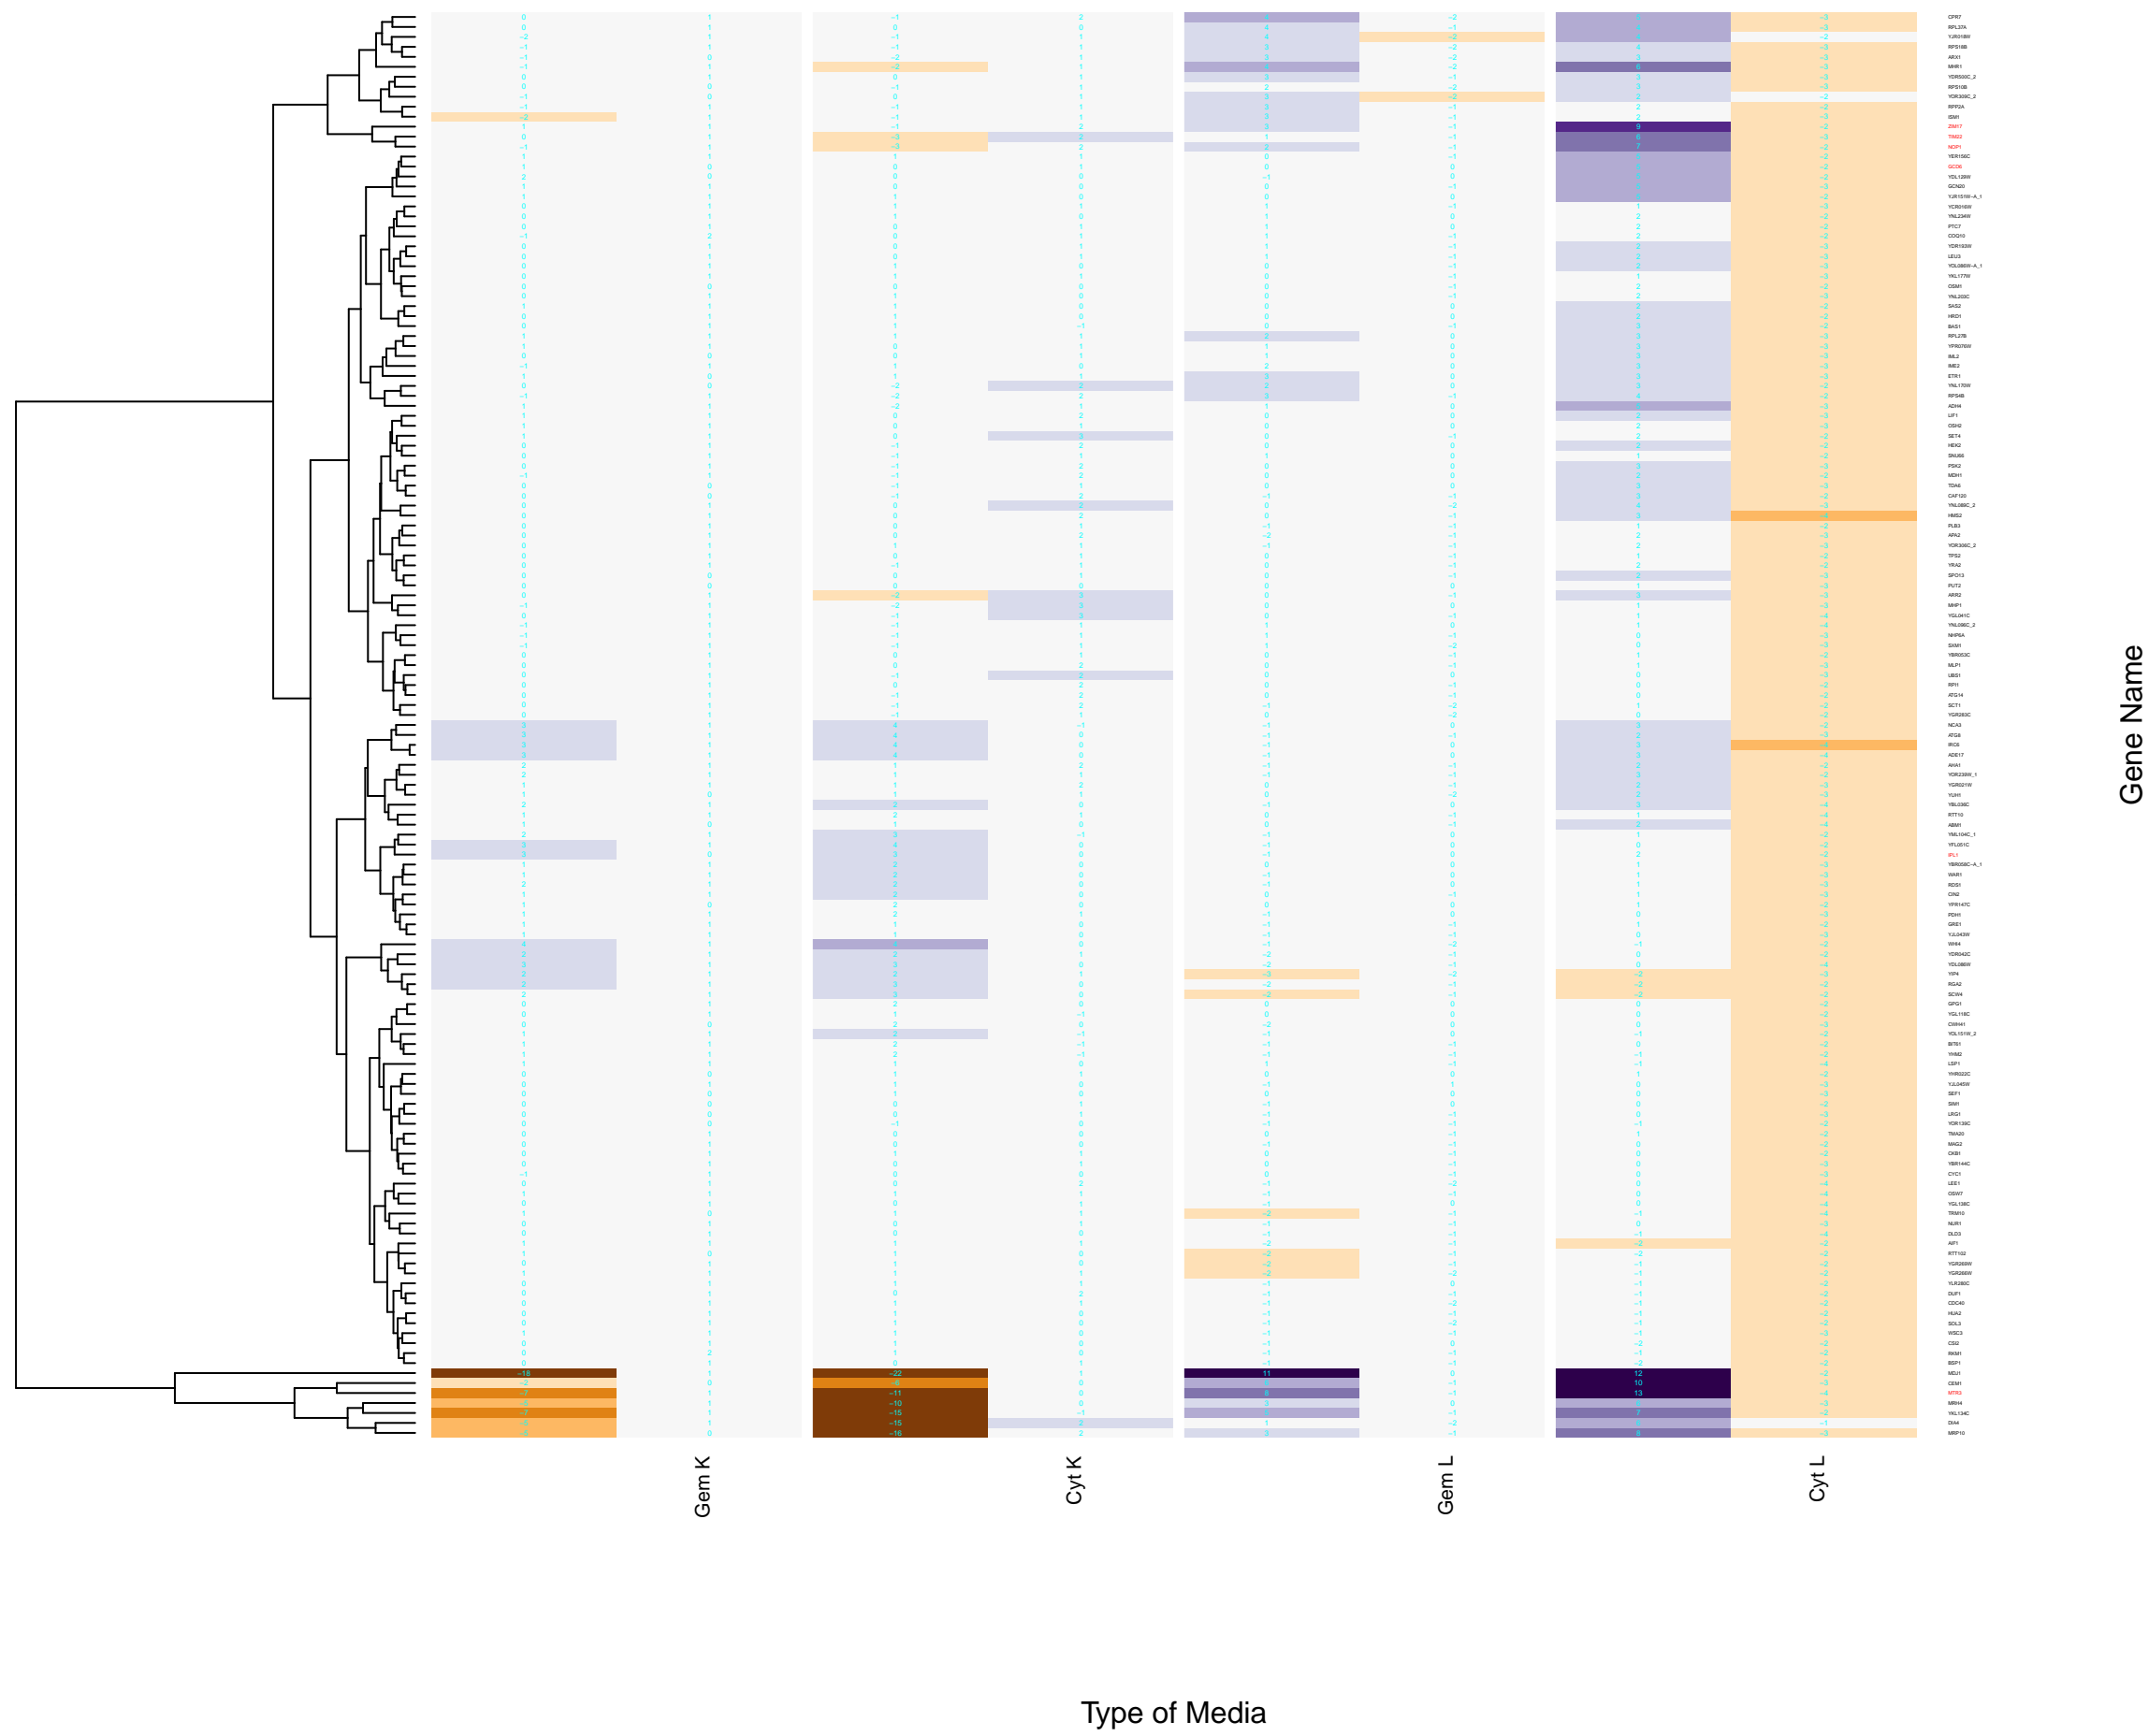

1-0-13

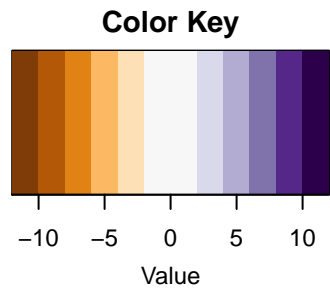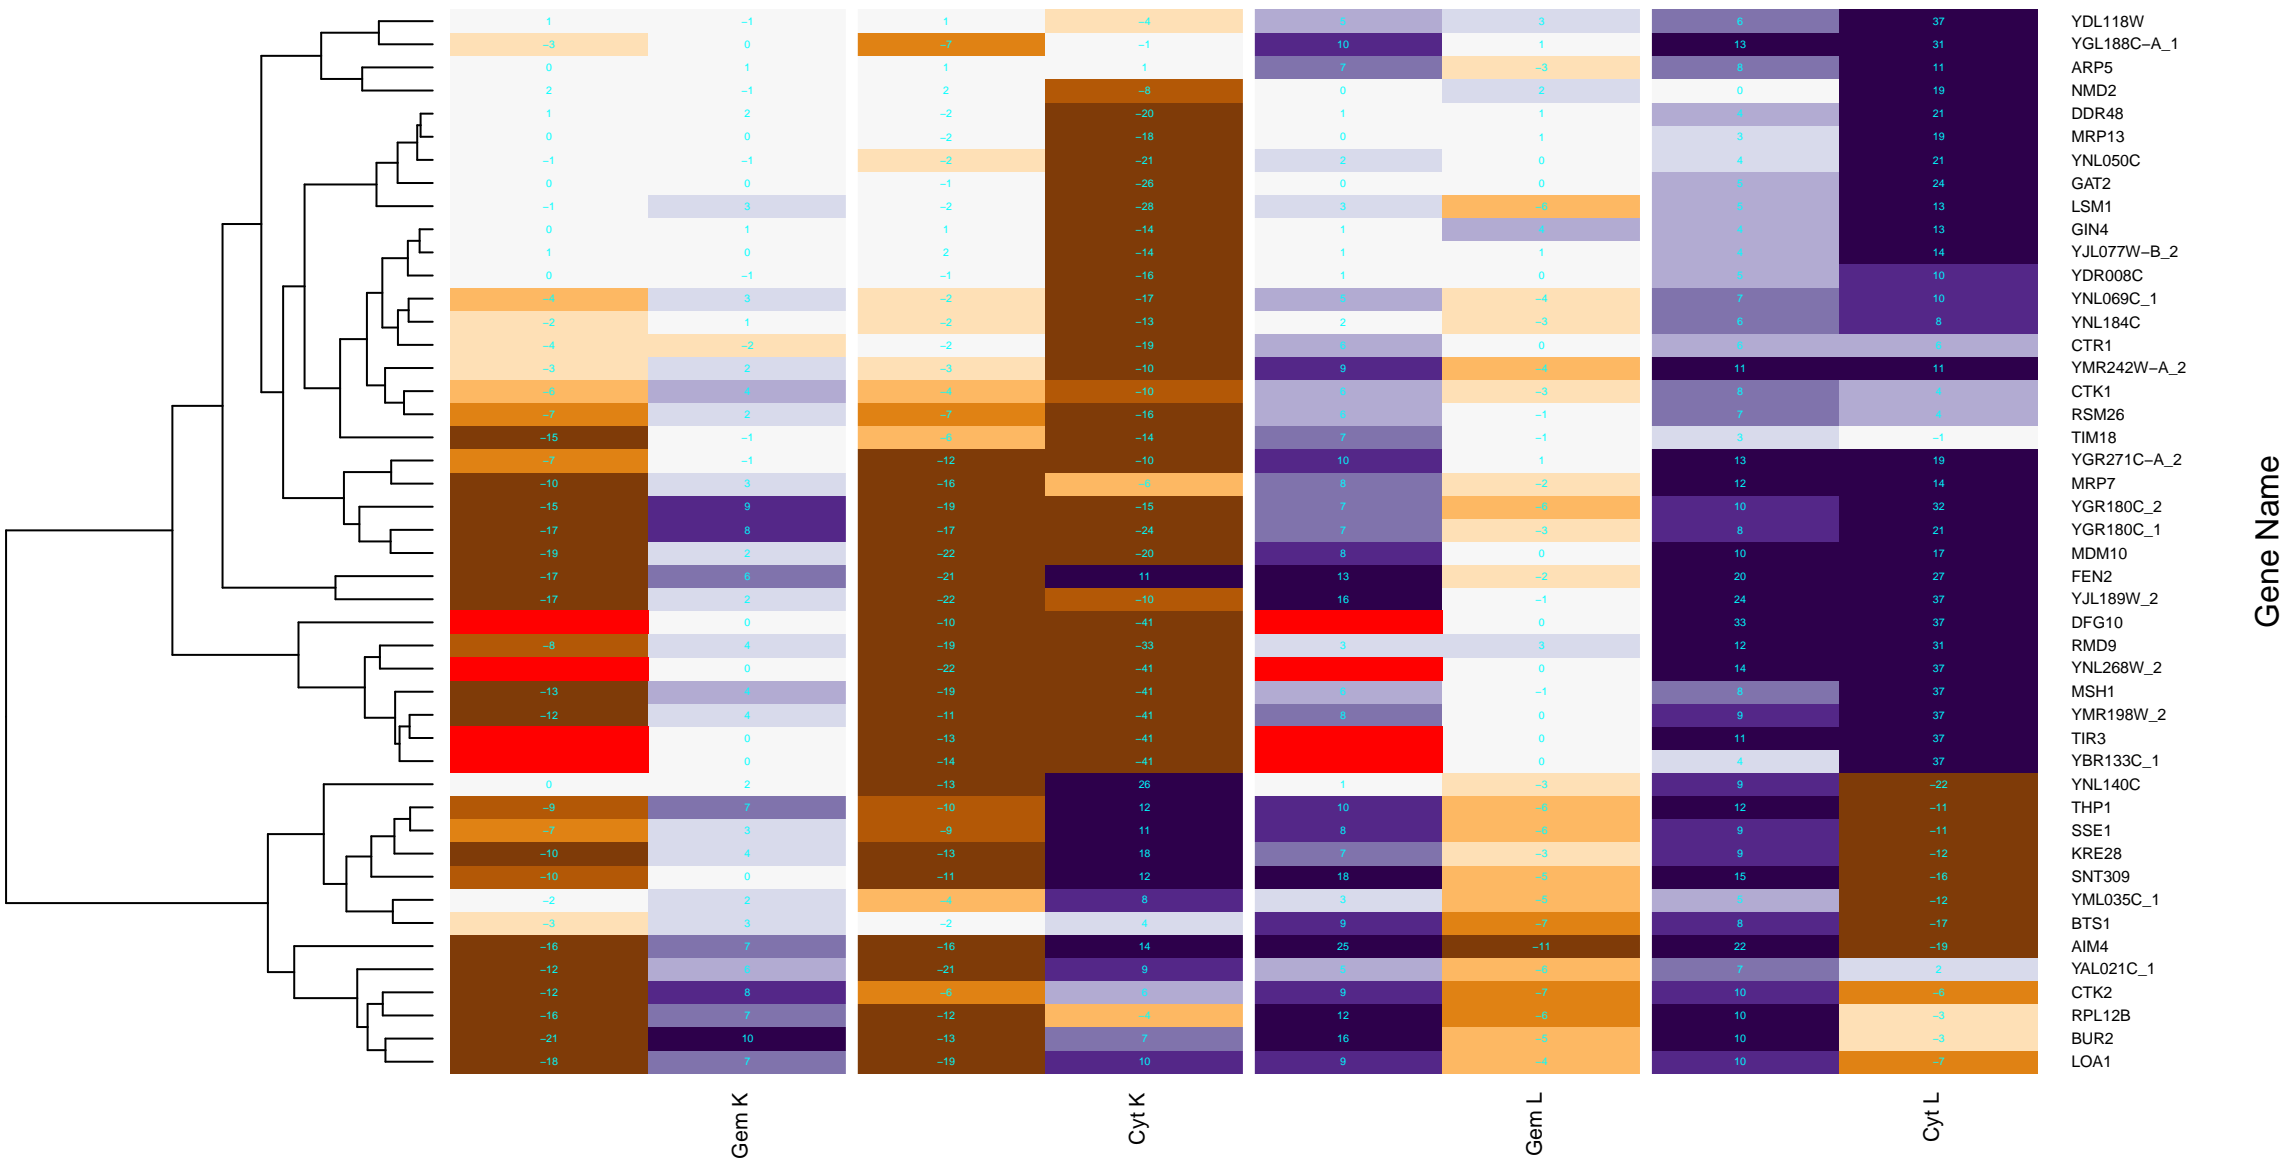

1-0-14

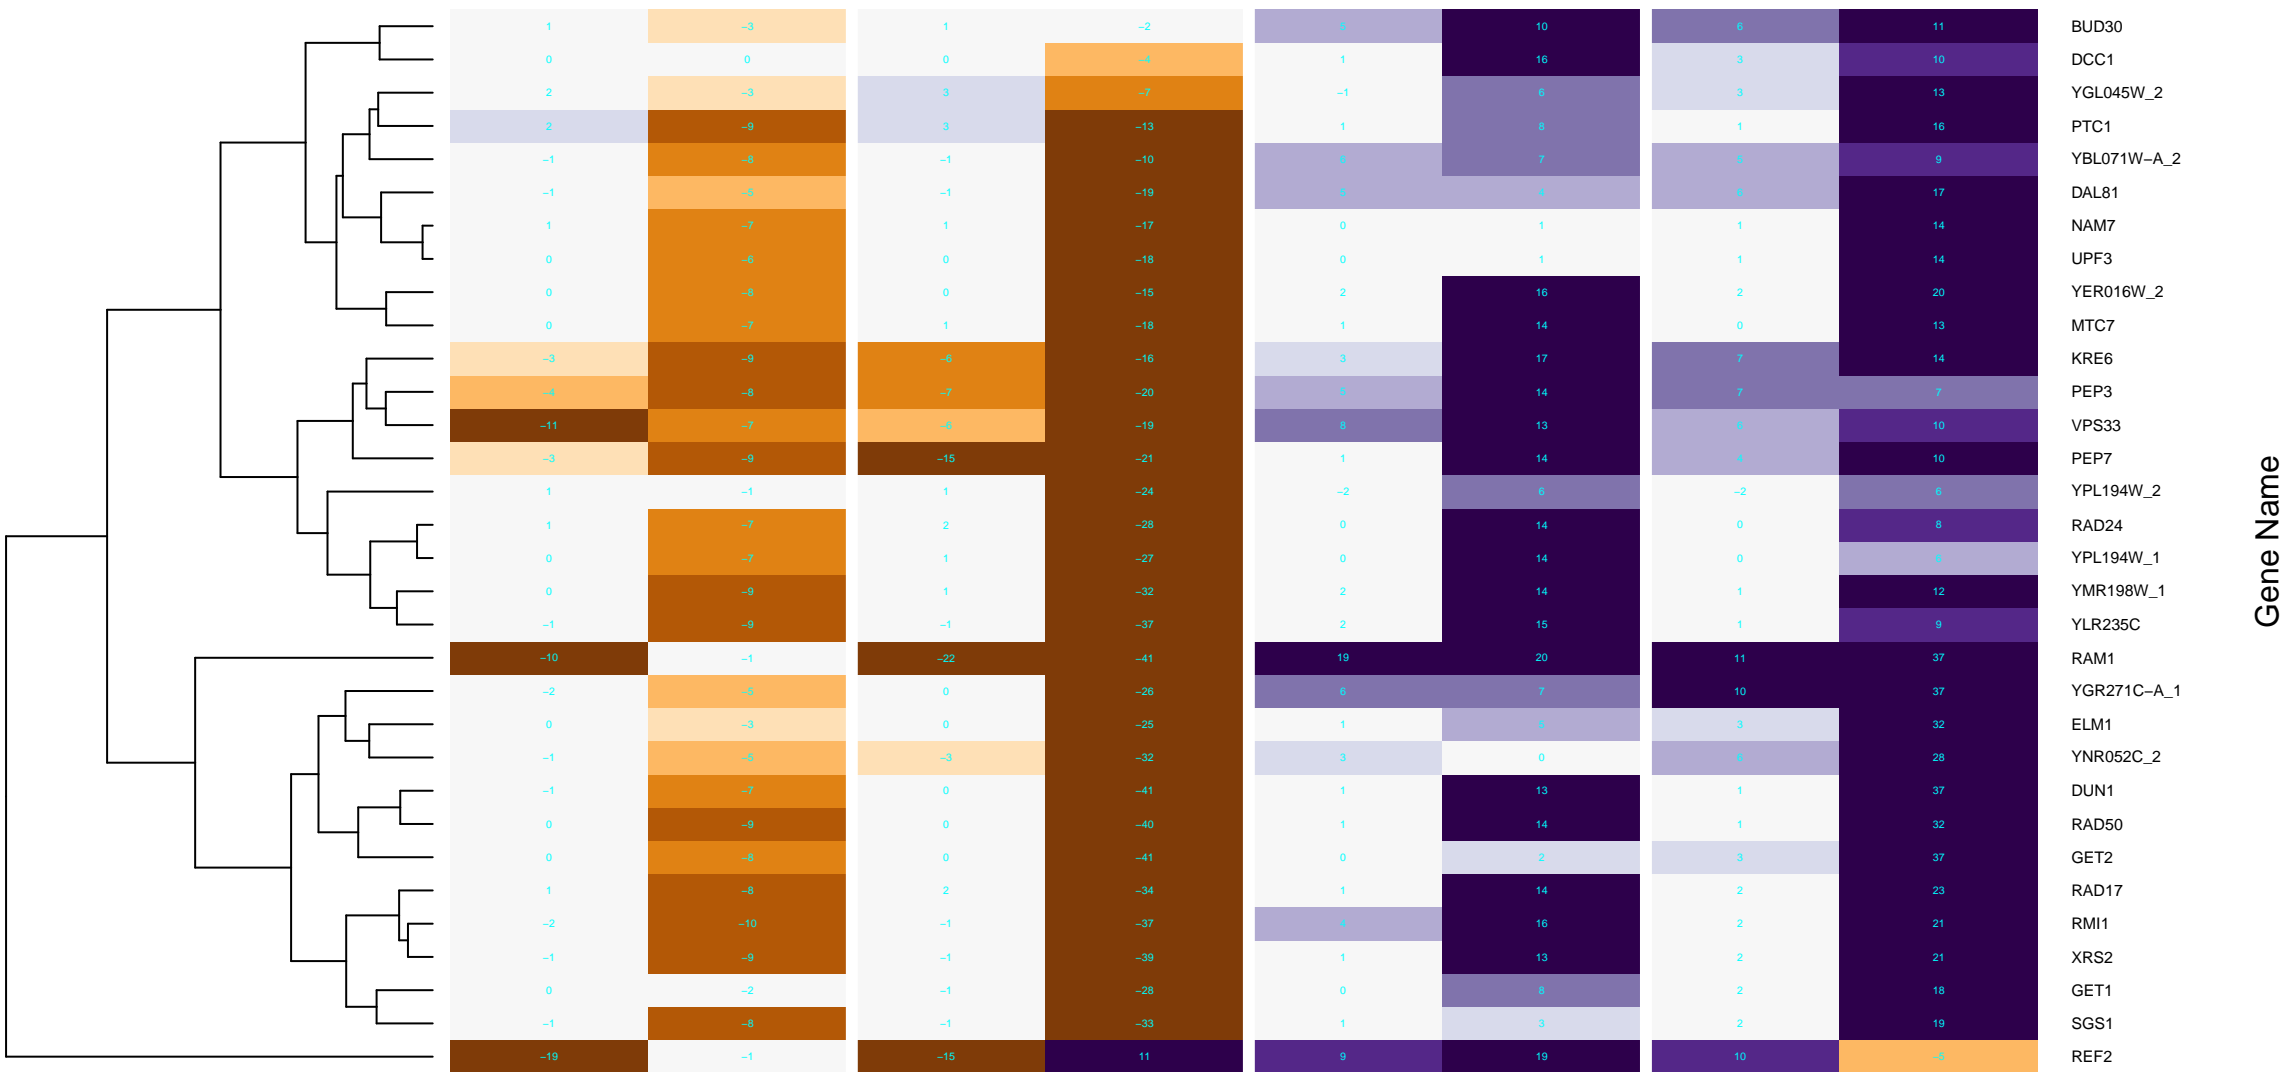

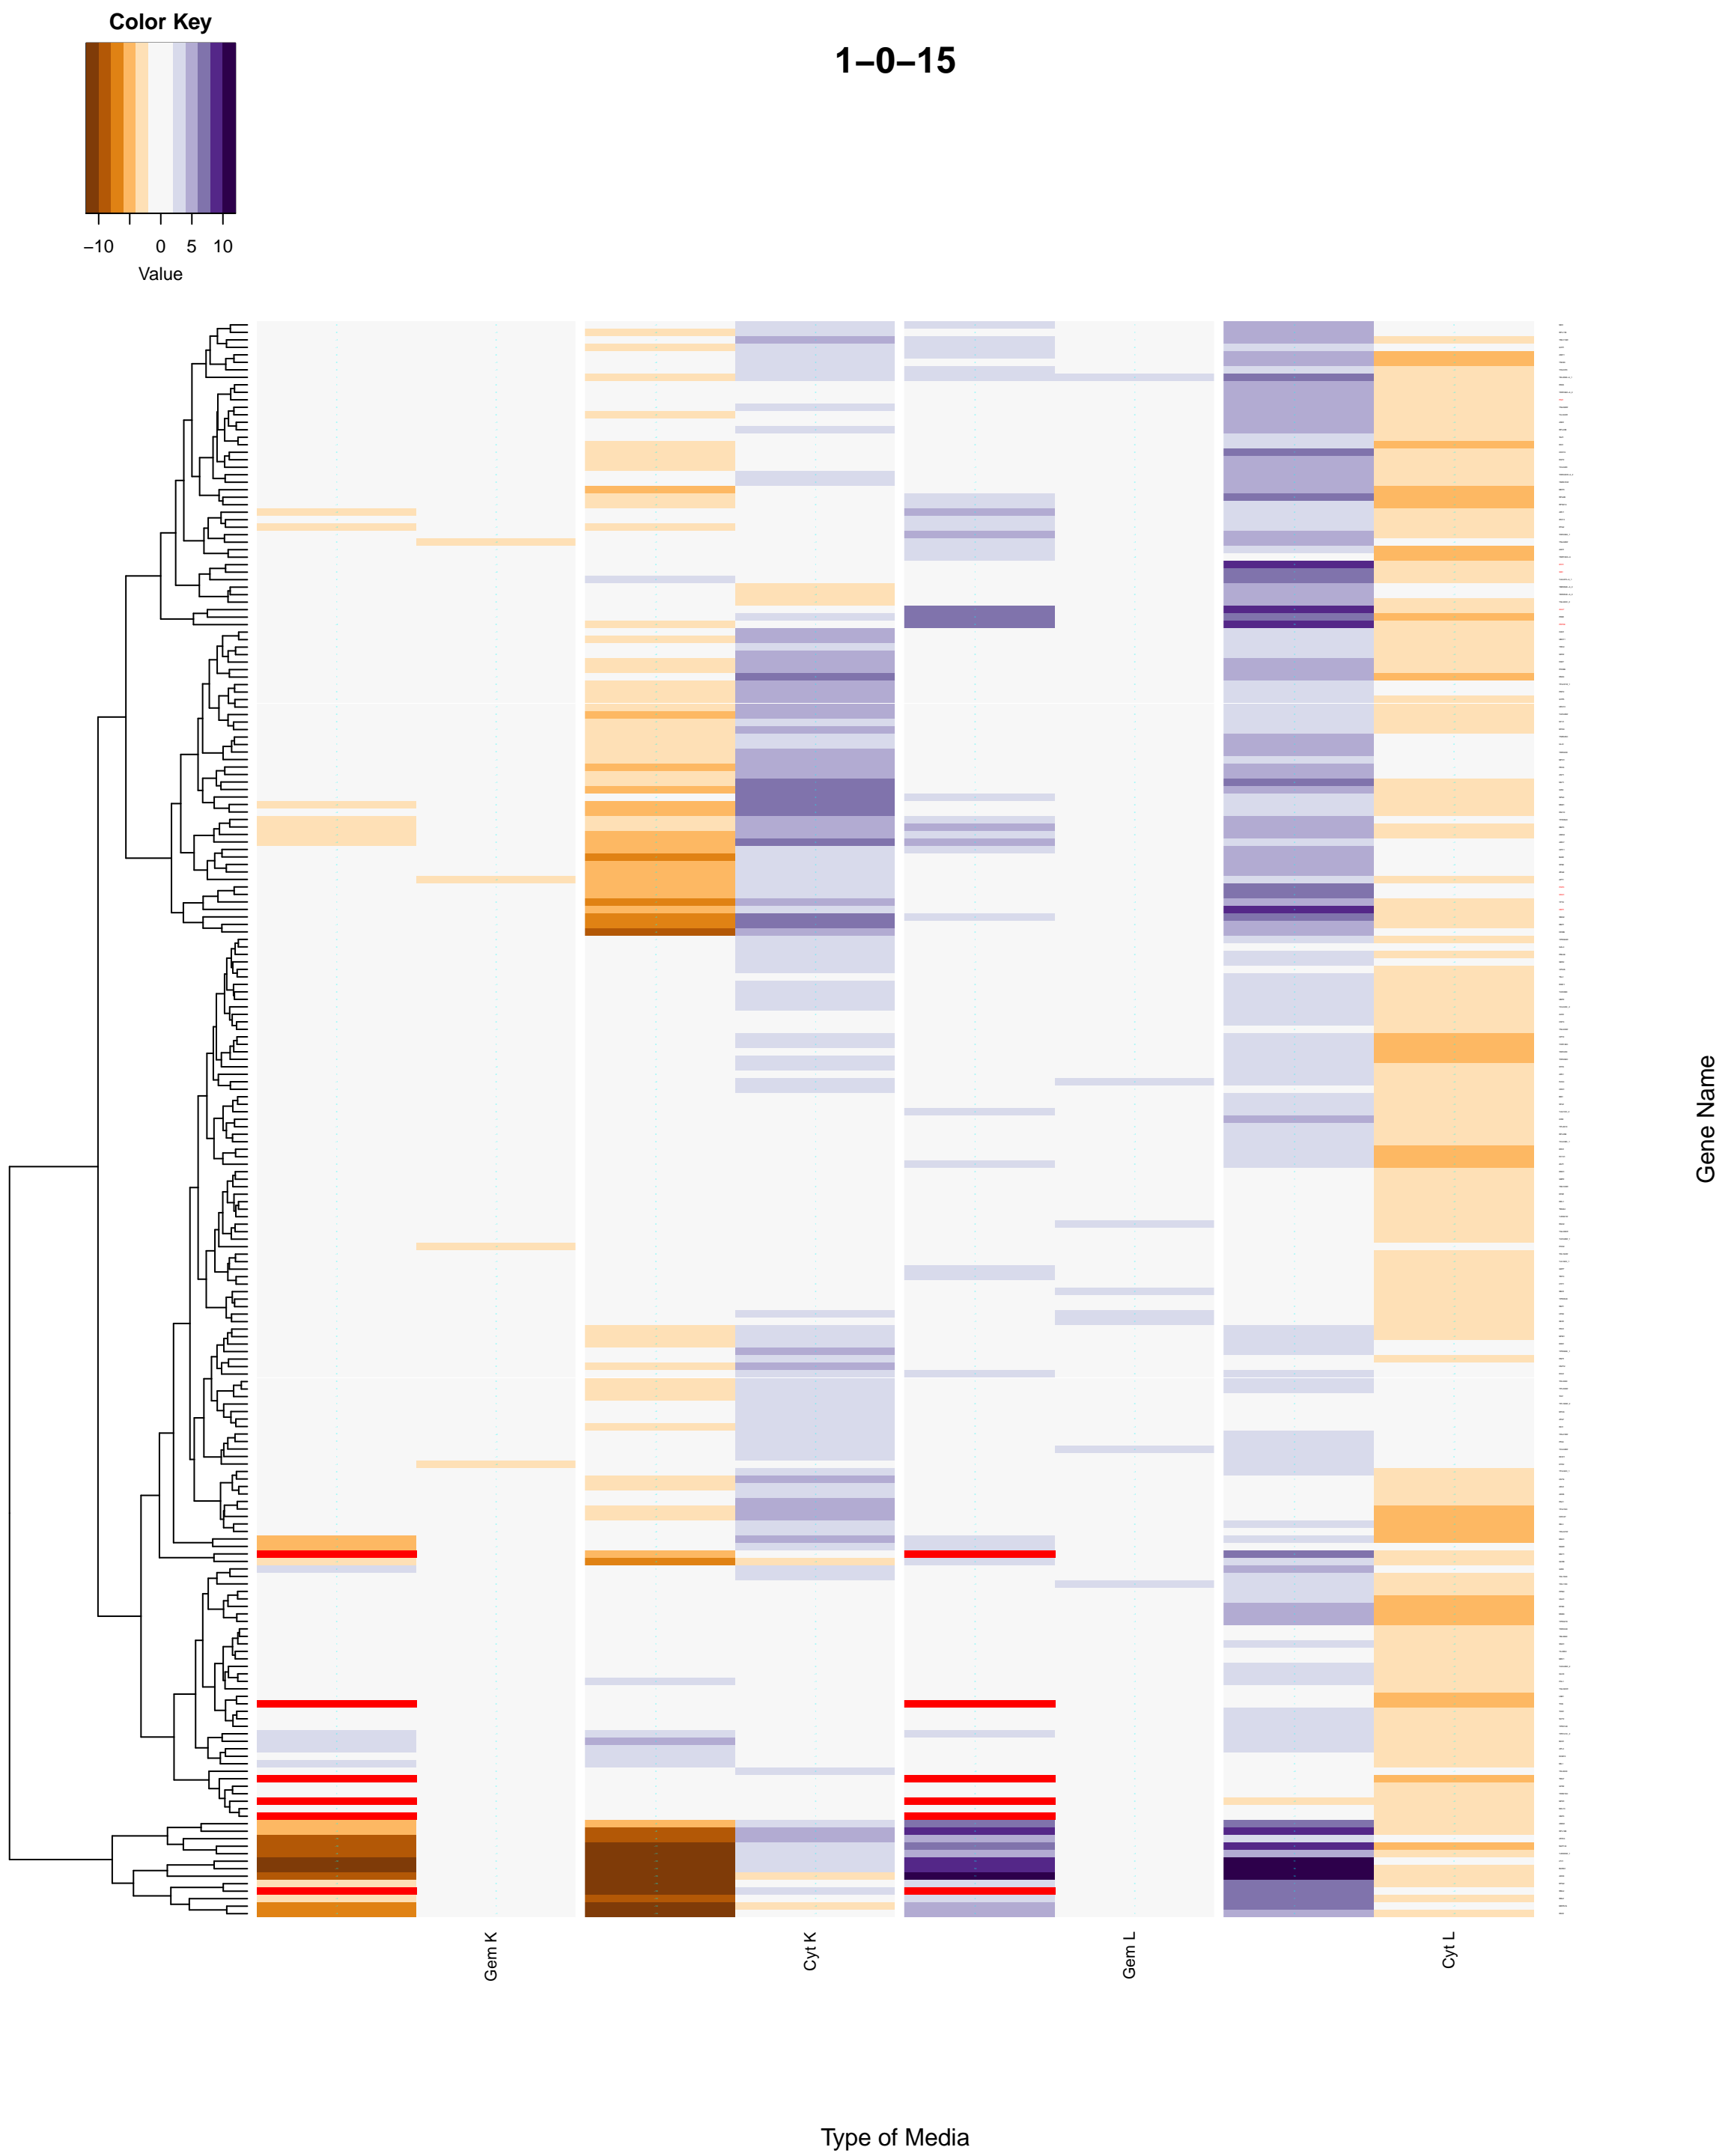



**1-0-16**

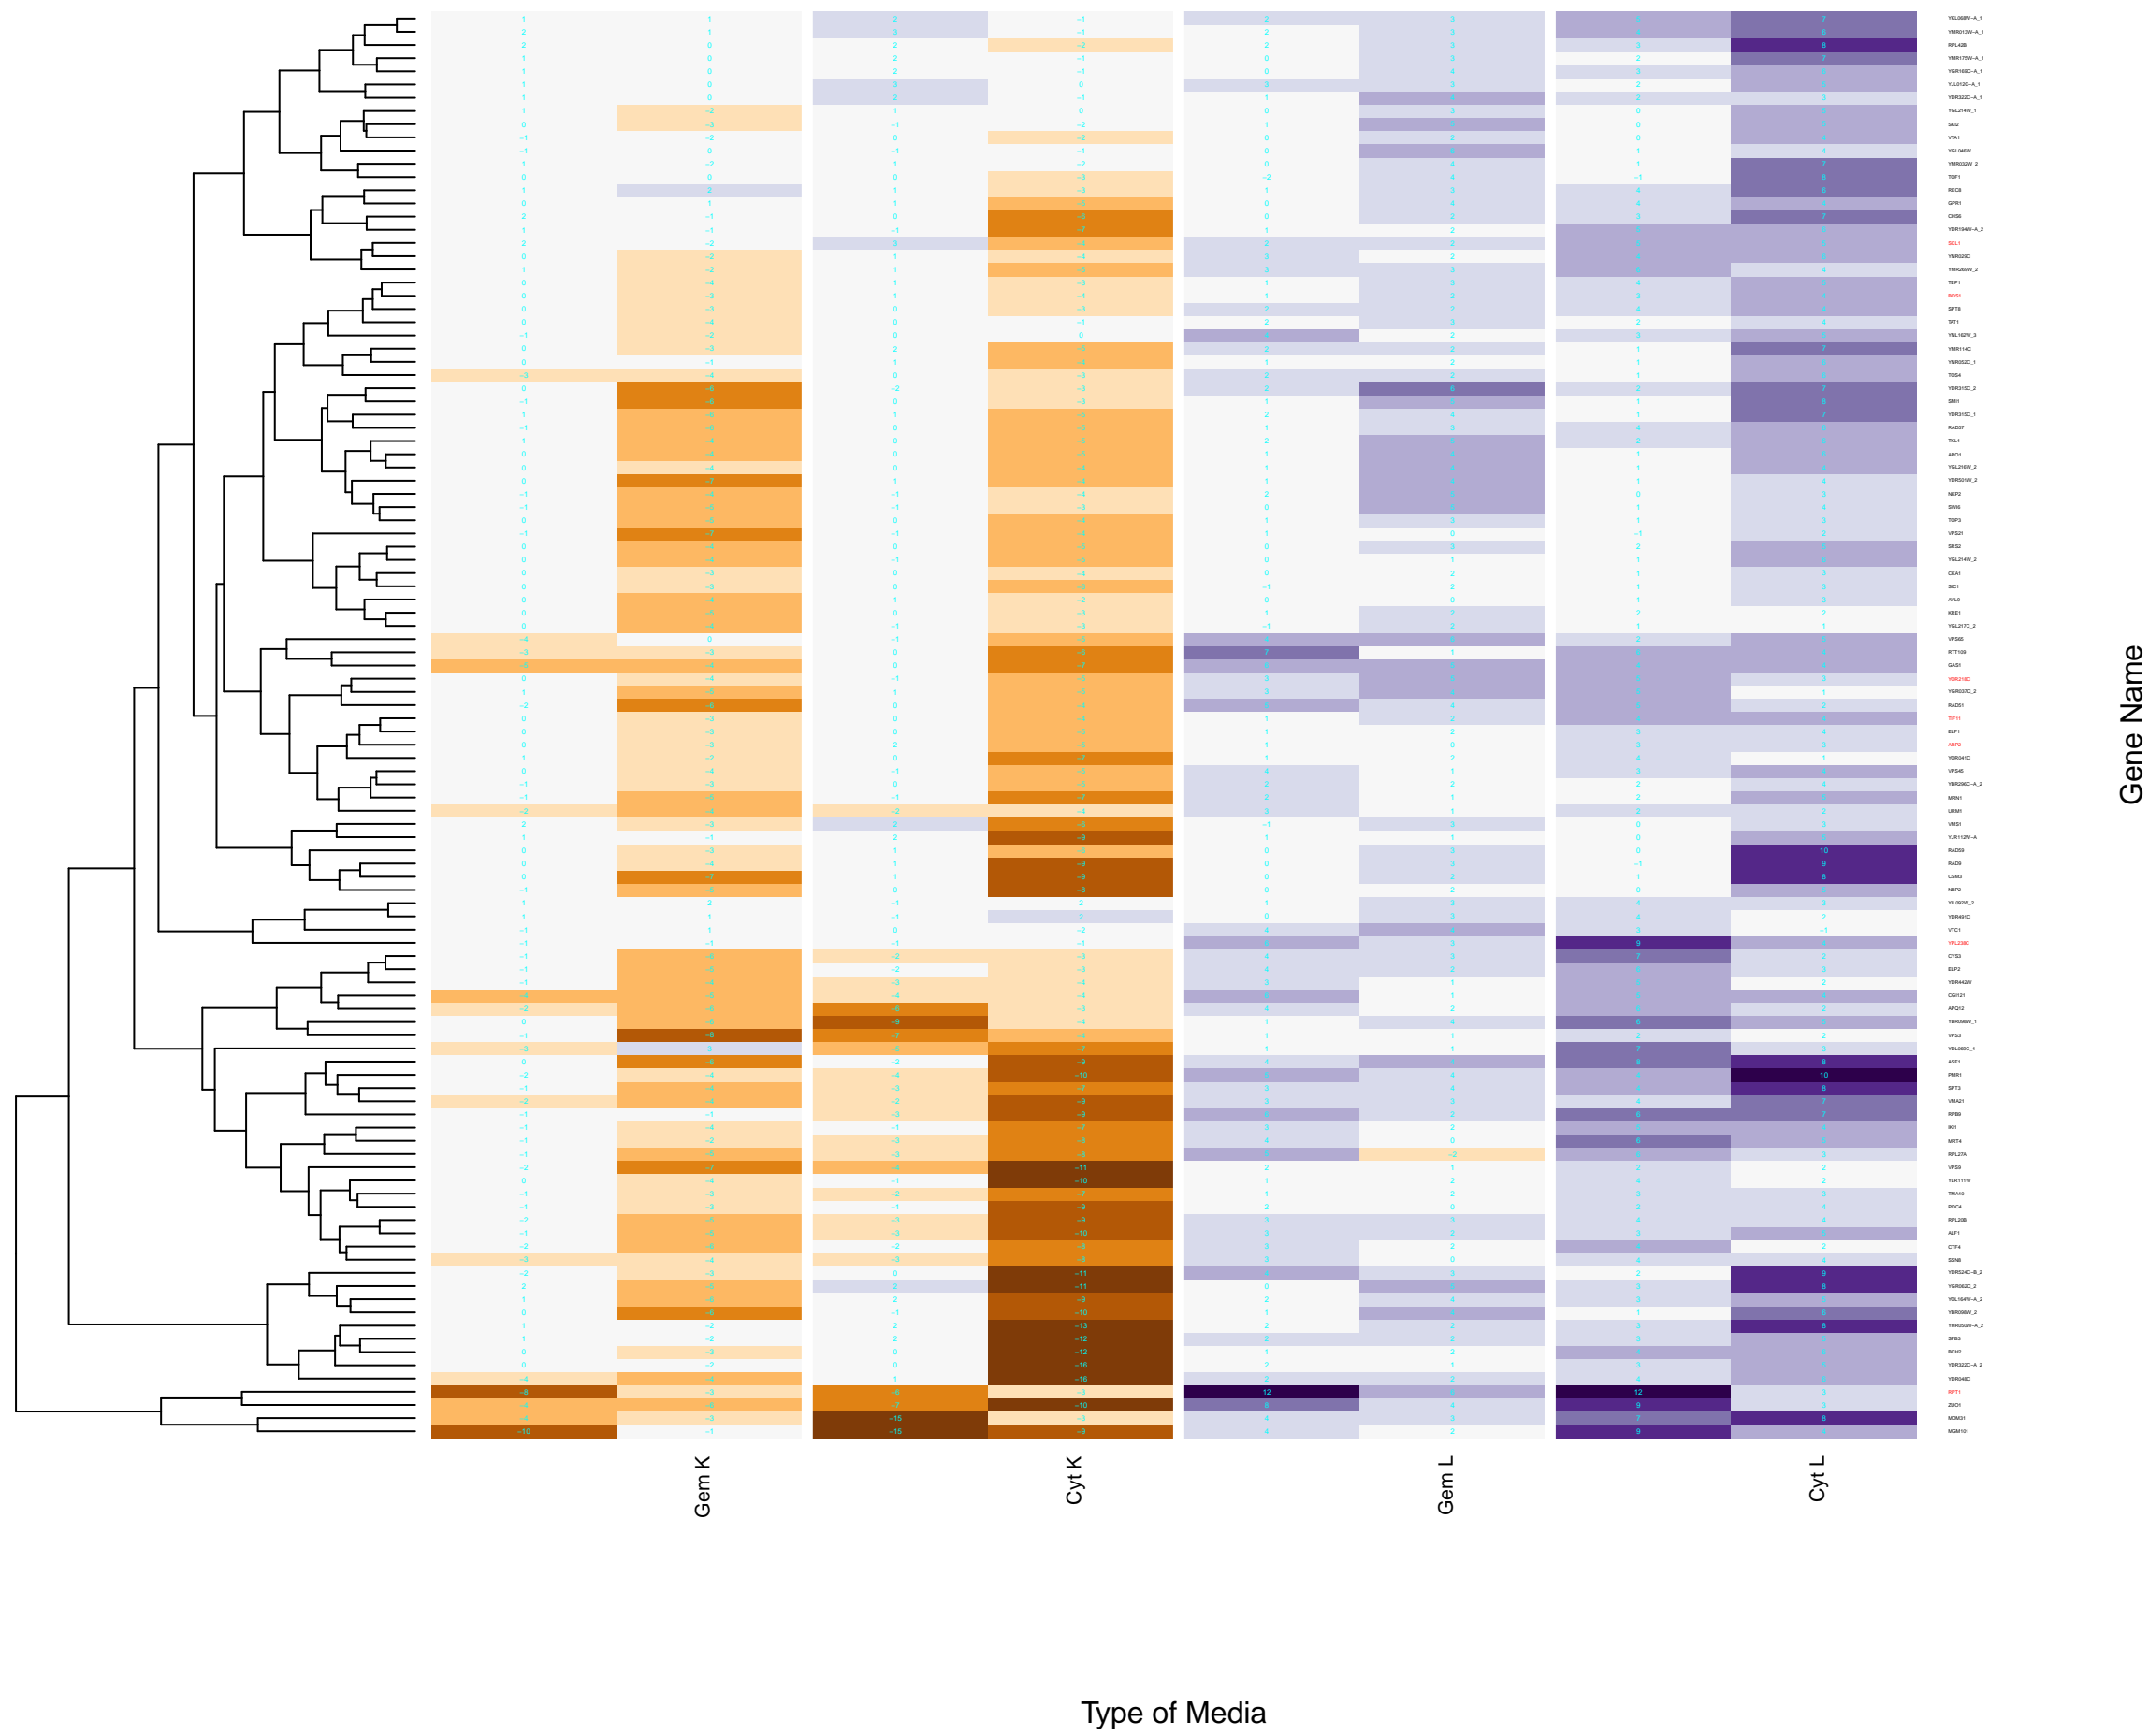

1-0-17

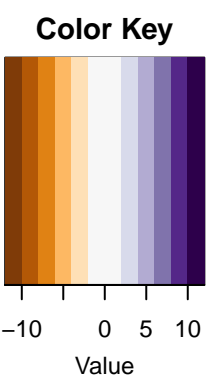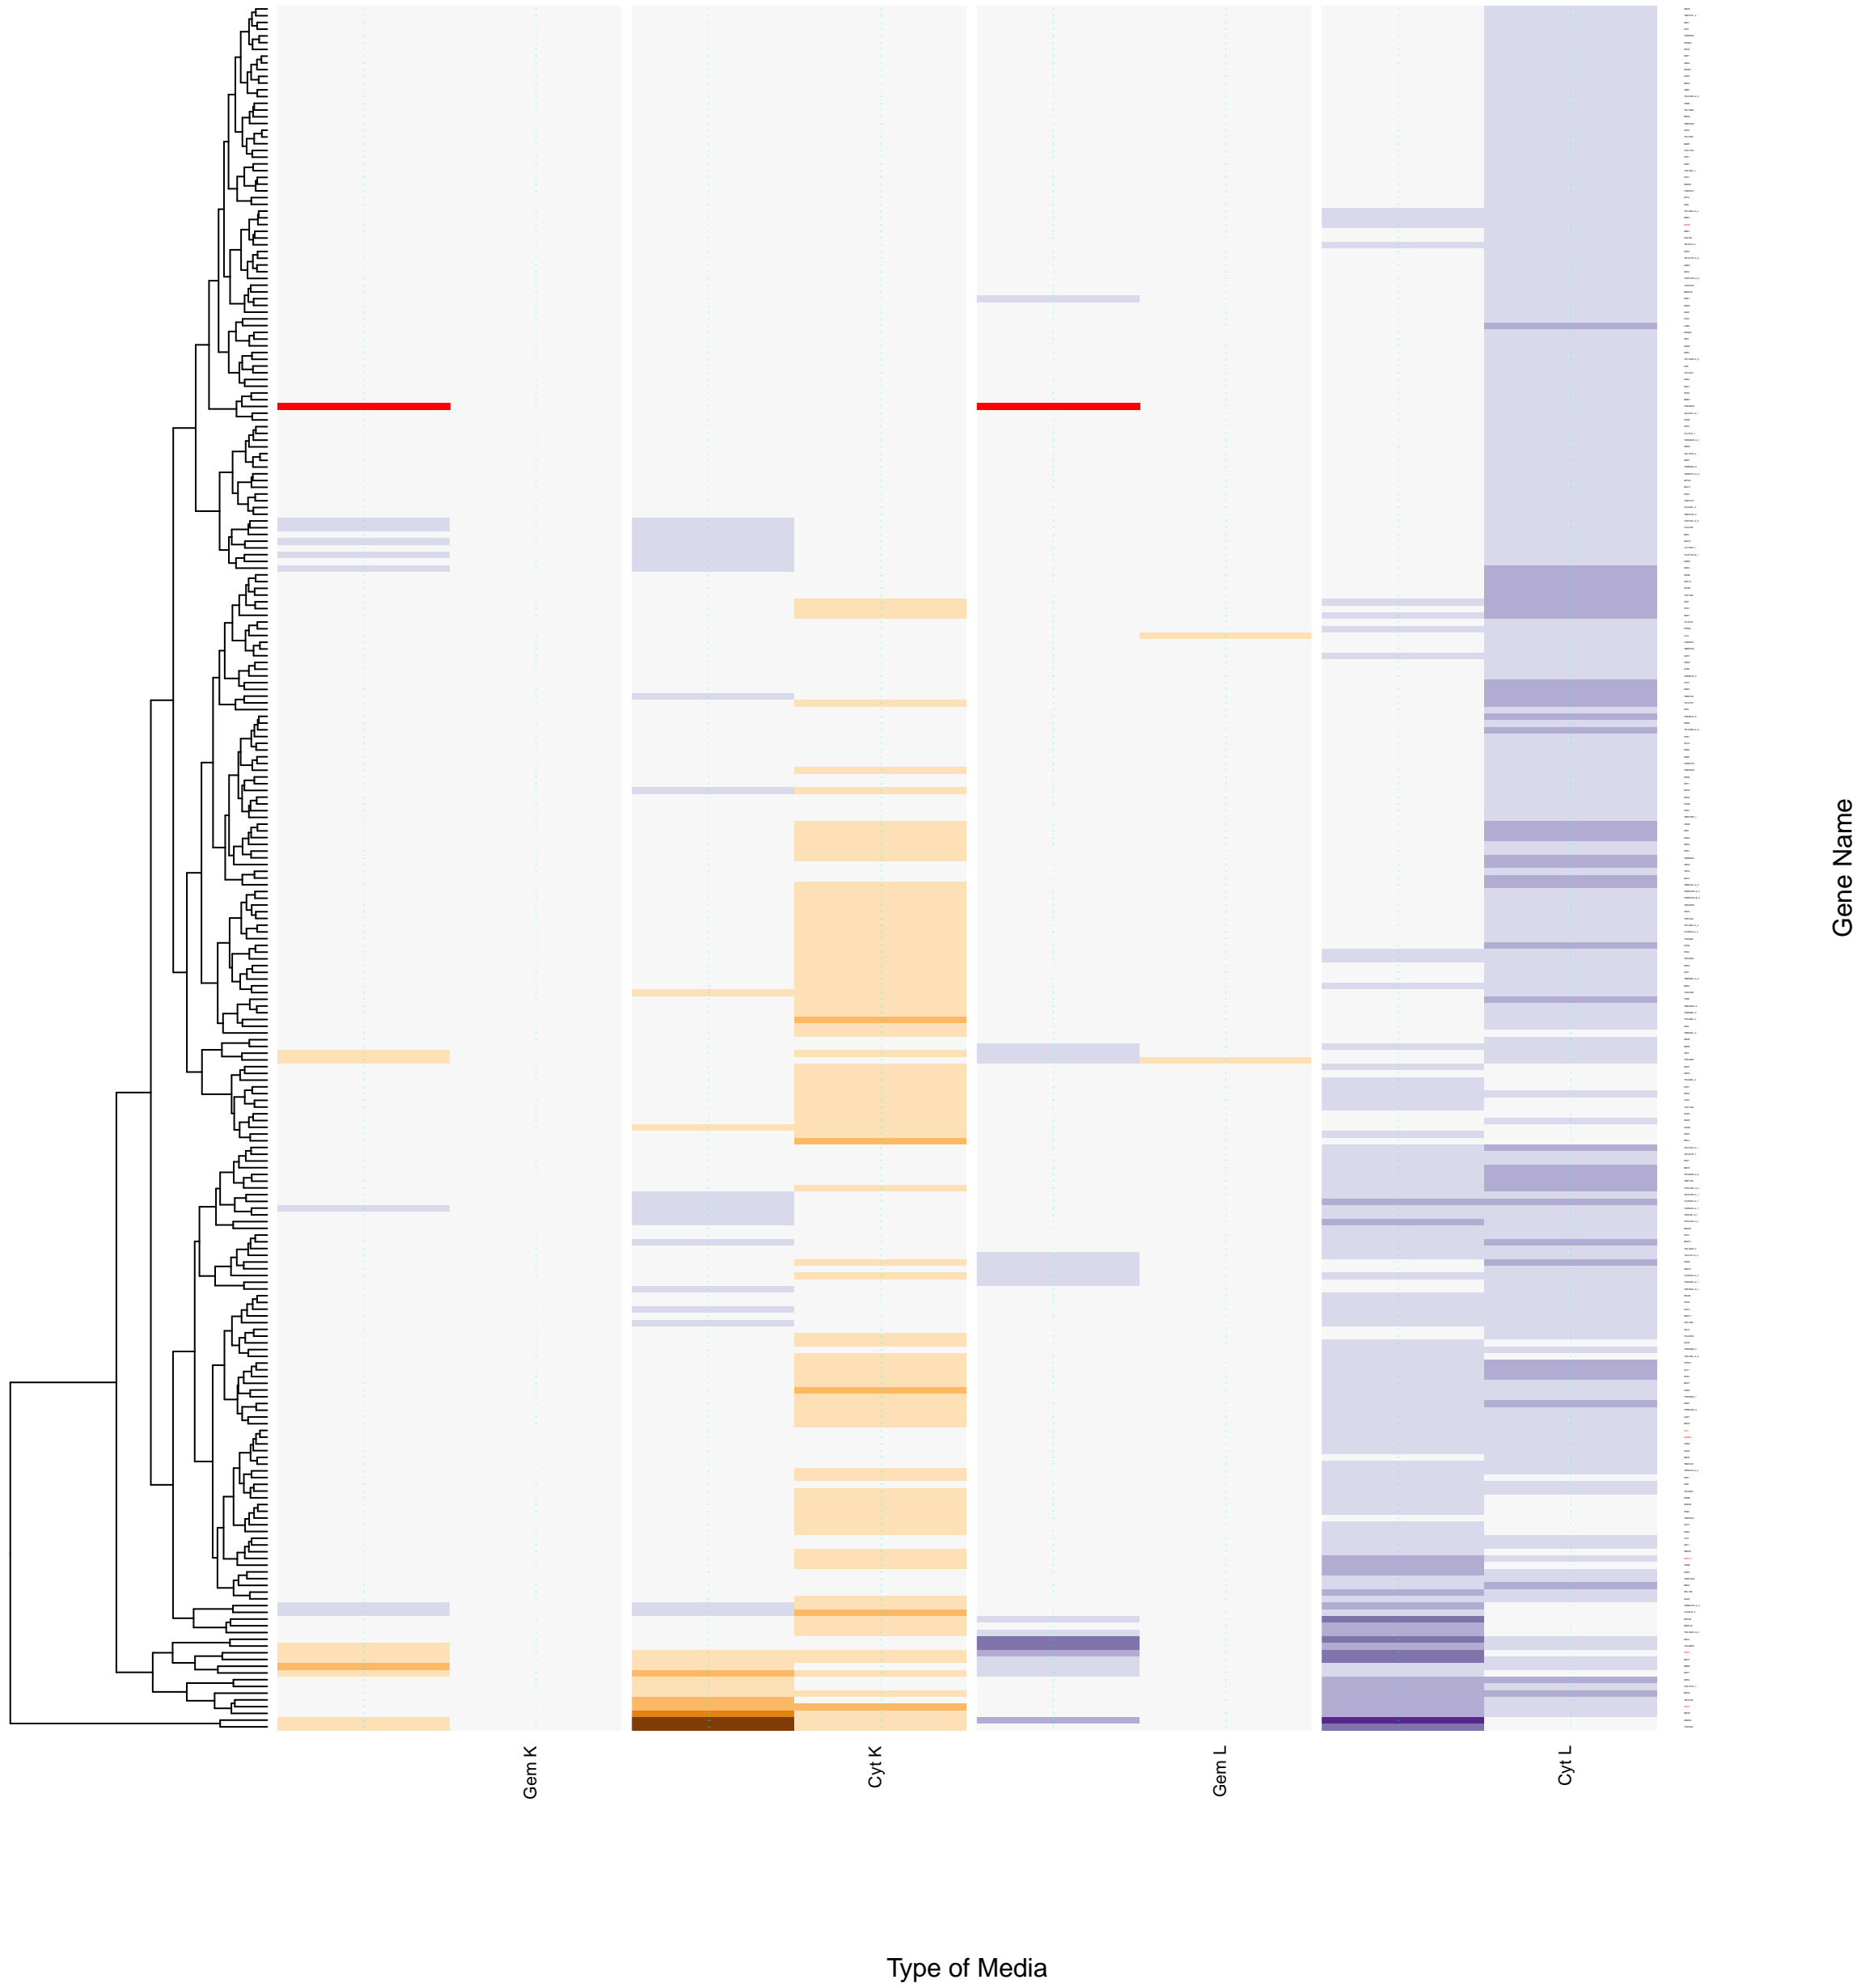

1-0-2

Color Key

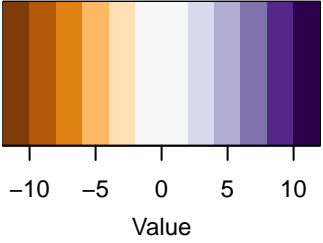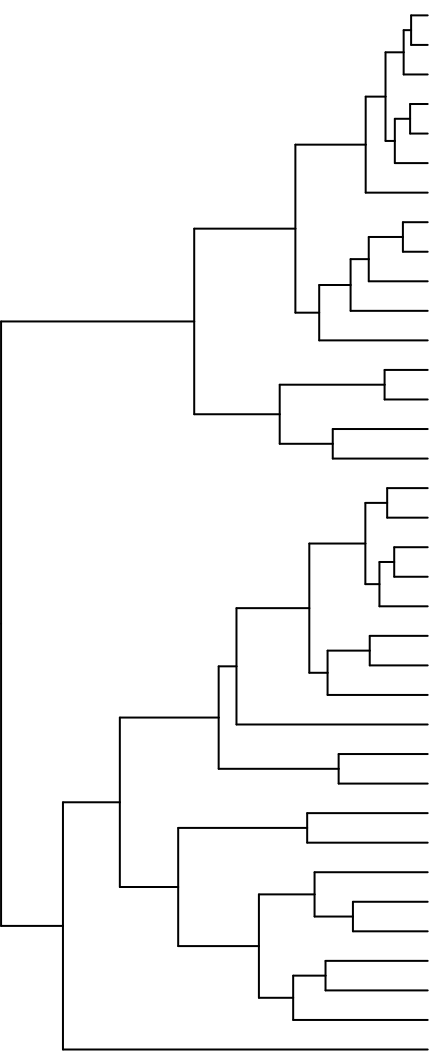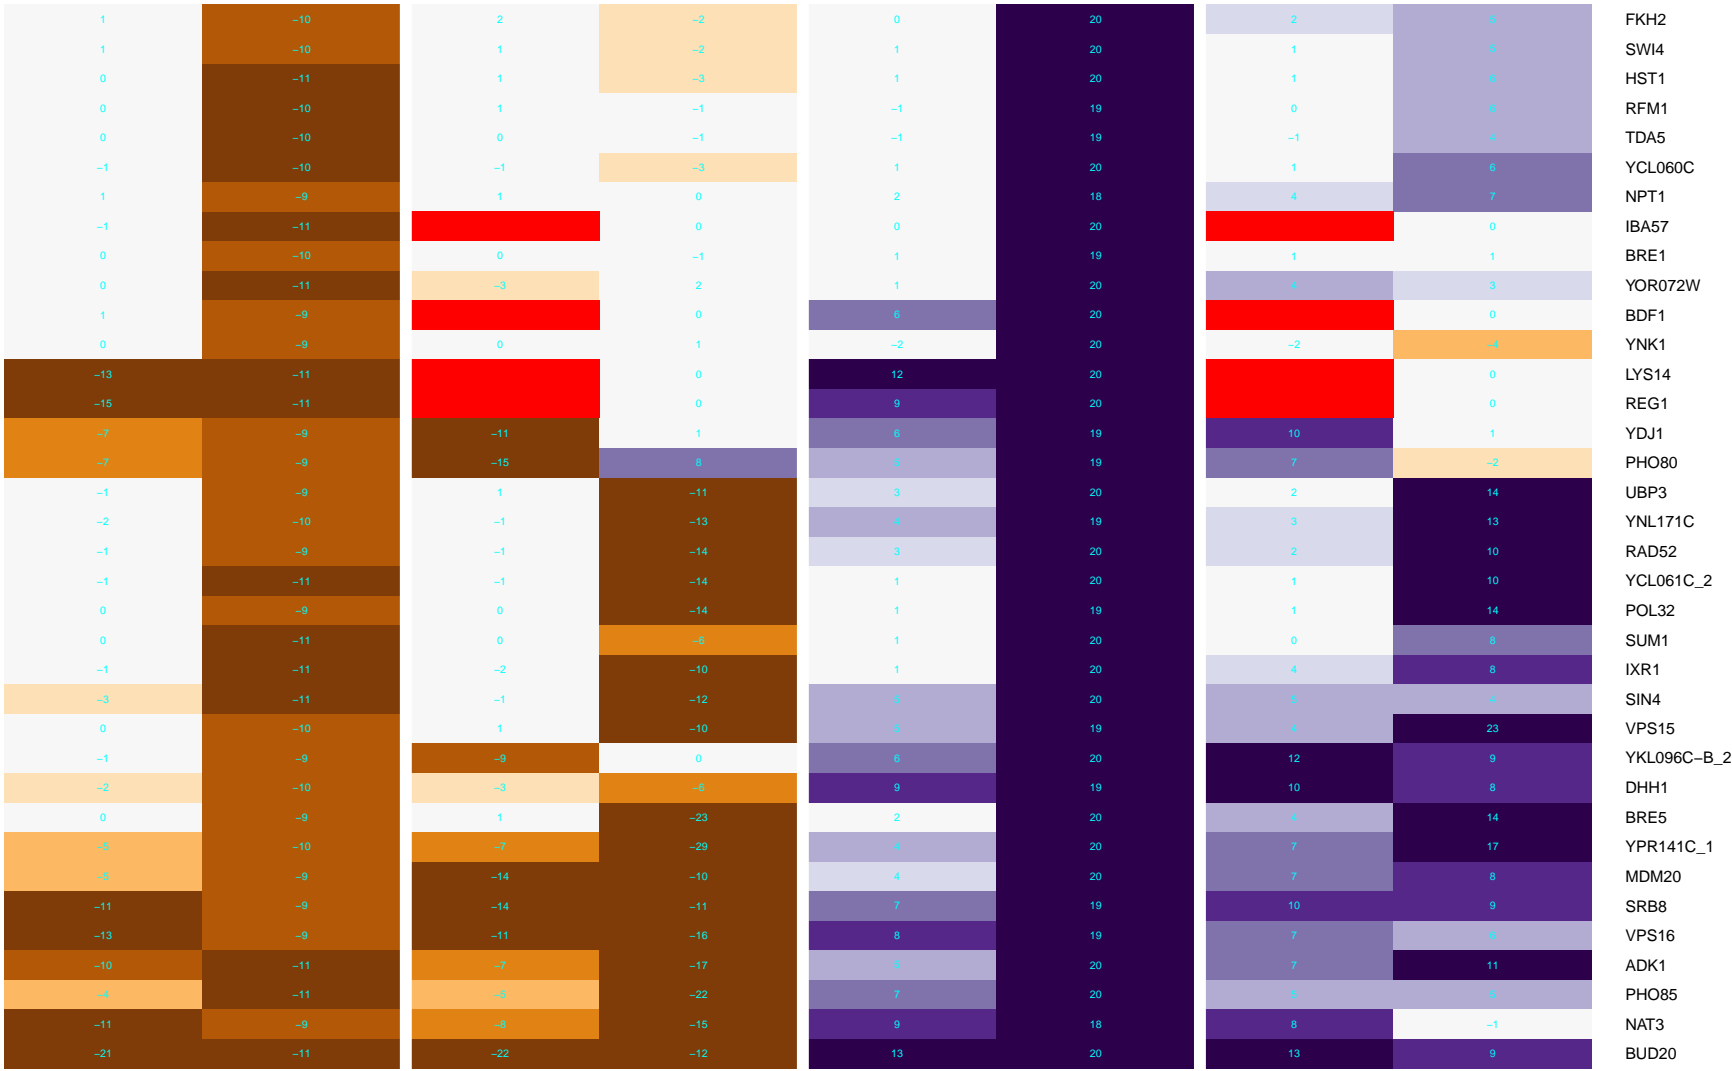

Gem K

Cyt K

Gem L

Cyt L

Gene Name

Type of Media

1-0-3

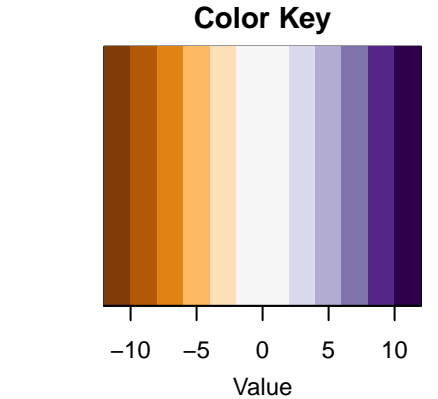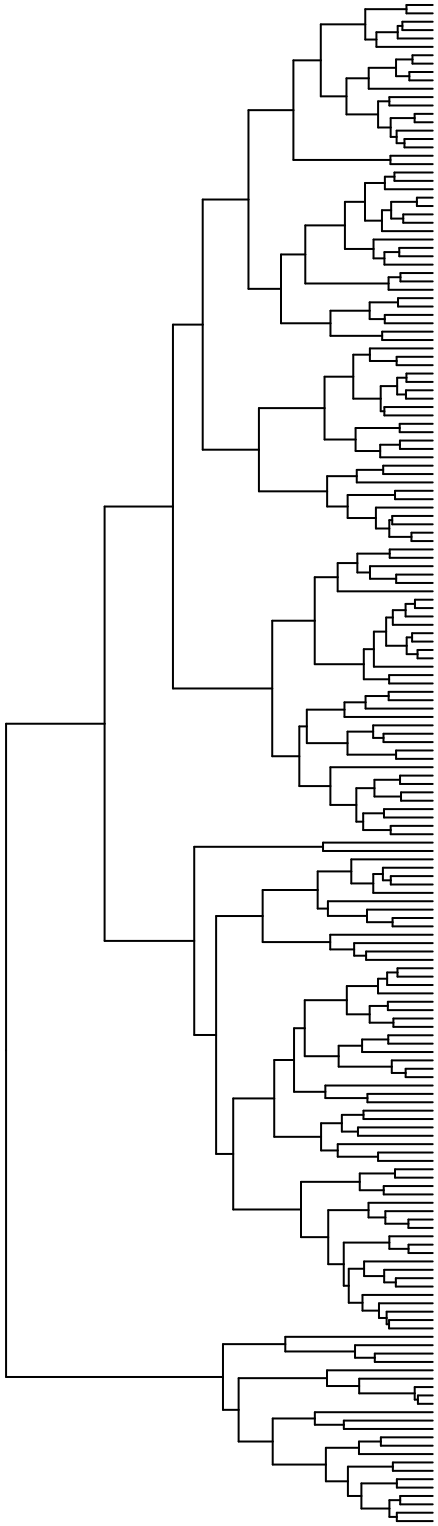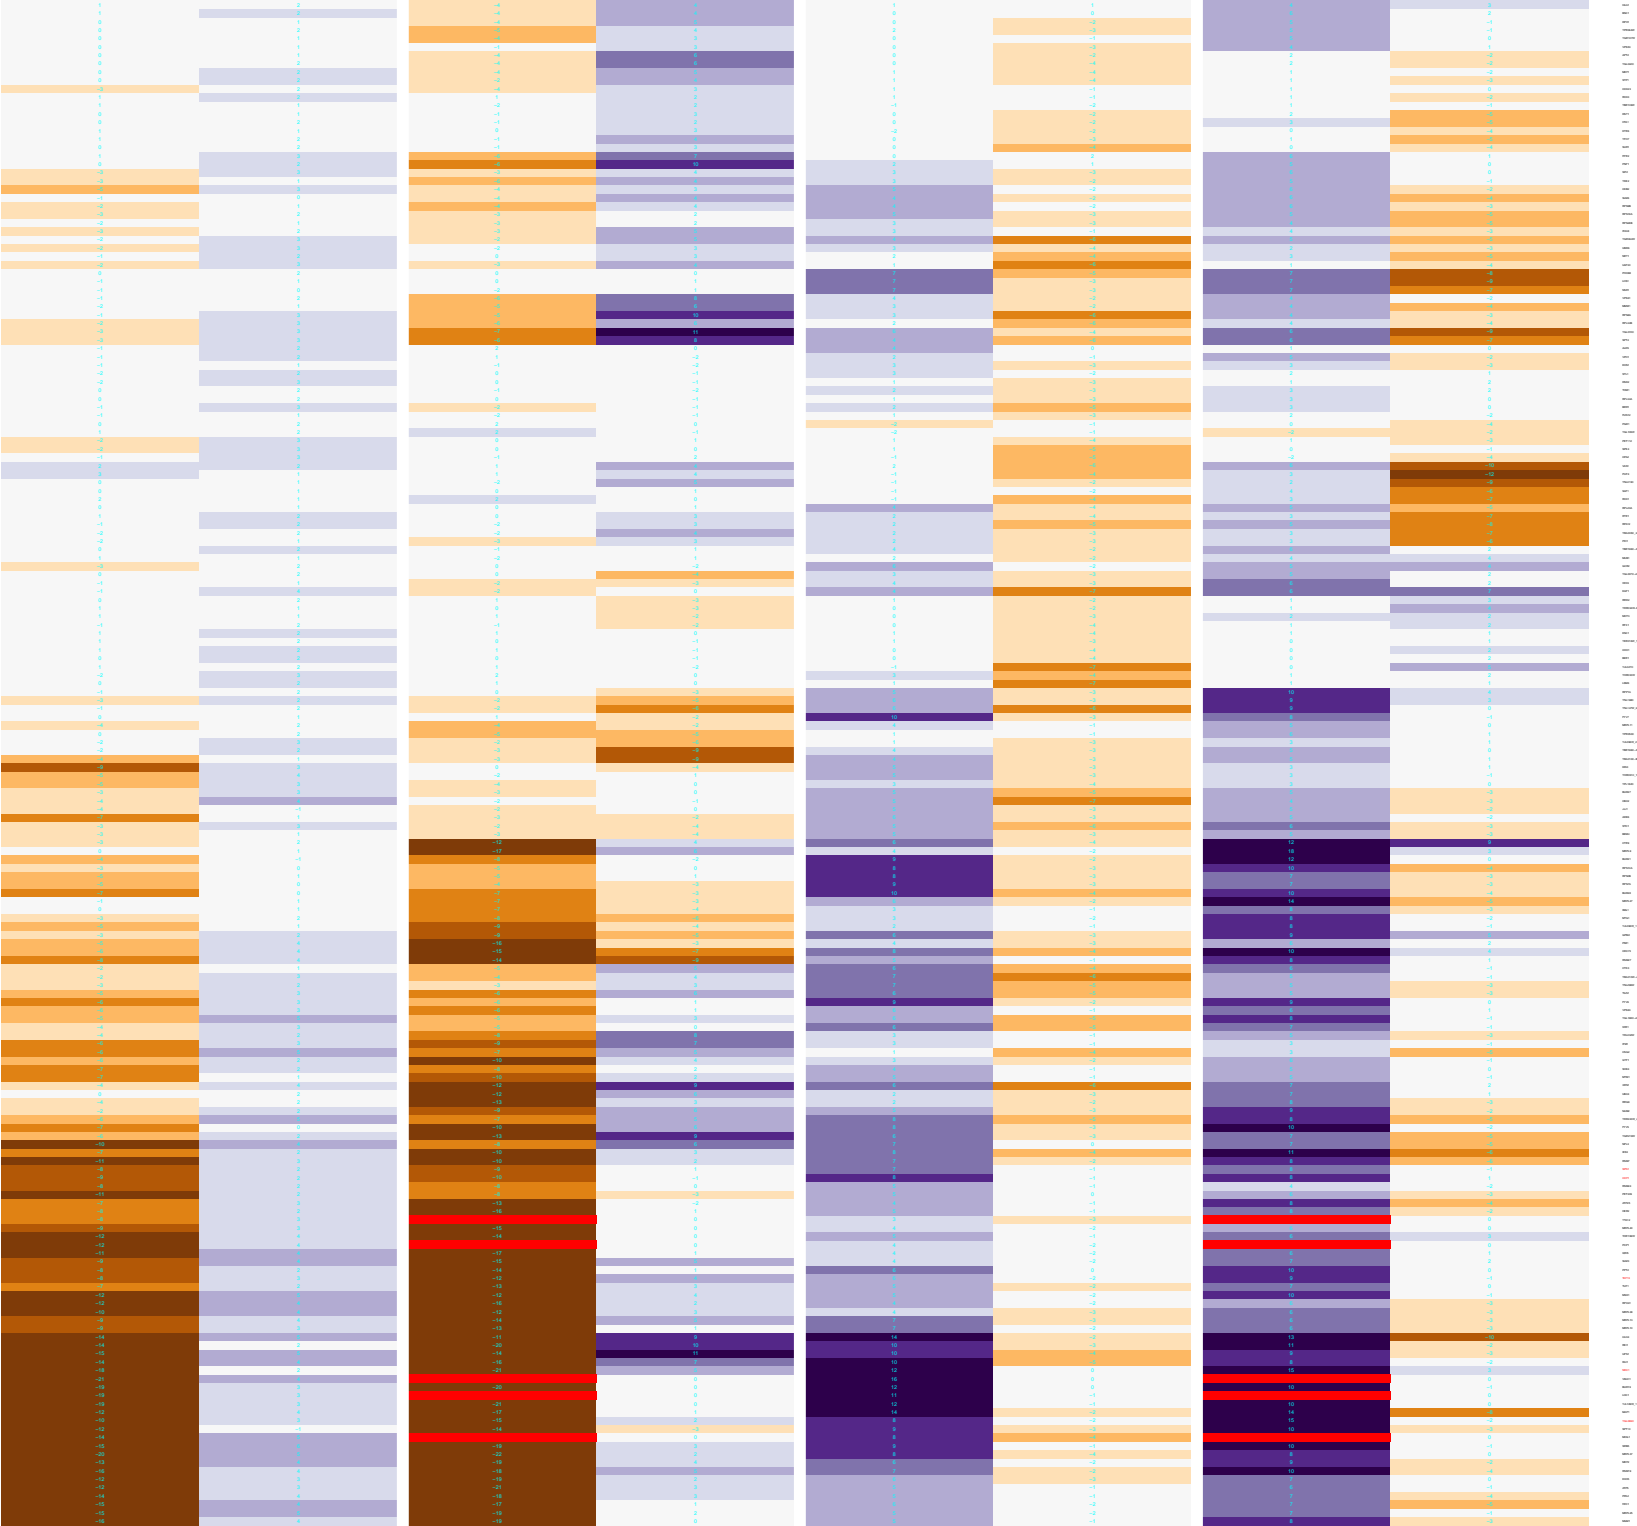

Gene Name

Type of Media



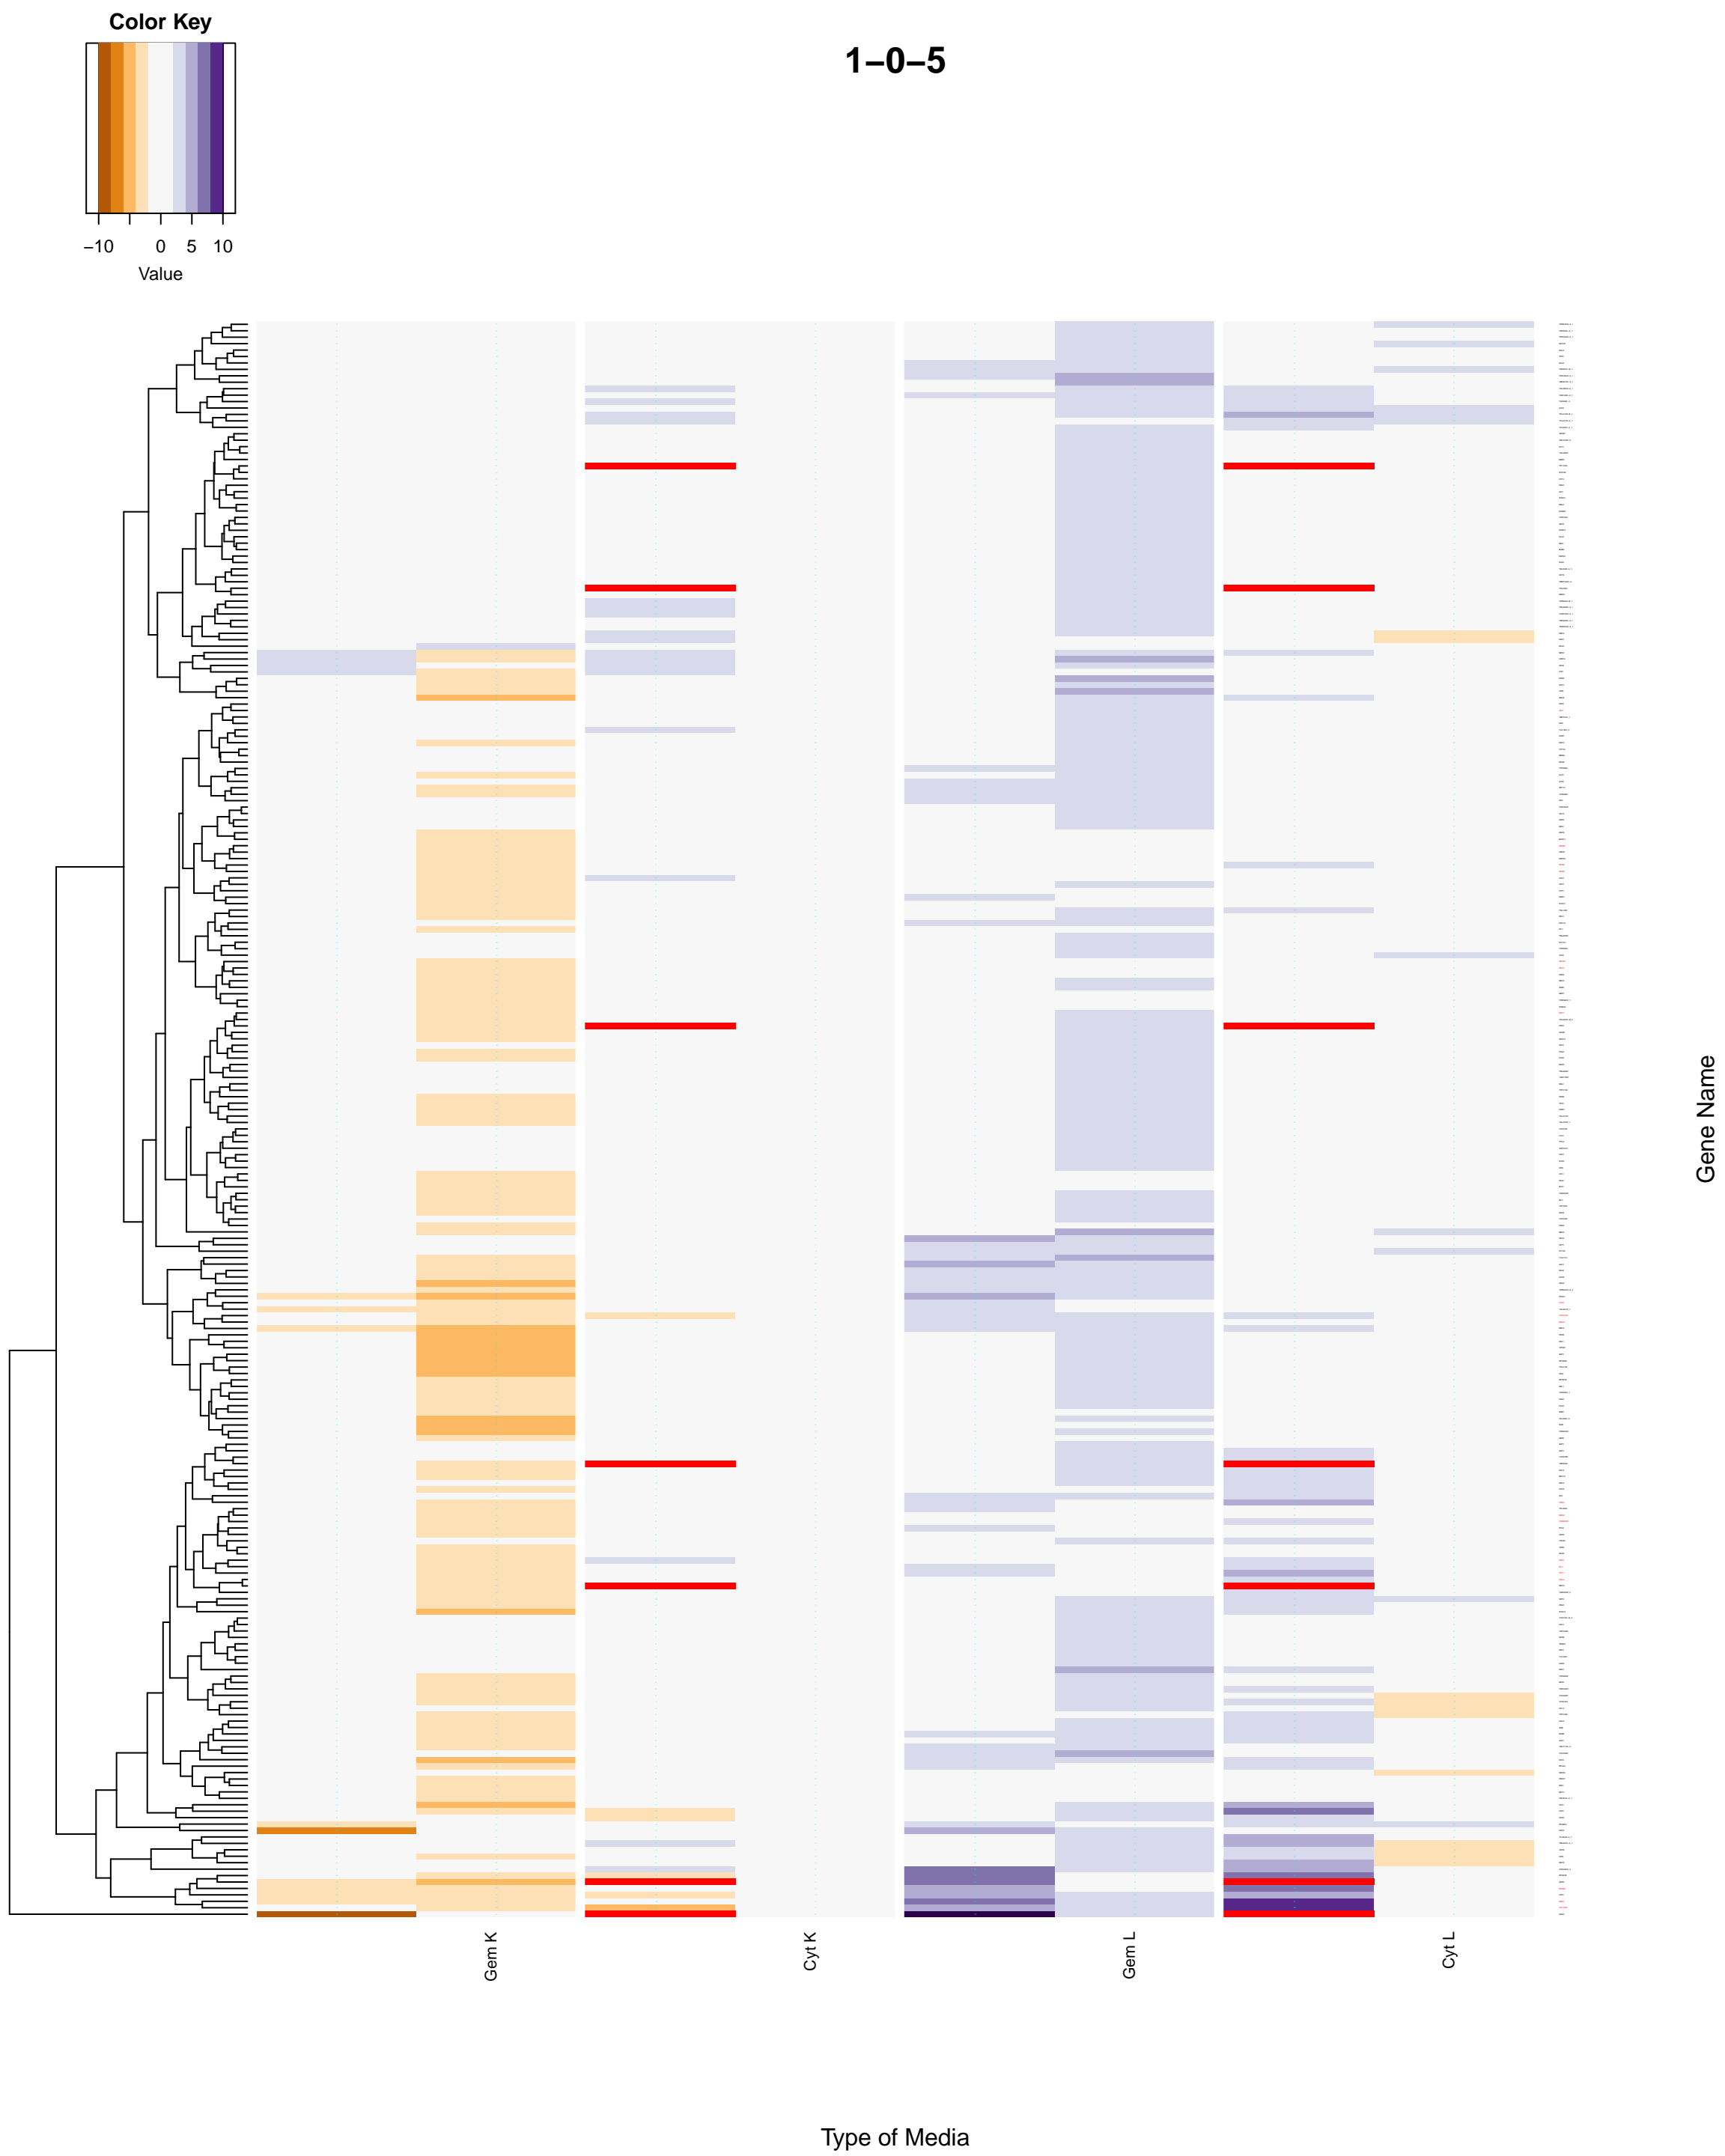

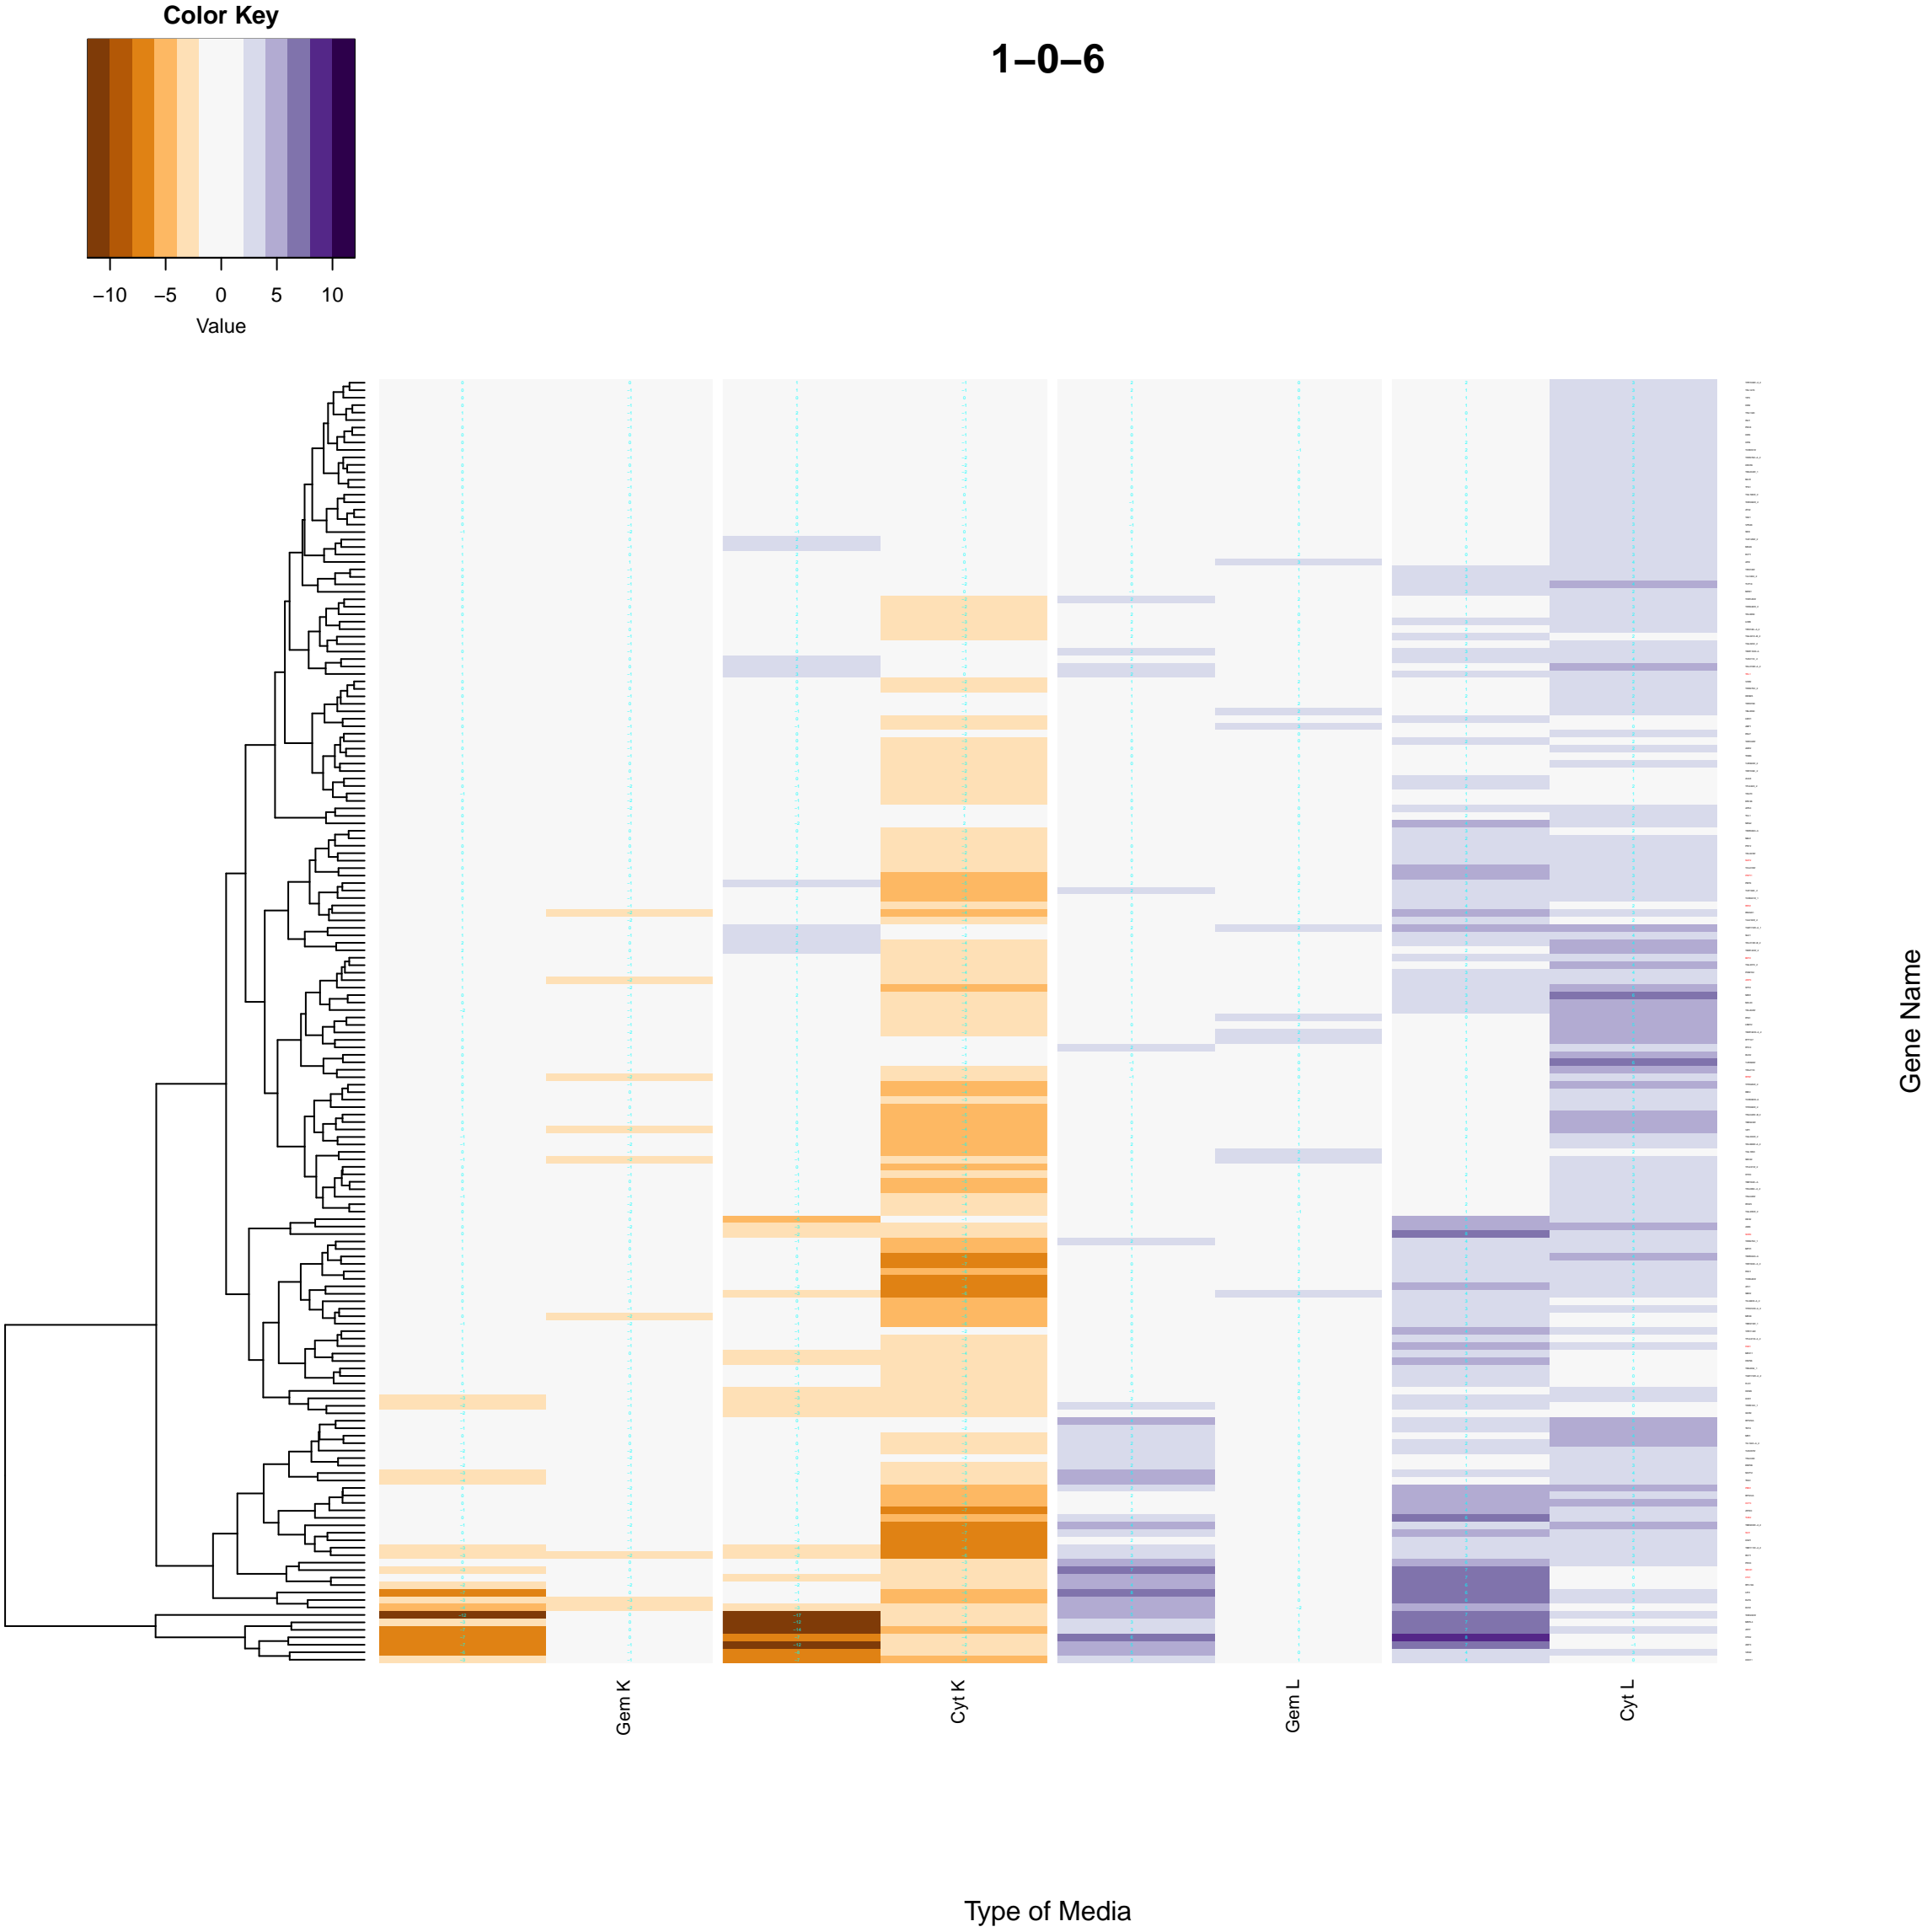

1-0-7

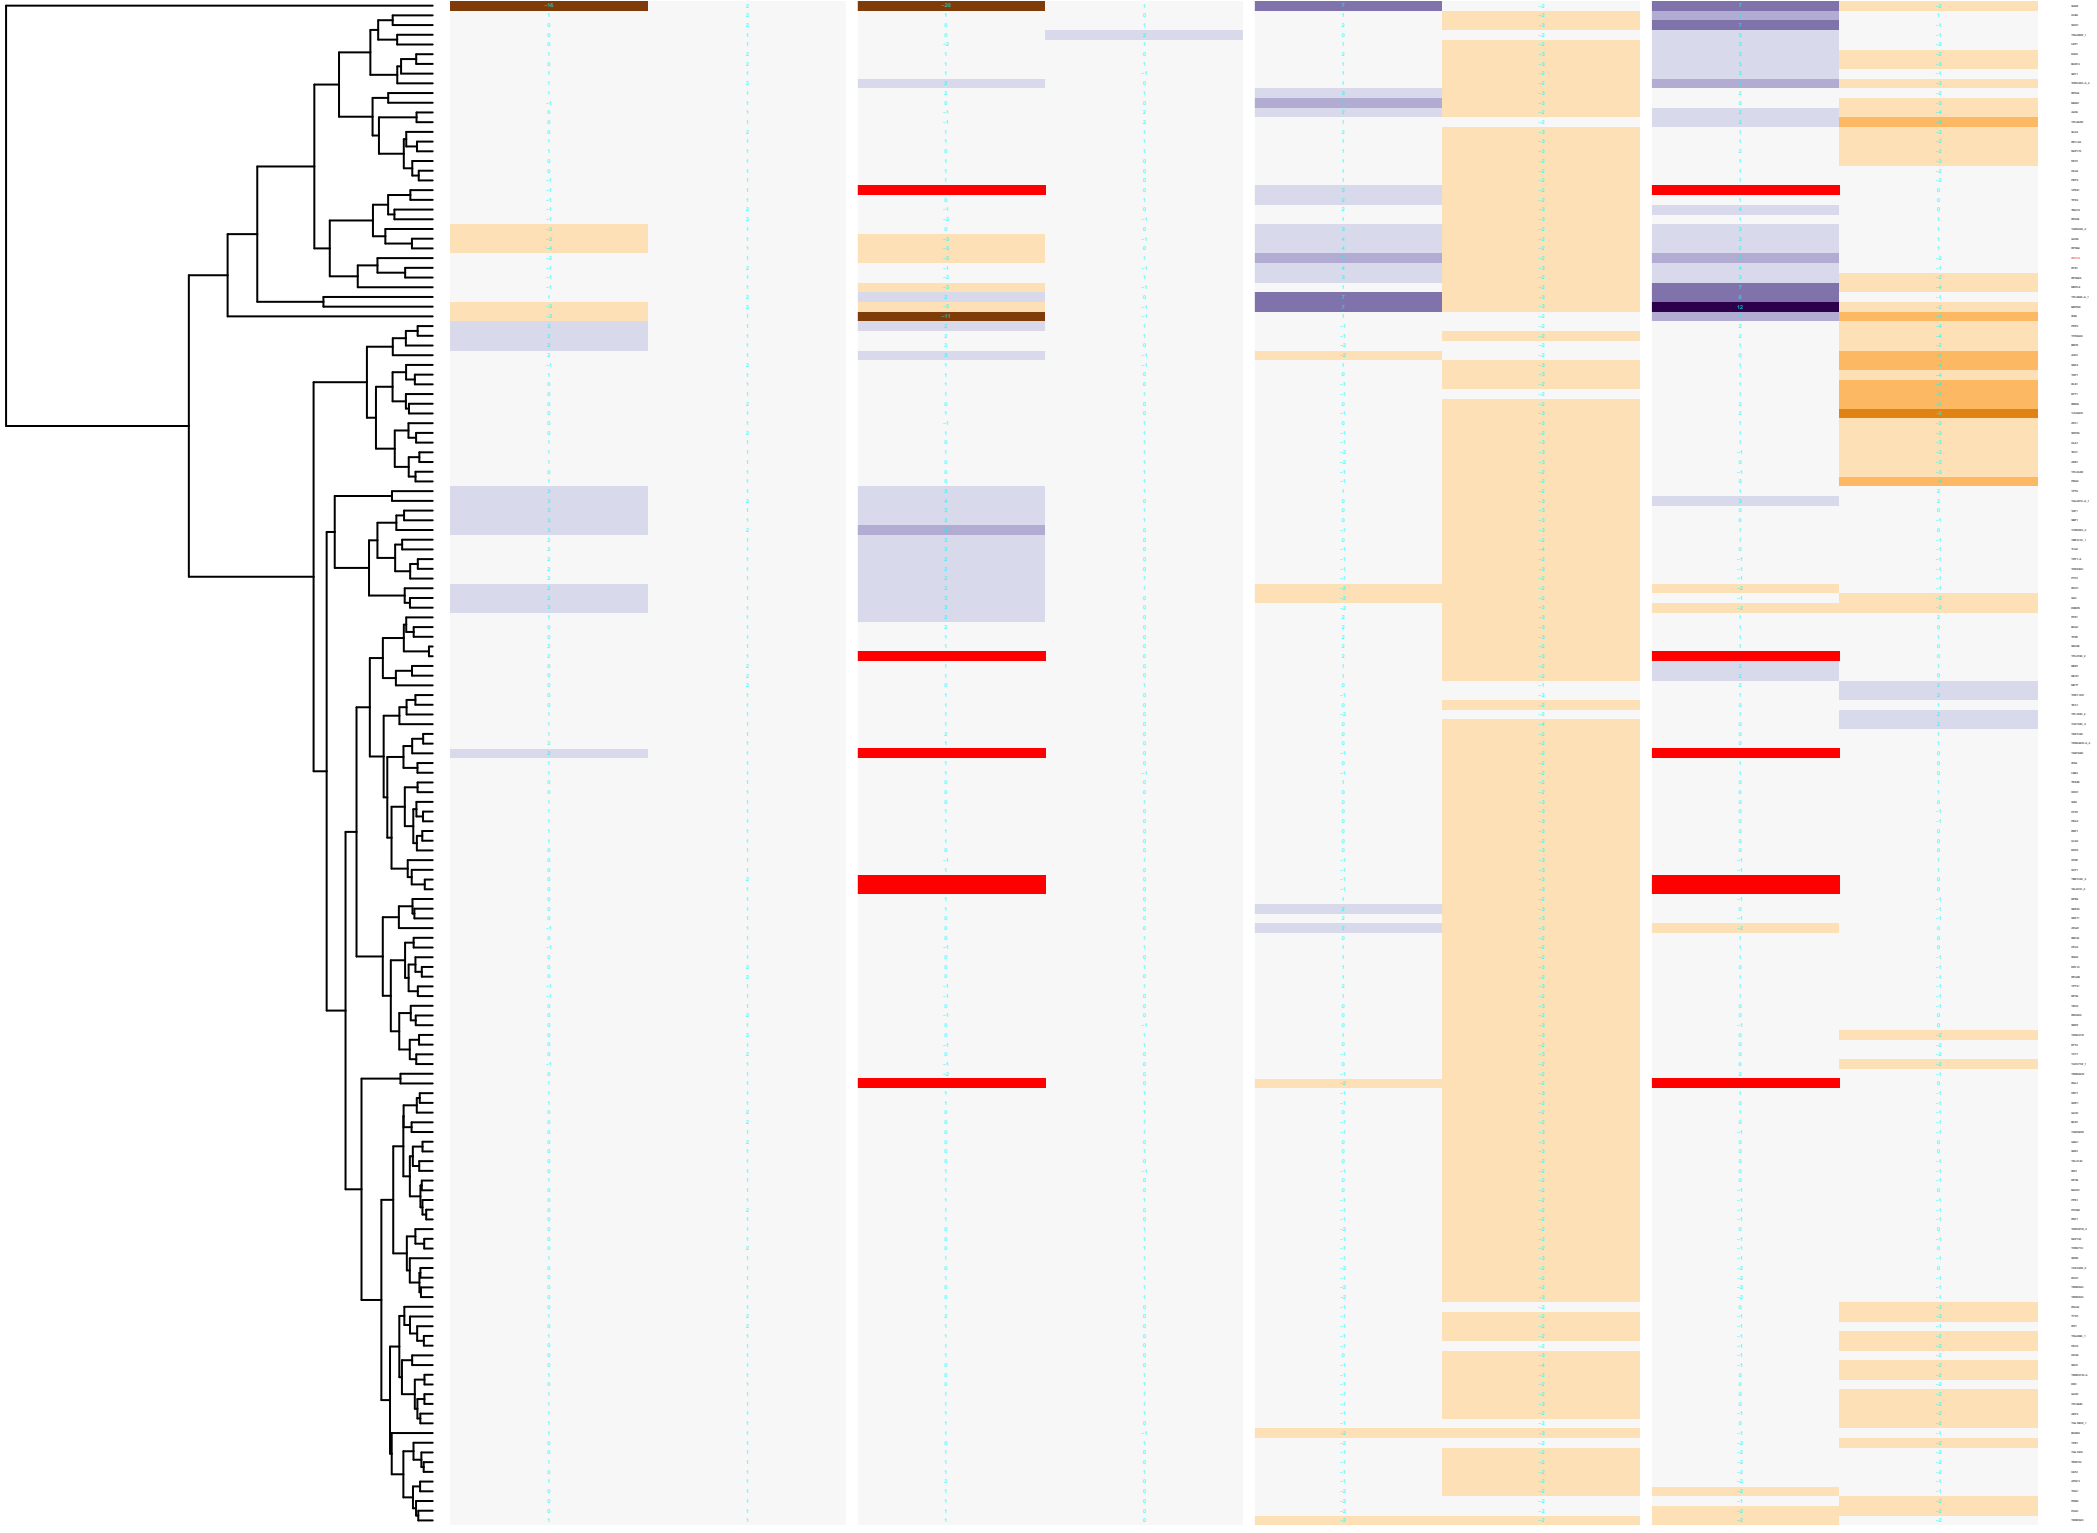





**1-0-9**

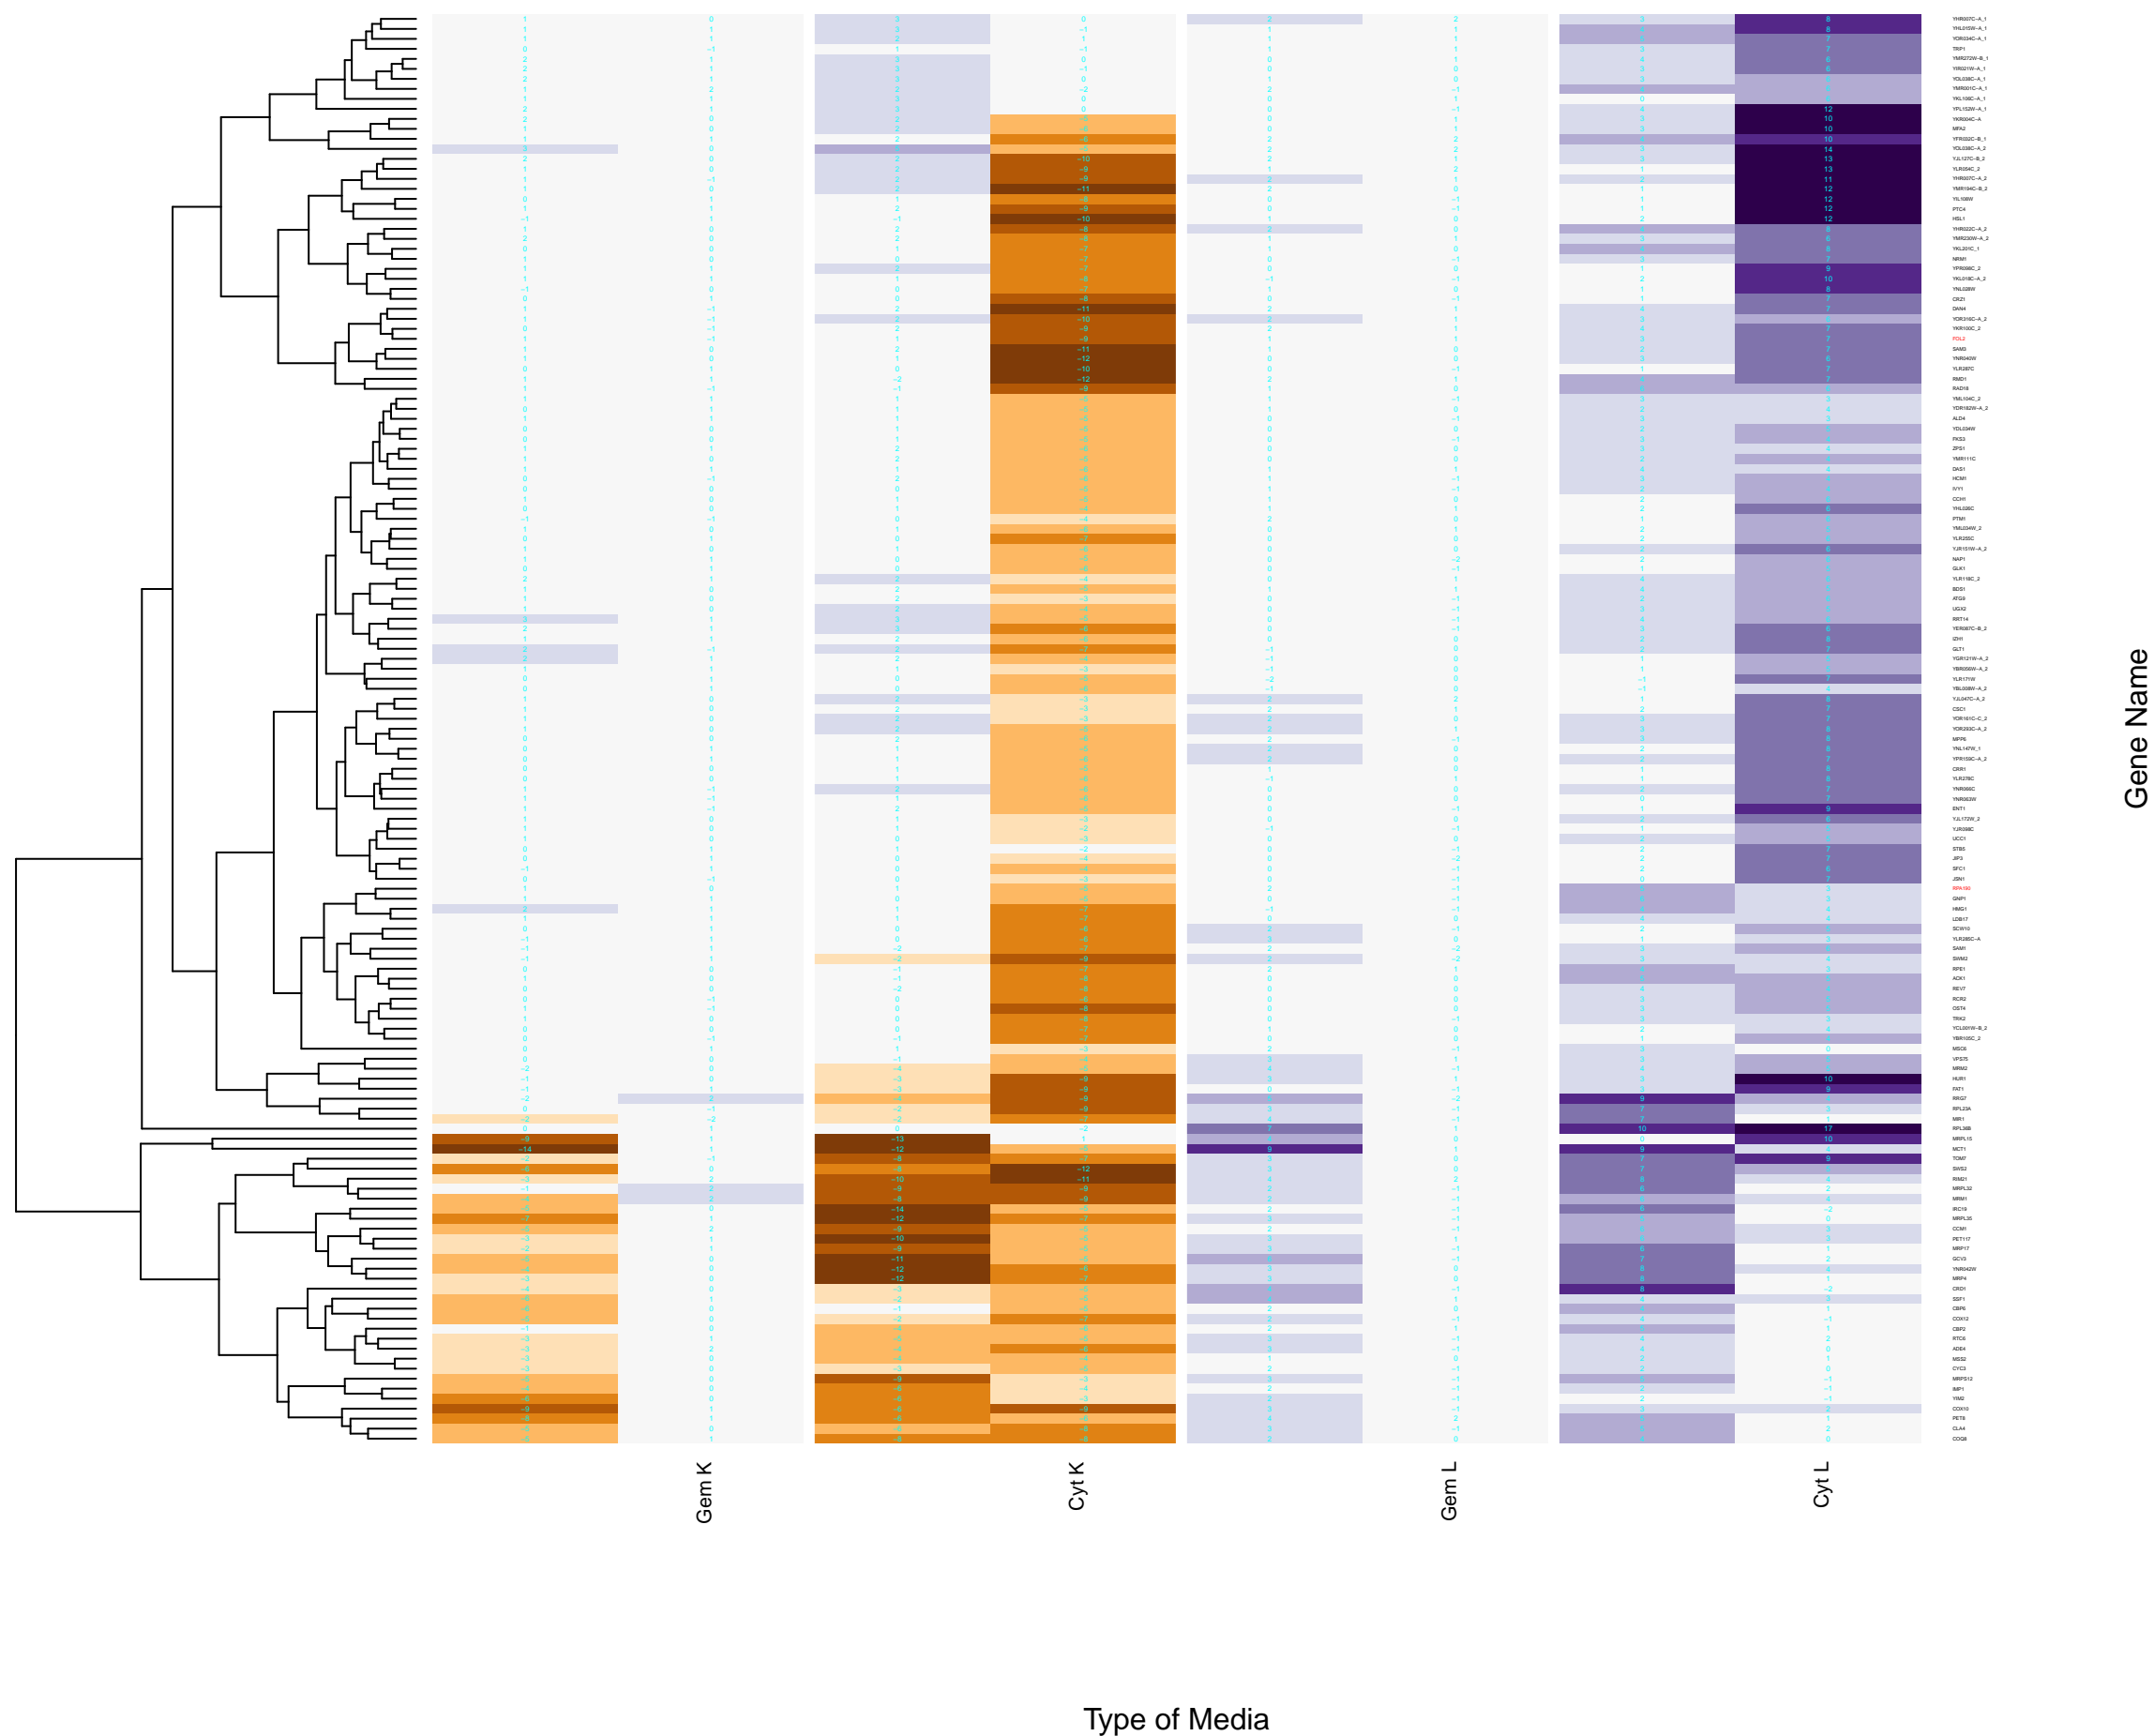

2-0.1-0

Color Key

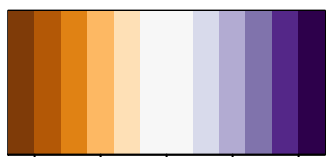

-10 -5 0 5 10

Value

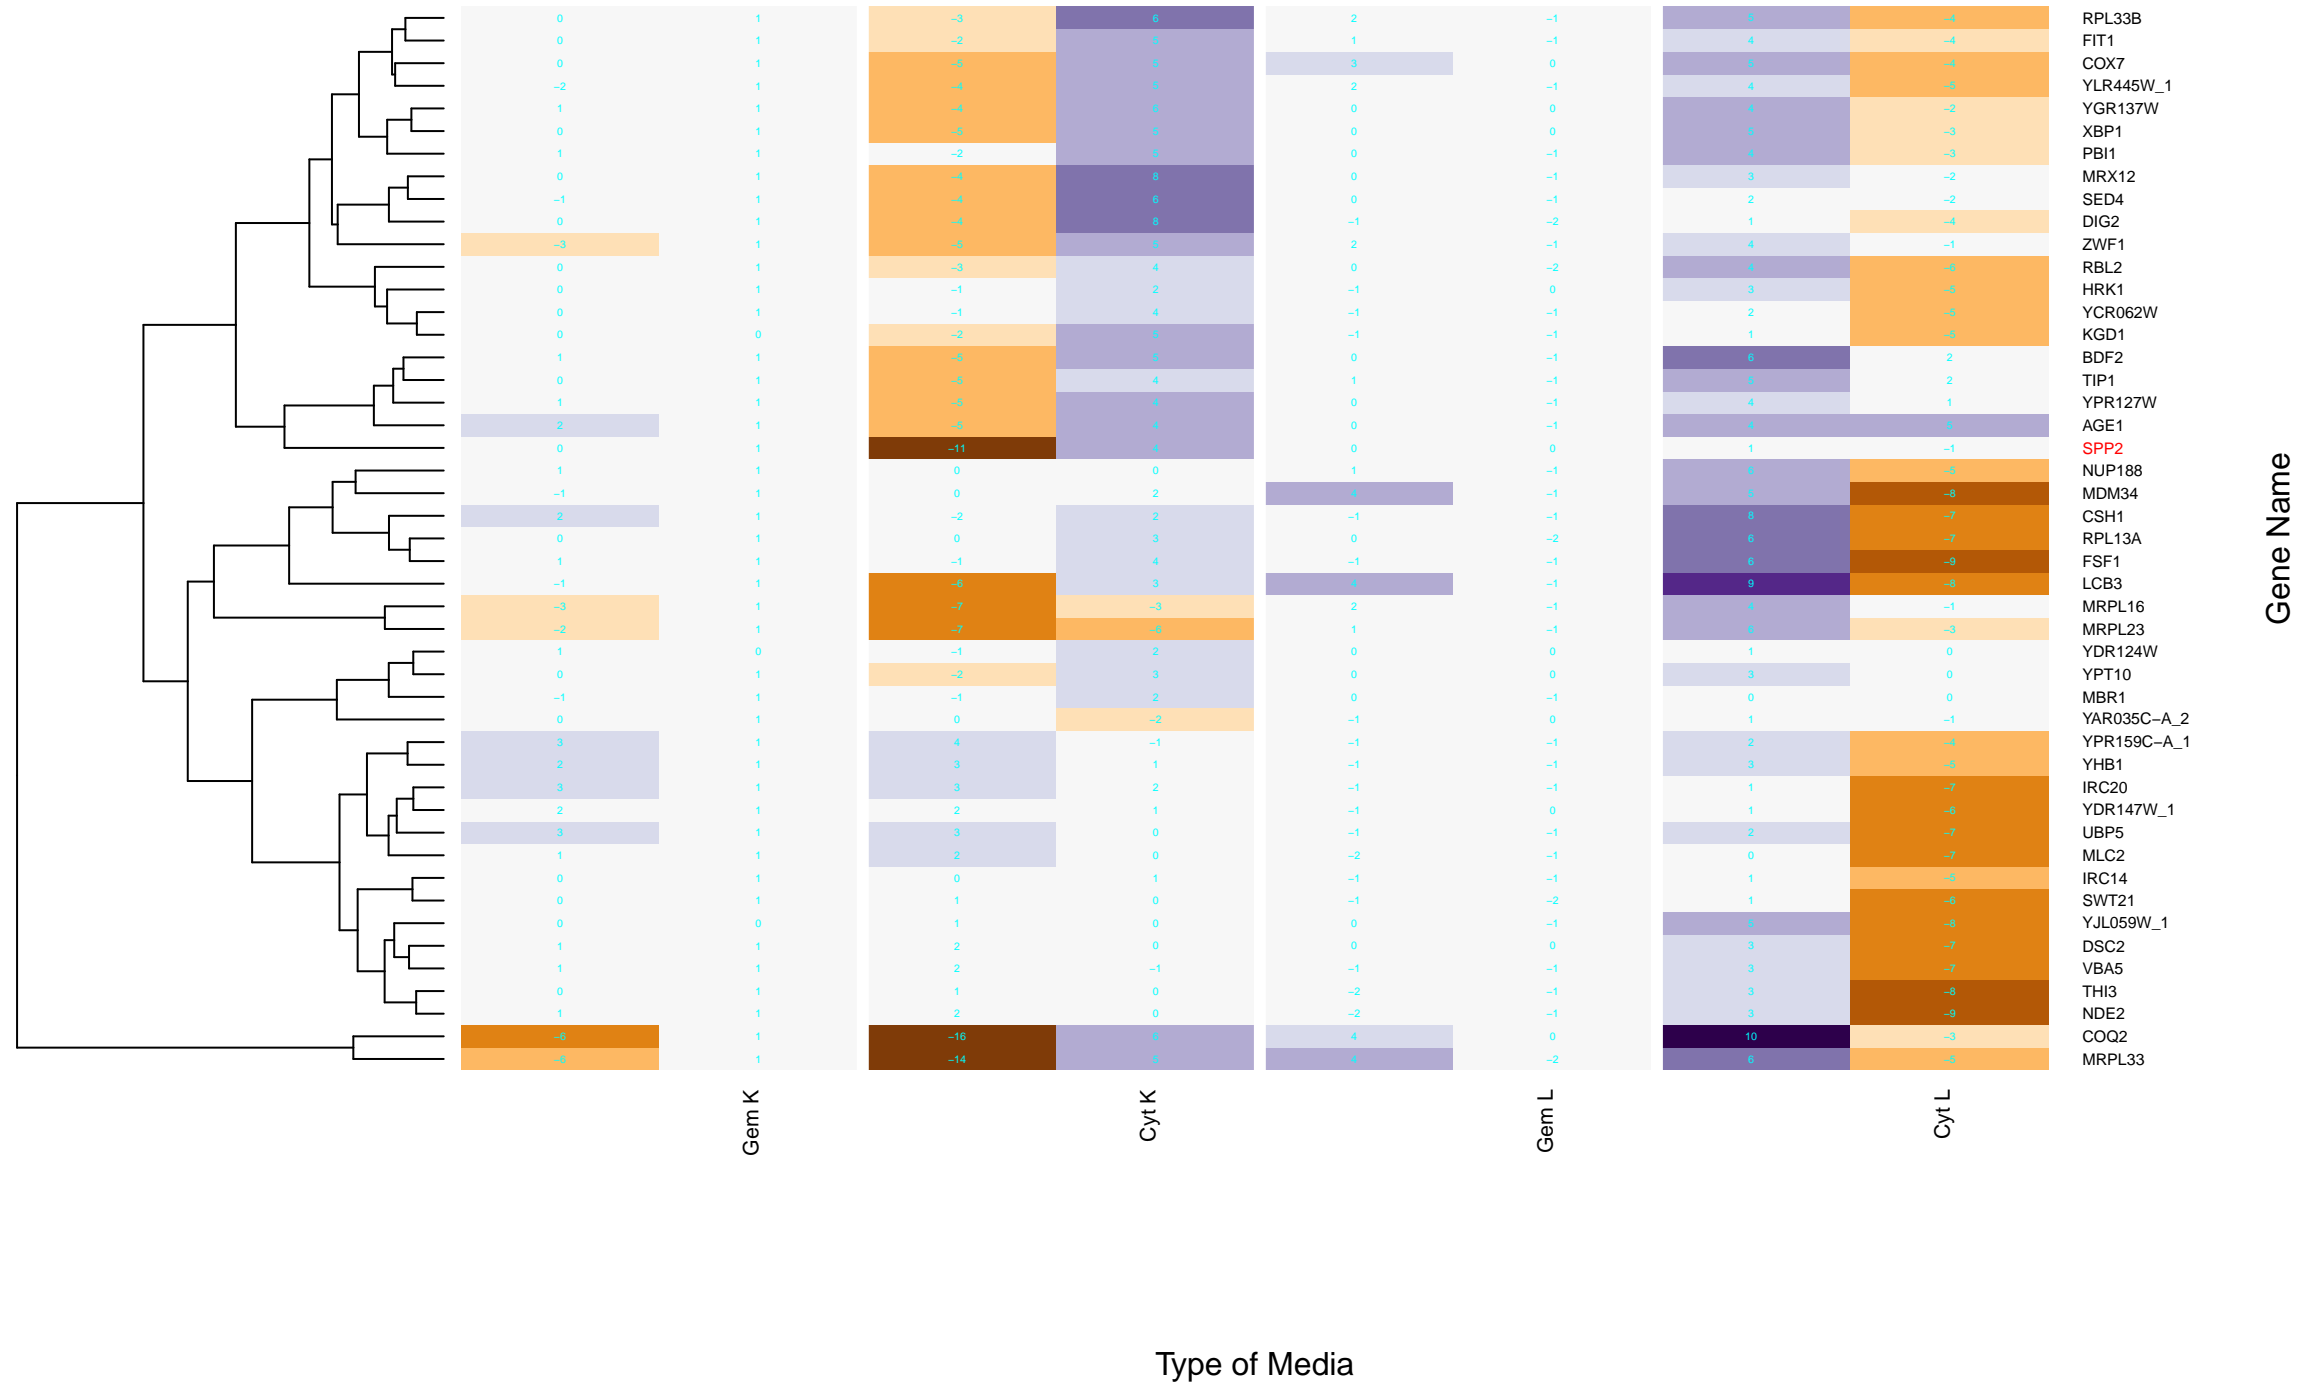



2-0.13-0

Color Key

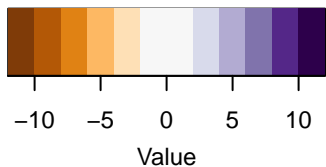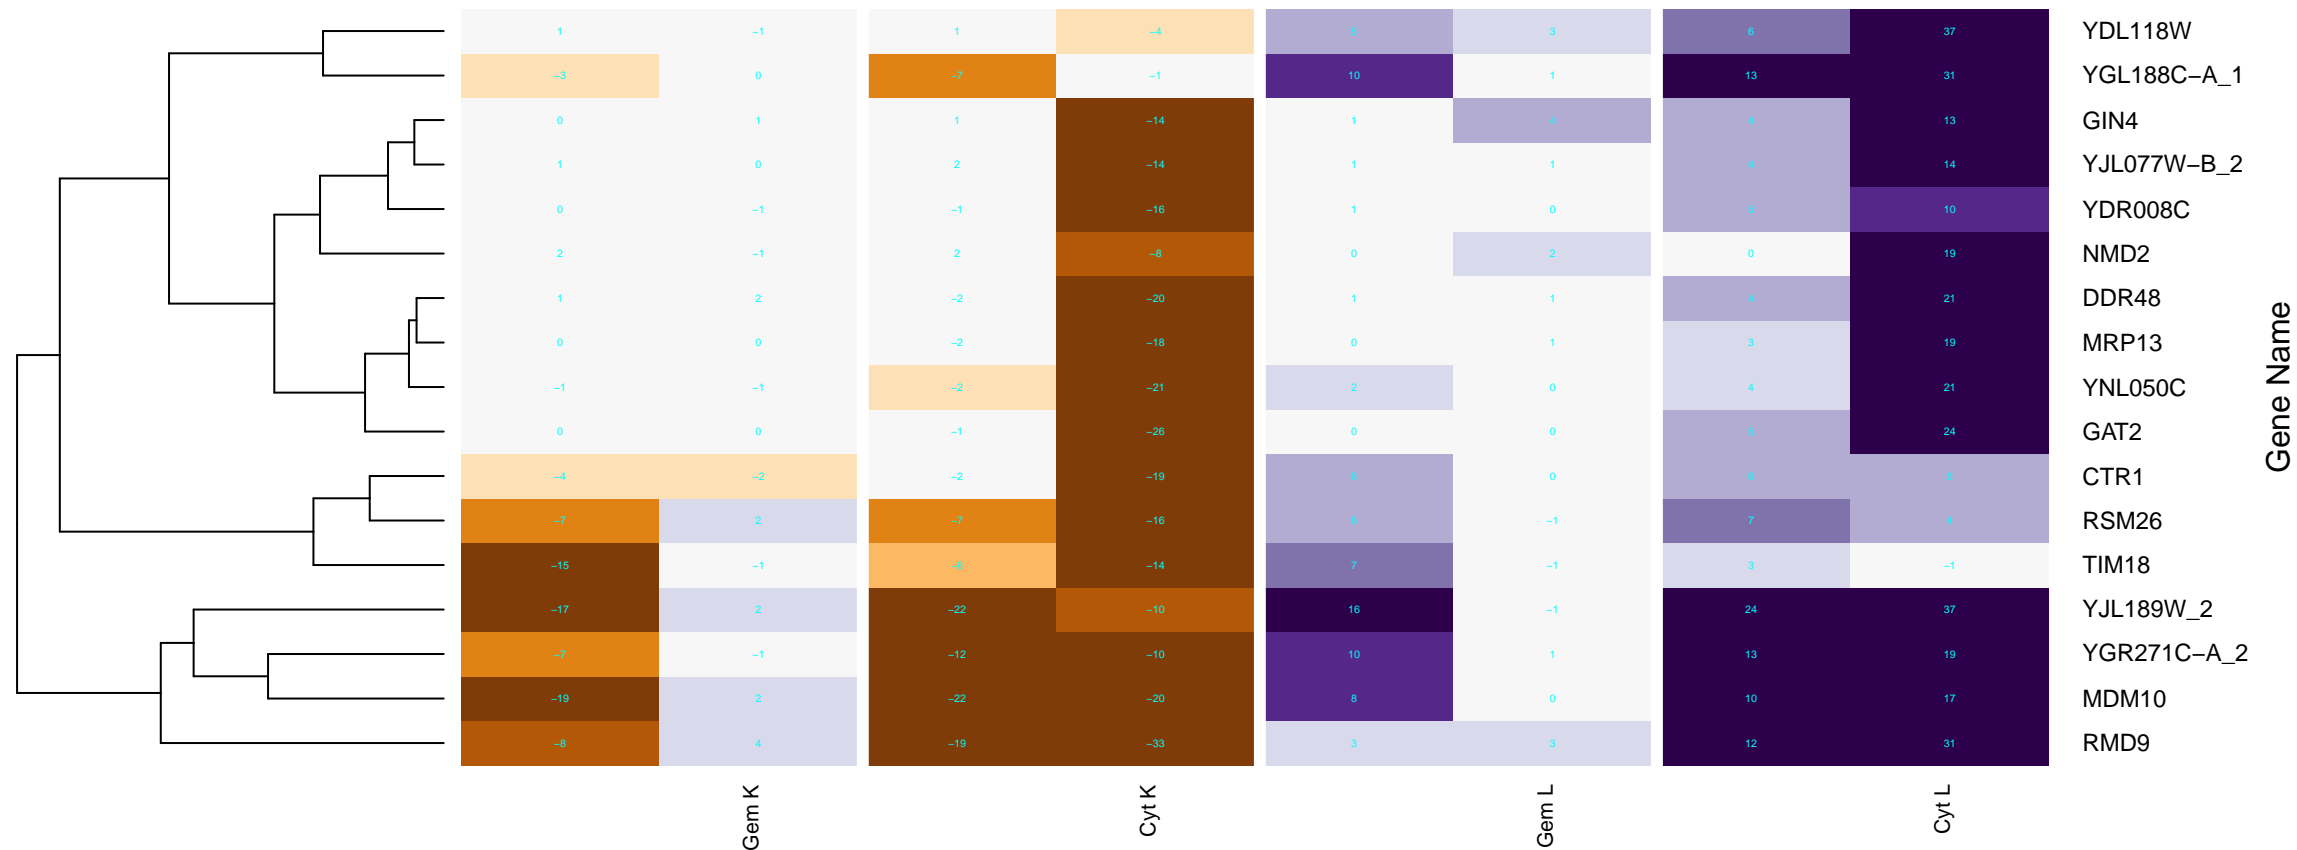

2-0.13-1

Color Key

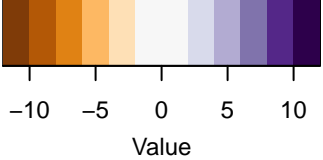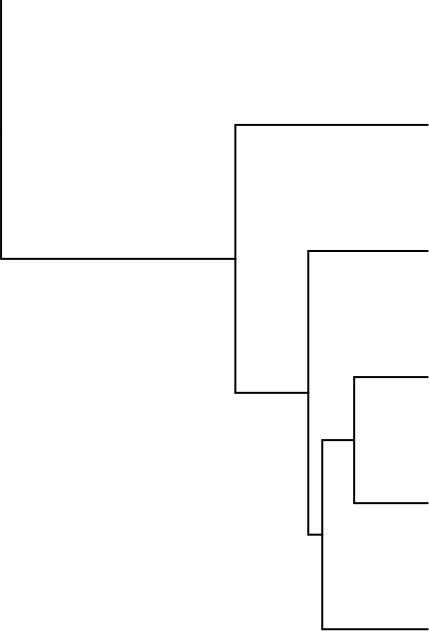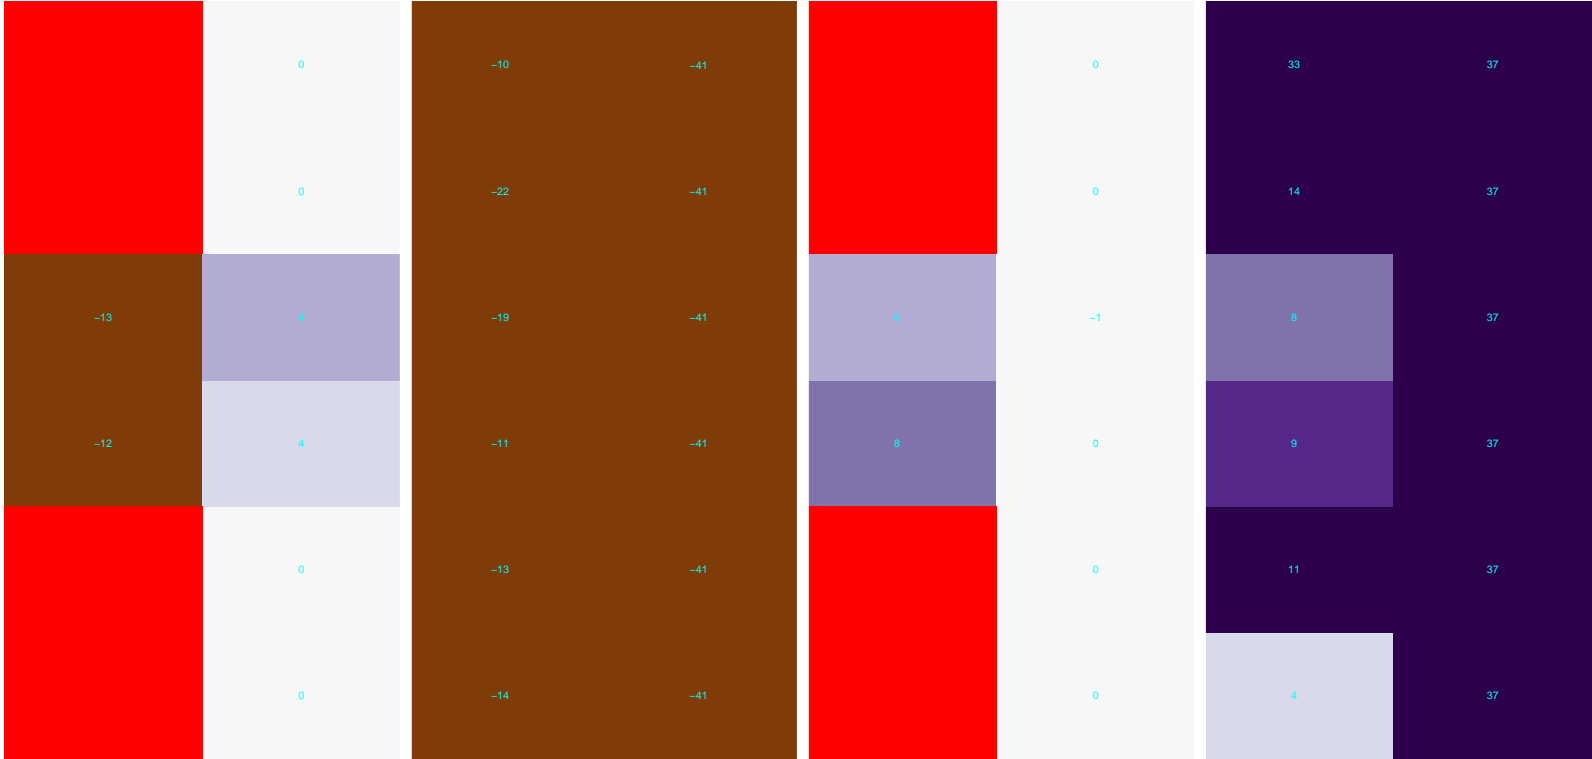

Gem K

Cyt K

Gem L

Cyt L

Gene Name

Type of Media

2-0.13-2

Color Key

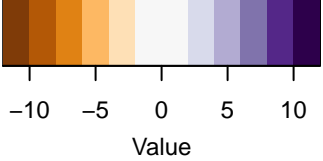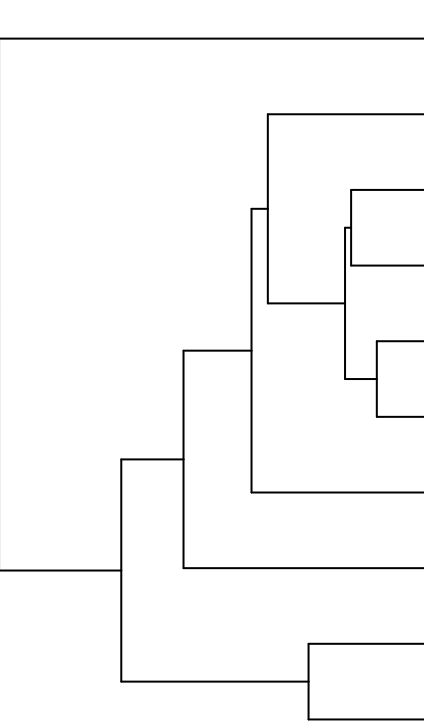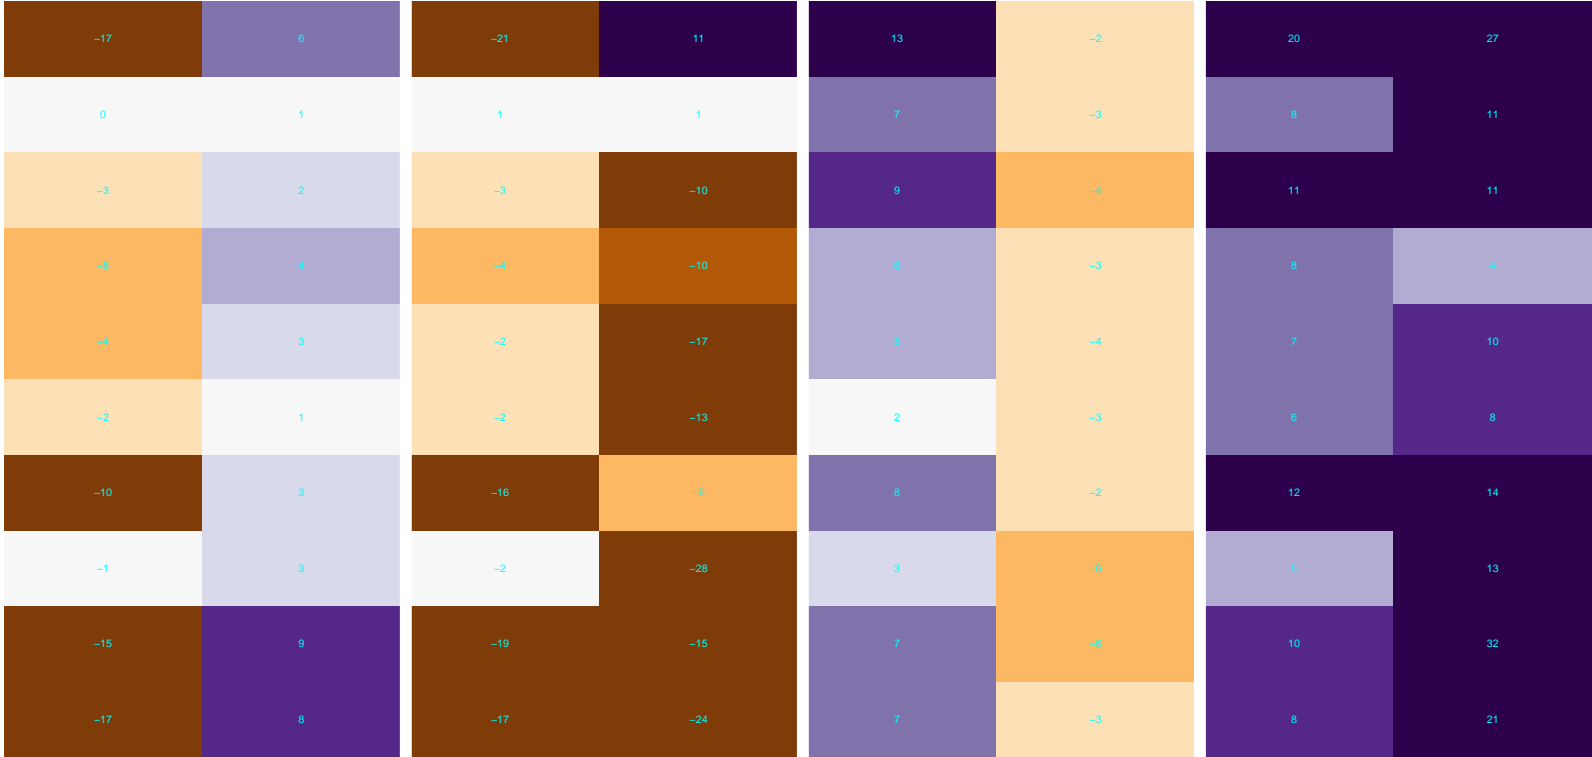

Gene Name

Type of Media

2-0.13-3

Color Key

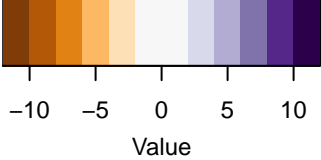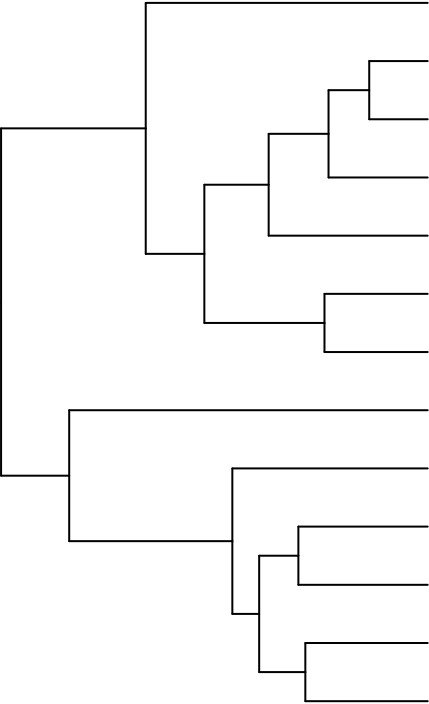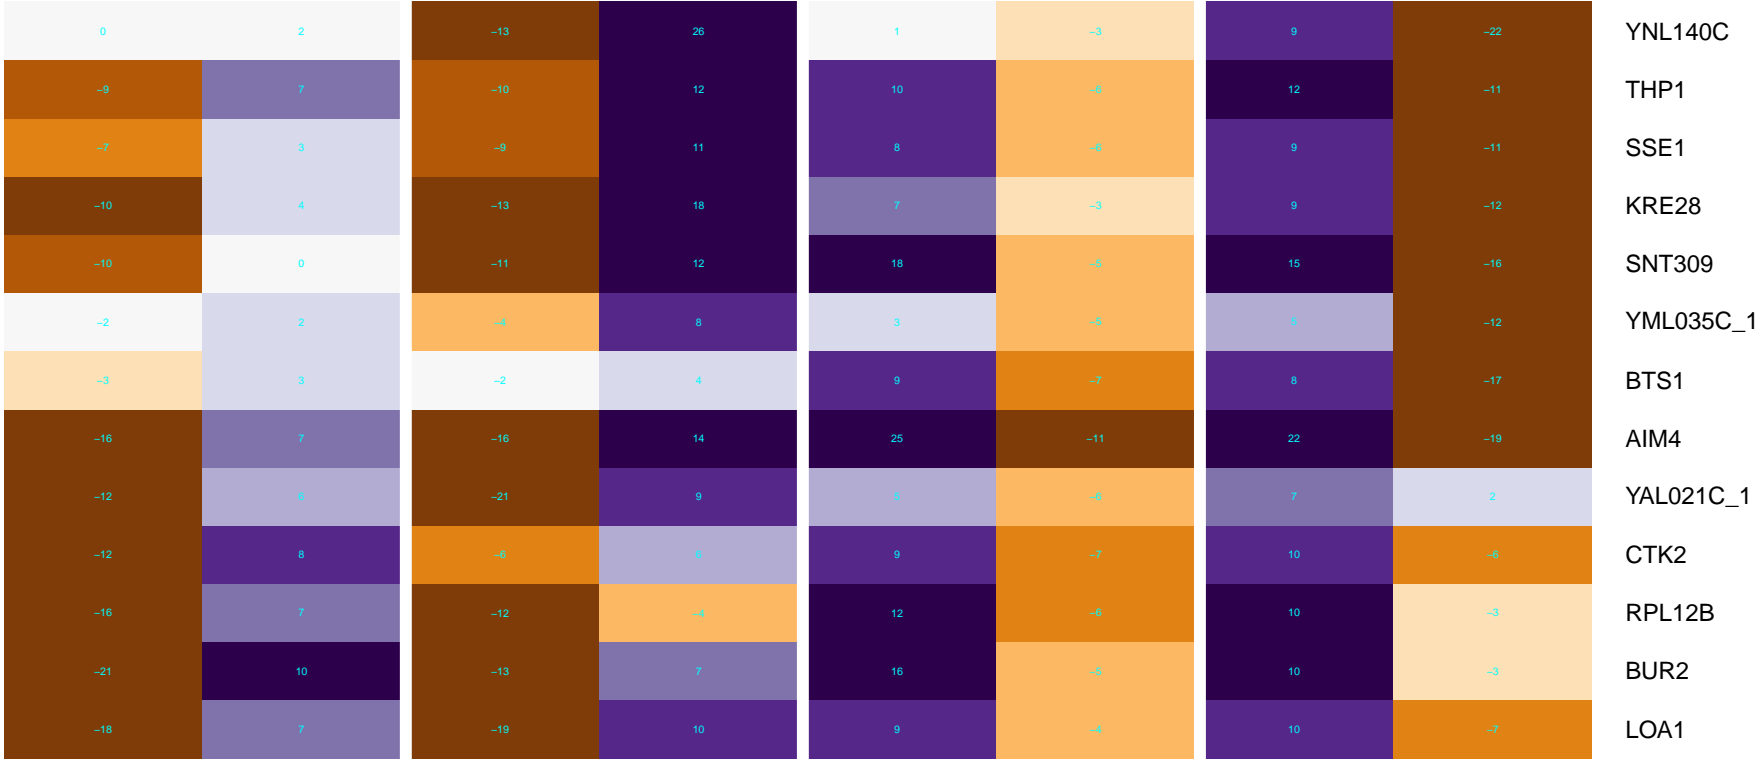

Gem K

Cyt K

Gem L

Cyt L

Gene Name

Type of Media

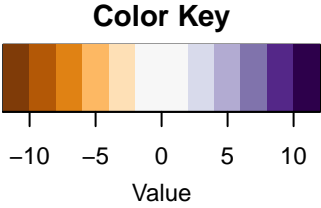

2-0.14-0

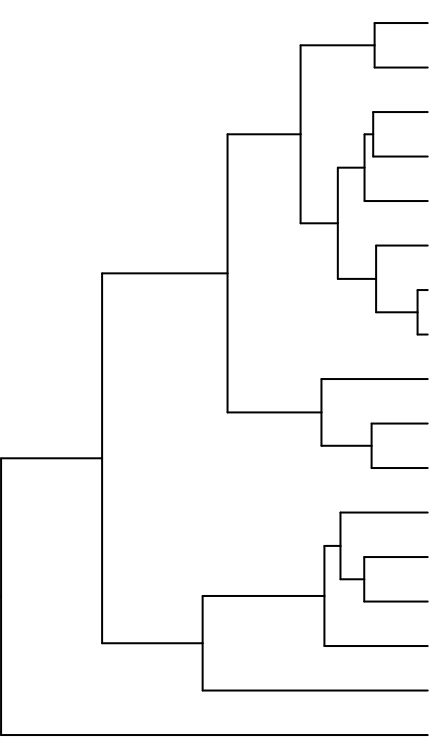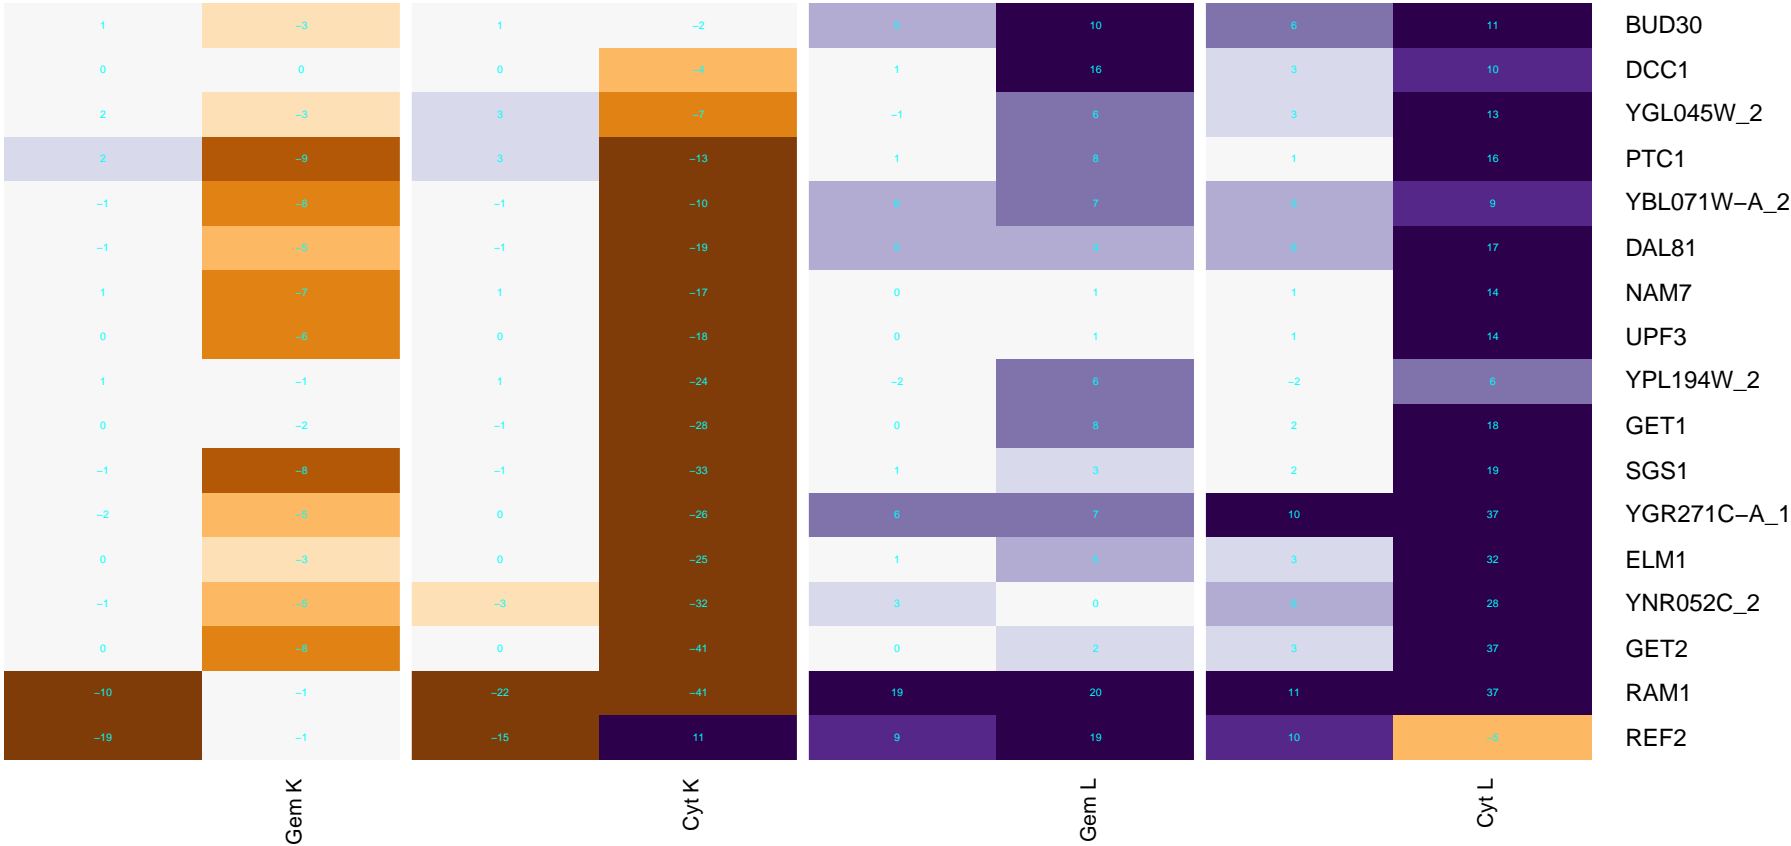

Type of Media

2-0.14-1

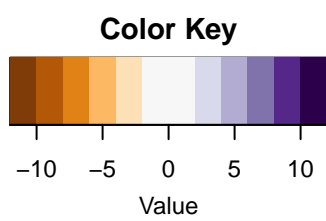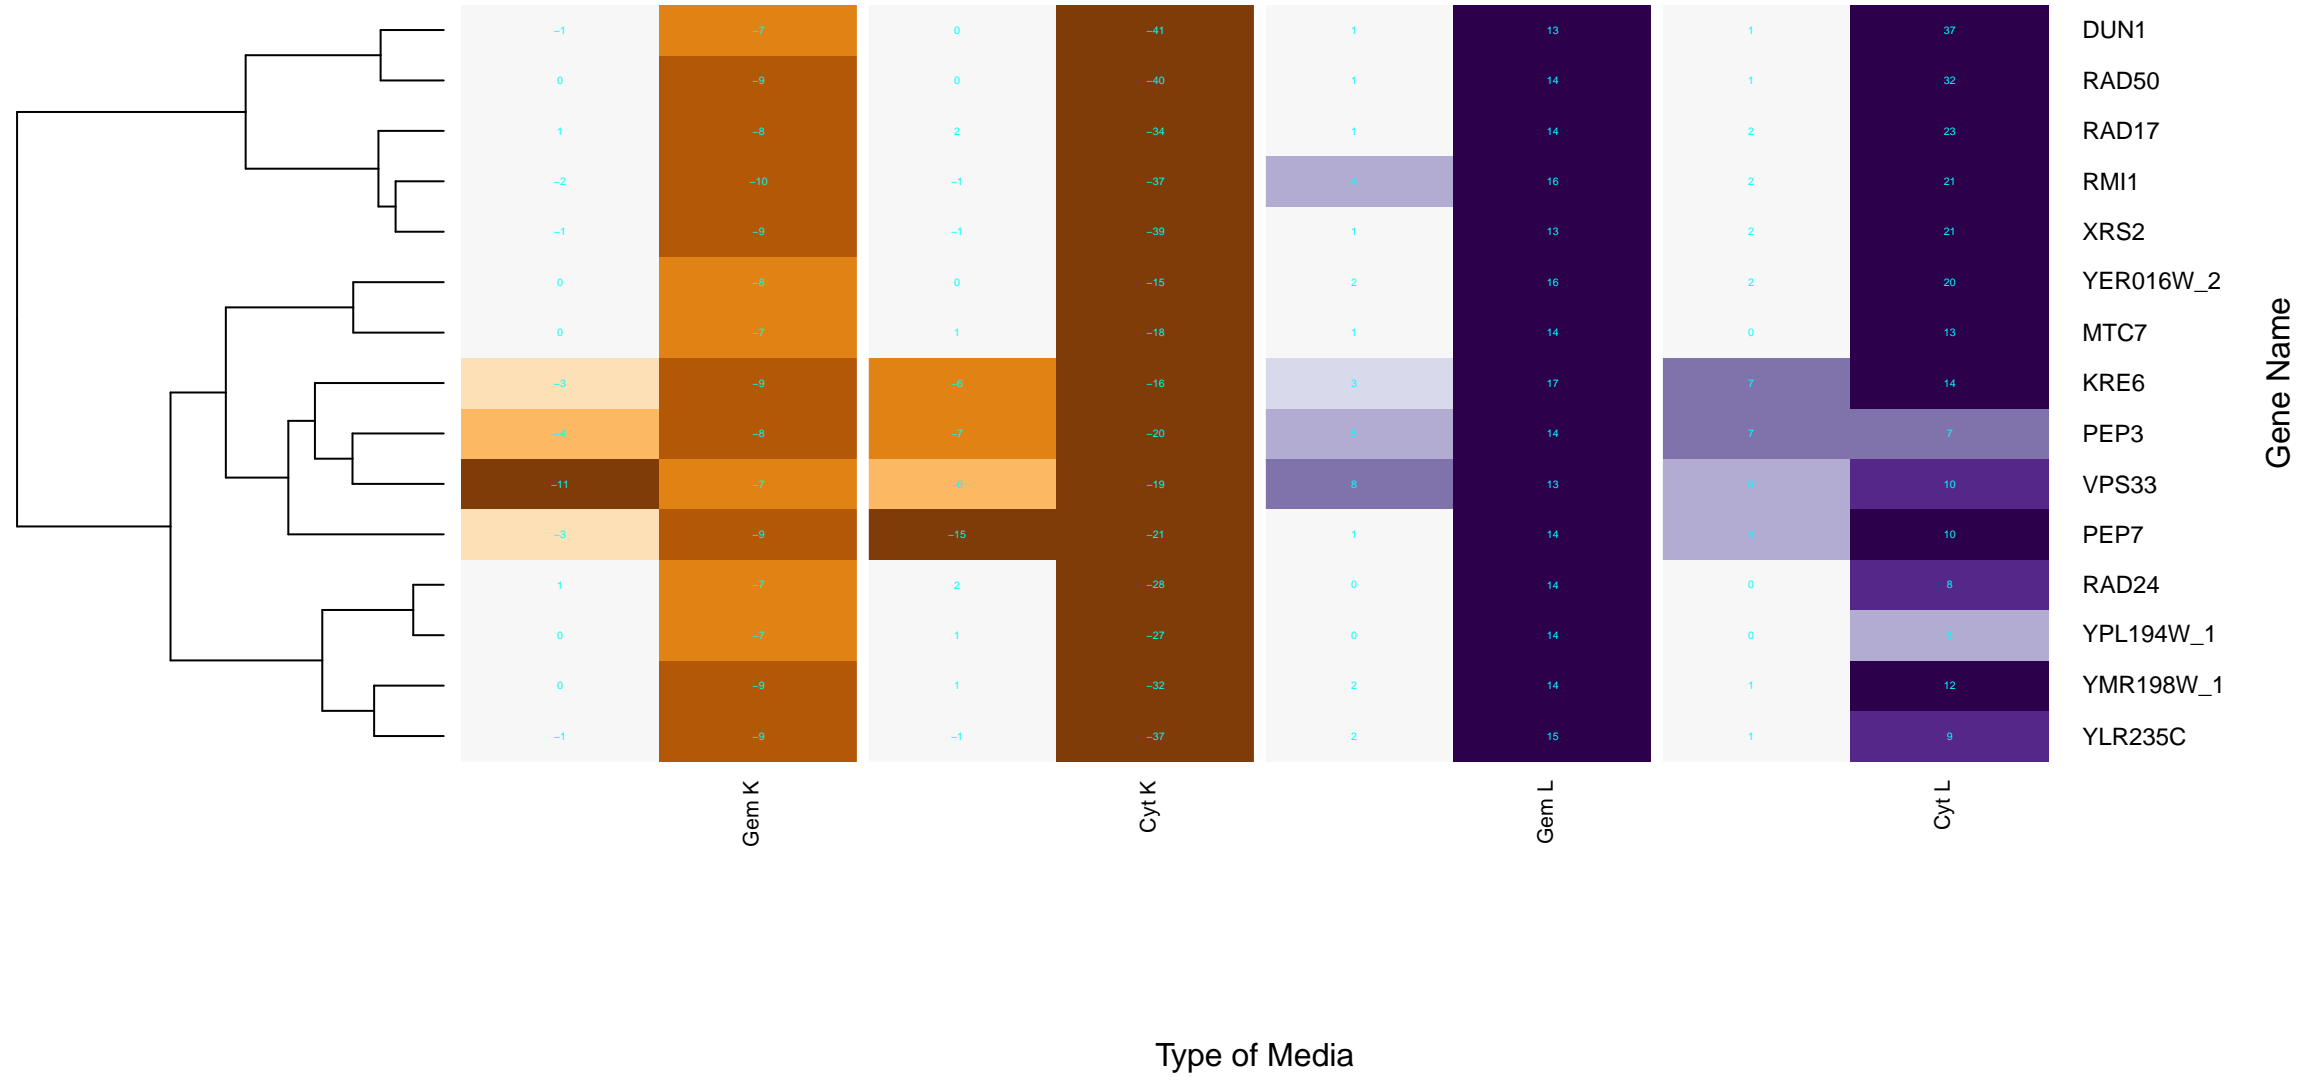

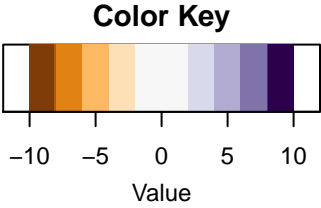

2-0.16-0

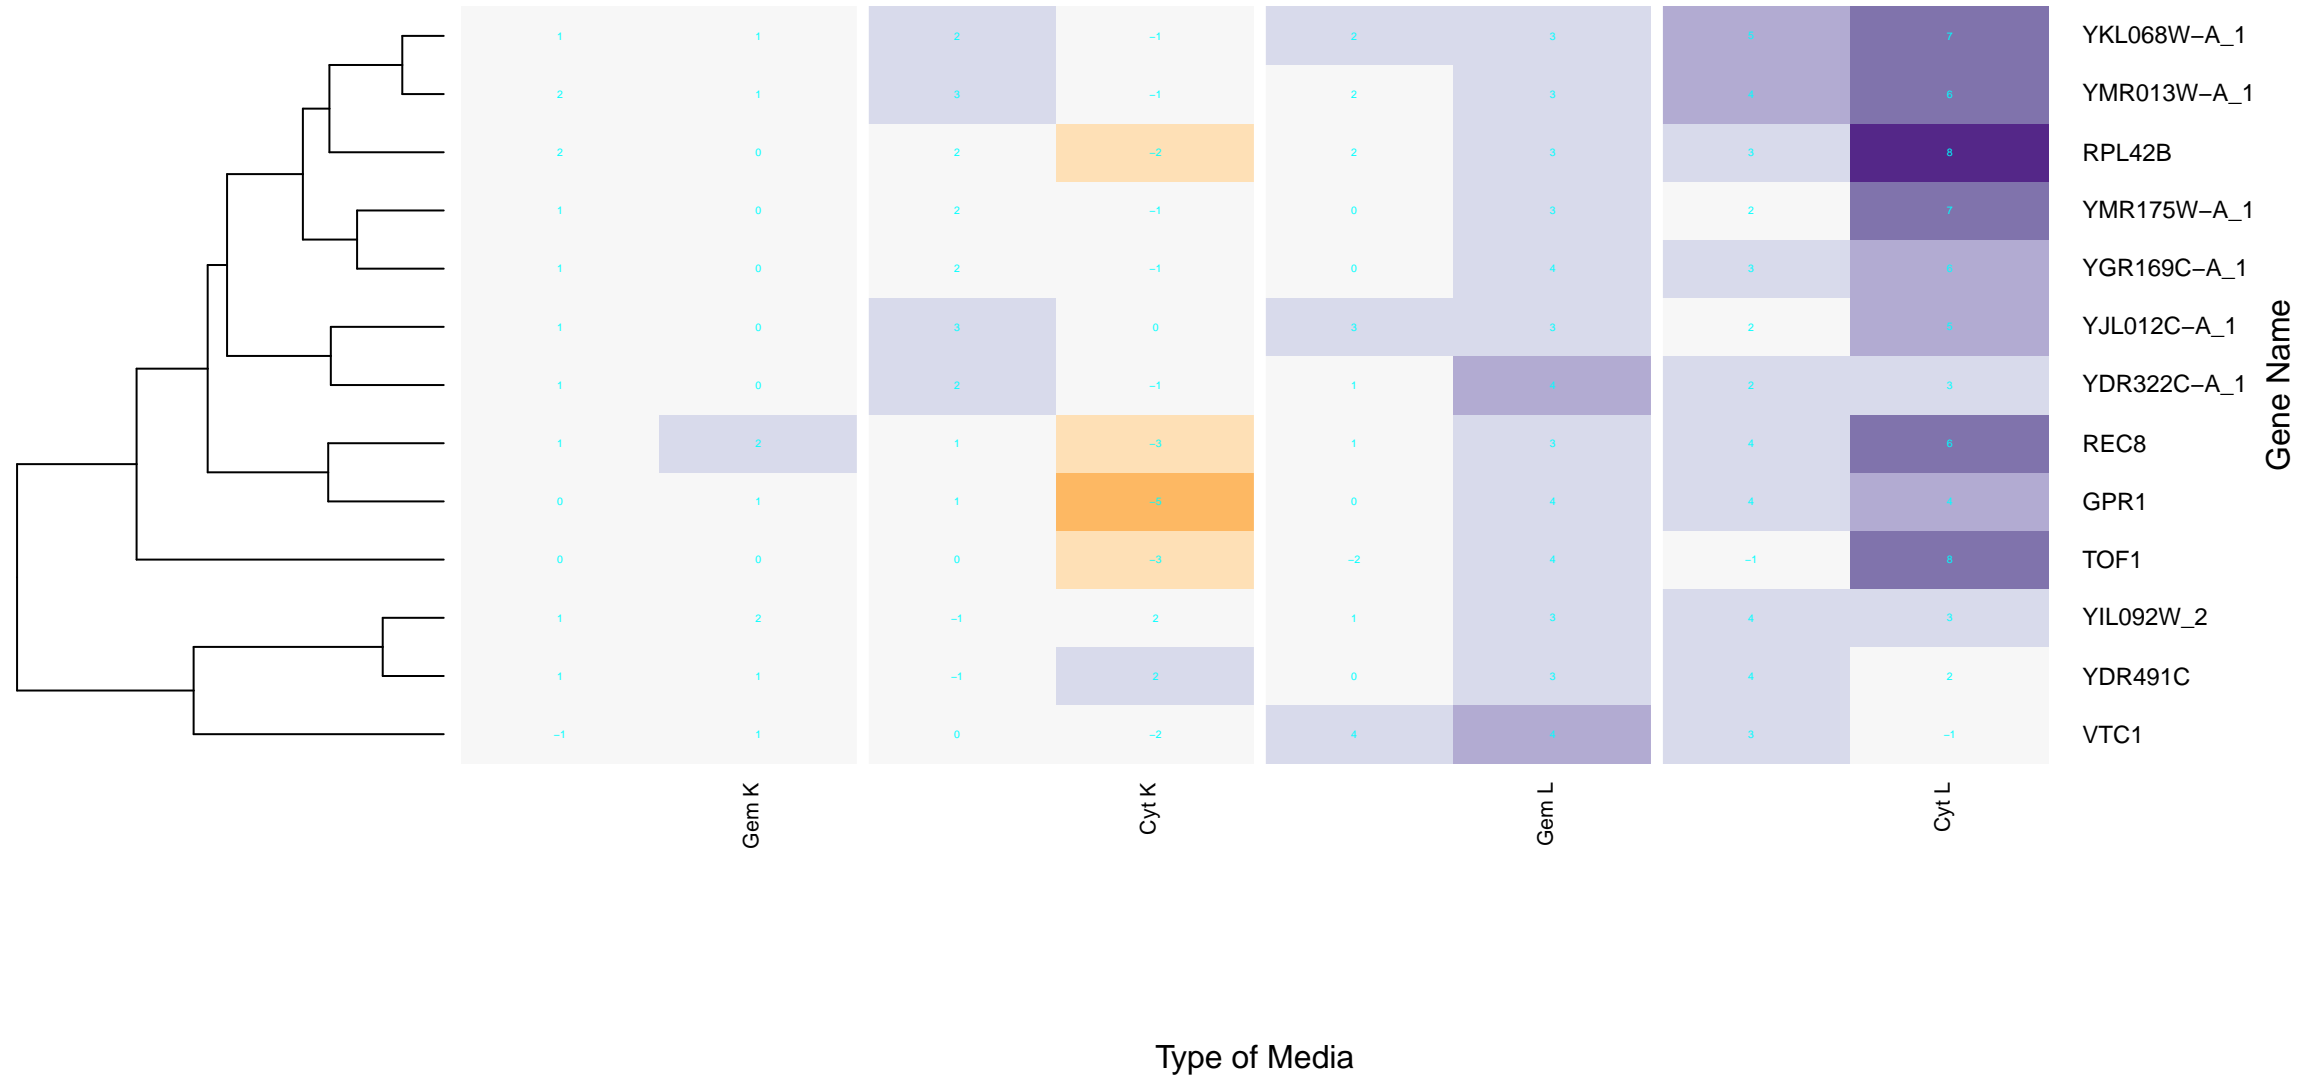



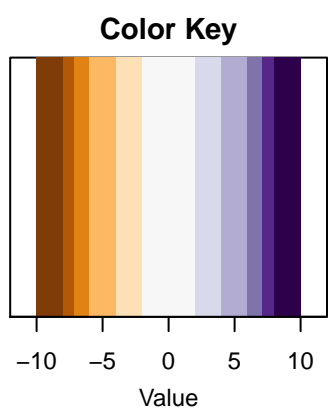

**2-0.17-0**

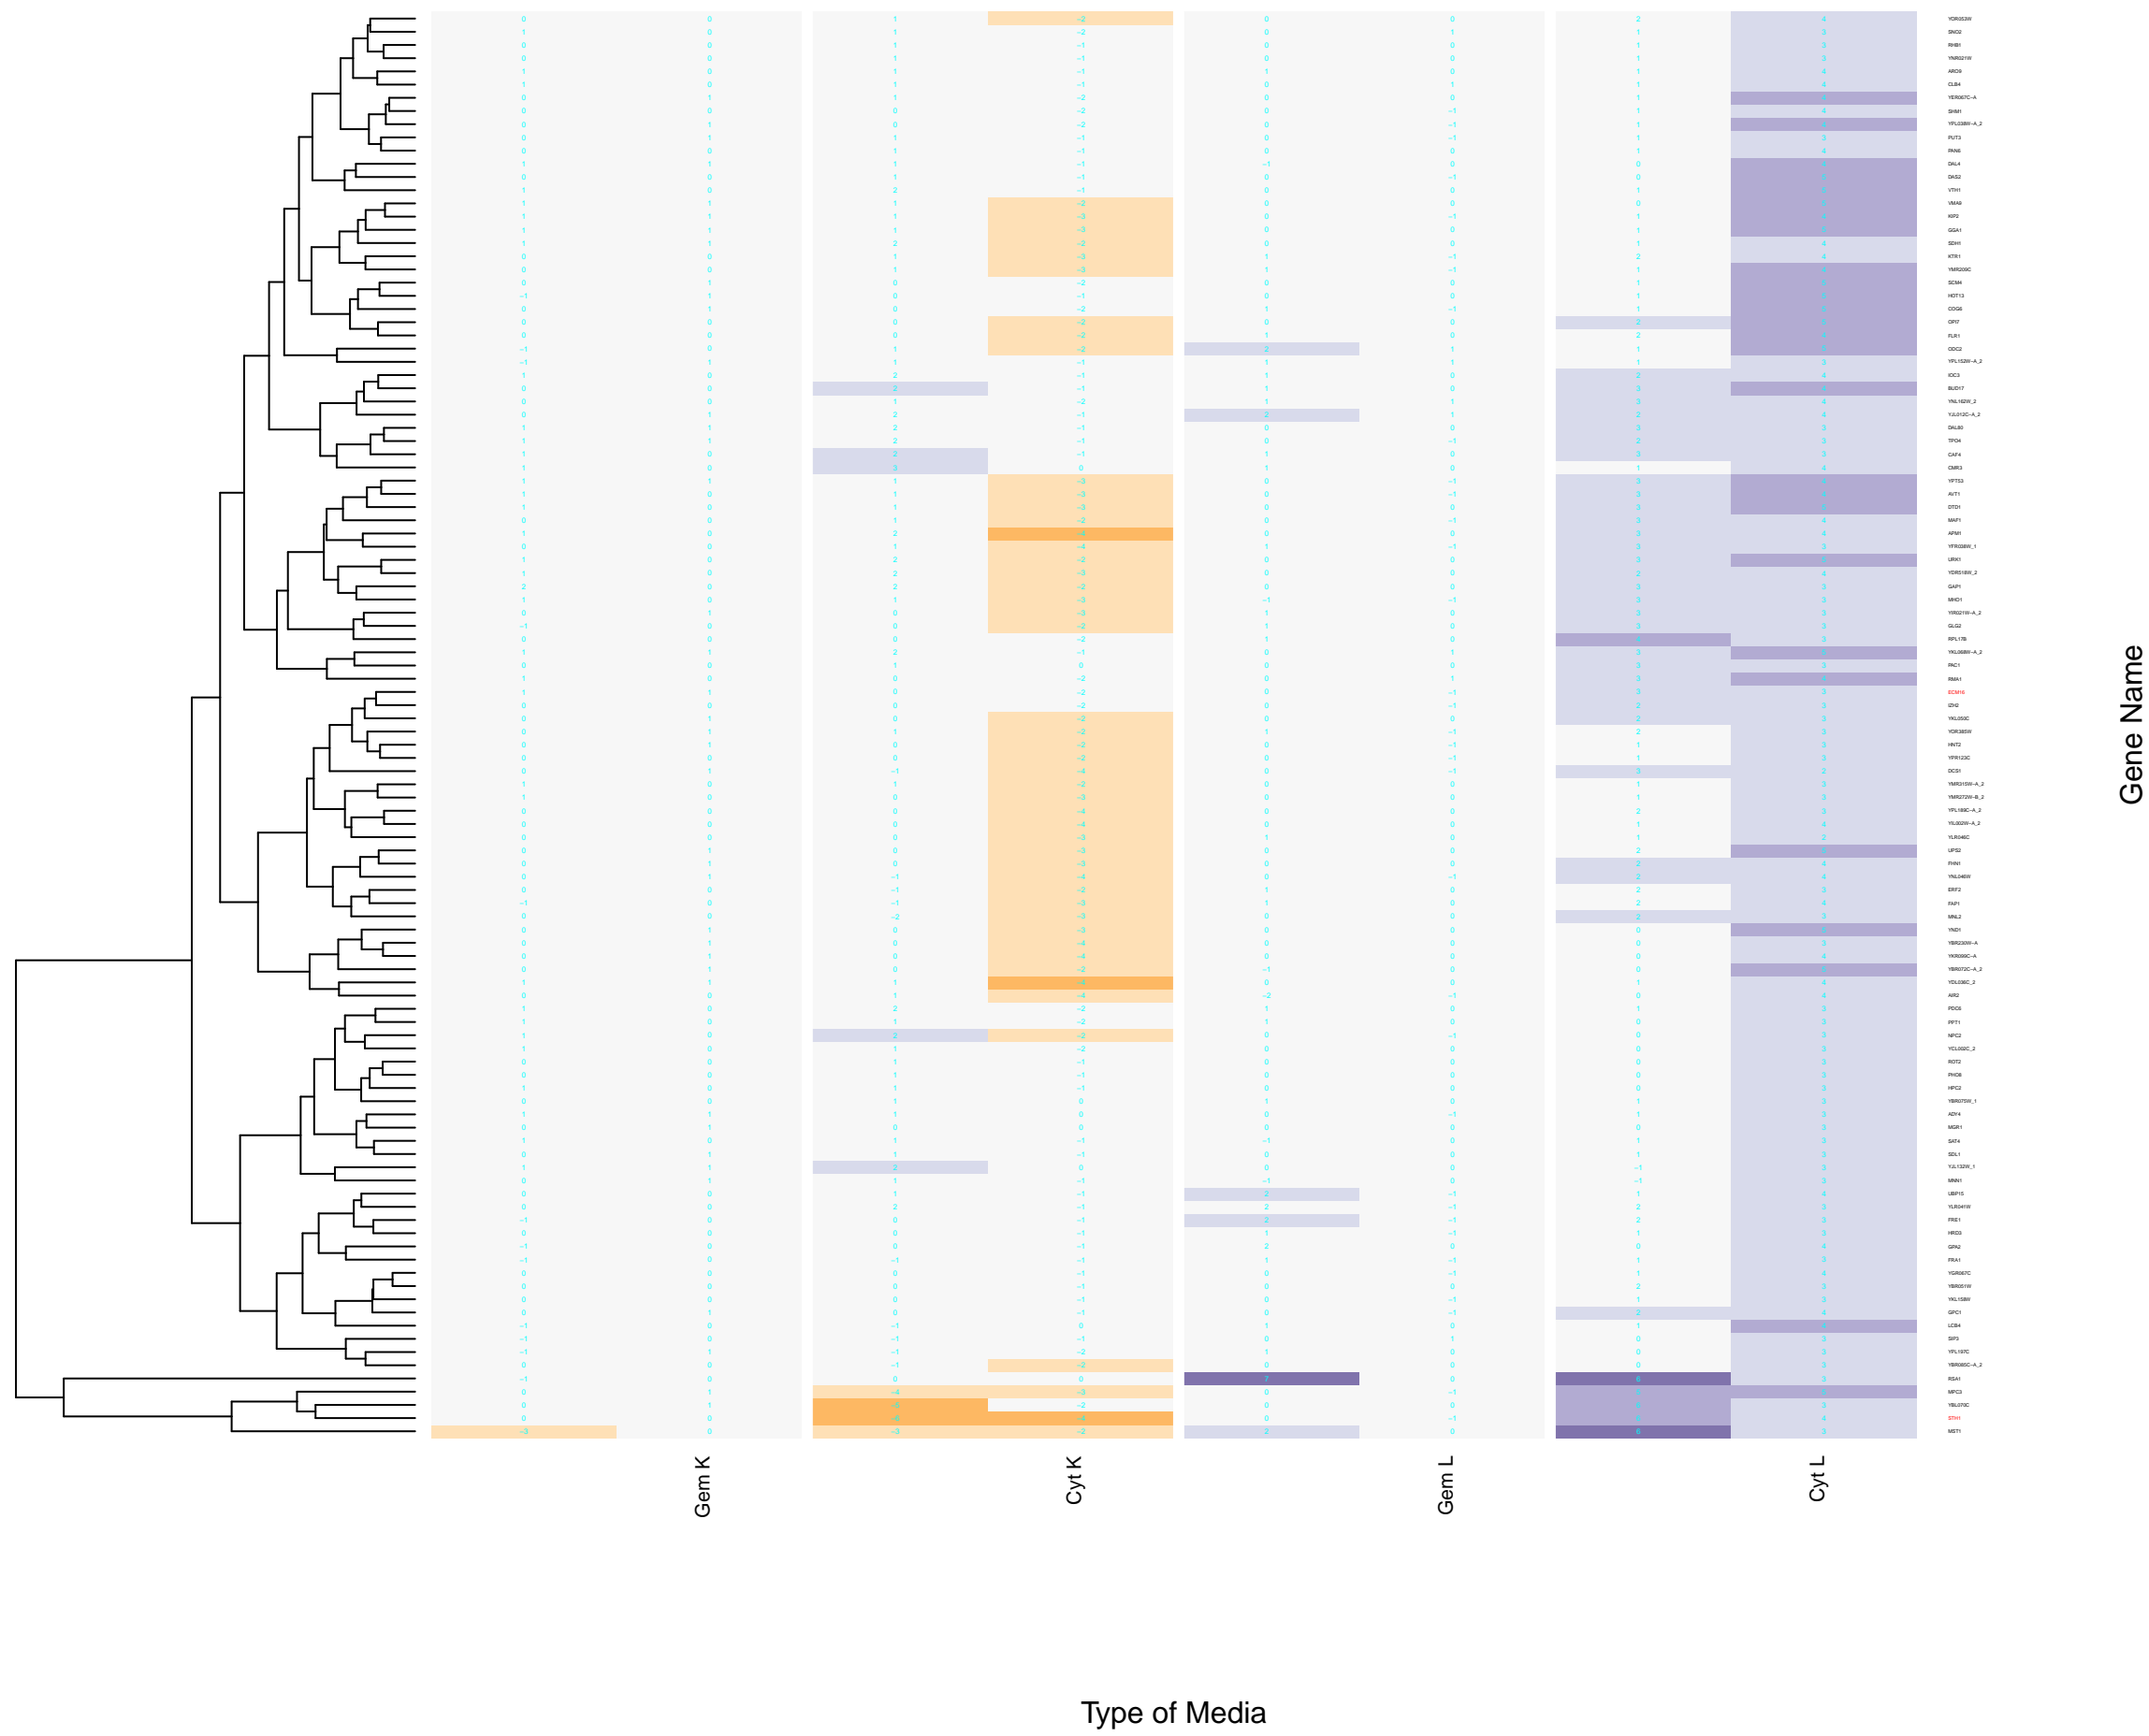

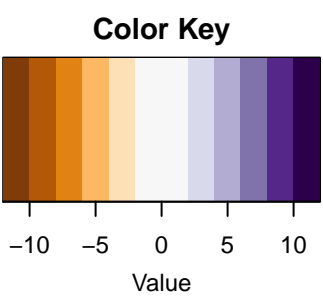

2-0.17-1

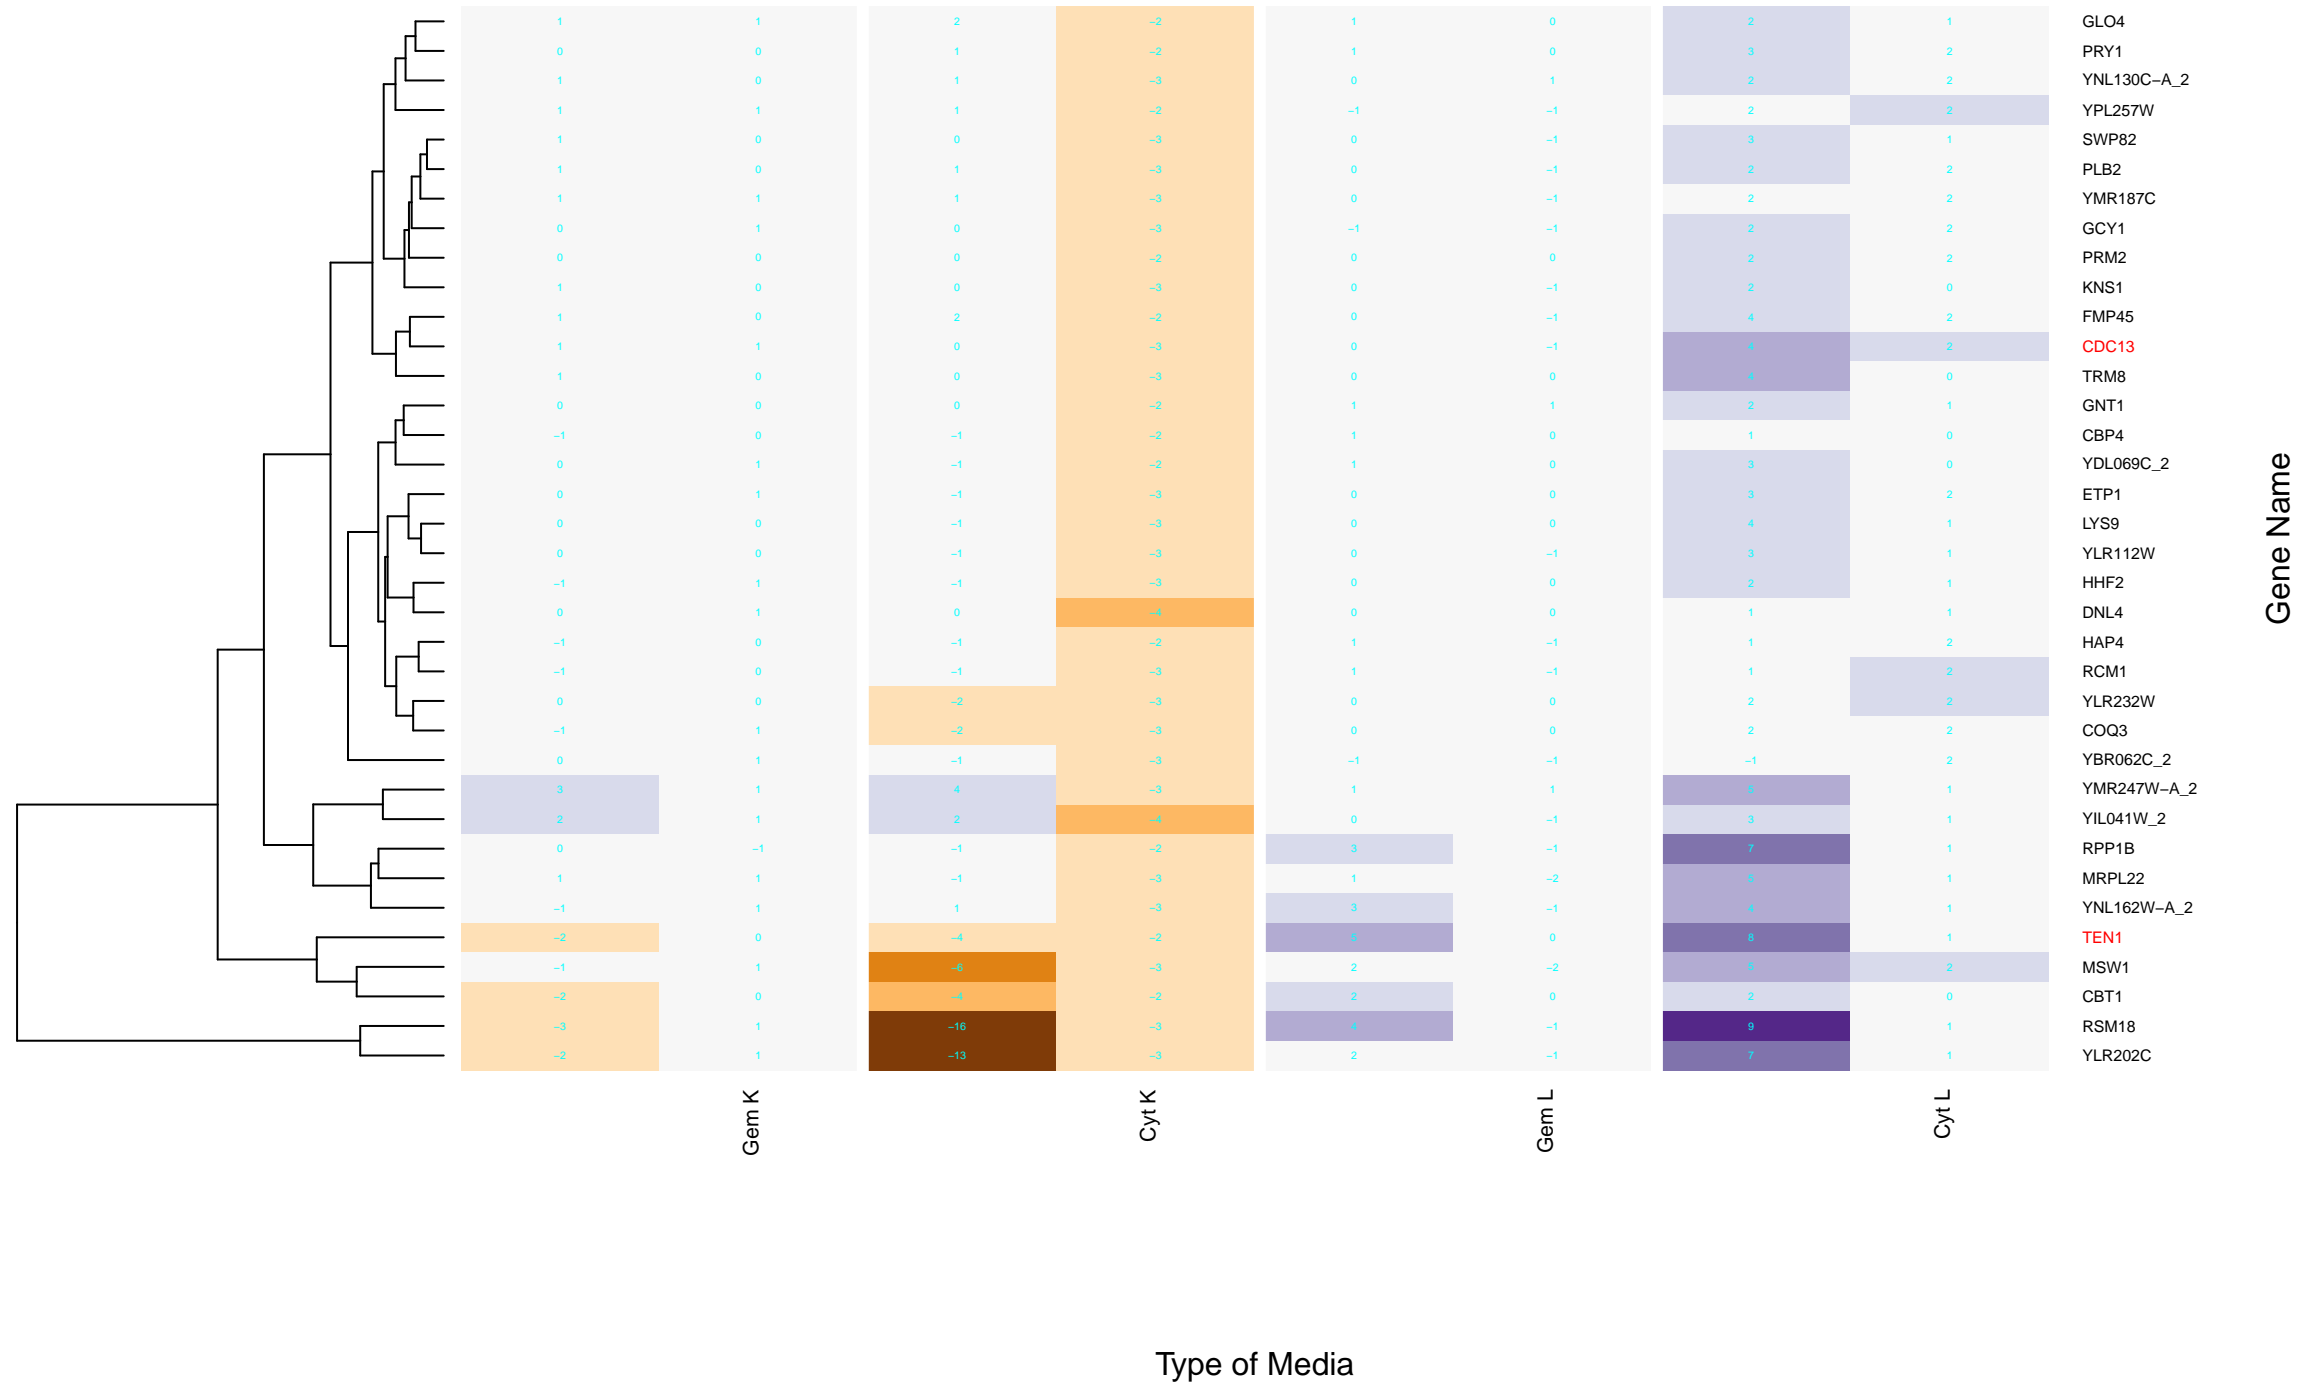

2-0.17-2

Color Key

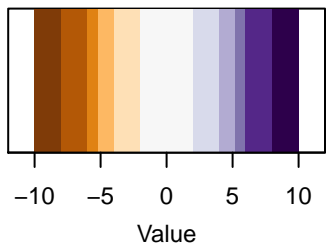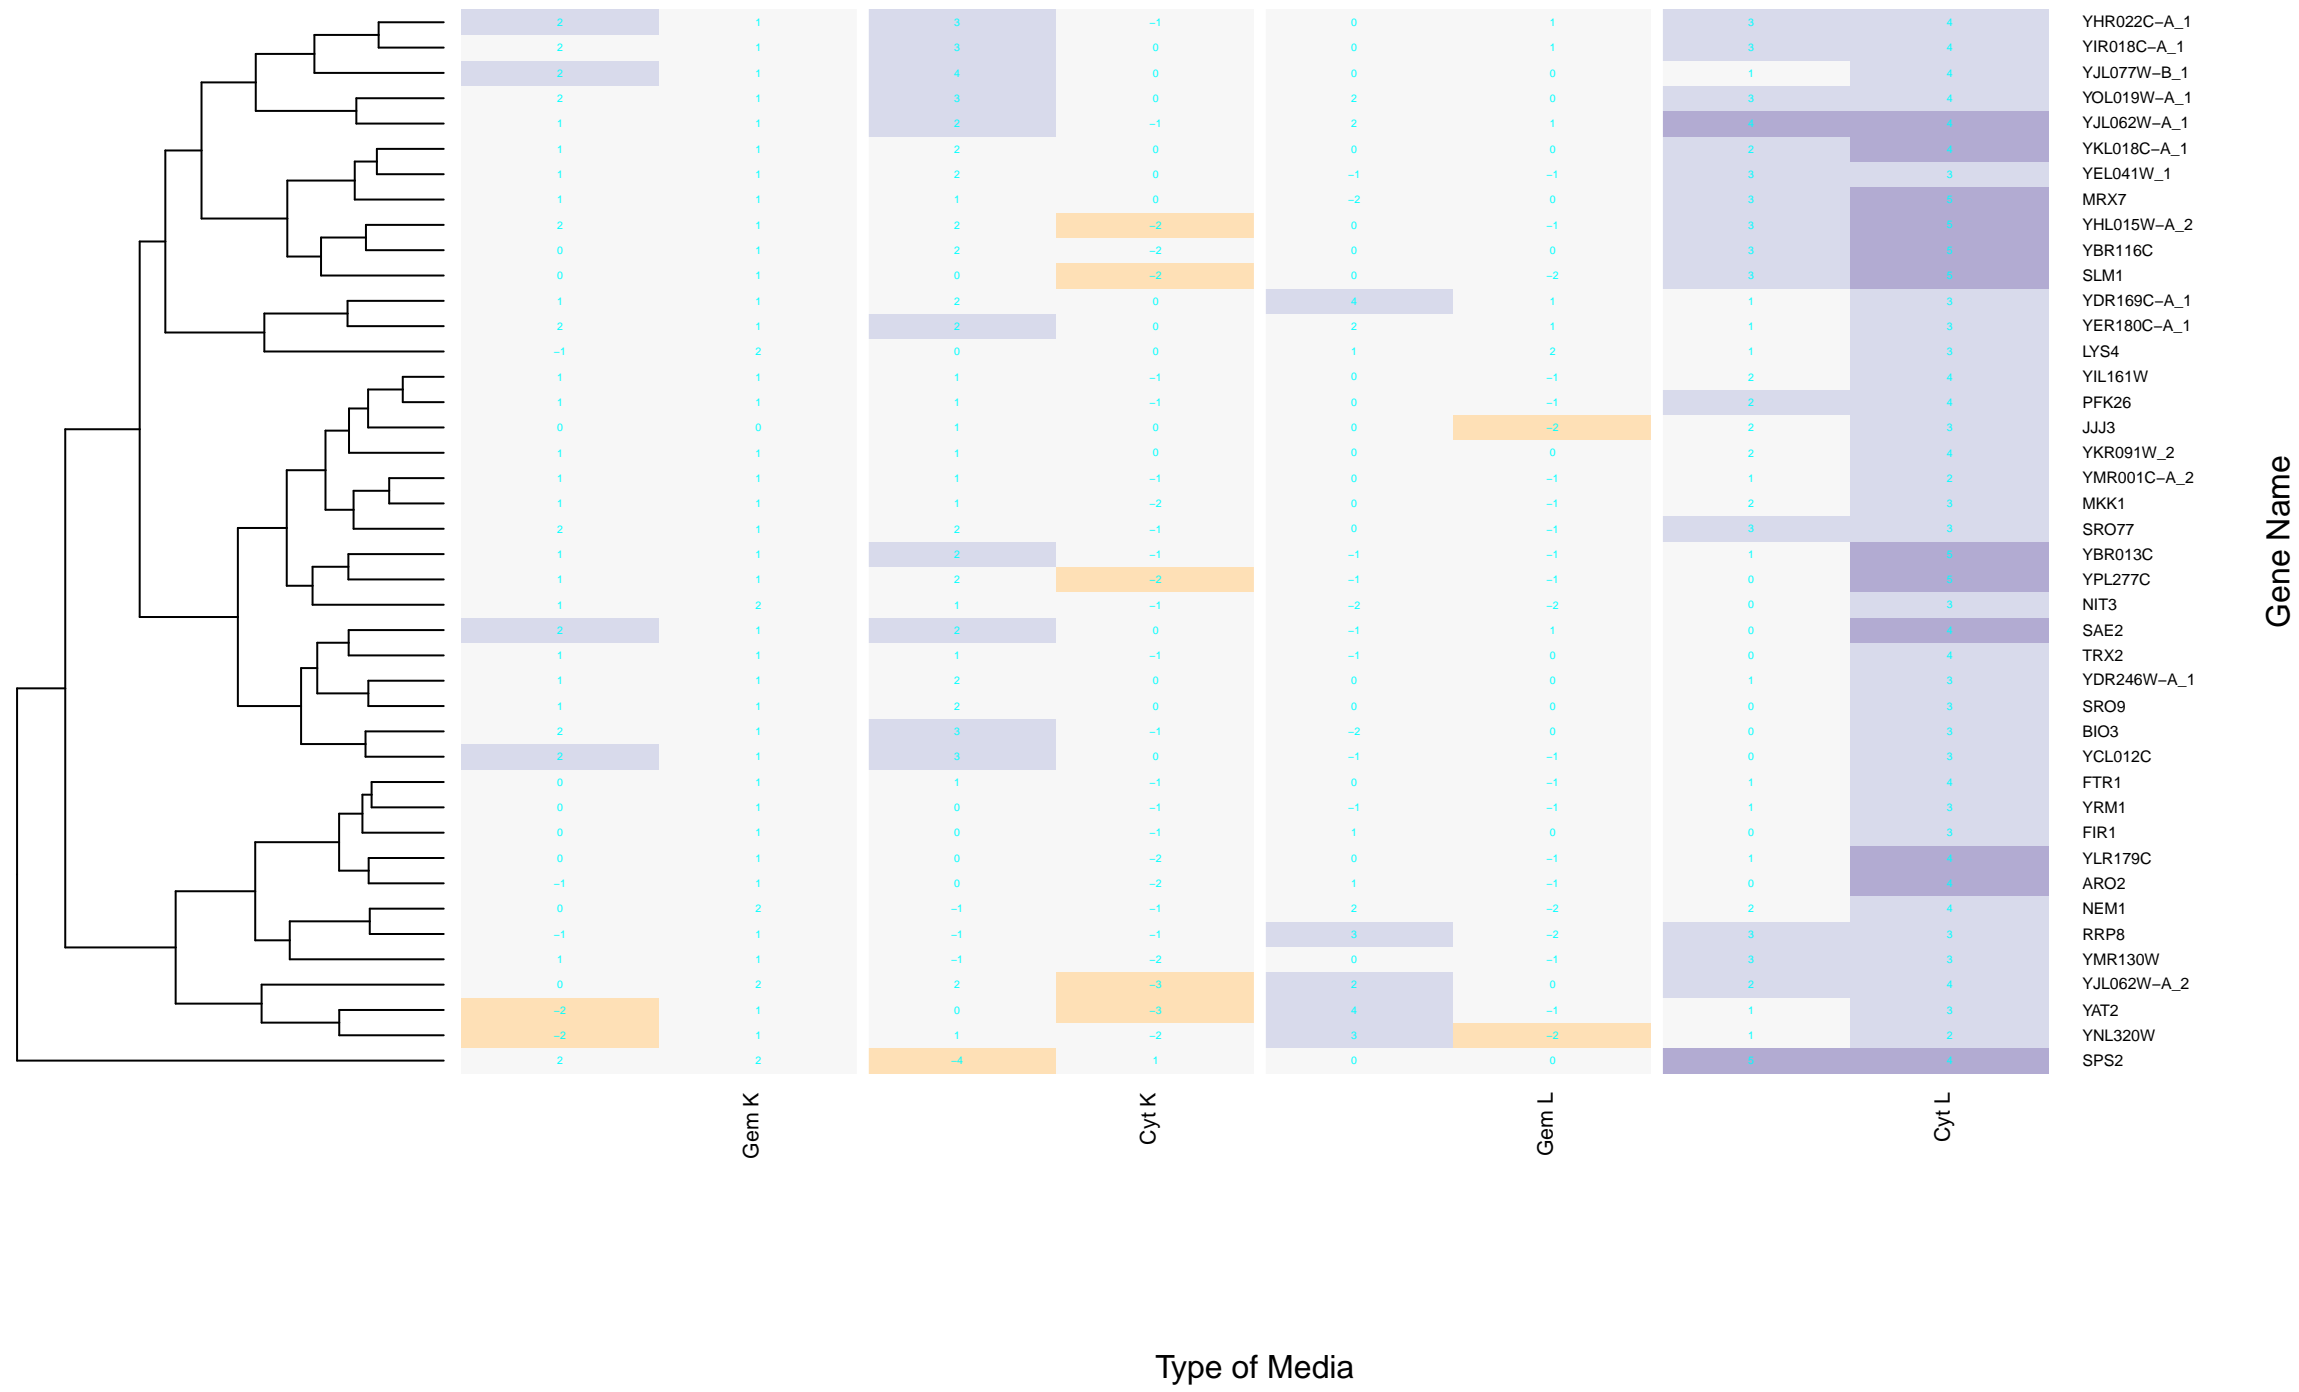



2-0.2-0

Color Key

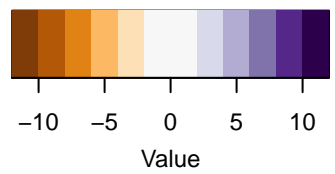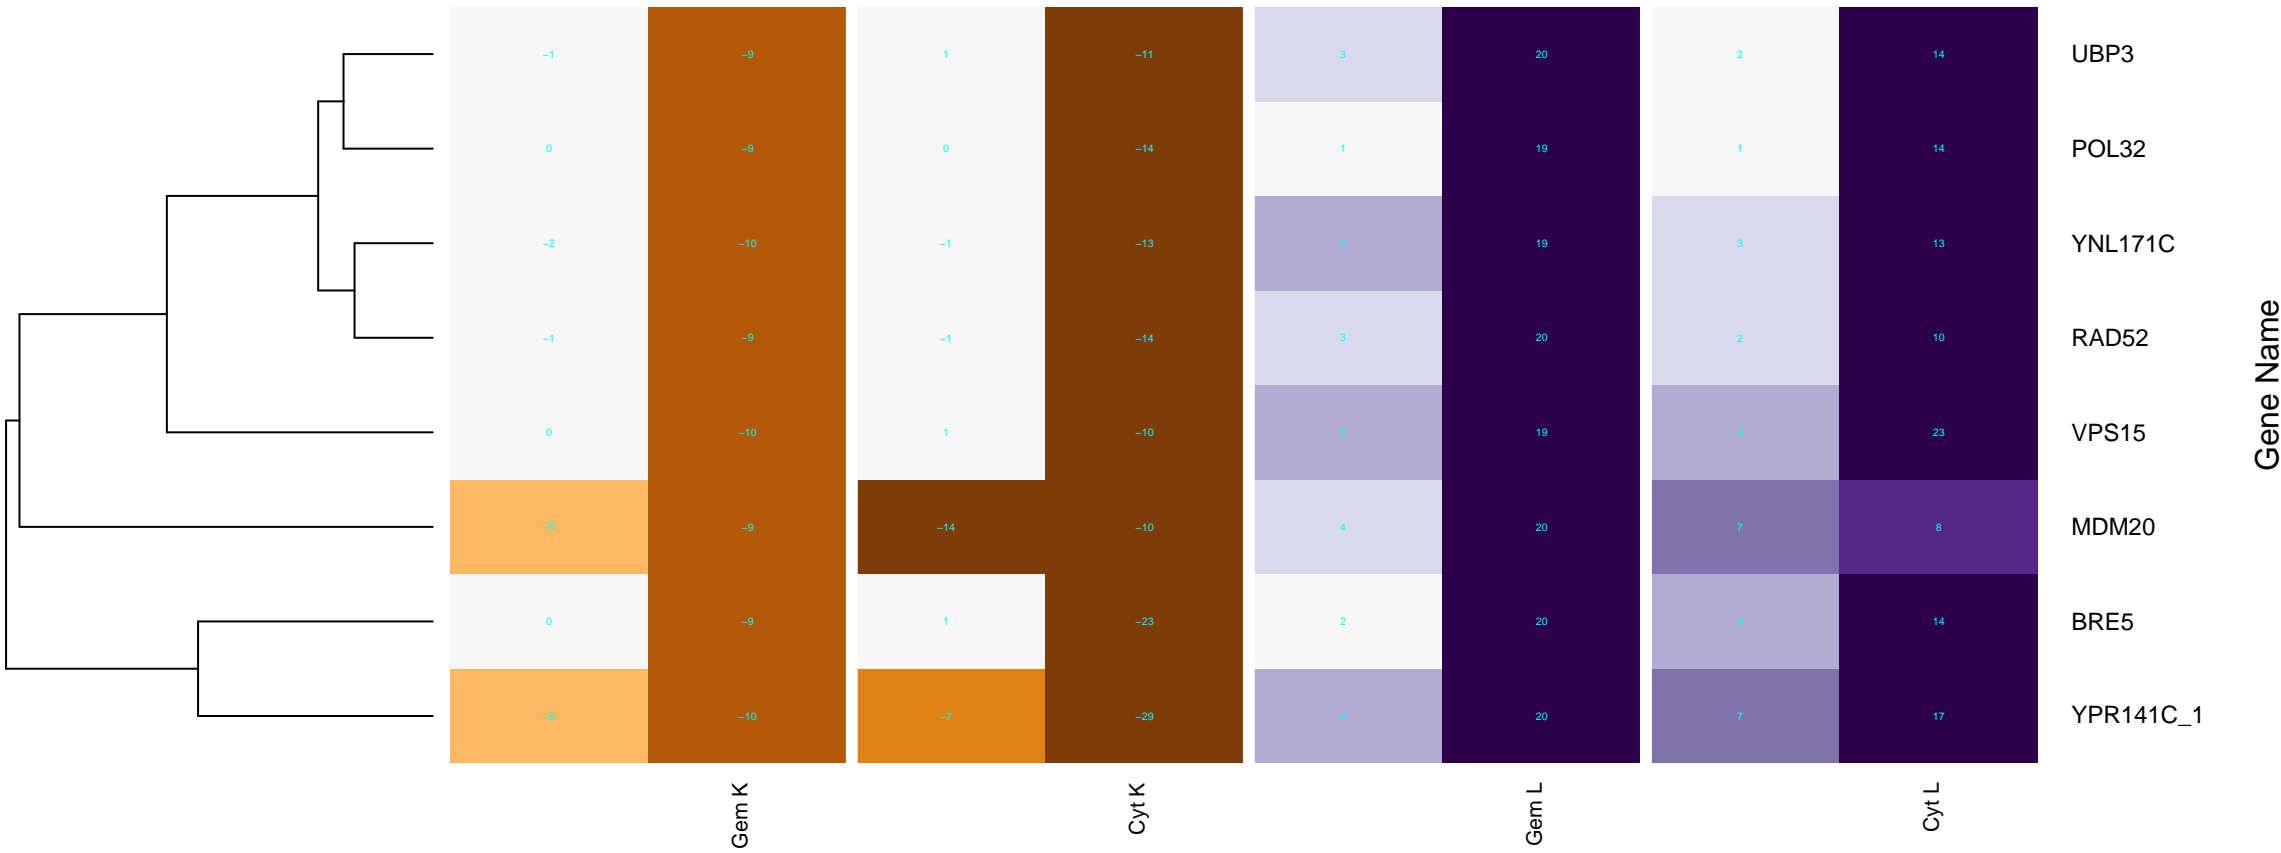

Type of Media

2-0.2-1

Color Key

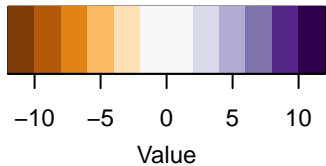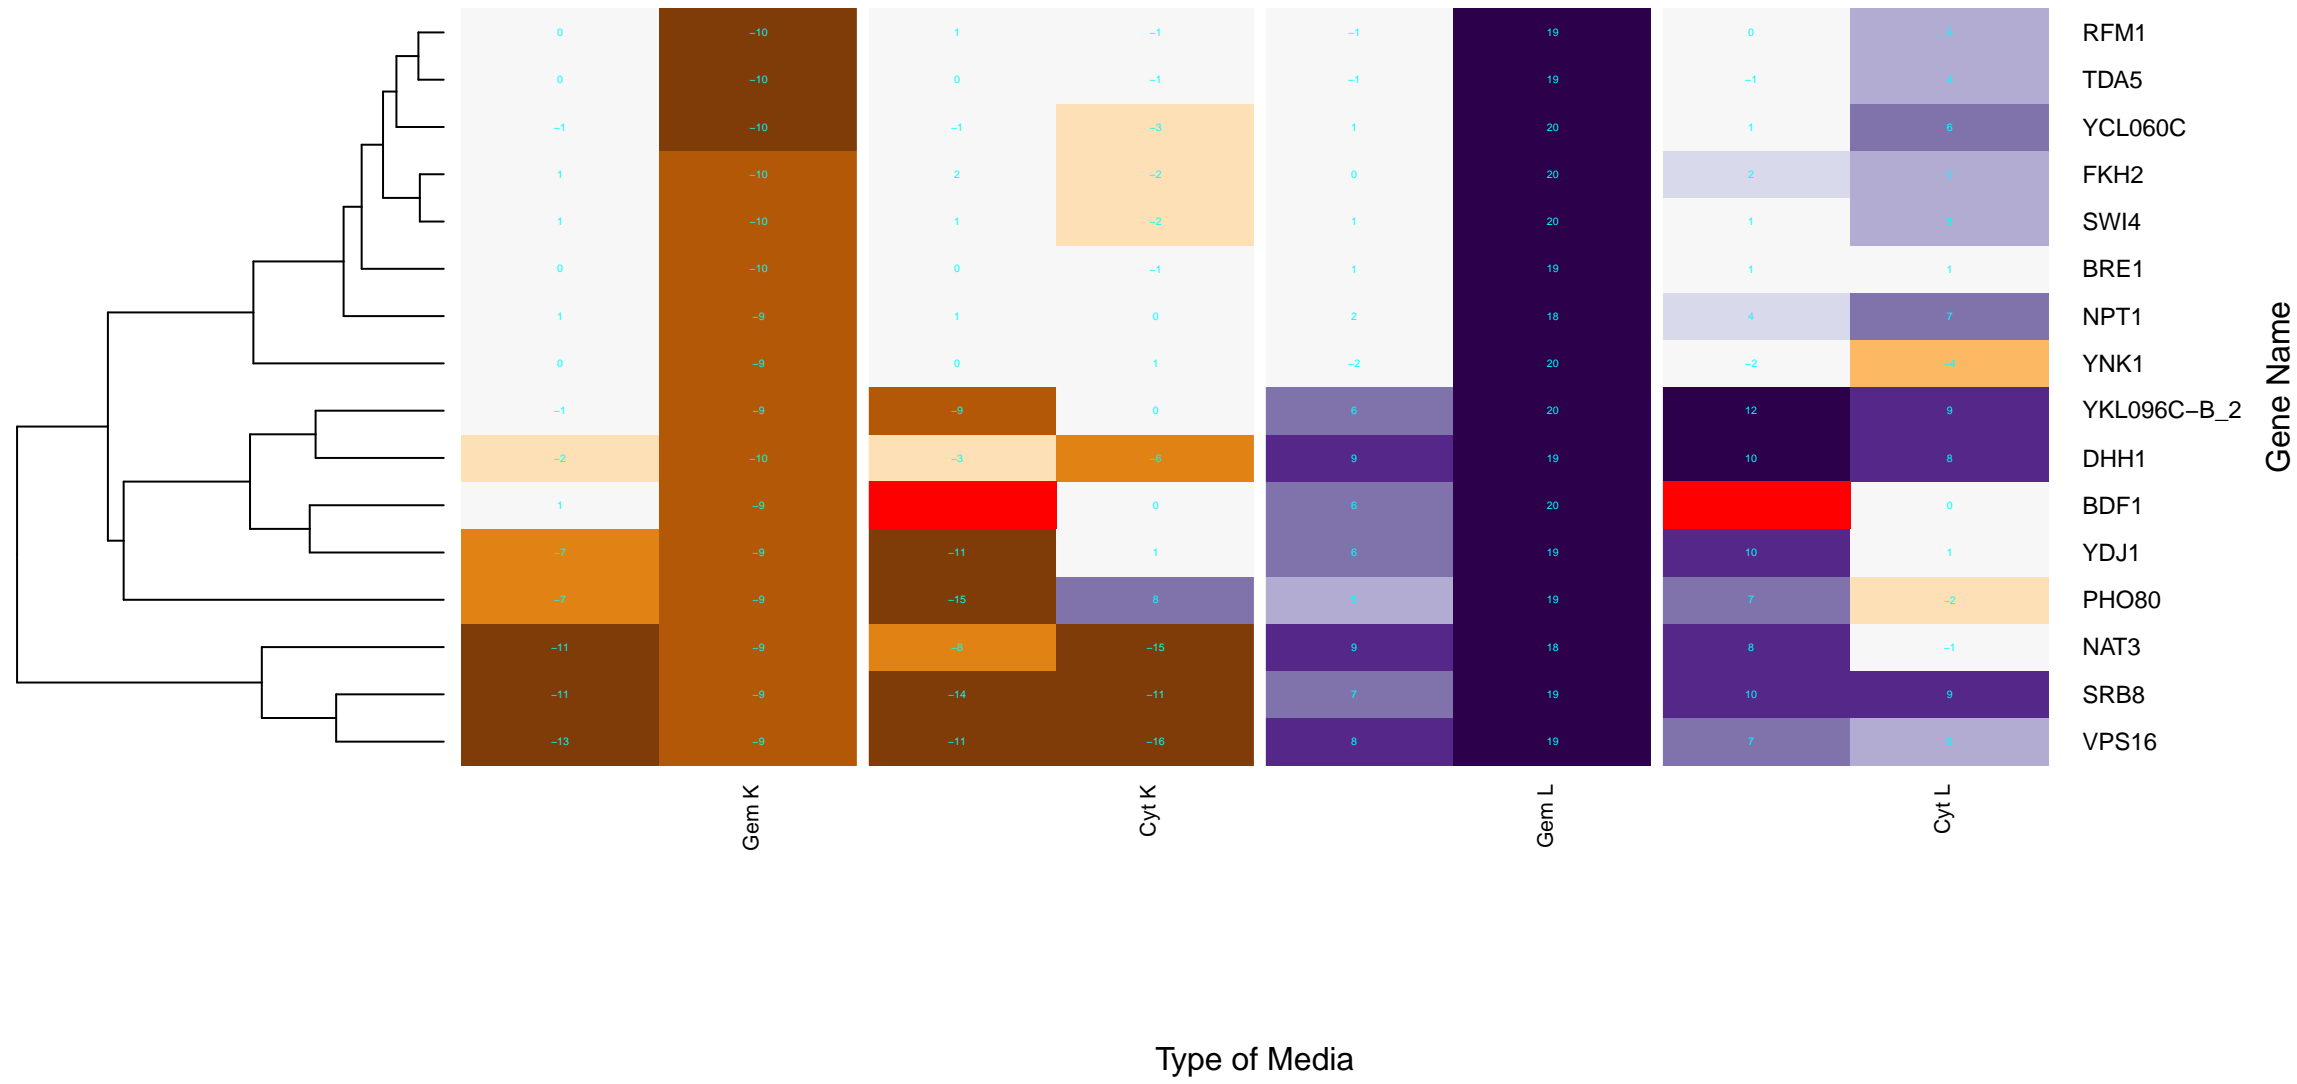

2-0.2-2

Color Key

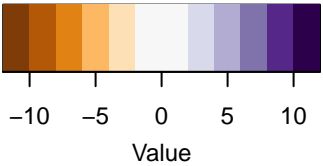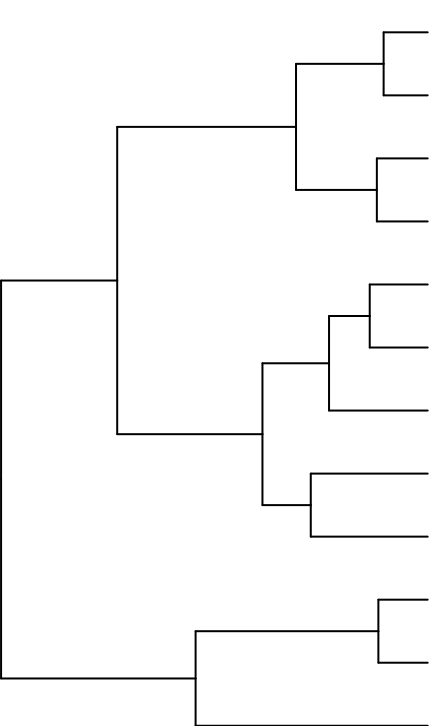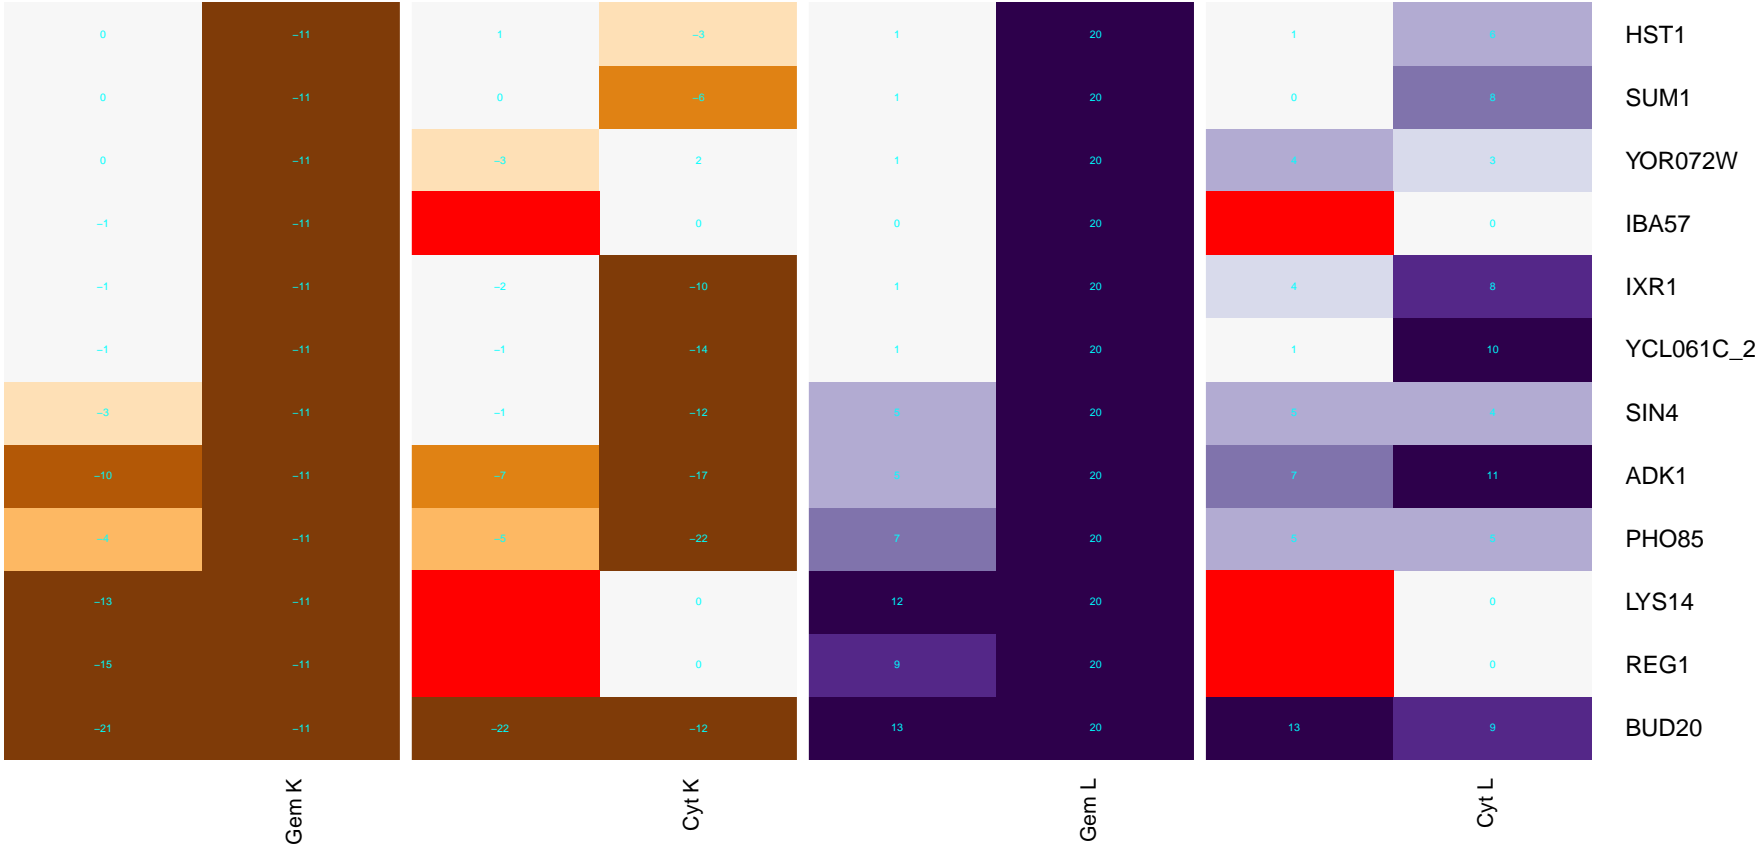



2-0.8-1

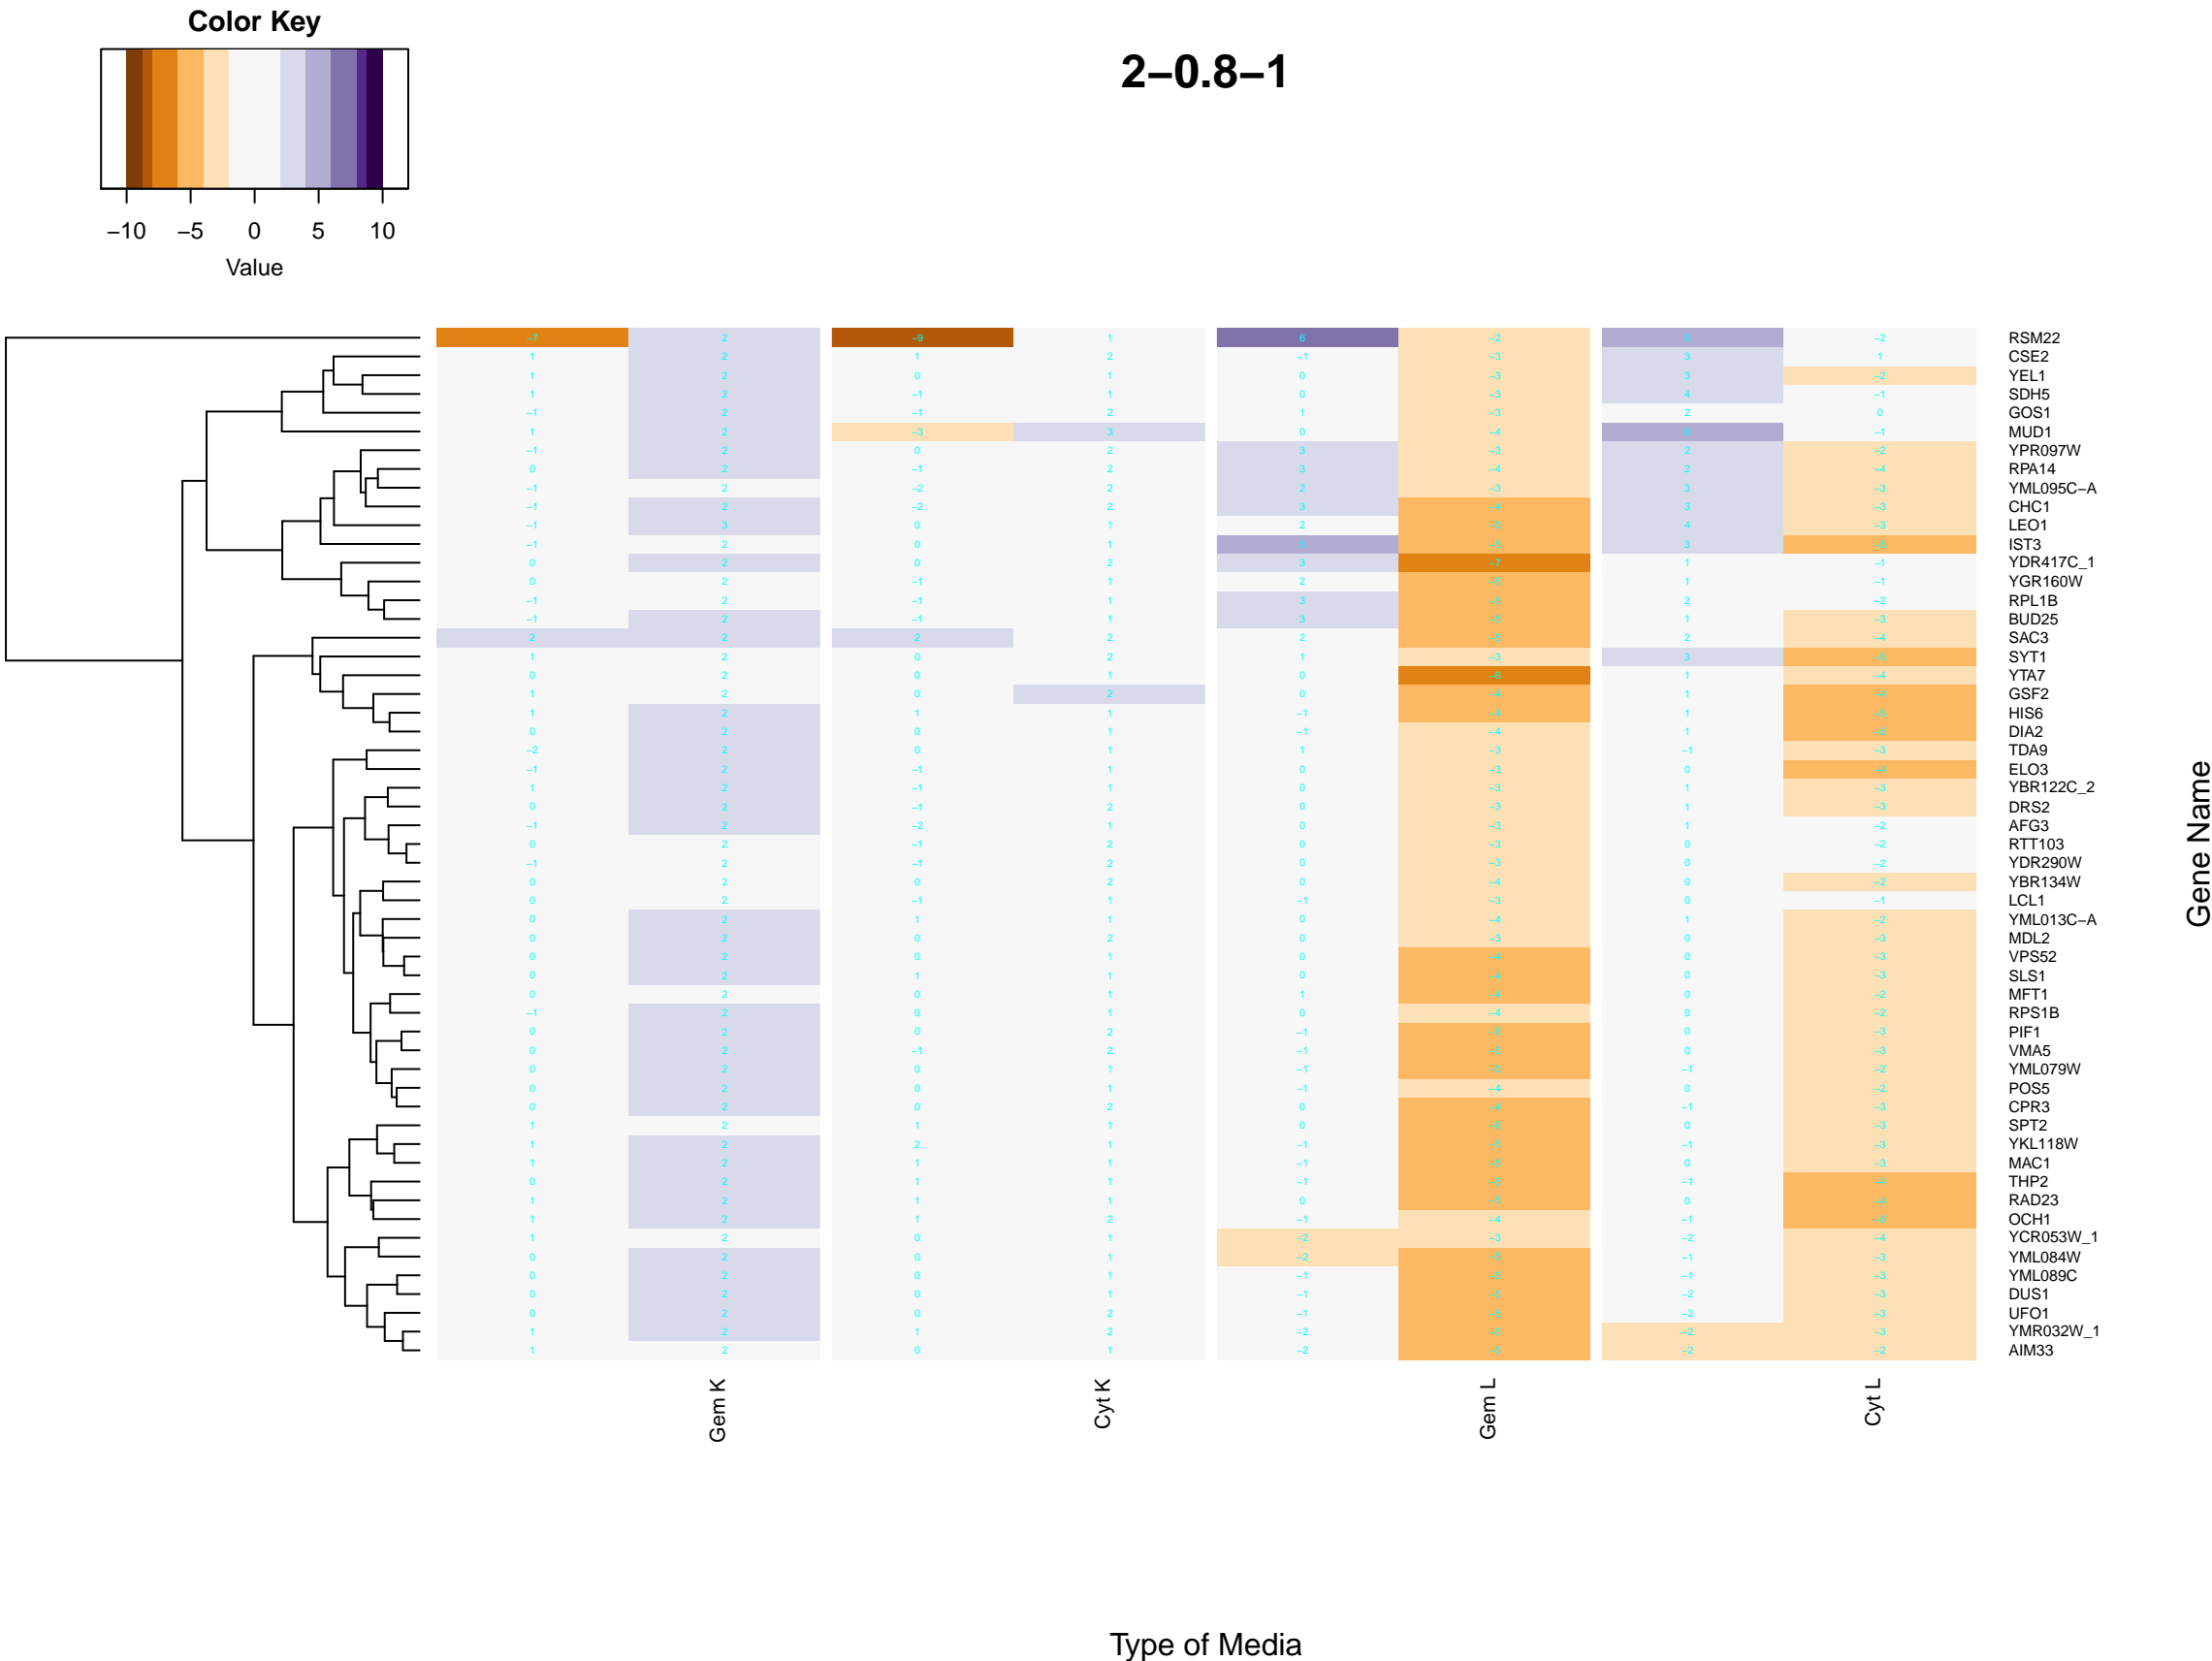

2-0.9-0

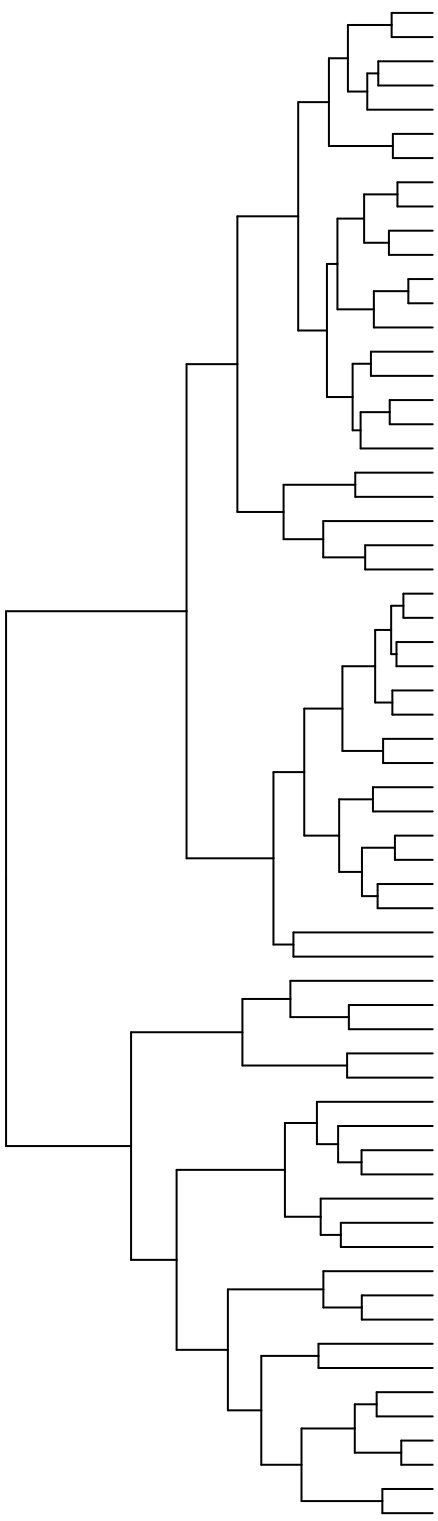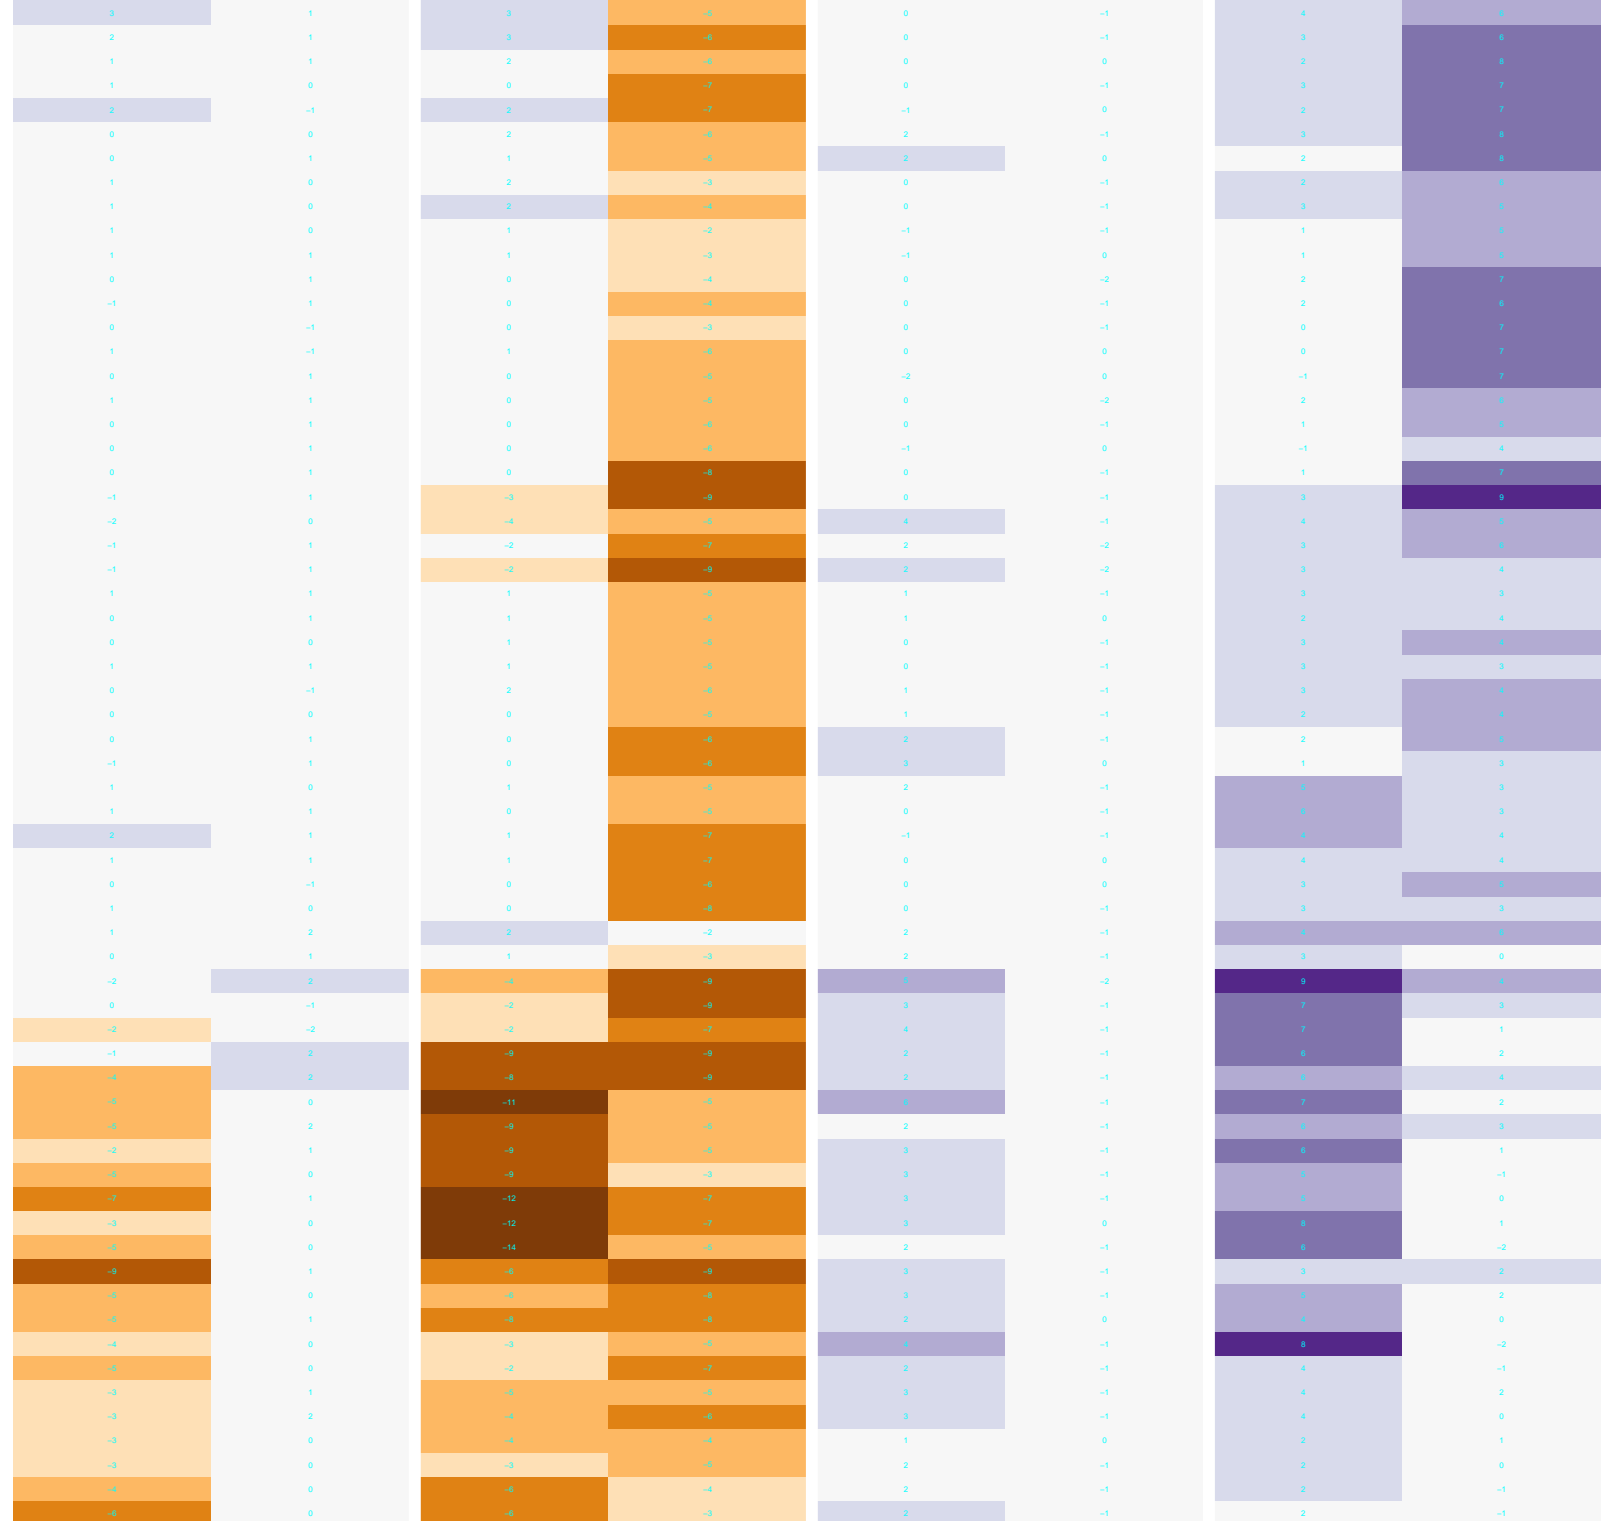

Gene Name

Type of Media

2-0.9-1

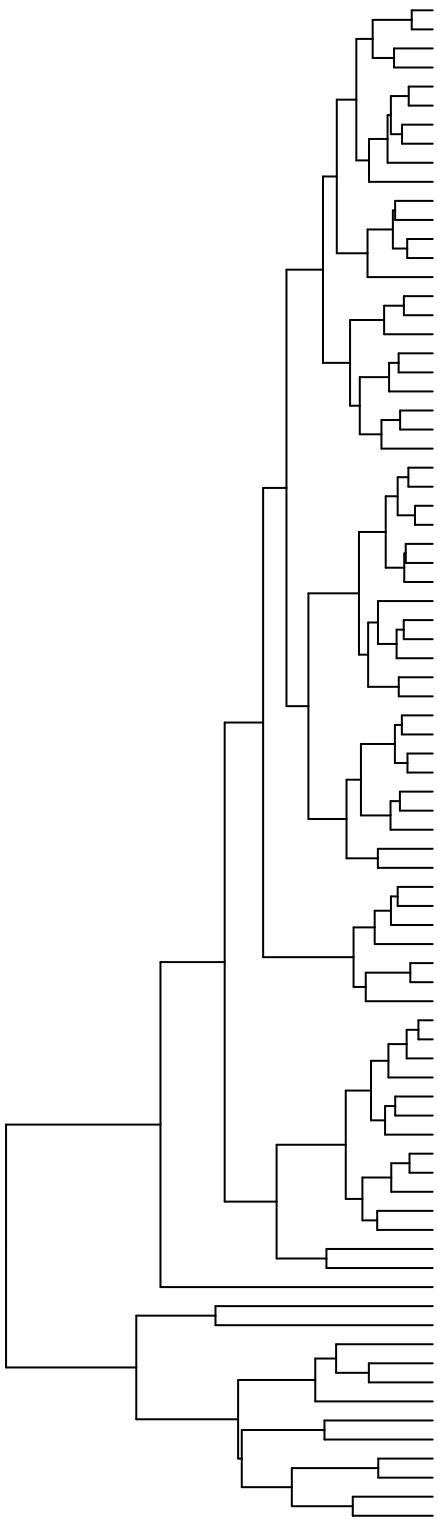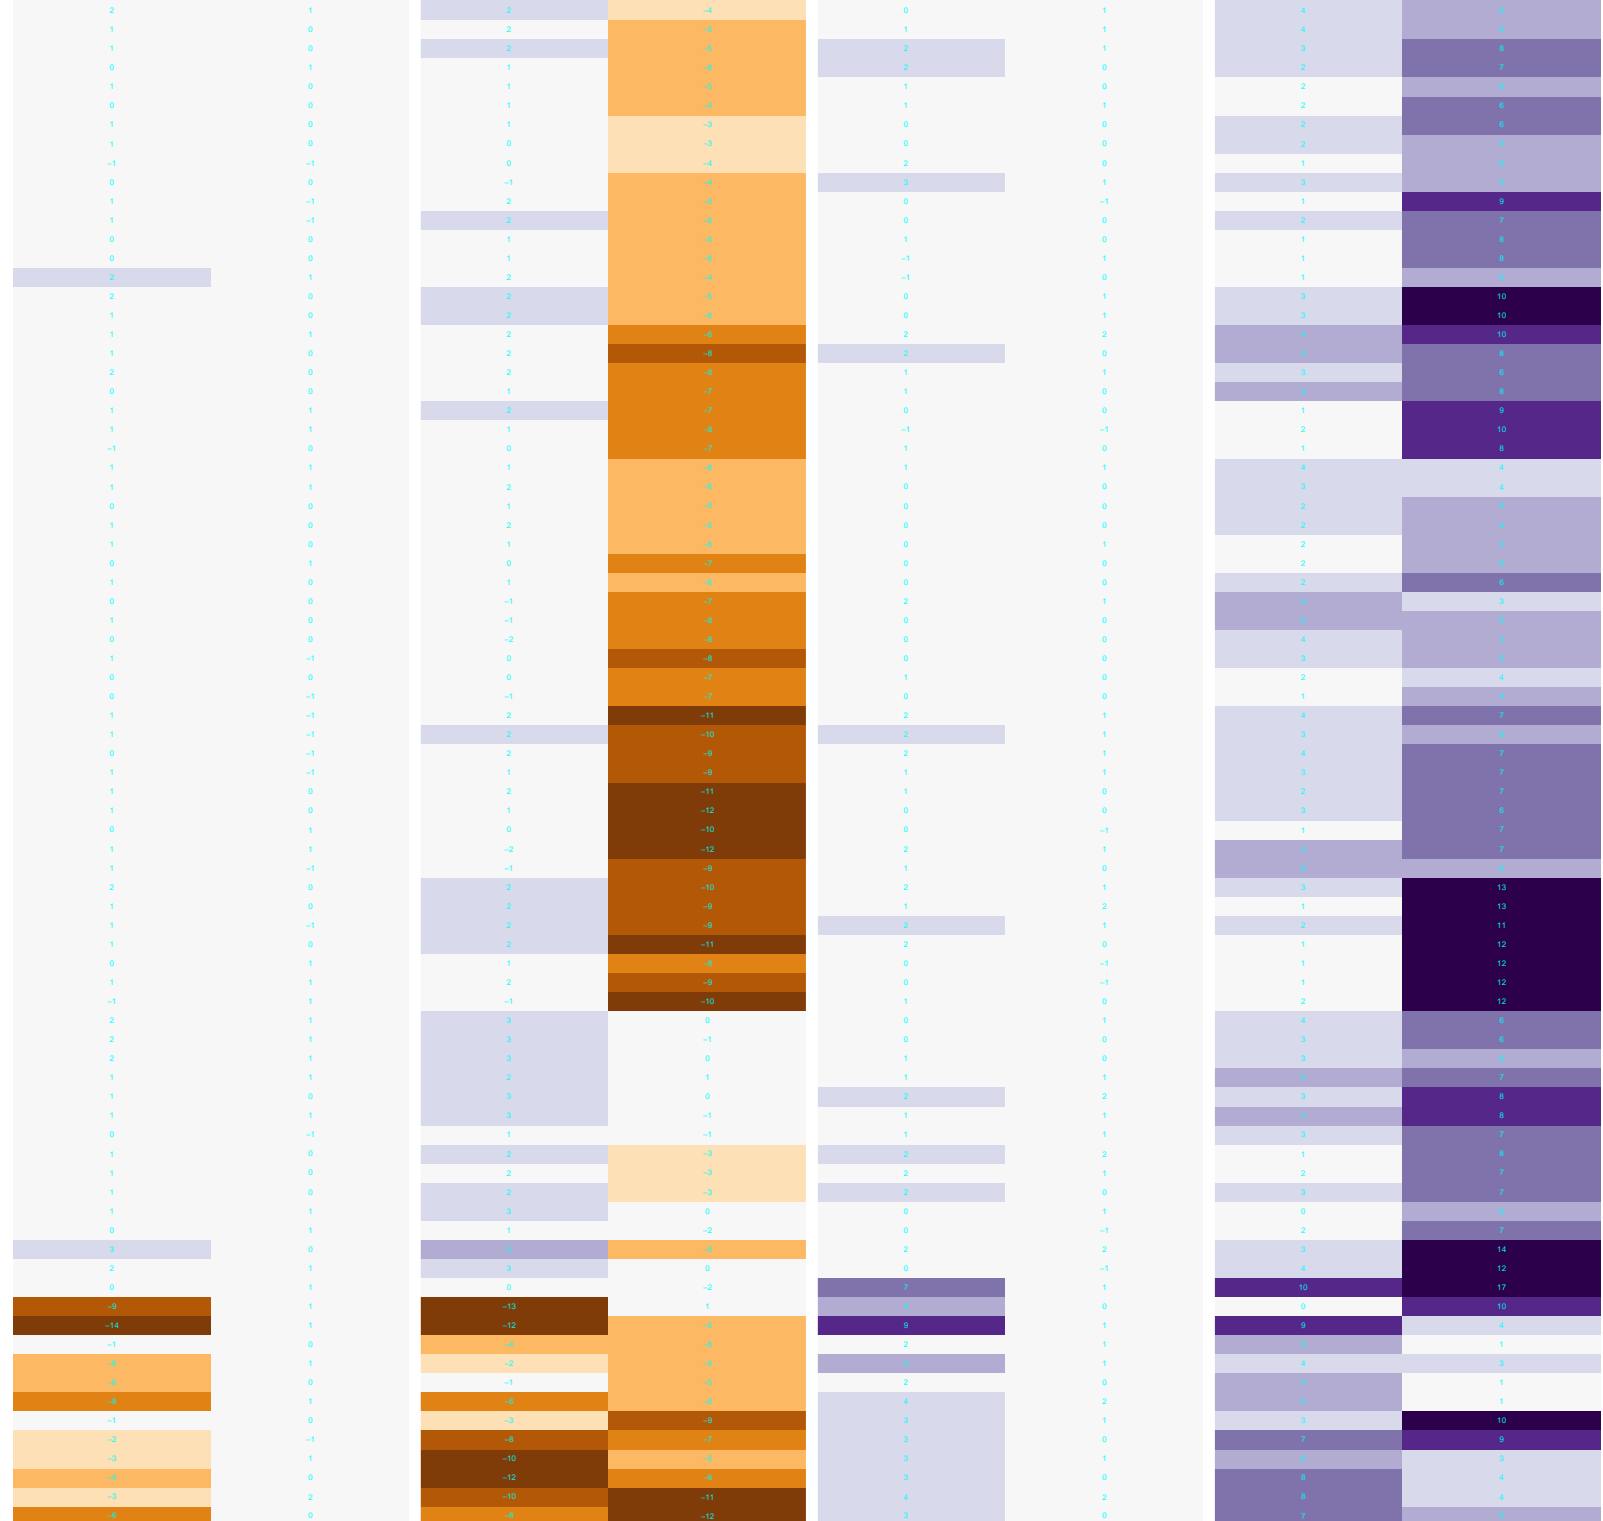

Gene Name

3-0.17.2-0

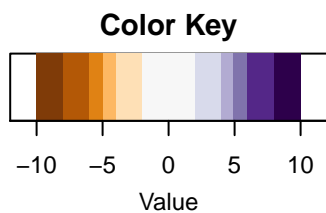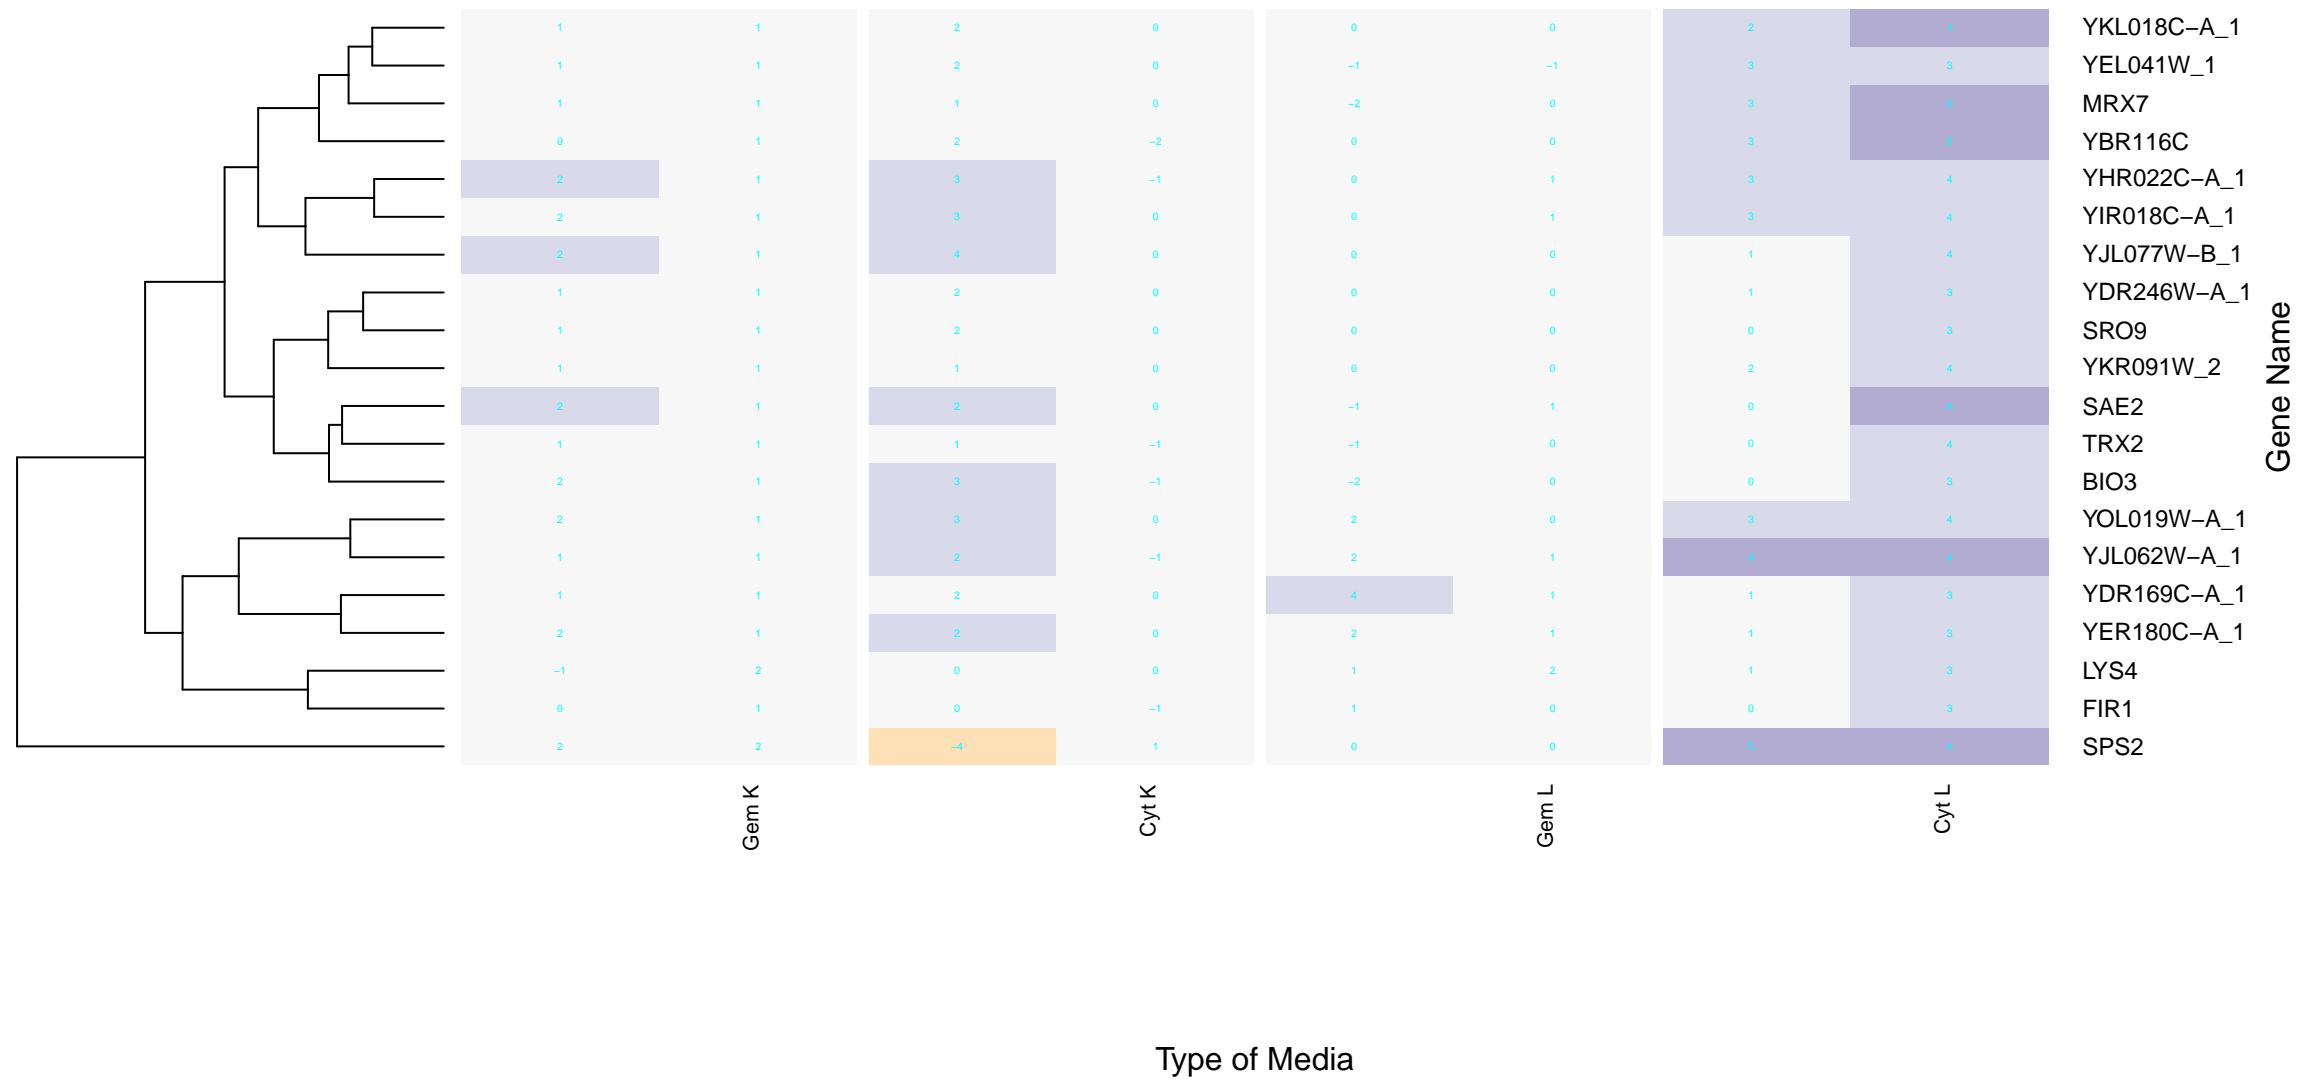

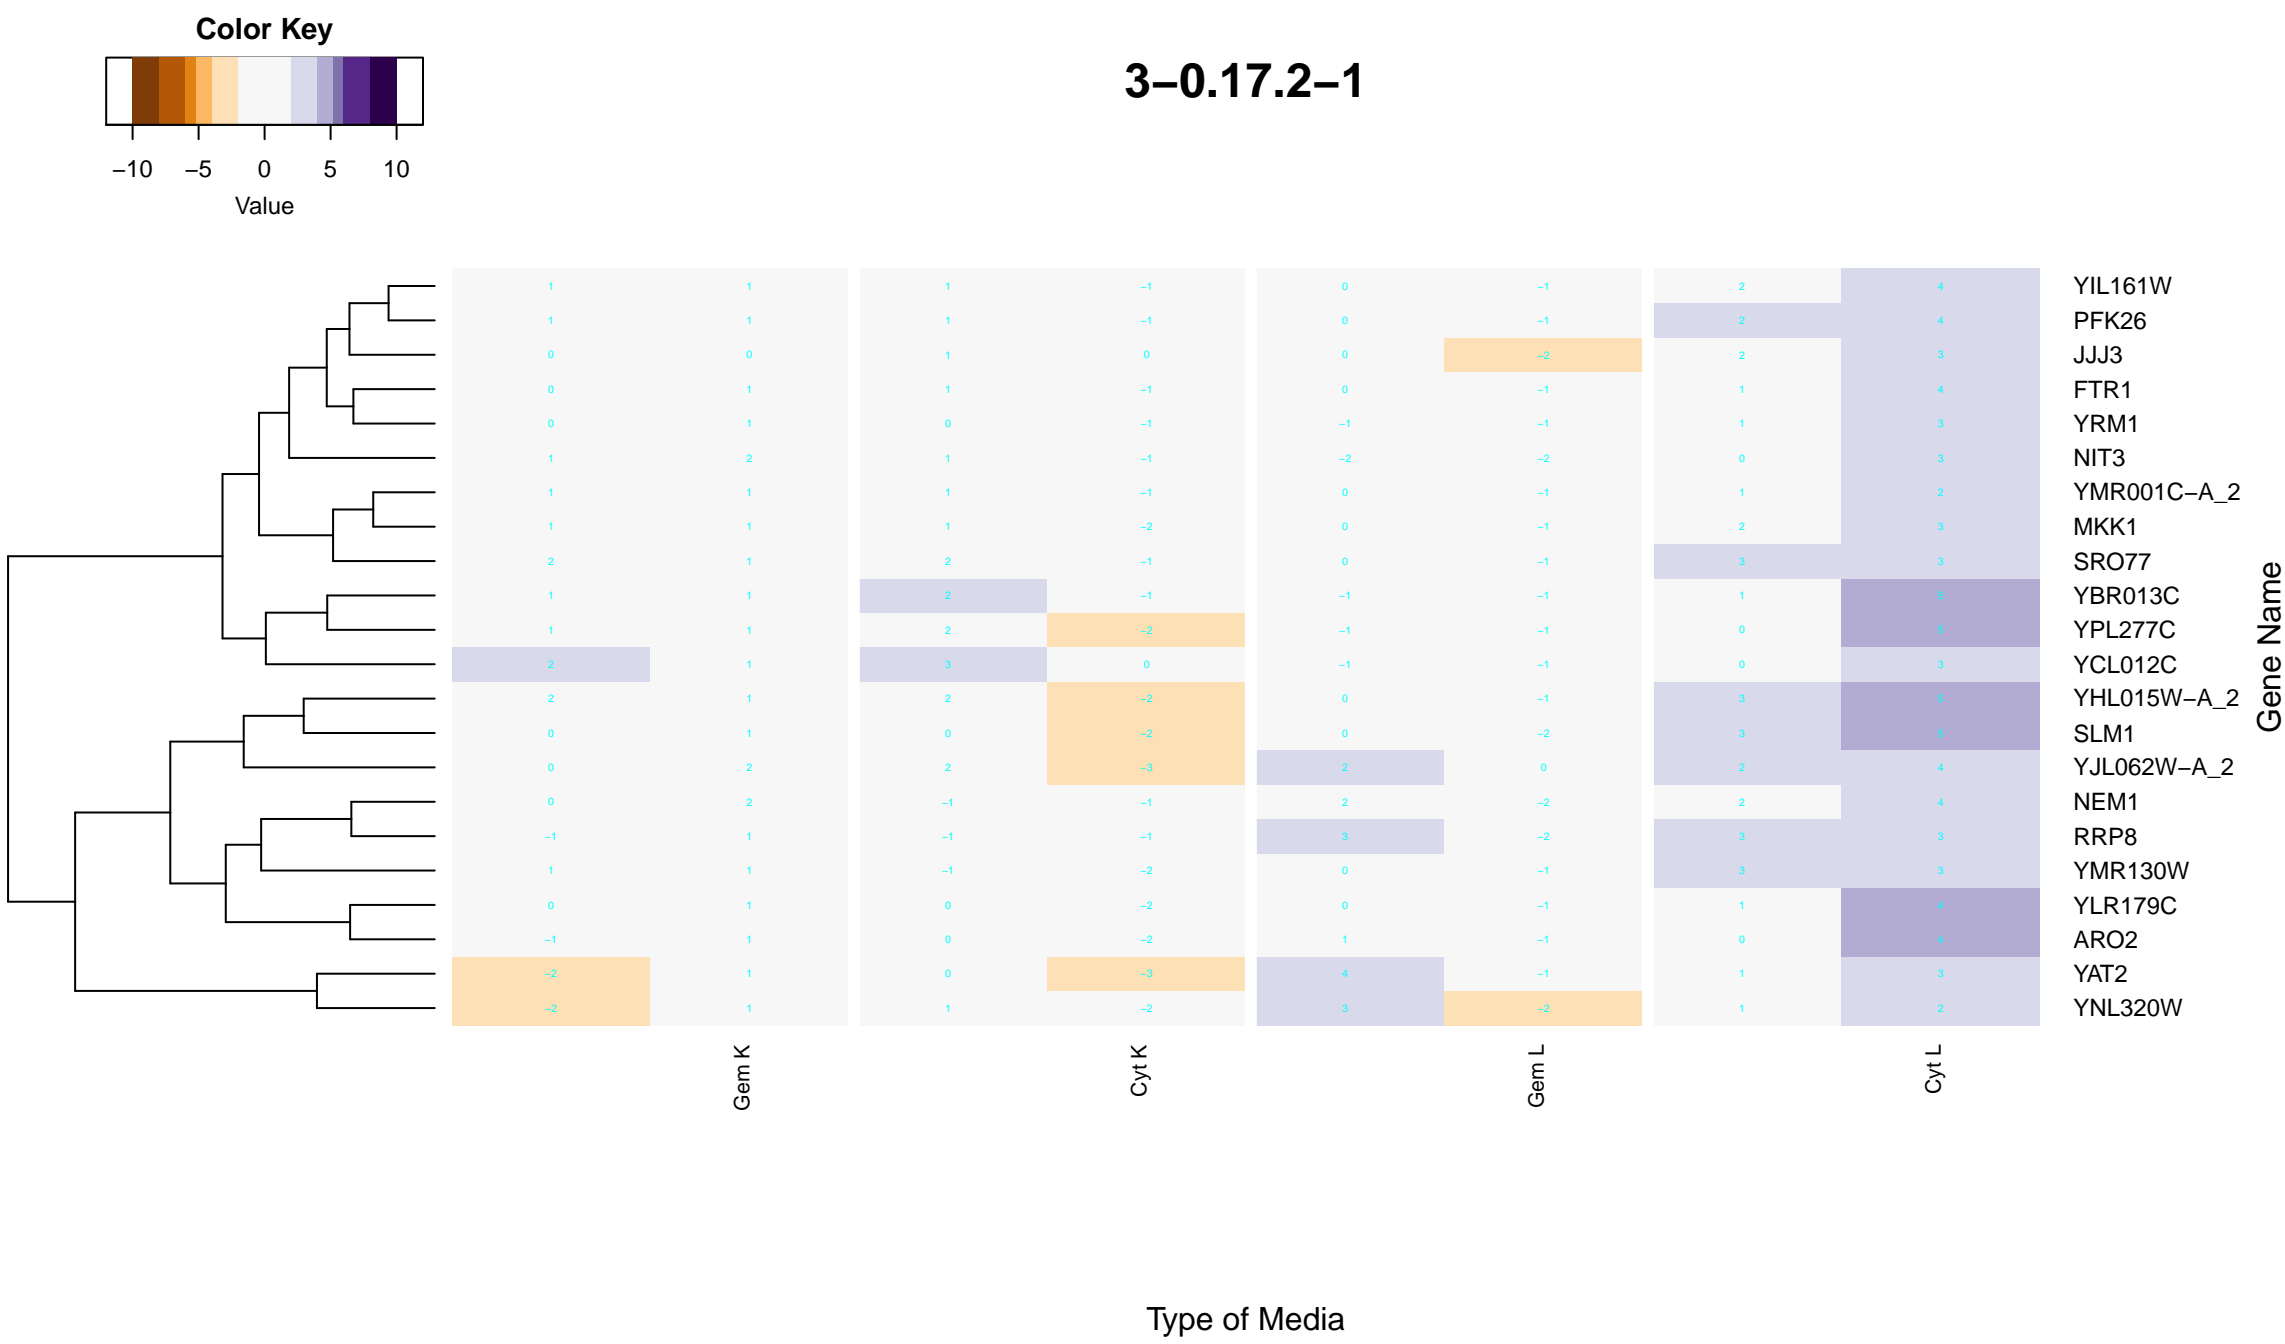

3-0.2.2-0

Color Key

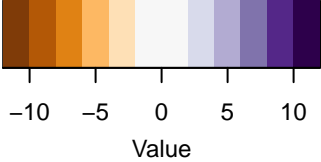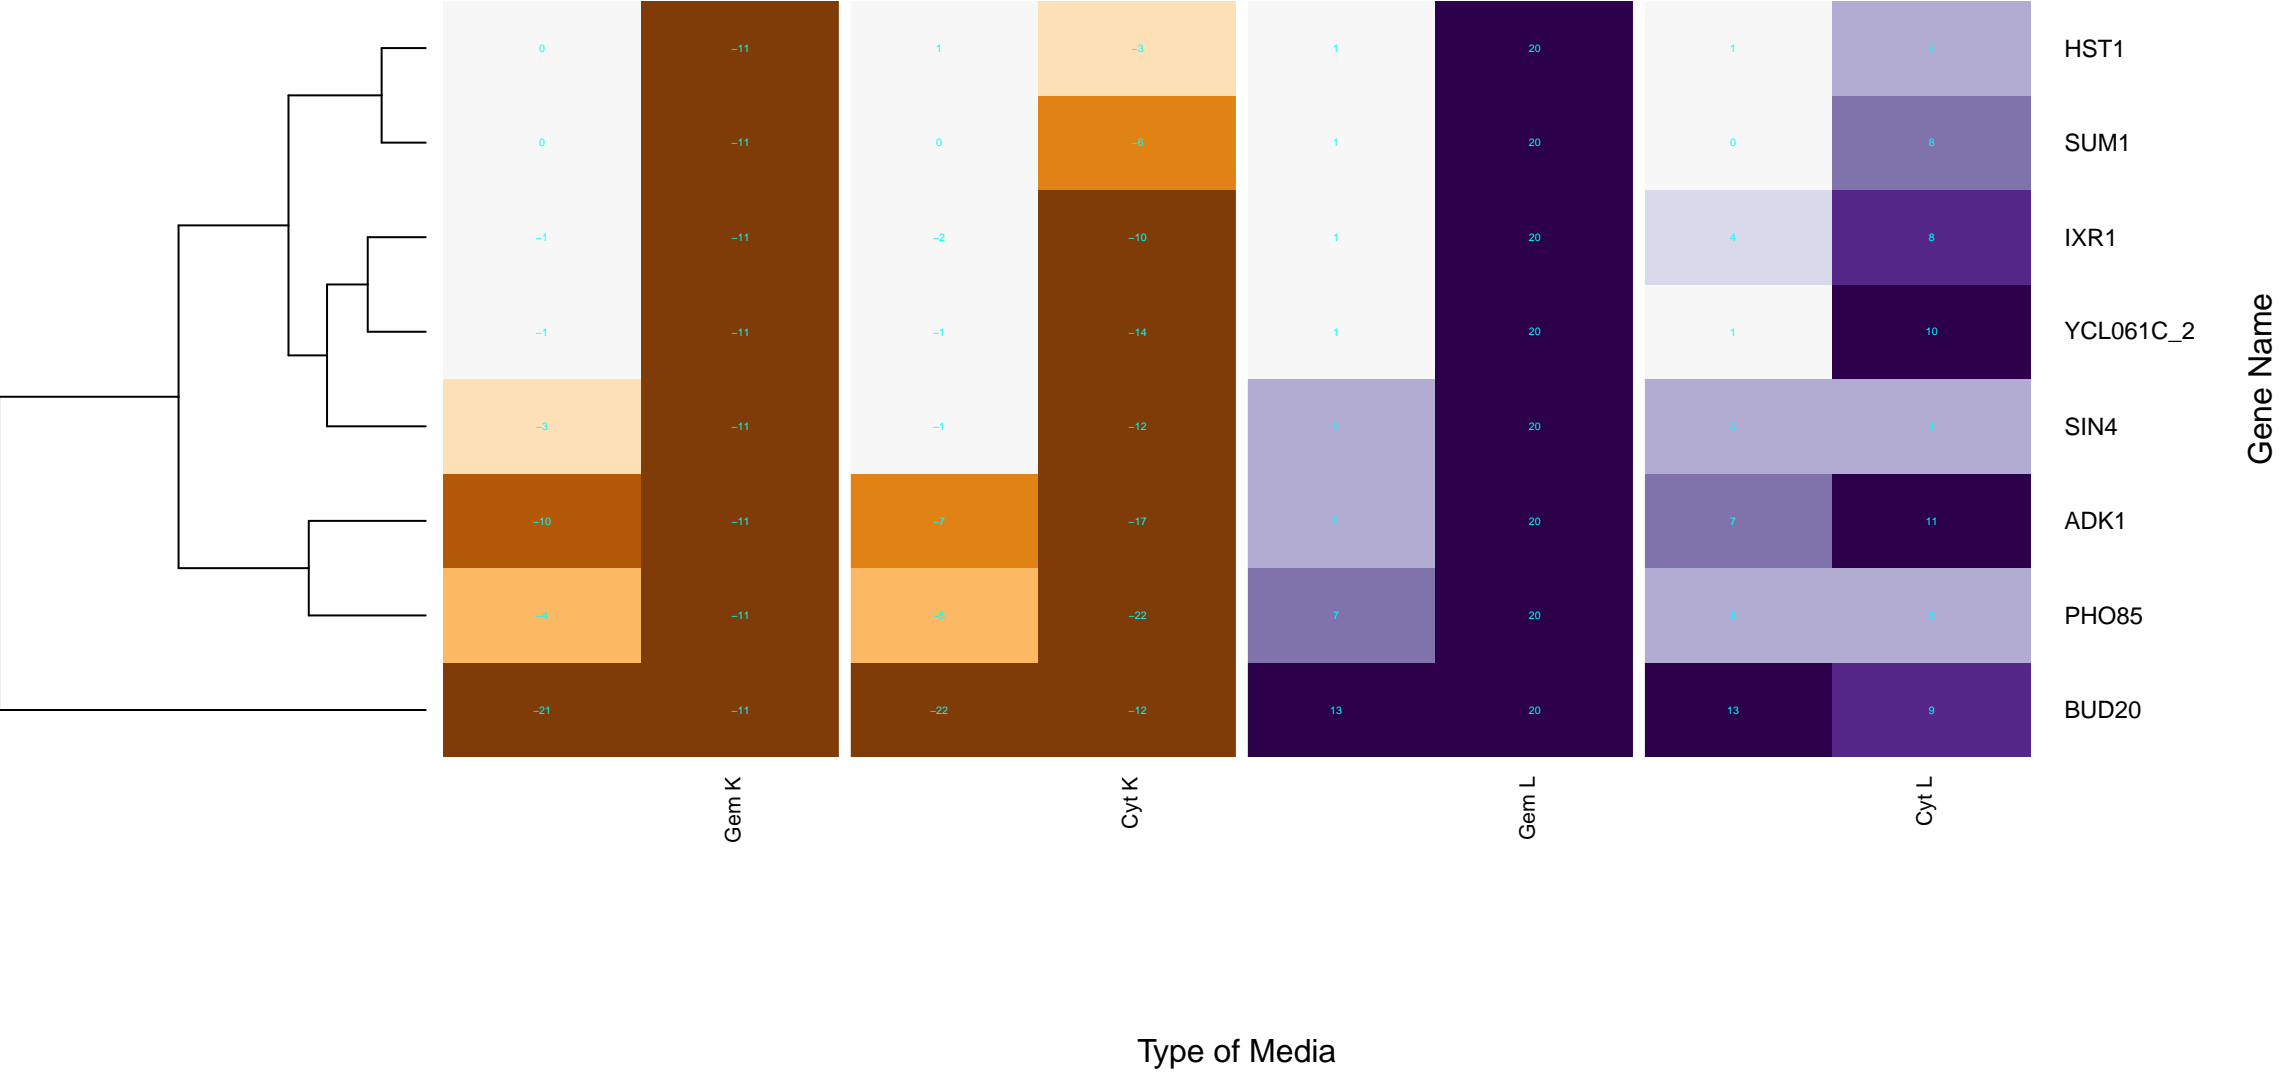

3-0.2.2-1

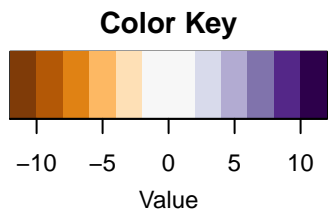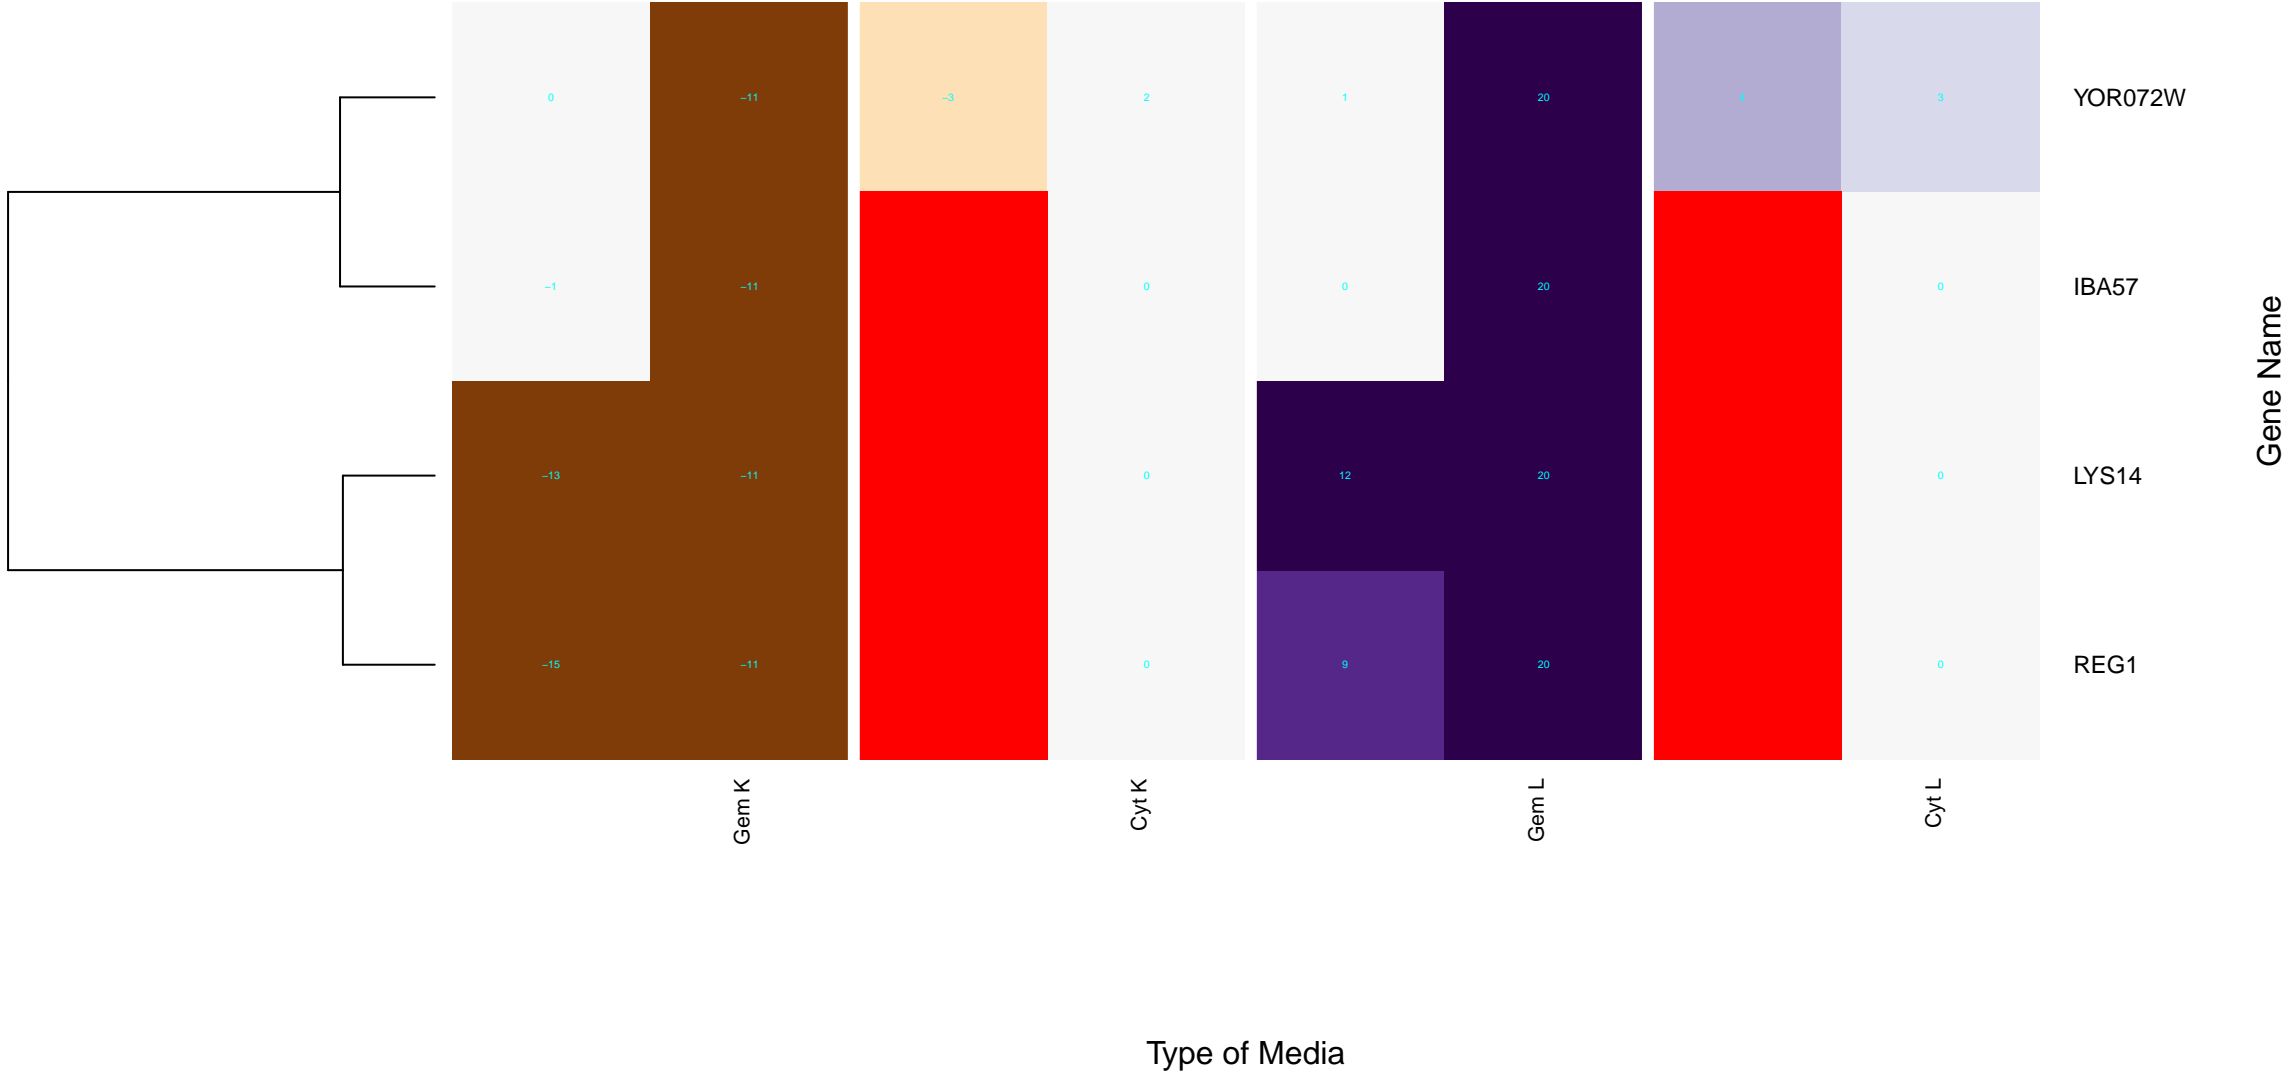

3-0.8.0-0

Color Key

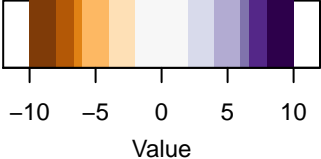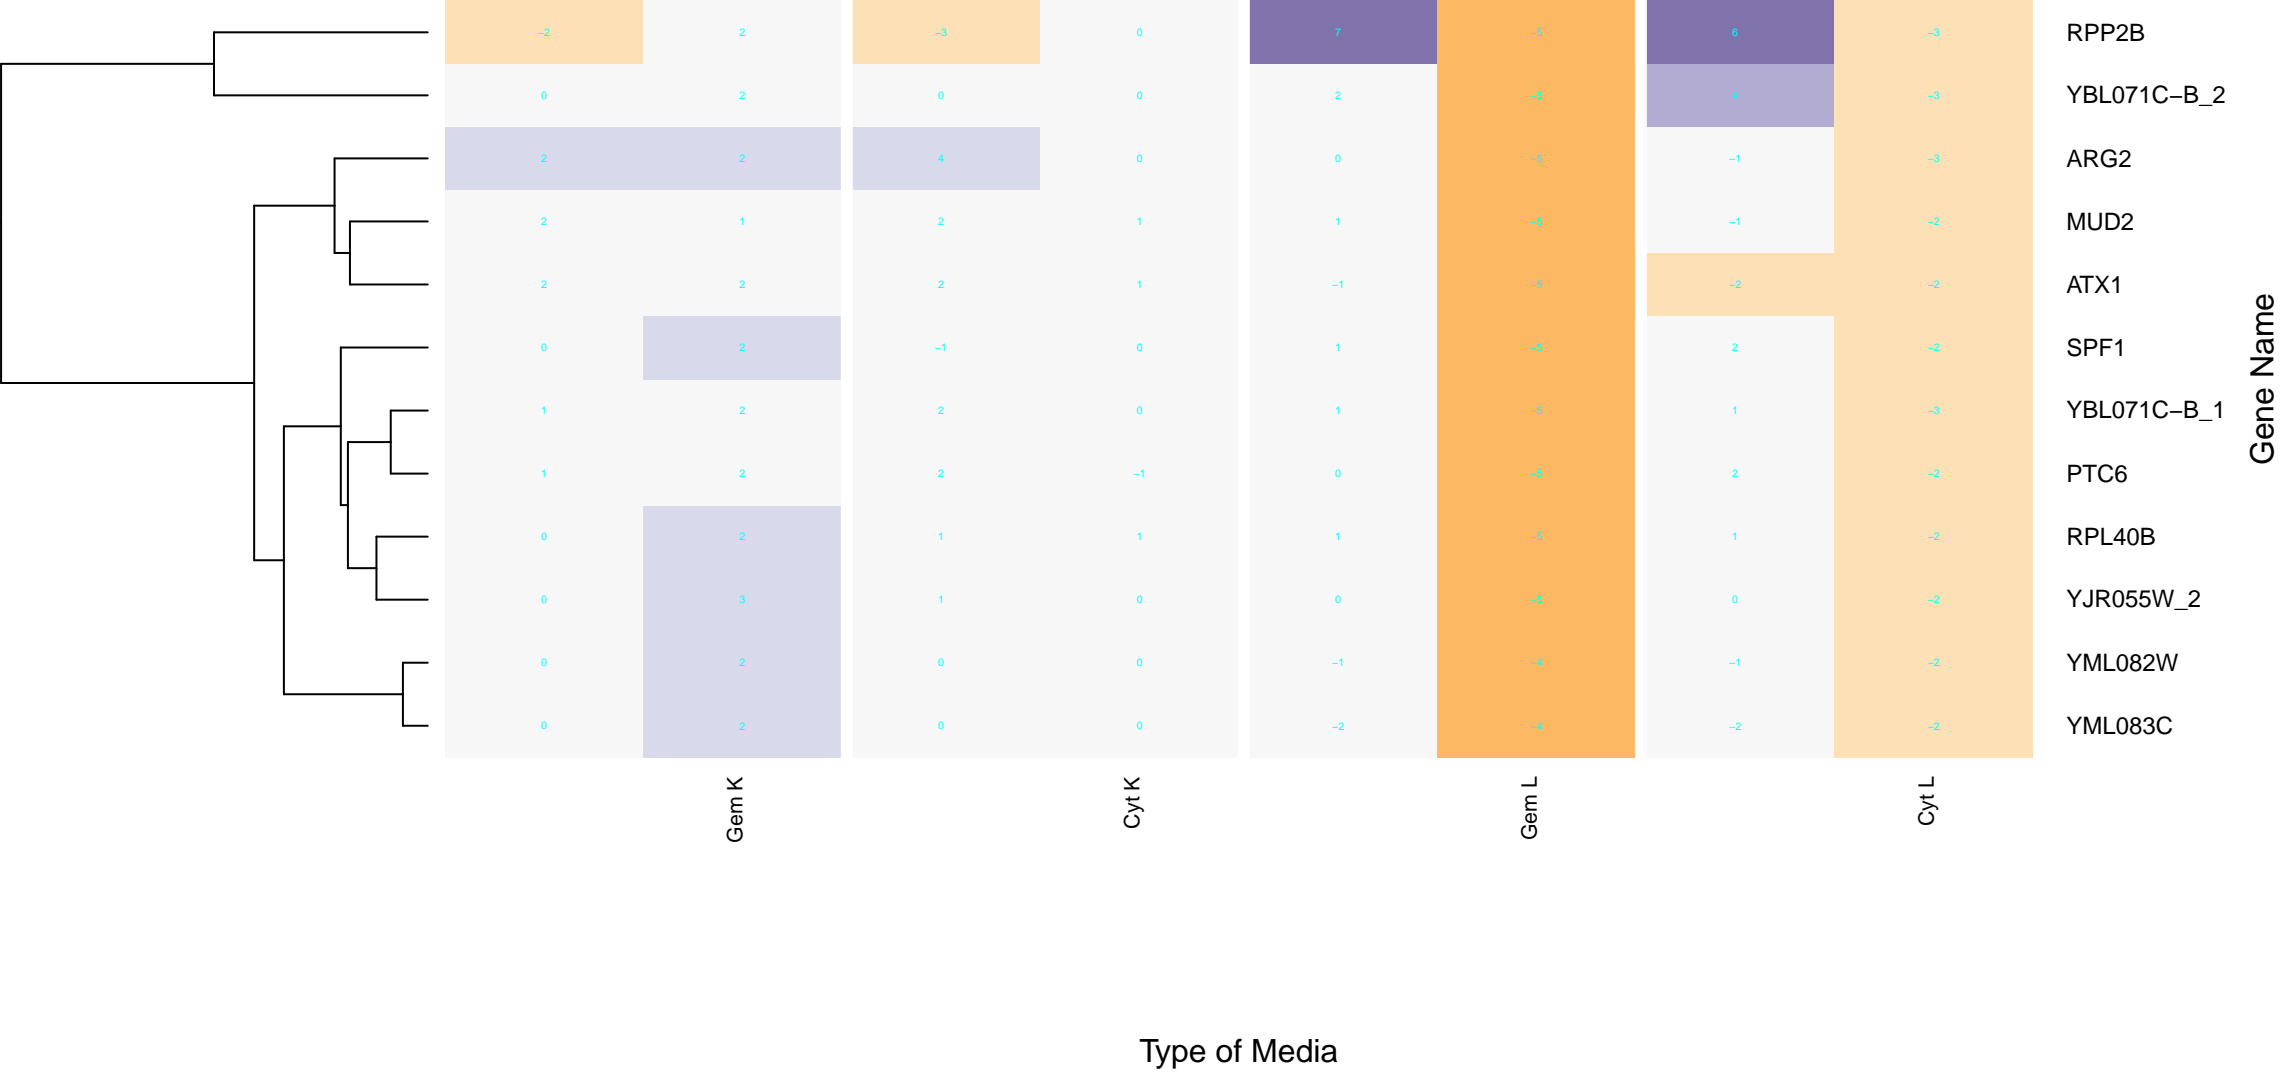

3-0.8.0-1

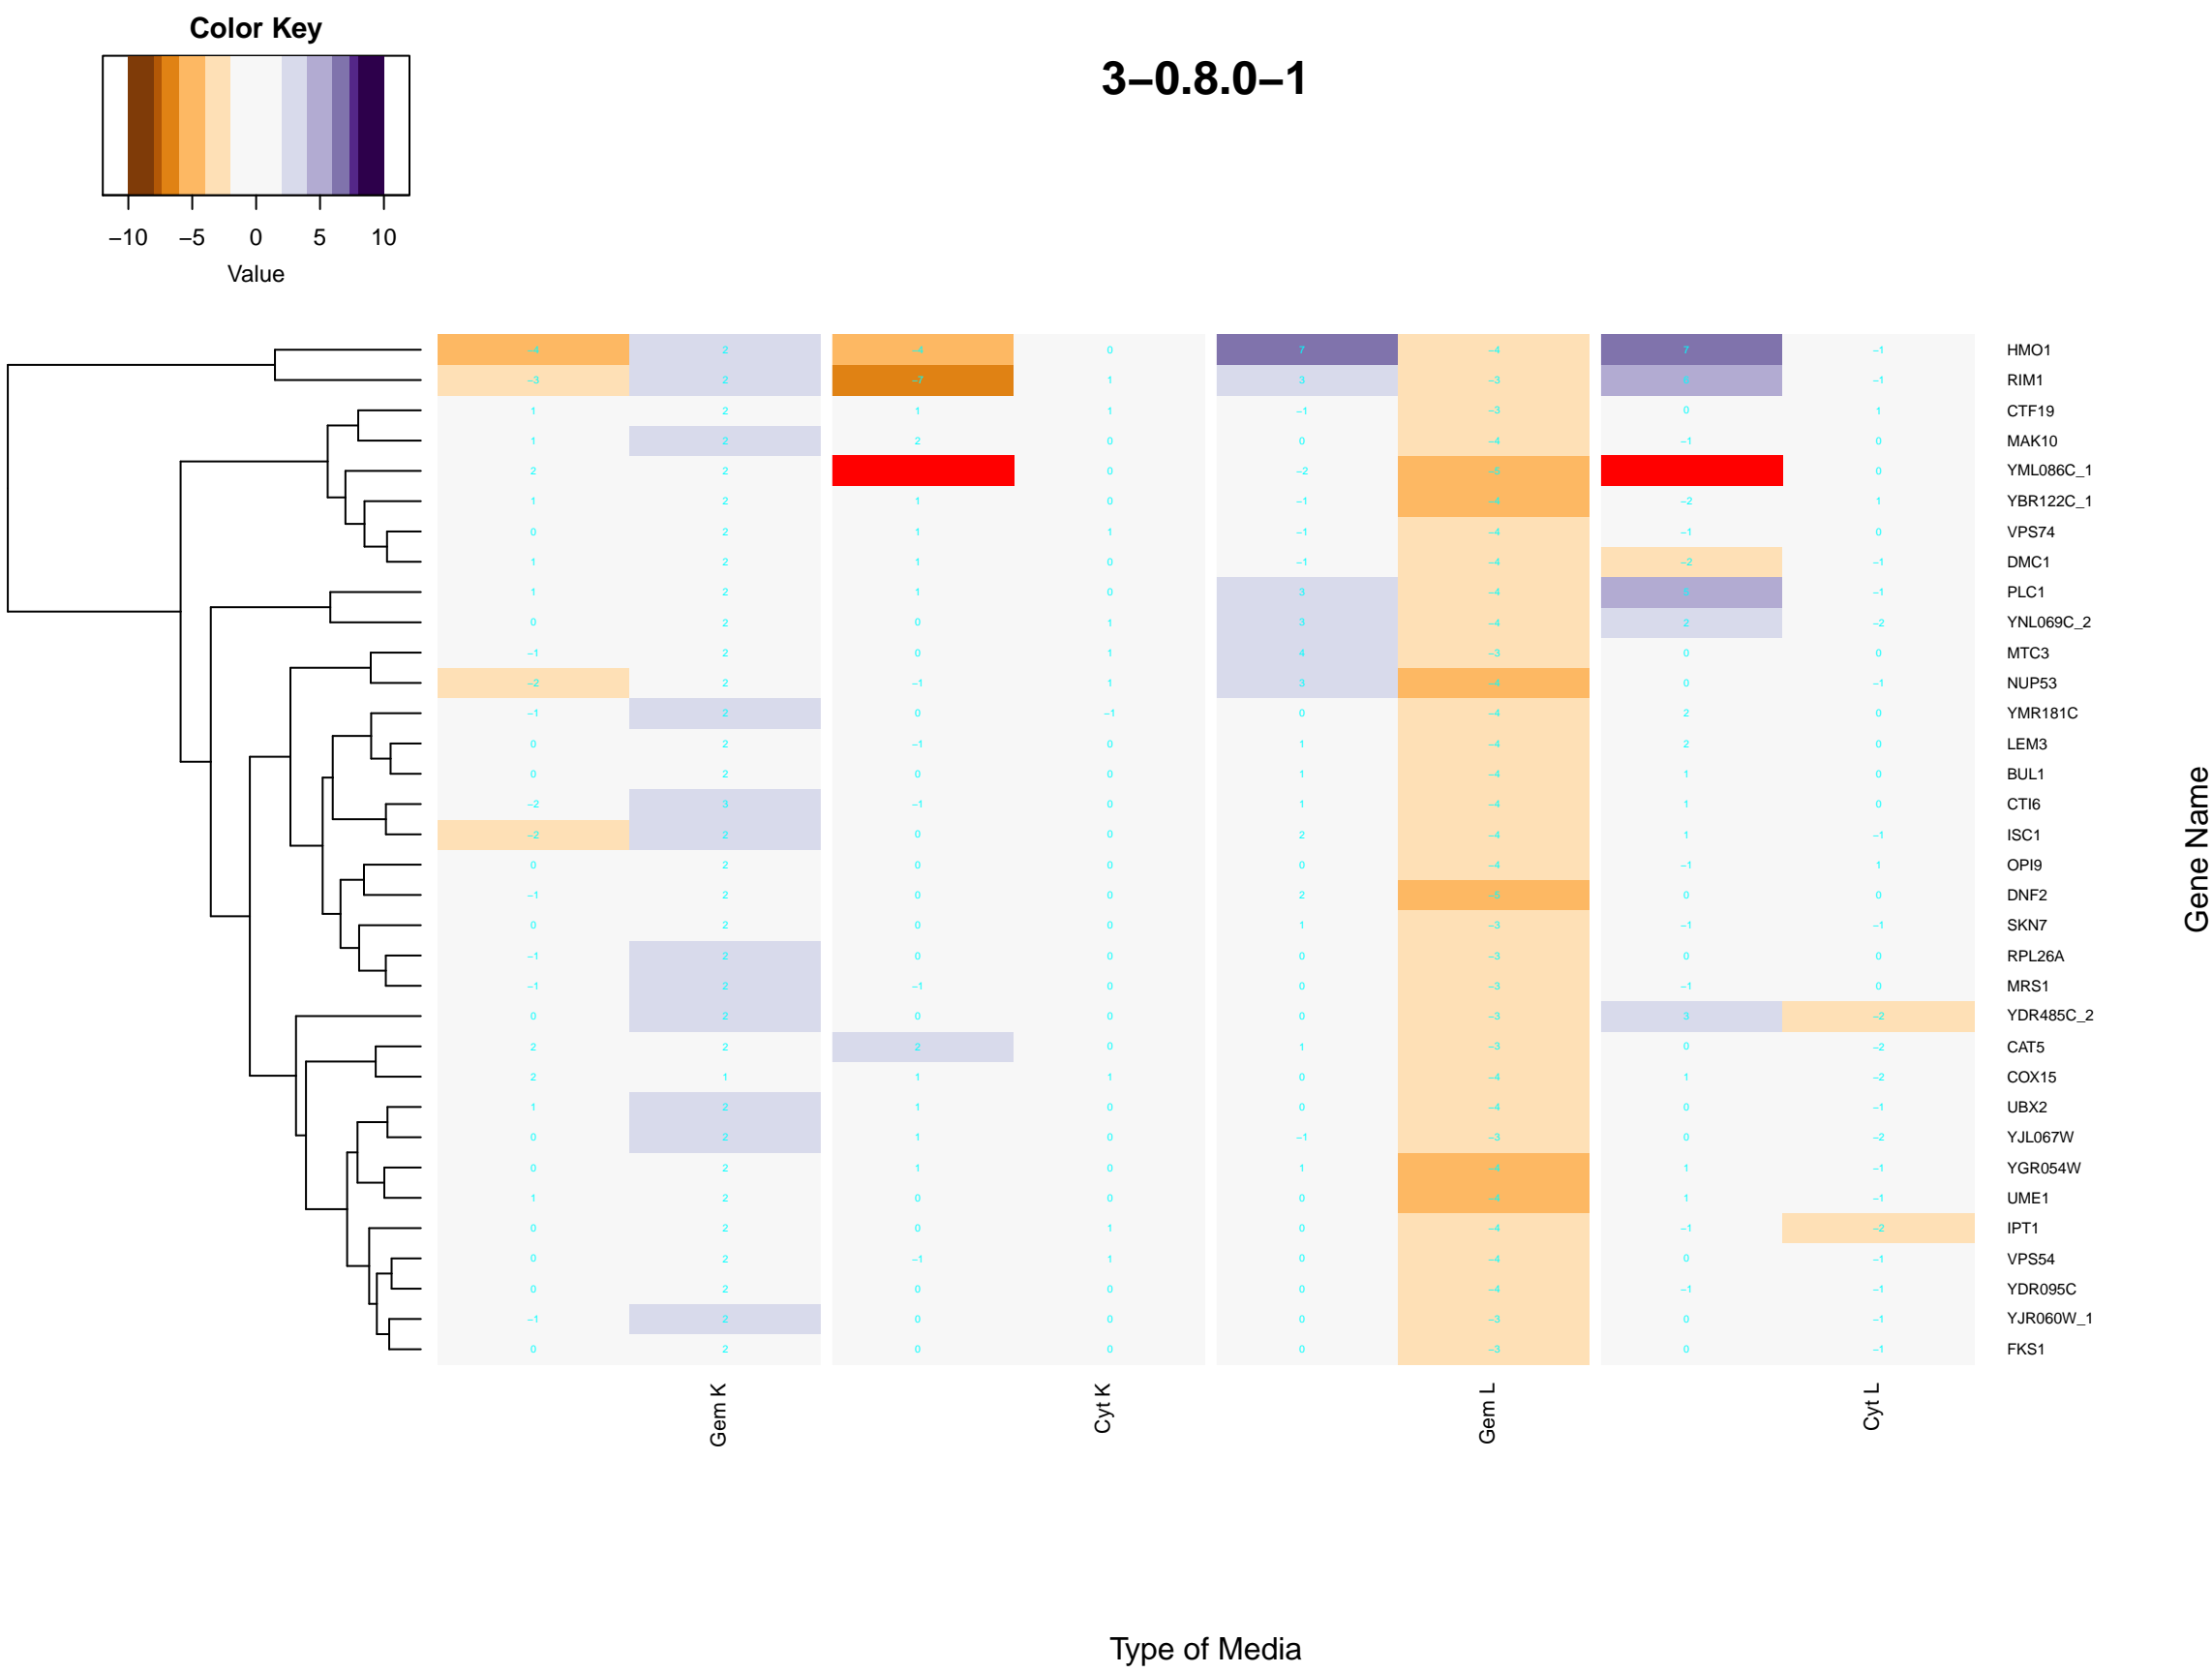

Supplement: s1 [file s1]
