# Supplementary material for: A Humanized Yeast Phenomic Model of Deoxycytidine Kinase to Predict Genetic Buffering of Nucleoside Analog Cytotoxicity
Source: MDPI journal article supplement (doi:10.3390/genes10100770), 2019-09-30

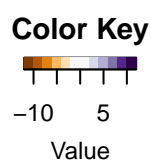

# snoRNA processing

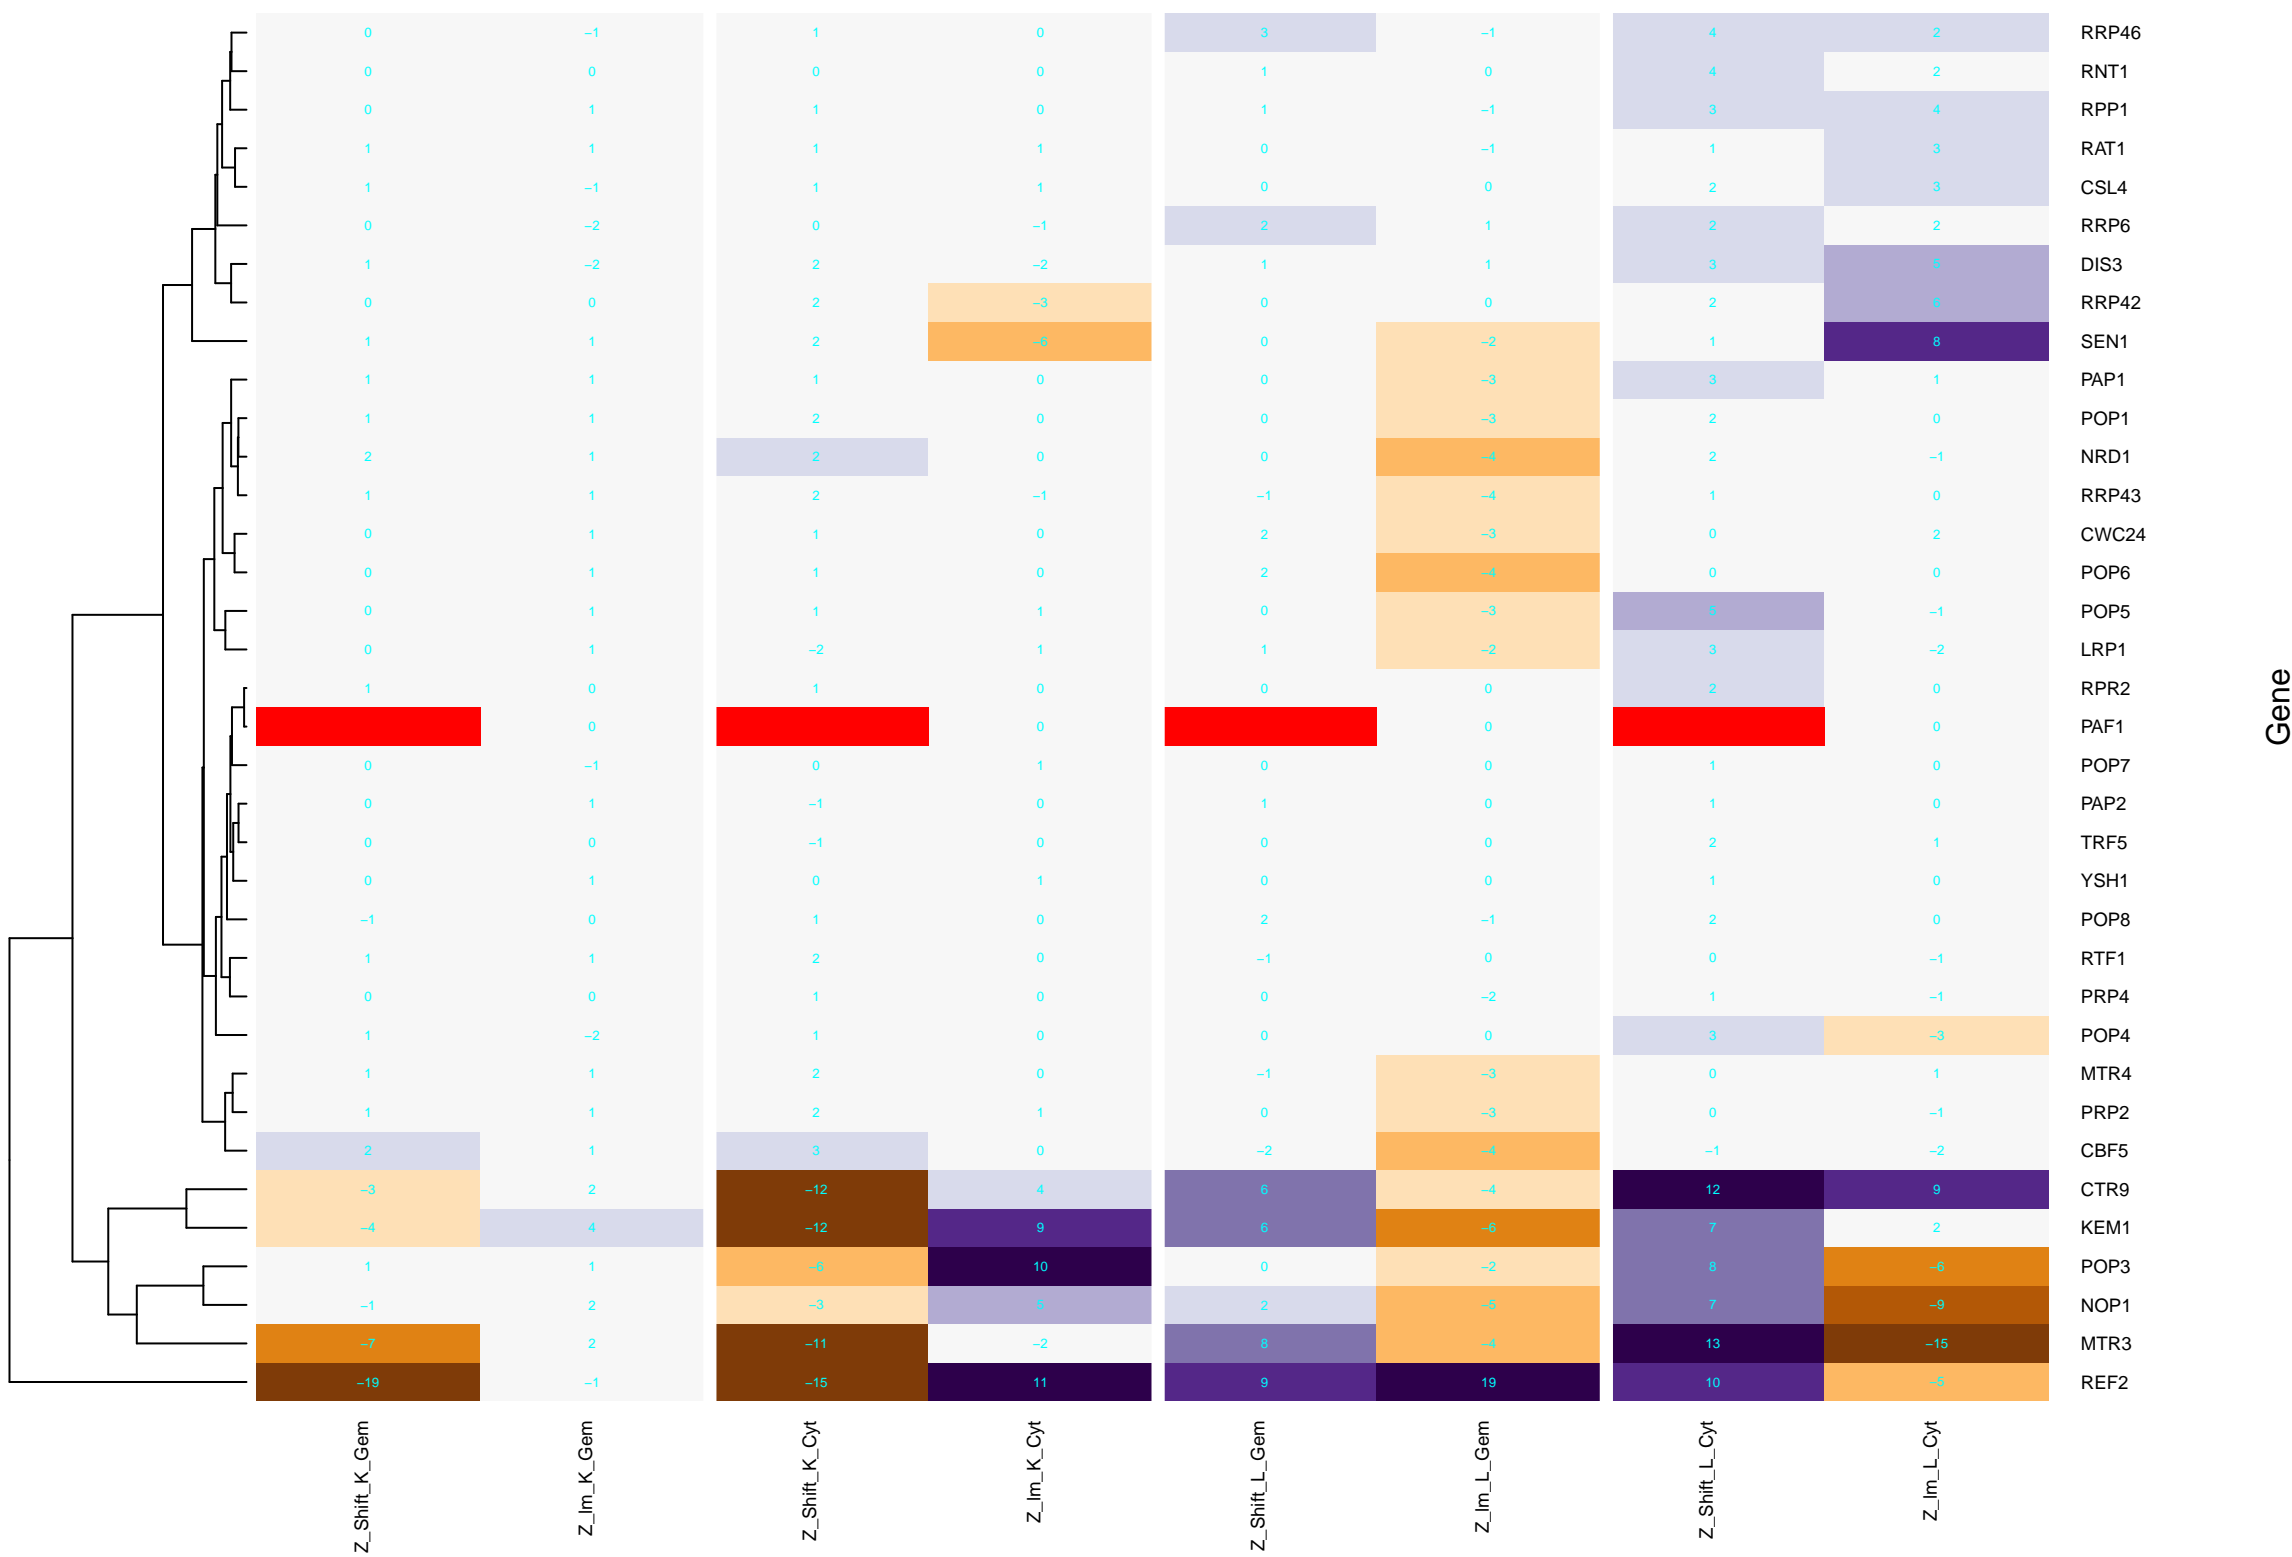

Color Key

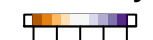

-10 5

Value

# intronic snoRNA processing

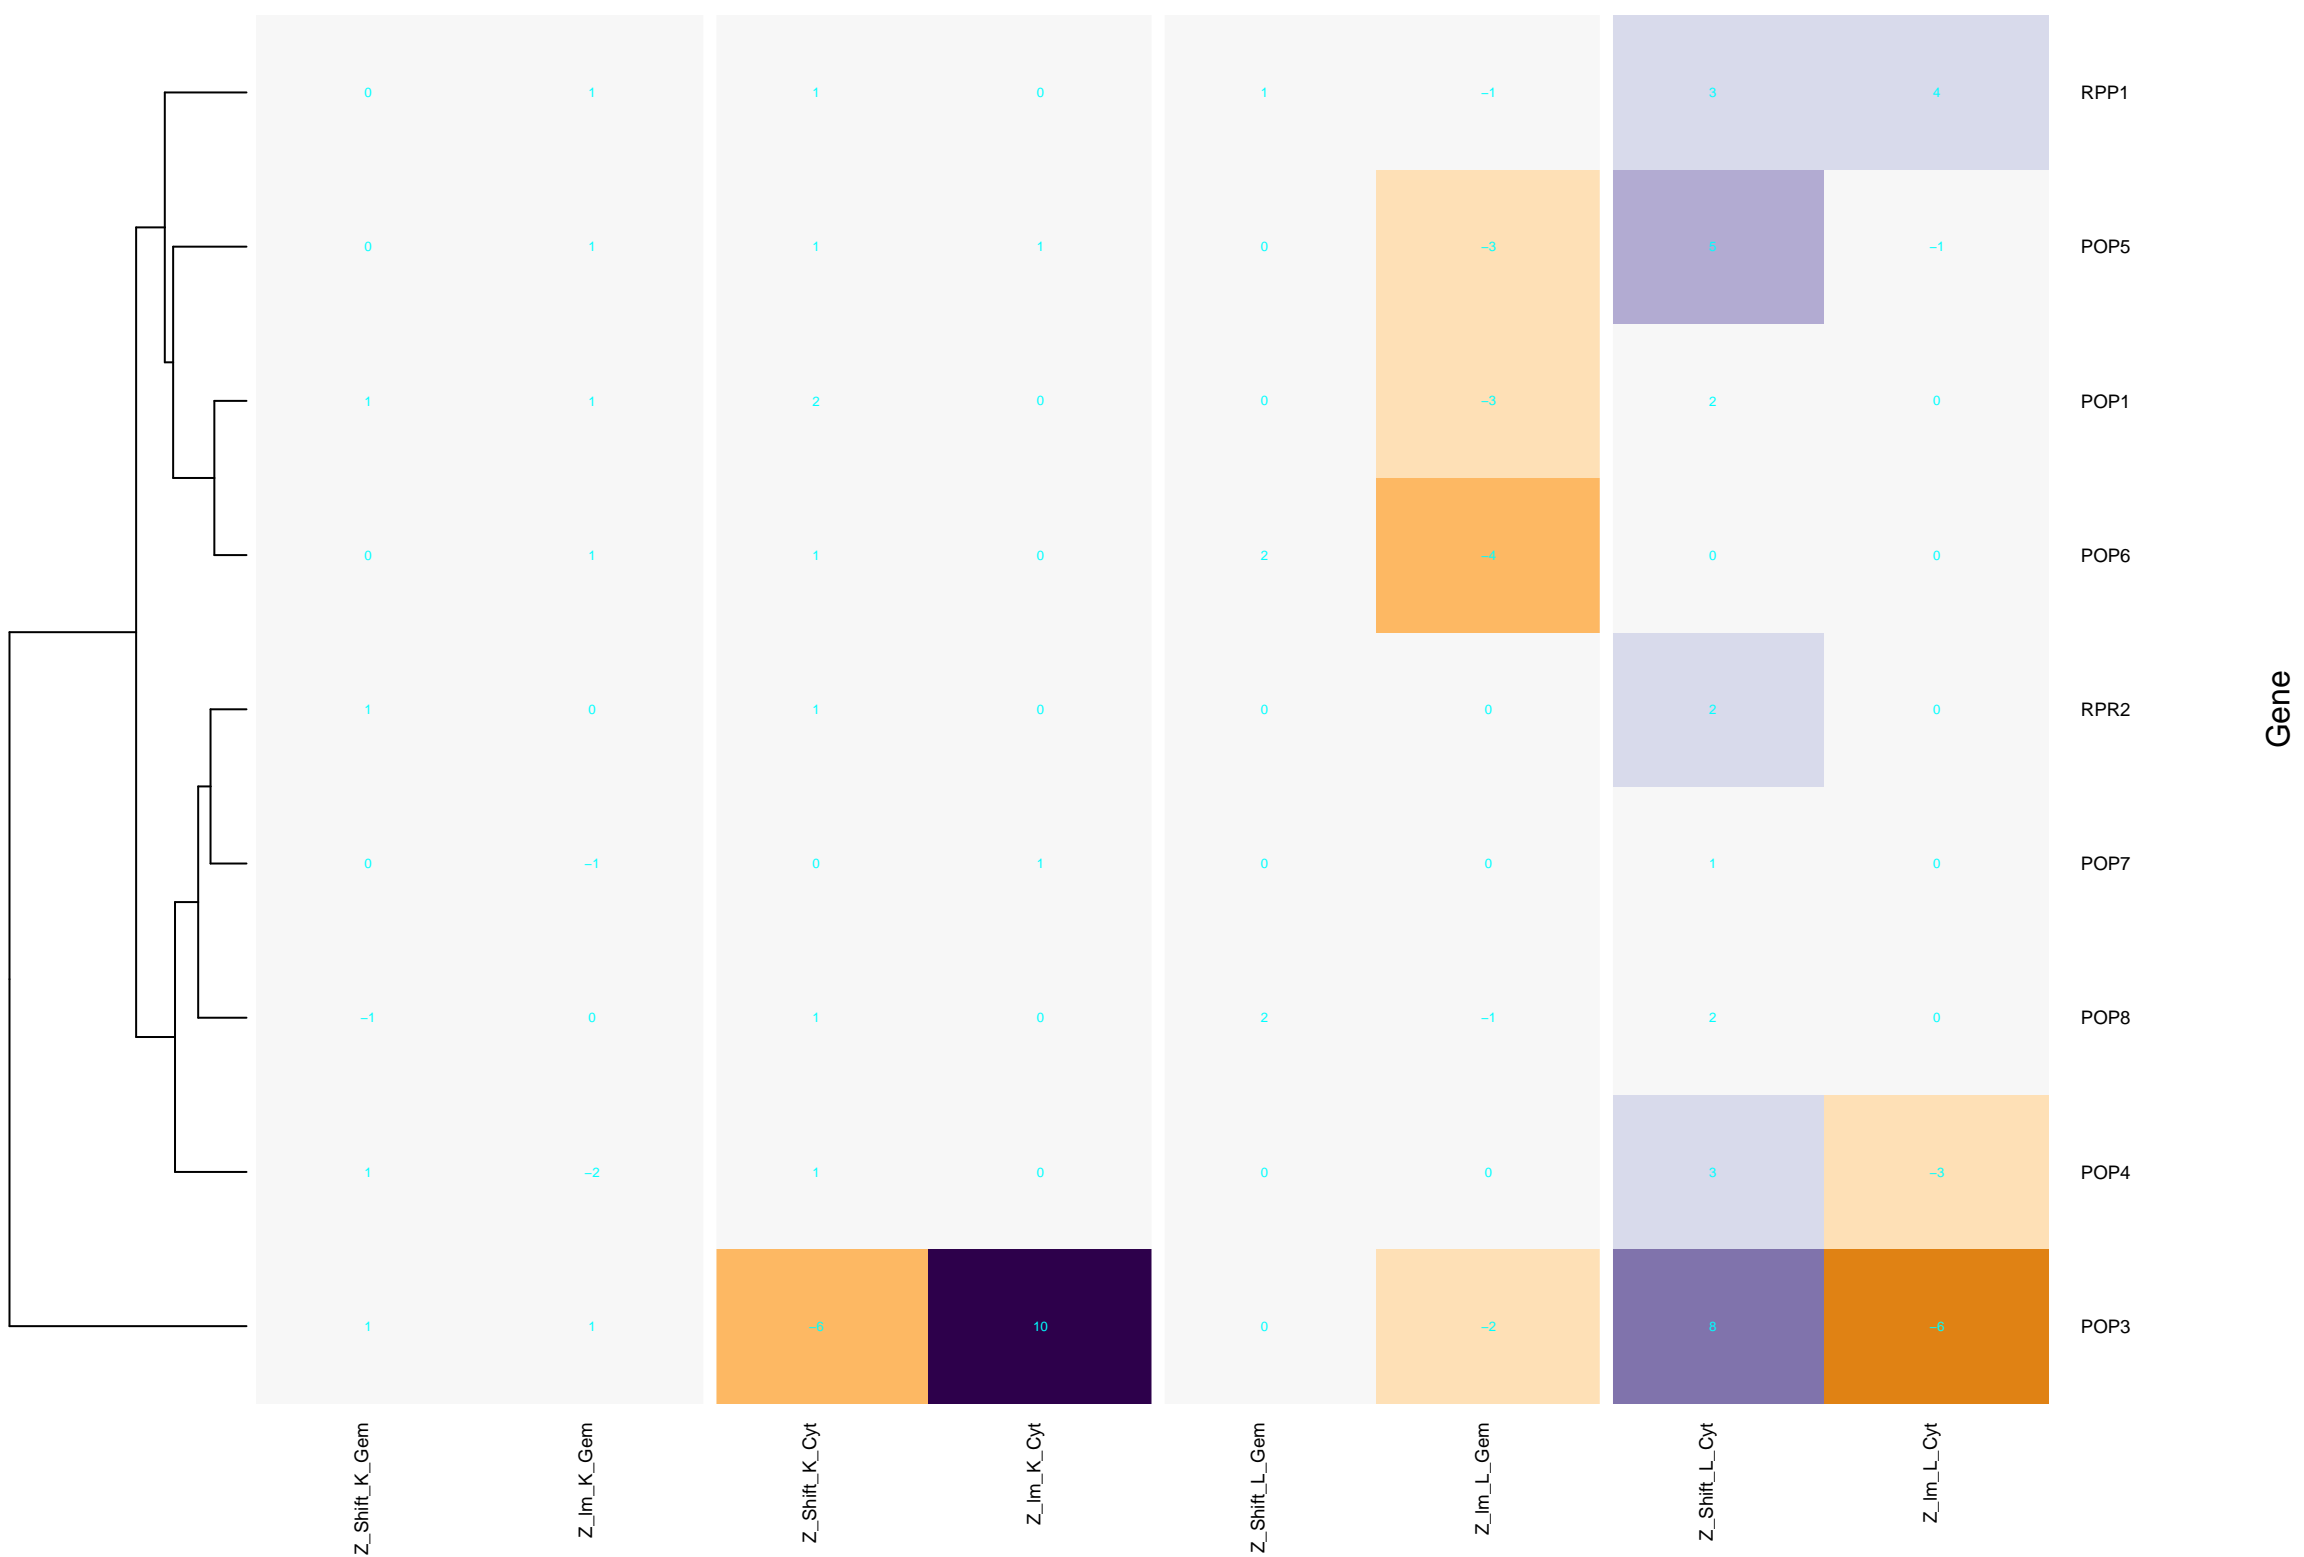

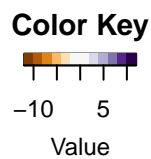

# snoRNA 3'-end processing

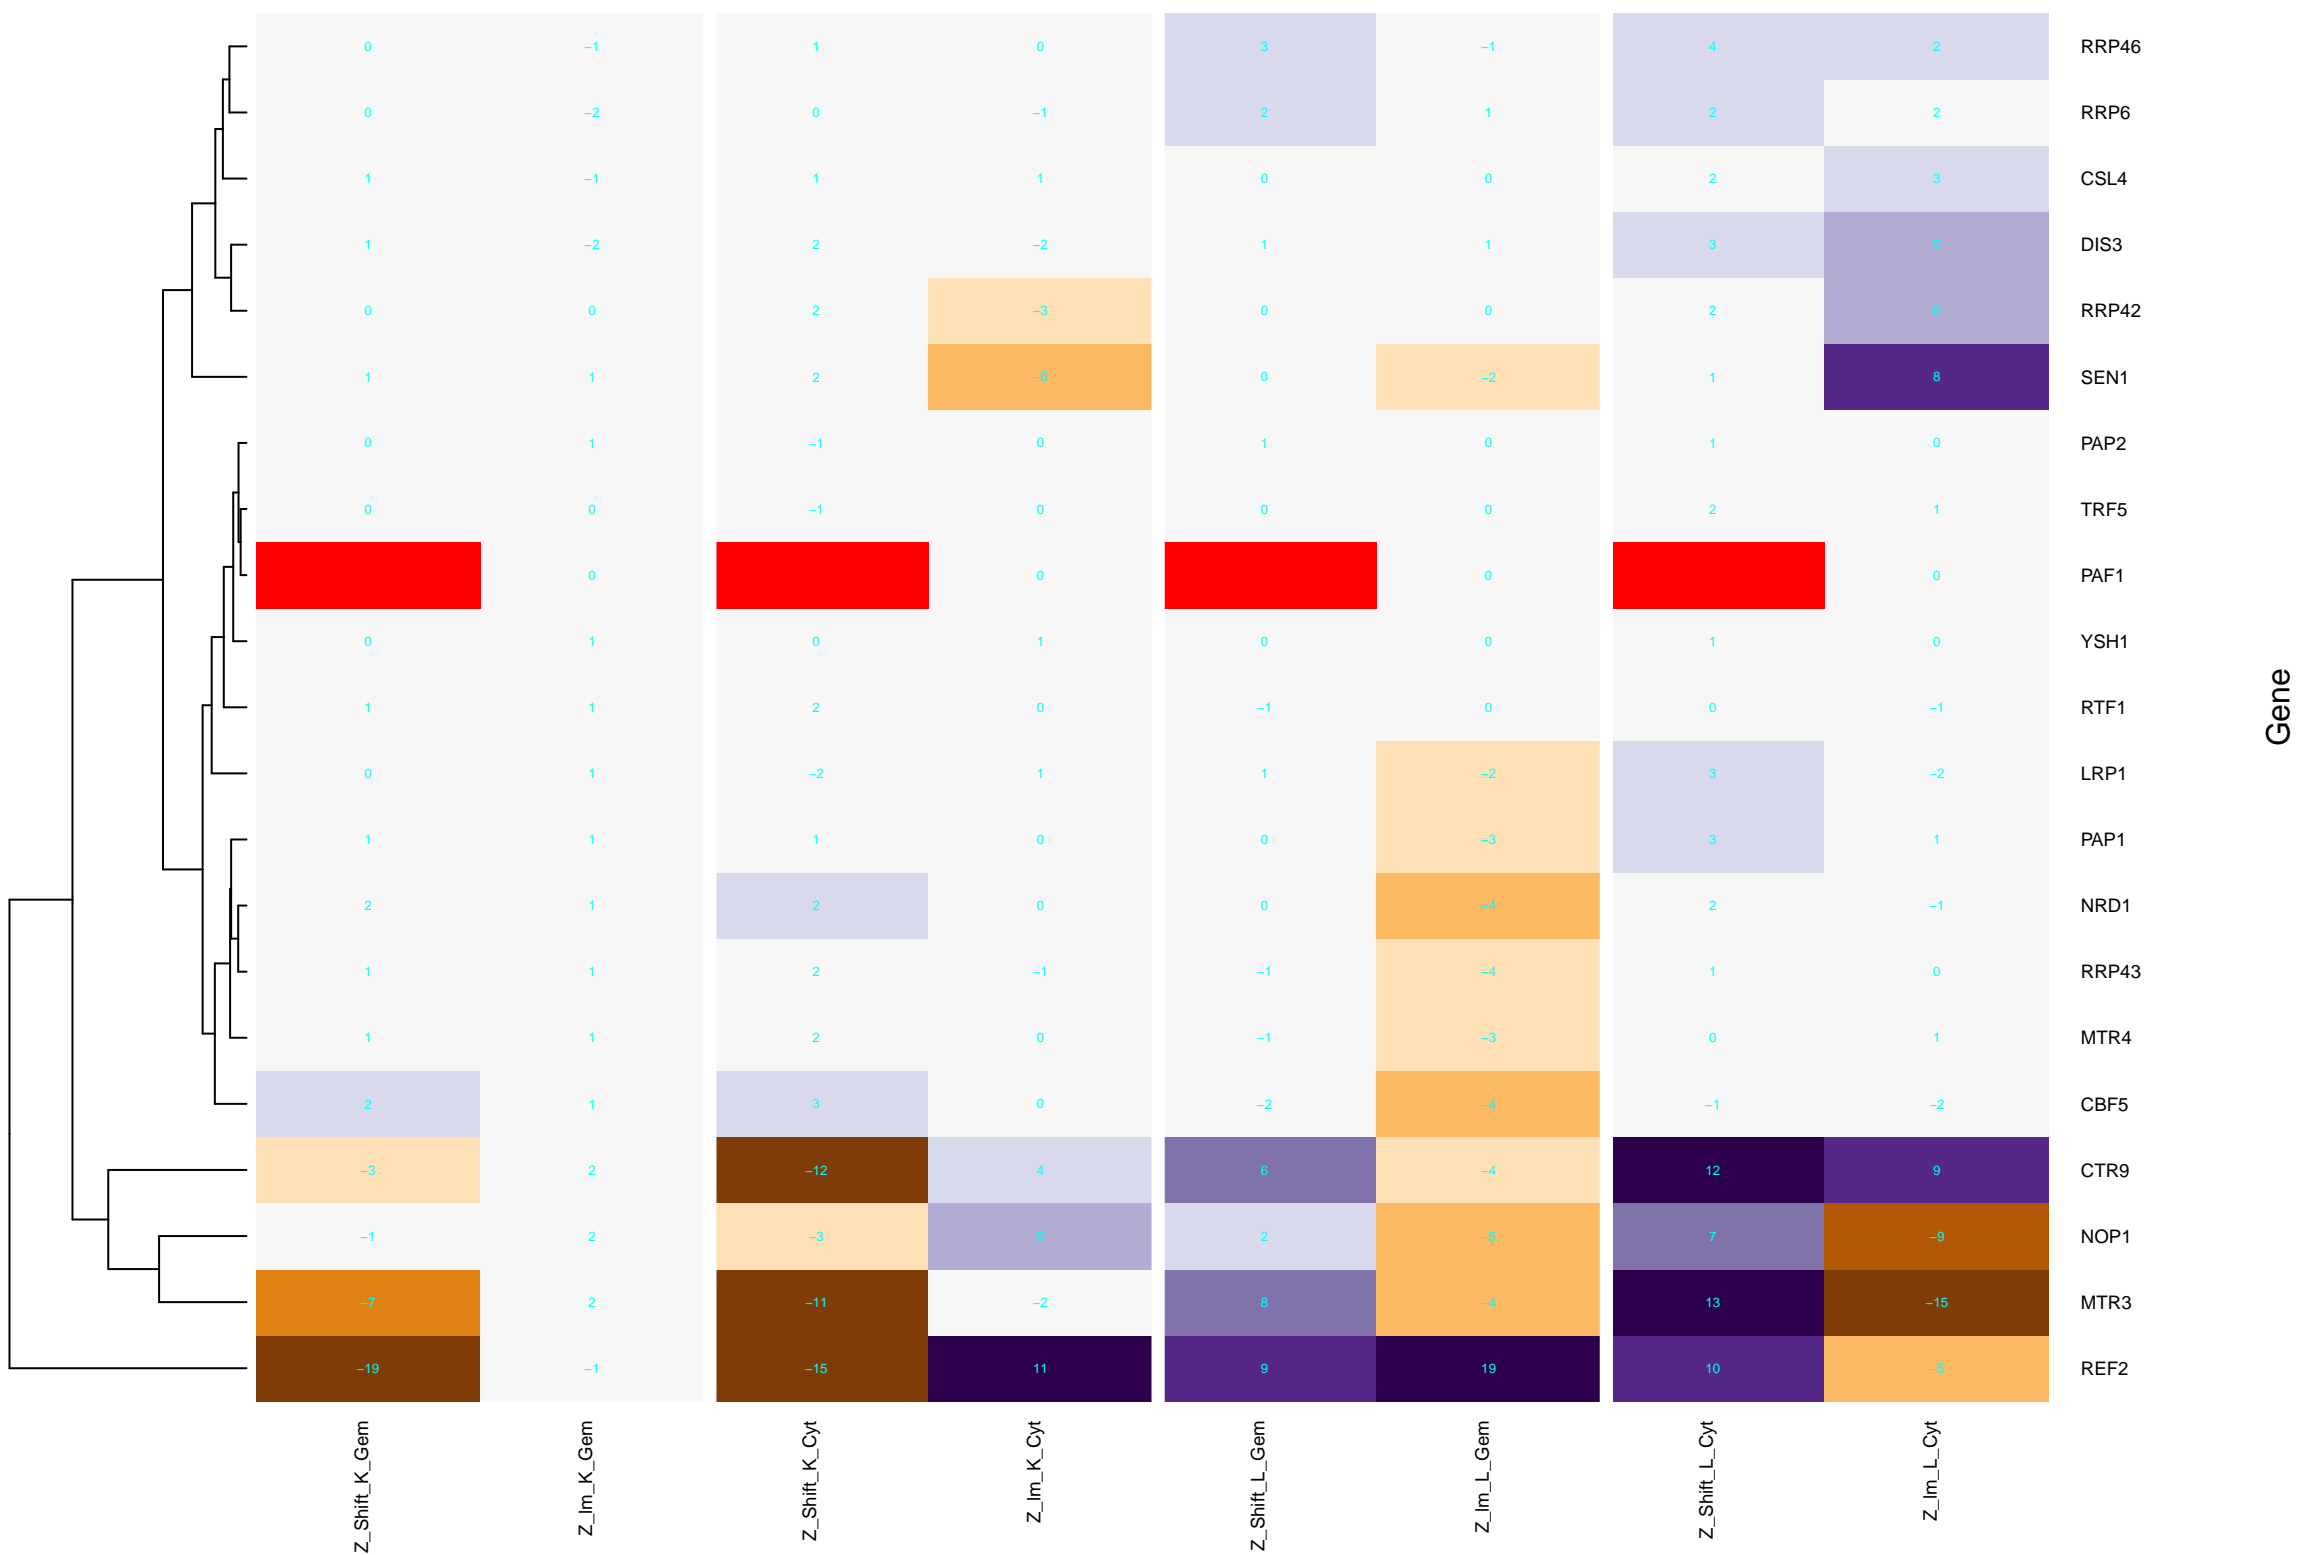

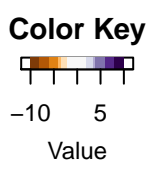

# snoRNA splicing

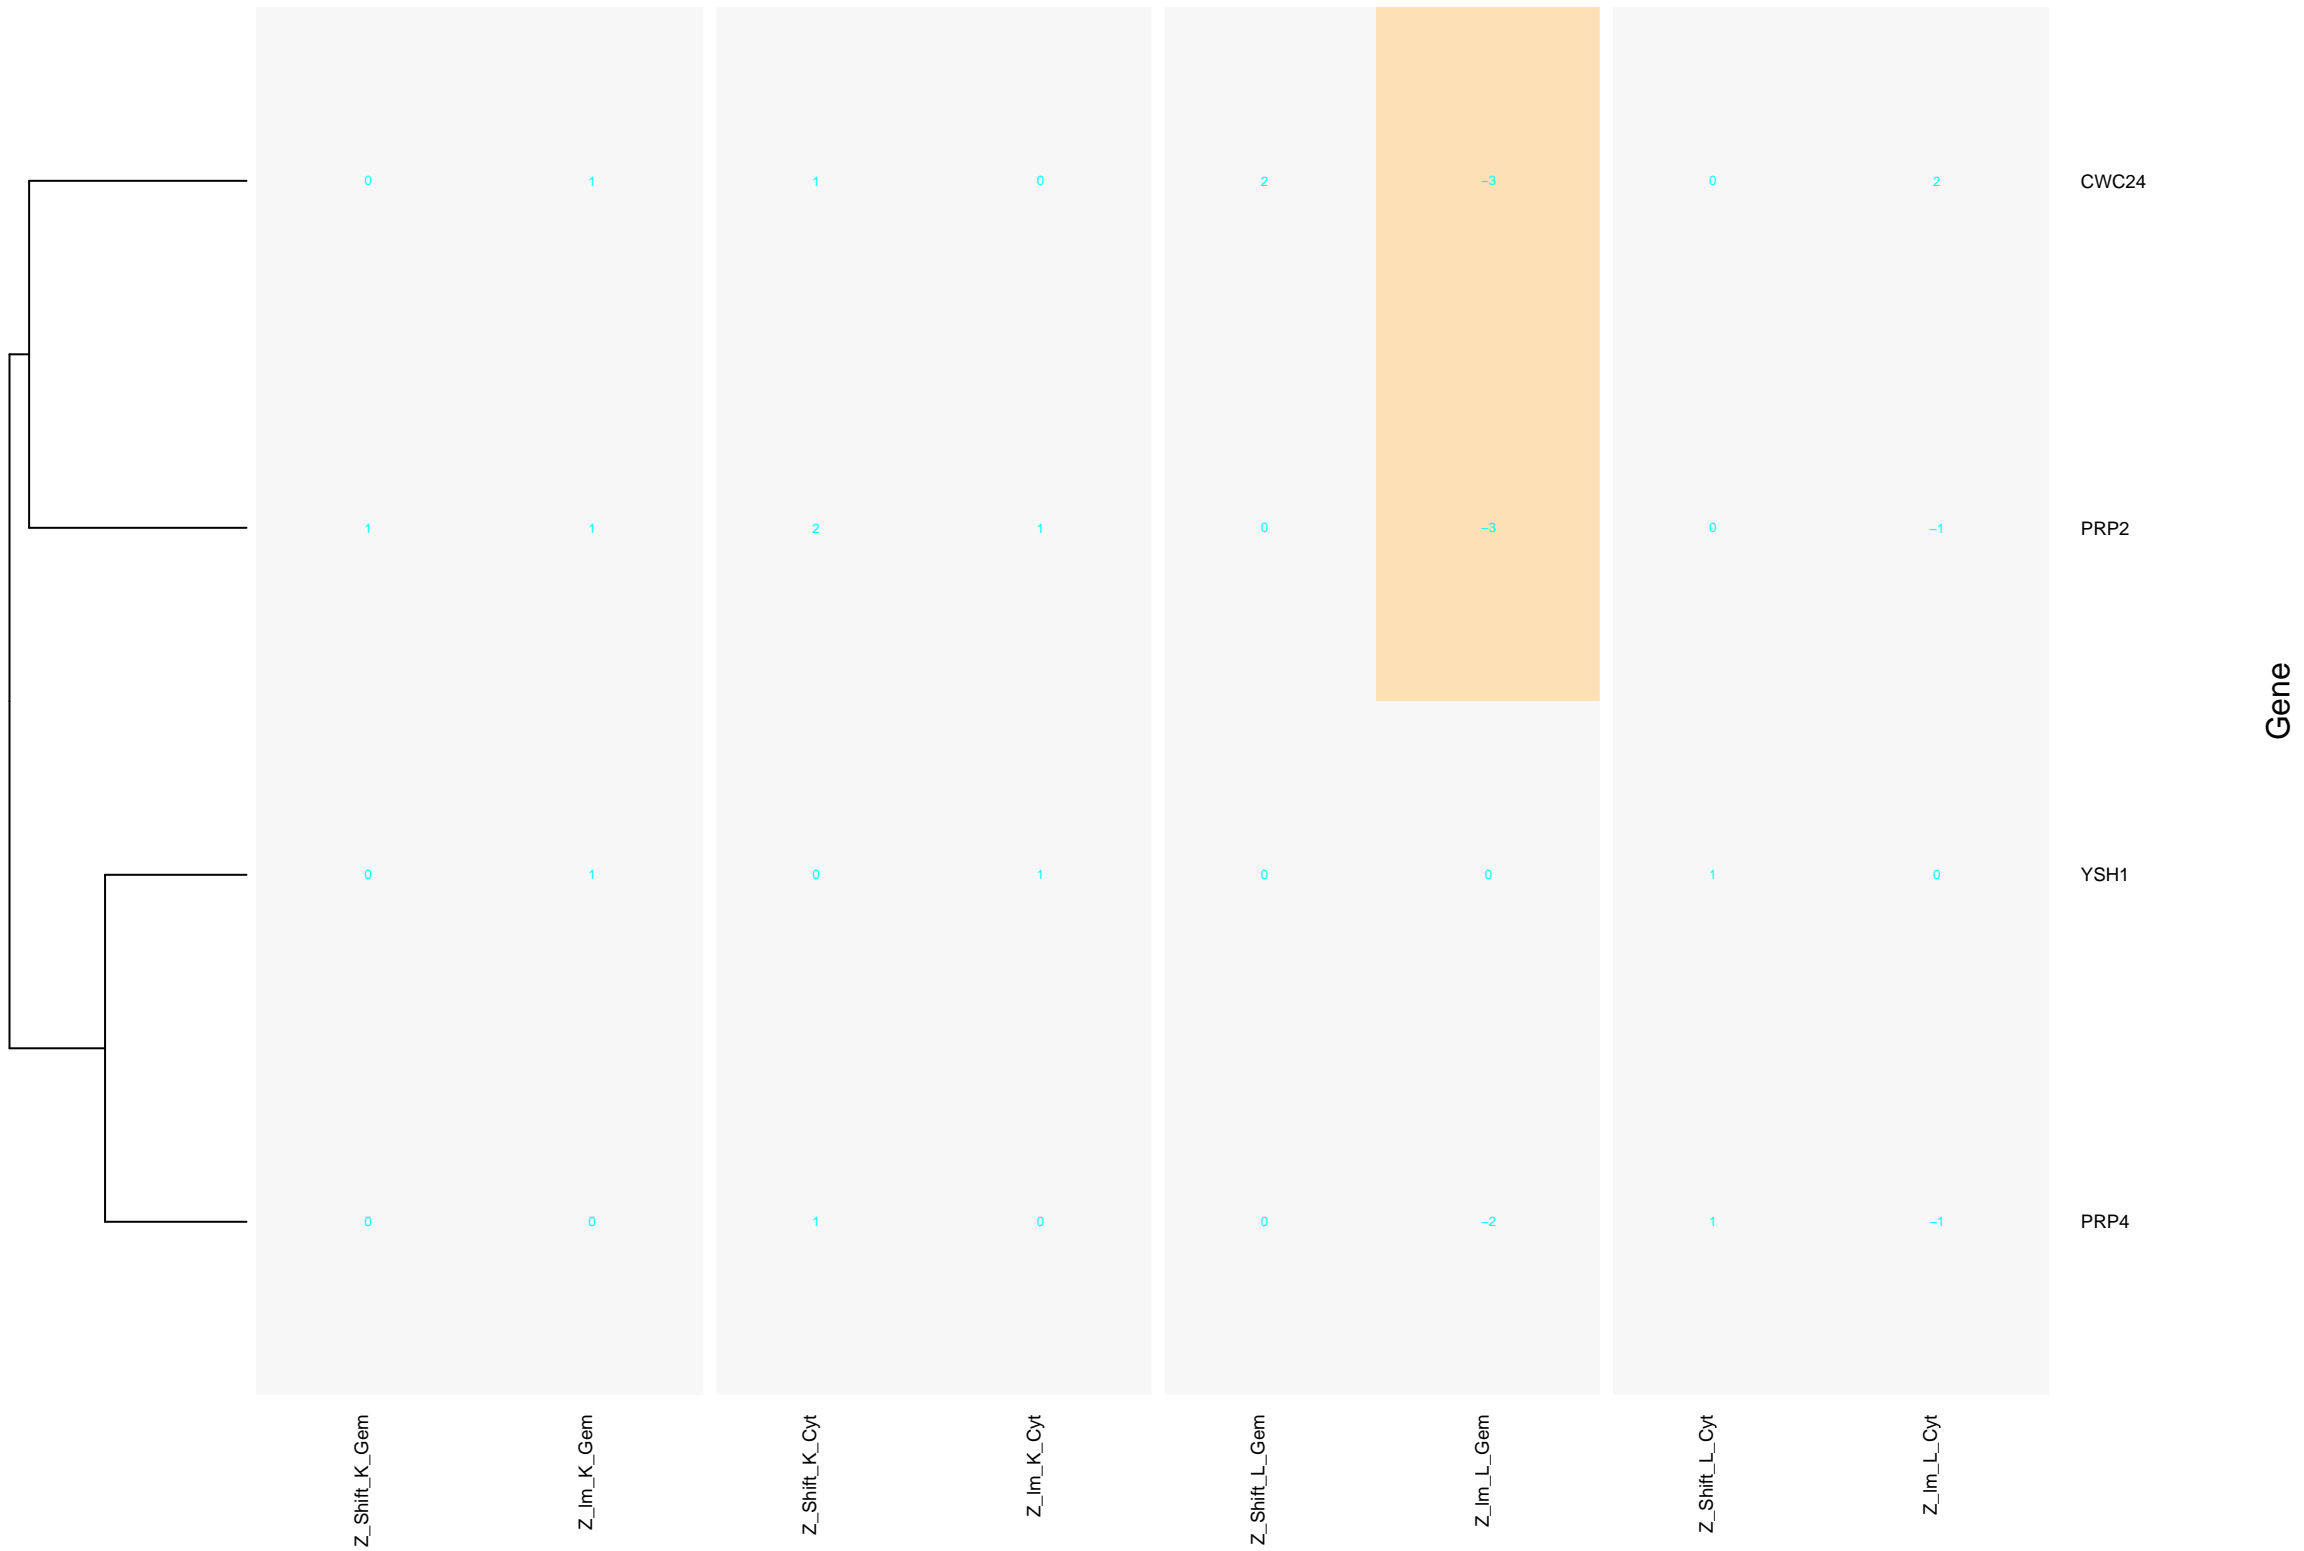

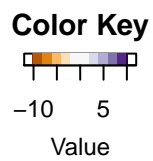

# box C/D snoRNA processing

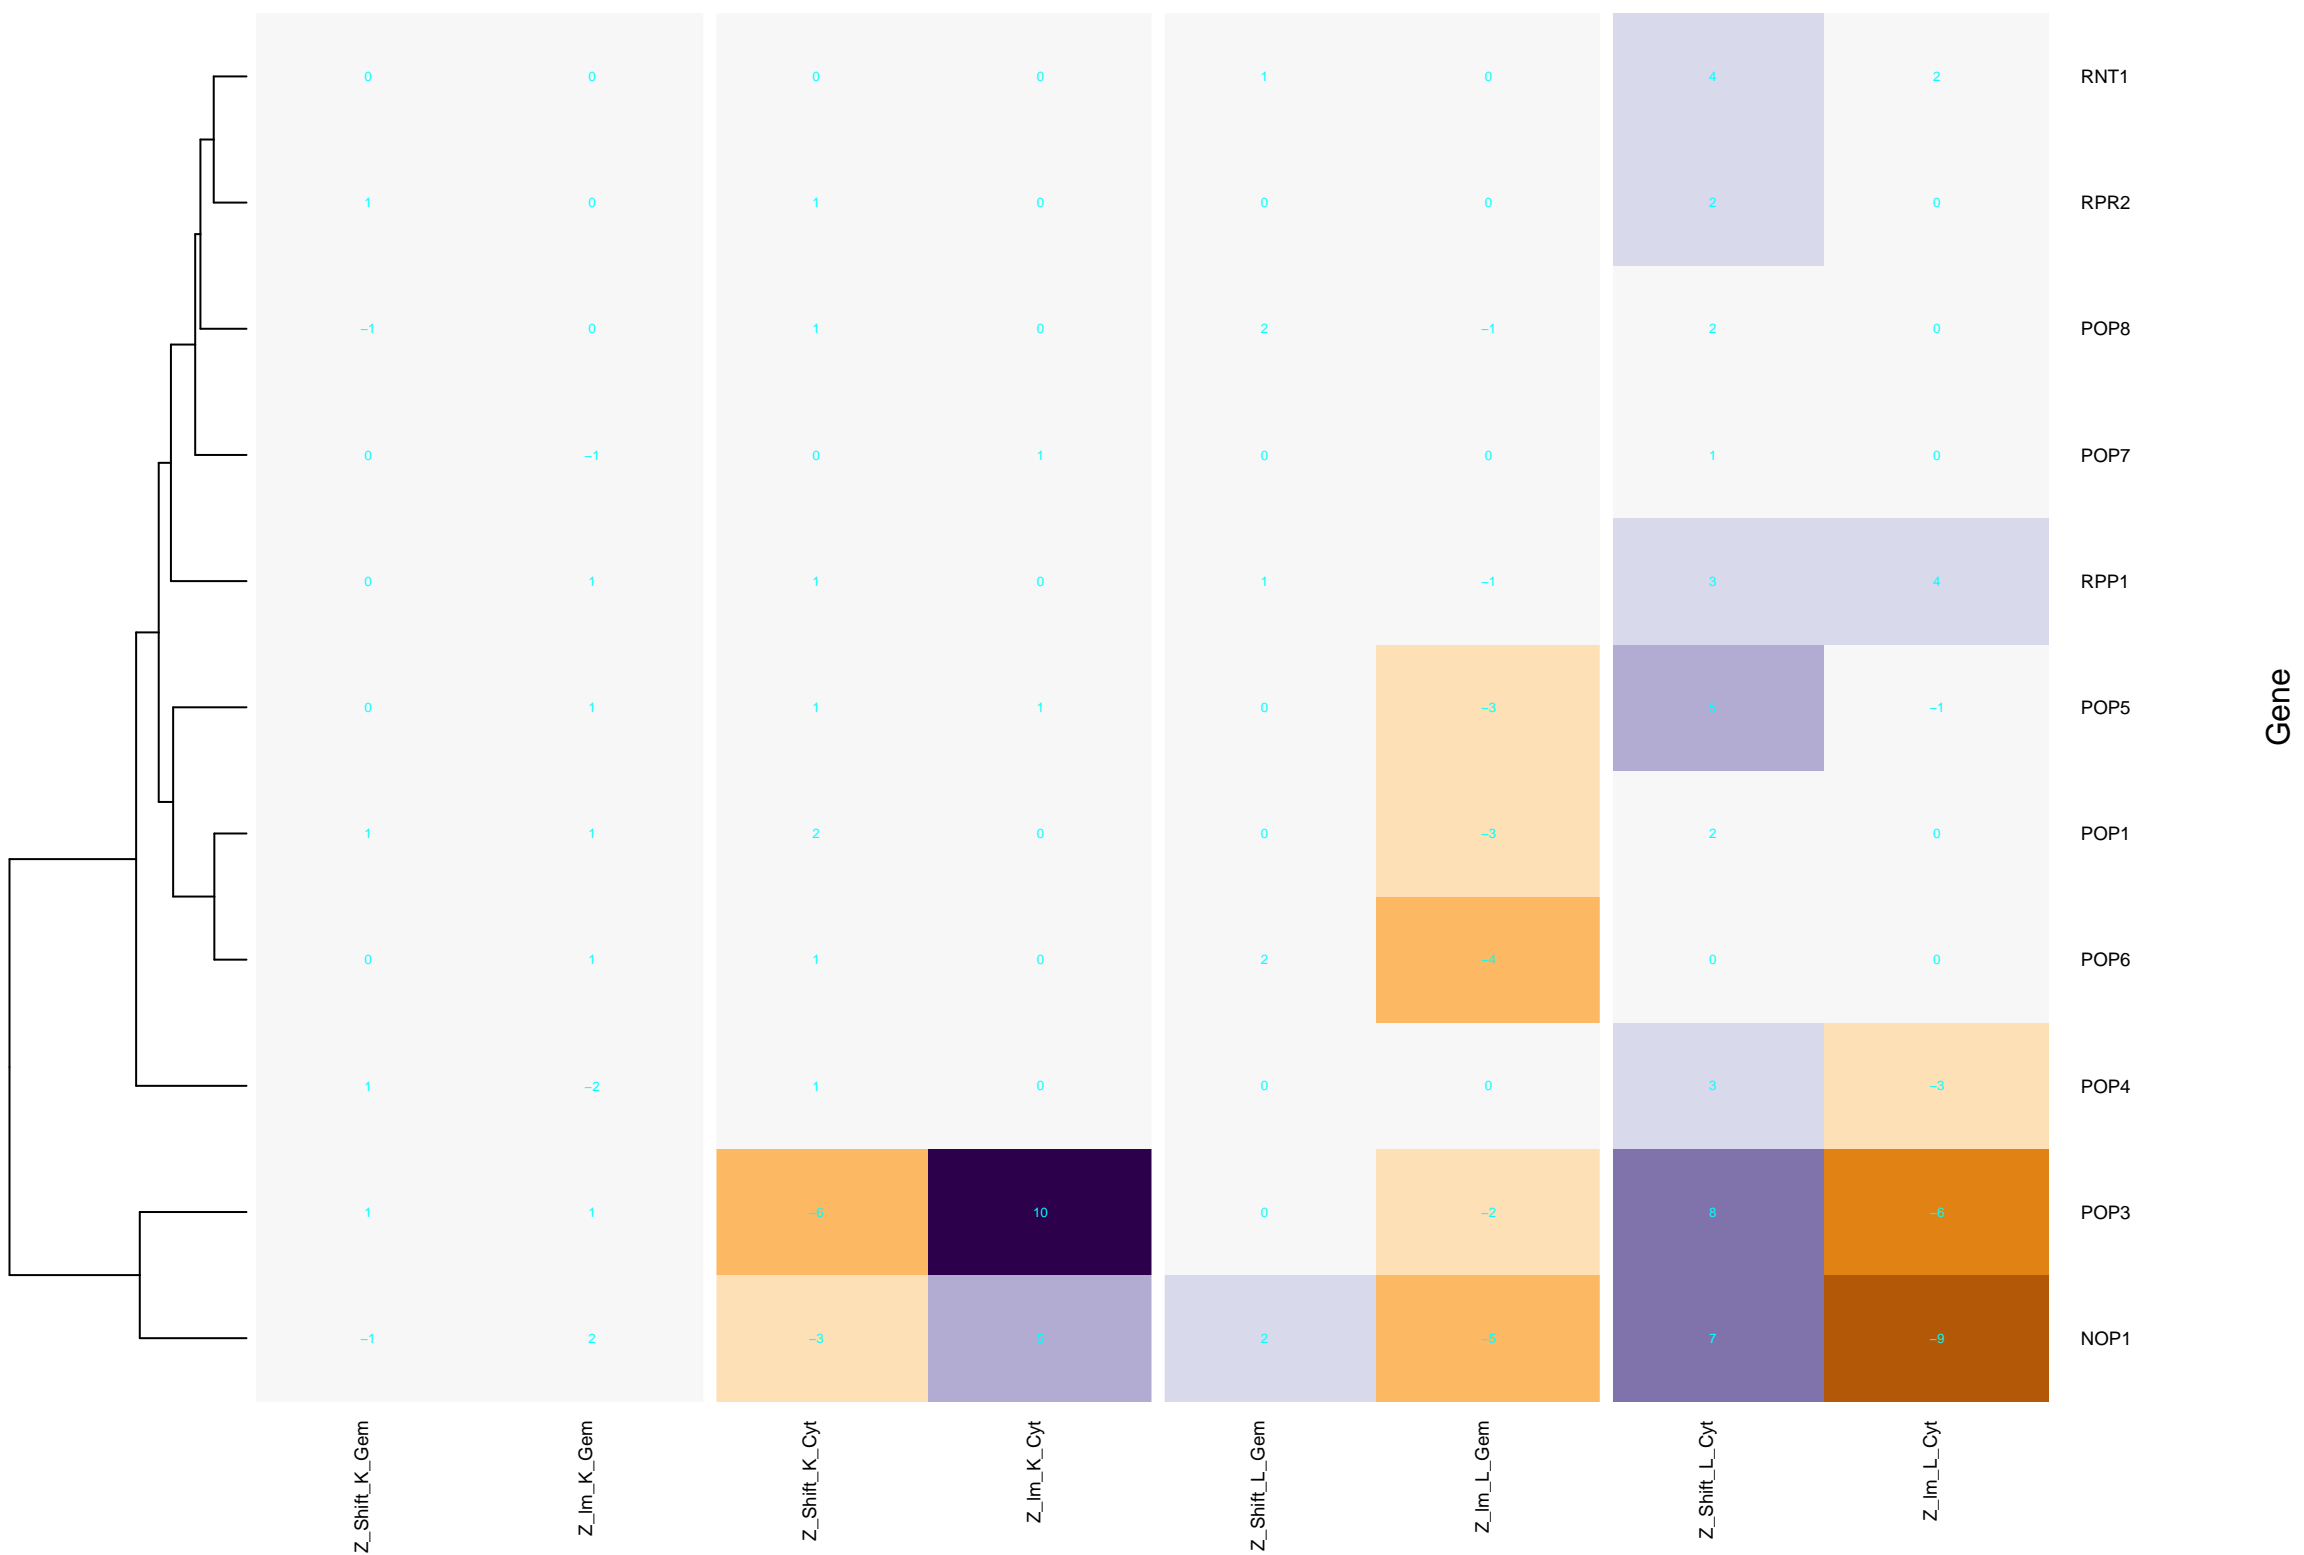

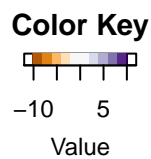

# intronic box C/D snoRNA processing



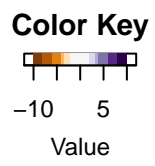

# snoRNA polyadenylation

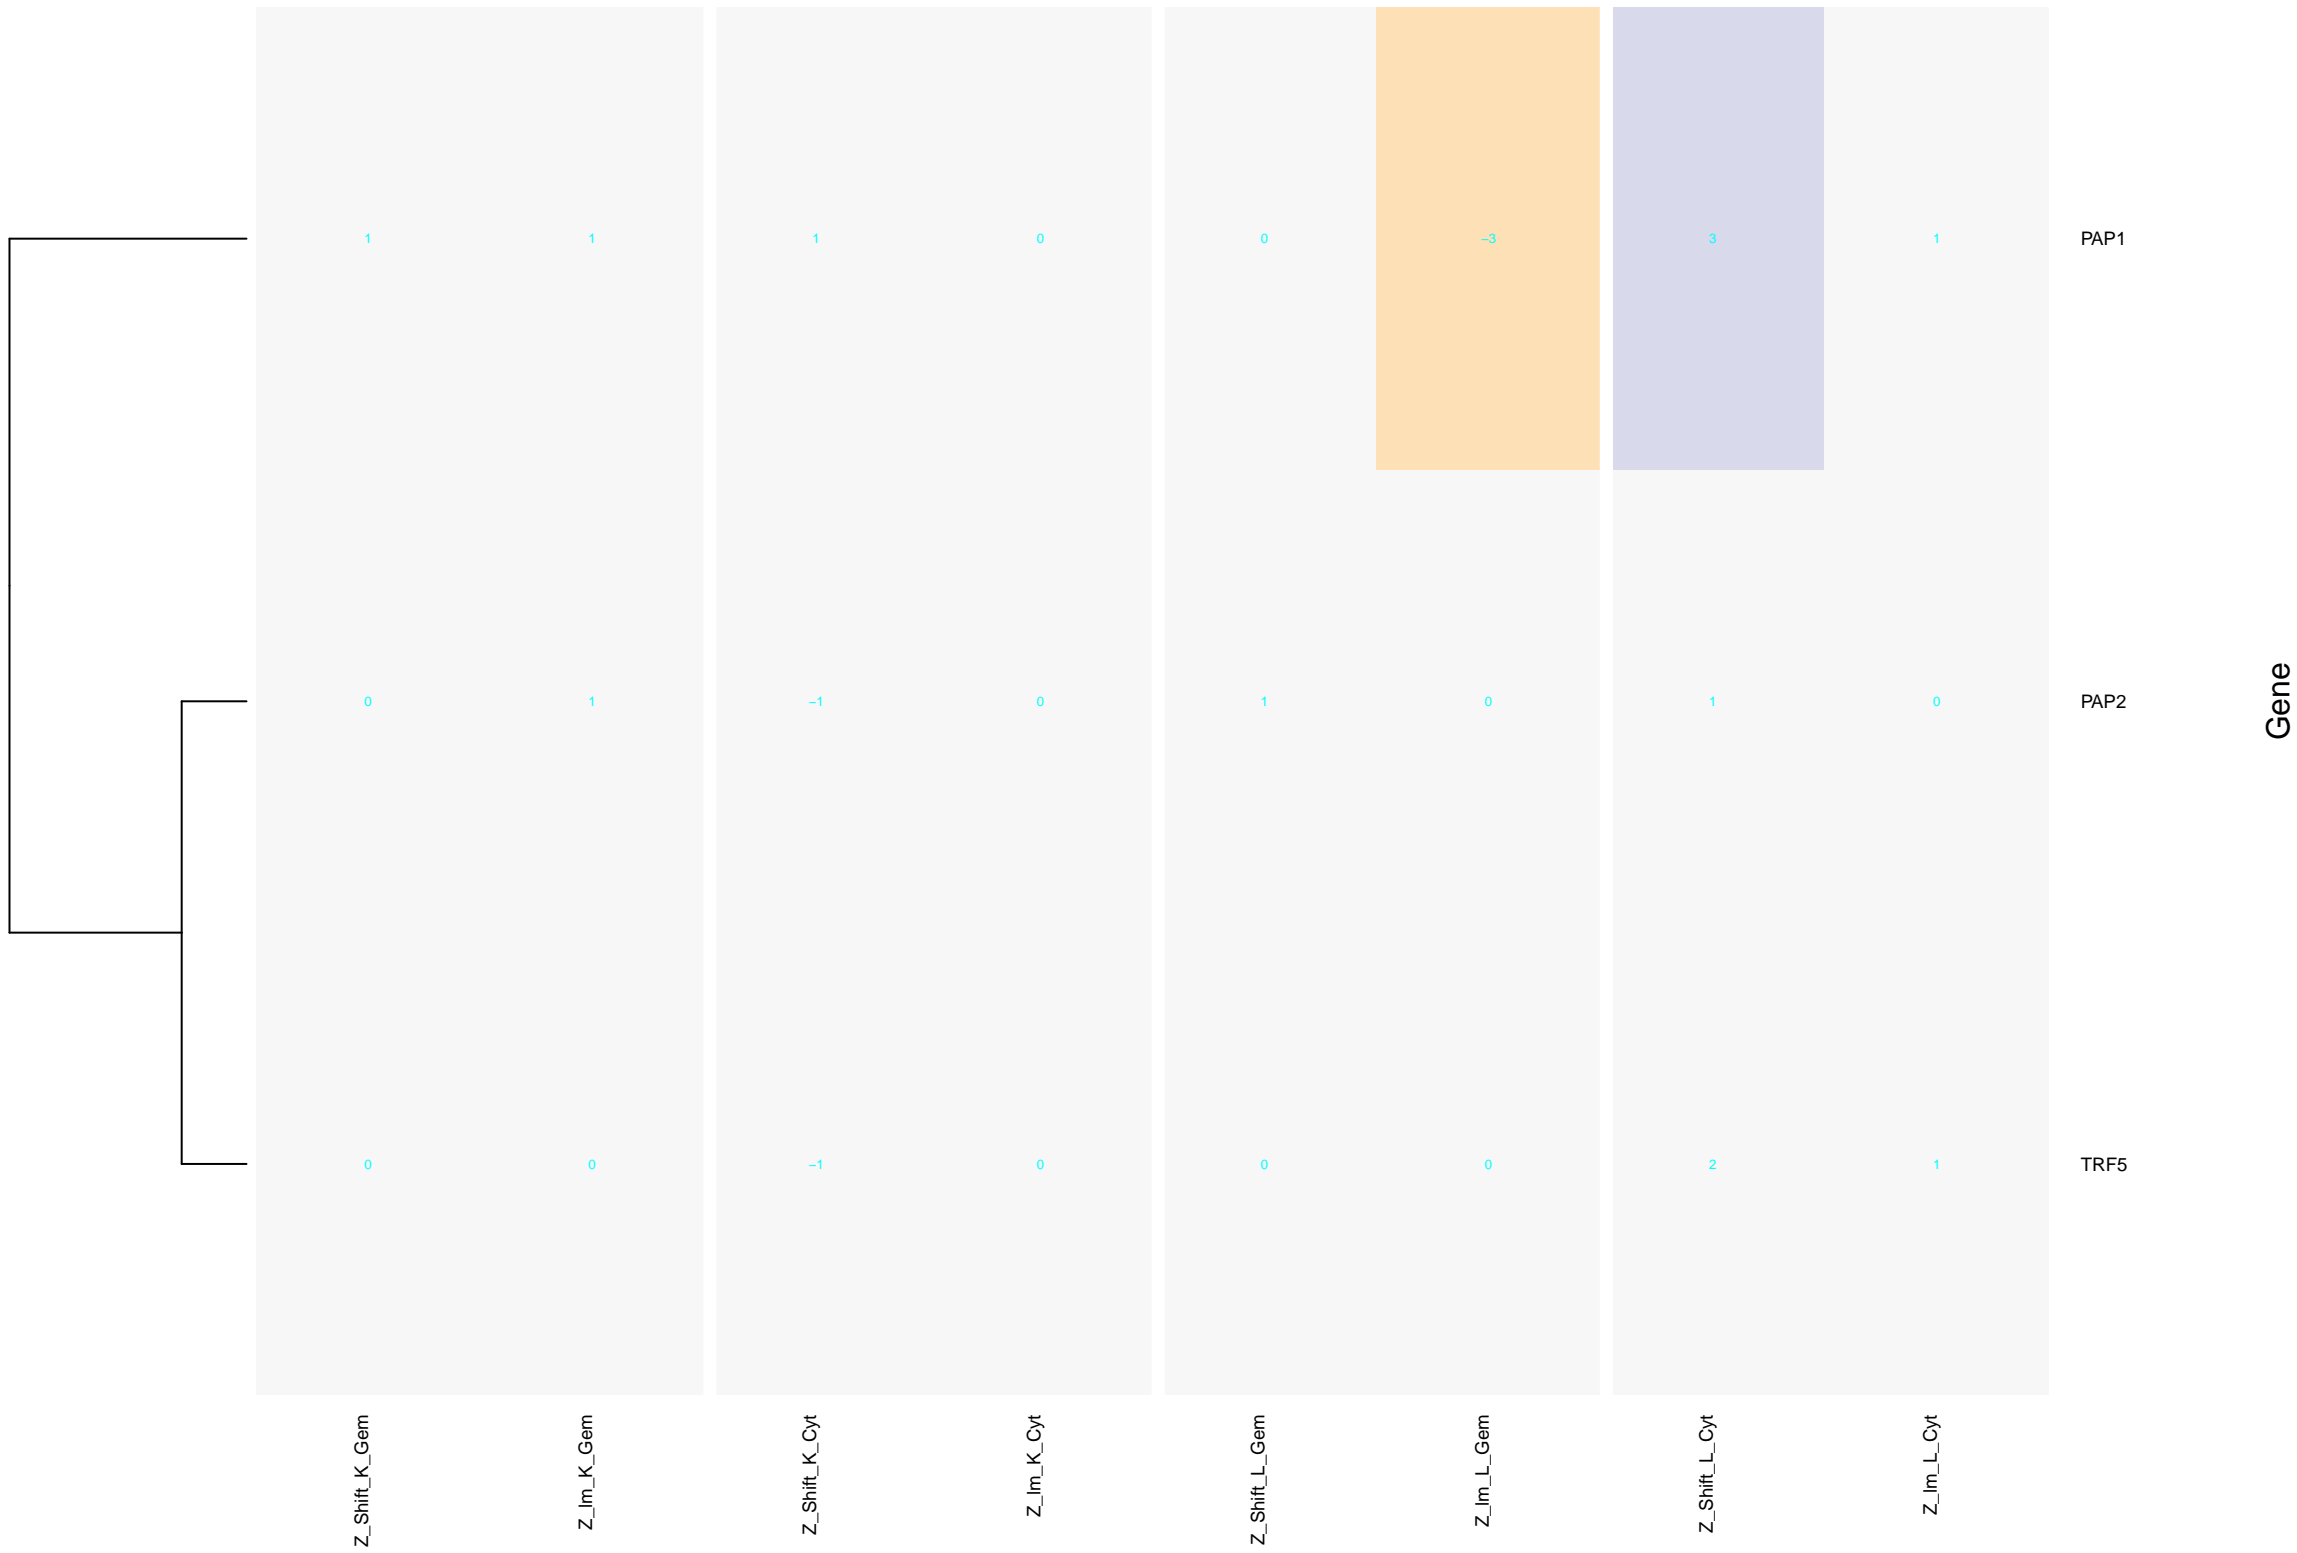

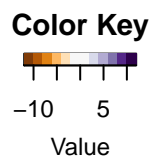

# polyadenylation-dependent snoRNA 3'-end processing

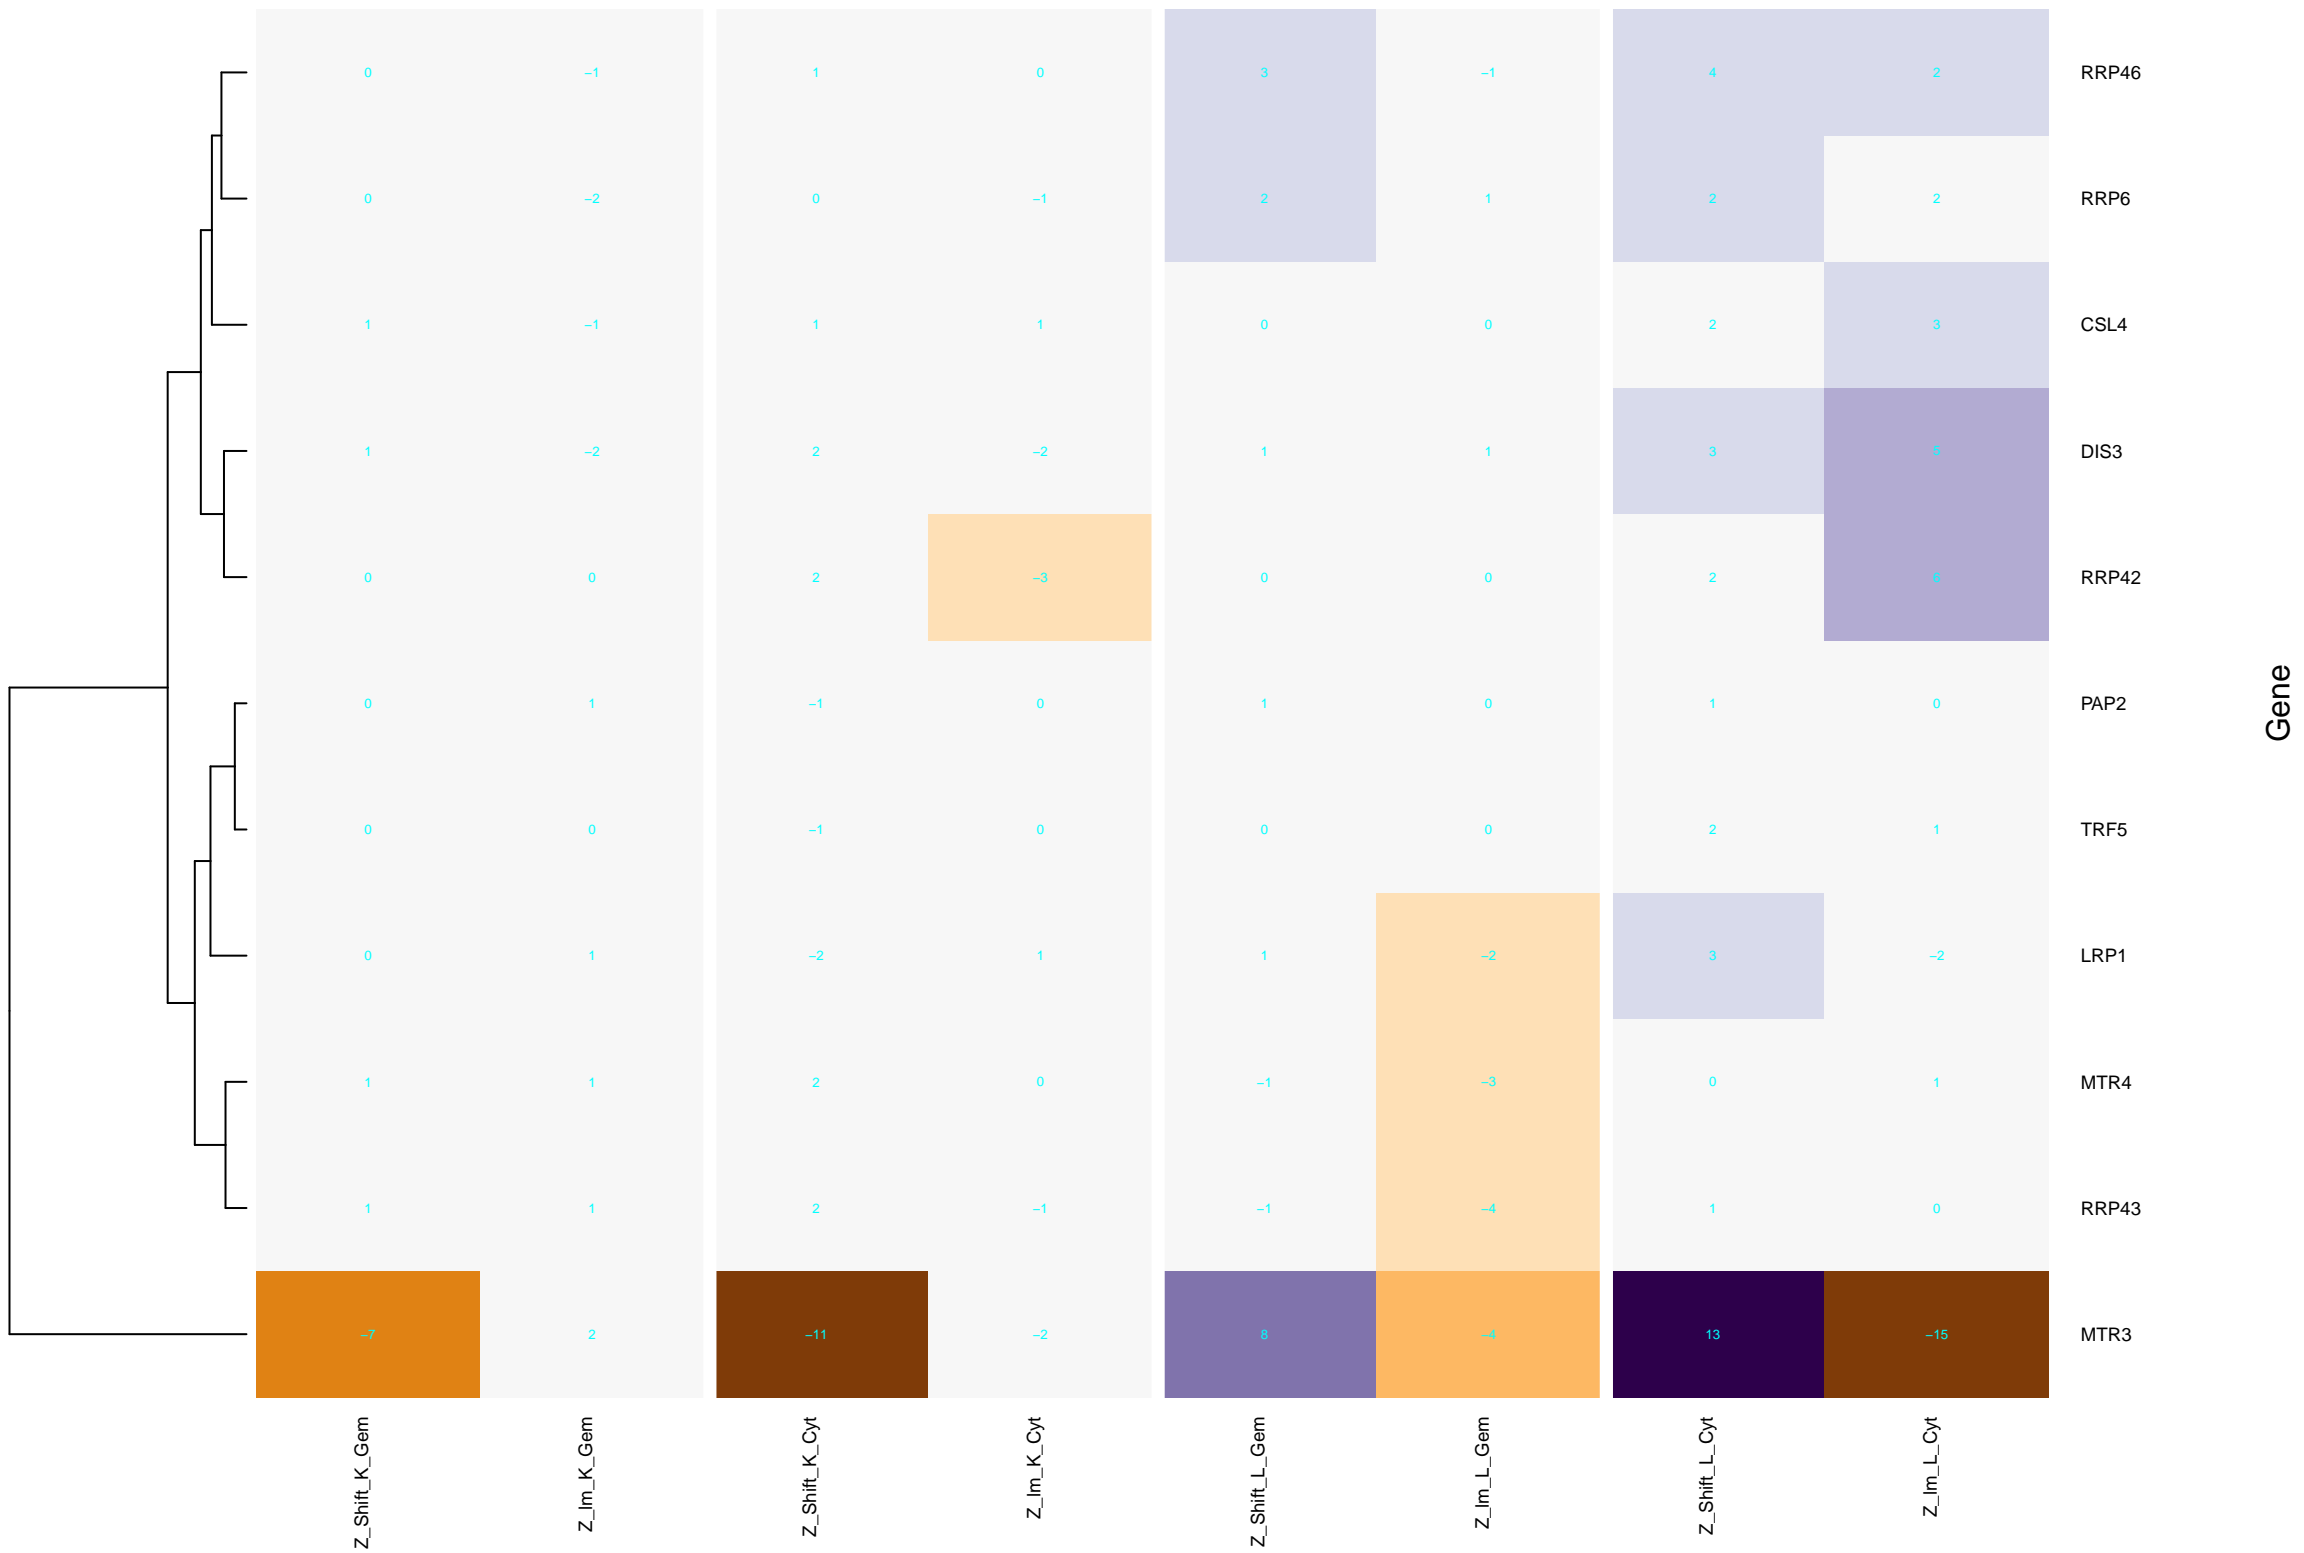

Supplement: s1 [file s1]
