# Supplementary material for: A Humanized Yeast Phenomic Model of Deoxycytidine Kinase to Predict Genetic Buffering of Nucleoside Analog Cytotoxicity
Source: MDPI journal article supplement (doi:10.3390/genes10100770), 2019-09-30

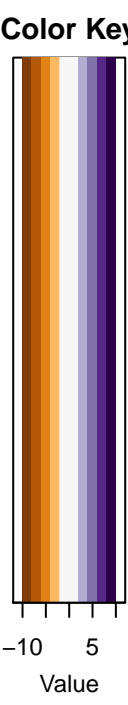

nucleotide-excision repair, DNA damage recognition

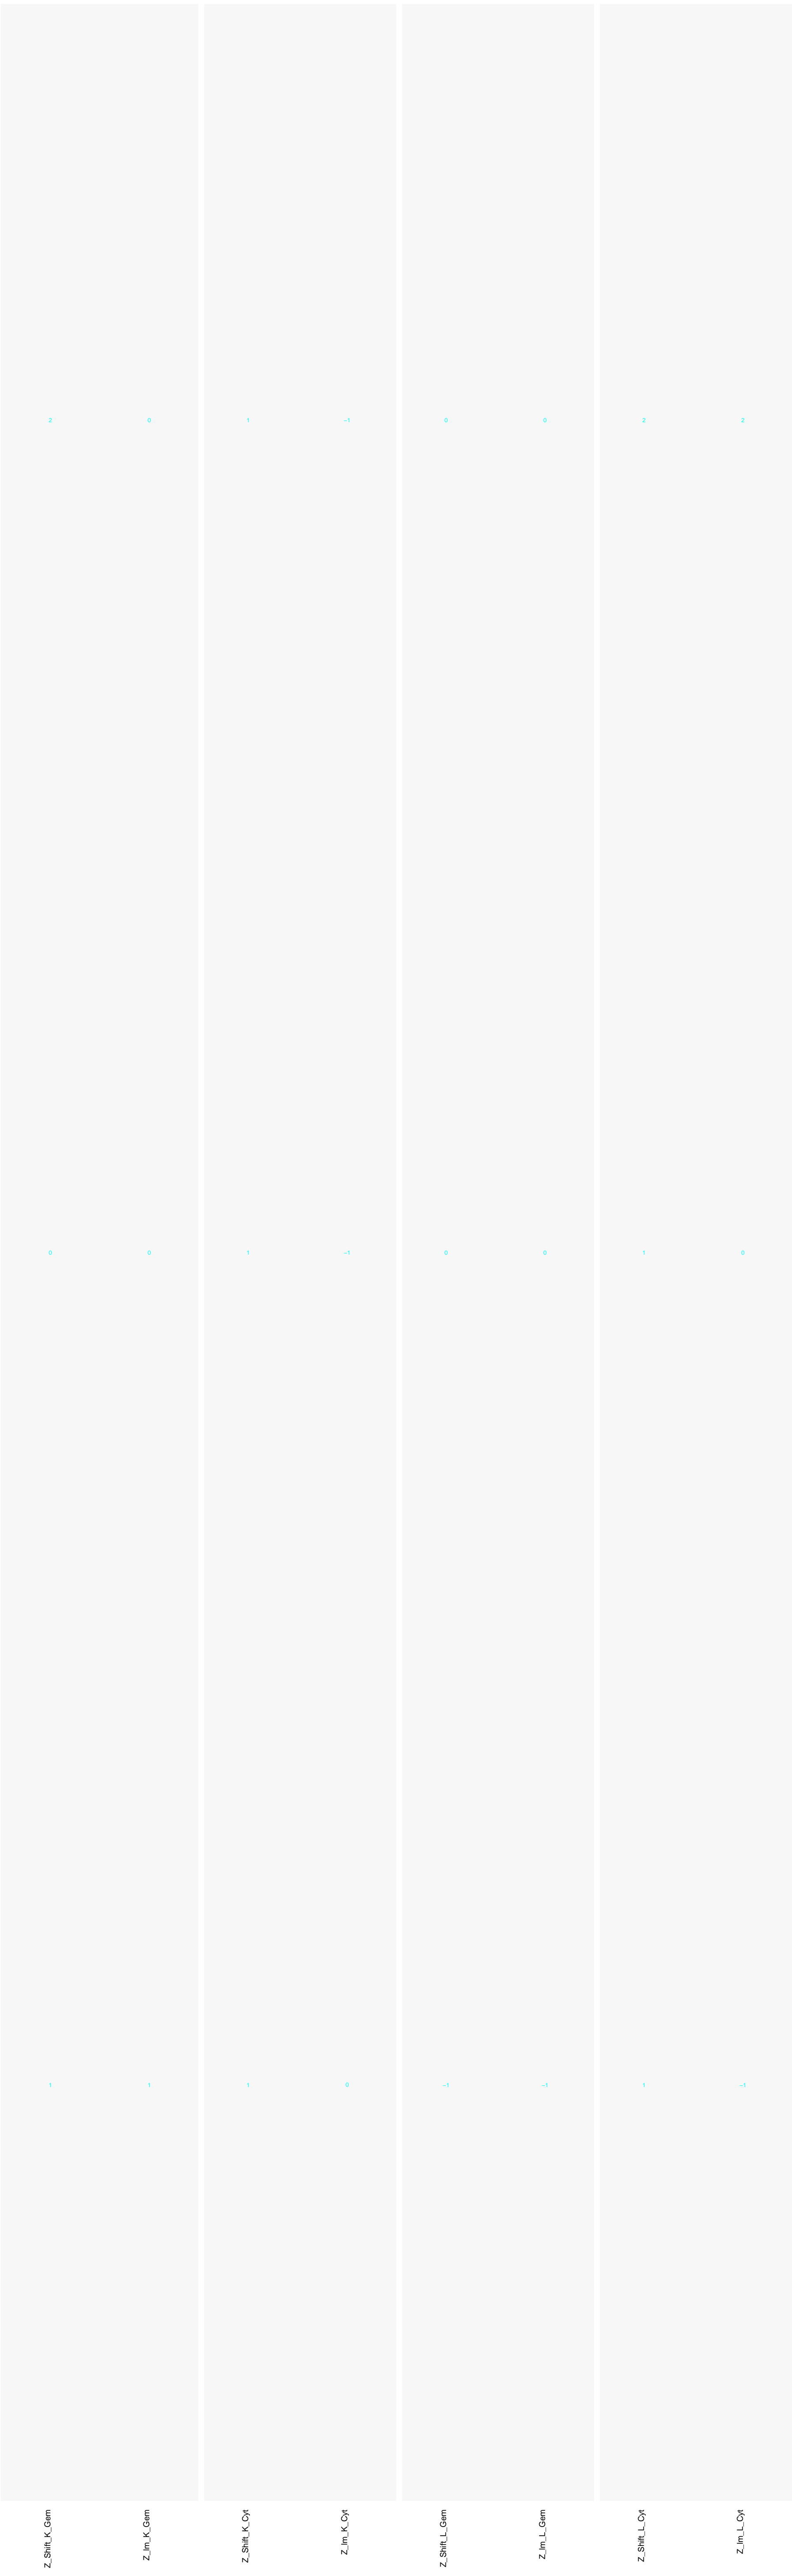

Gene

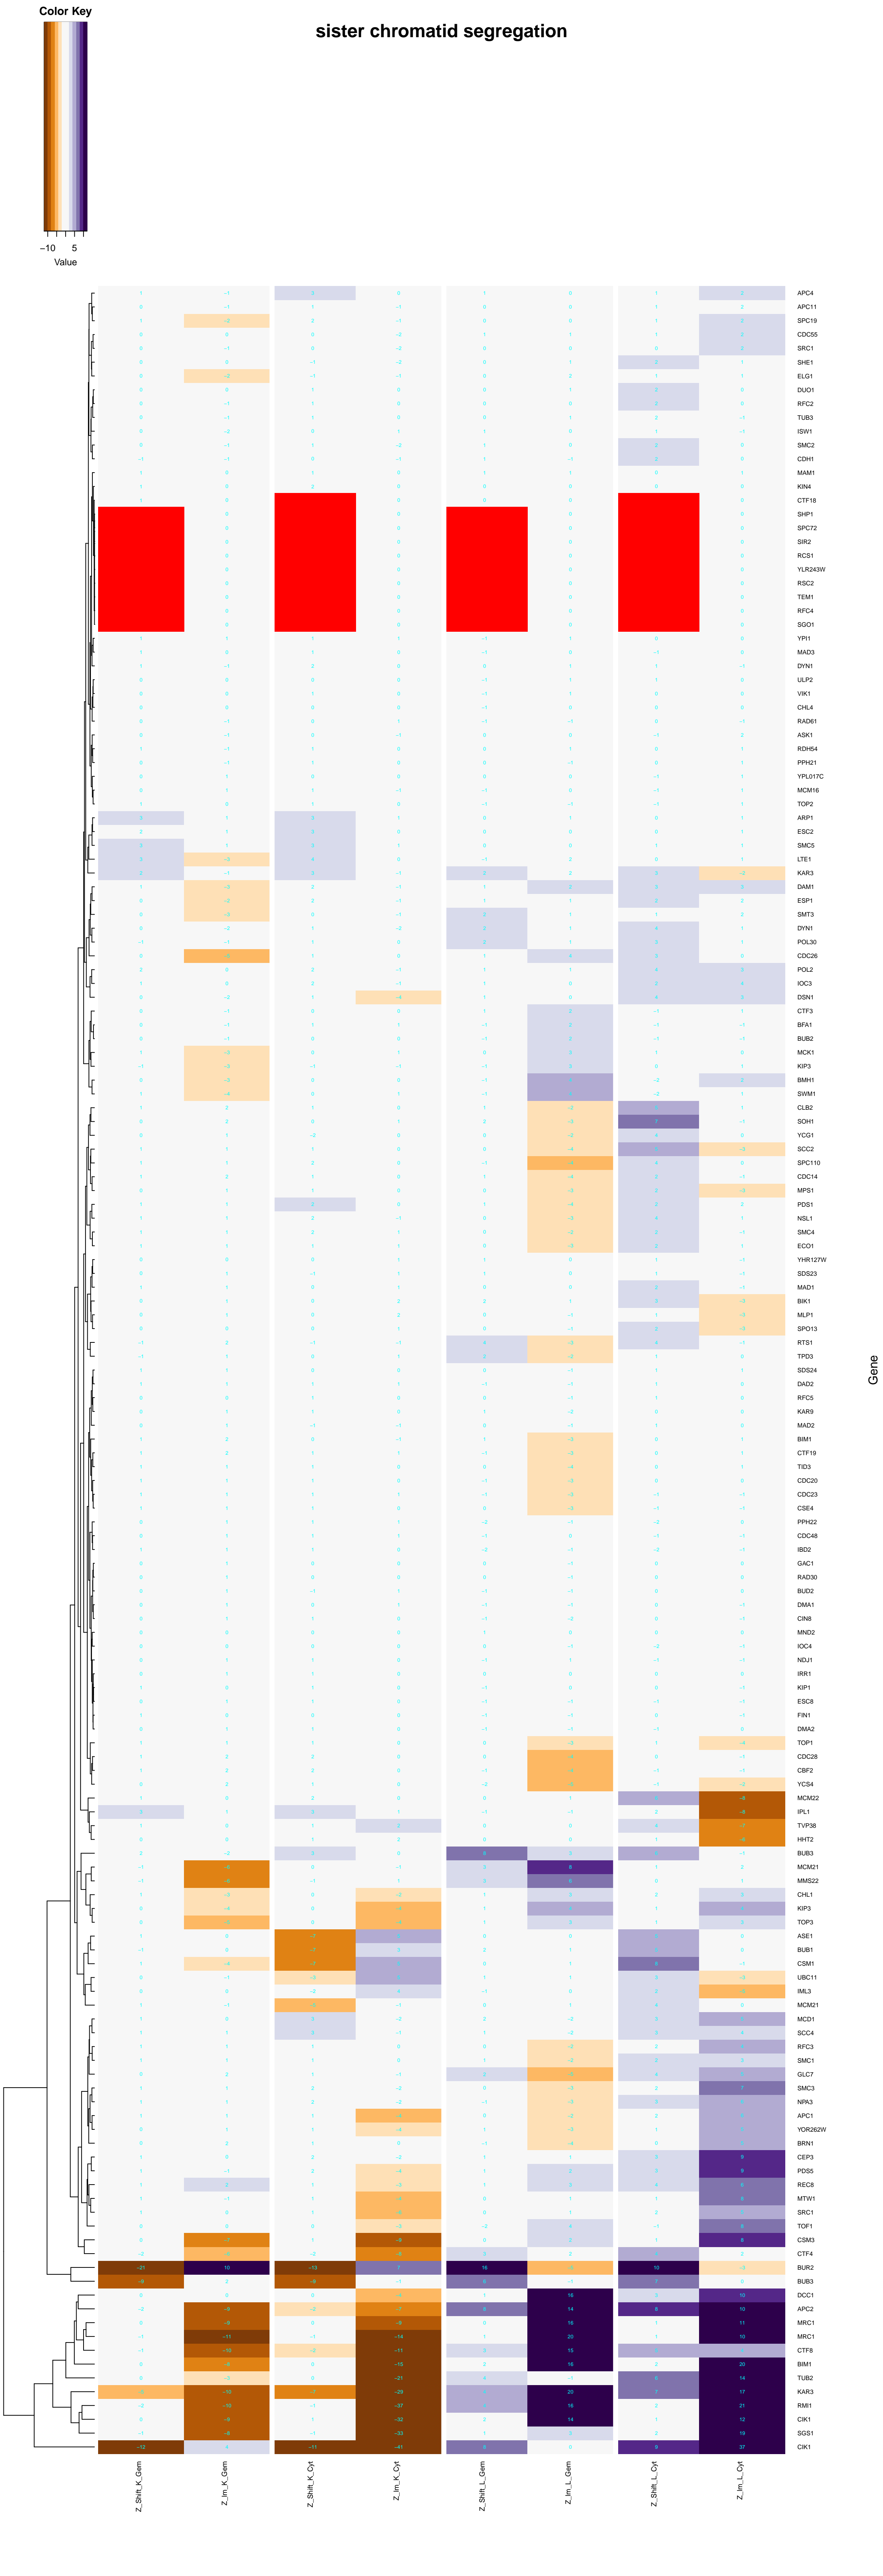

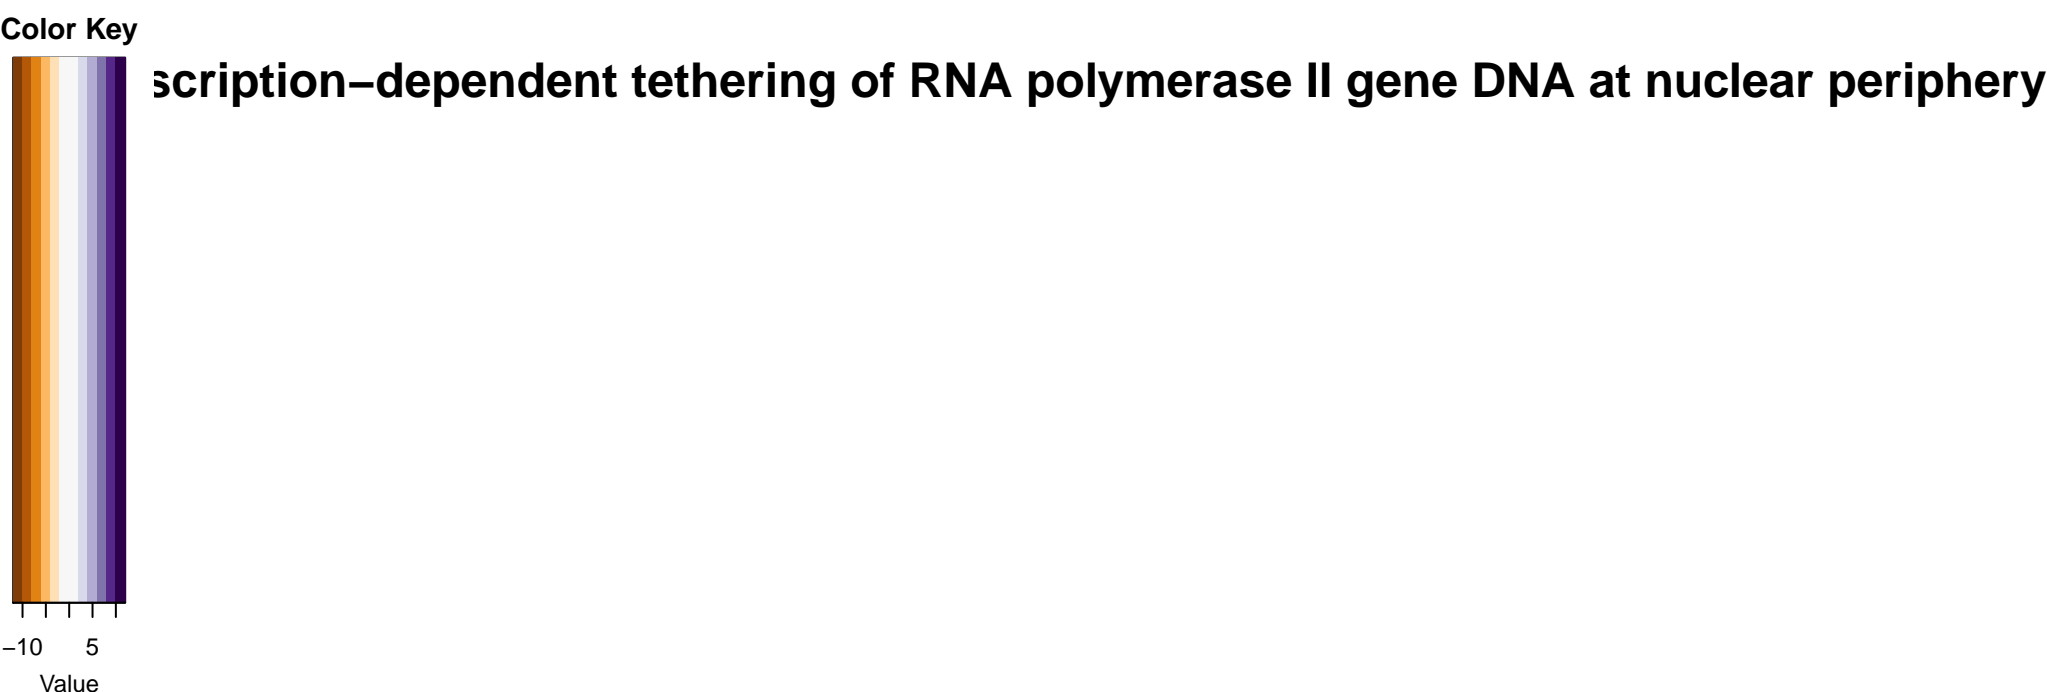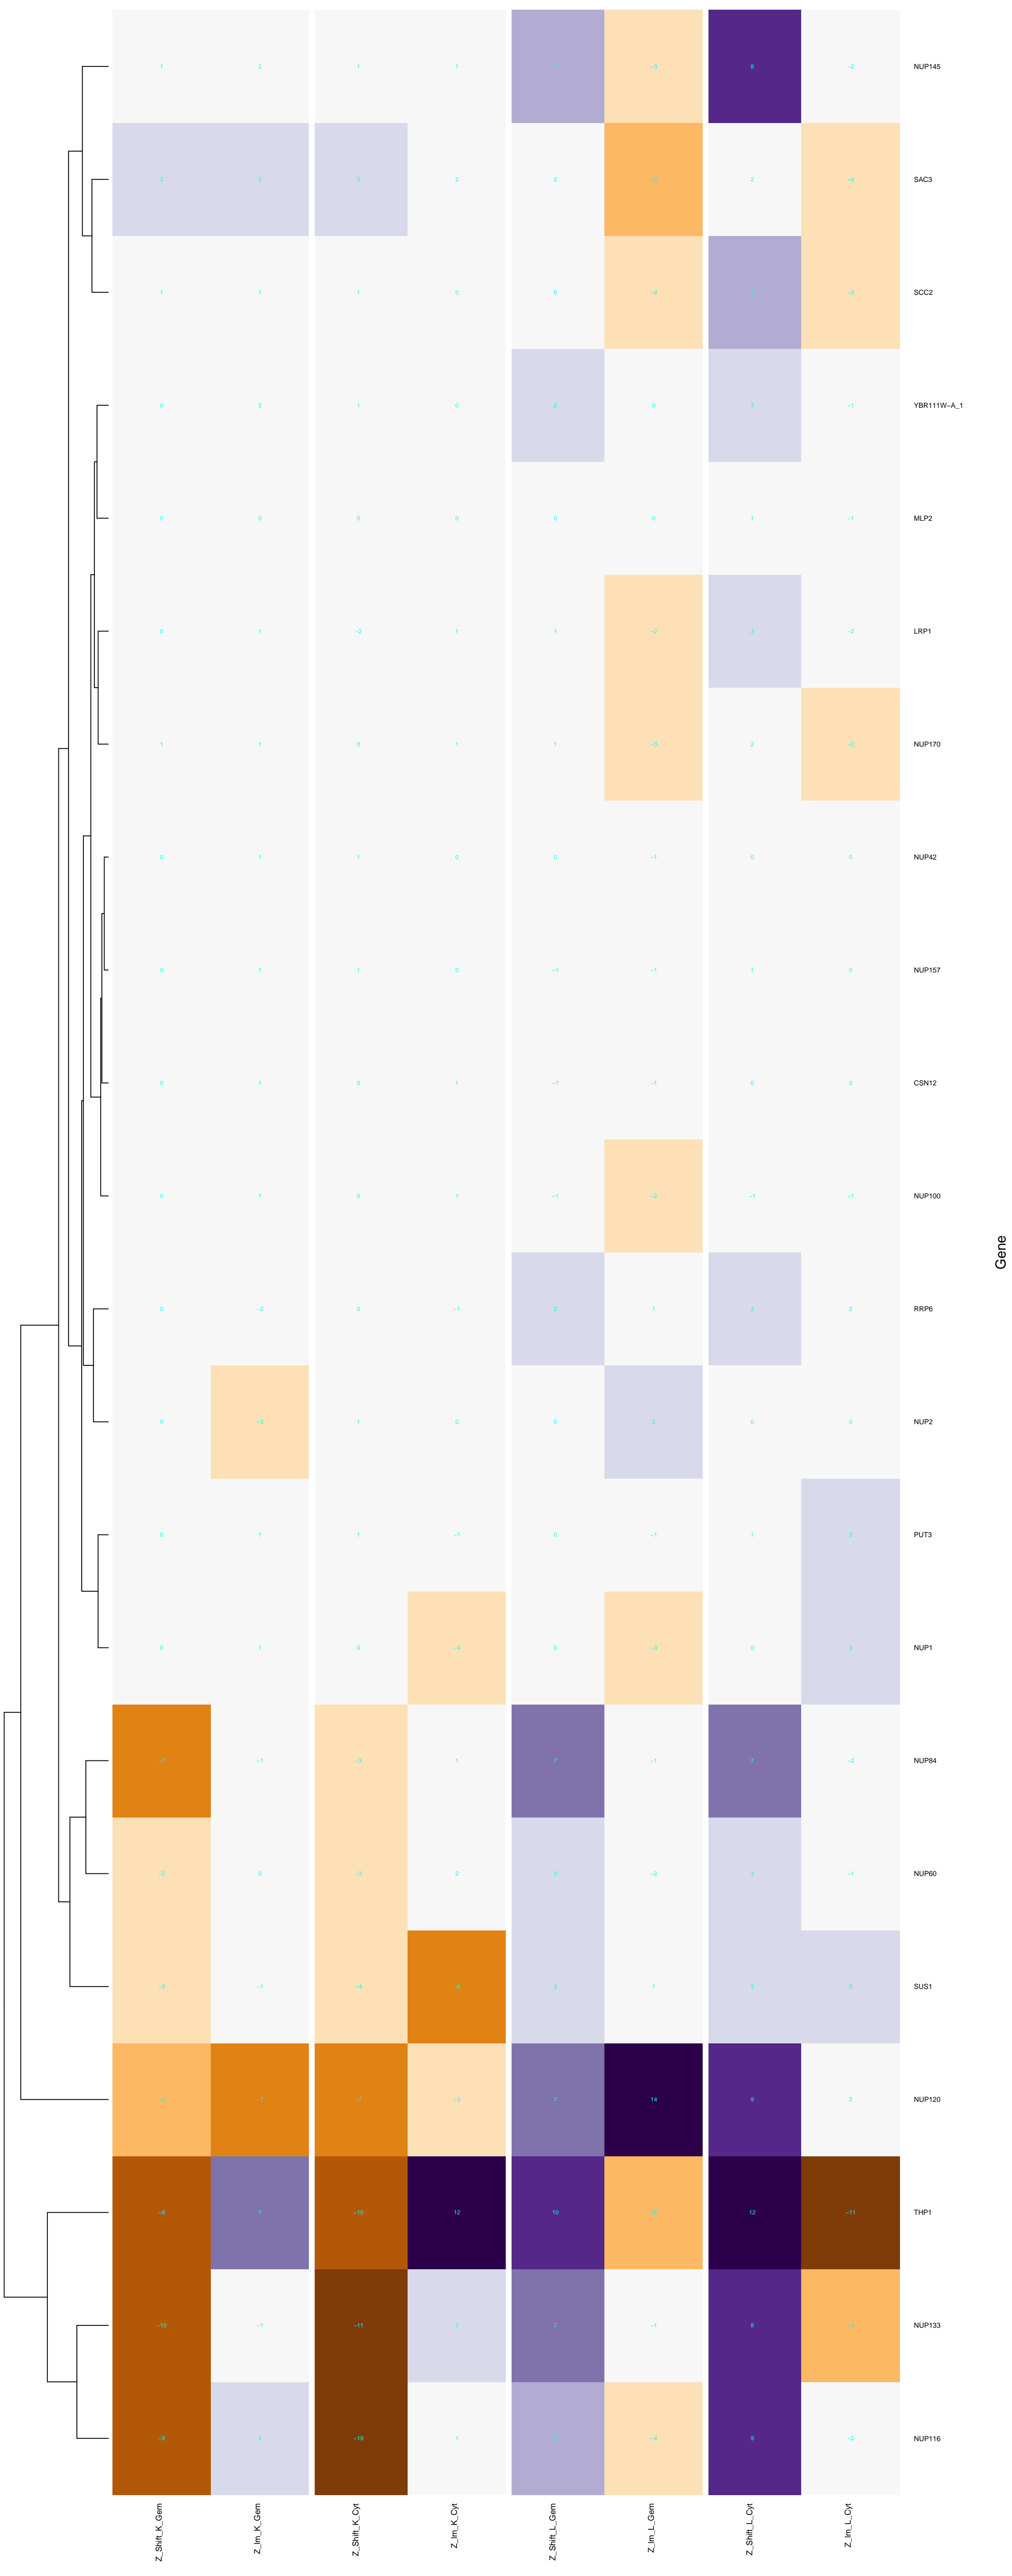

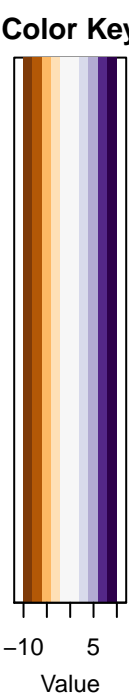

establishment of chromatin silencing

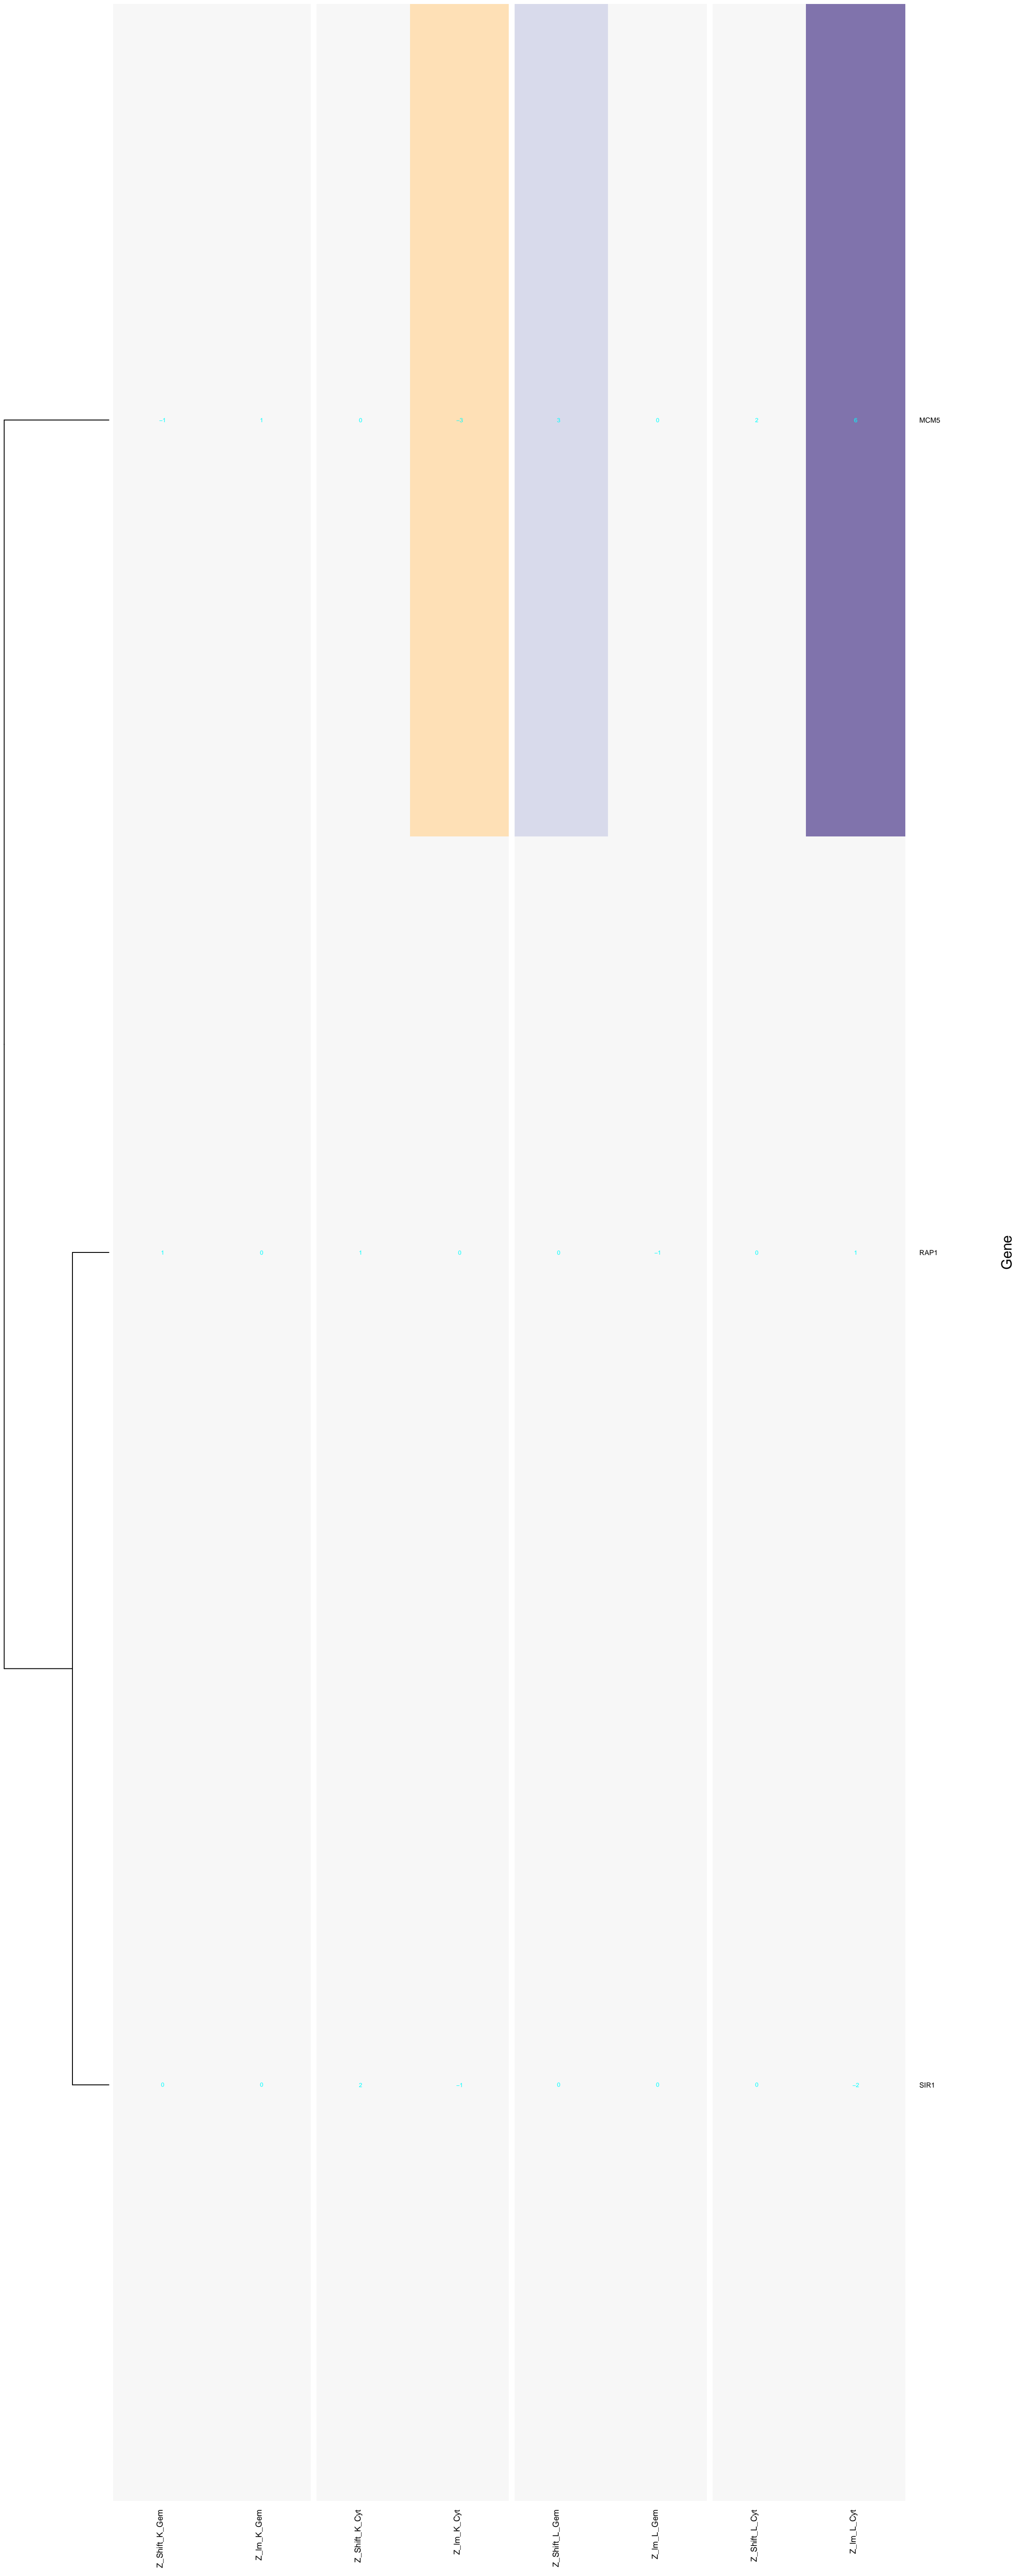

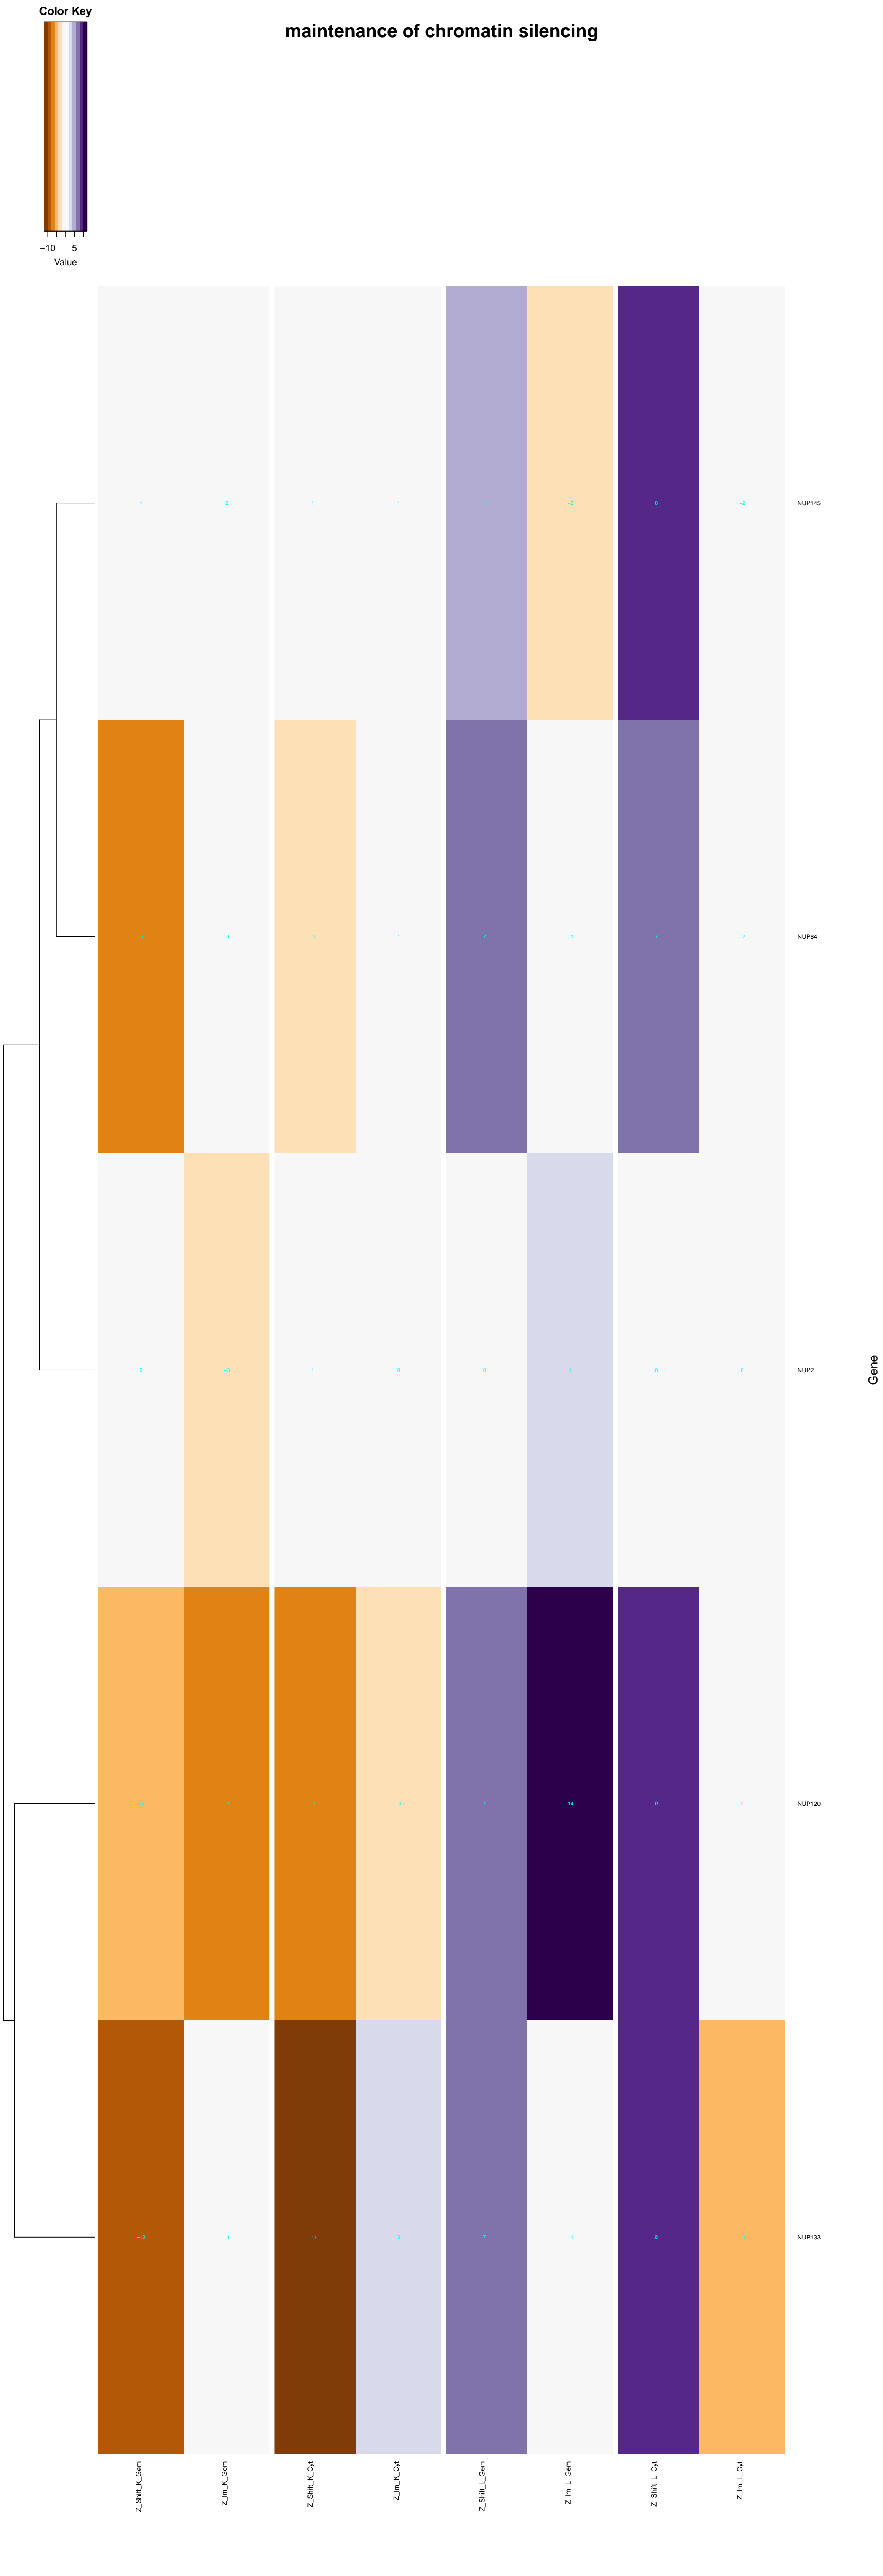

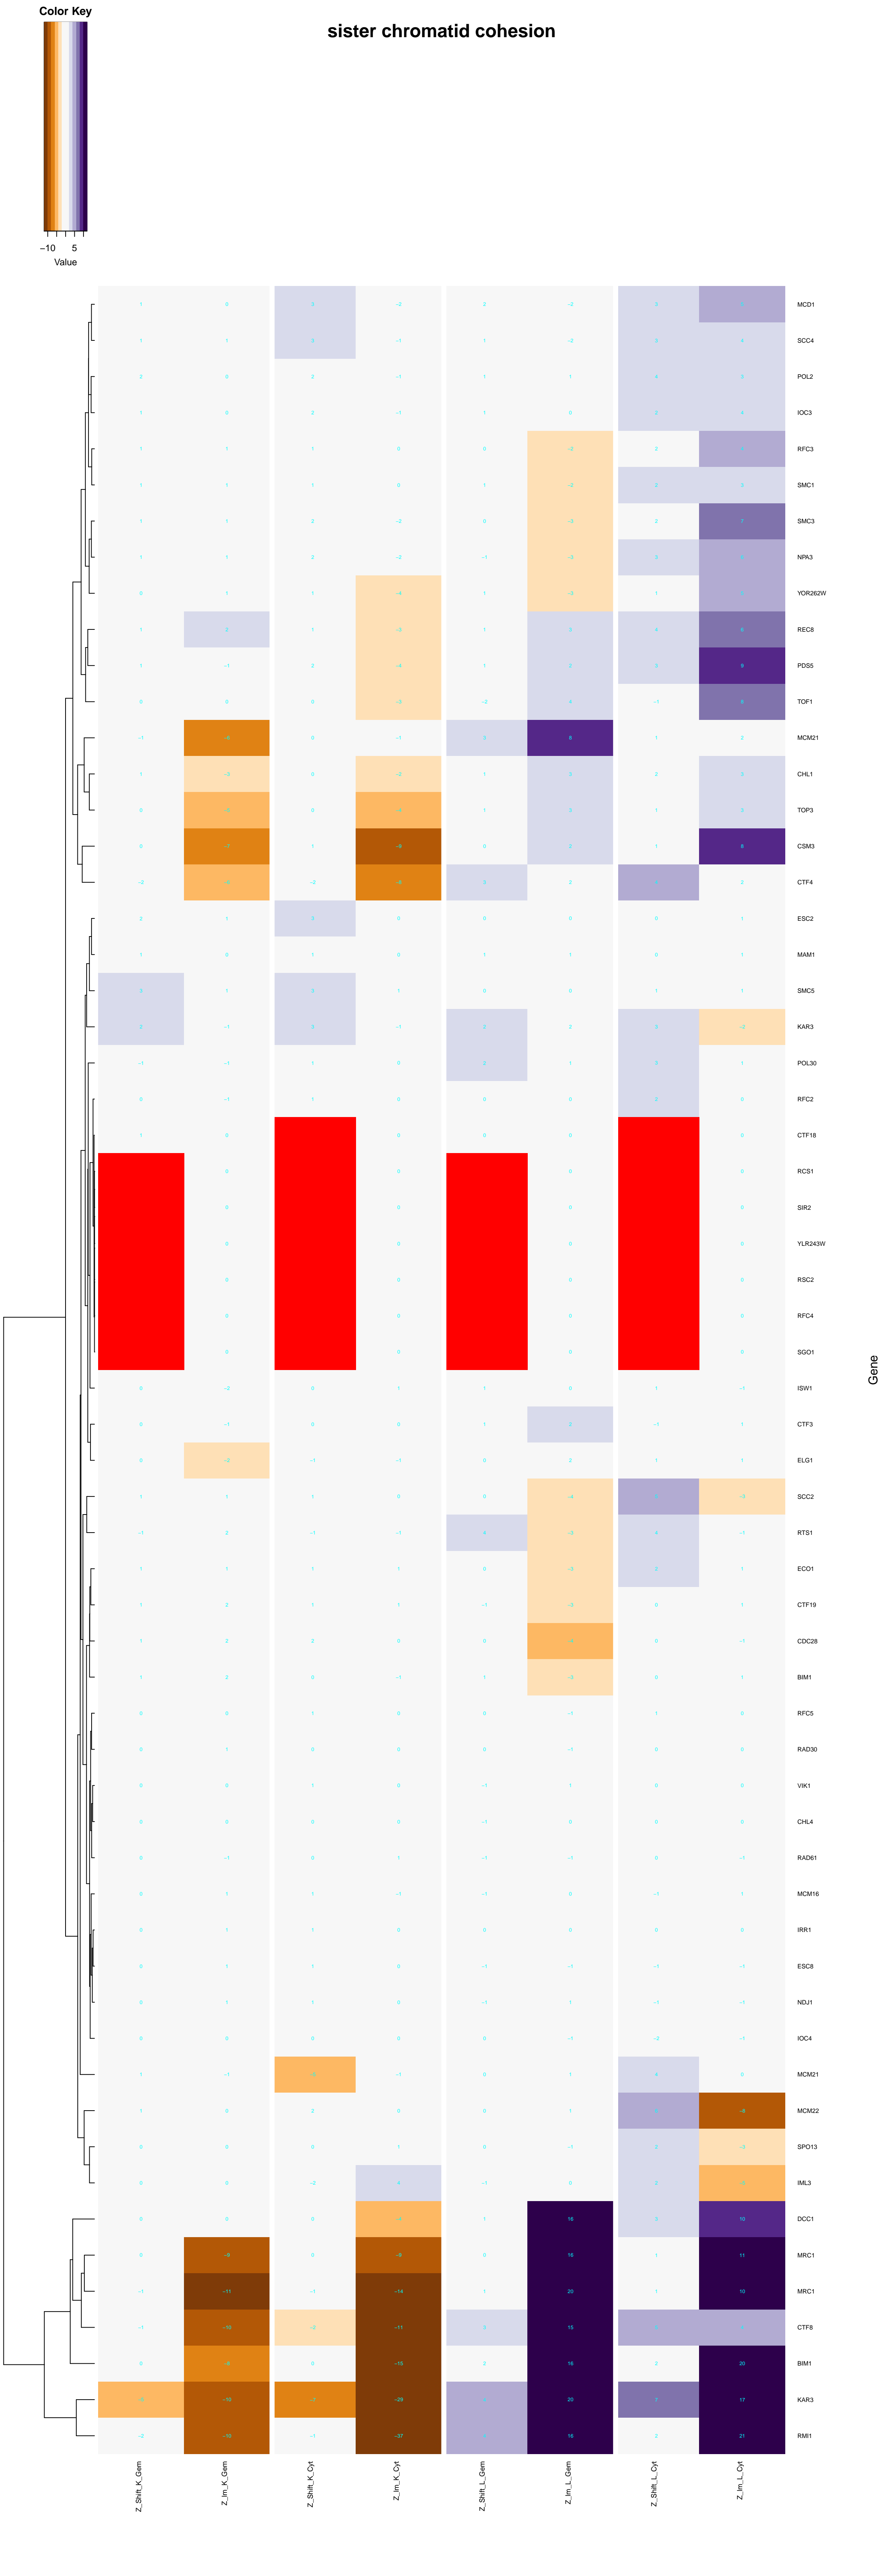

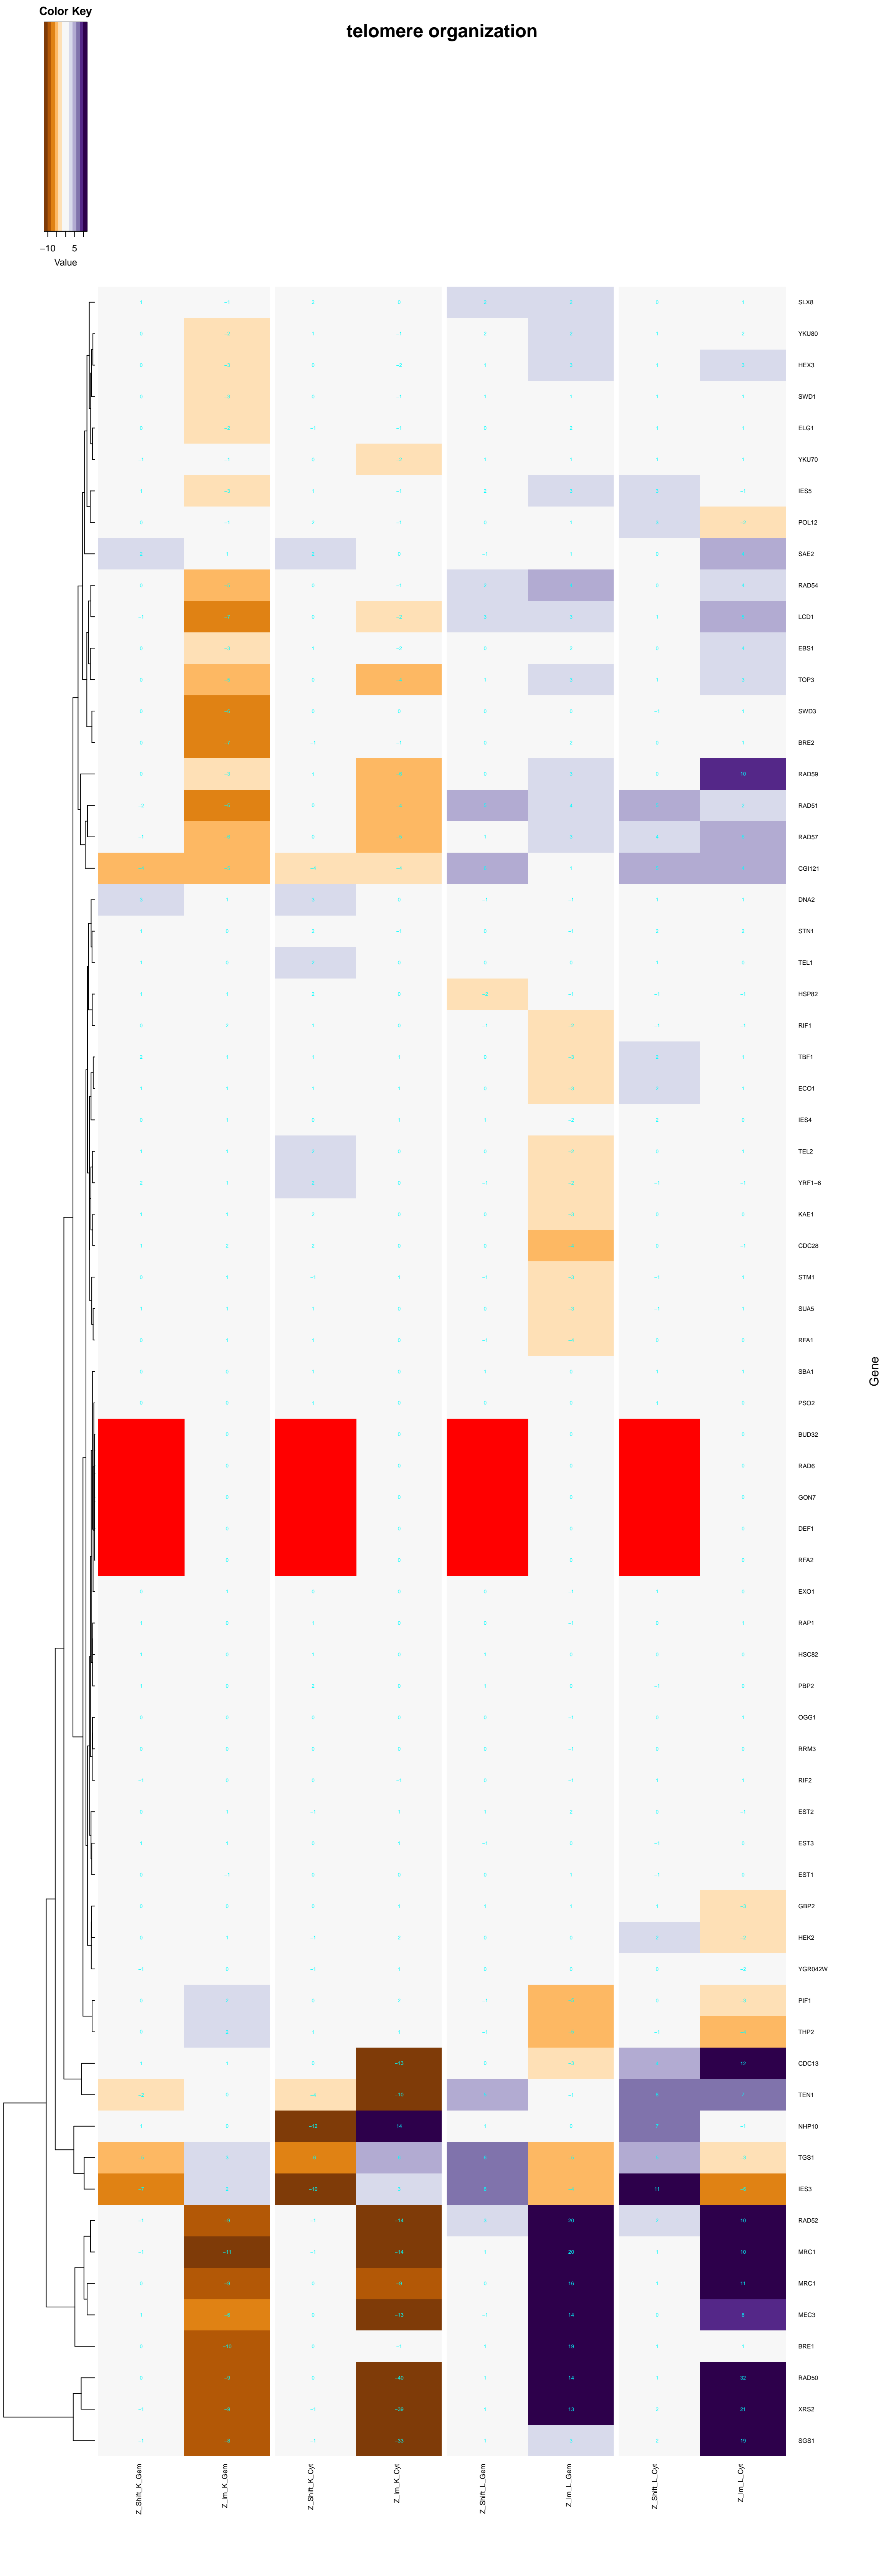

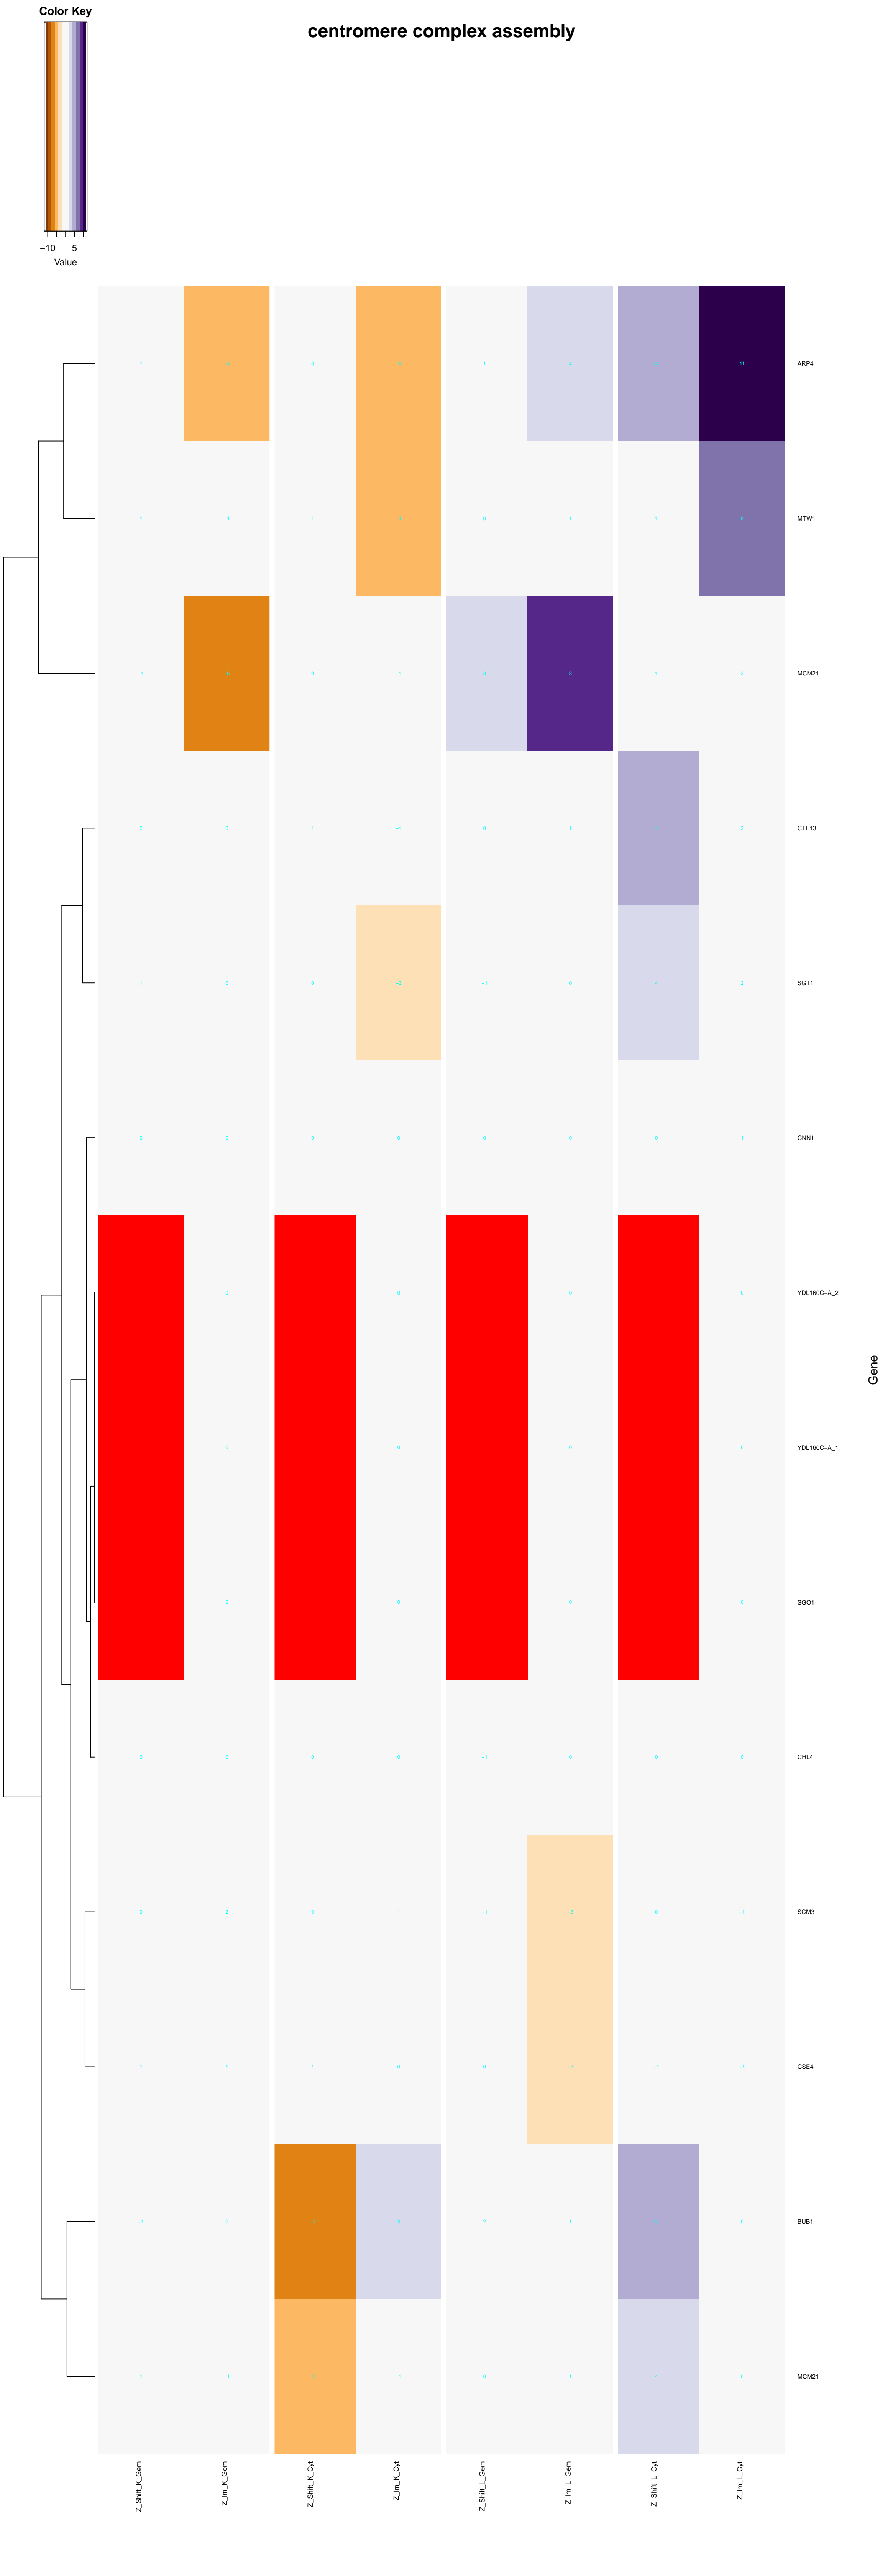

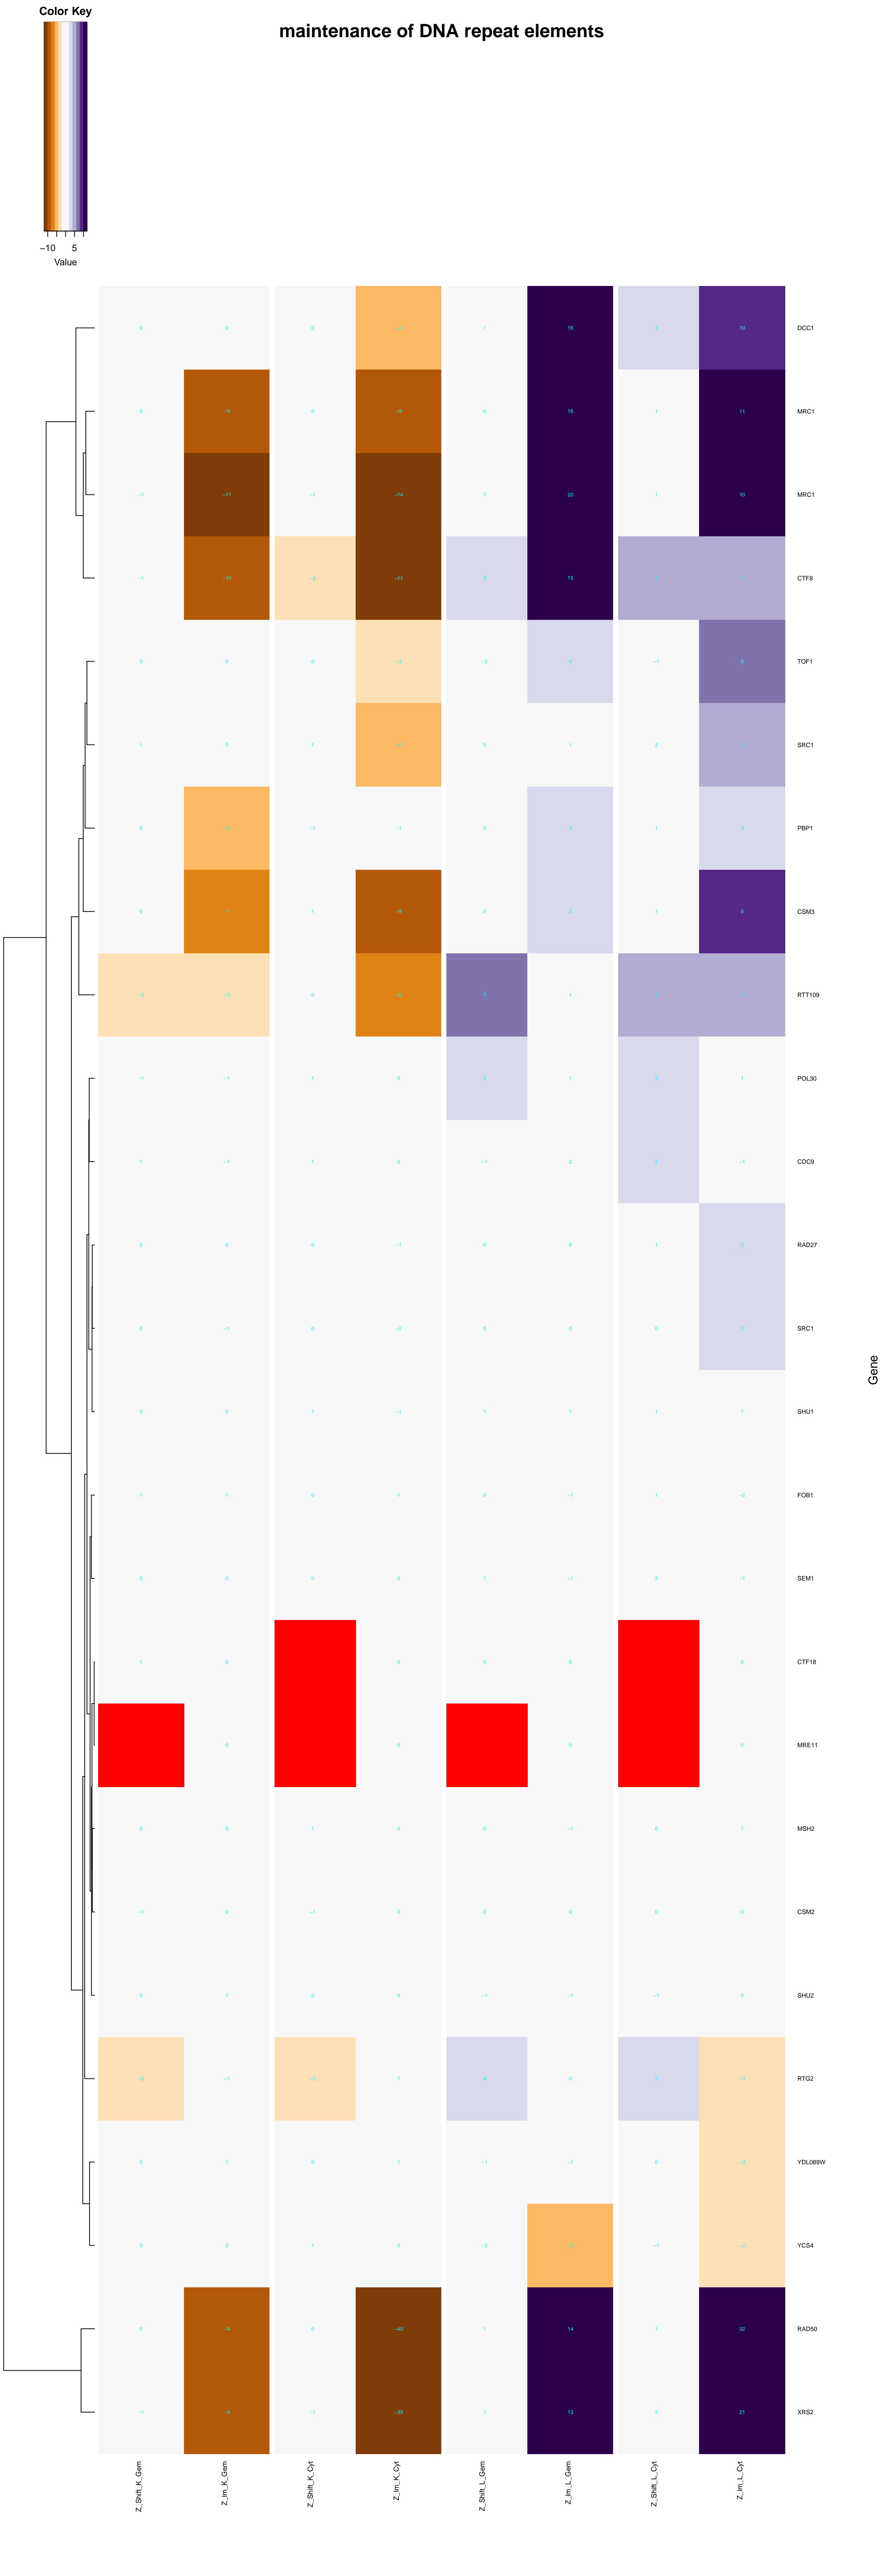

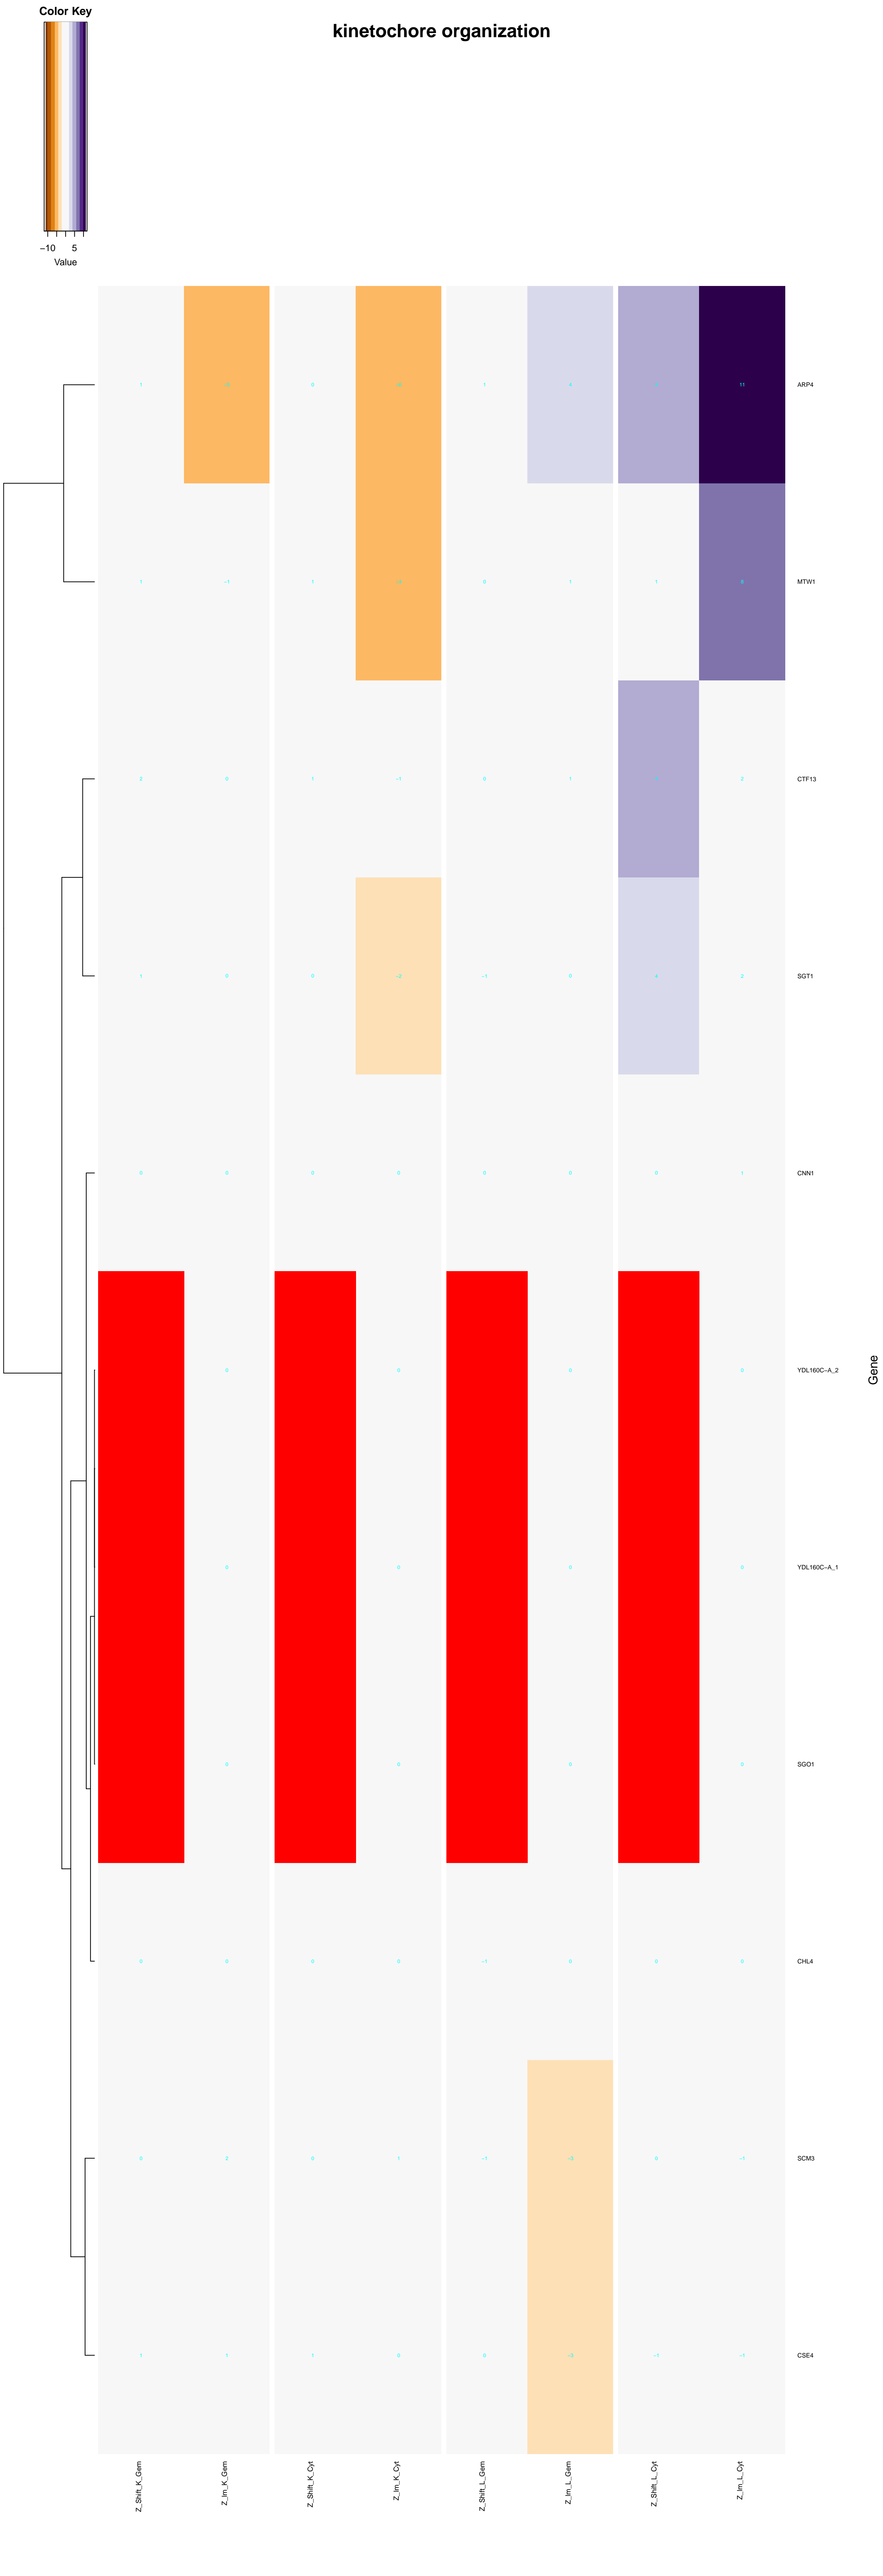

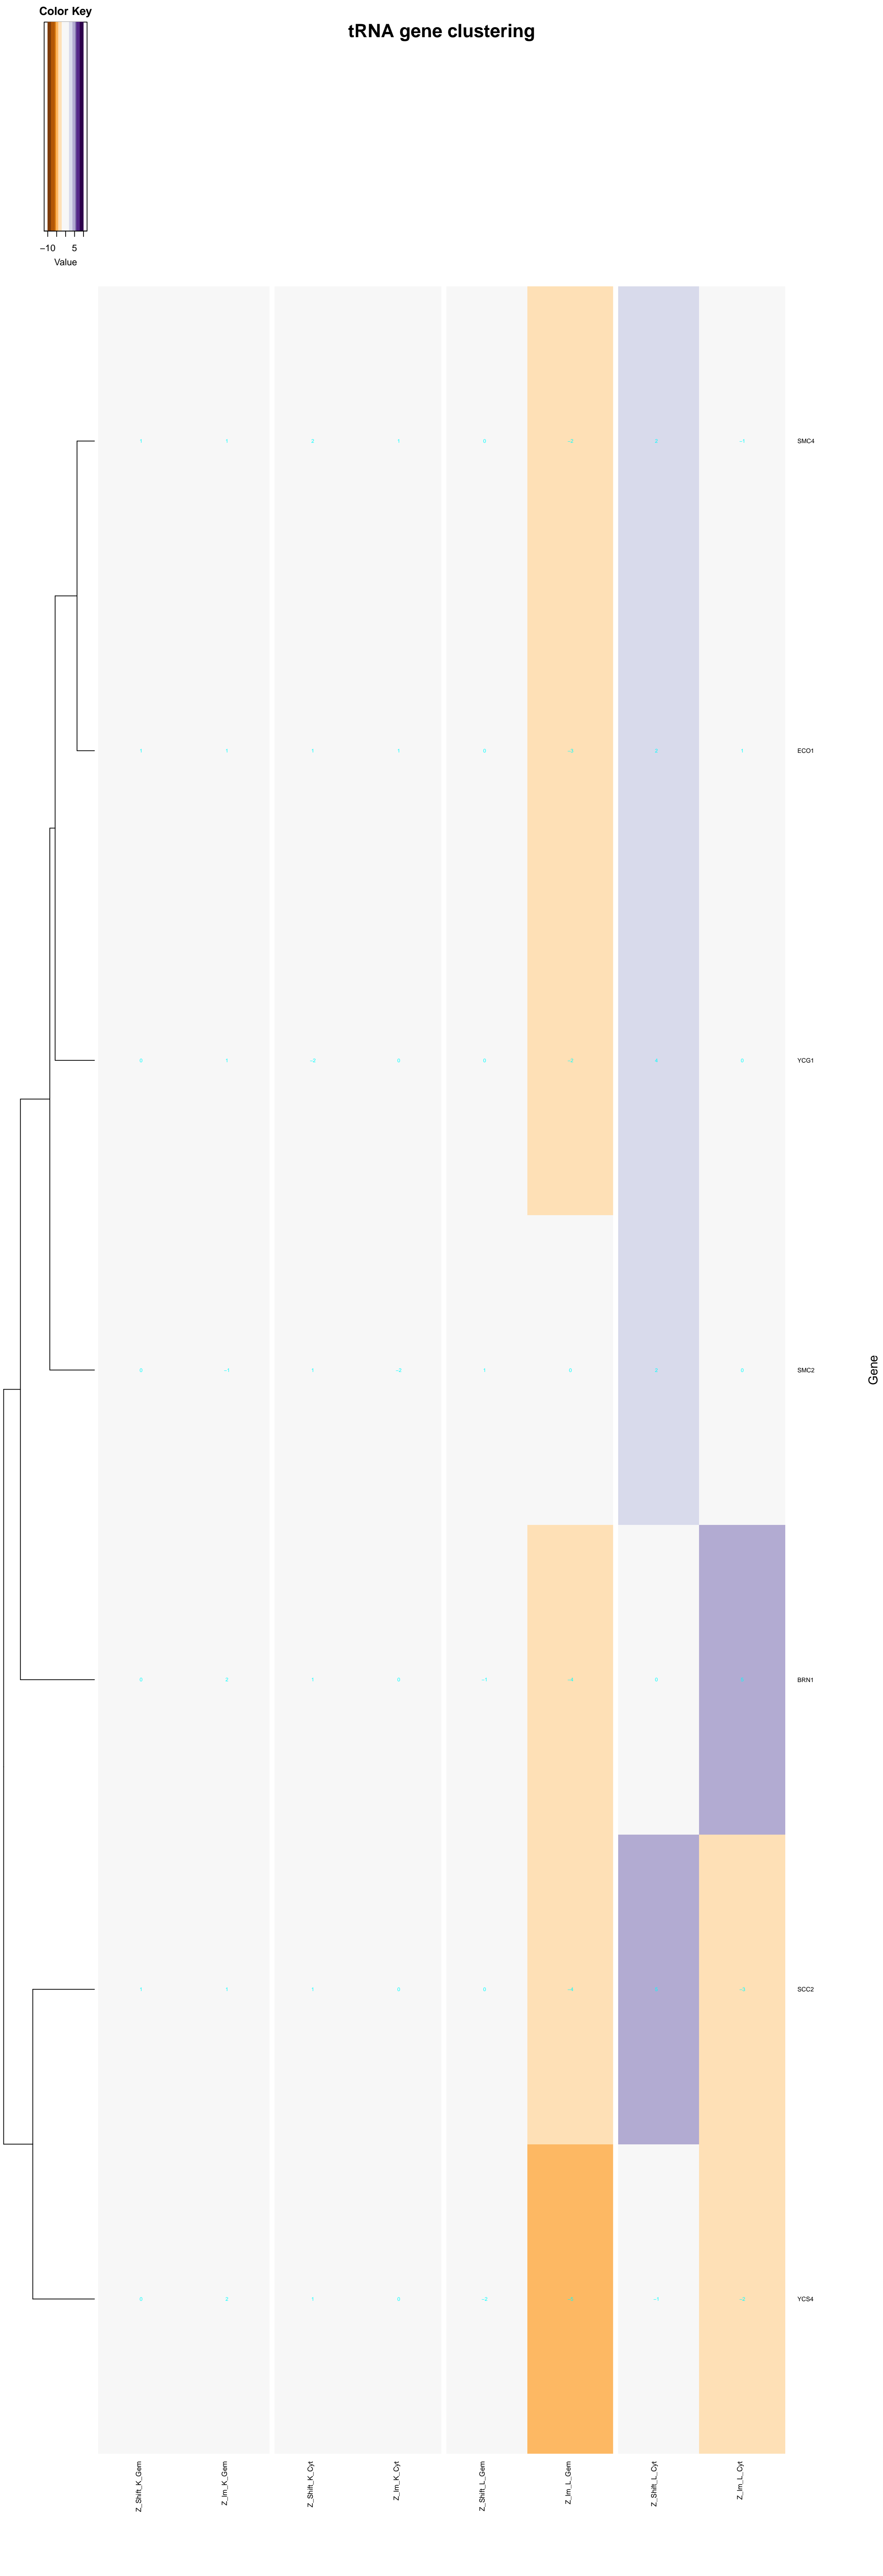

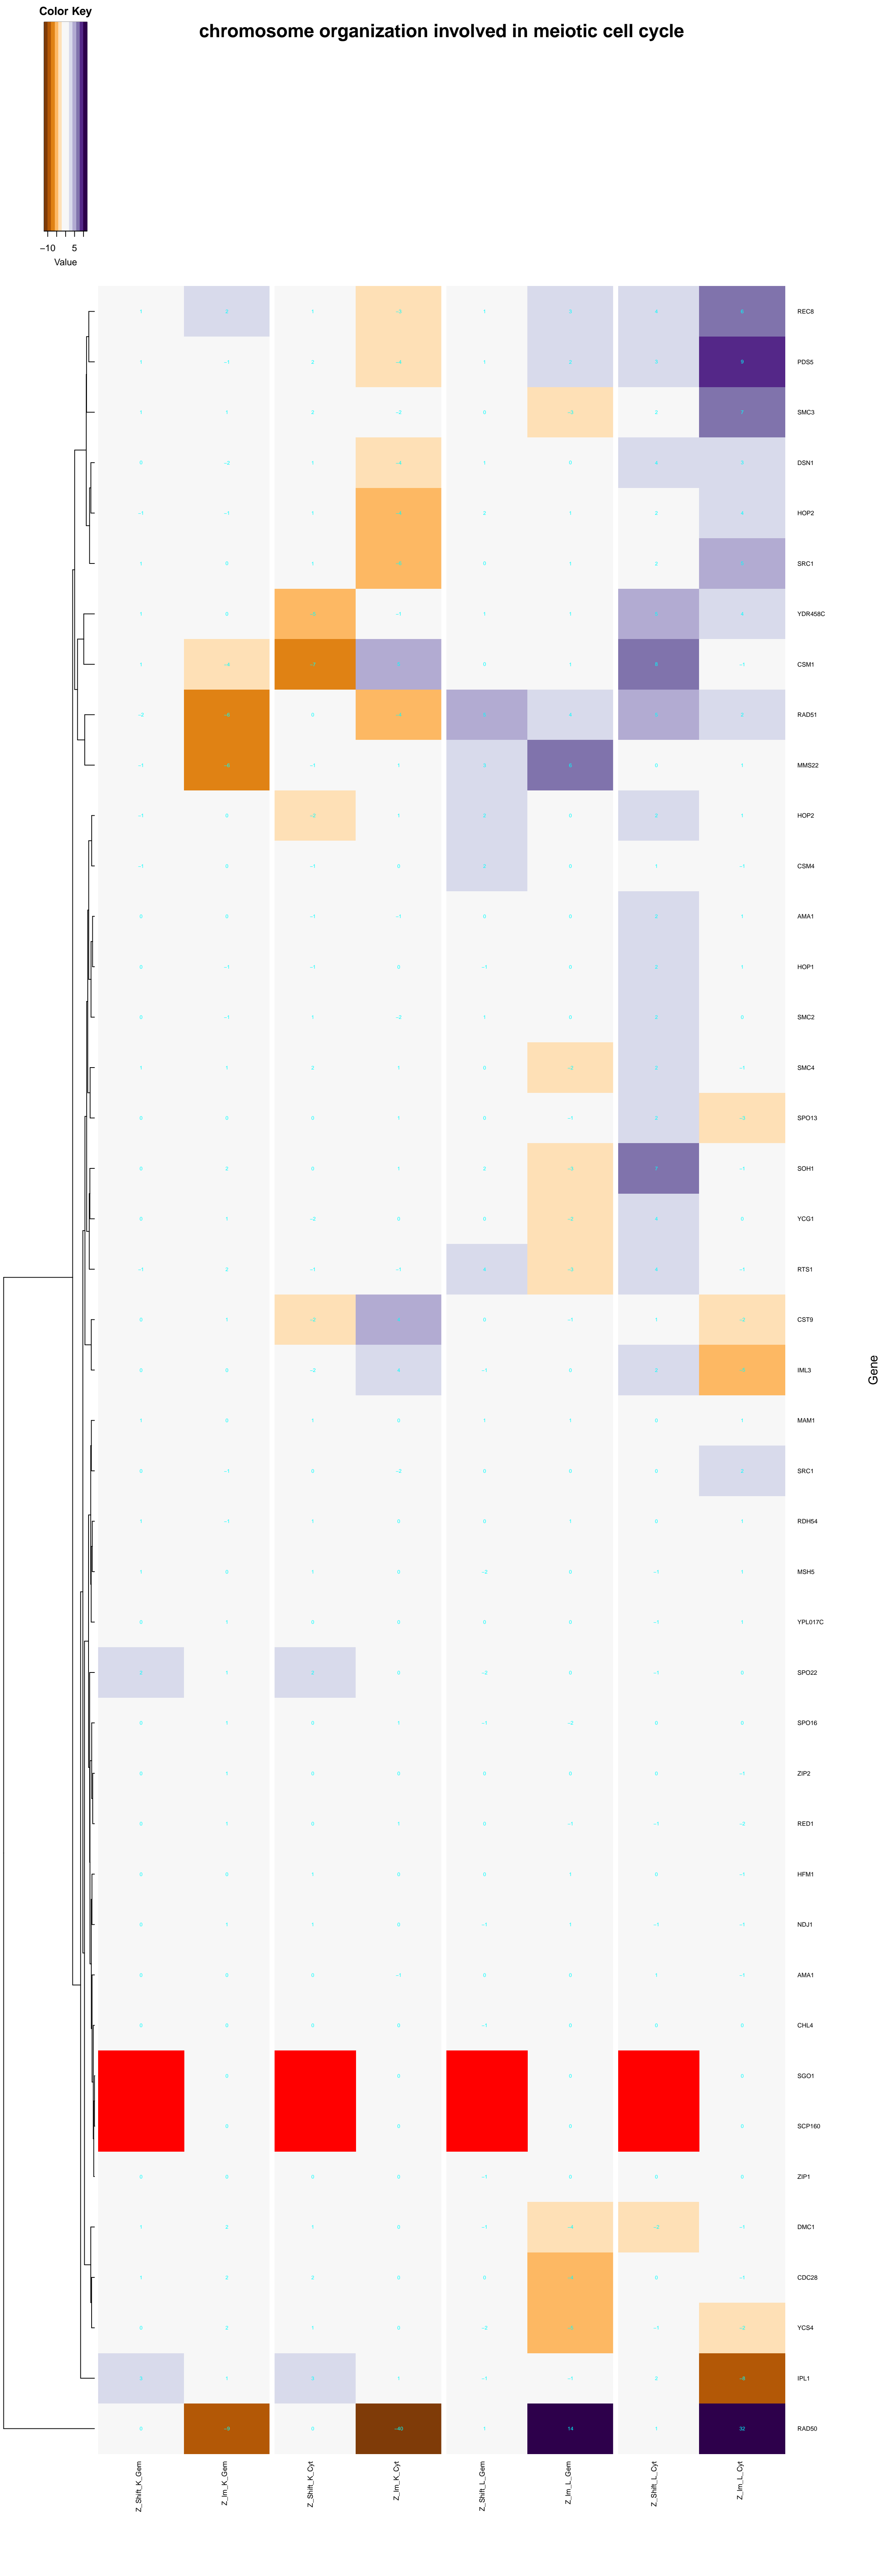

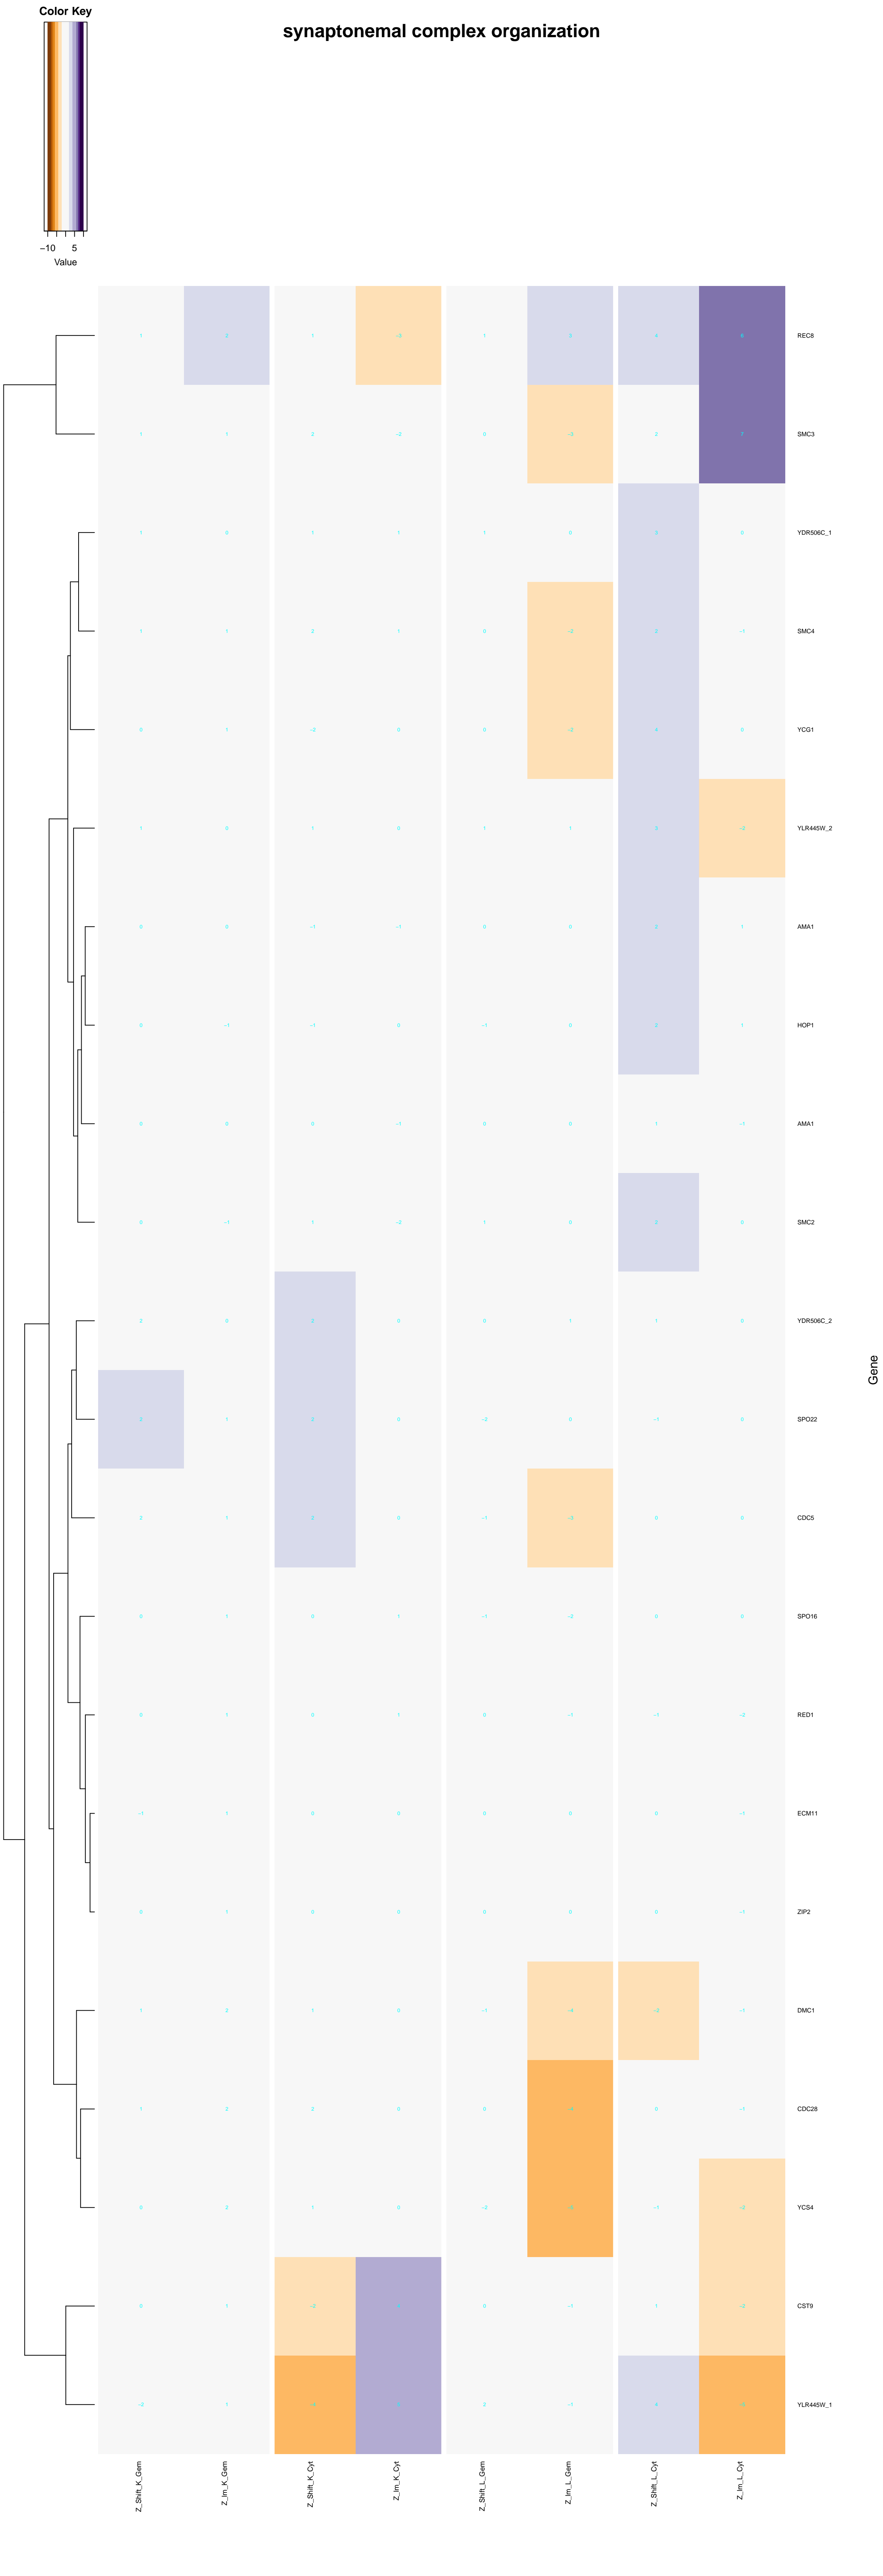

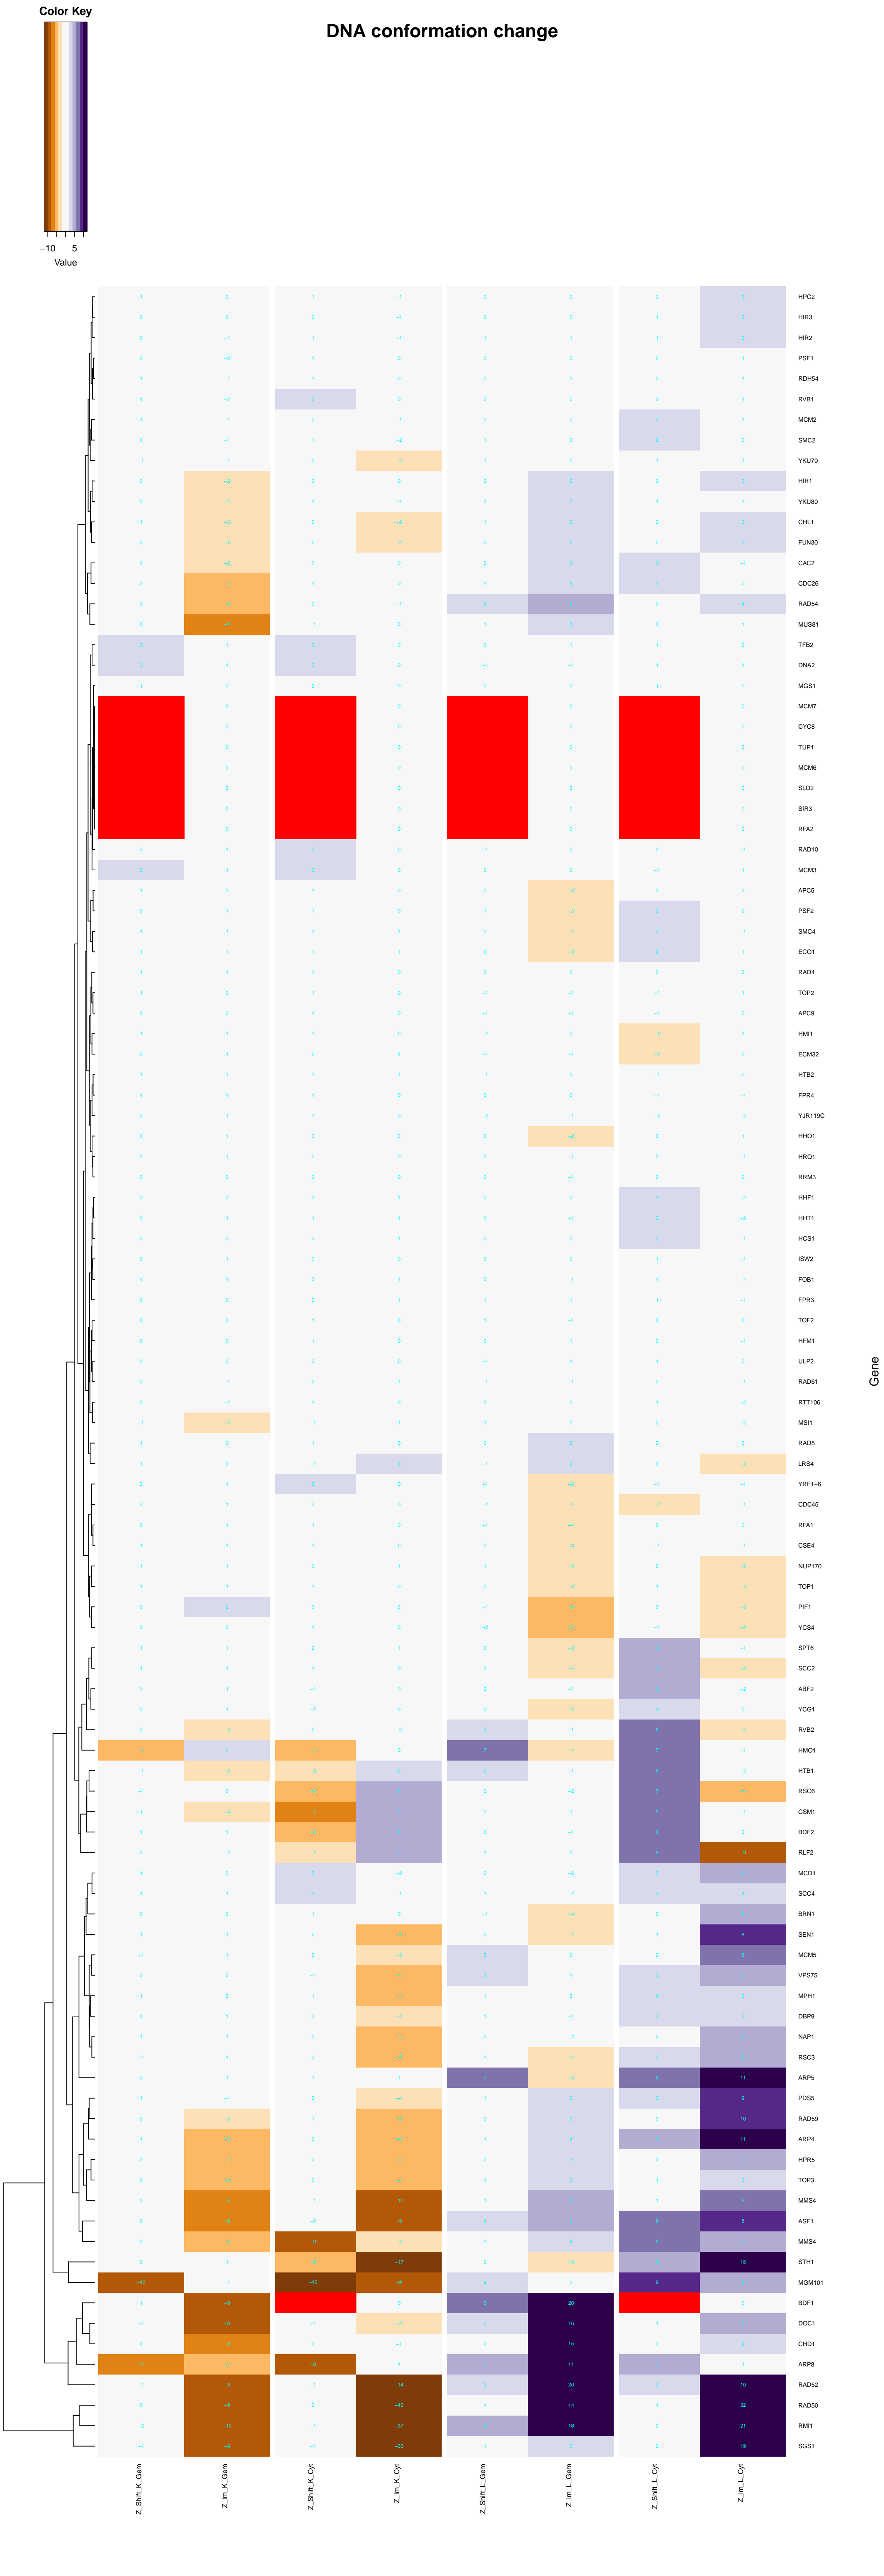

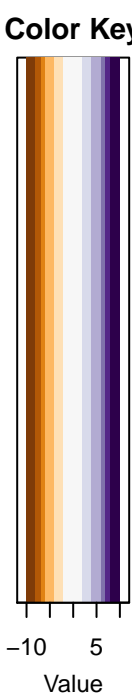

dsDNA loop formation

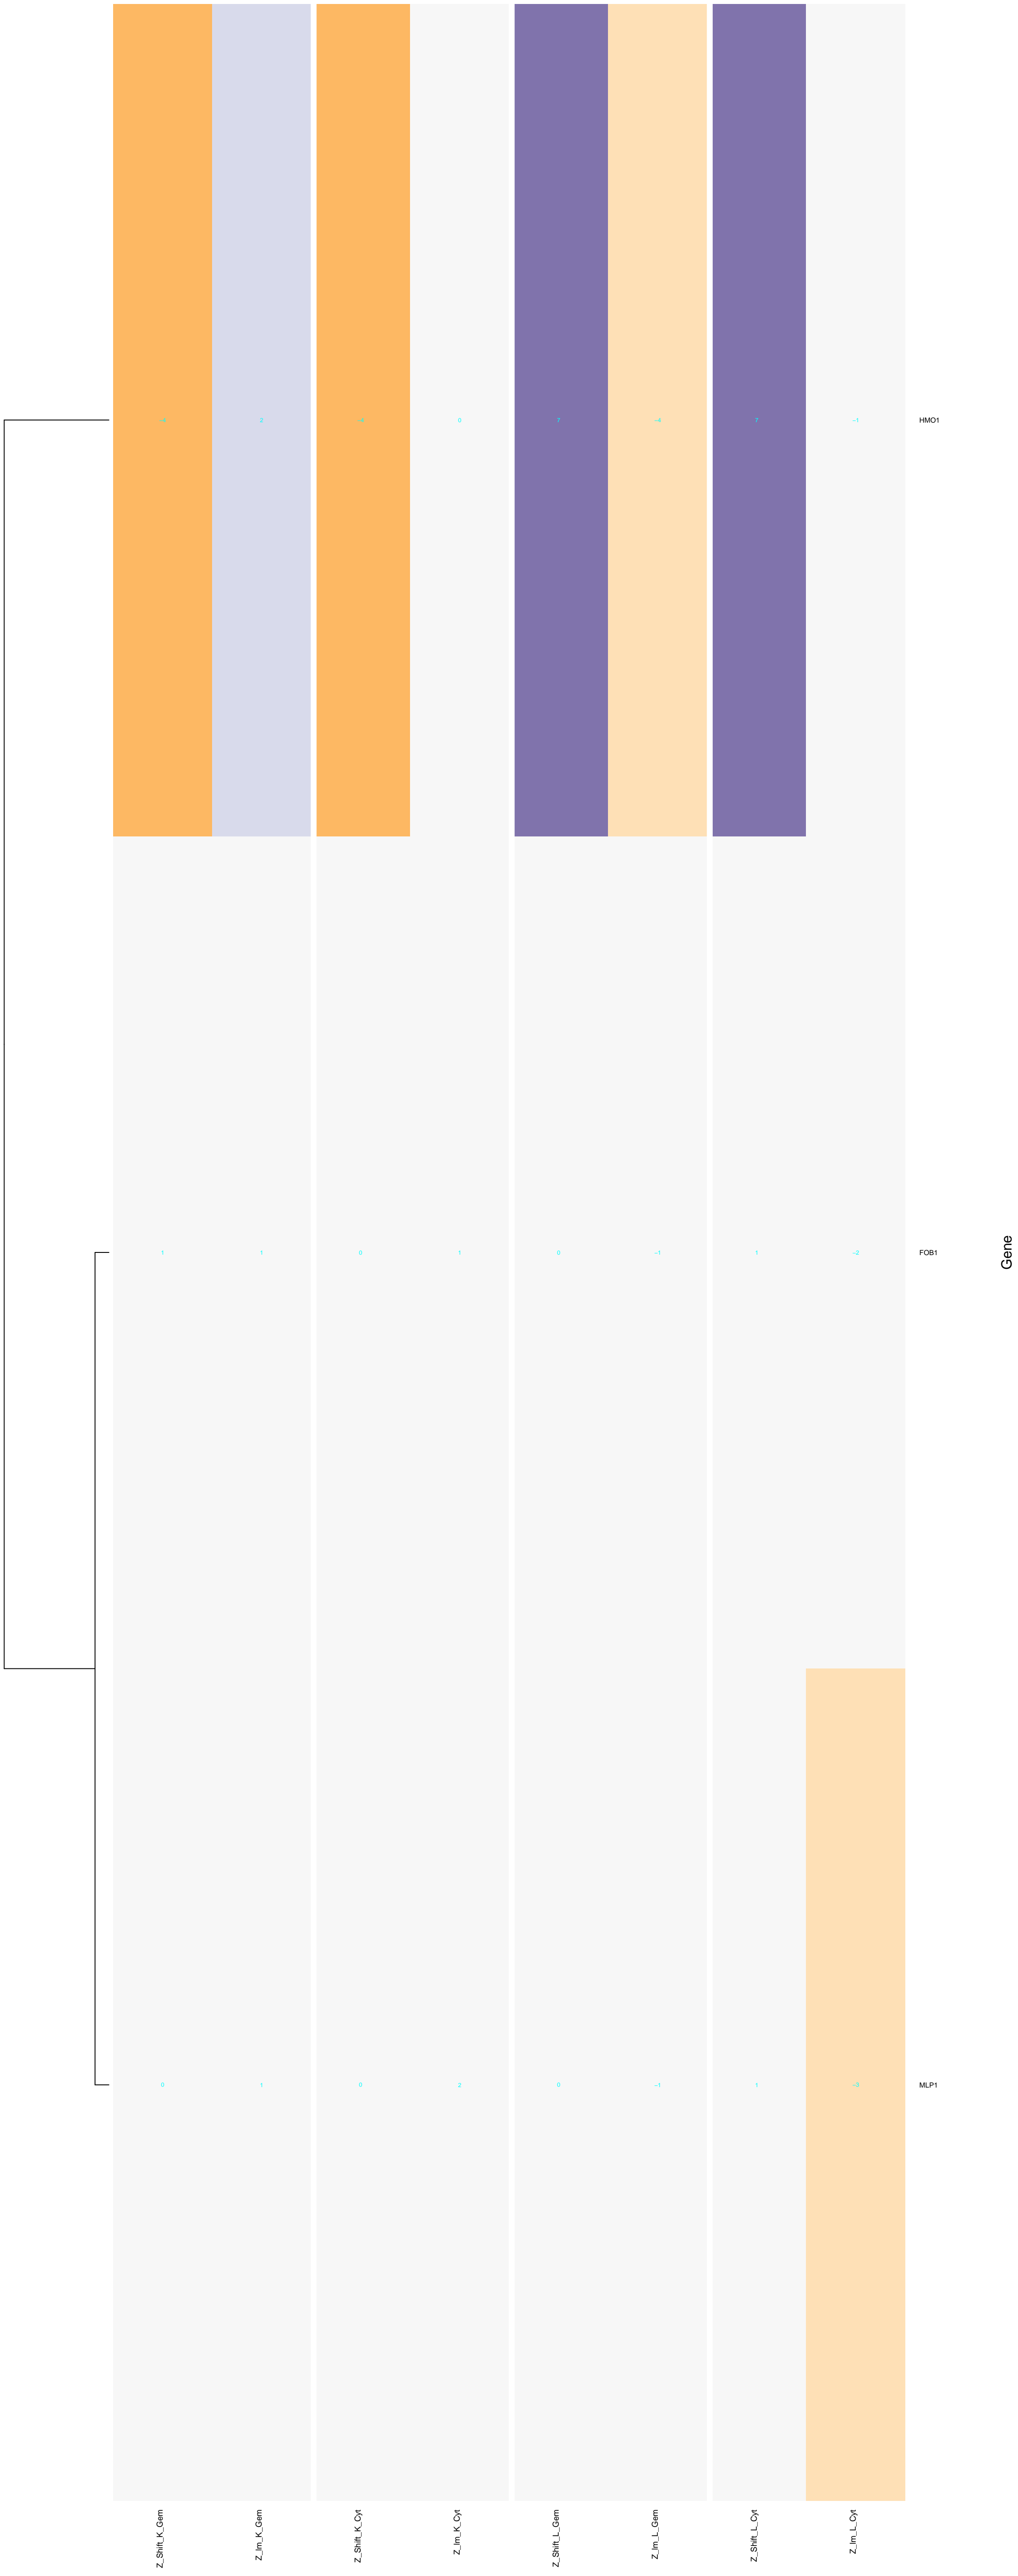



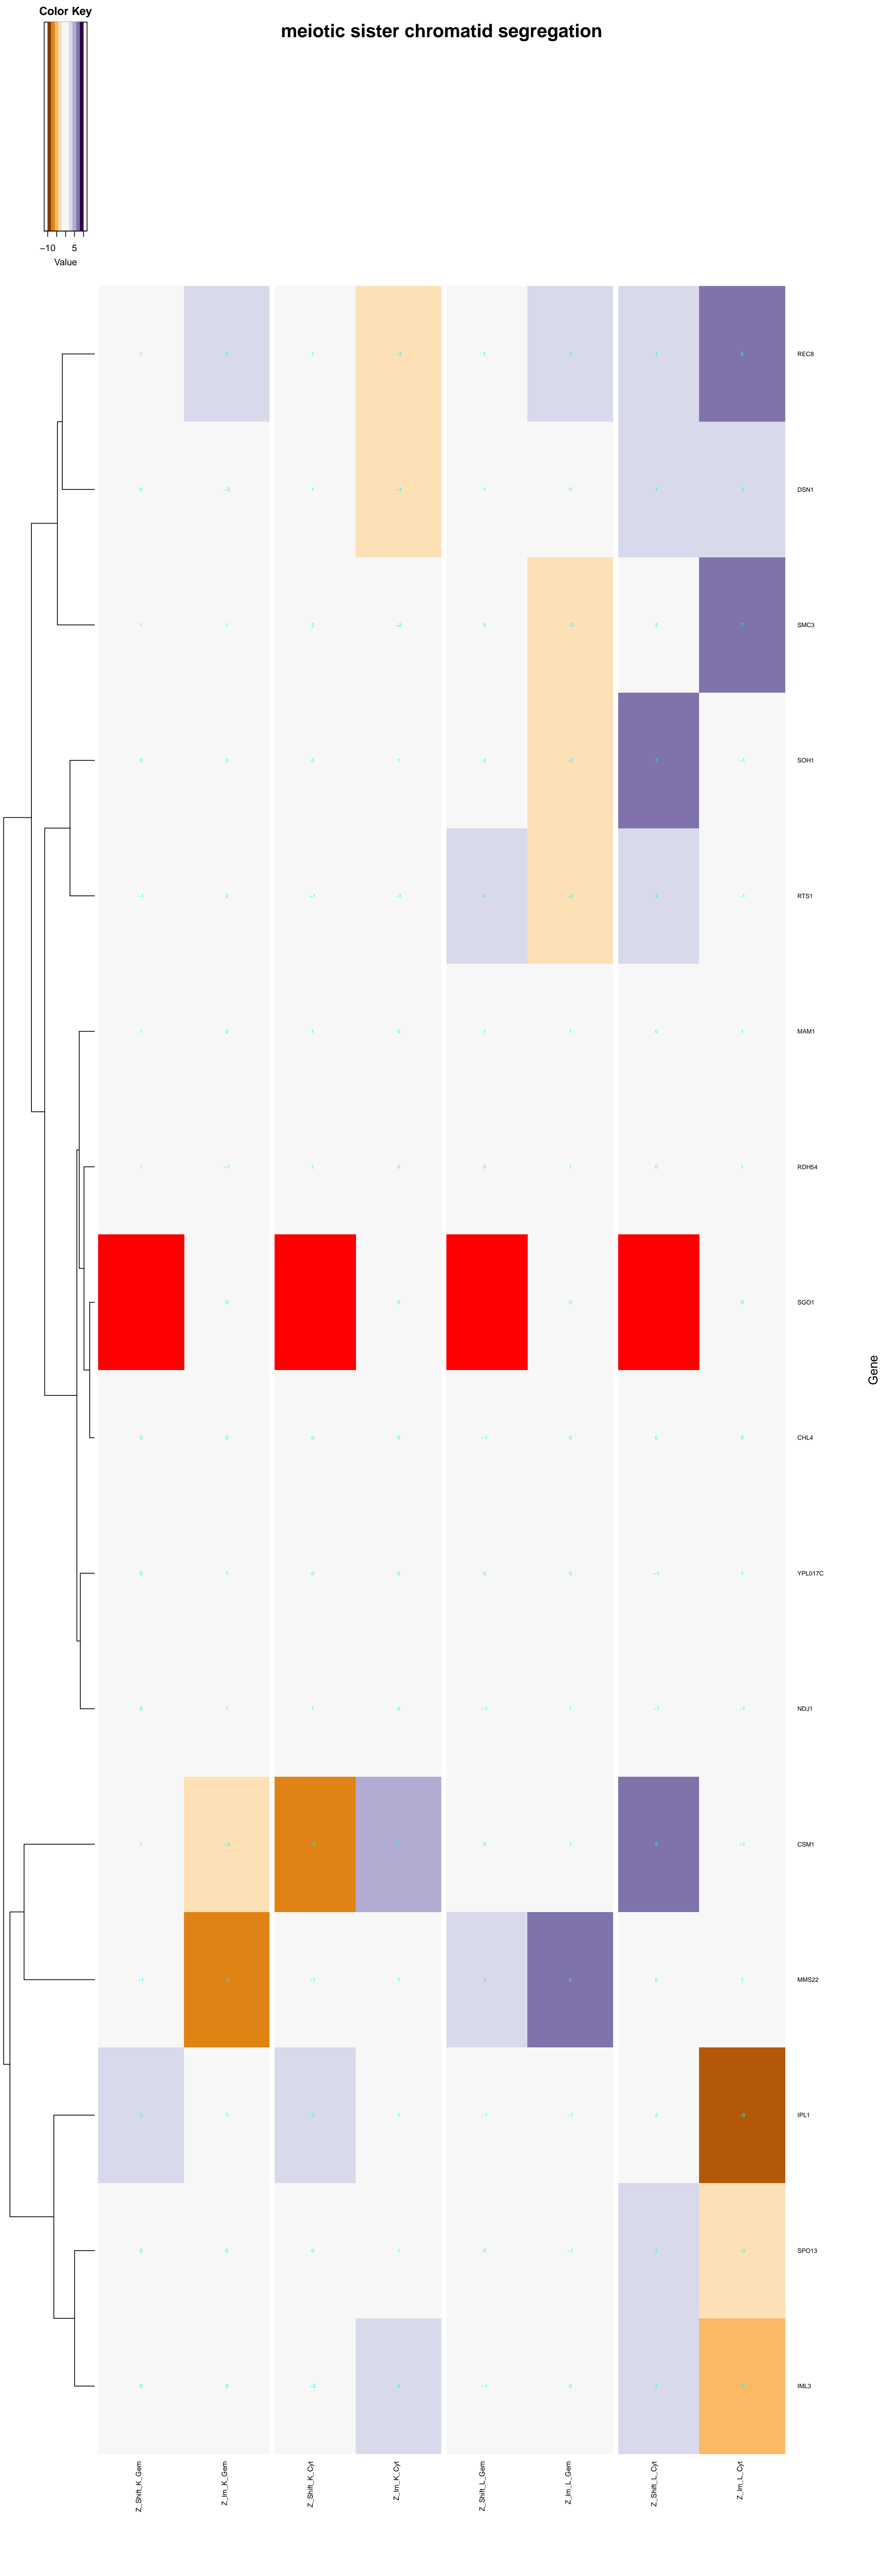

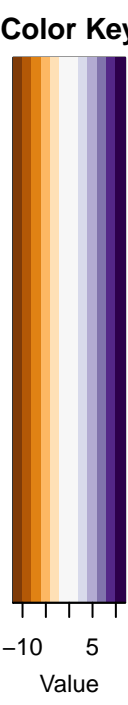

osttranscriptional tethering of RNA polymerase II gene DNA at nuclear periphery

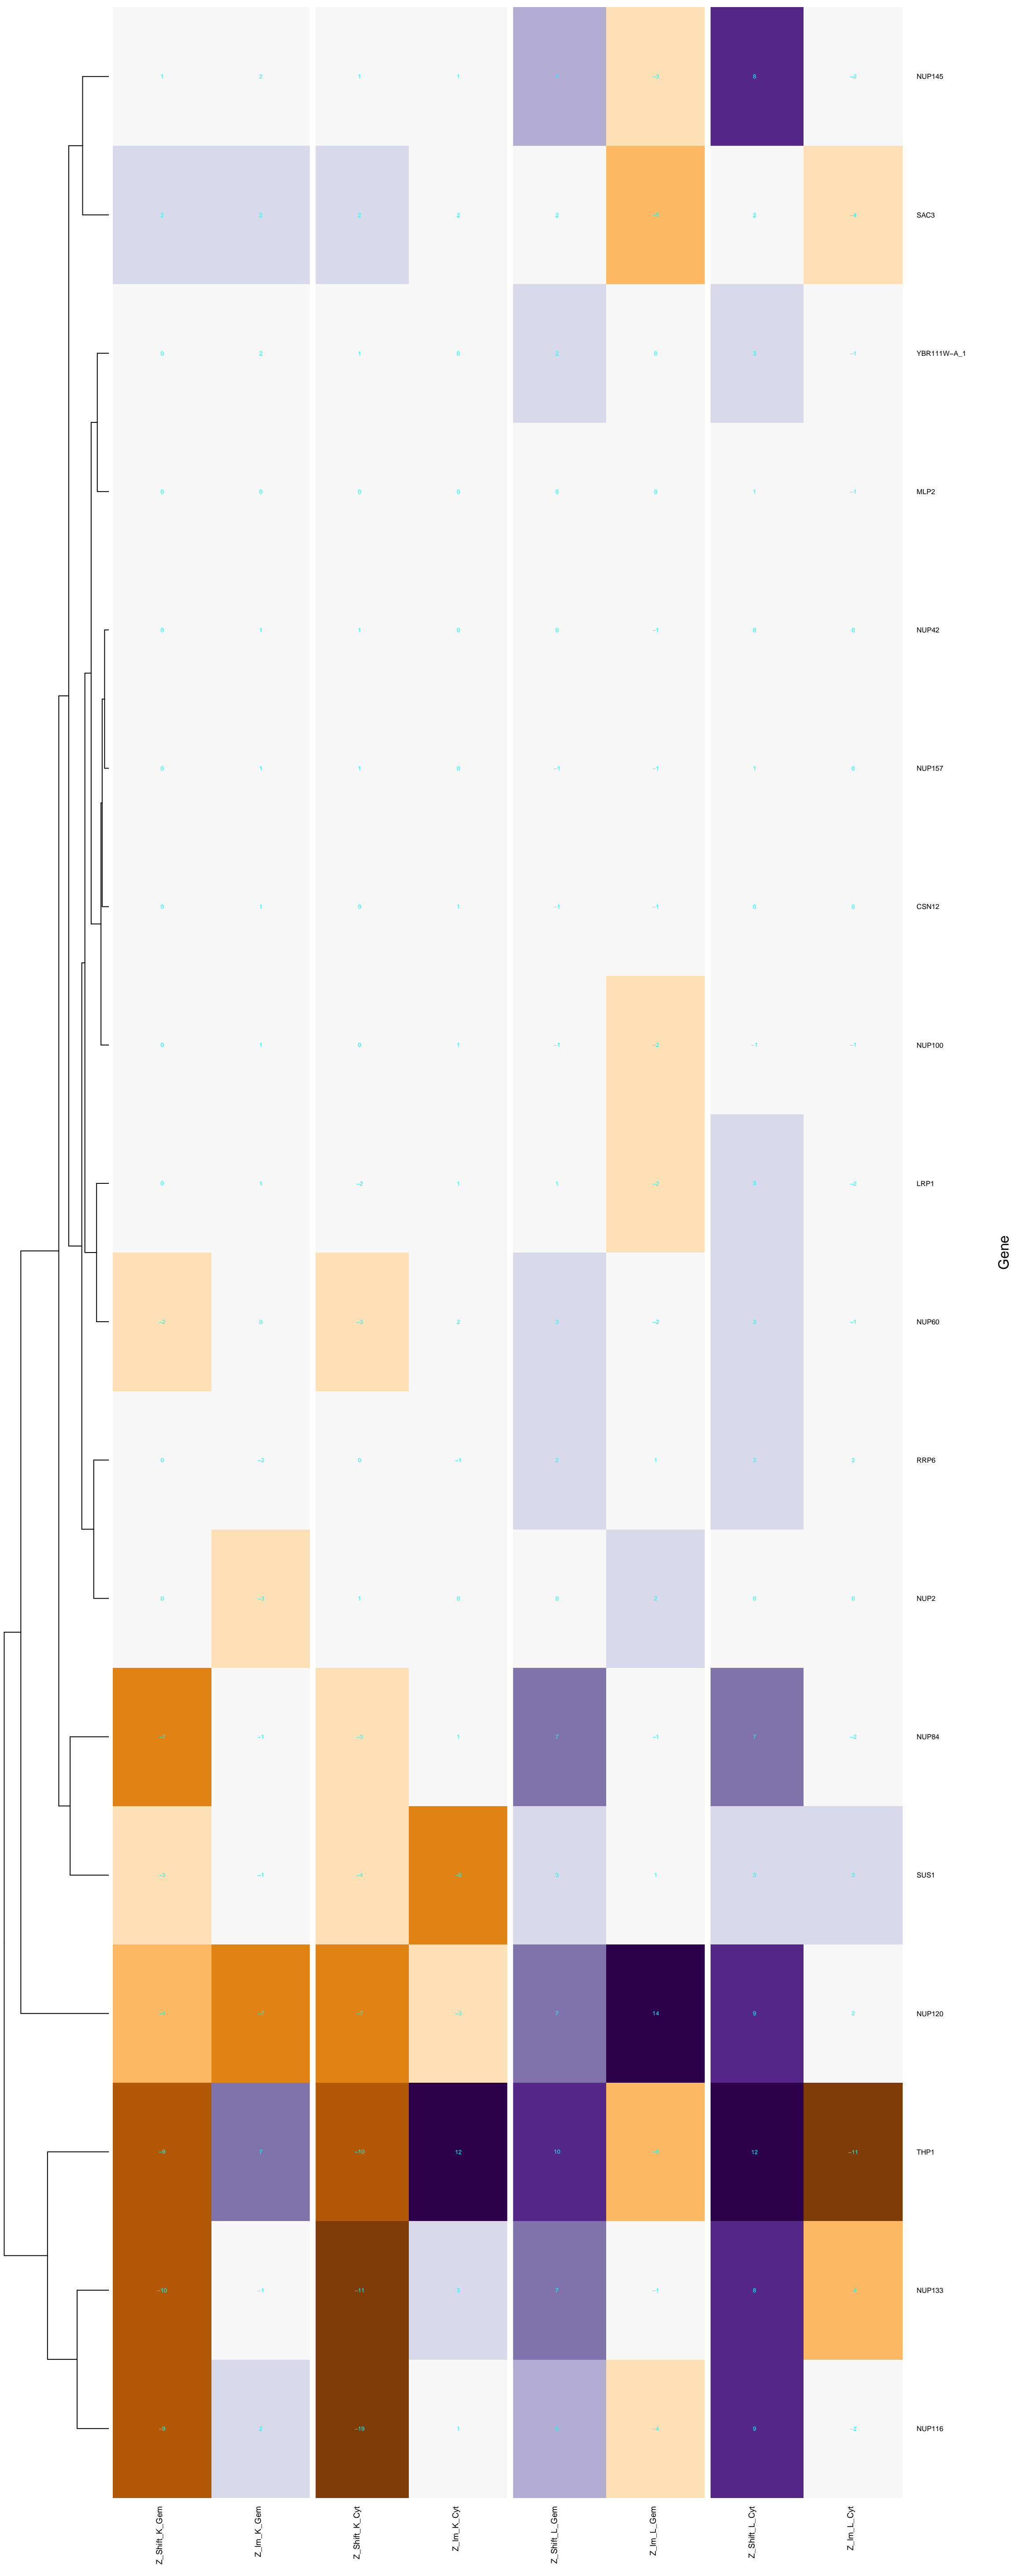



maintenance of chromatin silencing at telomere

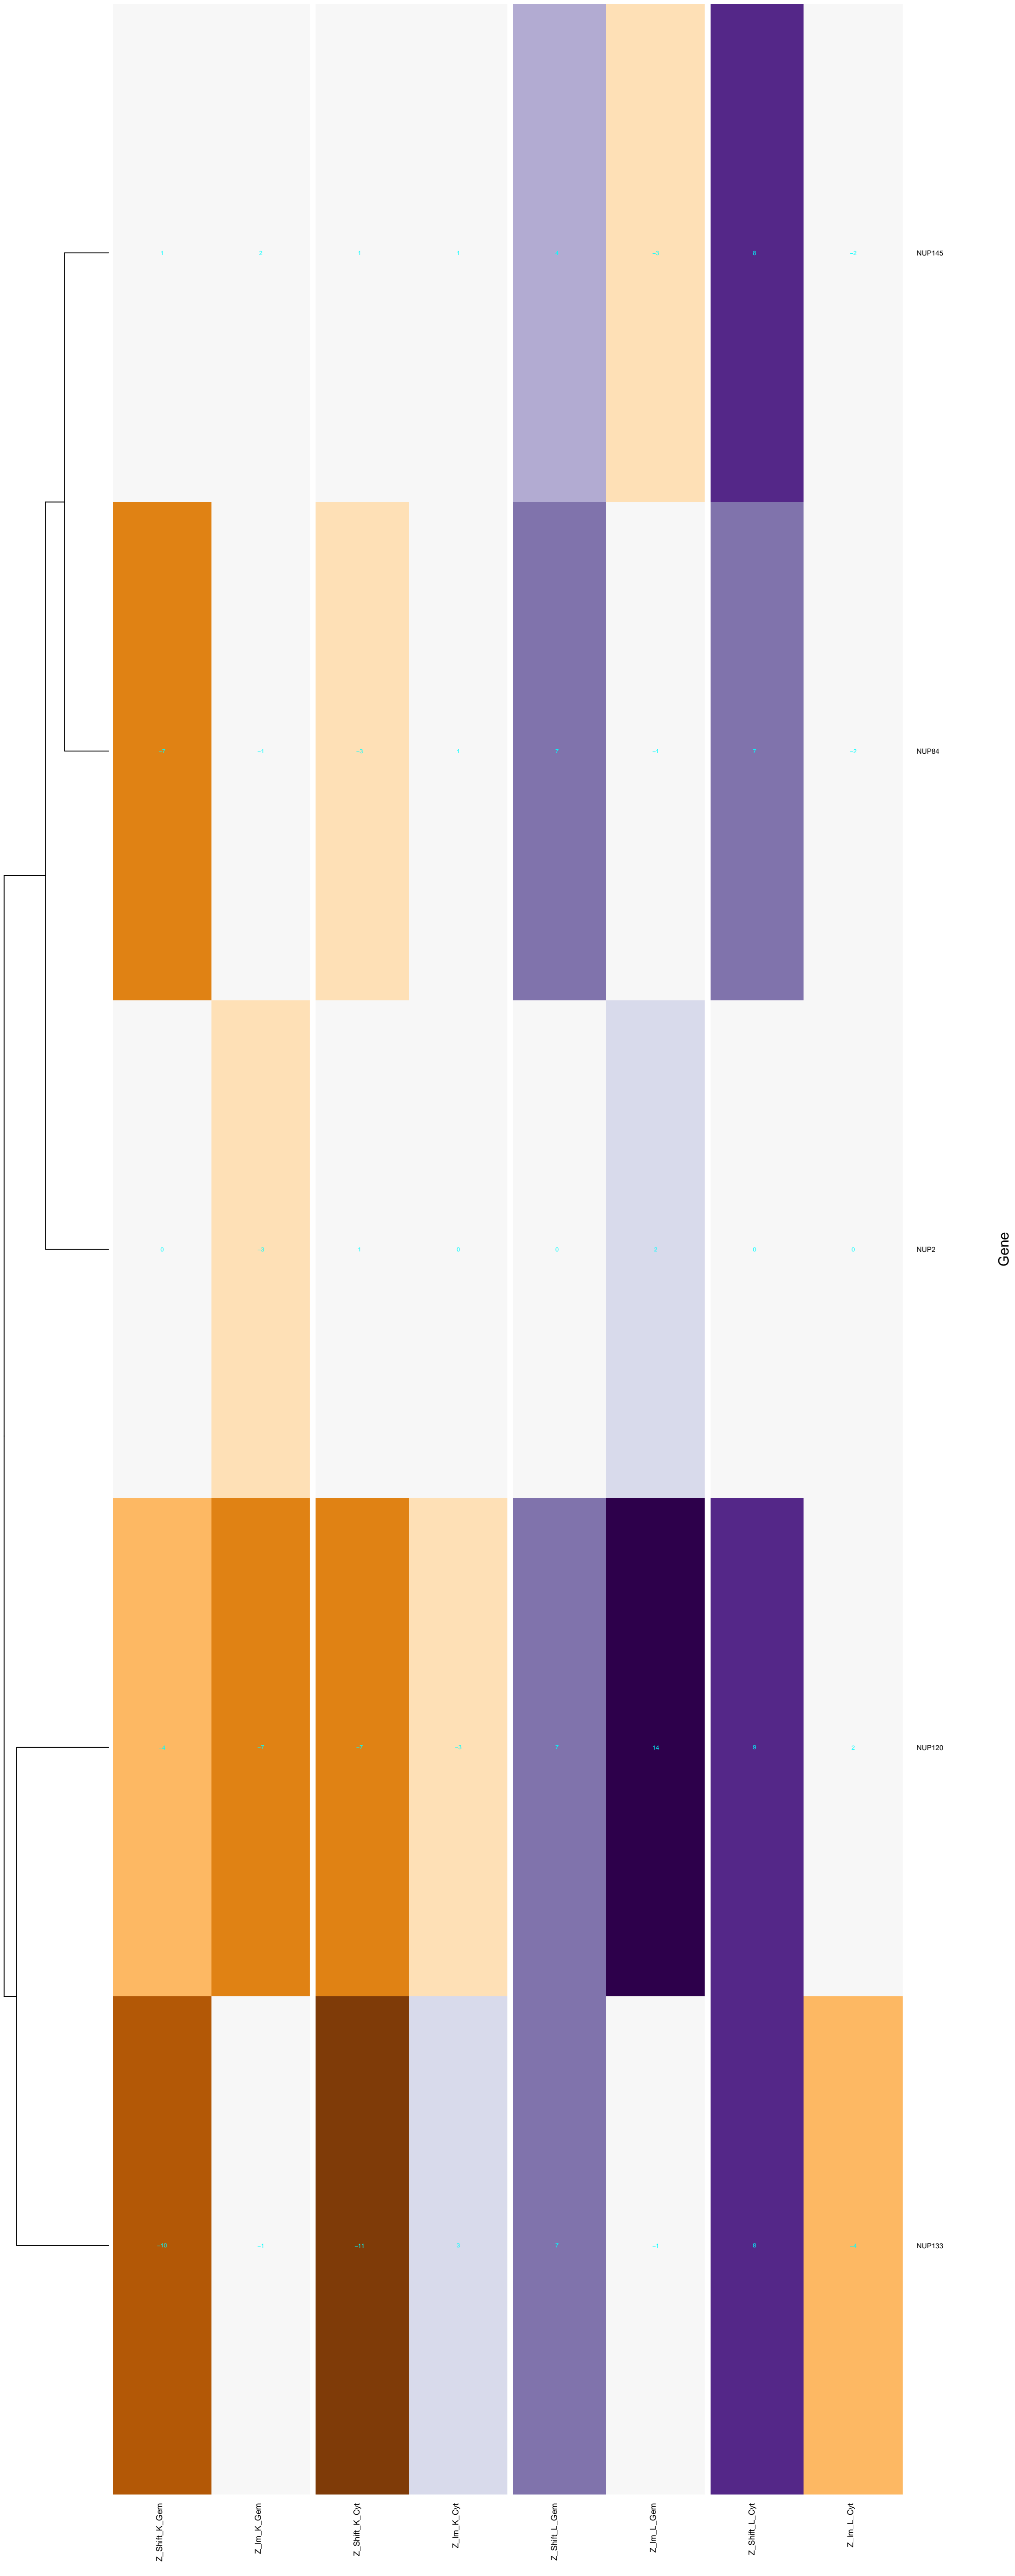

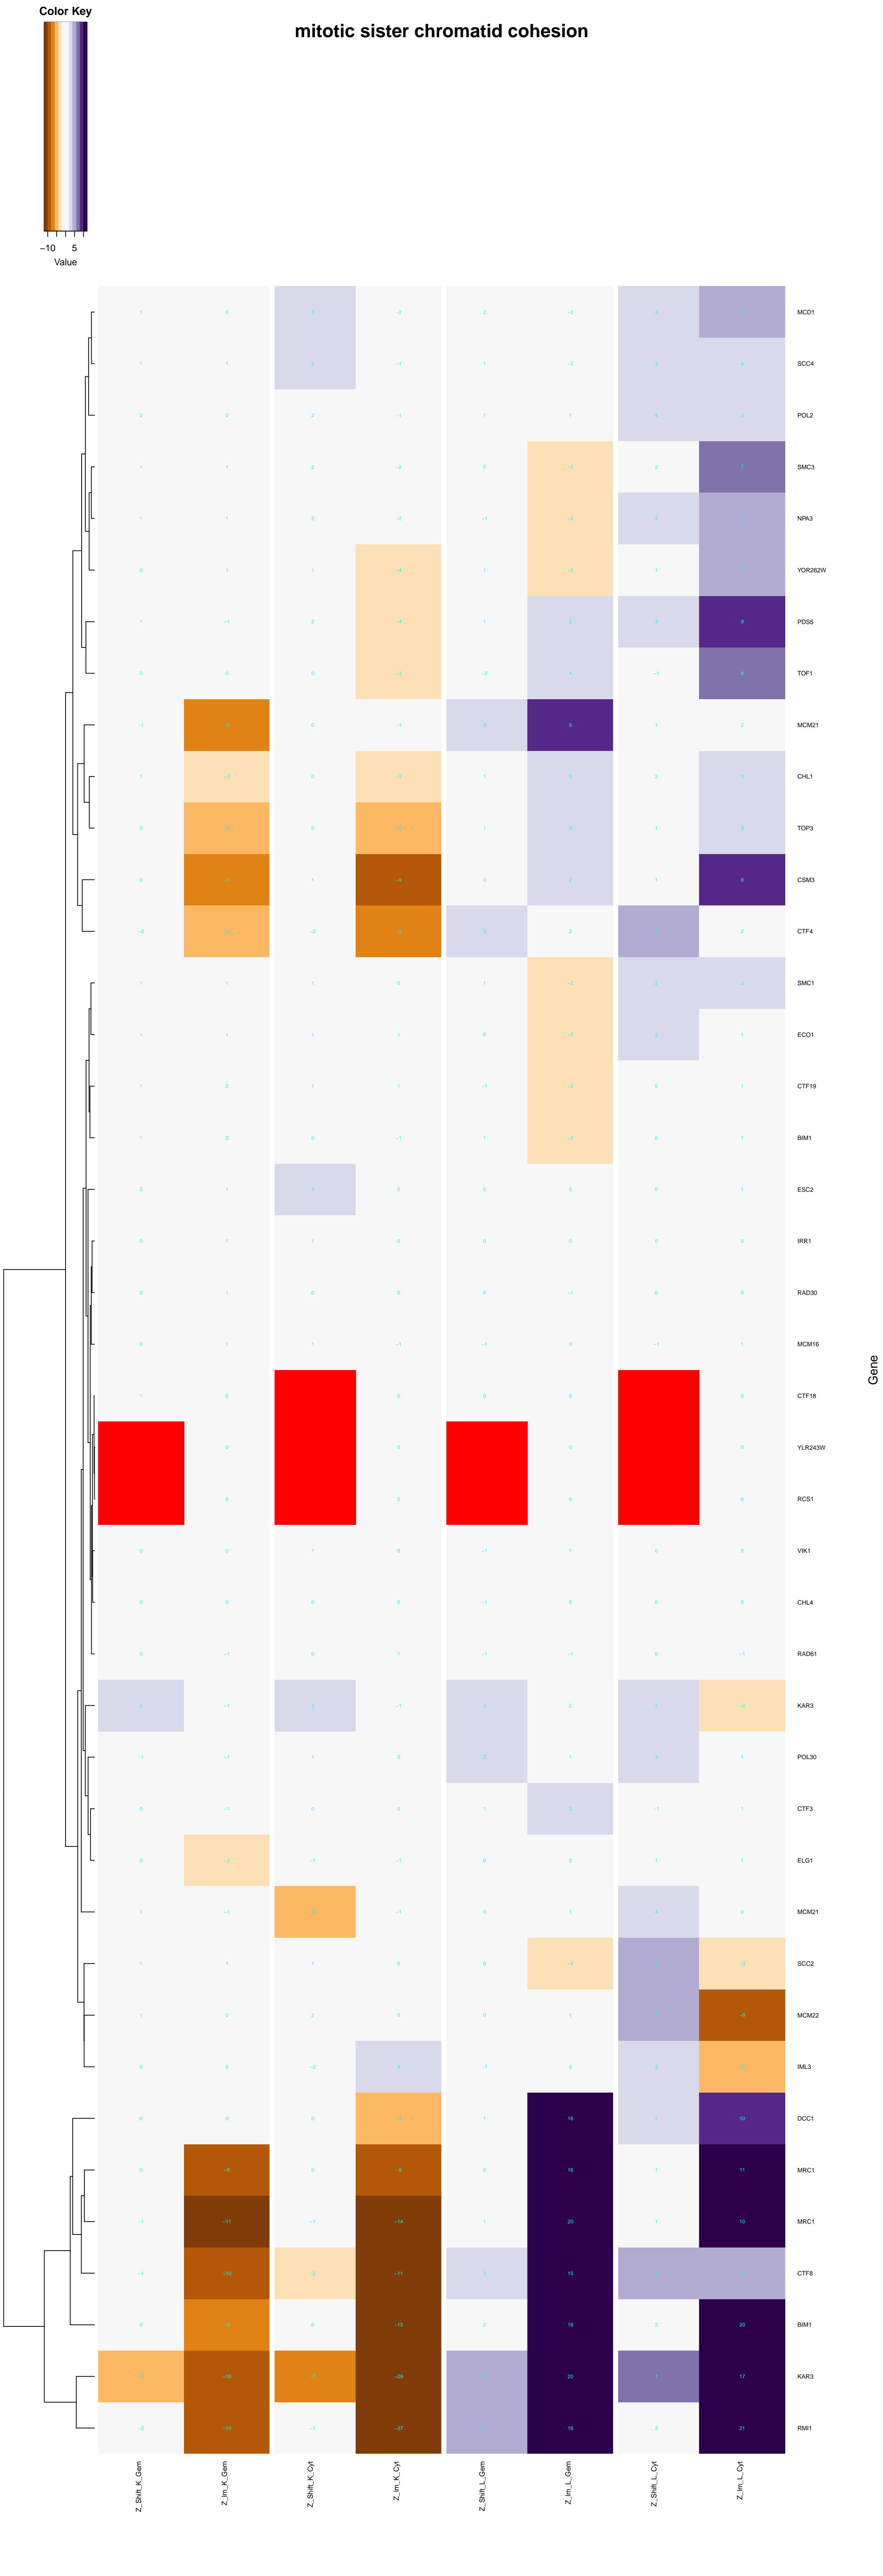

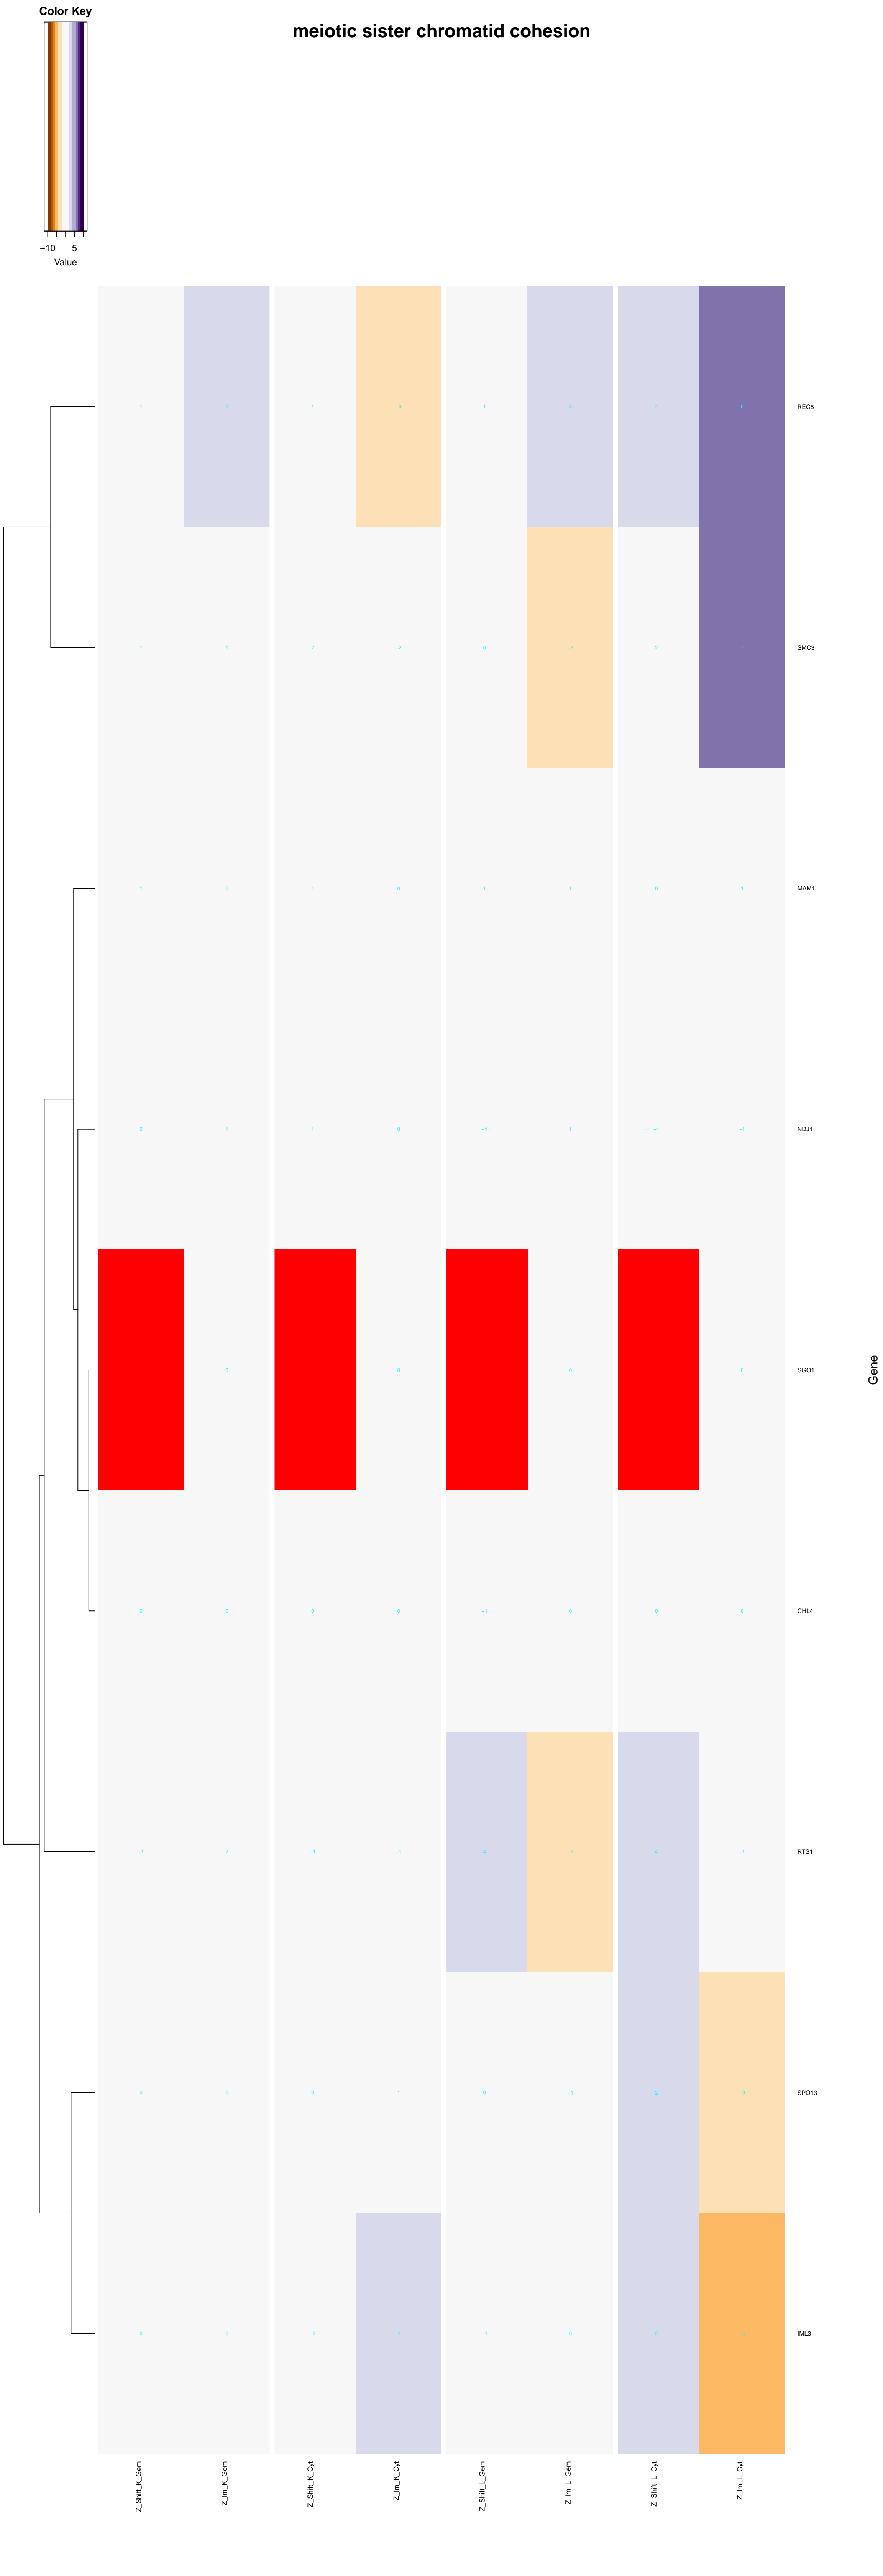





maintenance of DNA trinucleotide repeats

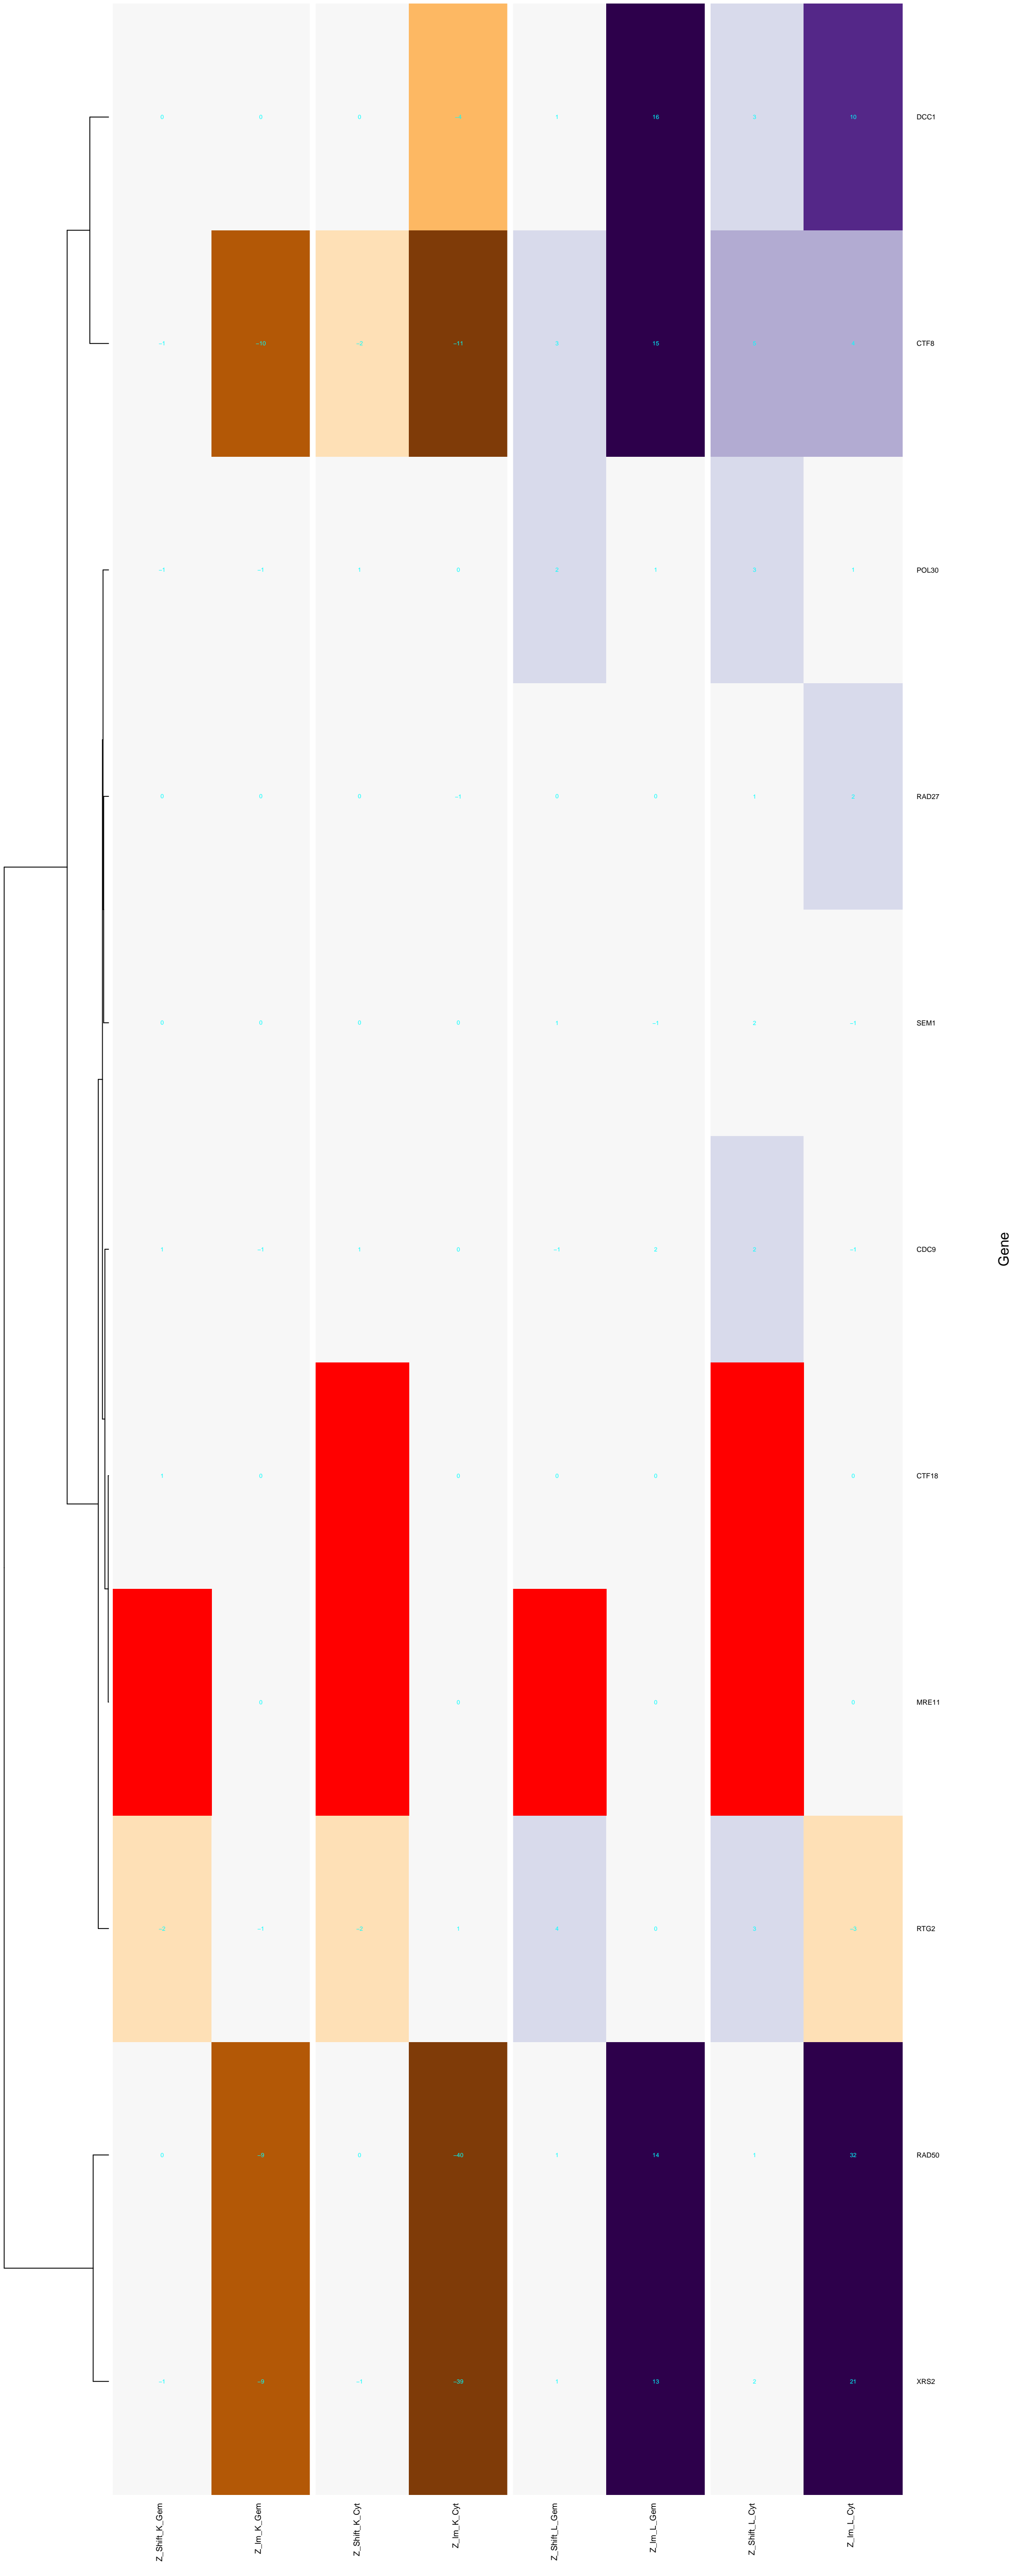

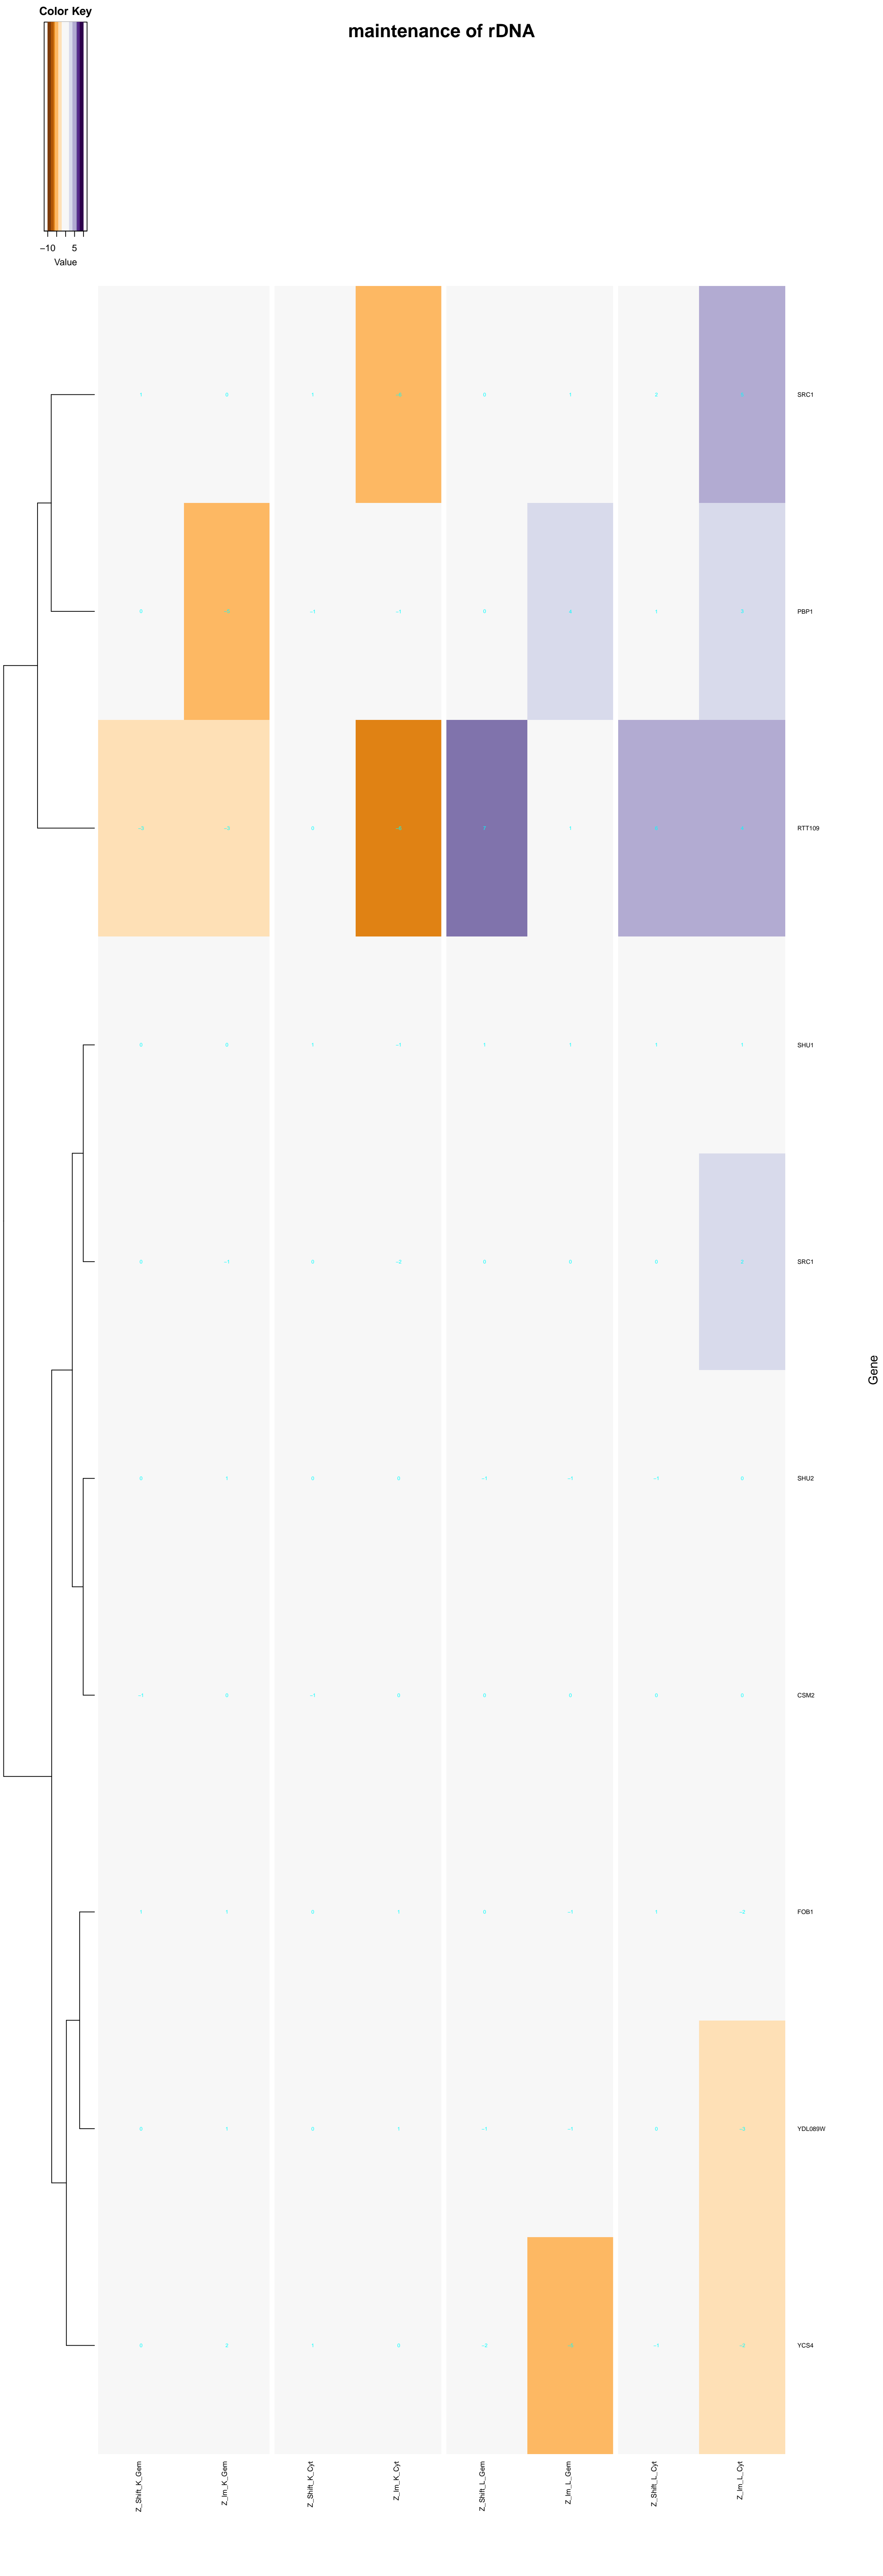

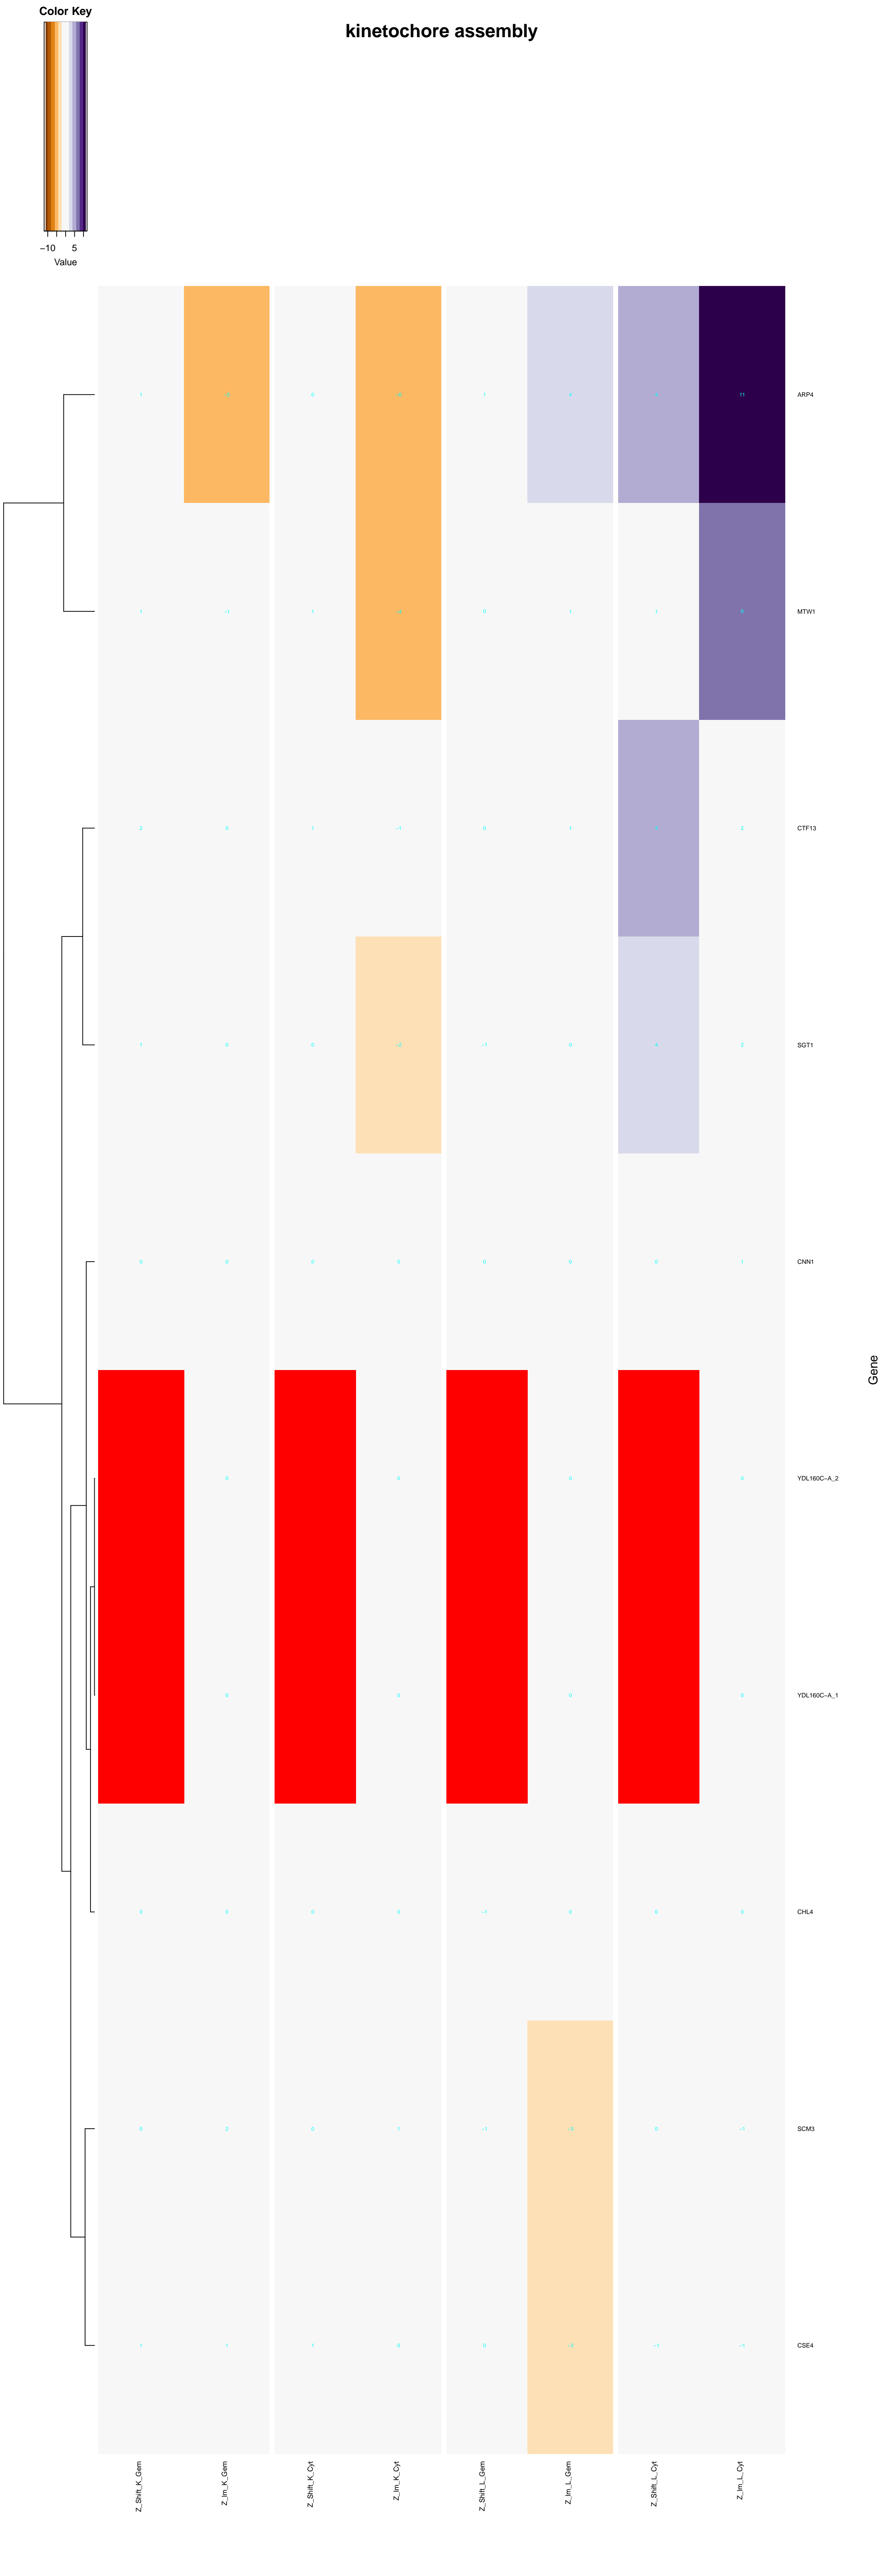

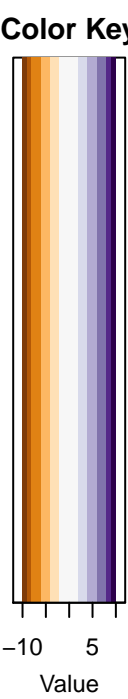

synopsis

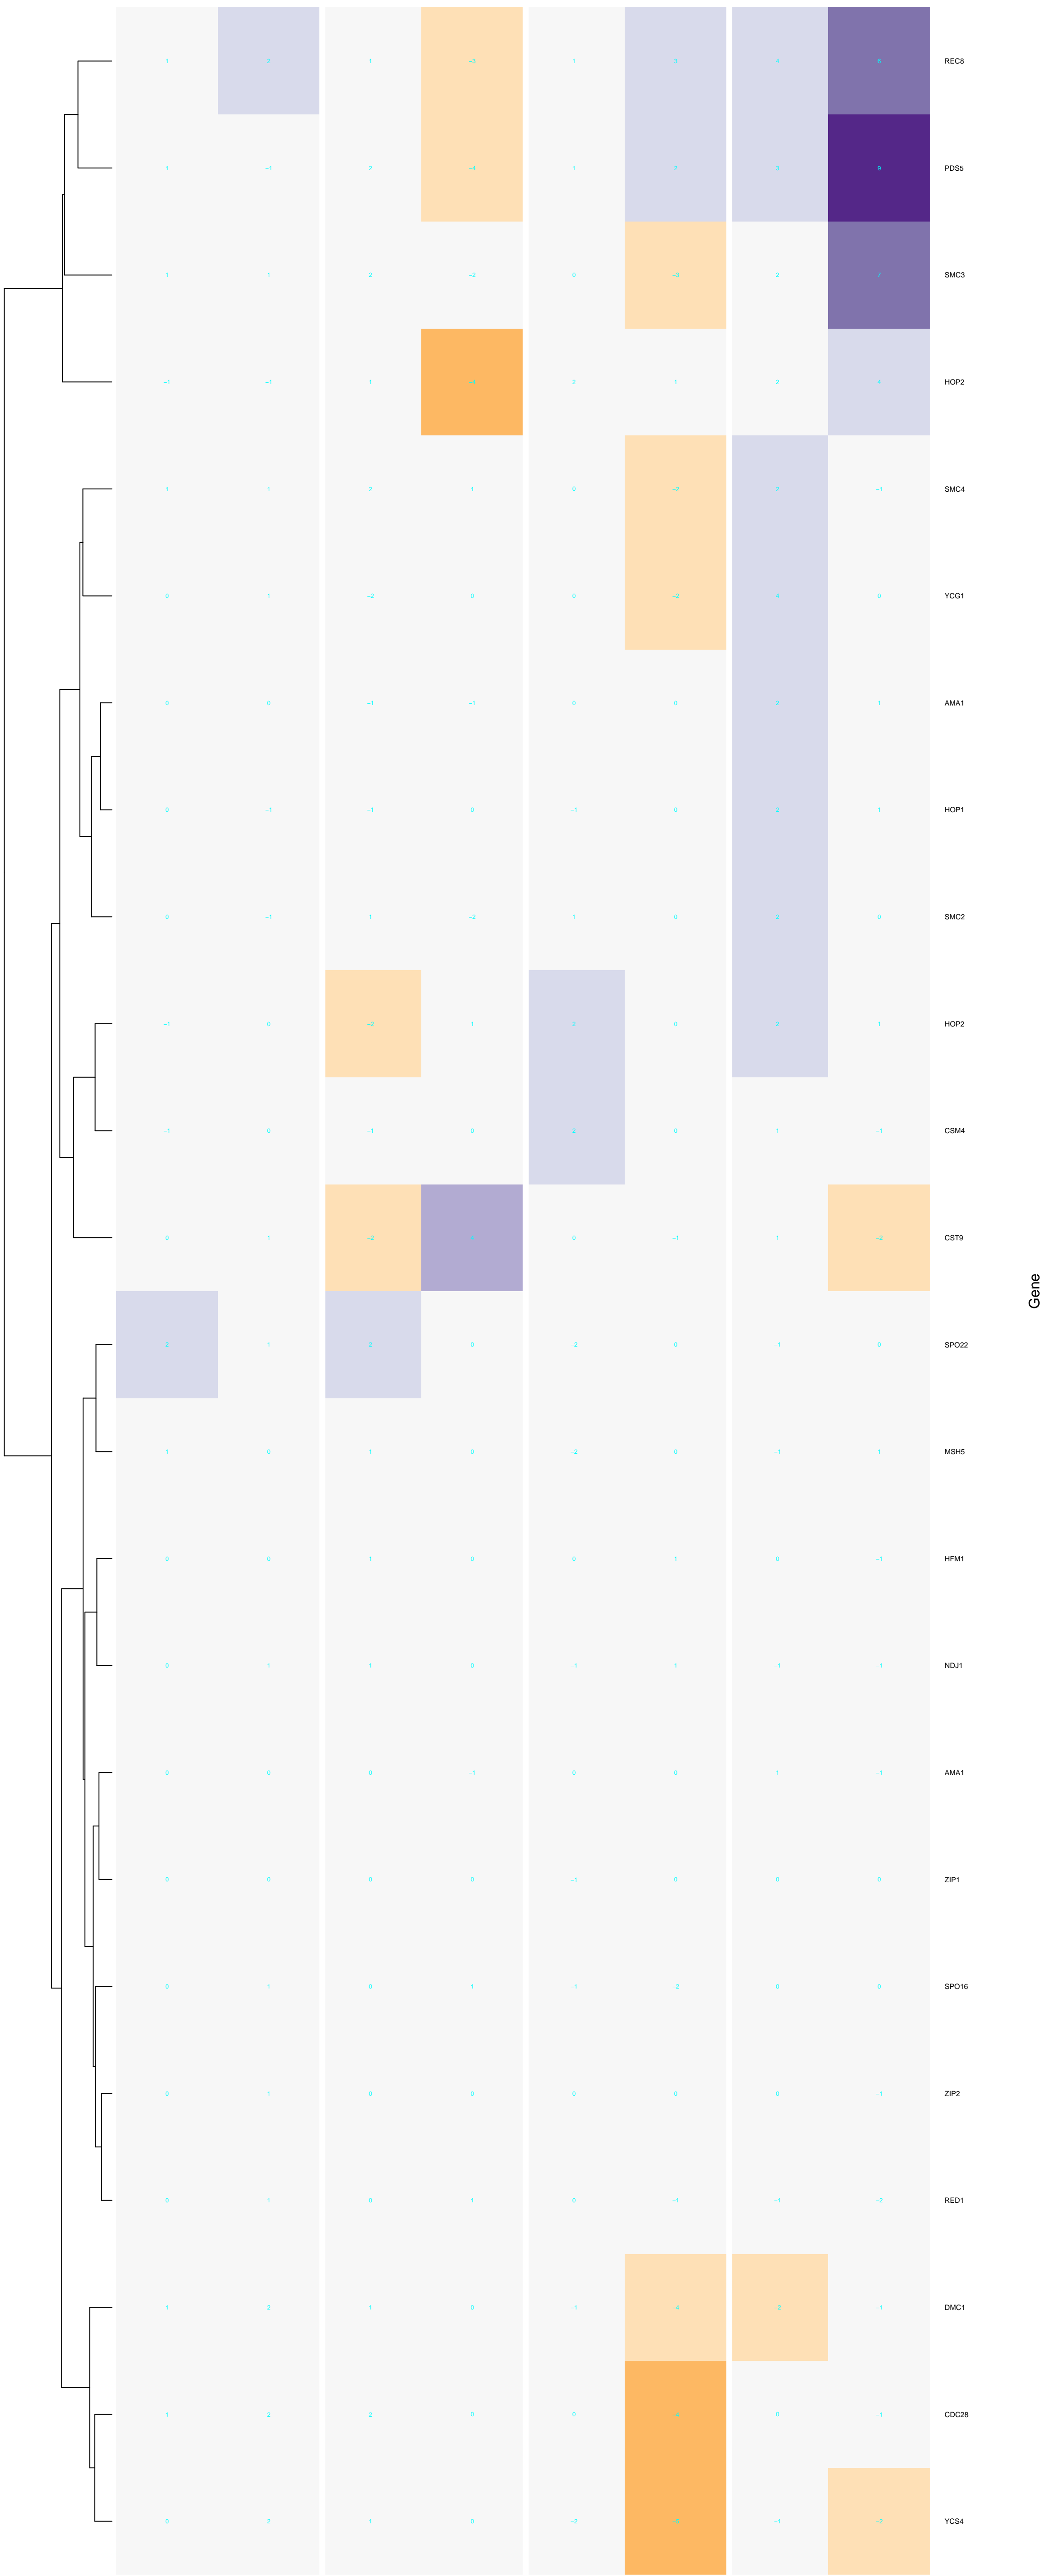

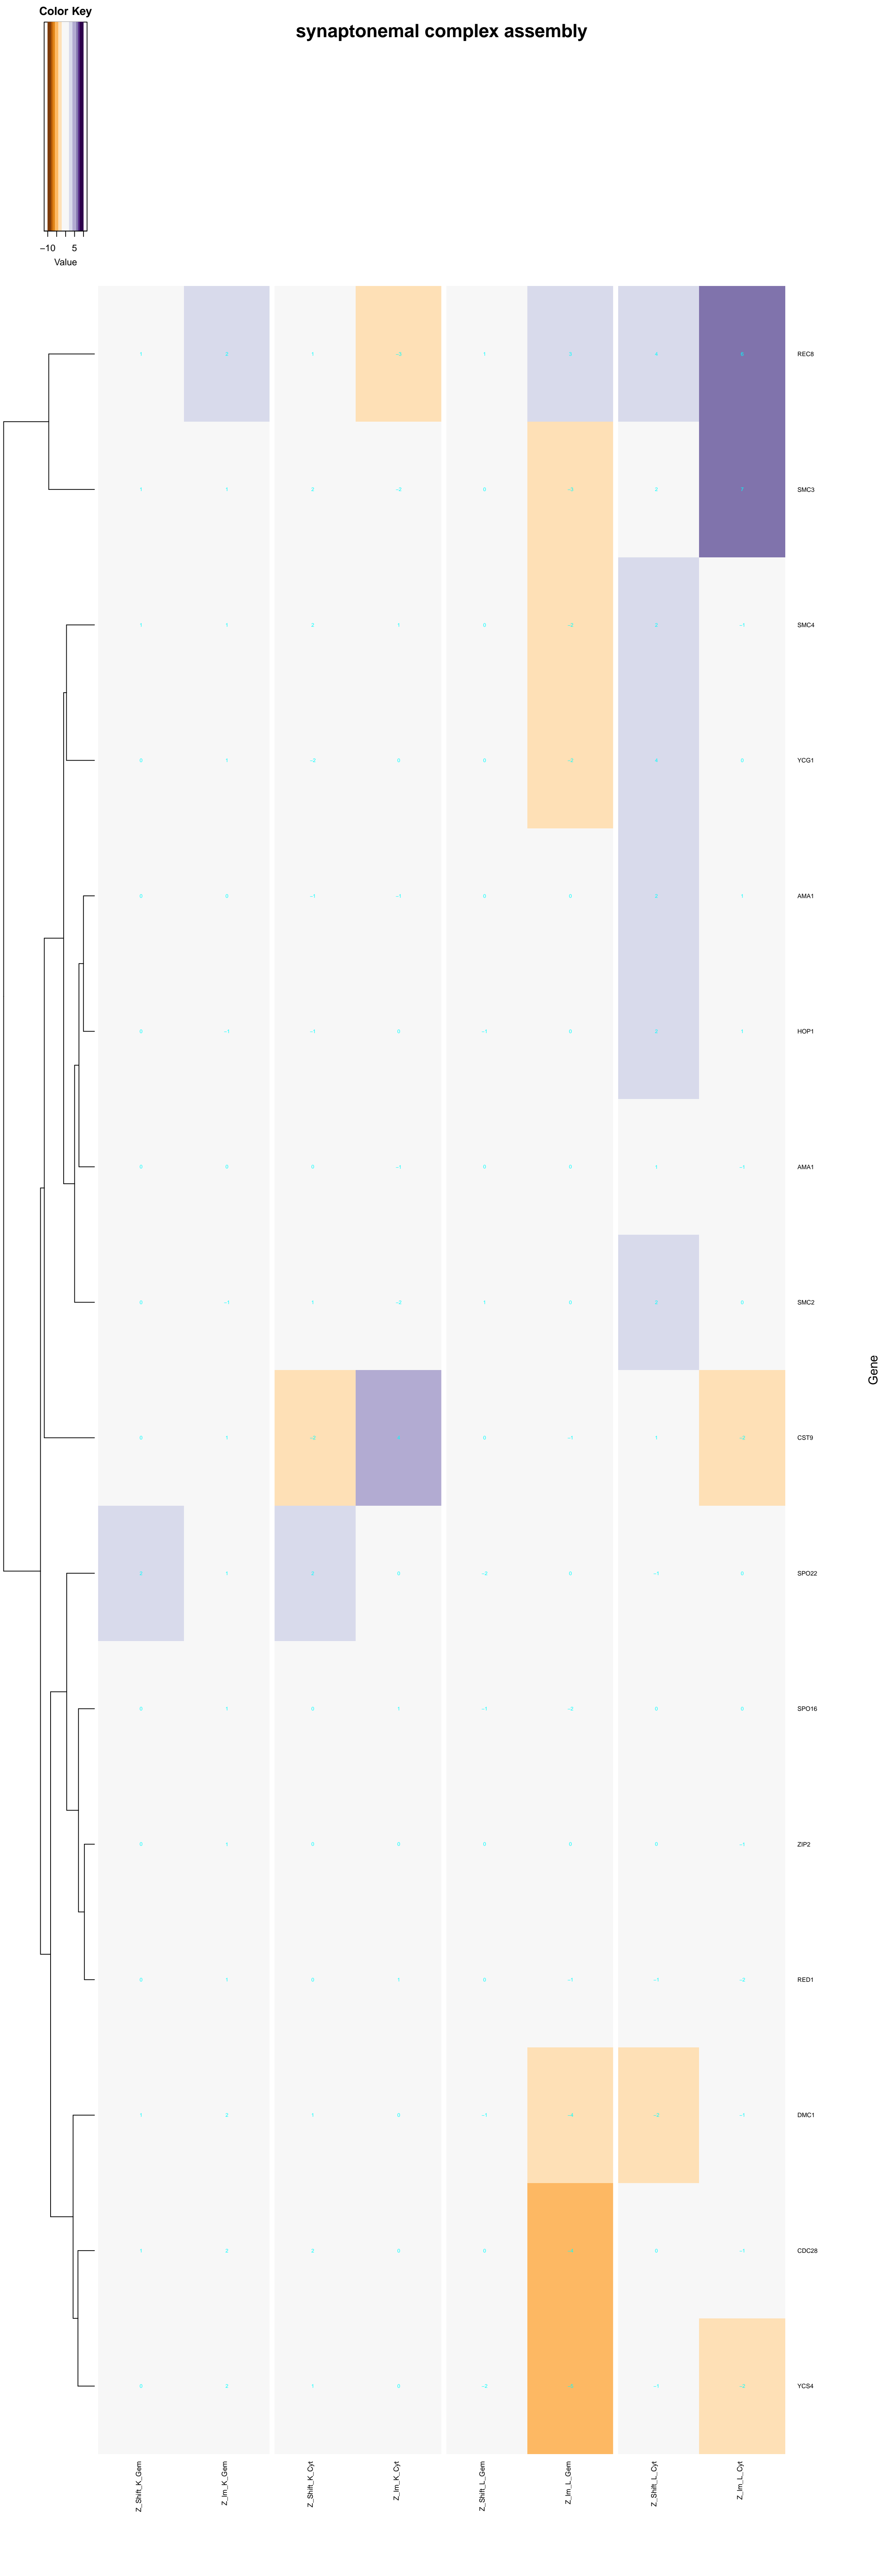

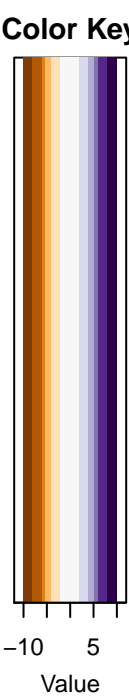

meiotic chromosome condensation

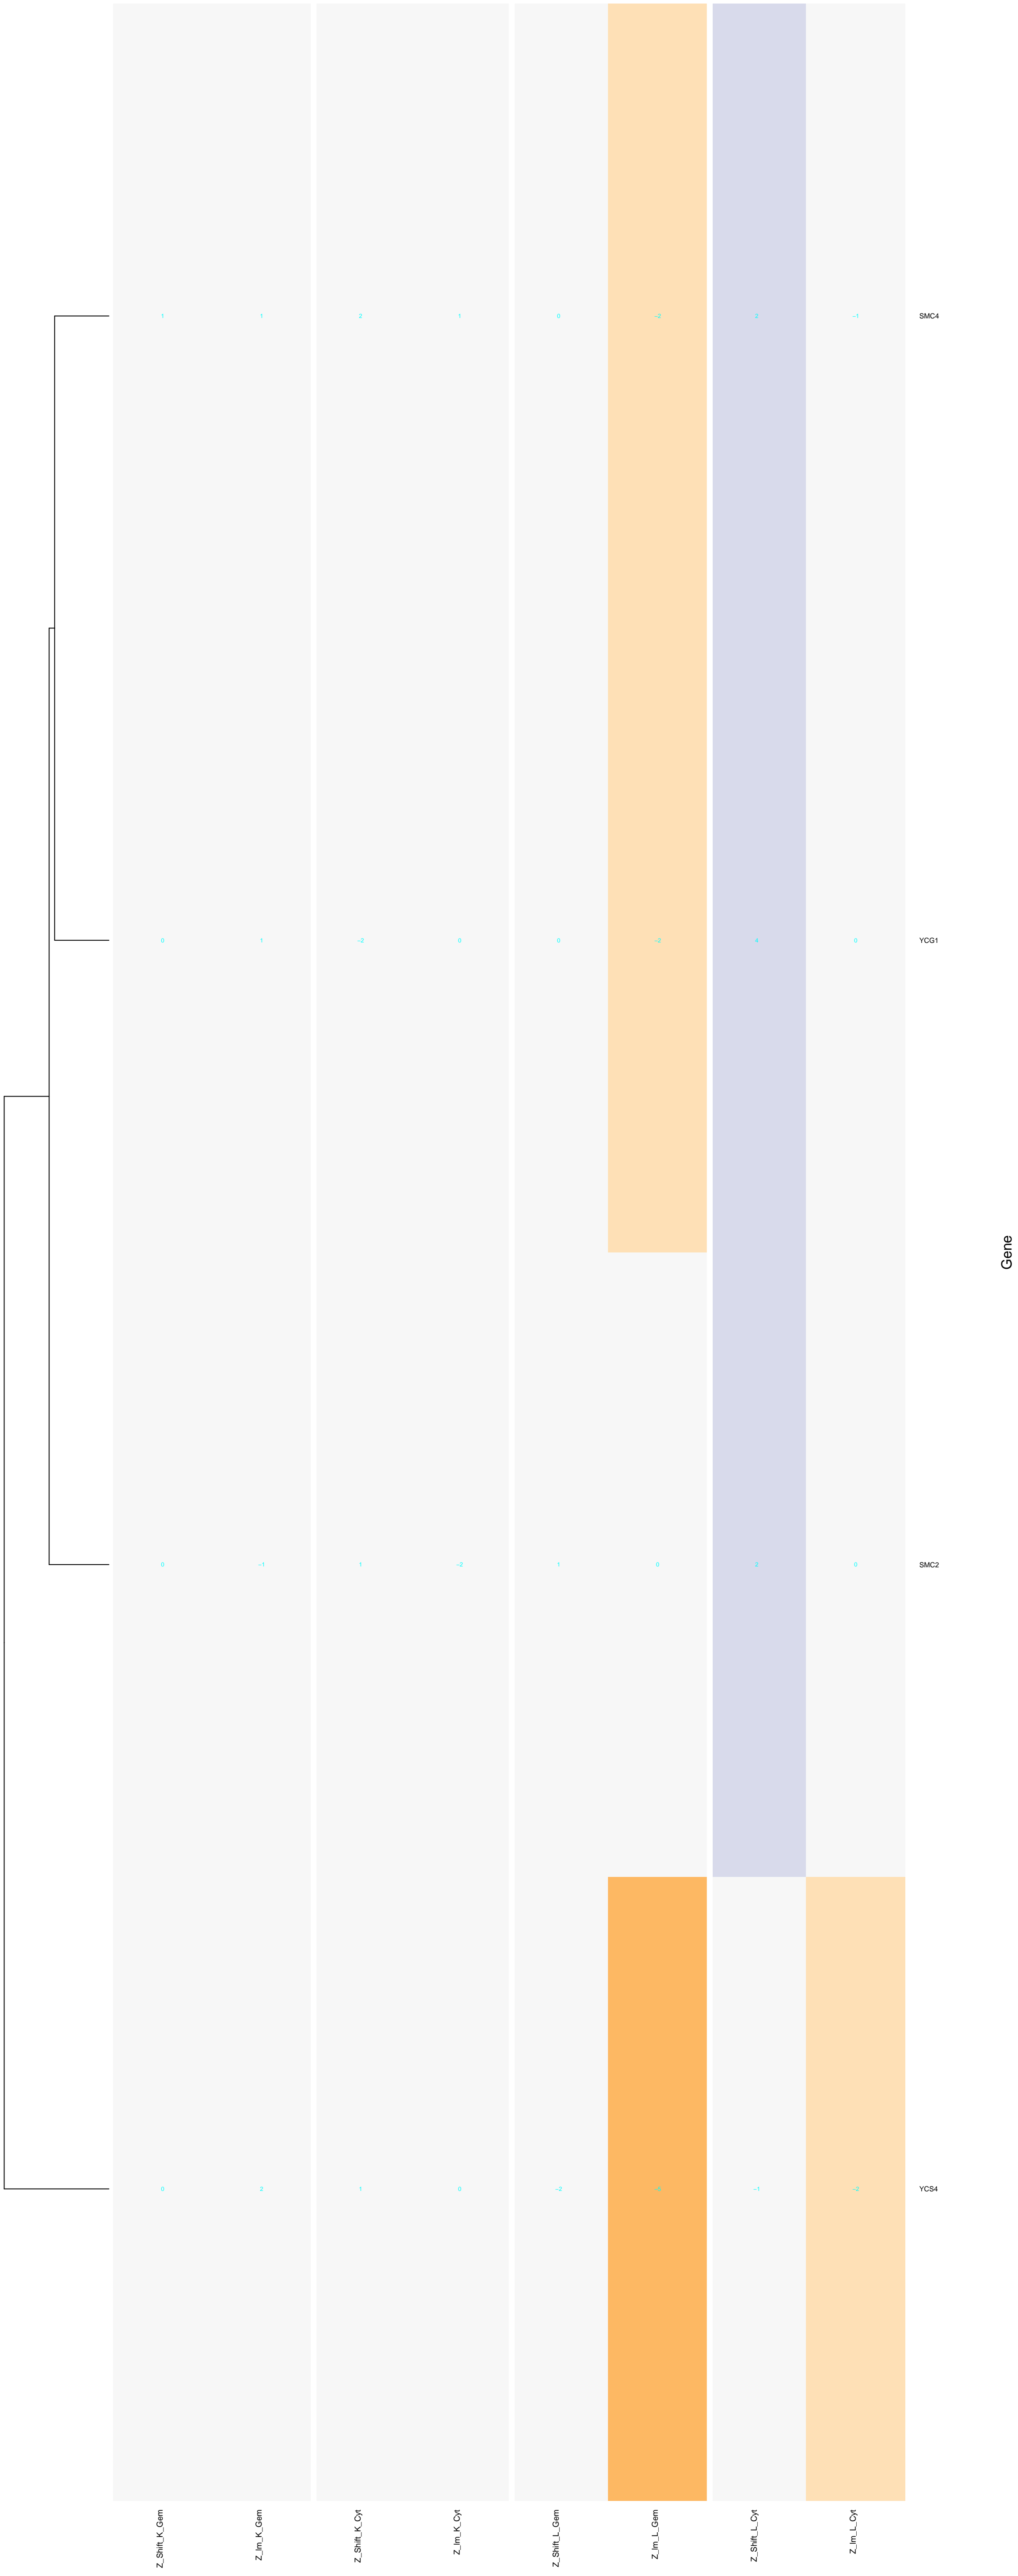



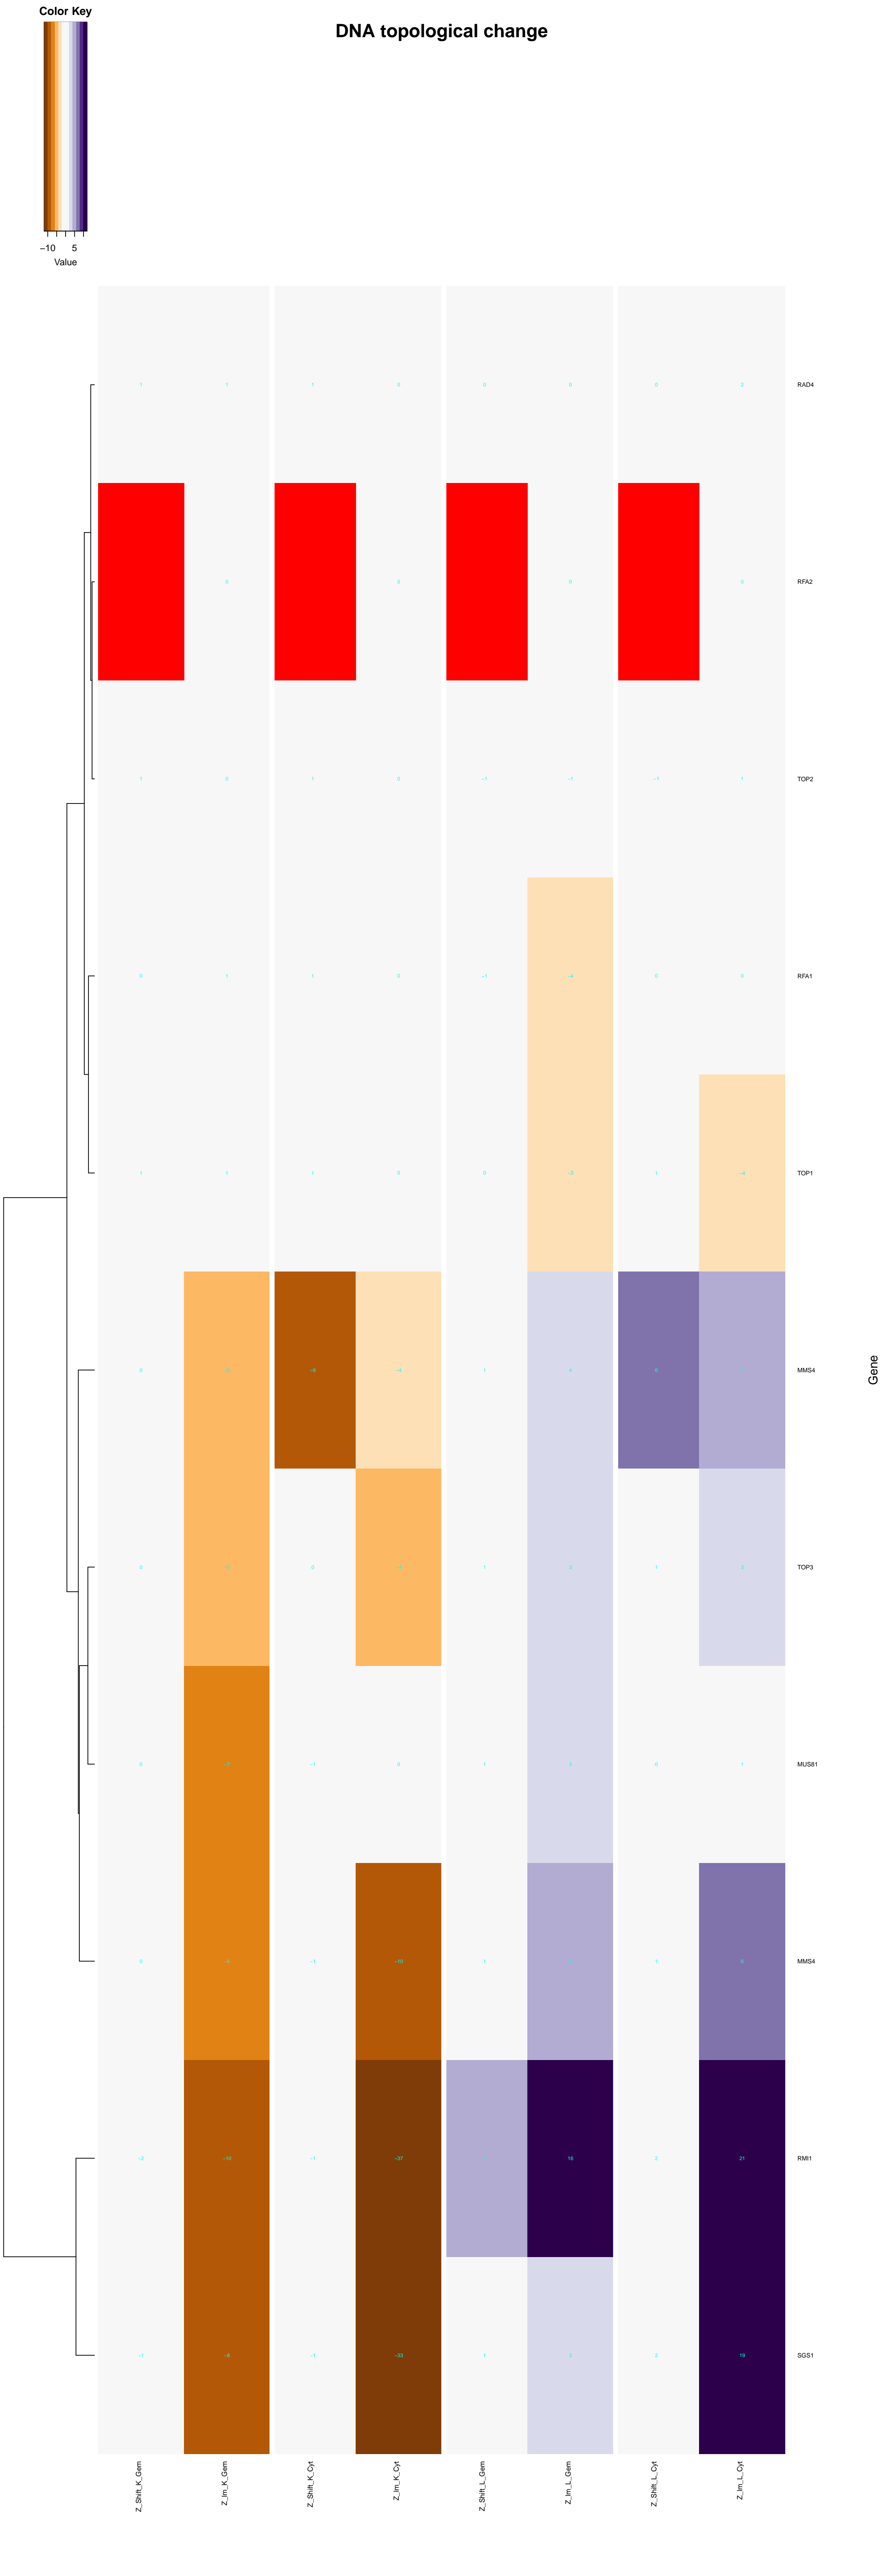

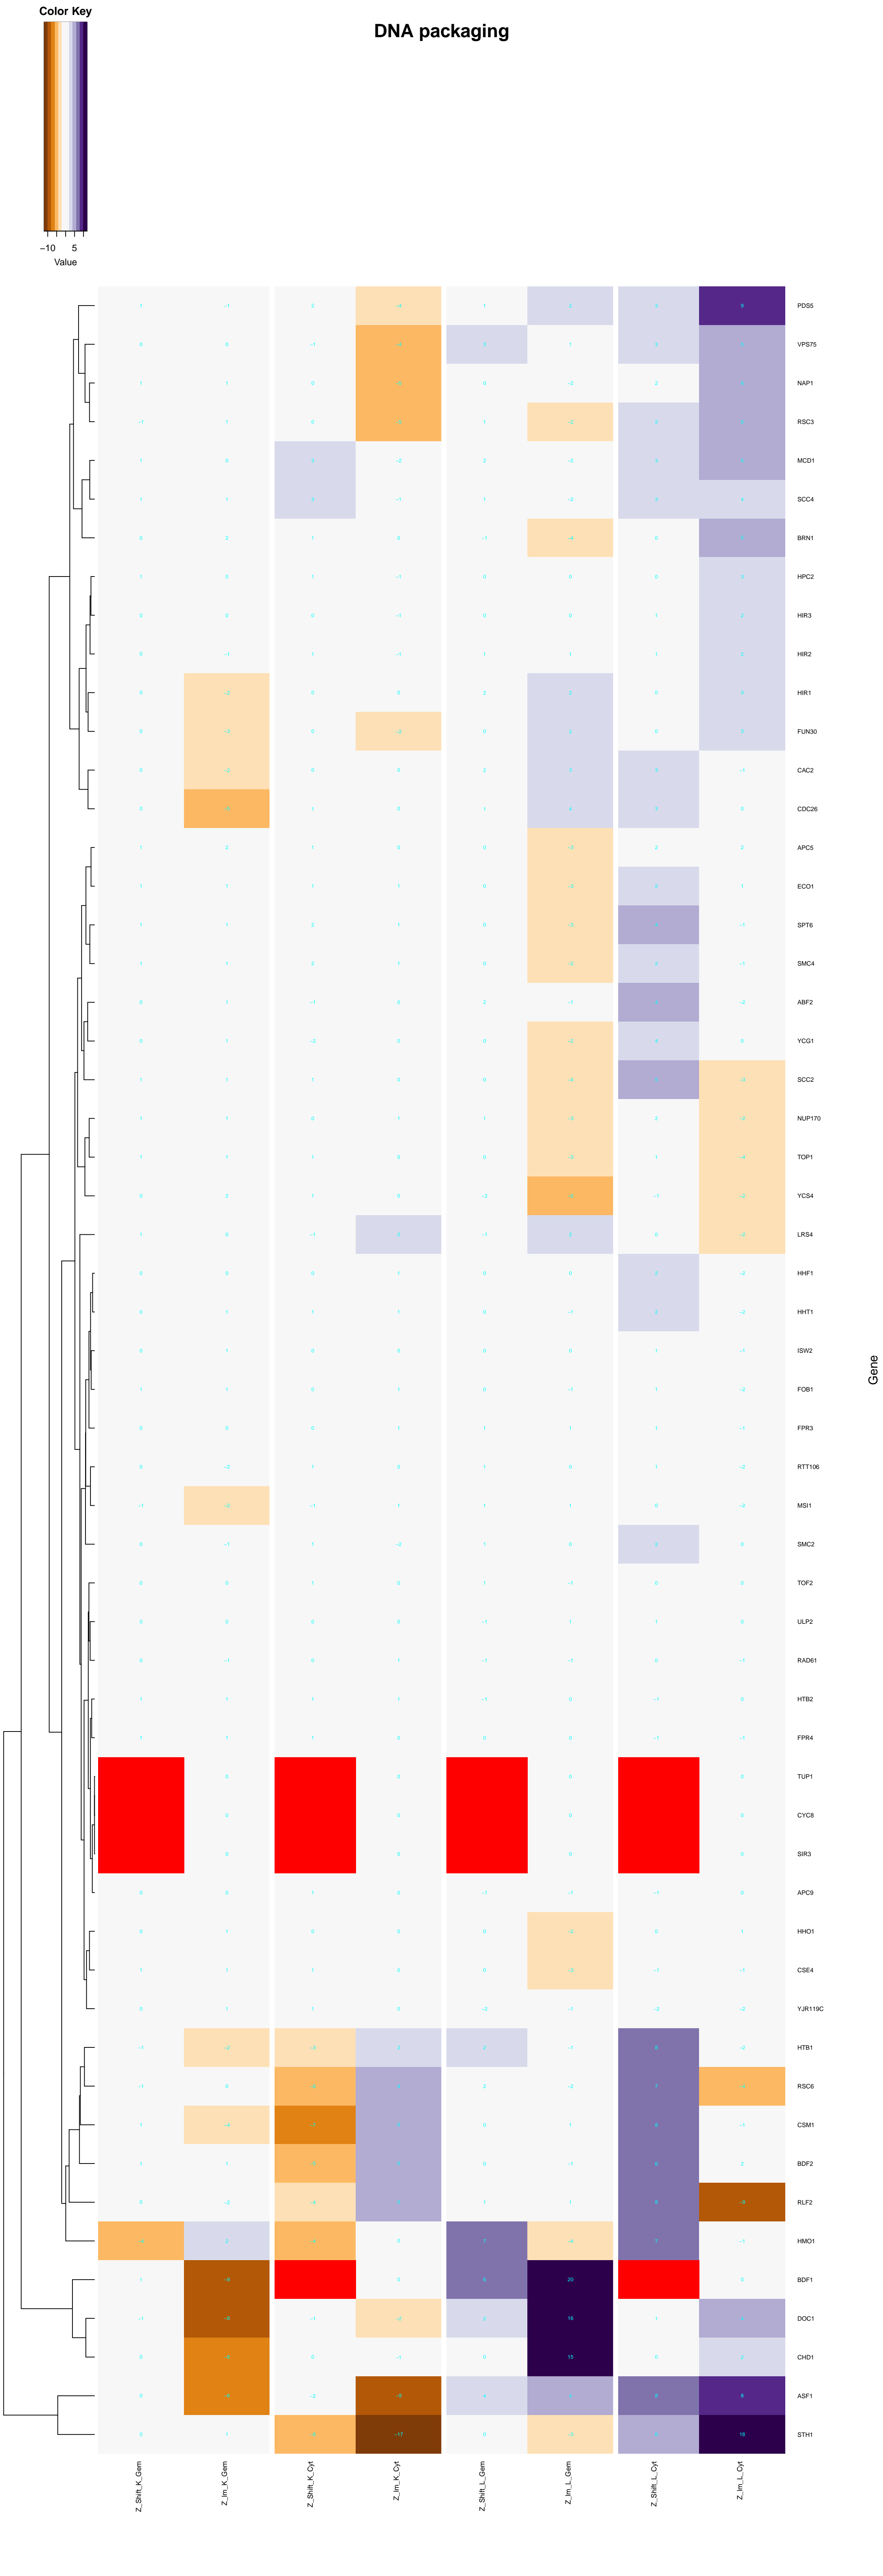

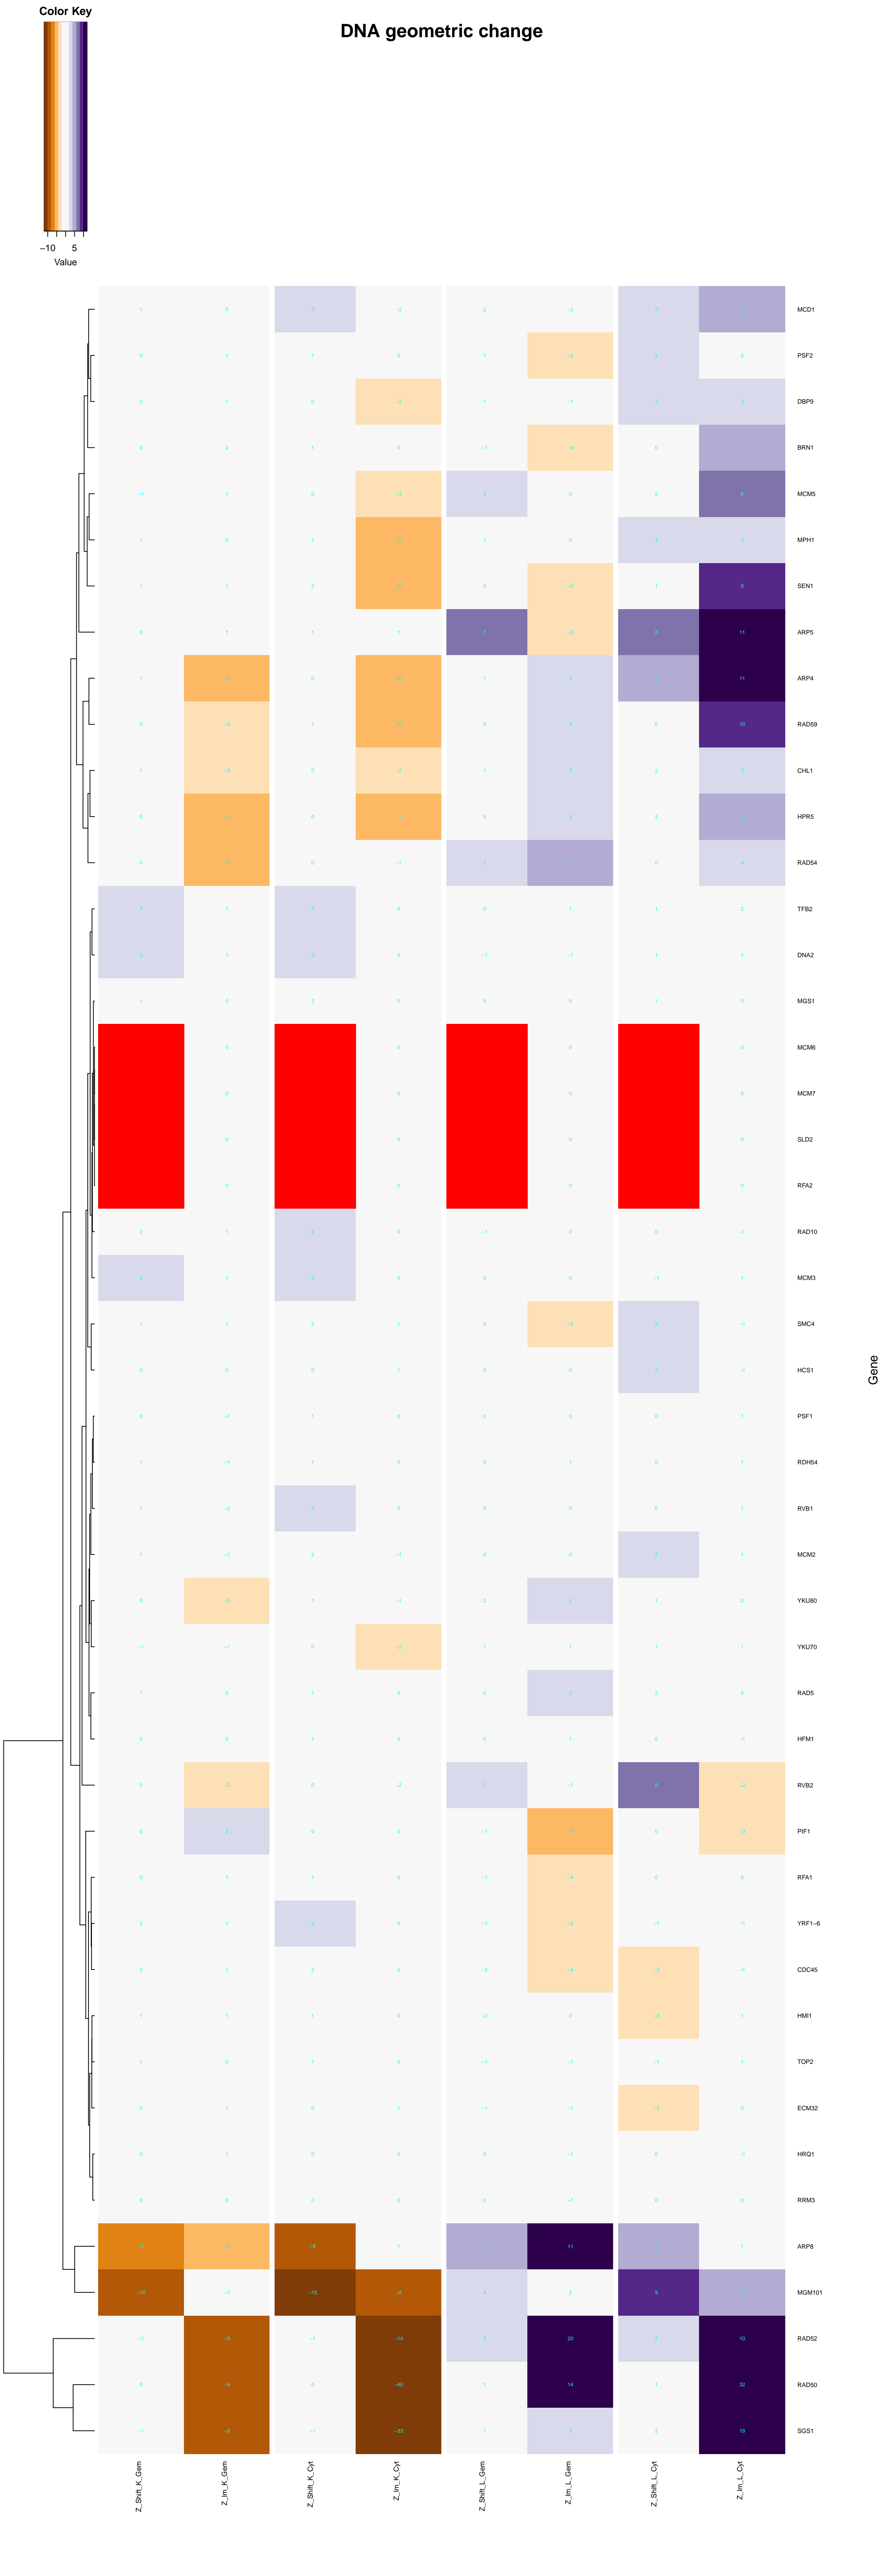



telomere maintenance via recombination

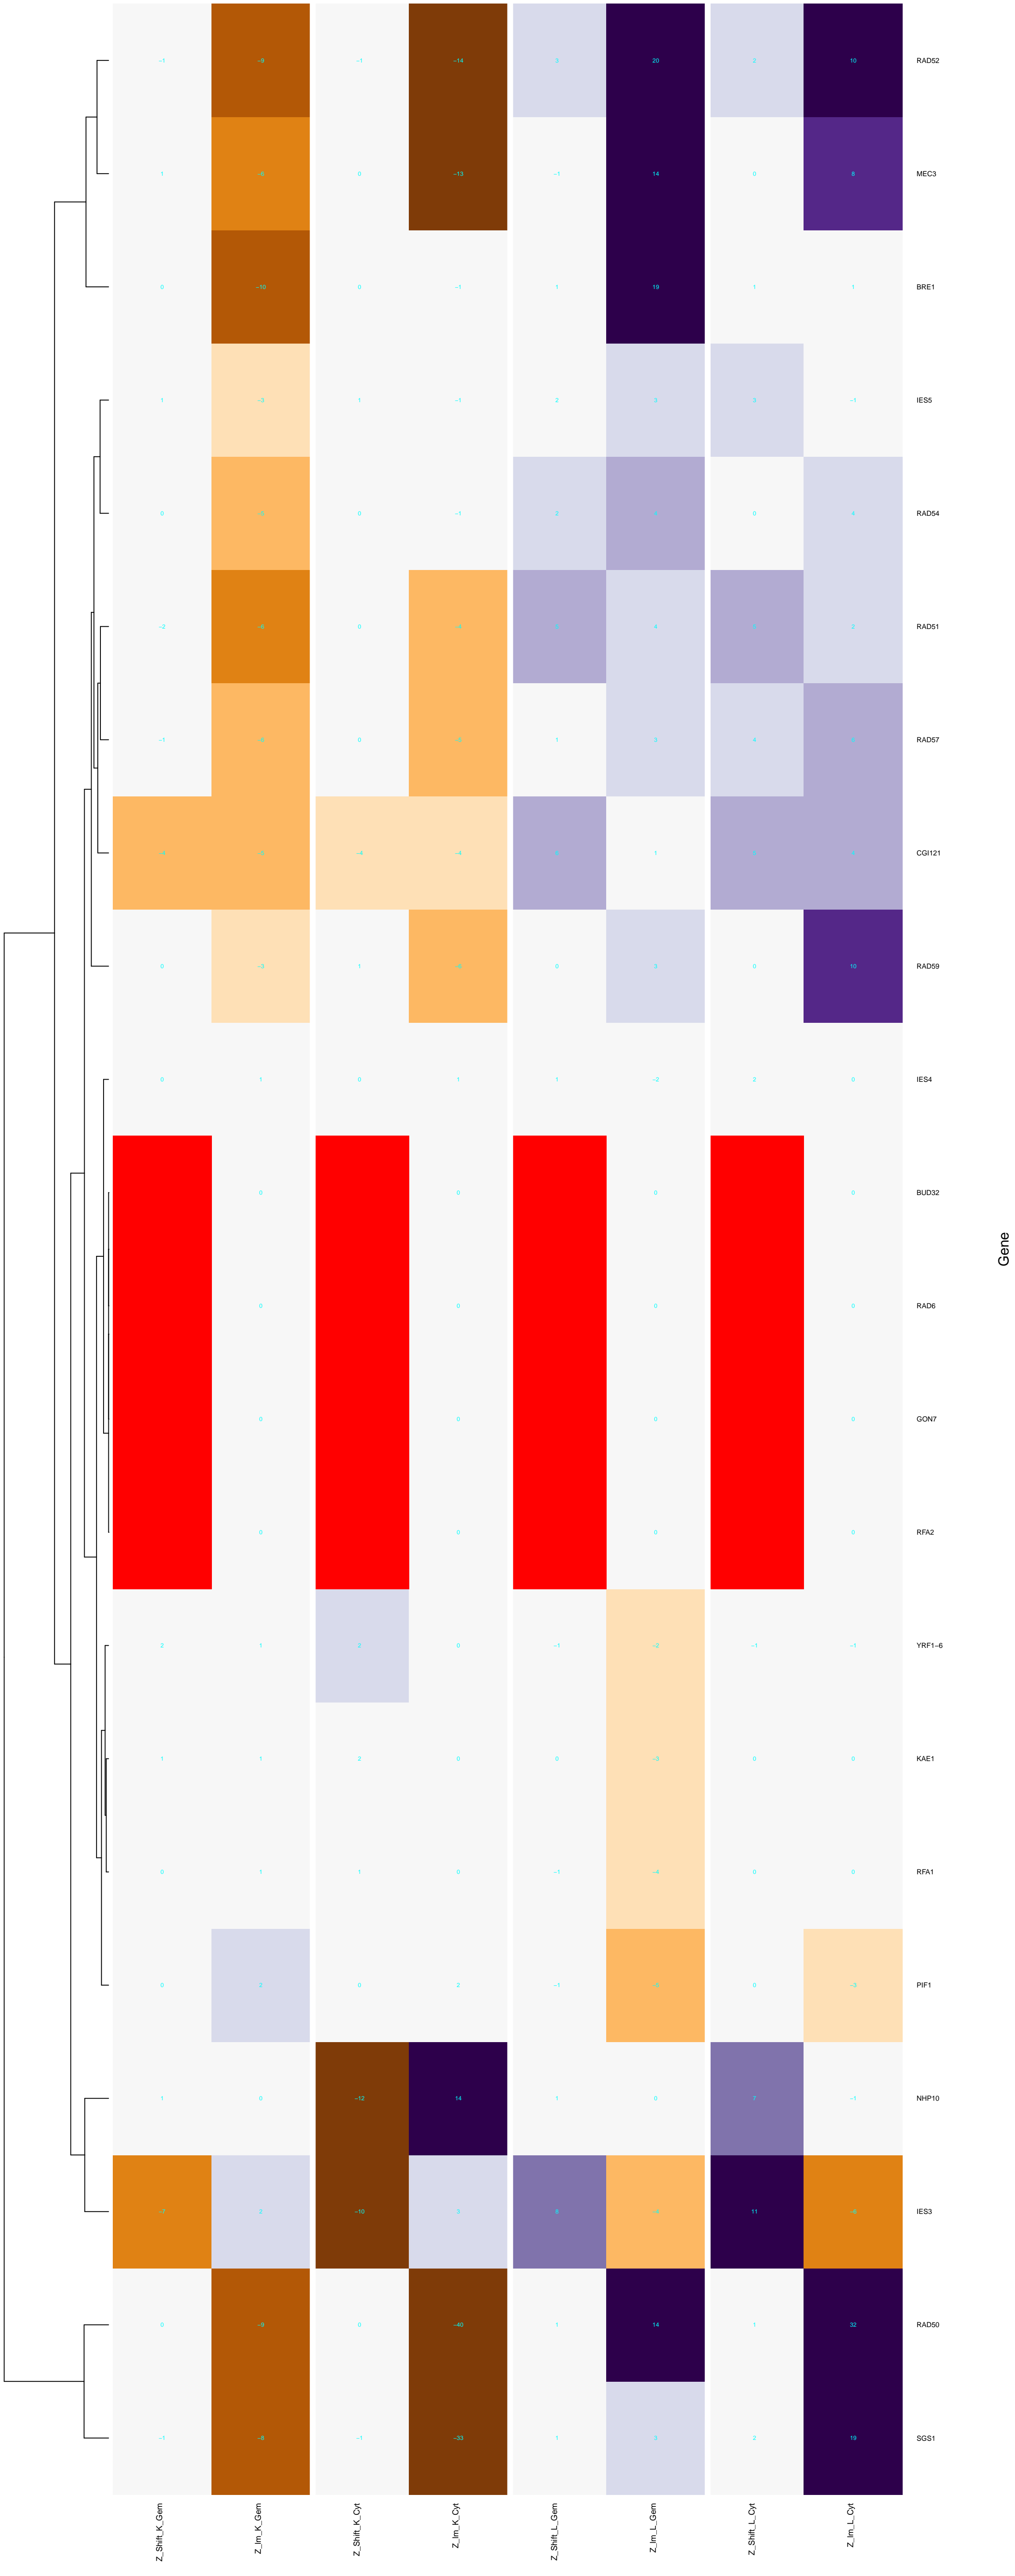

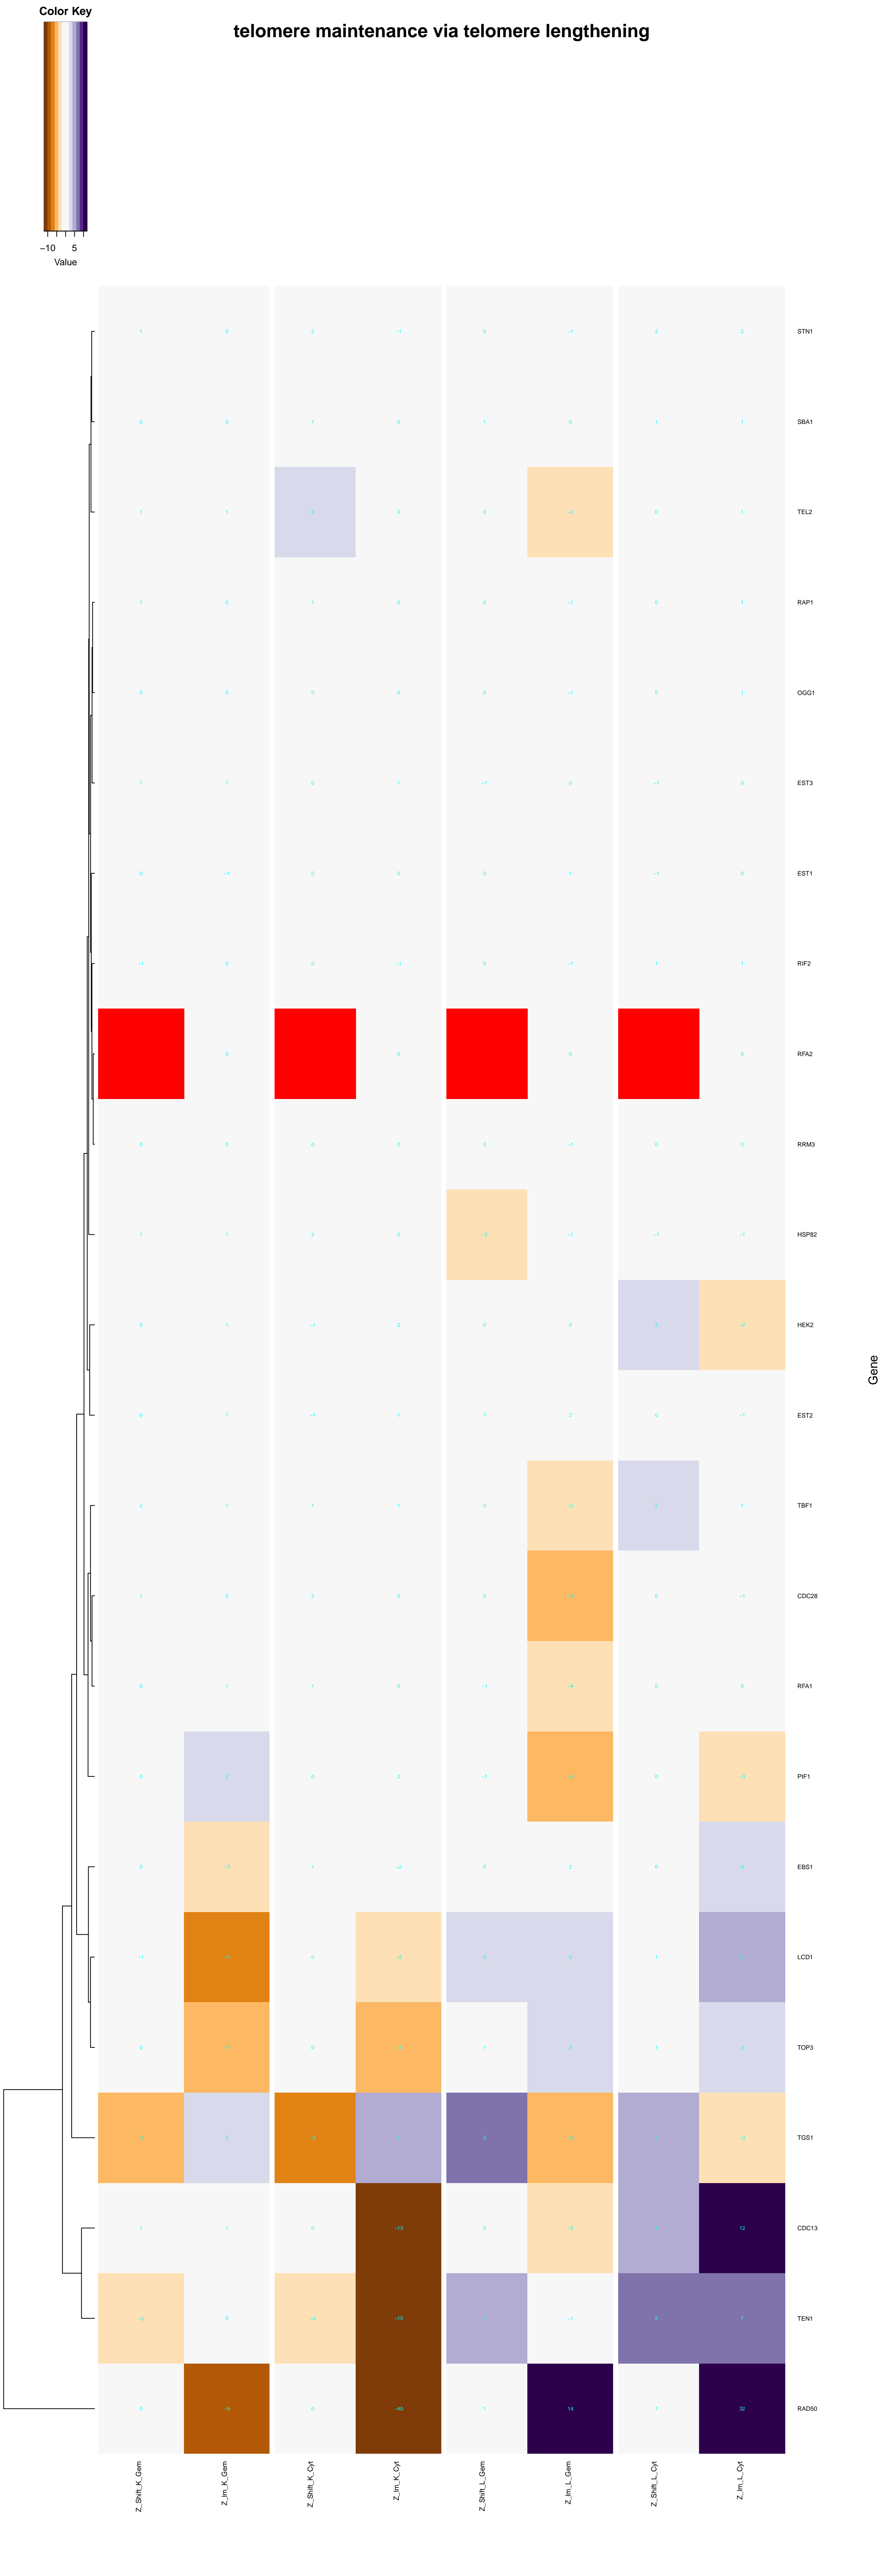

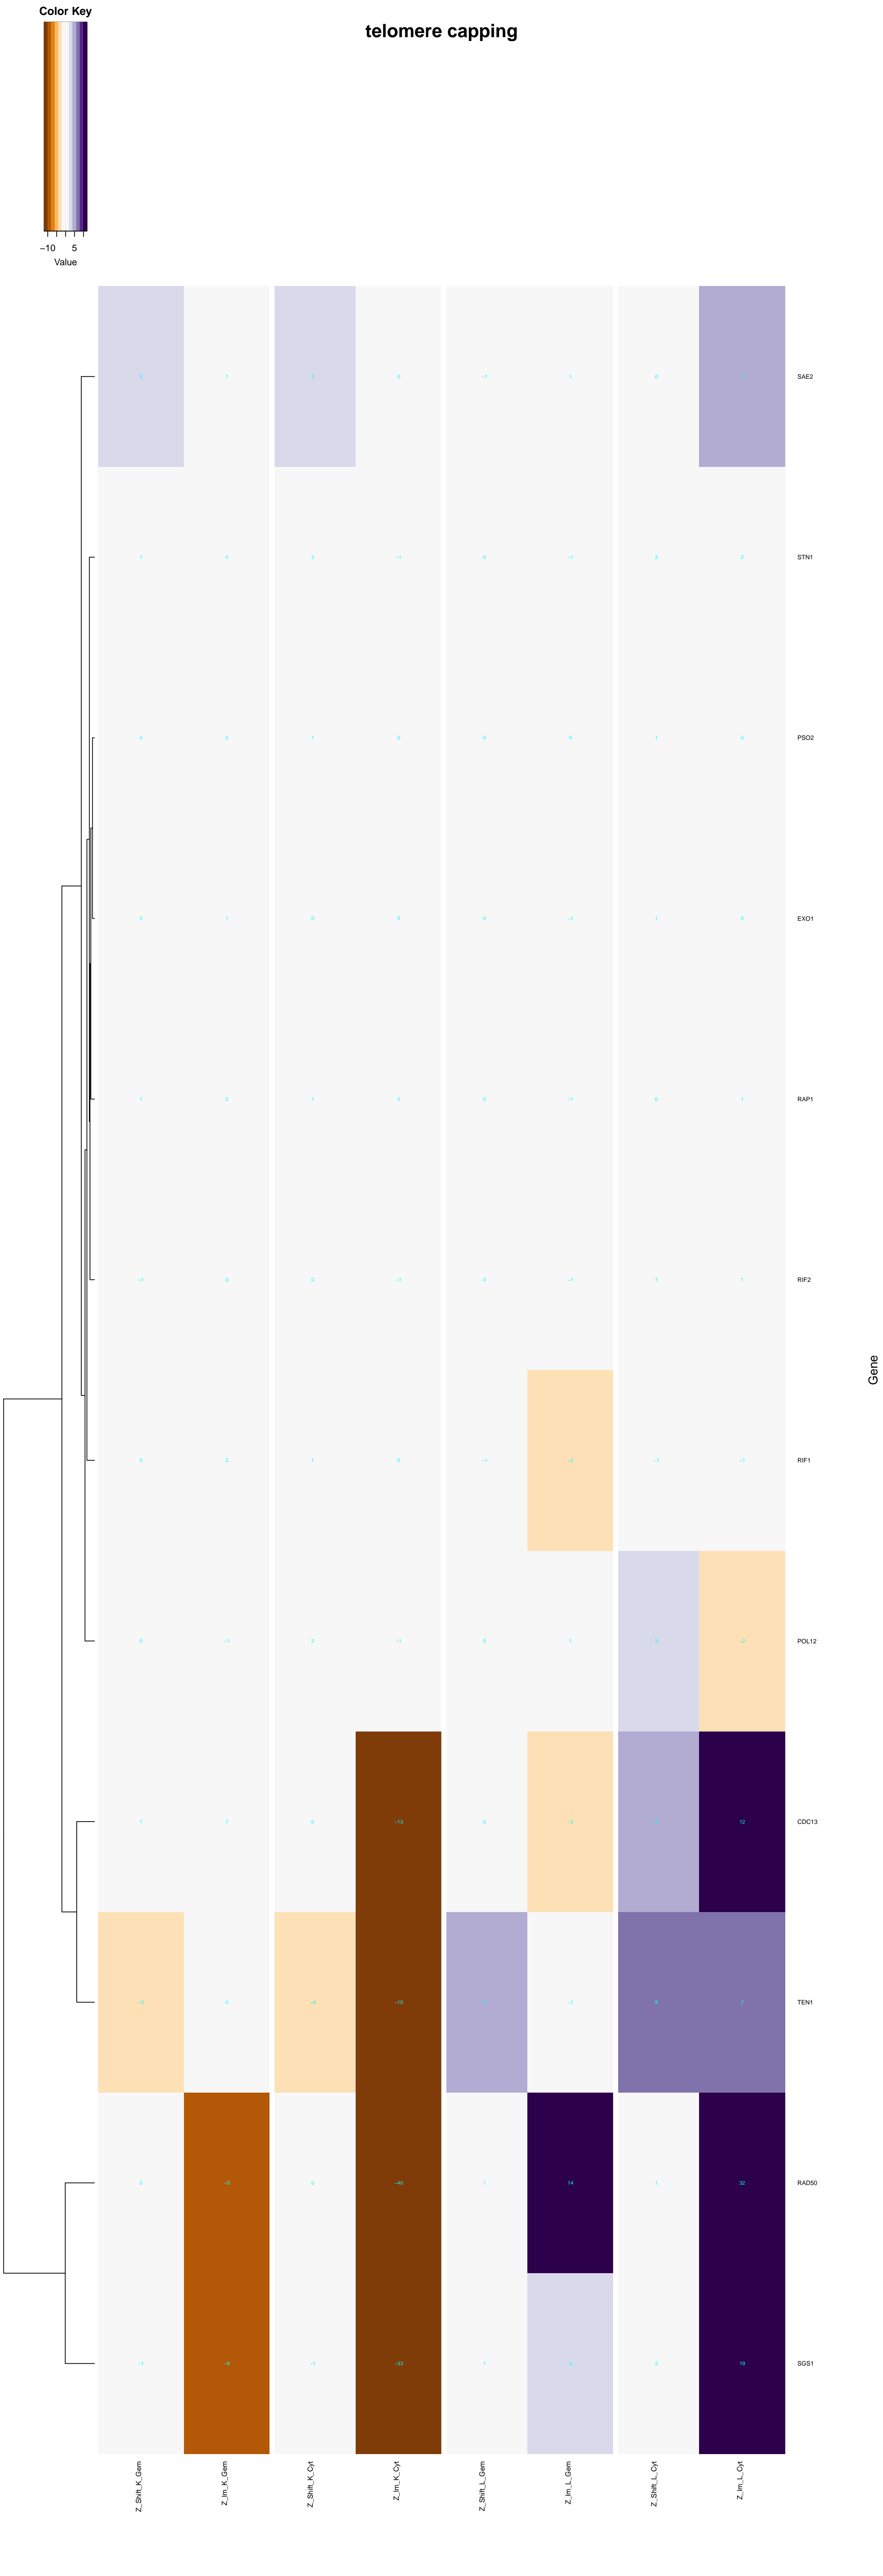

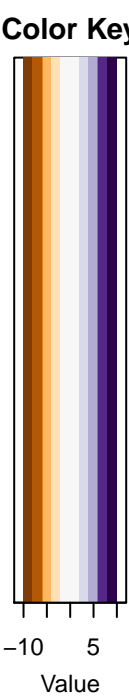

meiotic telomere tethering at nuclear periphery

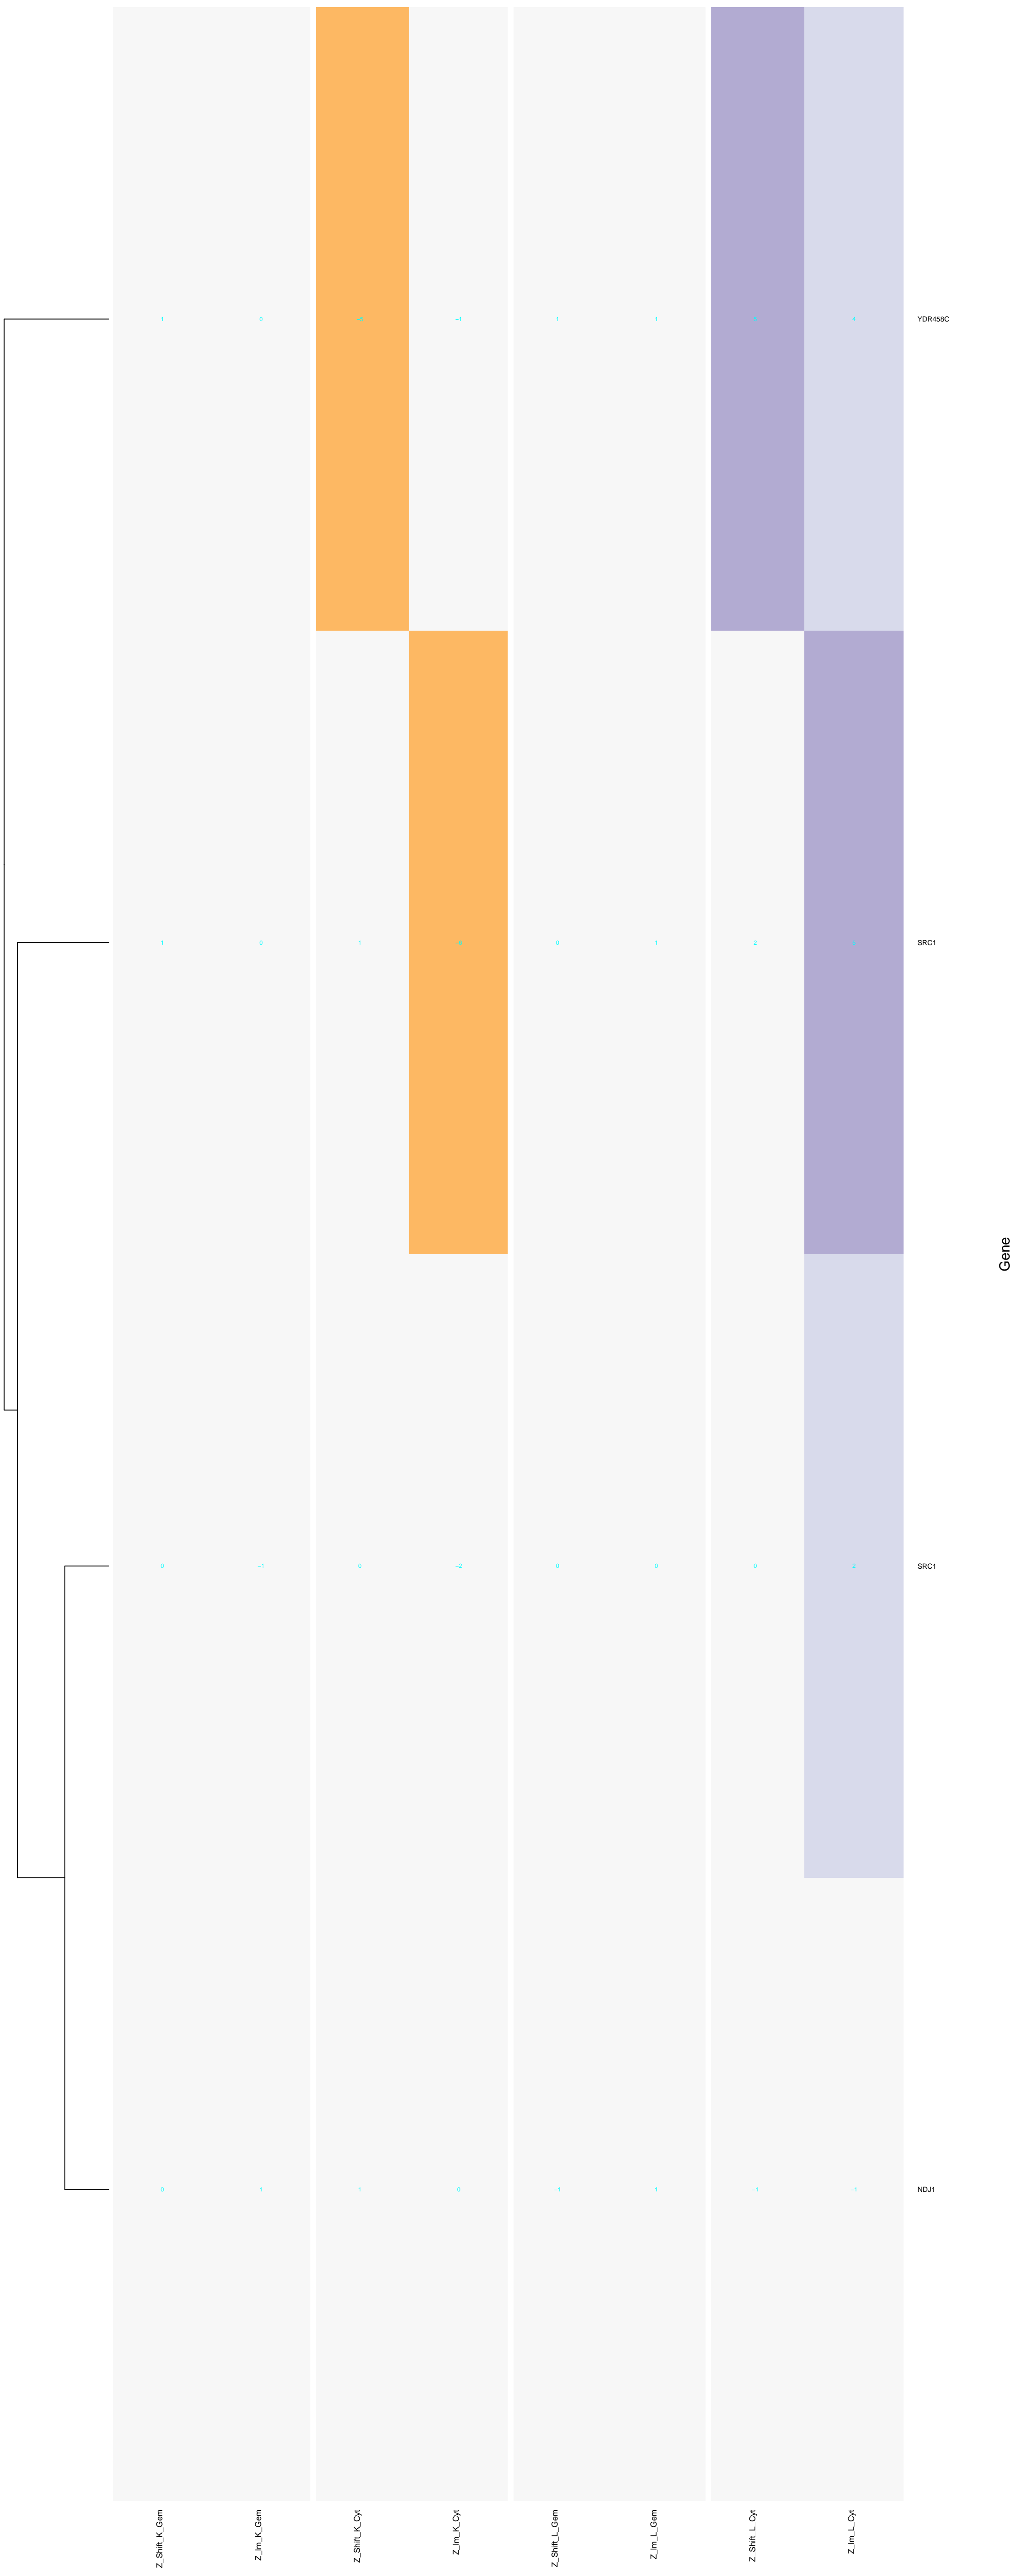

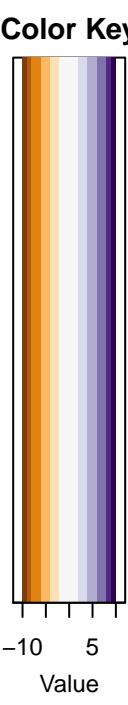

chromosome condensation

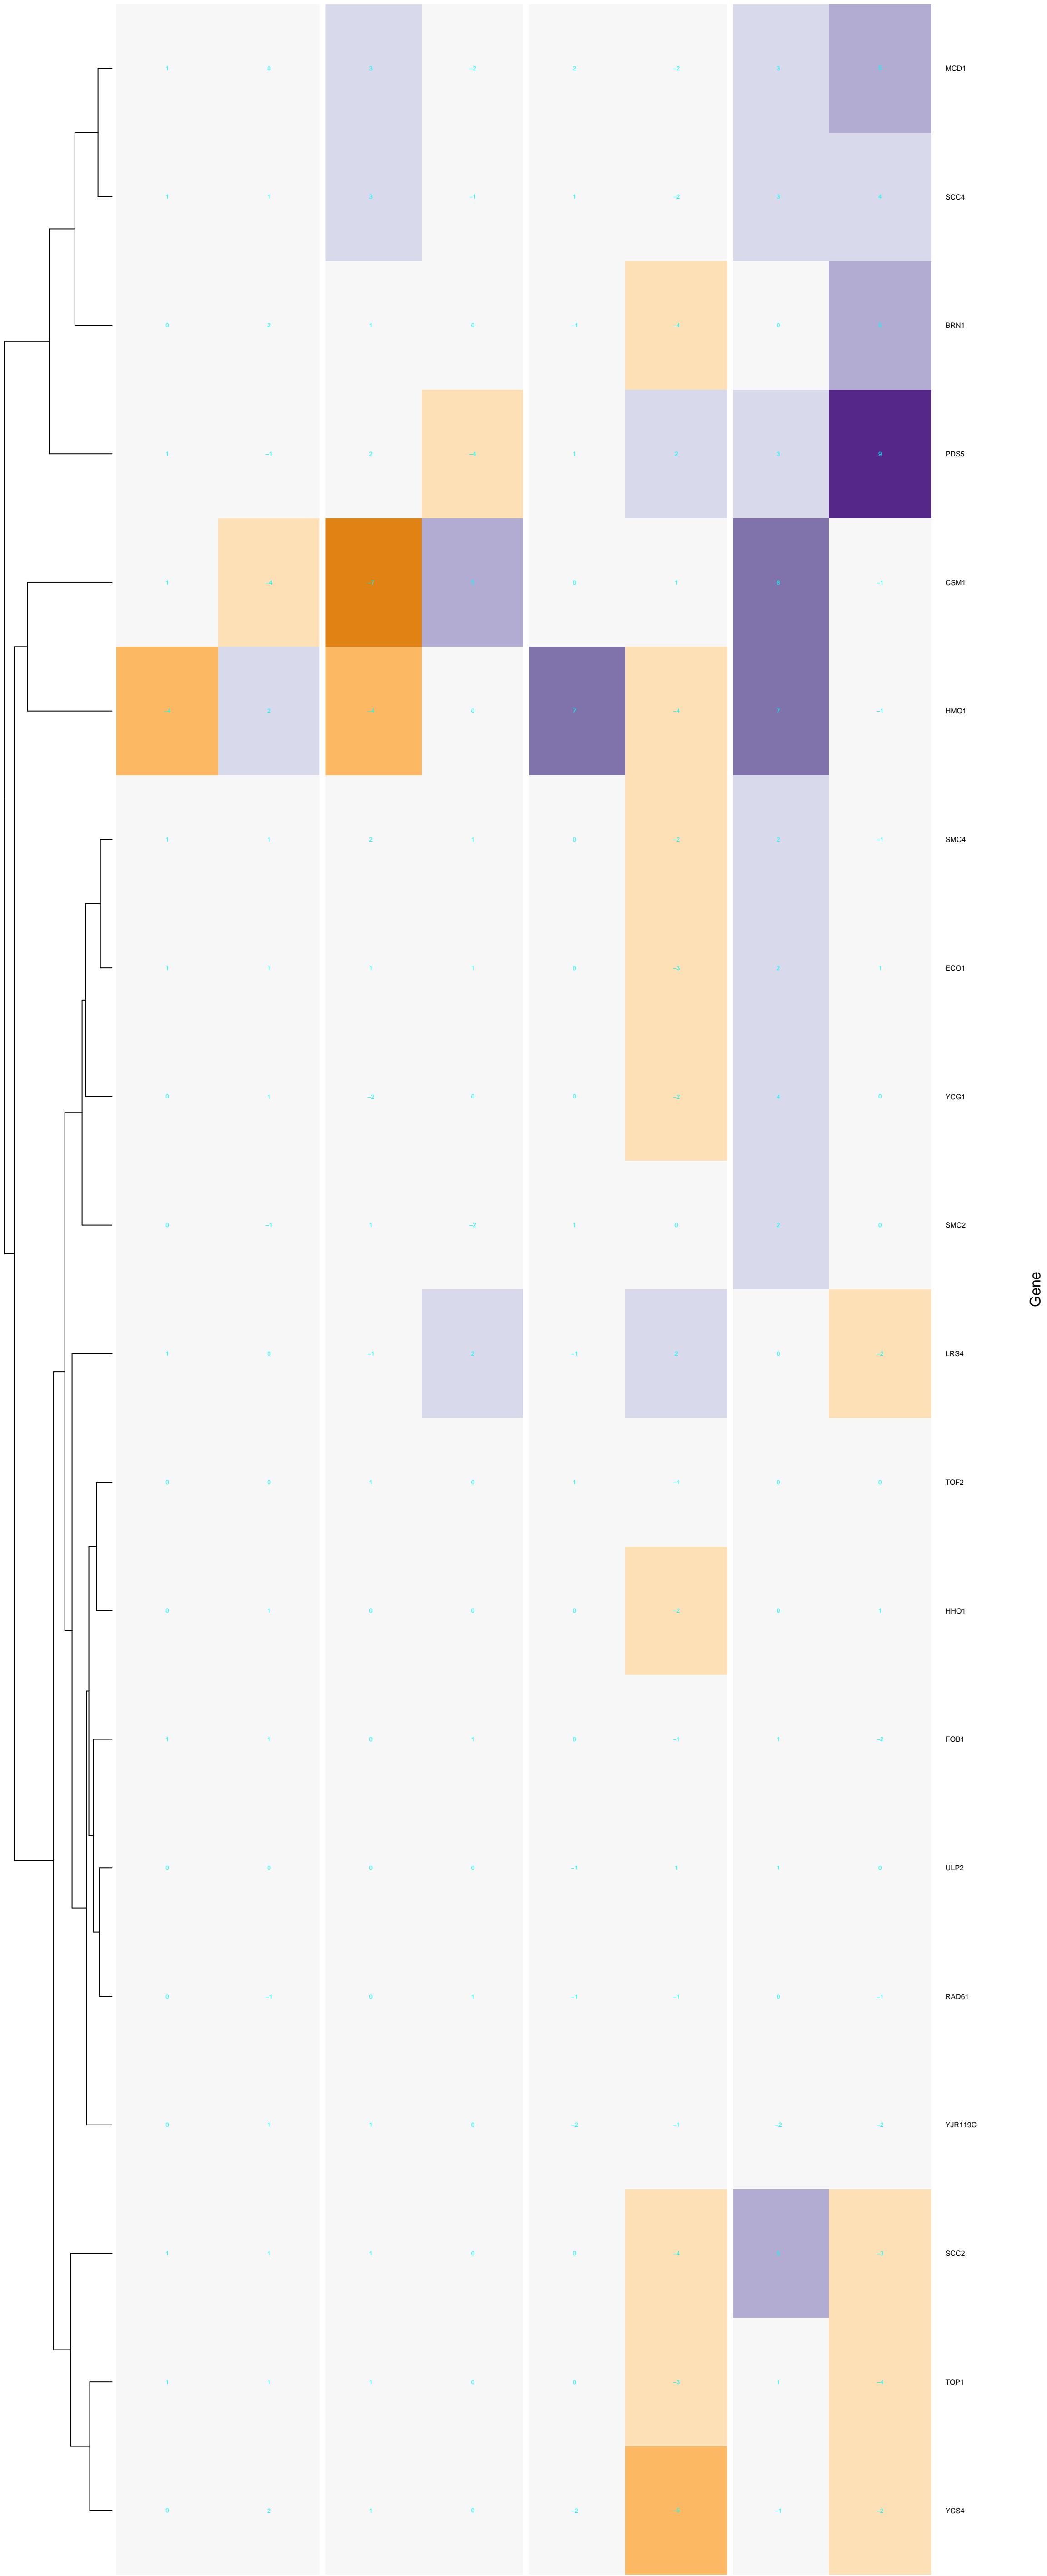

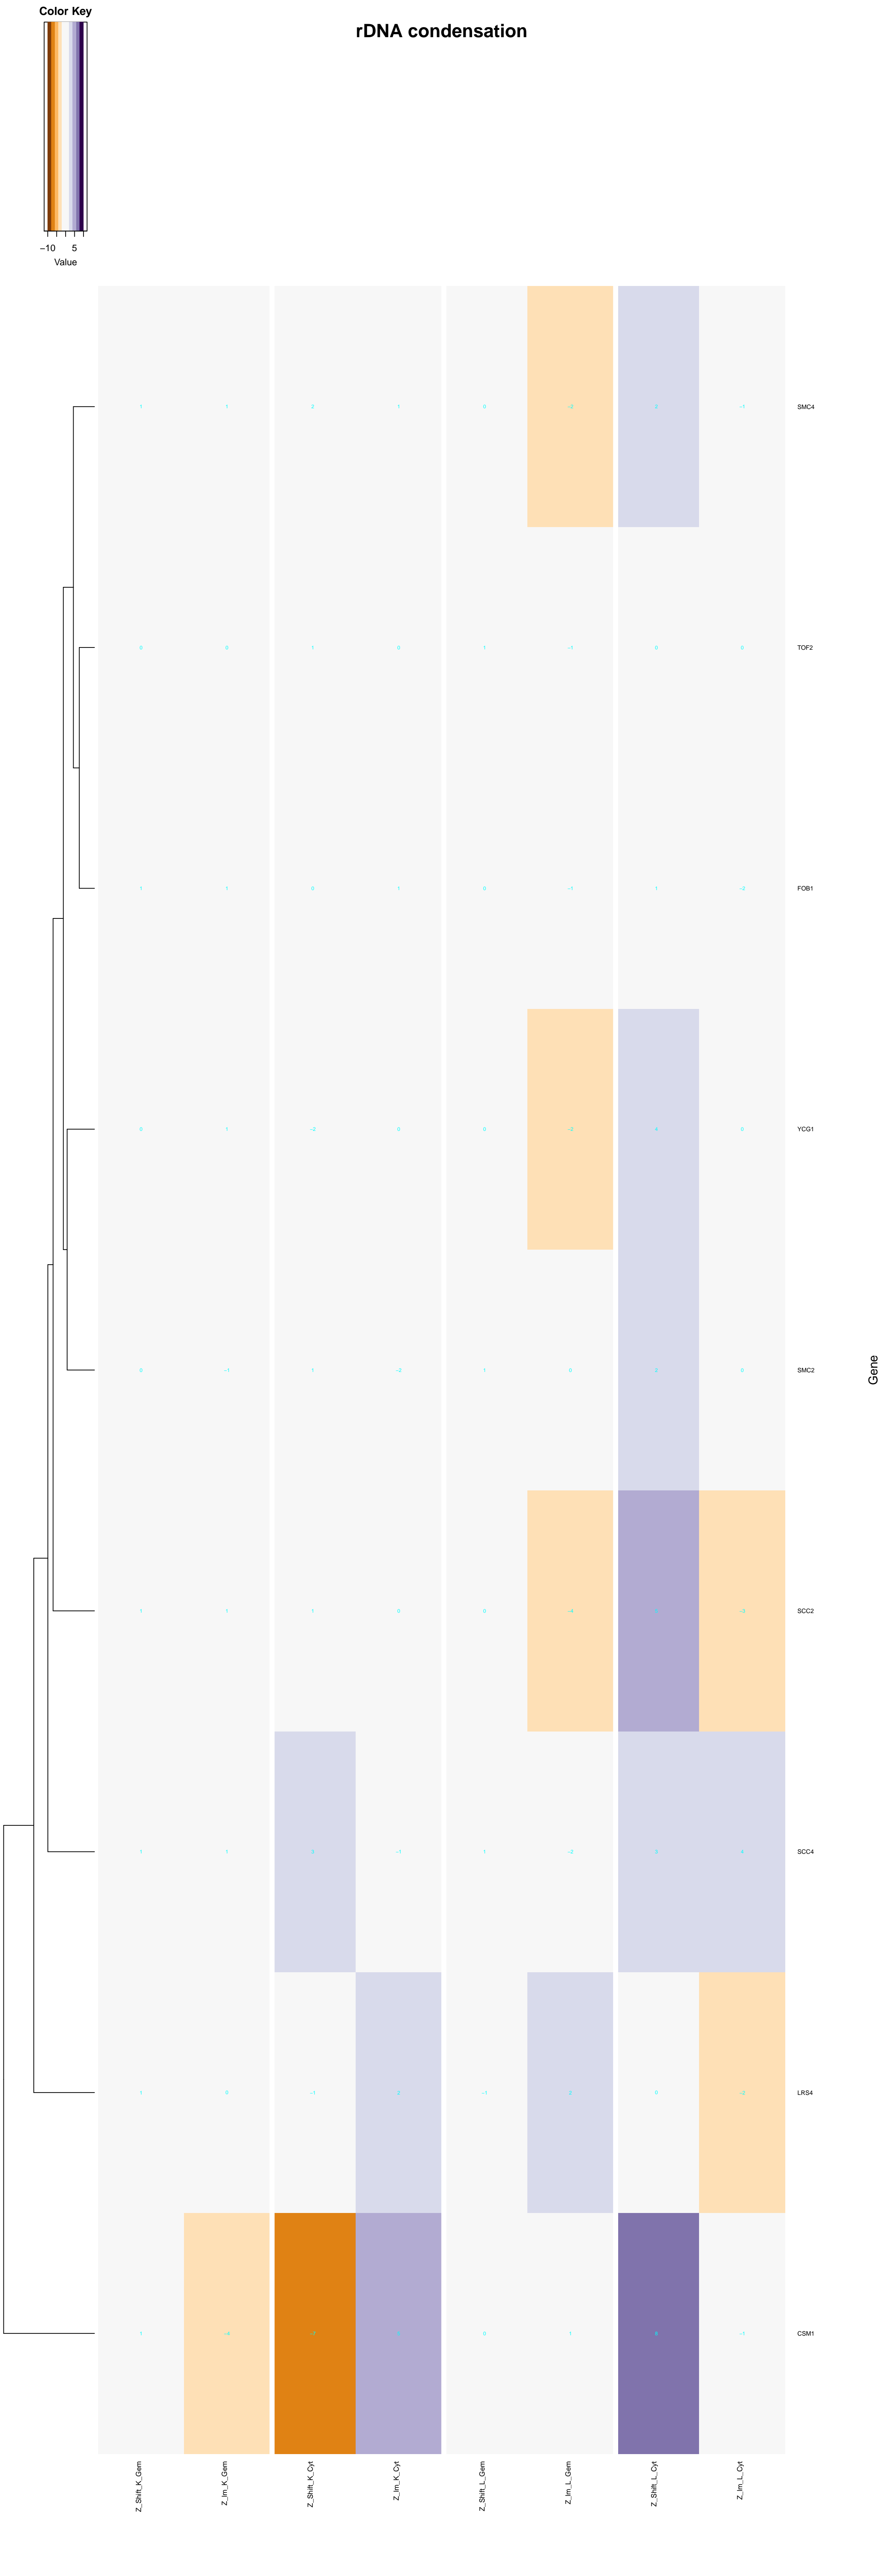

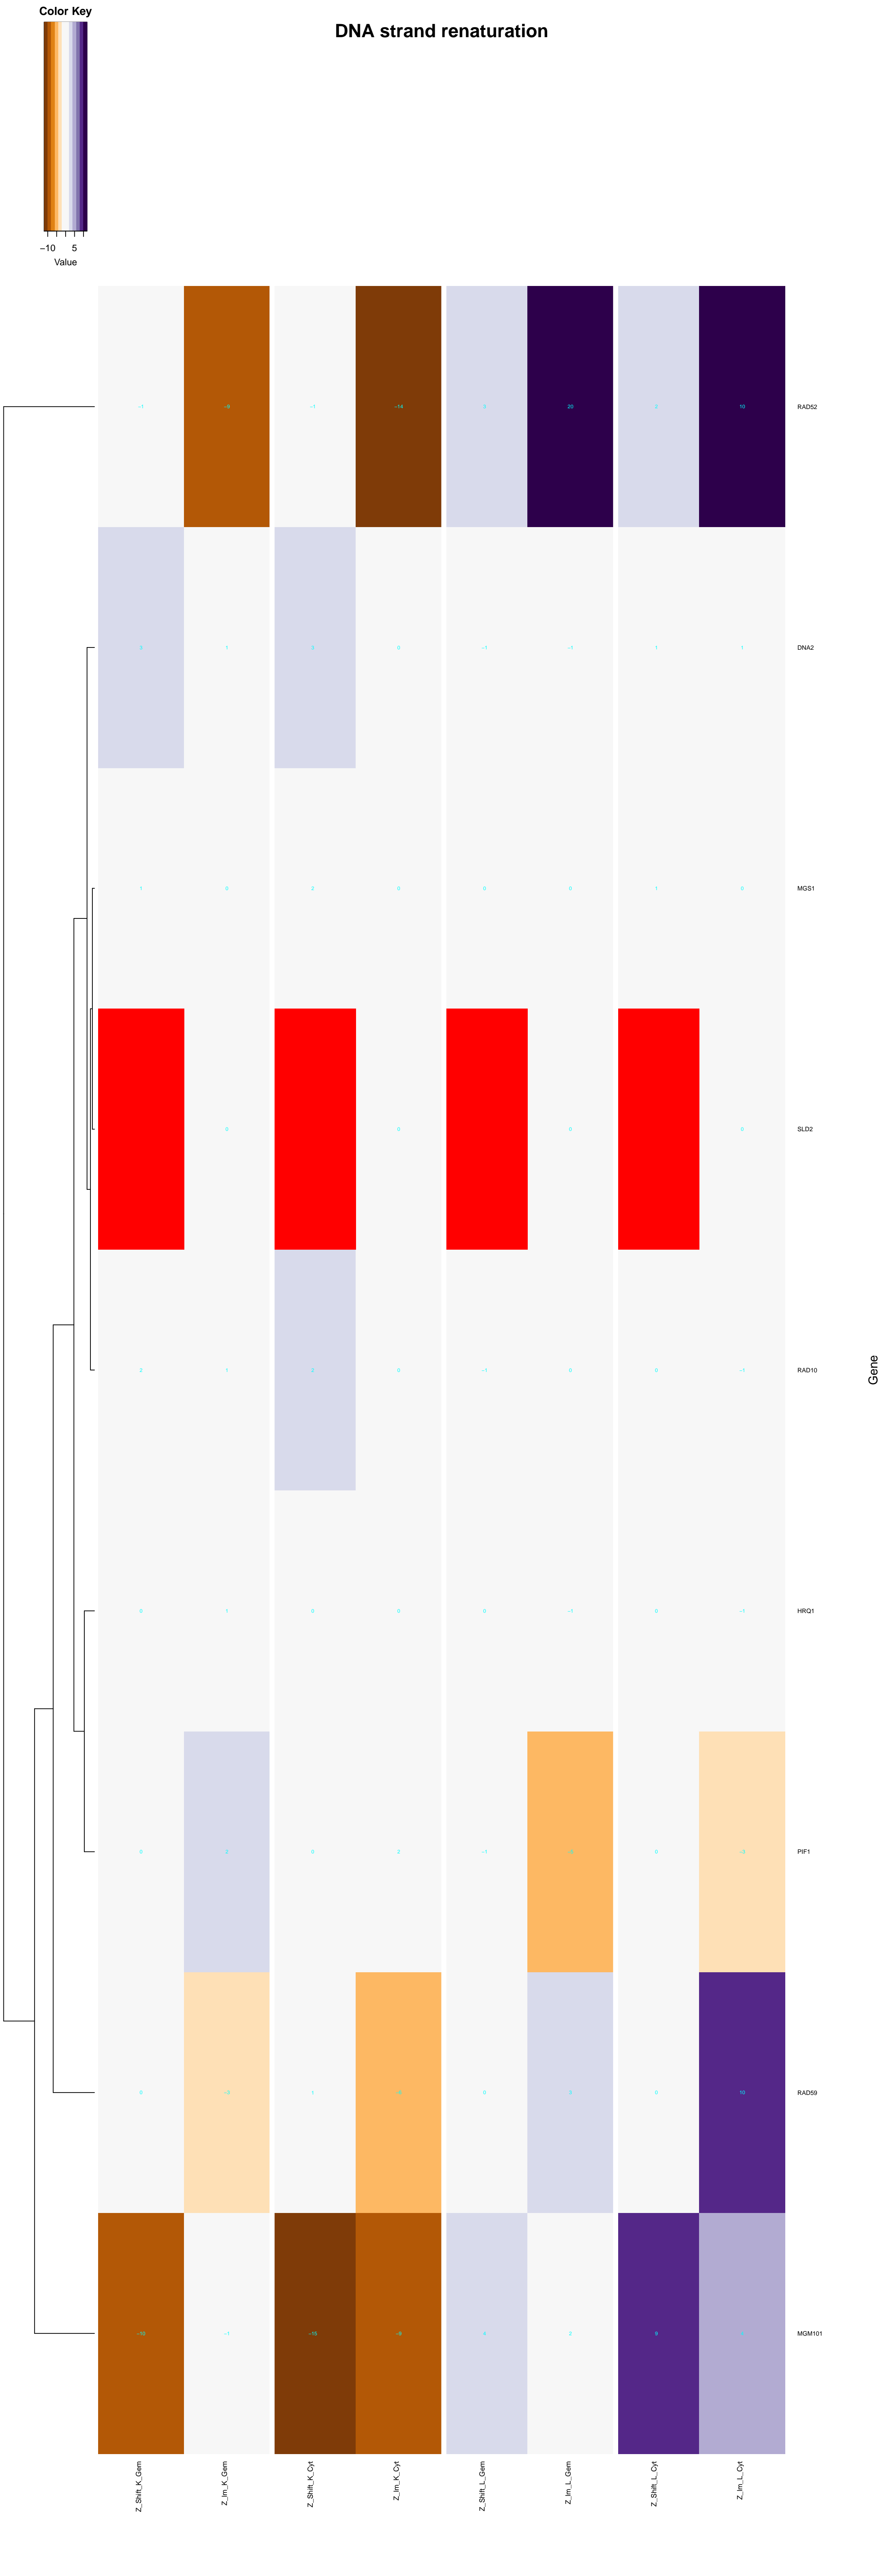

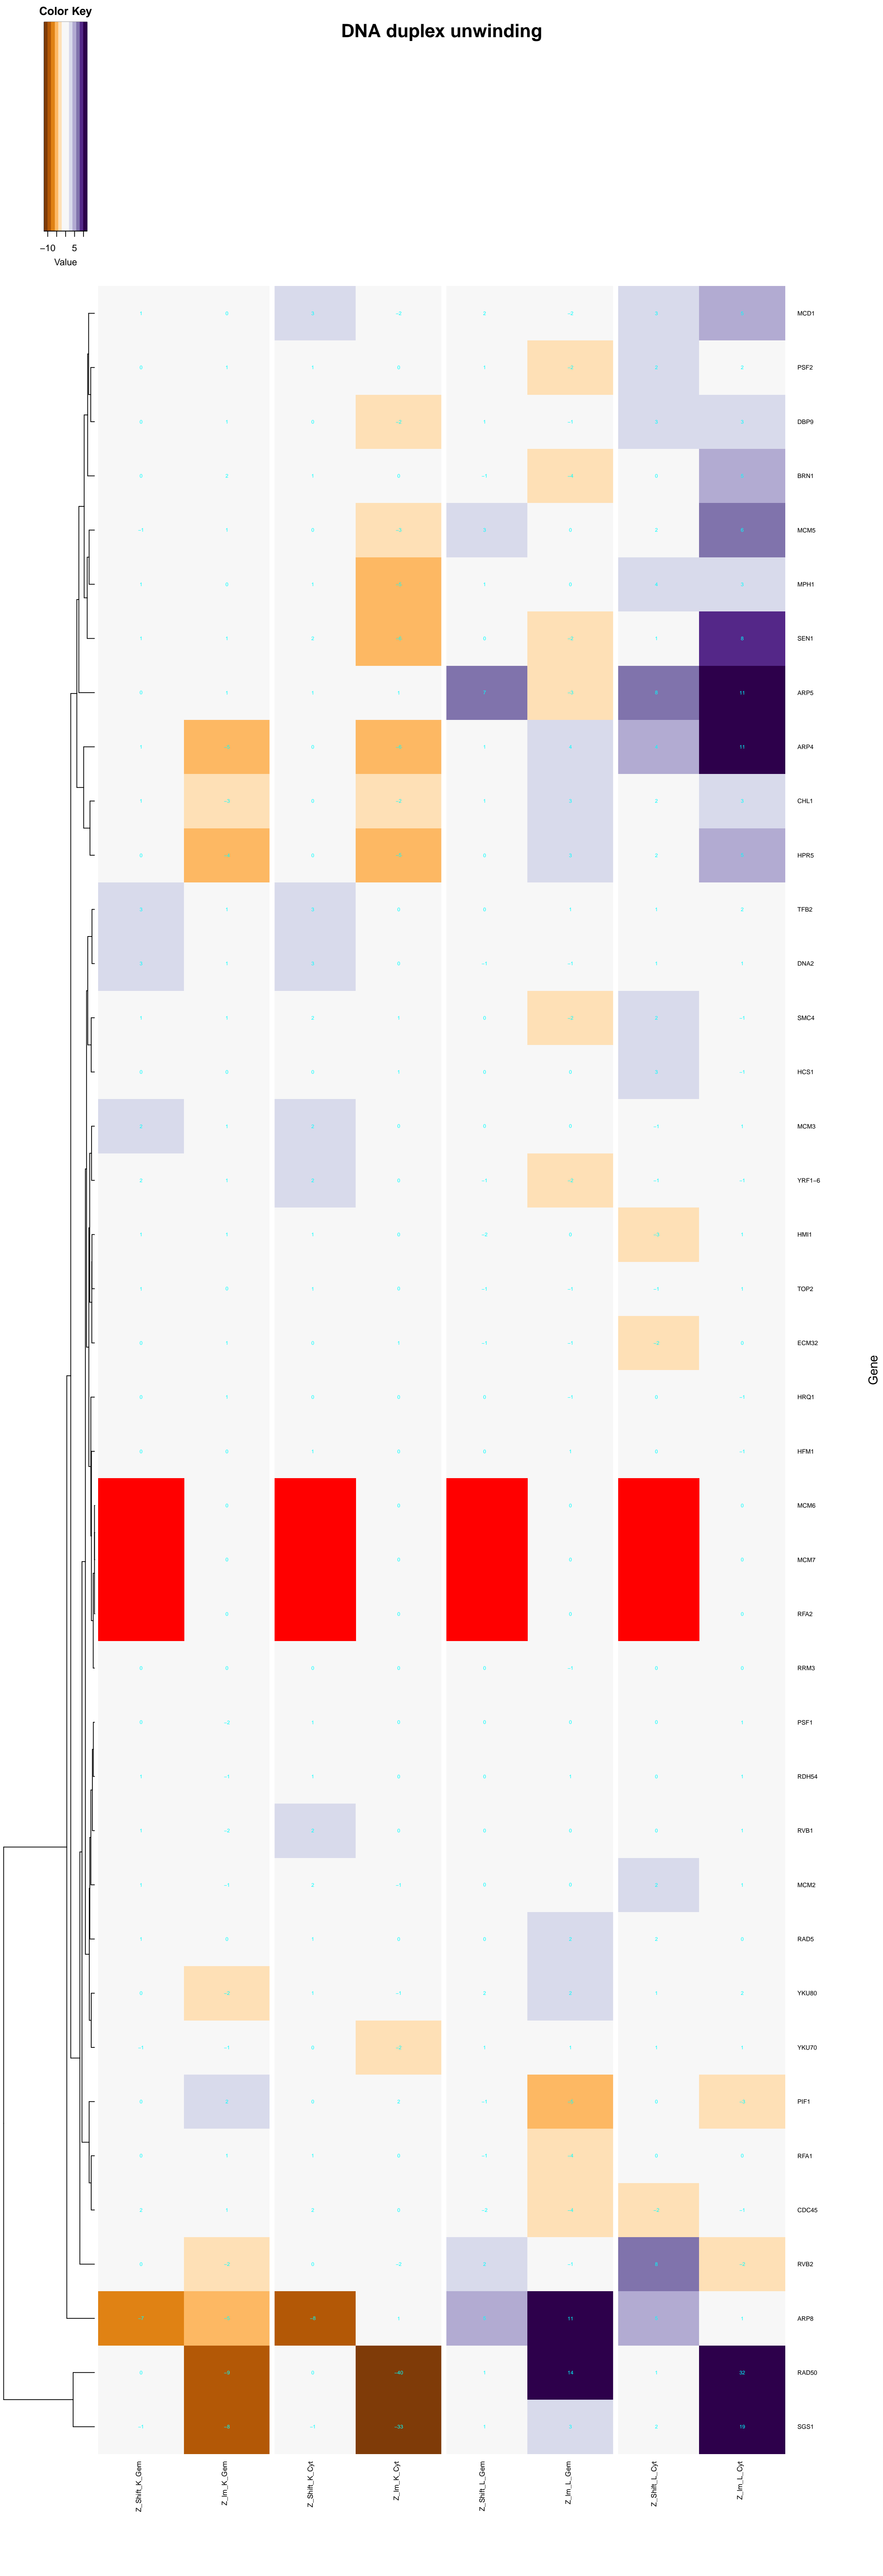

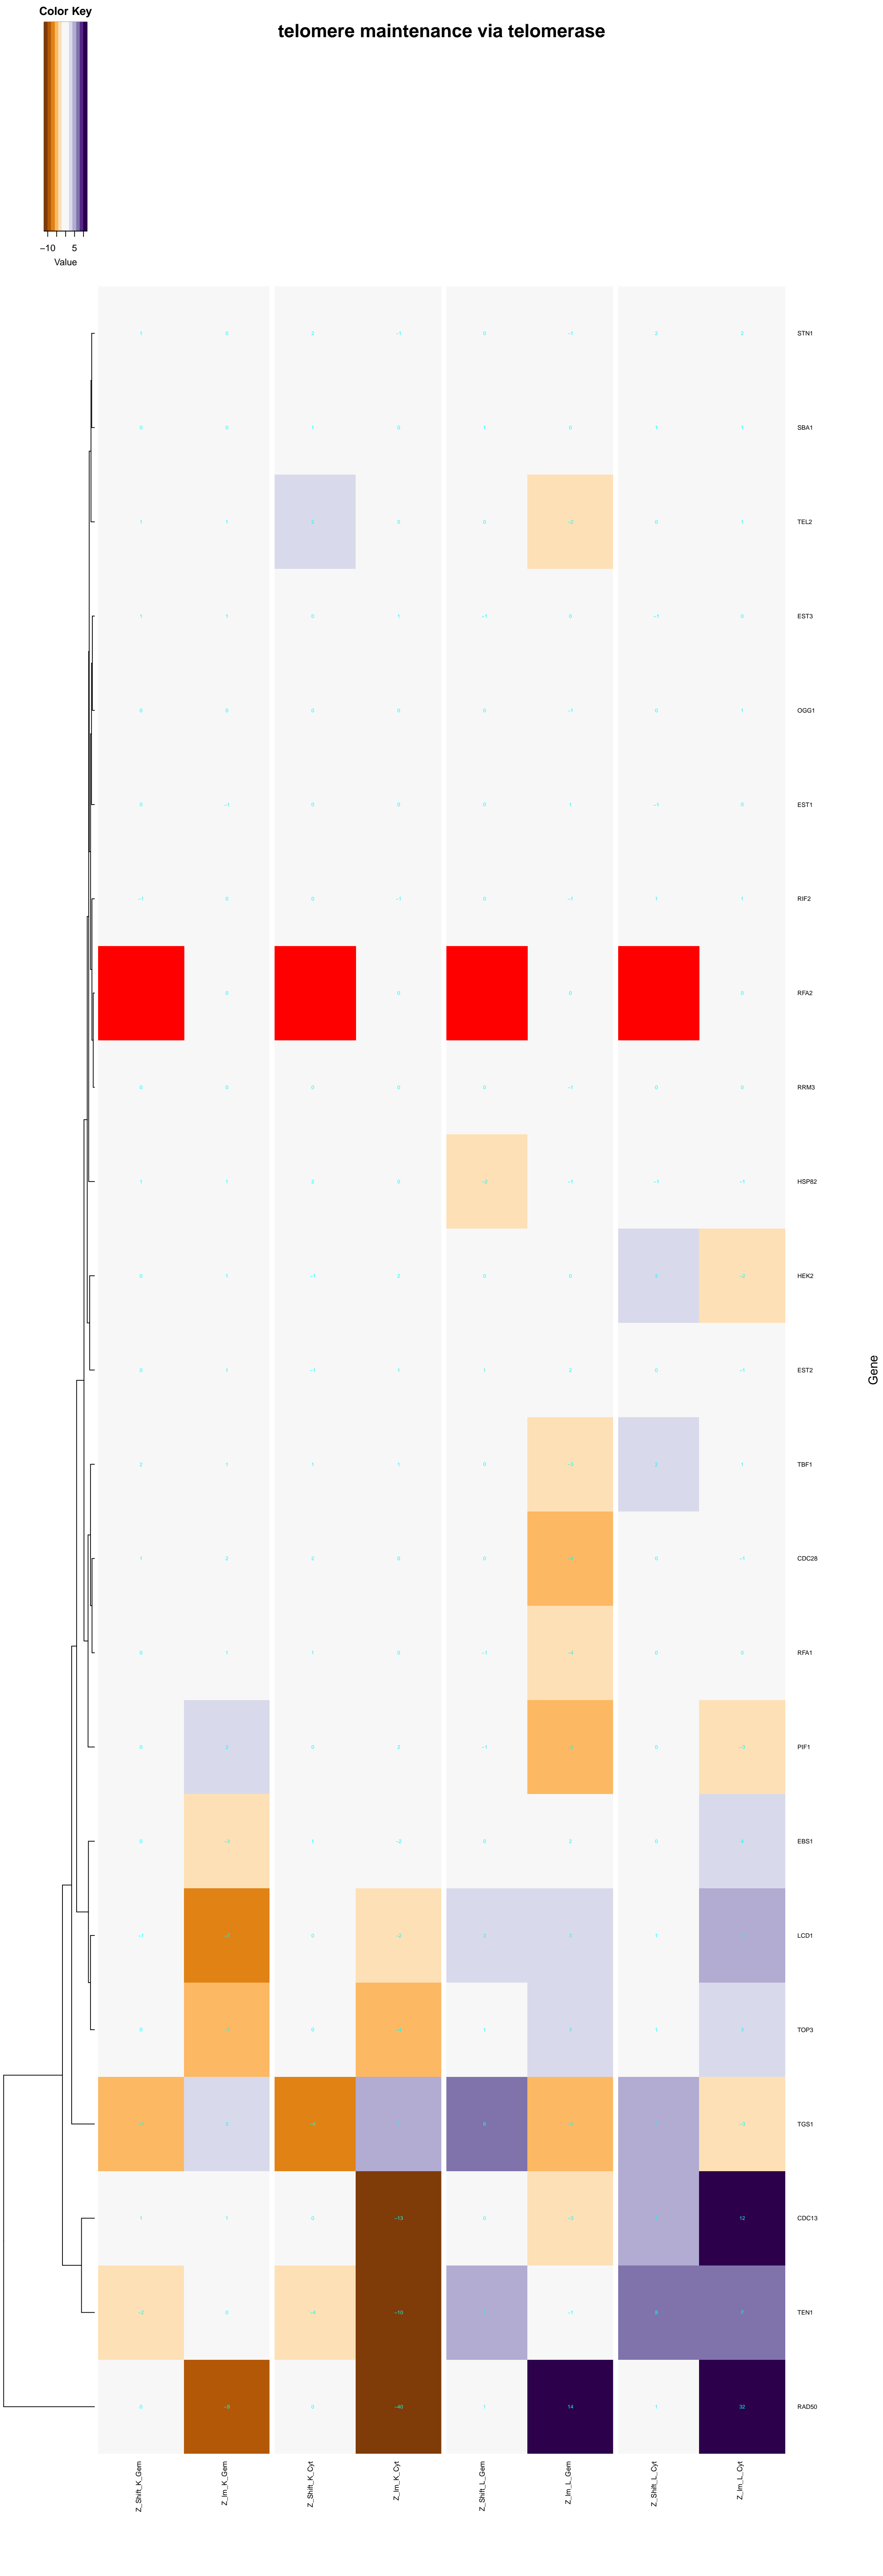

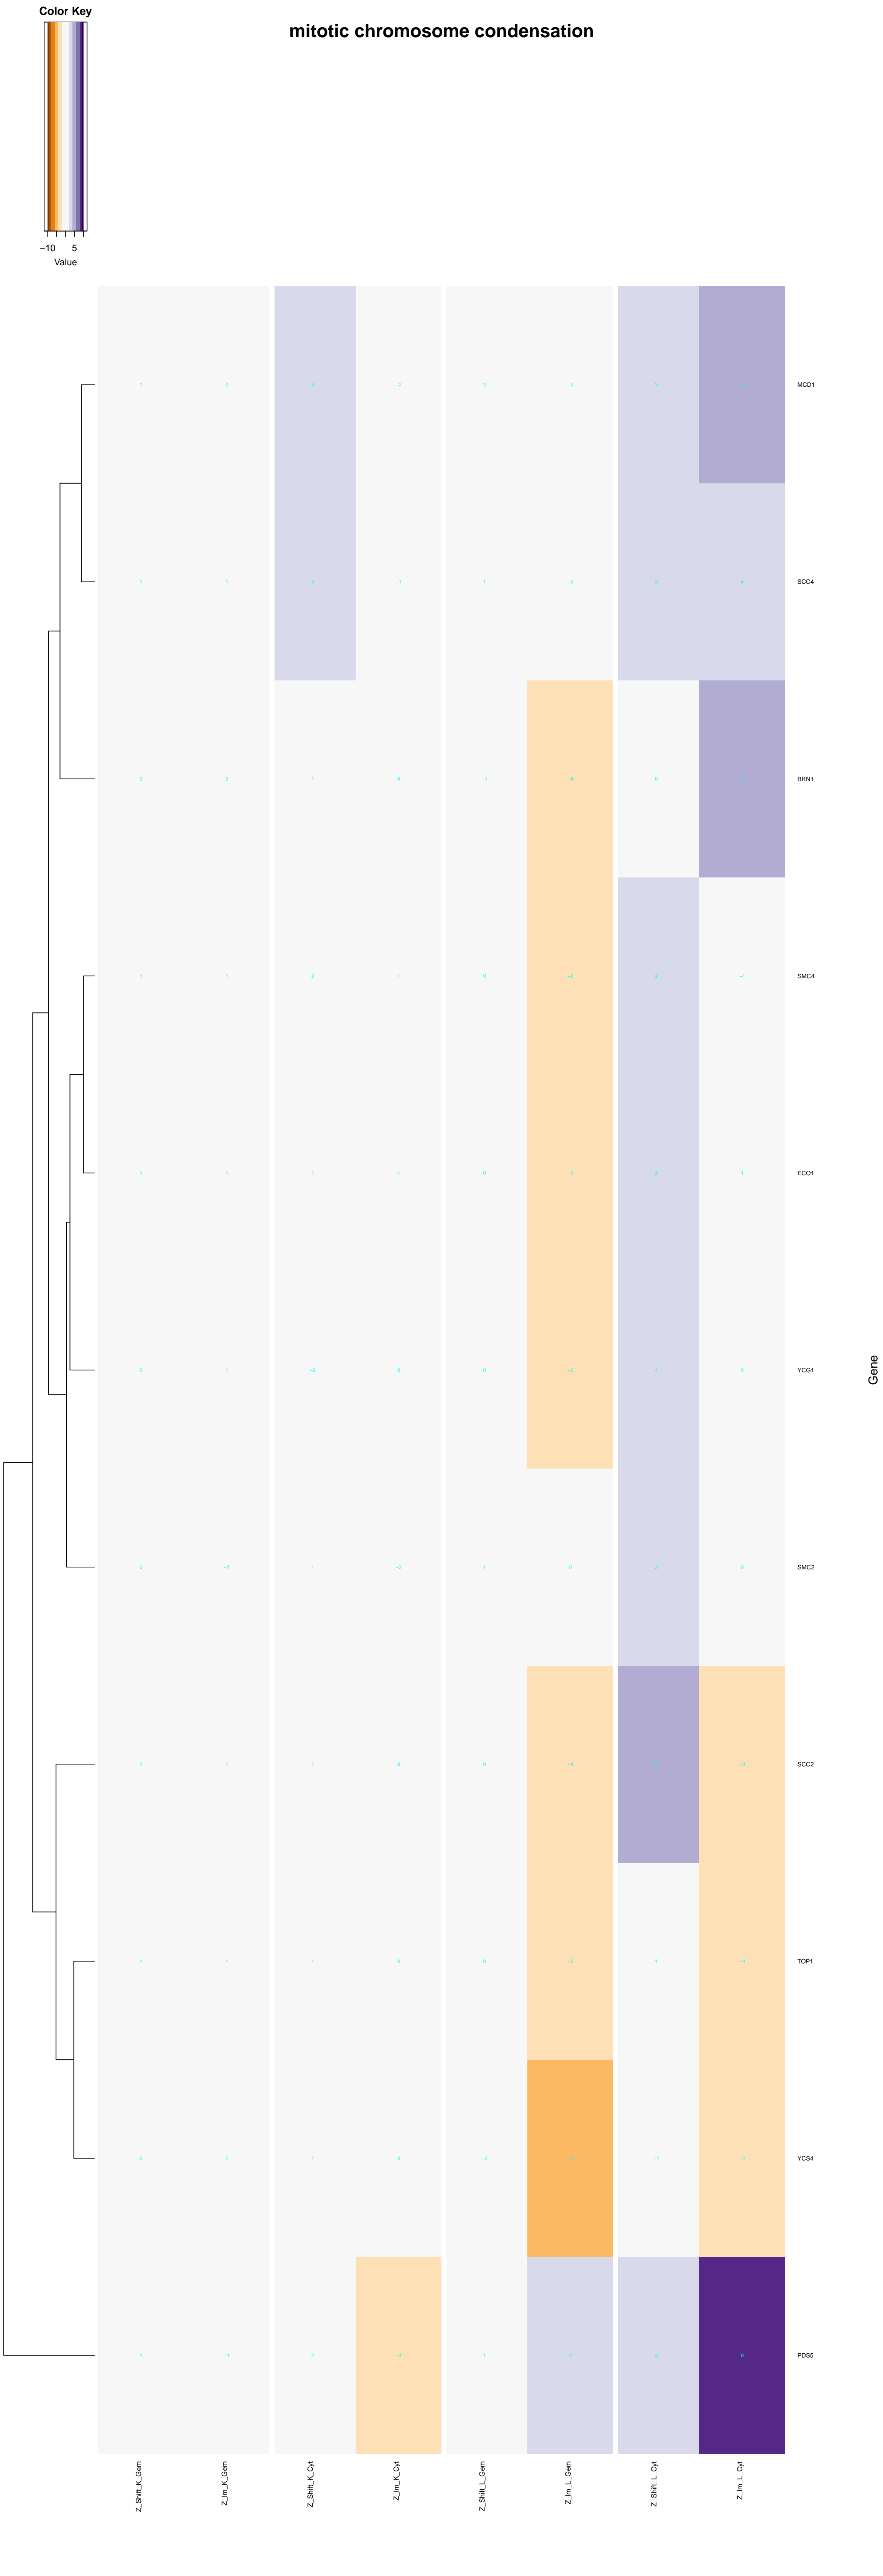



meiotic chromosome condensation





DNA unwinding involved in DNA replication

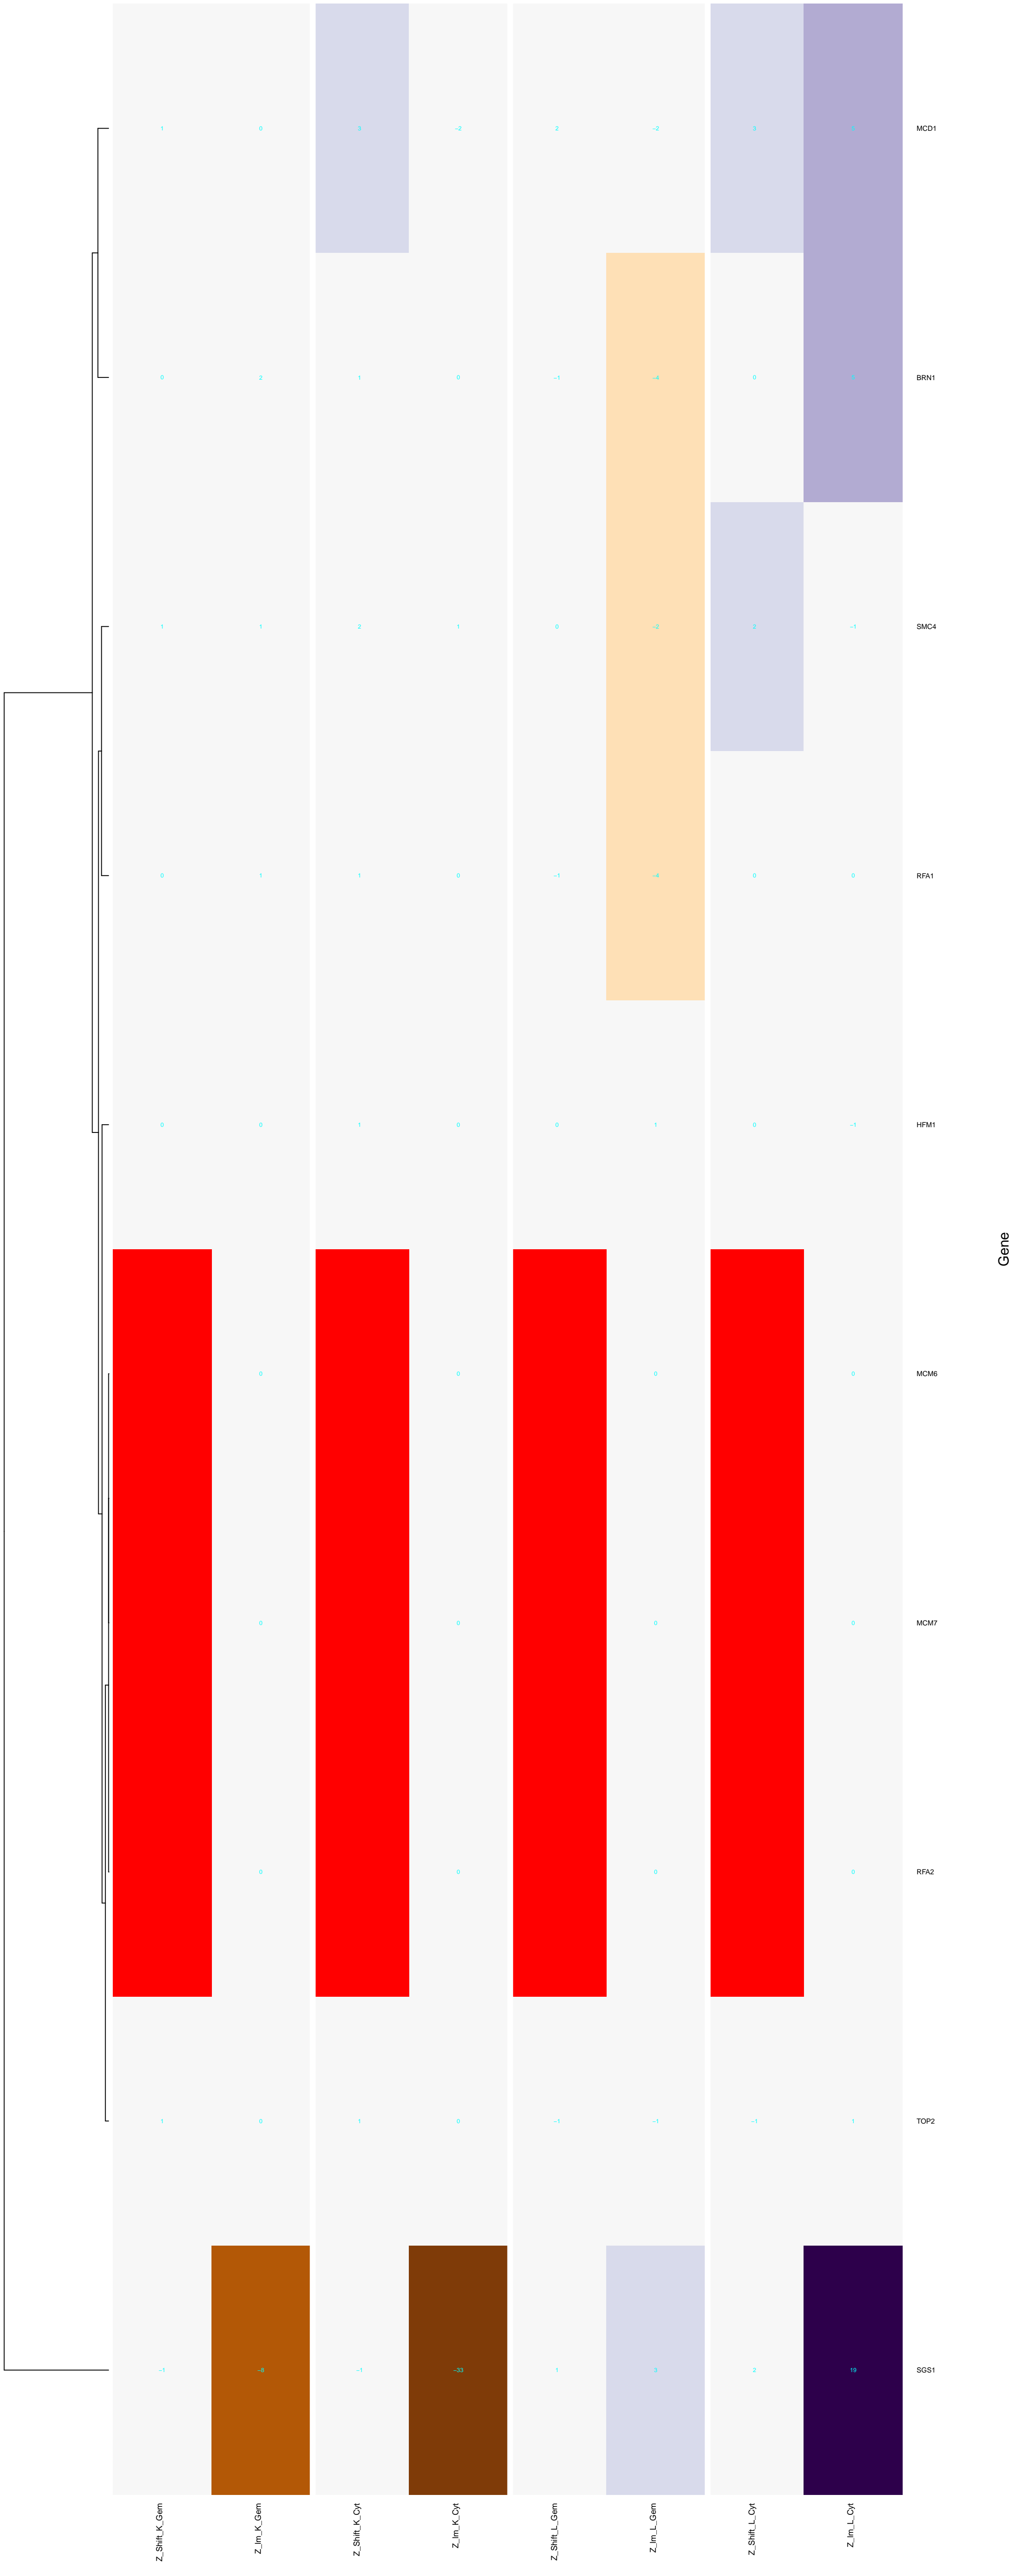

Supplement: s1 [file s1]
