# Supplementary material for: A Humanized Yeast Phenomic Model of Deoxycytidine Kinase to Predict Genetic Buffering of Nucleoside Analog Cytotoxicity
Source: MDPI journal article supplement (doi:10.3390/genes10100770), 2019-09-30

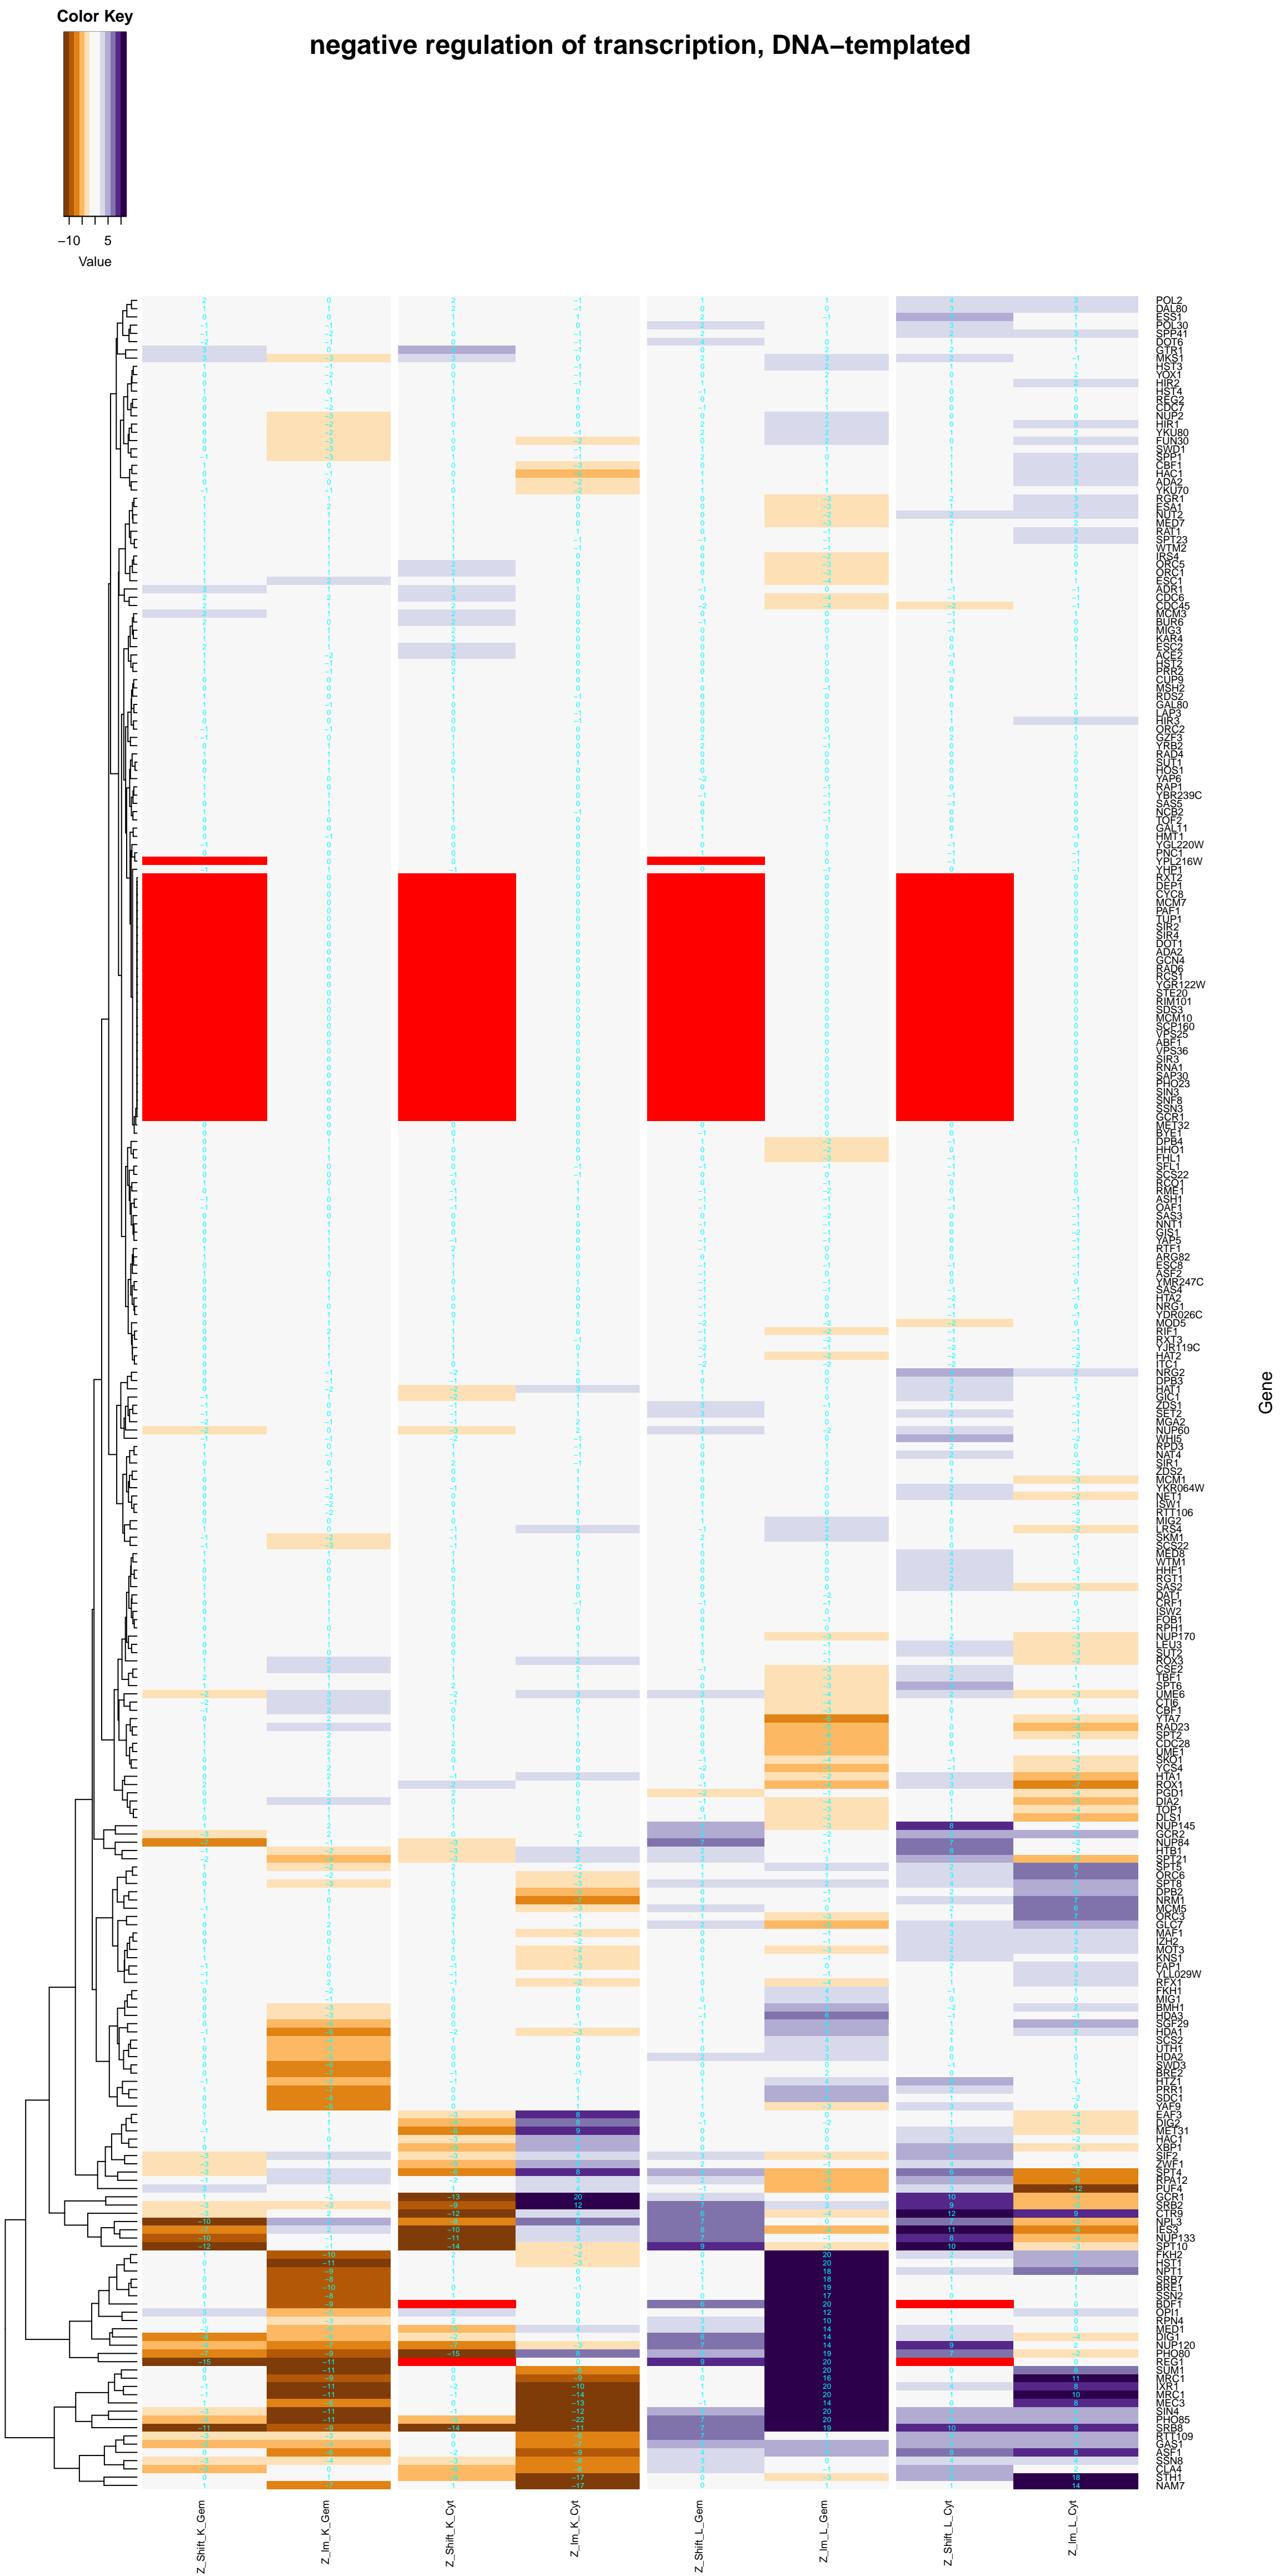

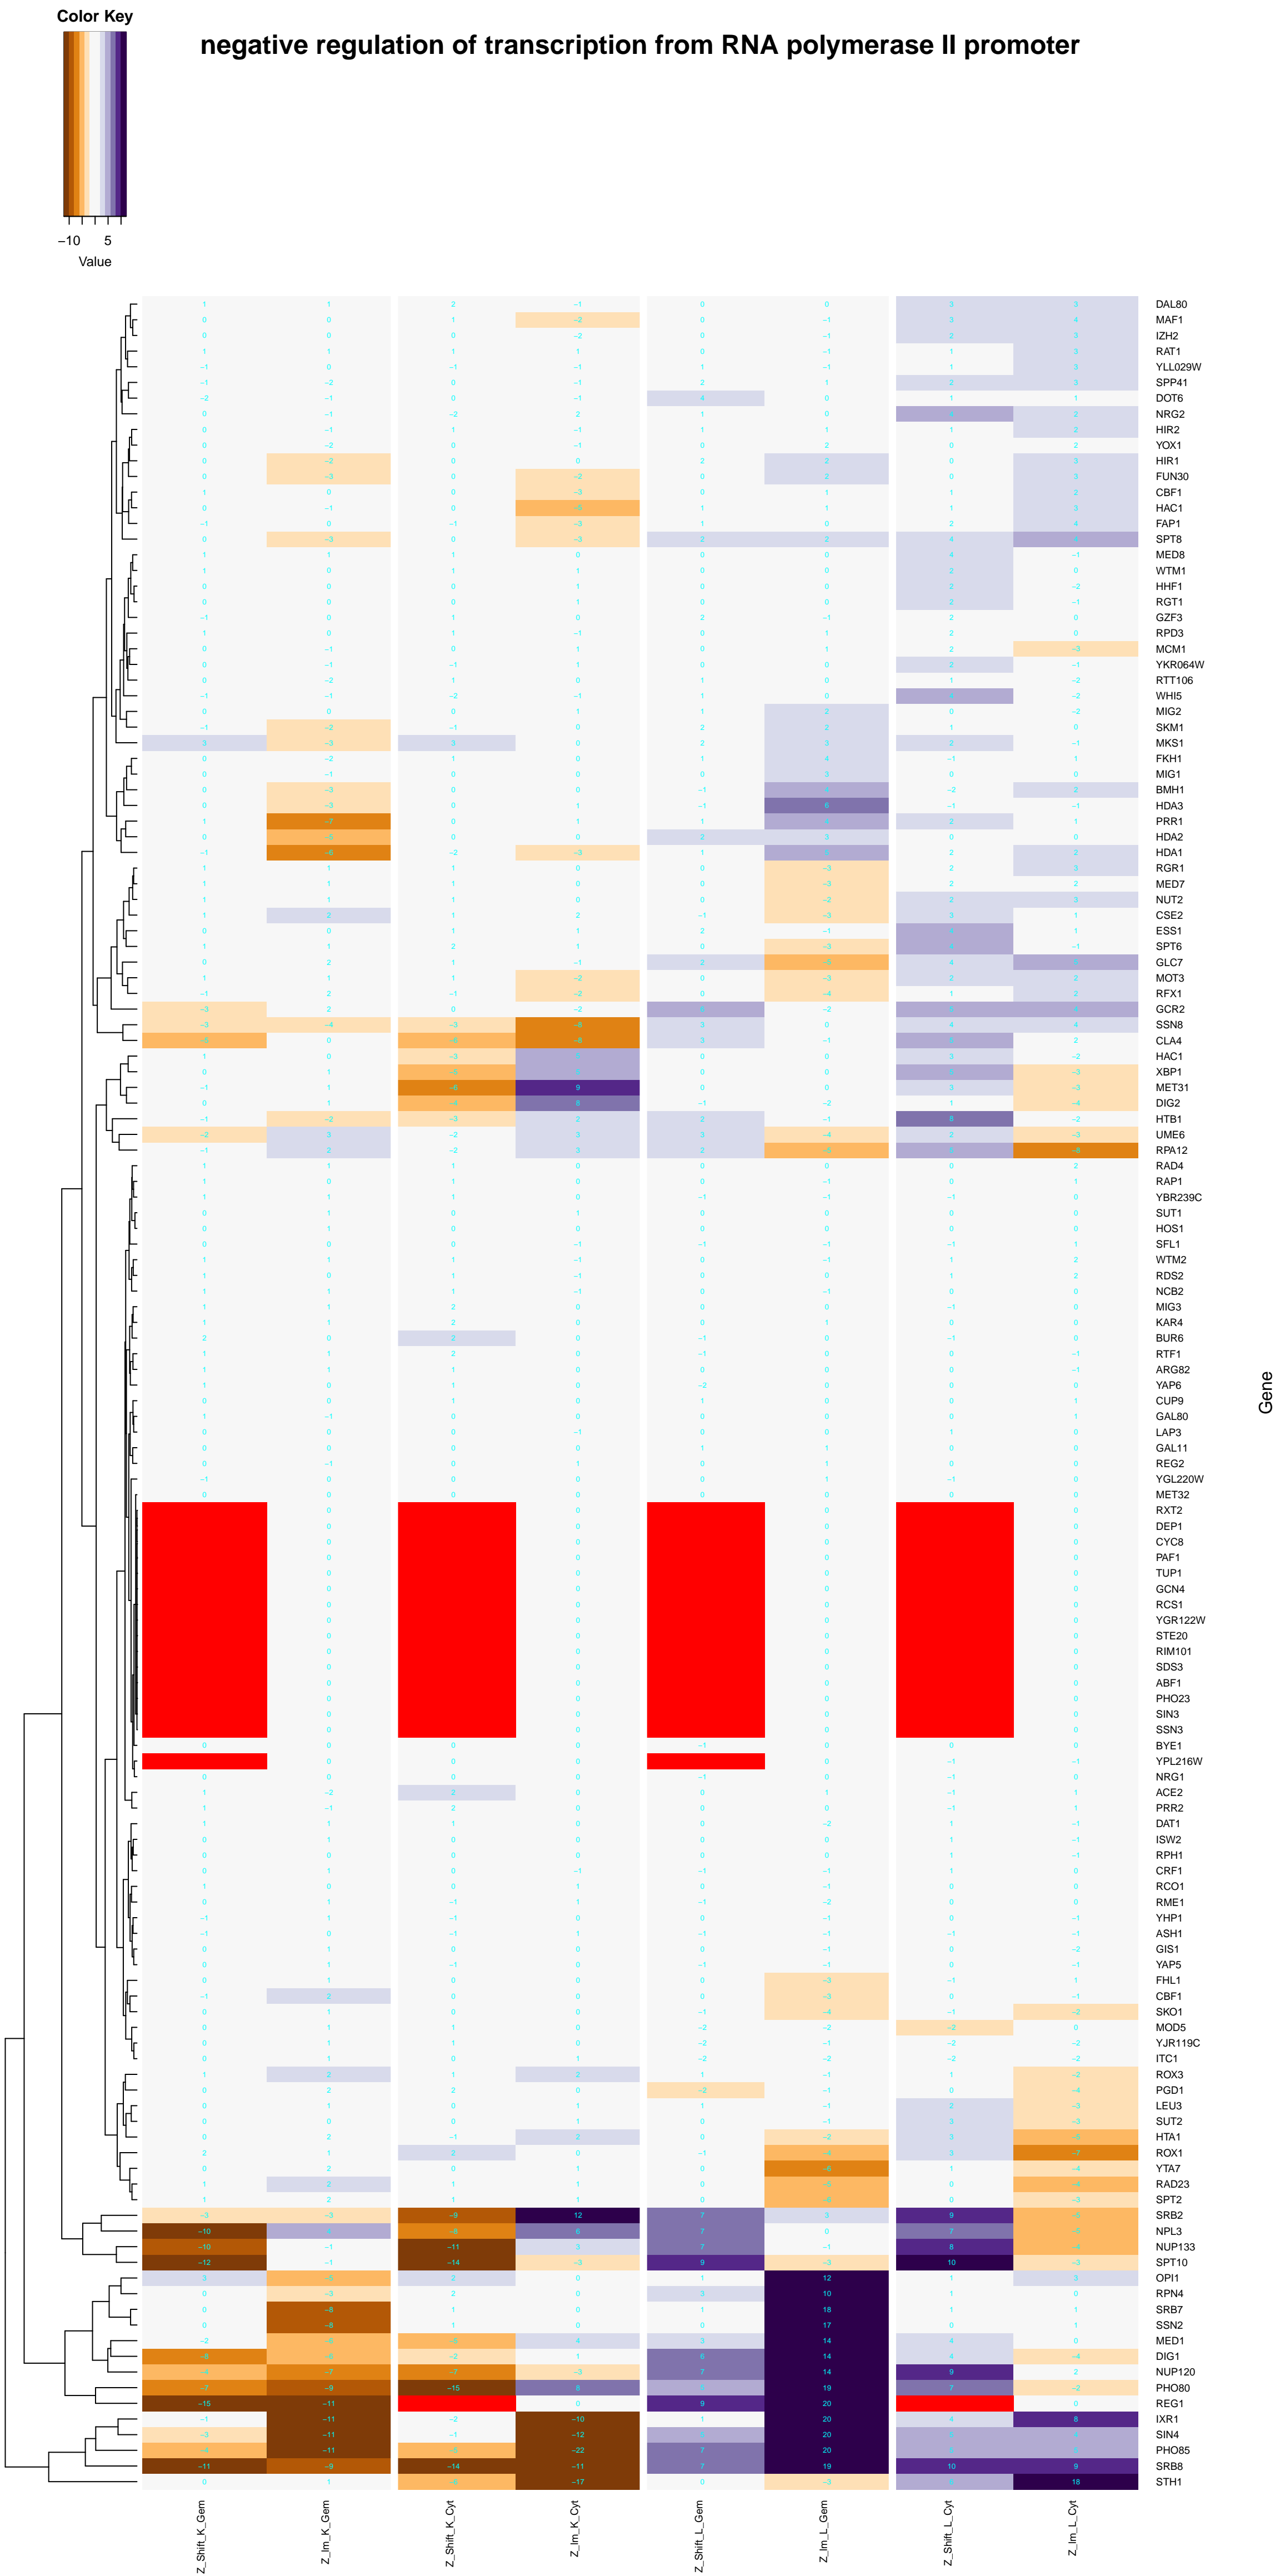

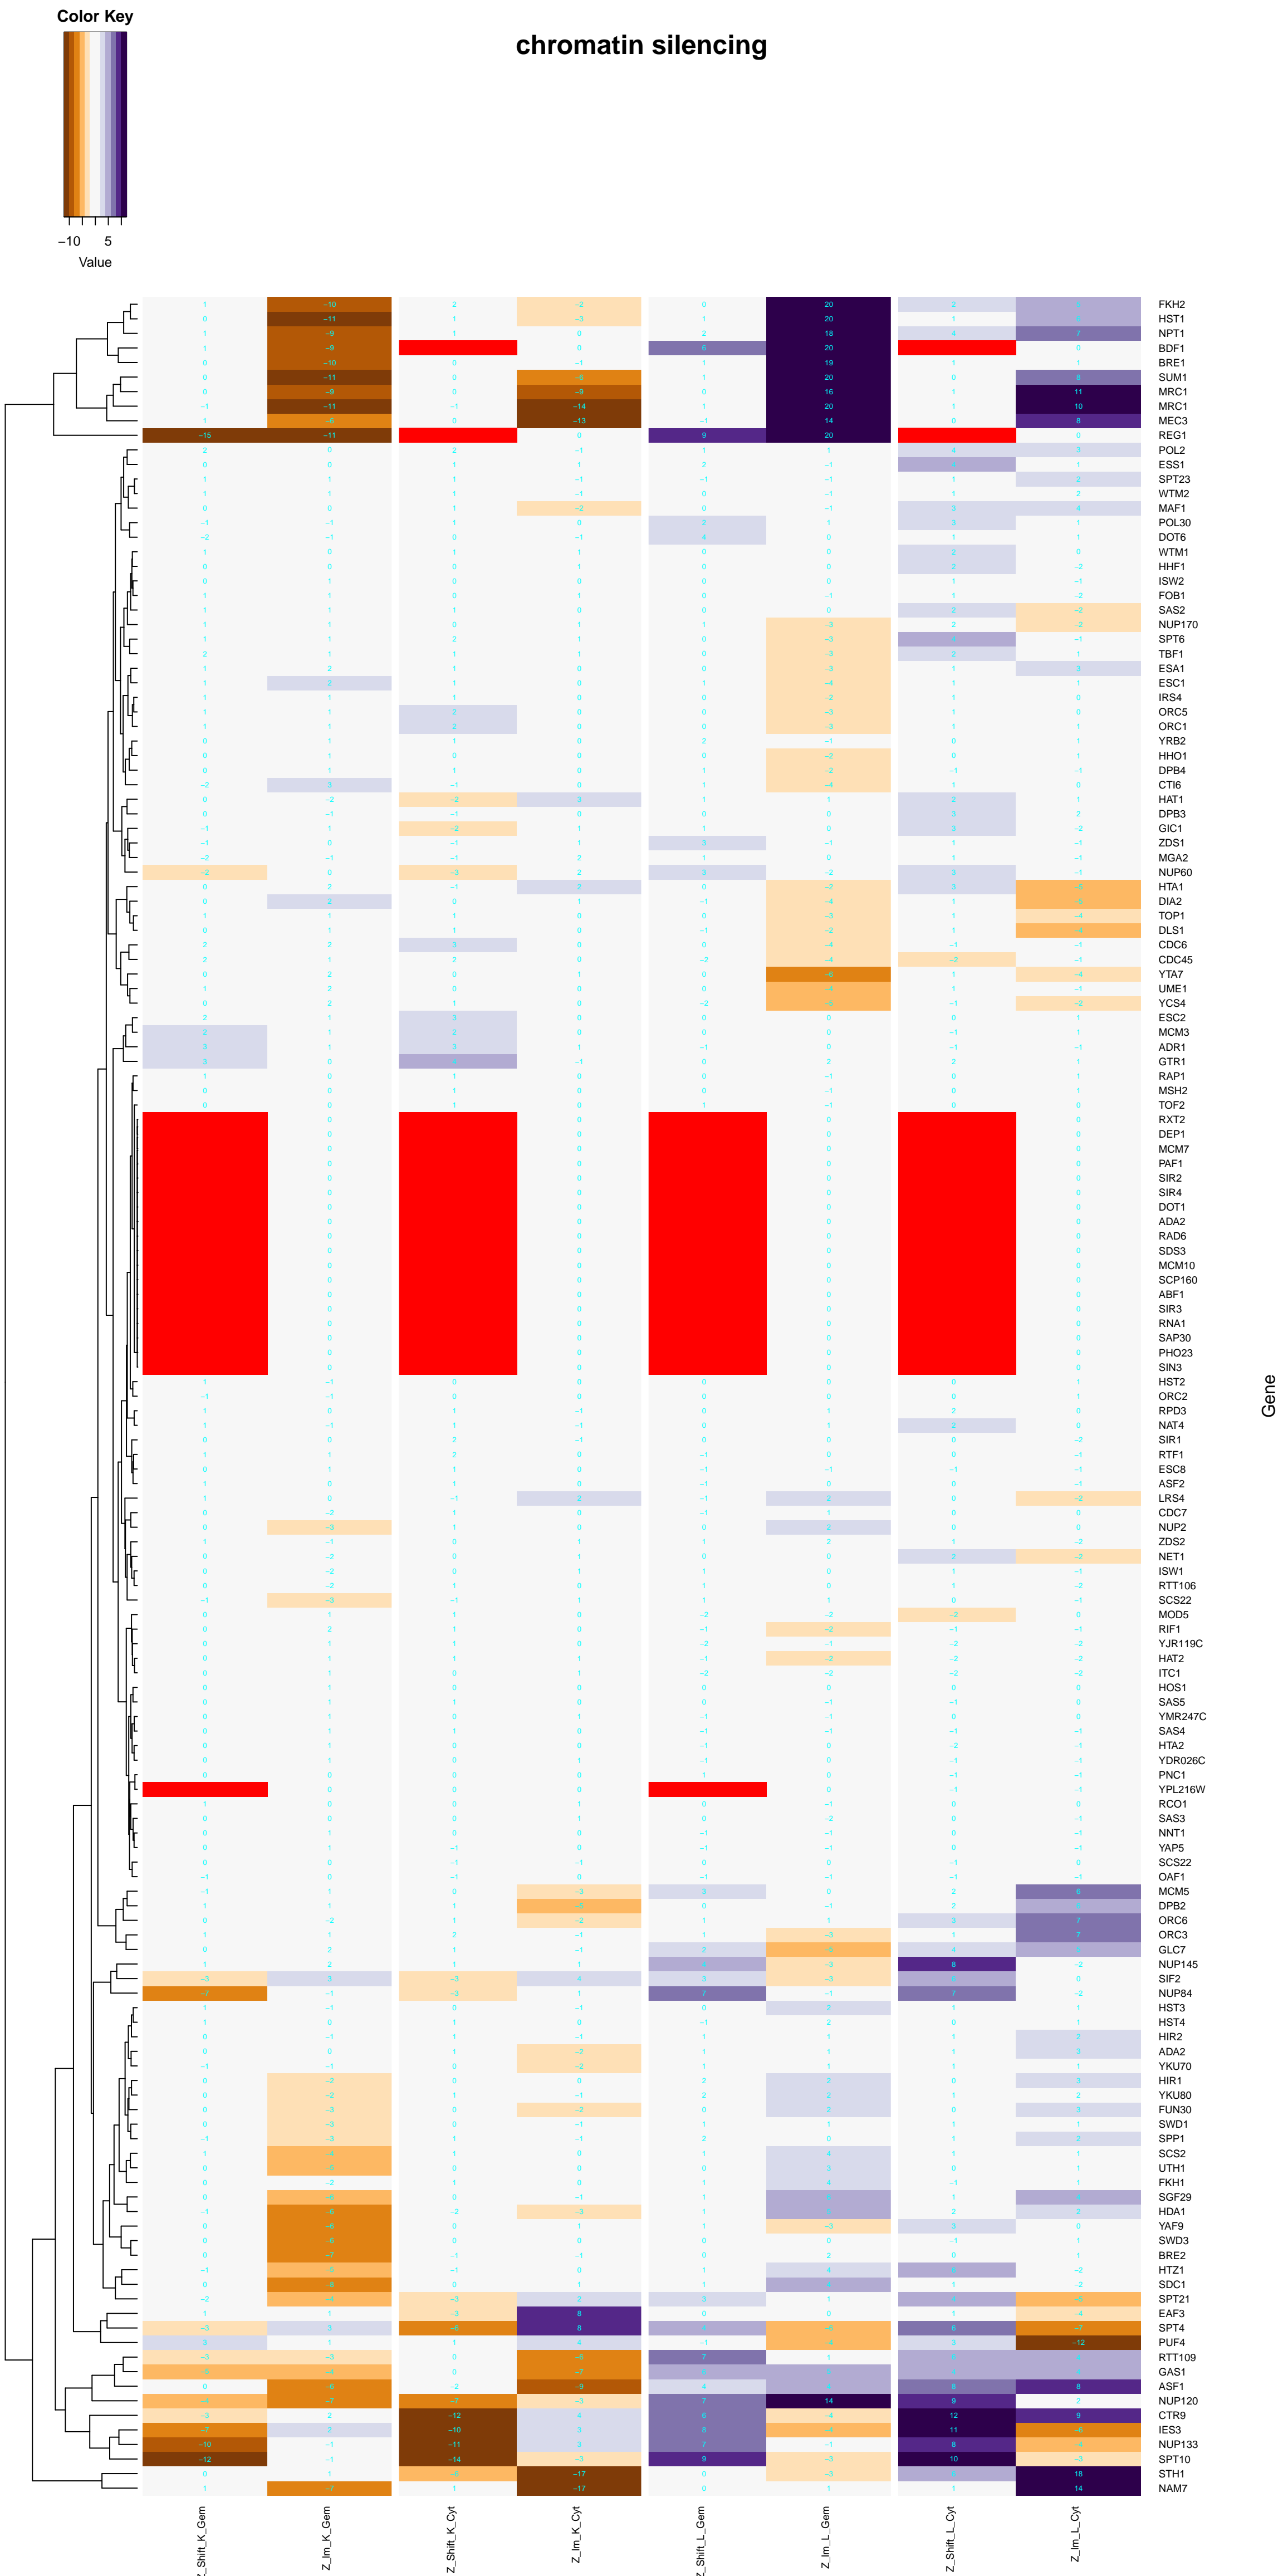

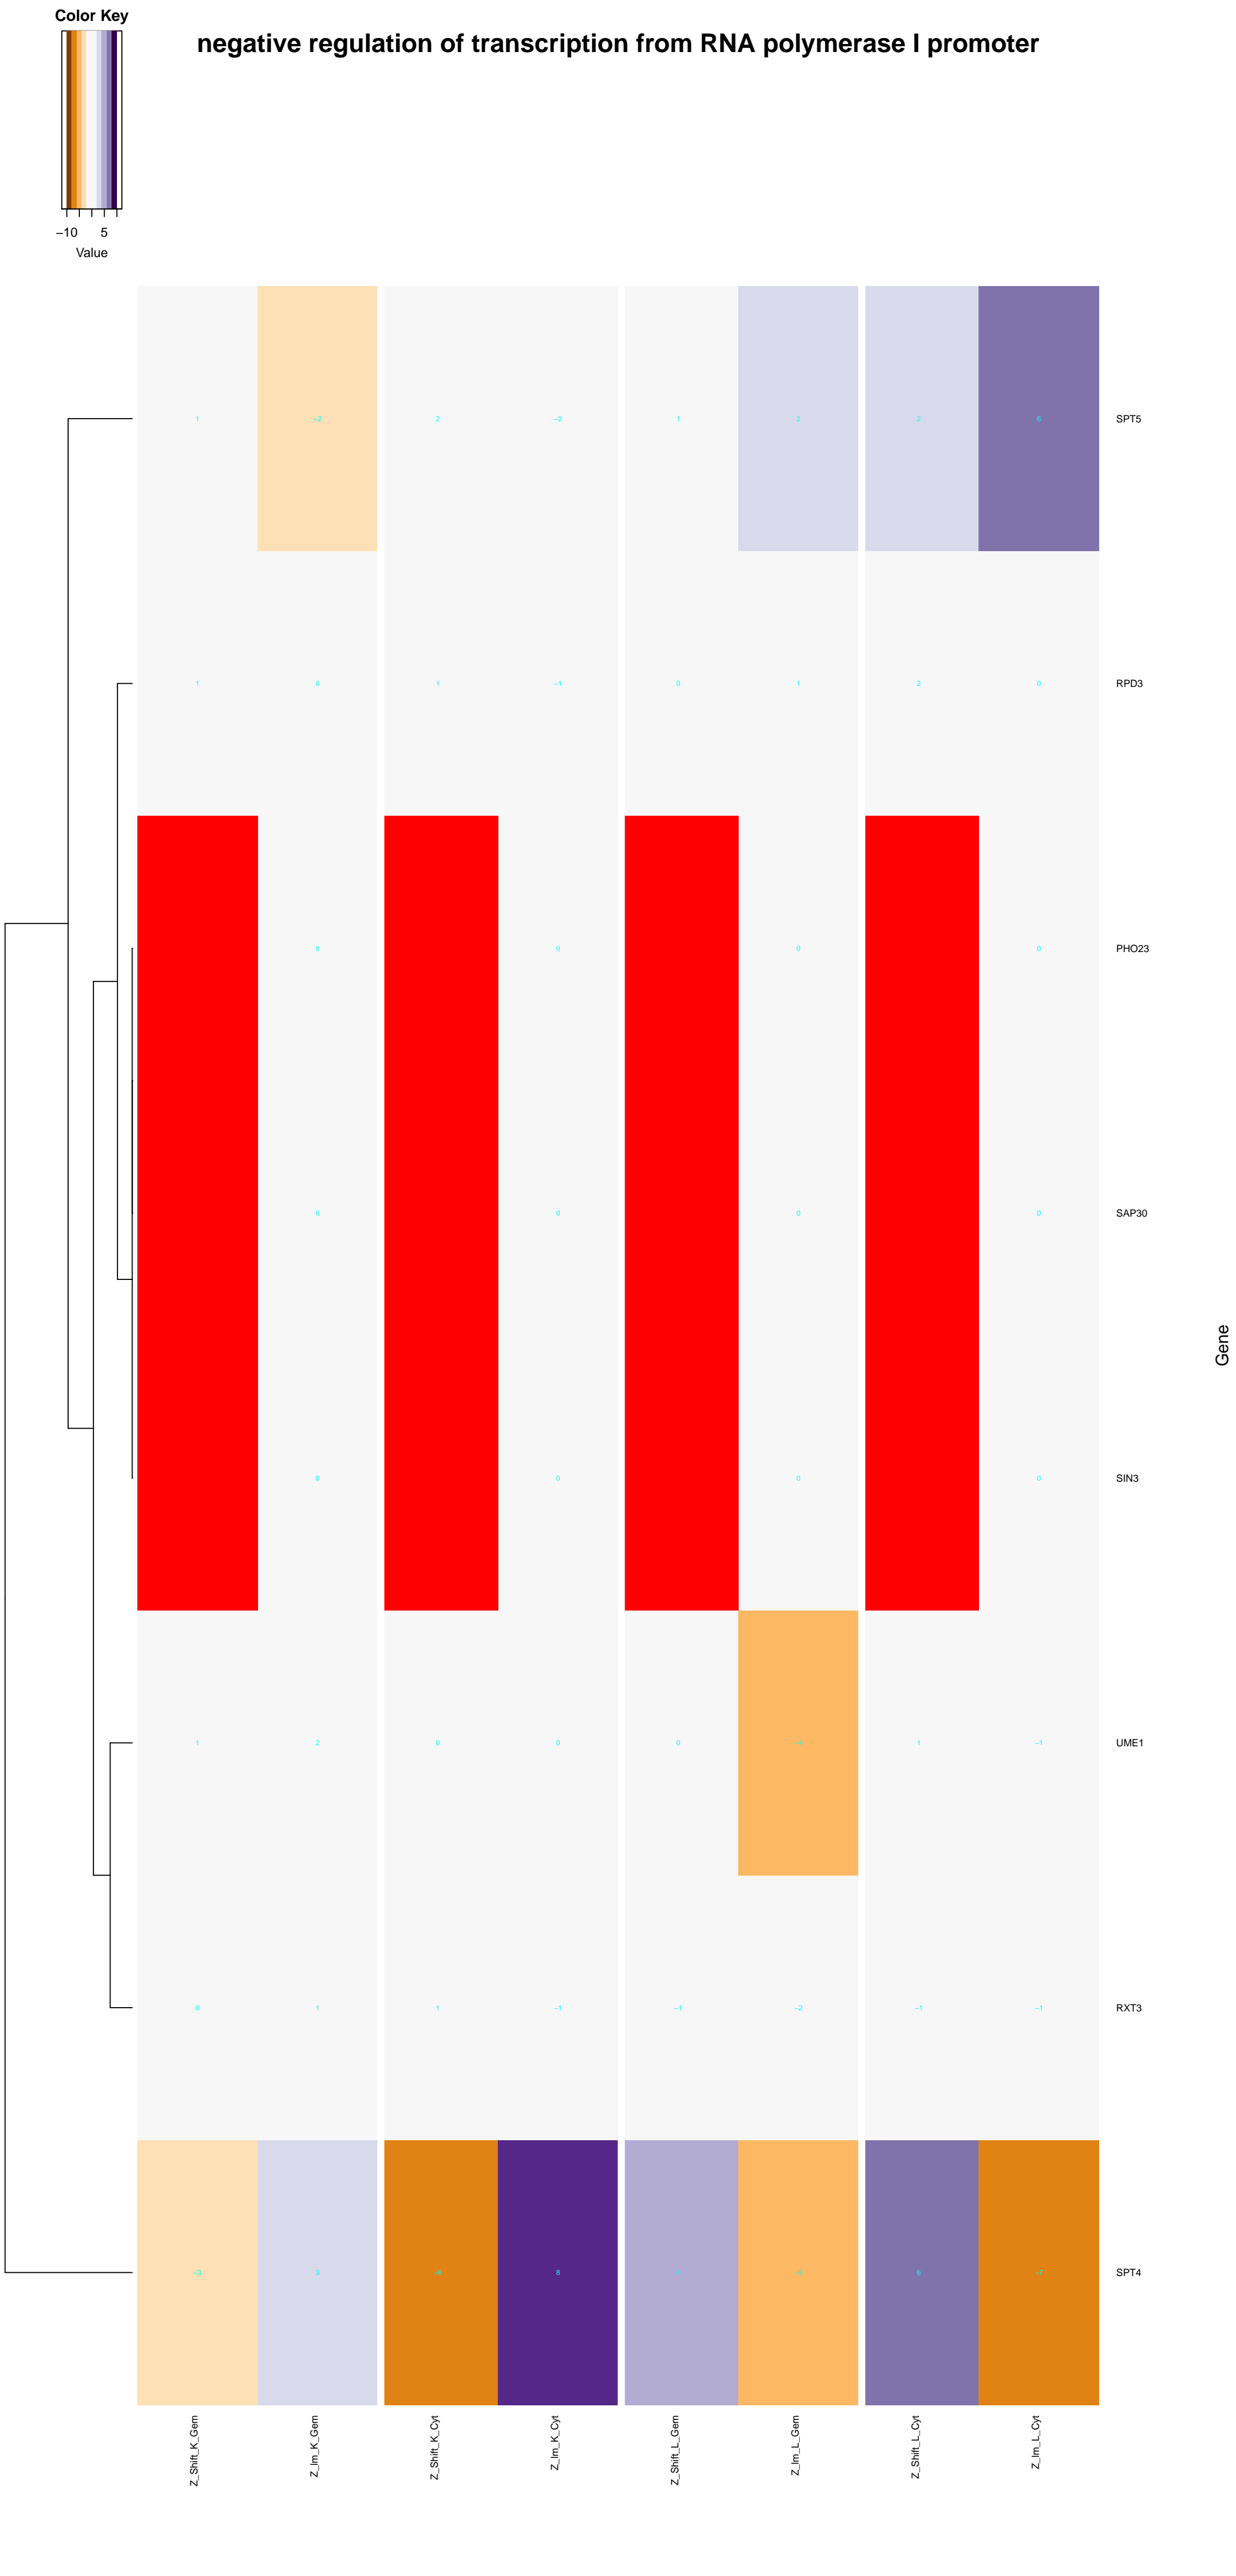

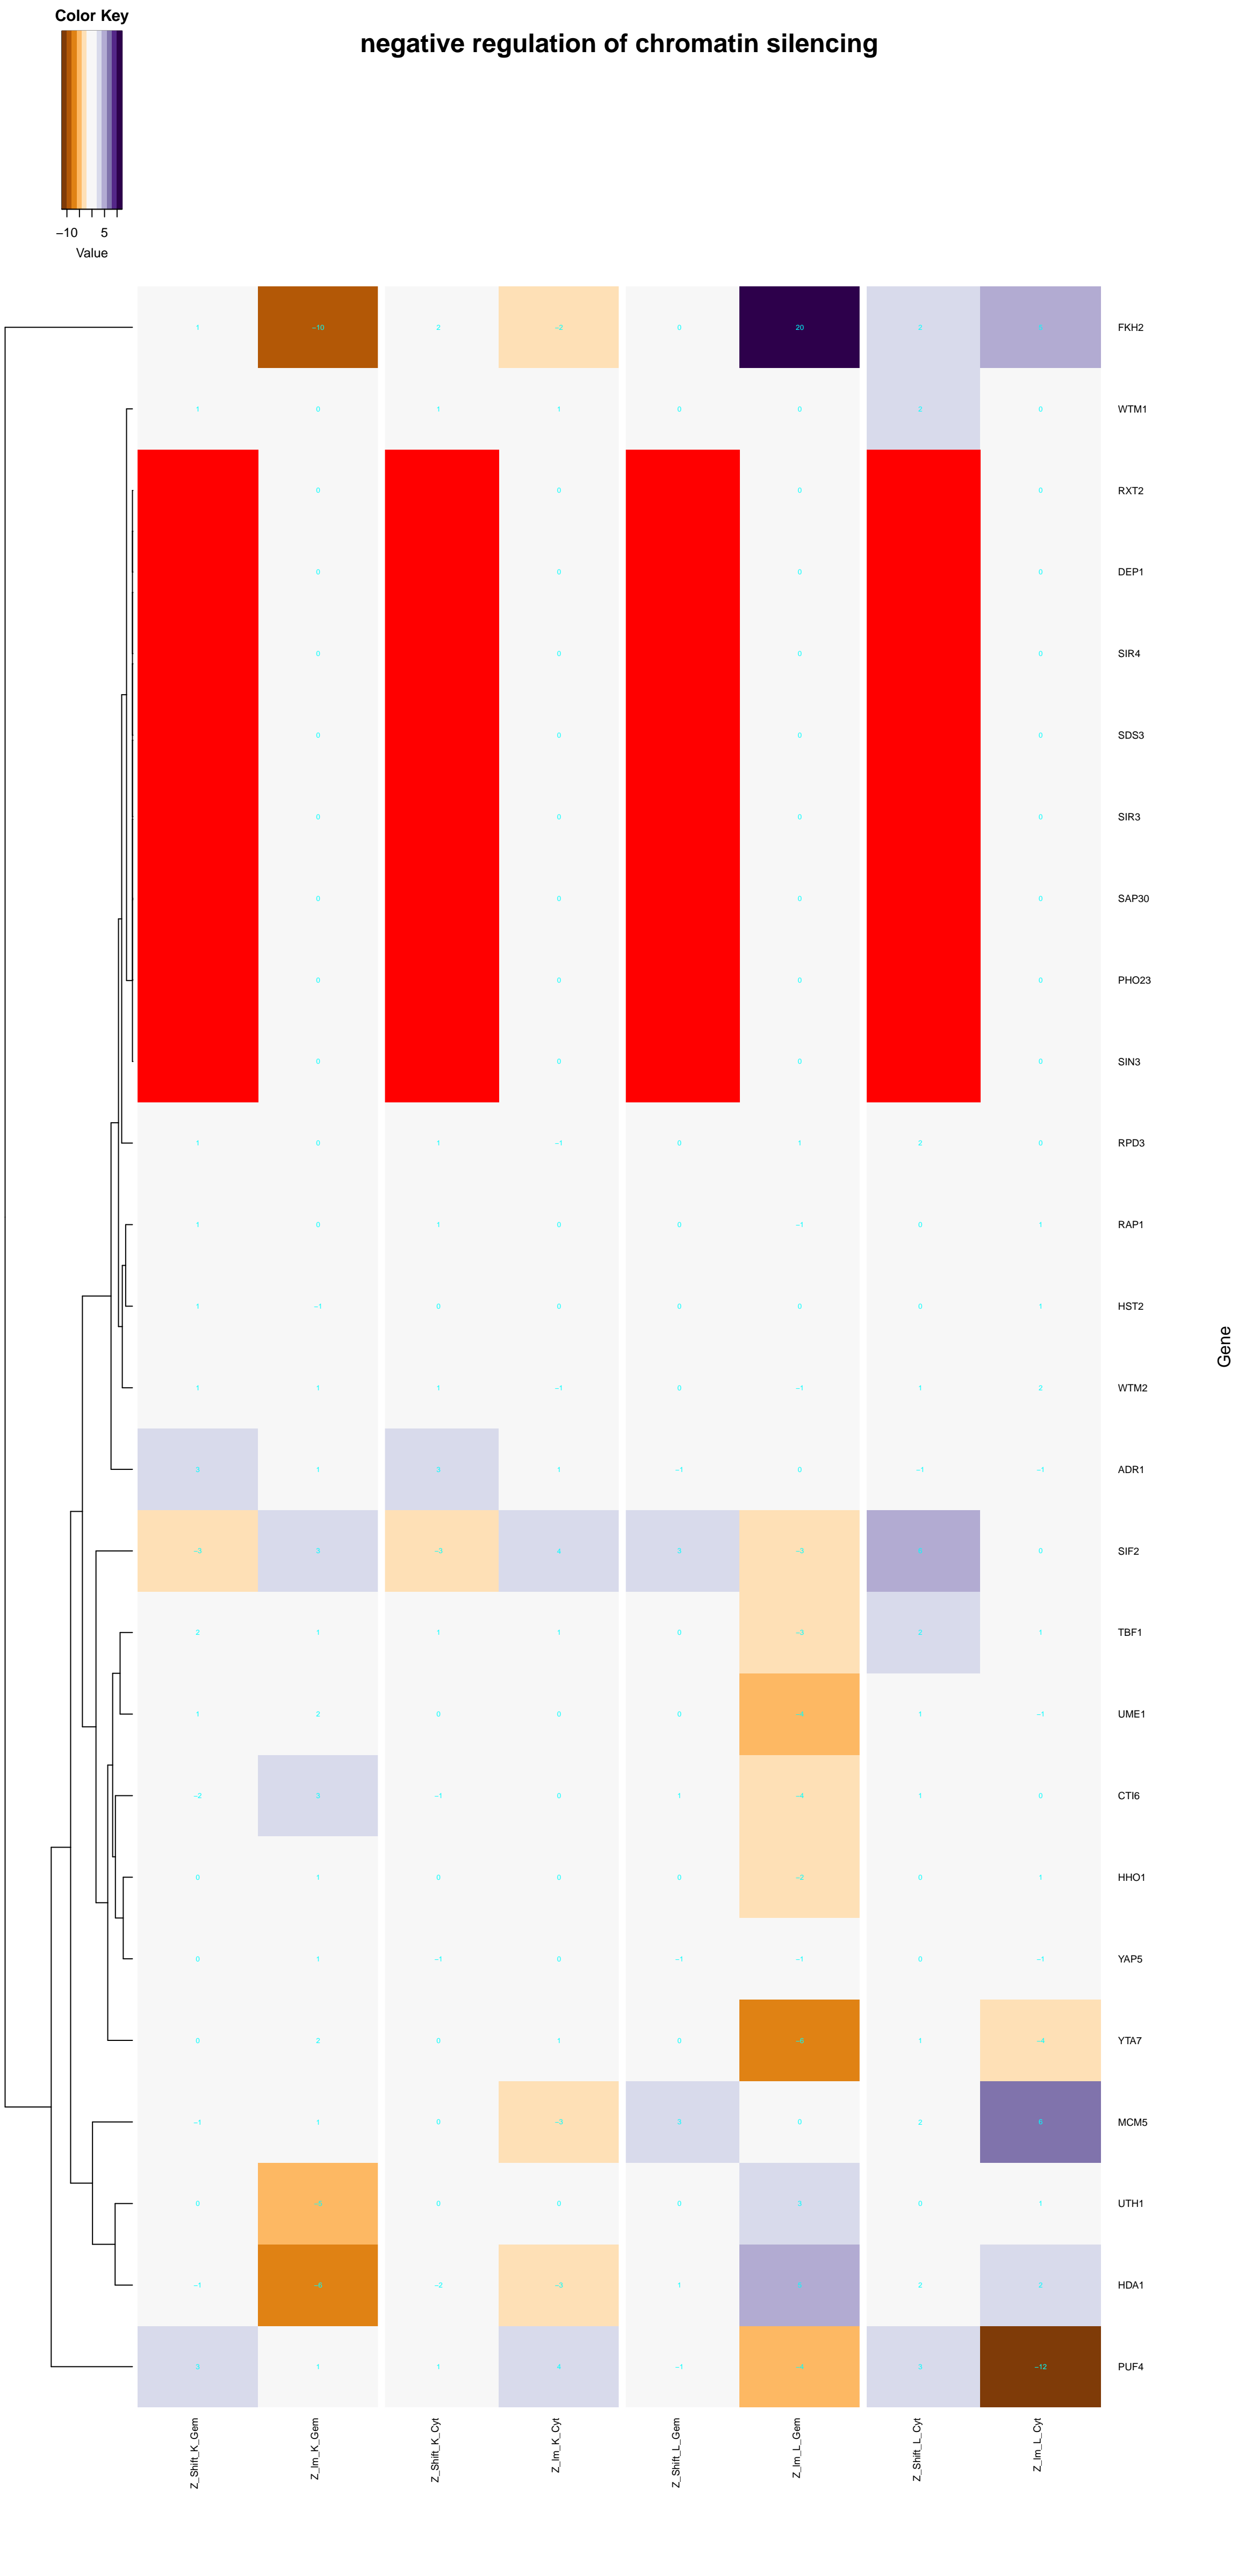

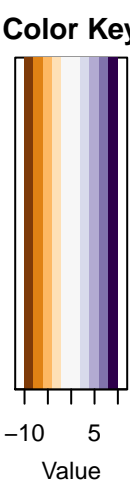

negative regulation of DNA-templated transcription, elongation

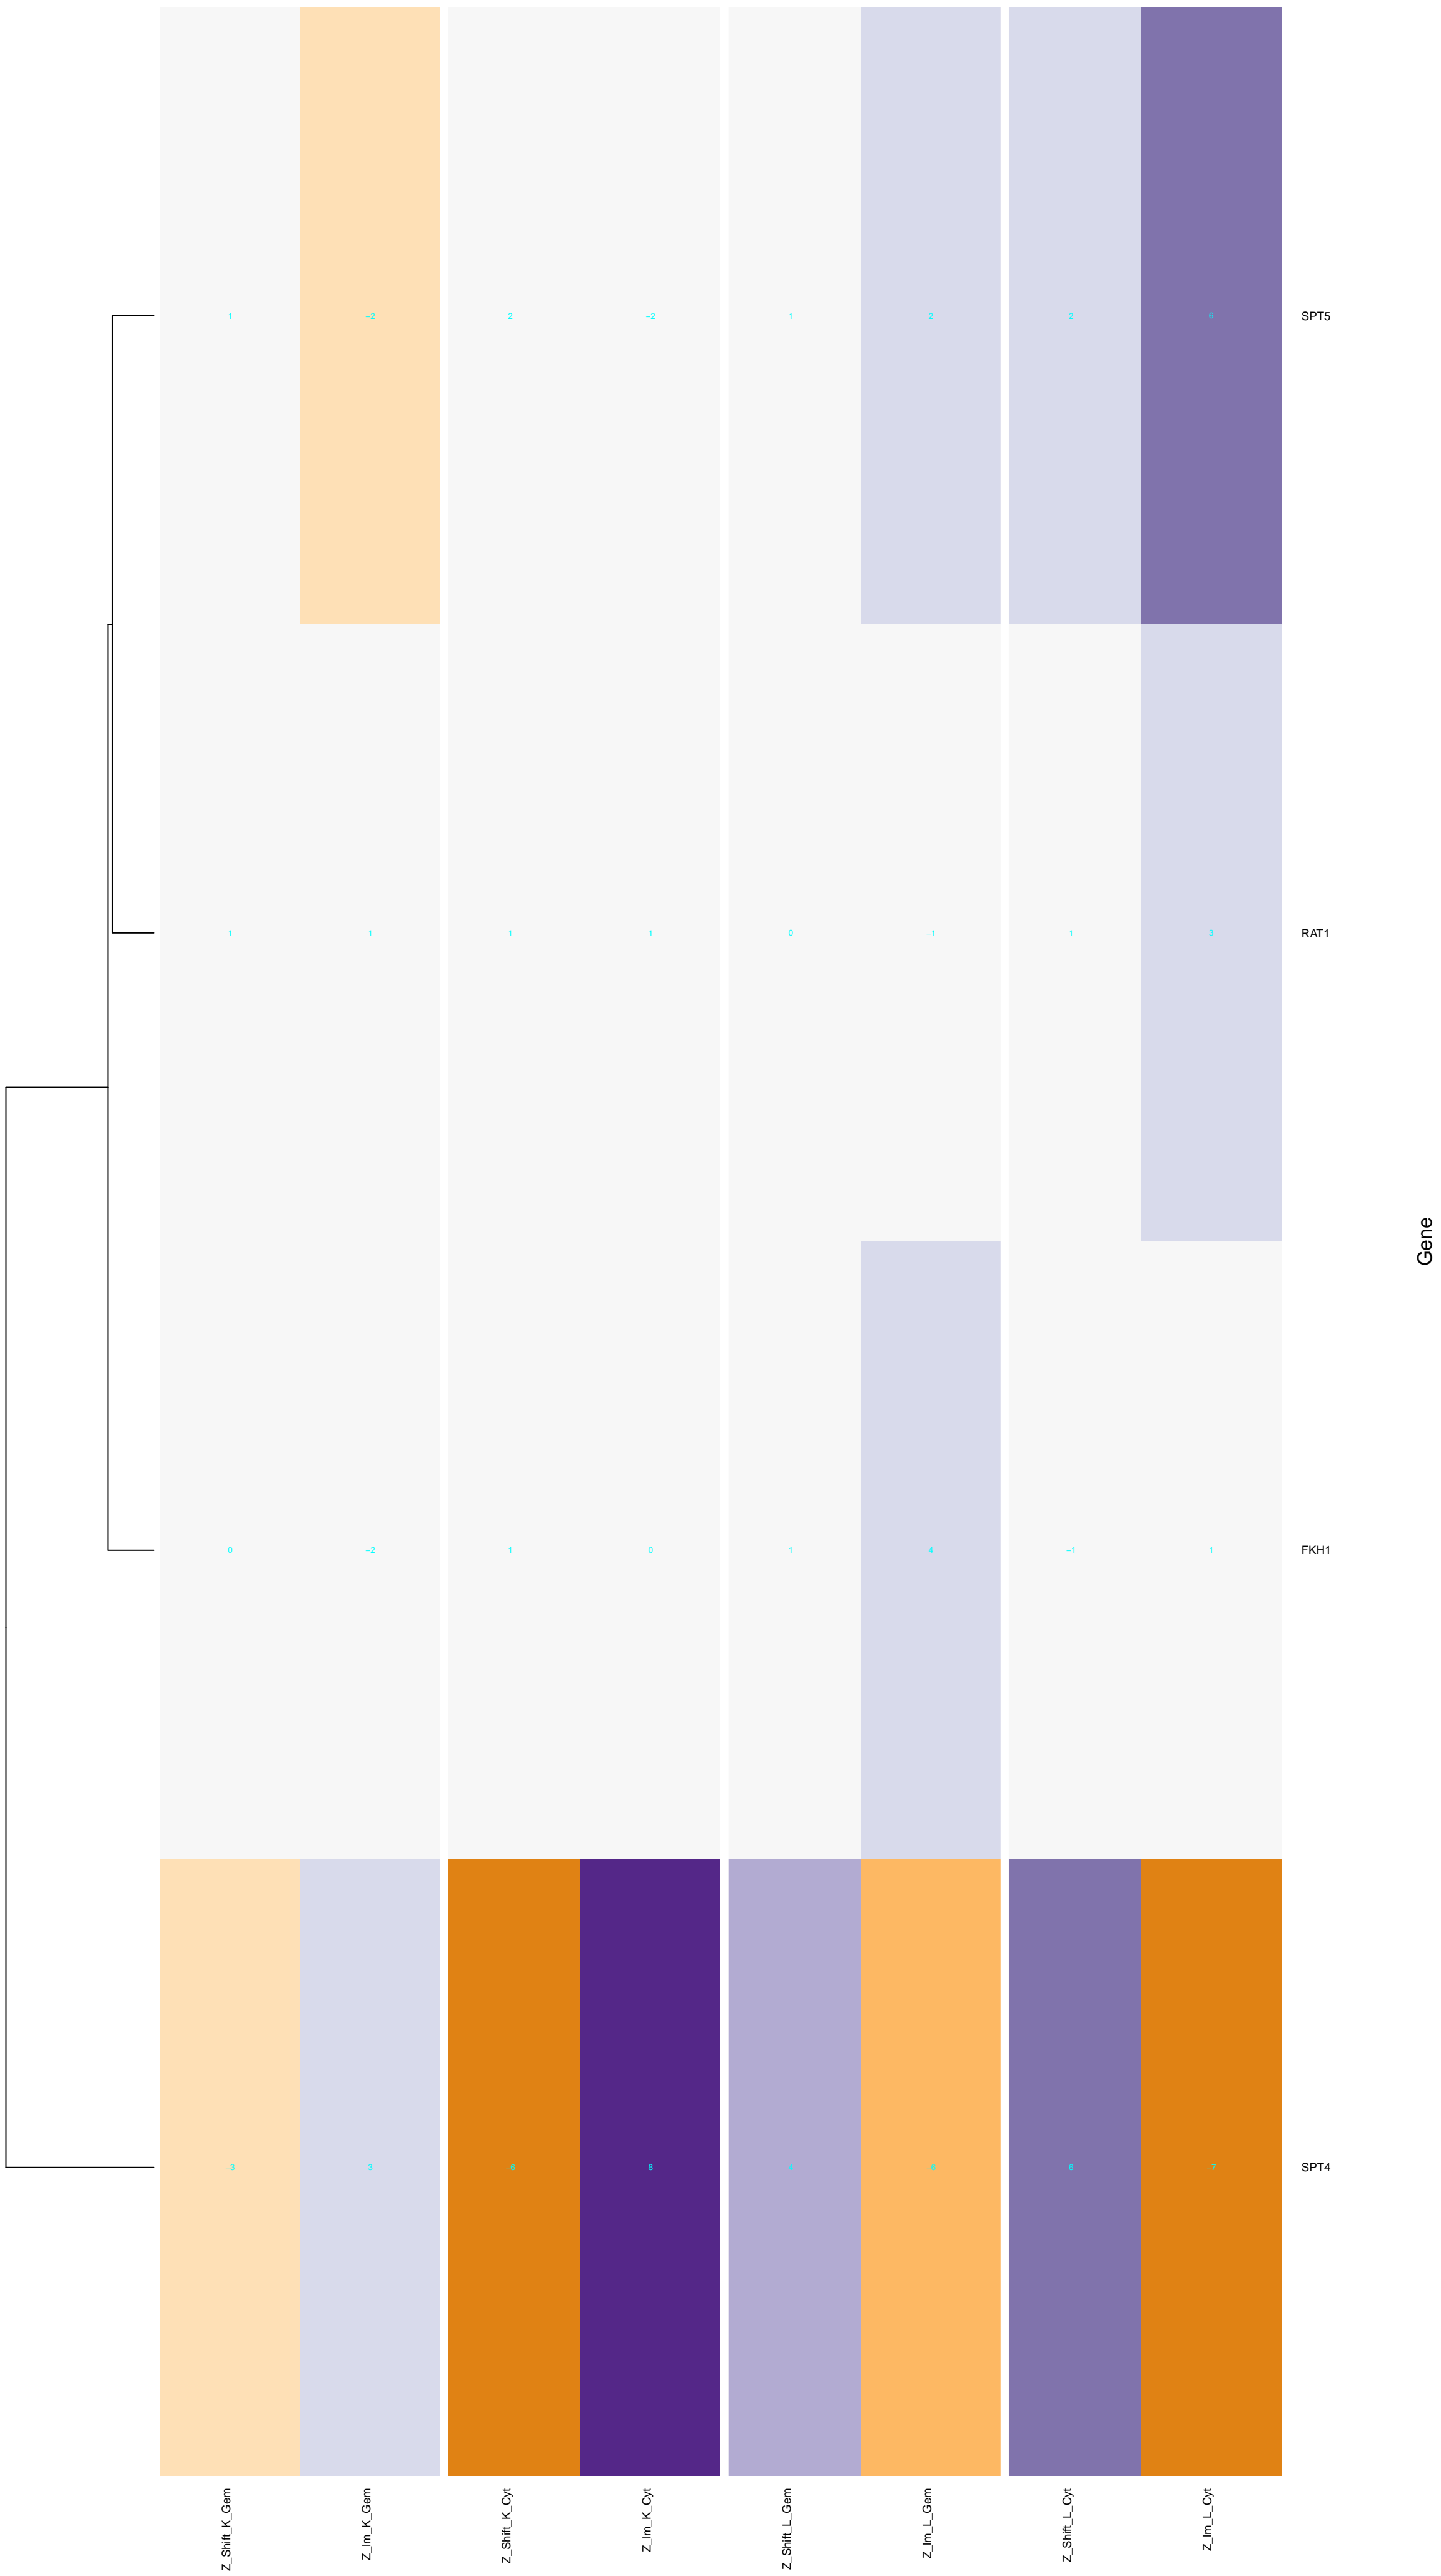

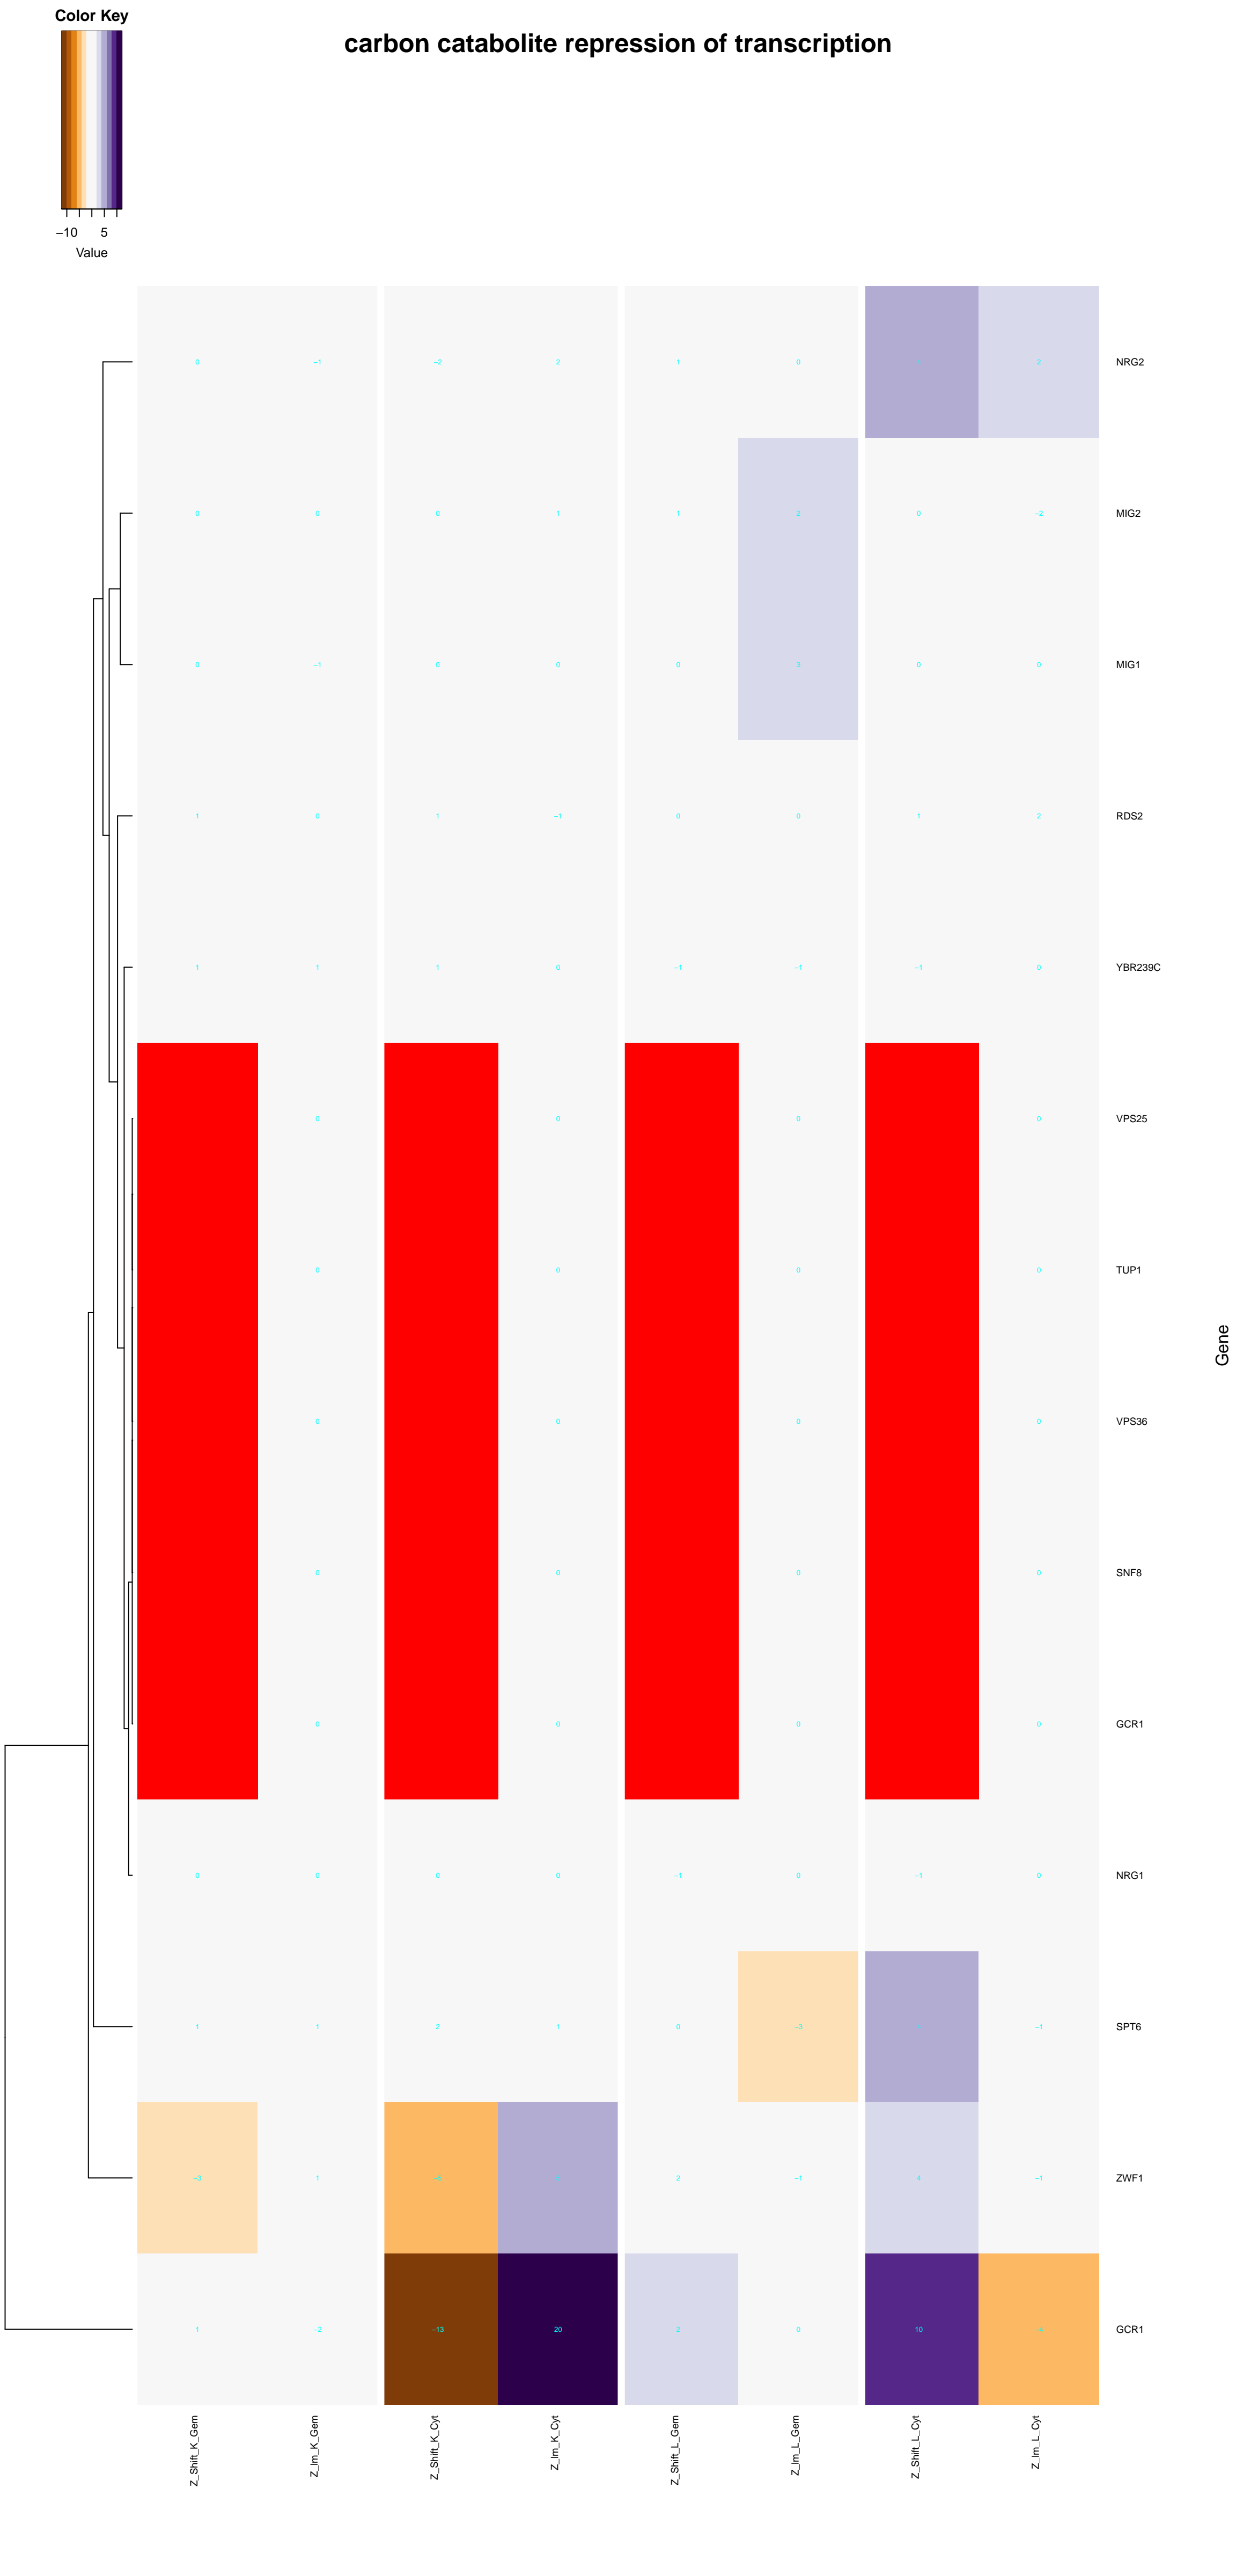

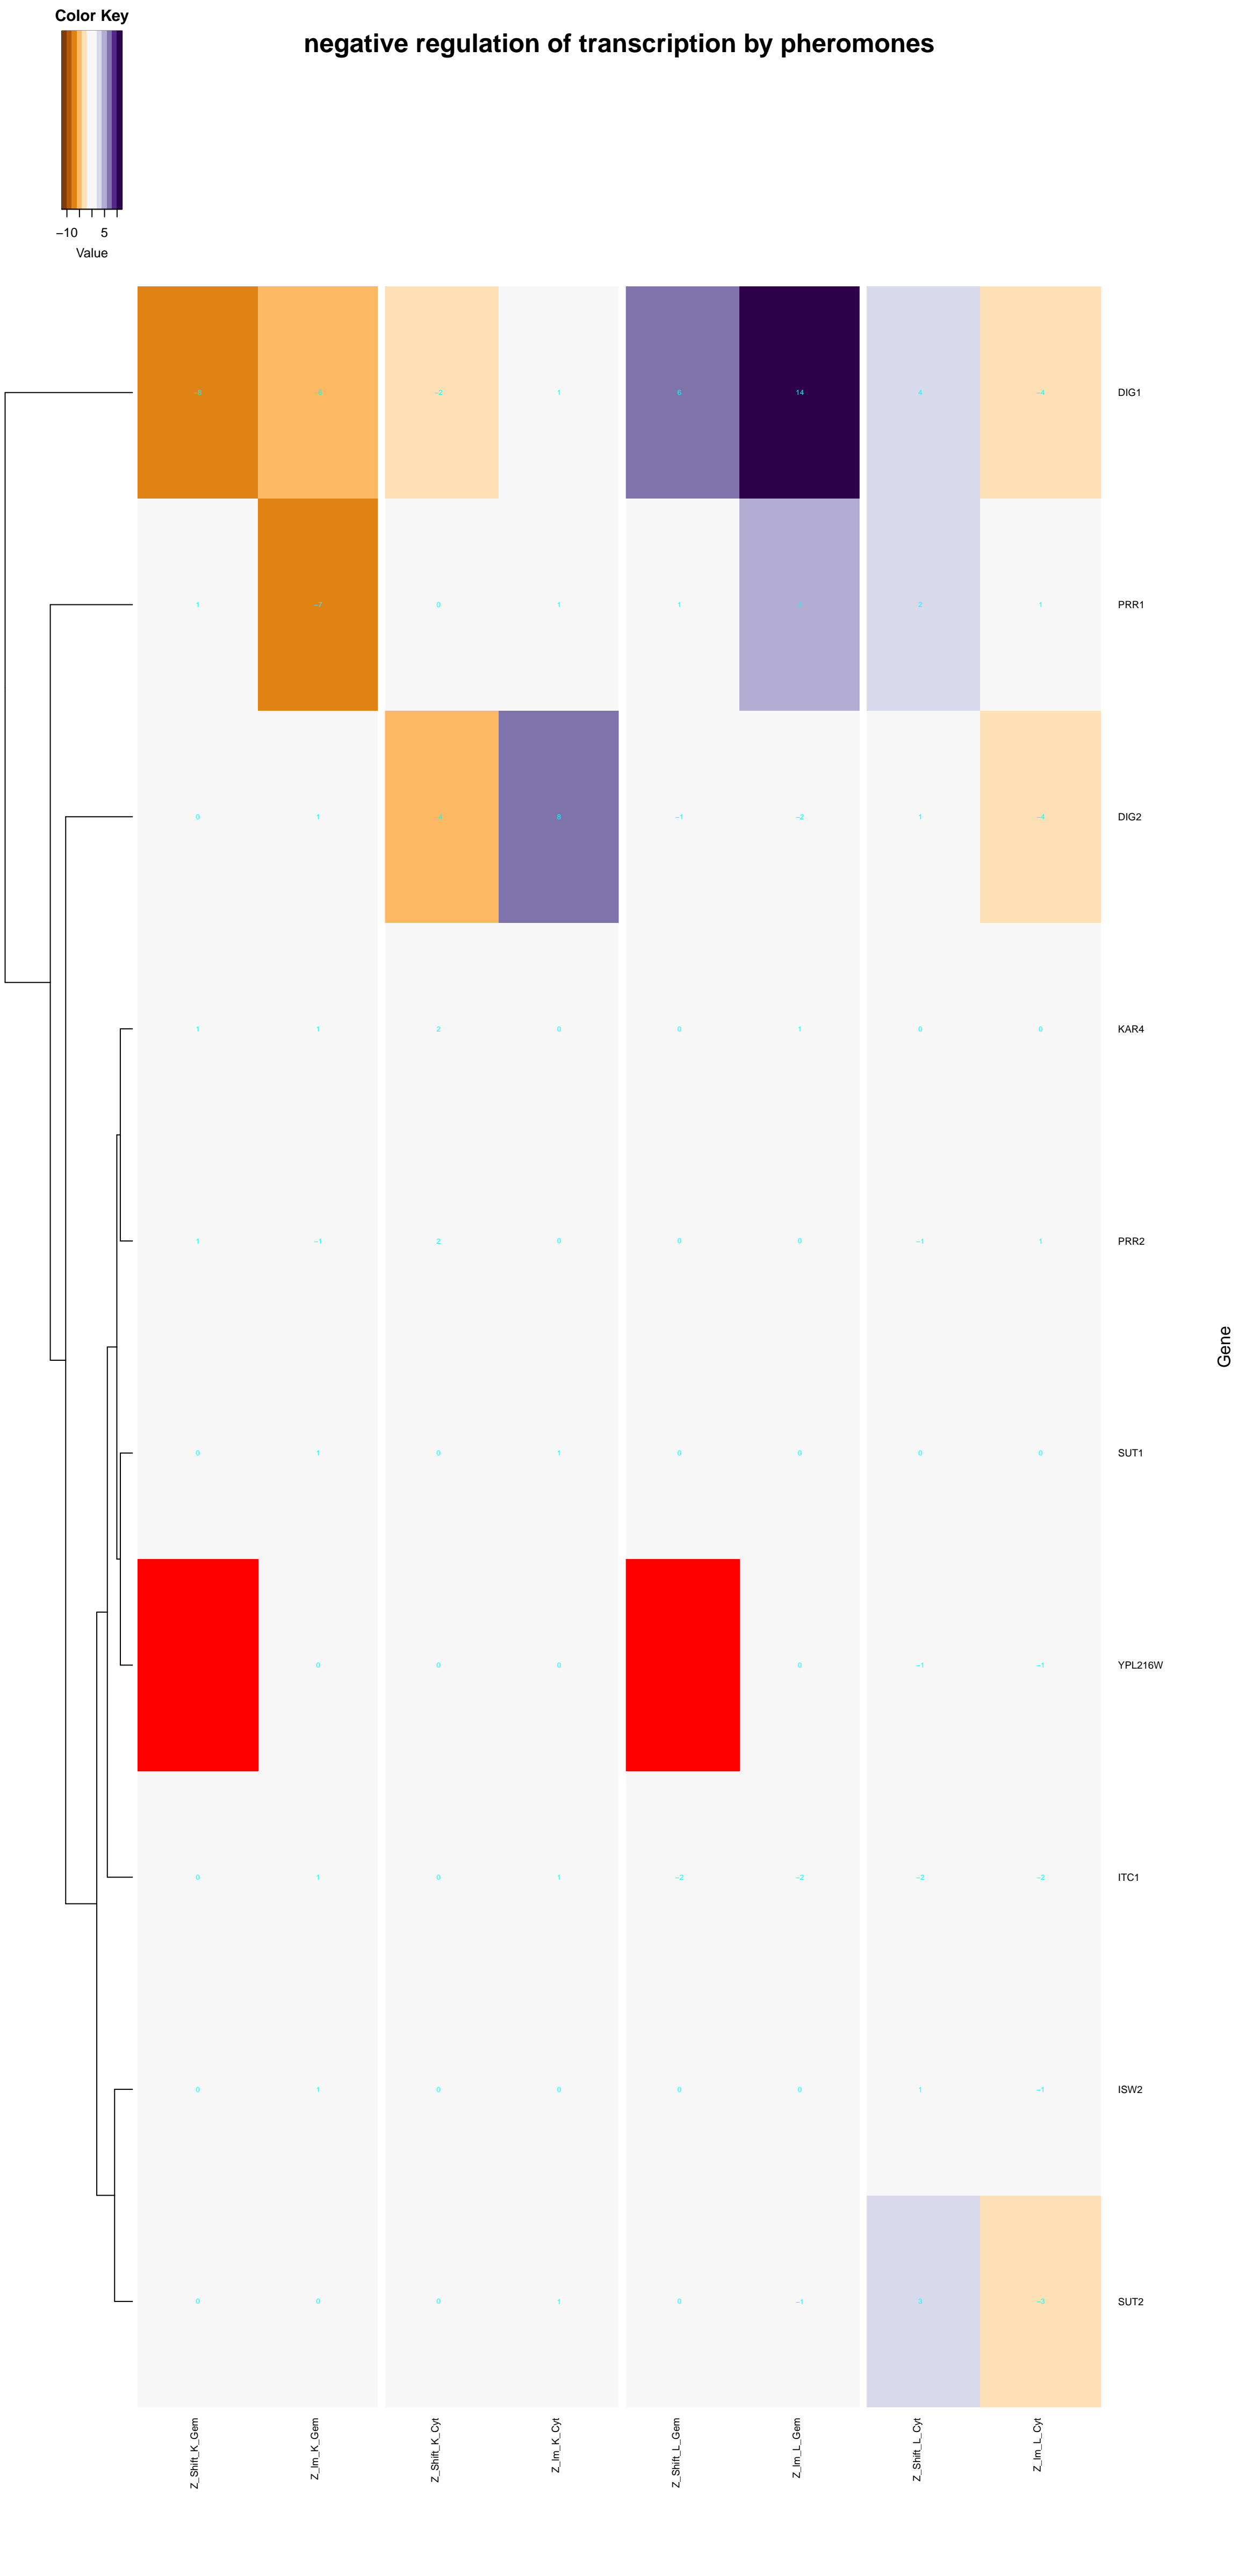

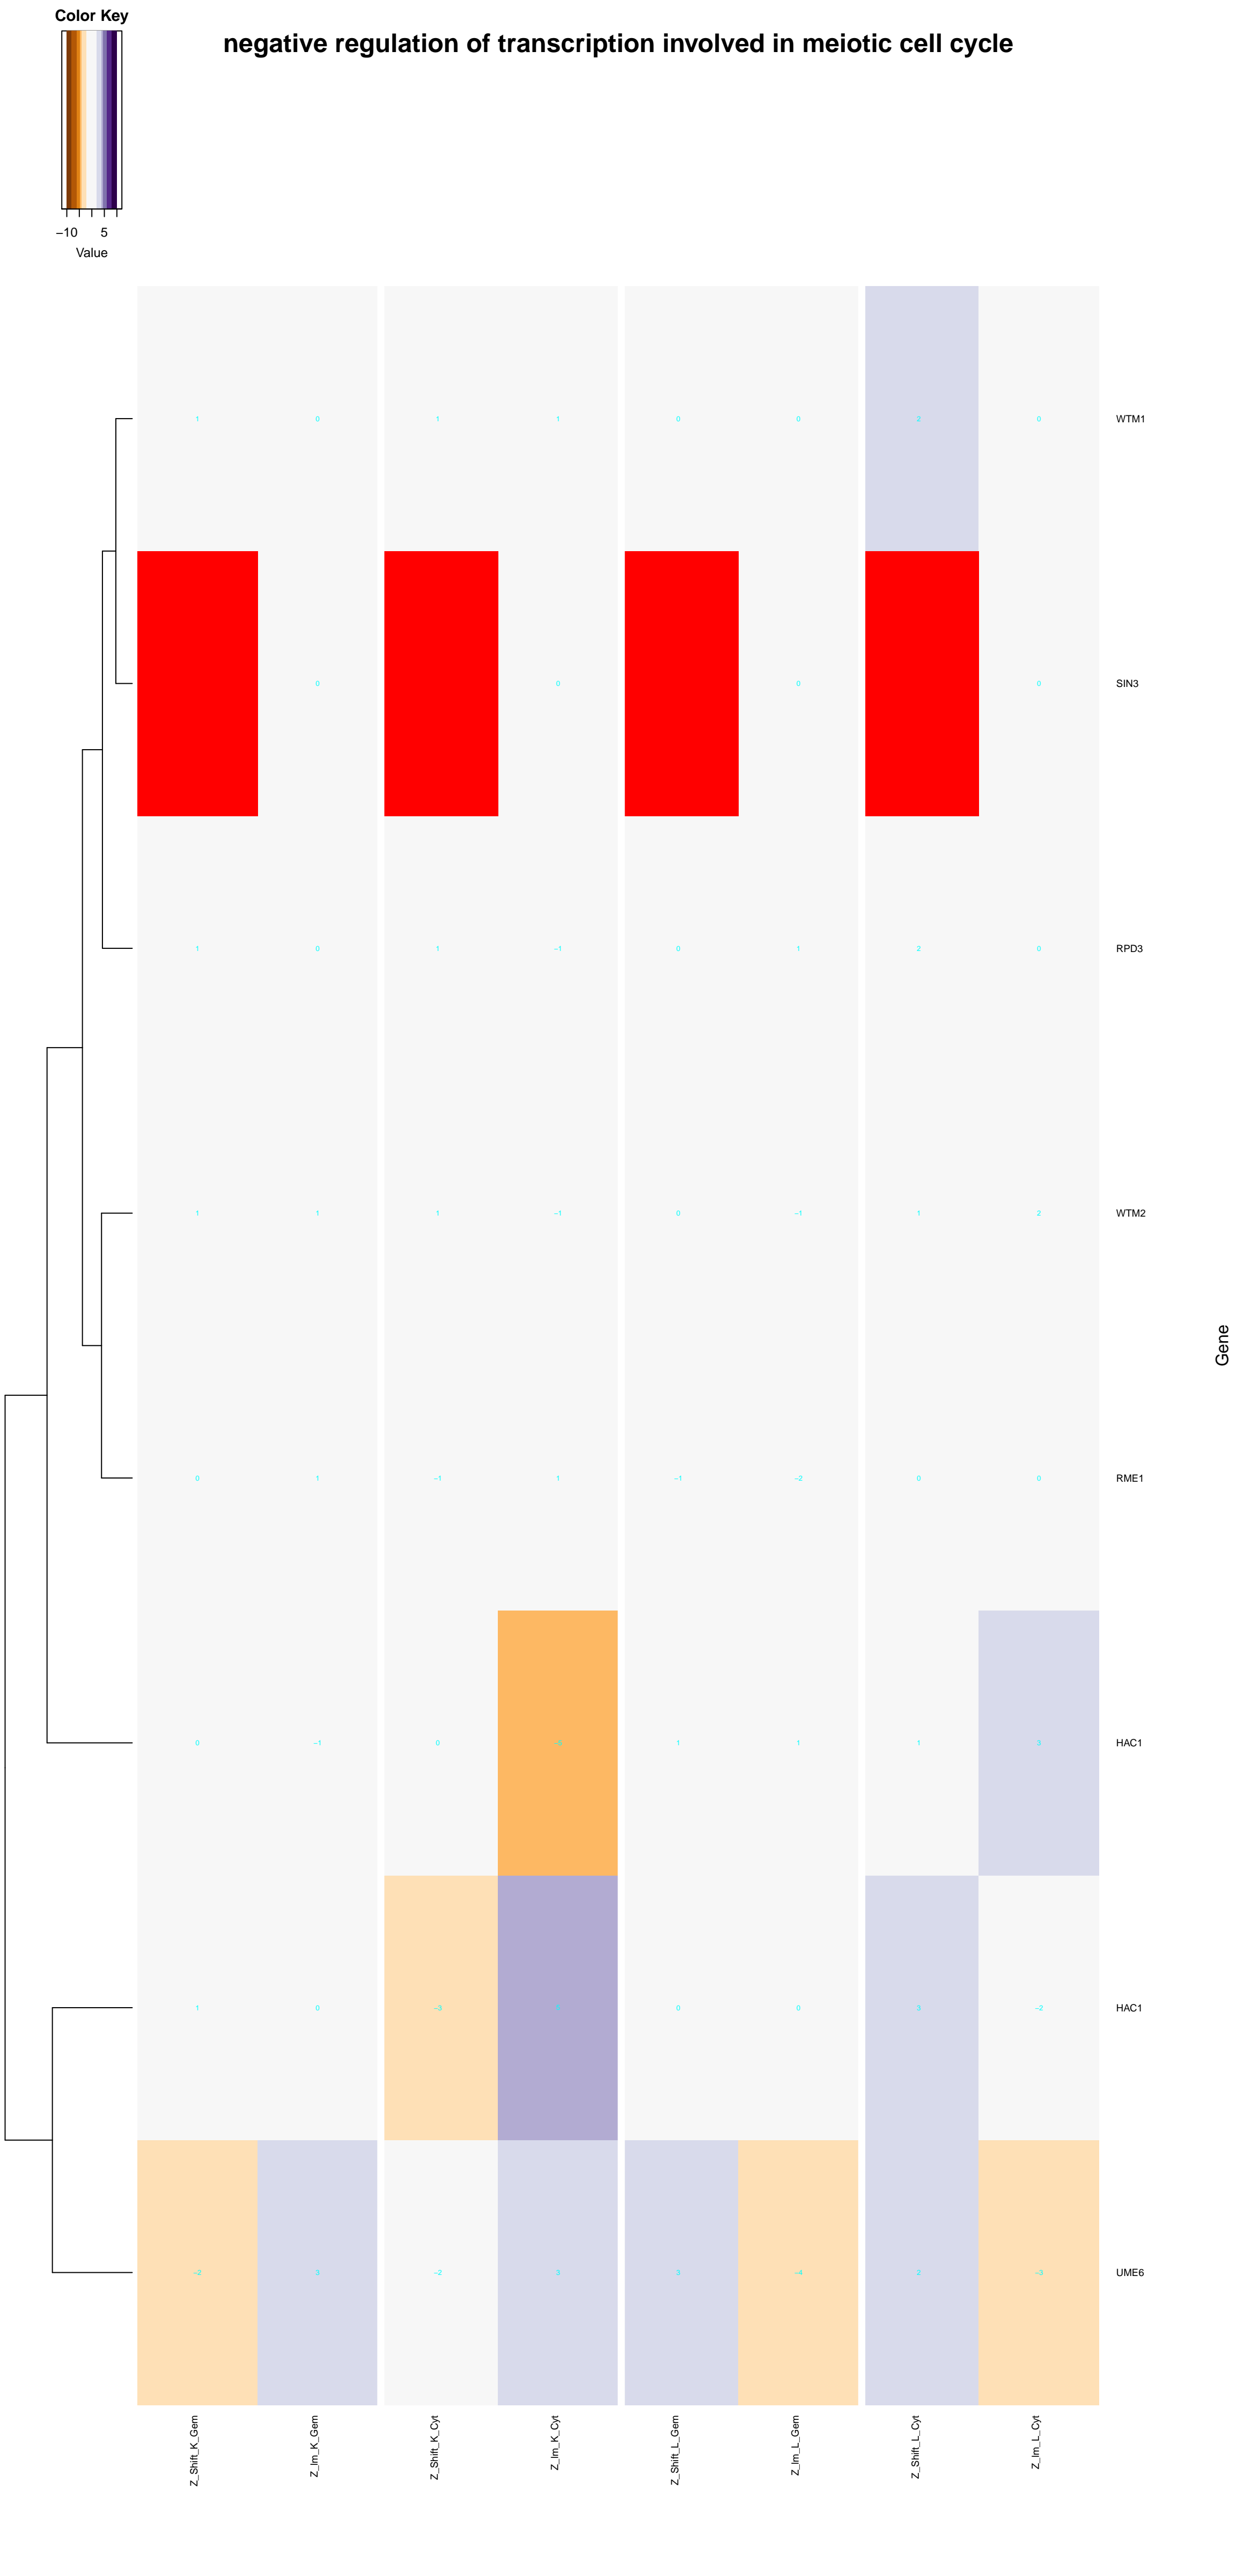

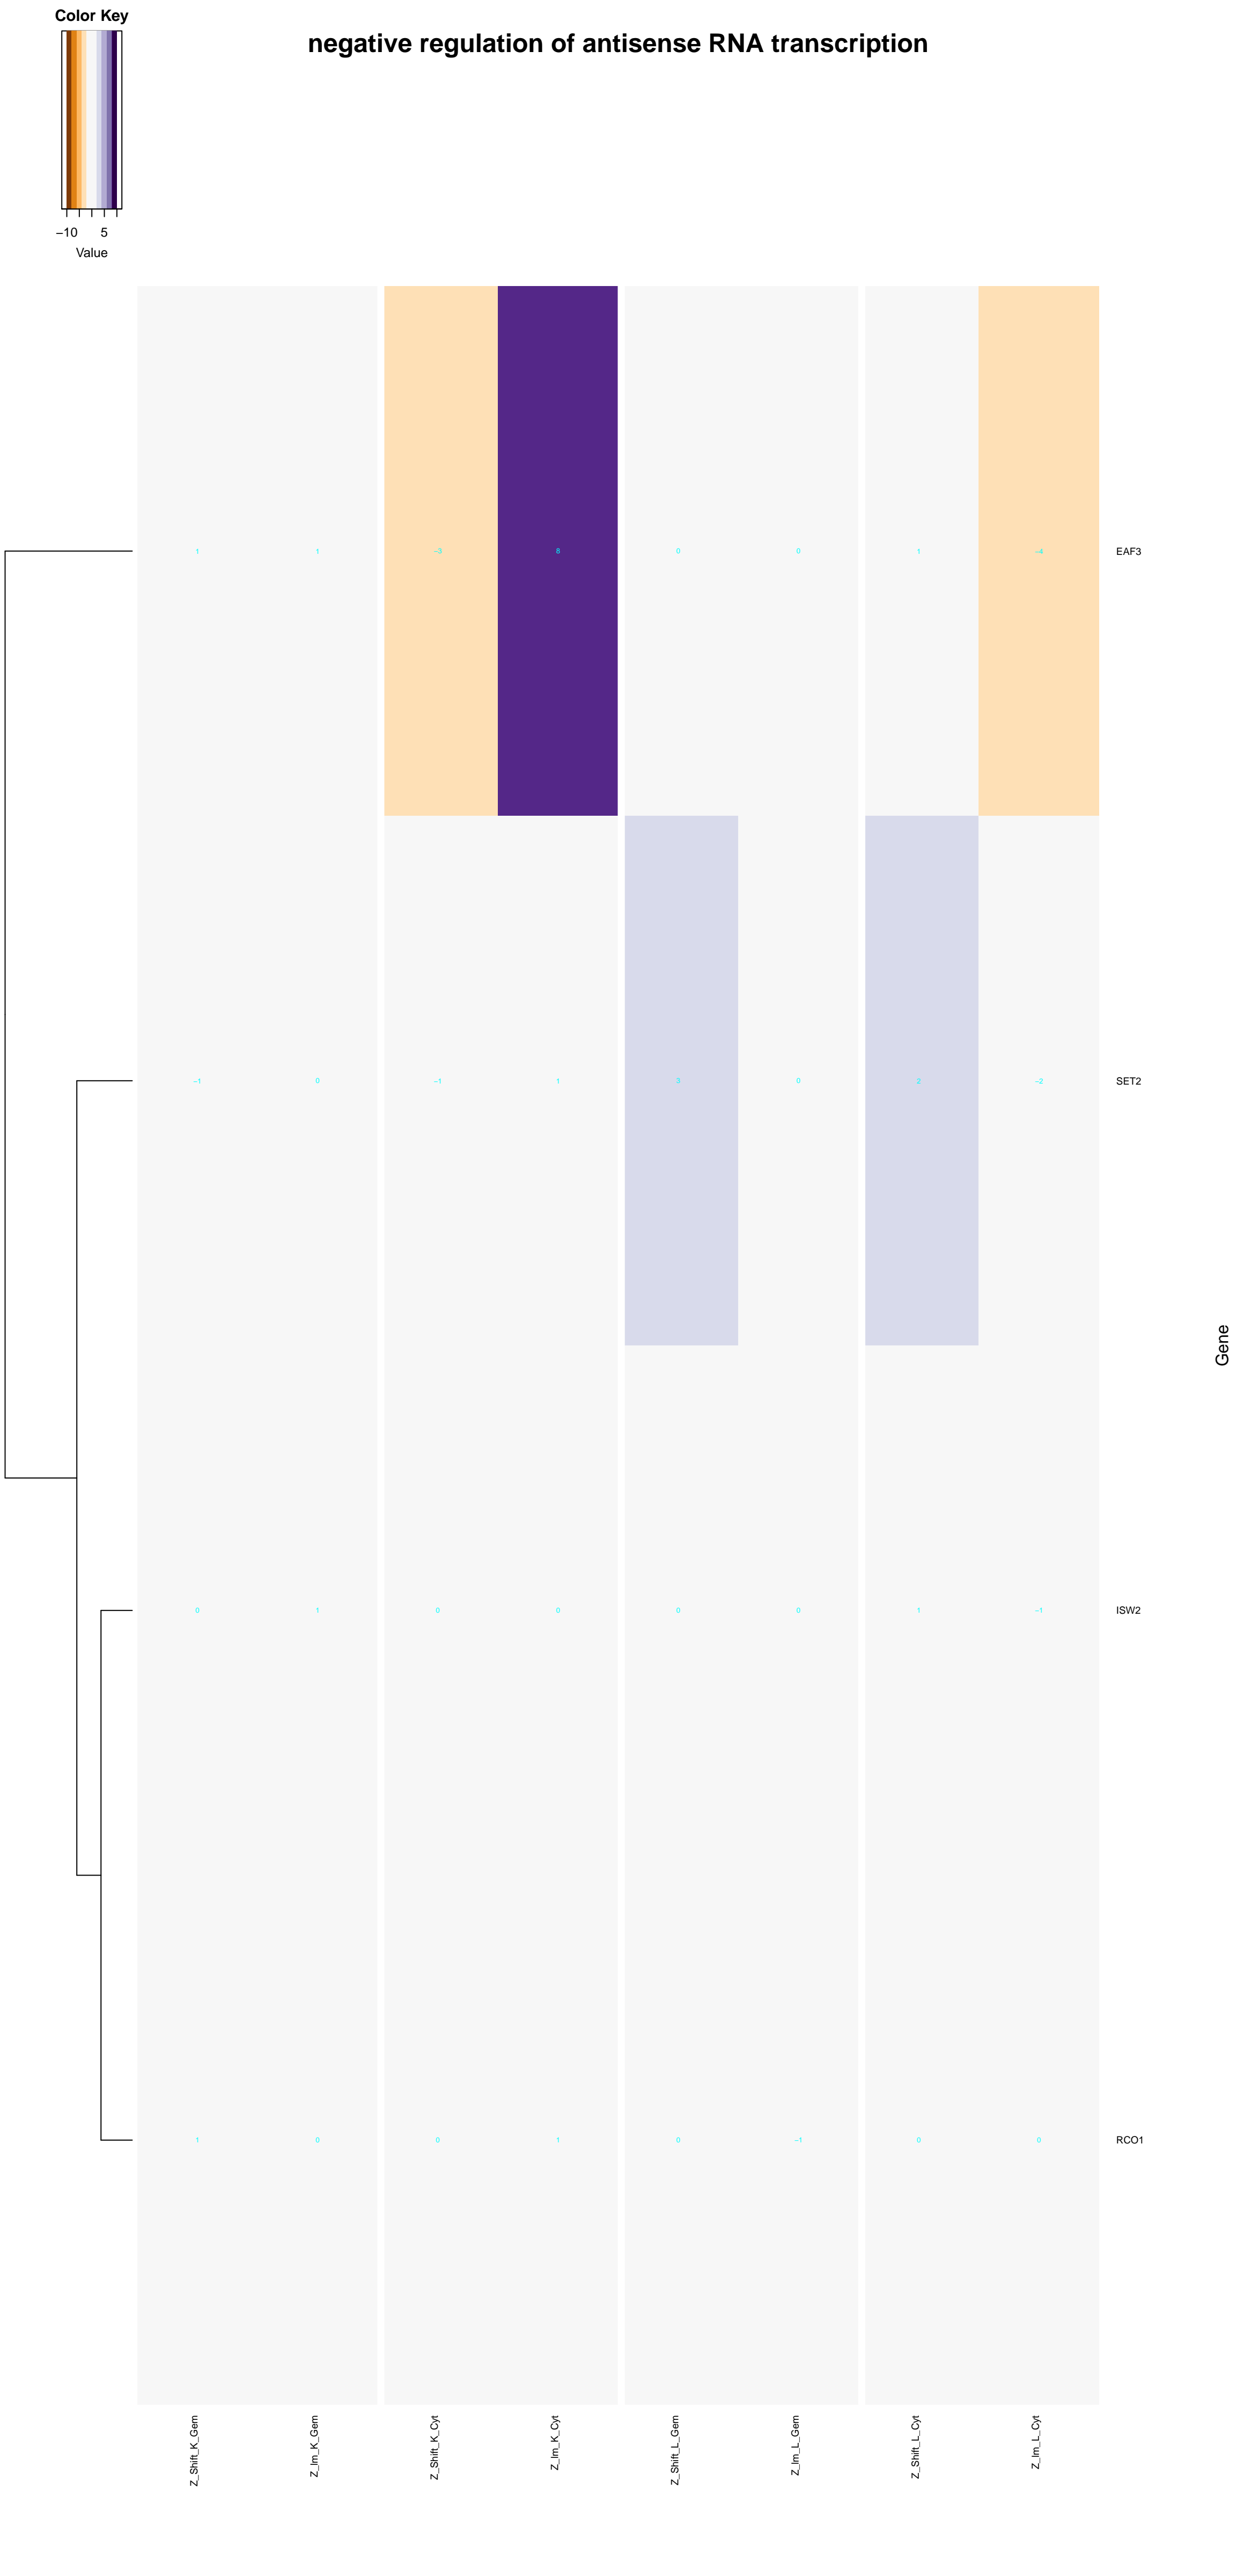

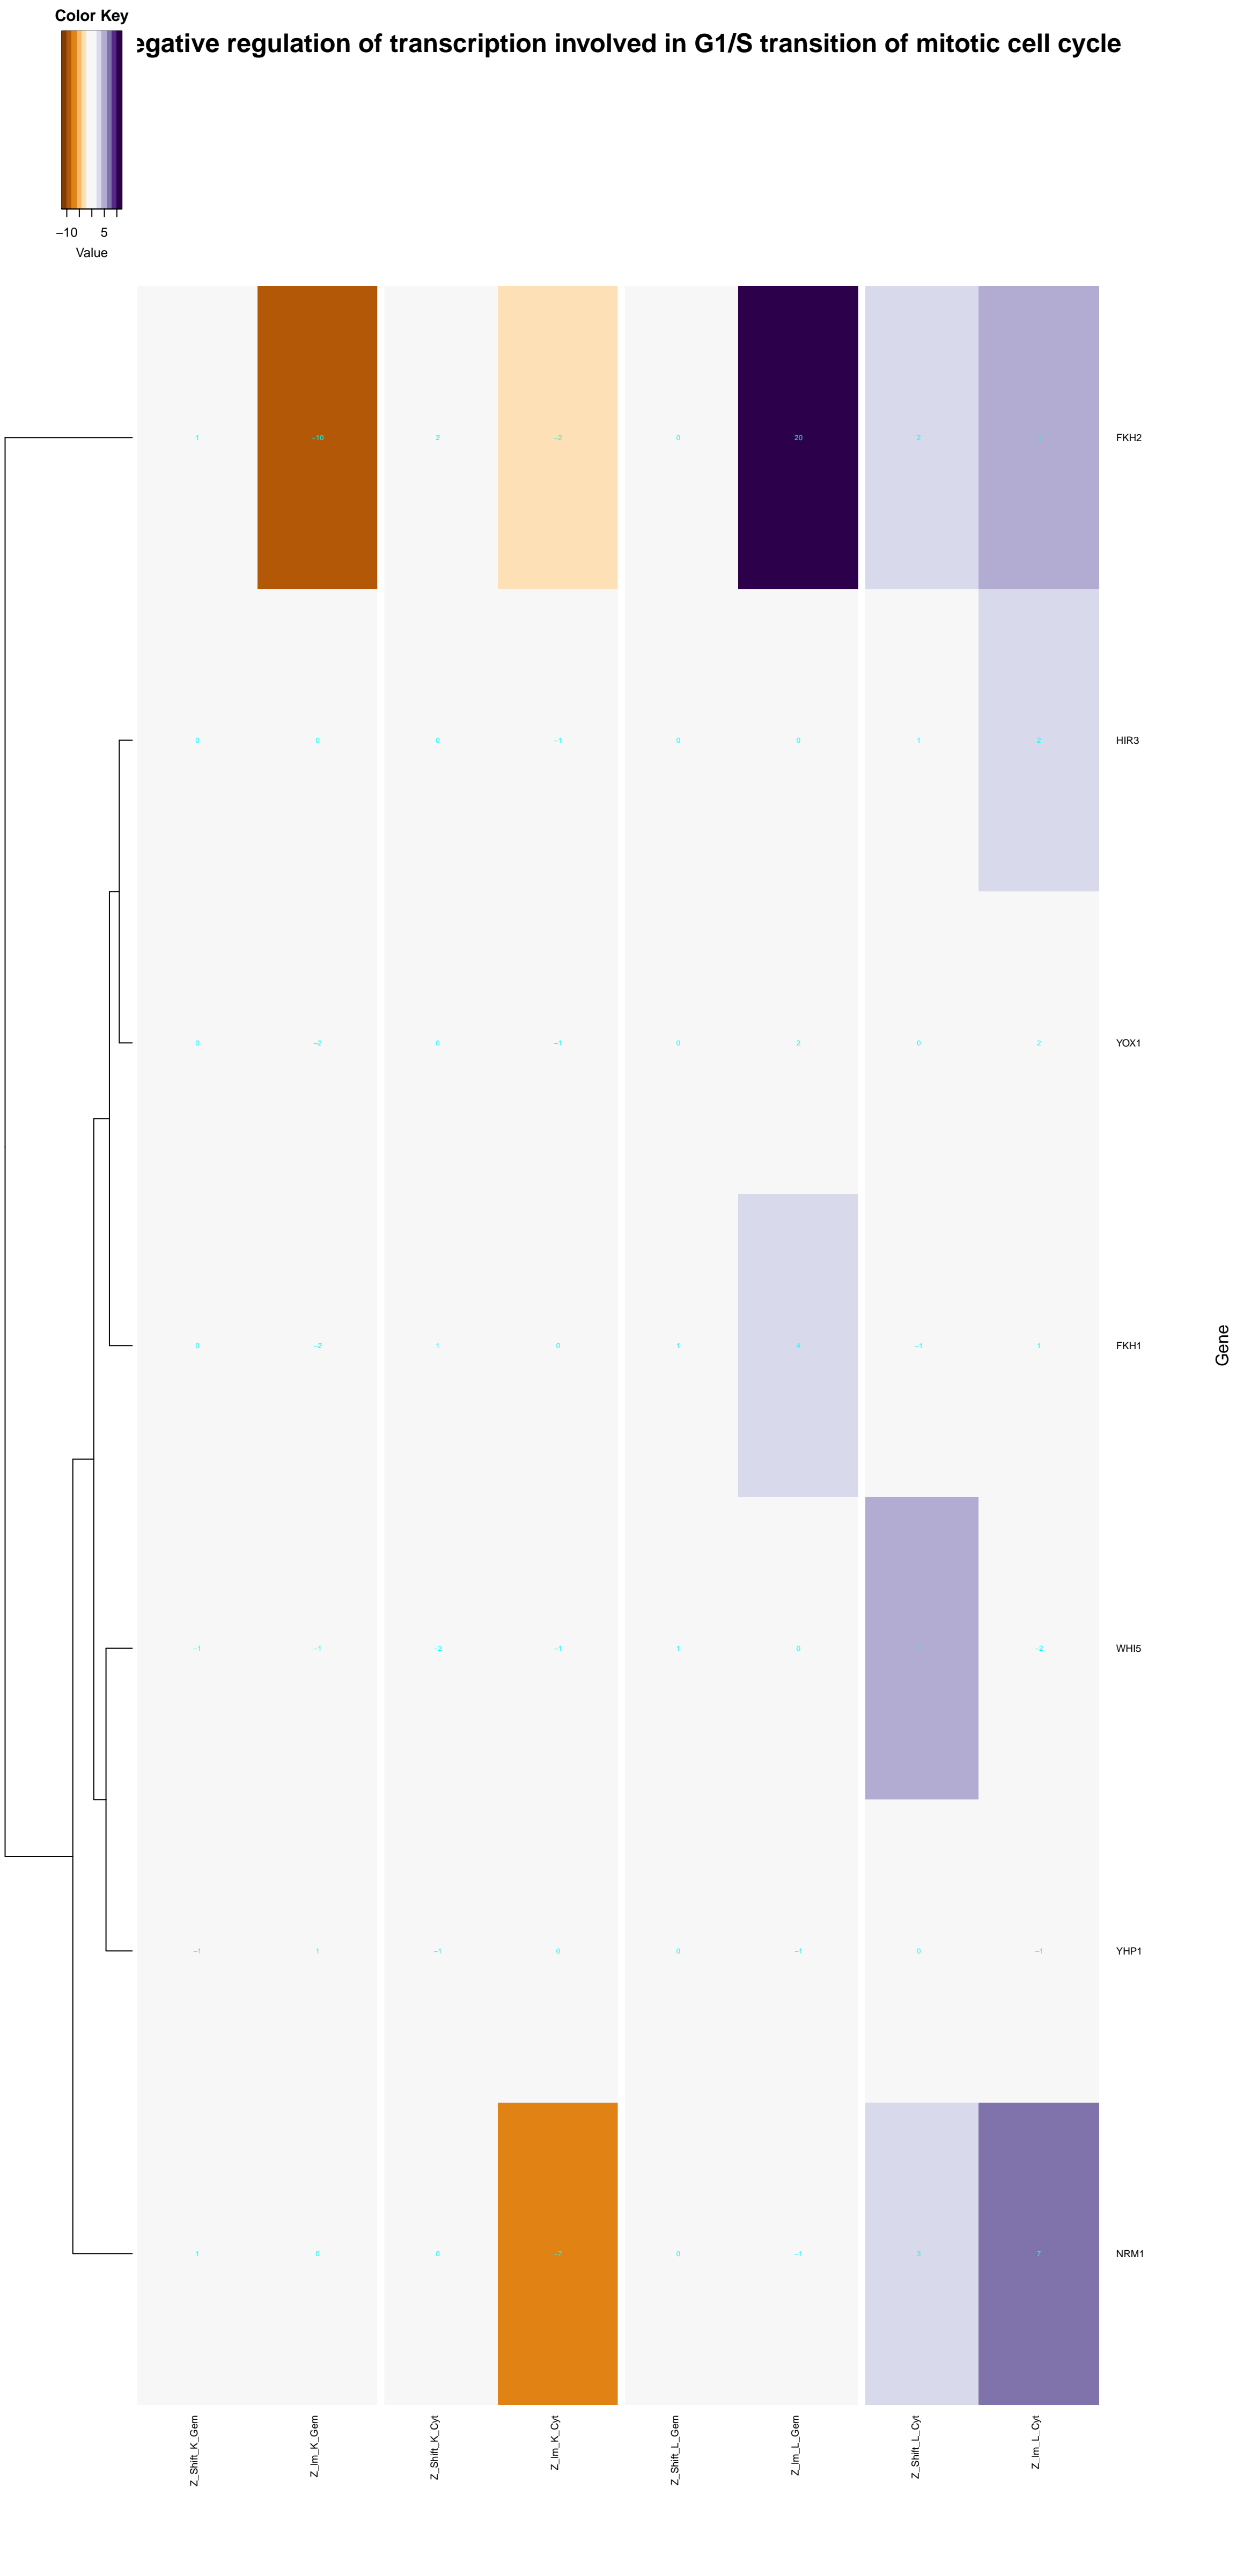

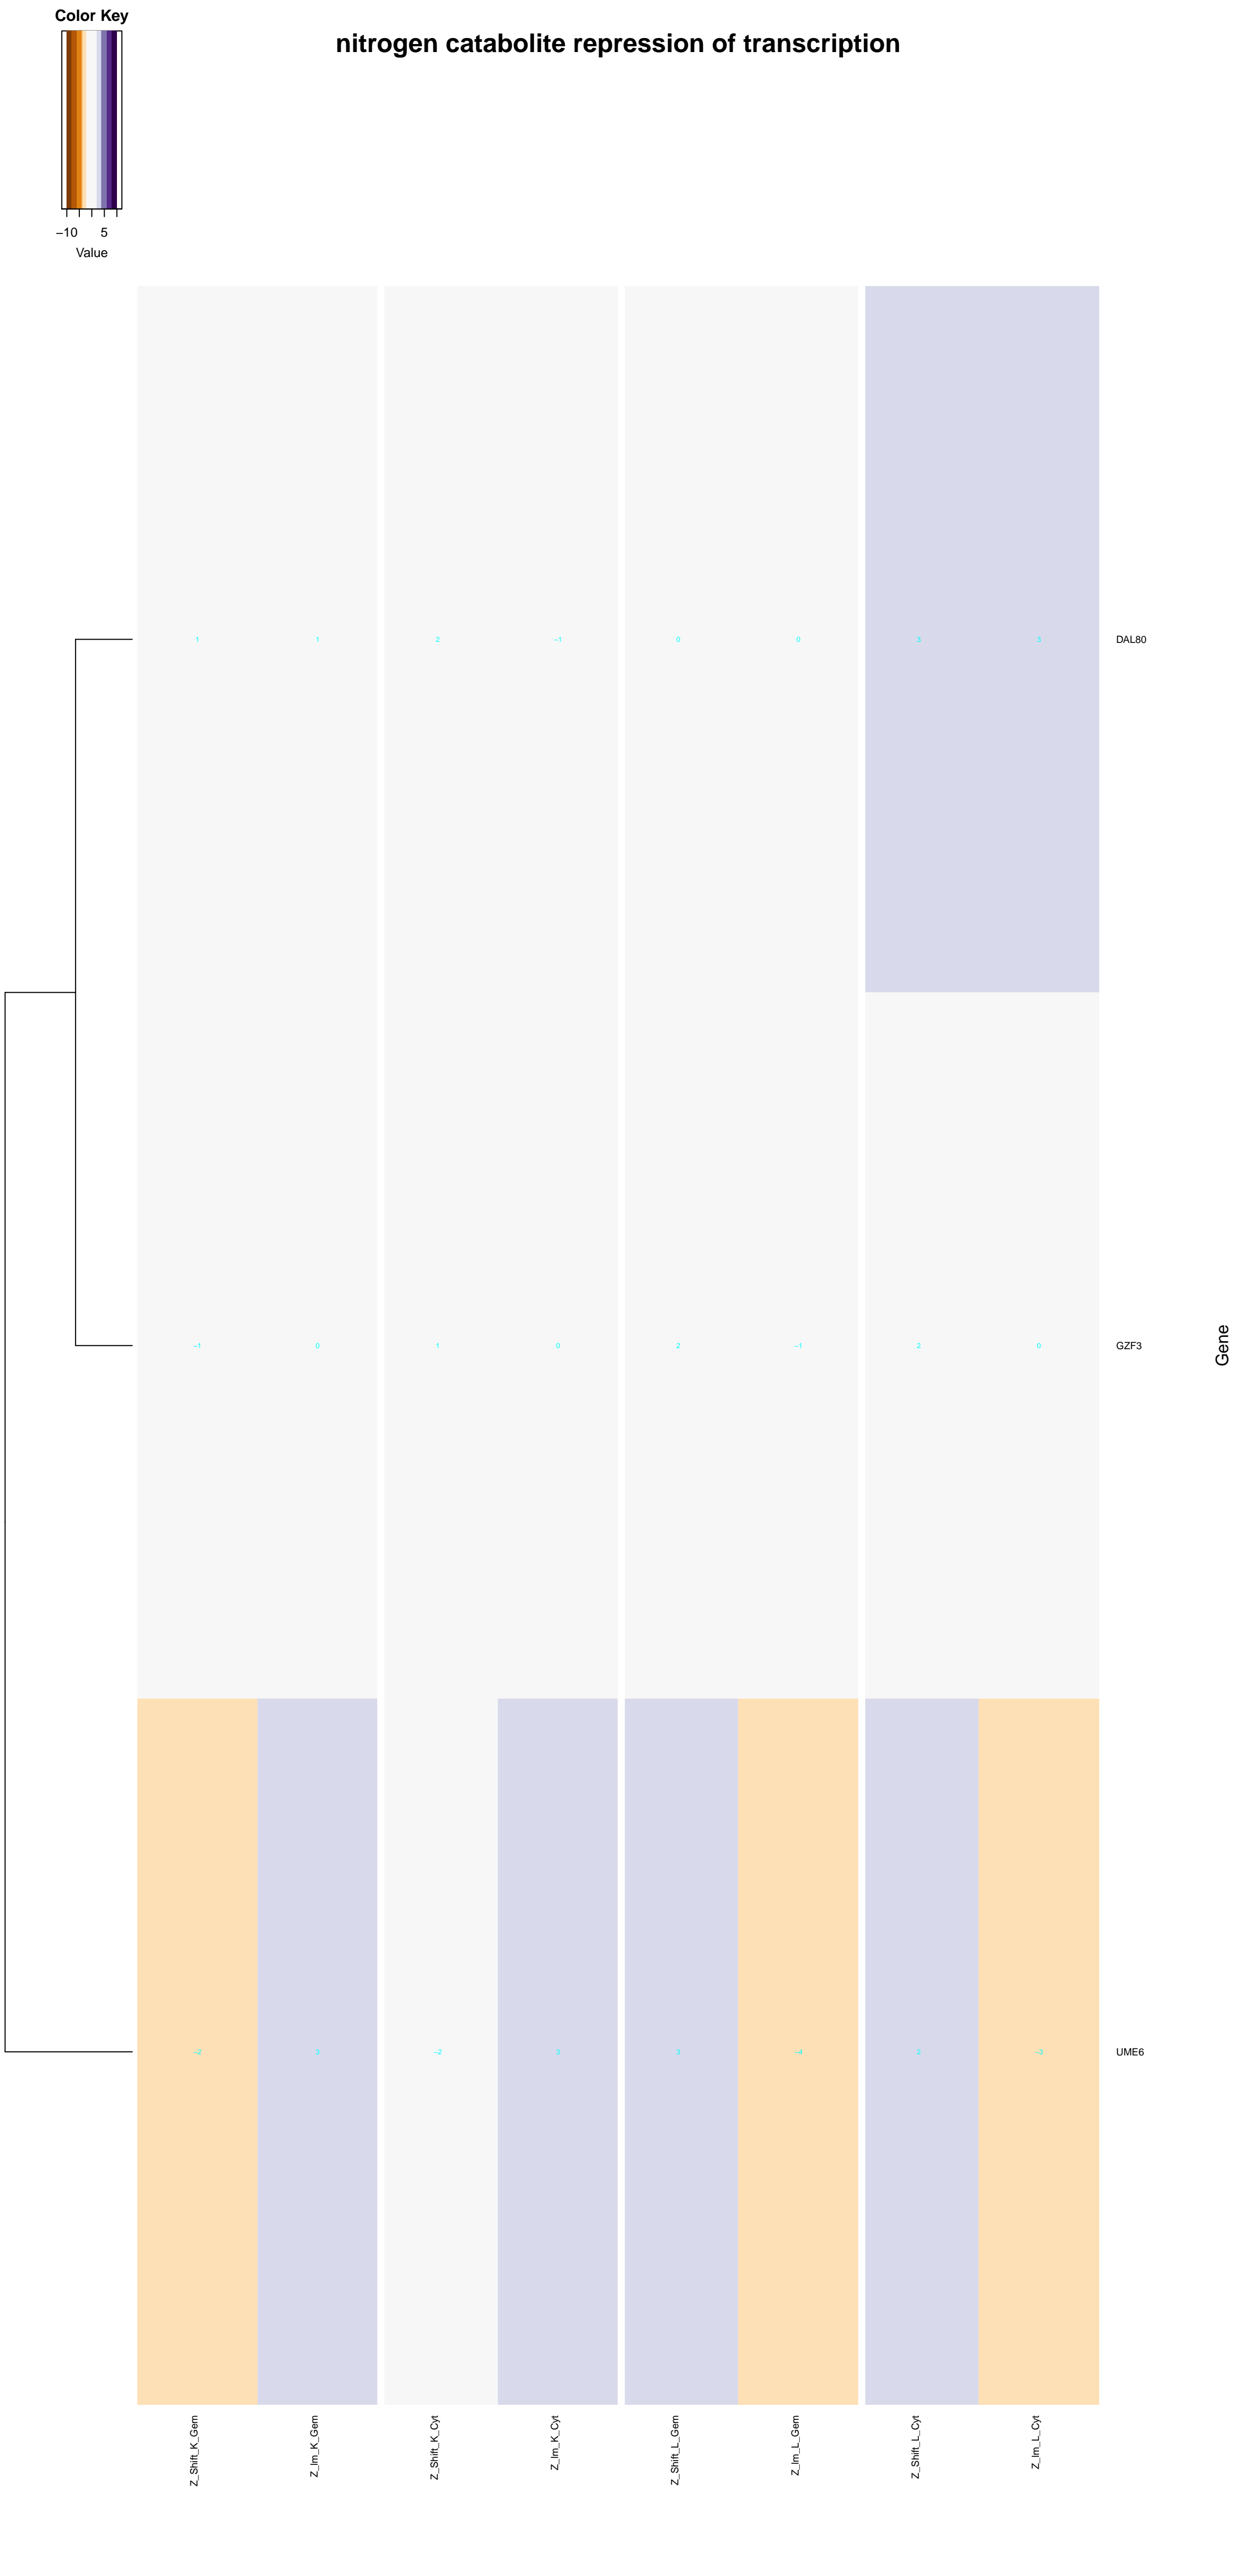

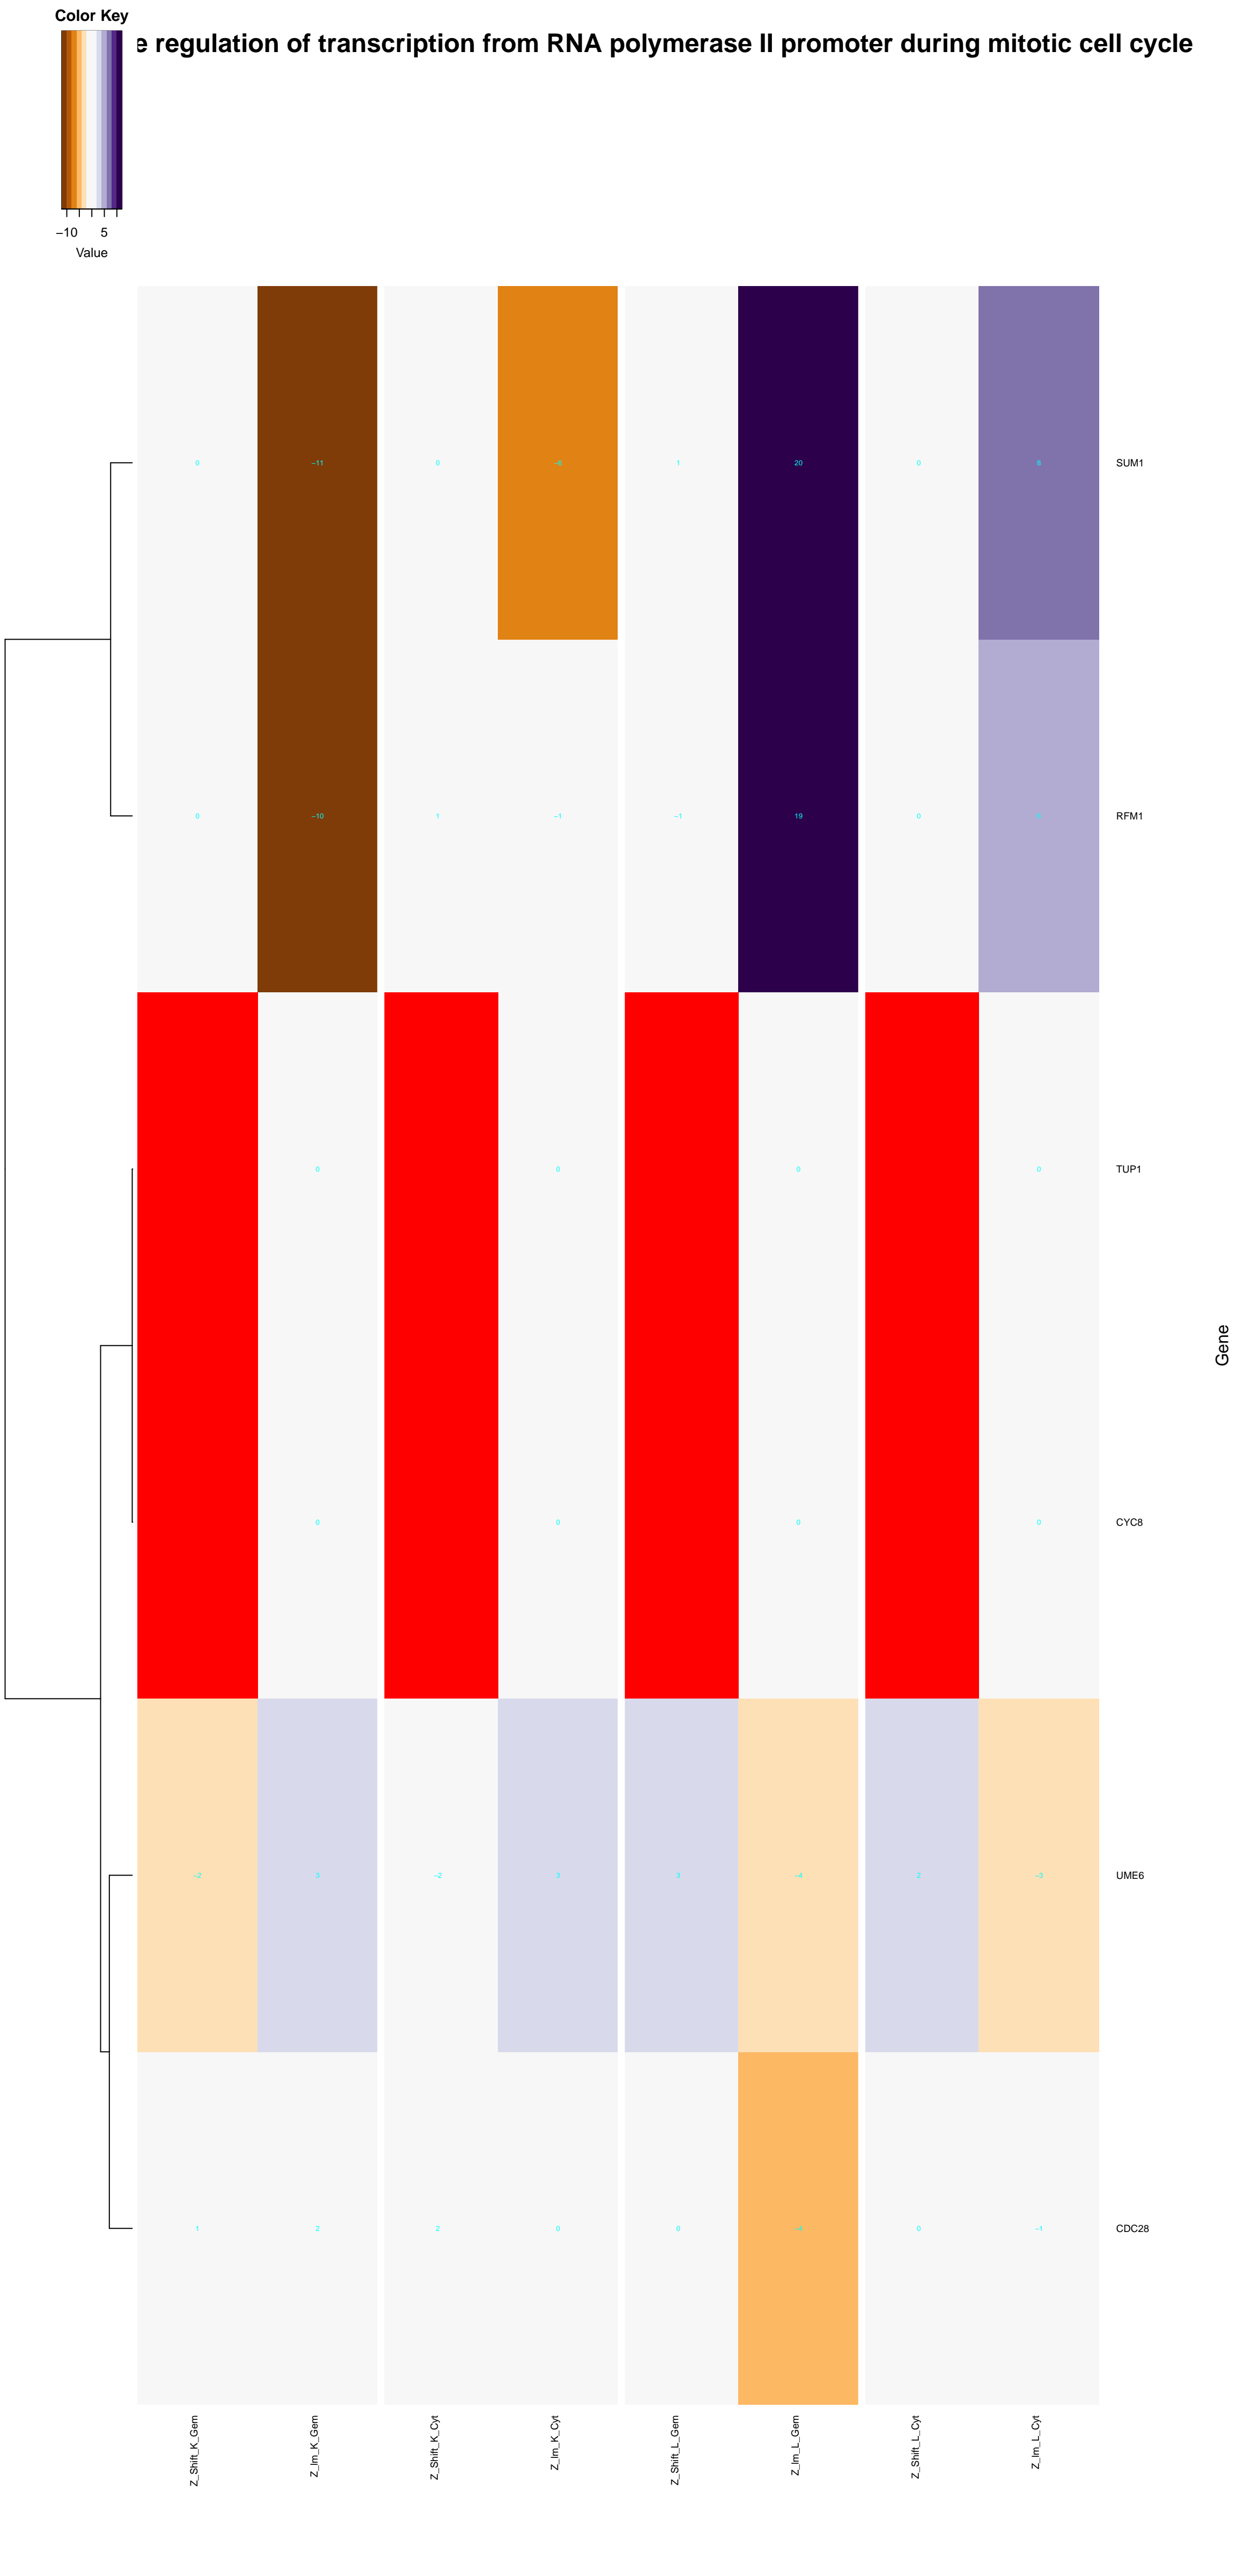

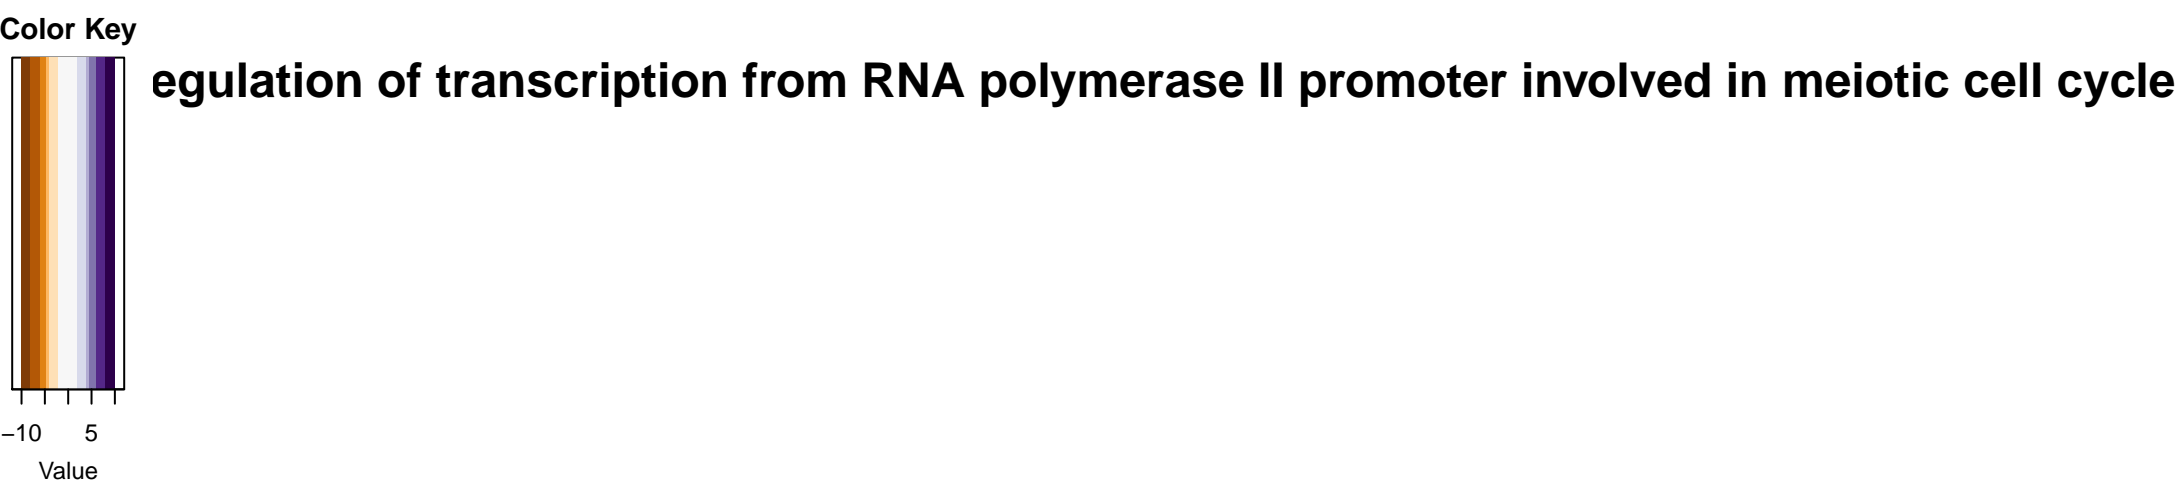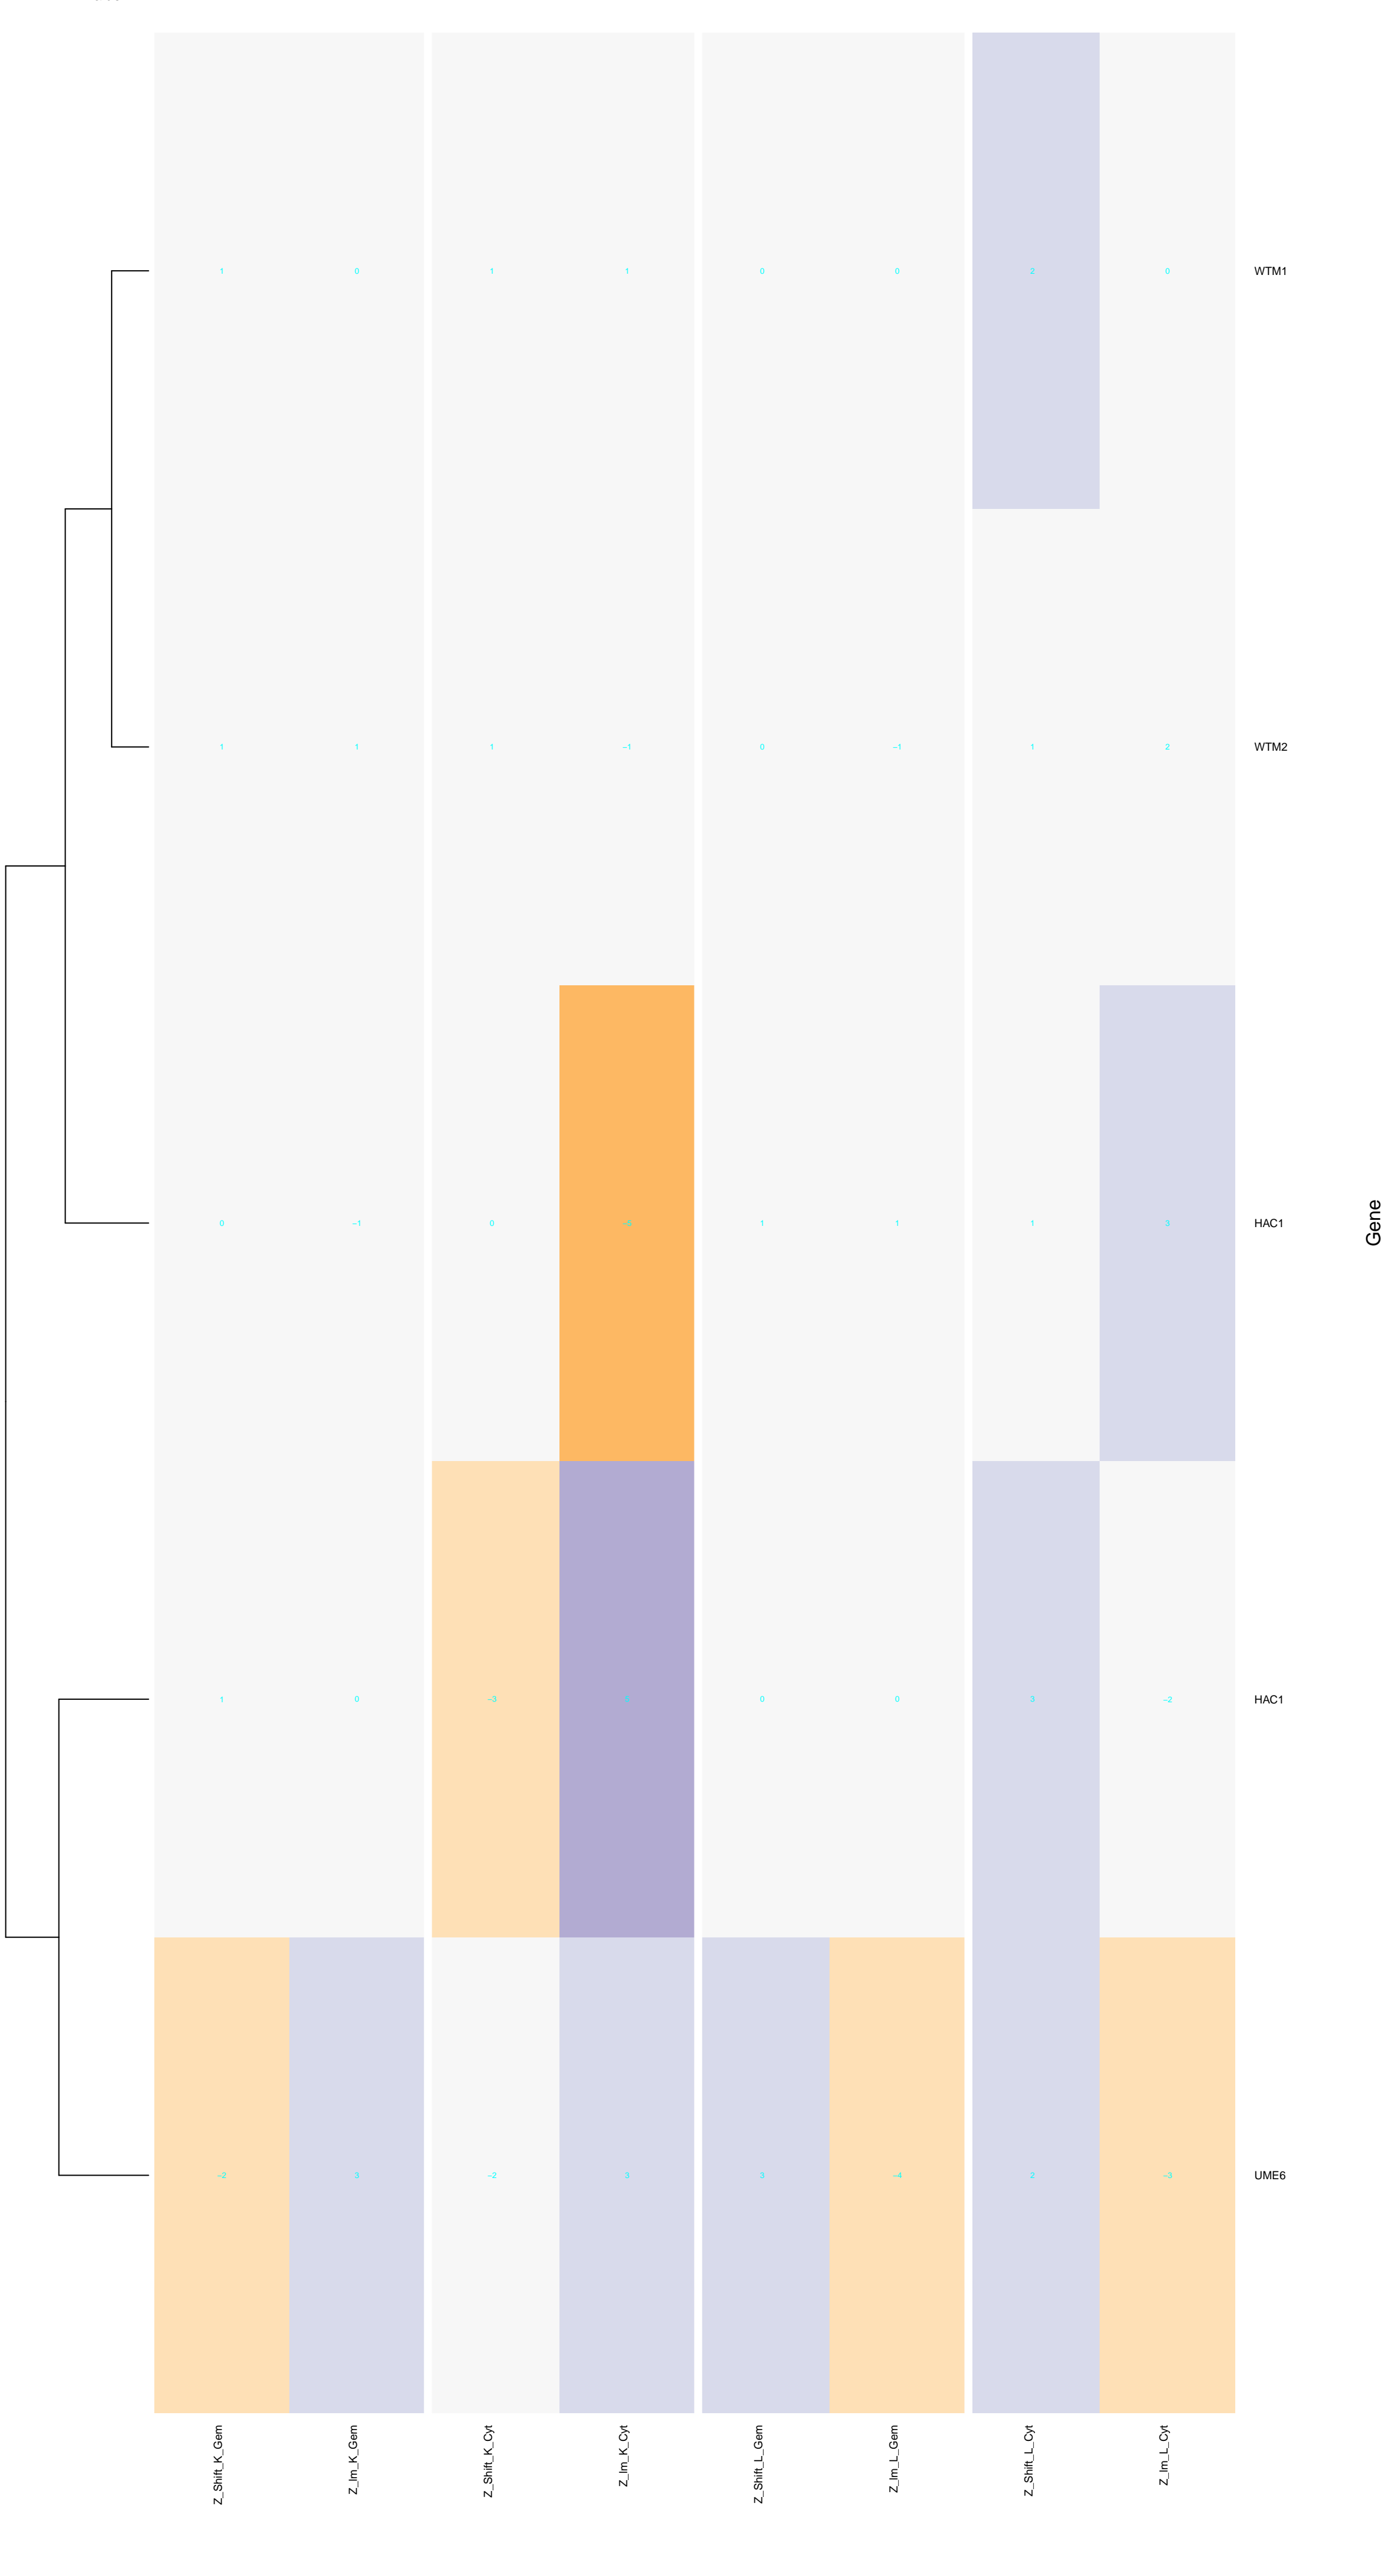

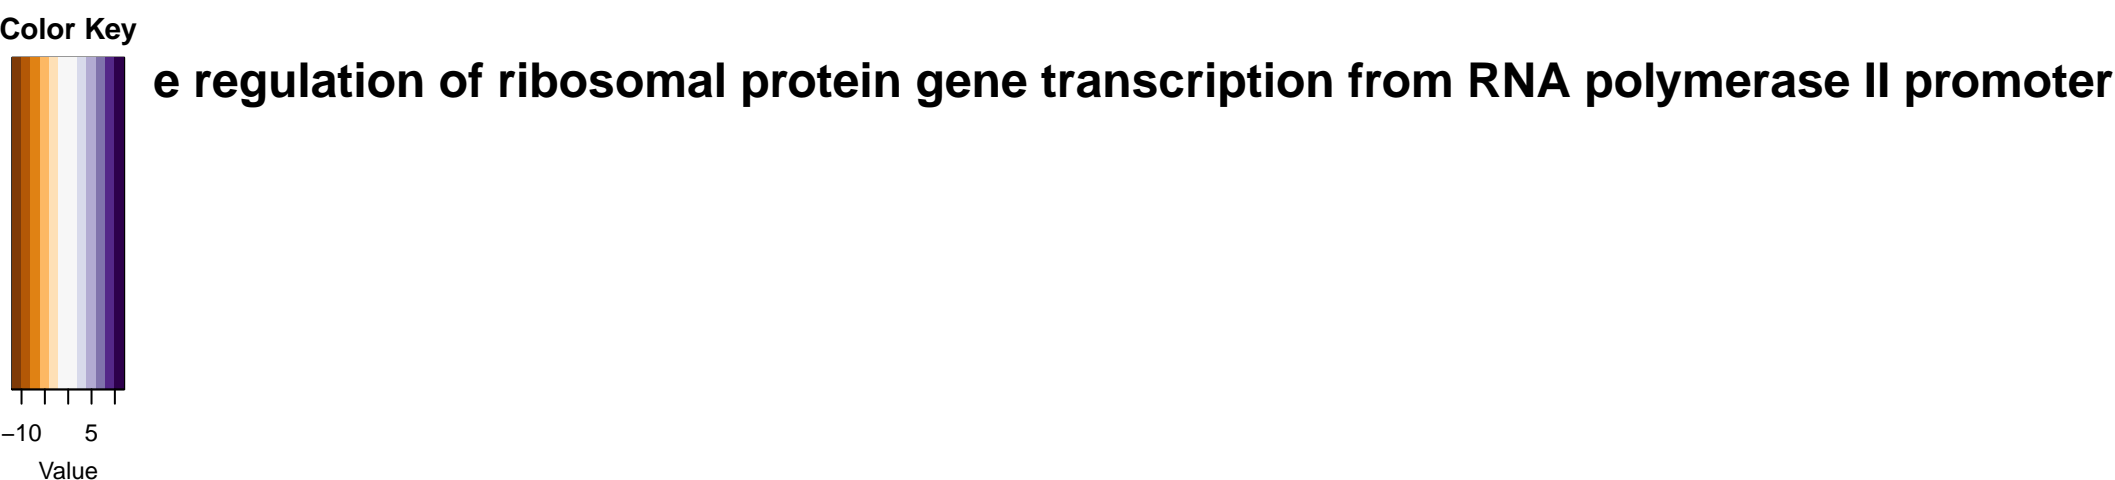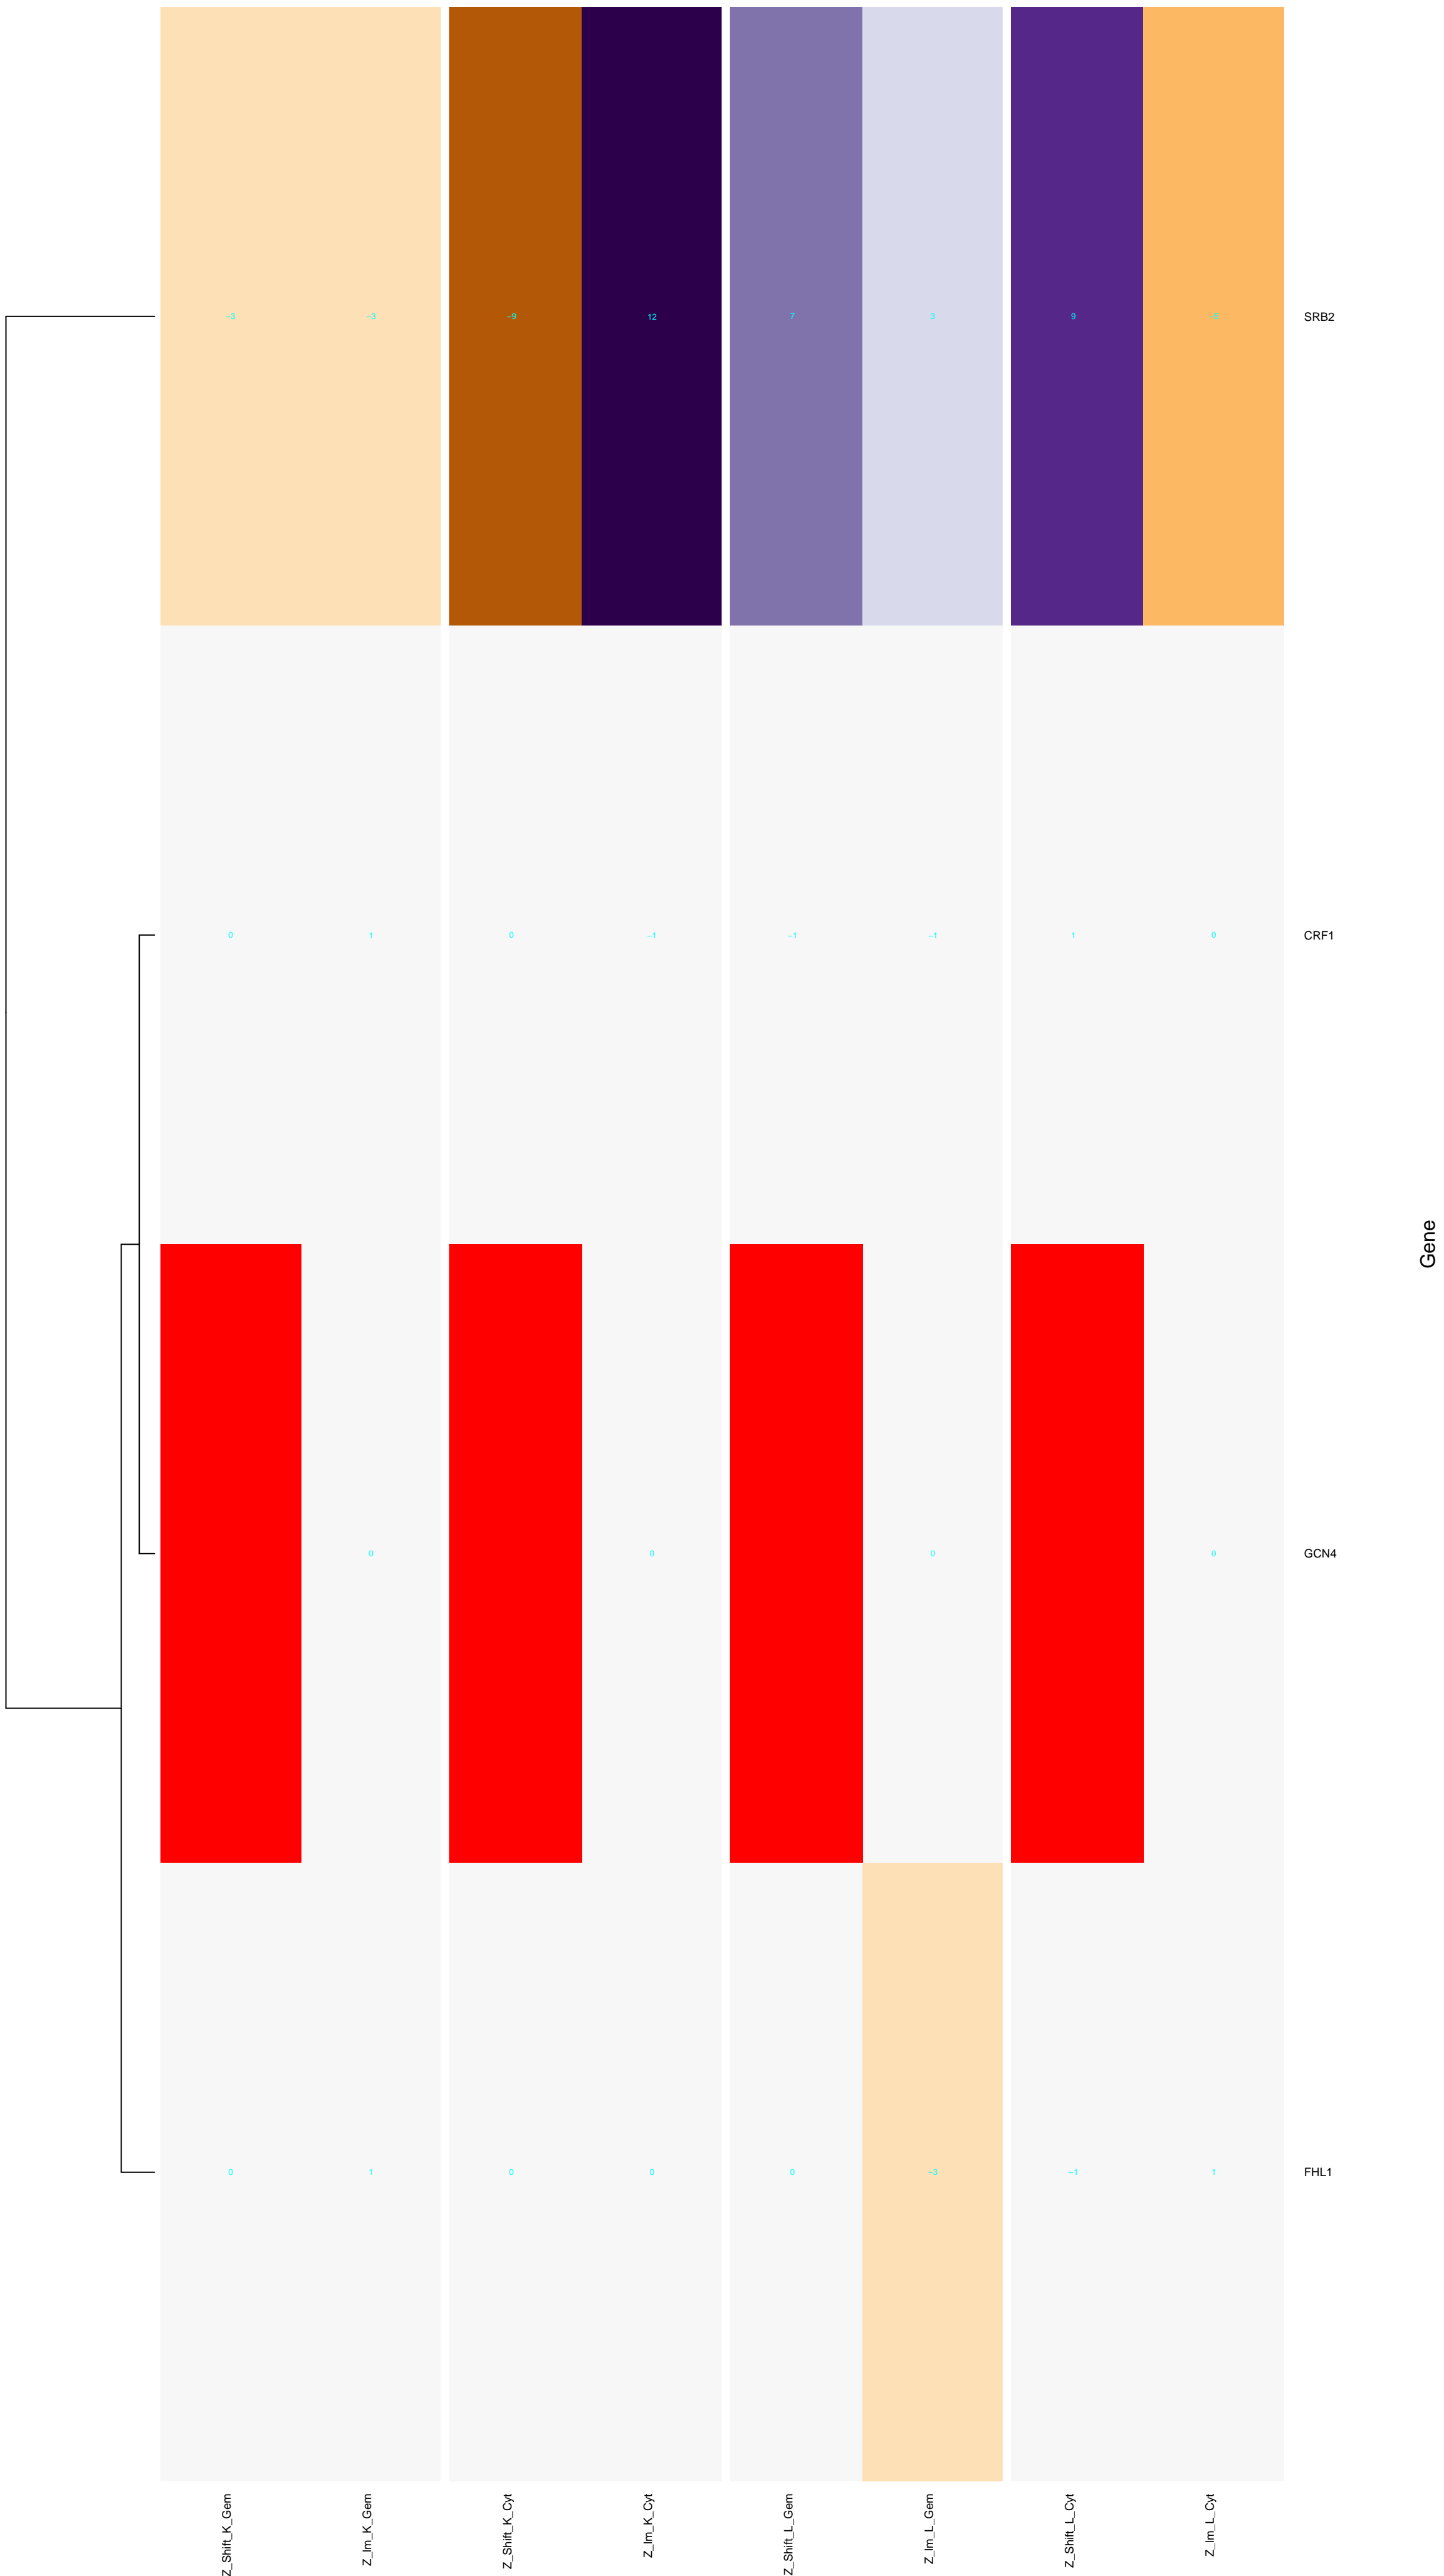

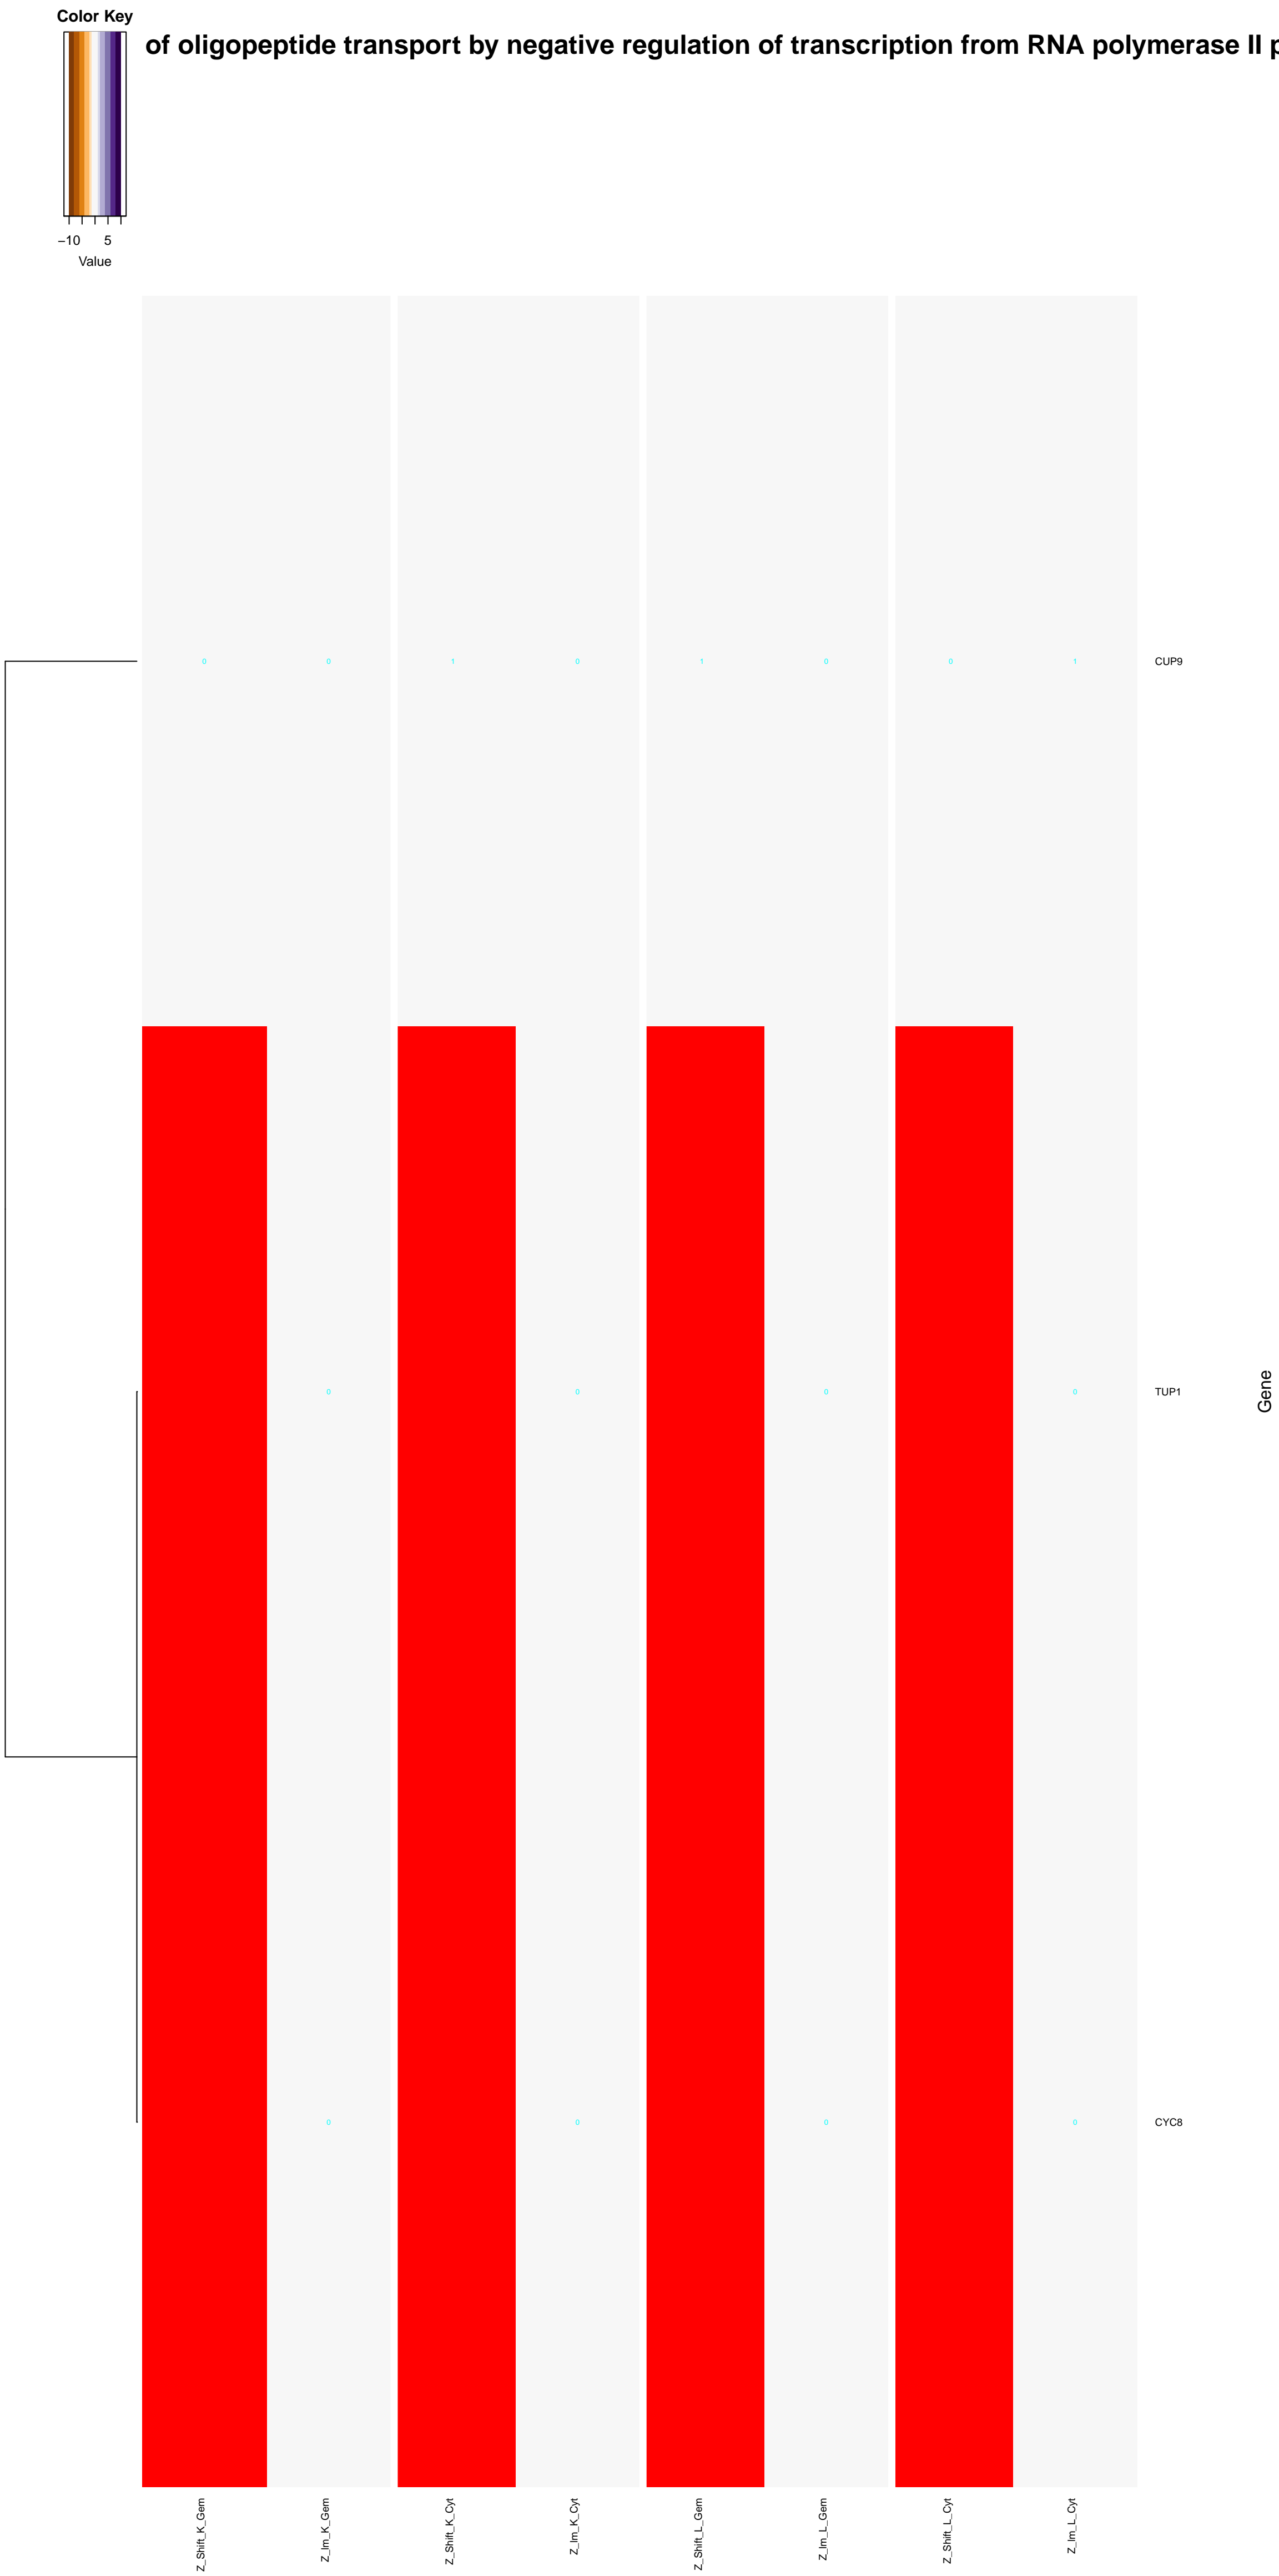

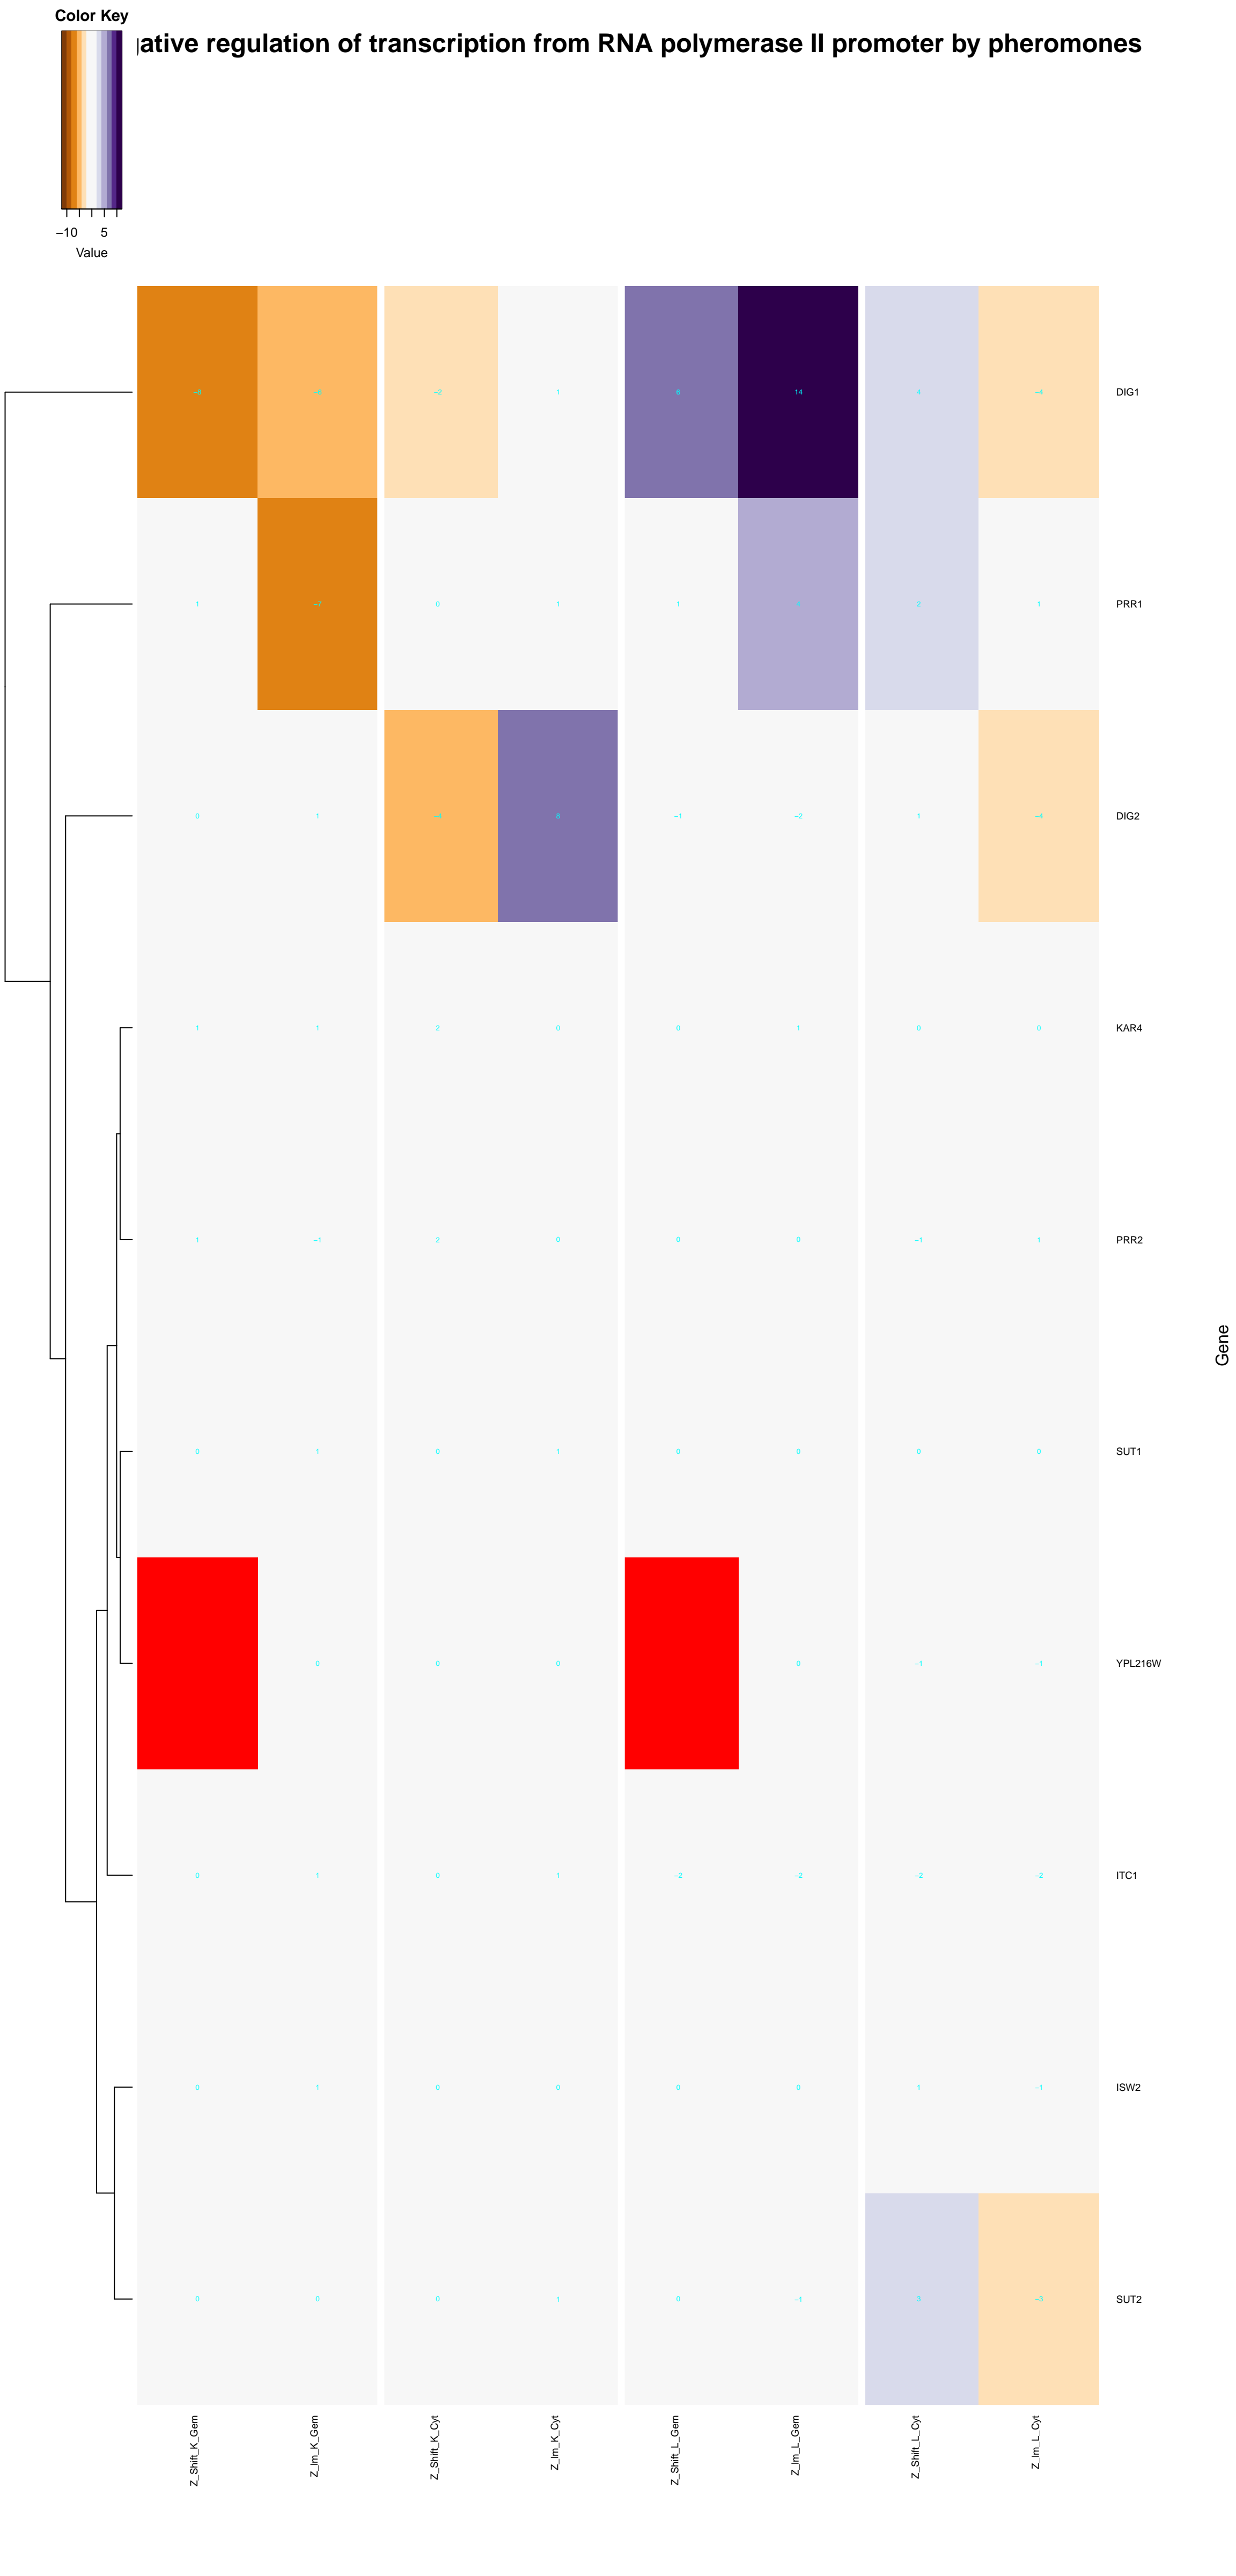

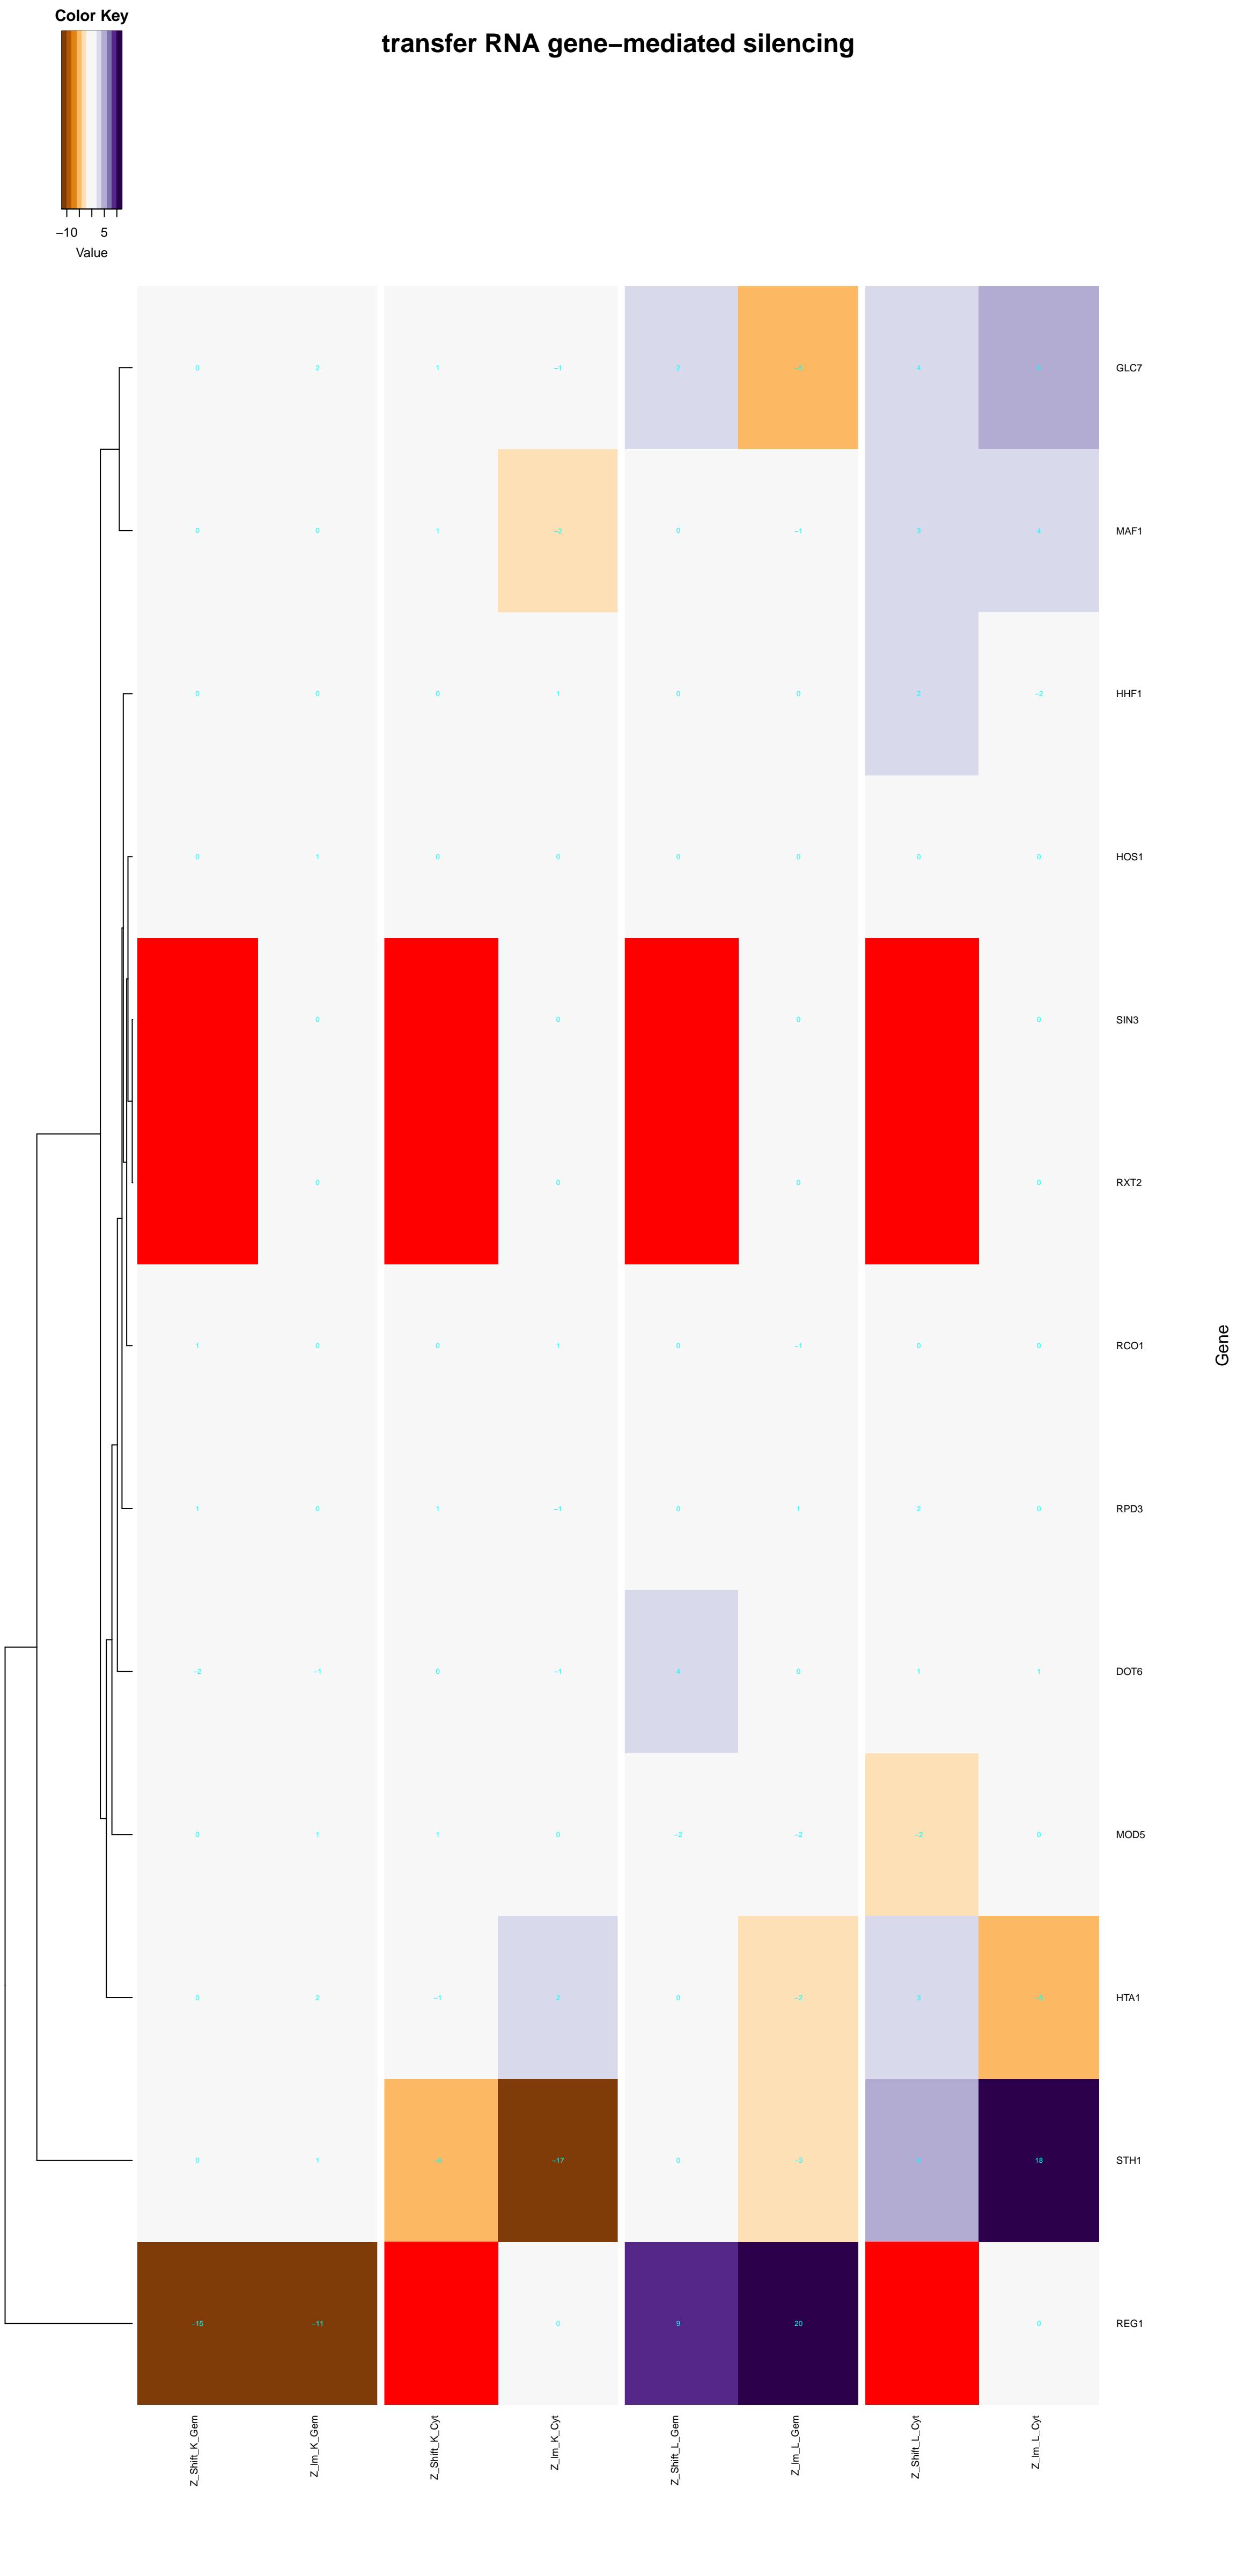

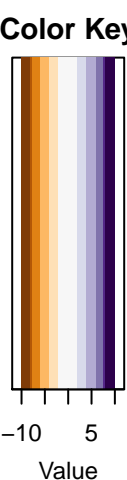

of lipid transport by negative regulation of transcription from RNA polymerase II promoter

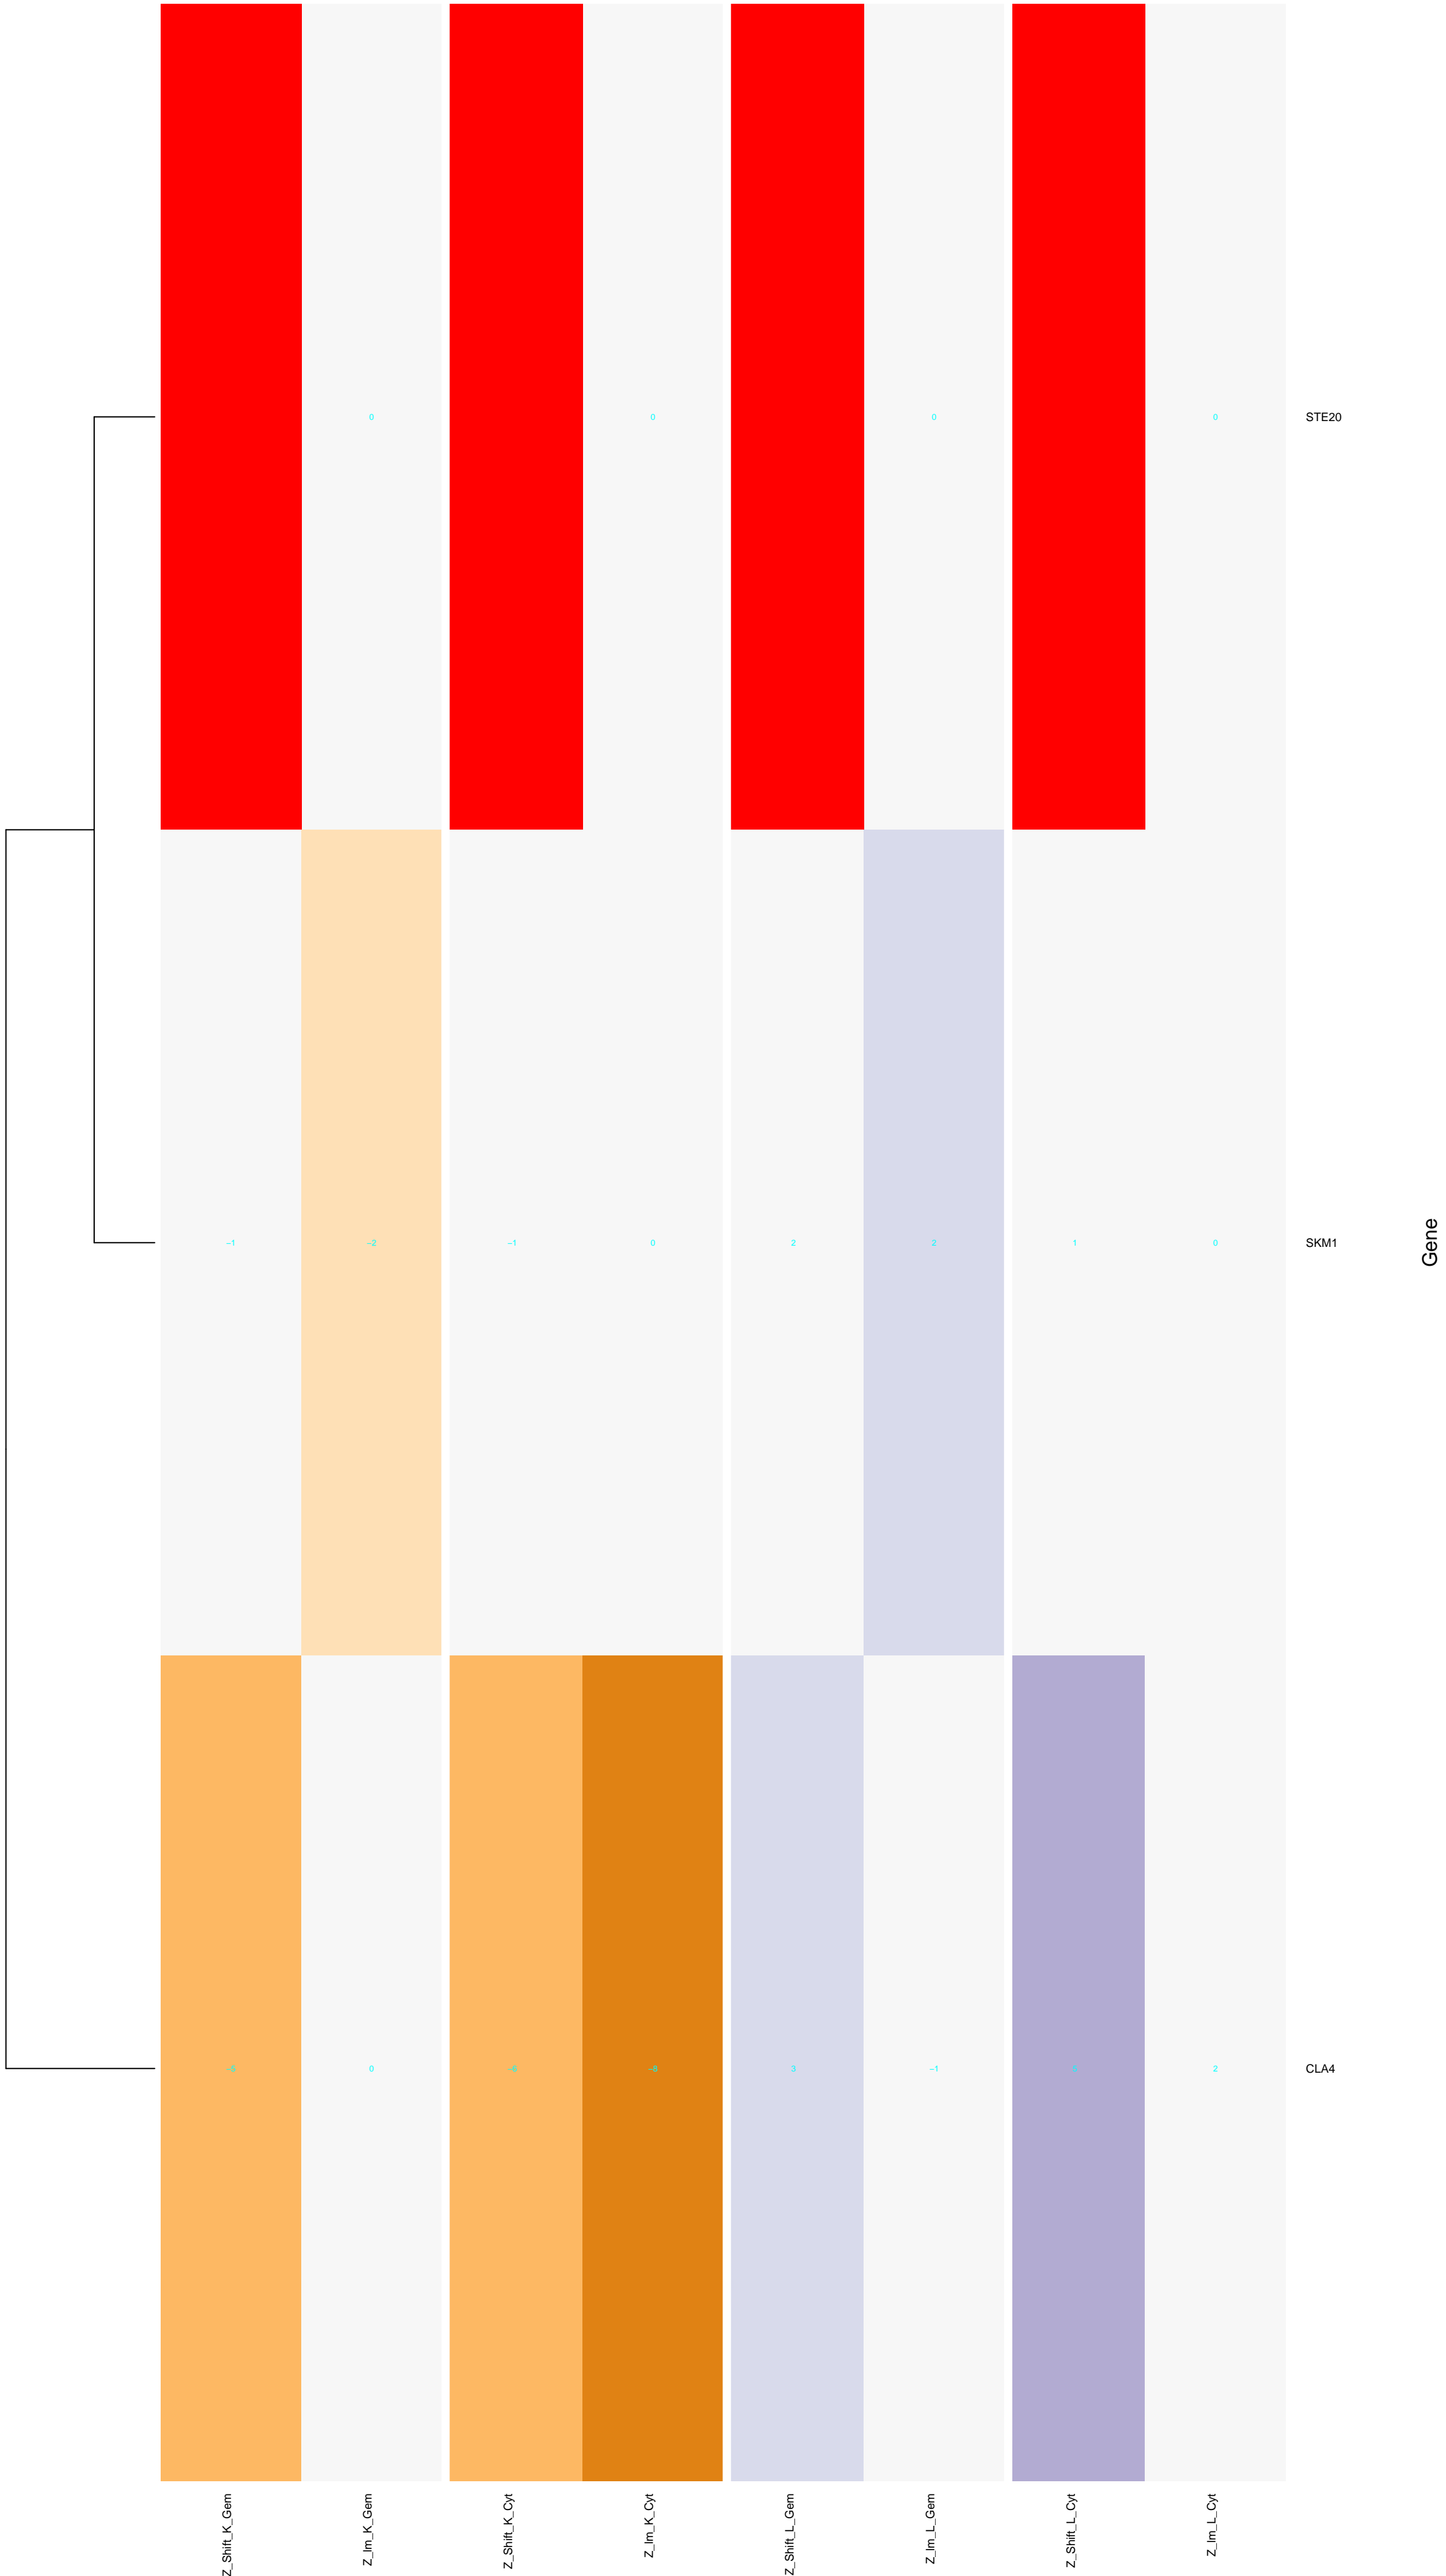

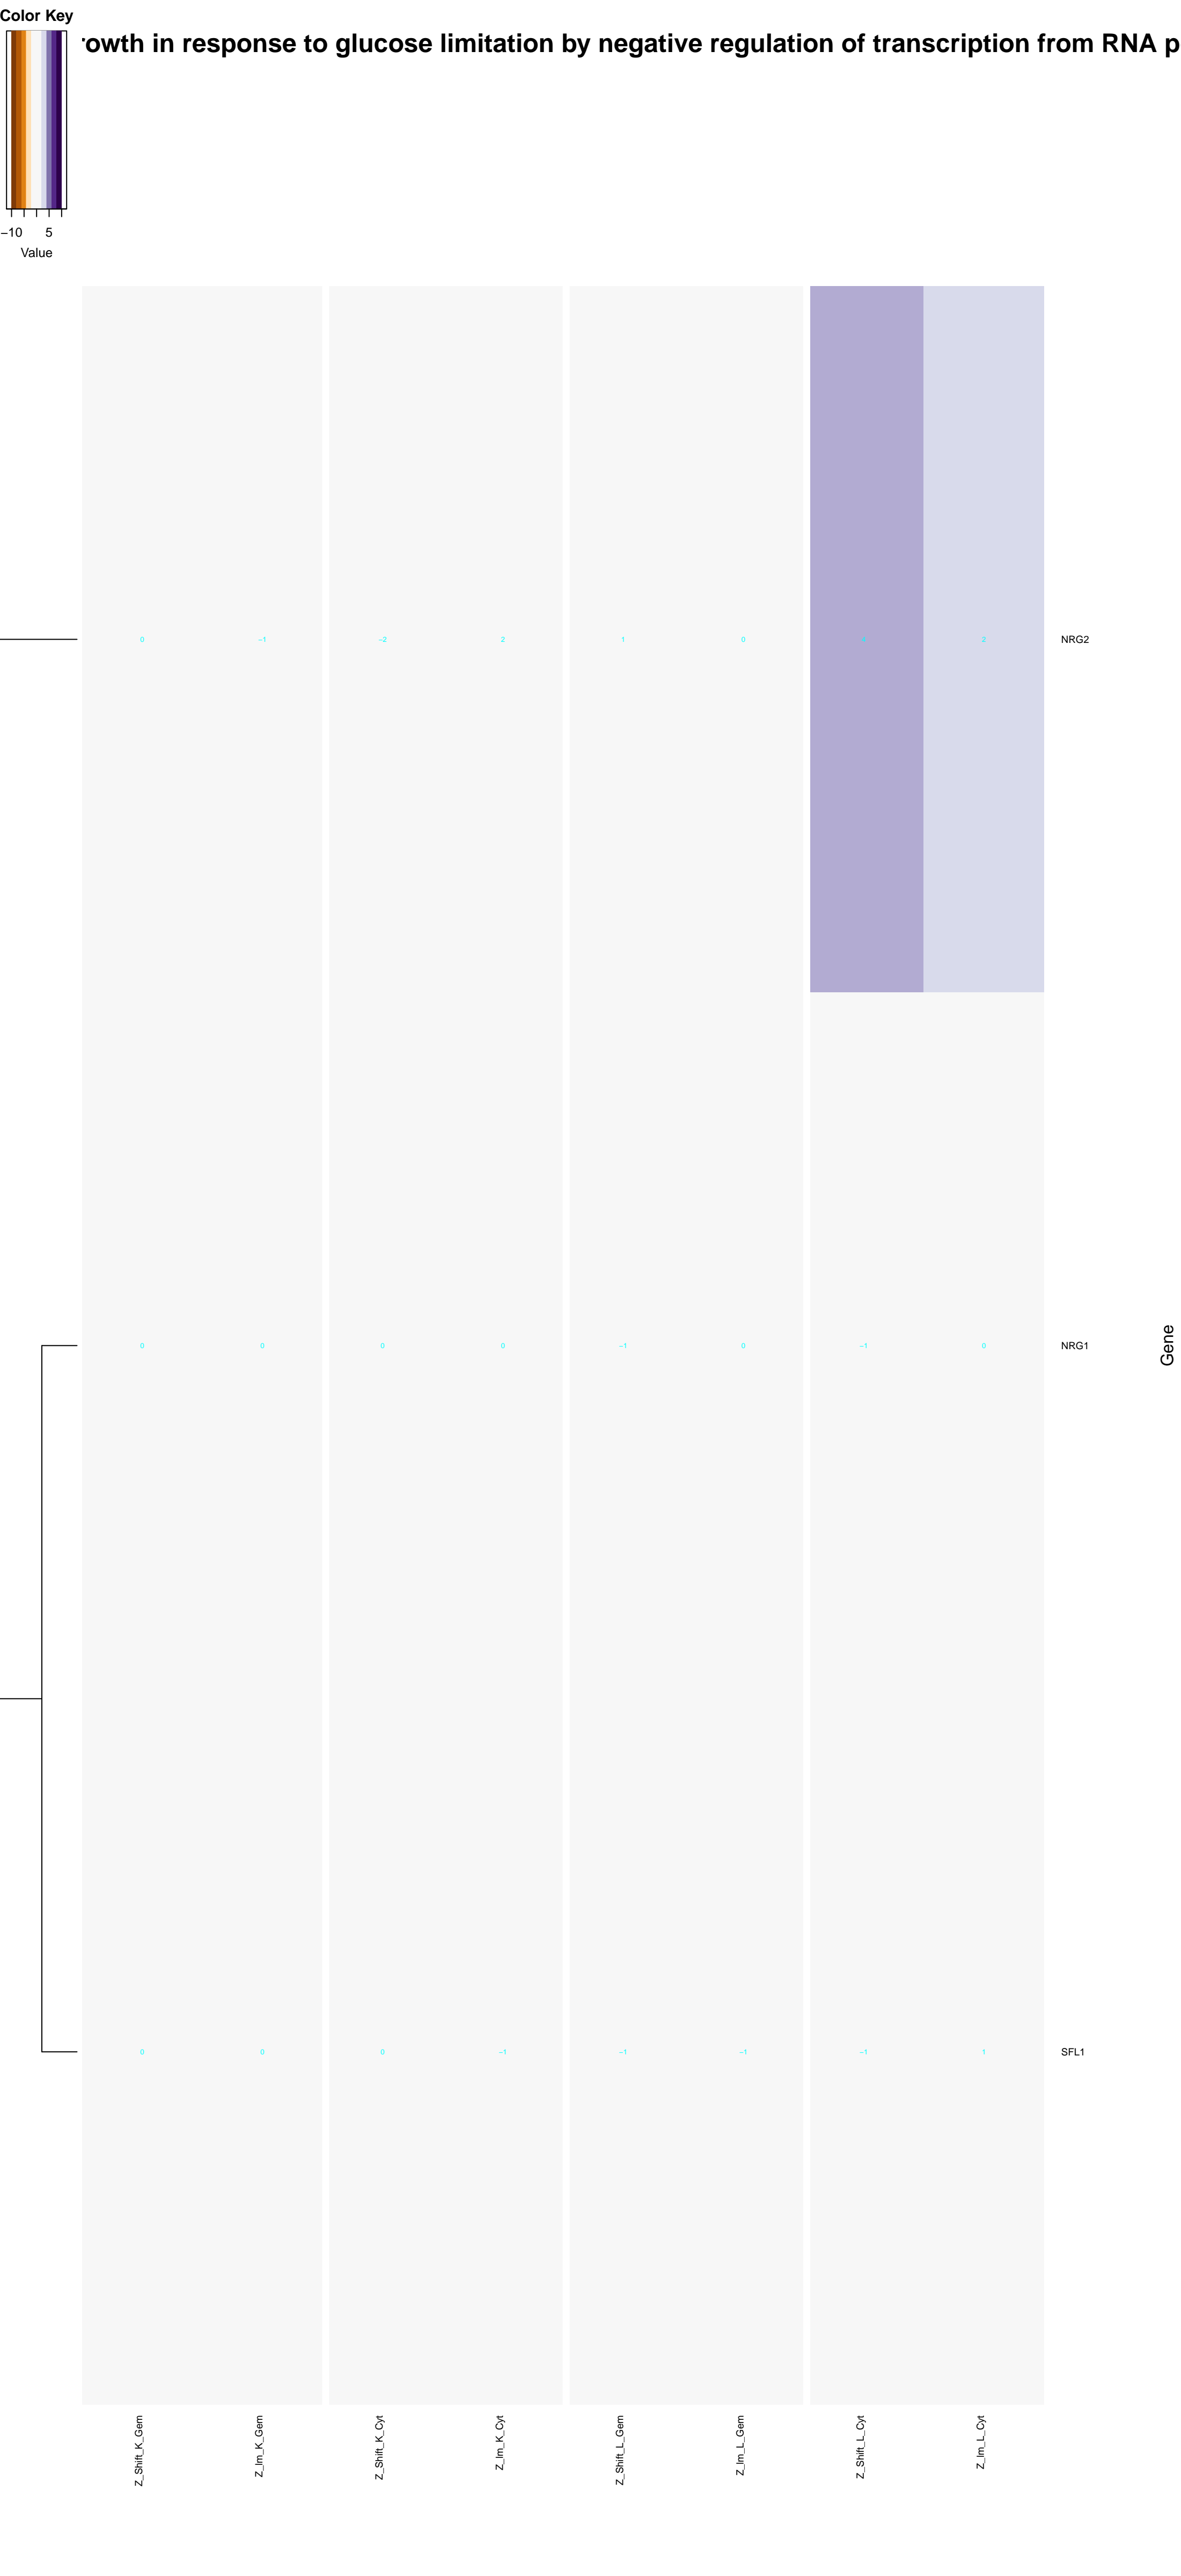

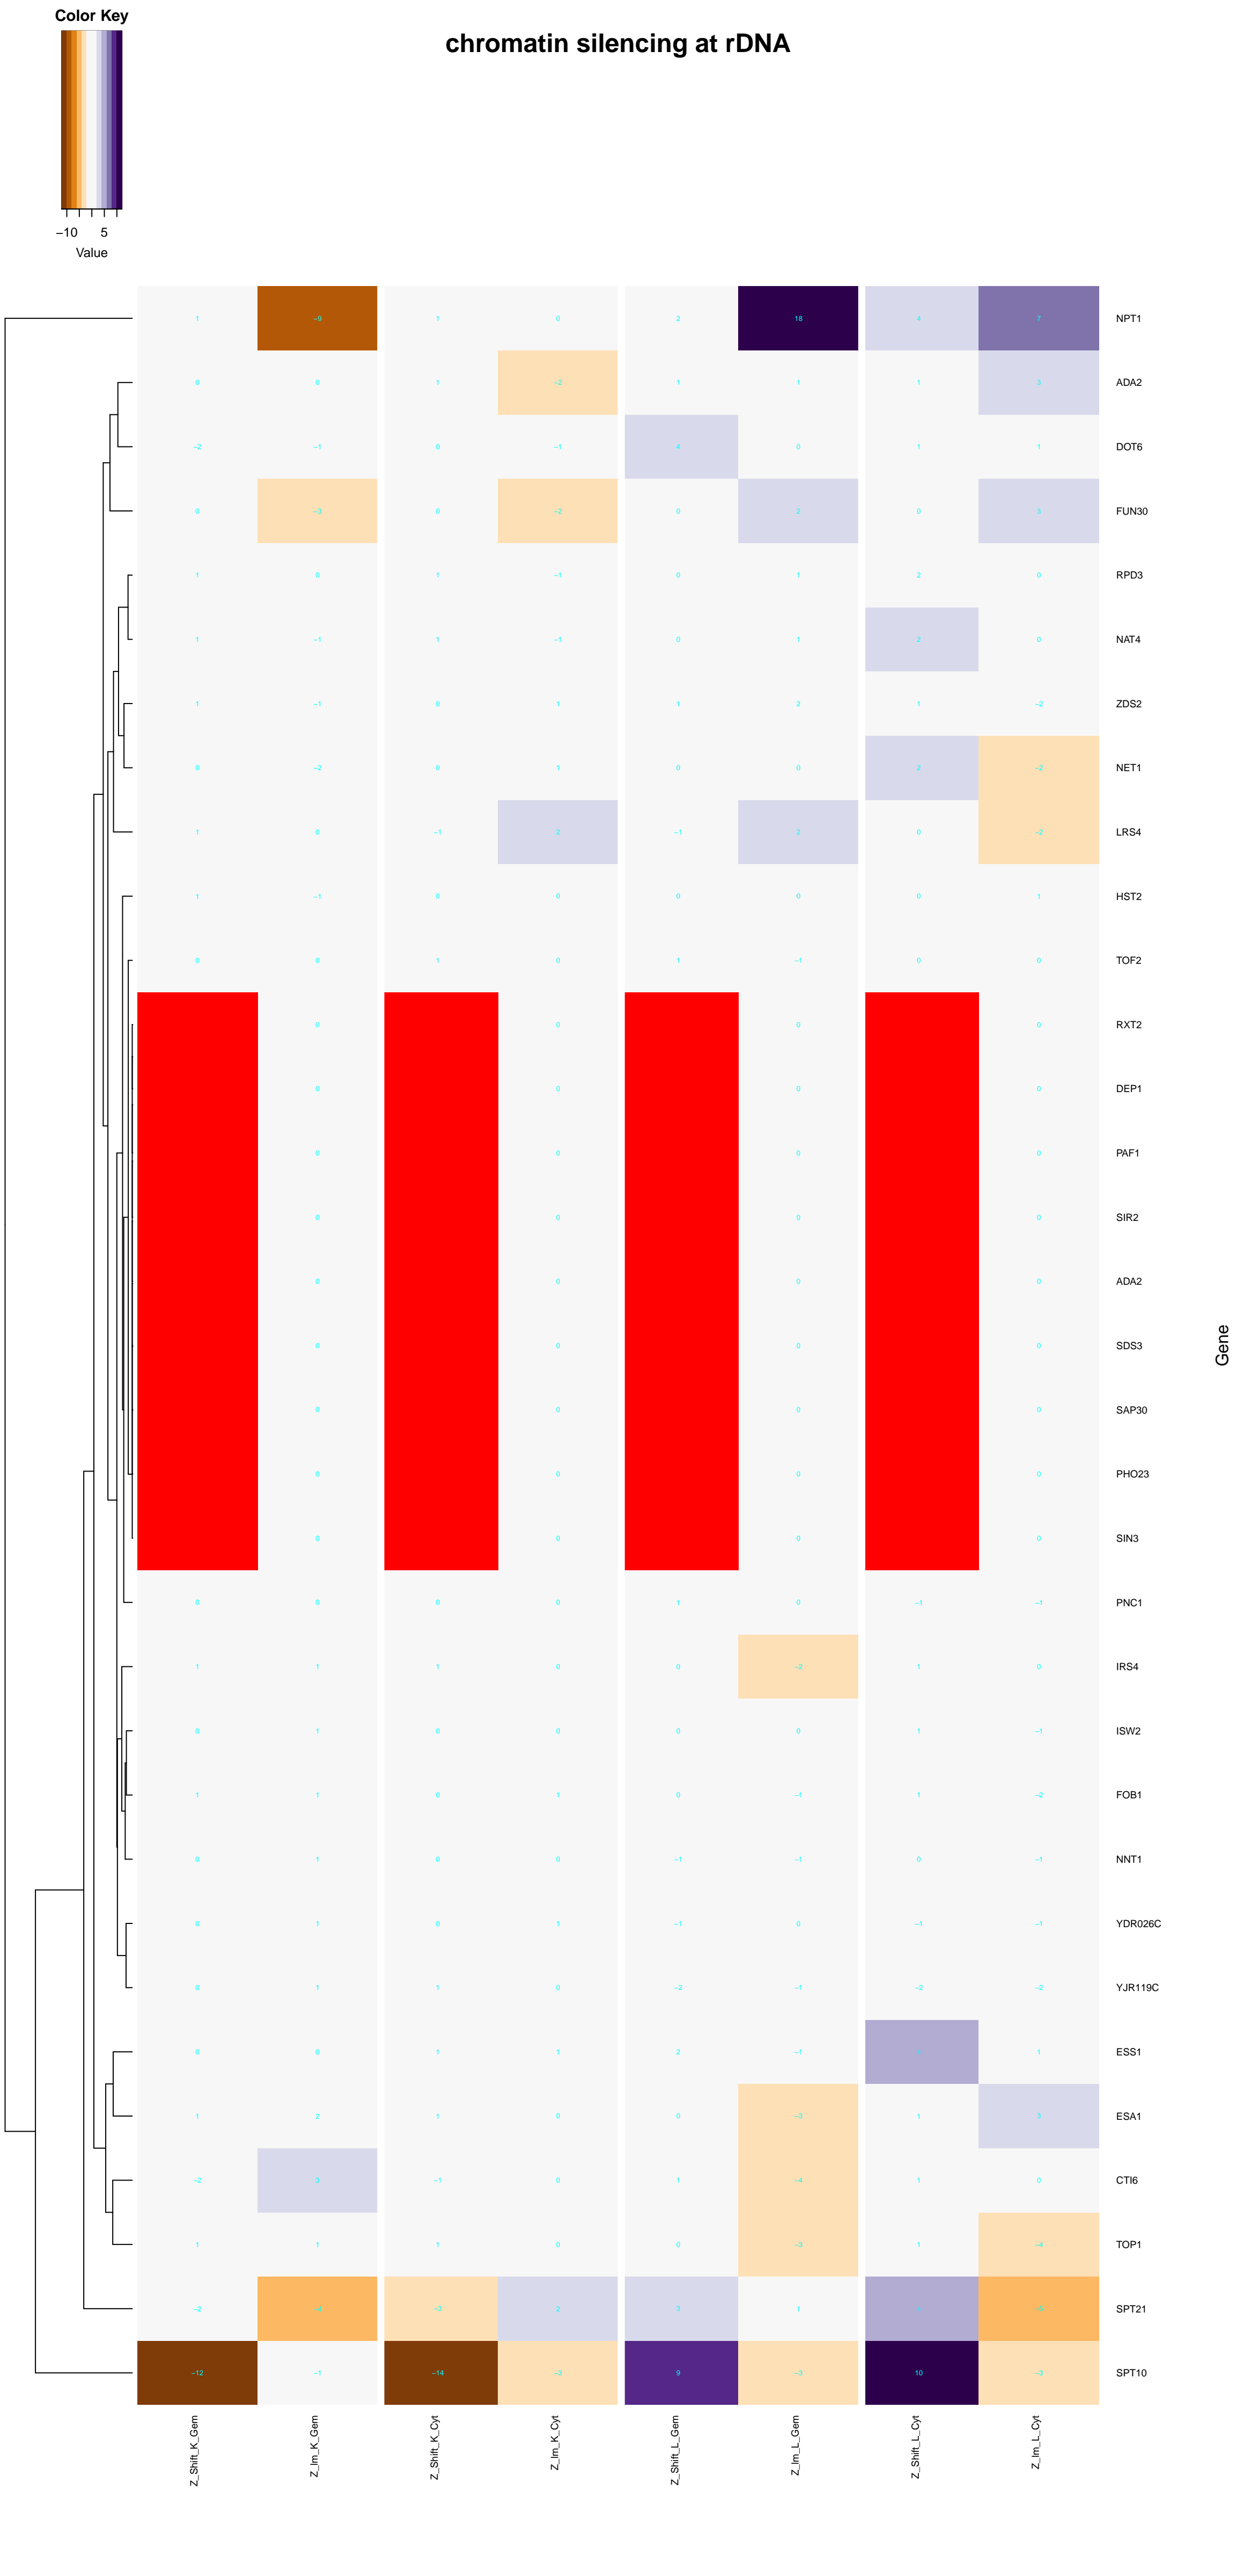

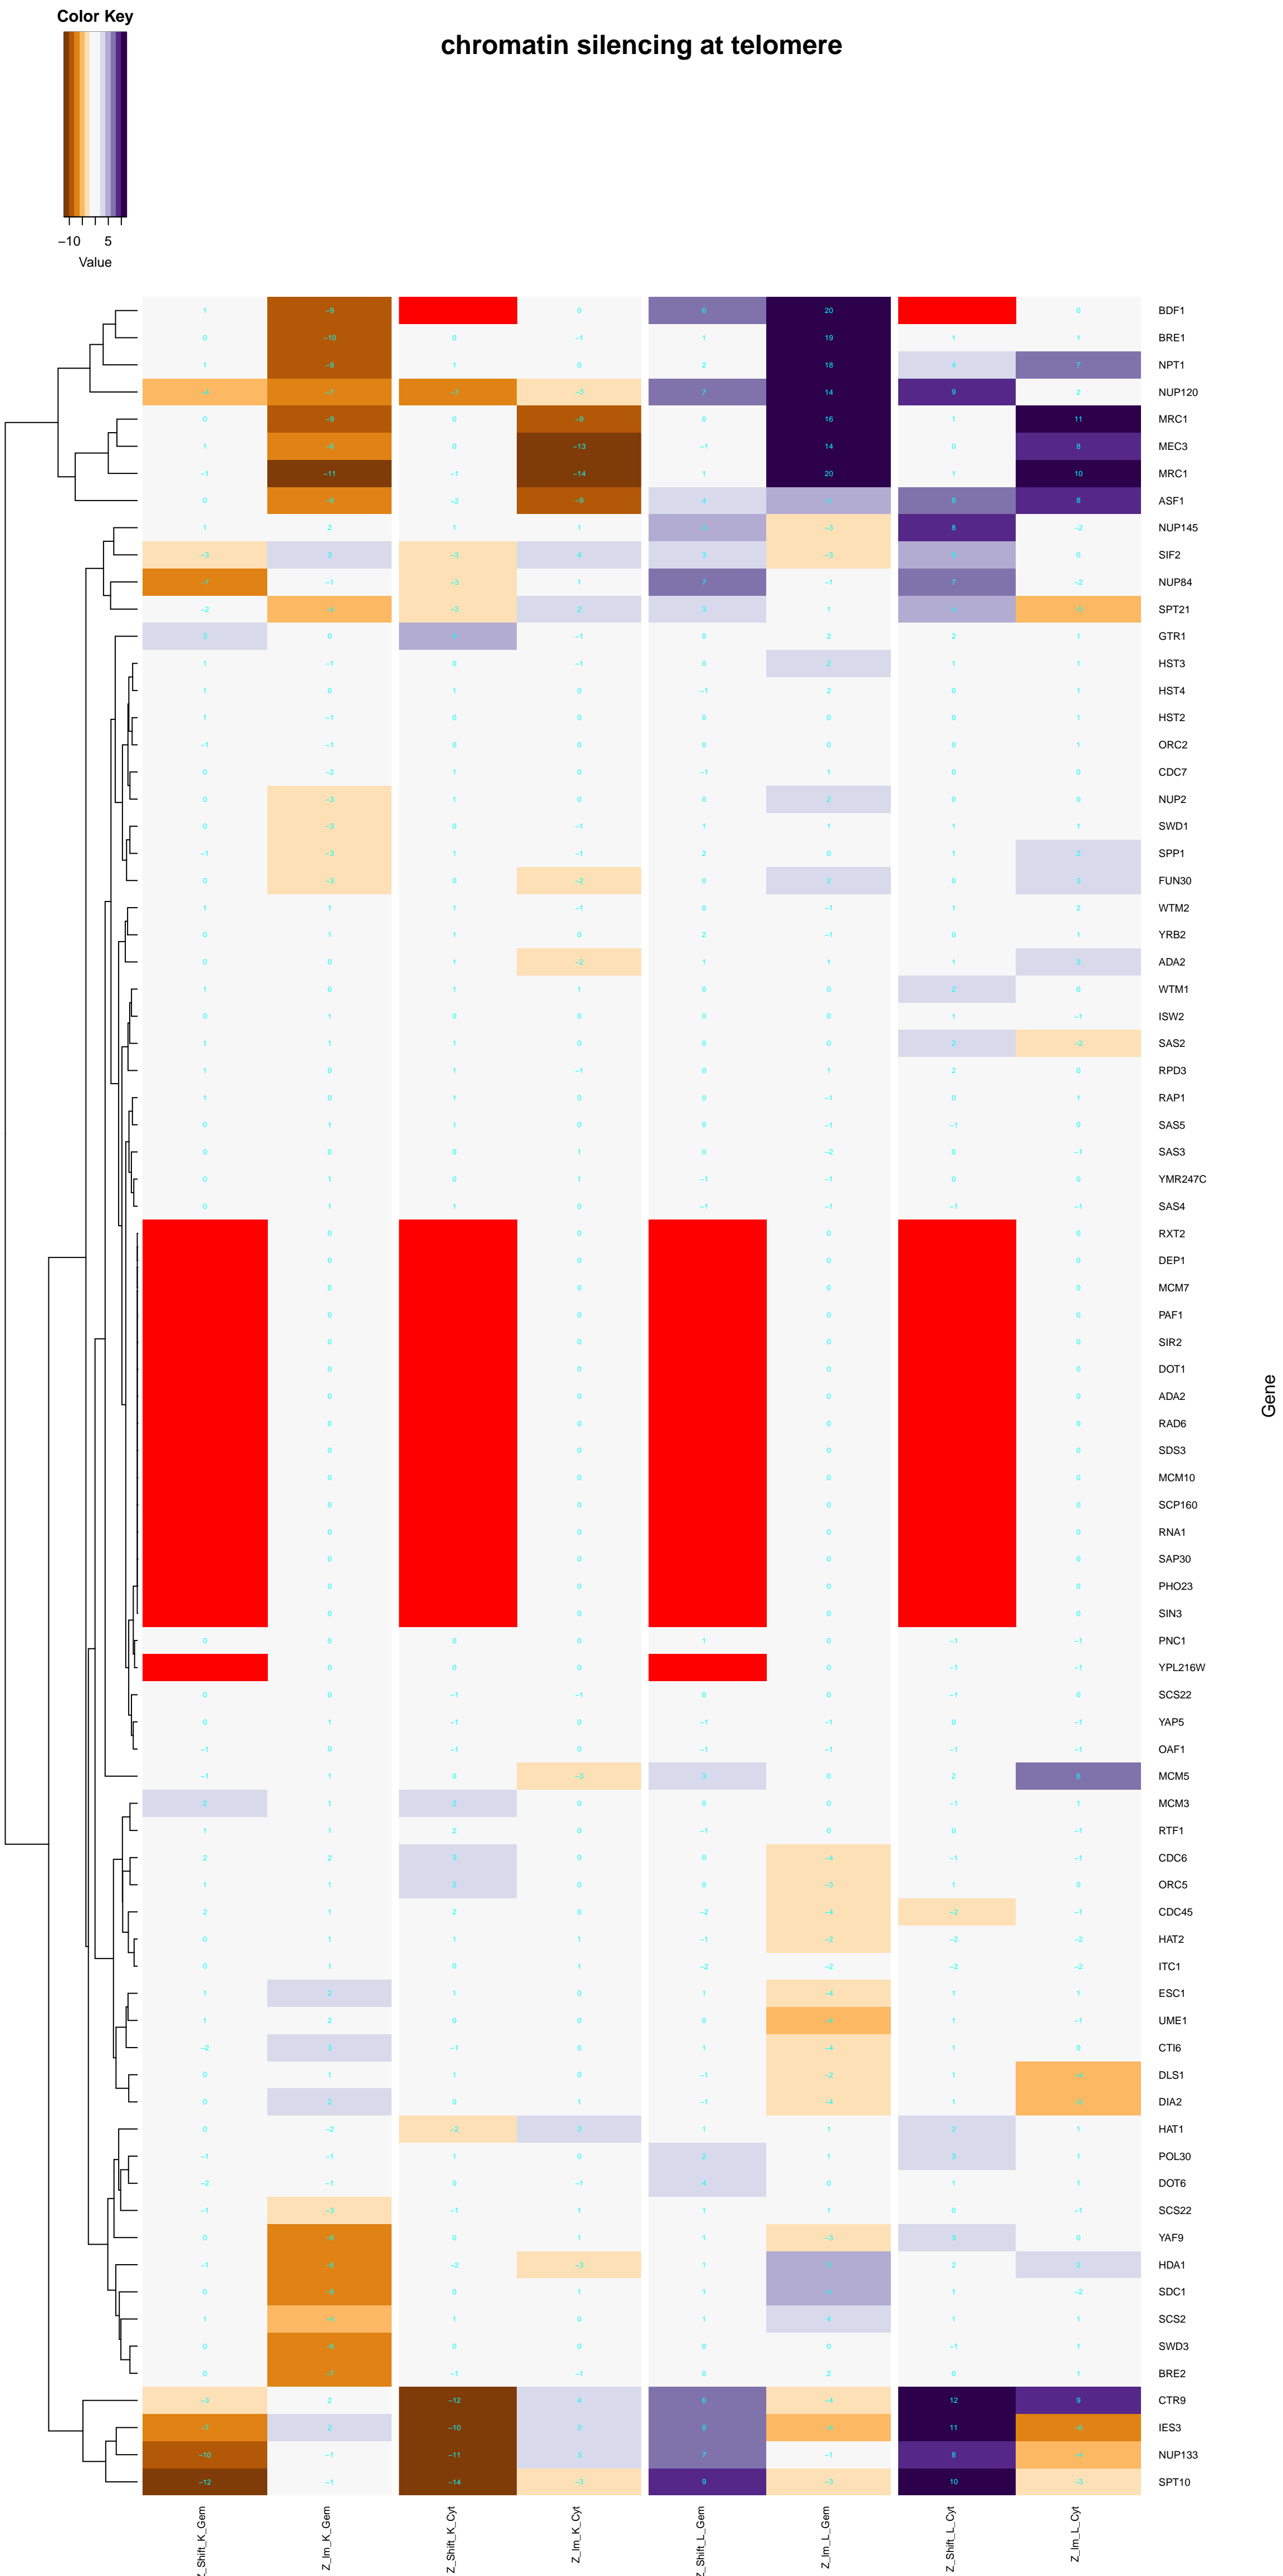

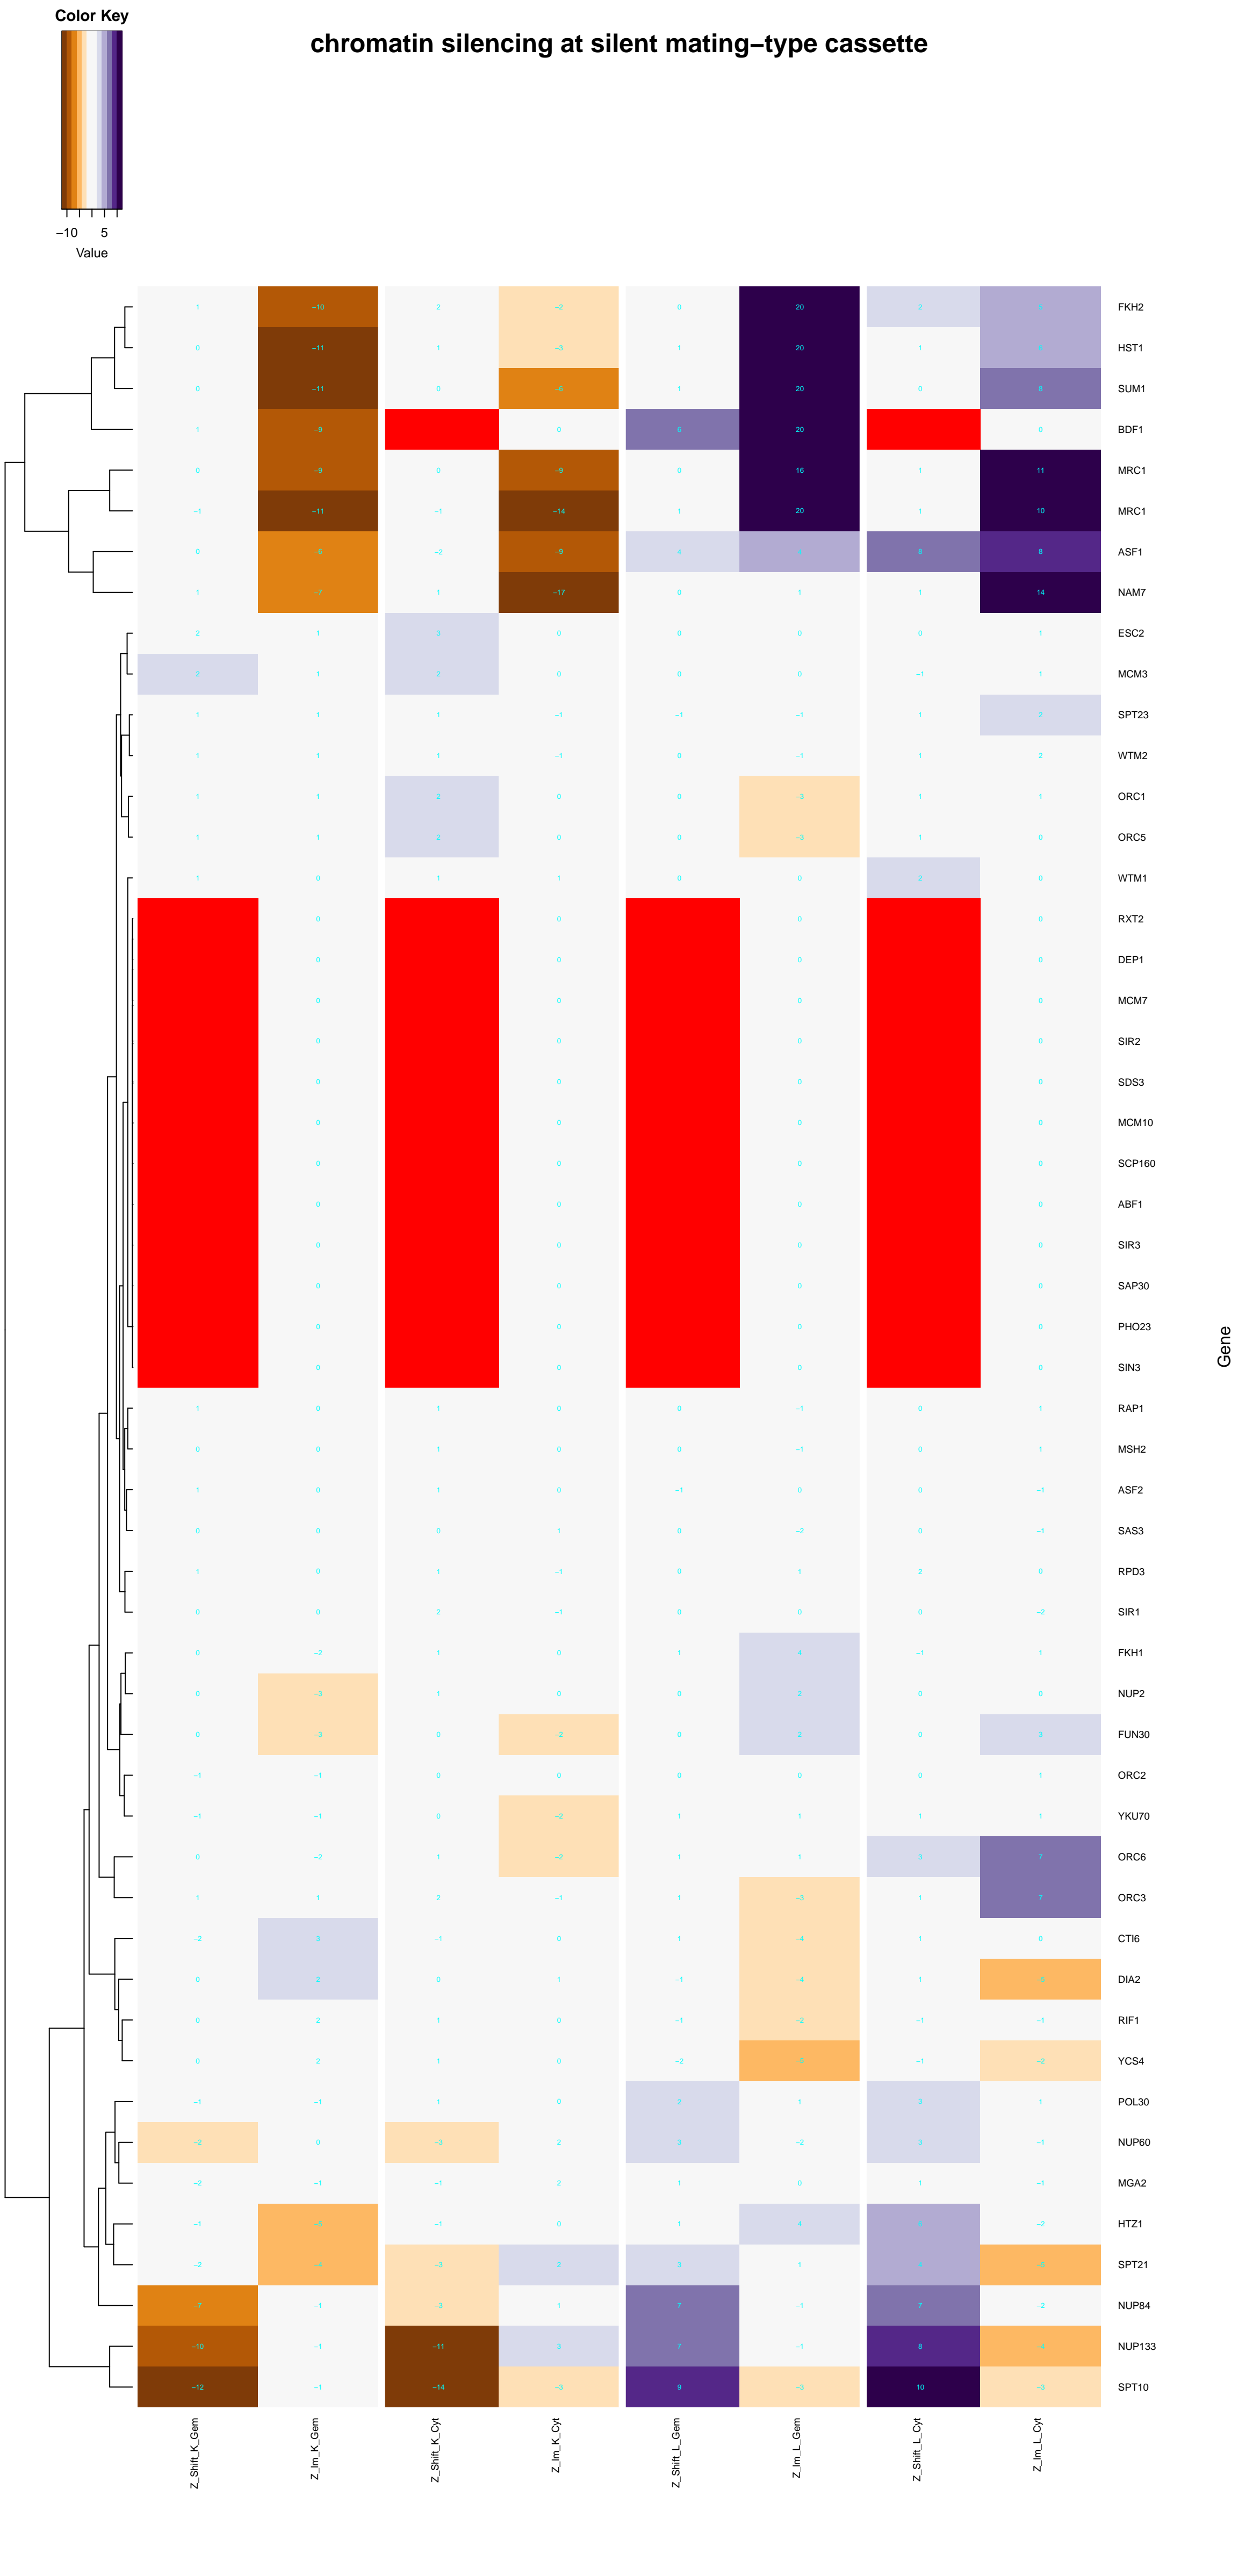



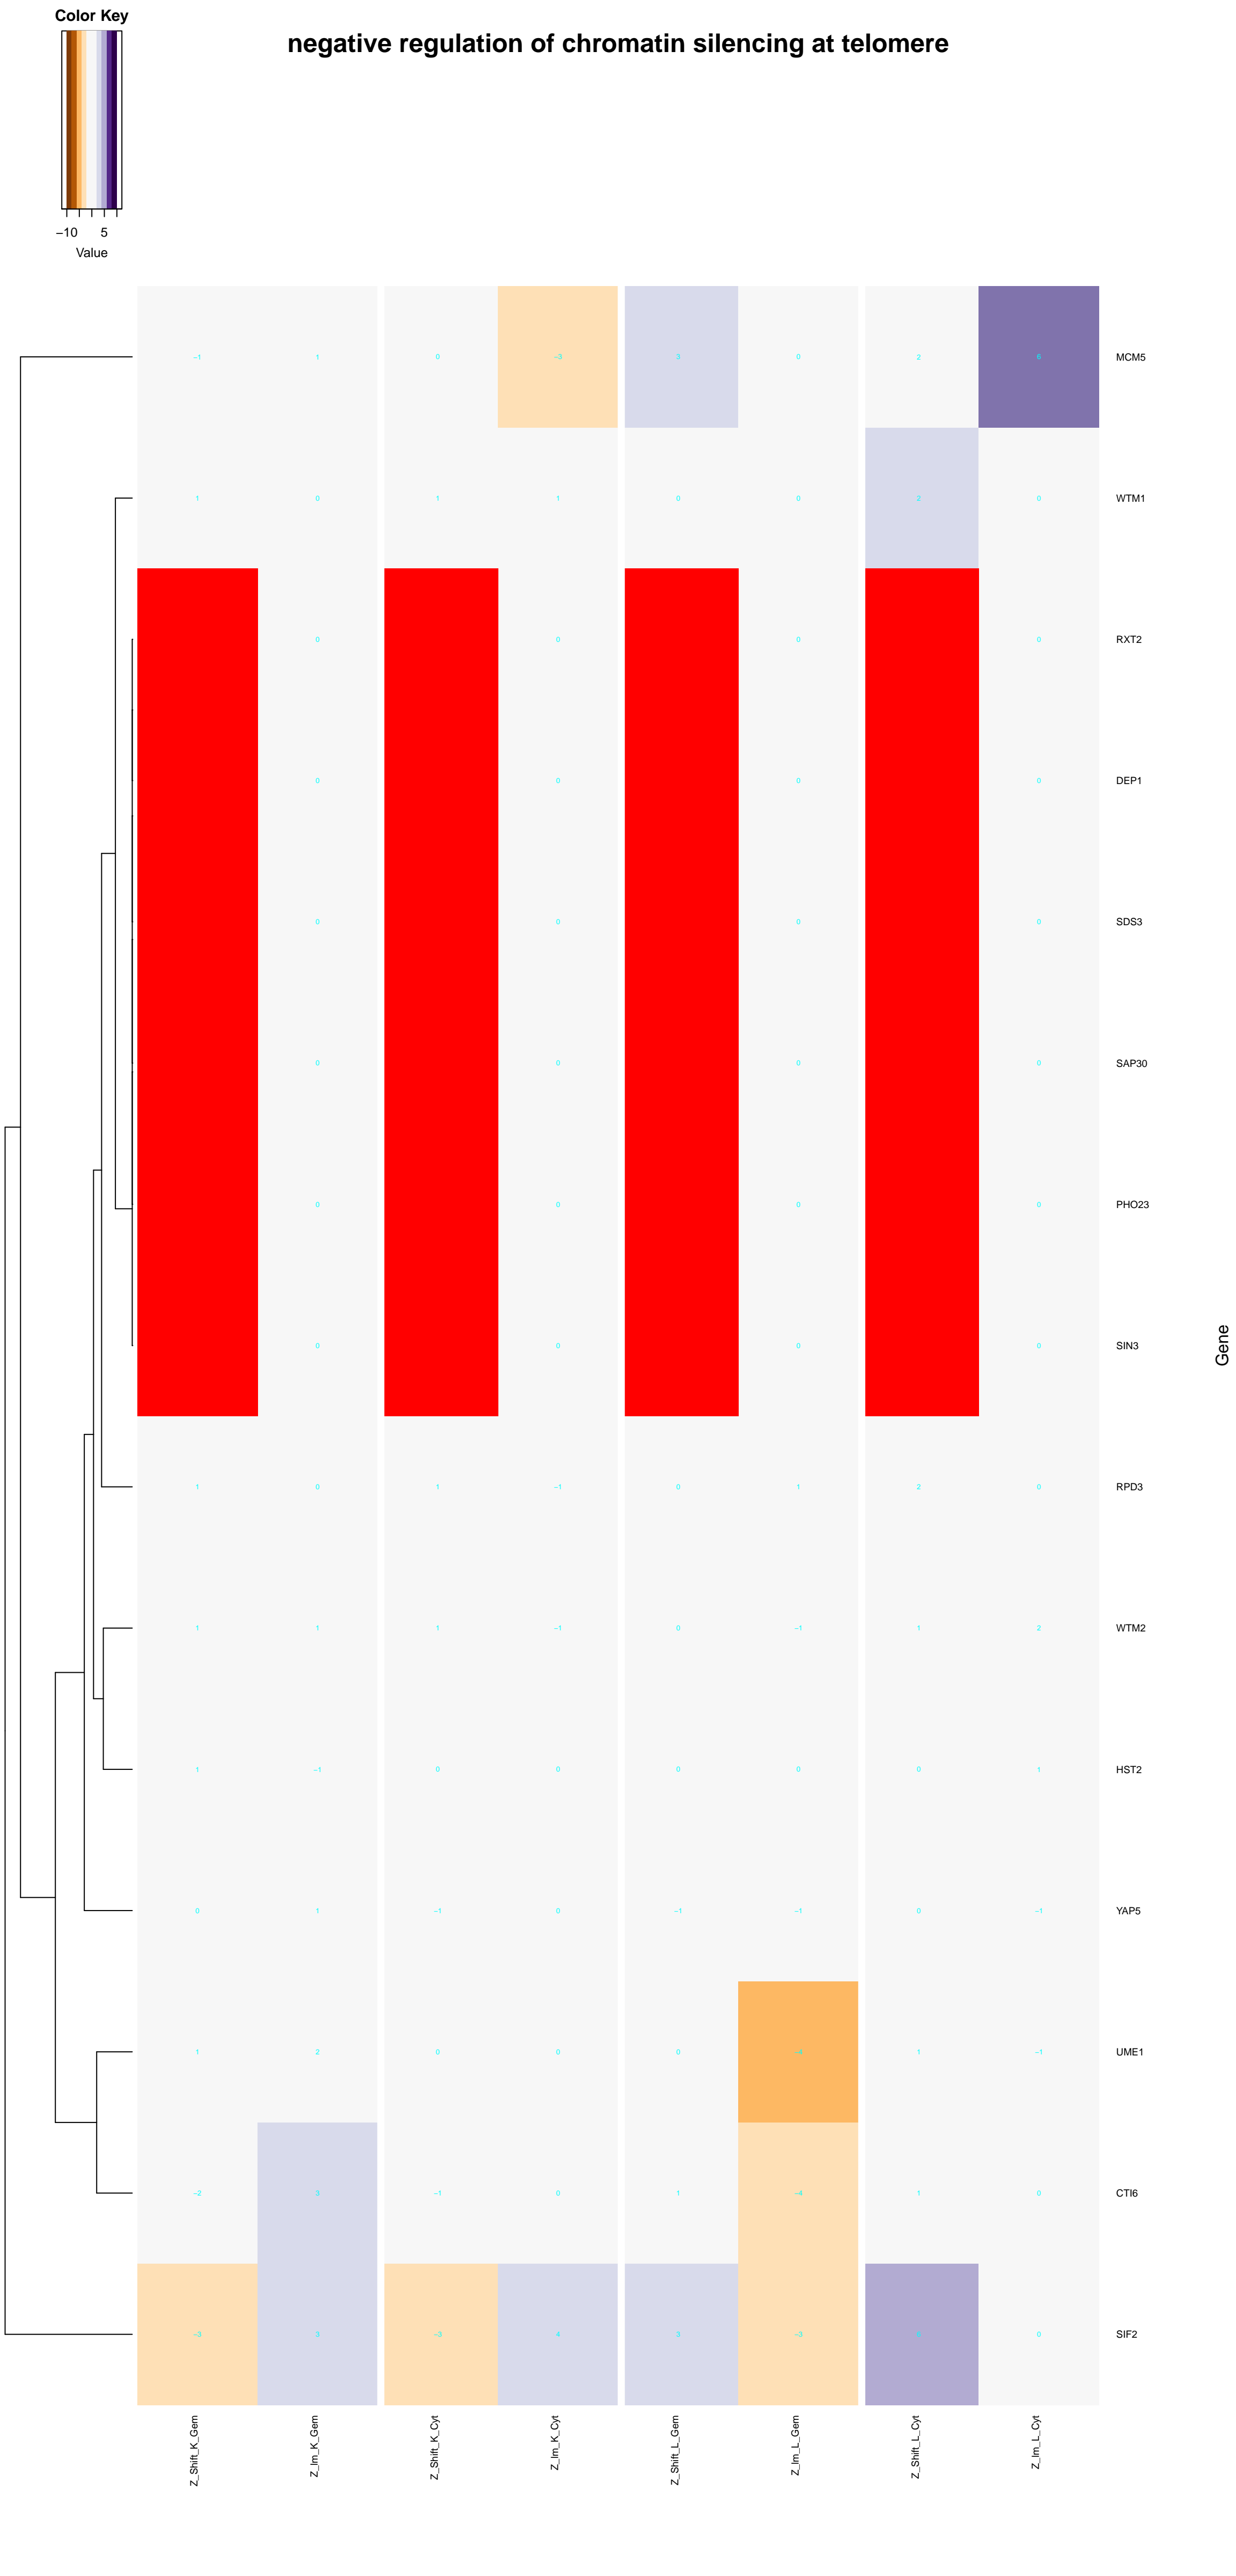

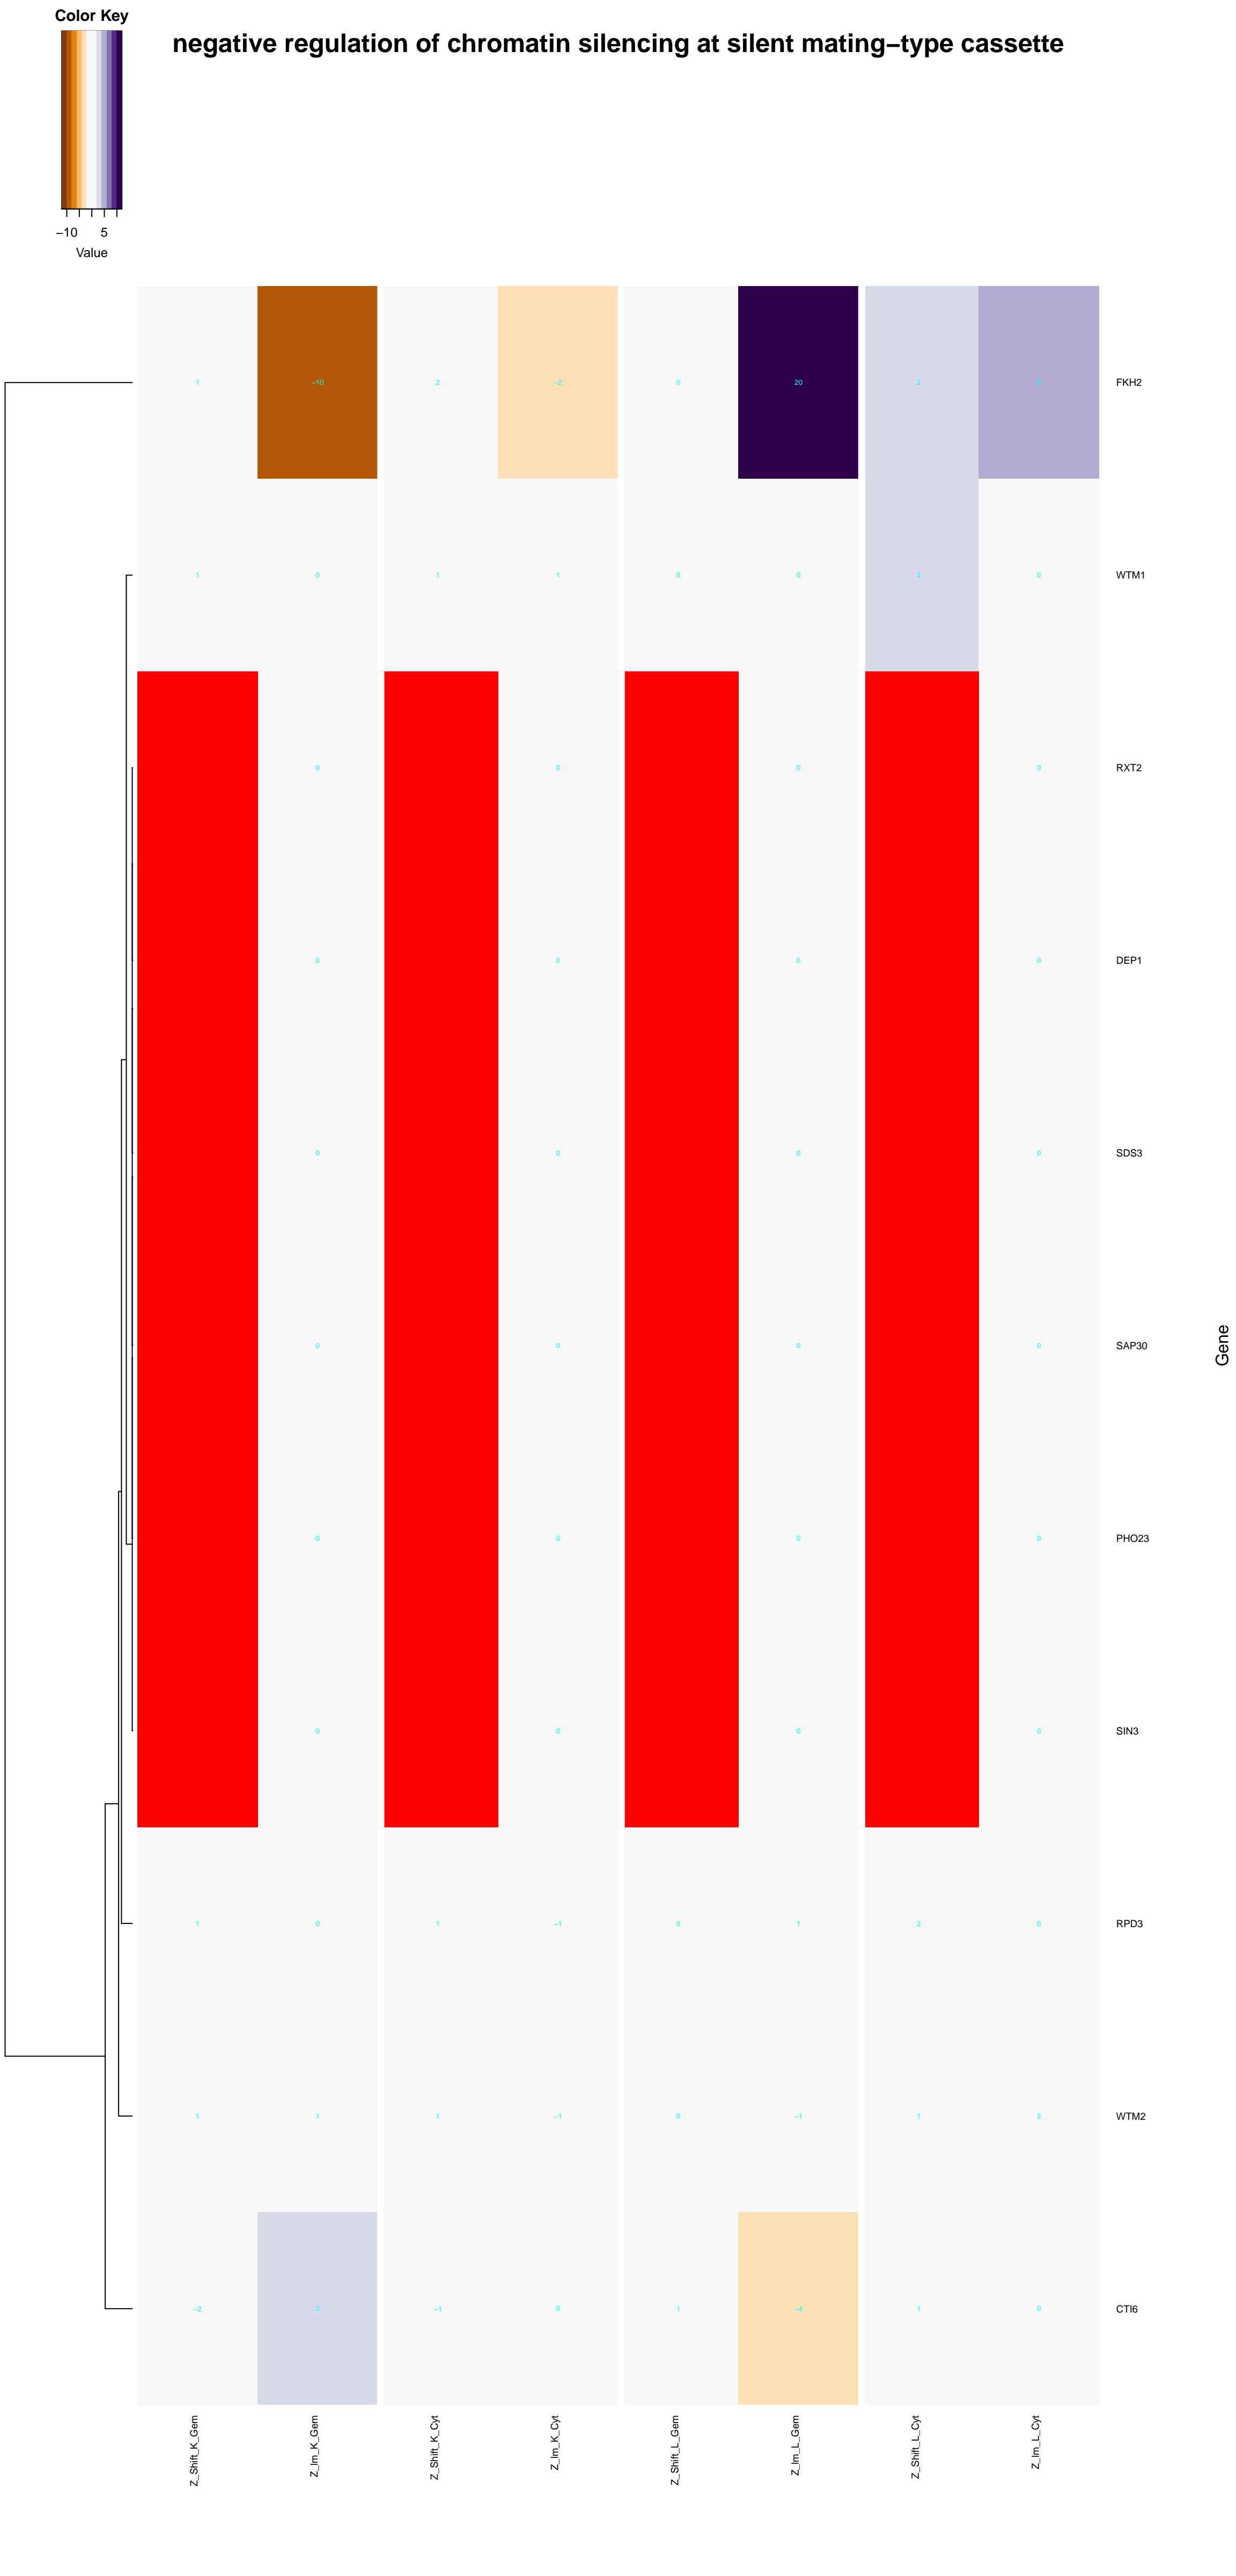

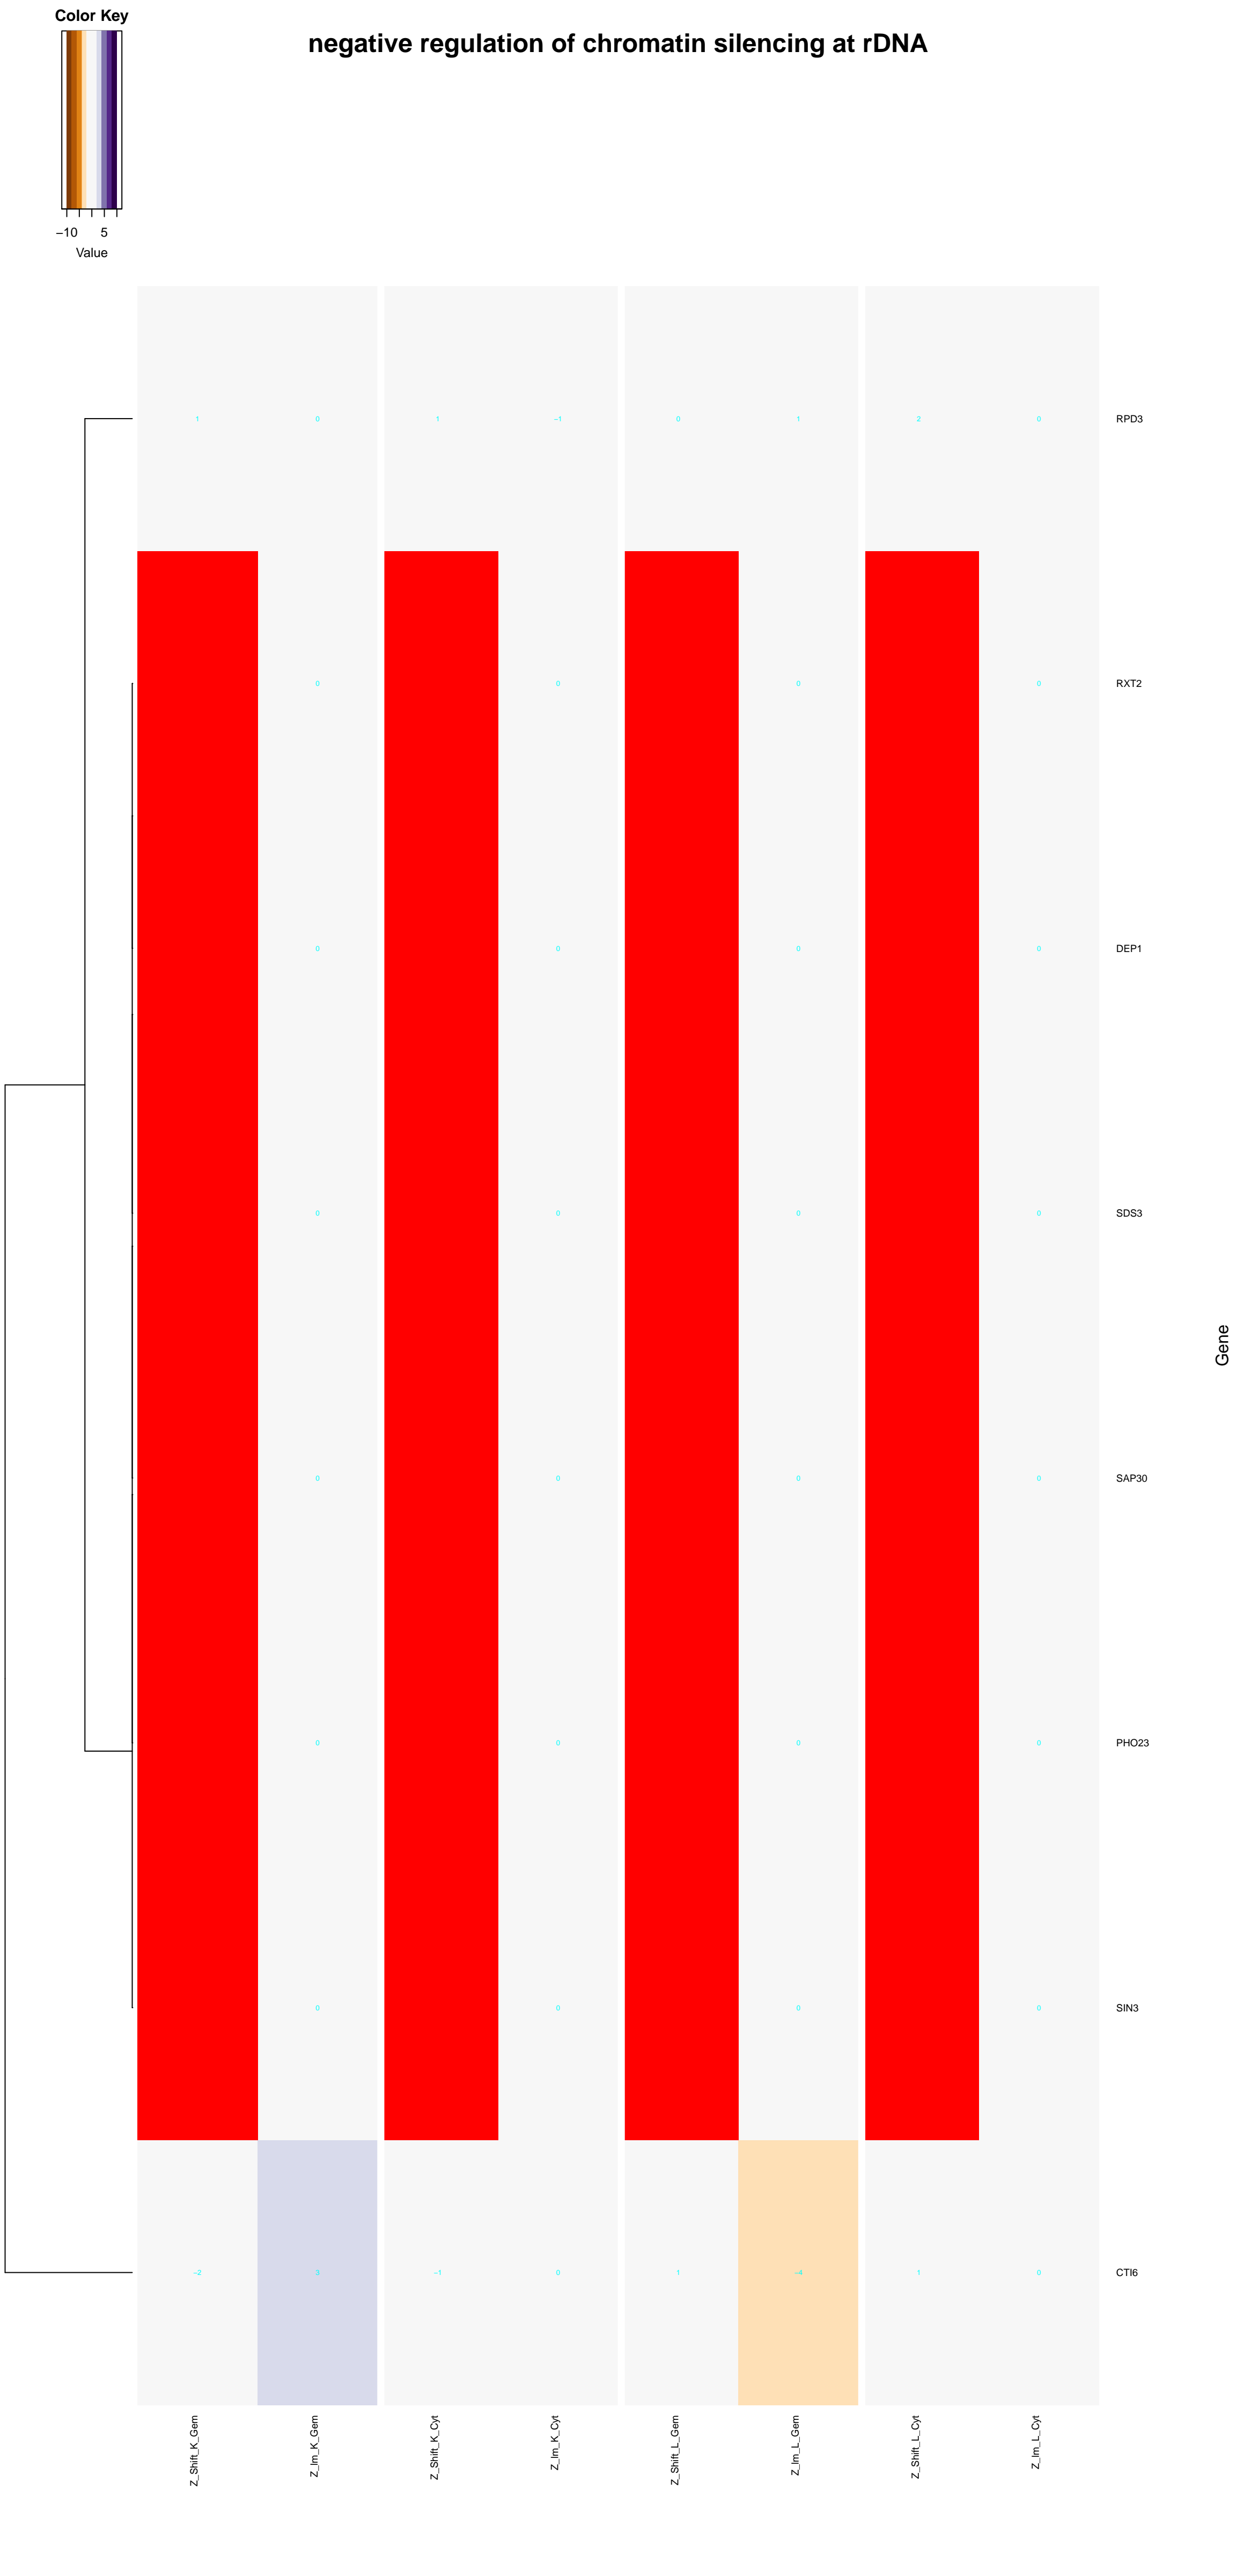

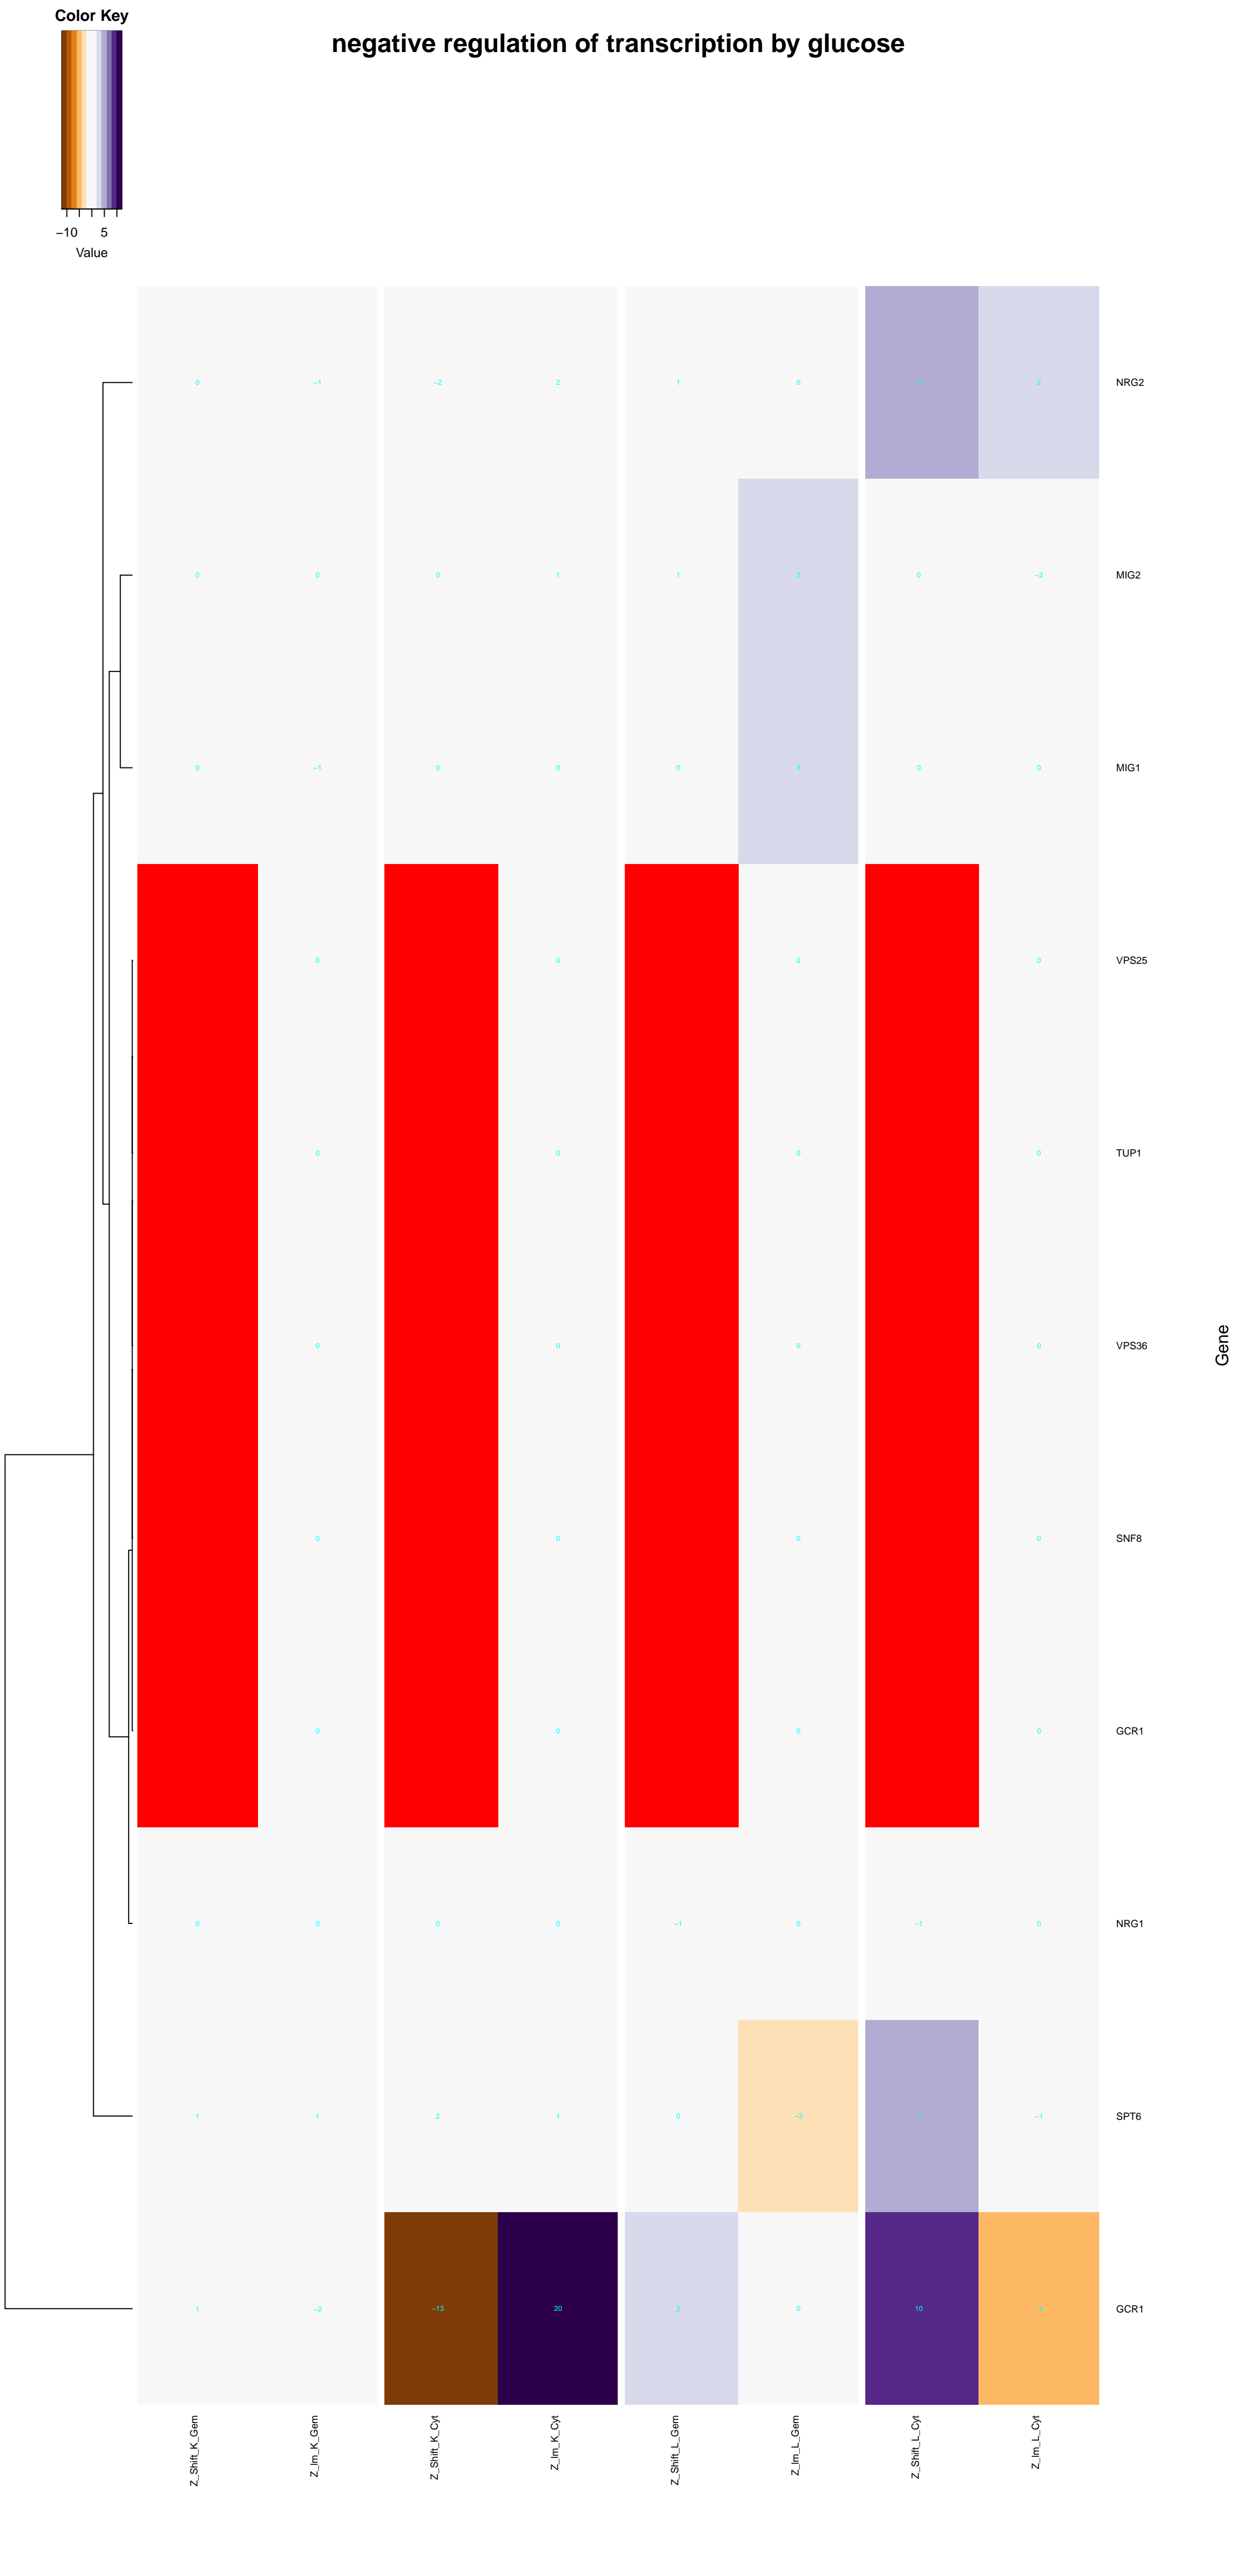

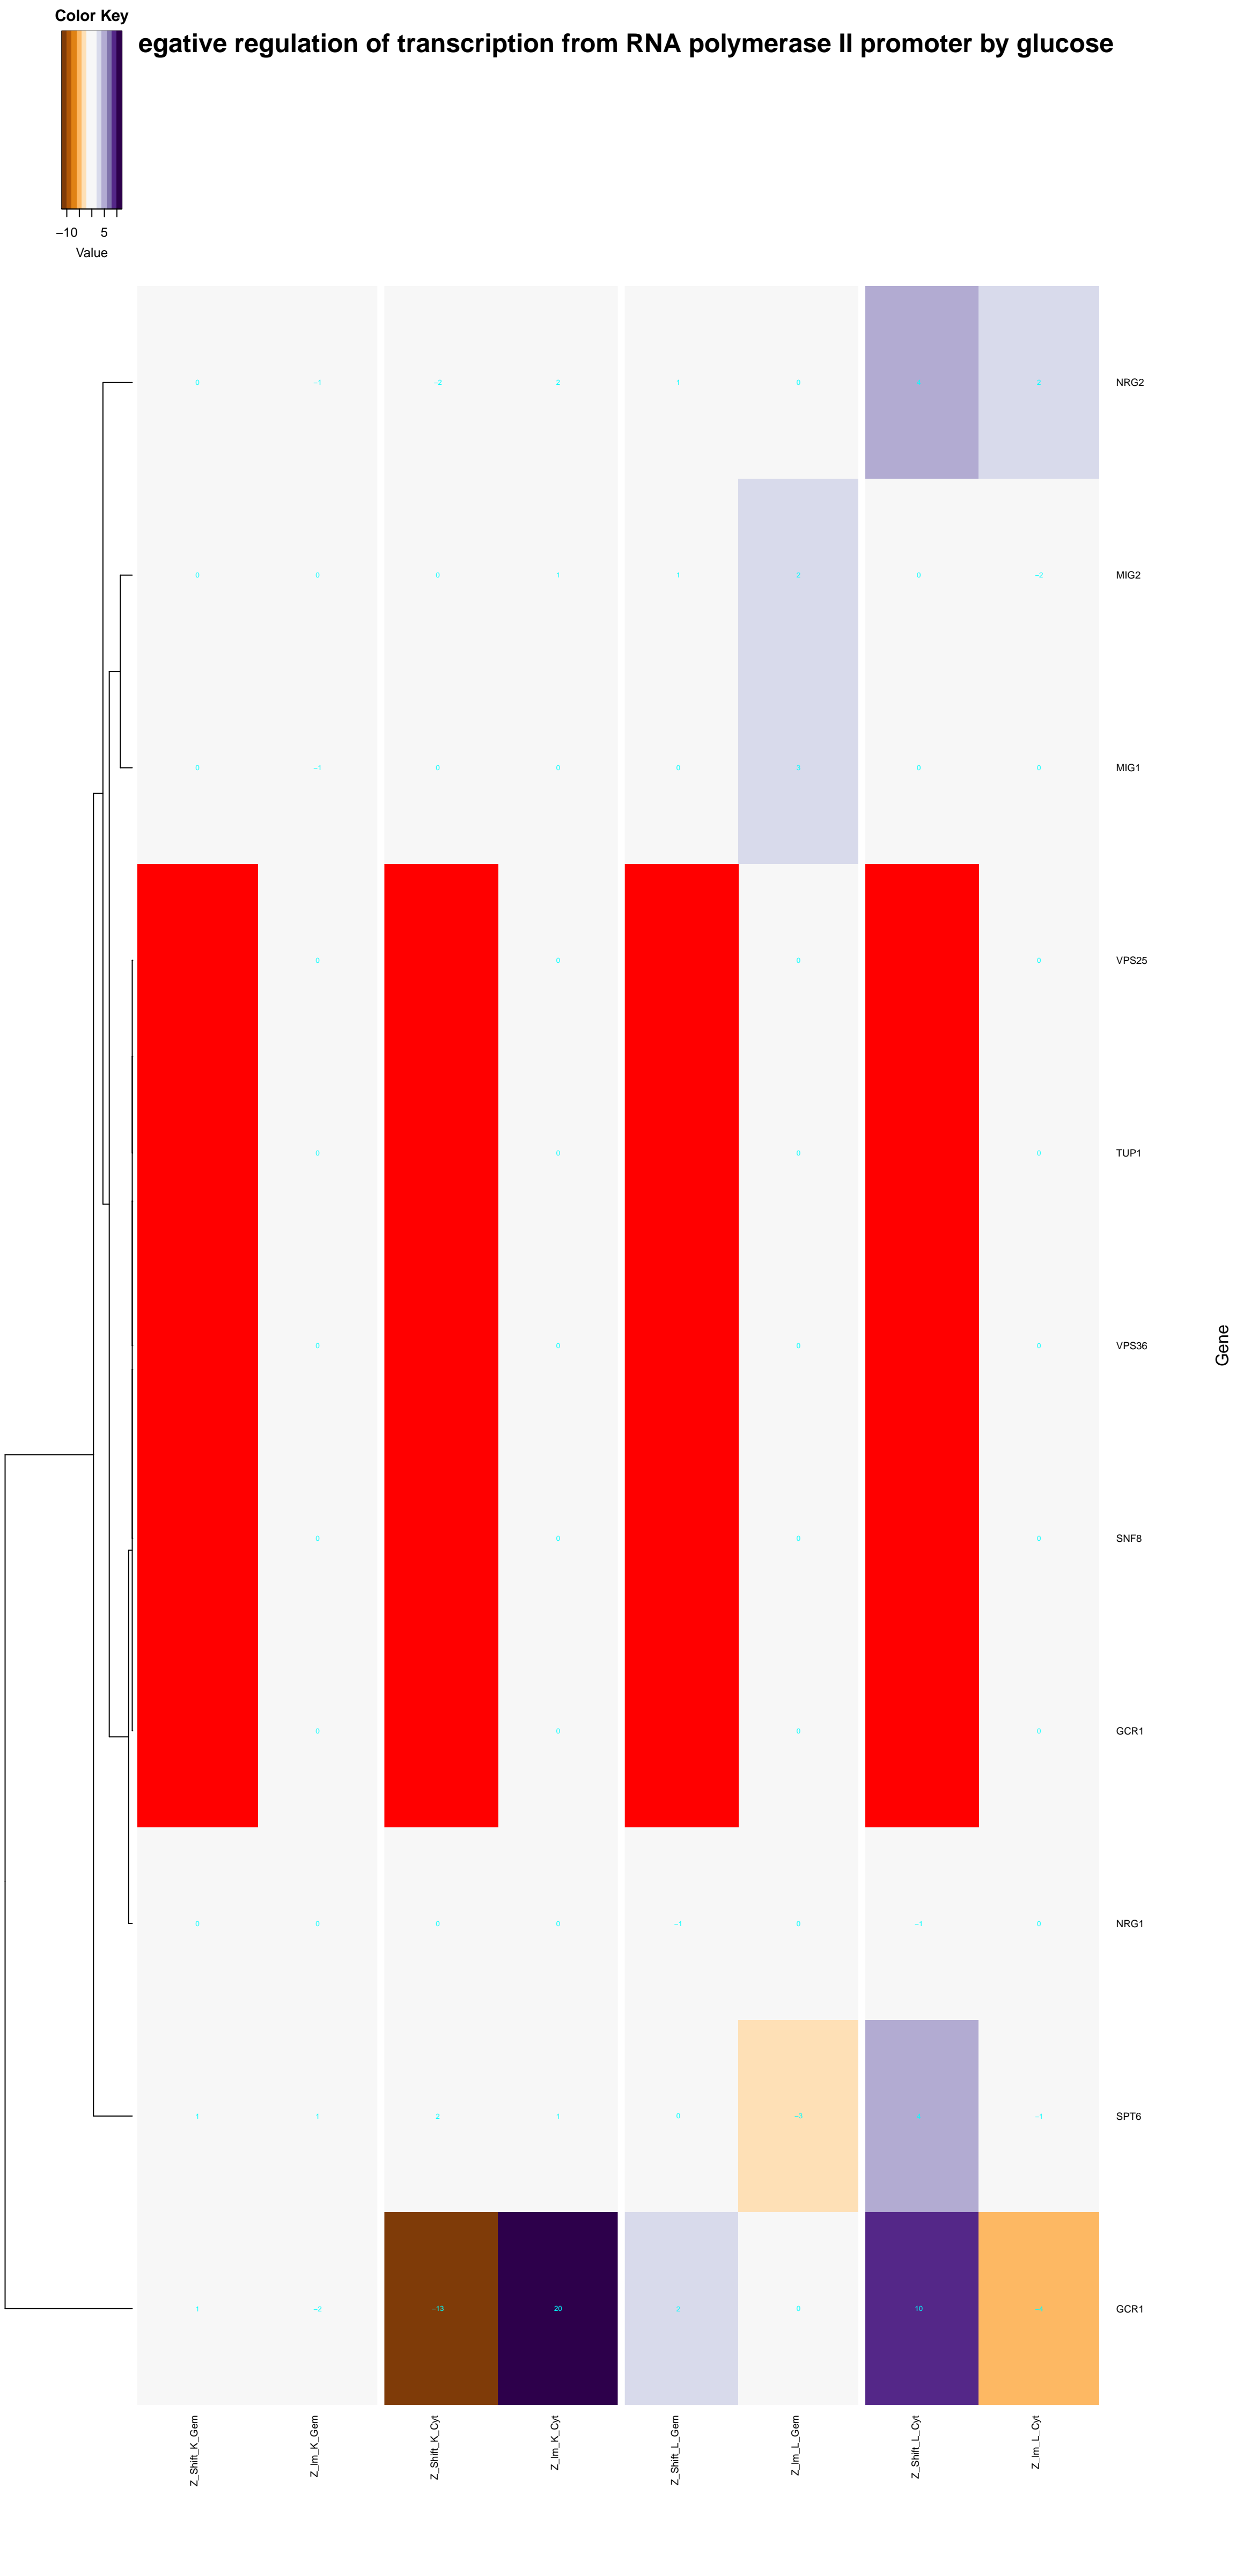

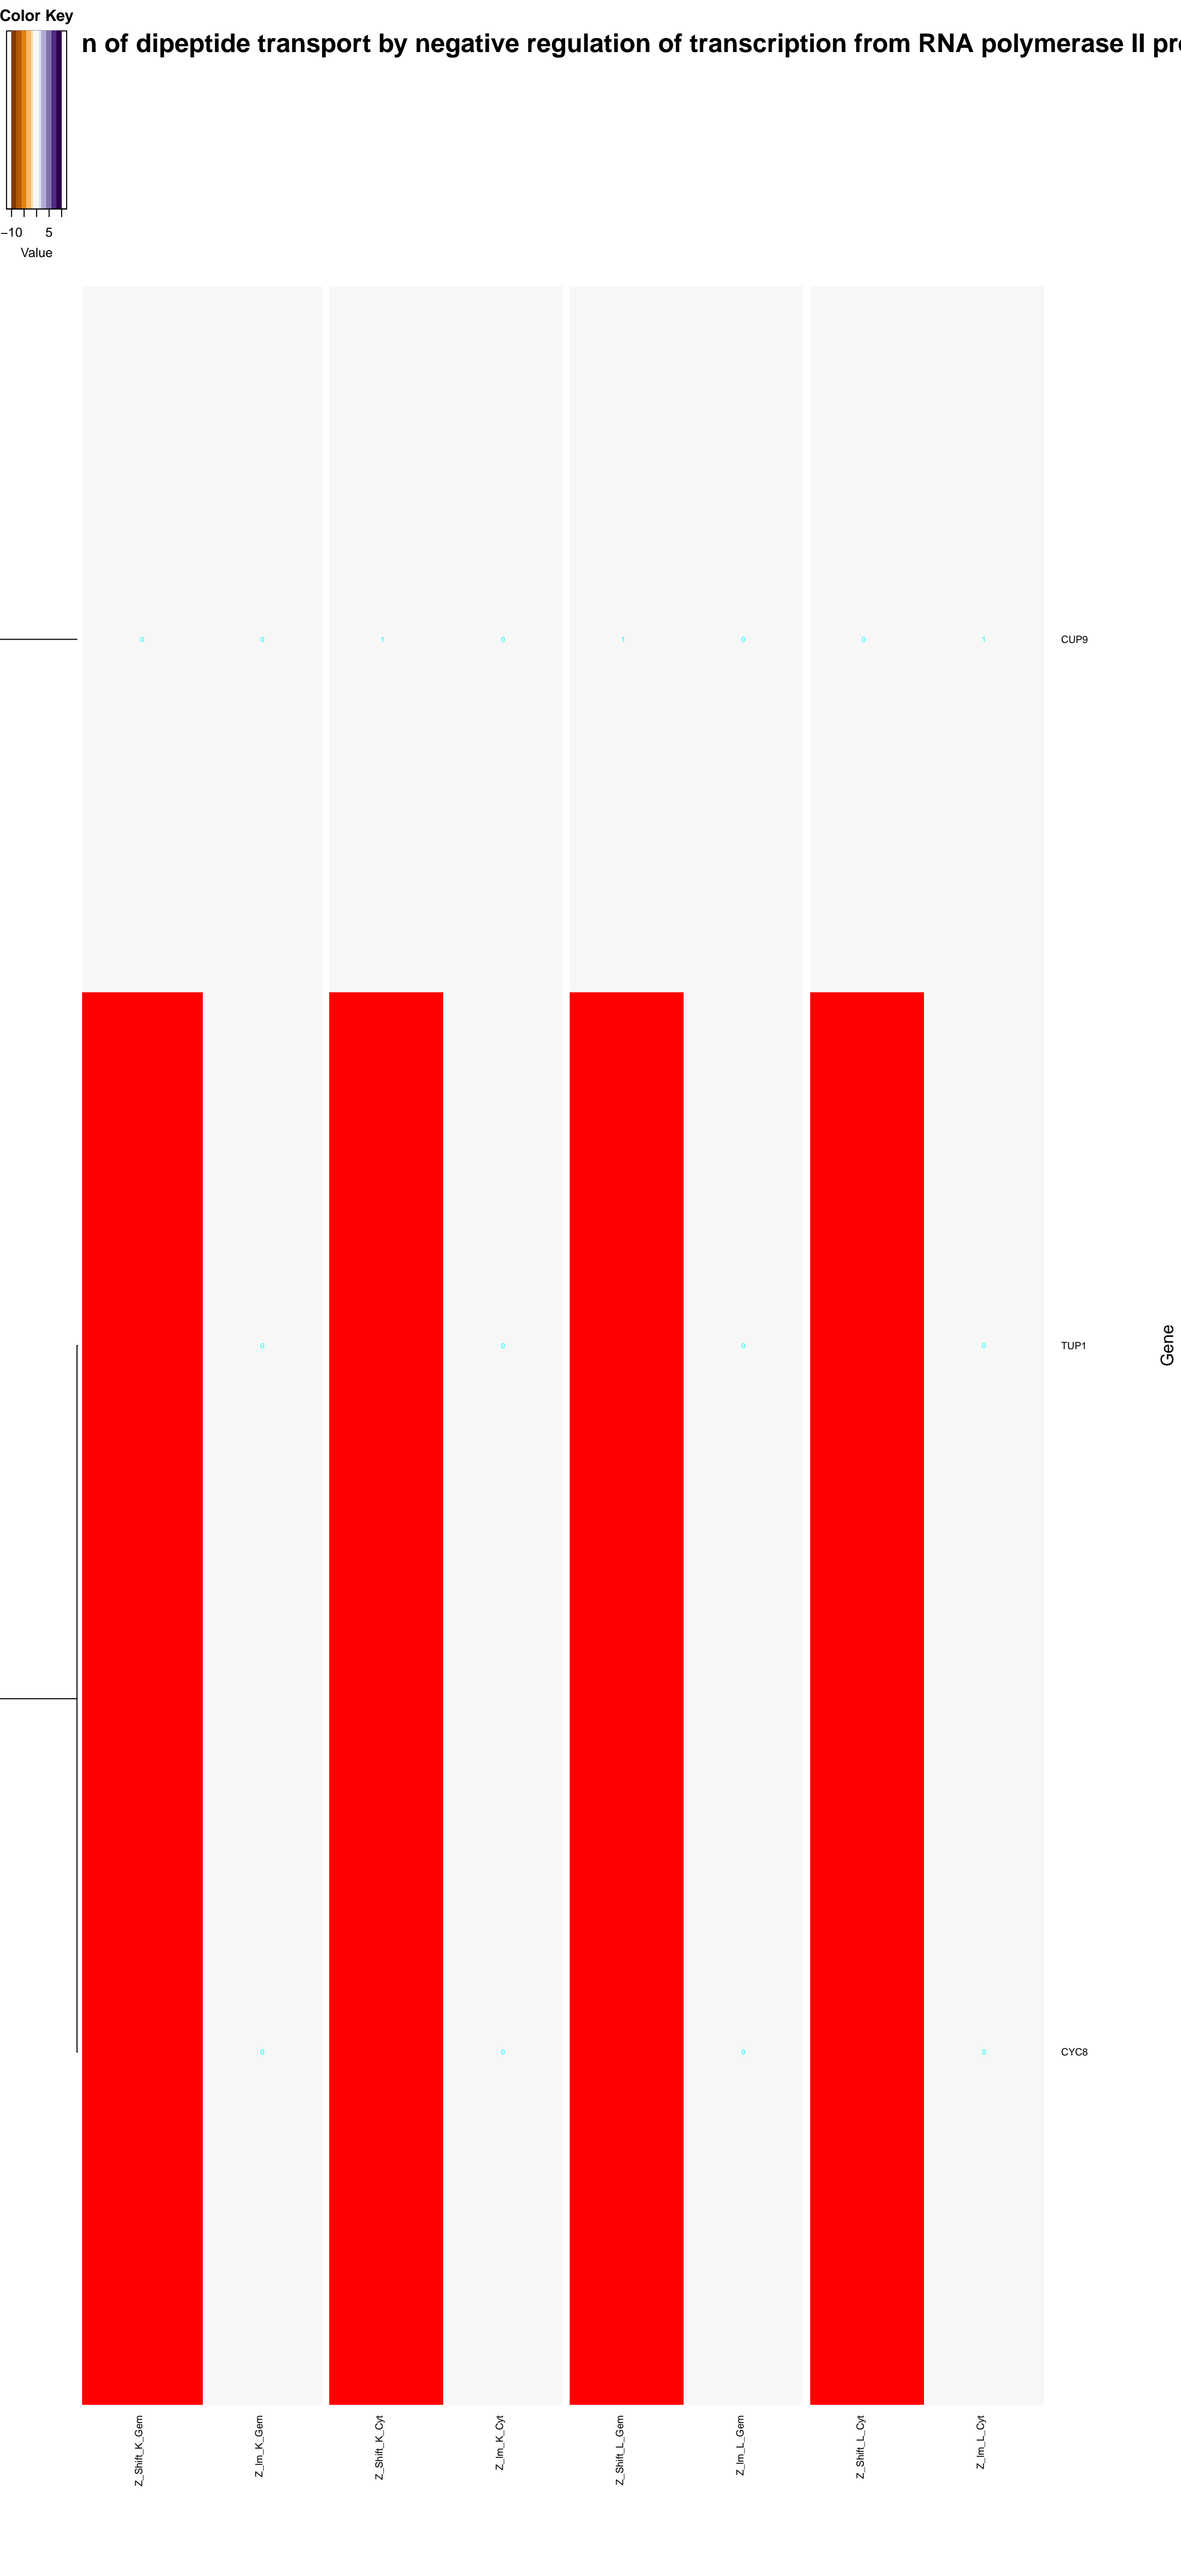

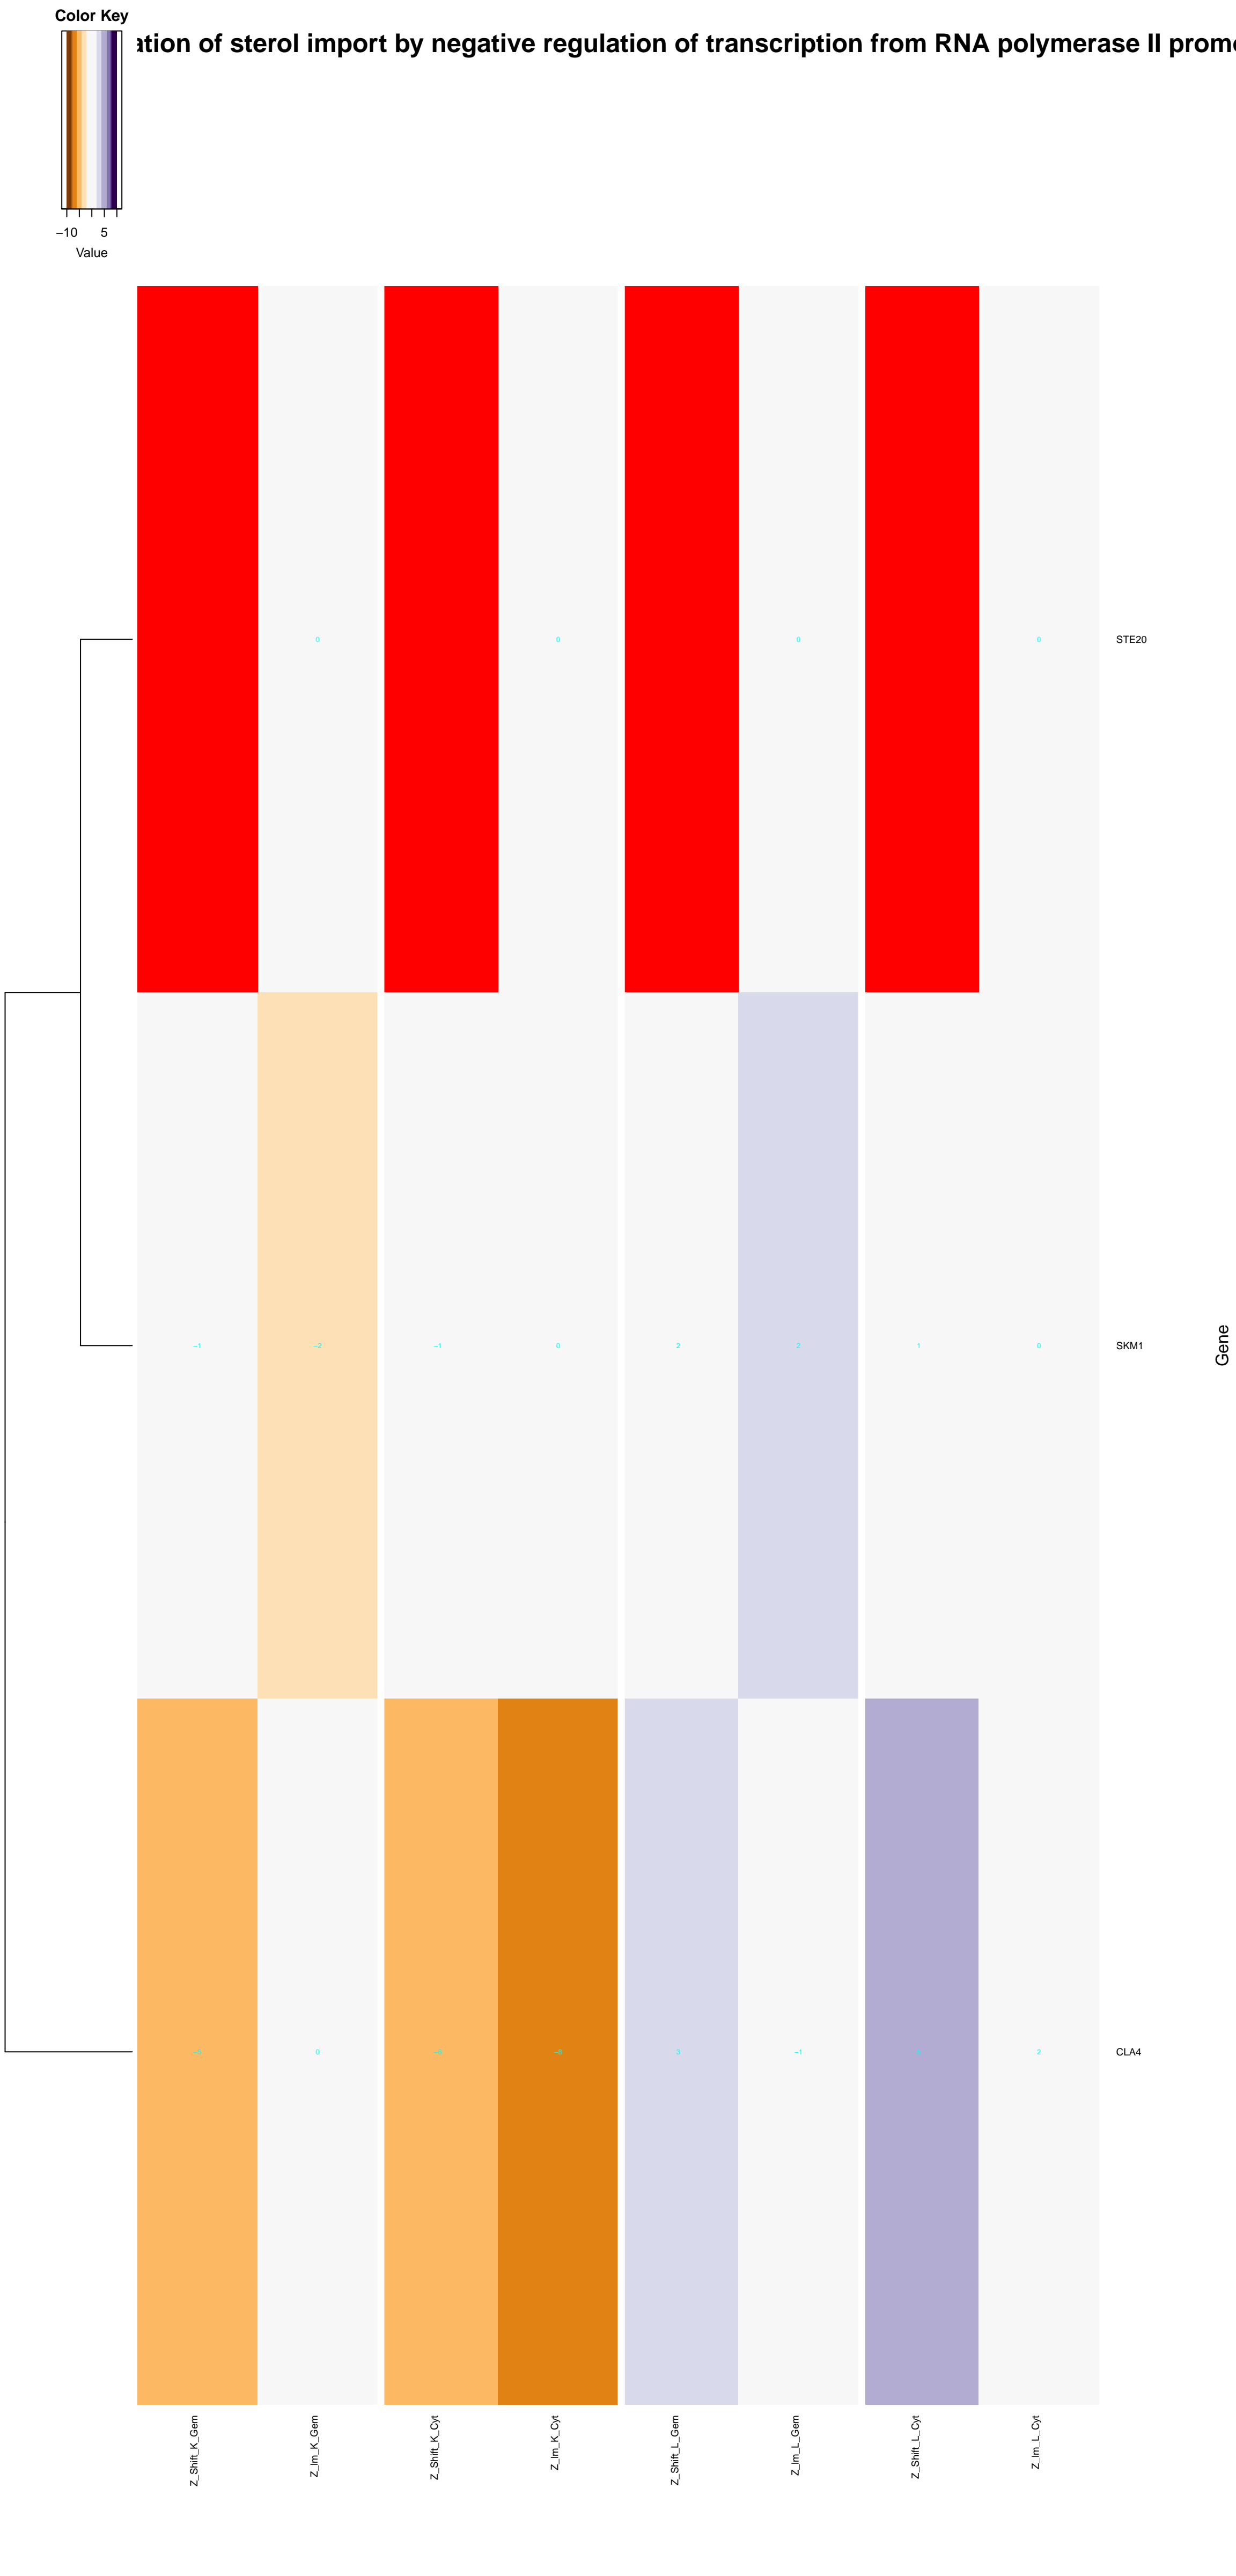

Supplement: s1 [file s1]
