# Supplementary material for: A Humanized Yeast Phenomic Model of Deoxycytidine Kinase to Predict Genetic Buffering of Nucleoside Analog Cytotoxicity
Source: MDPI journal article supplement (doi:10.3390/genes10100770), 2019-09-30

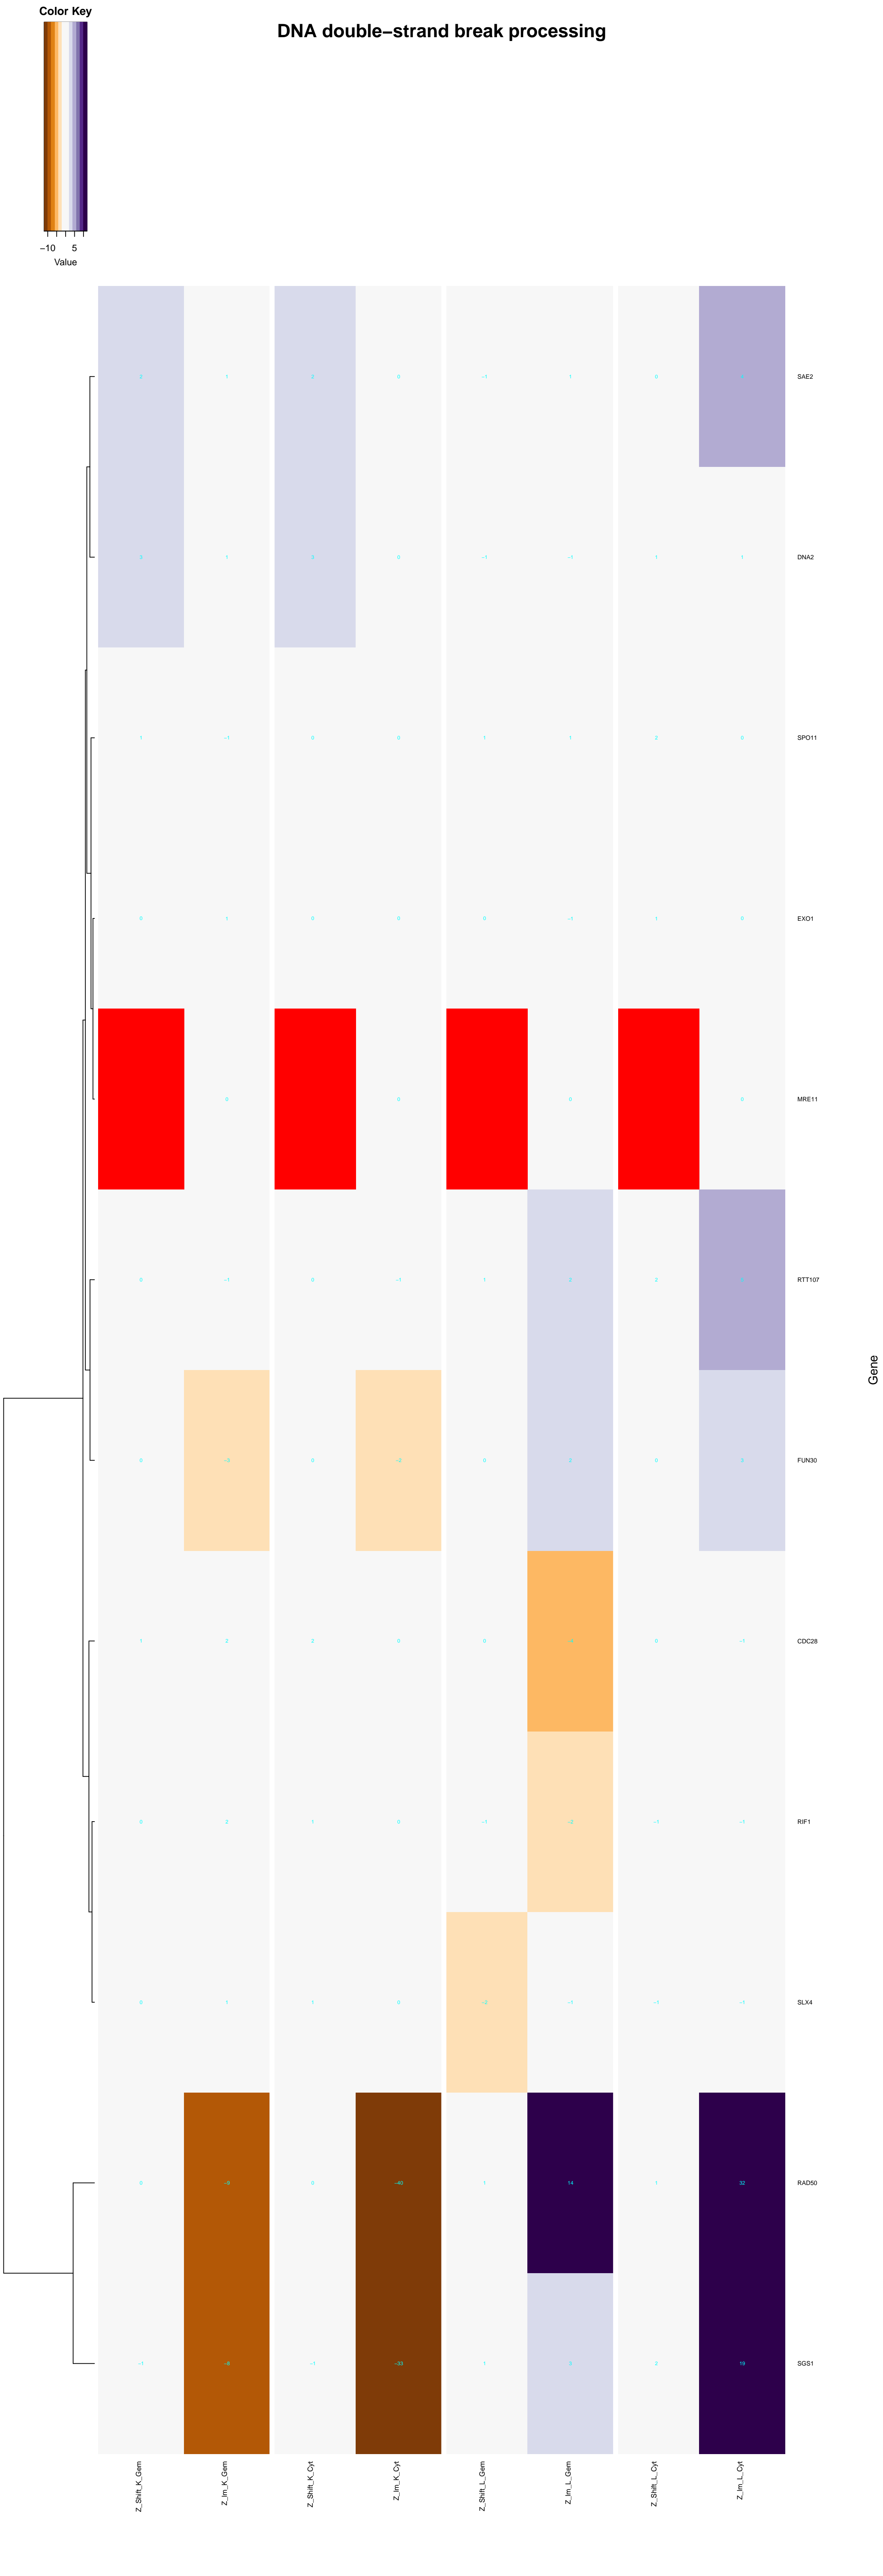

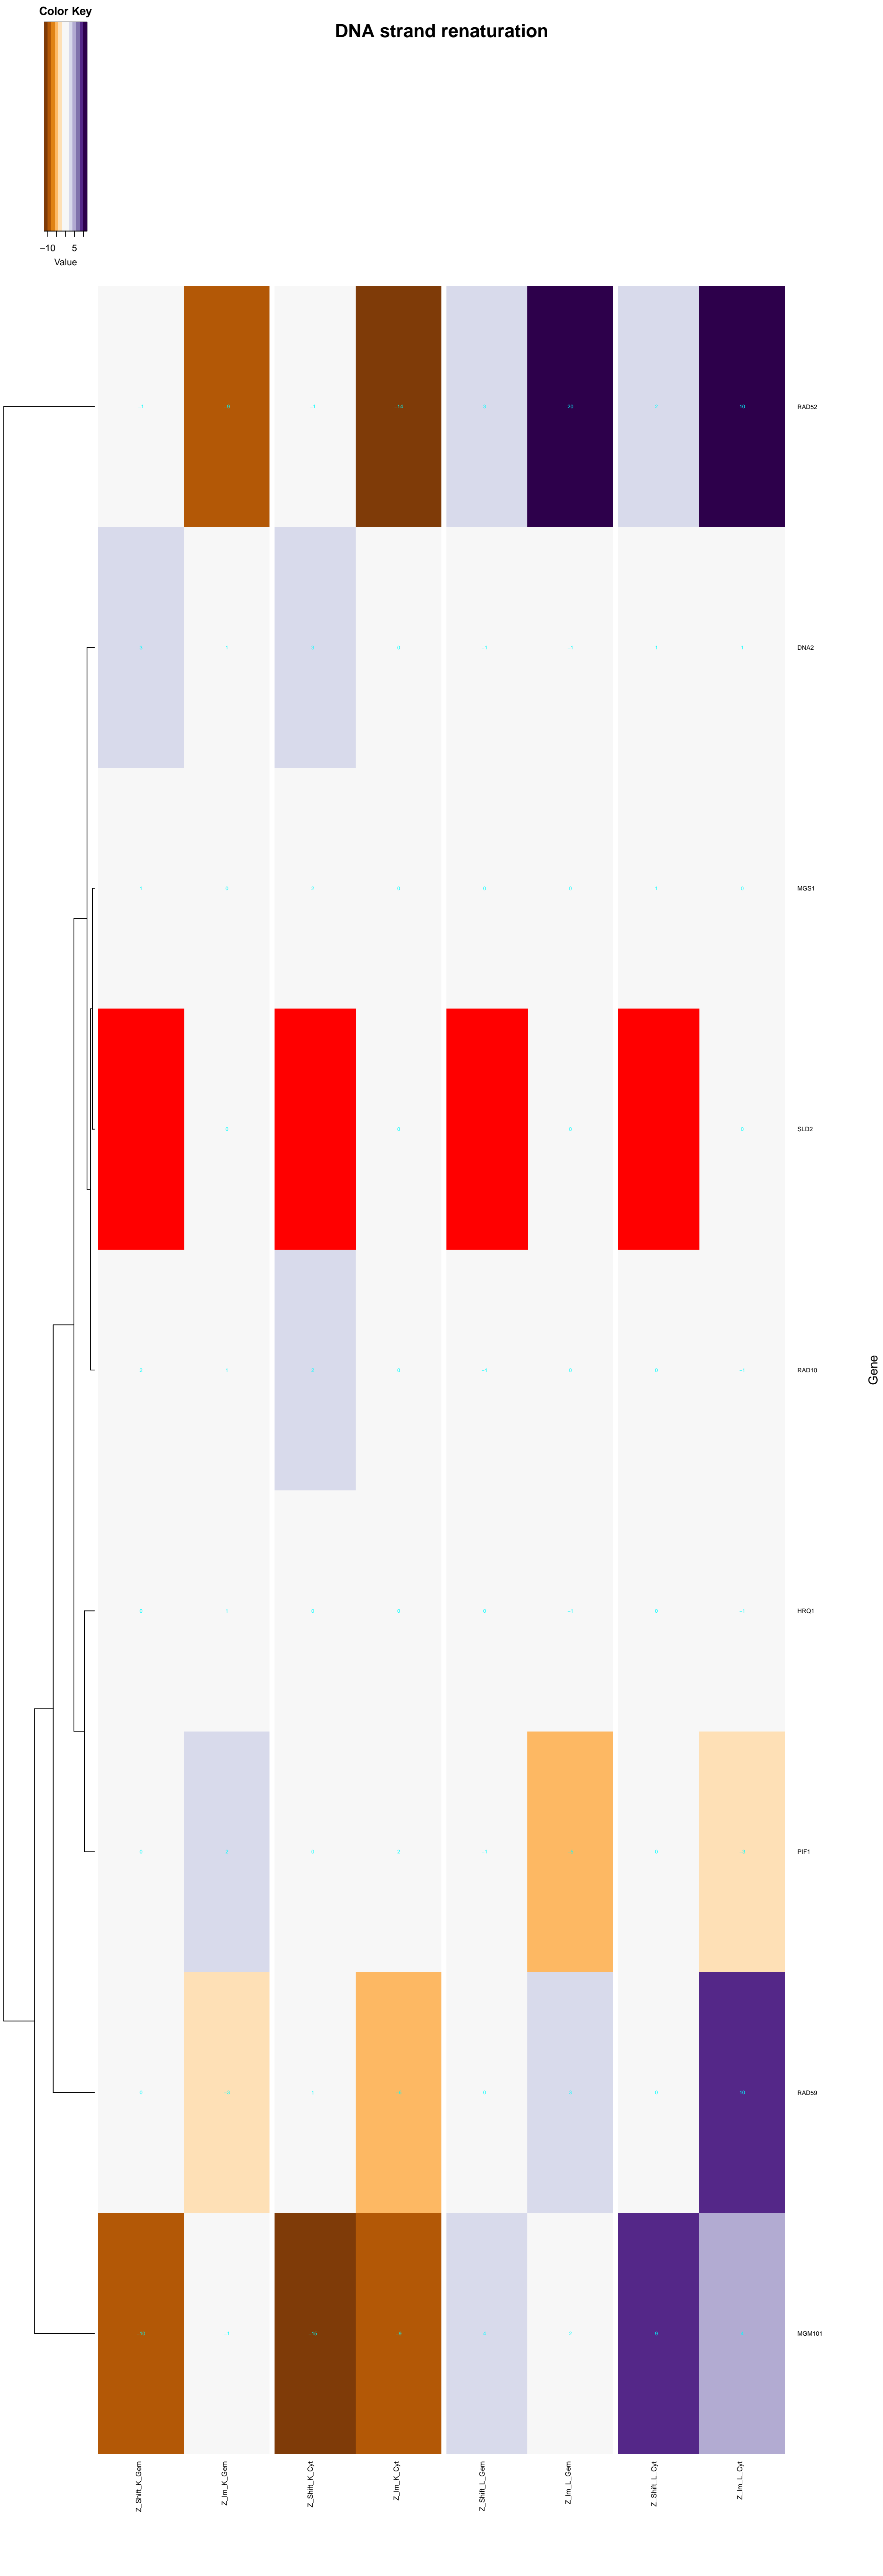

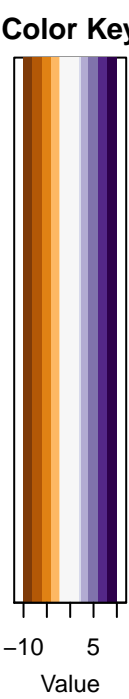

removal of nonhomologous ends

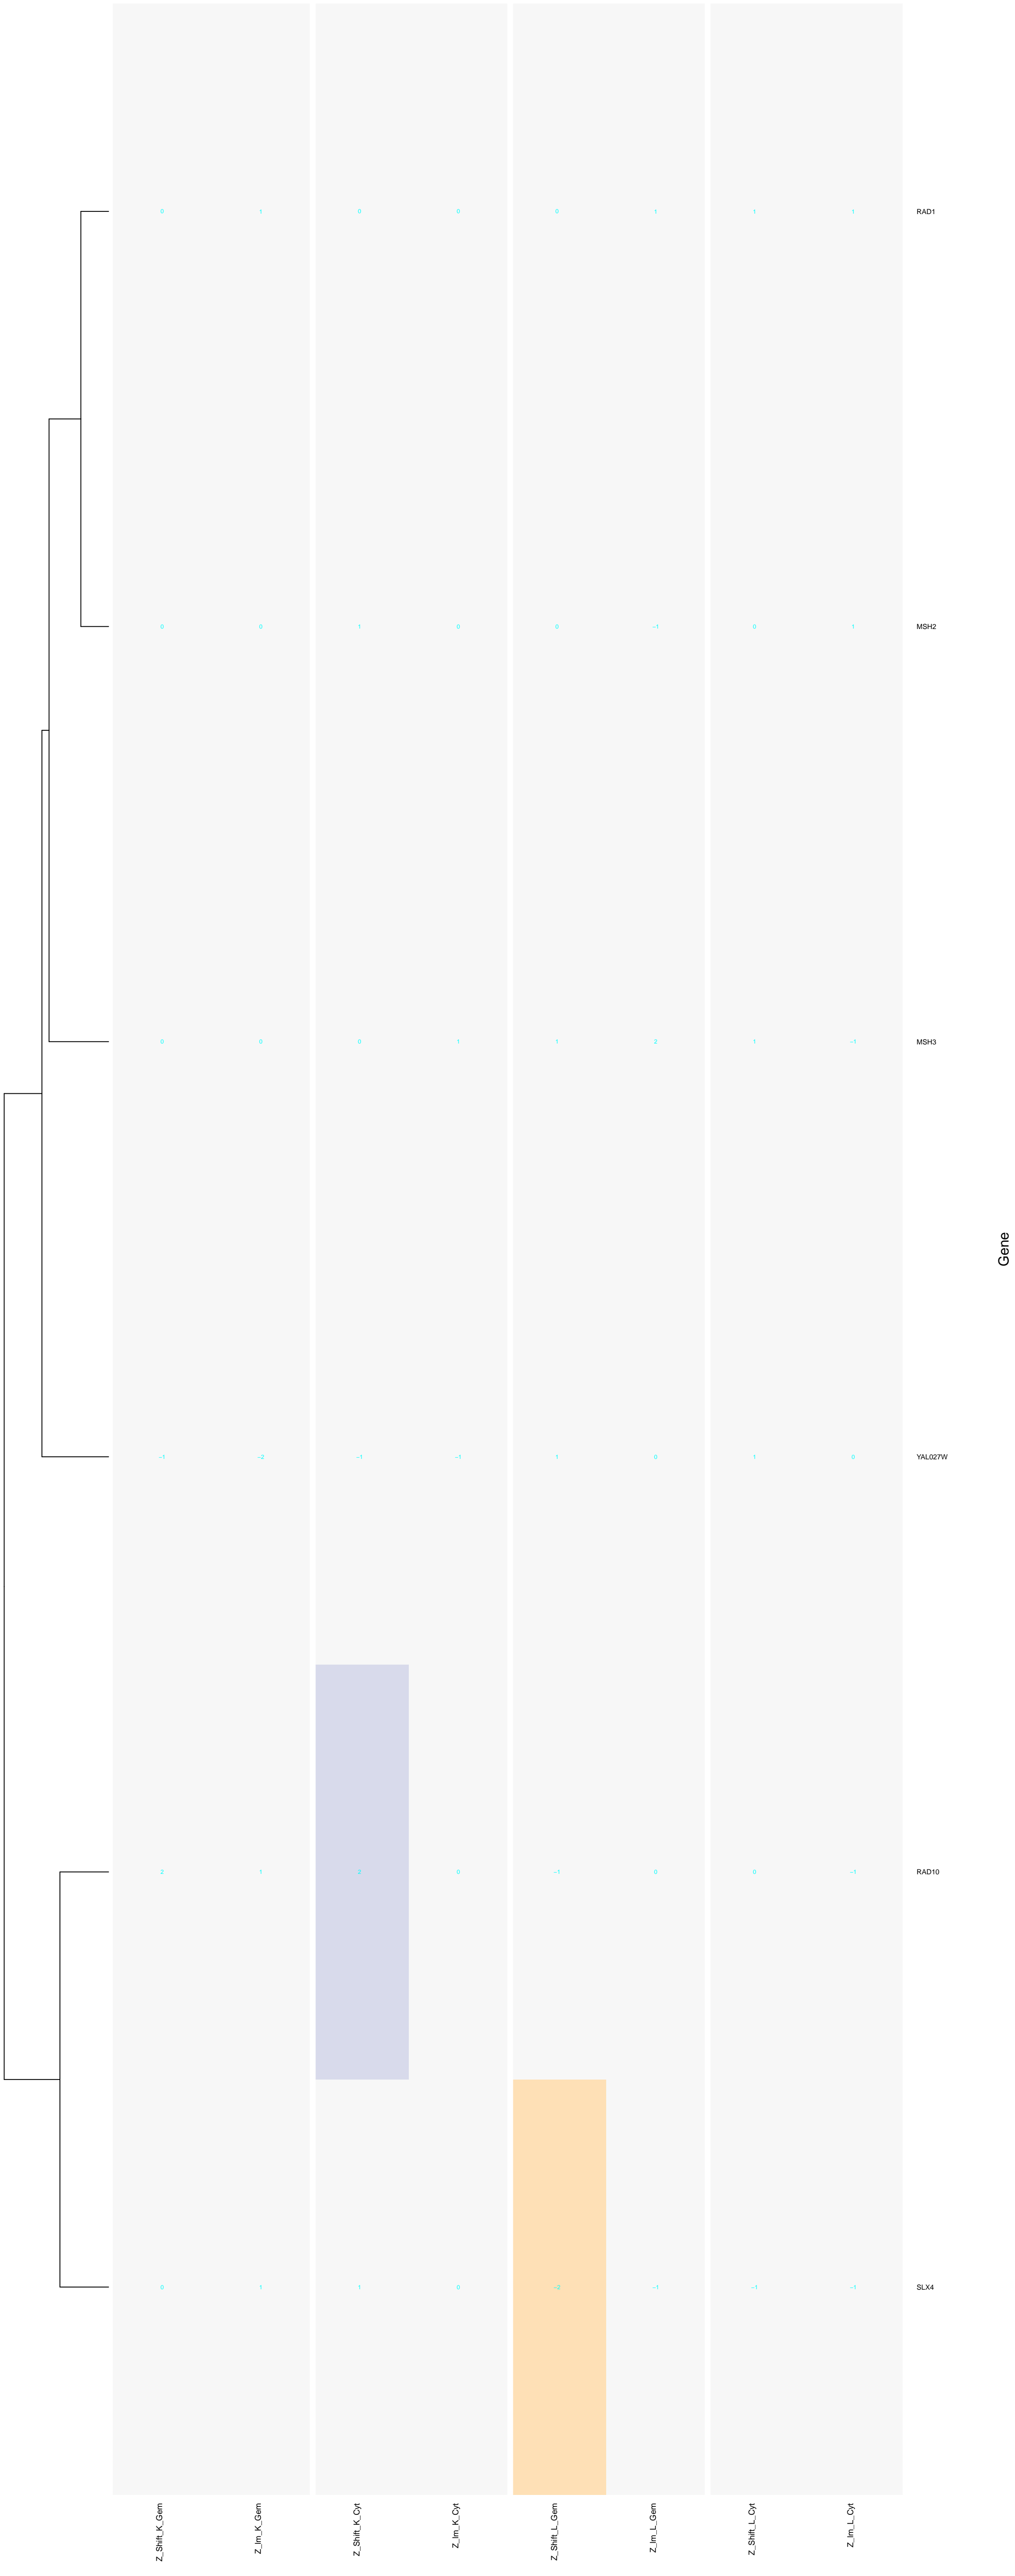



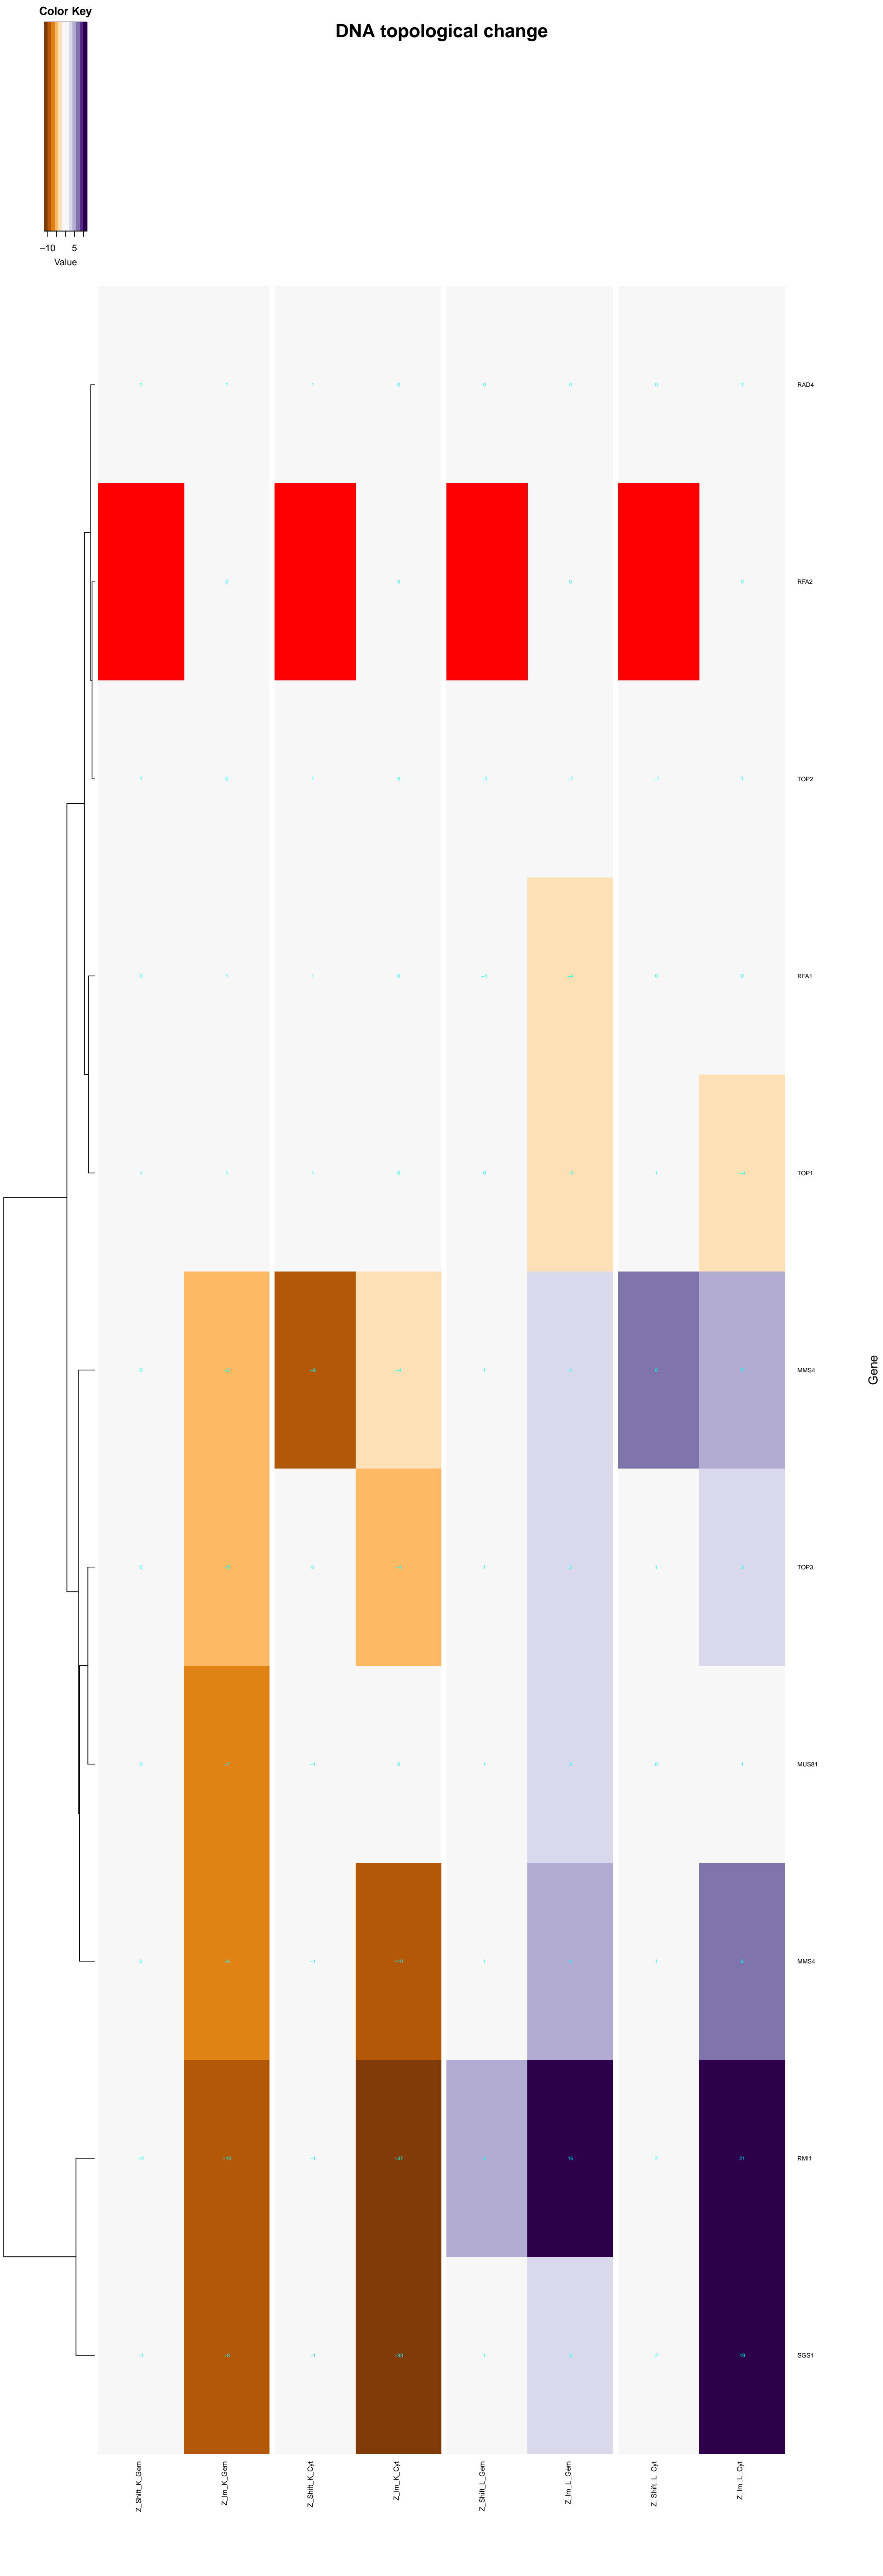

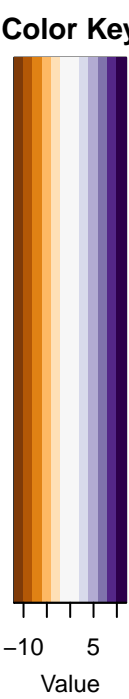

DNA replication, synthesis of RNA primer

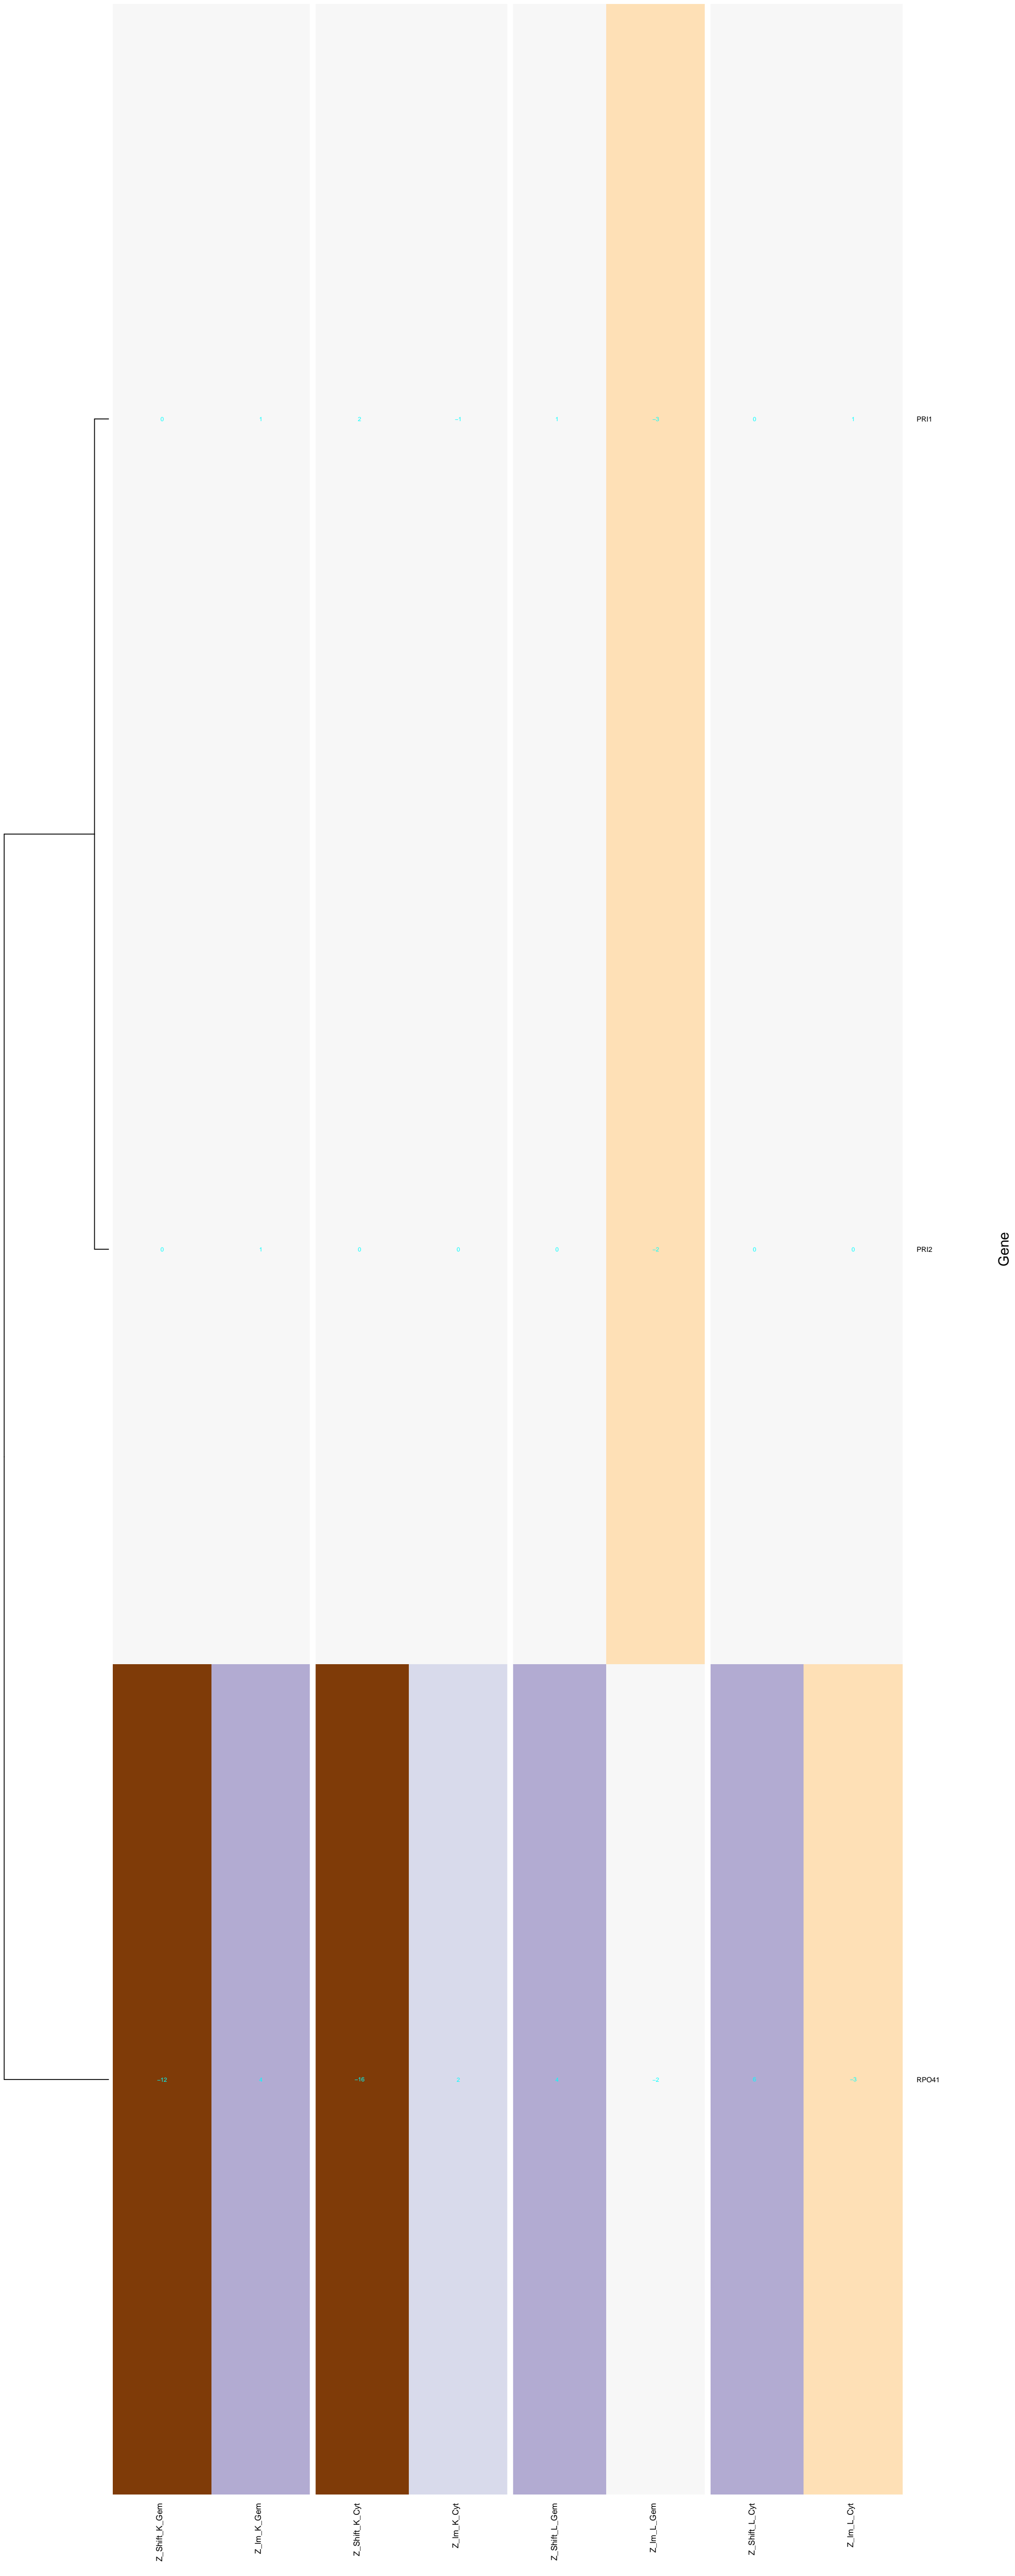

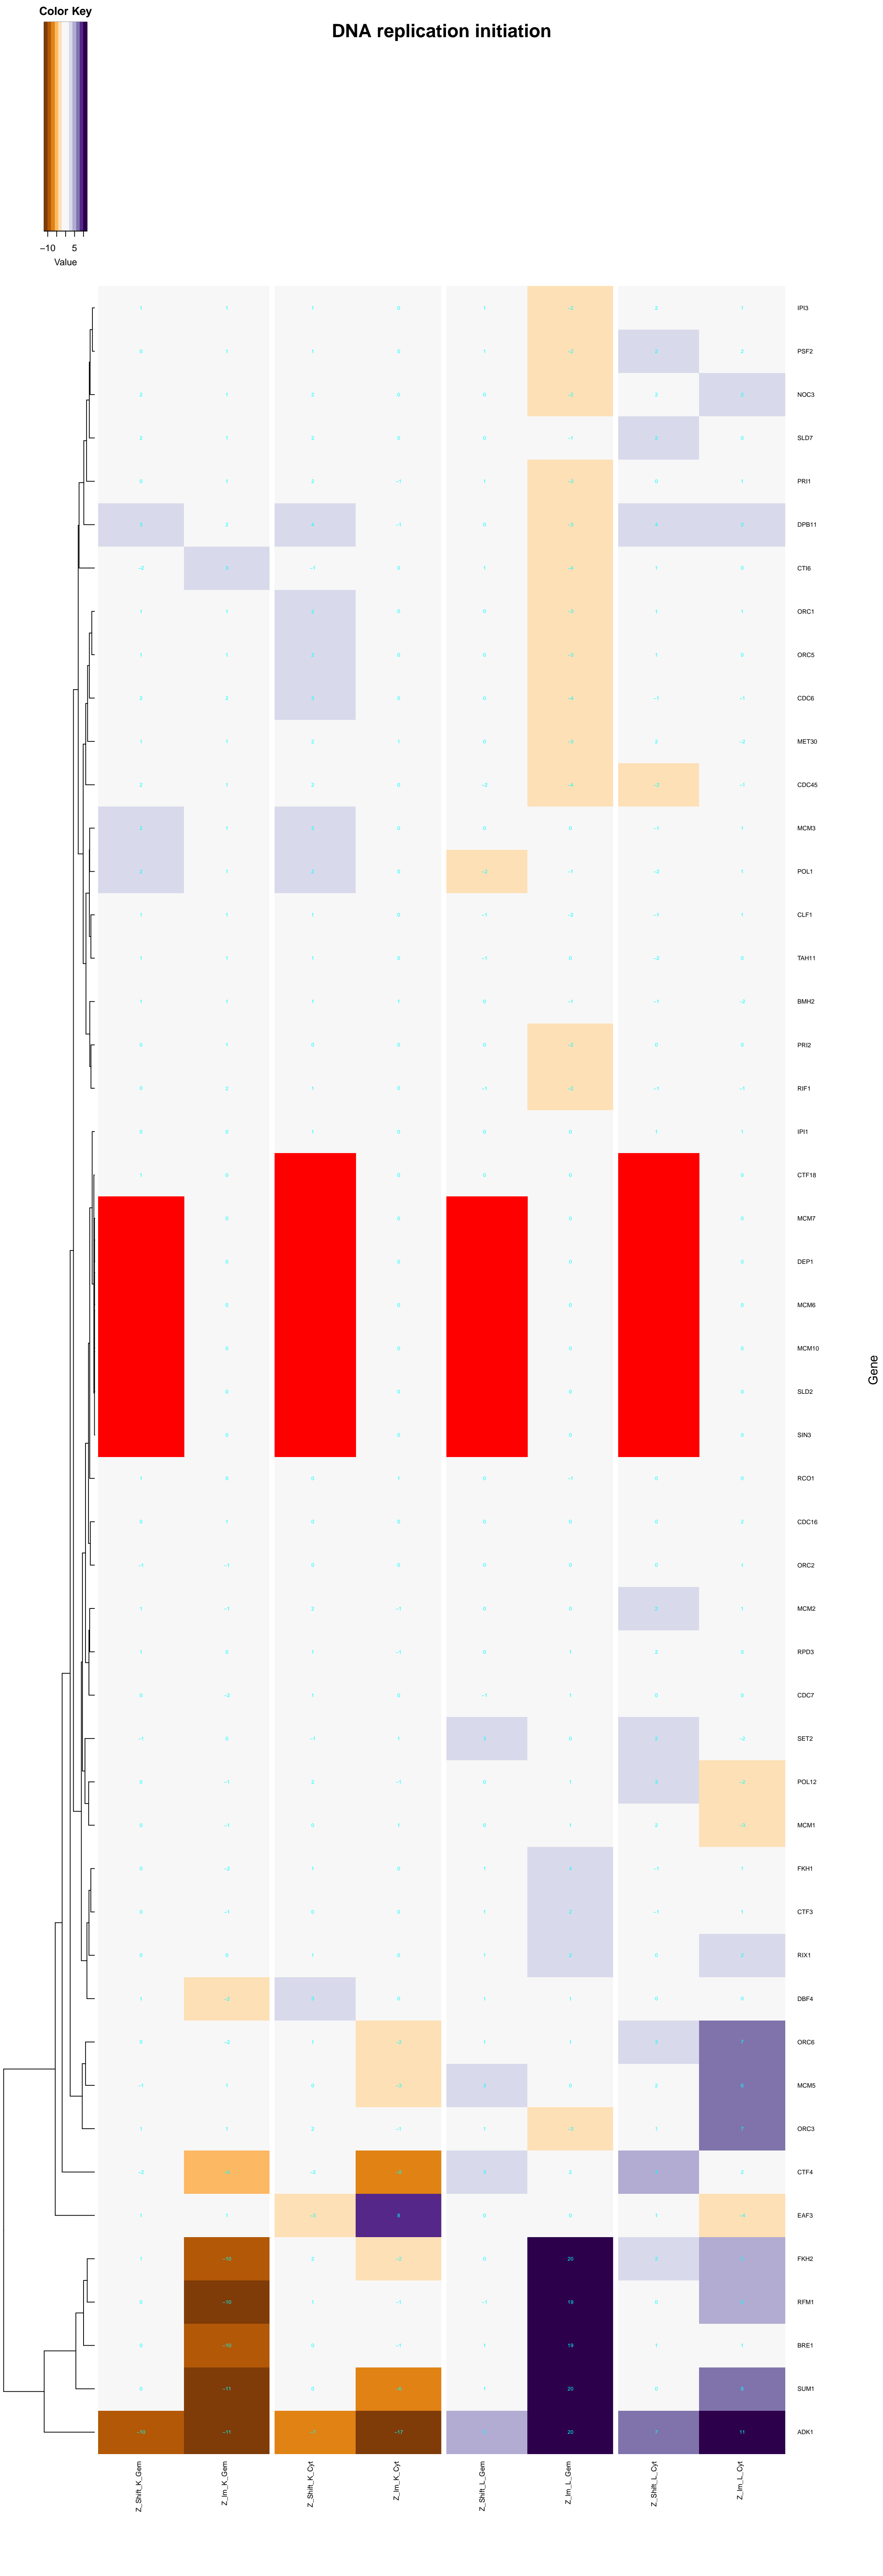



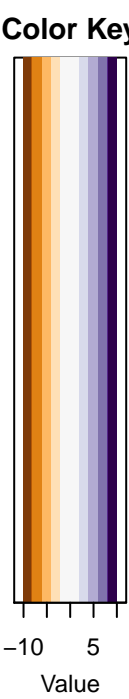

base-excision repair, AP site formation

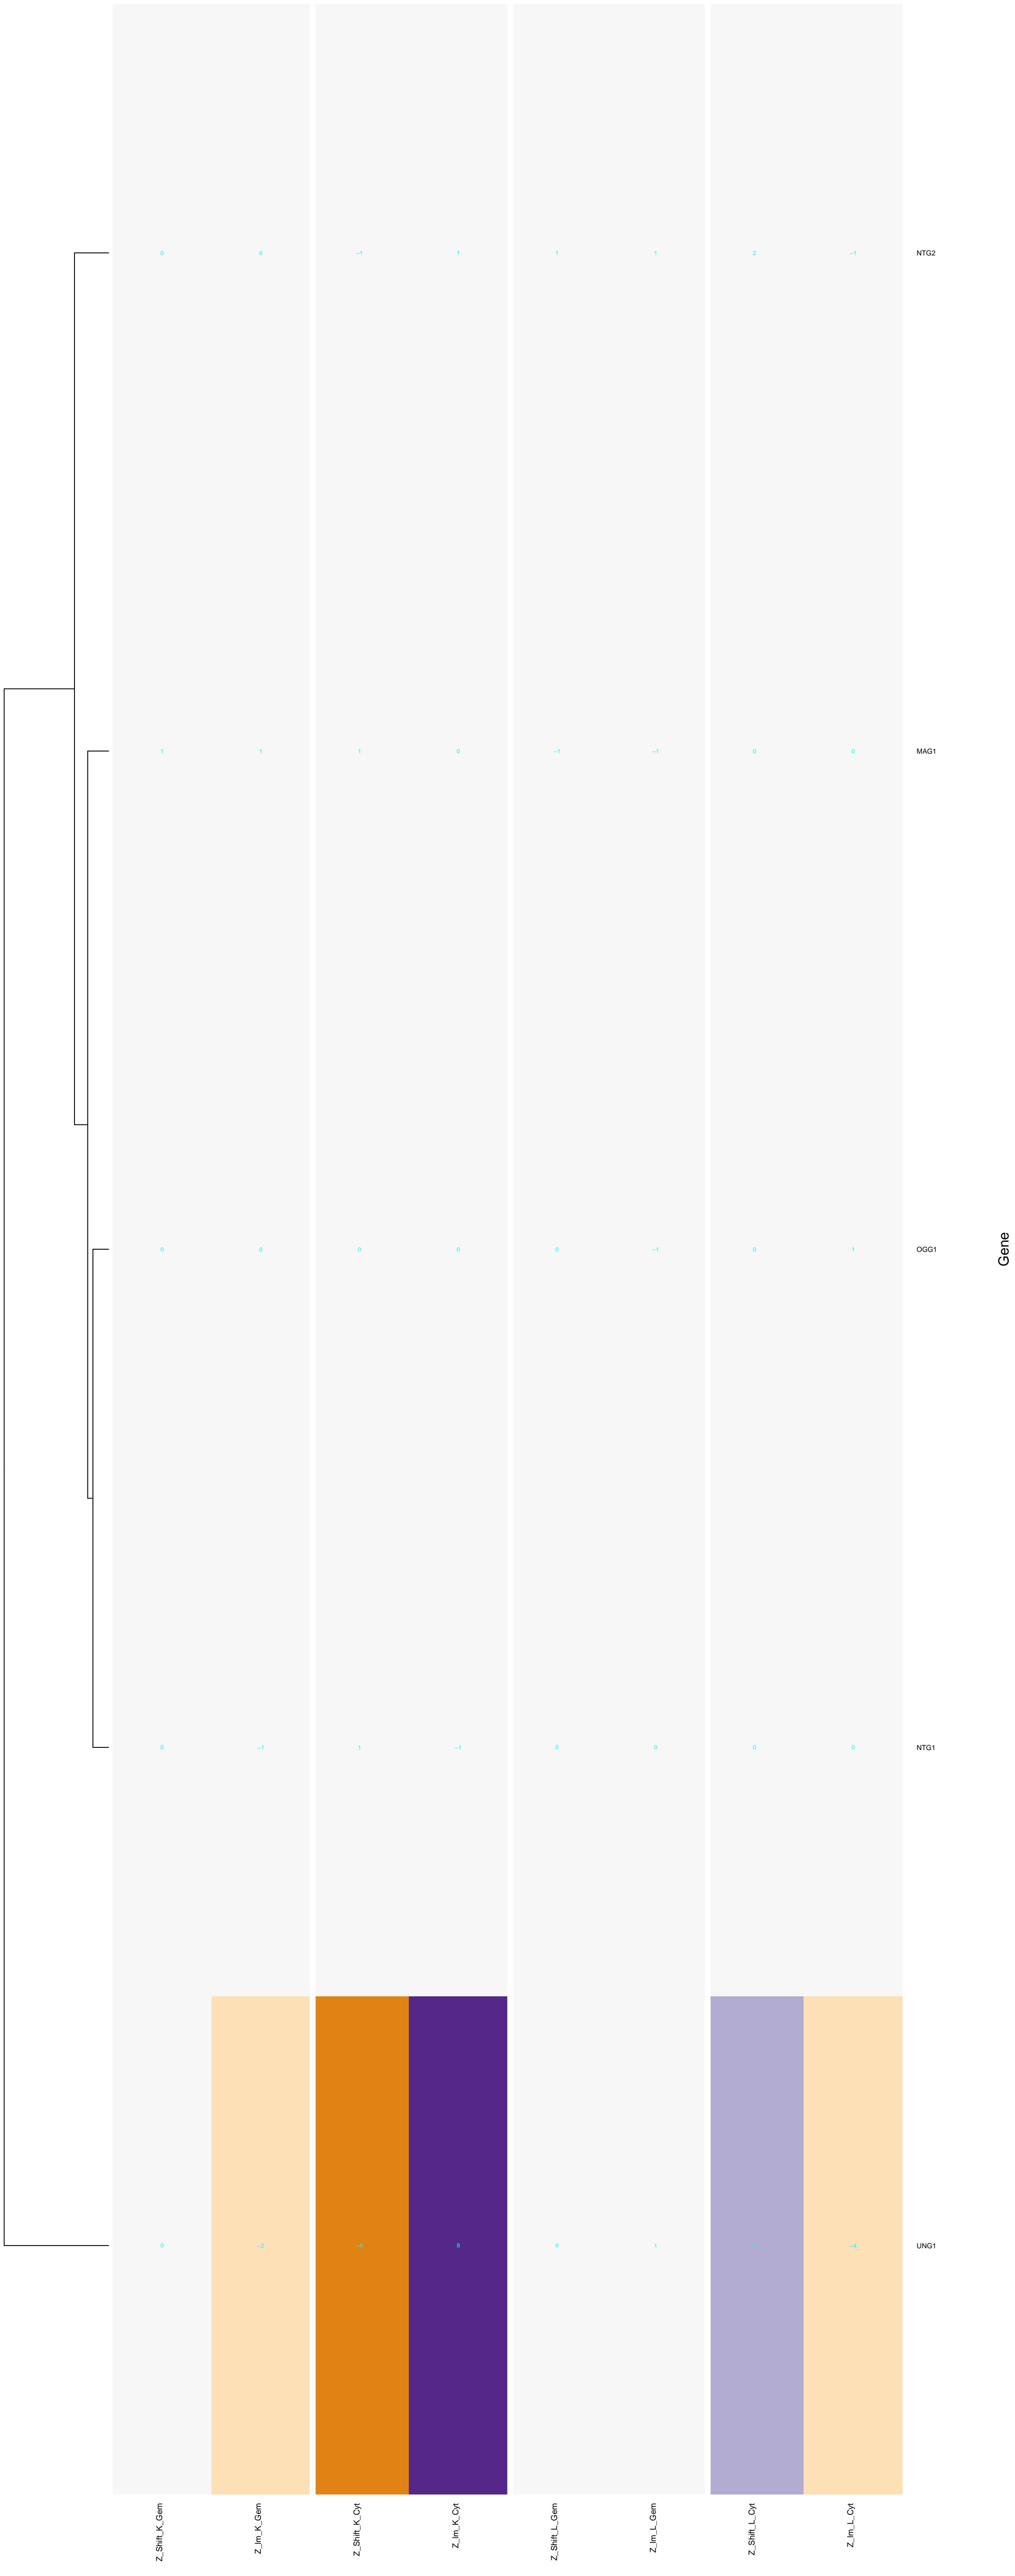

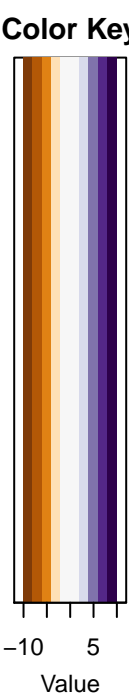

nucleotide-excision repair, DNA gap filling

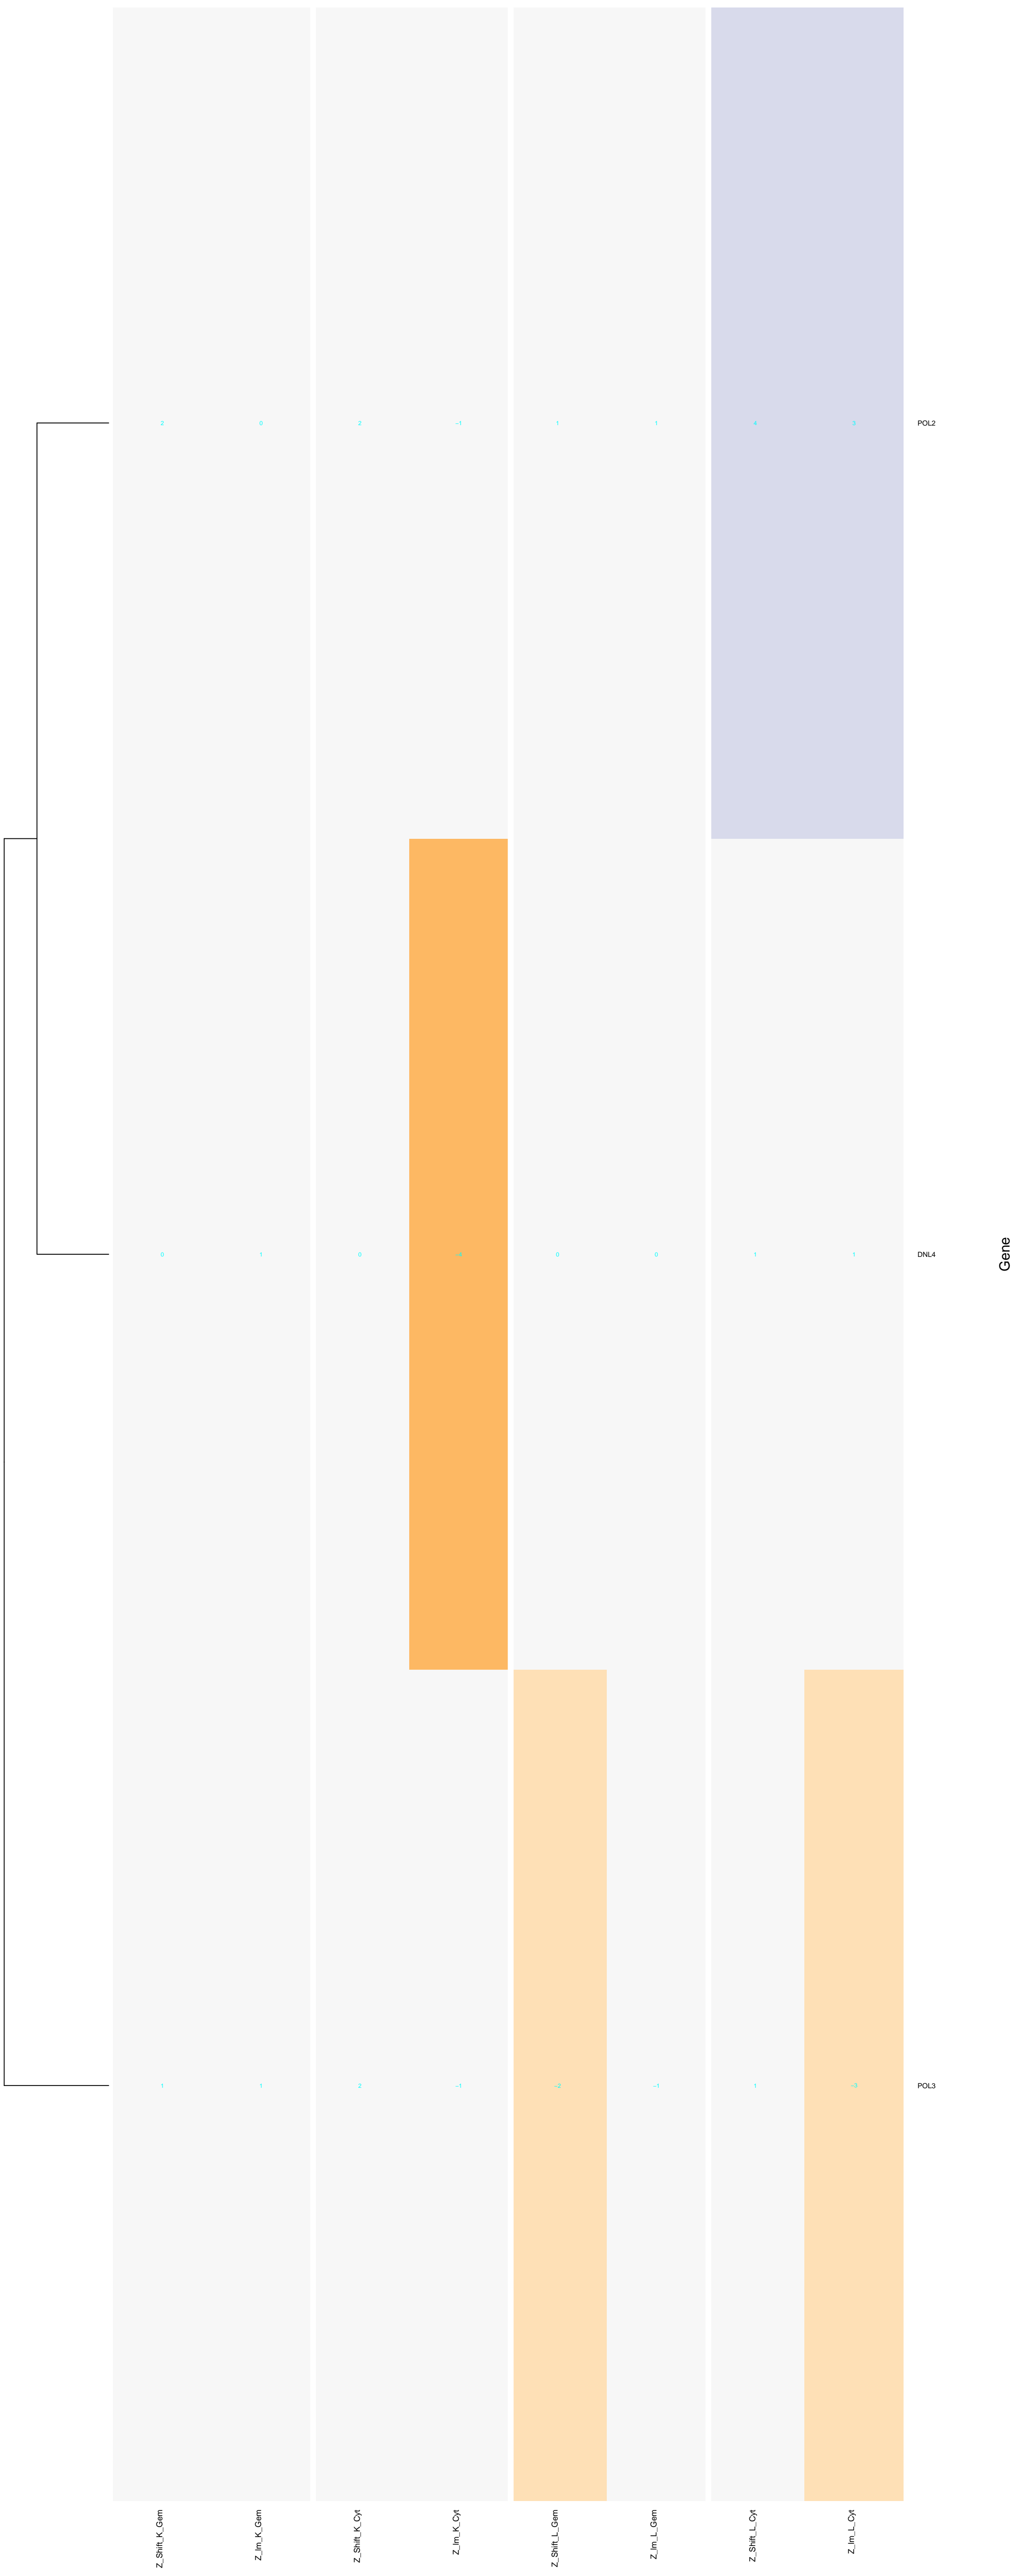

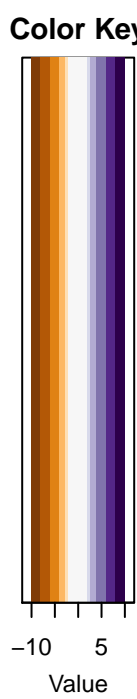

DNA modification

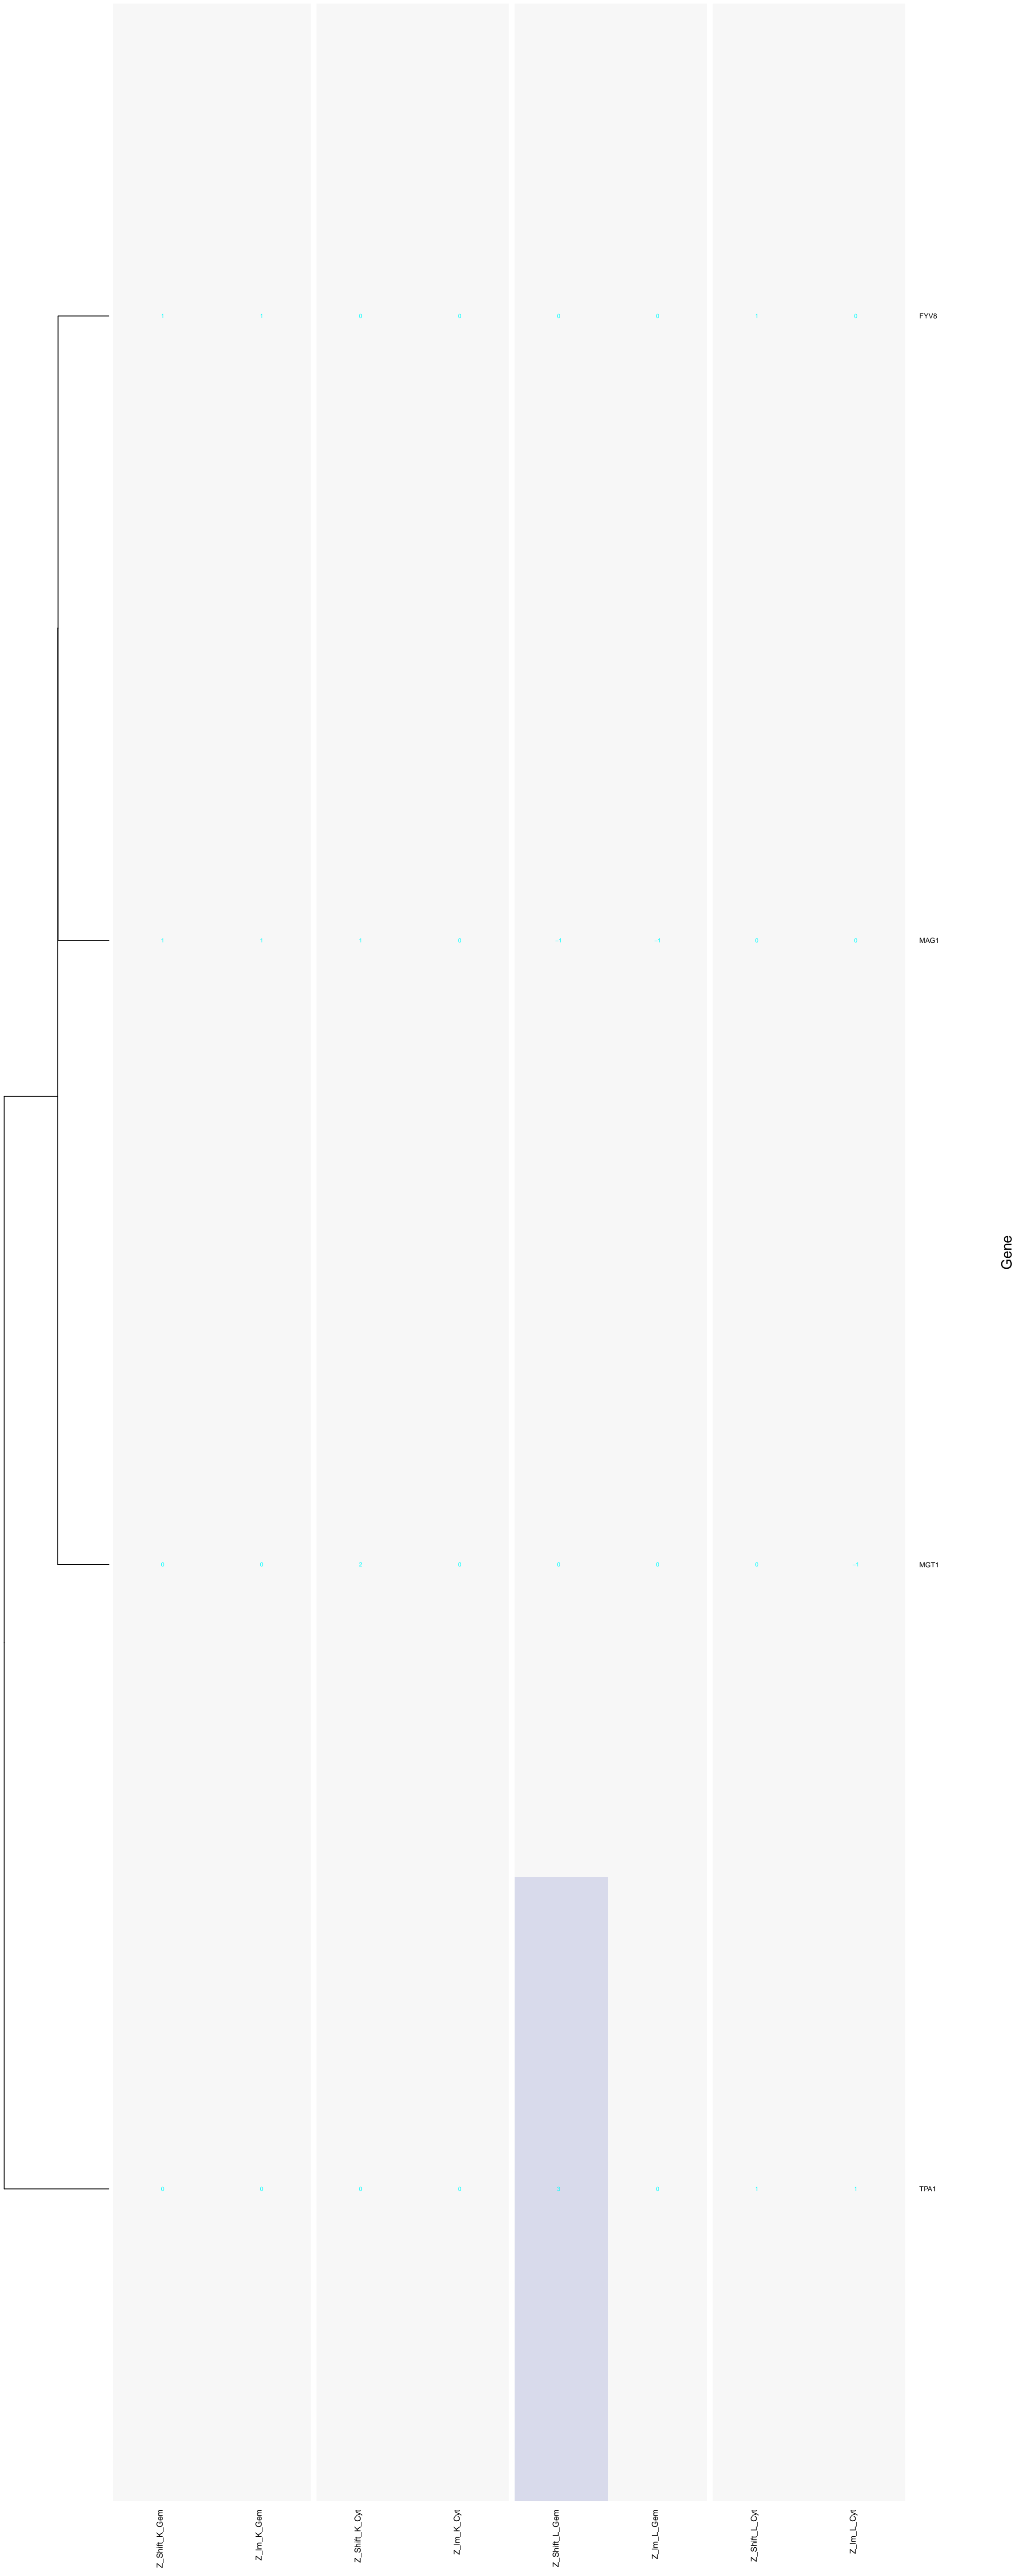

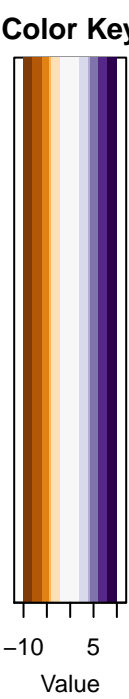

DNA catabolic process

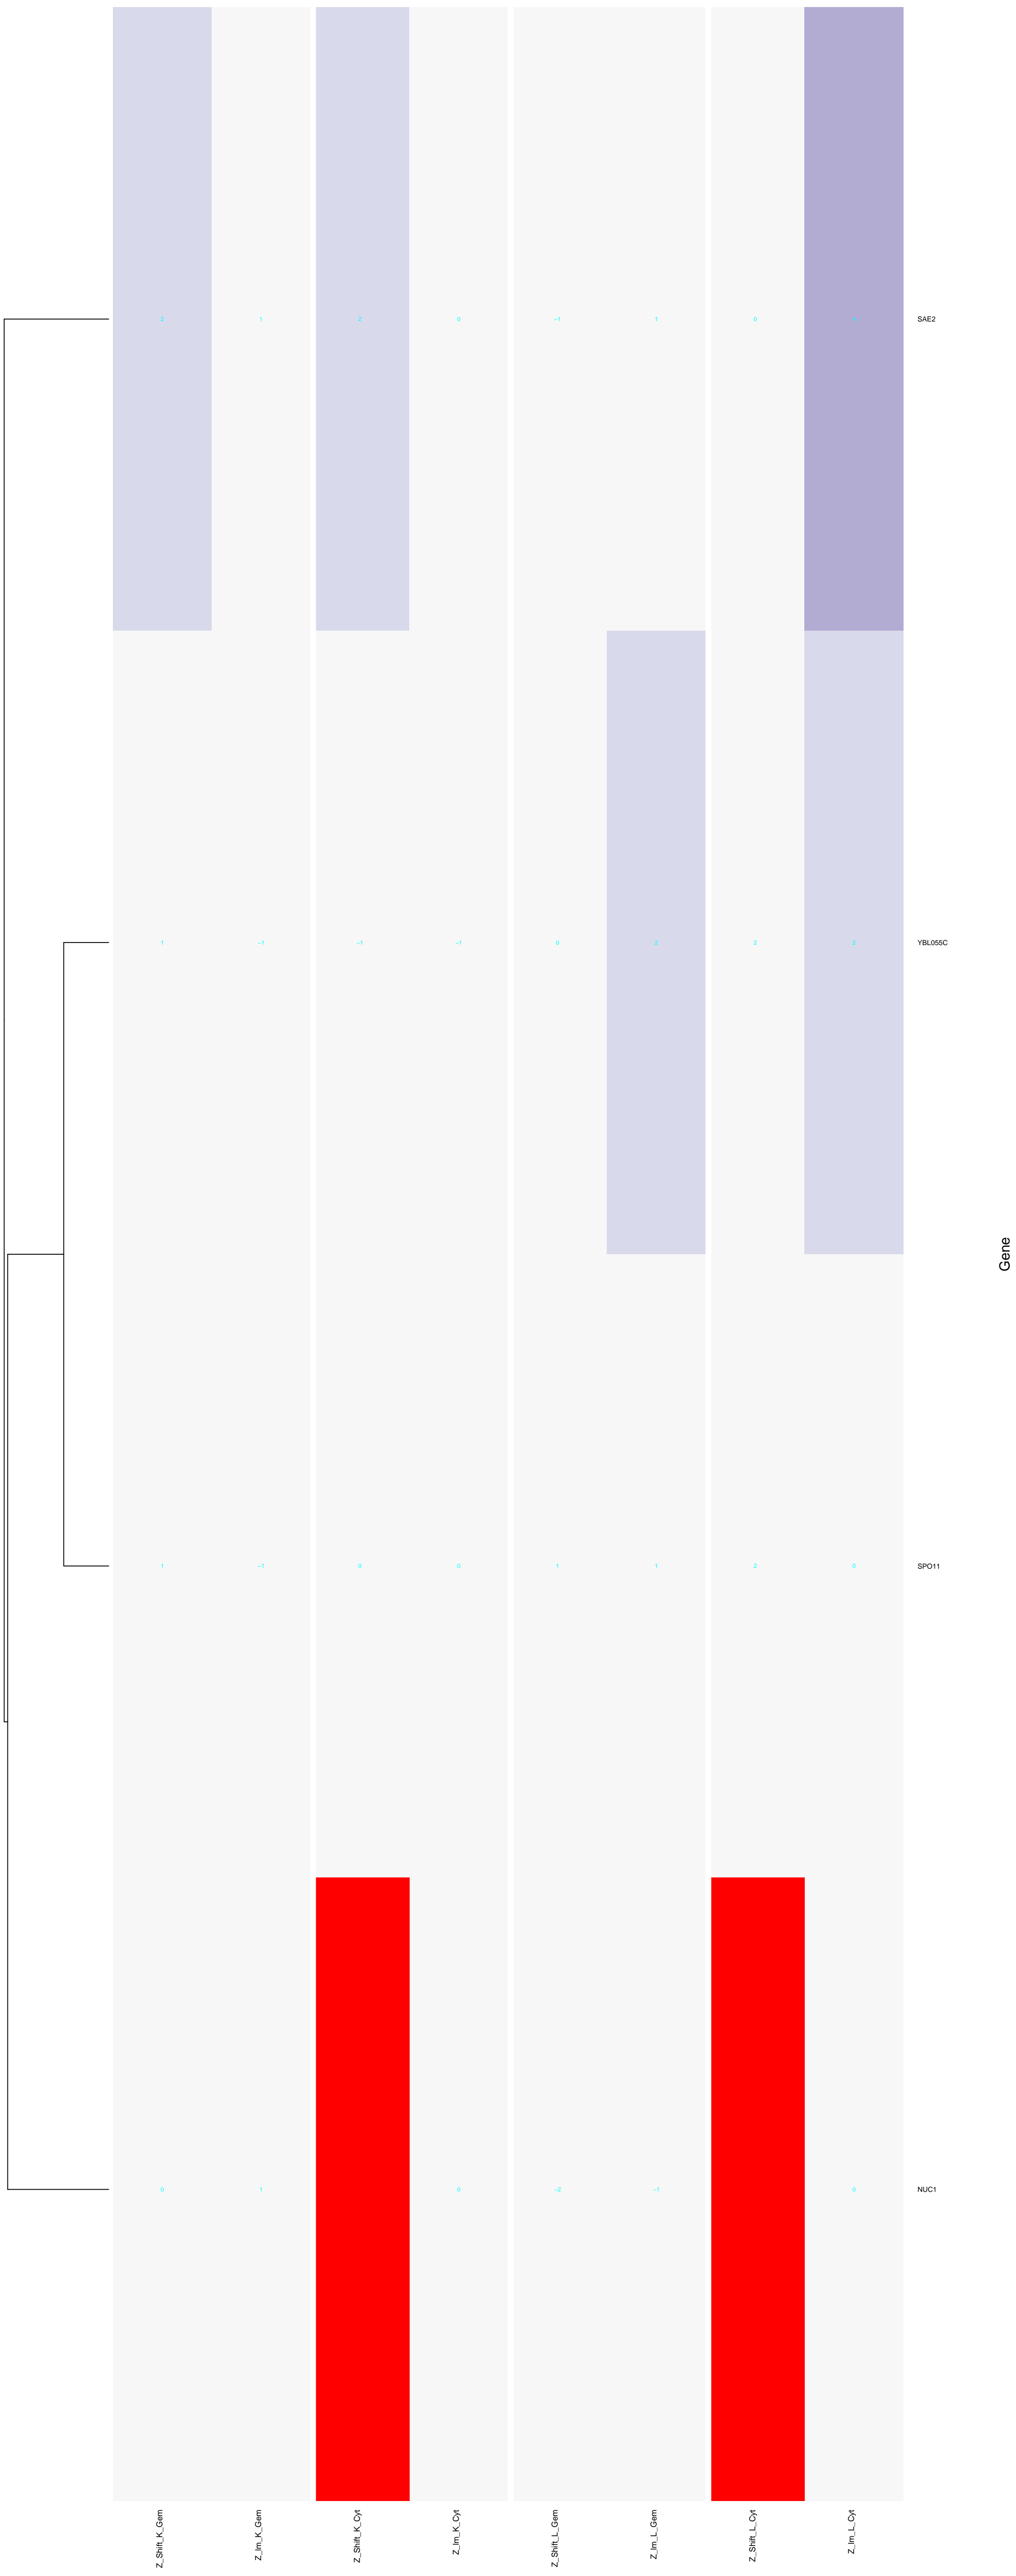



DNA integration

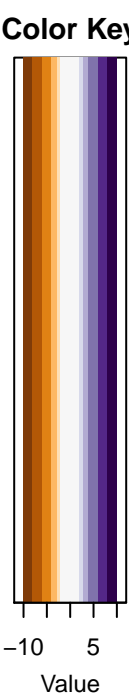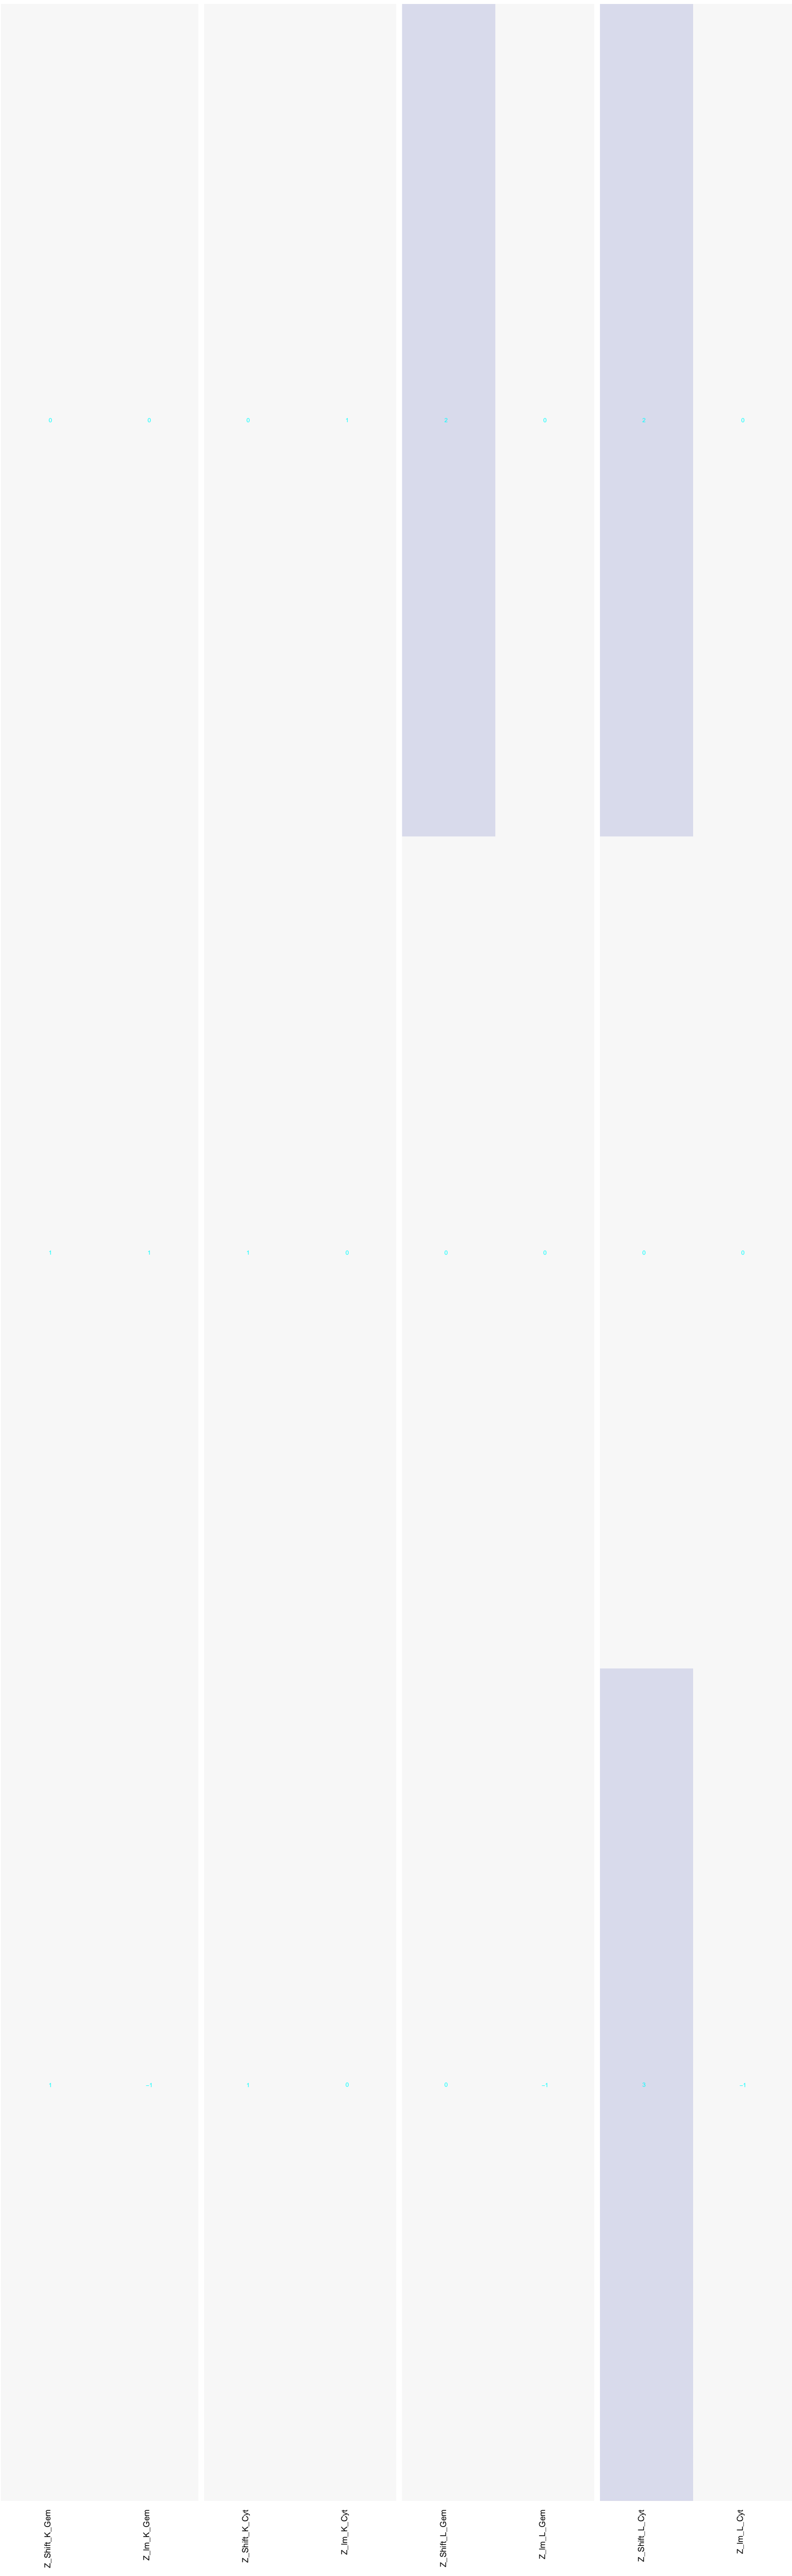

Gene

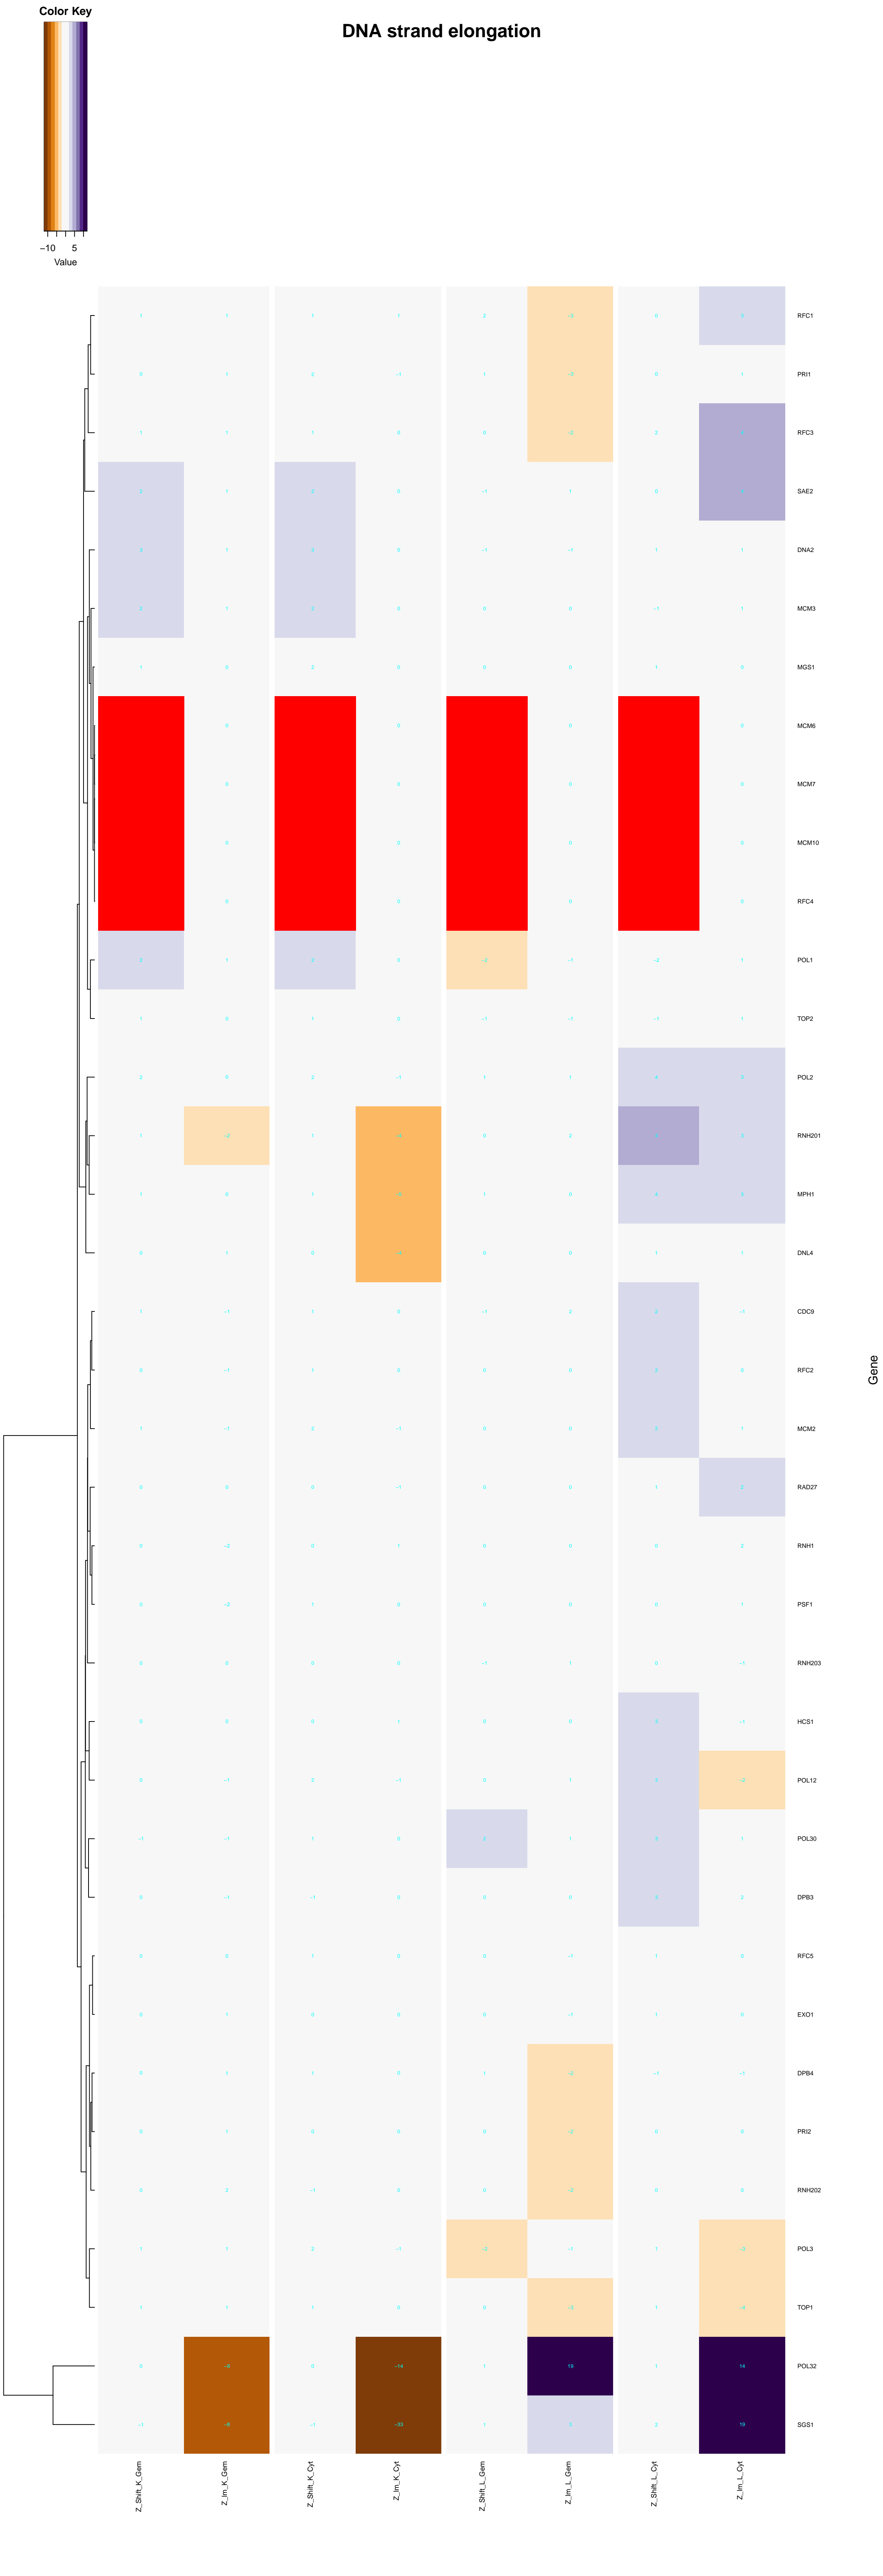

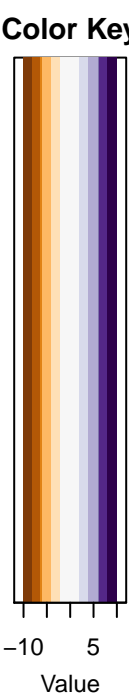

heteroduplex formation

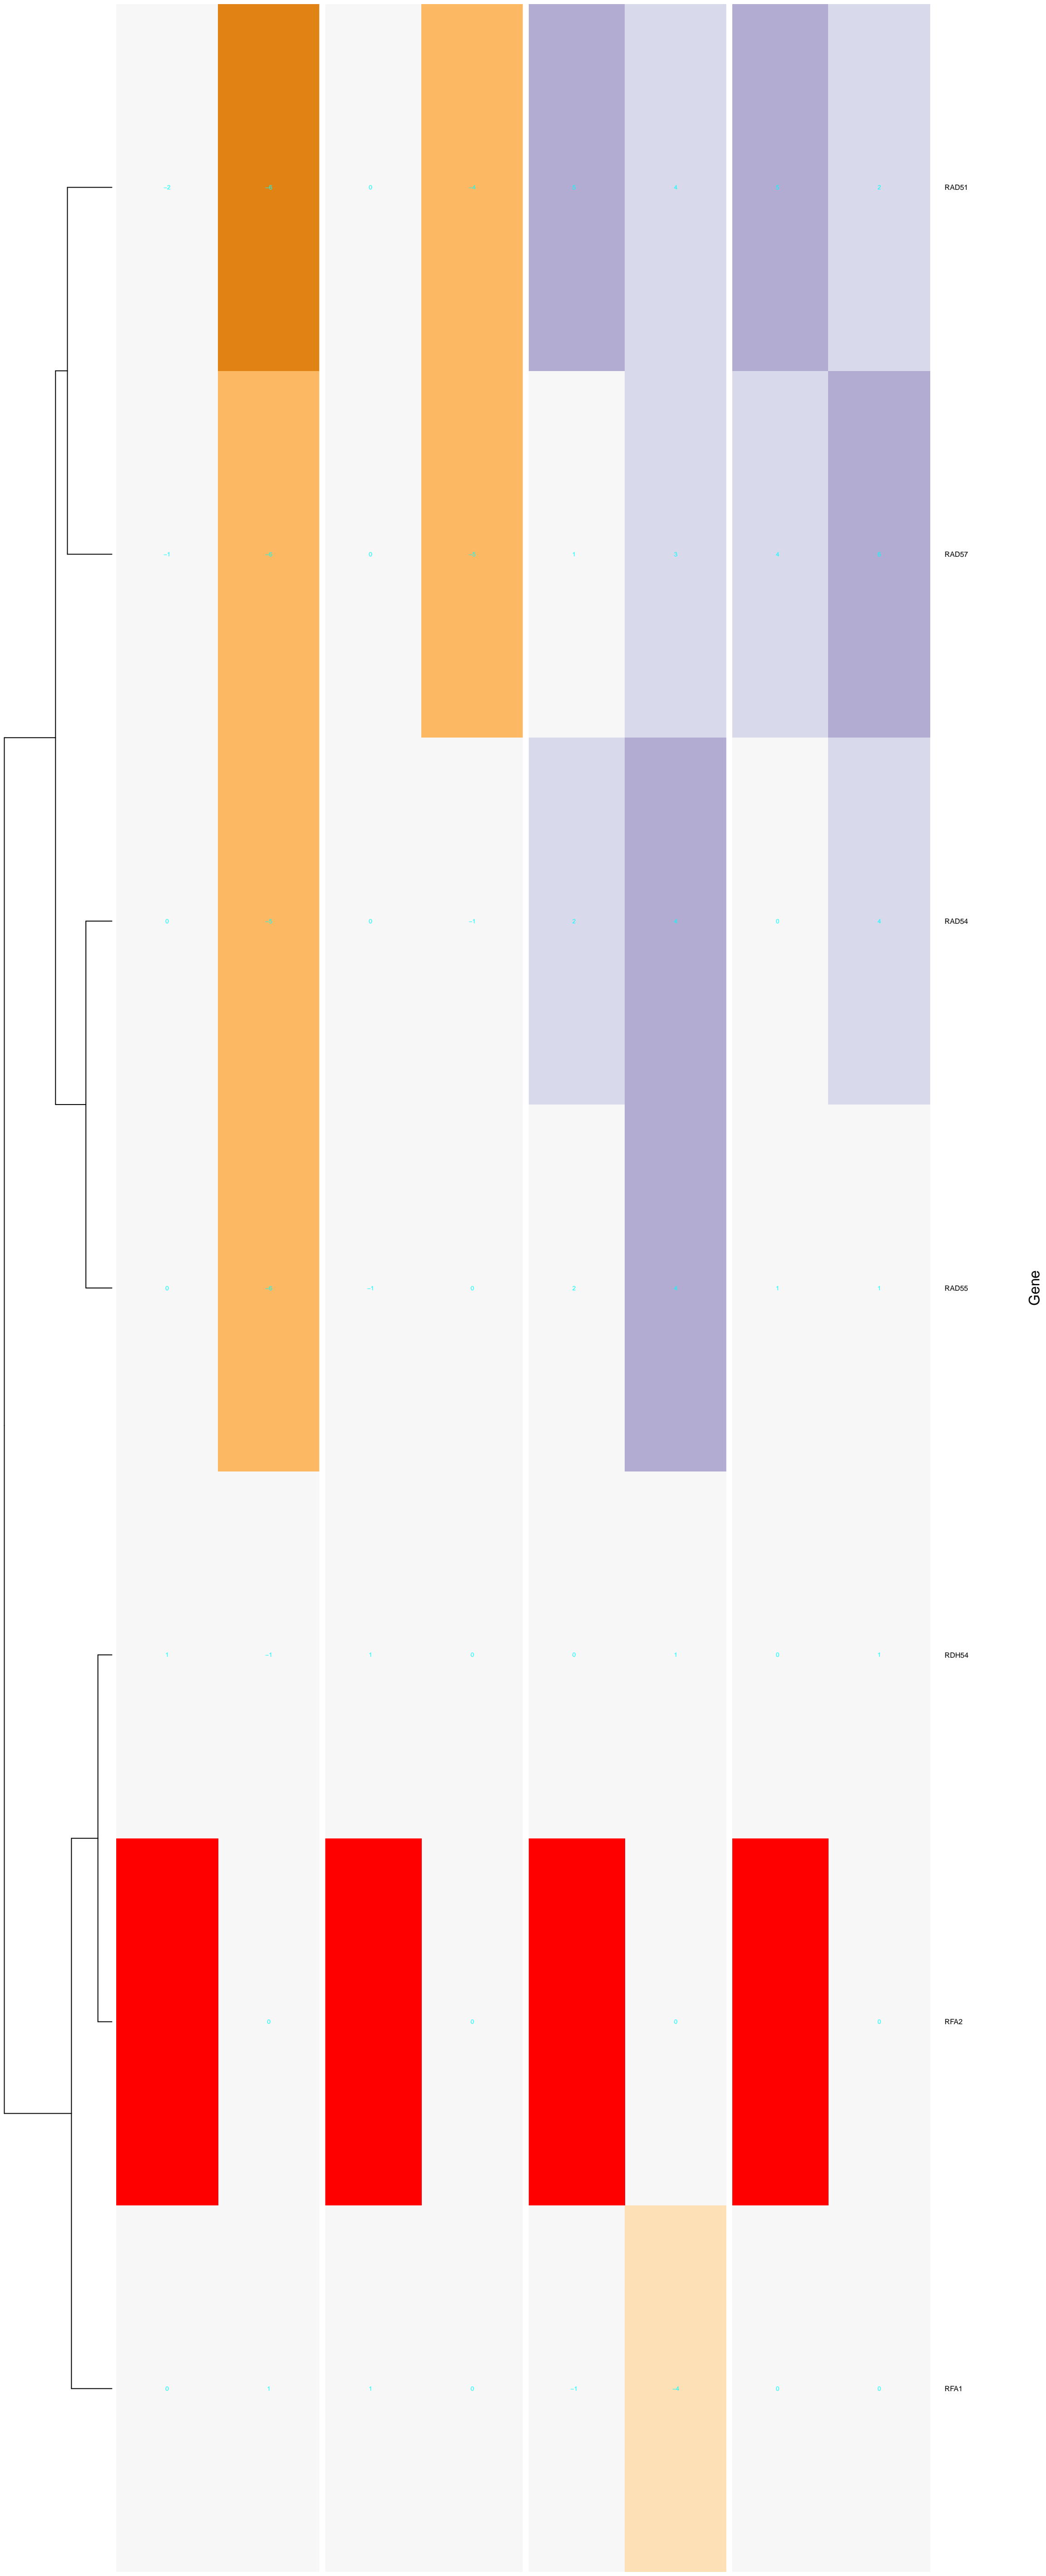

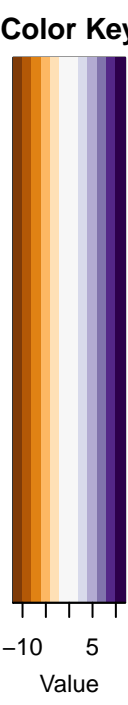

mitochondrial DNA metabolic process

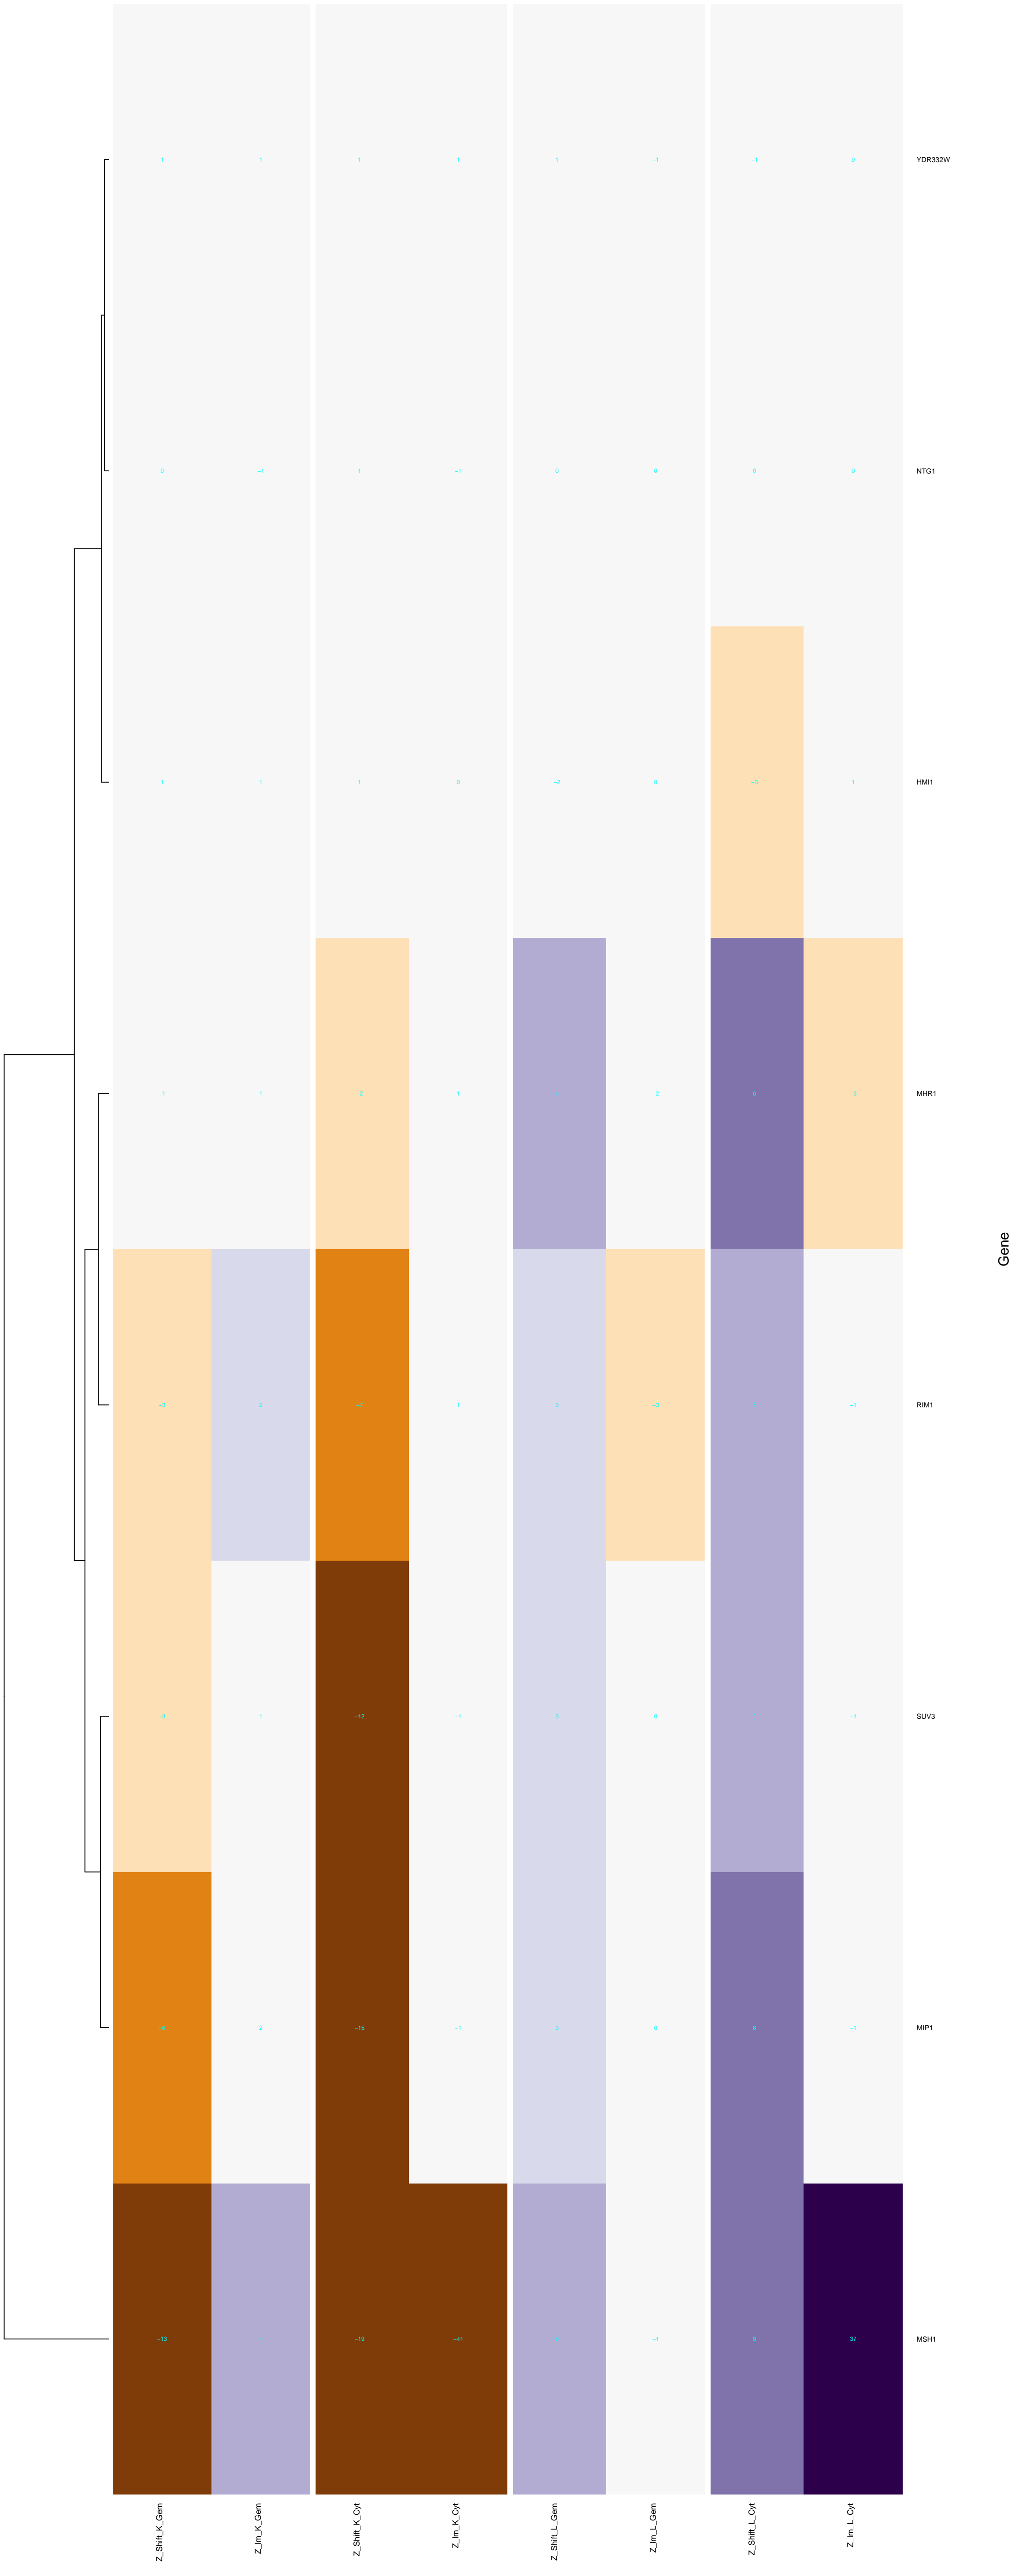

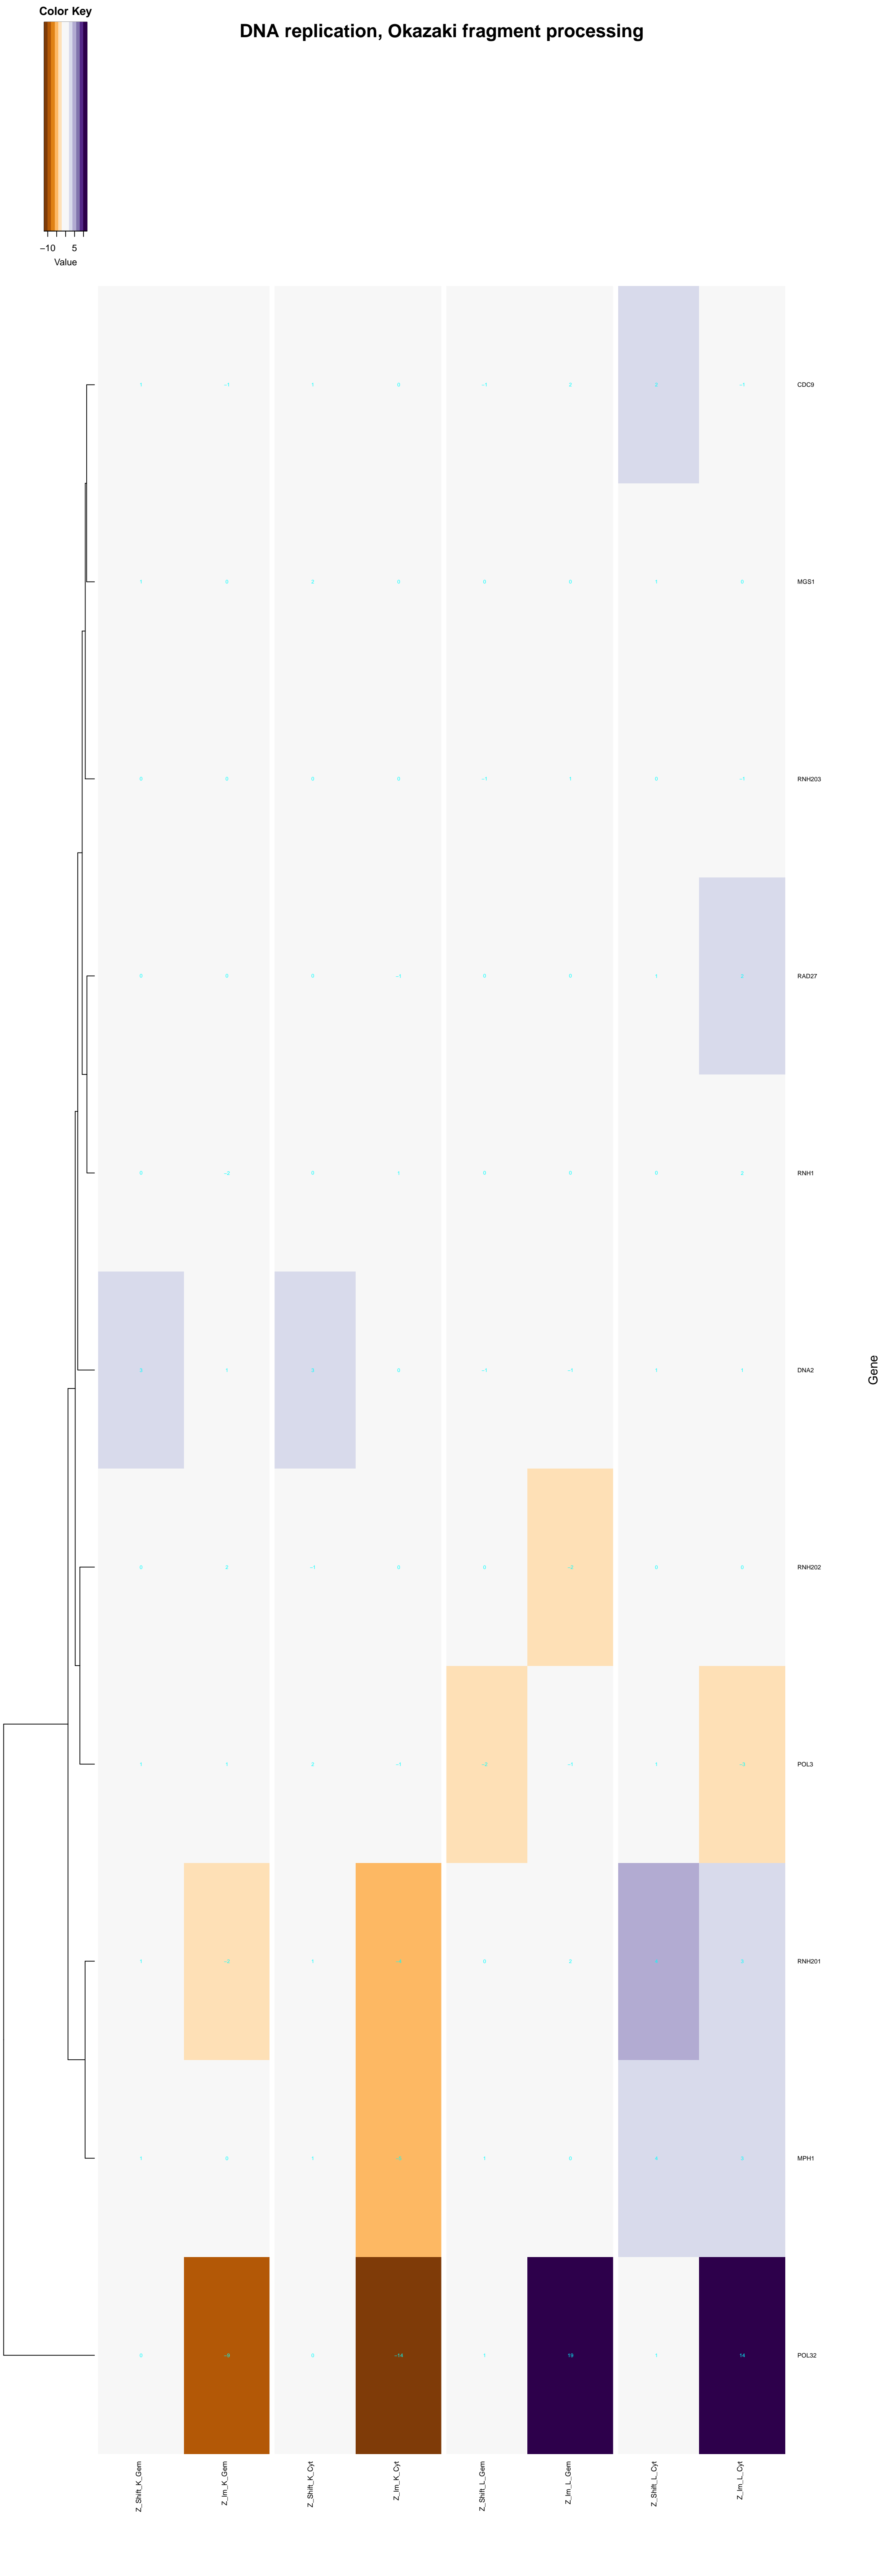



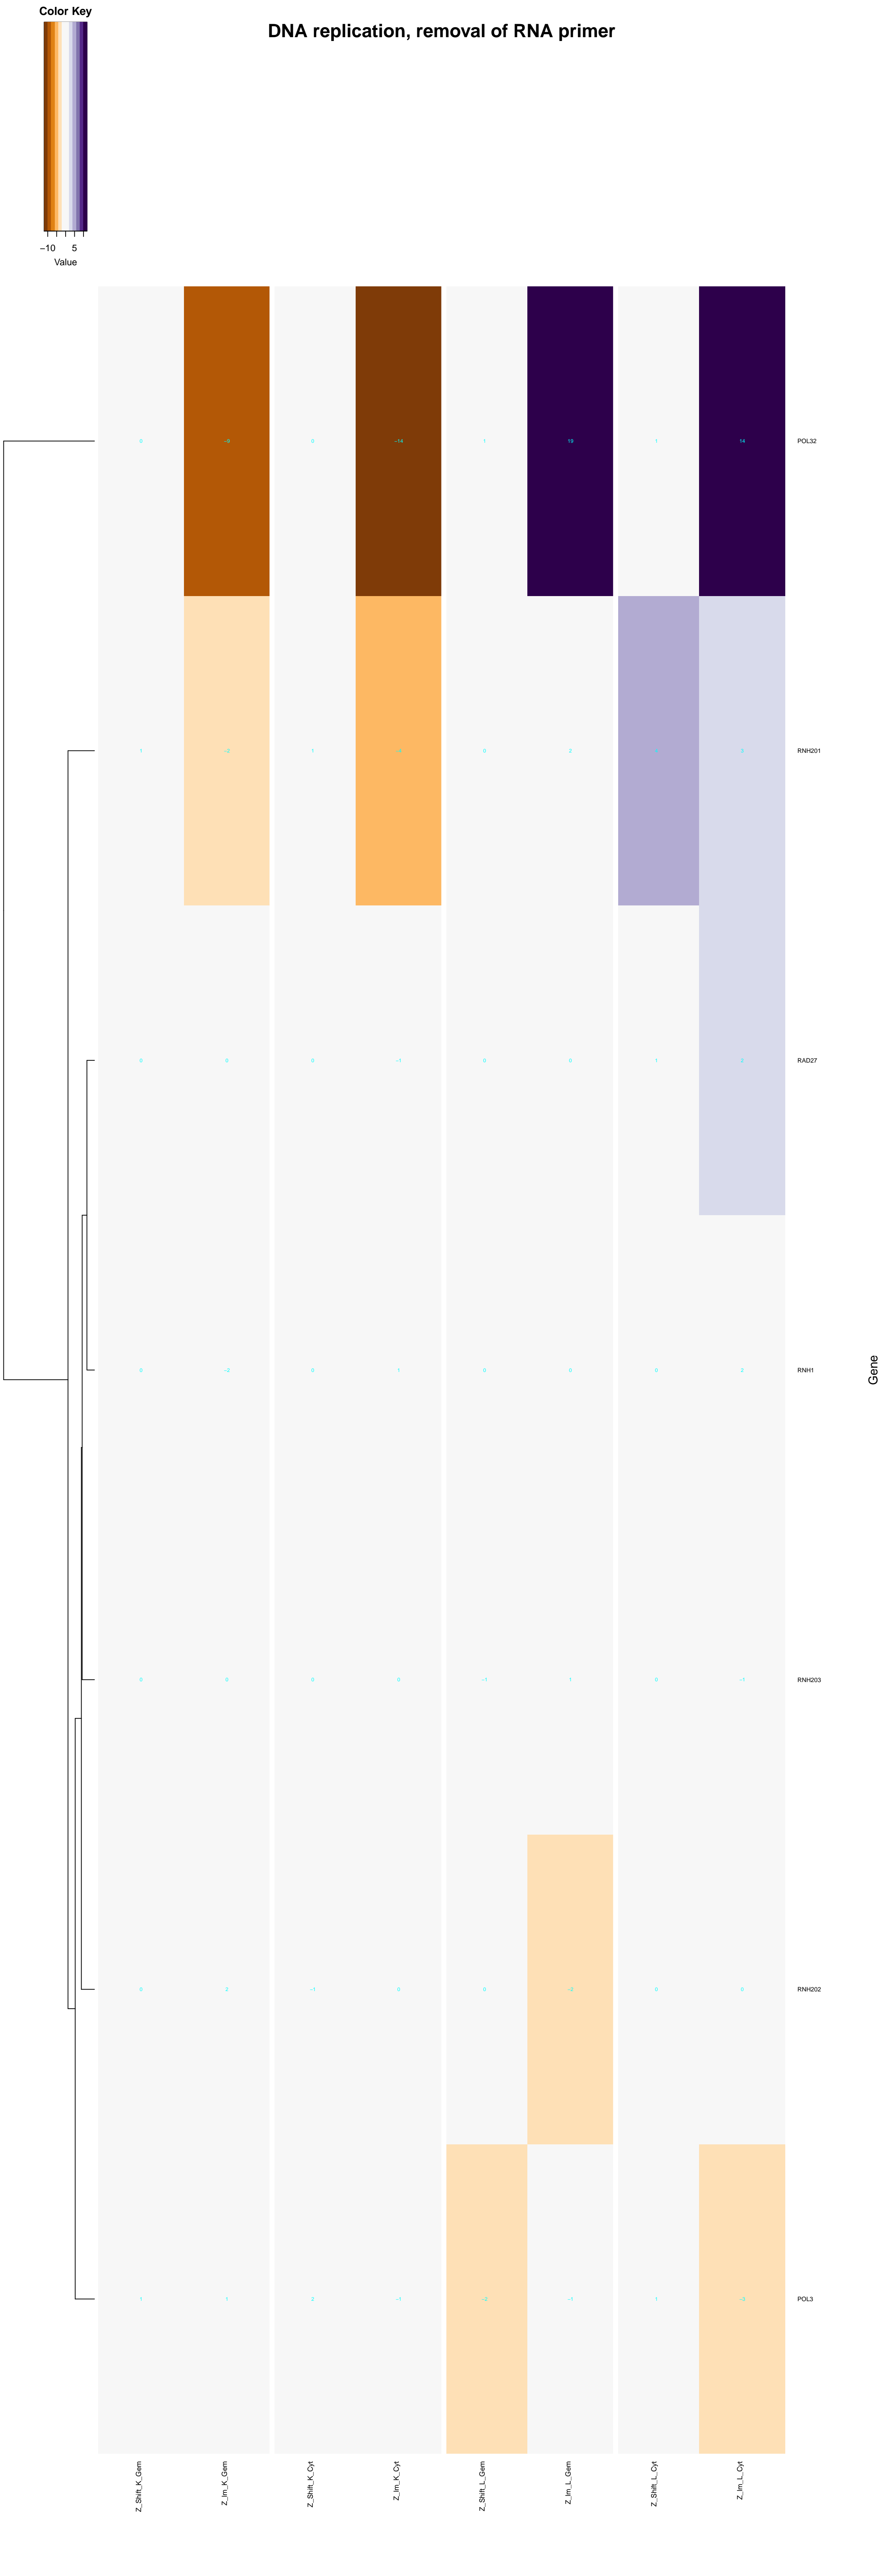

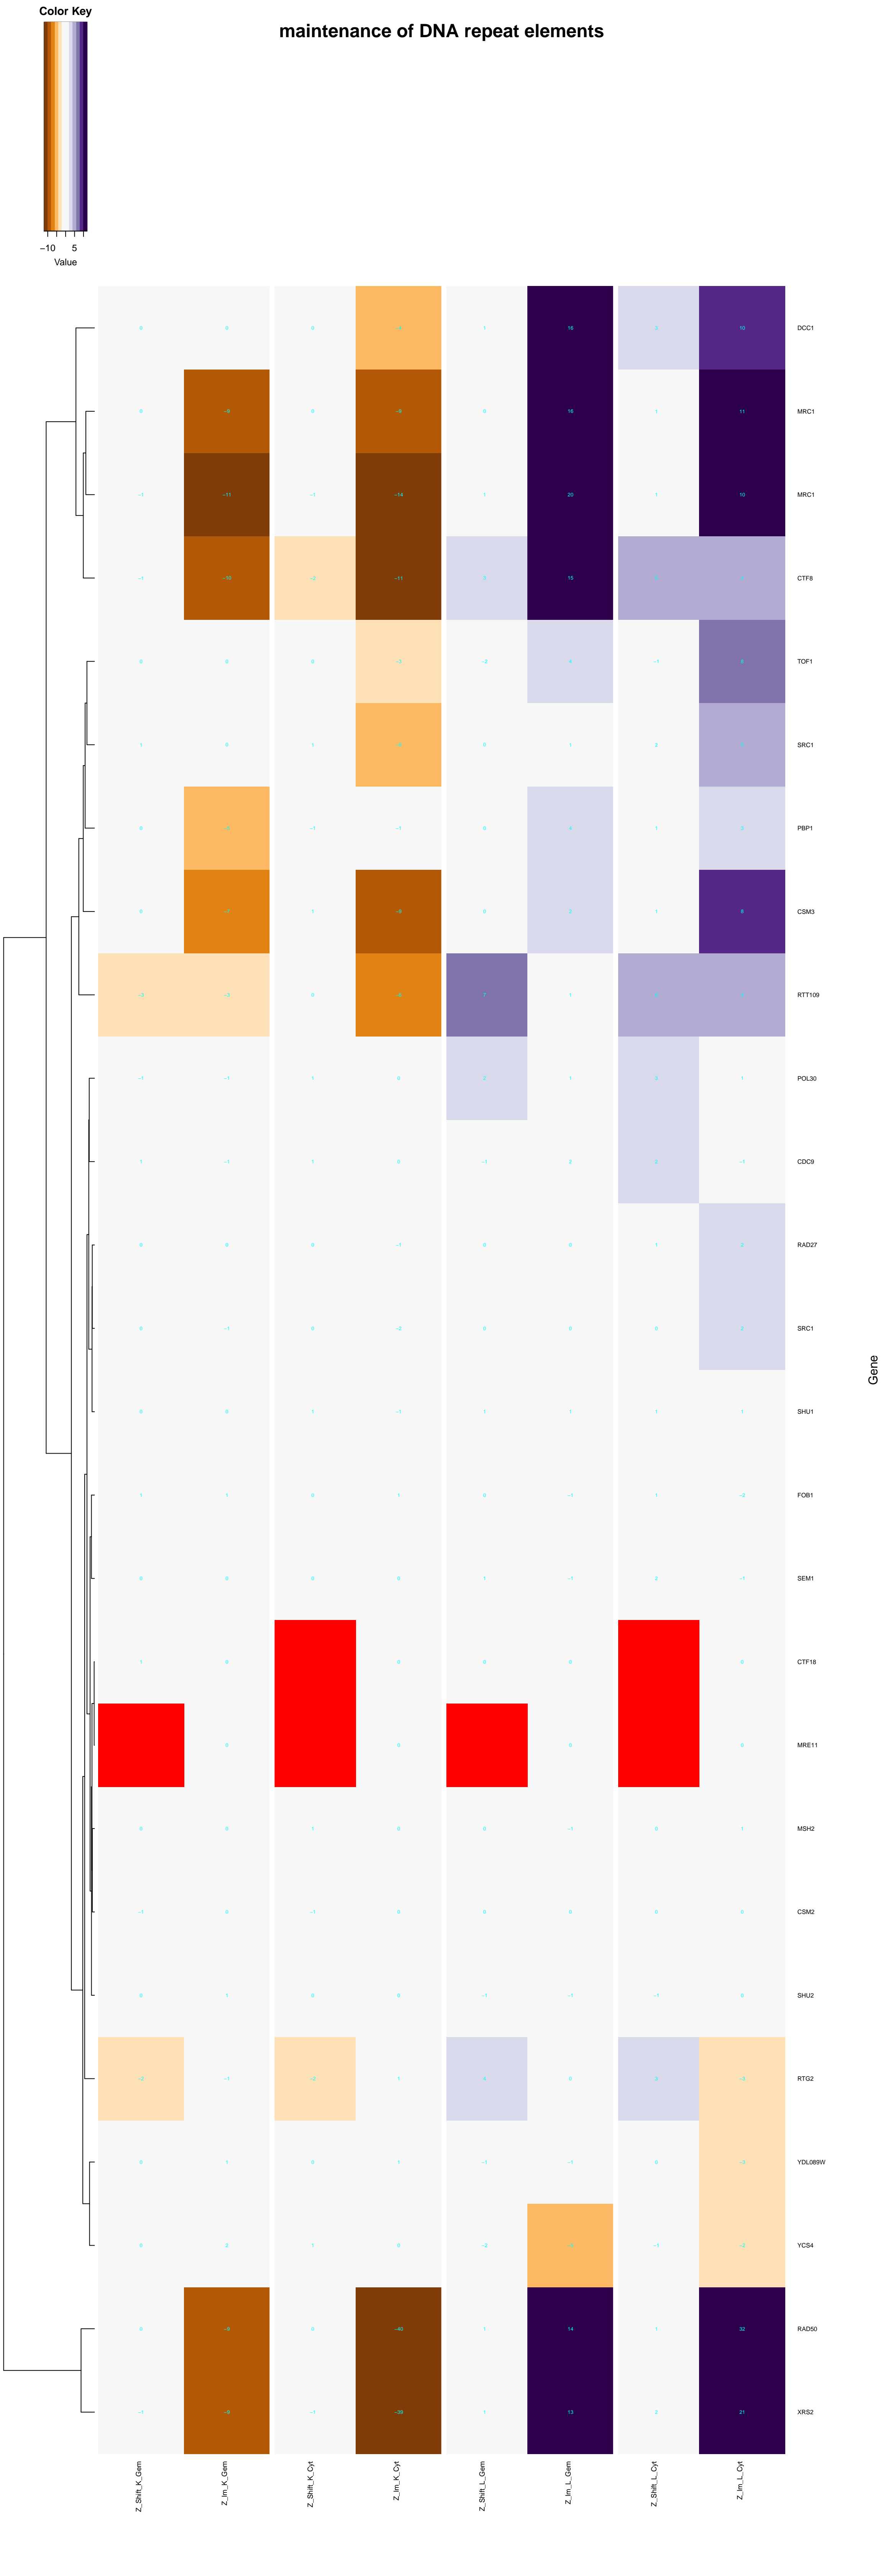

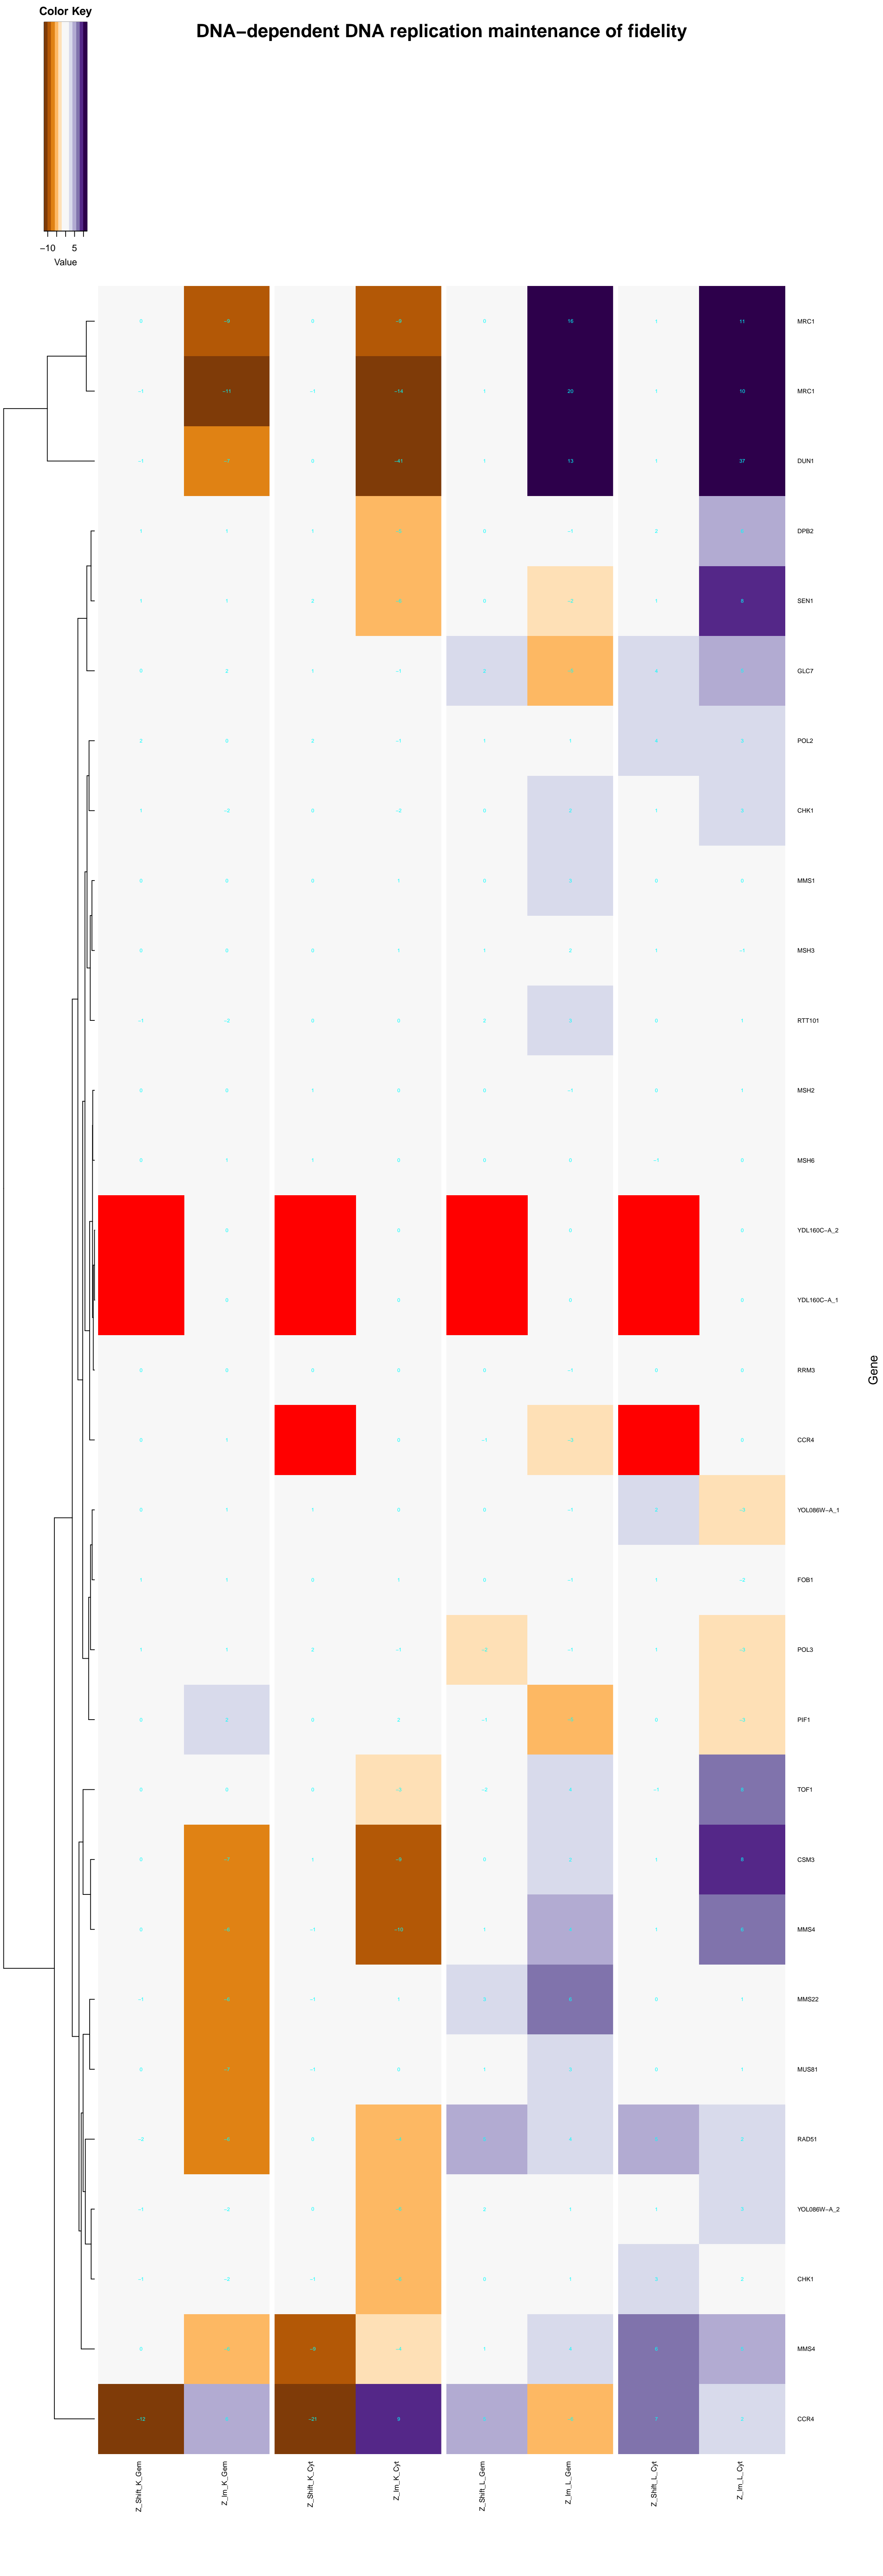



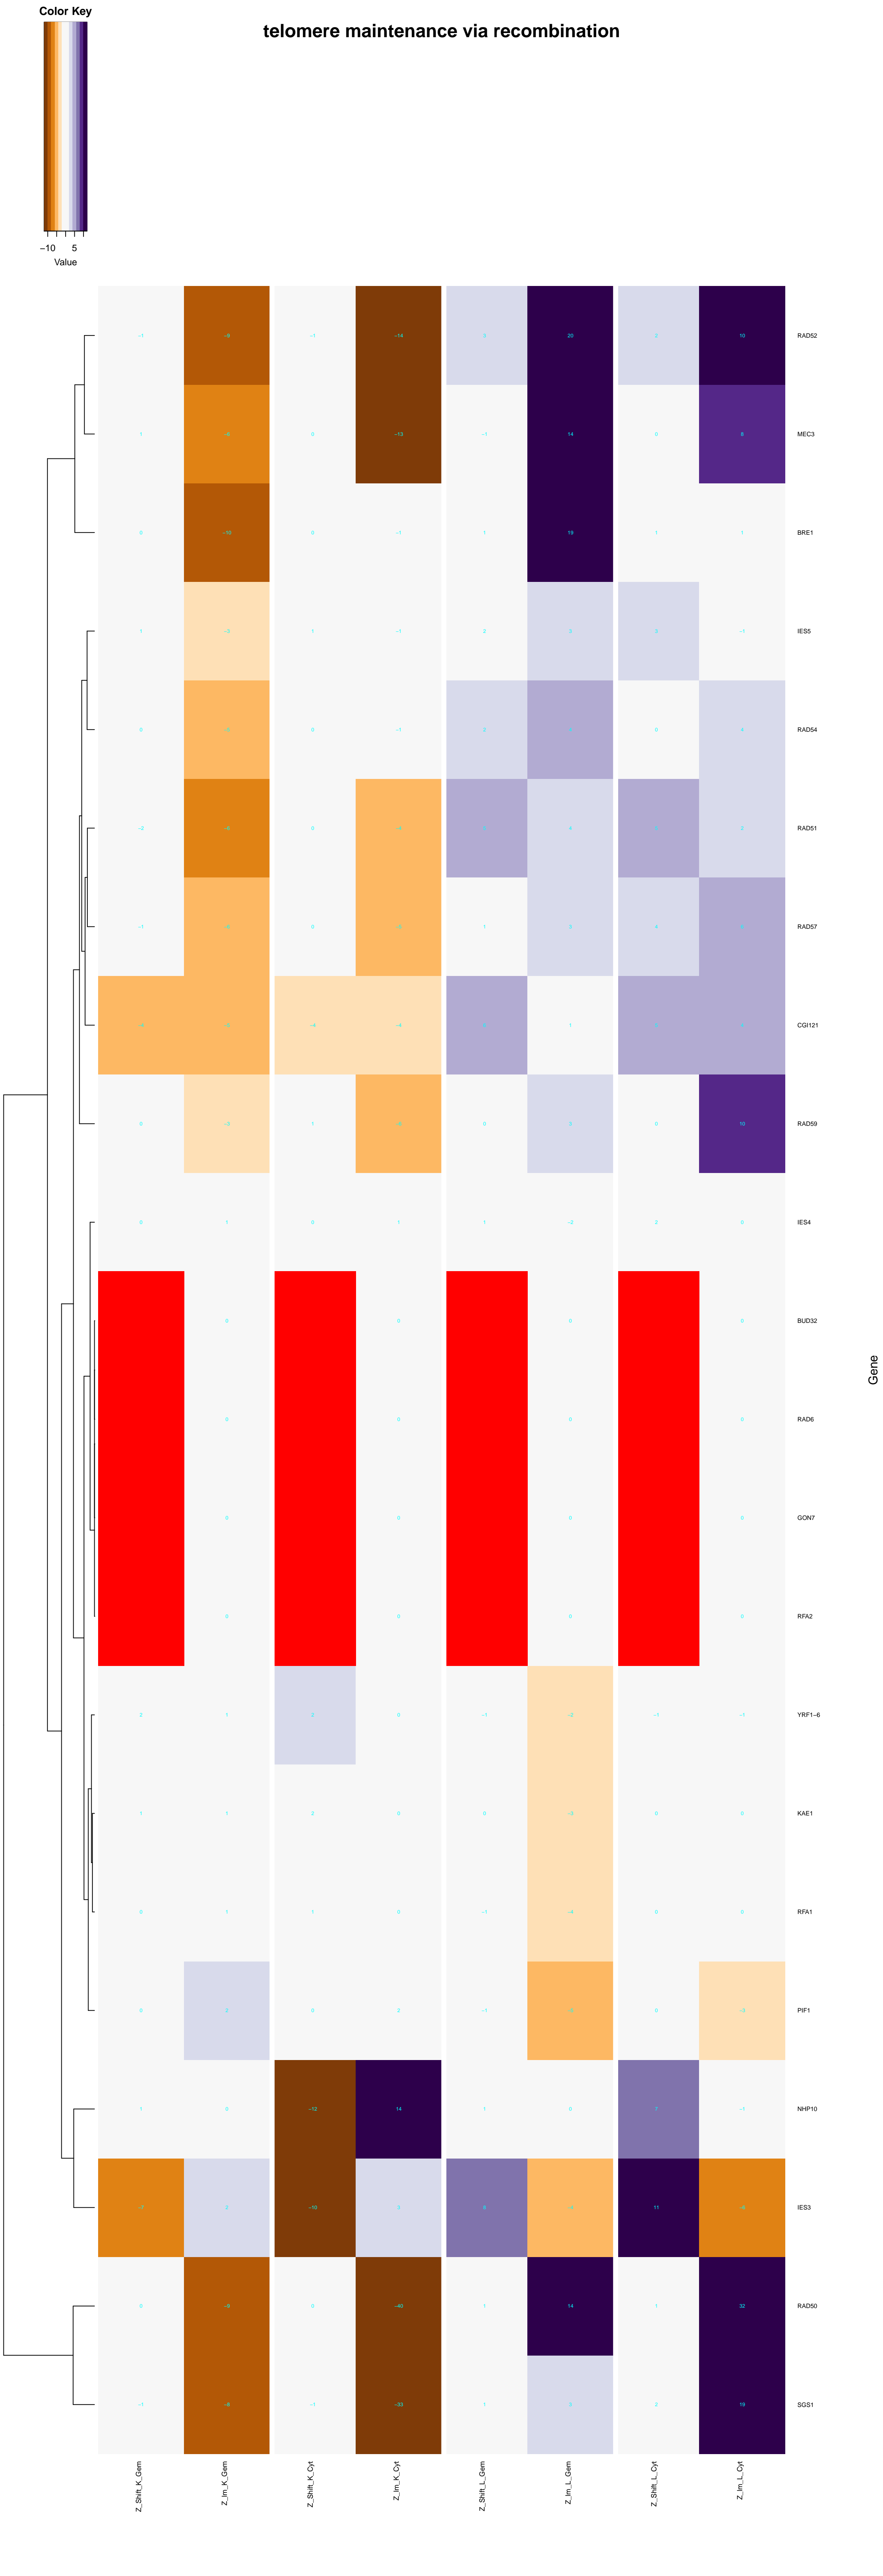

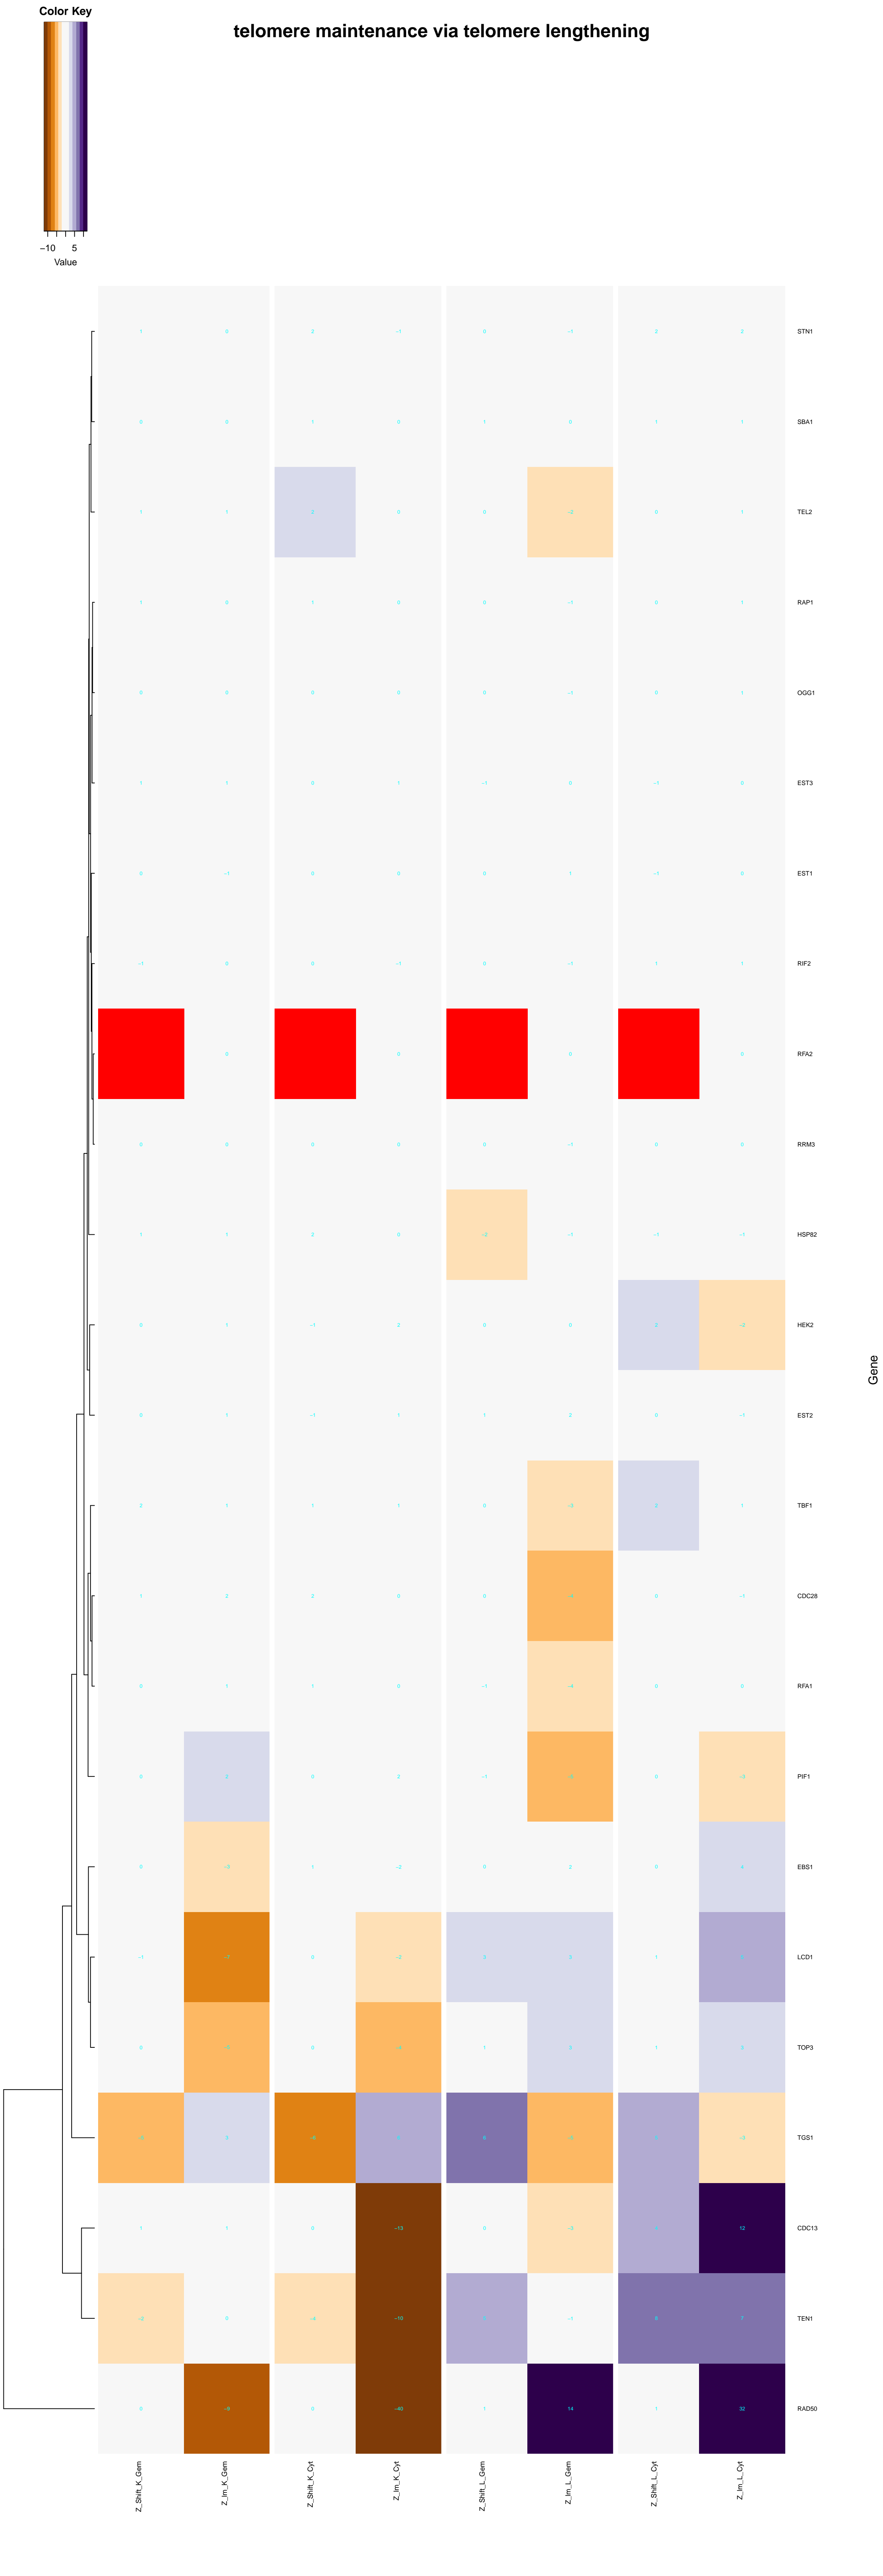

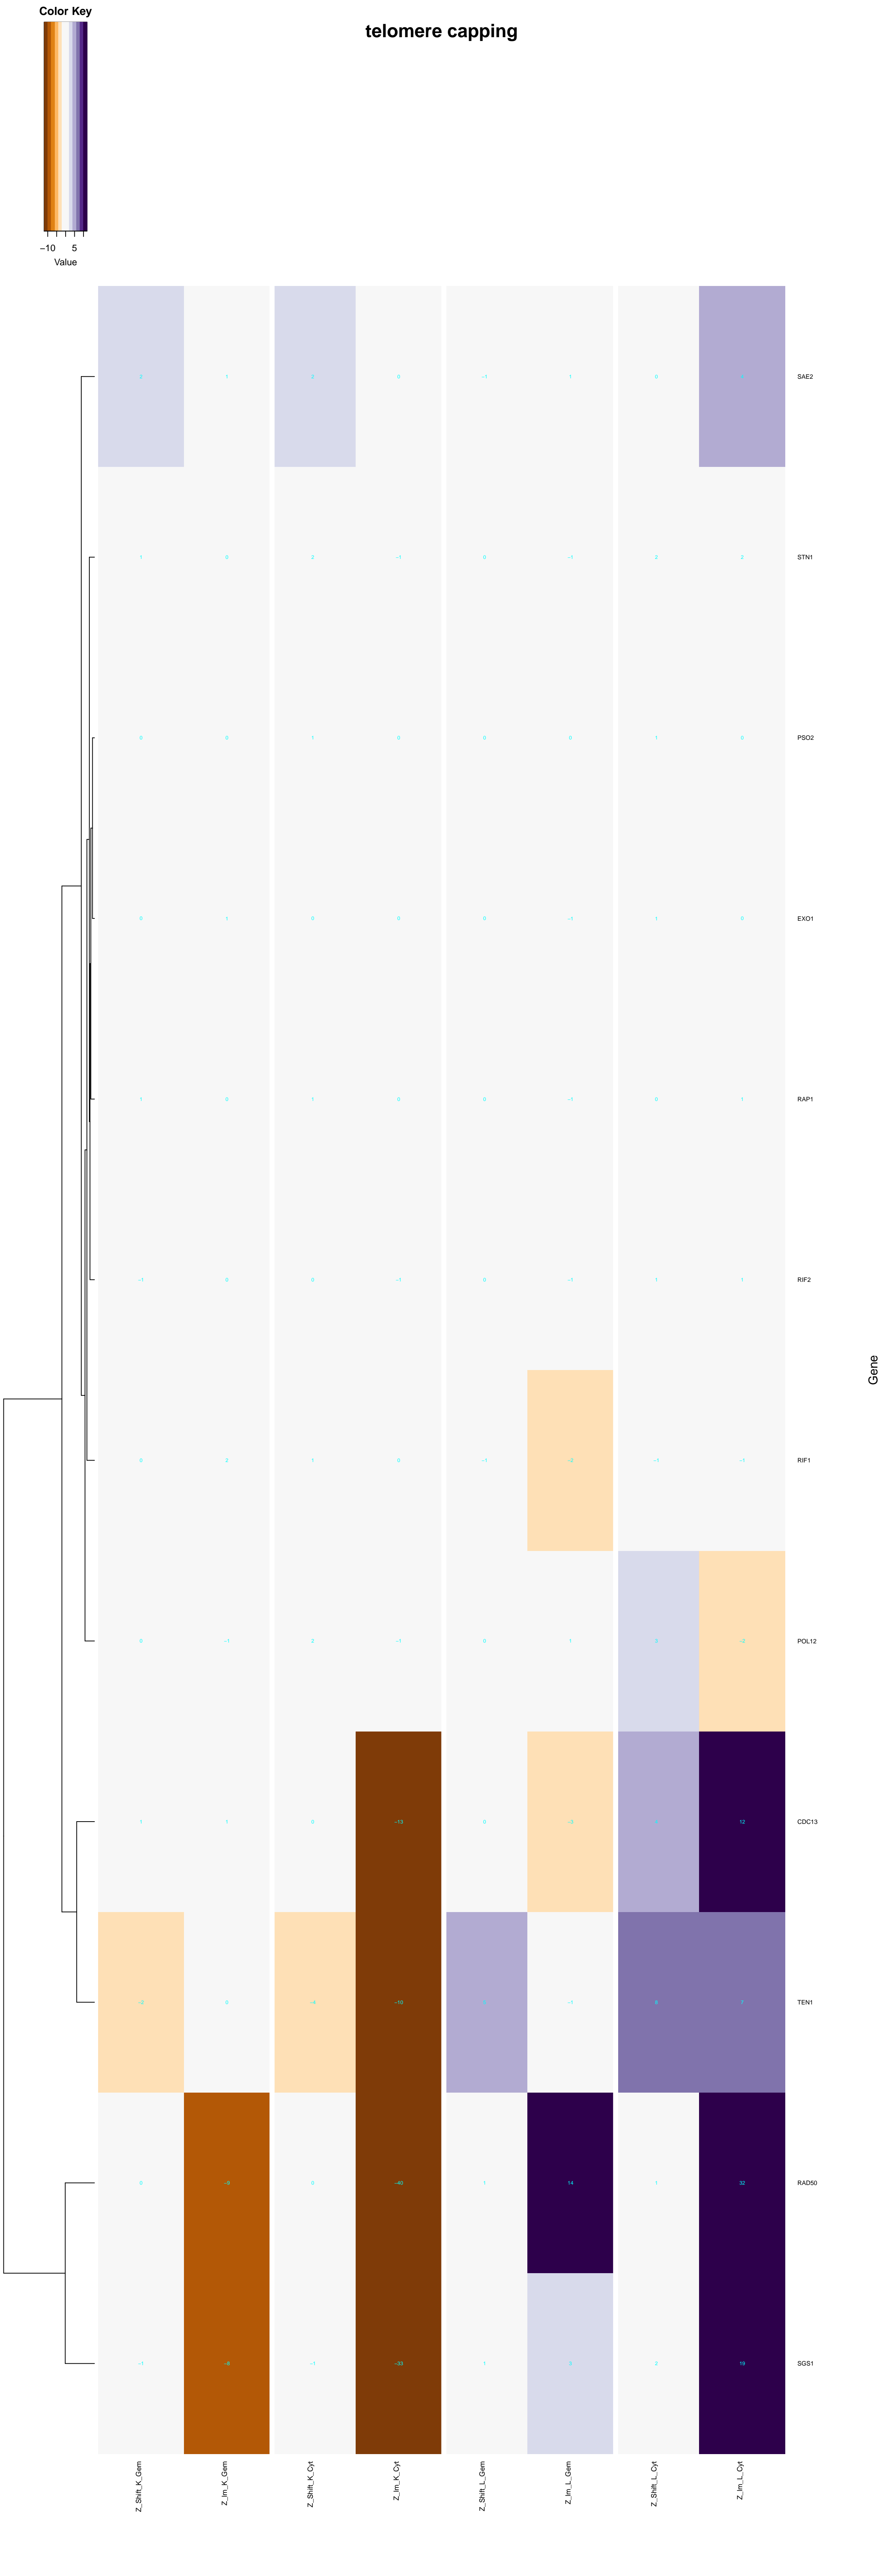

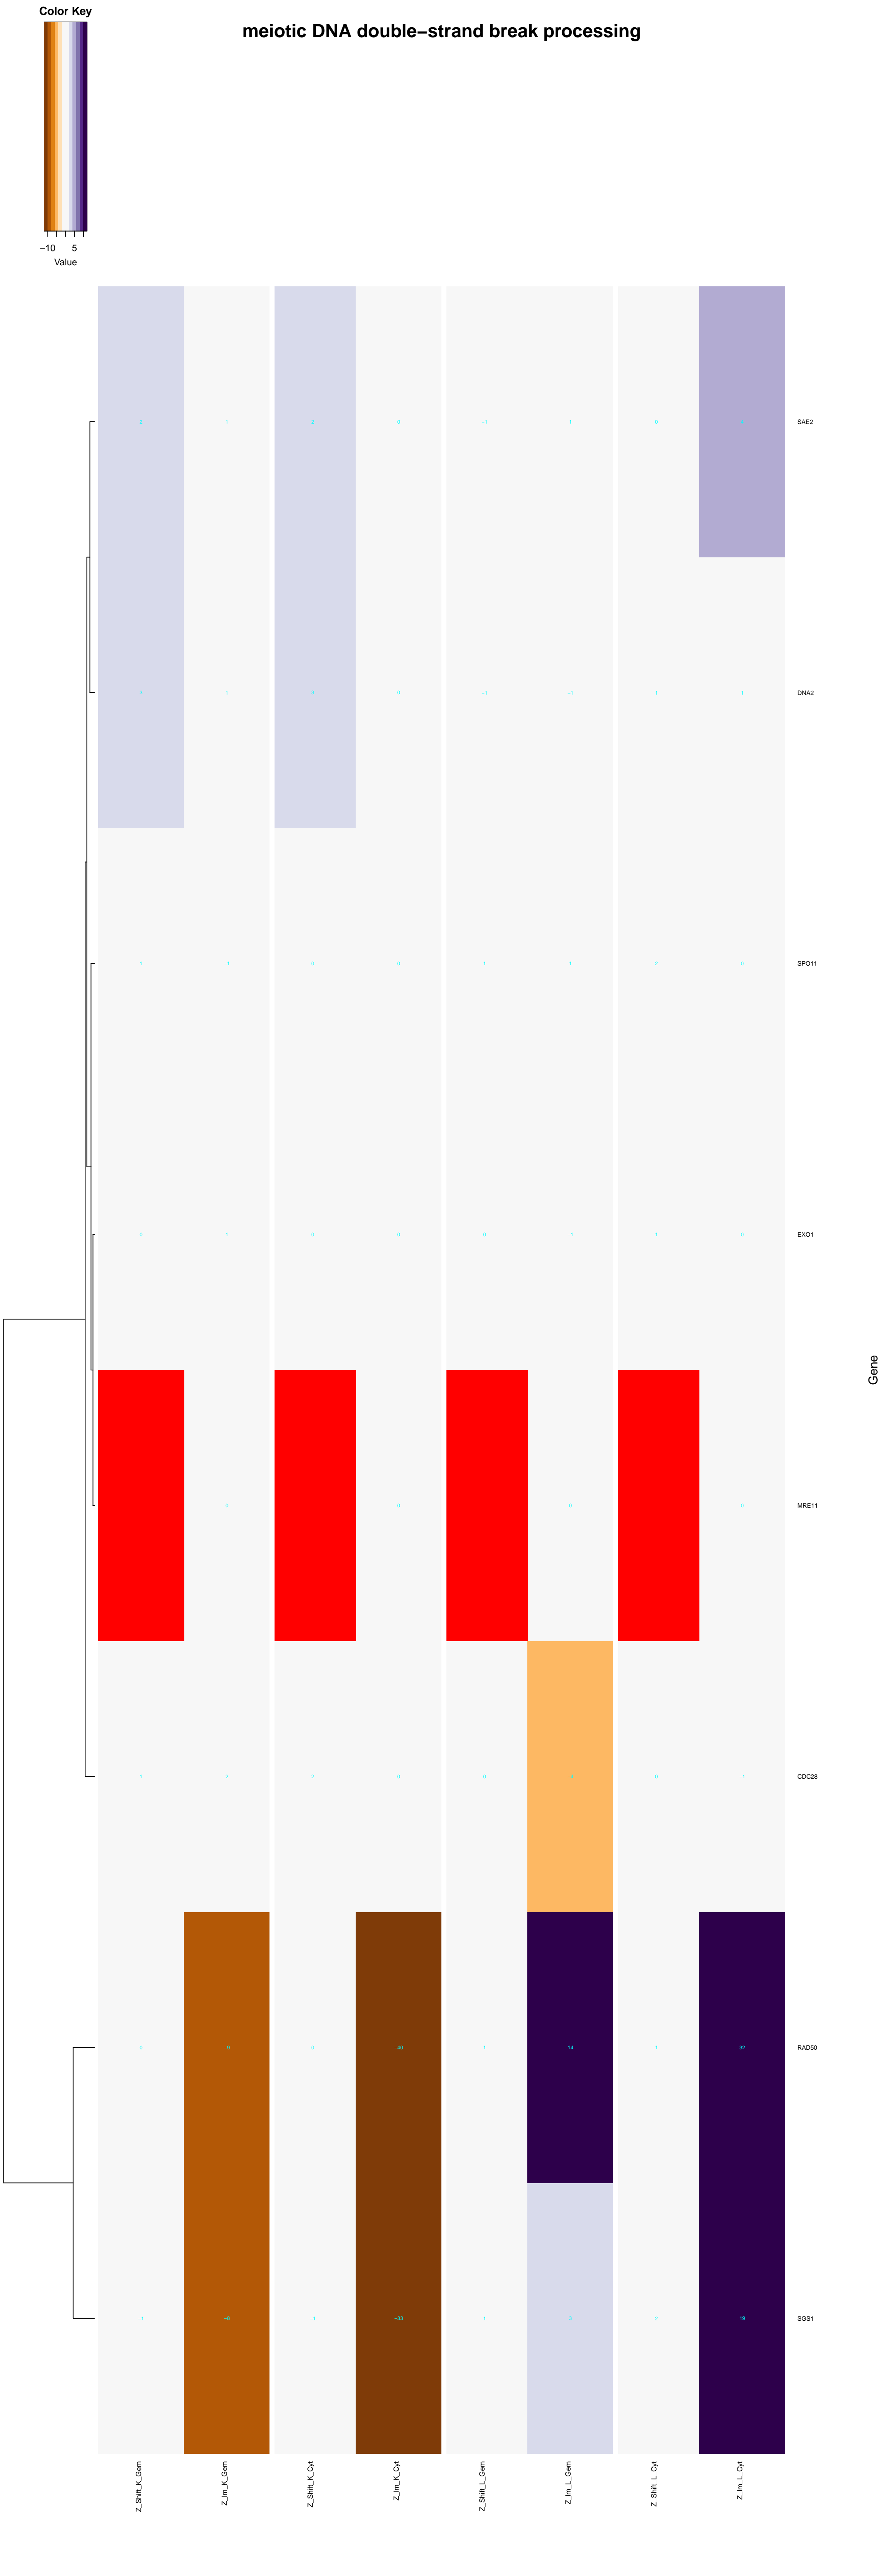



gene conversion at mating-type locus, DNA double-strand break processing

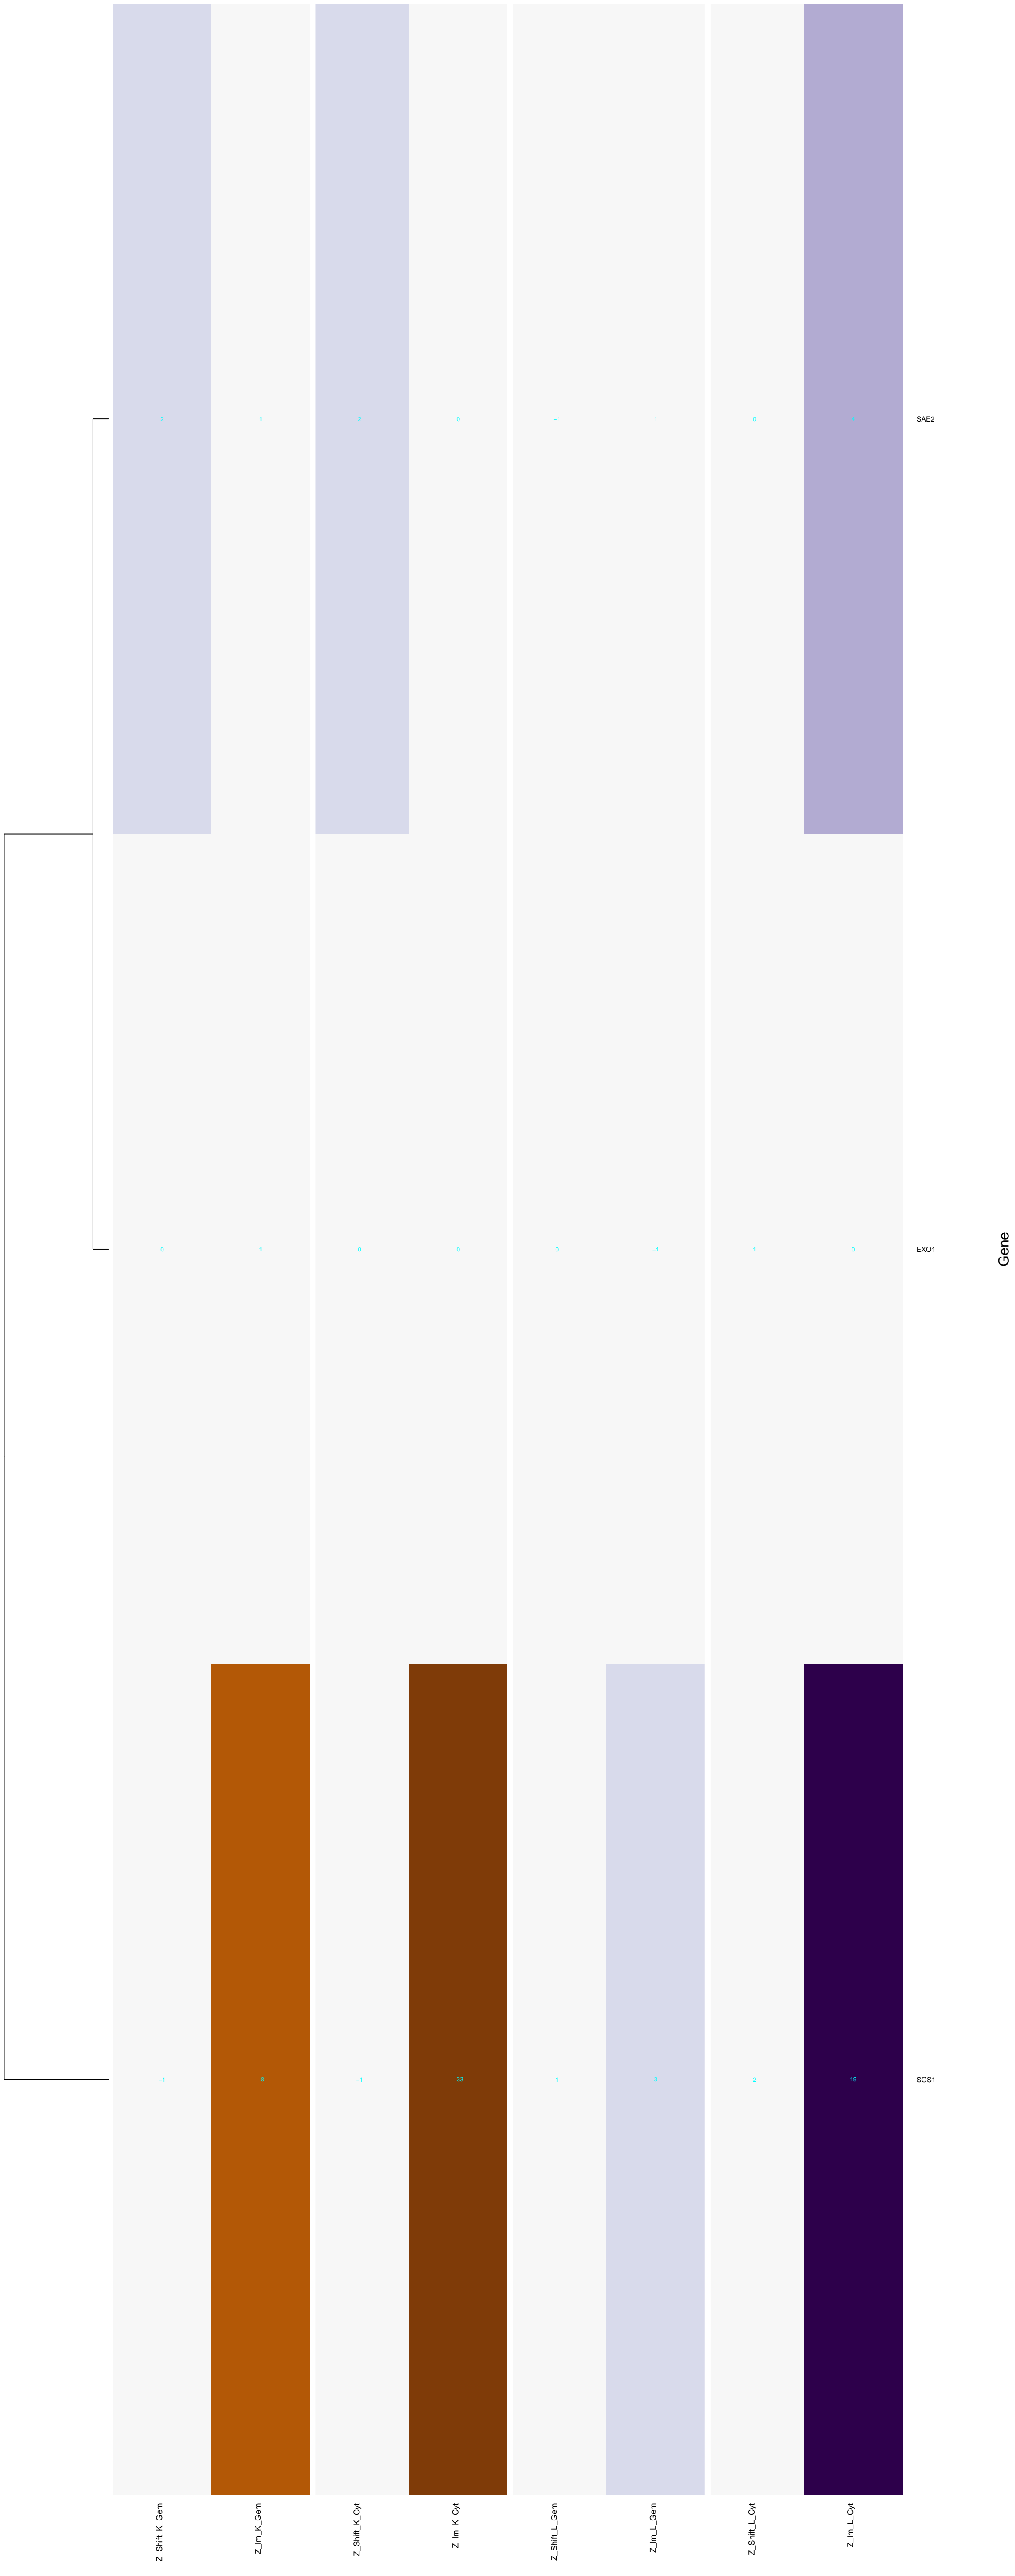

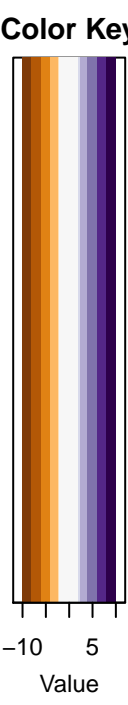

e-strand break repair via single-strand annealing, removal of nonhomologous ends

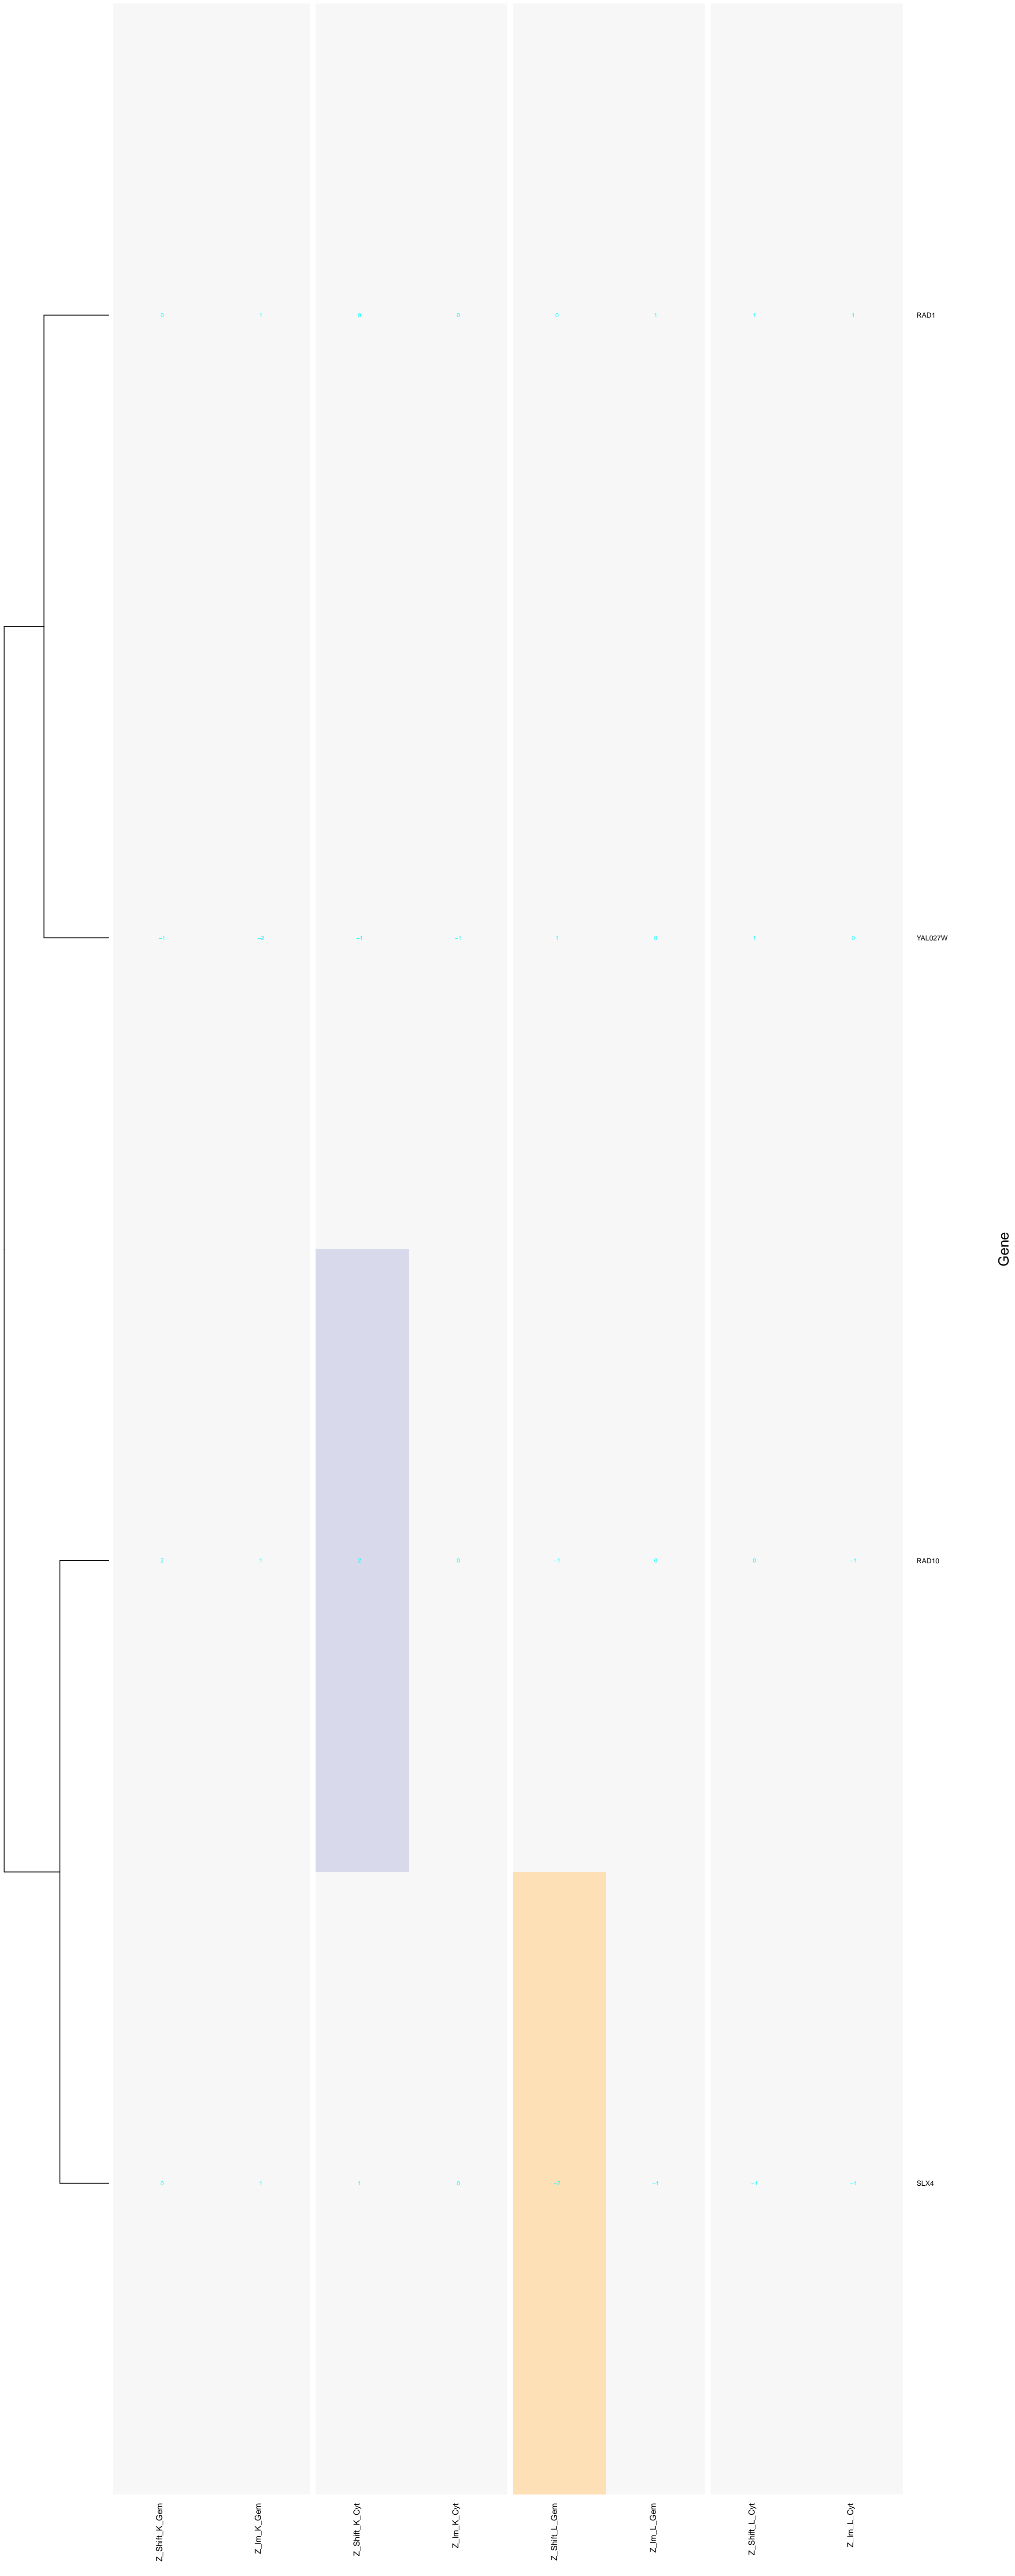





cell cycle DNA replication initiation

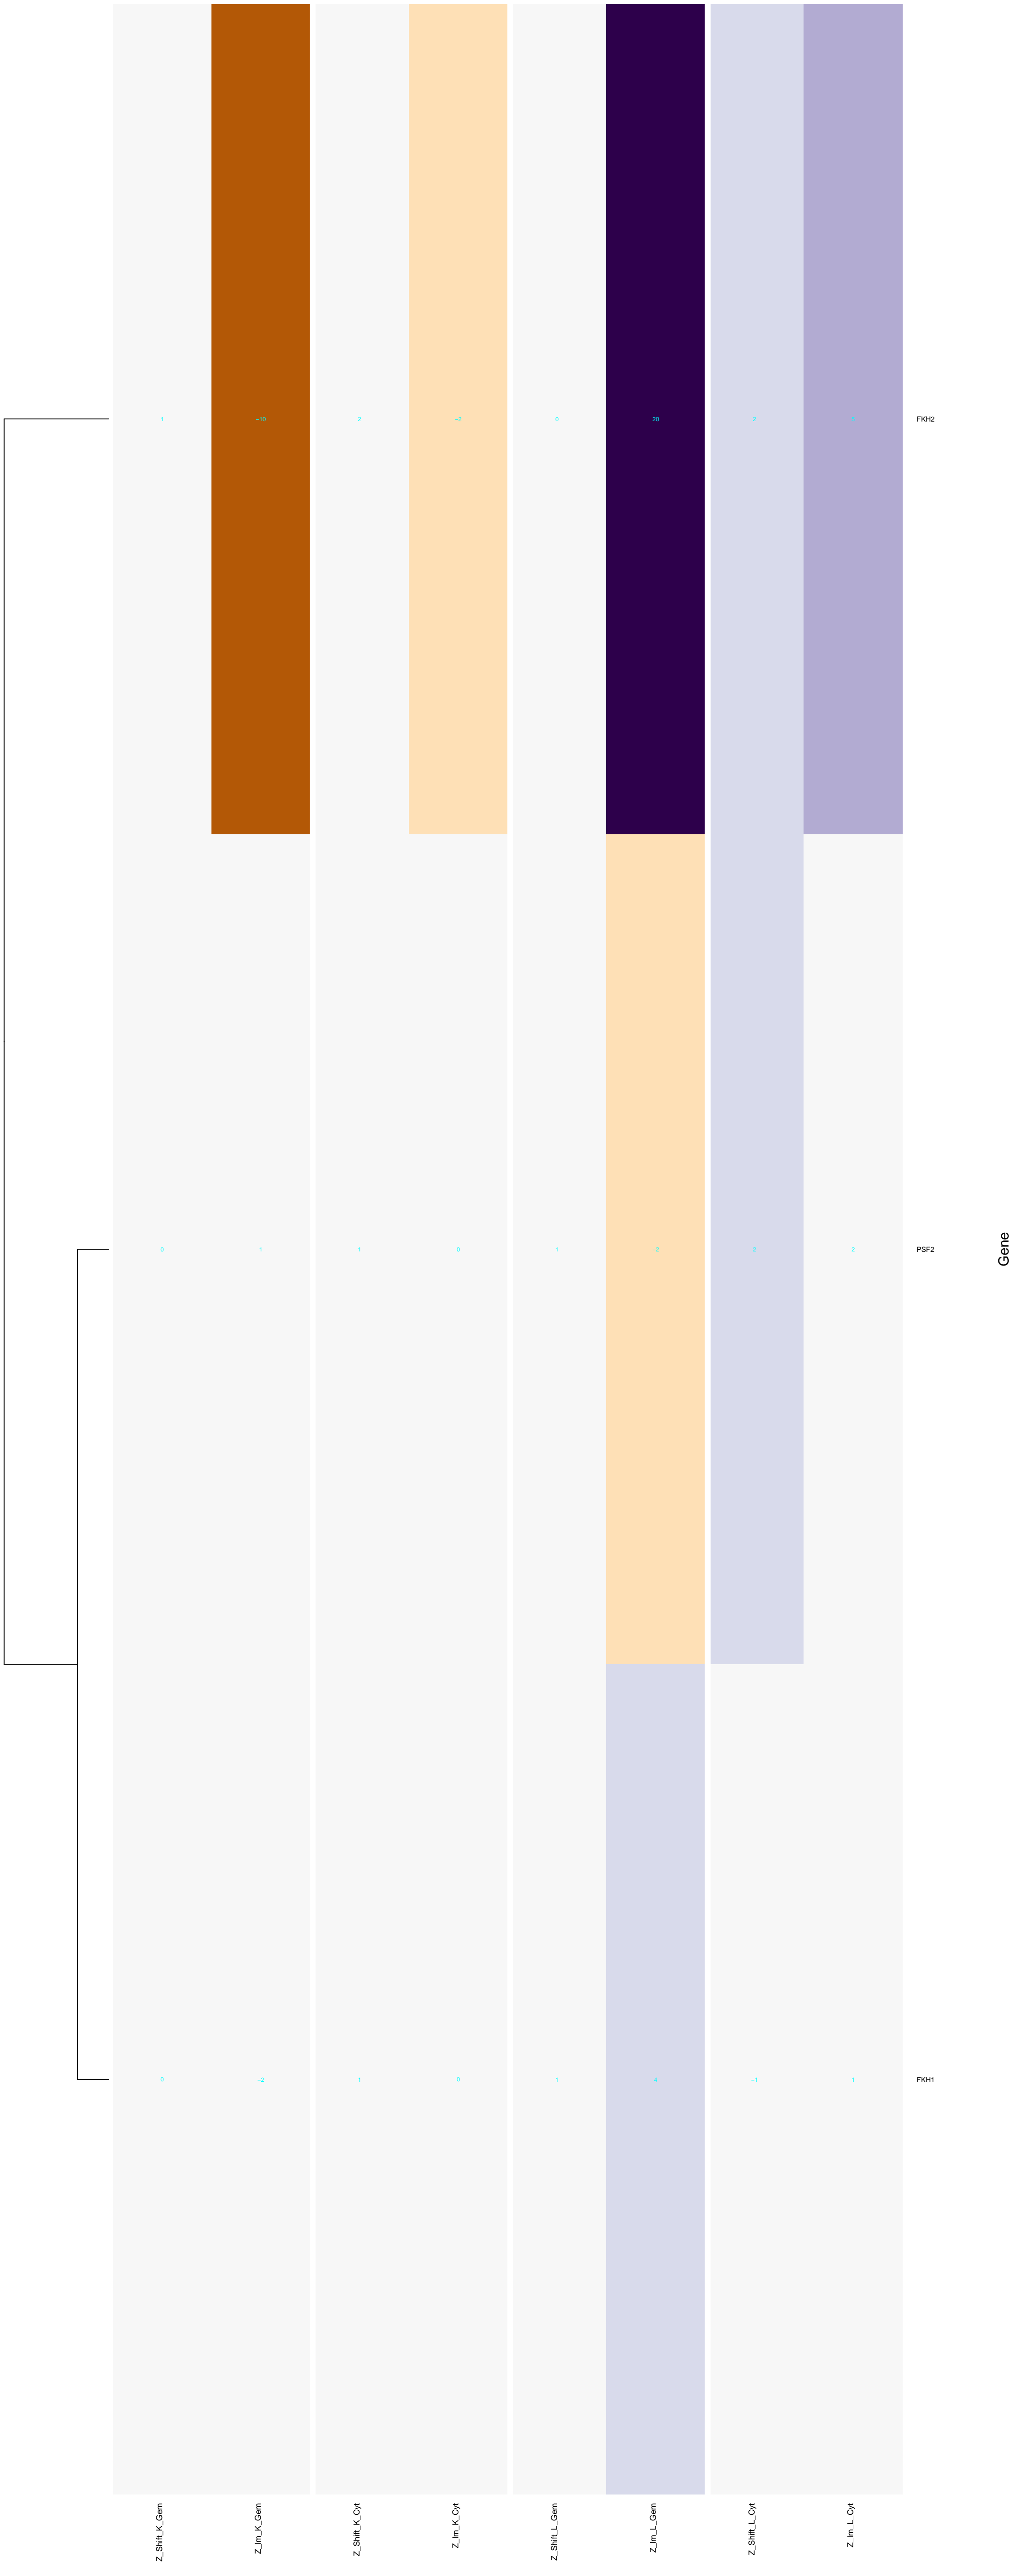



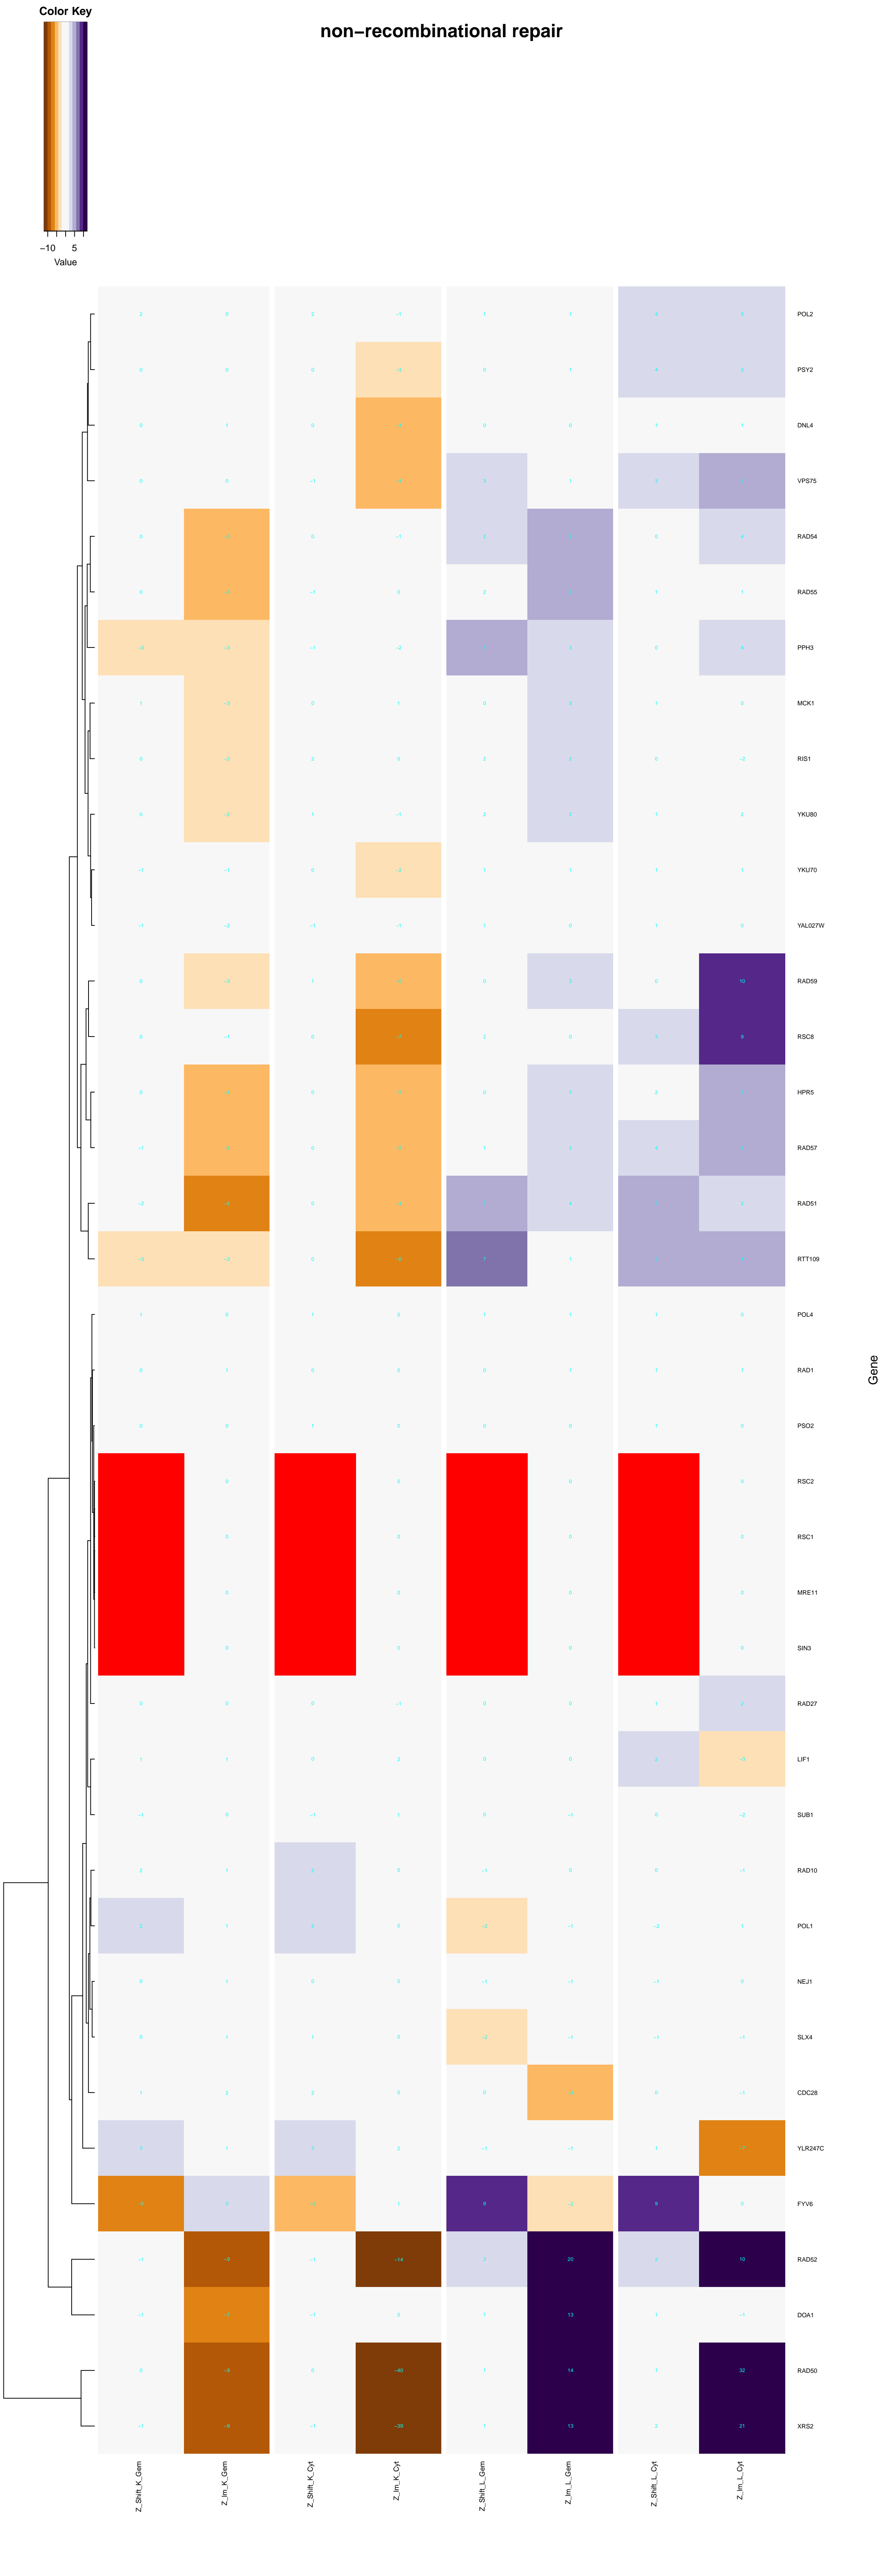

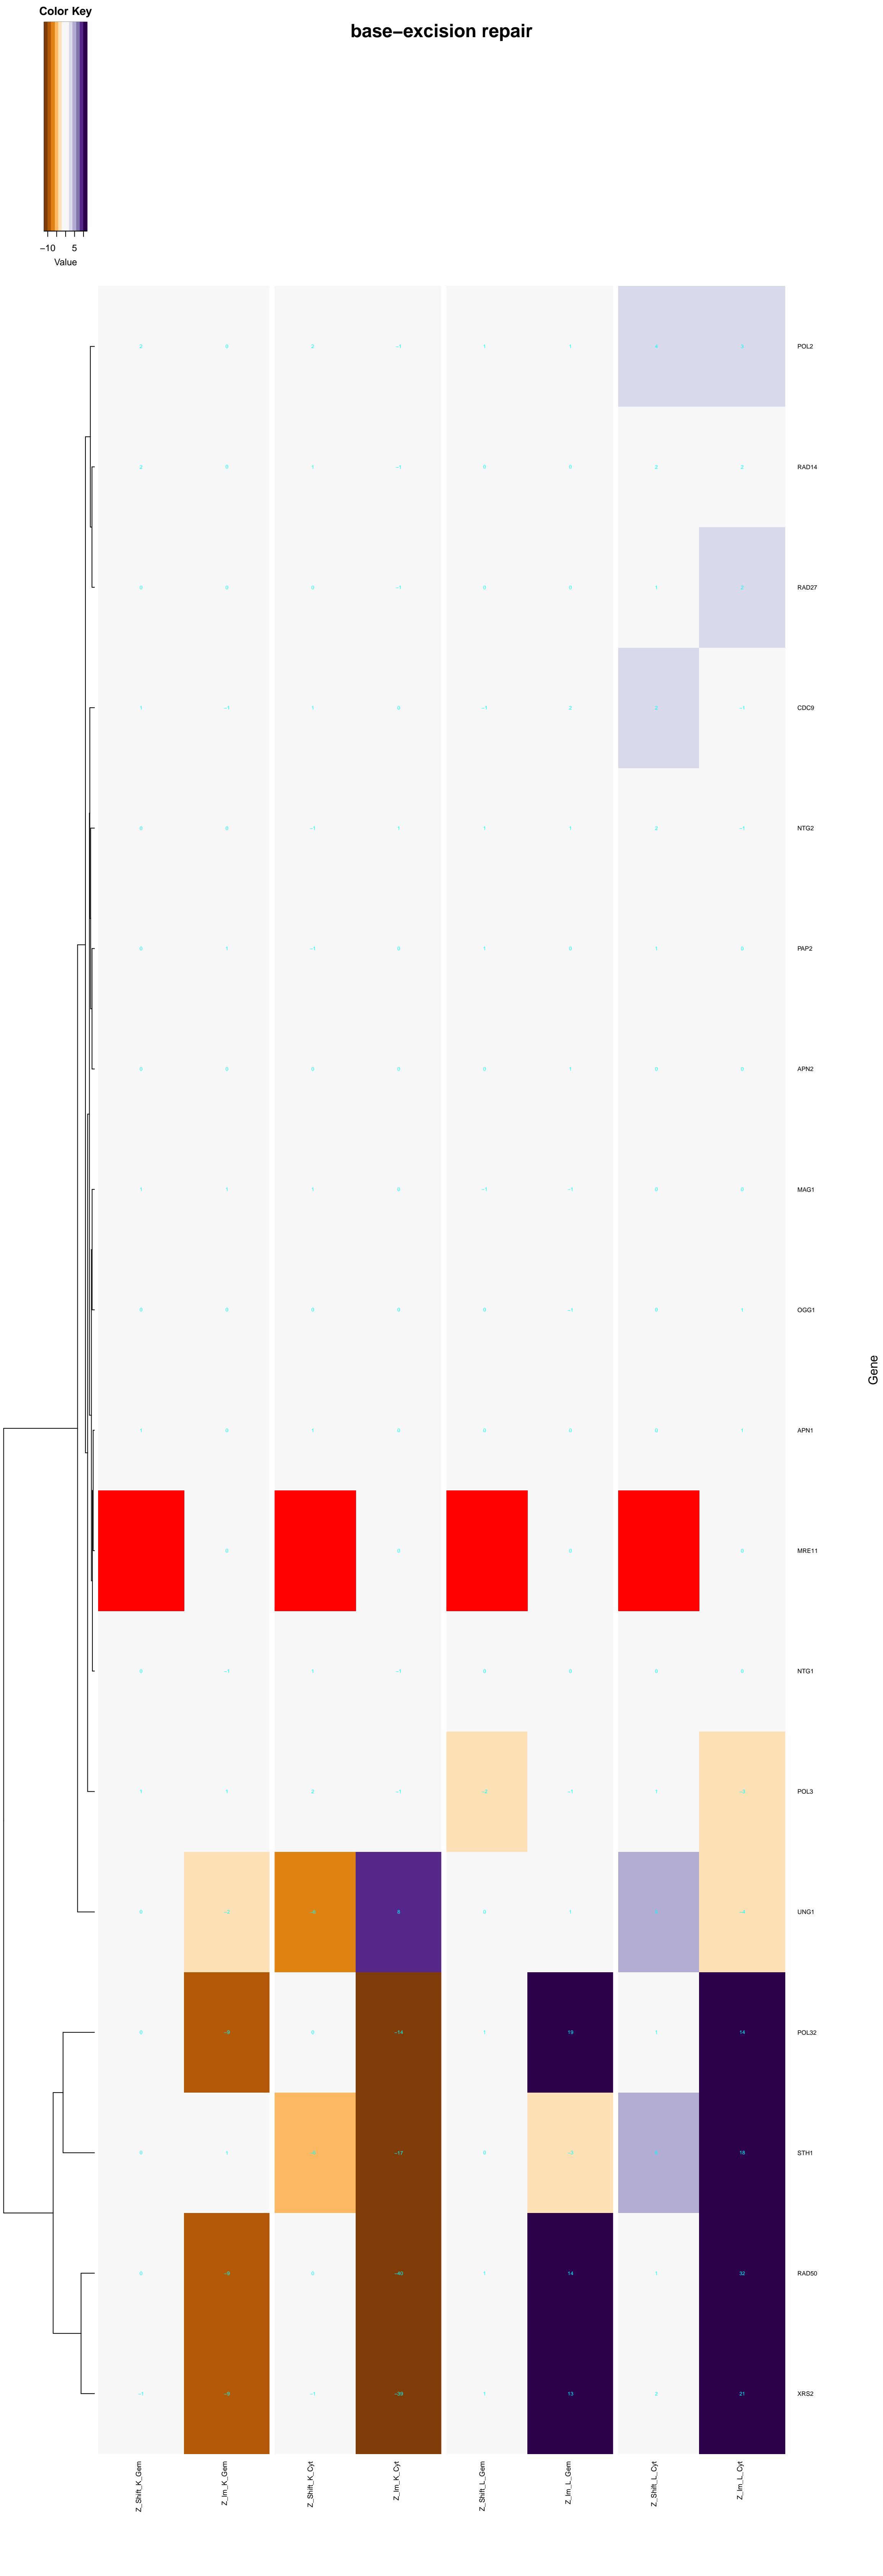

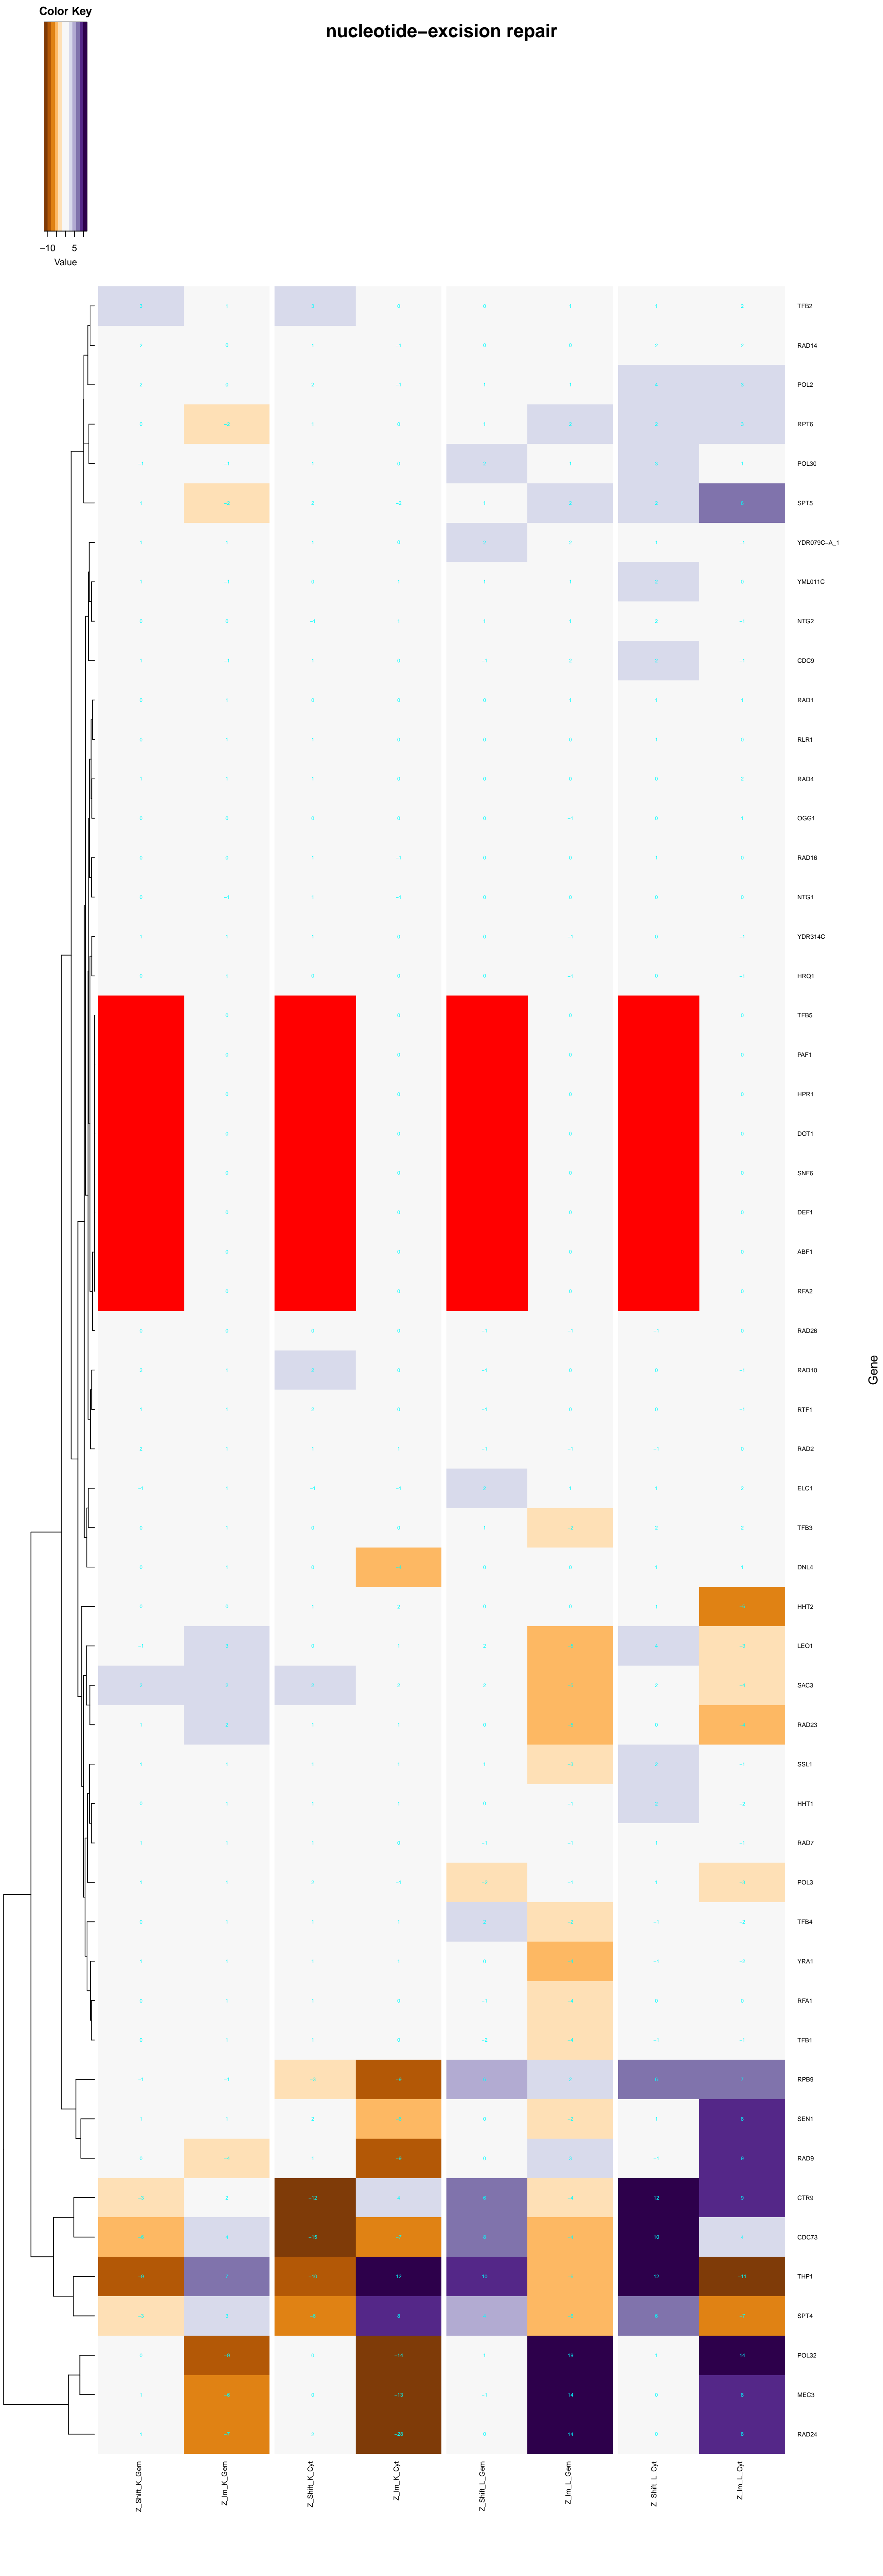

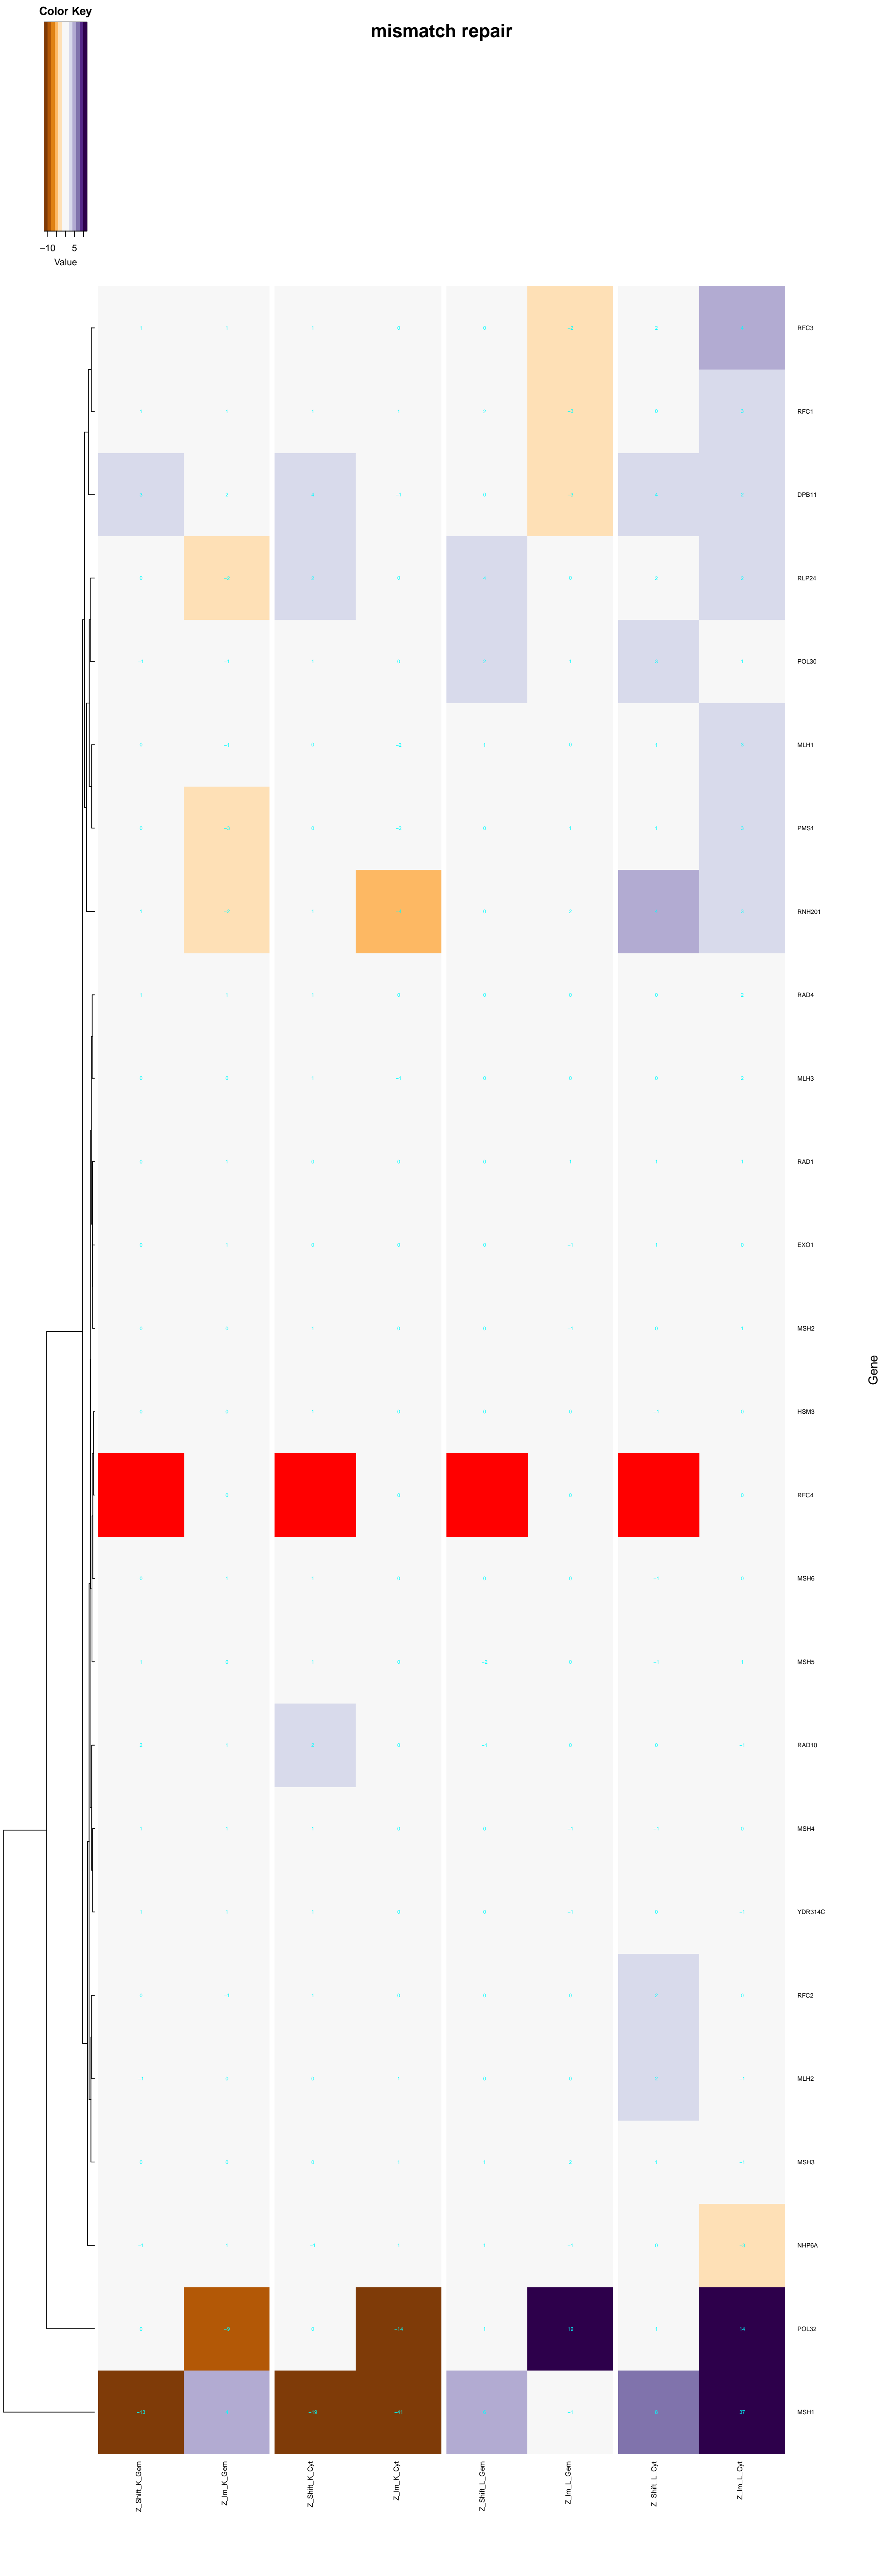

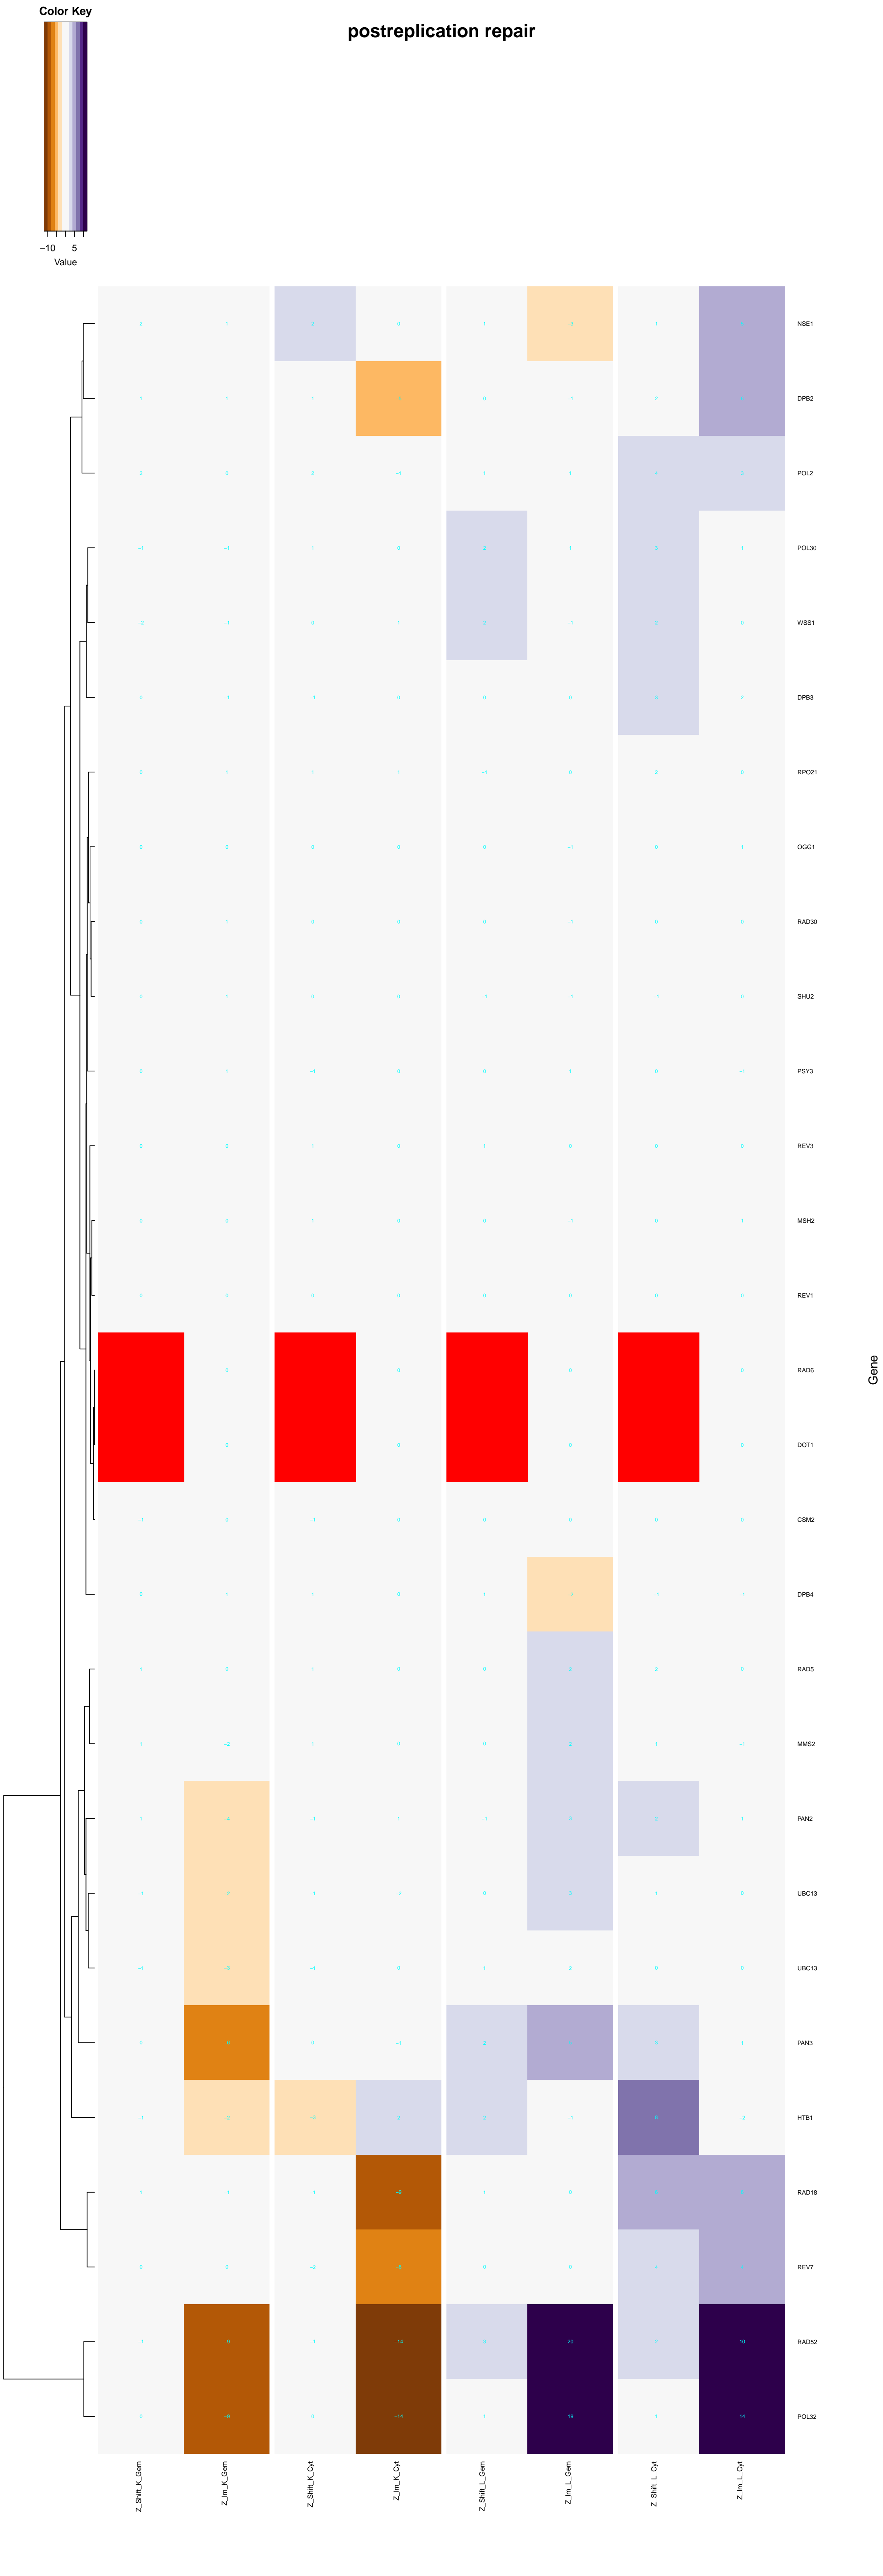



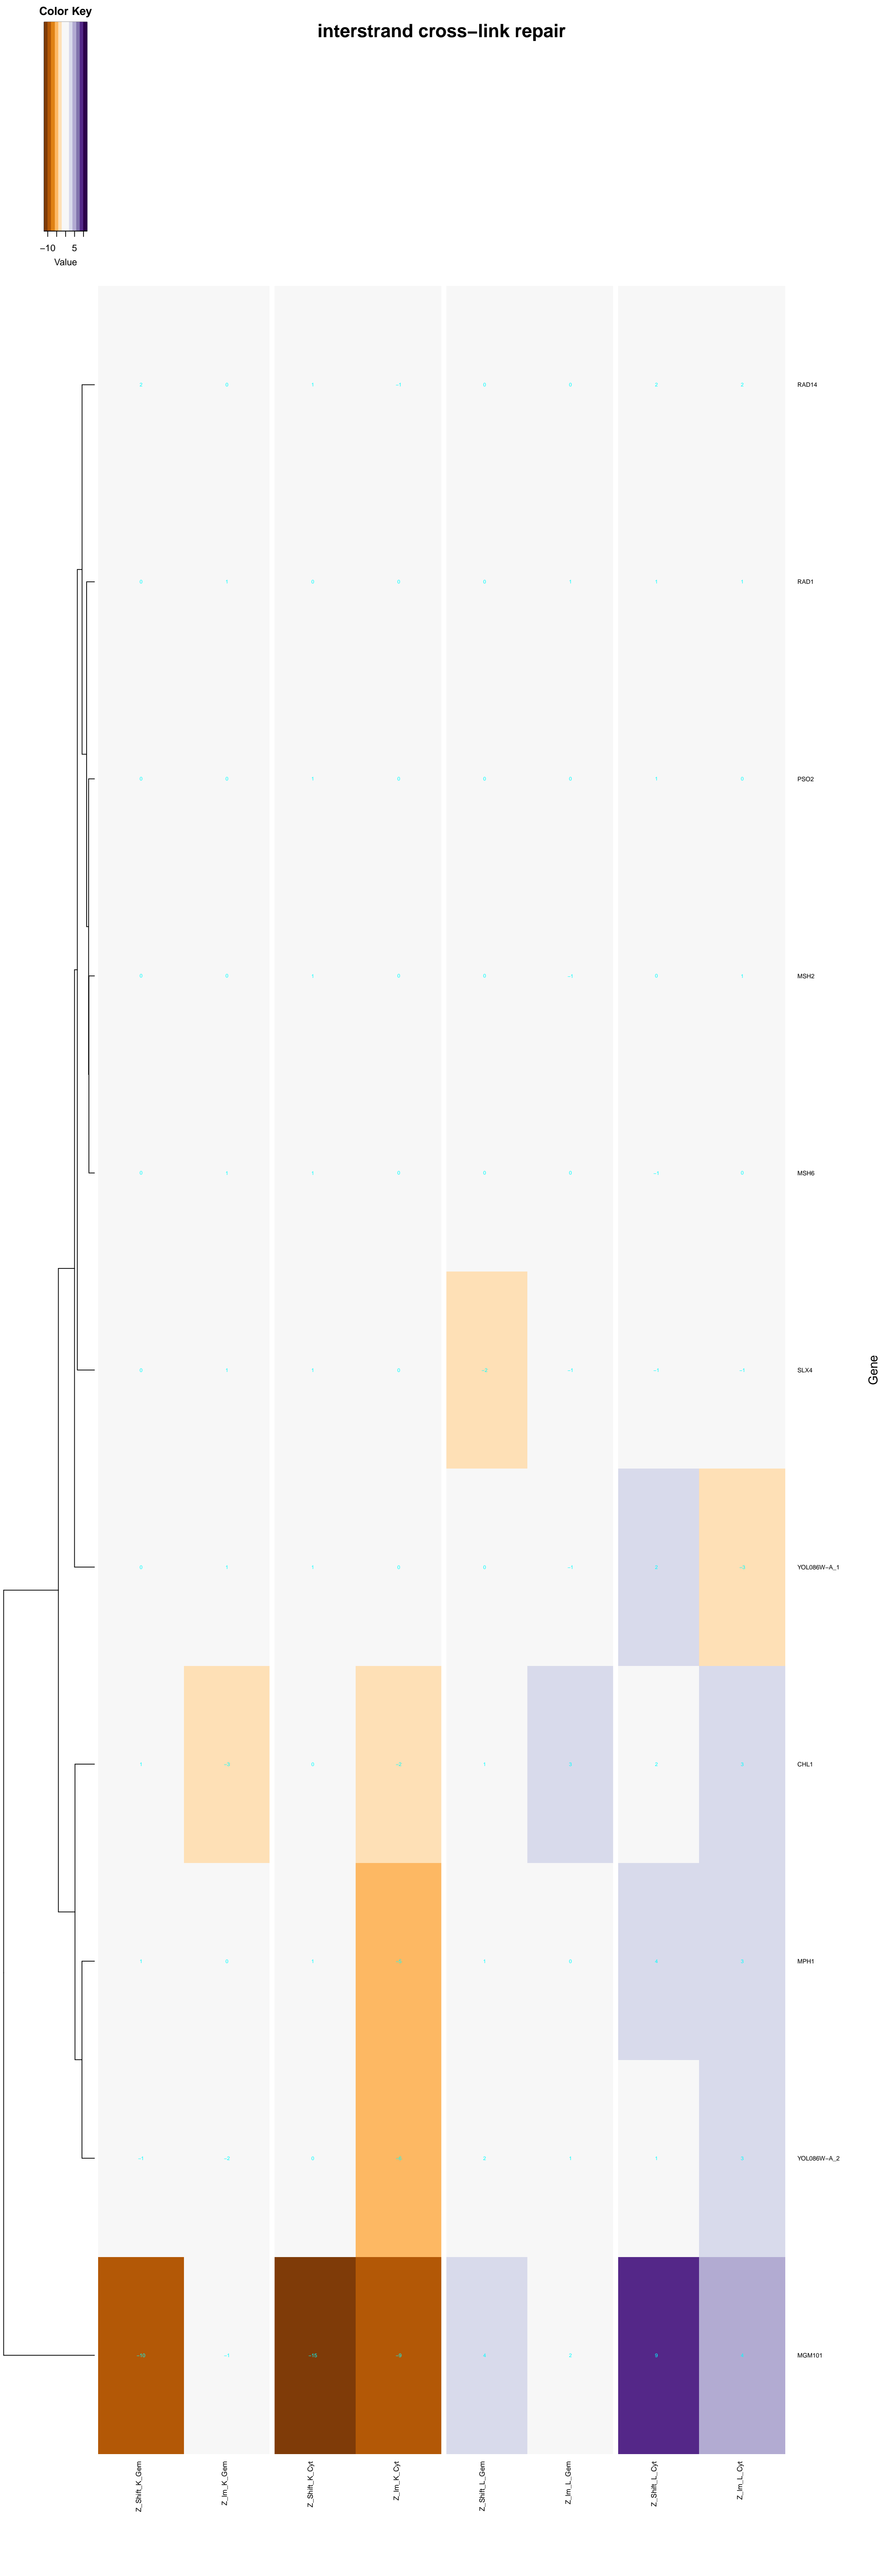



UV-damage excision repair

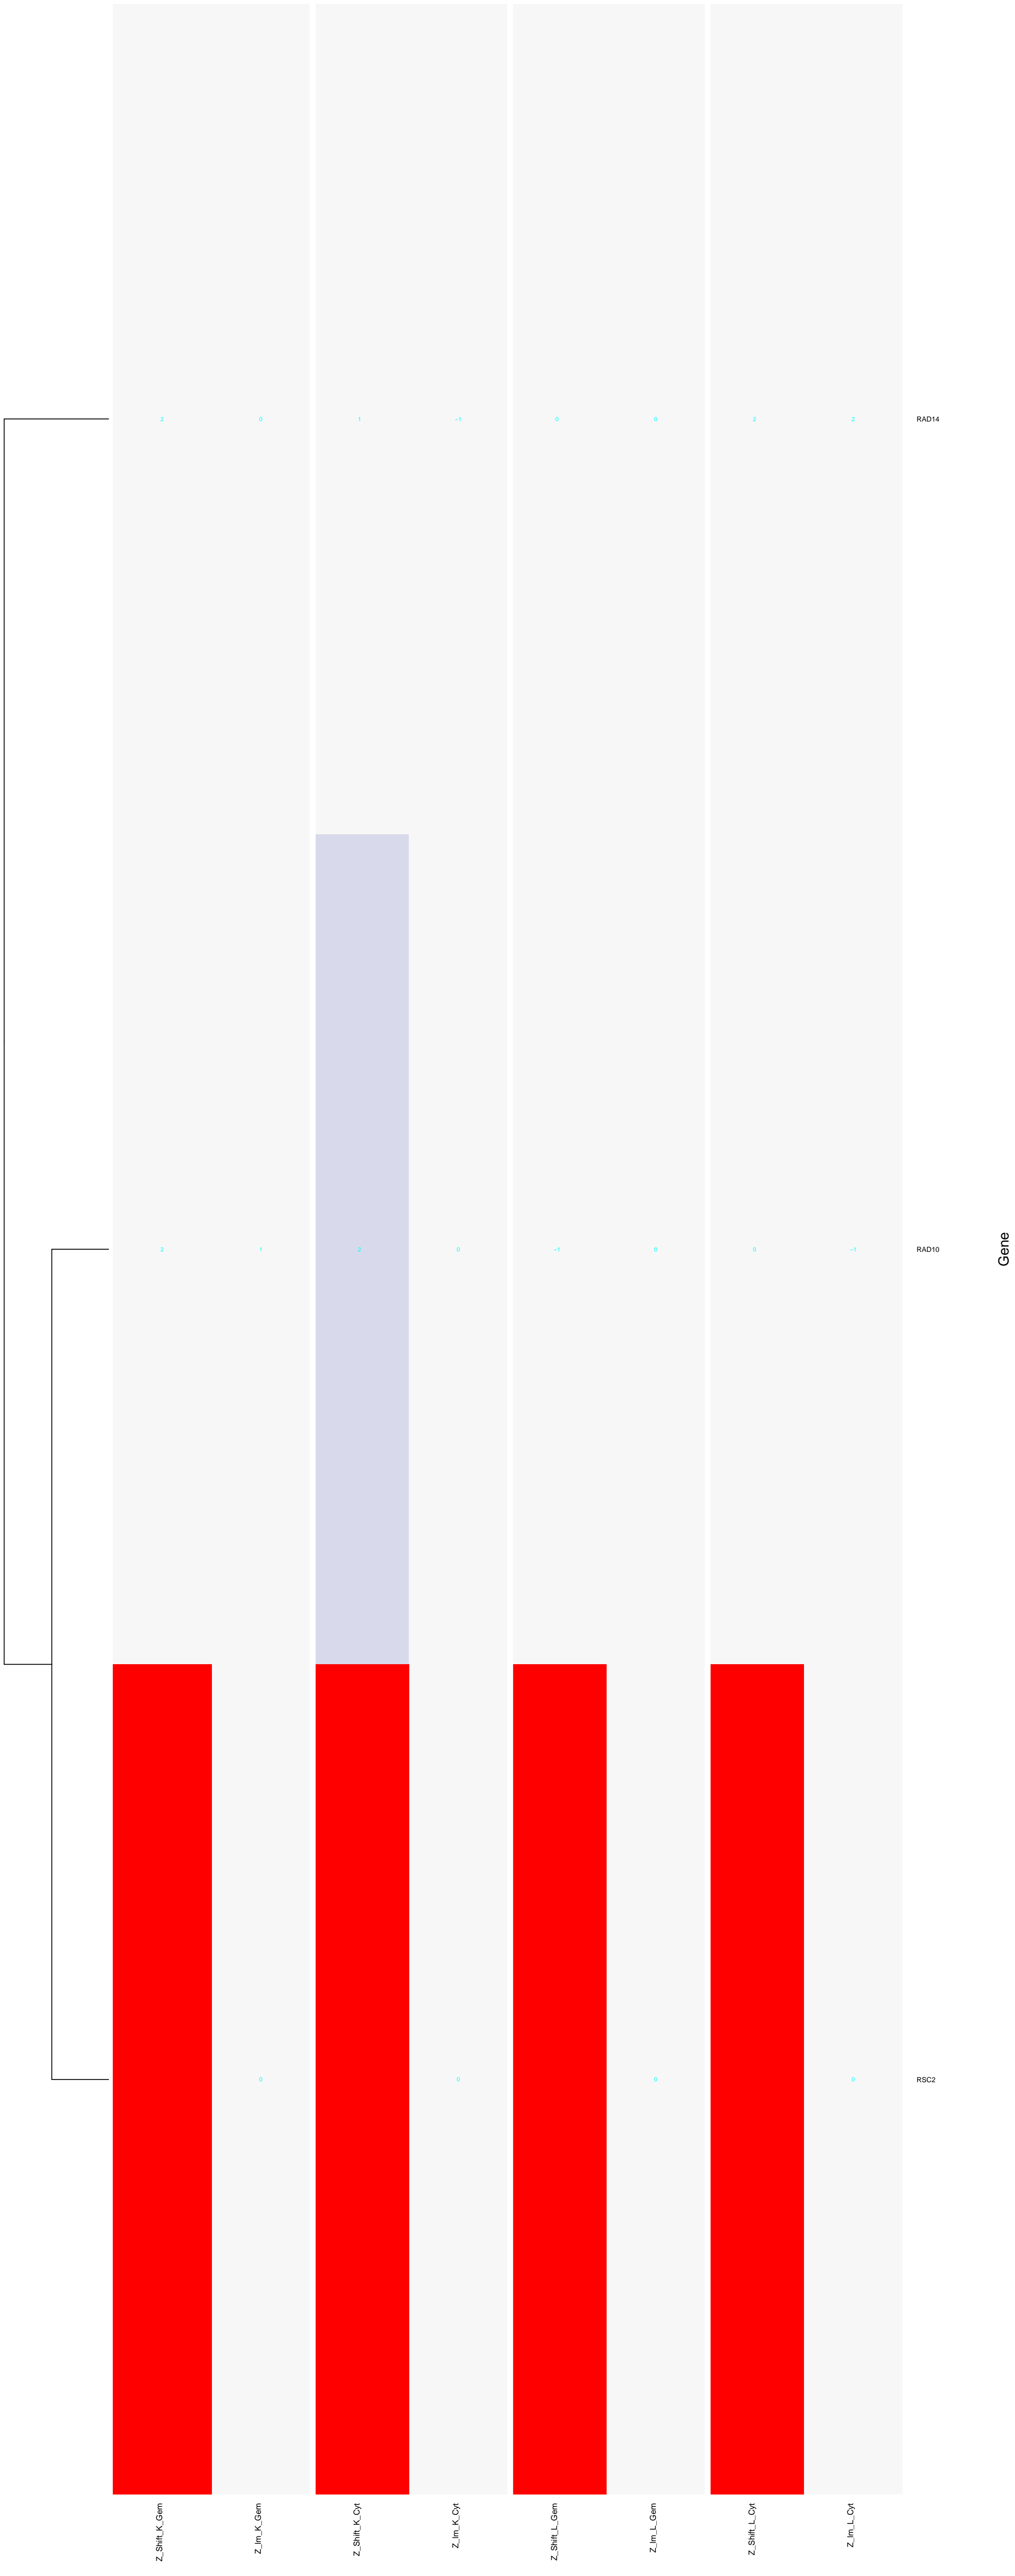

DNA dealkylation

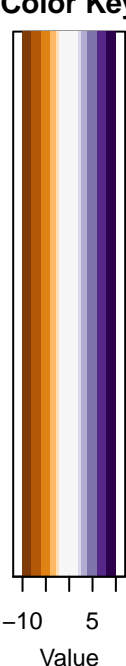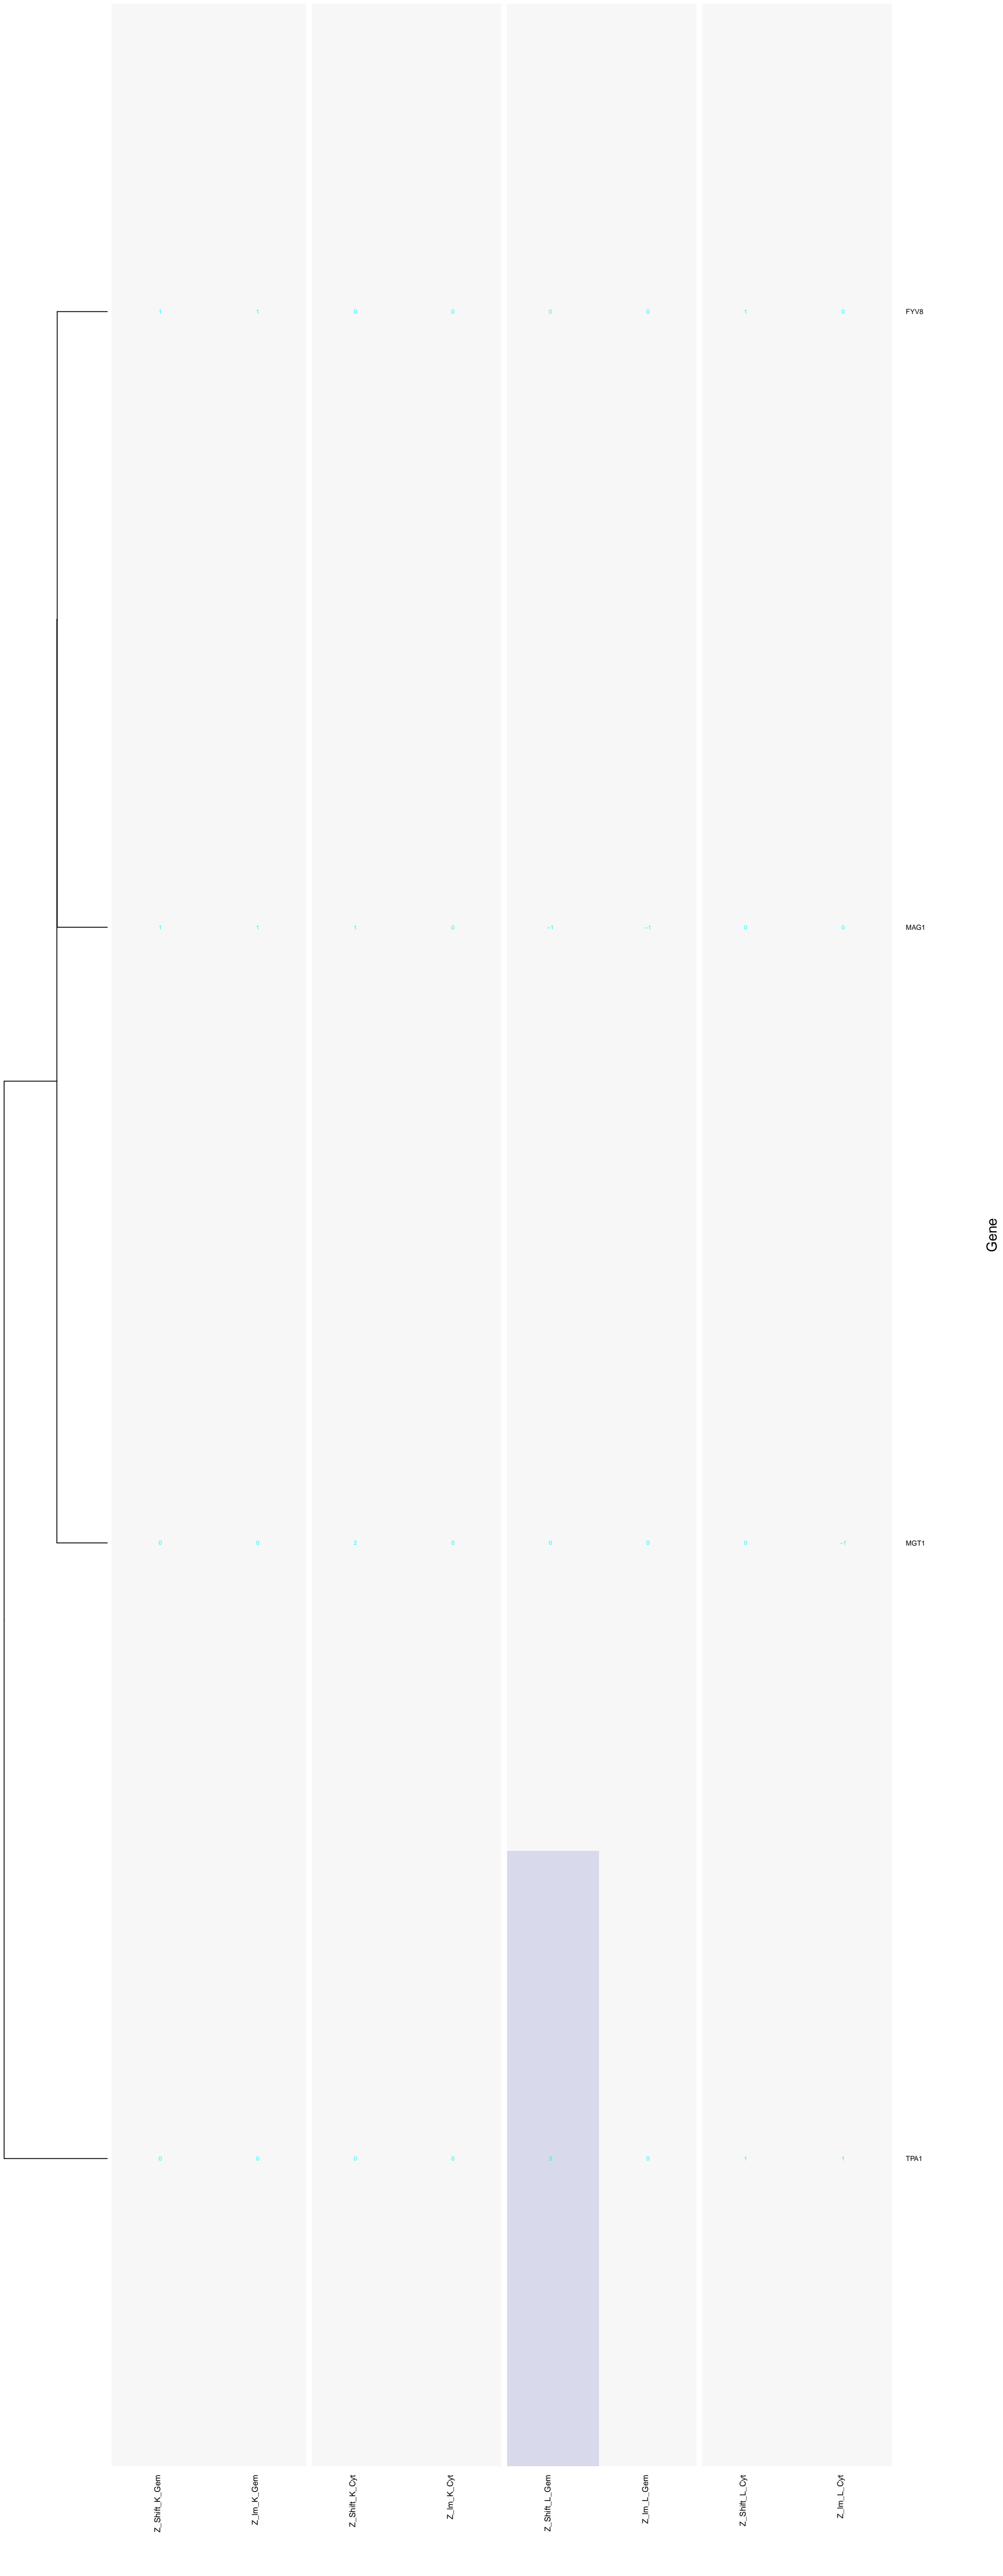



DNA catabolic process, endonucleolytic



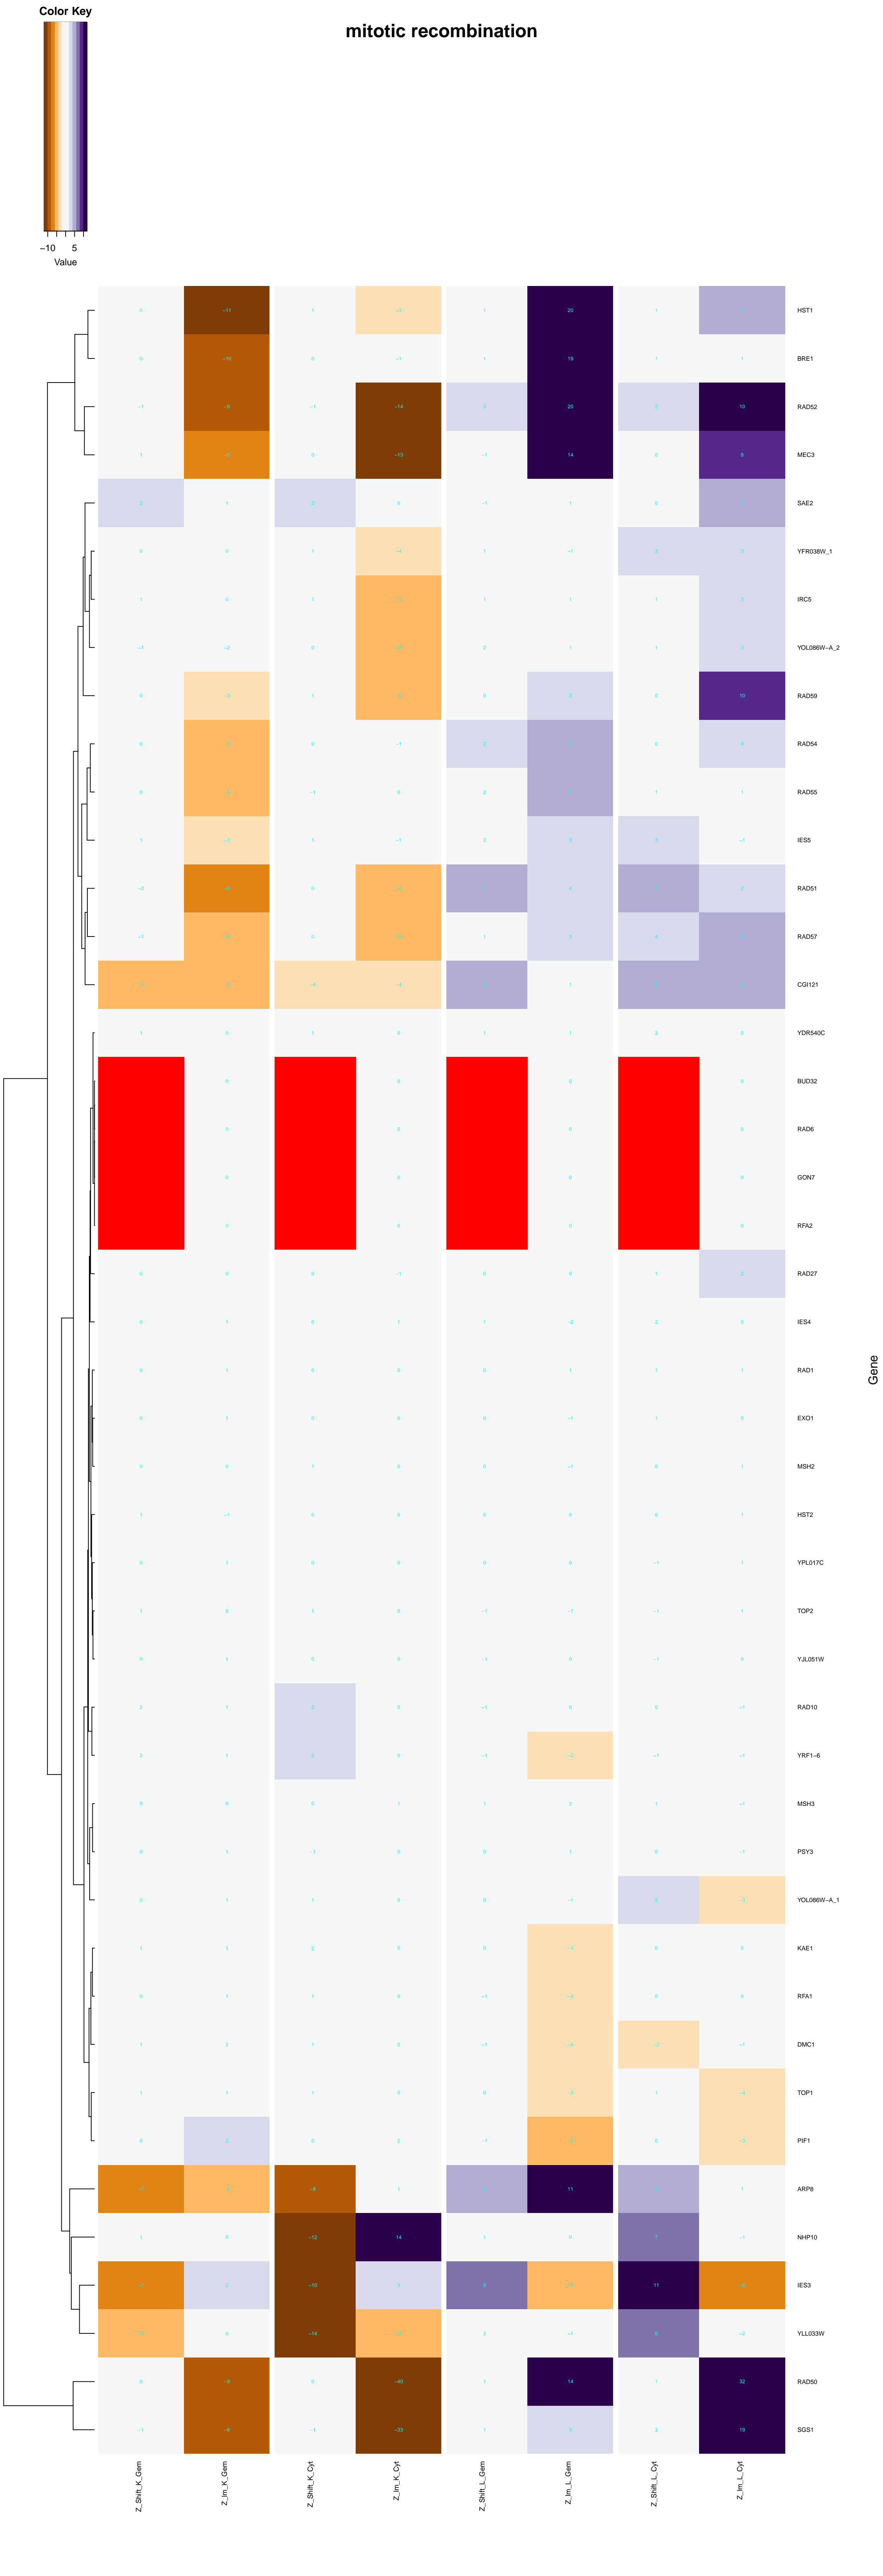

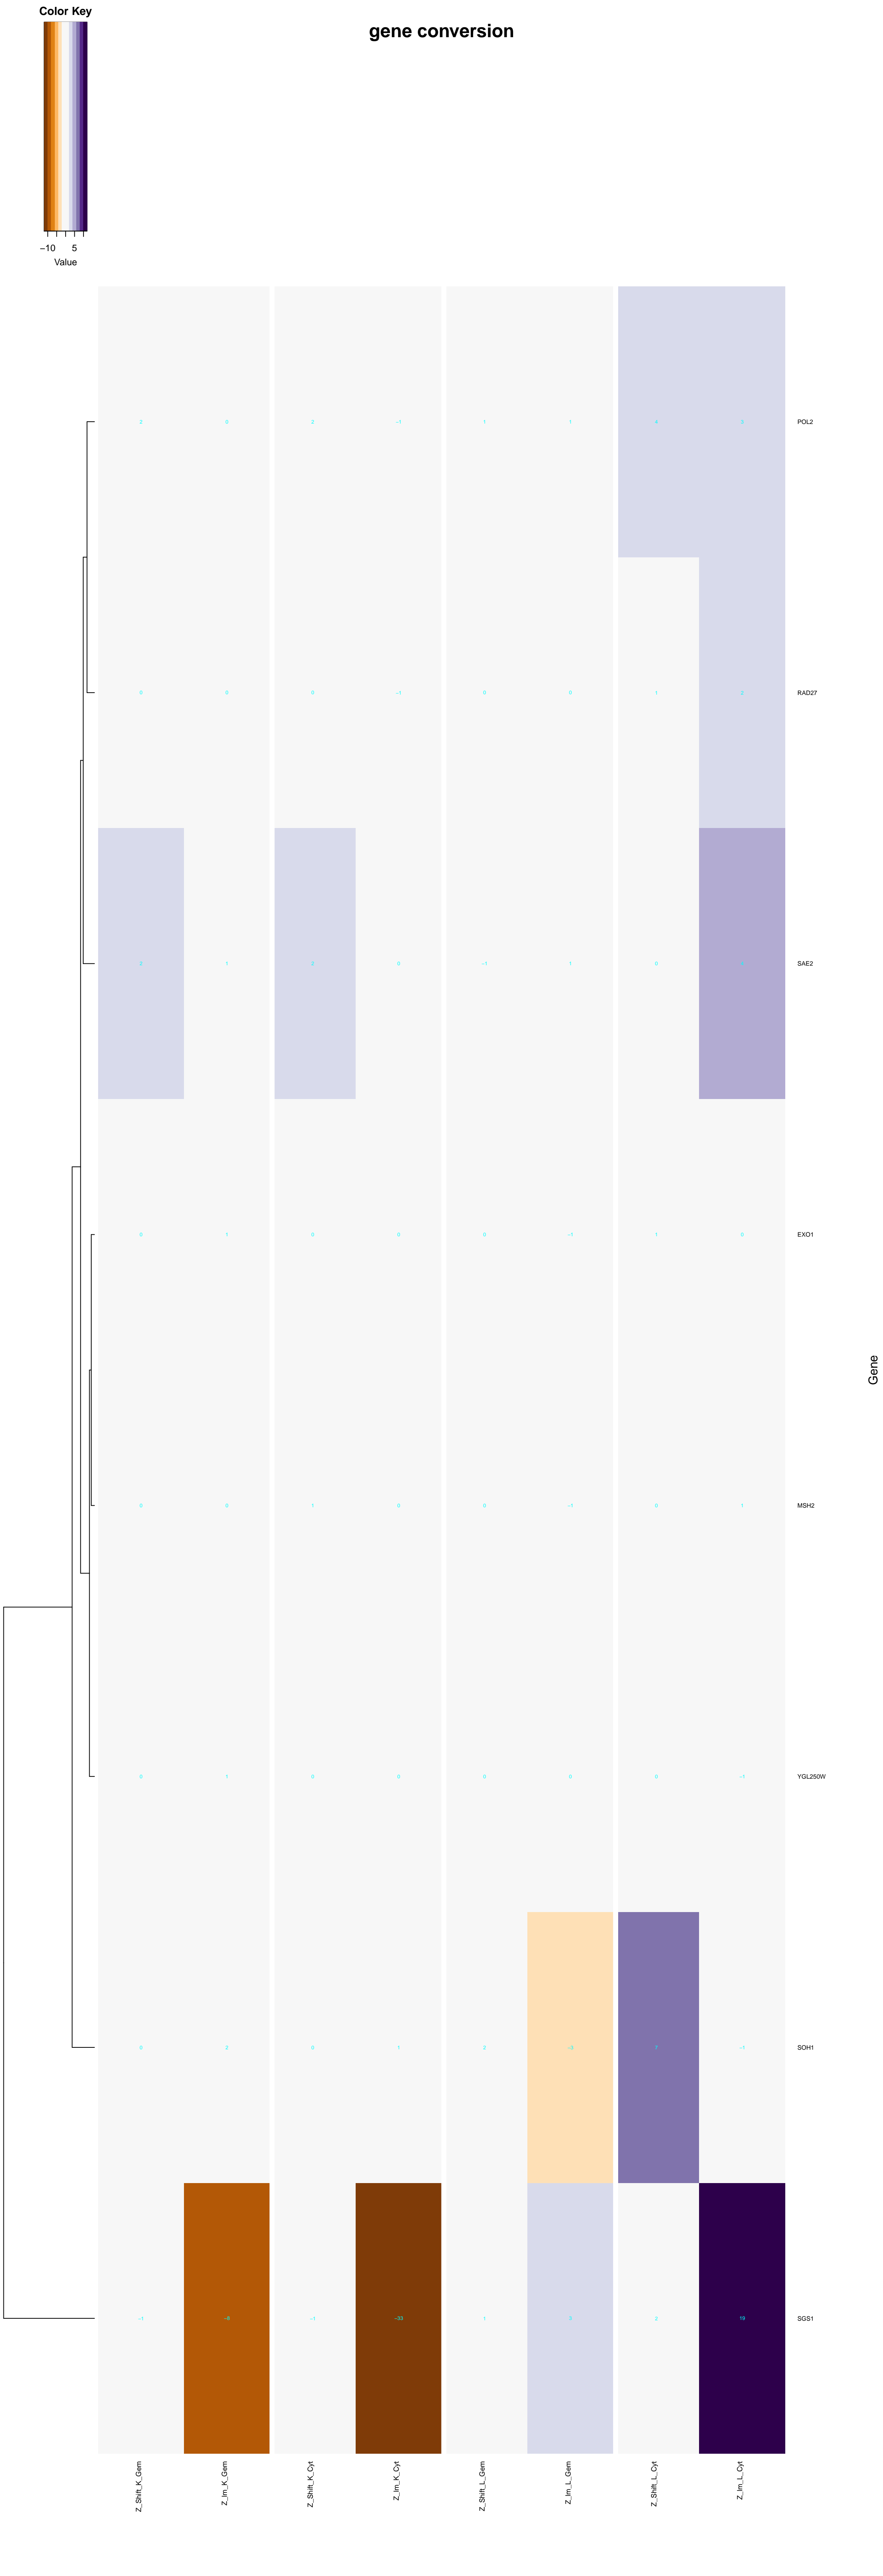





transposon integration



Gene

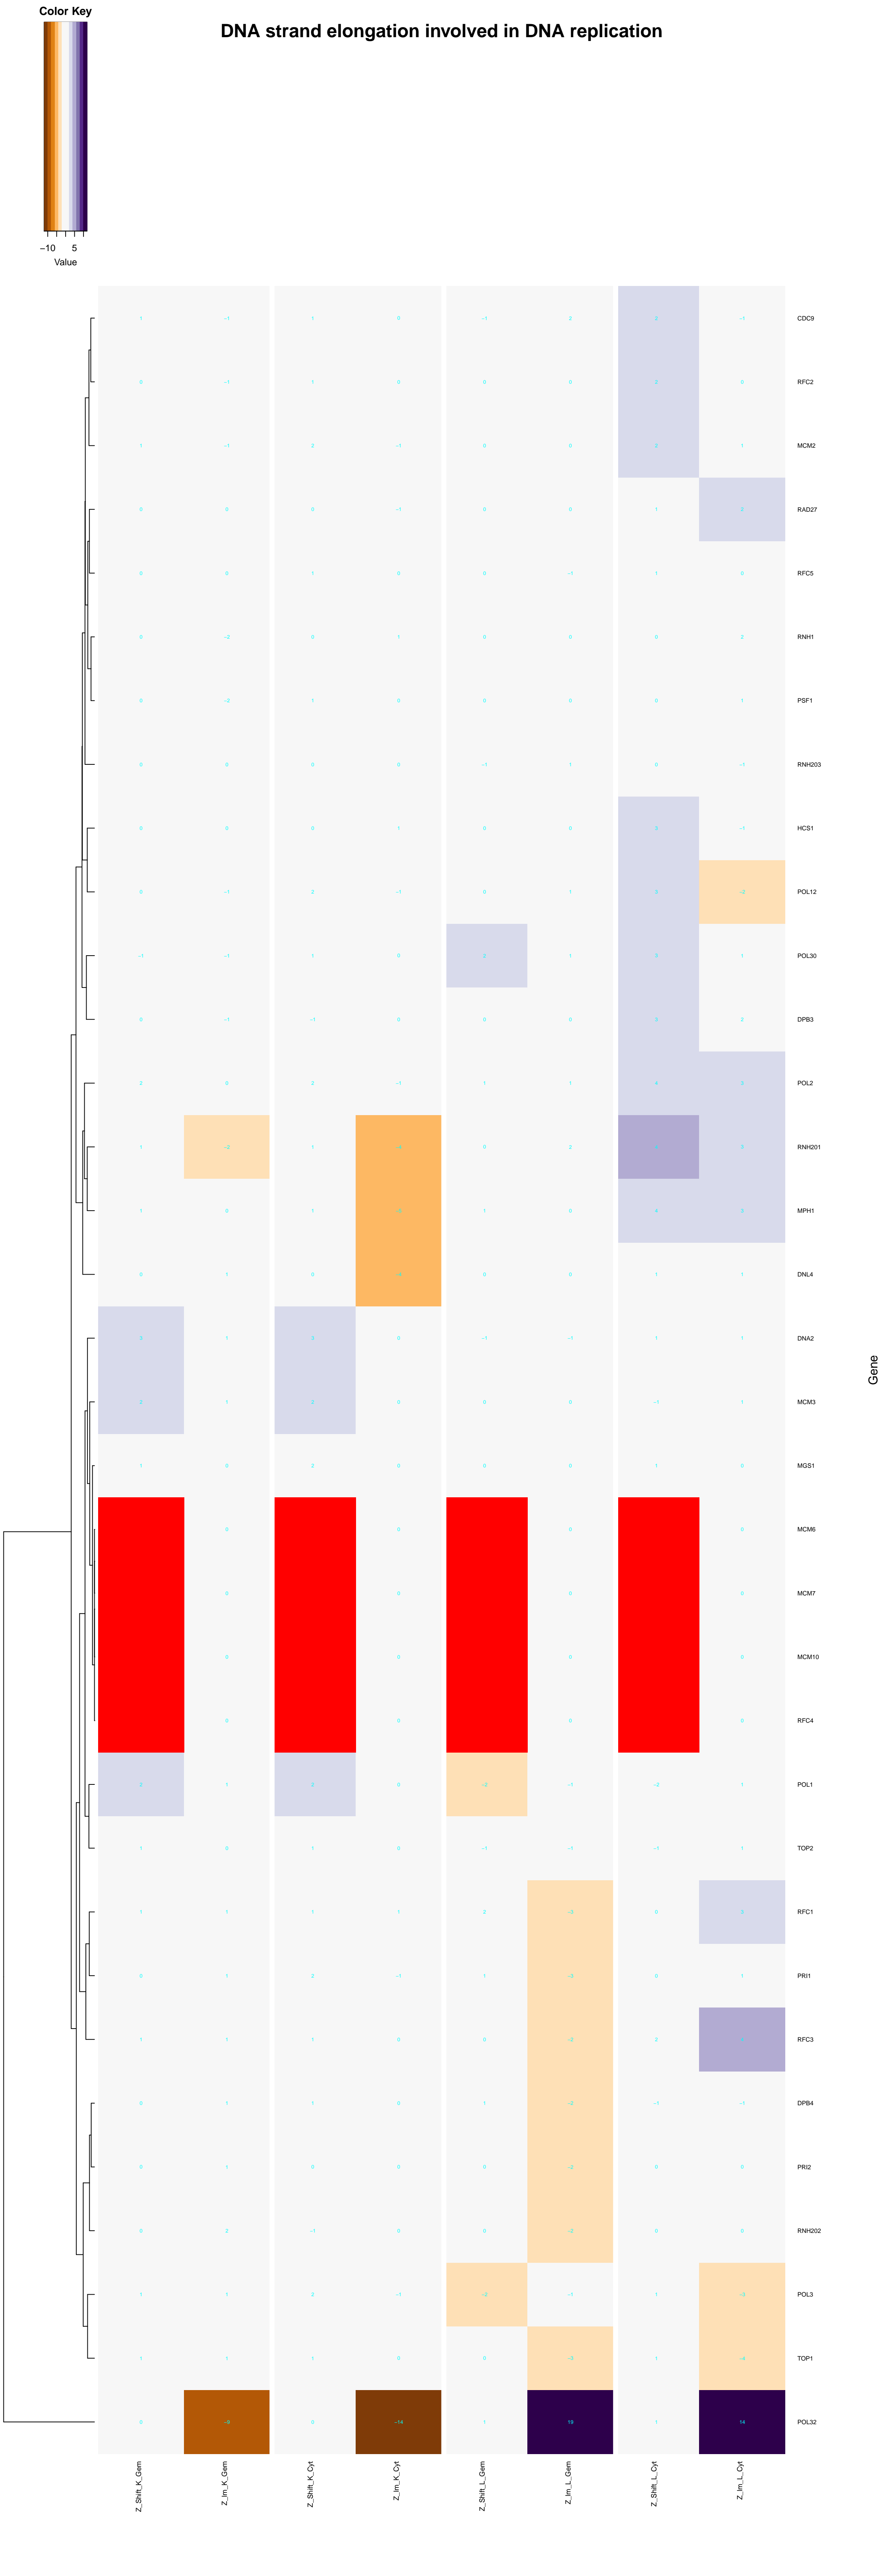

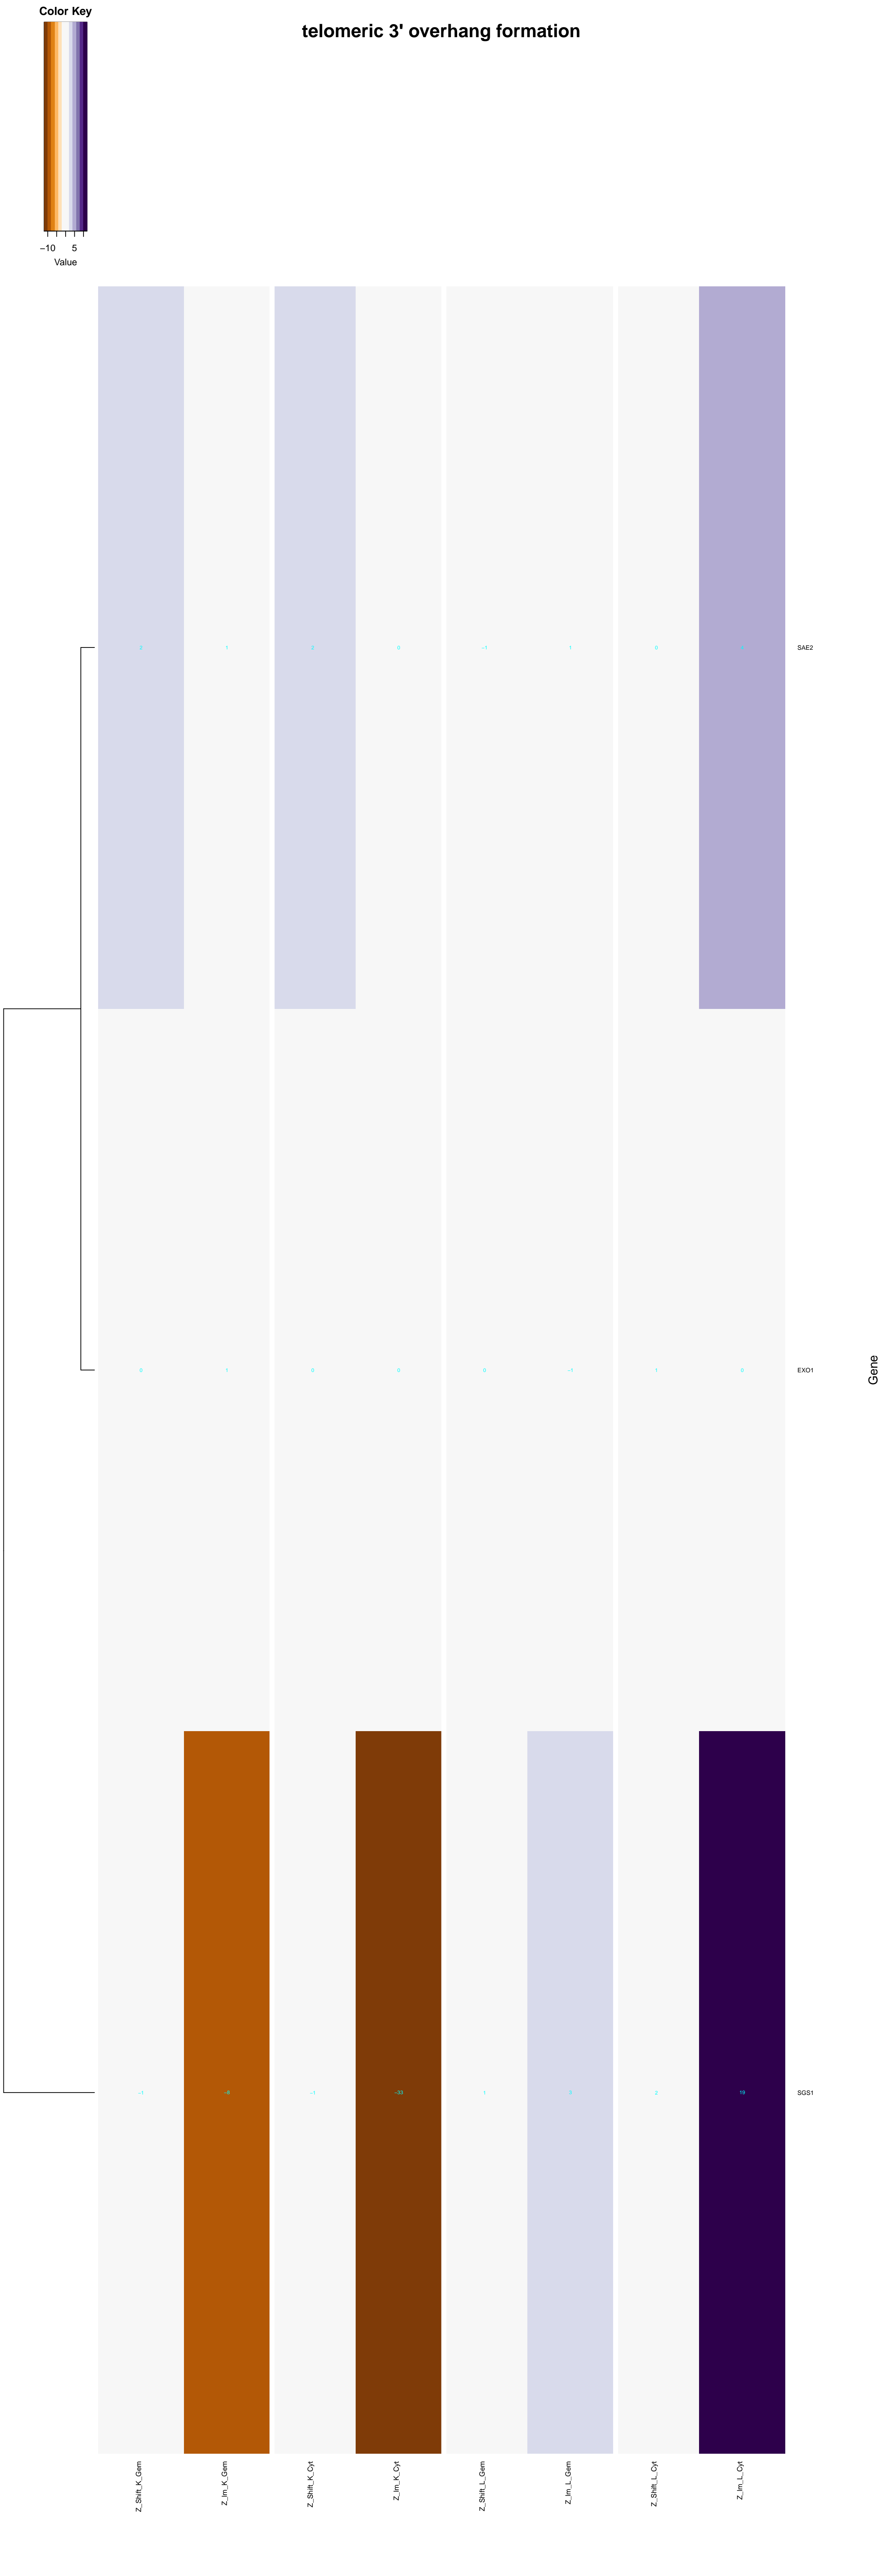



mitochondrial DNA replication

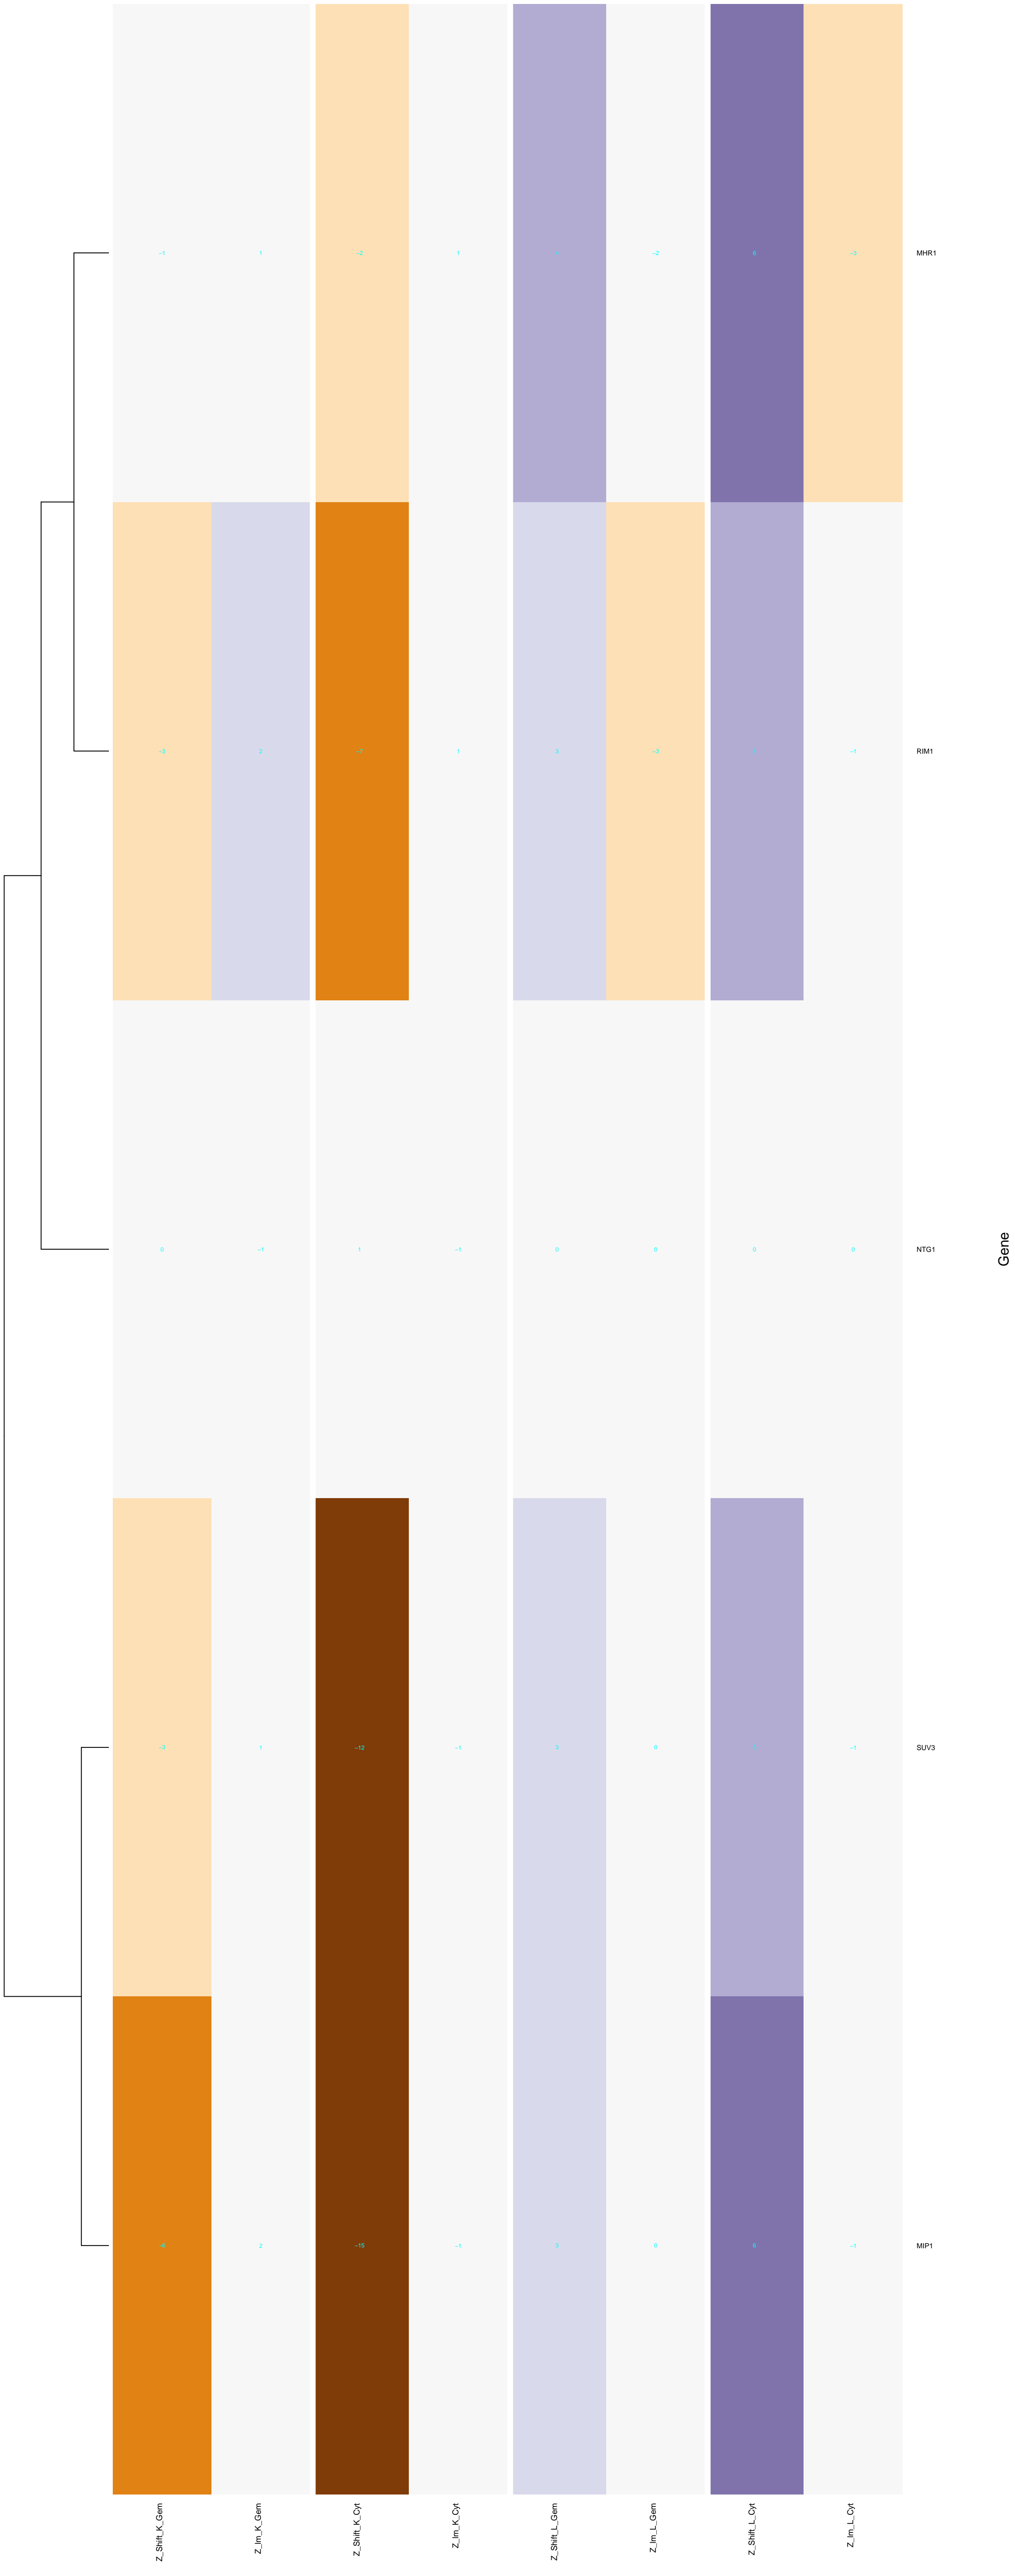

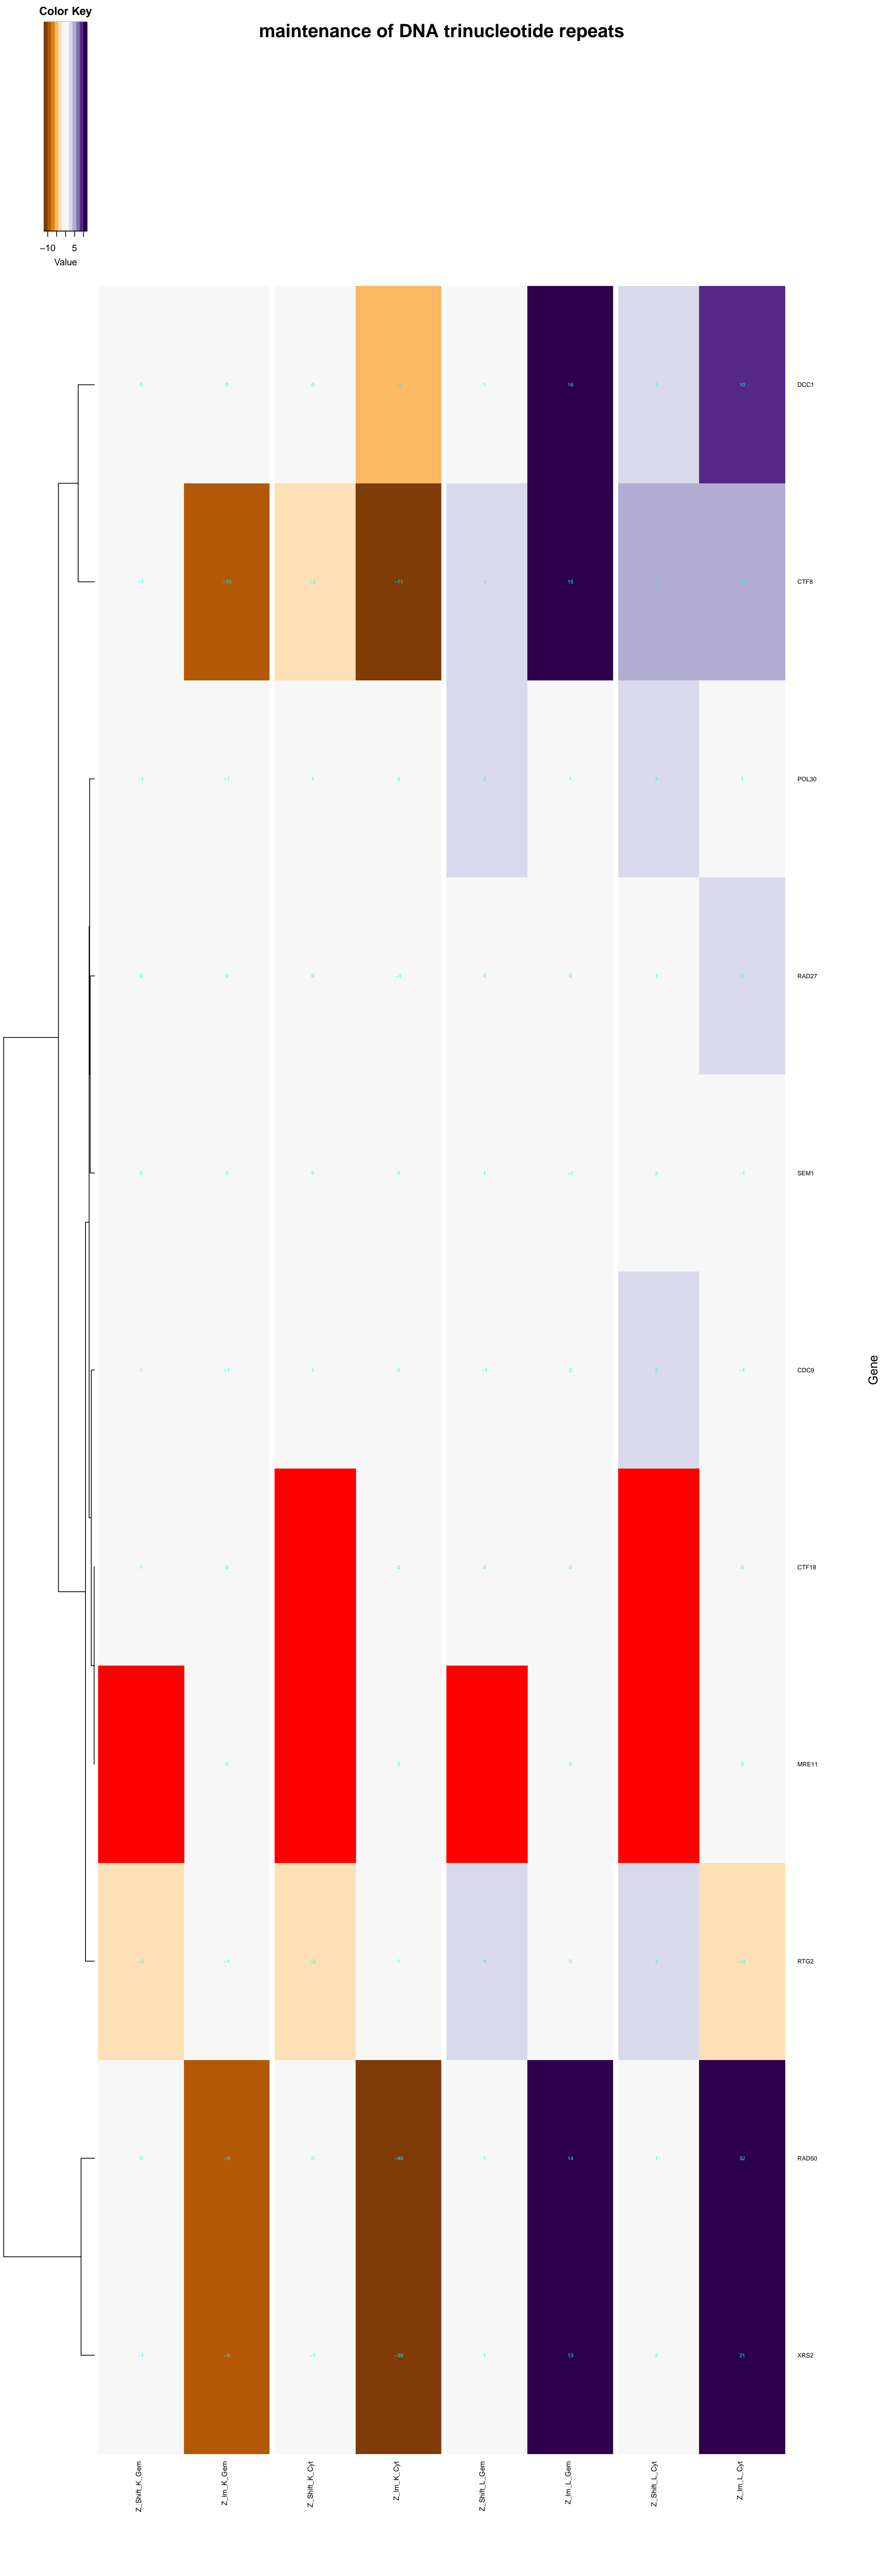

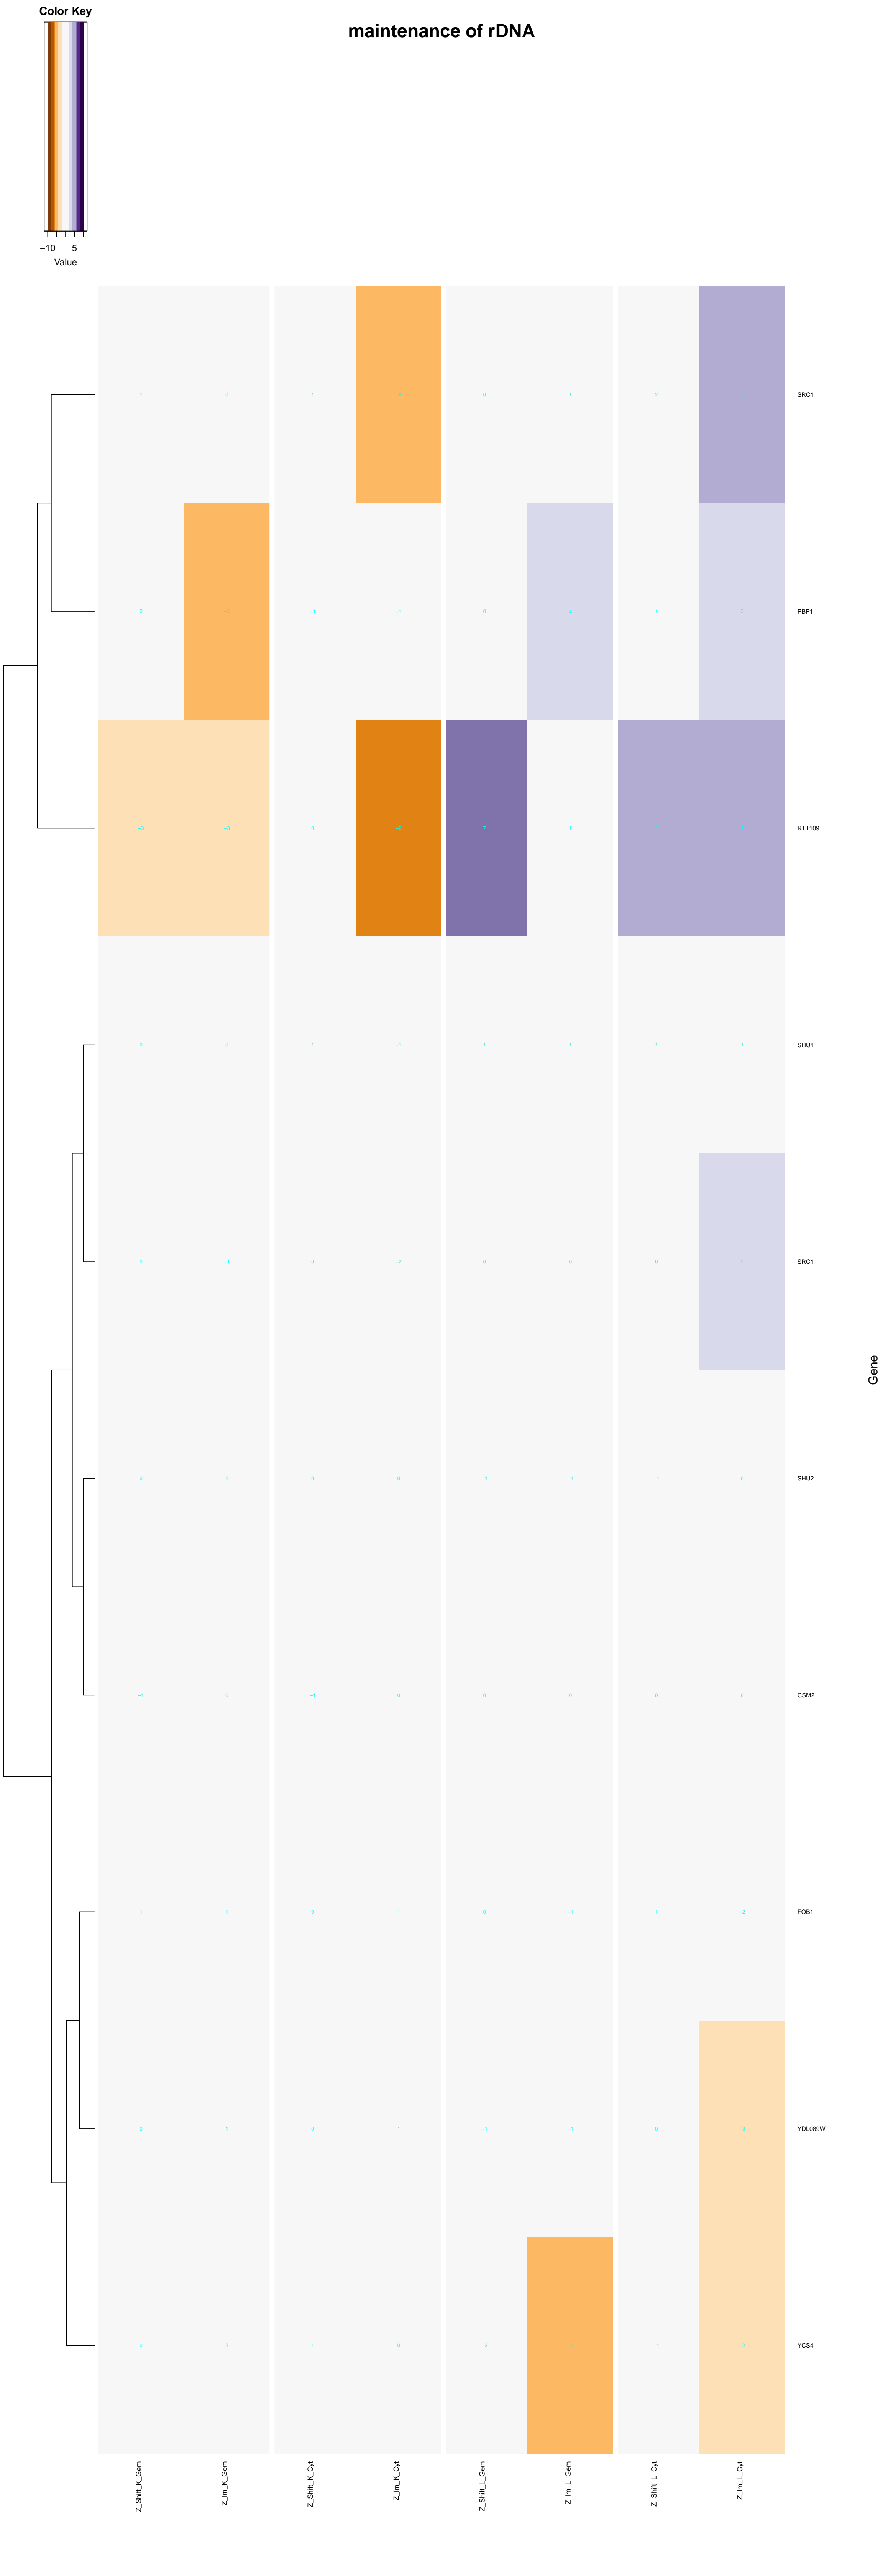

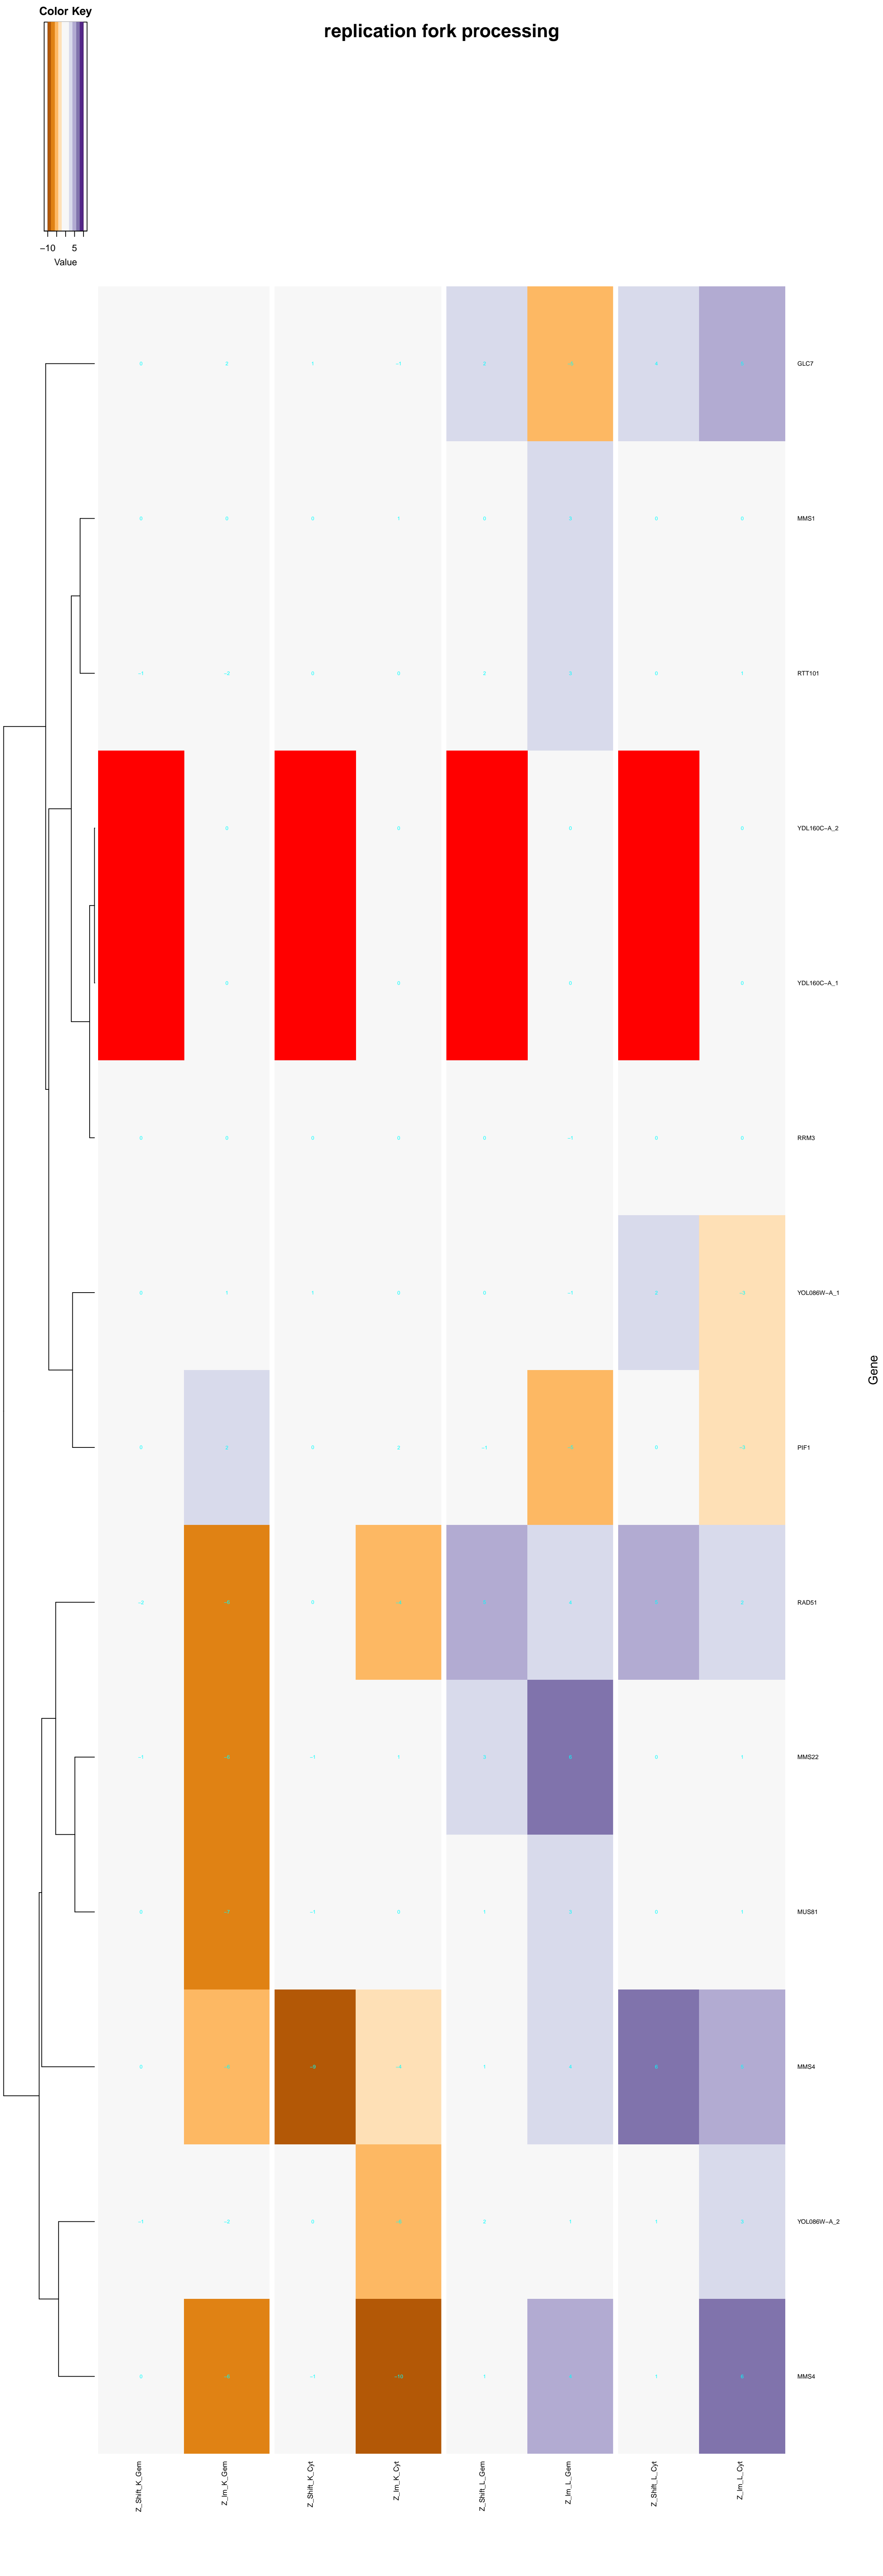

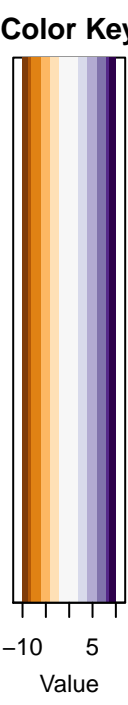

replication fork arrest

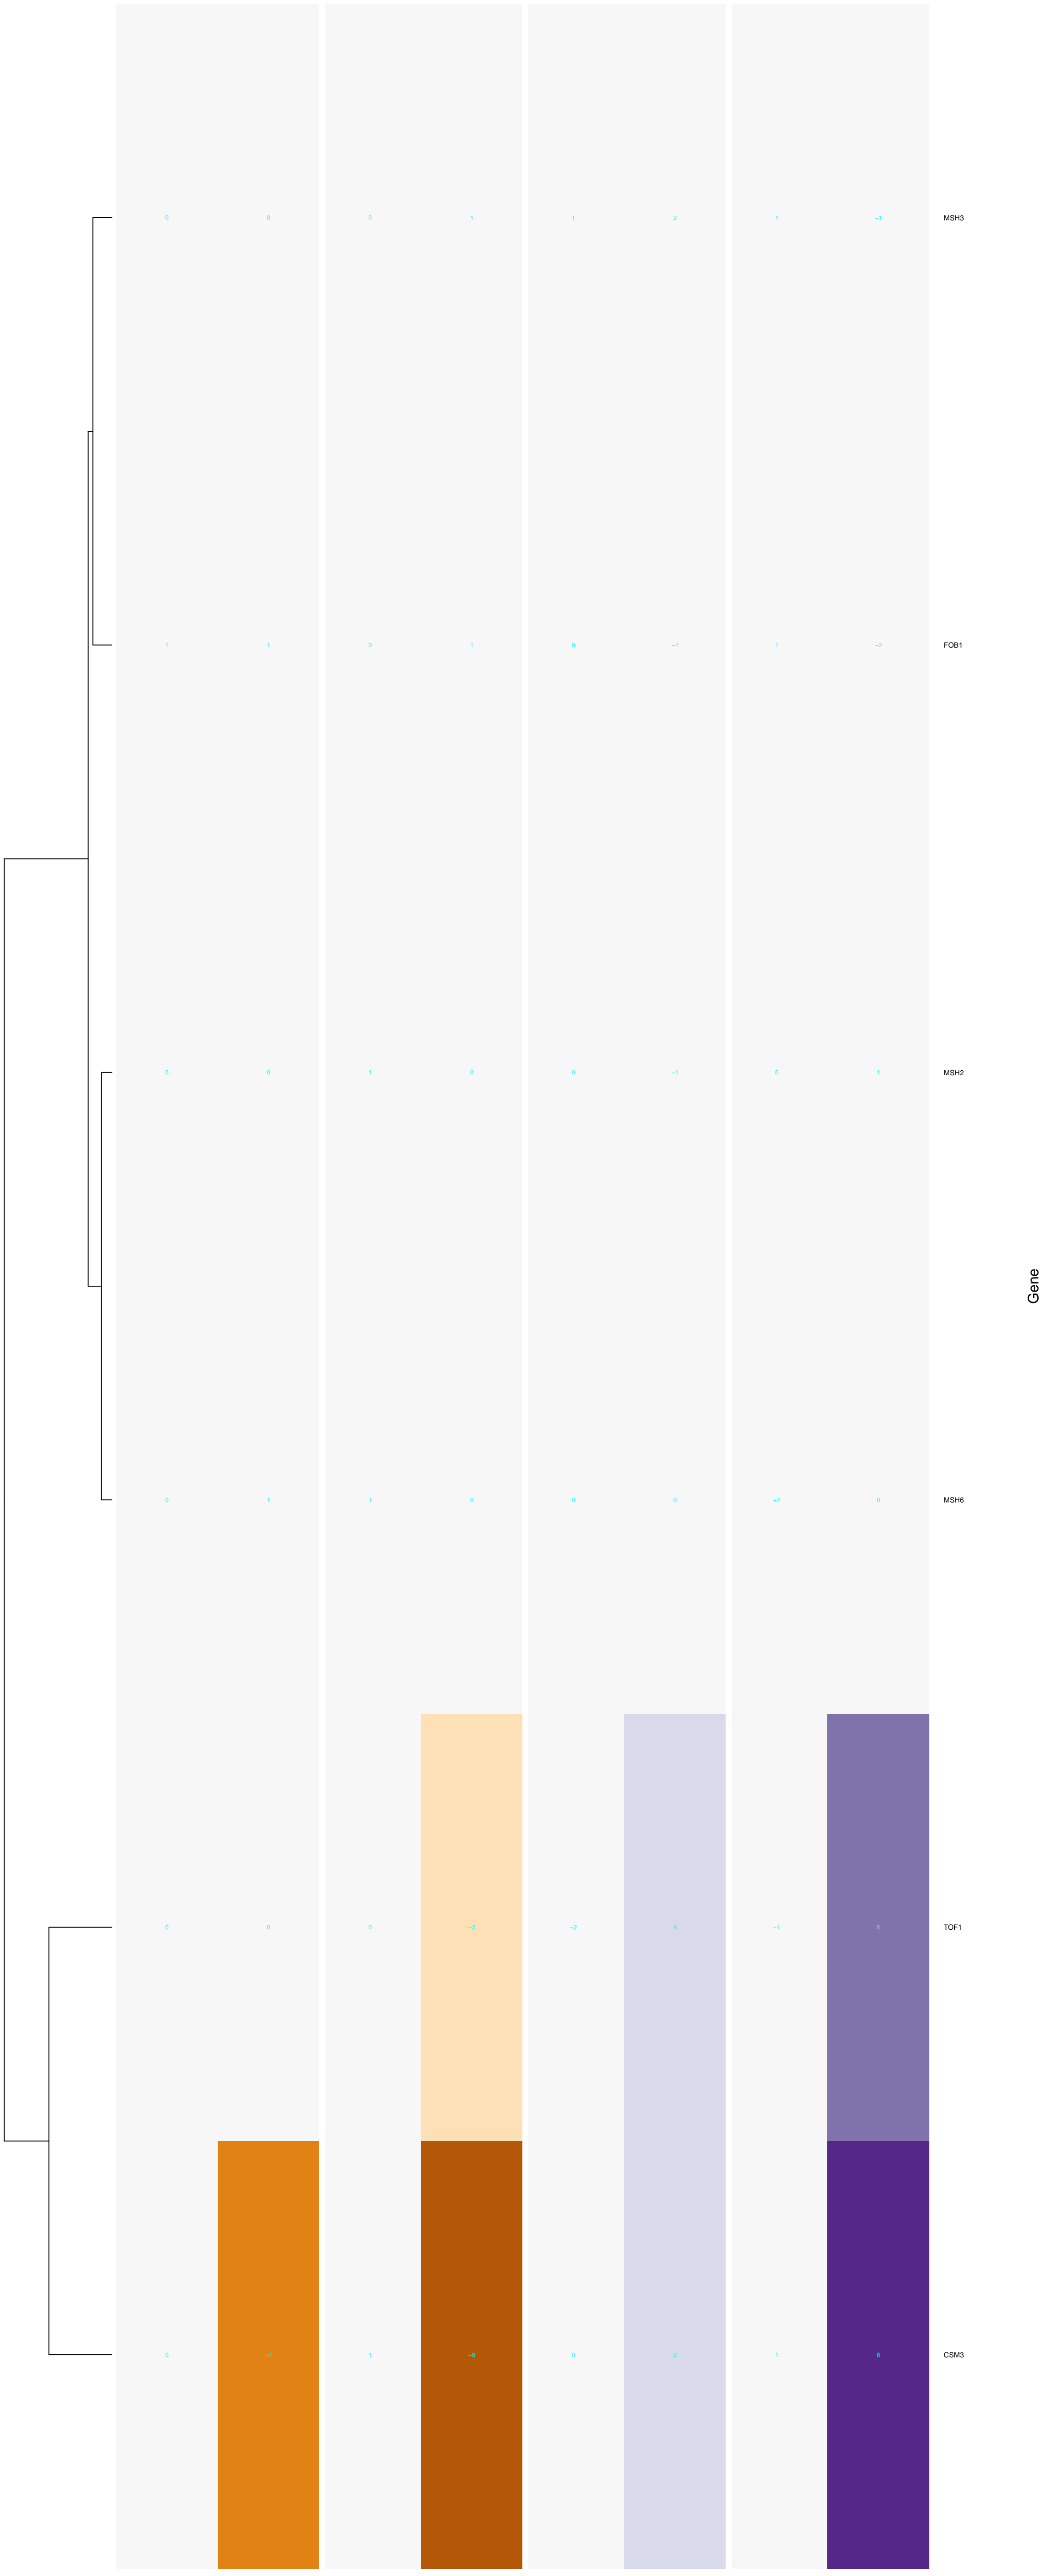

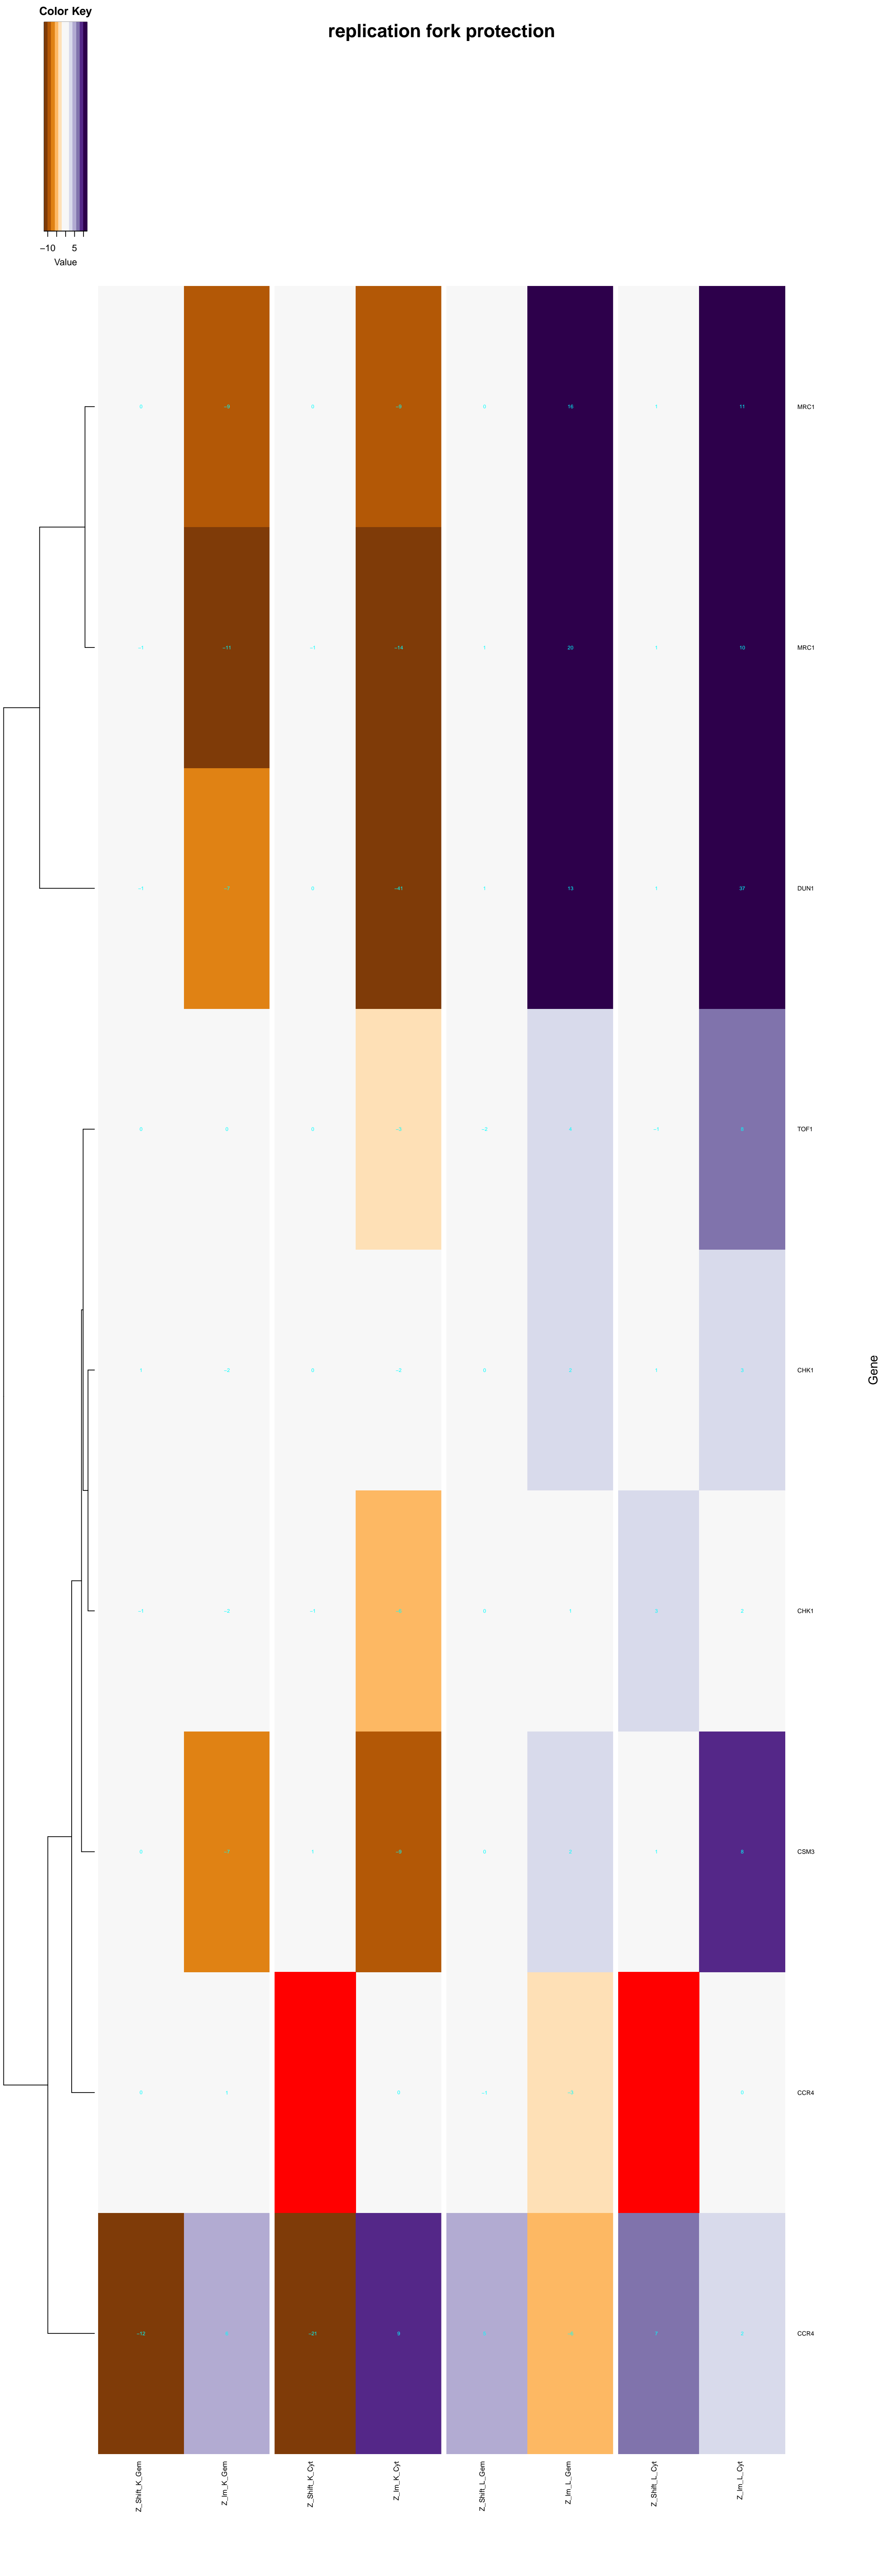

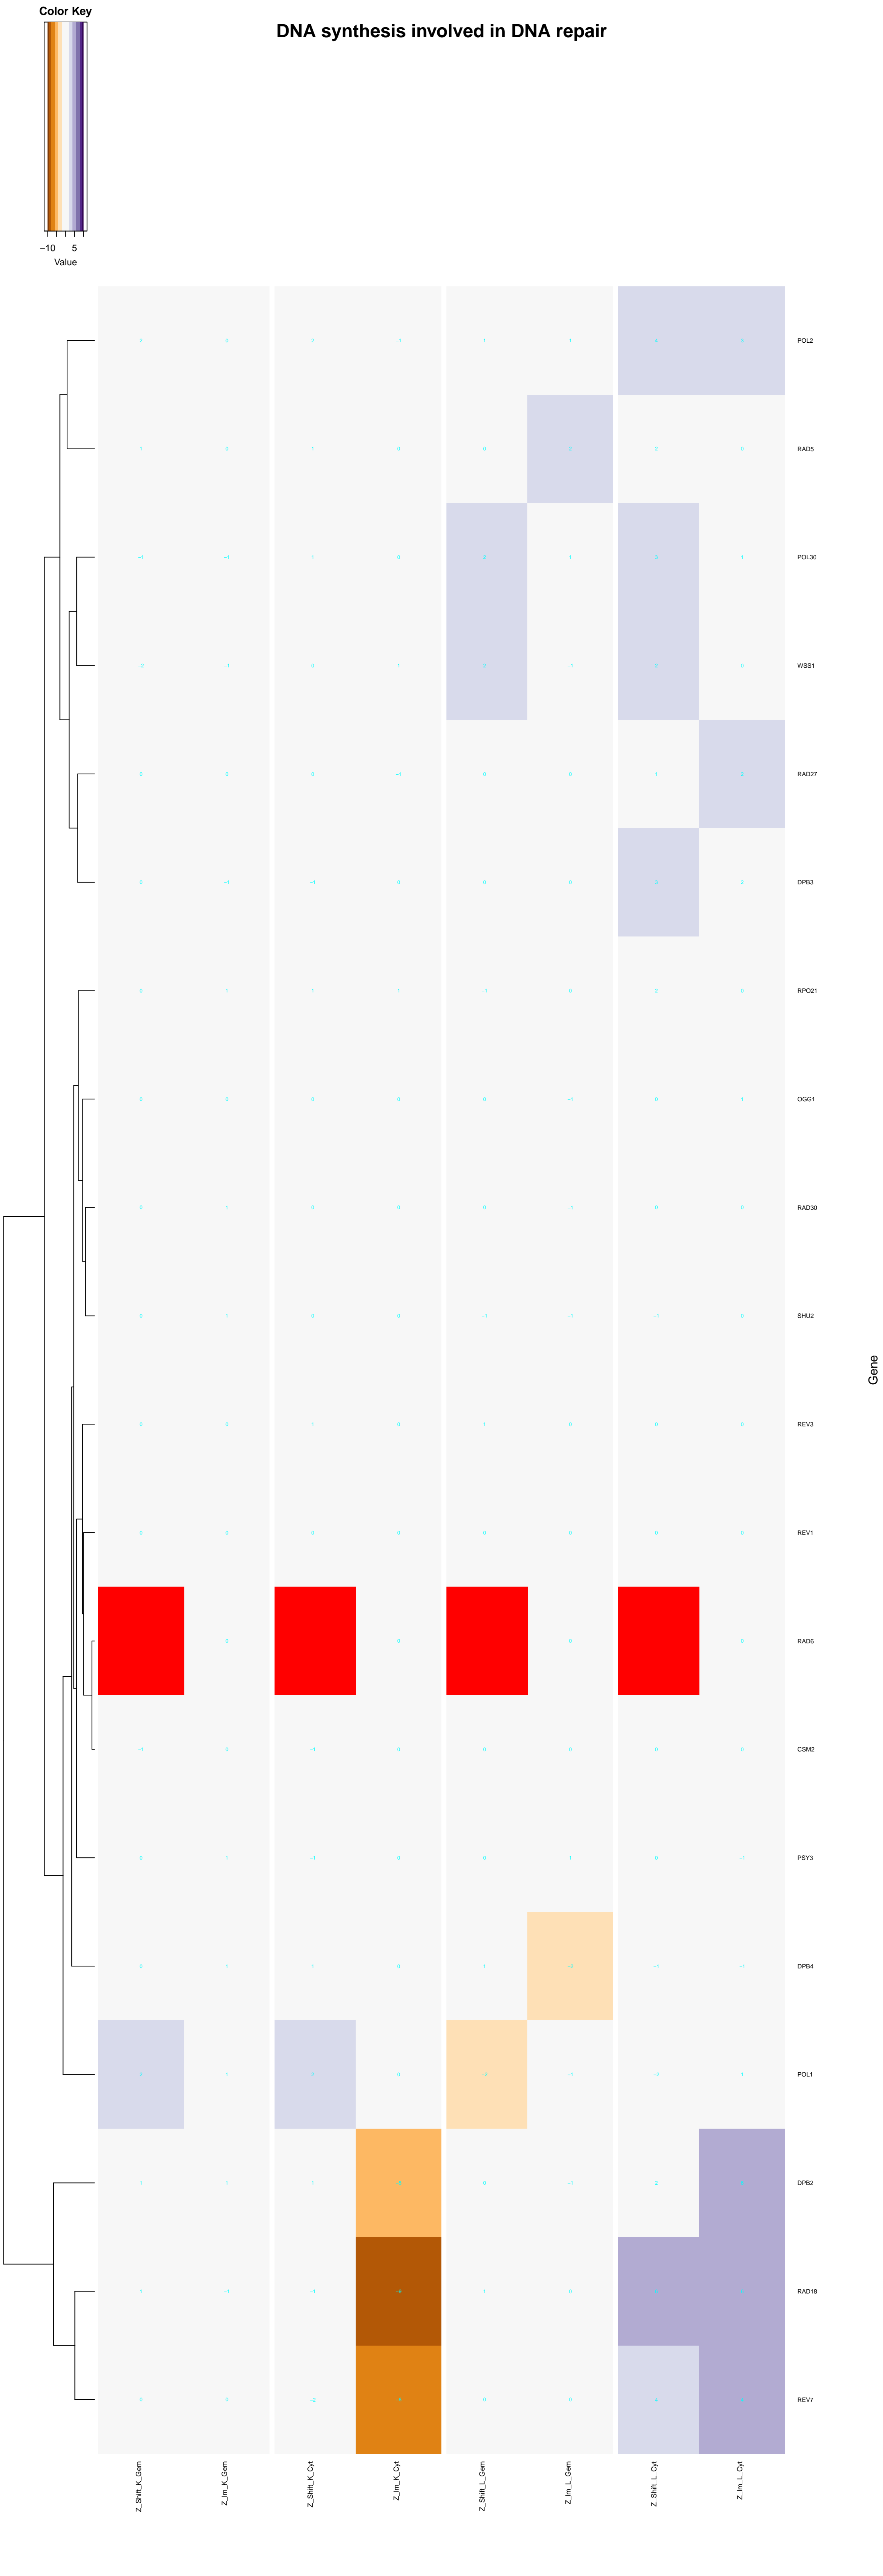

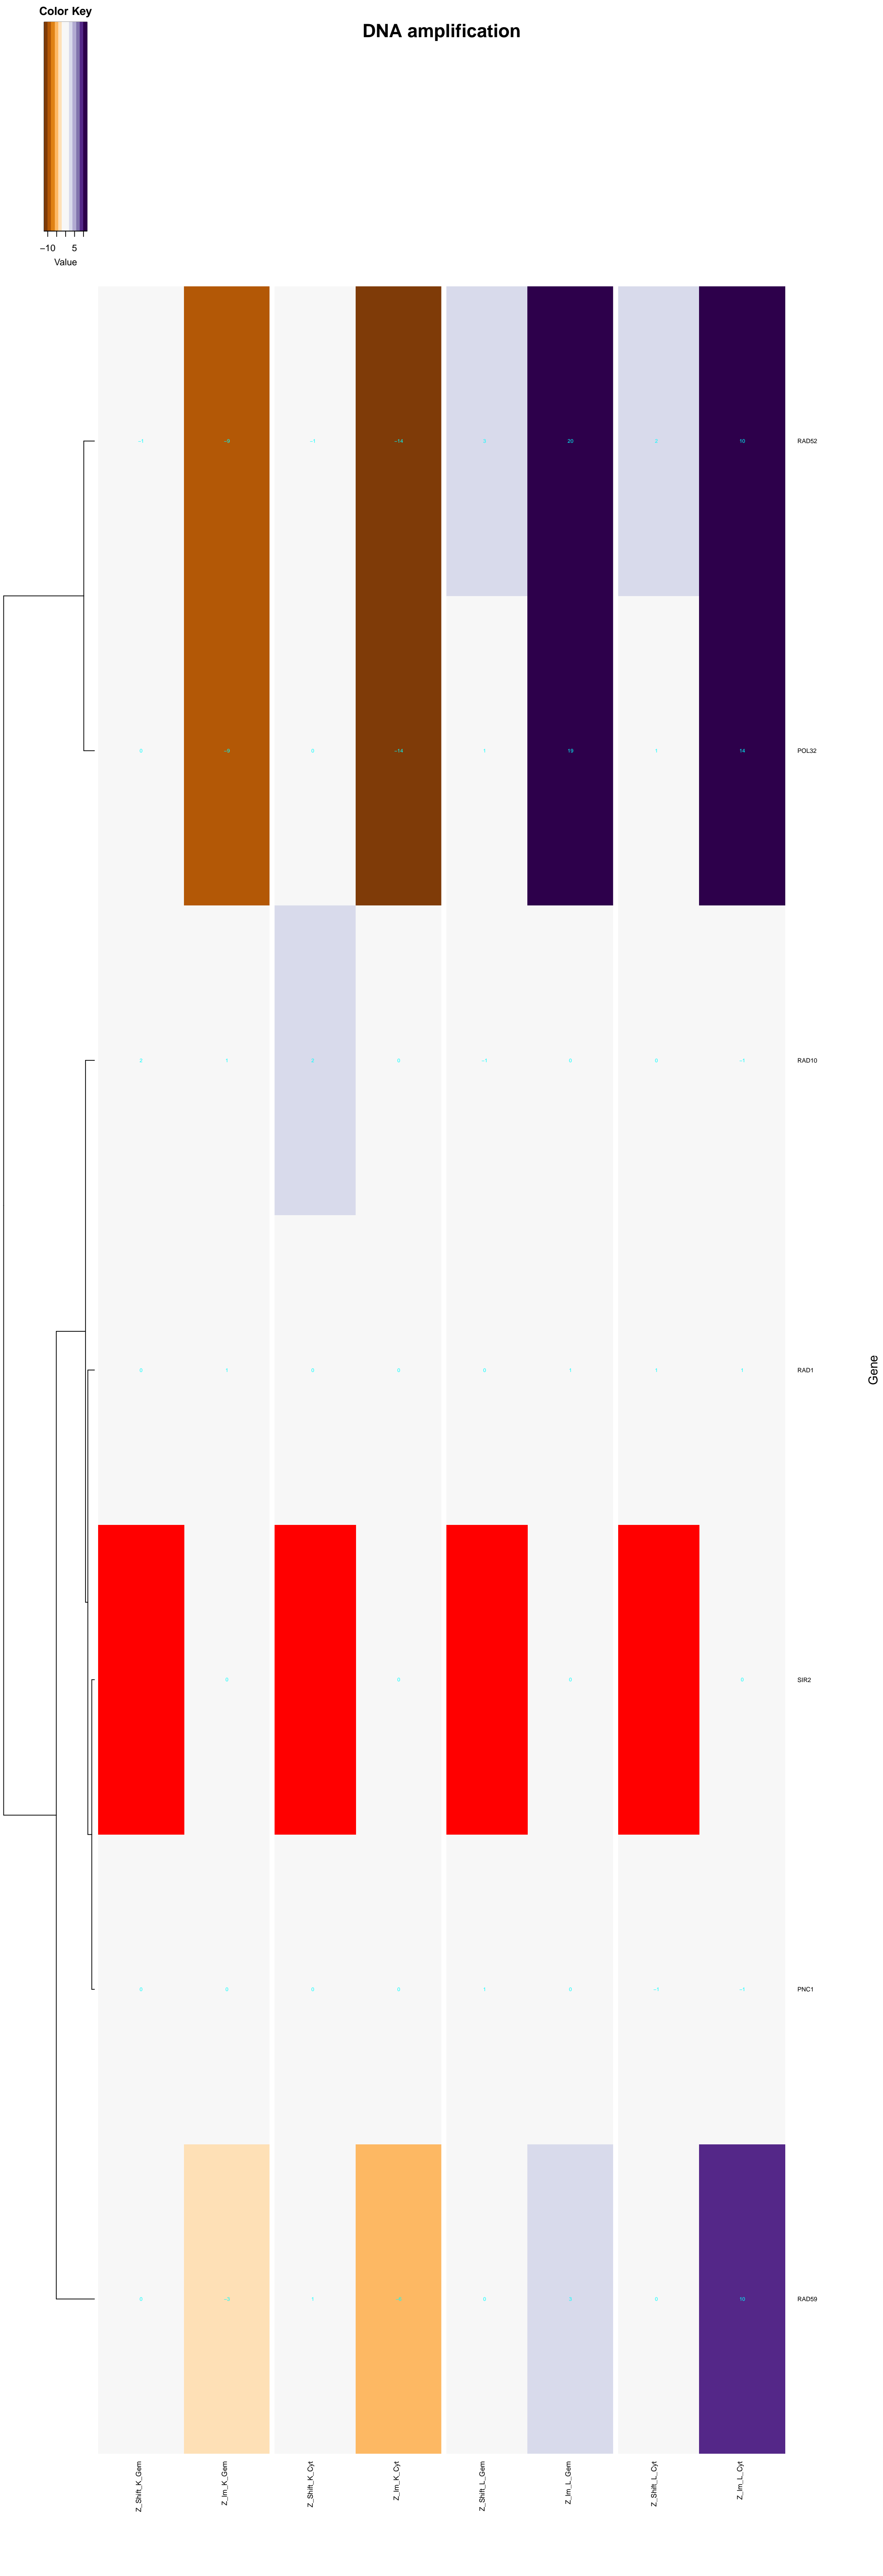

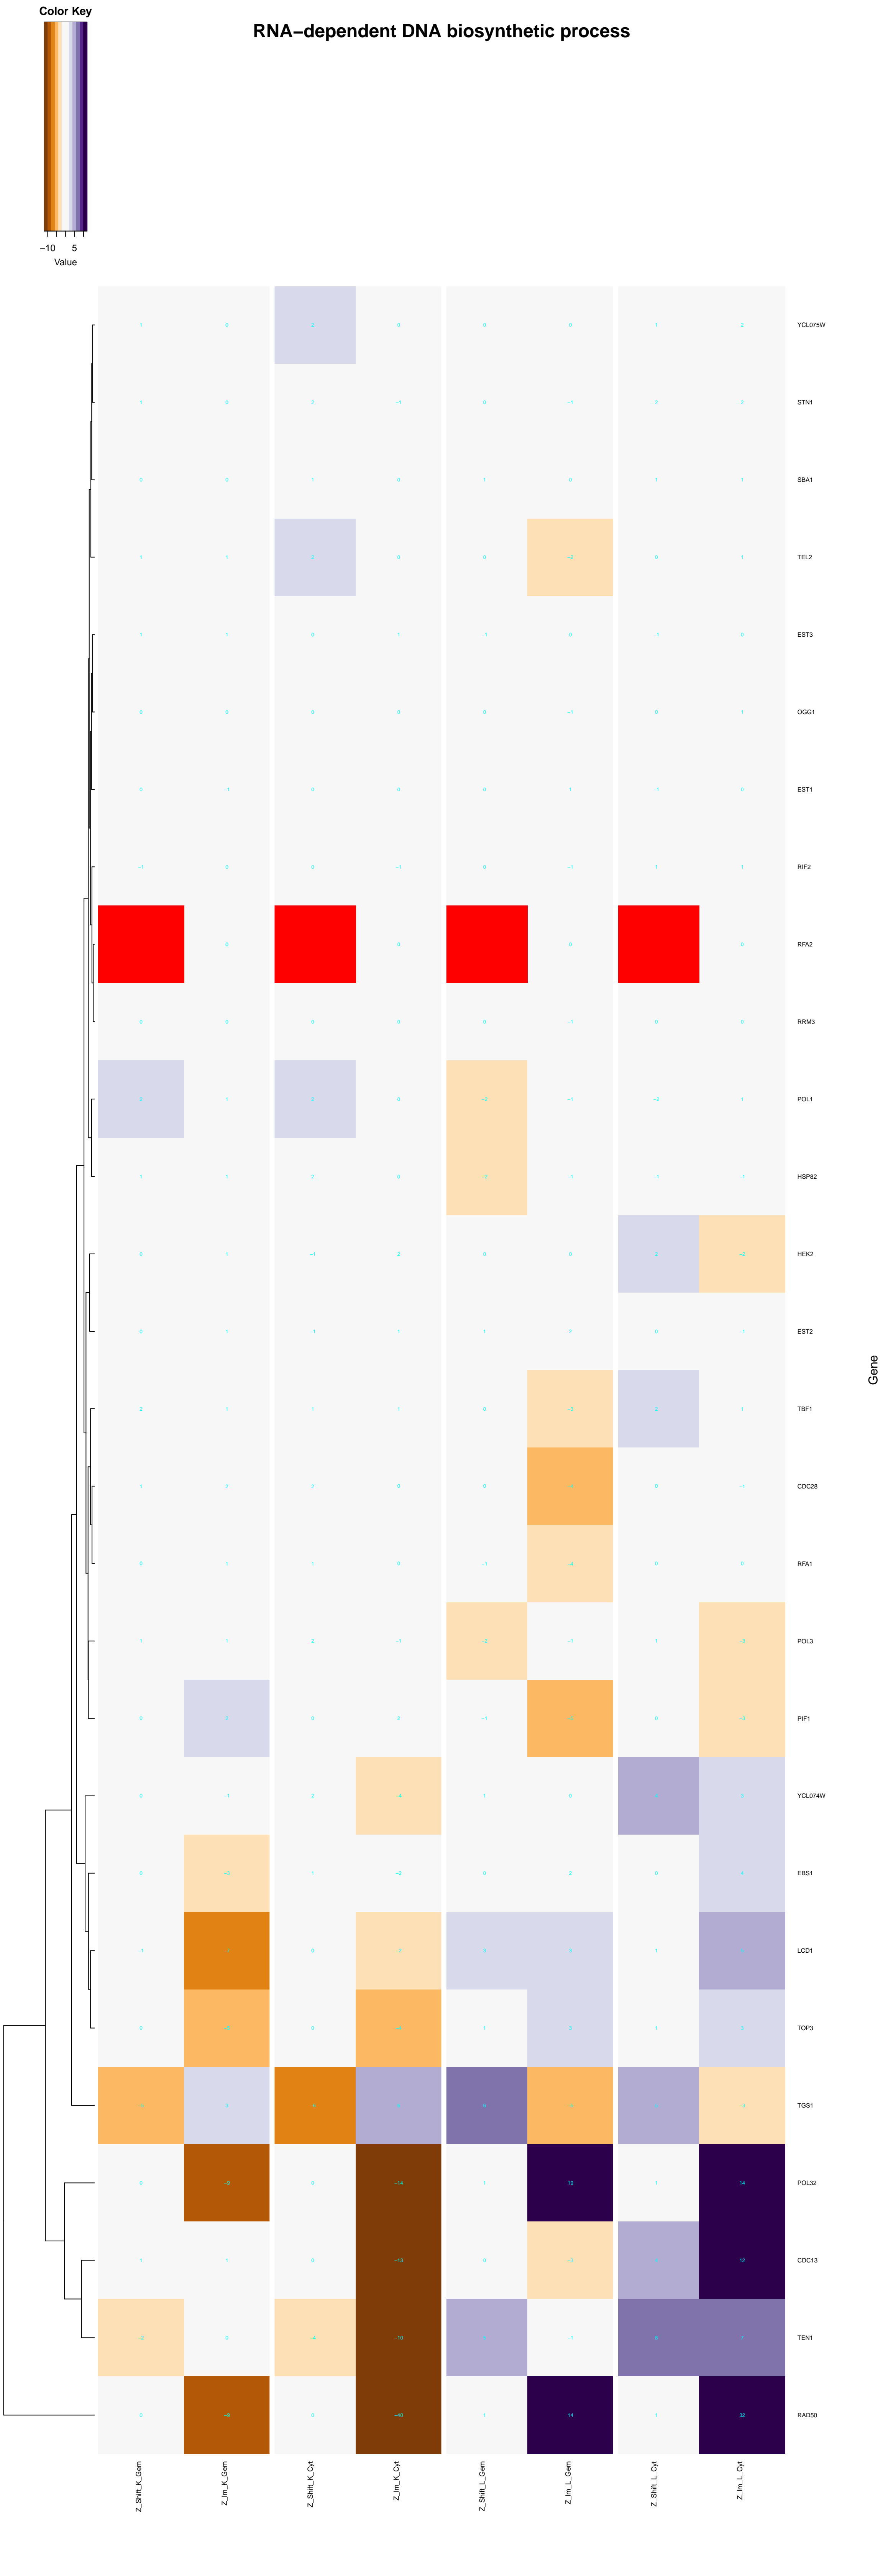

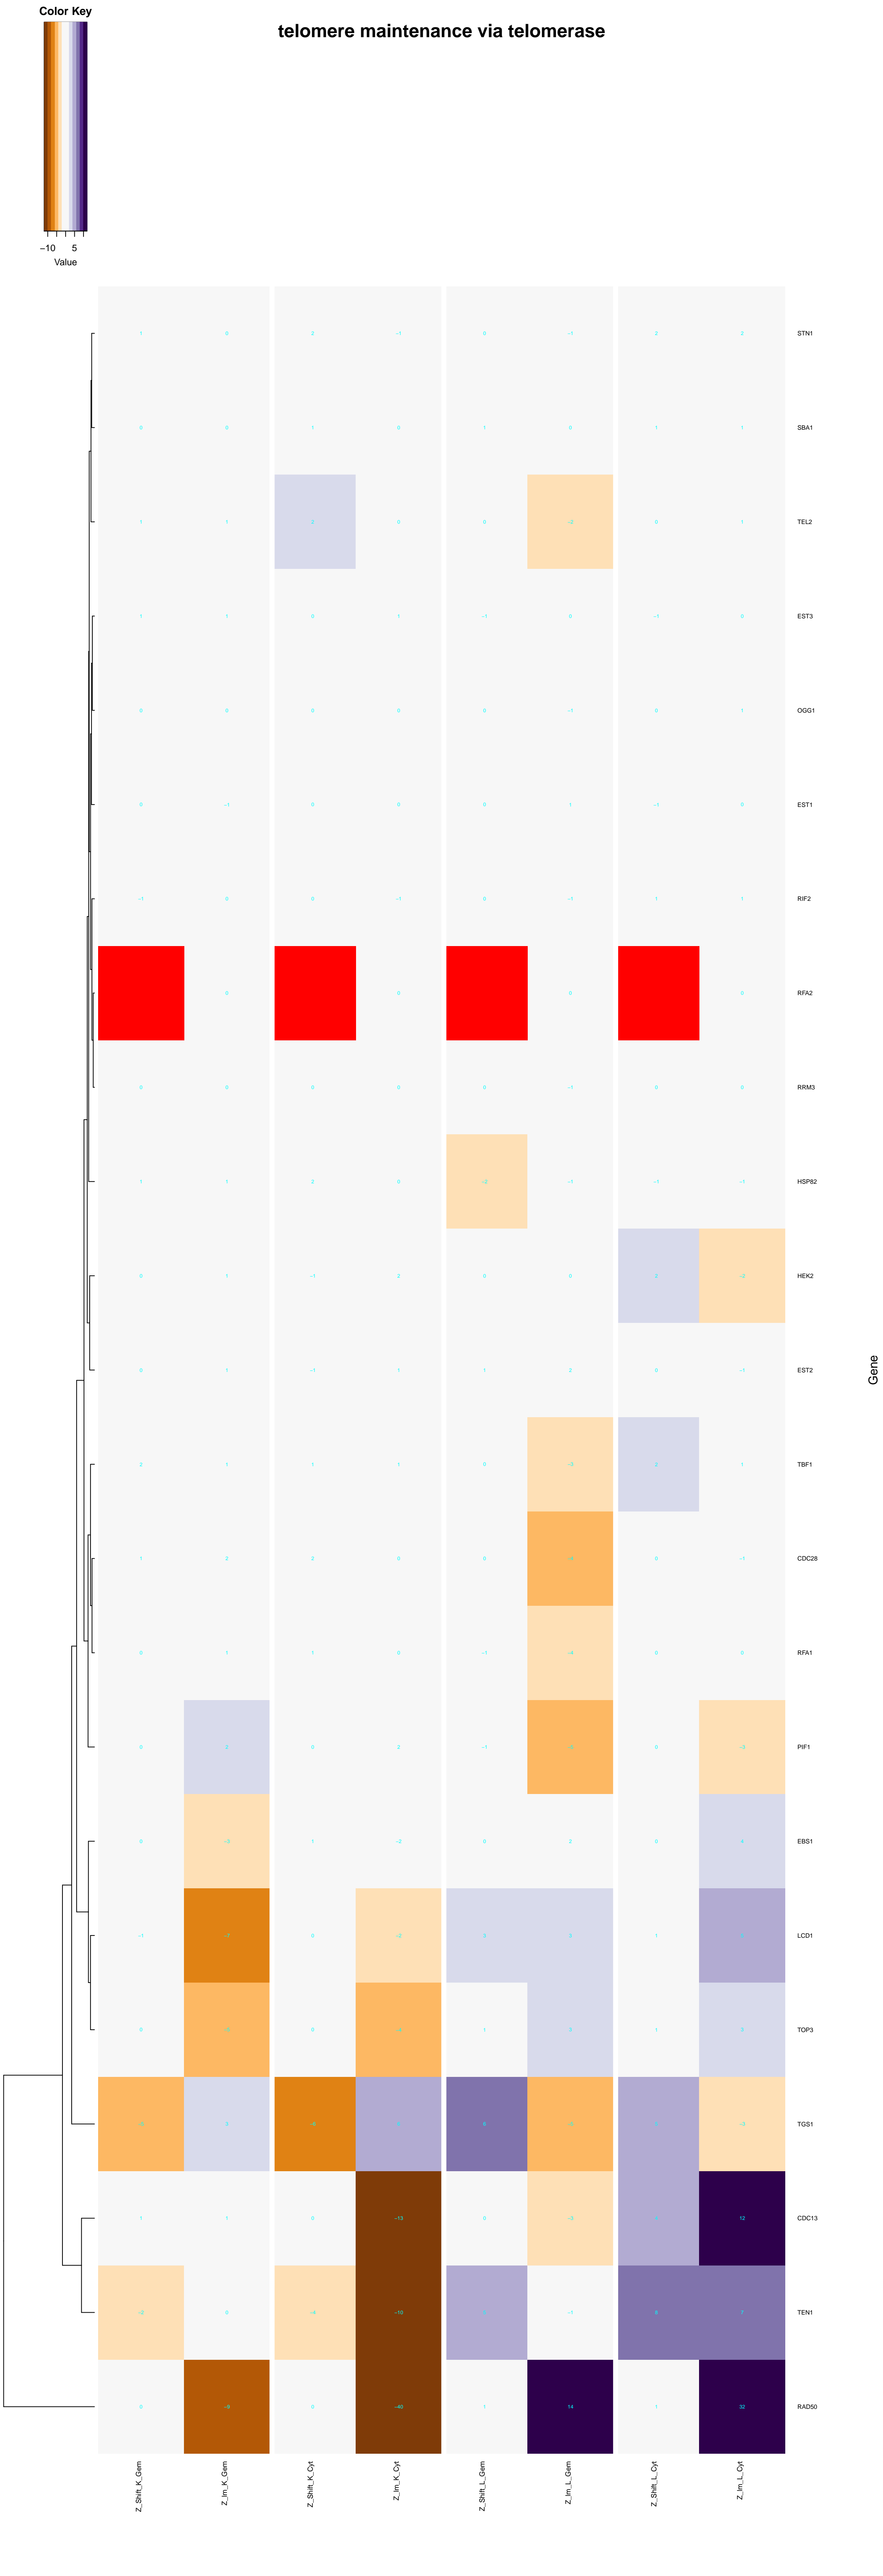

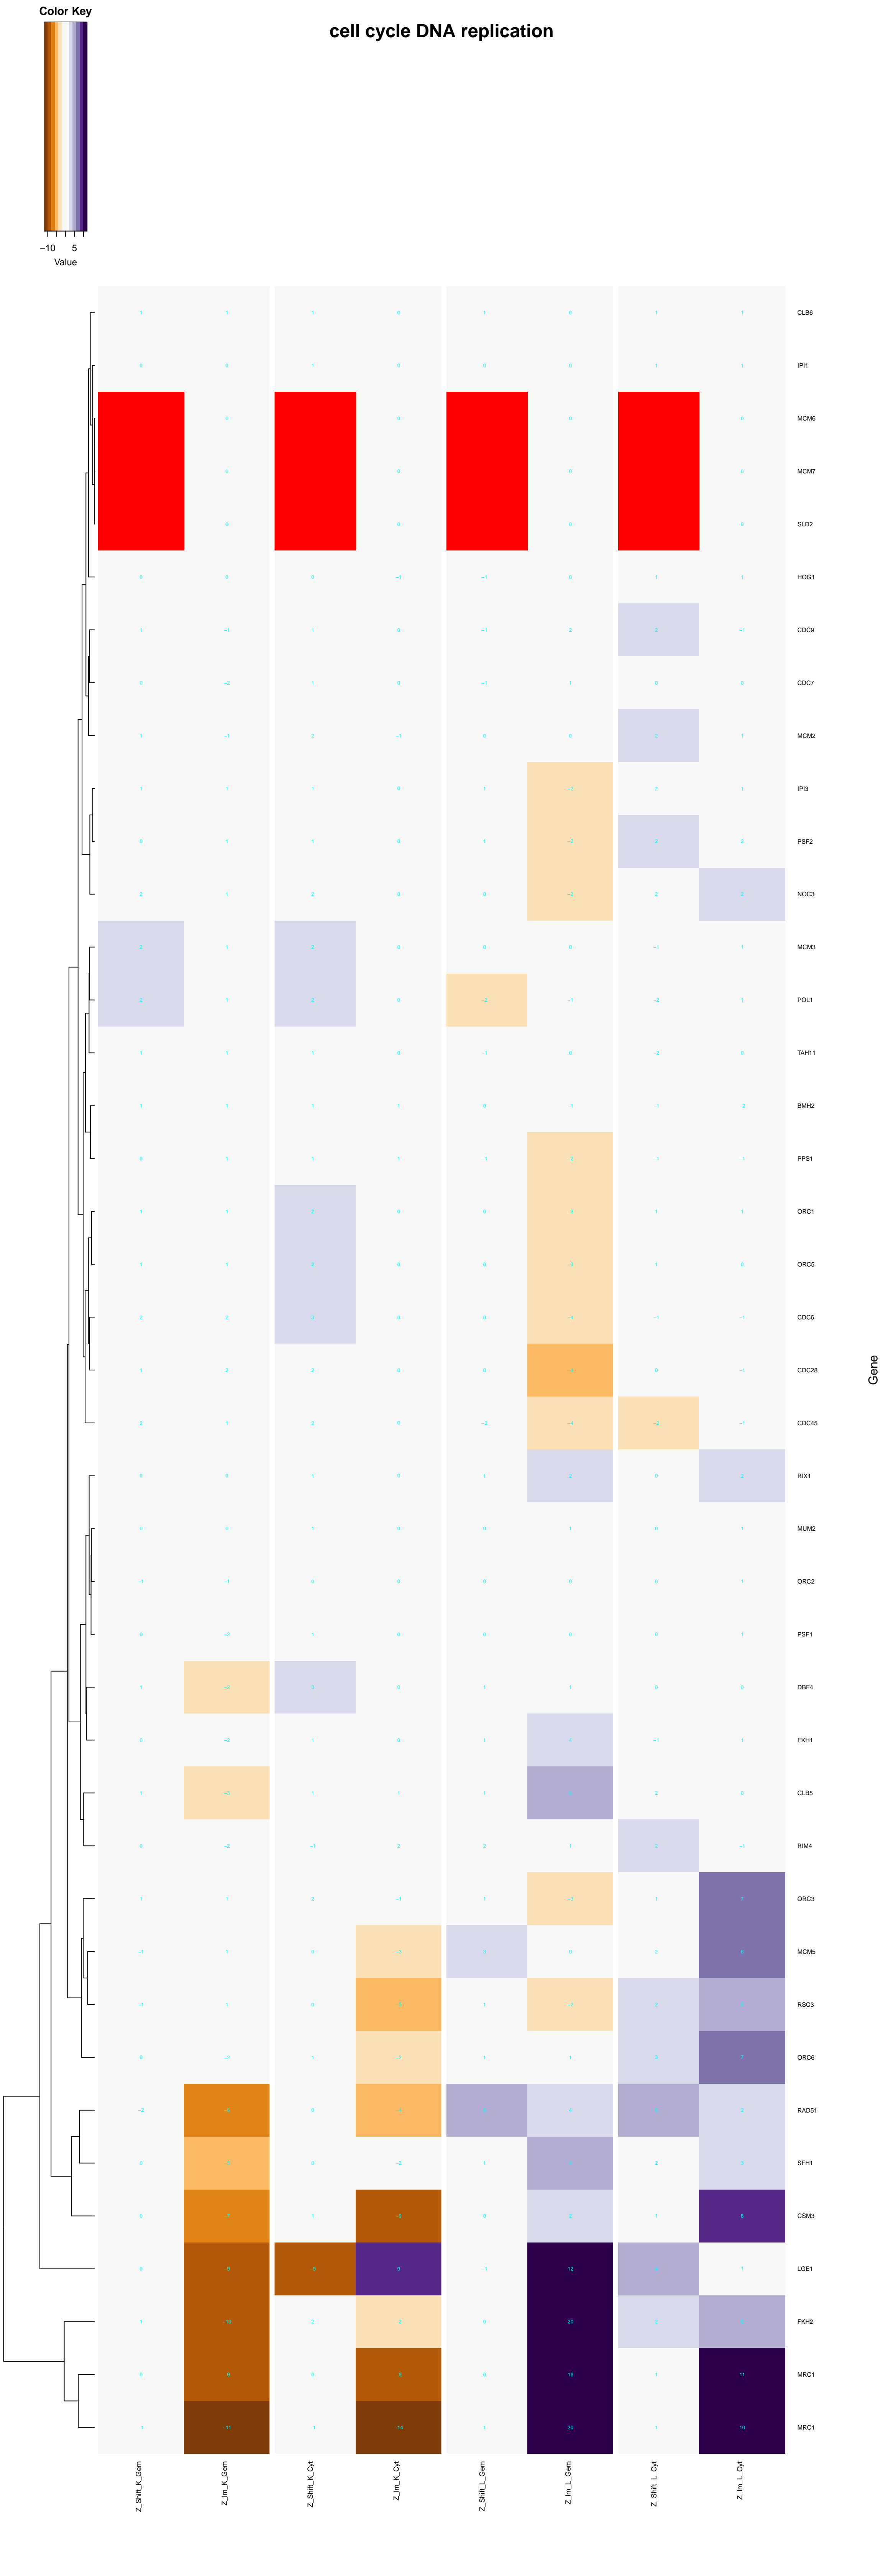



nuclear cell cycle DNA replication initiation







mitochondrial double-strand break repair via homologous recombination

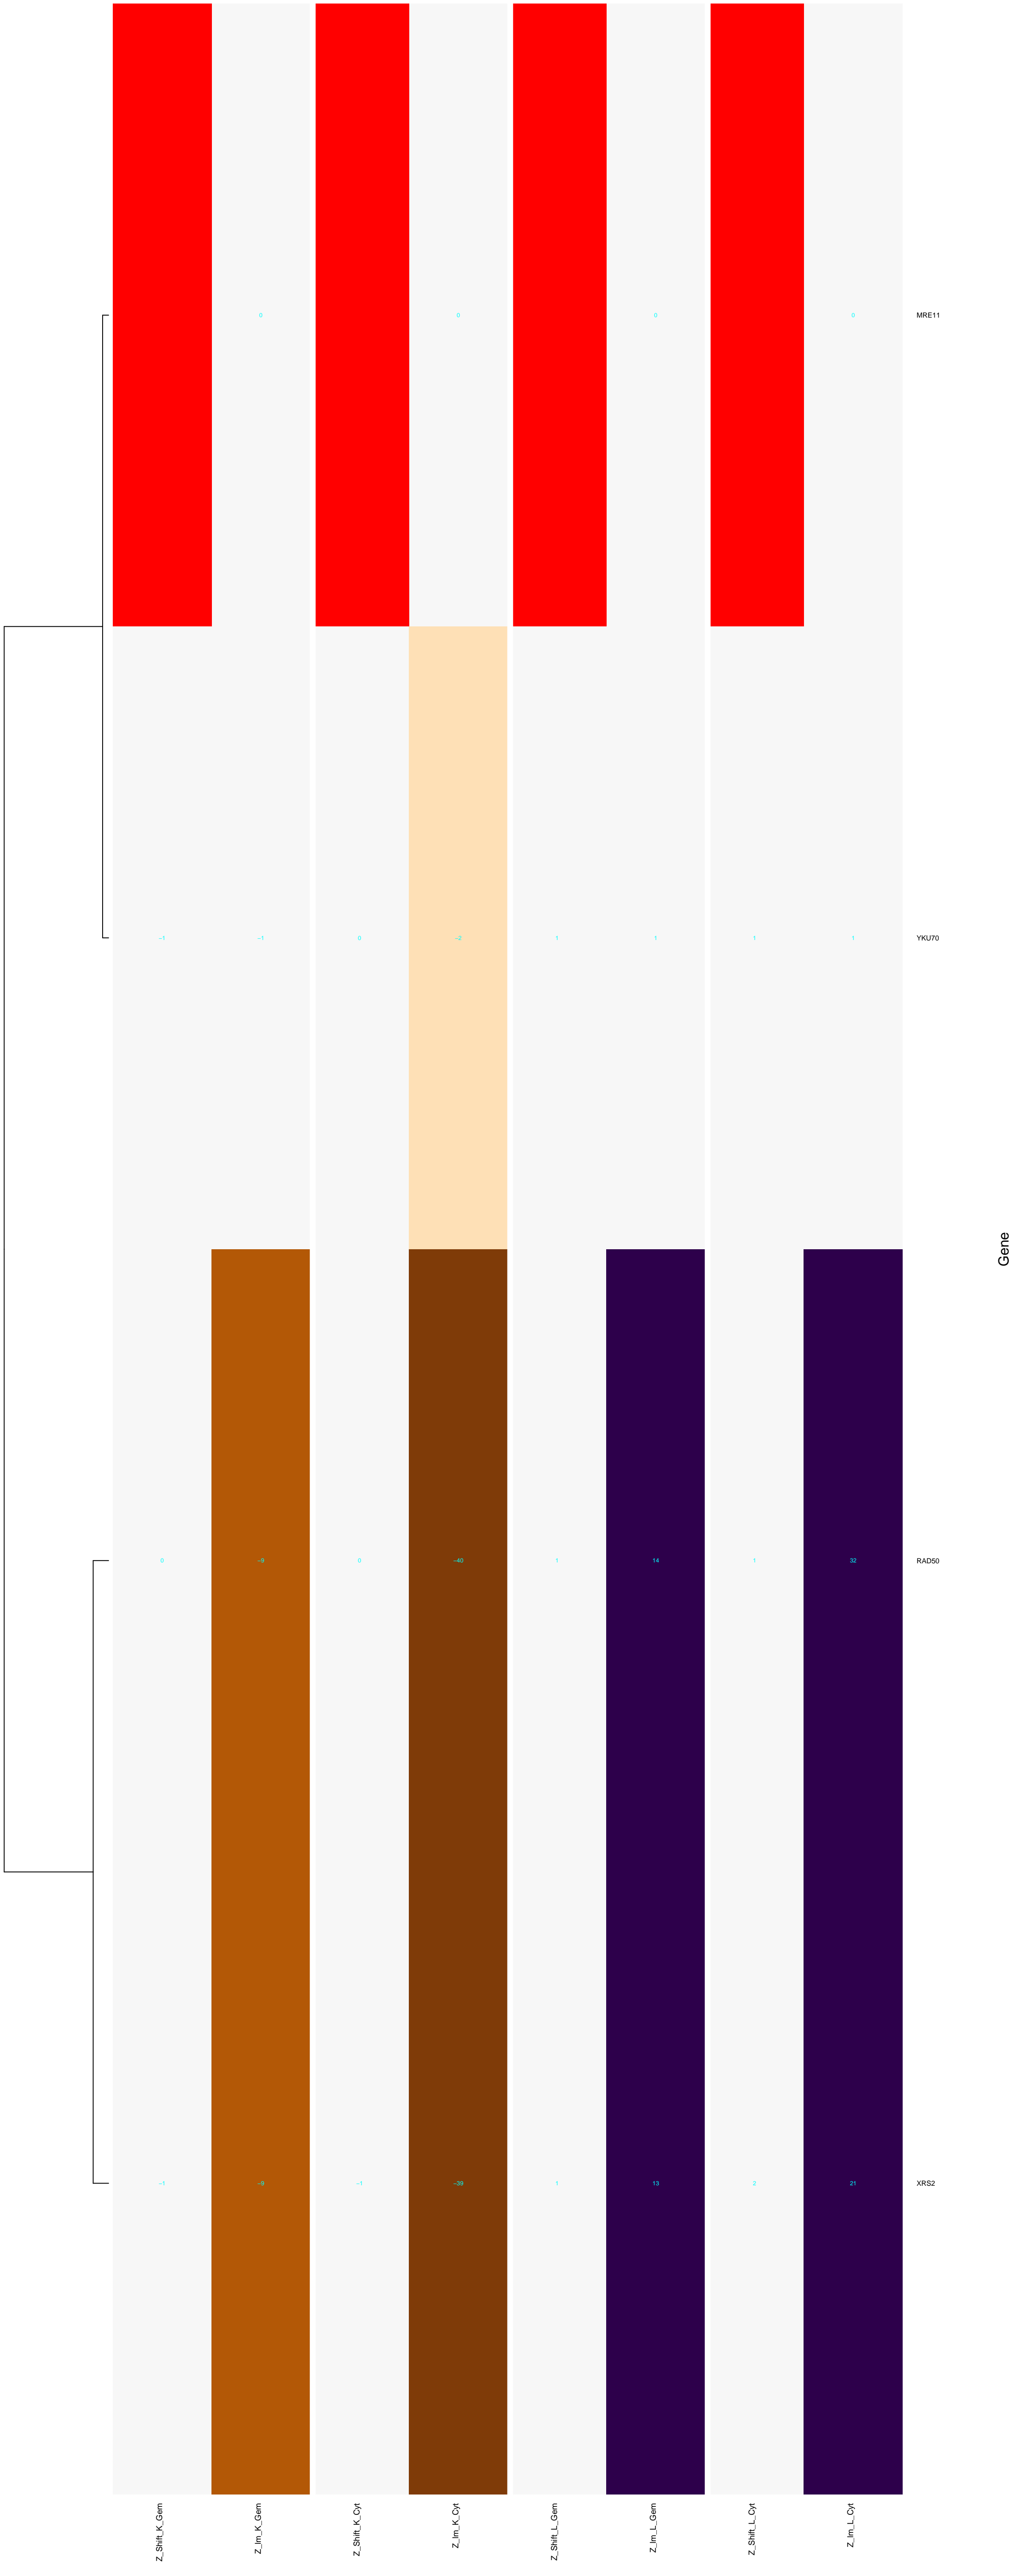

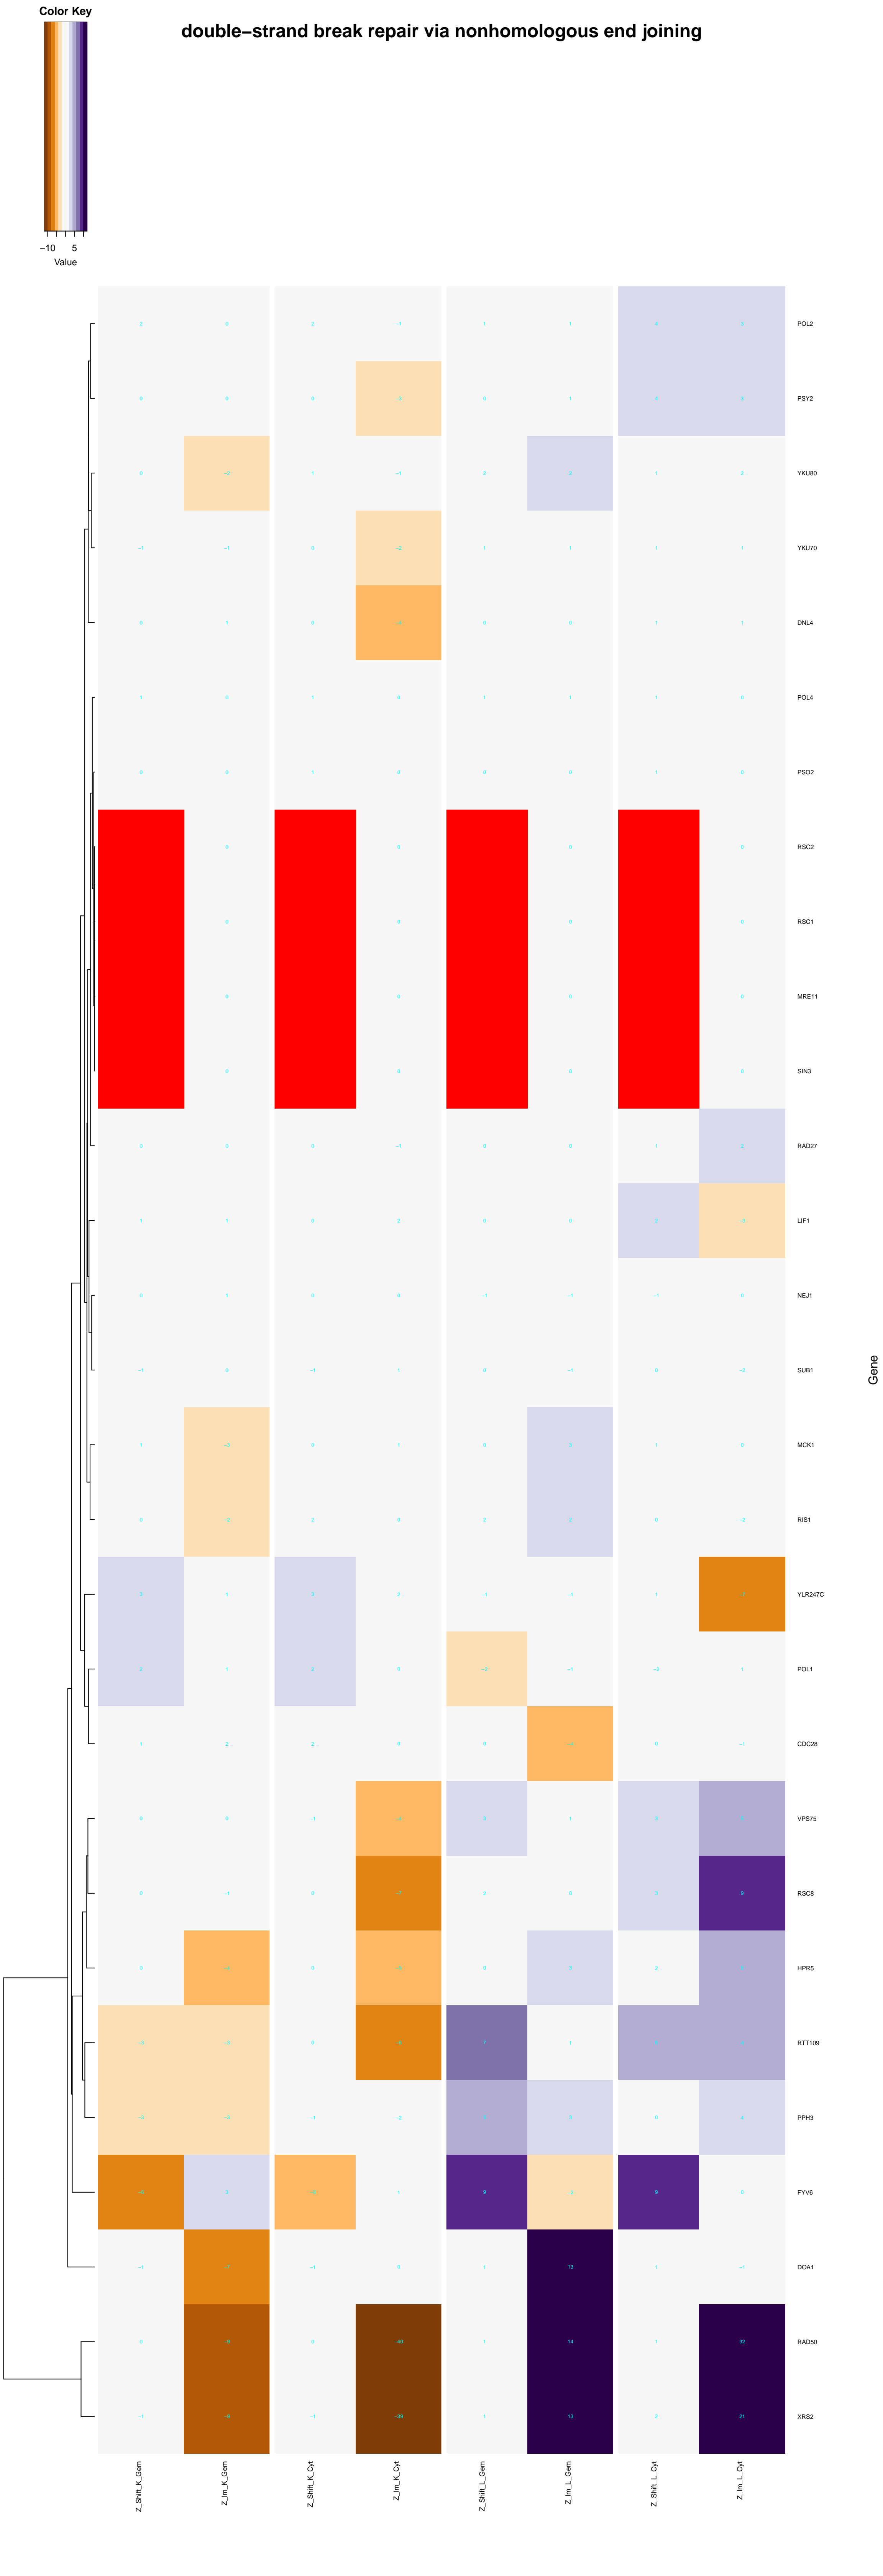

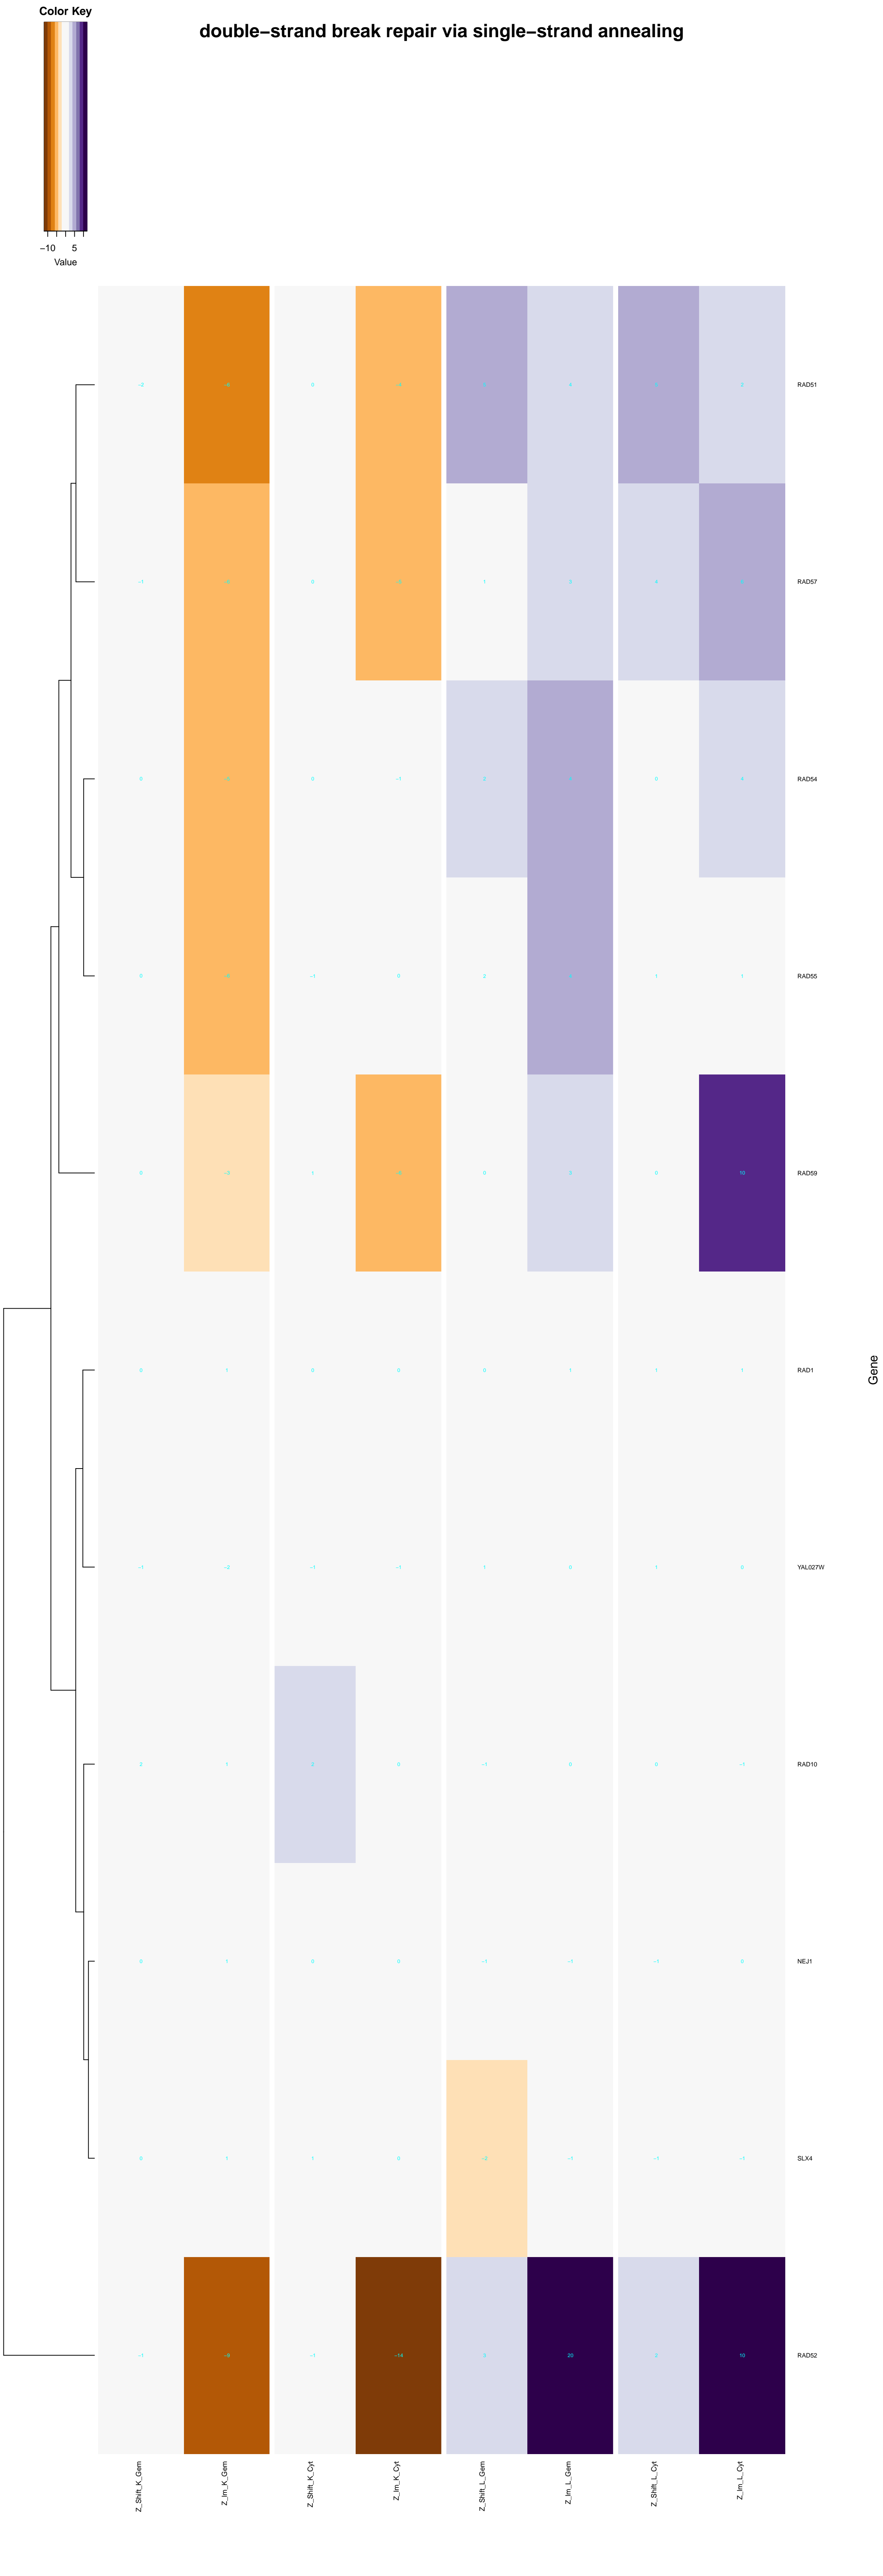

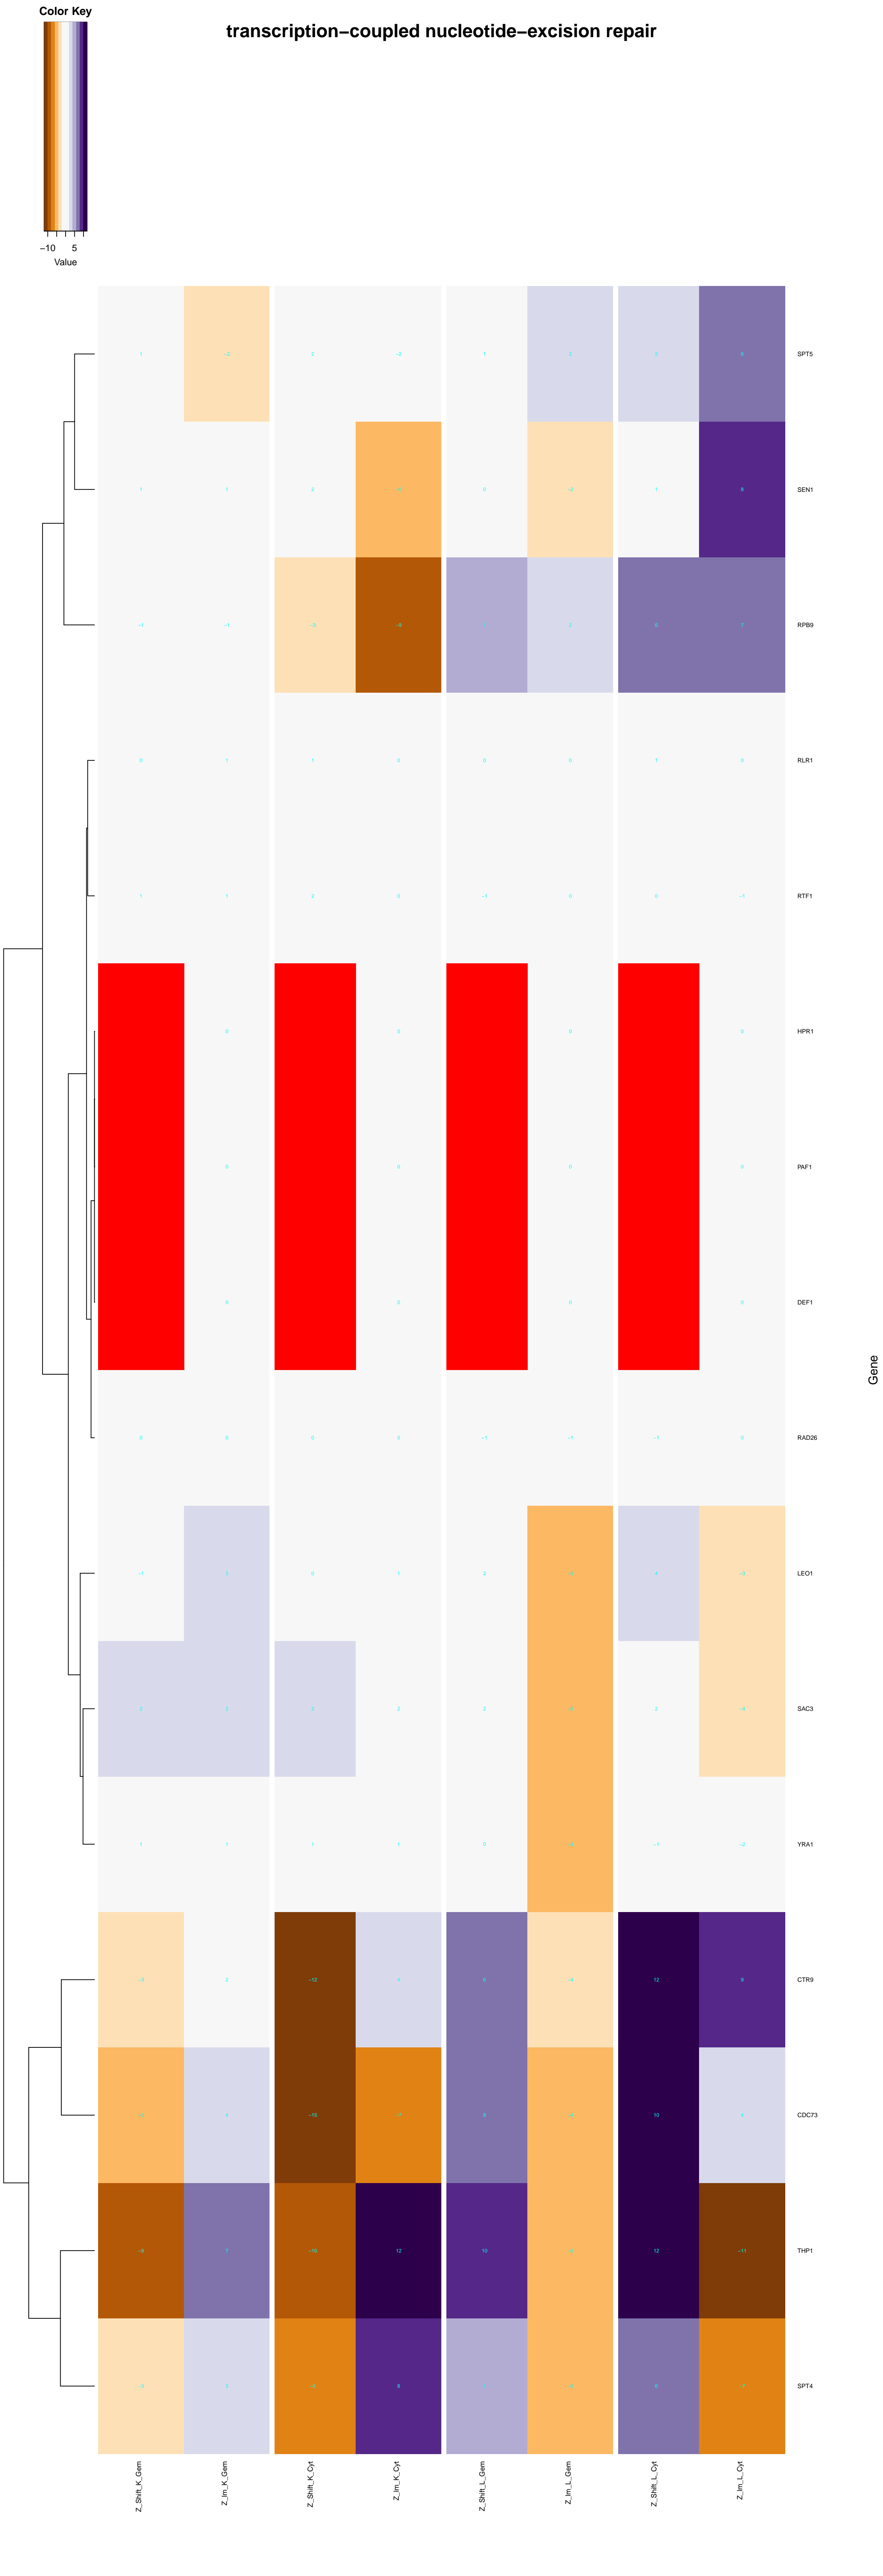

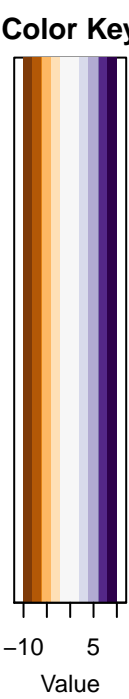

global genome nucleotide–excision repair

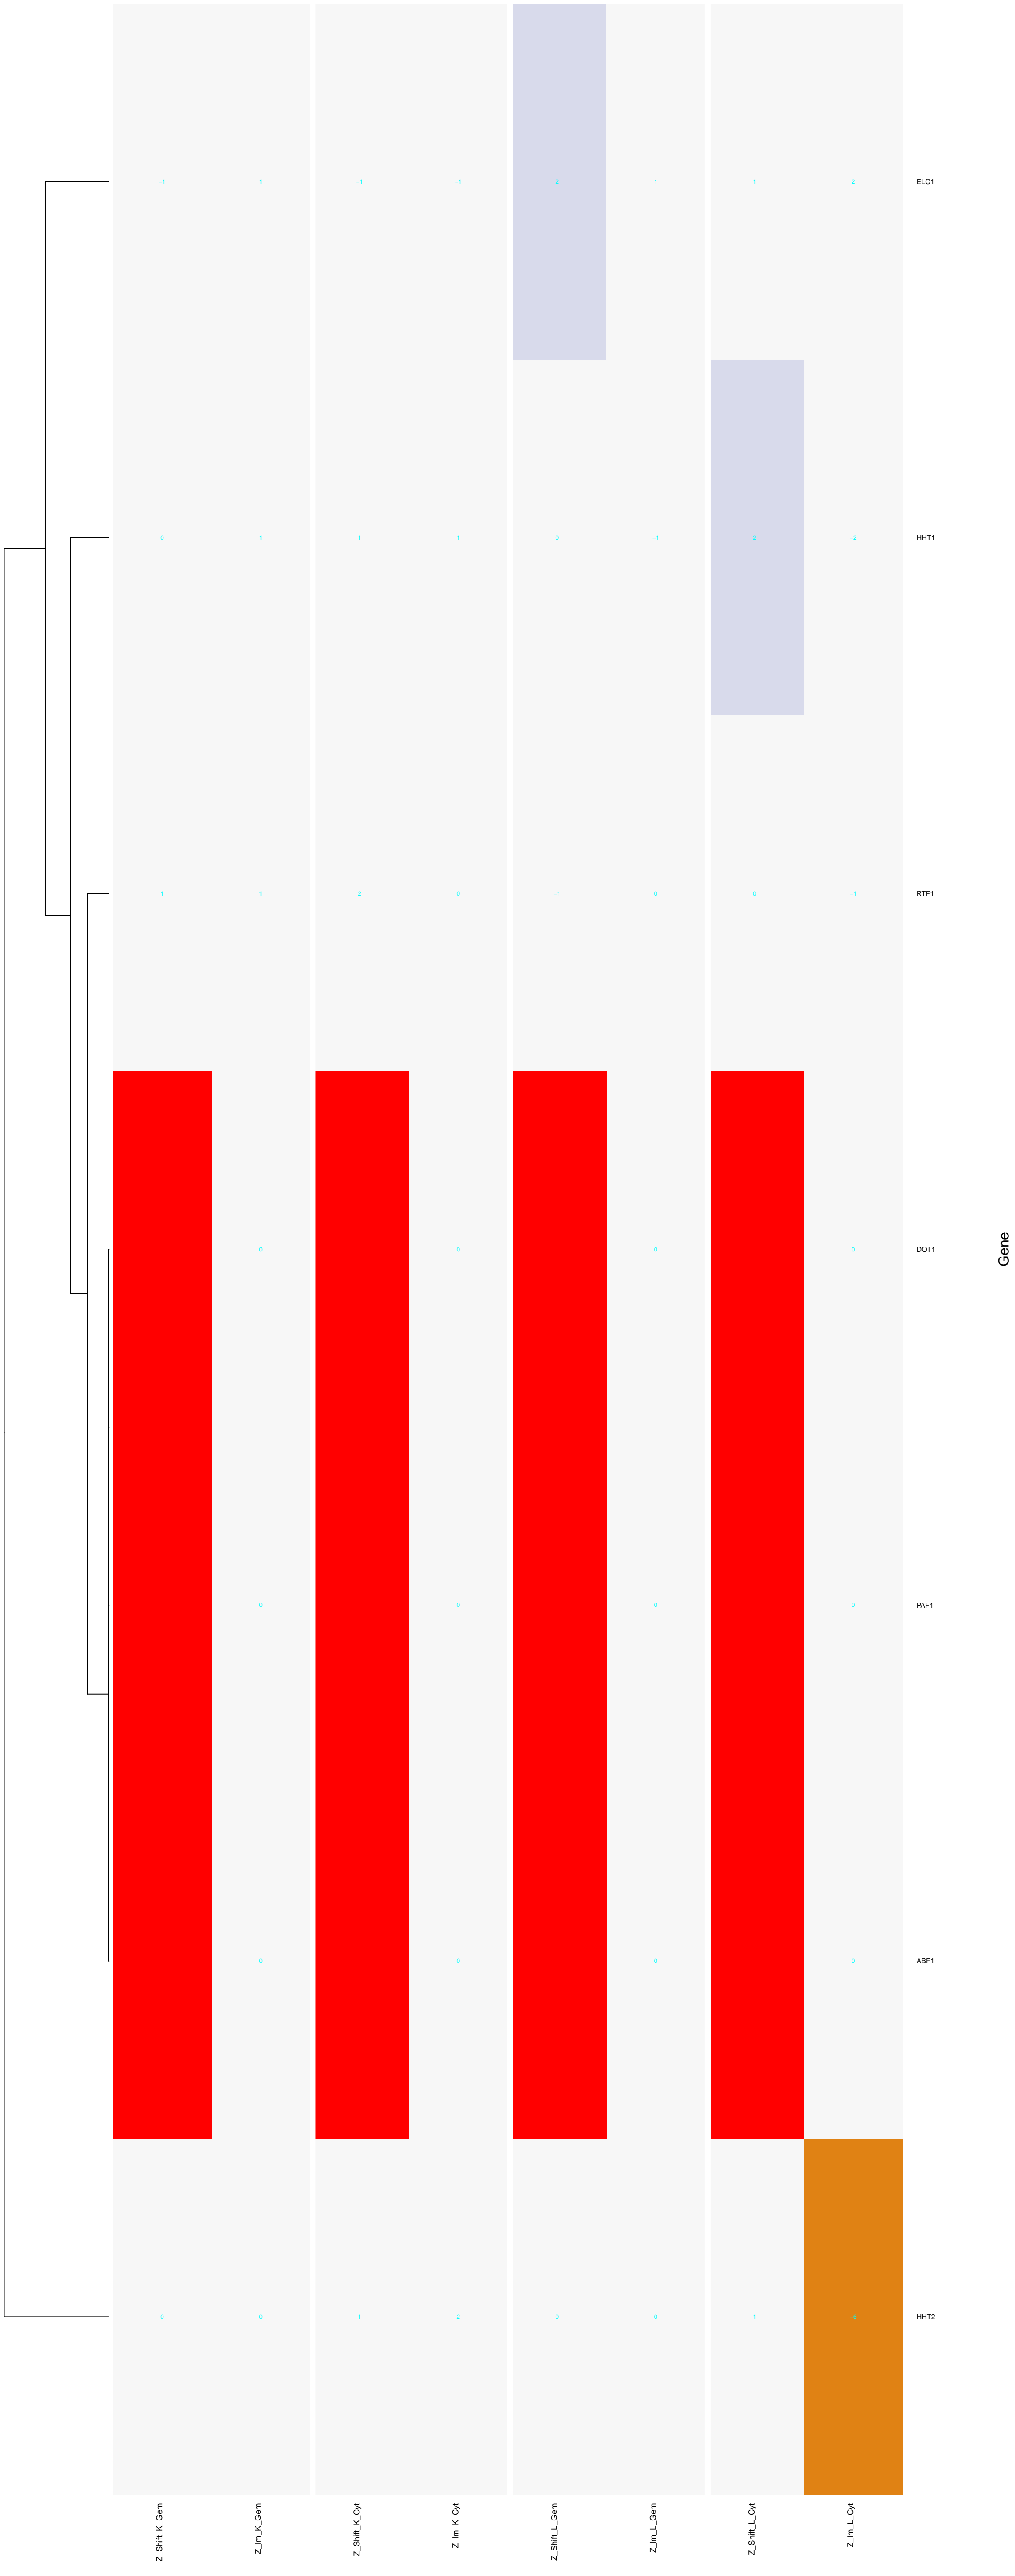



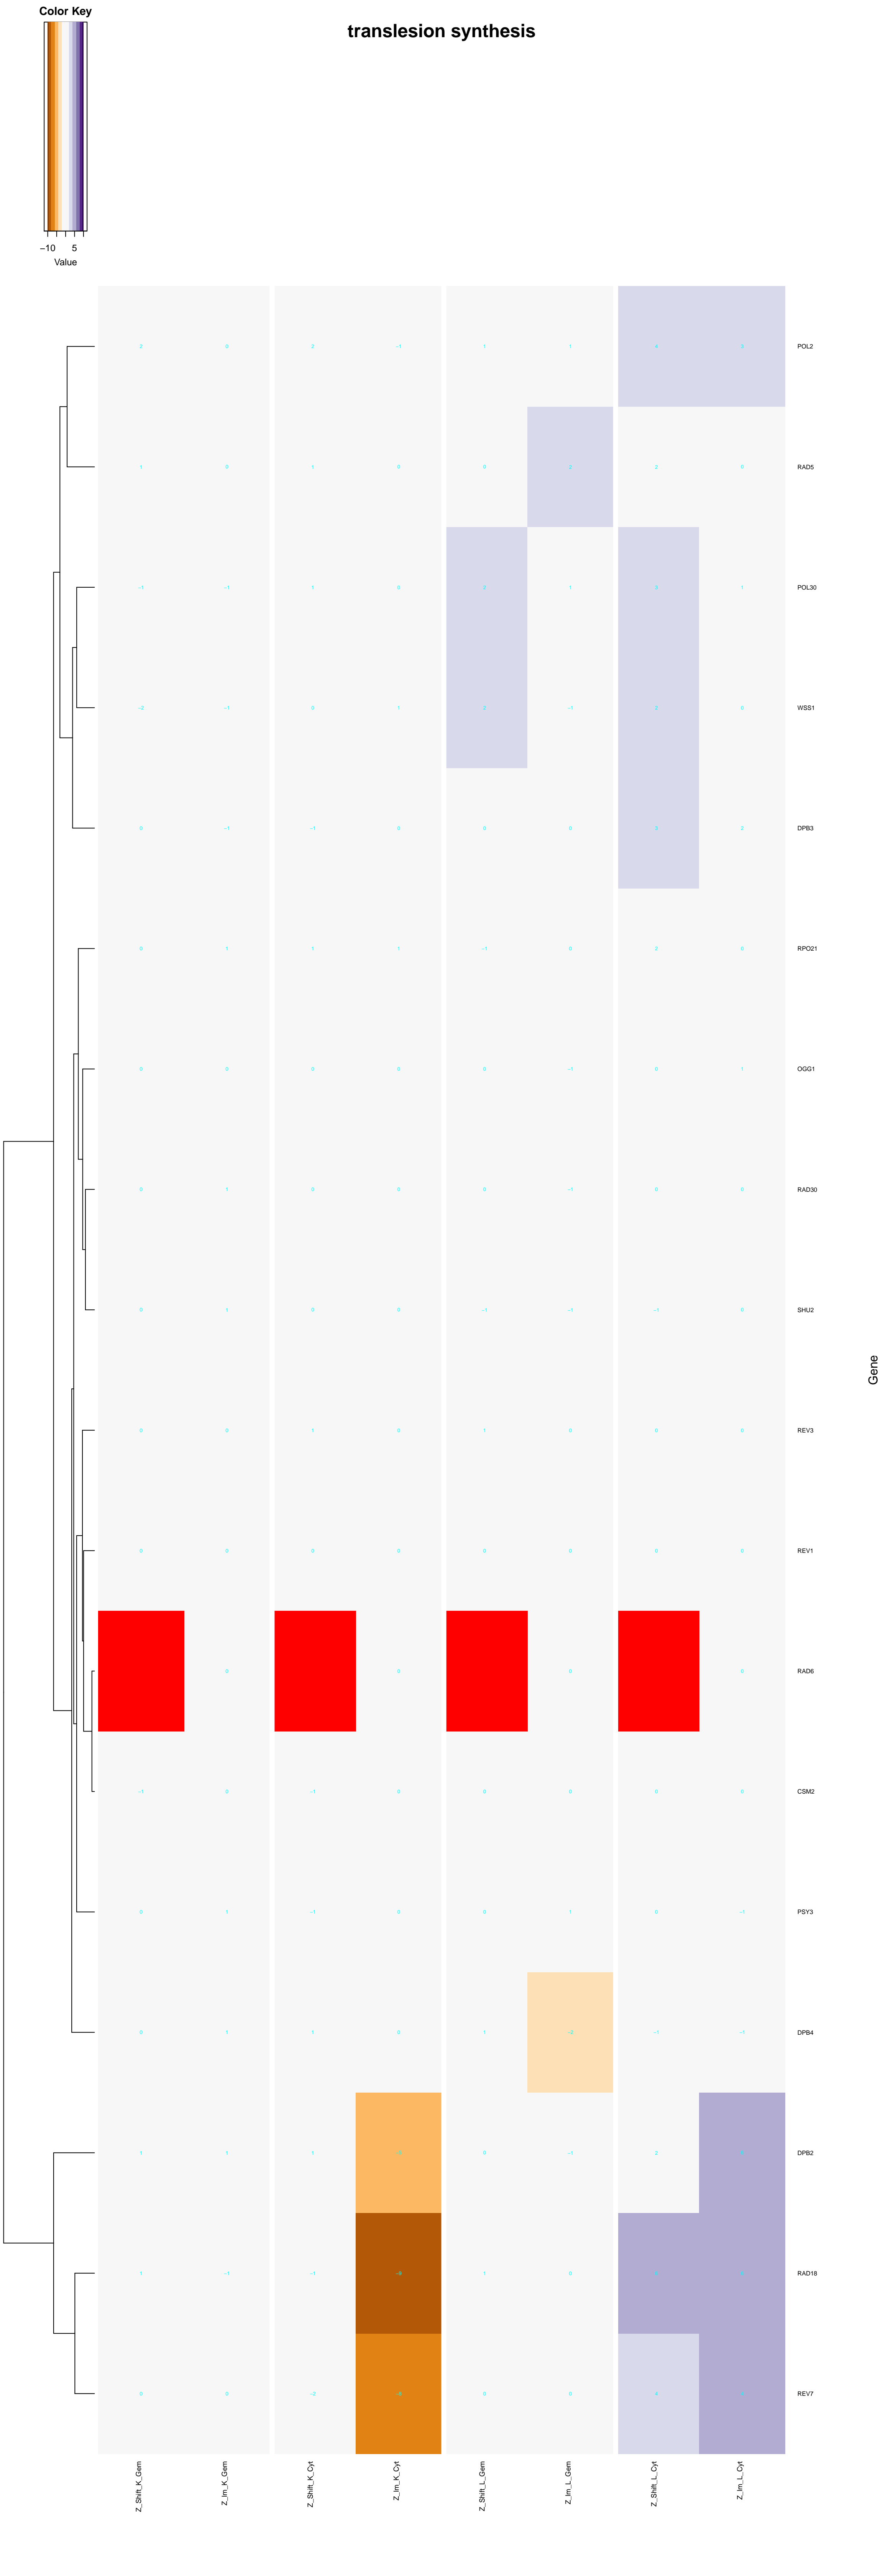

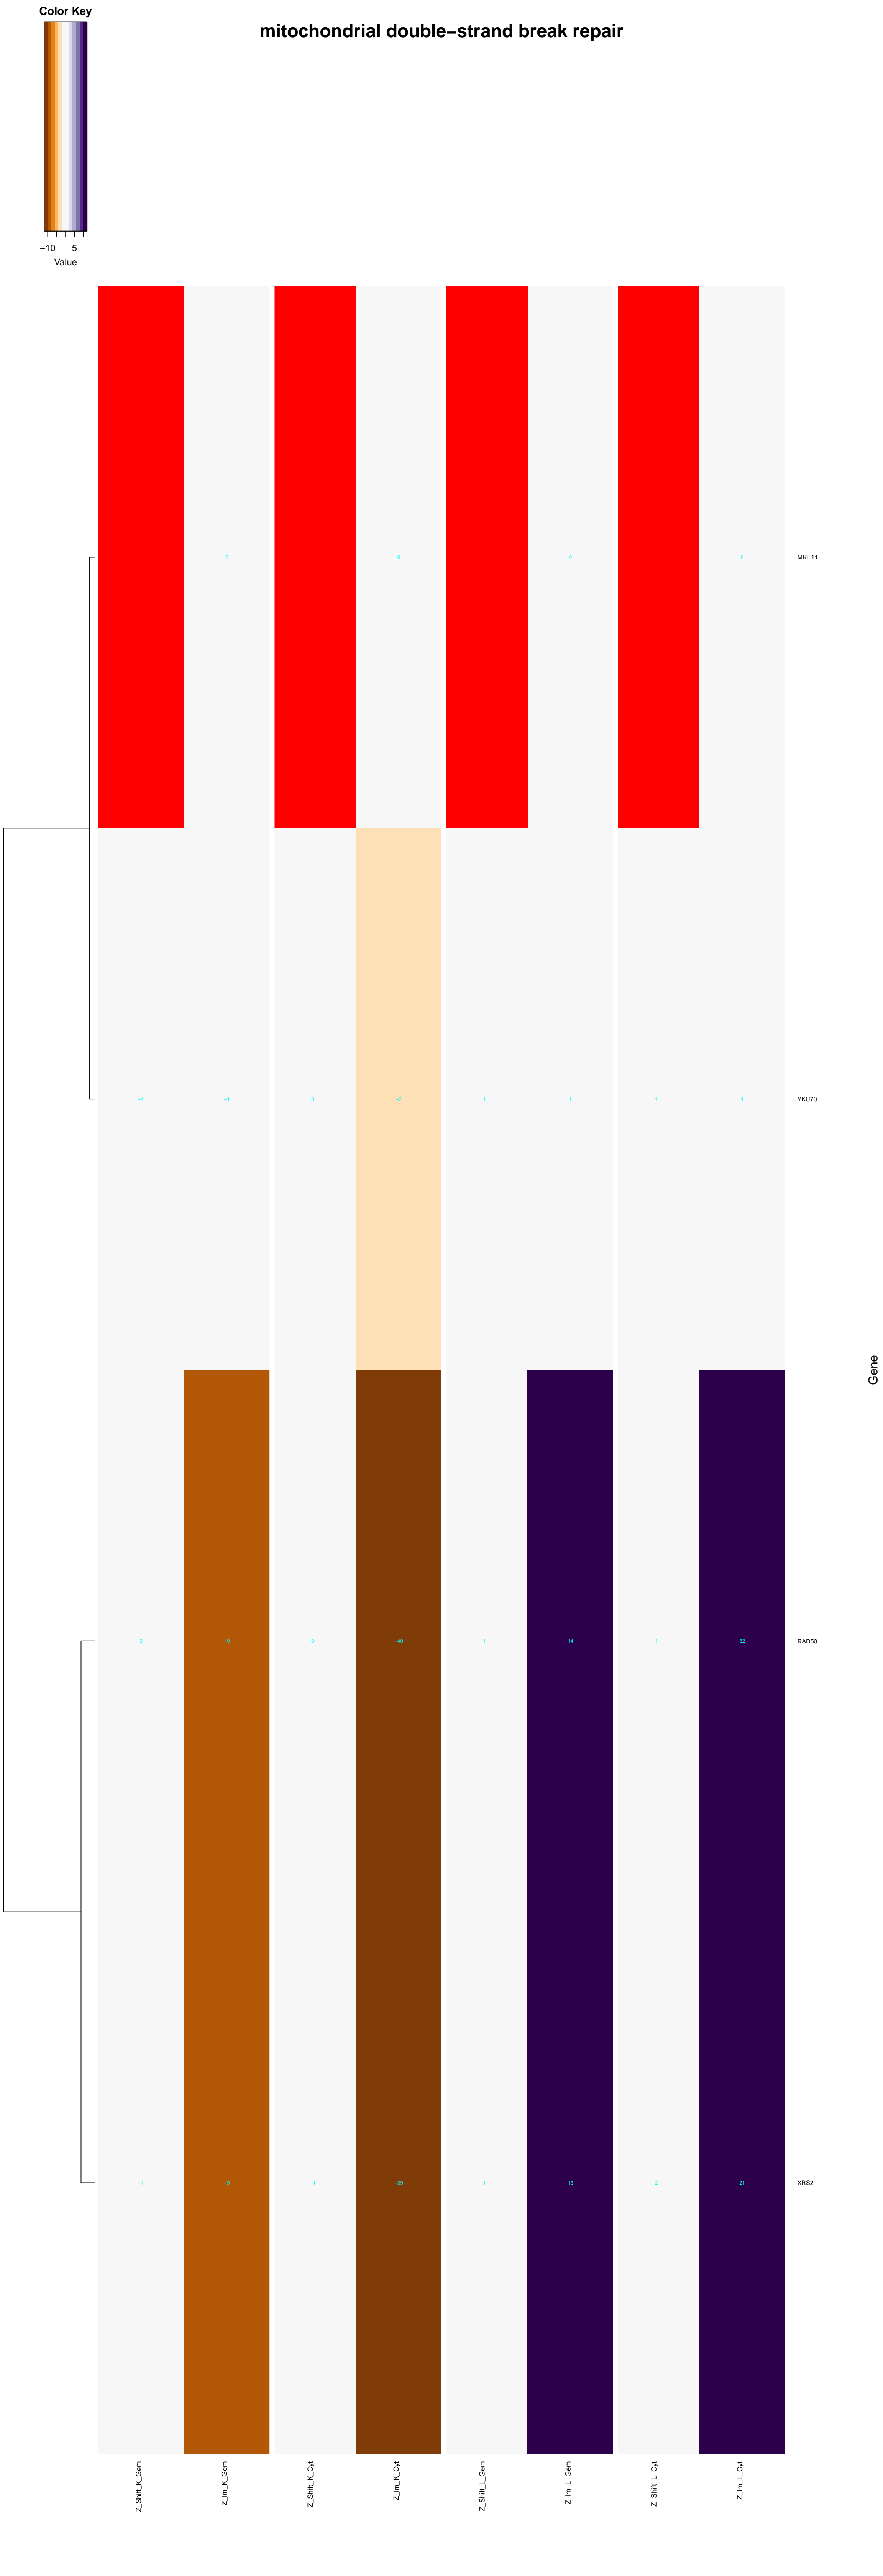

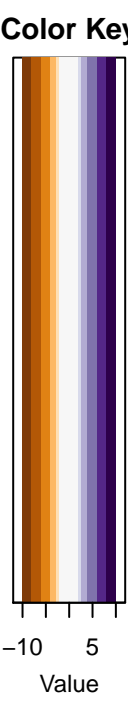

DNA dealkylation involved in DNA repair

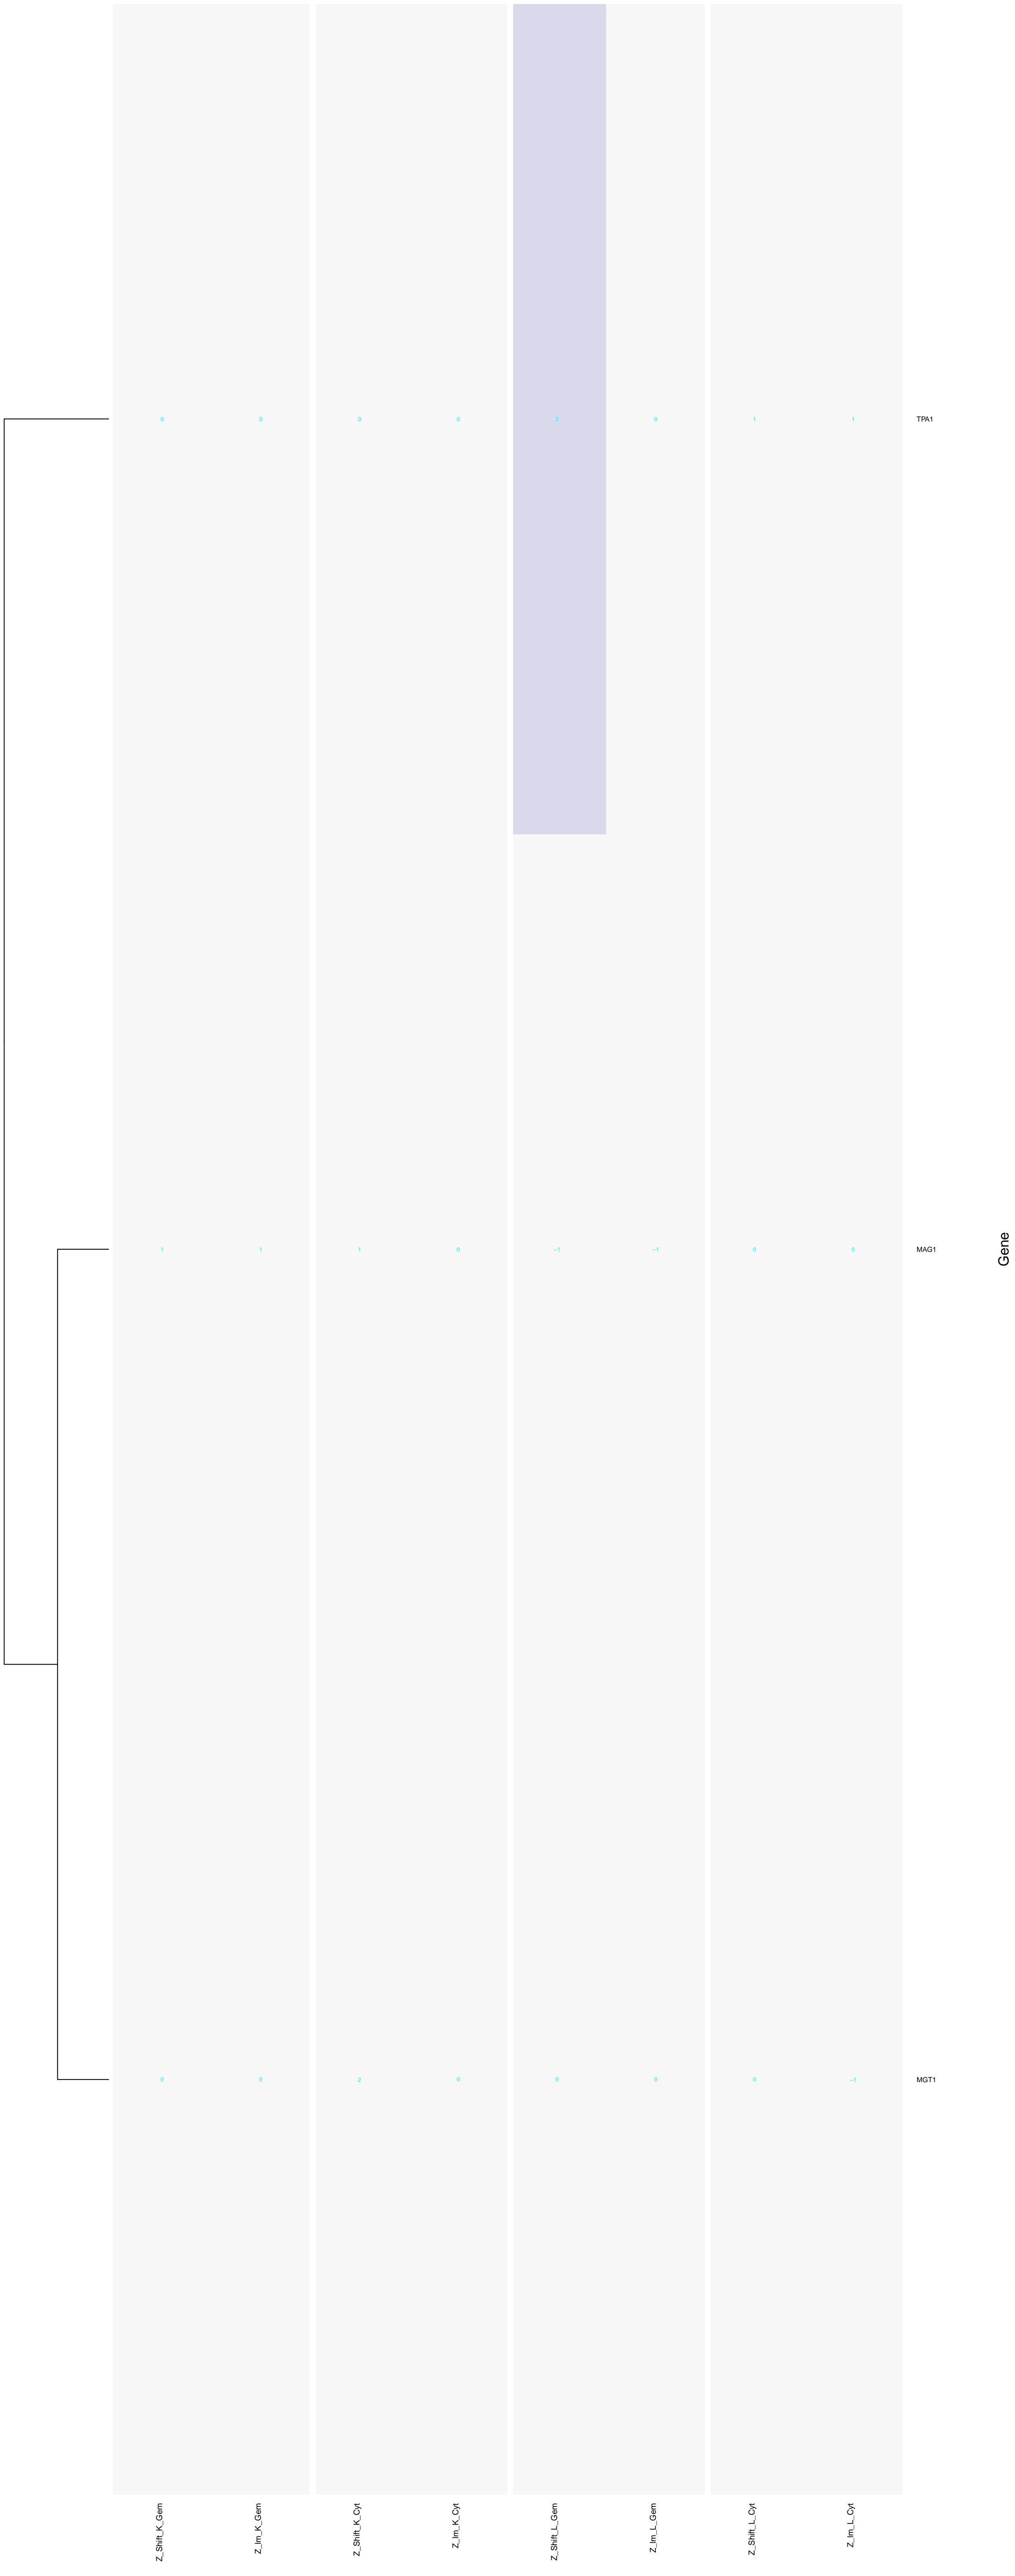

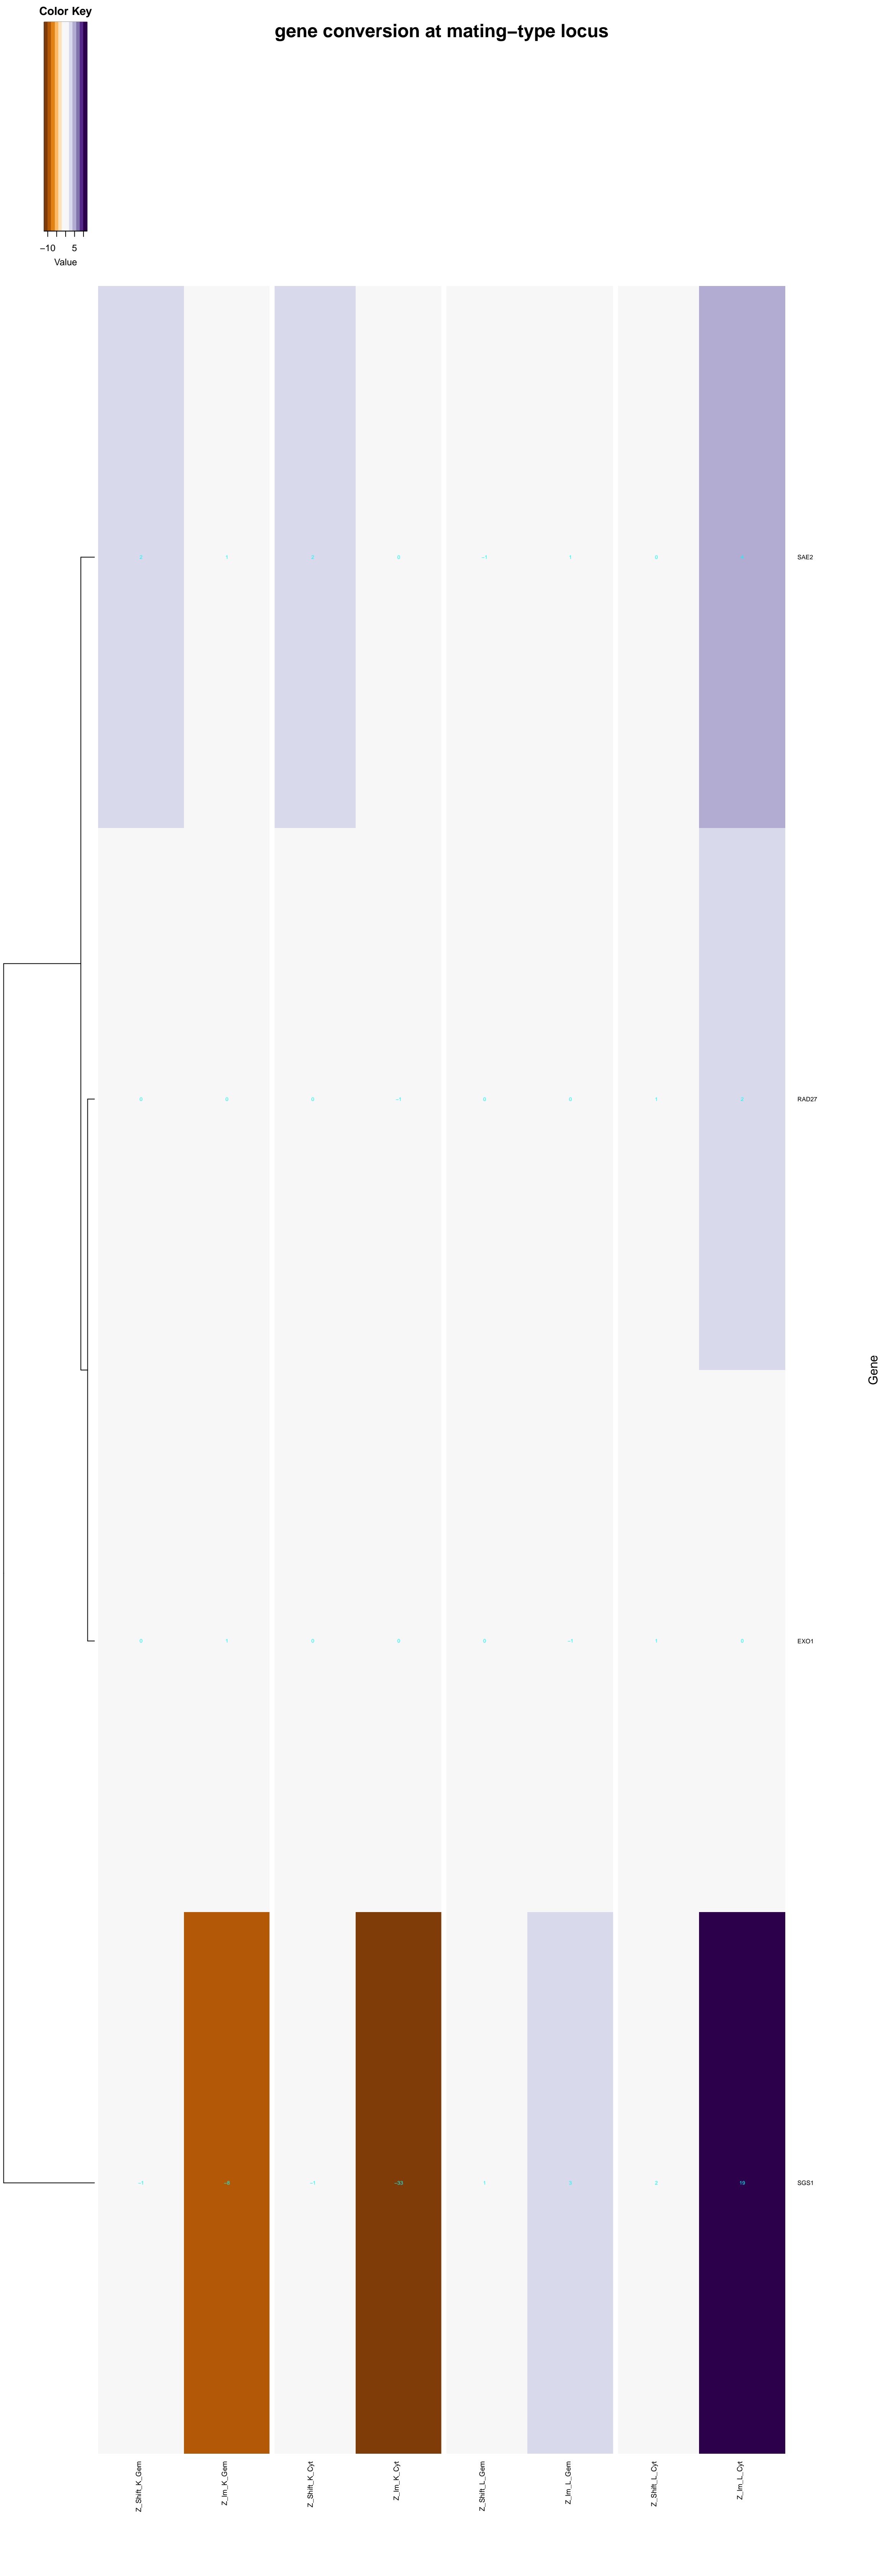

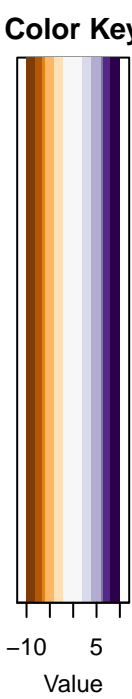

meiotic gene conversion

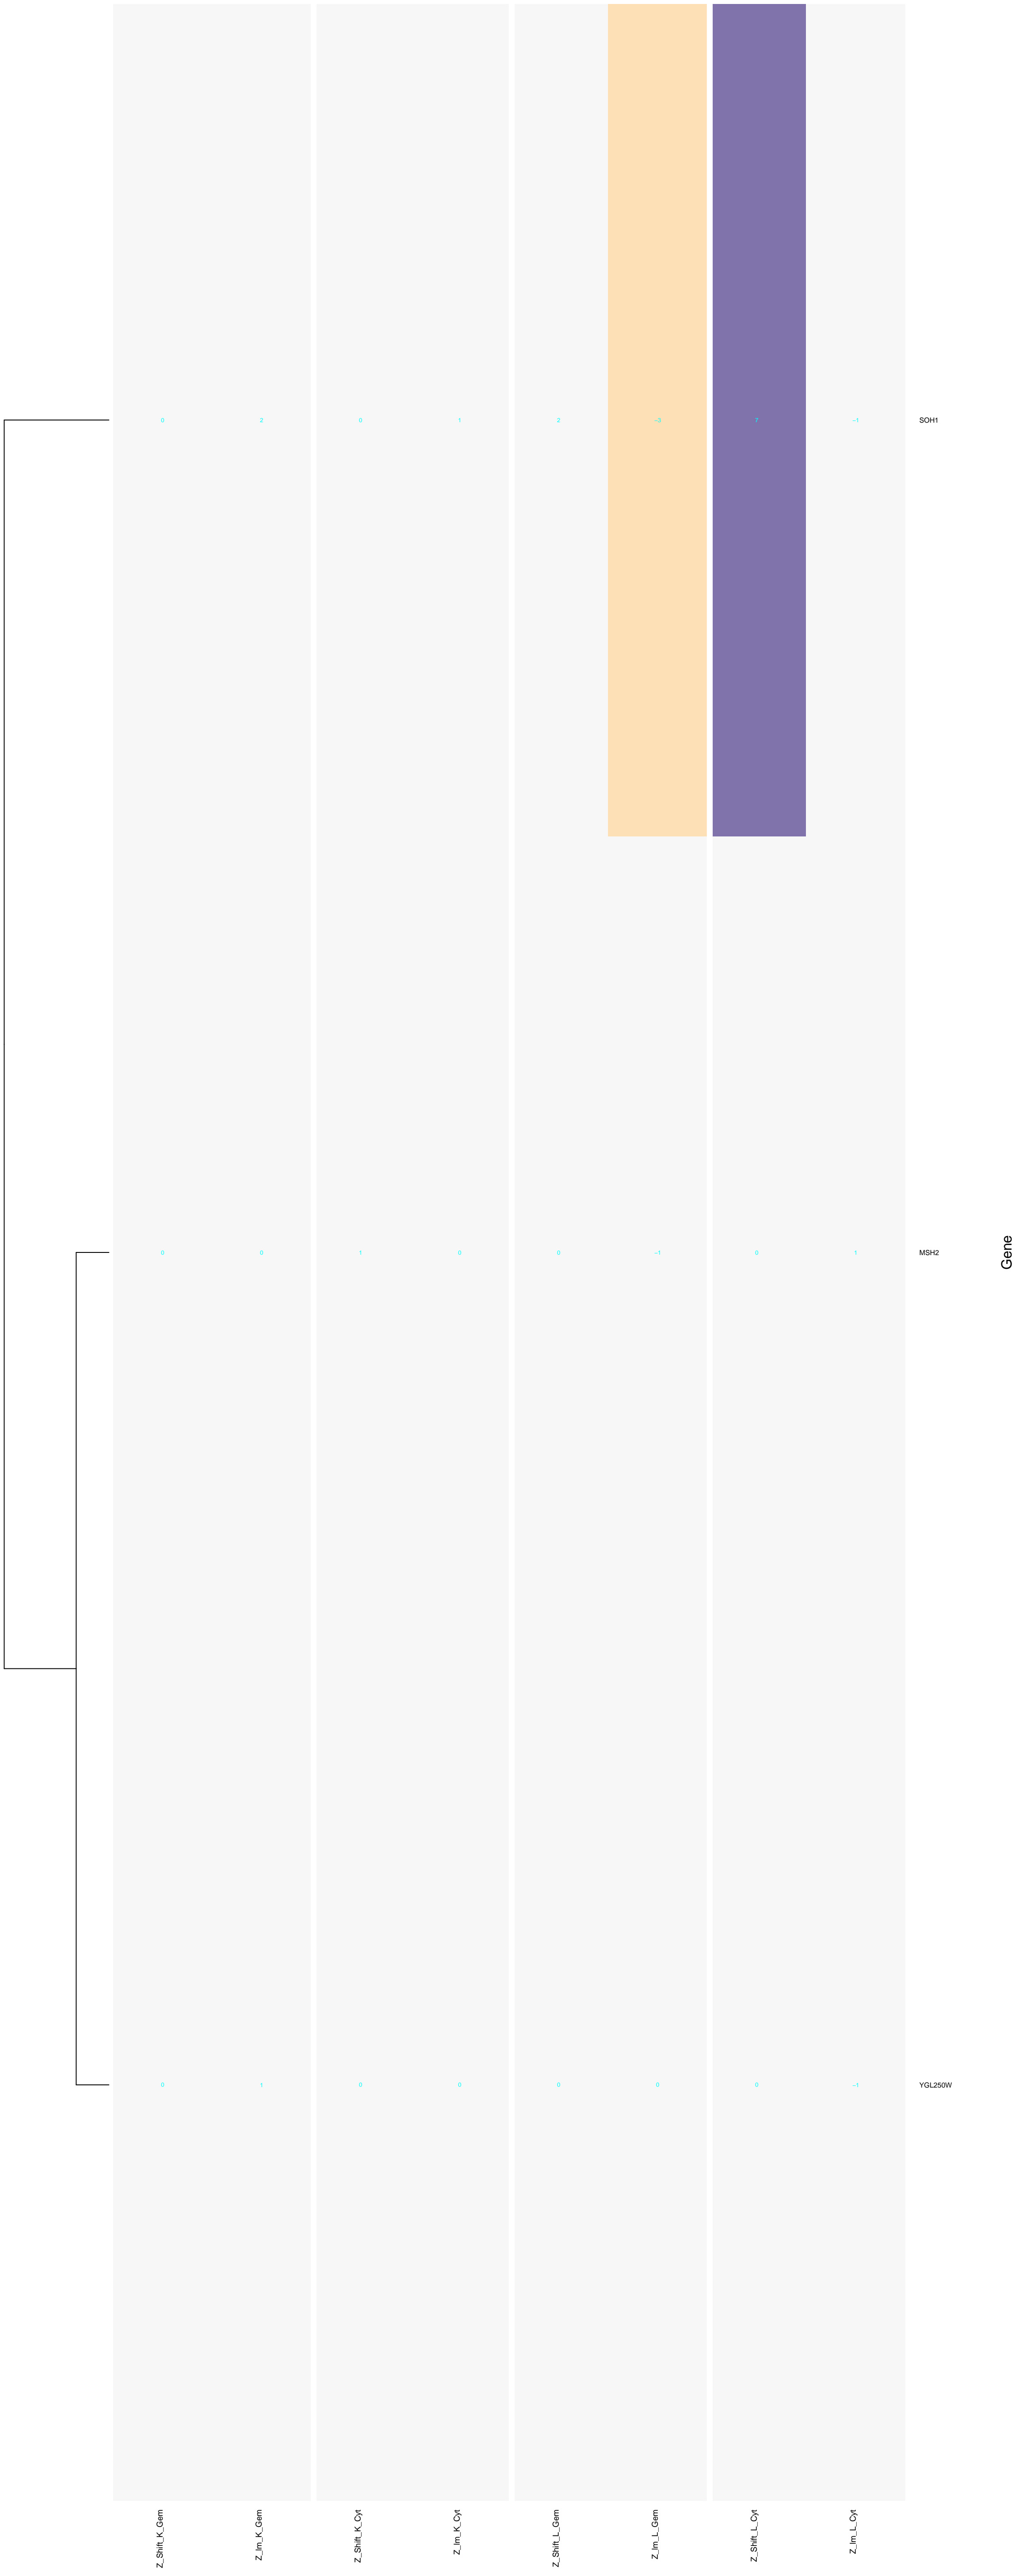



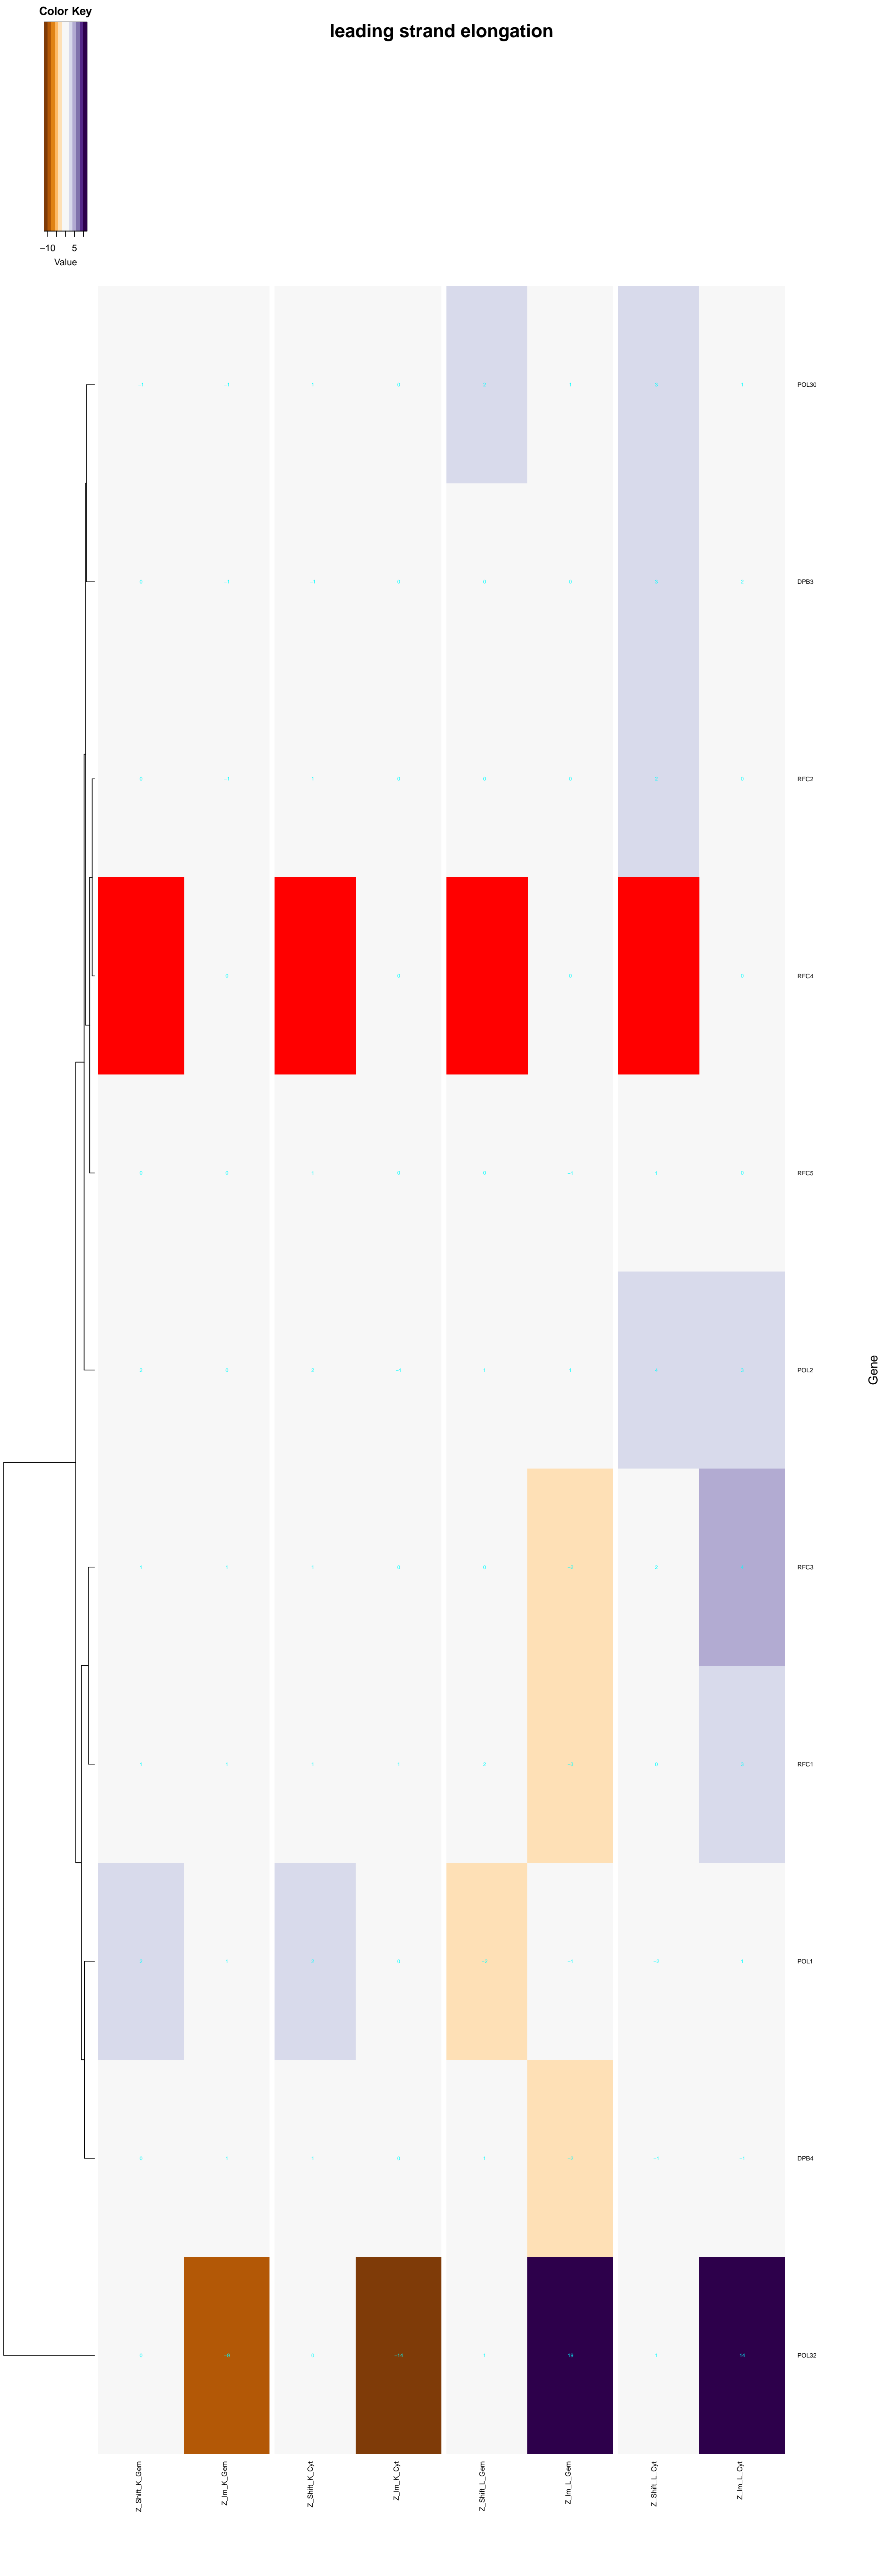

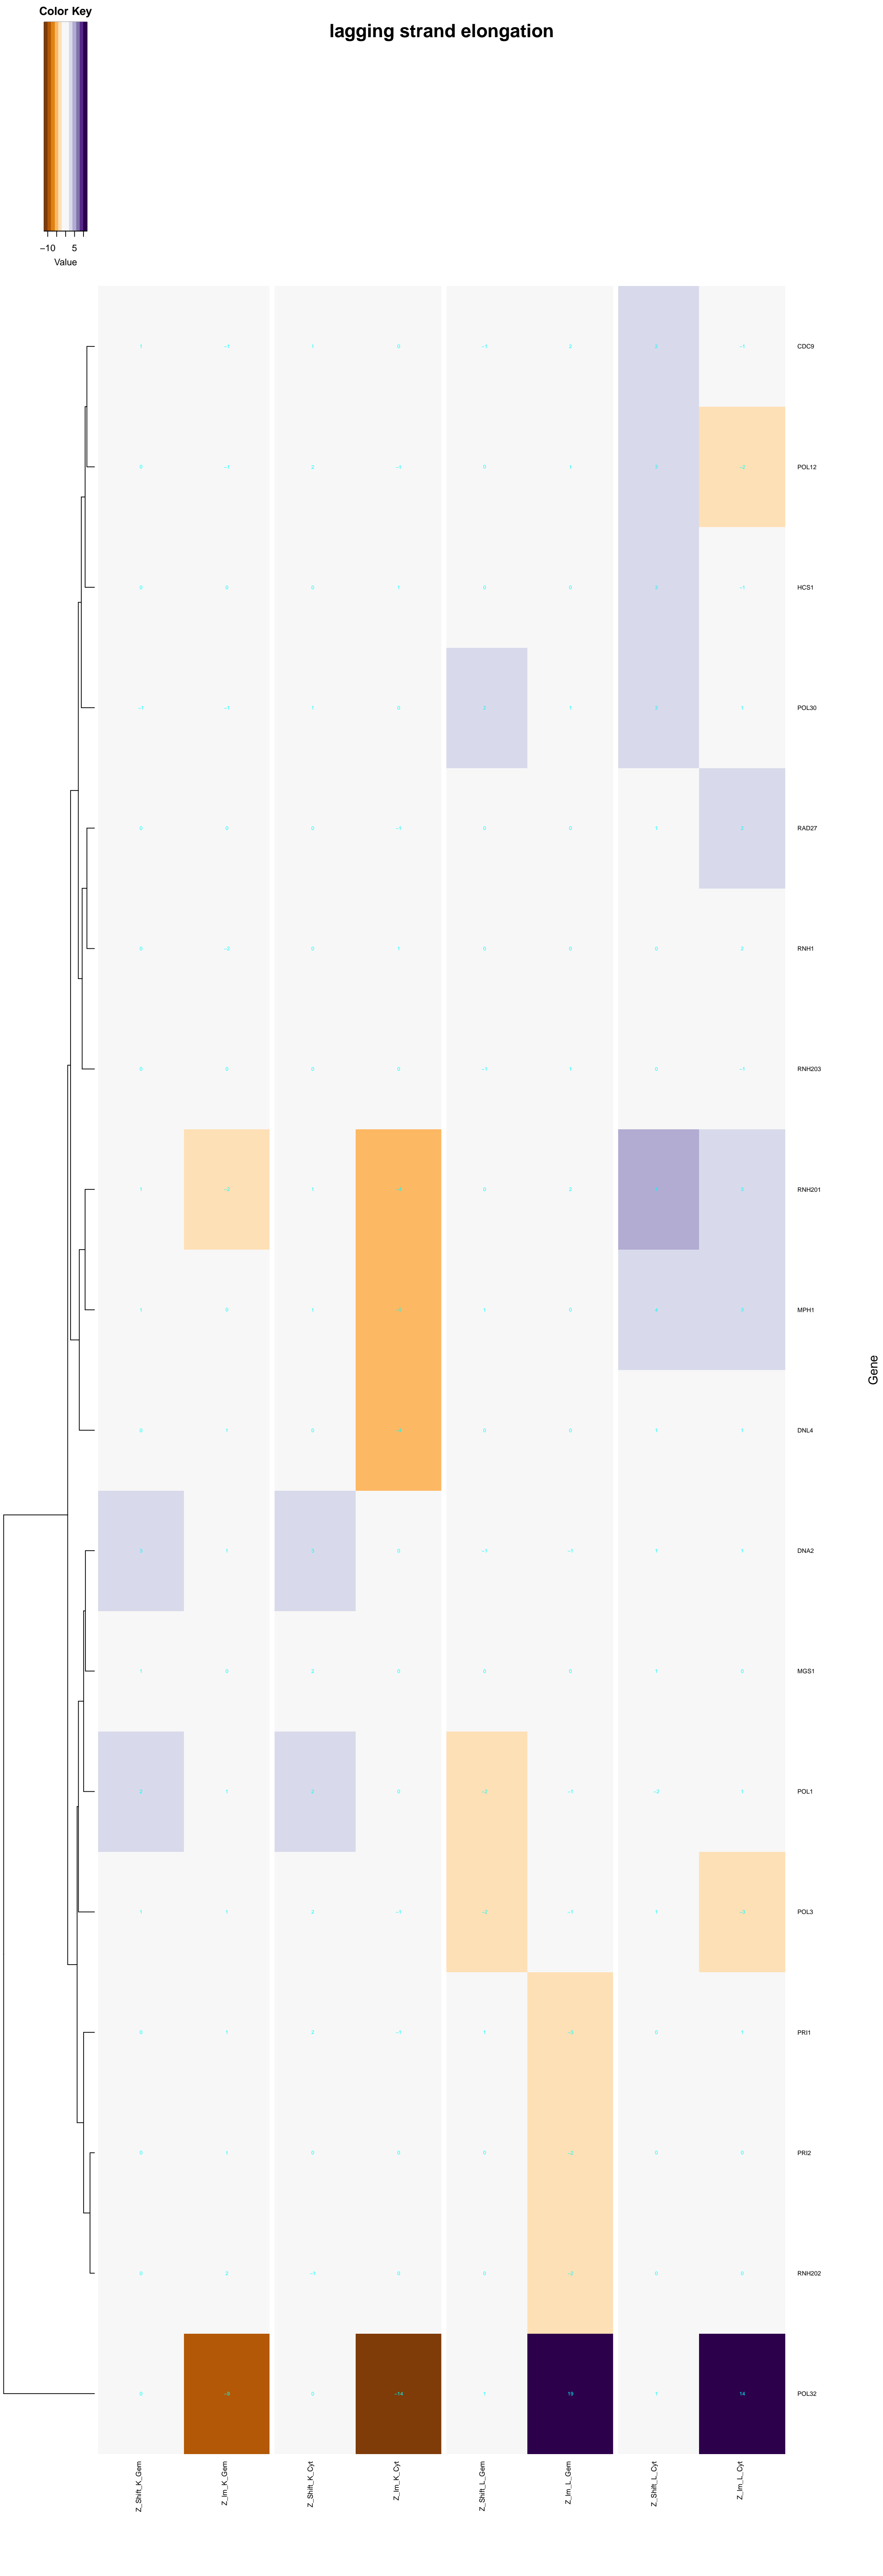

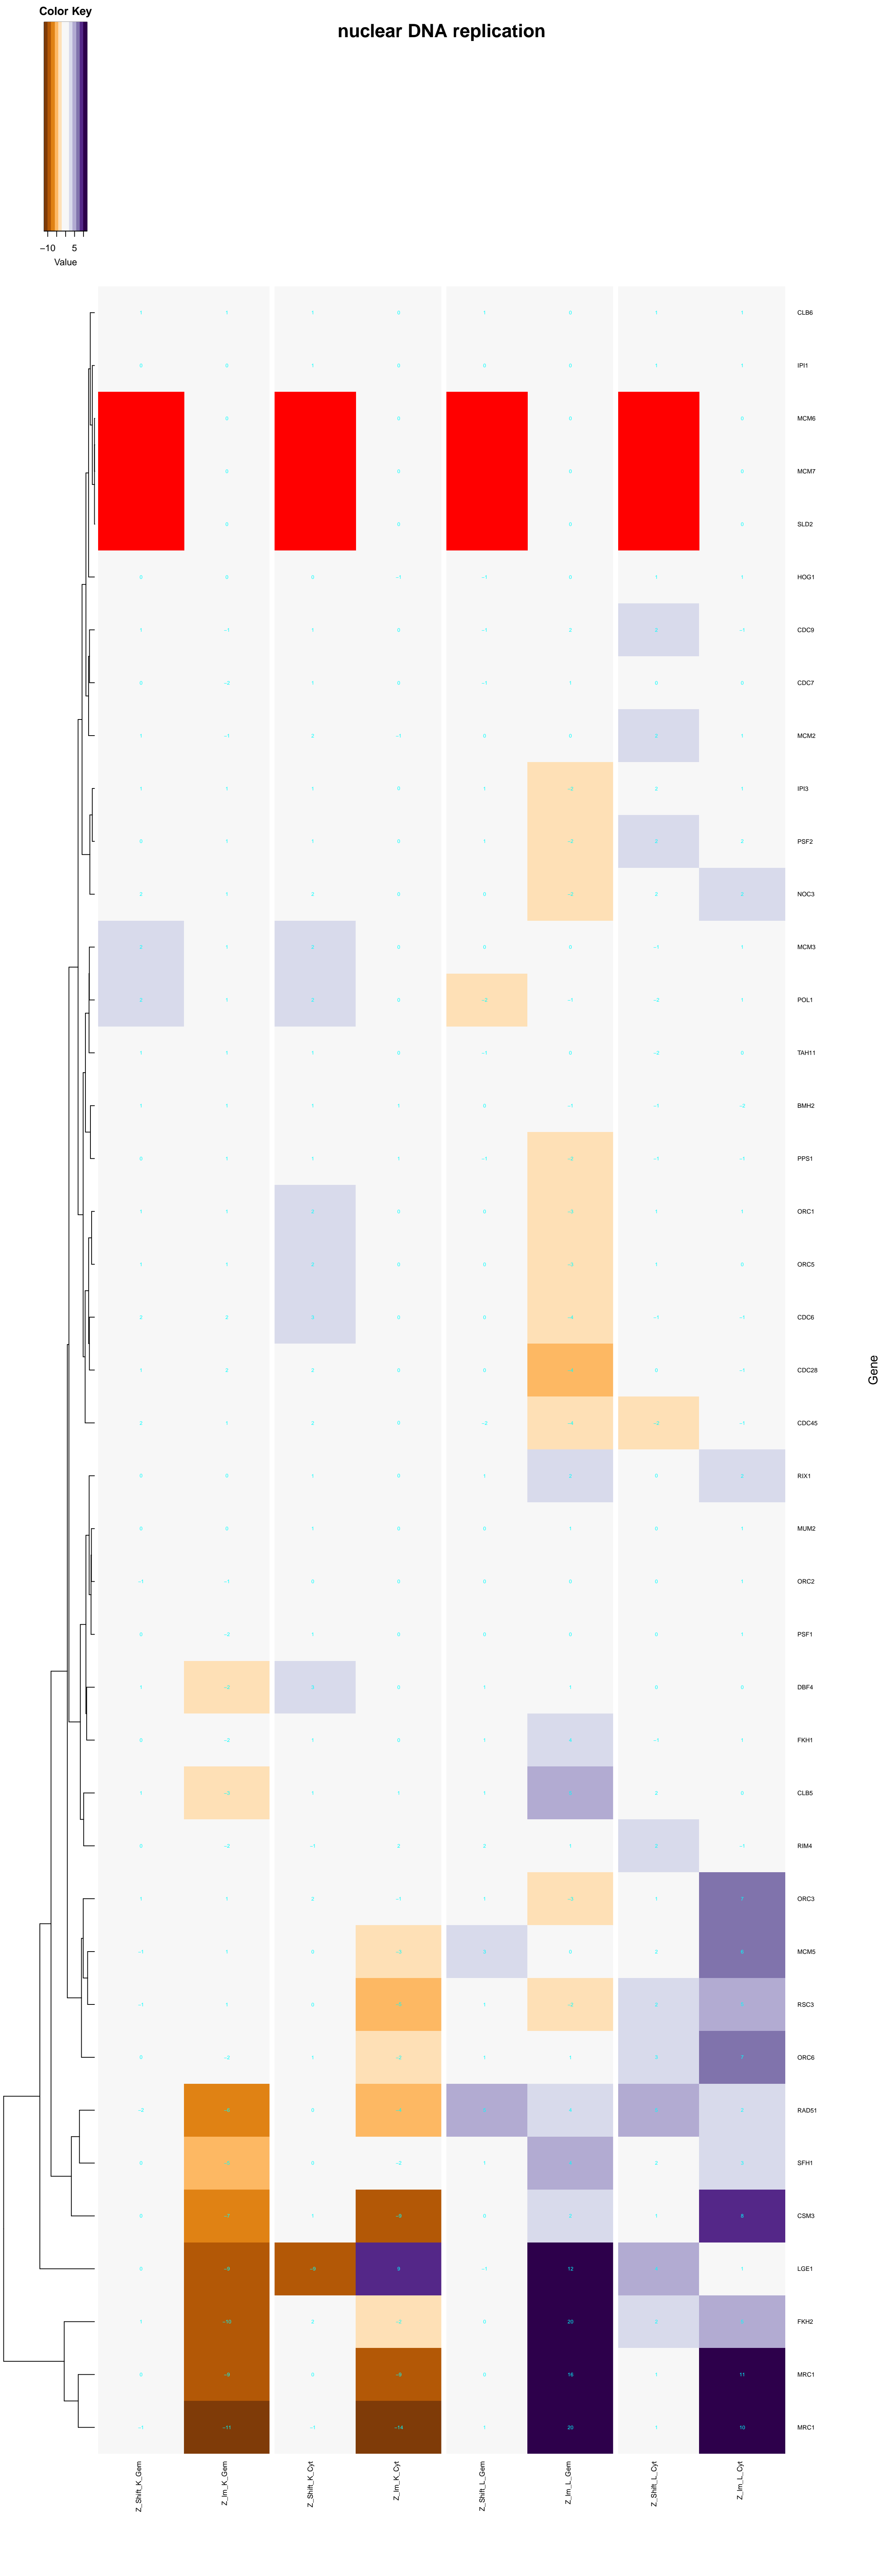



mitotic DNA replication initiation



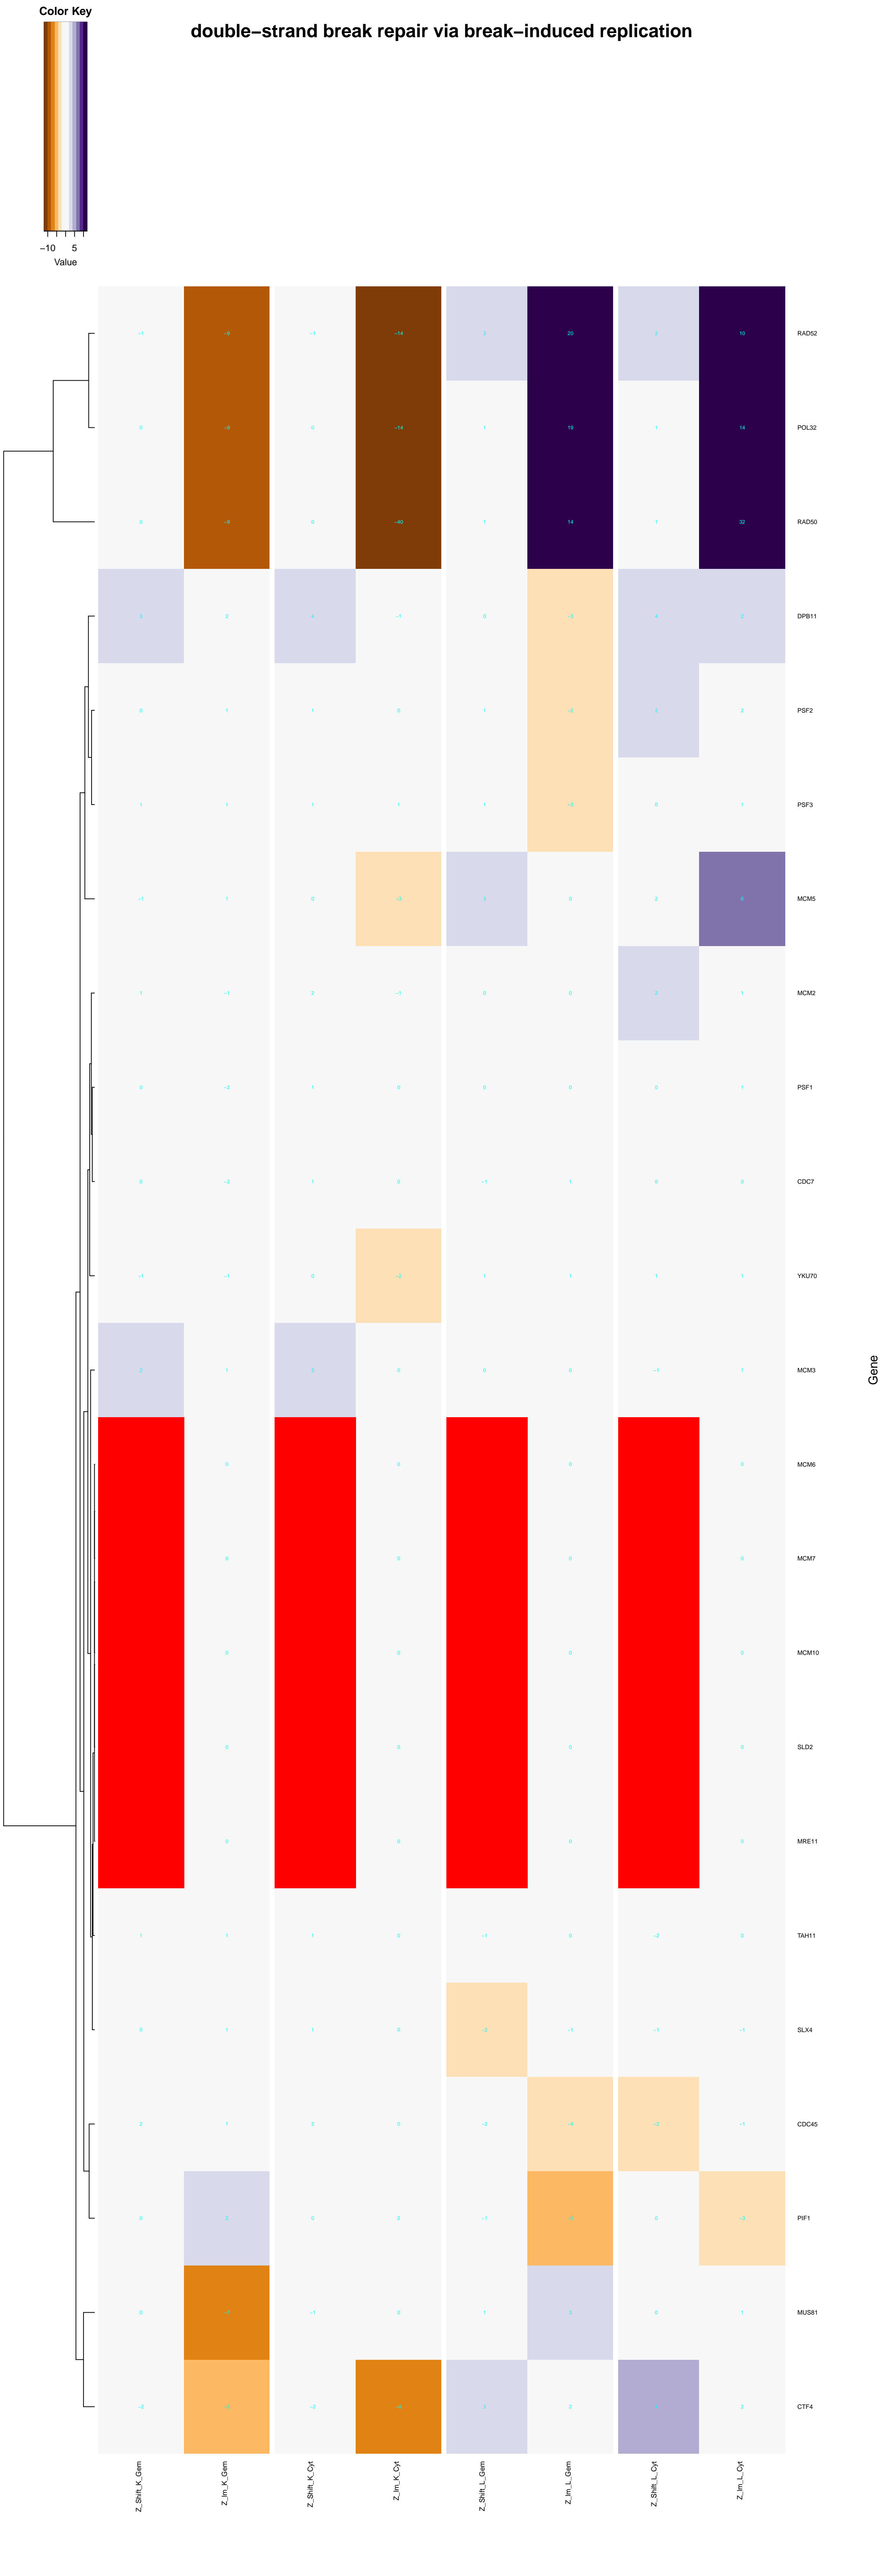

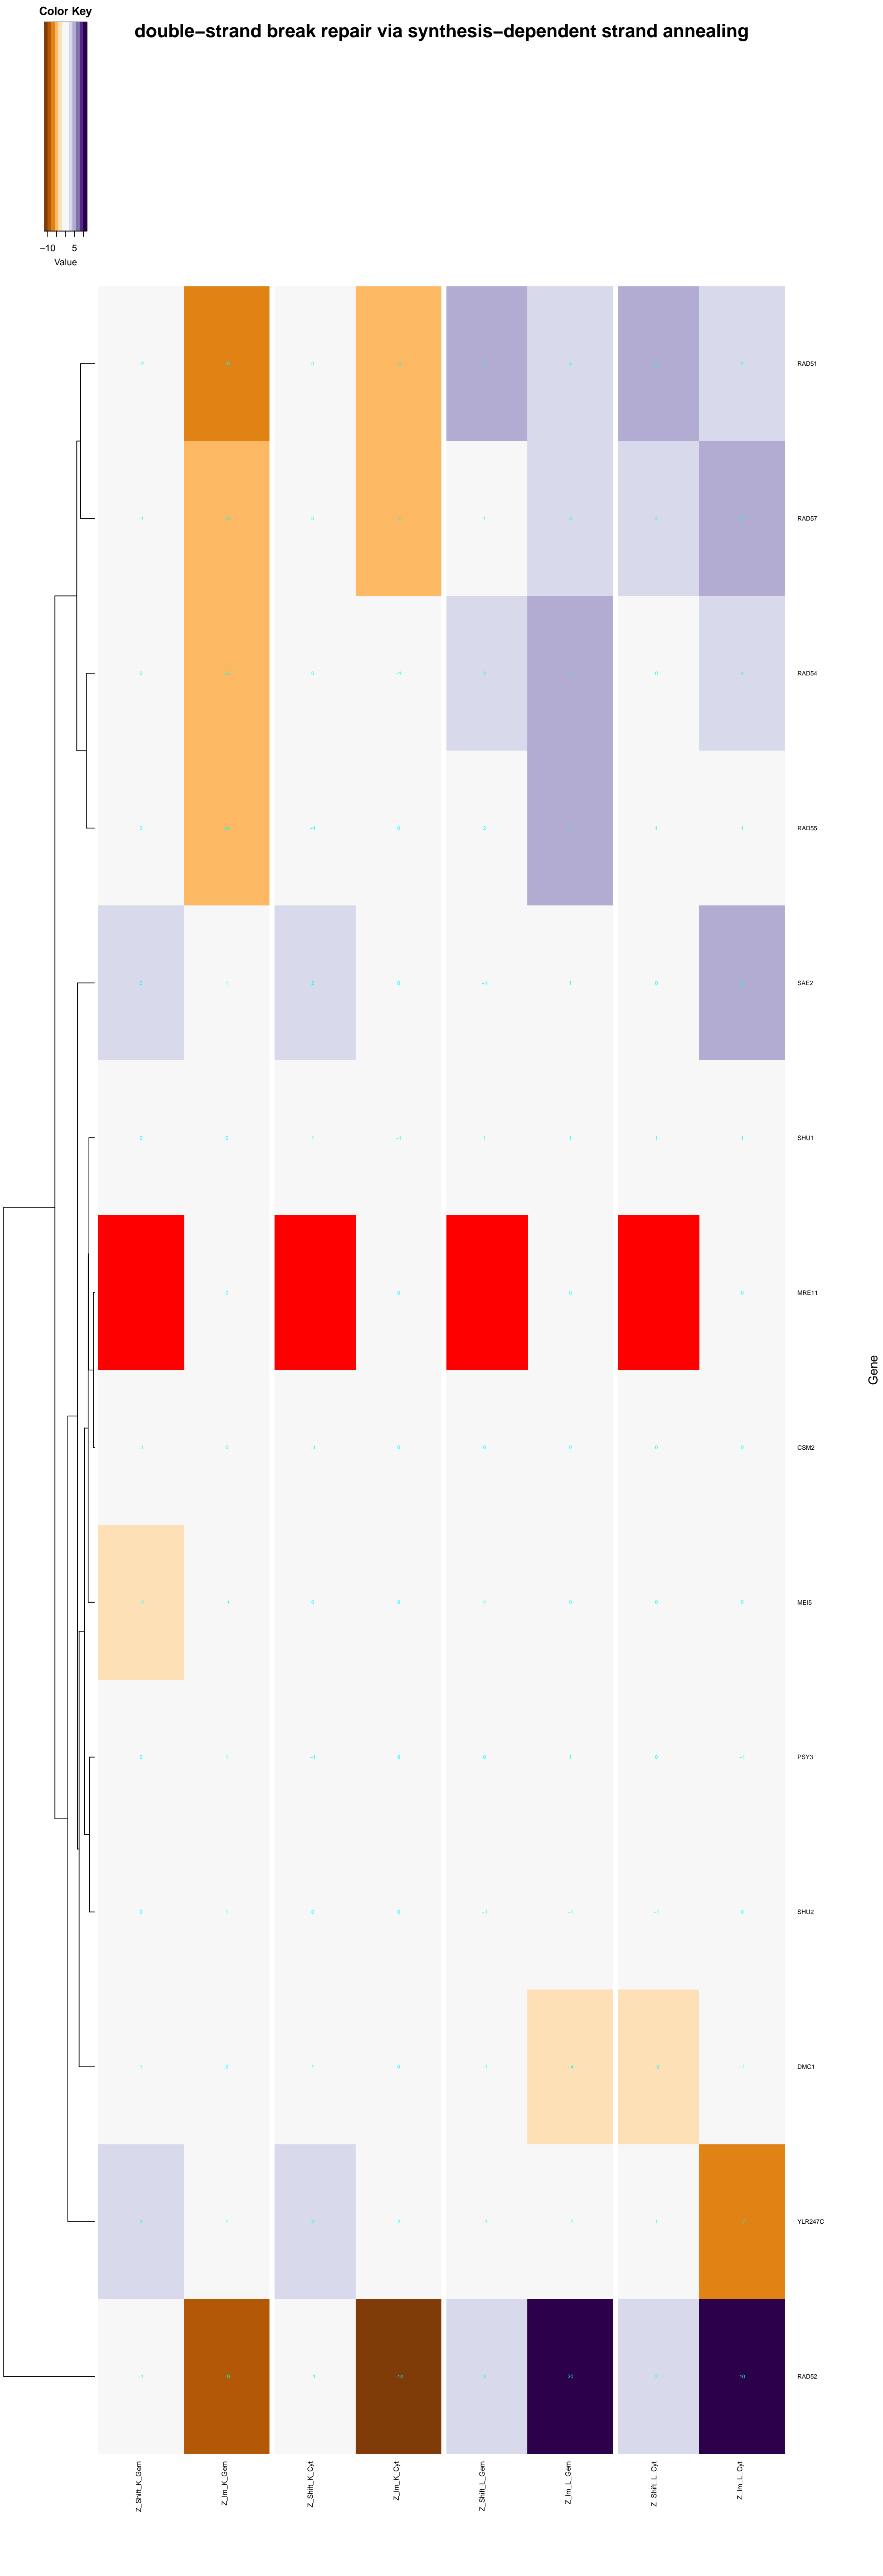

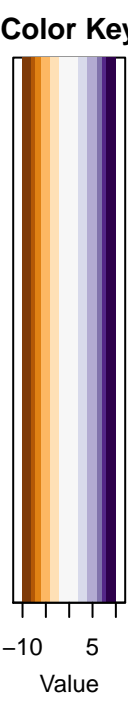

replication–born double–strand break repair via sister chromatid exchange

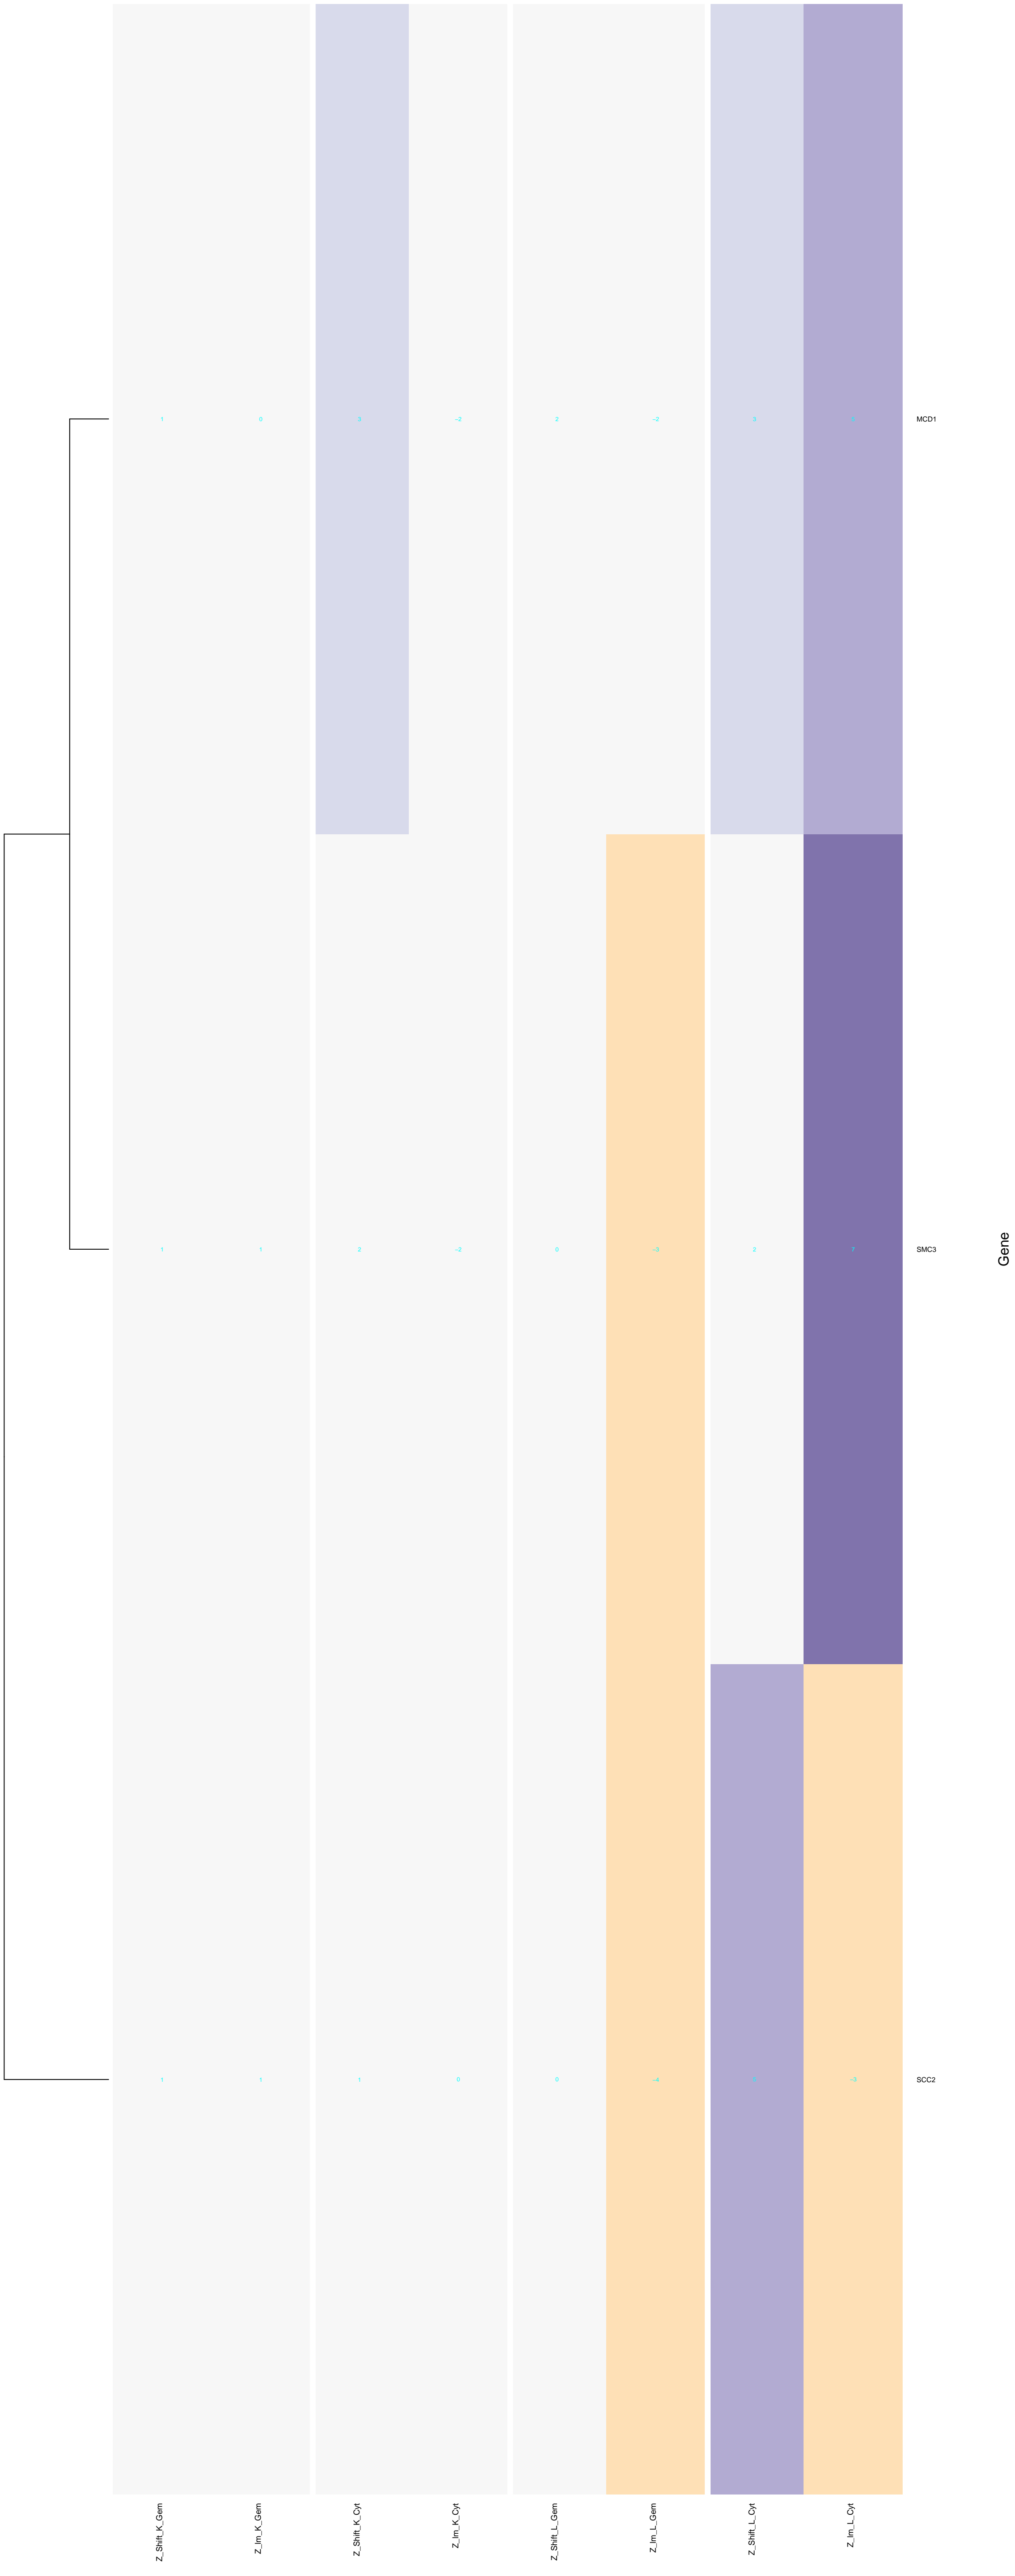

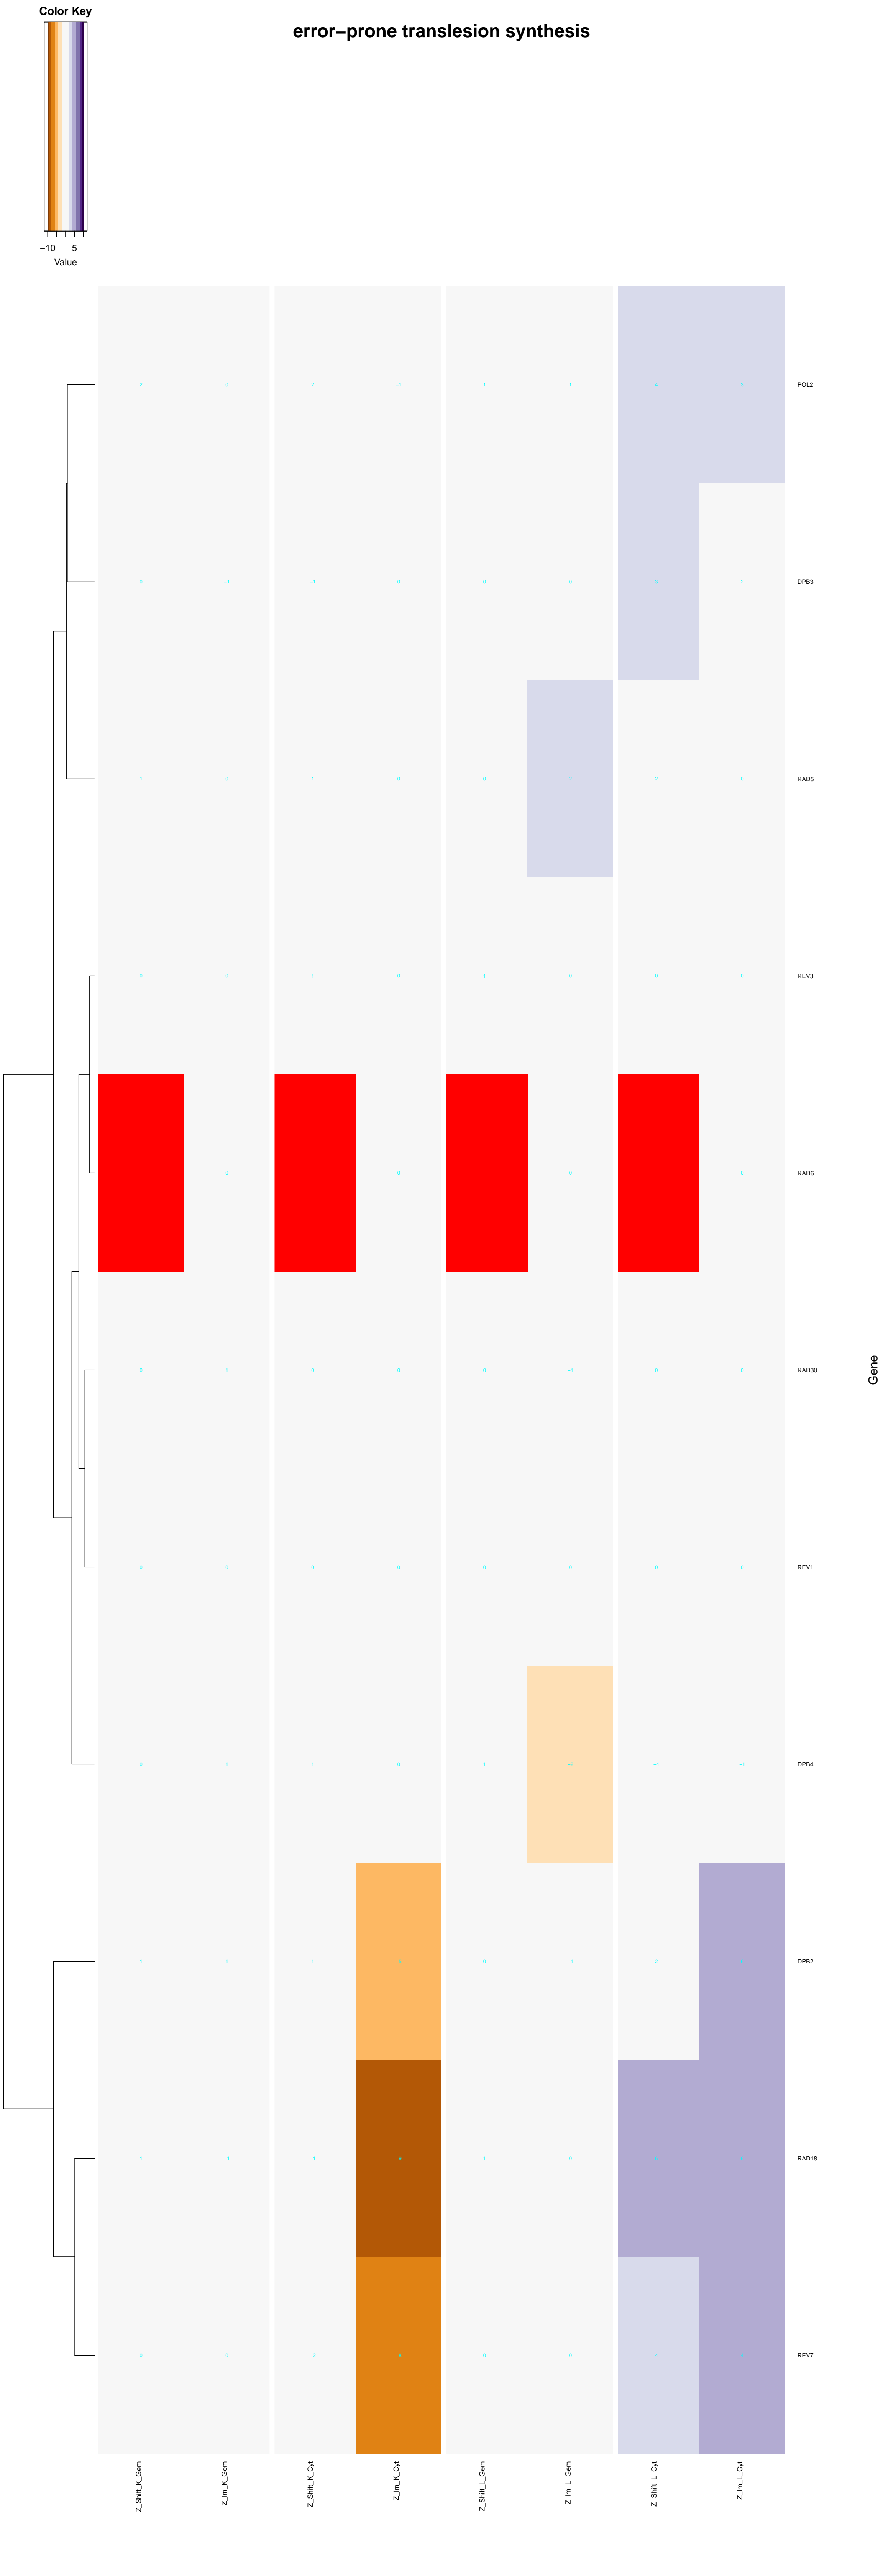



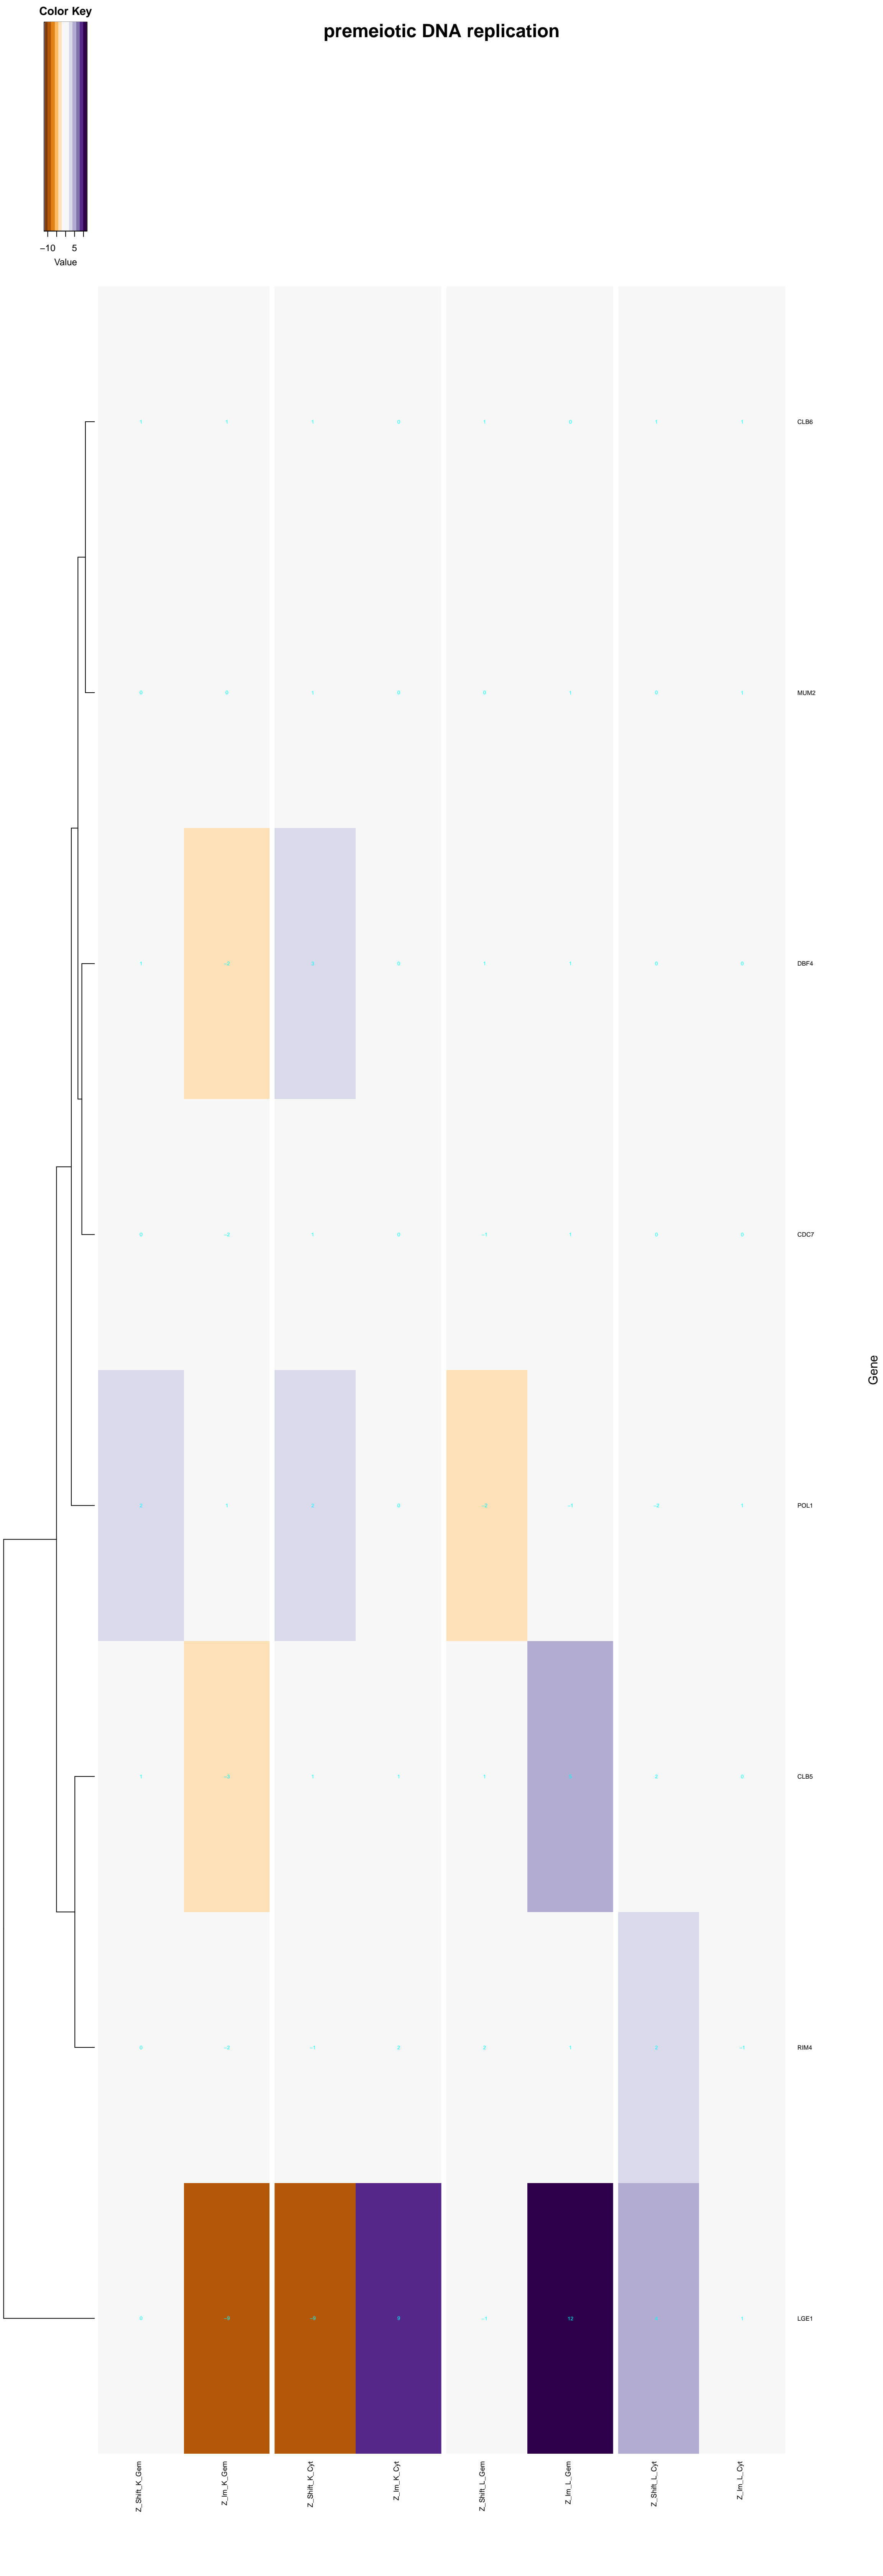

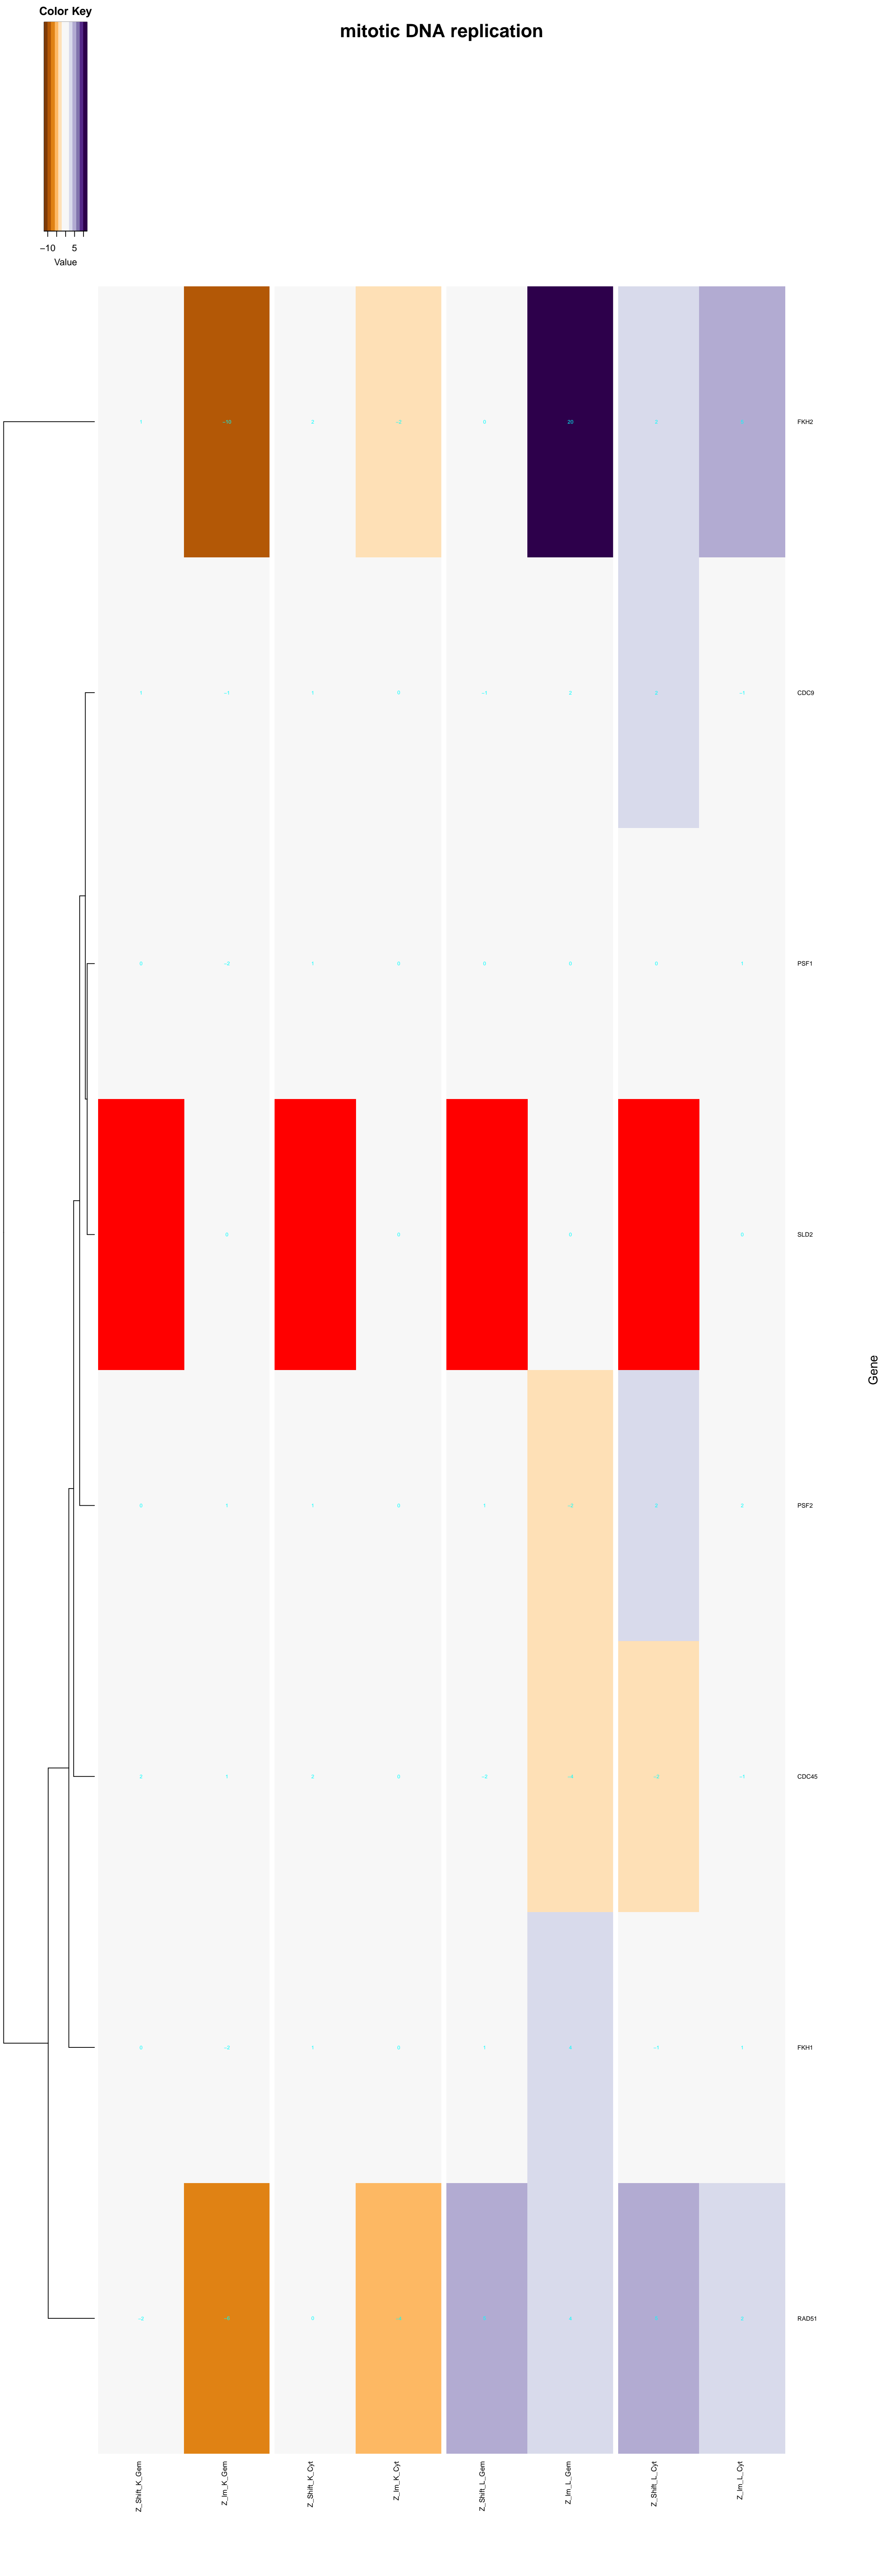

Supplement: s1 [file s1]
