# Supplementary material for: A Humanized Yeast Phenomic Model of Deoxycytidine Kinase to Predict Genetic Buffering of Nucleoside Analog Cytotoxicity
Source: MDPI journal article supplement (doi:10.3390/genes10100770), 2019-09-30

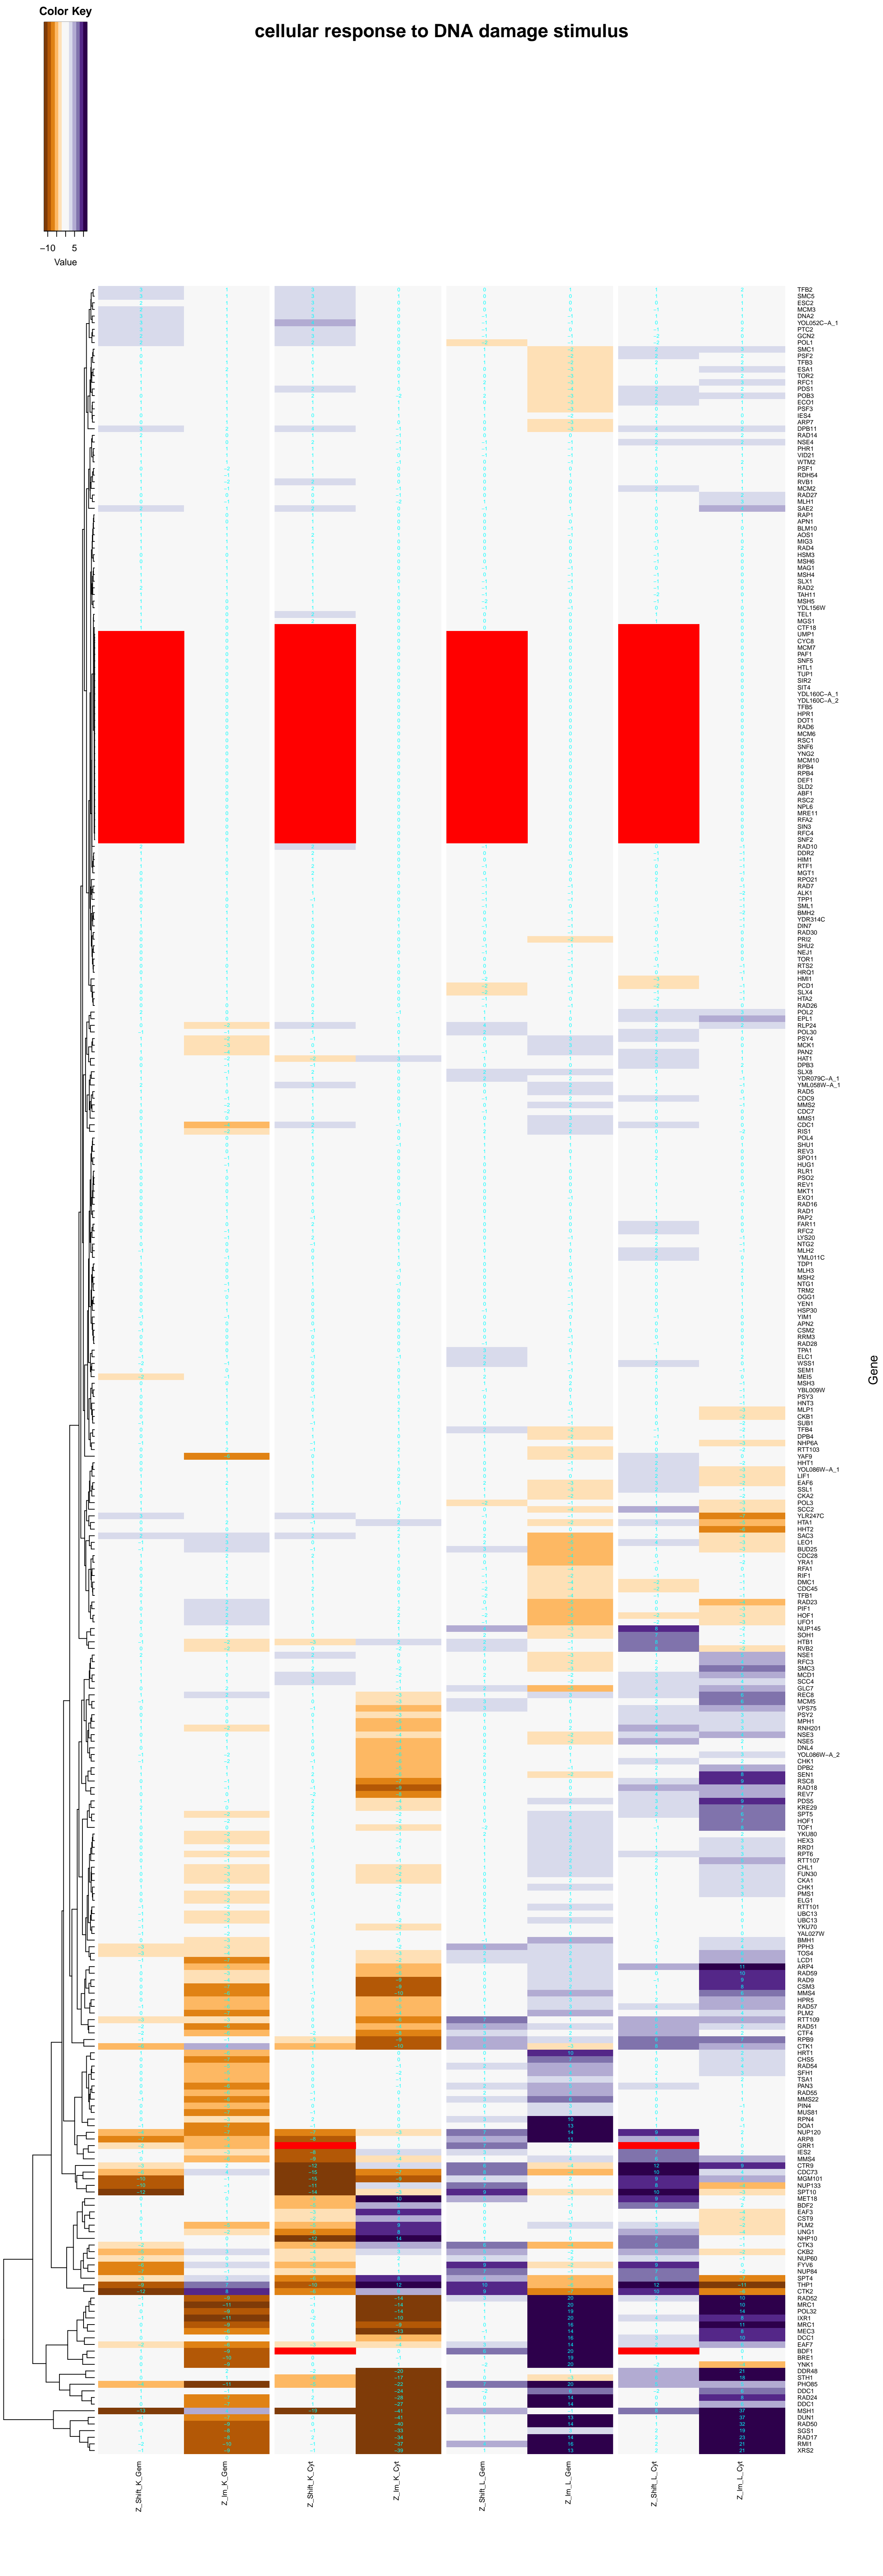

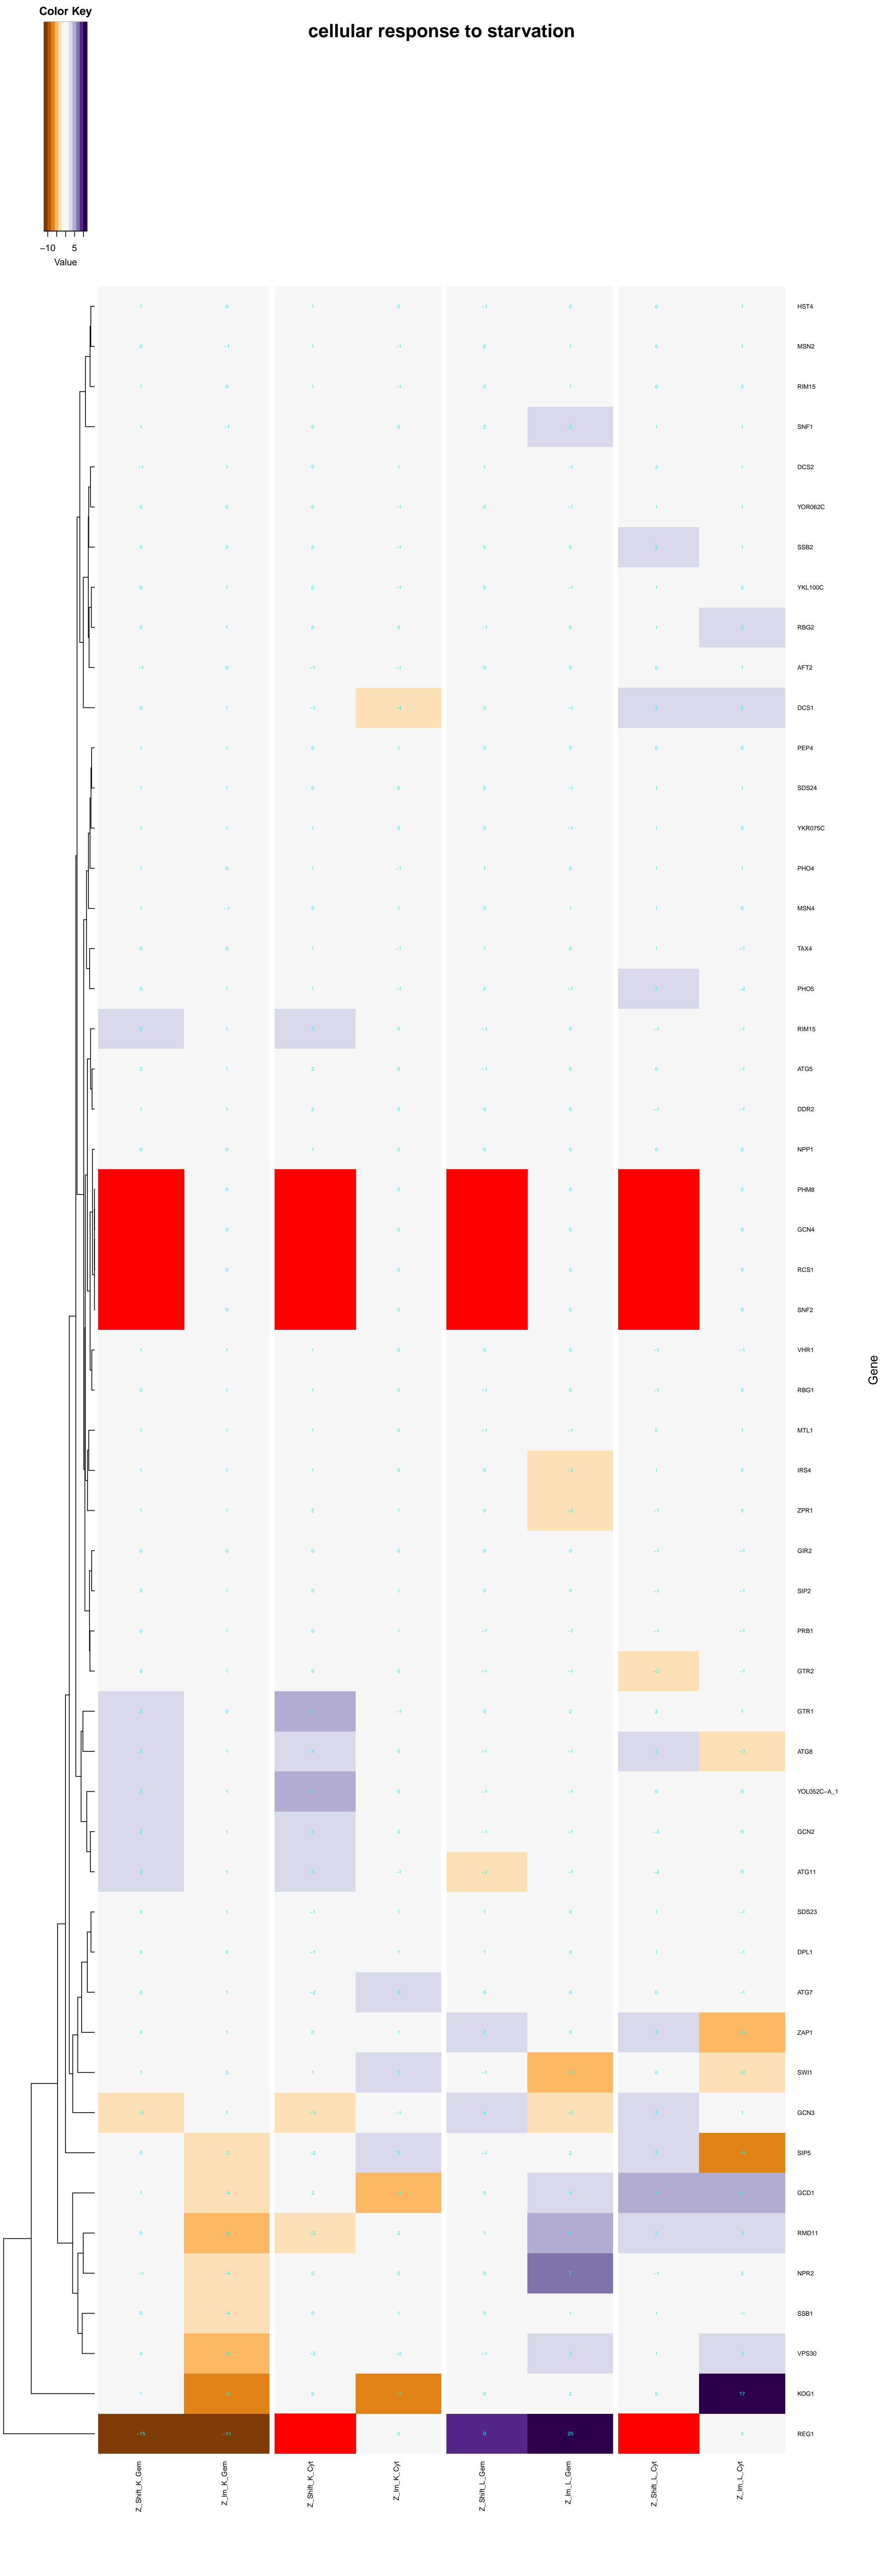

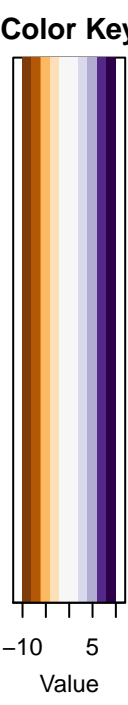

stress-activated protein kinase signaling cascade

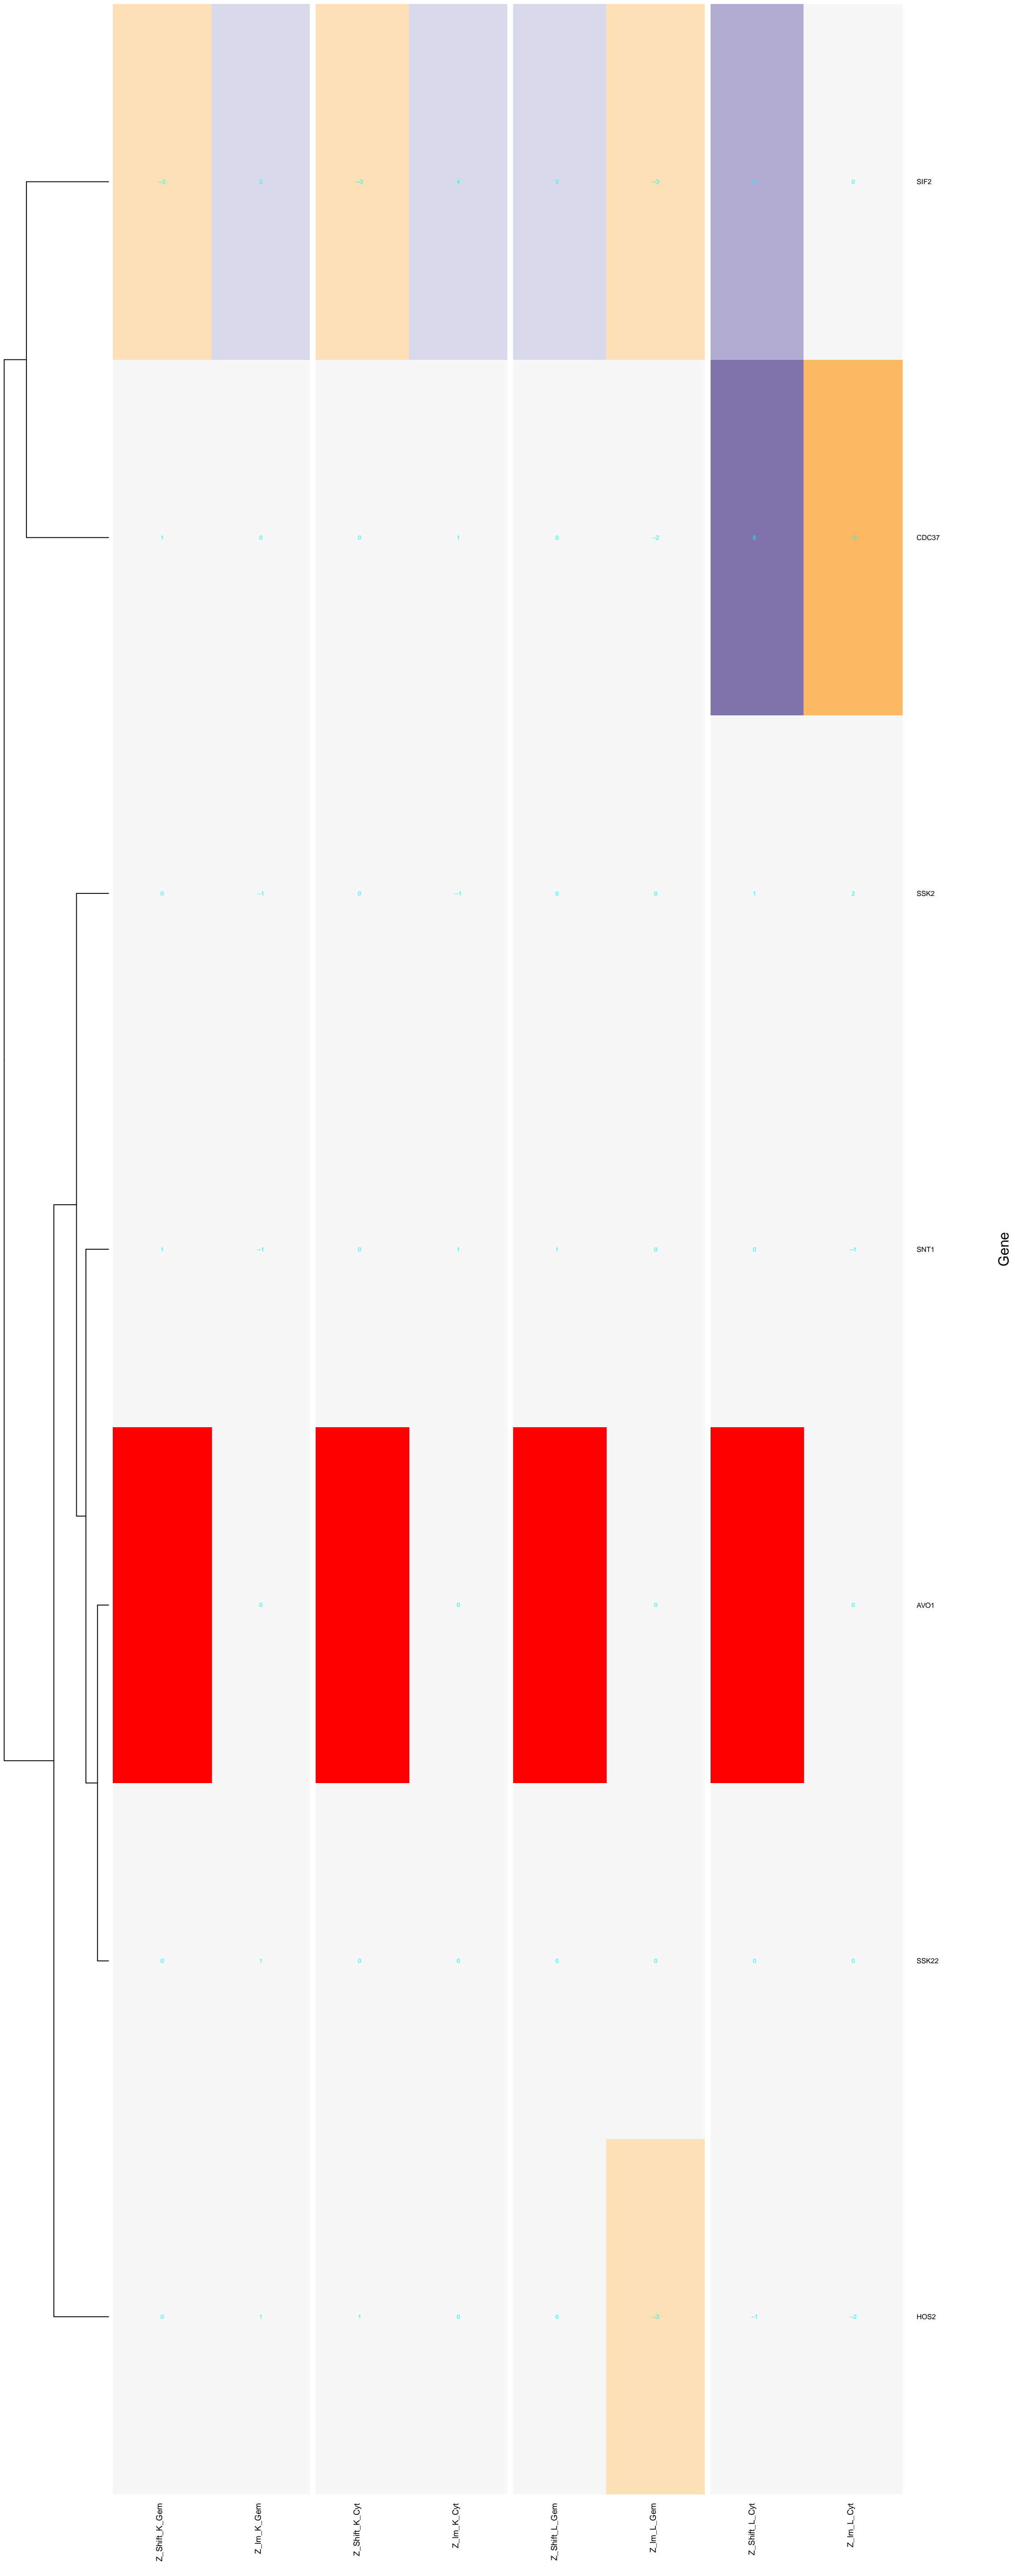



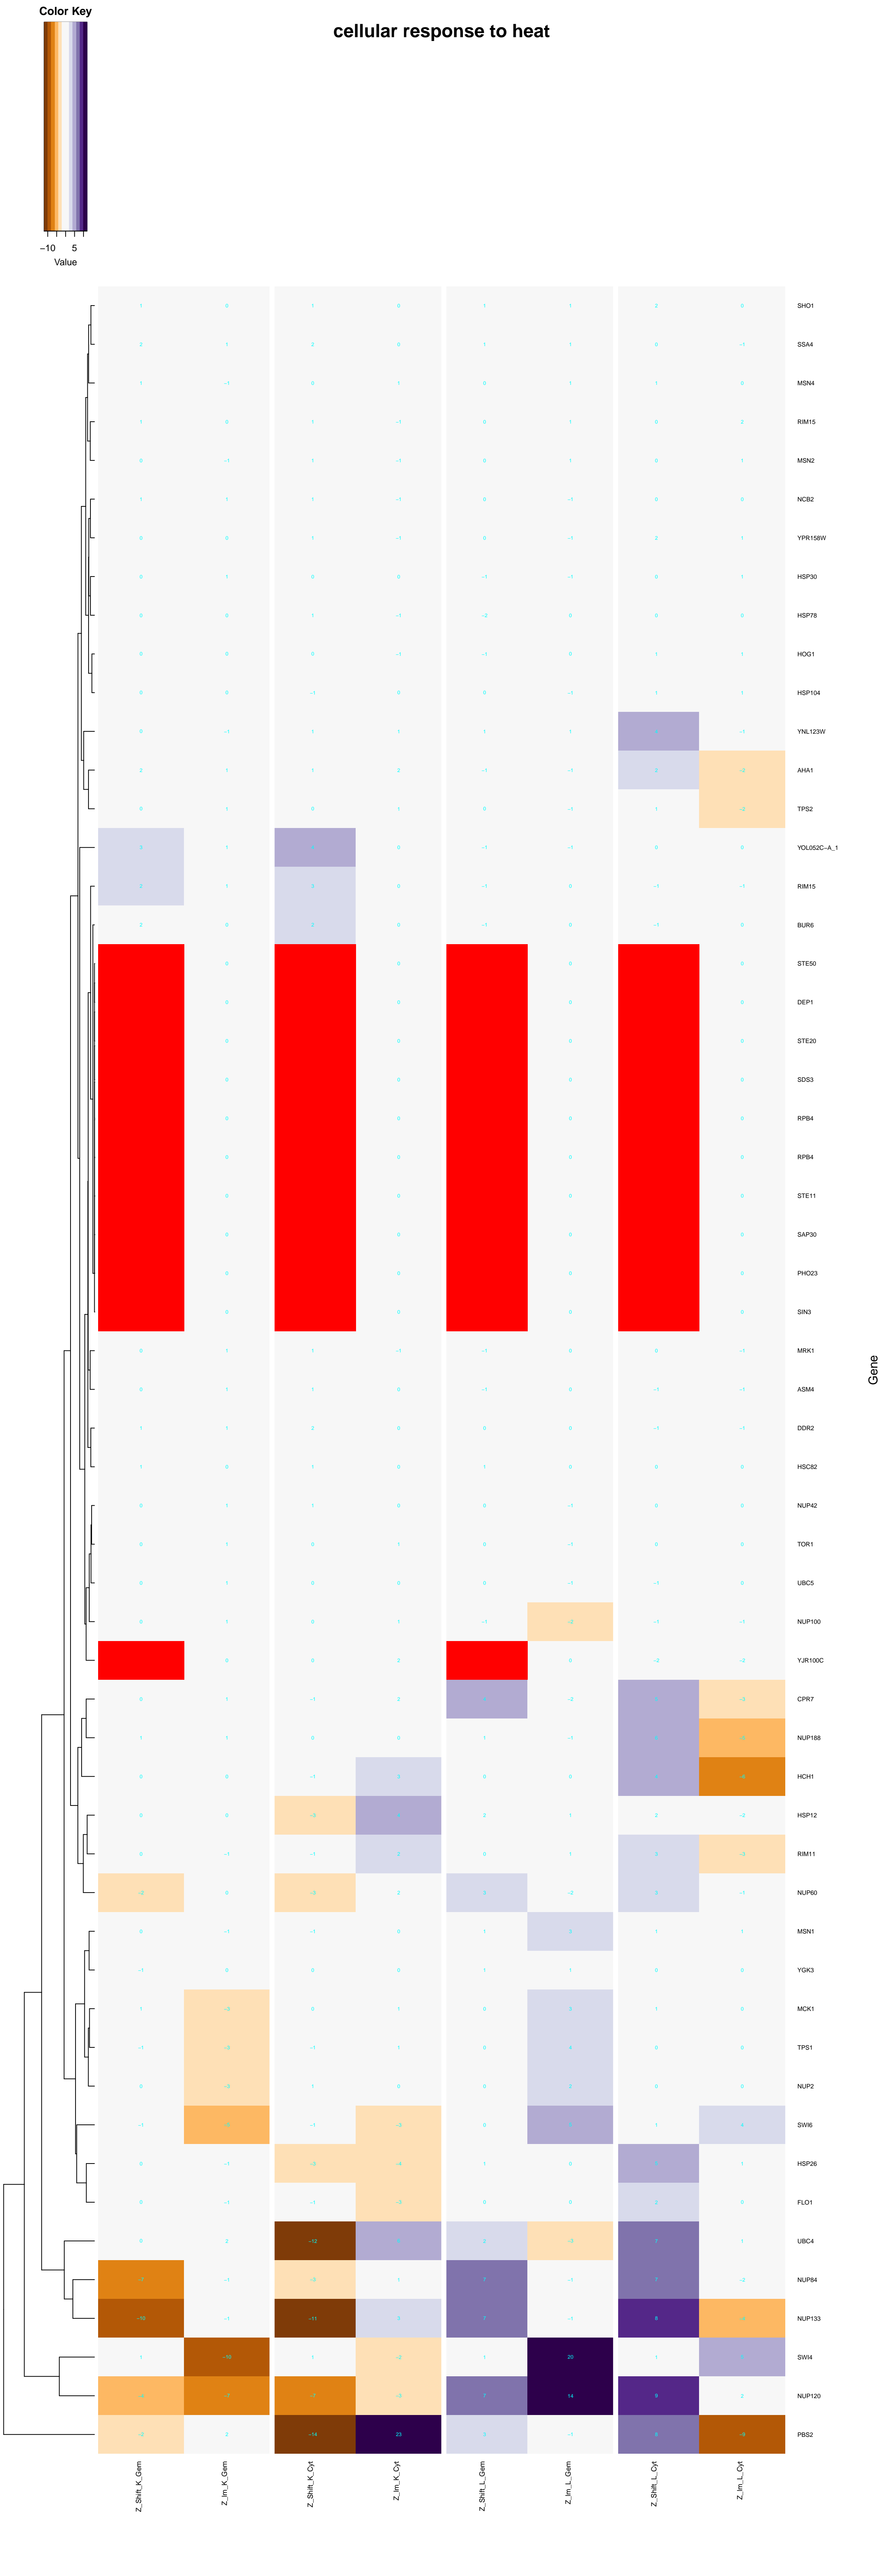

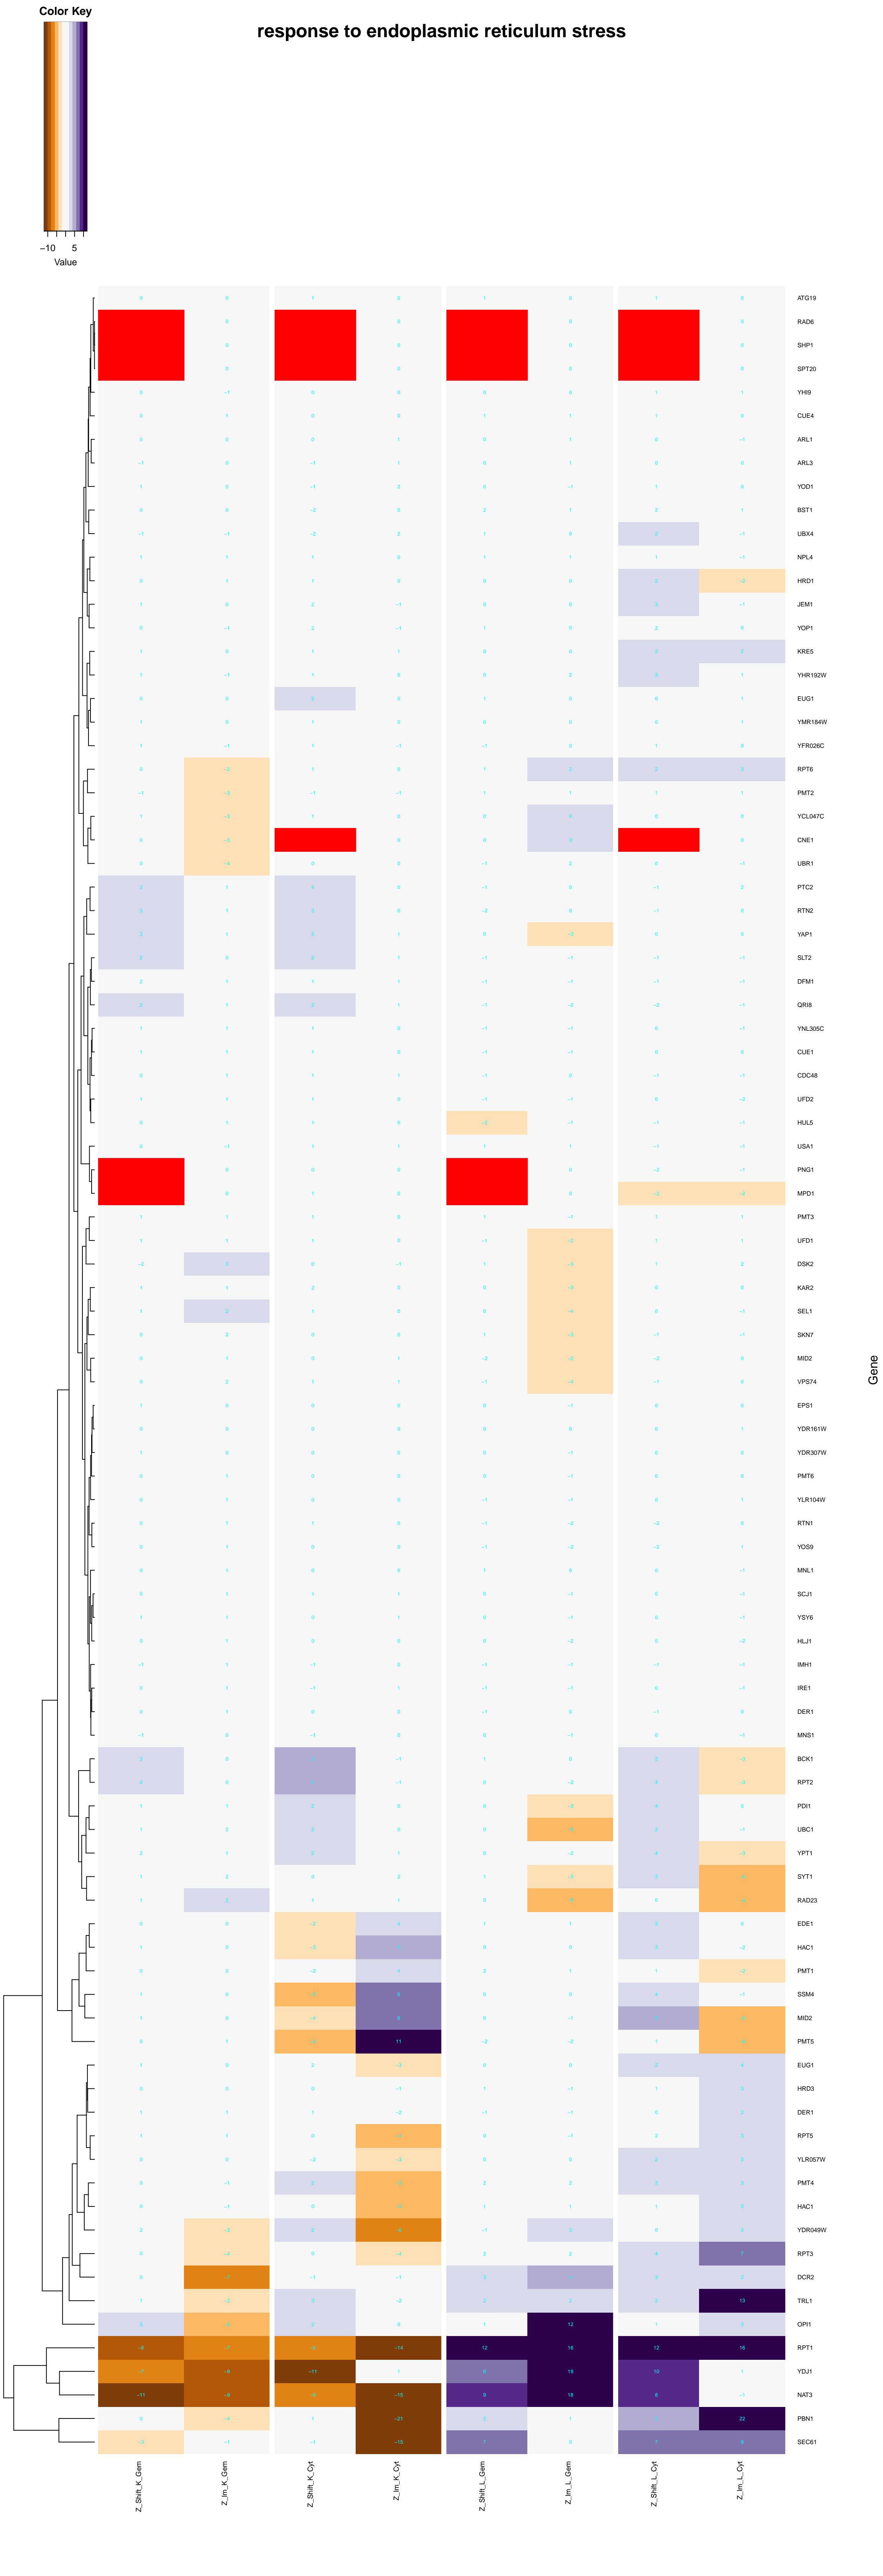

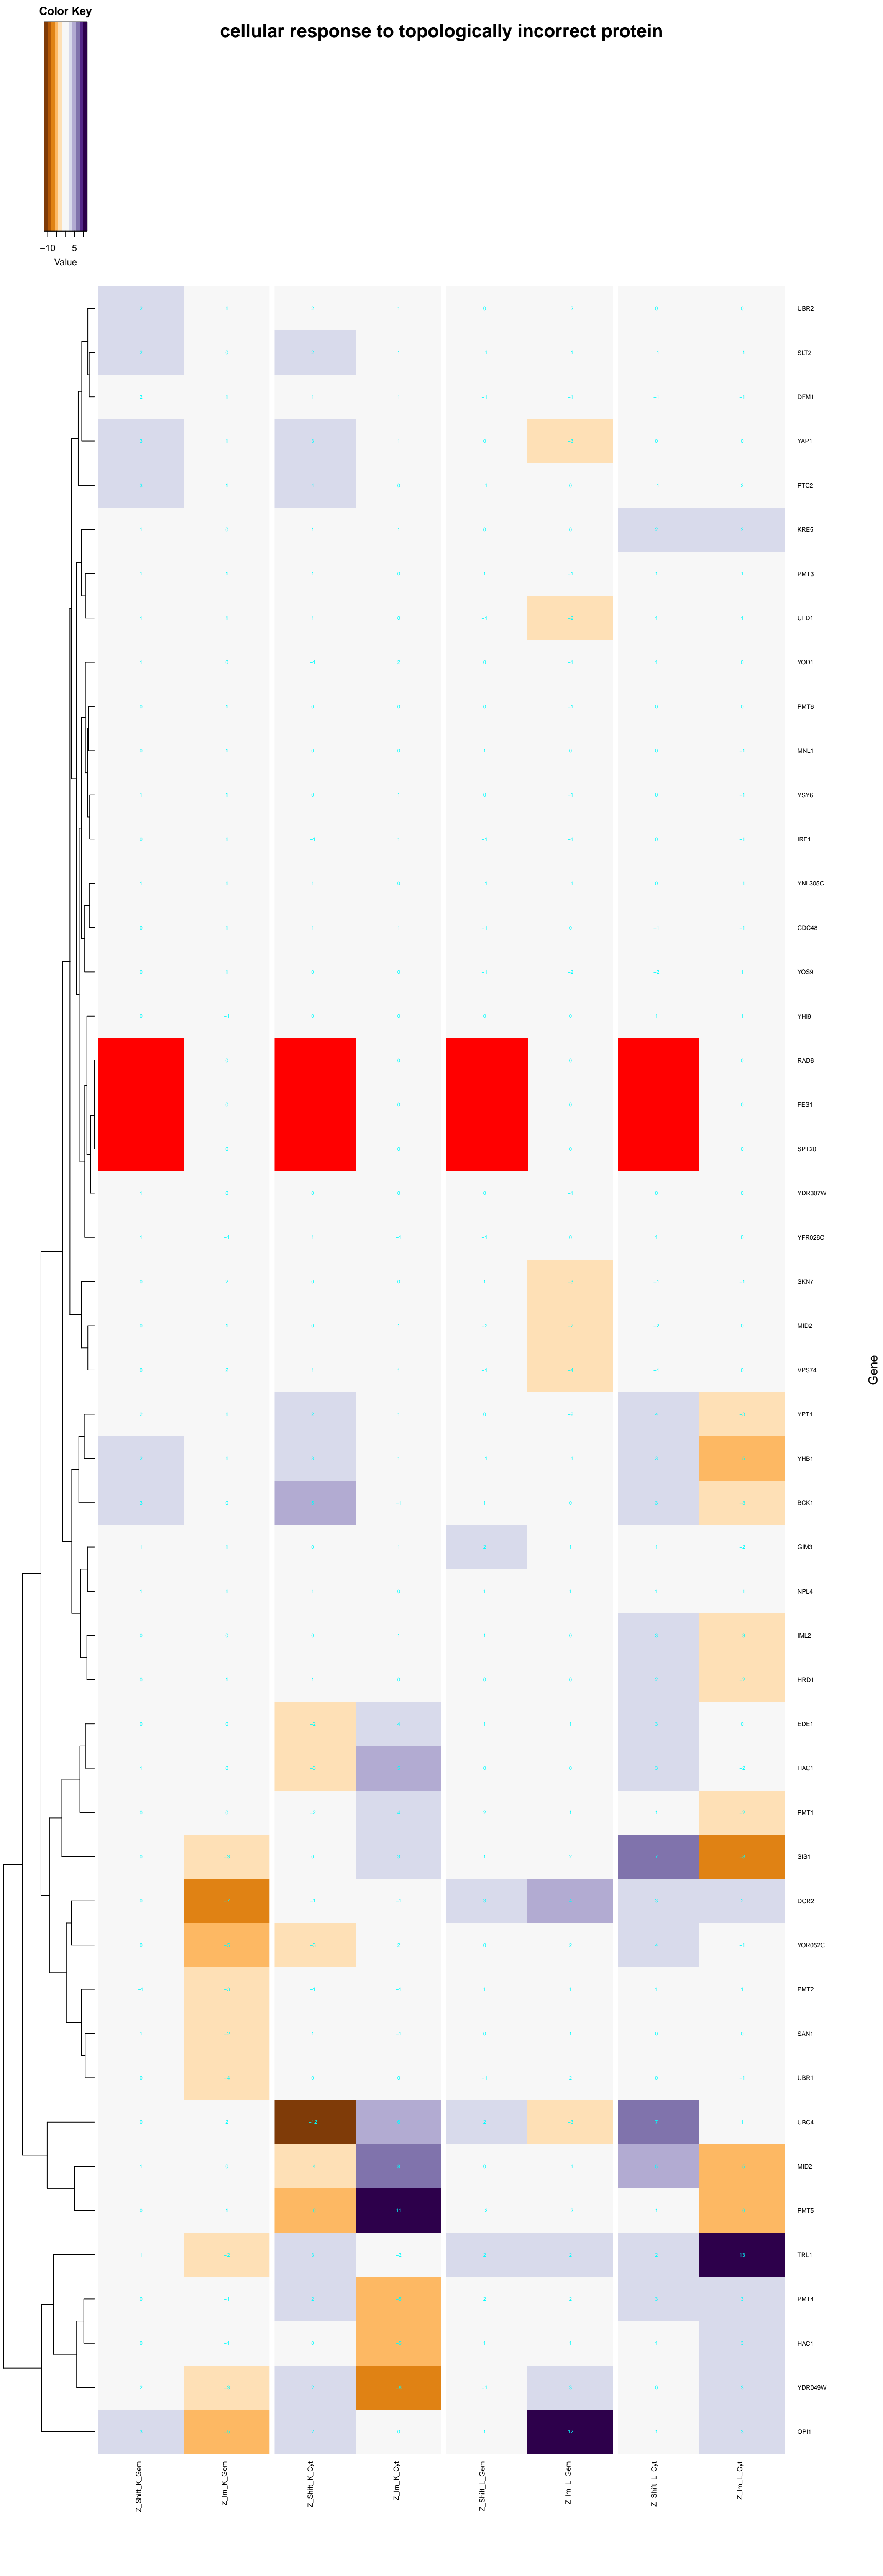

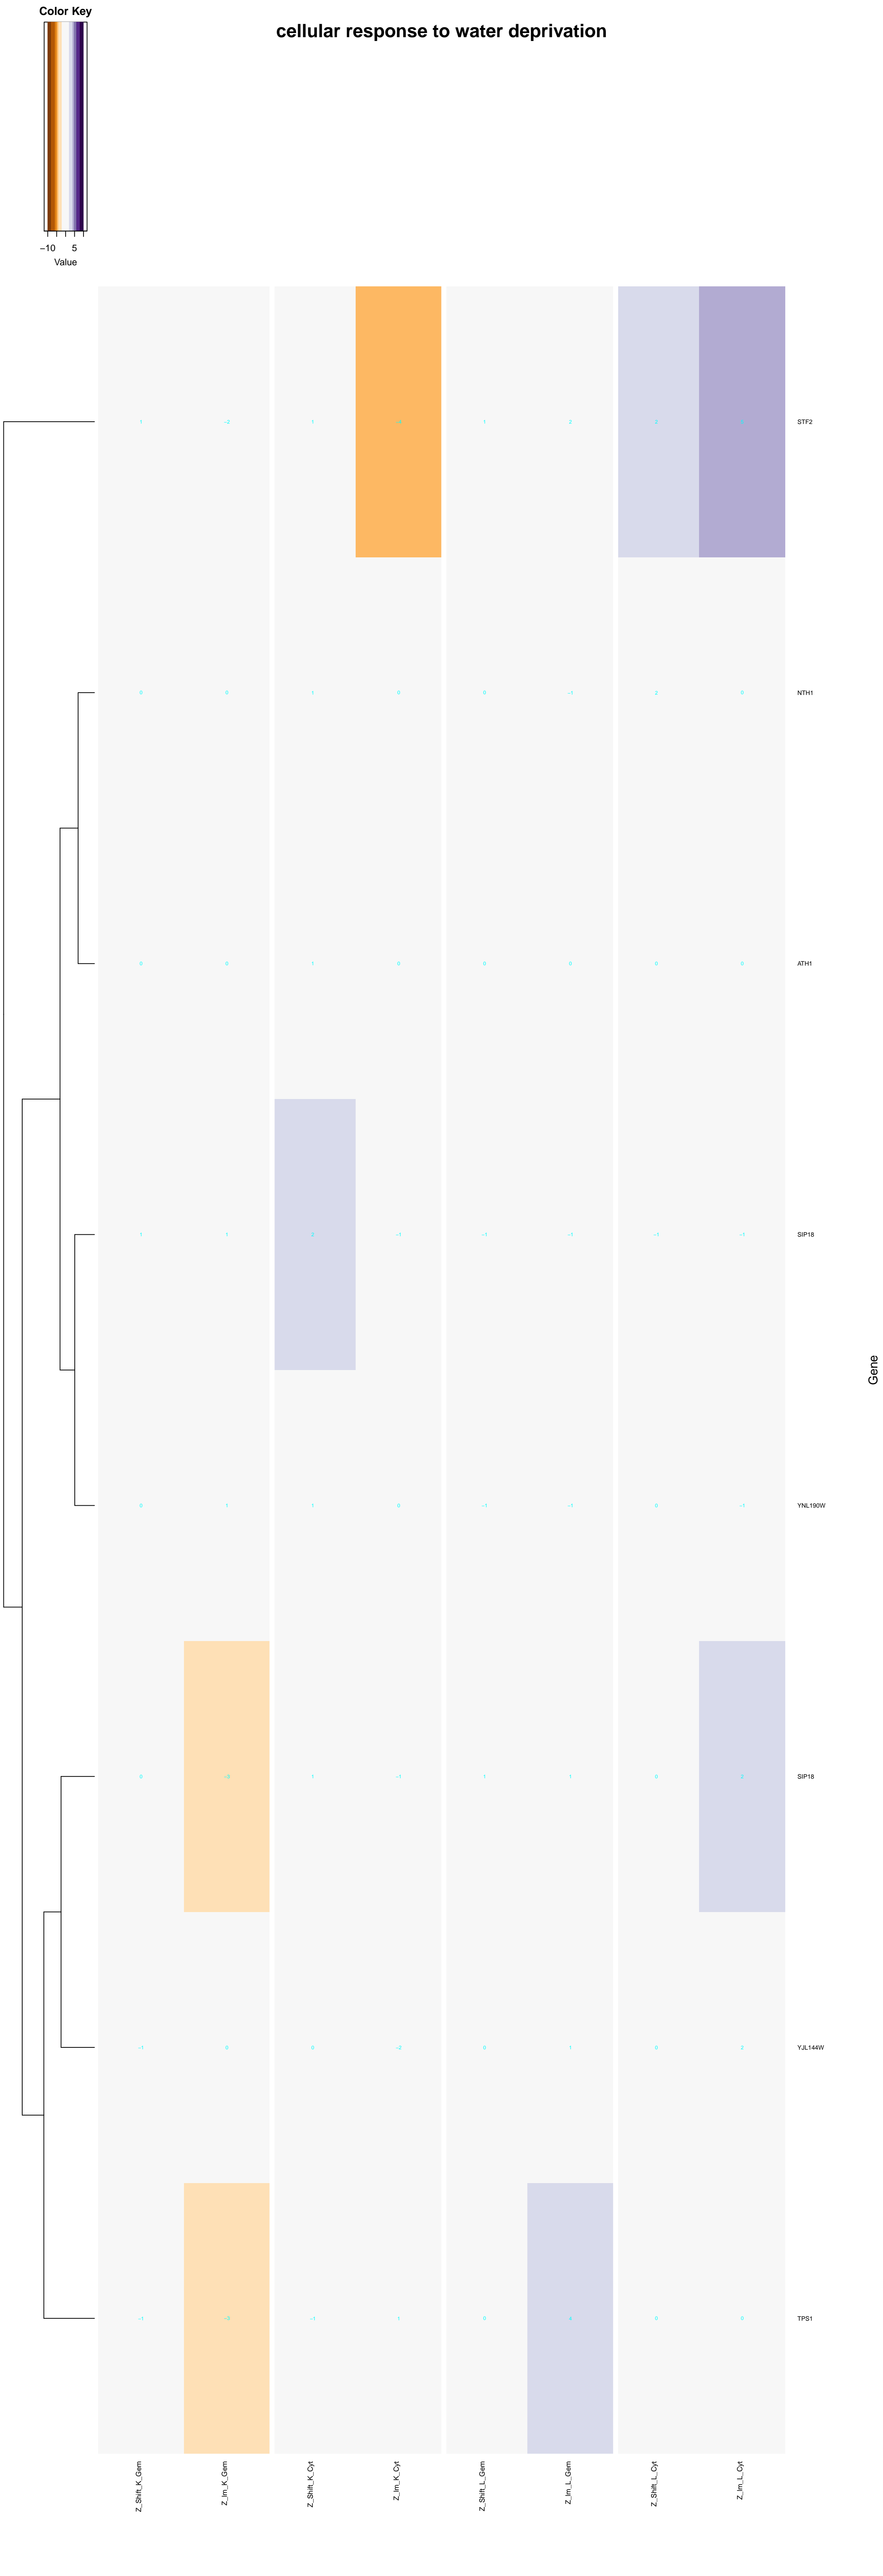

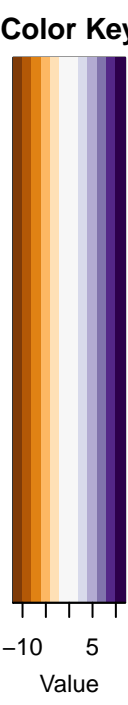

regulation of translation in response to stress

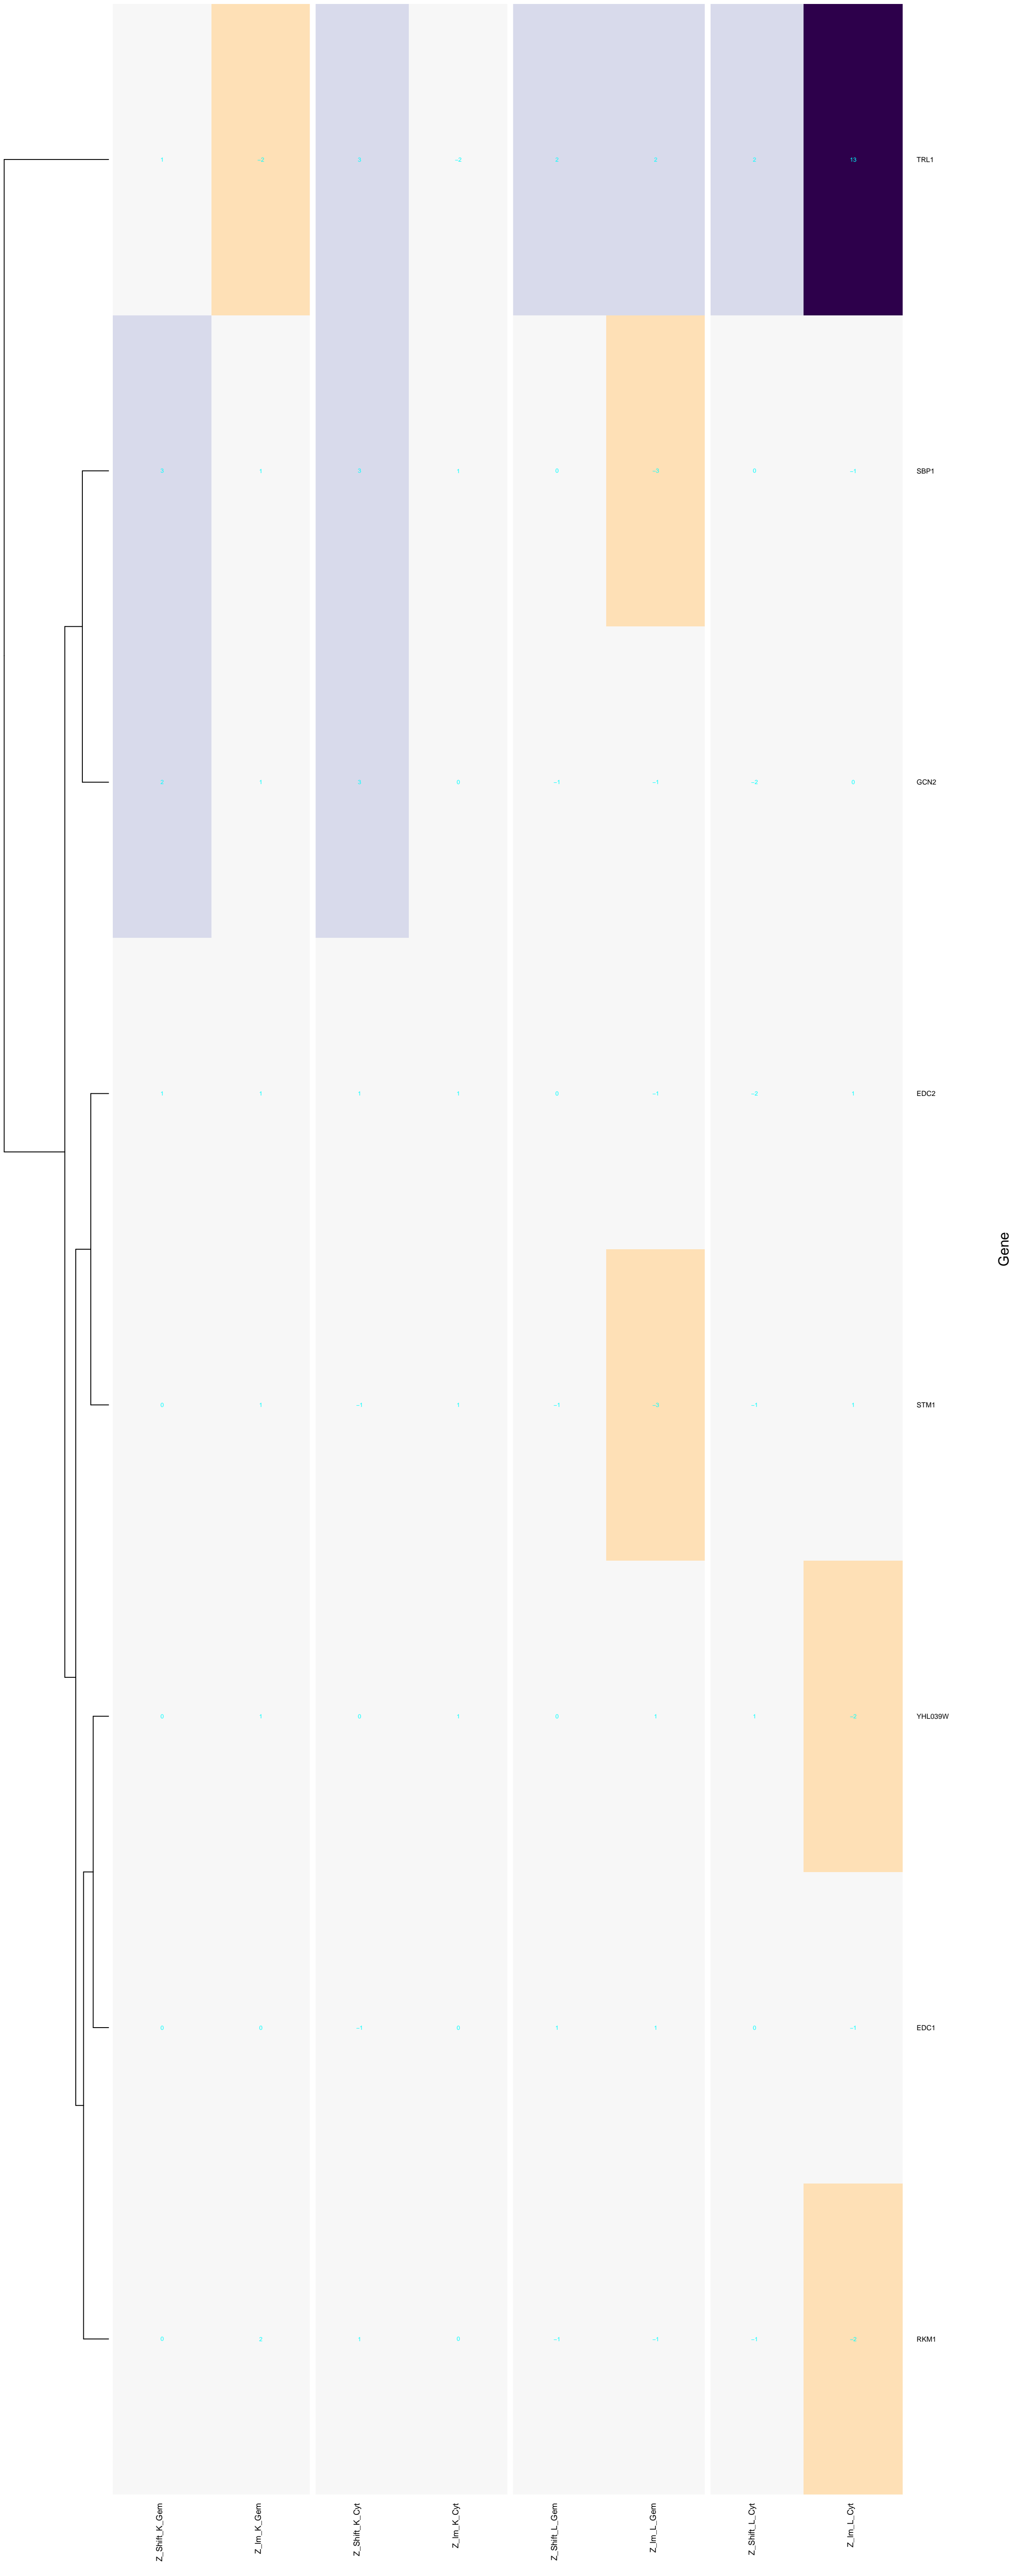

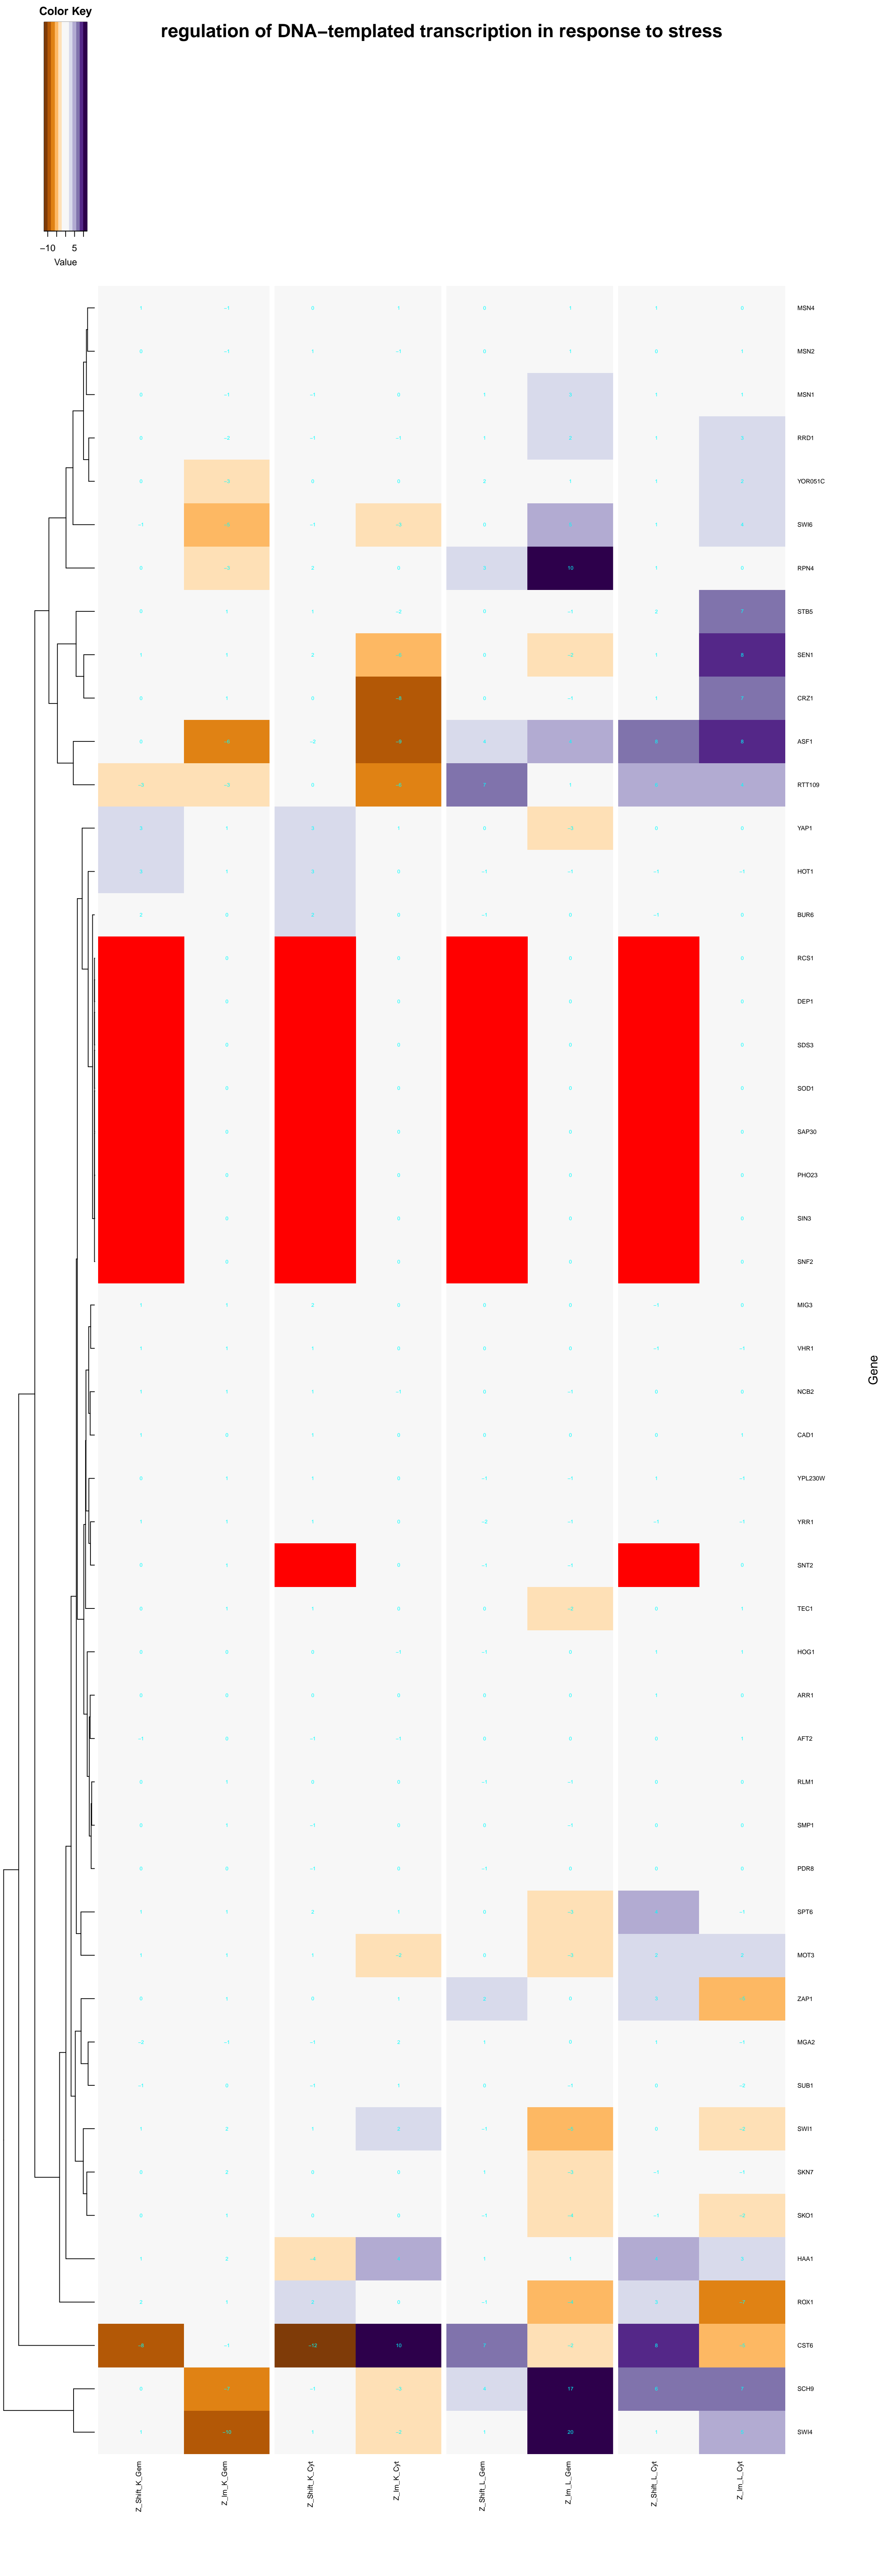



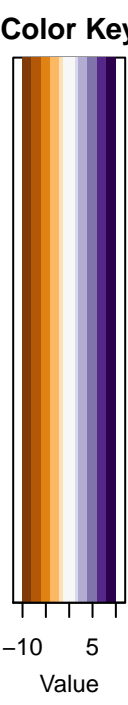

cellular response to anoxia

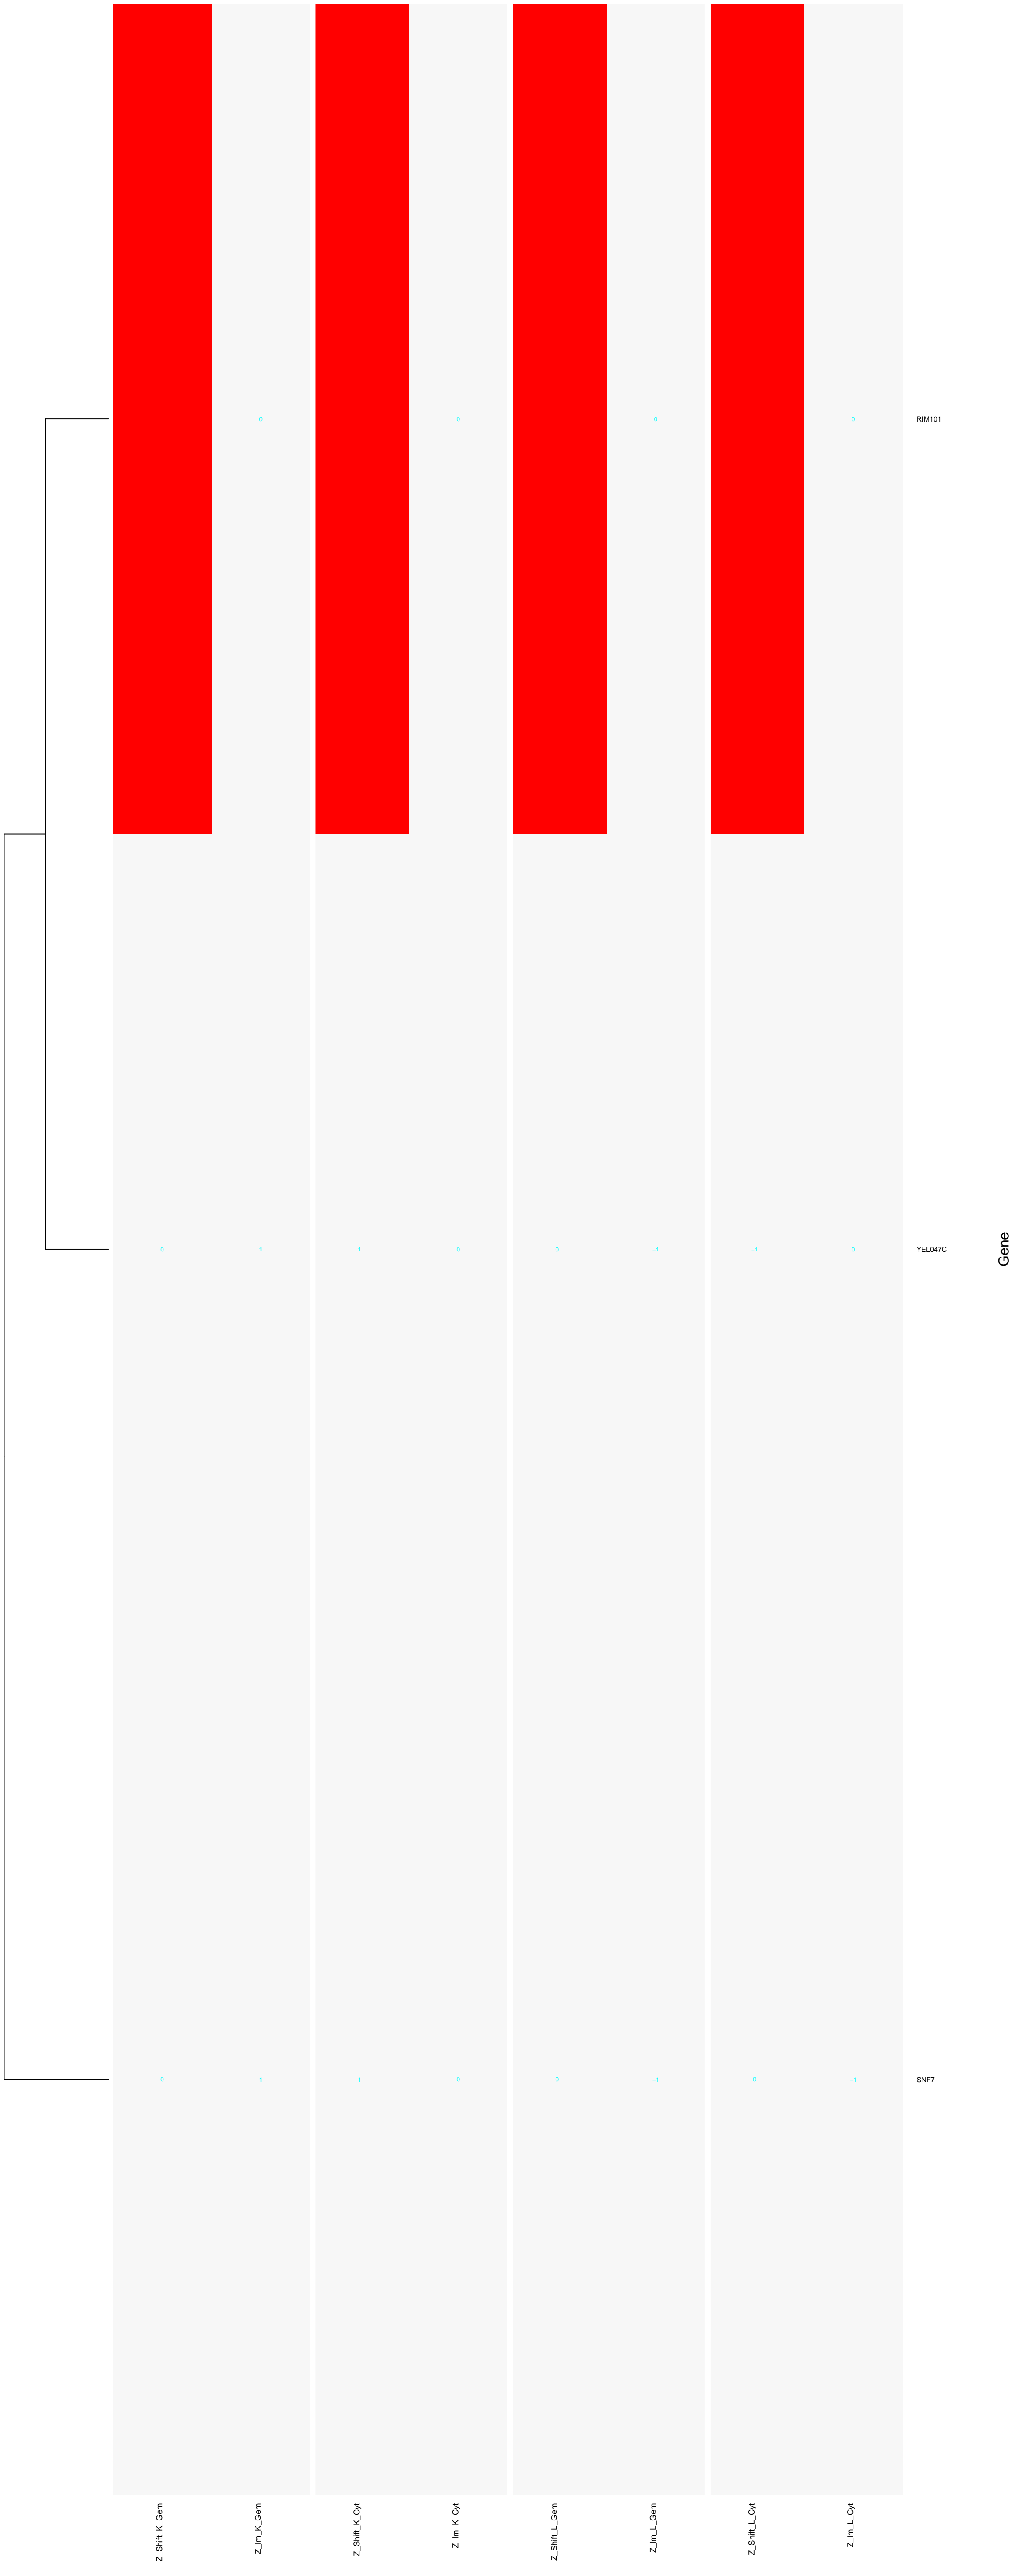



cellular response to hypoxia

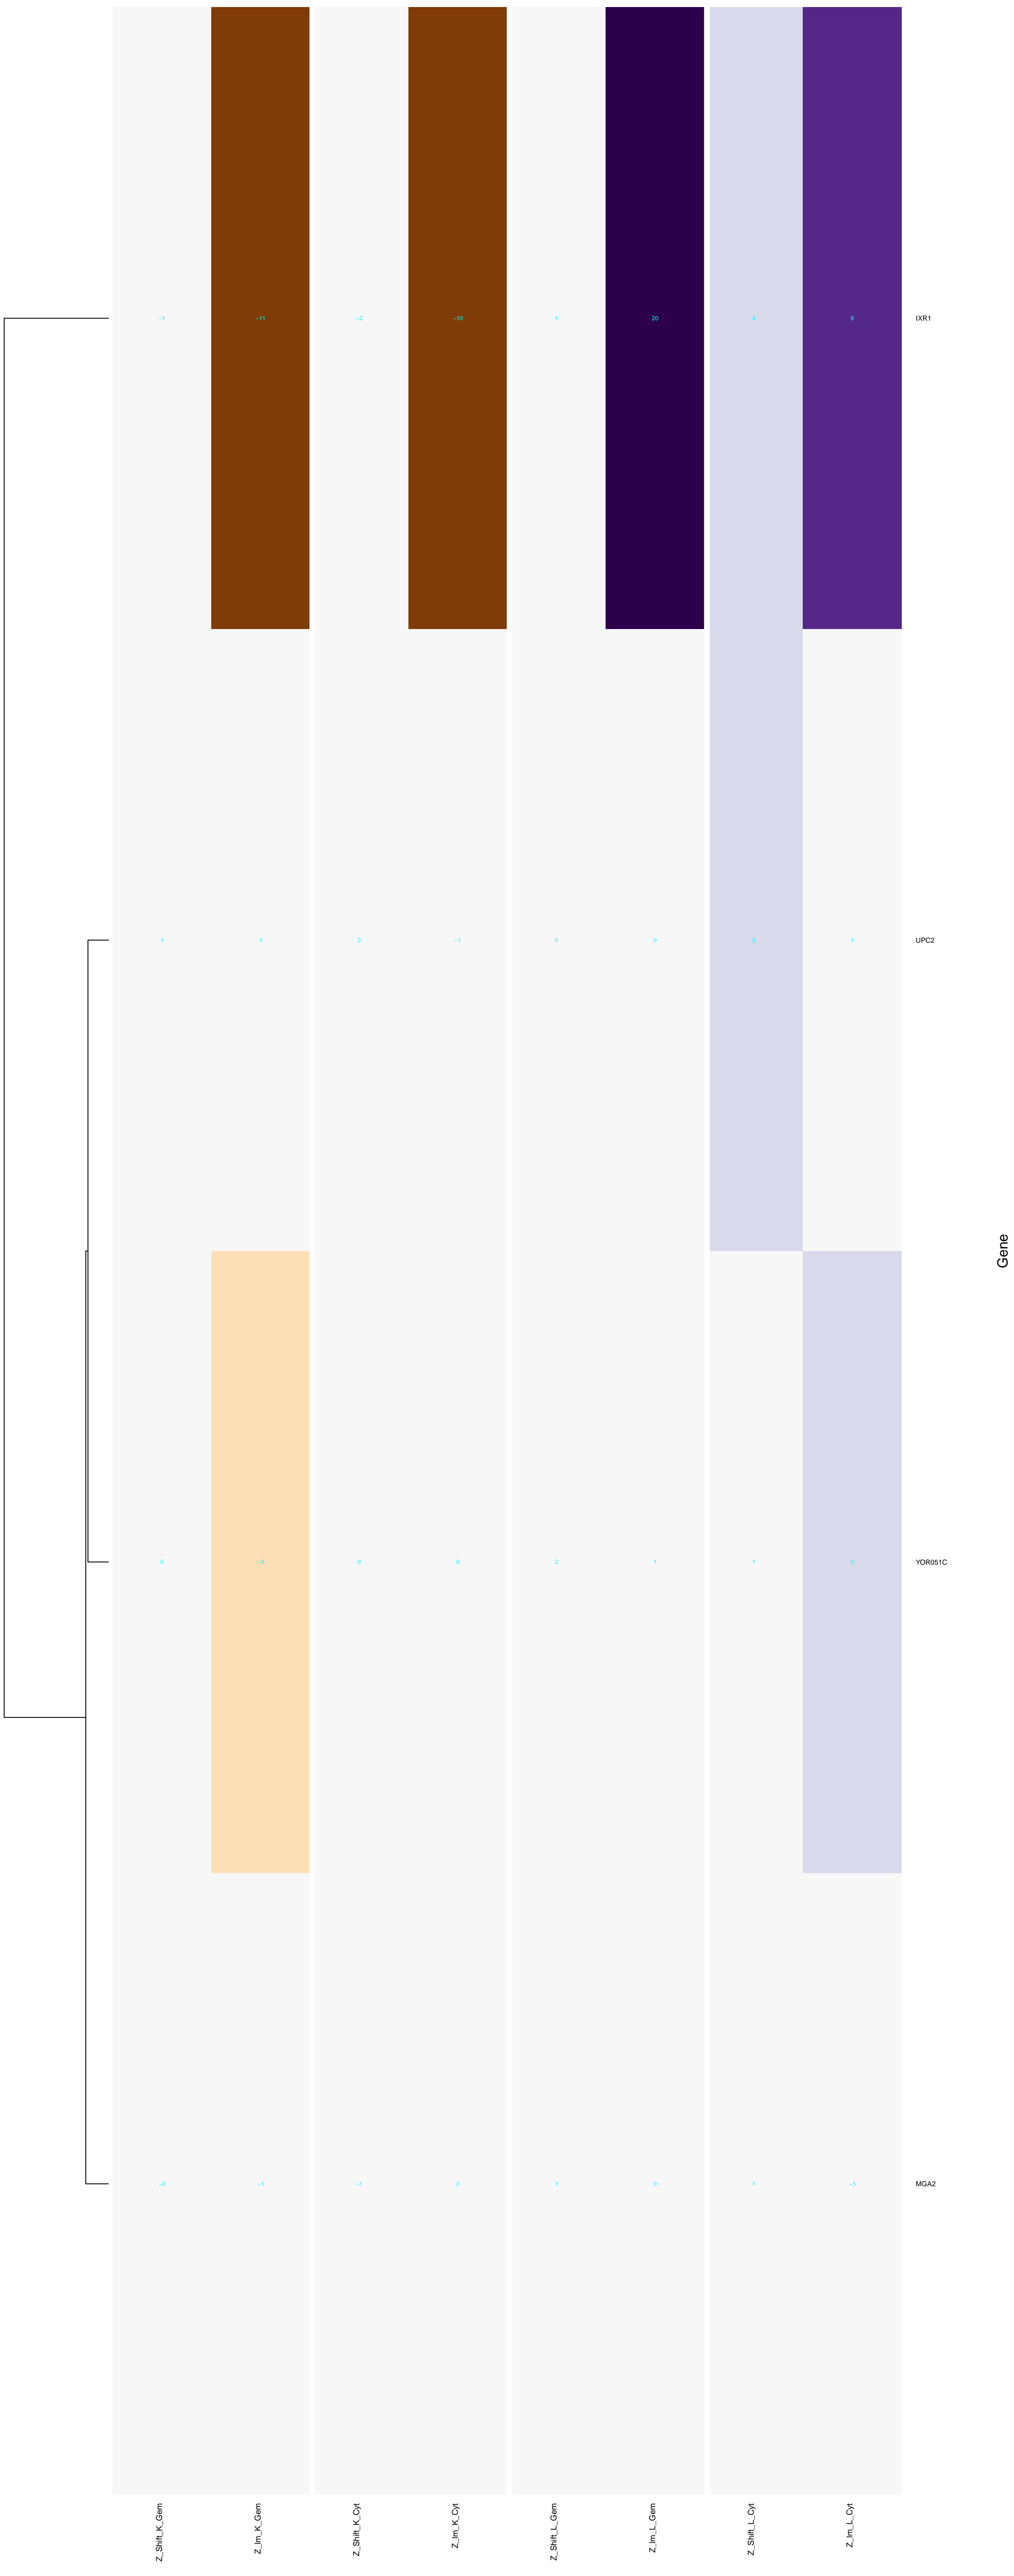

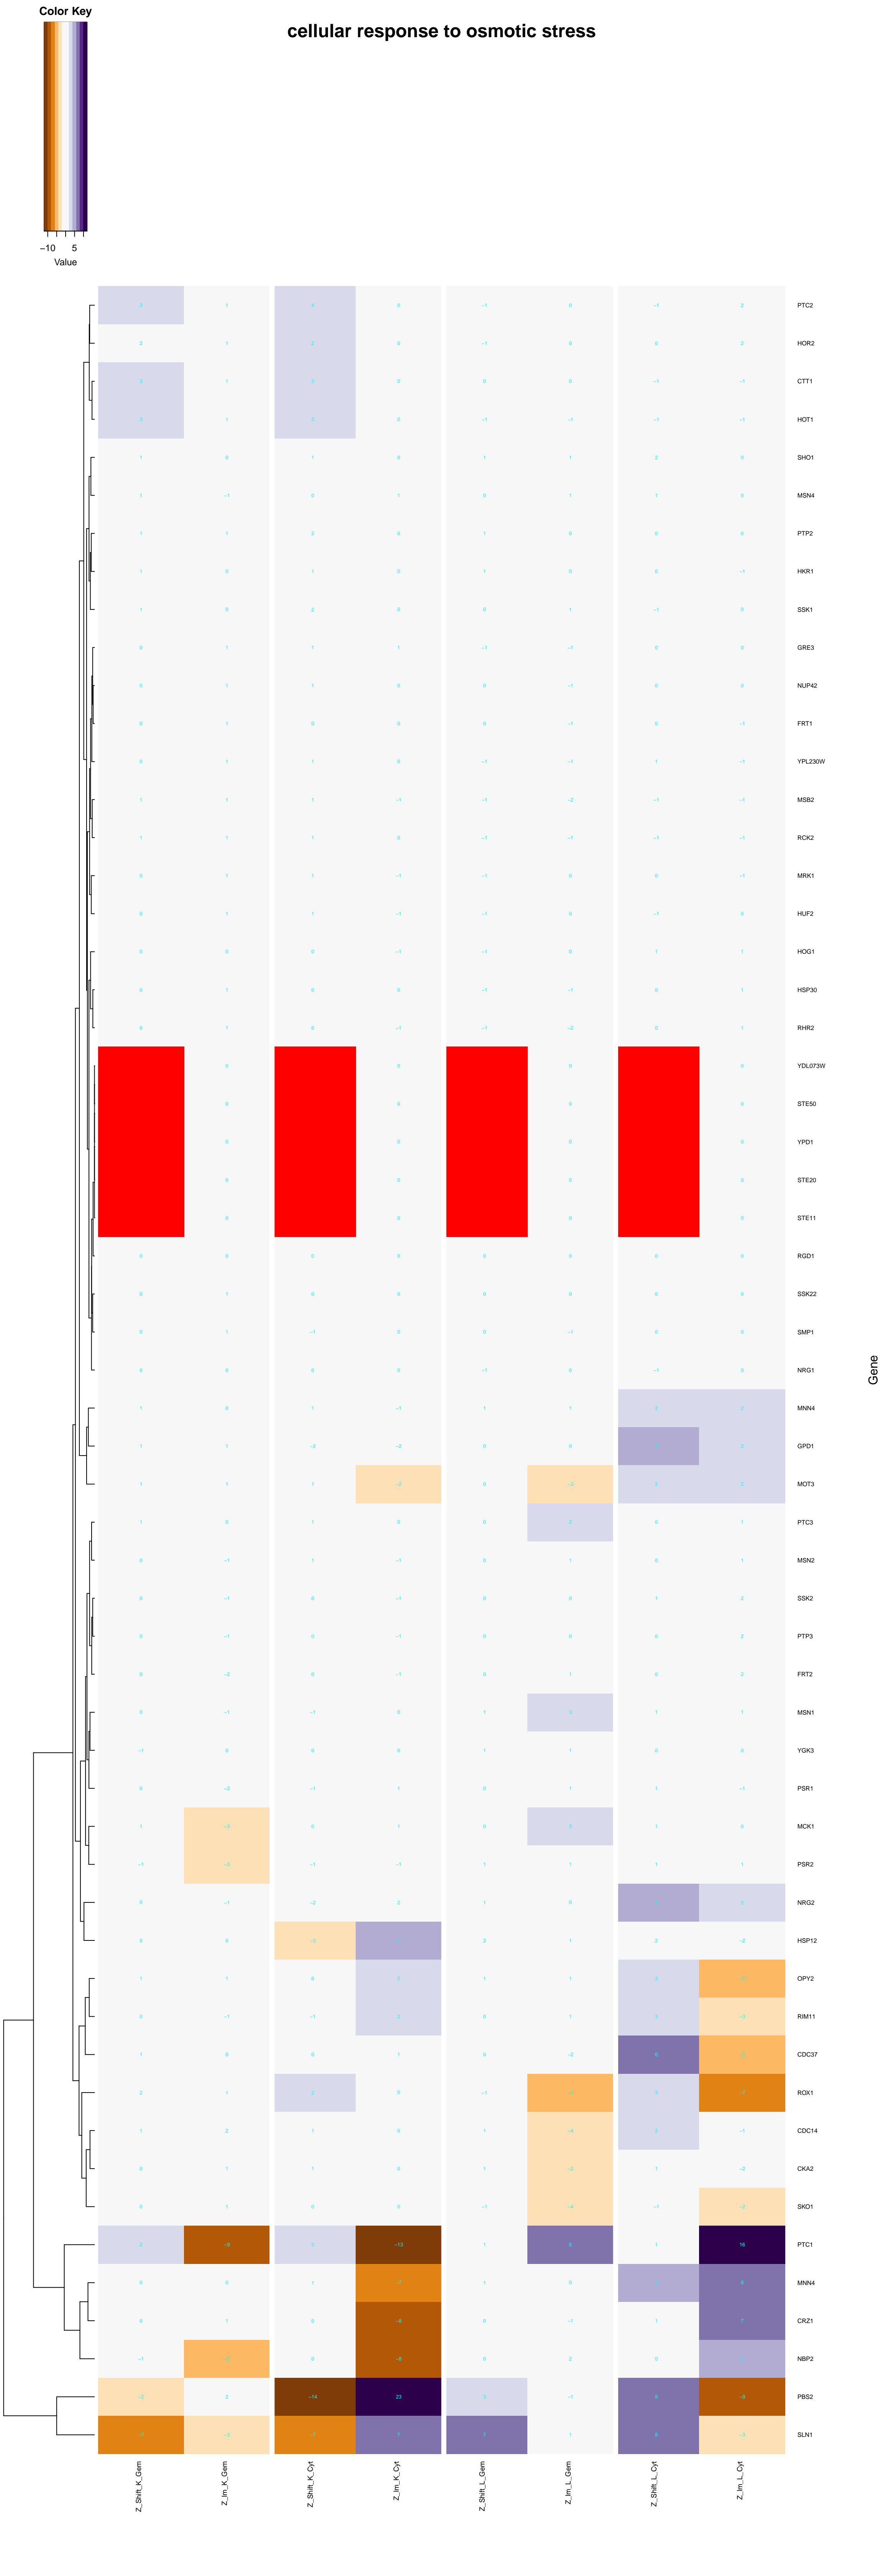

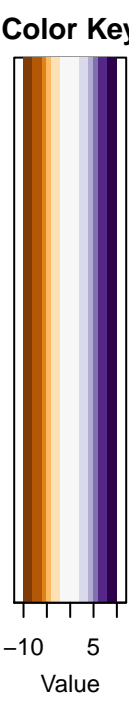

cellular response to nitrosative stress

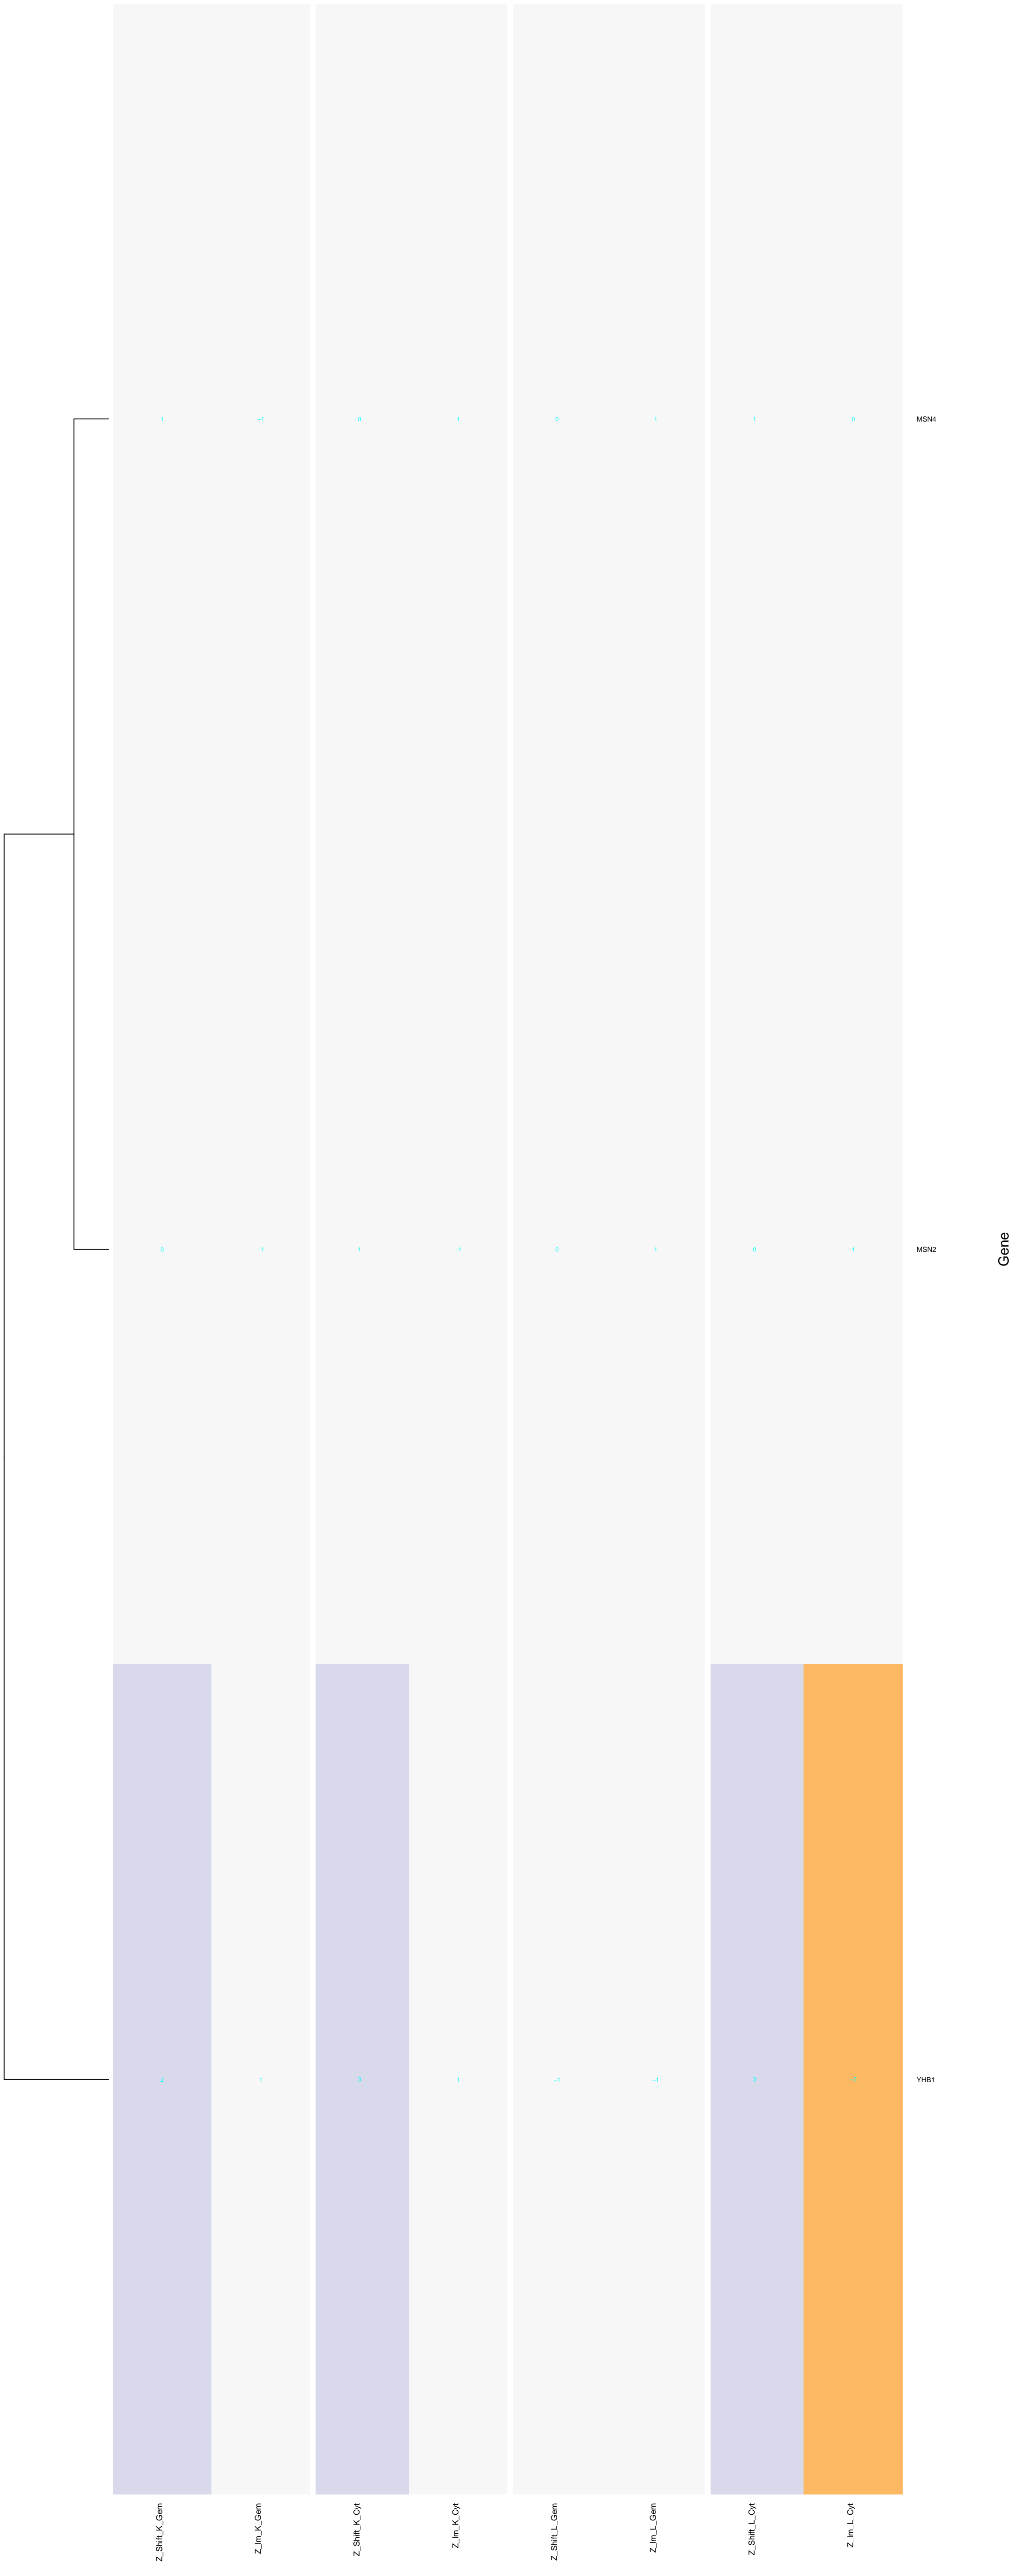

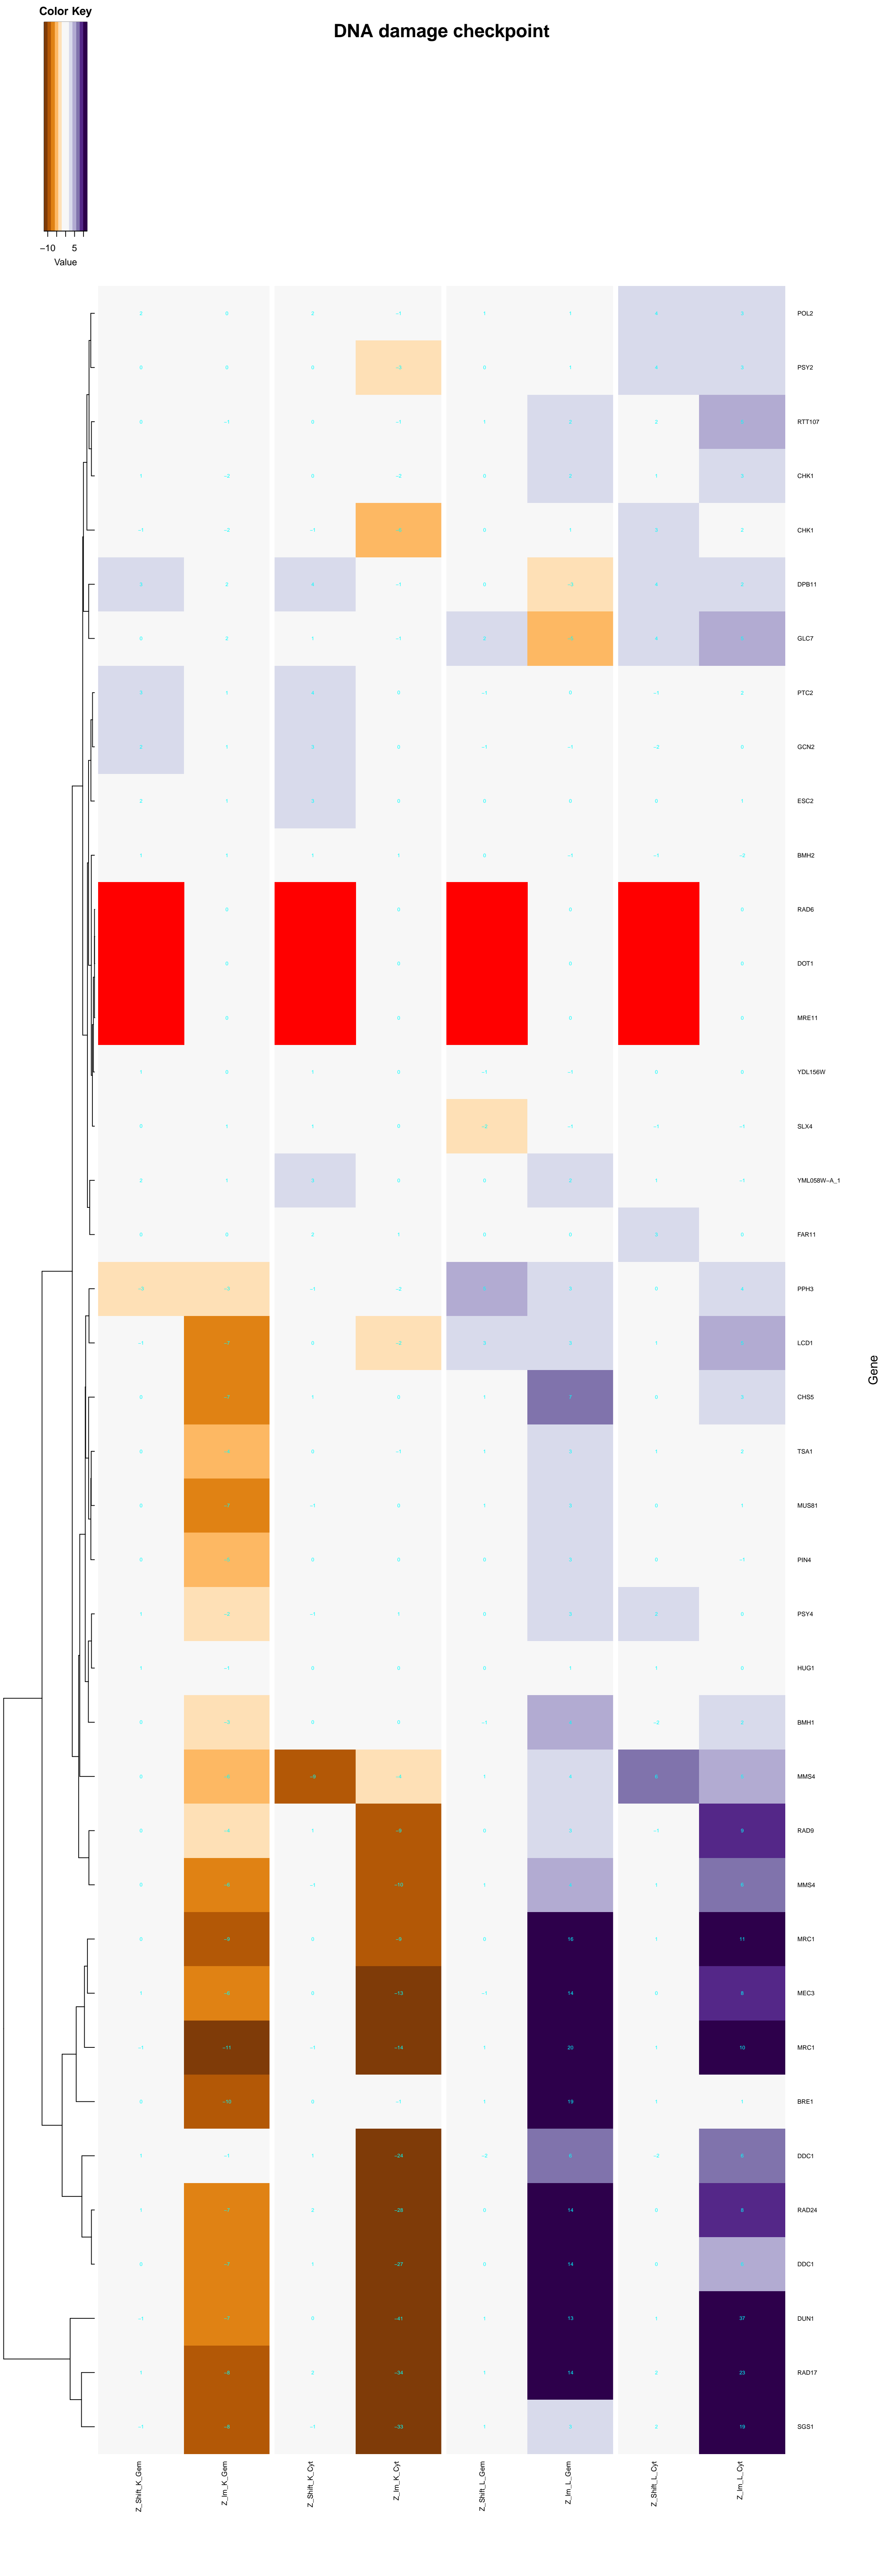



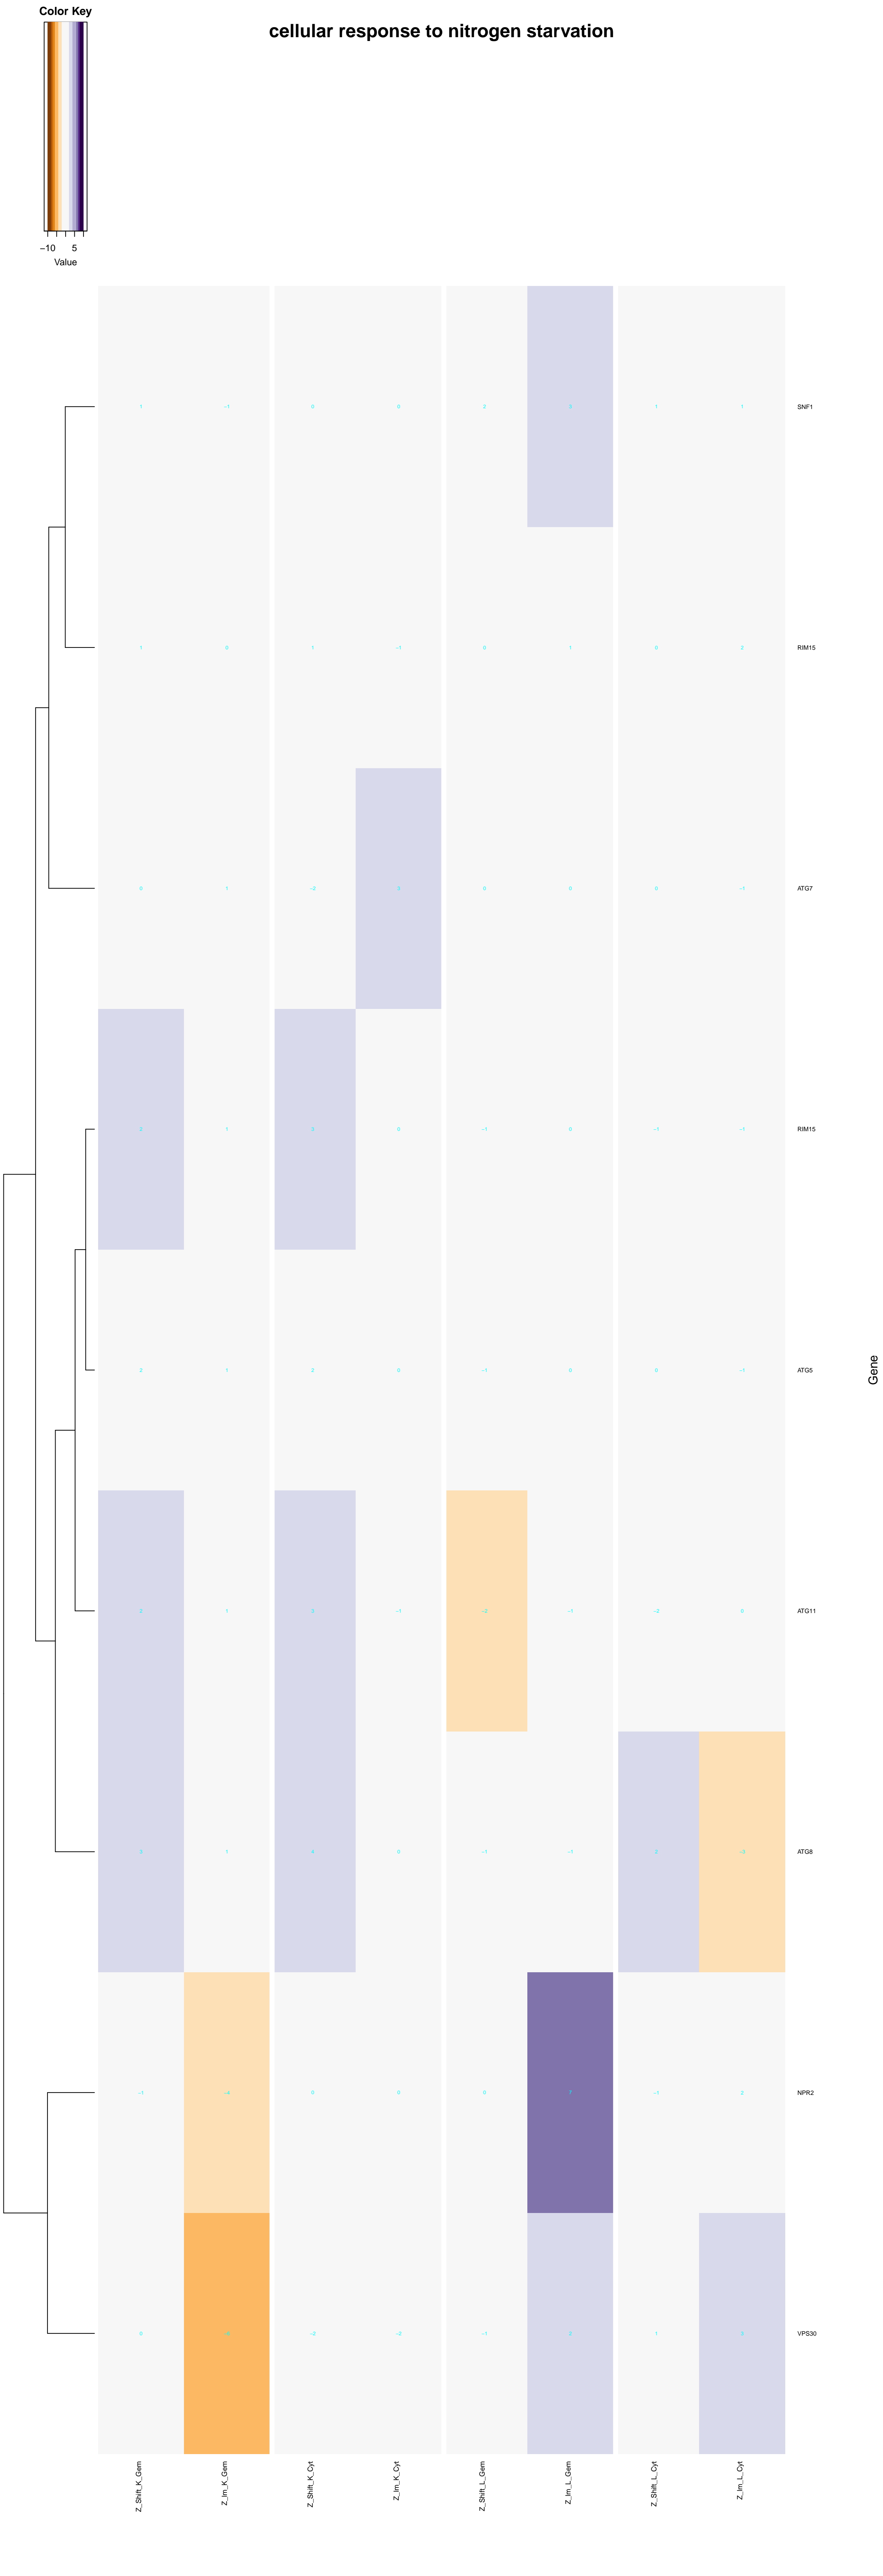

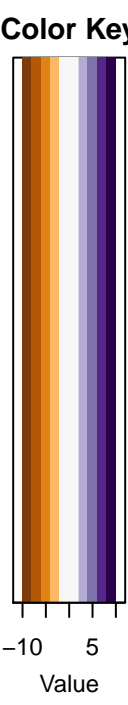

cellular response to phosphate starvation

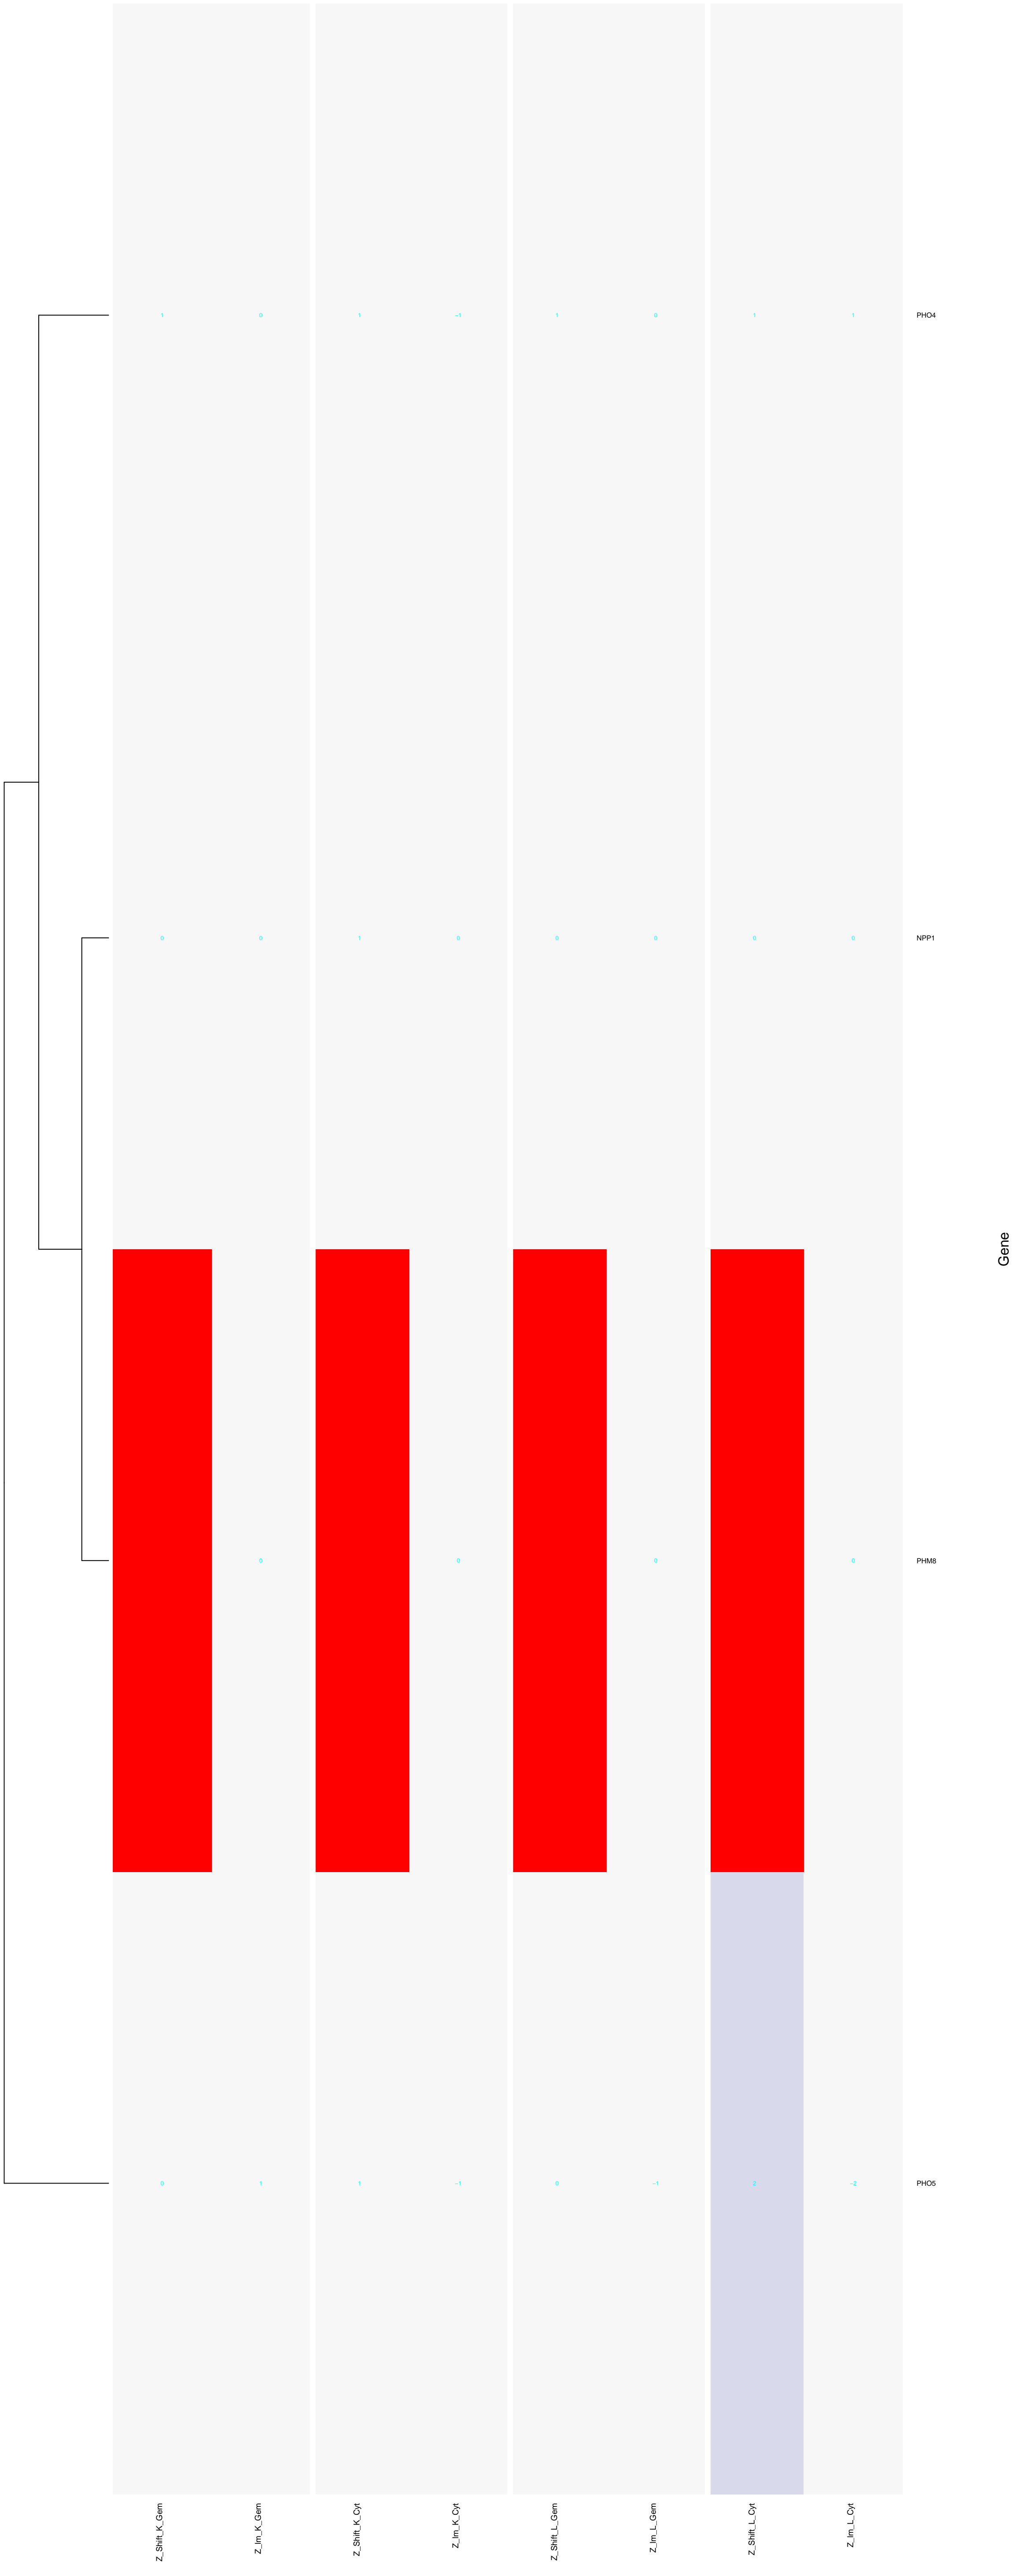

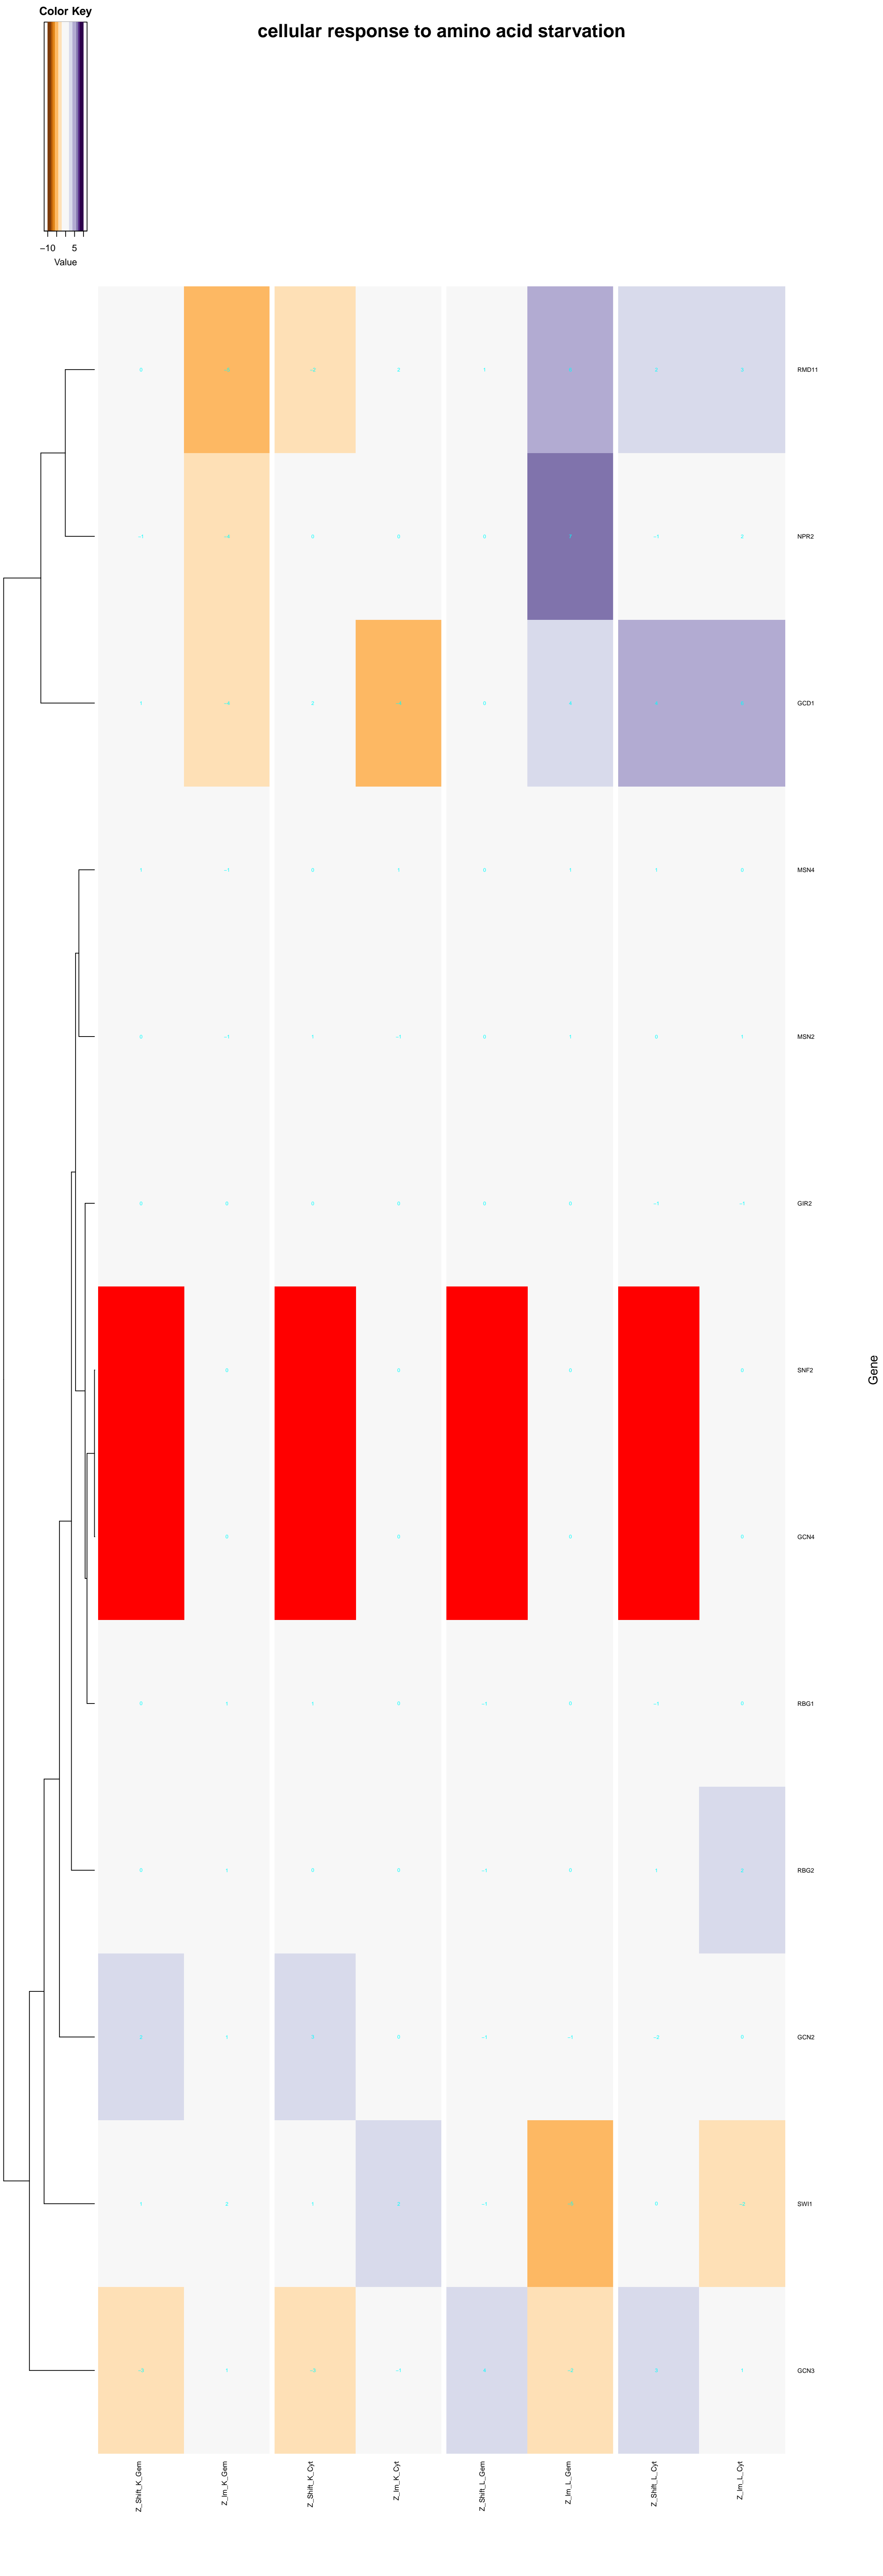

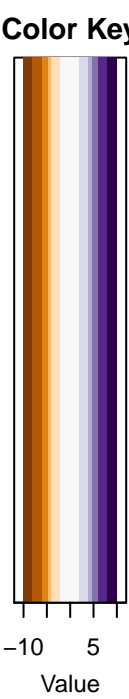

cellular response to zinc ion starvation

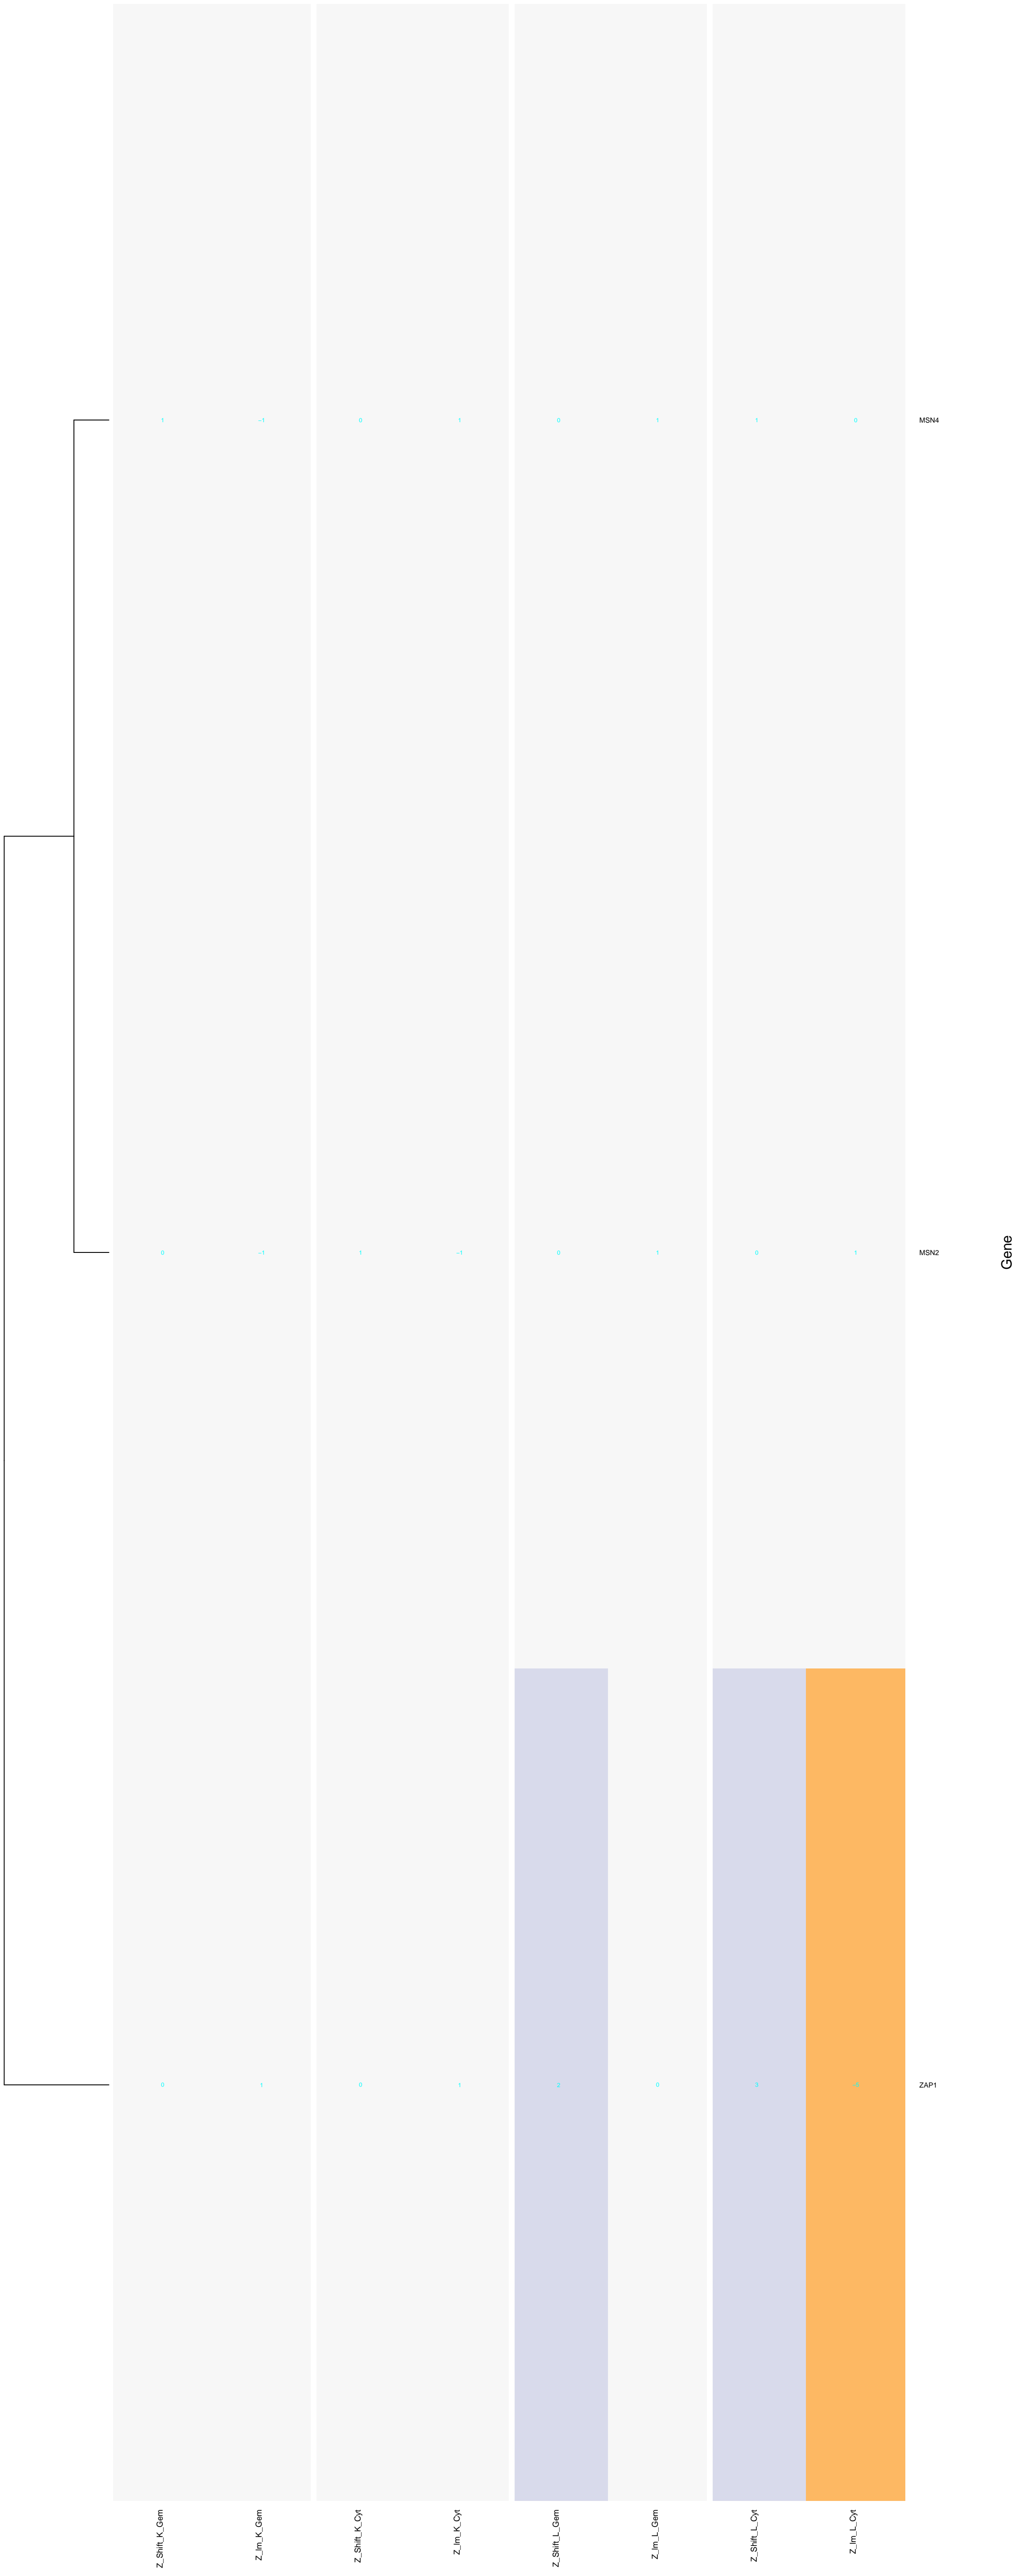

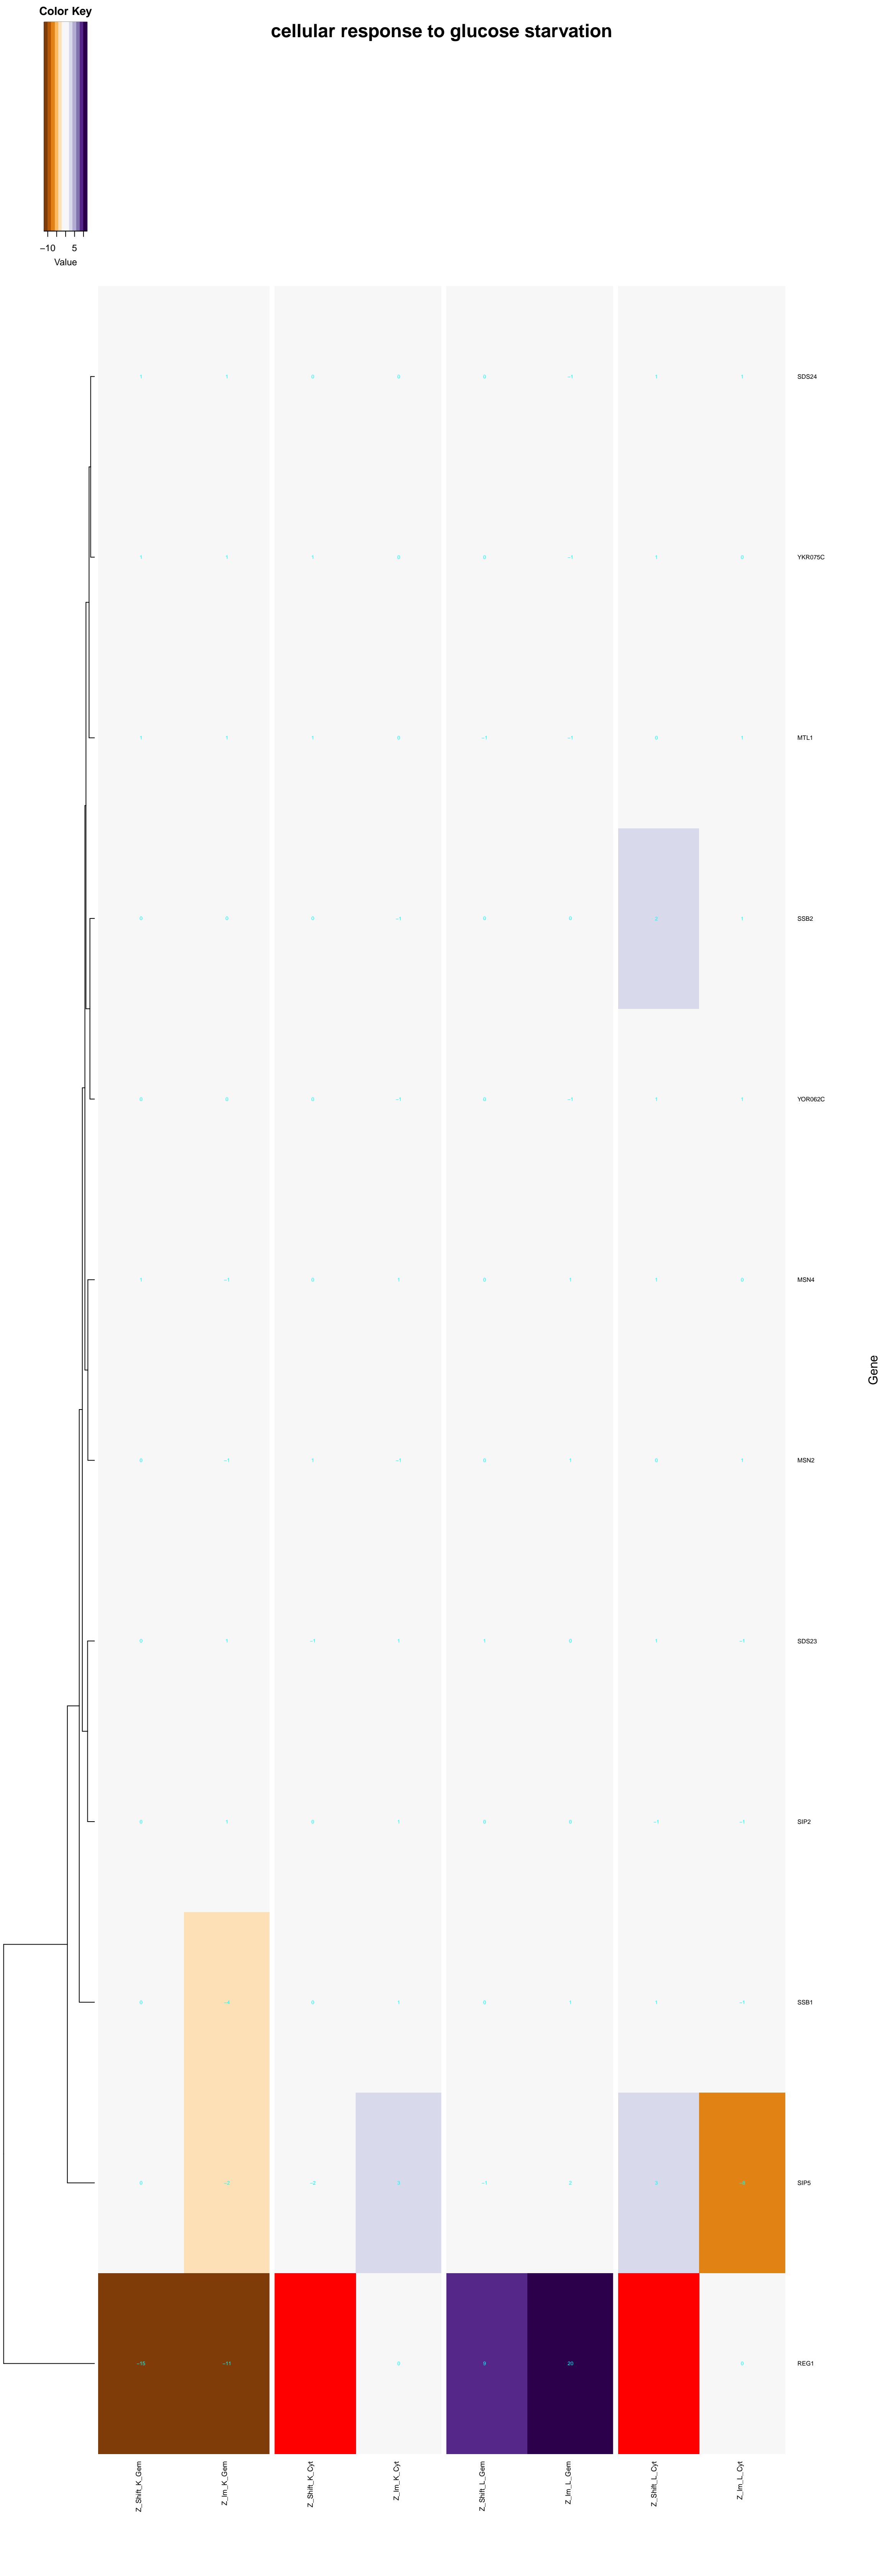

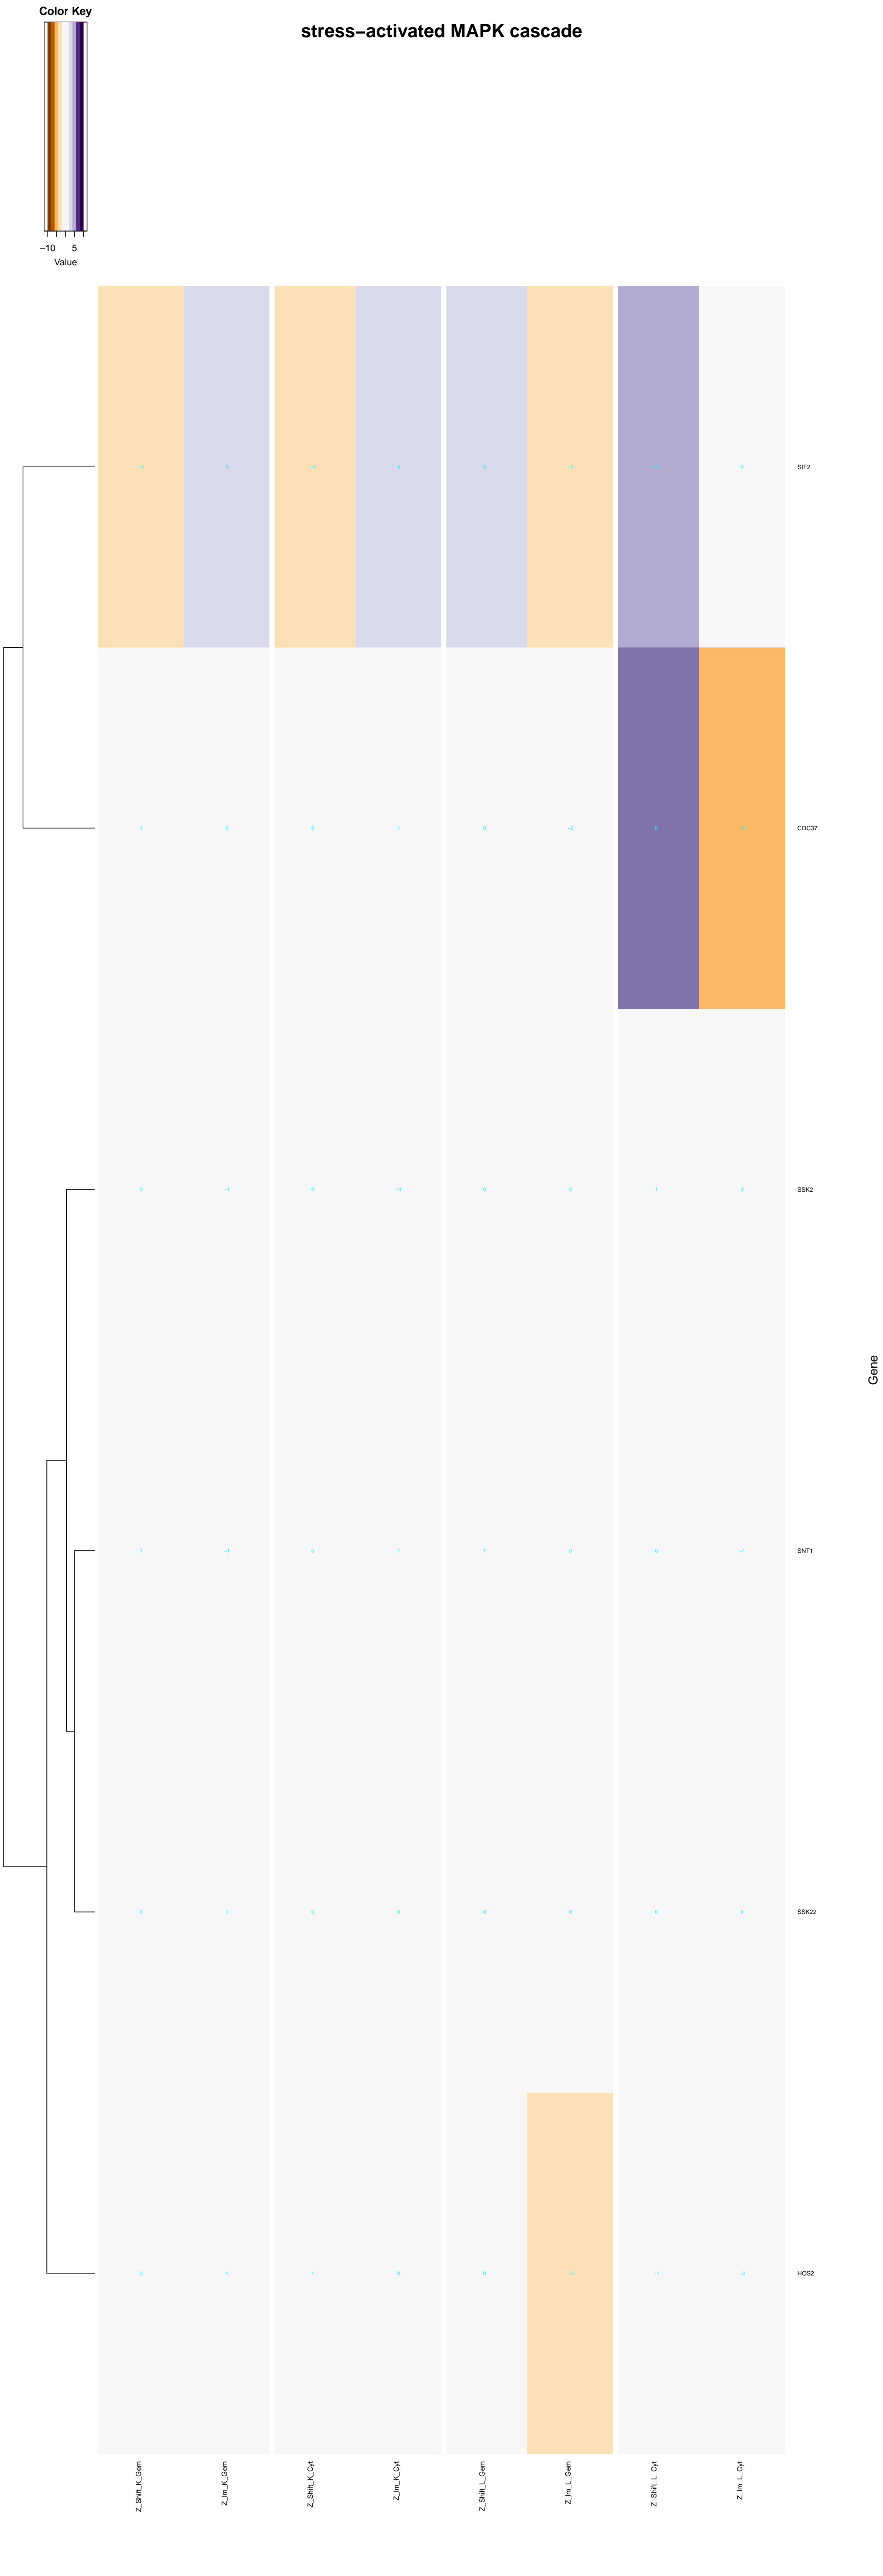

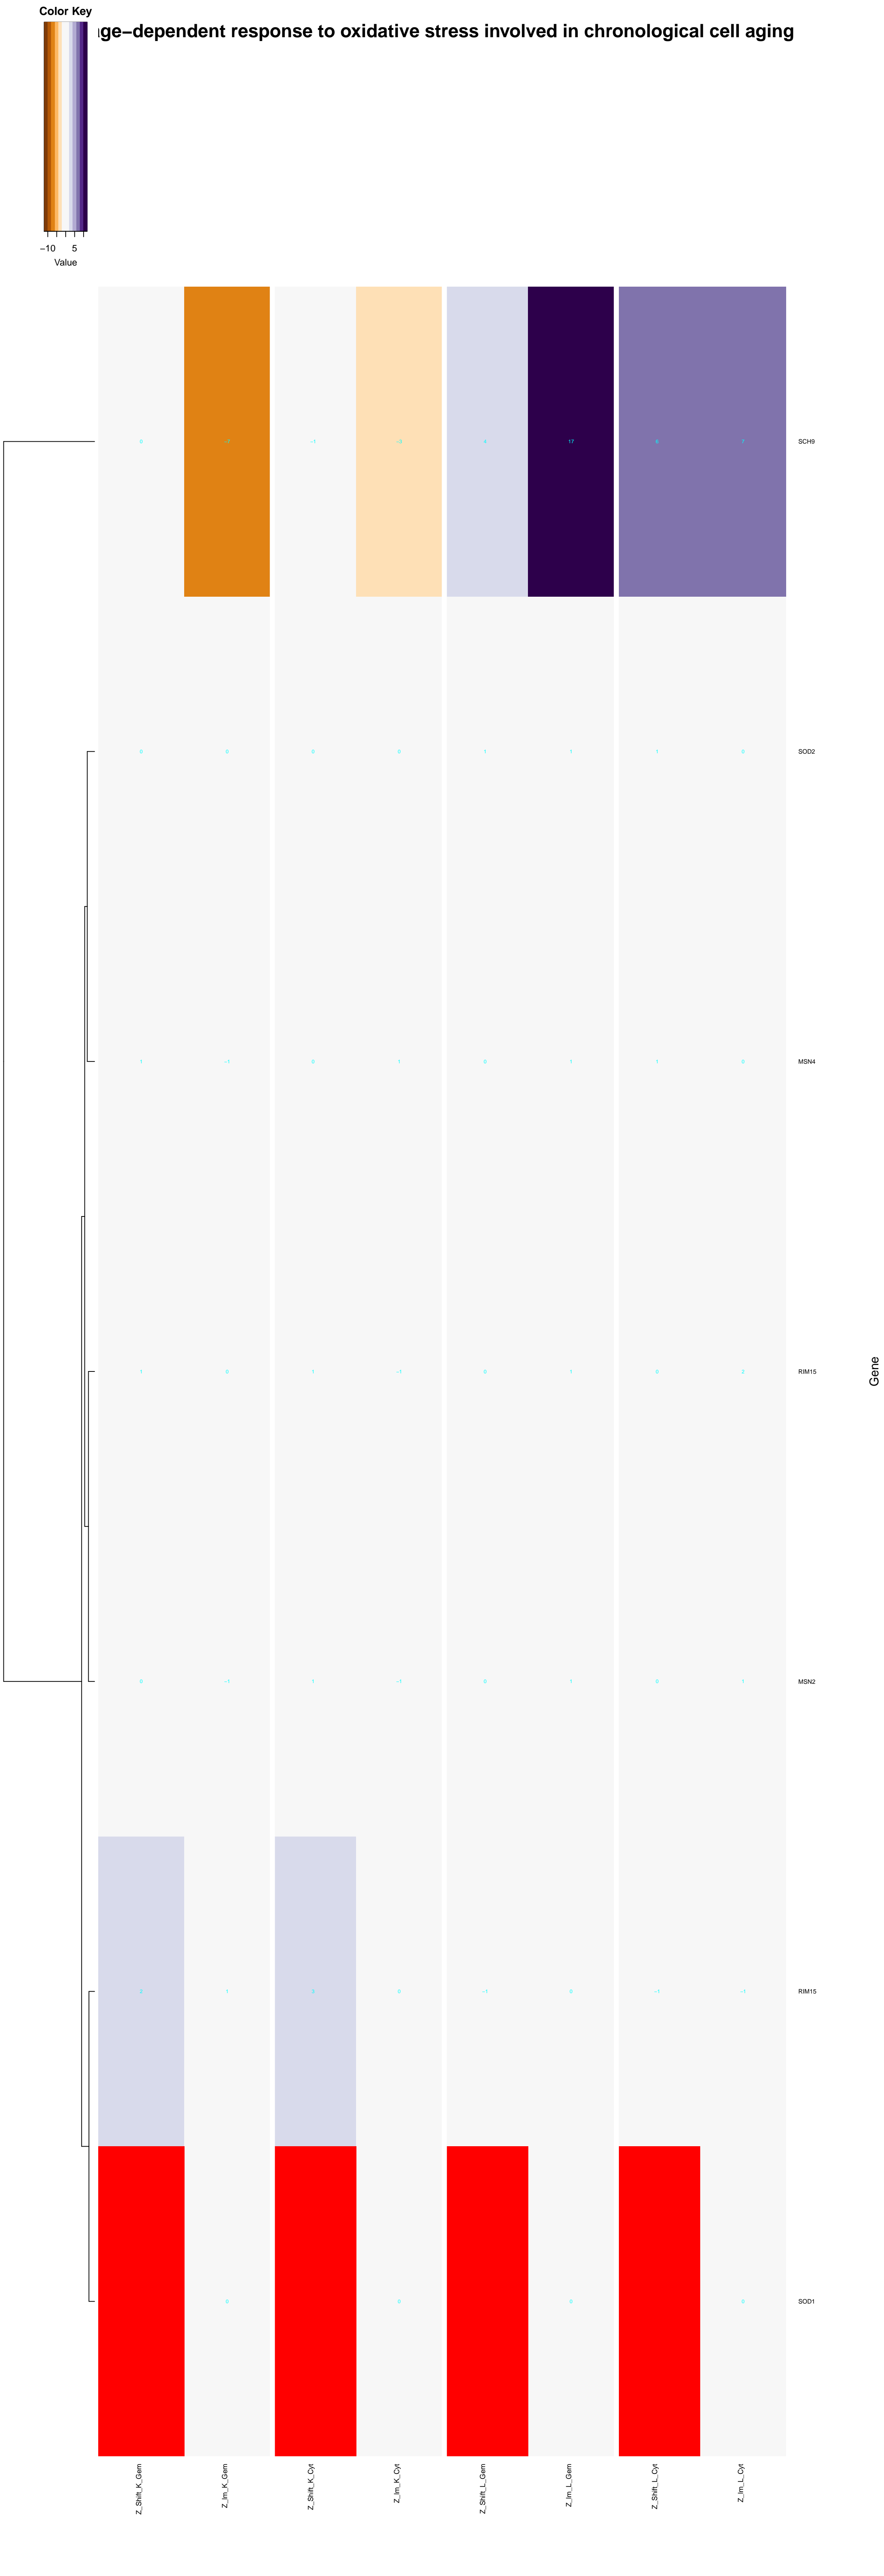

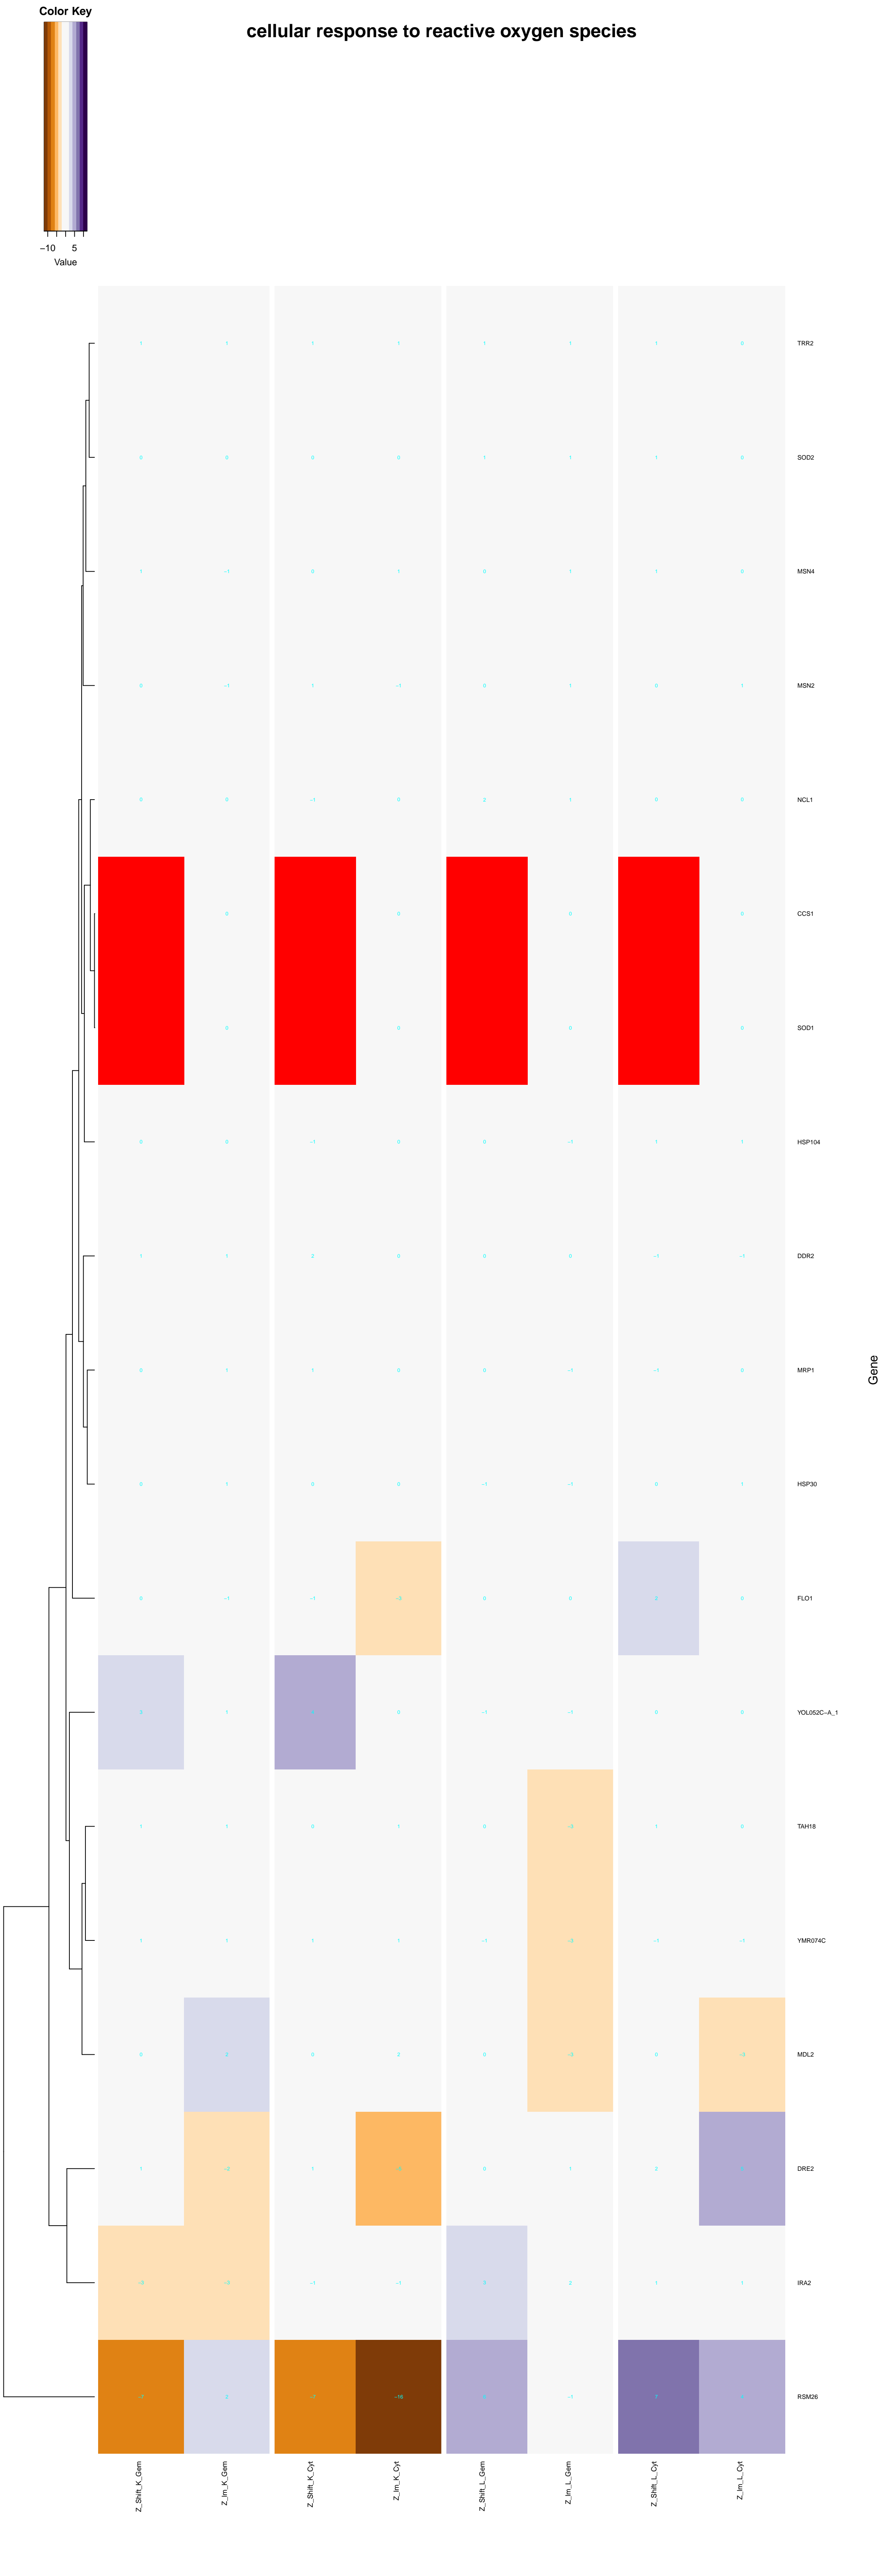

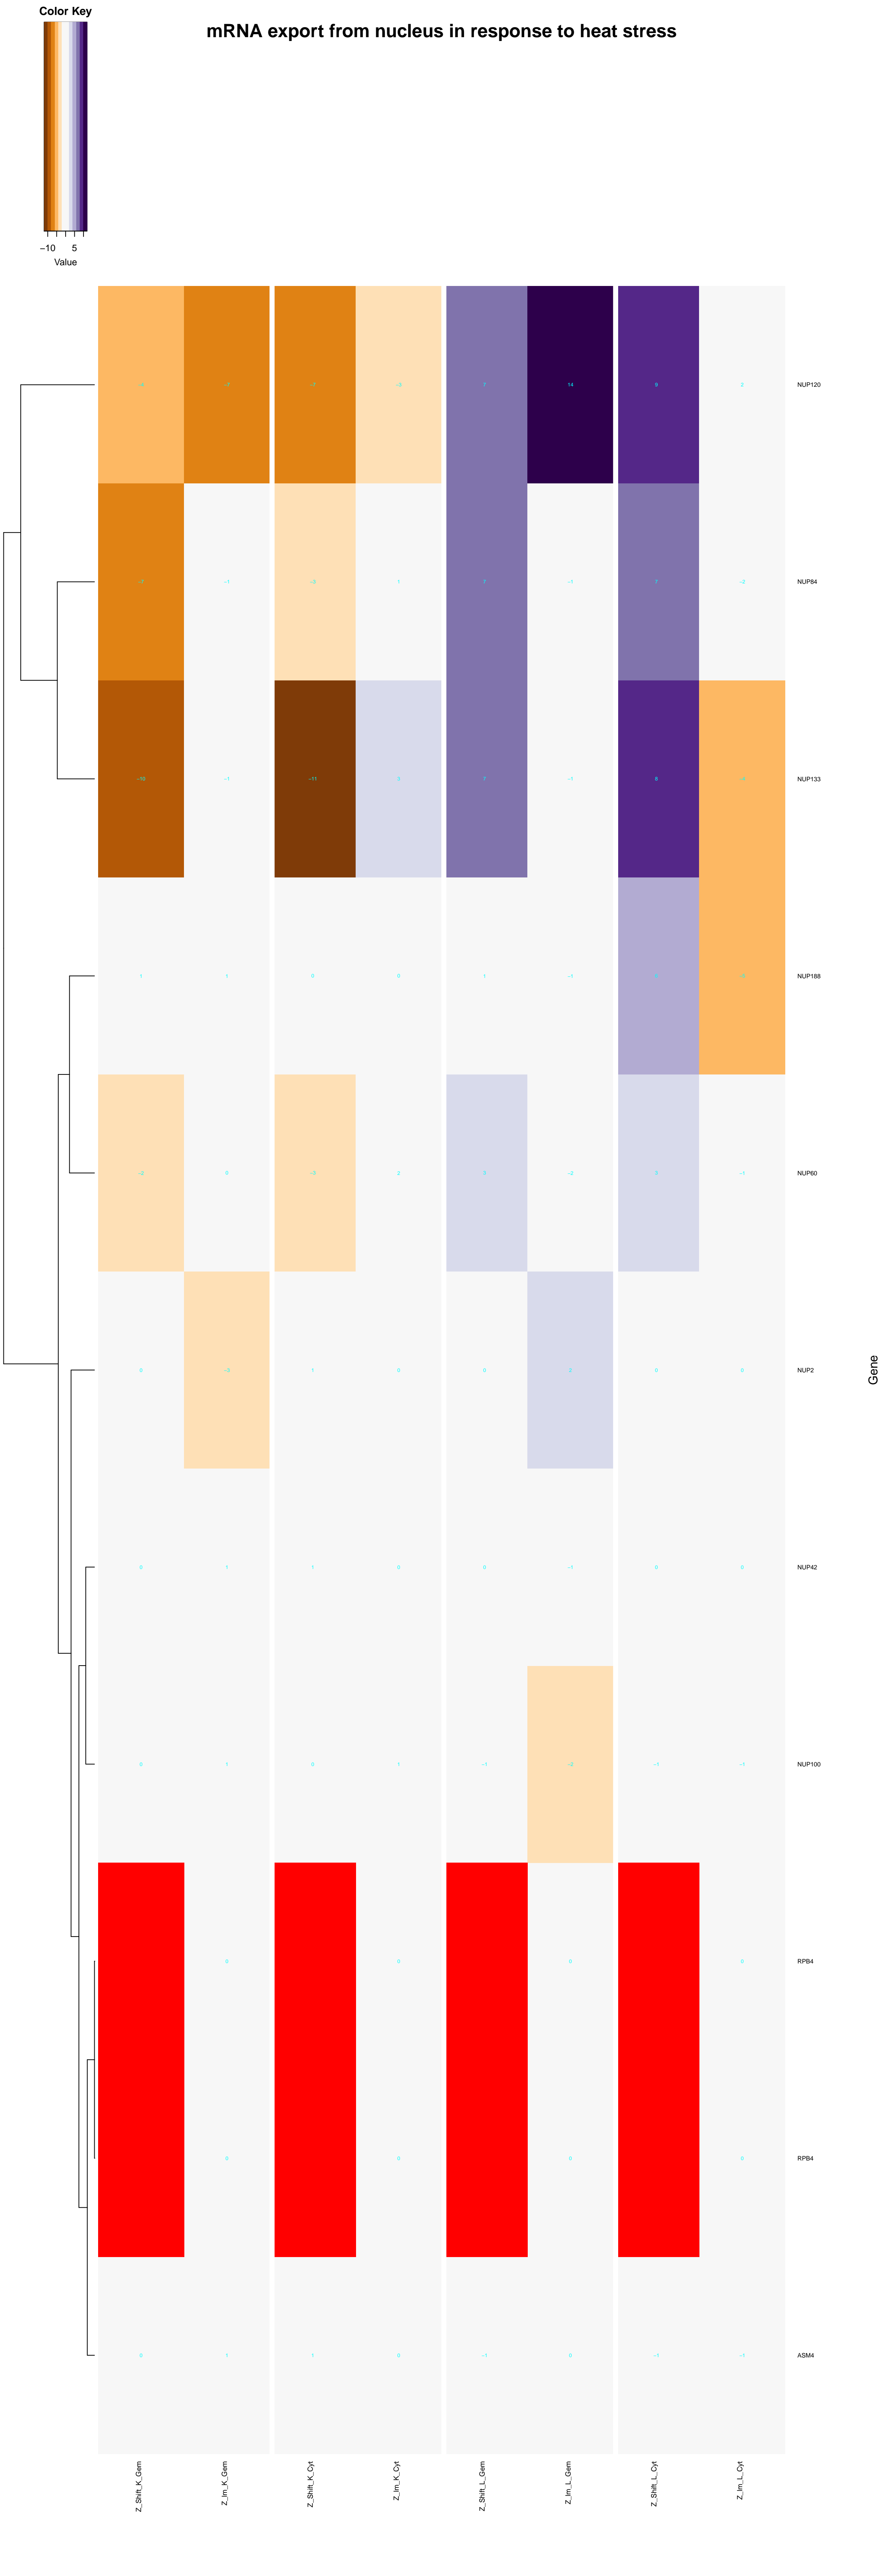

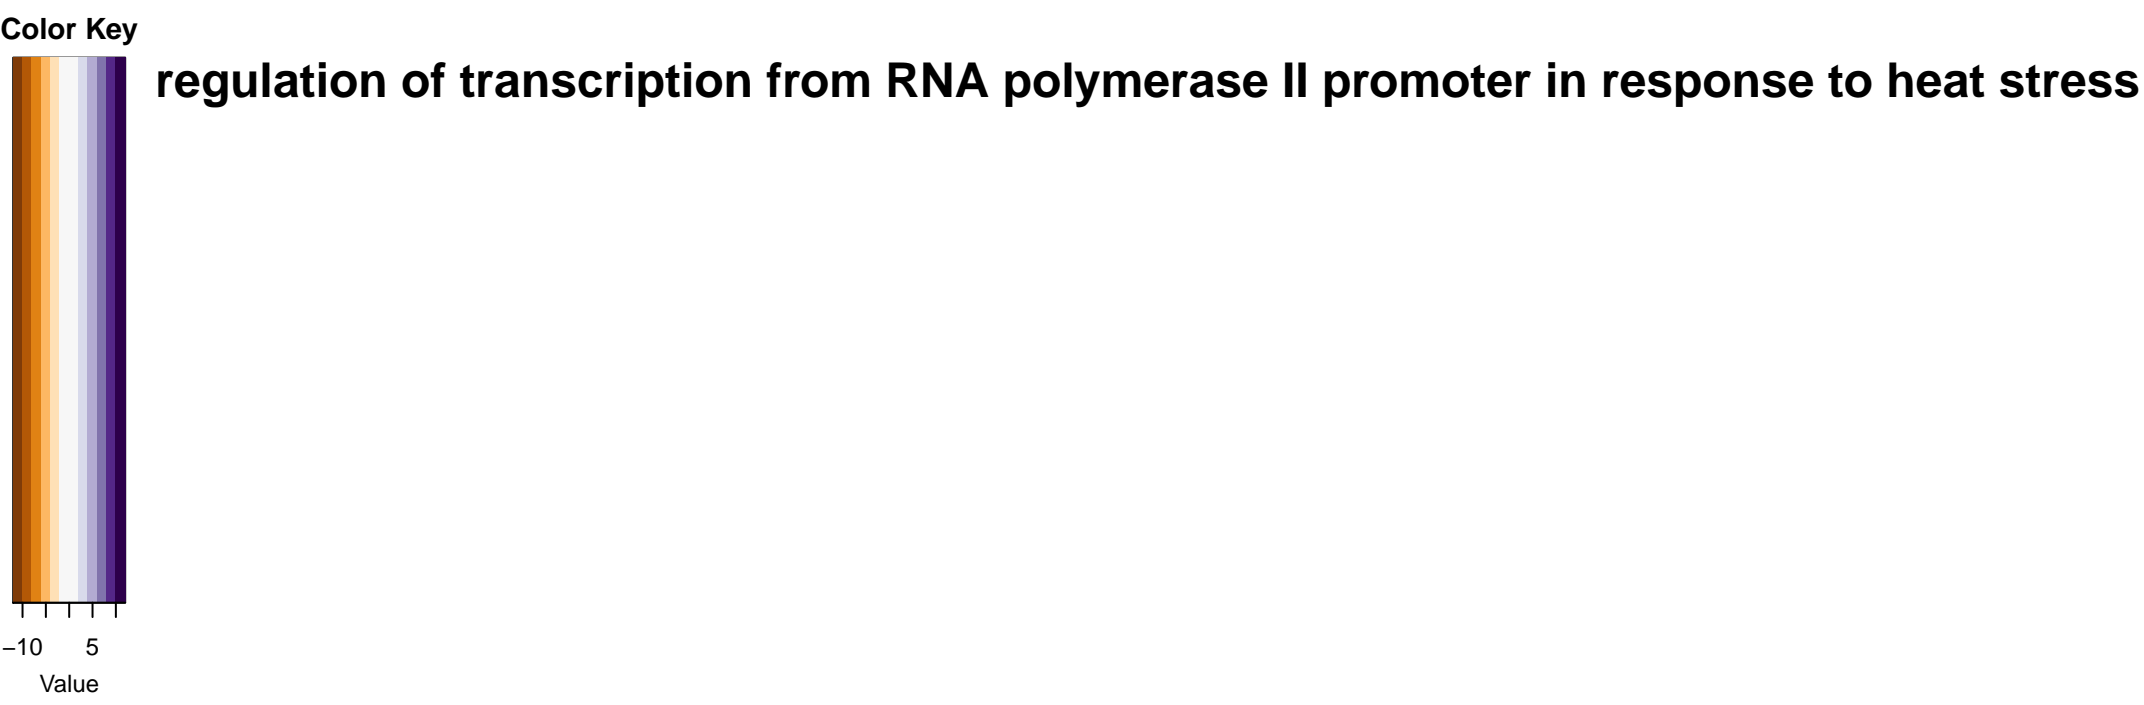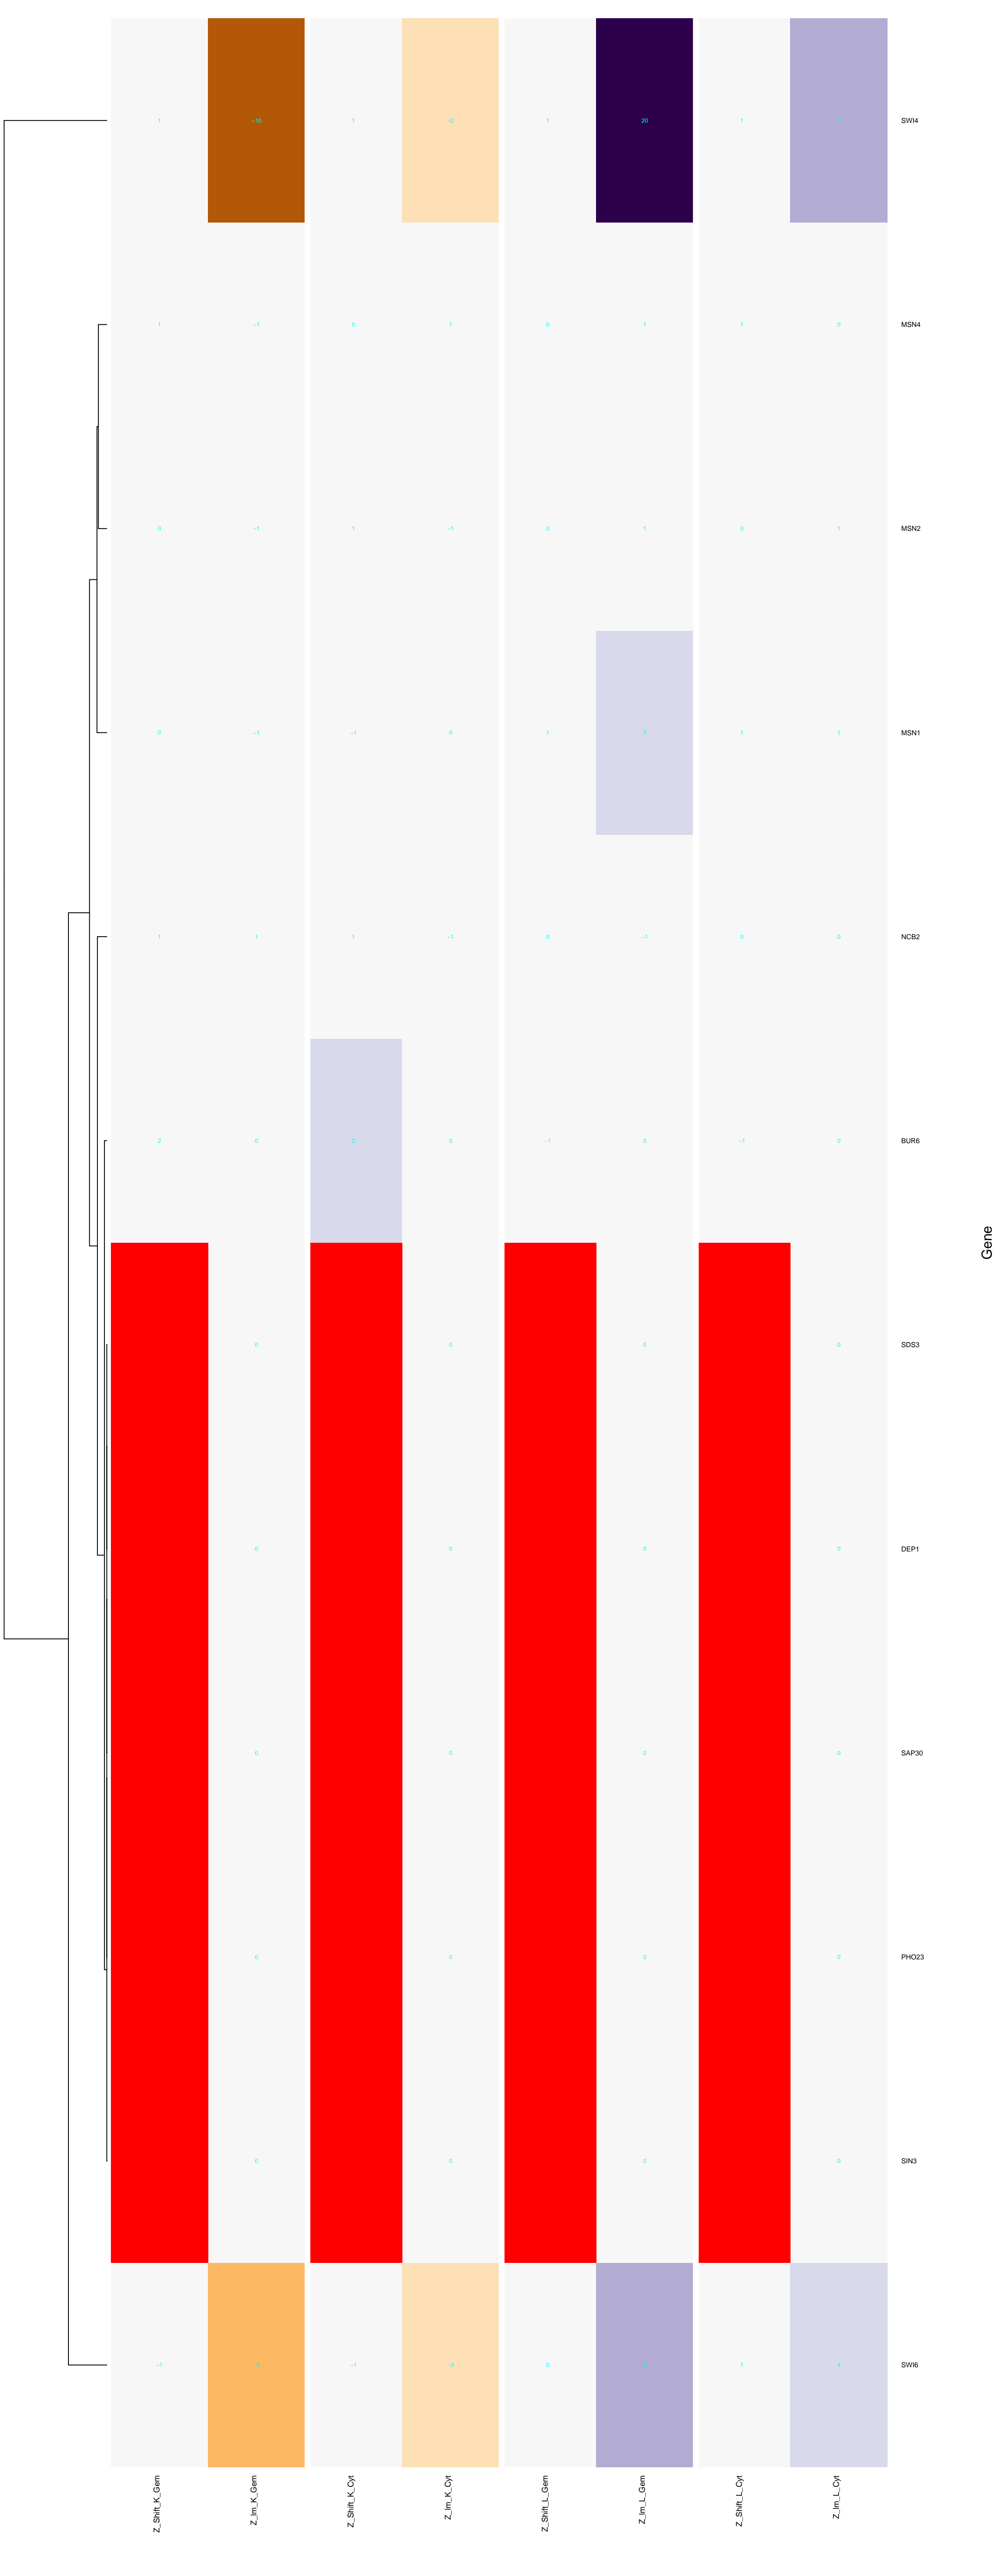

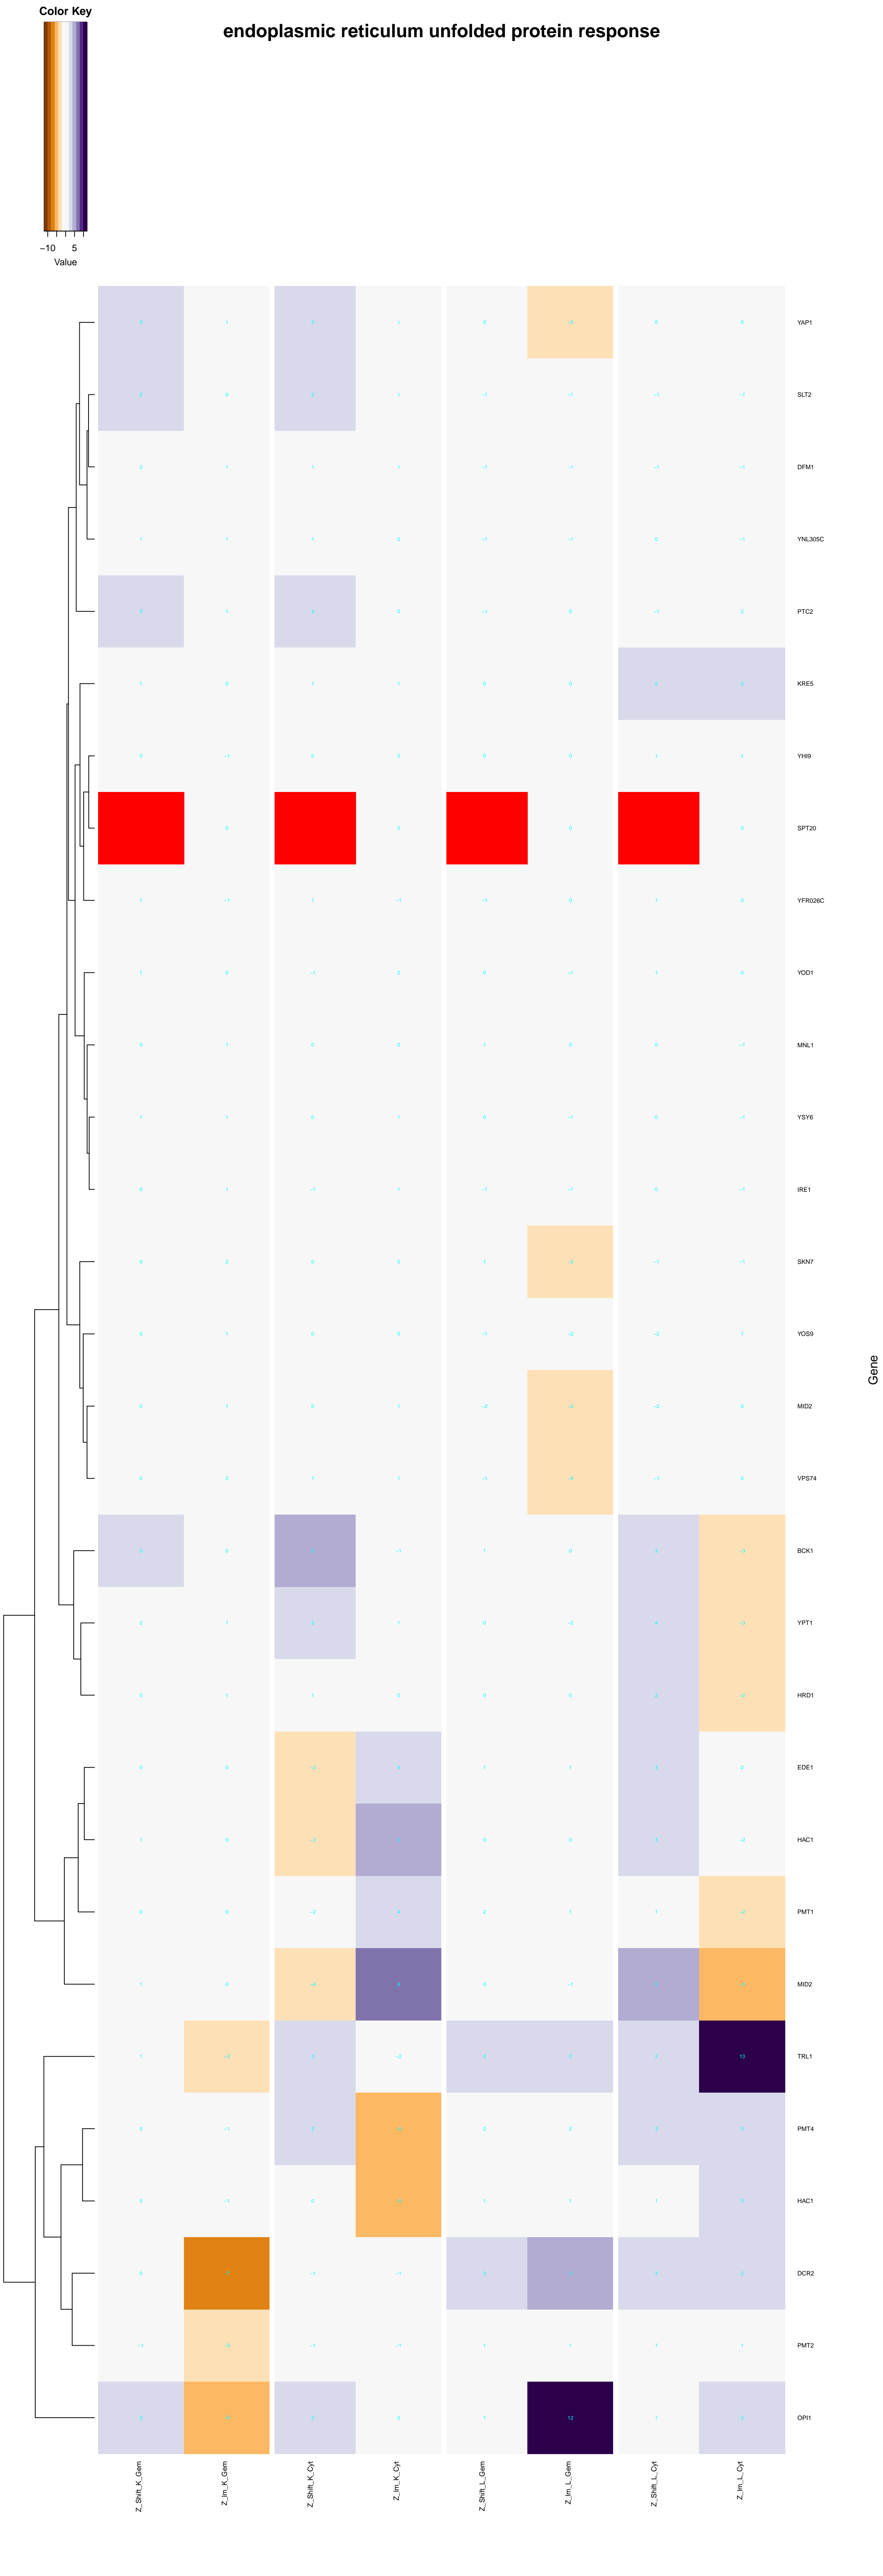

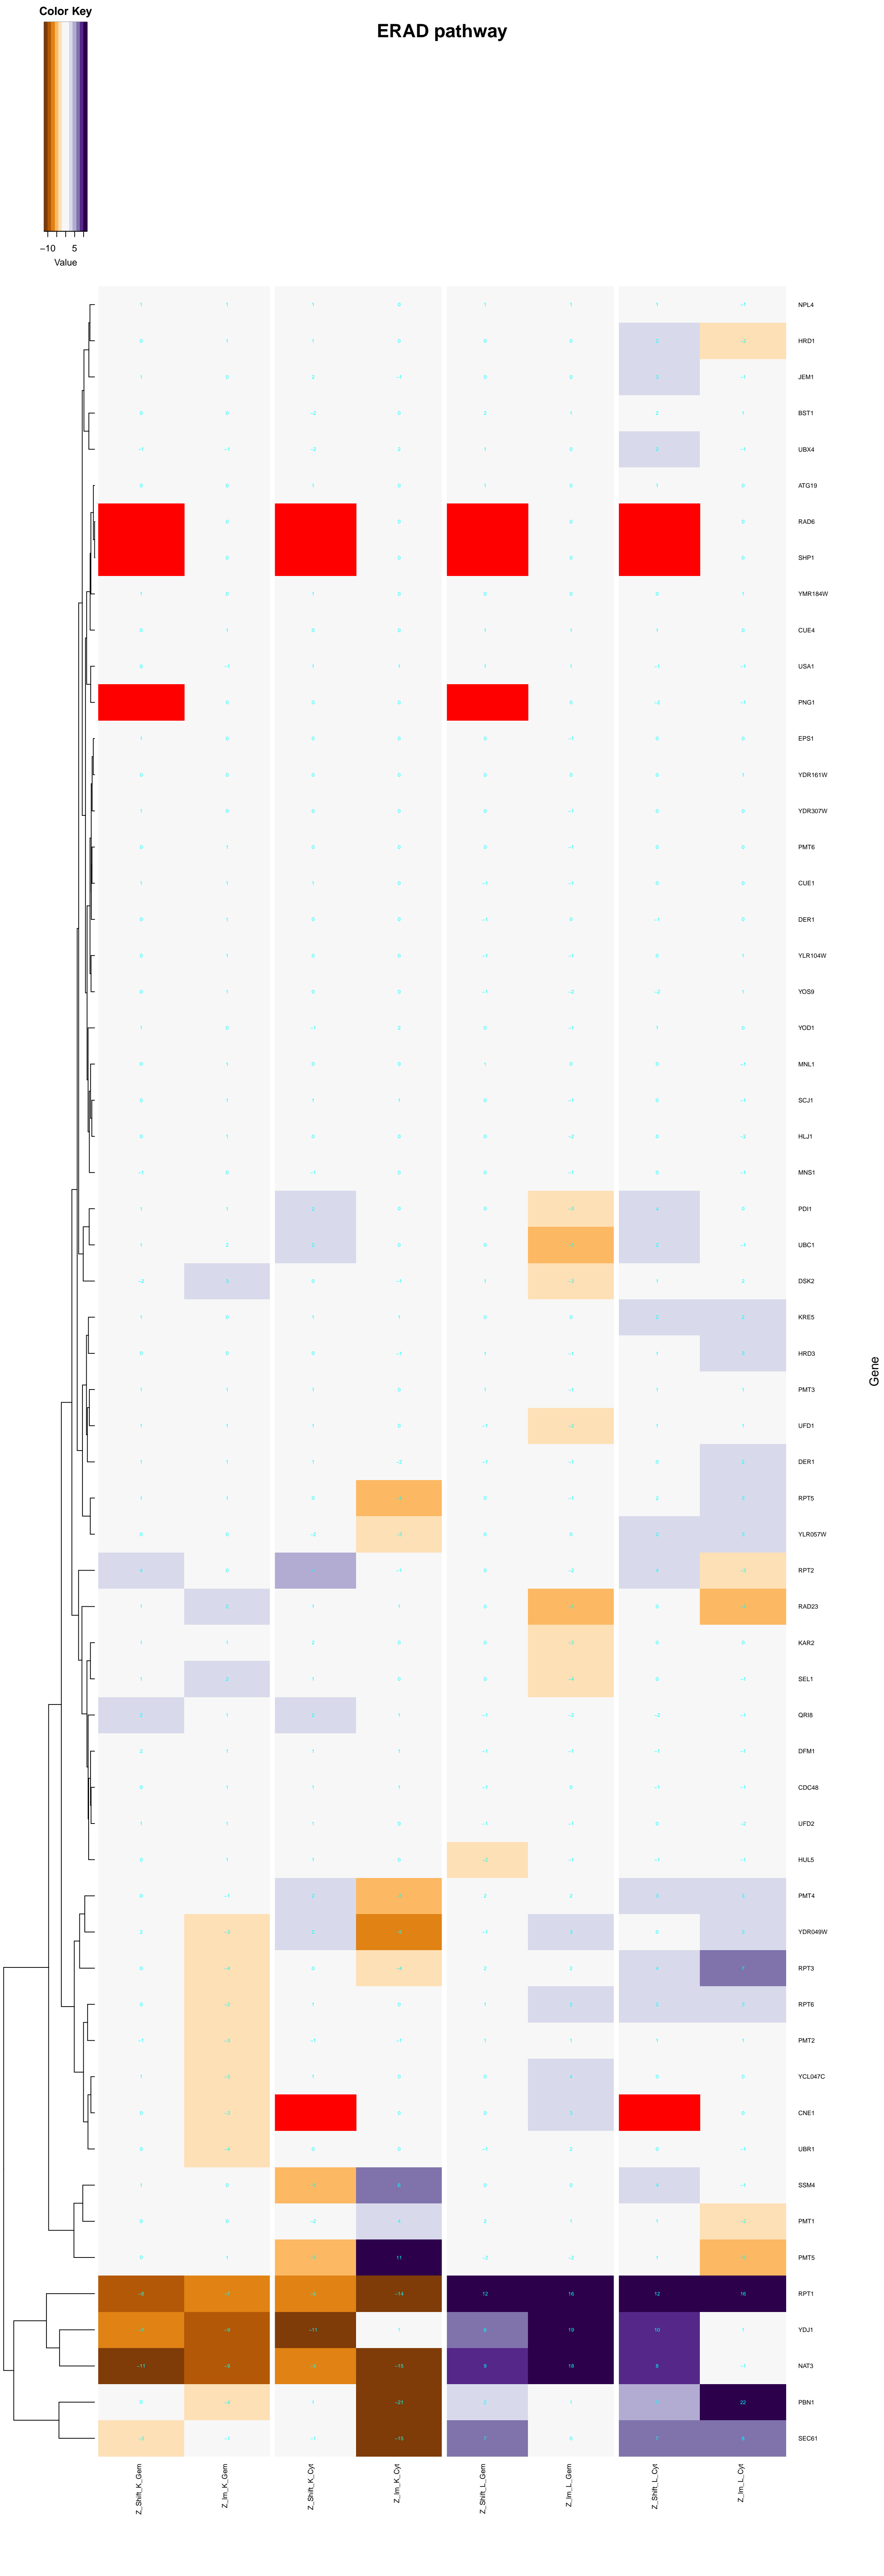

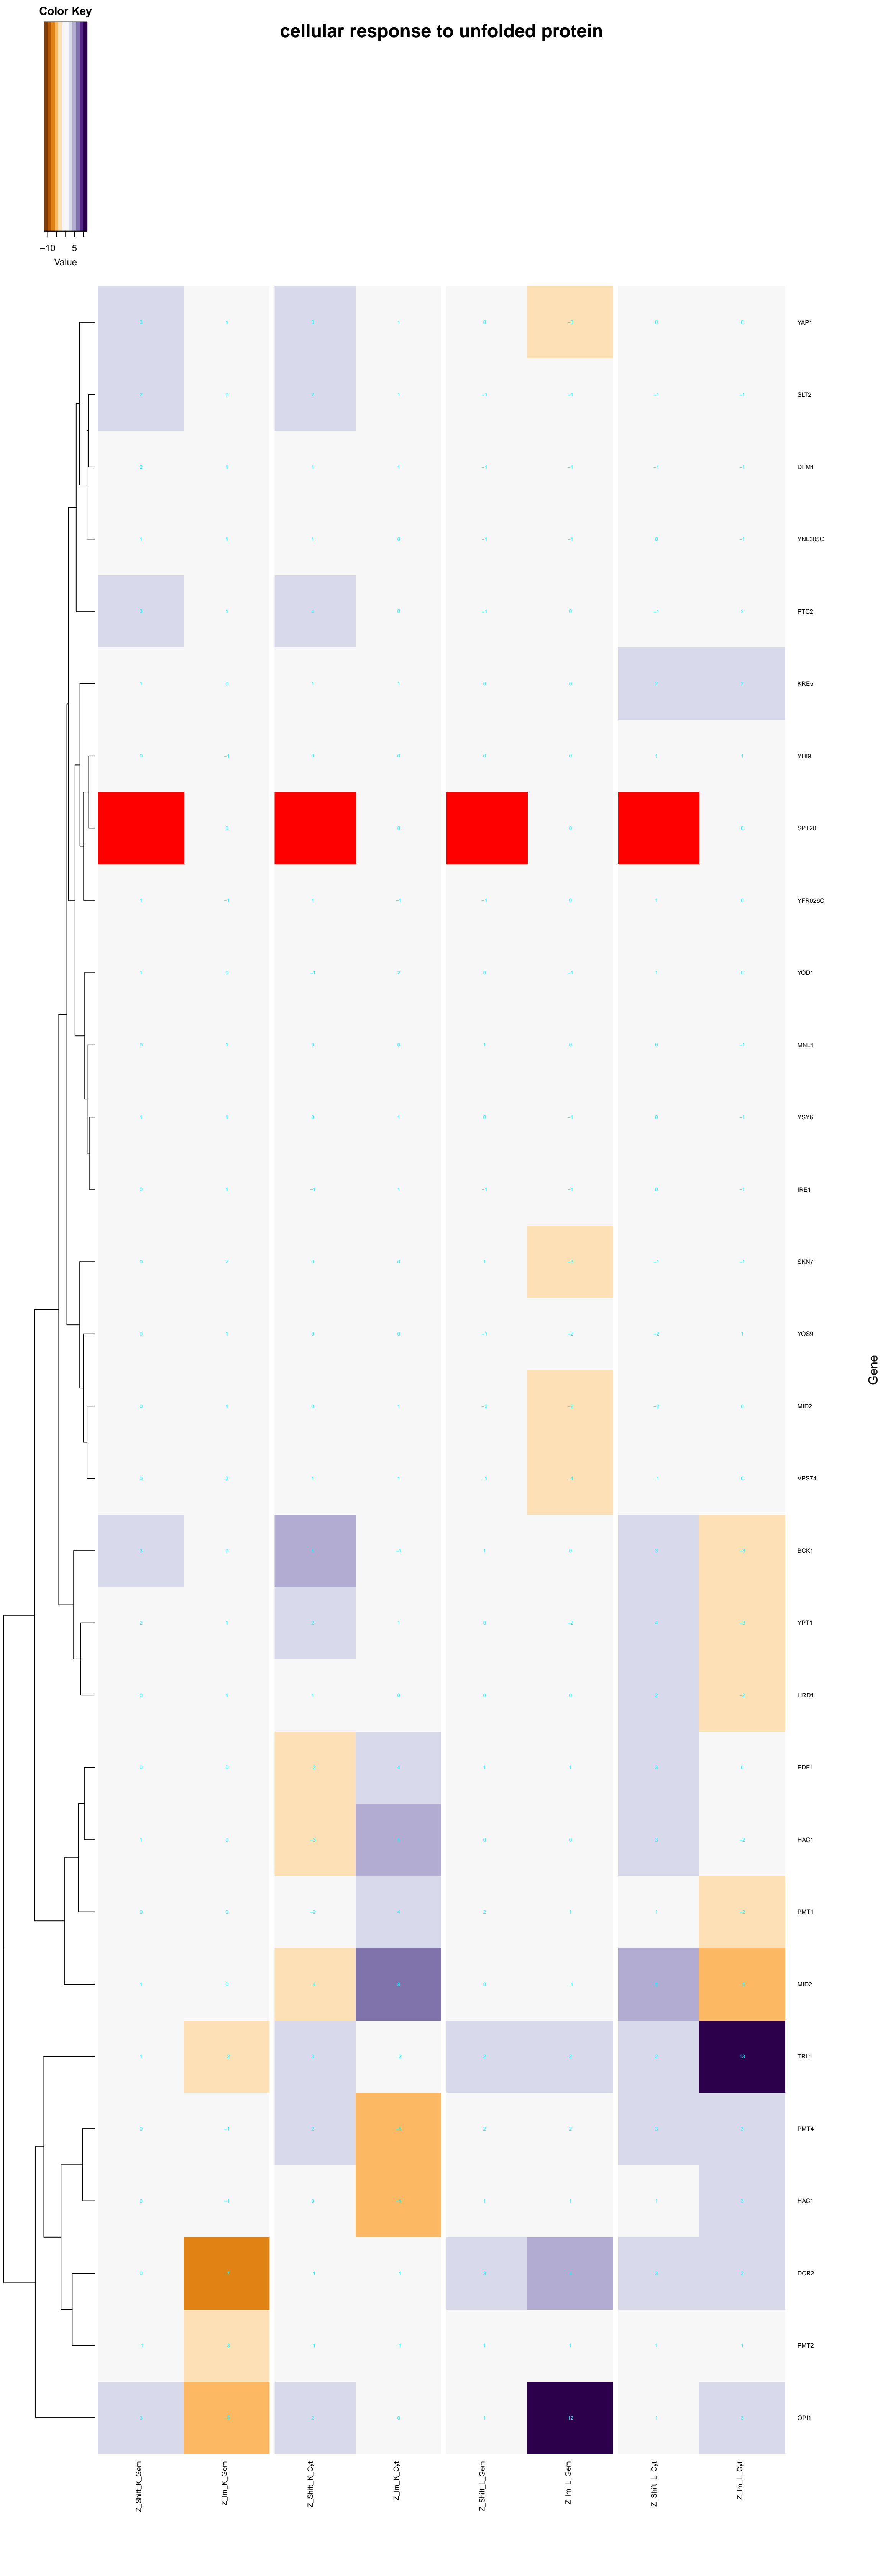

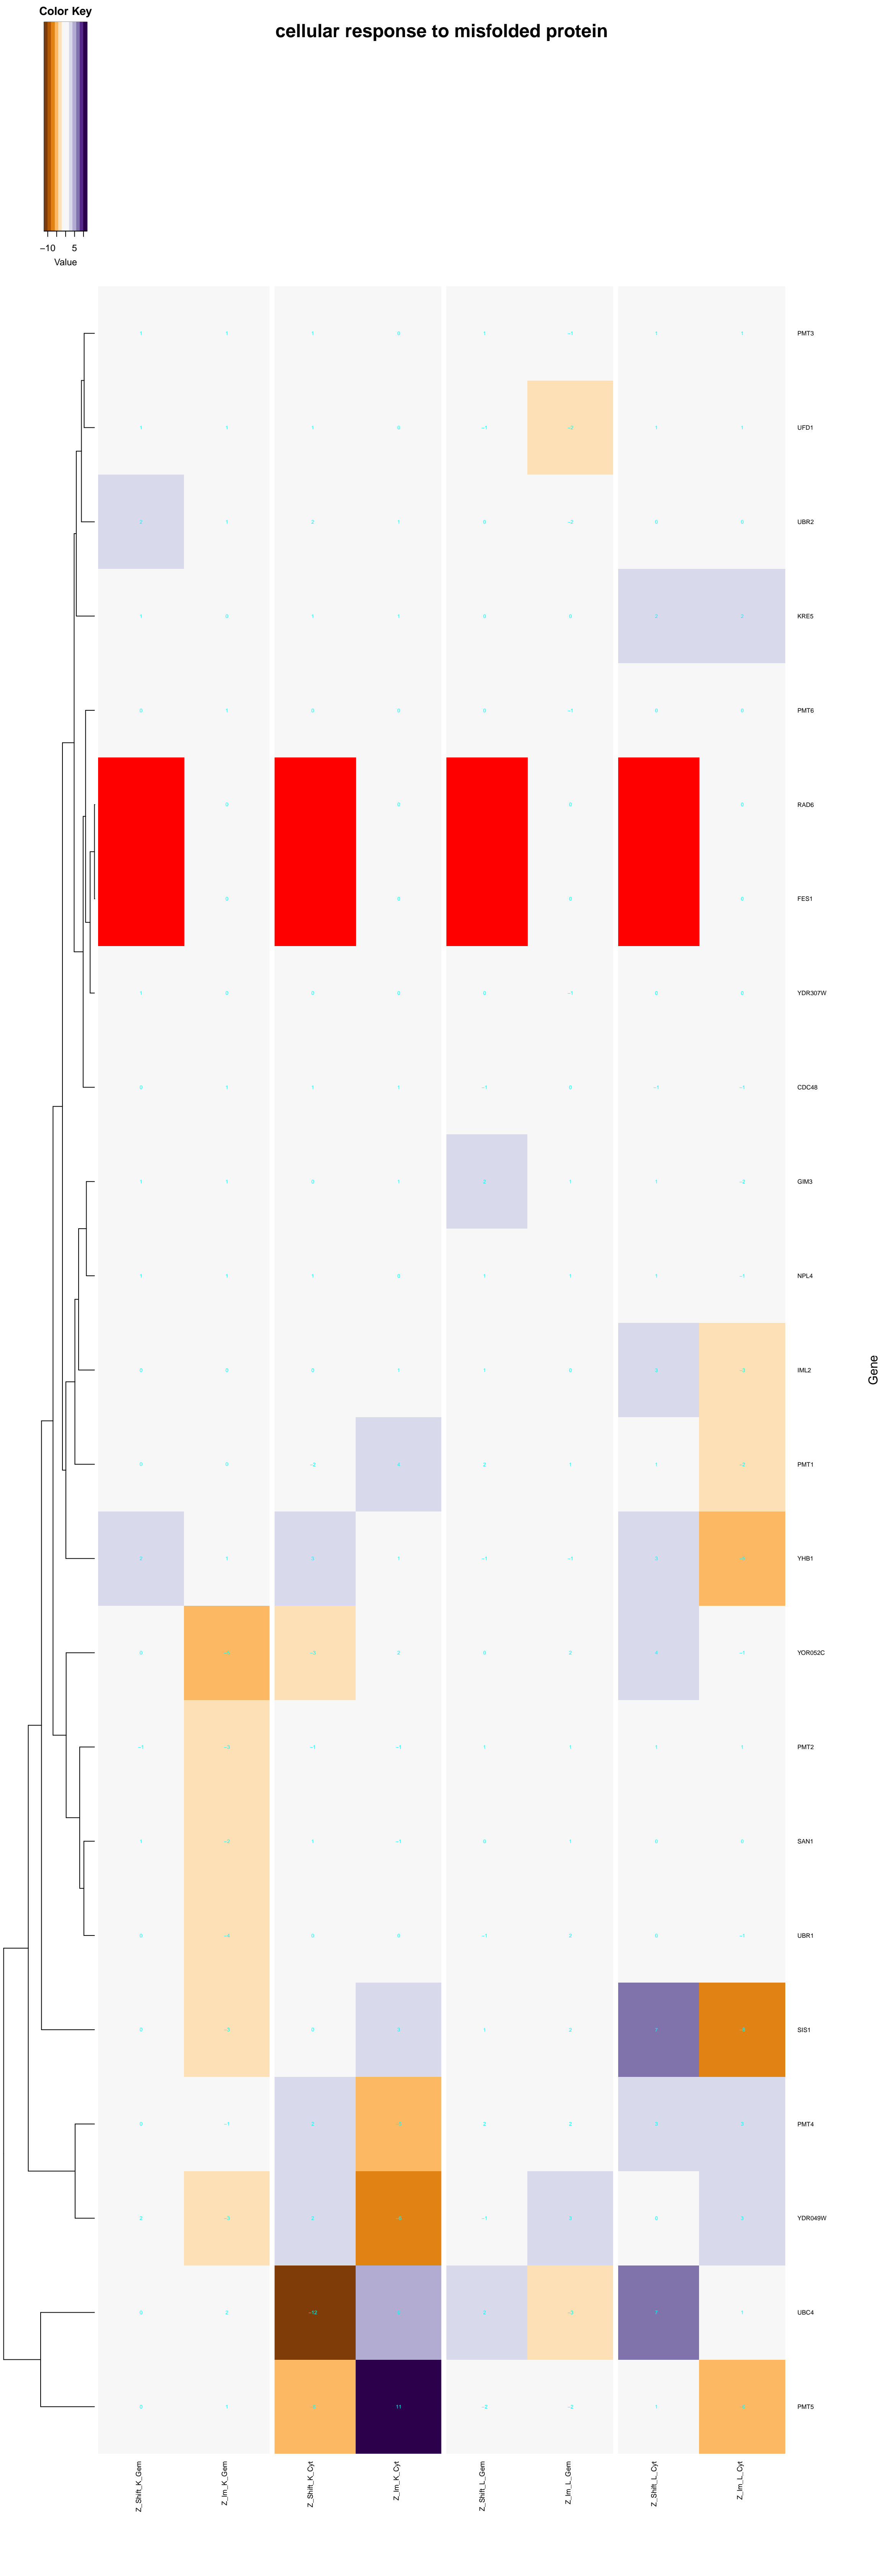

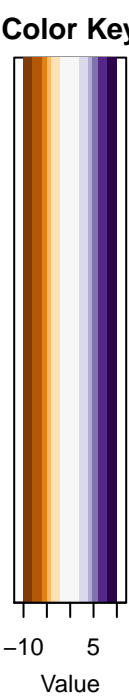

cellular response to desiccation

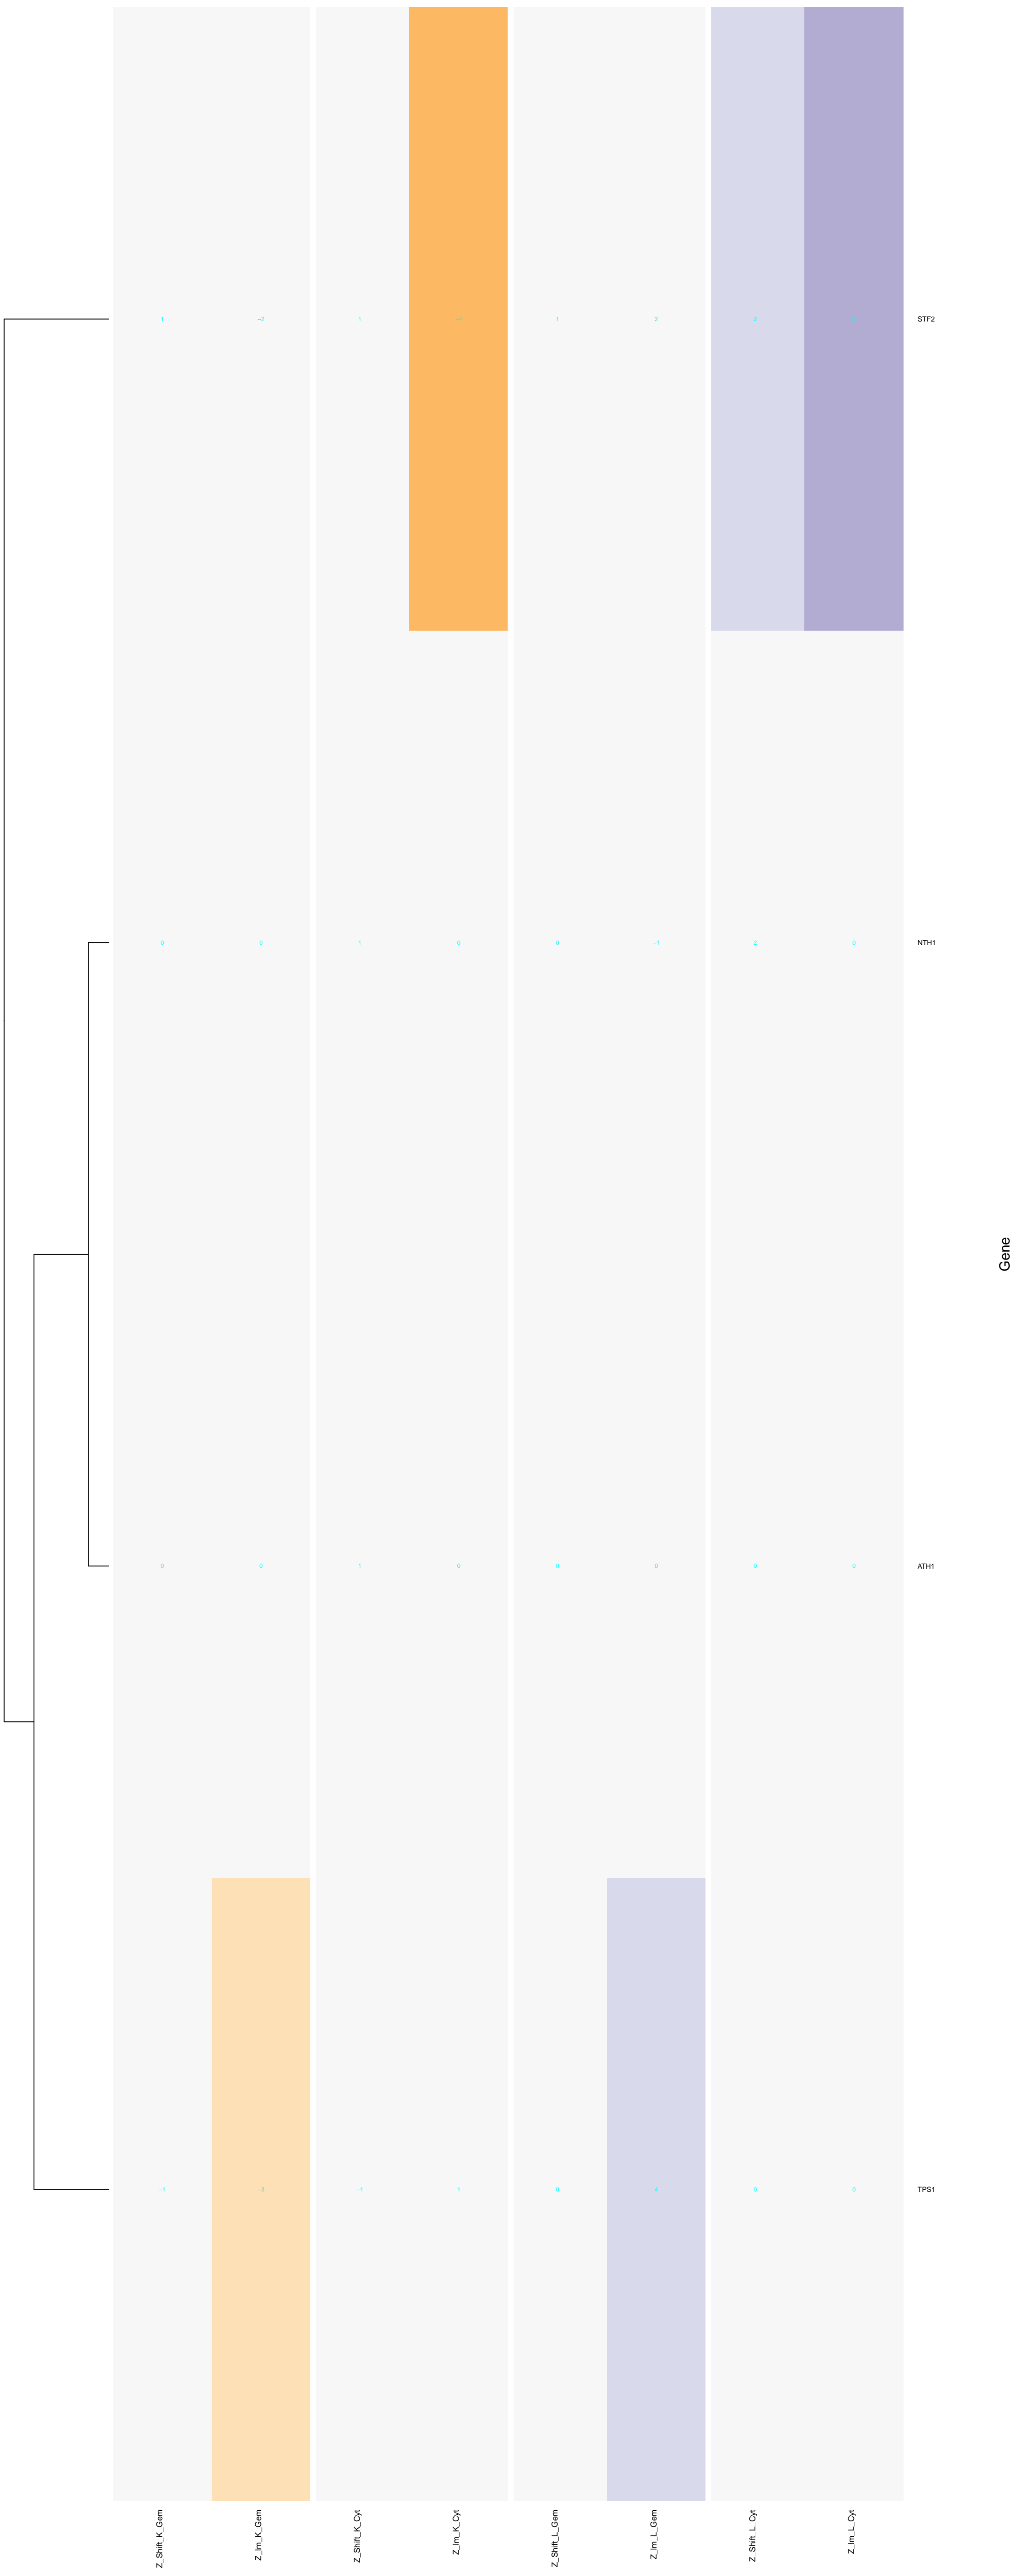

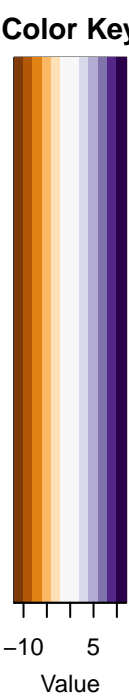

positive regulation of translation in response to stress

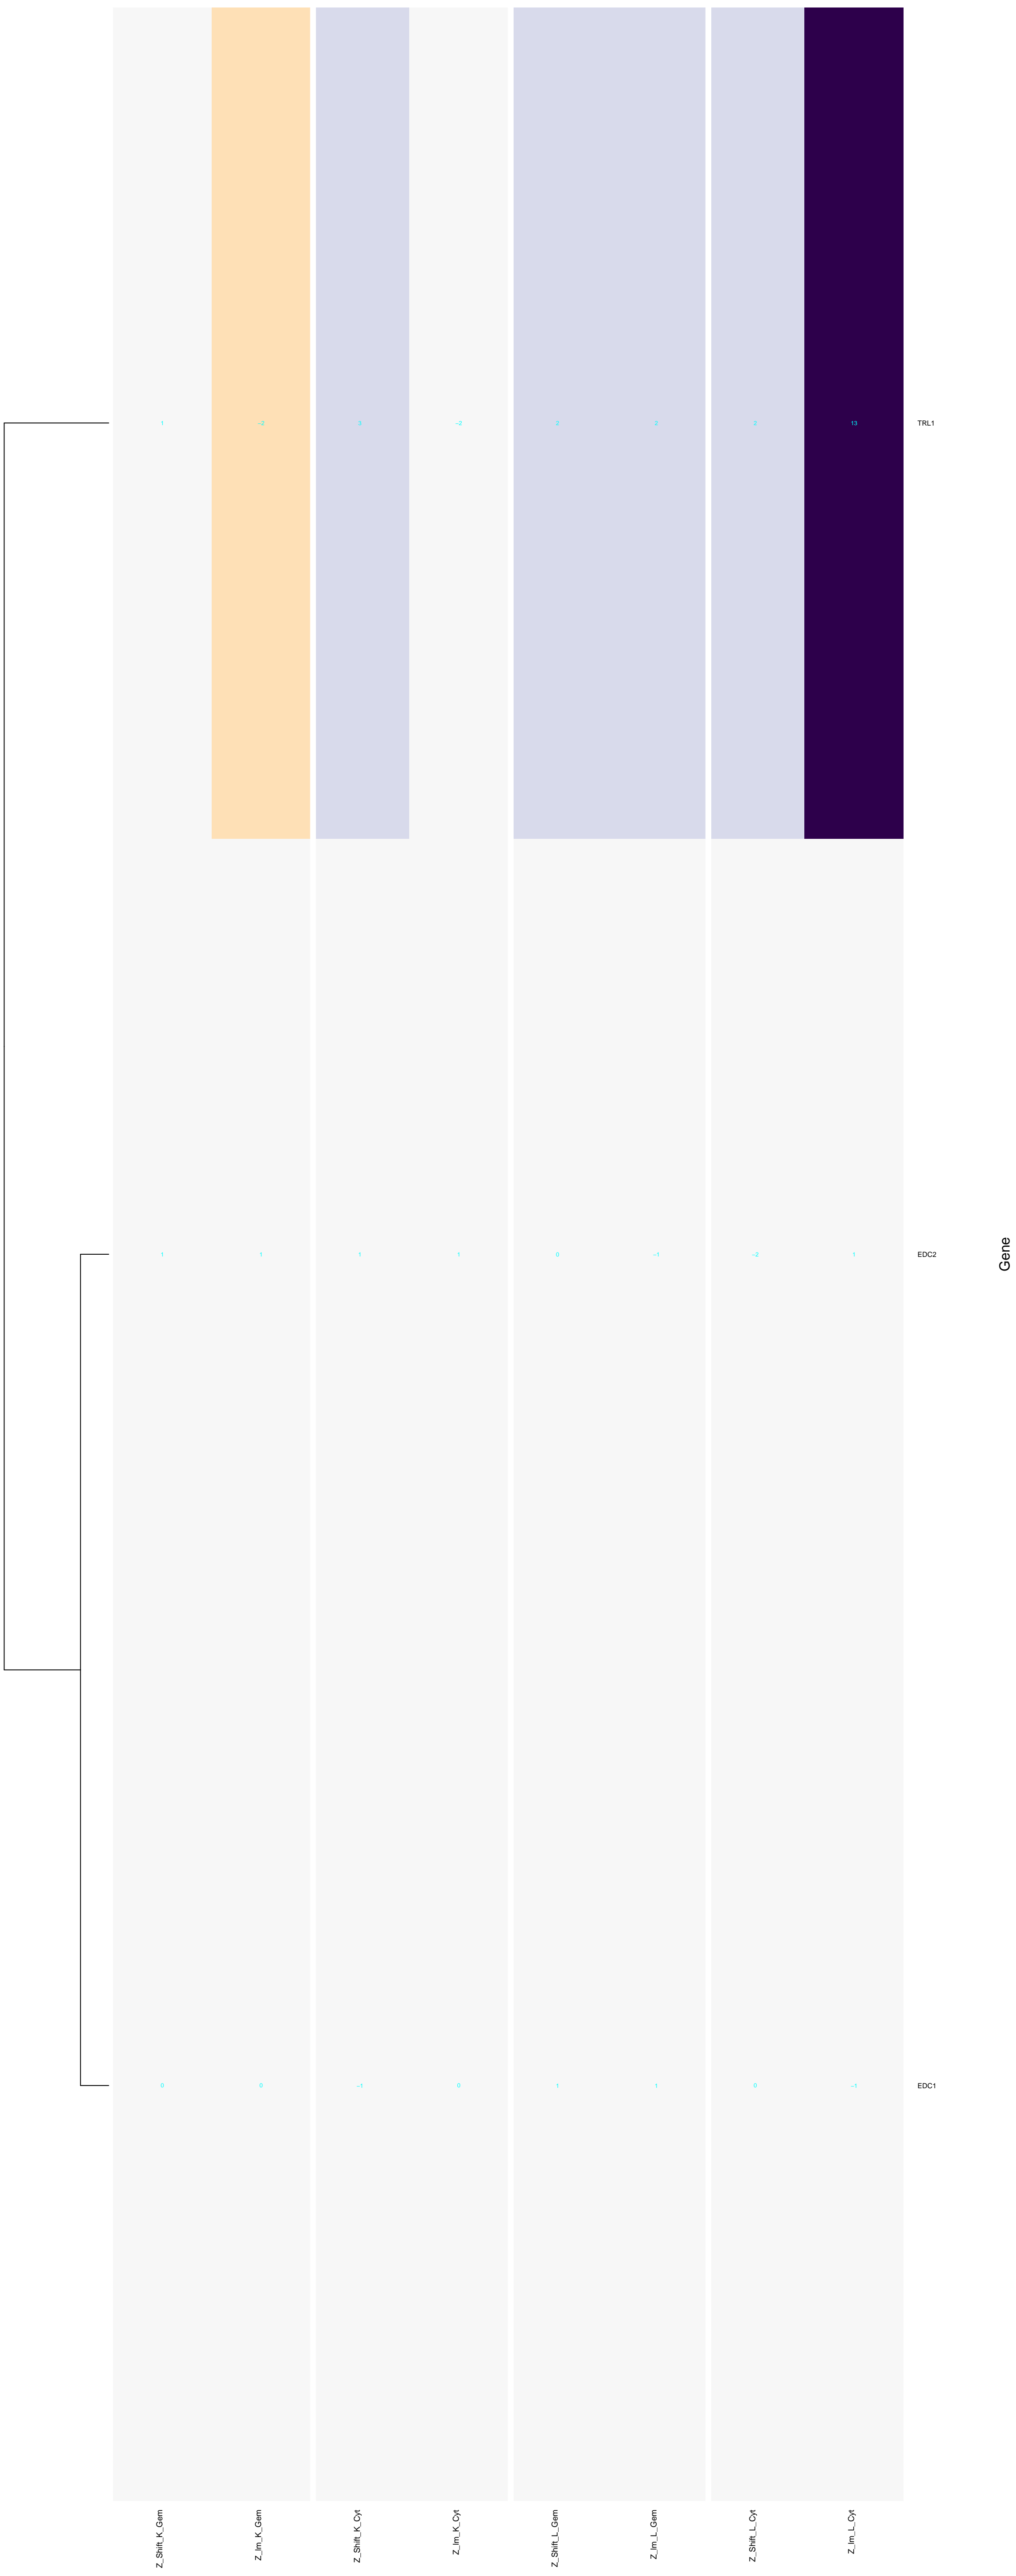

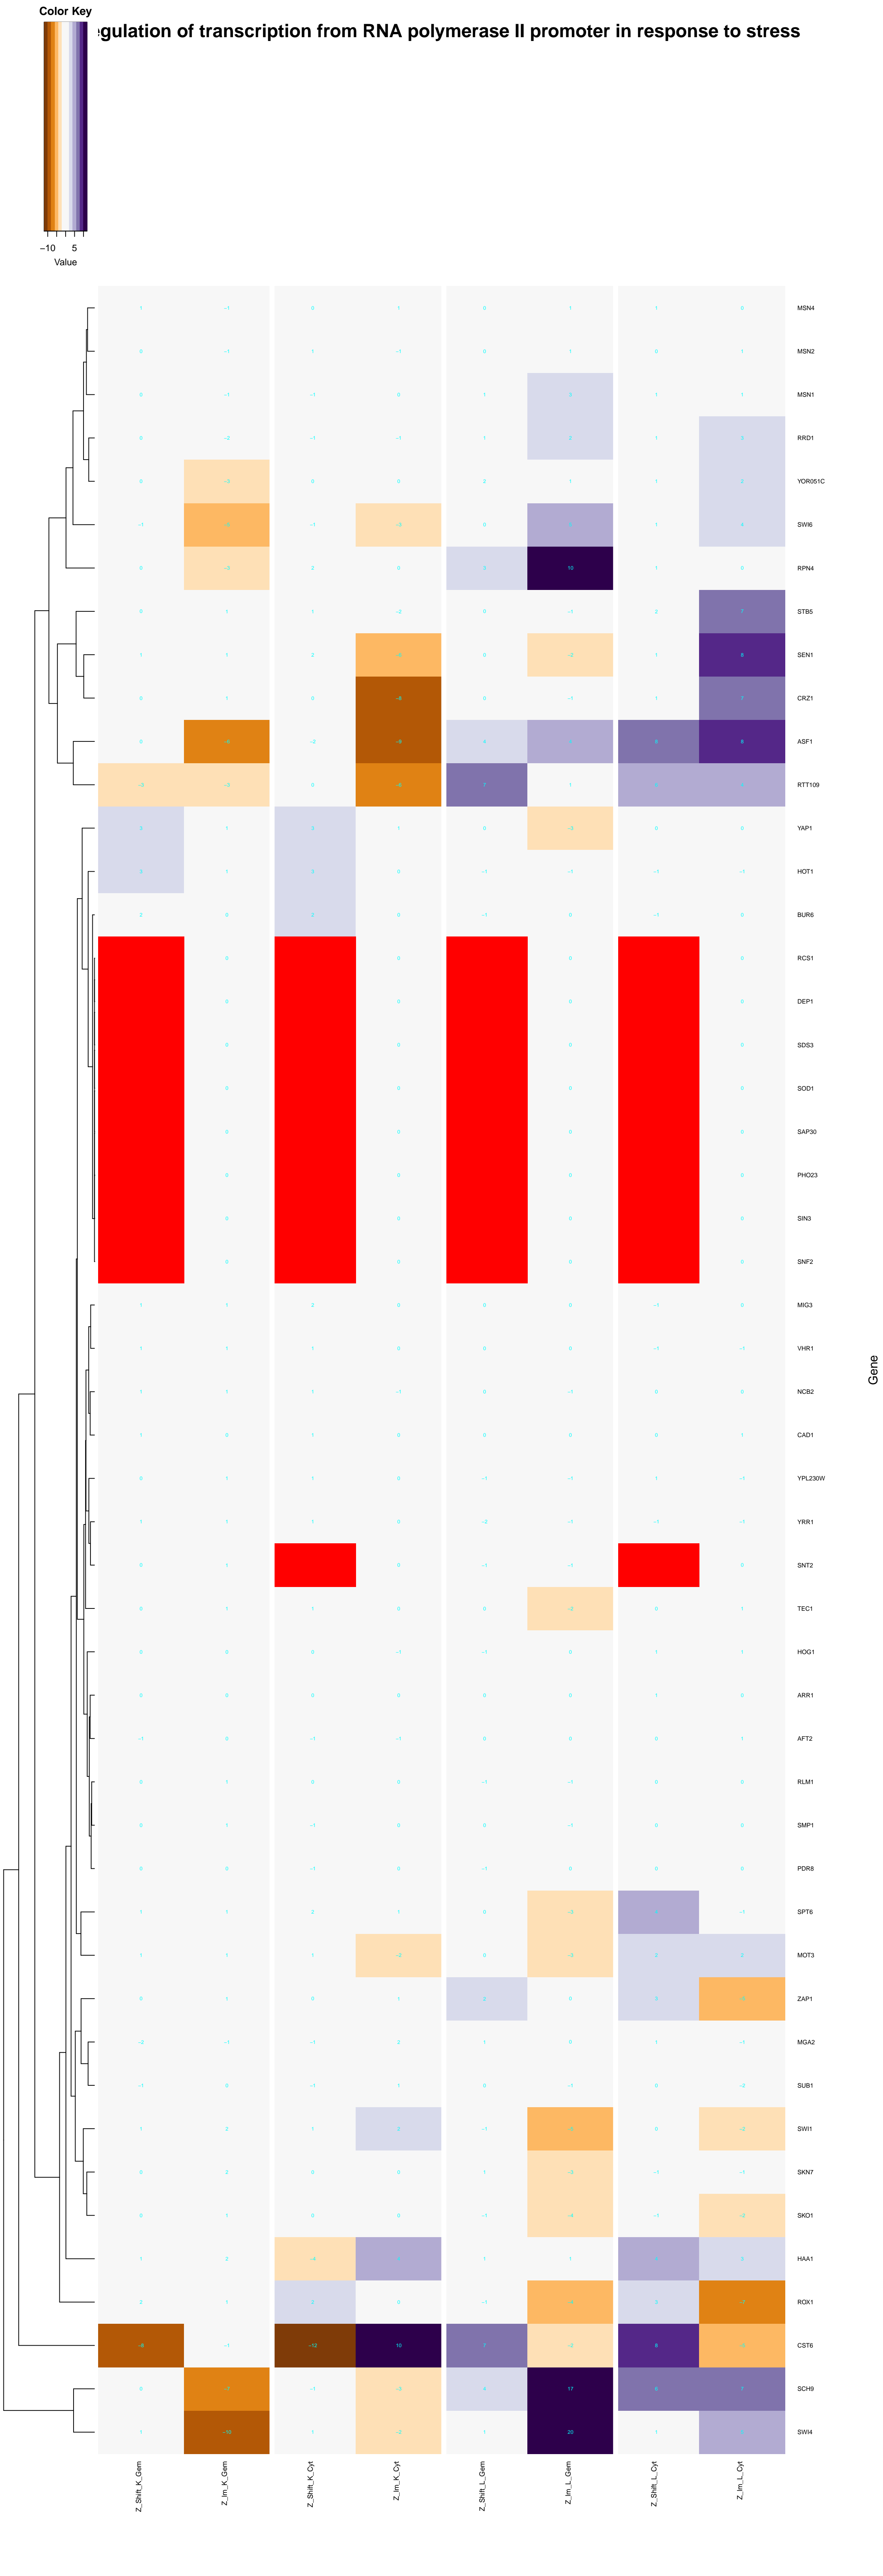

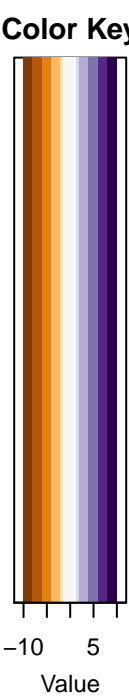

cellular response to freezing

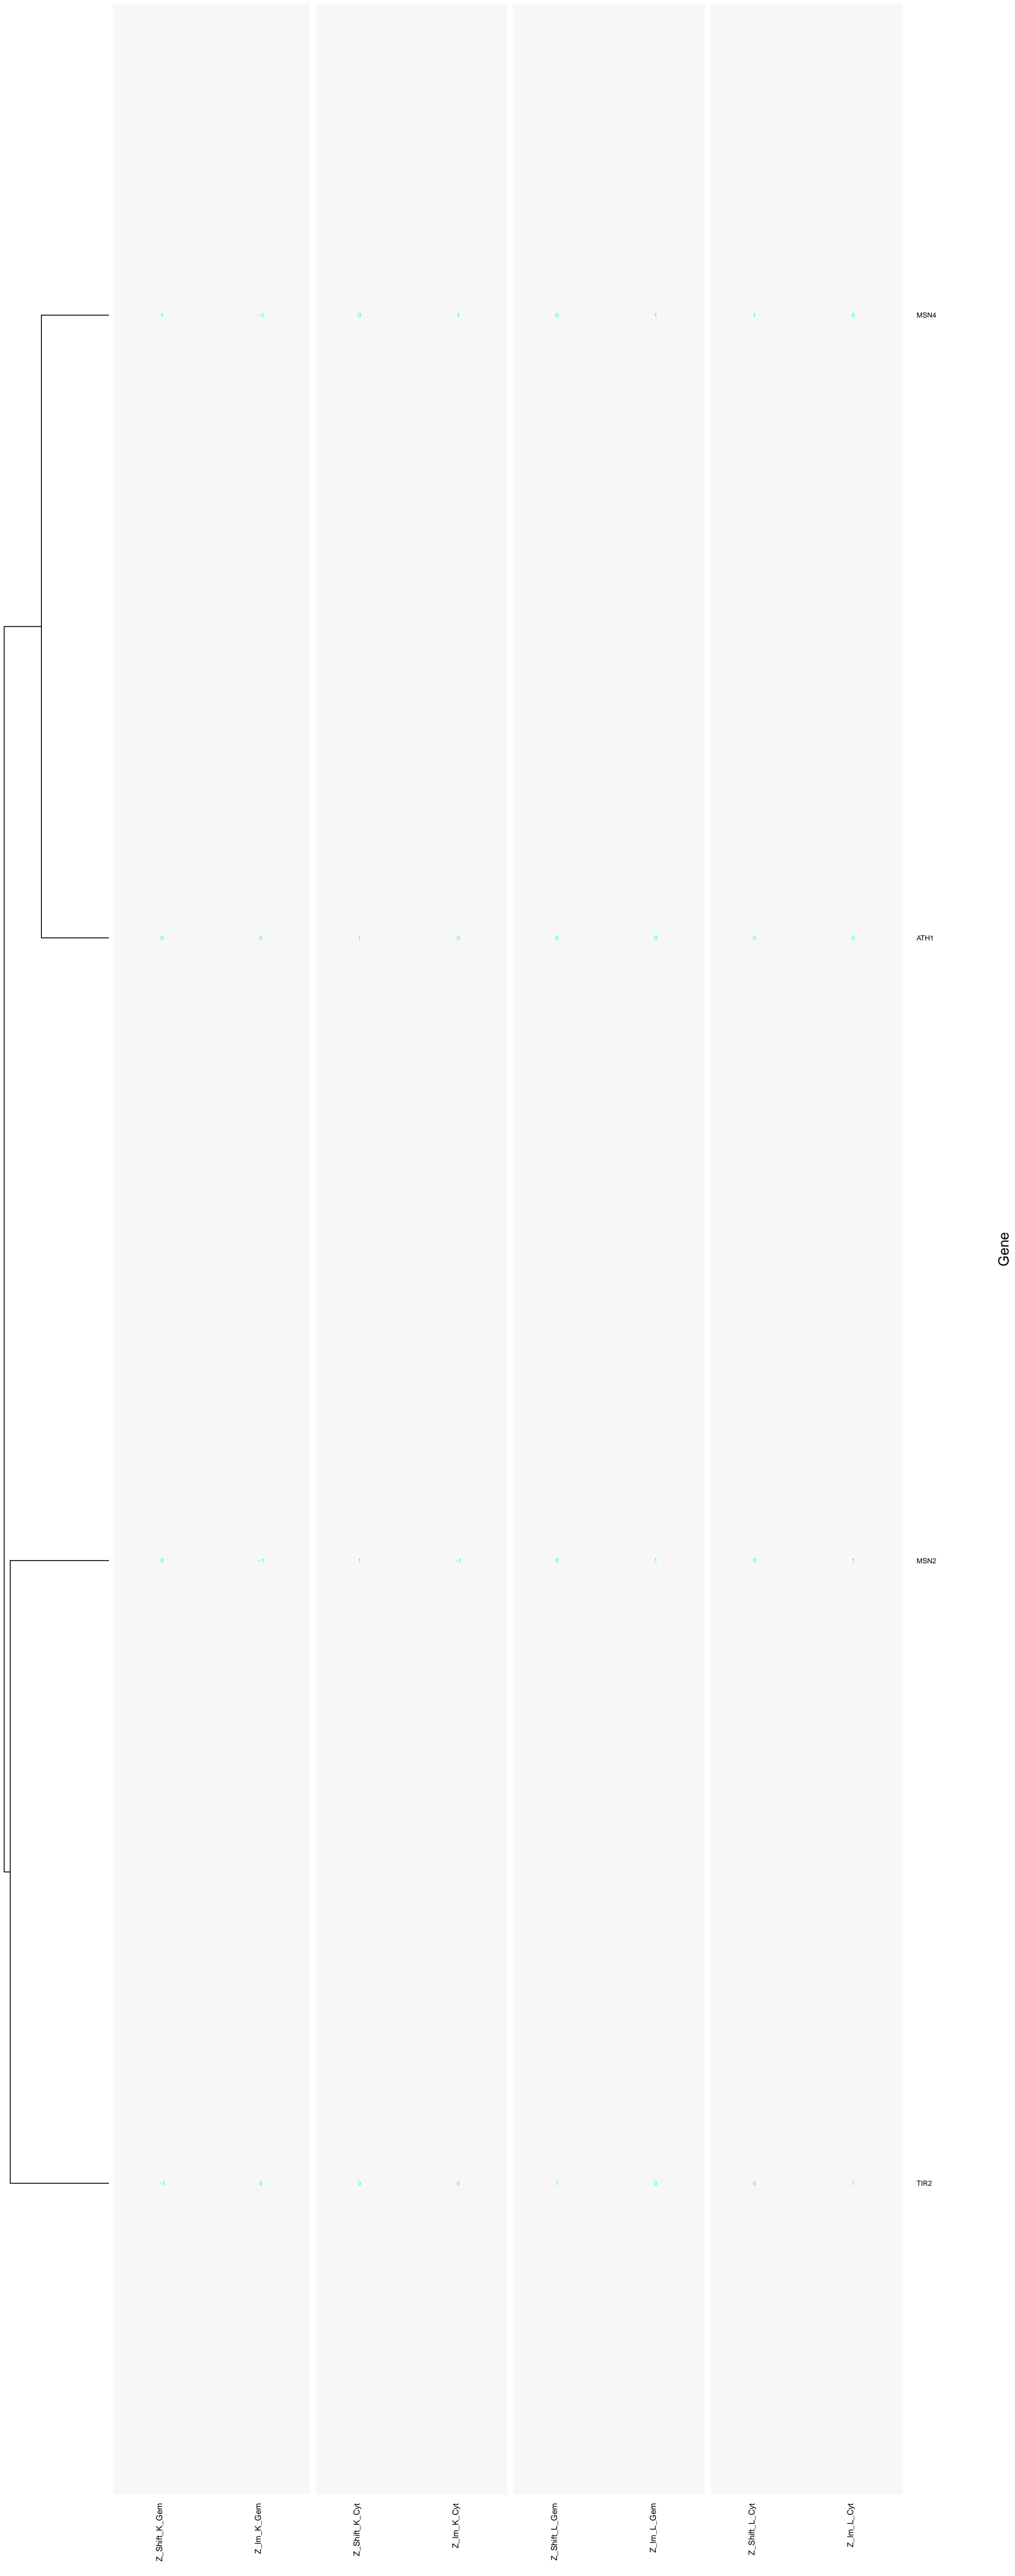

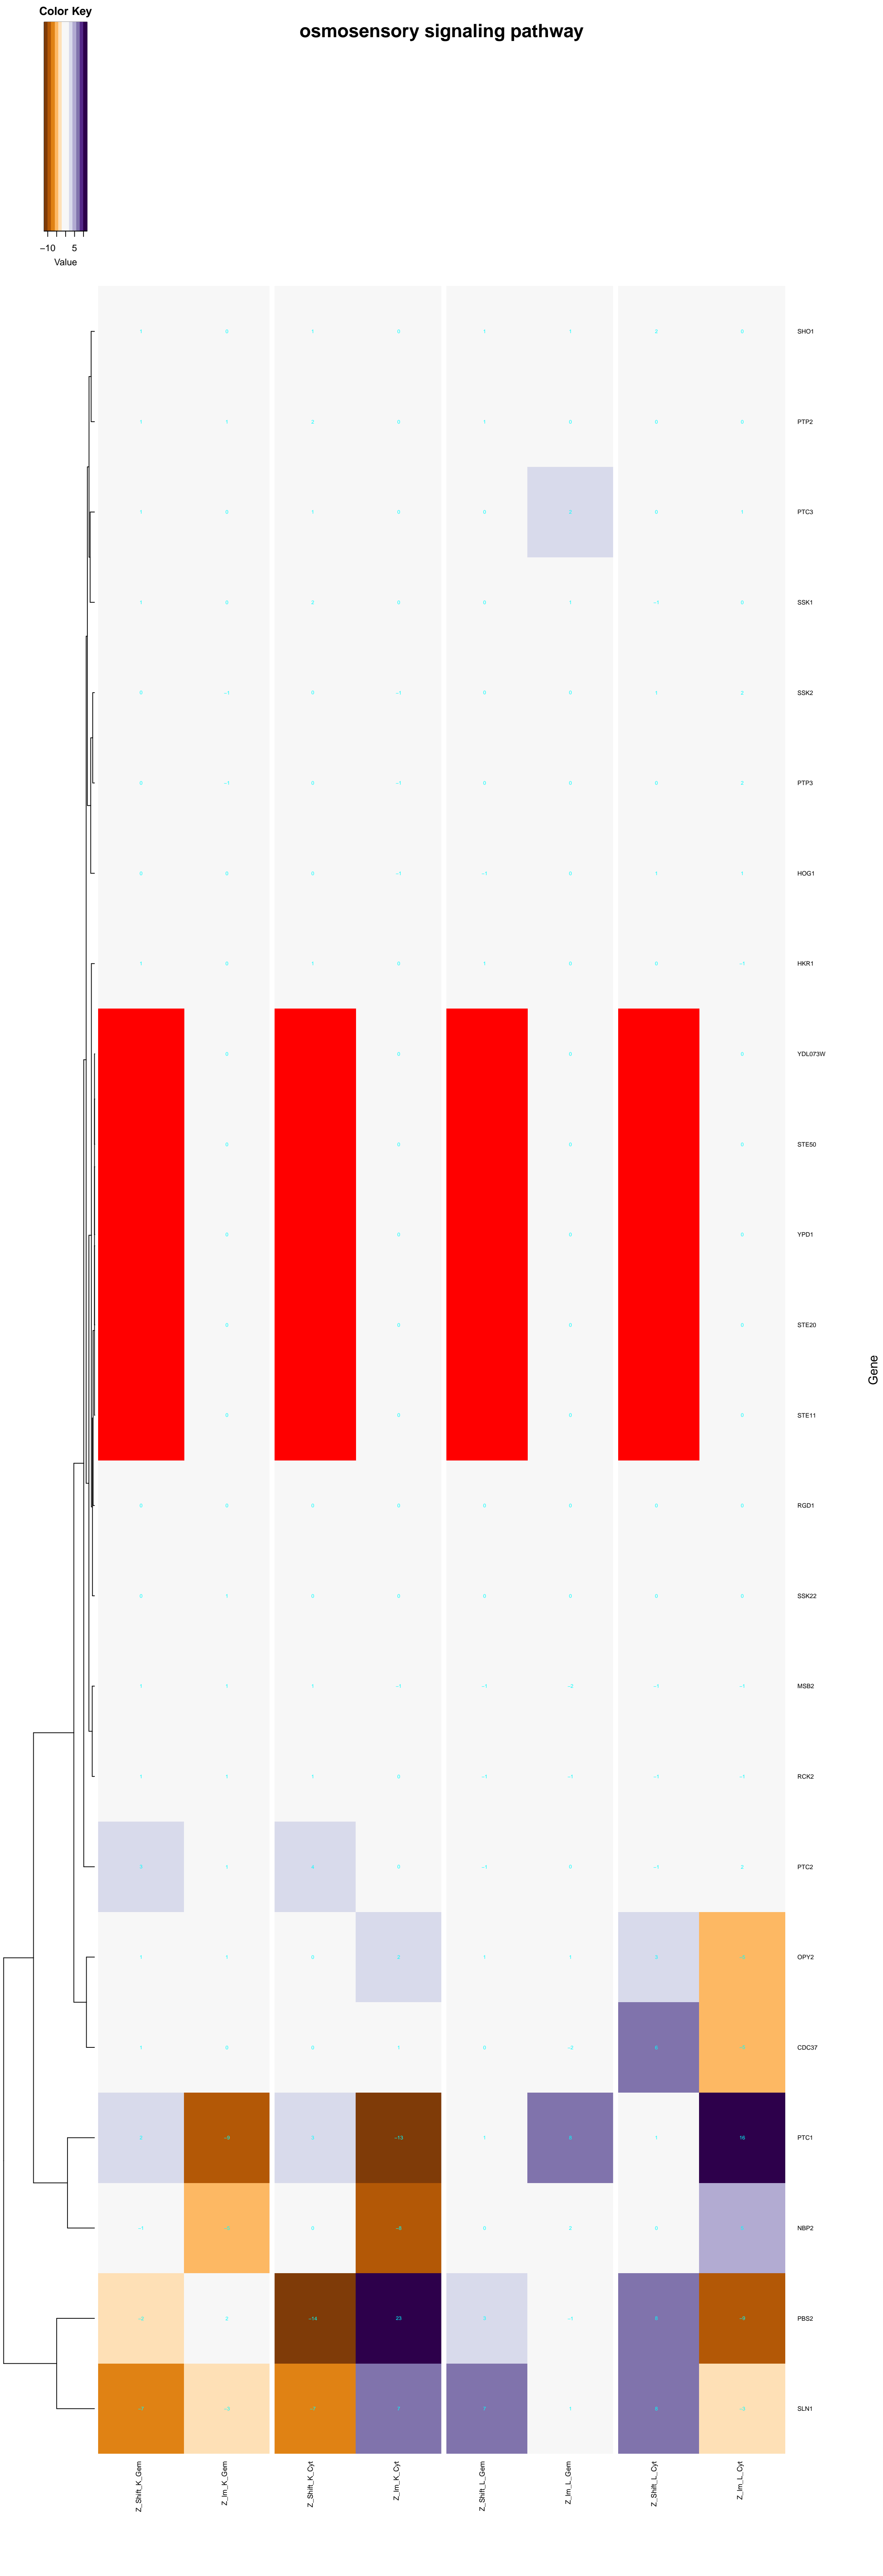

Color Key

Value

10 5

tion of transcription from RNA polymerase II promoter in response to osmotic stress

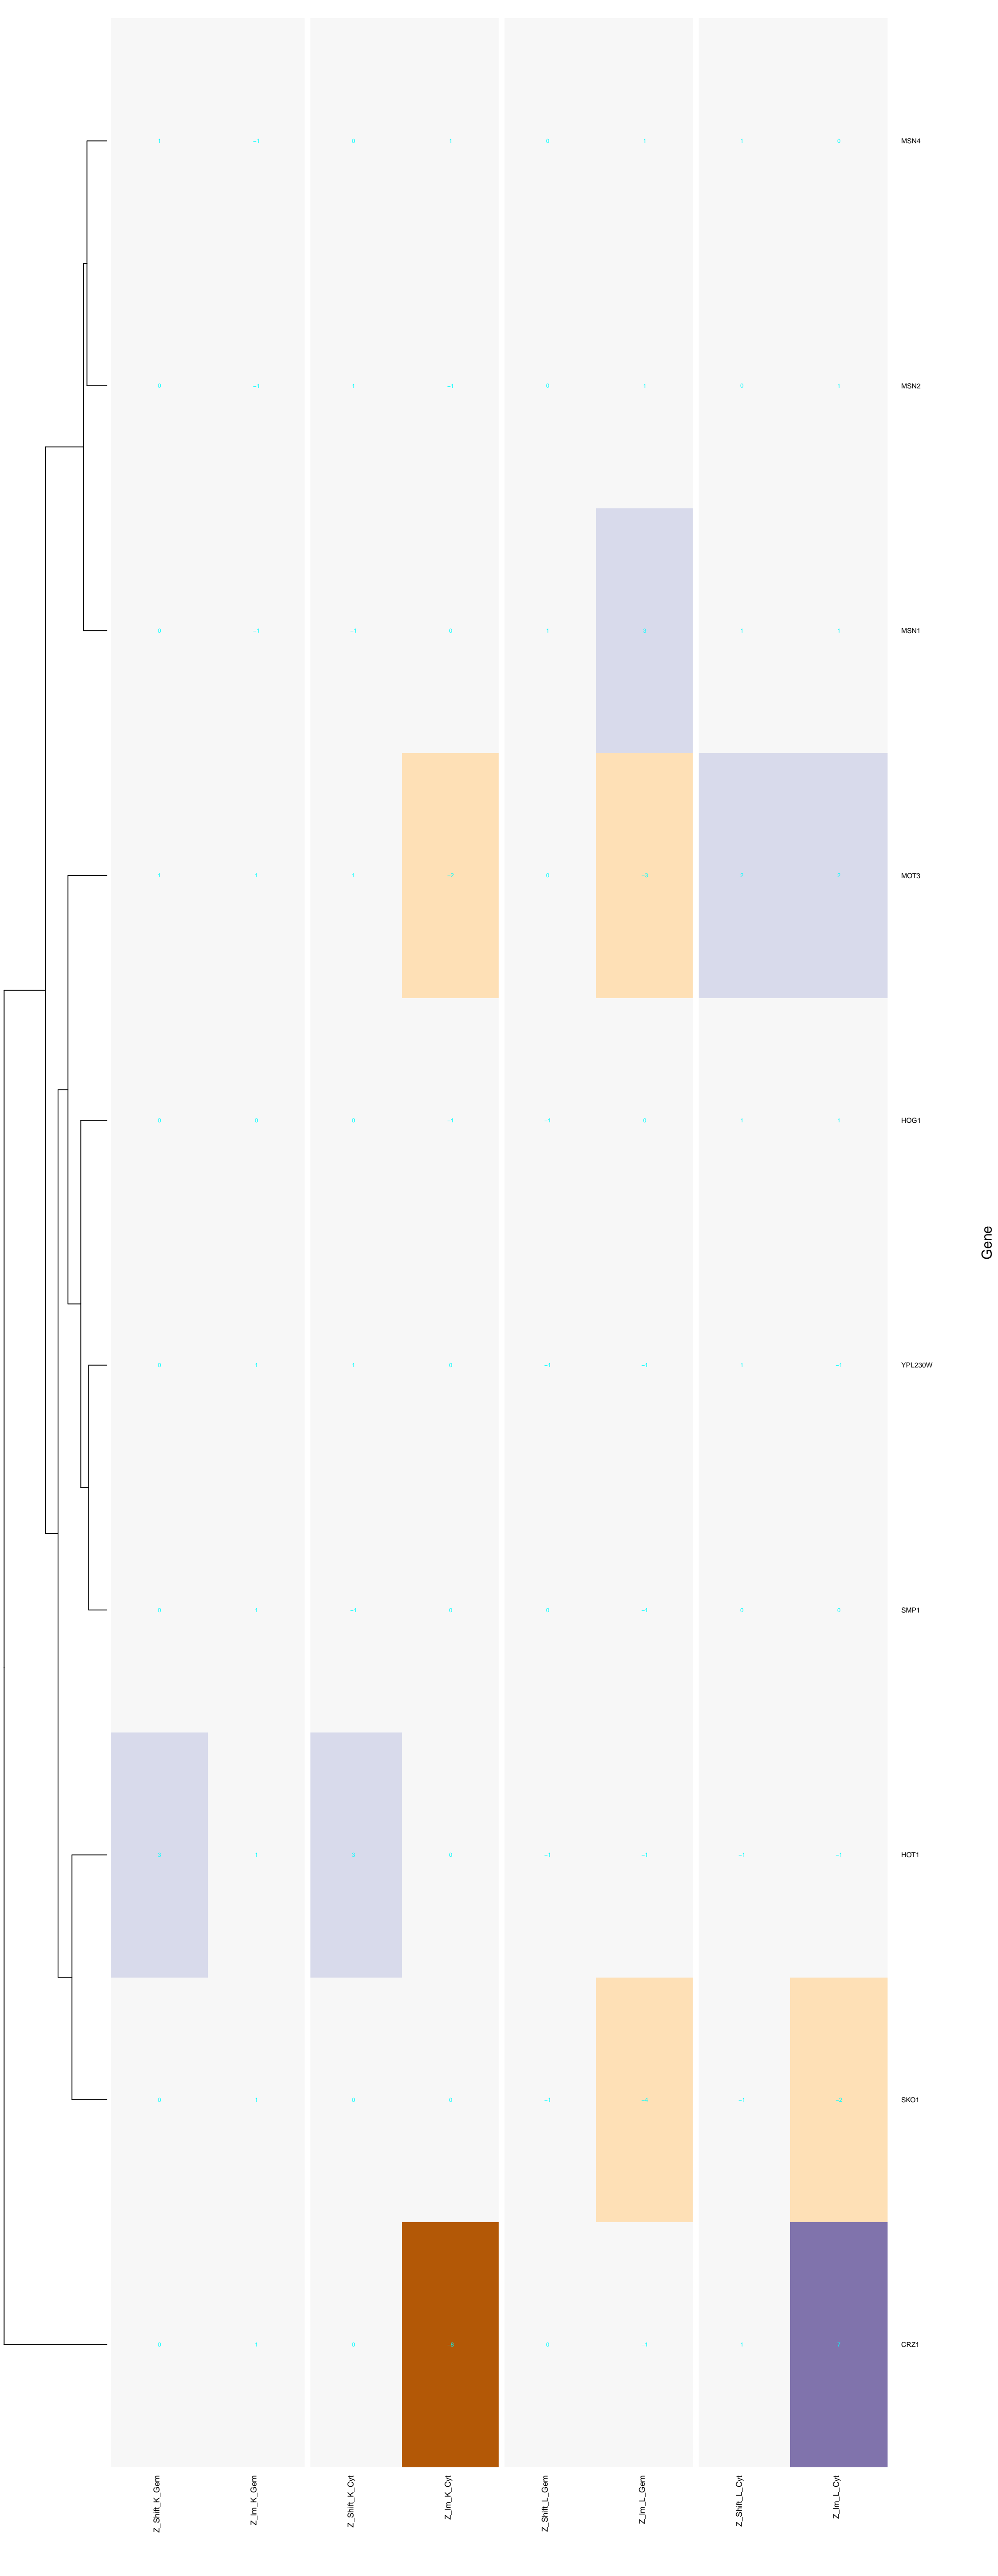

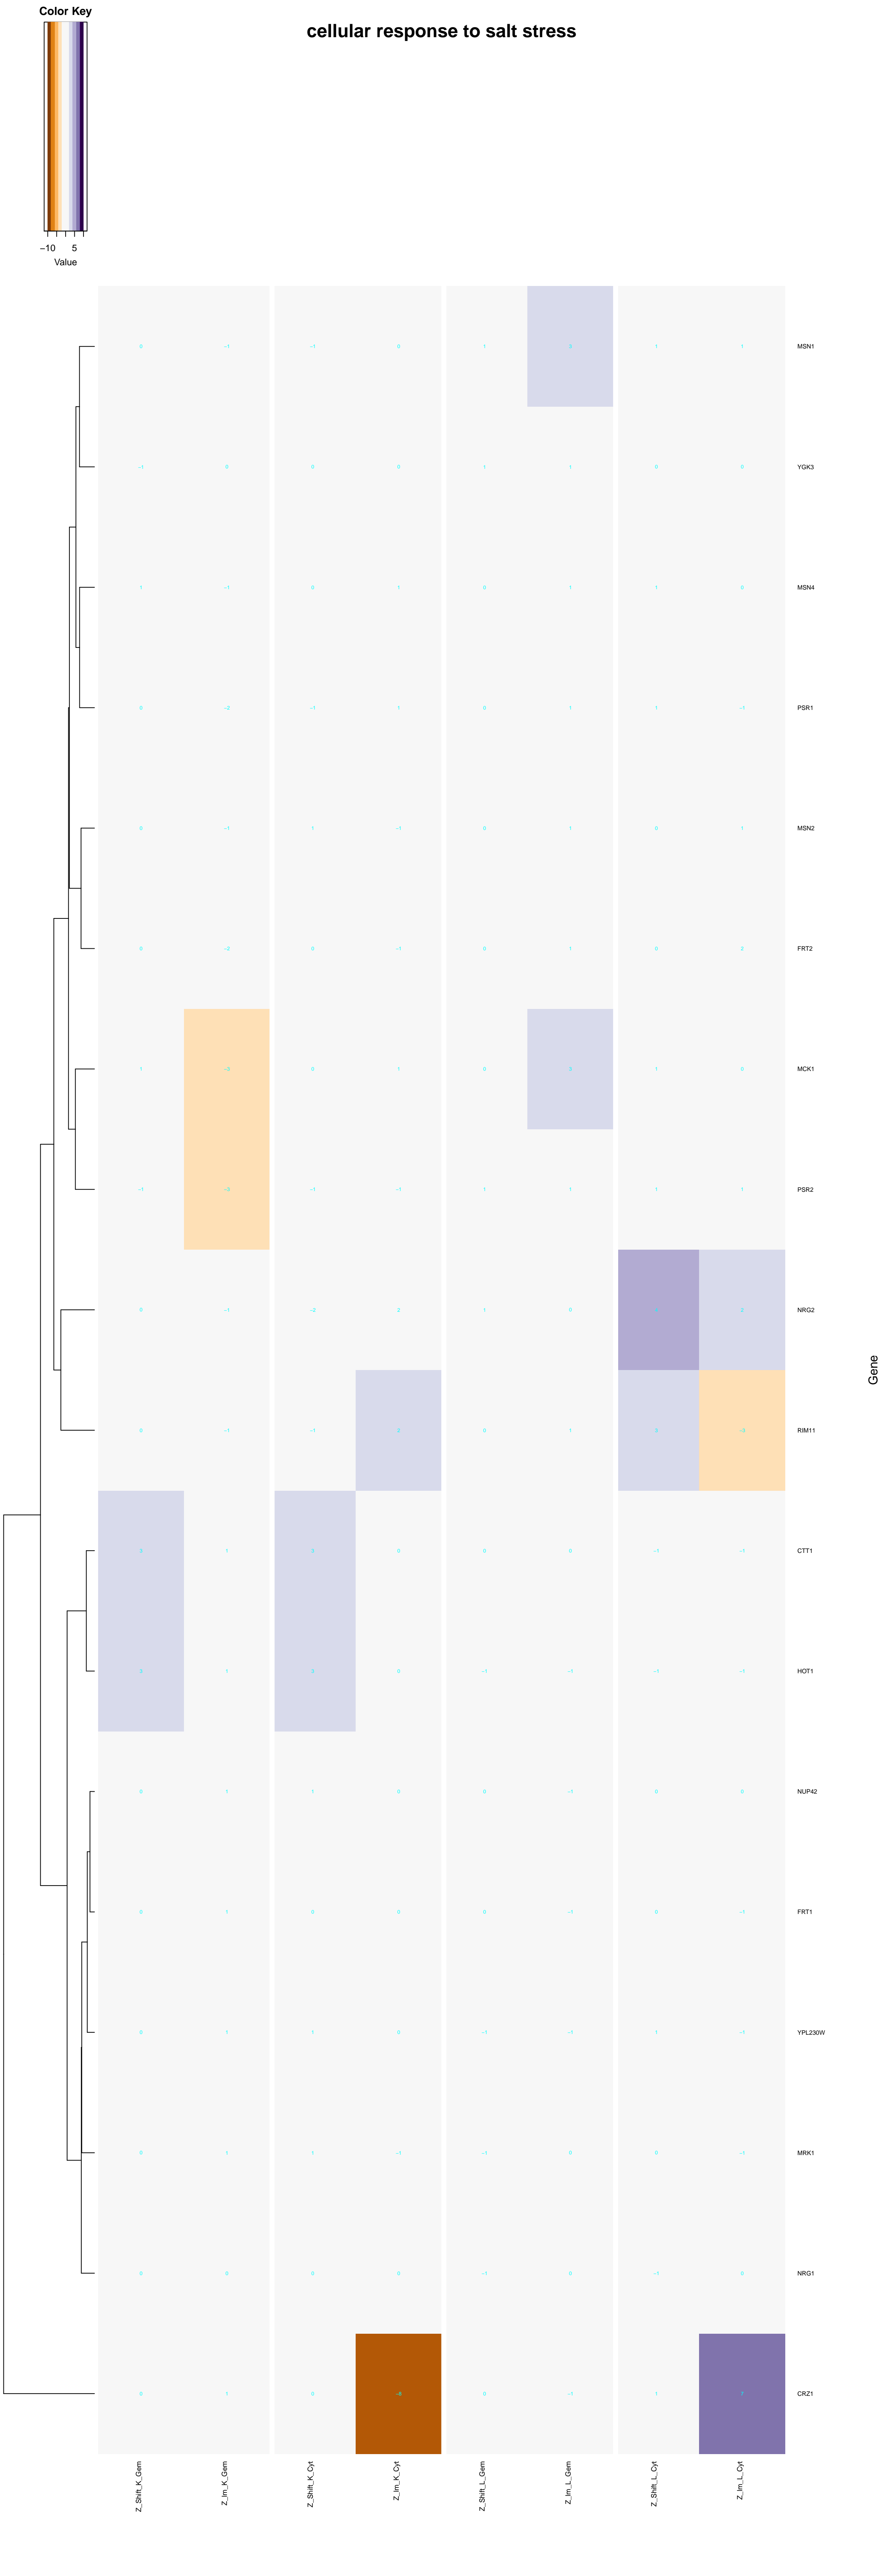

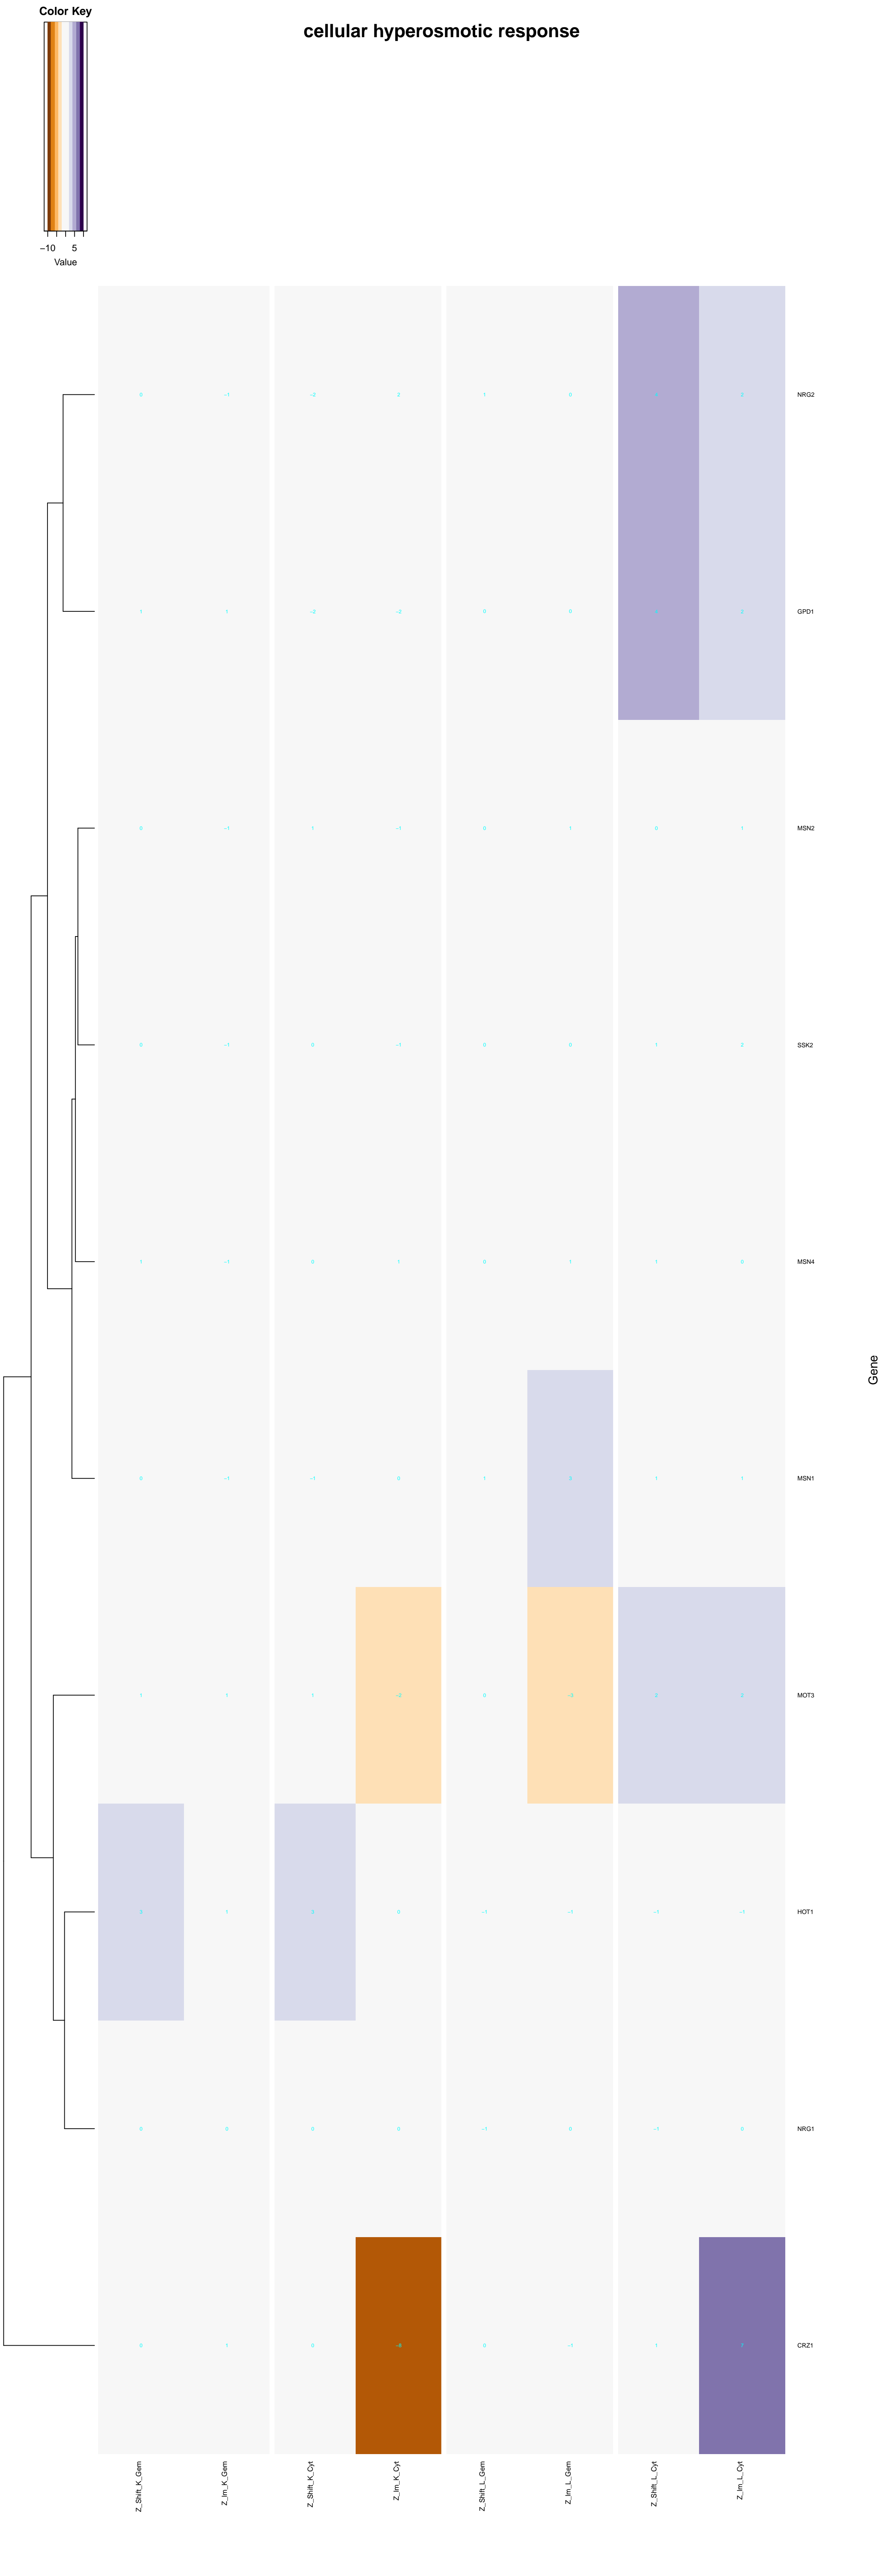



cellular hypotonic response

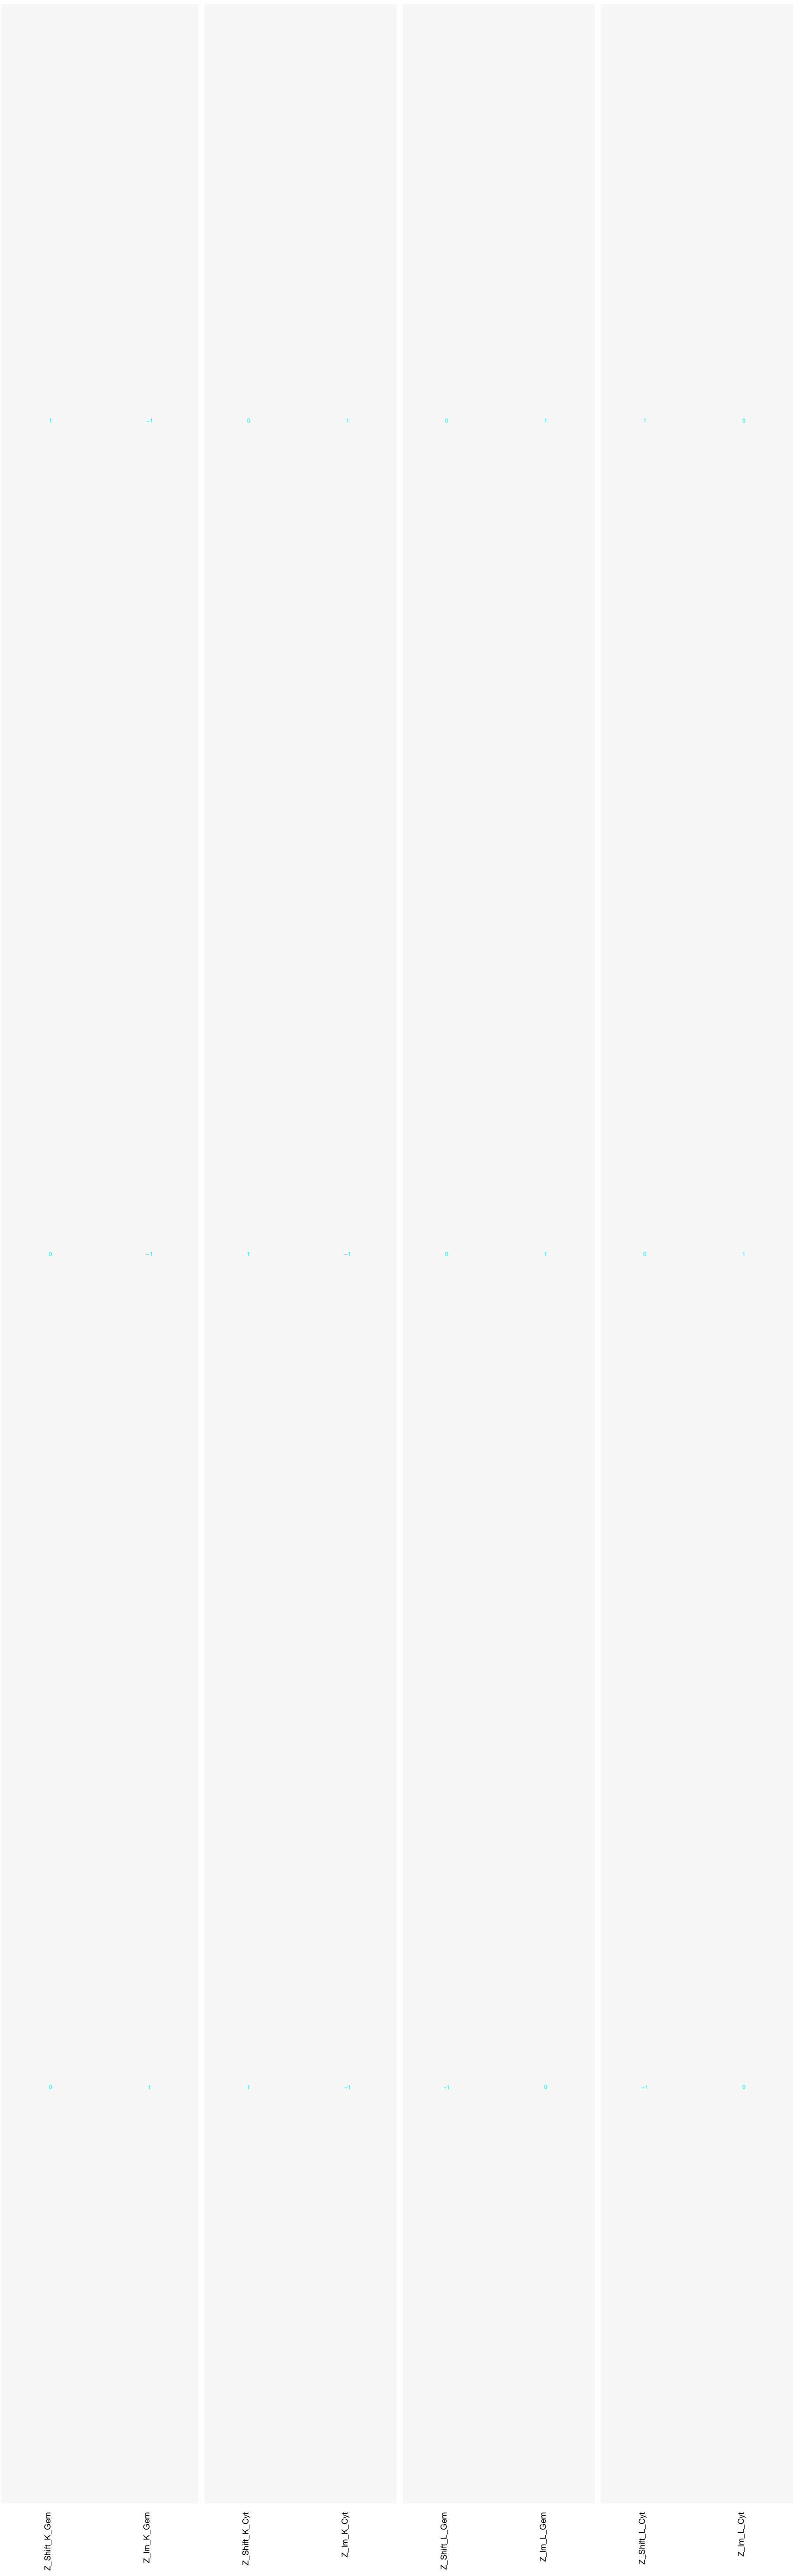

Gene

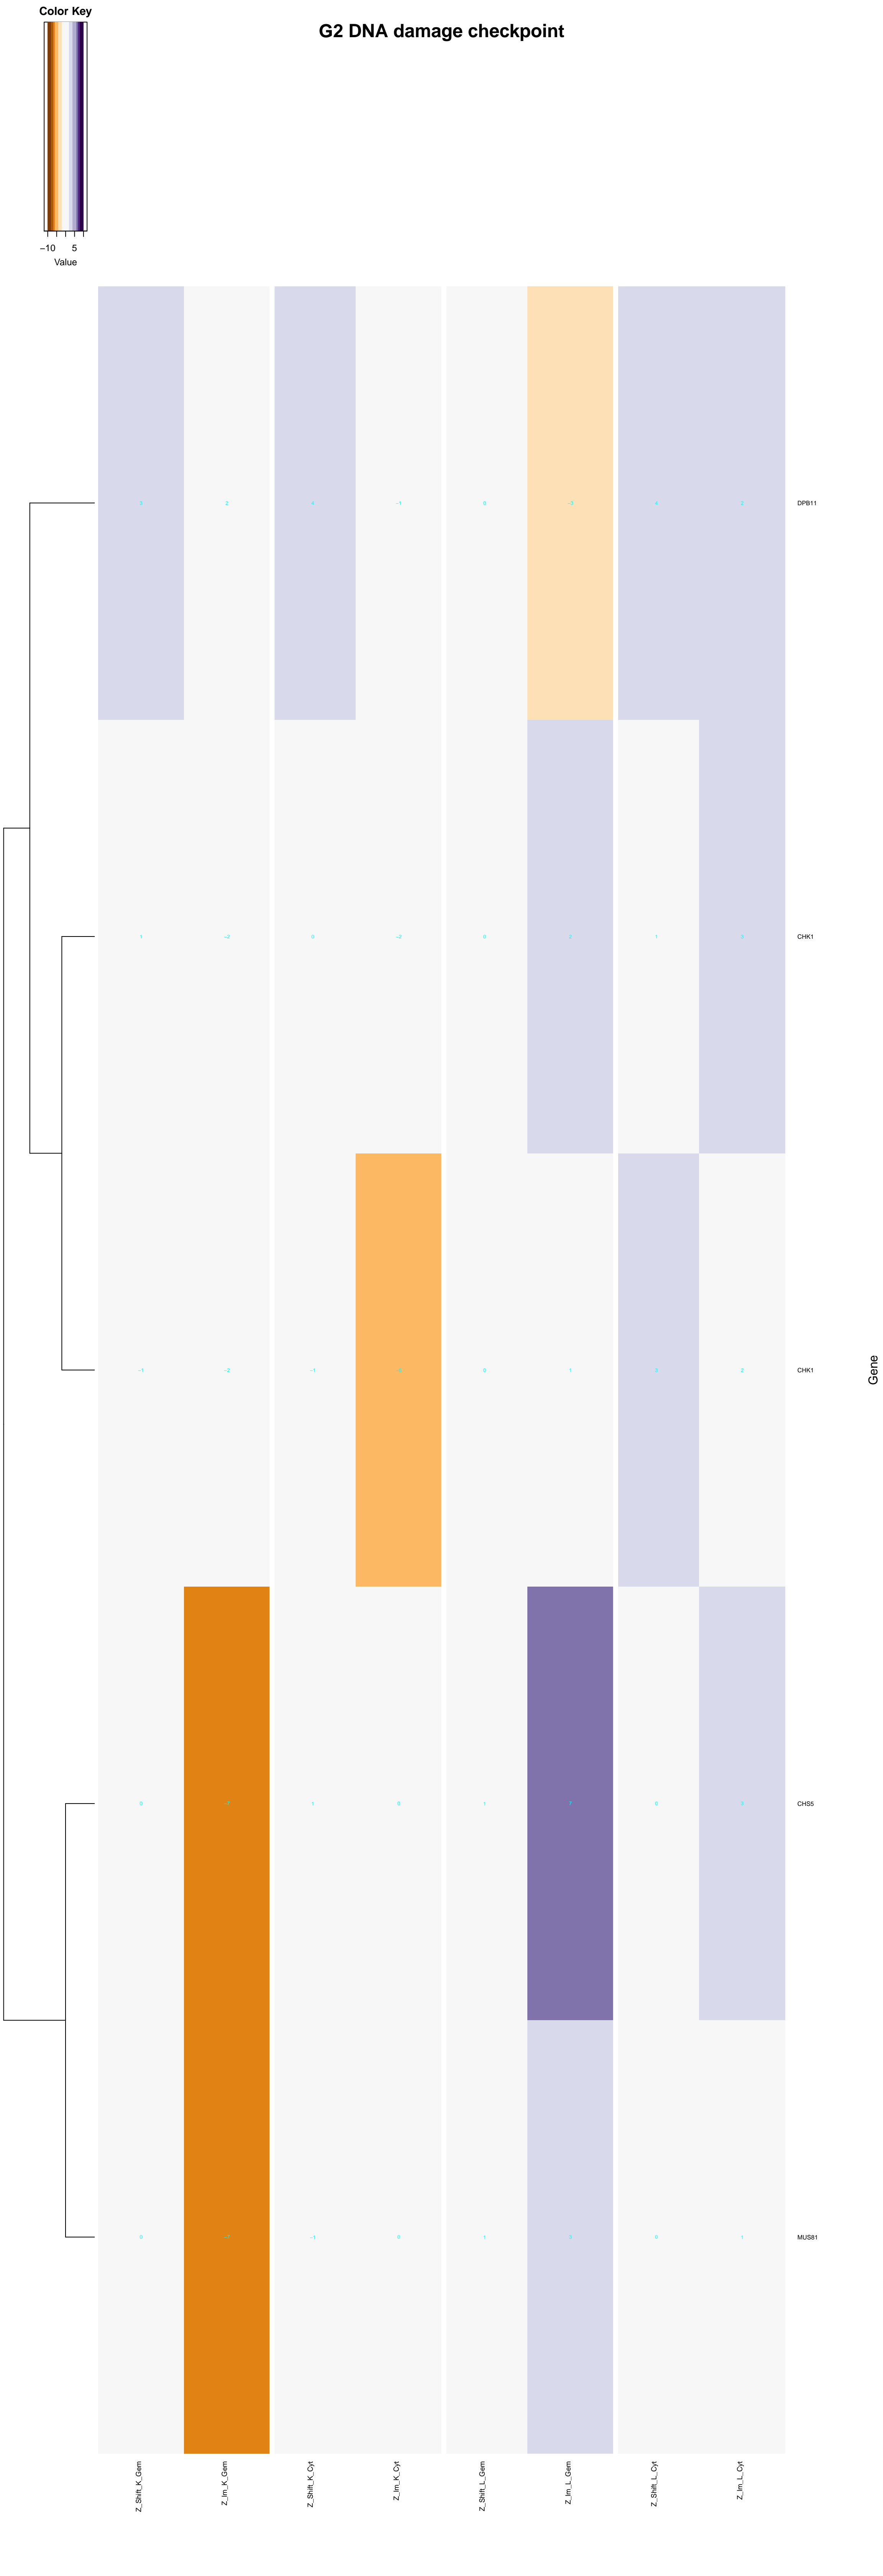

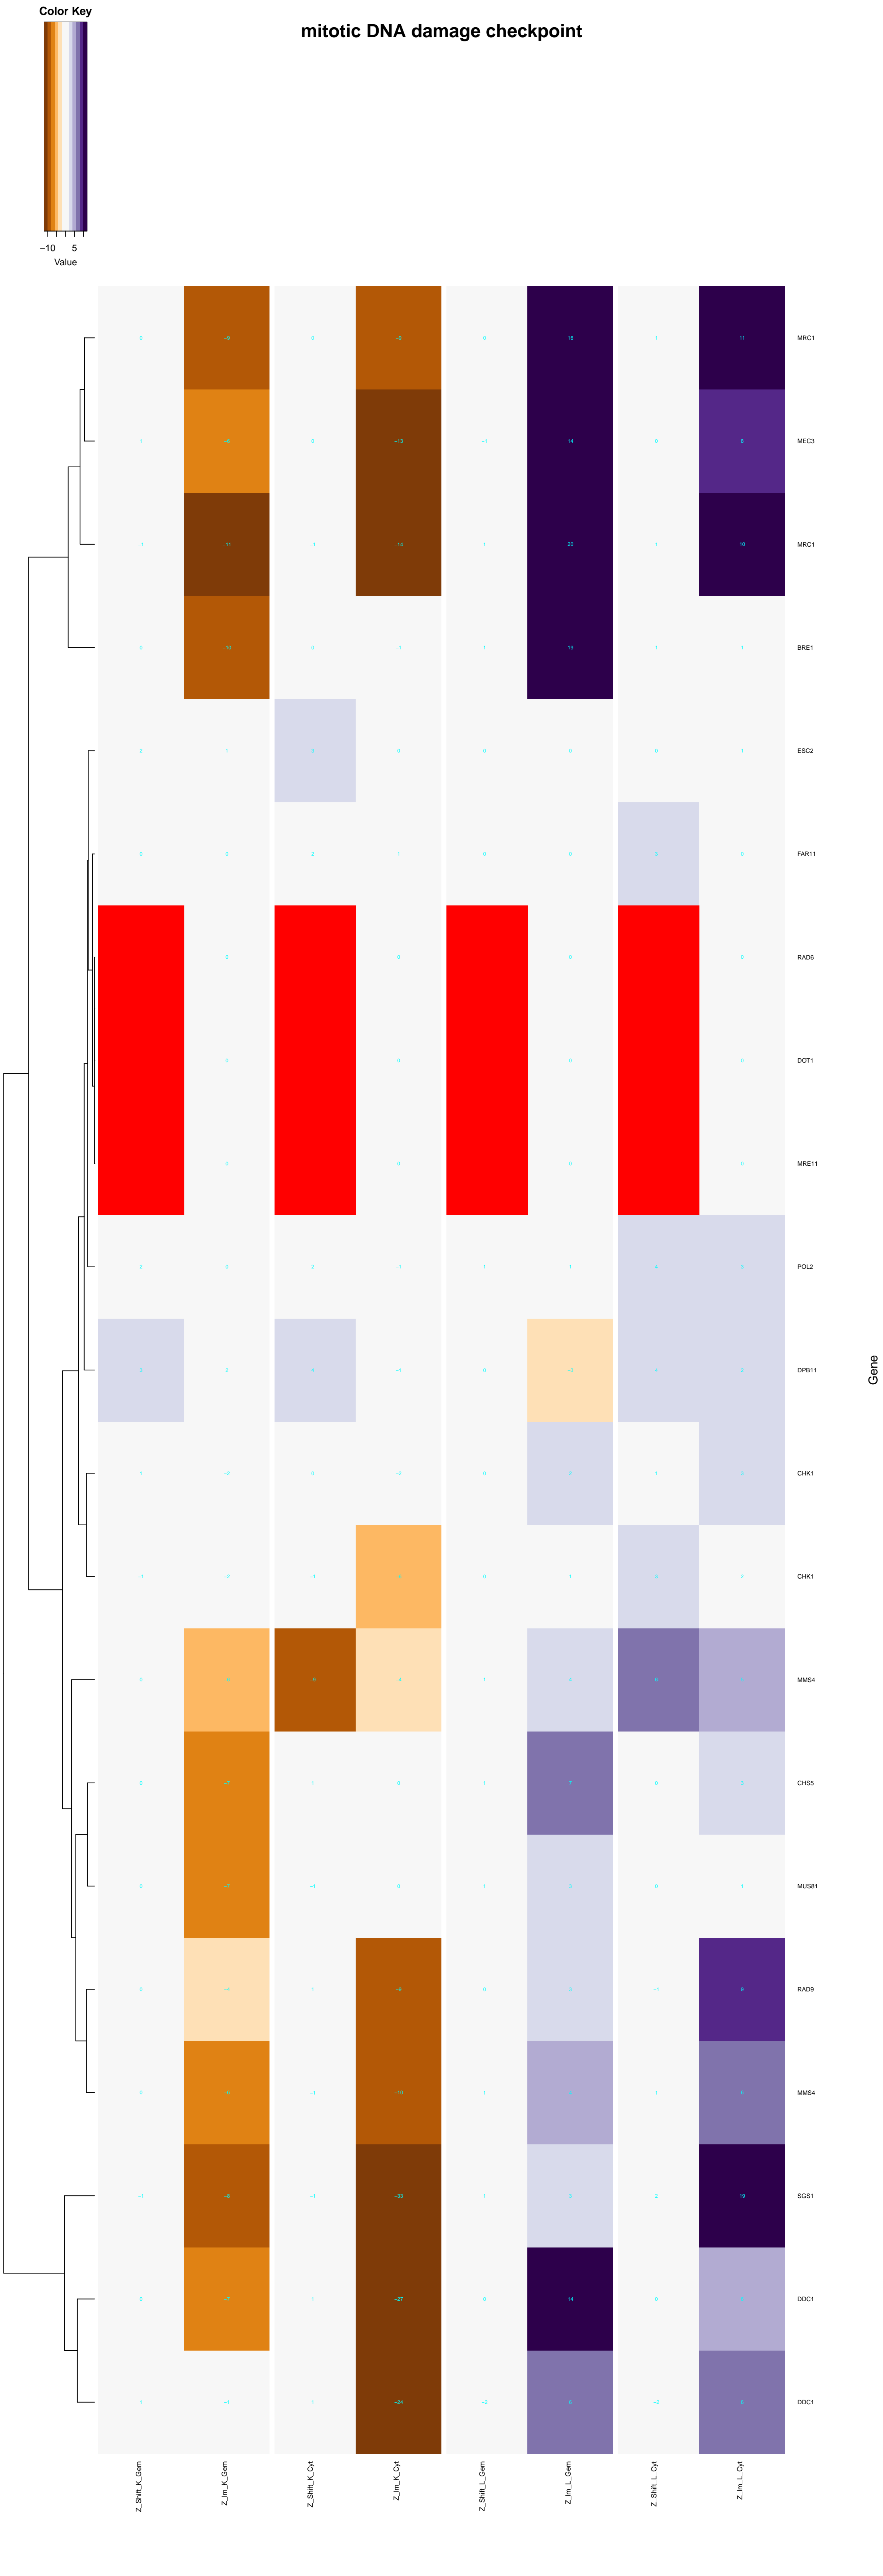

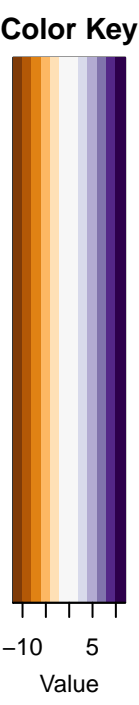

G1 DNA damage checkpoint

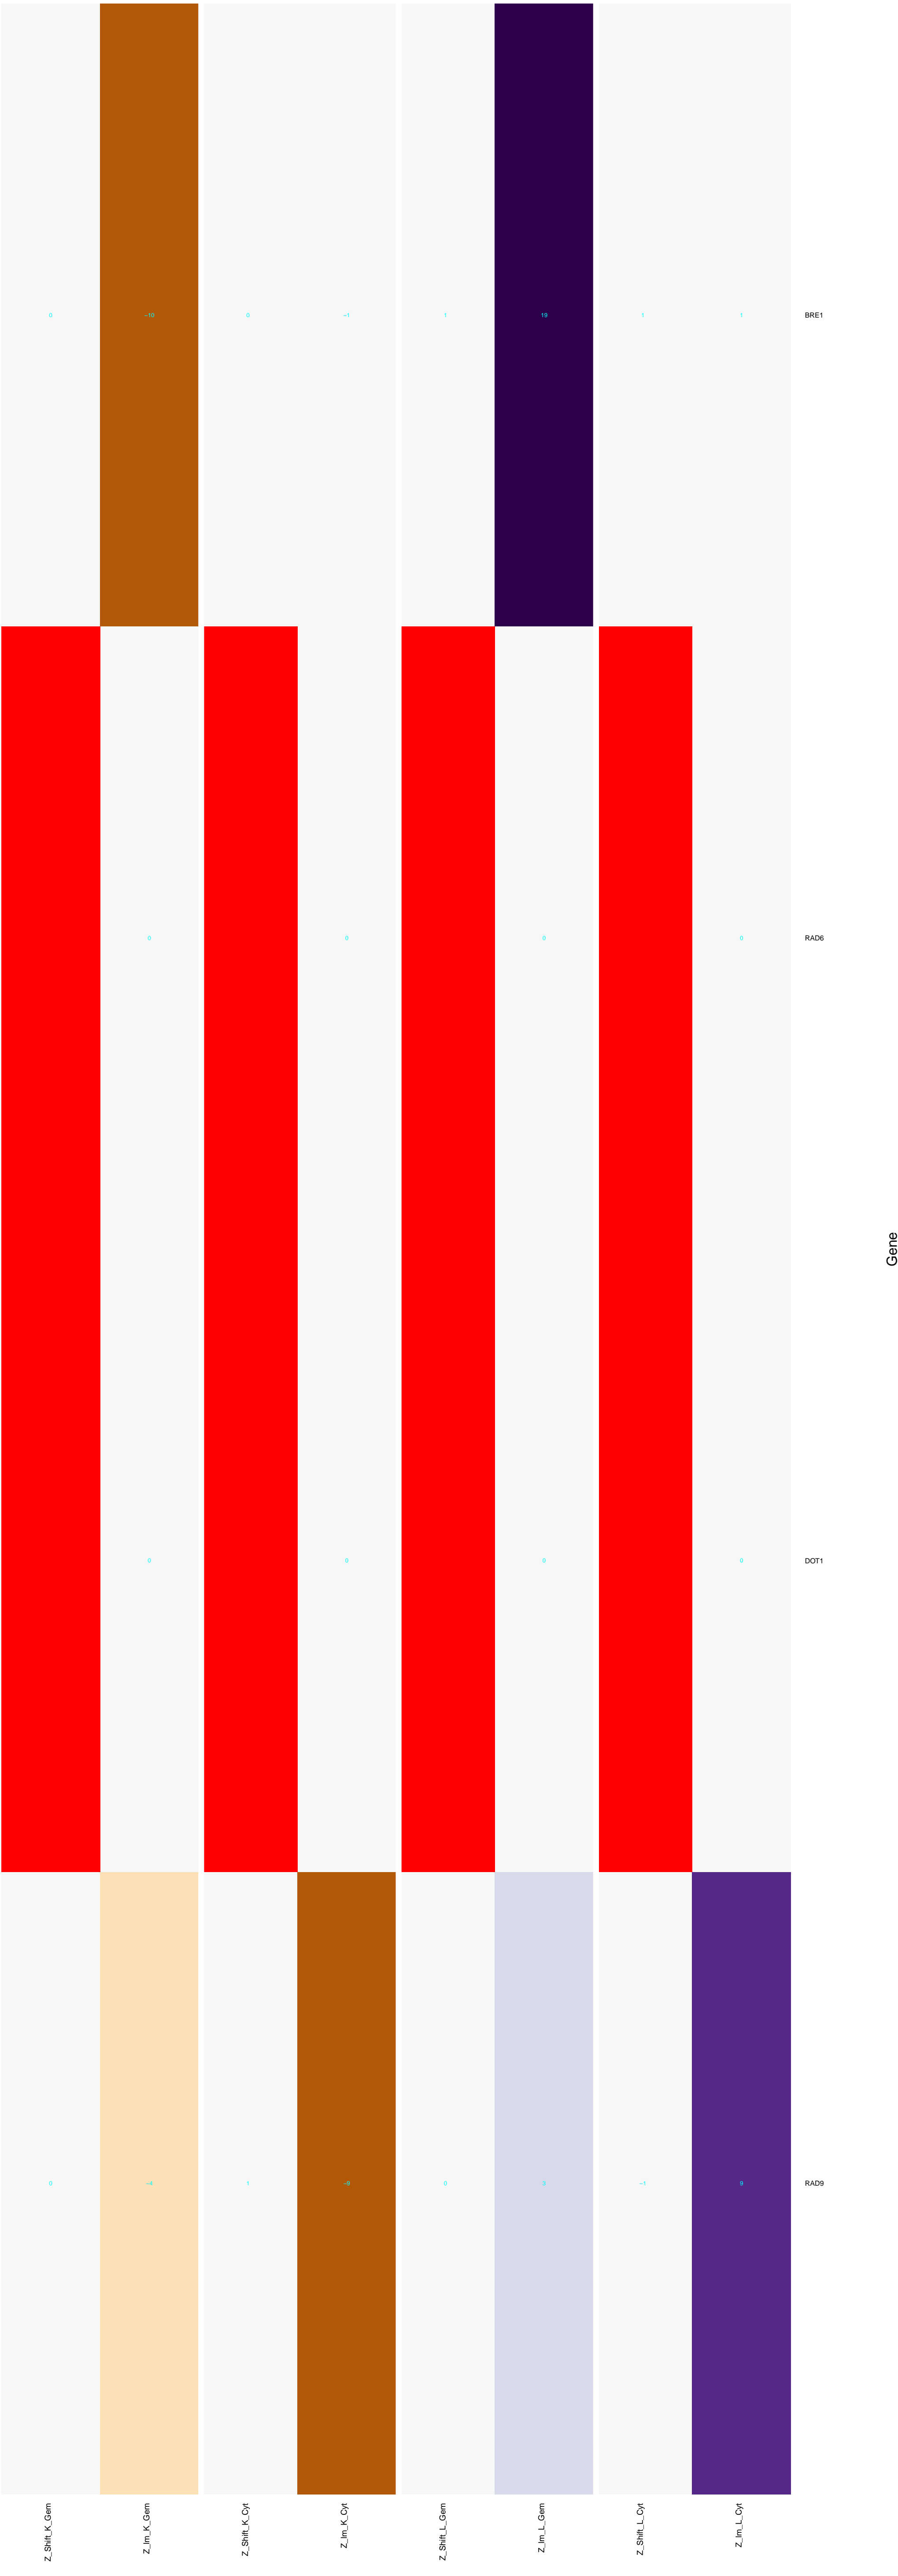

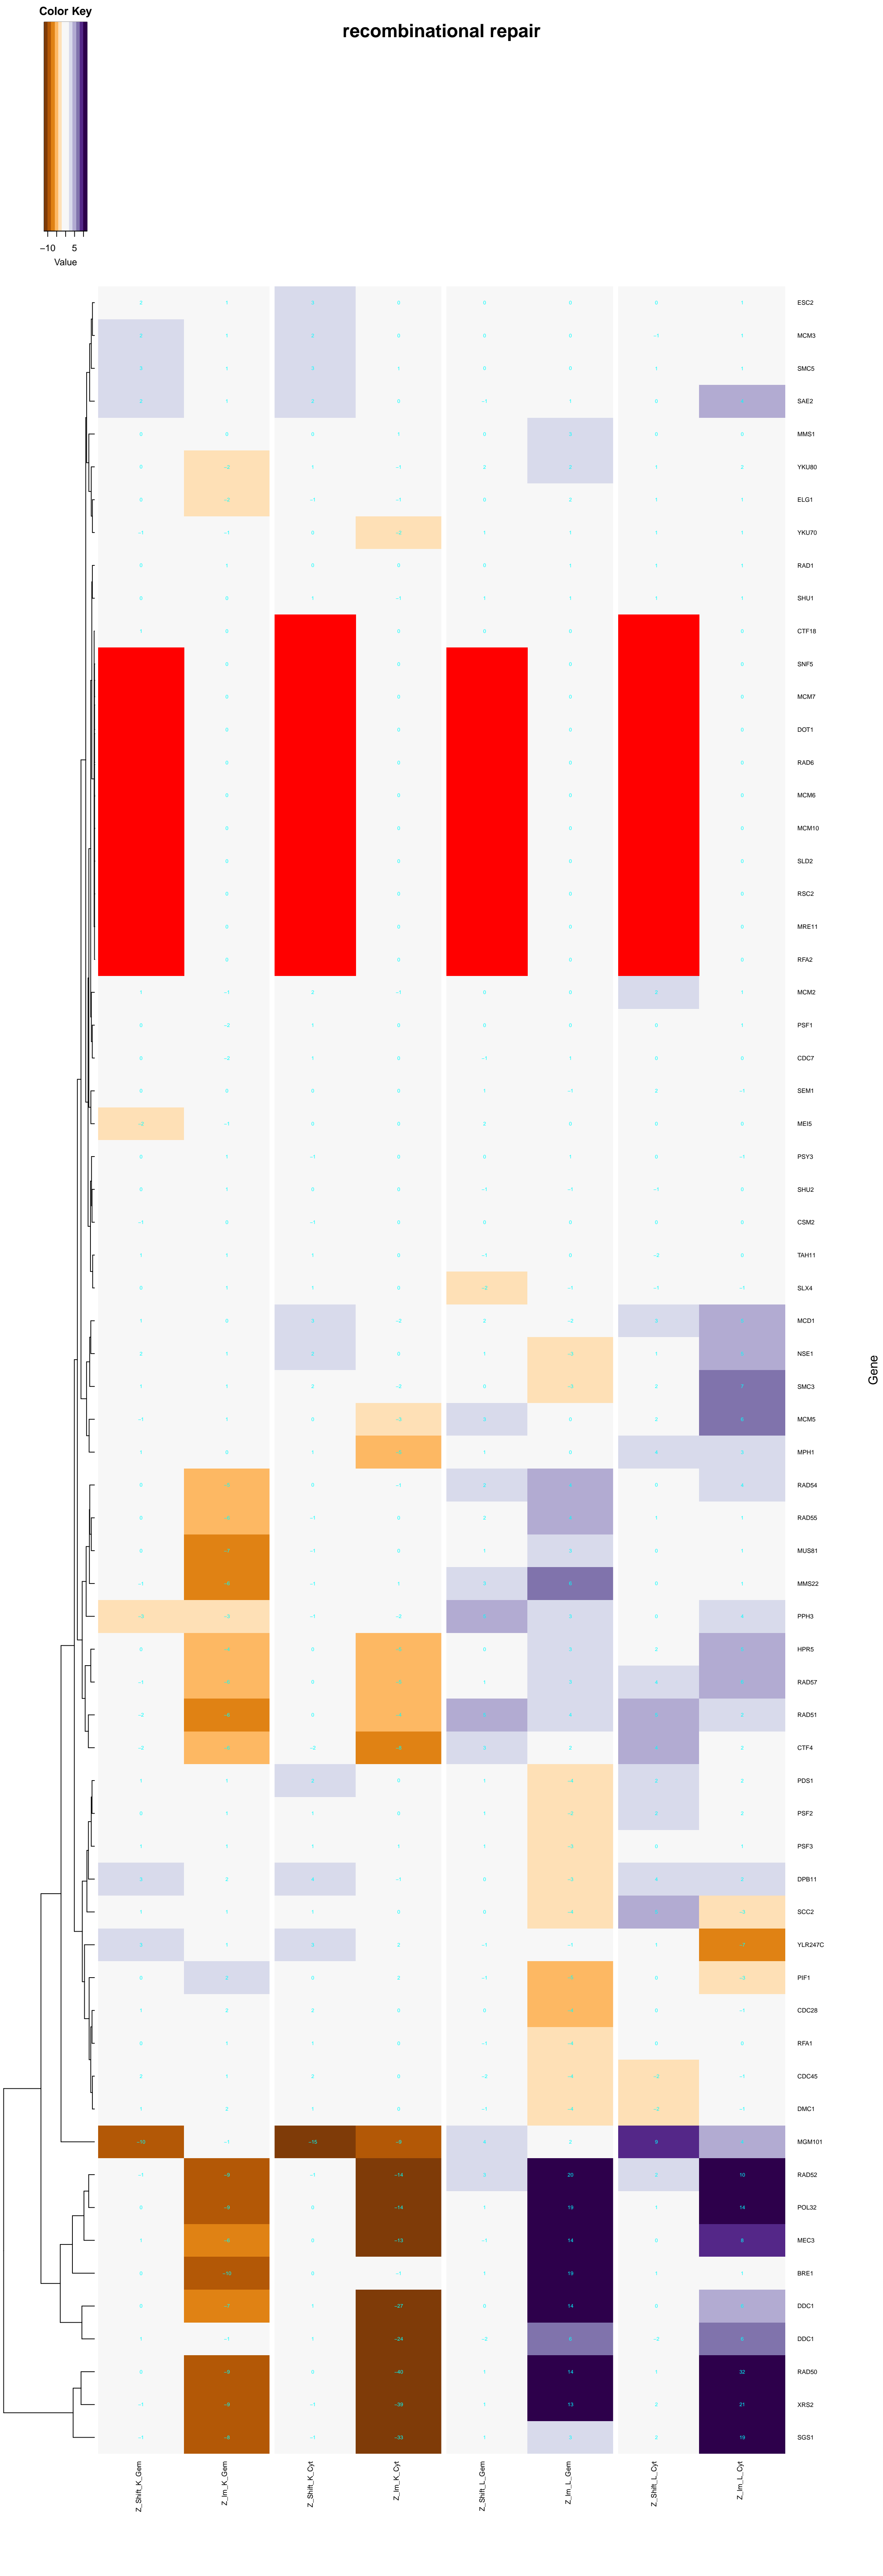

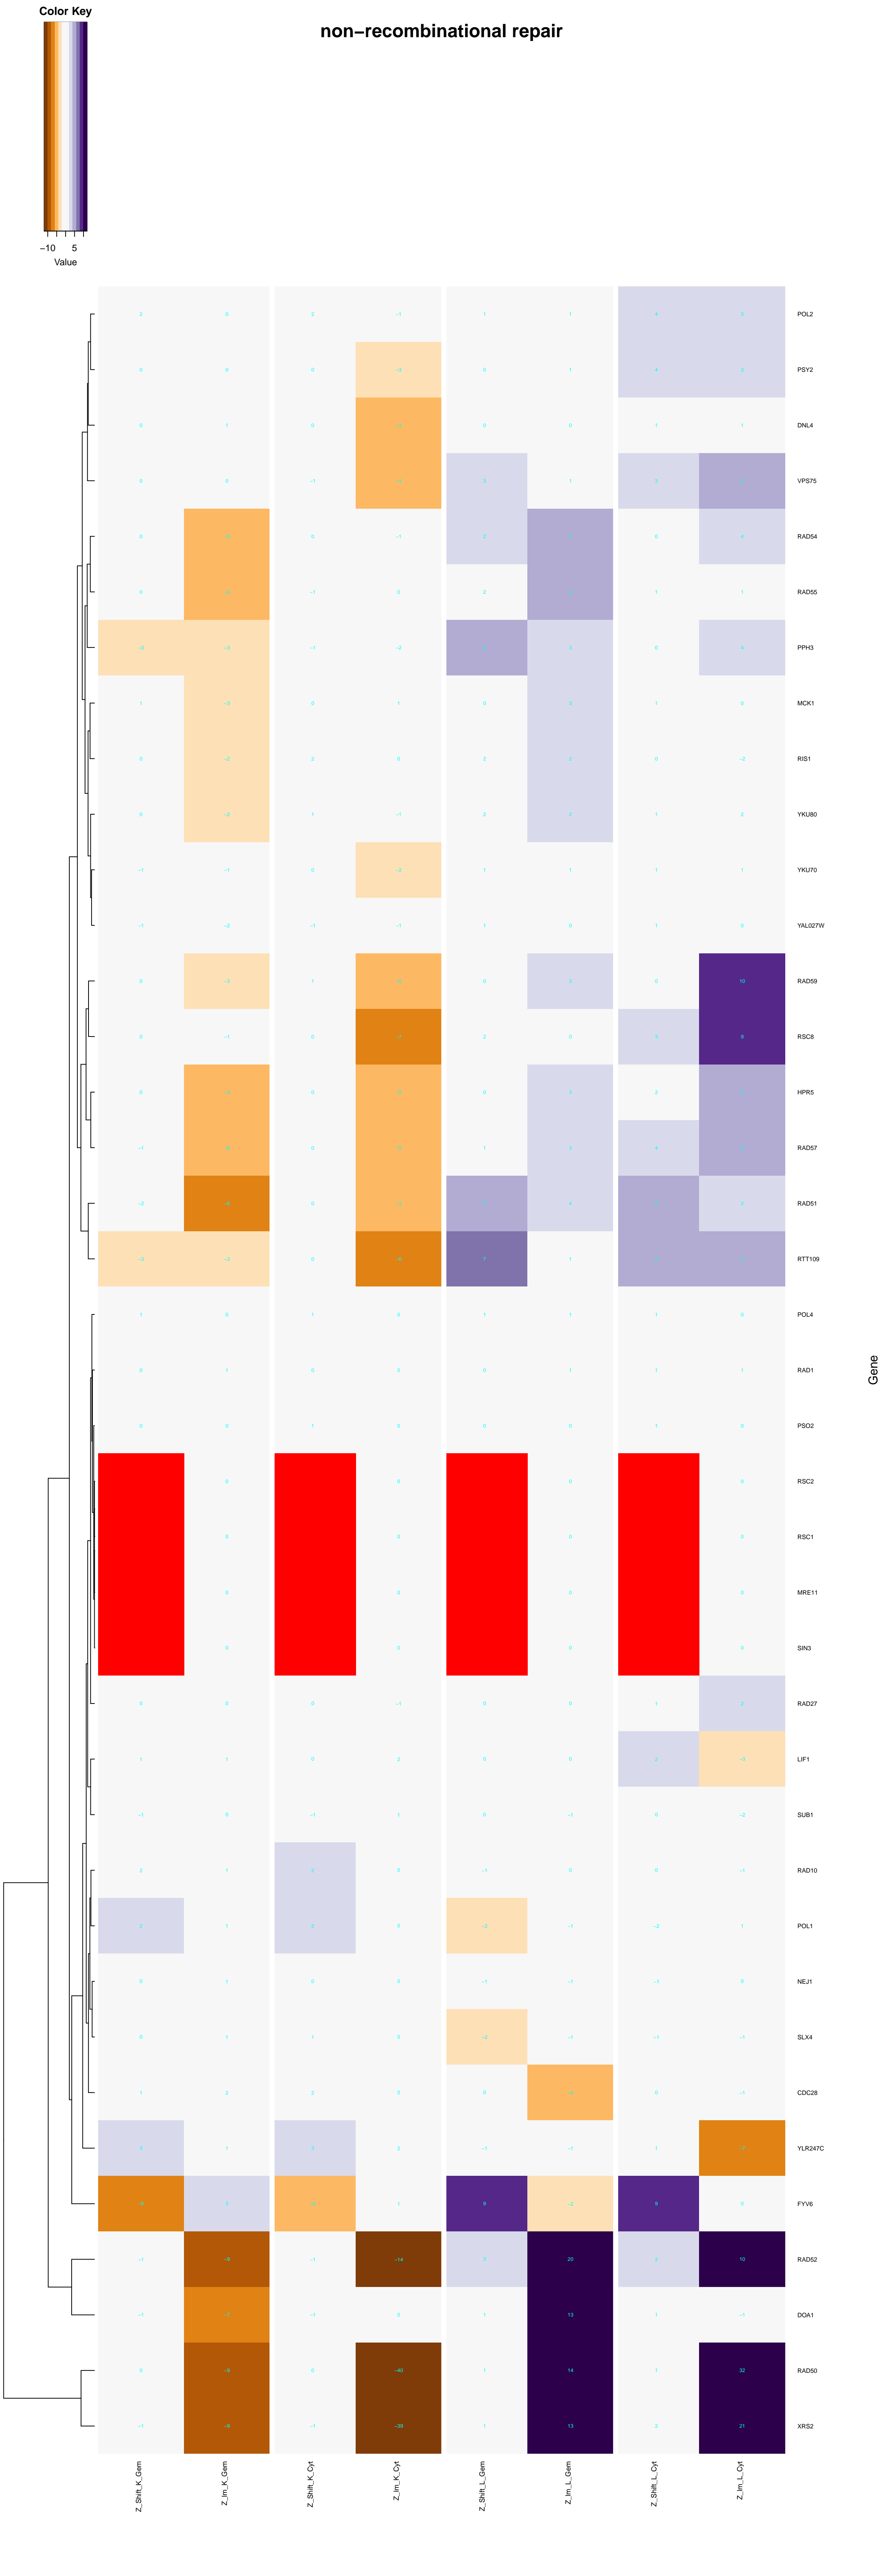

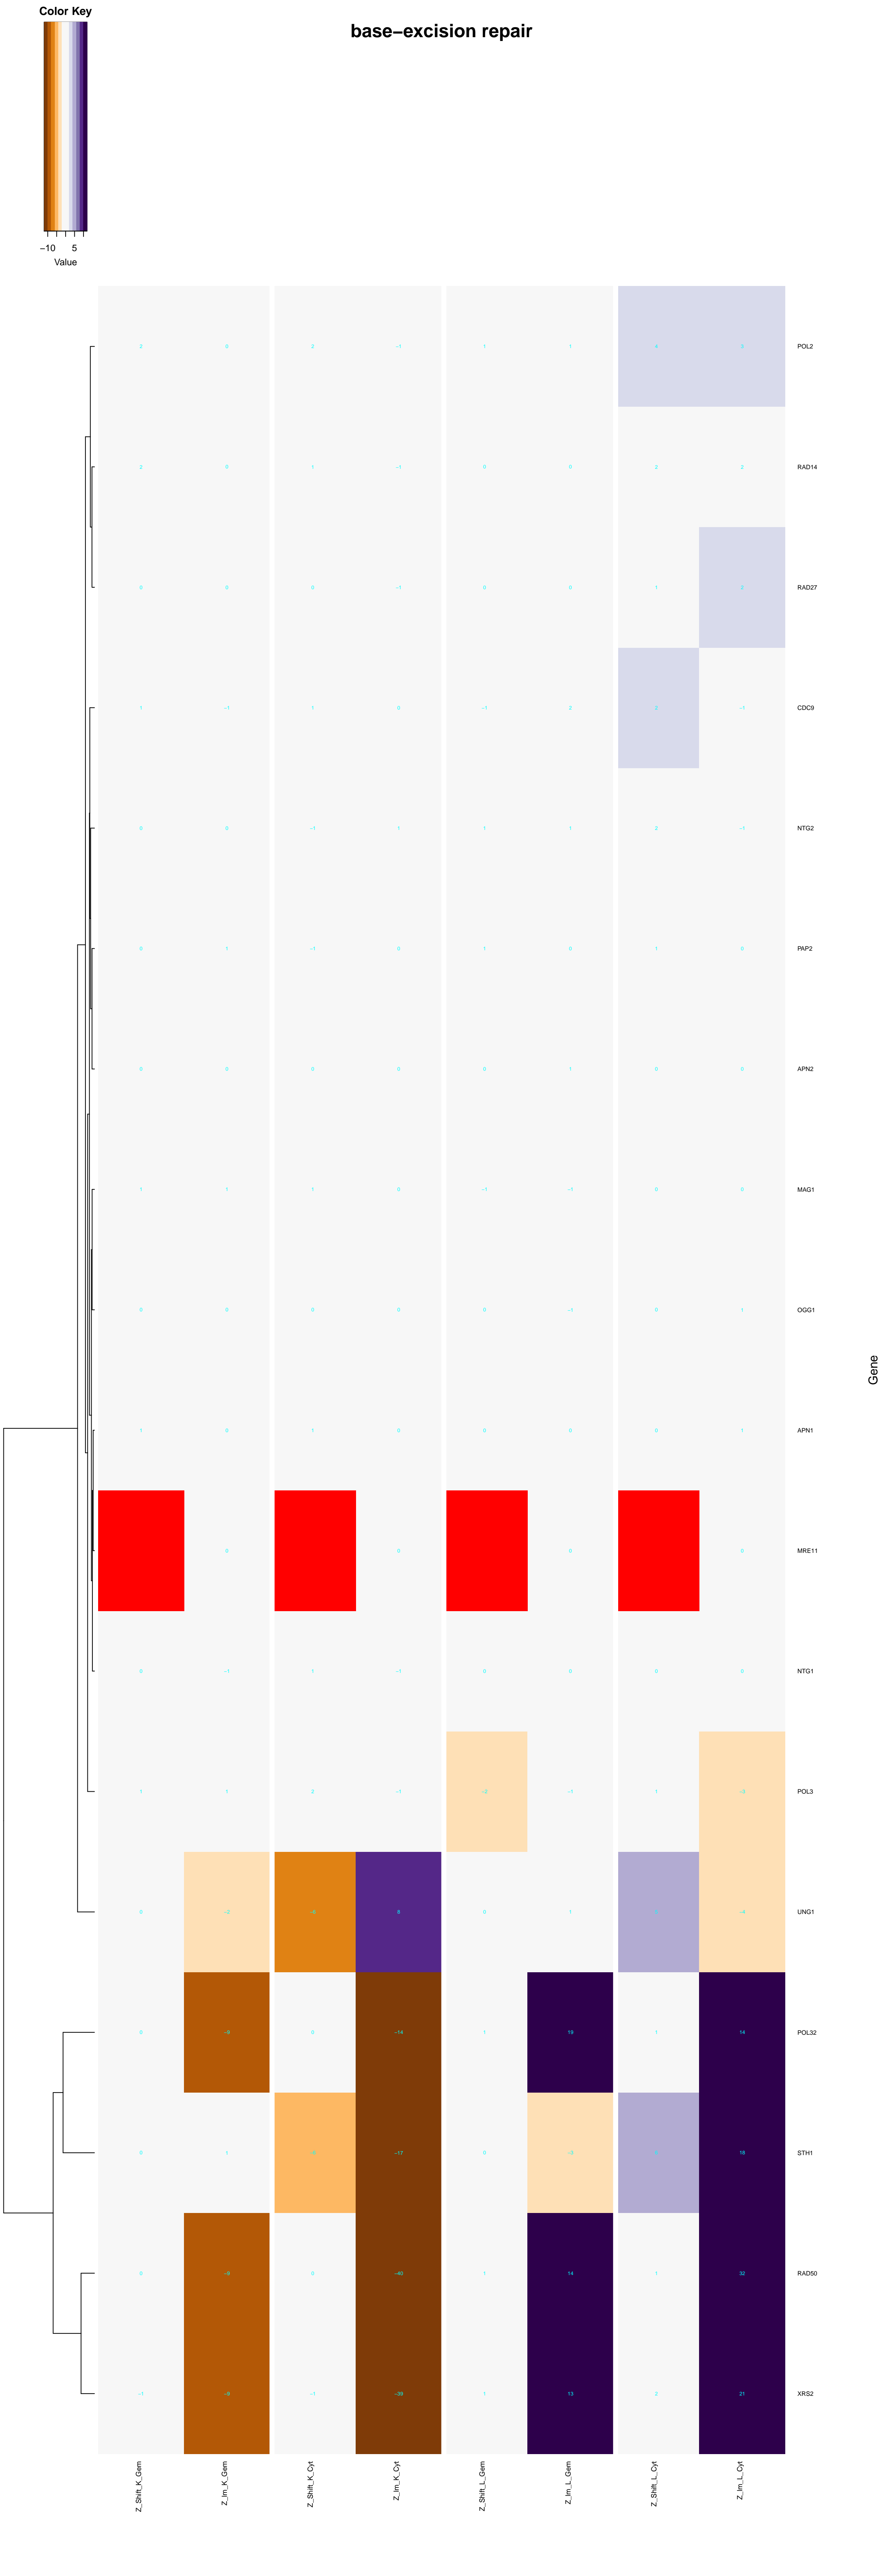

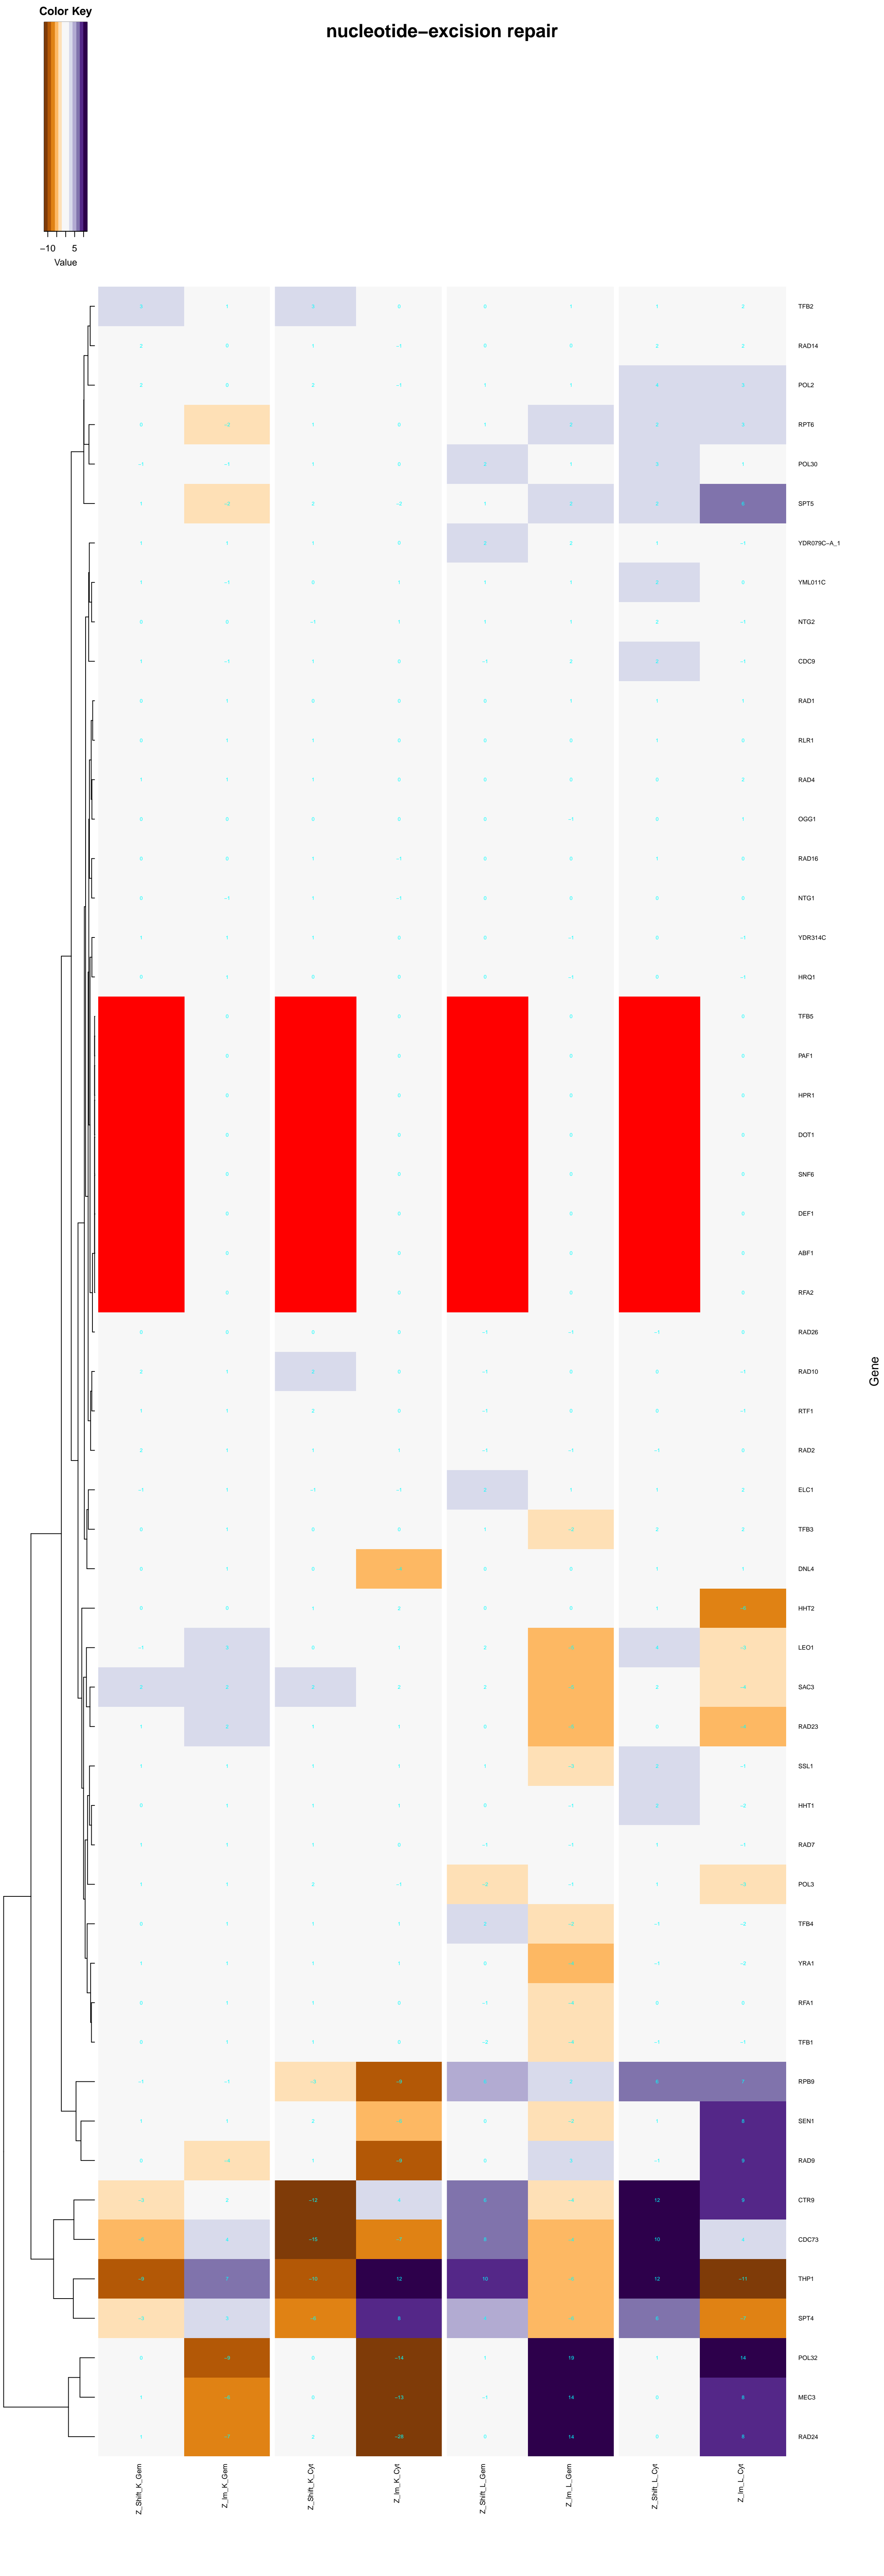

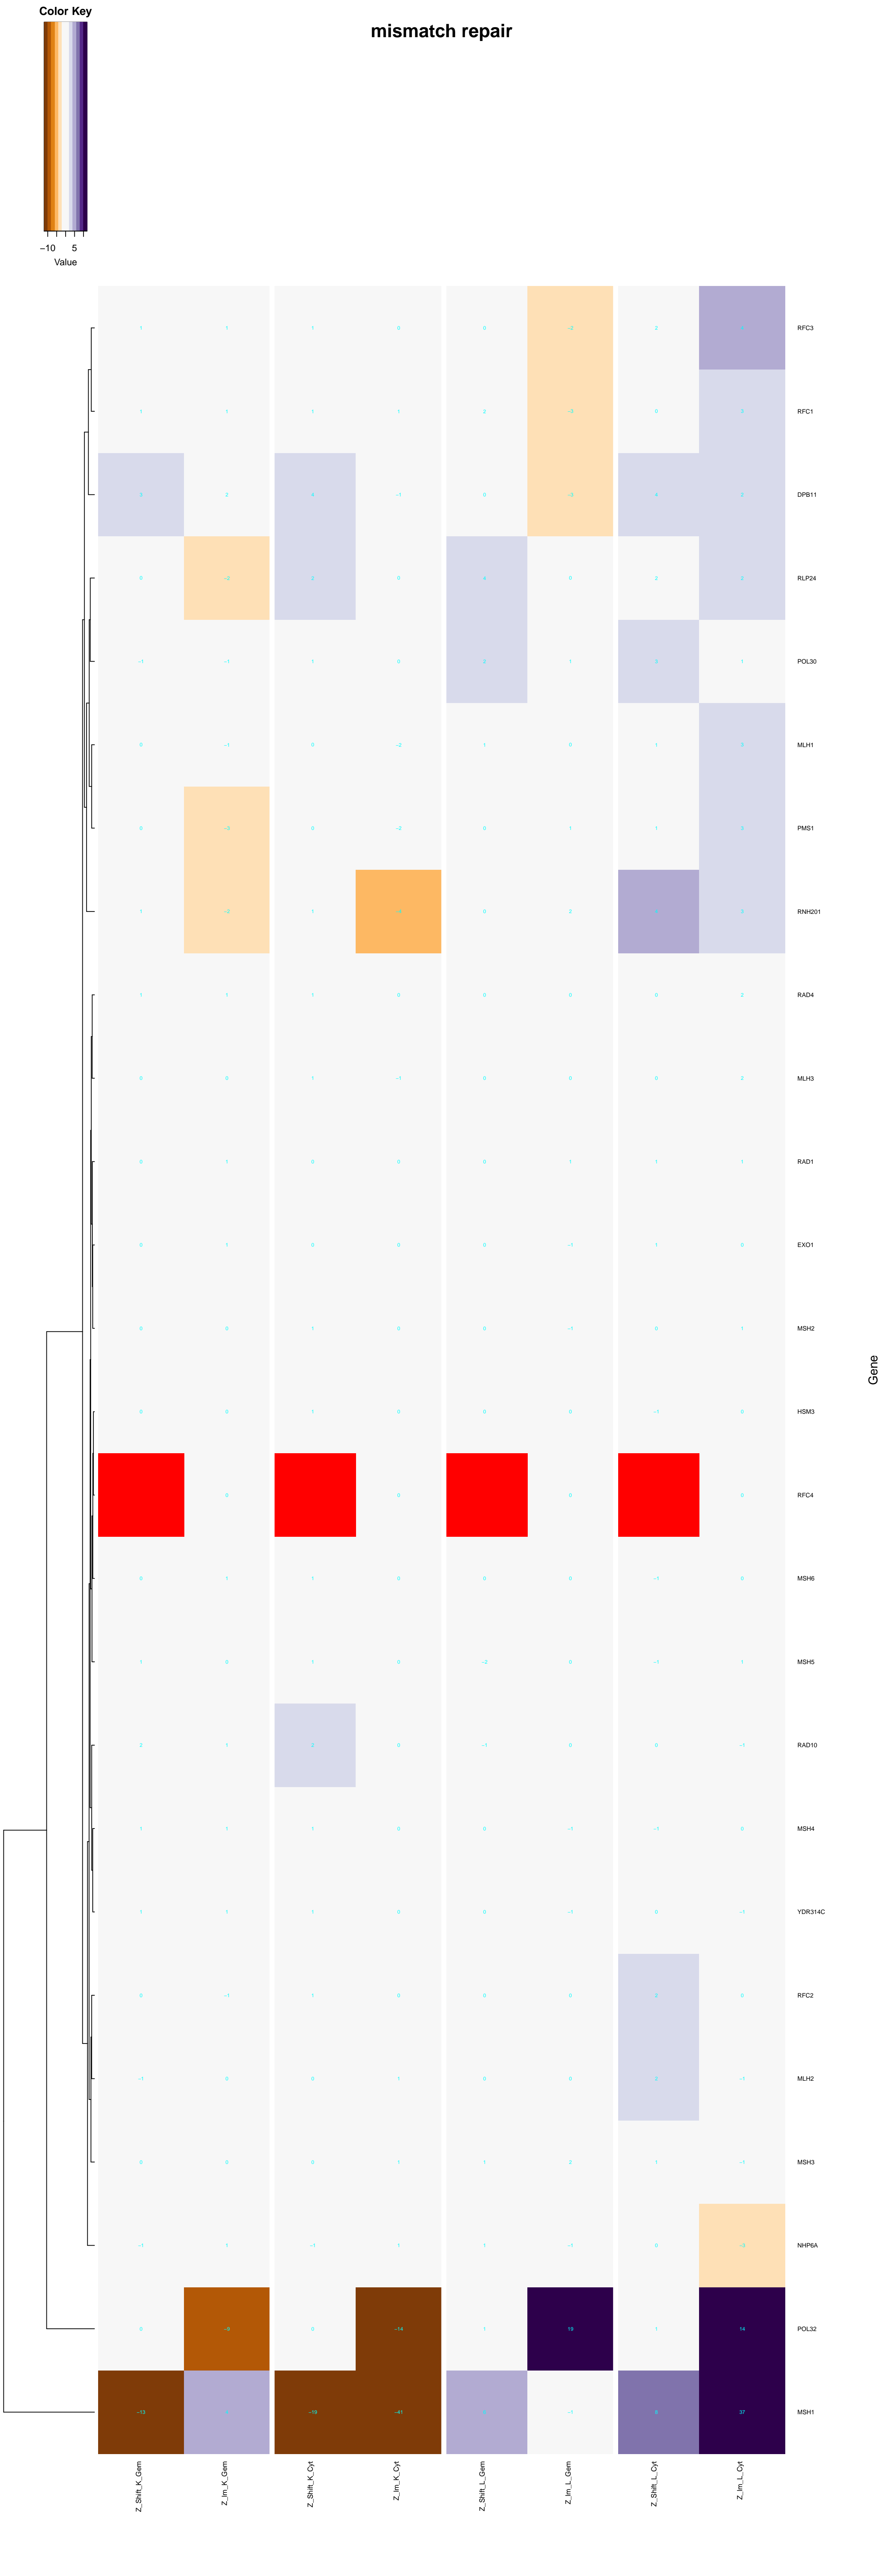

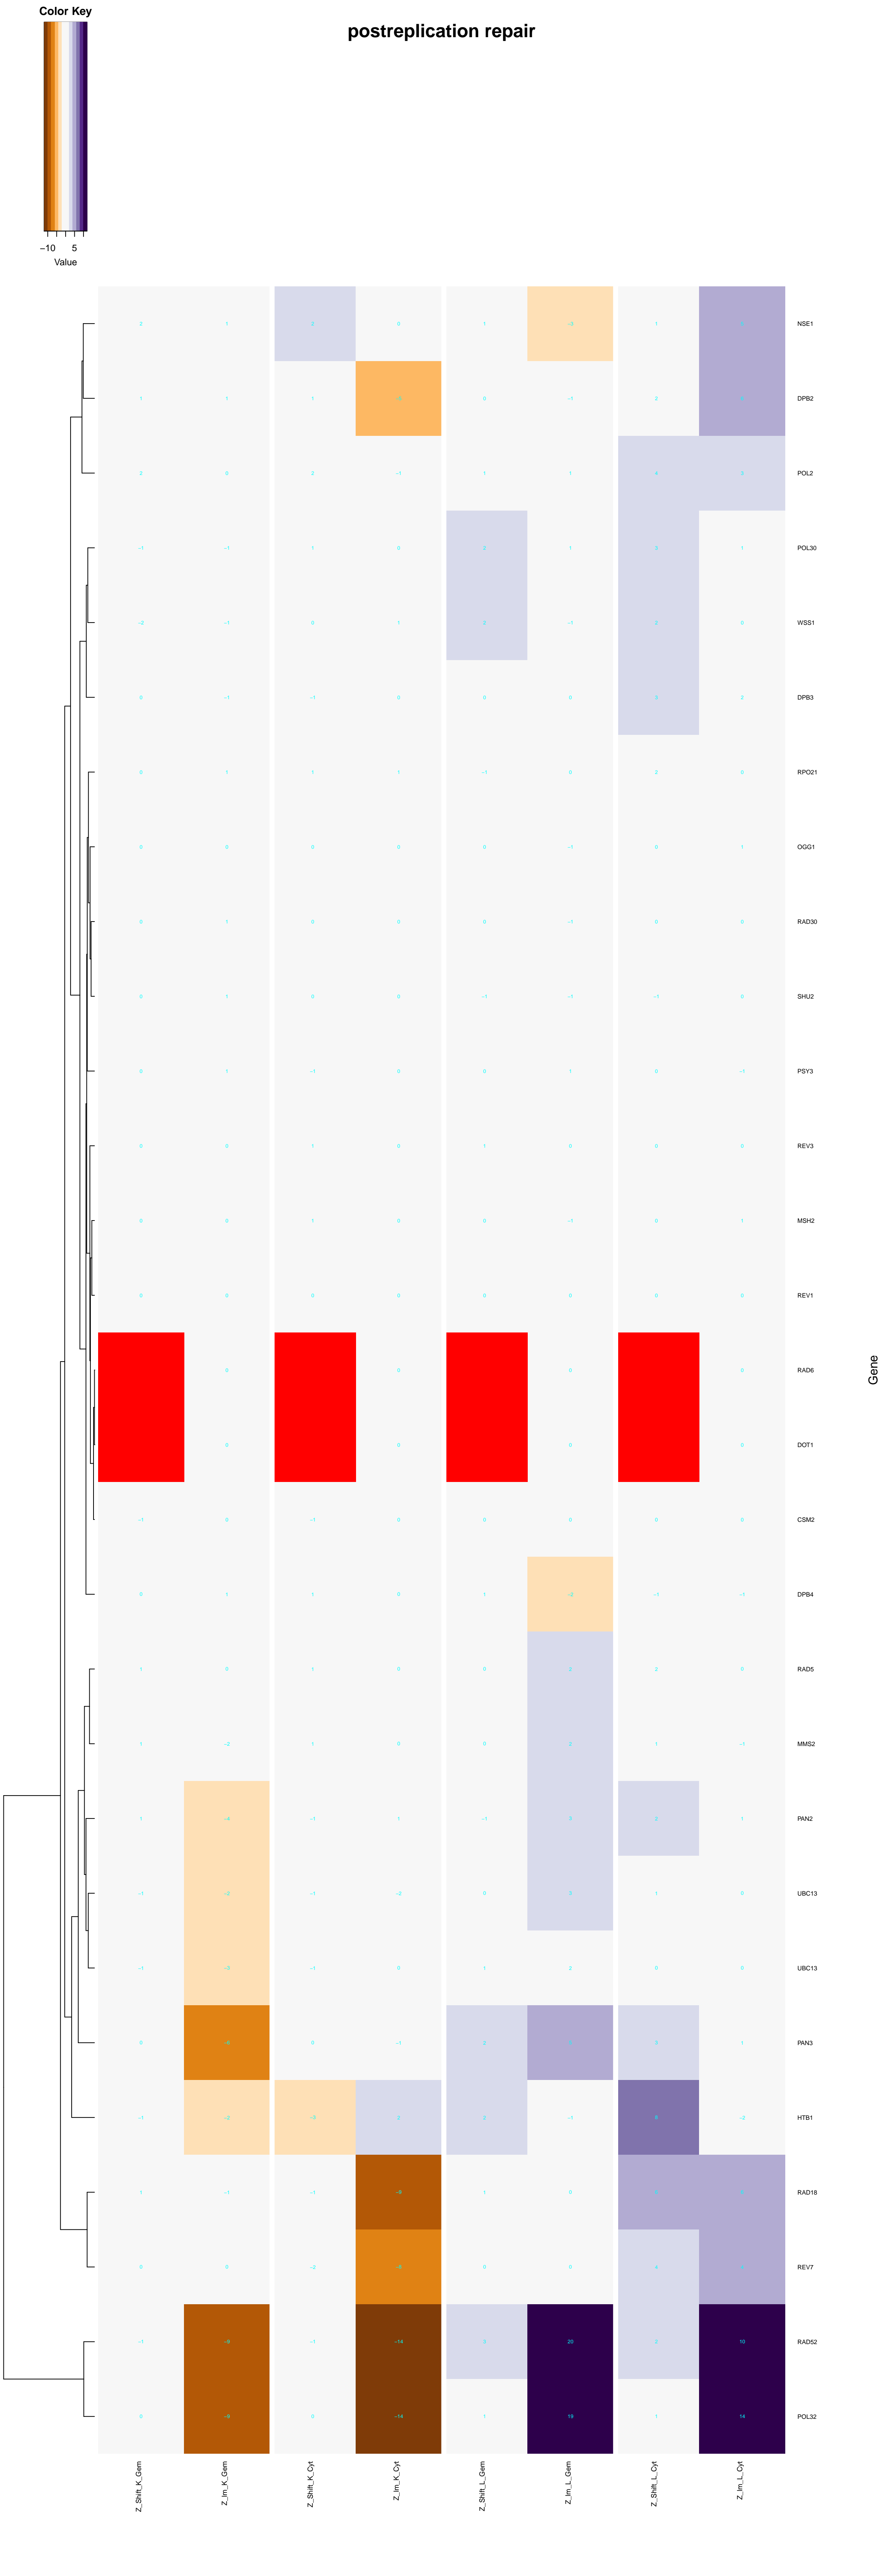



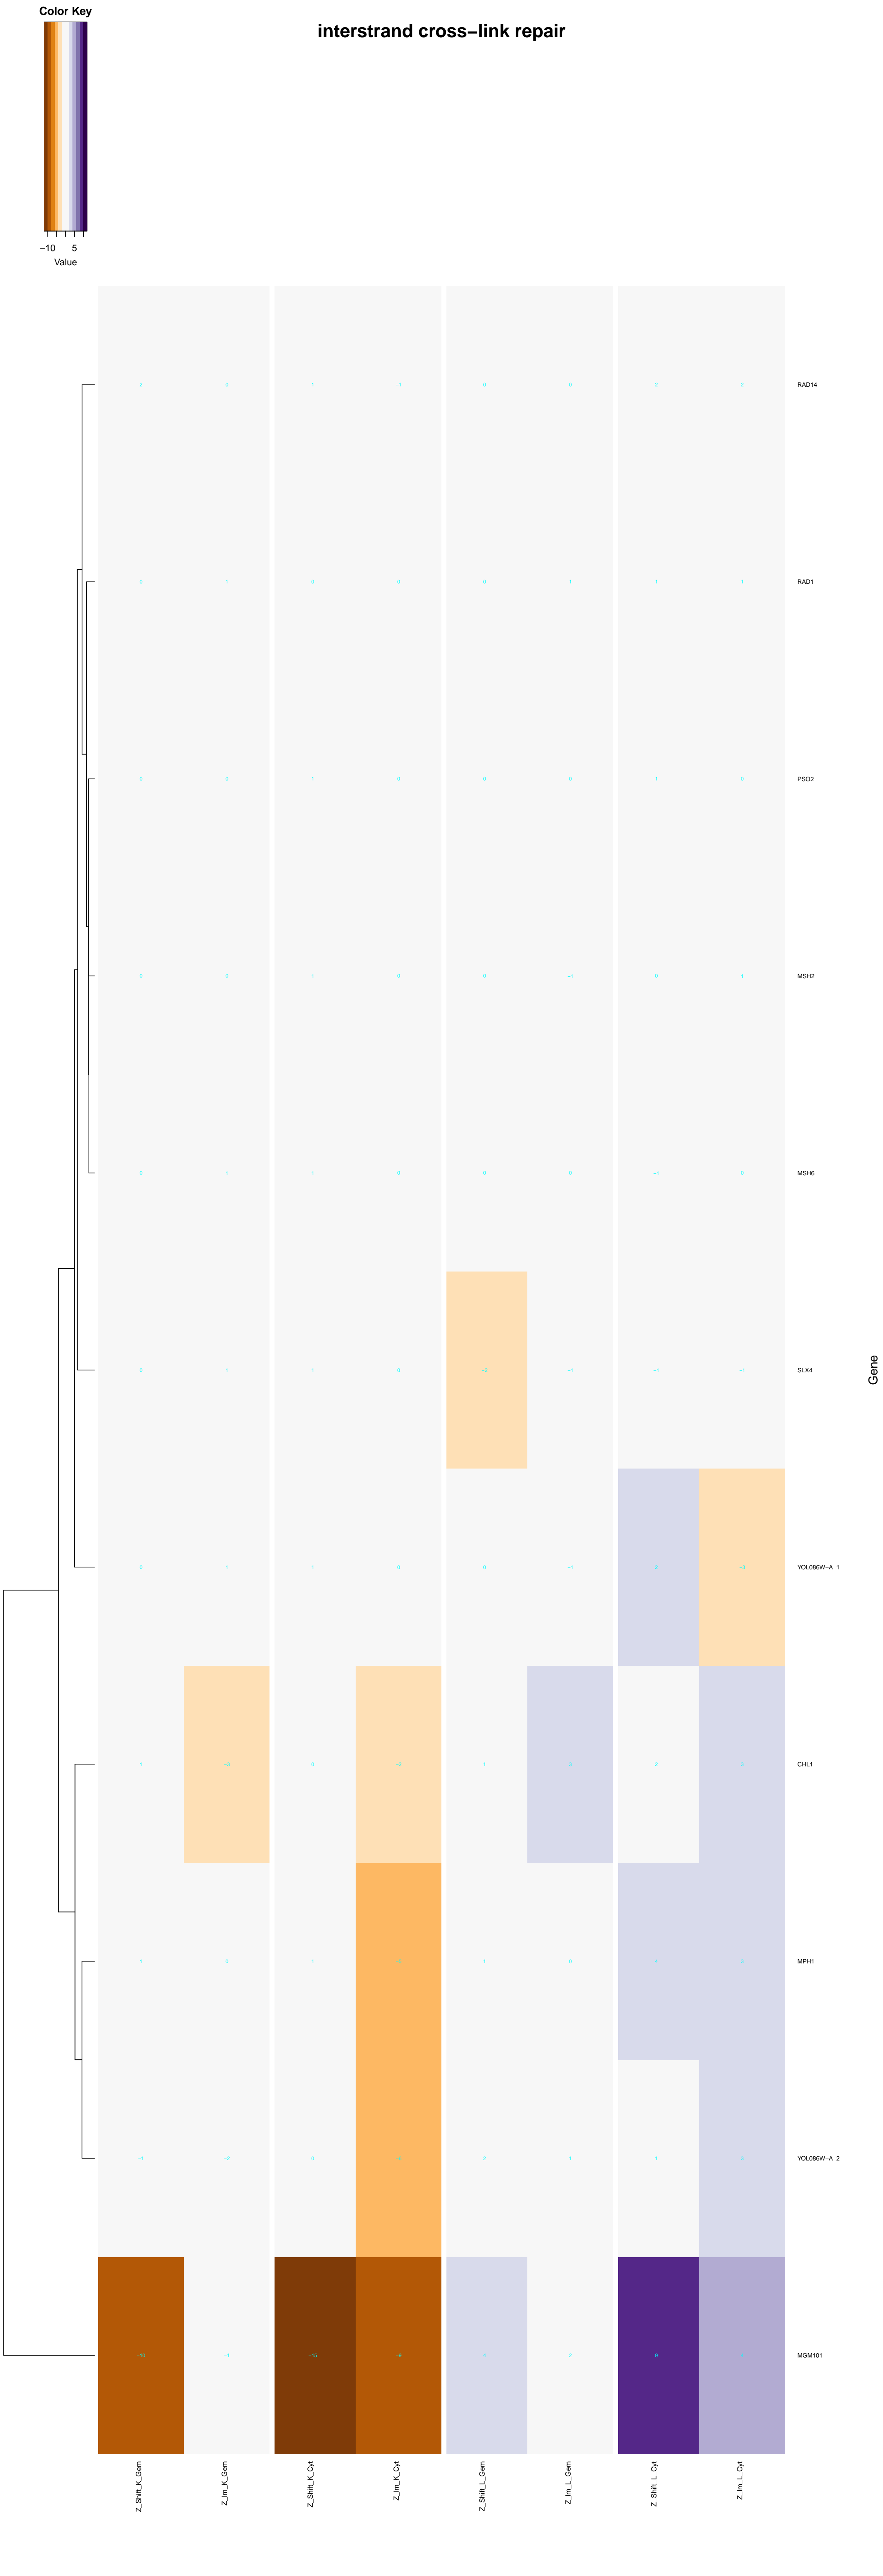

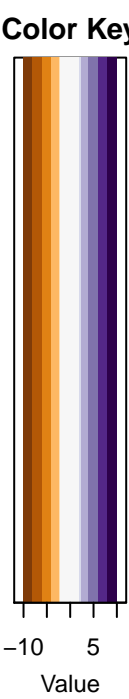

UV-damage excision repair

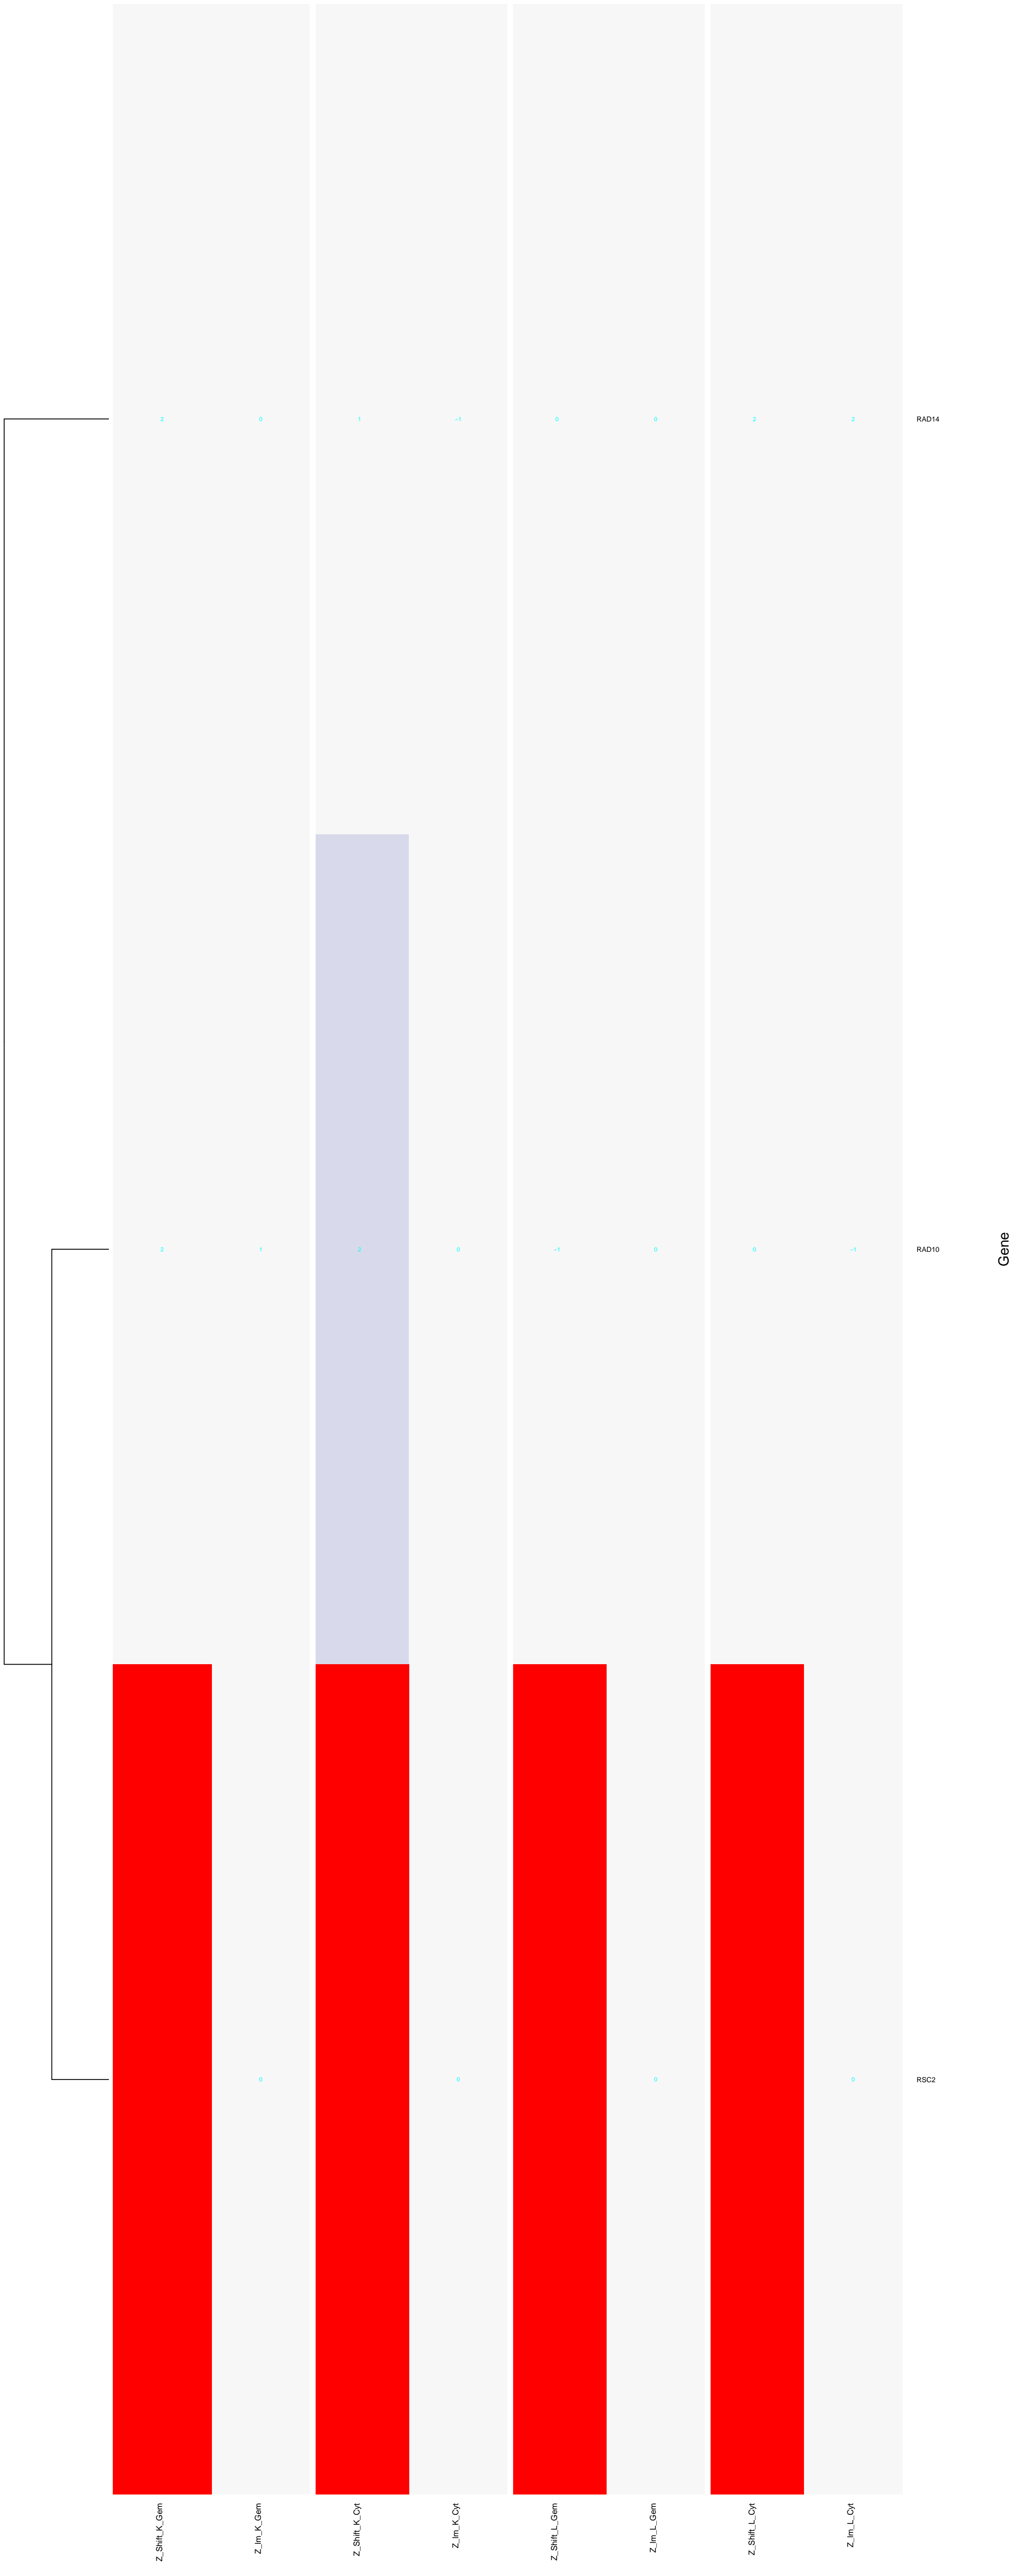

Color Key

ation of transcription from RNA polymerase II promoter in response to amino acid starvation

-10 5

Value

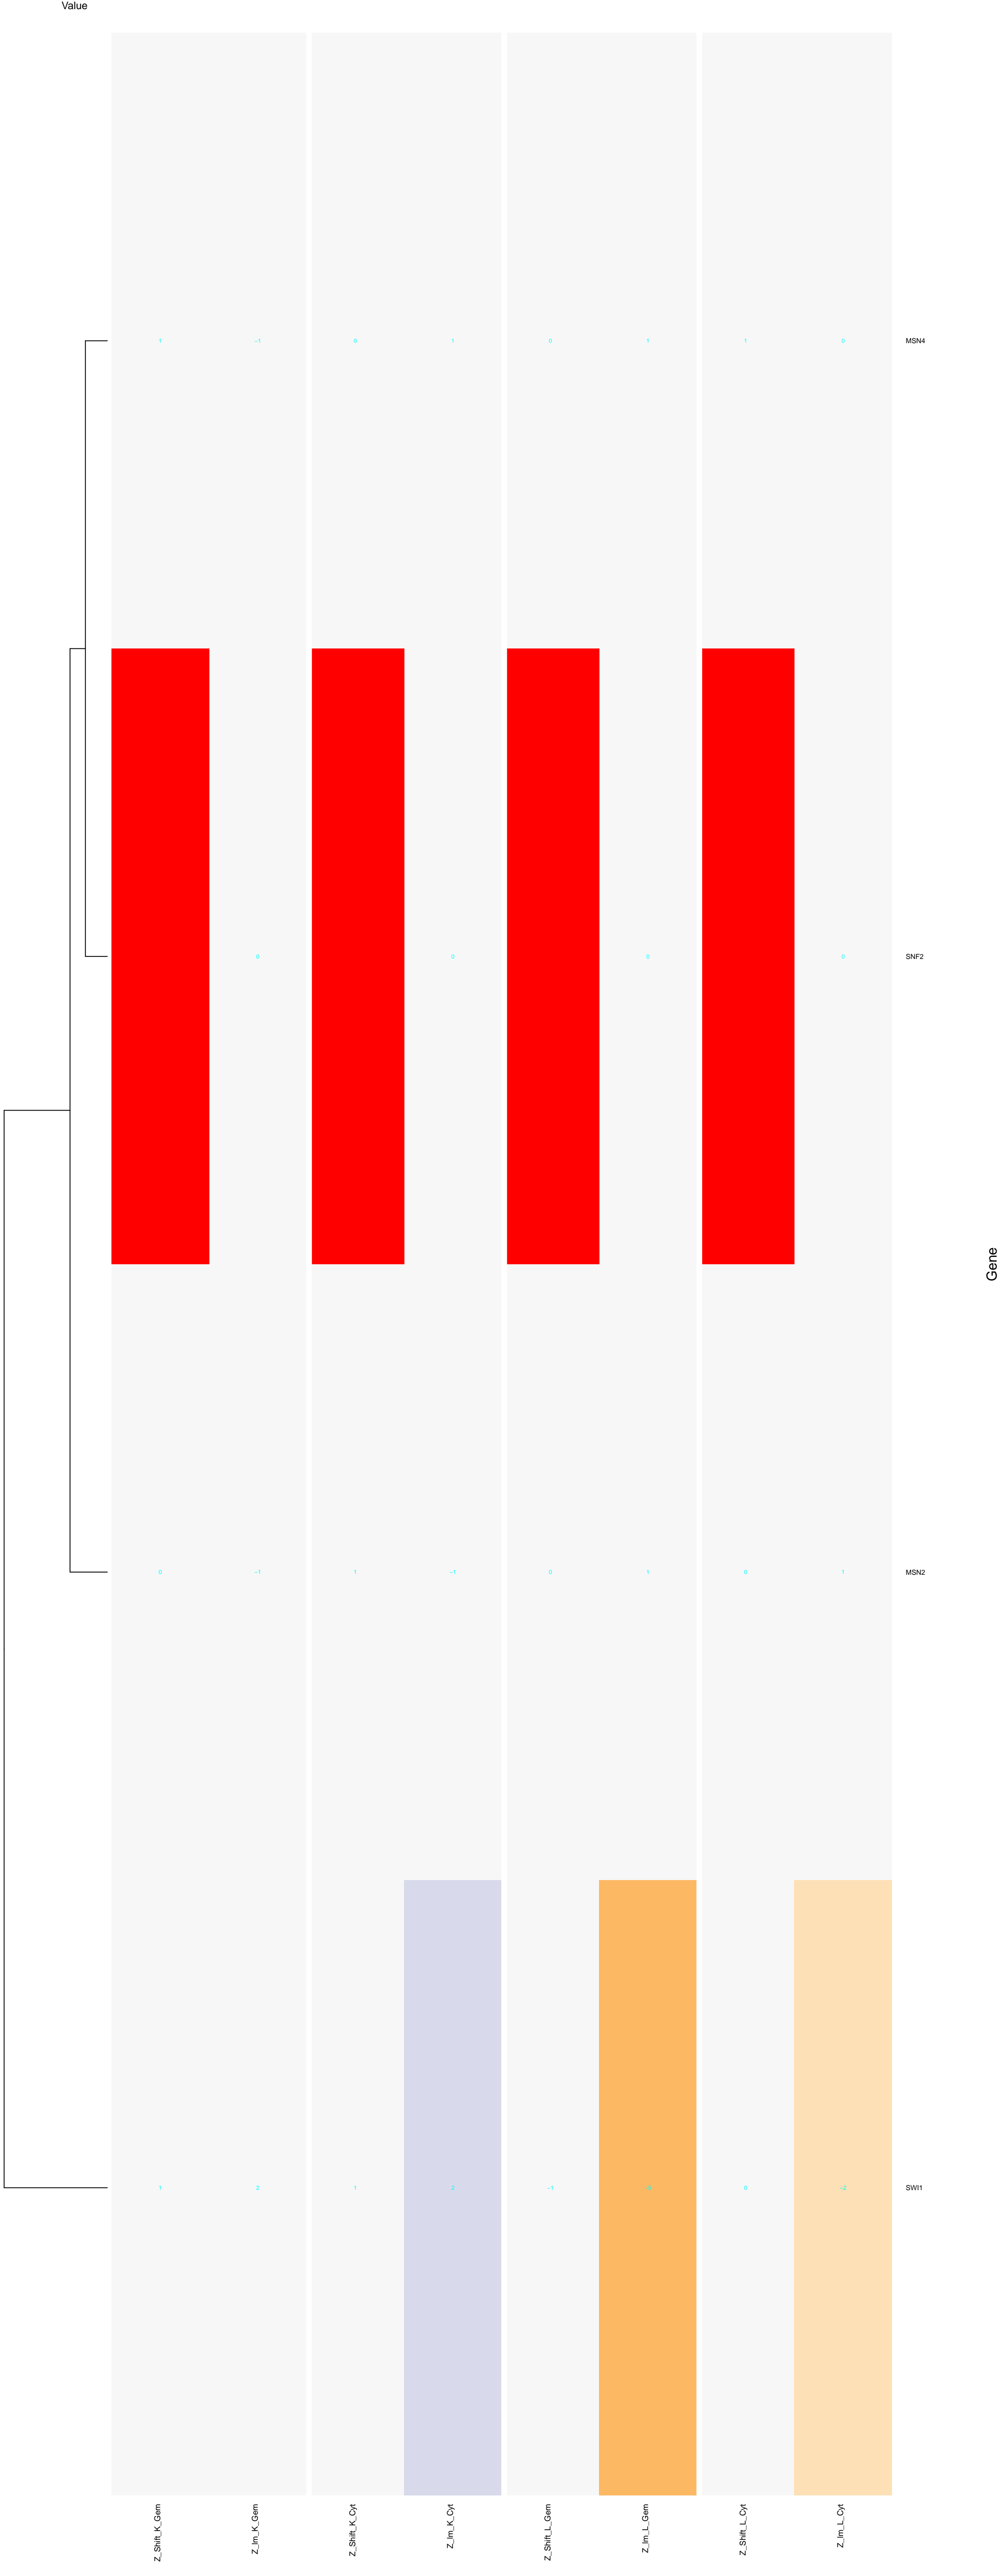

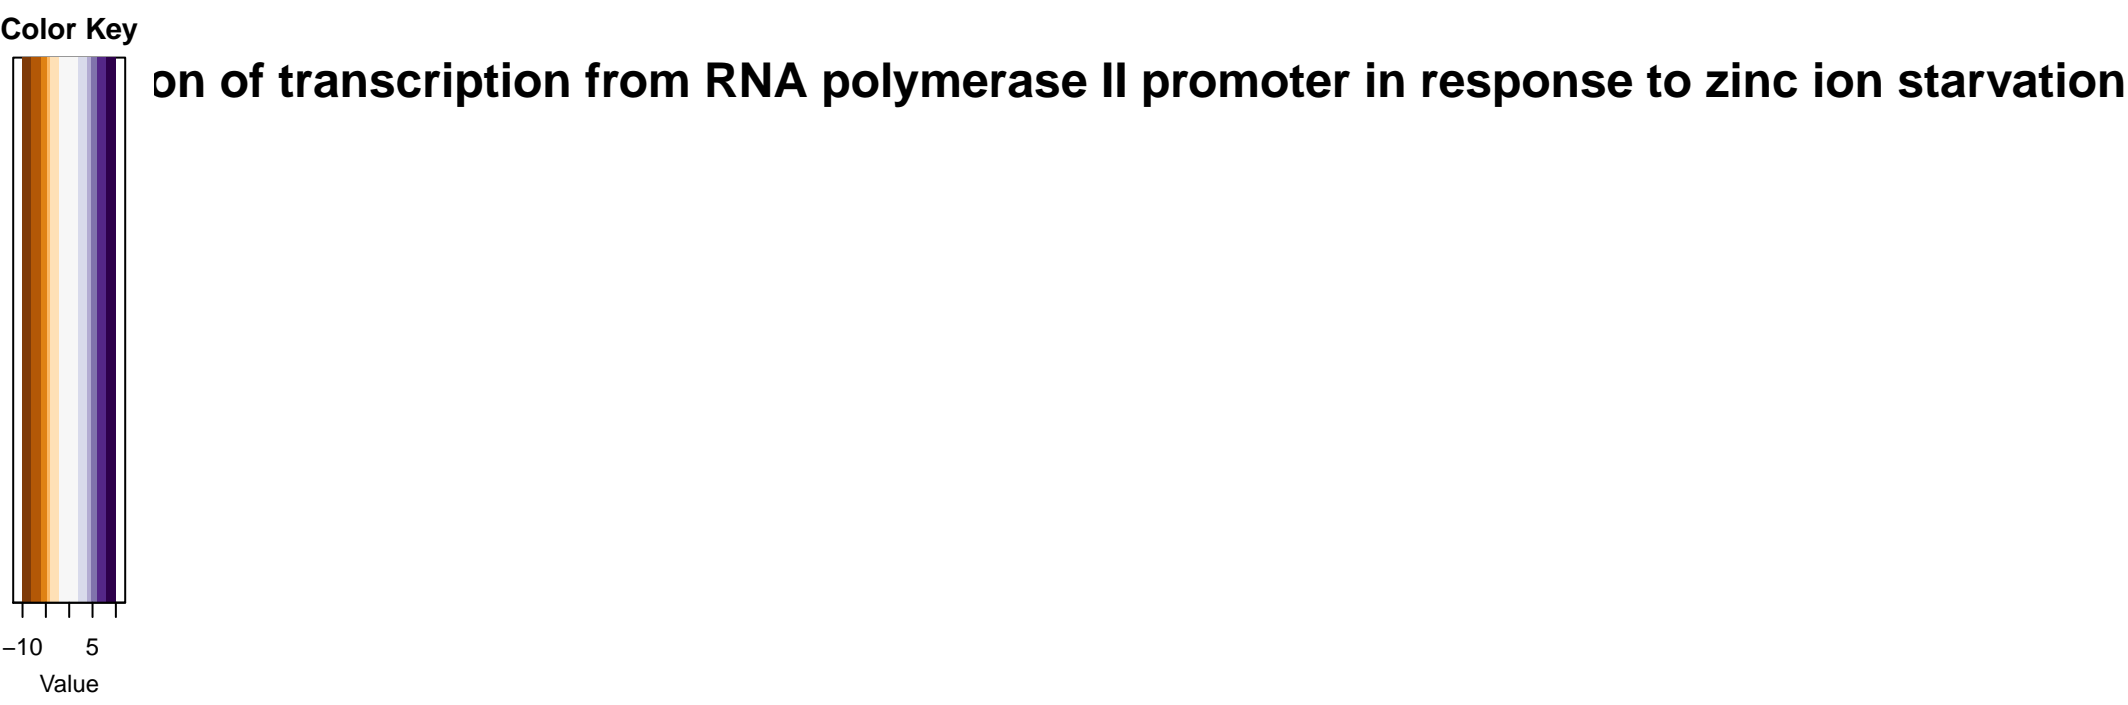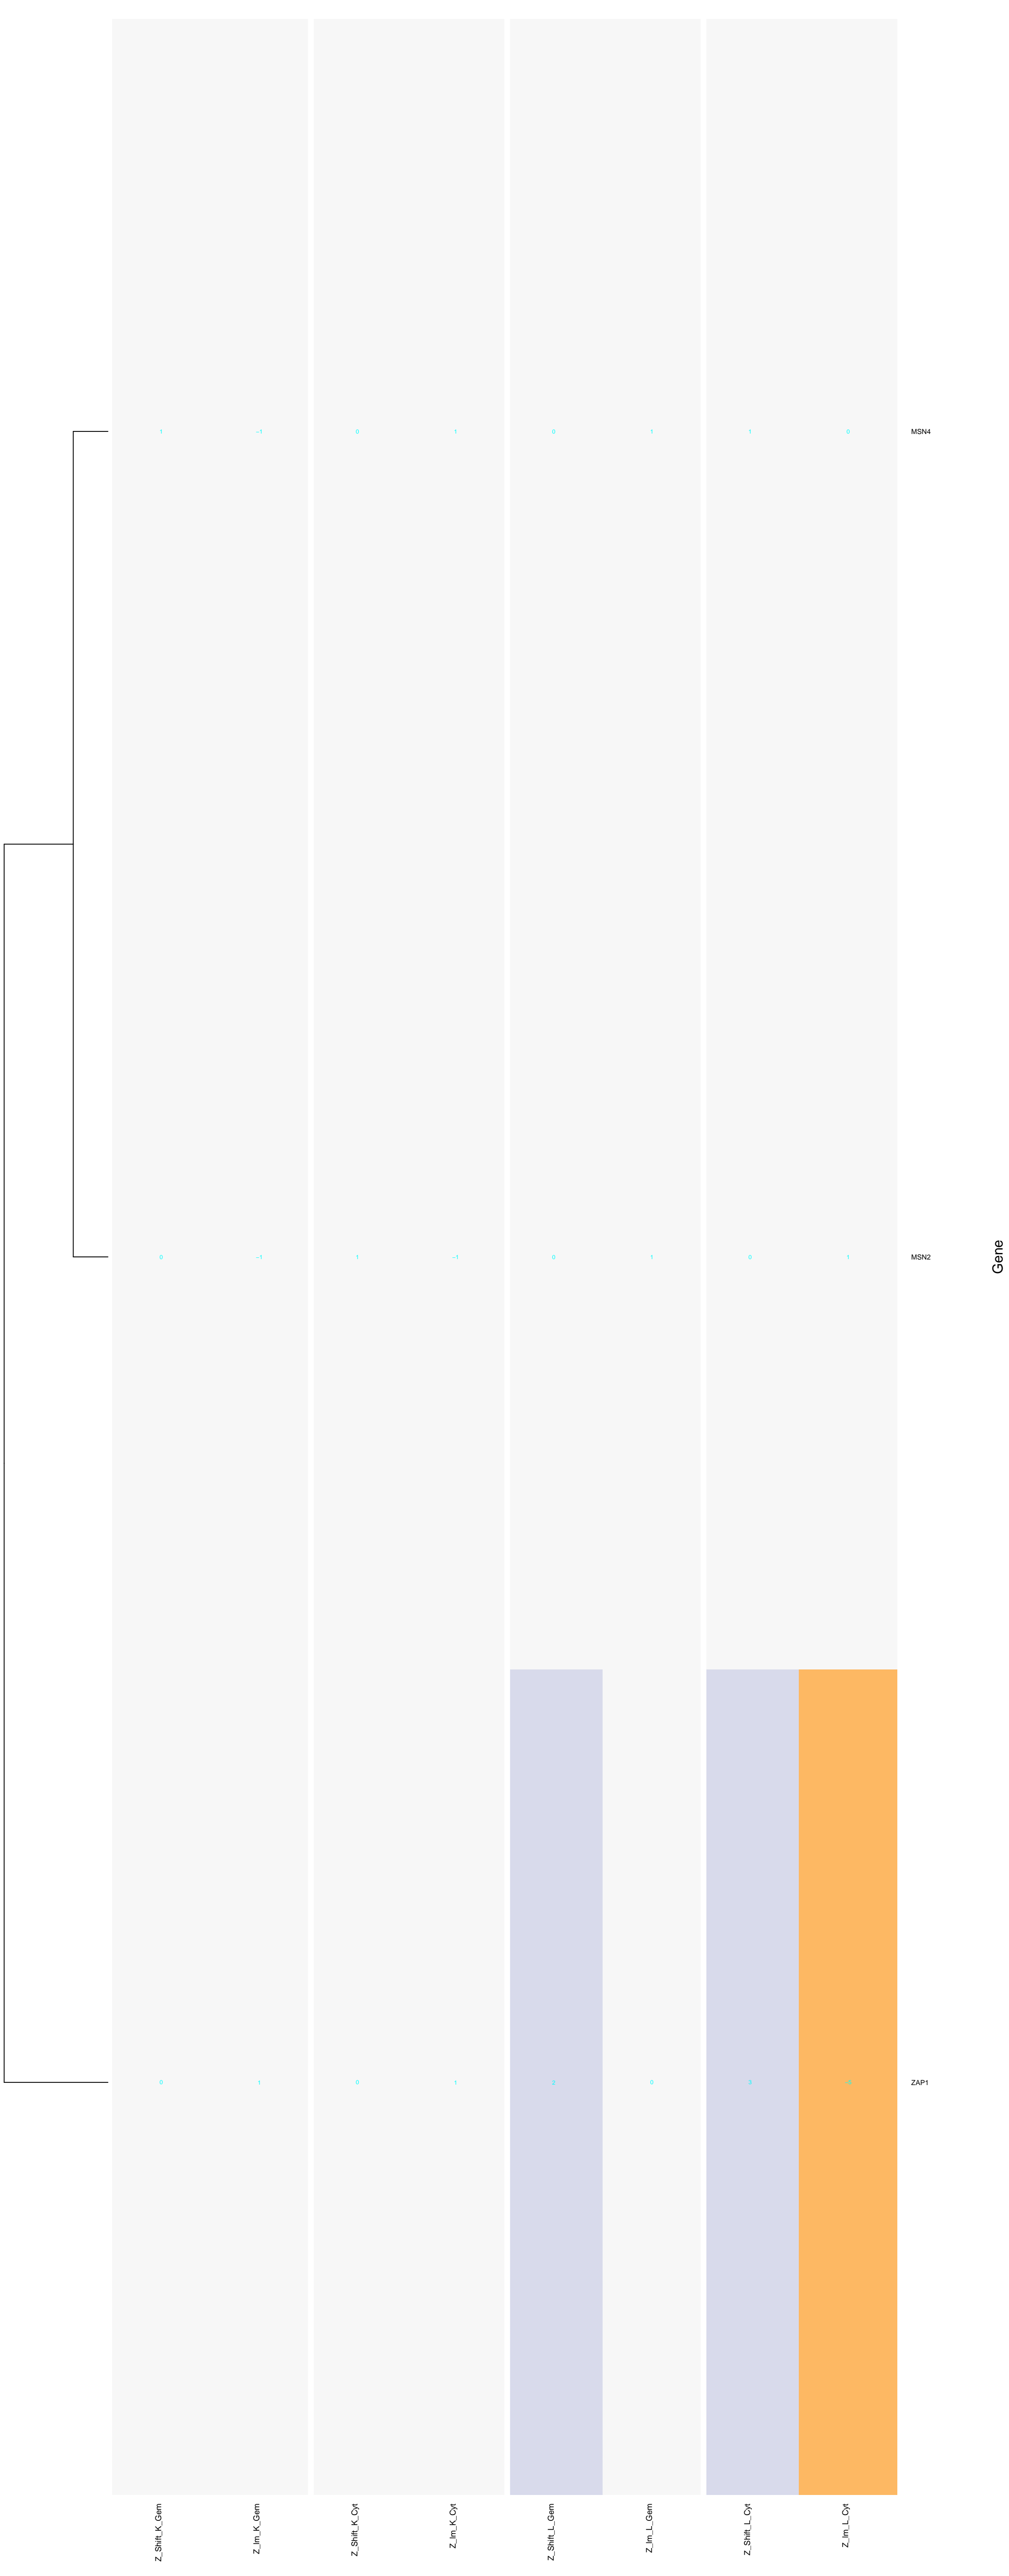

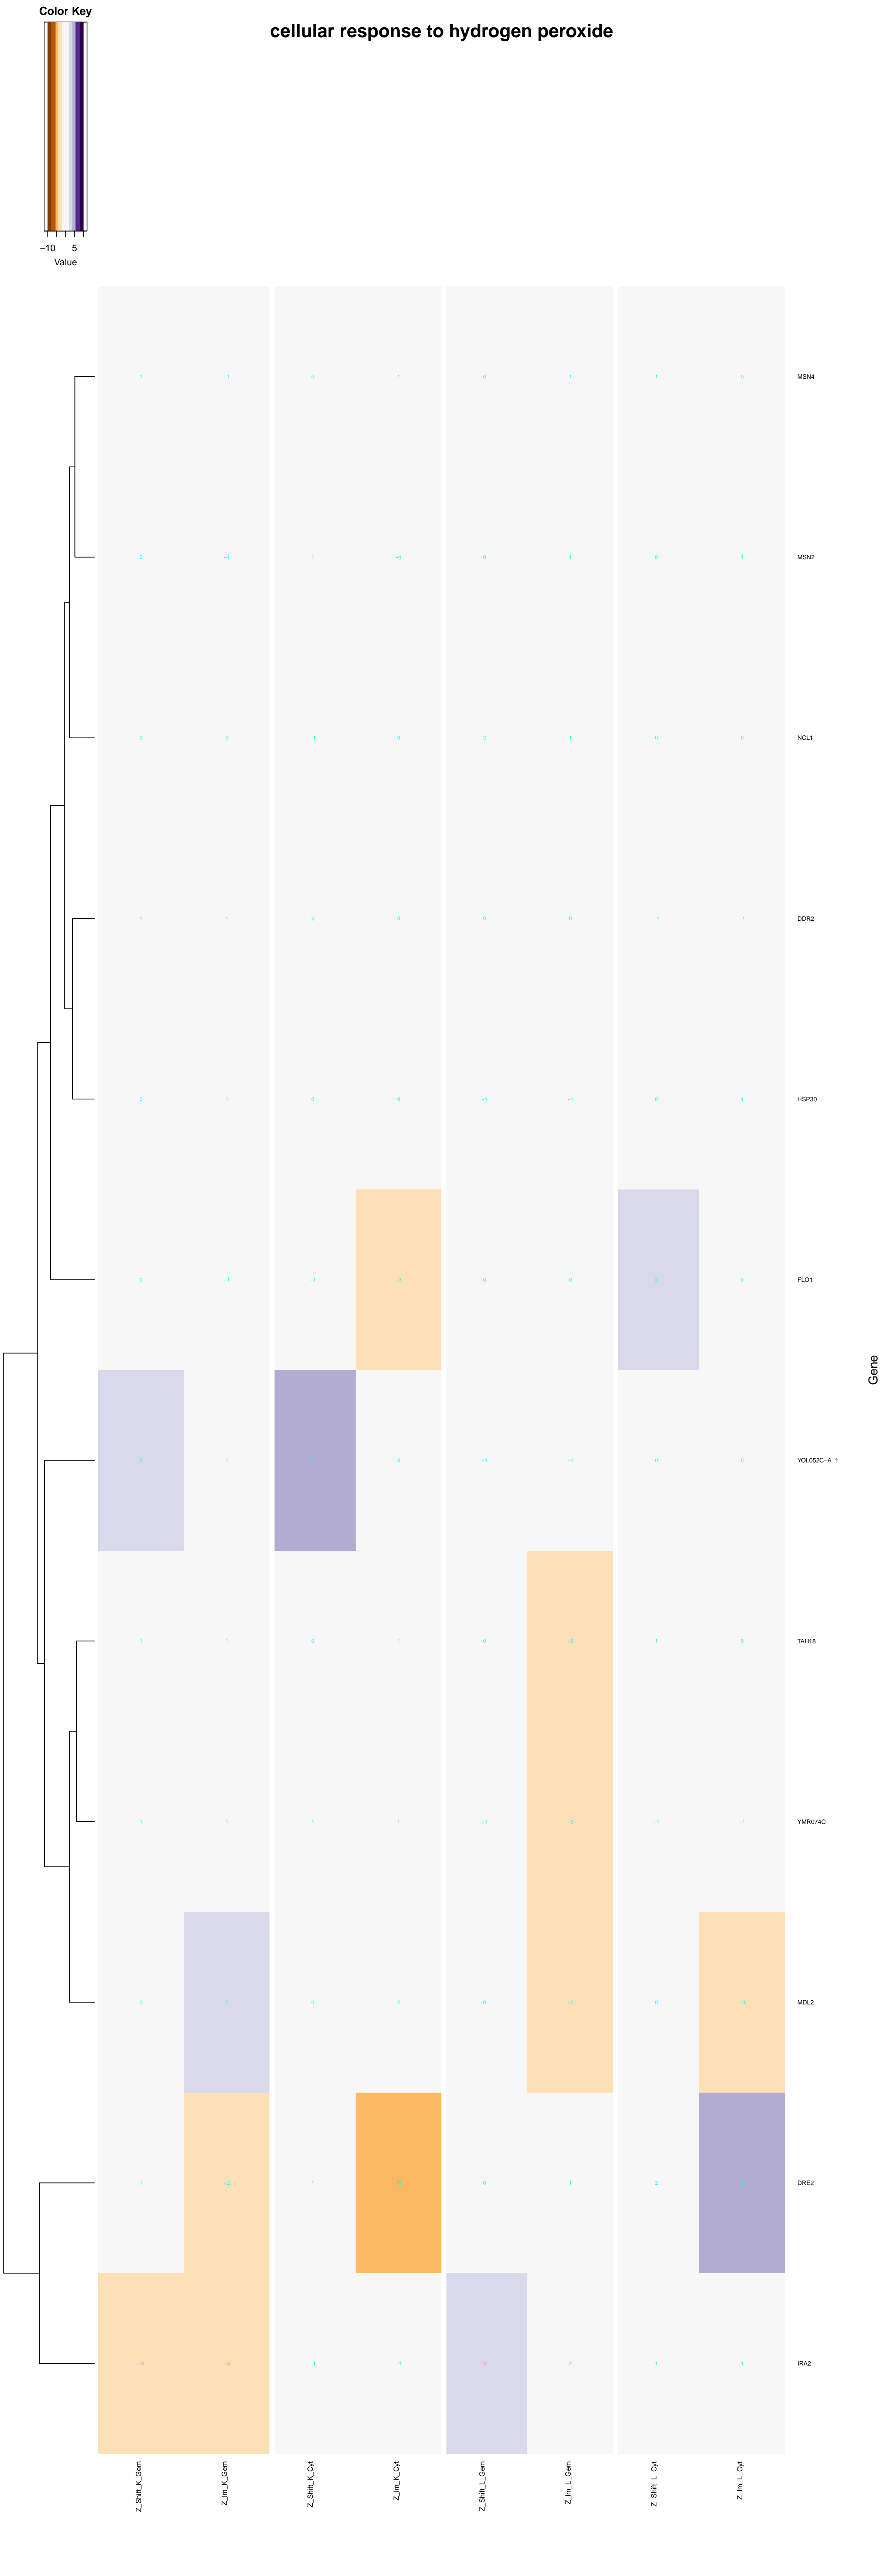

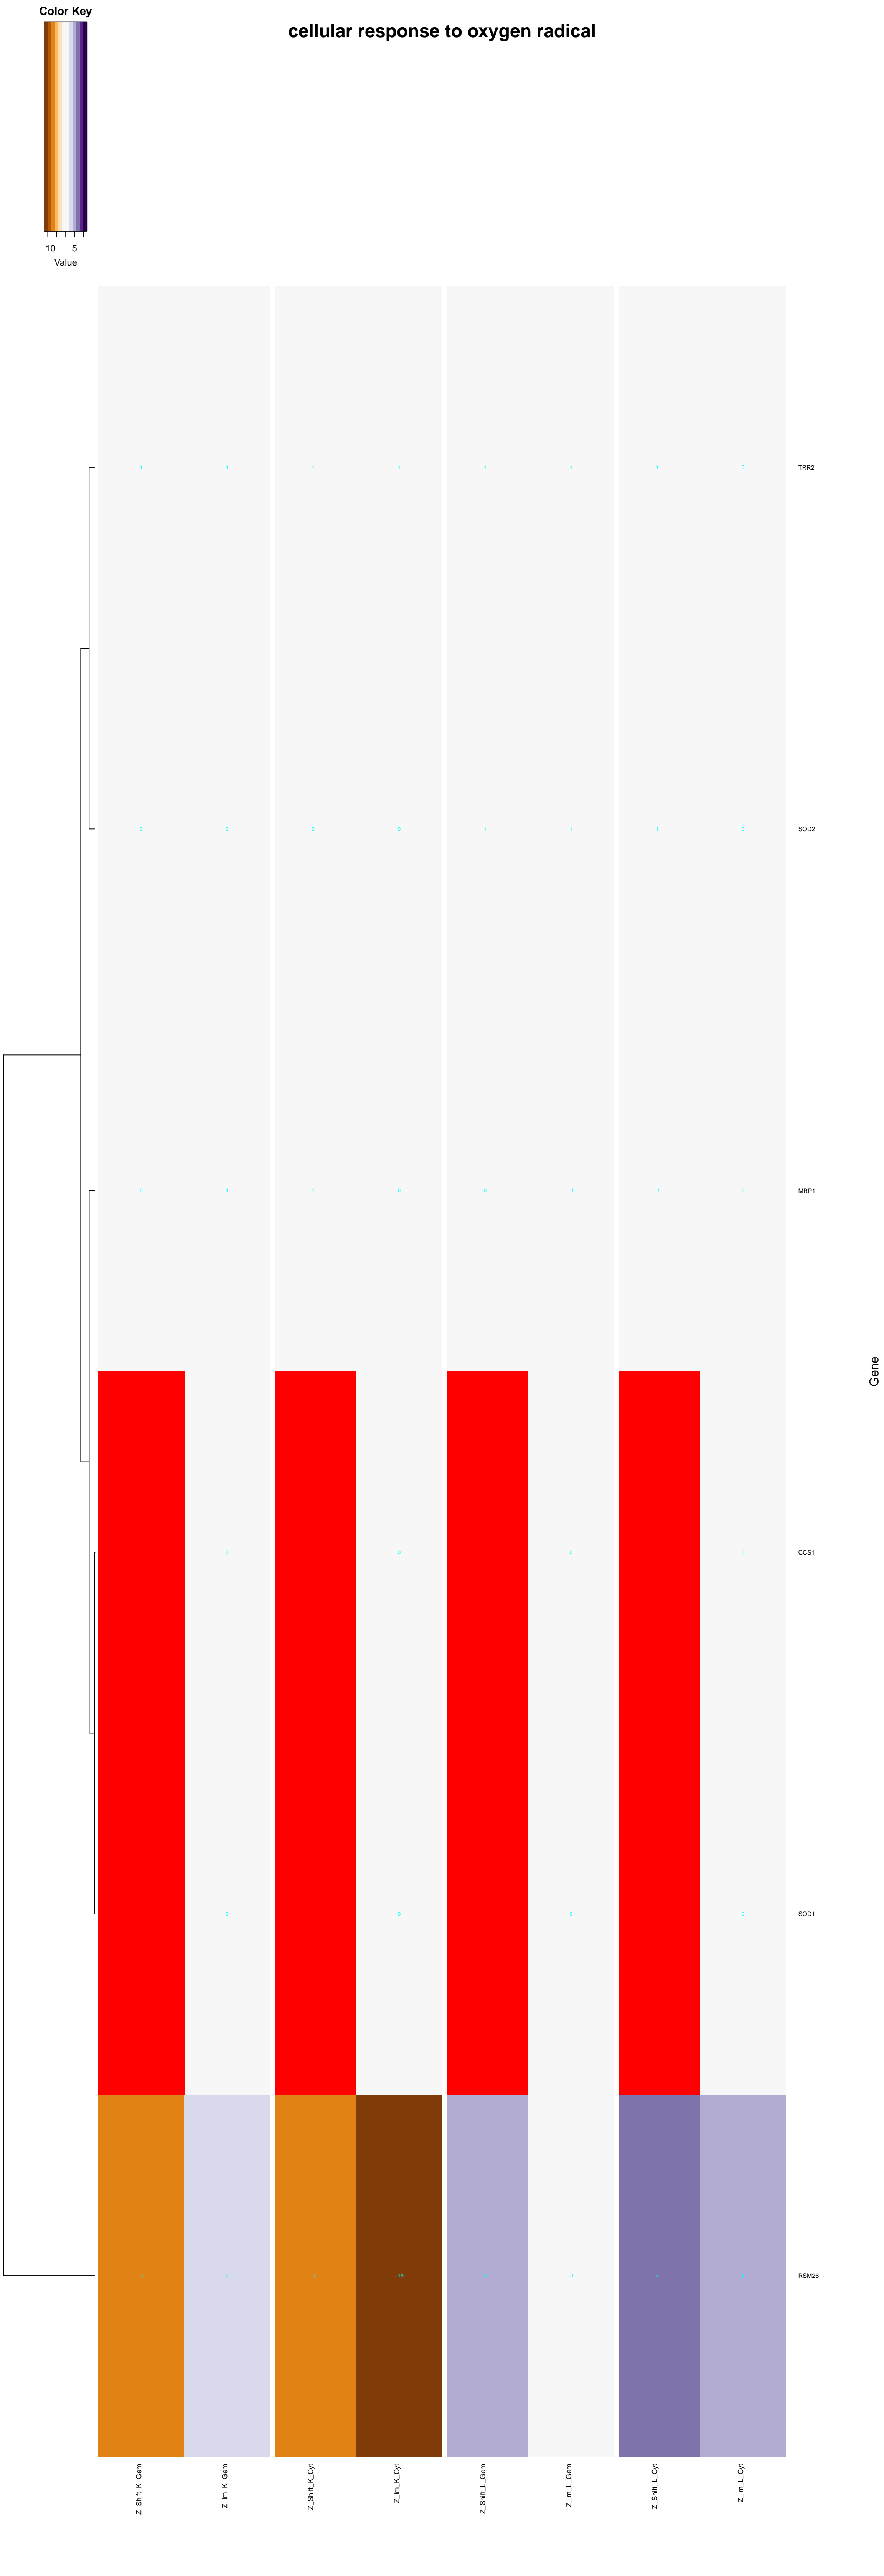

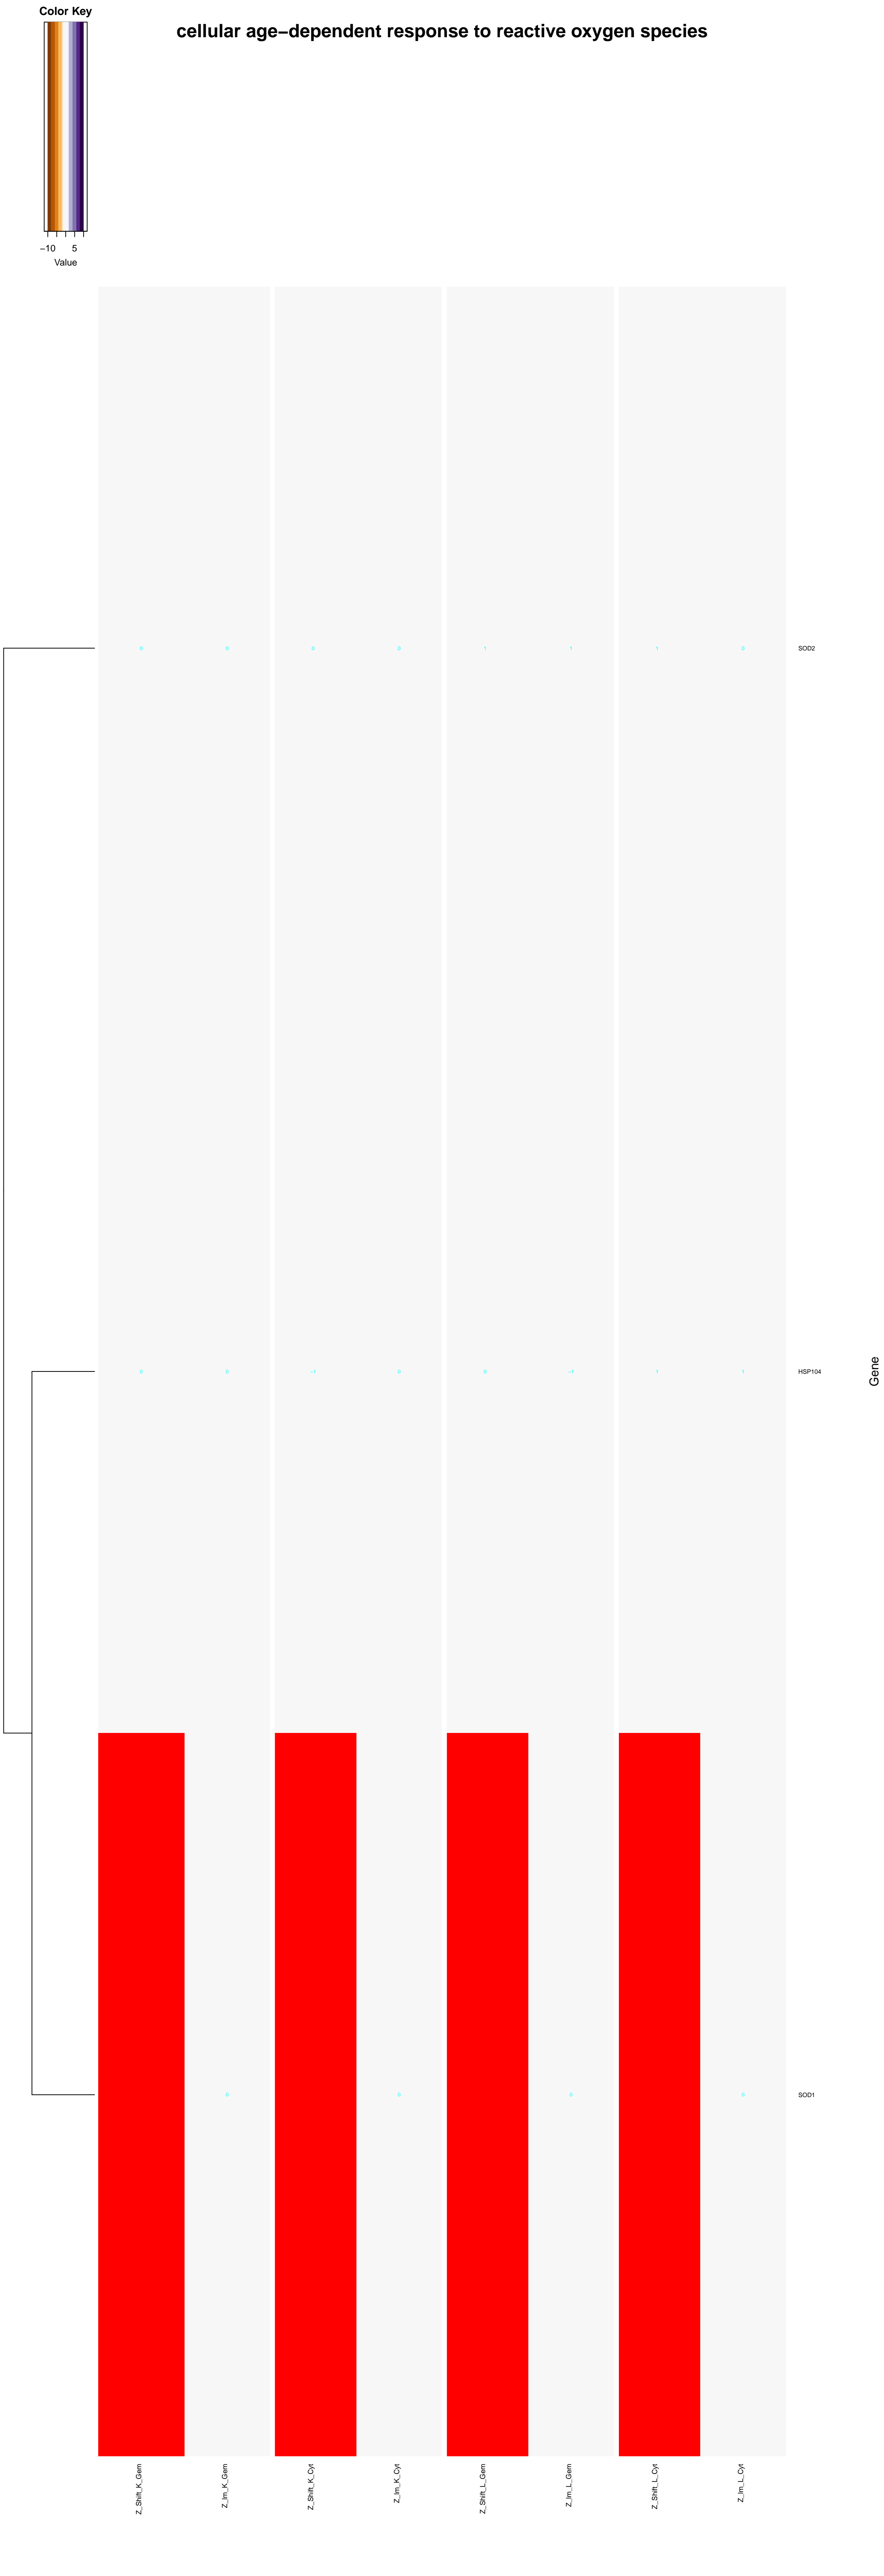

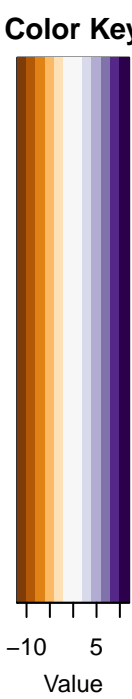

IRE1-mediated unfolded protein response

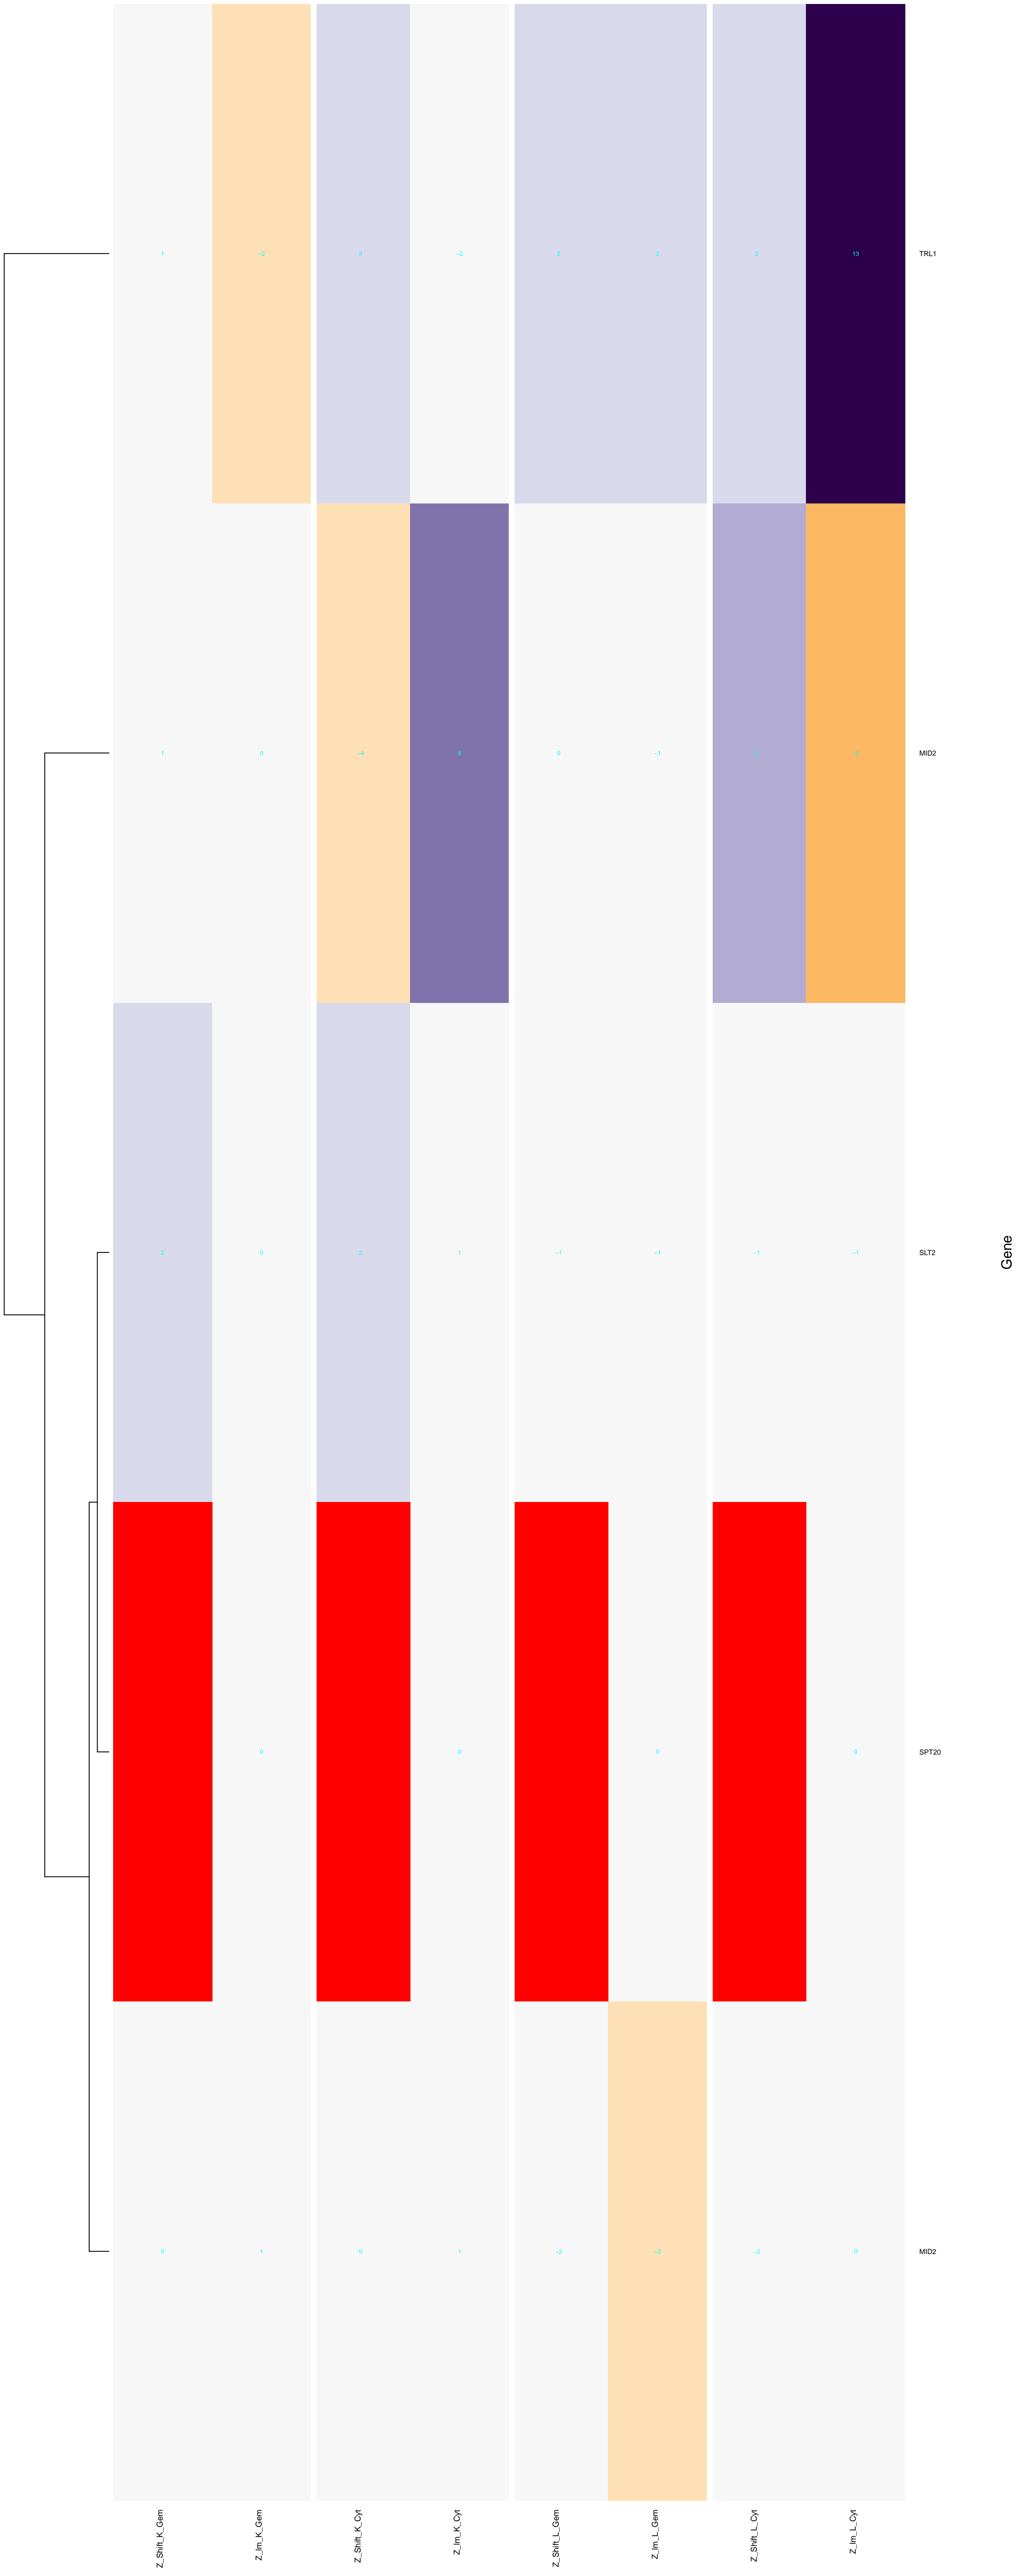

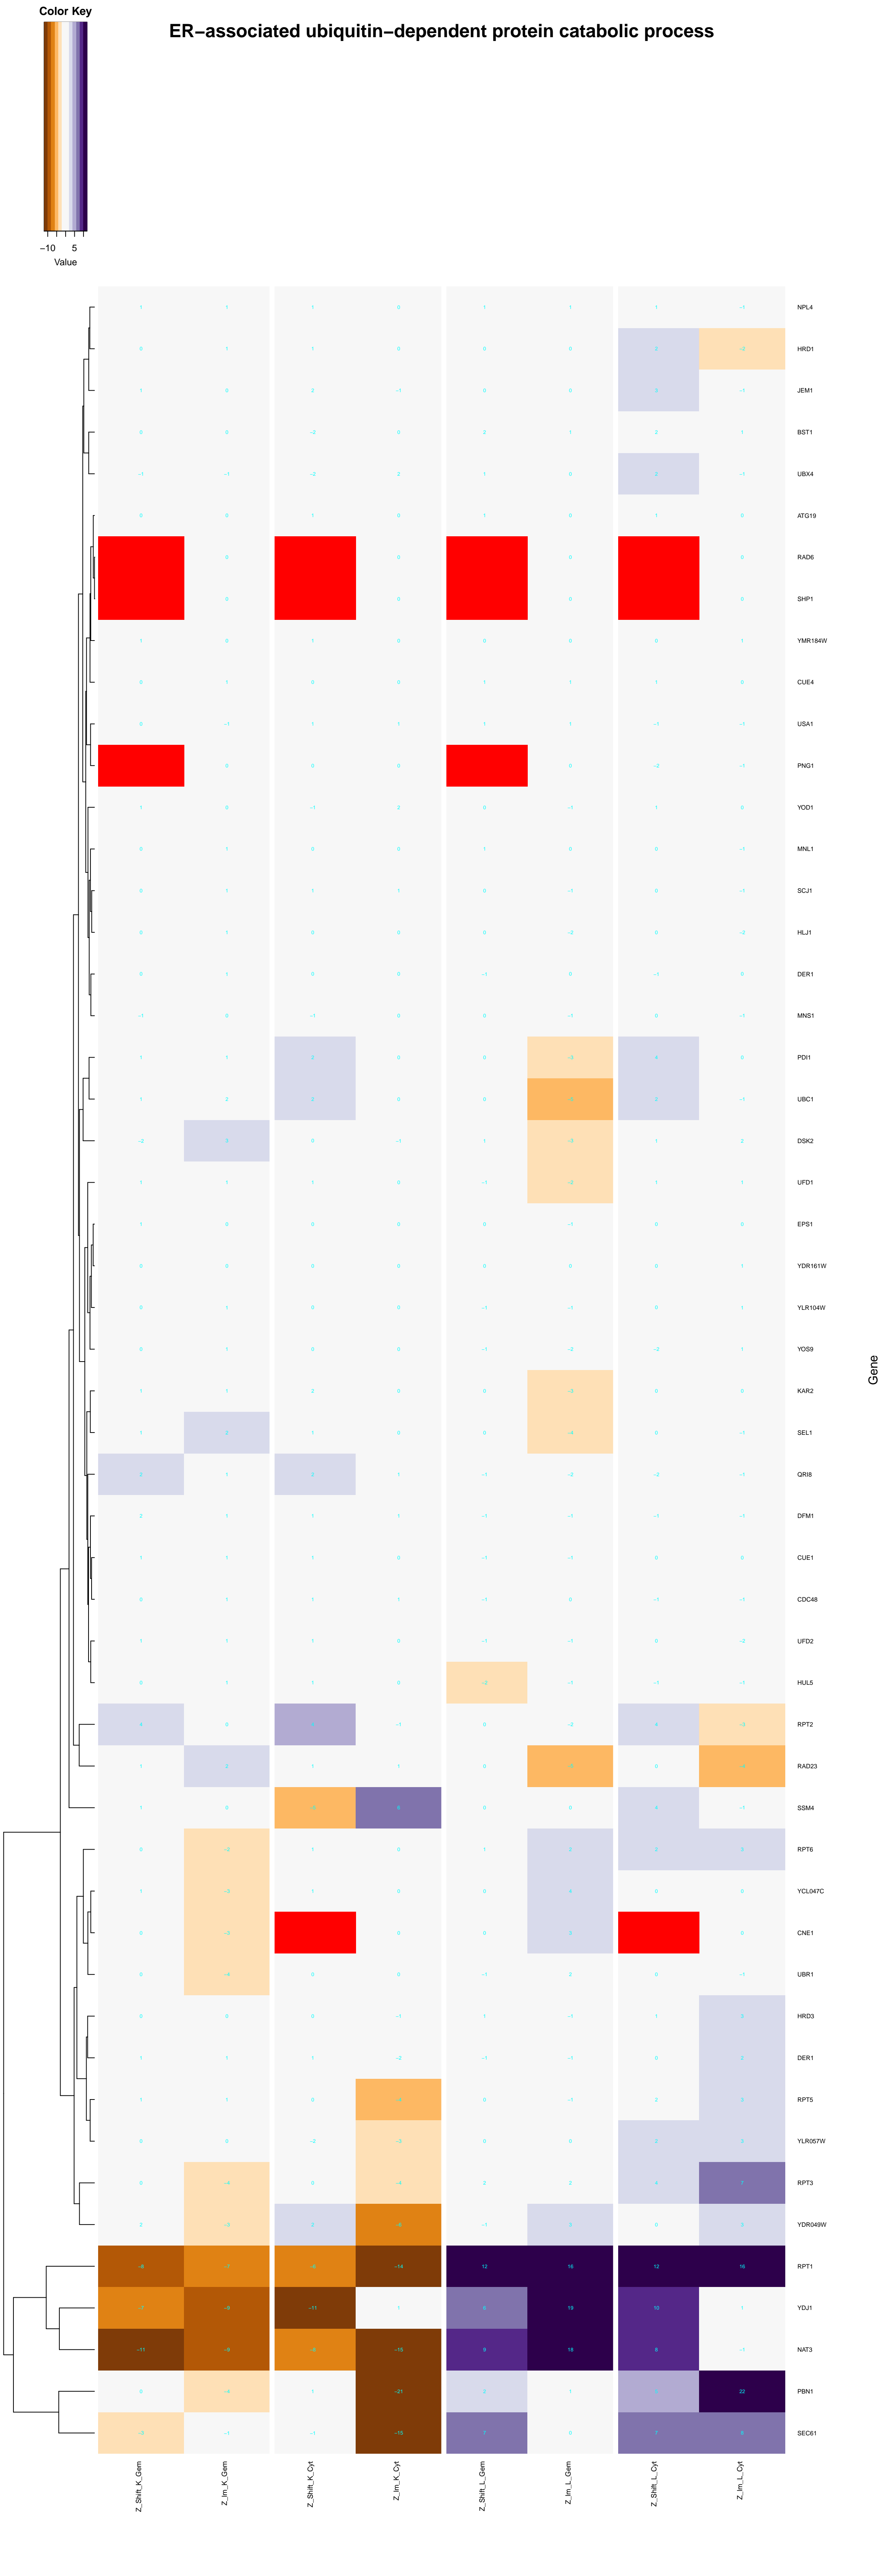

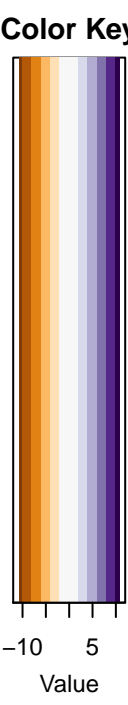

ER-associated misfolded protein catabolic process

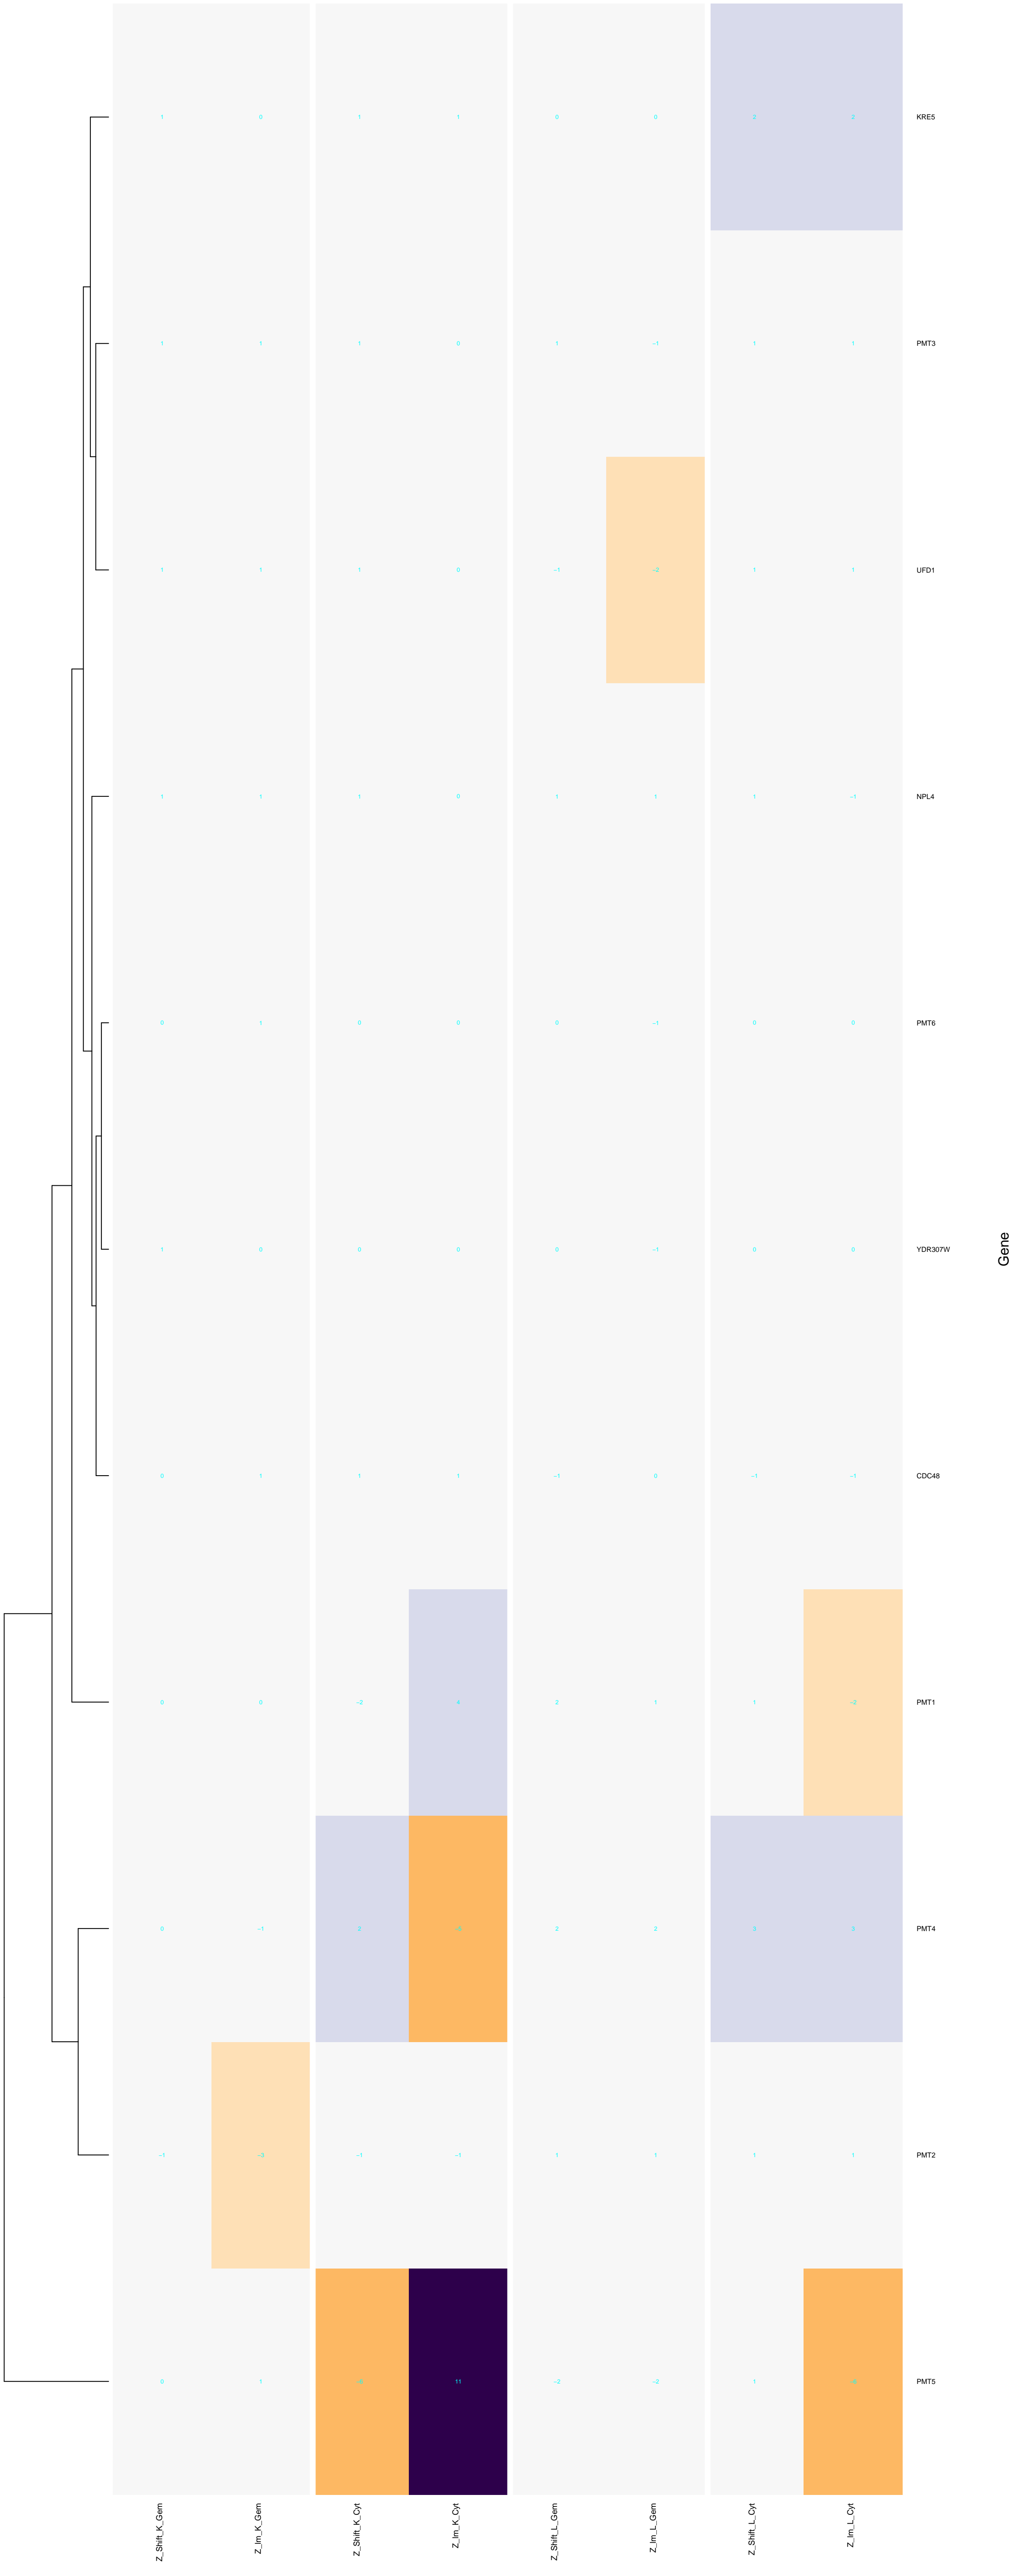

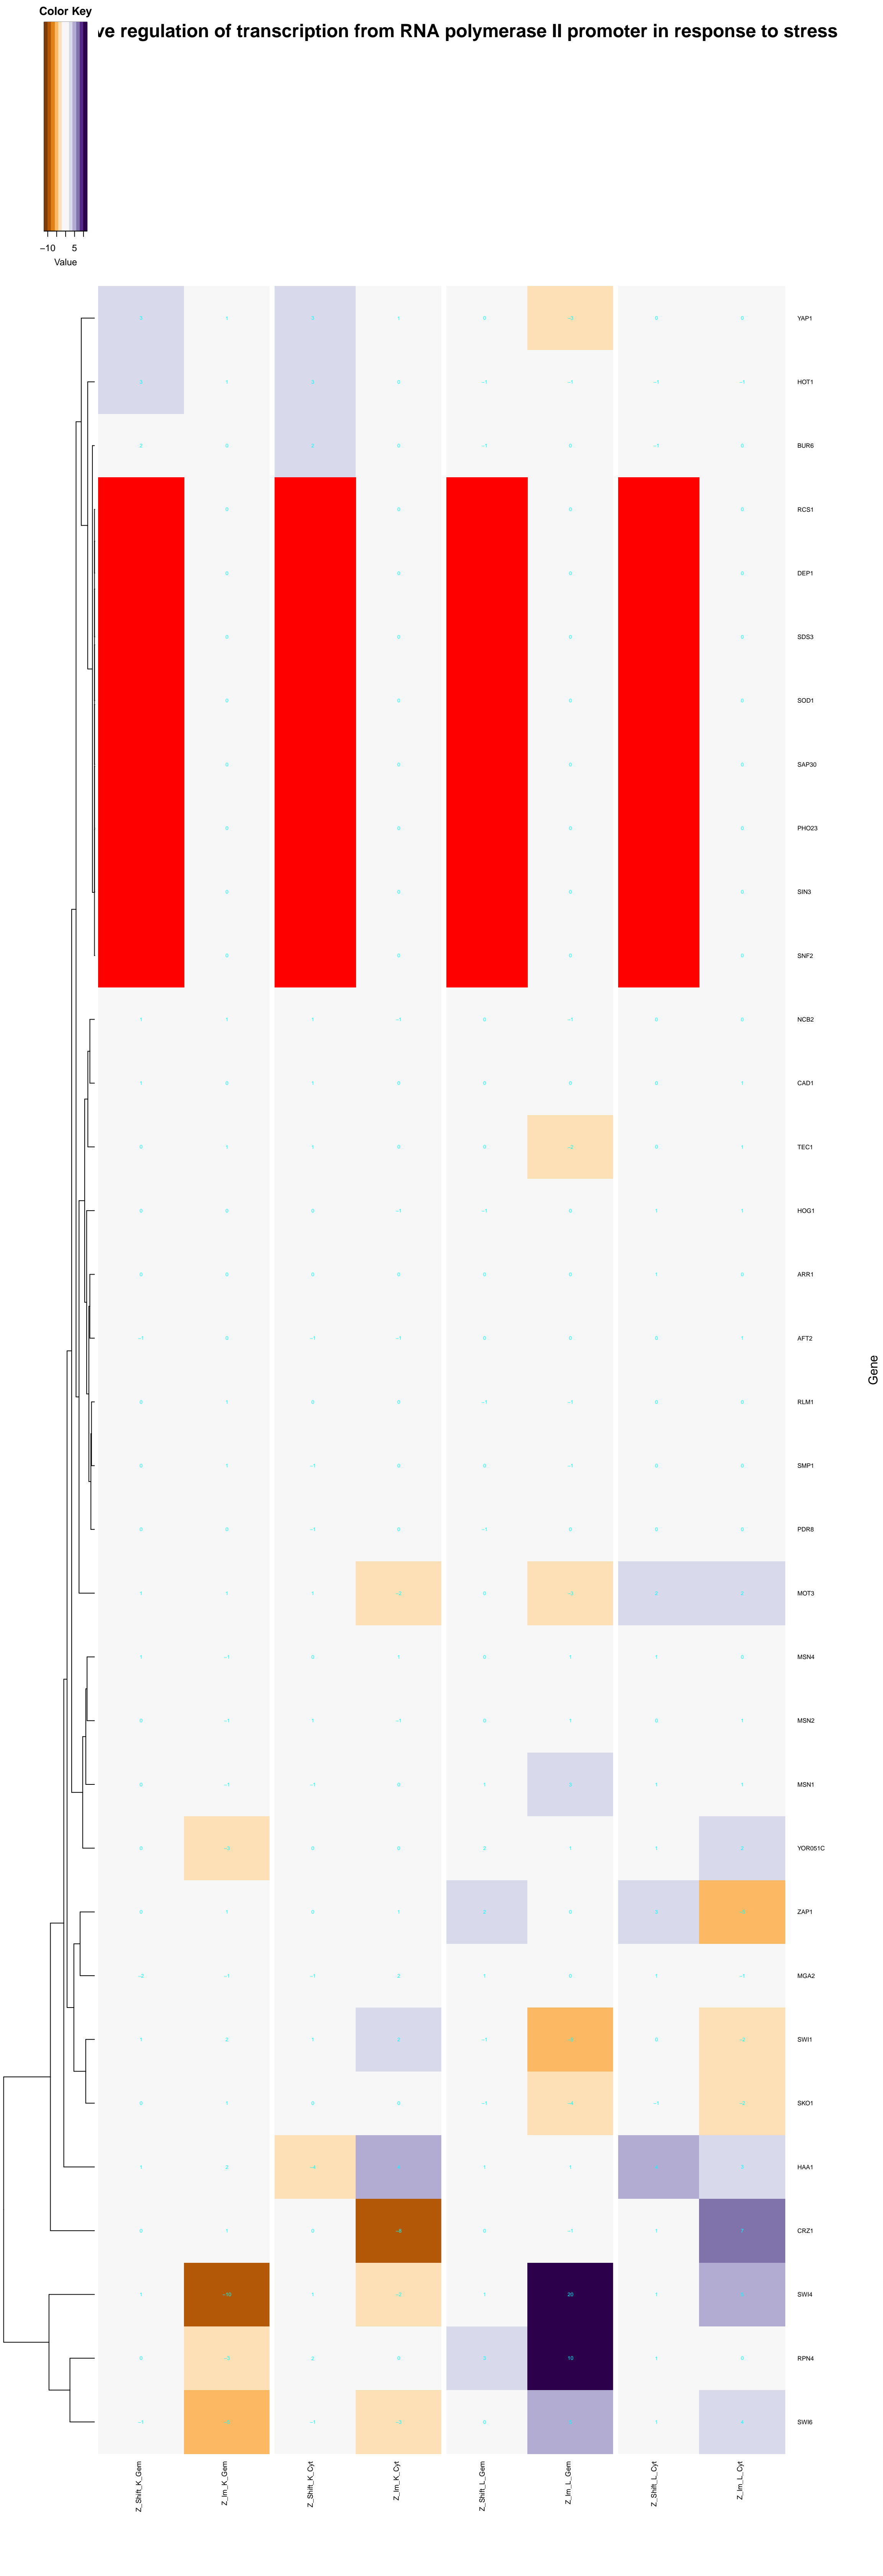

Color Key

tion of transcription from RNA polymerase II promoter in response to oxidative stress

-10 5

Value

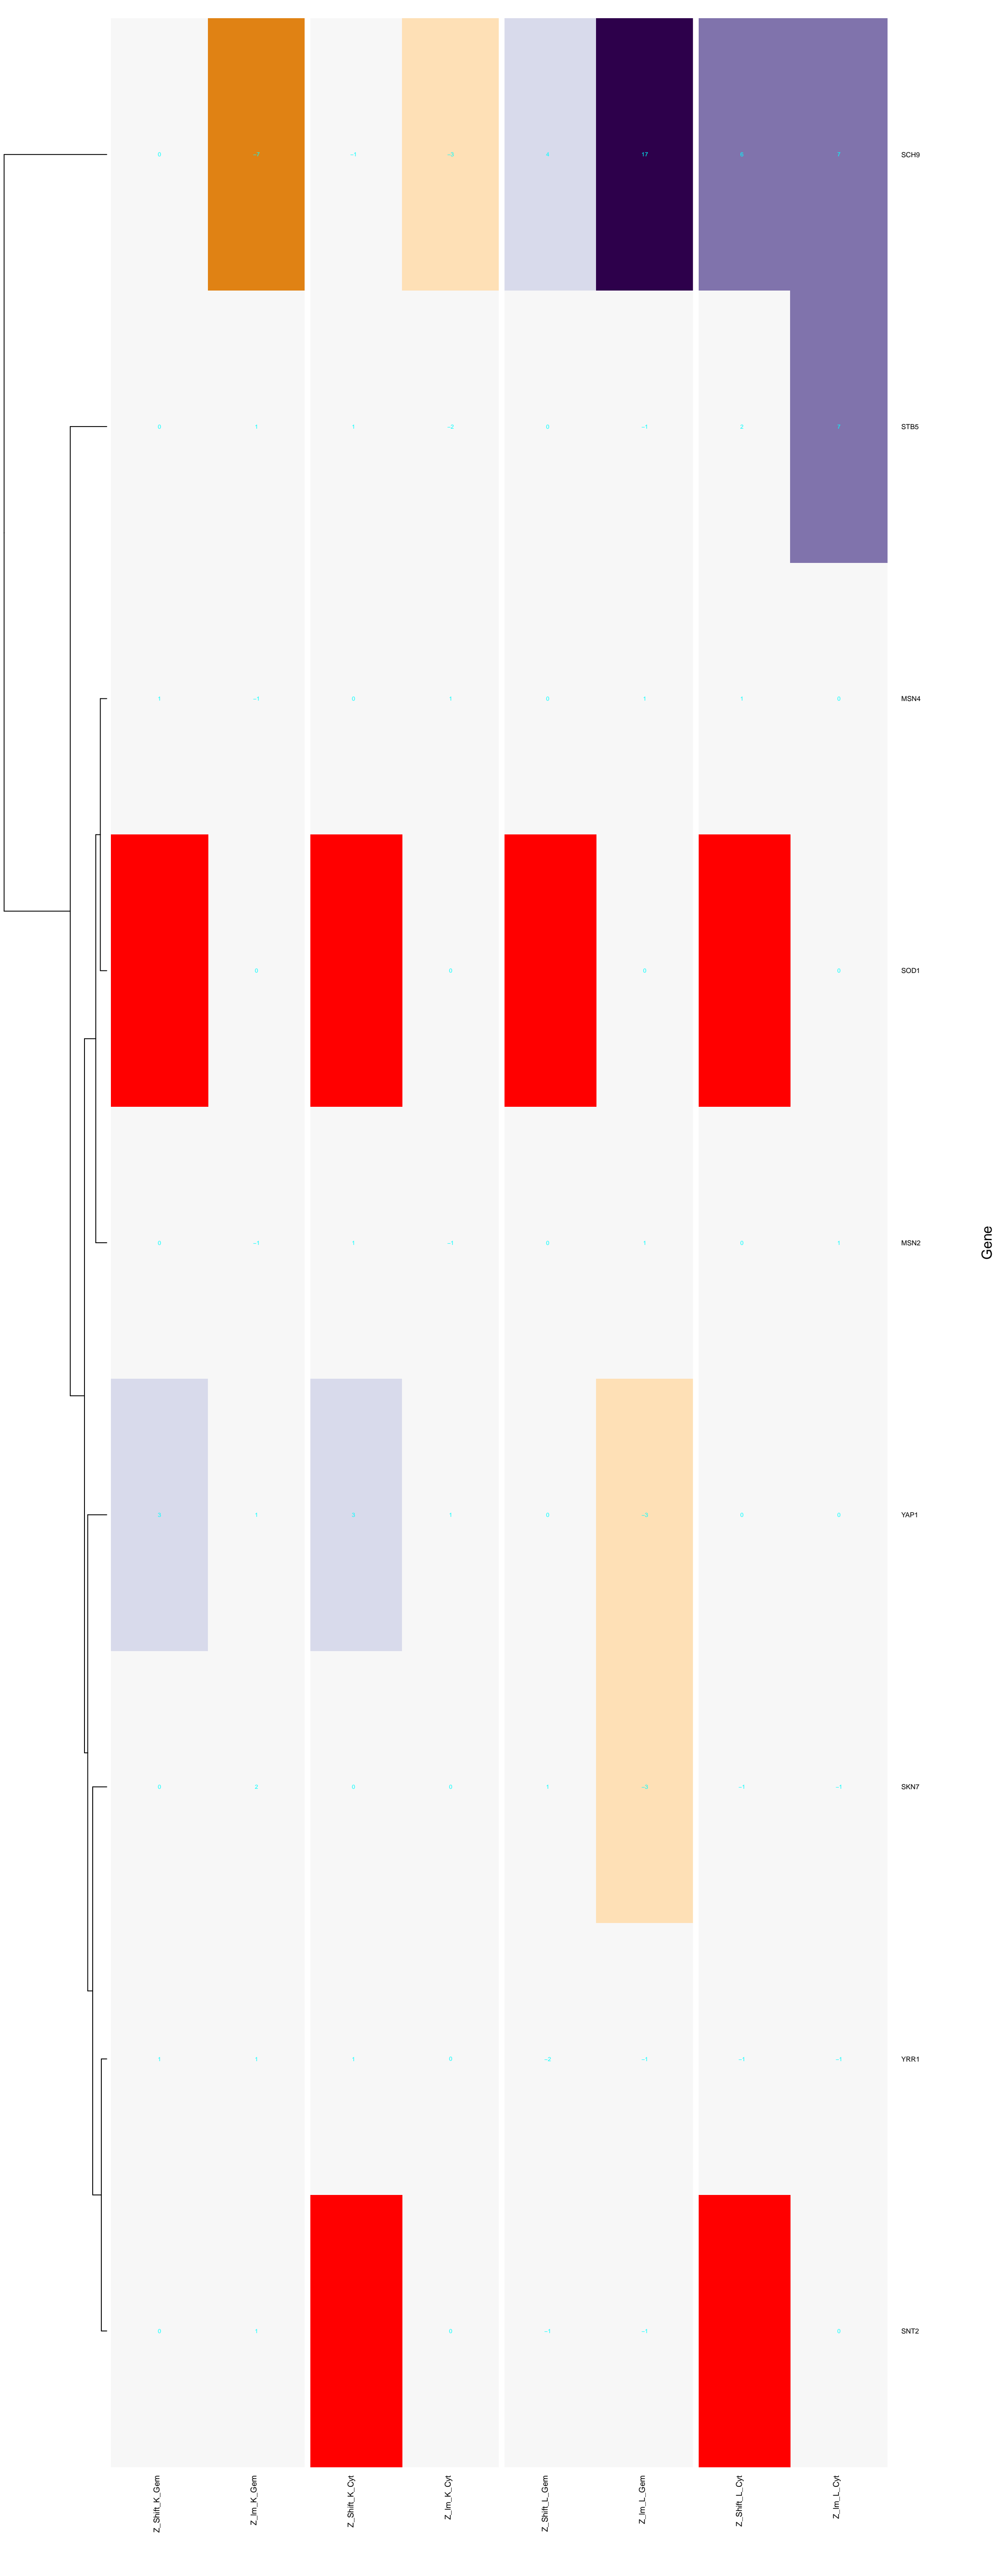

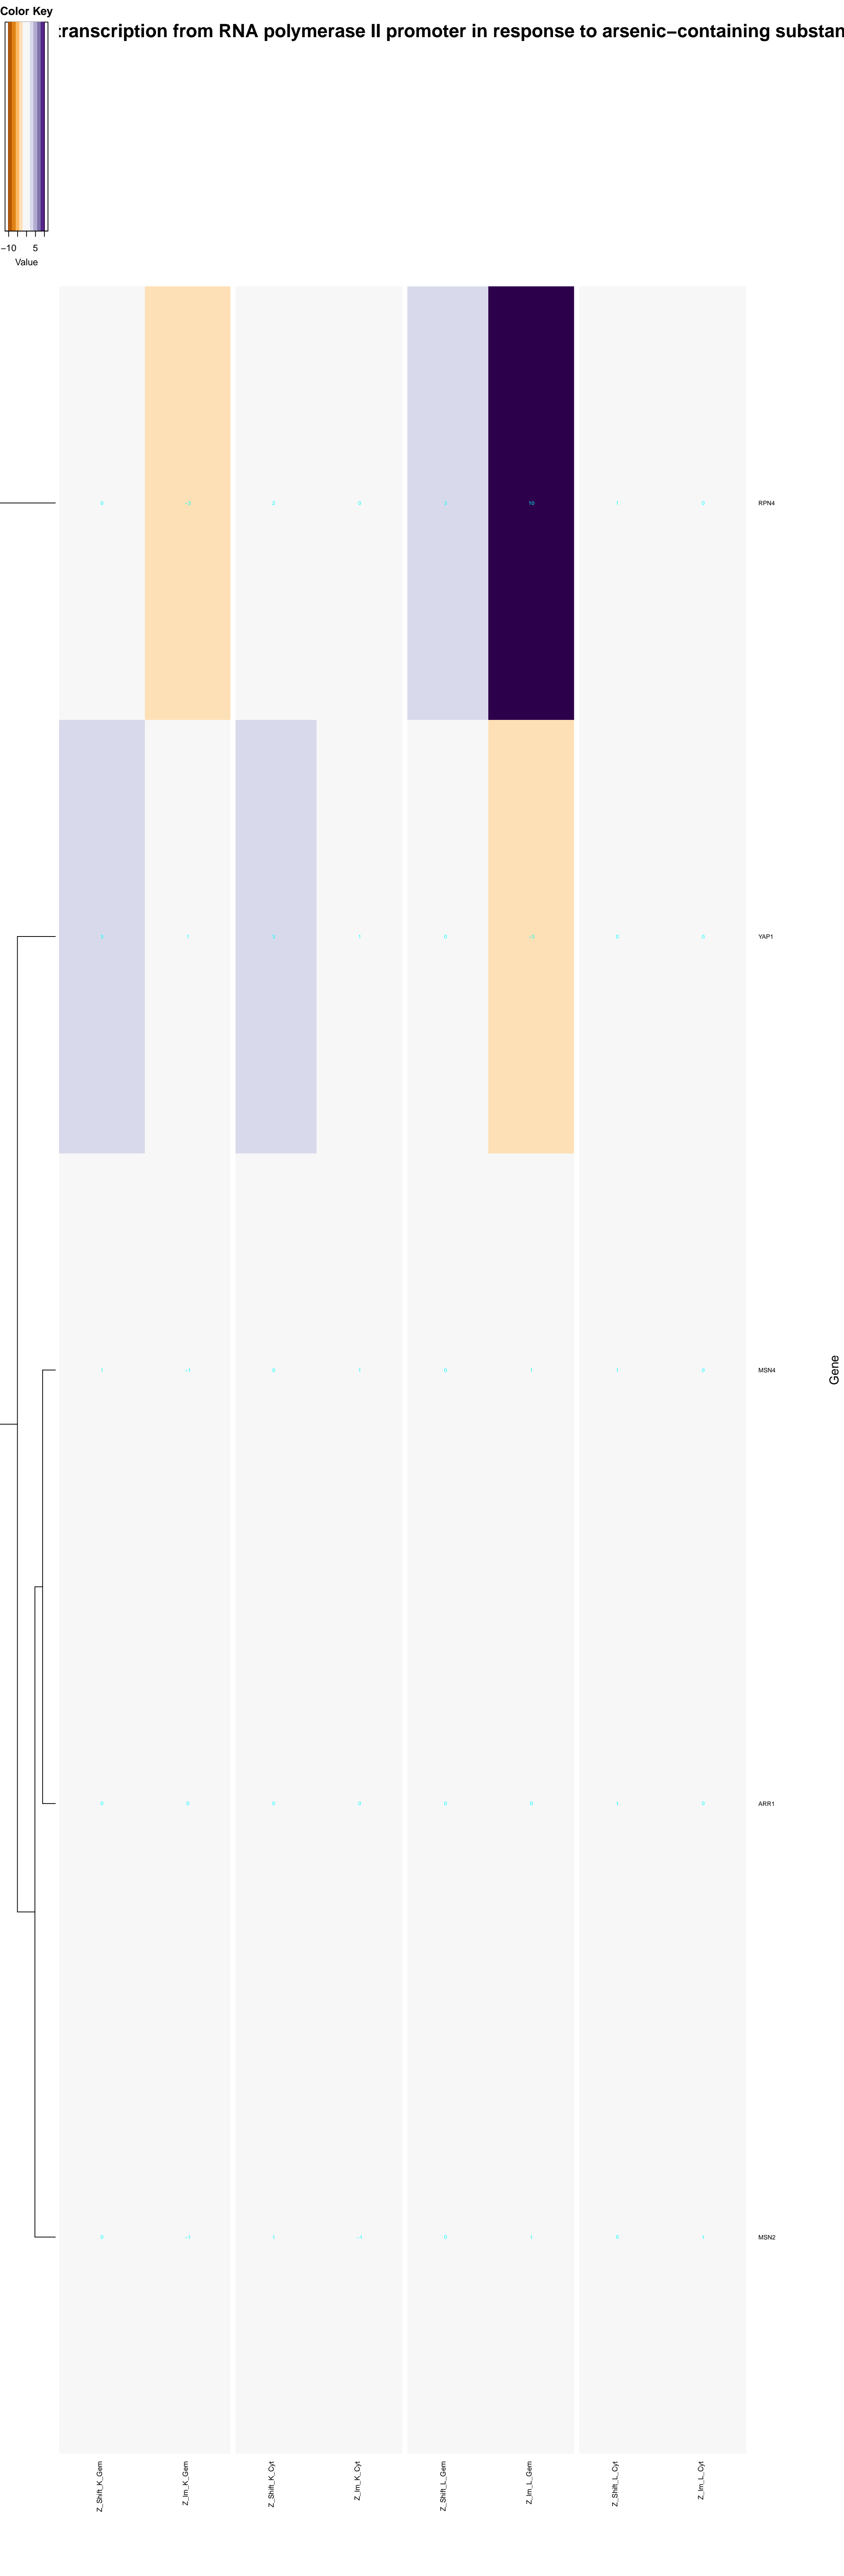

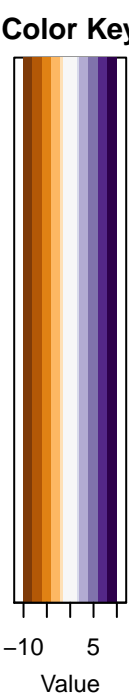

osmosensory signaling pathway via Sho1 osmosensor

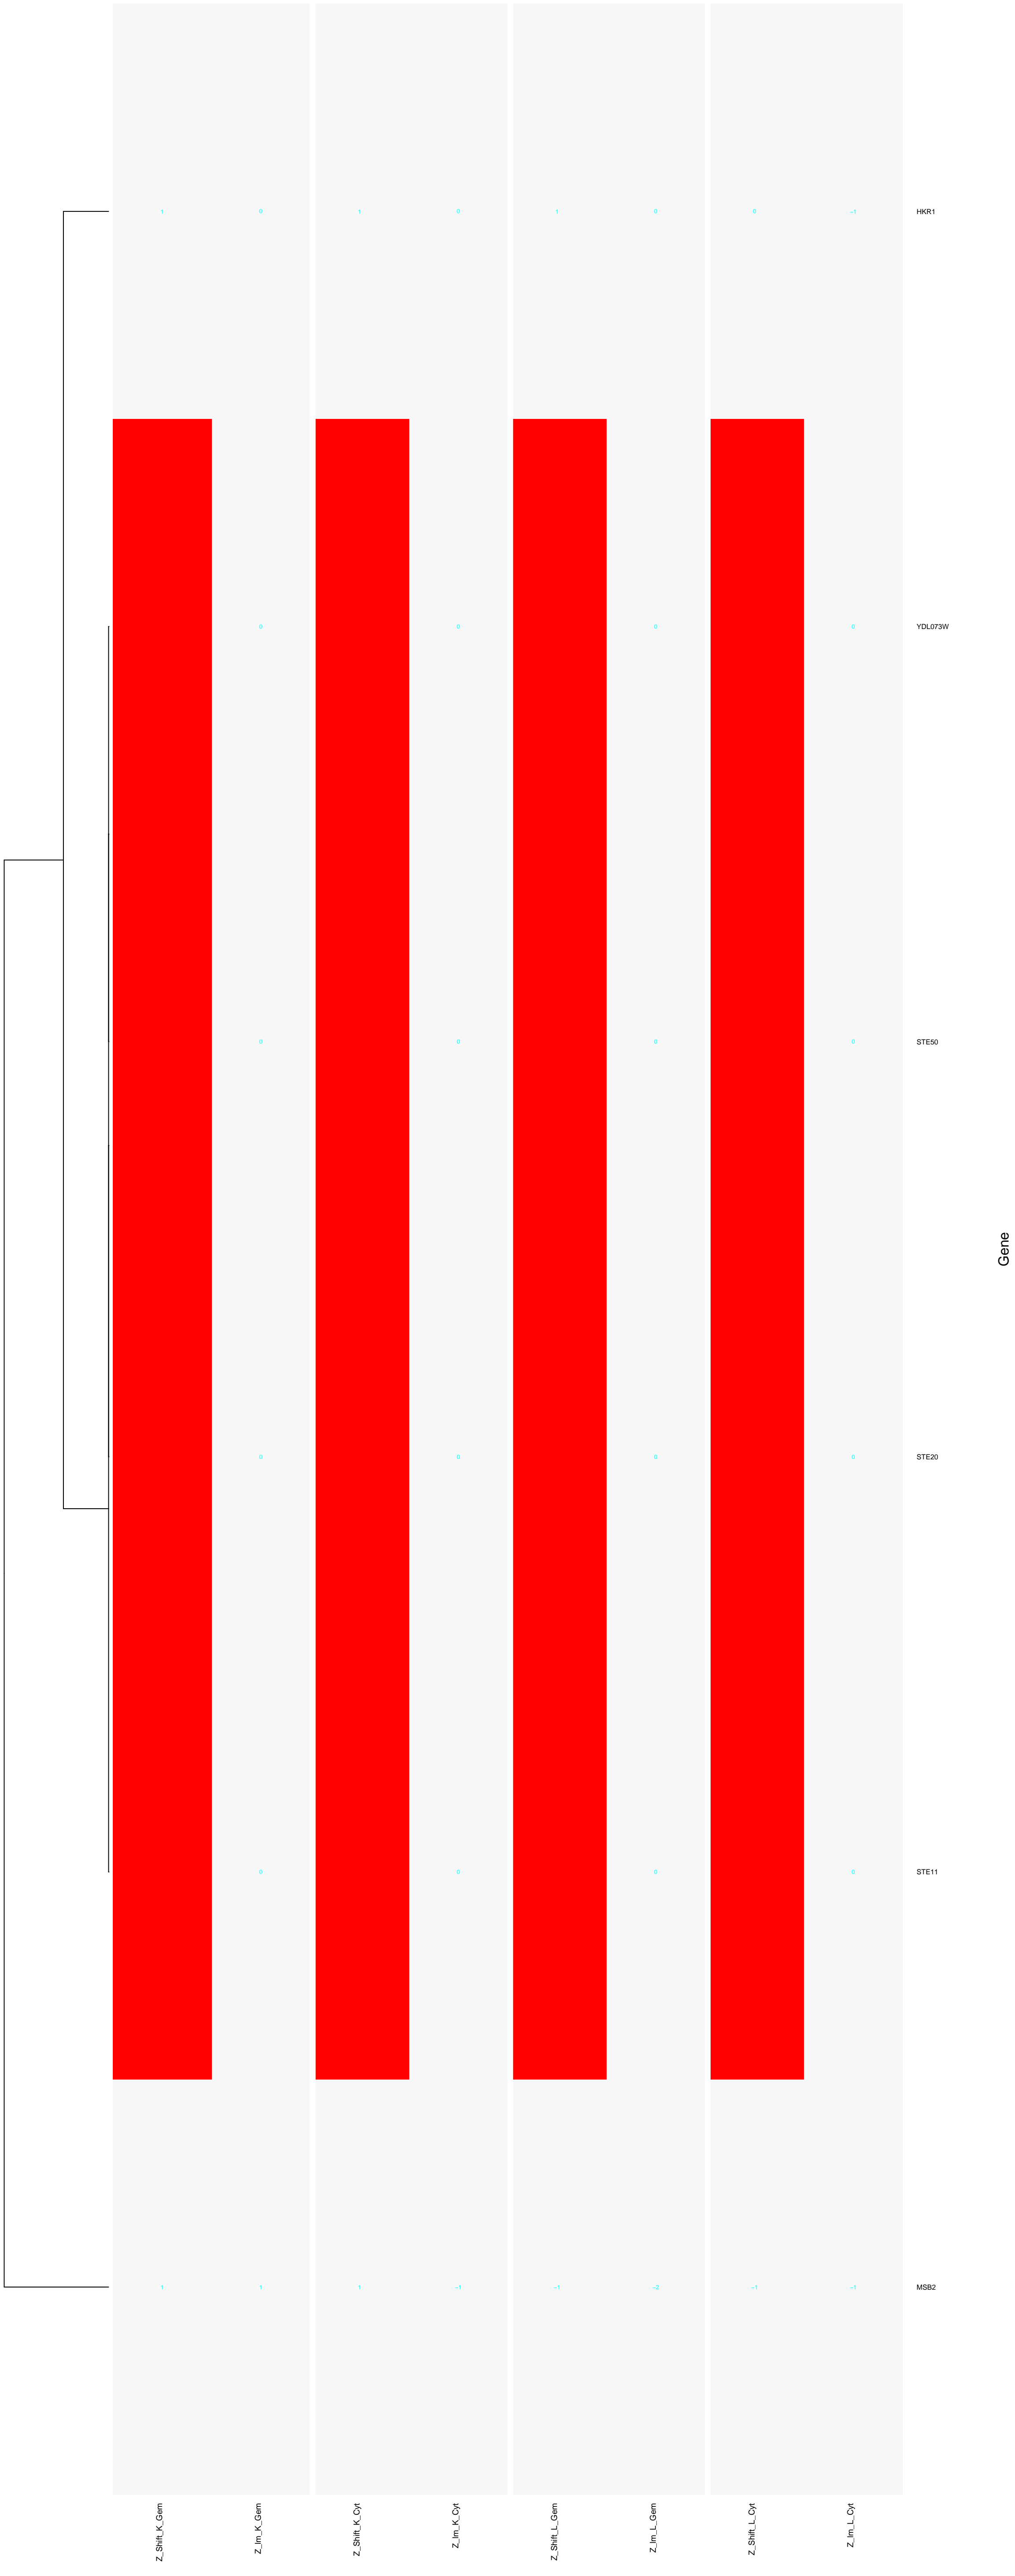

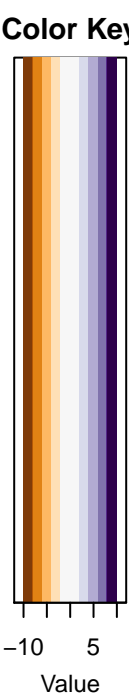

osmosensory signaling via phosphorelay pathway

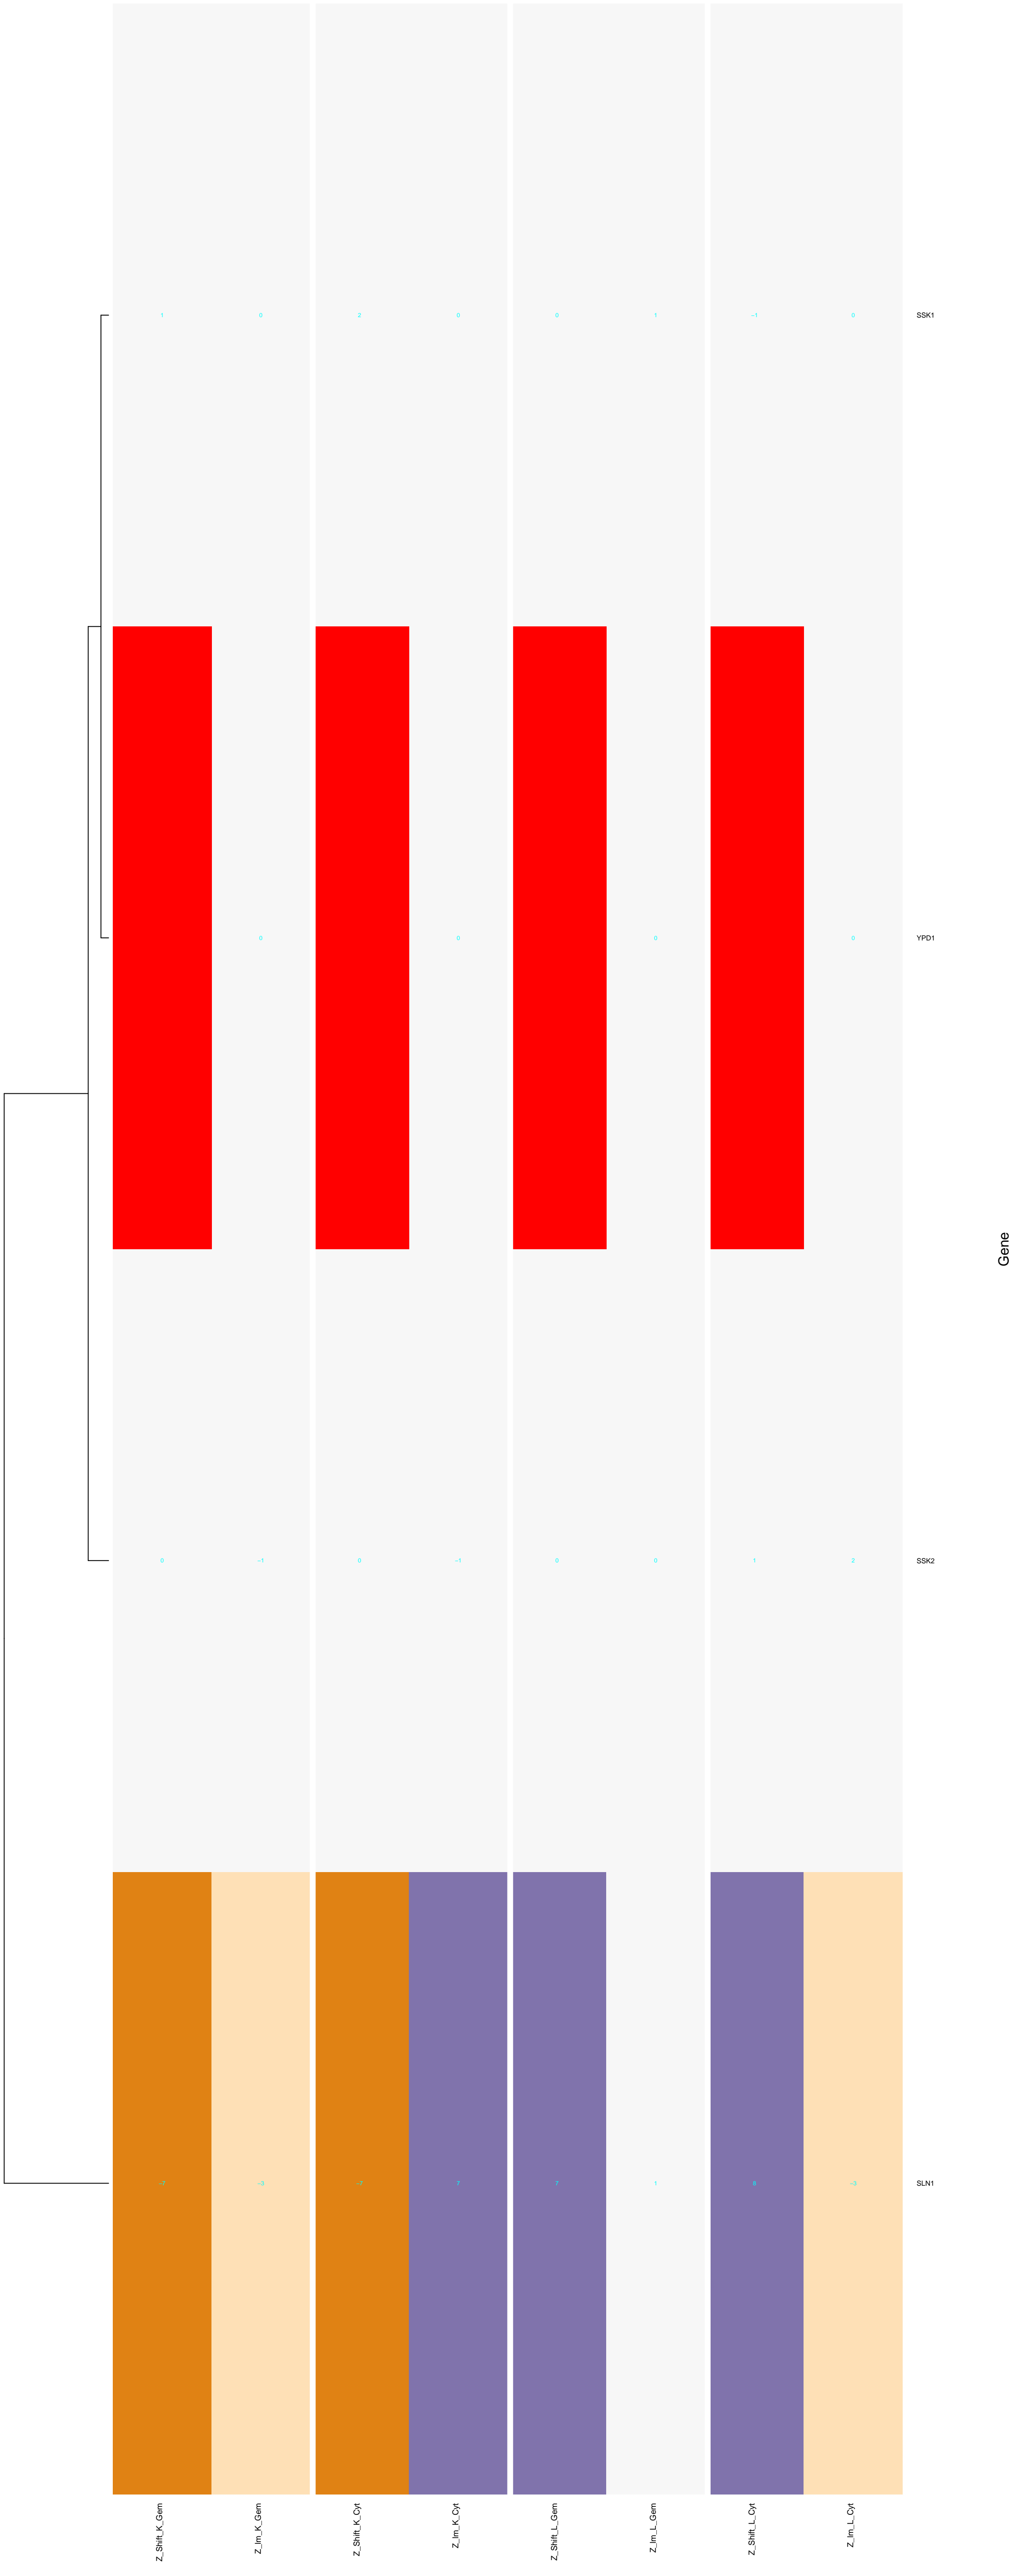

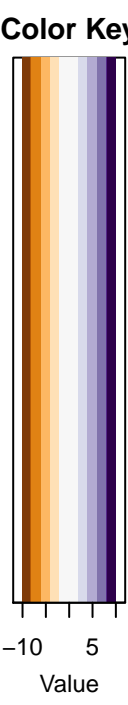

gulation of transcription from RNA polymerase II promoter in response to osmotic stress

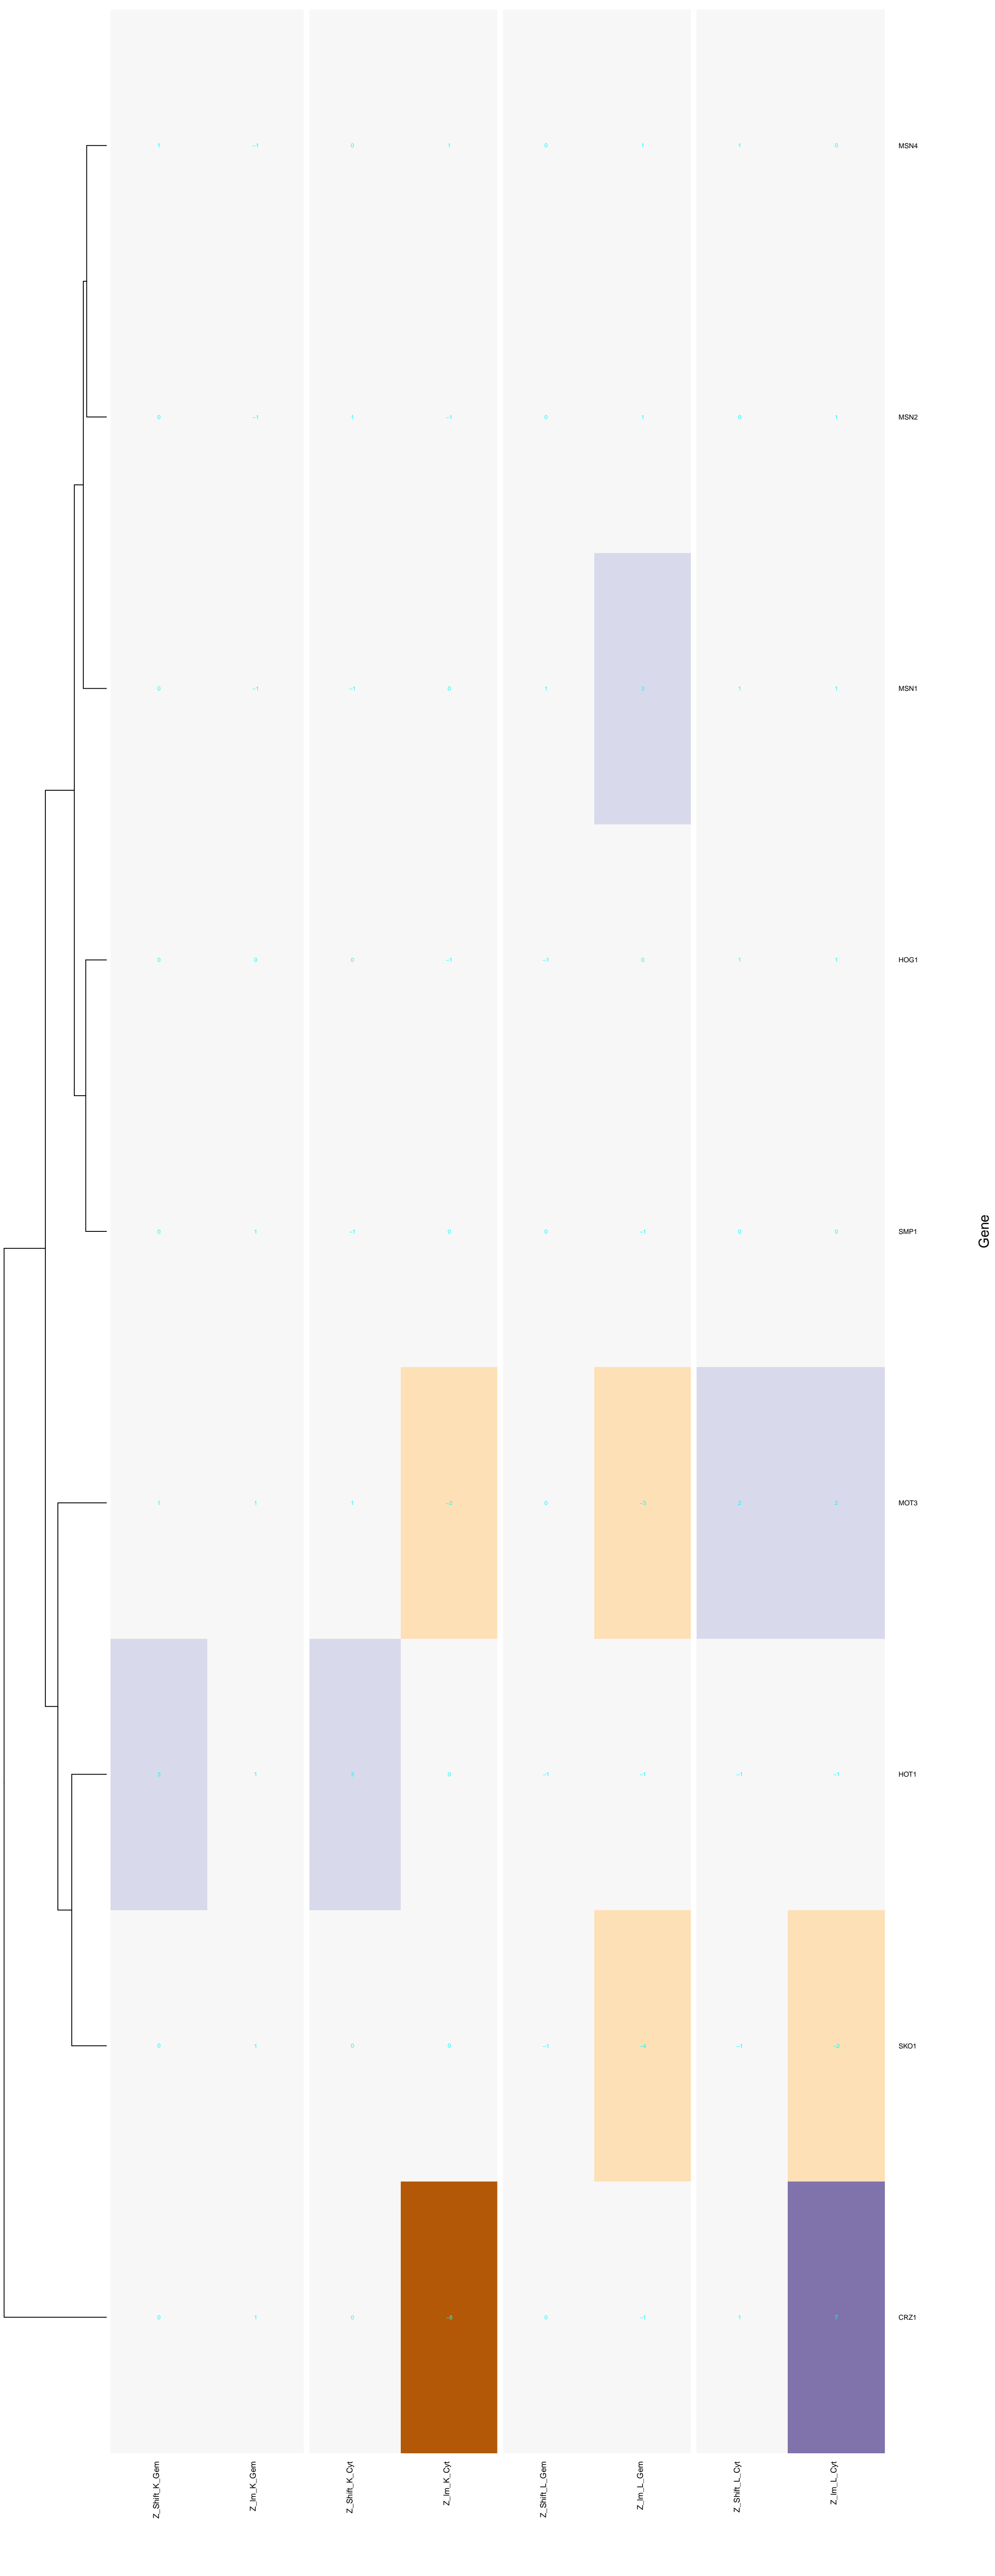

Color Key

Correlation of transcription from RNA polymerase II promoter in response to salt stress

Value

-10 5

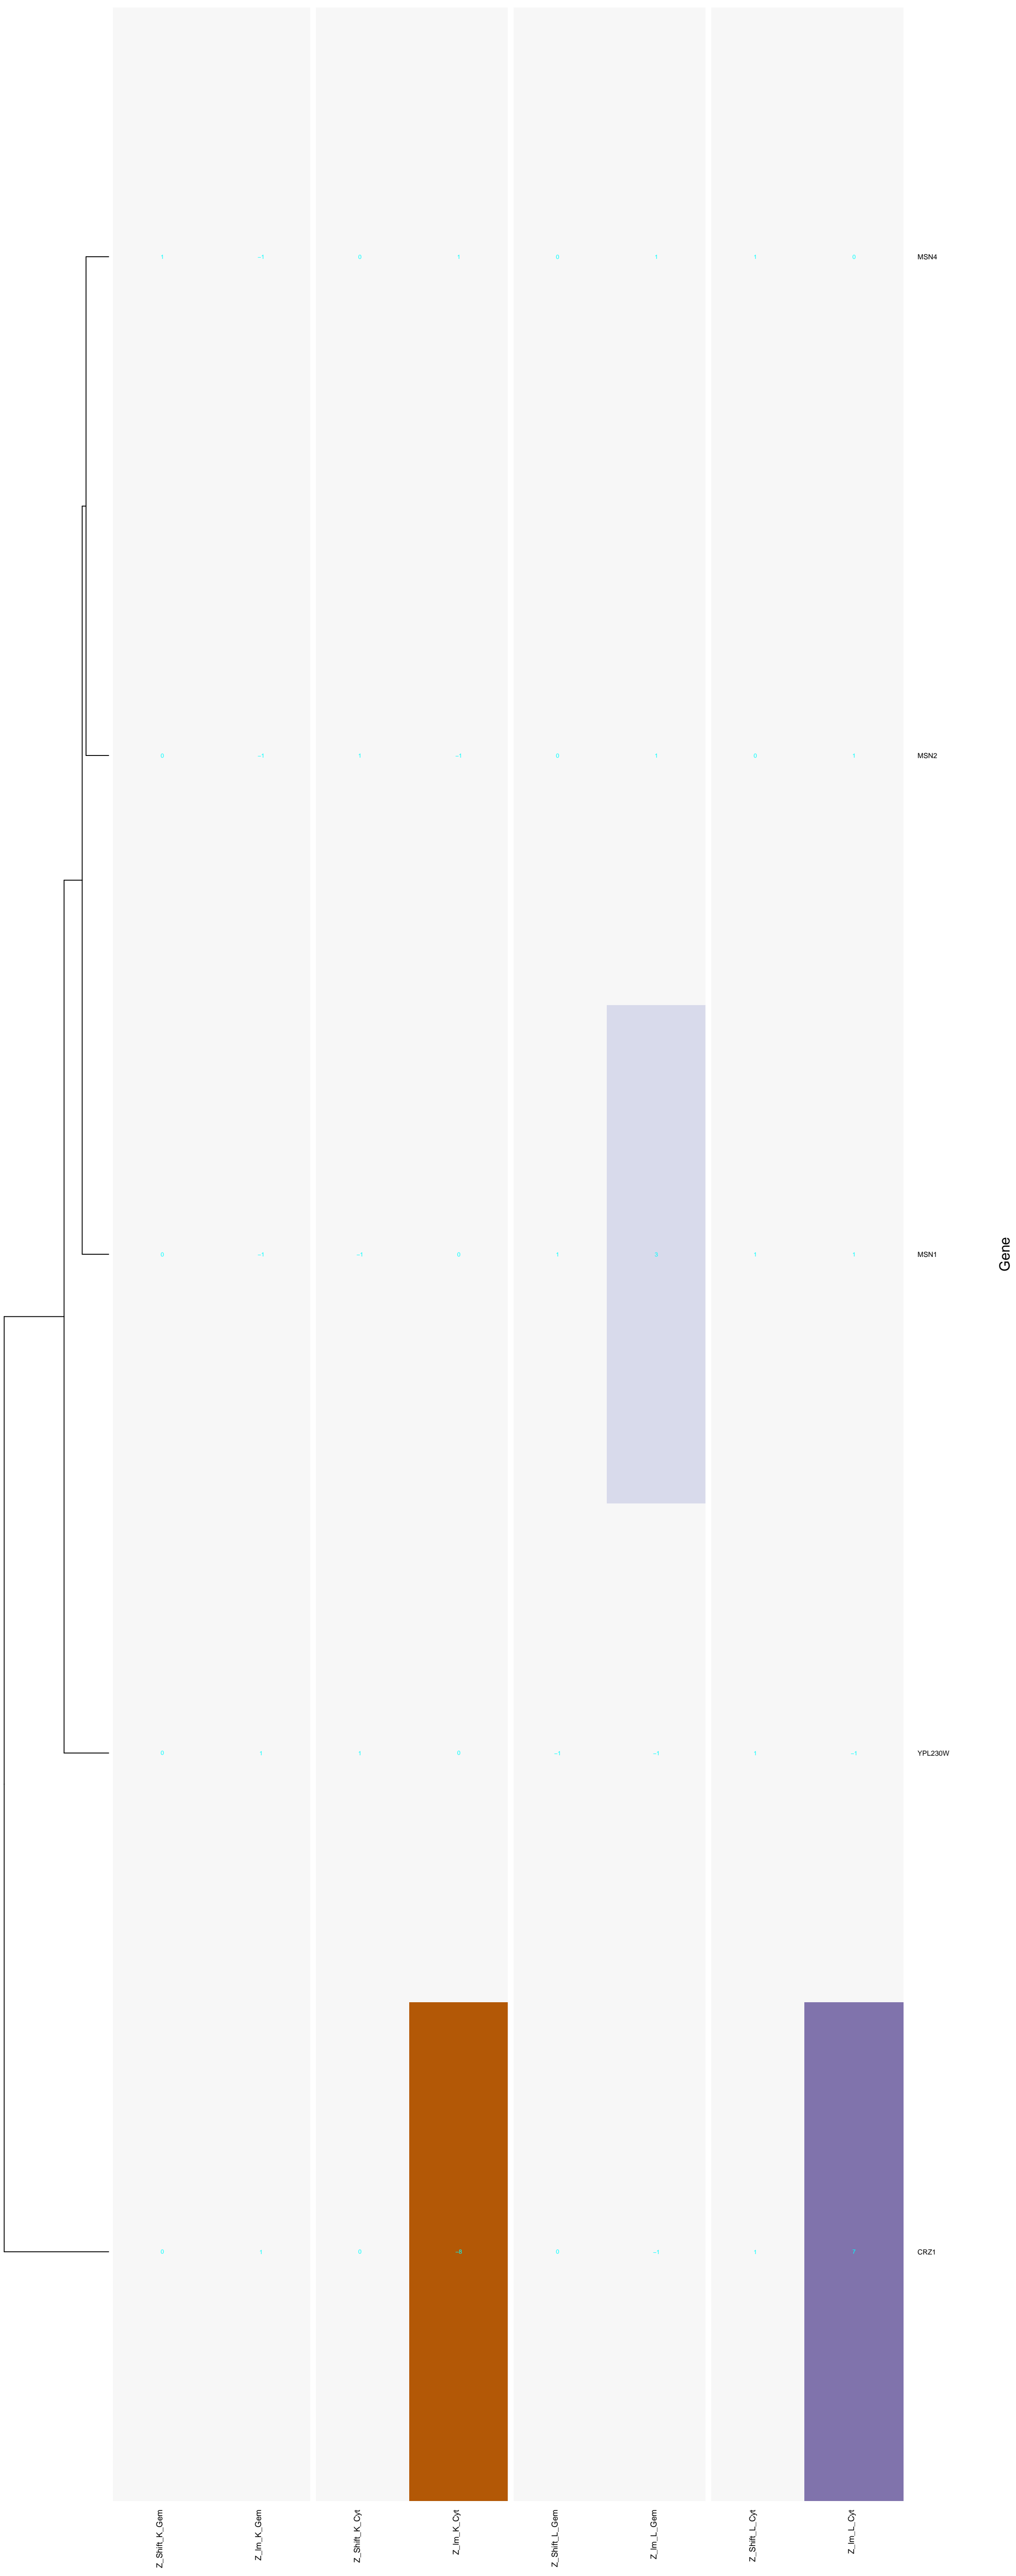

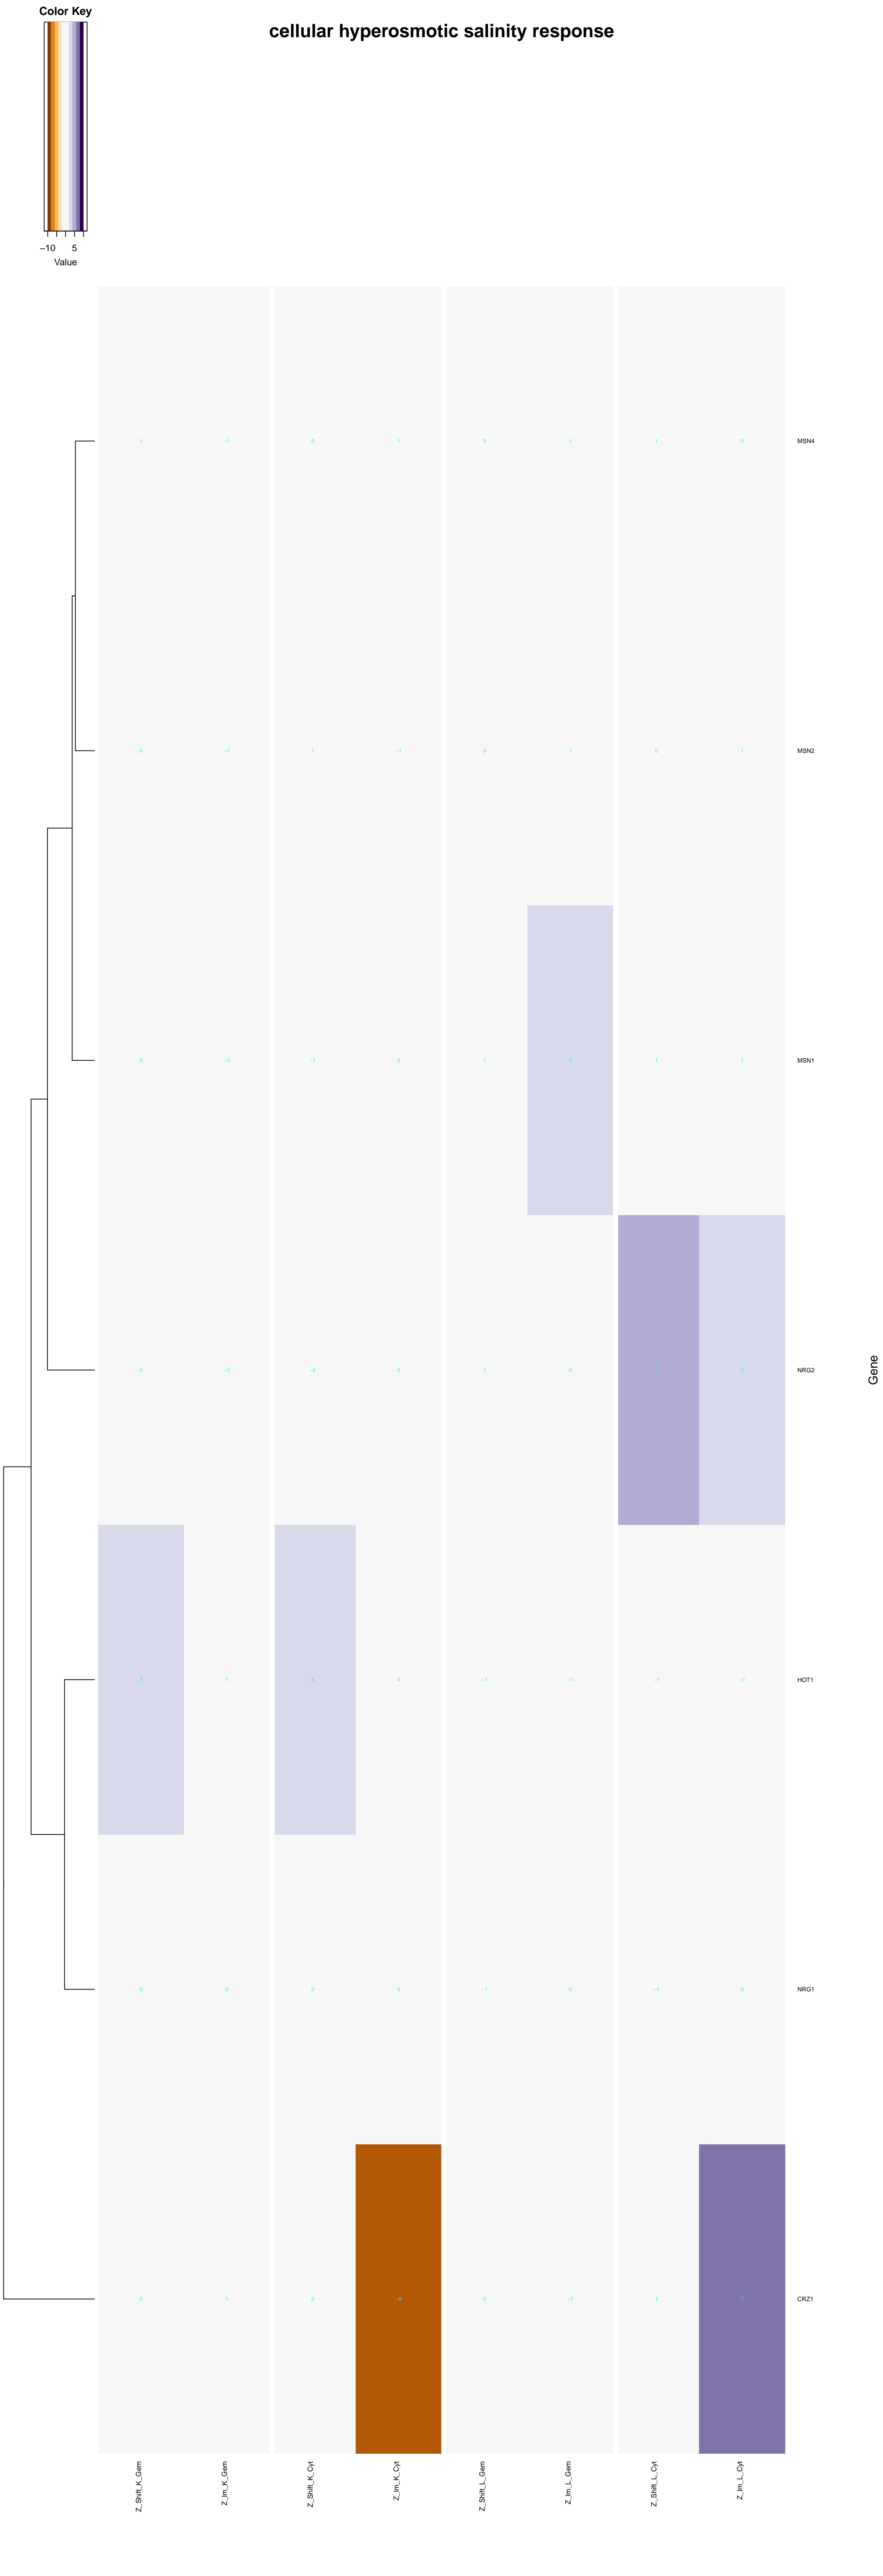

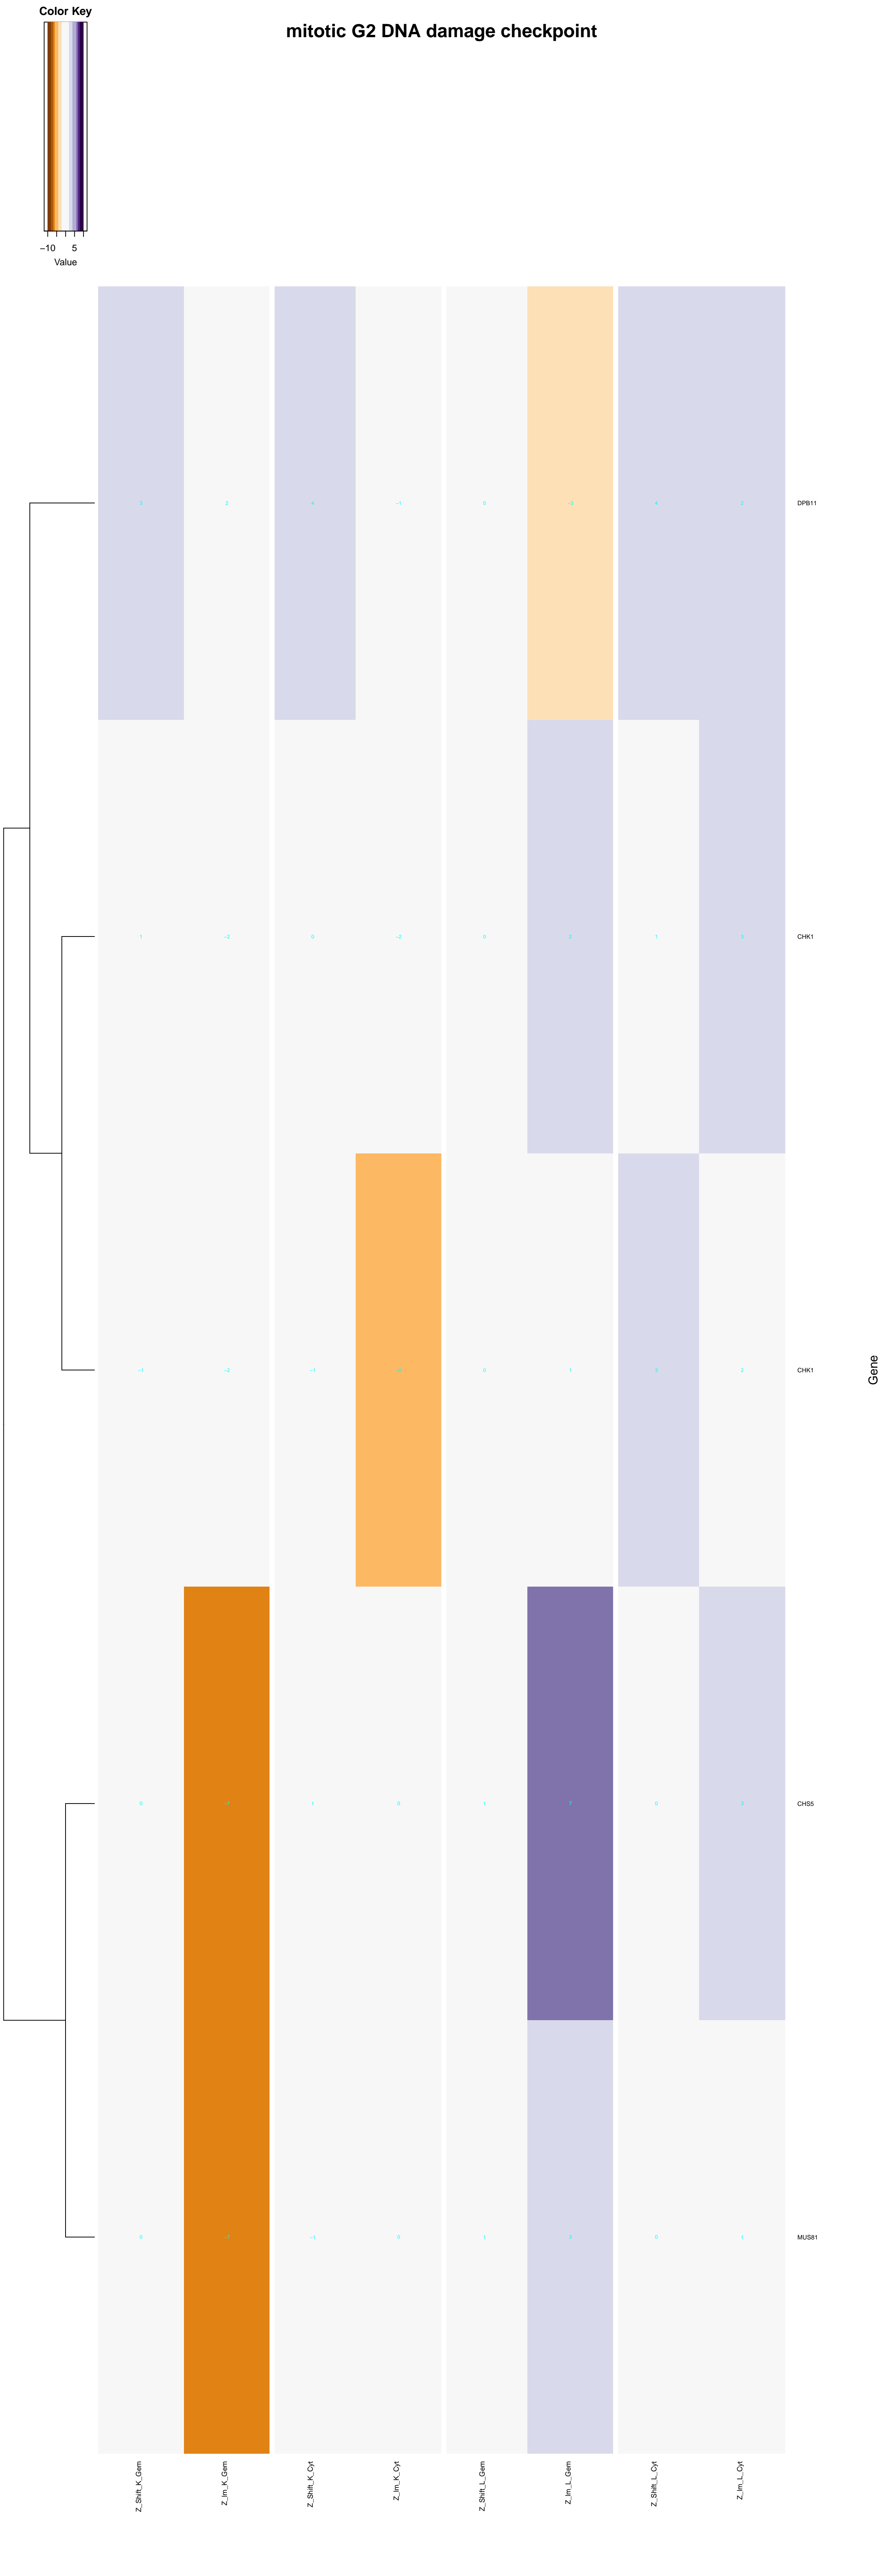



mitotic G1 DNA damage checkpoint

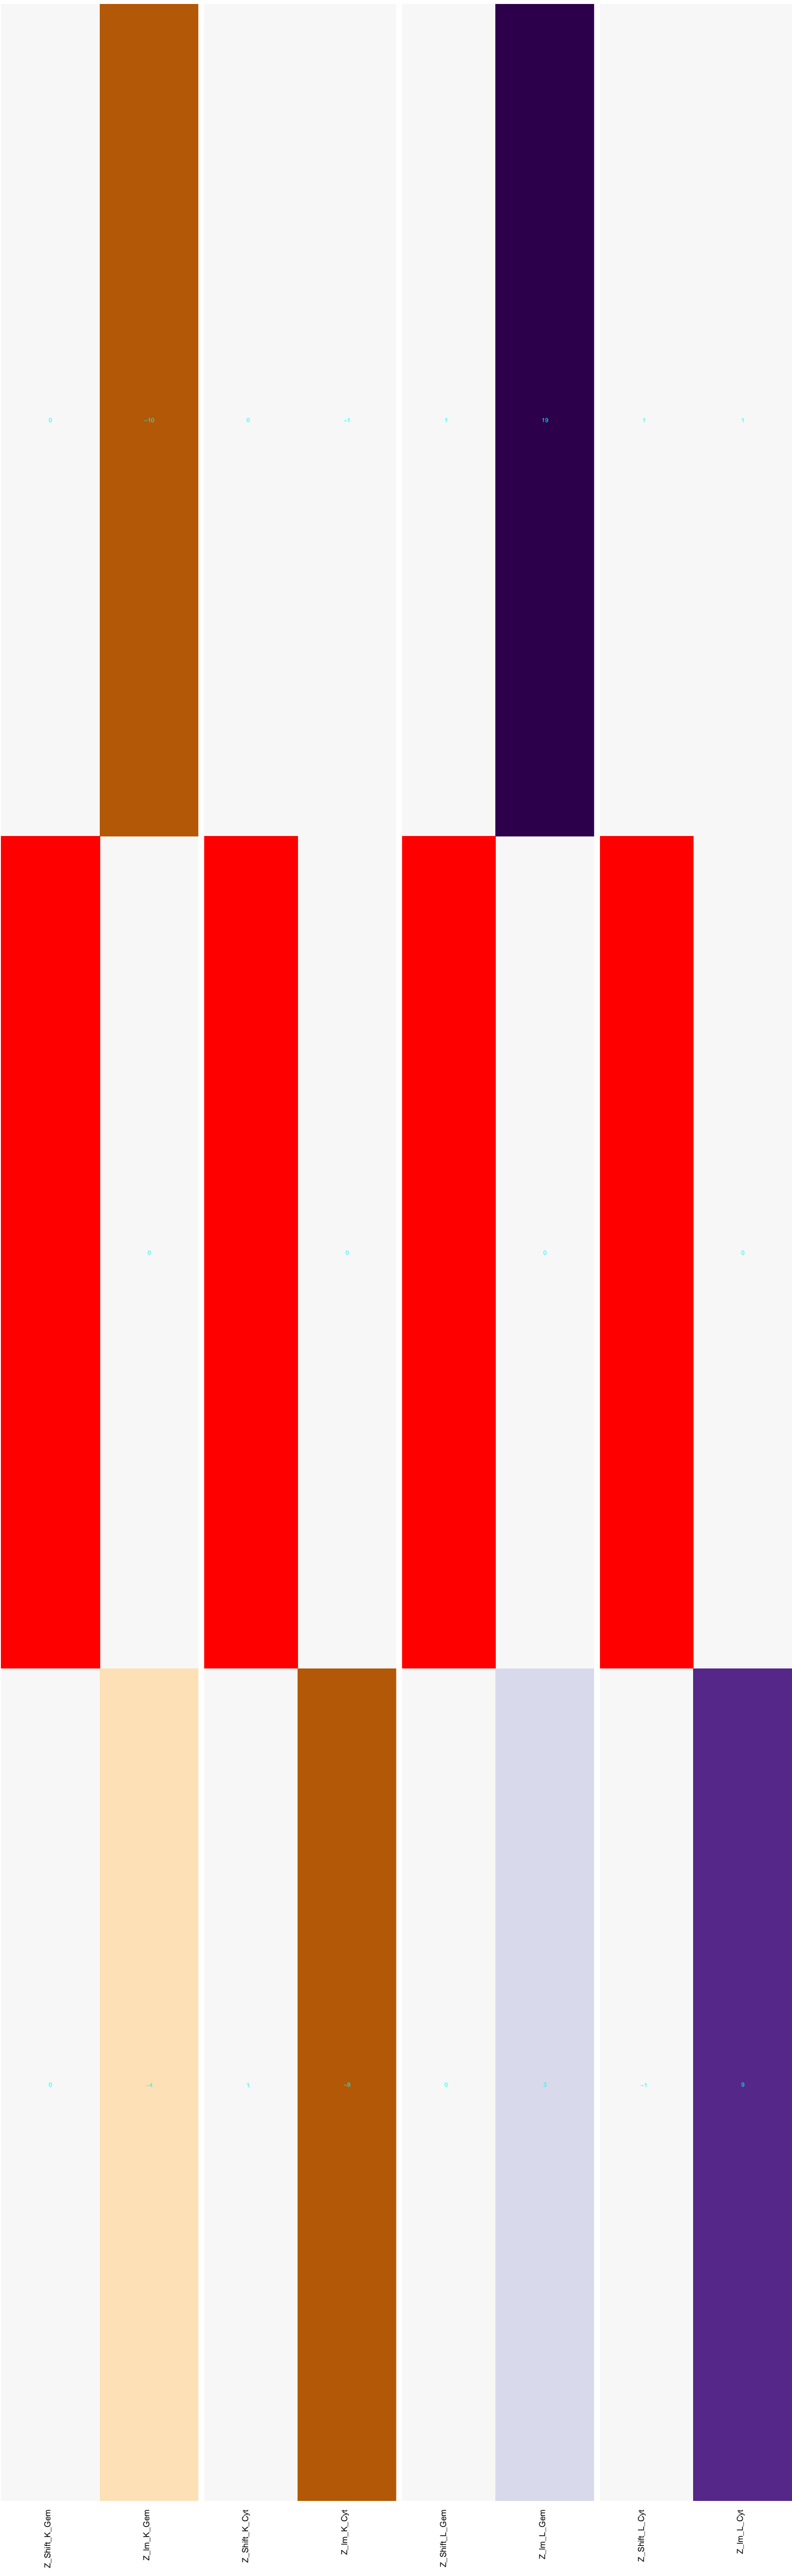

Gene

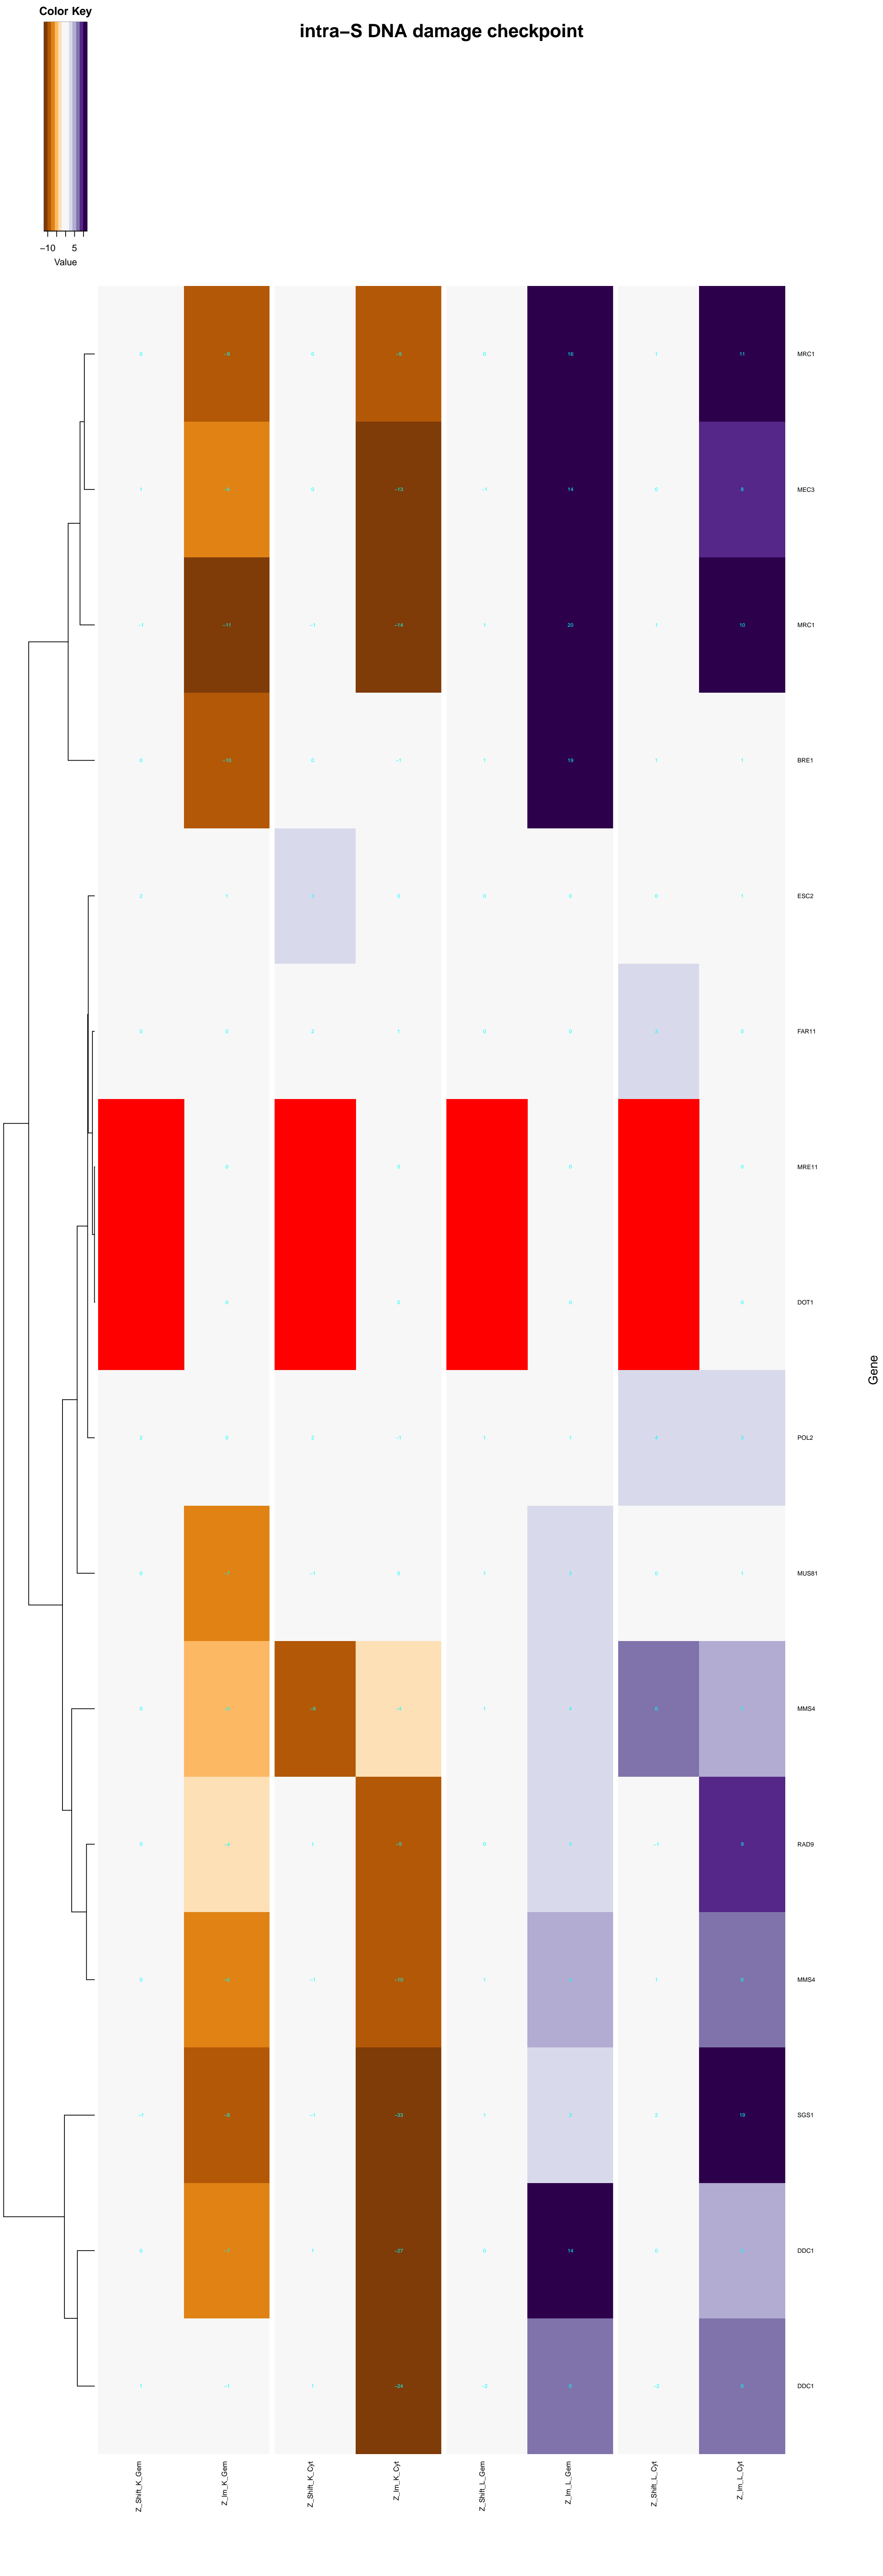

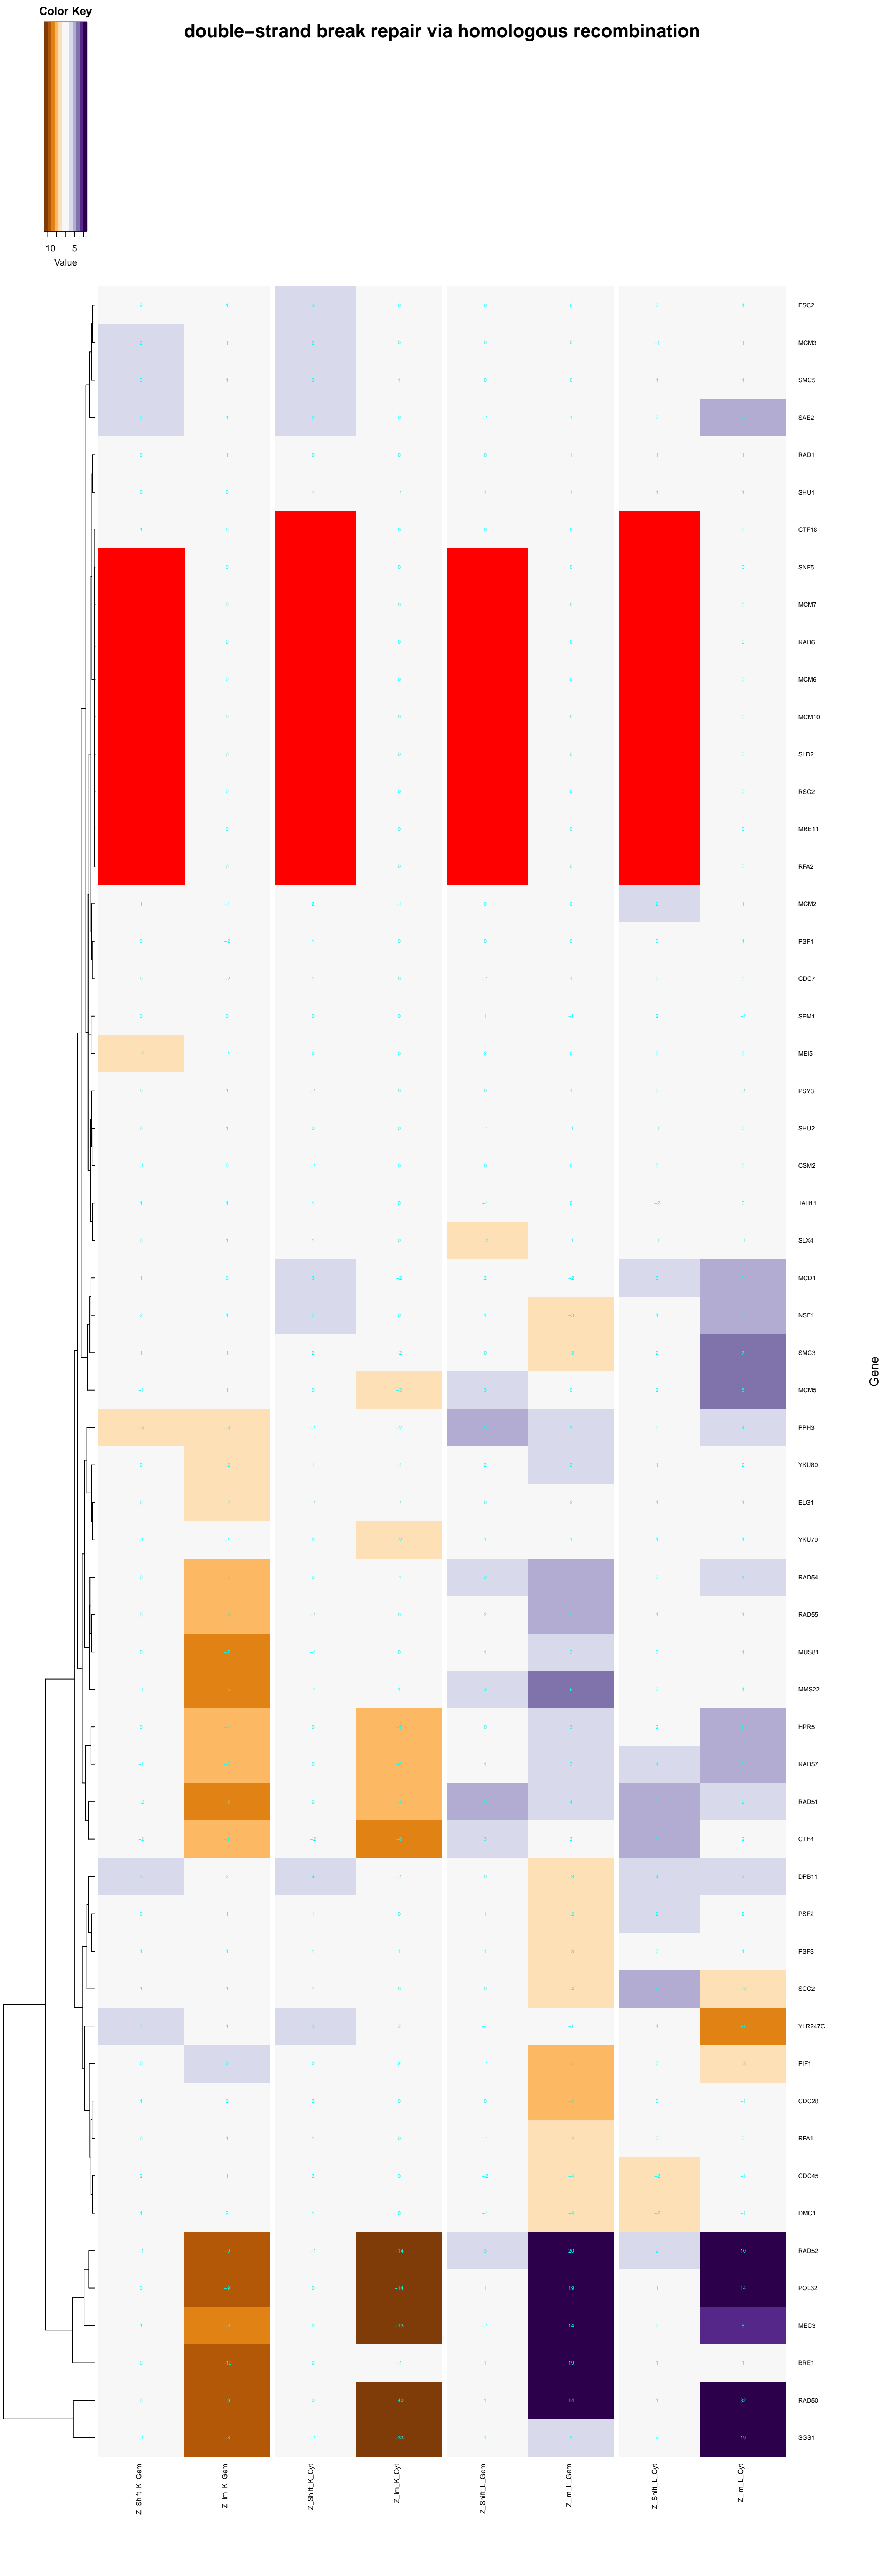



mitochondrial double-strand break repair via homologous recombination

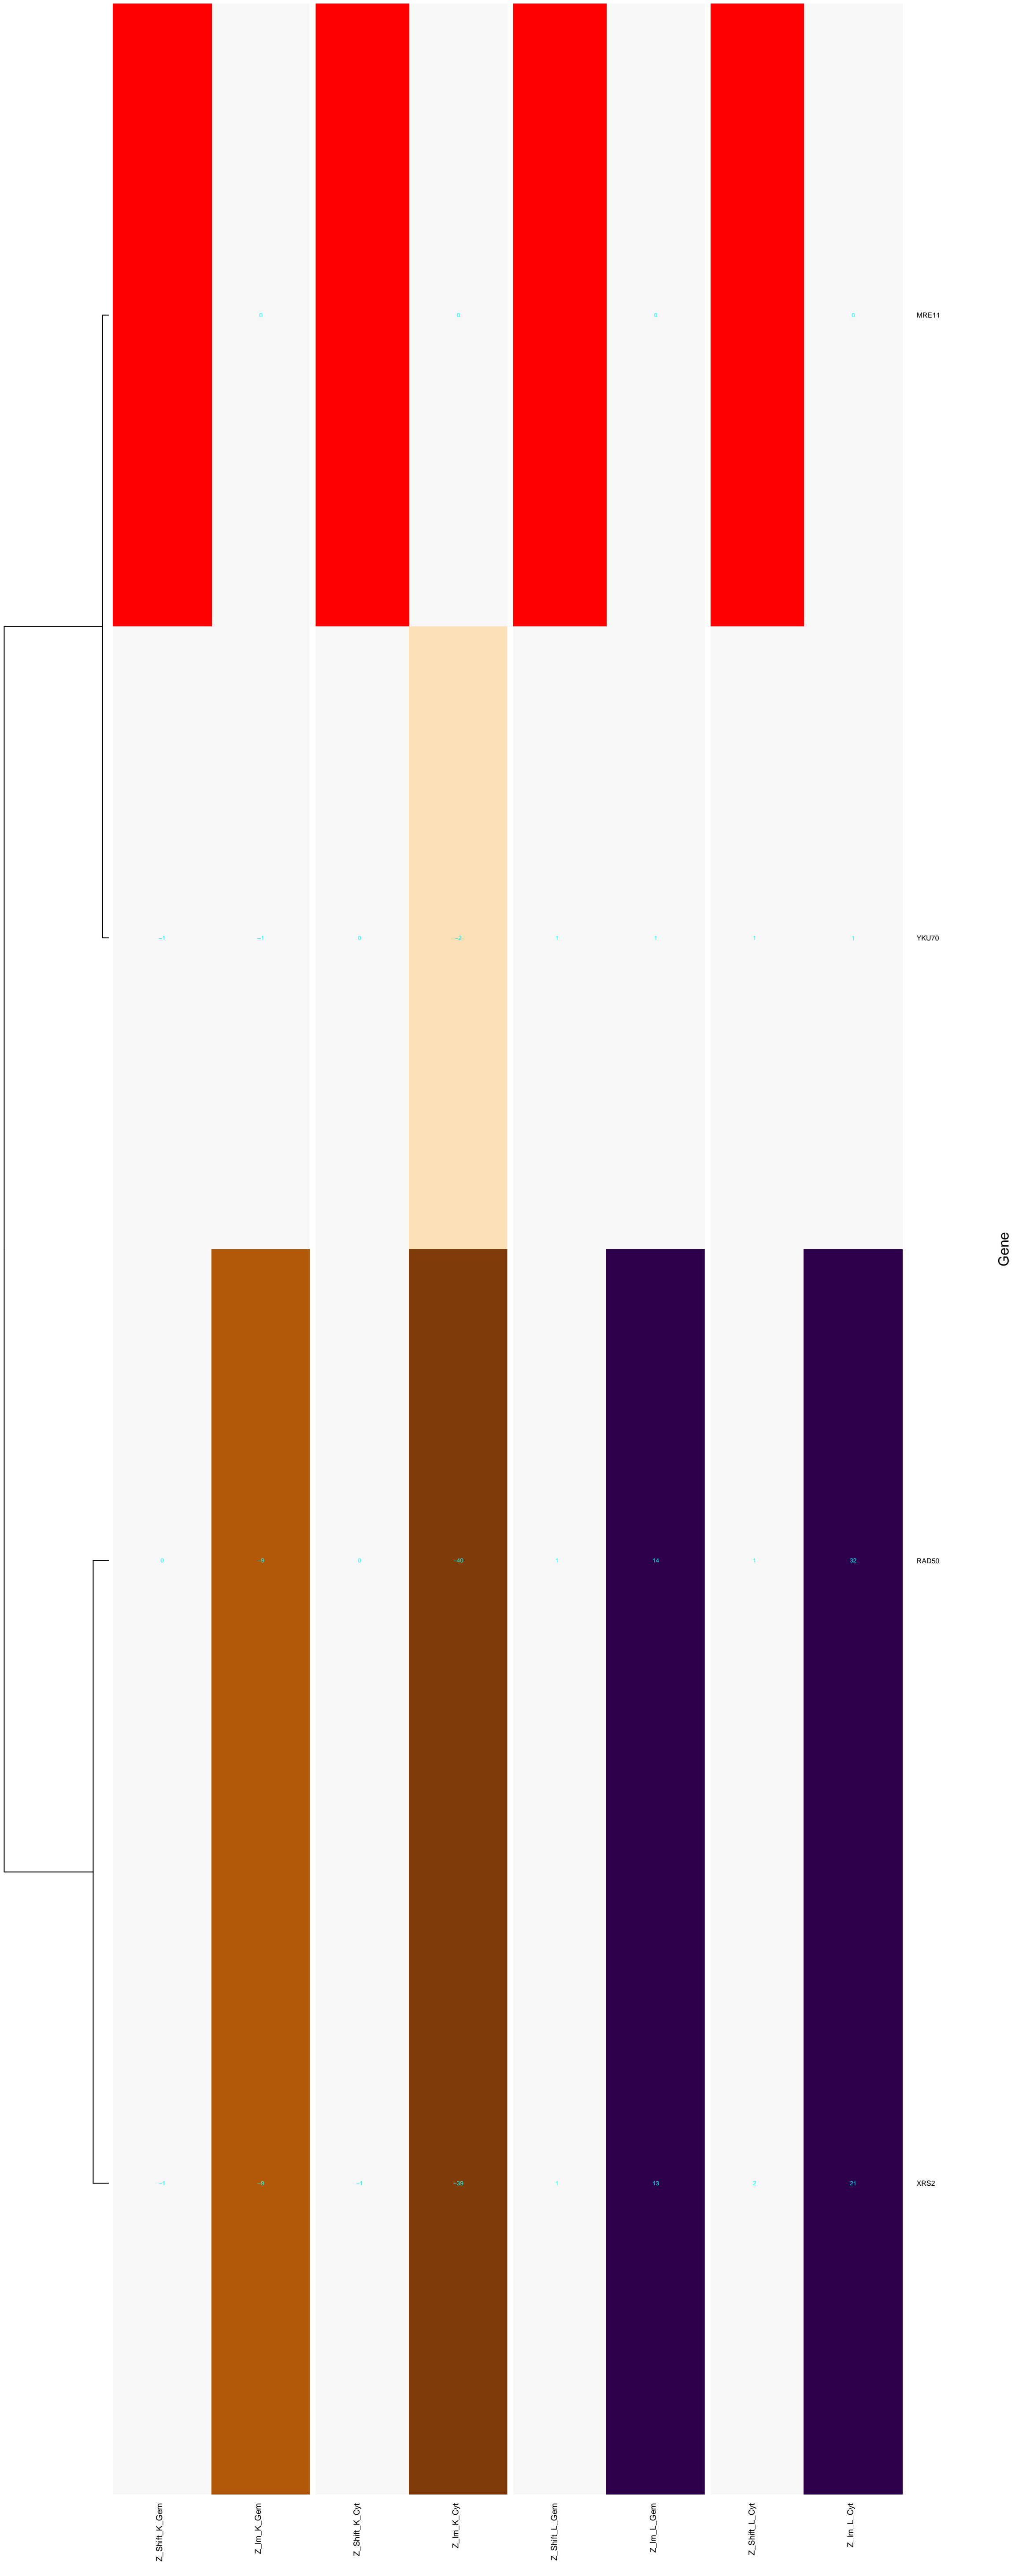

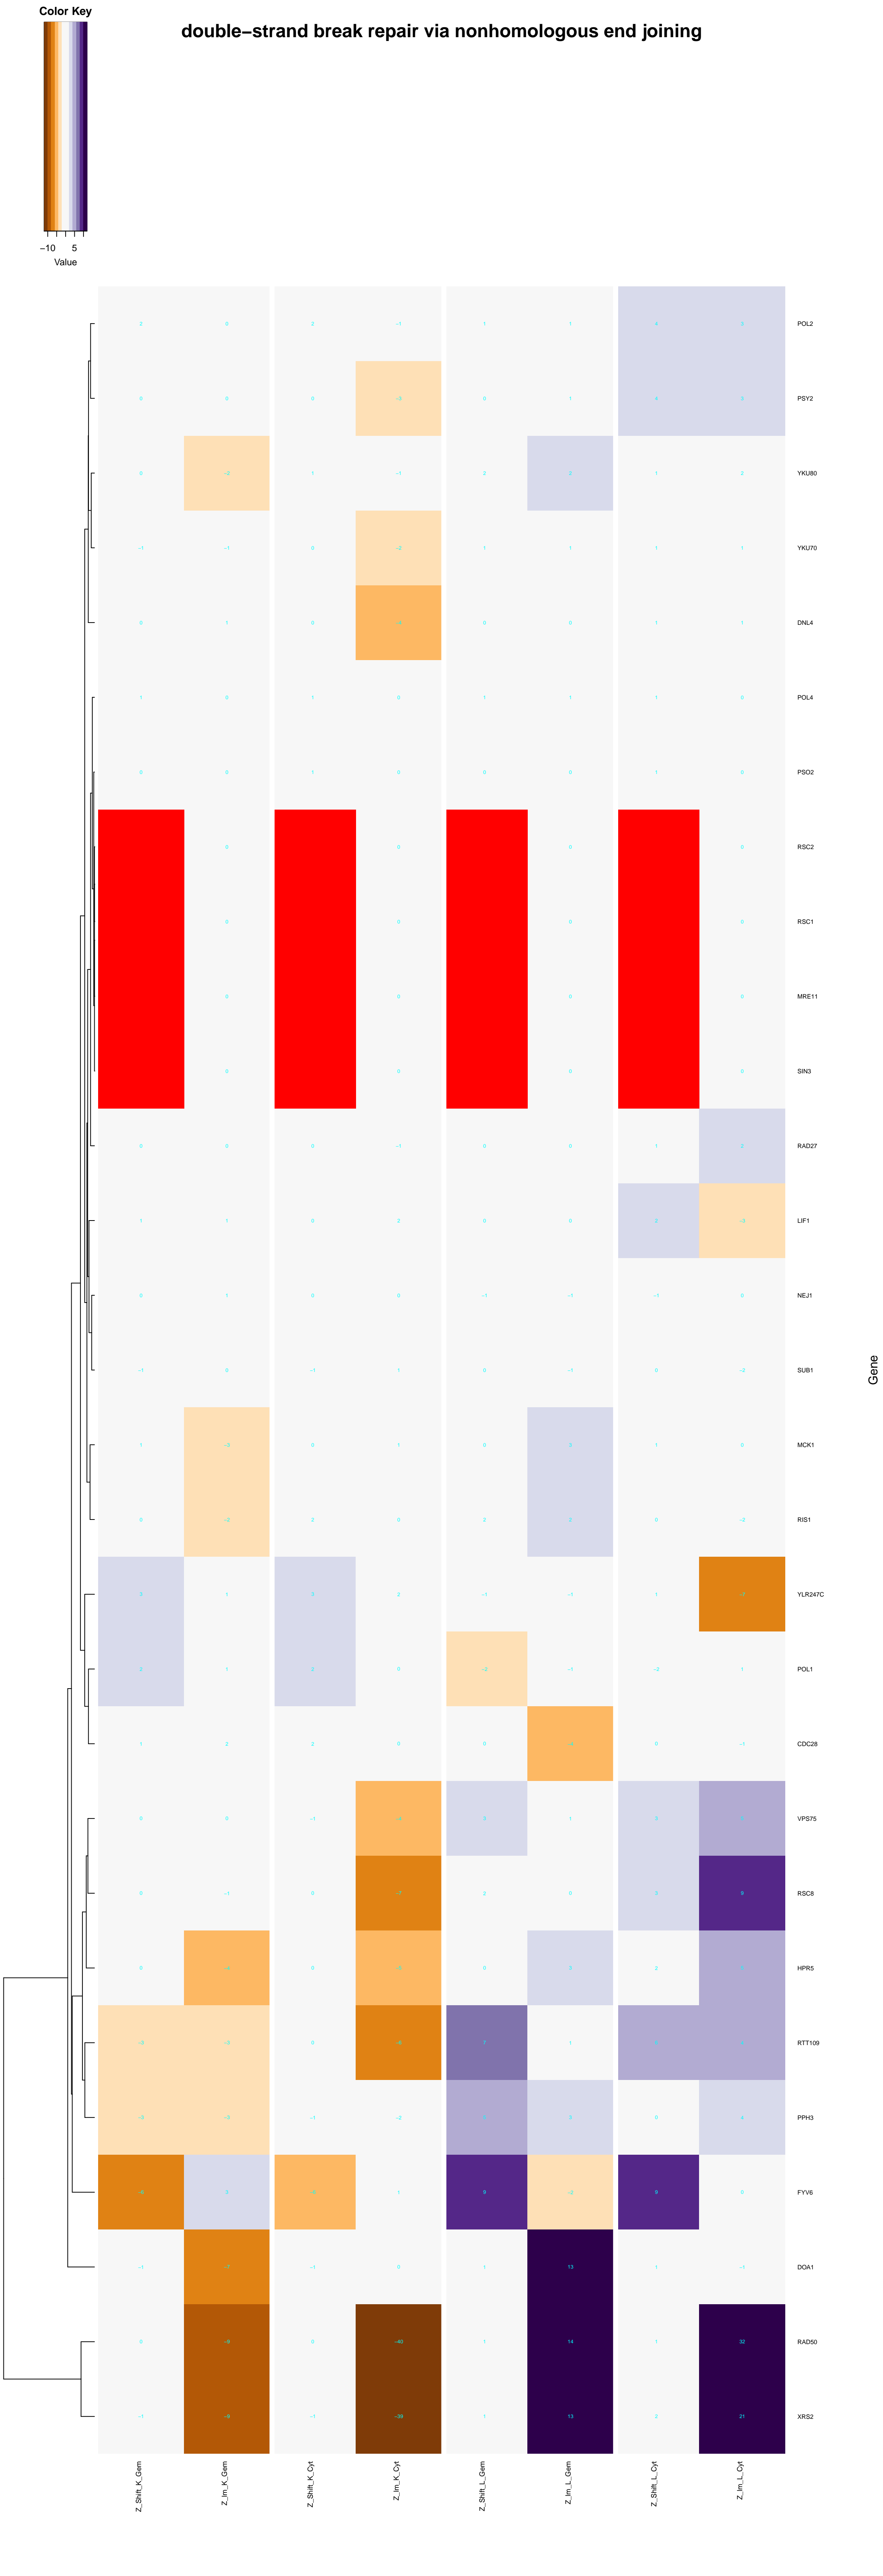

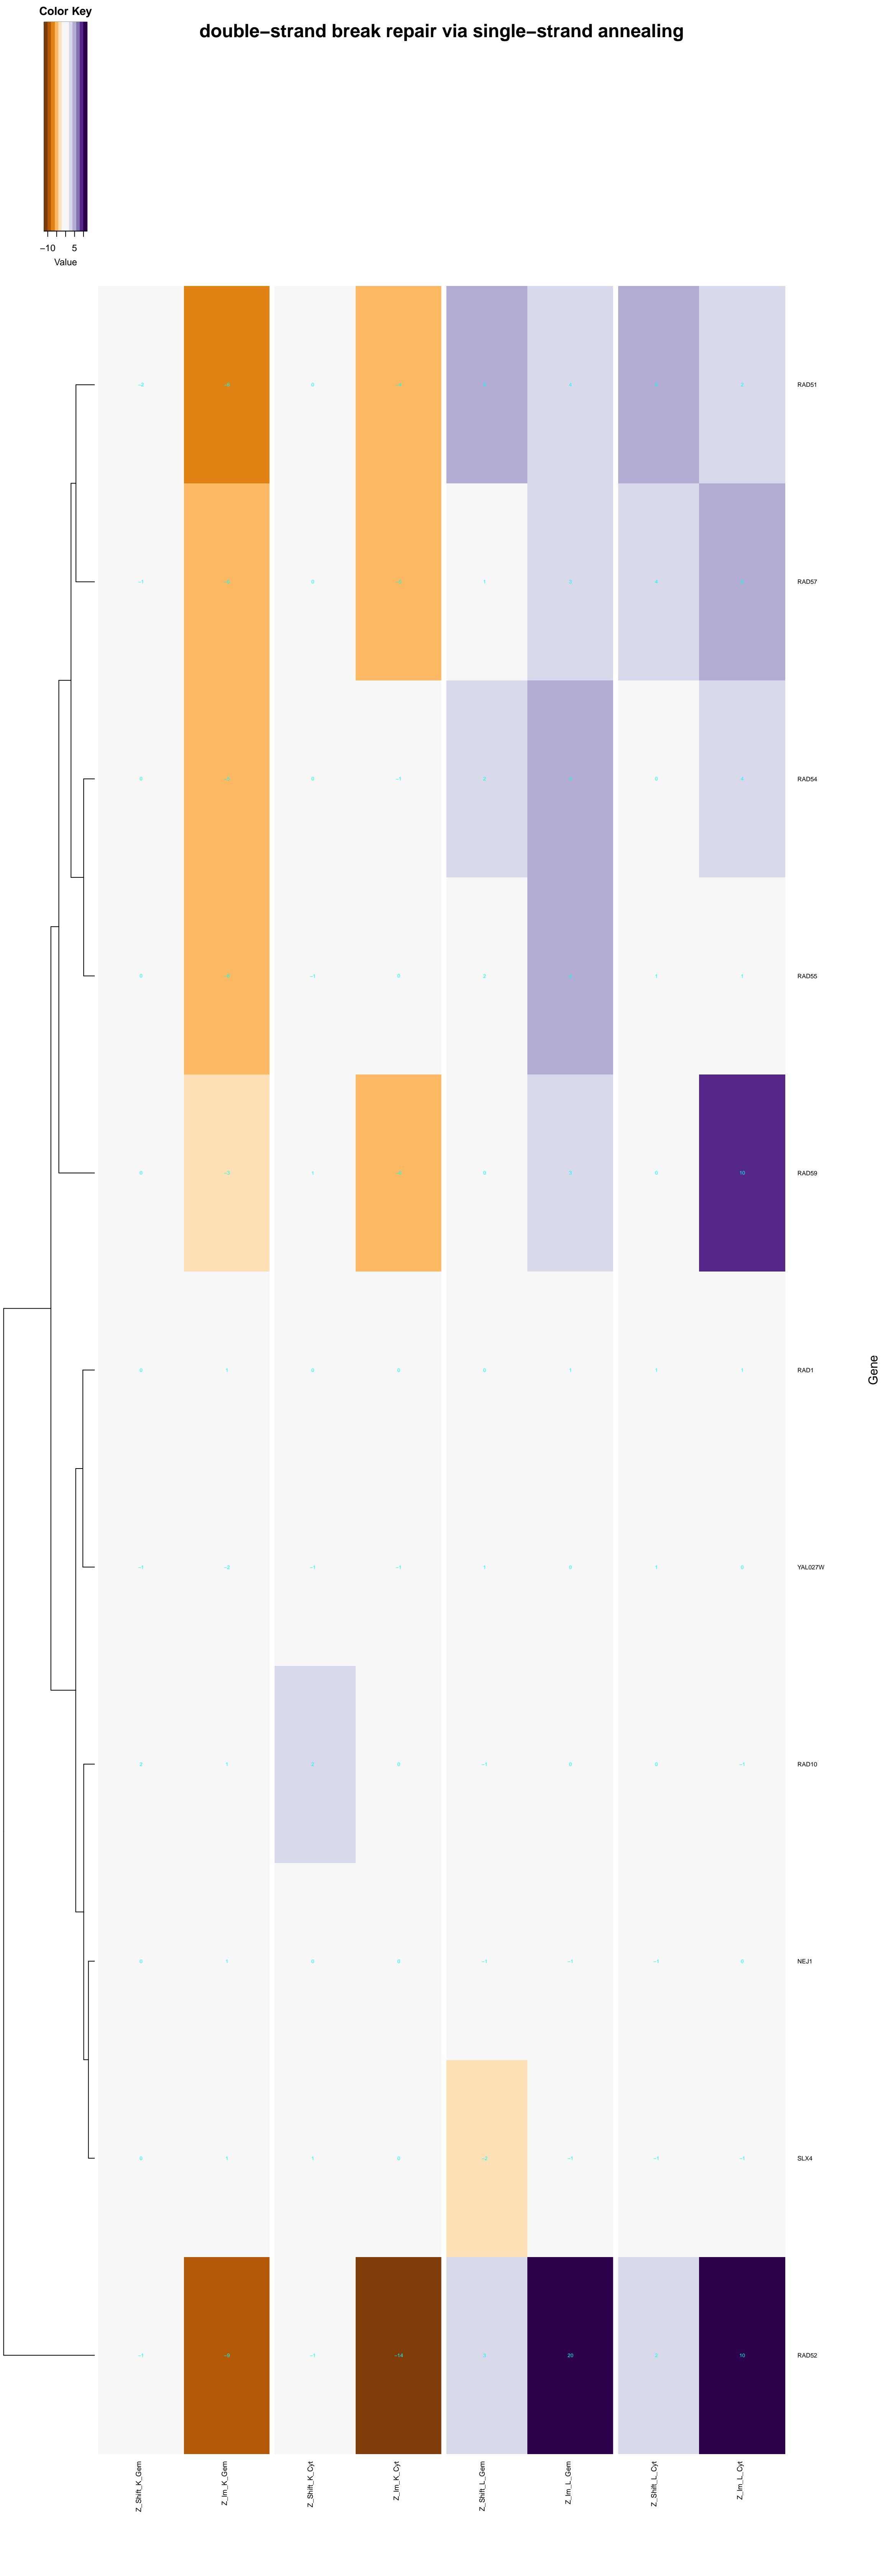

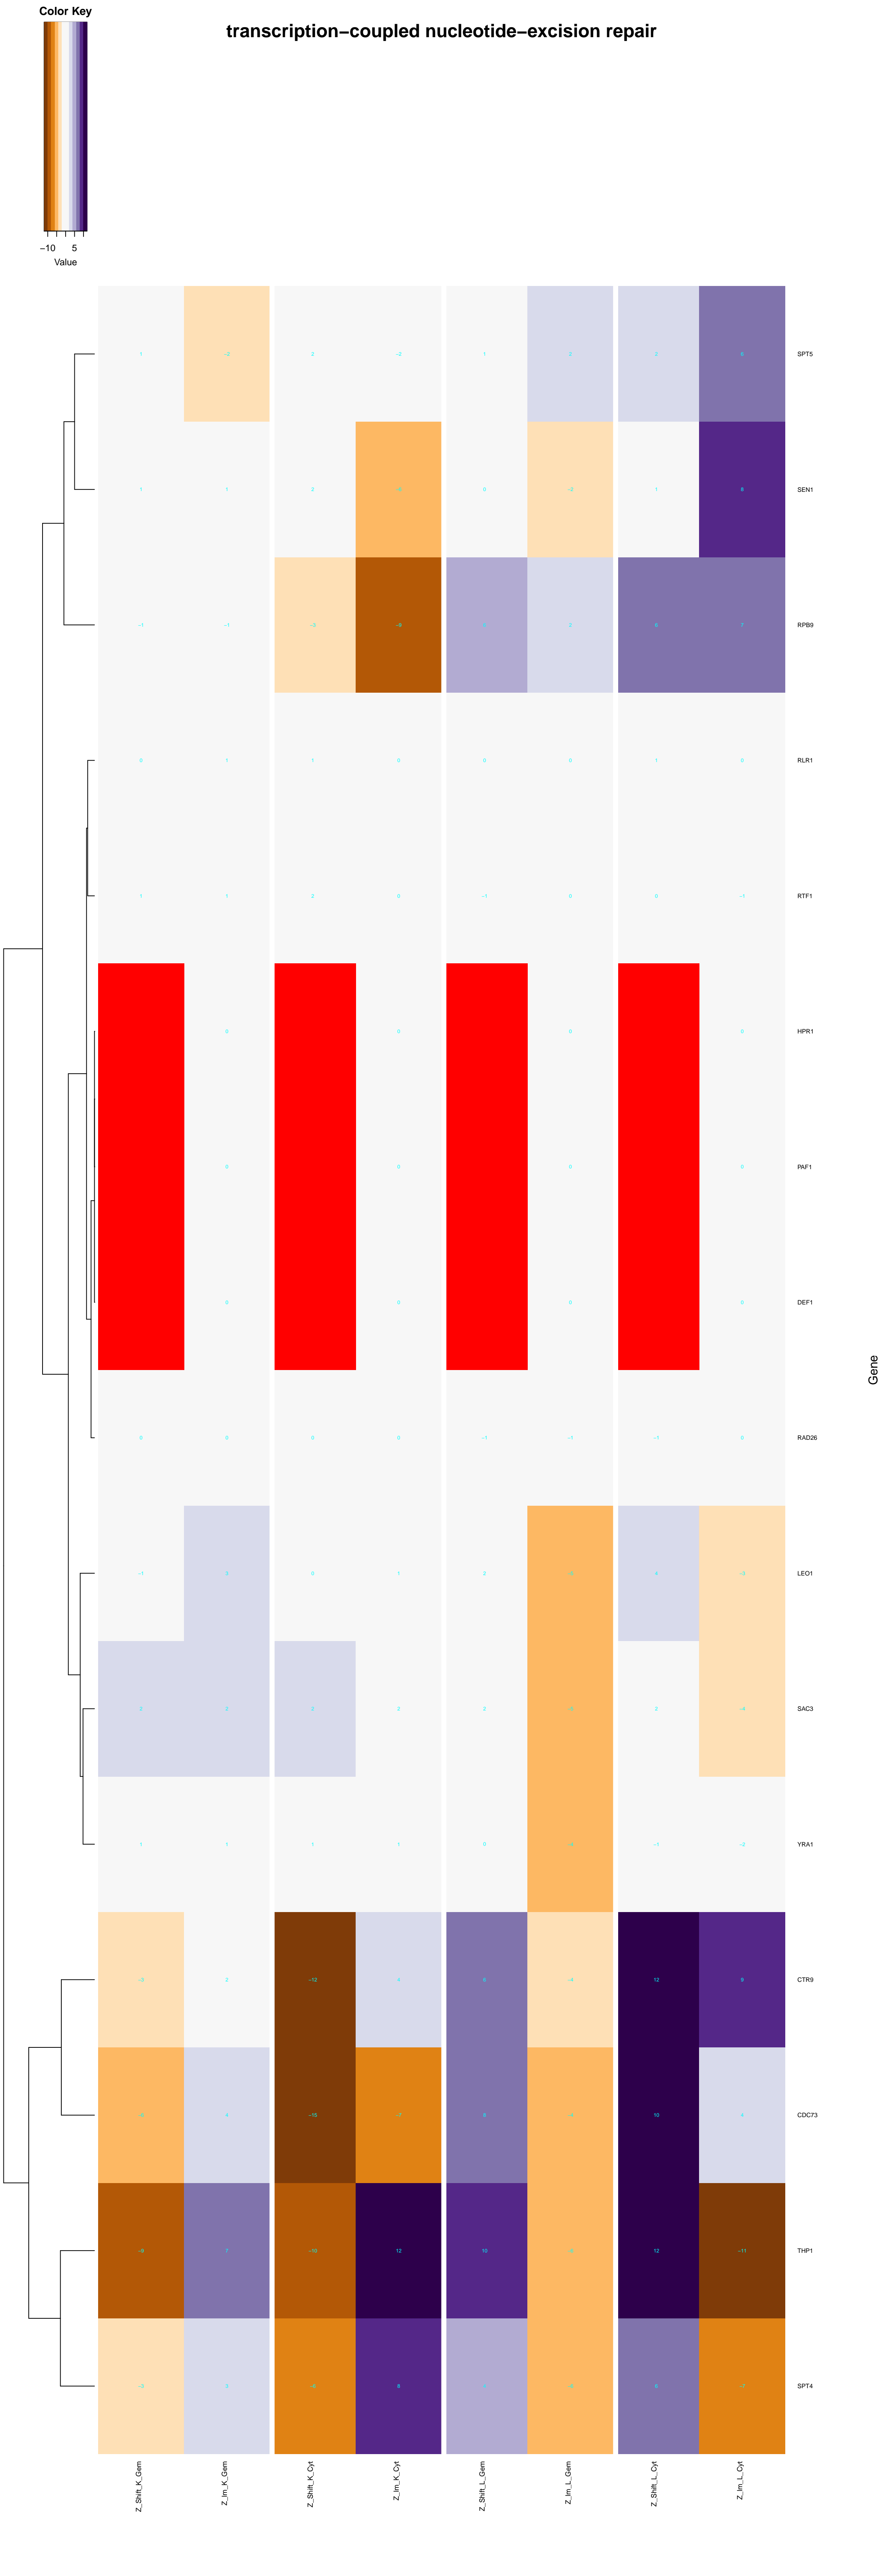

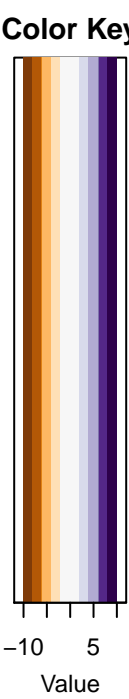

global genome nucleotide–excision repair

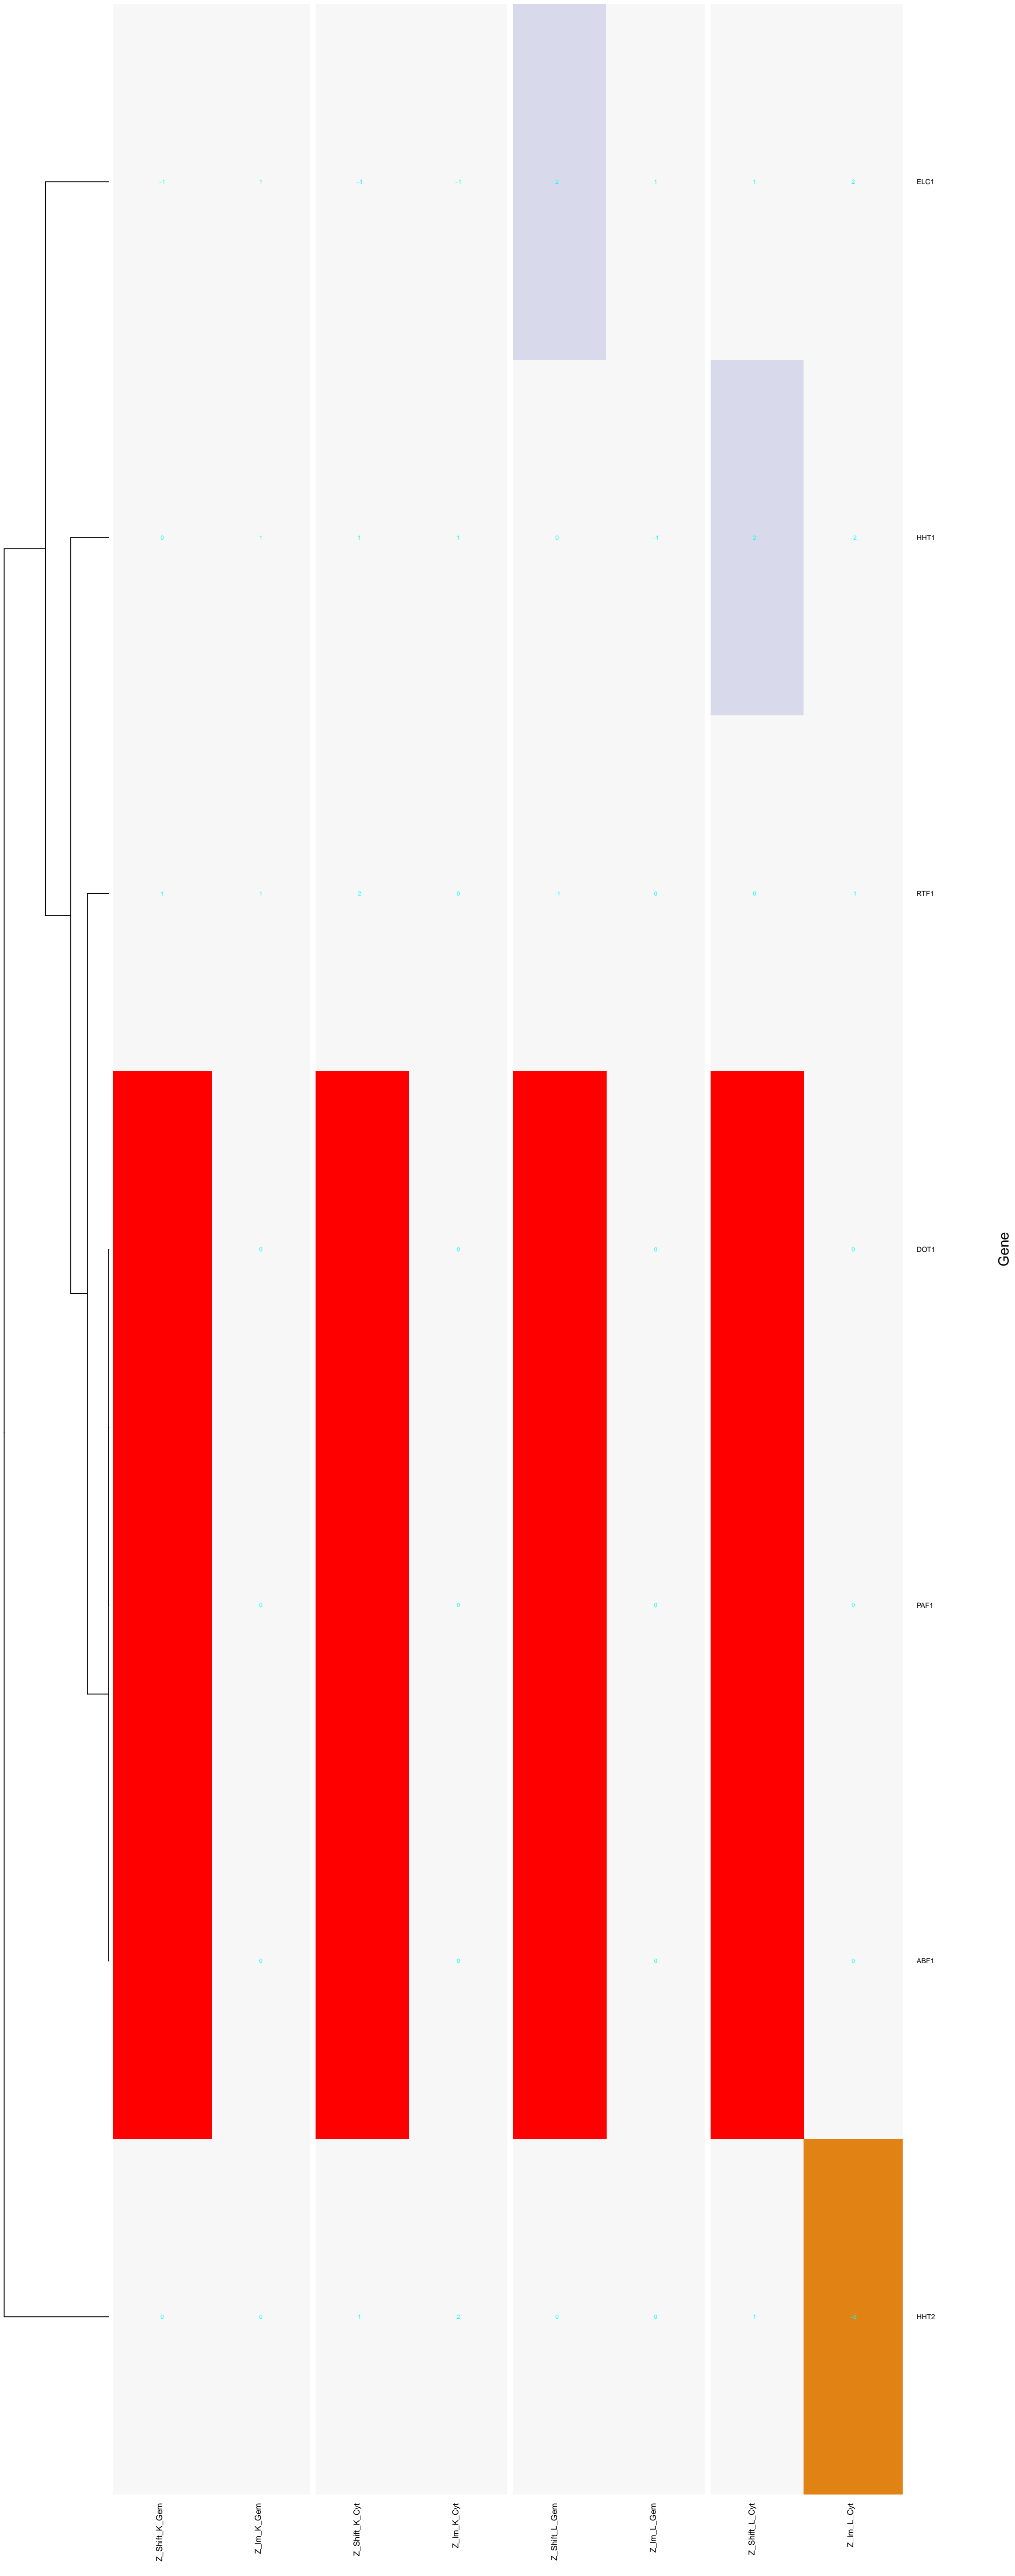



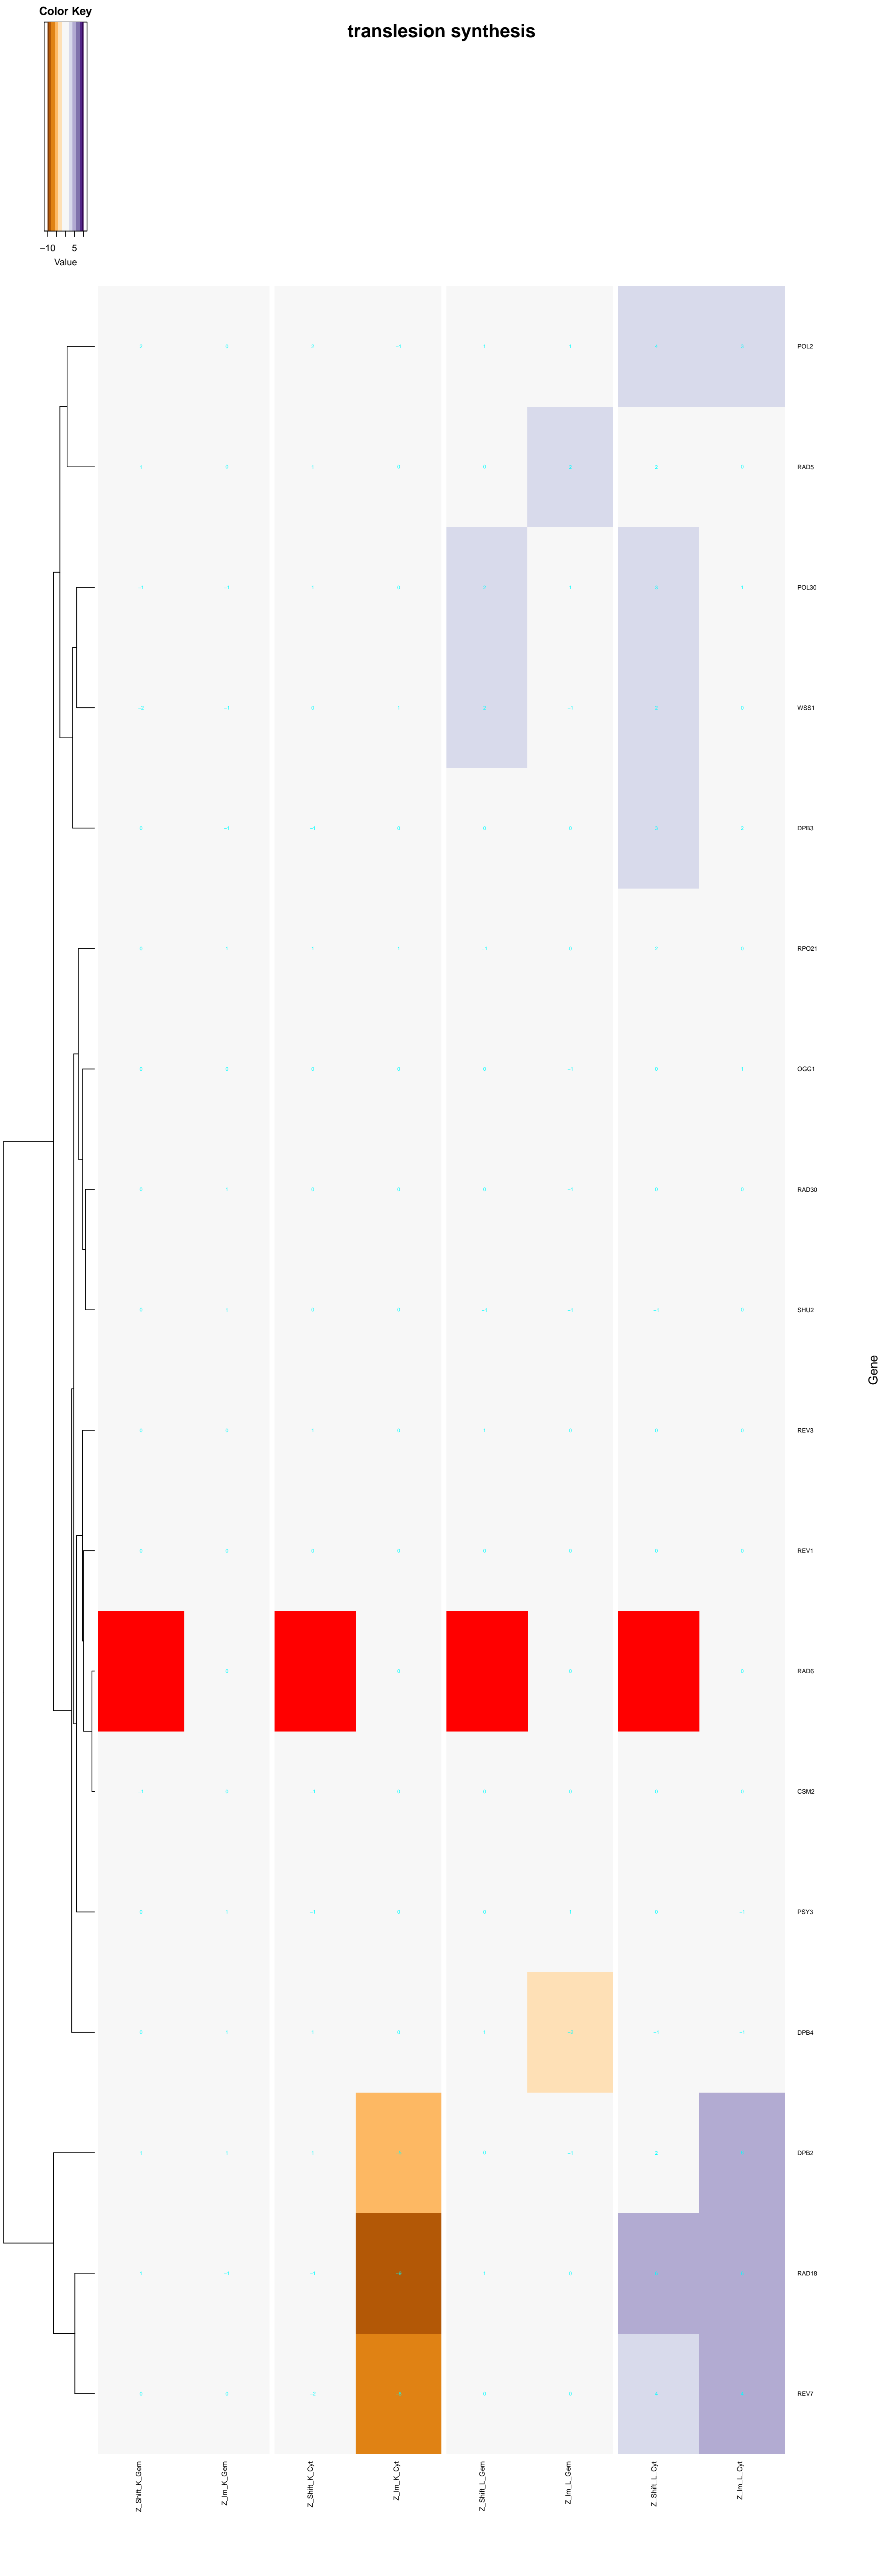

## mitochondrial double-strand break repair

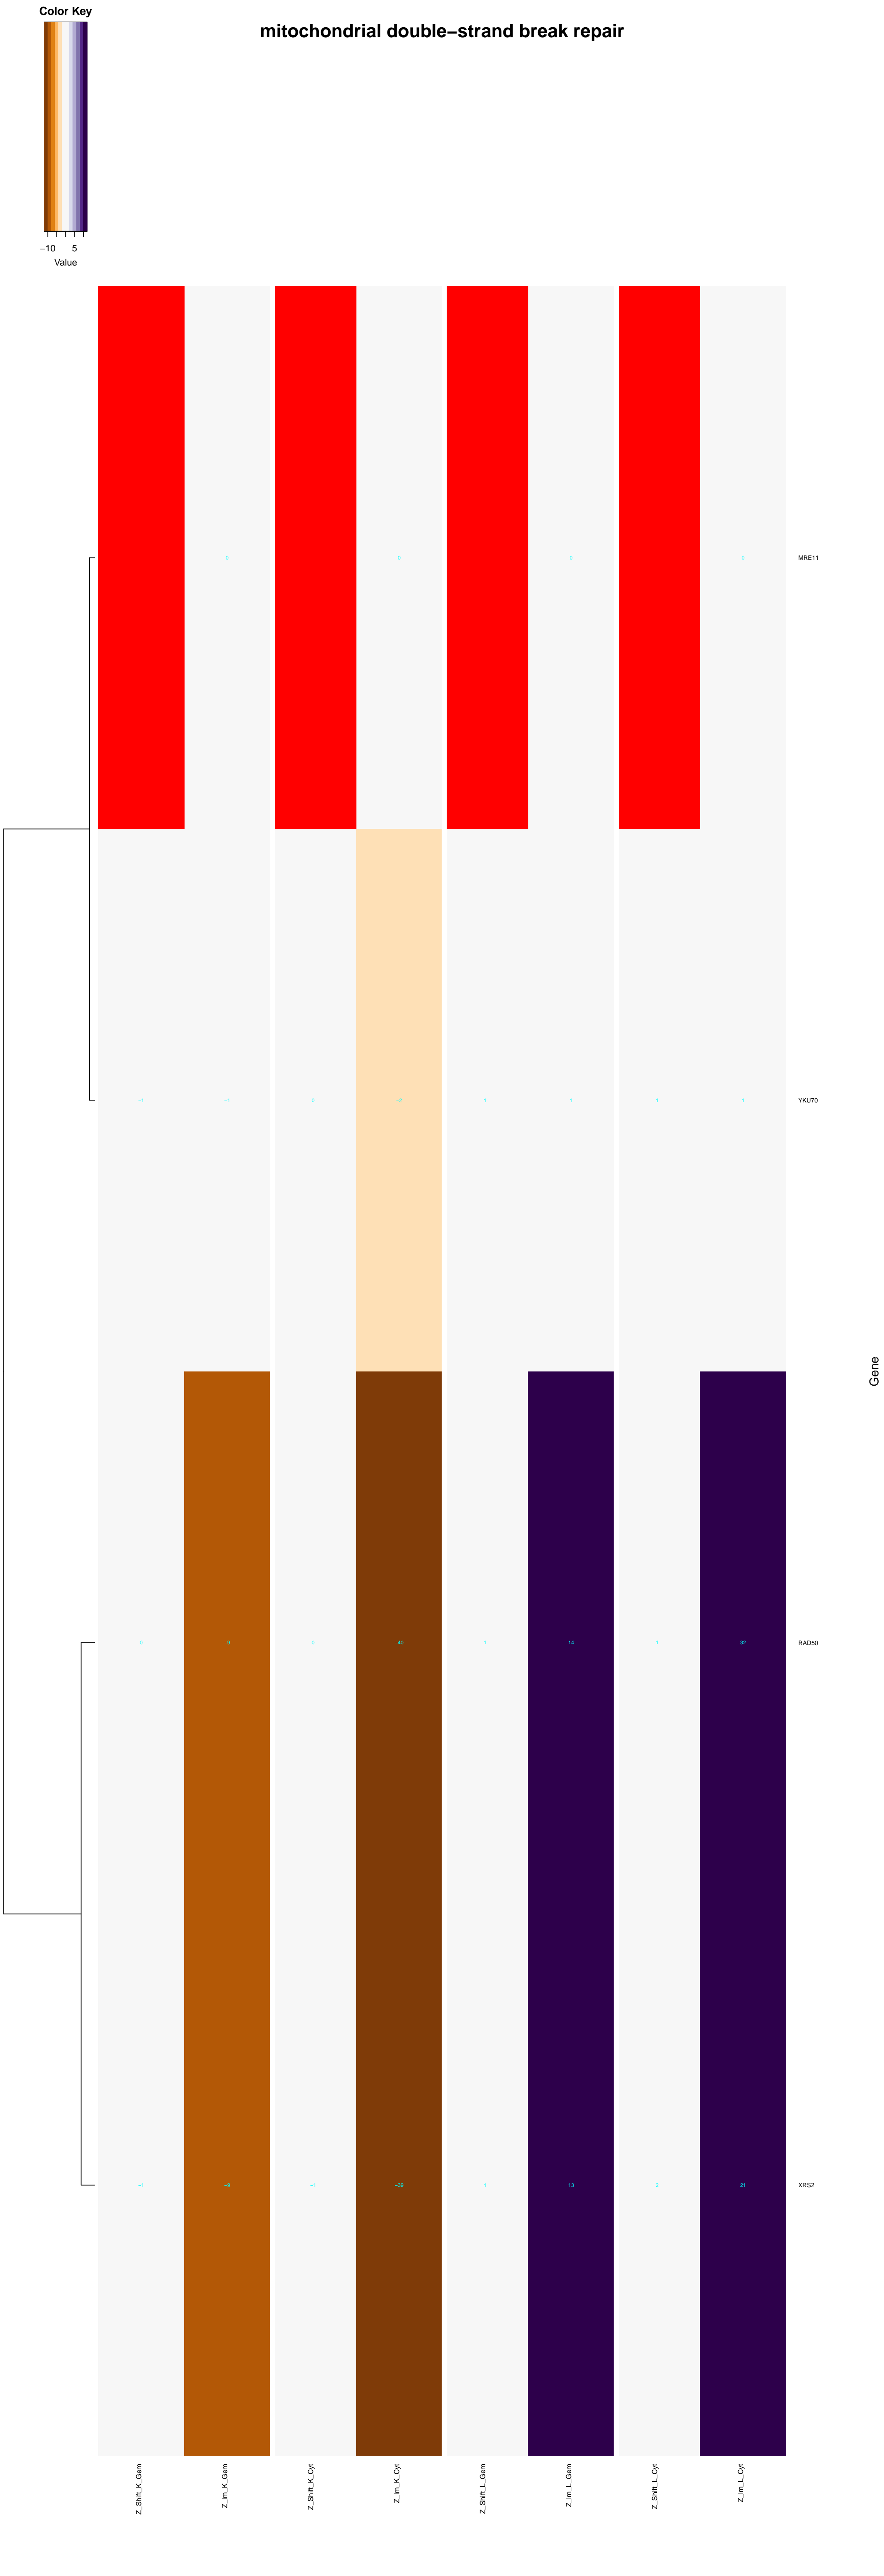

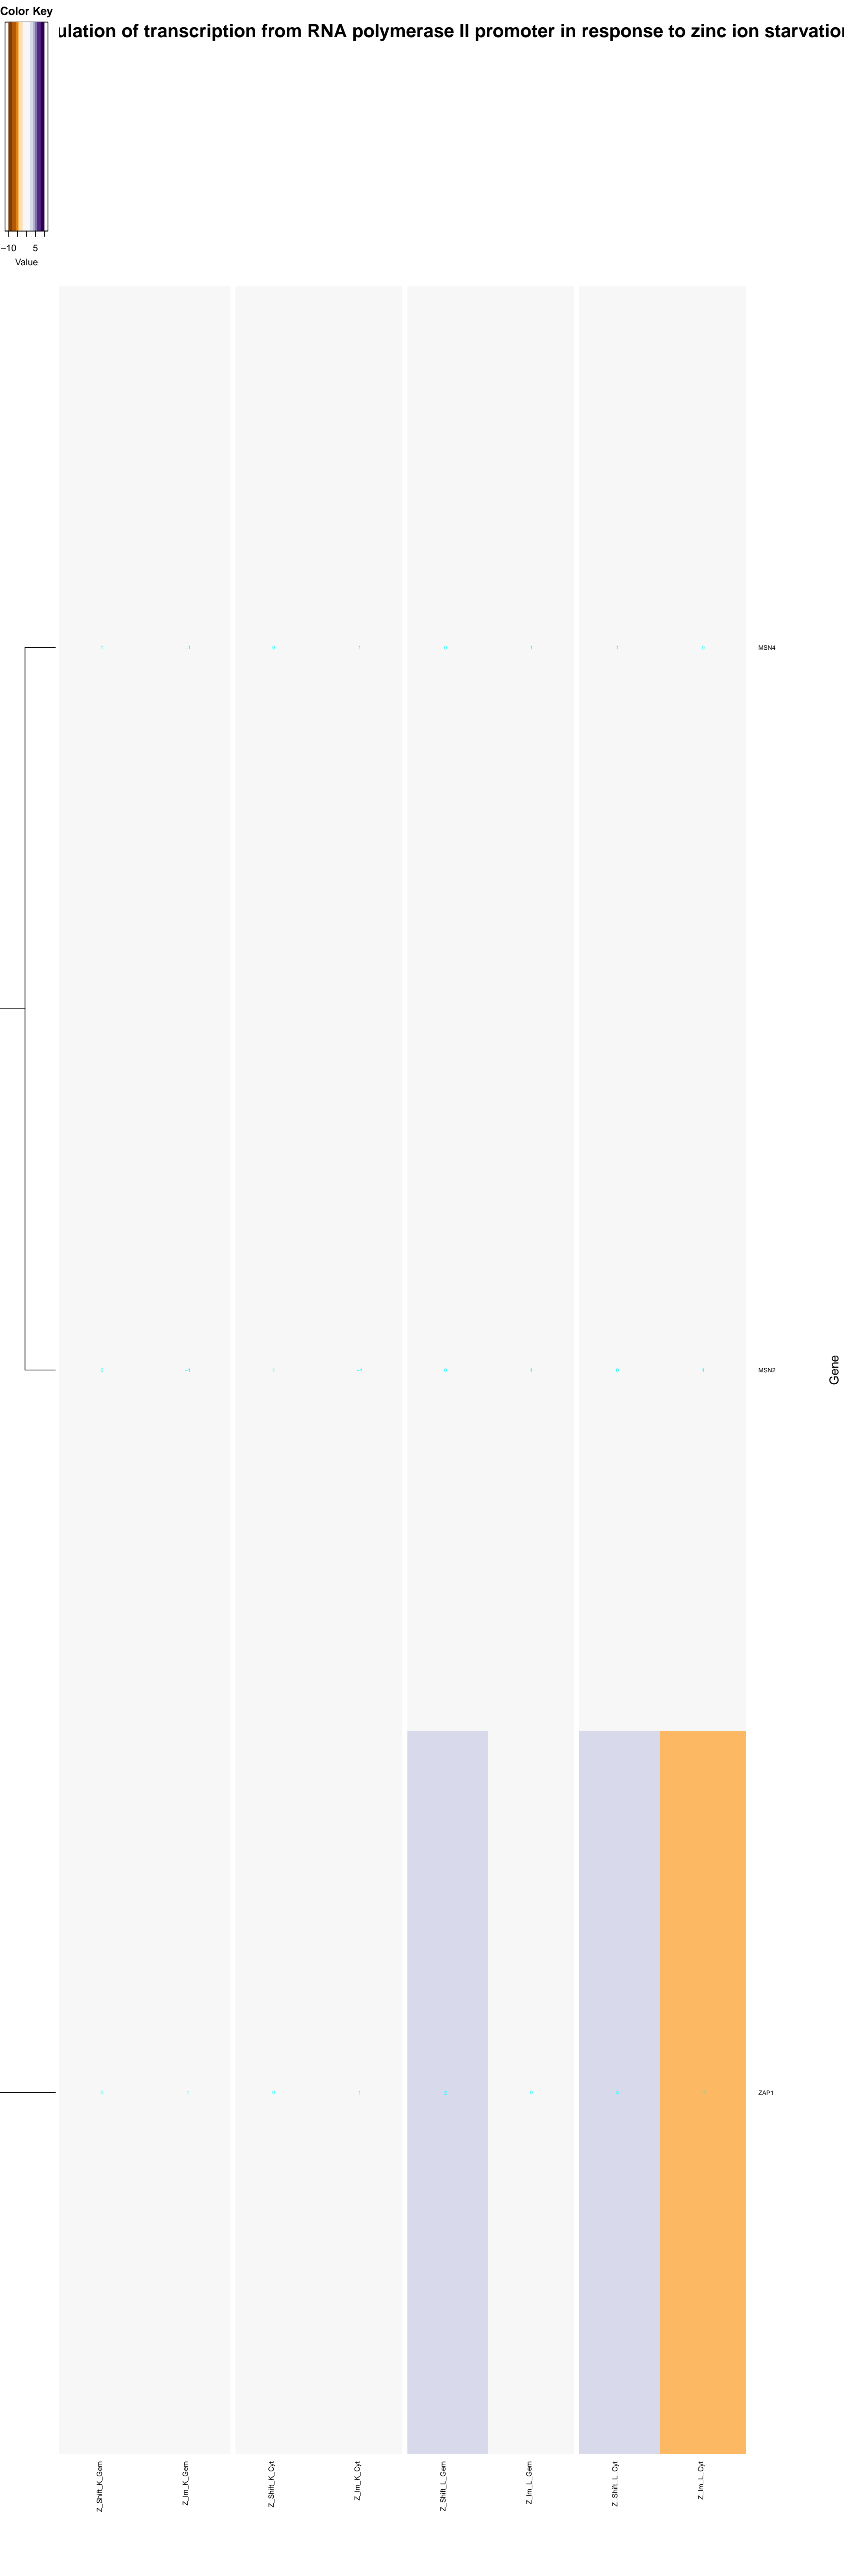

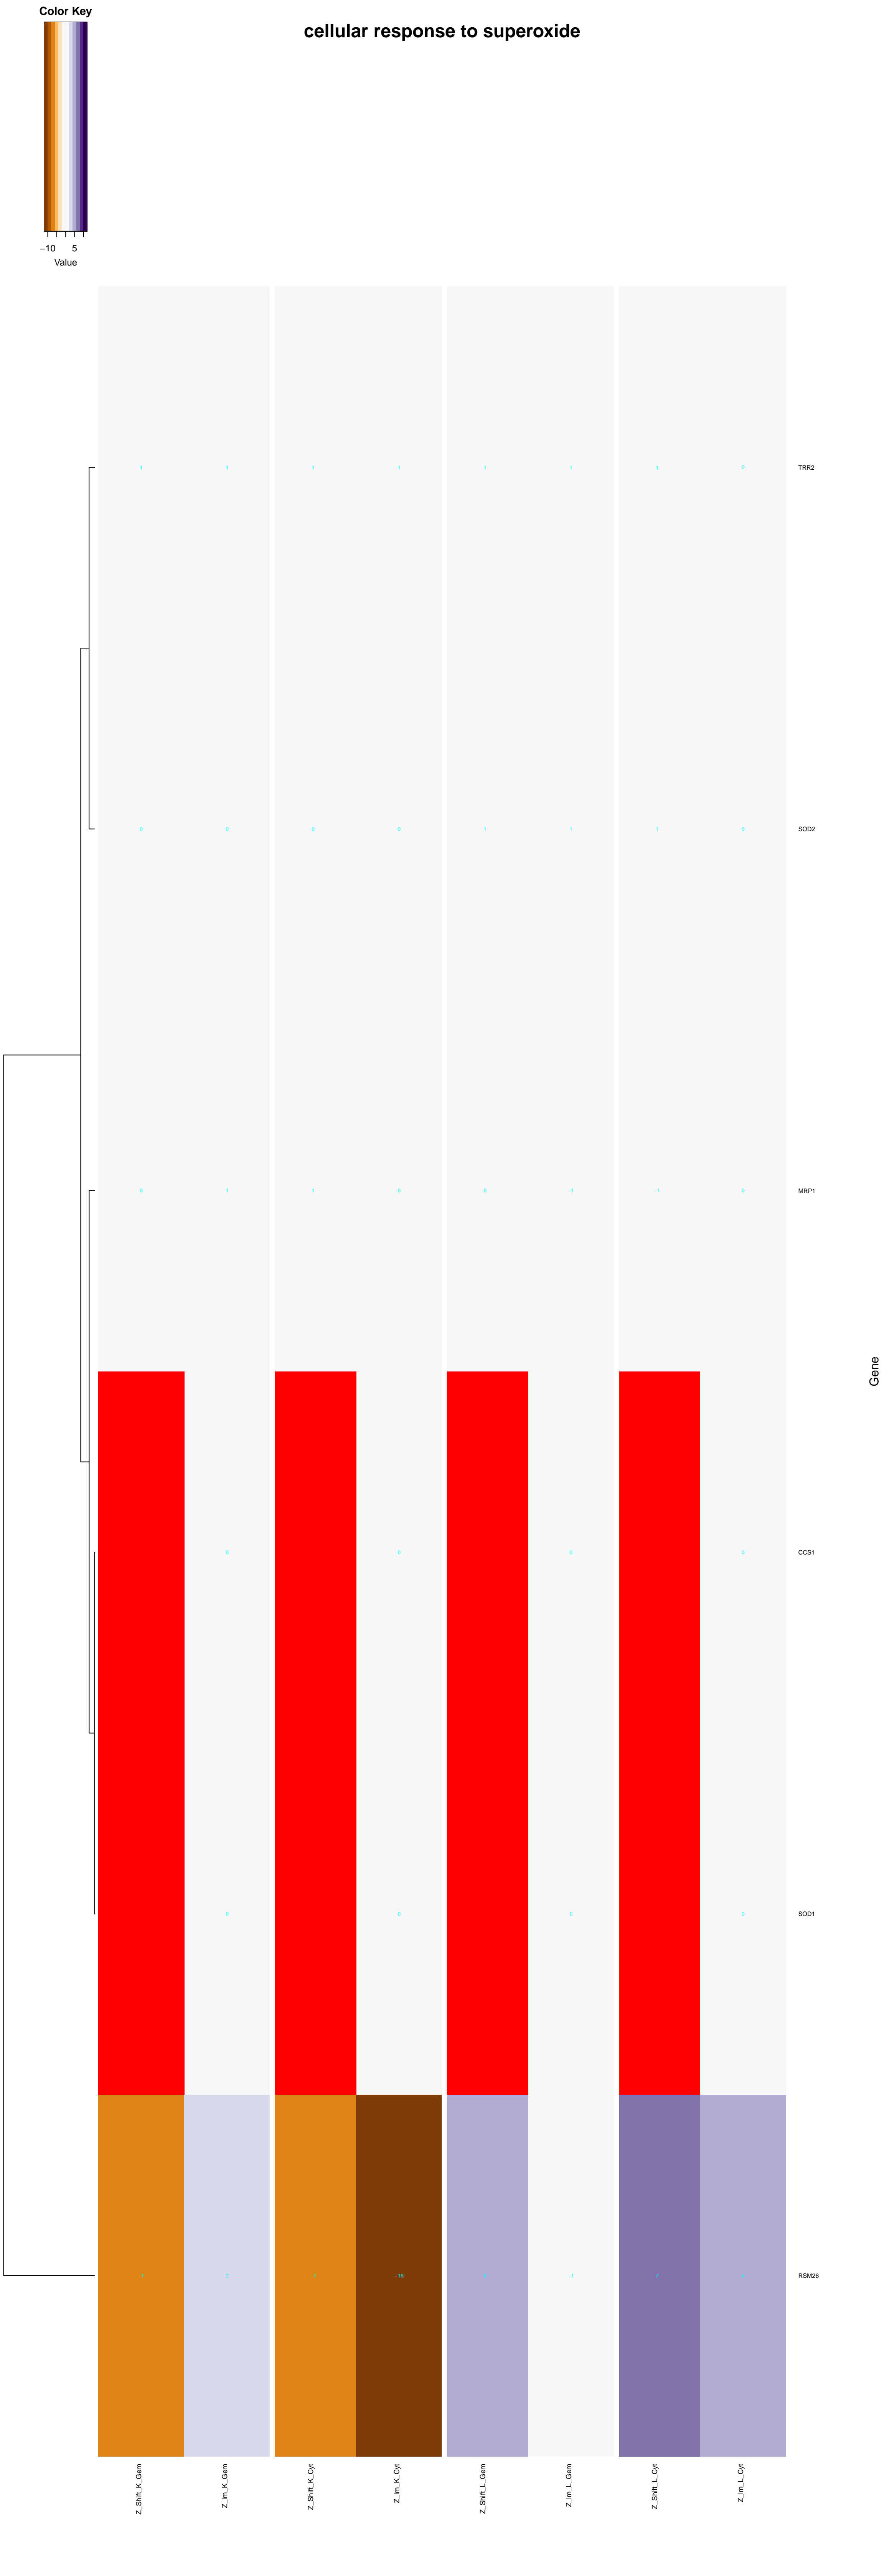

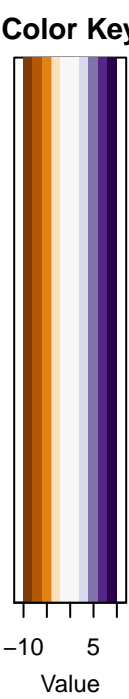

glycoprotein ERAD pathway

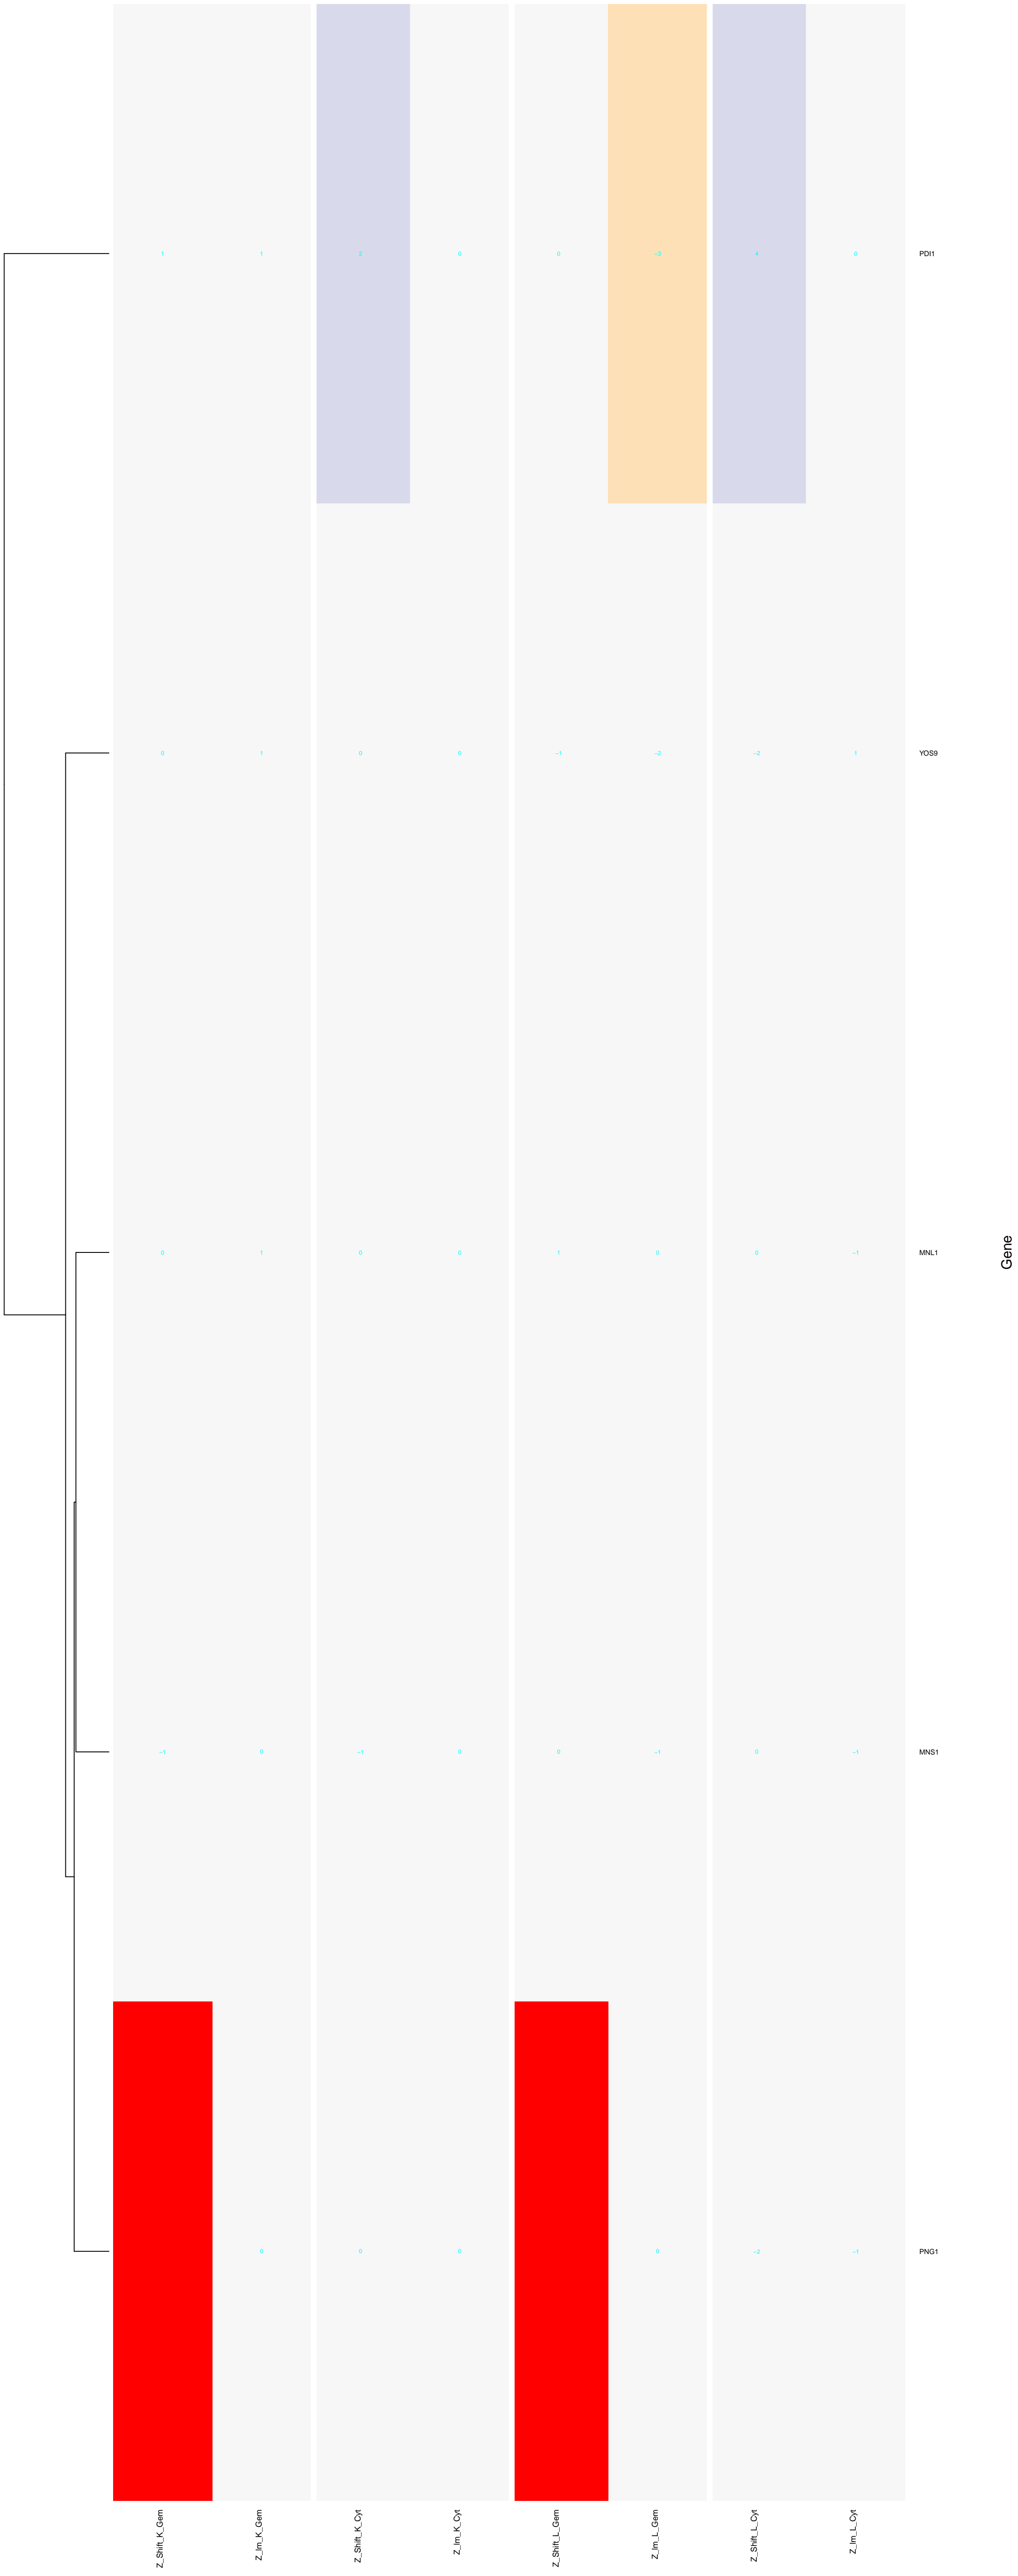

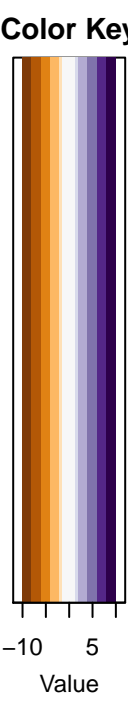

gulation of transcription from RNA polymerase II promoter in response to oxidative stress

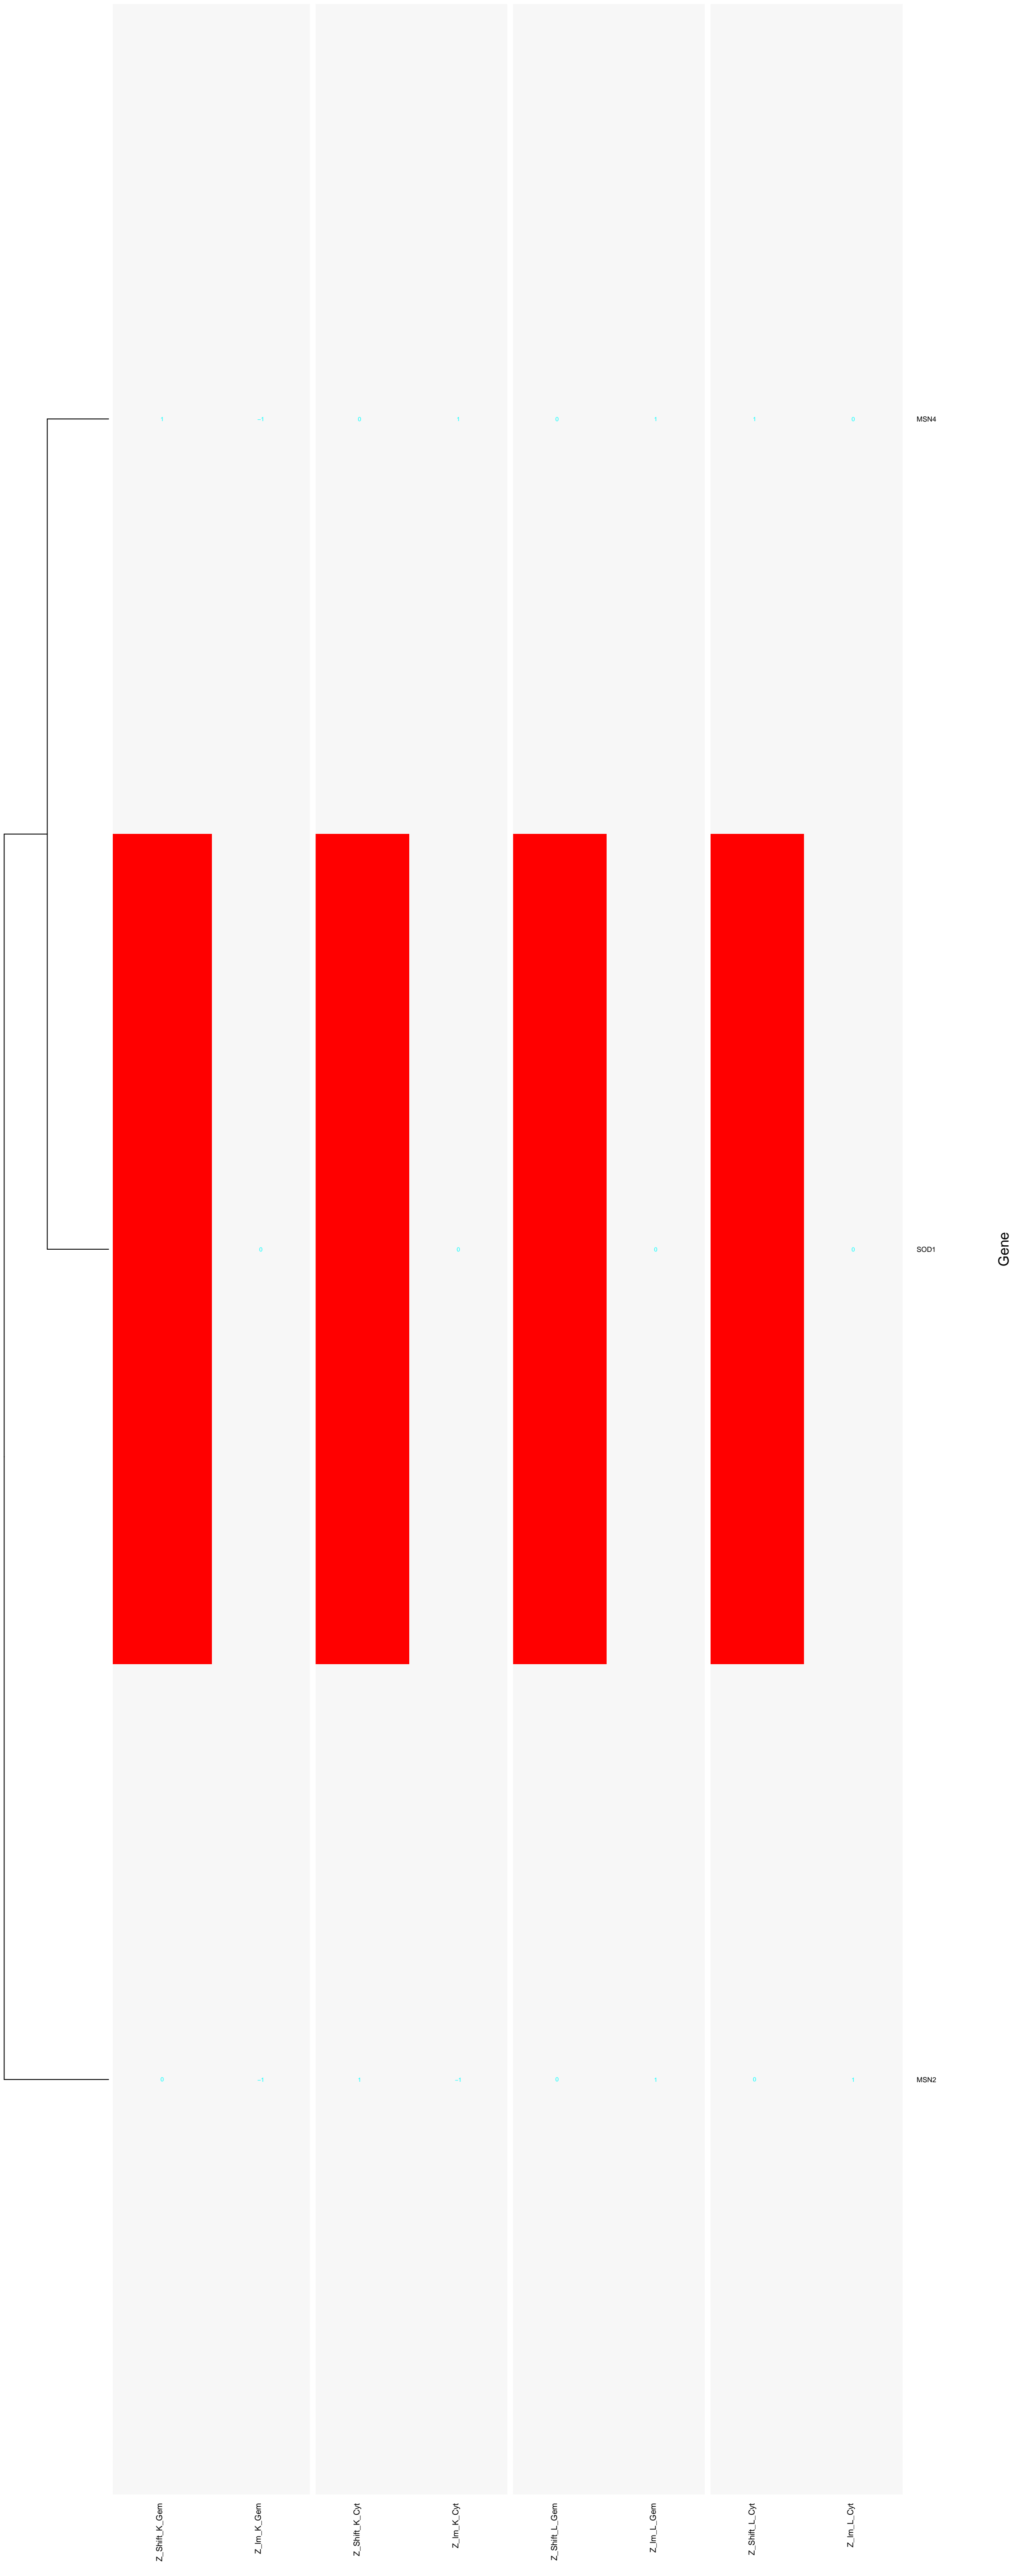

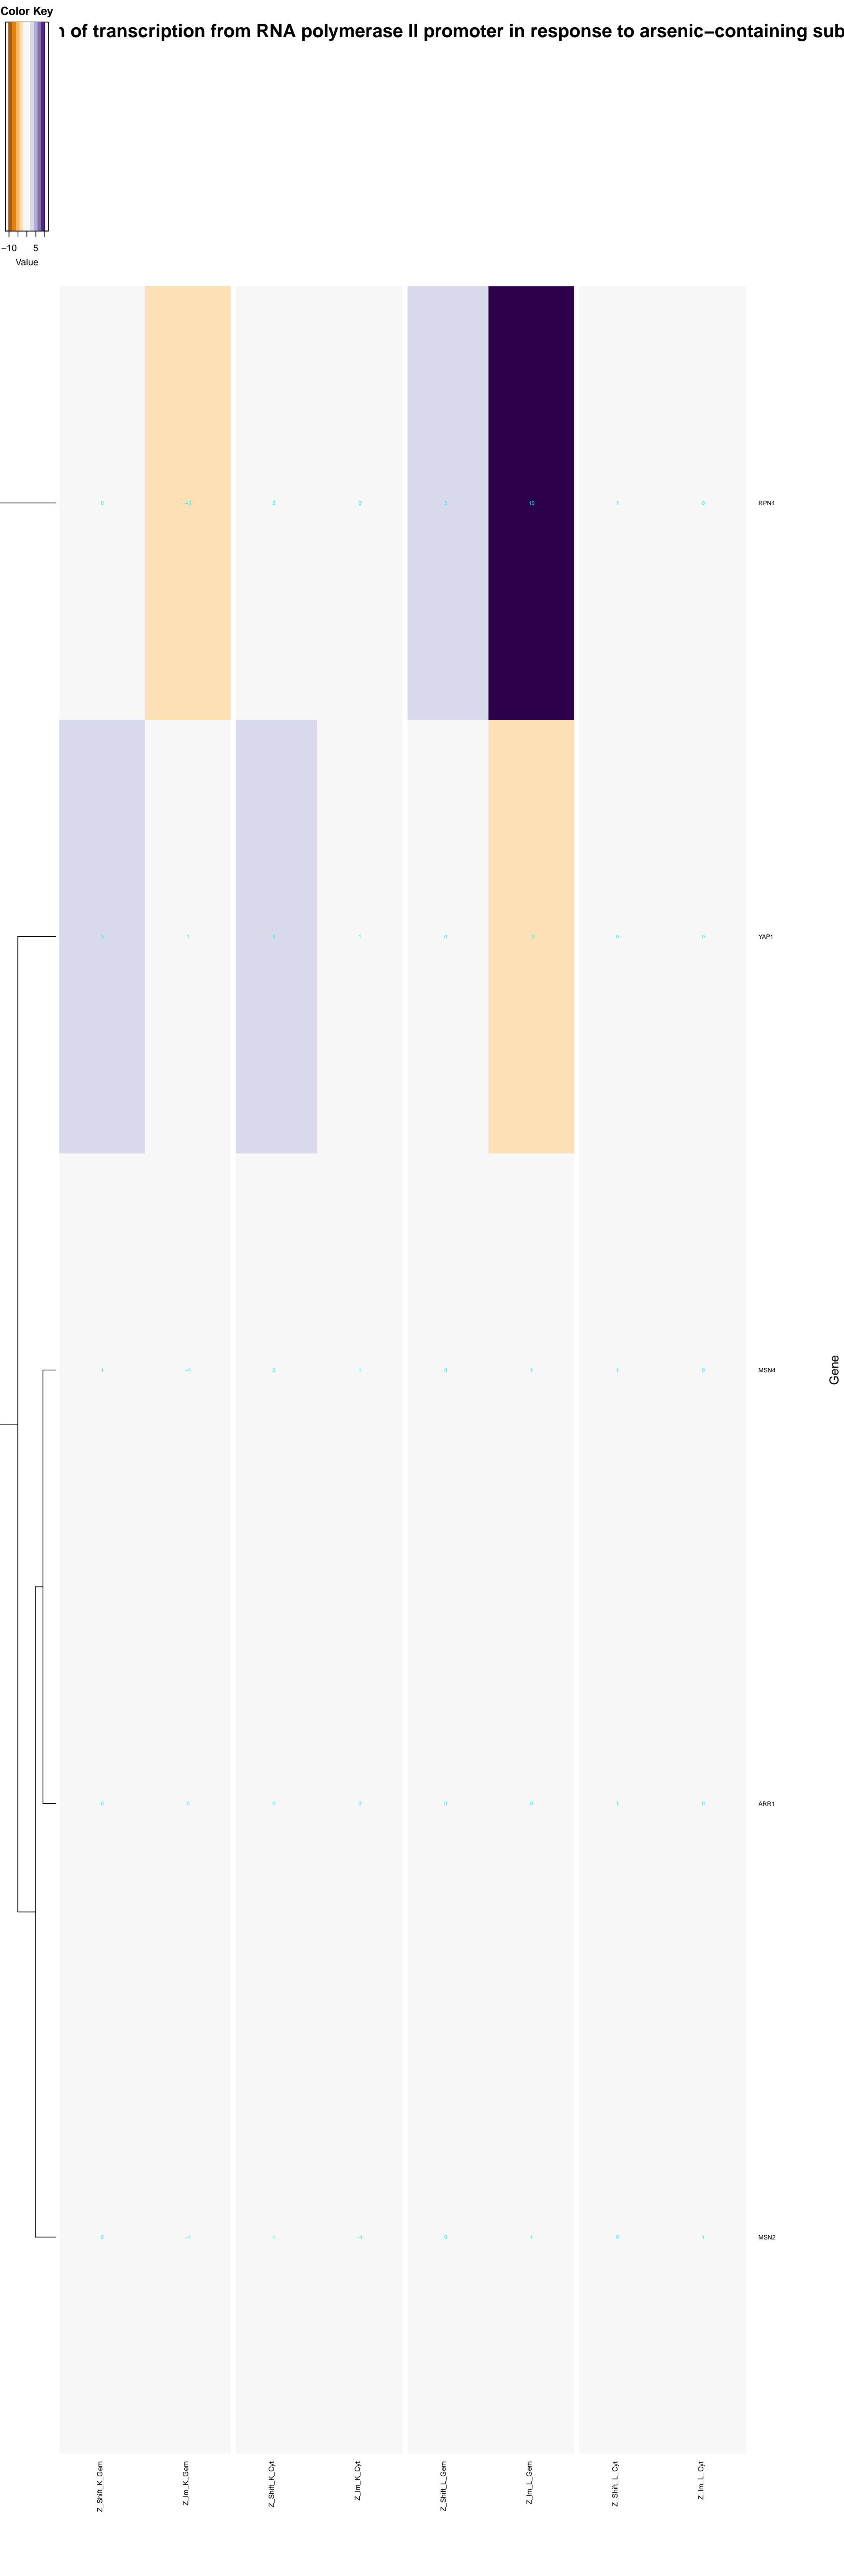



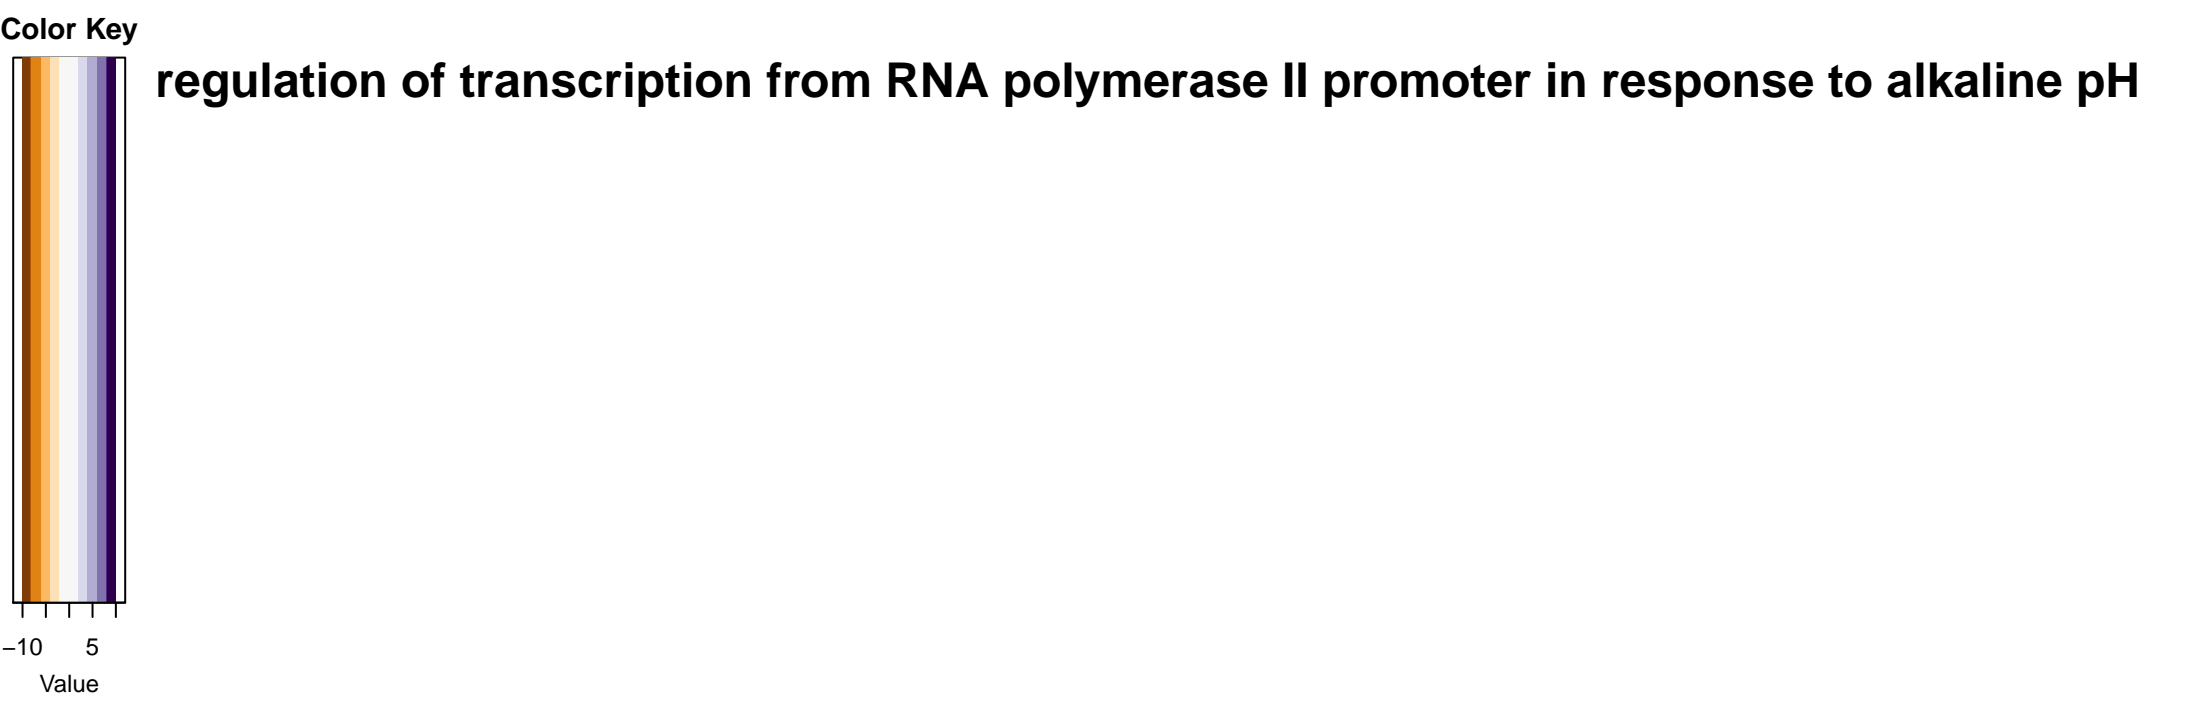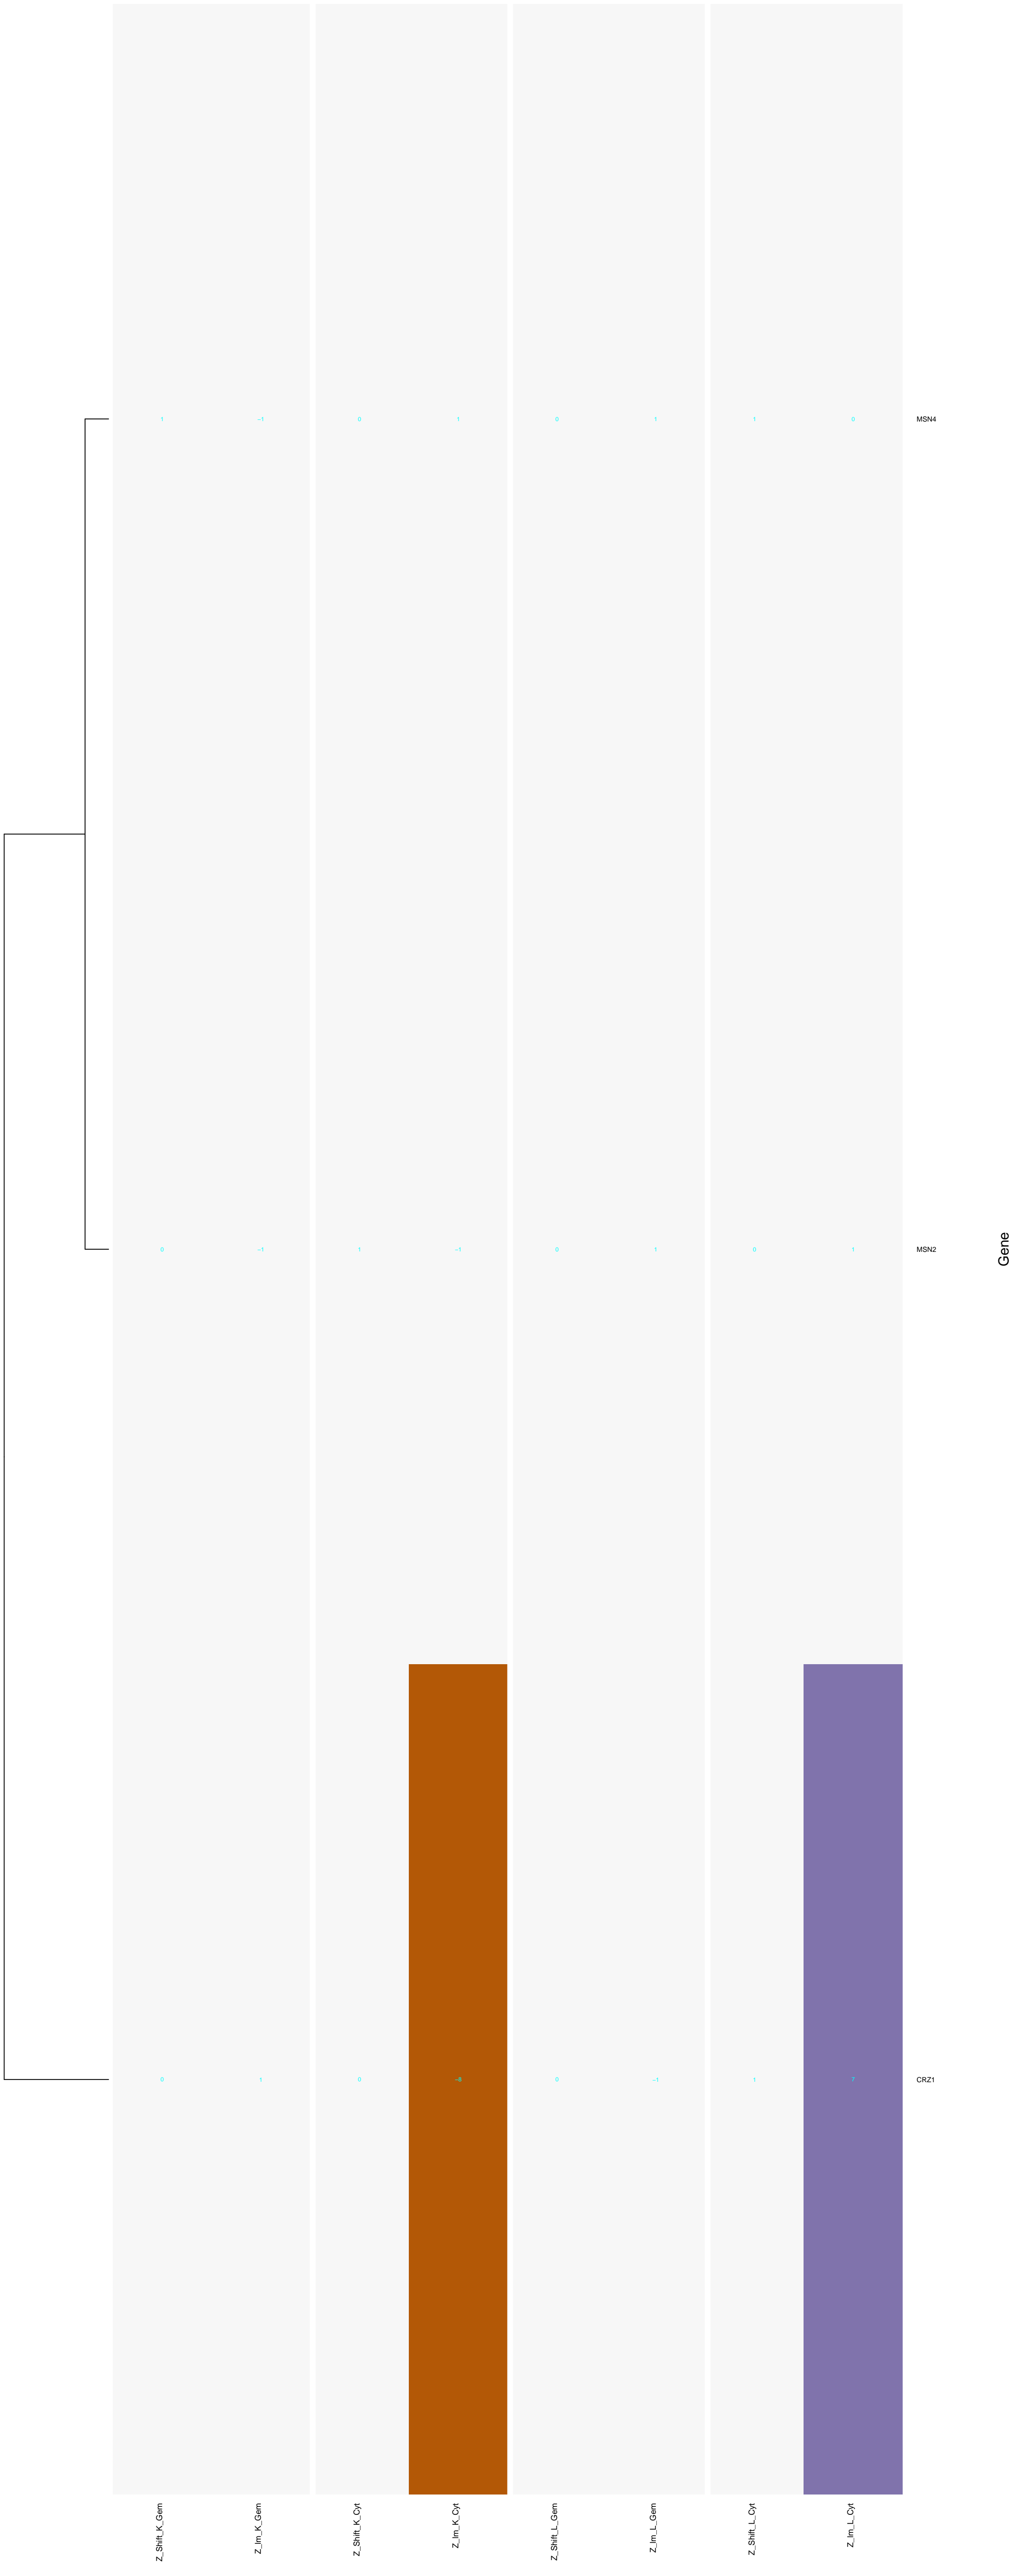

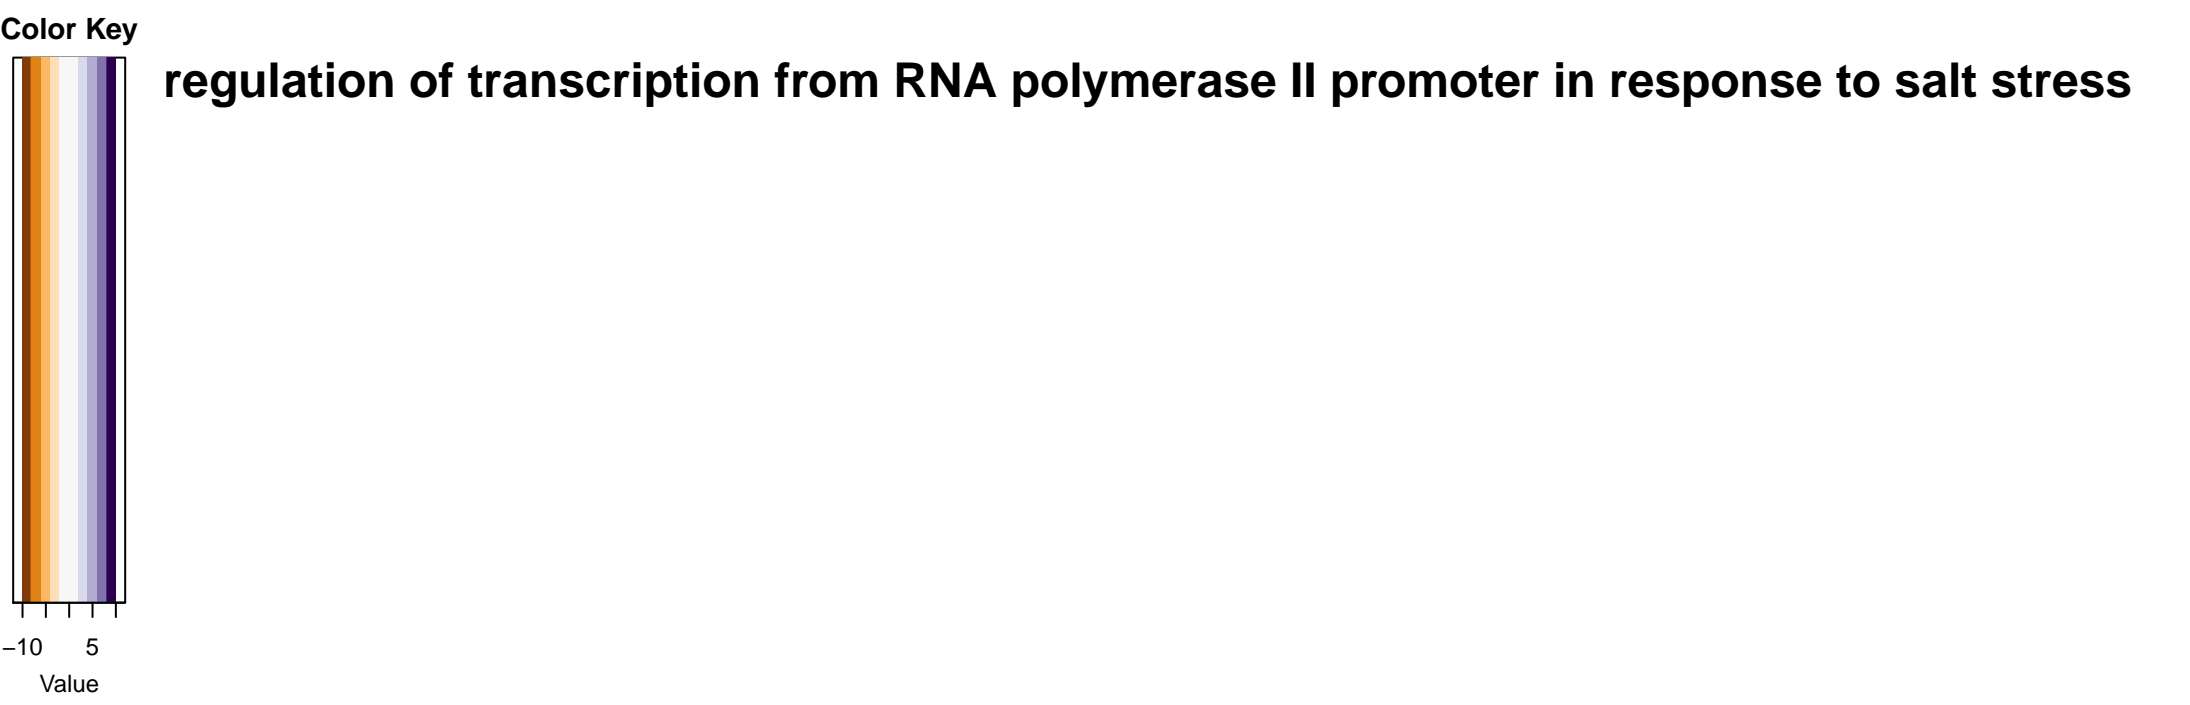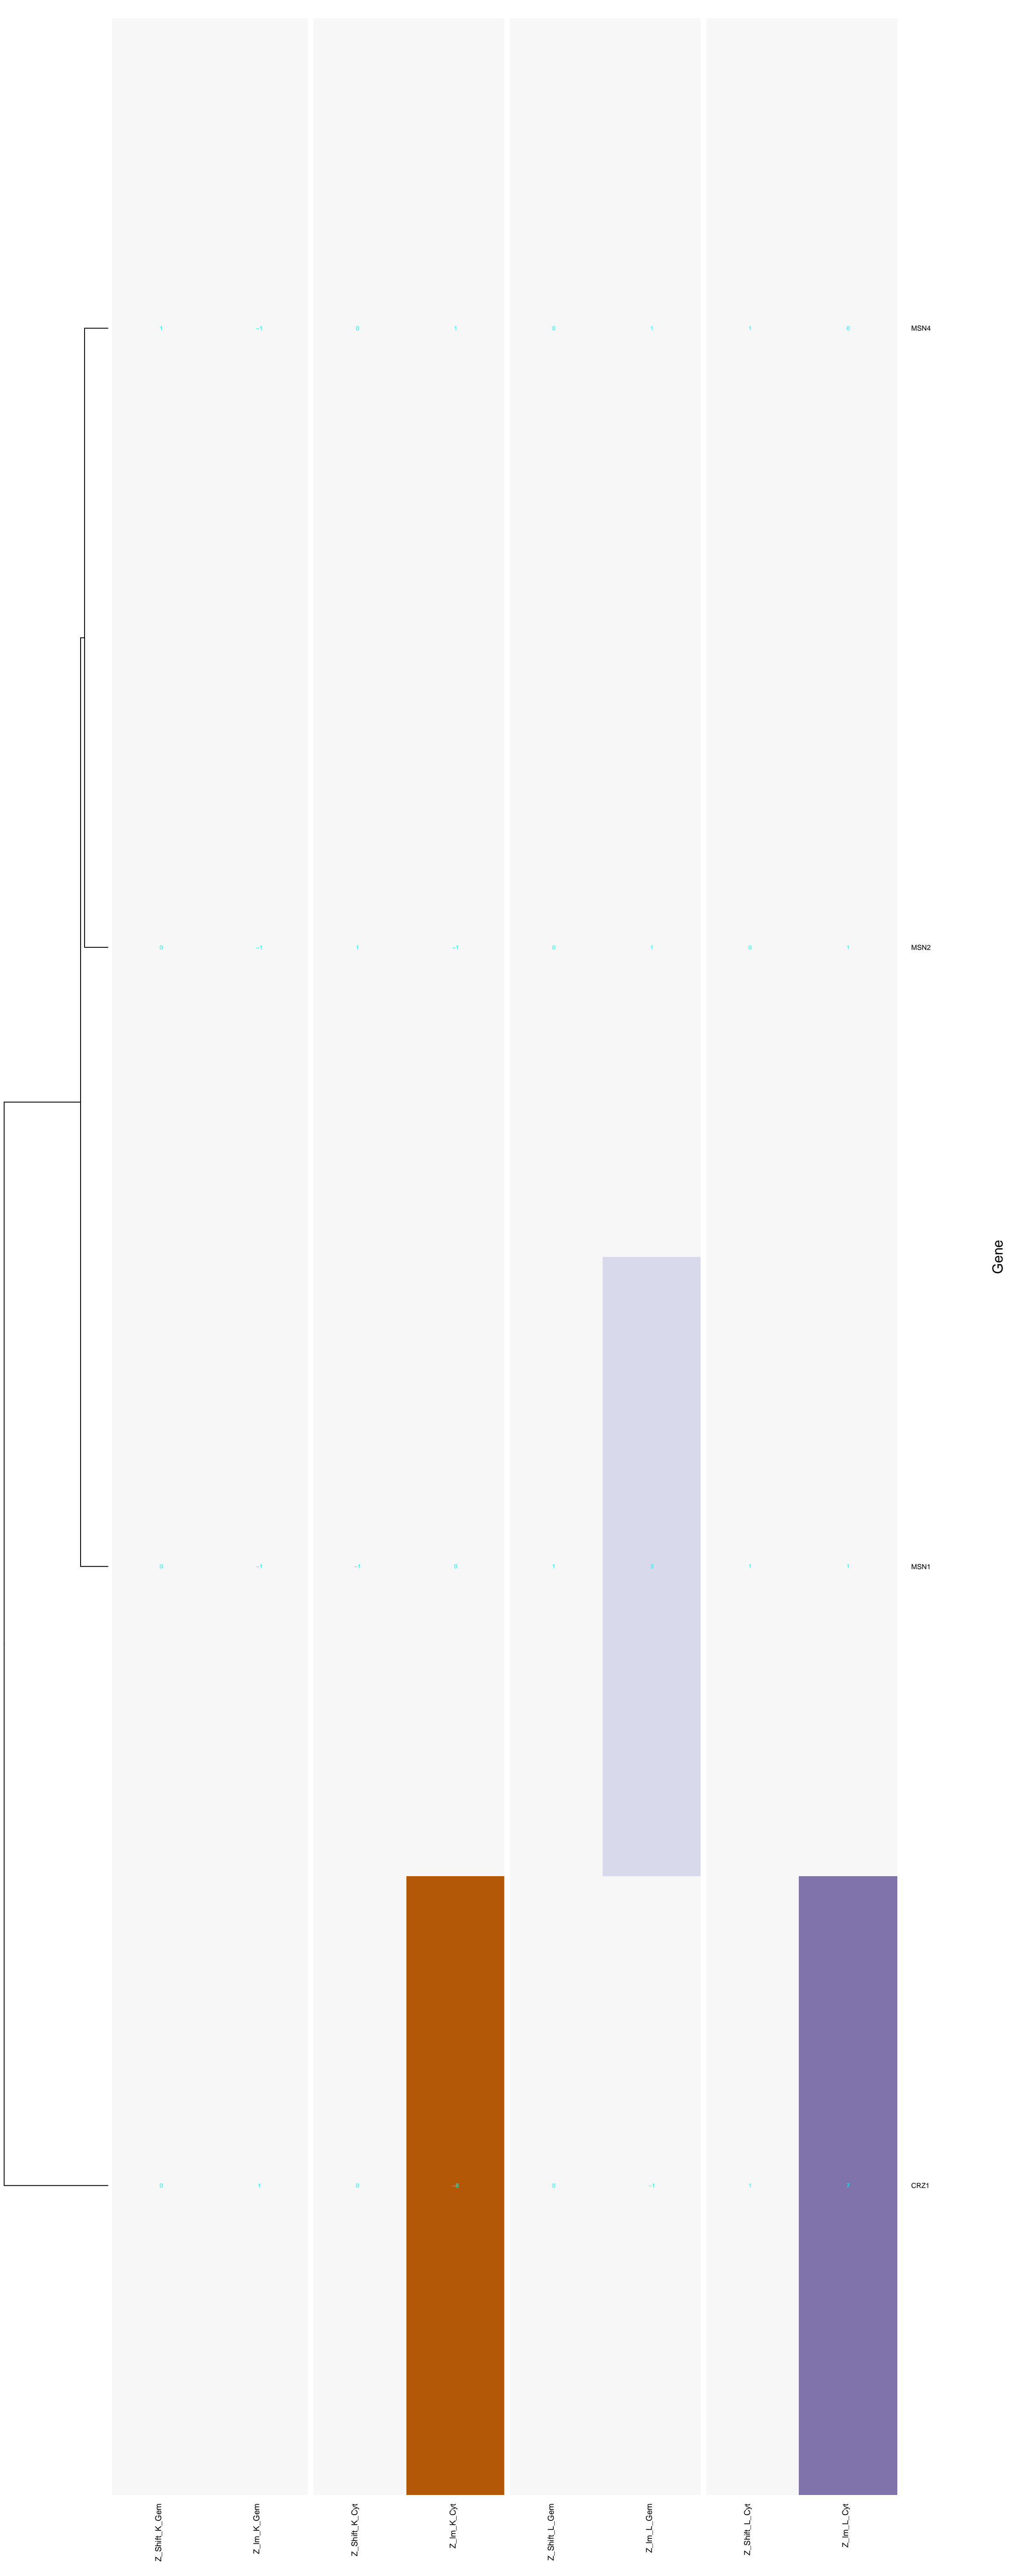



Regulation of transcription from RNA polymerase II promoter in response to increased salt

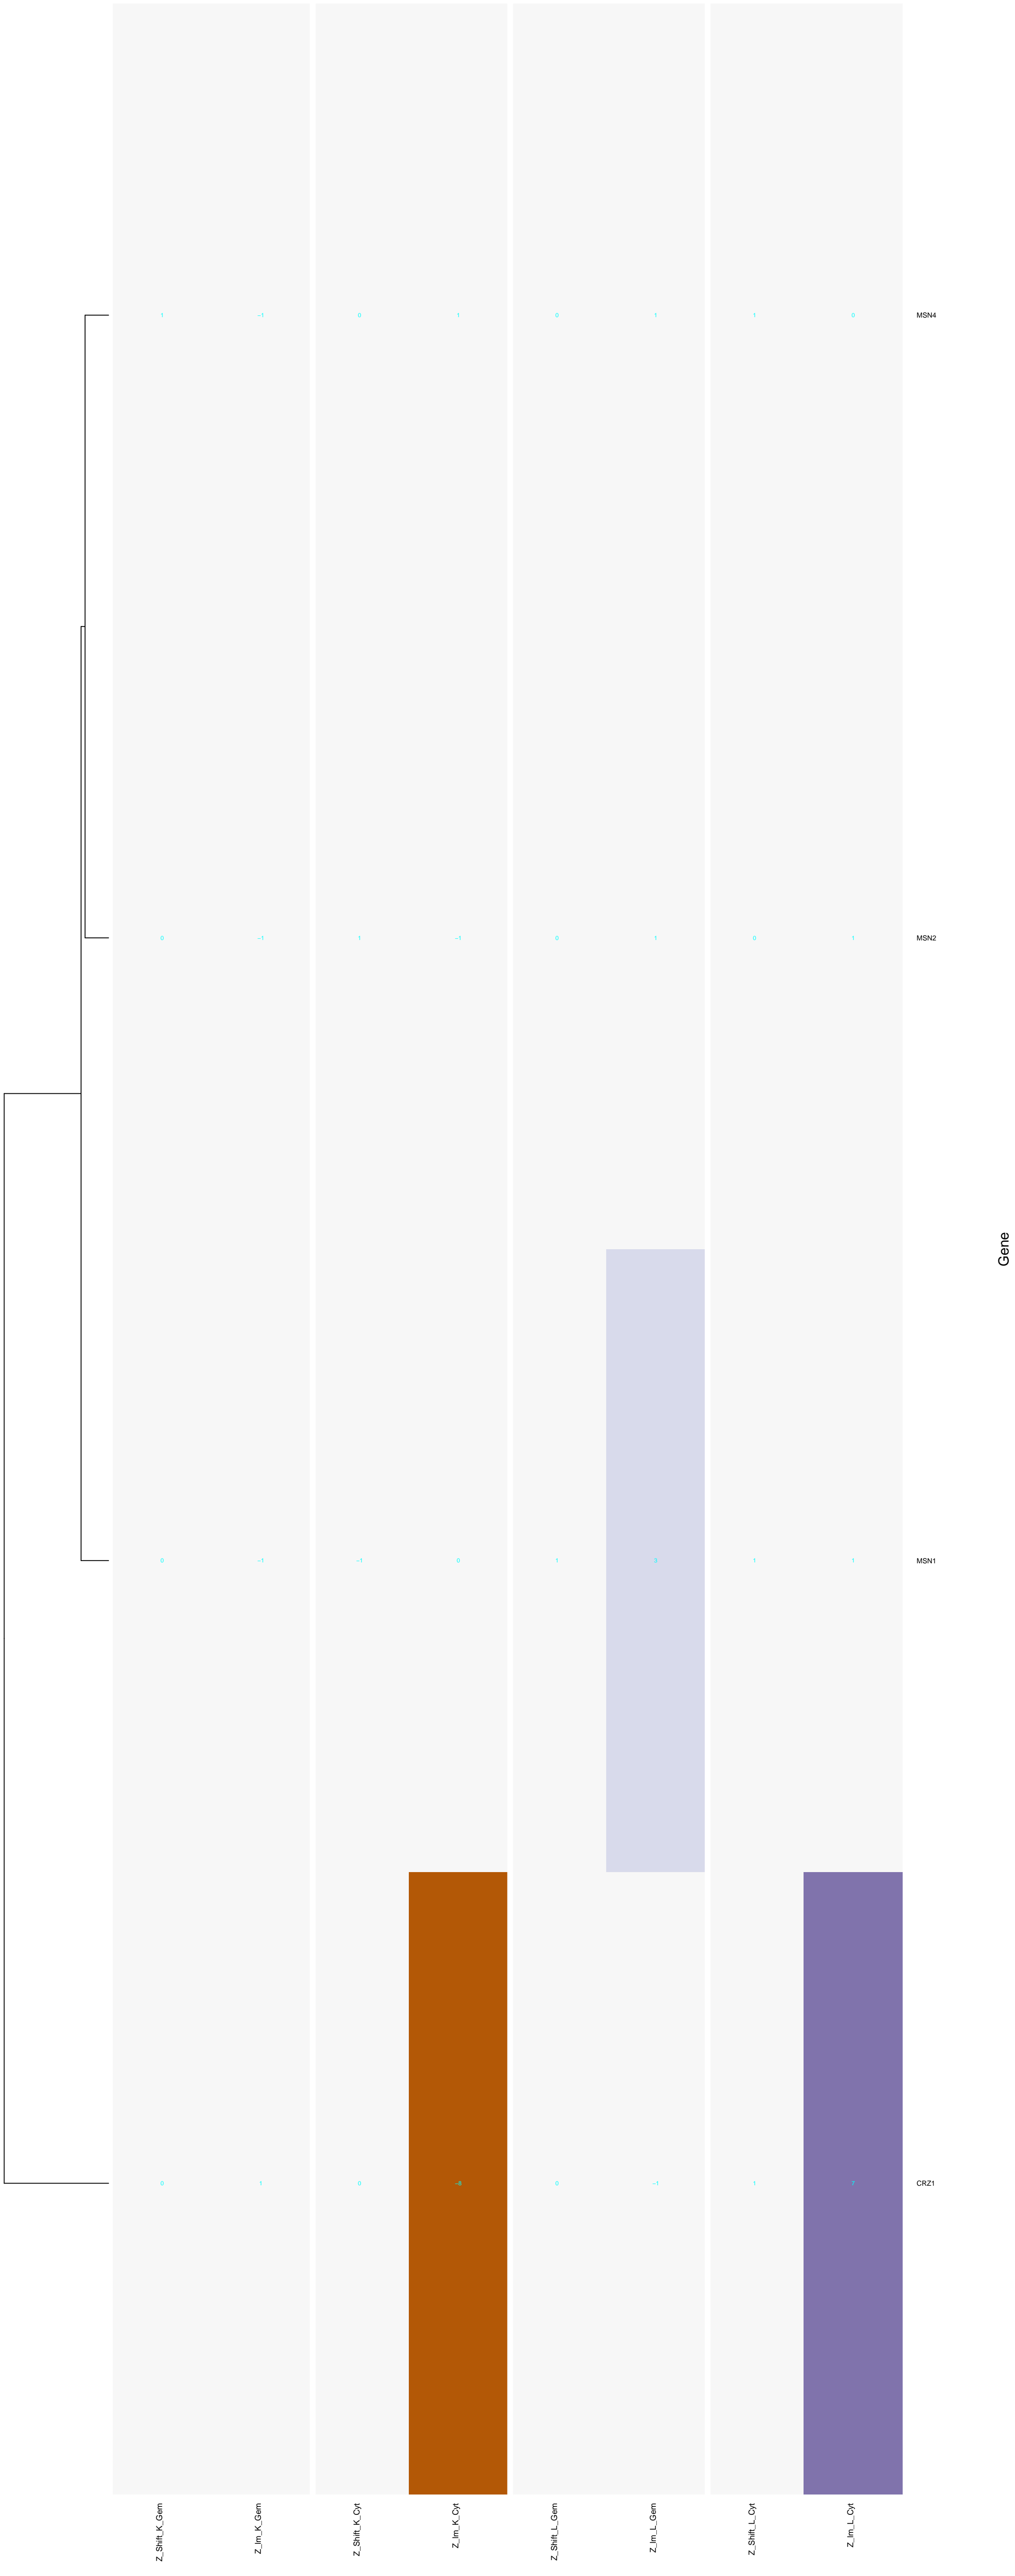

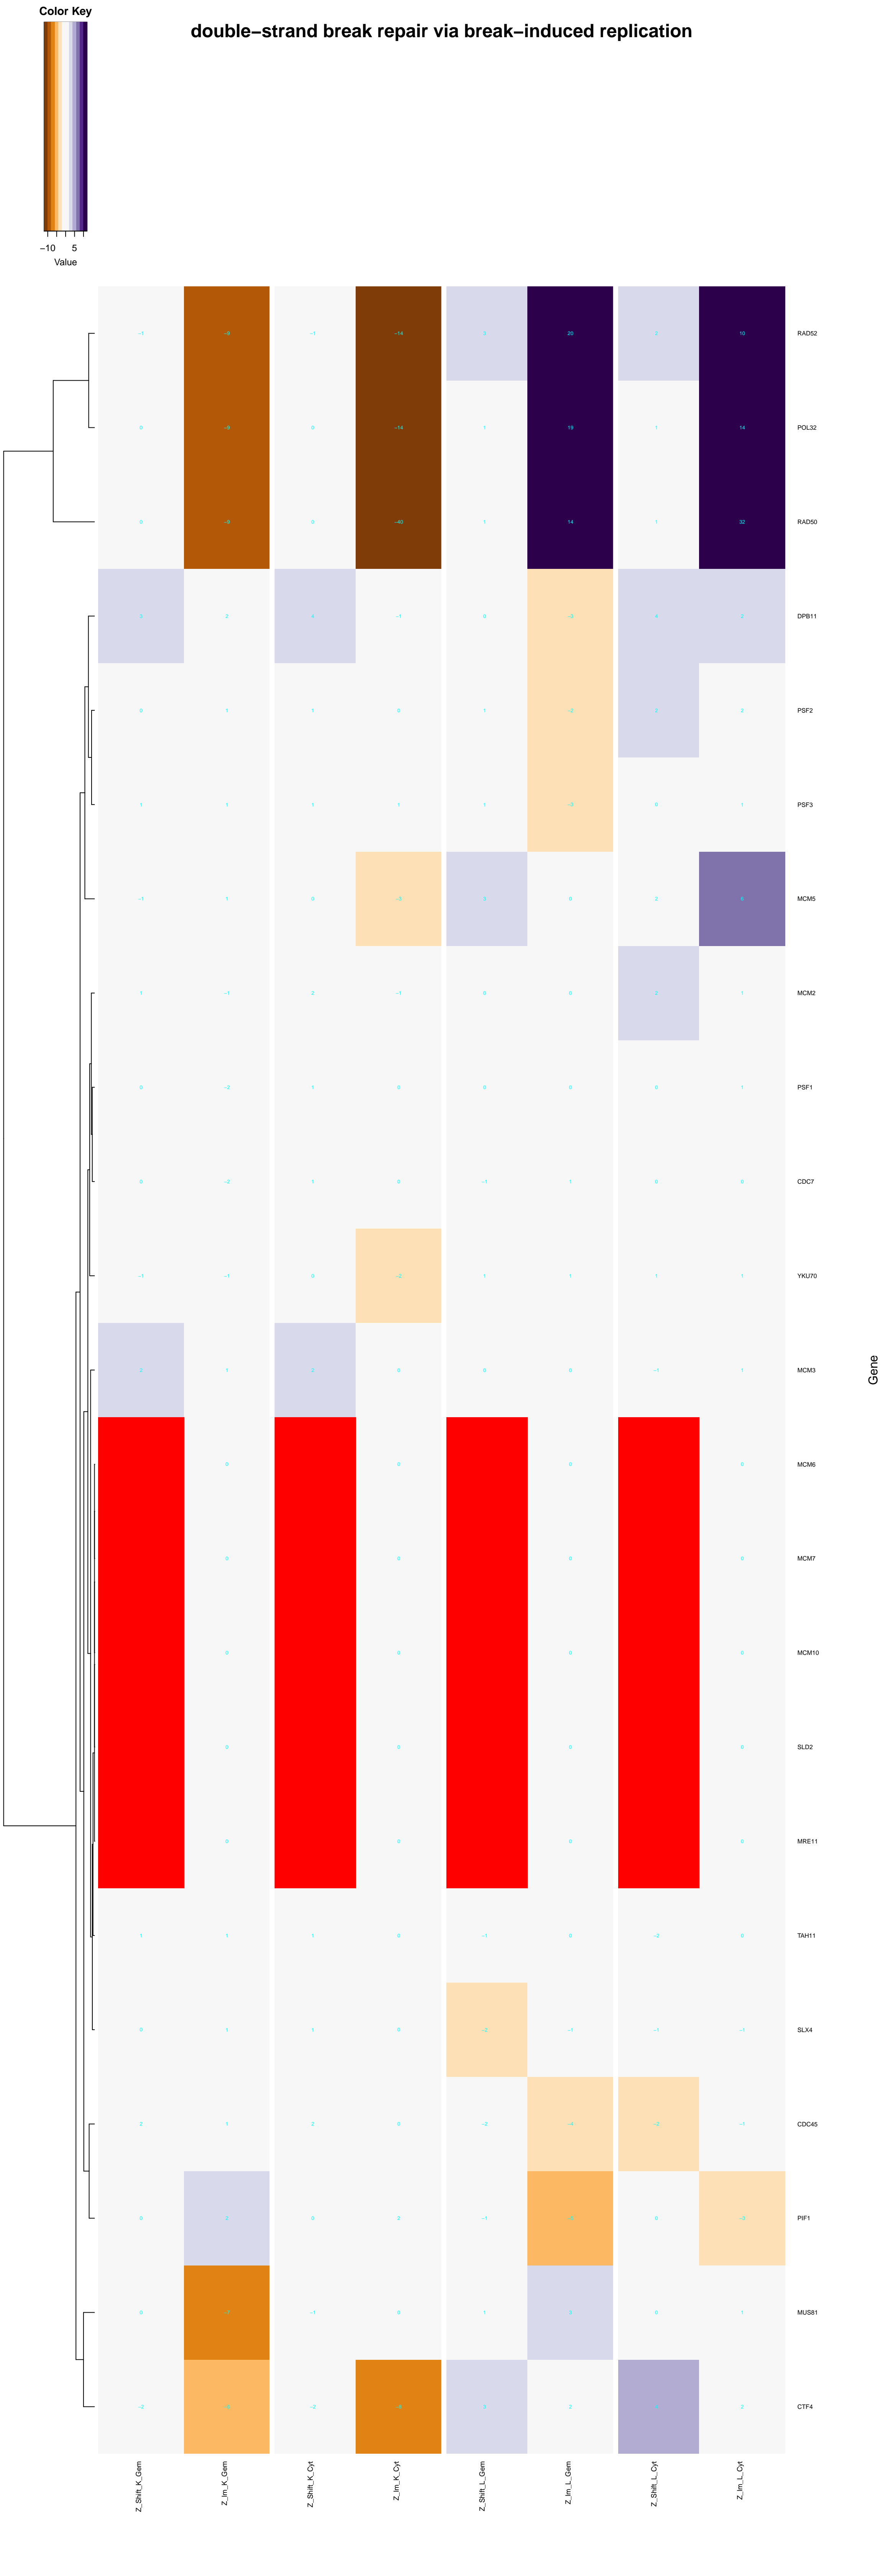

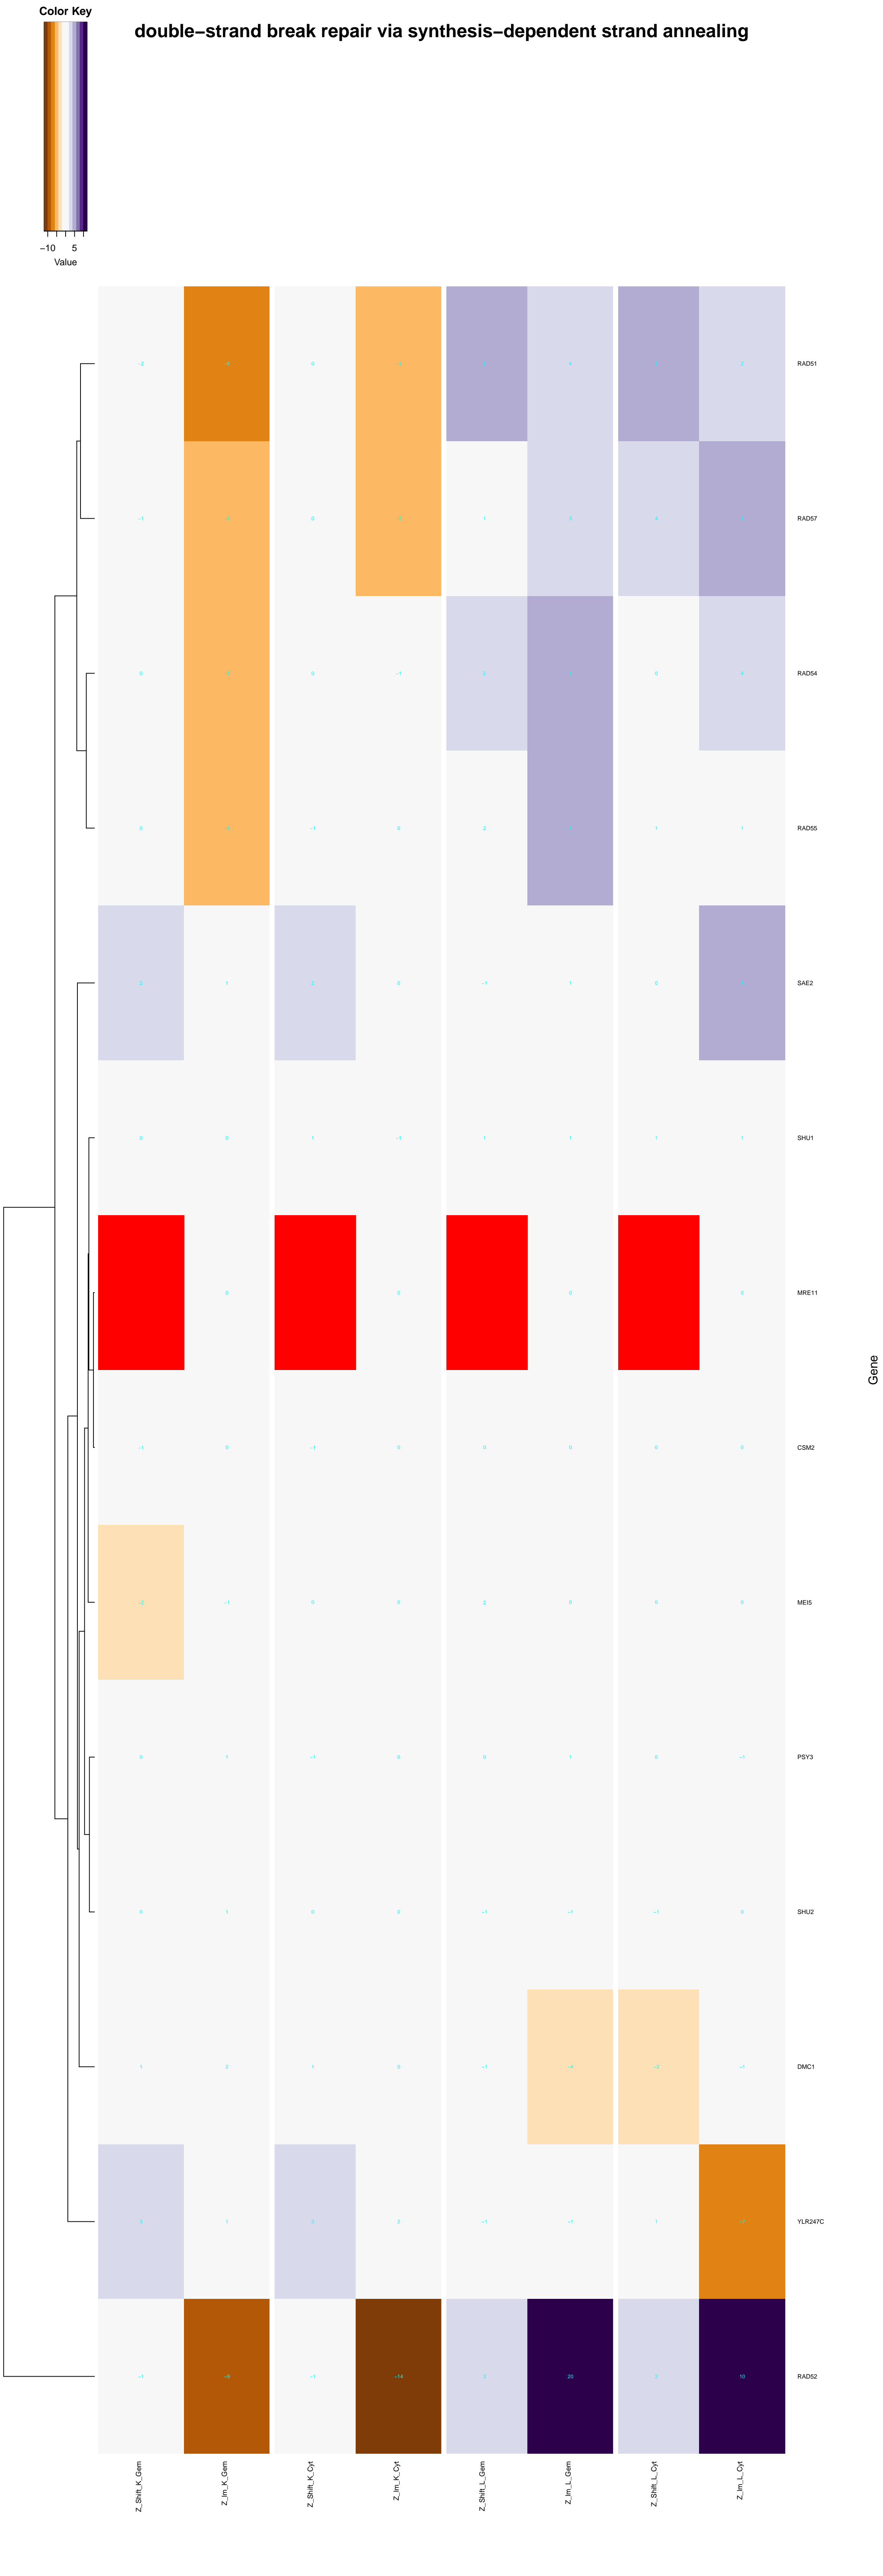

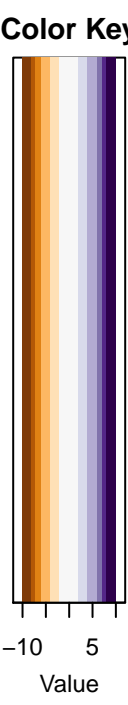

replication–born double–strand break repair via sister chromatid exchange

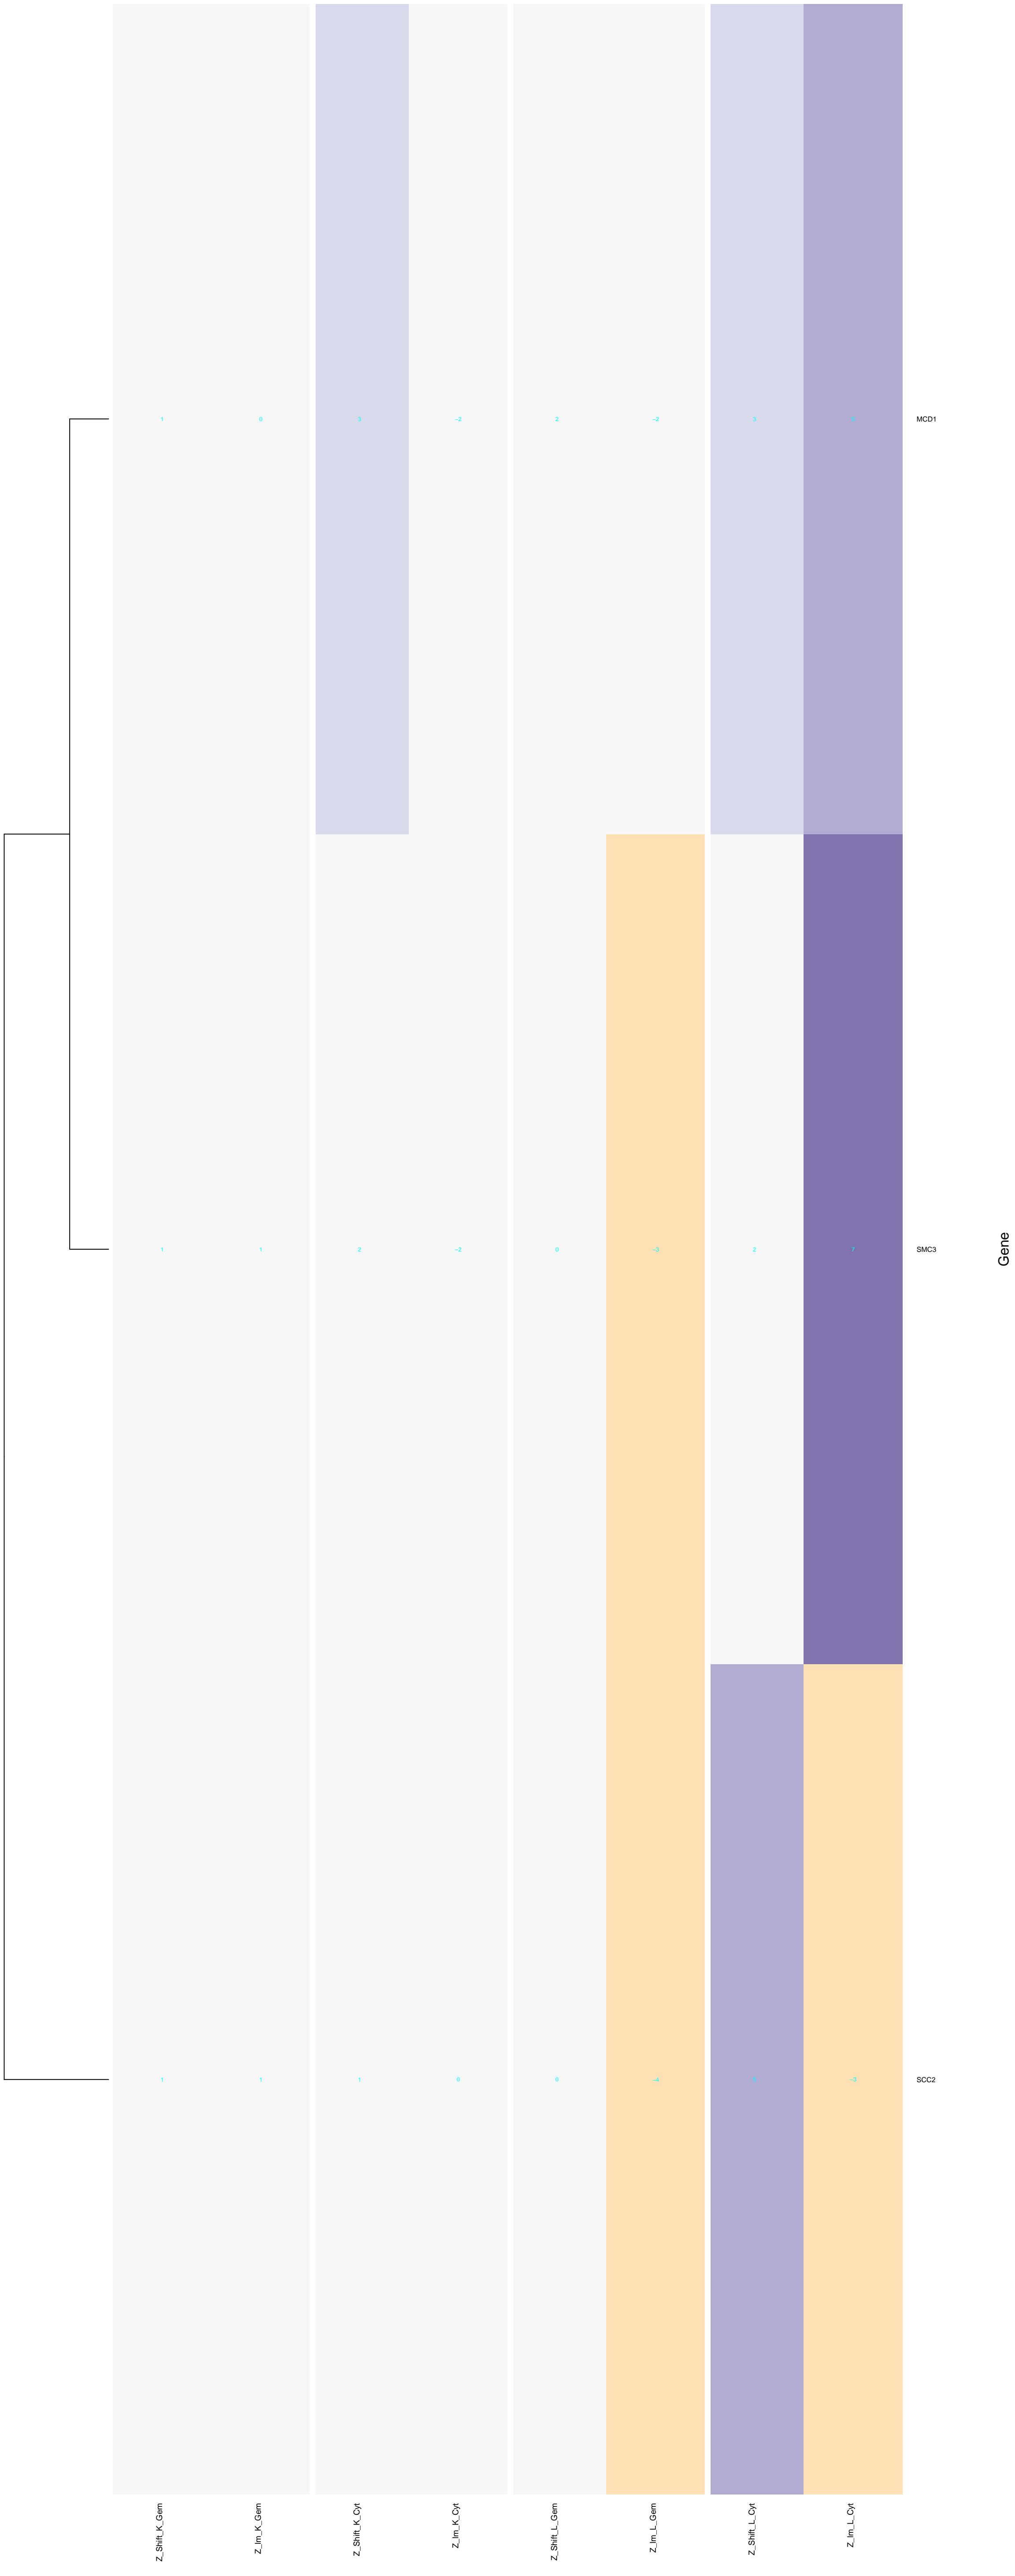

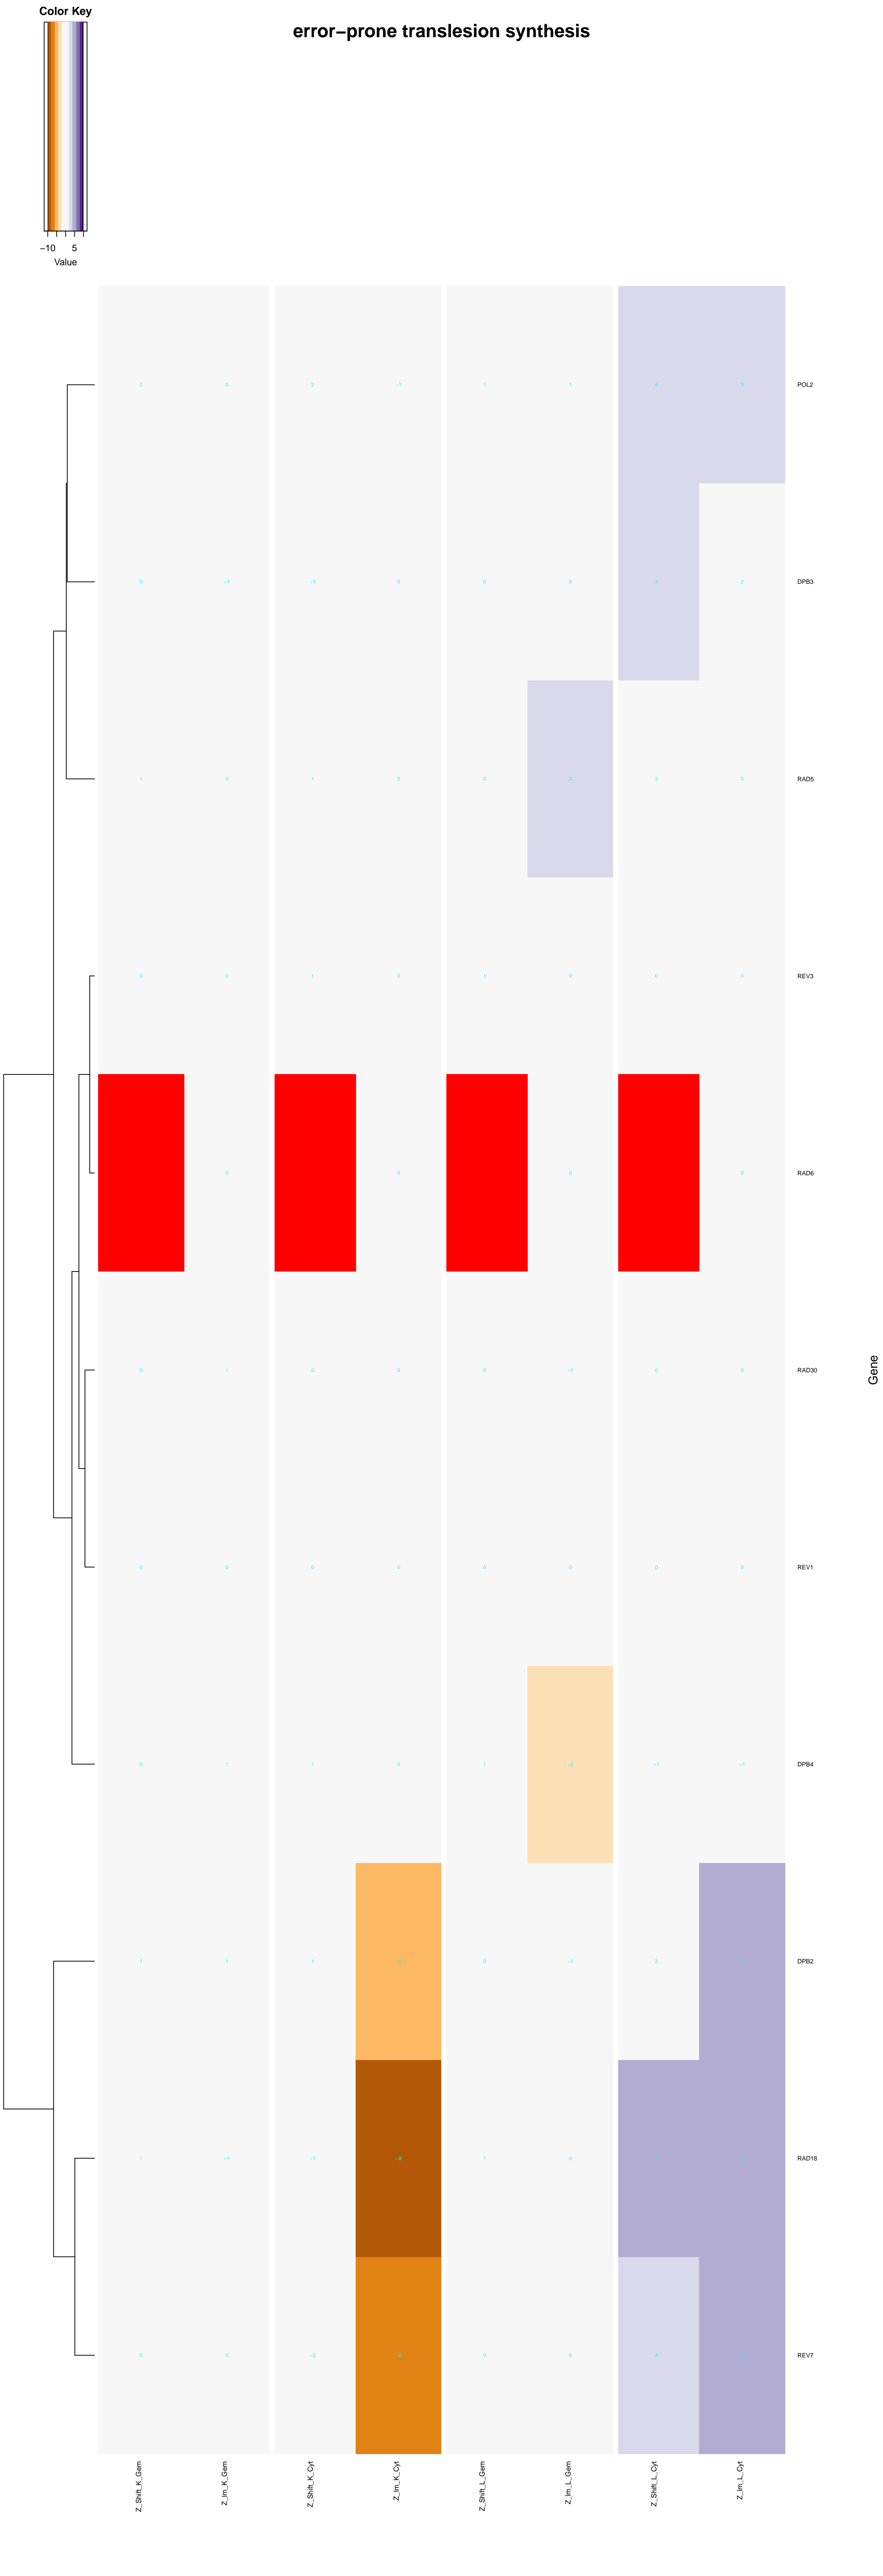

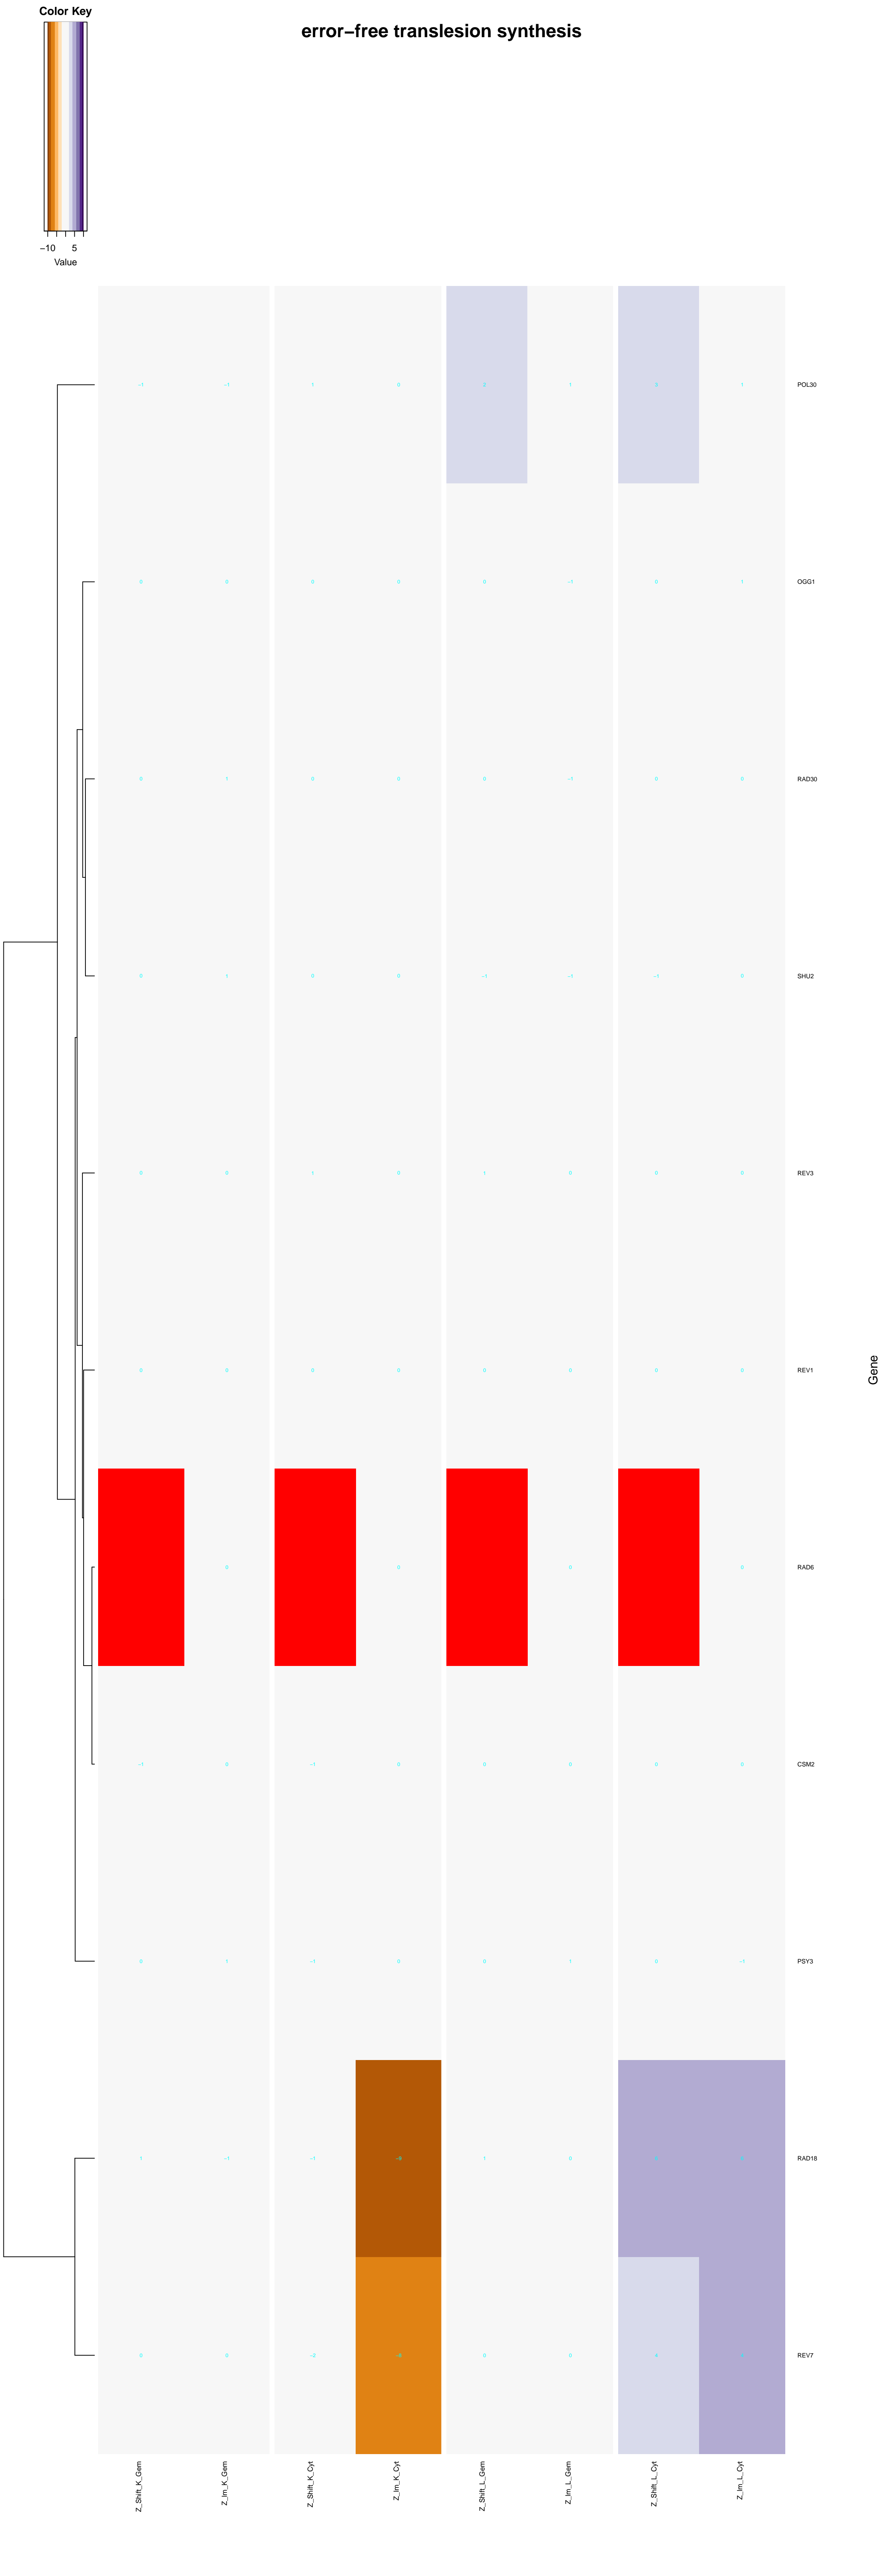

Supplement: s1 [file s1]
