# Supplementary material for: A Humanized Yeast Phenomic Model of Deoxycytidine Kinase to Predict Genetic Buffering of Nucleoside Analog Cytotoxicity
Source: MDPI journal article supplement (doi:10.3390/genes10100770), 2019-09-30

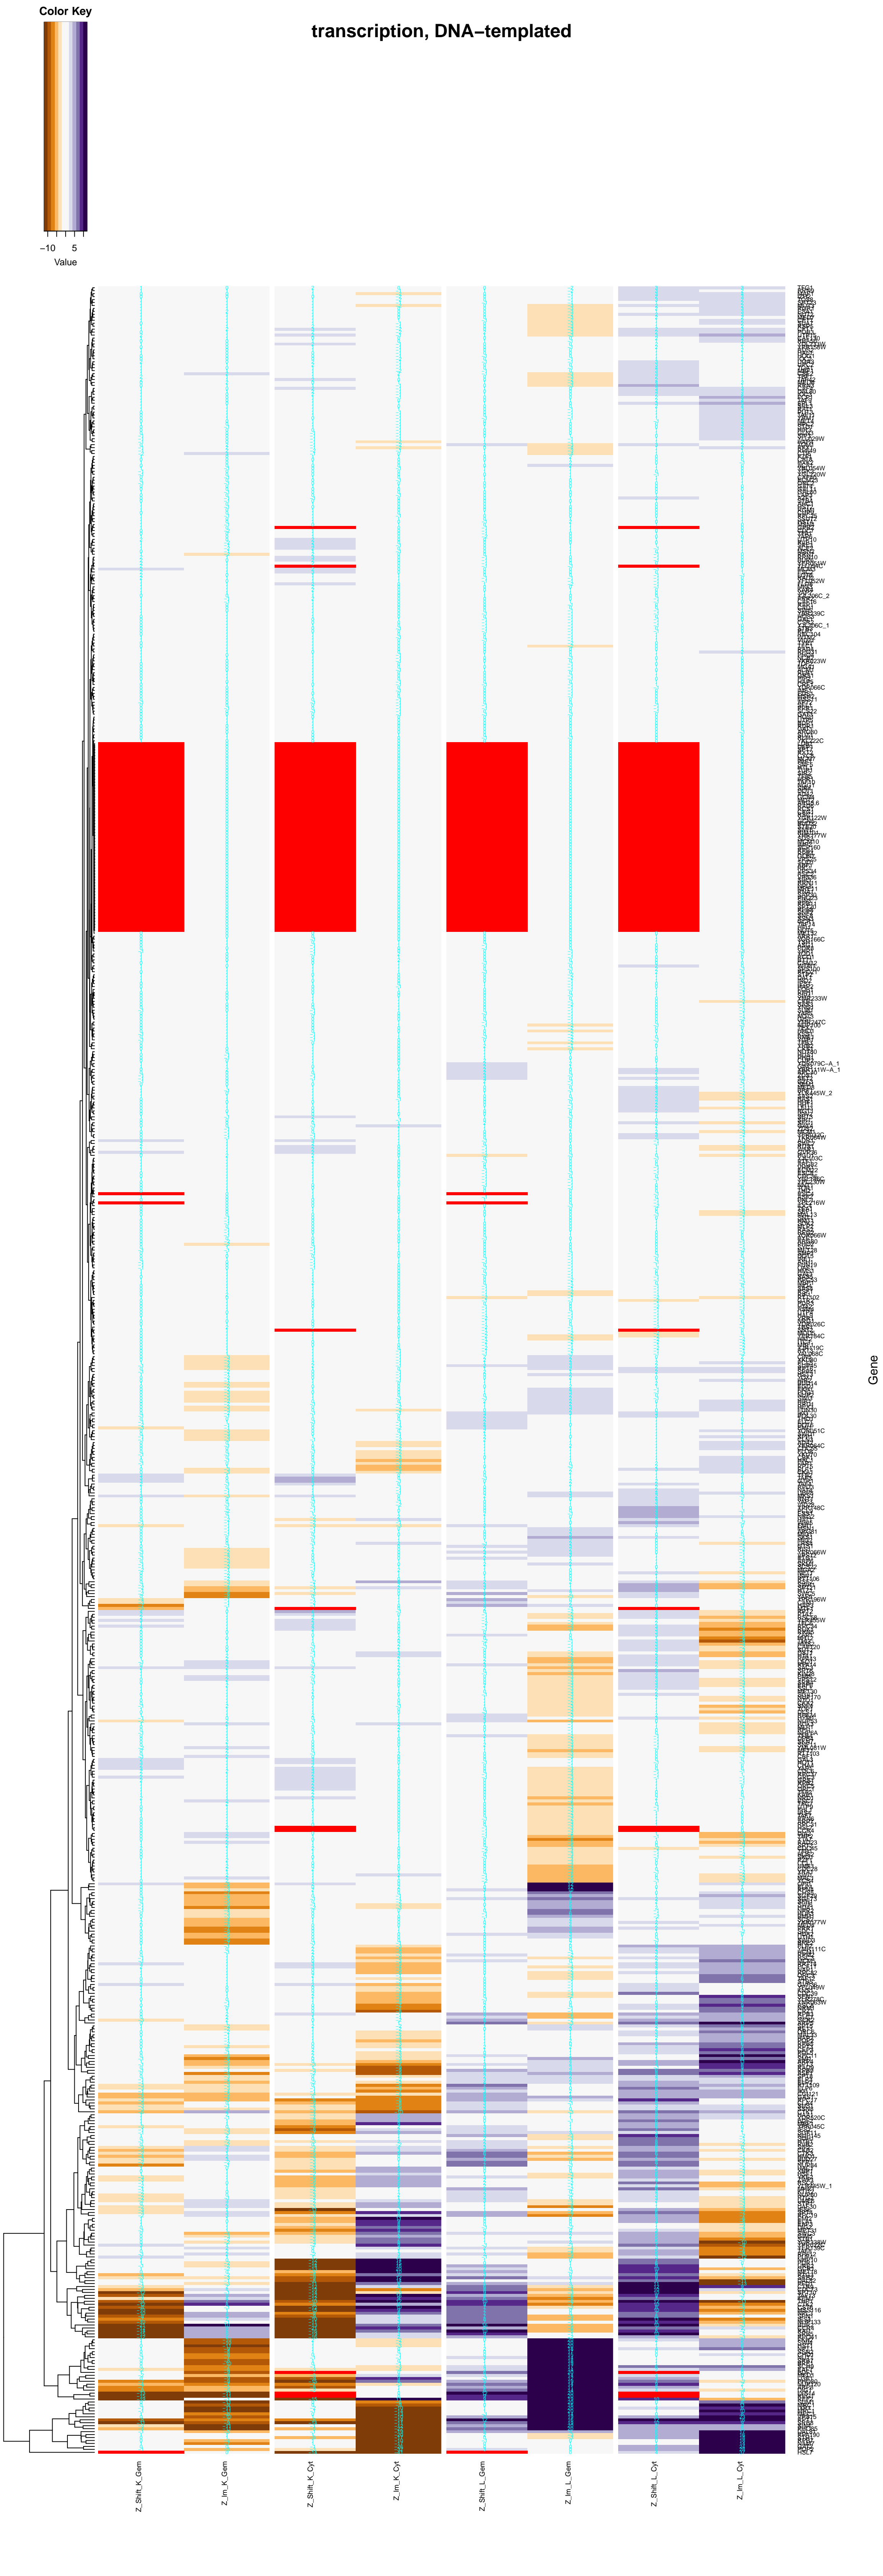

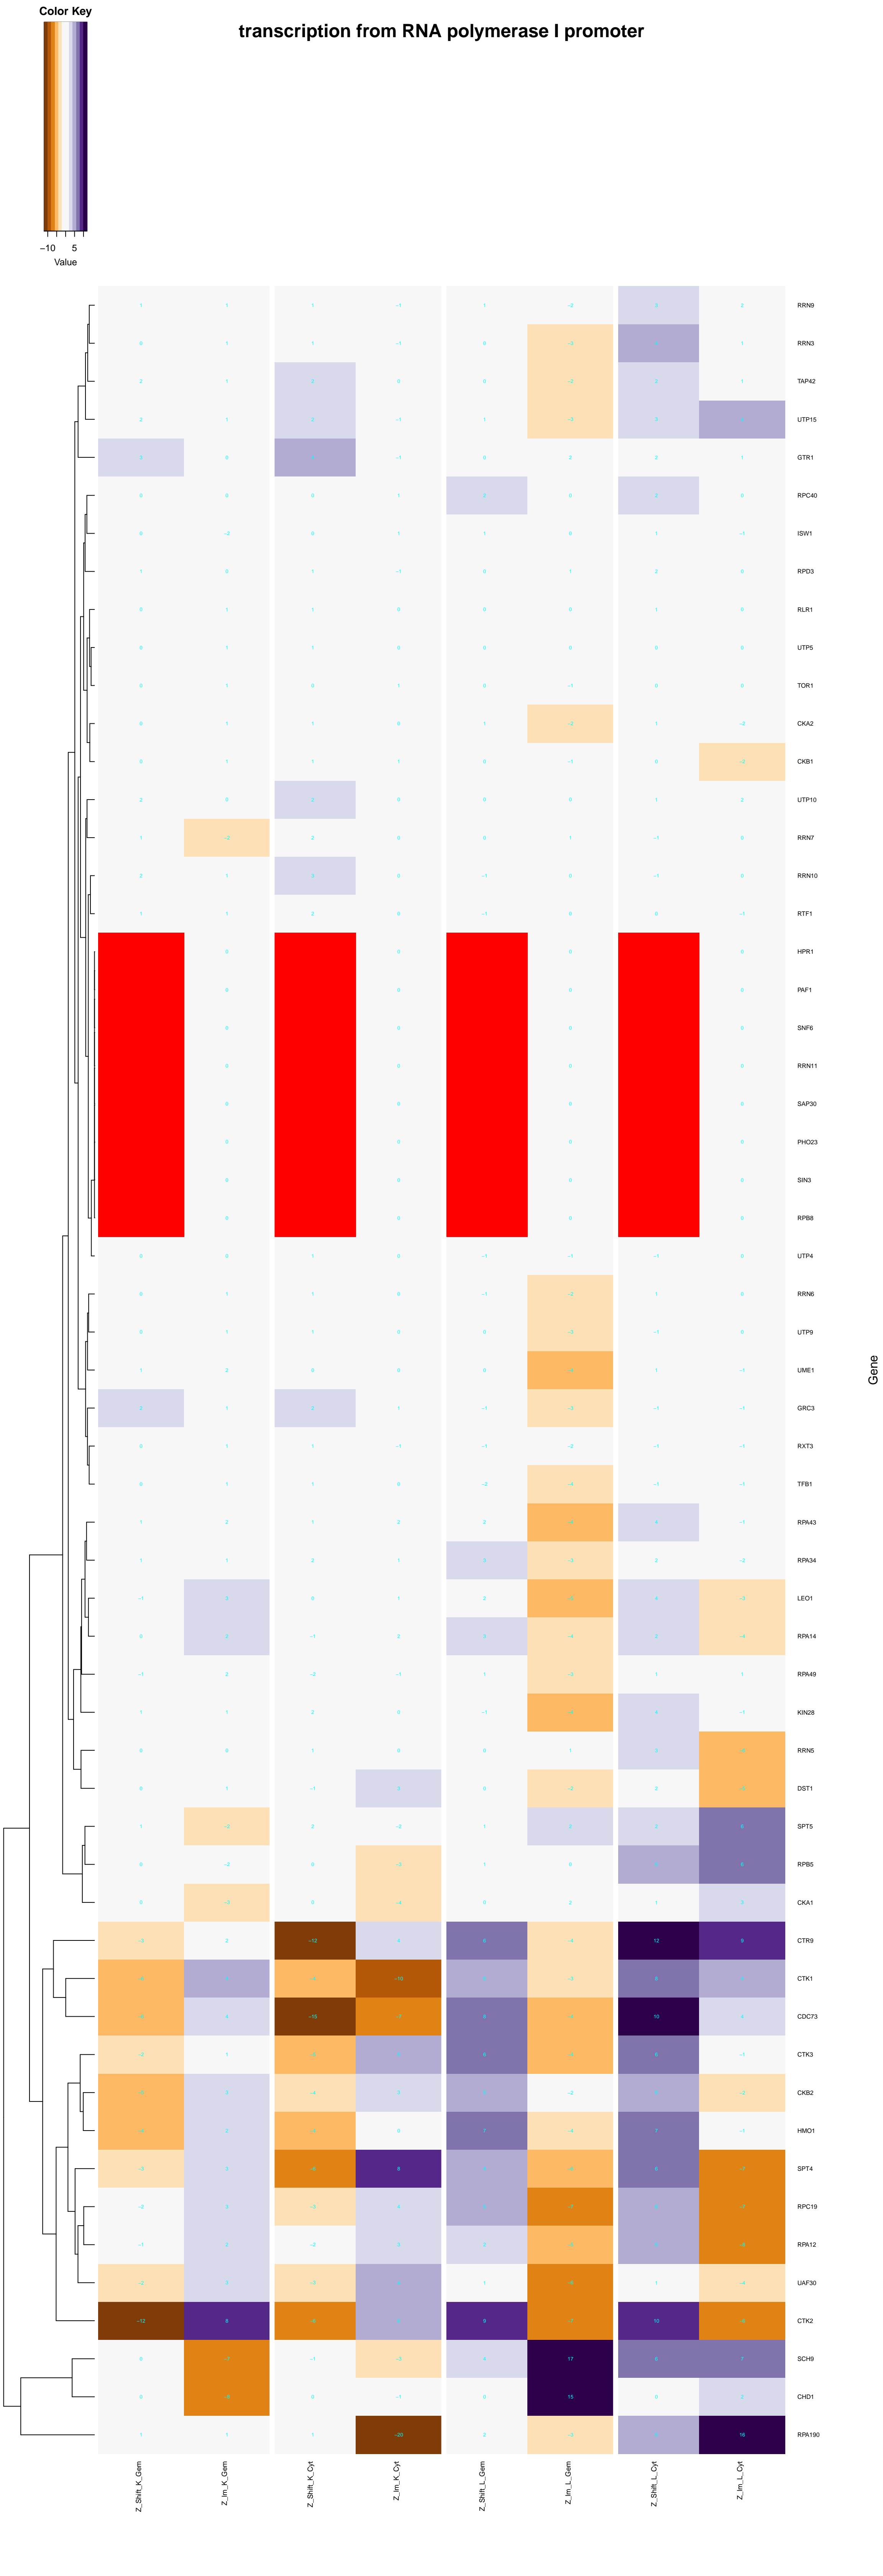

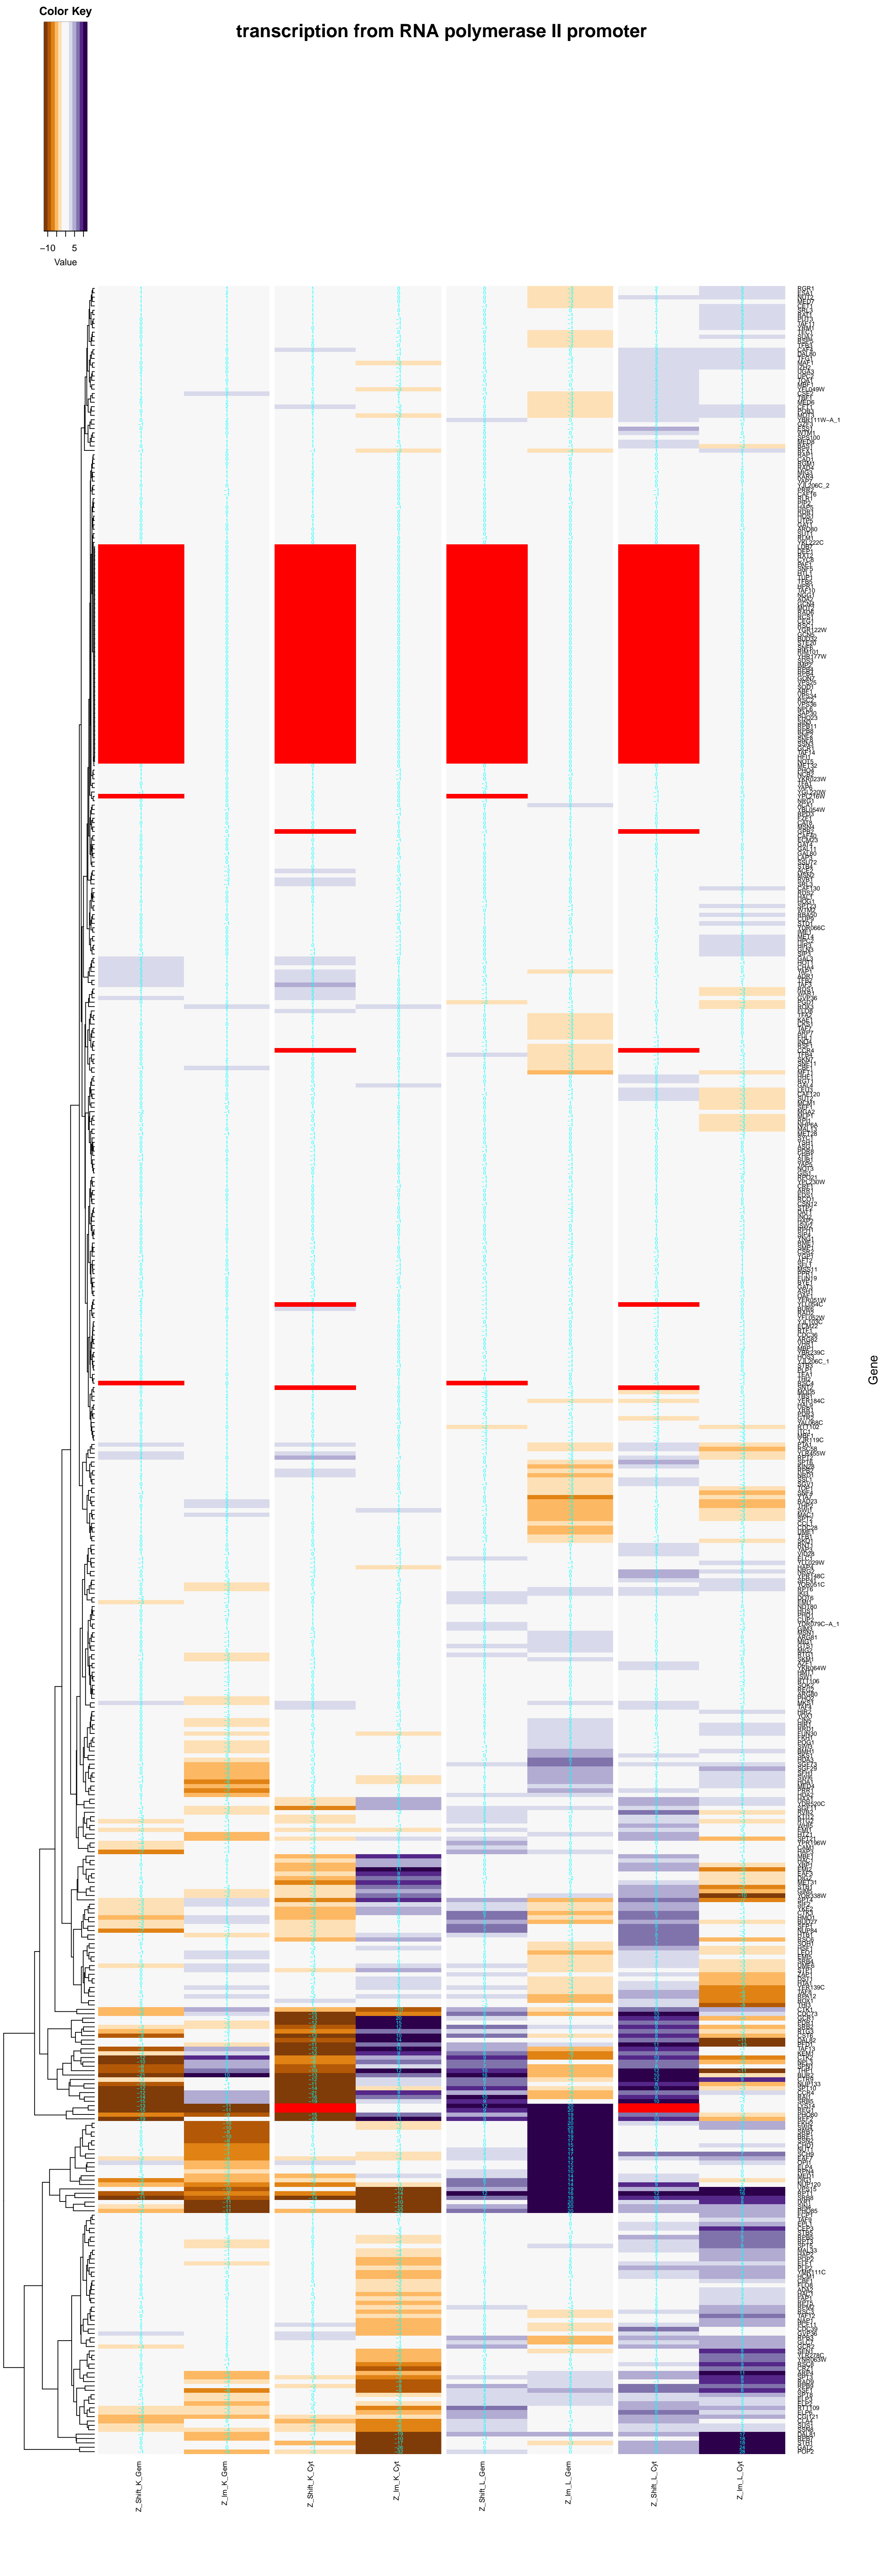

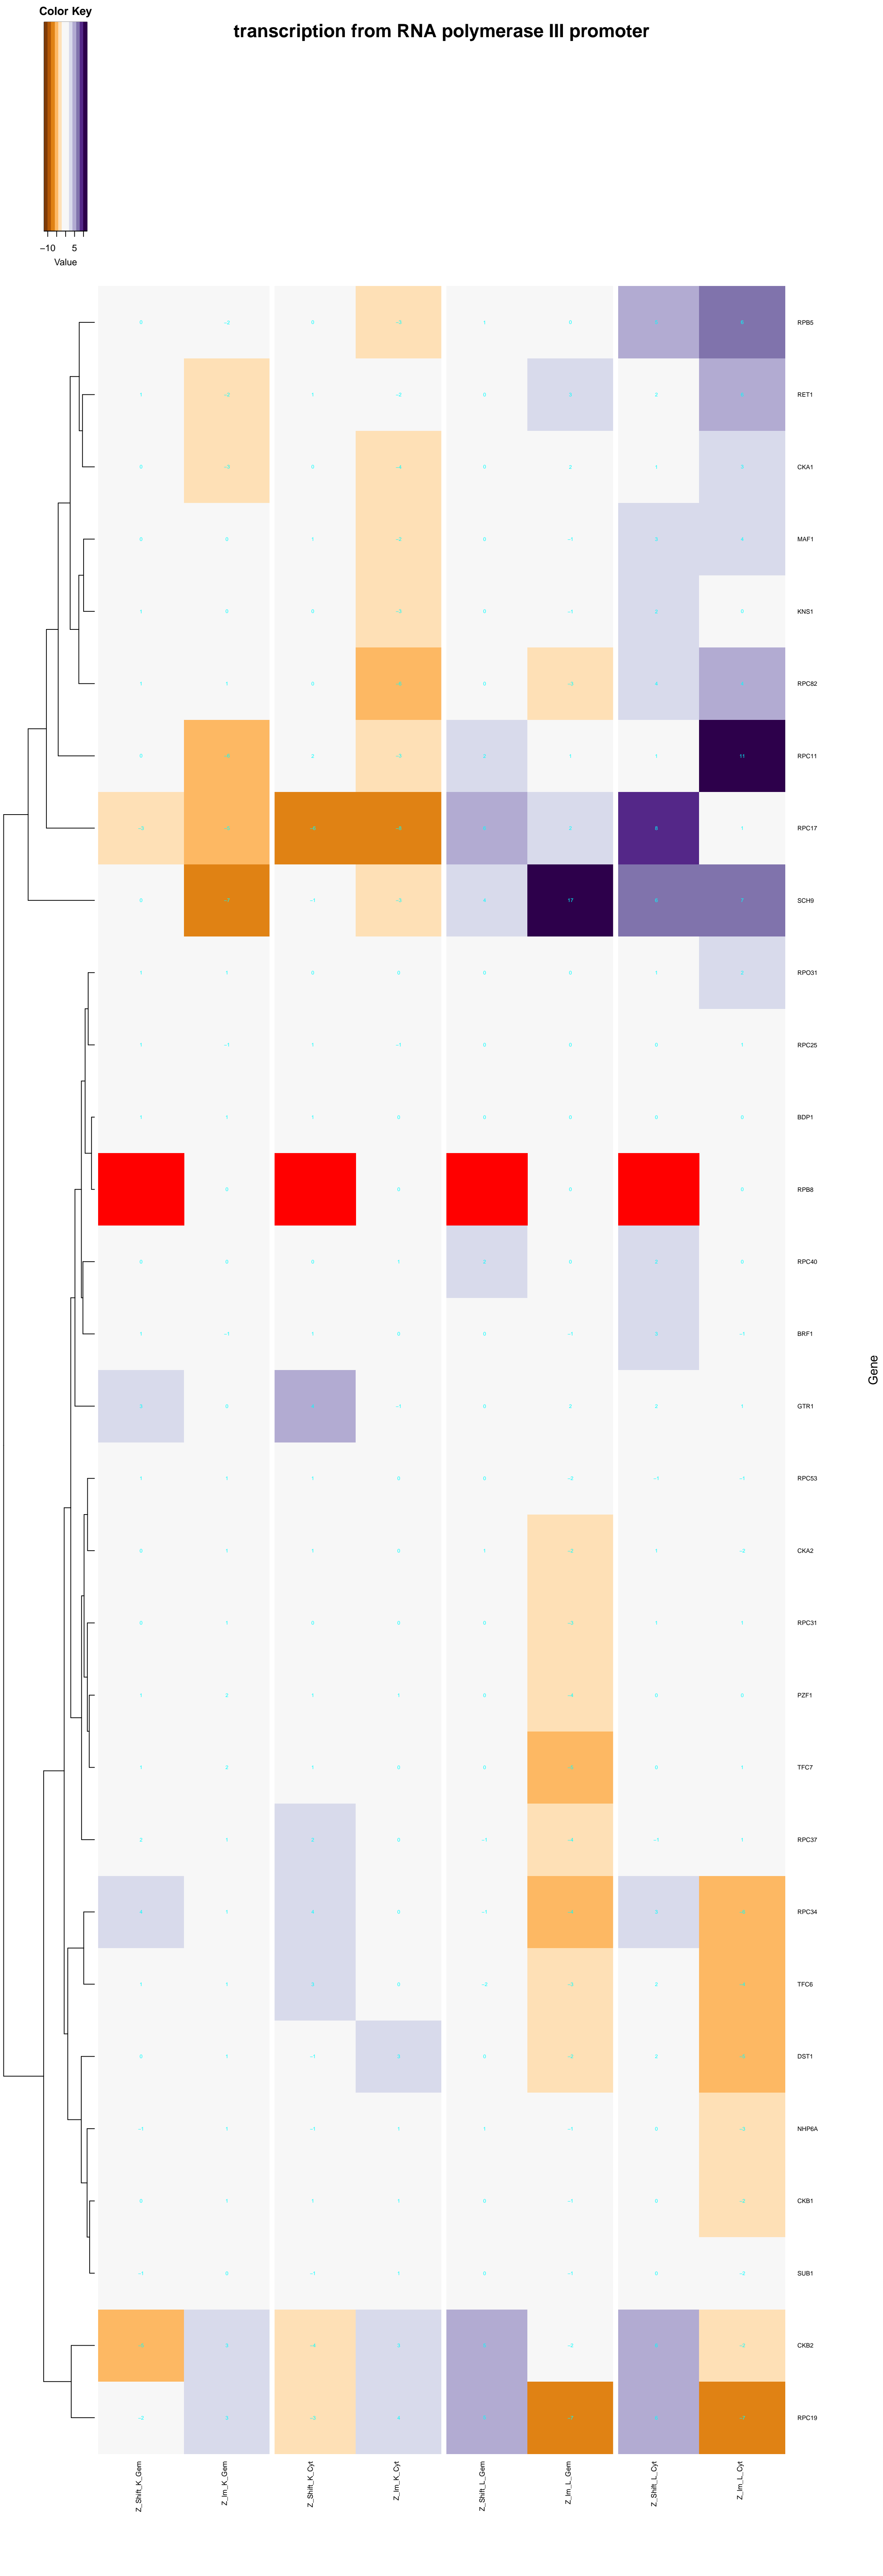

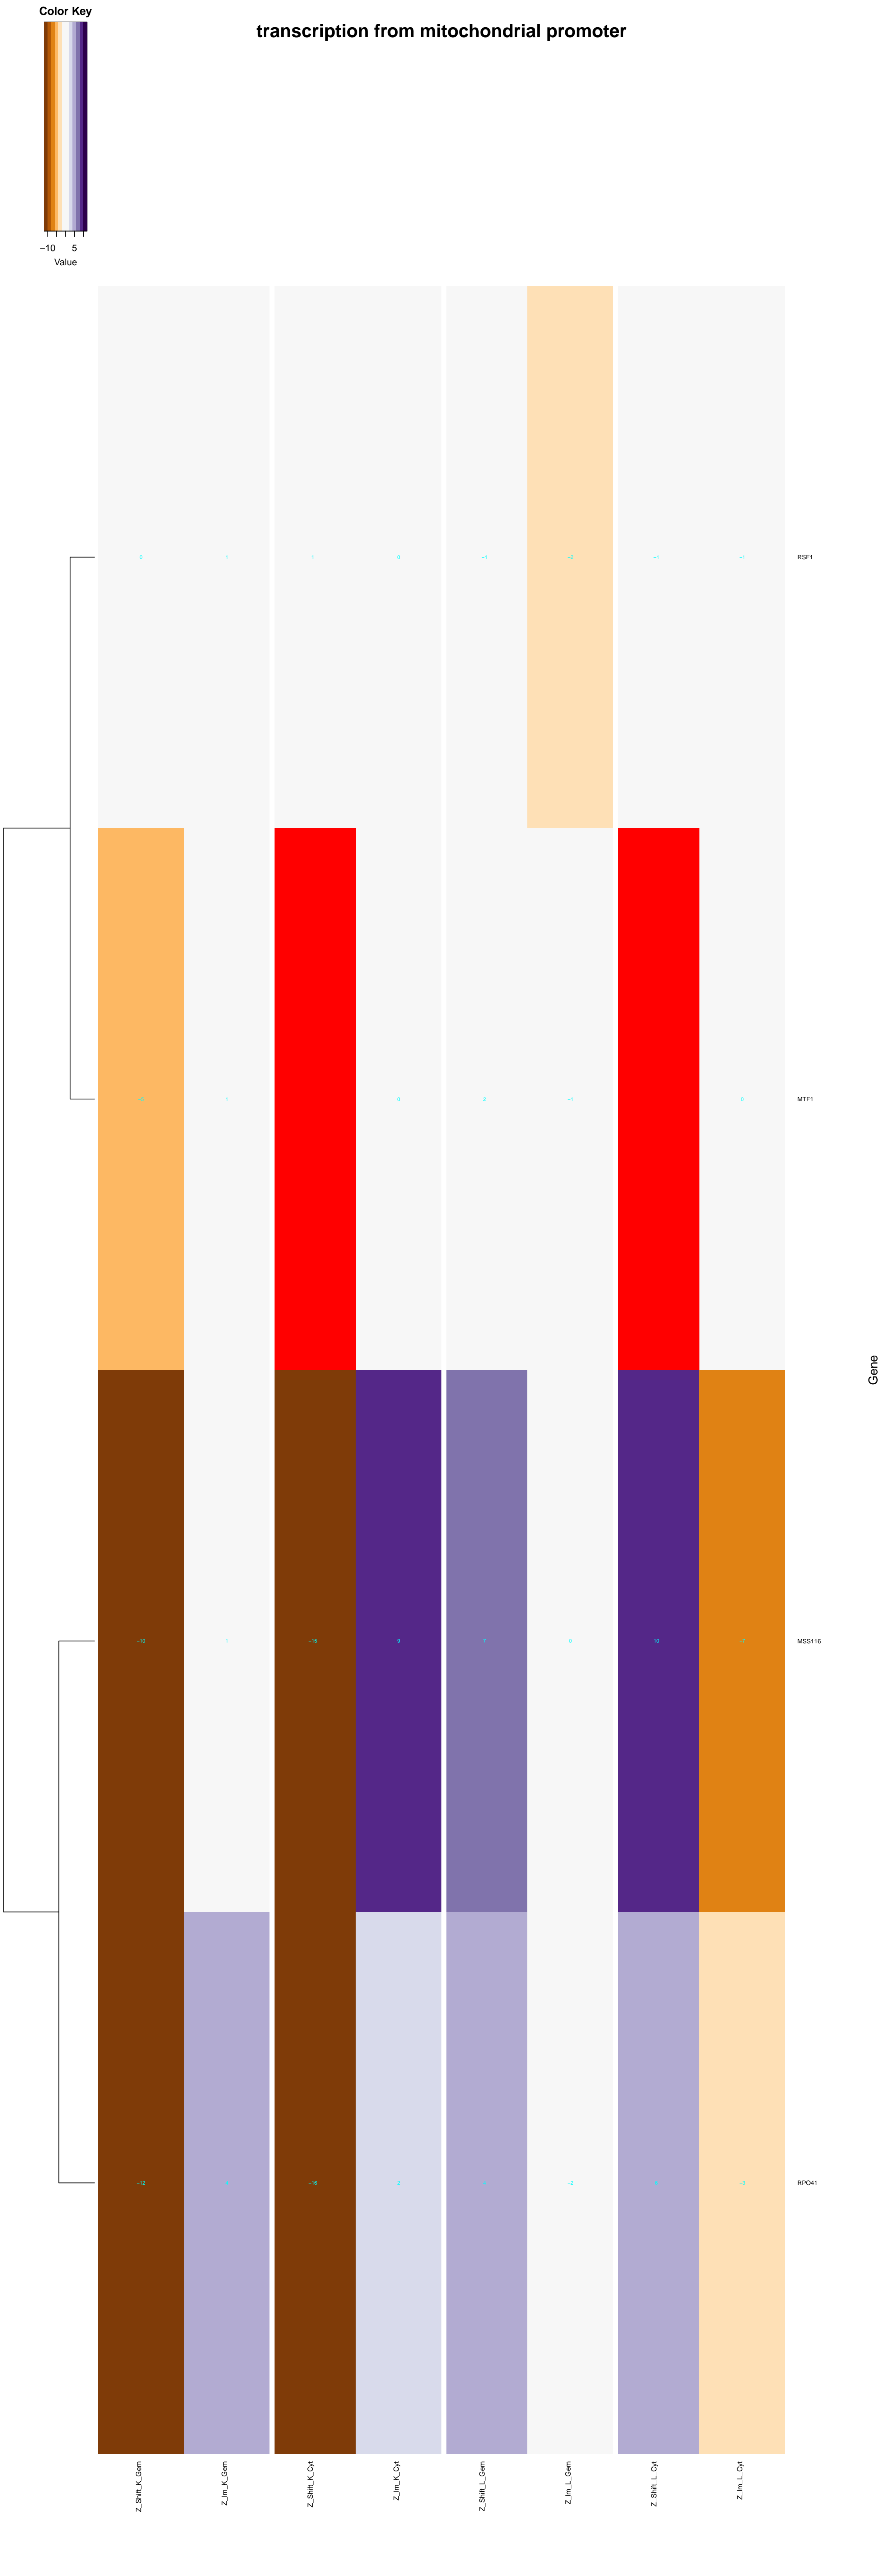

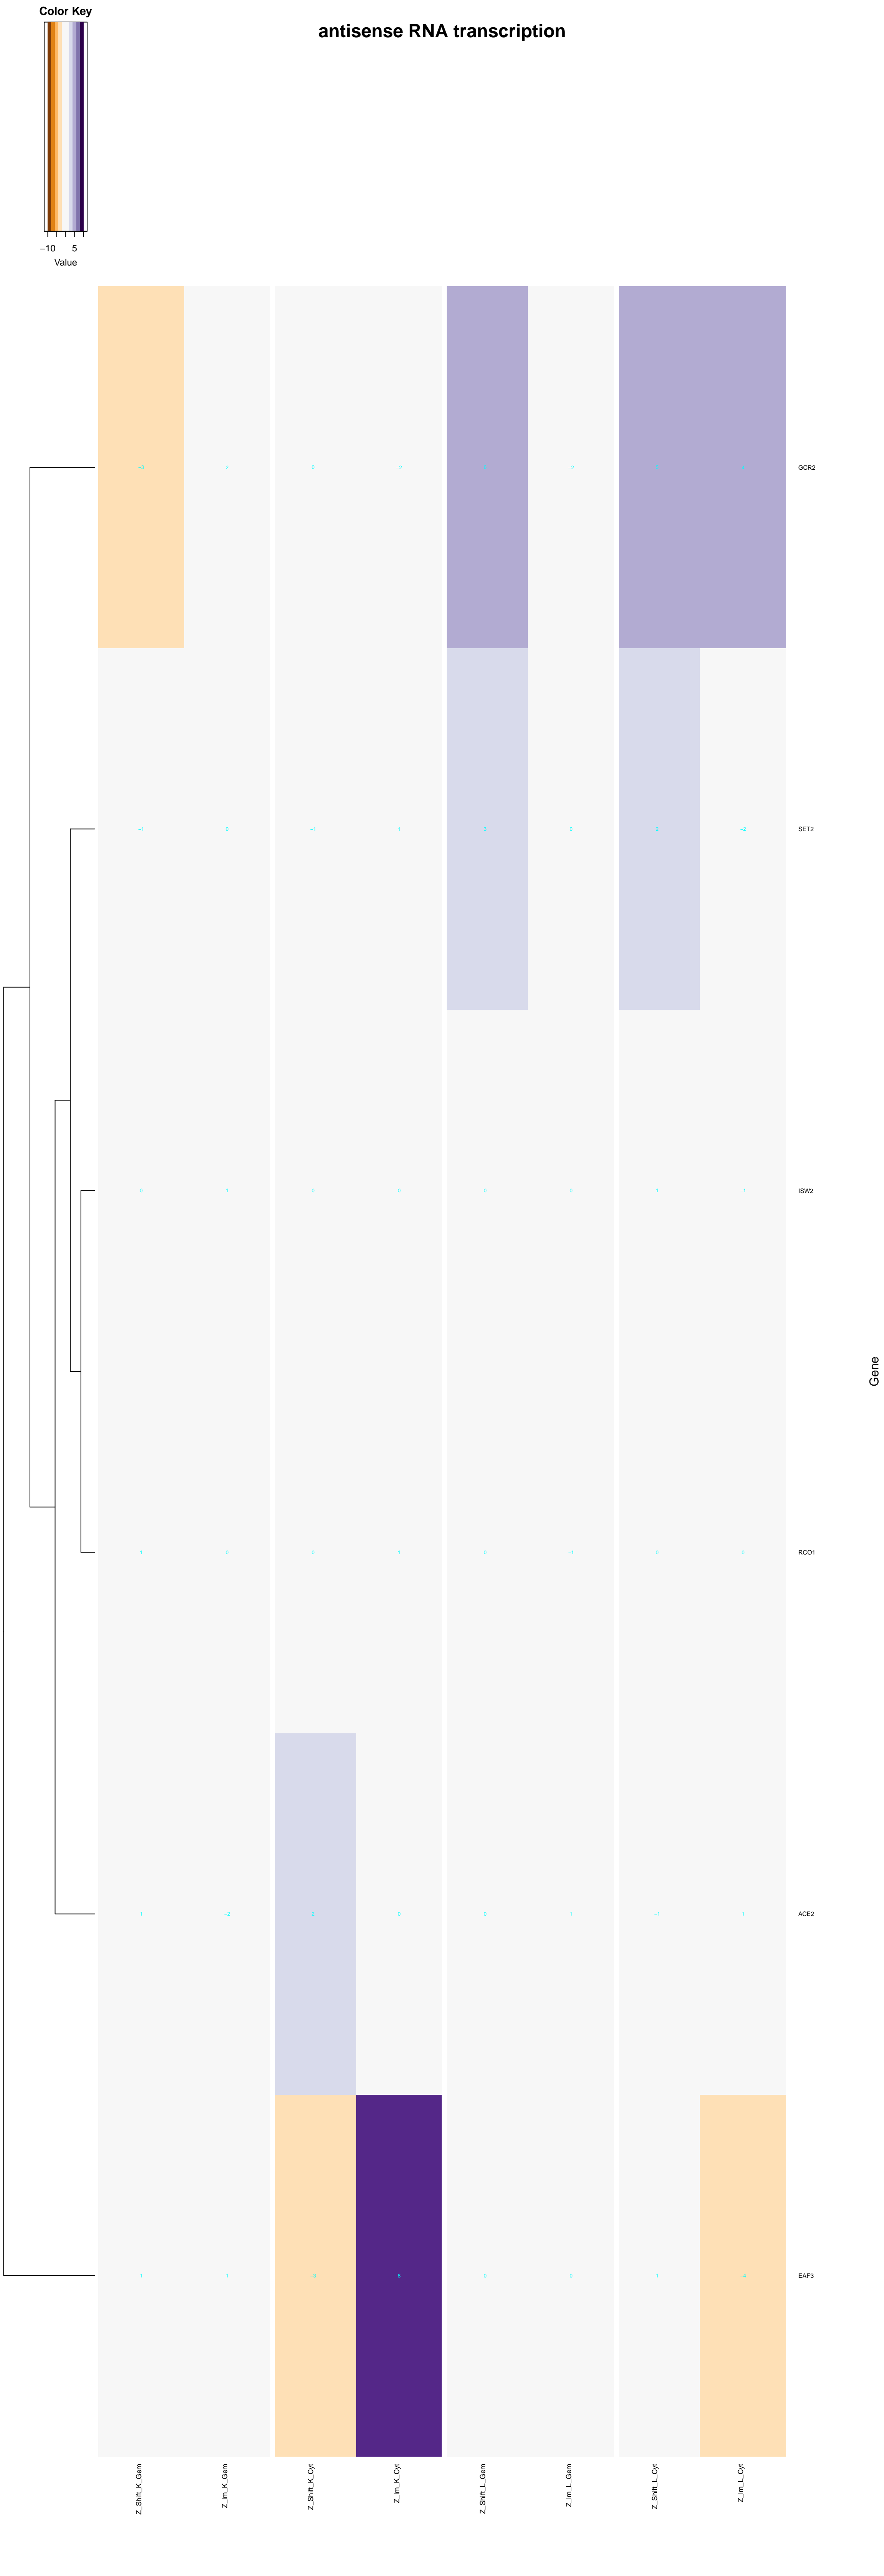

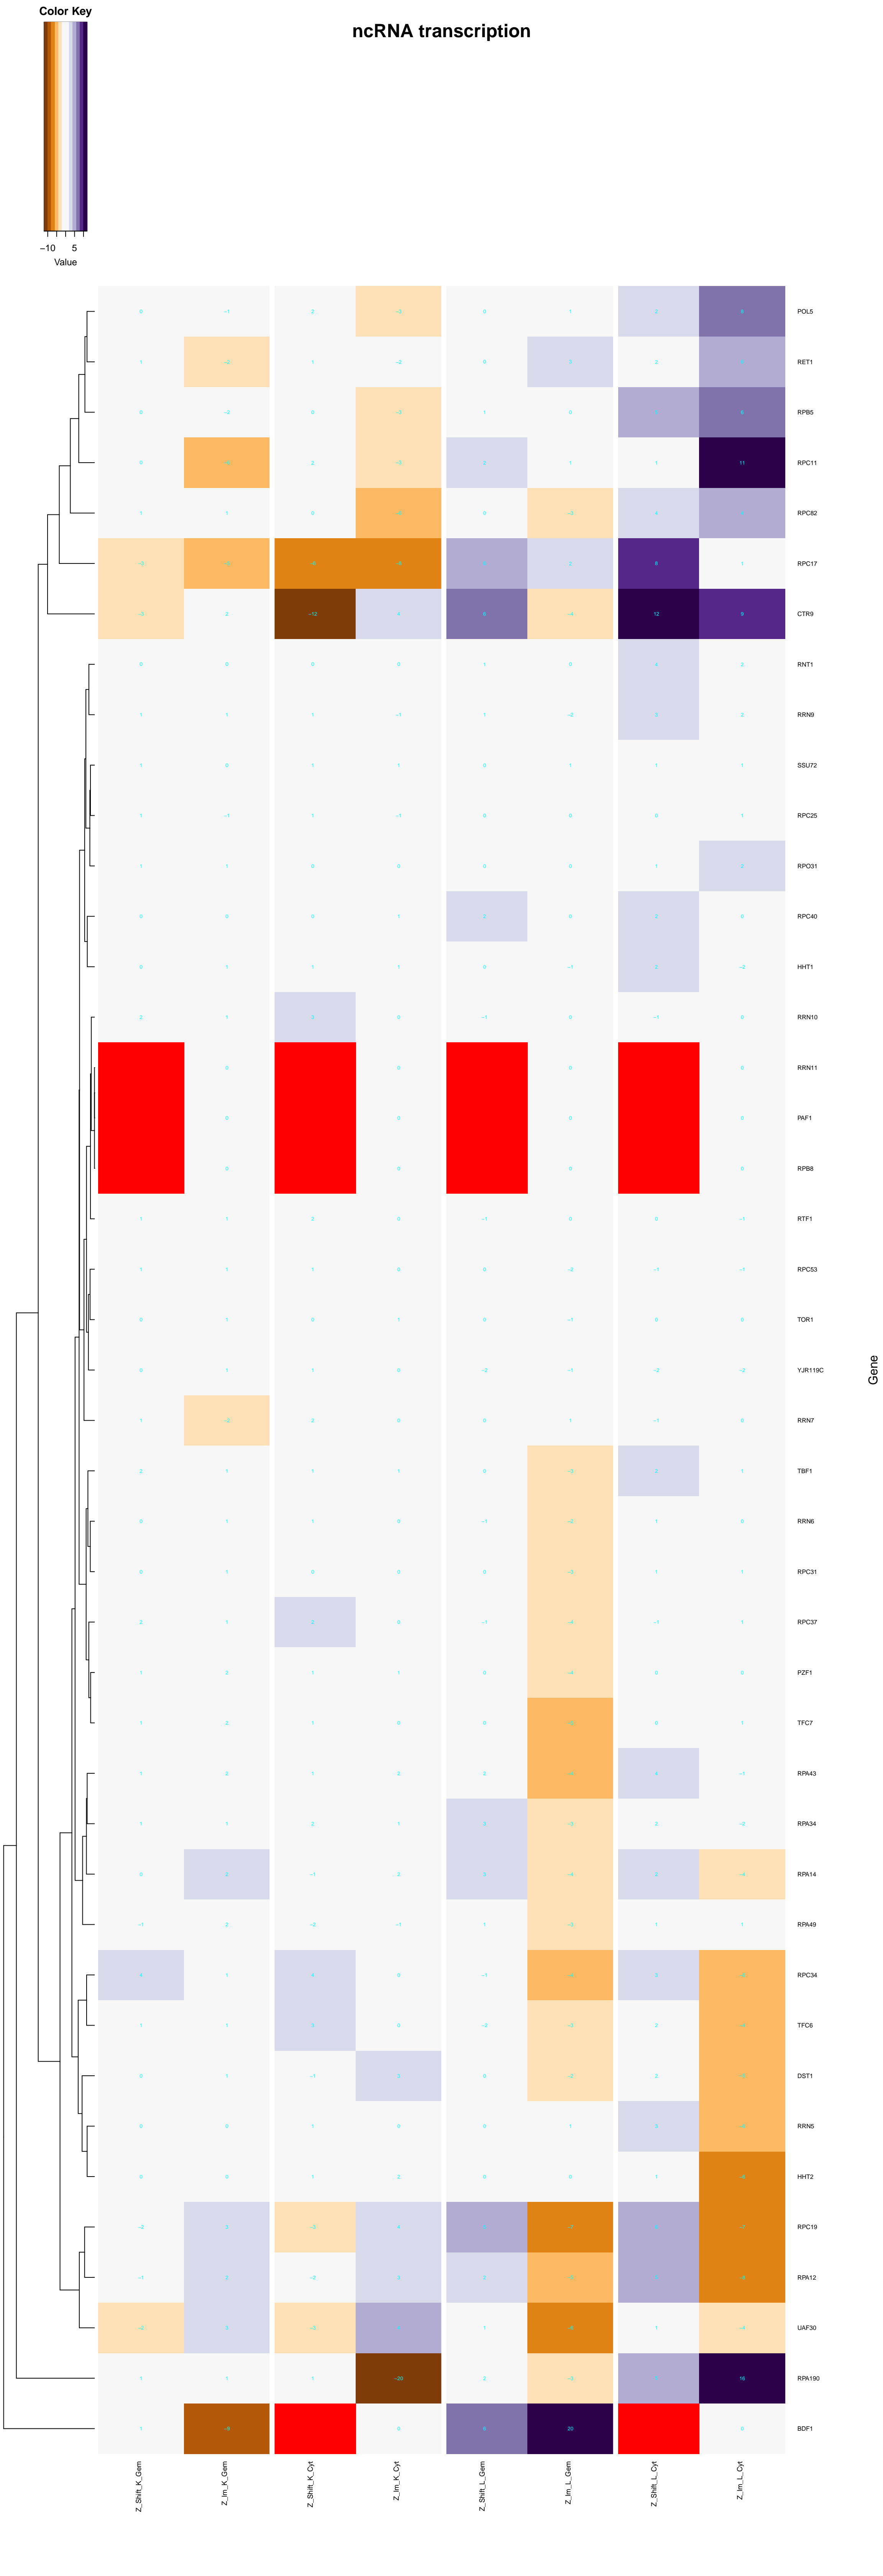

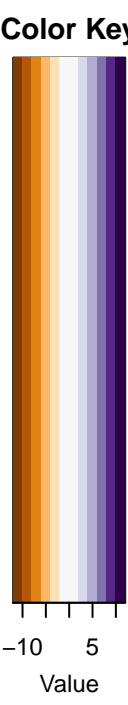

transcription of nuclear large rRNA transcript from RNA polymerase I promoter

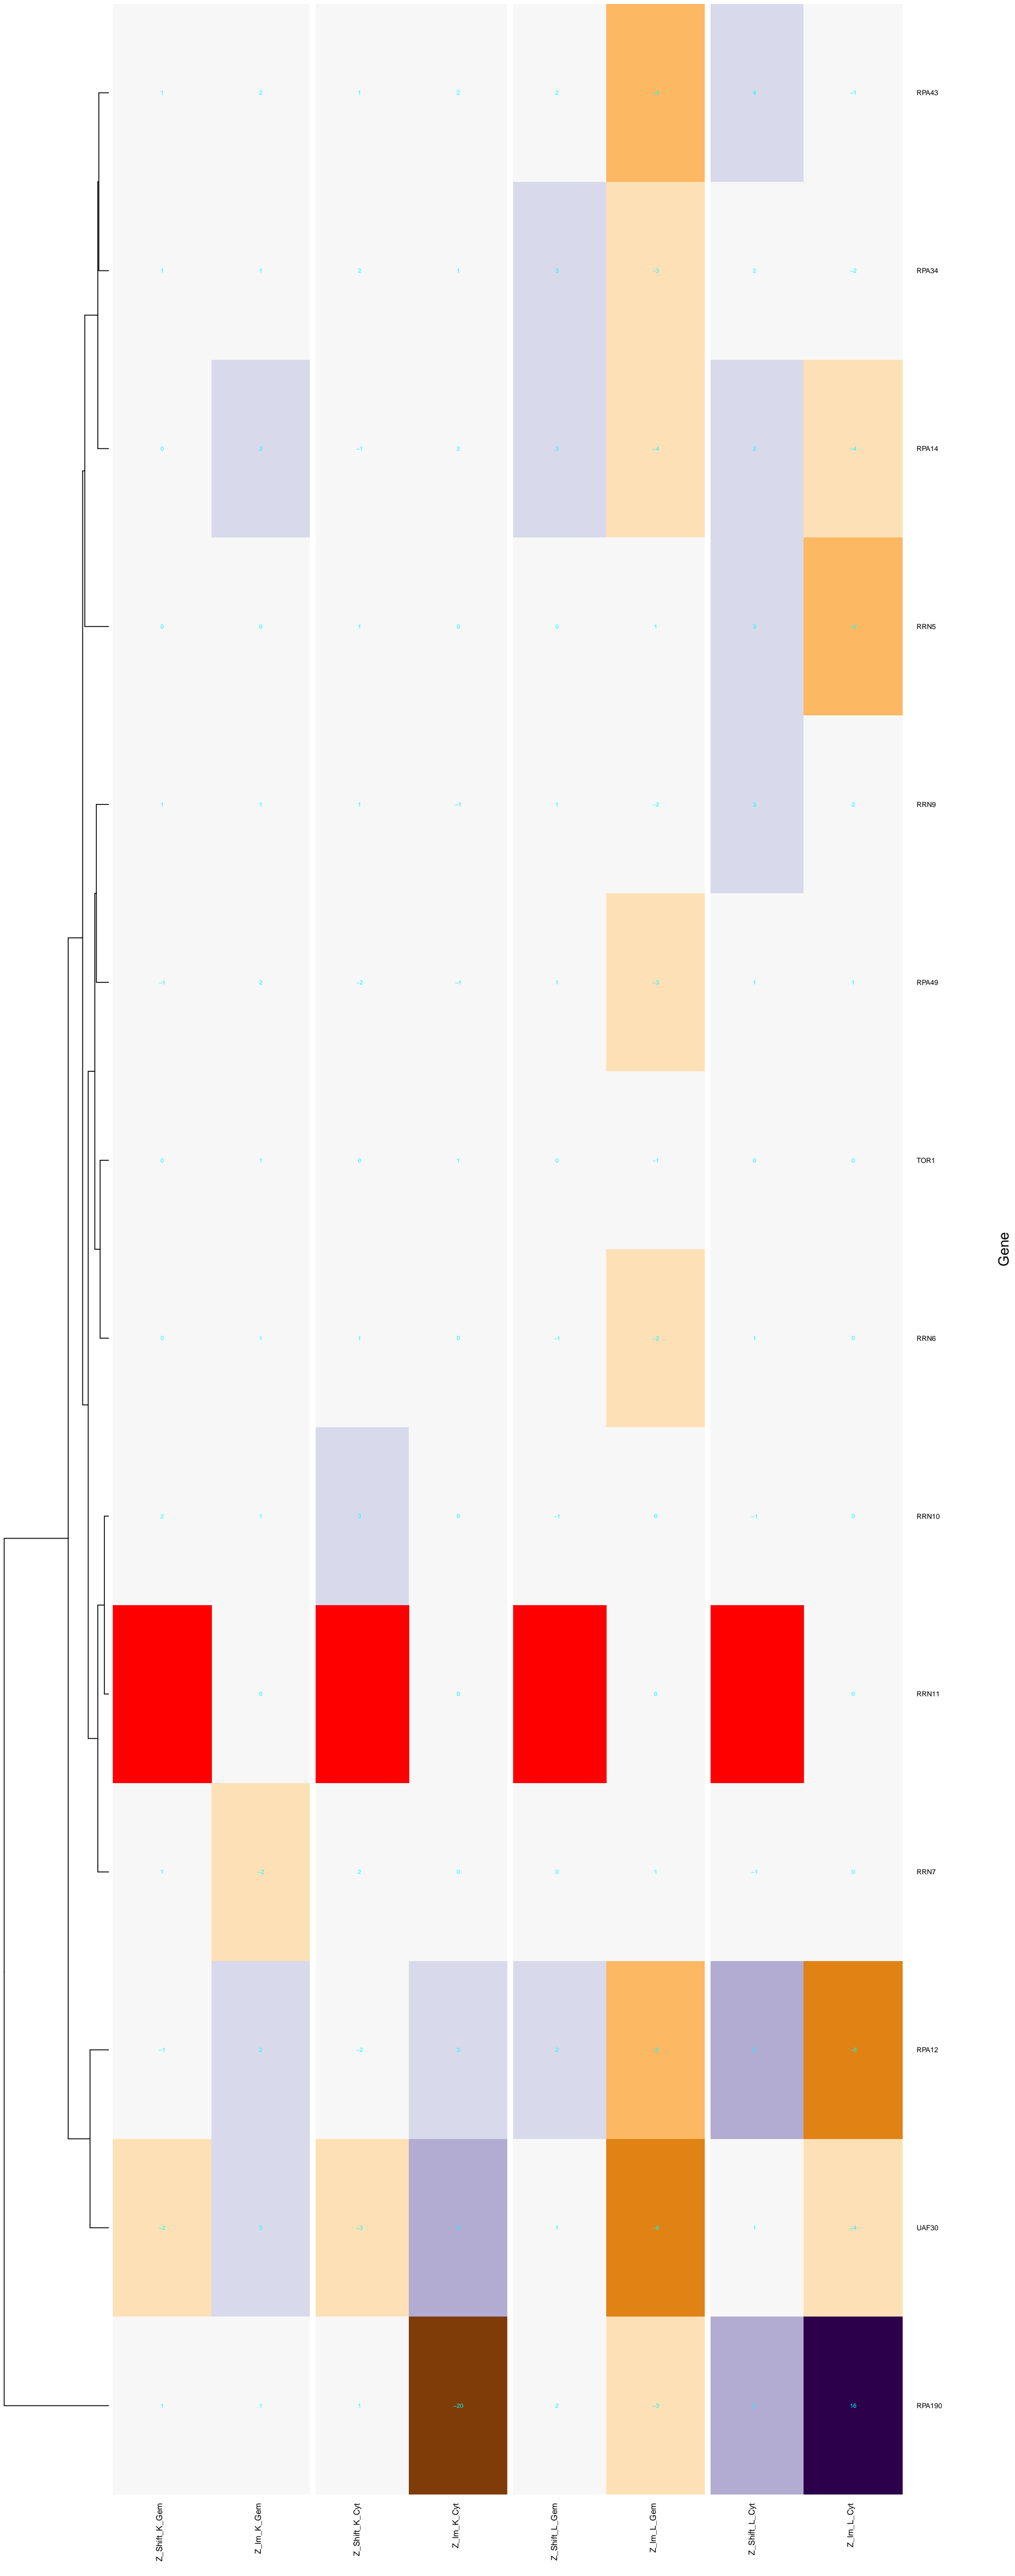





Color Key

on of fatty acid biosynthetic process by transcription from RNA polymerase II promoter

-10 5

Value

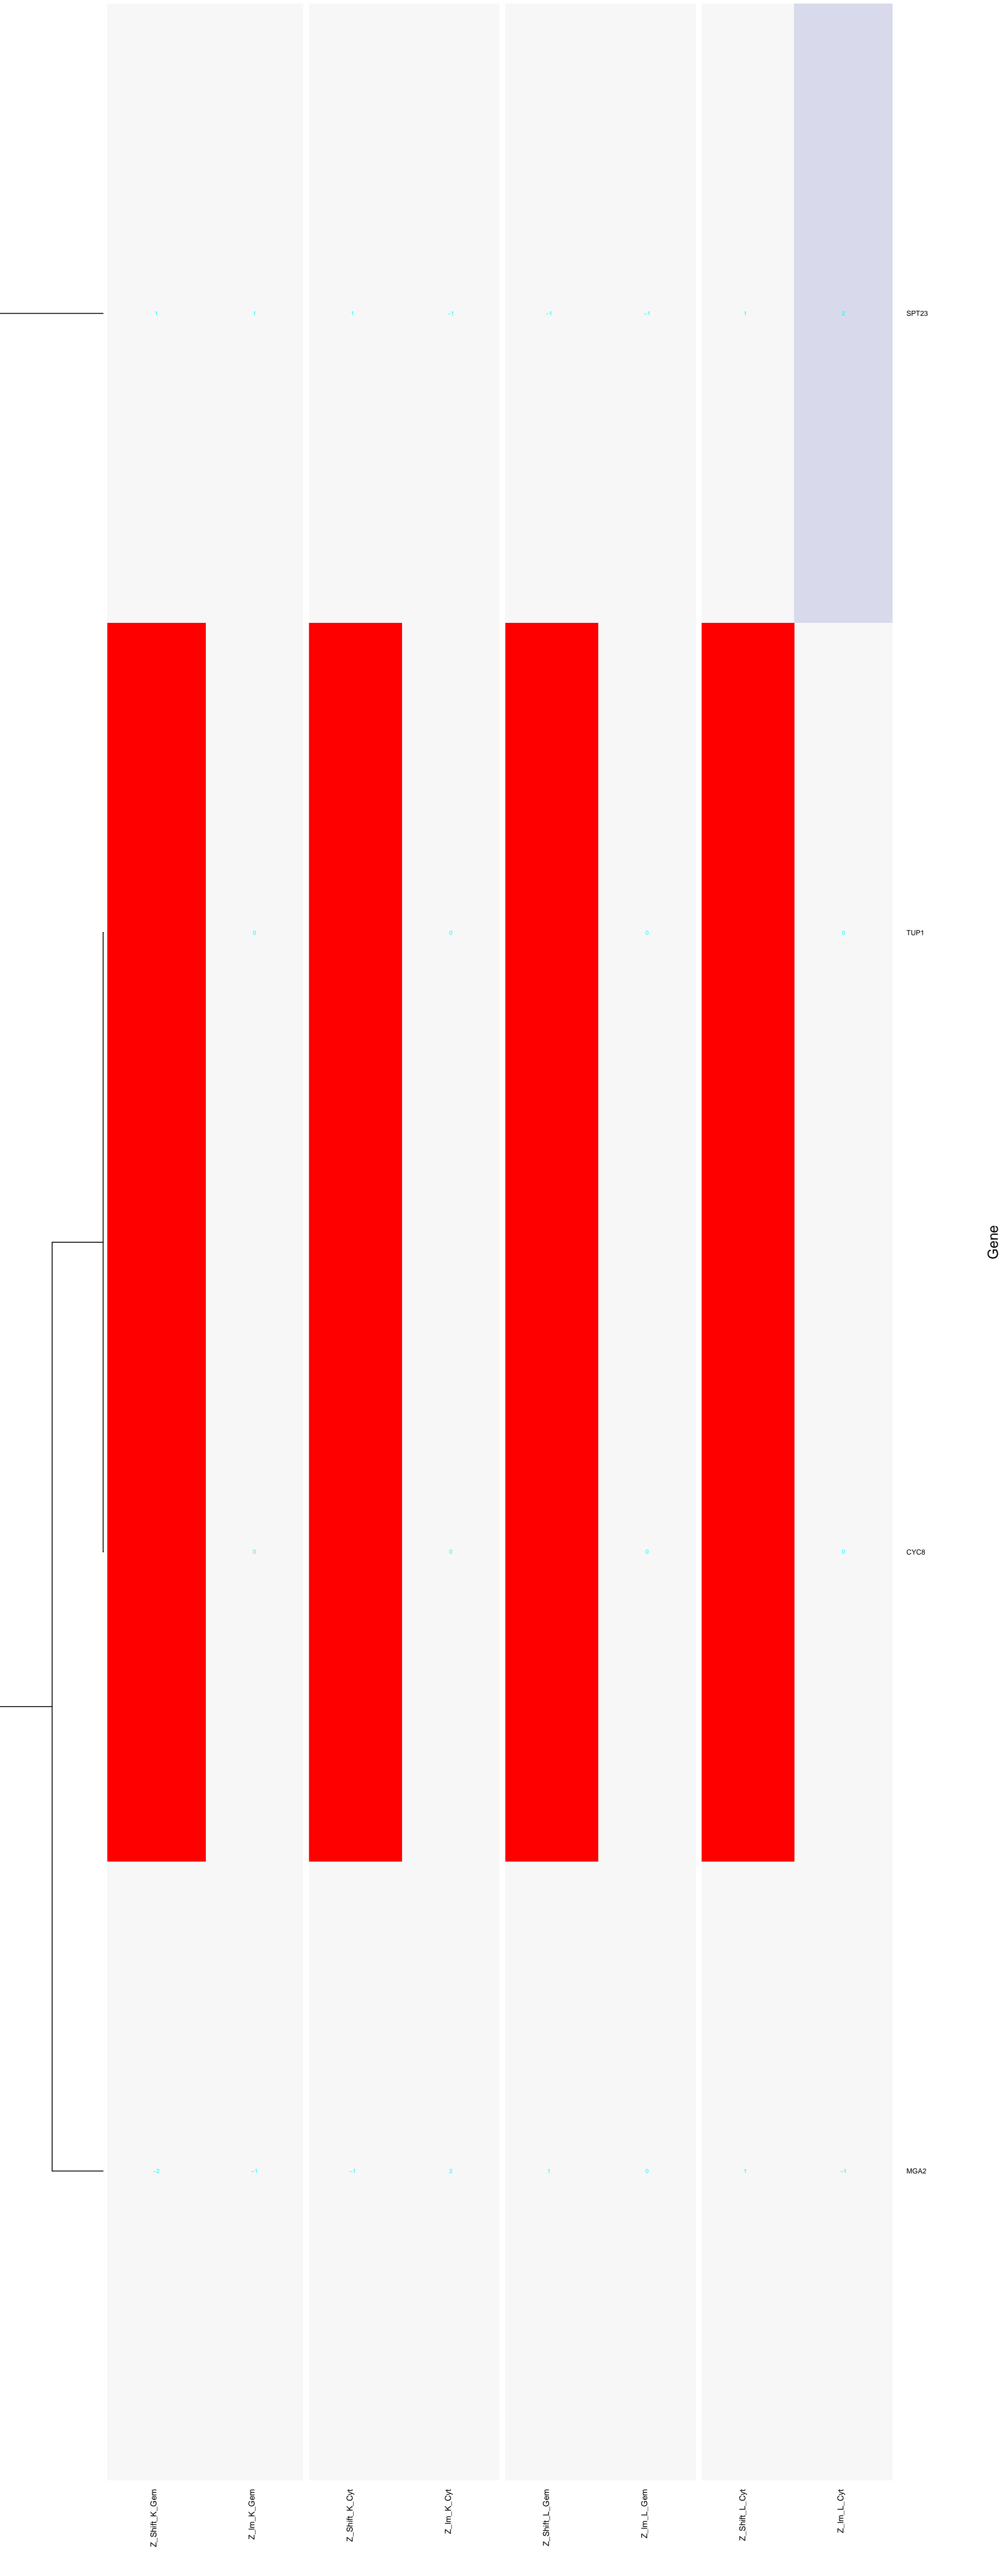

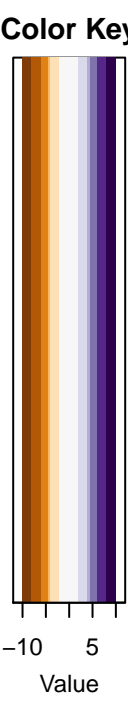

5S class rRNA transcription from RNA polymerase III type 1 promoter

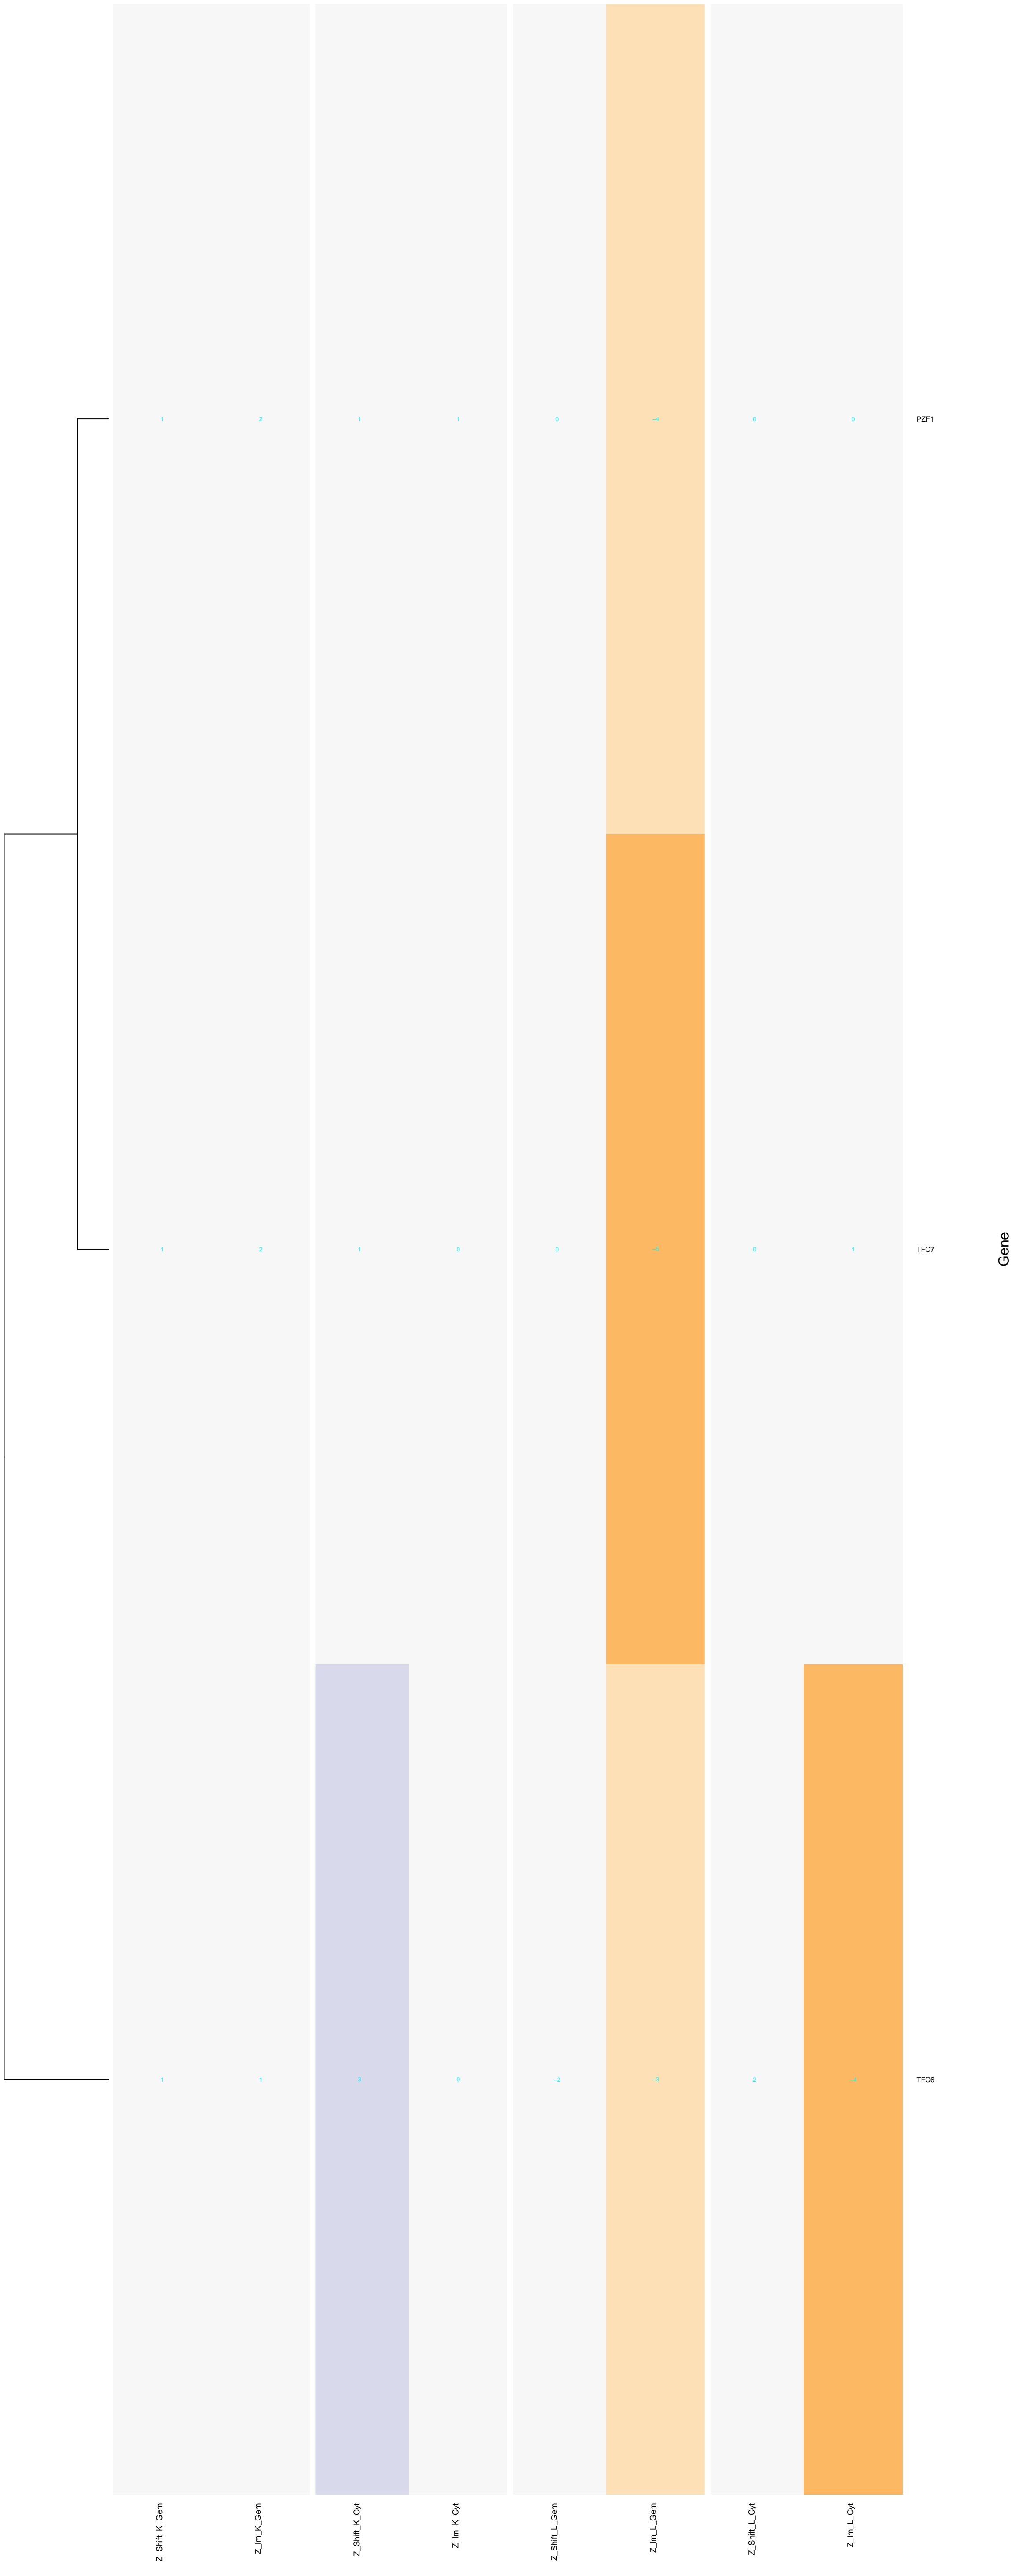

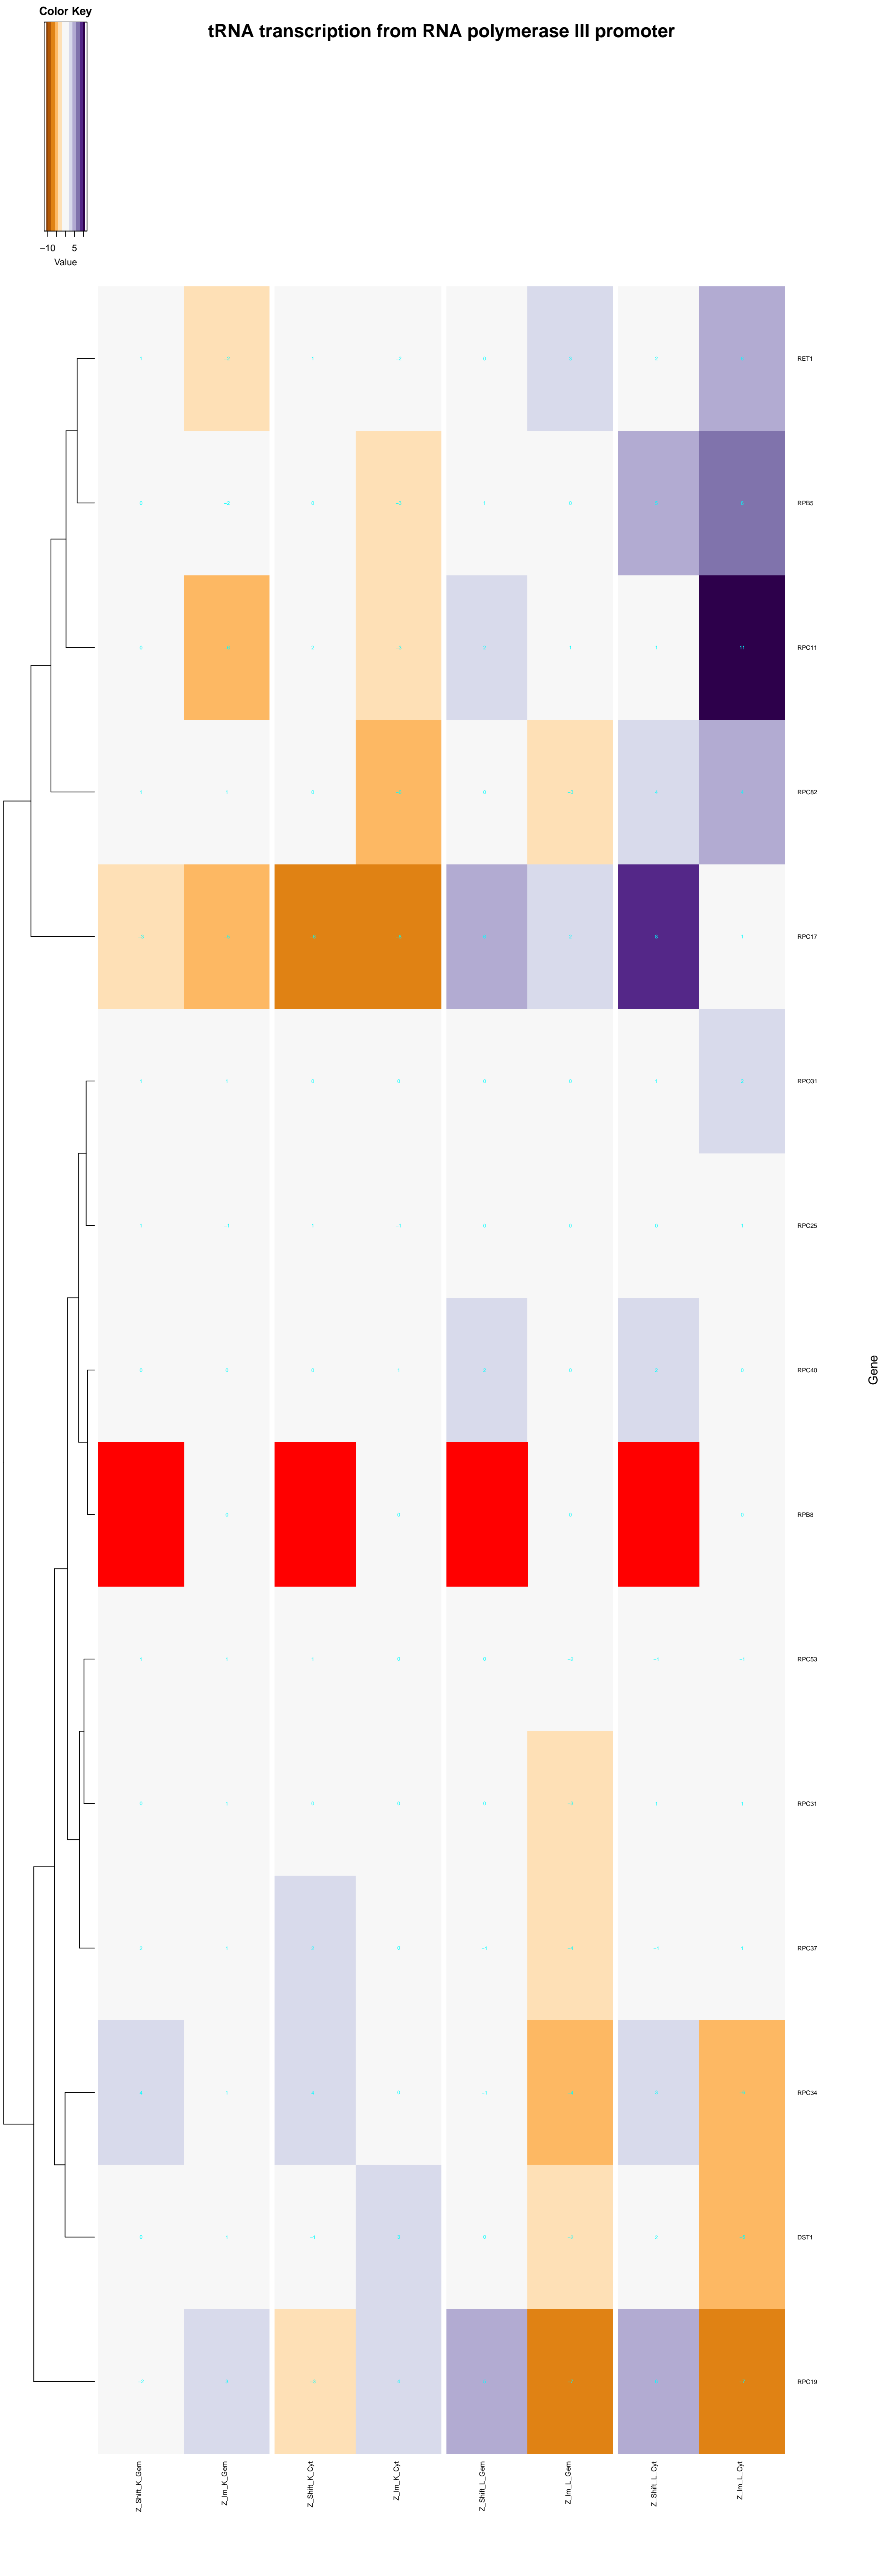

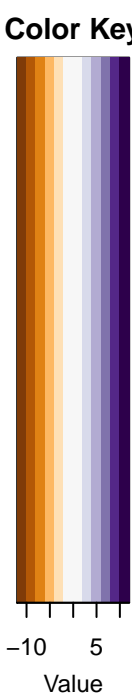

# snoRNA transcription

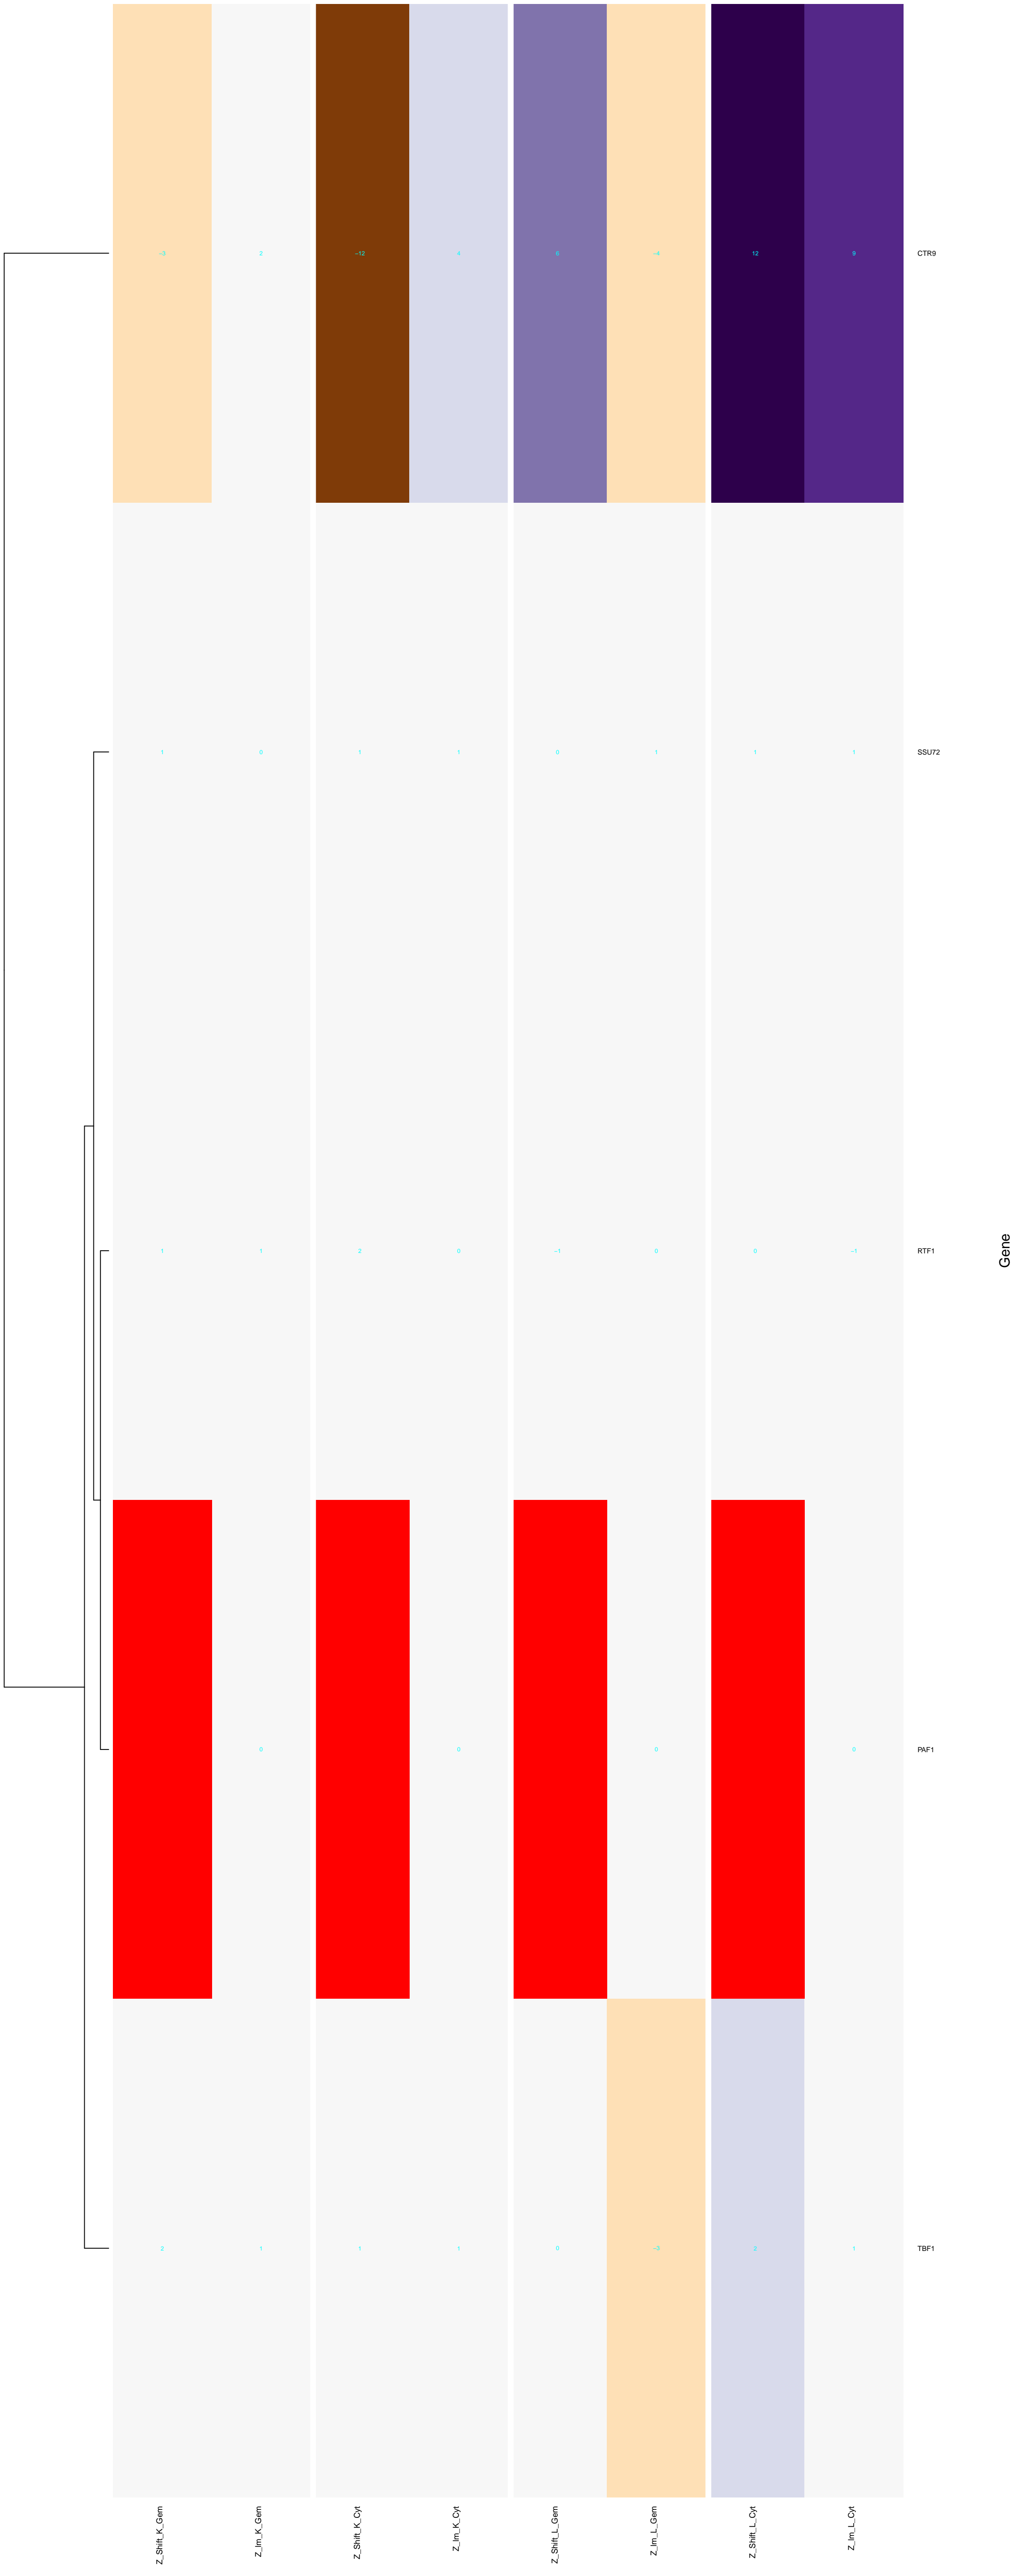

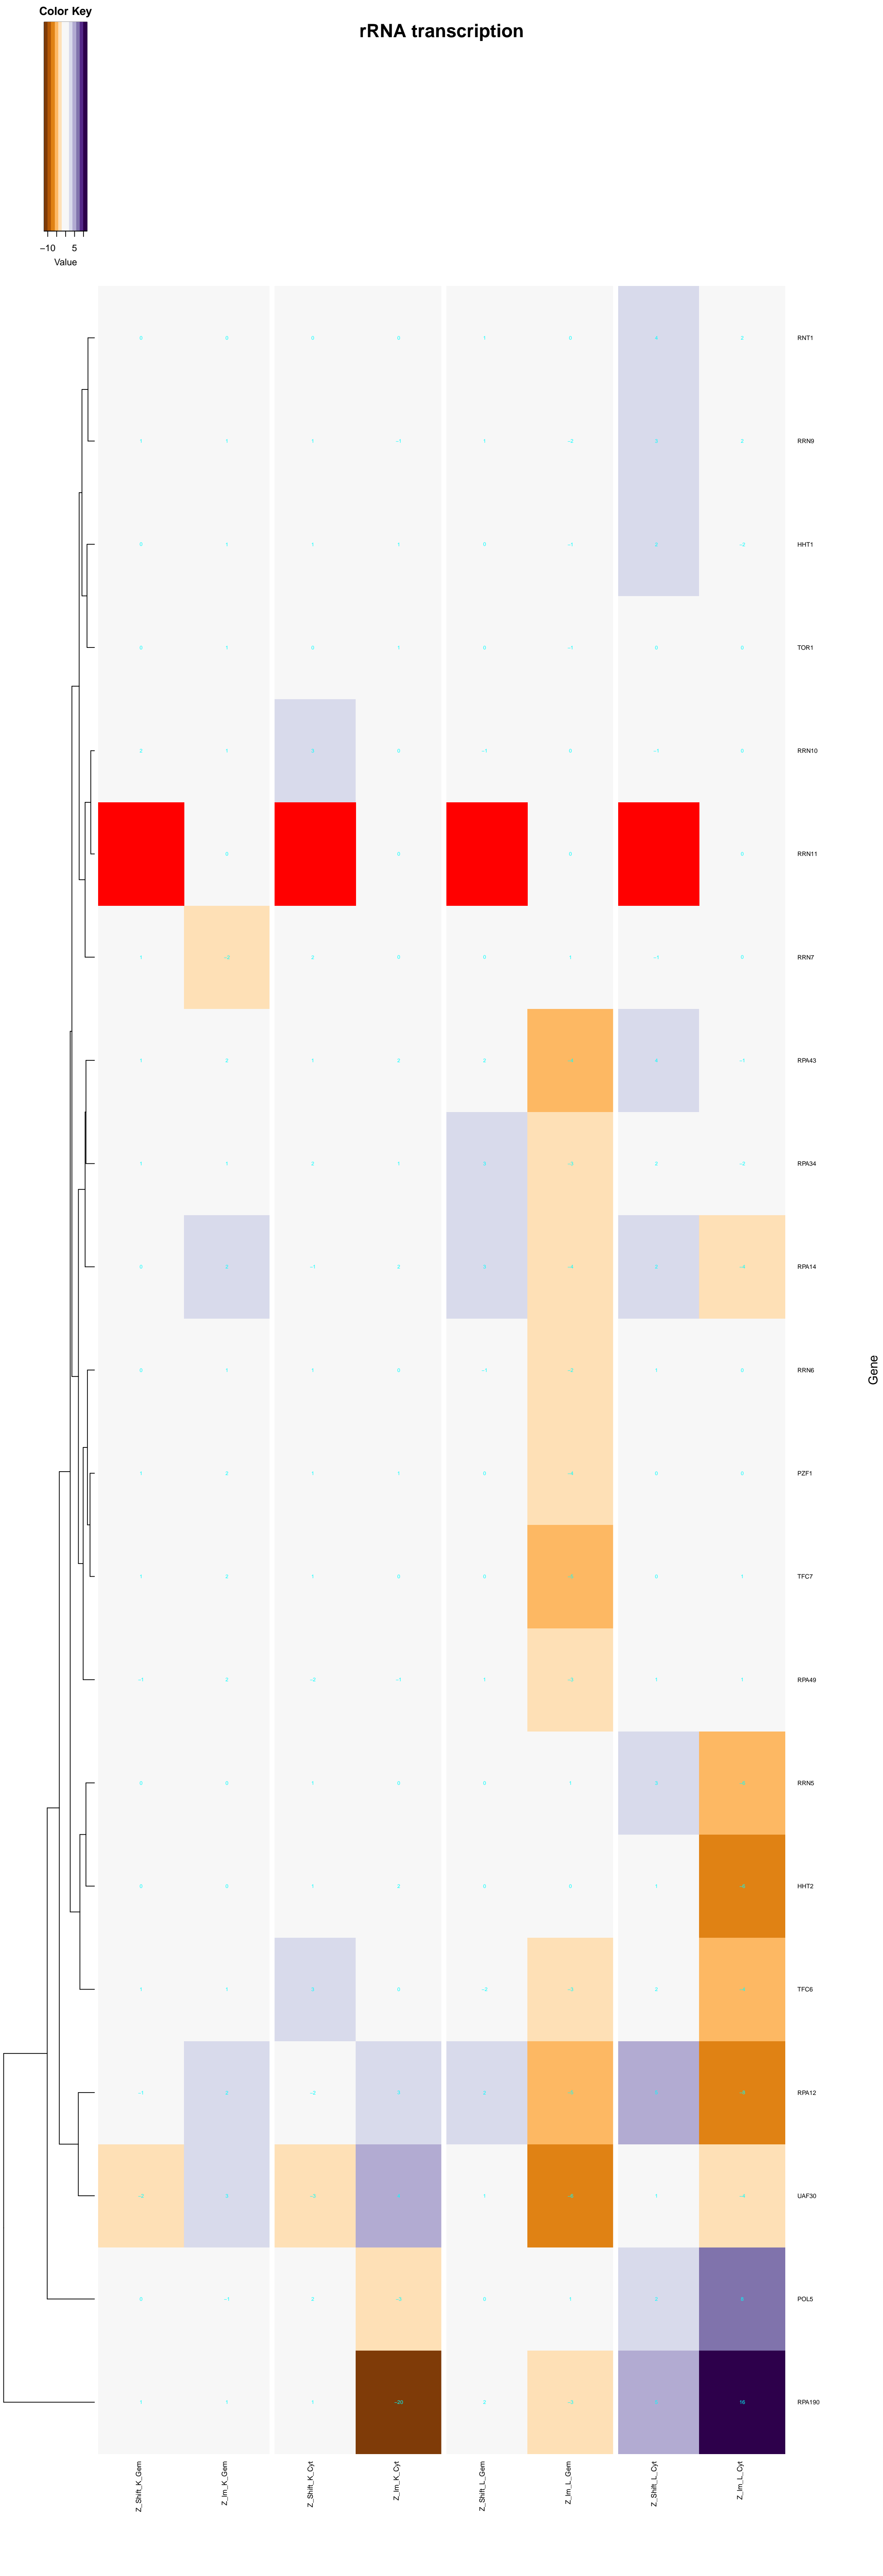

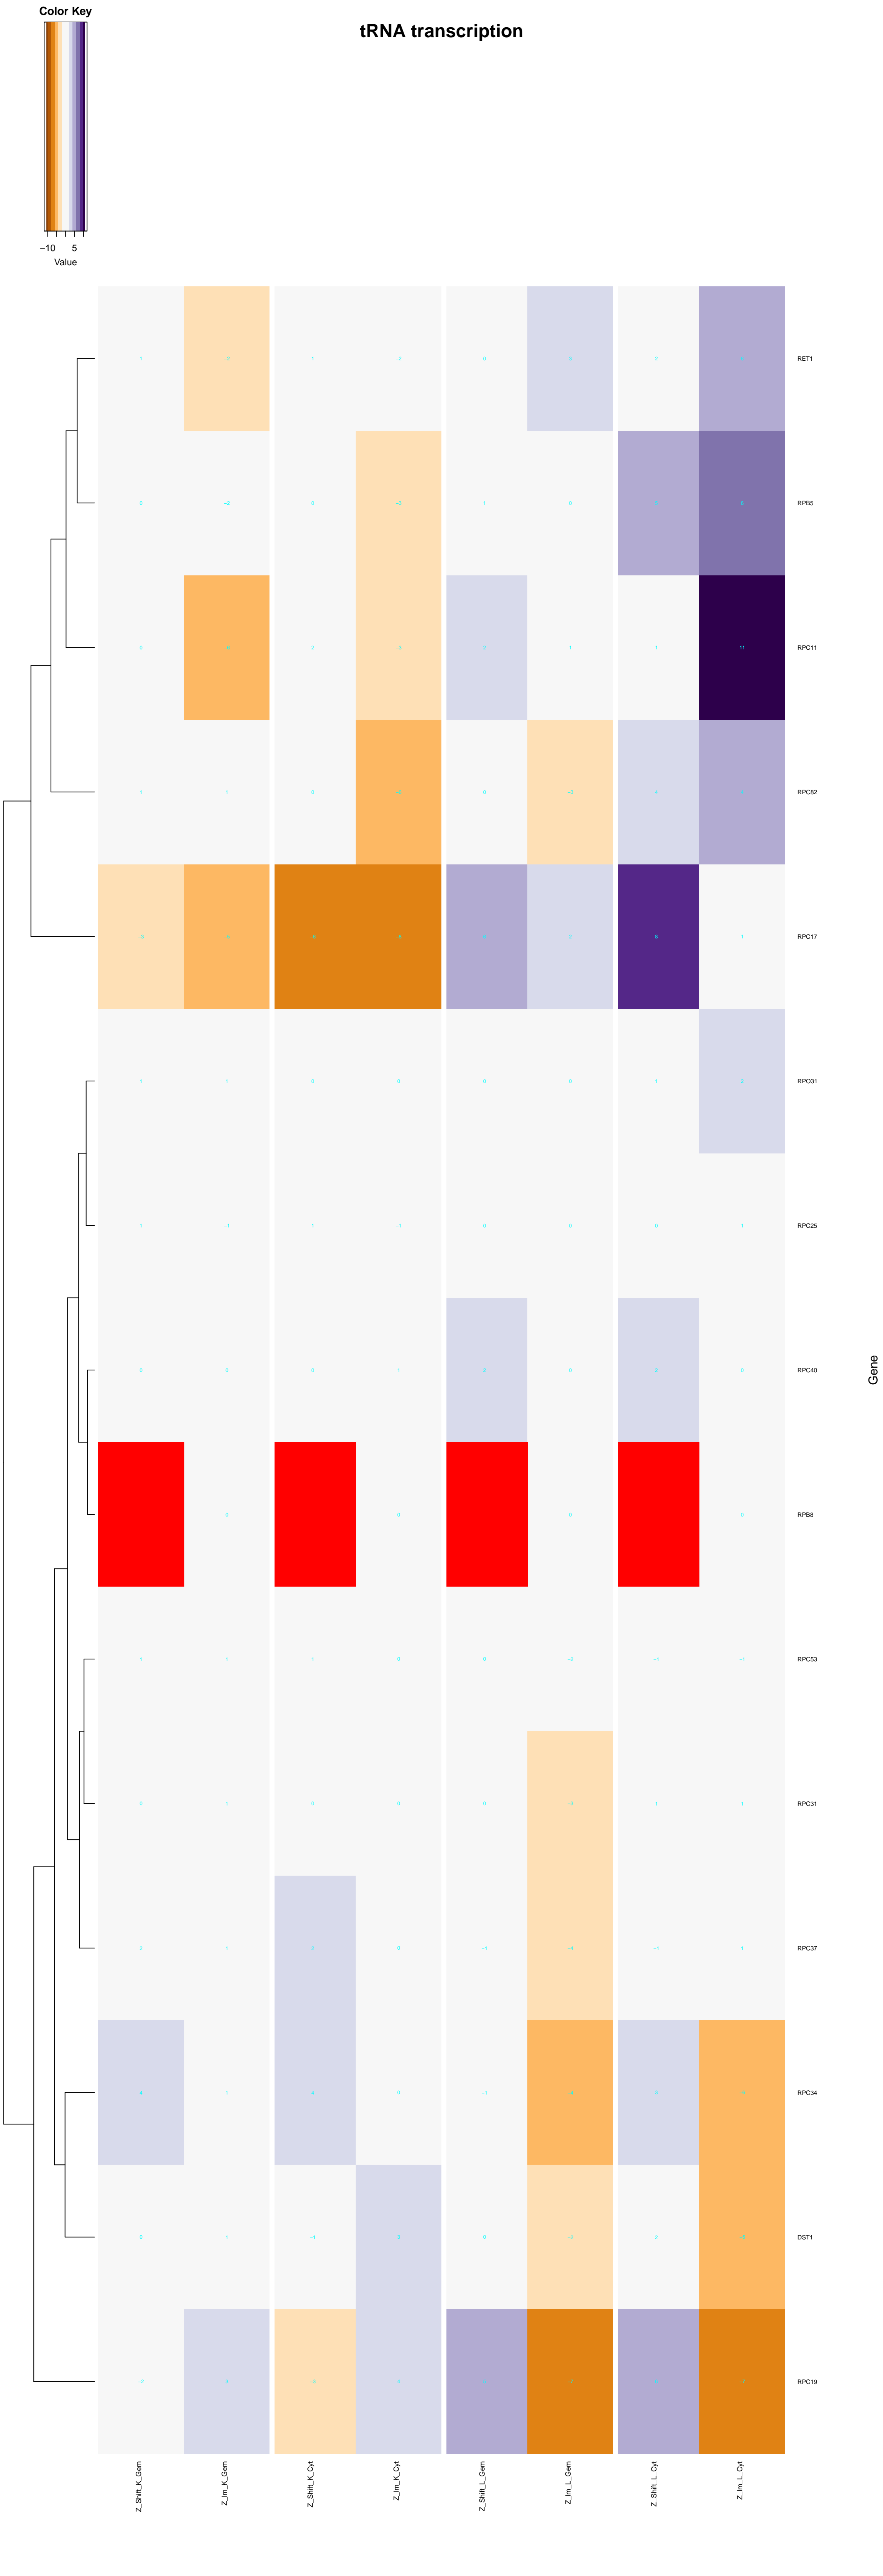

Supplement: s1 [file s1]
