# Supplementary material for: A Humanized Yeast Phenomic Model of Deoxycytidine Kinase to Predict Genetic Buffering of Nucleoside Analog Cytotoxicity
Source: MDPI journal article supplement (doi:10.3390/genes10100770), 2019-09-30

YDL227C Scatter RF for L with SD

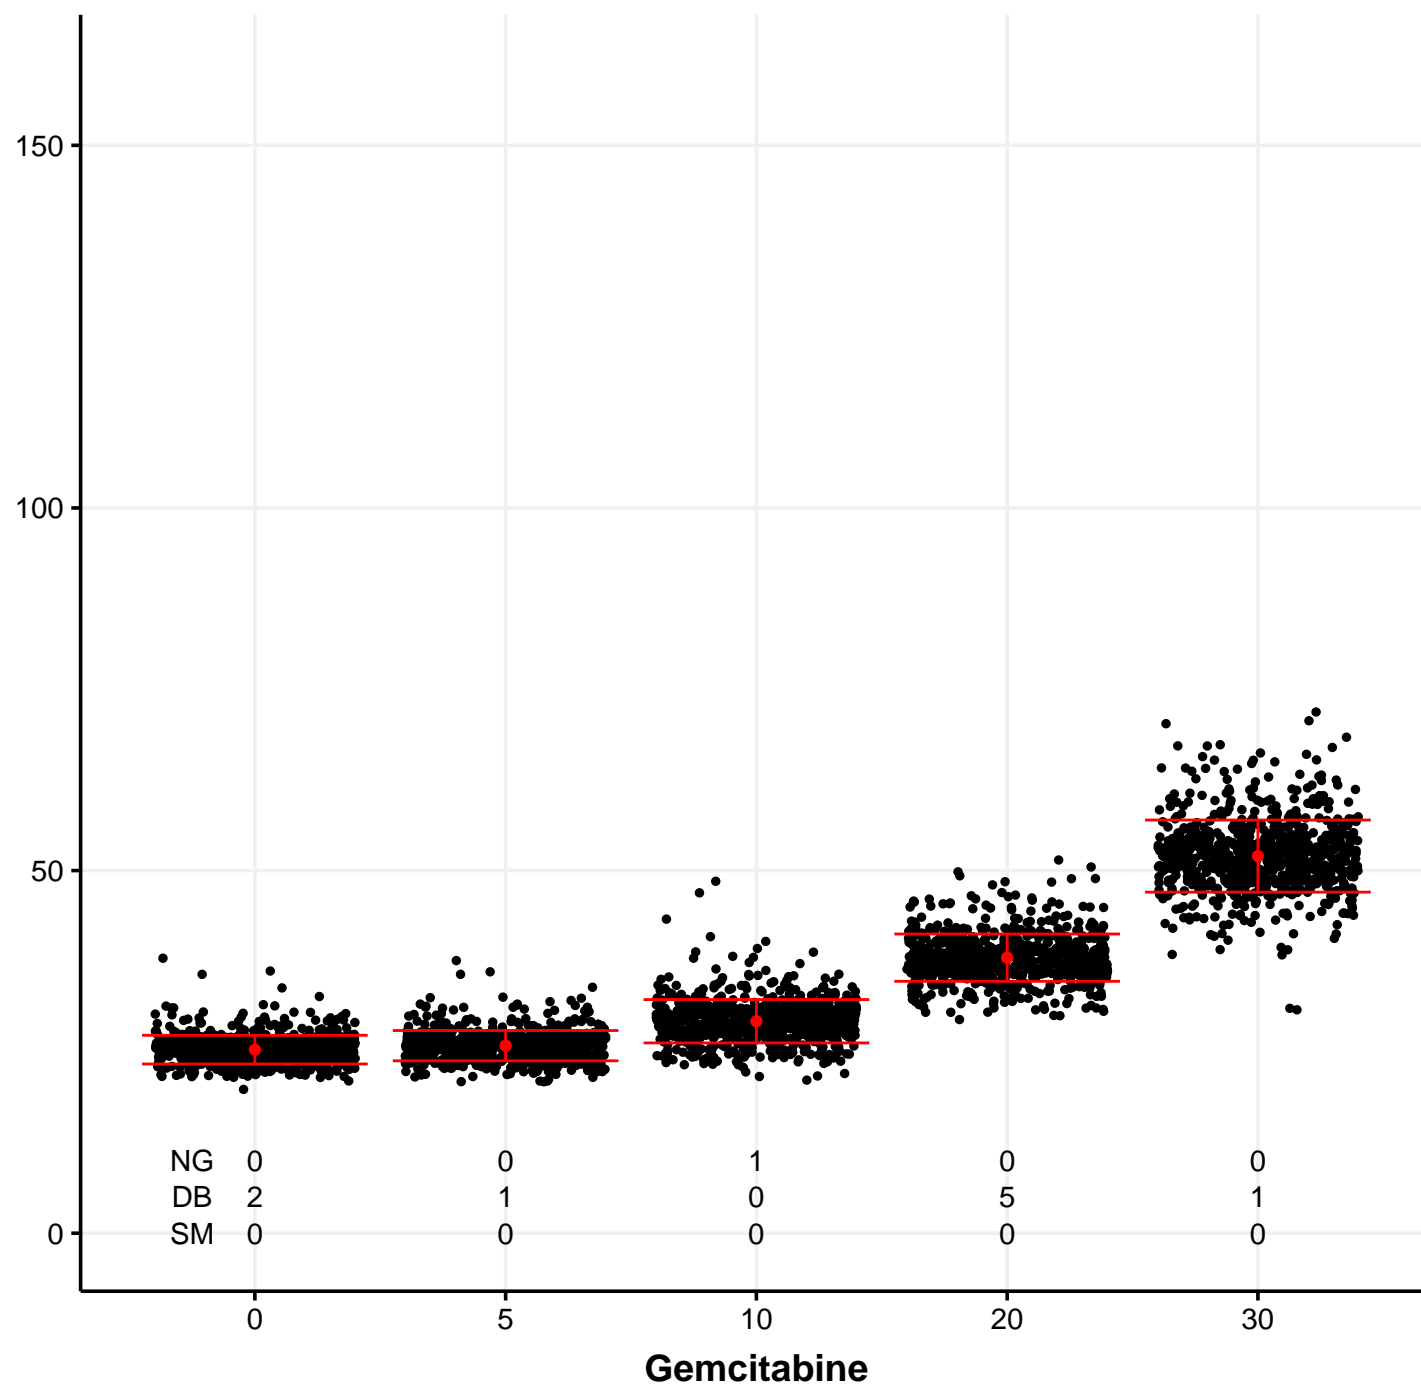

YDL227C Scatter RF for K with SD

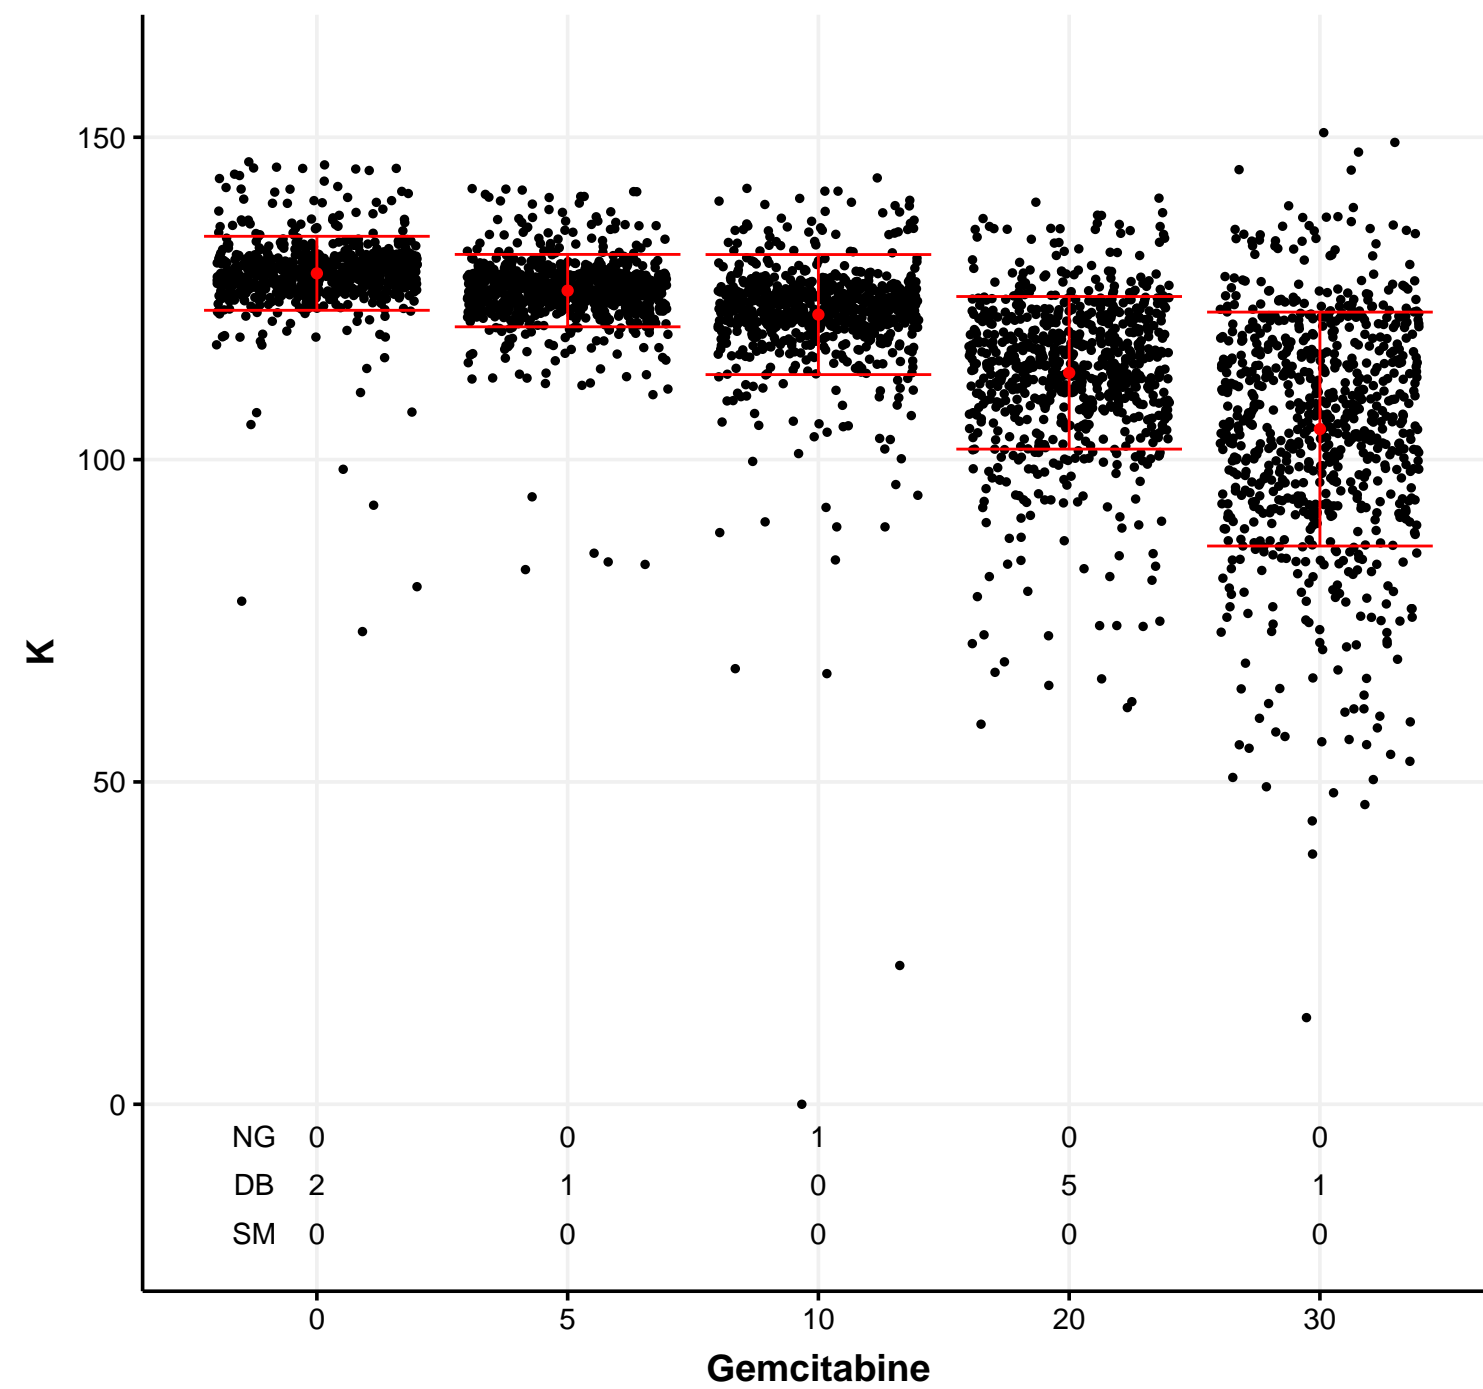

YDL227C Scatter RF for r with SD

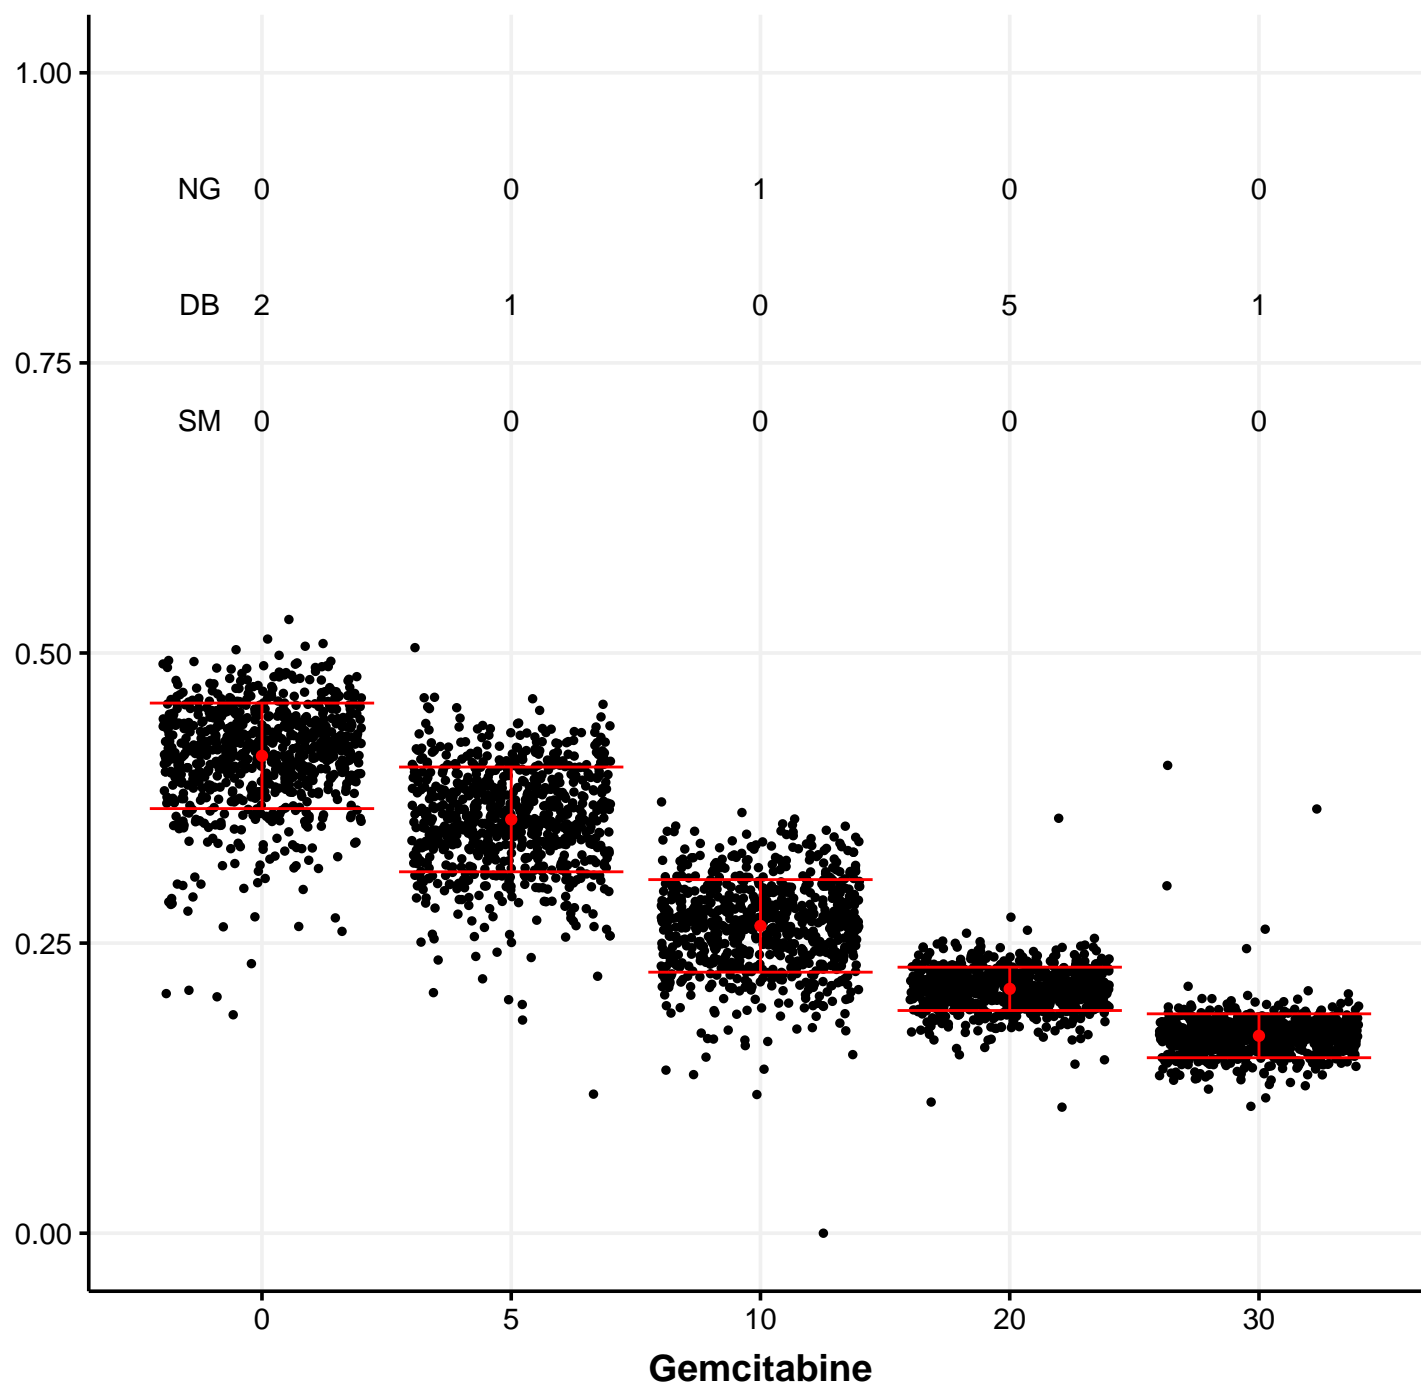

YDL227C Scatter RF for AUC with SD

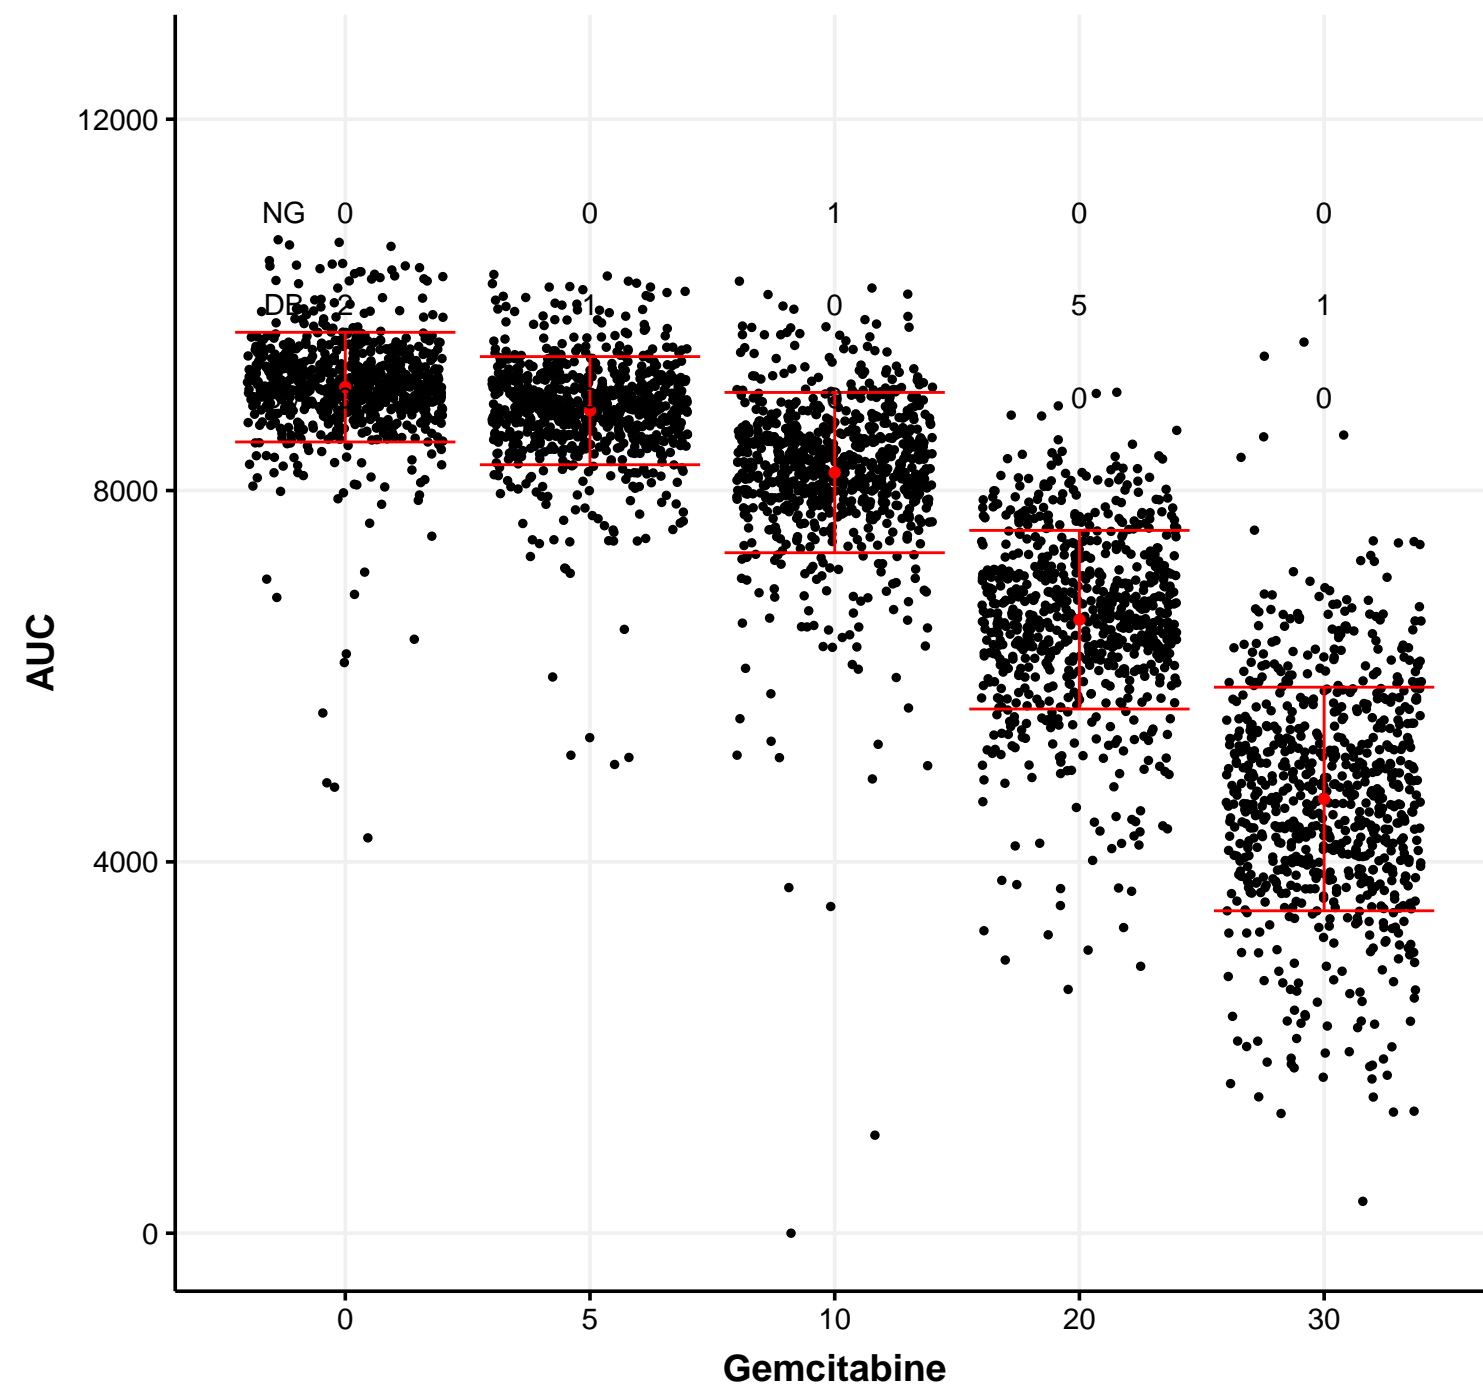

YDL227C Scatter RF for L with SD

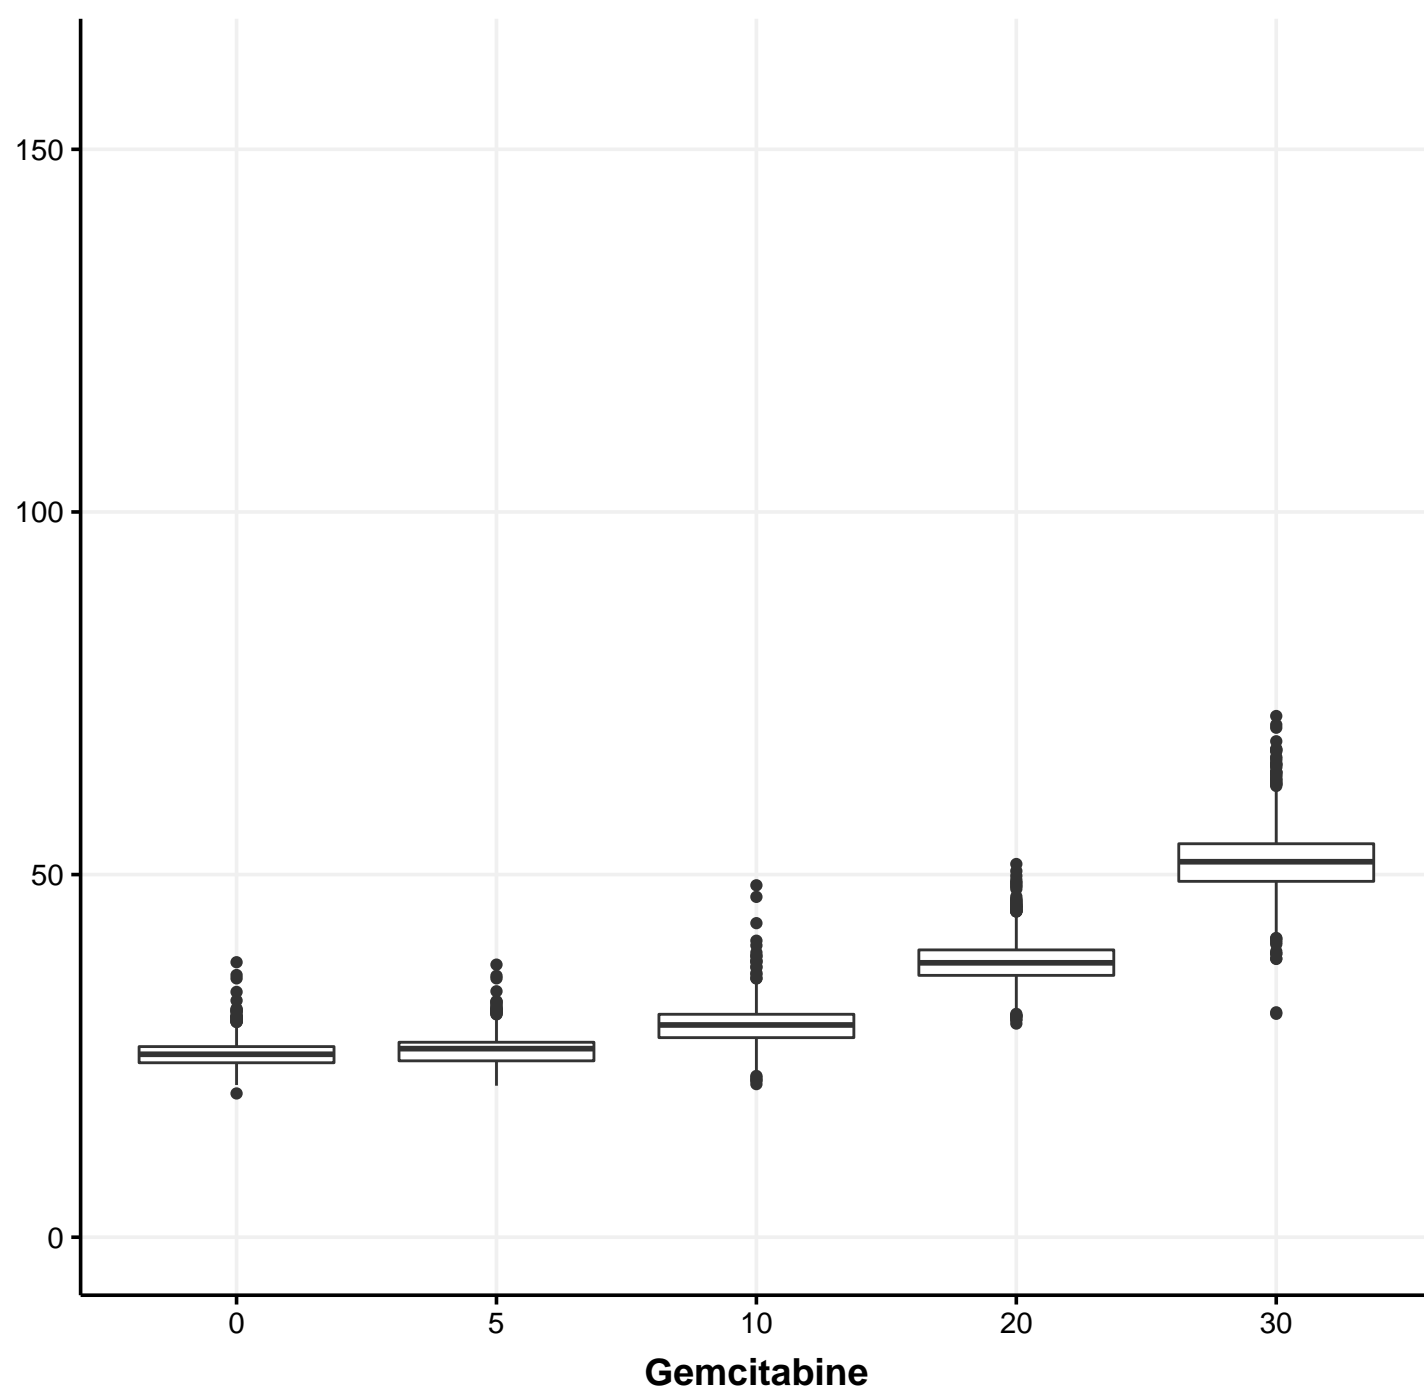

YDL227C Scatter RF for K with SD

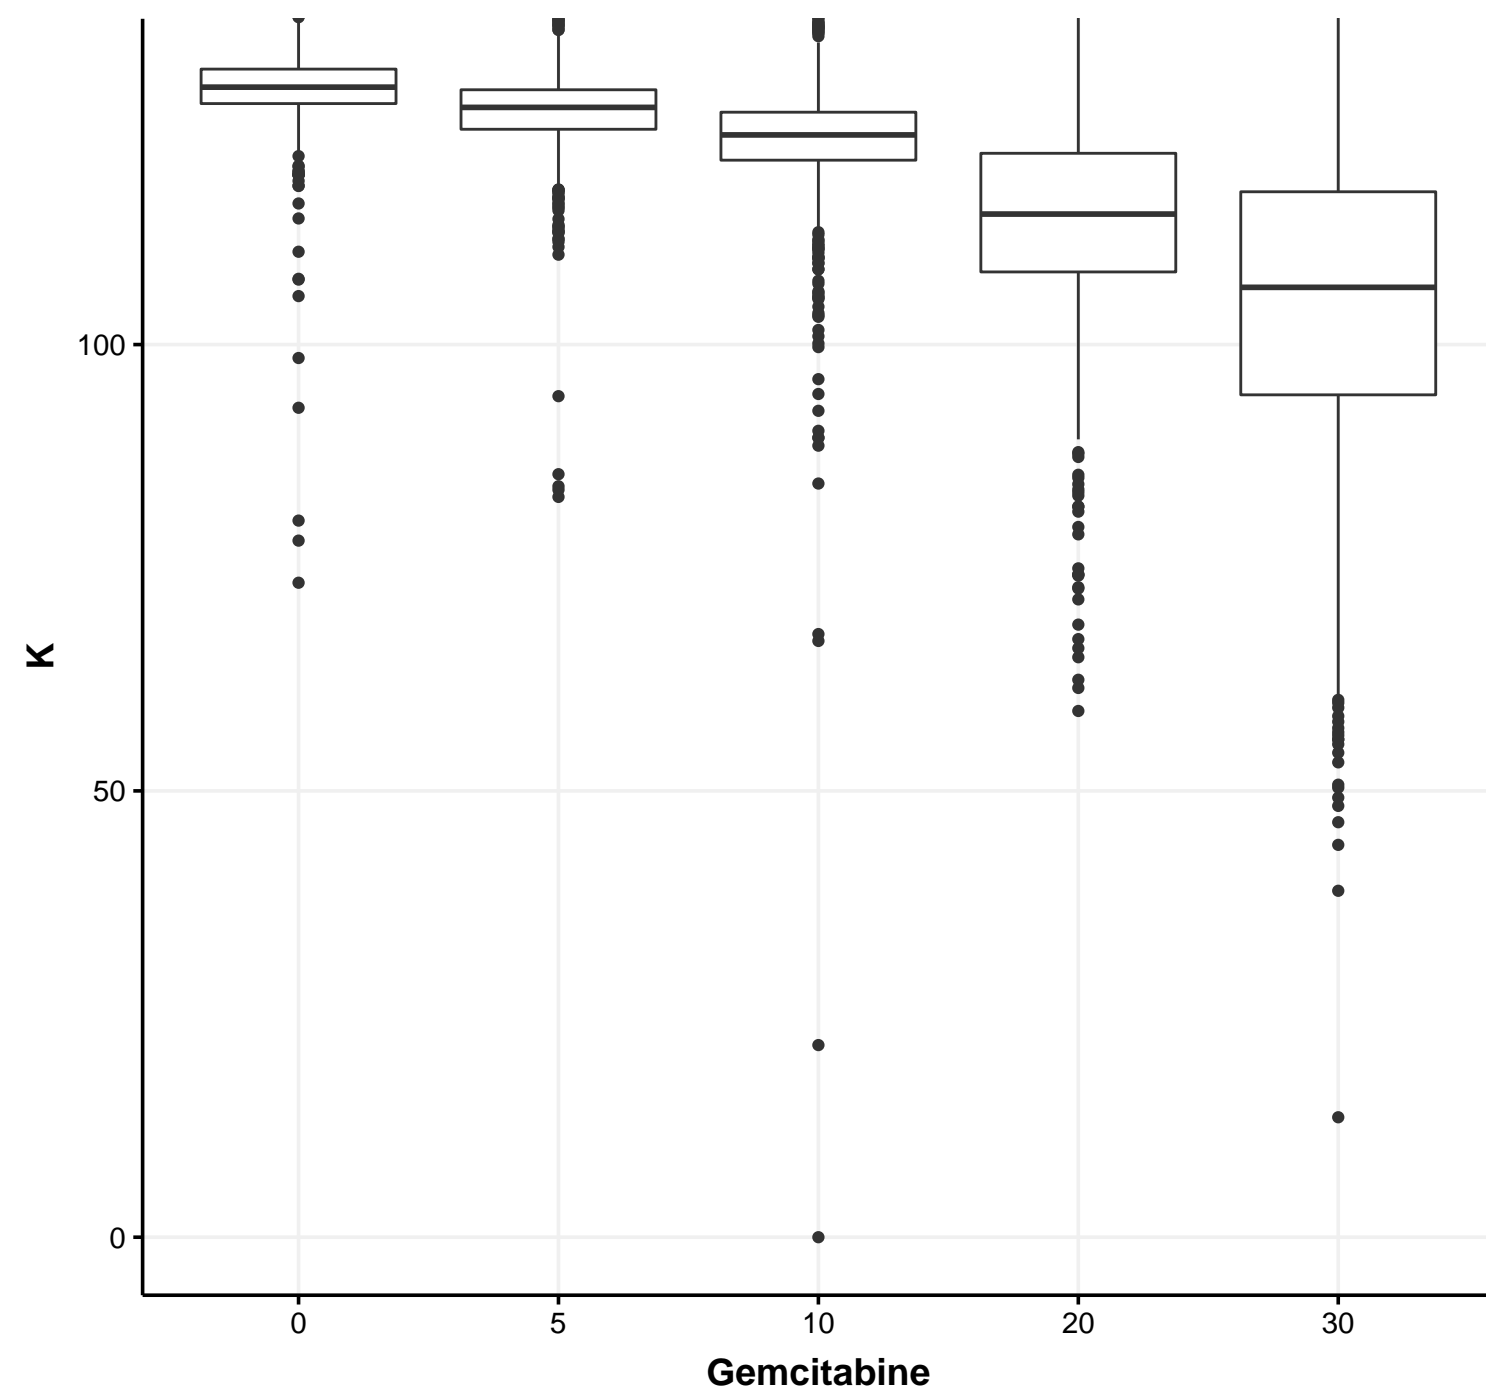

YDL227C Scatter RF for r with SD

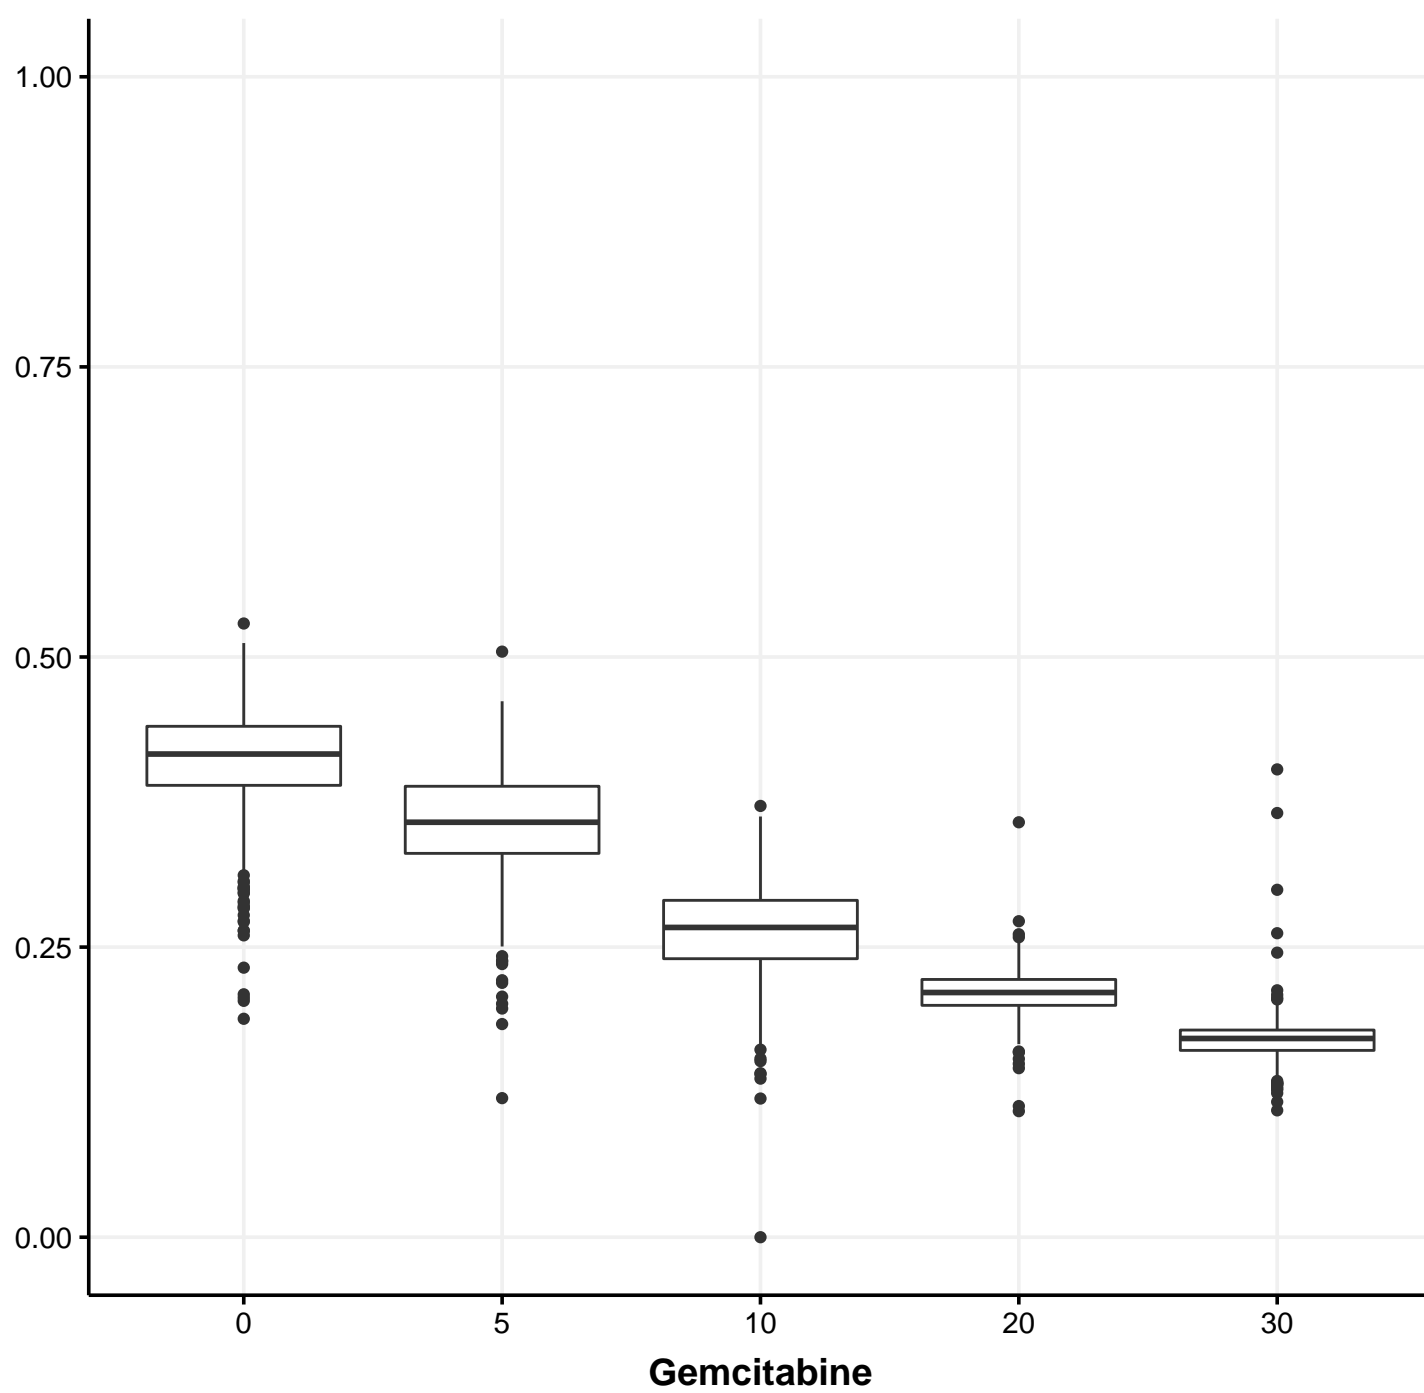

YDL227C Scatter RF for AUC with SD

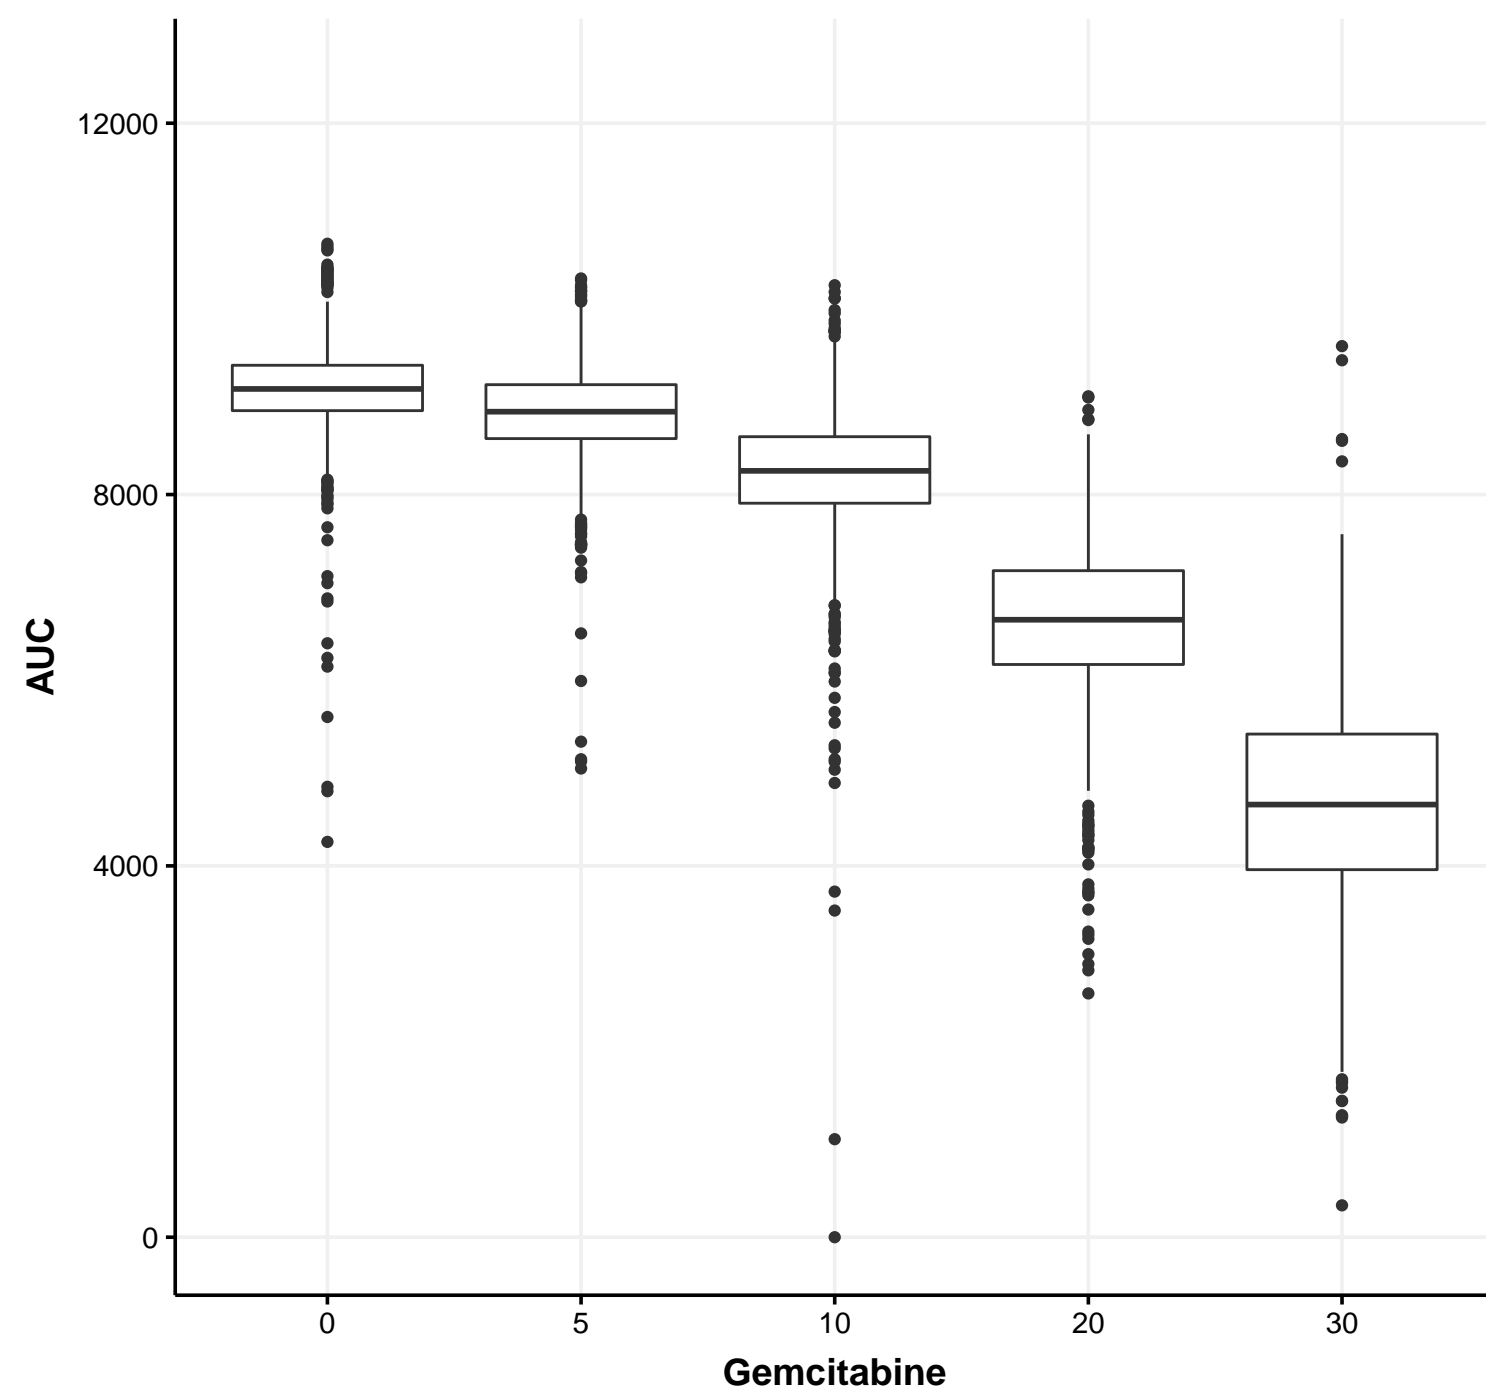

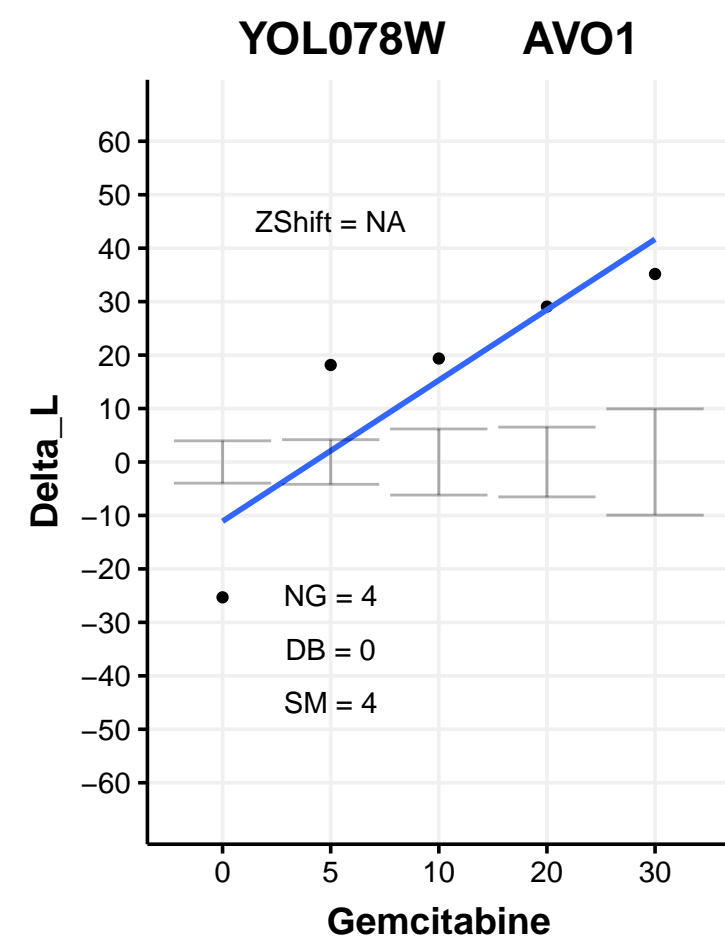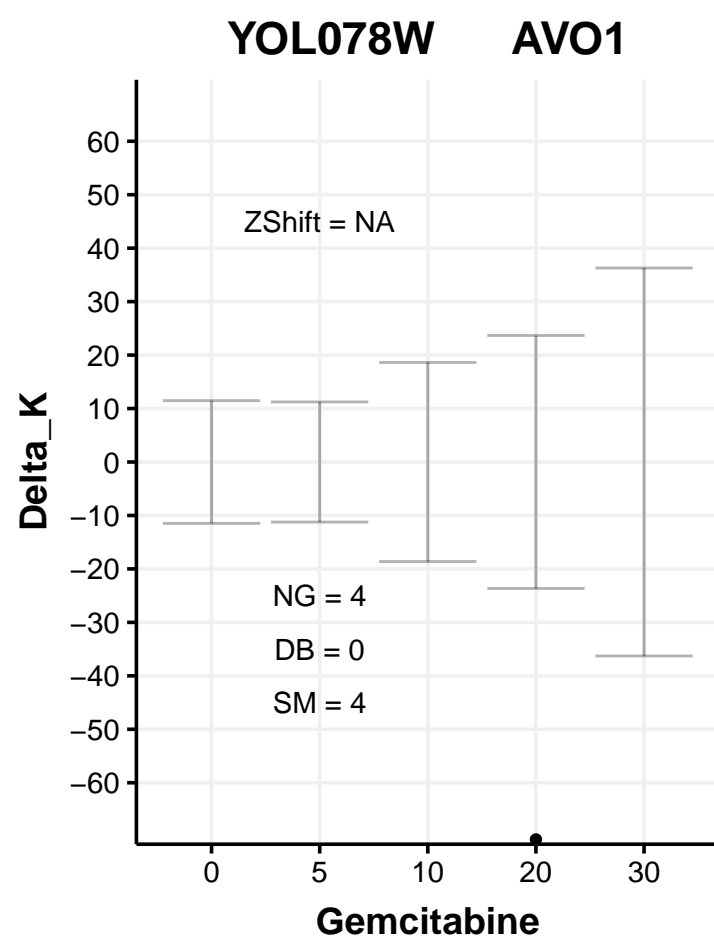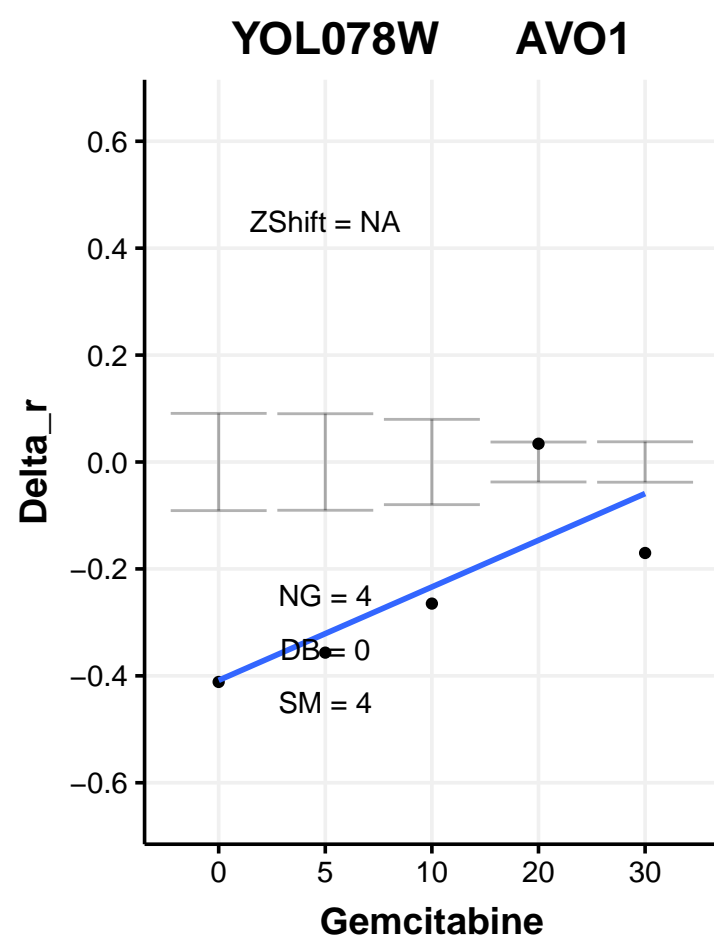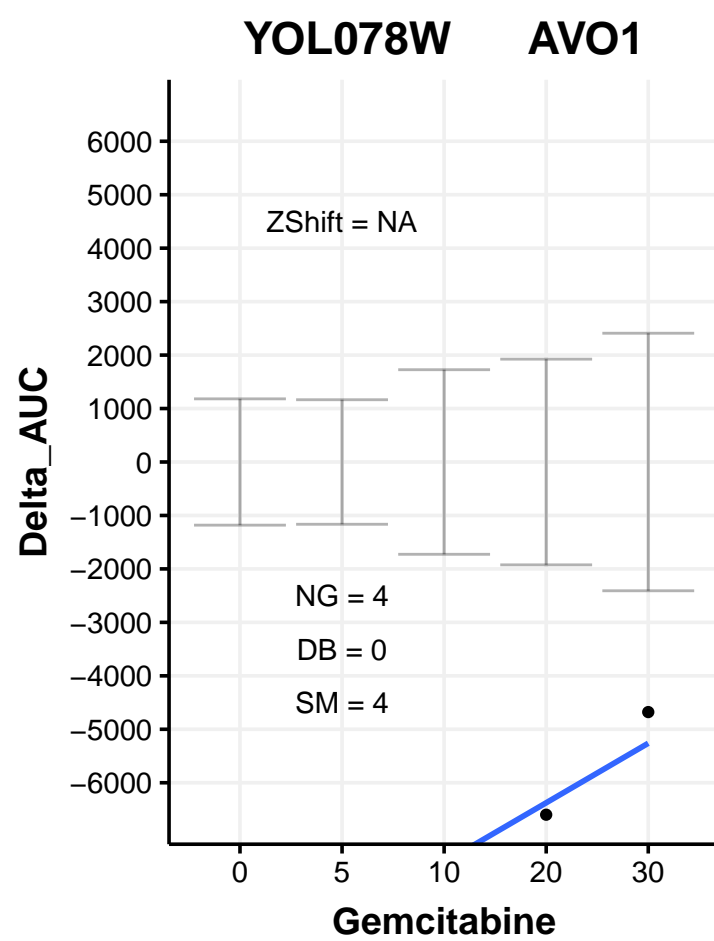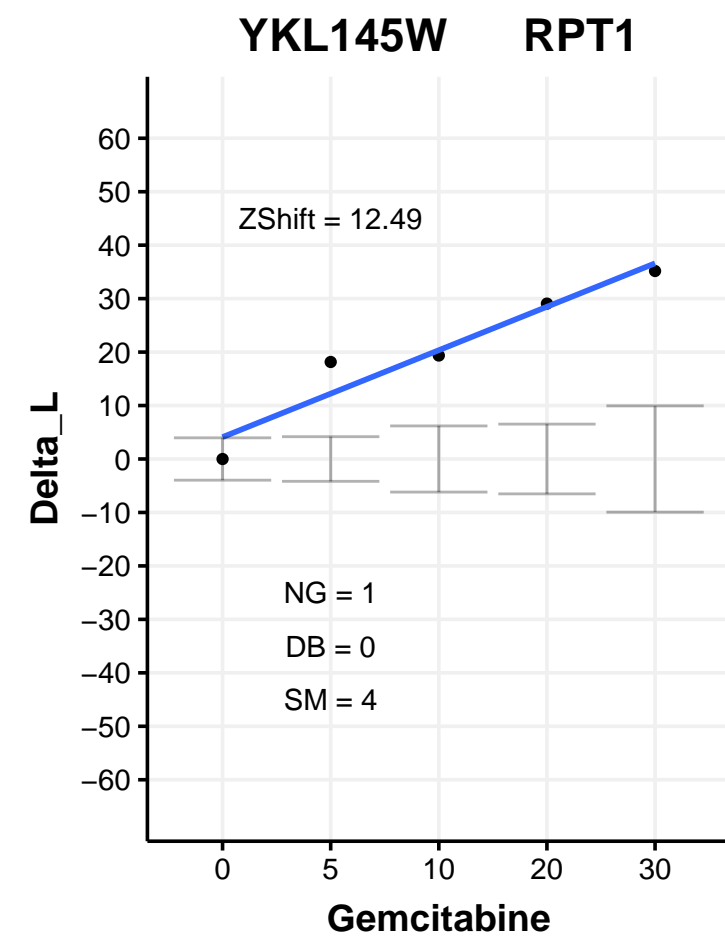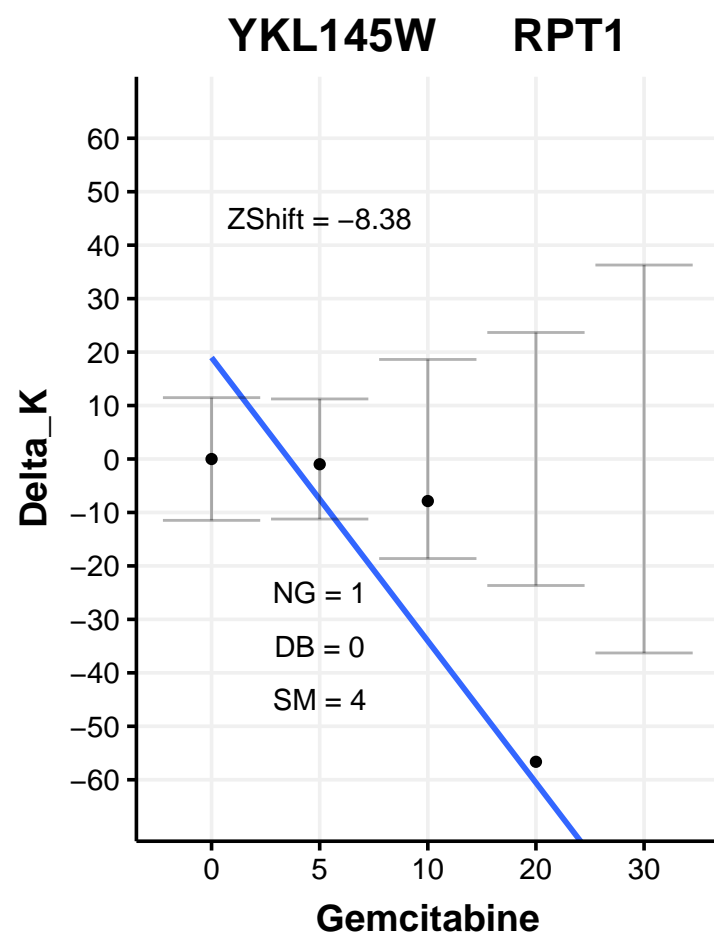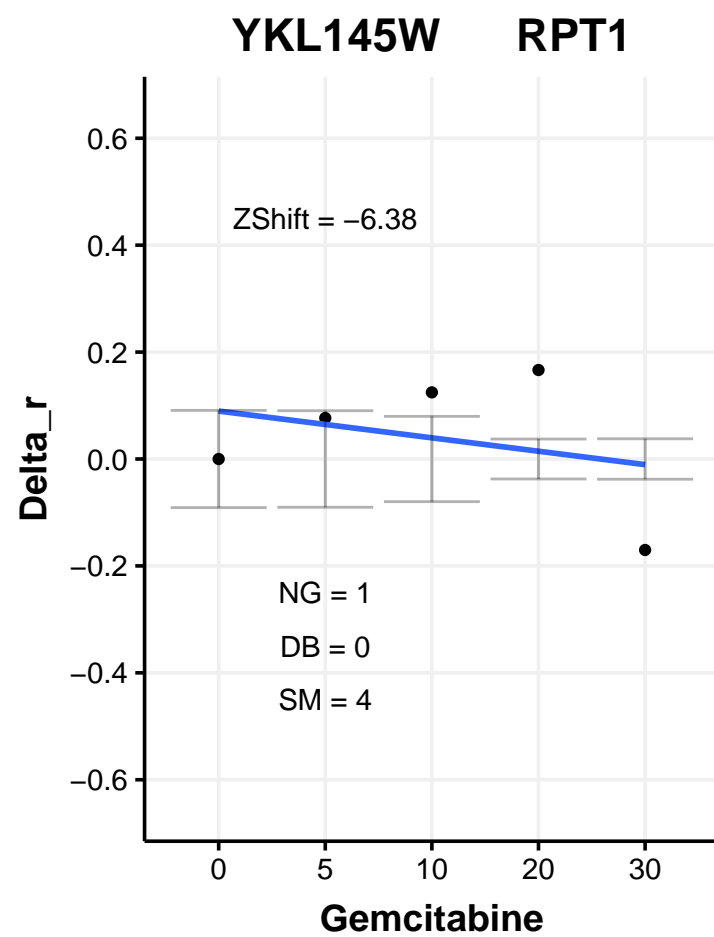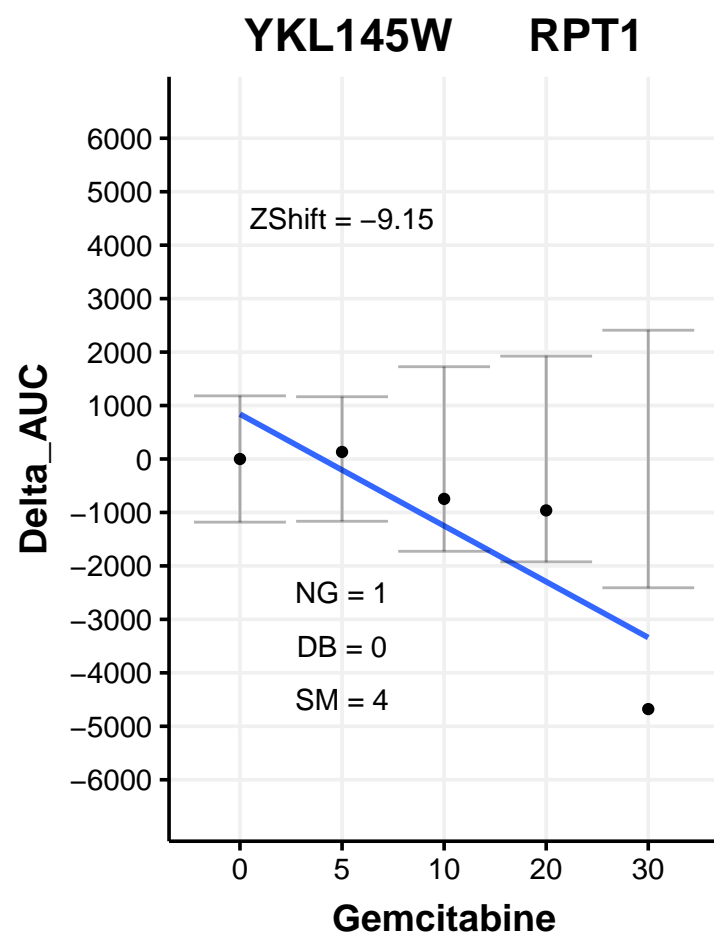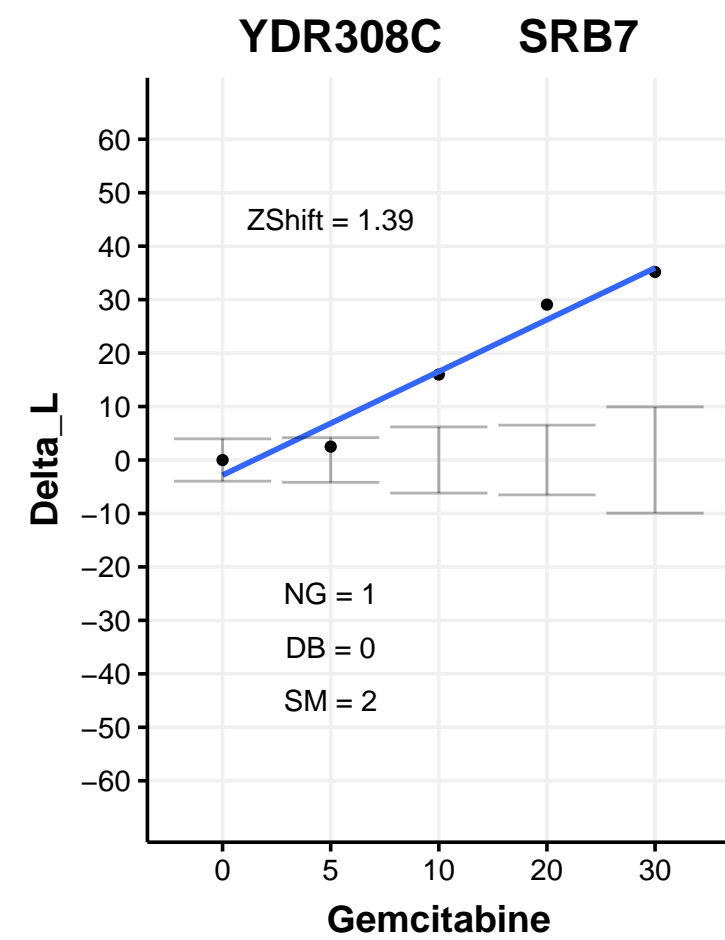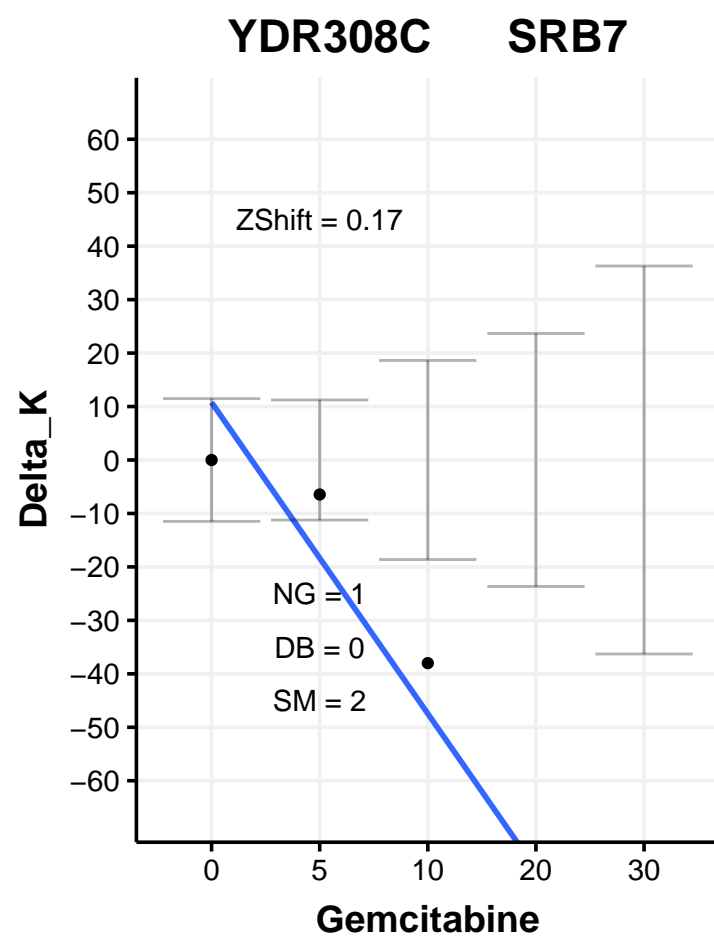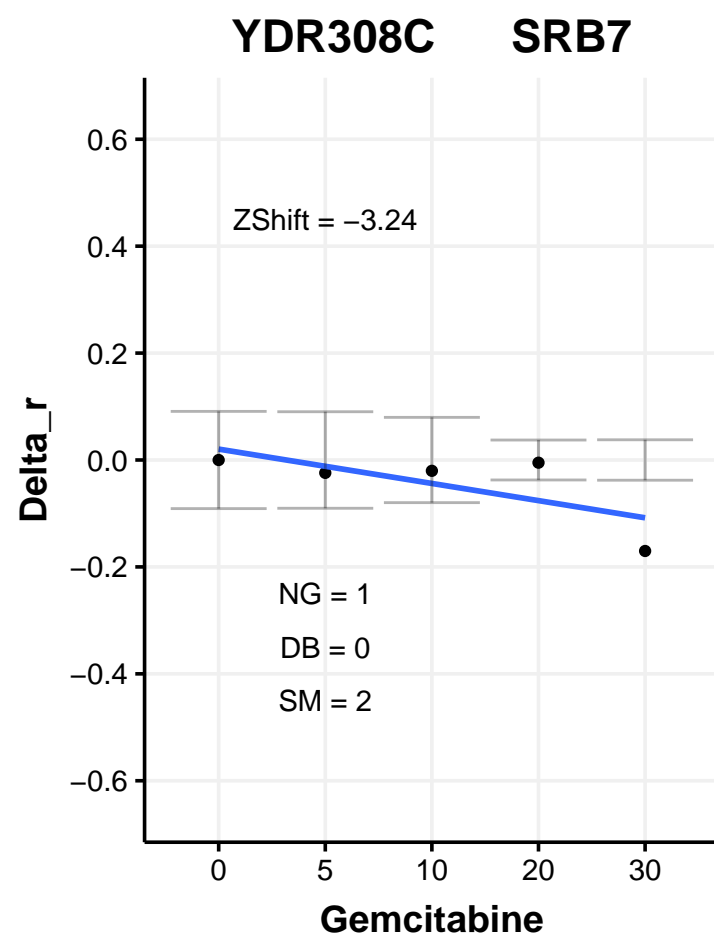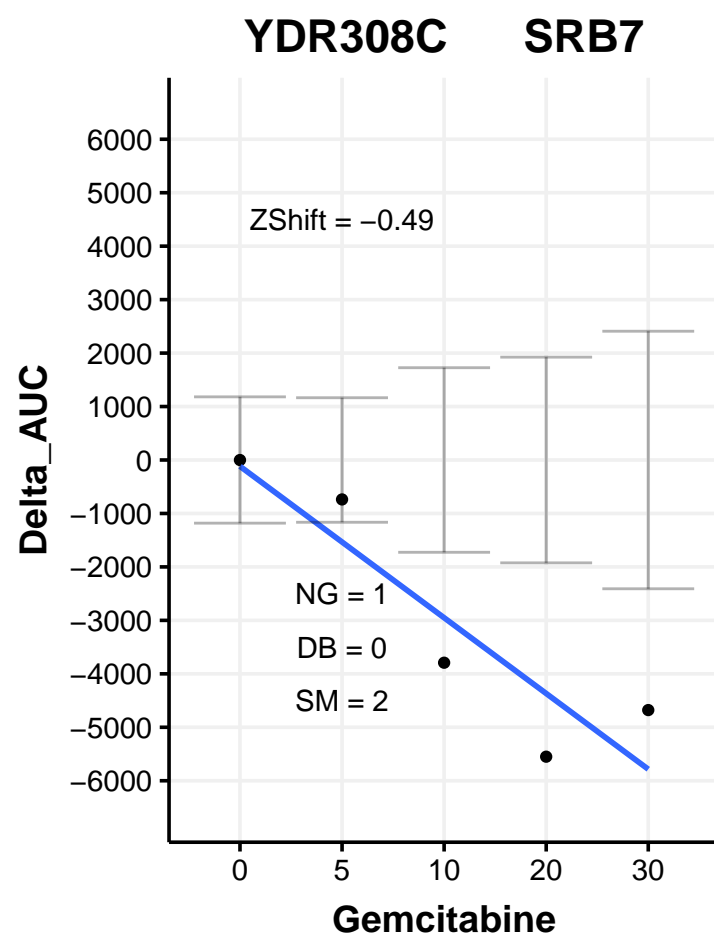

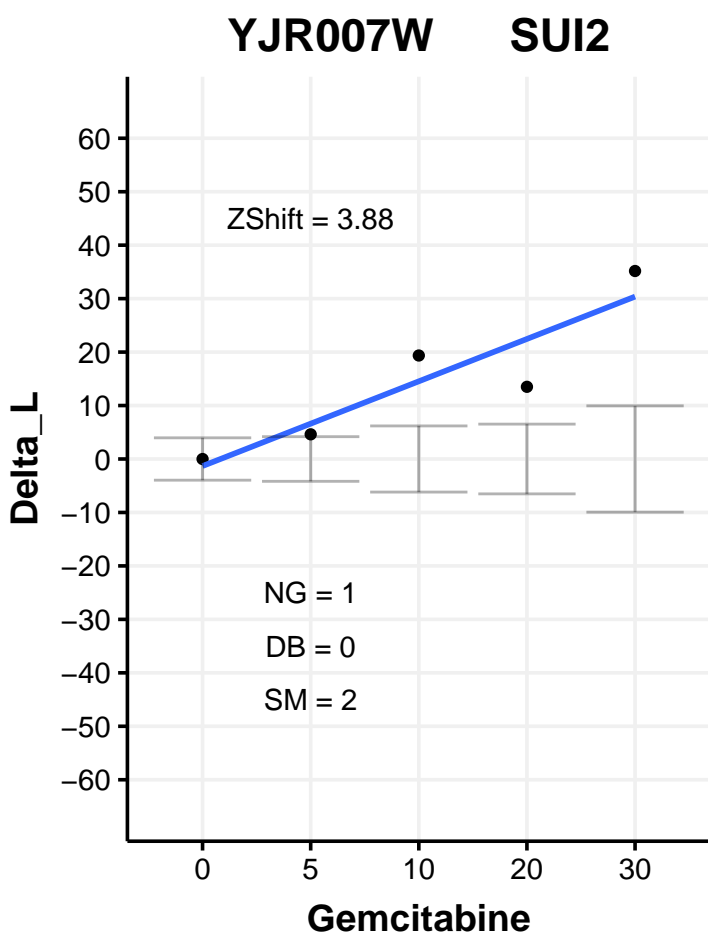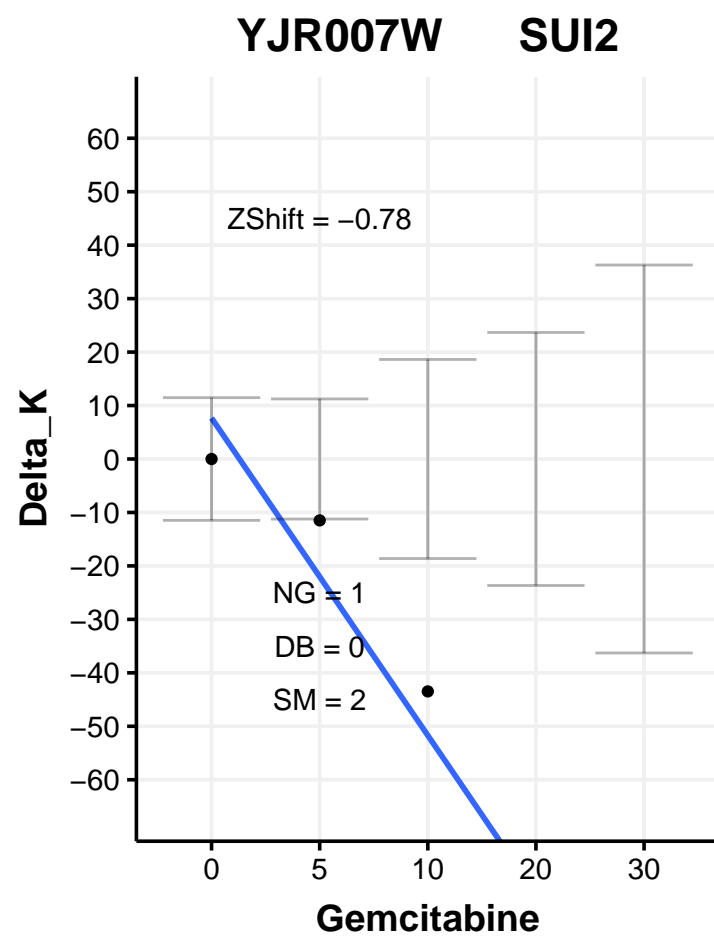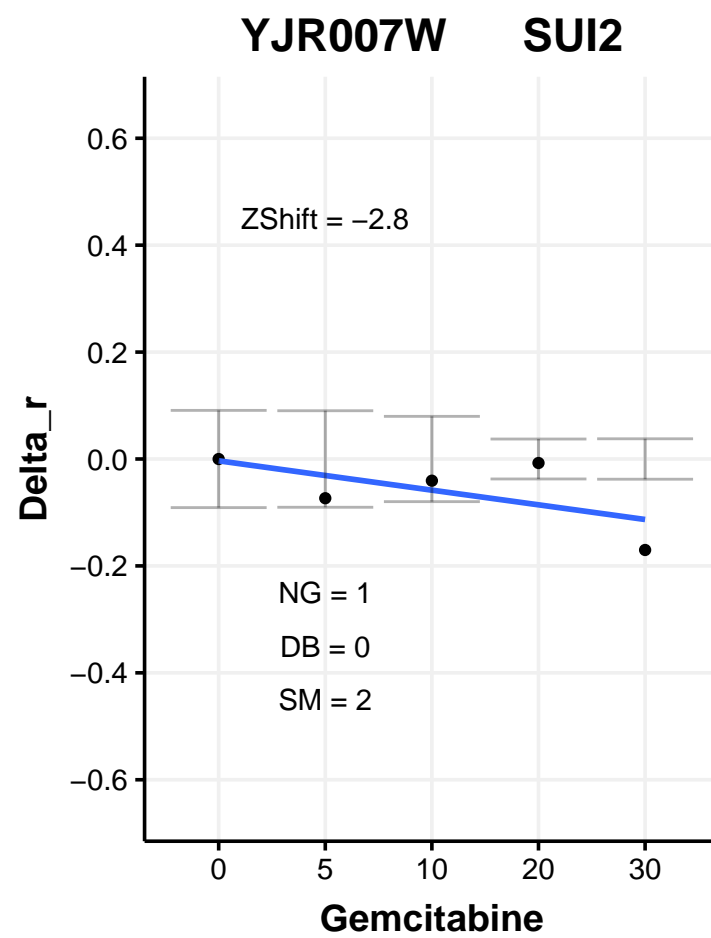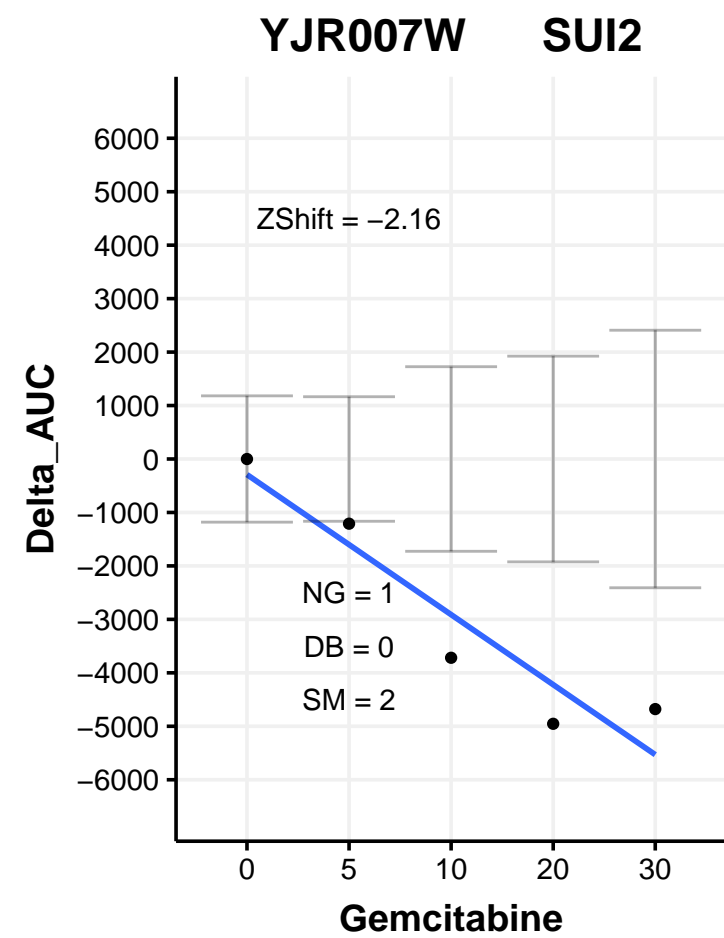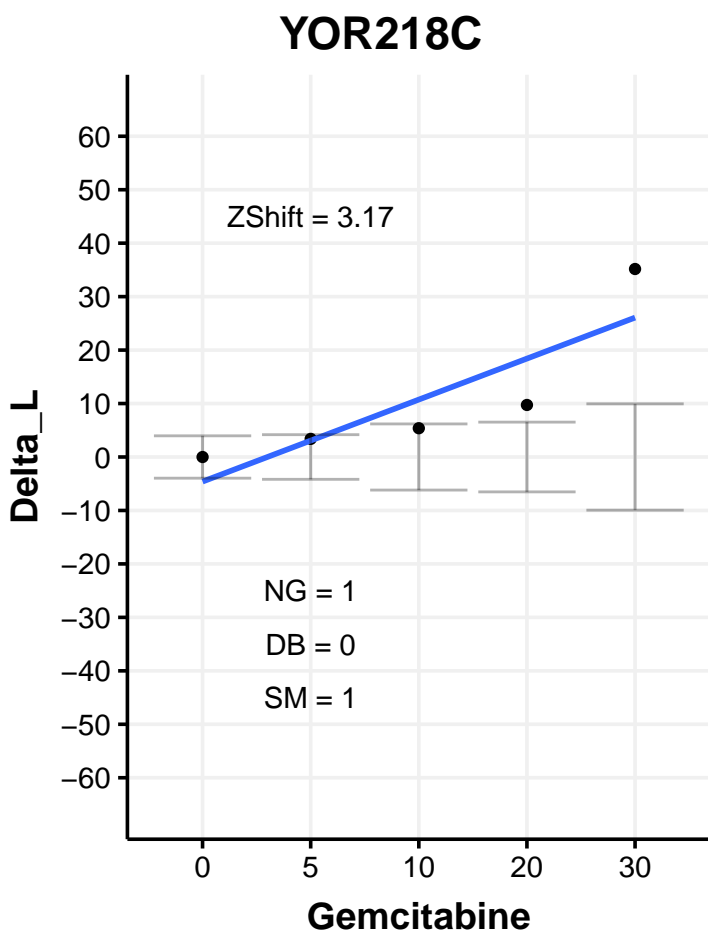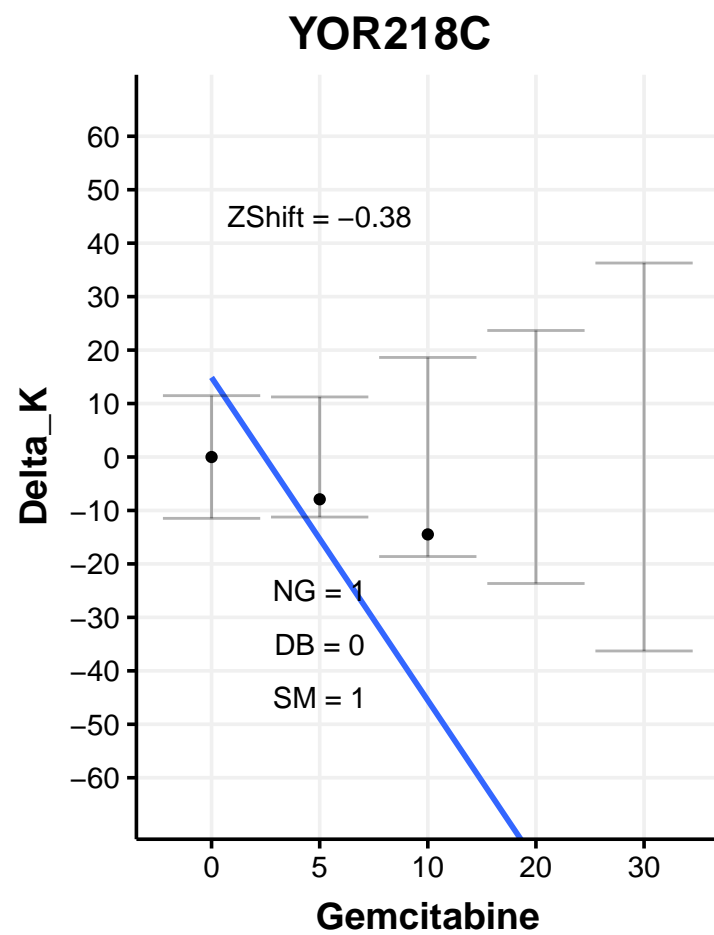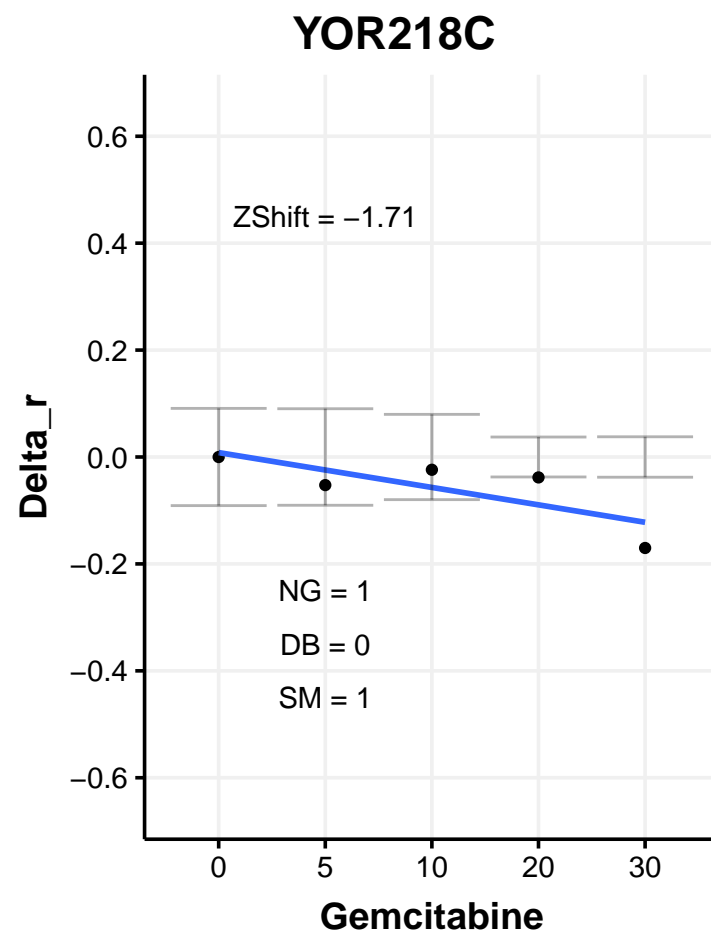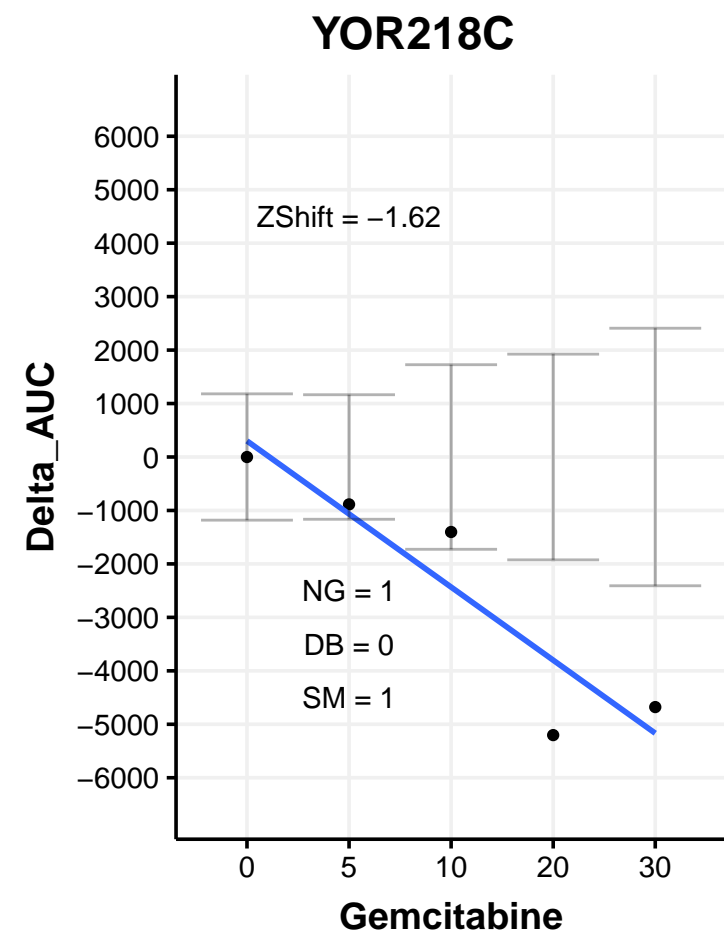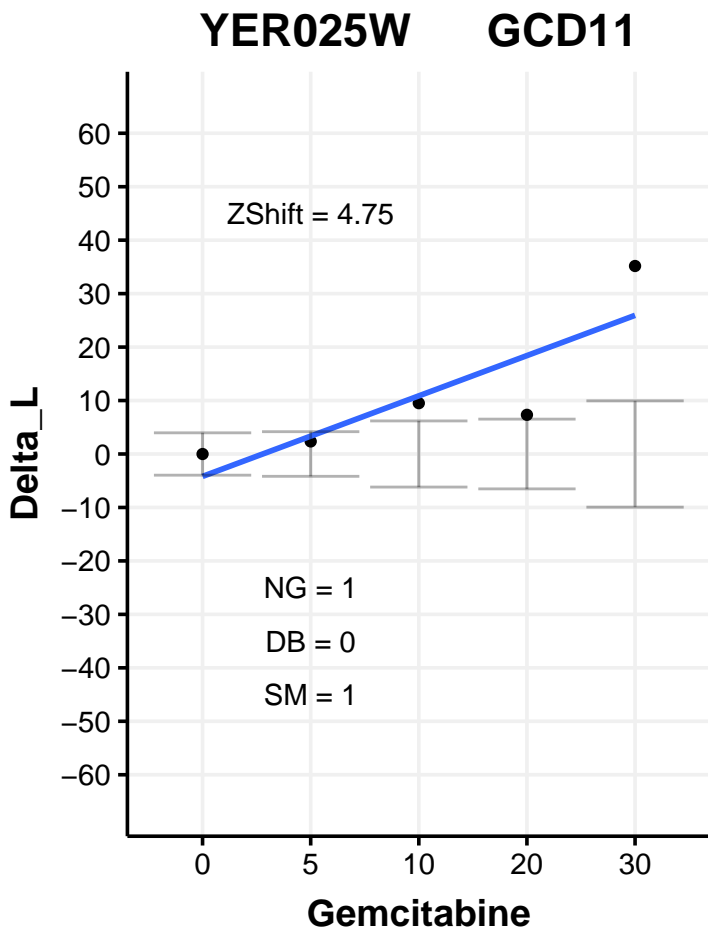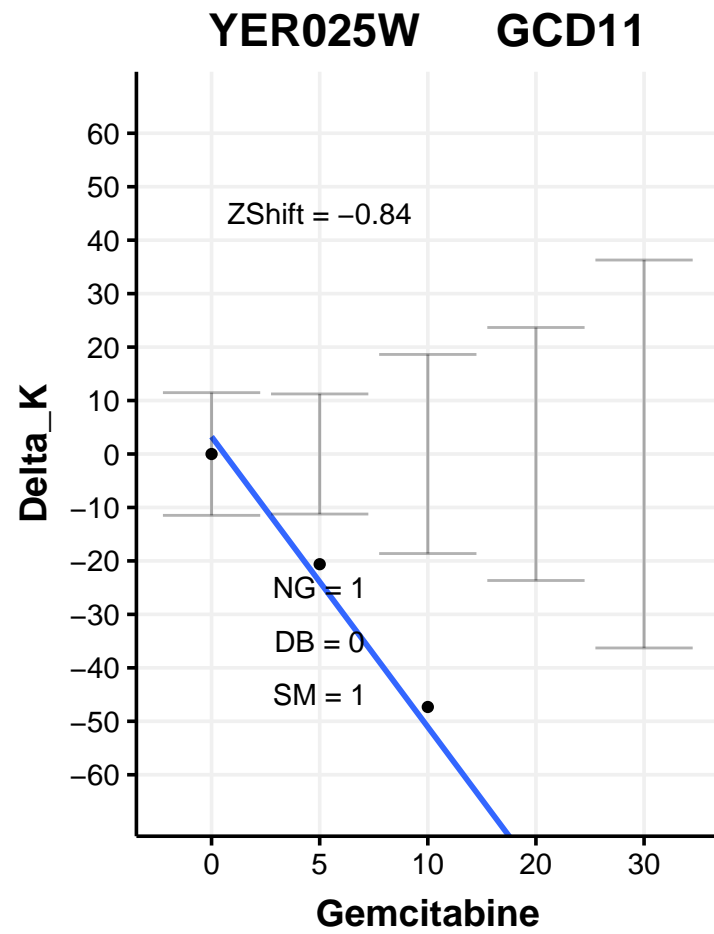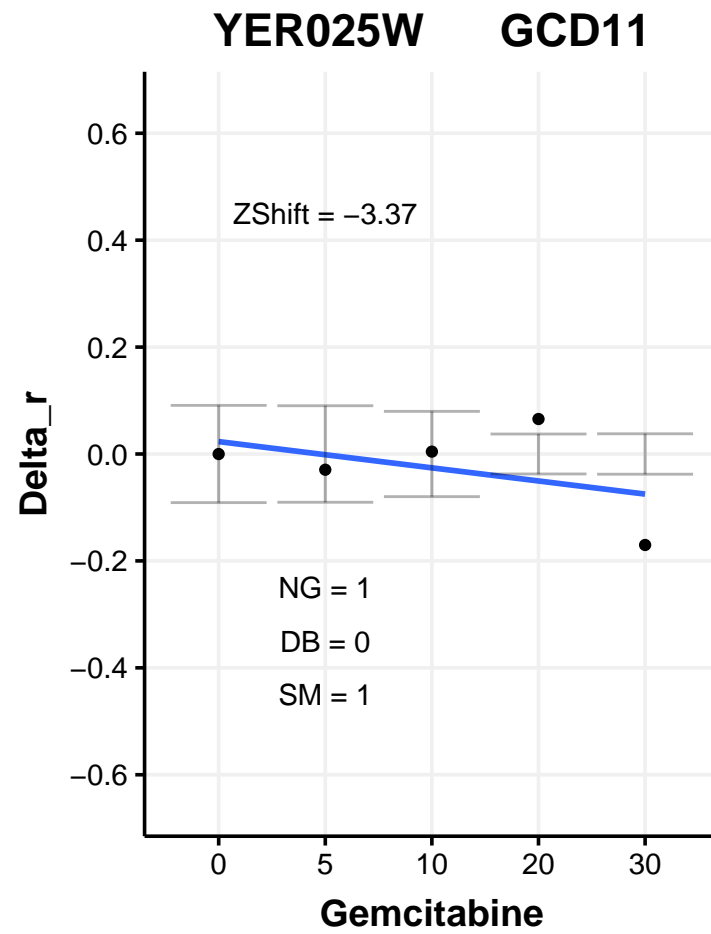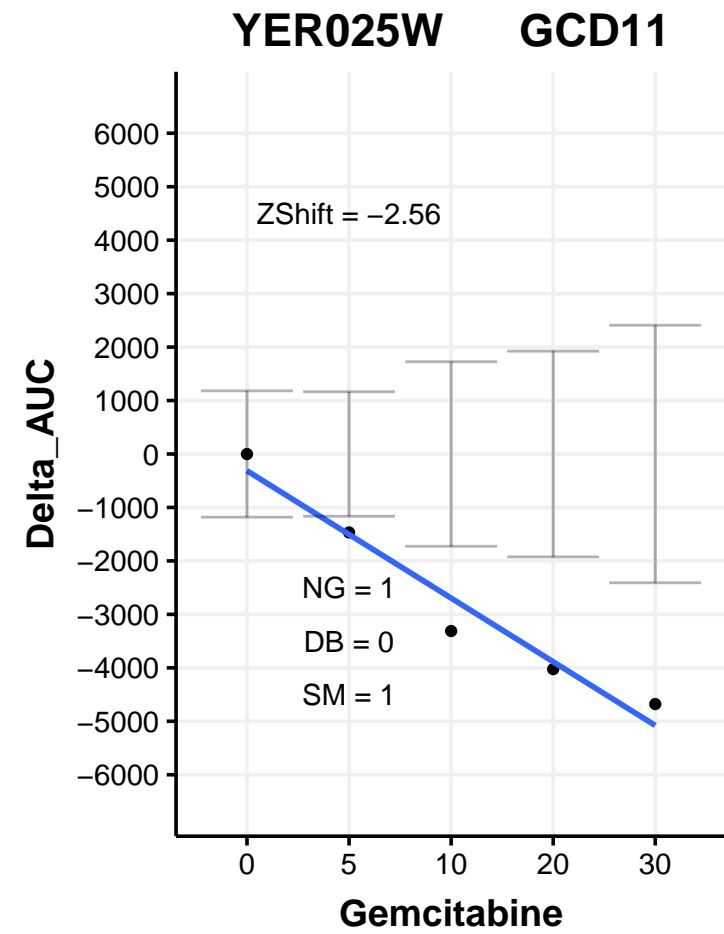

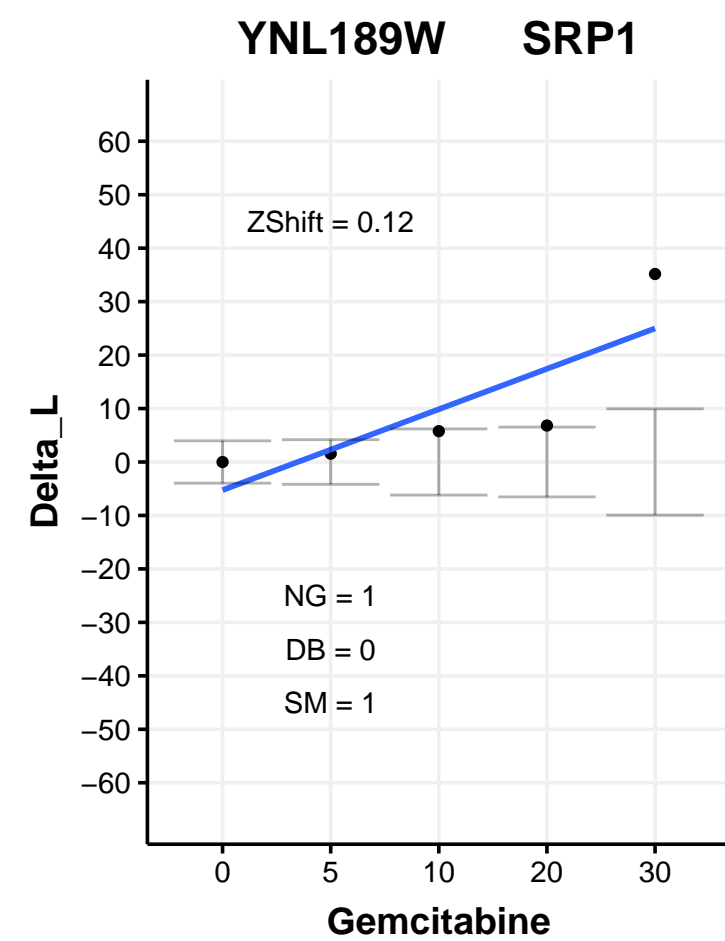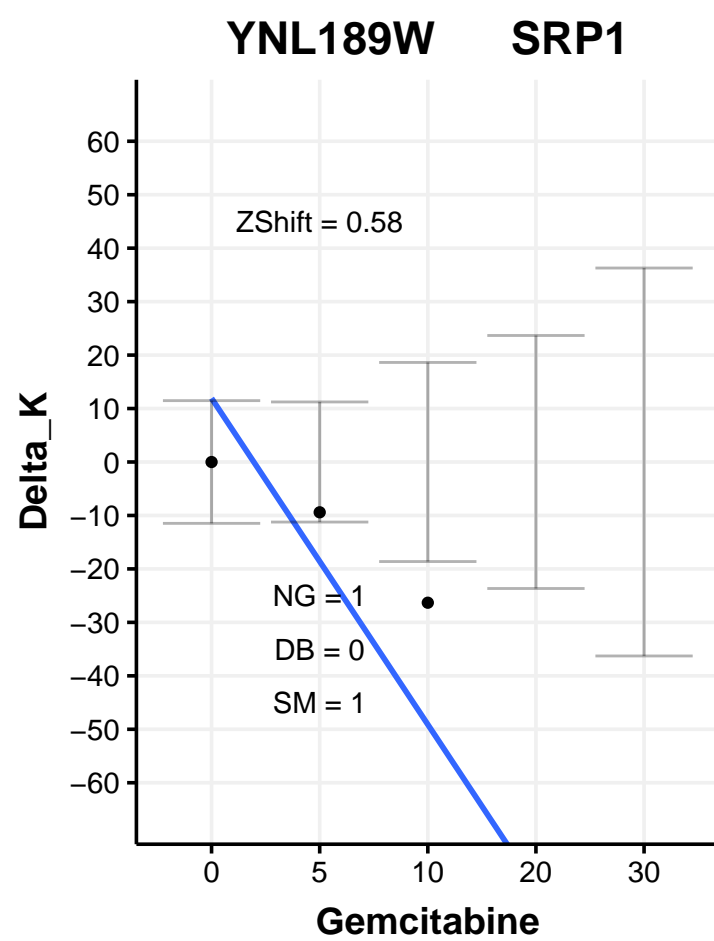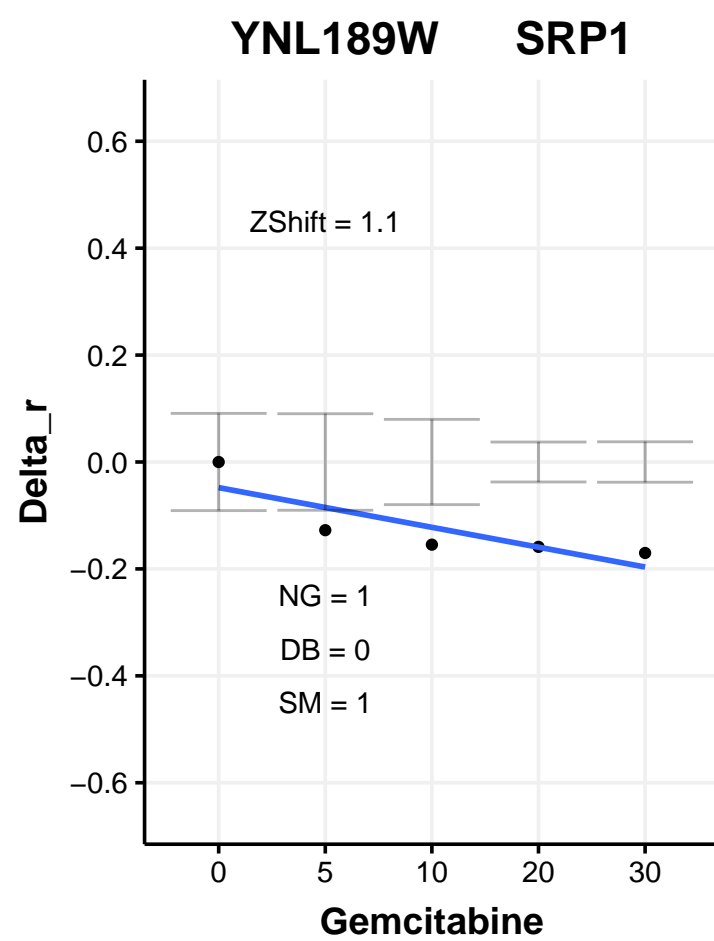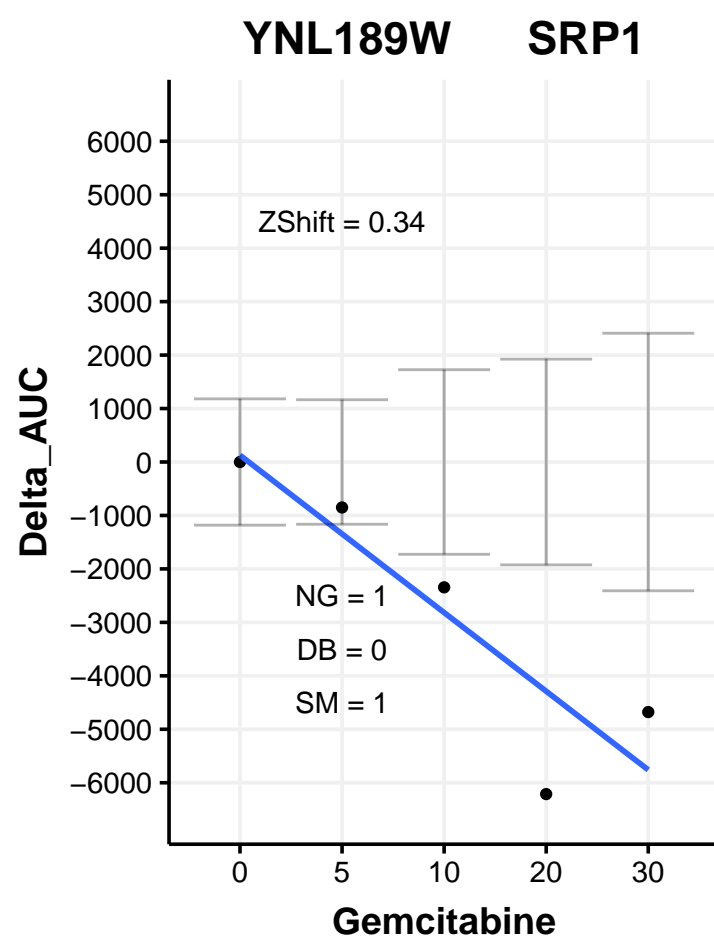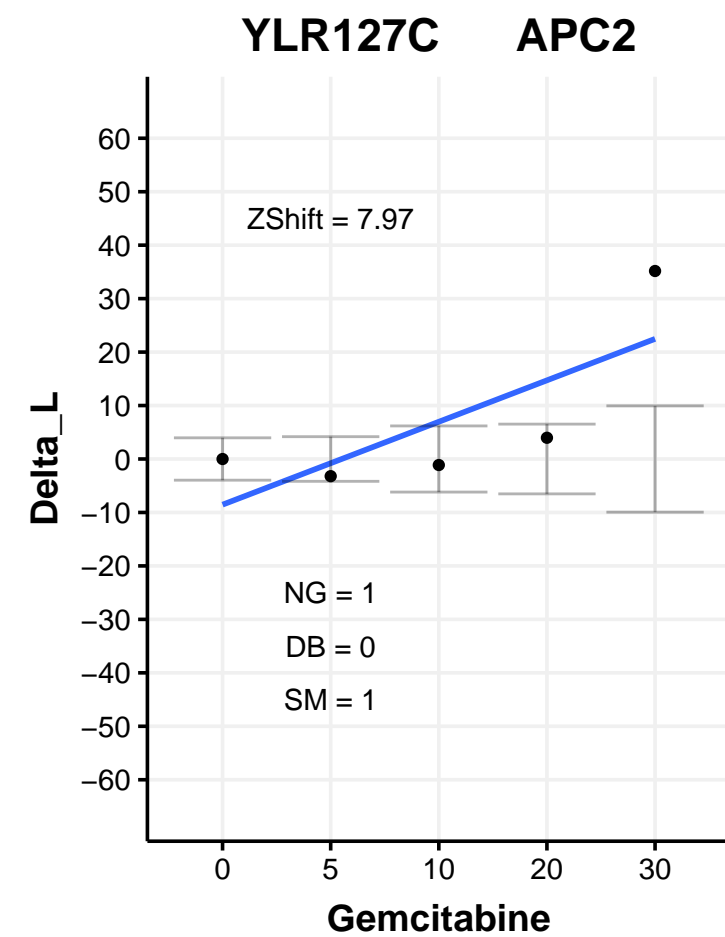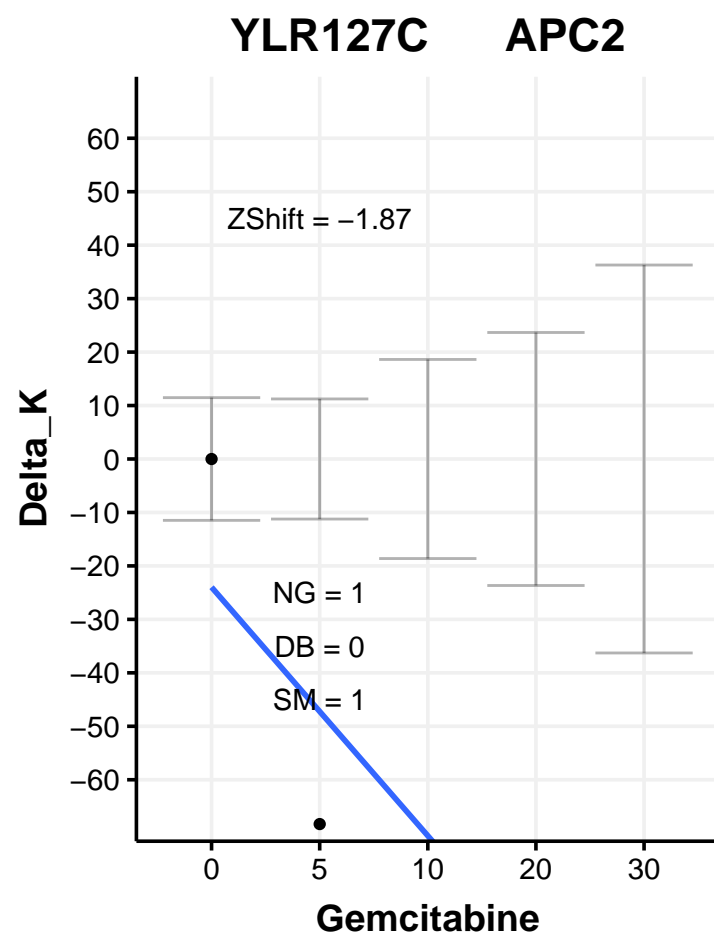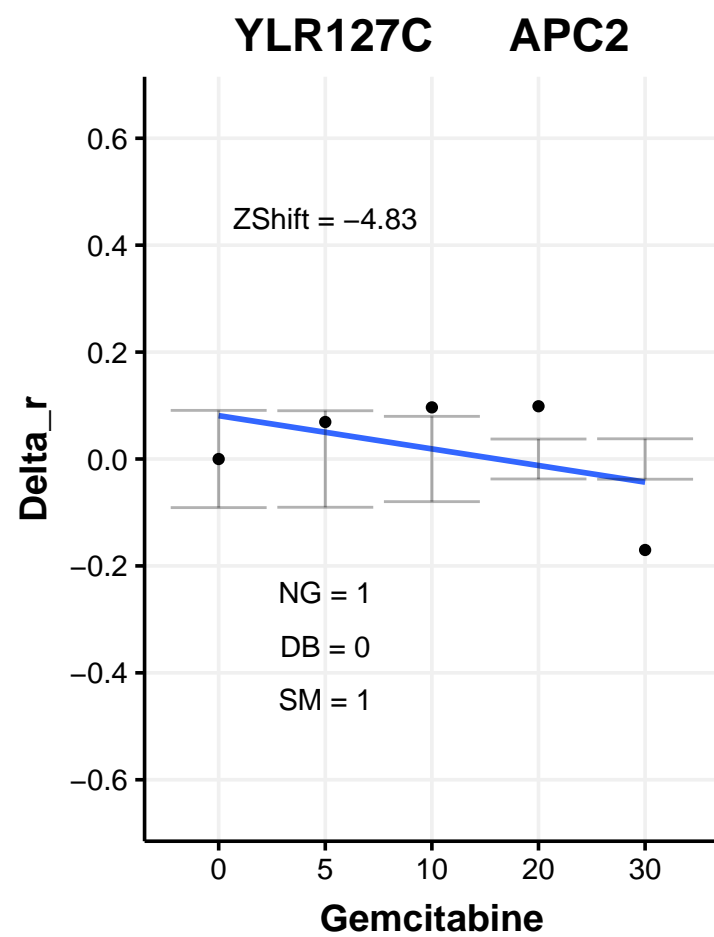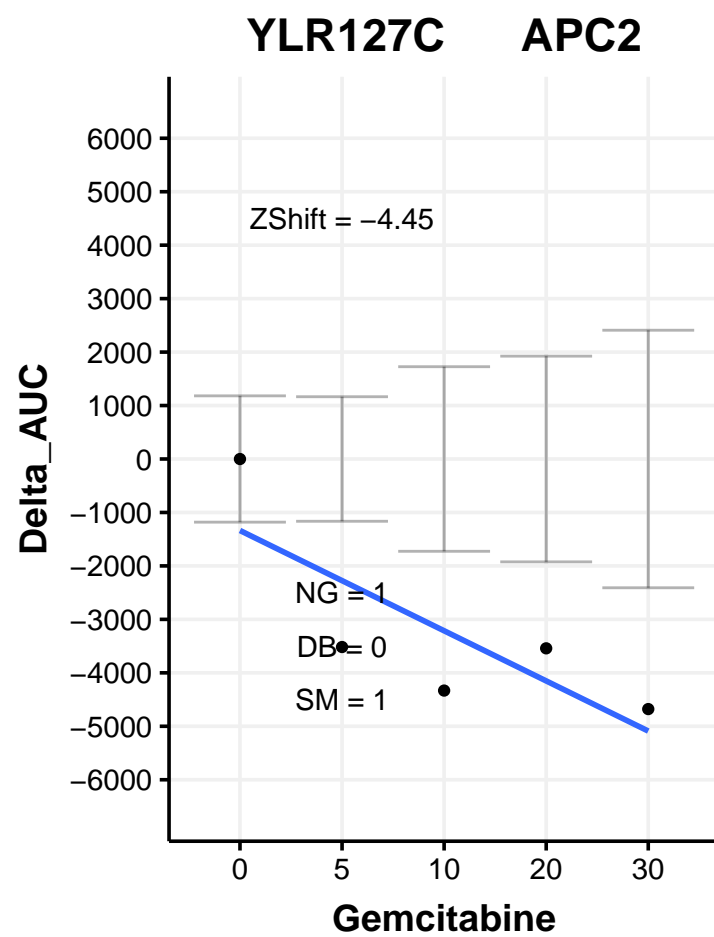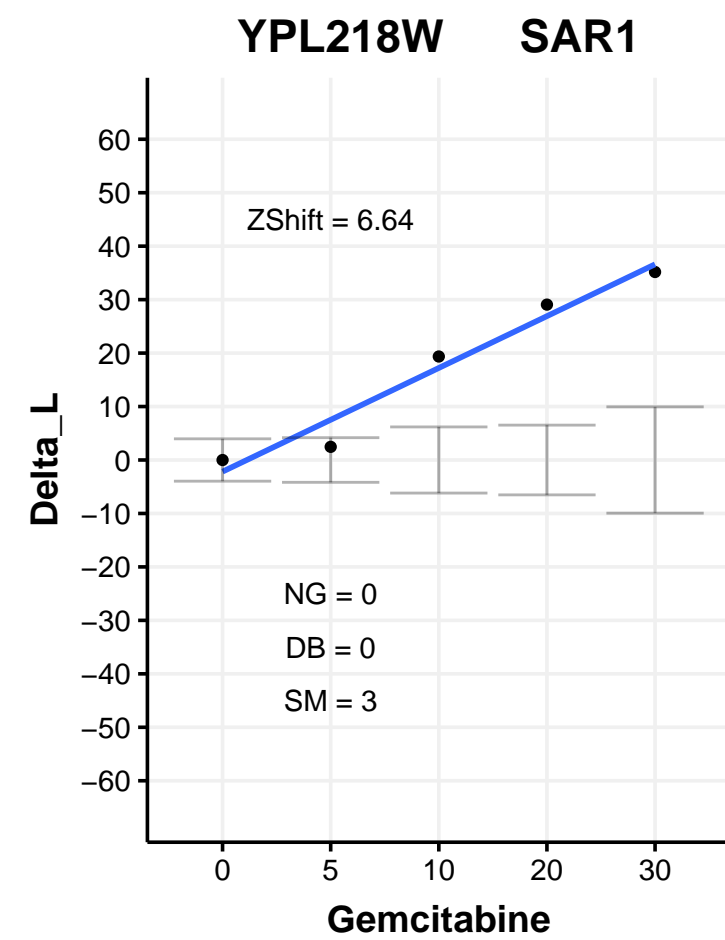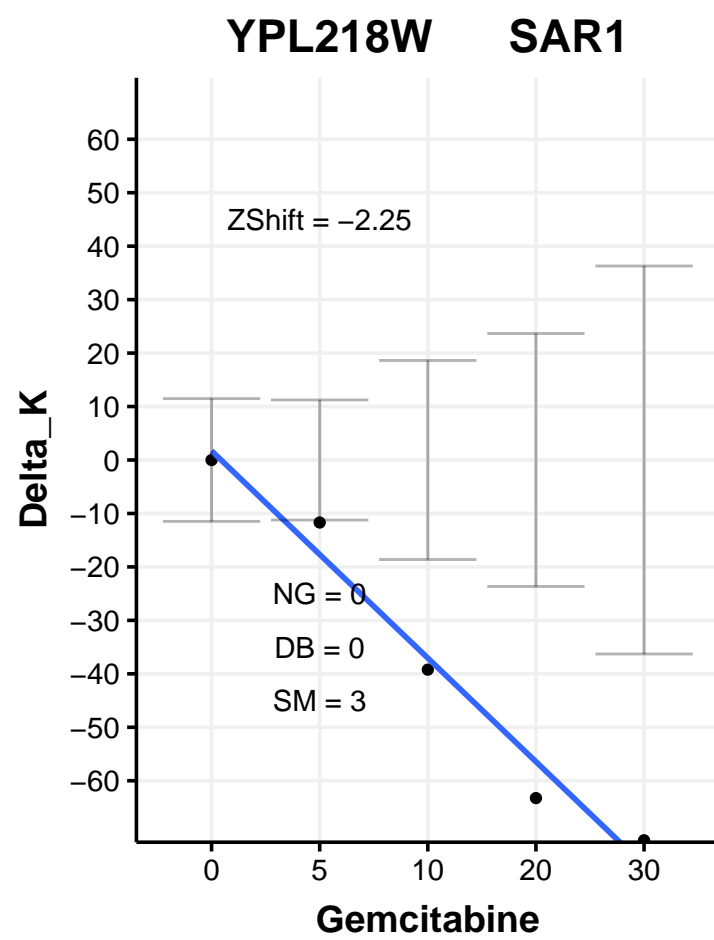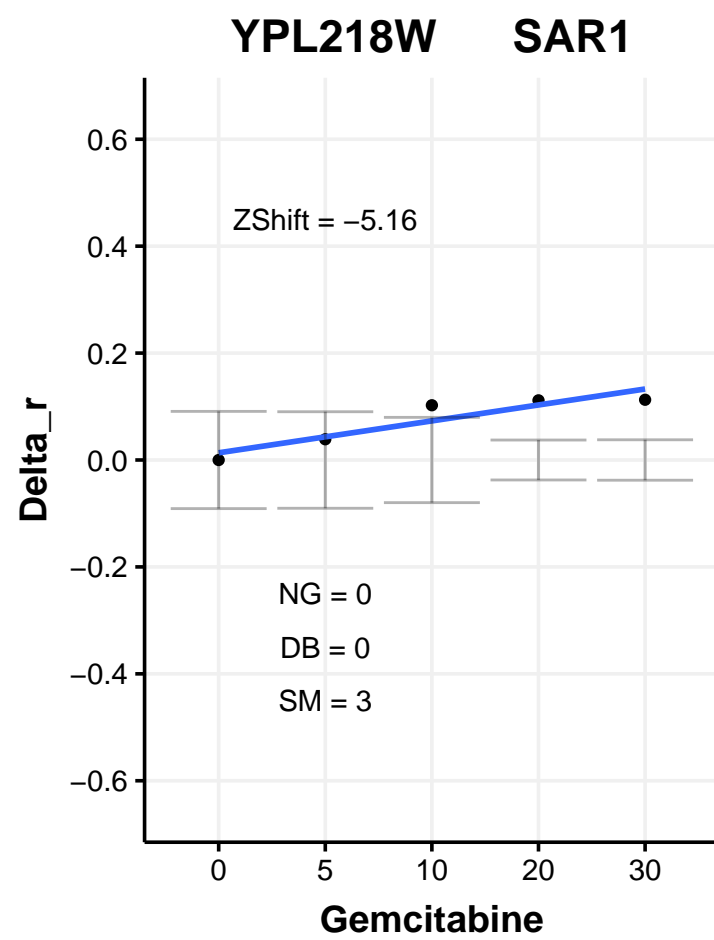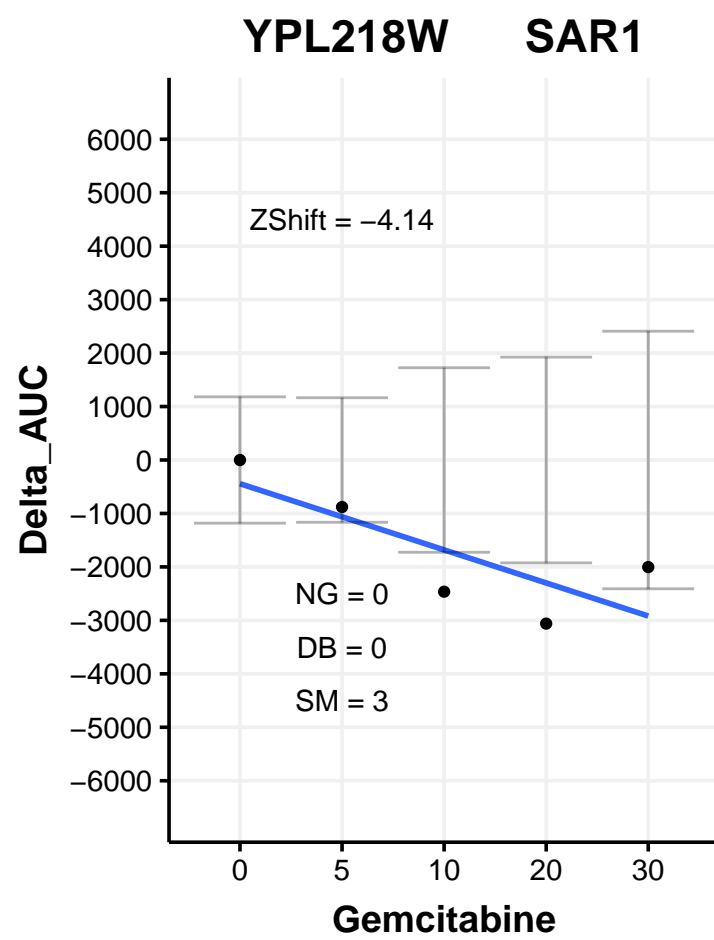

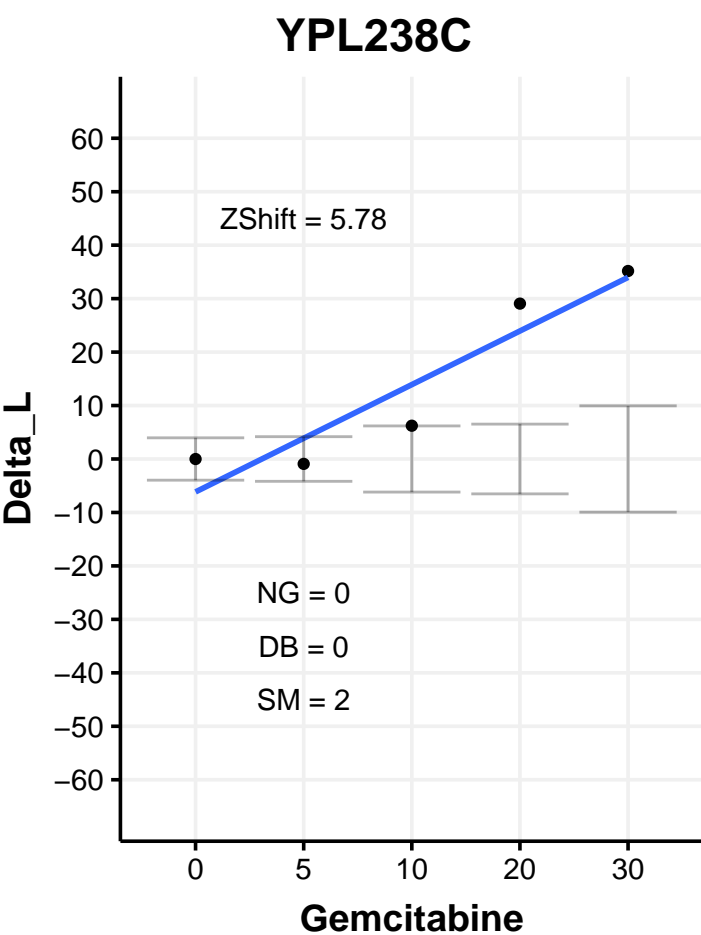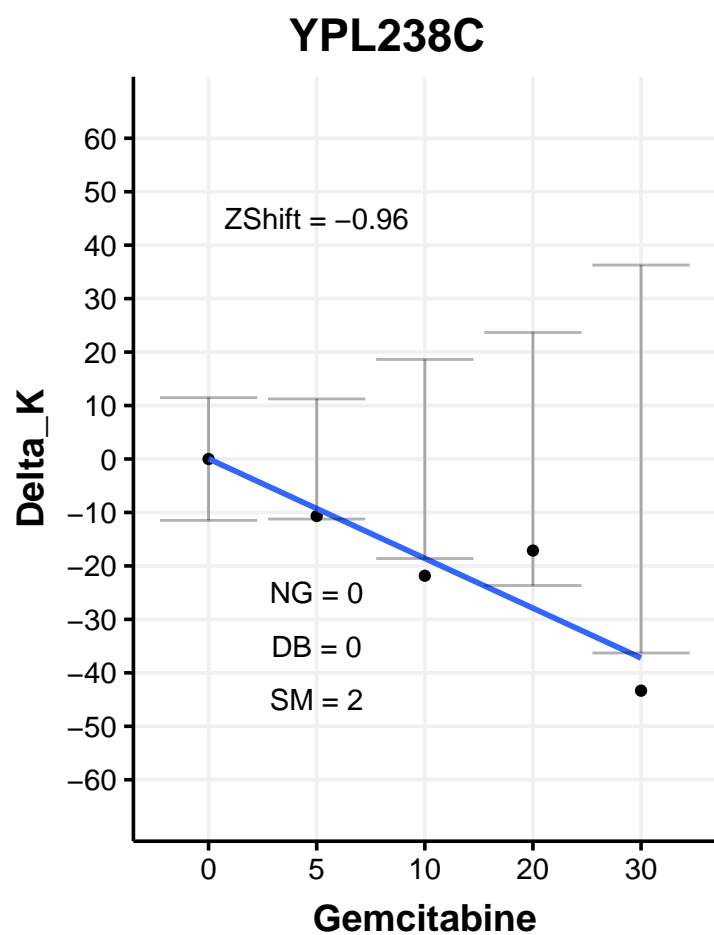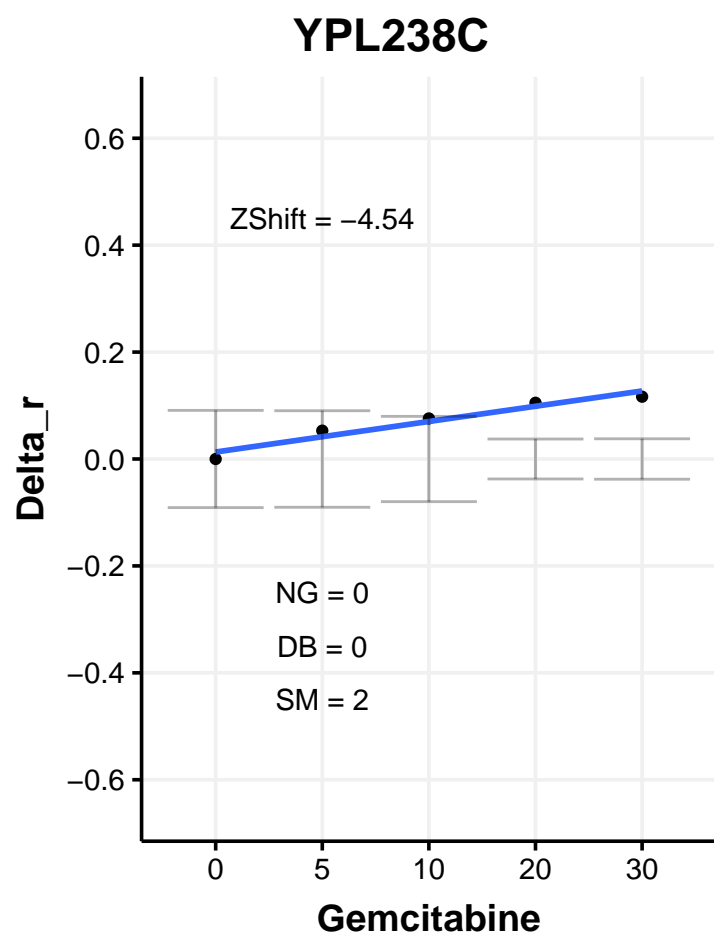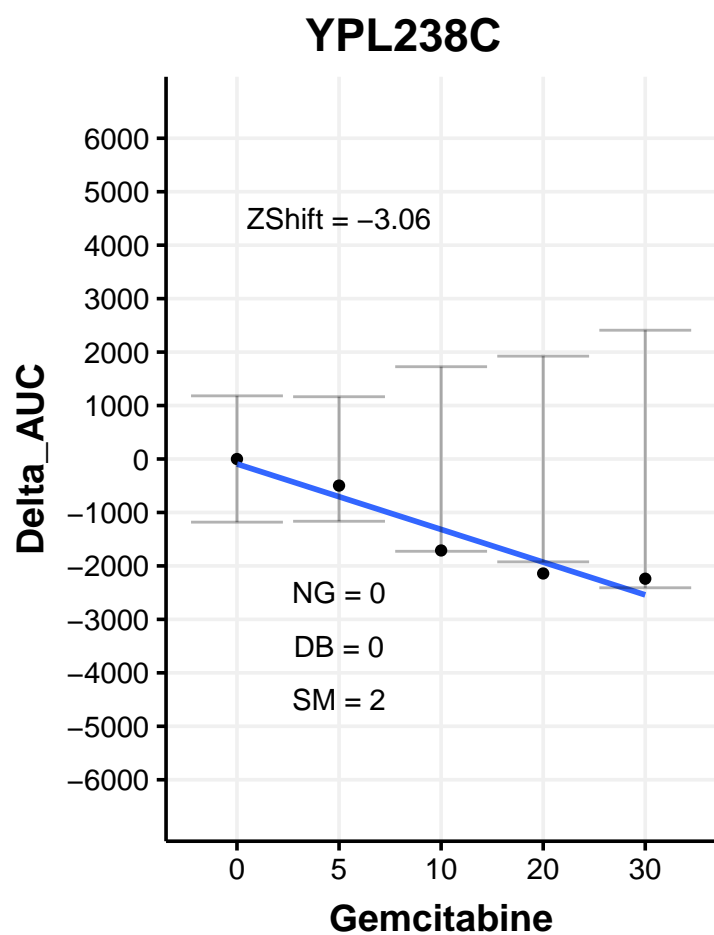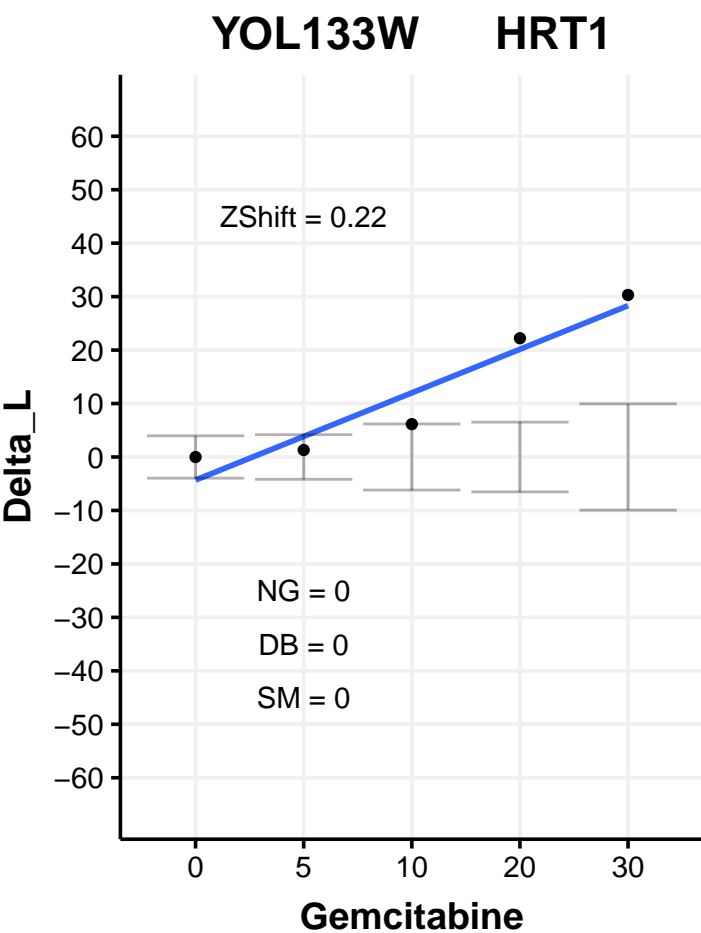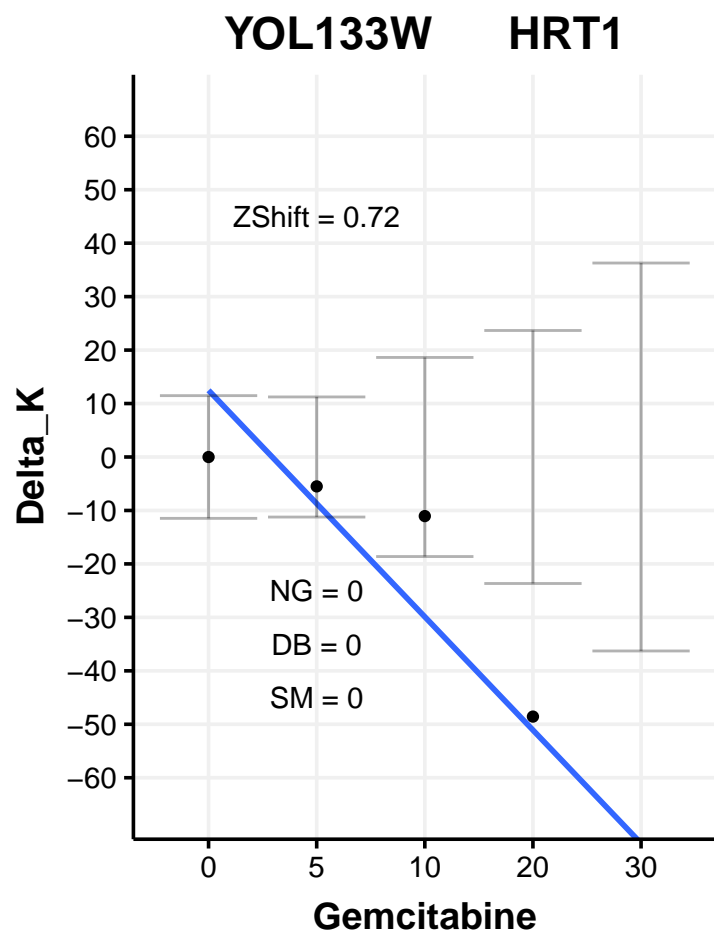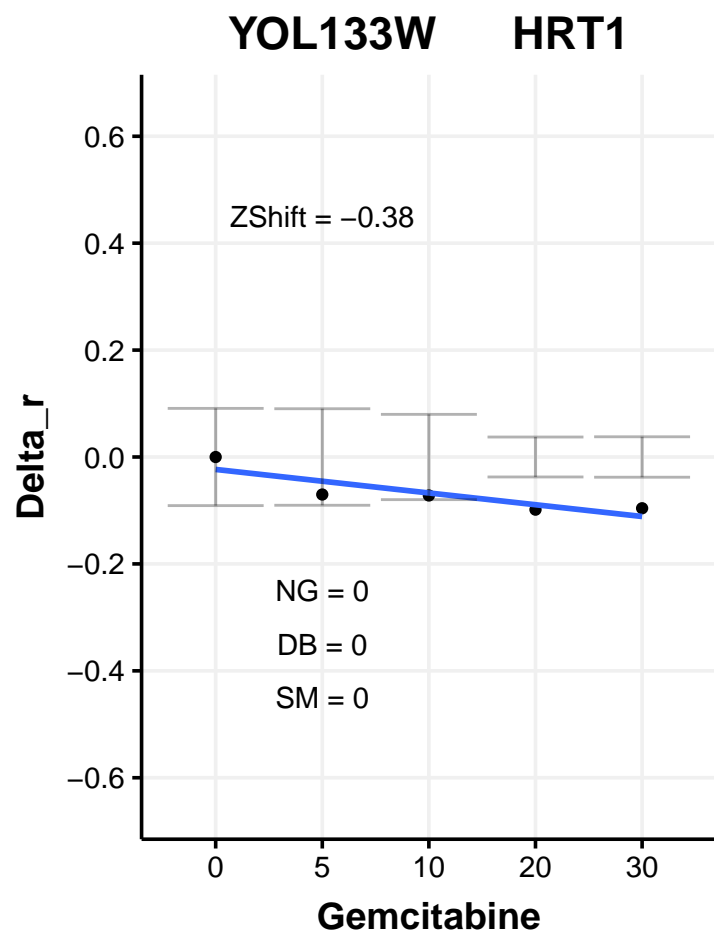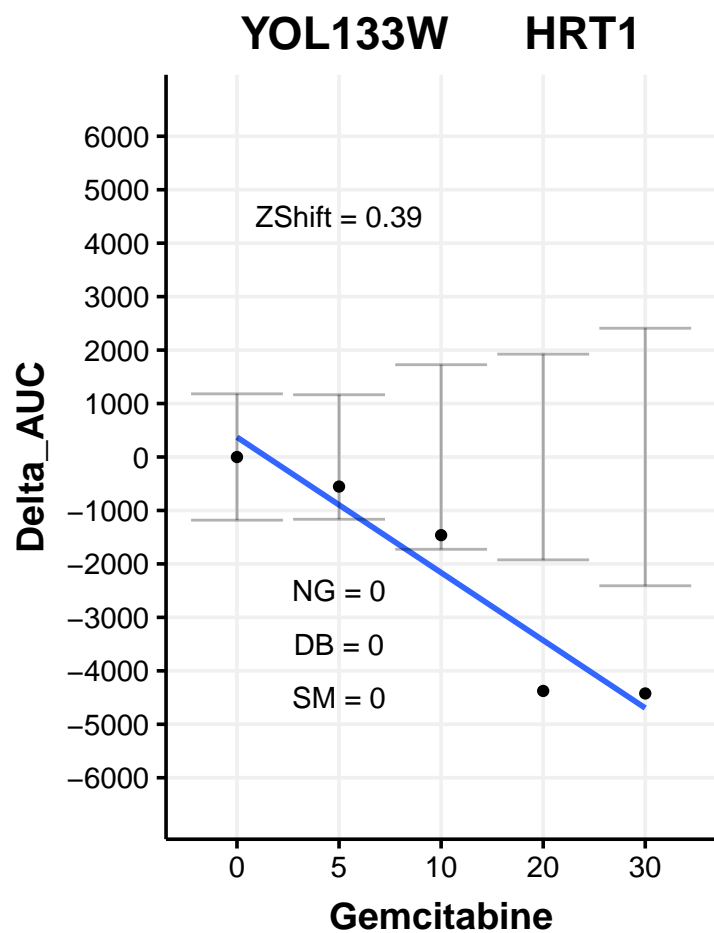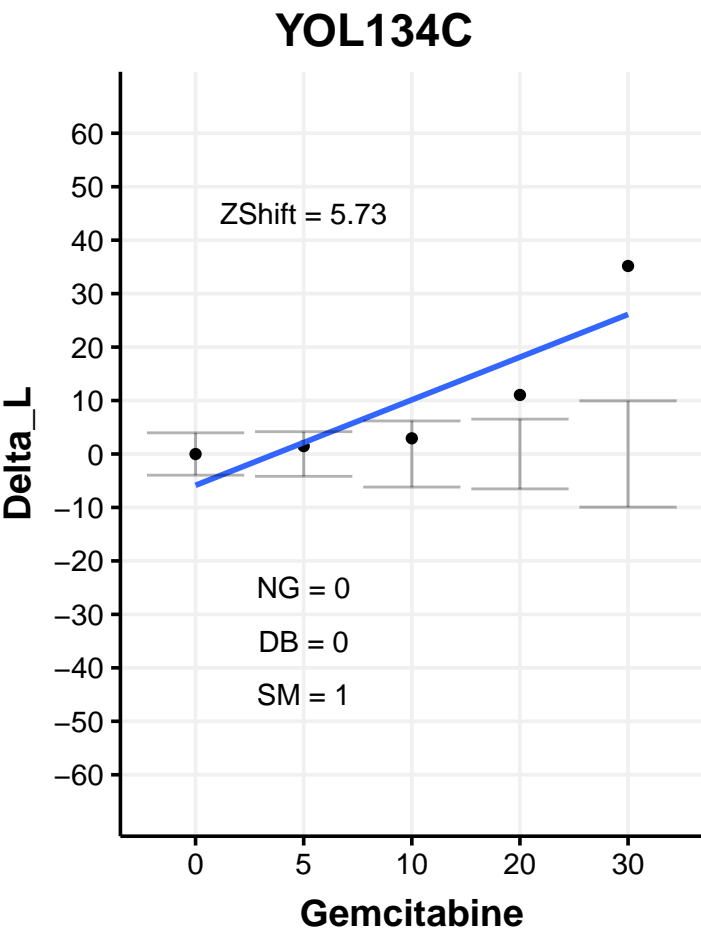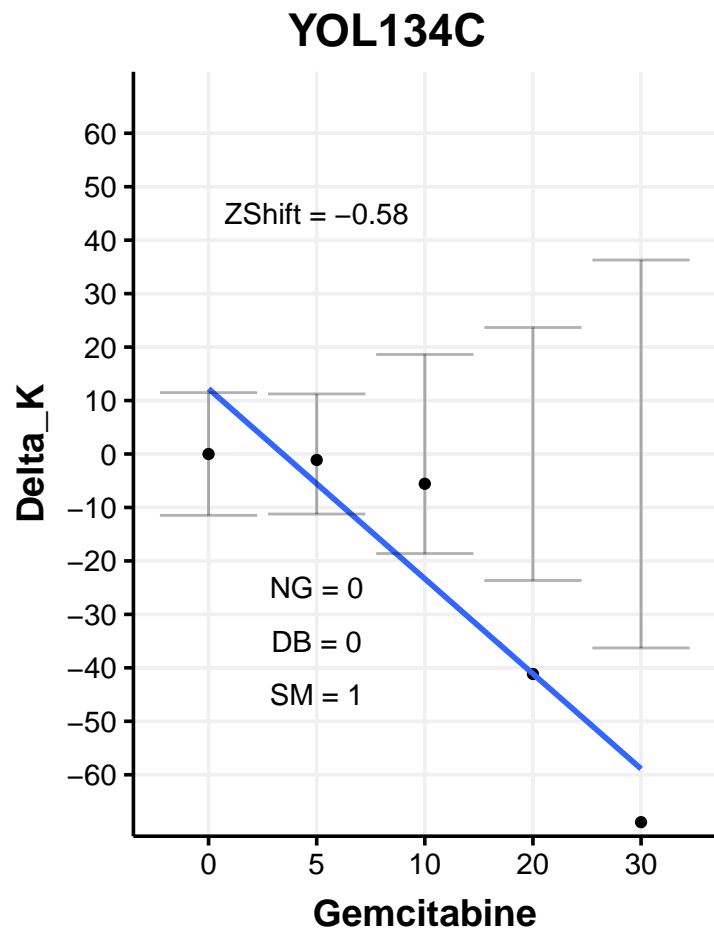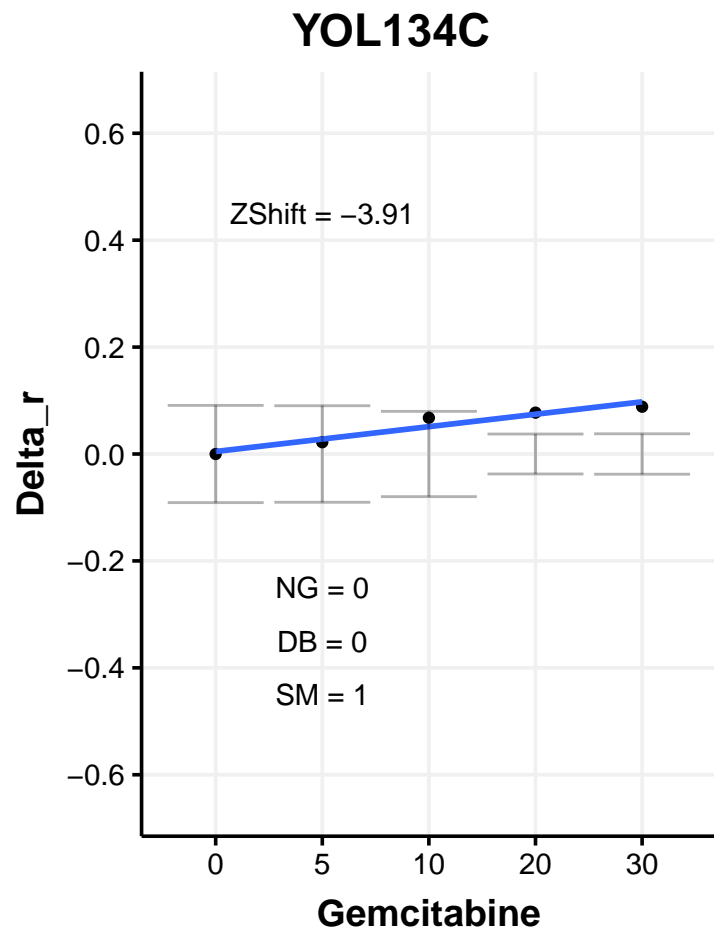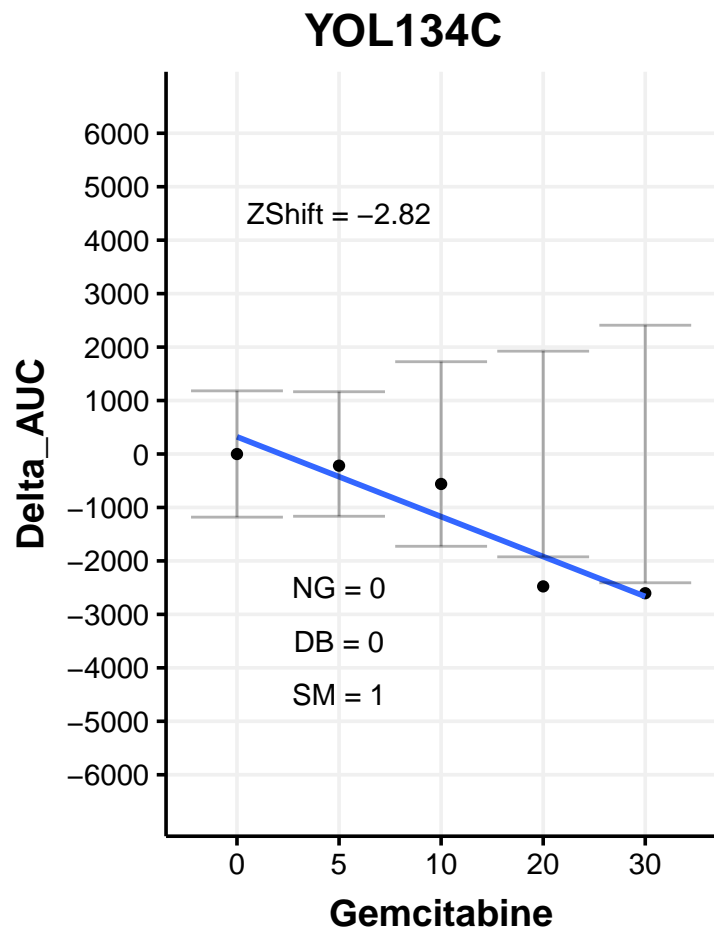

YLR317W

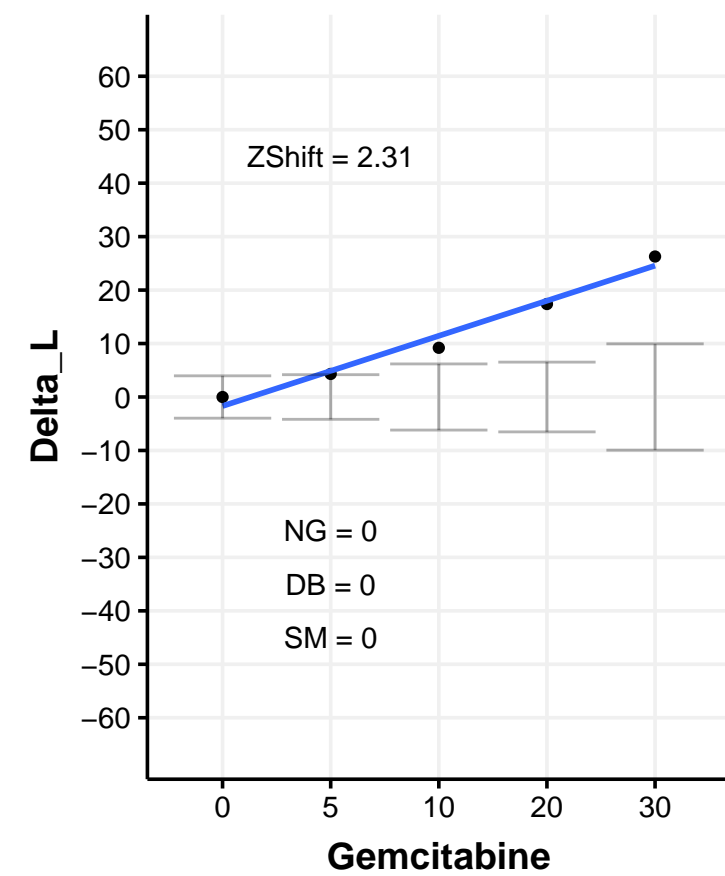

YLR317W

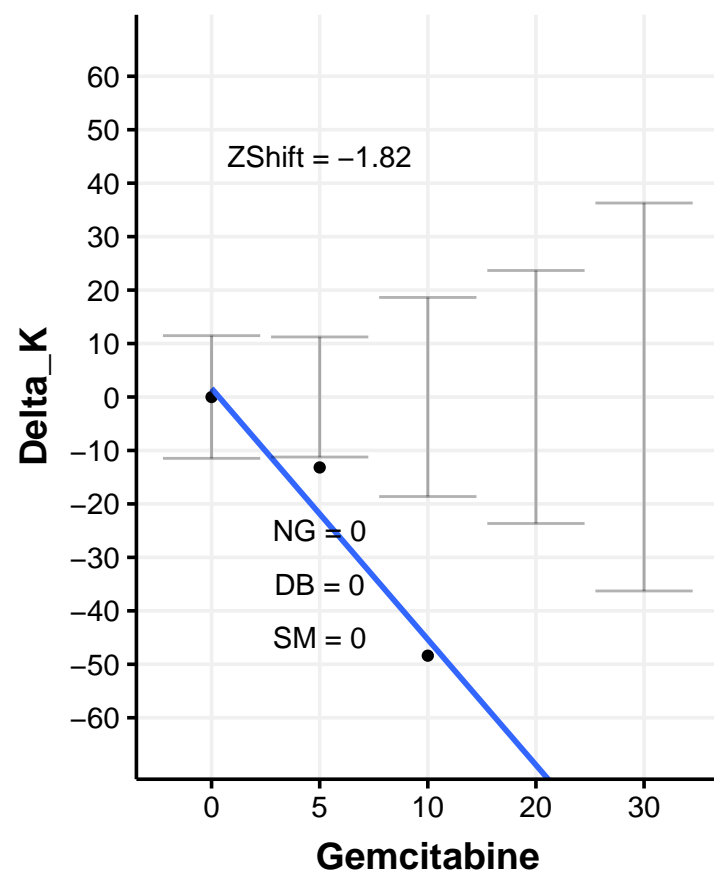

YLR317W

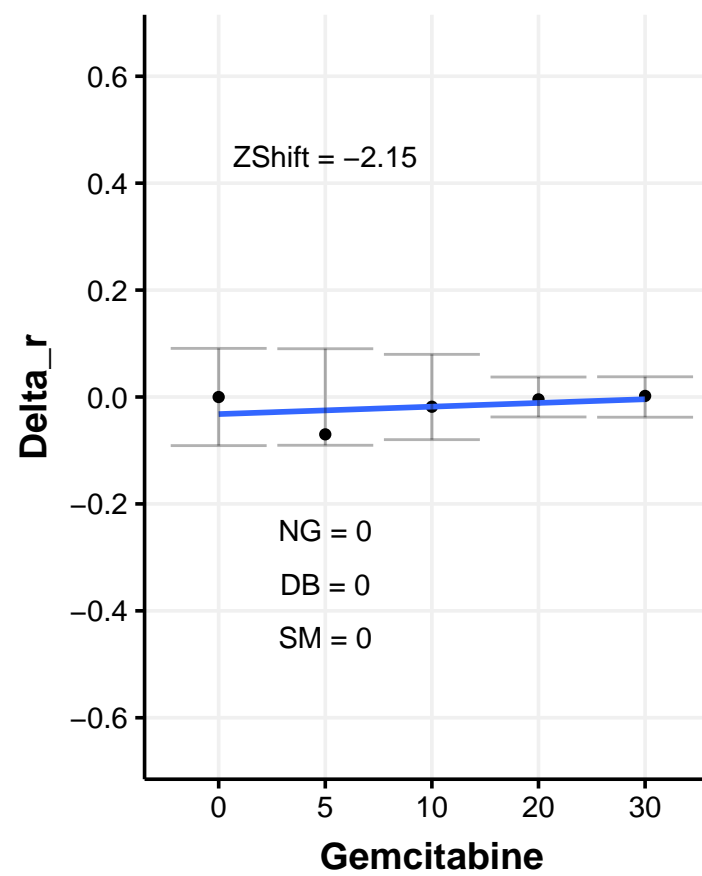

YLR317W

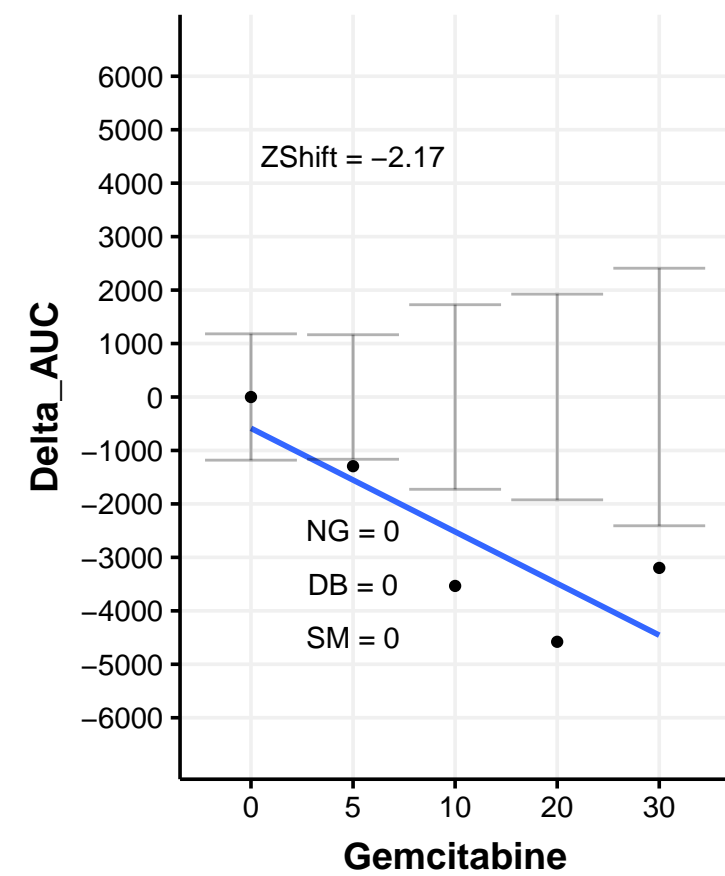

YGL018C JAC1

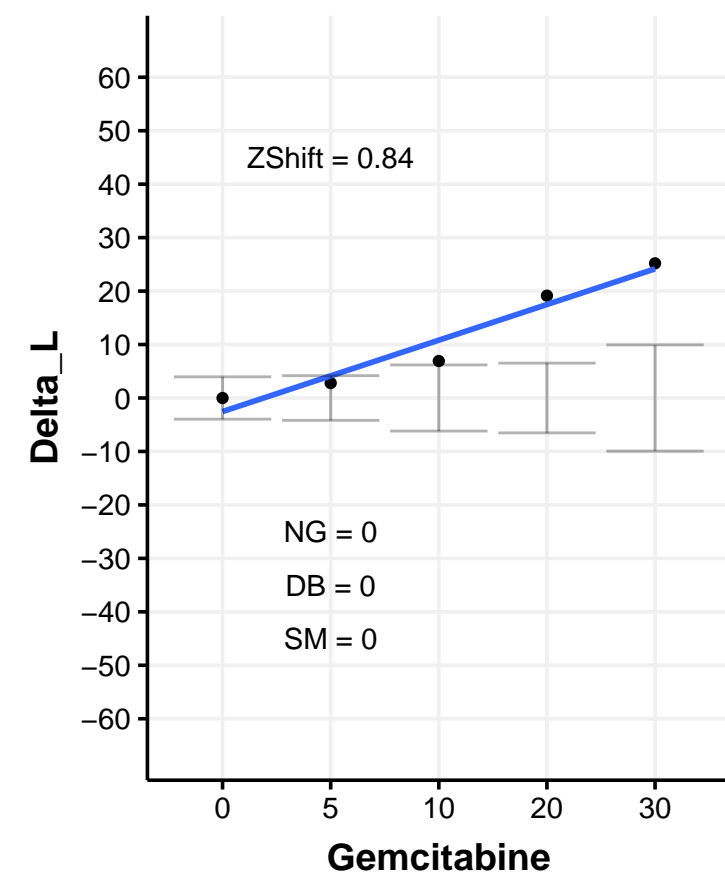

YGL018C JAC1

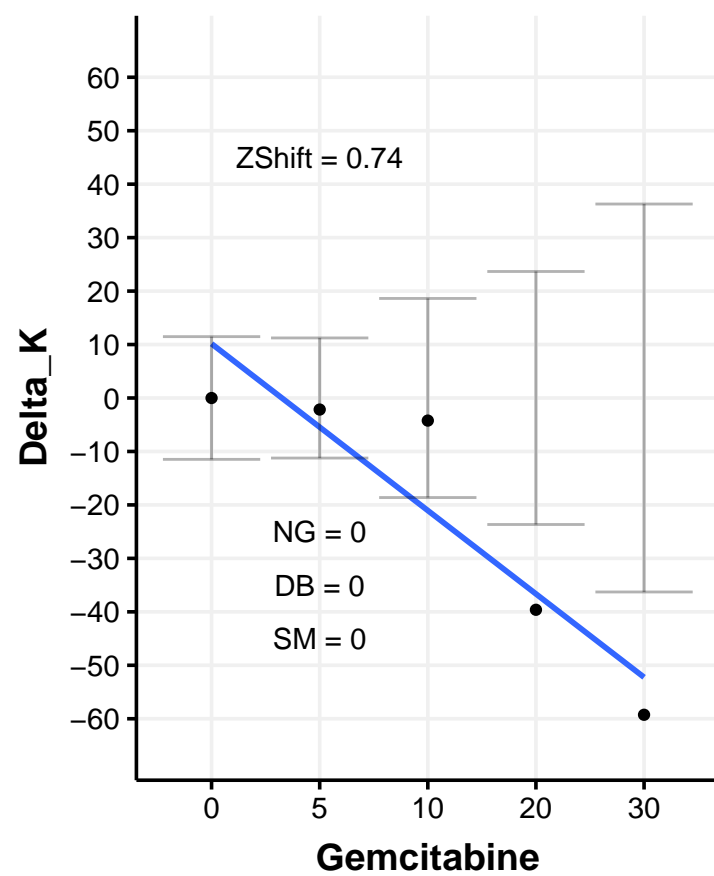

YGL018C JAC1

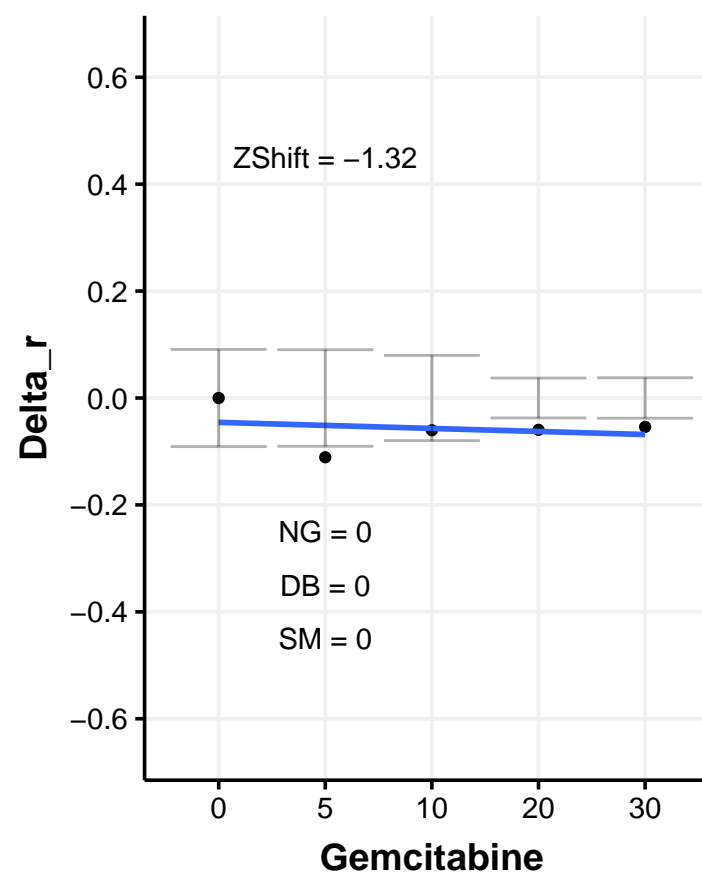

YGL018C JAC1

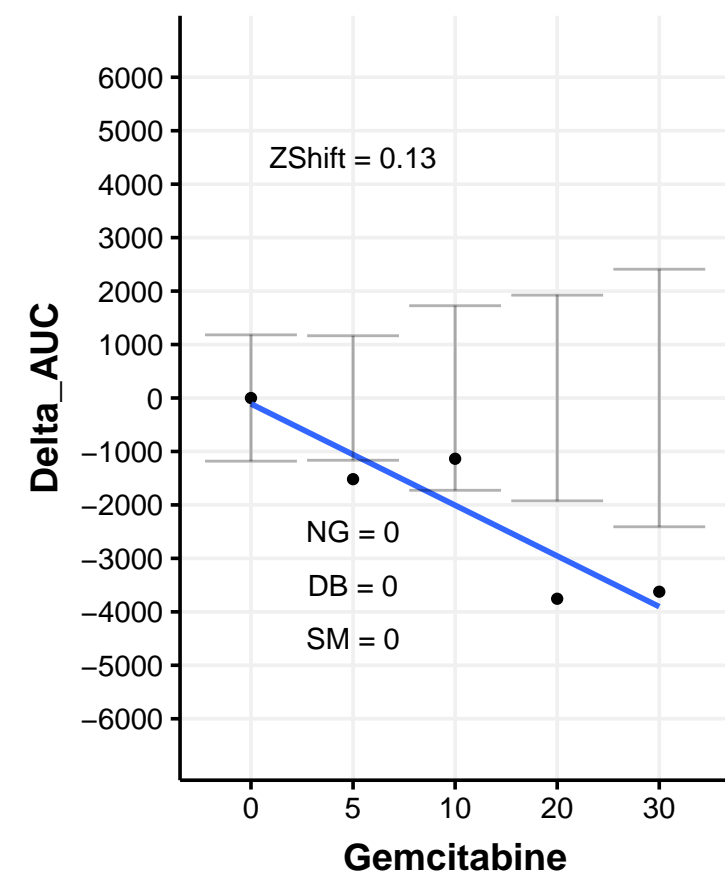

YPR144C NOC4

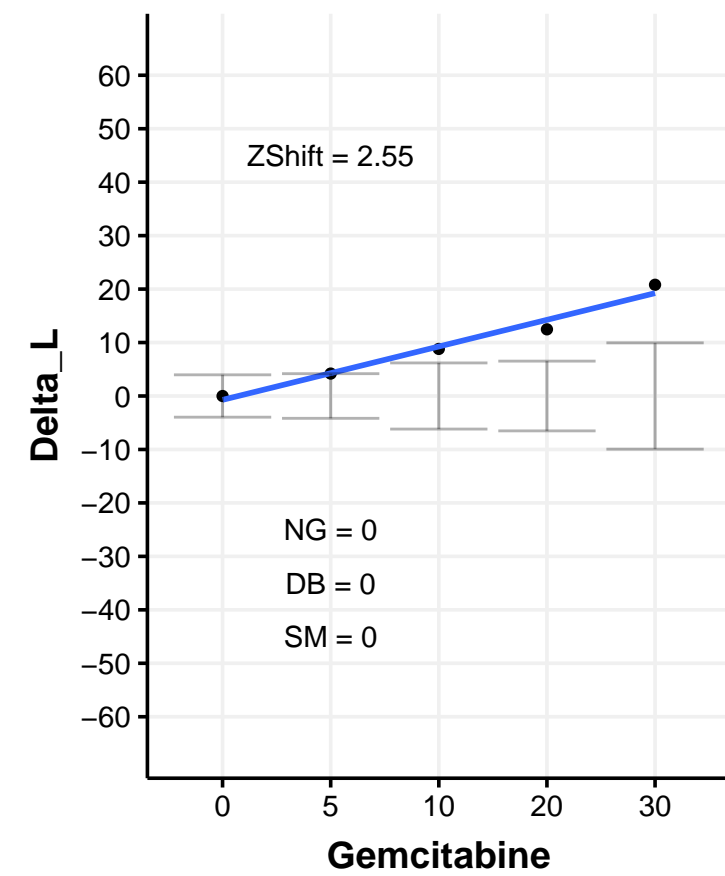

YPR144C NOC4

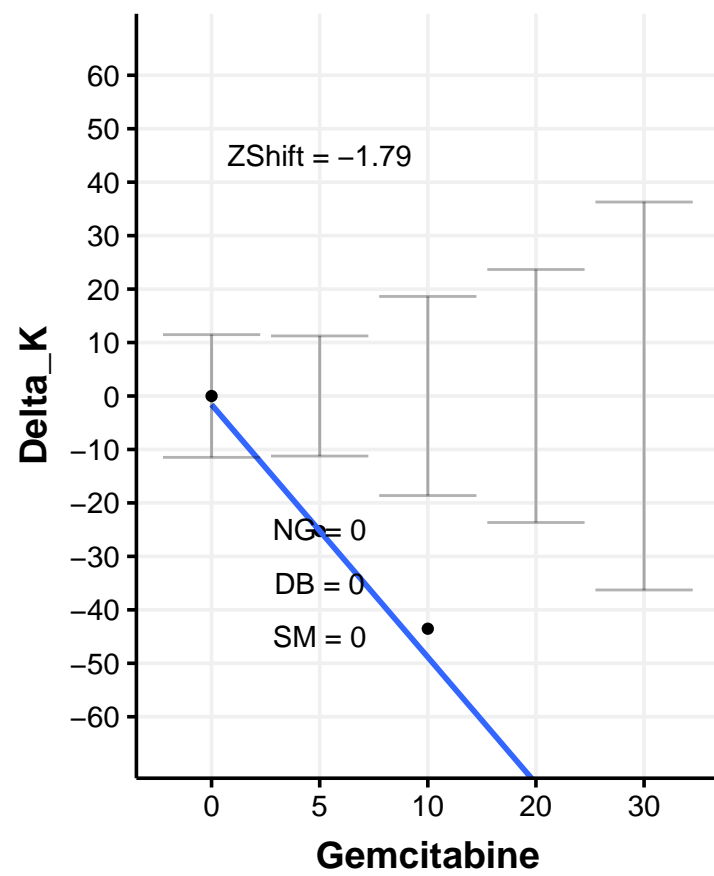

YPR144C NOC4

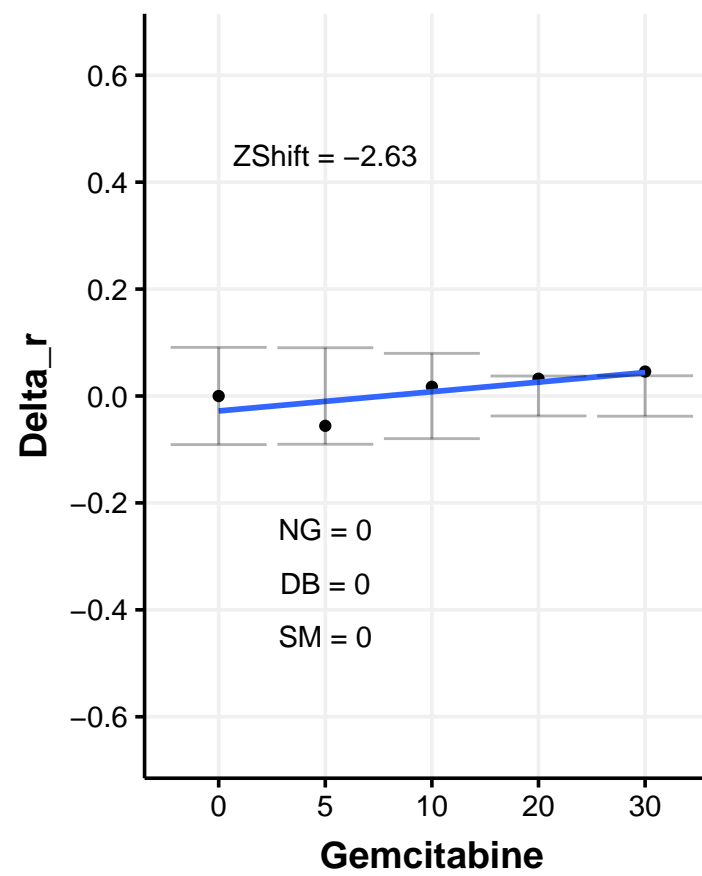

YPR144C NOC4

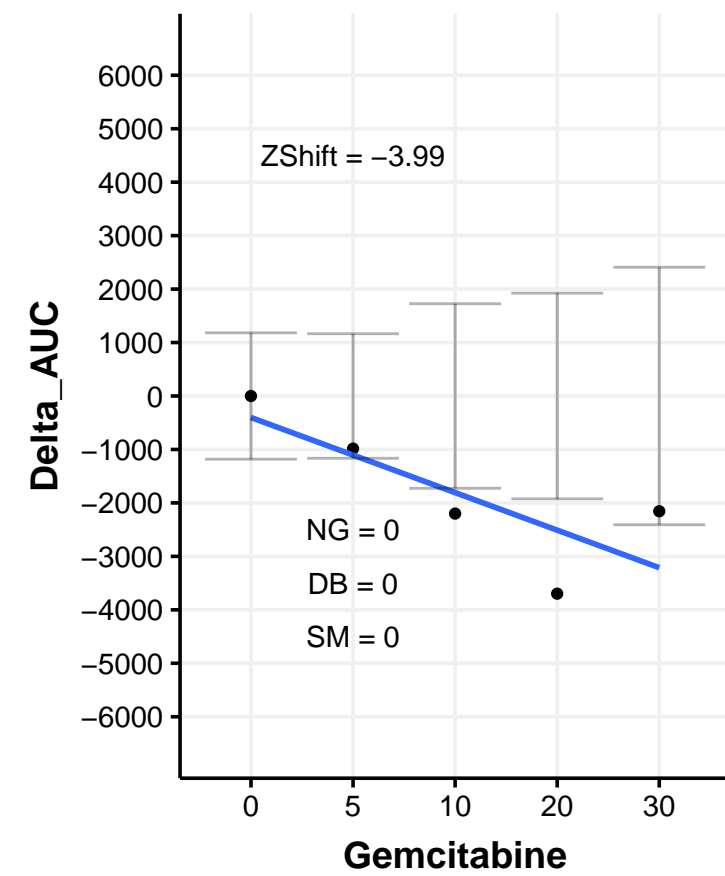

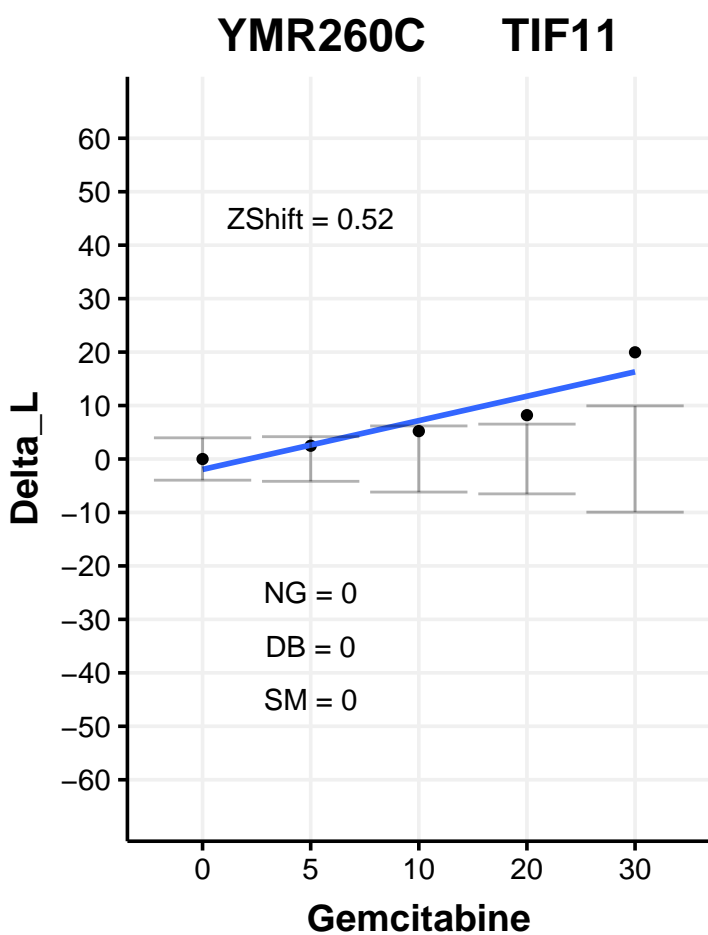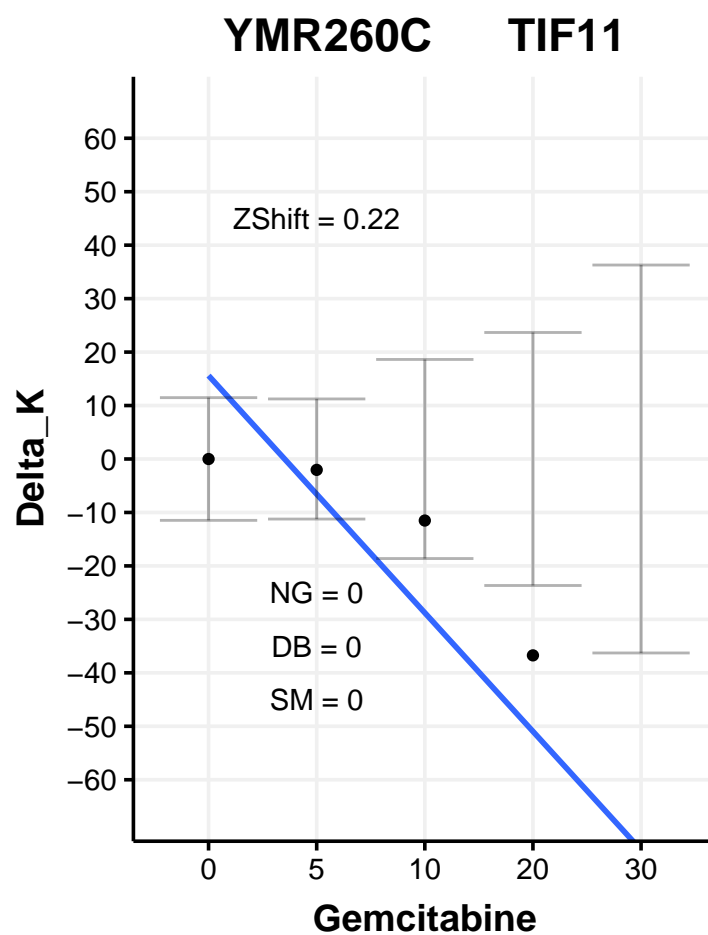

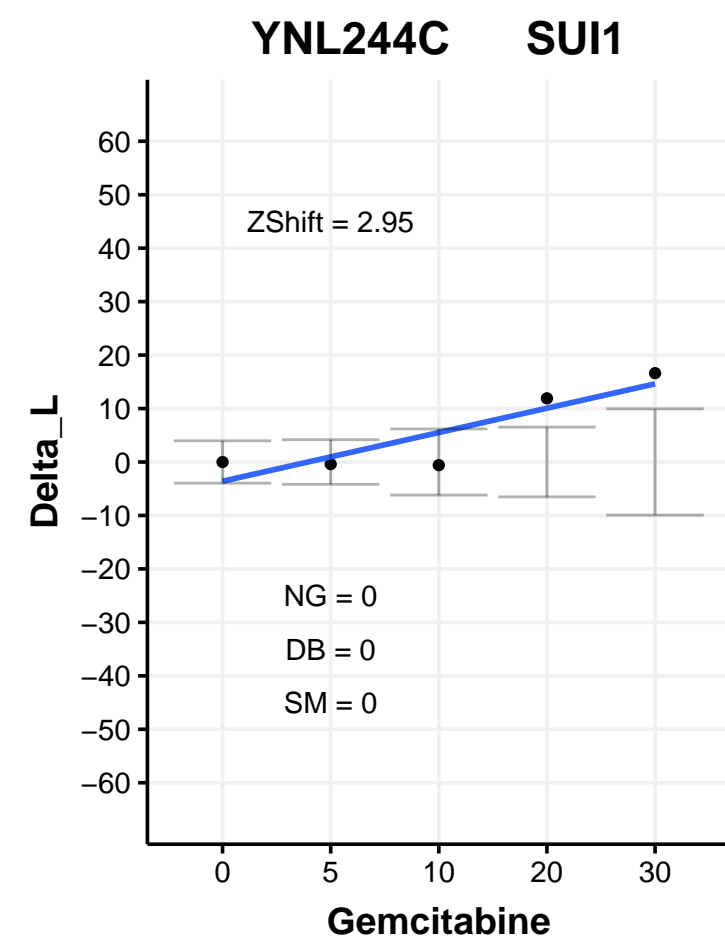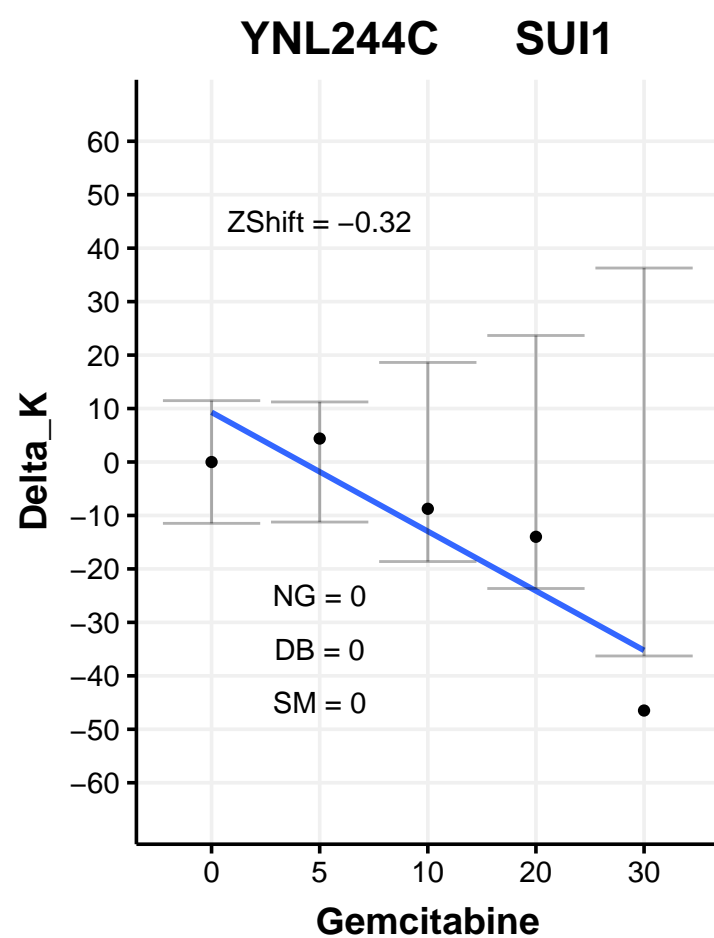

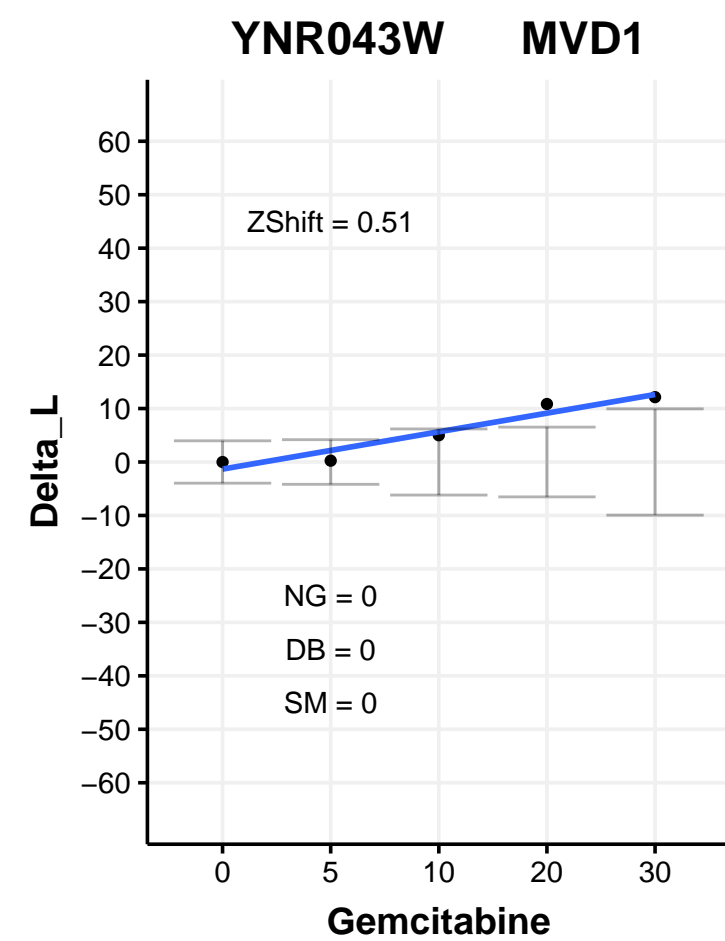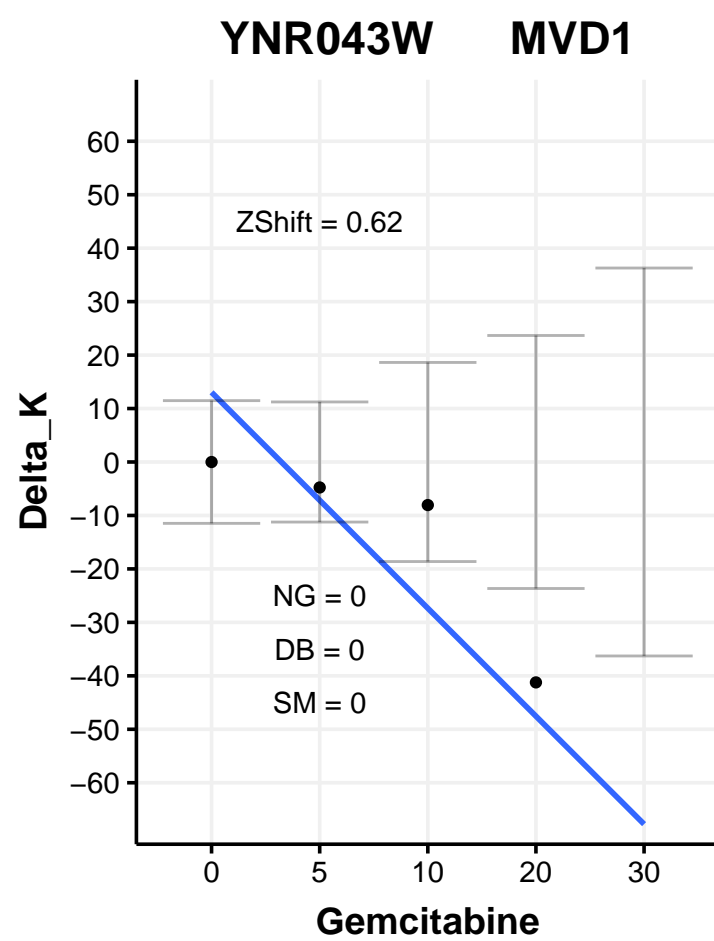

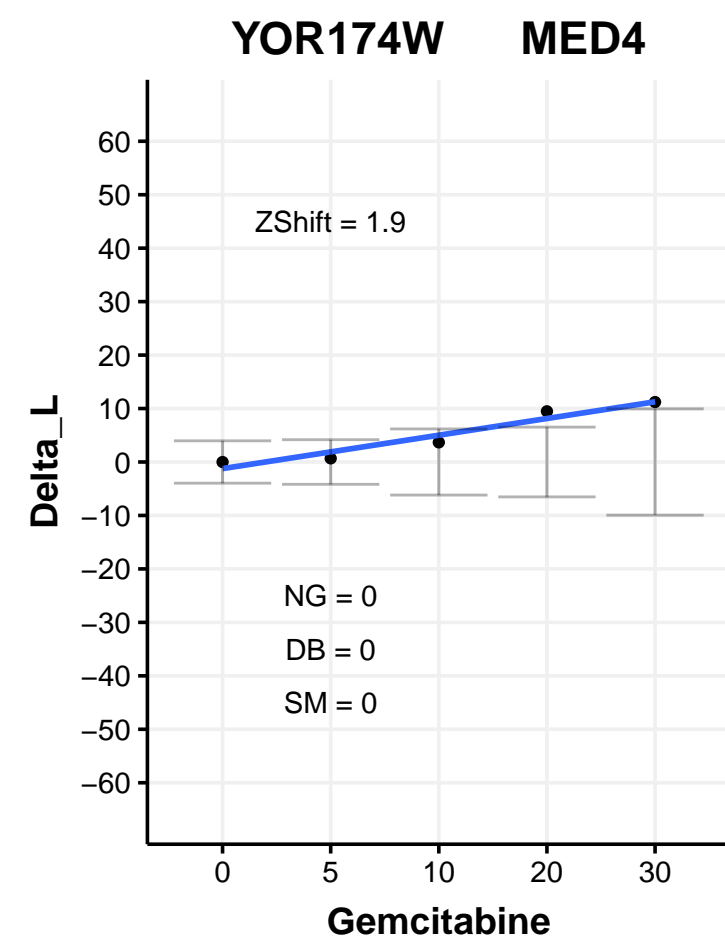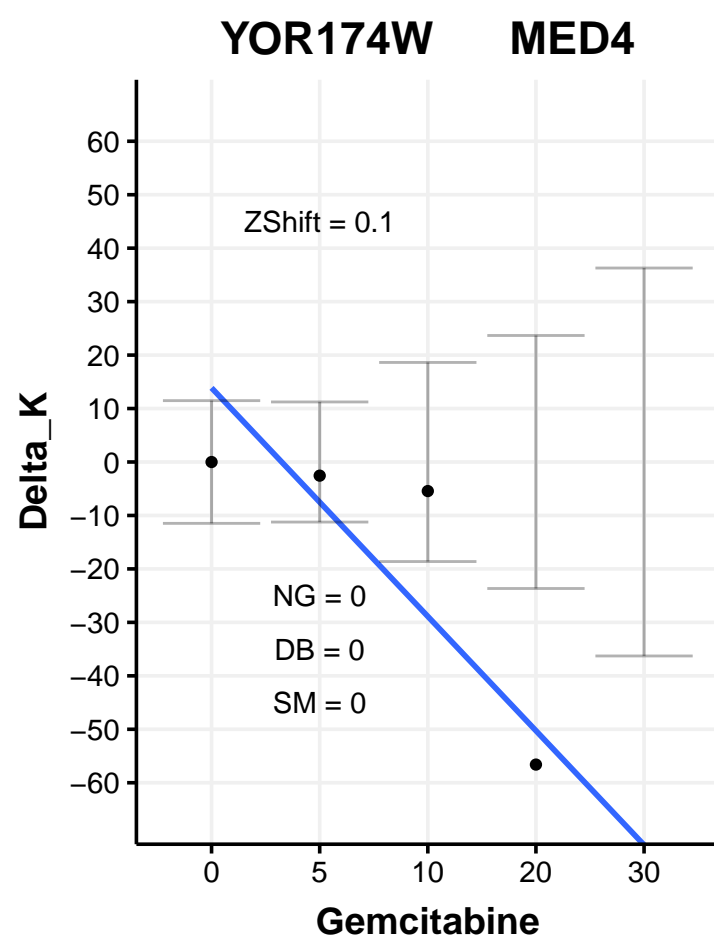

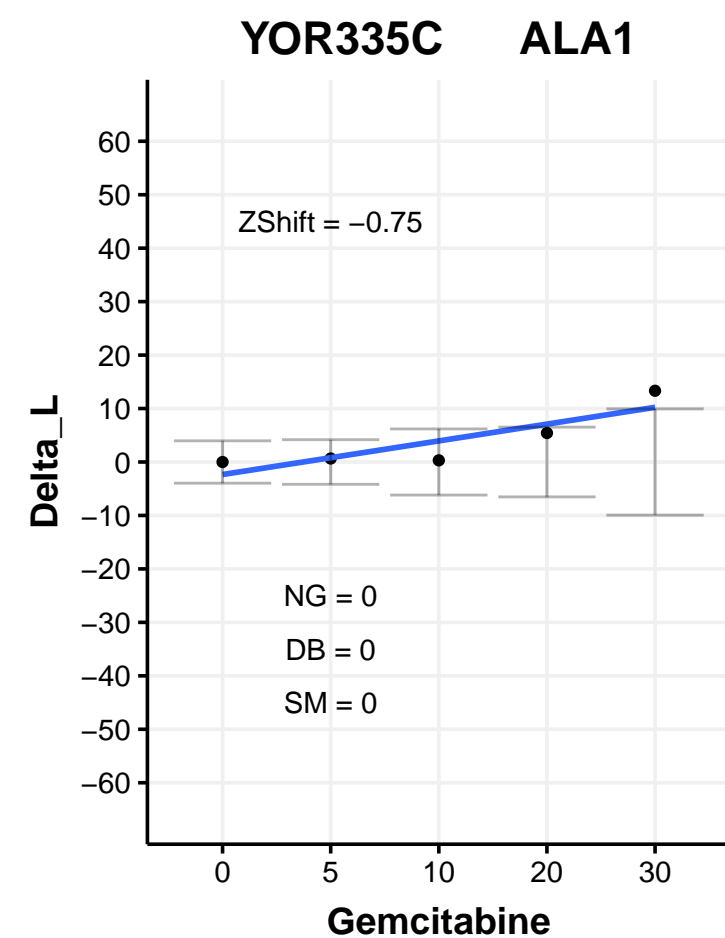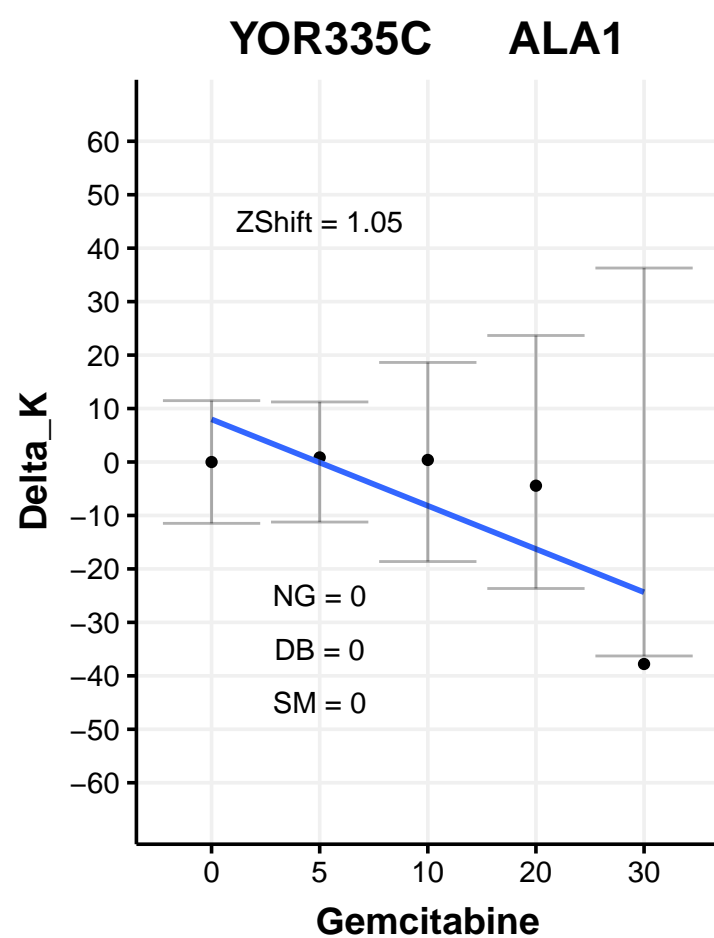

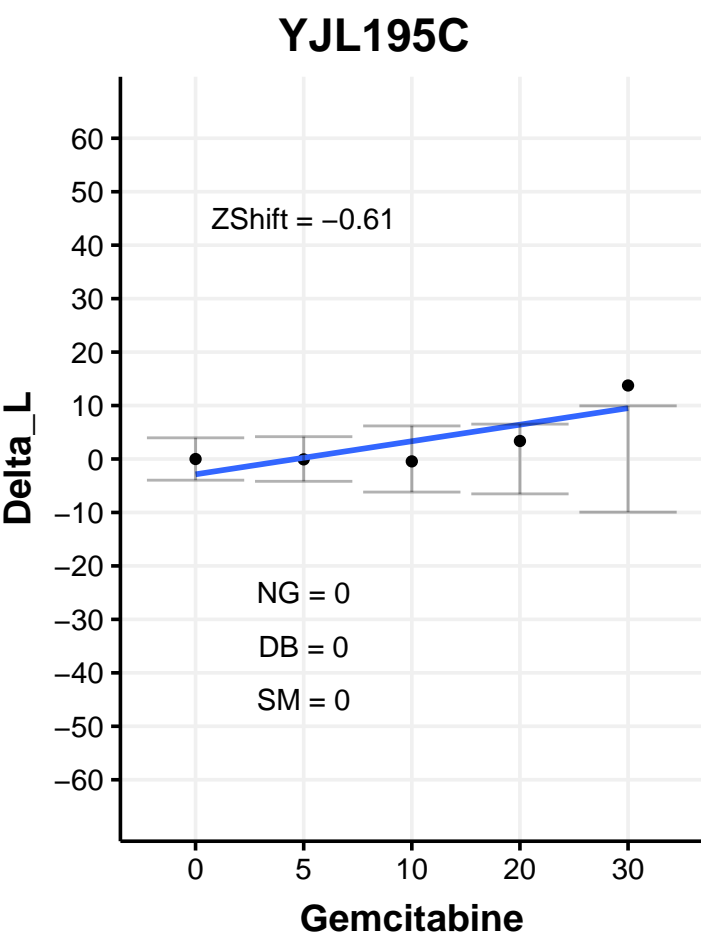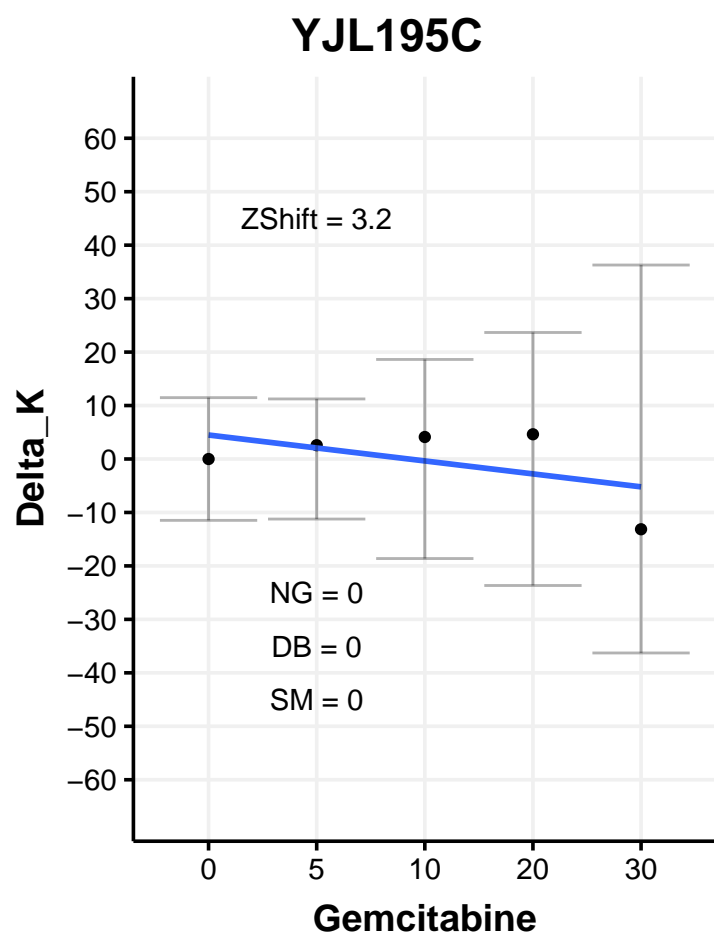

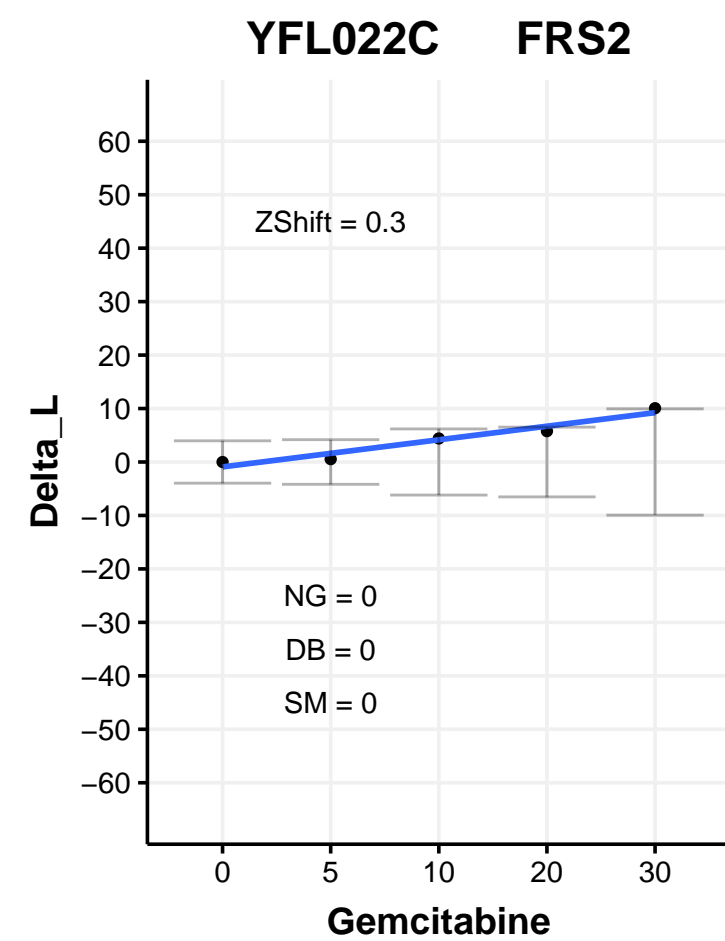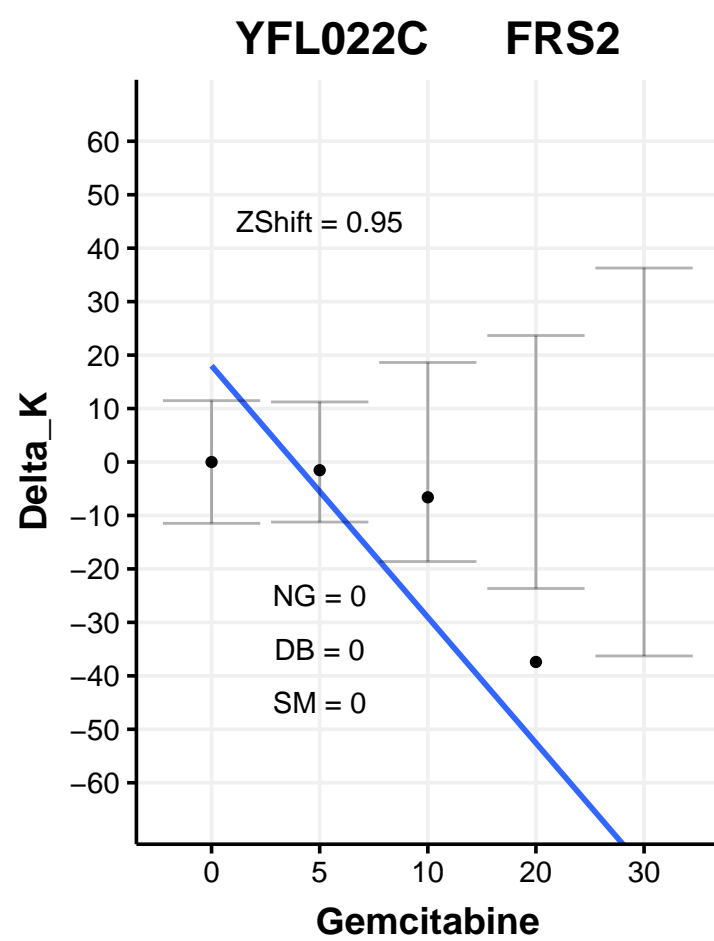

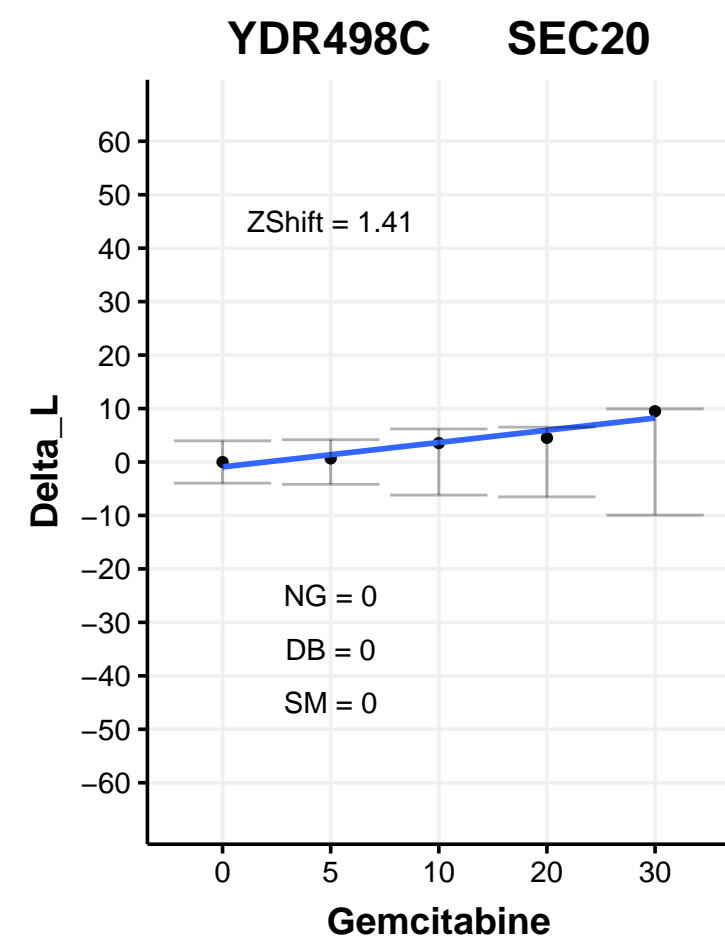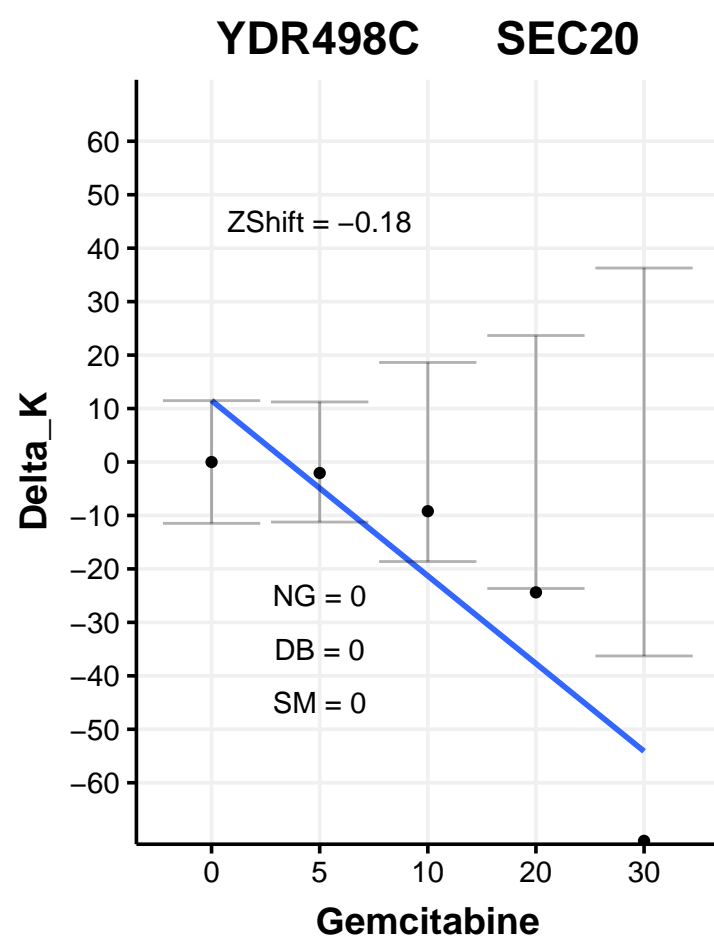

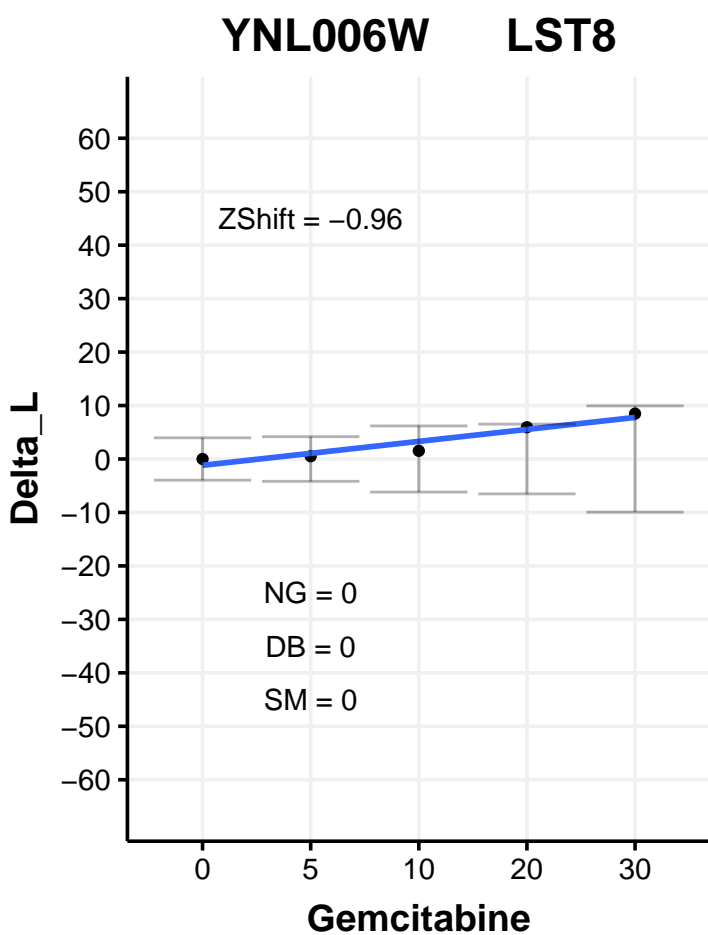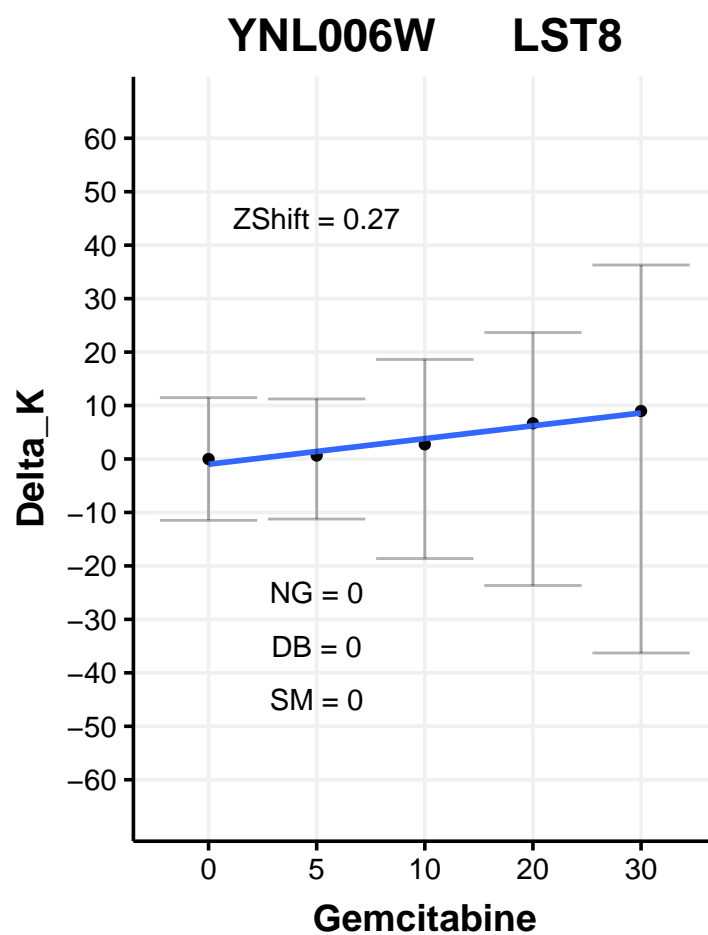

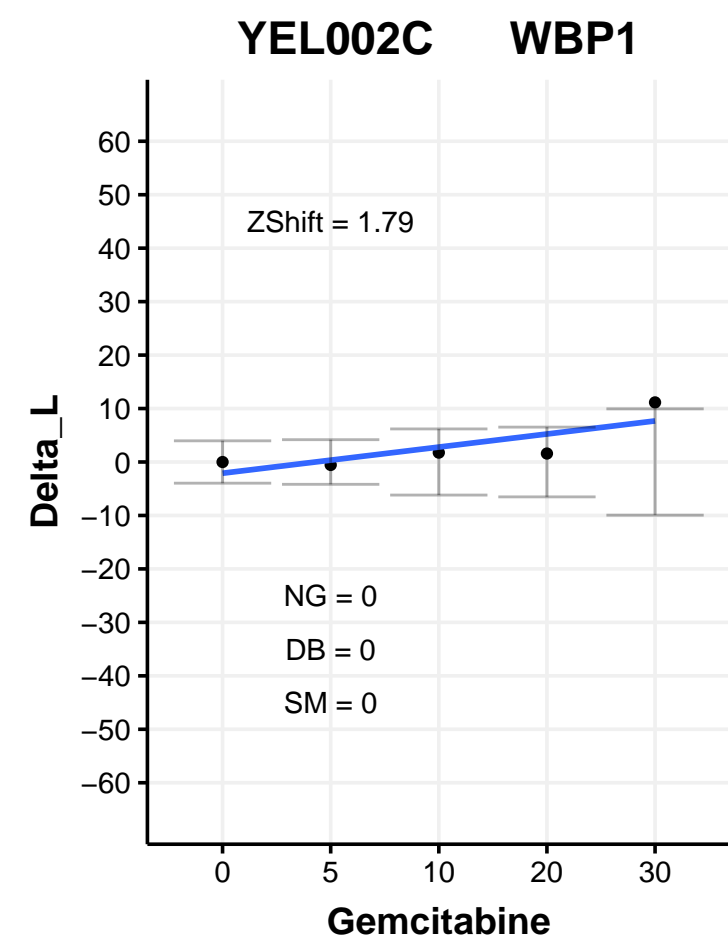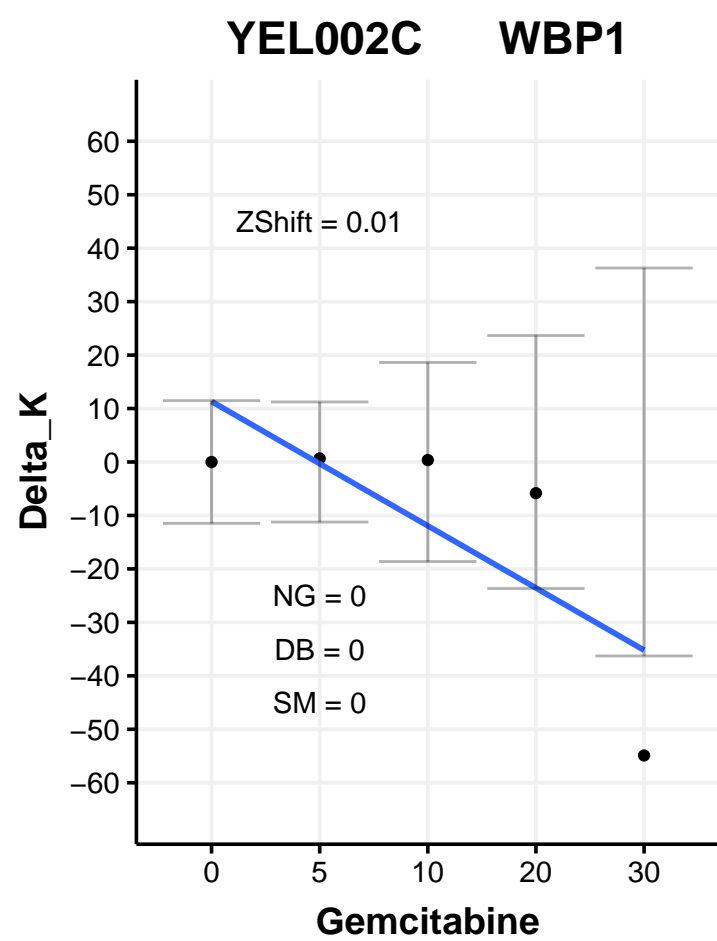

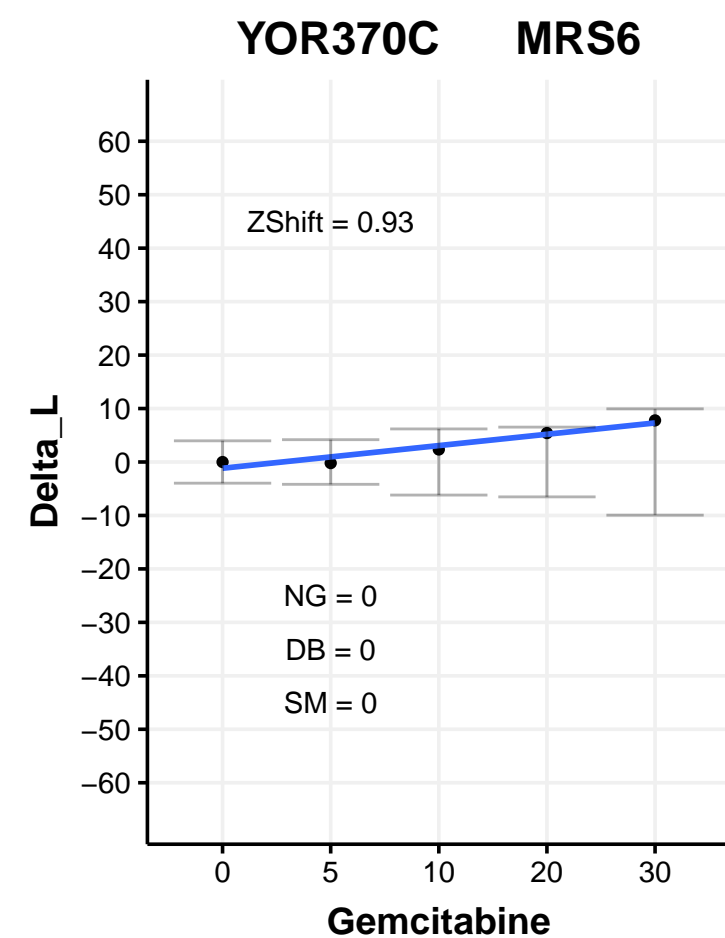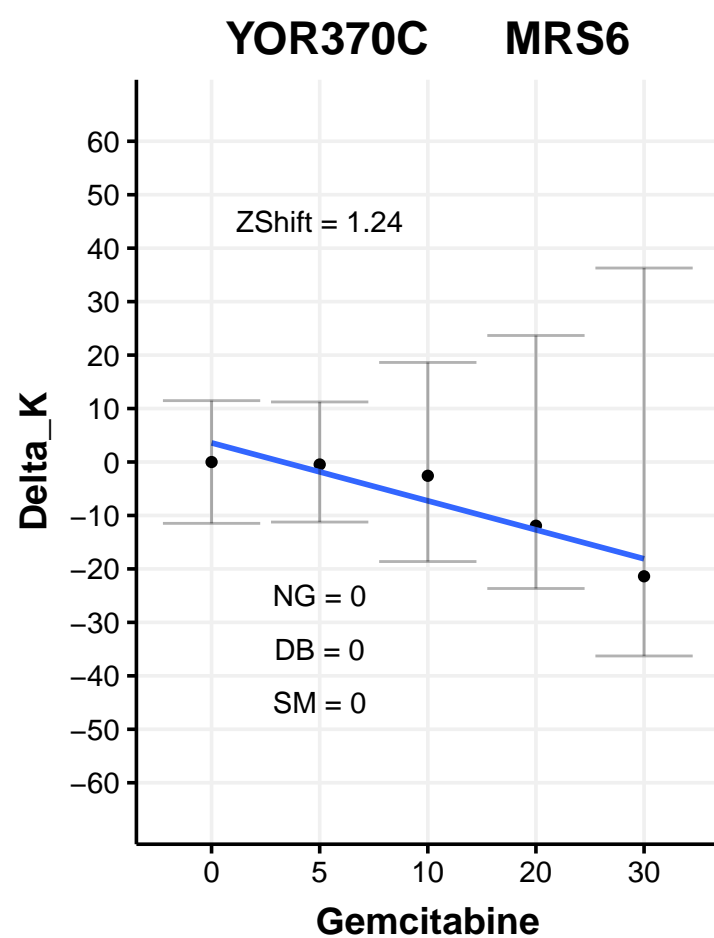

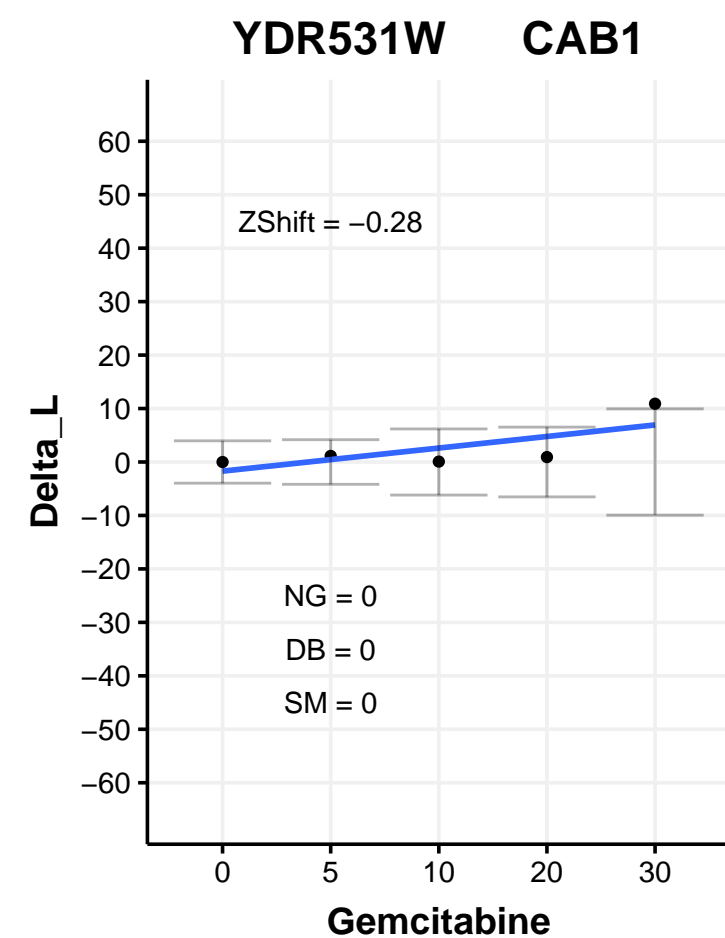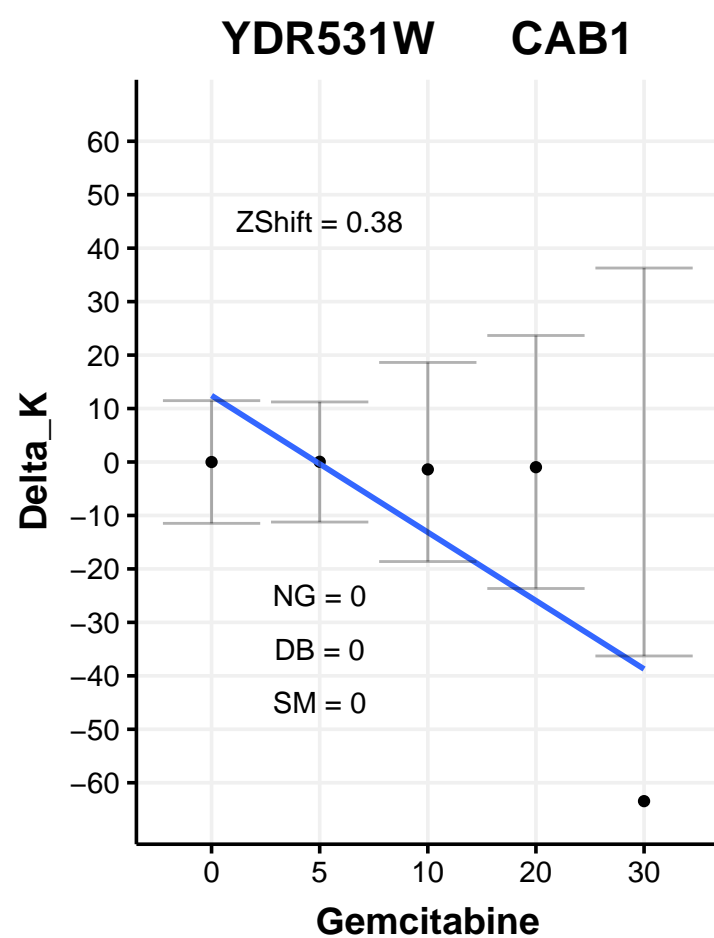

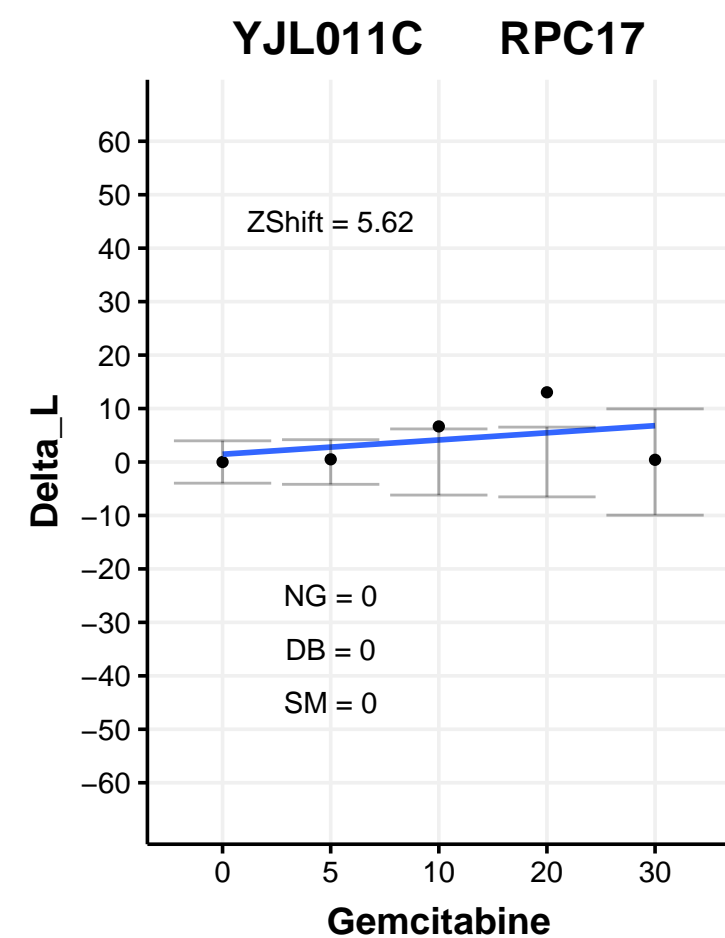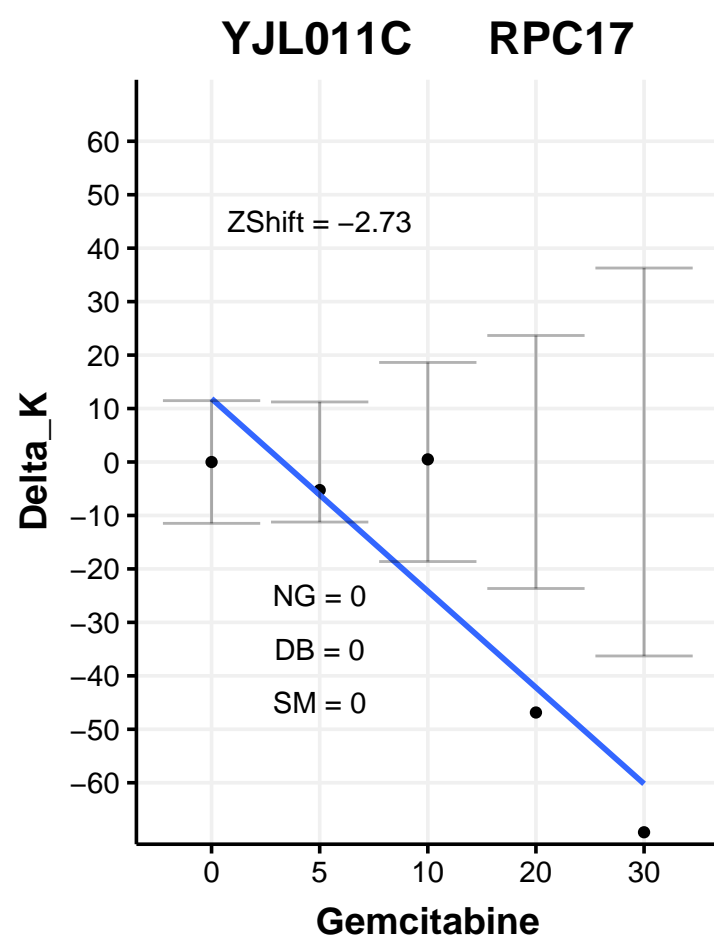

YMR185W

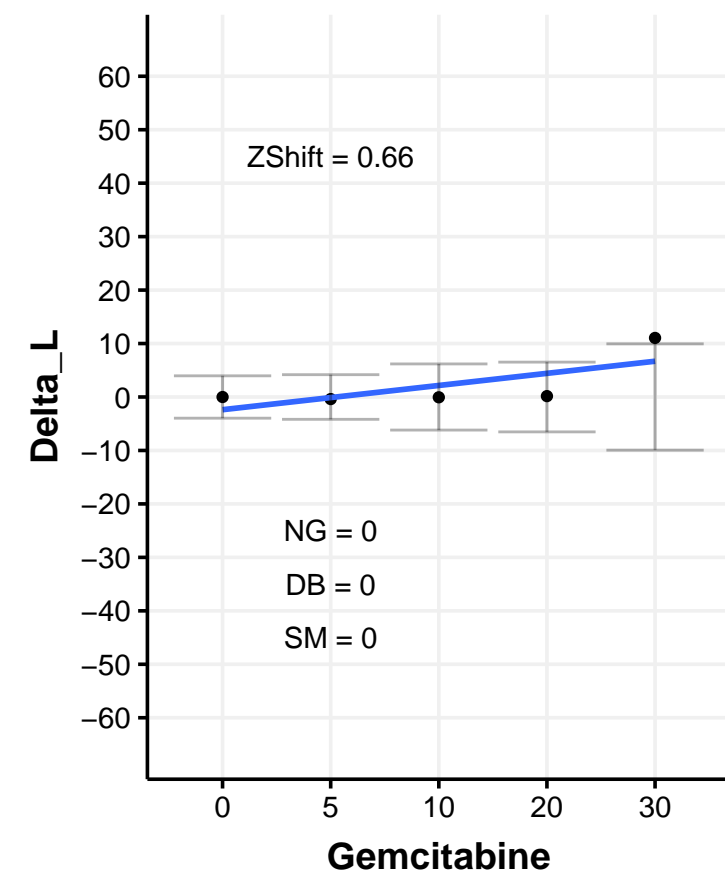

YMR185W

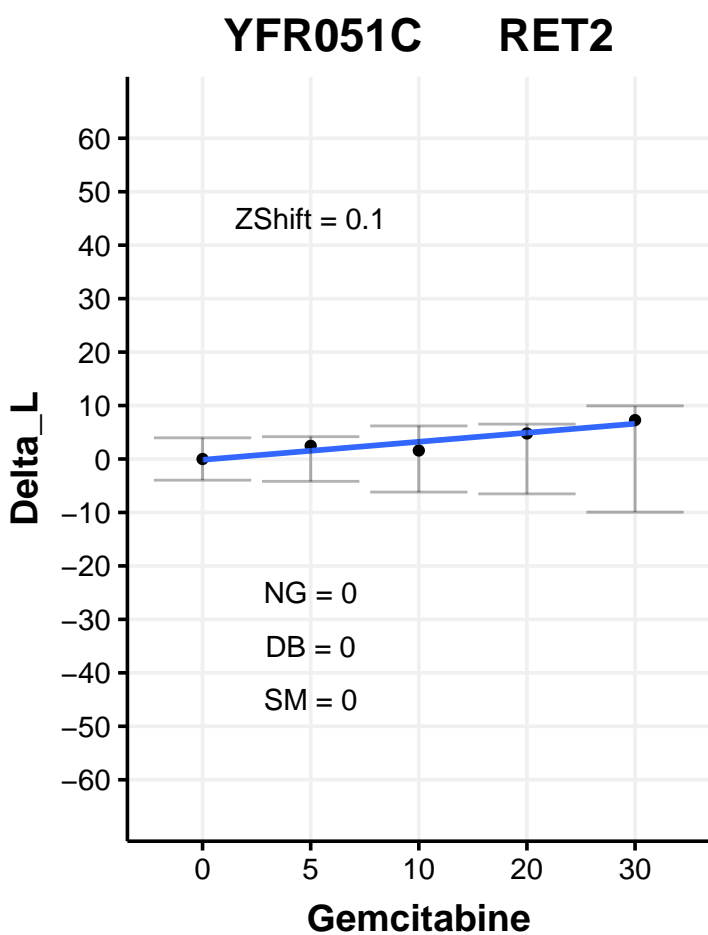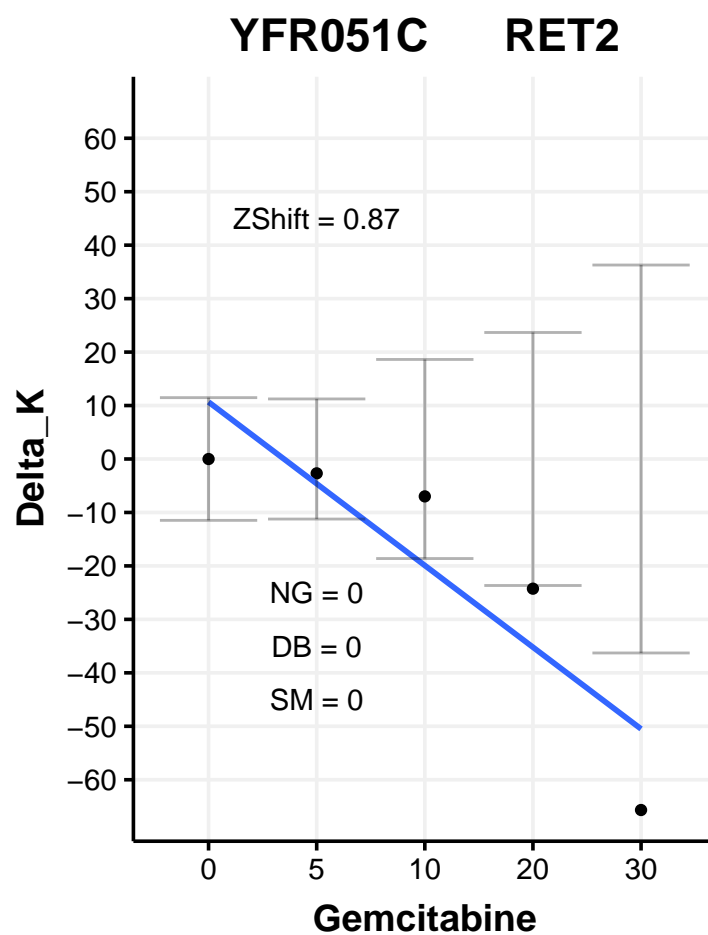

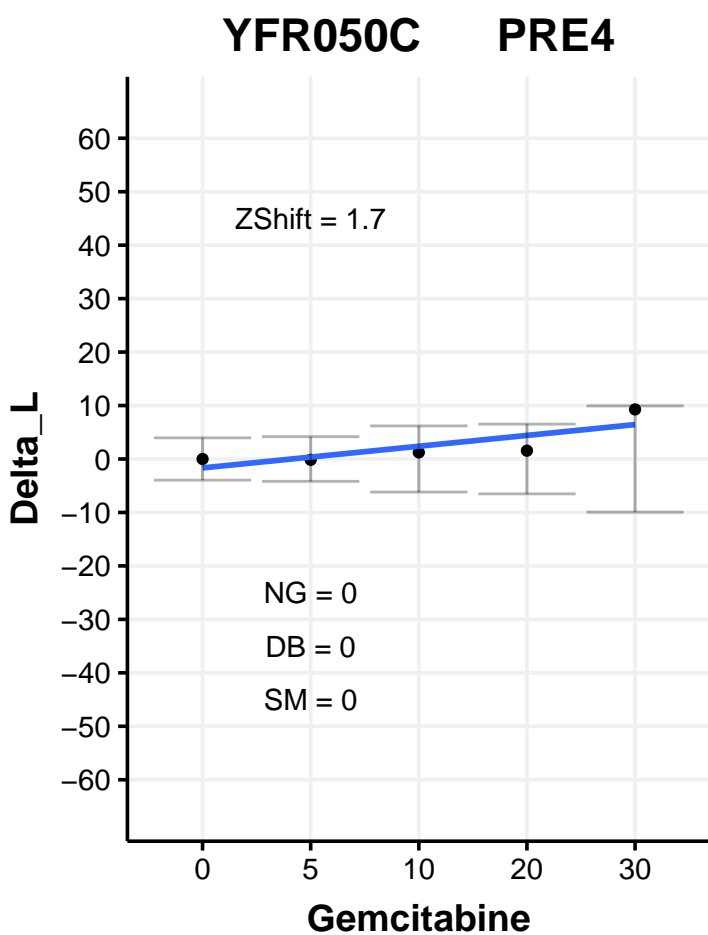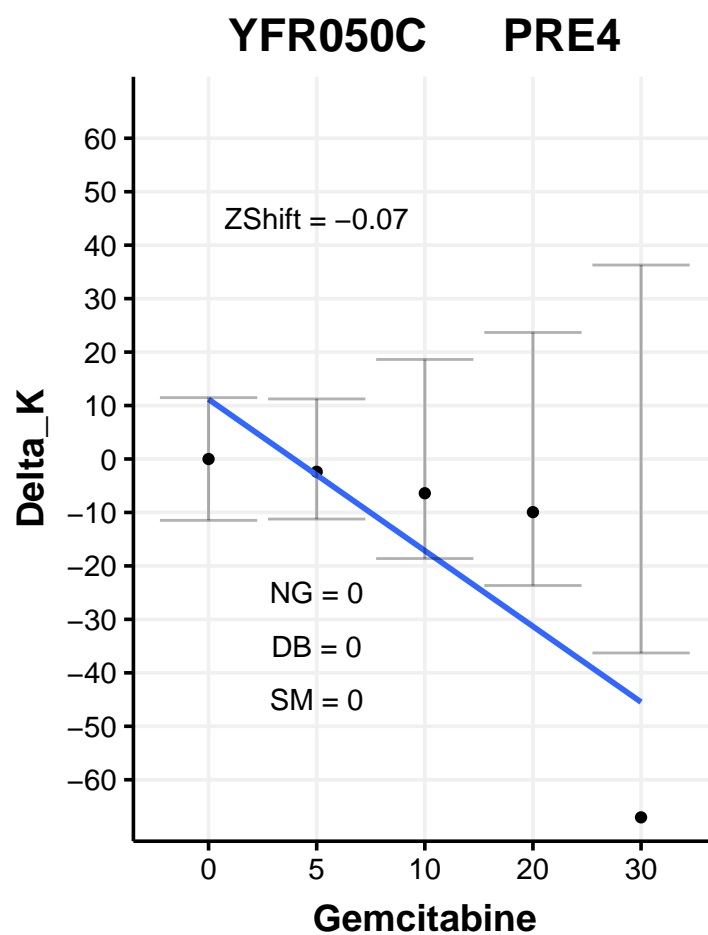

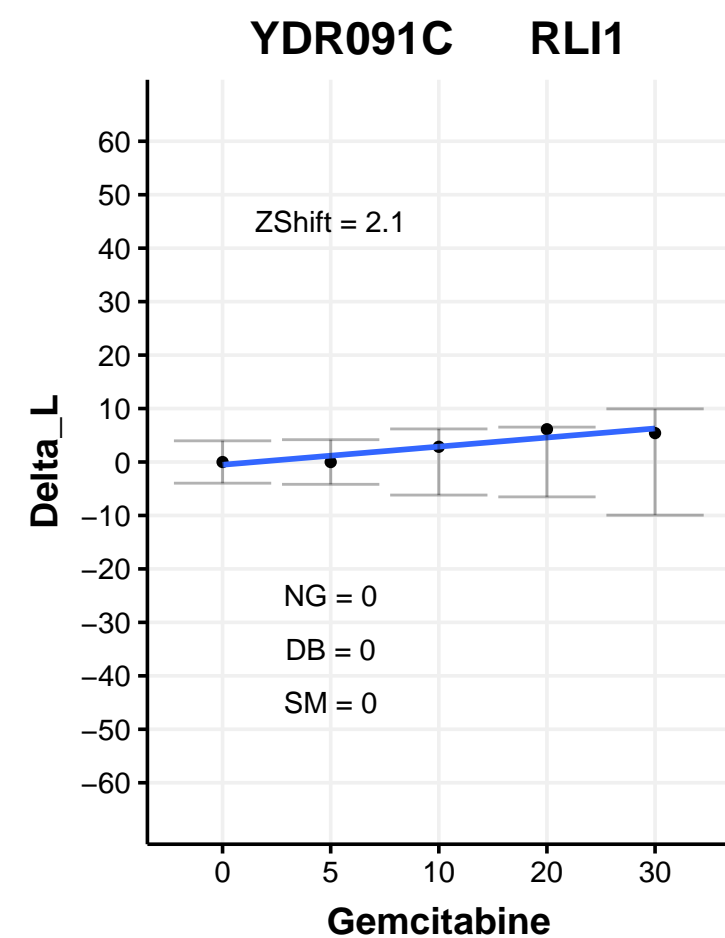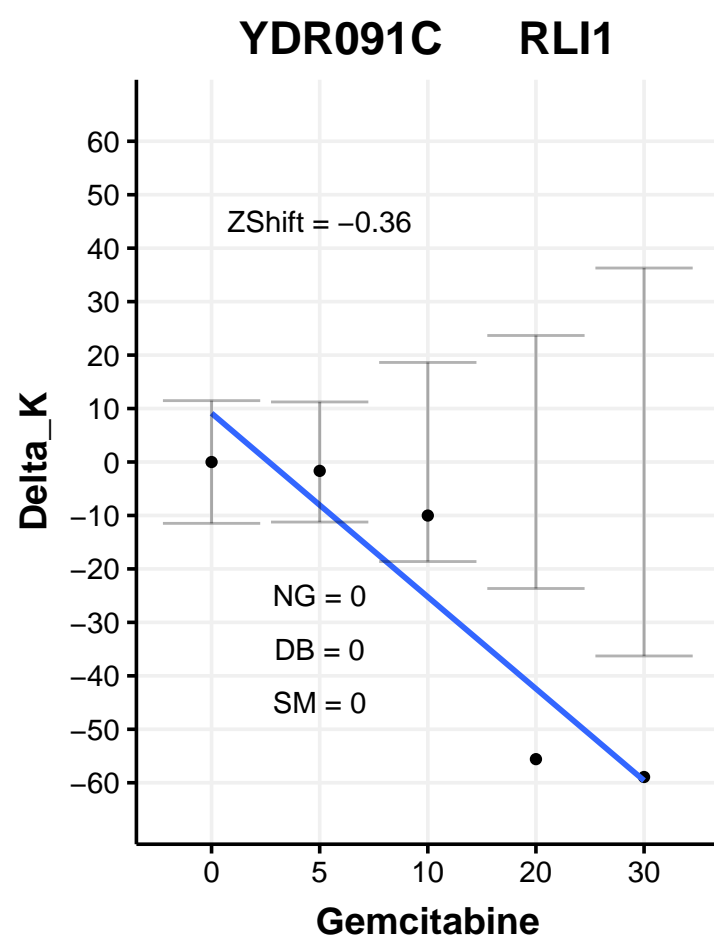

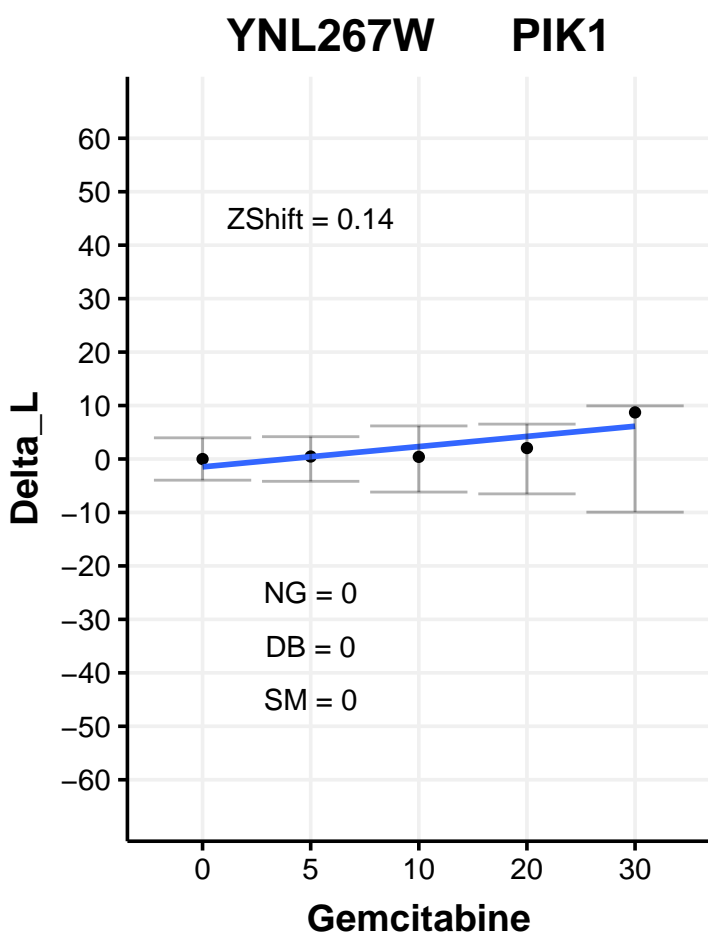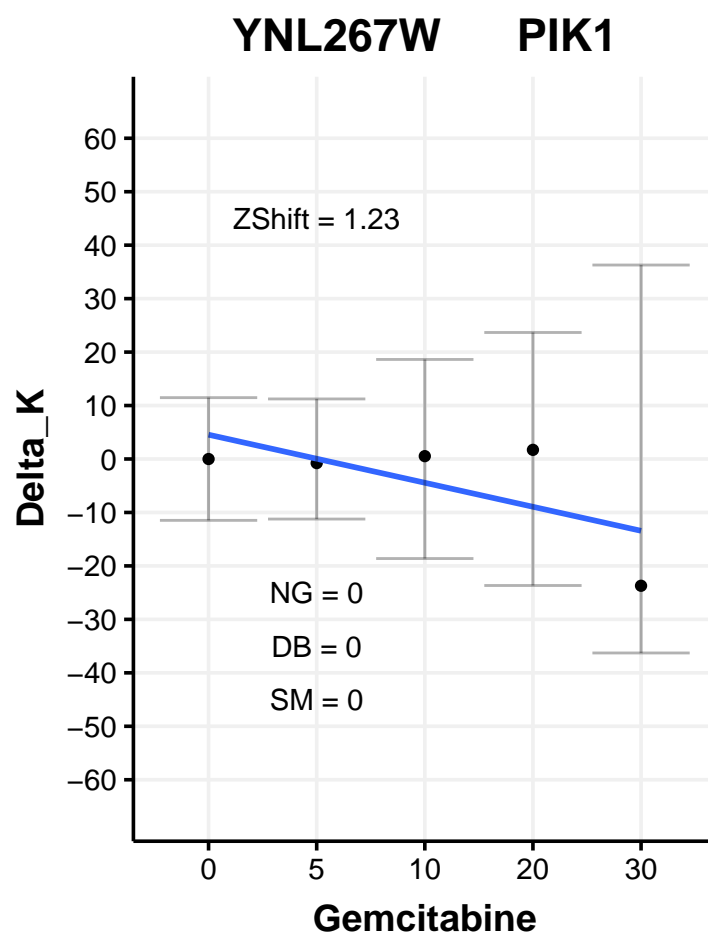

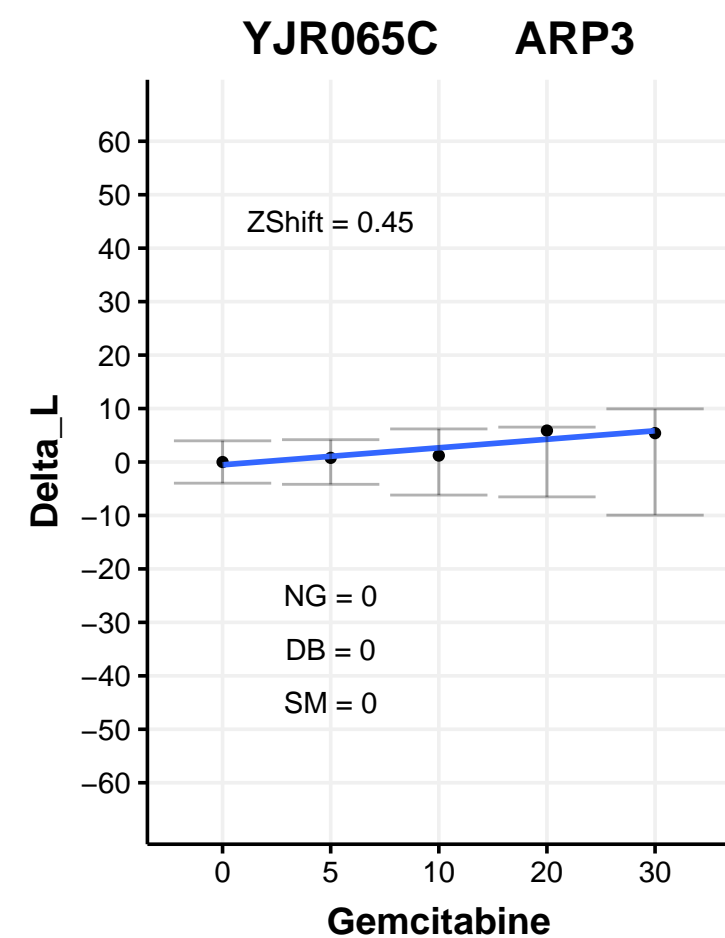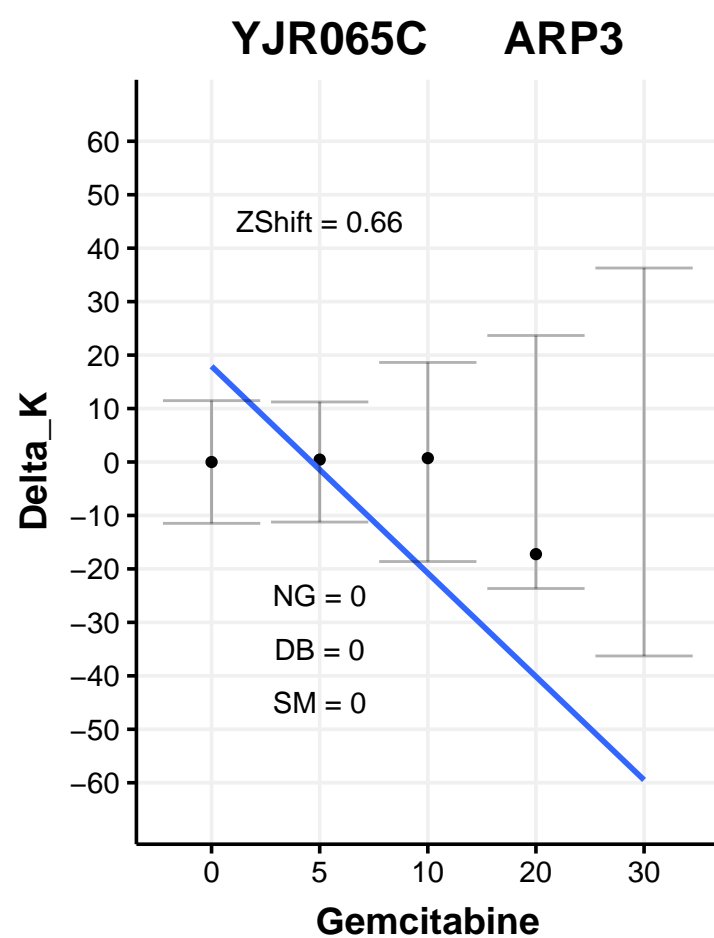

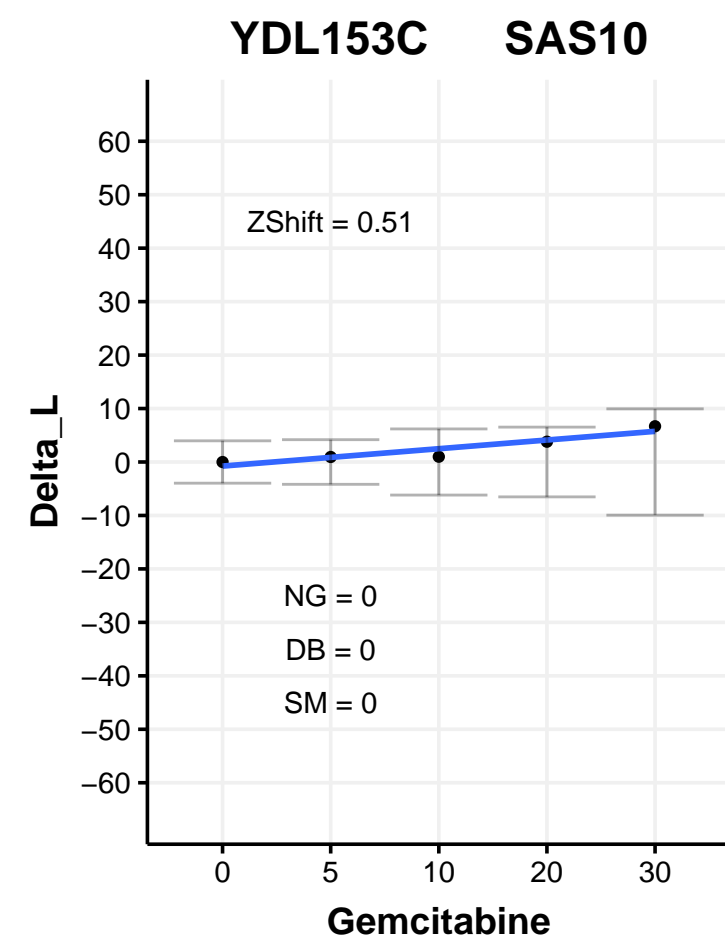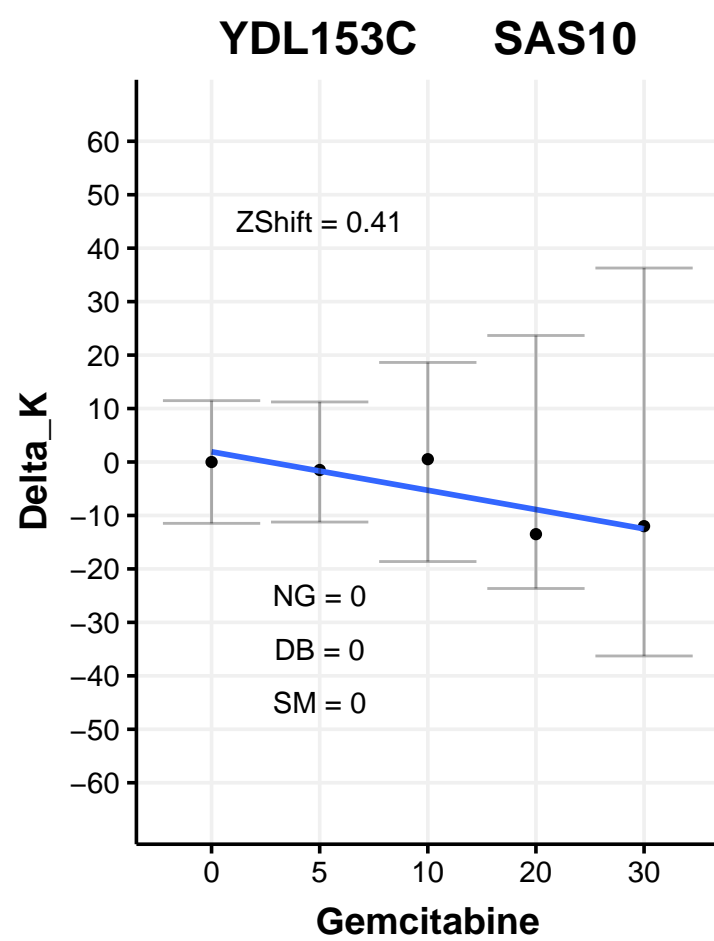

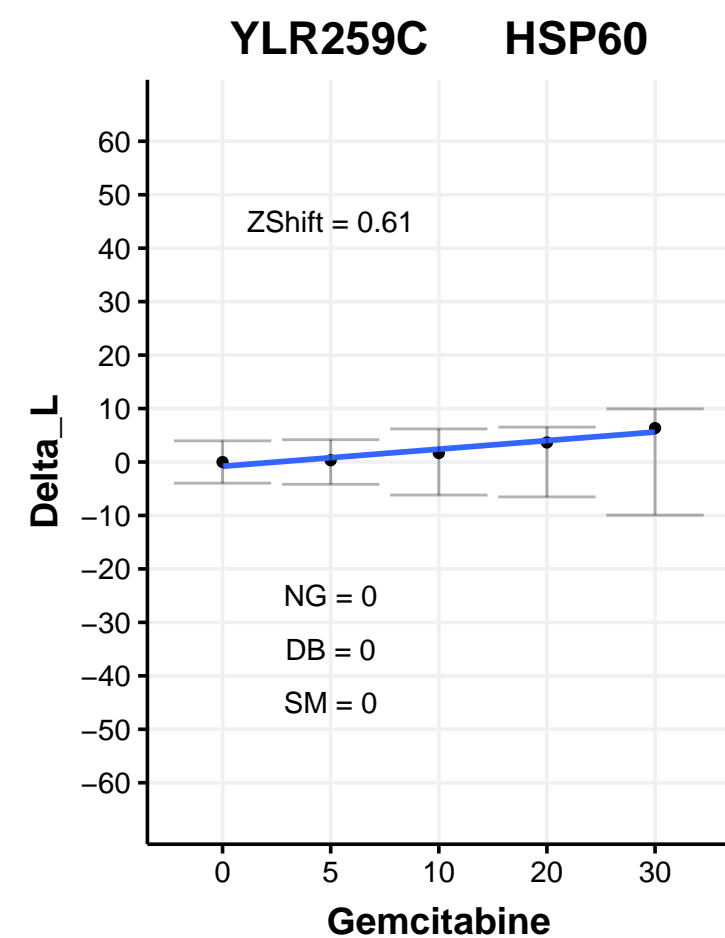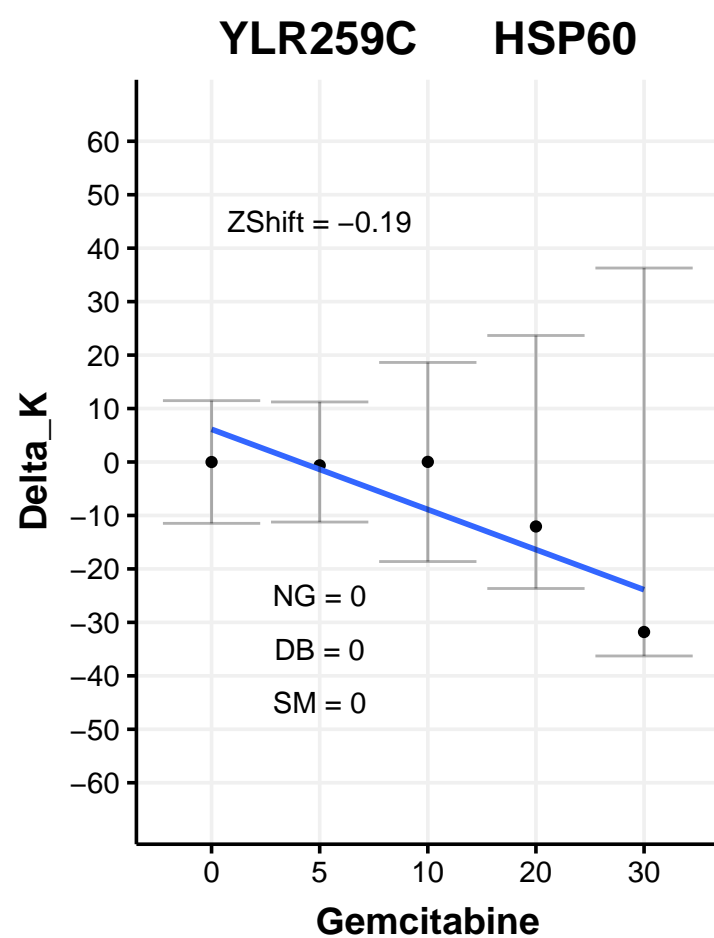

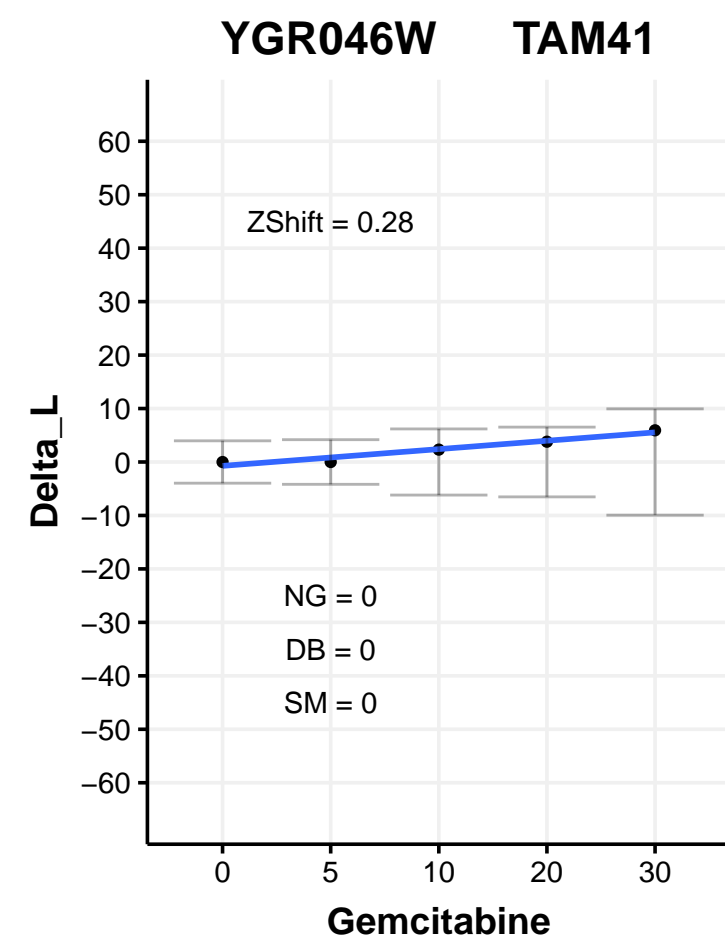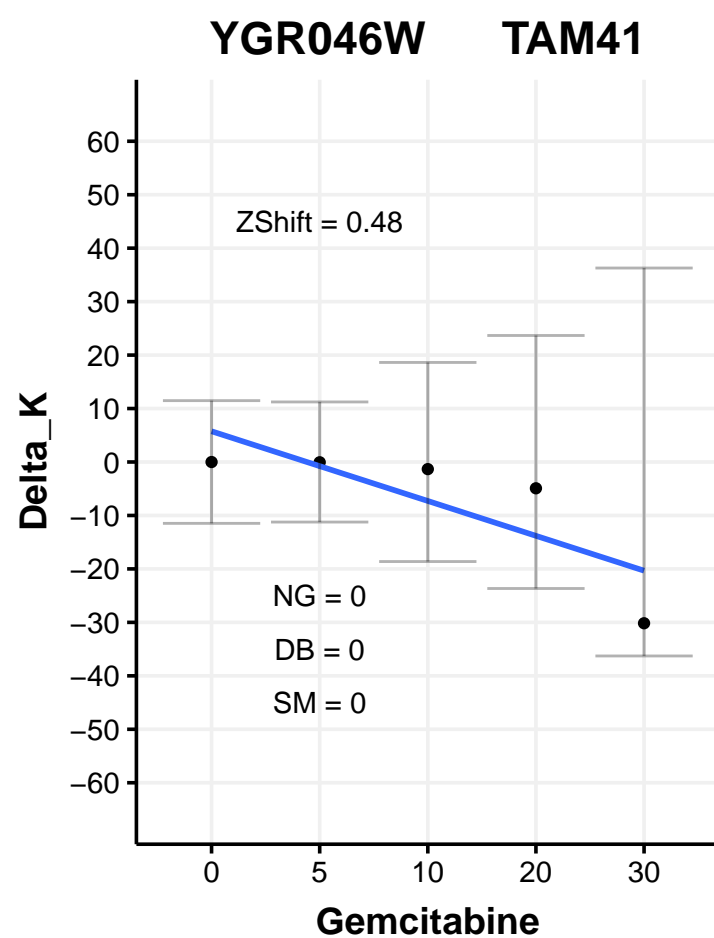

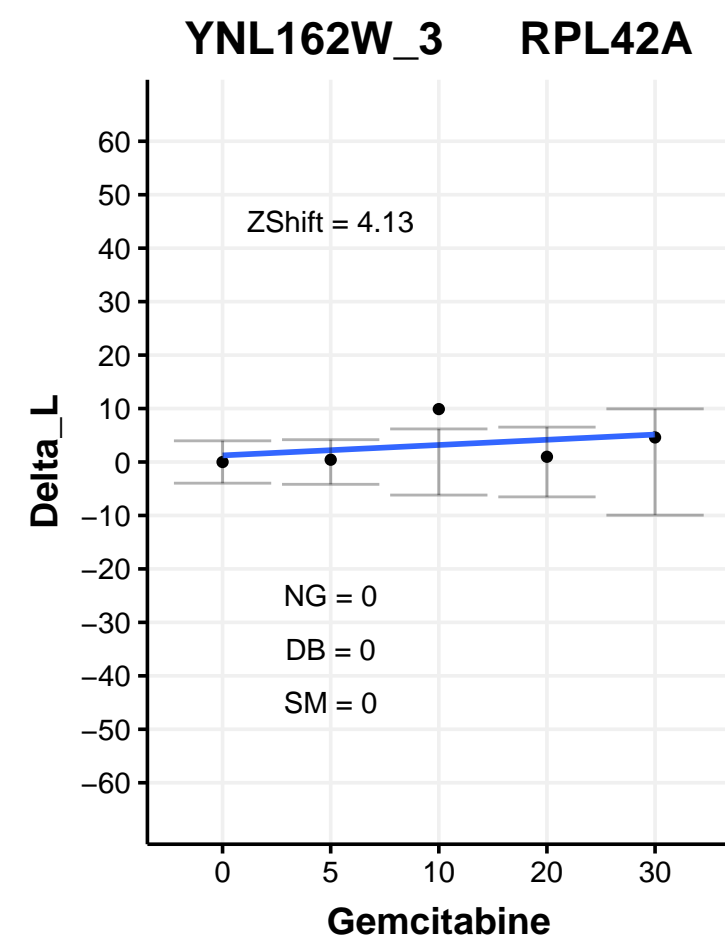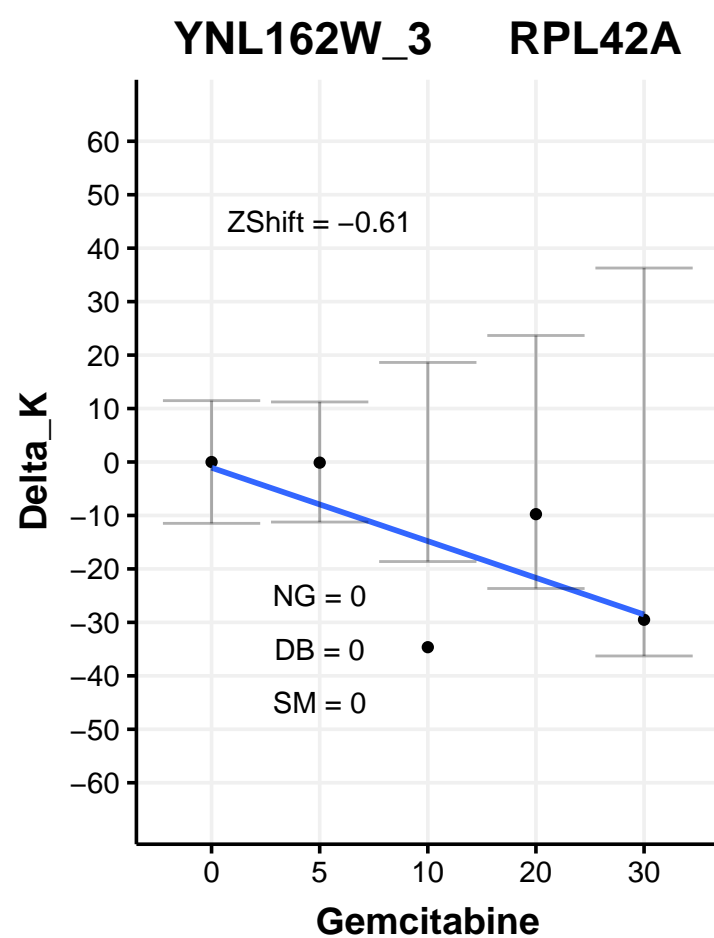

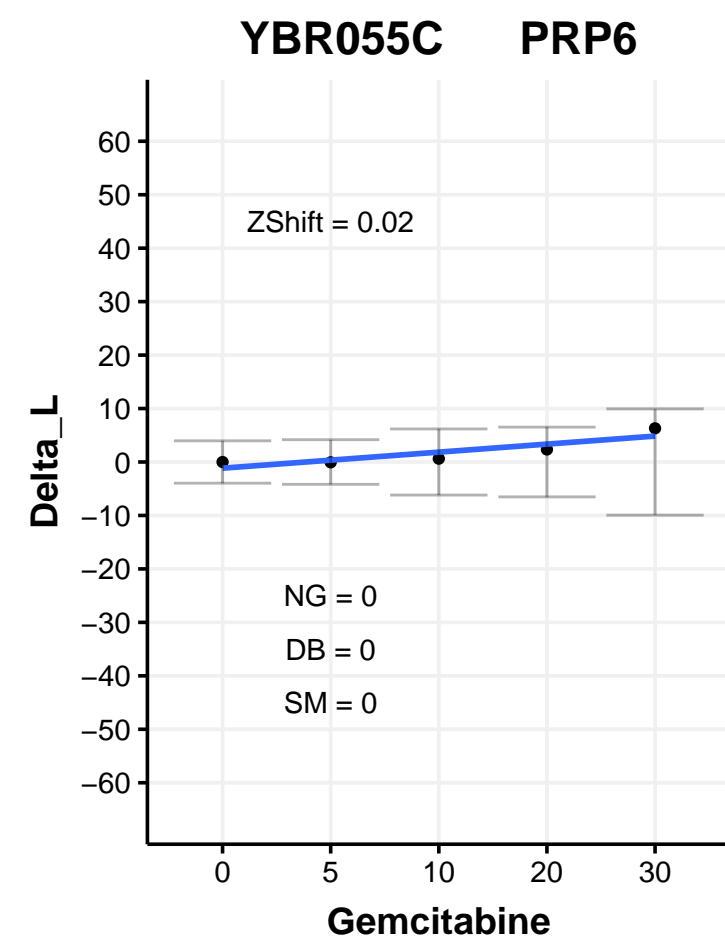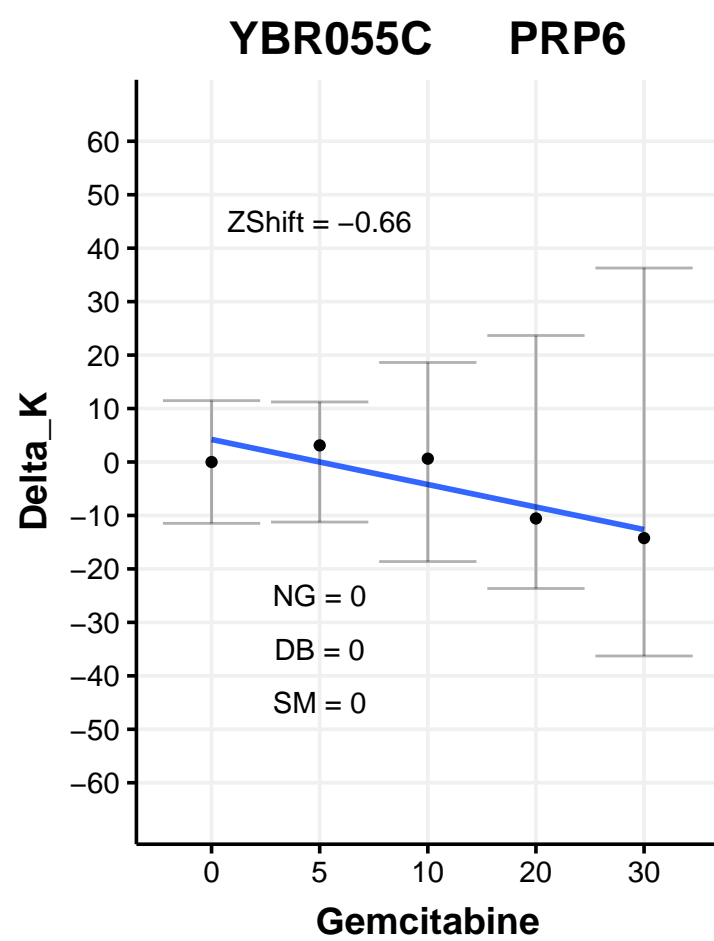

YGR265W

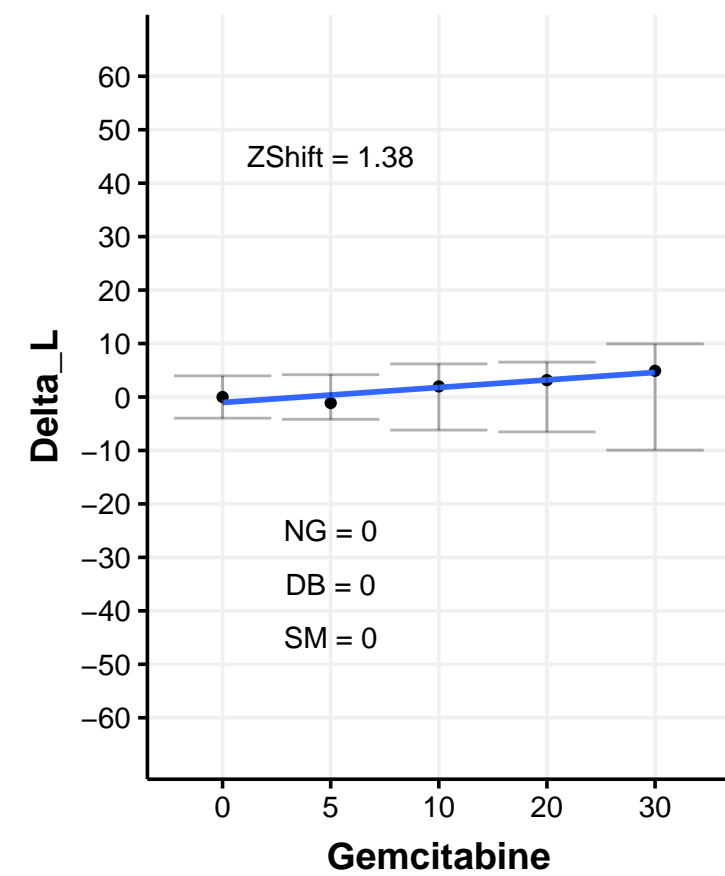

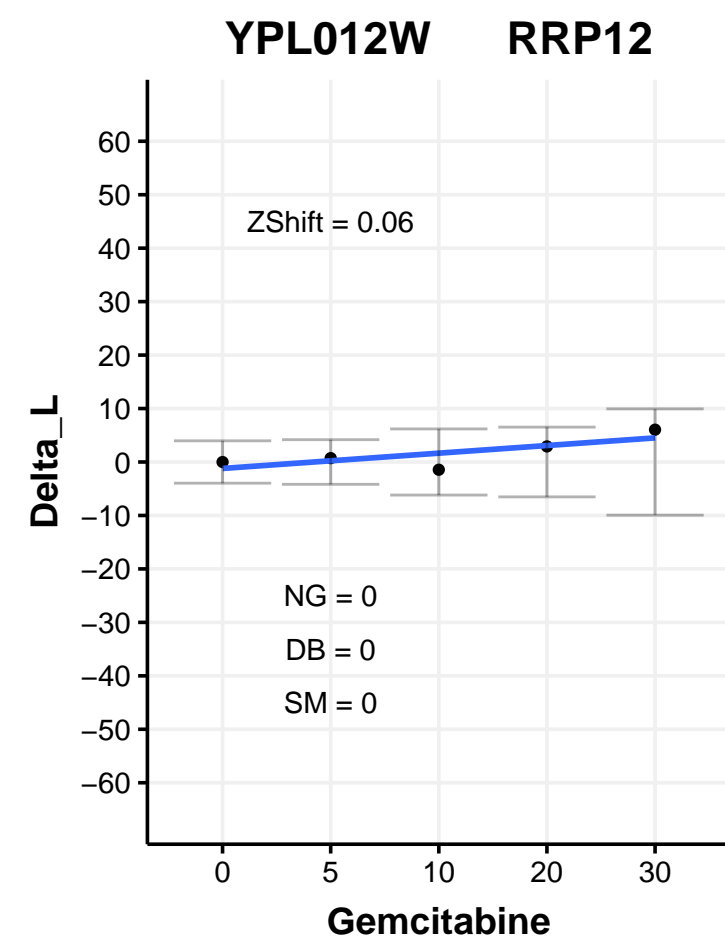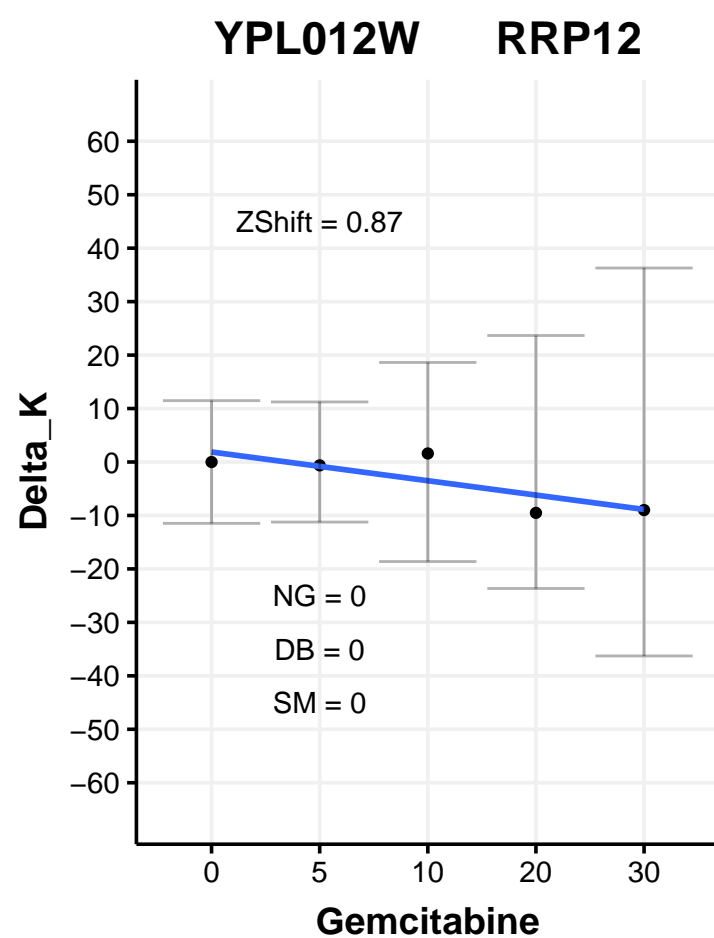

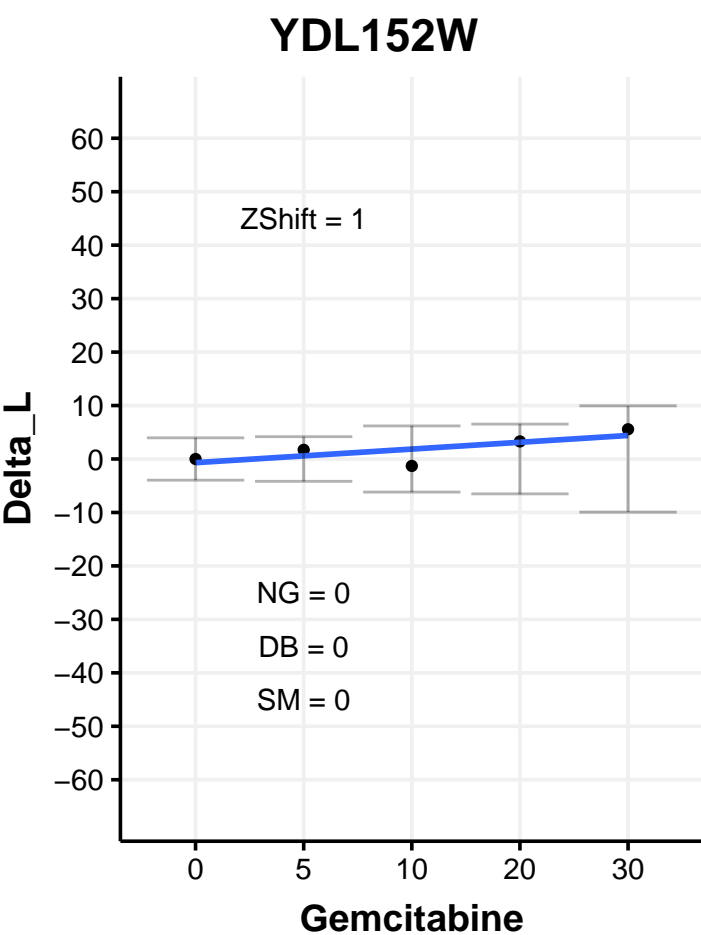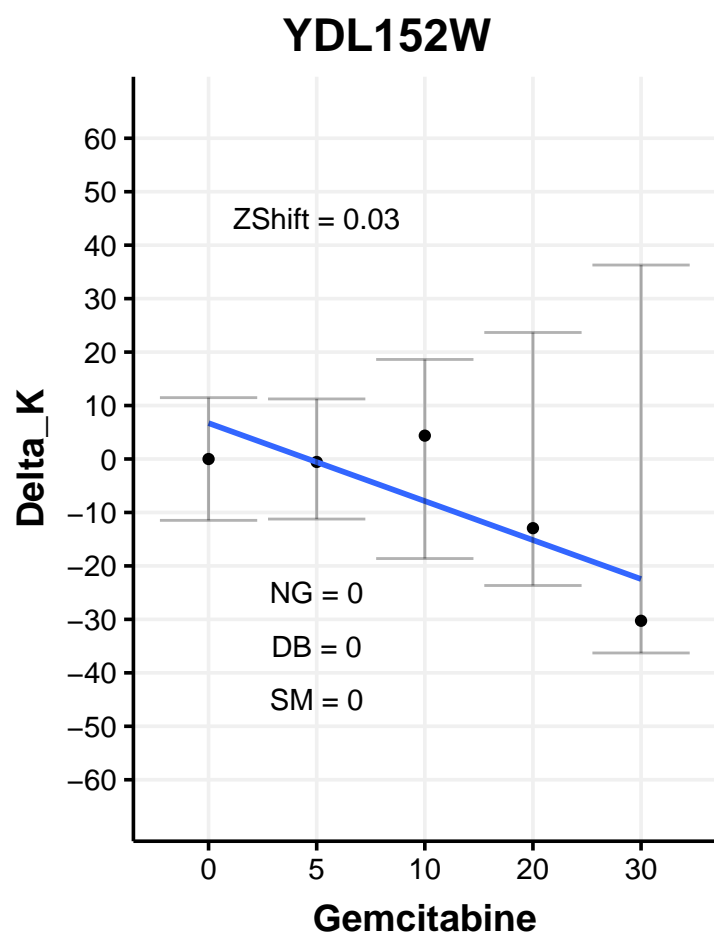

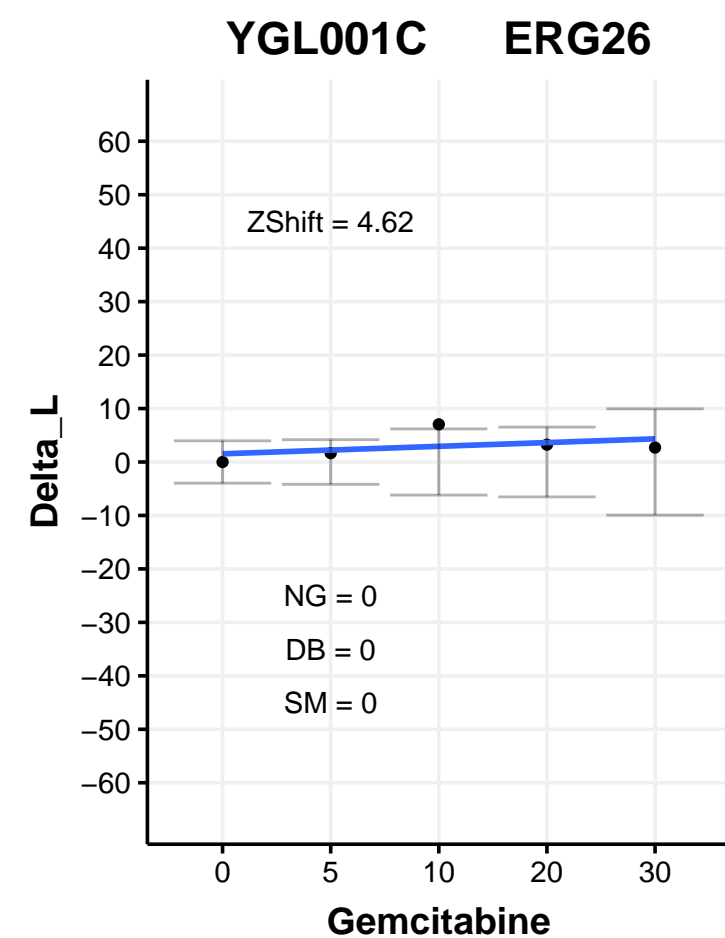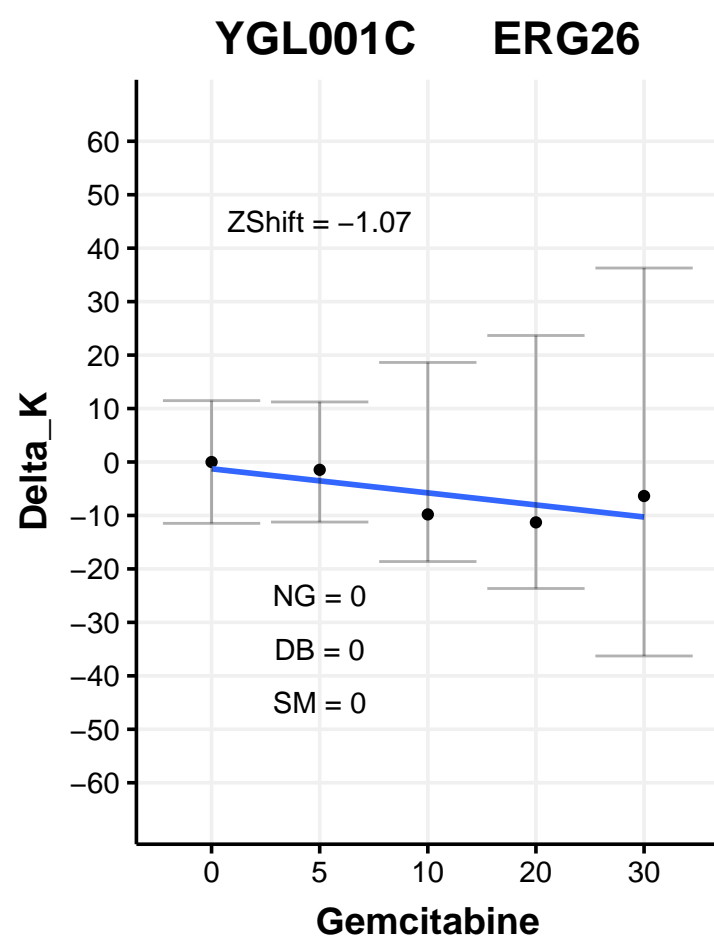

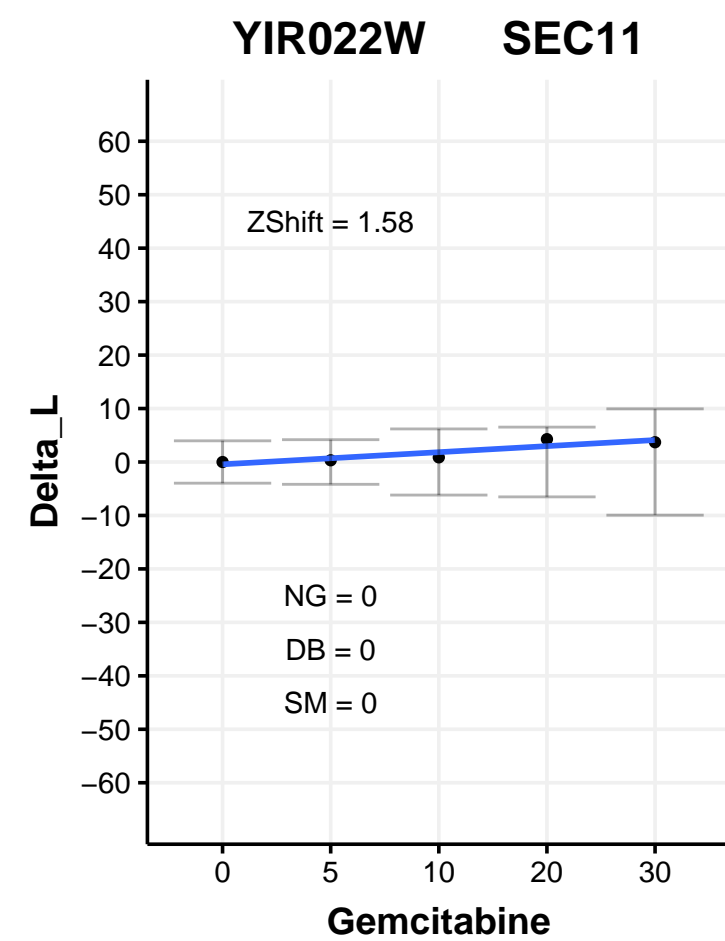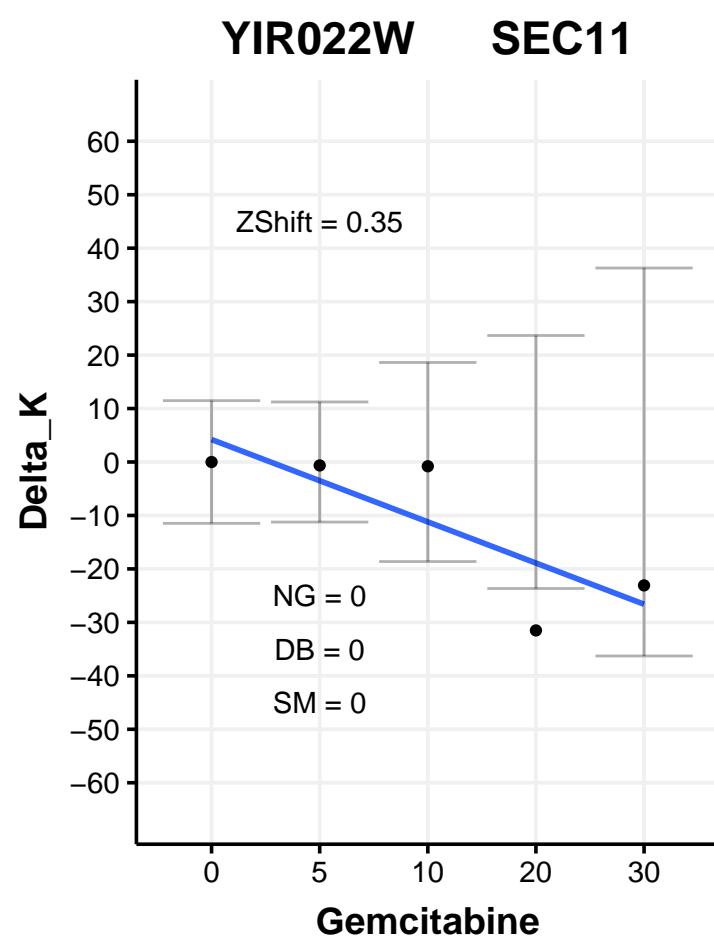

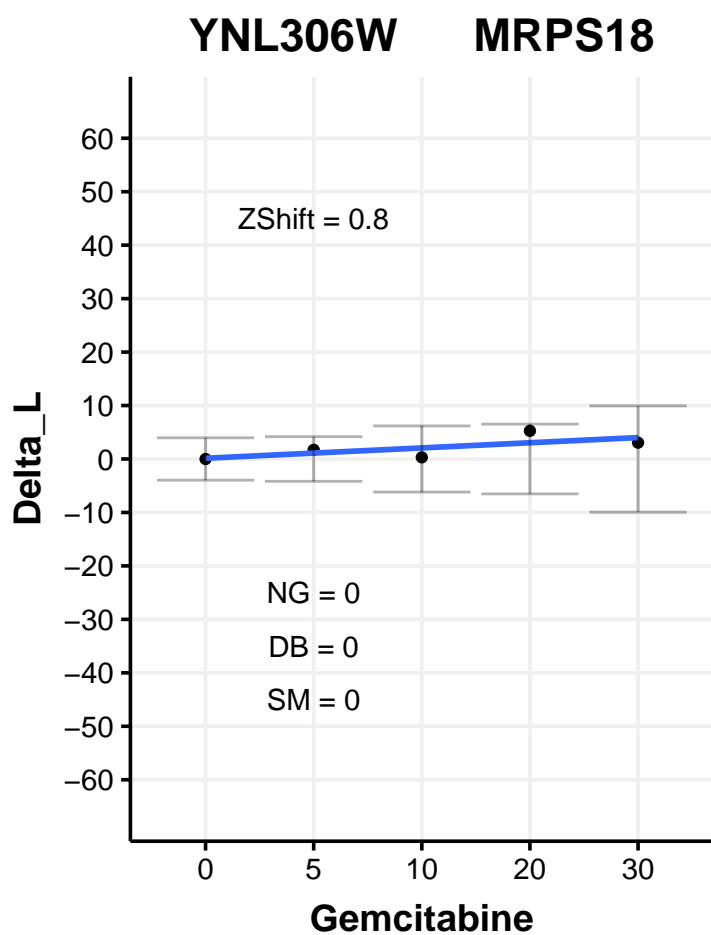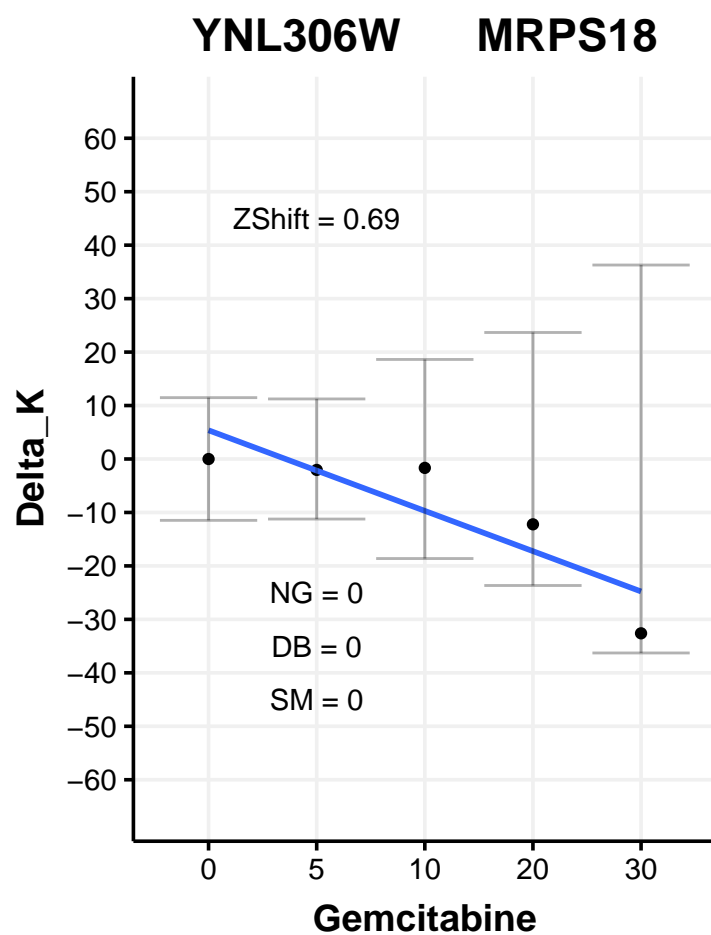

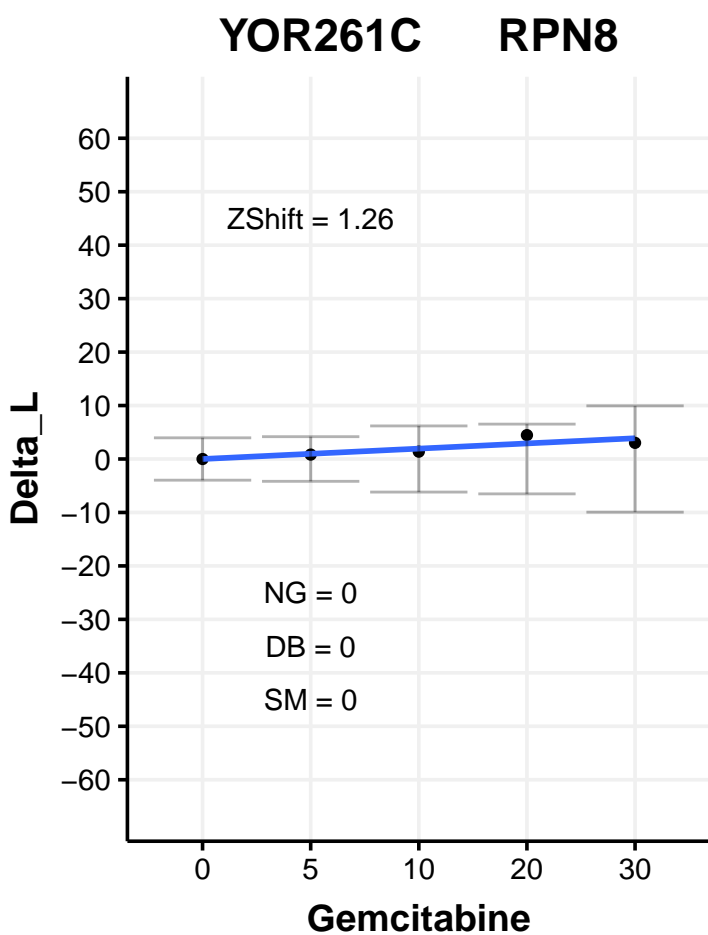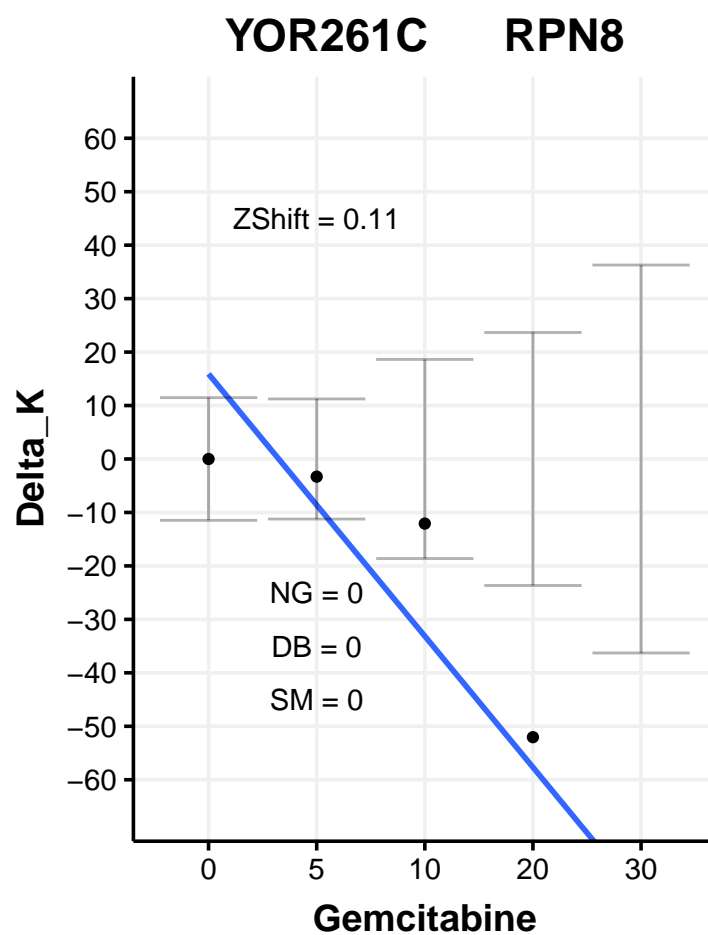

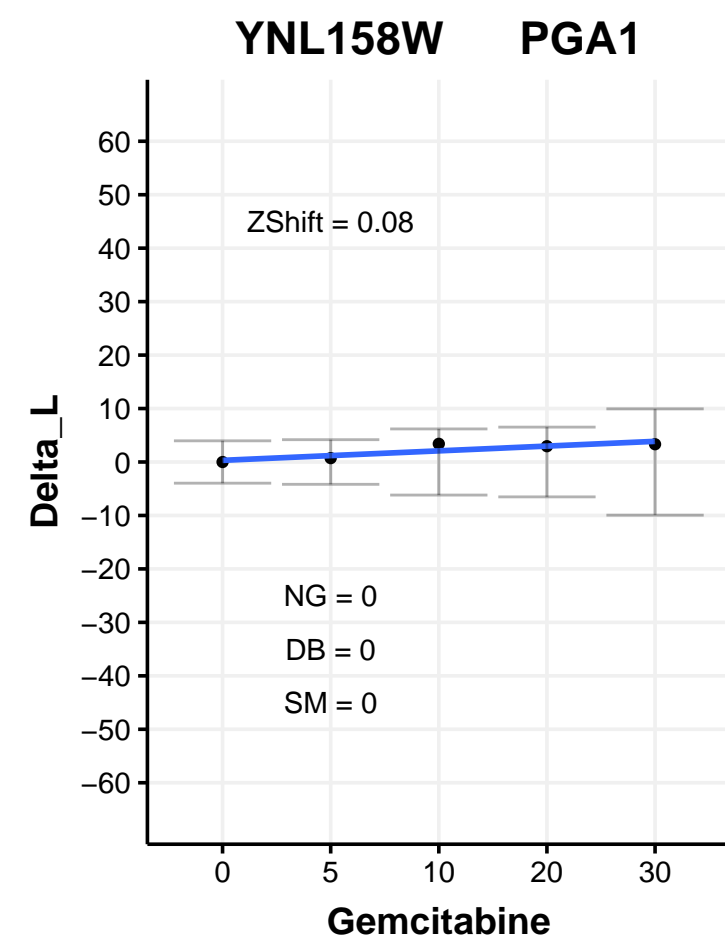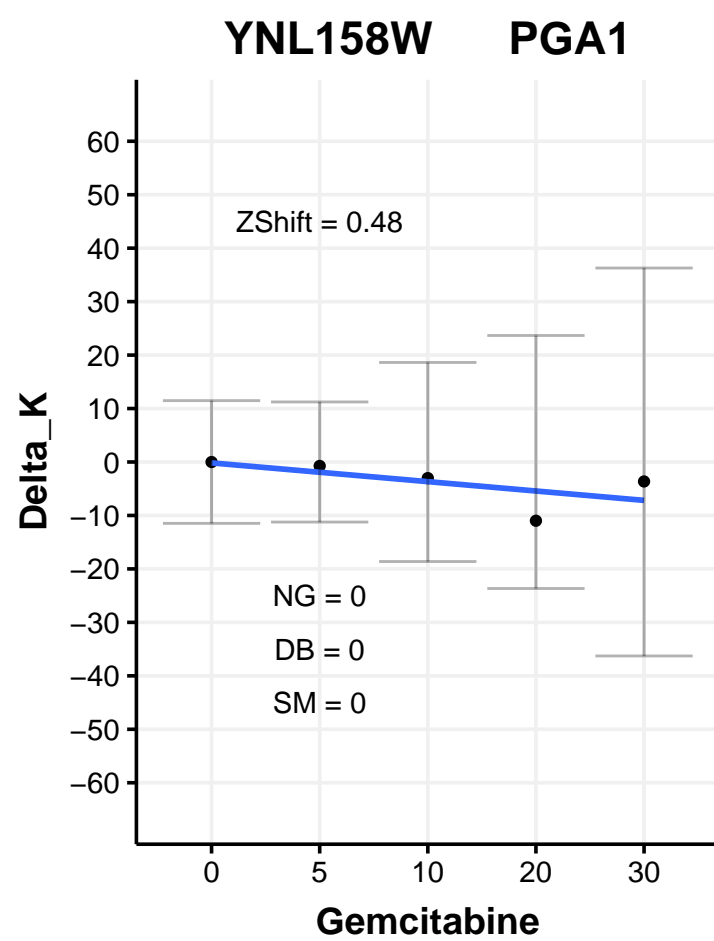

Supplement: s1 [file s1]
