# Supplementary material for: A Humanized Yeast Phenomic Model of Deoxycytidine Kinase to Predict Genetic Buffering of Nucleoside Analog Cytotoxicity
Source: MDPI journal article supplement (doi:10.3390/genes10100770), 2019-09-30

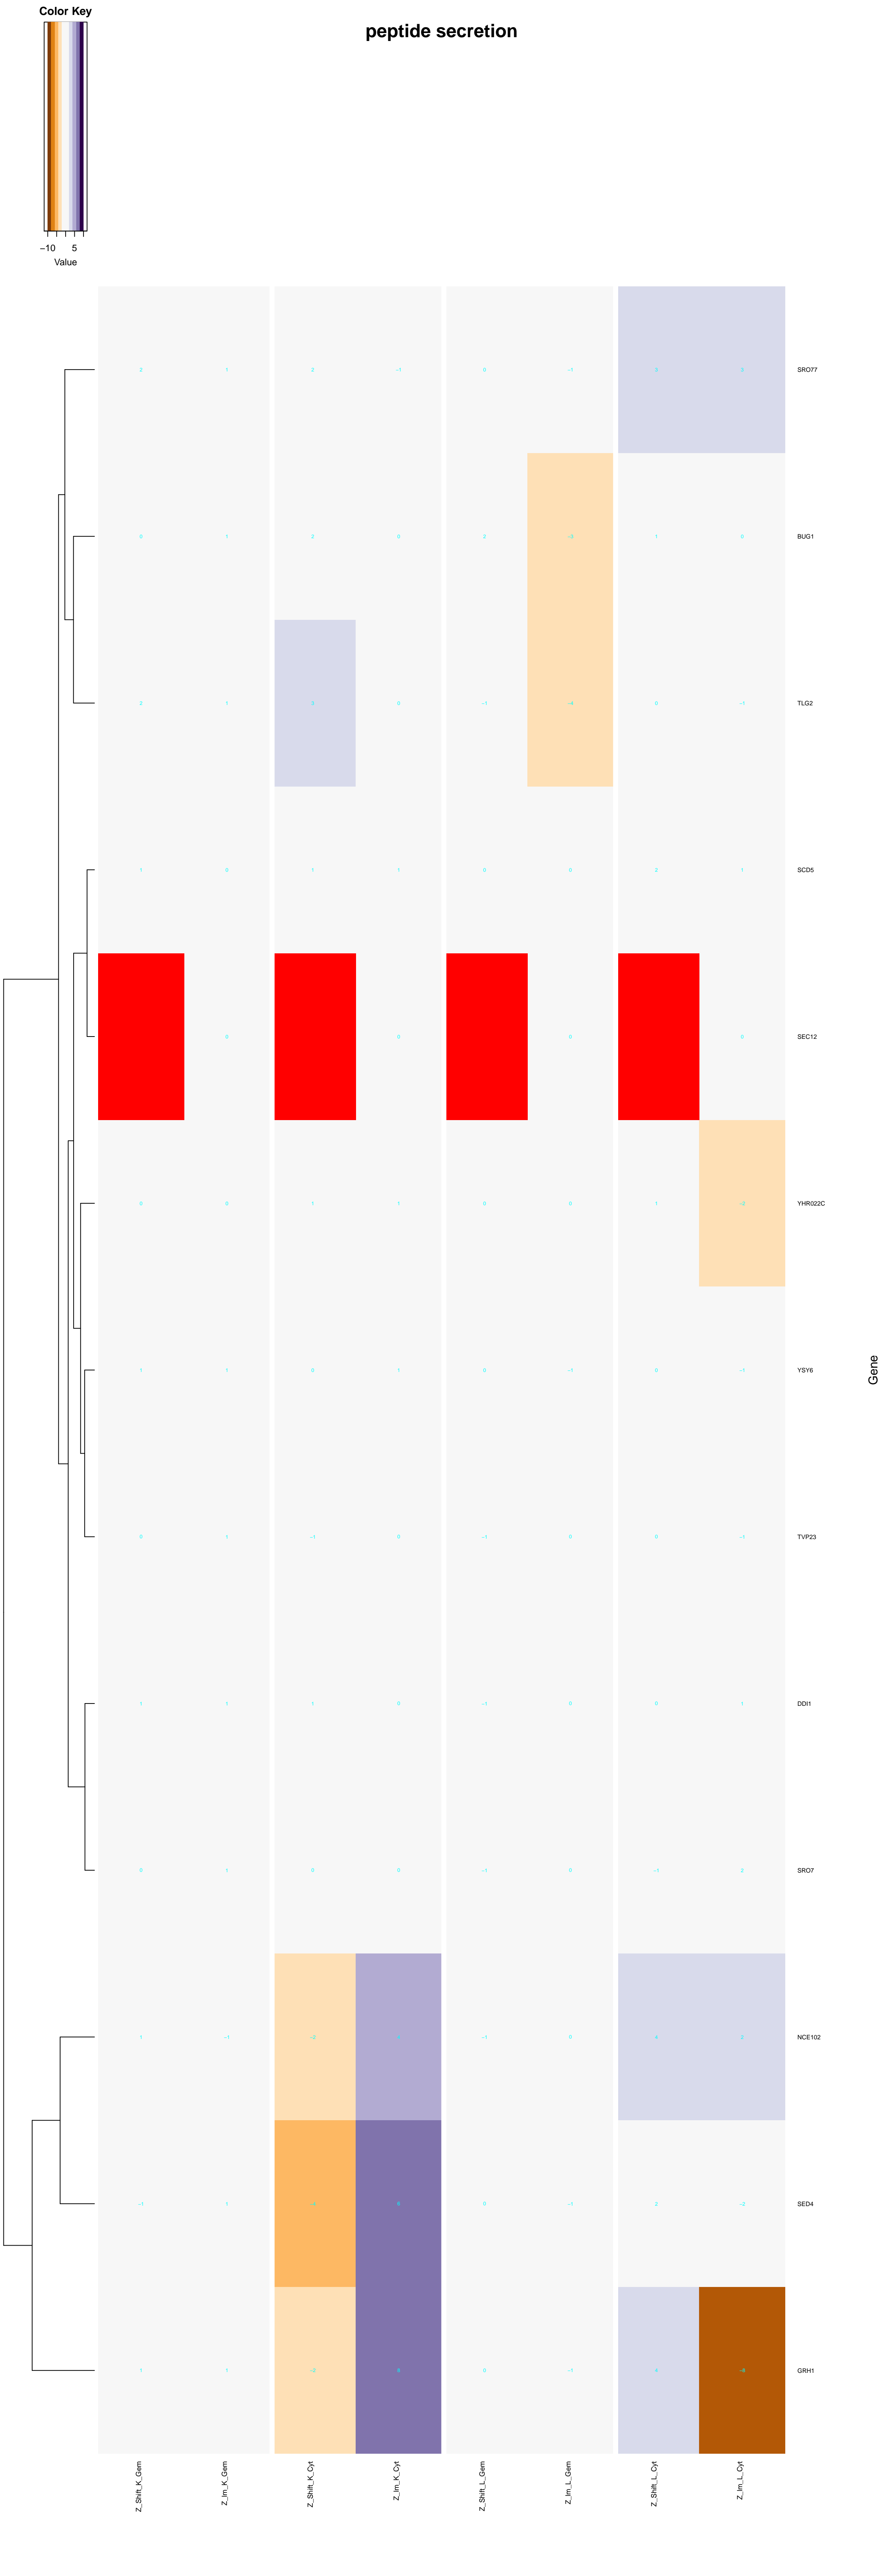

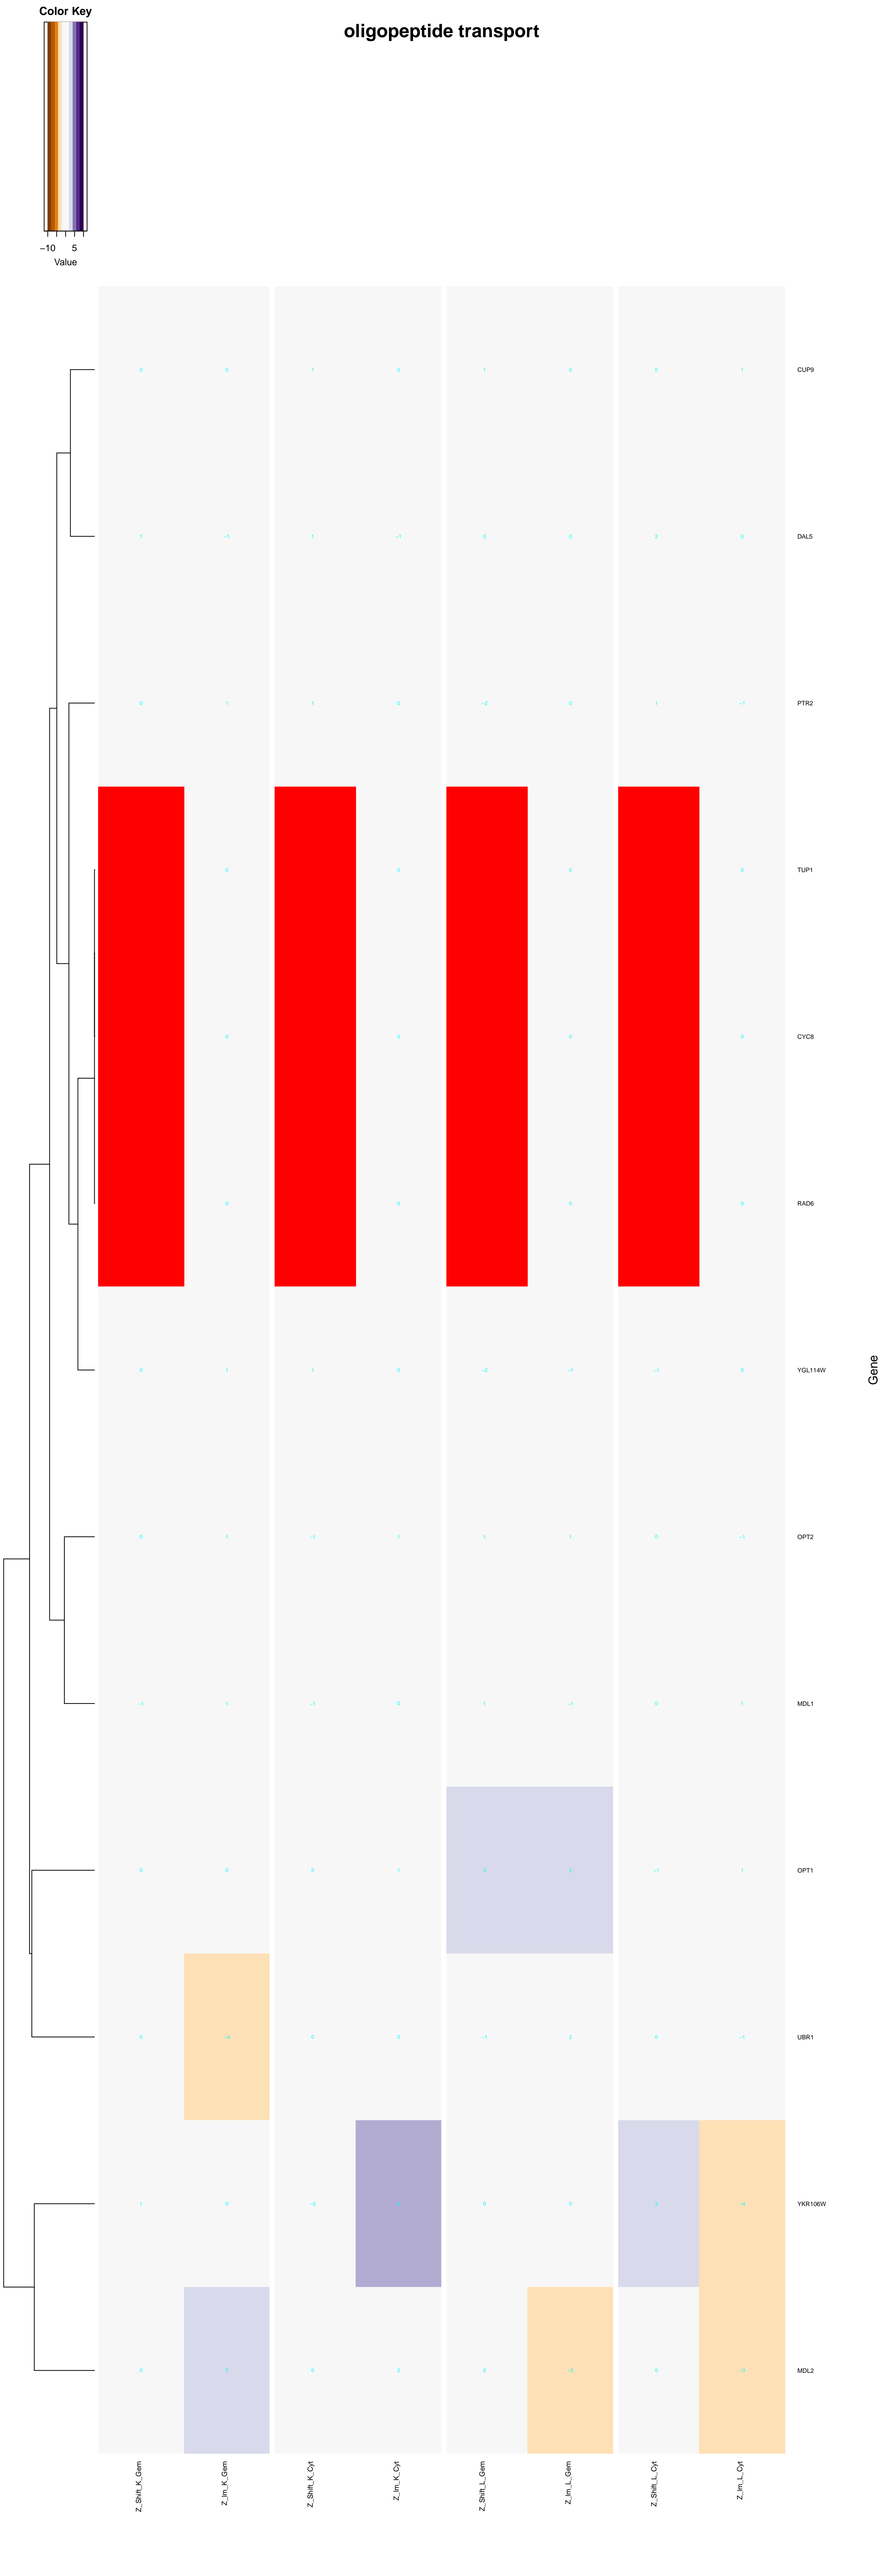

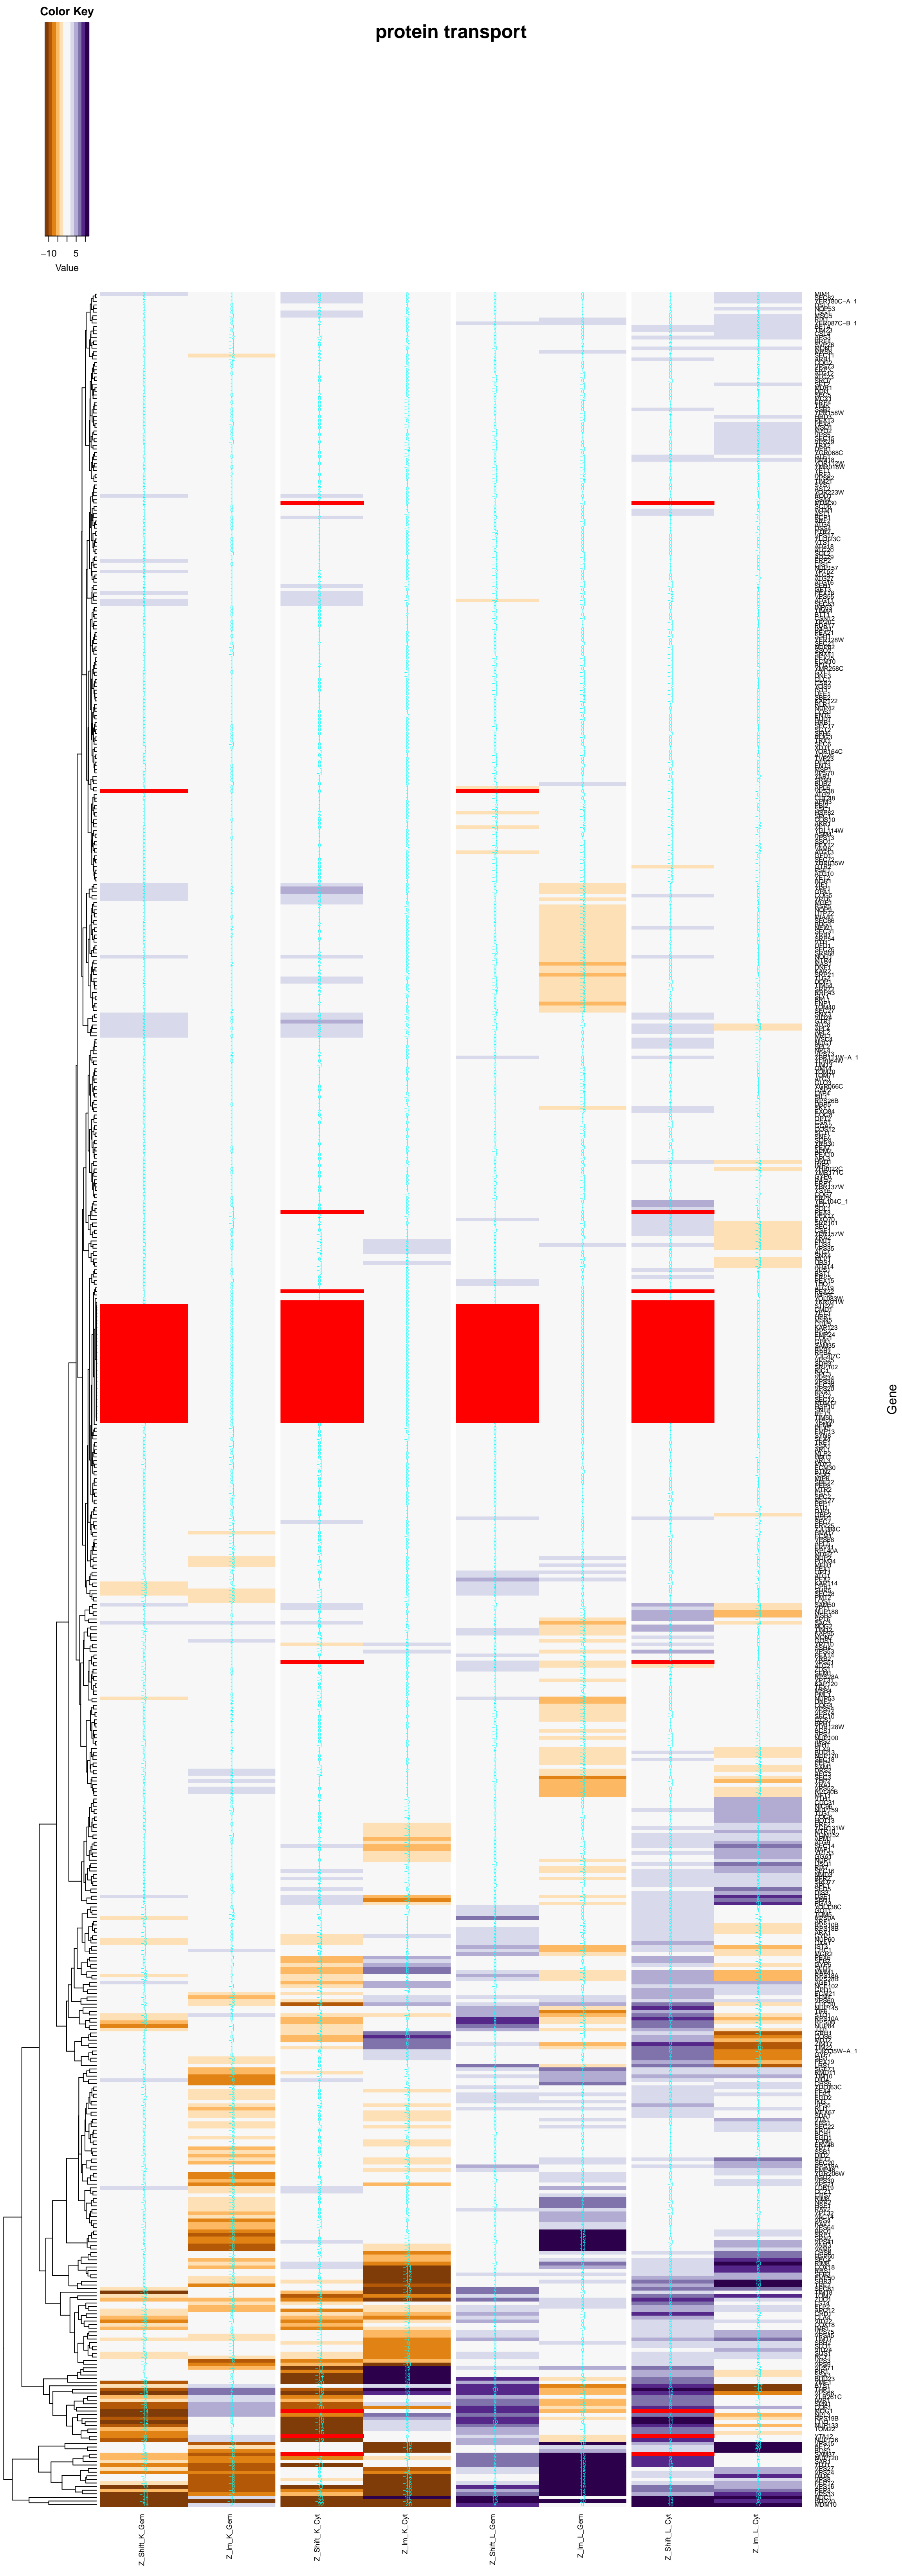

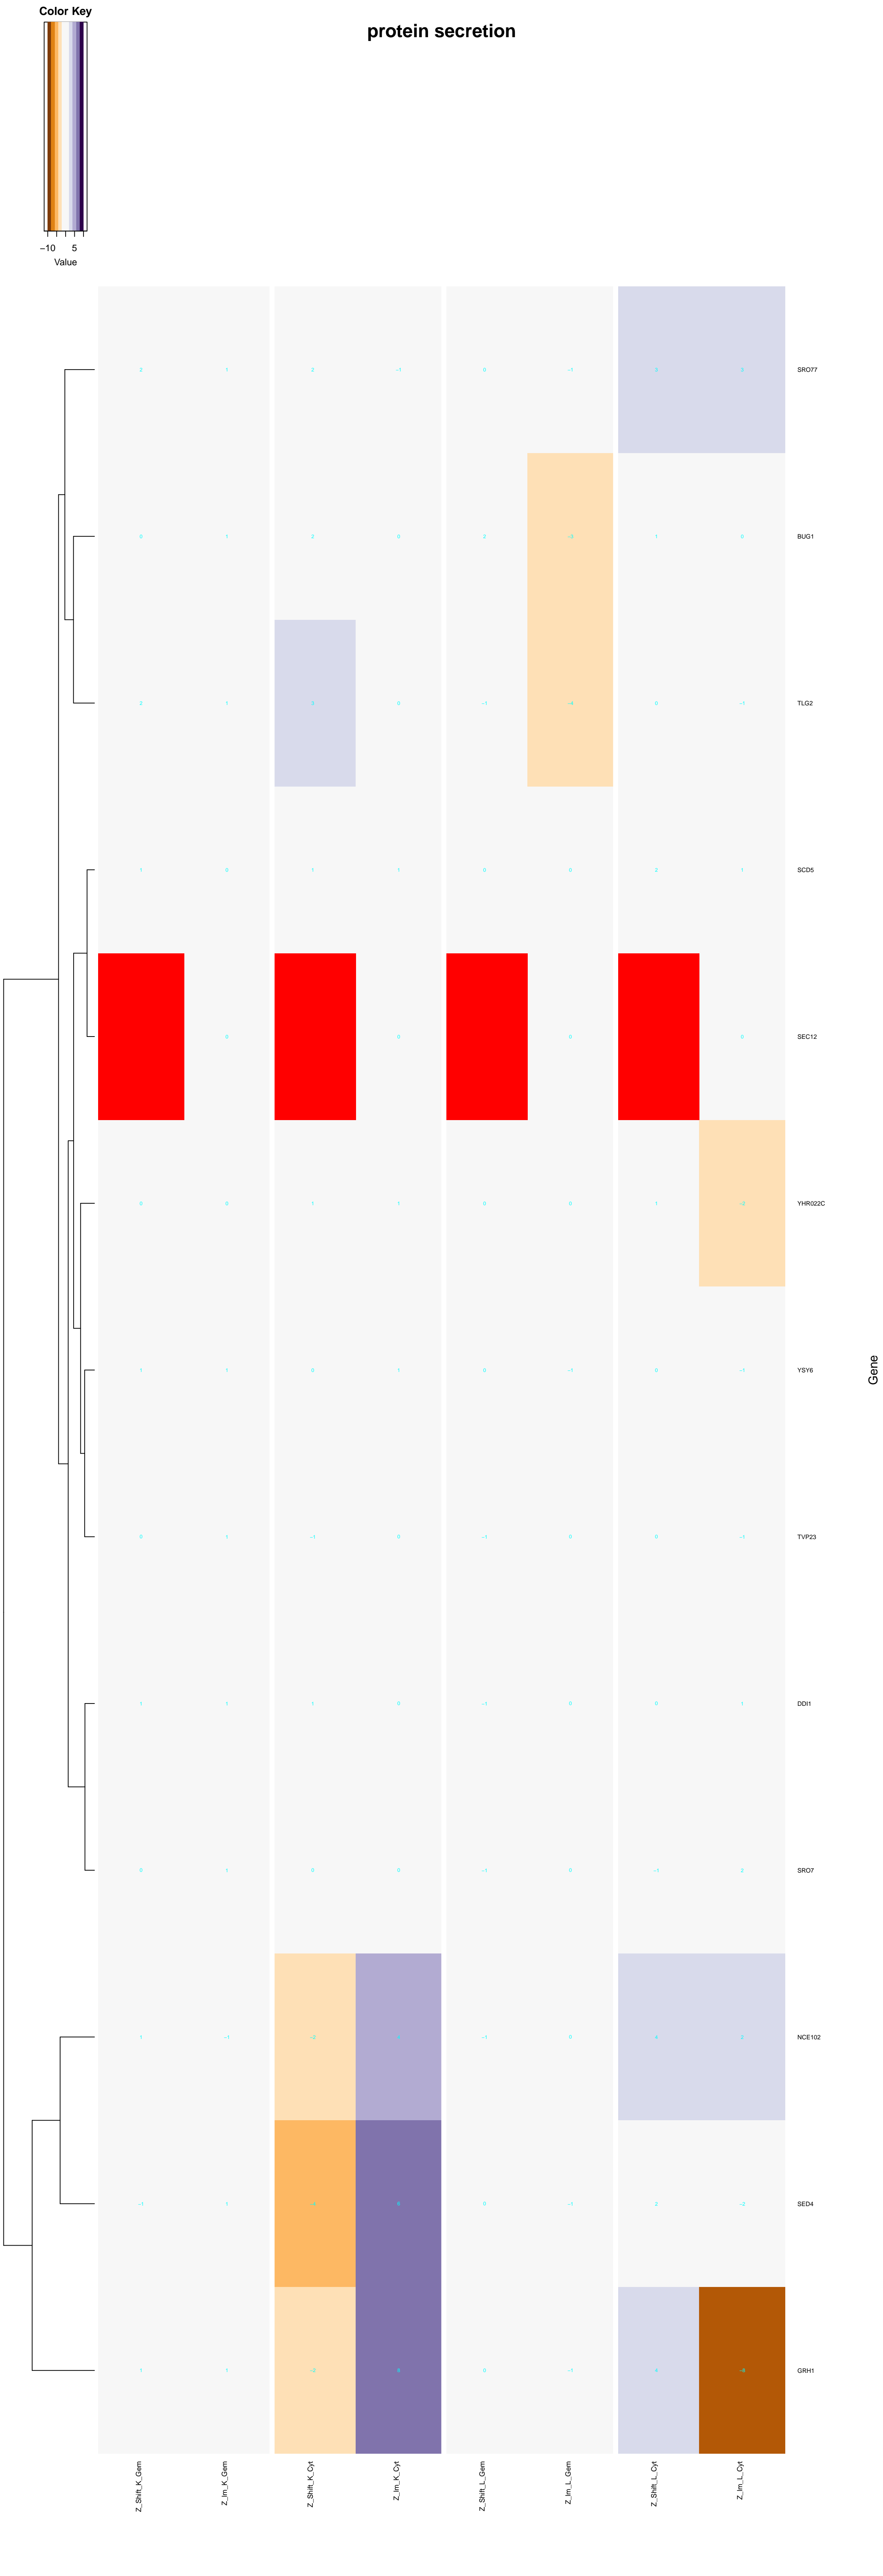

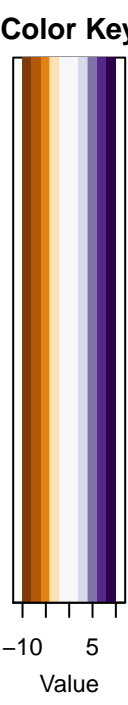

oligopeptide transmembrane transport

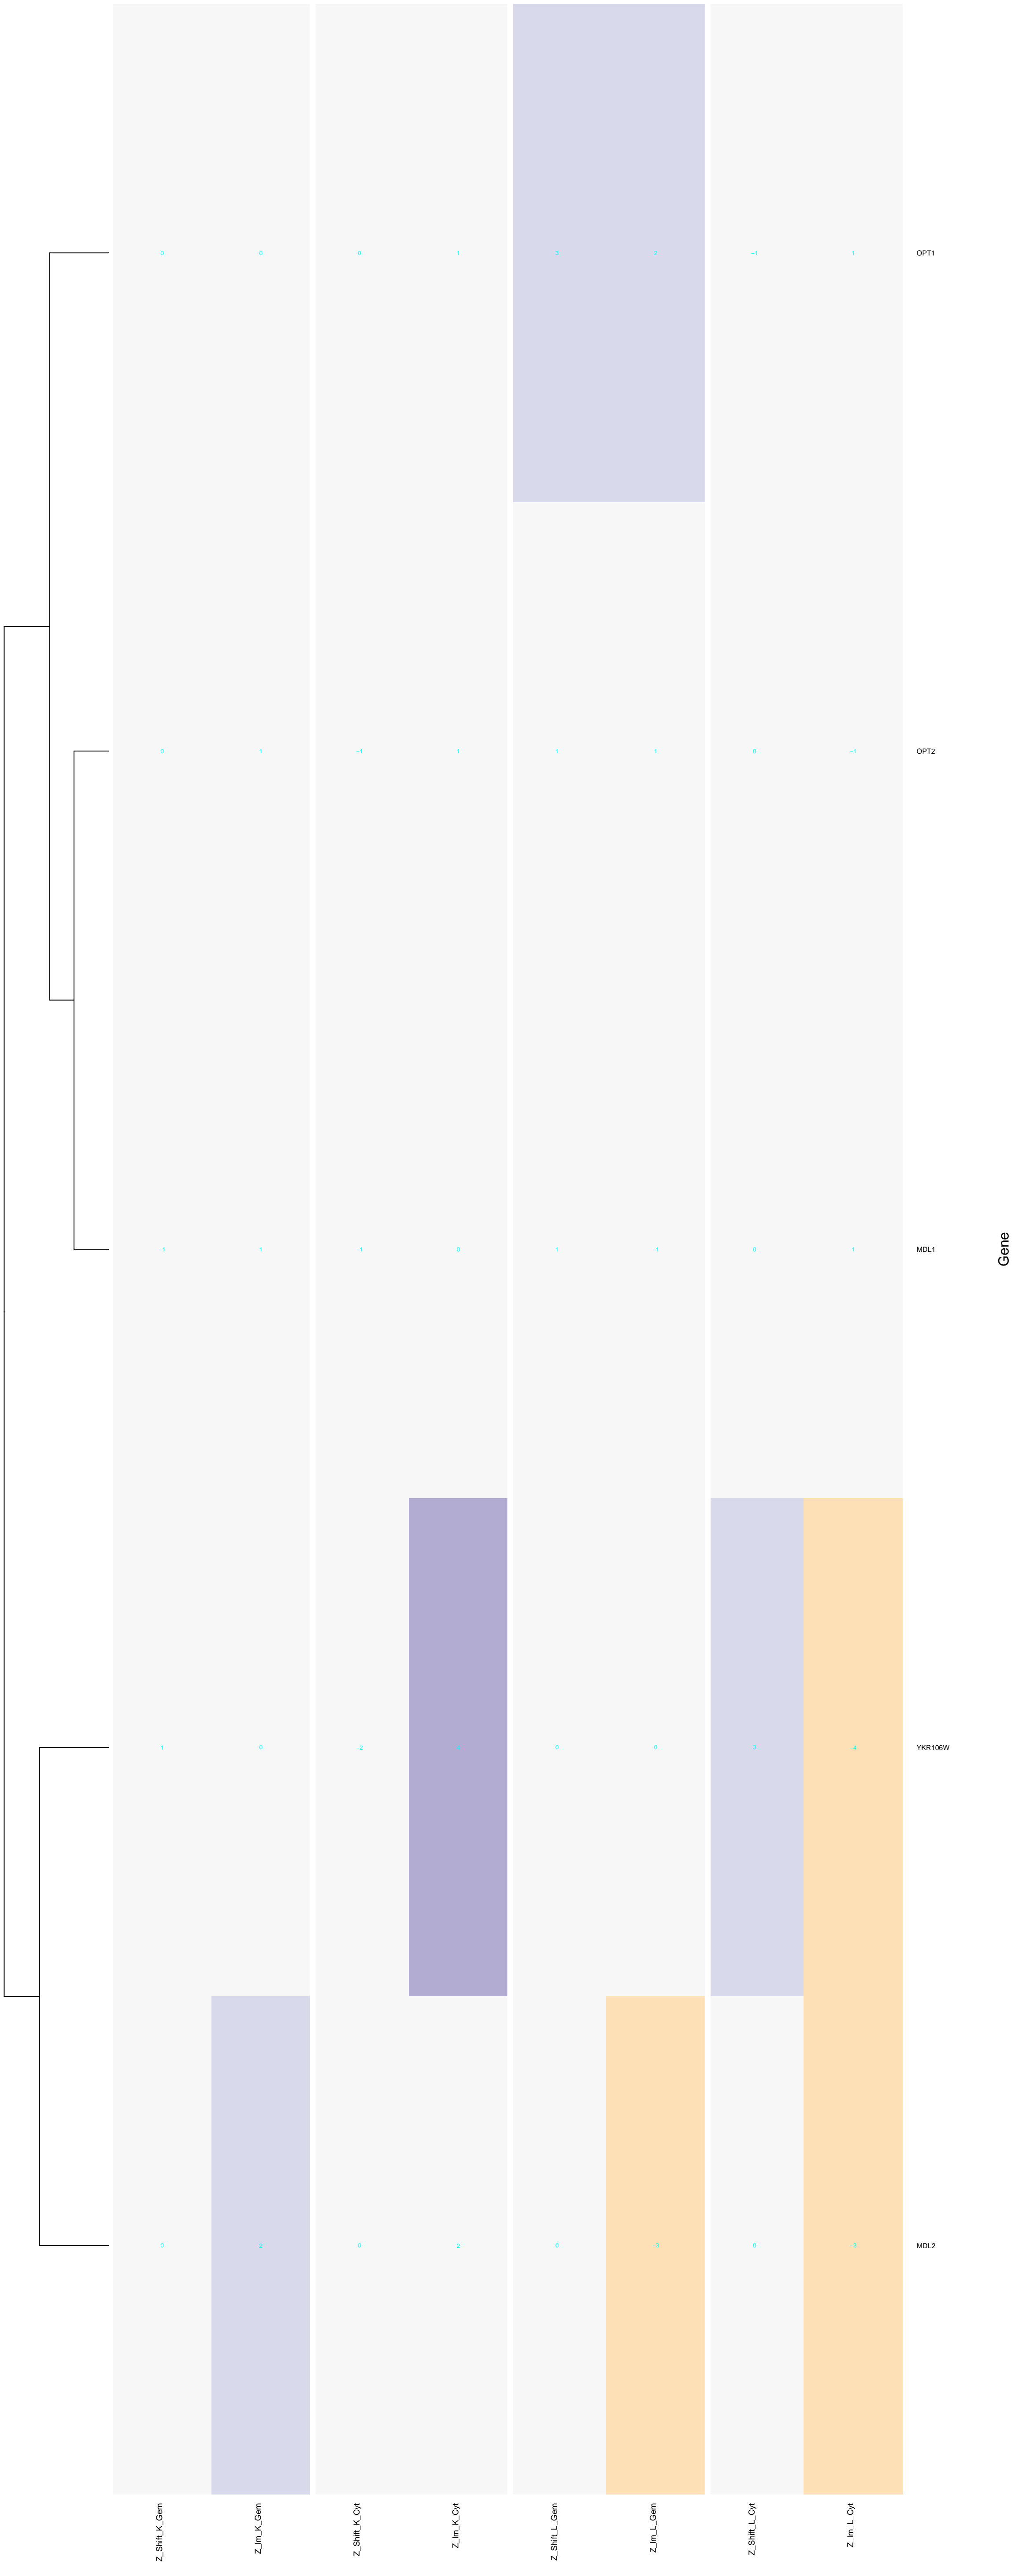

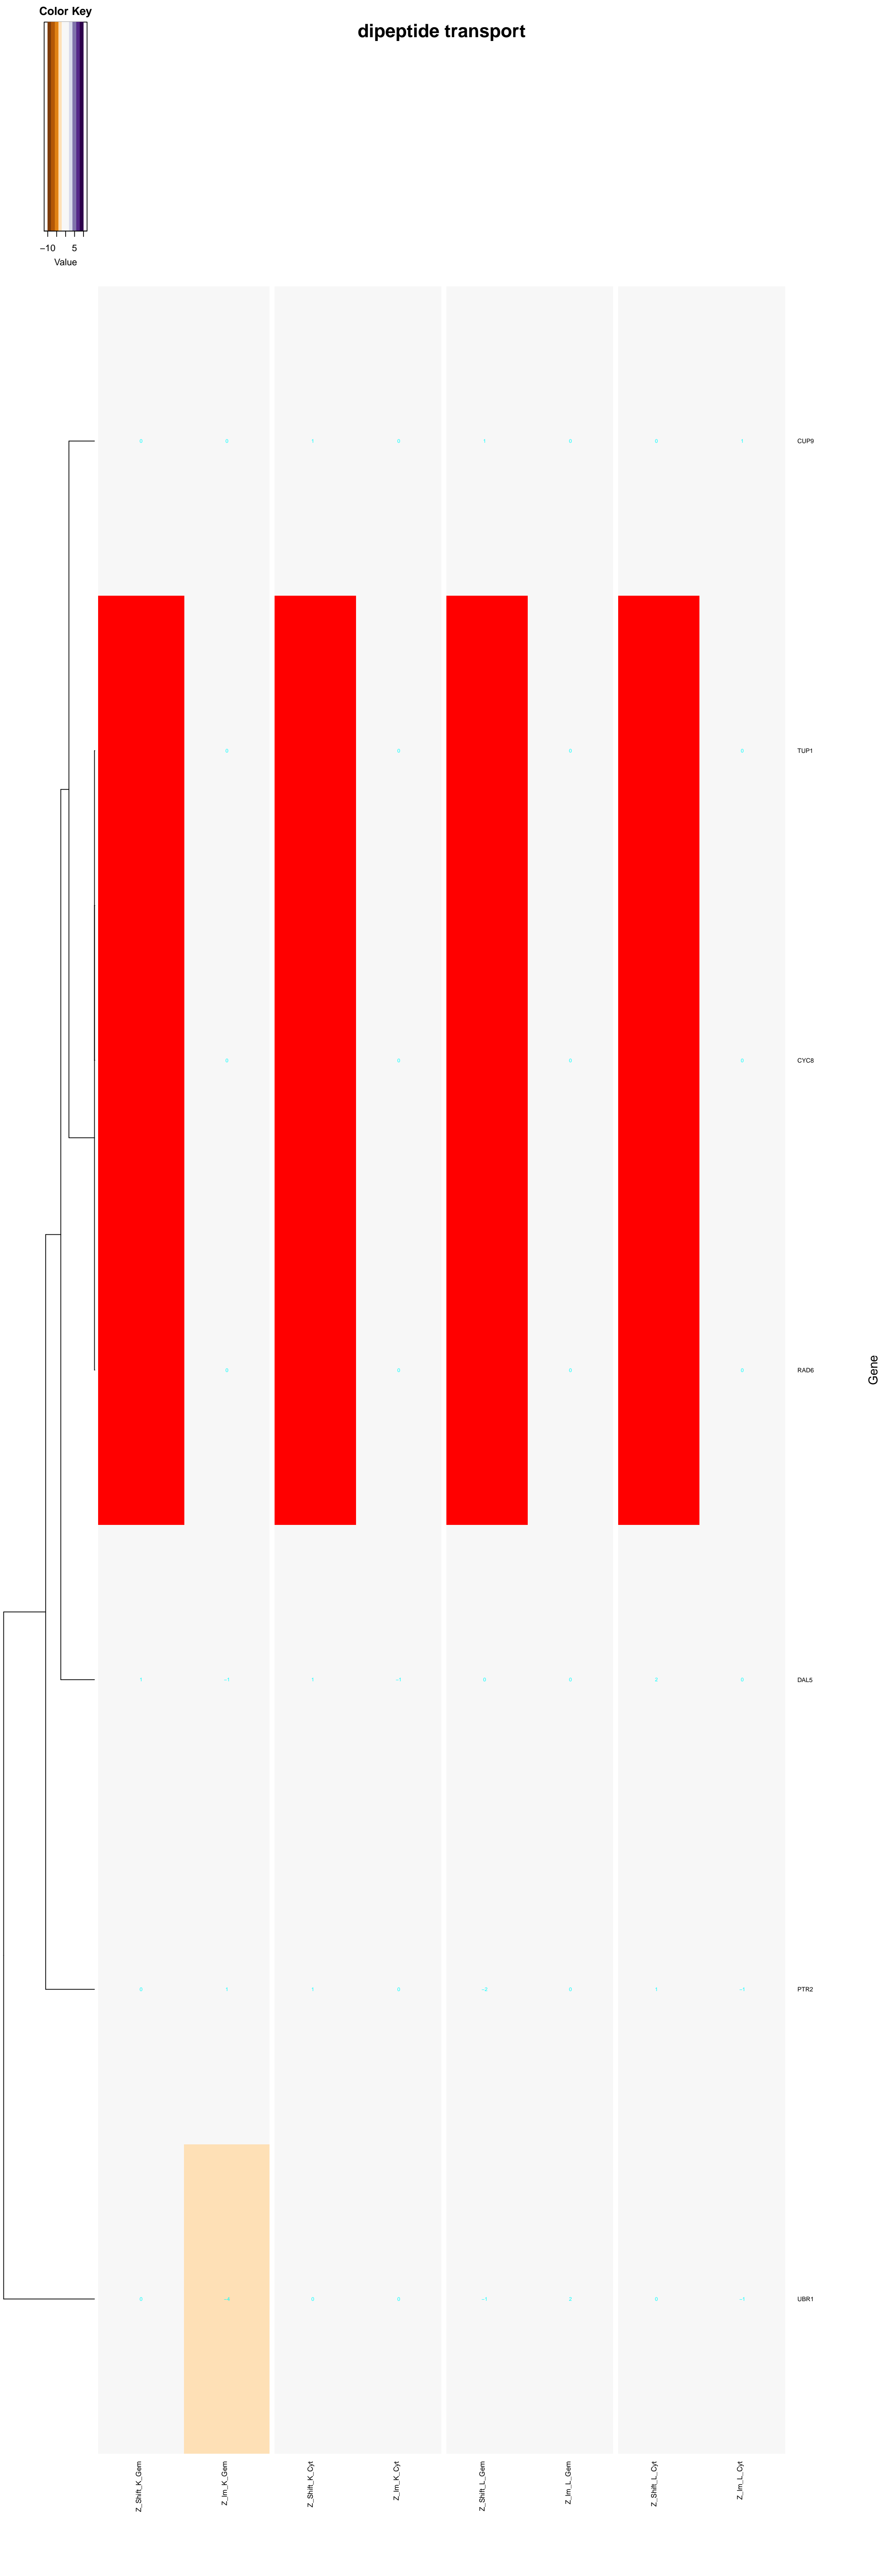

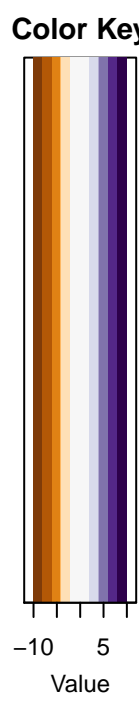

tripeptide transport

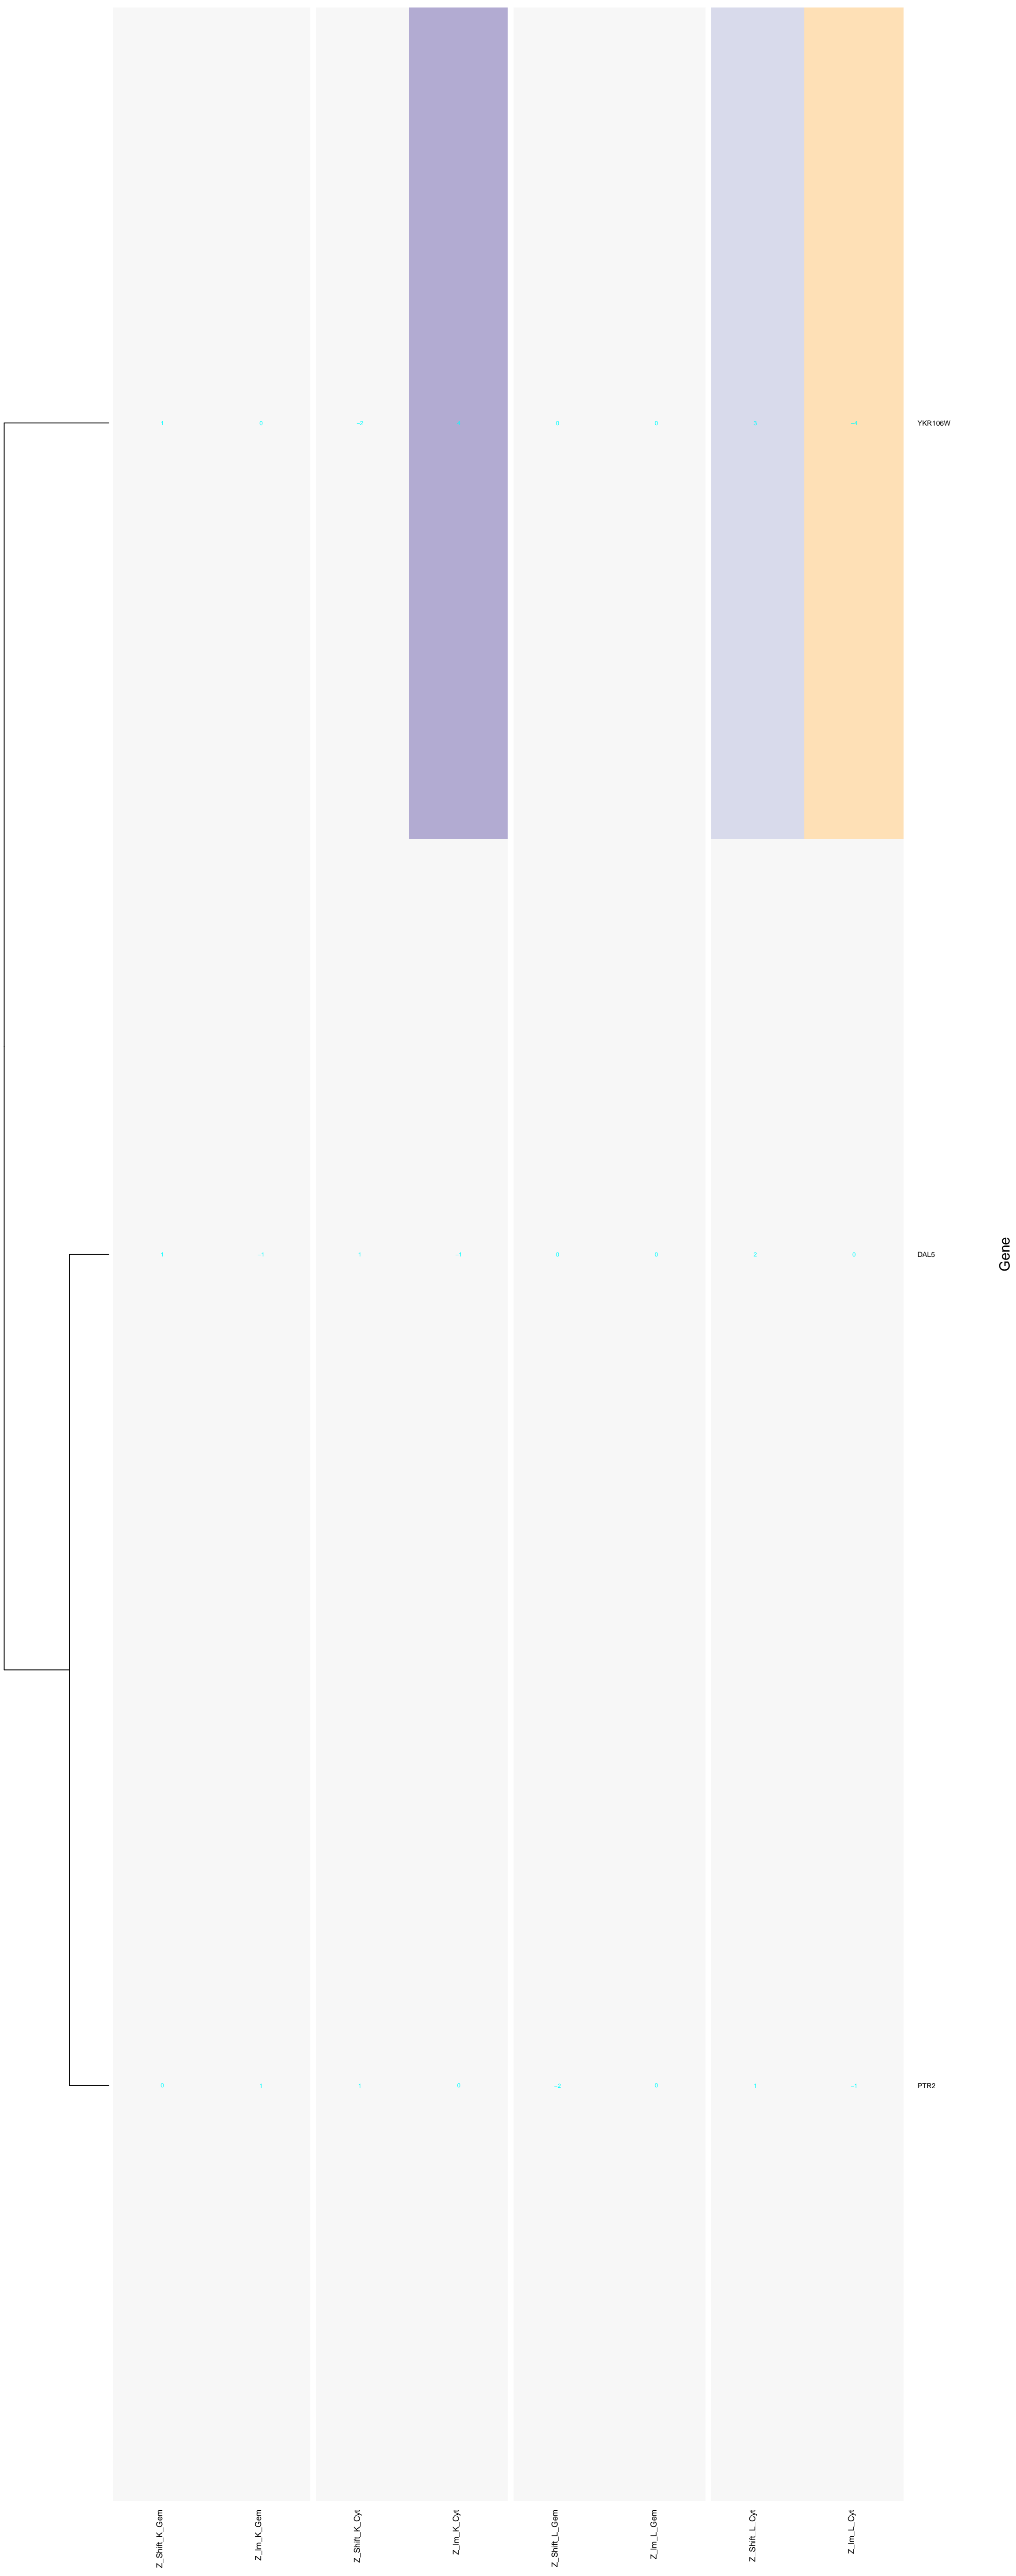

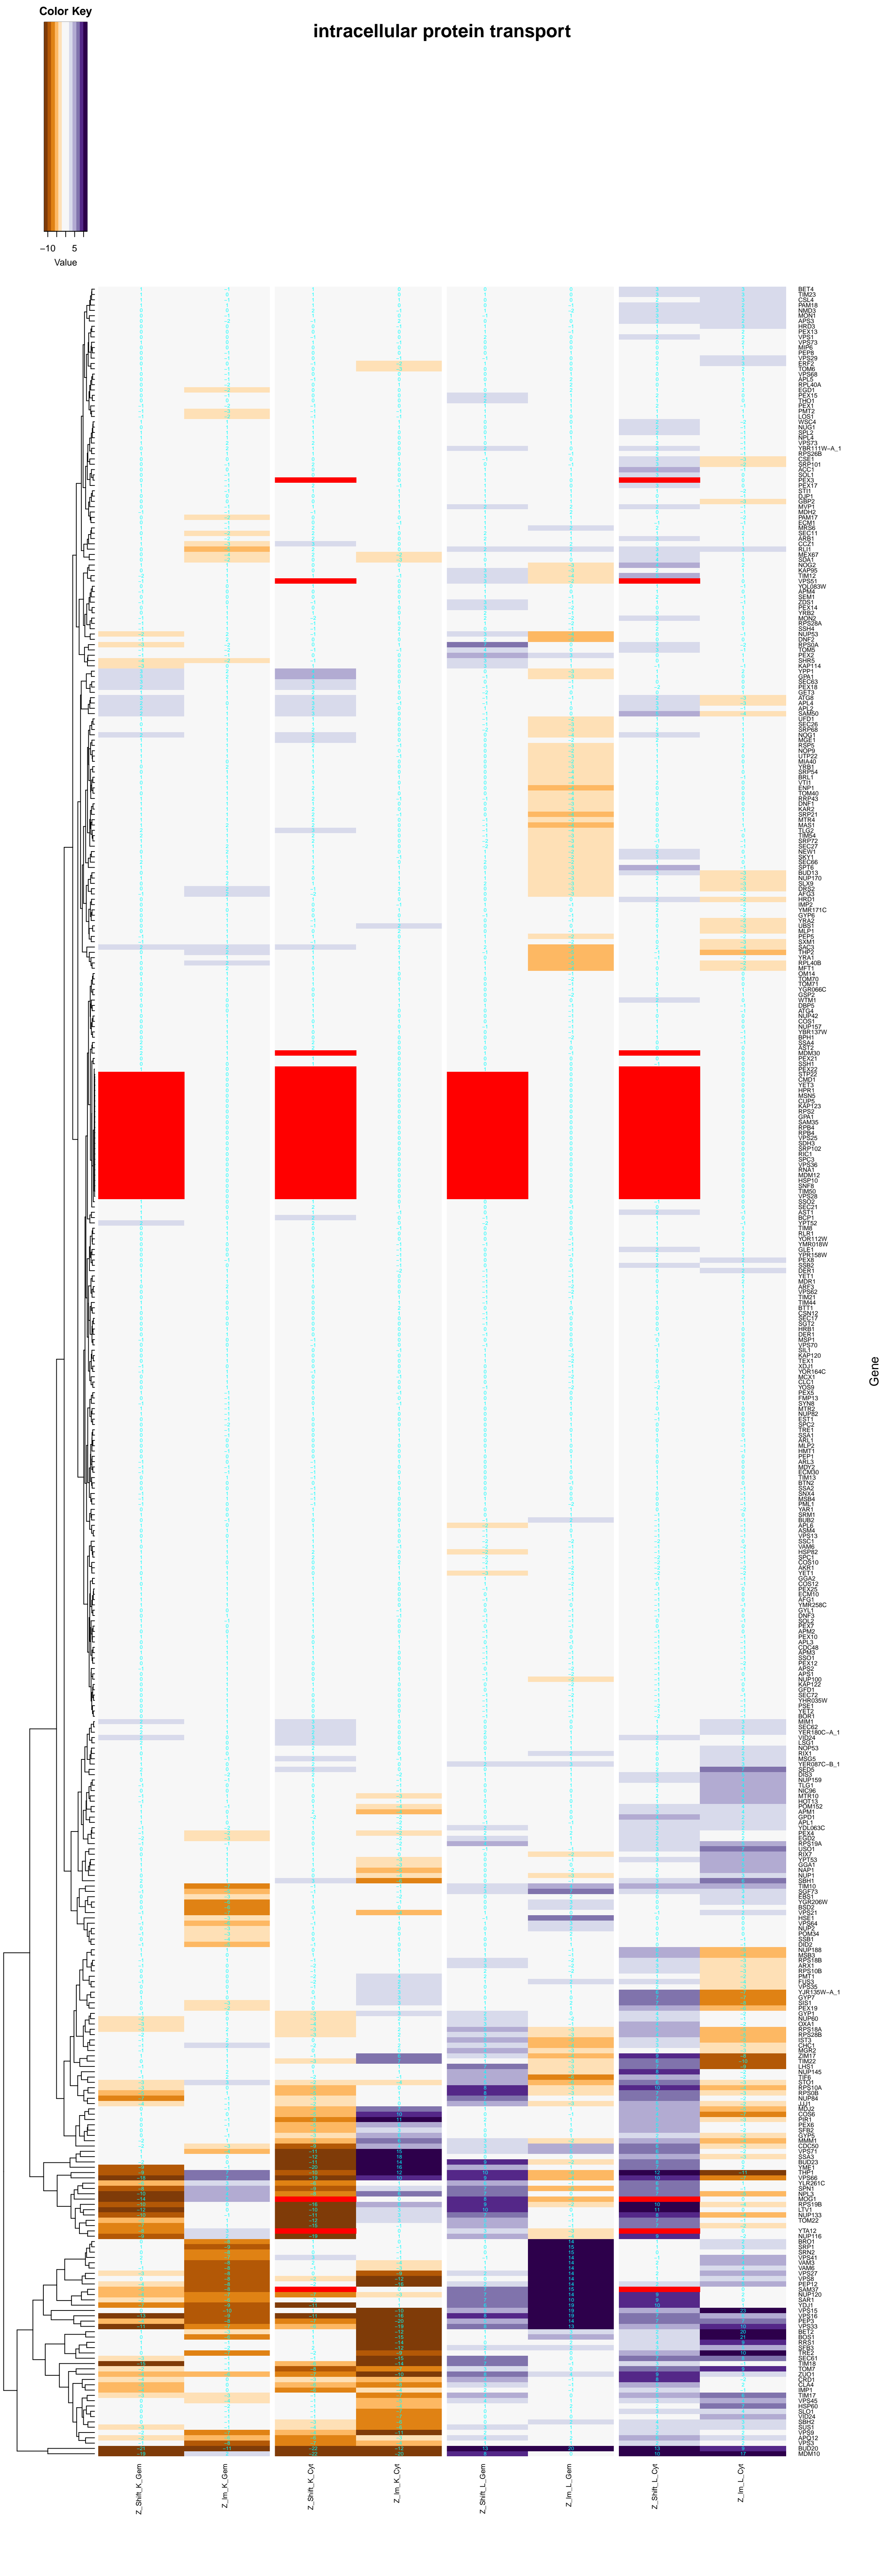

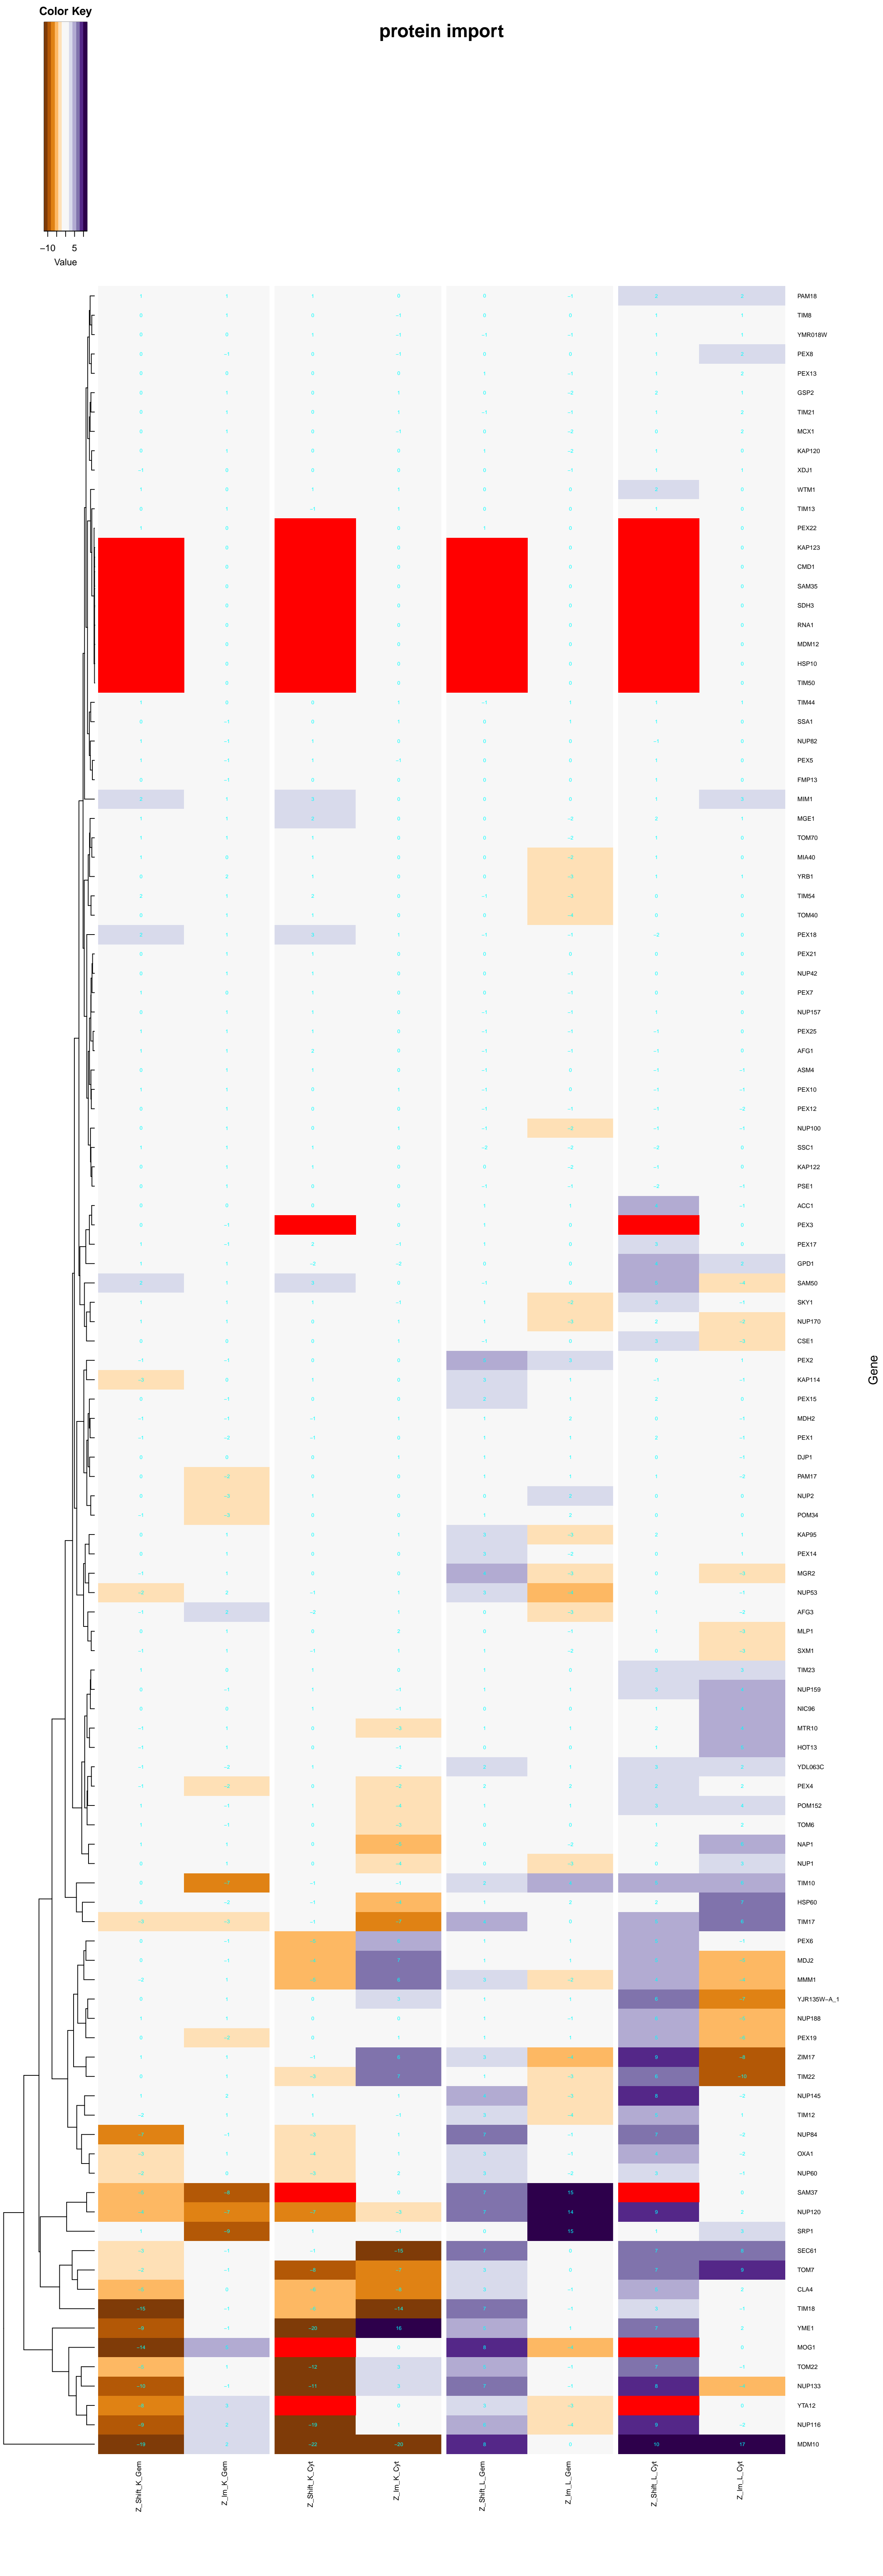

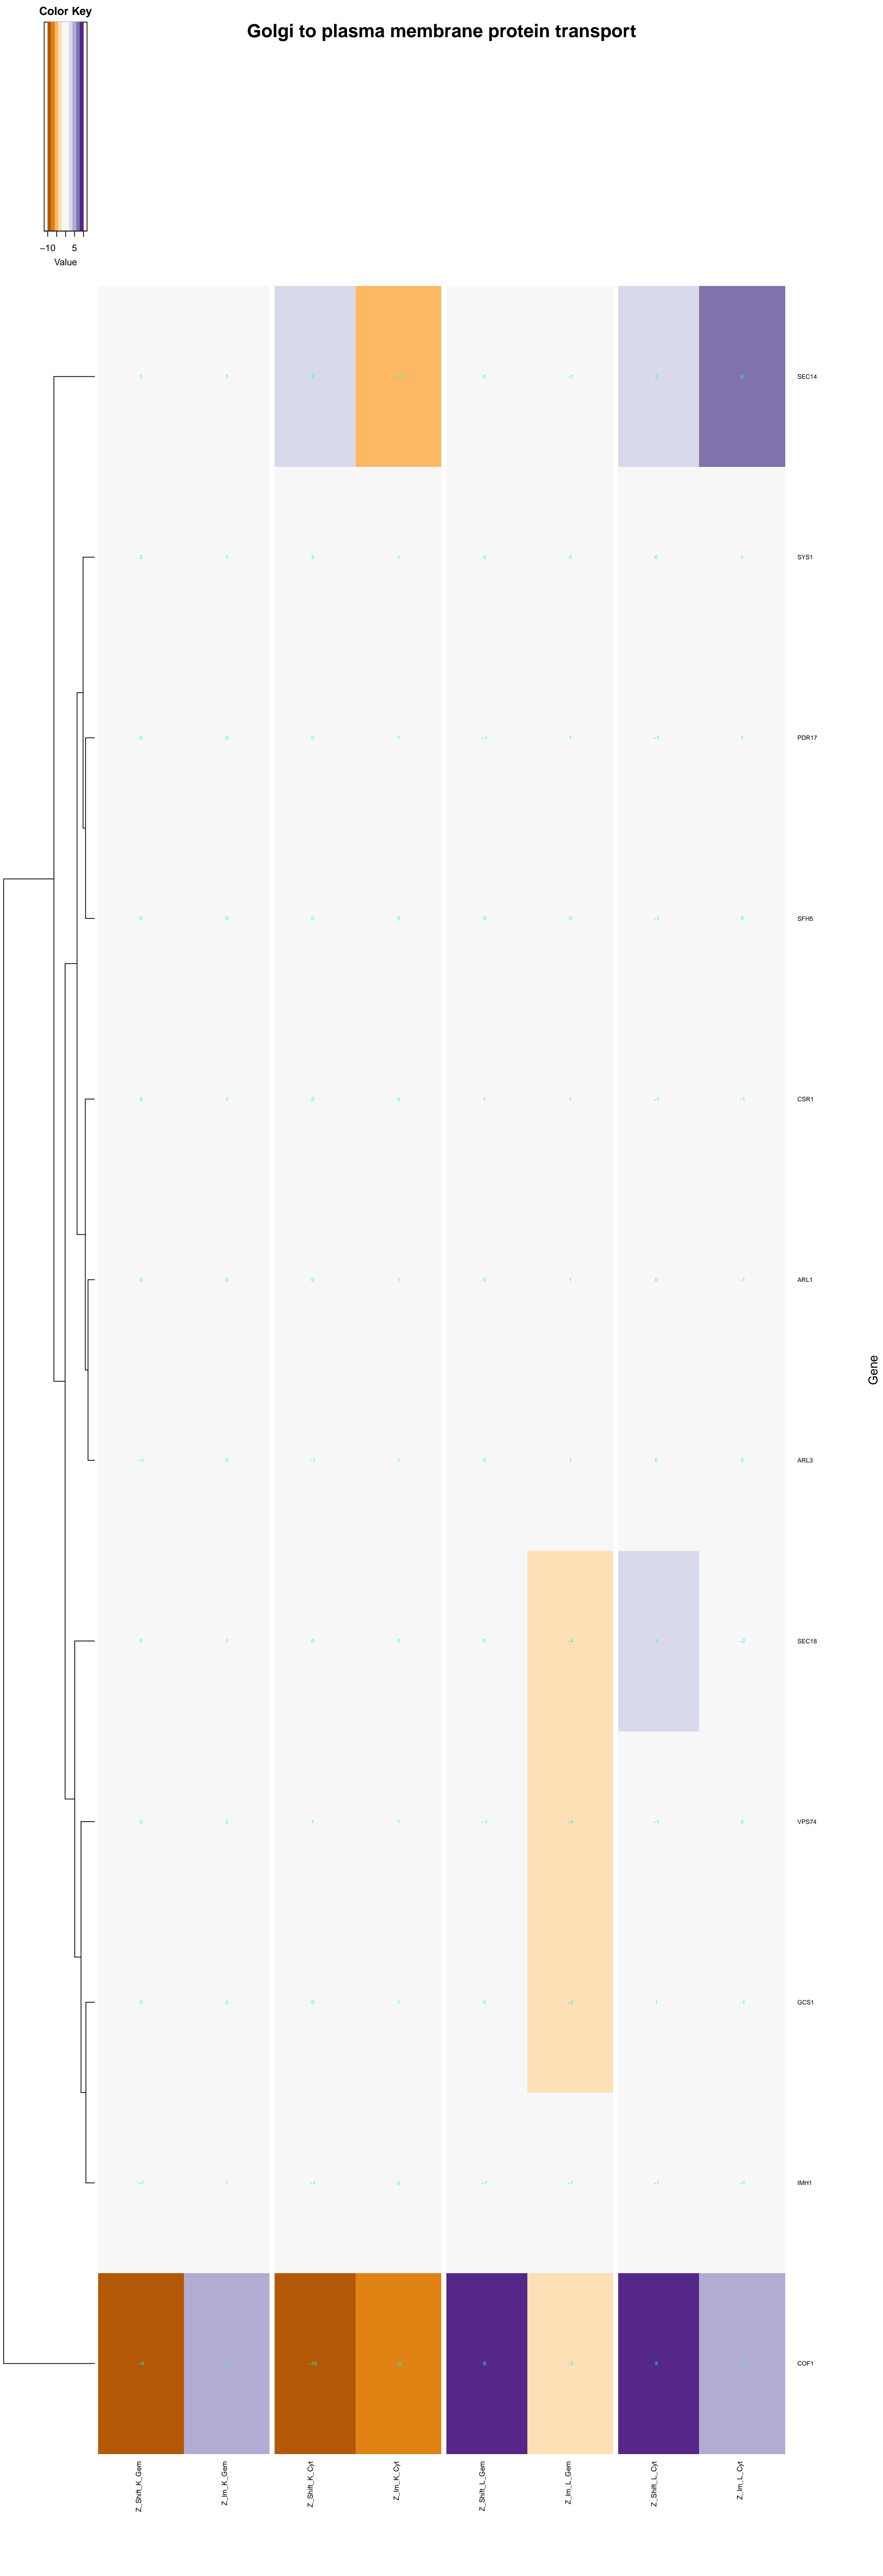

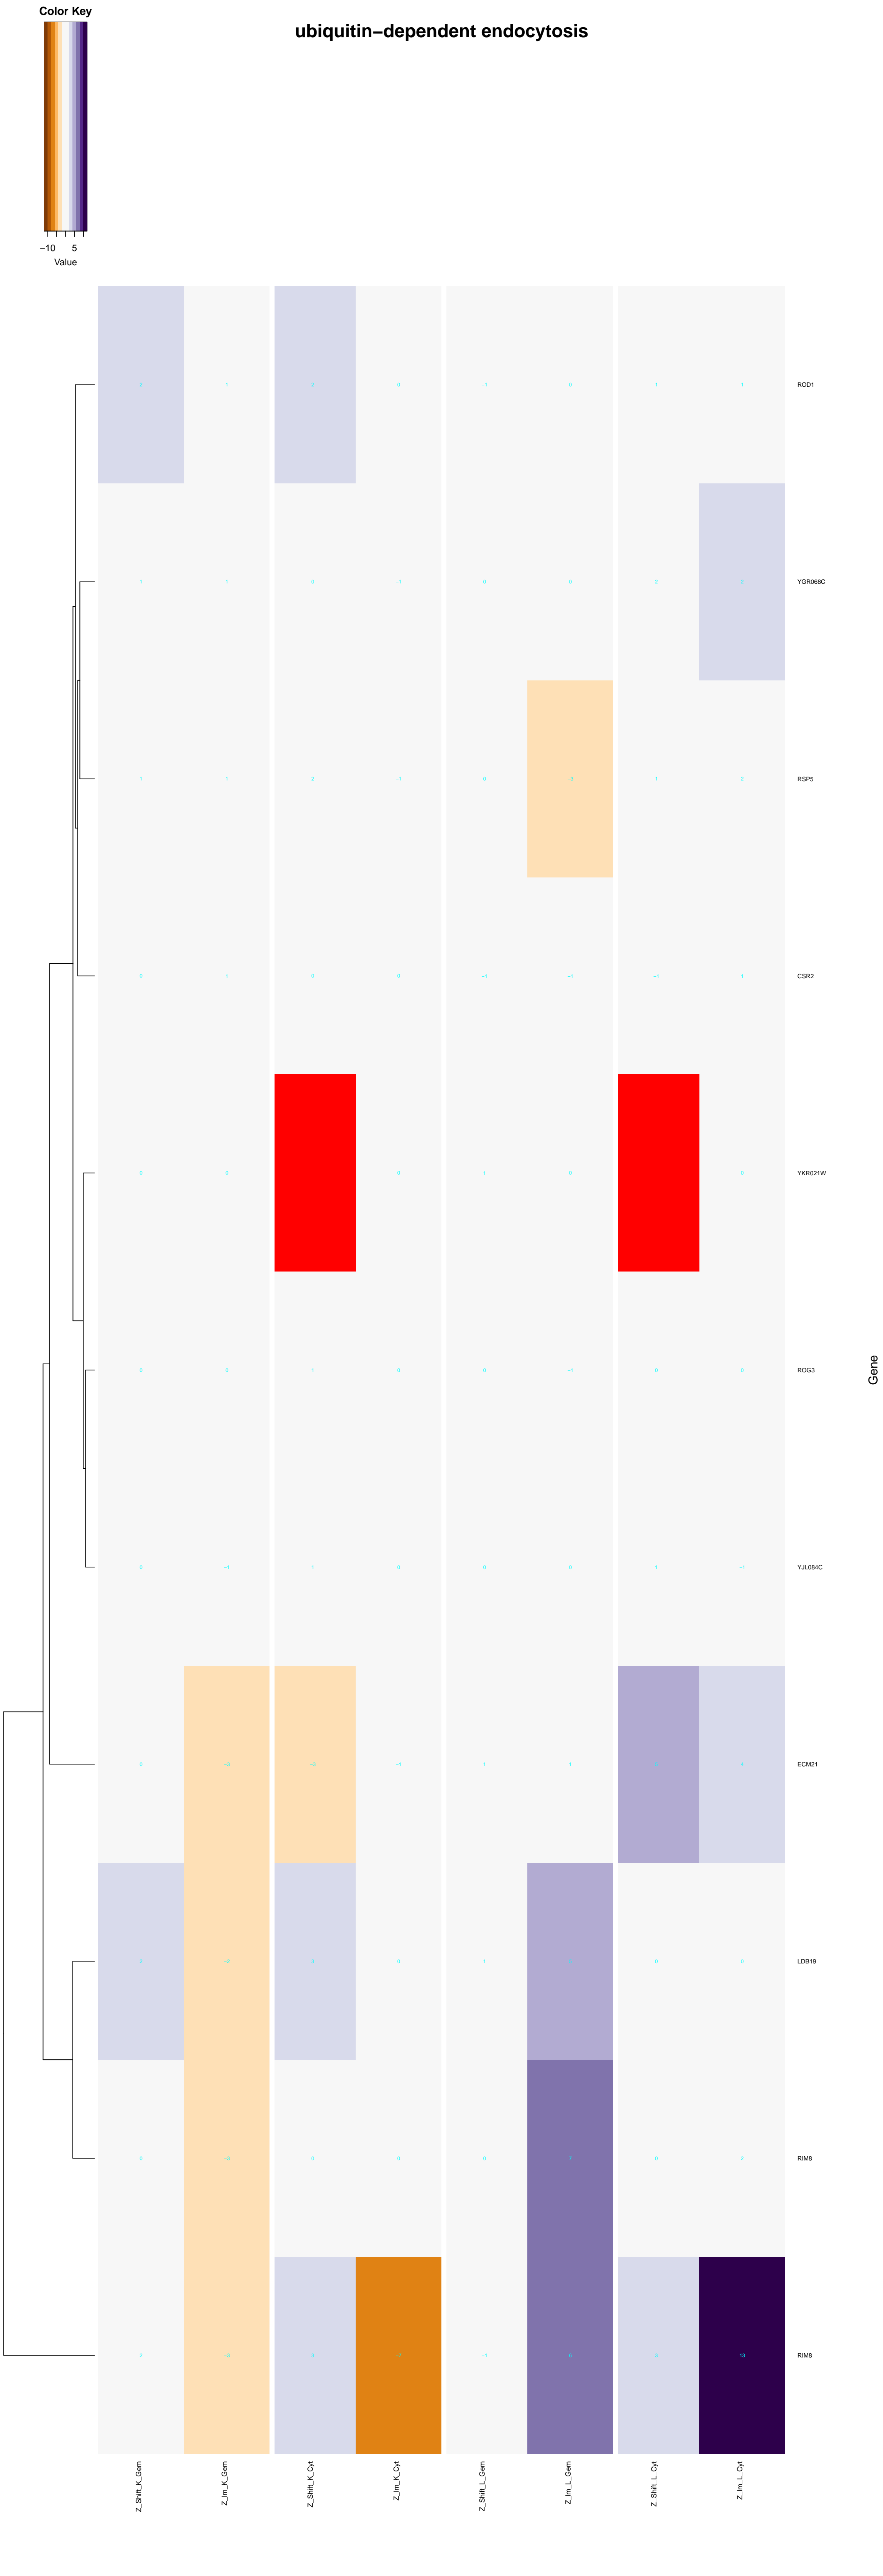

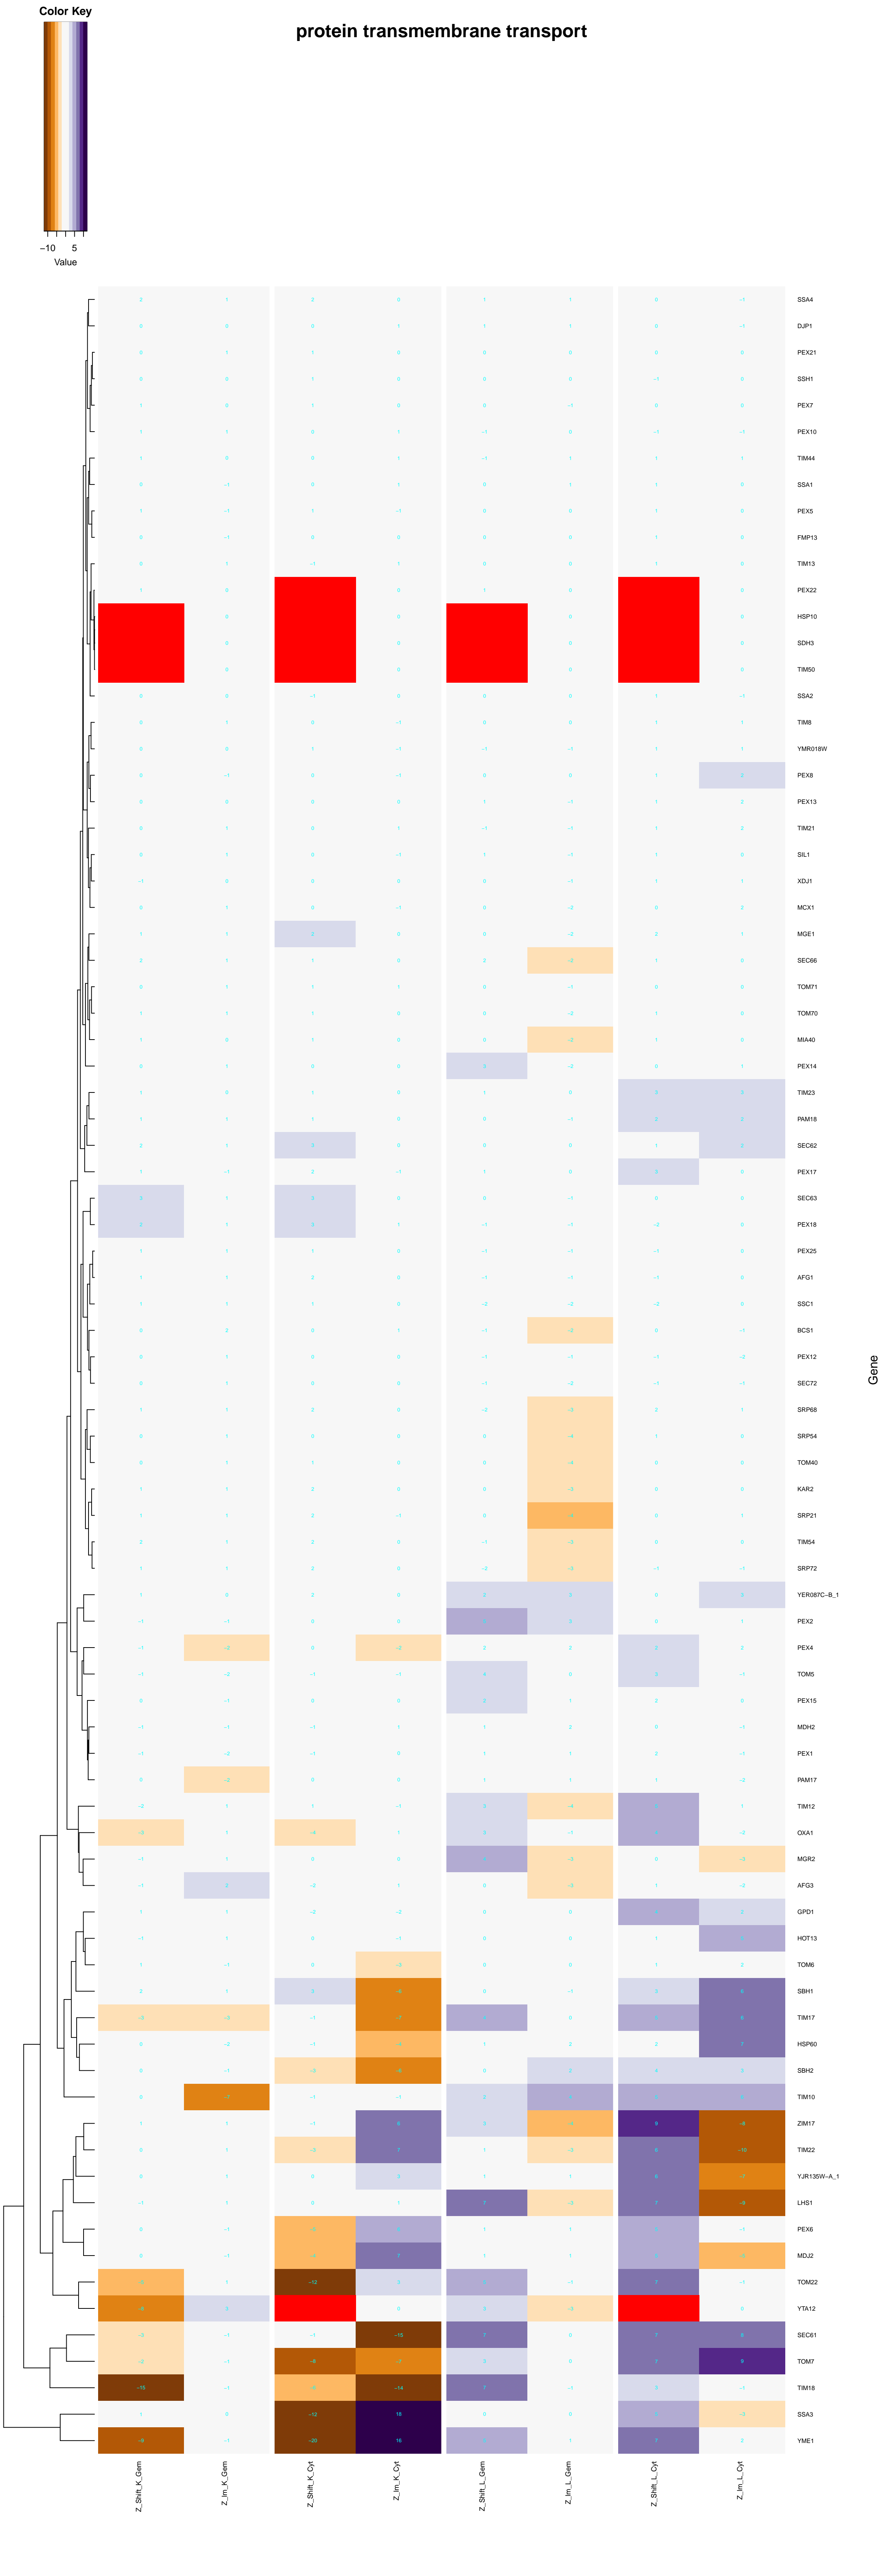

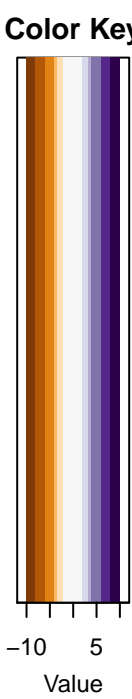

protein import into nucleus, translocation

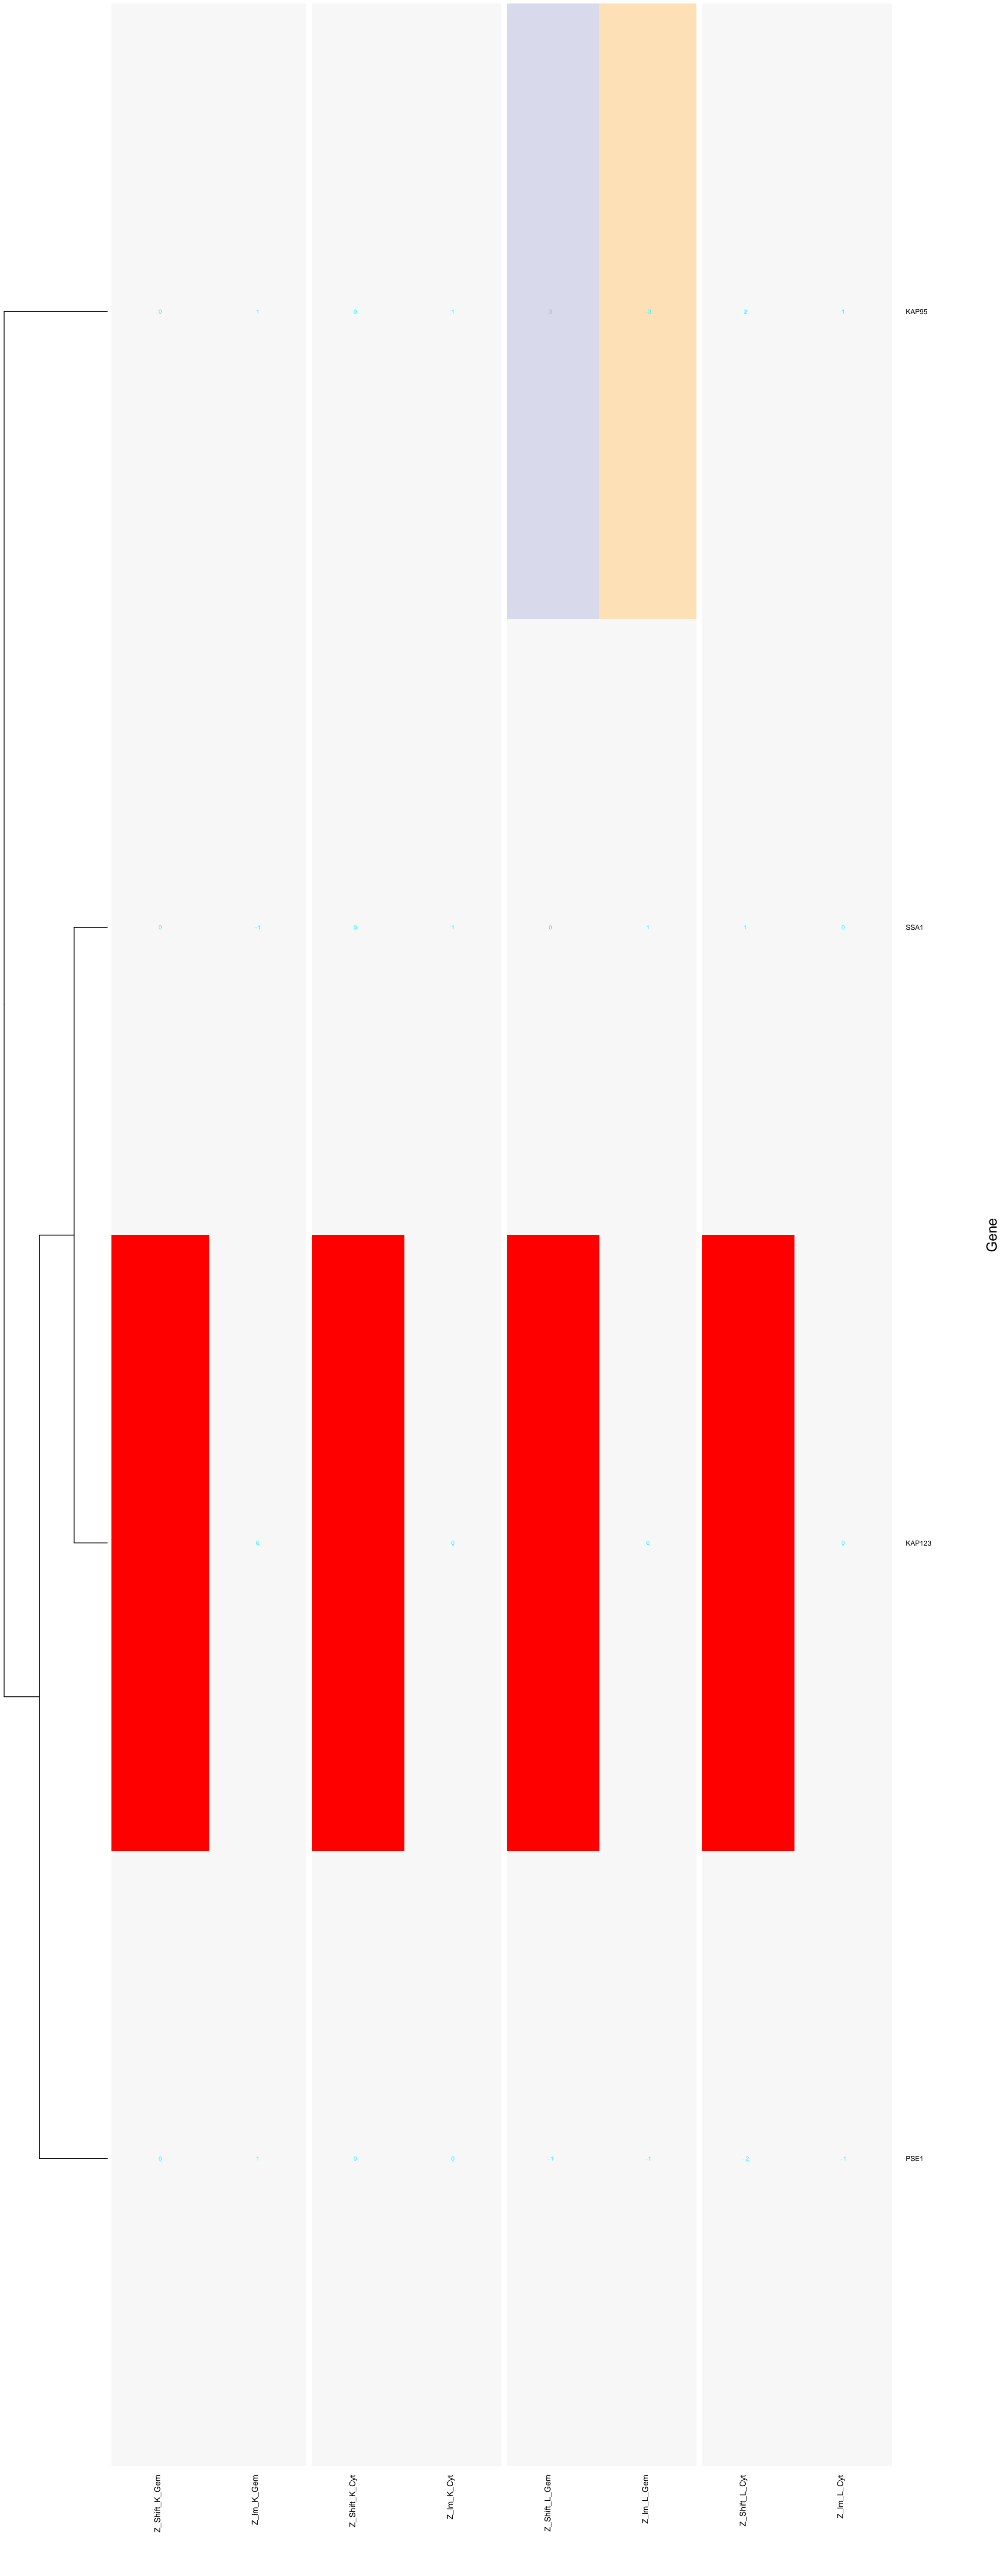

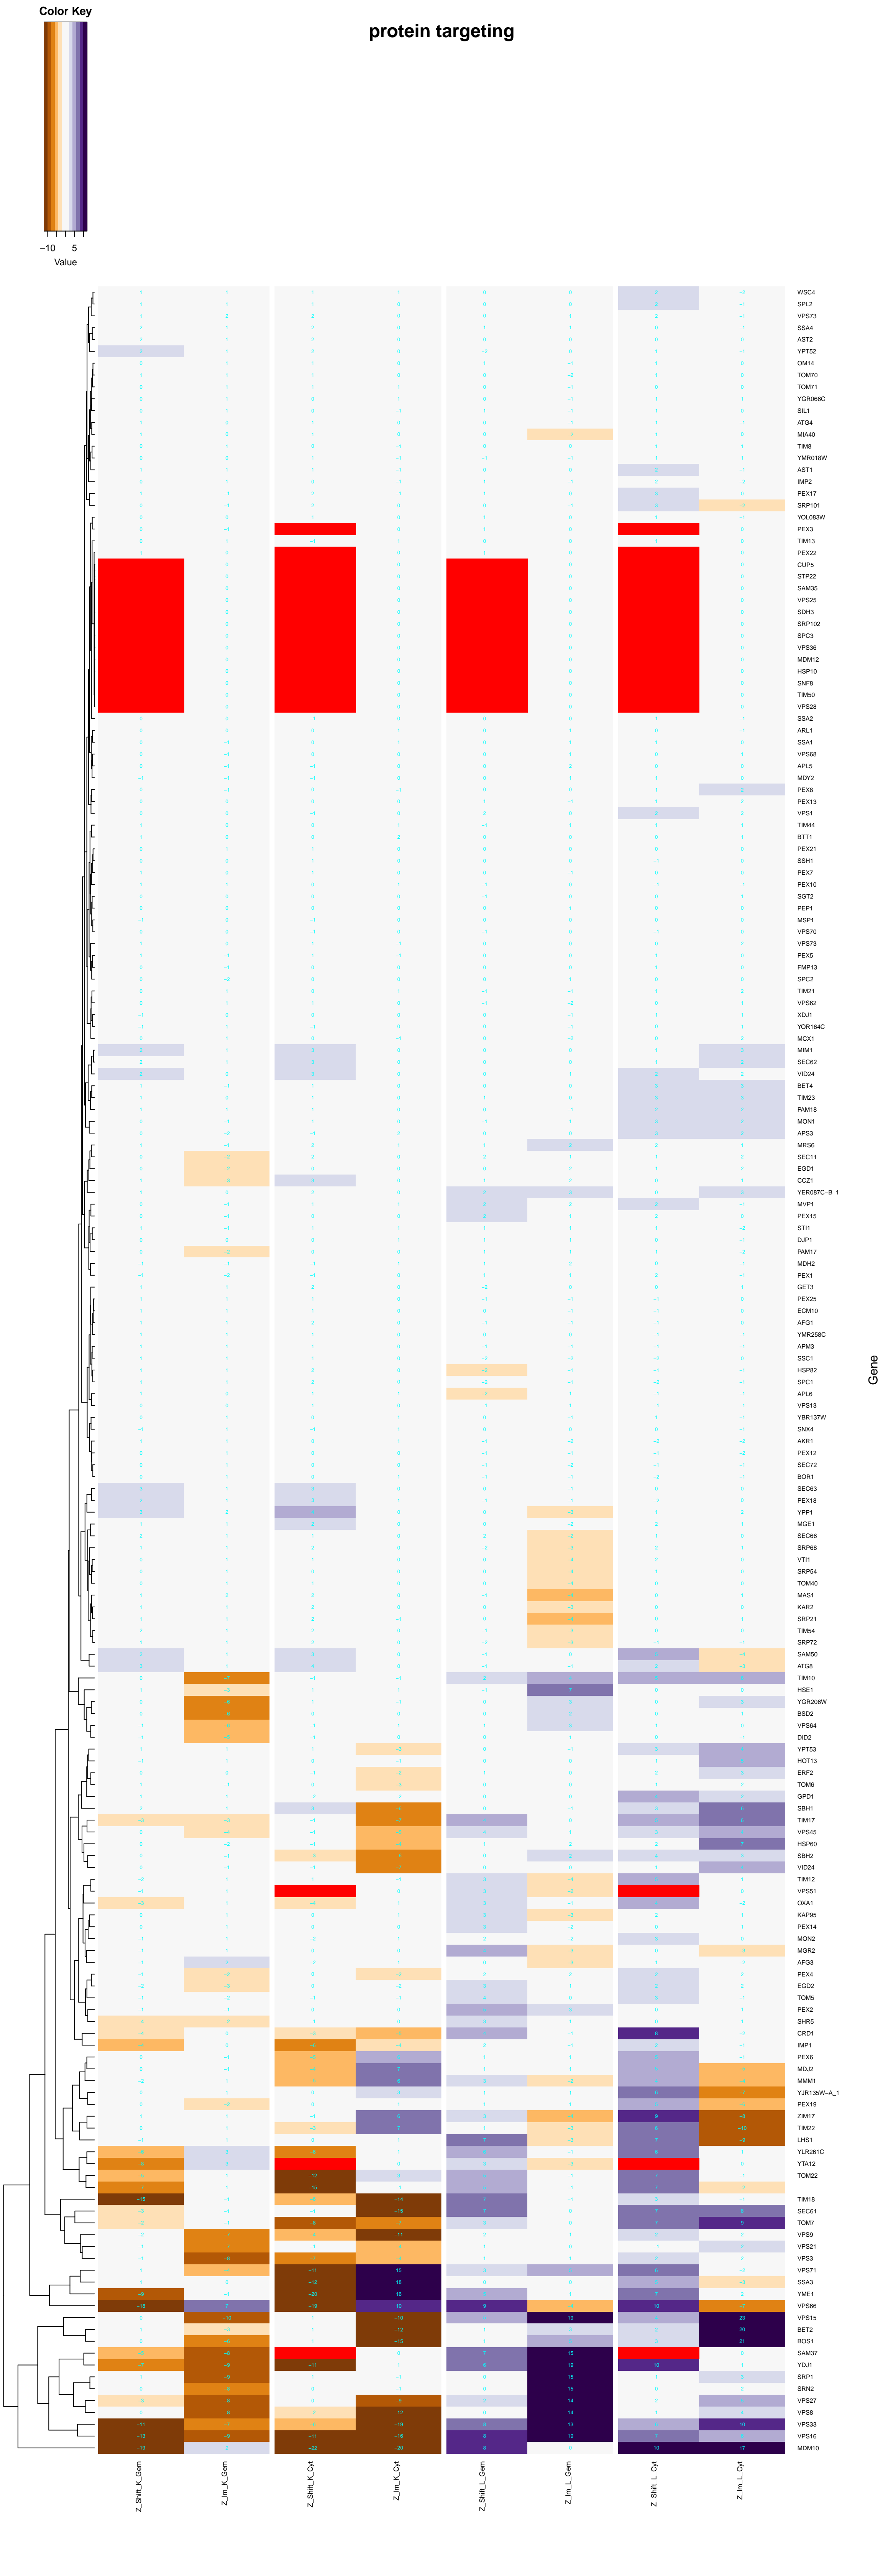

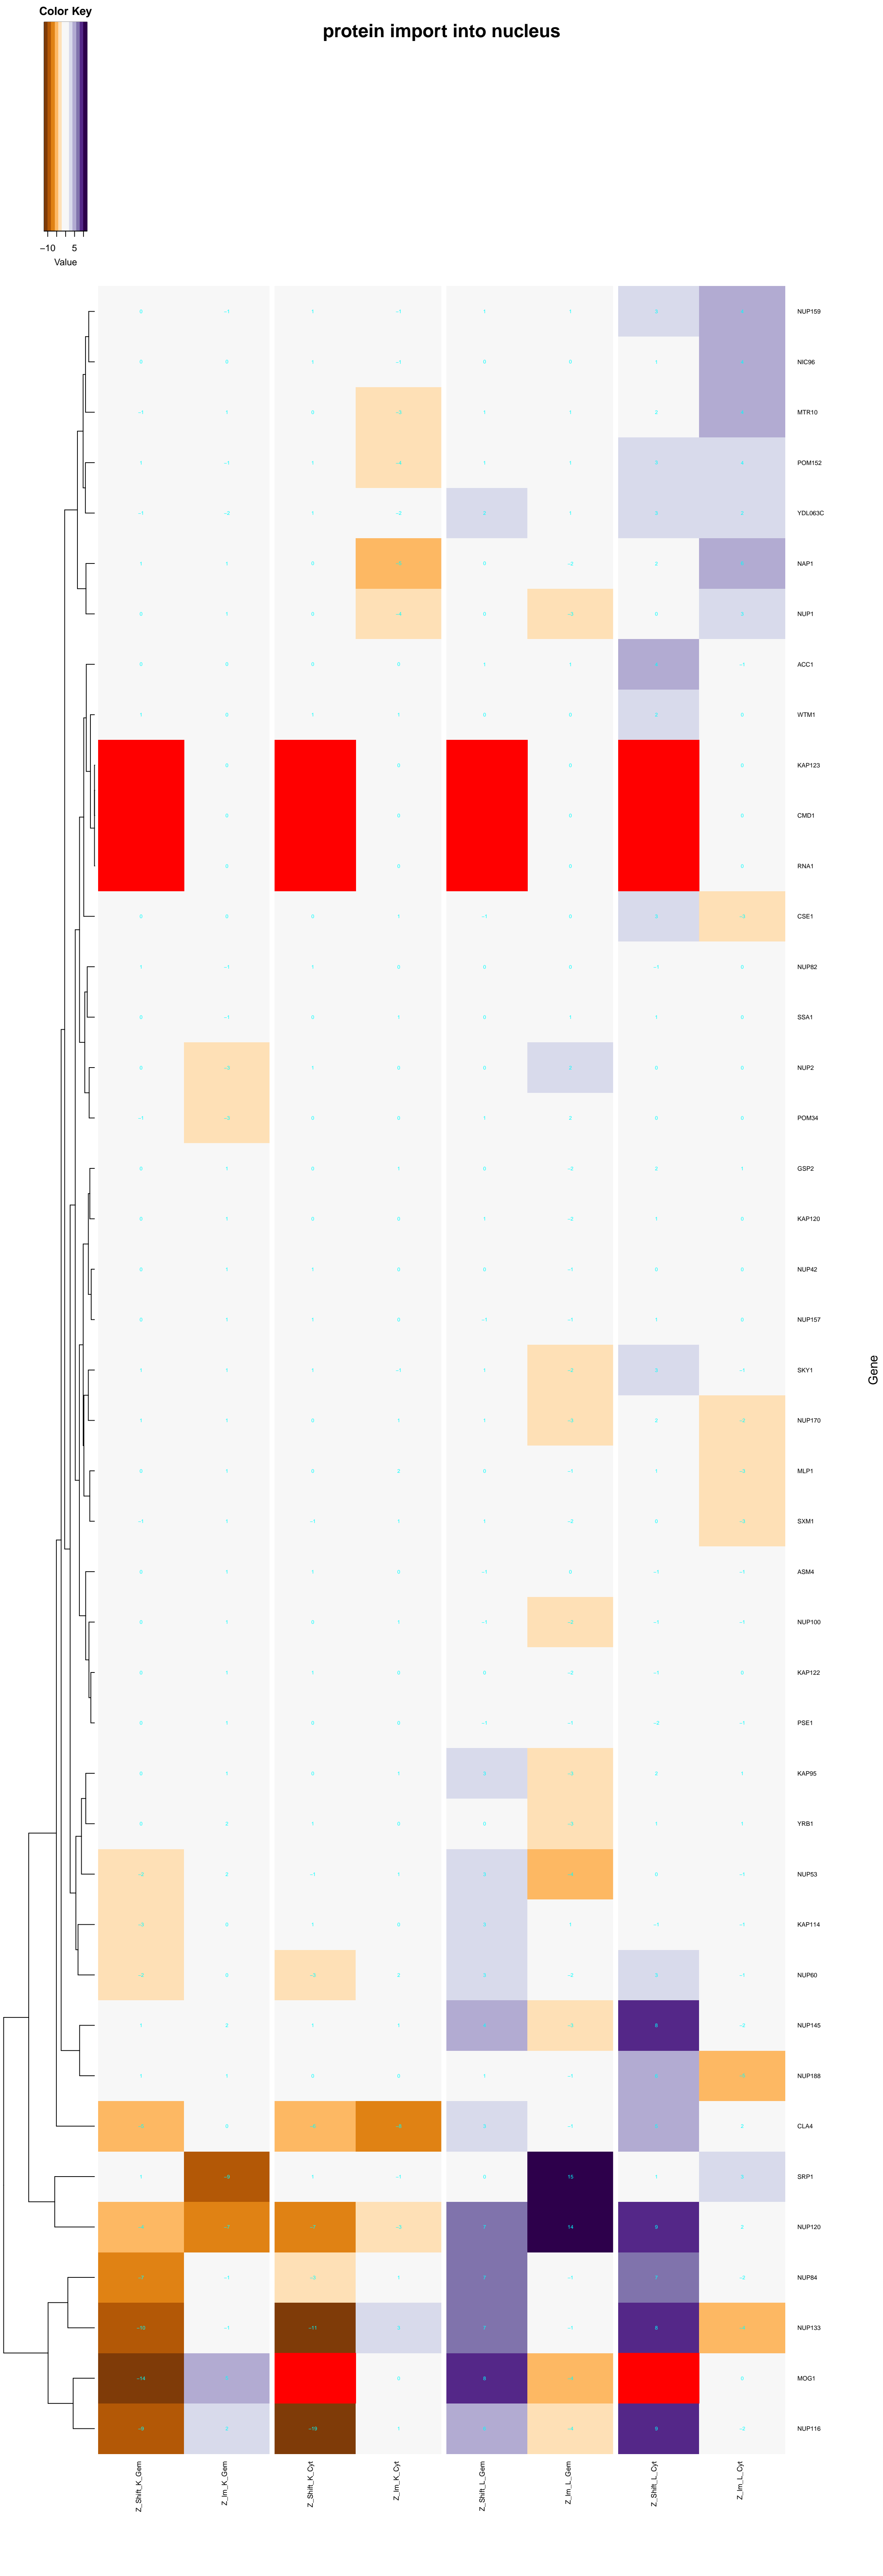

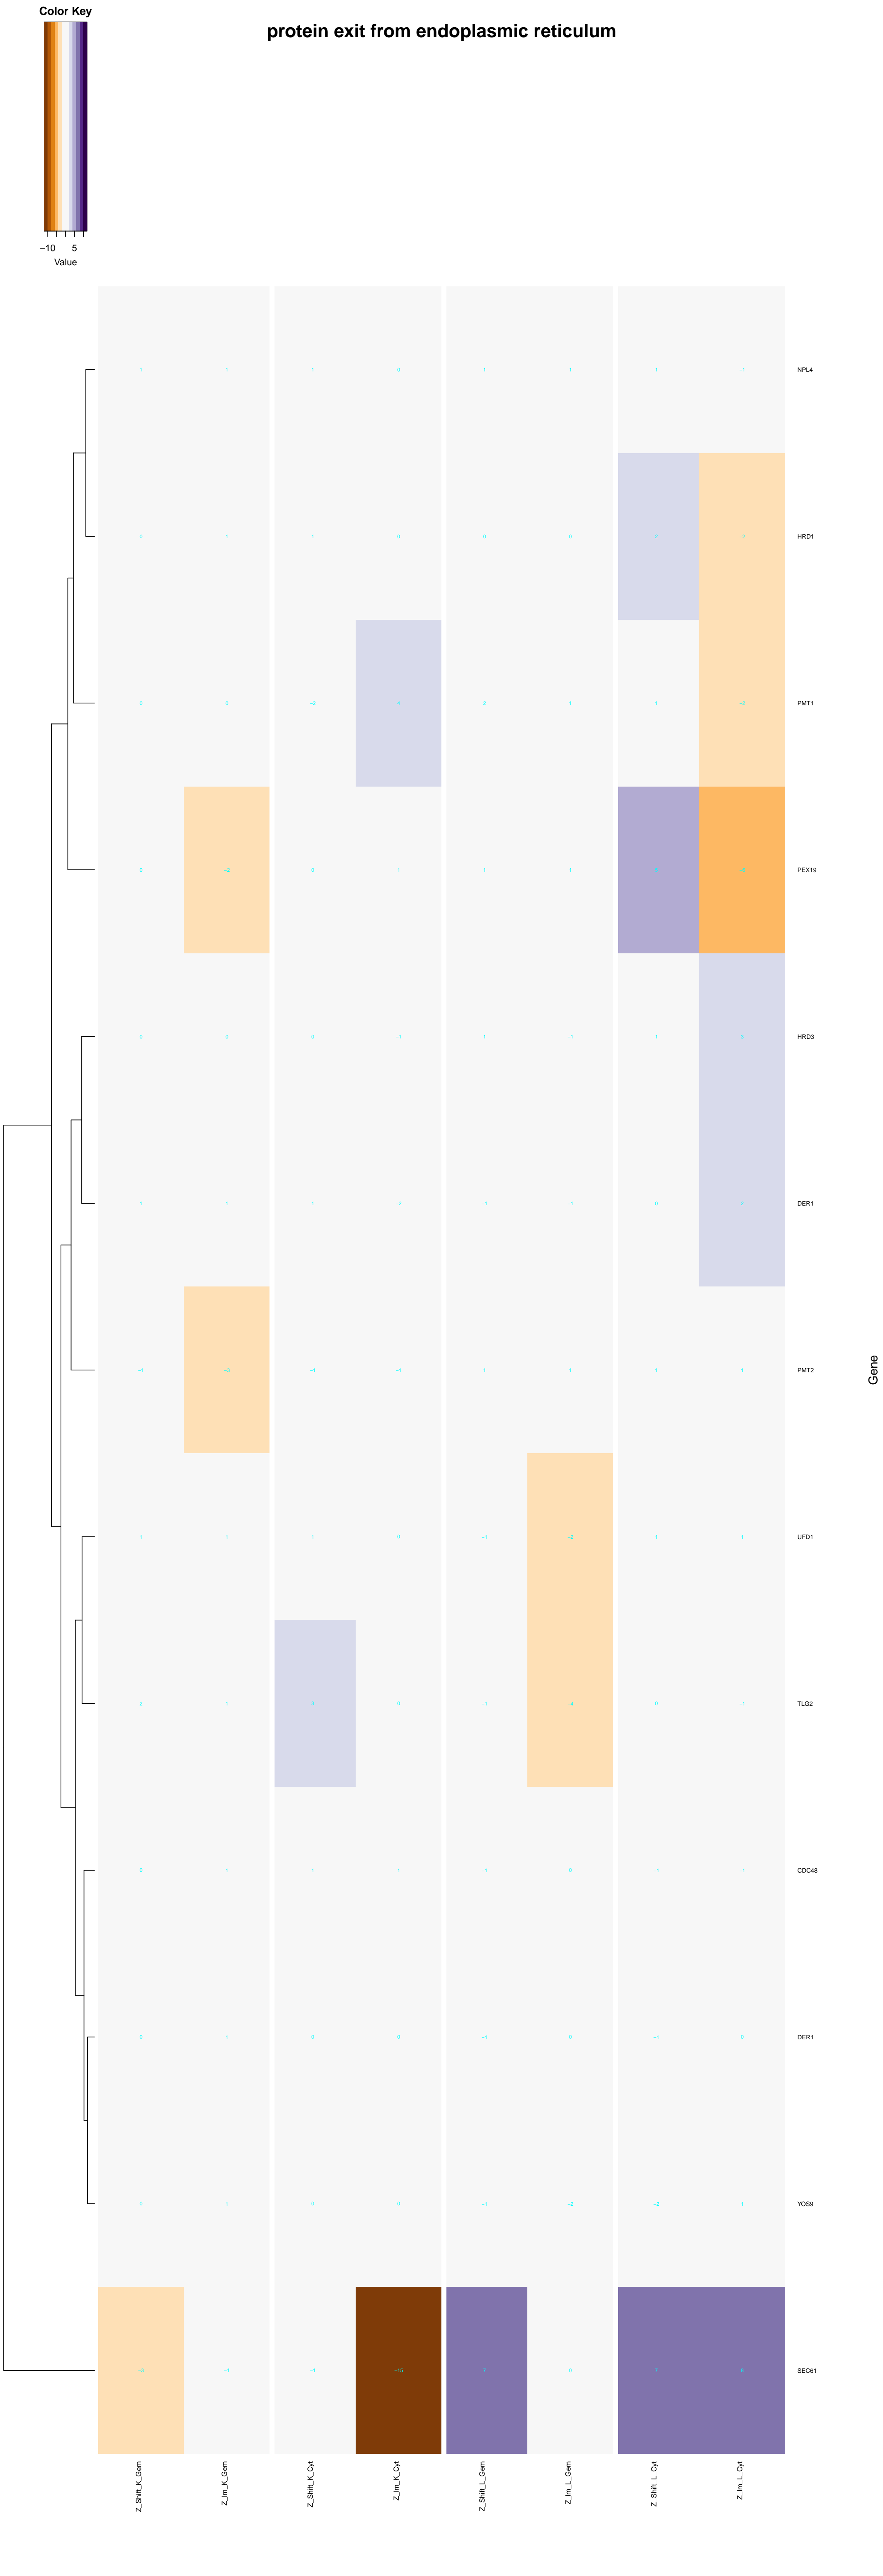

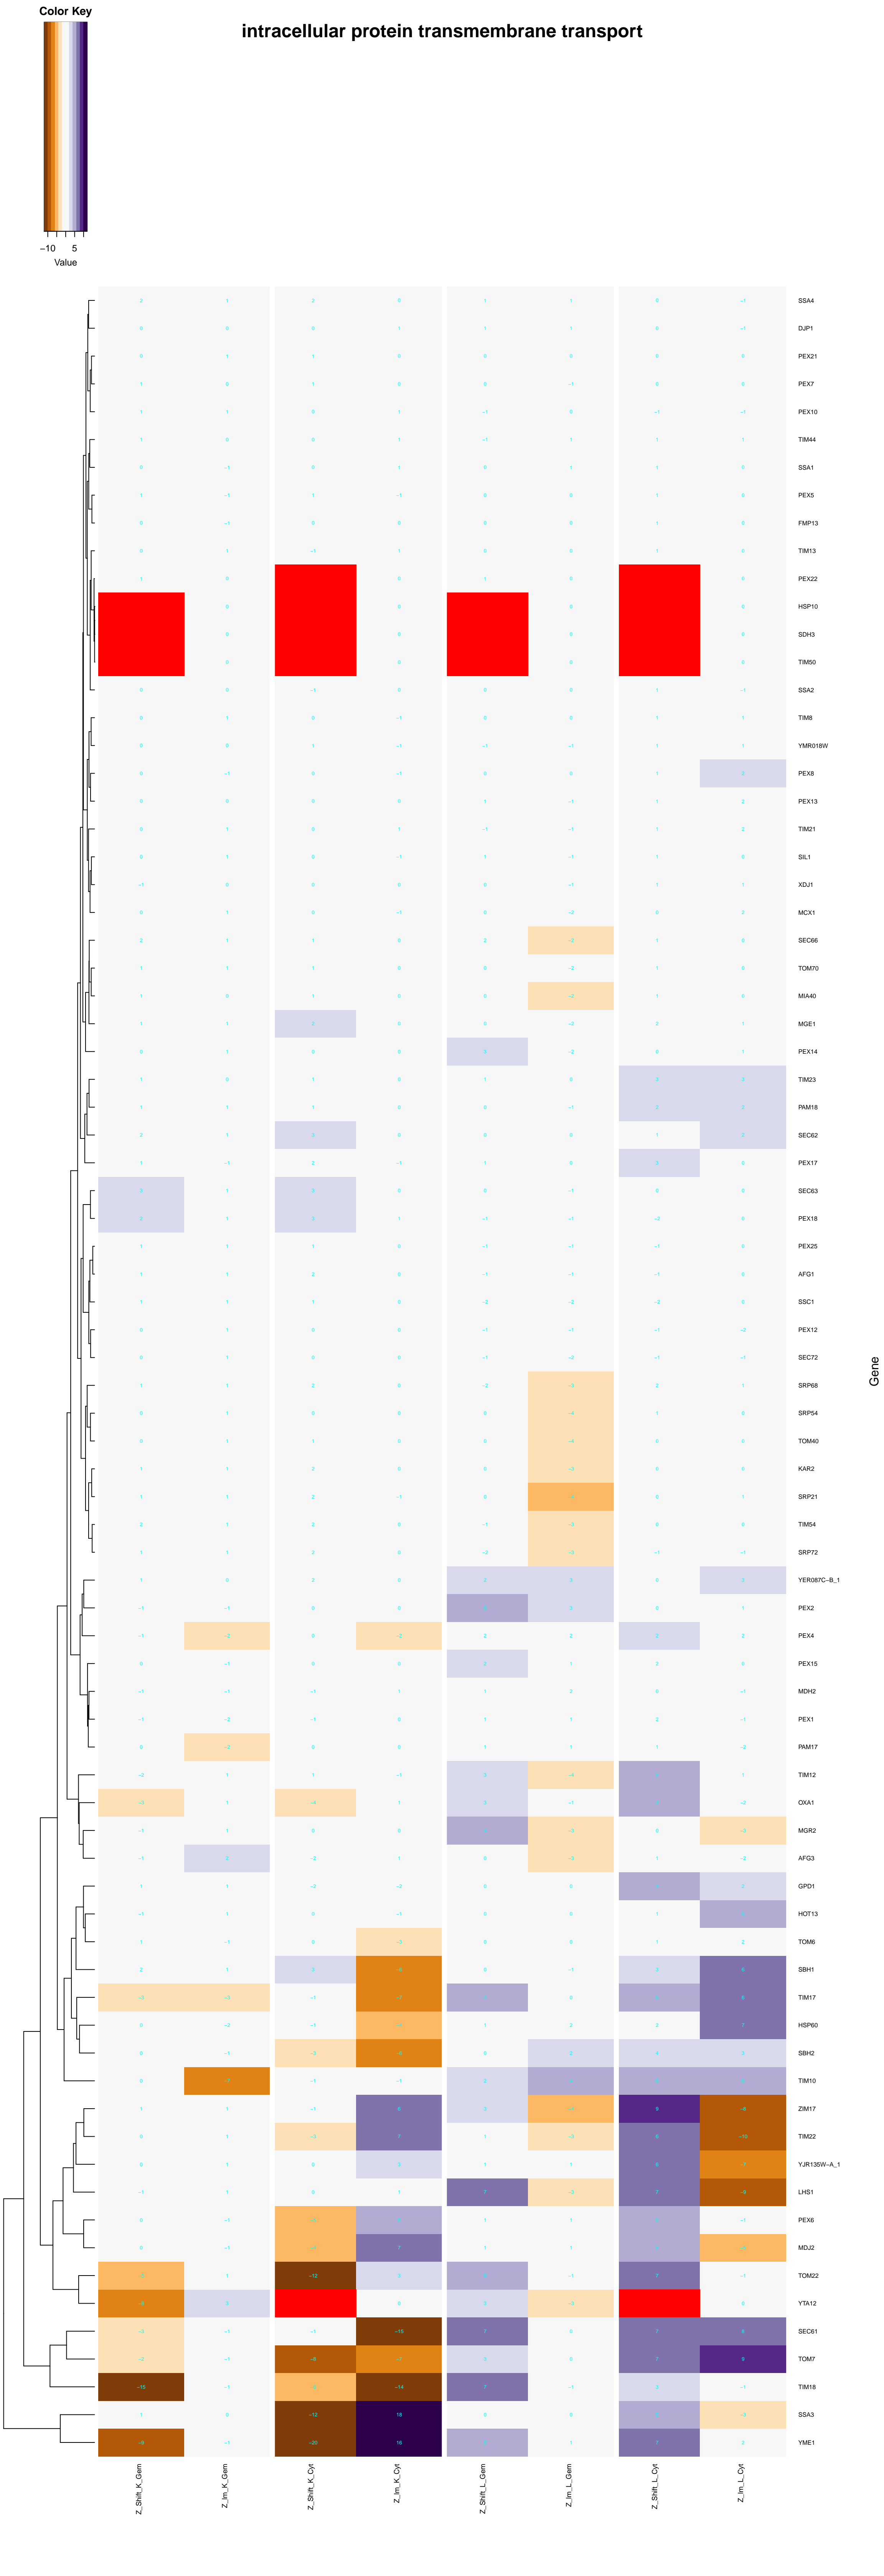

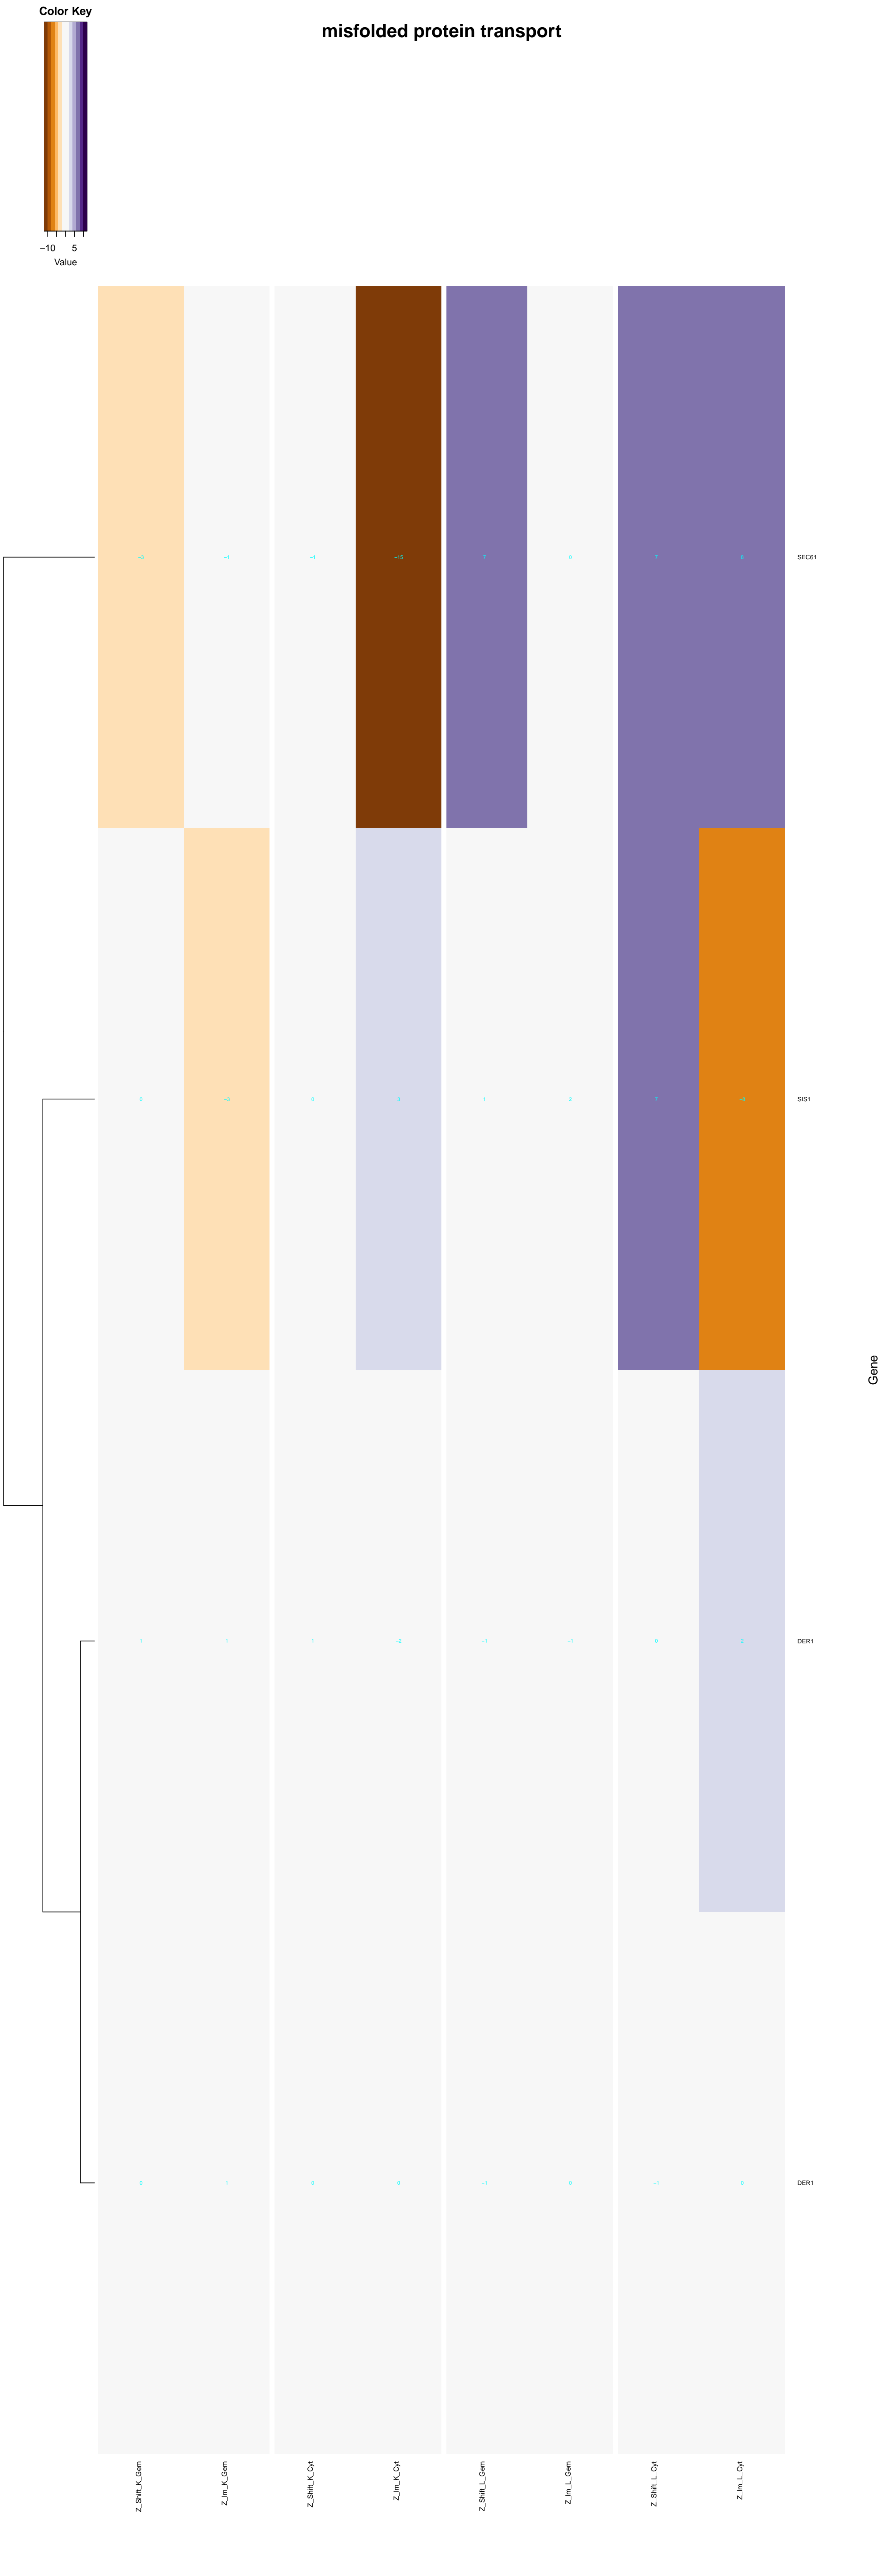

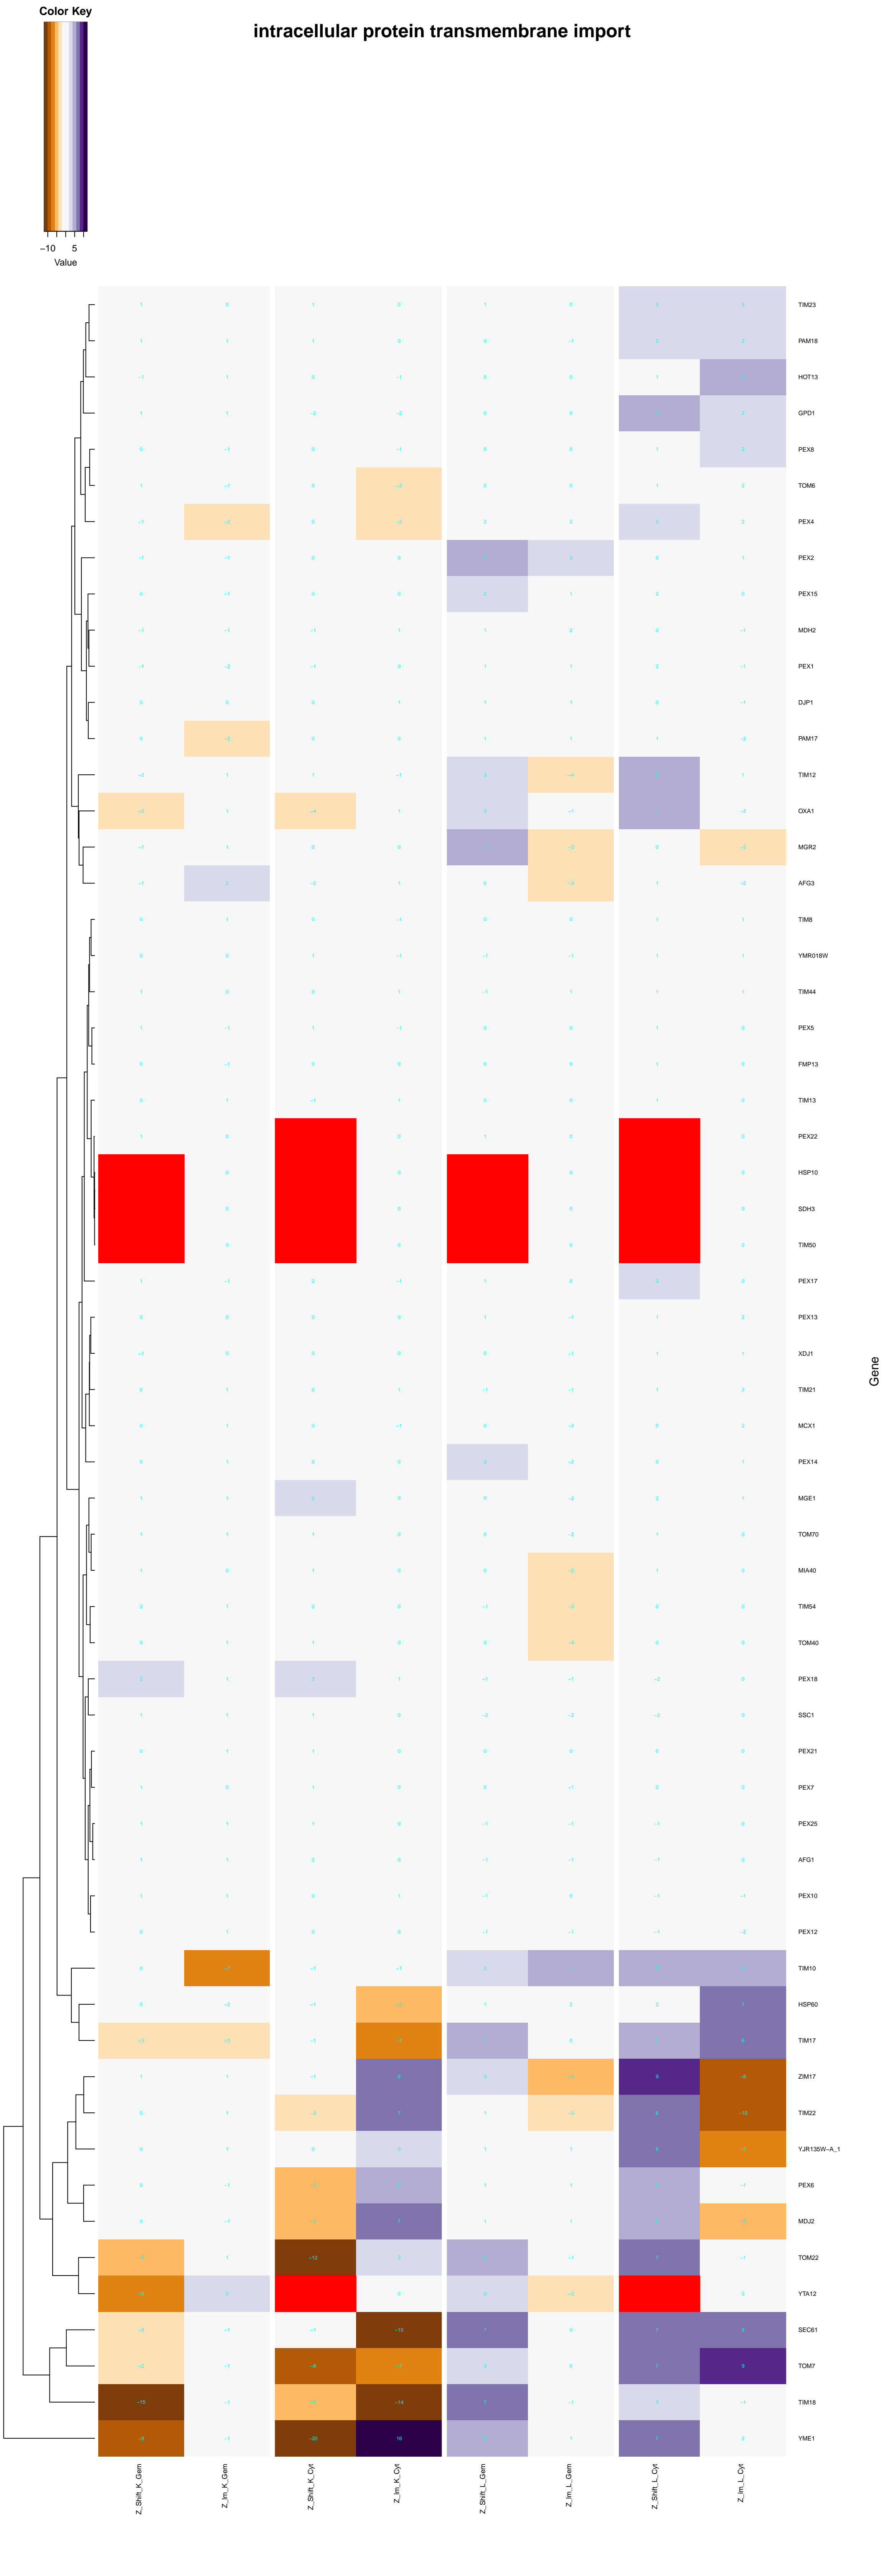

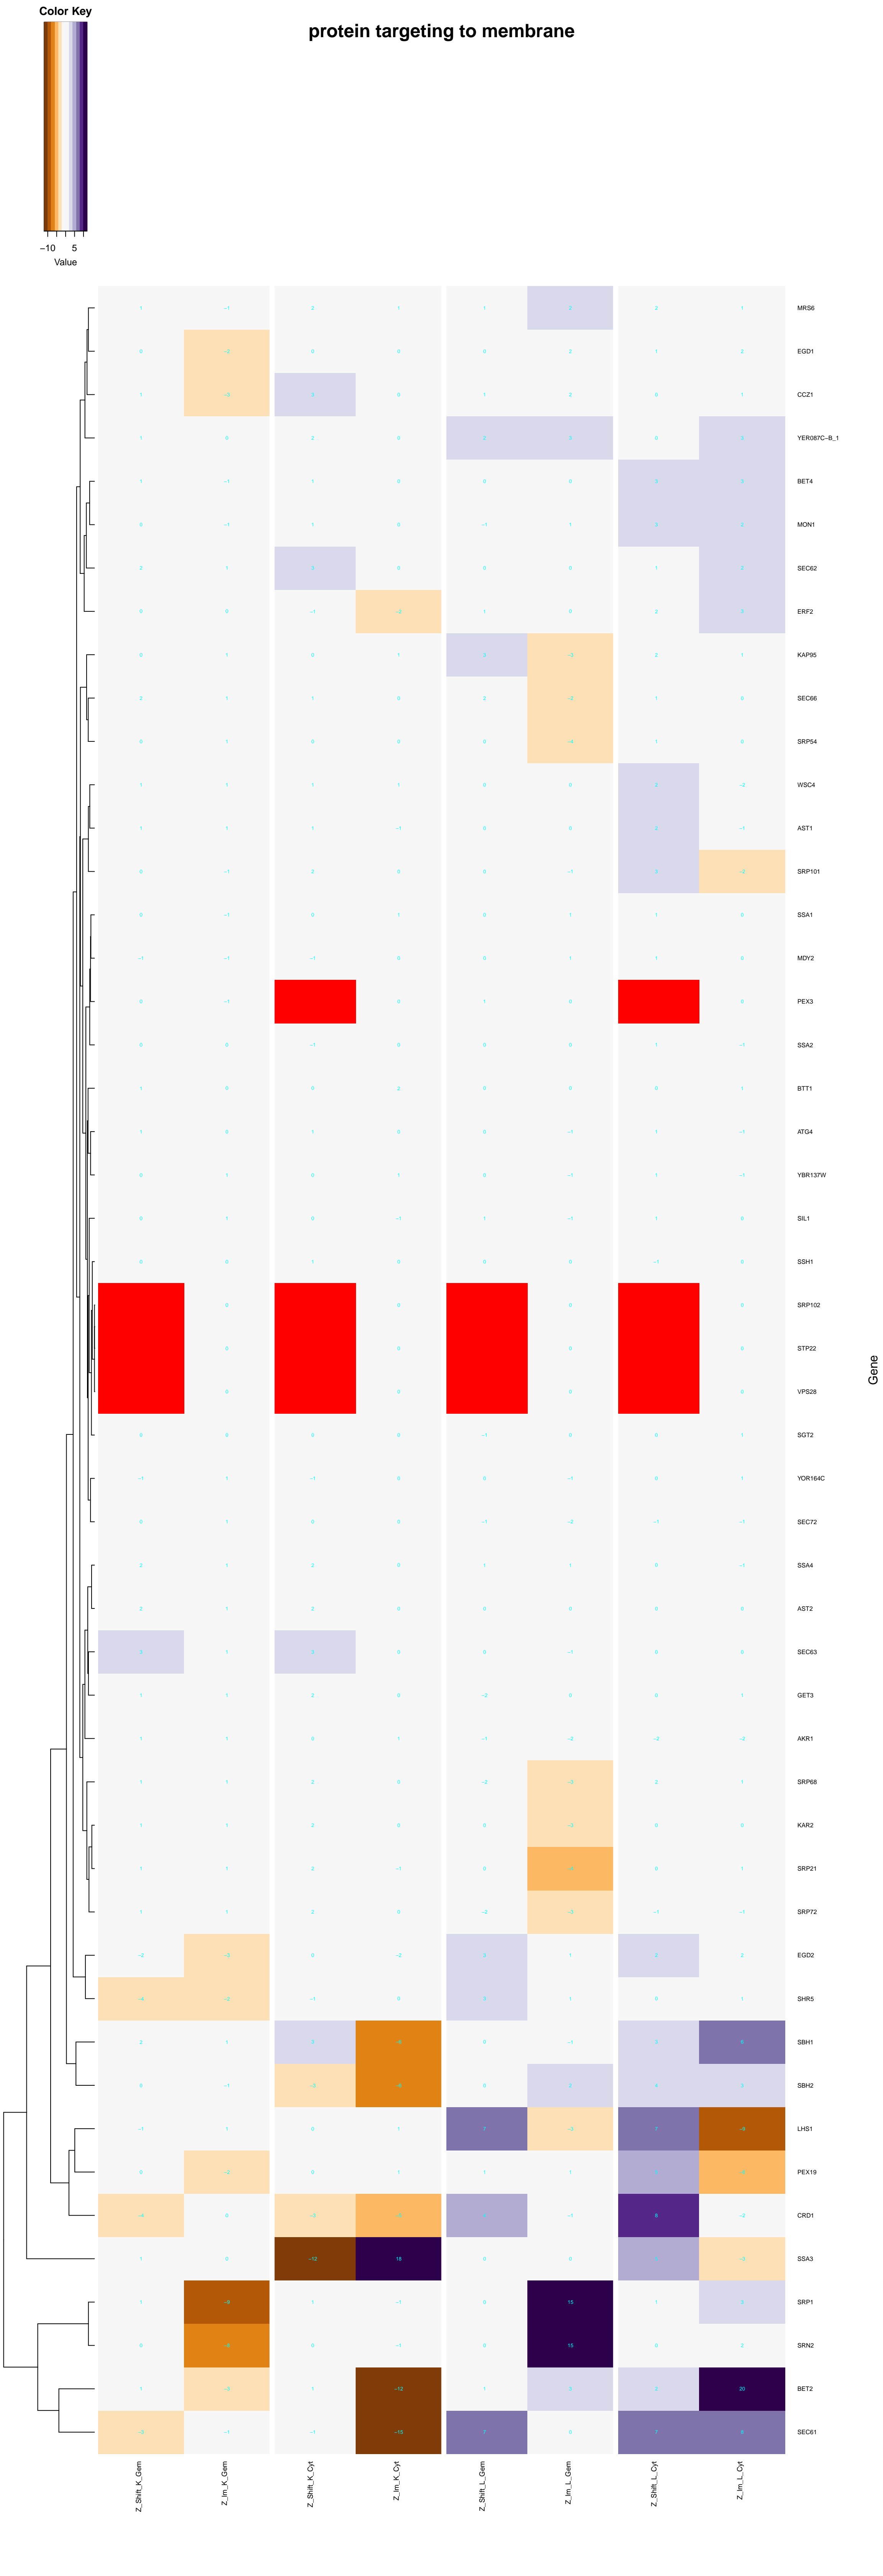

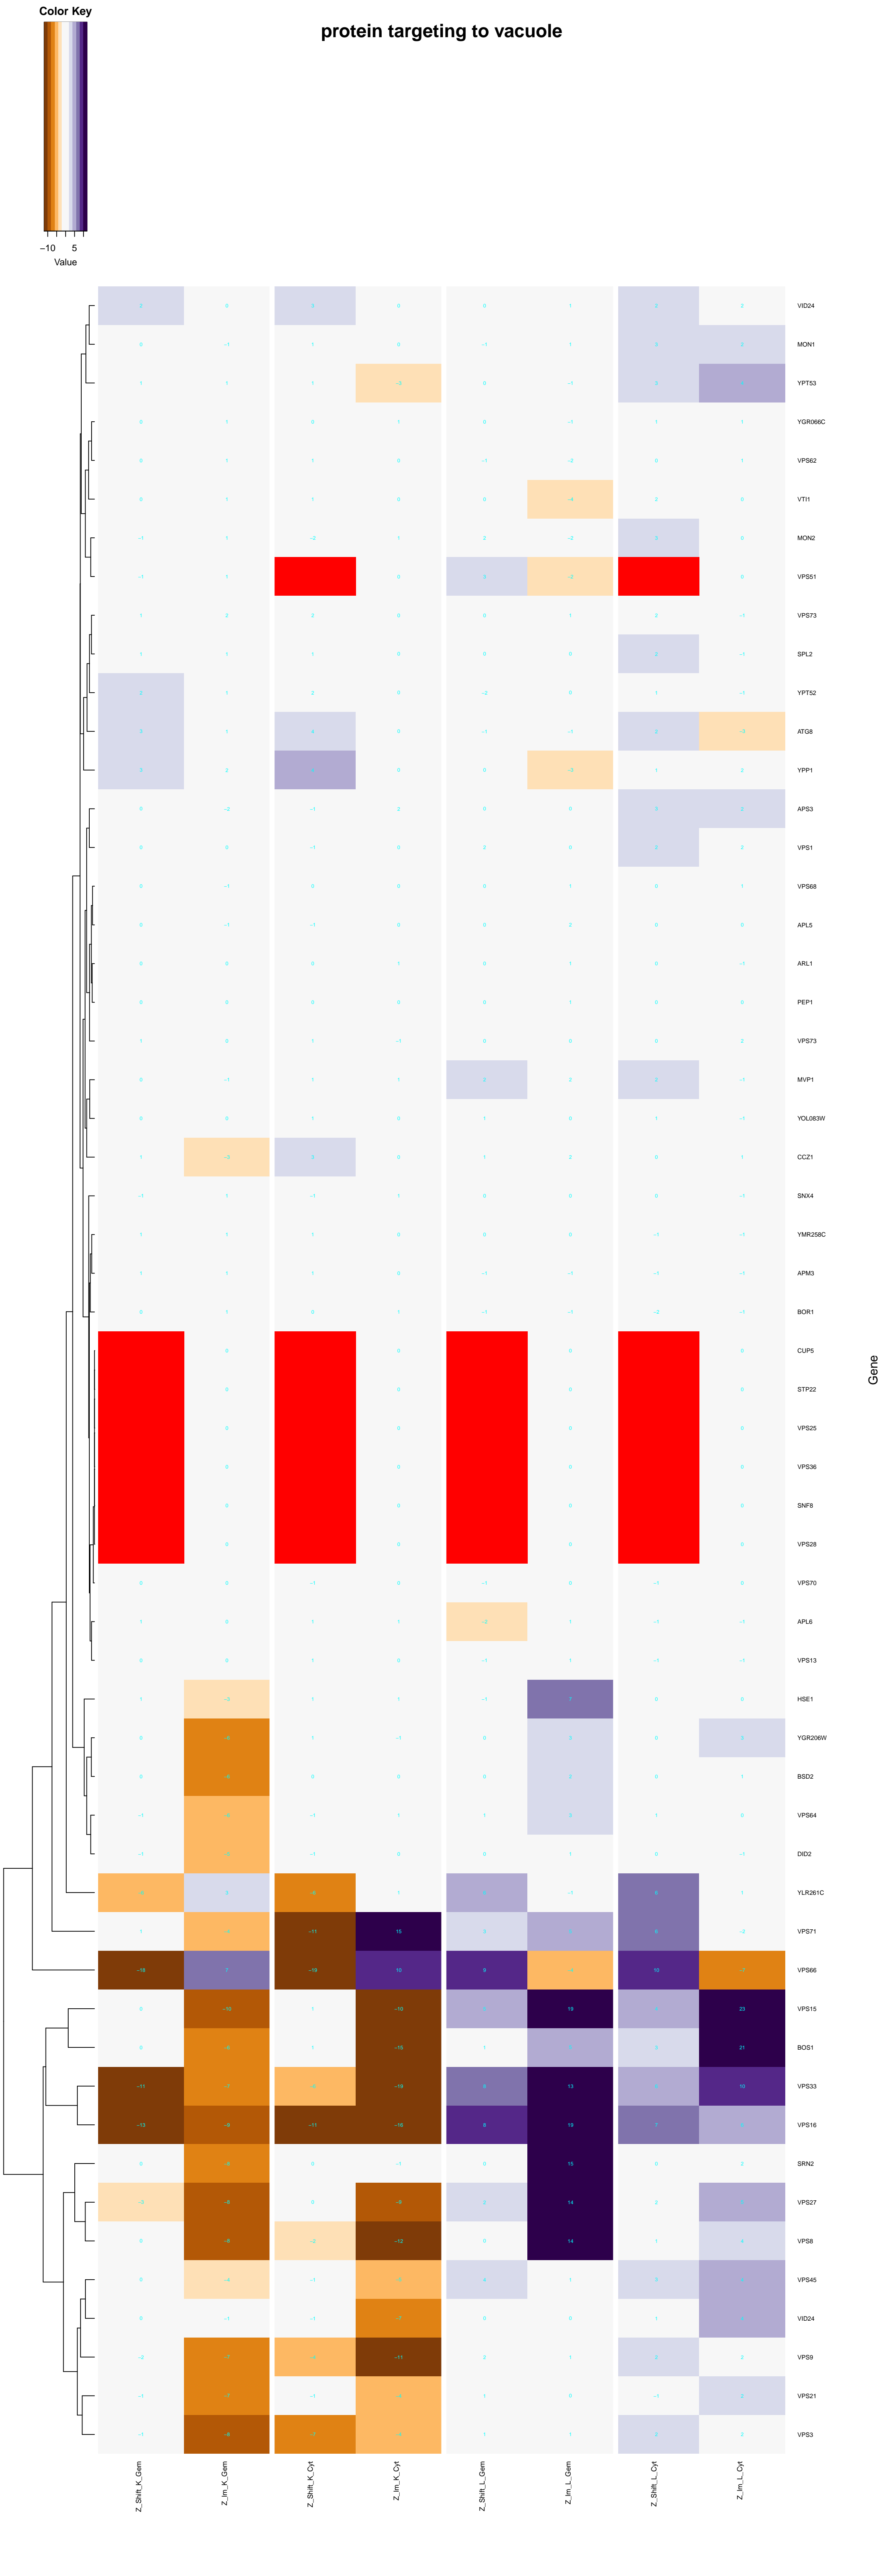

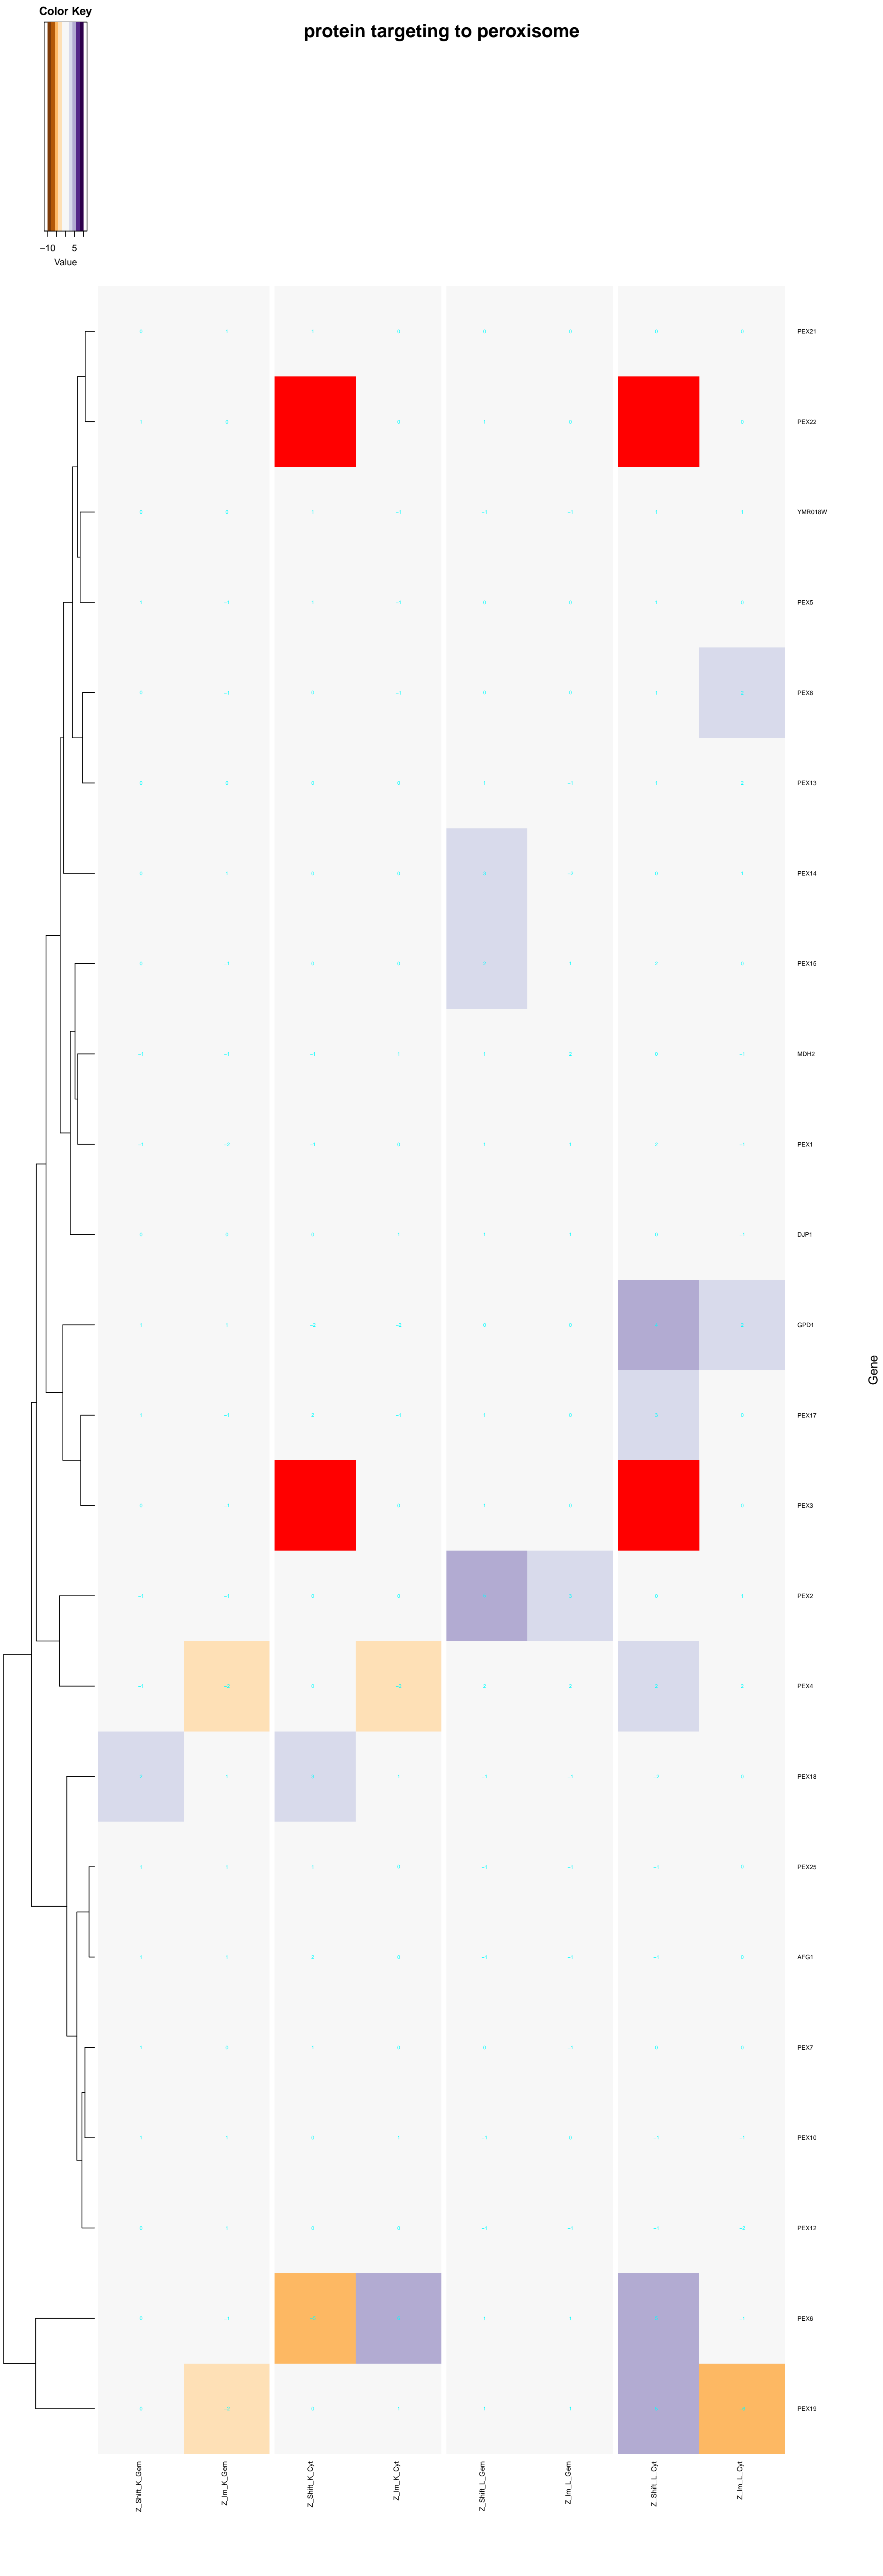

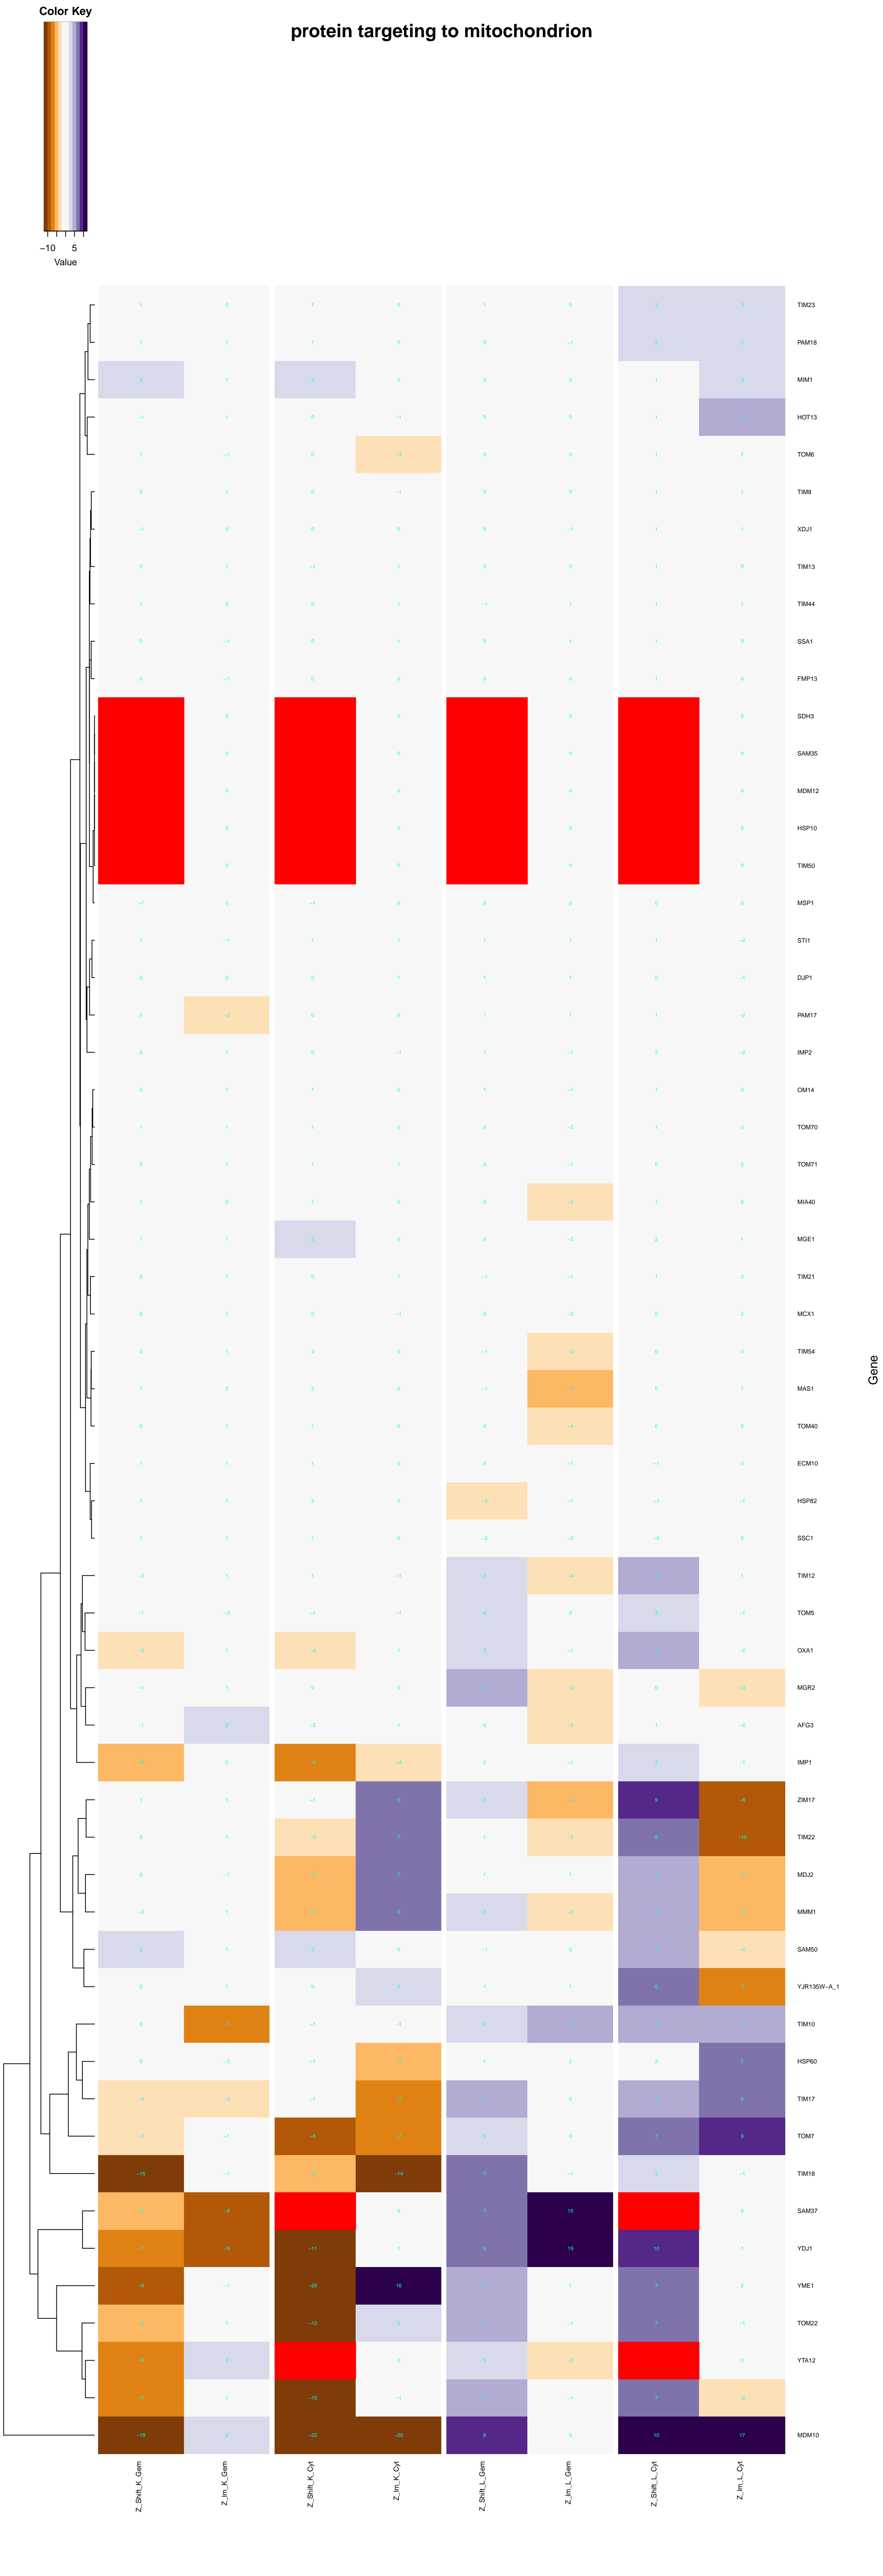

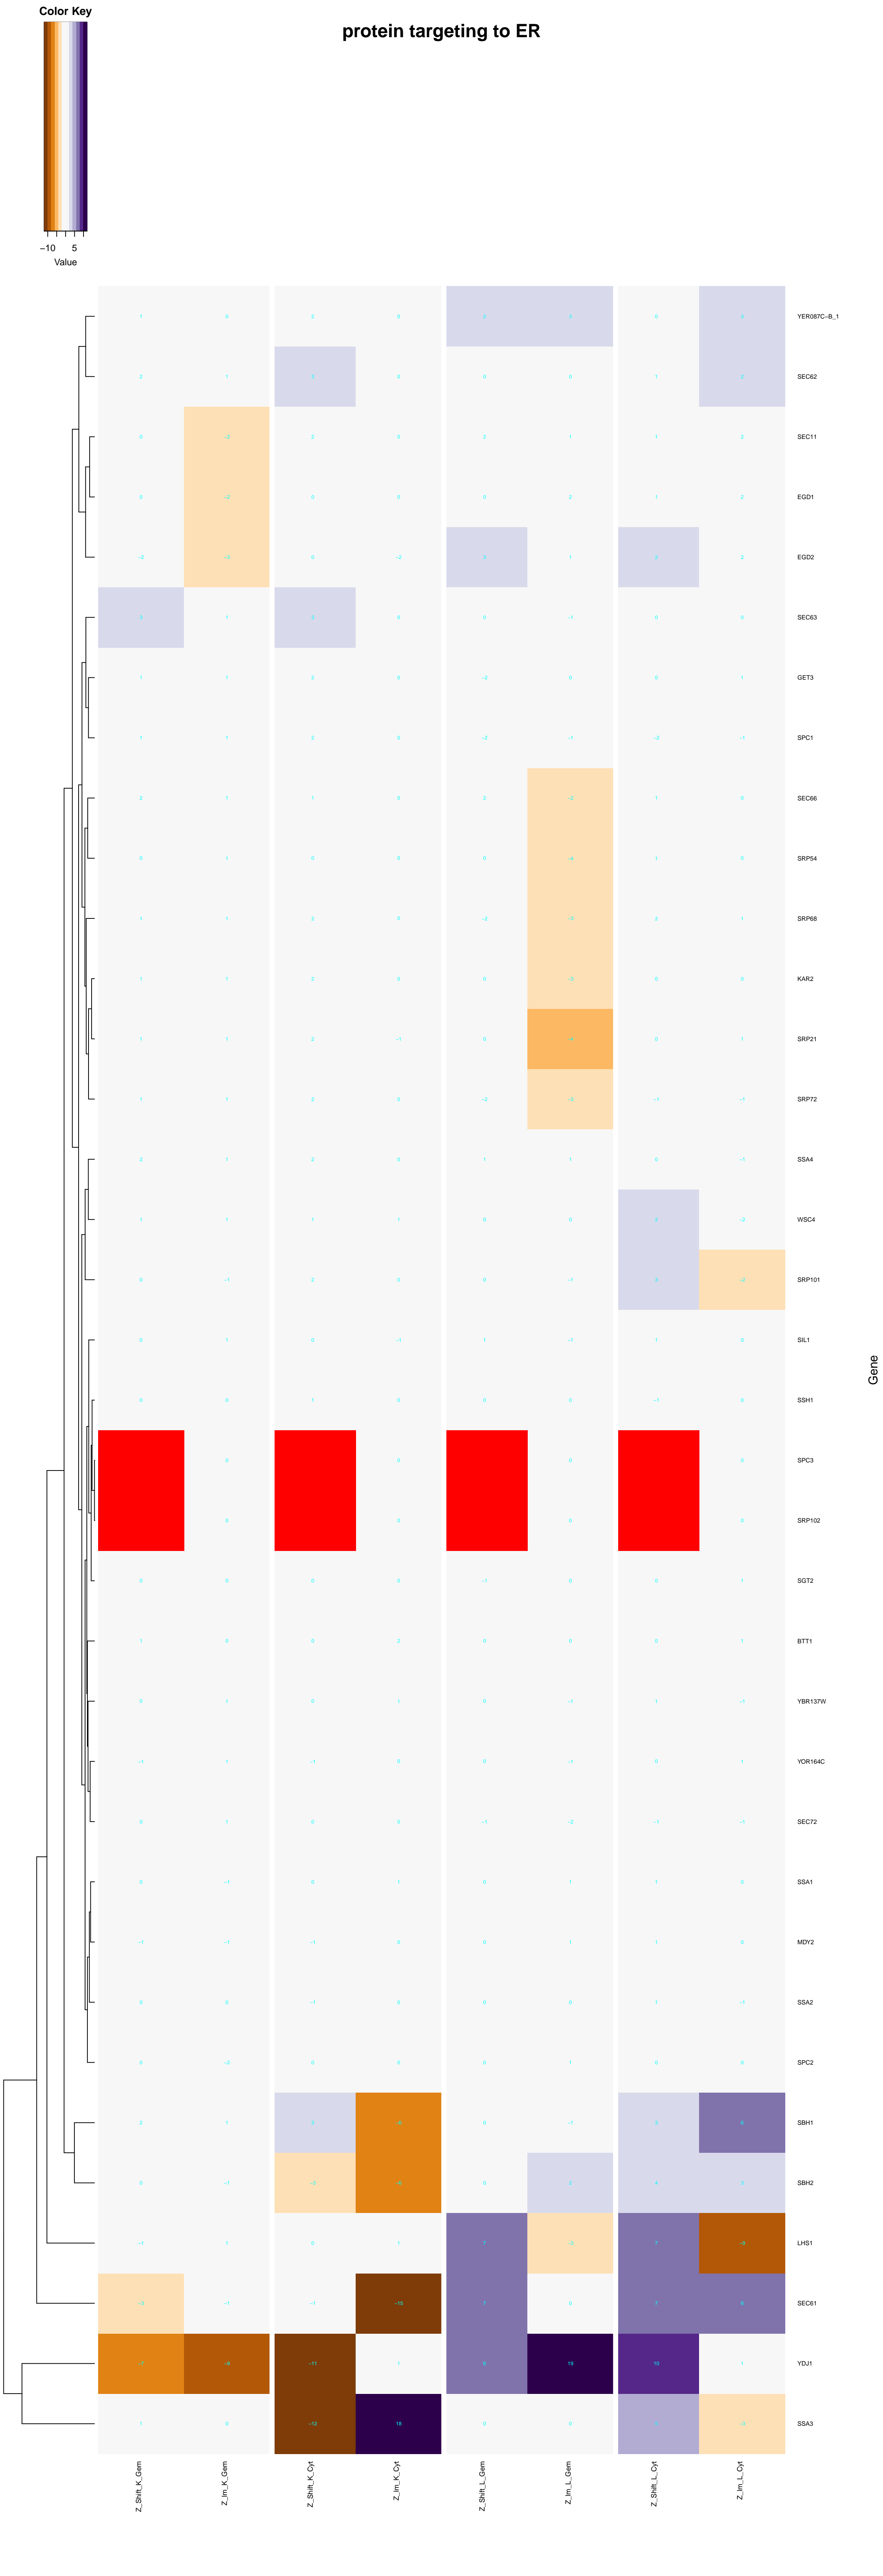

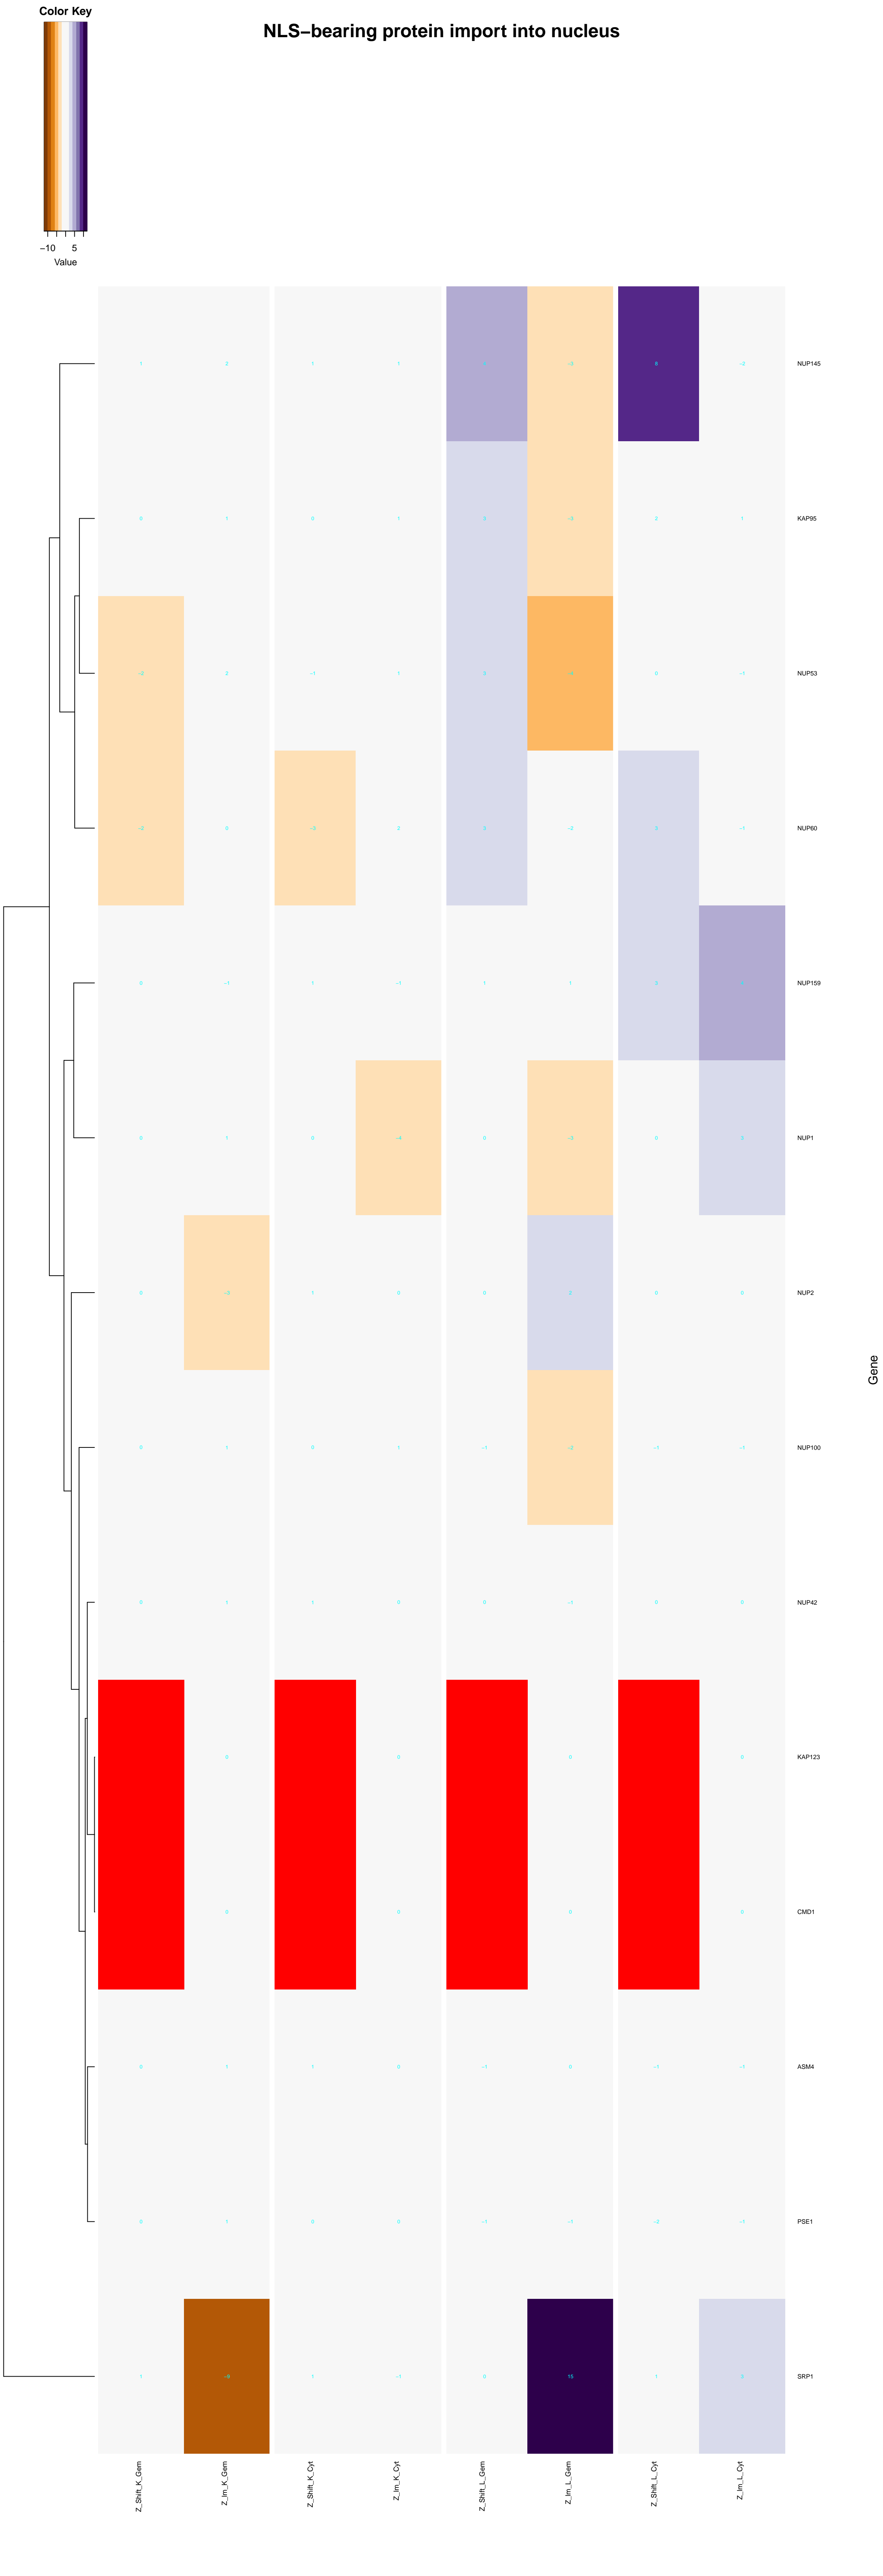

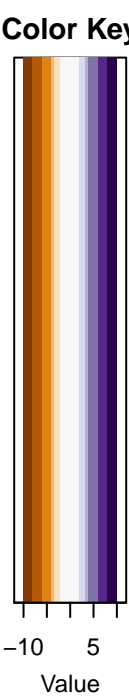

ribosomal protein import into nucleus

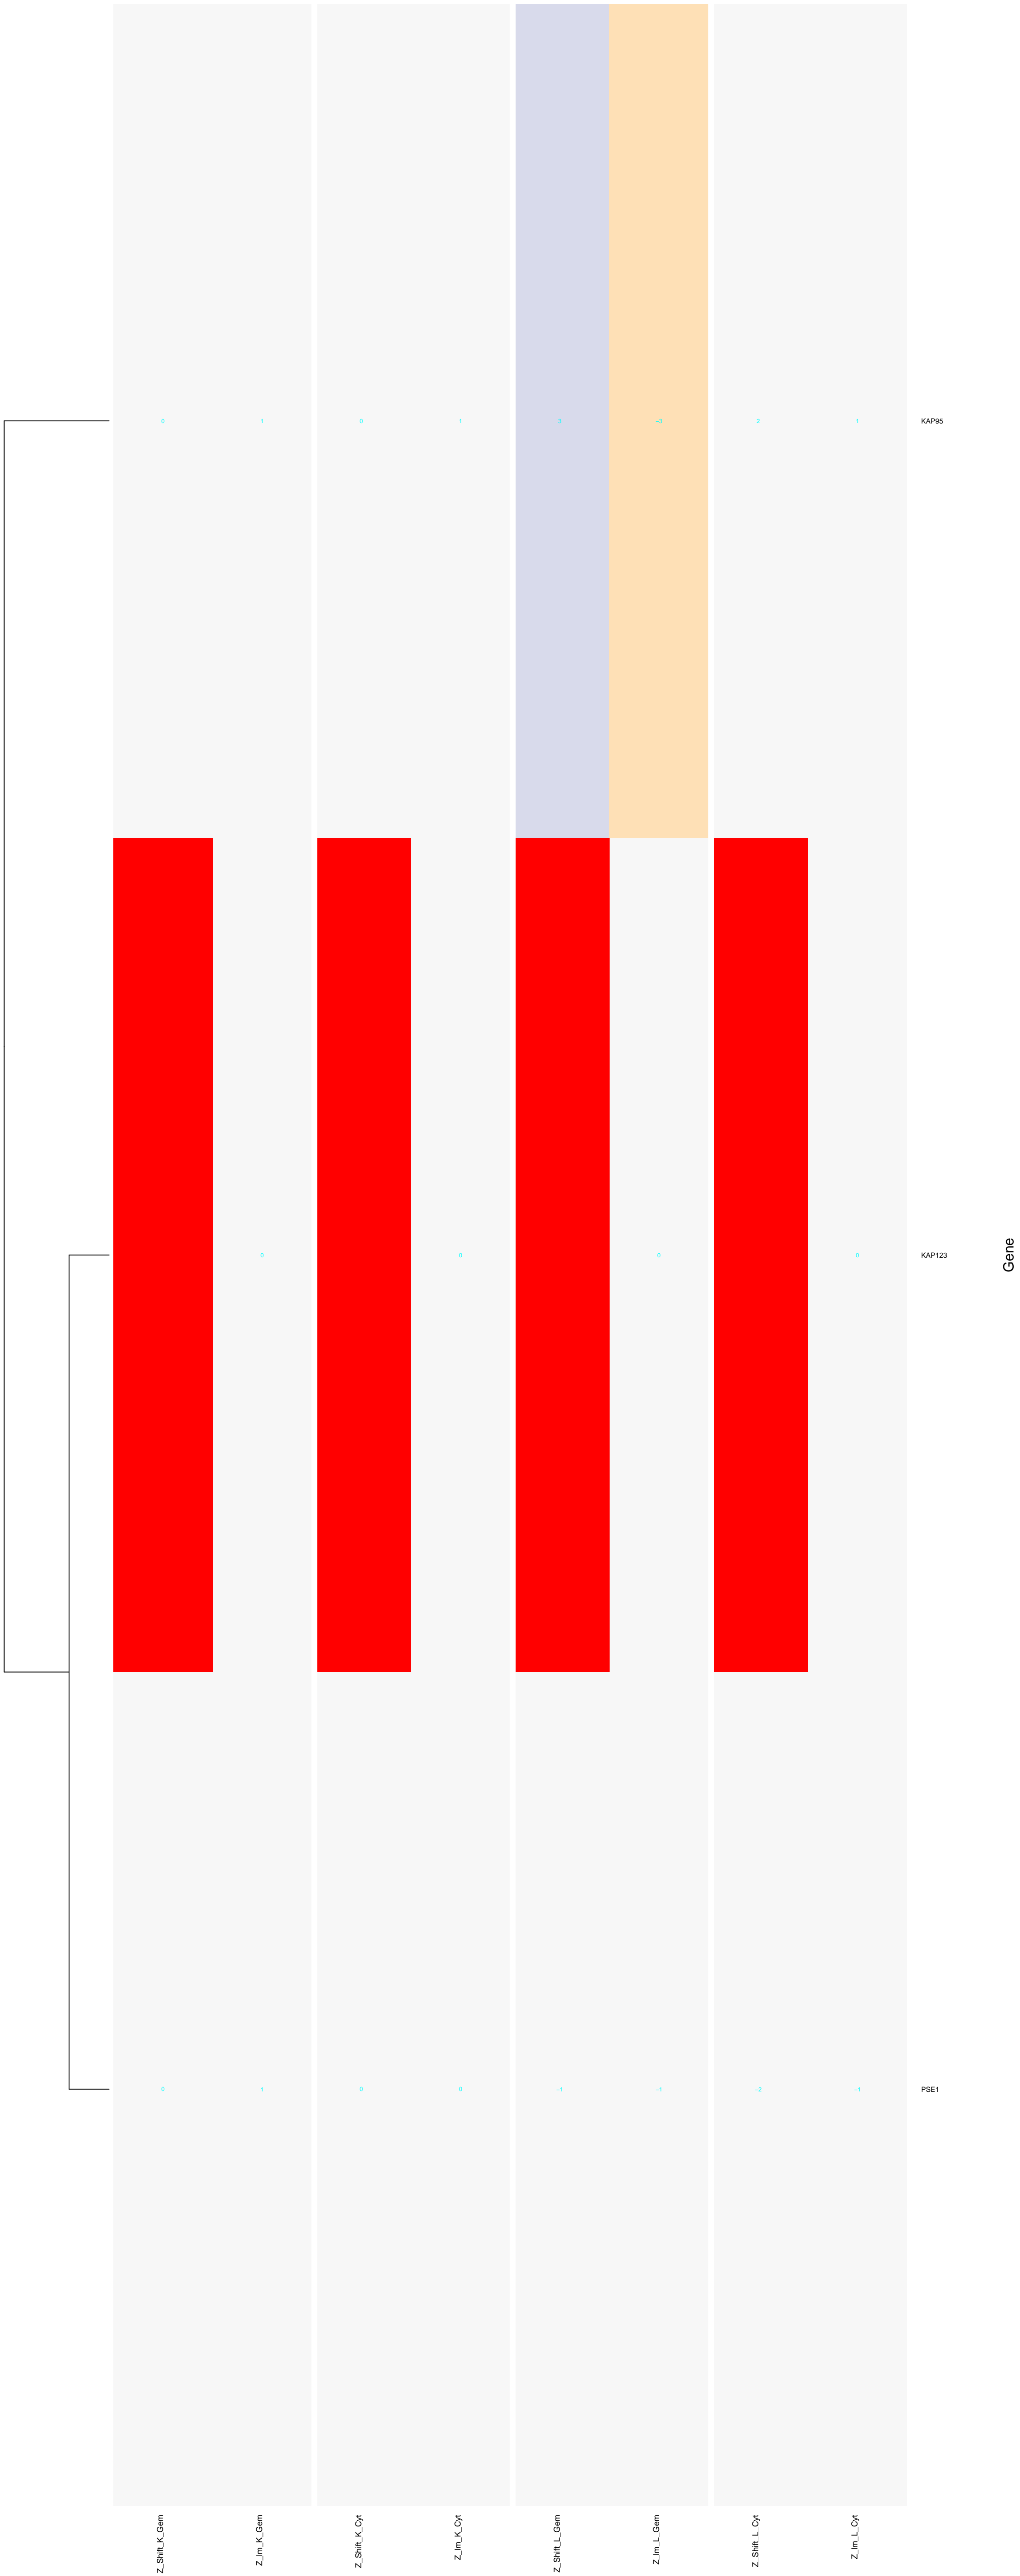

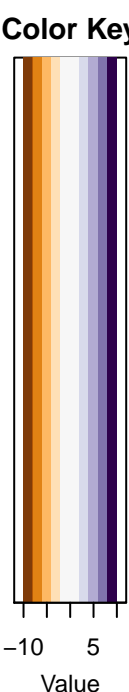

transcription factor import into nucleus

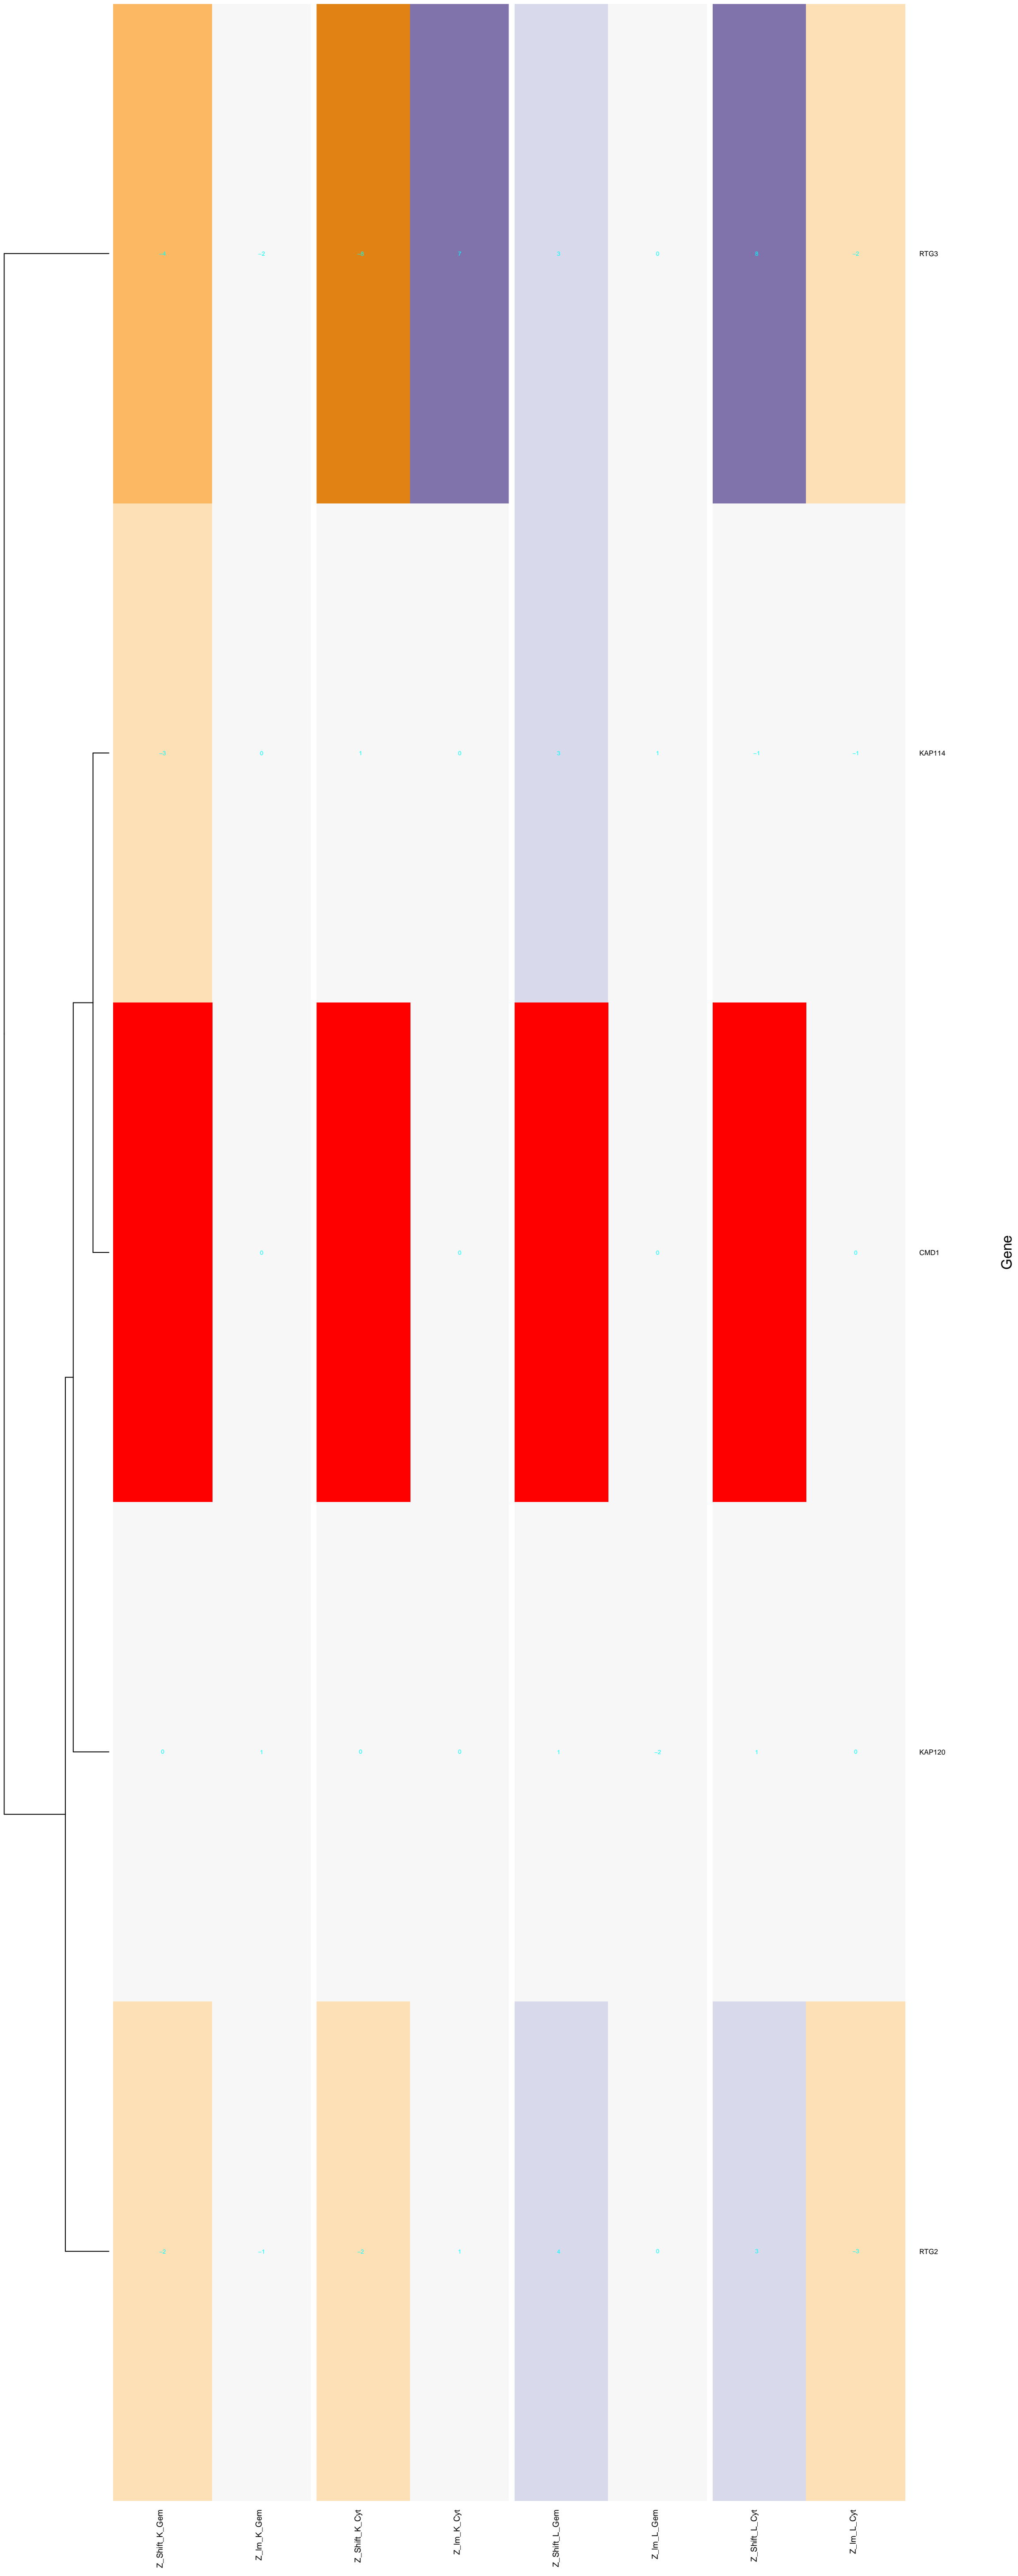

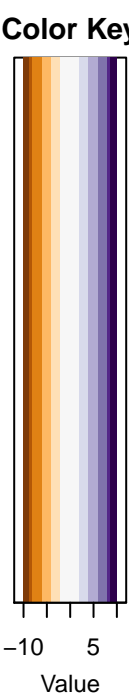

RNA polymerase II complex import to nucleus

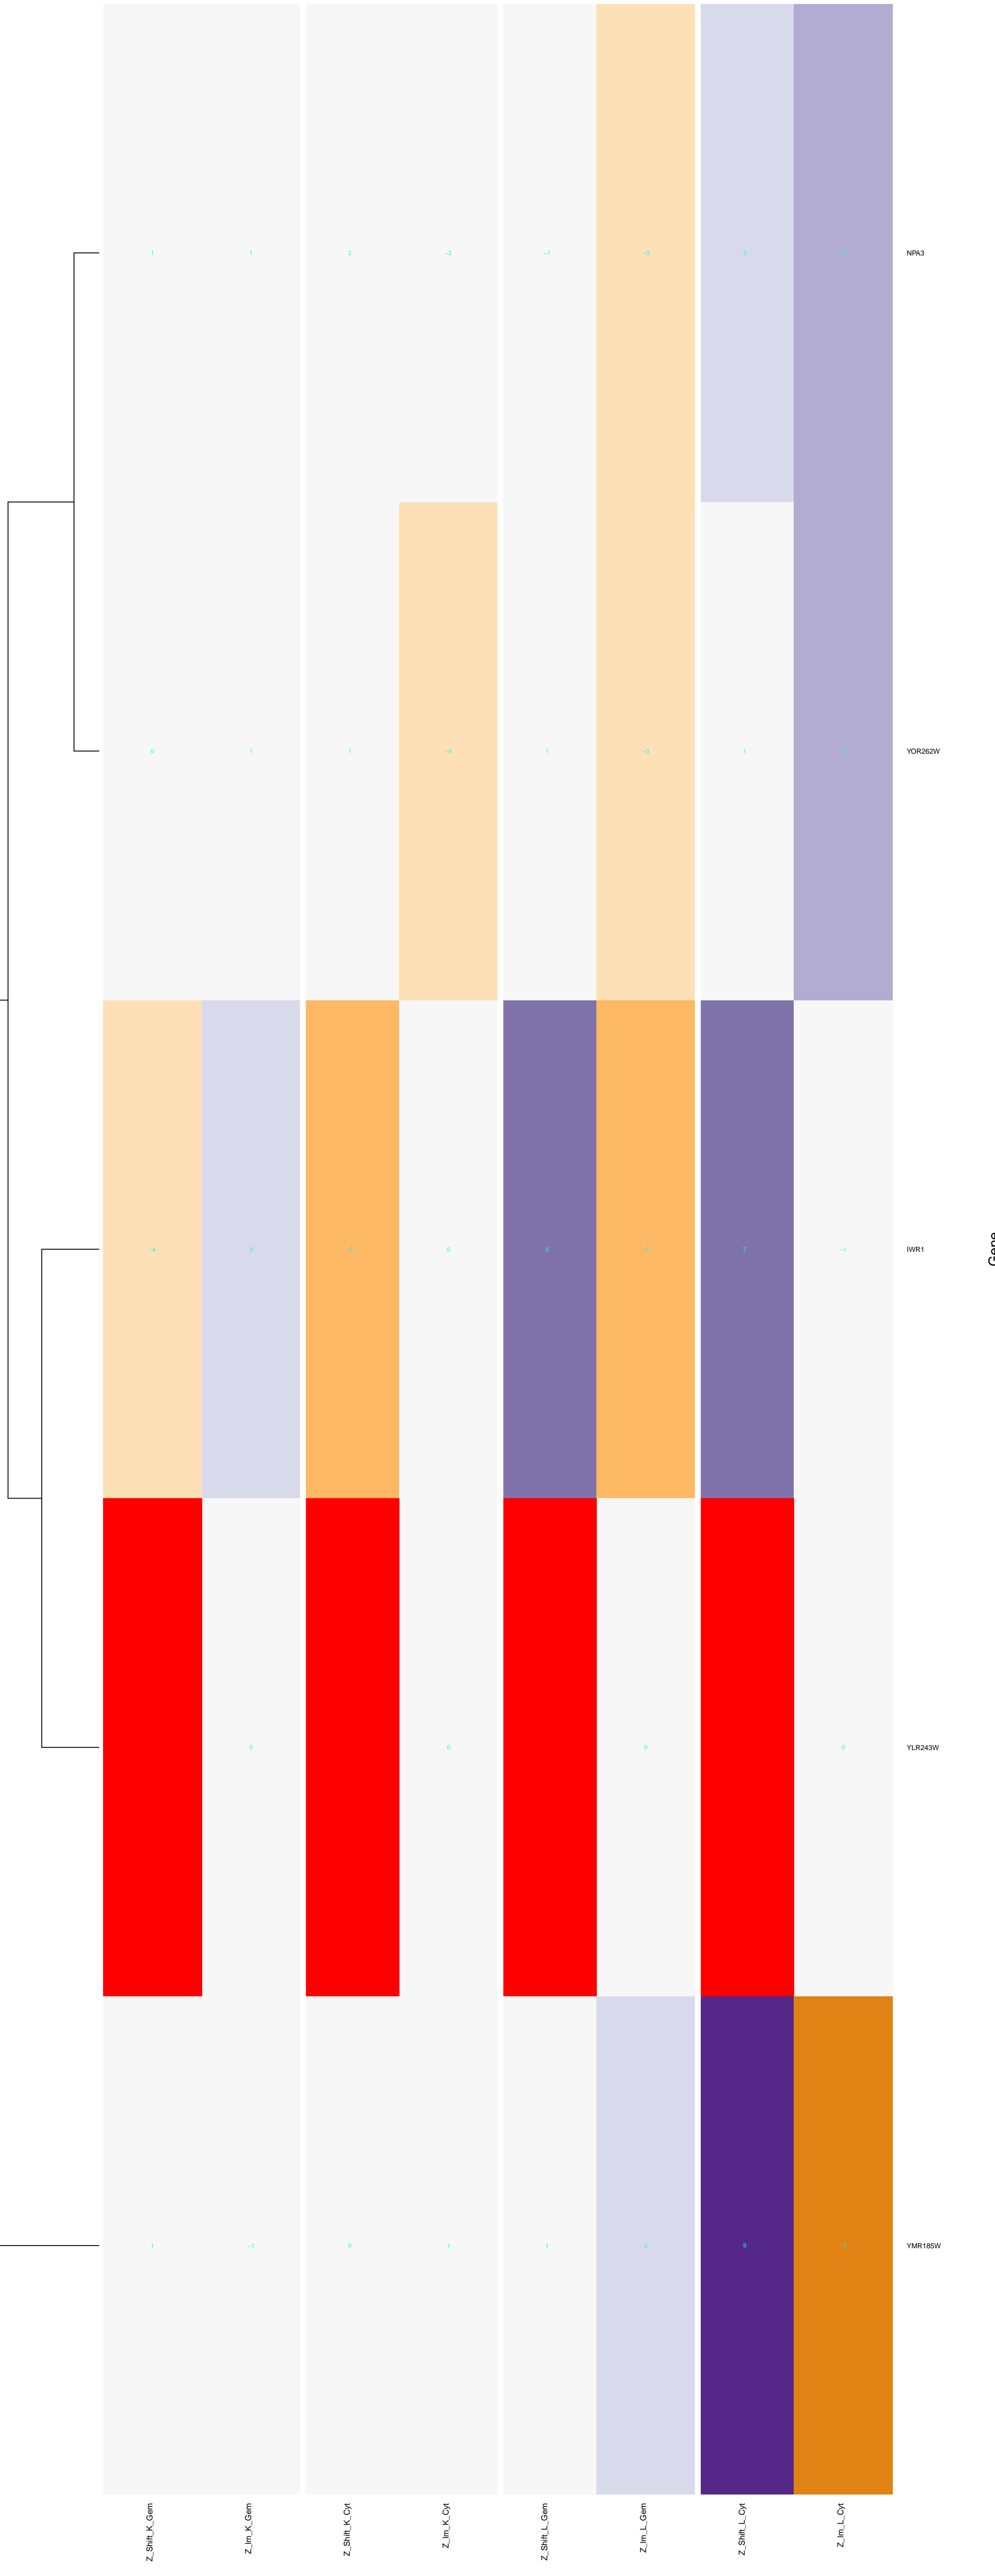

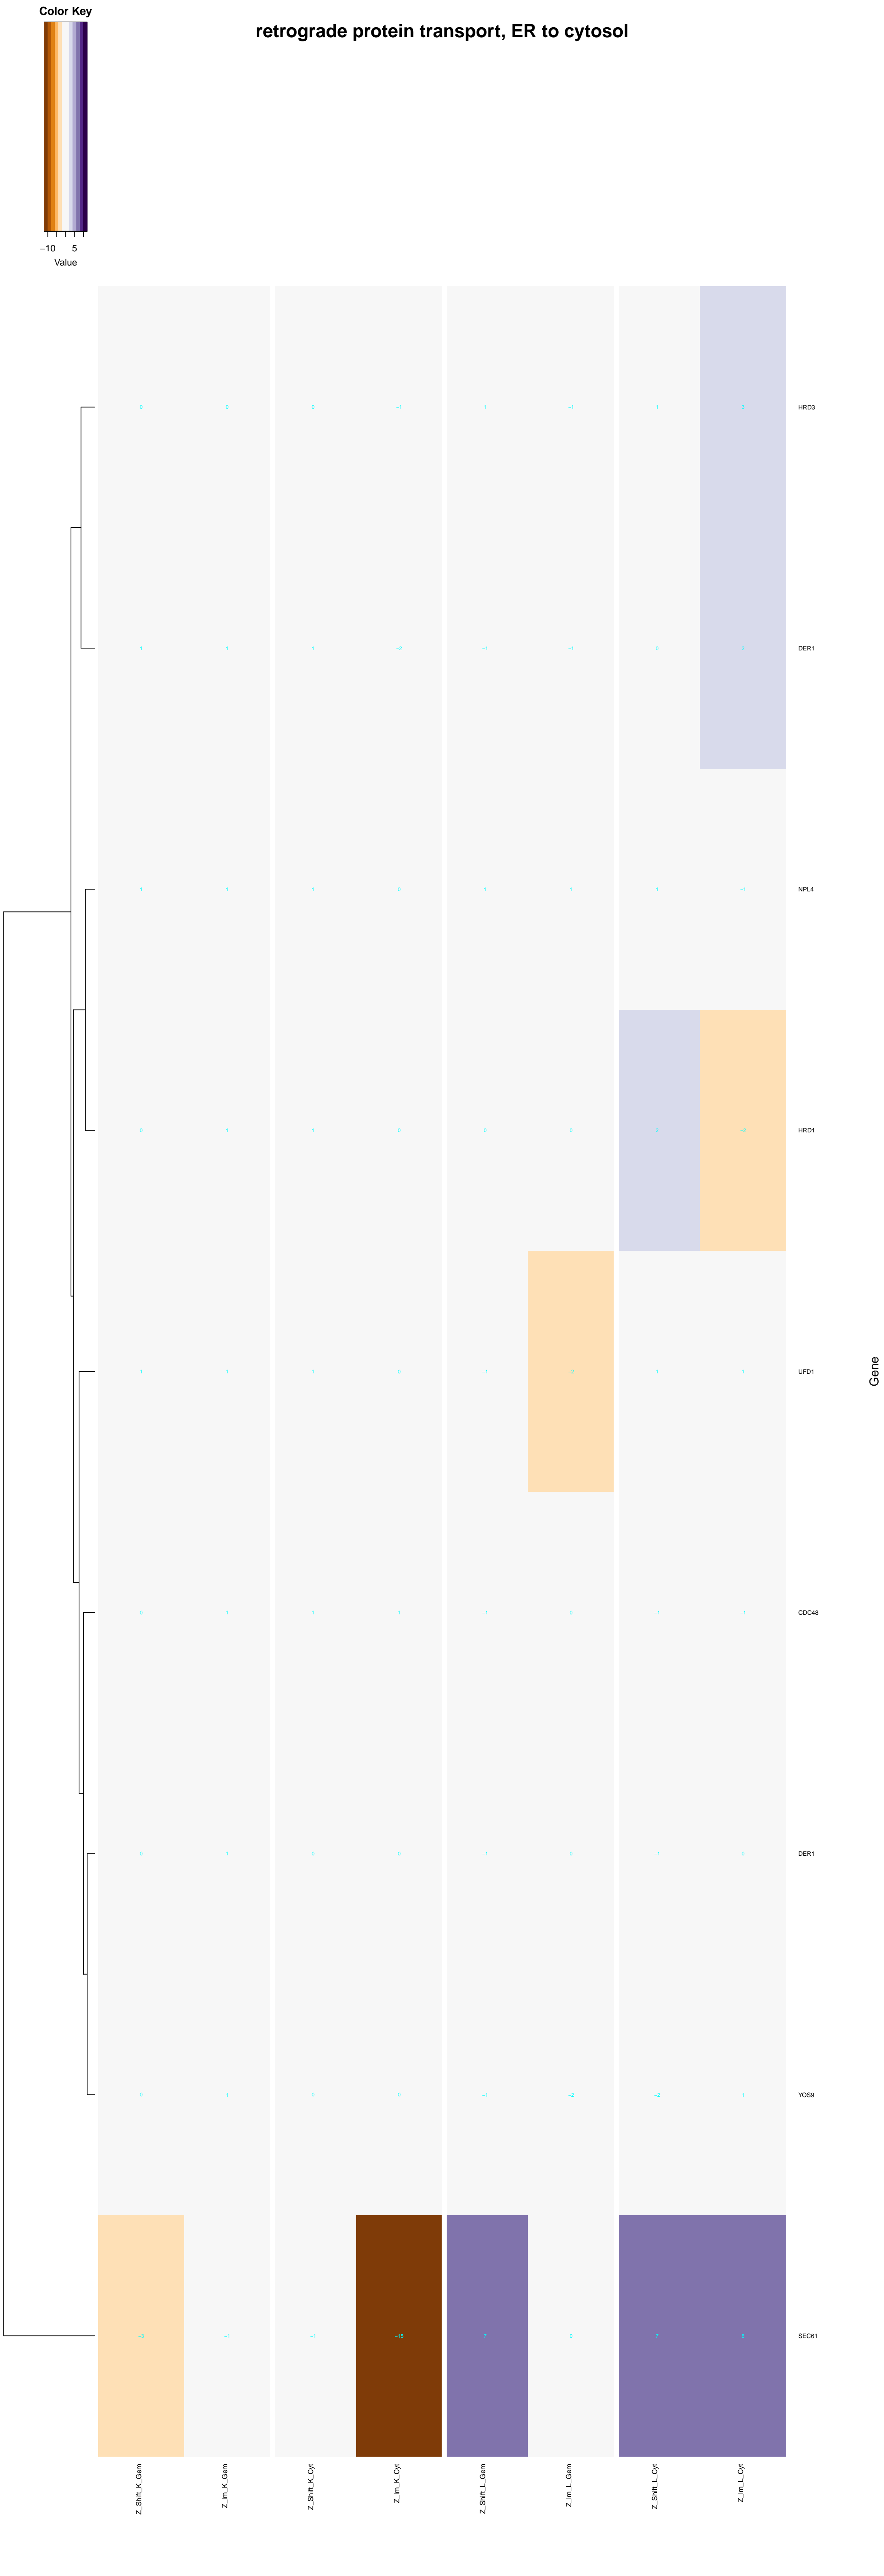

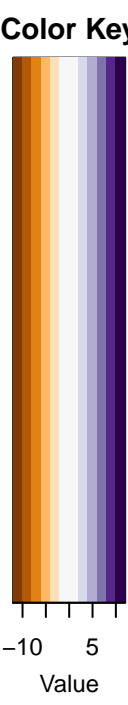

SRP-dependent cotranslational protein targeting to membrane, translocation

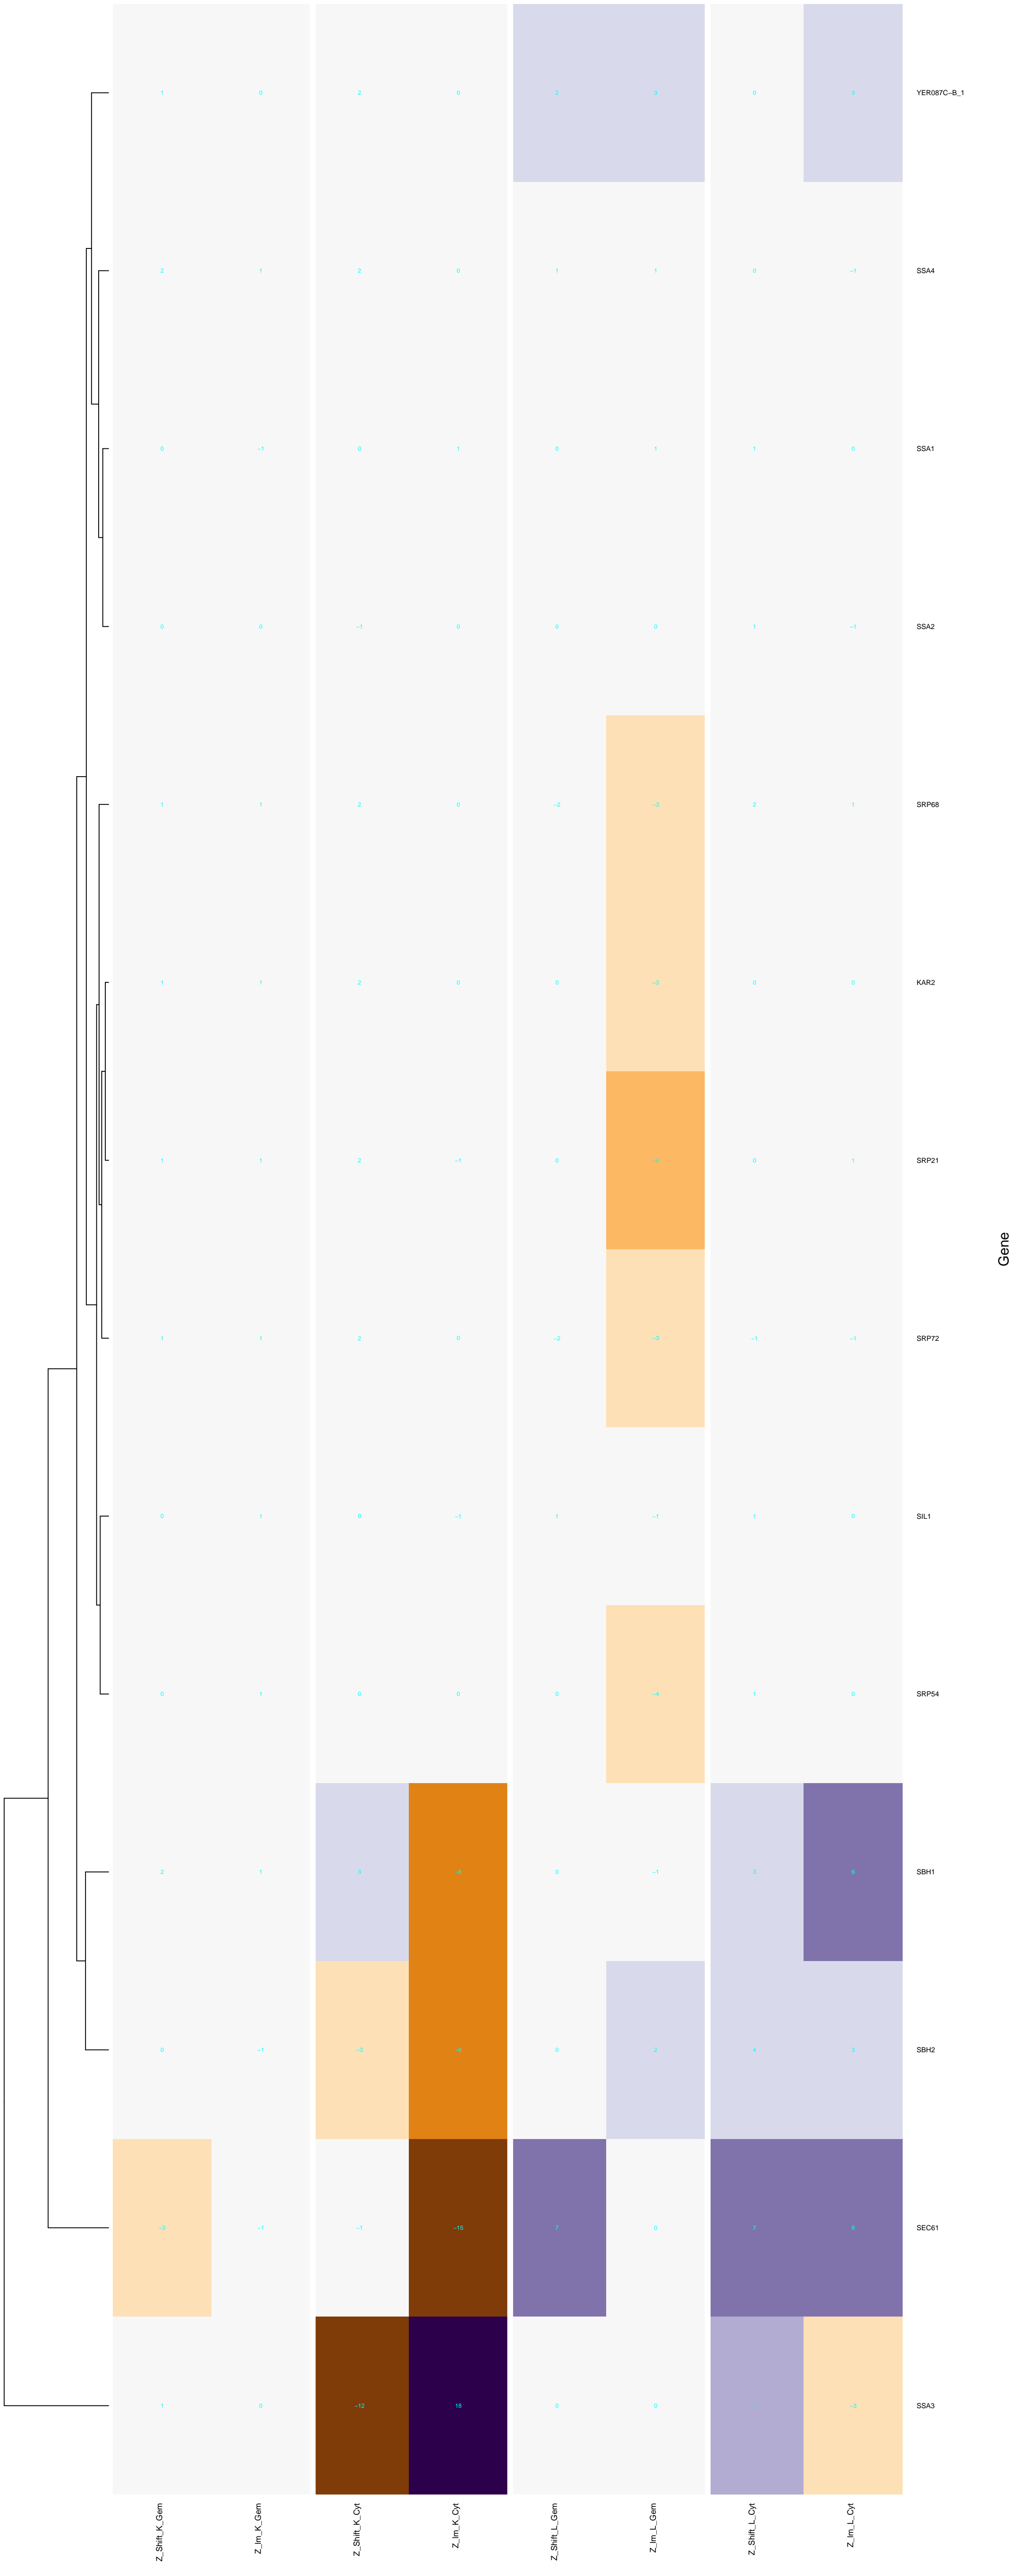



posttranslational protein targeting to membrane, translocation

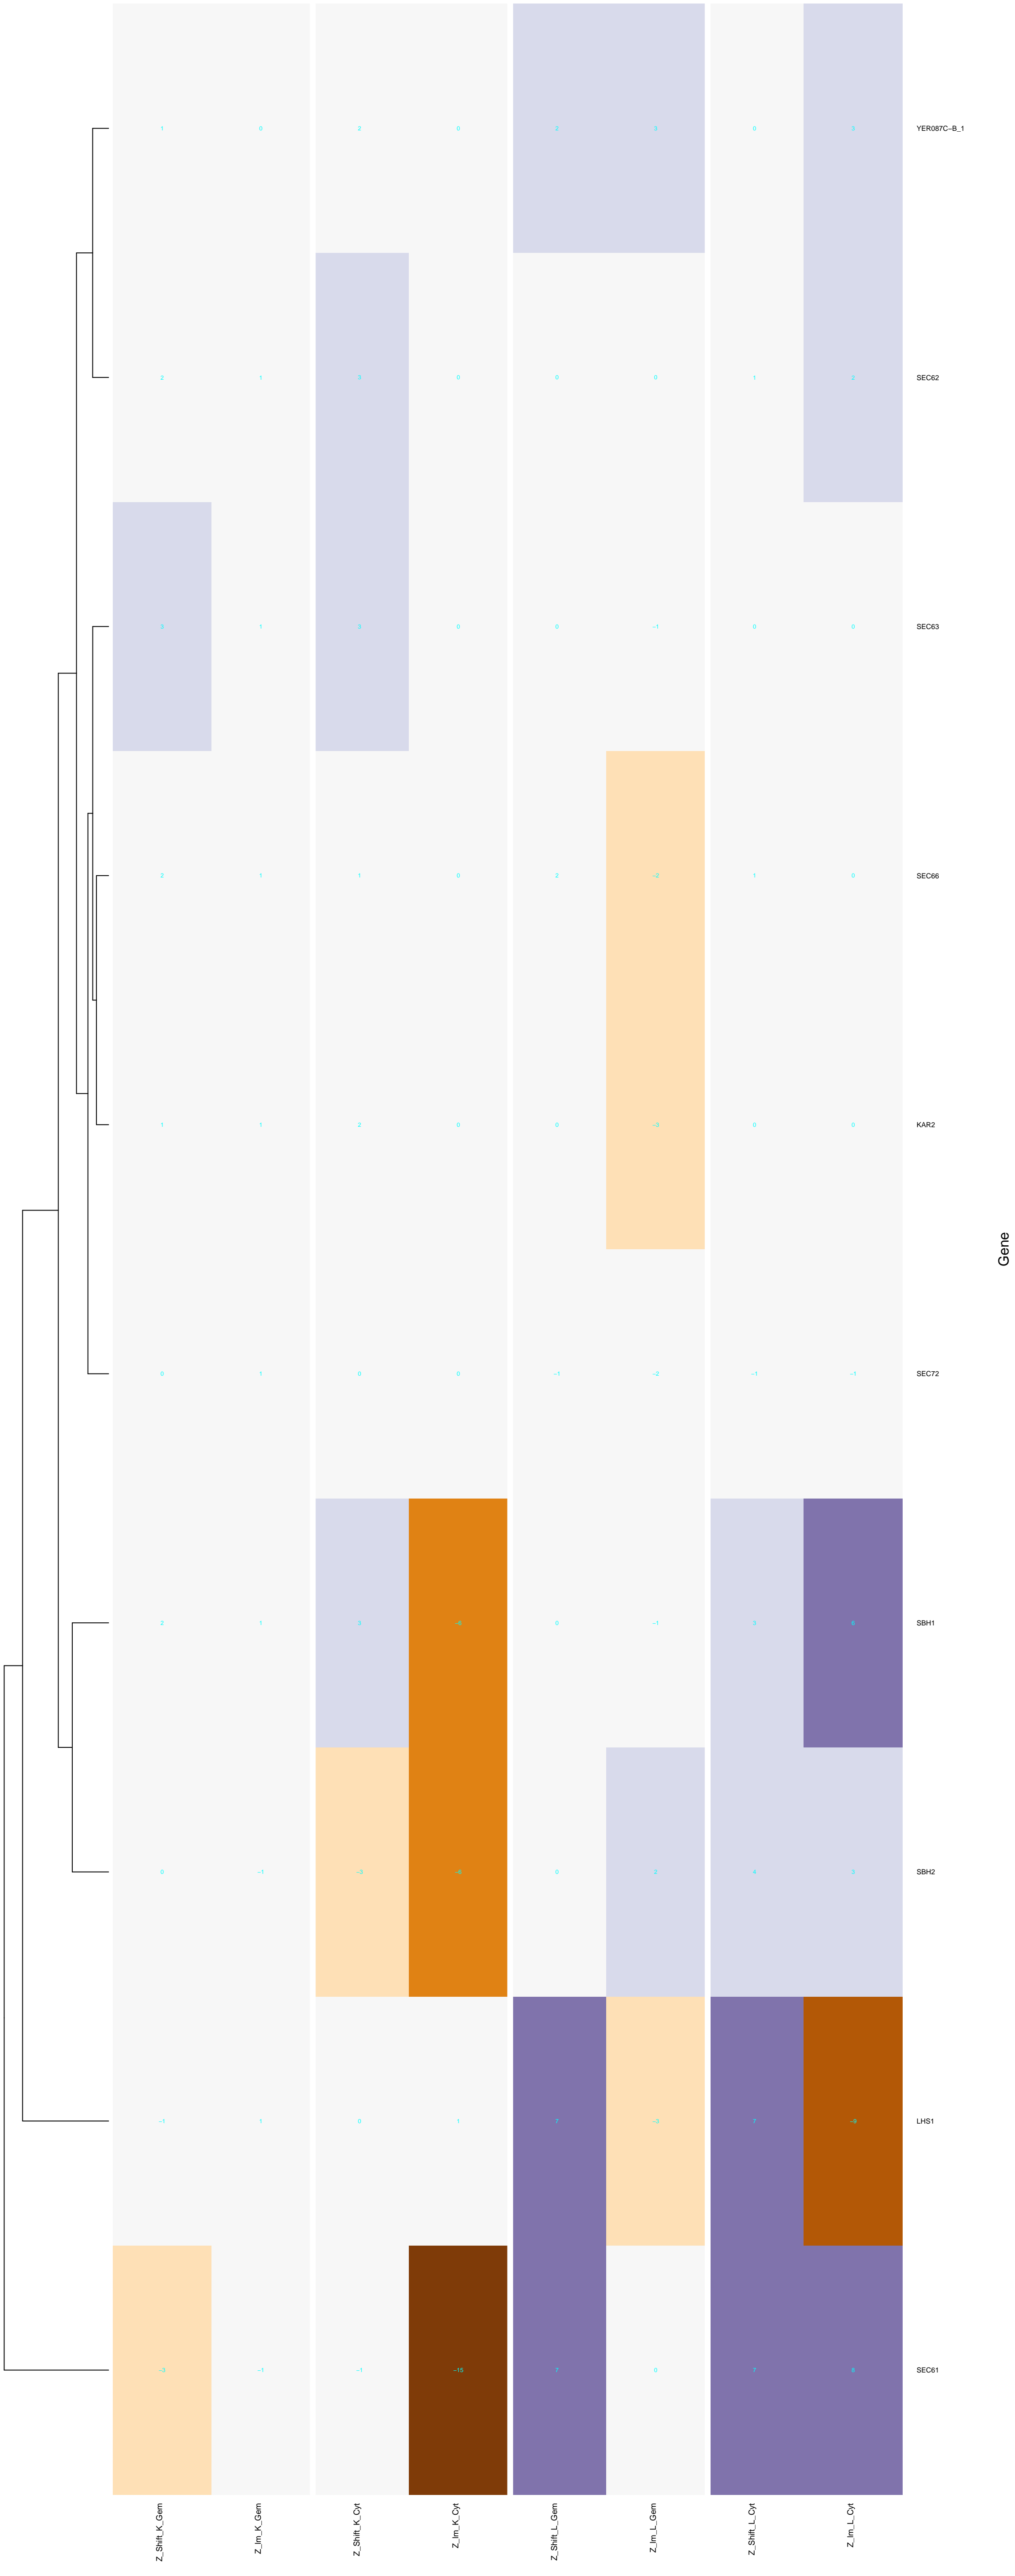

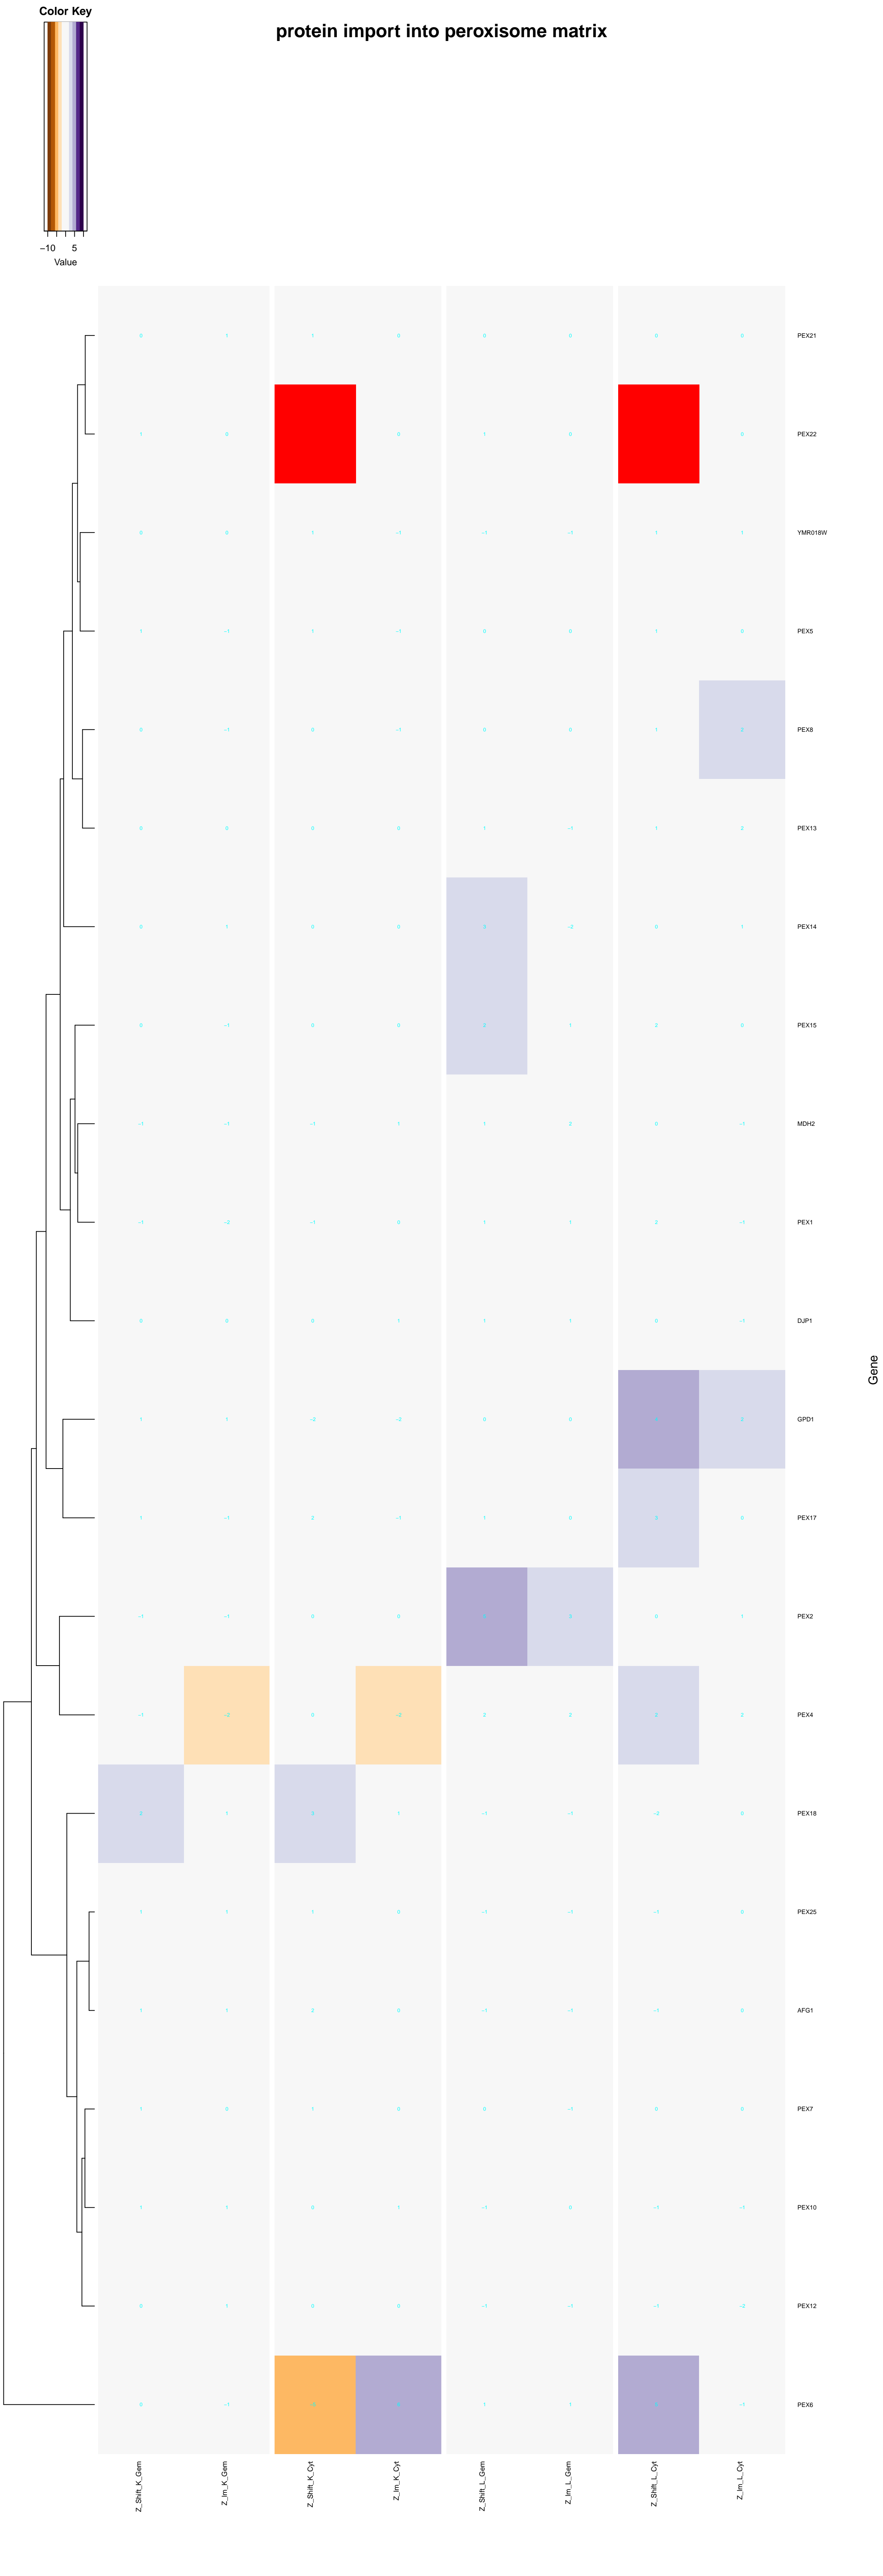

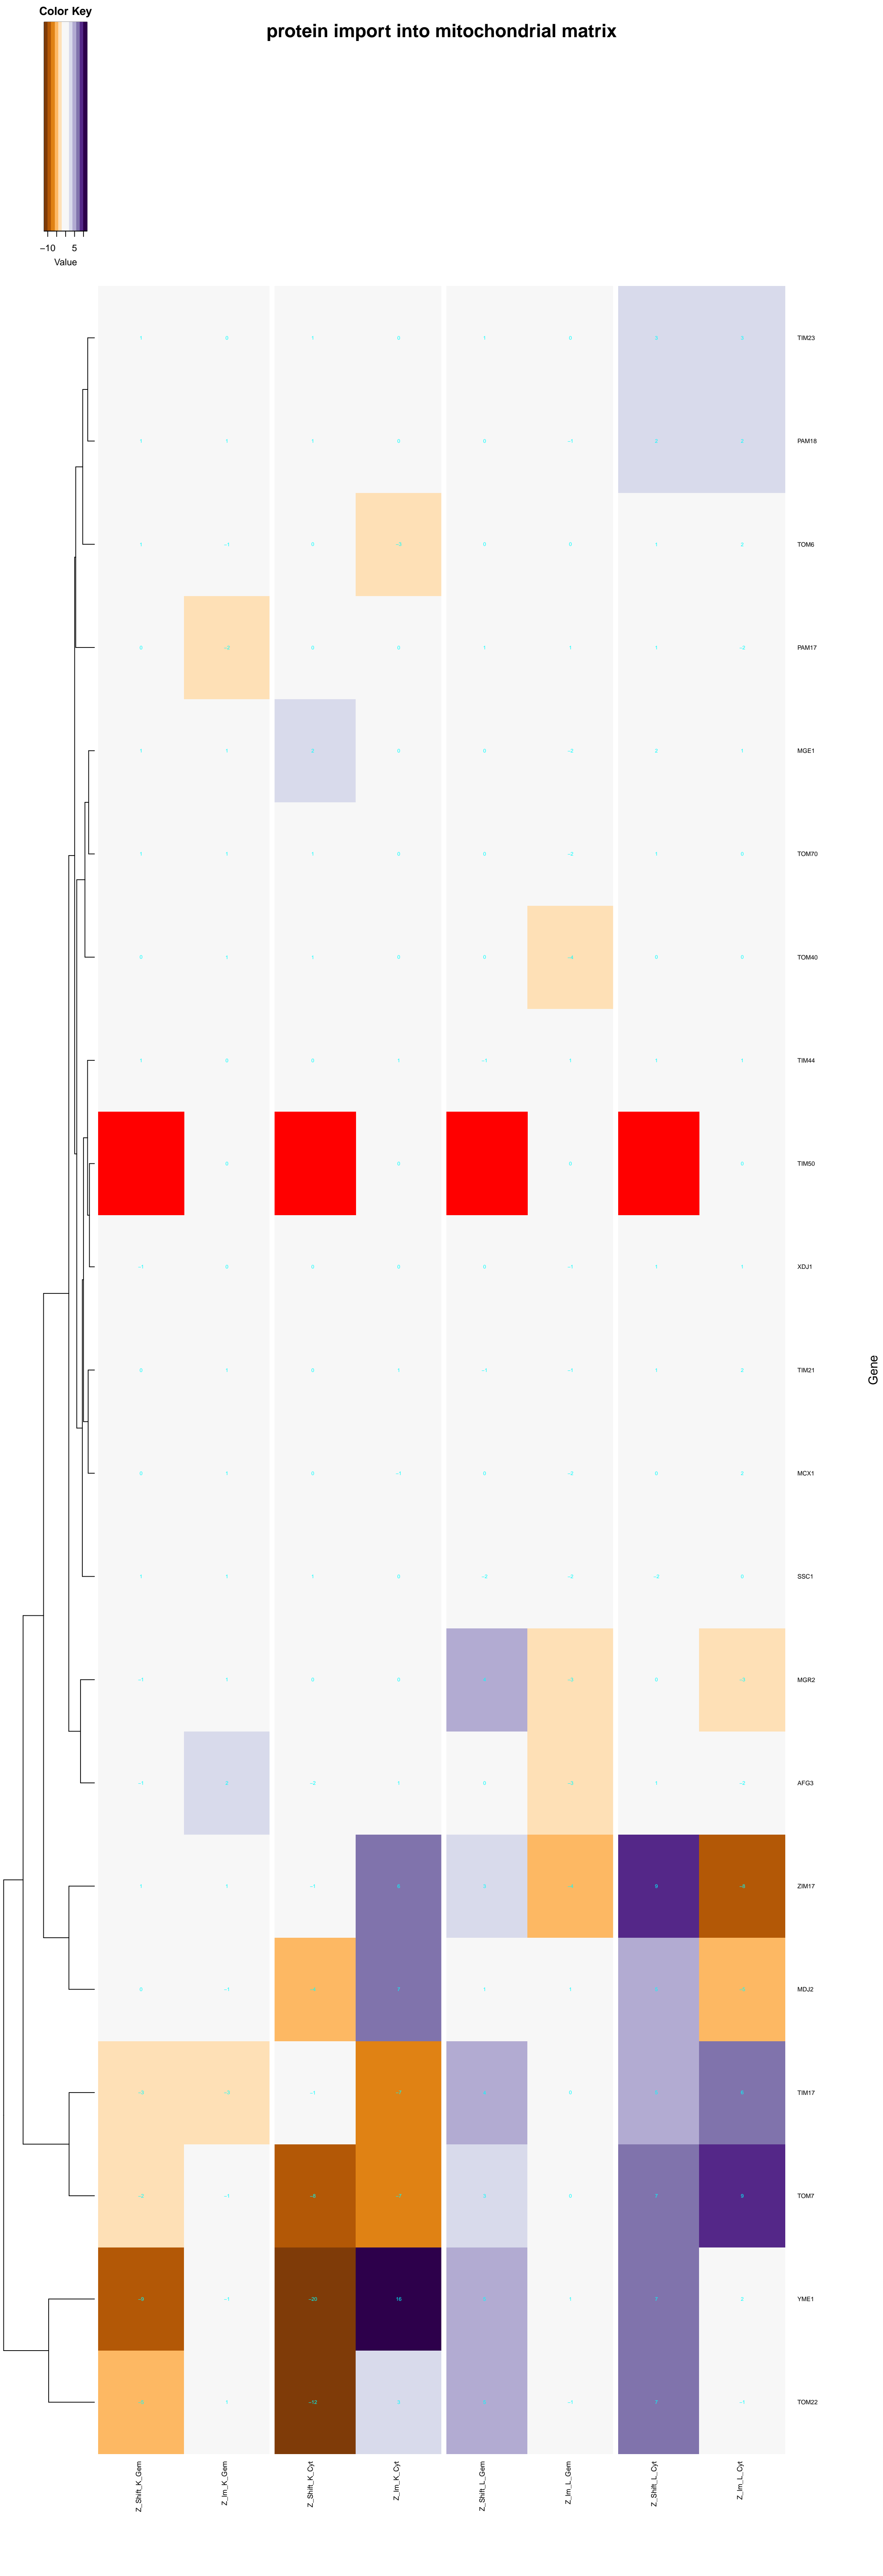

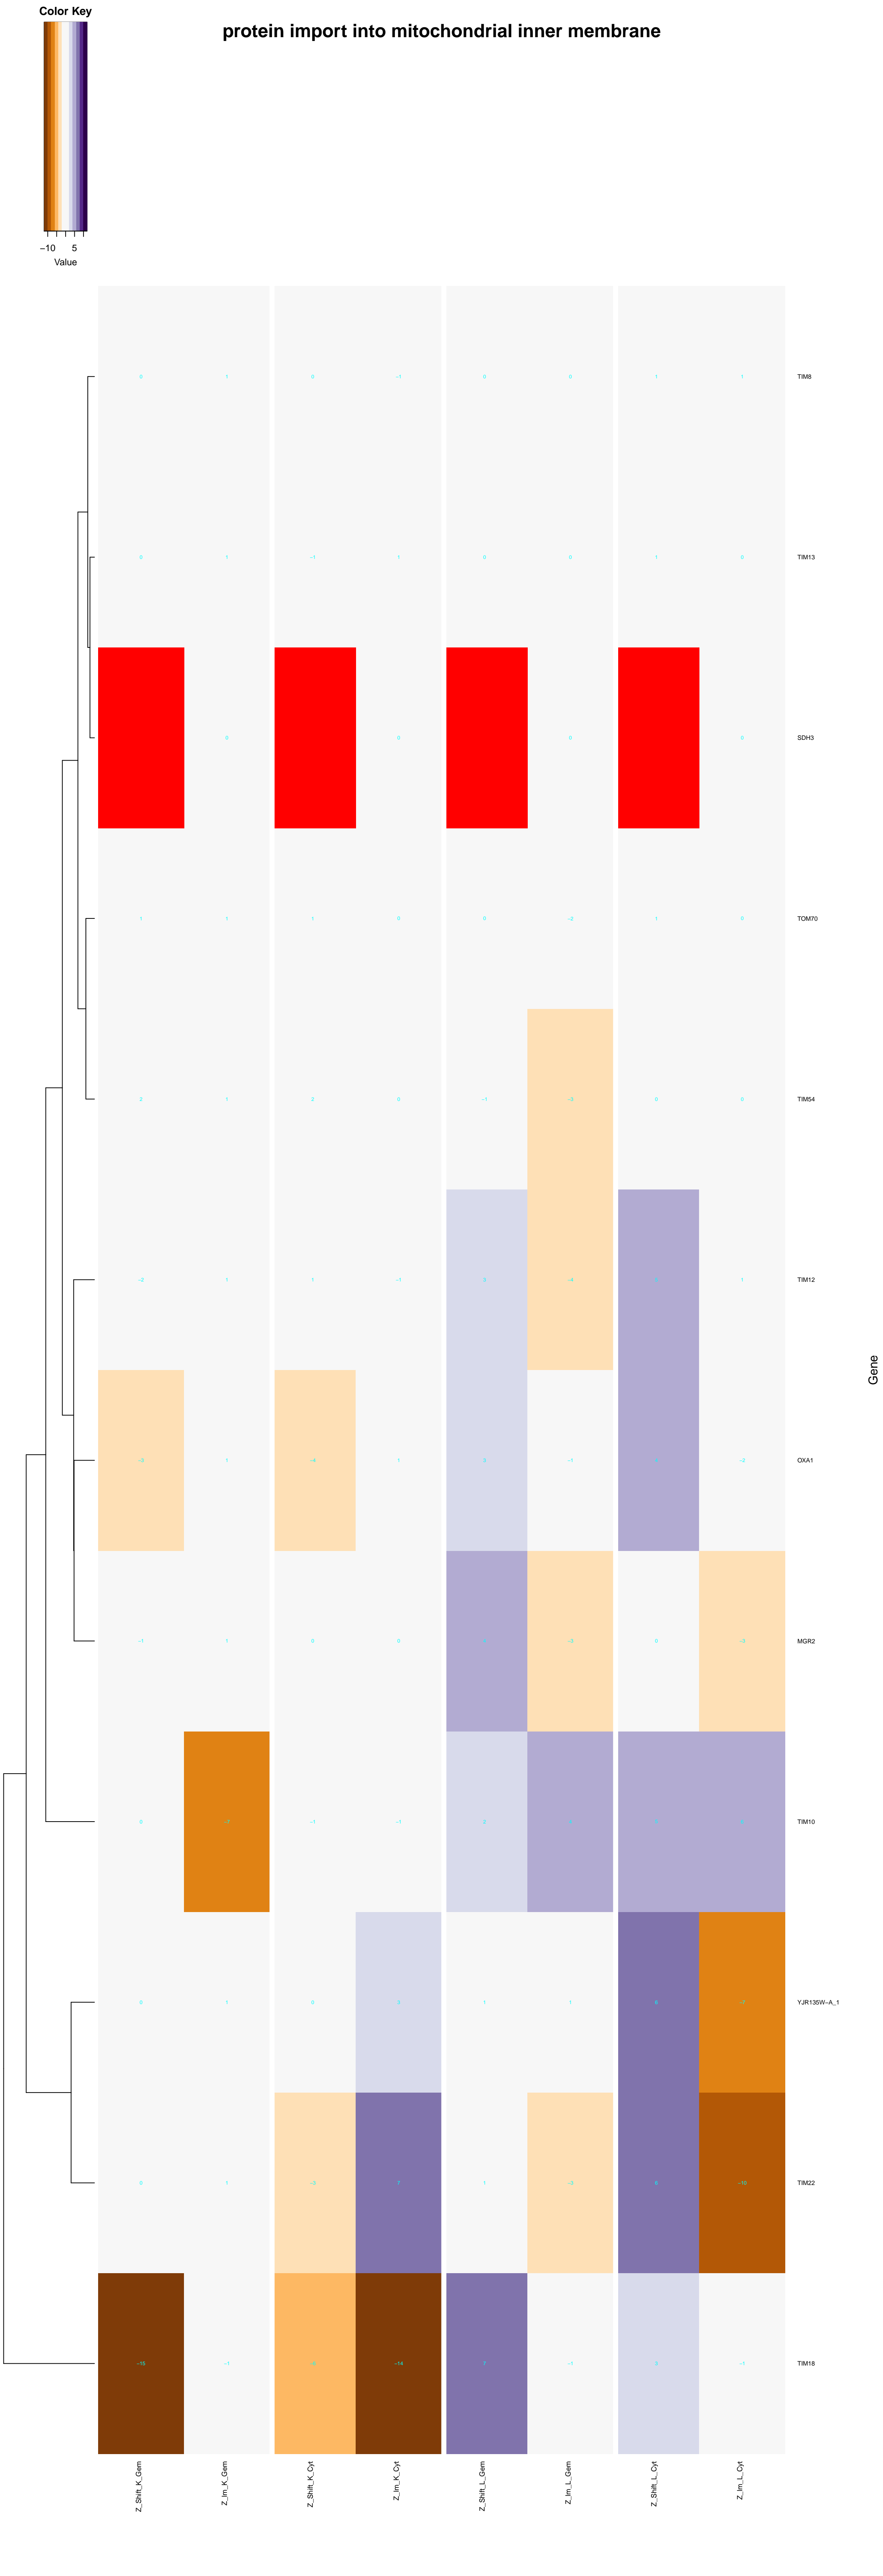

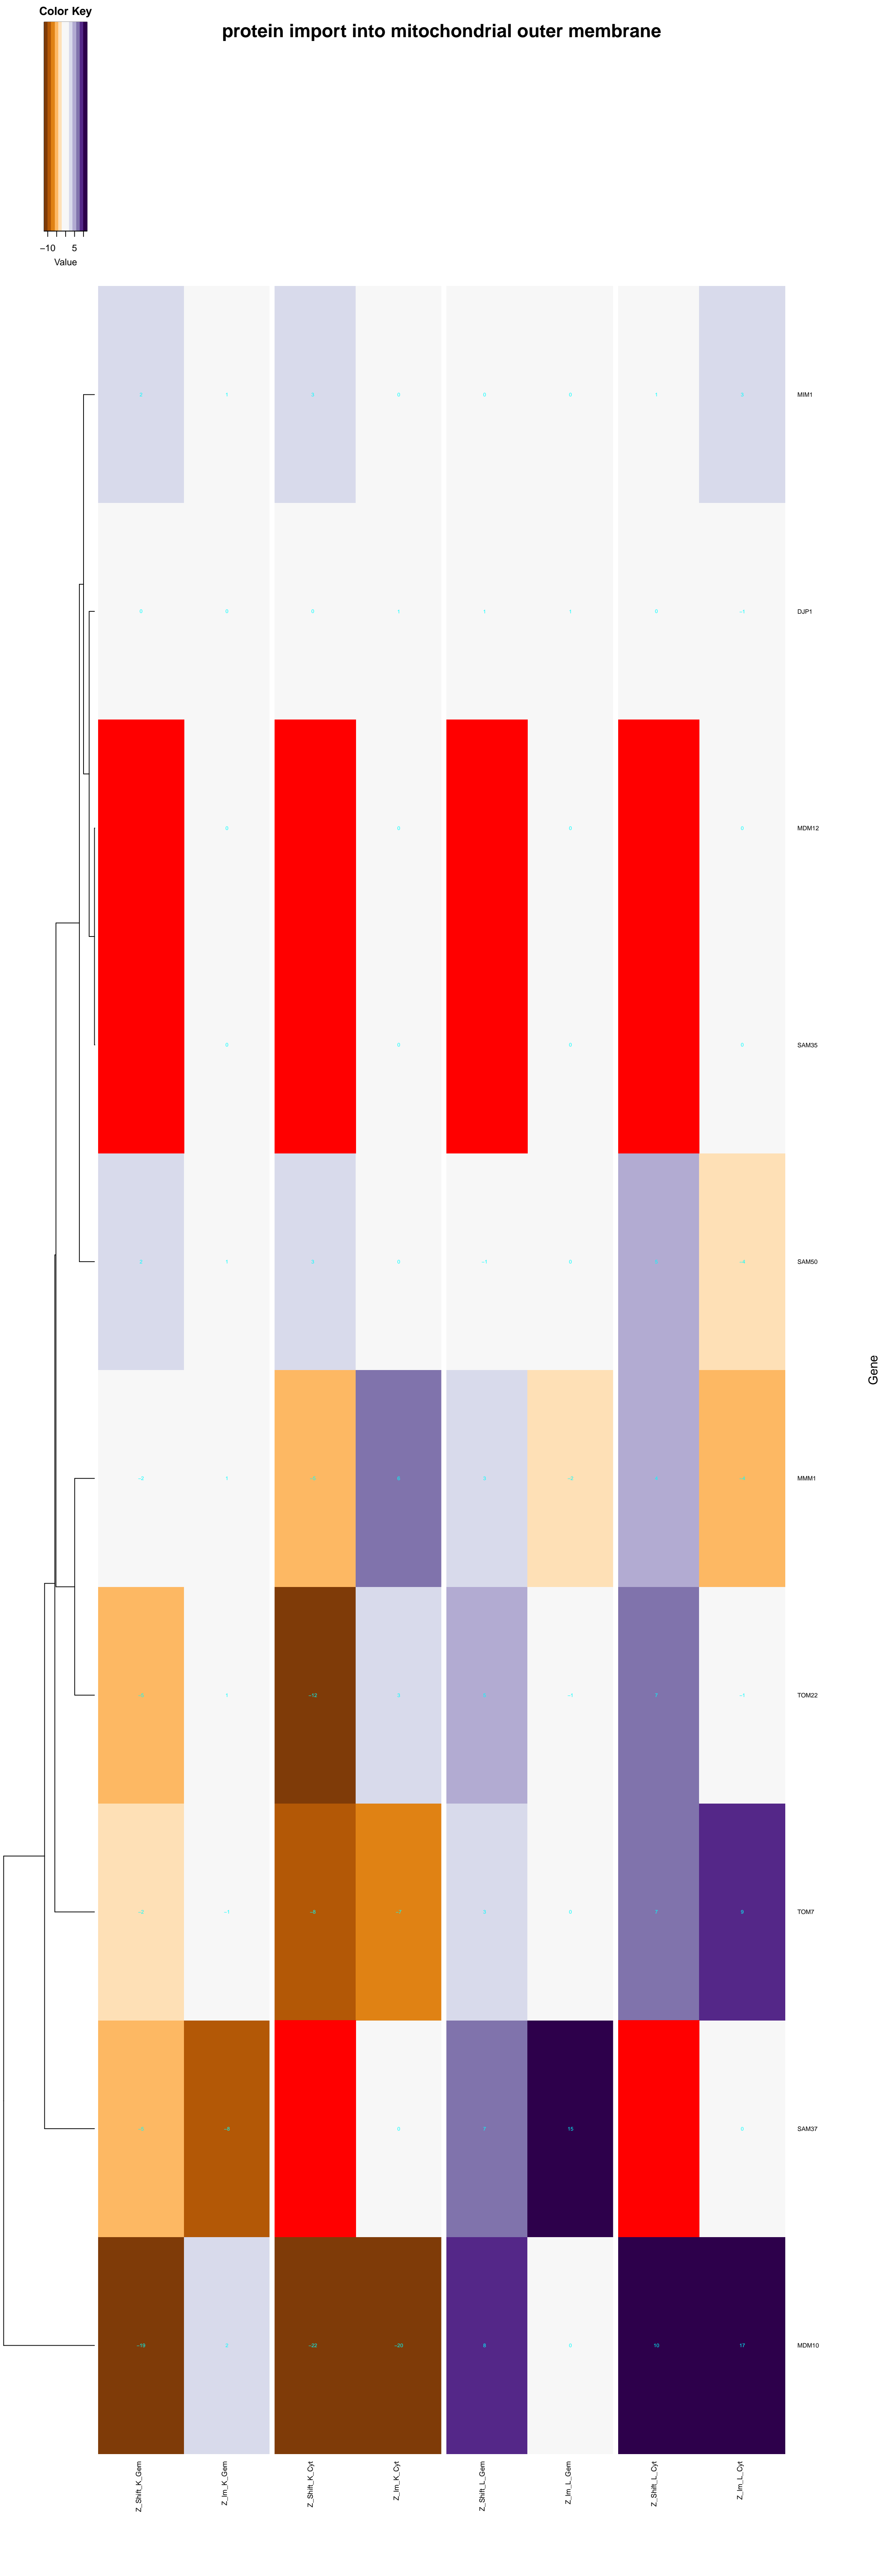

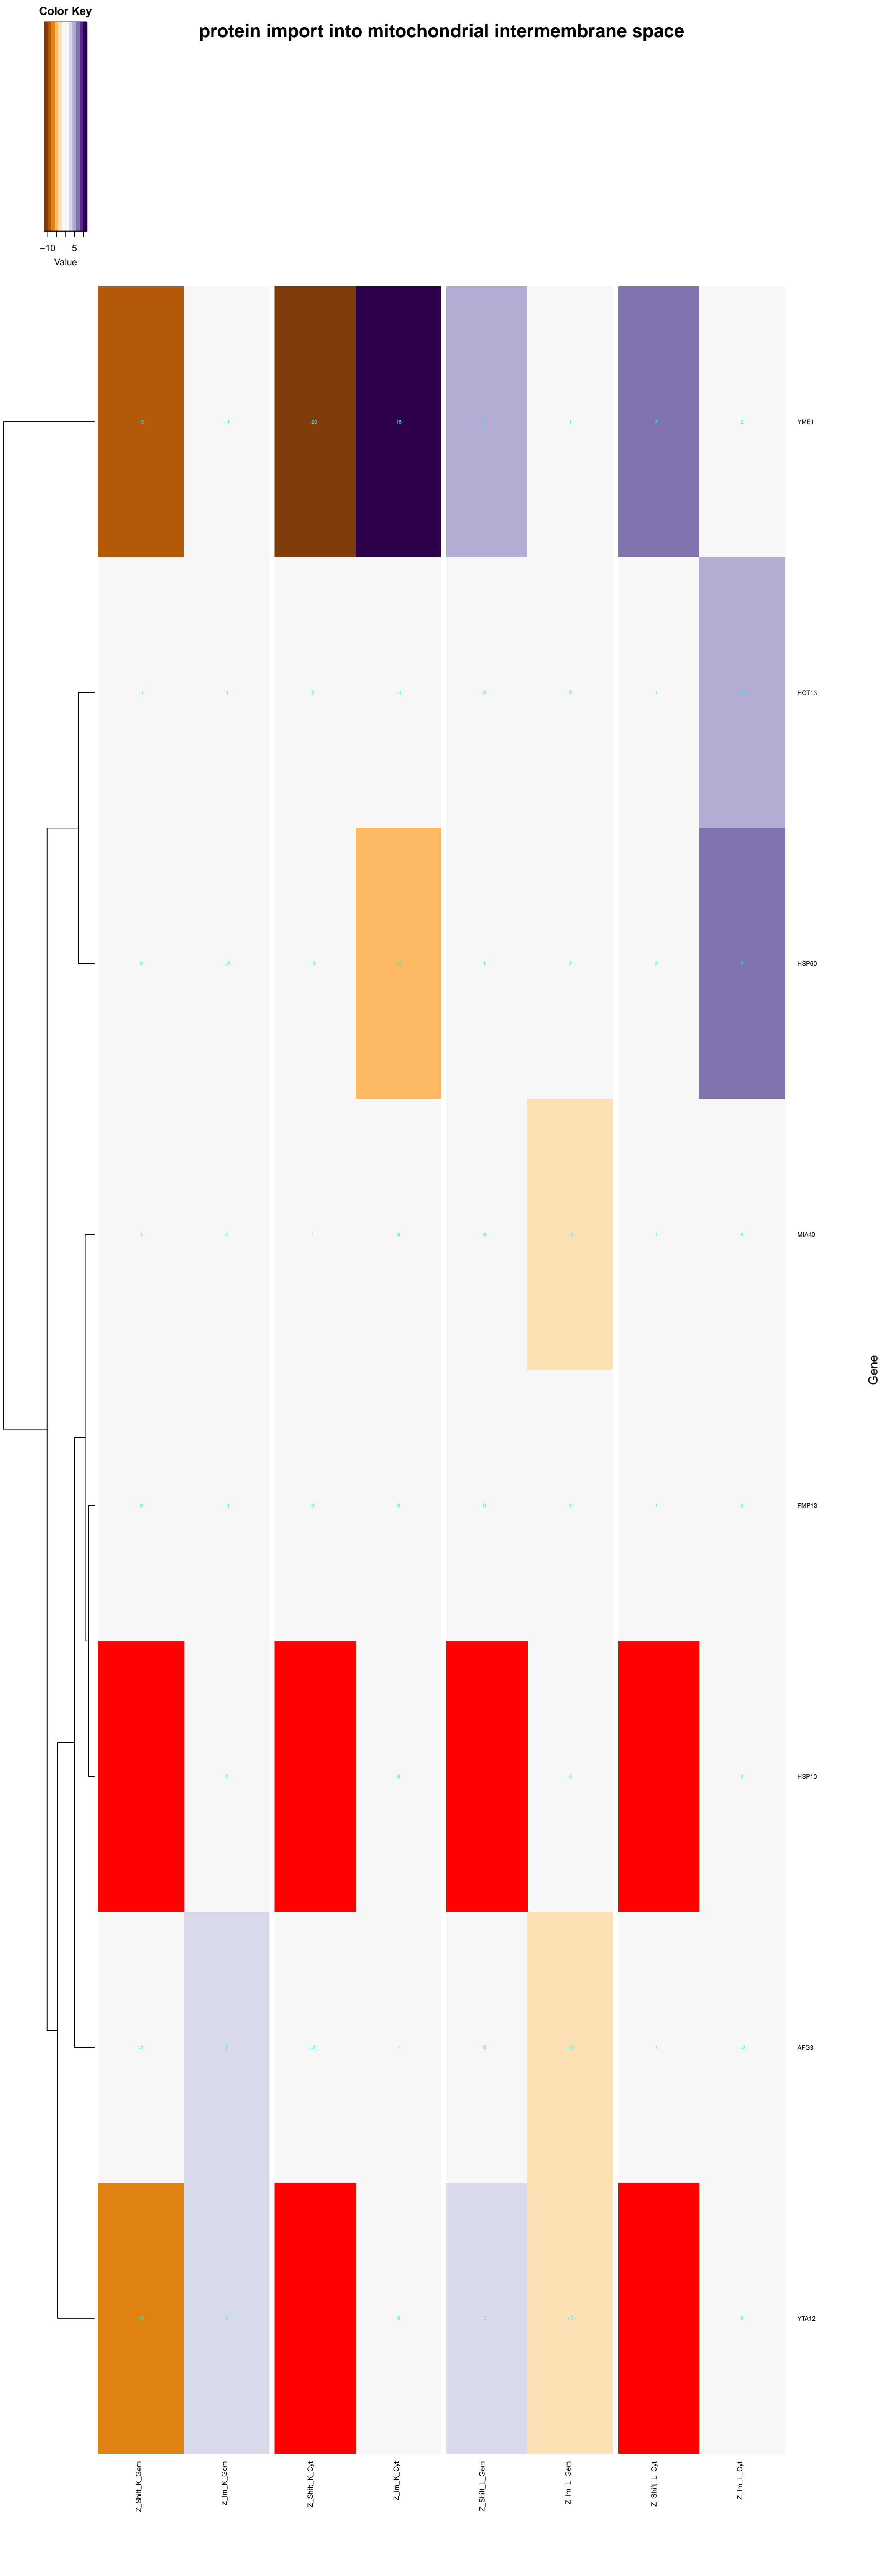

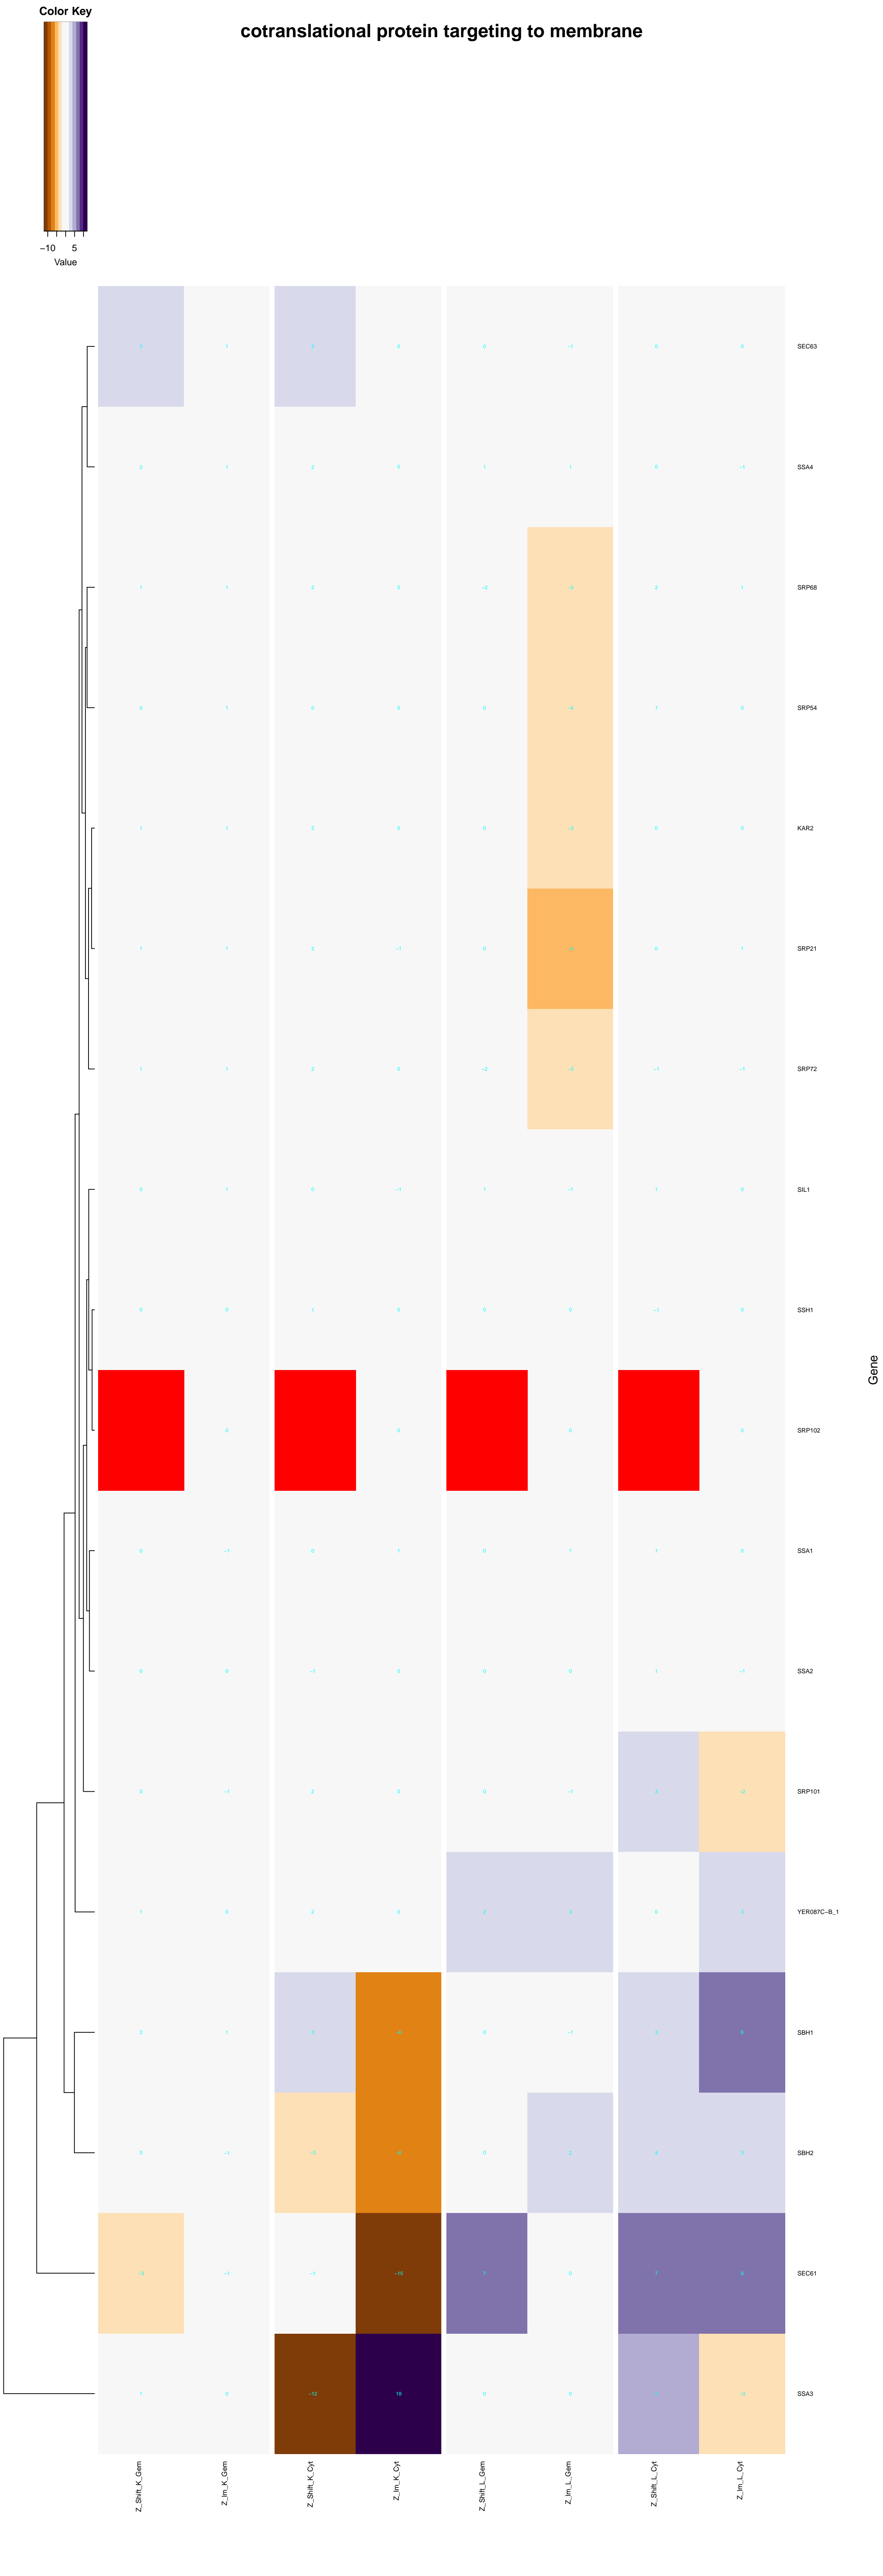

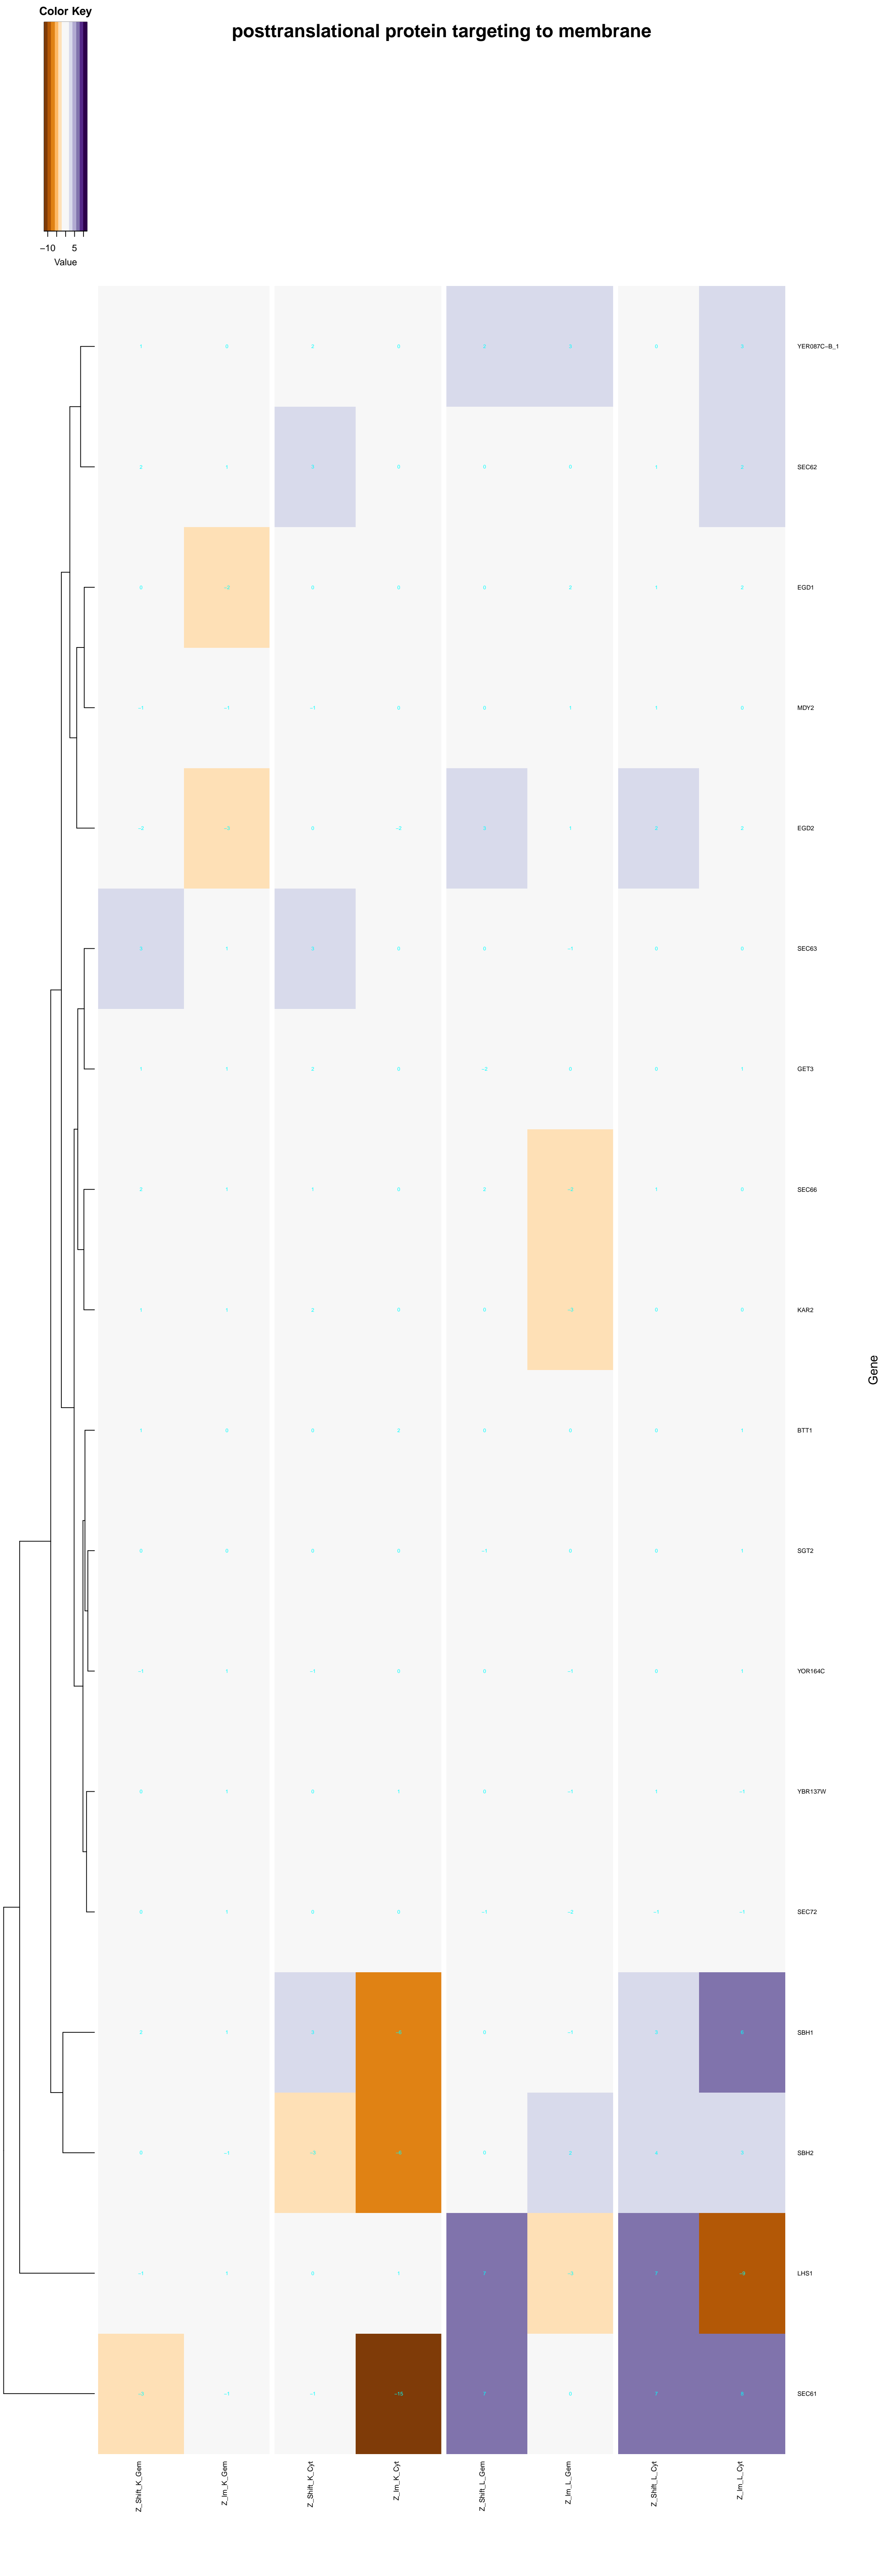

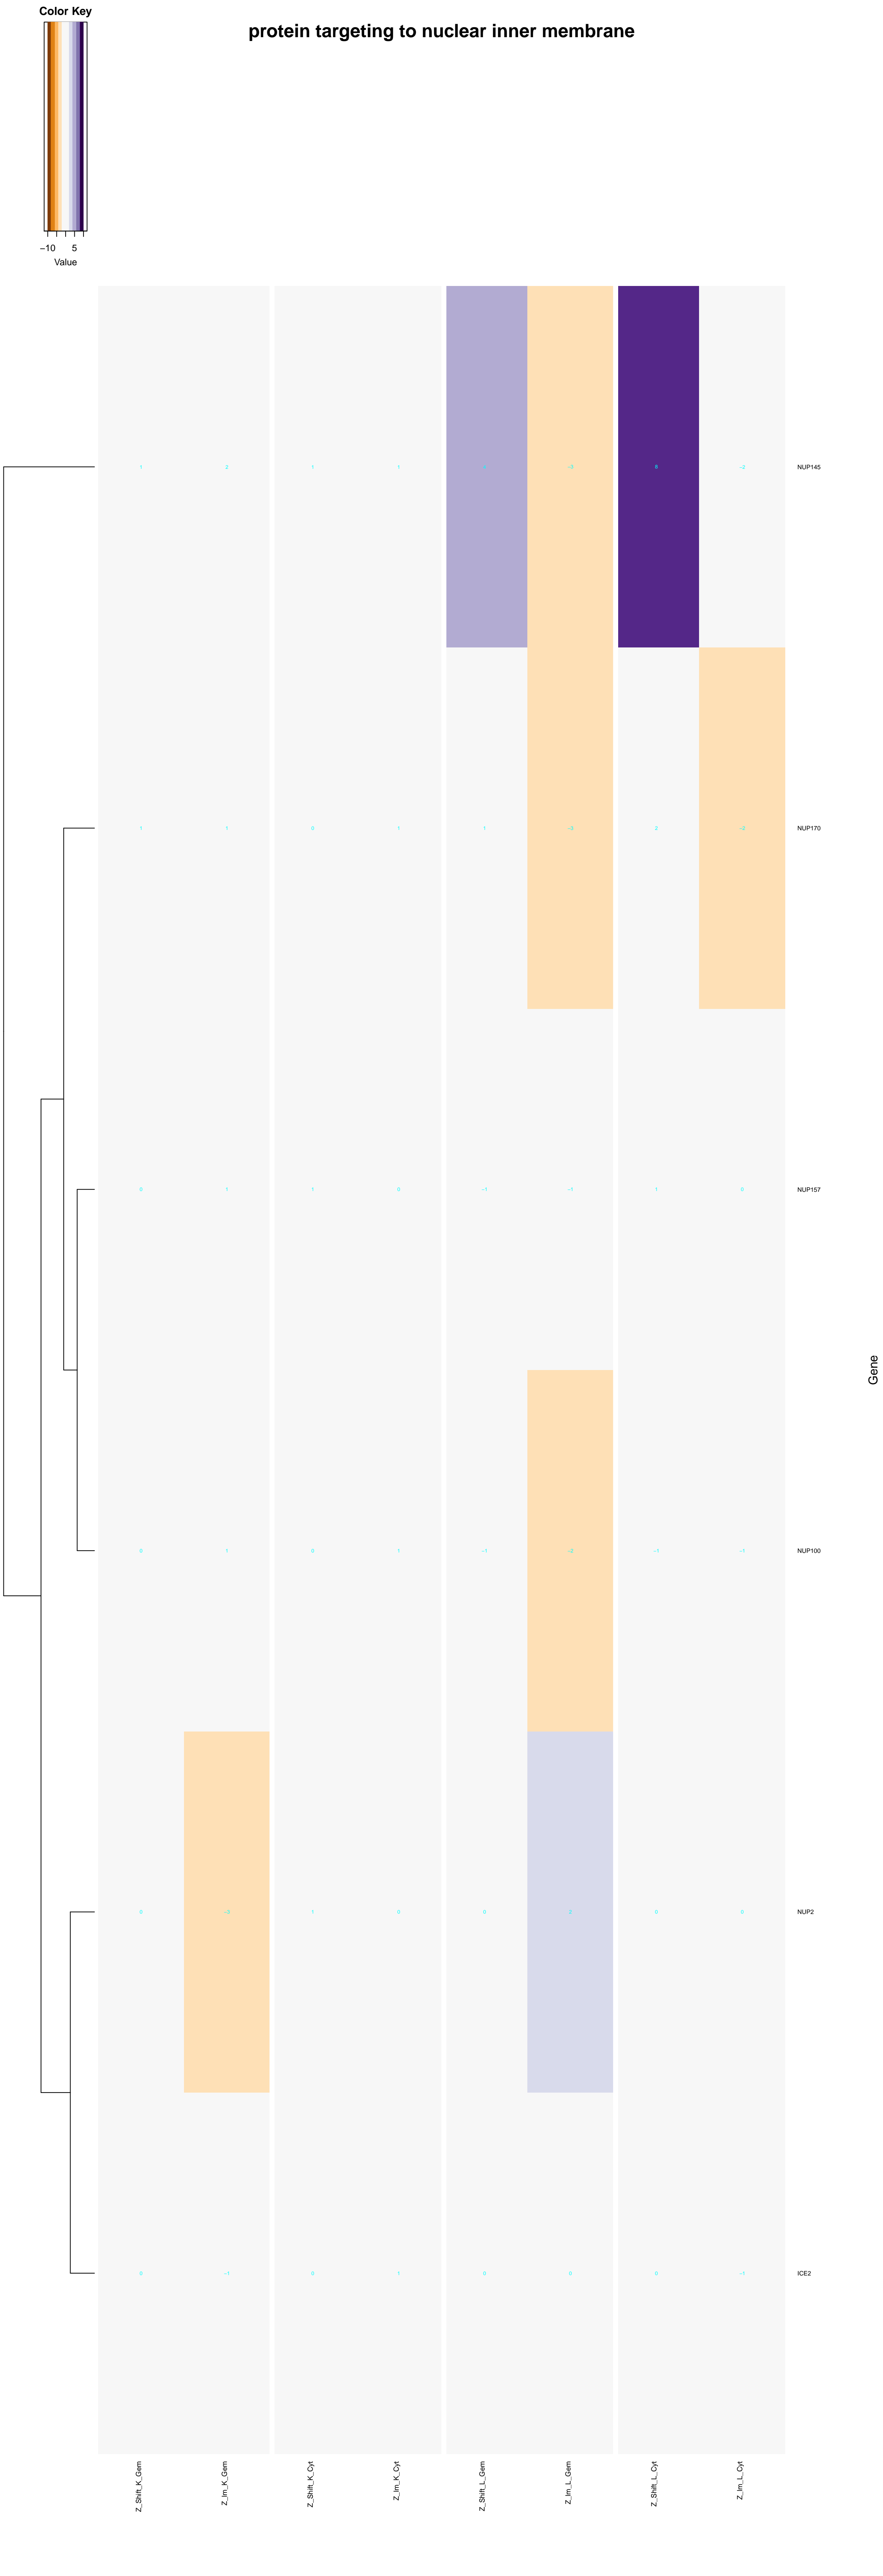

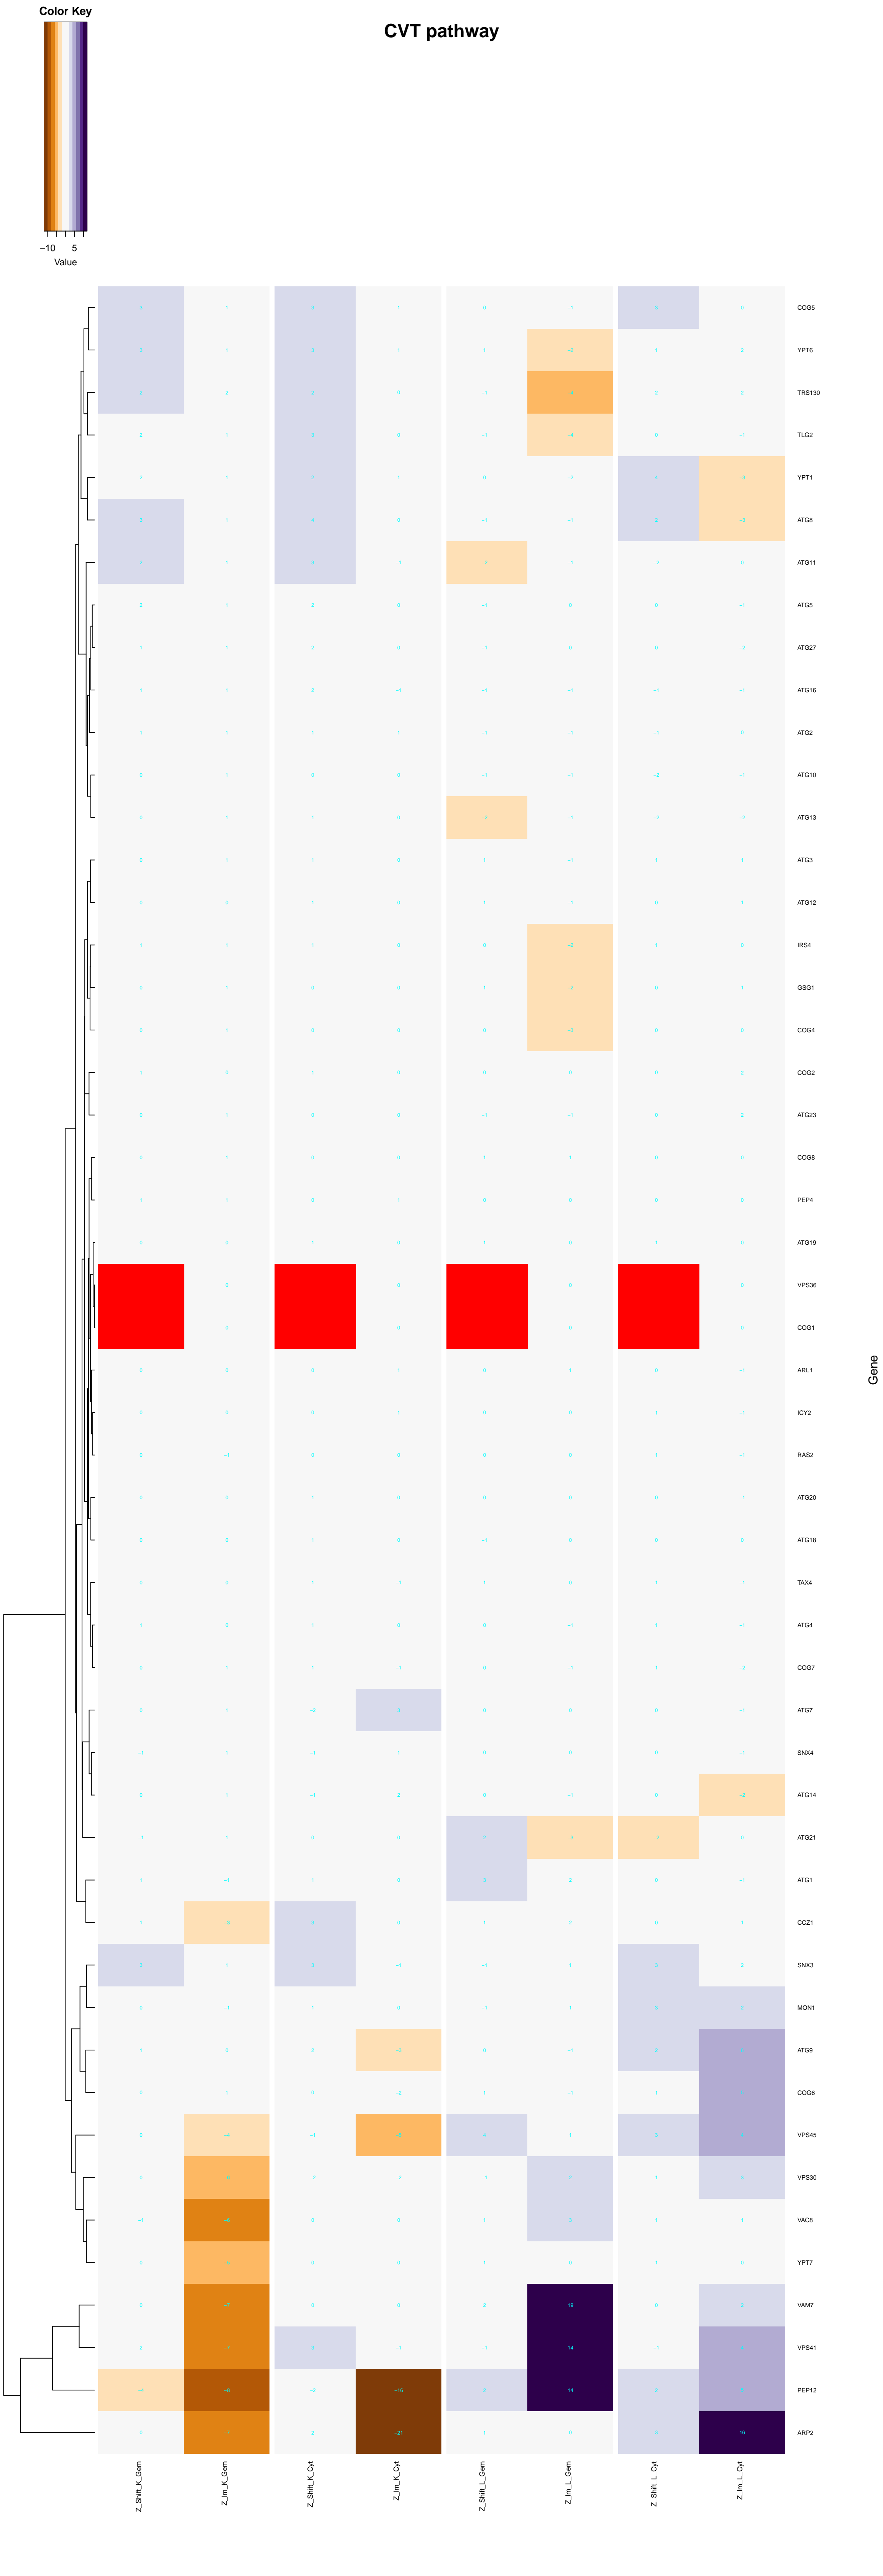

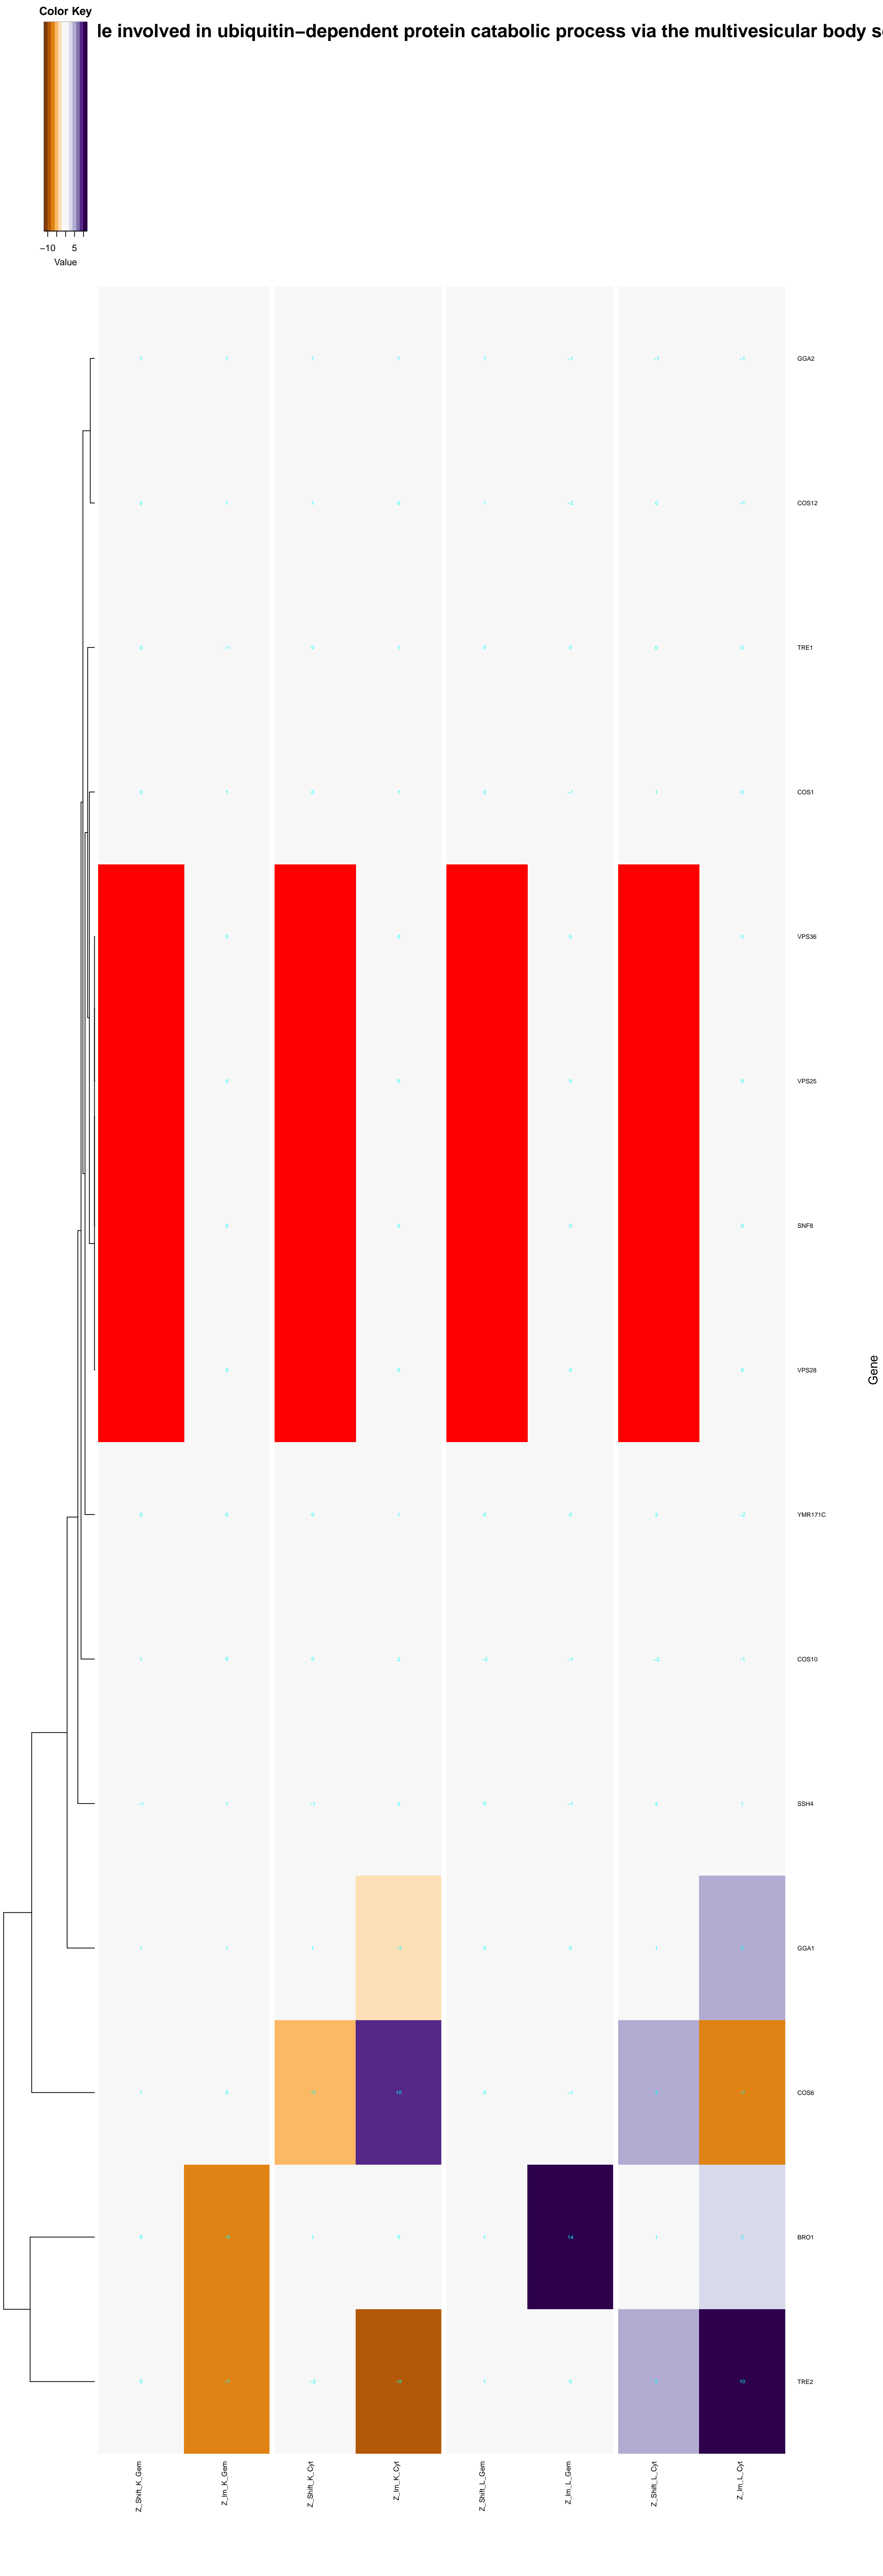

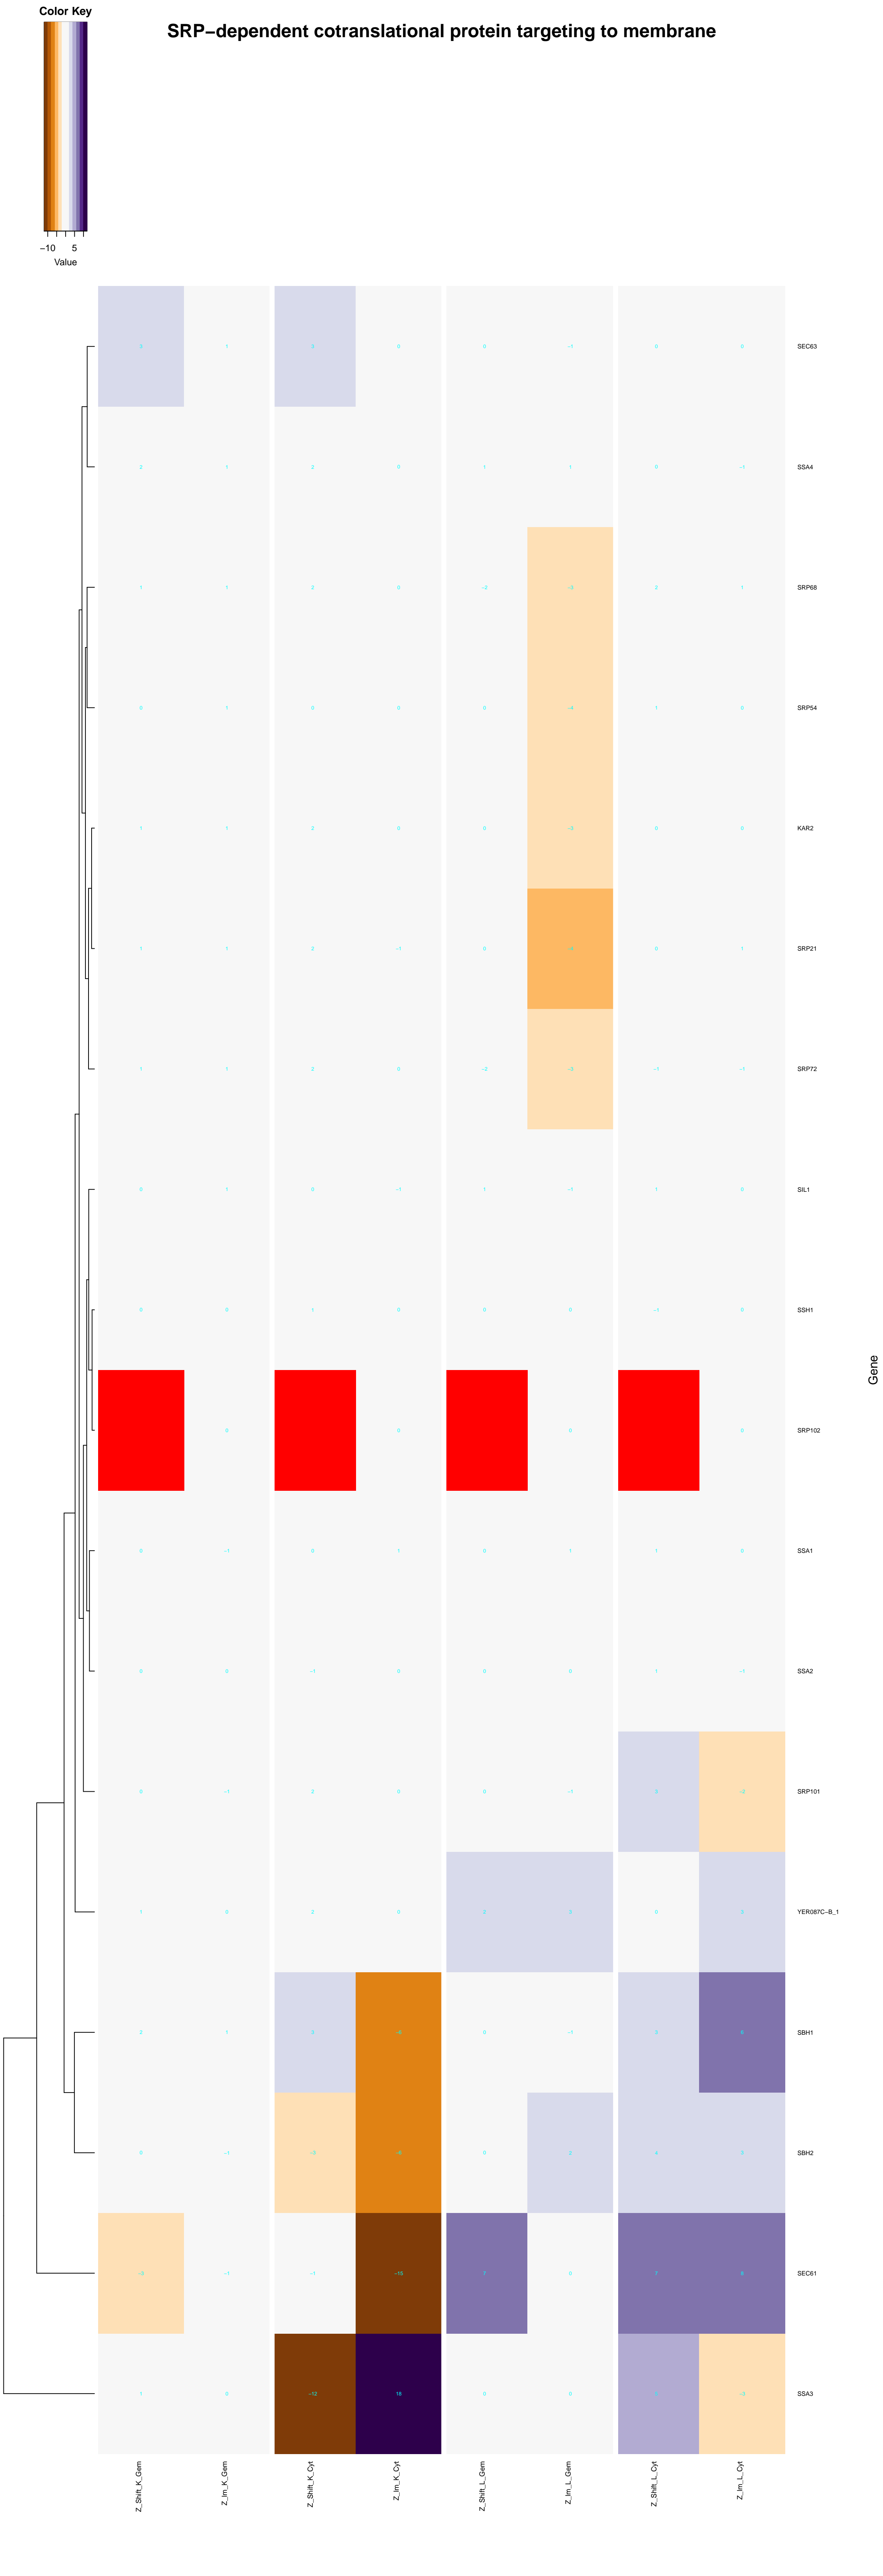

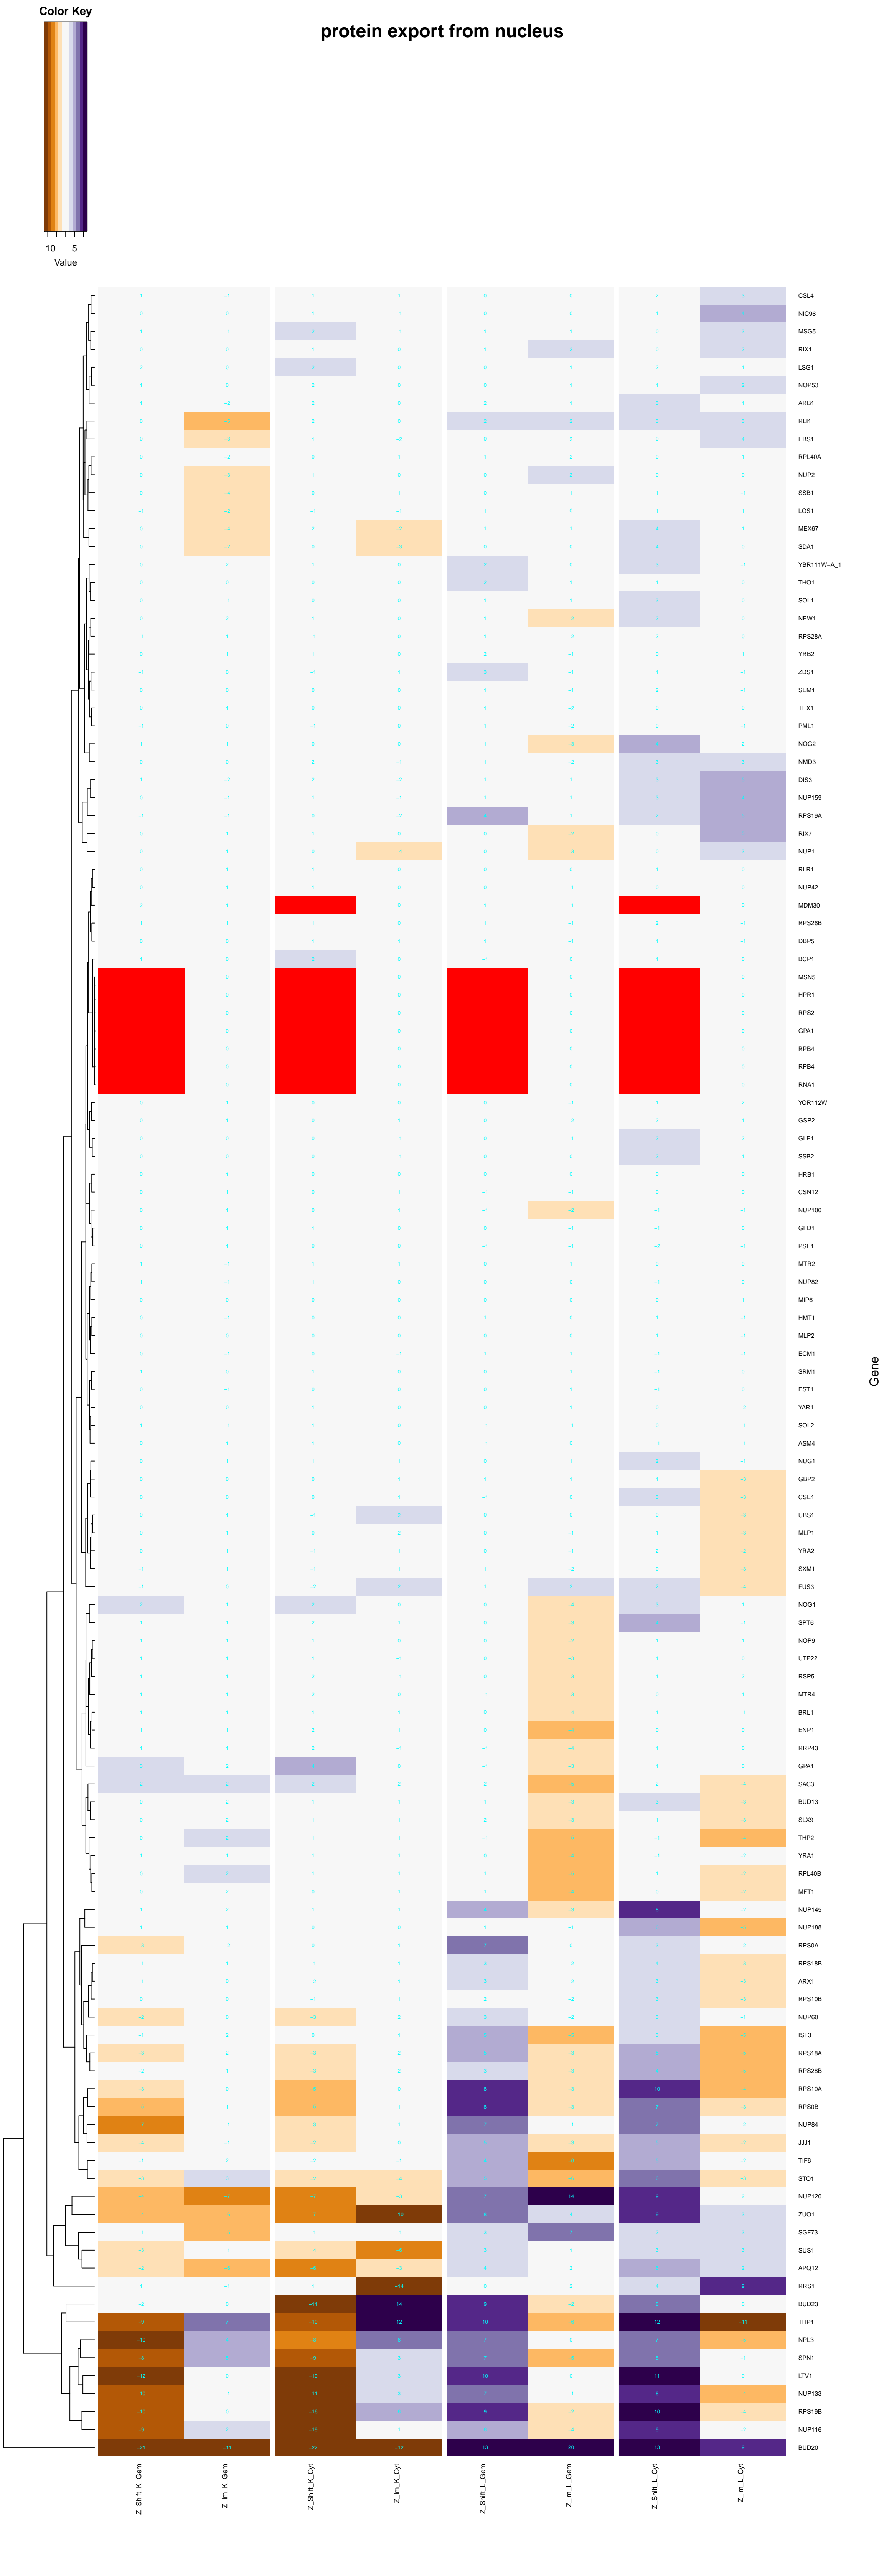

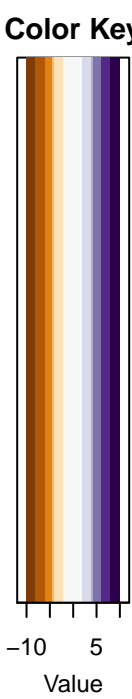

MAPK export from nucleus

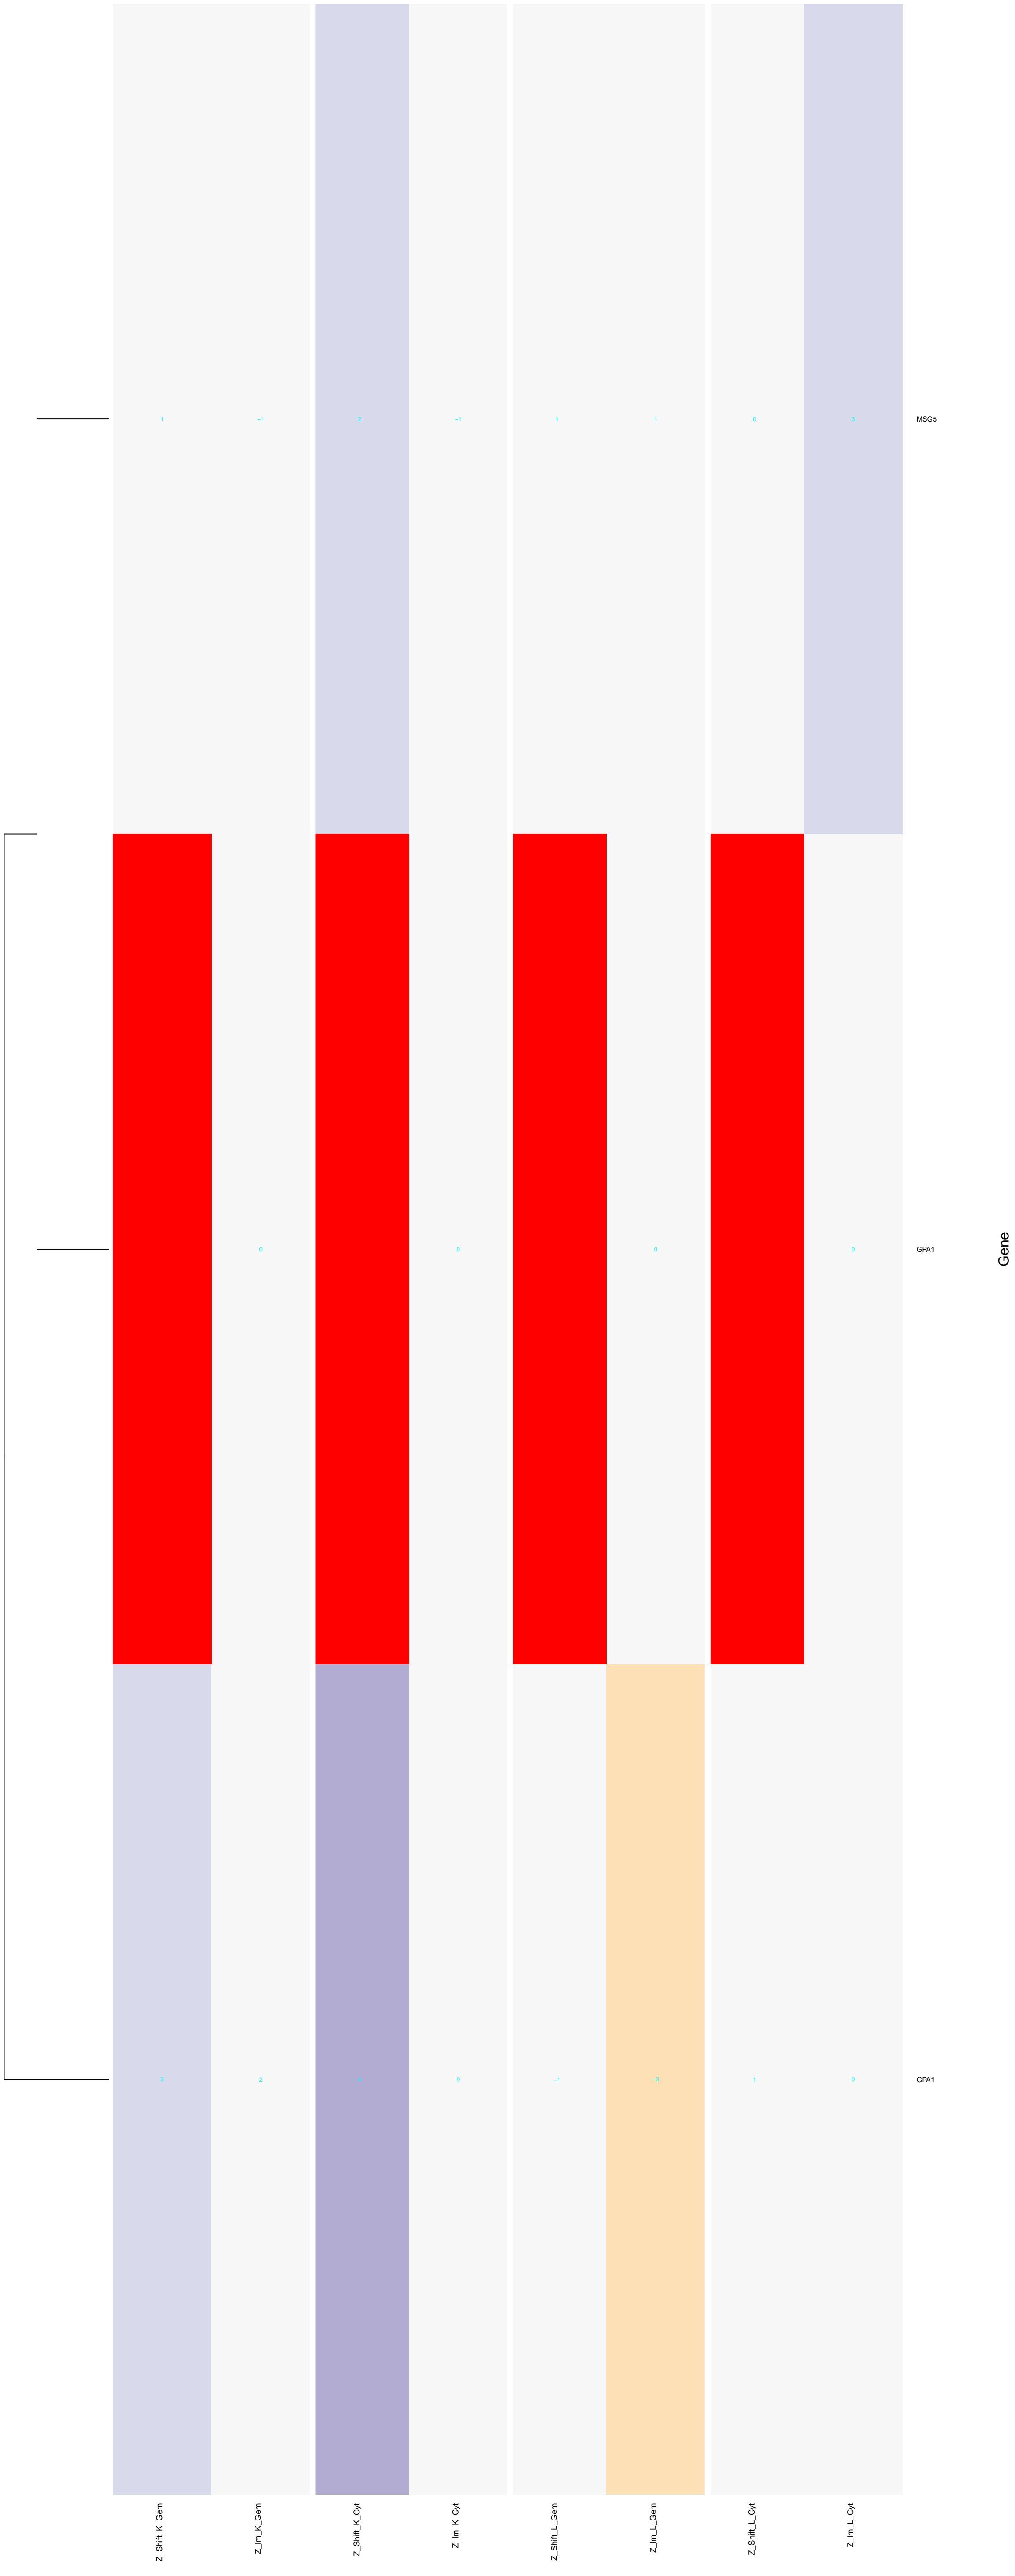

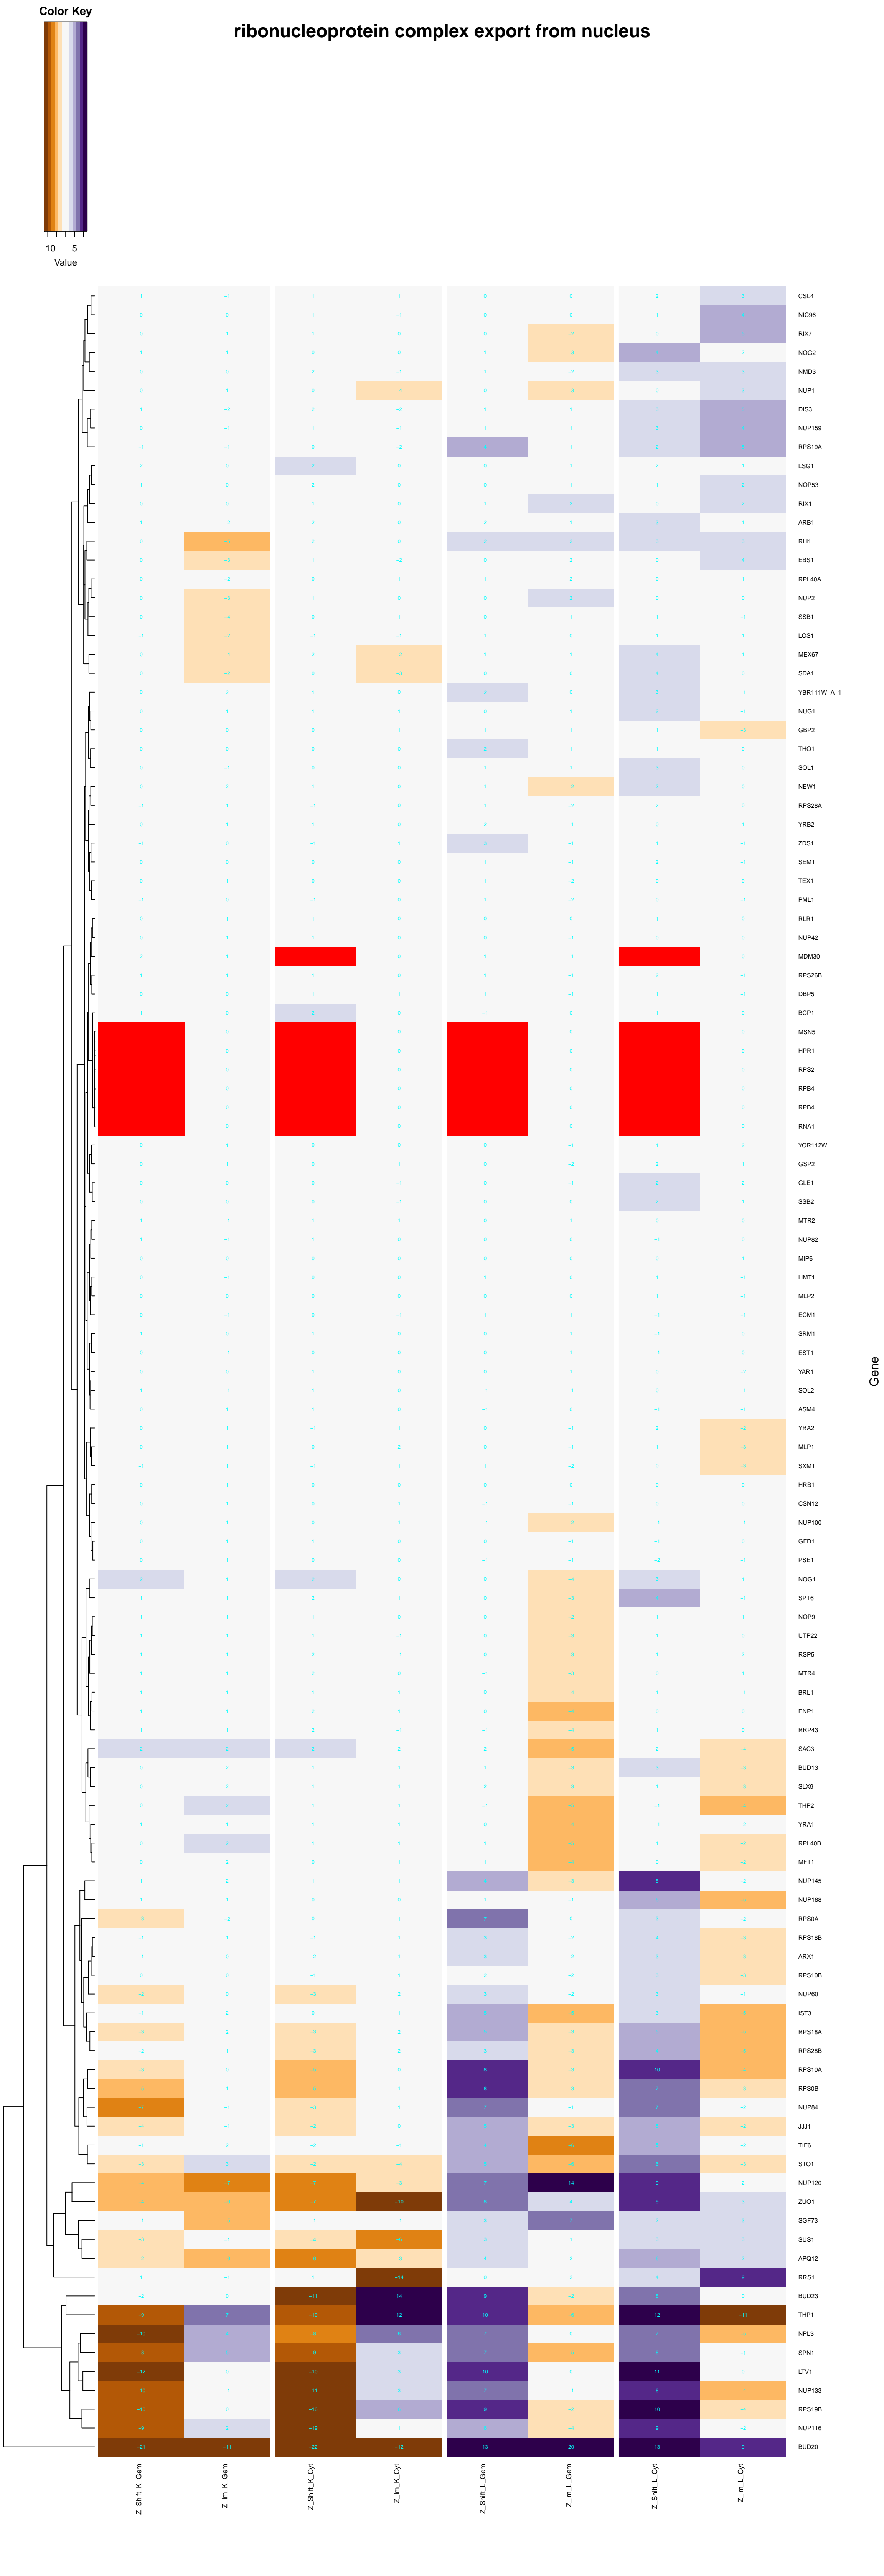

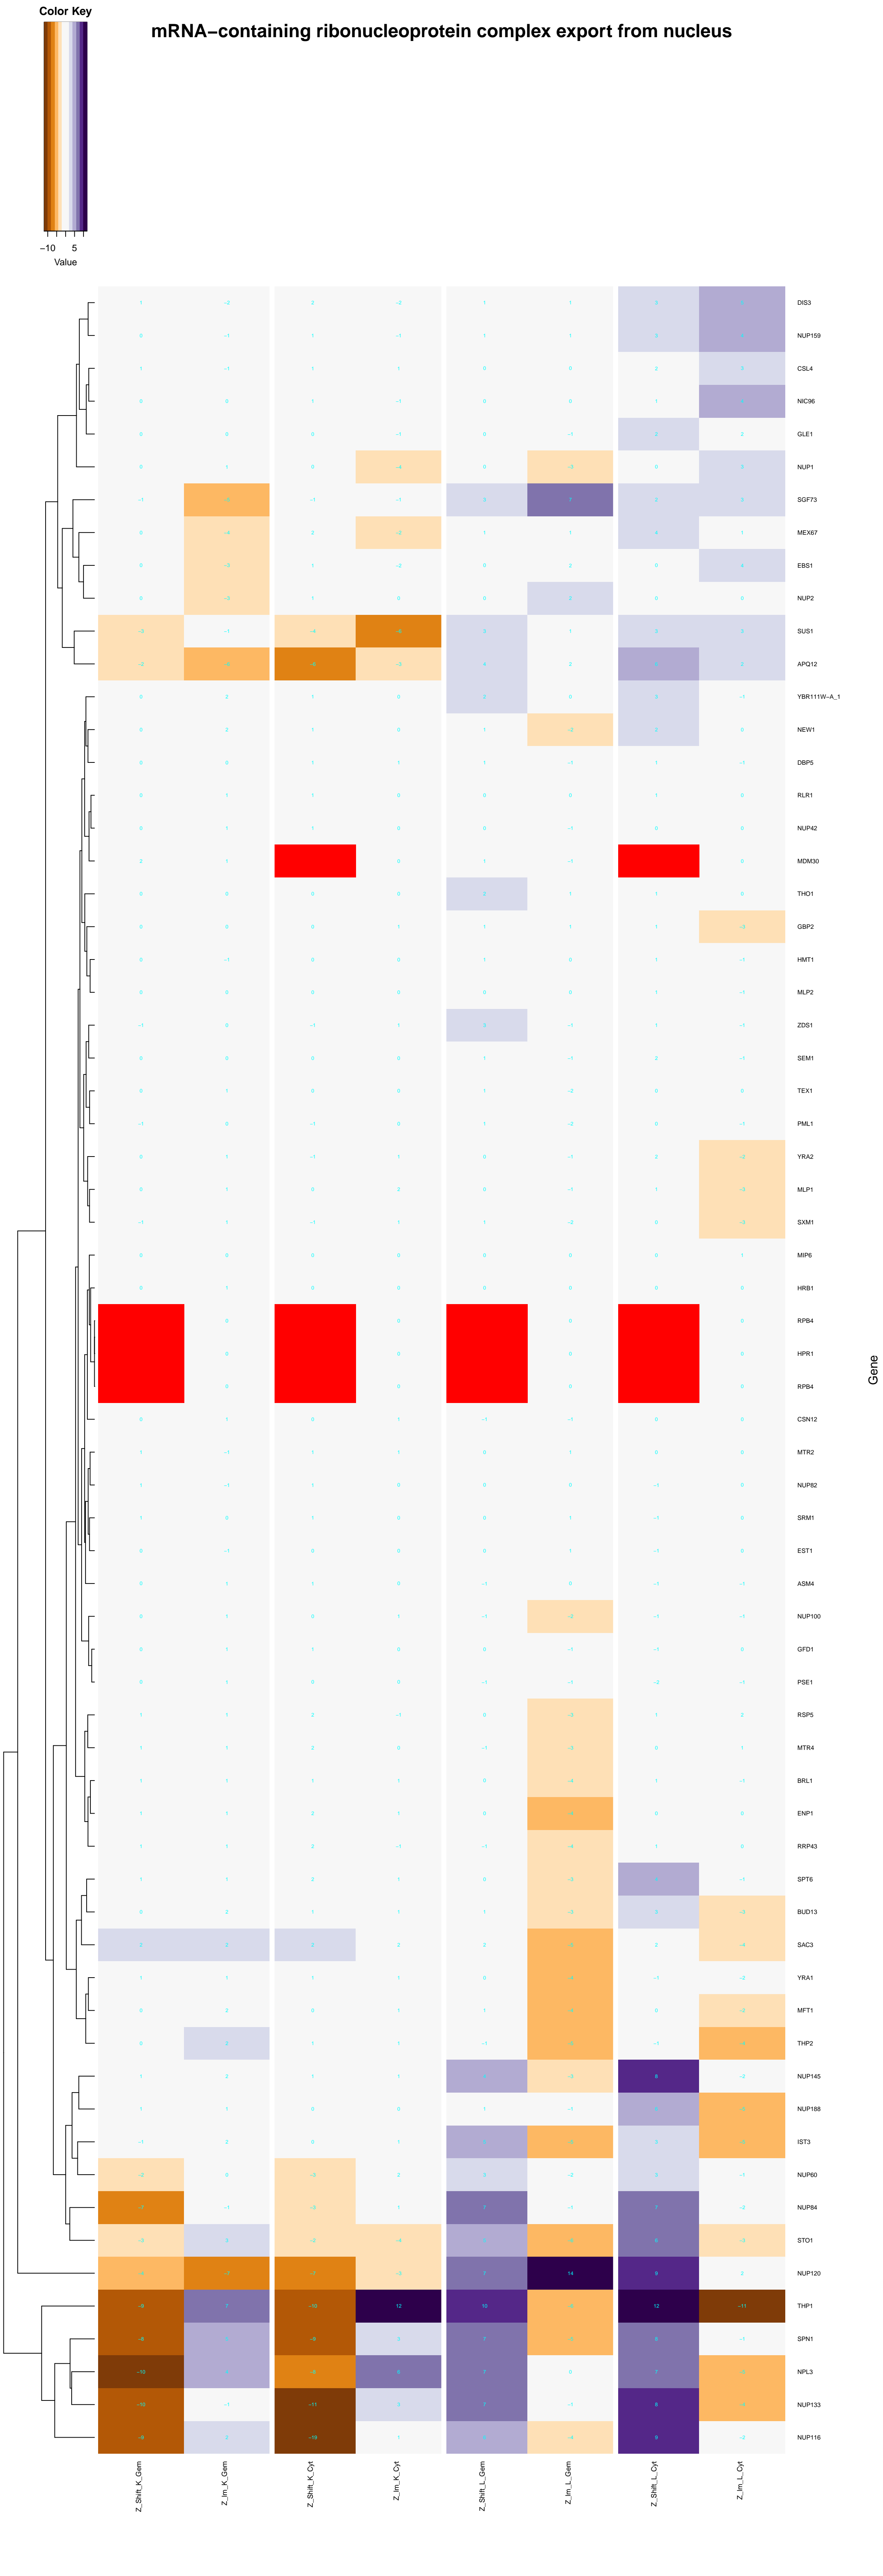

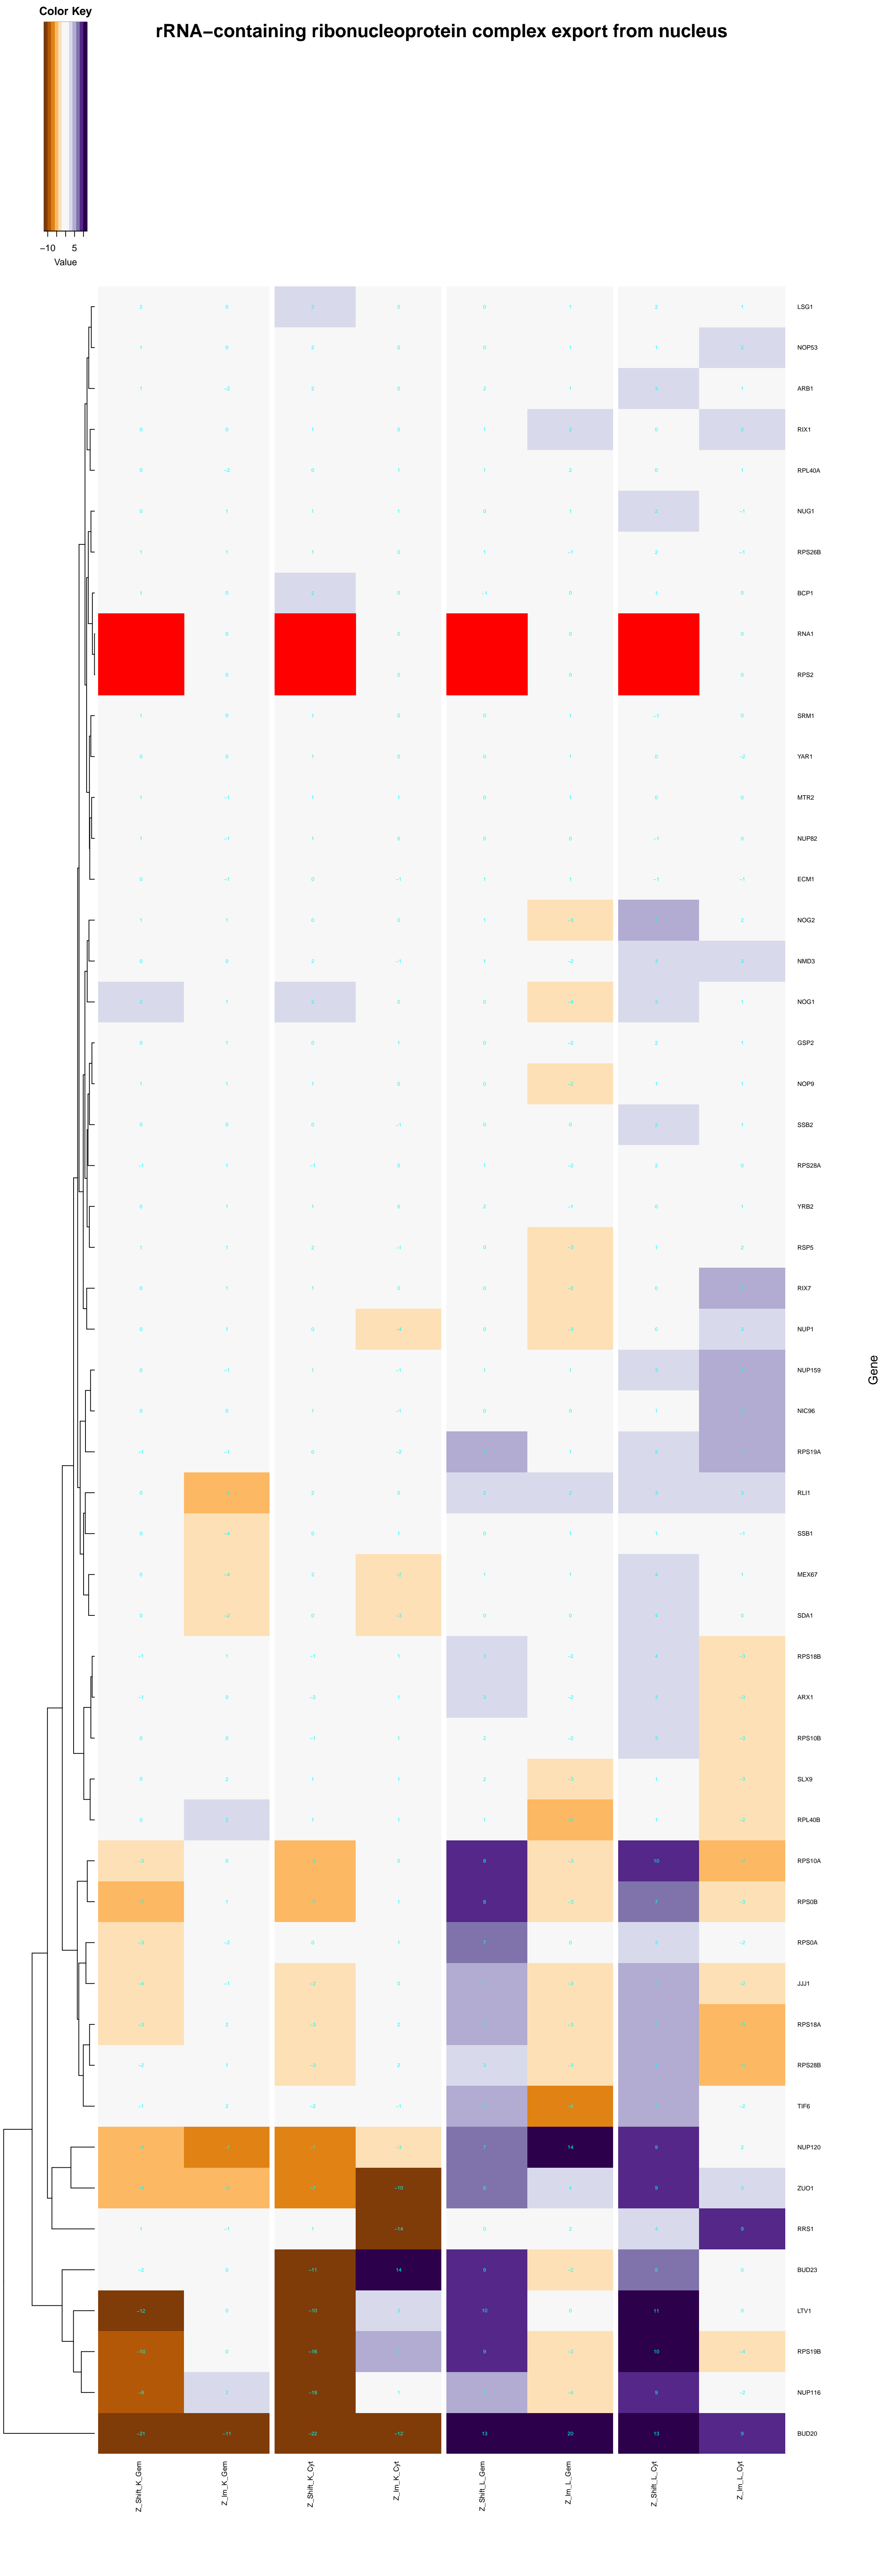

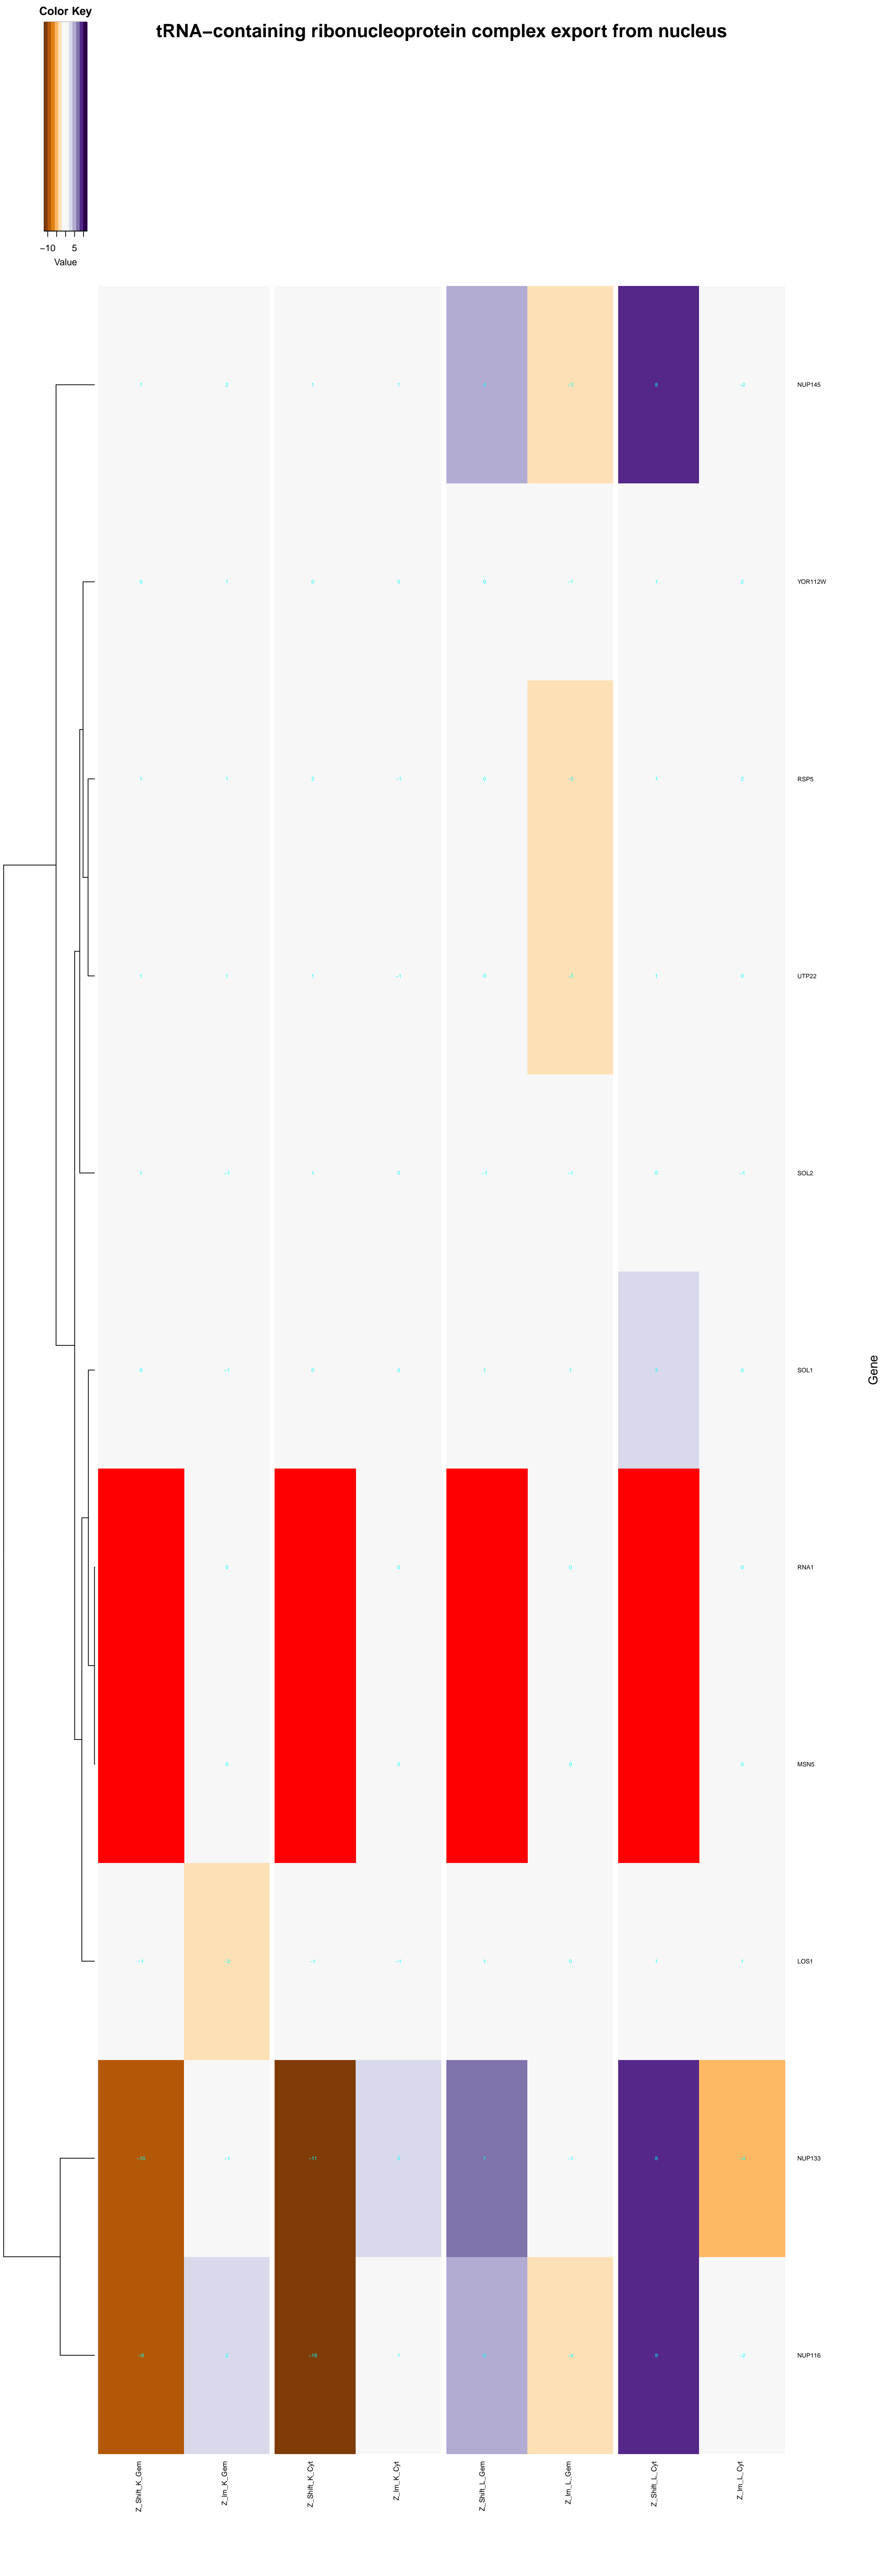

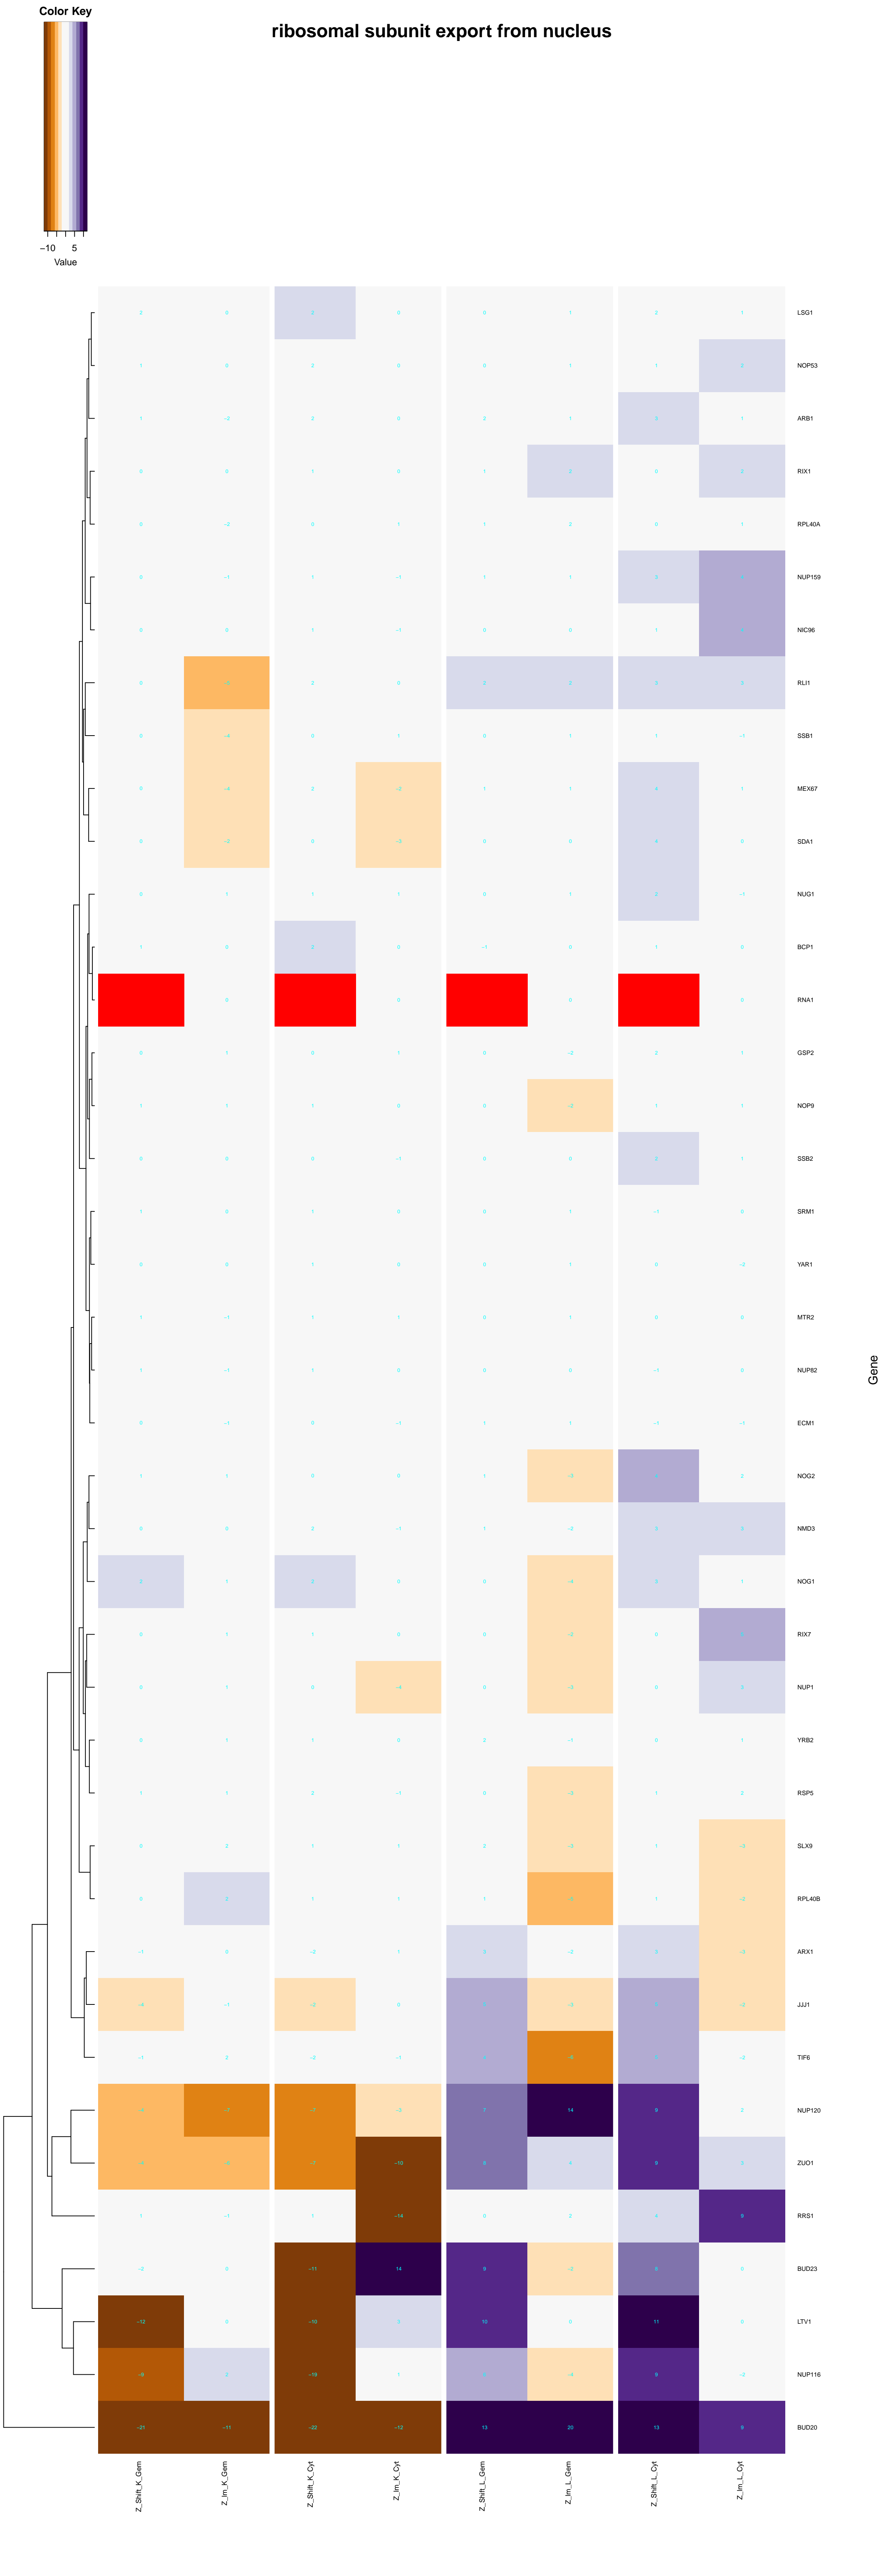

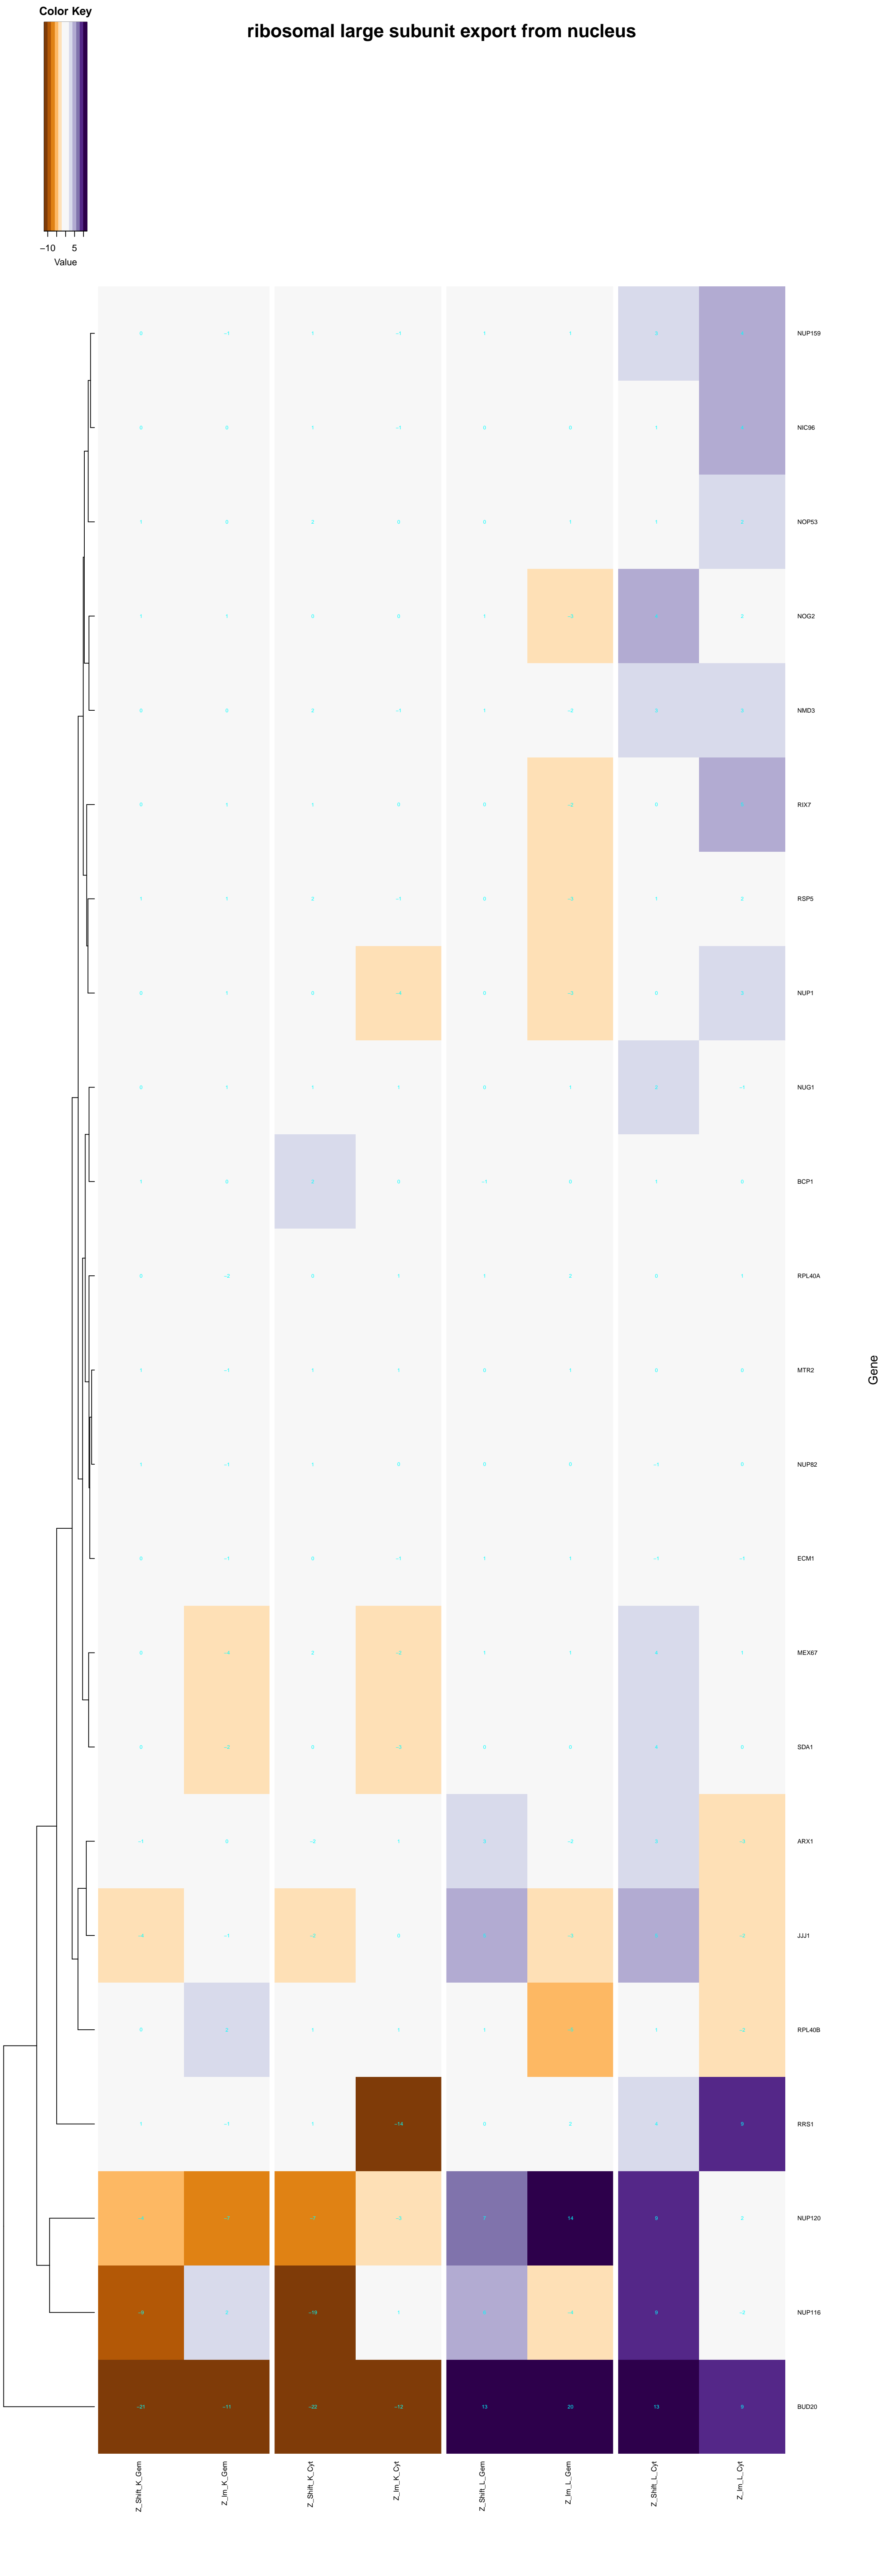

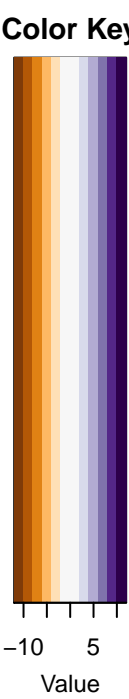

ribosomal small subunit export from nucleus

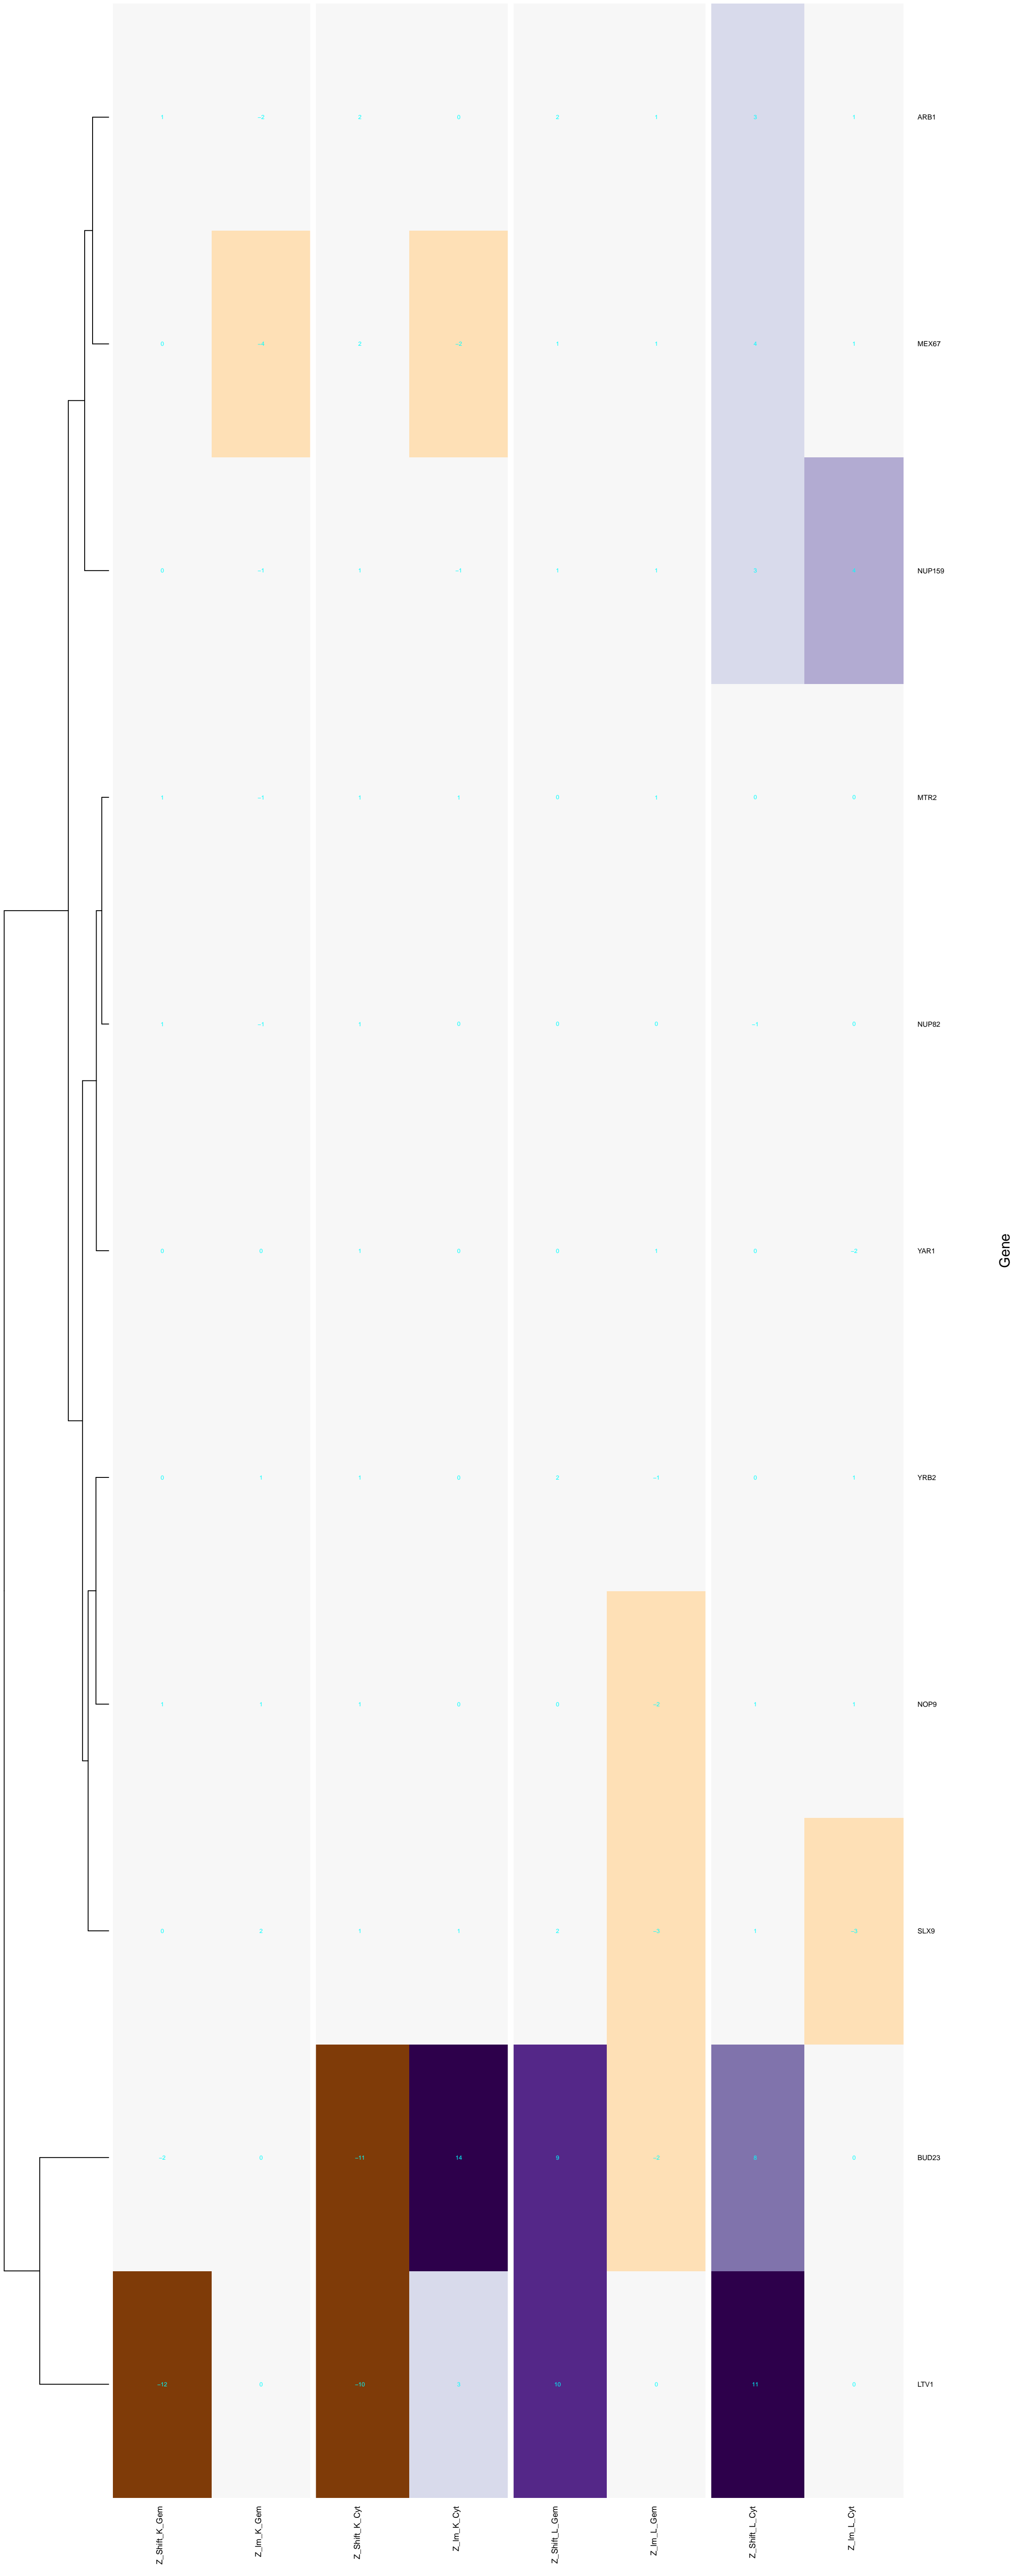

Supplement: s1 [file s1]
