# Supplementary material for: A Humanized Yeast Phenomic Model of Deoxycytidine Kinase to Predict Genetic Buffering of Nucleoside Analog Cytotoxicity
Source: MDPI journal article supplement (doi:10.3390/genes10100770), 2019-09-30

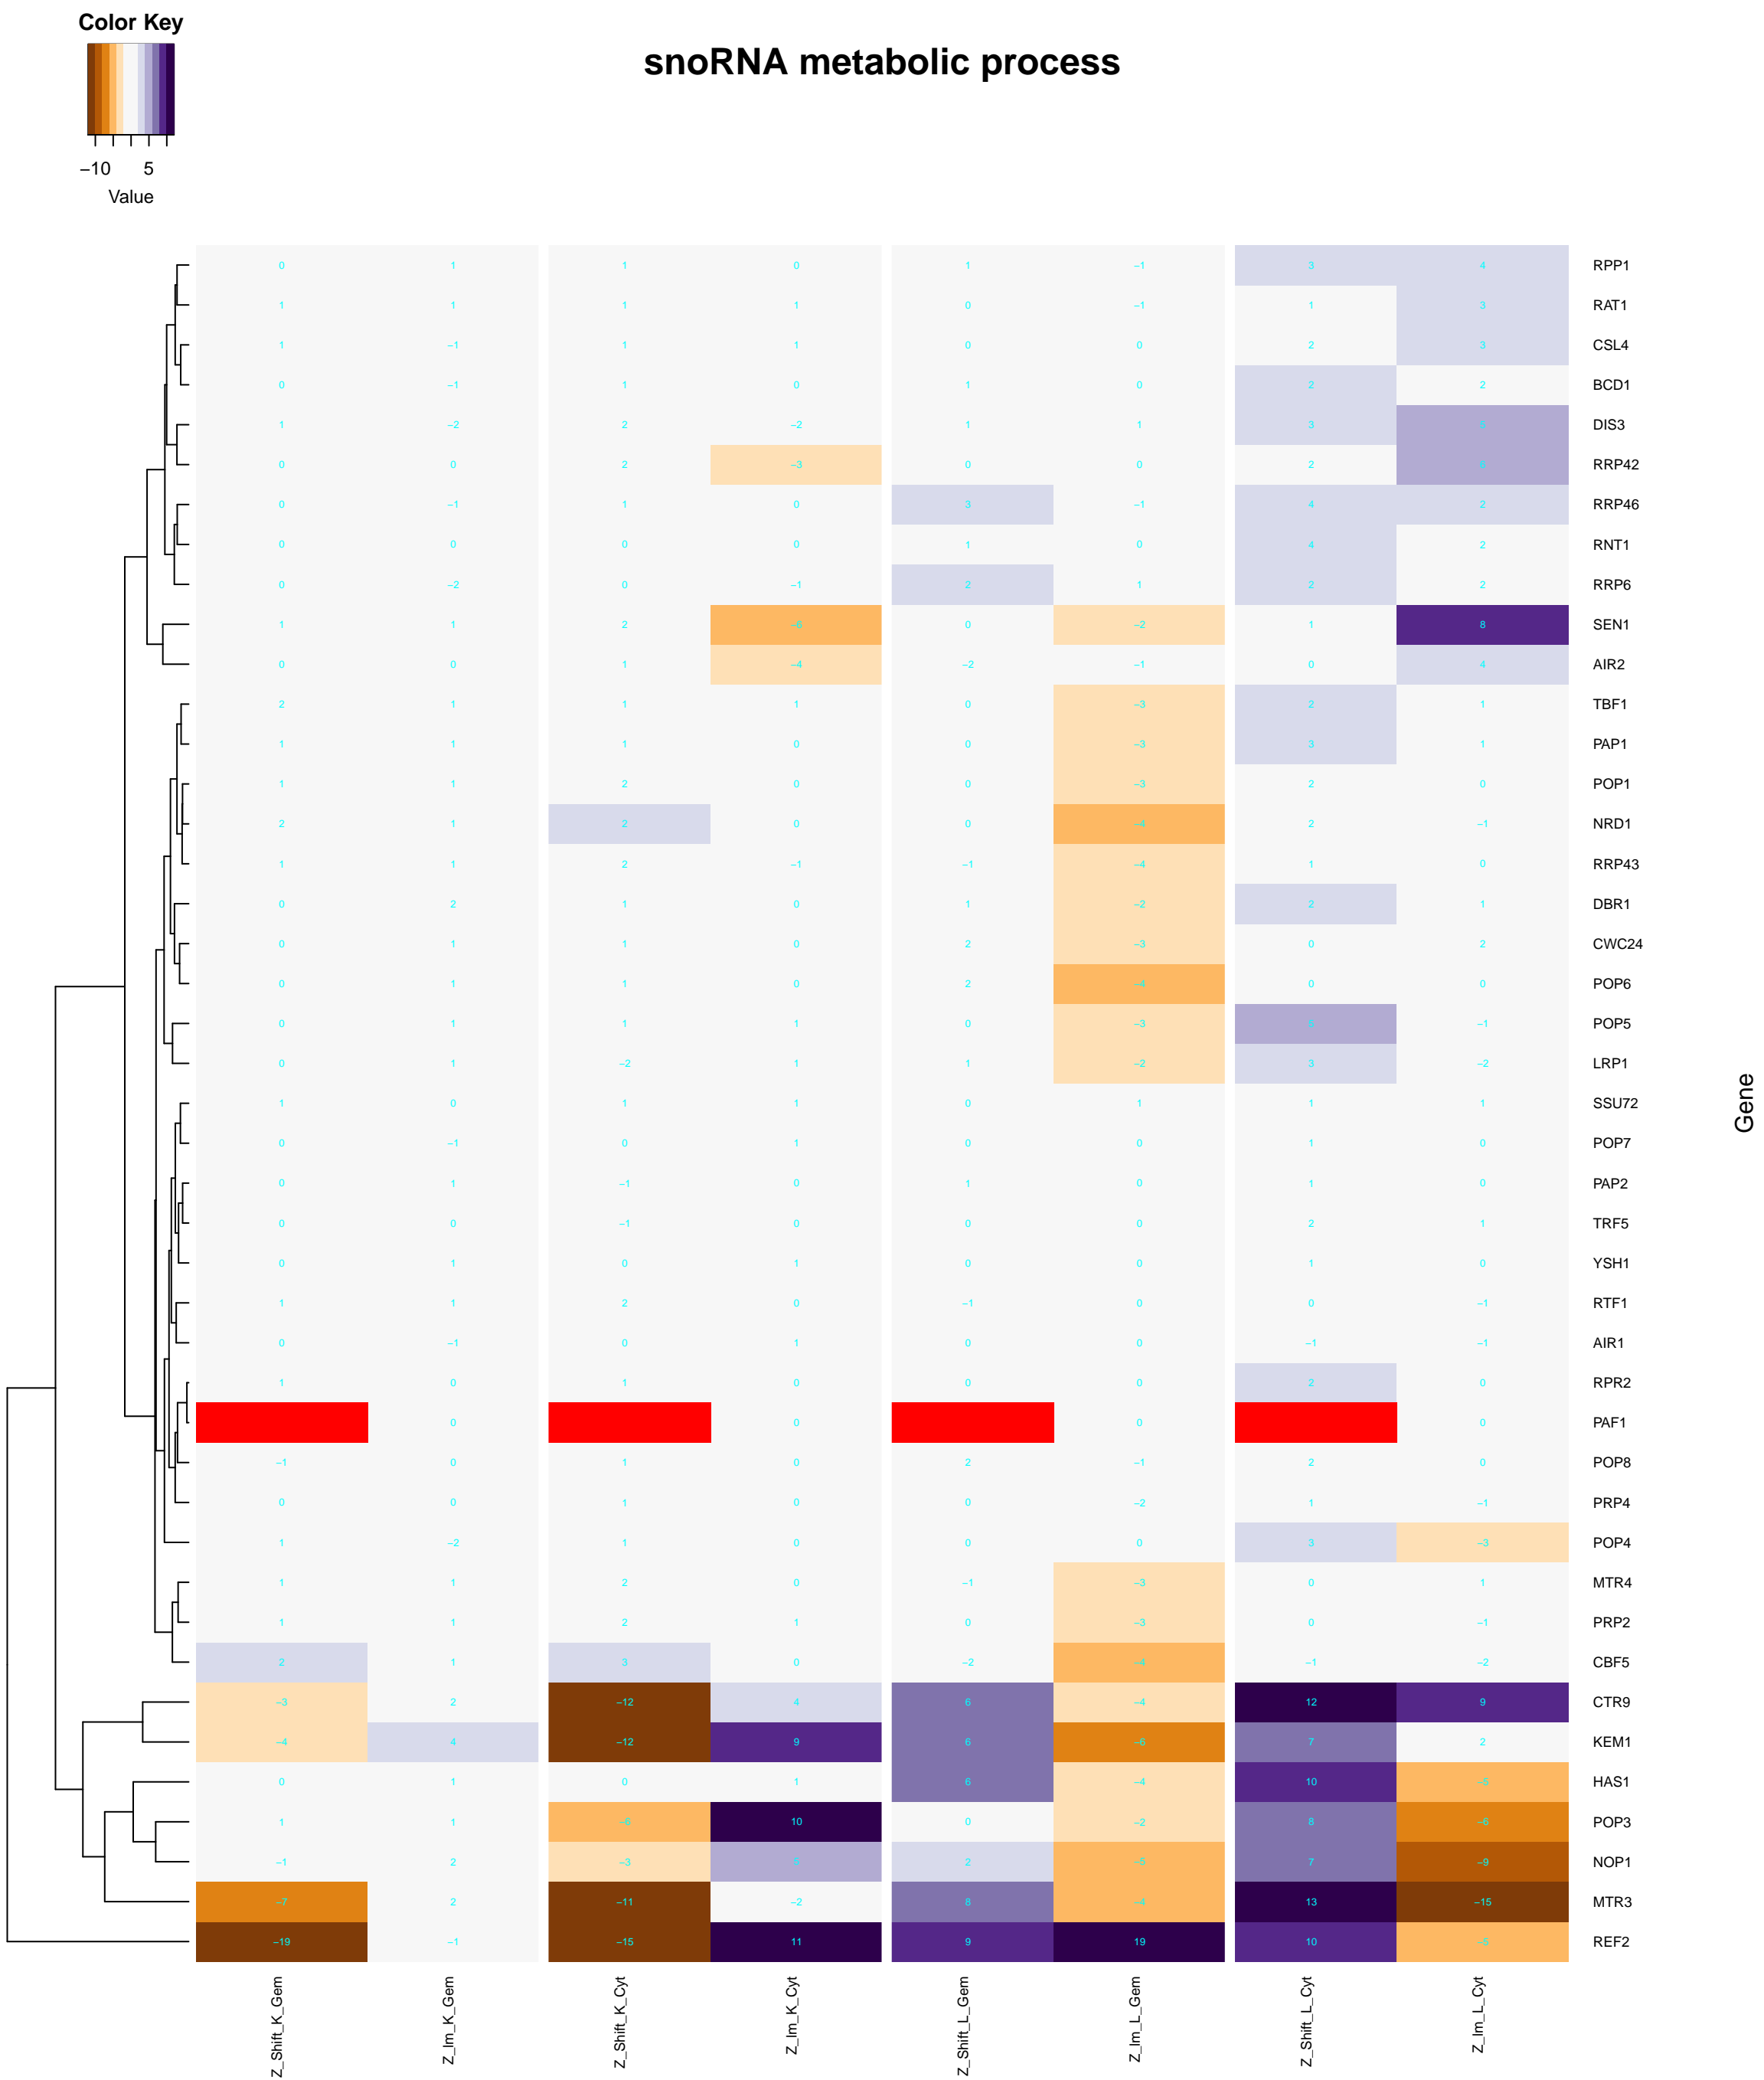

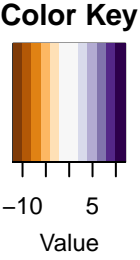

snoRNA transcription

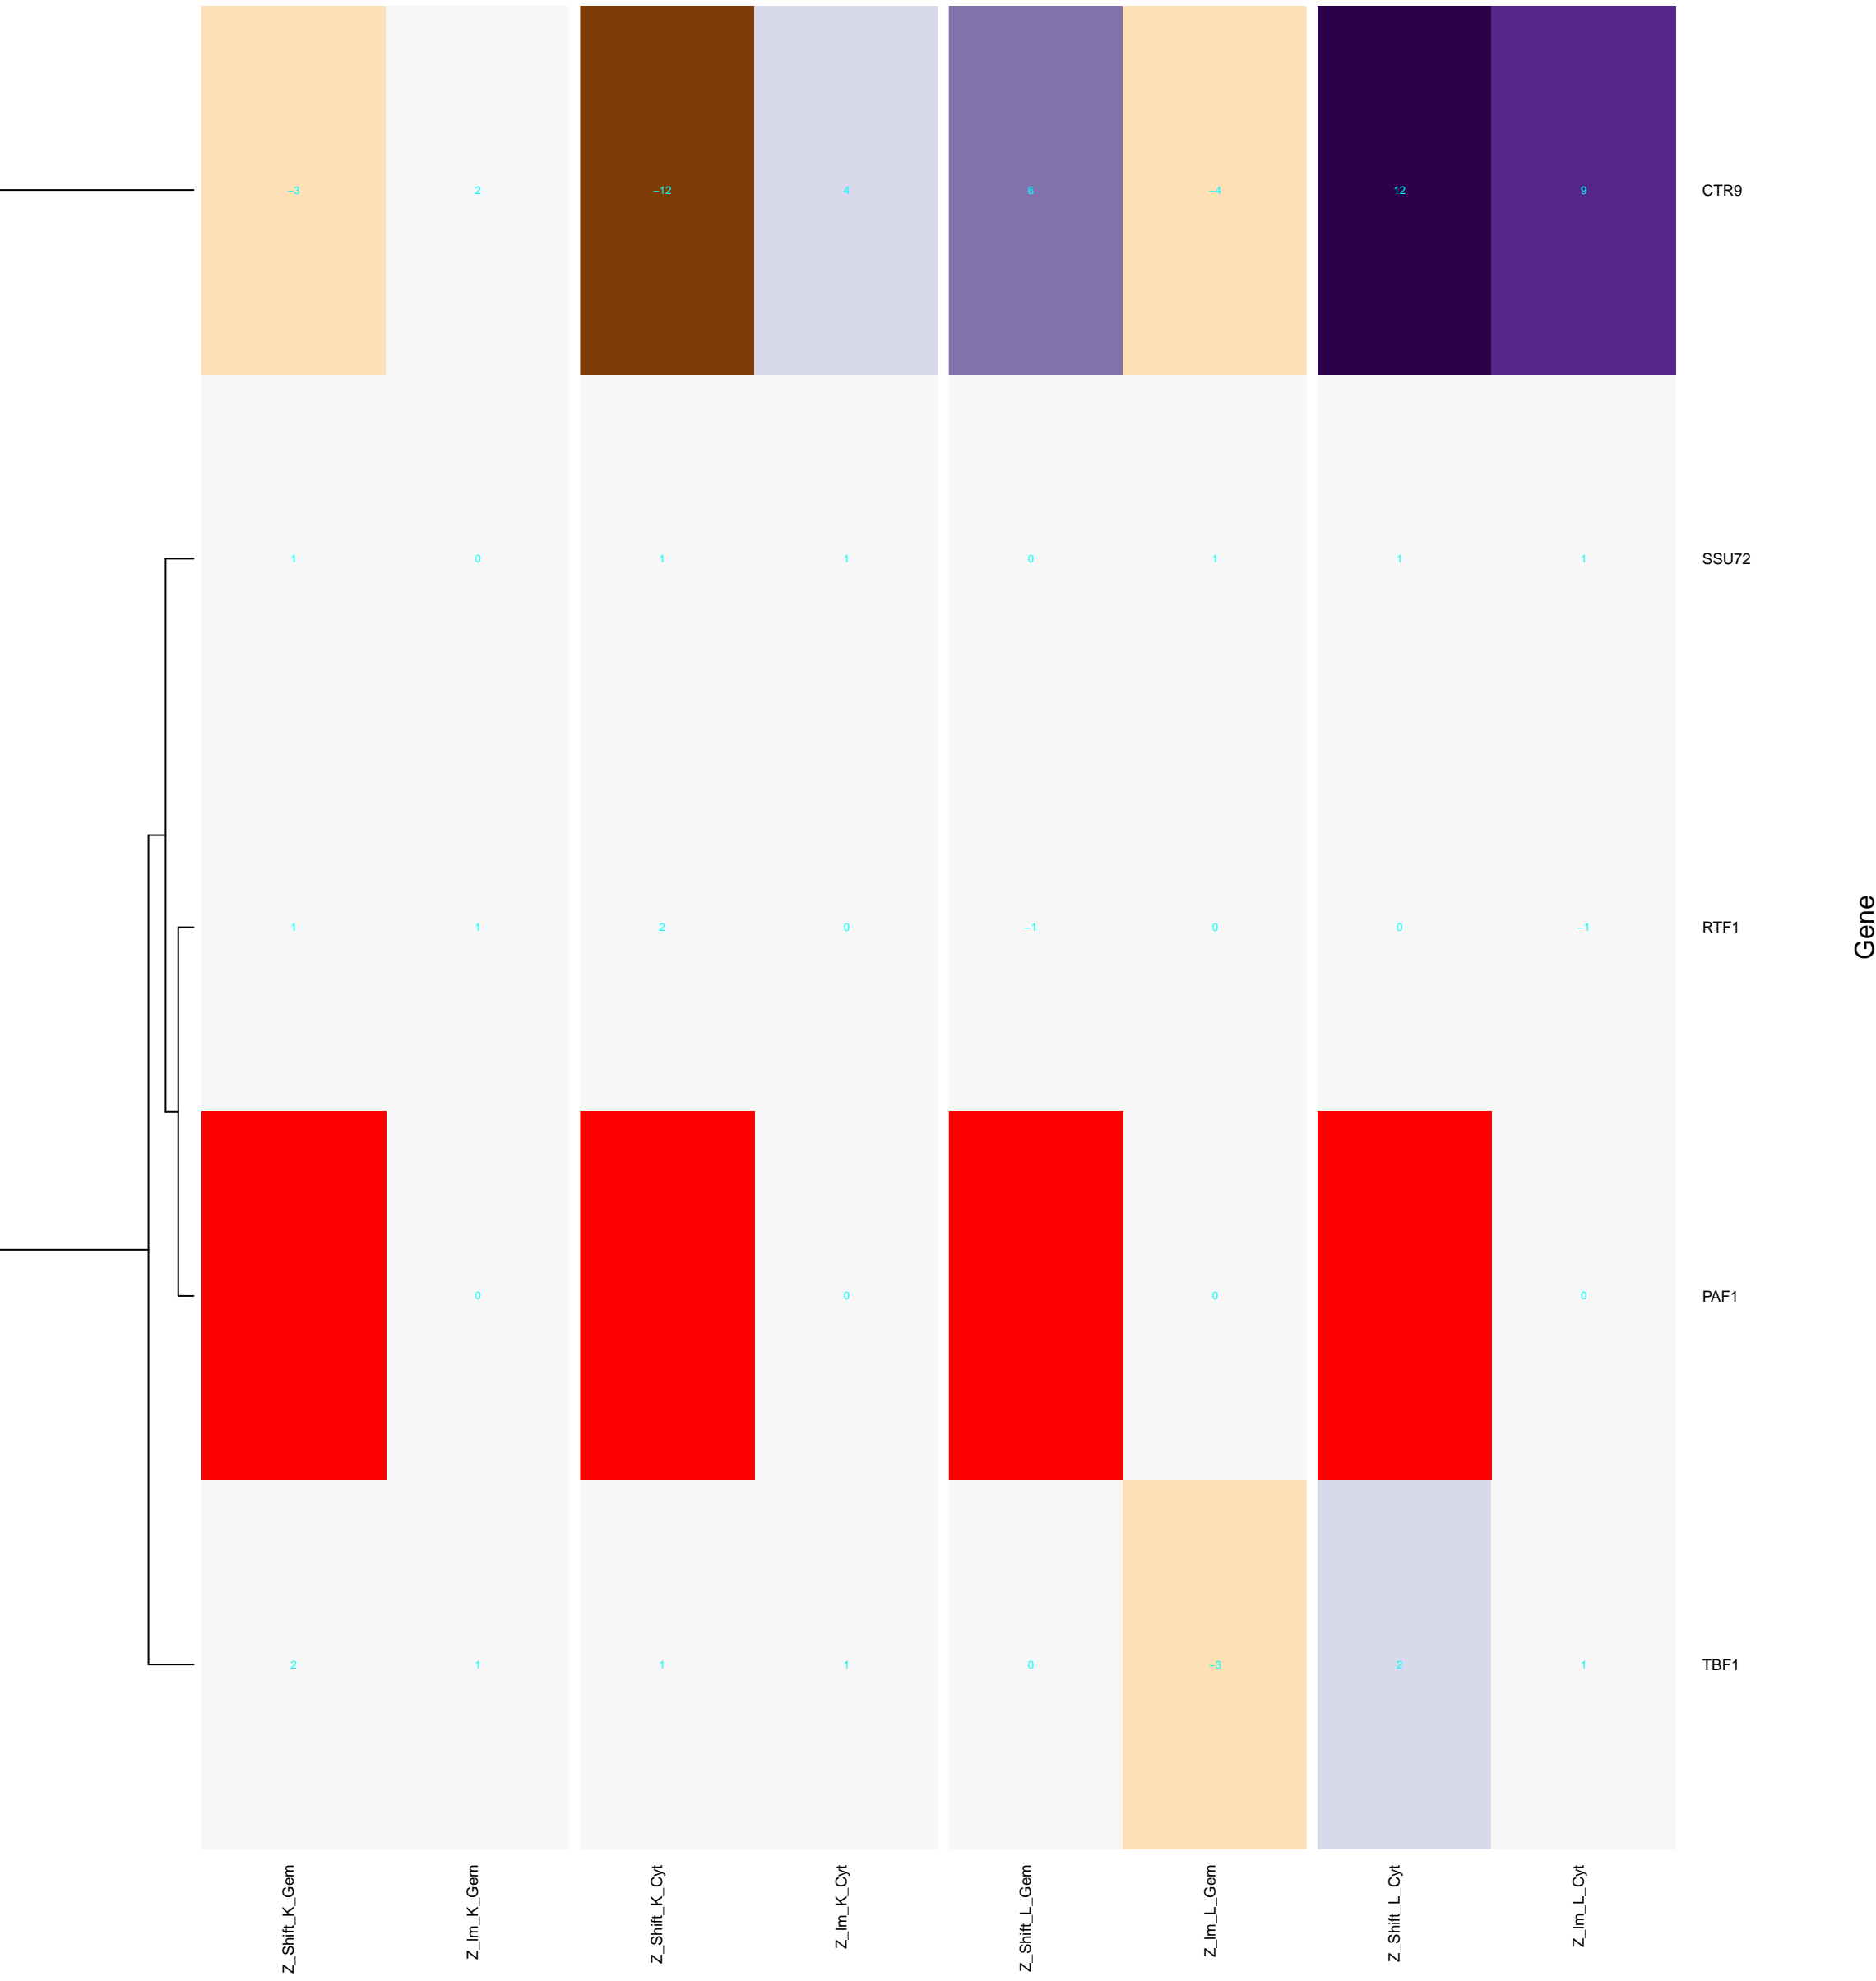

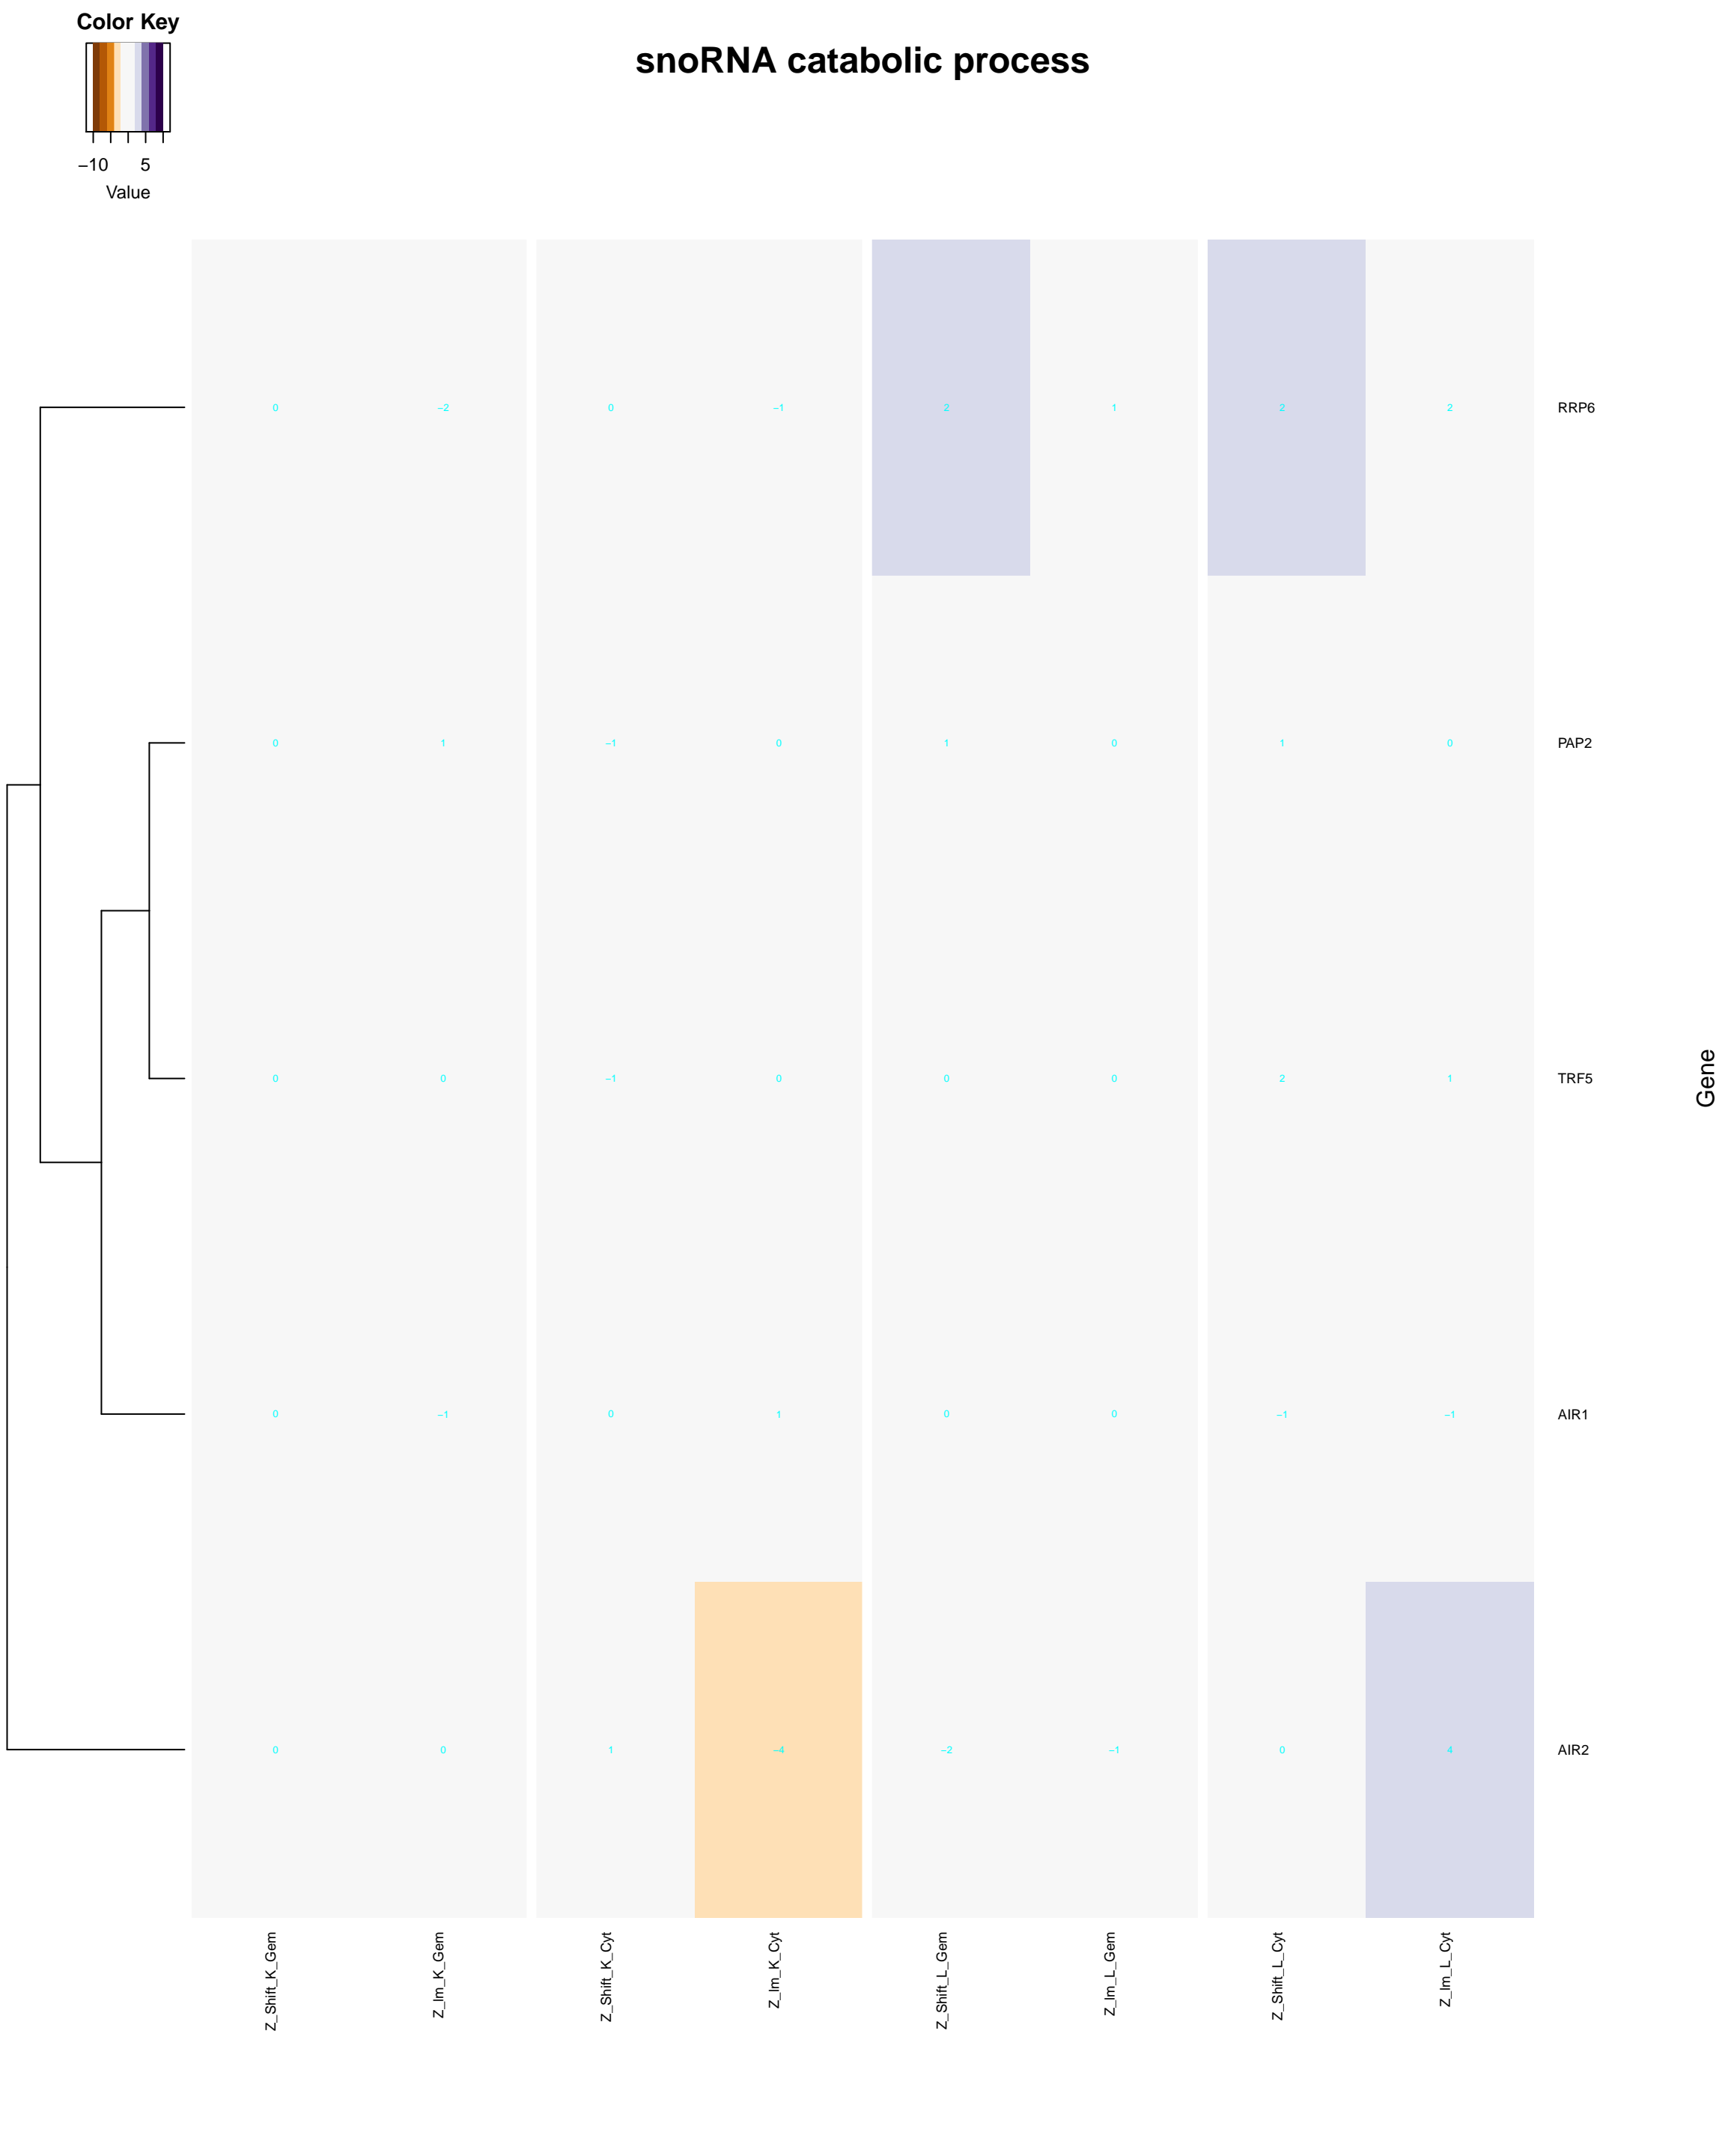

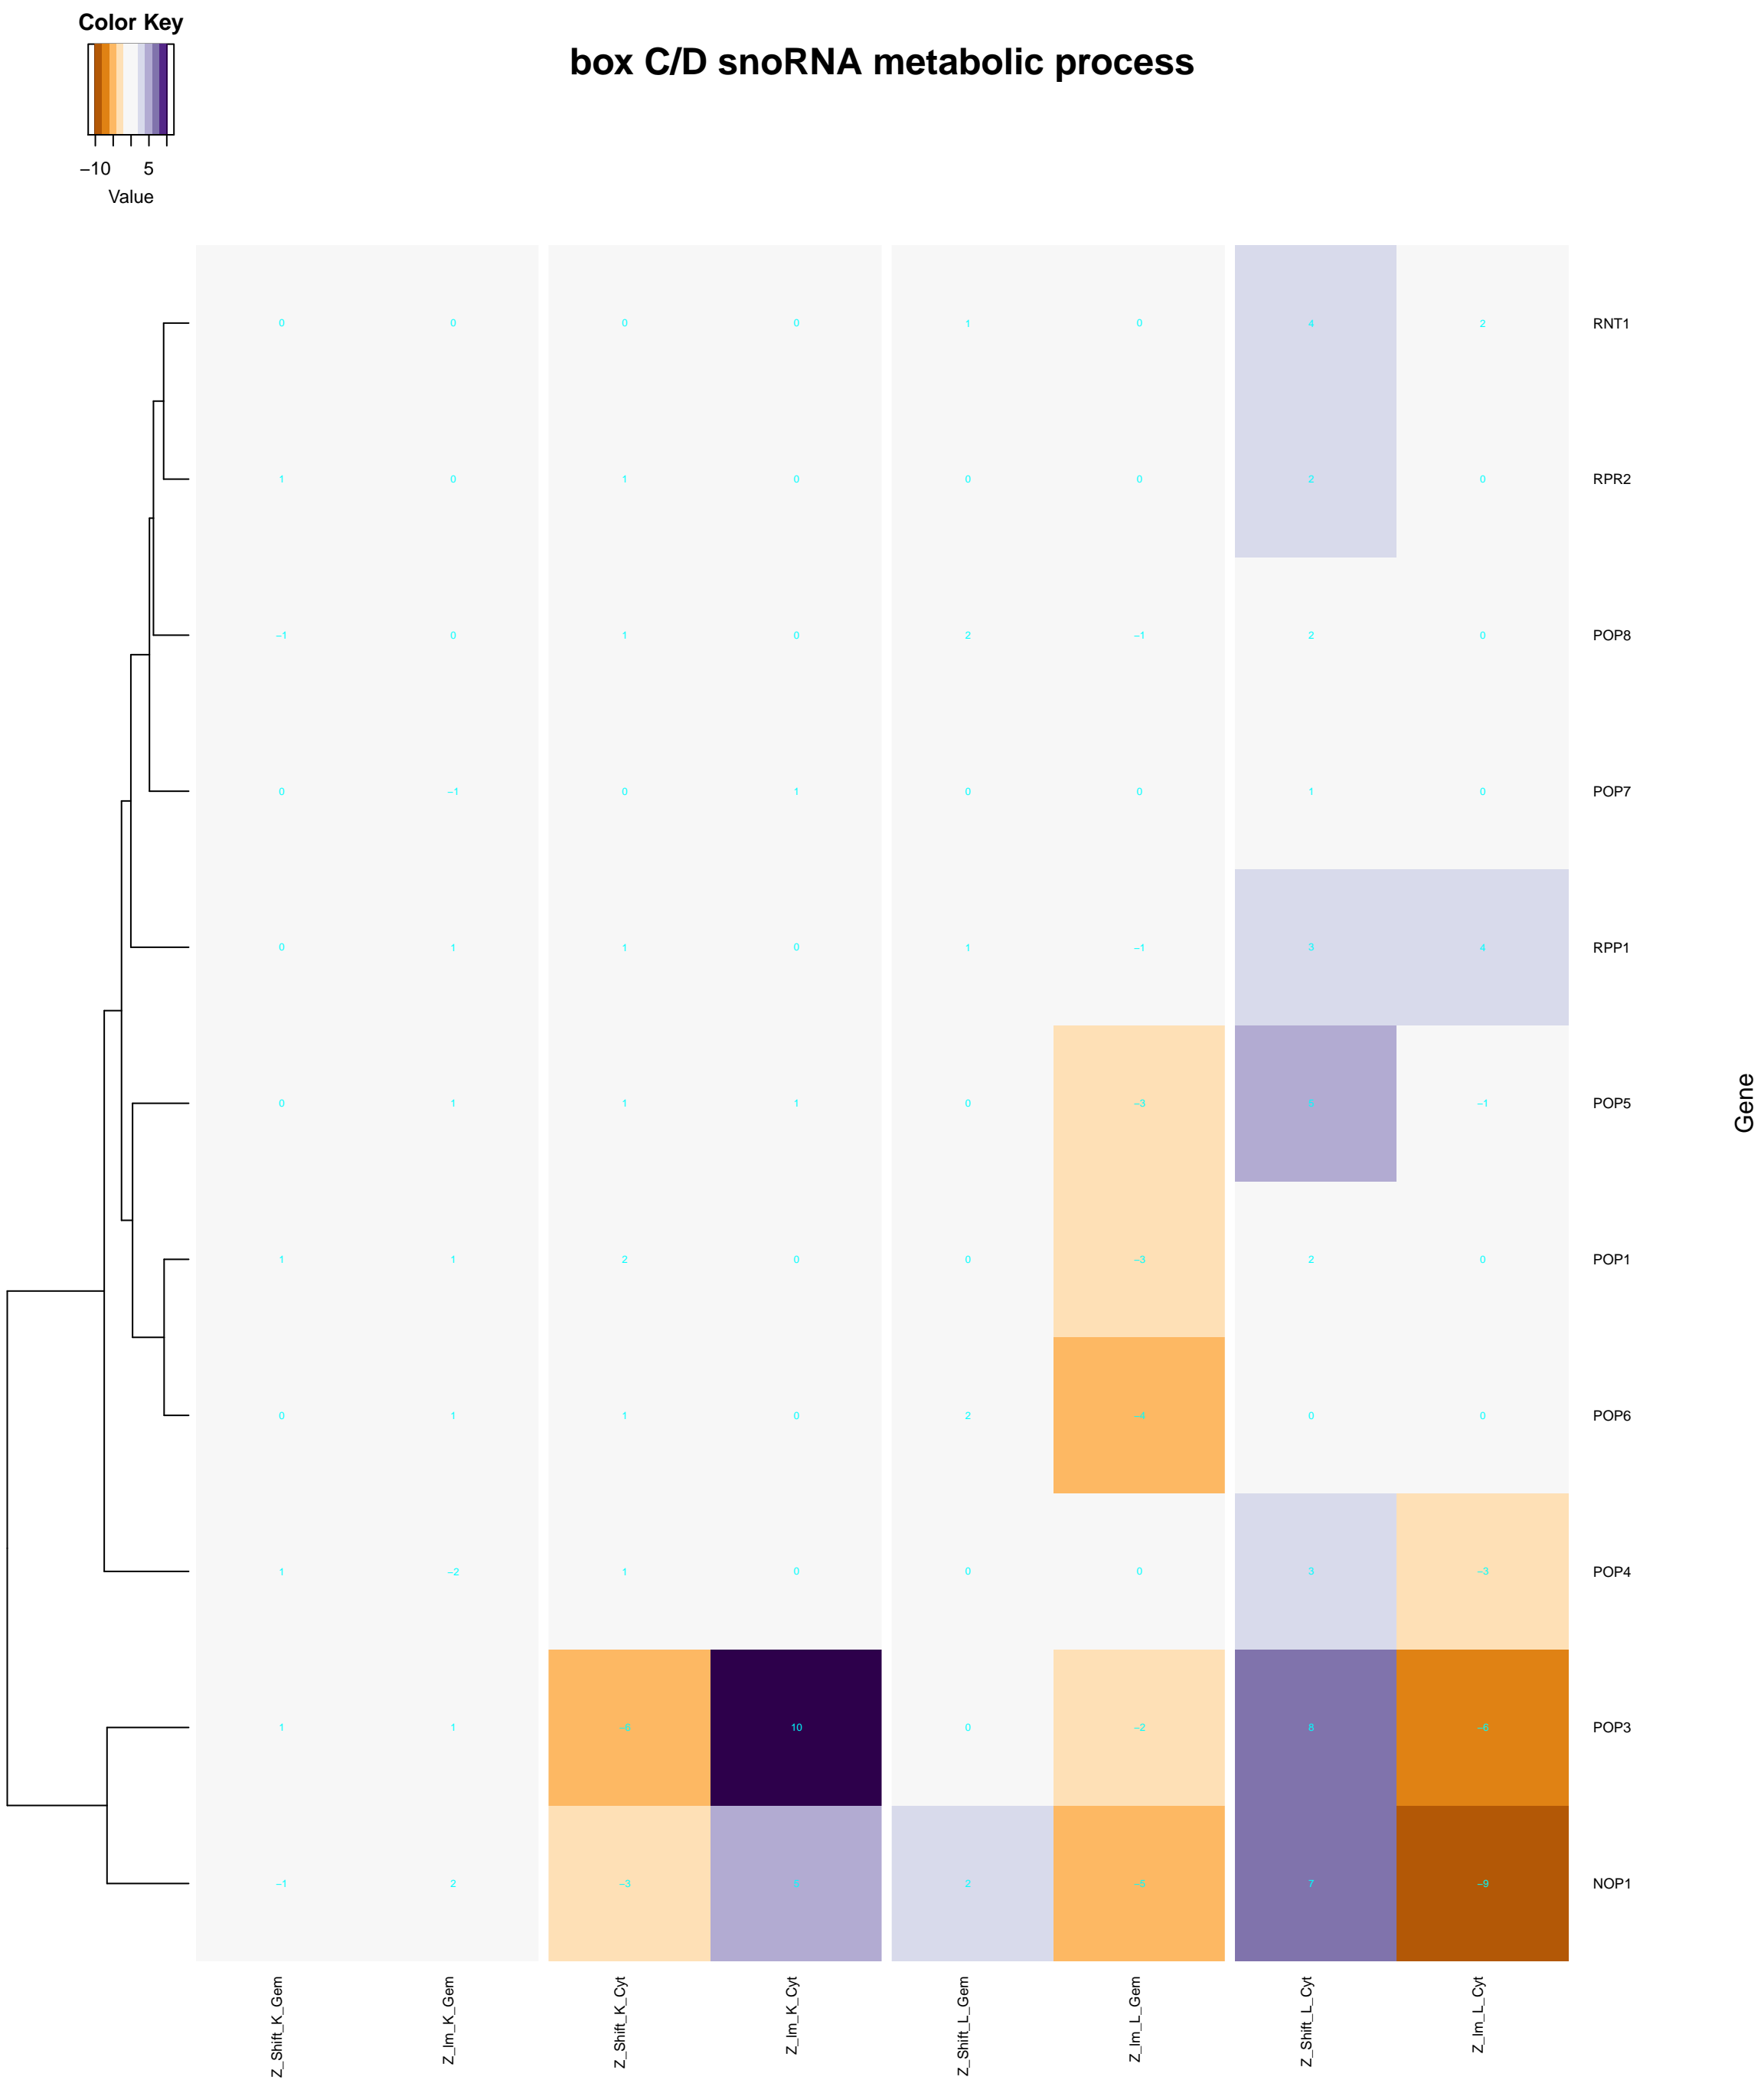

snoRNA processing

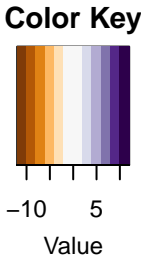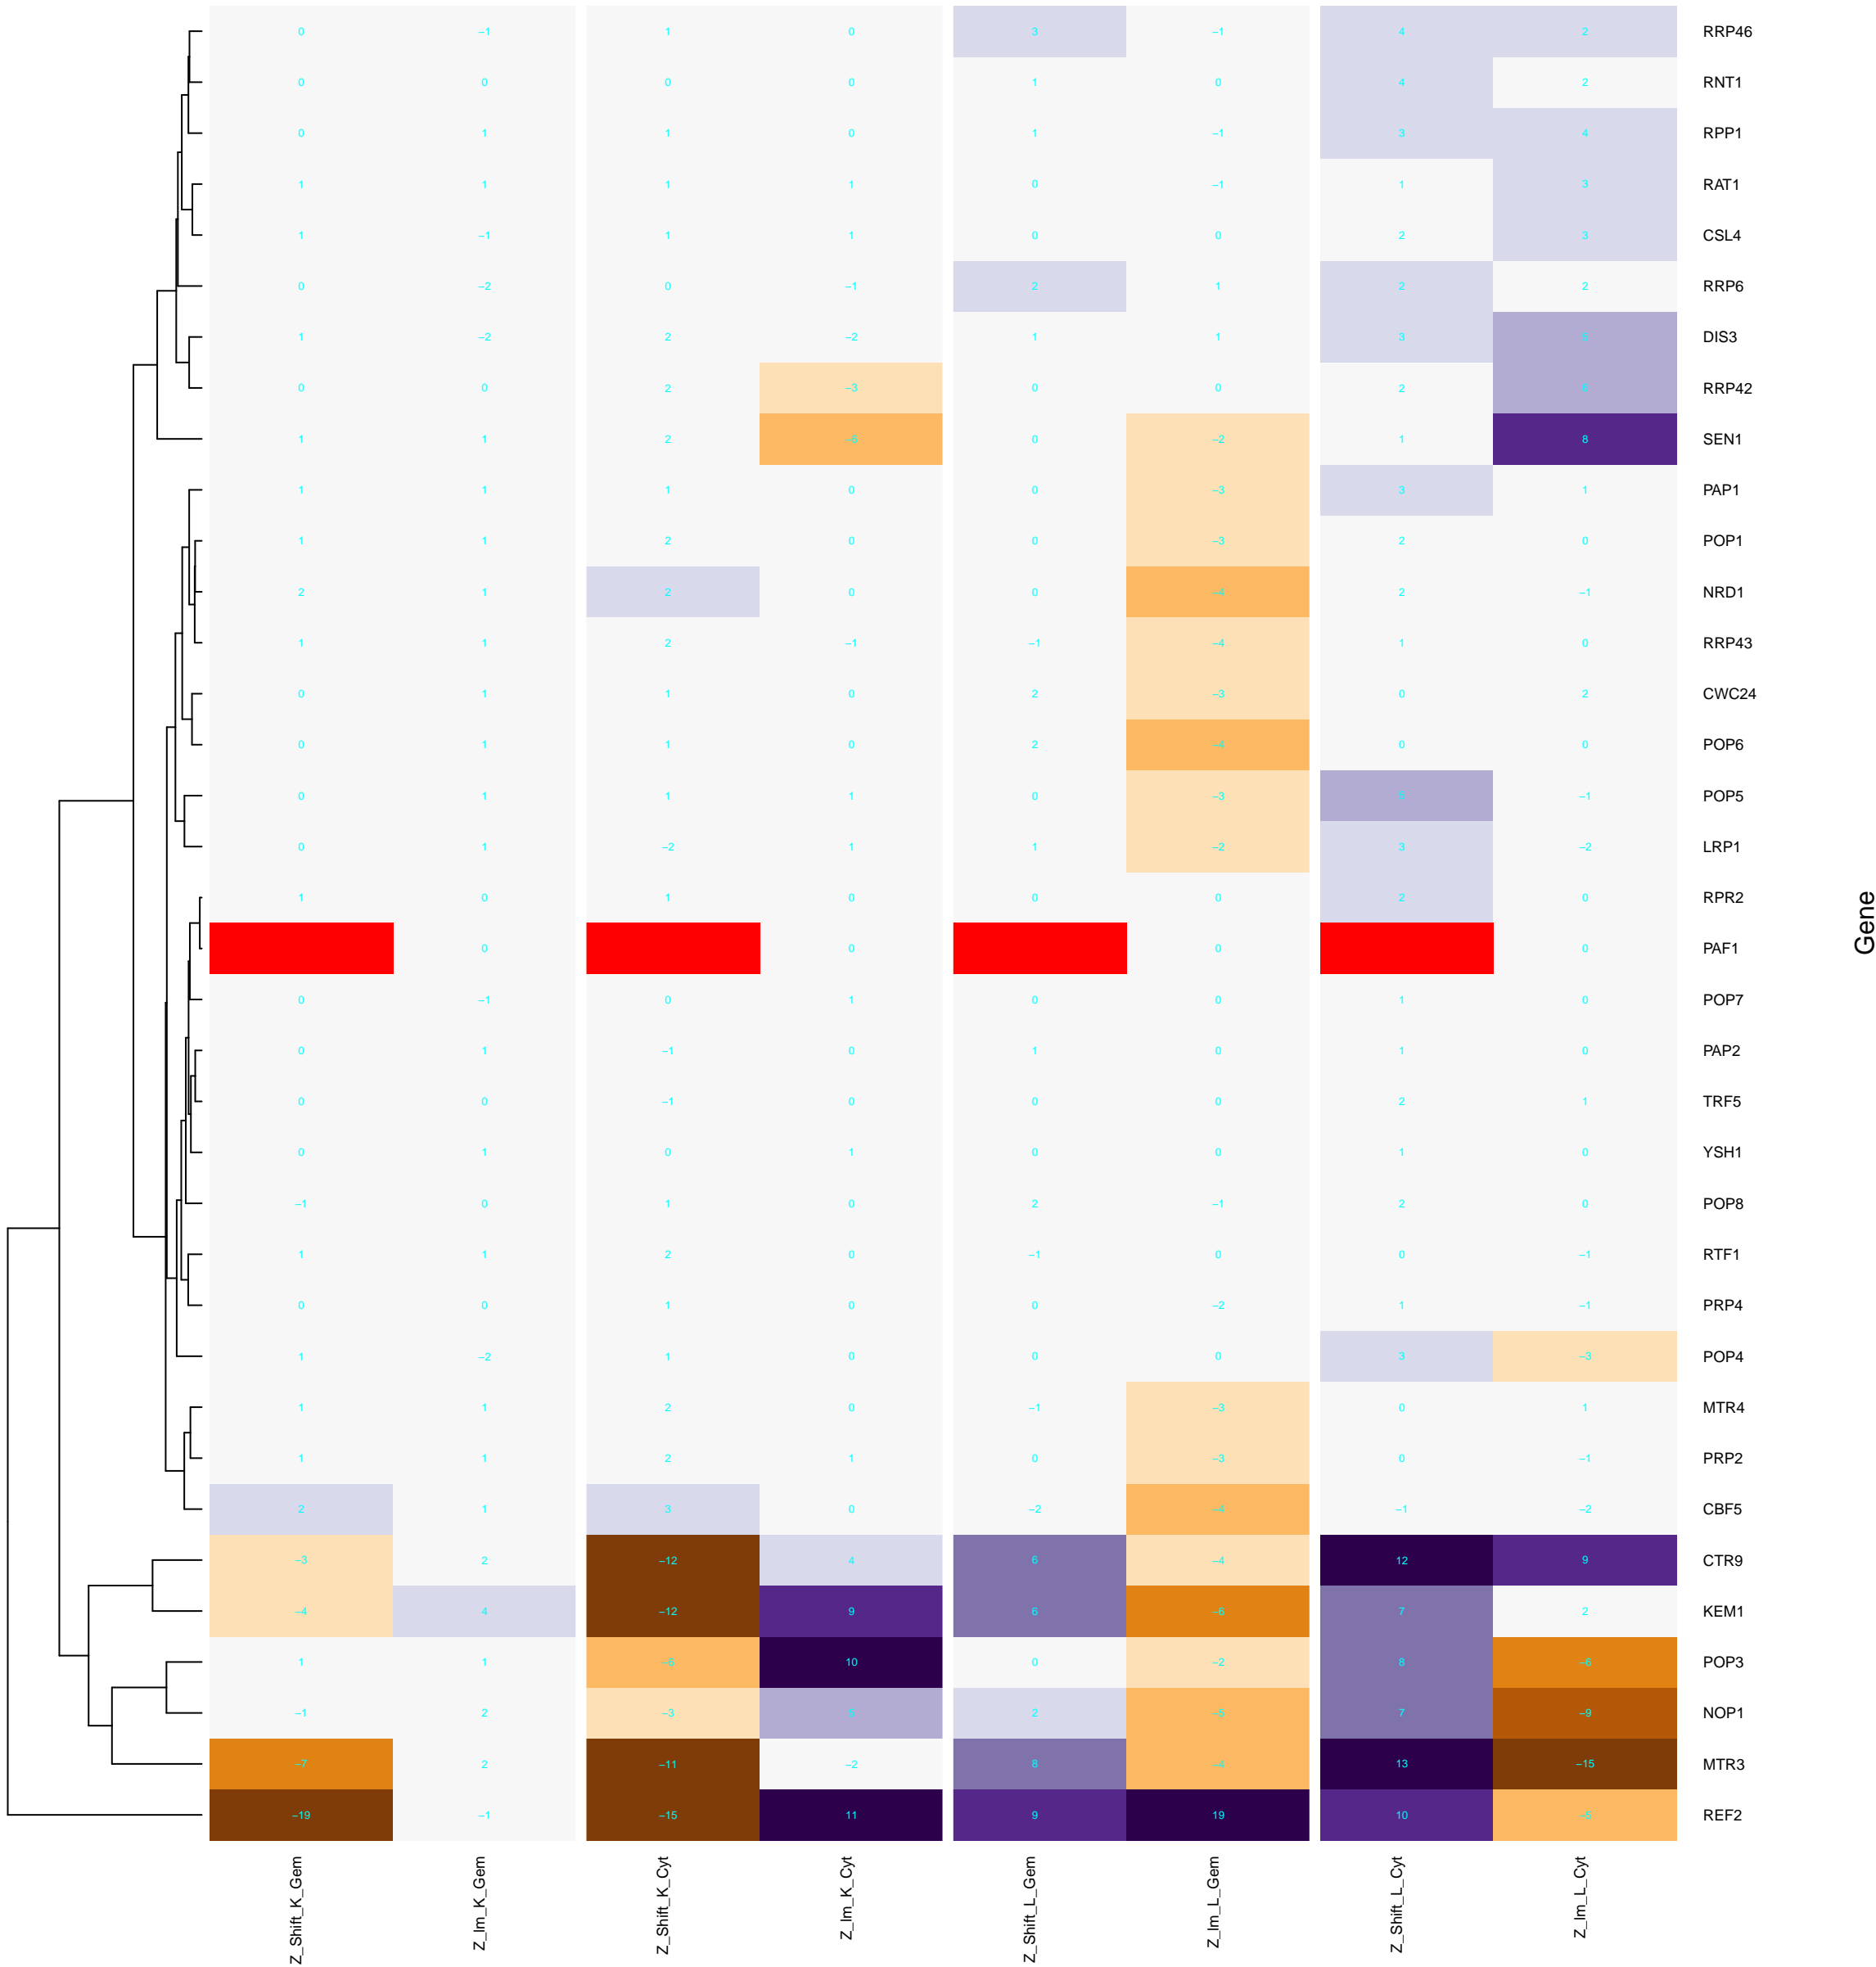



snoRNA transcription from an RNA polymerase II promoter

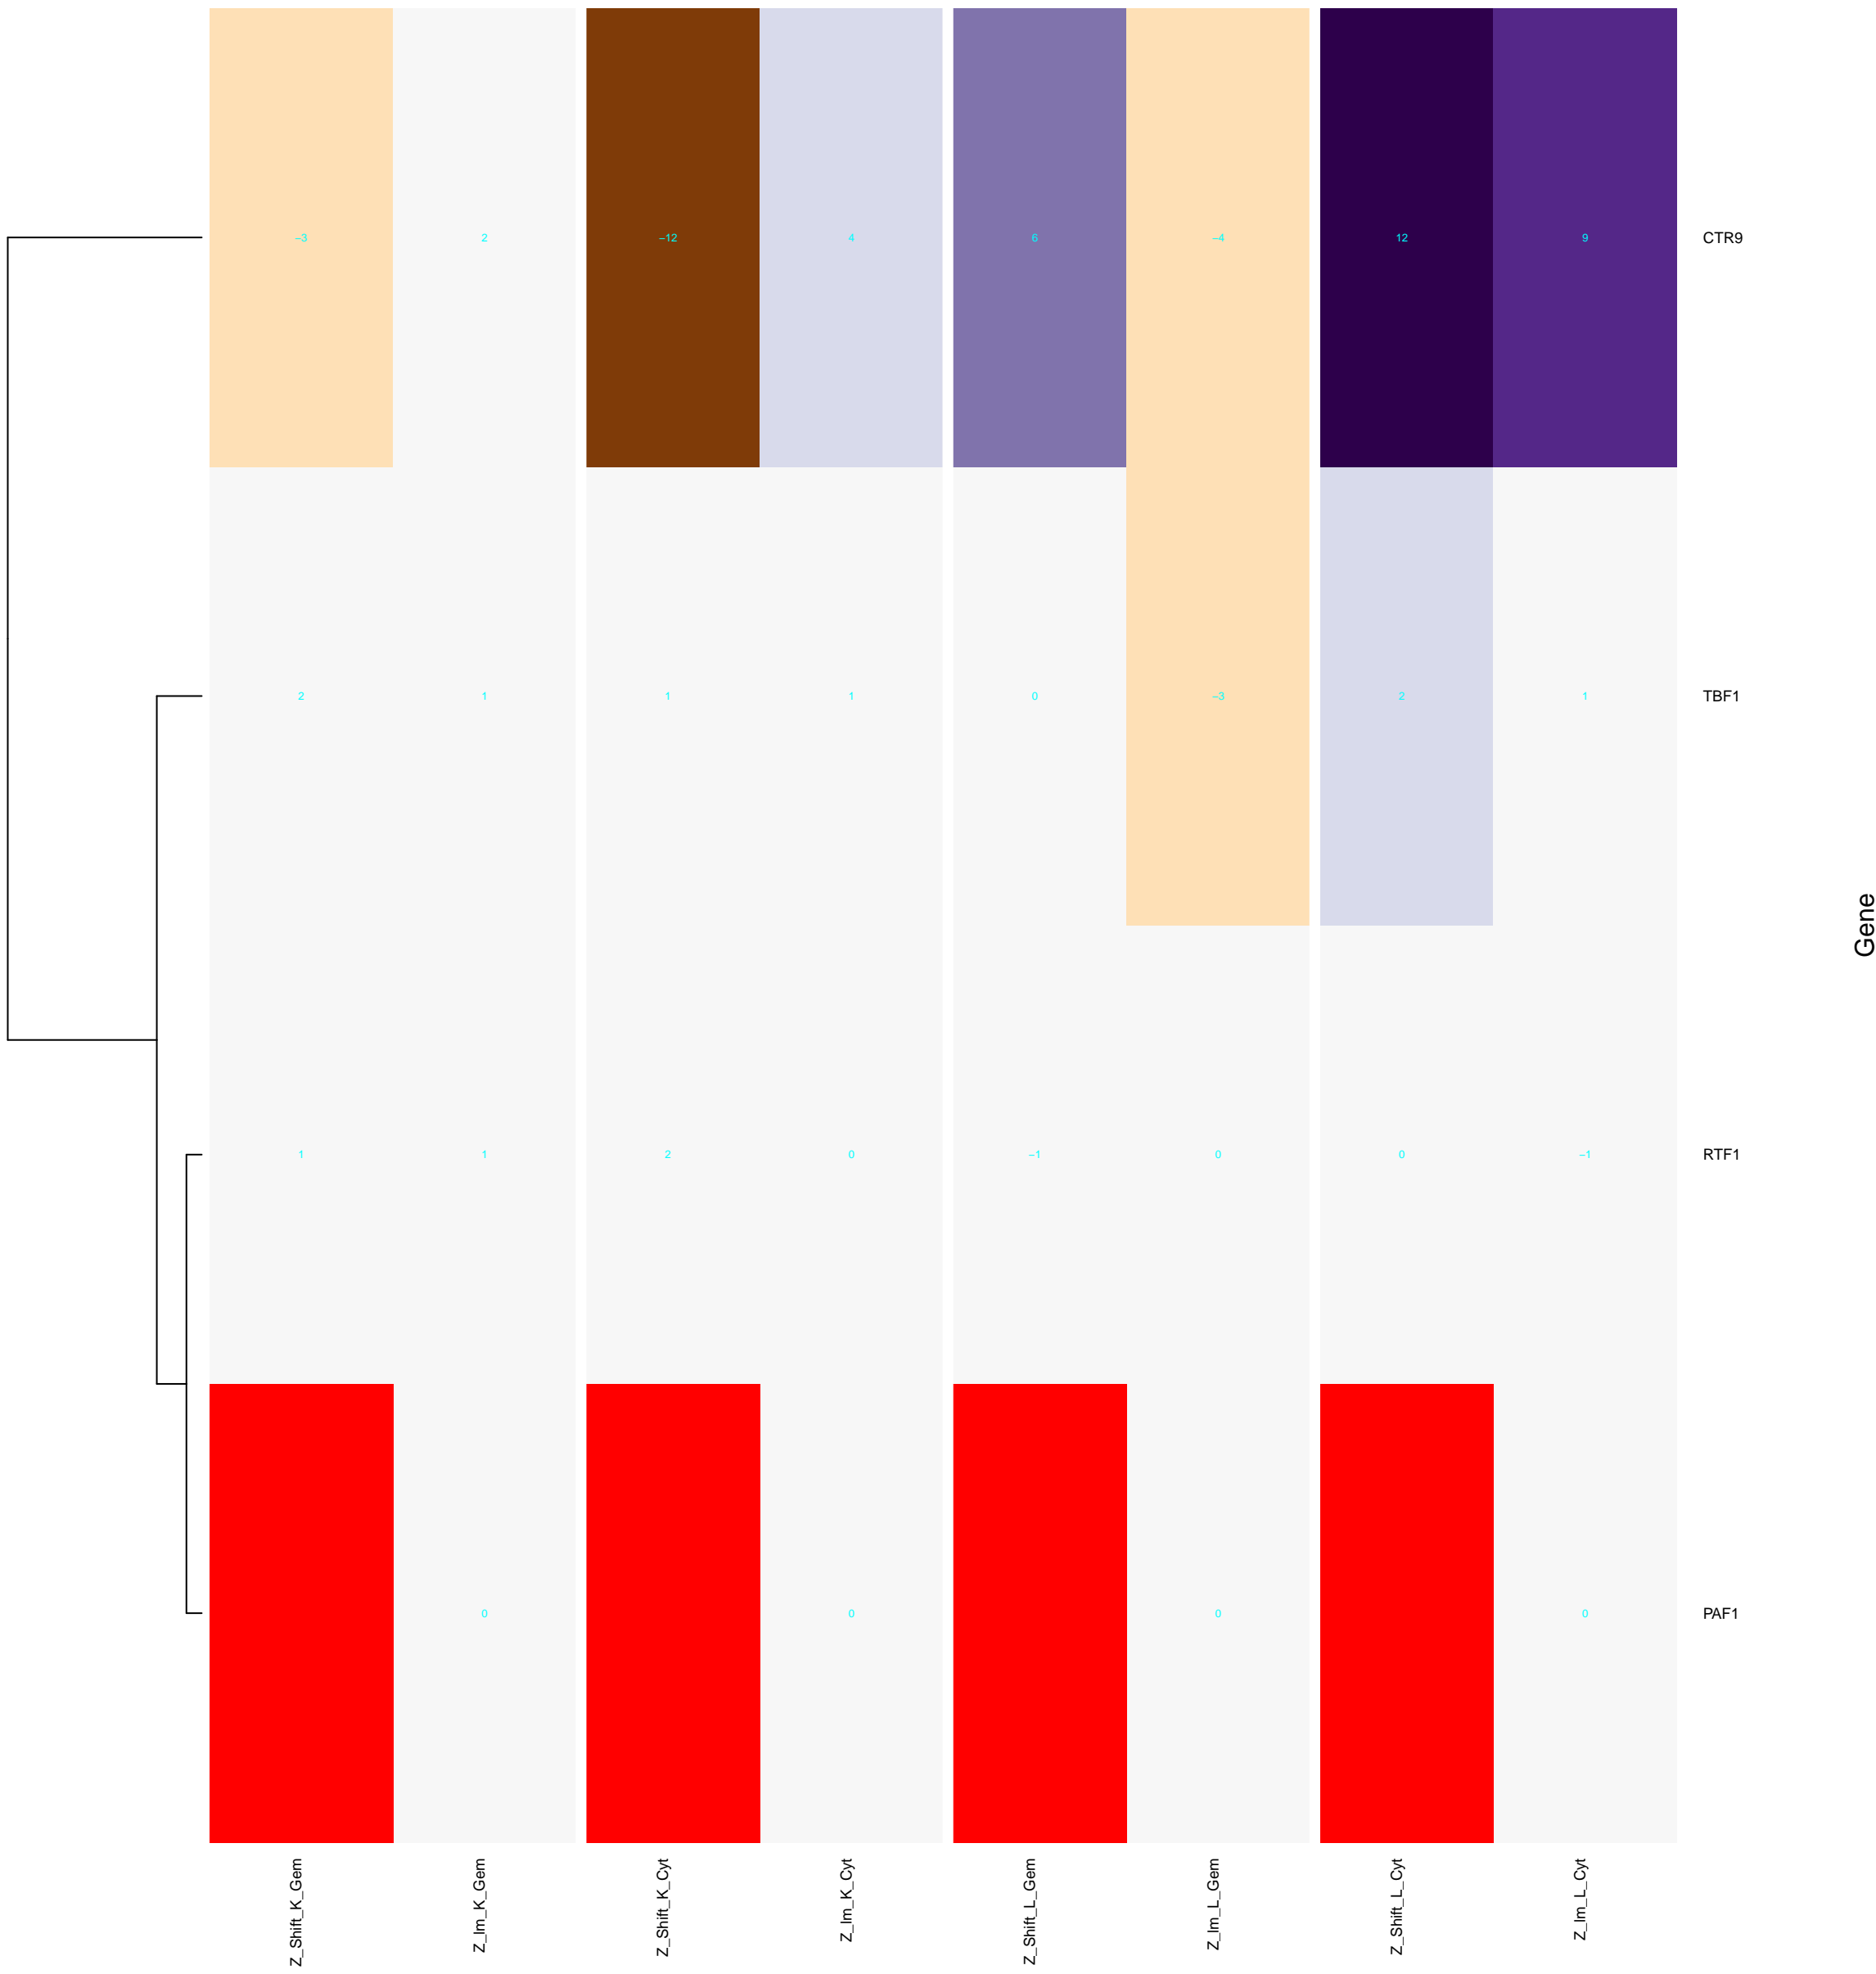

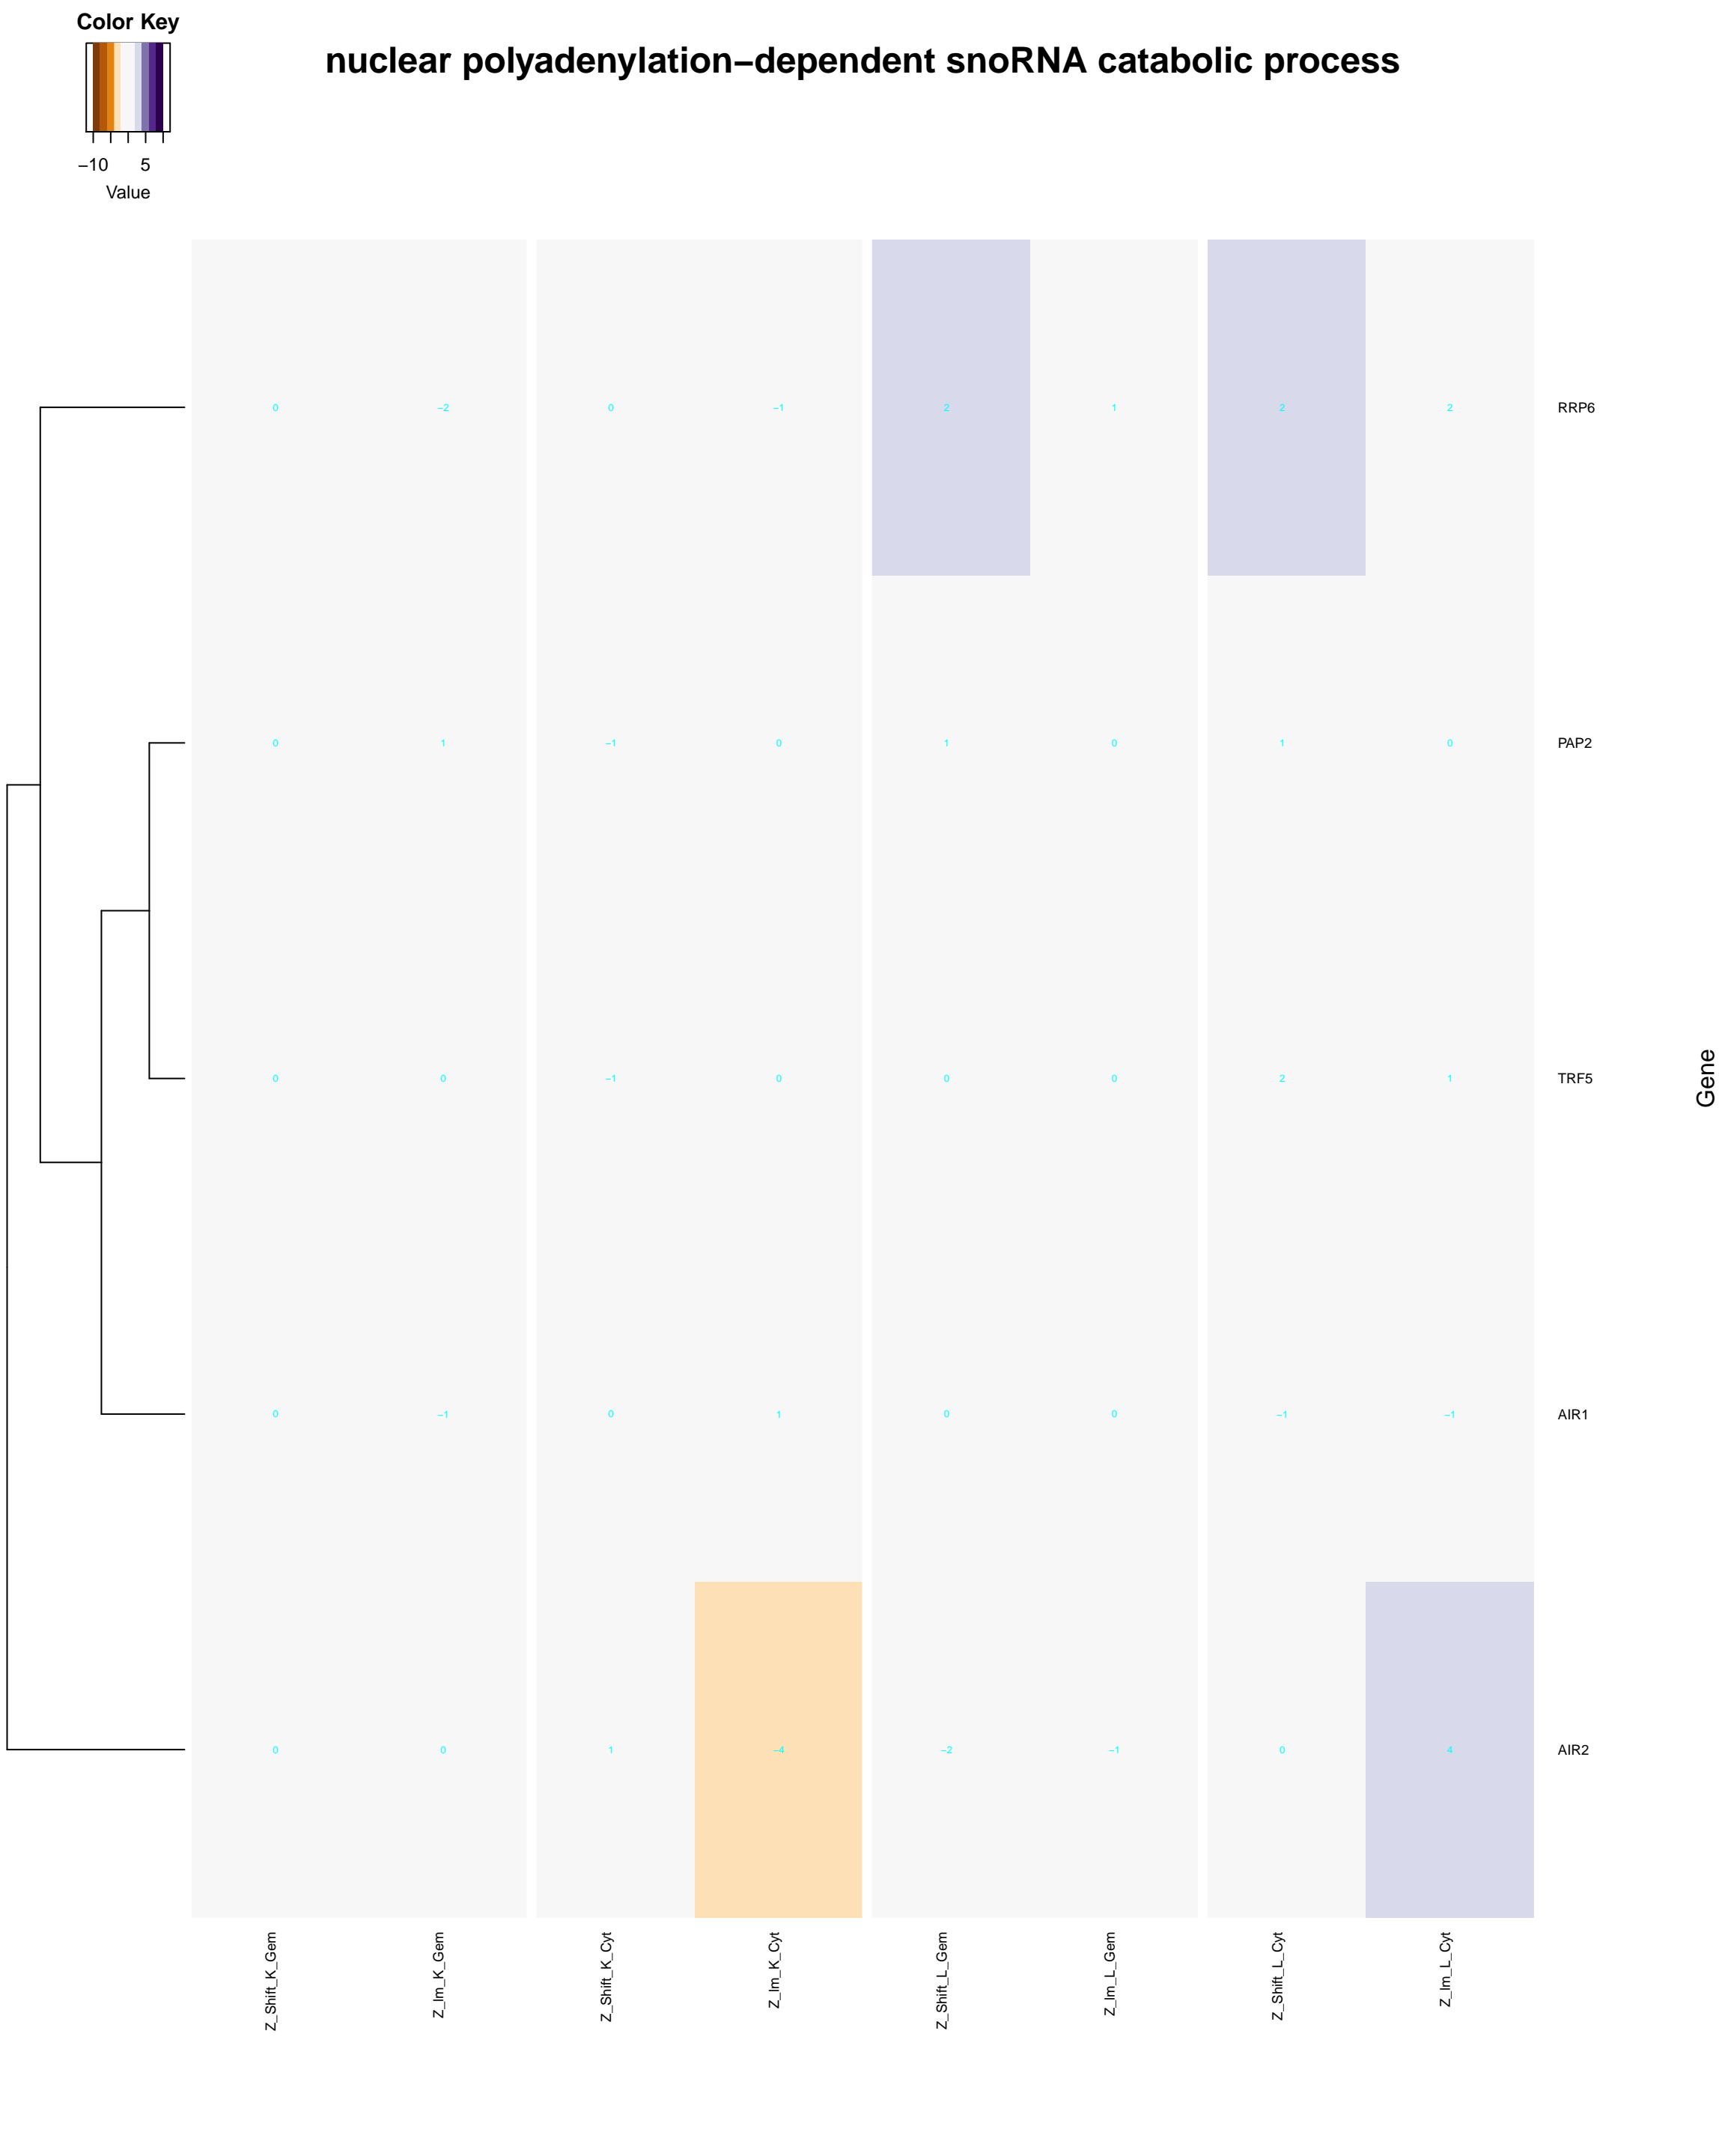

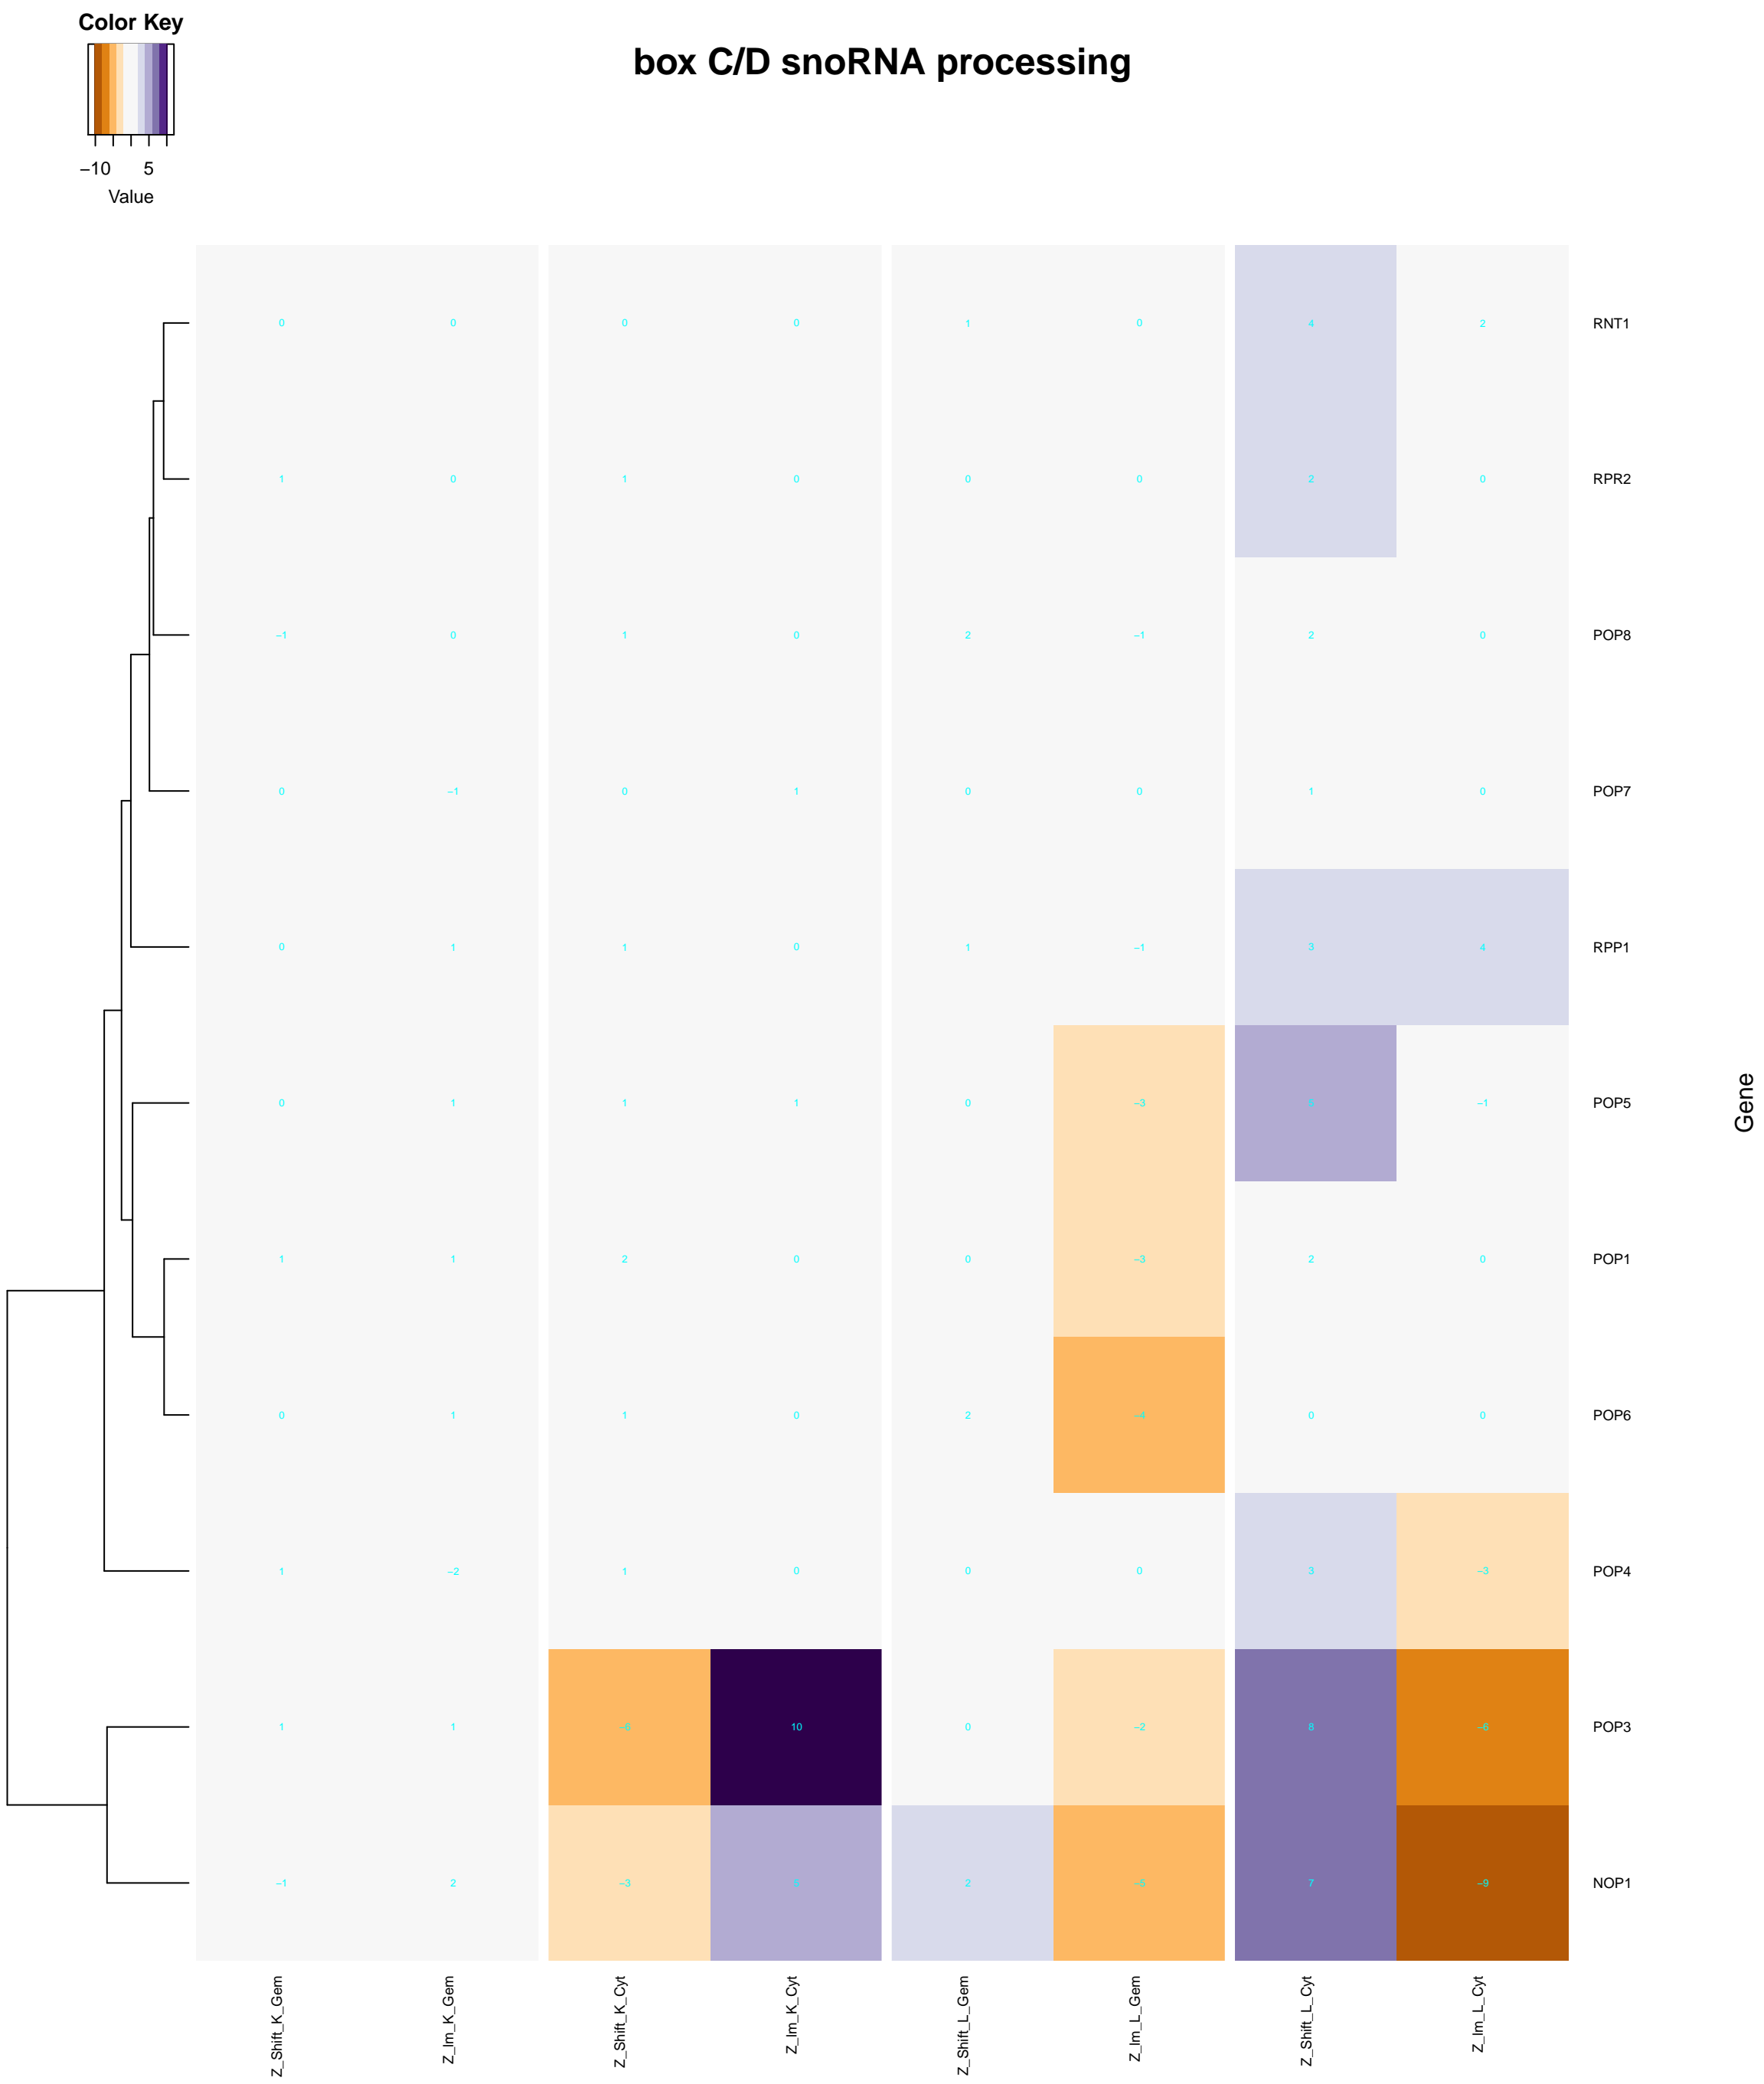



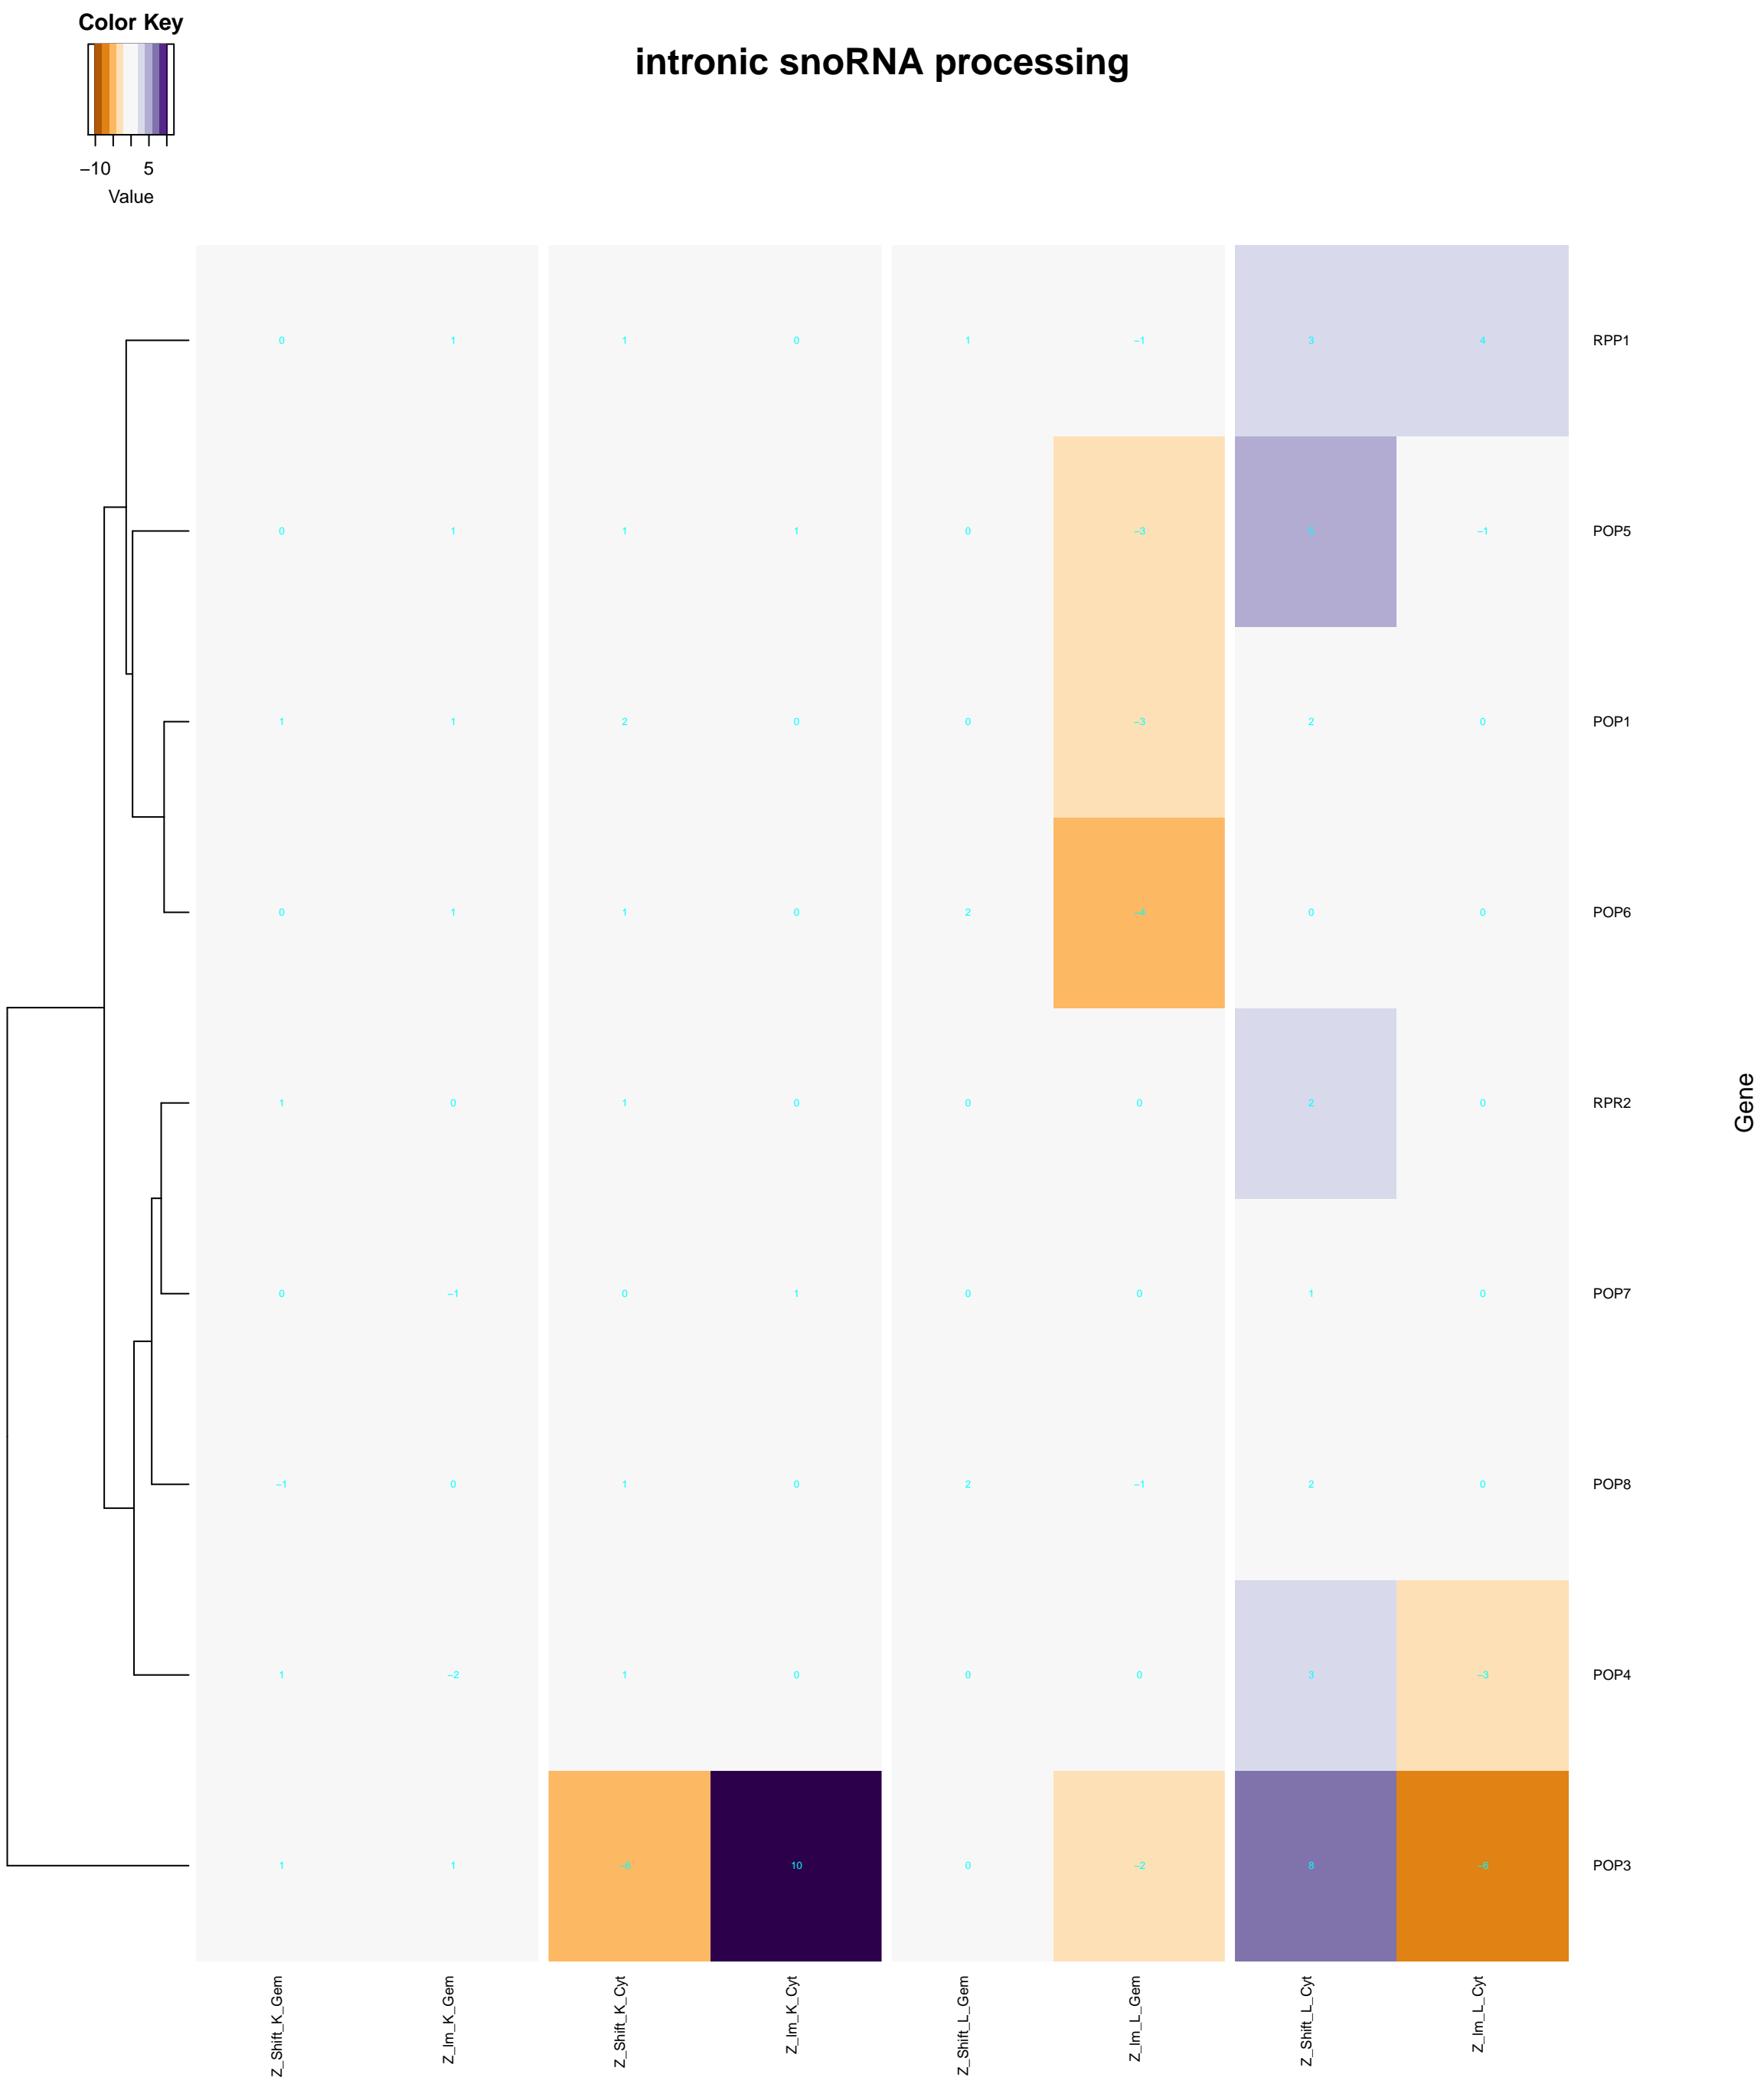

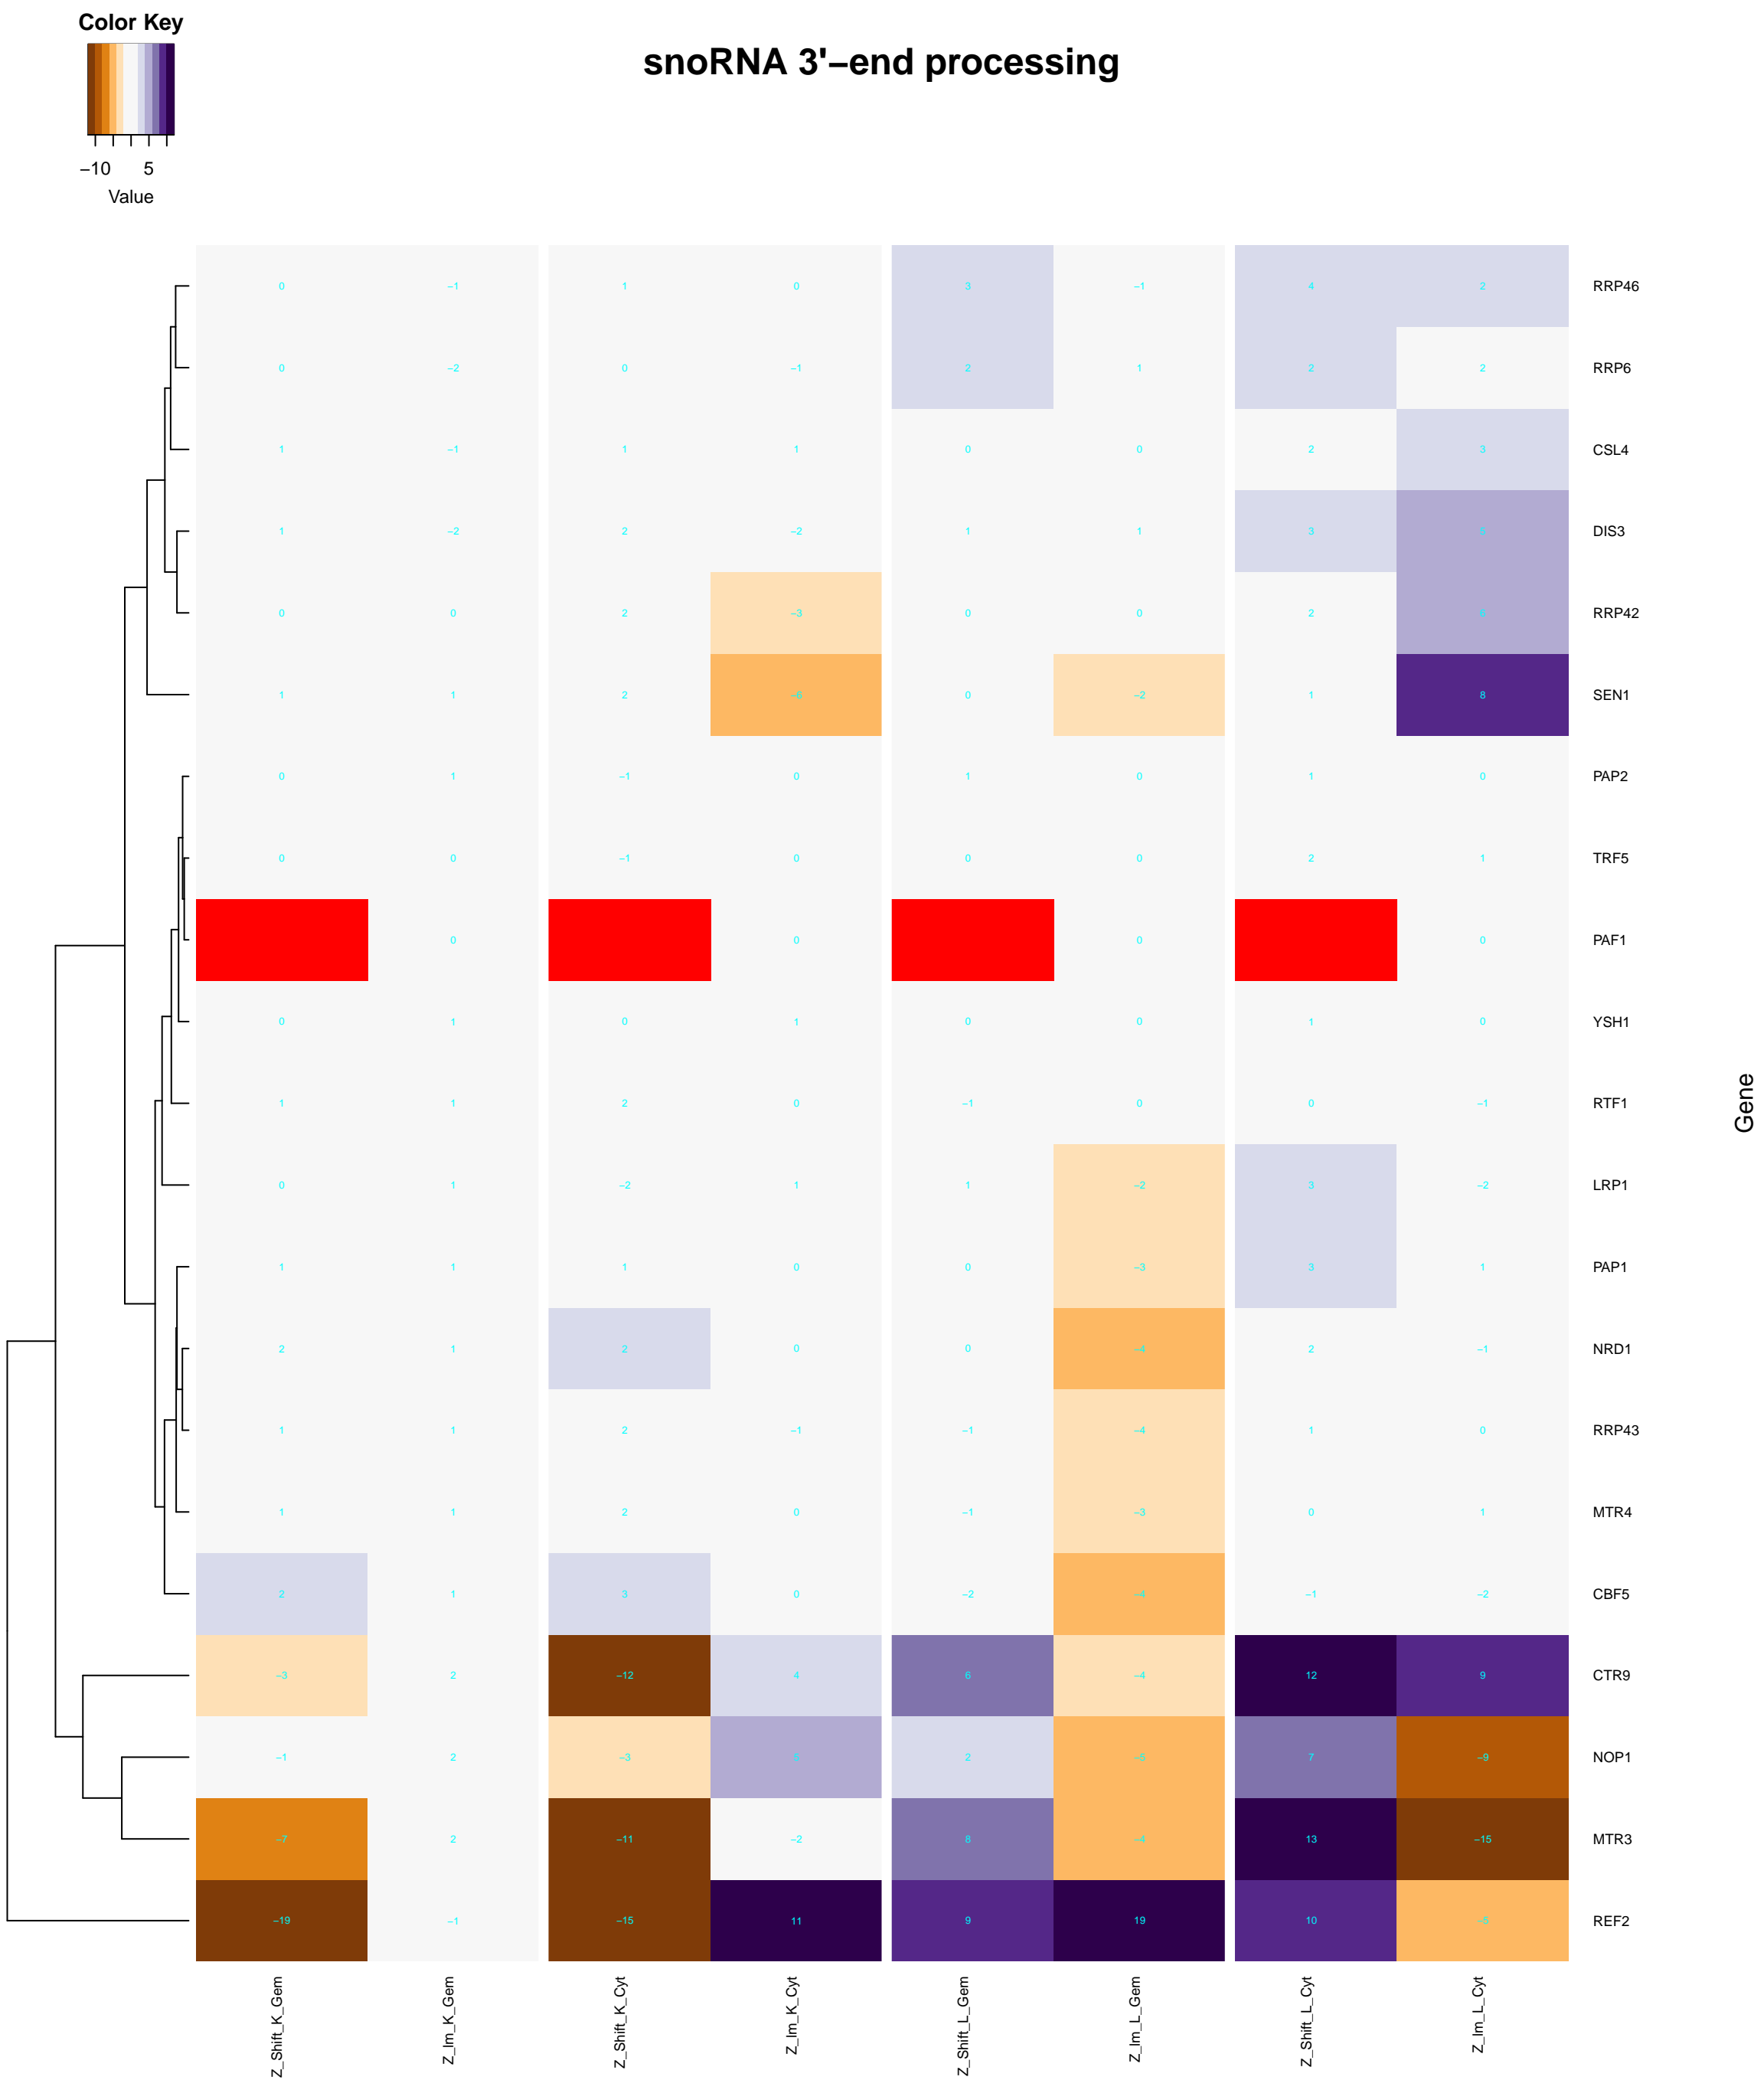

Color Key

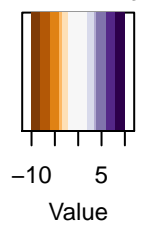

# snoRNA splicing

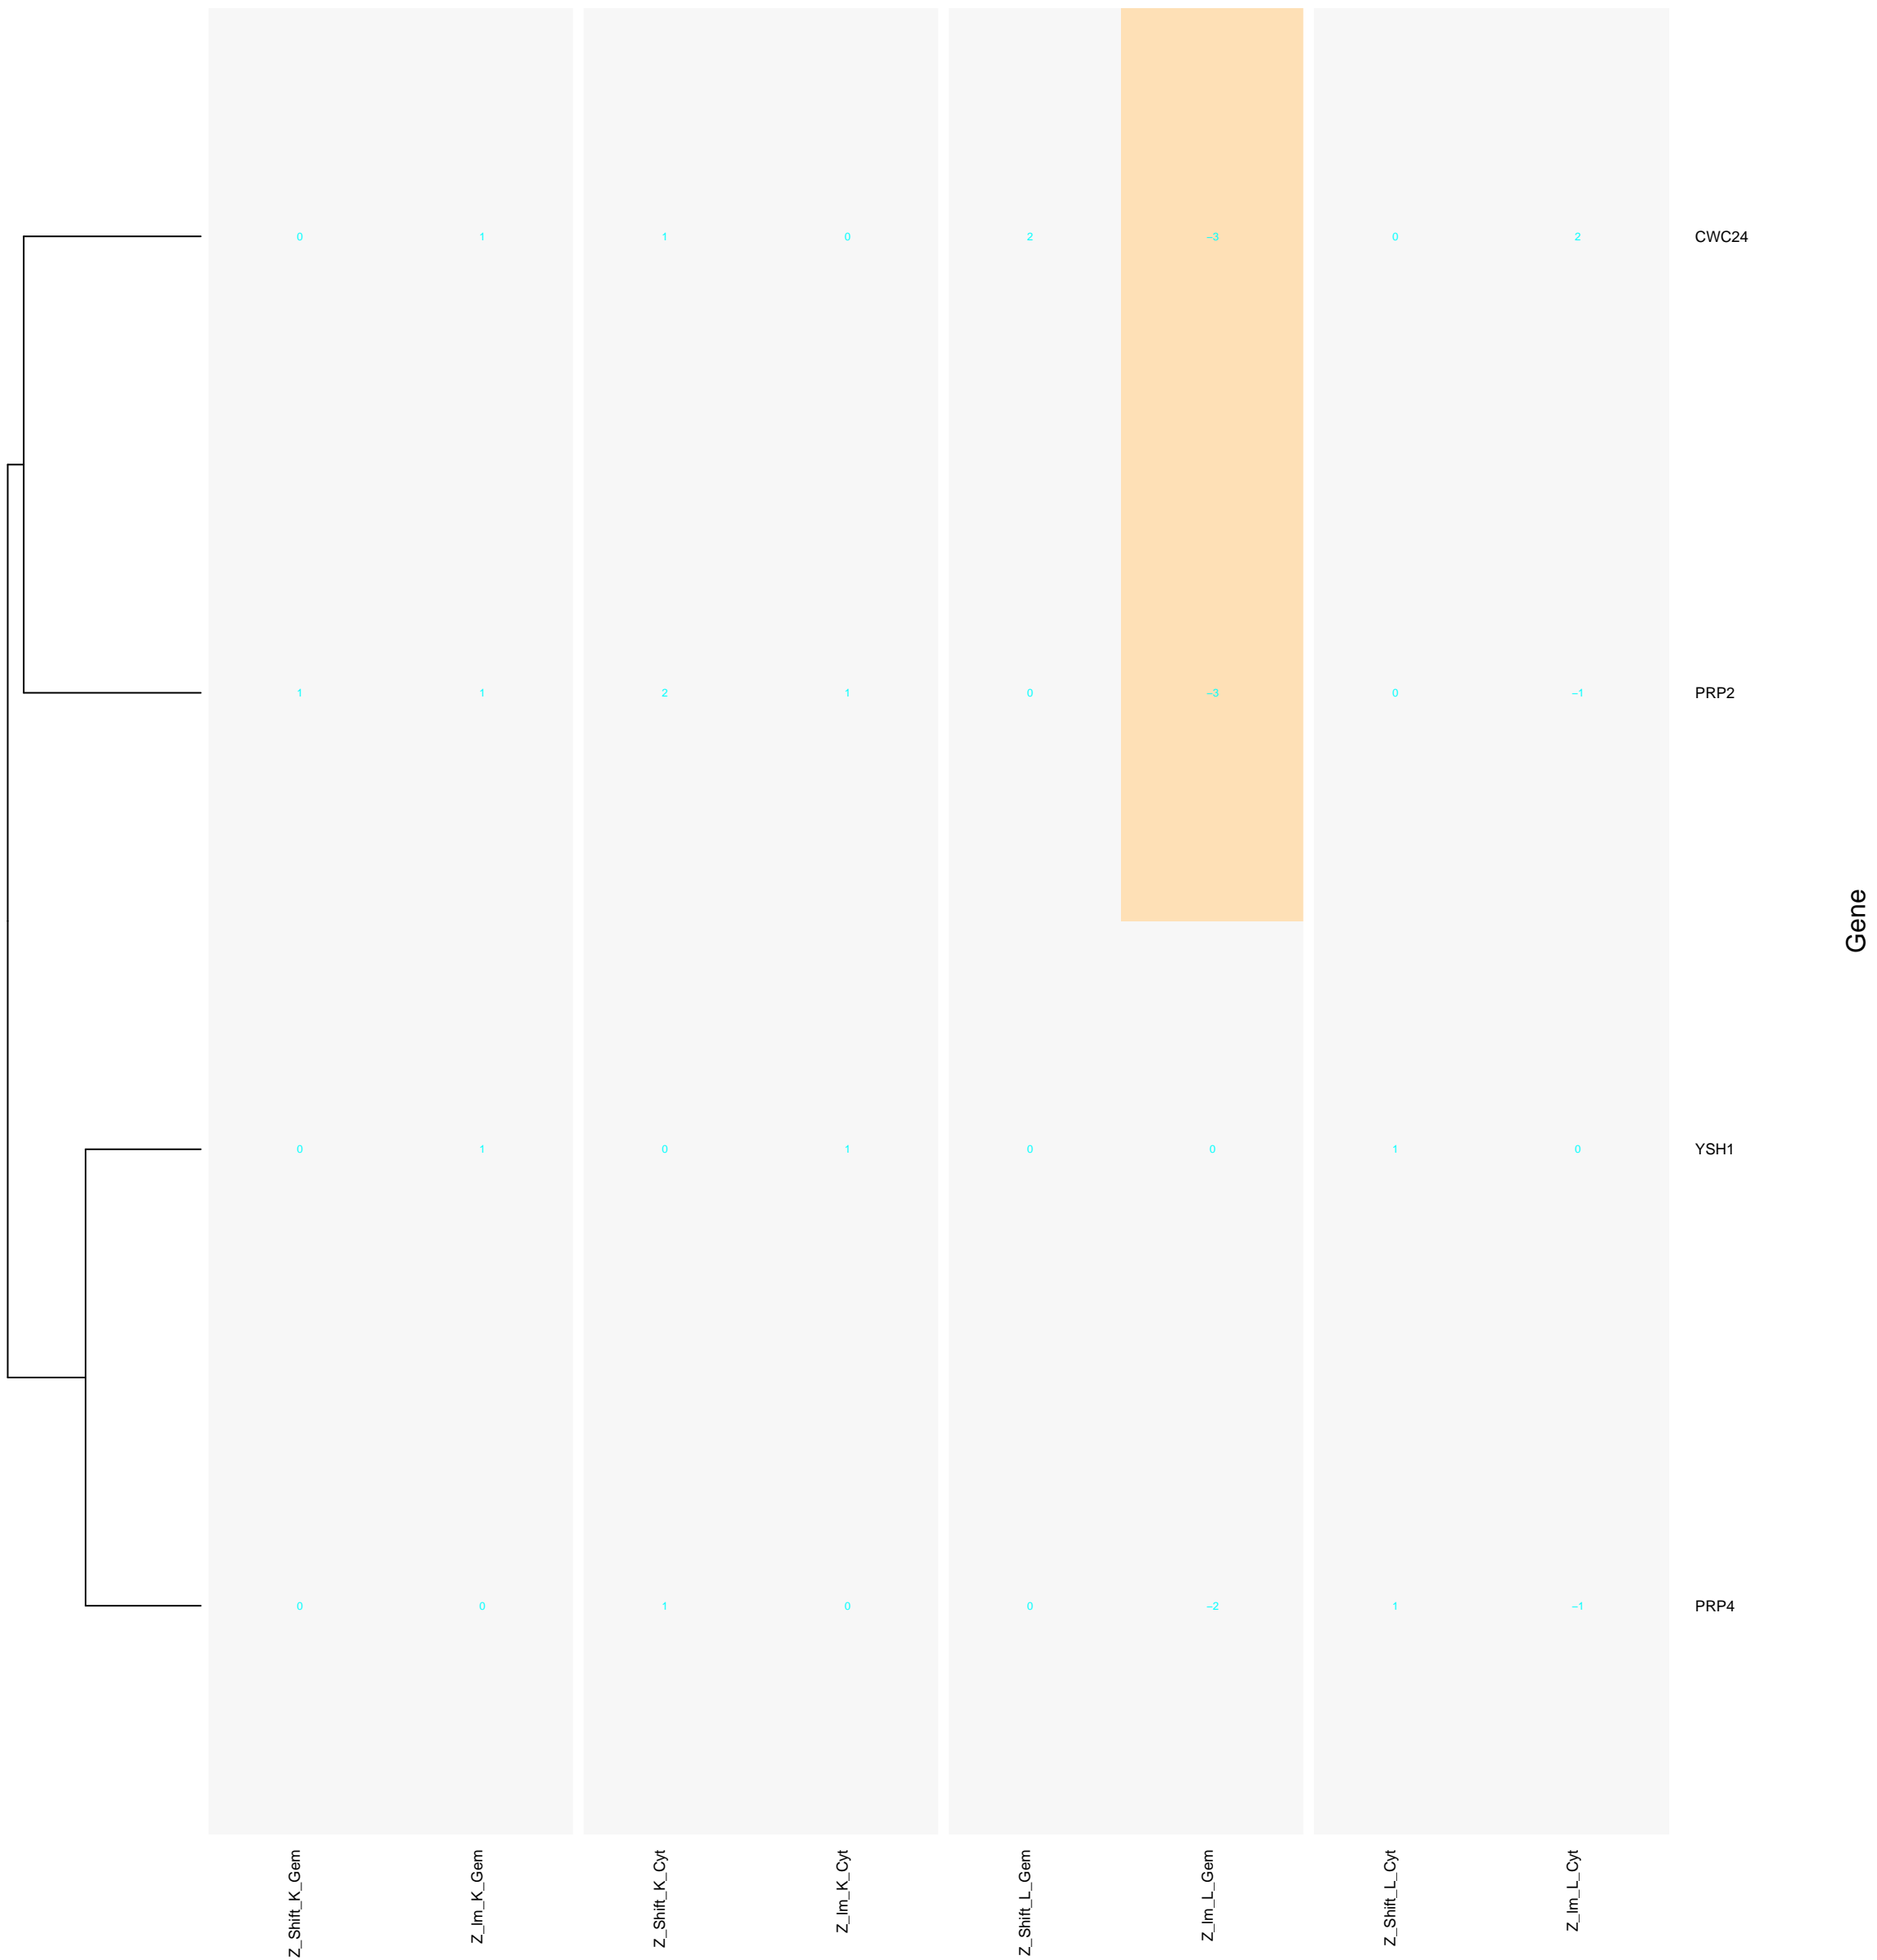

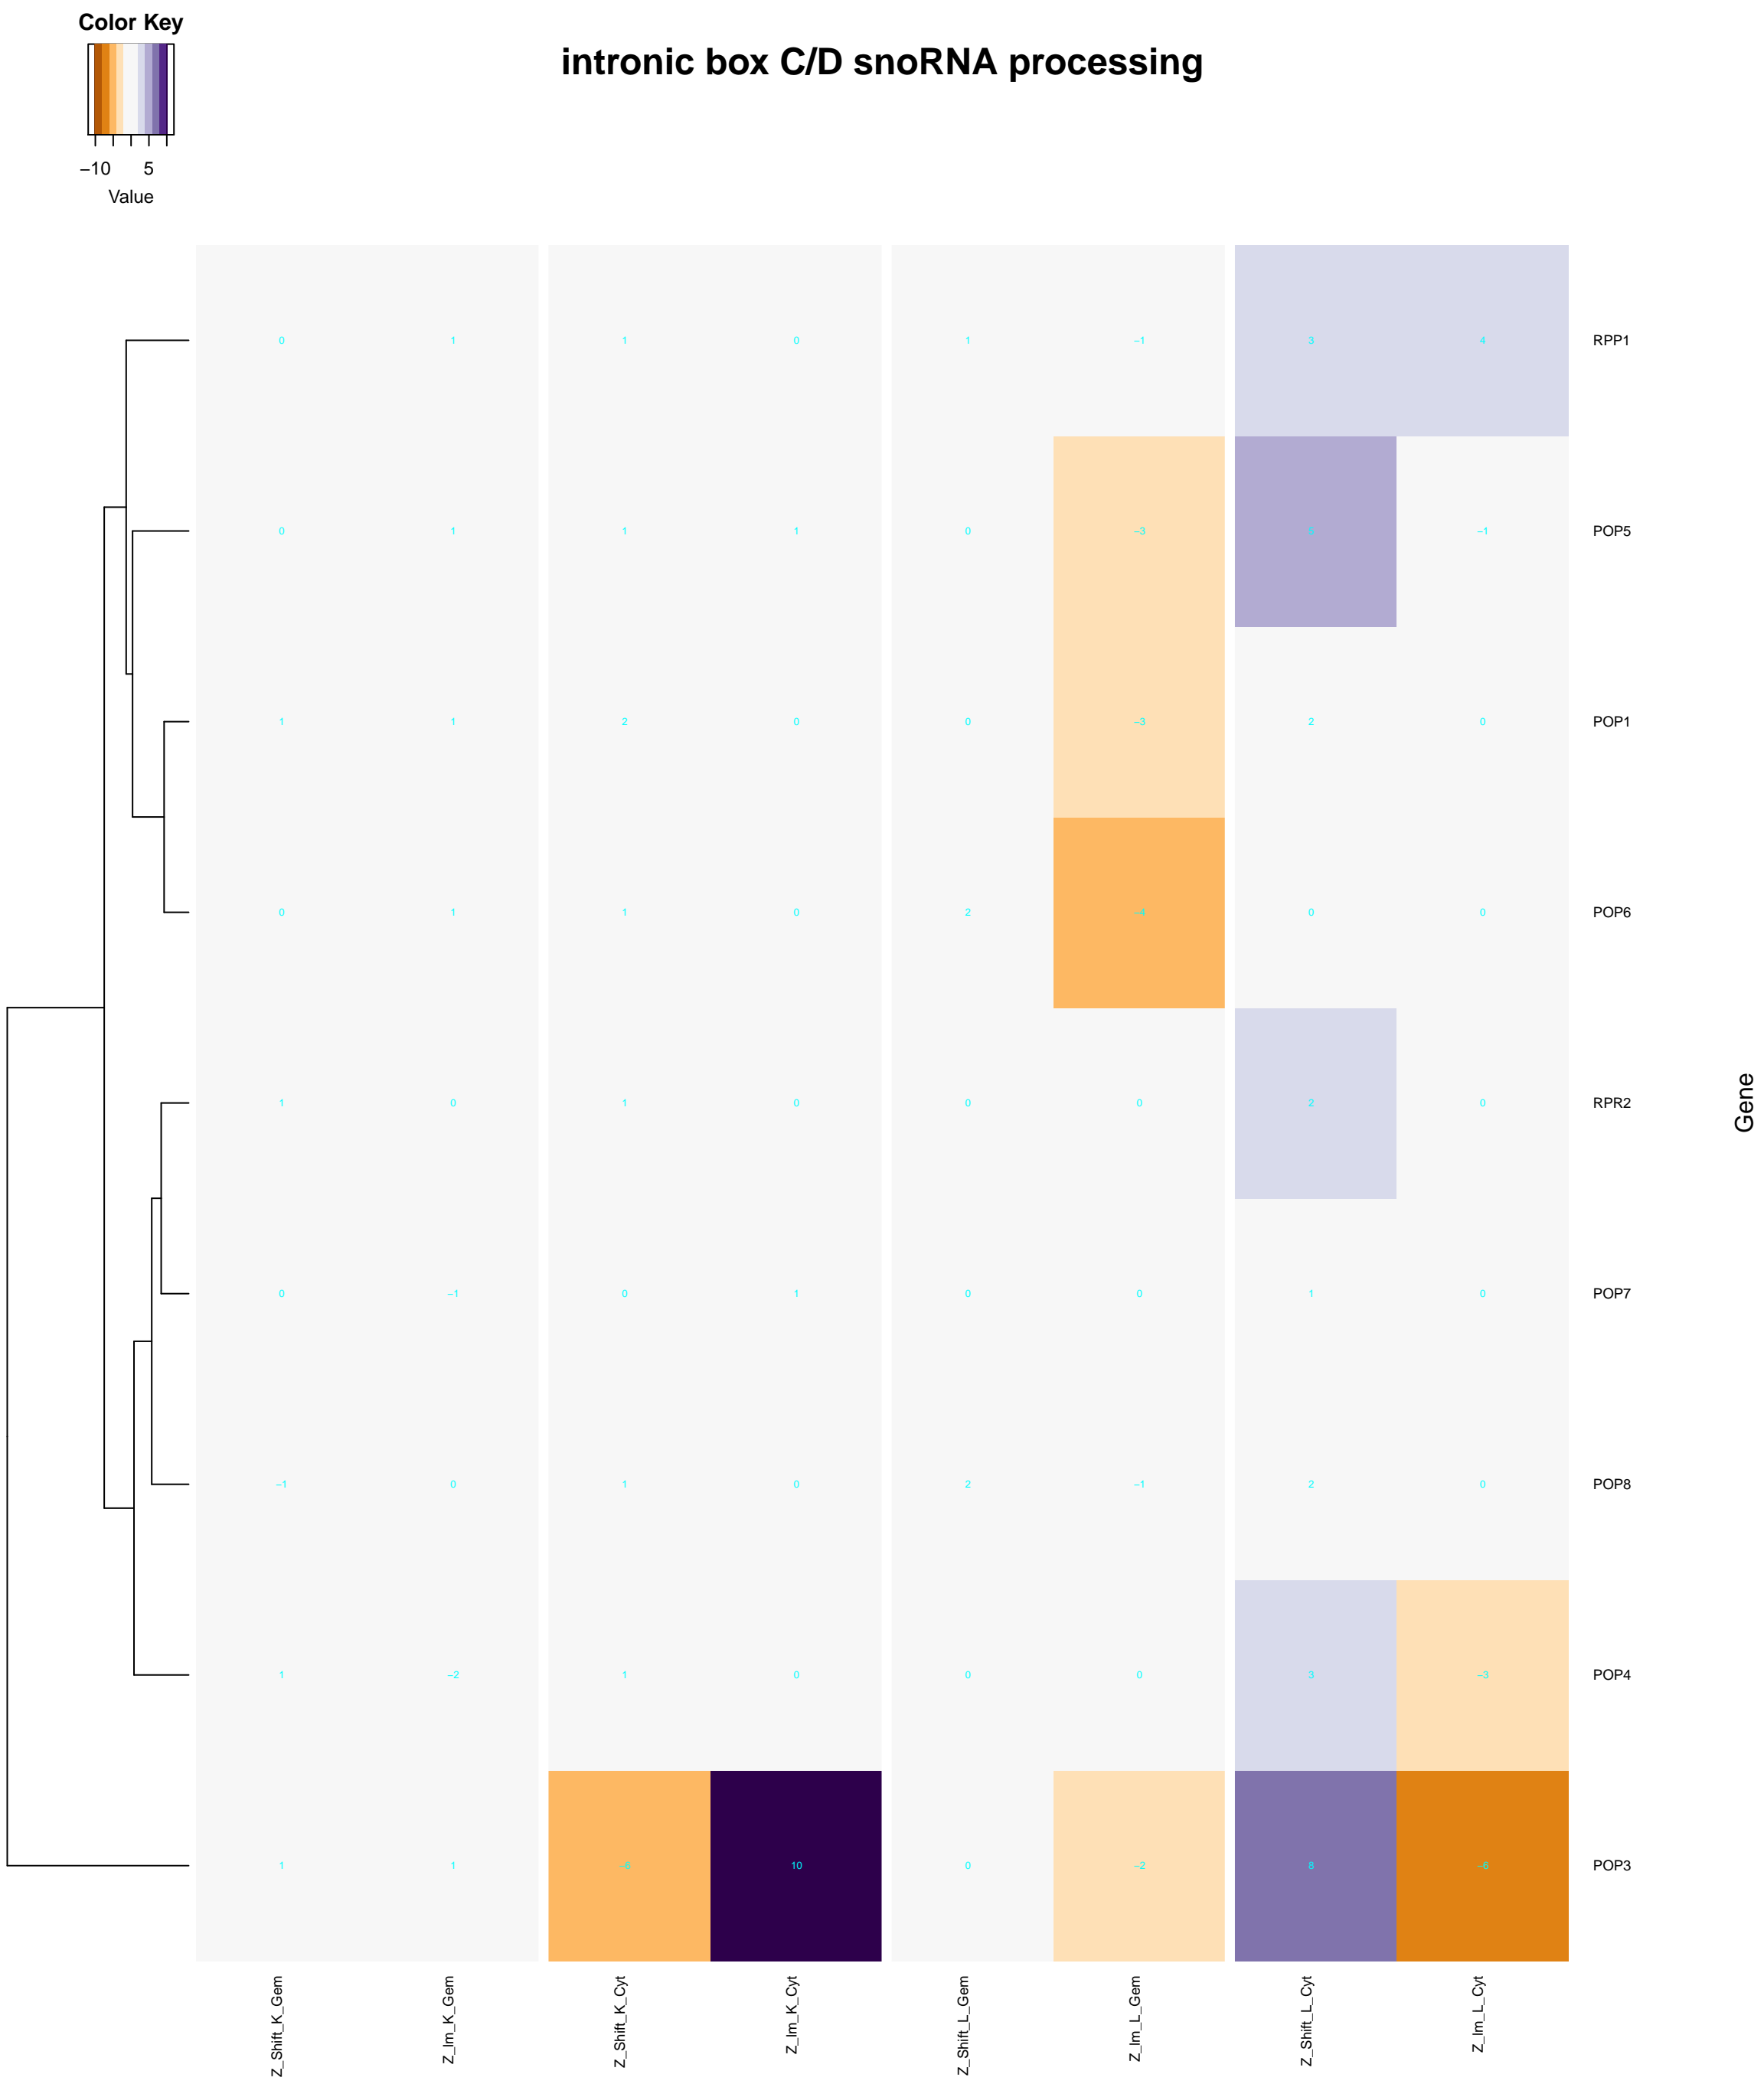

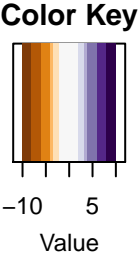

snoRNA polyadenylation

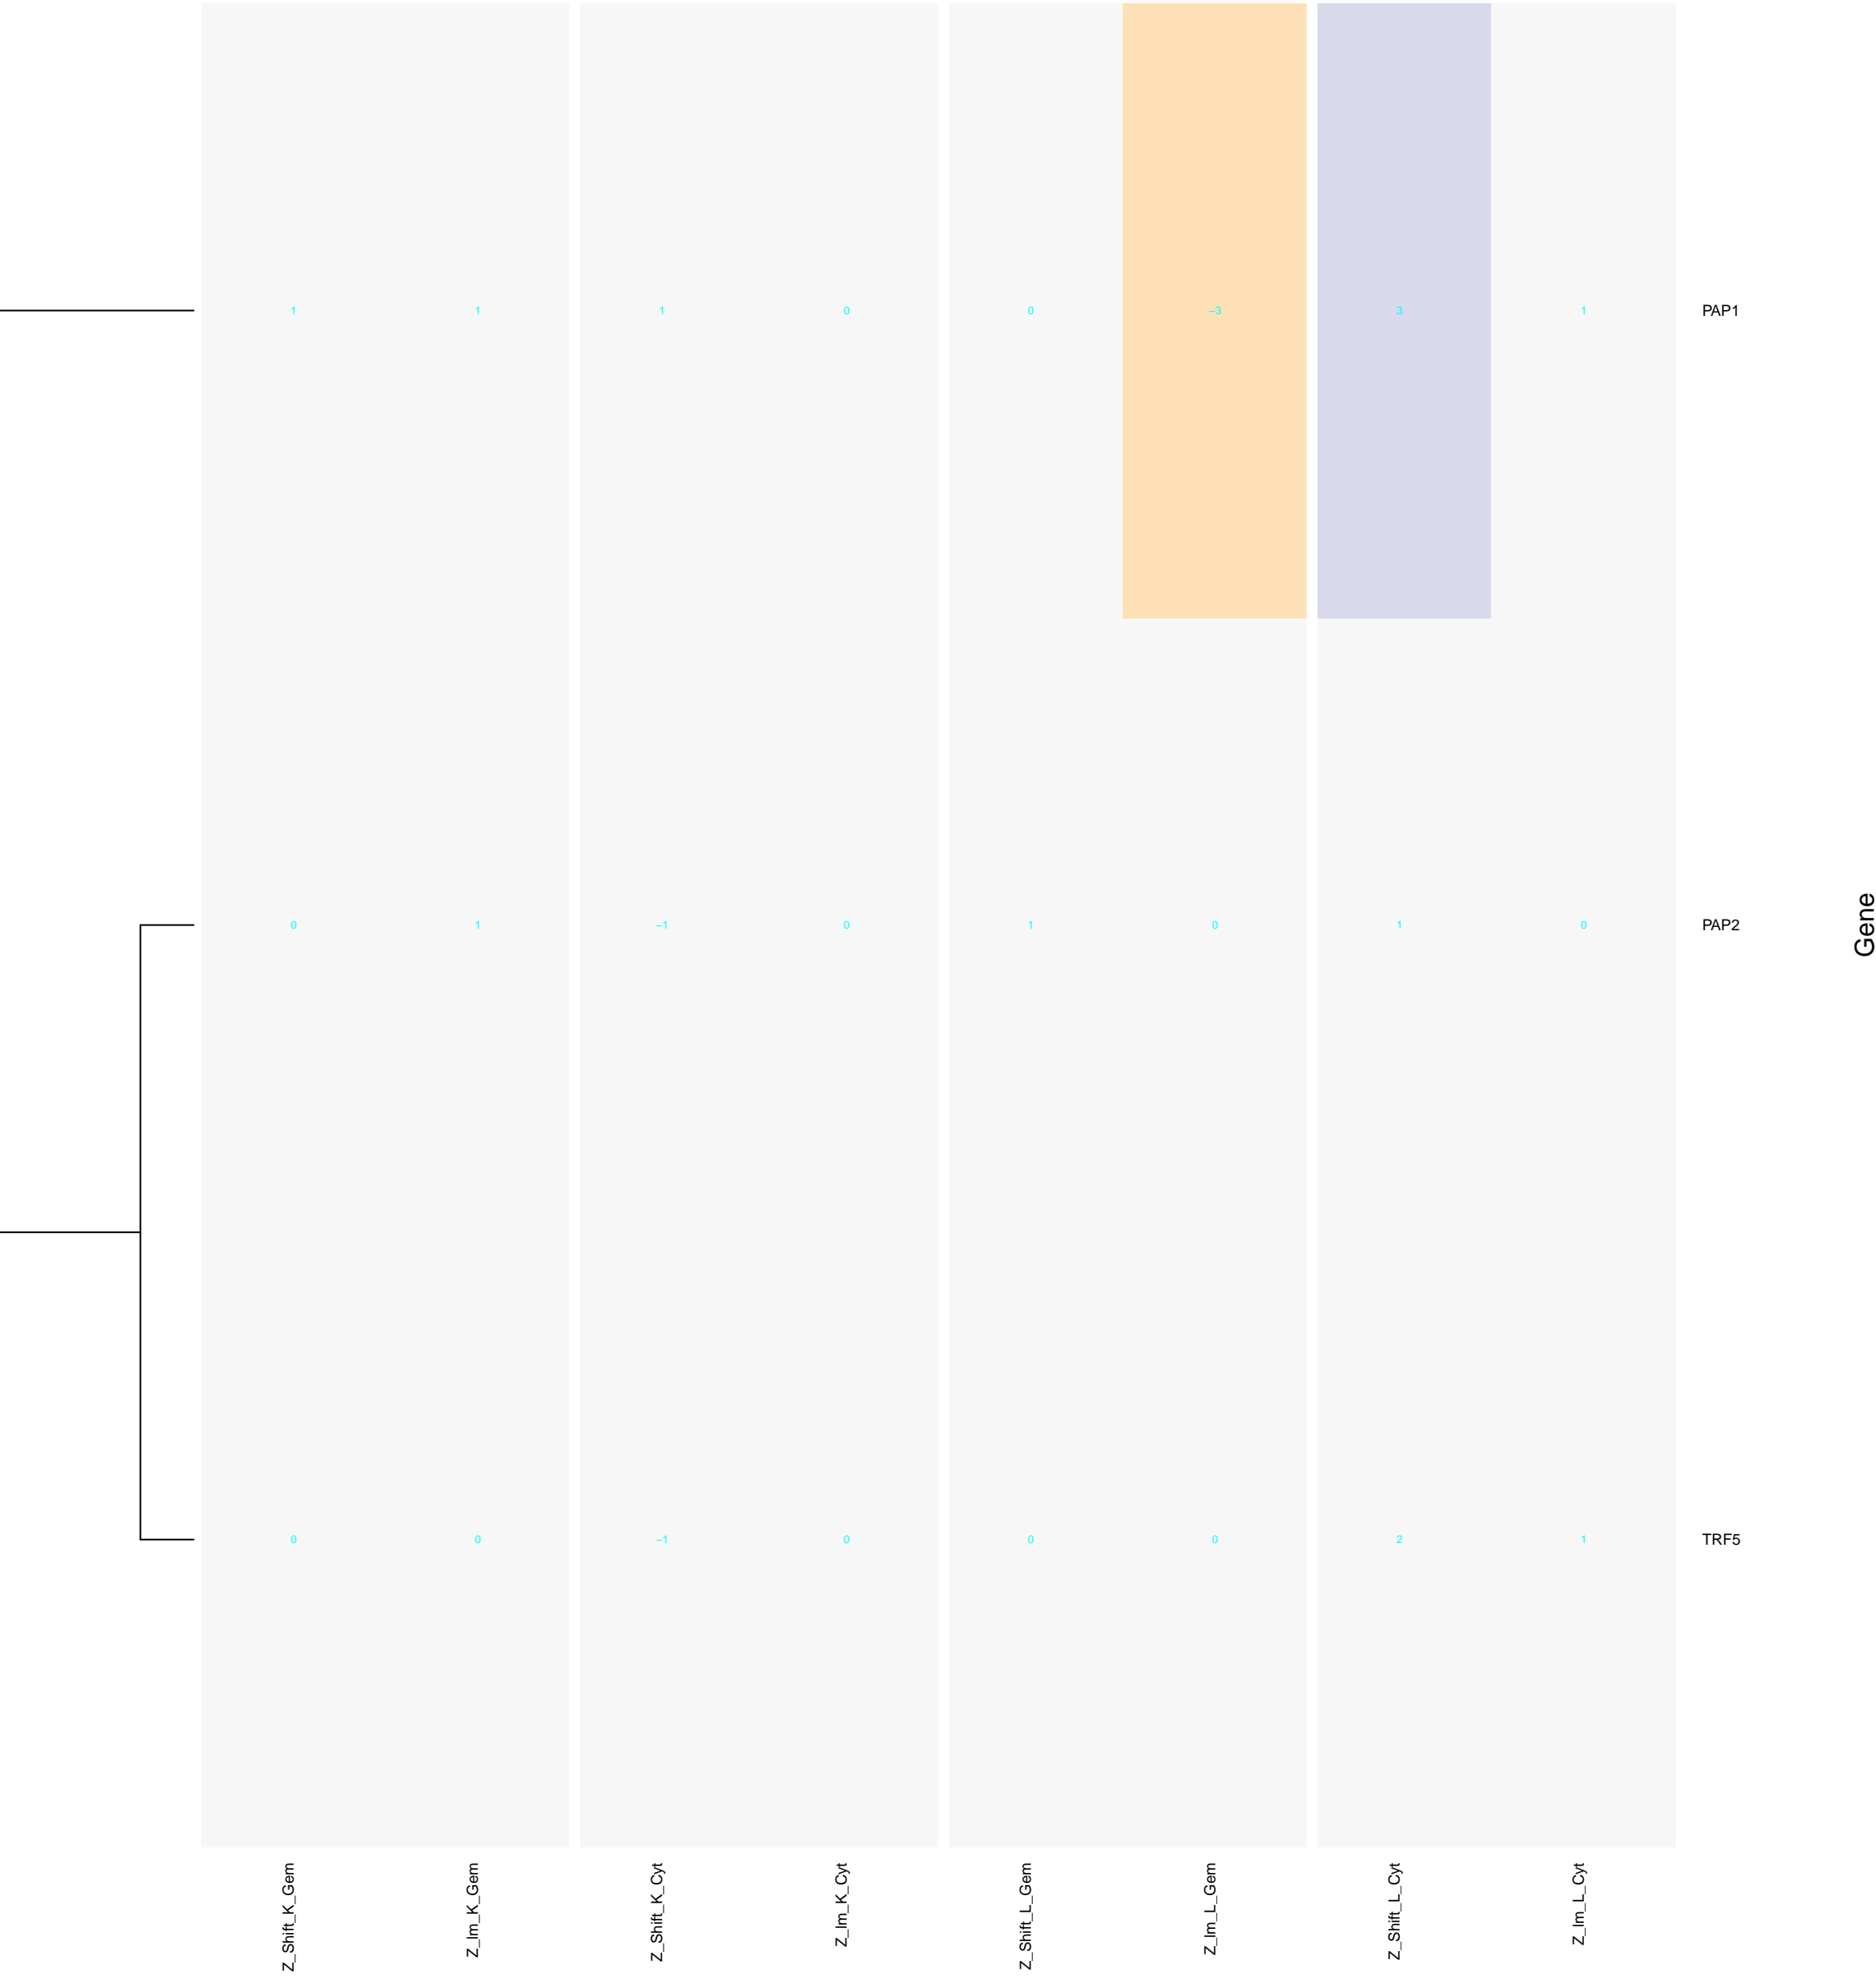

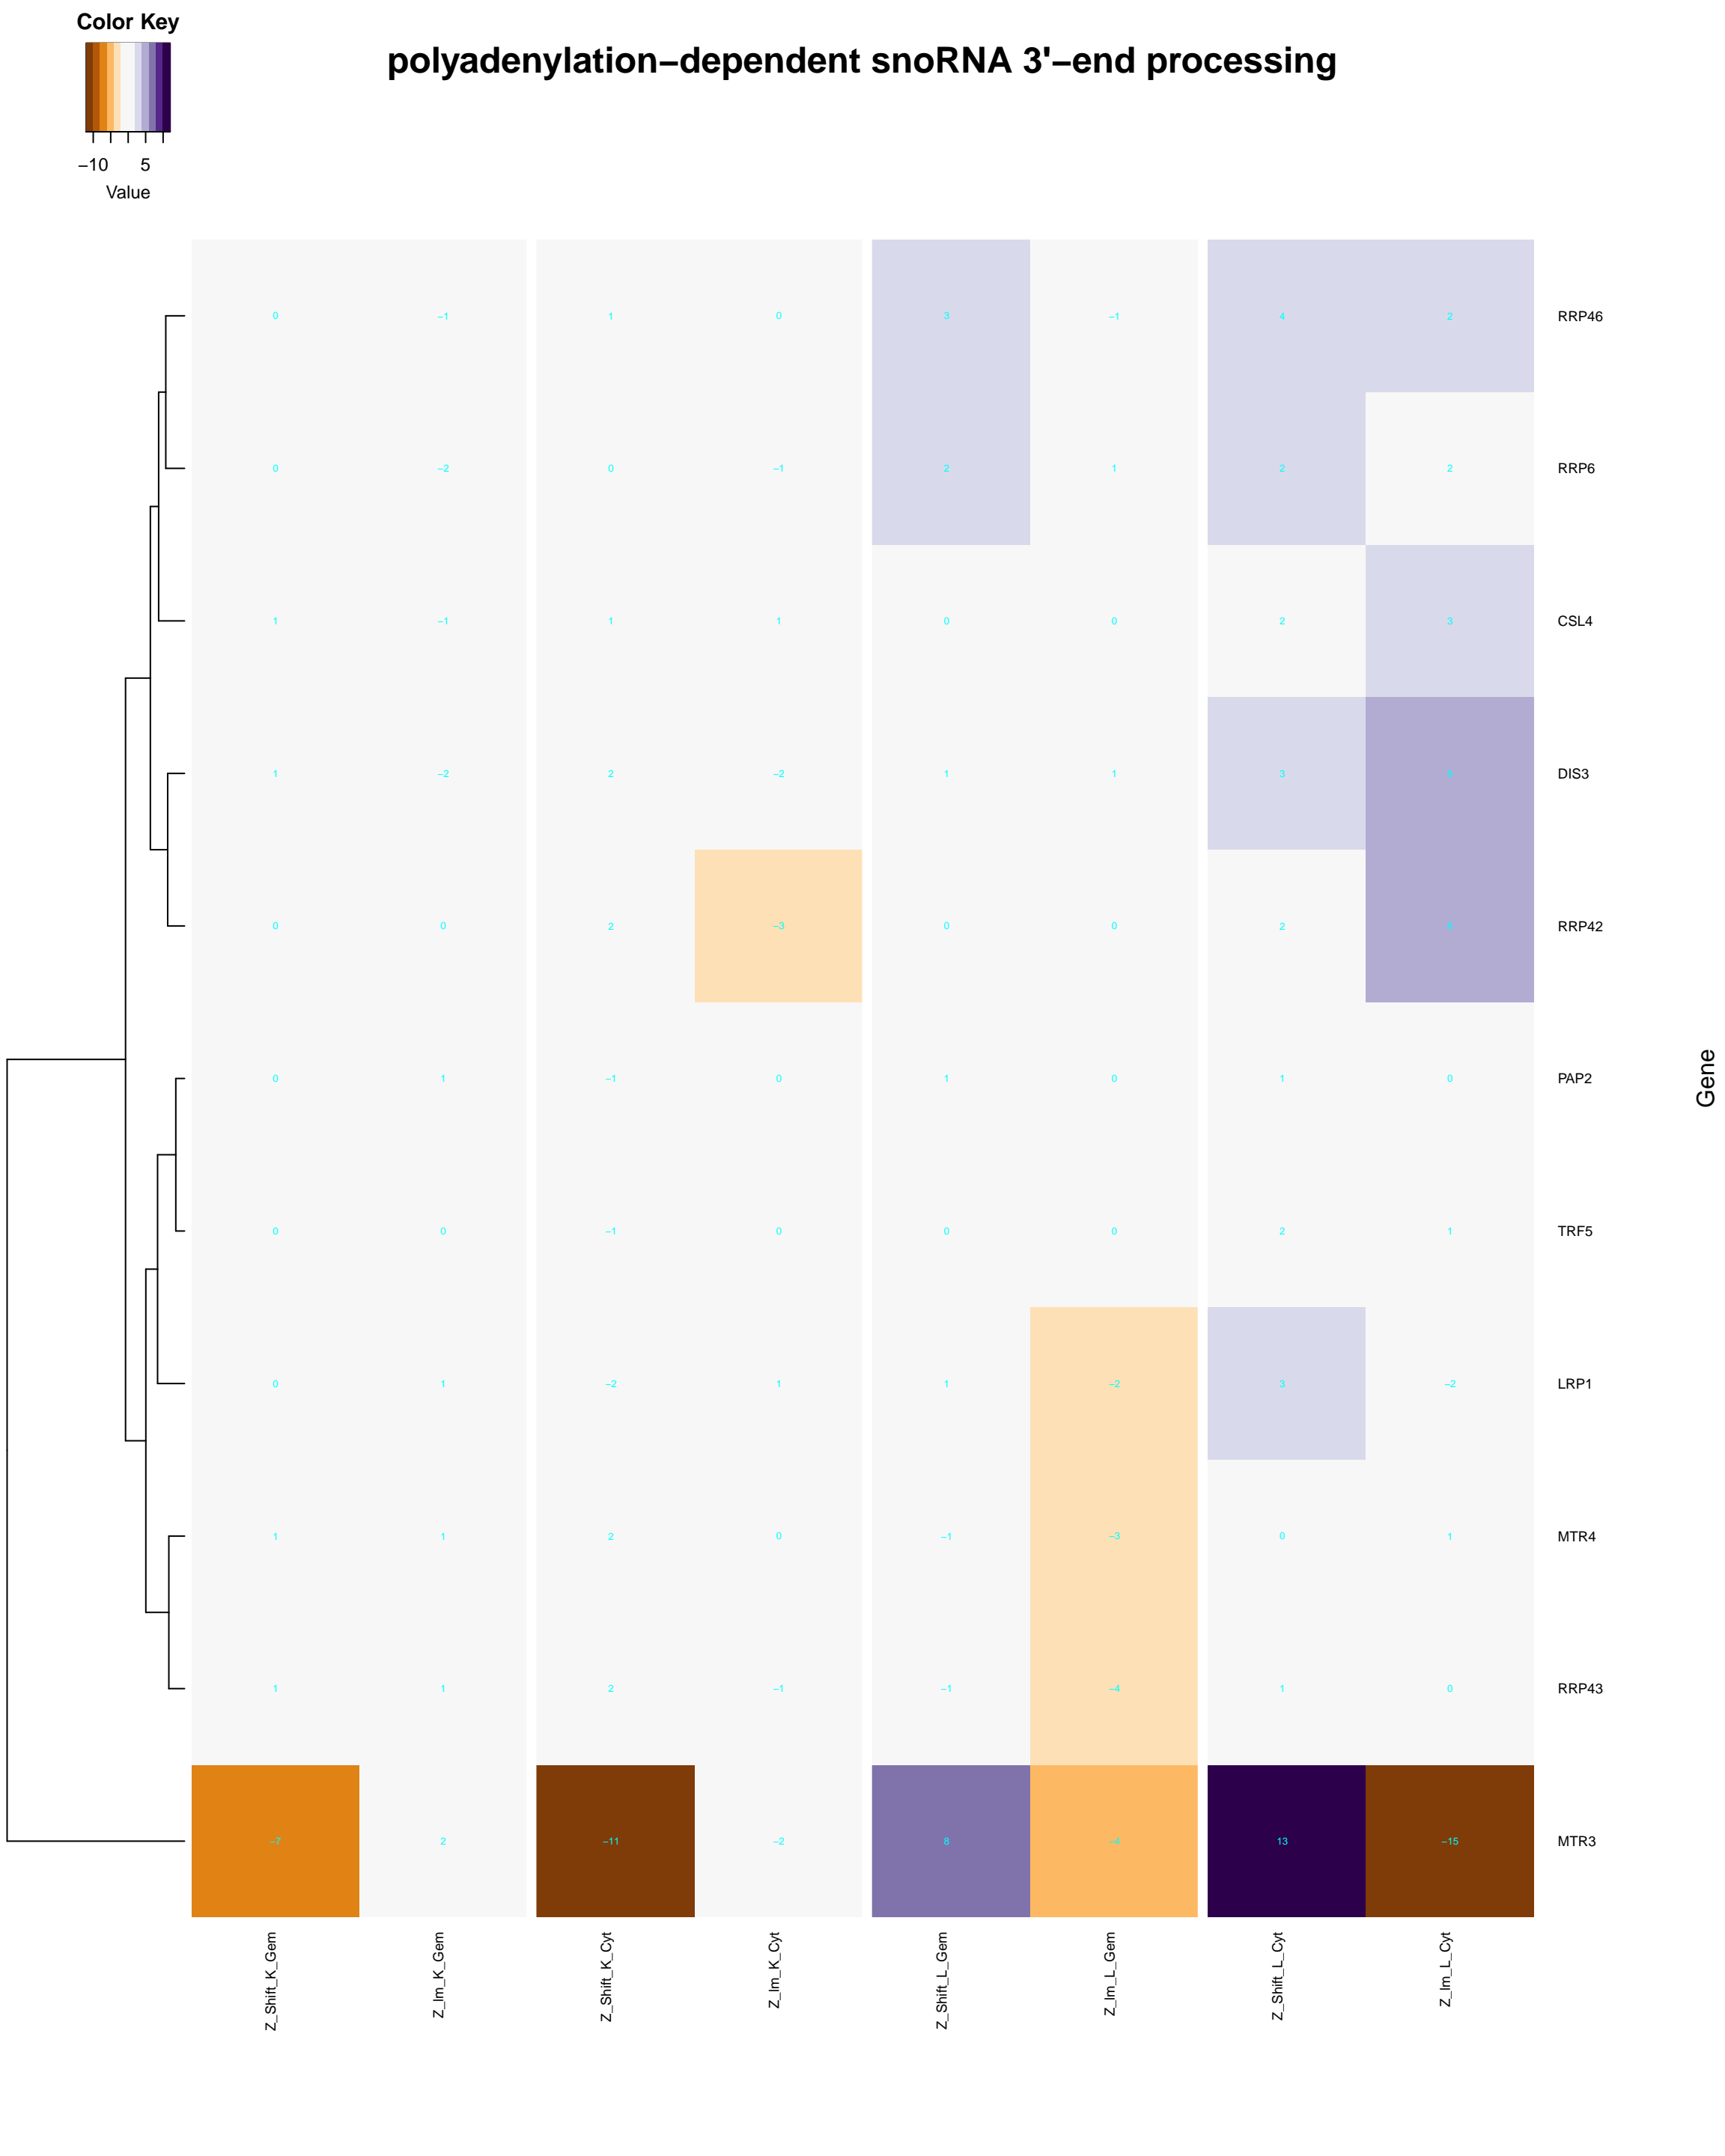

Supplement: s1 [file s1]
