# Supplementary material for: A Humanized Yeast Phenomic Model of Deoxycytidine Kinase to Predict Genetic Buffering of Nucleoside Analog Cytotoxicity
Source: MDPI journal article supplement (doi:10.3390/genes10100770), 2019-09-30

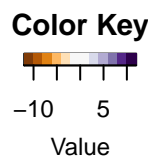

# regulation of transcription from RNA polymerase I promoter

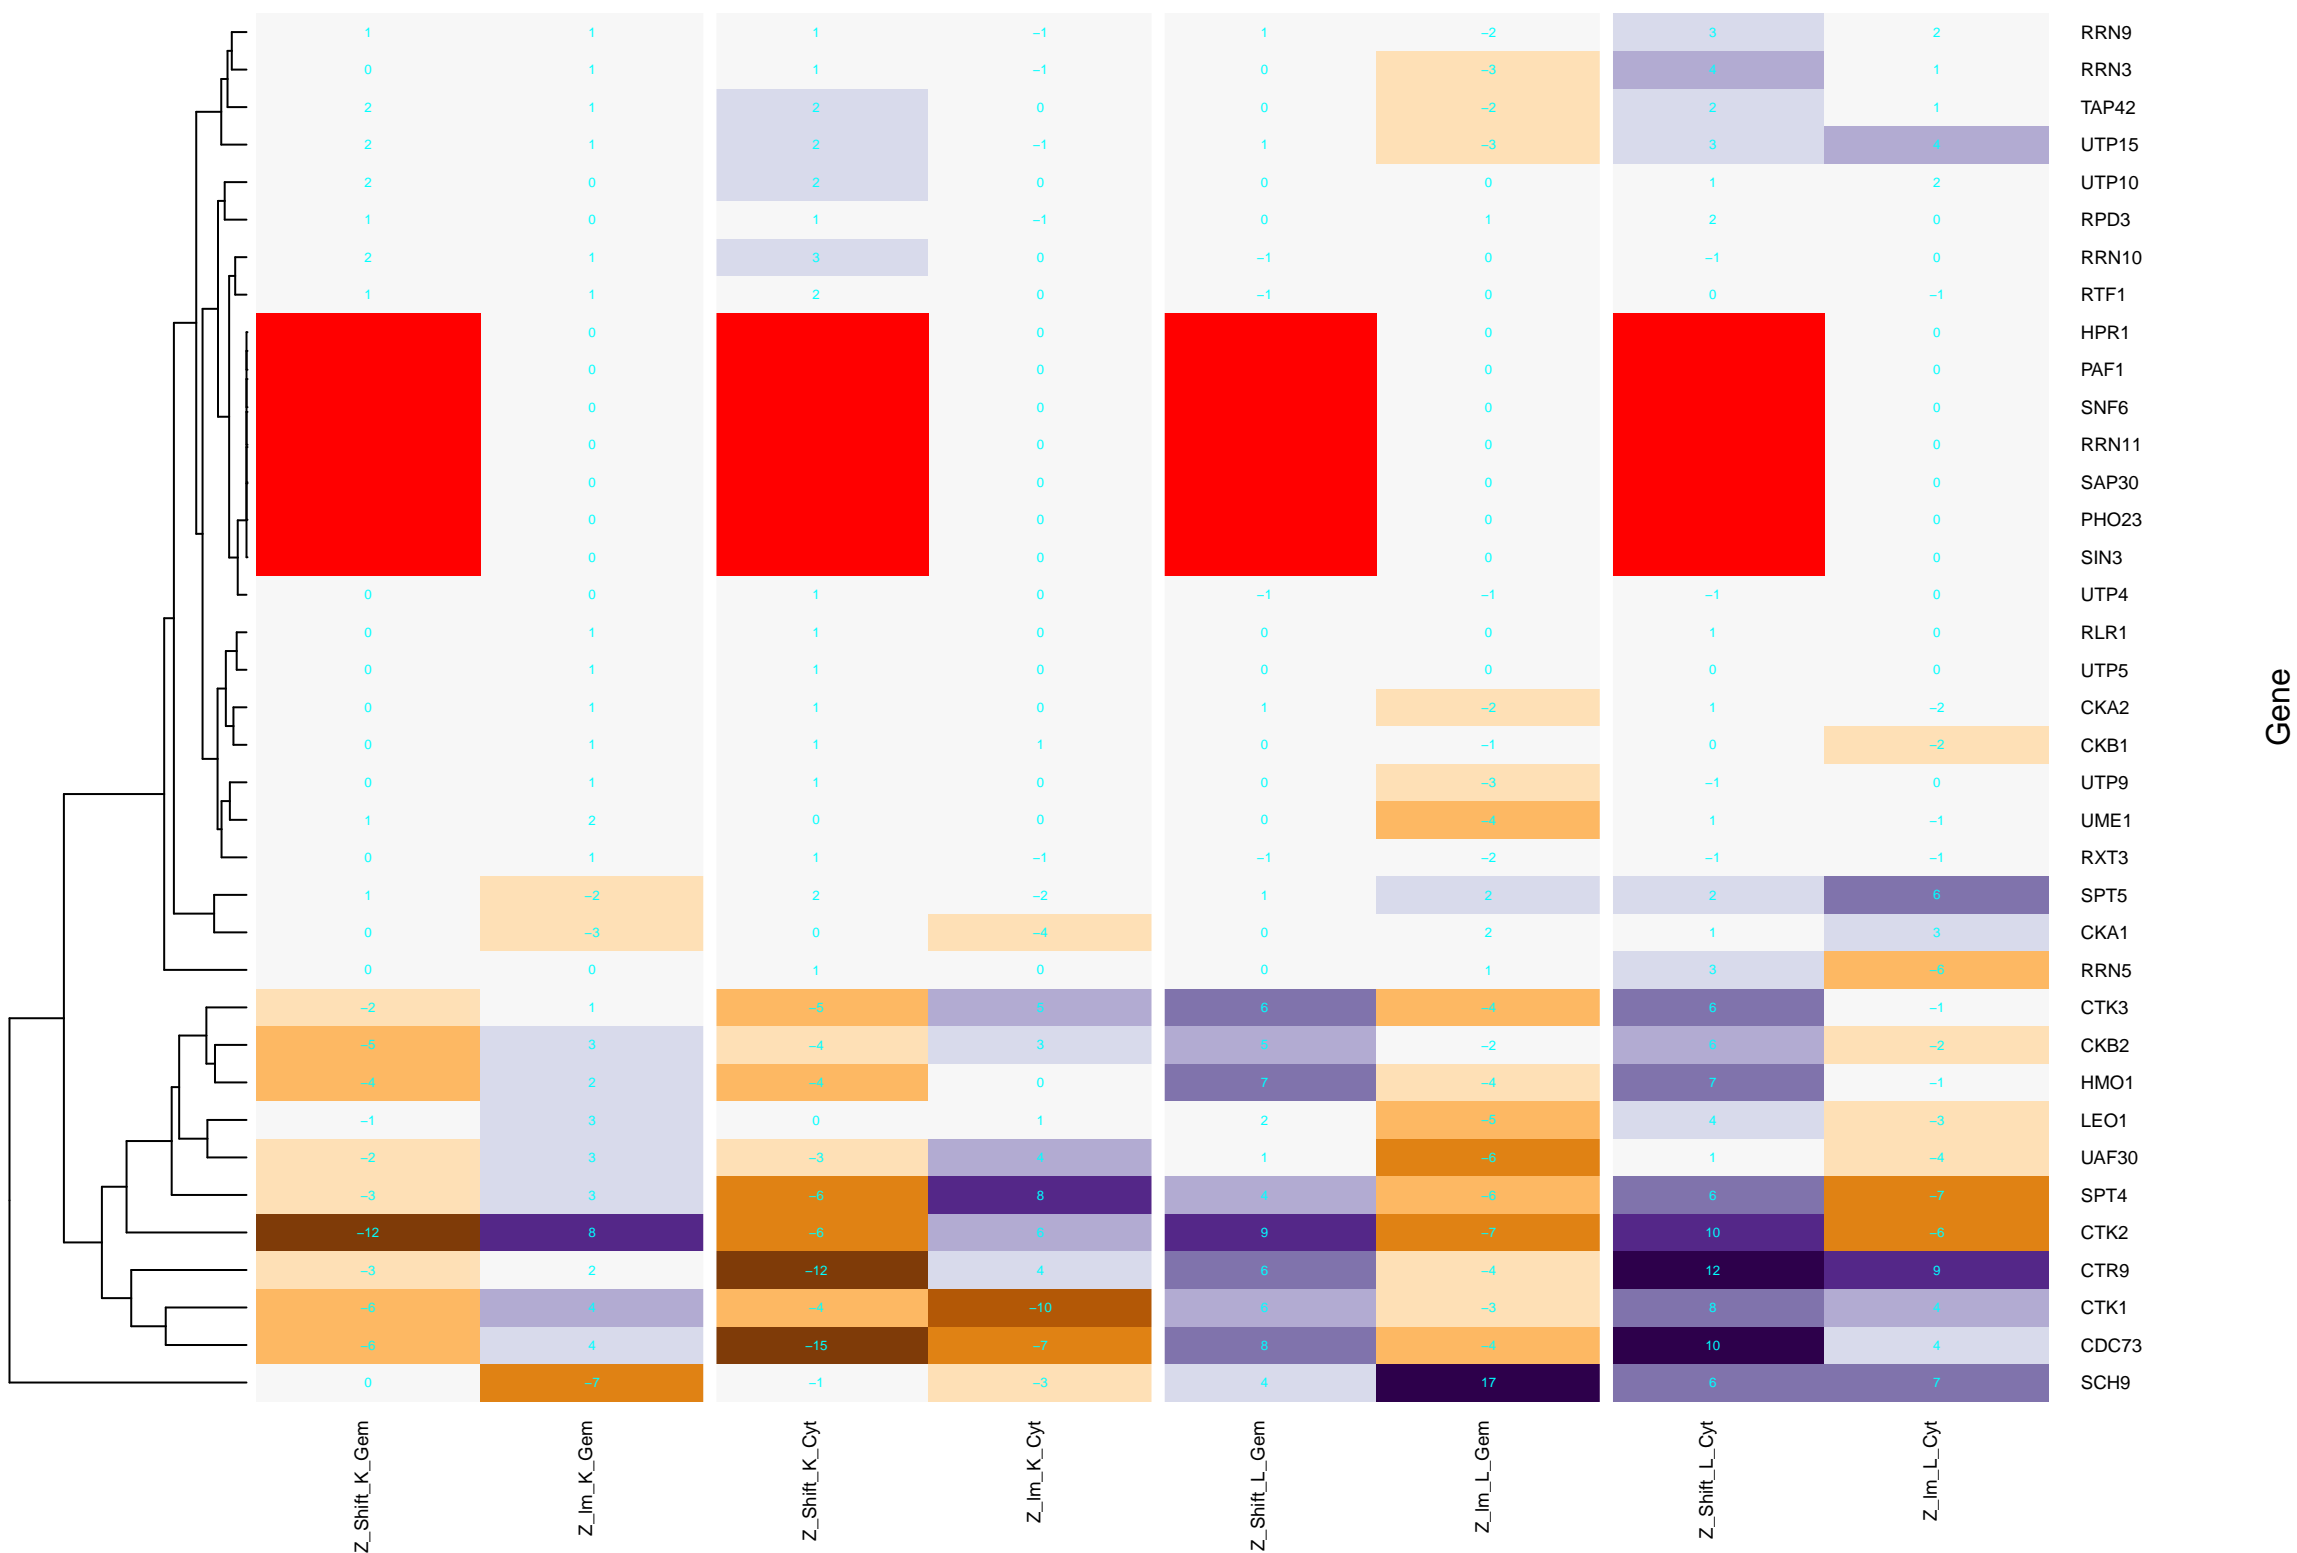

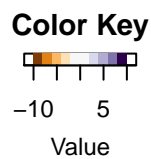

# negative regulation of transcription from RNA polymerase I promoter

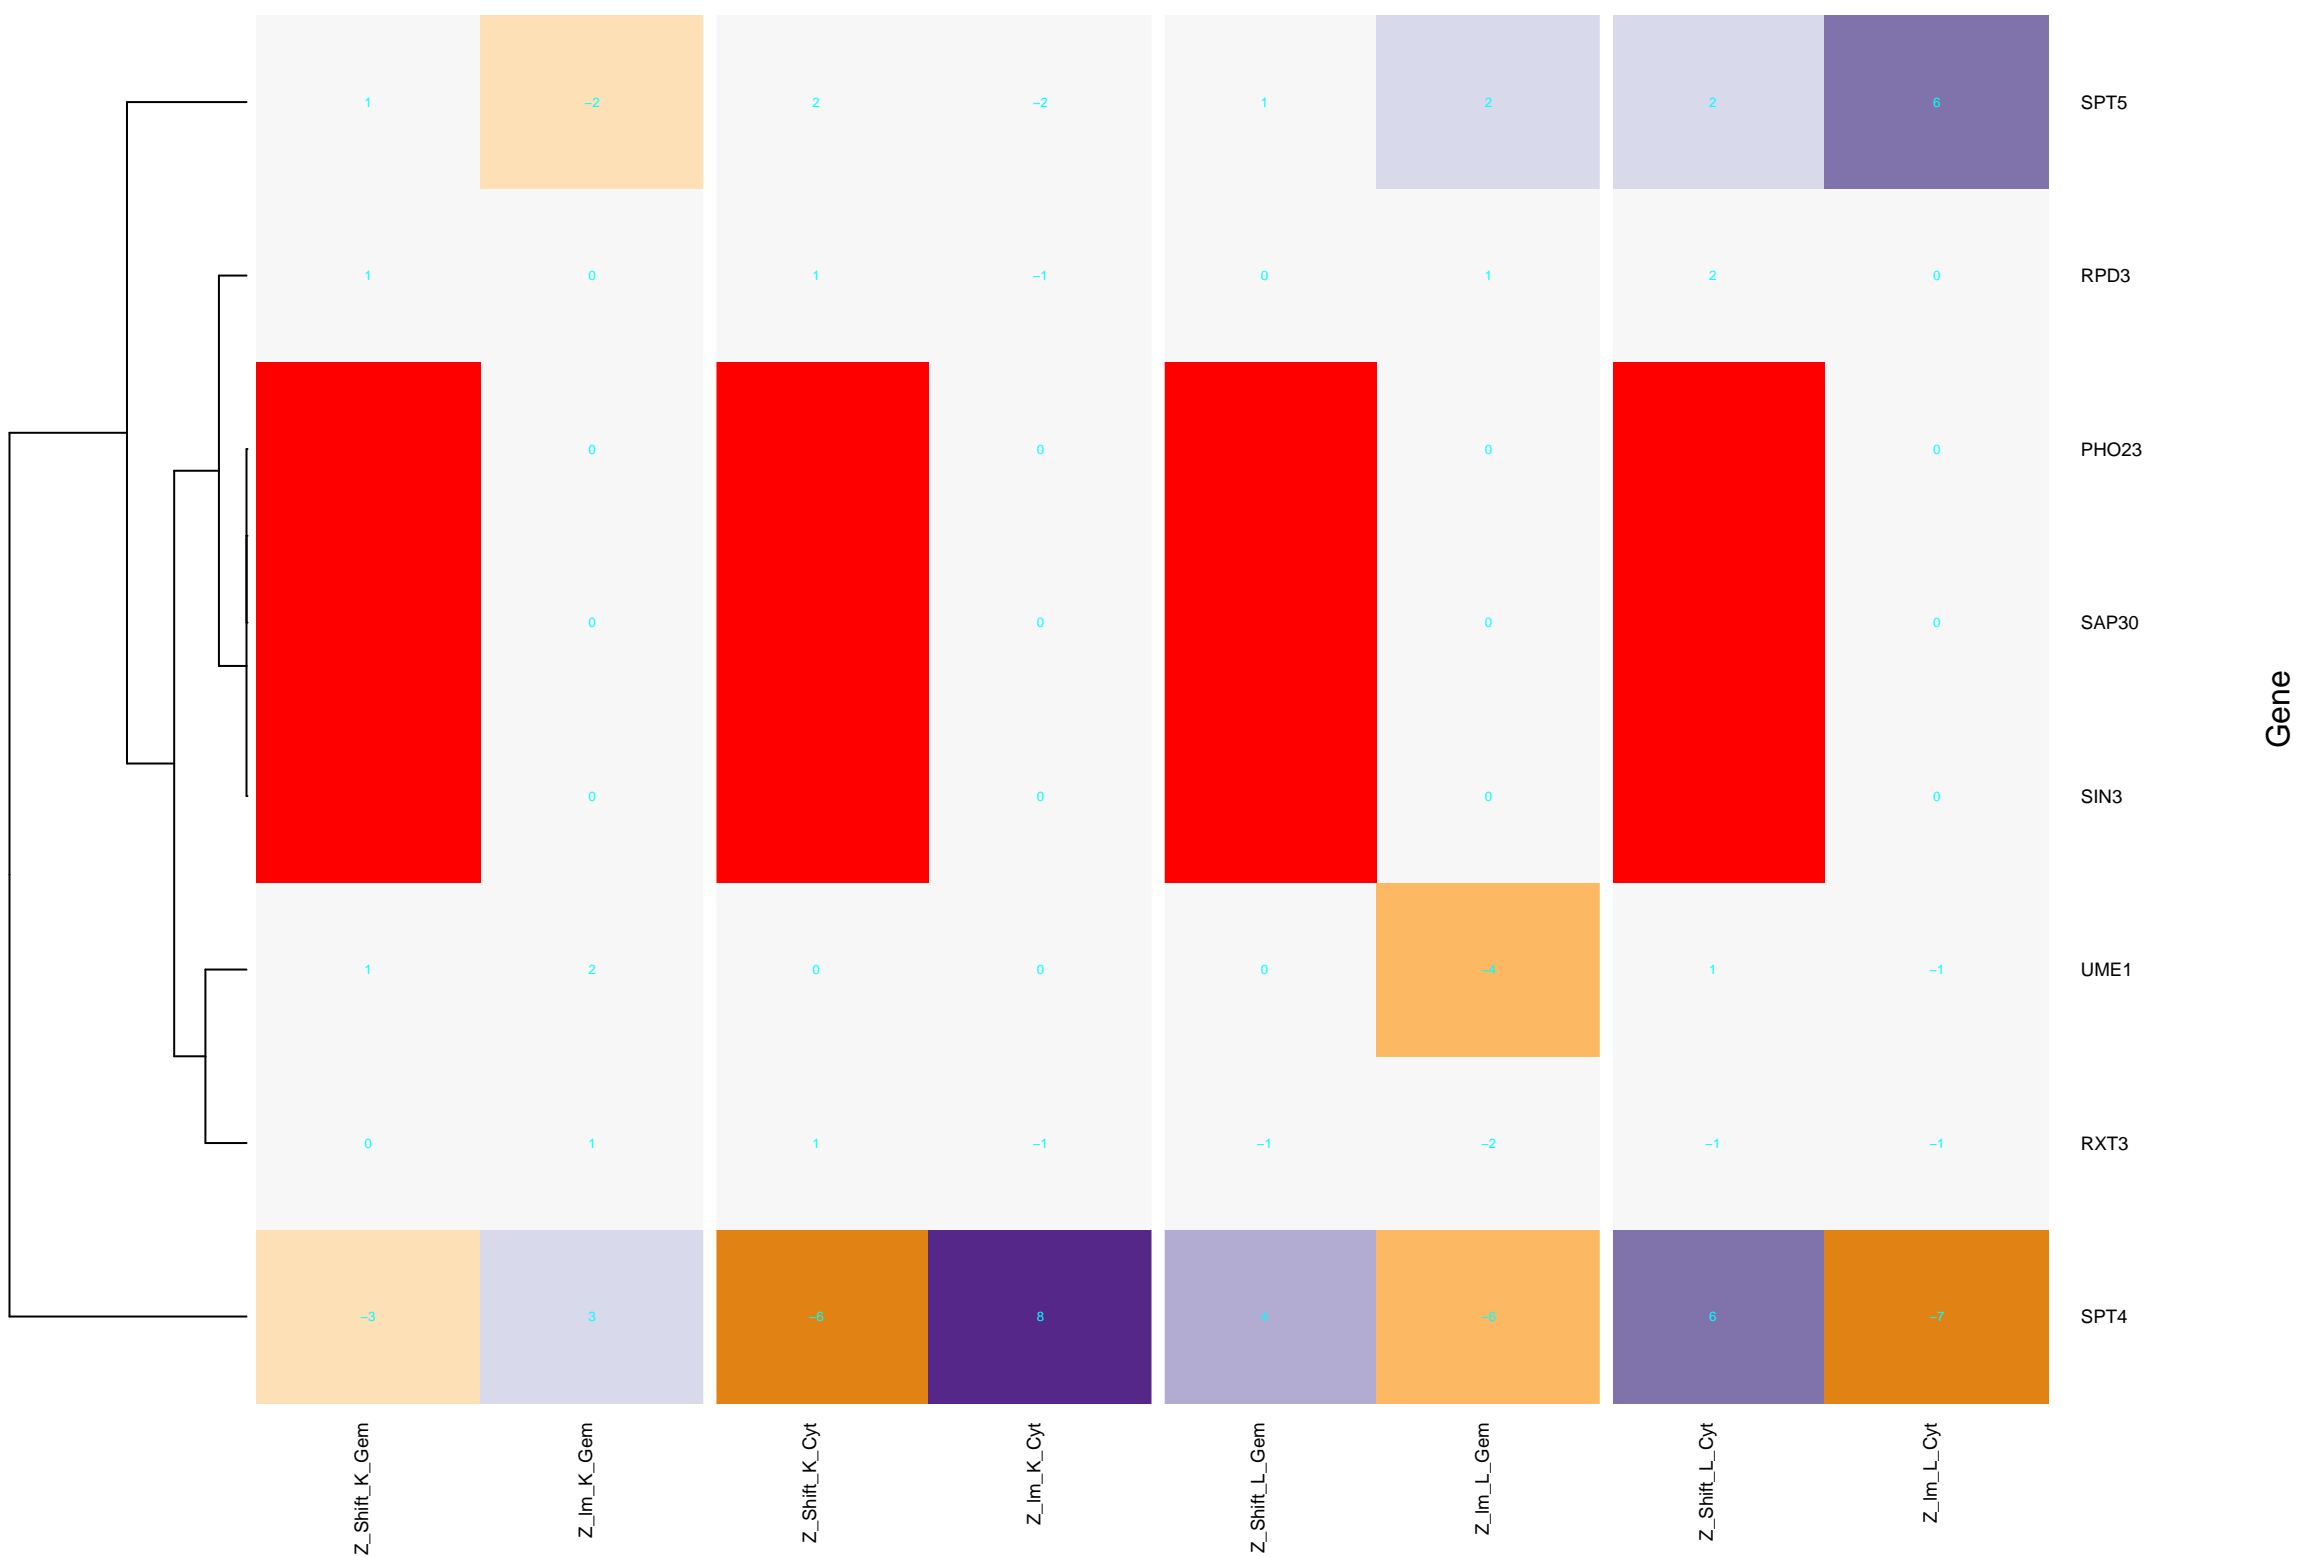



# positive regulation of transcription from RNA polymerase I promoter

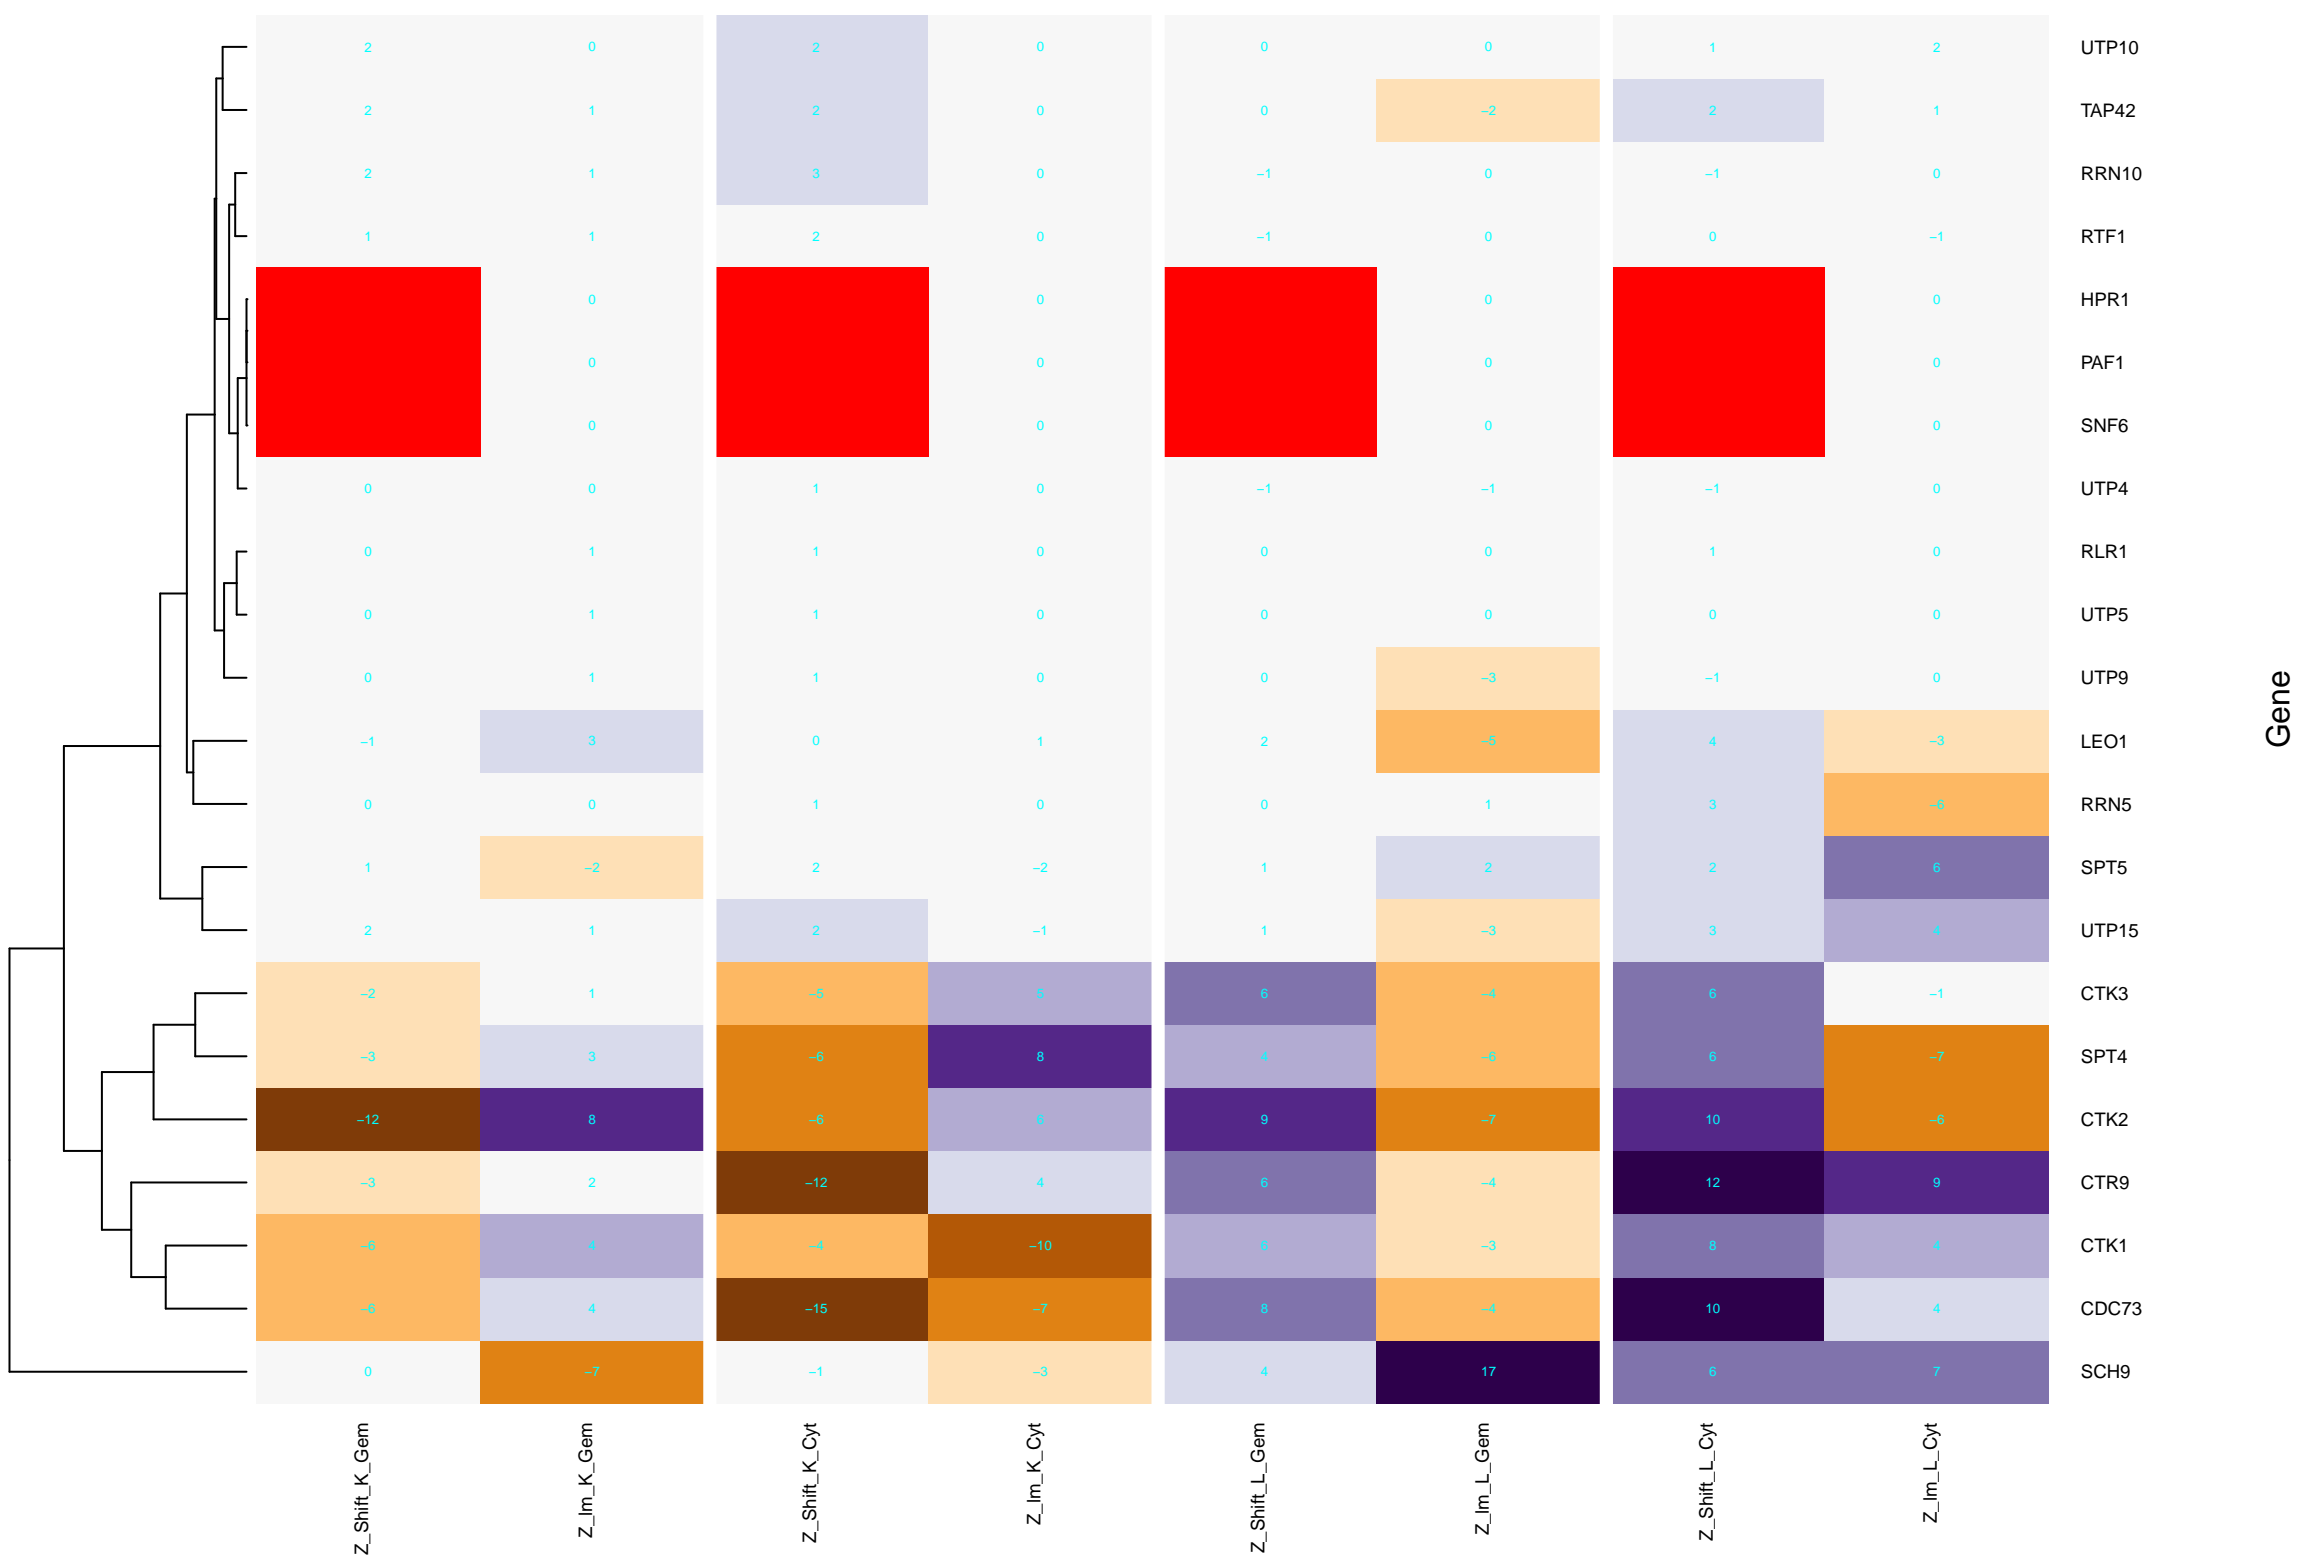

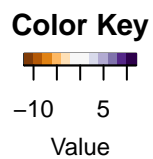

# regulation of transcription elongation from RNA polymerase I promoter

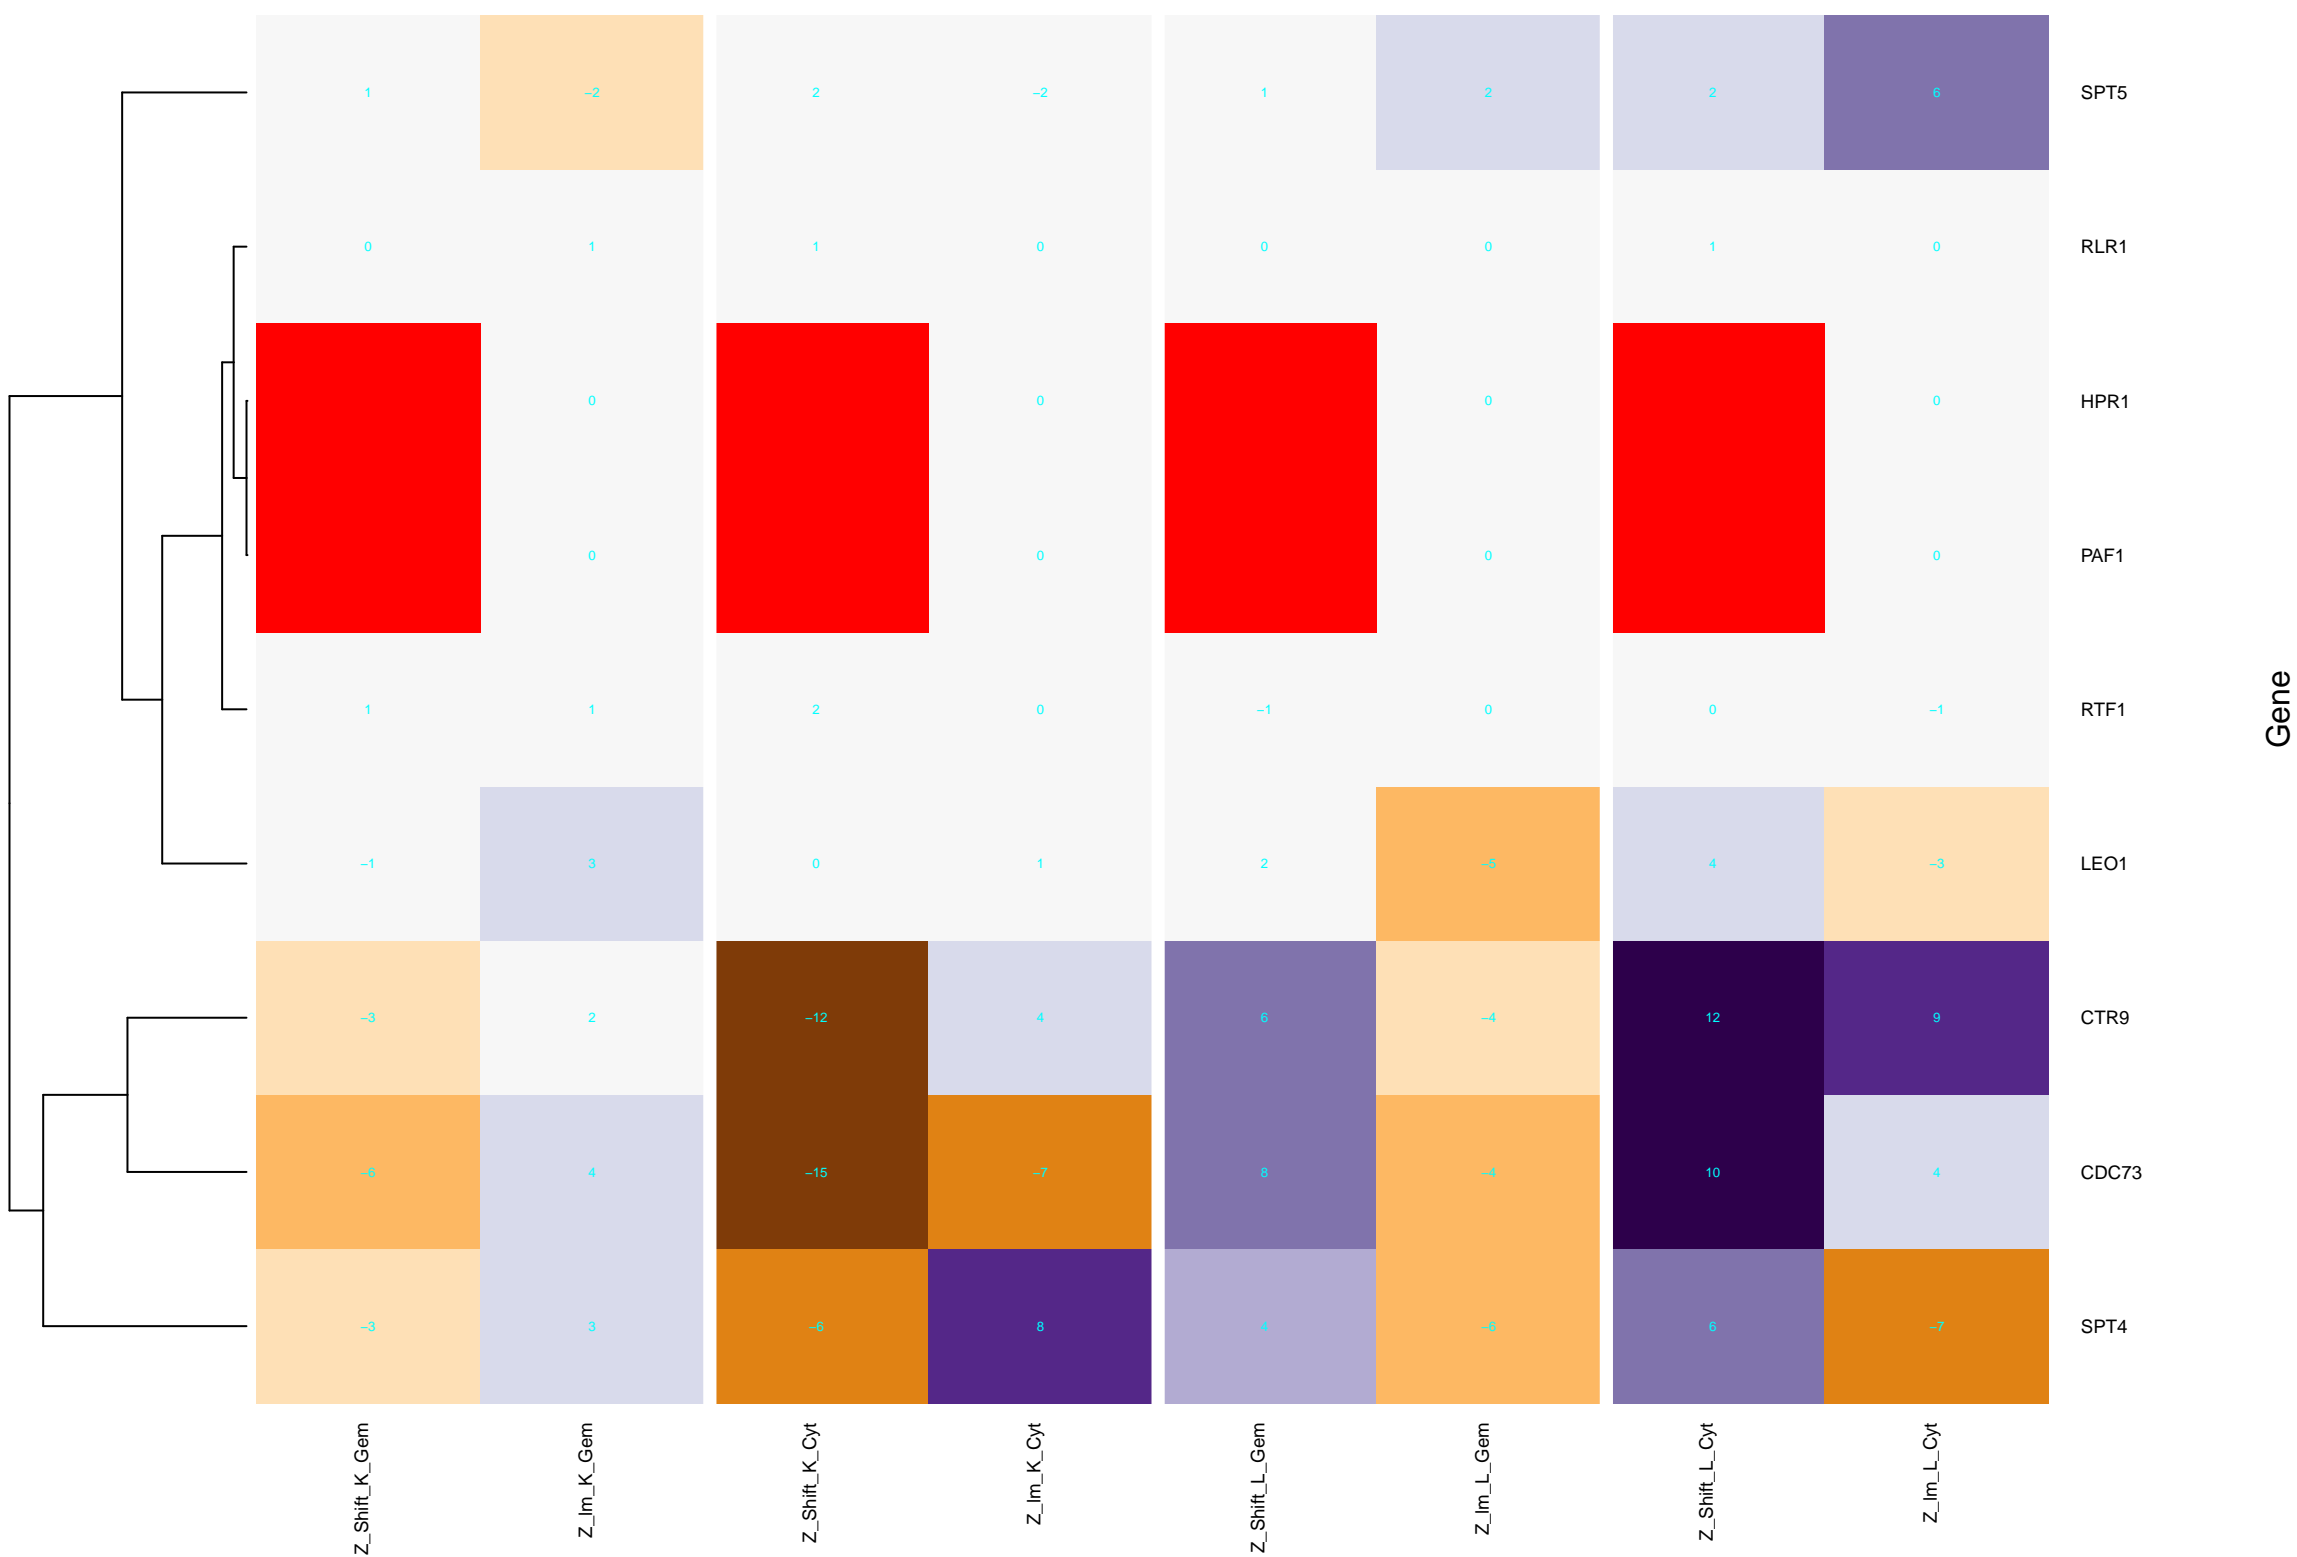

Color Key

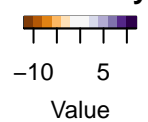

# positive regulation of transcription elongation from RNA polymerase I promoter

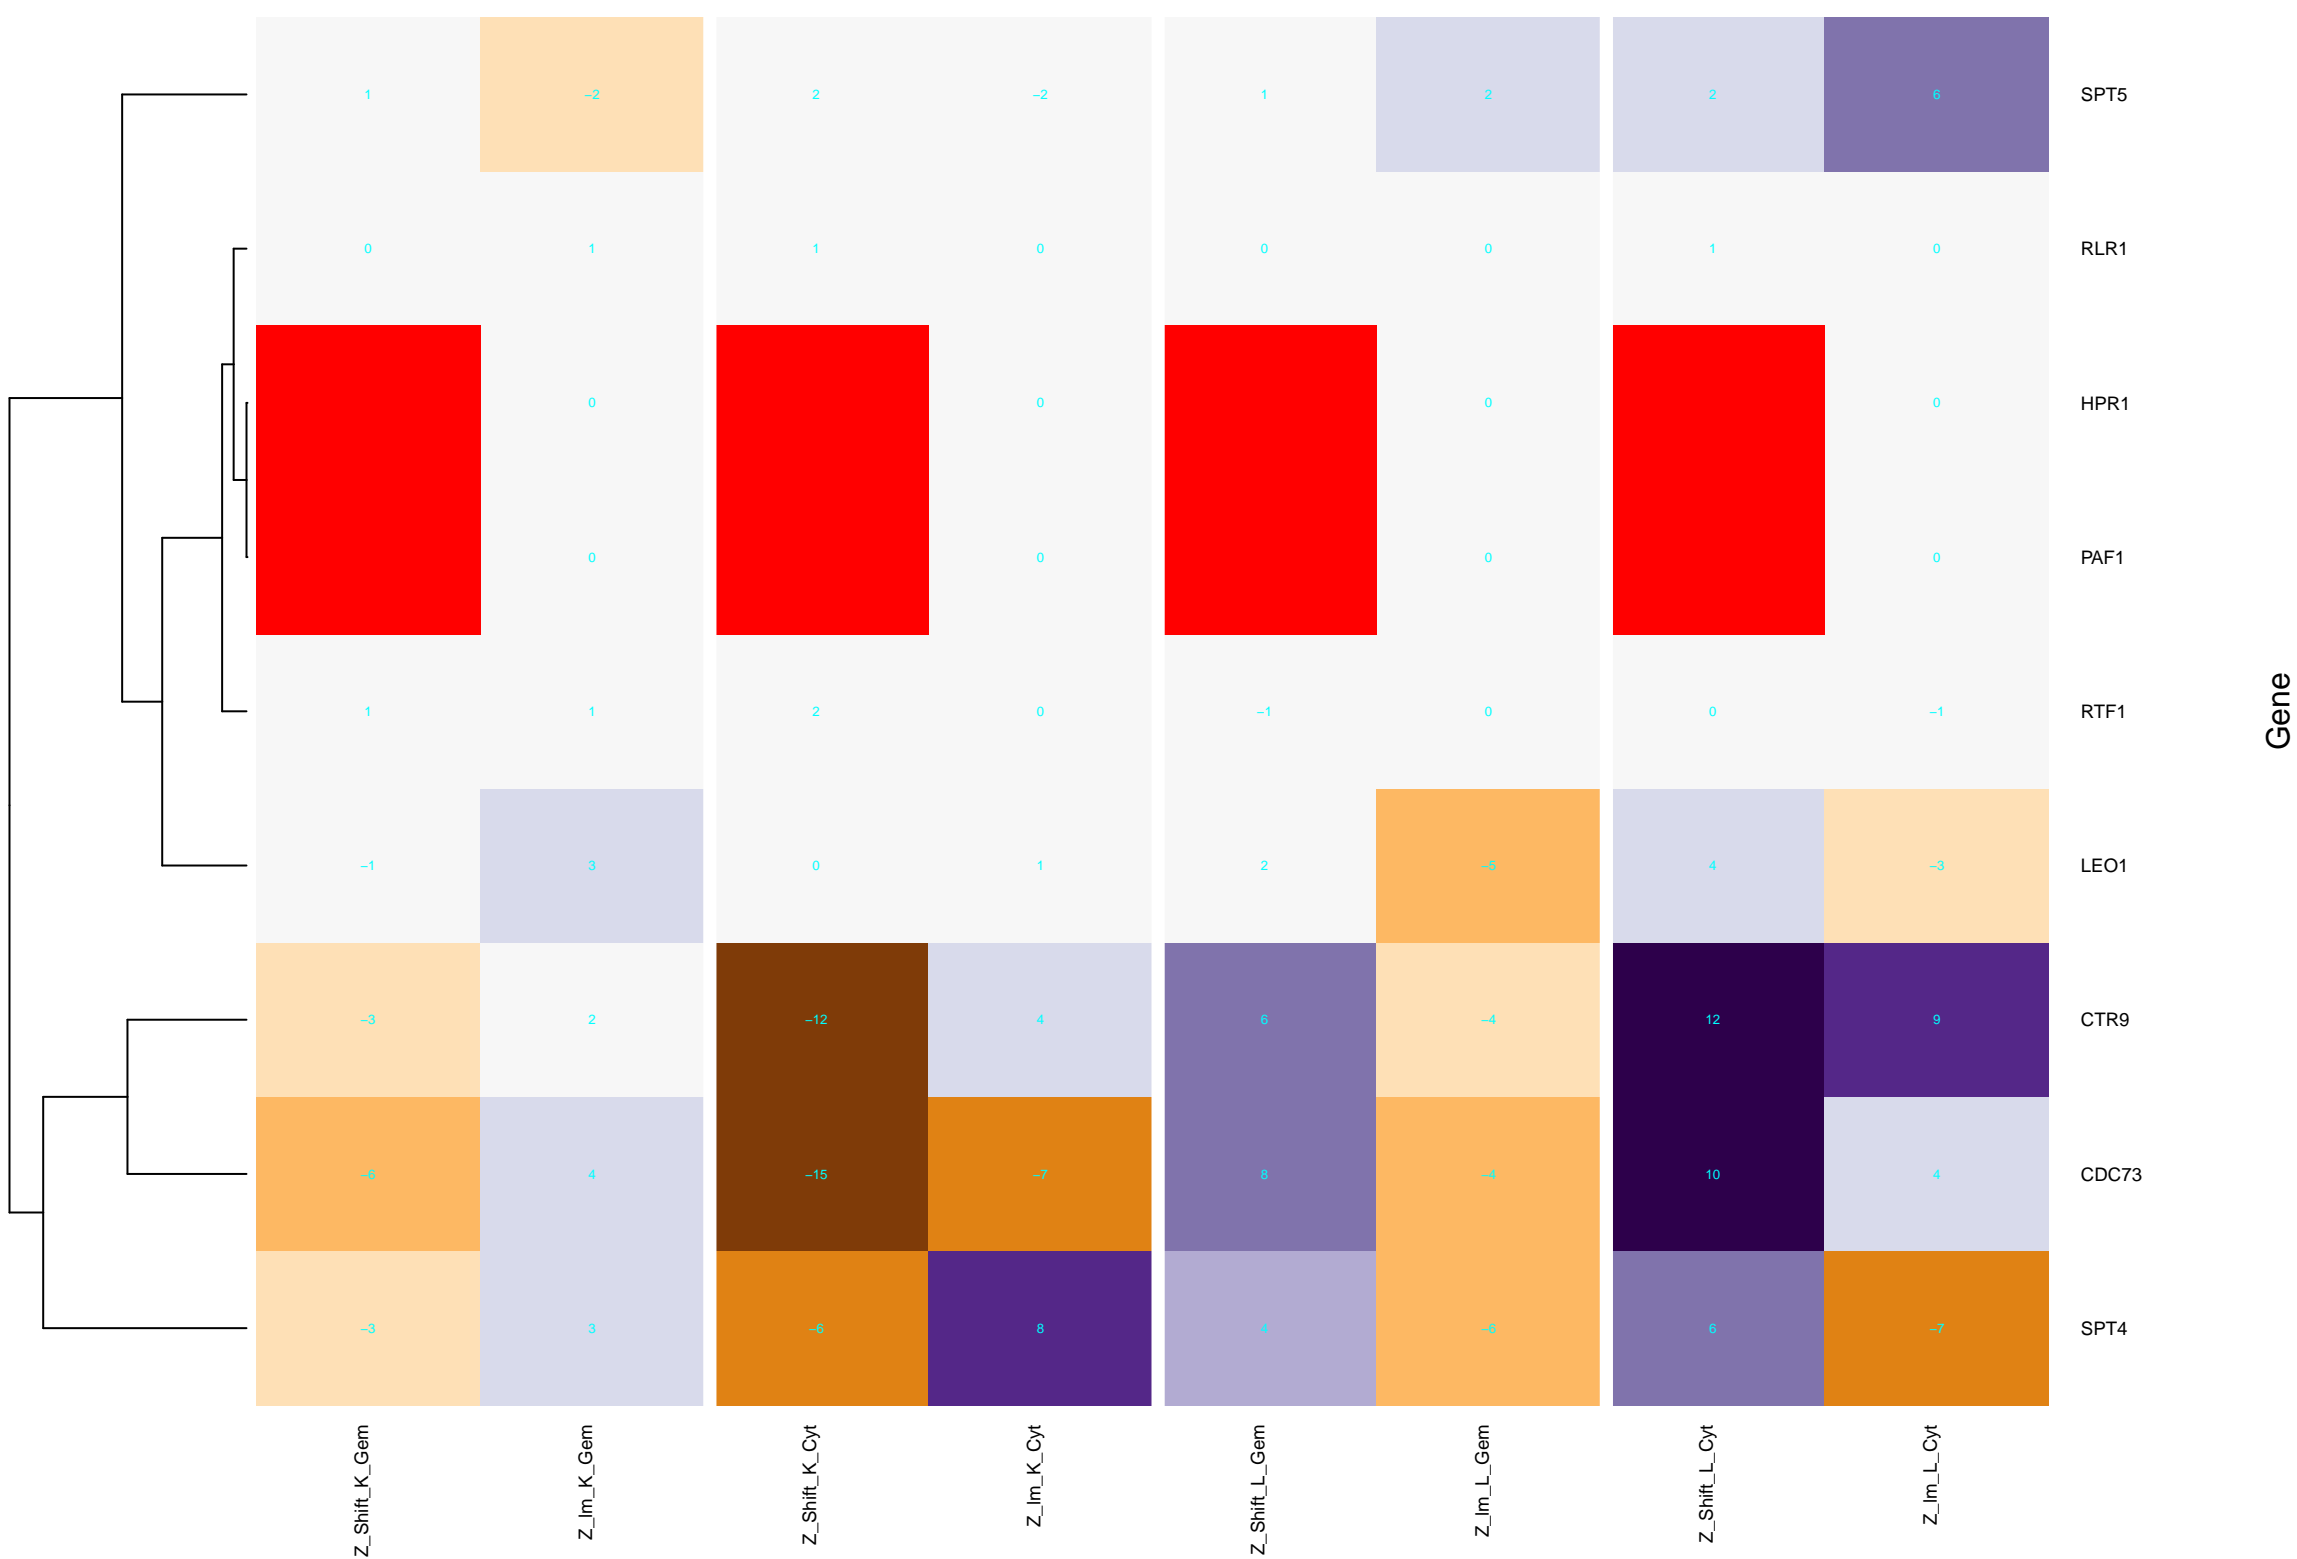

Supplement: s1 [file s1]
