# Supplementary material for: A Humanized Yeast Phenomic Model of Deoxycytidine Kinase to Predict Genetic Buffering of Nucleoside Analog Cytotoxicity
Source: MDPI journal article supplement (doi:10.3390/genes10100770), 2019-09-30

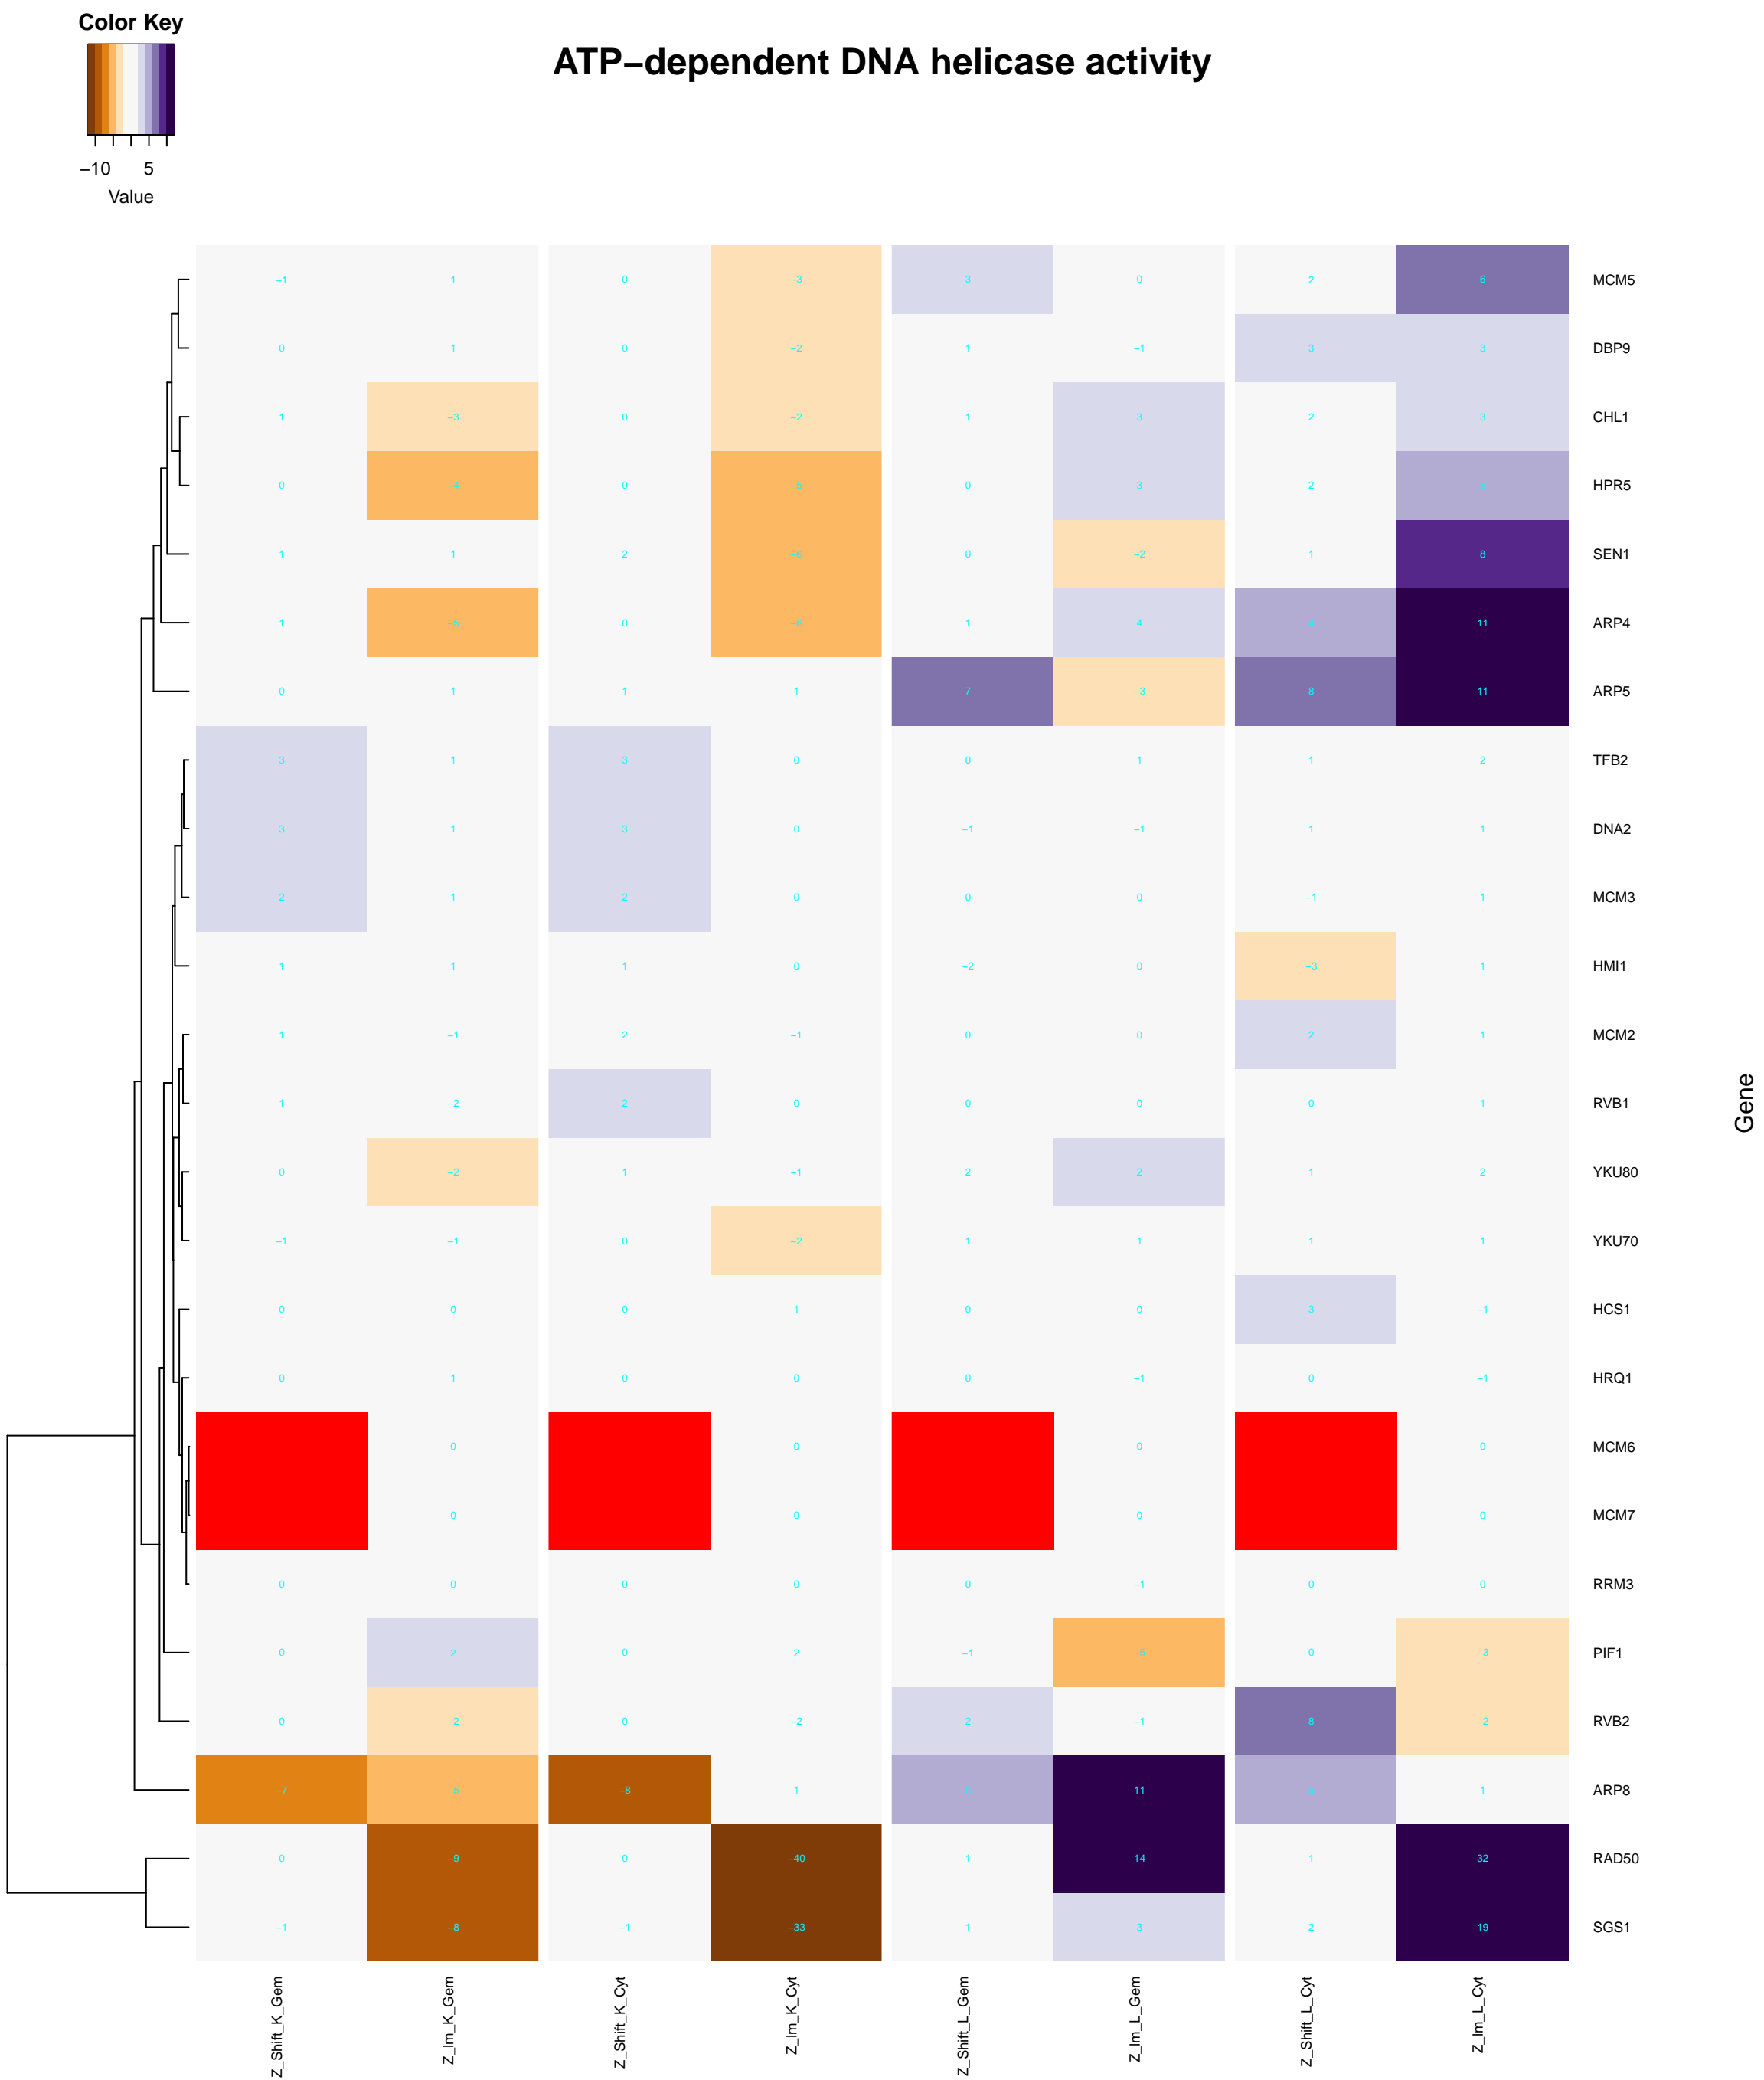

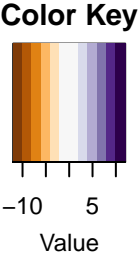

four-way junction helicase activity

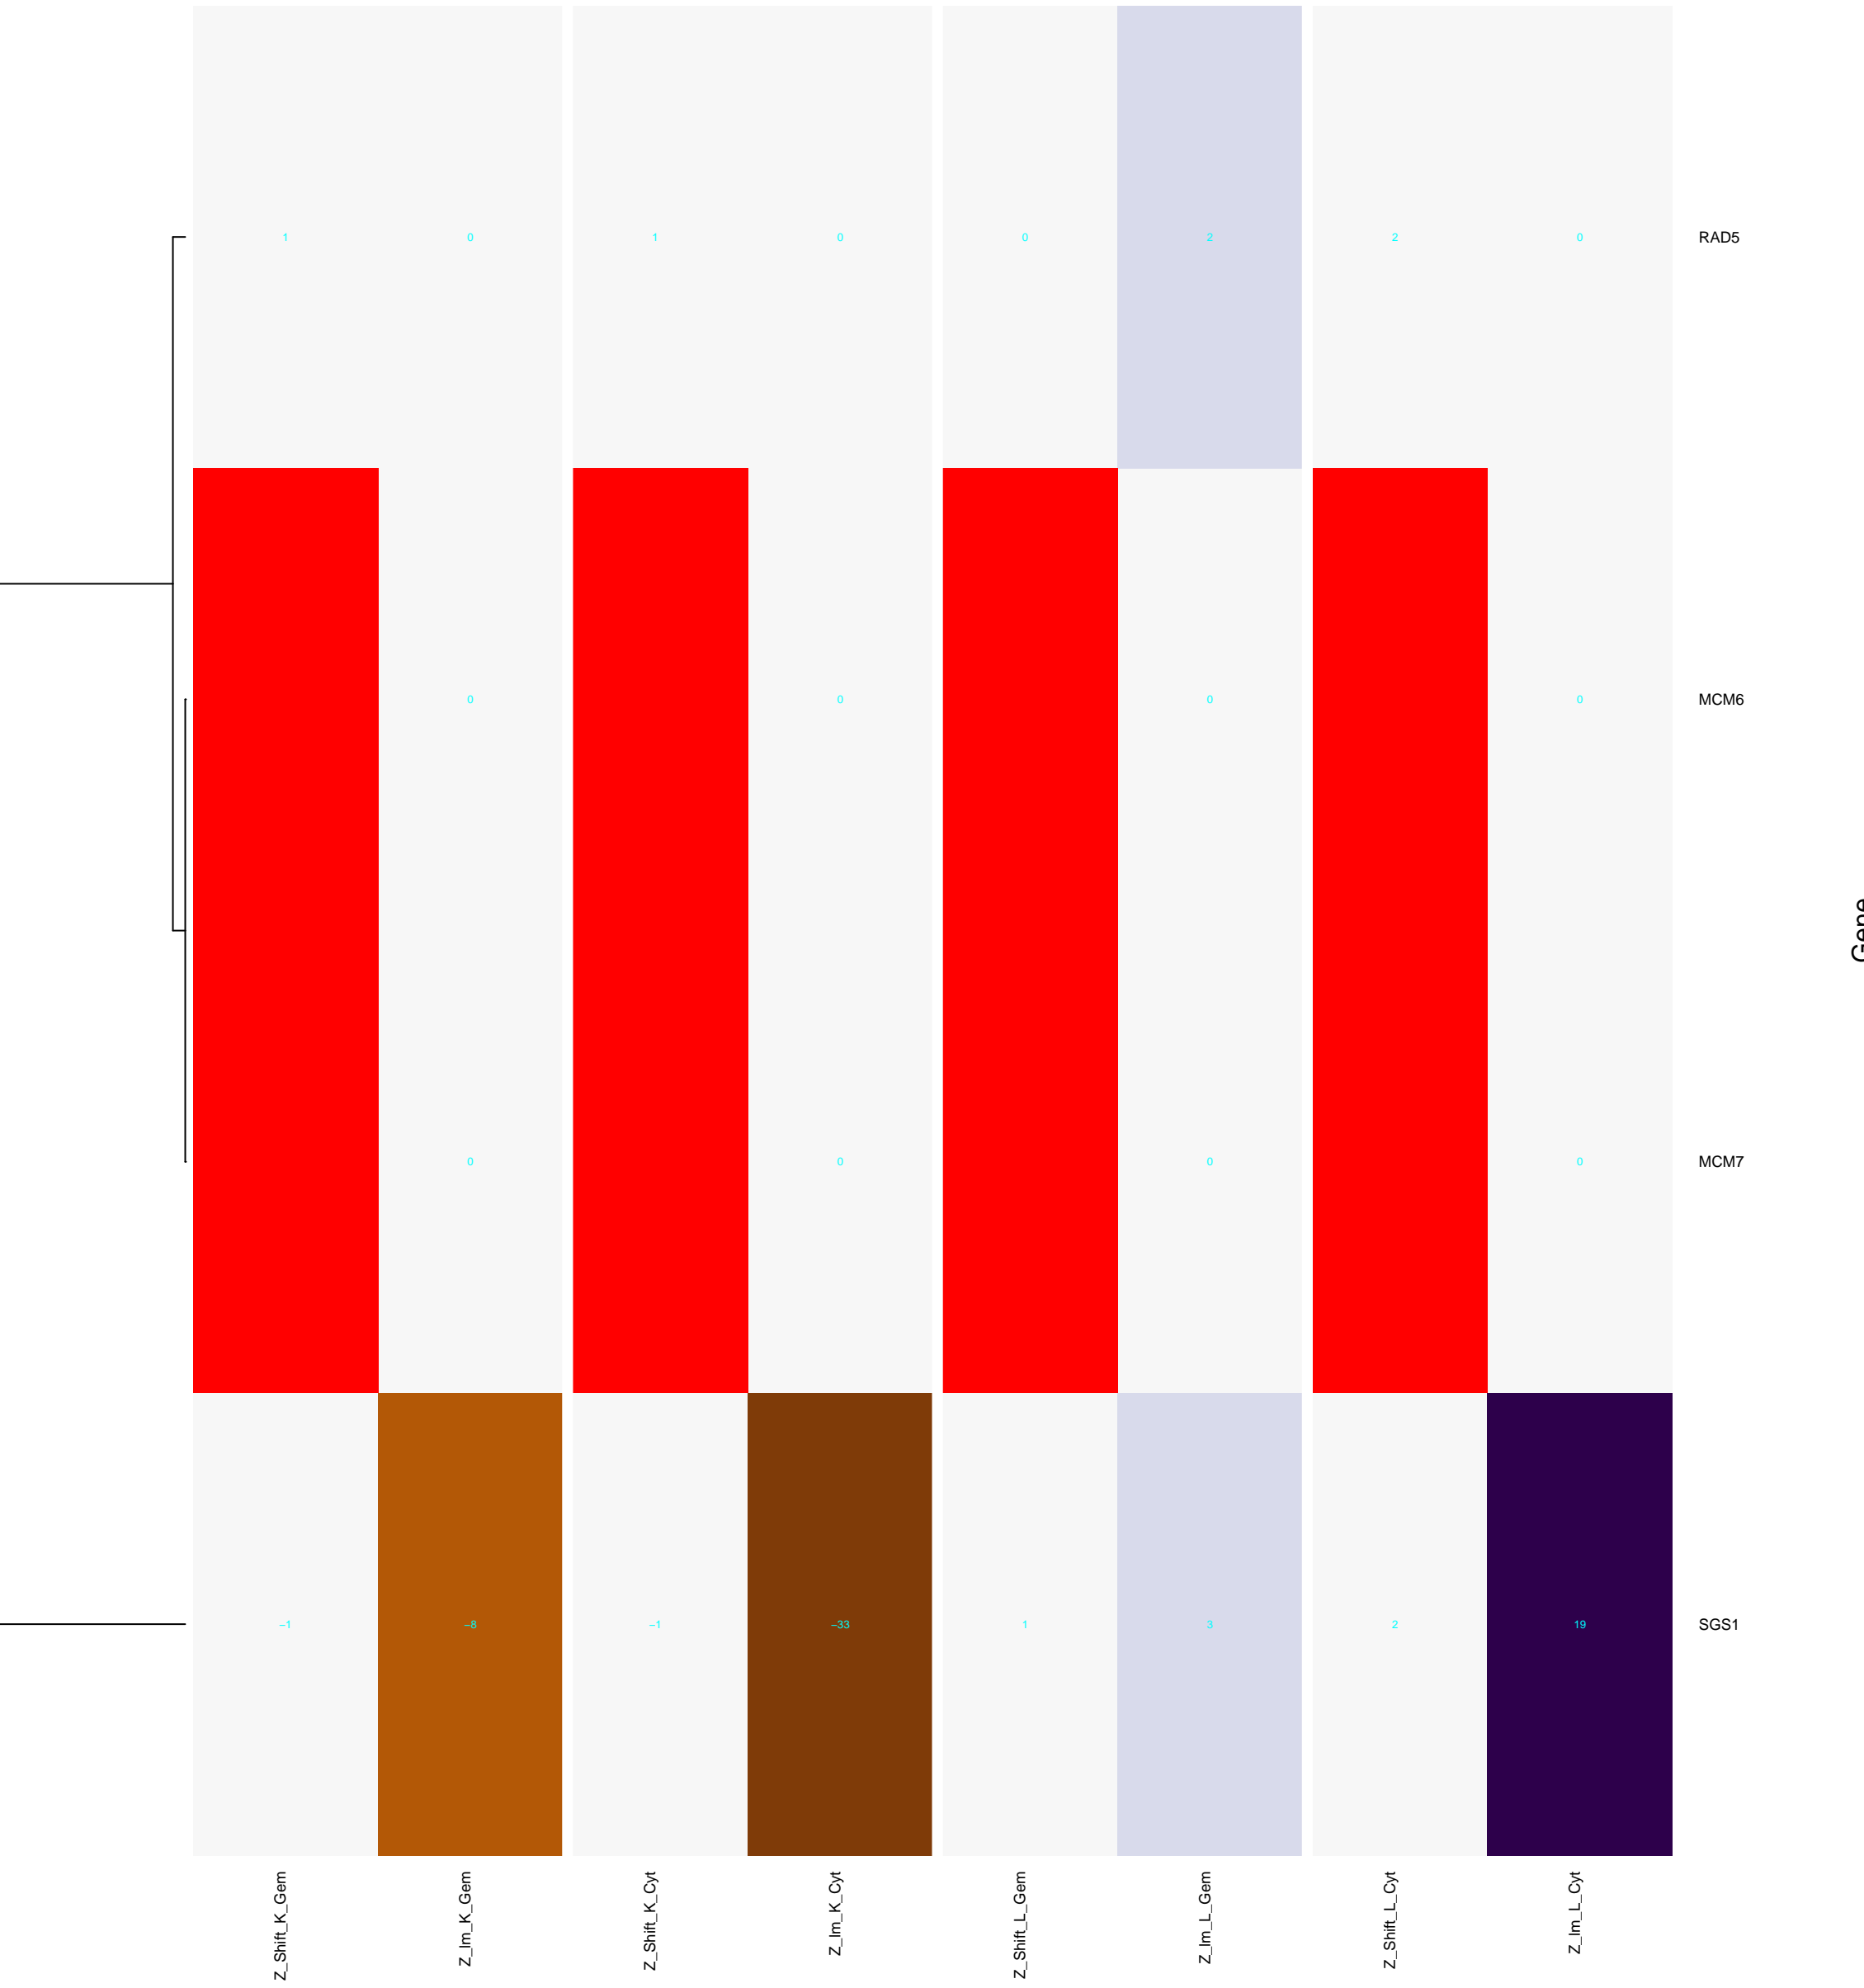



3'-5' DNA helicase activity

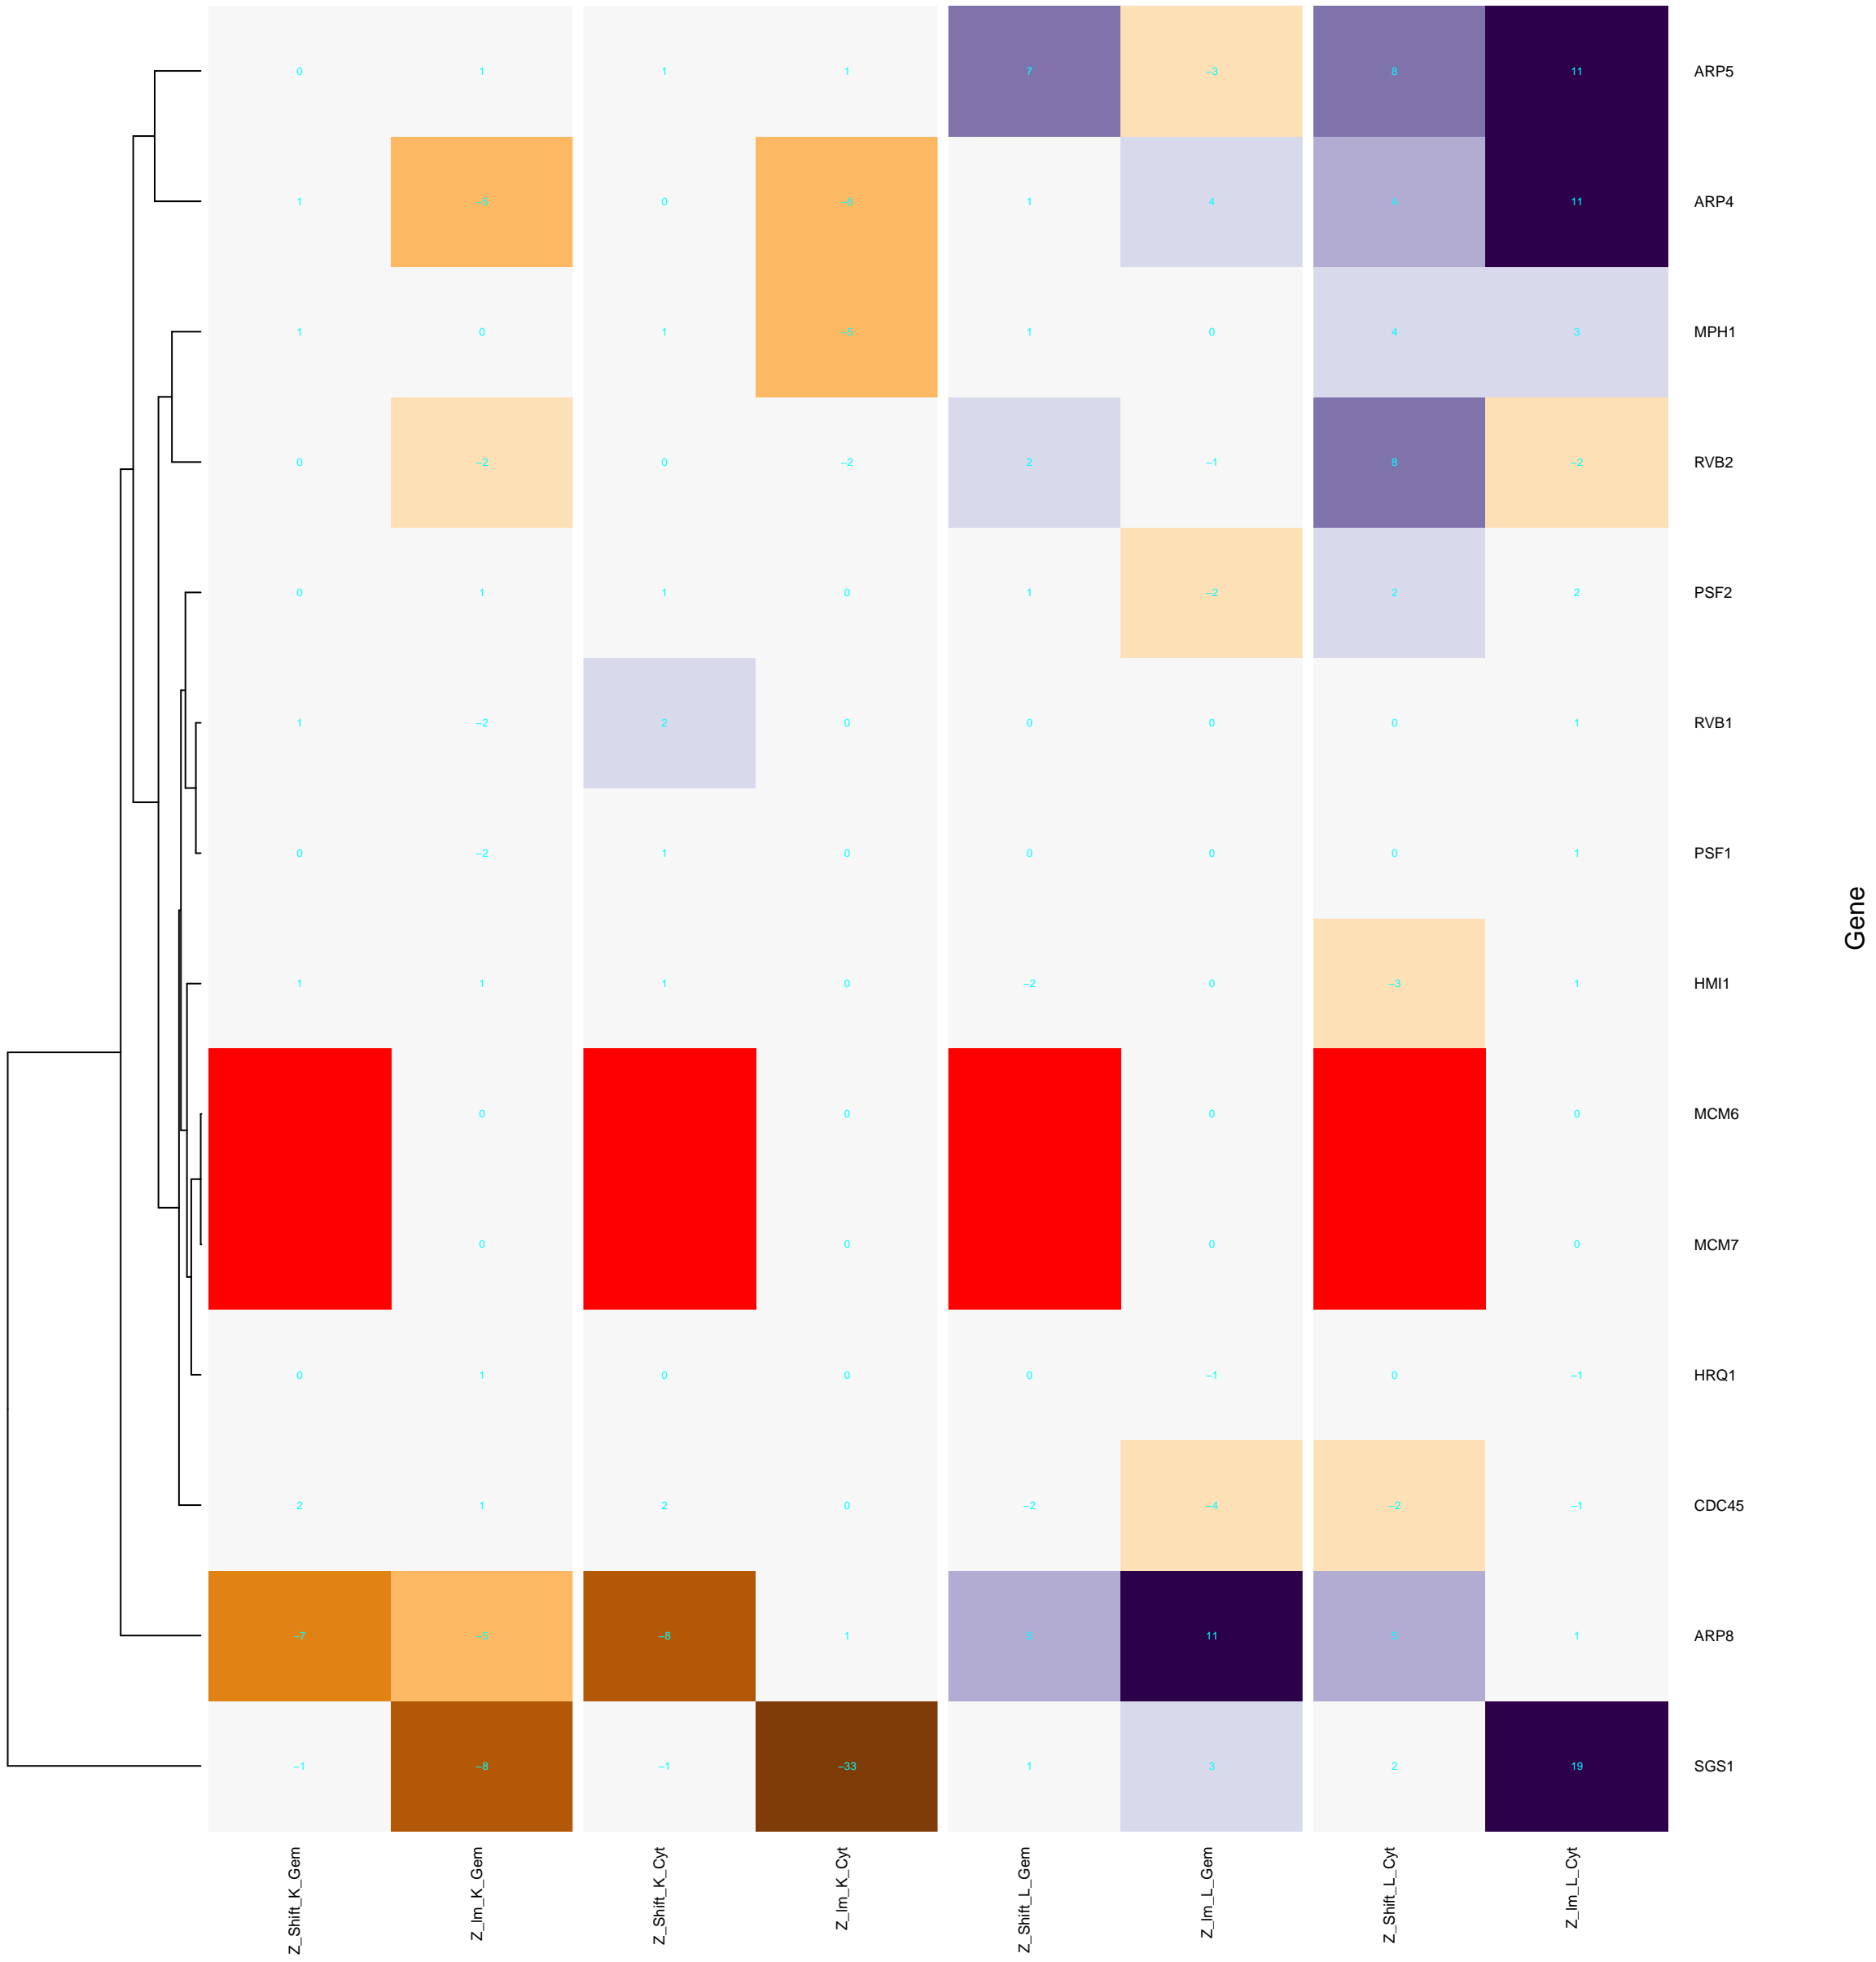

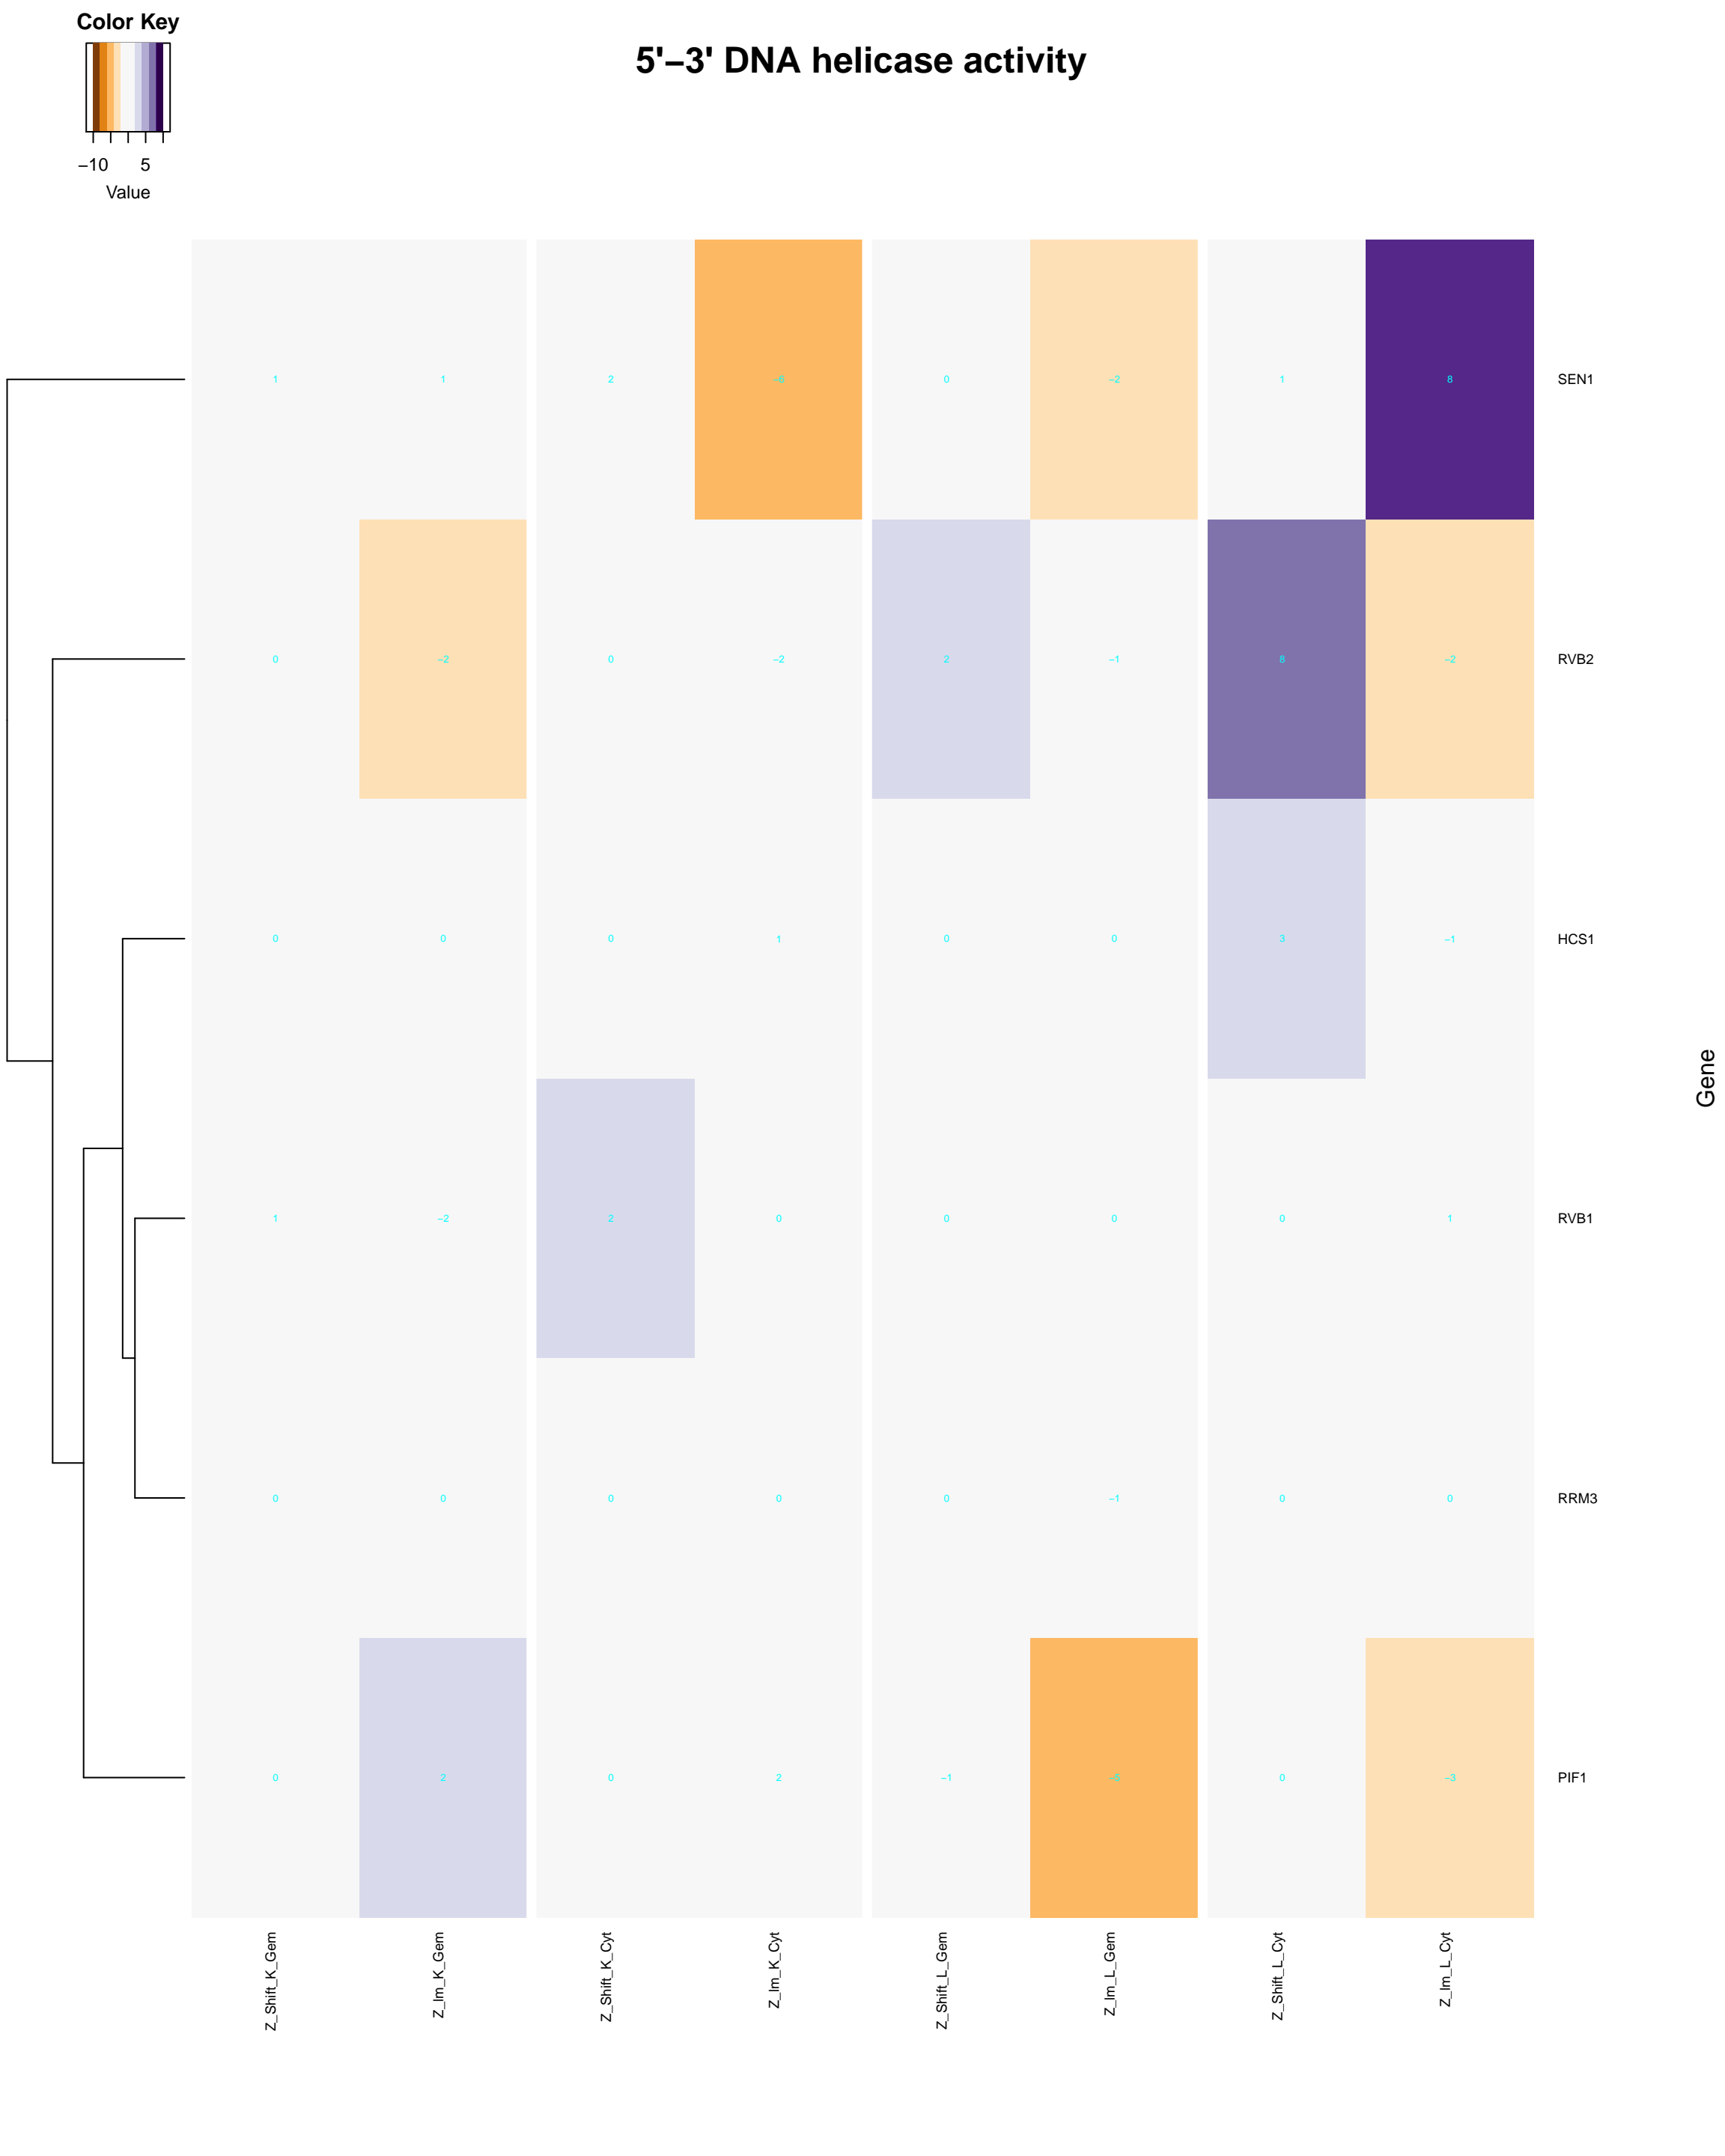

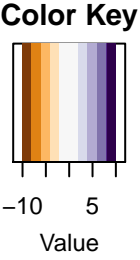

single-stranded DNA-dependent ATP-dependent DNA helicase activity

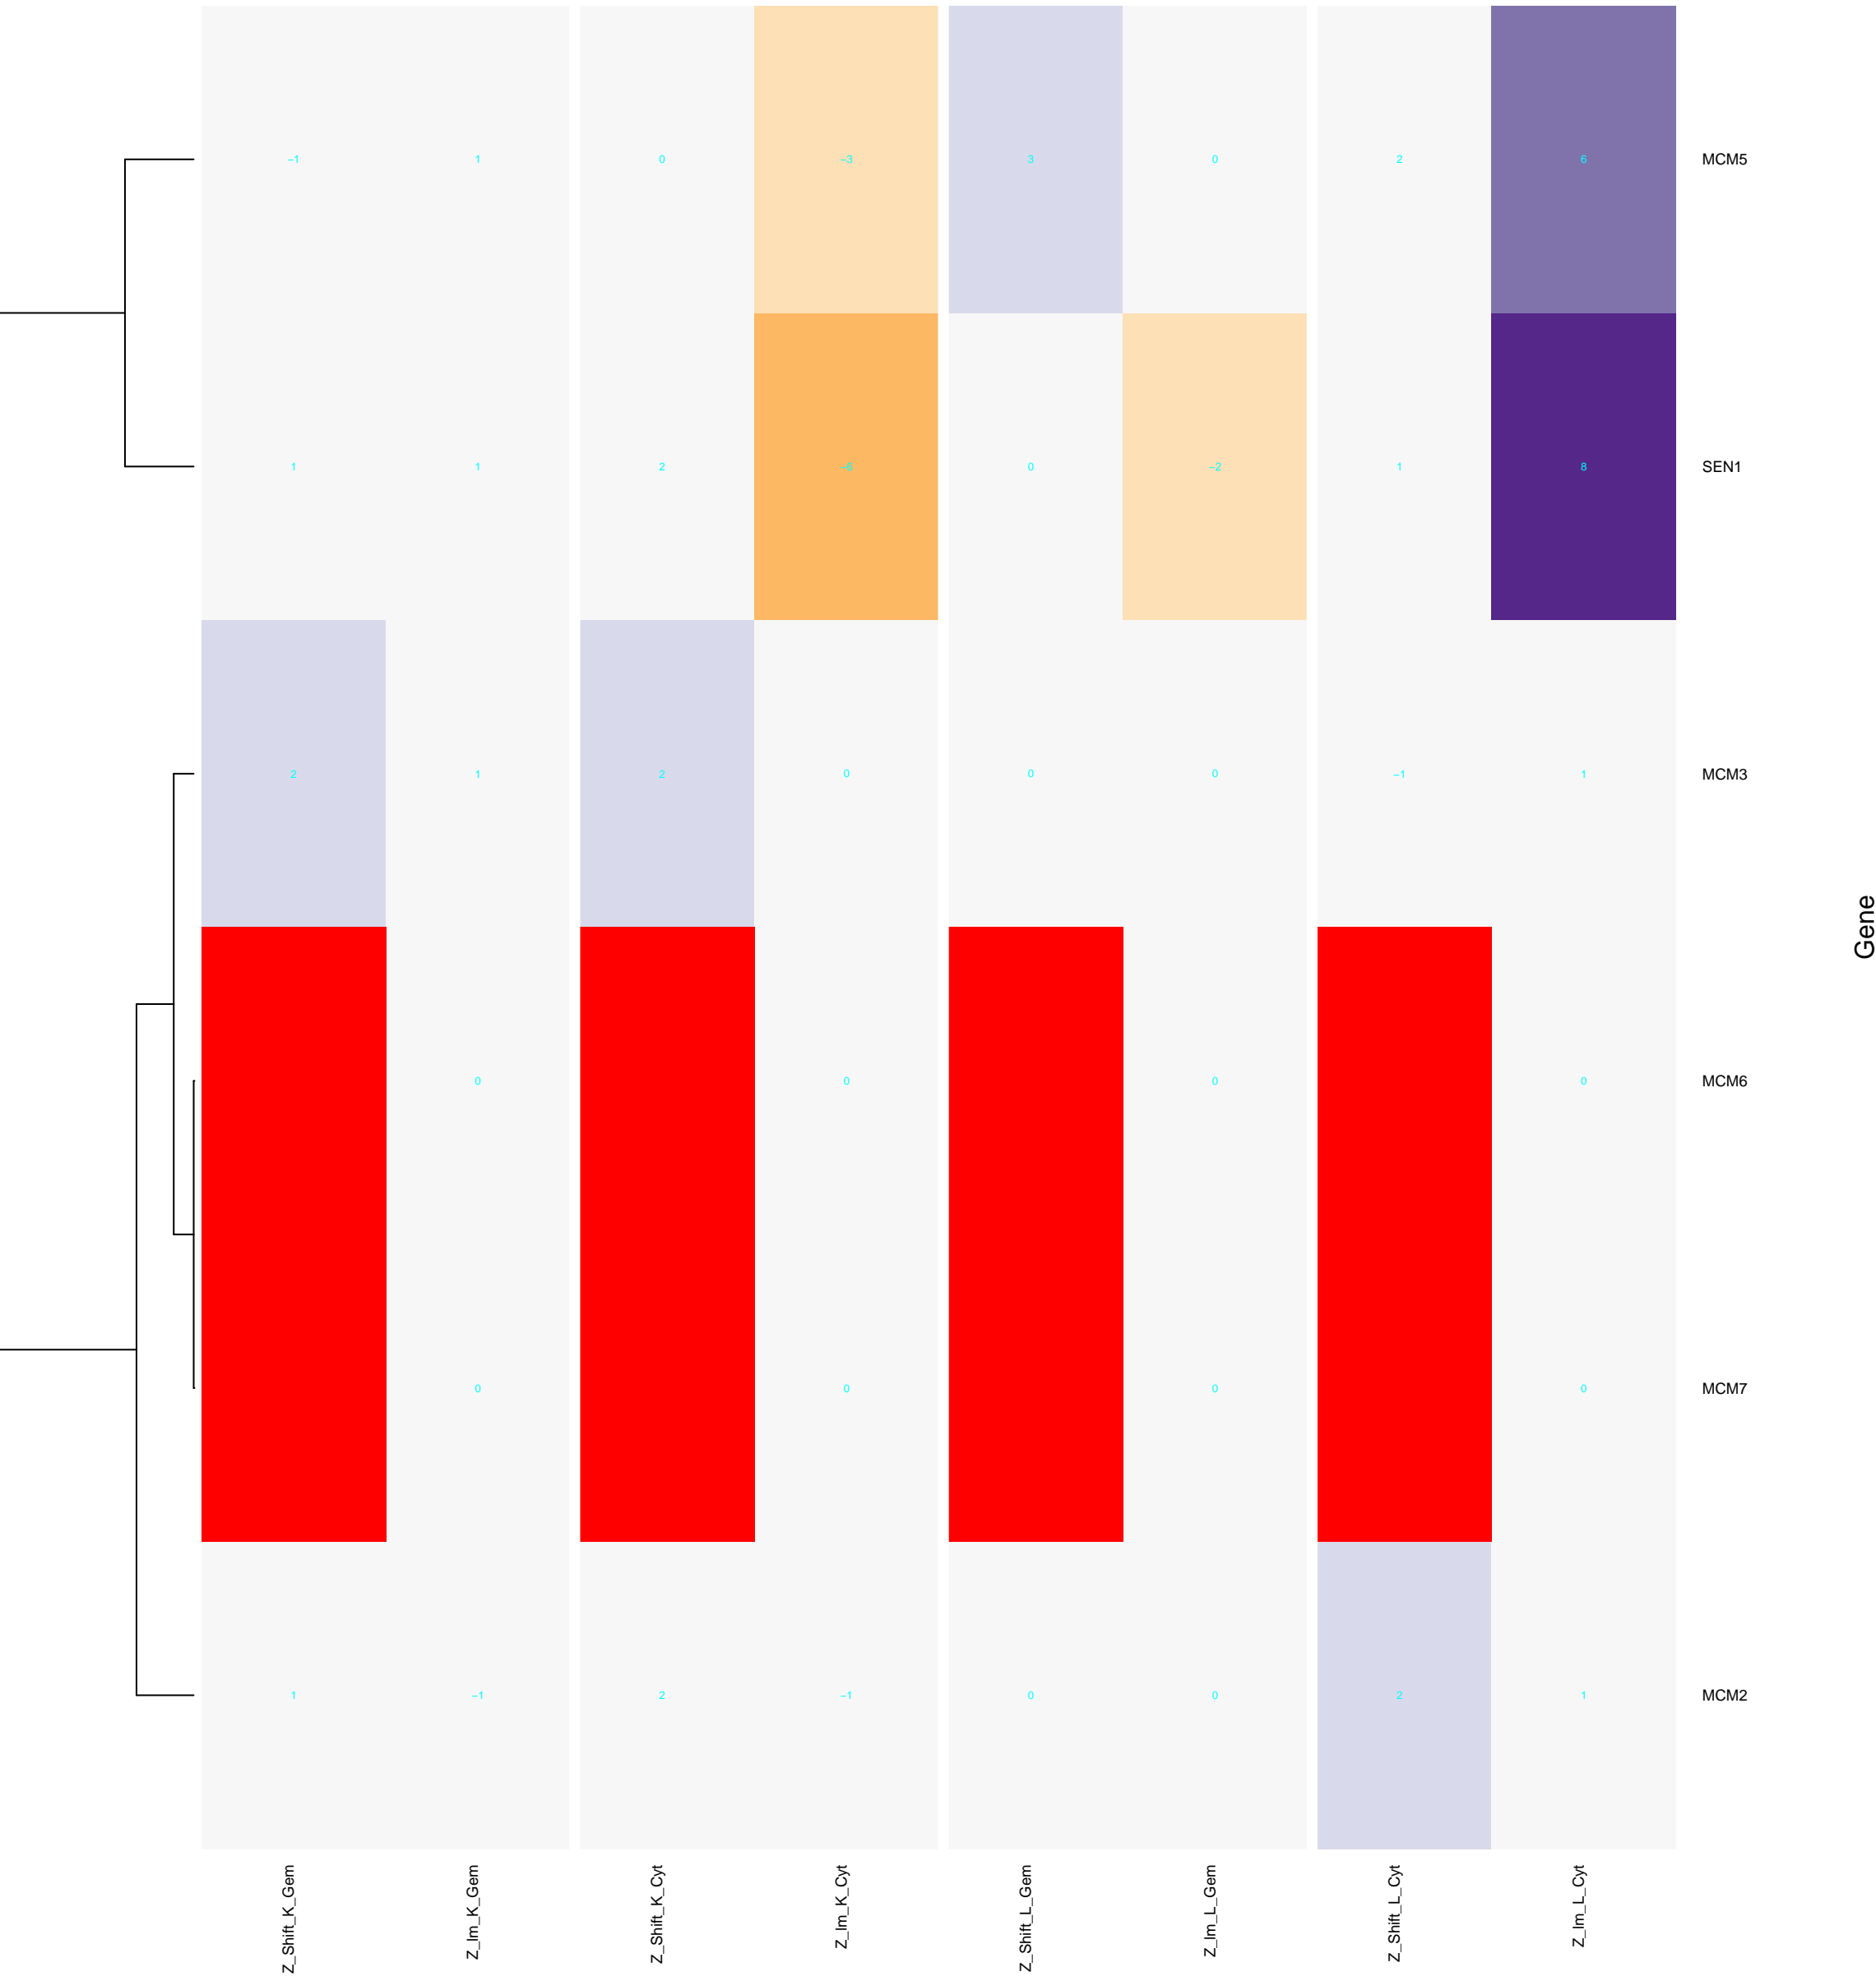



ATP-dependent 3'-5' DNA helicase activity

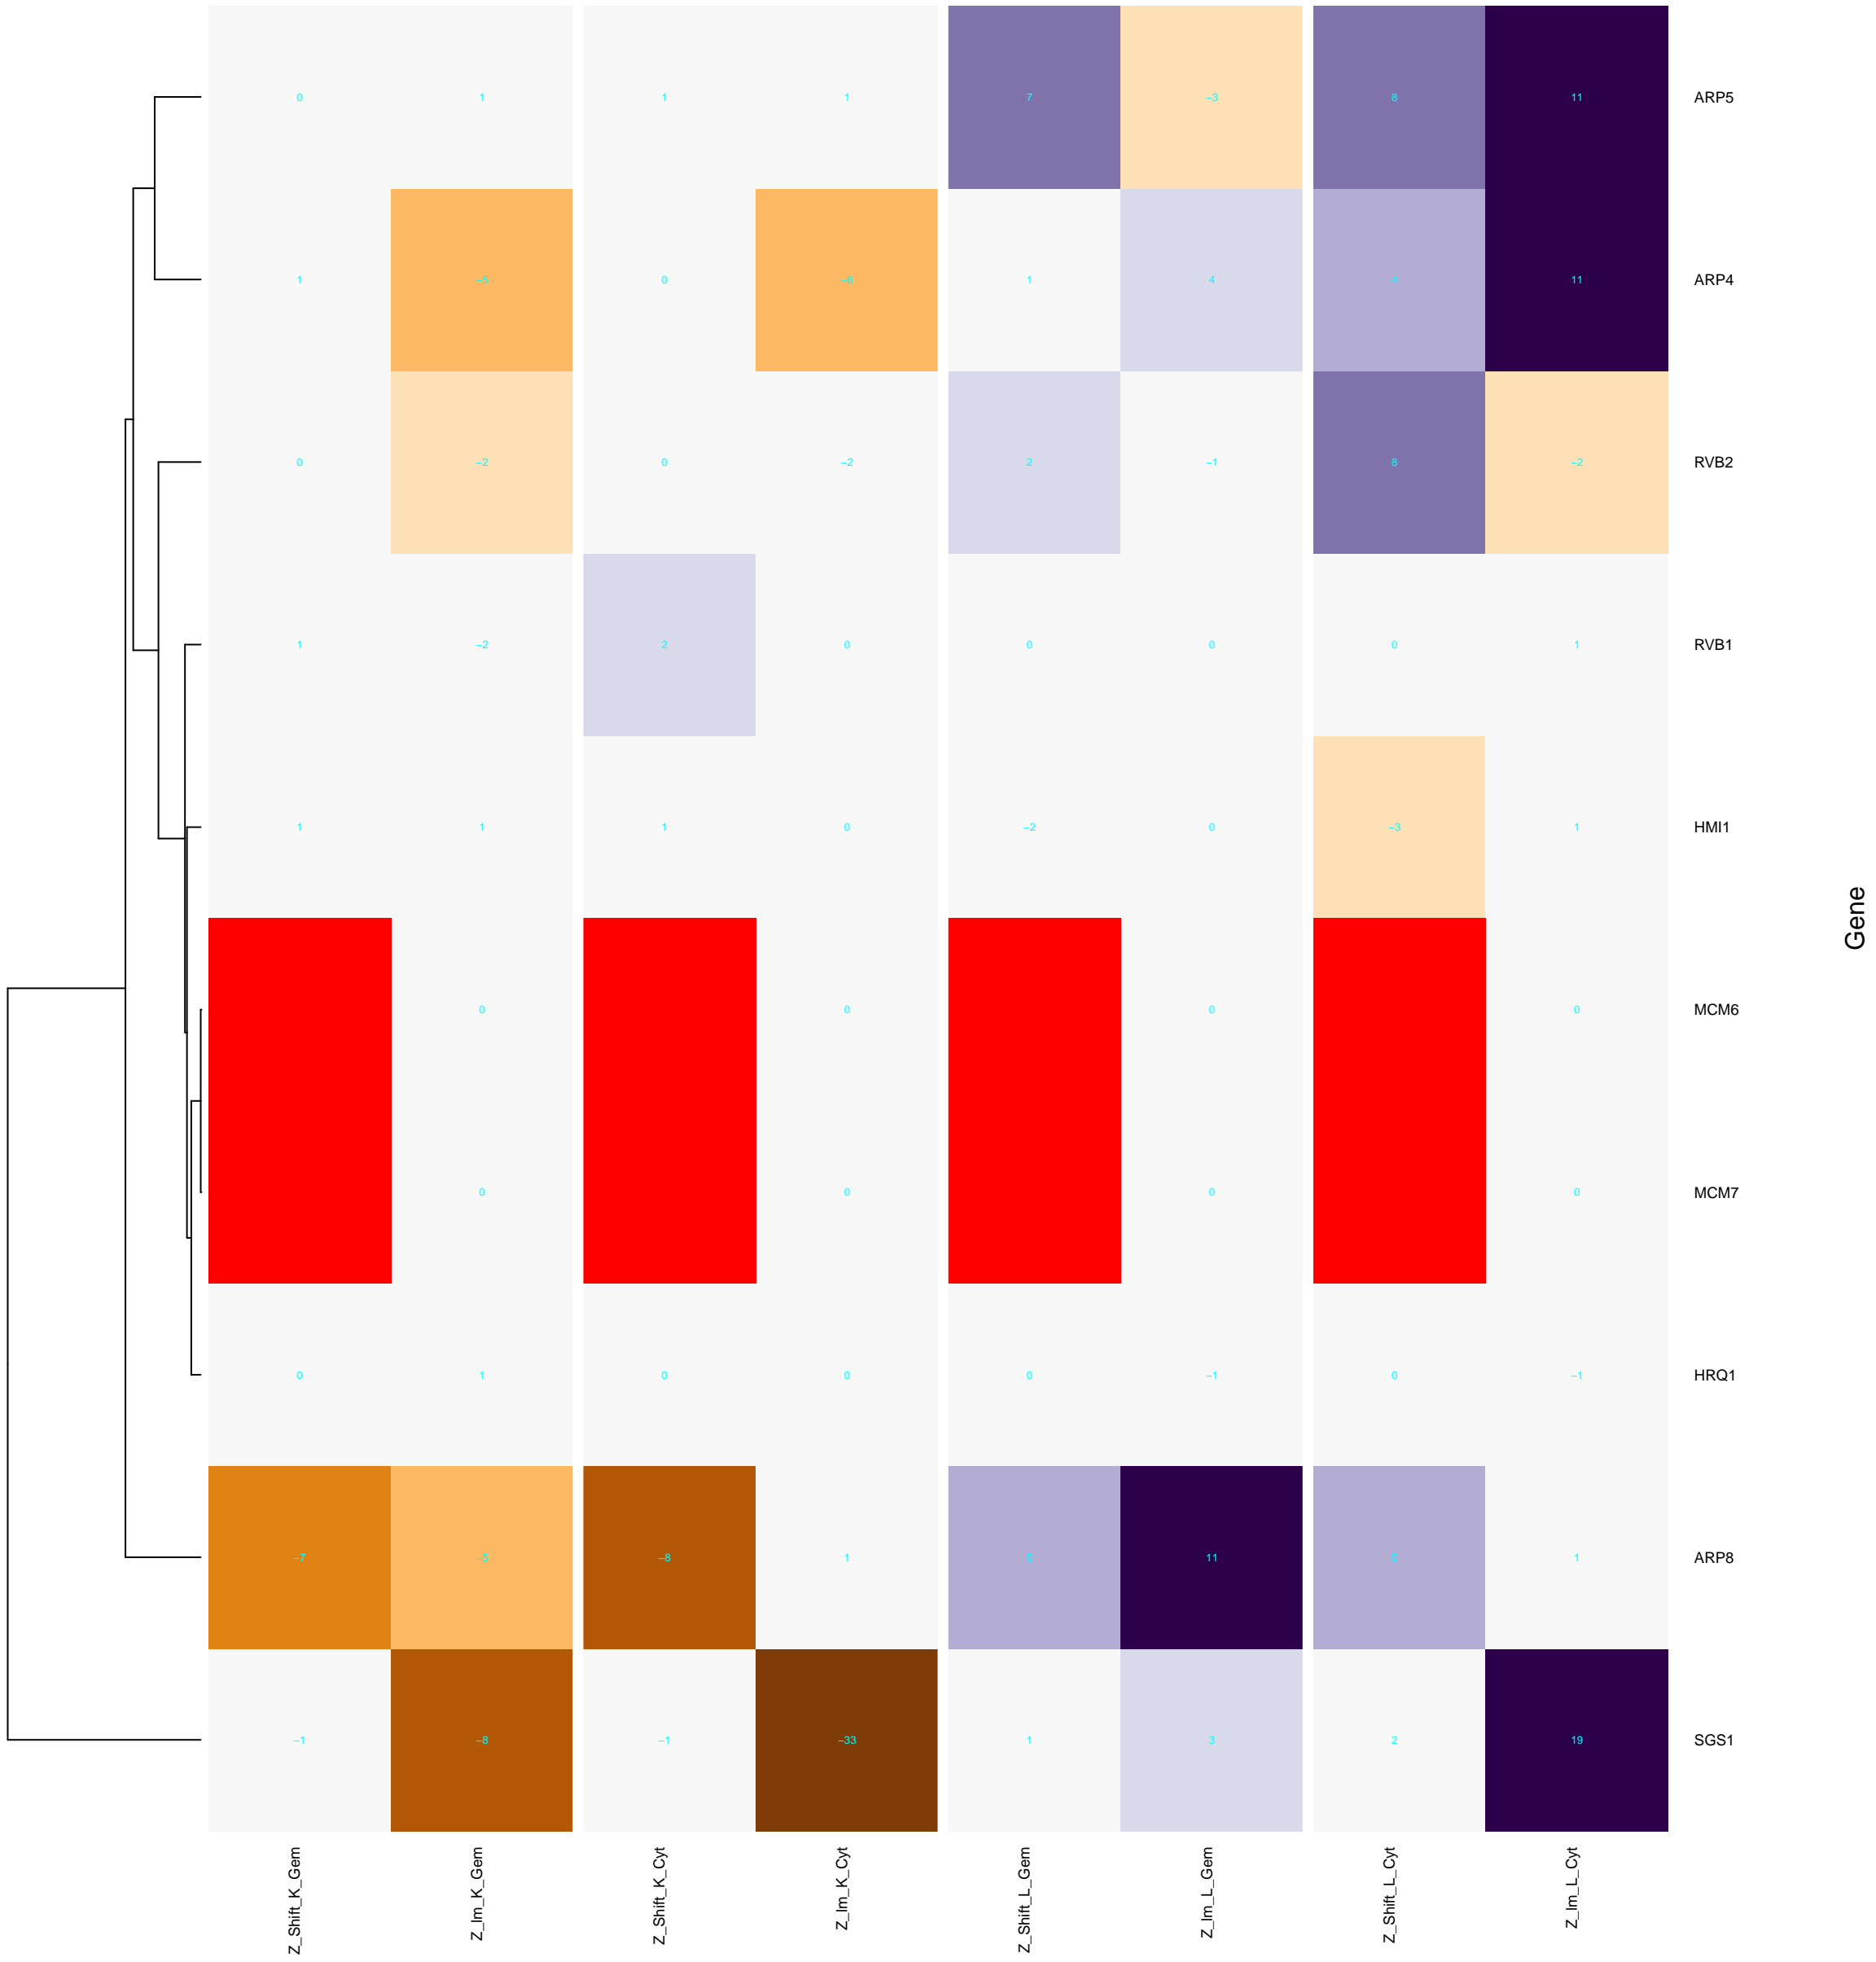

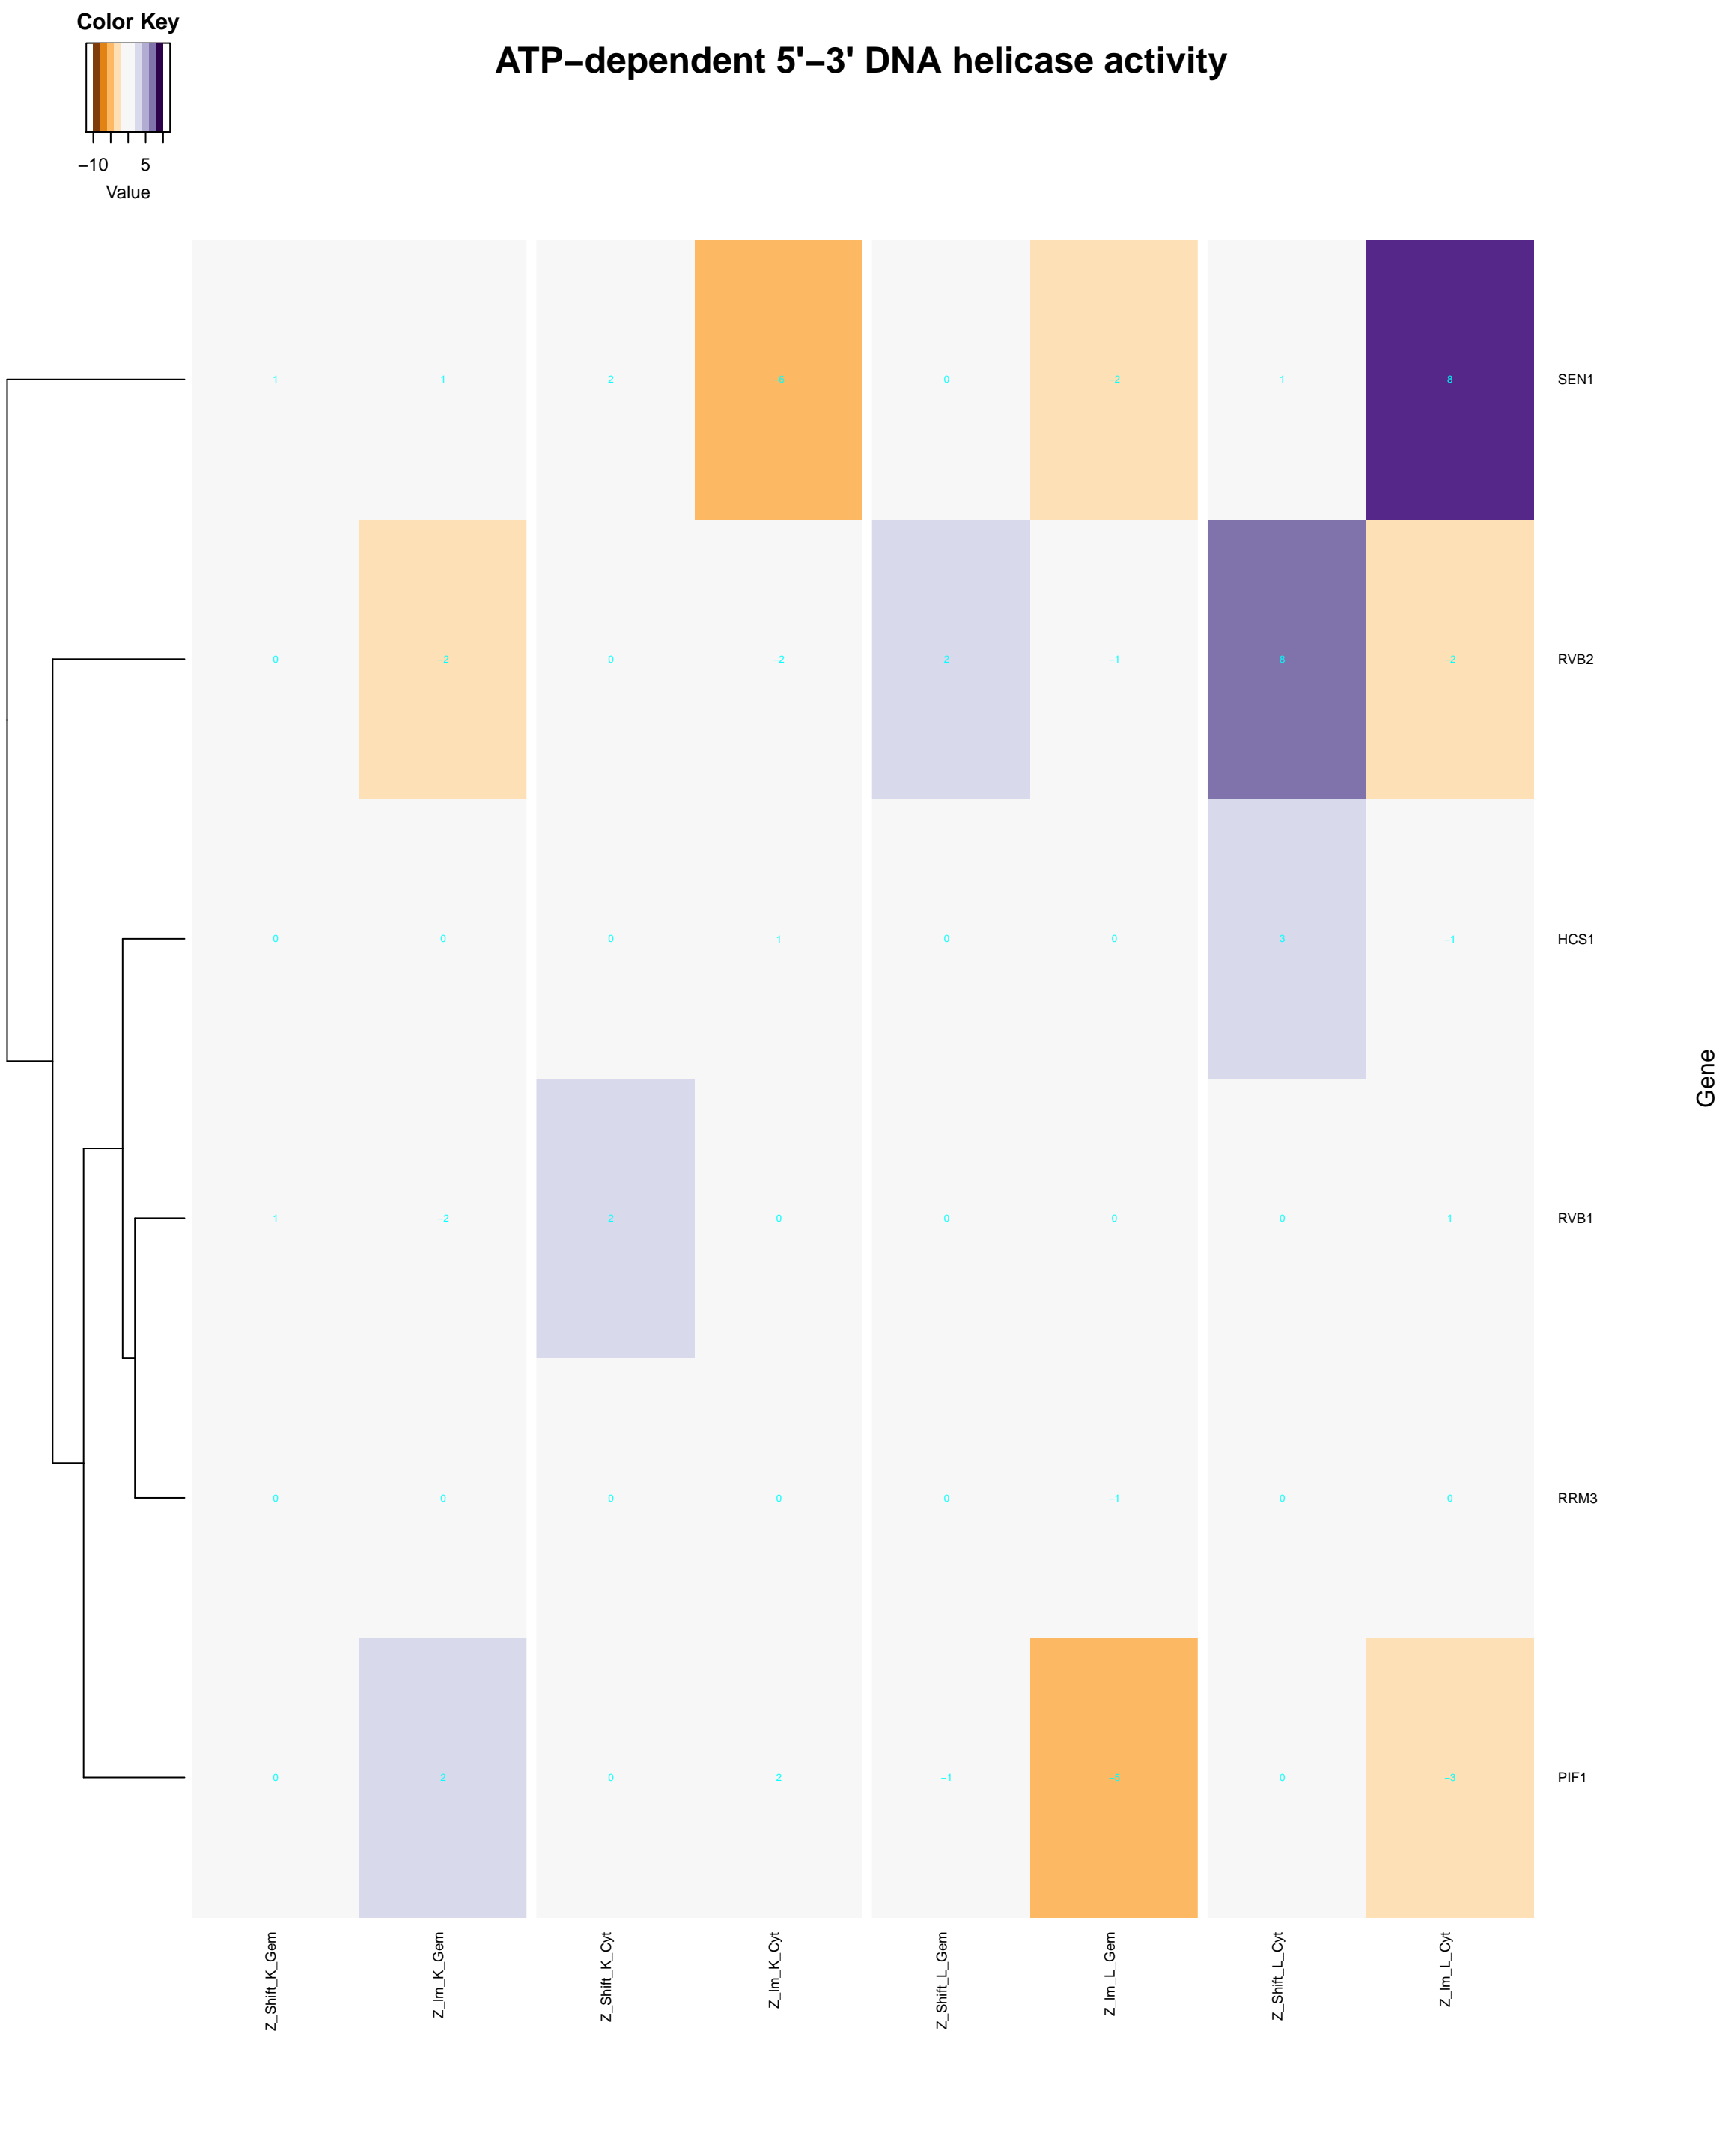

Supplement: s1 [file s1]
