# Supplementary material for: A Humanized Yeast Phenomic Model of Deoxycytidine Kinase to Predict Genetic Buffering of Nucleoside Analog Cytotoxicity
Source: MDPI journal article supplement (doi:10.3390/genes10100770), 2019-09-30
Supplement: s1 [file s1]

-10      5  
Value

**protein-DNA complex**

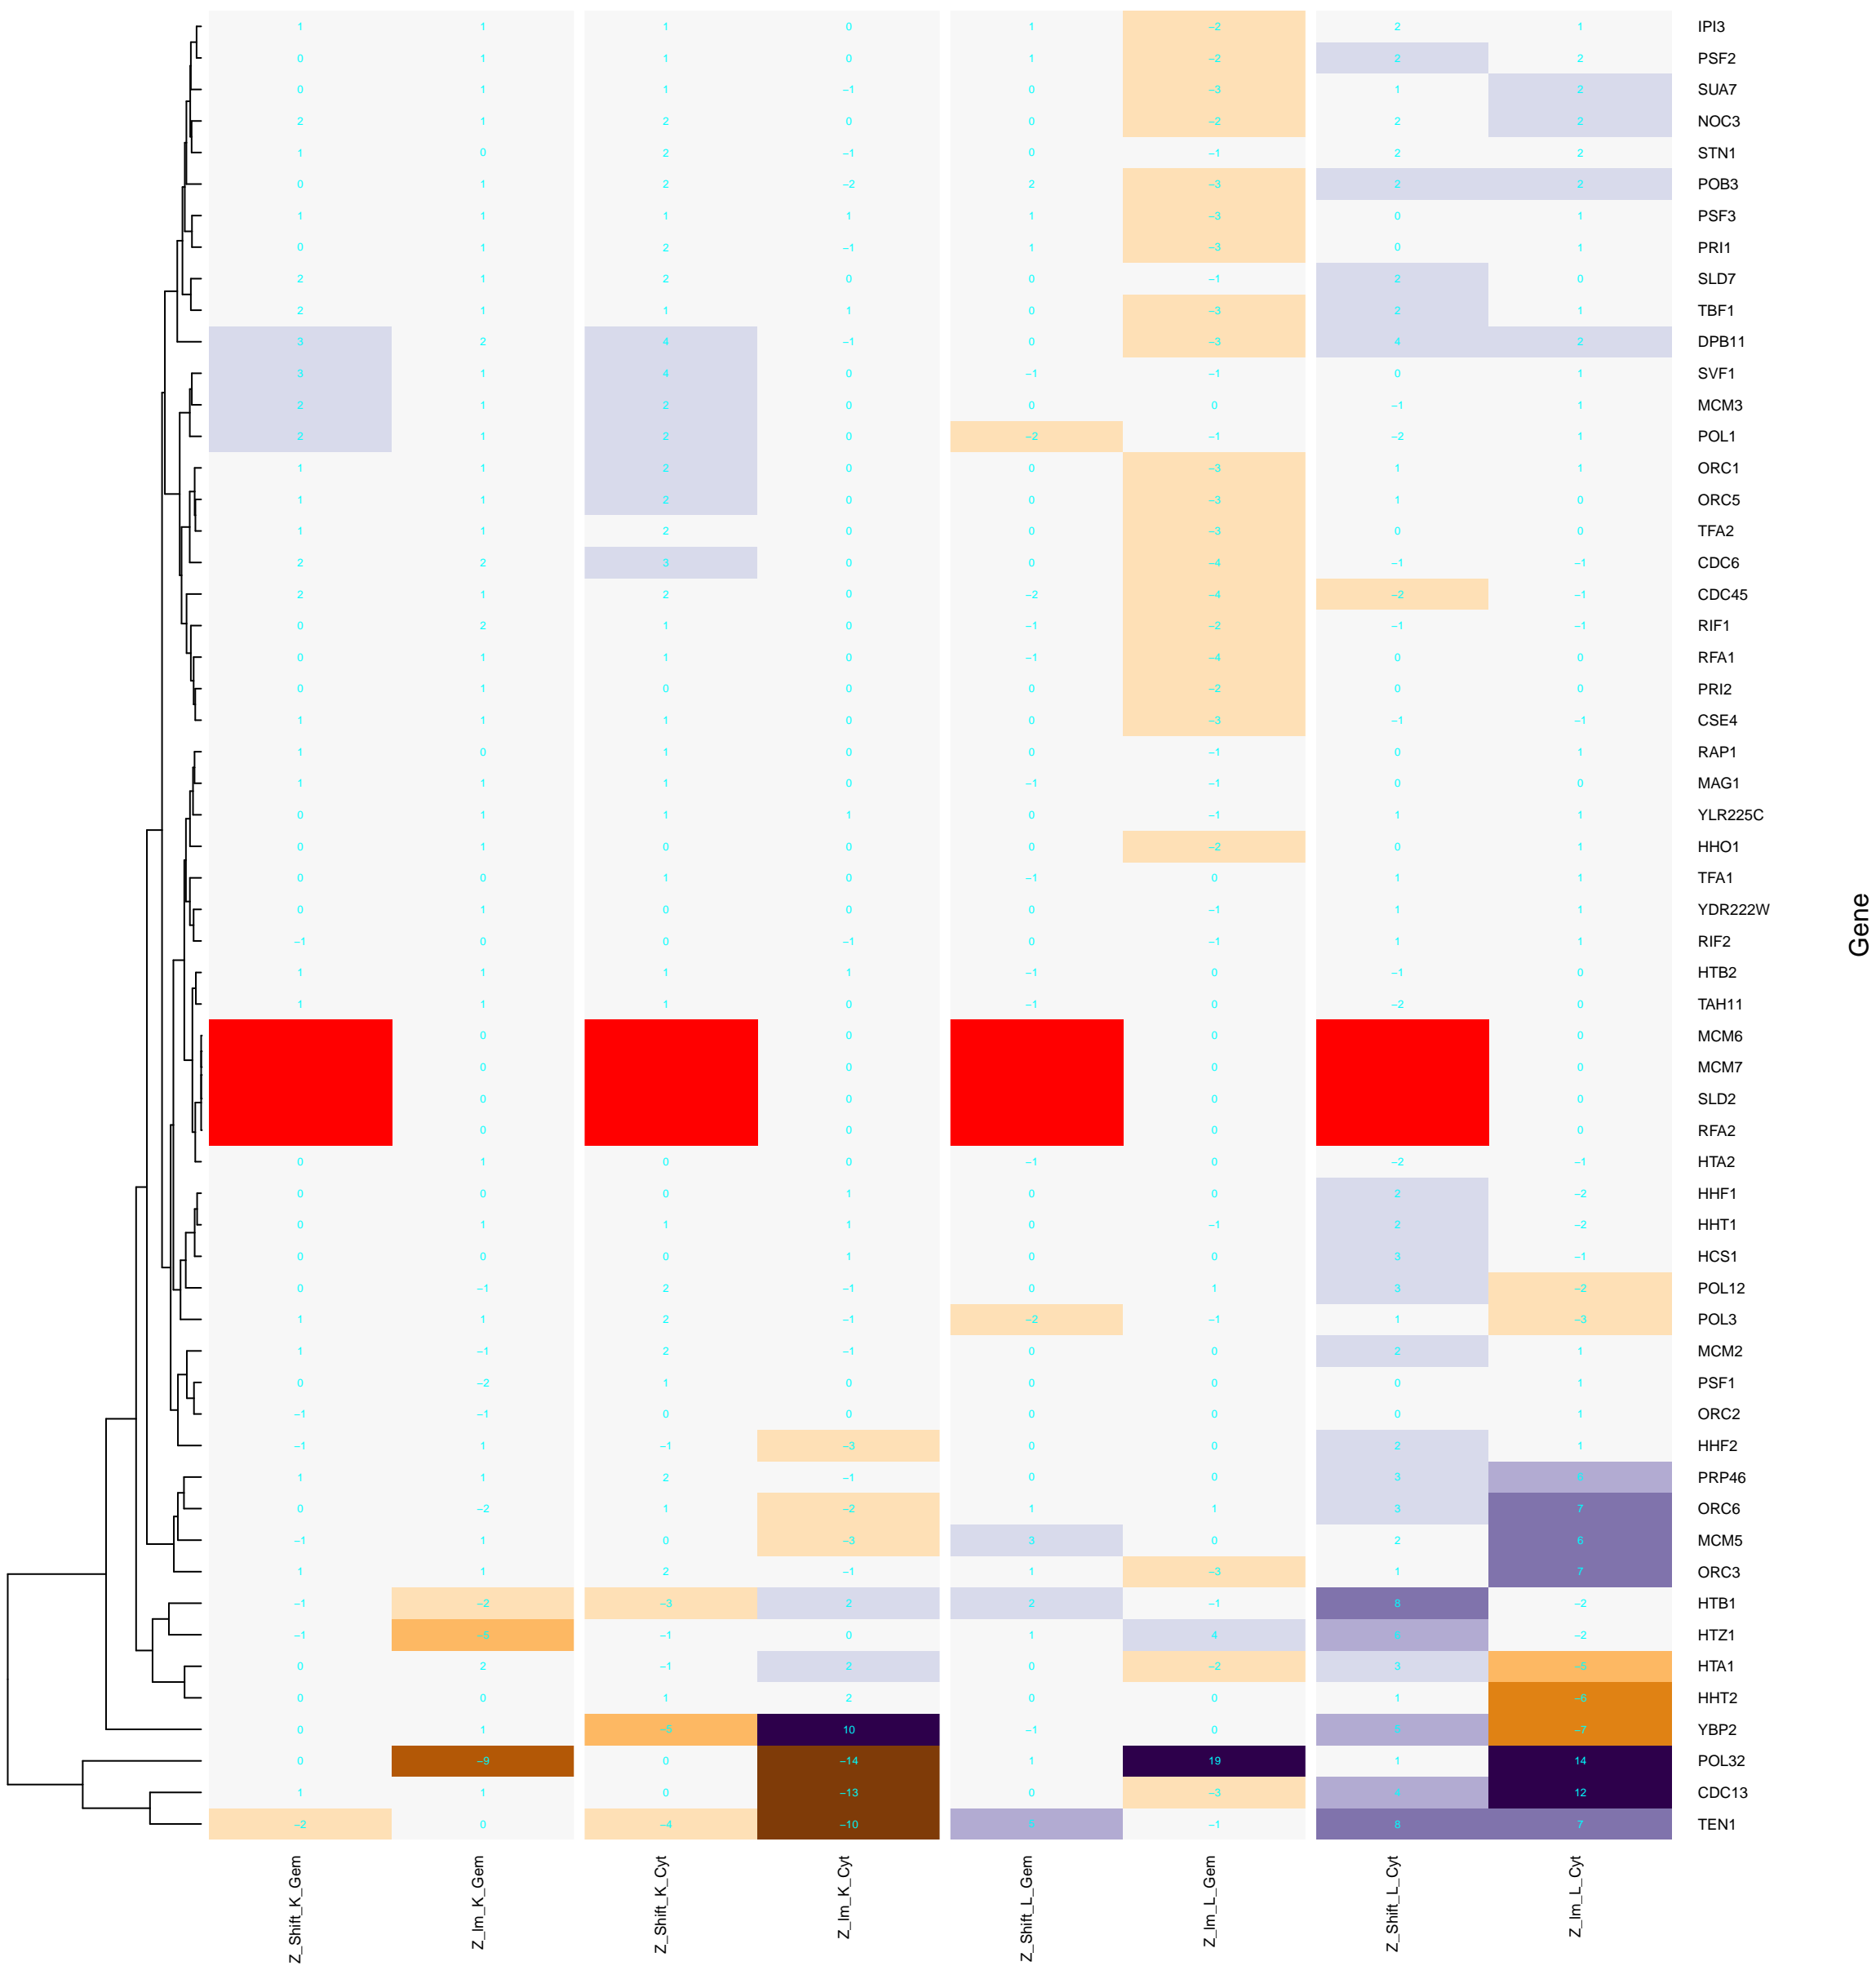

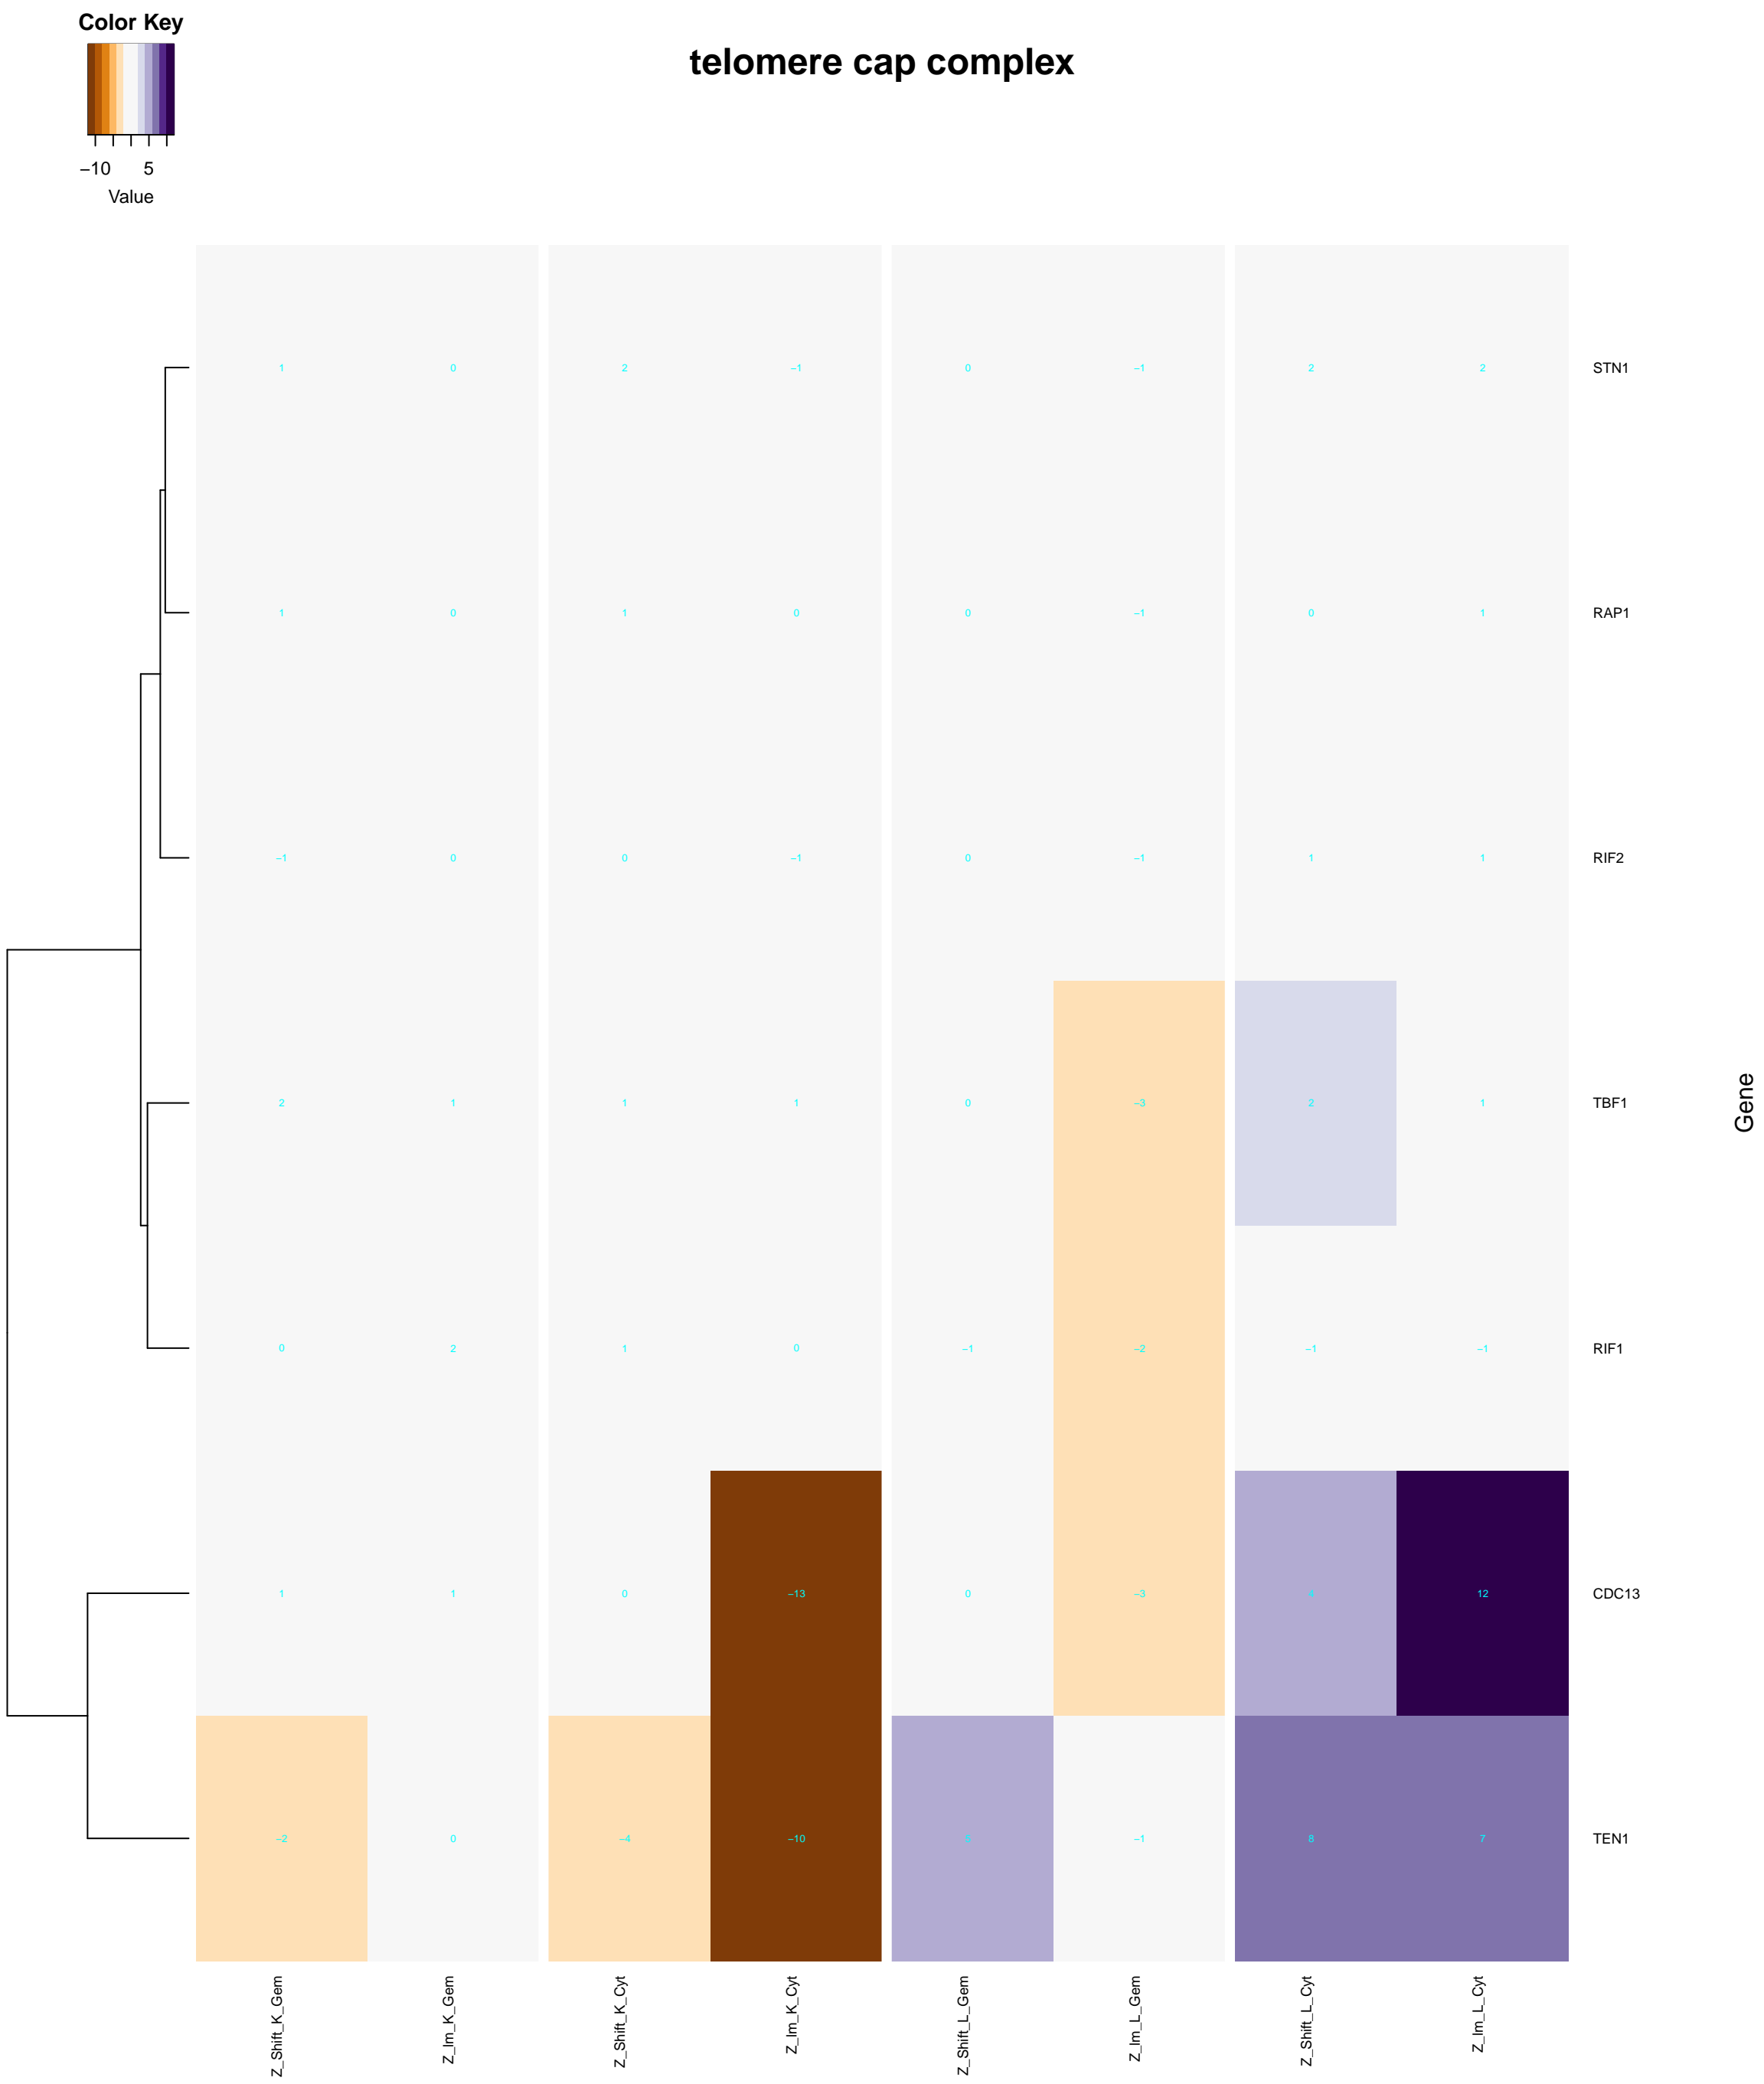

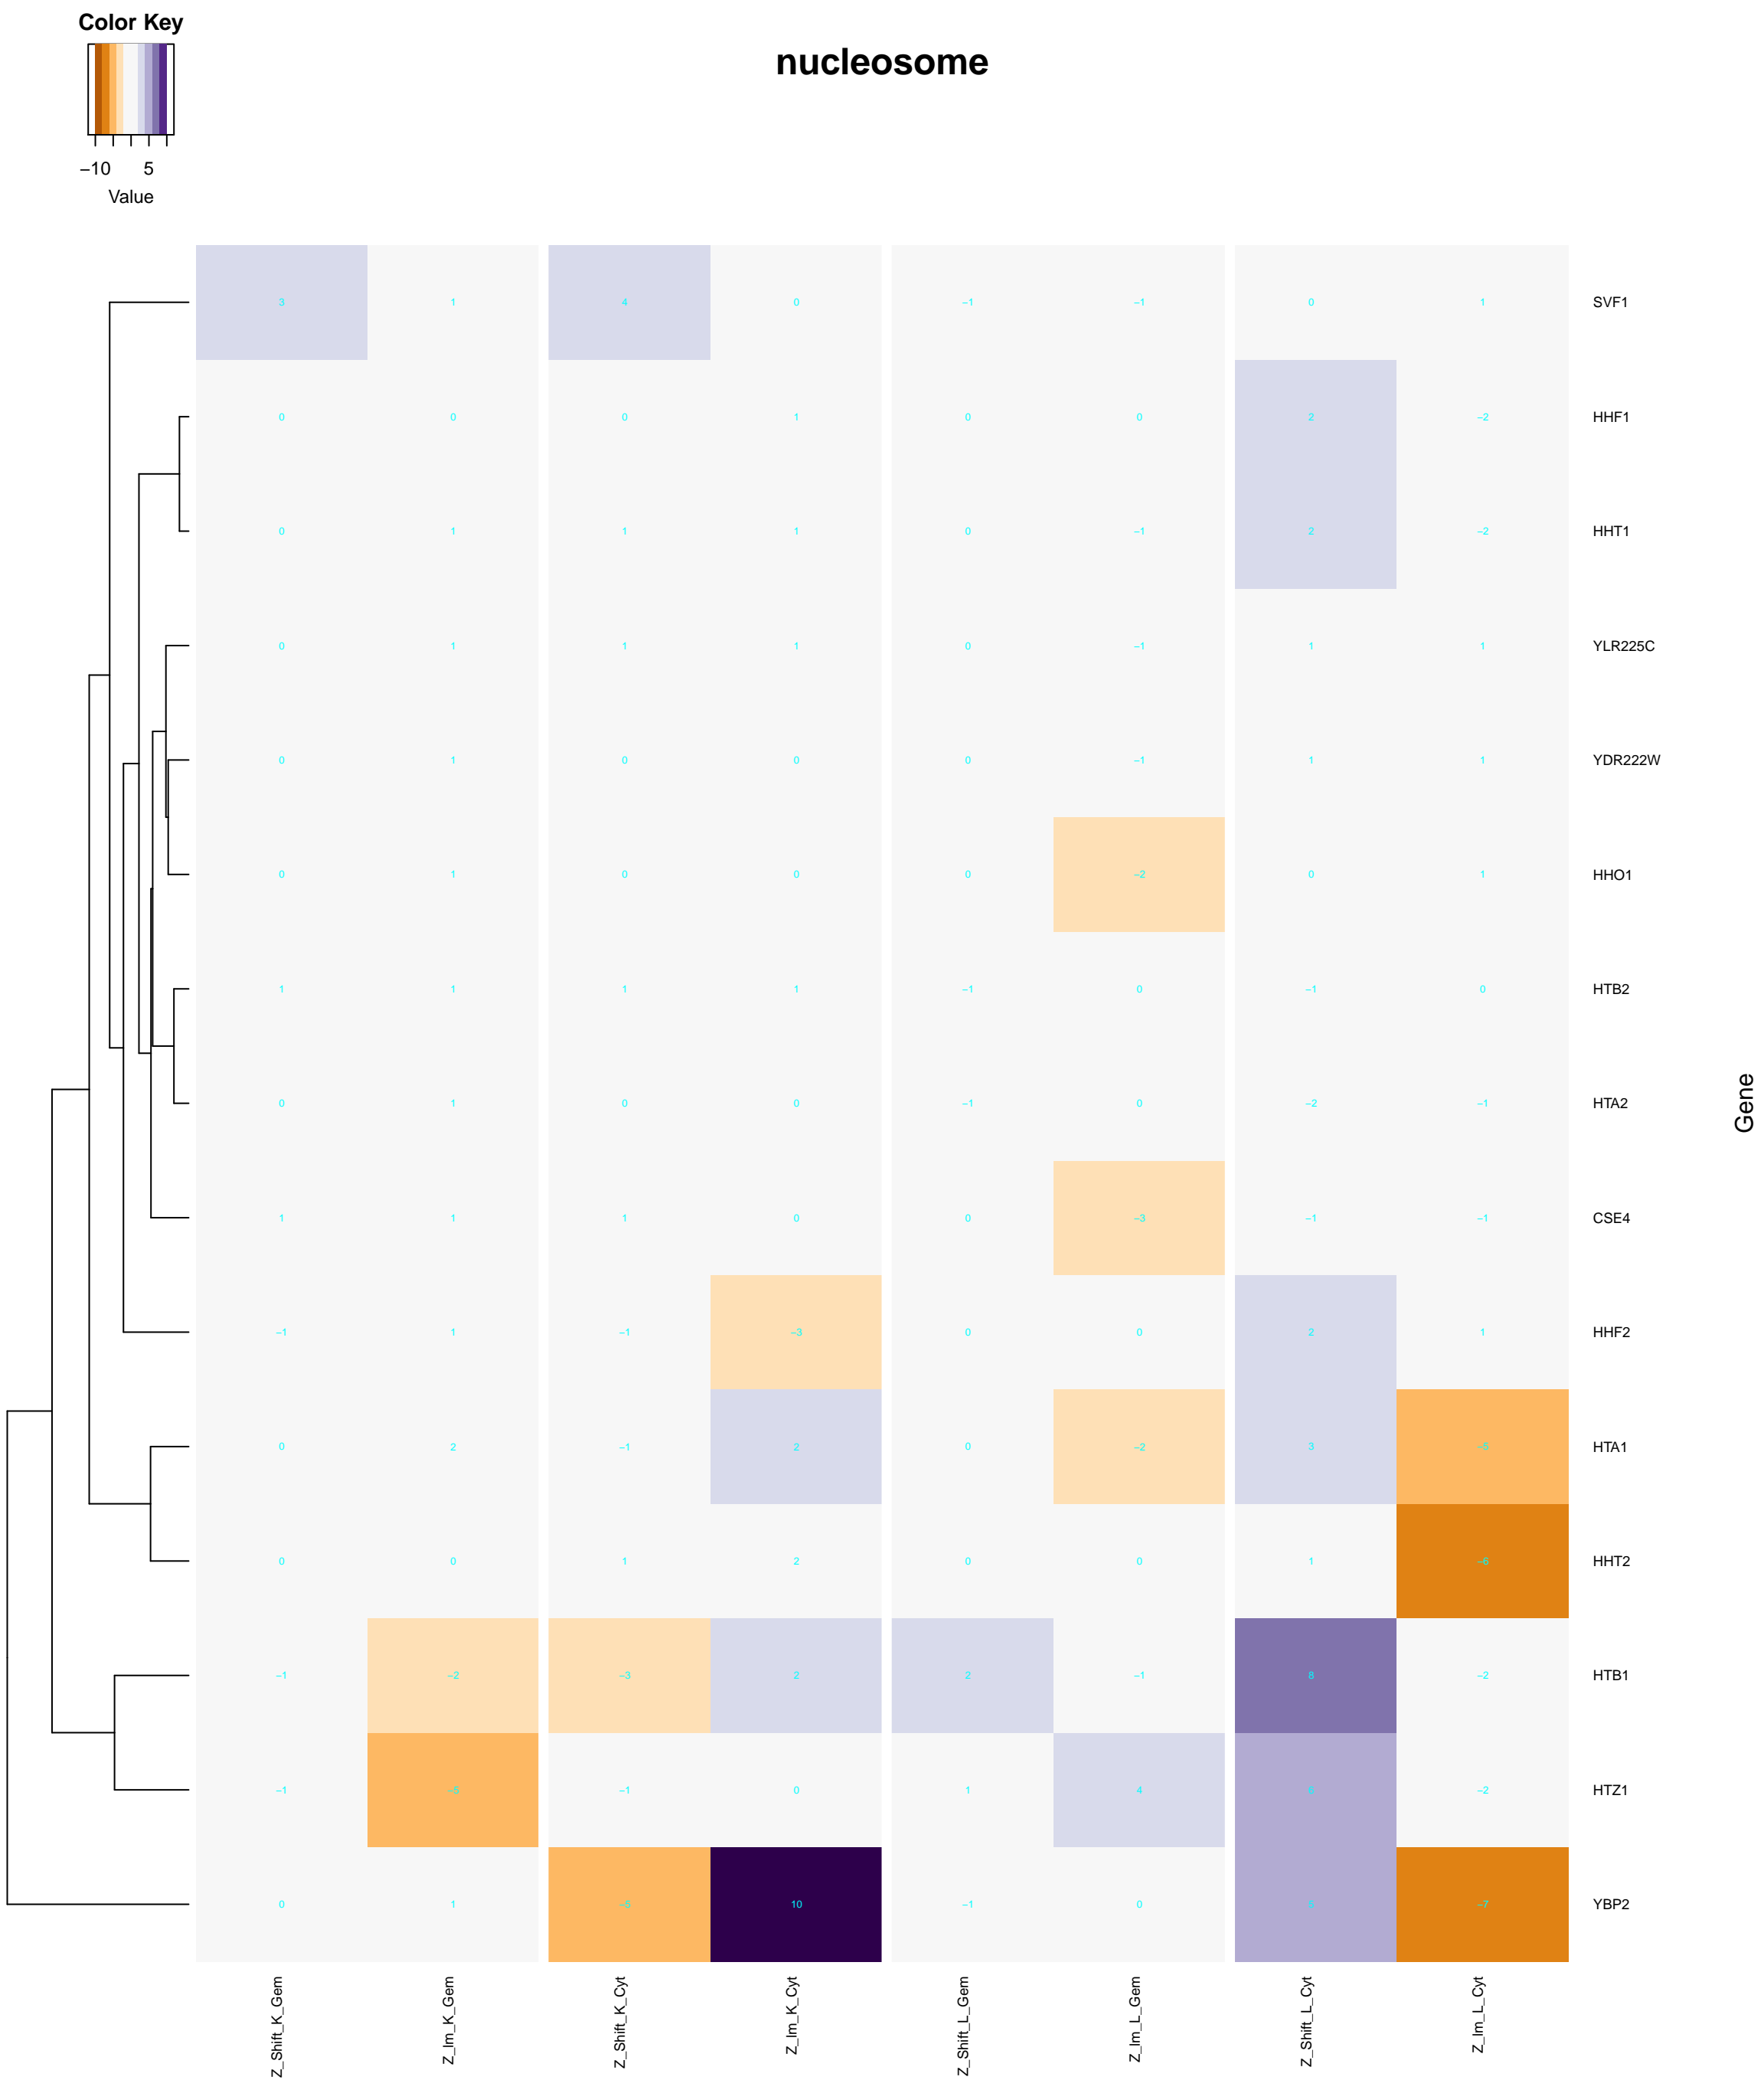

replisome

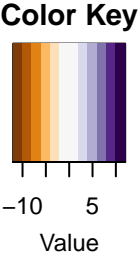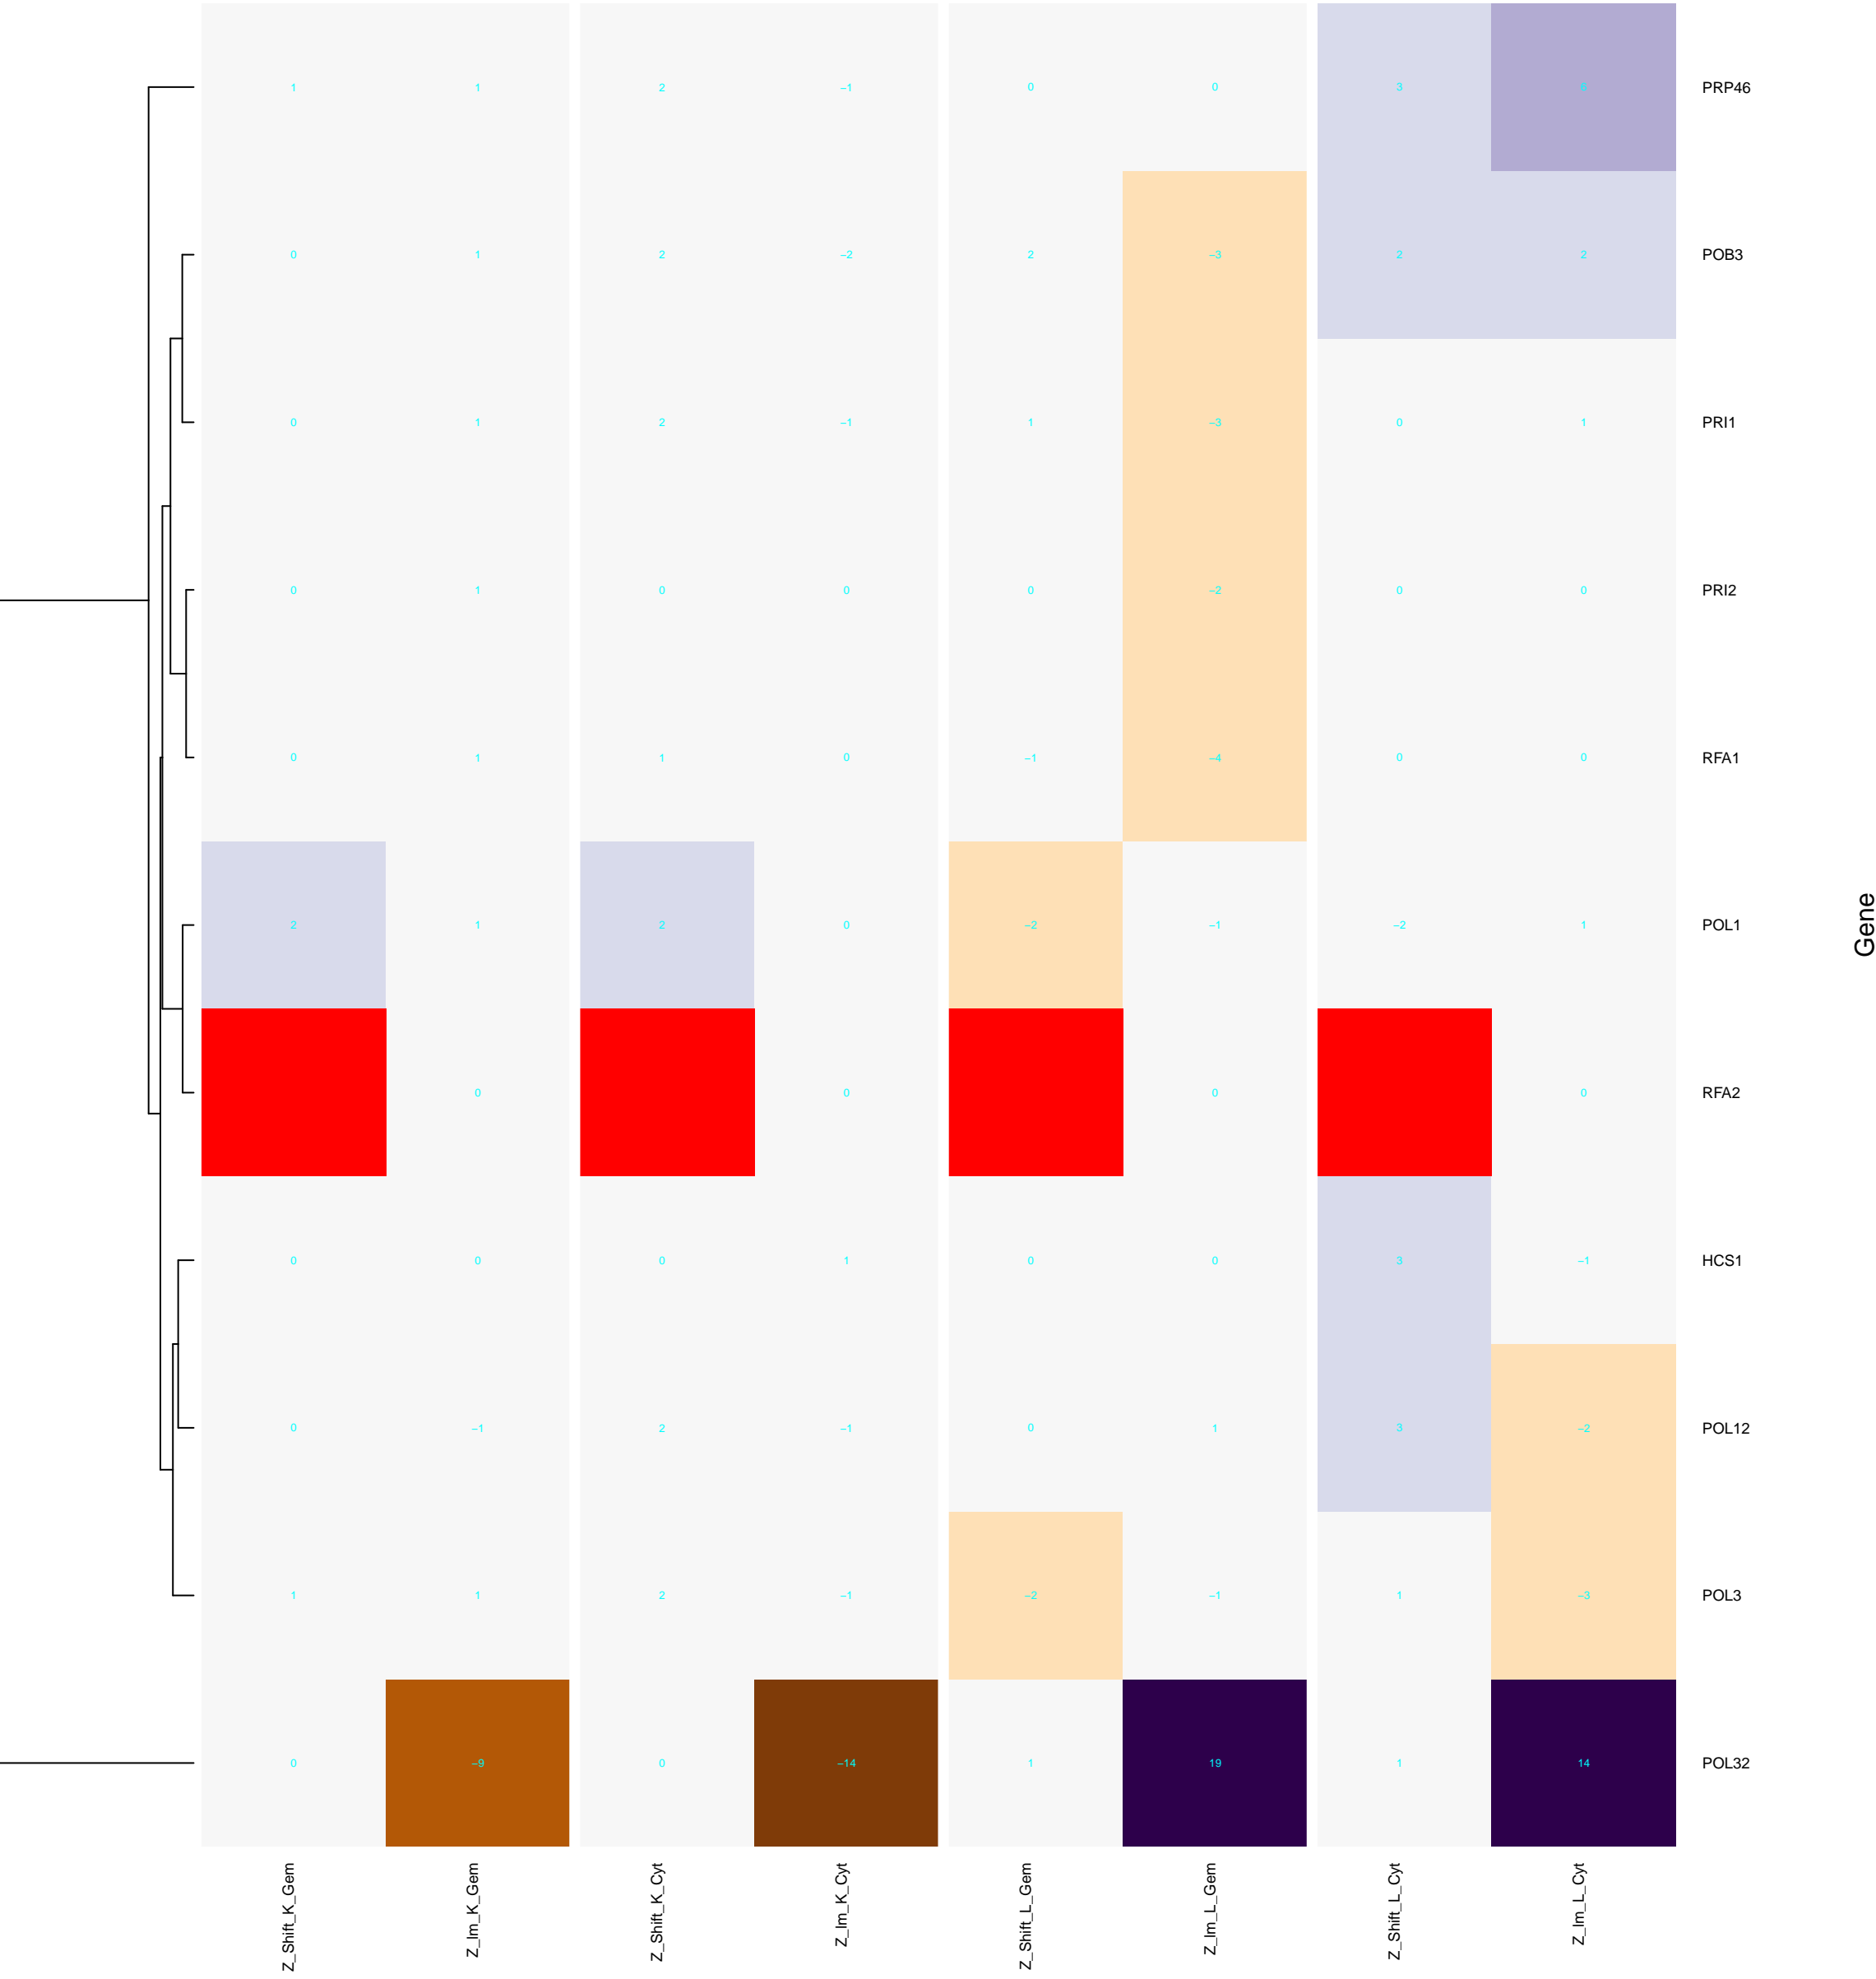

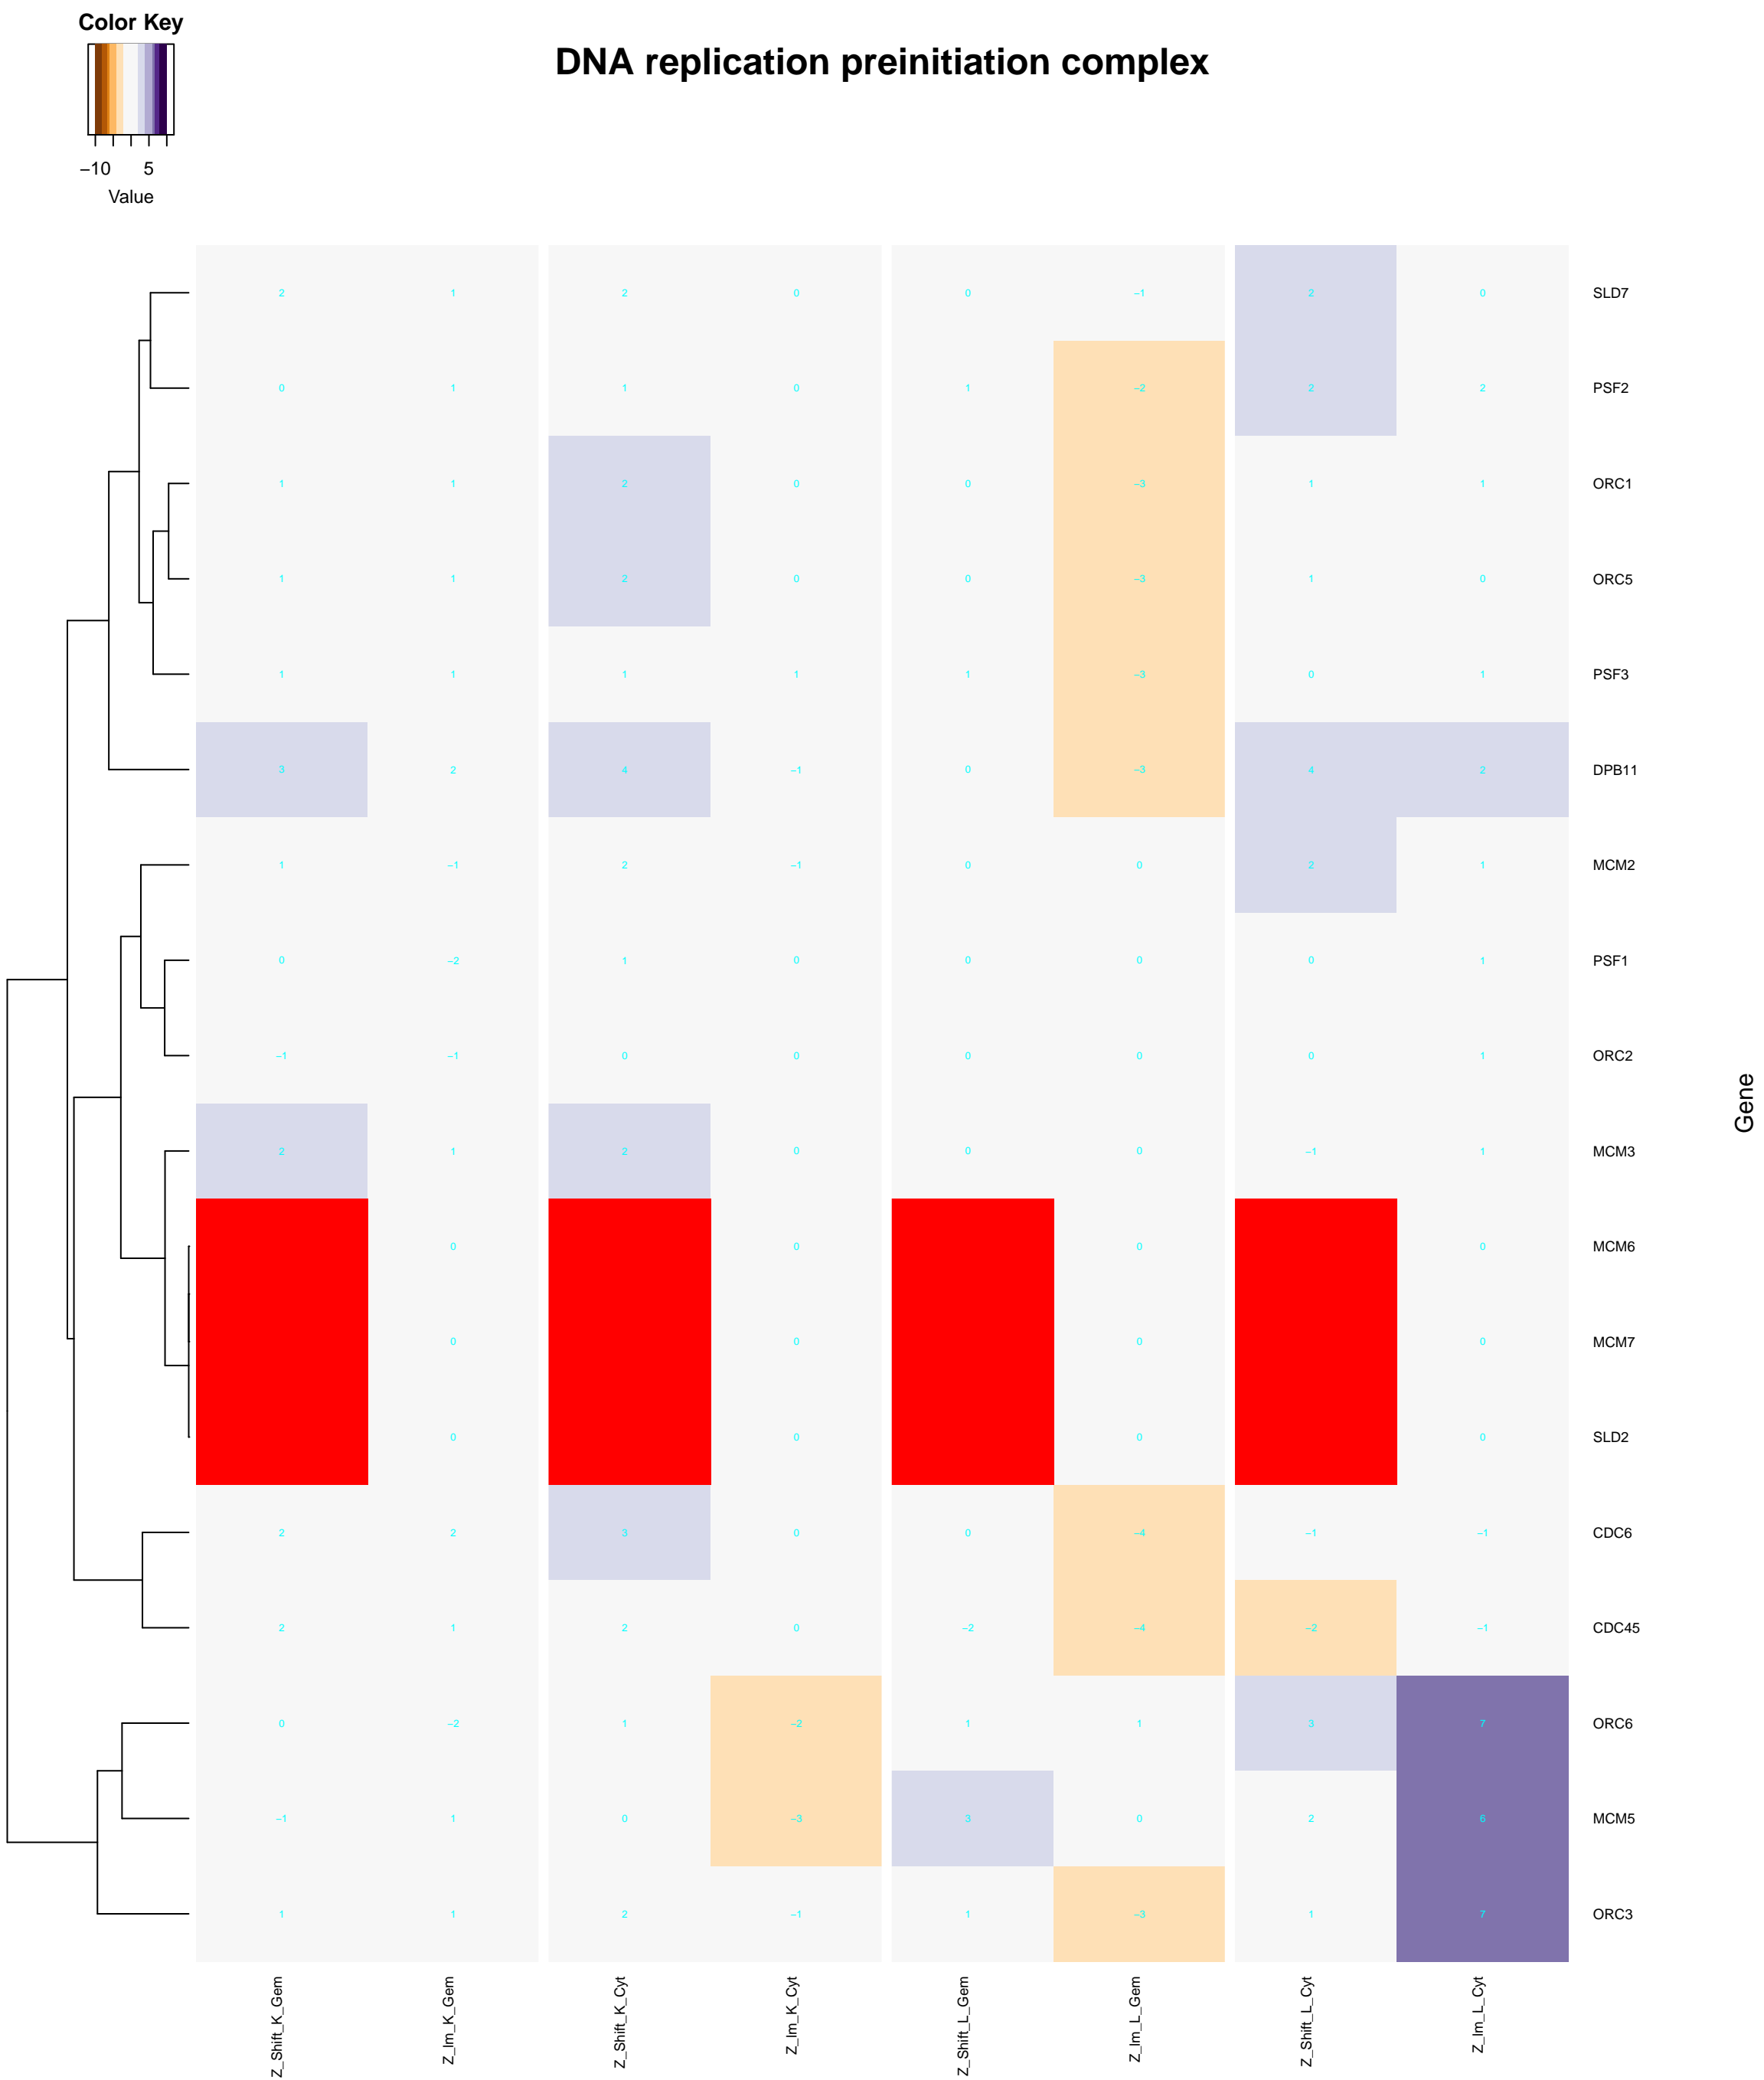

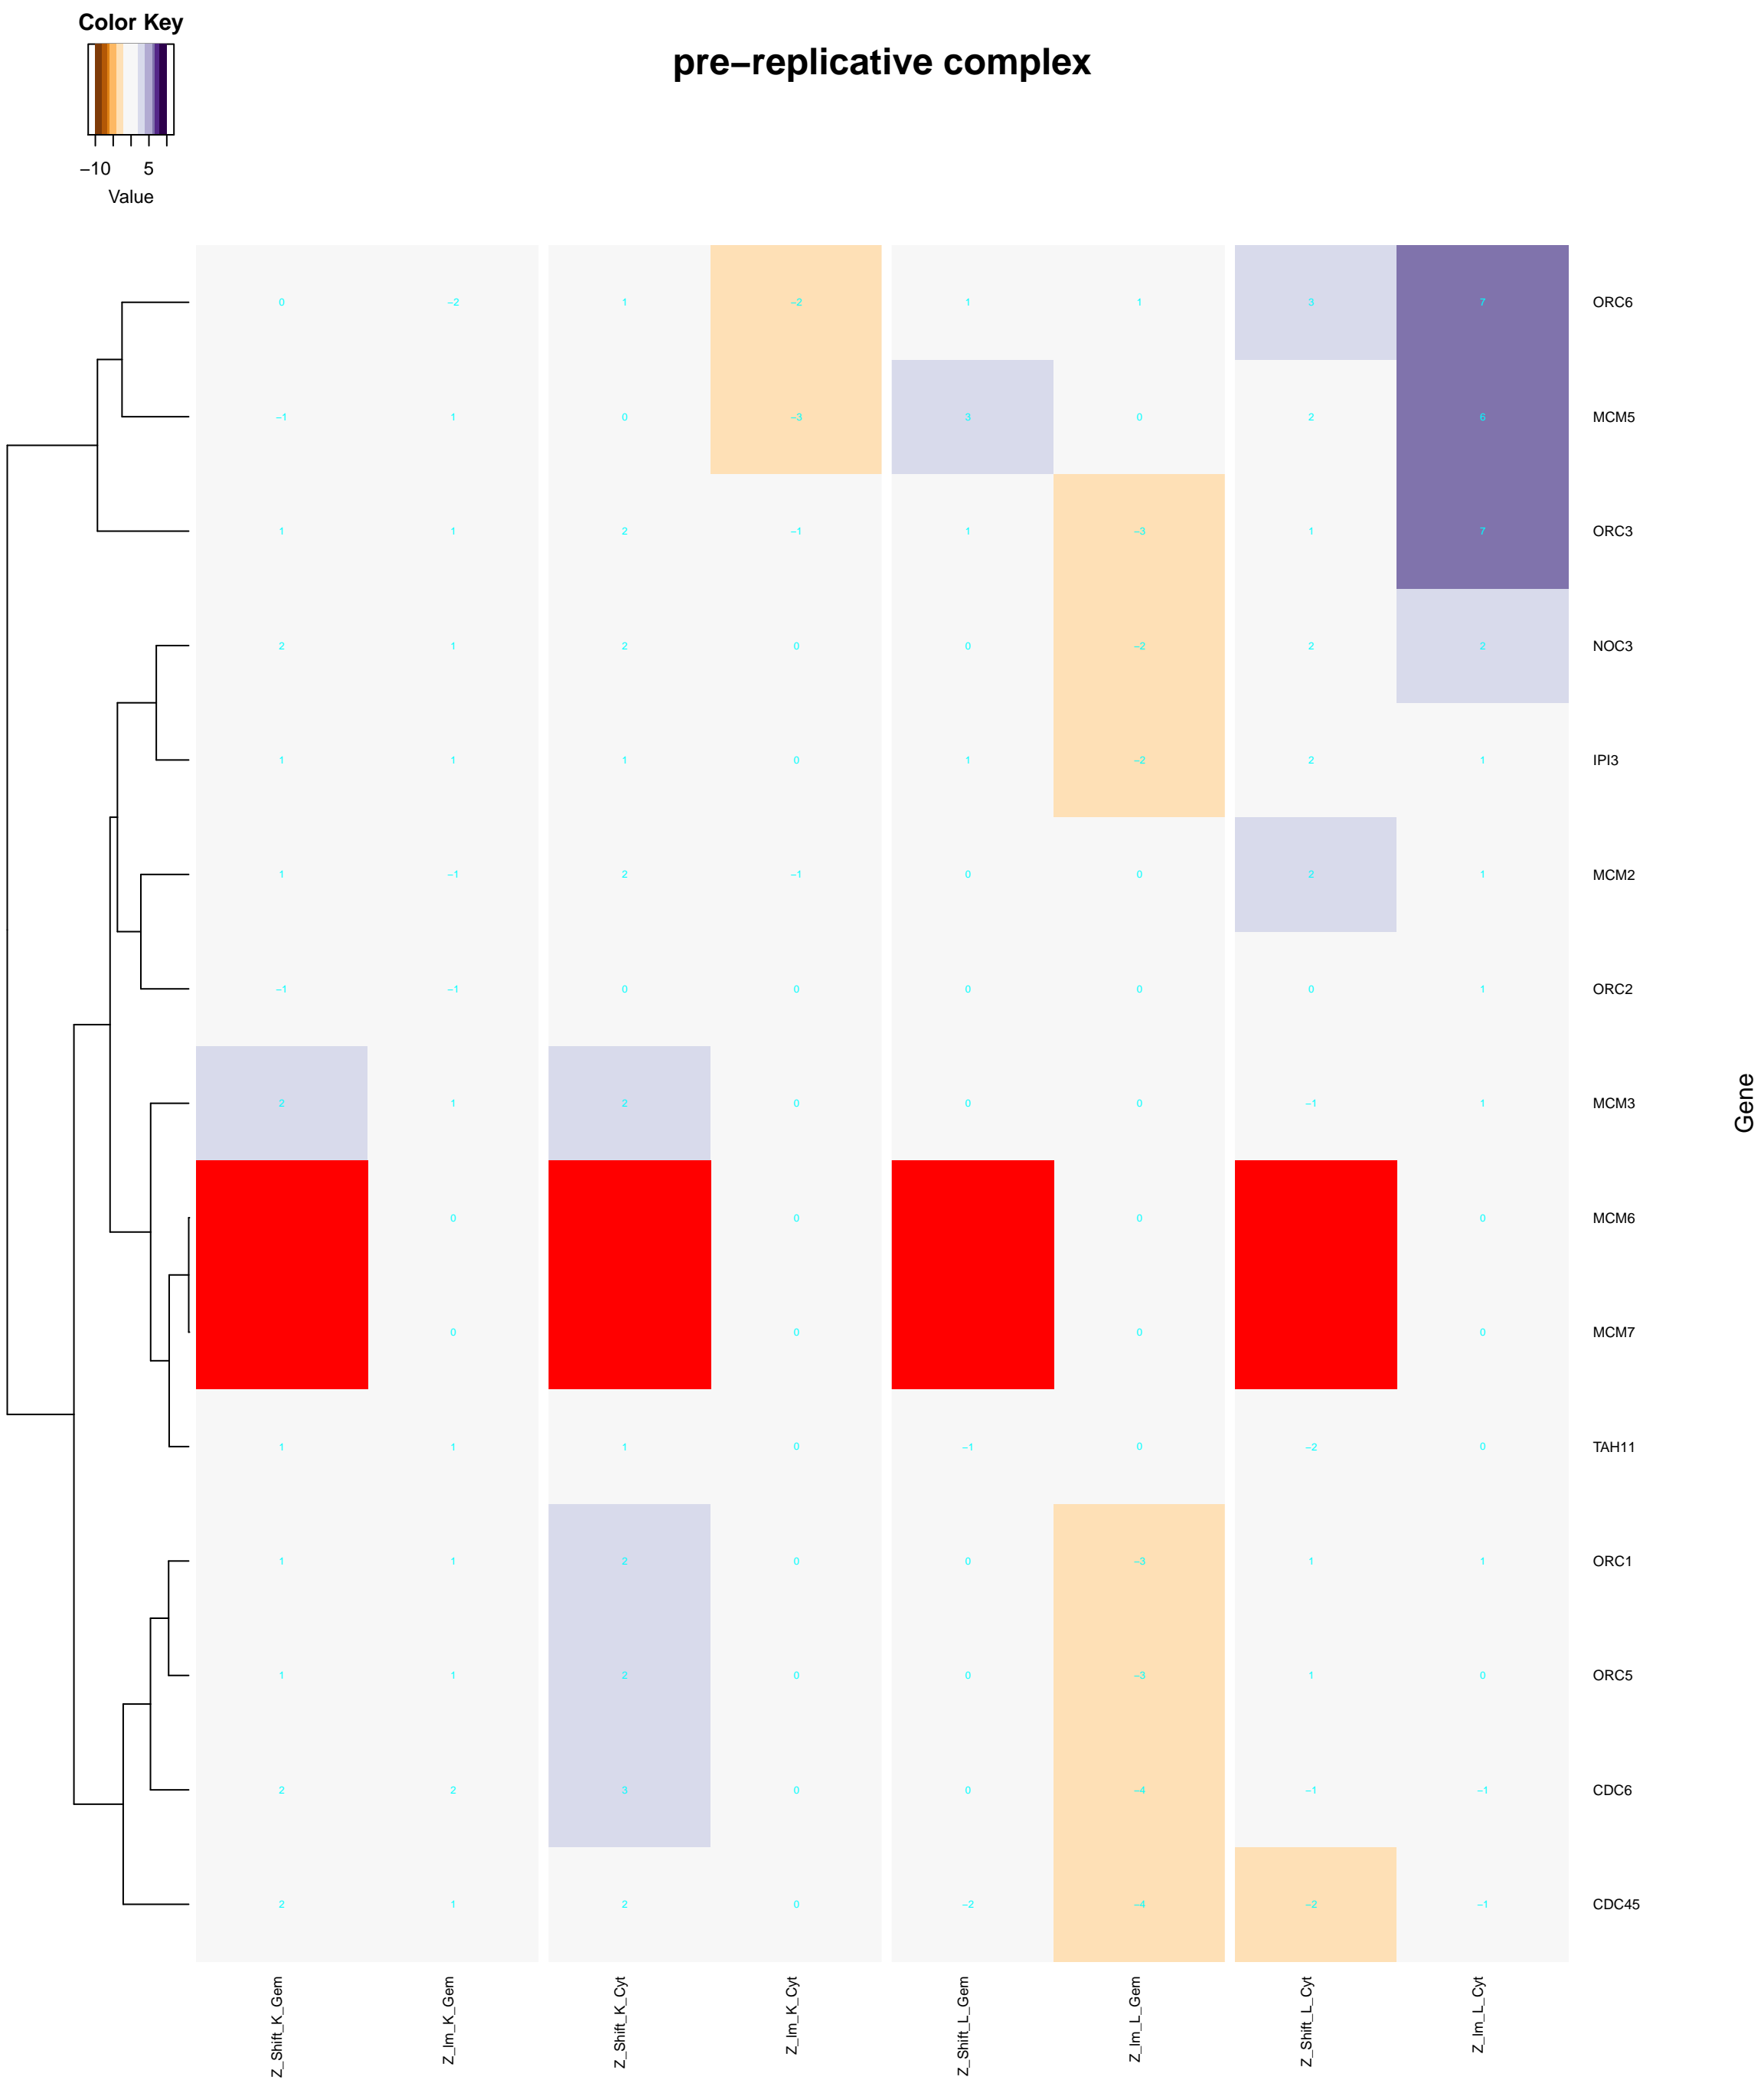

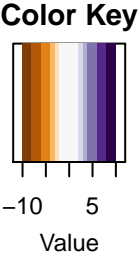

transcriptional preinitiation complex

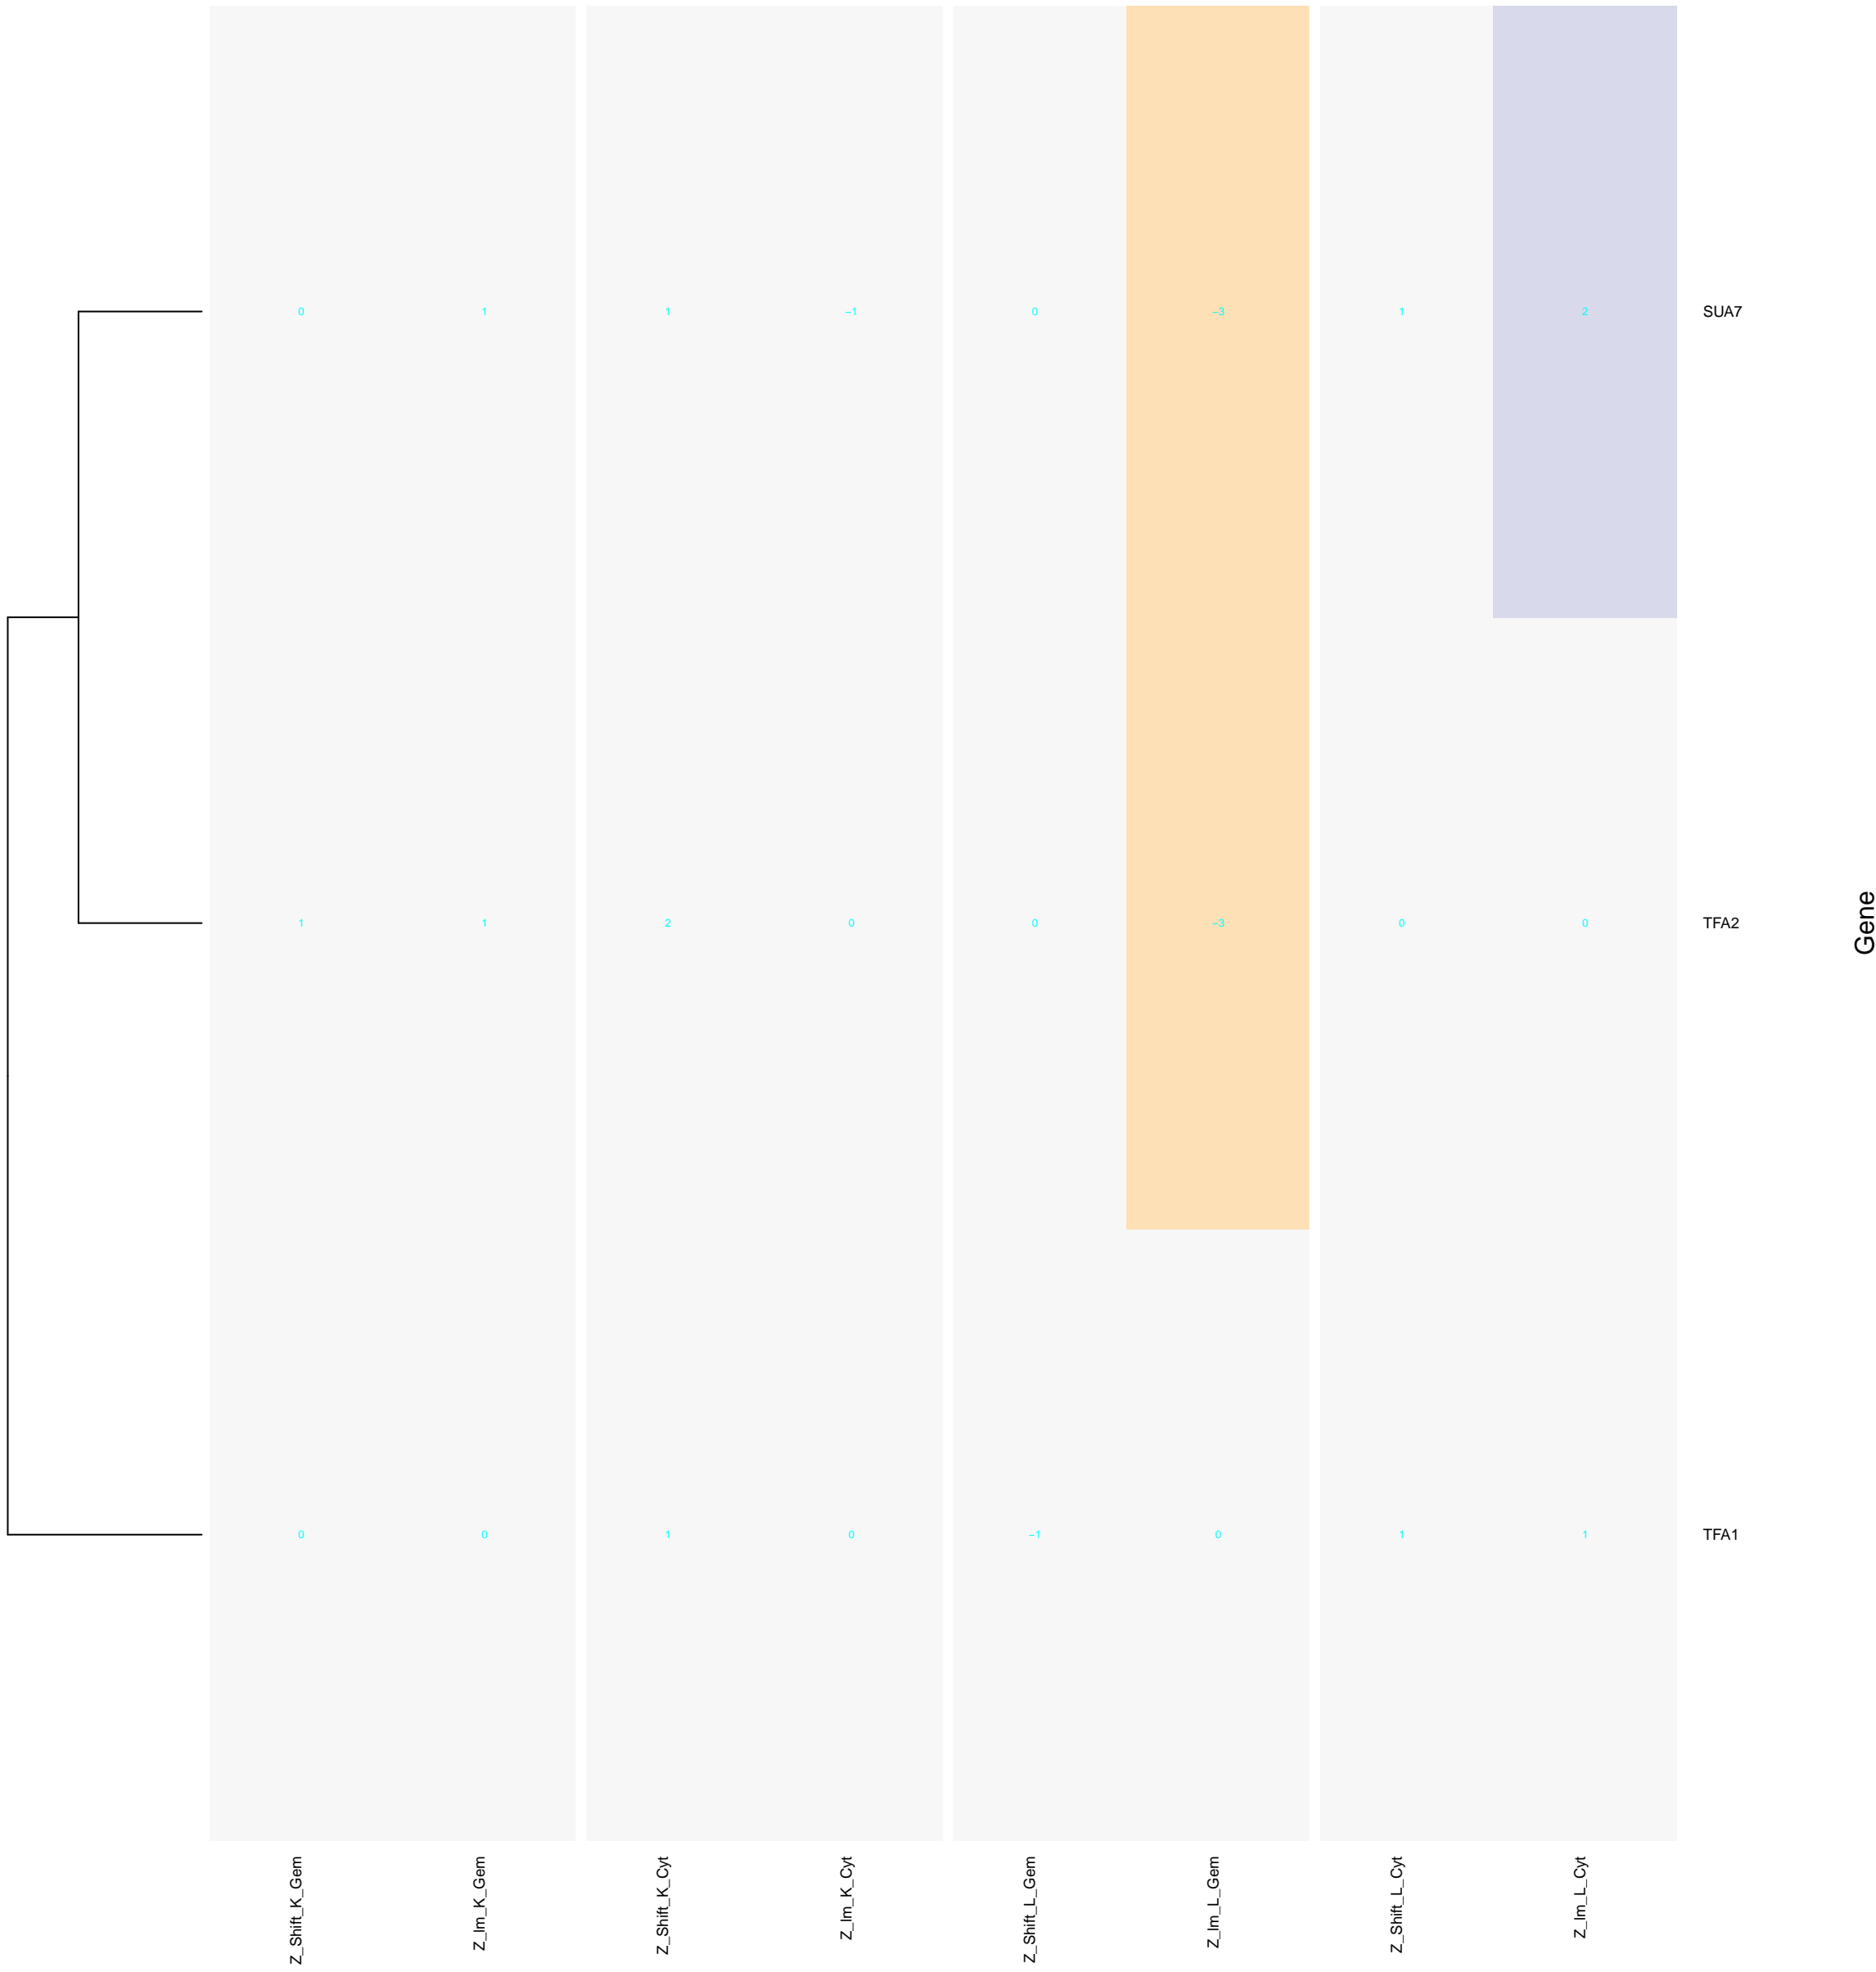

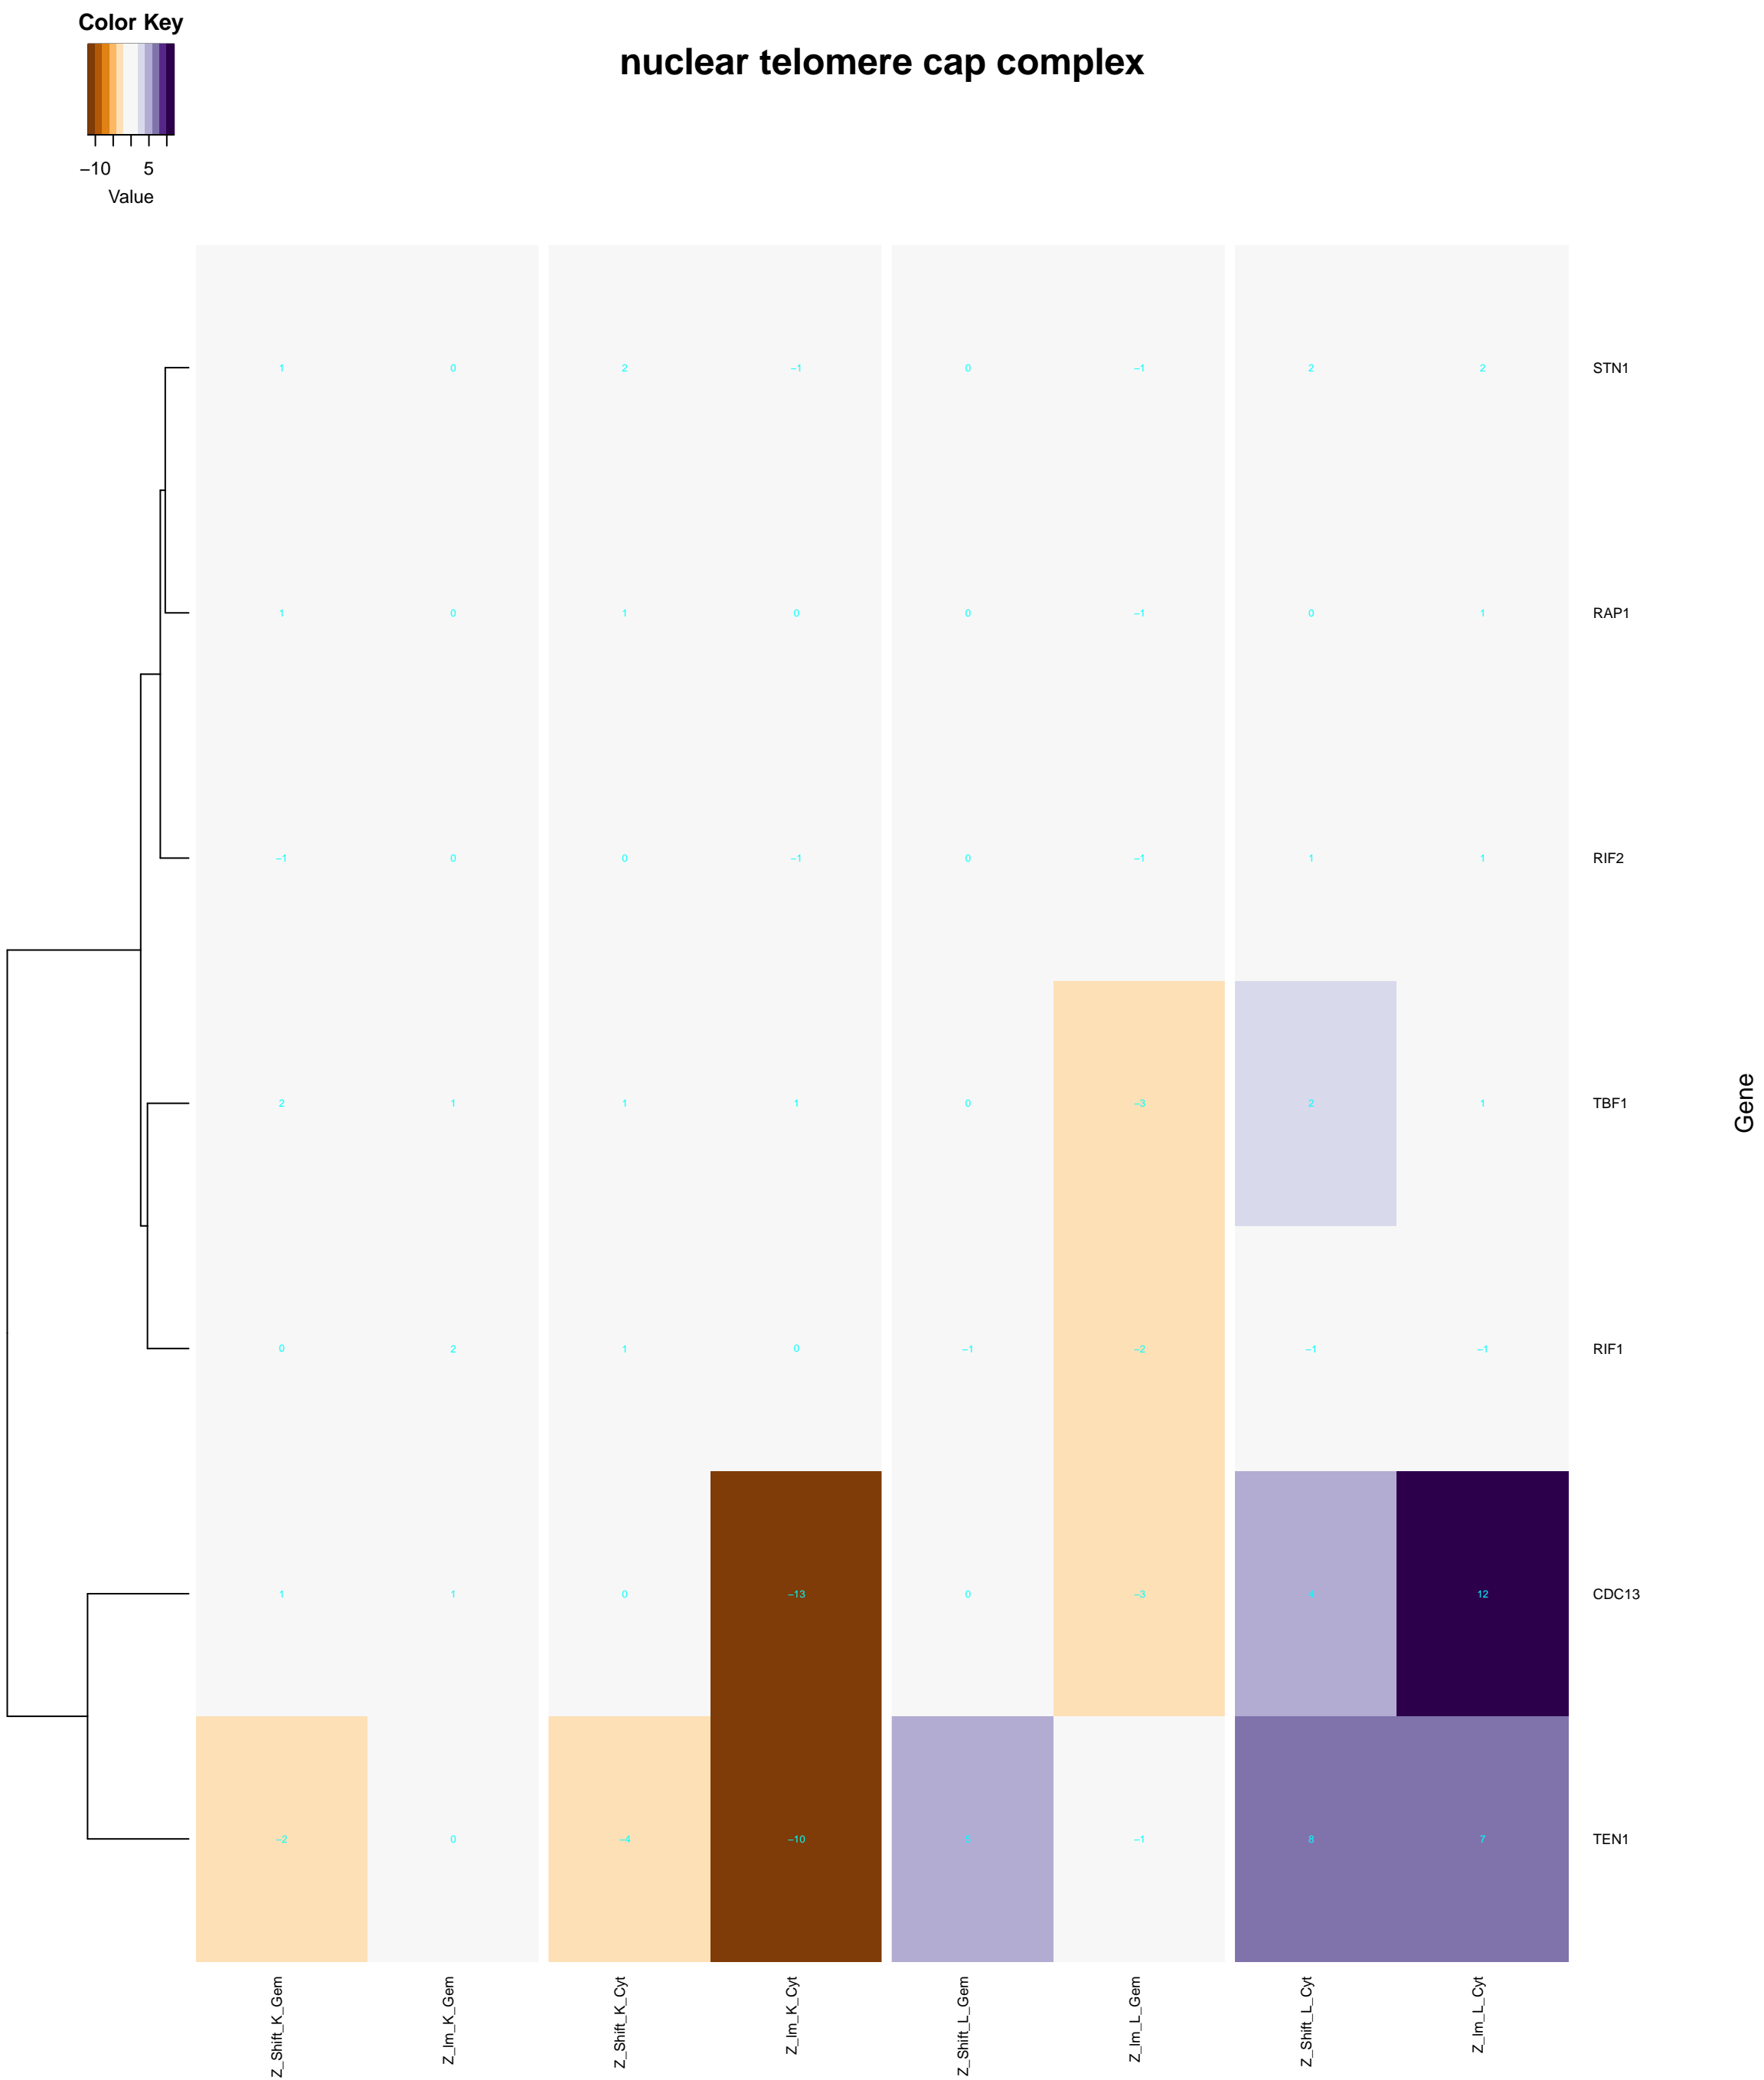

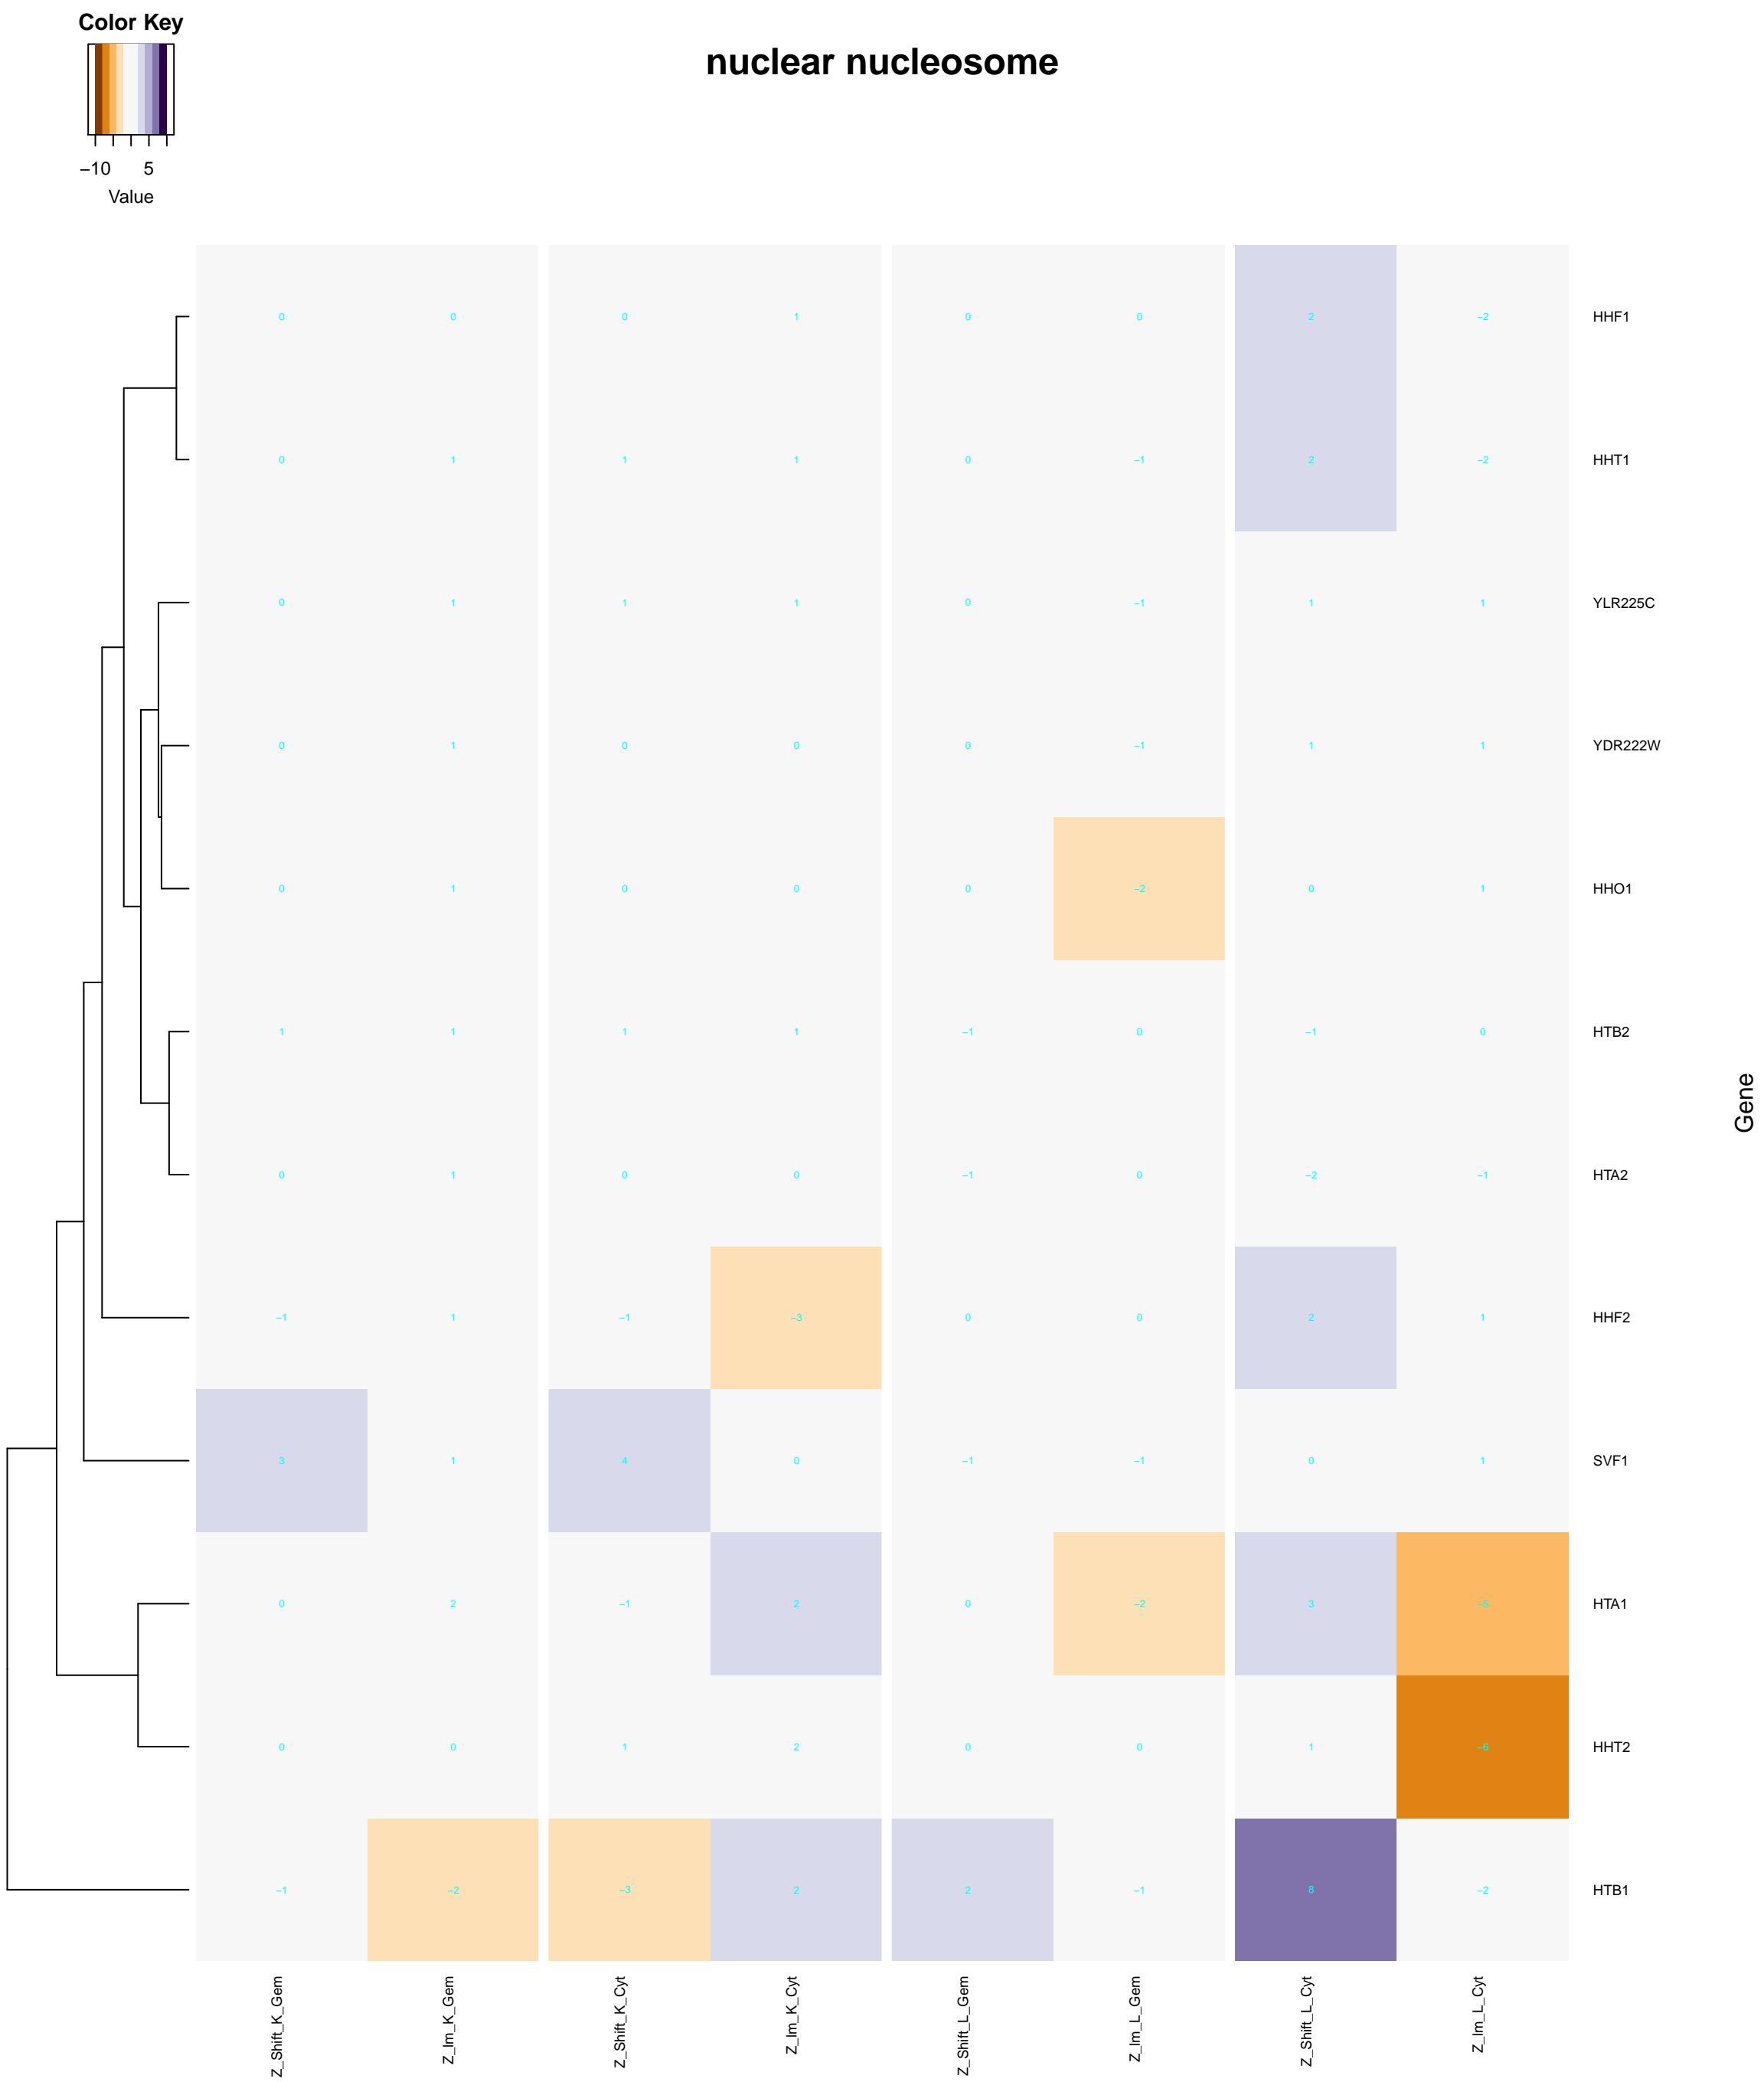

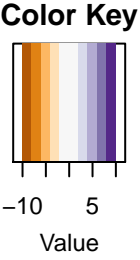

**CENP-A containing nucleosome**

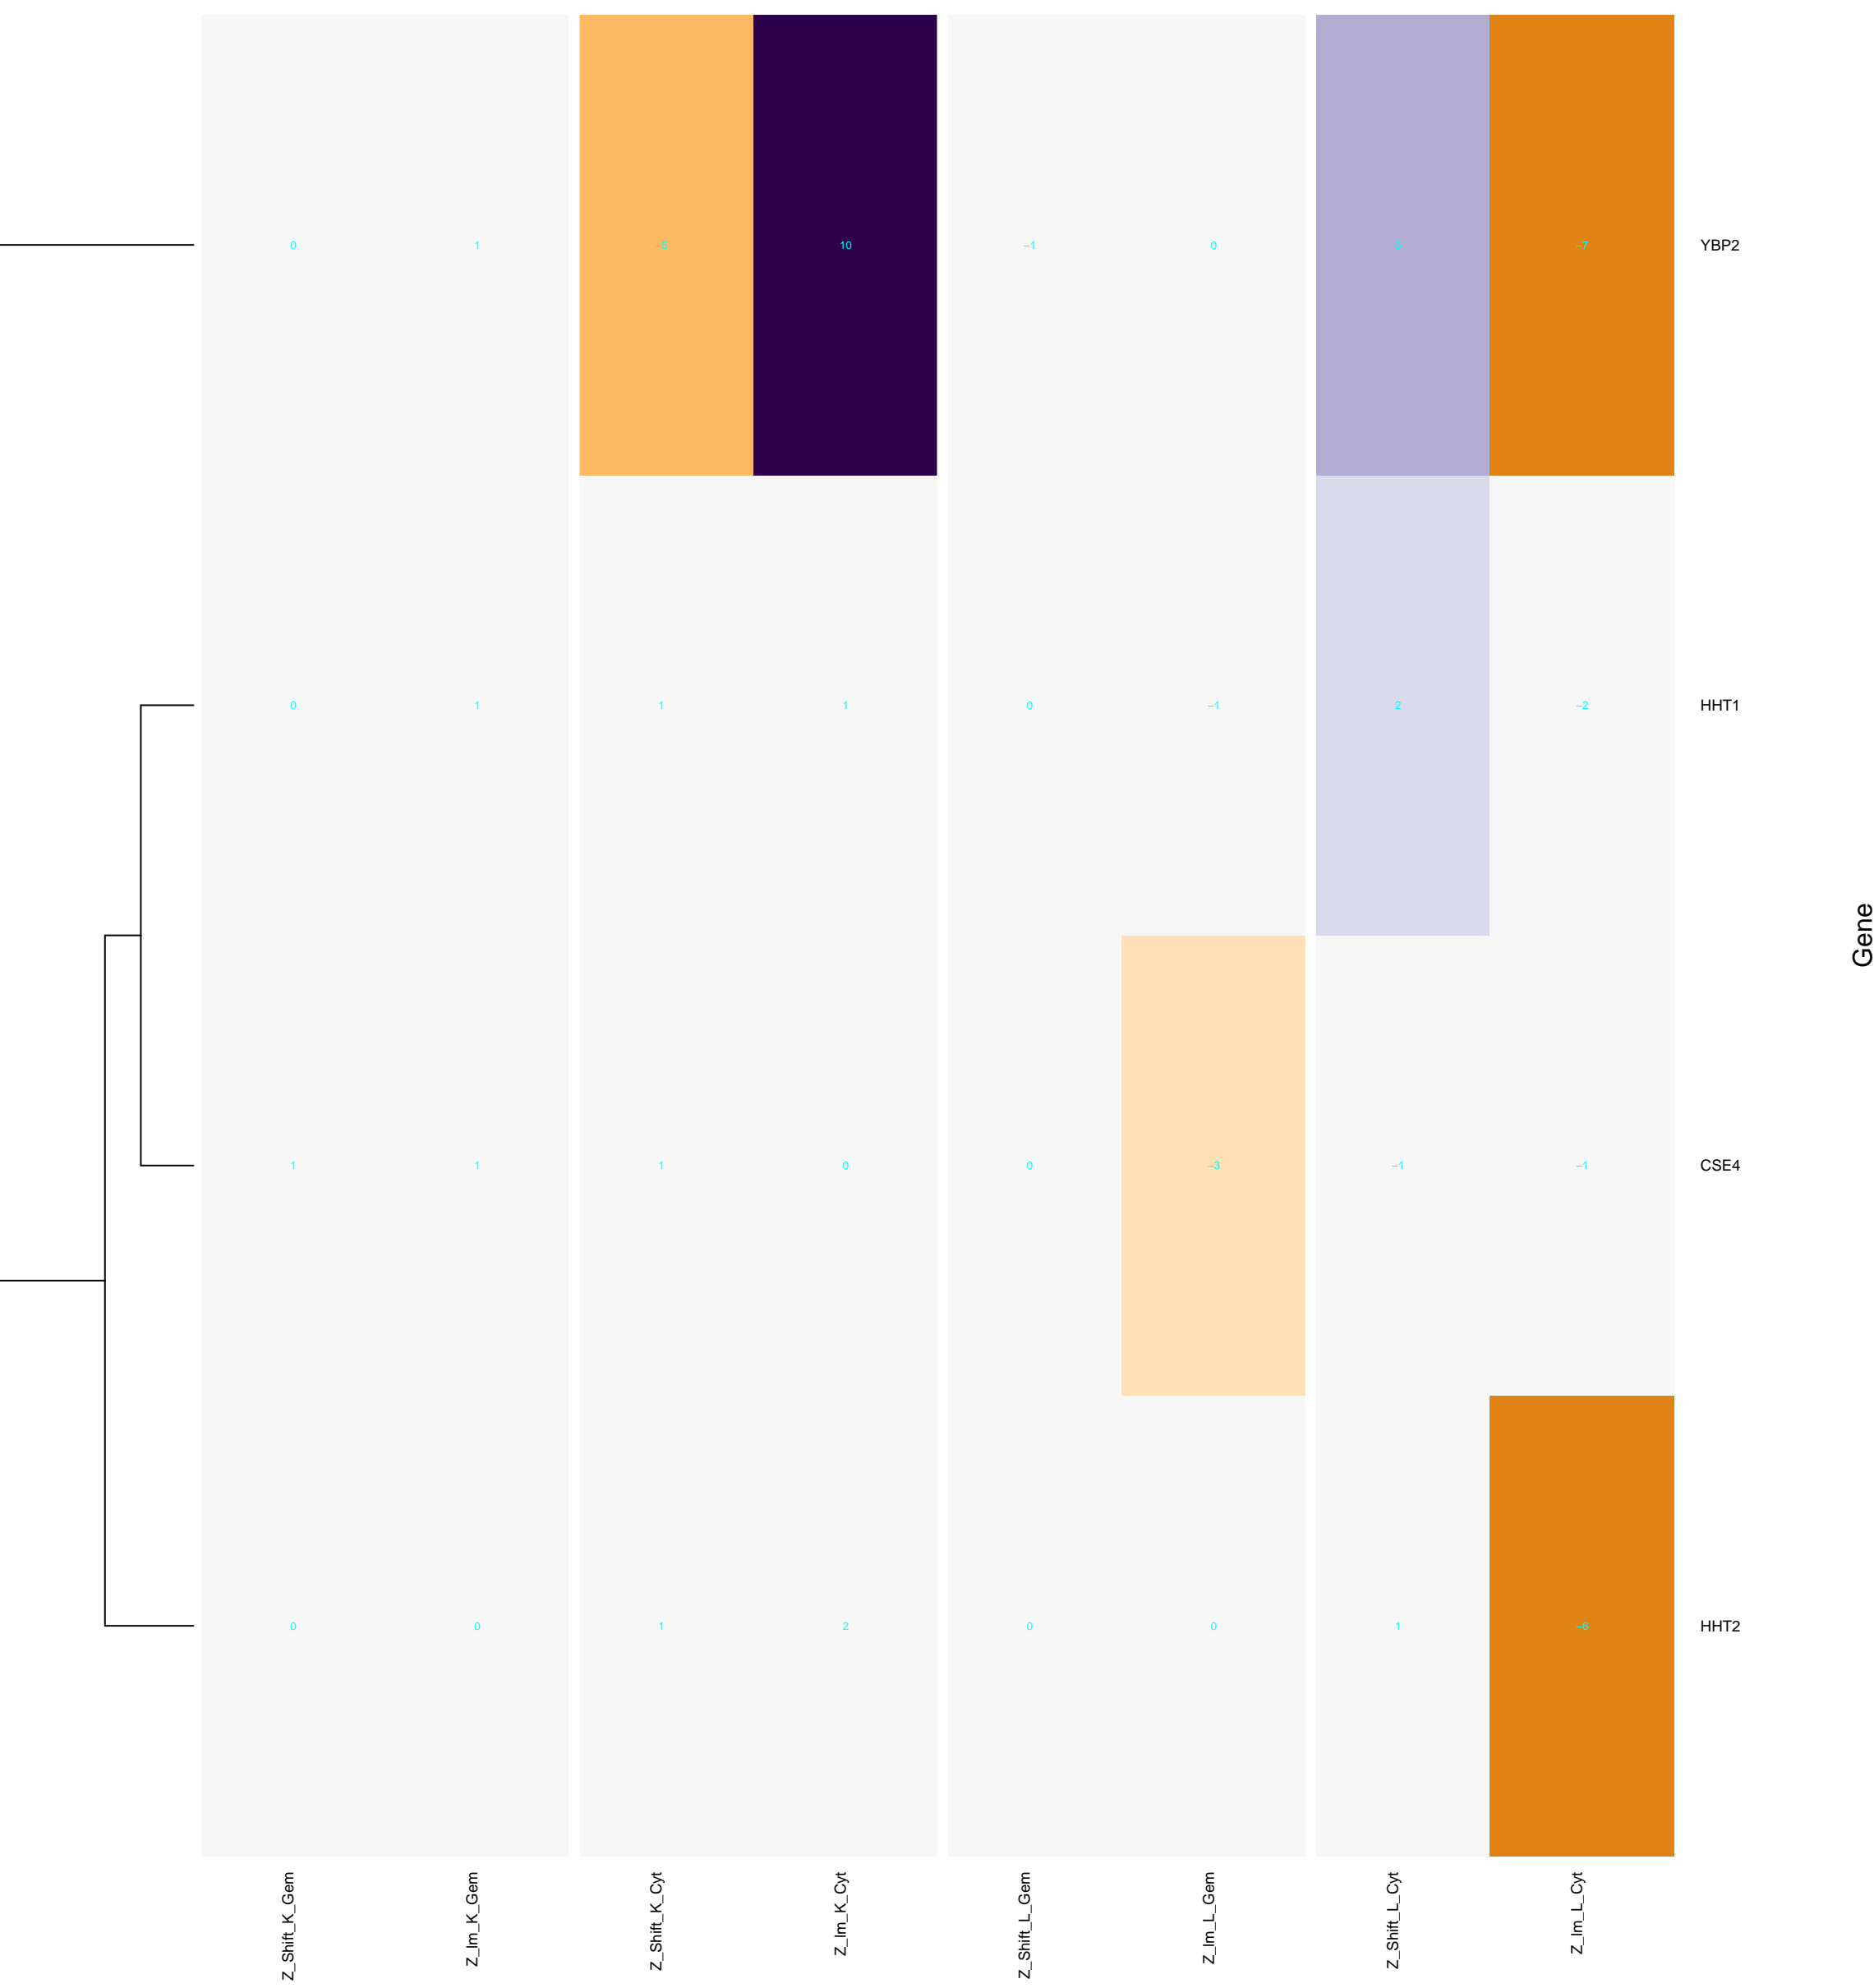

nuclear replisome

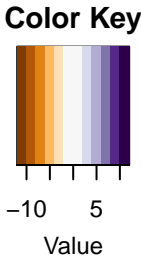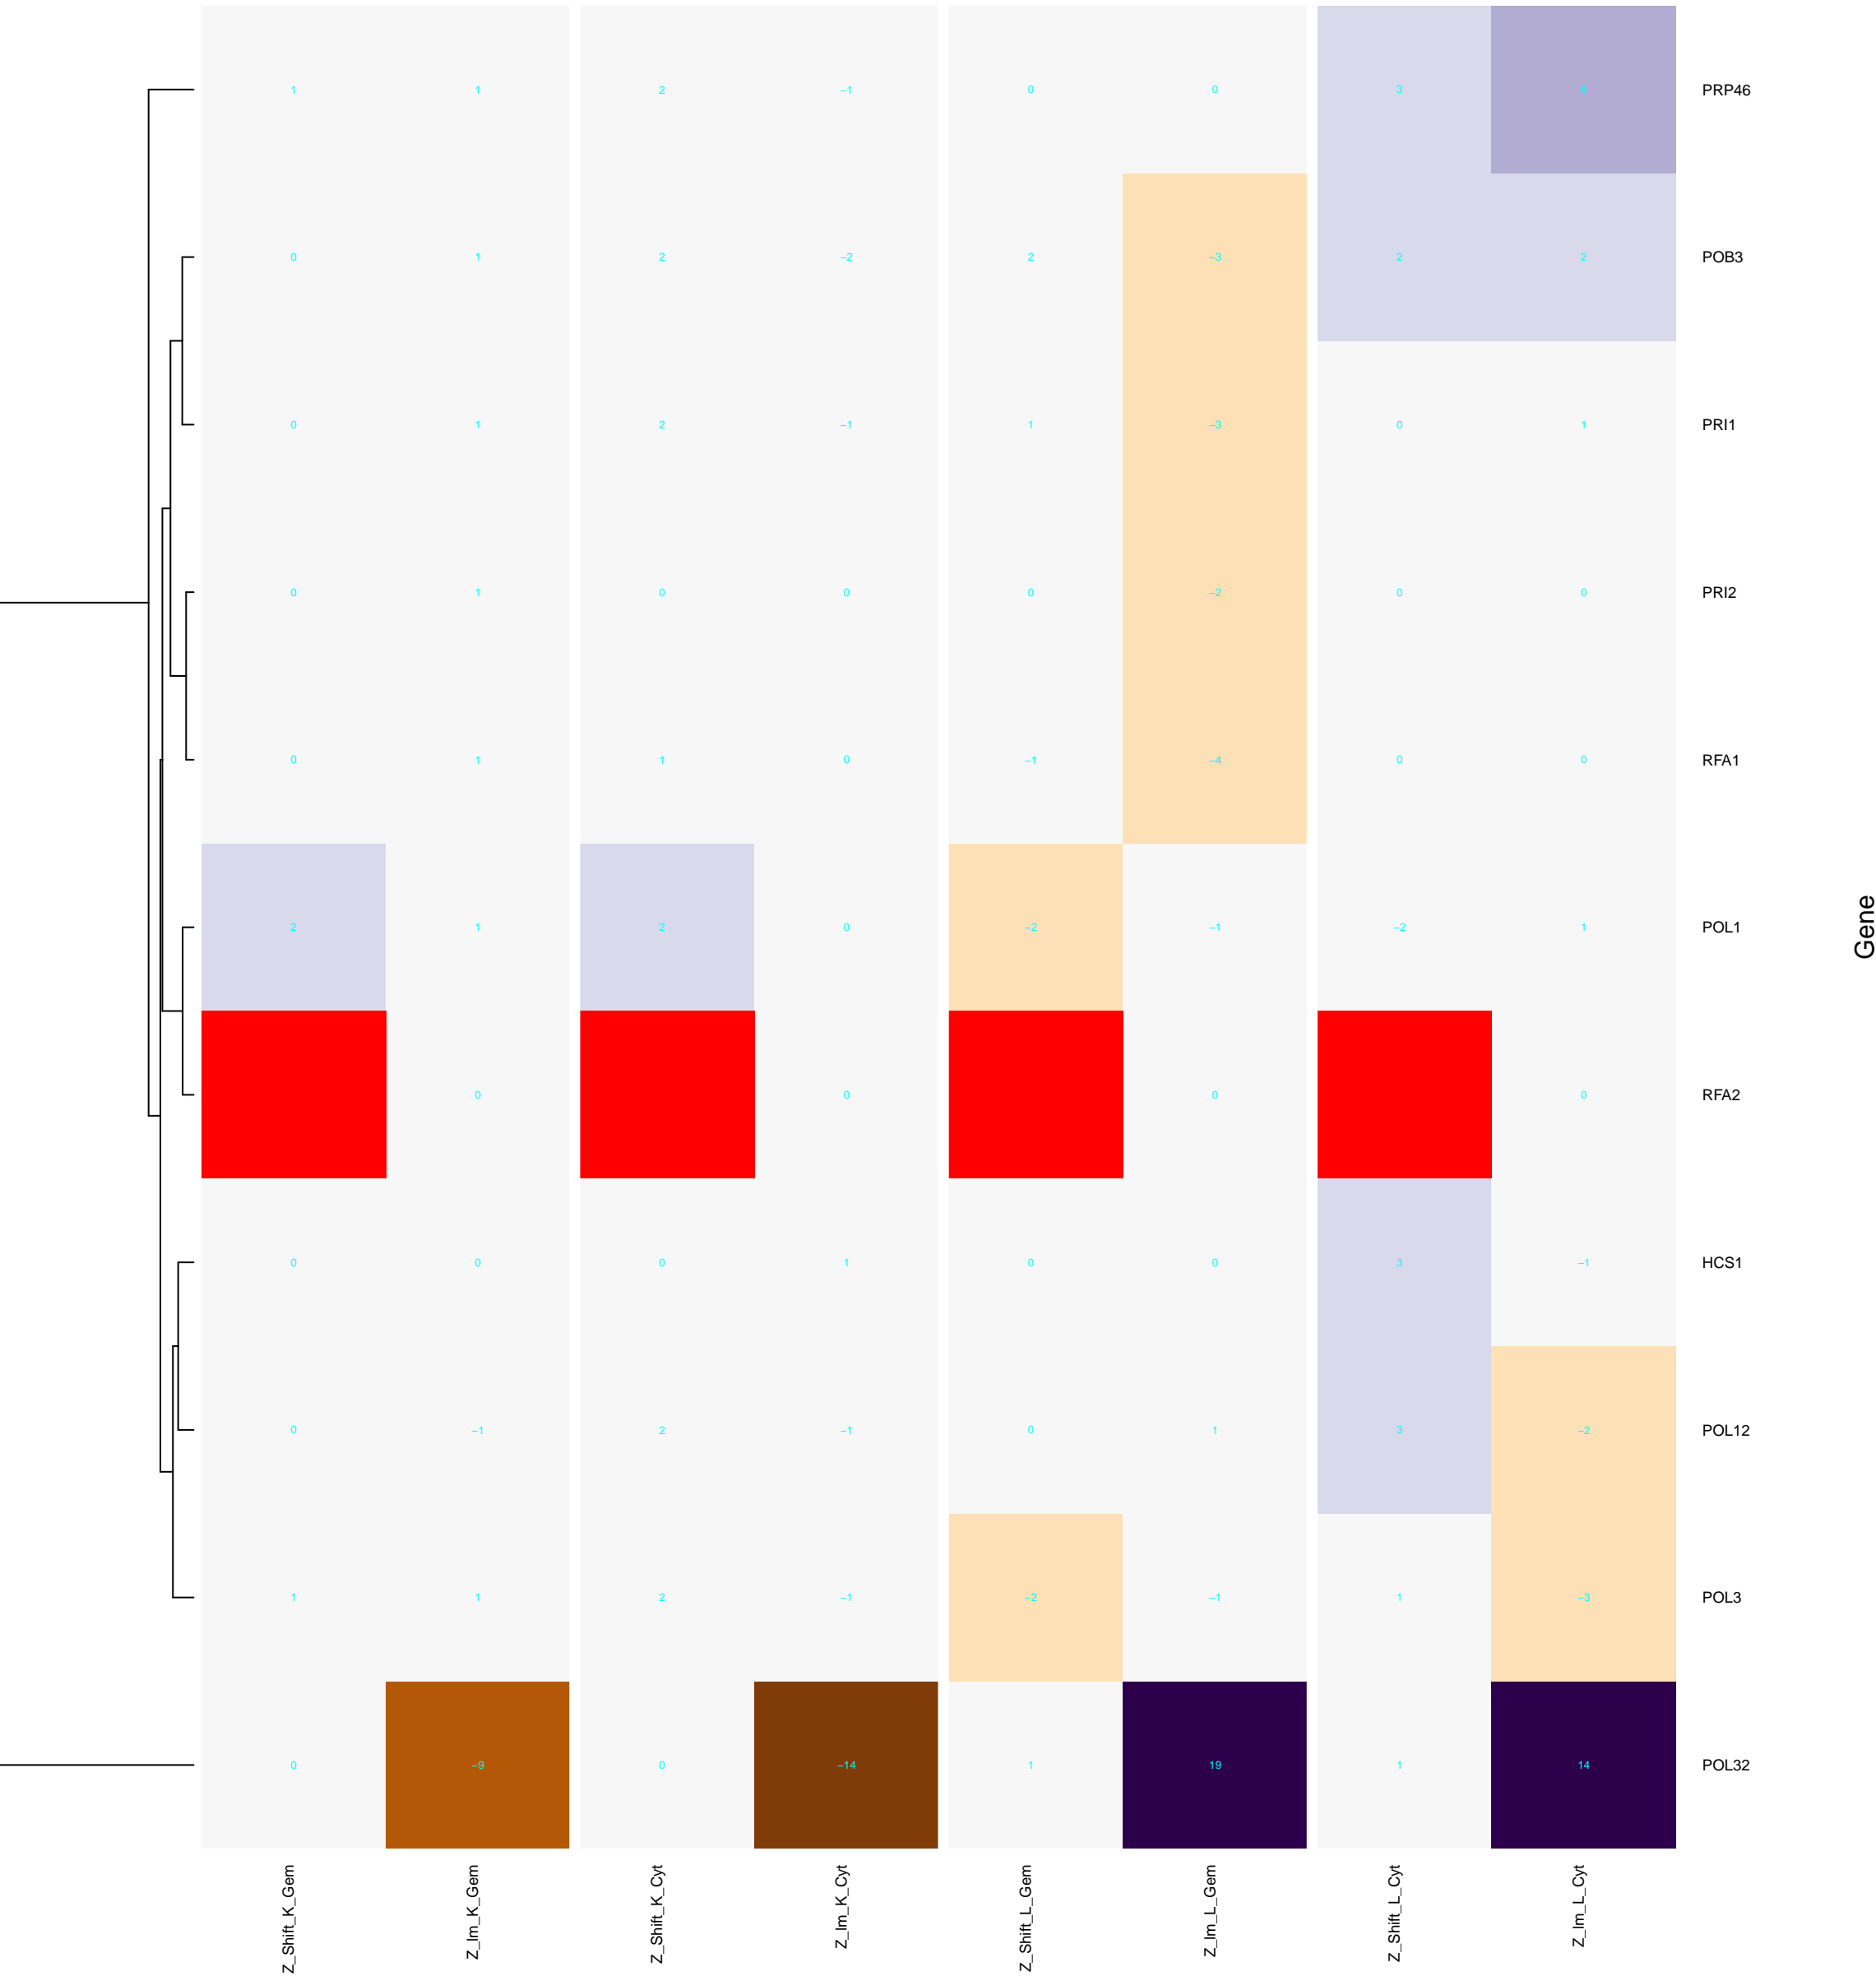

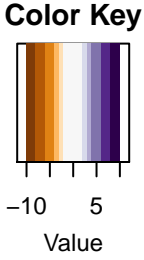

**GINS complex**

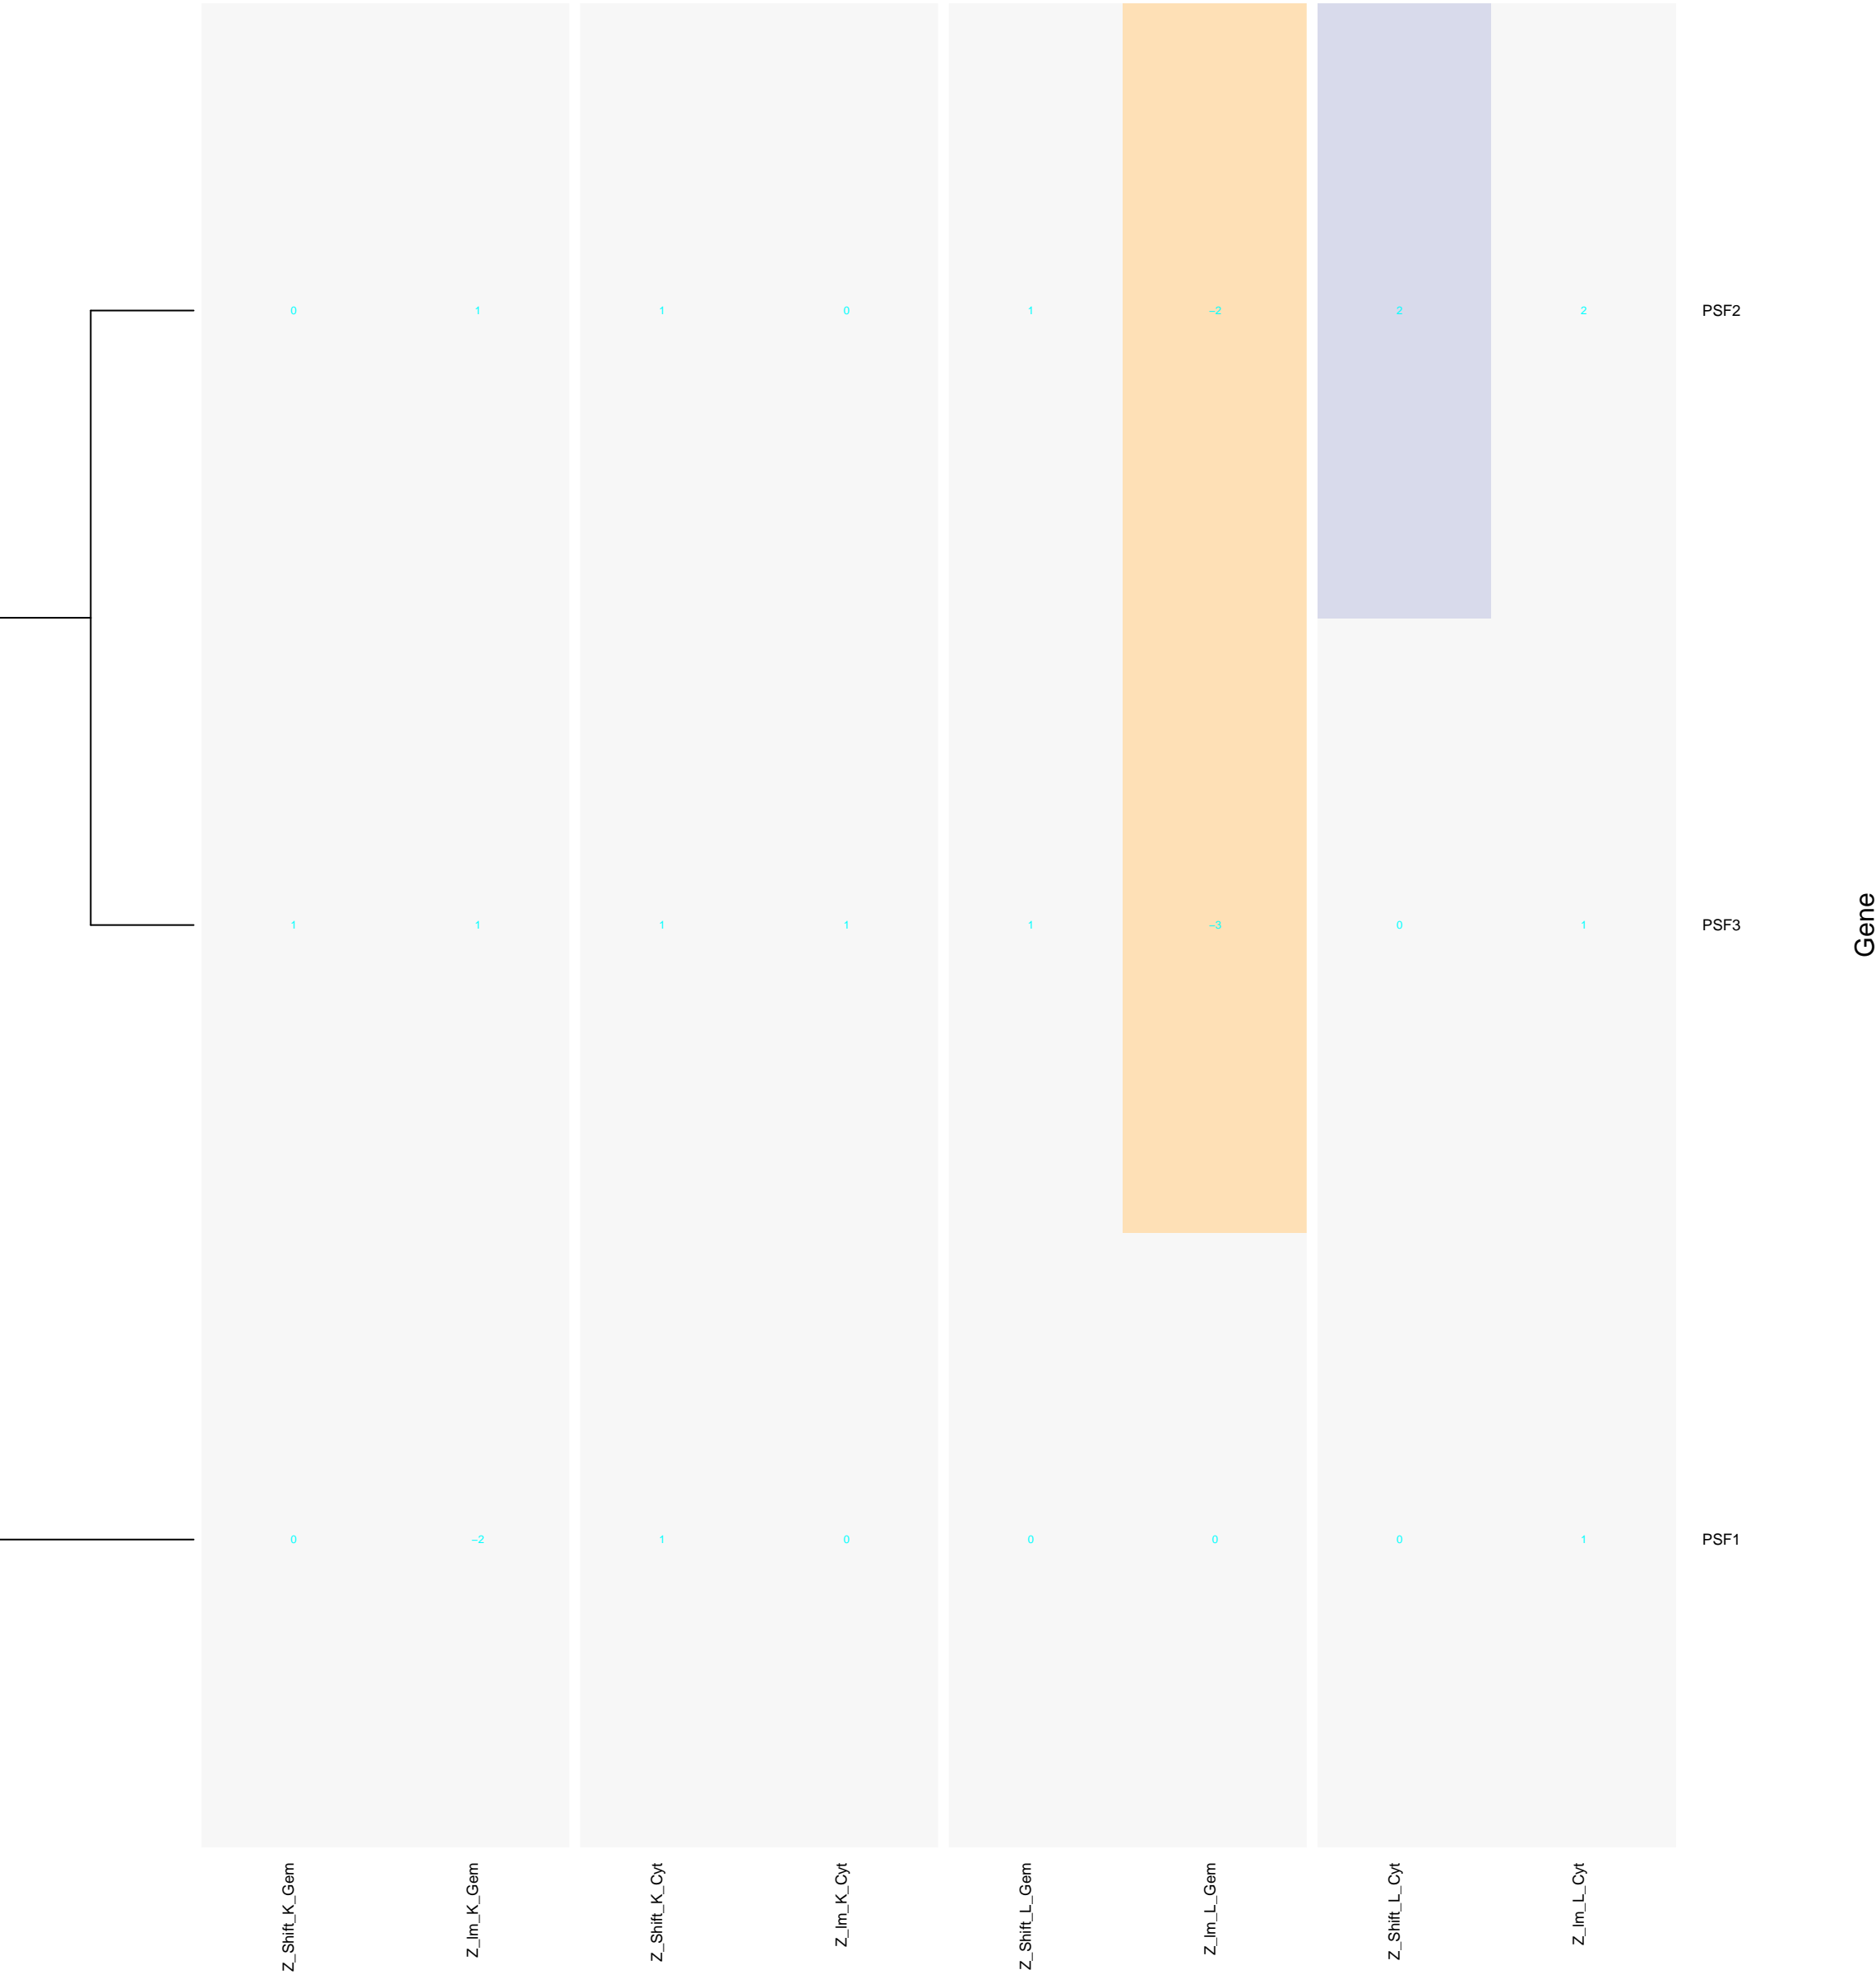

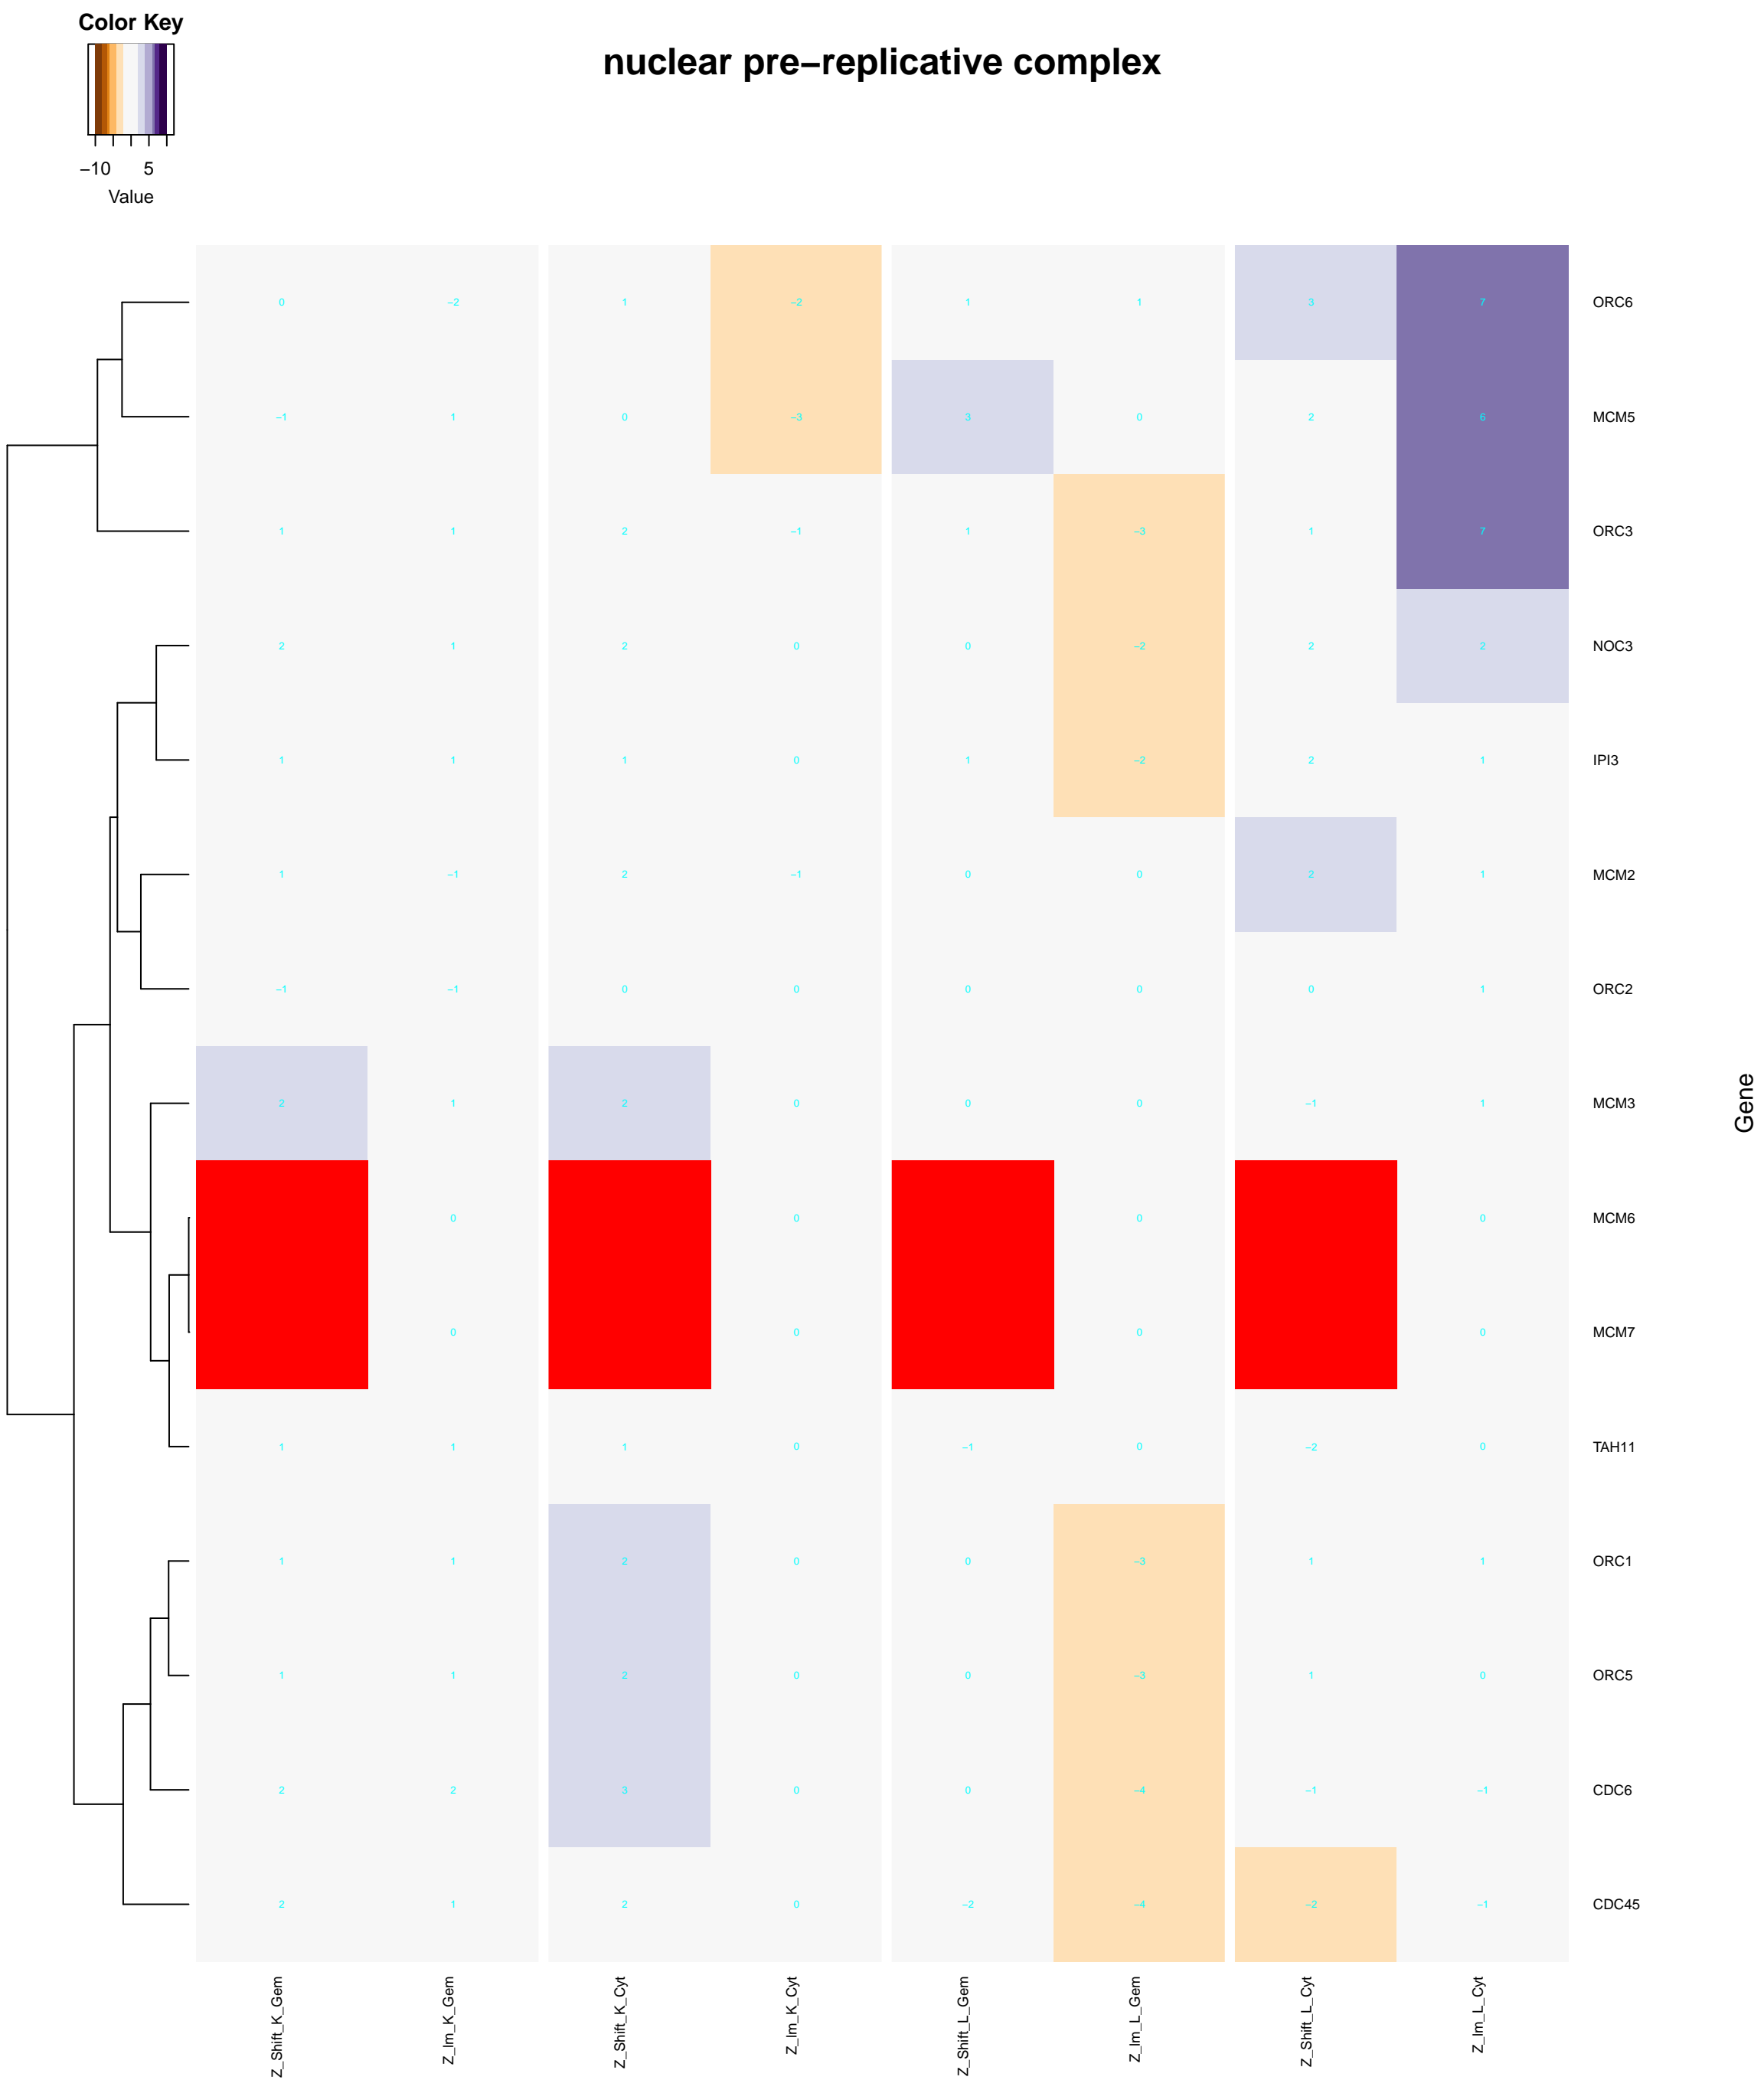

telosome

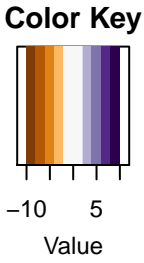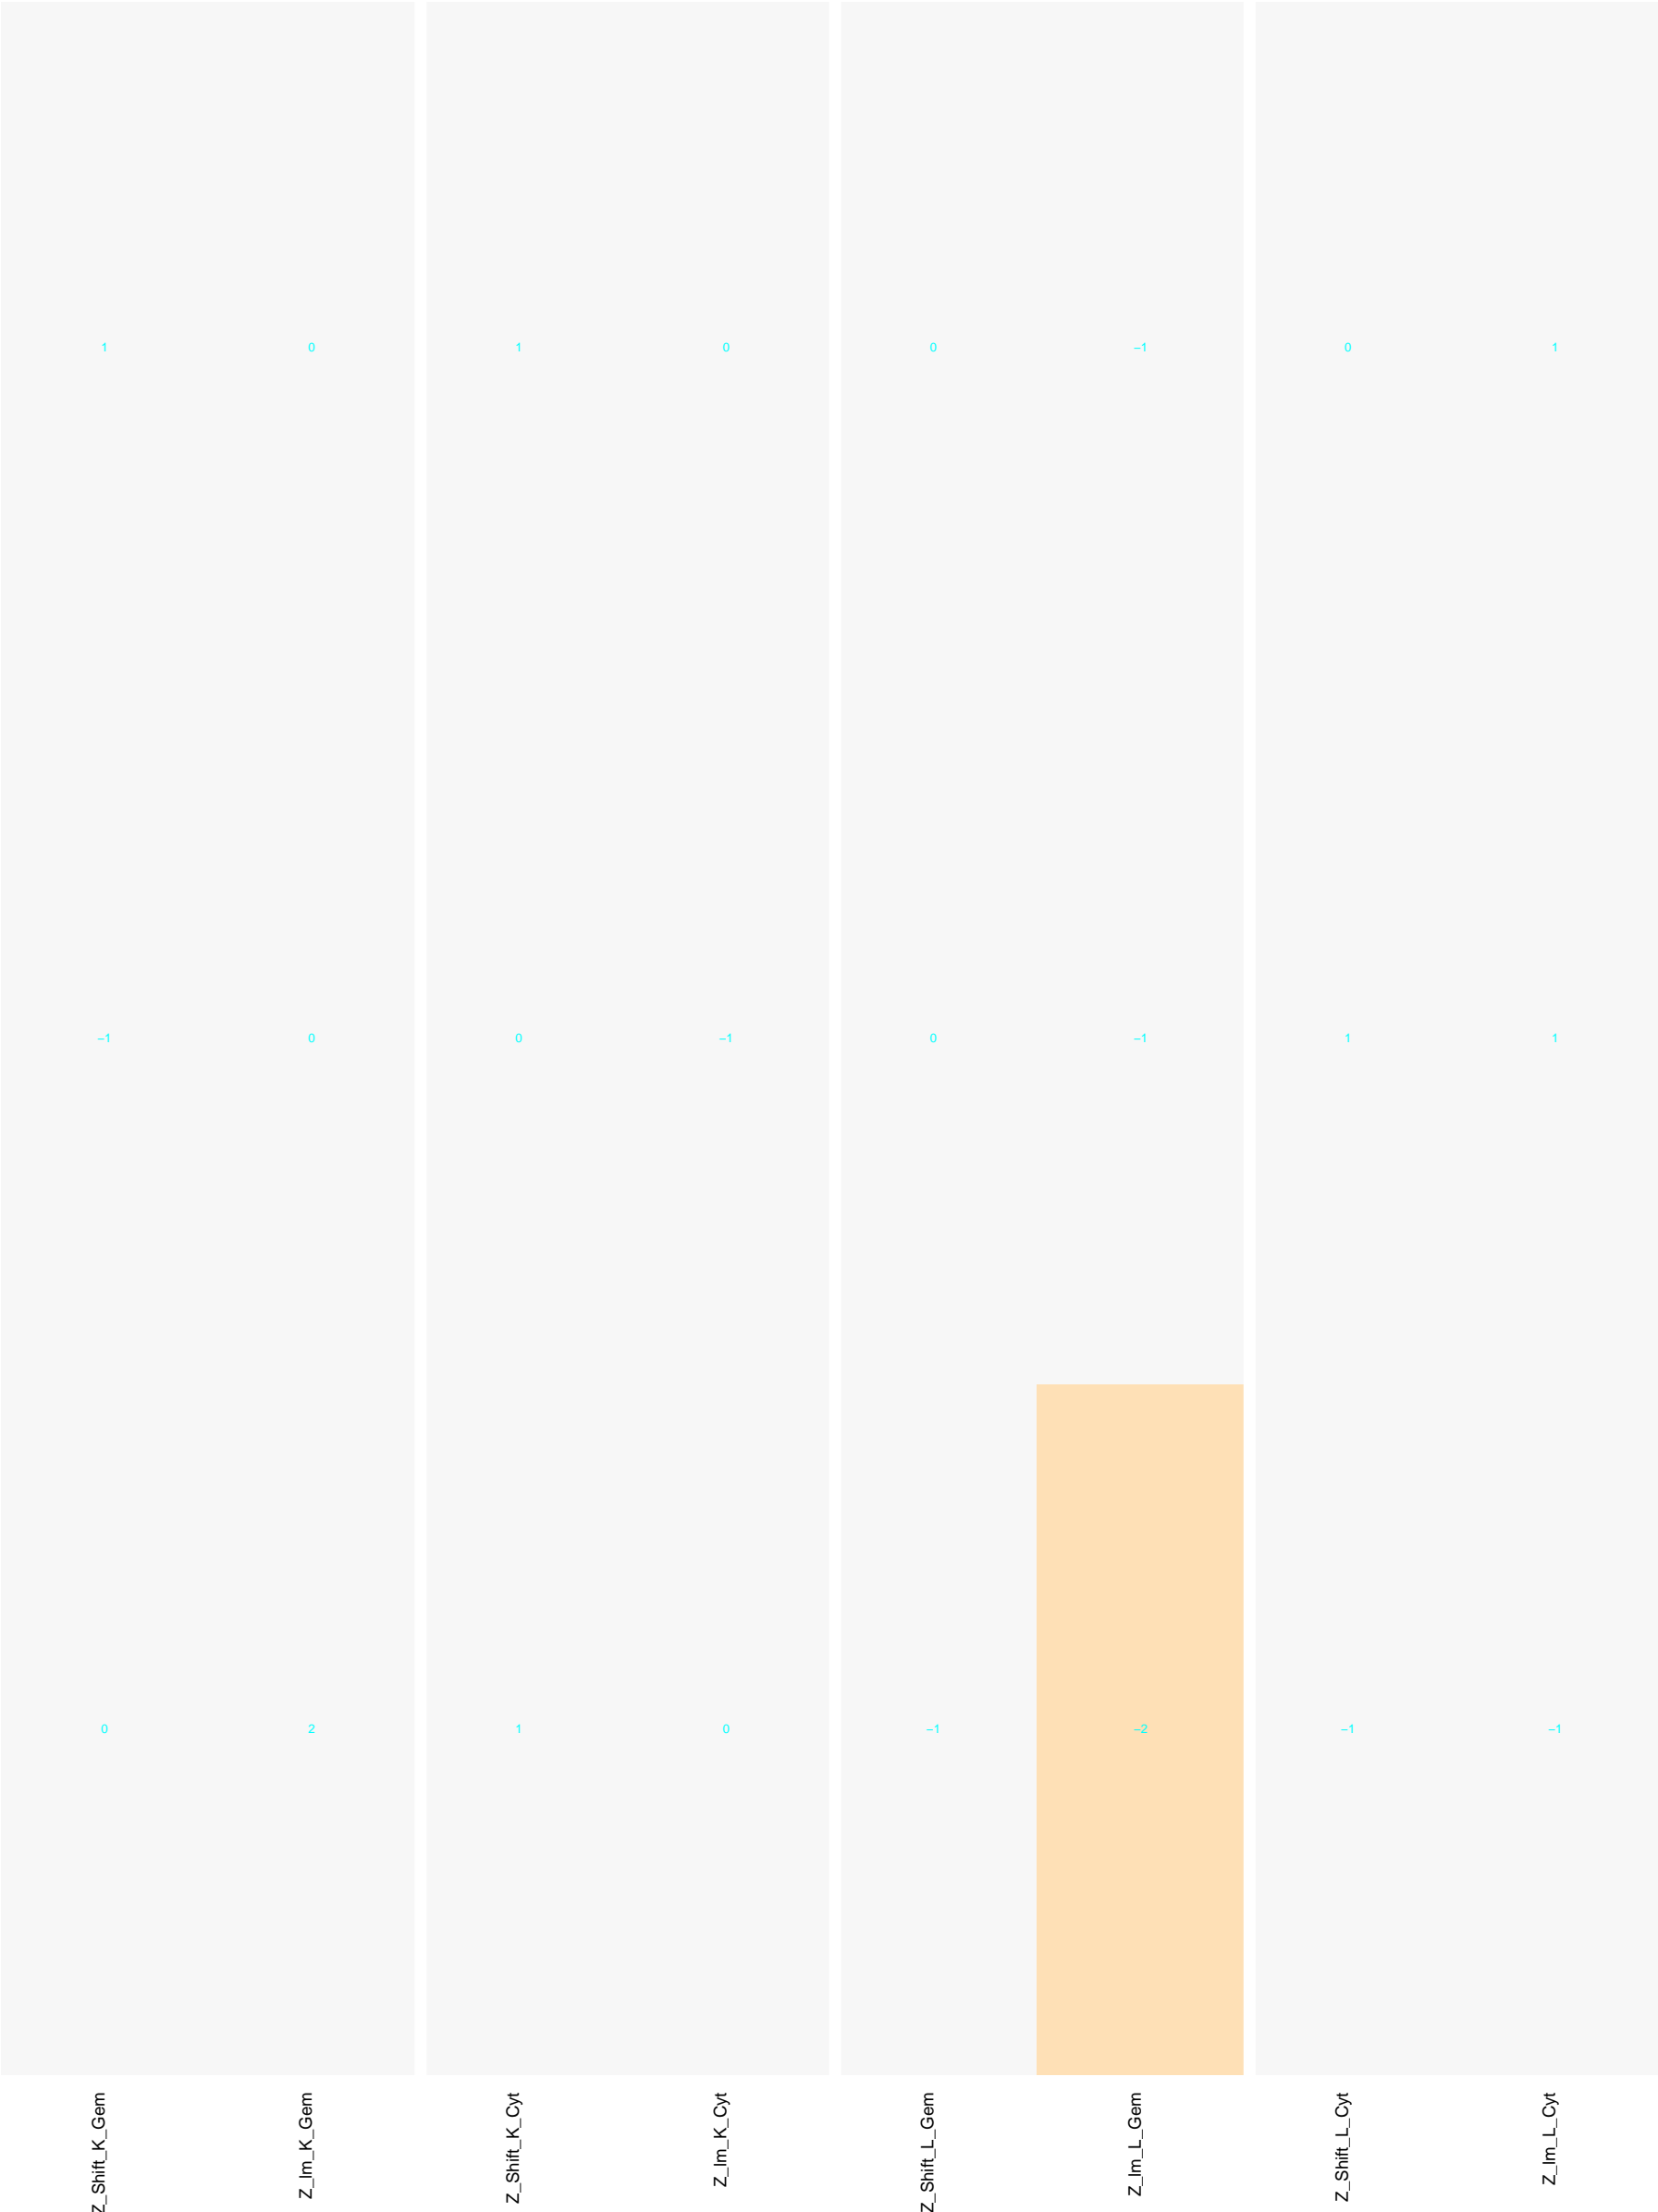

Gene

Color Key

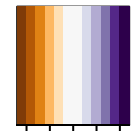

-10 5  
Value

CST complex

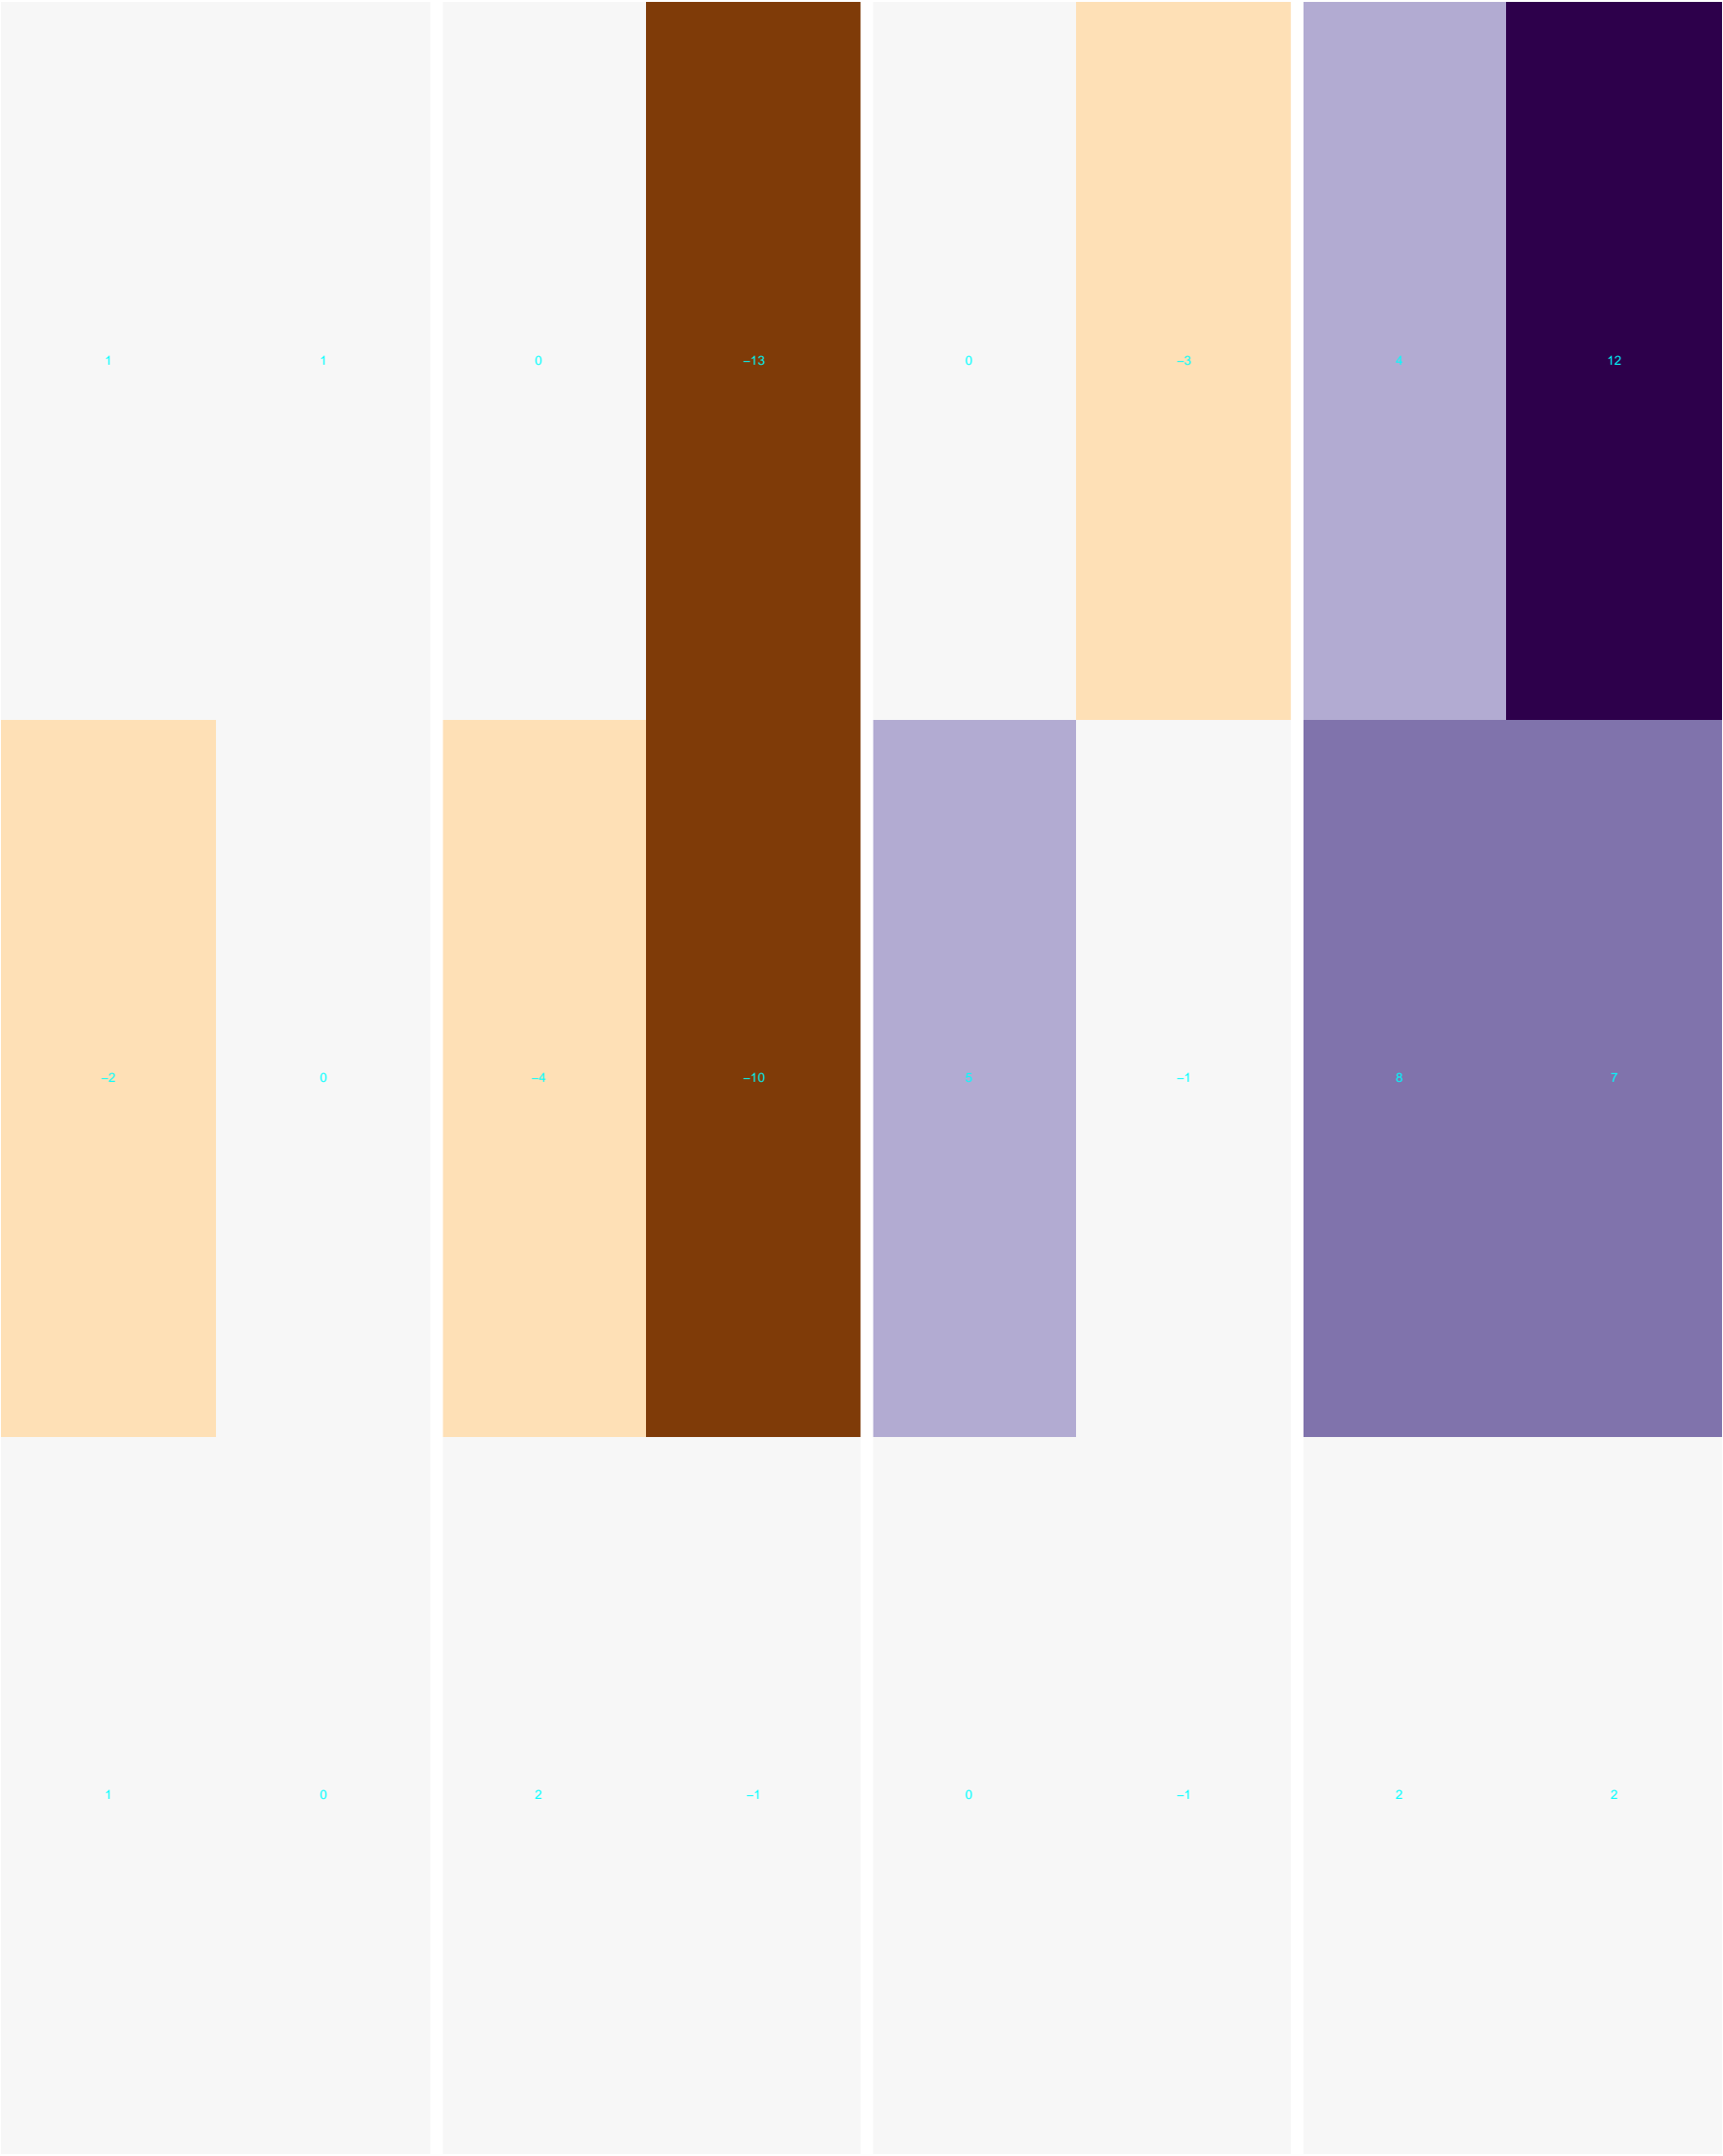

Gene
