# Supplementary material for: A Humanized Yeast Phenomic Model of Deoxycytidine Kinase to Predict Genetic Buffering of Nucleoside Analog Cytotoxicity
Source: MDPI journal article supplement (doi:10.3390/genes10100770), 2019-09-30
Supplement: s1 [file s1]

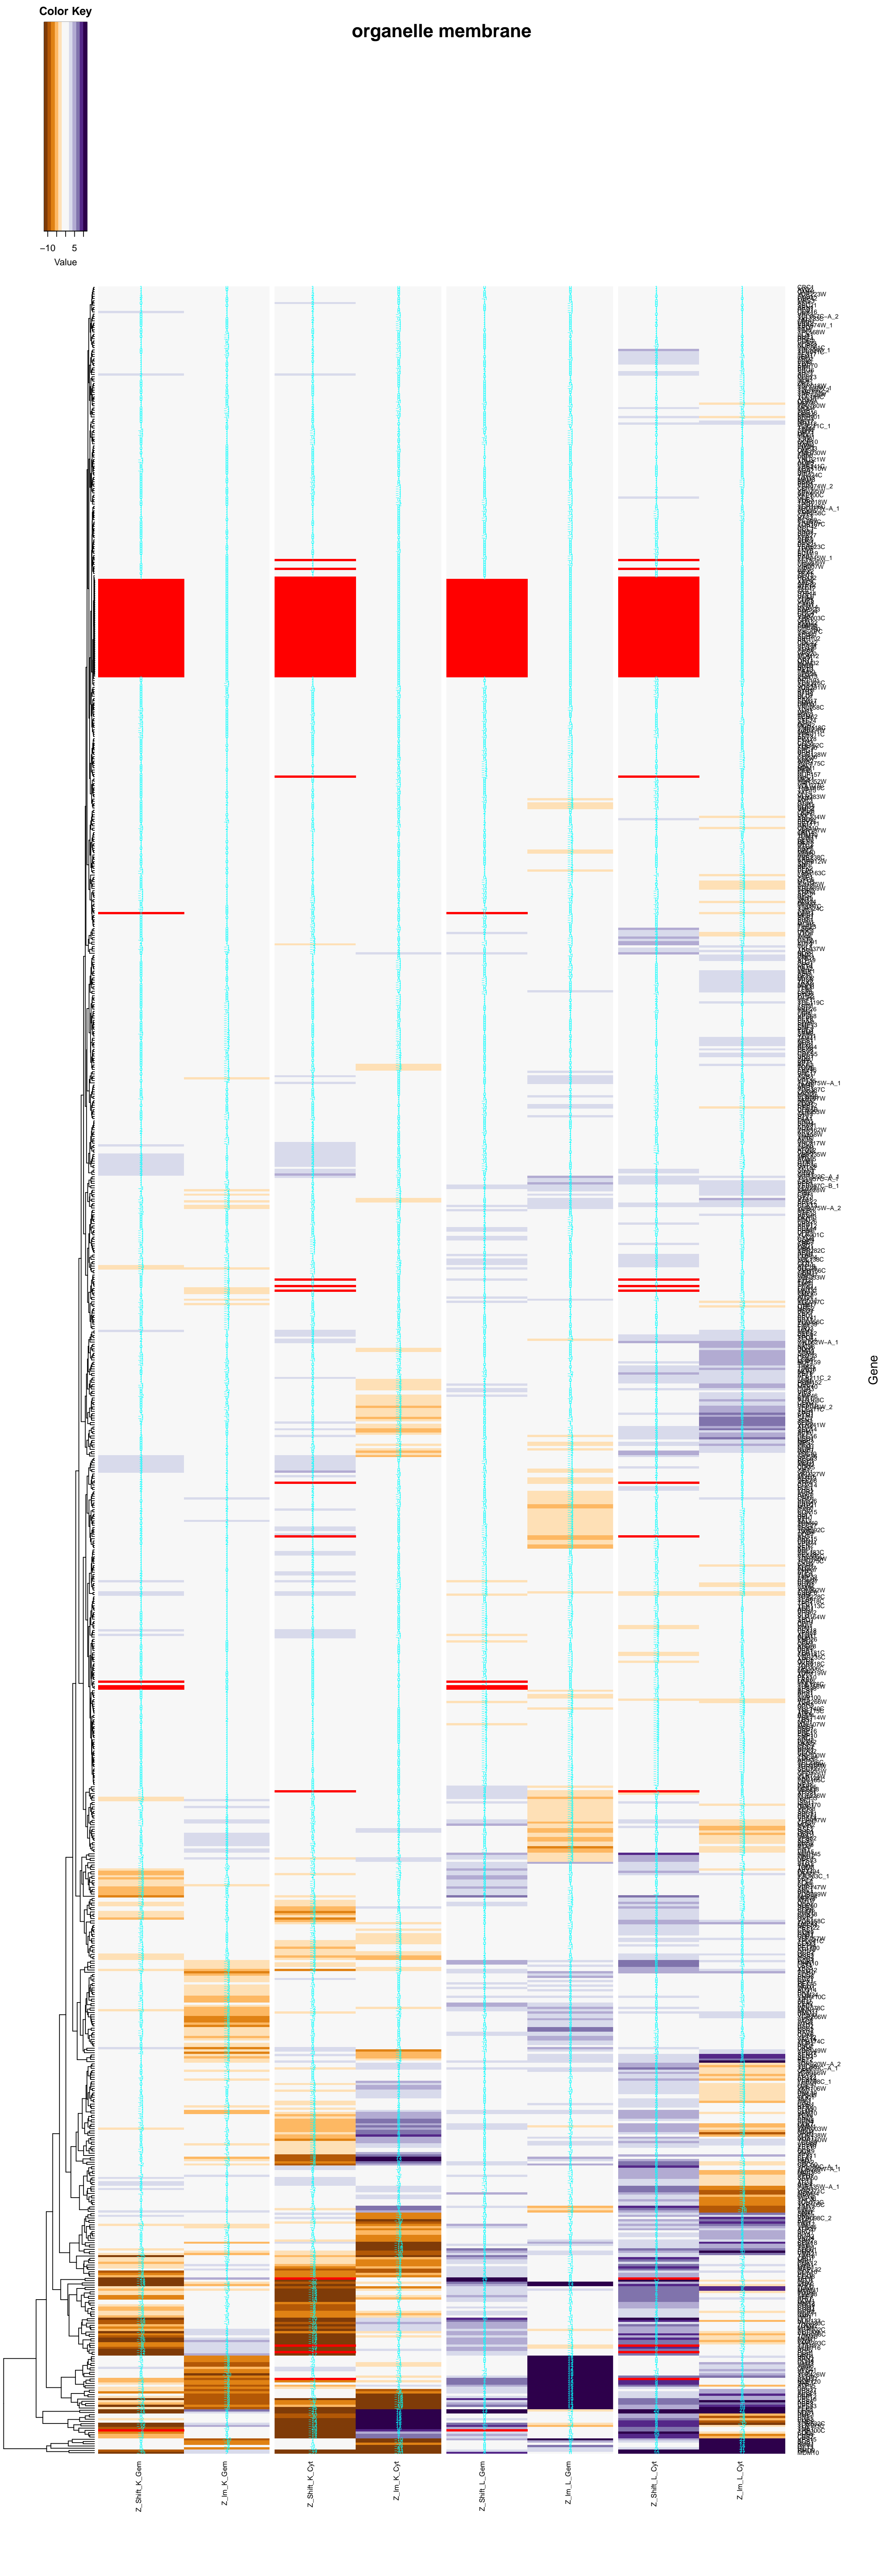

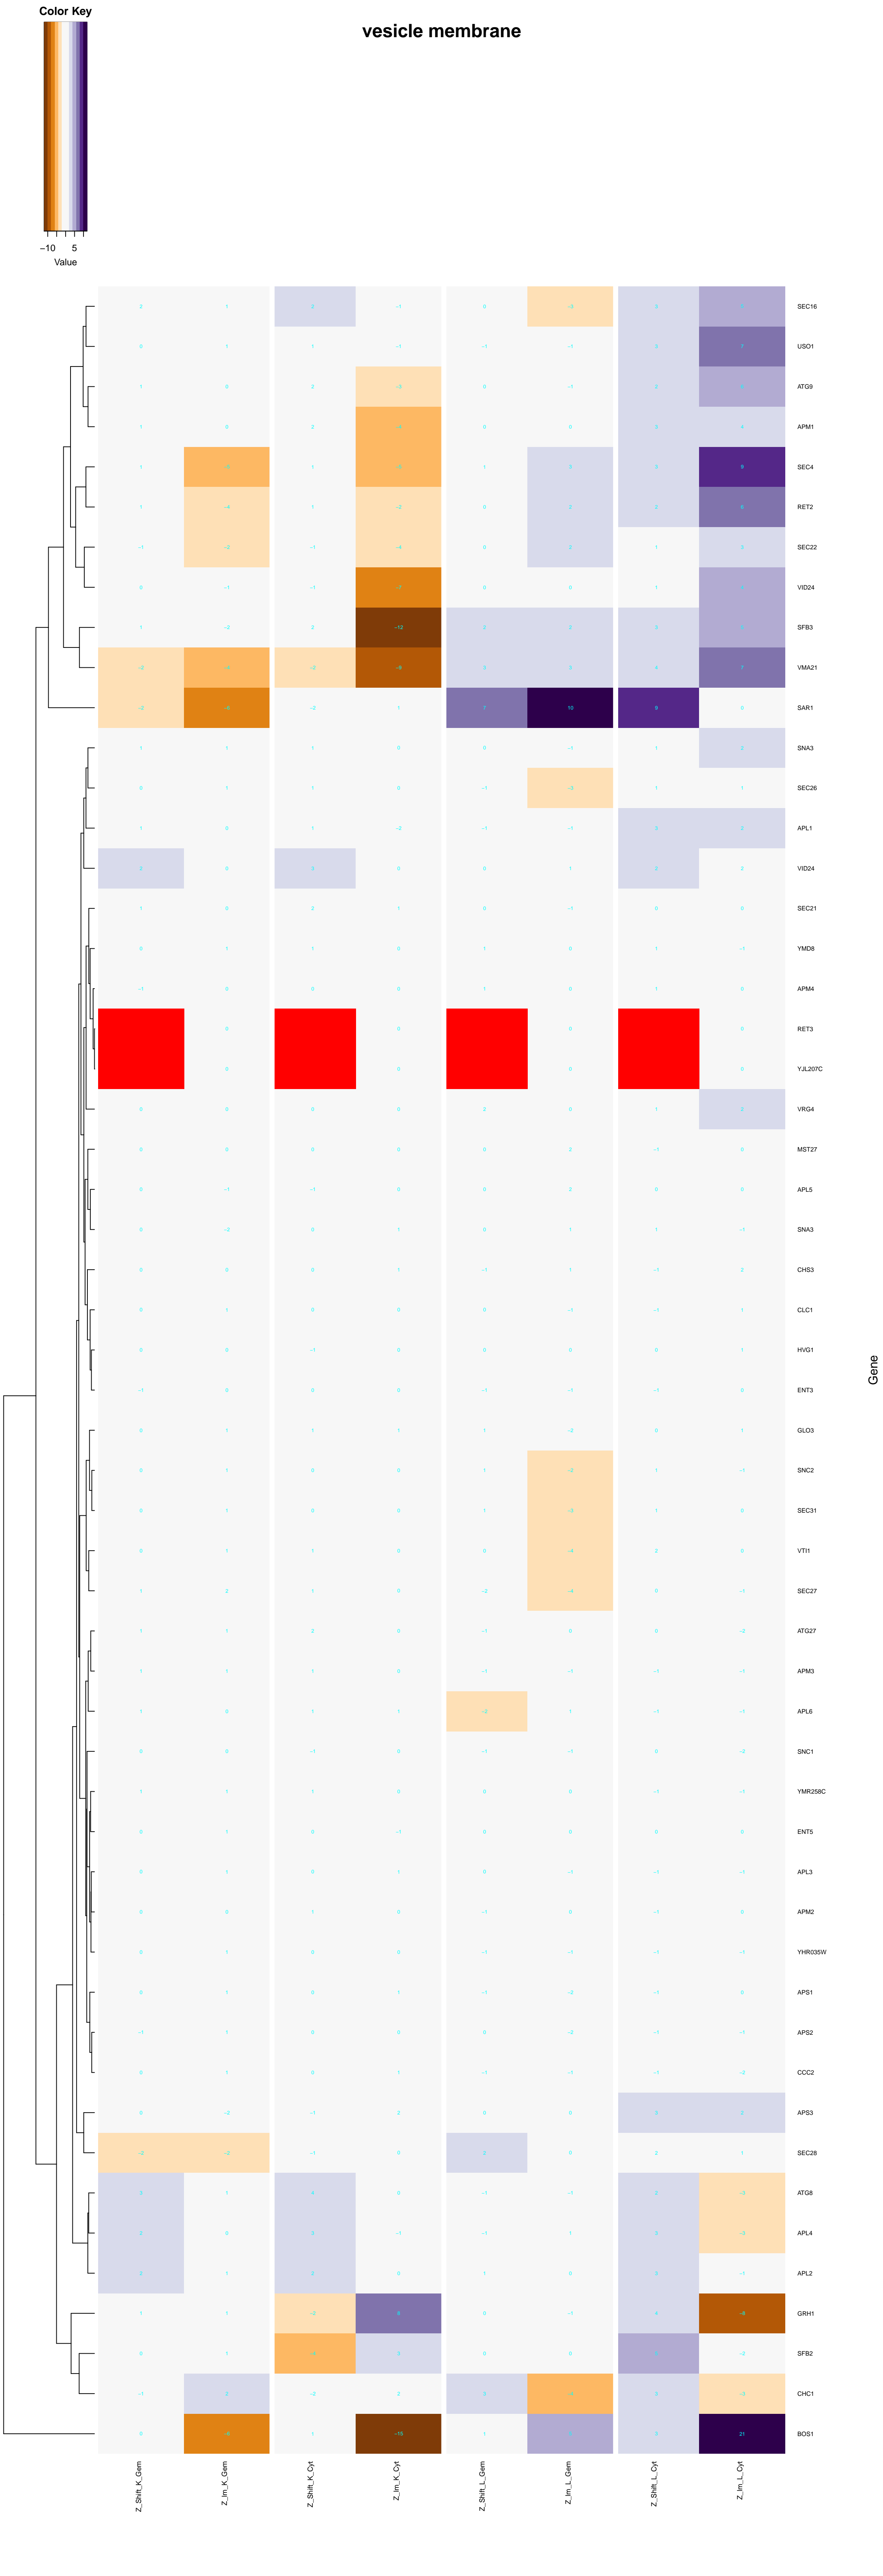

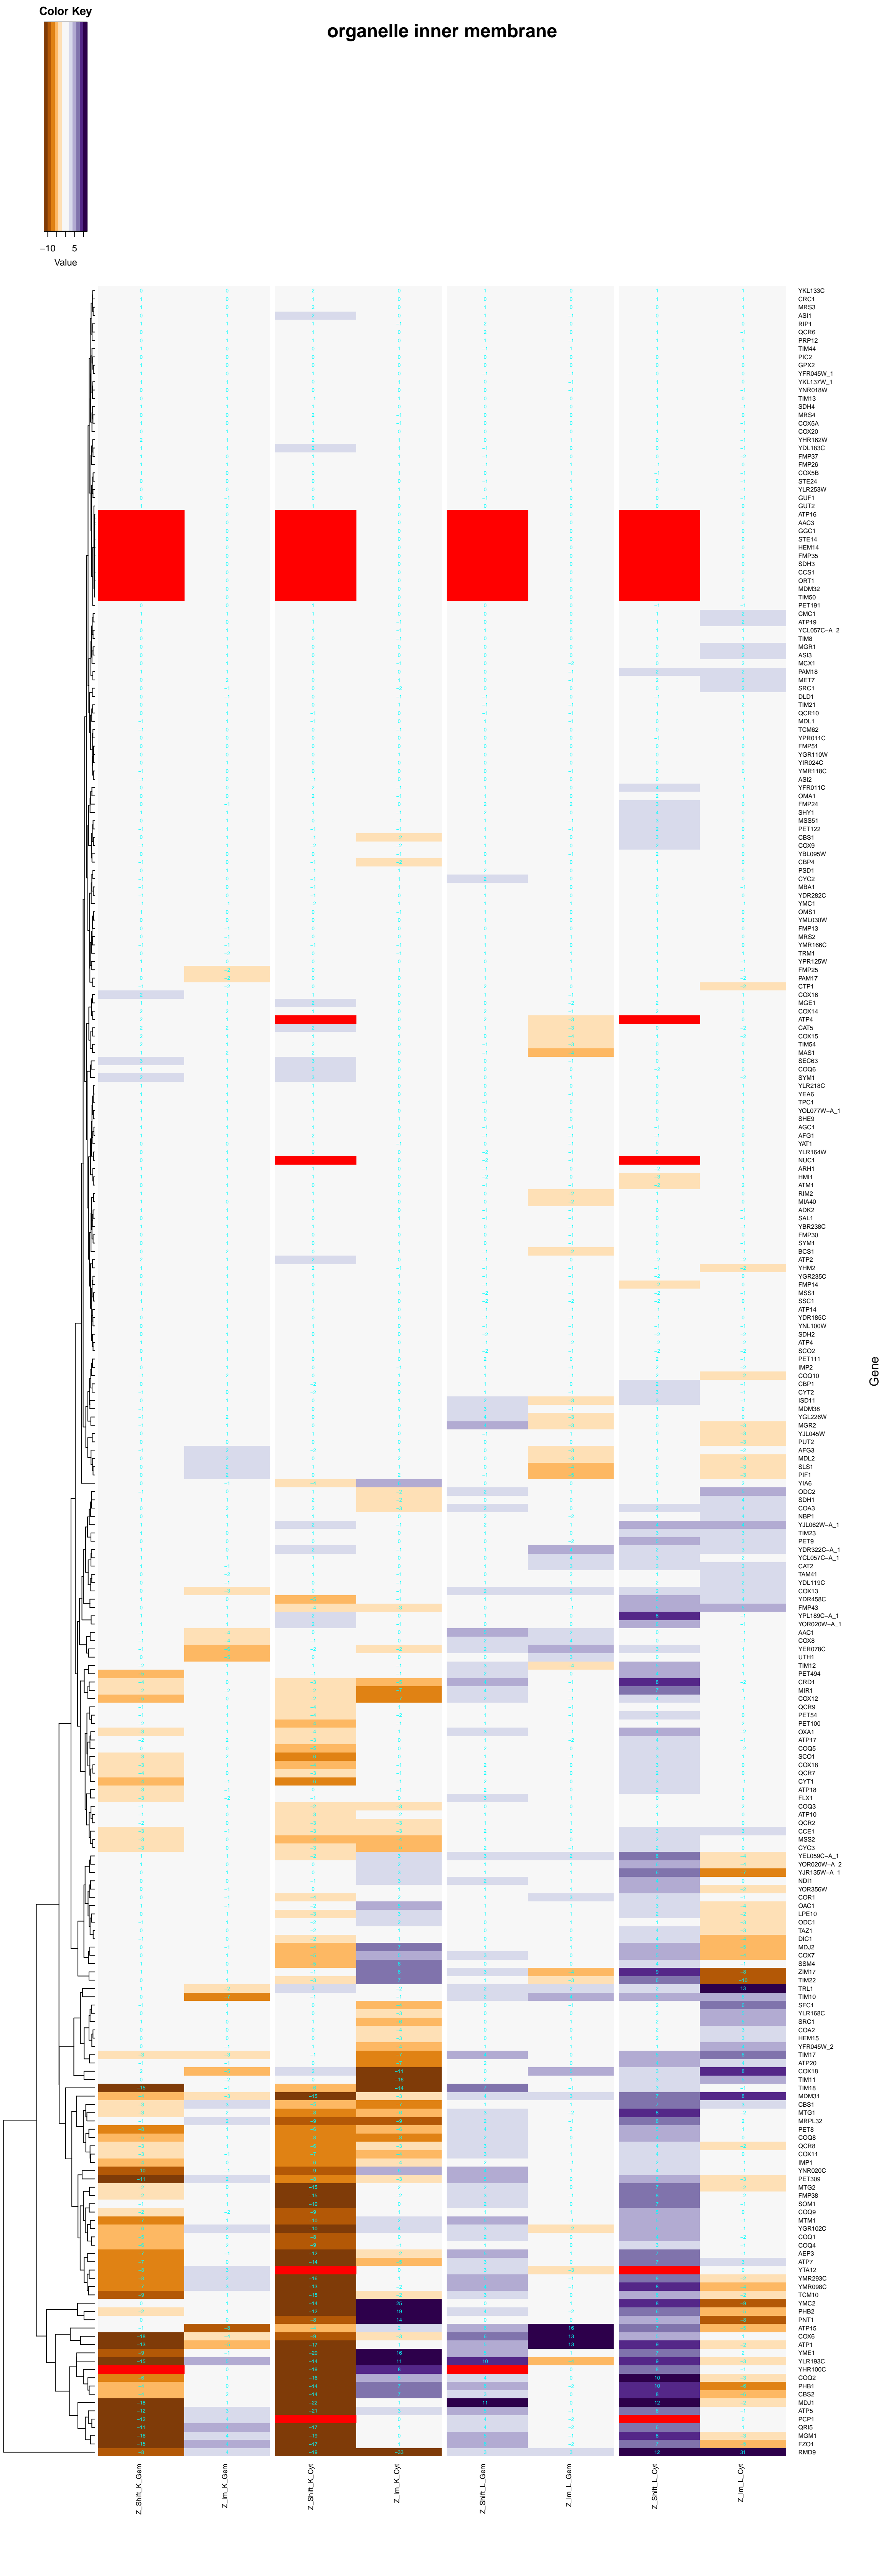

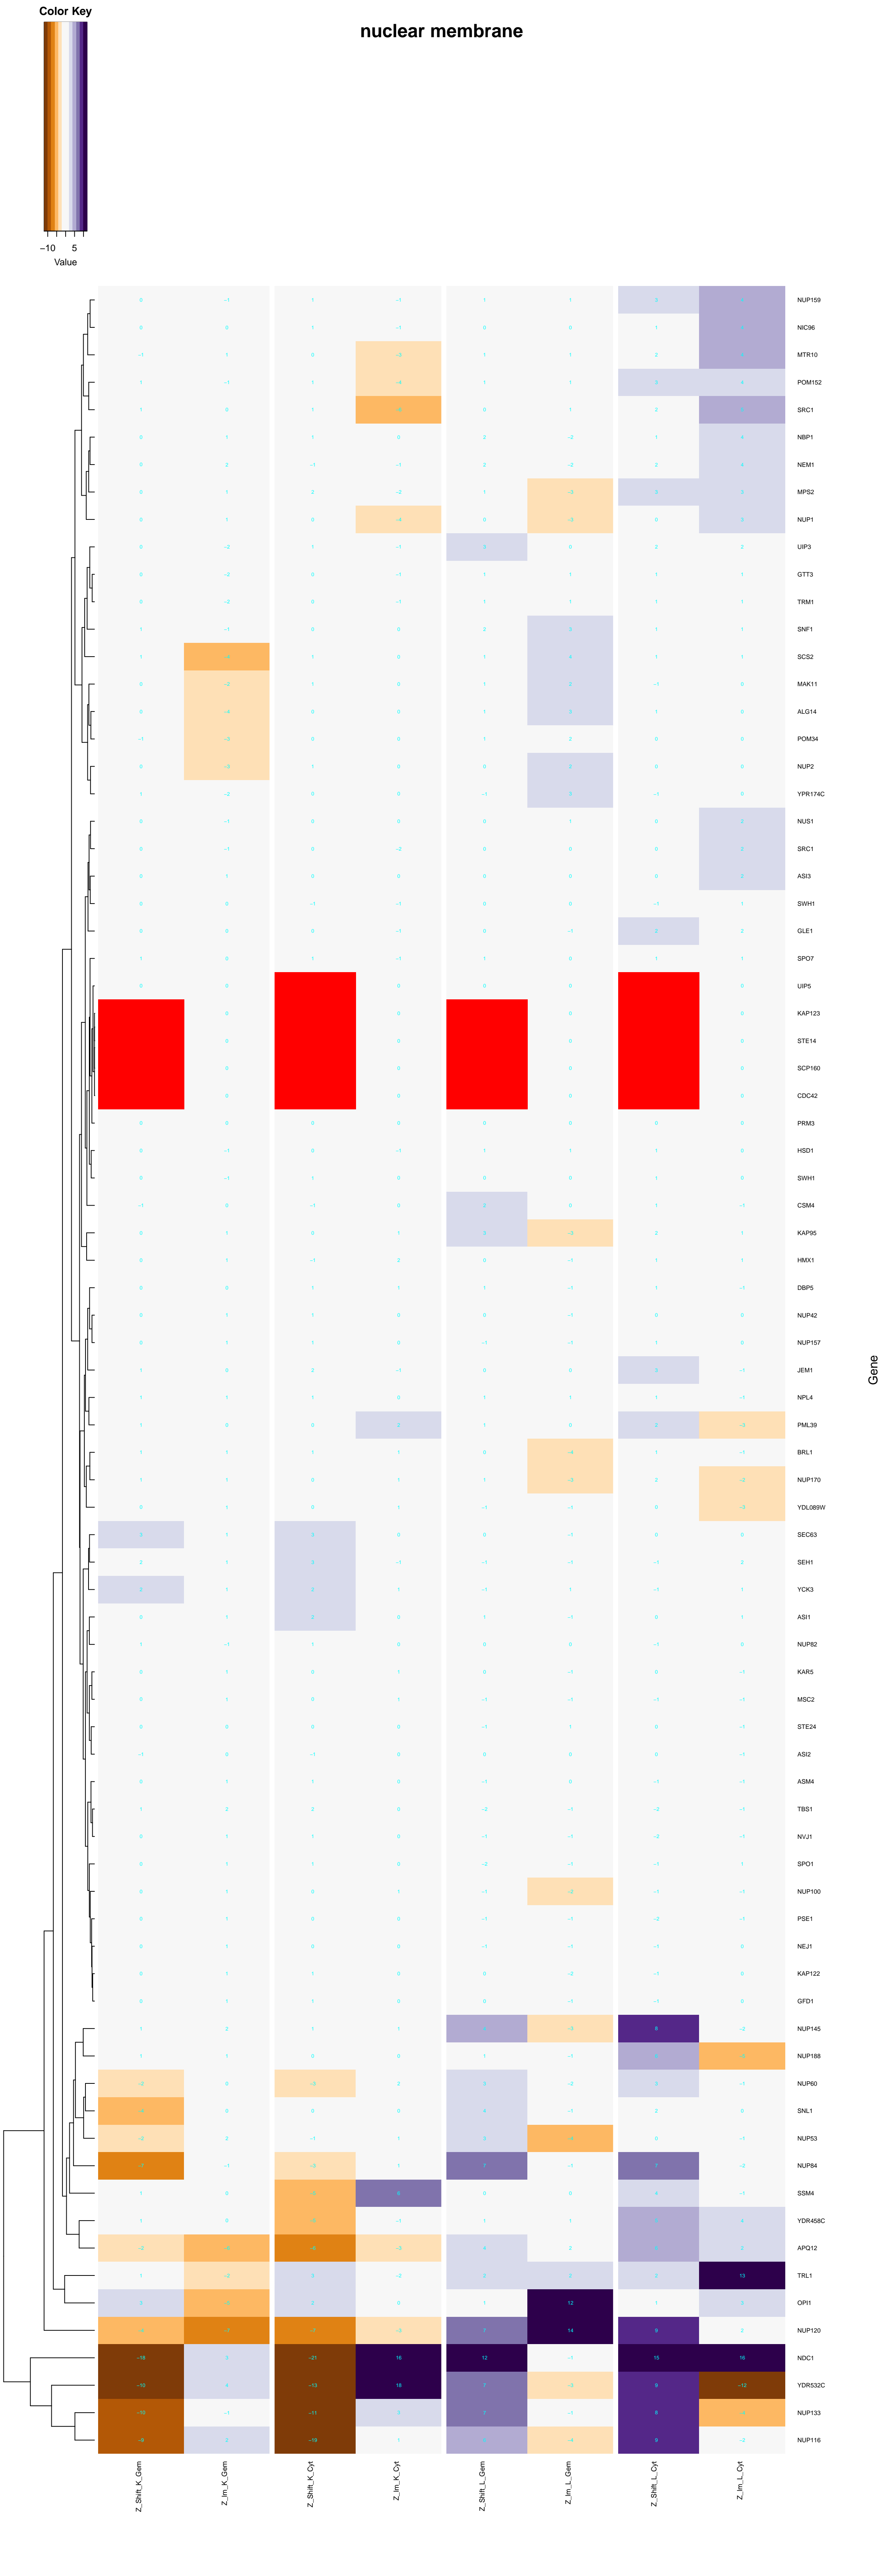



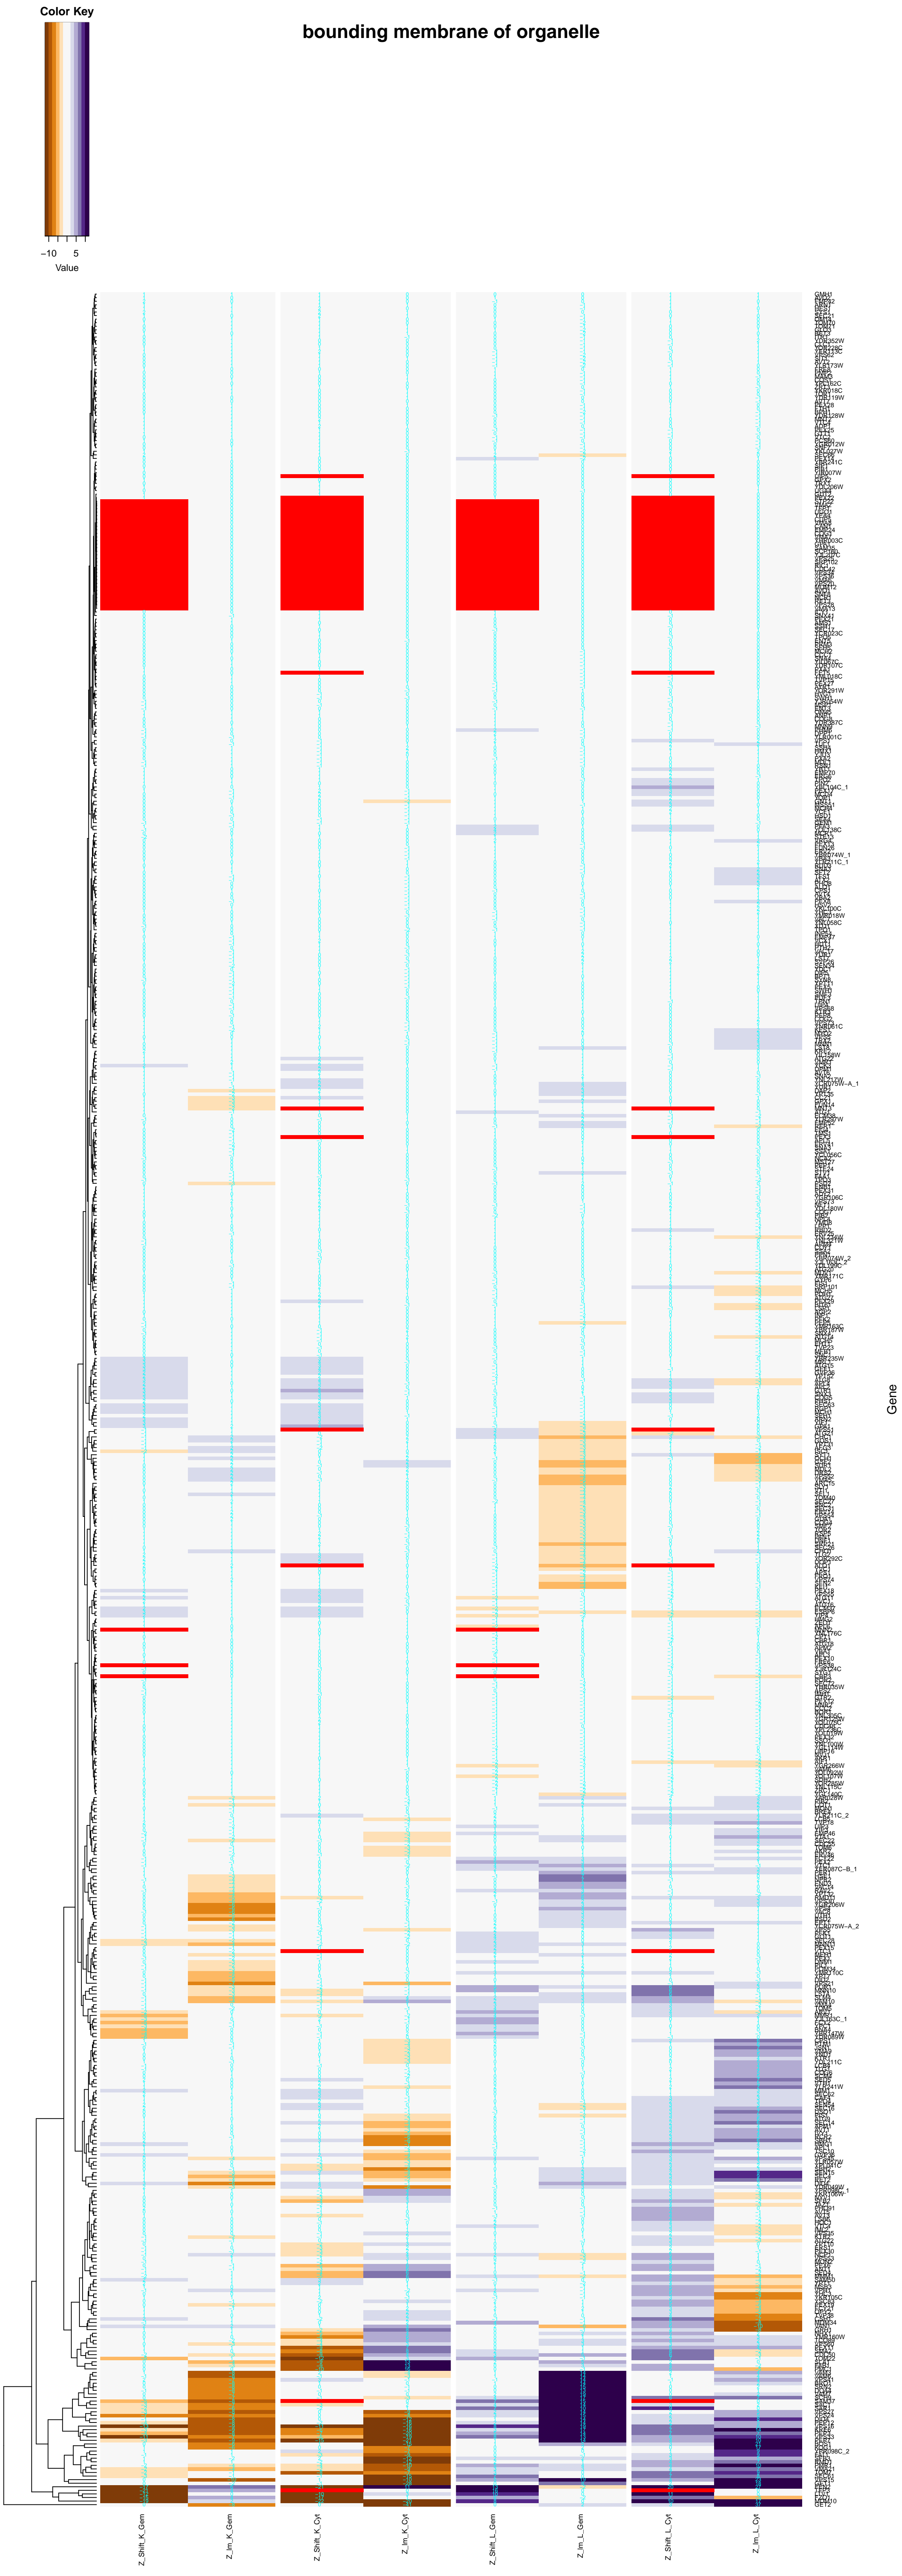

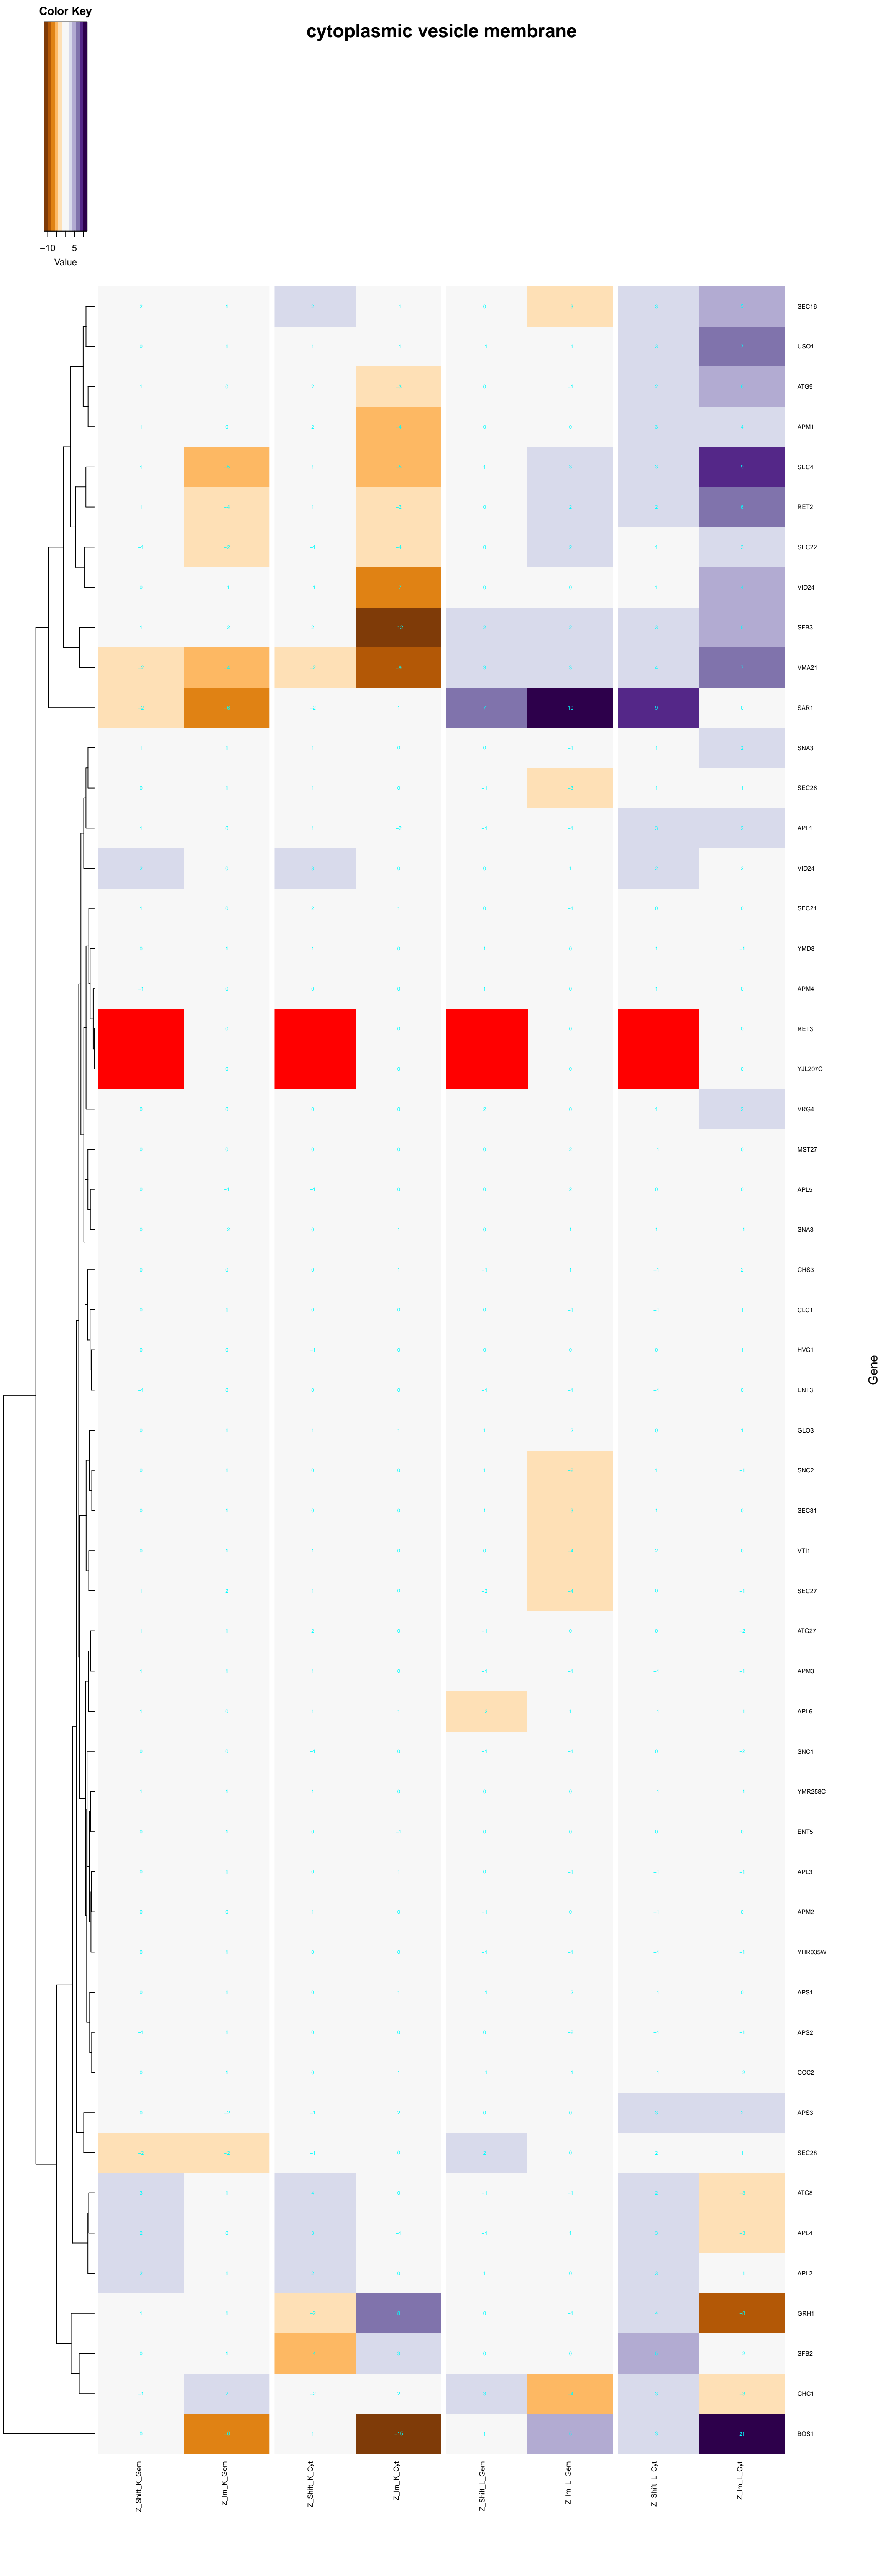

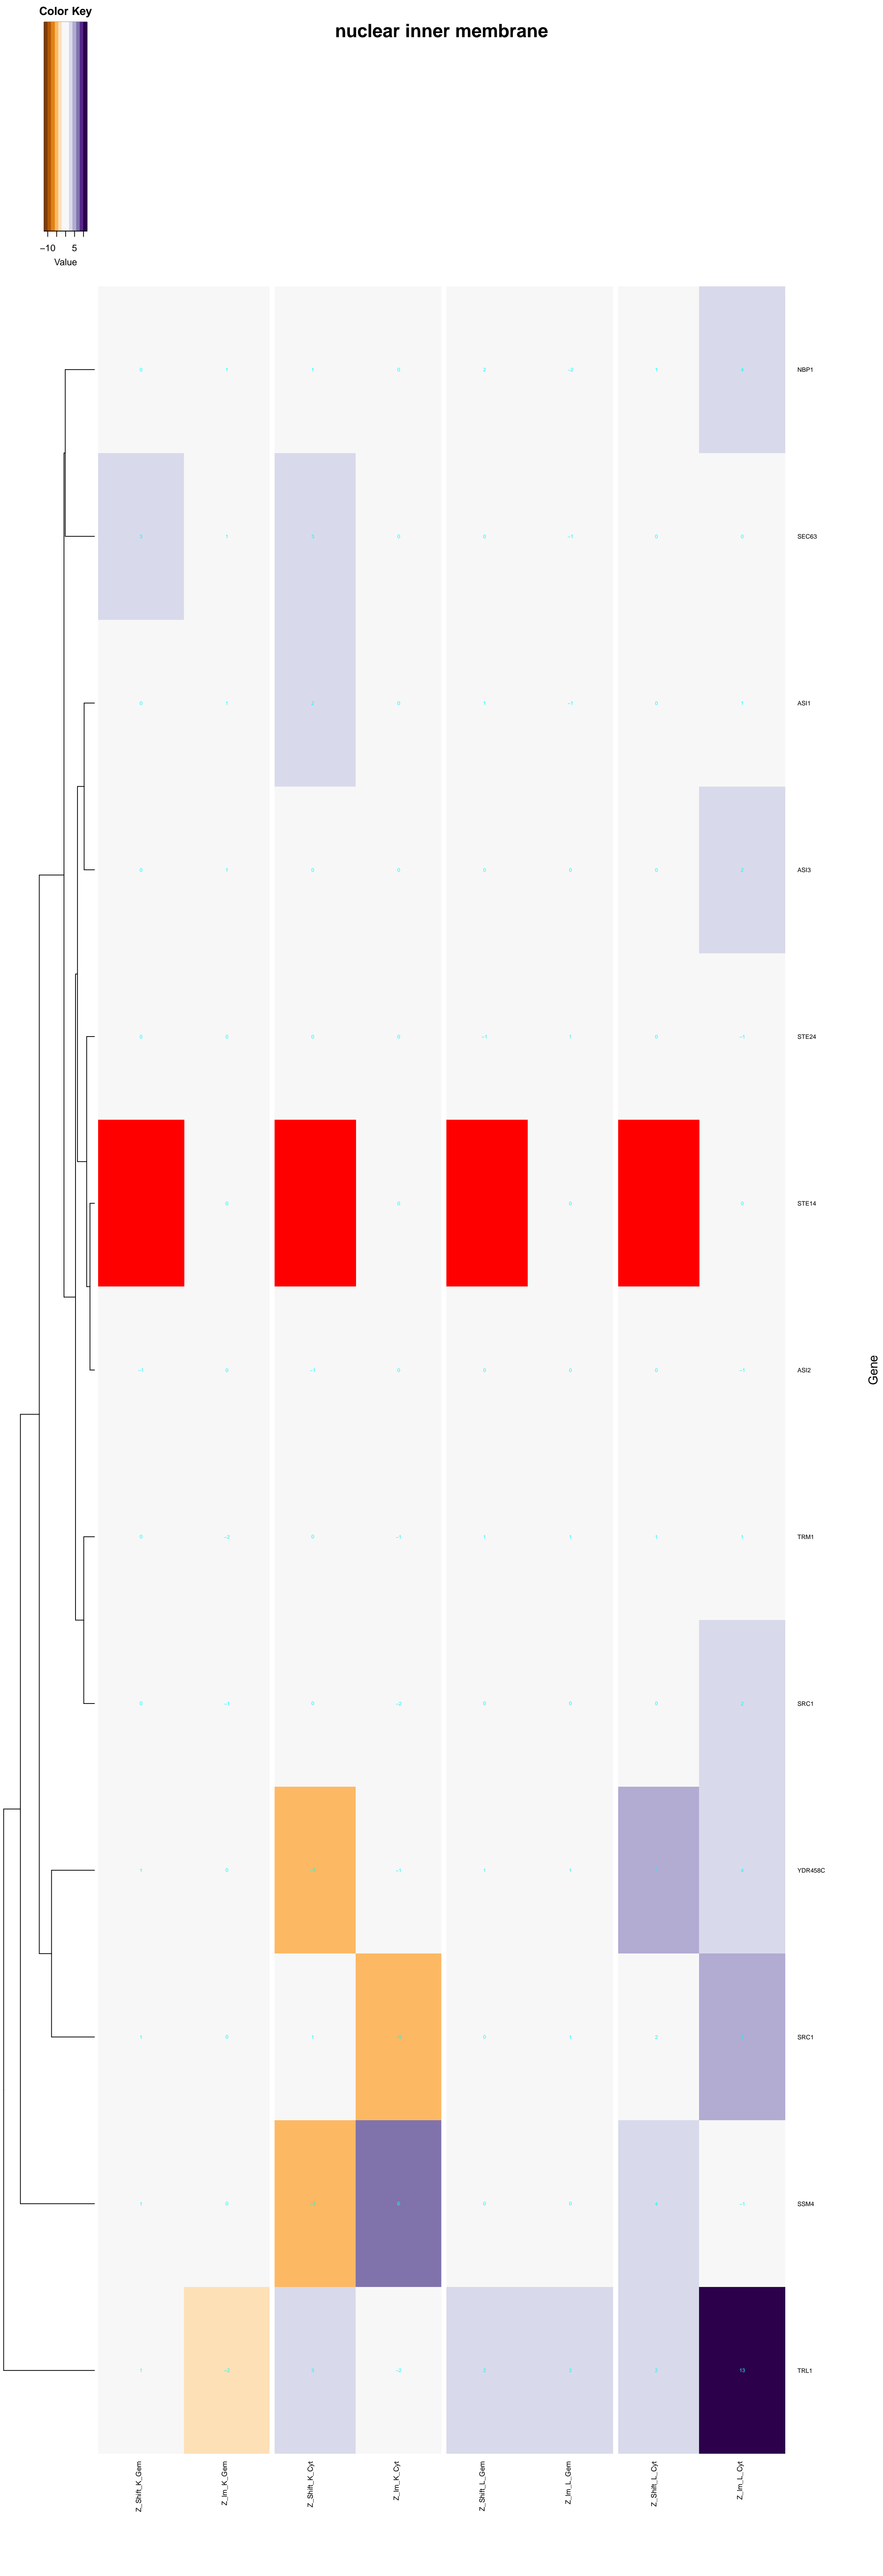





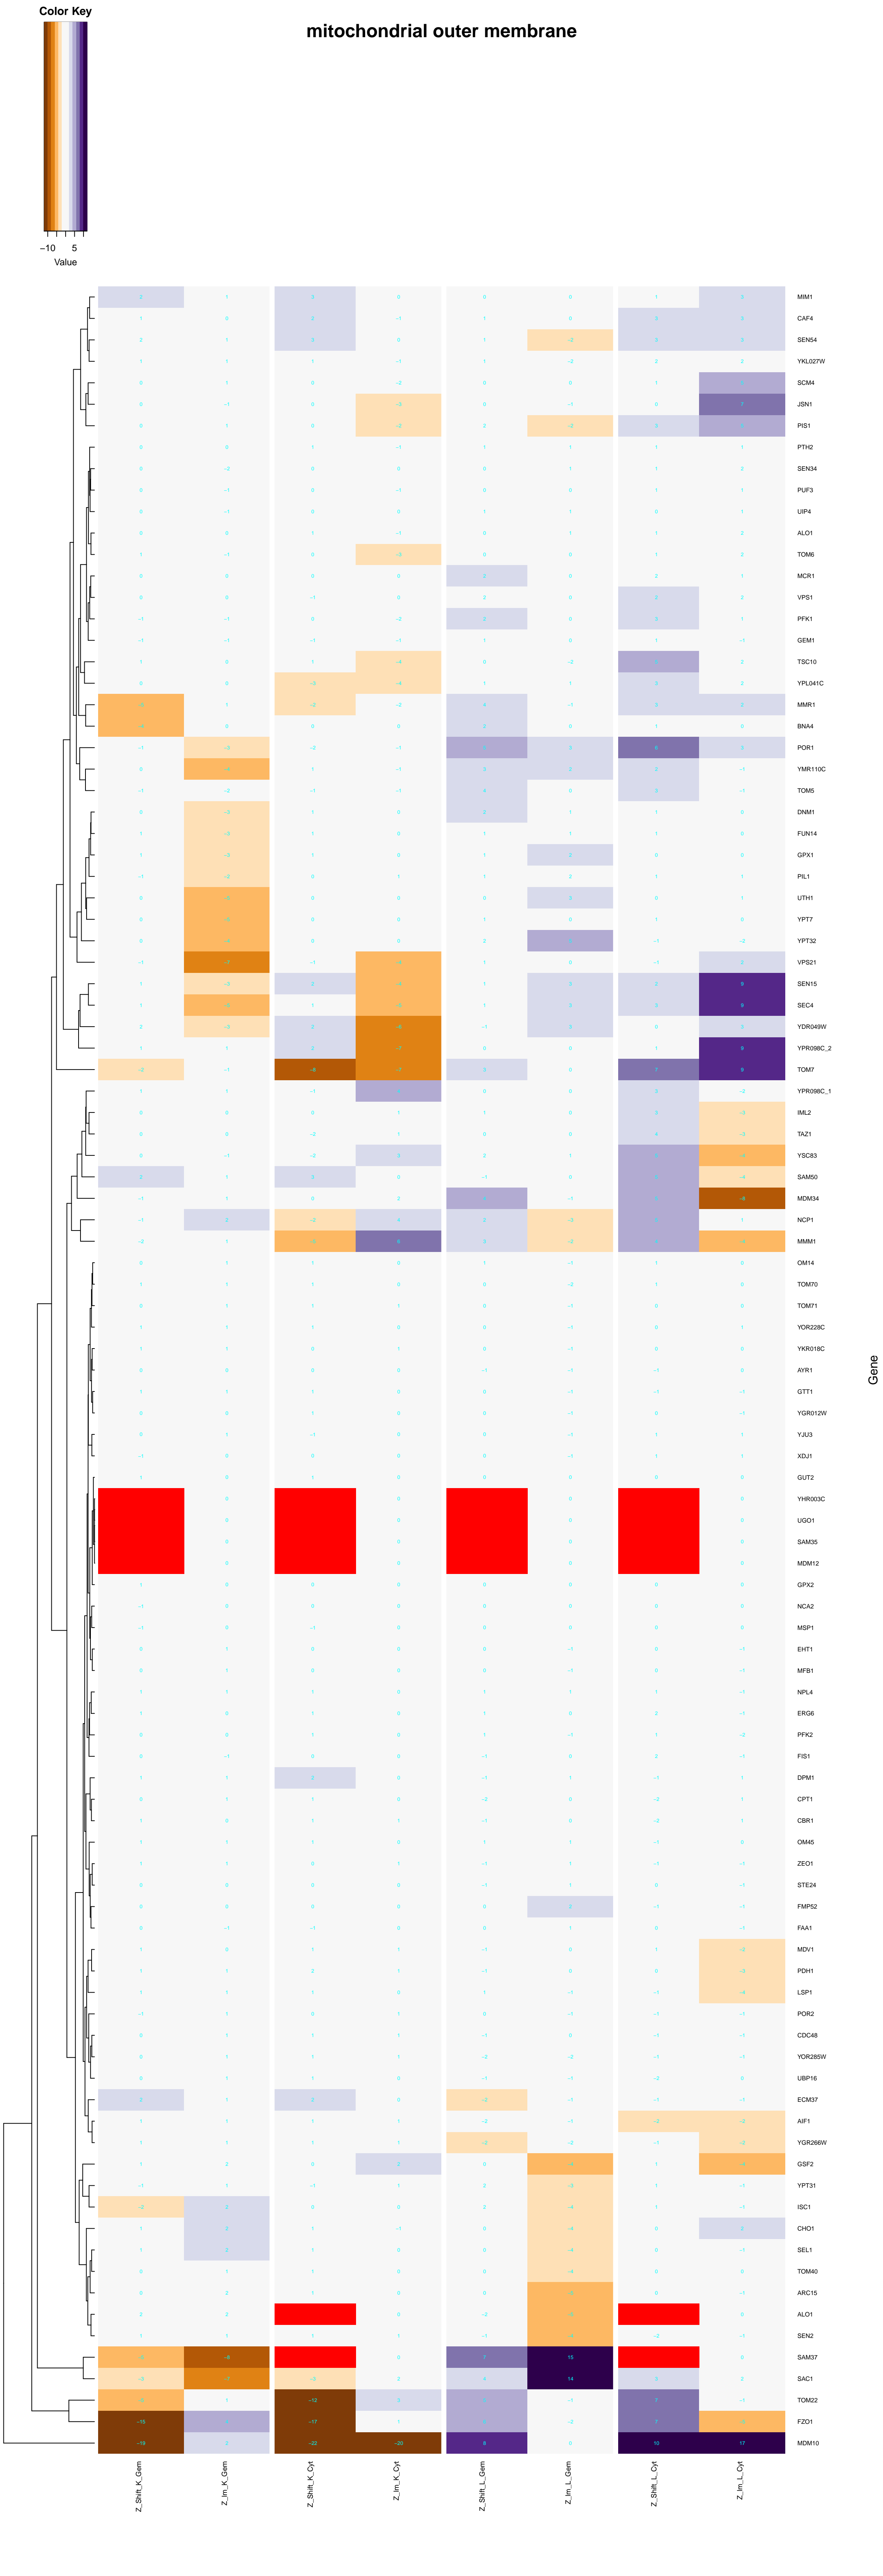

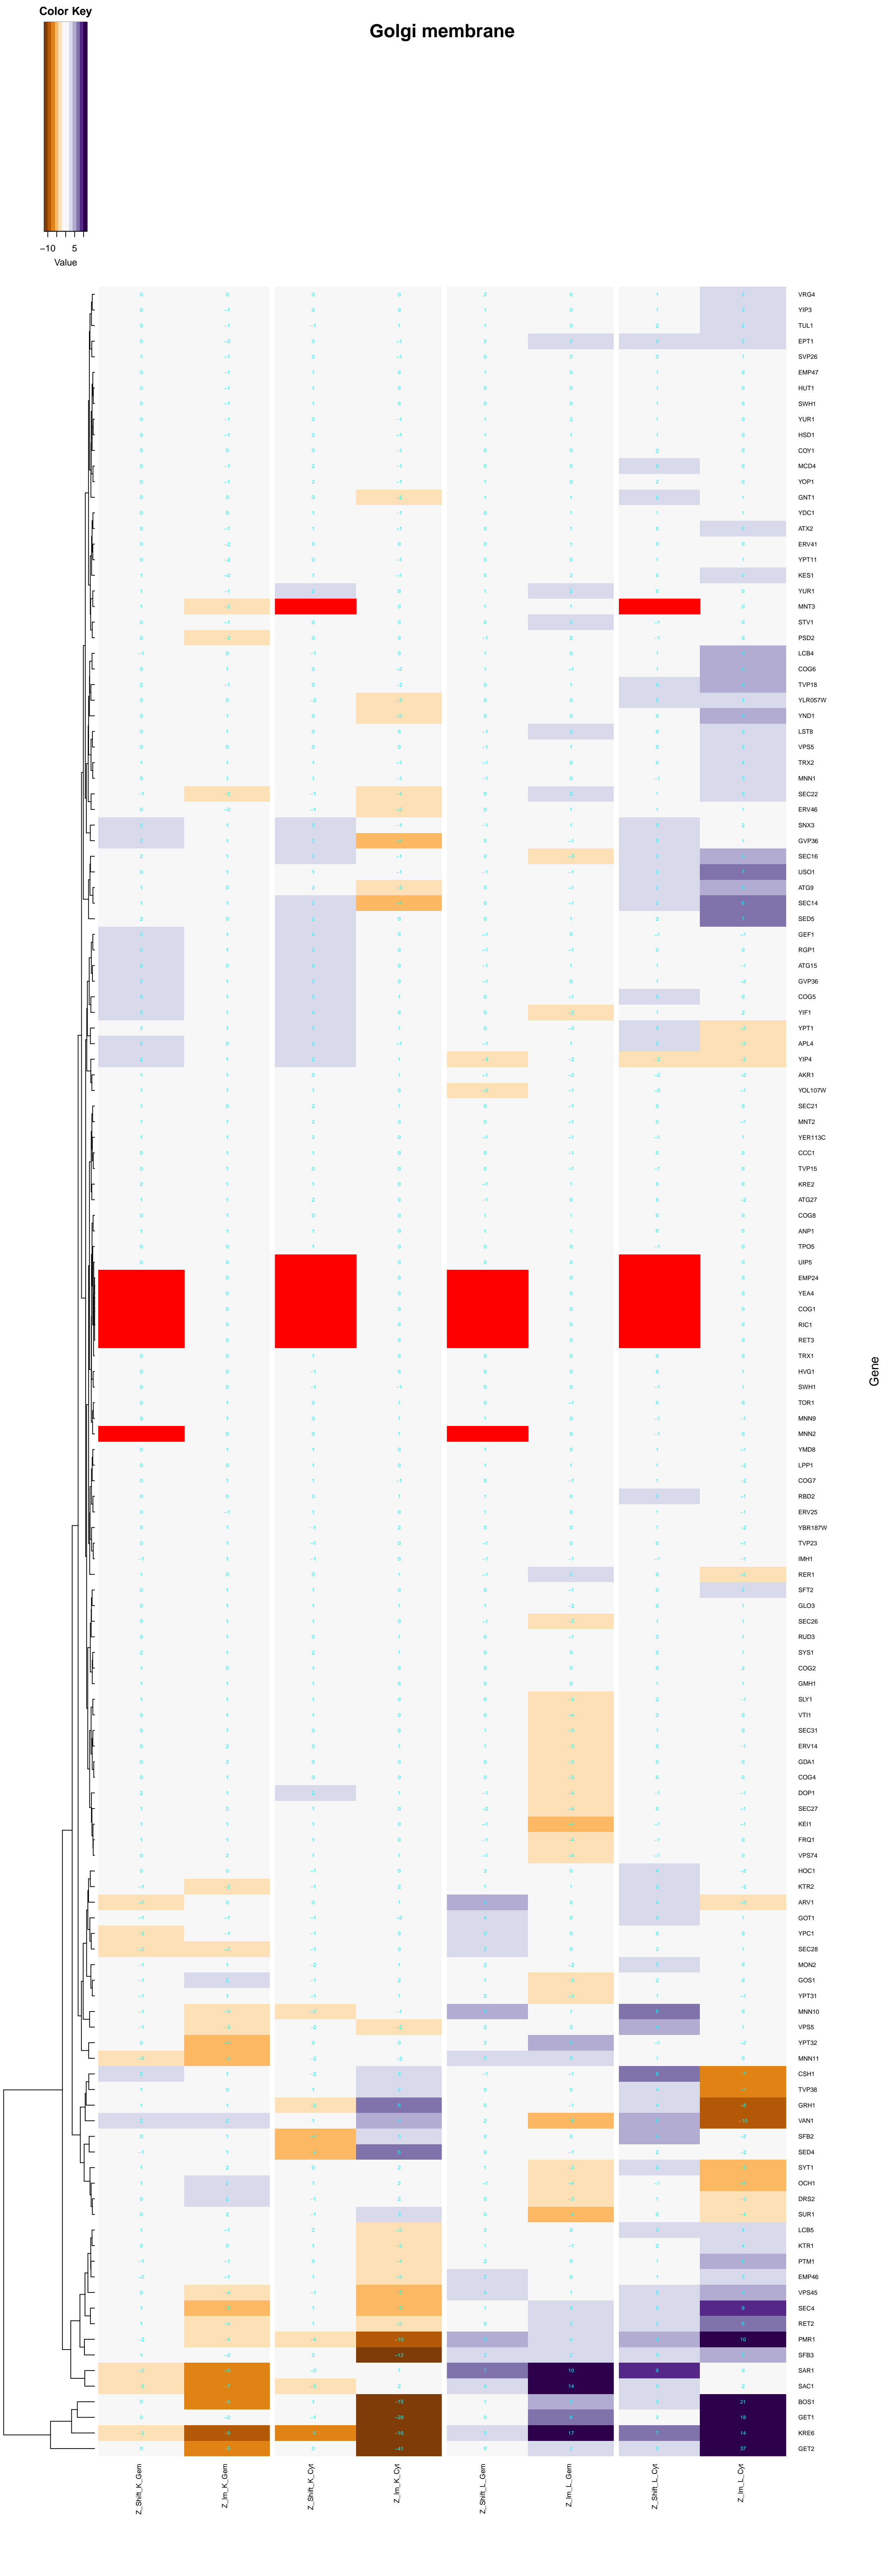



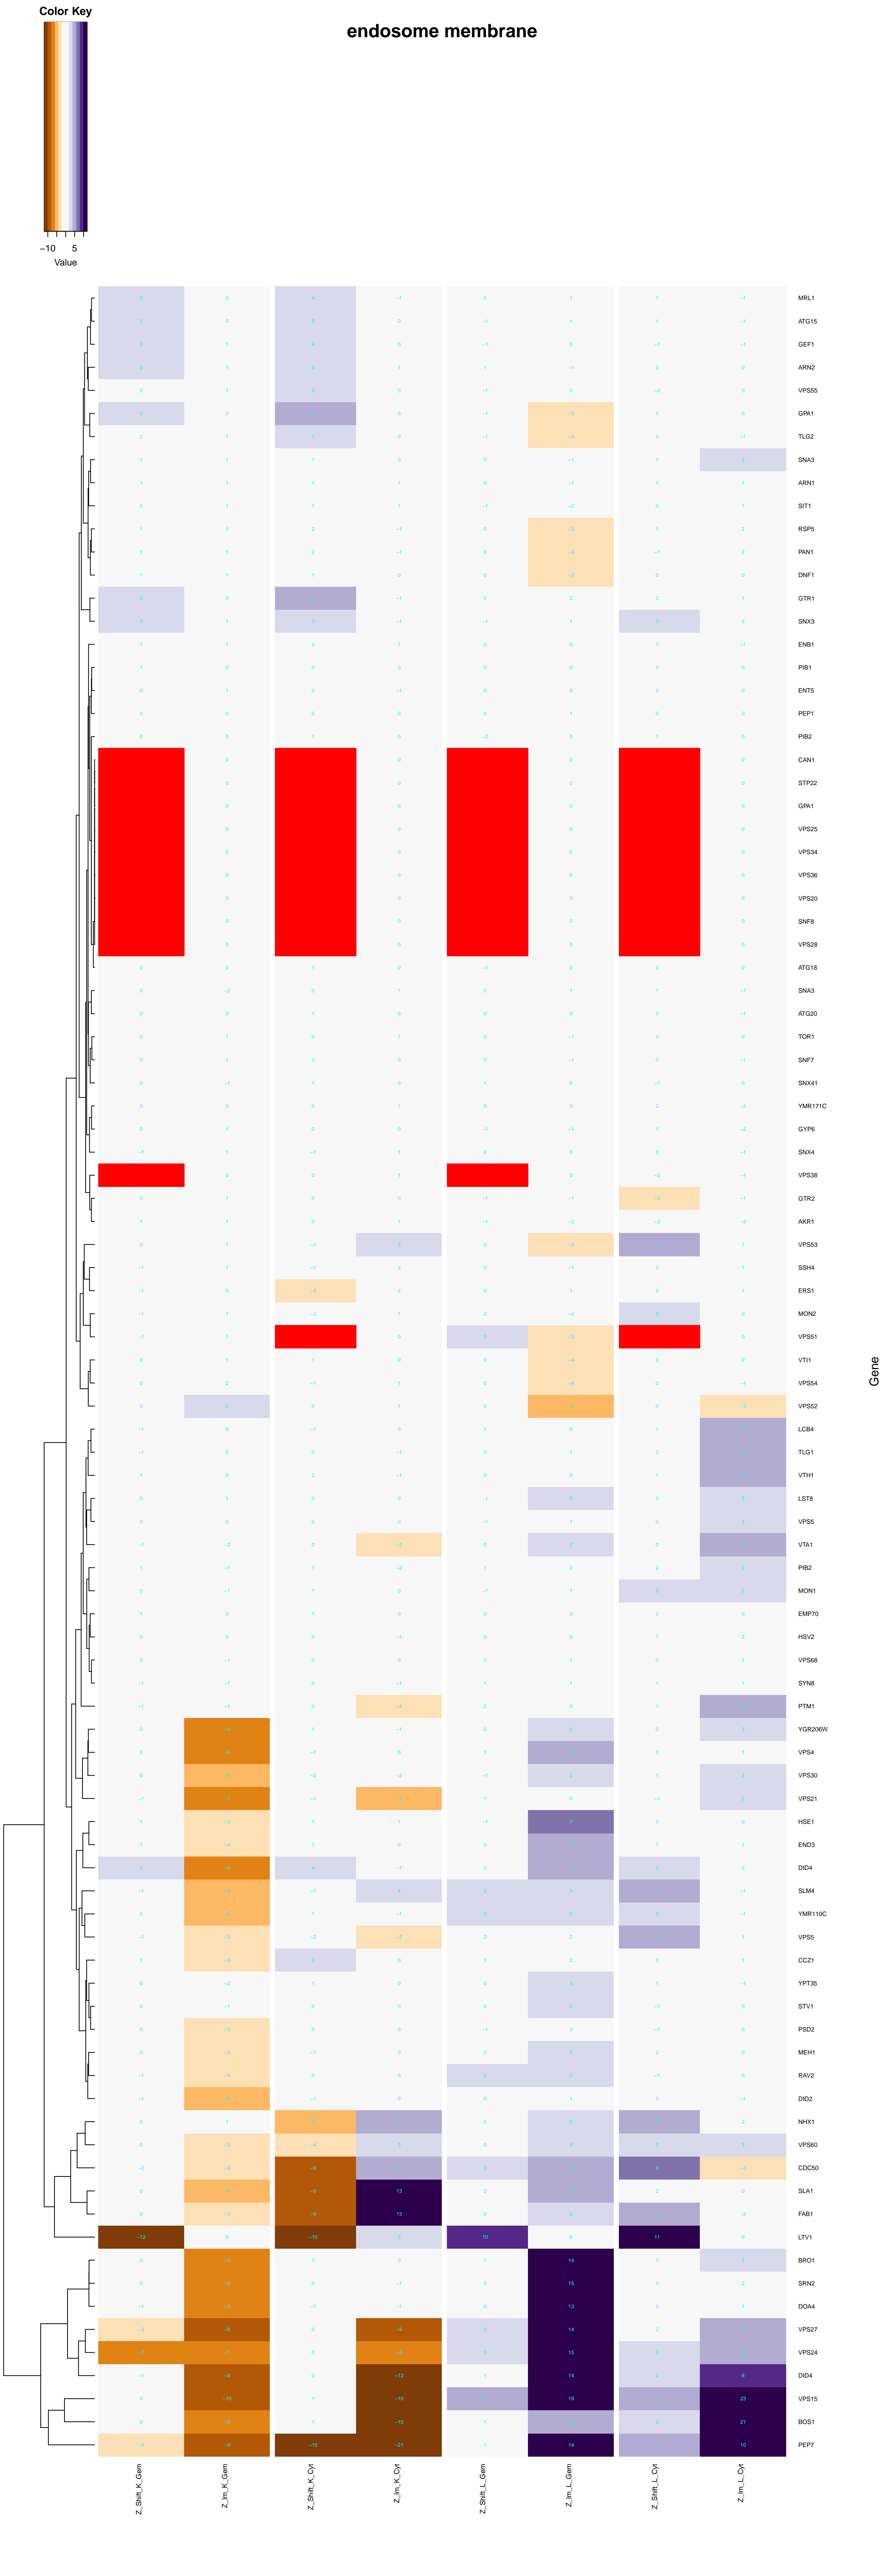

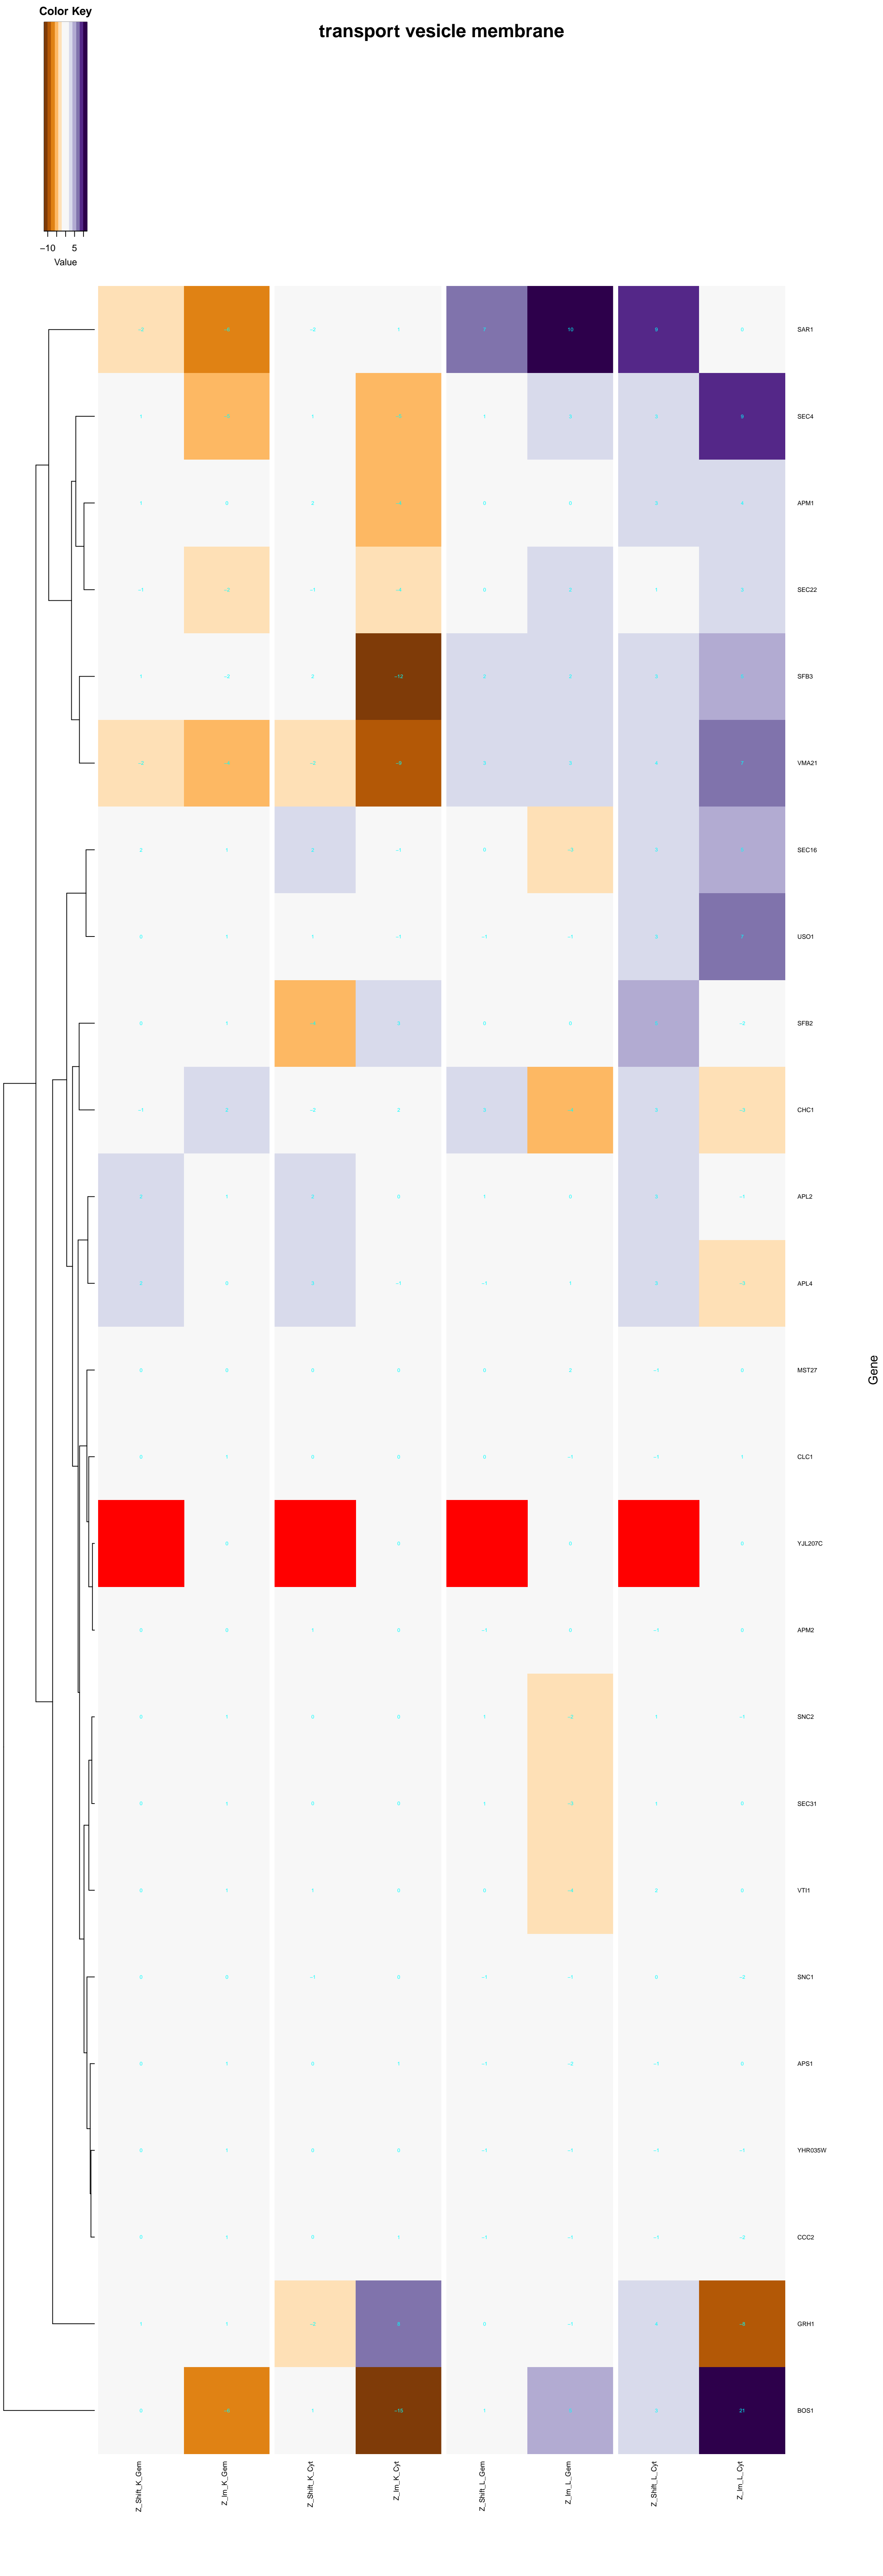

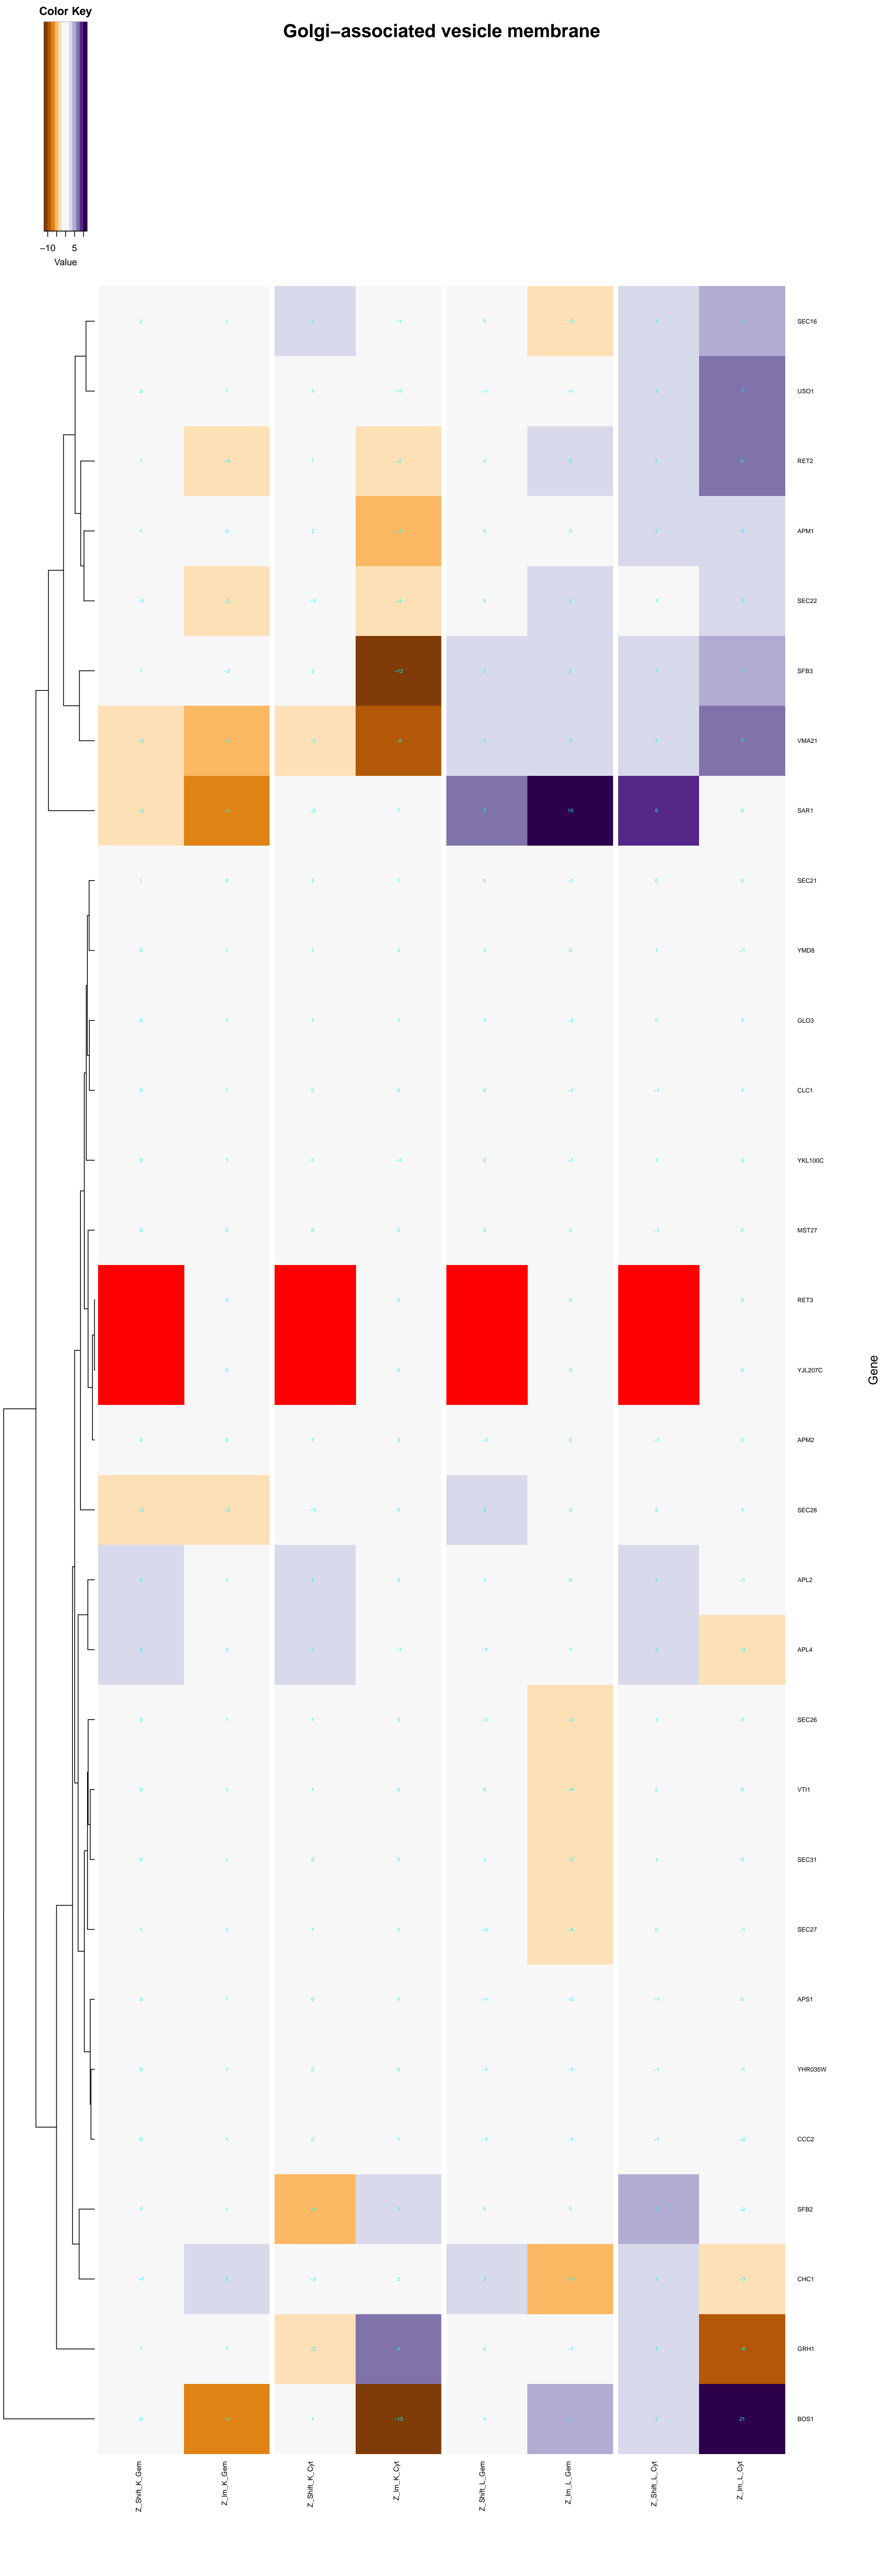

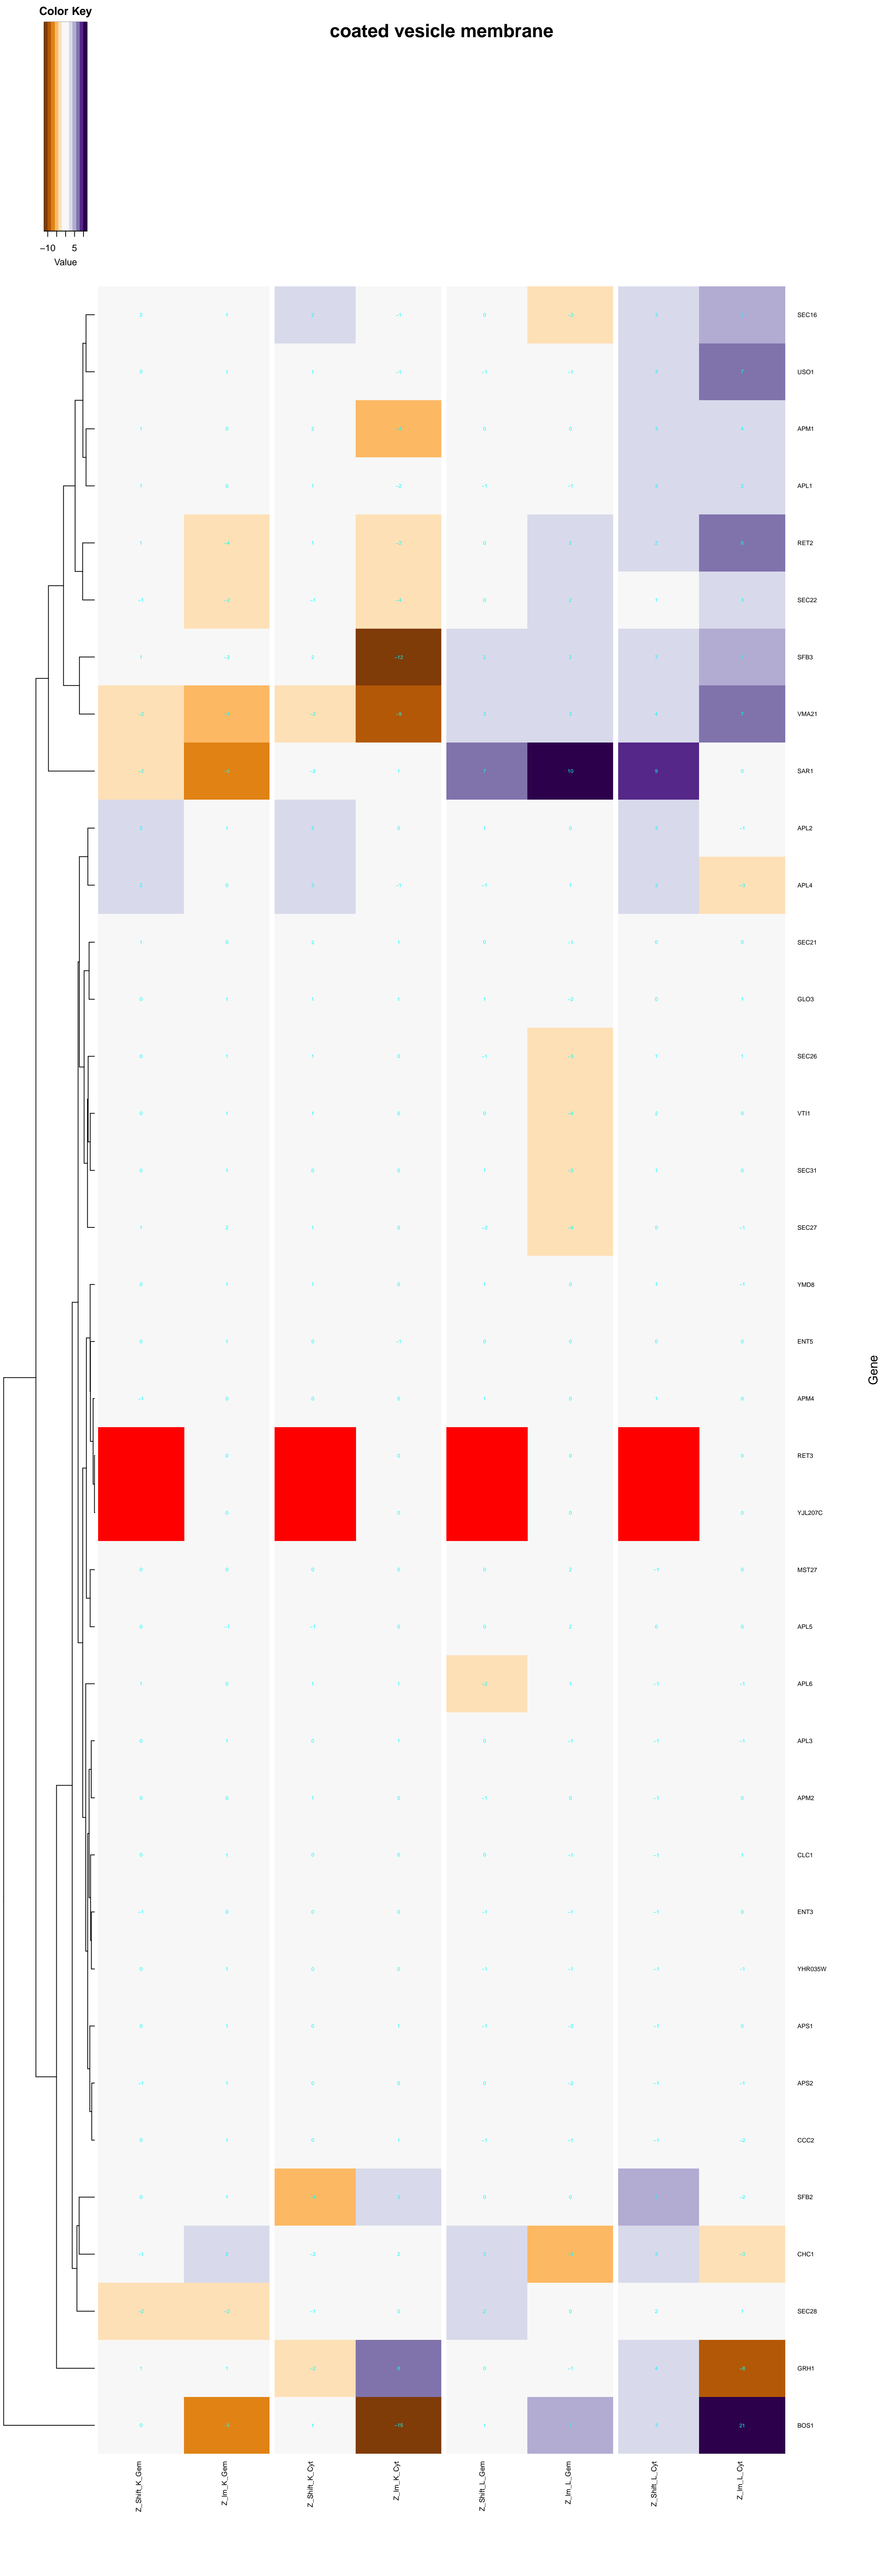

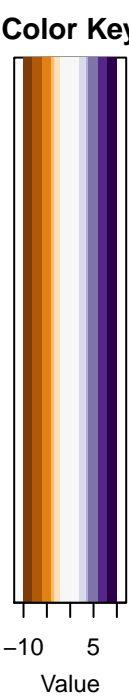

endocytic vesicle membrane

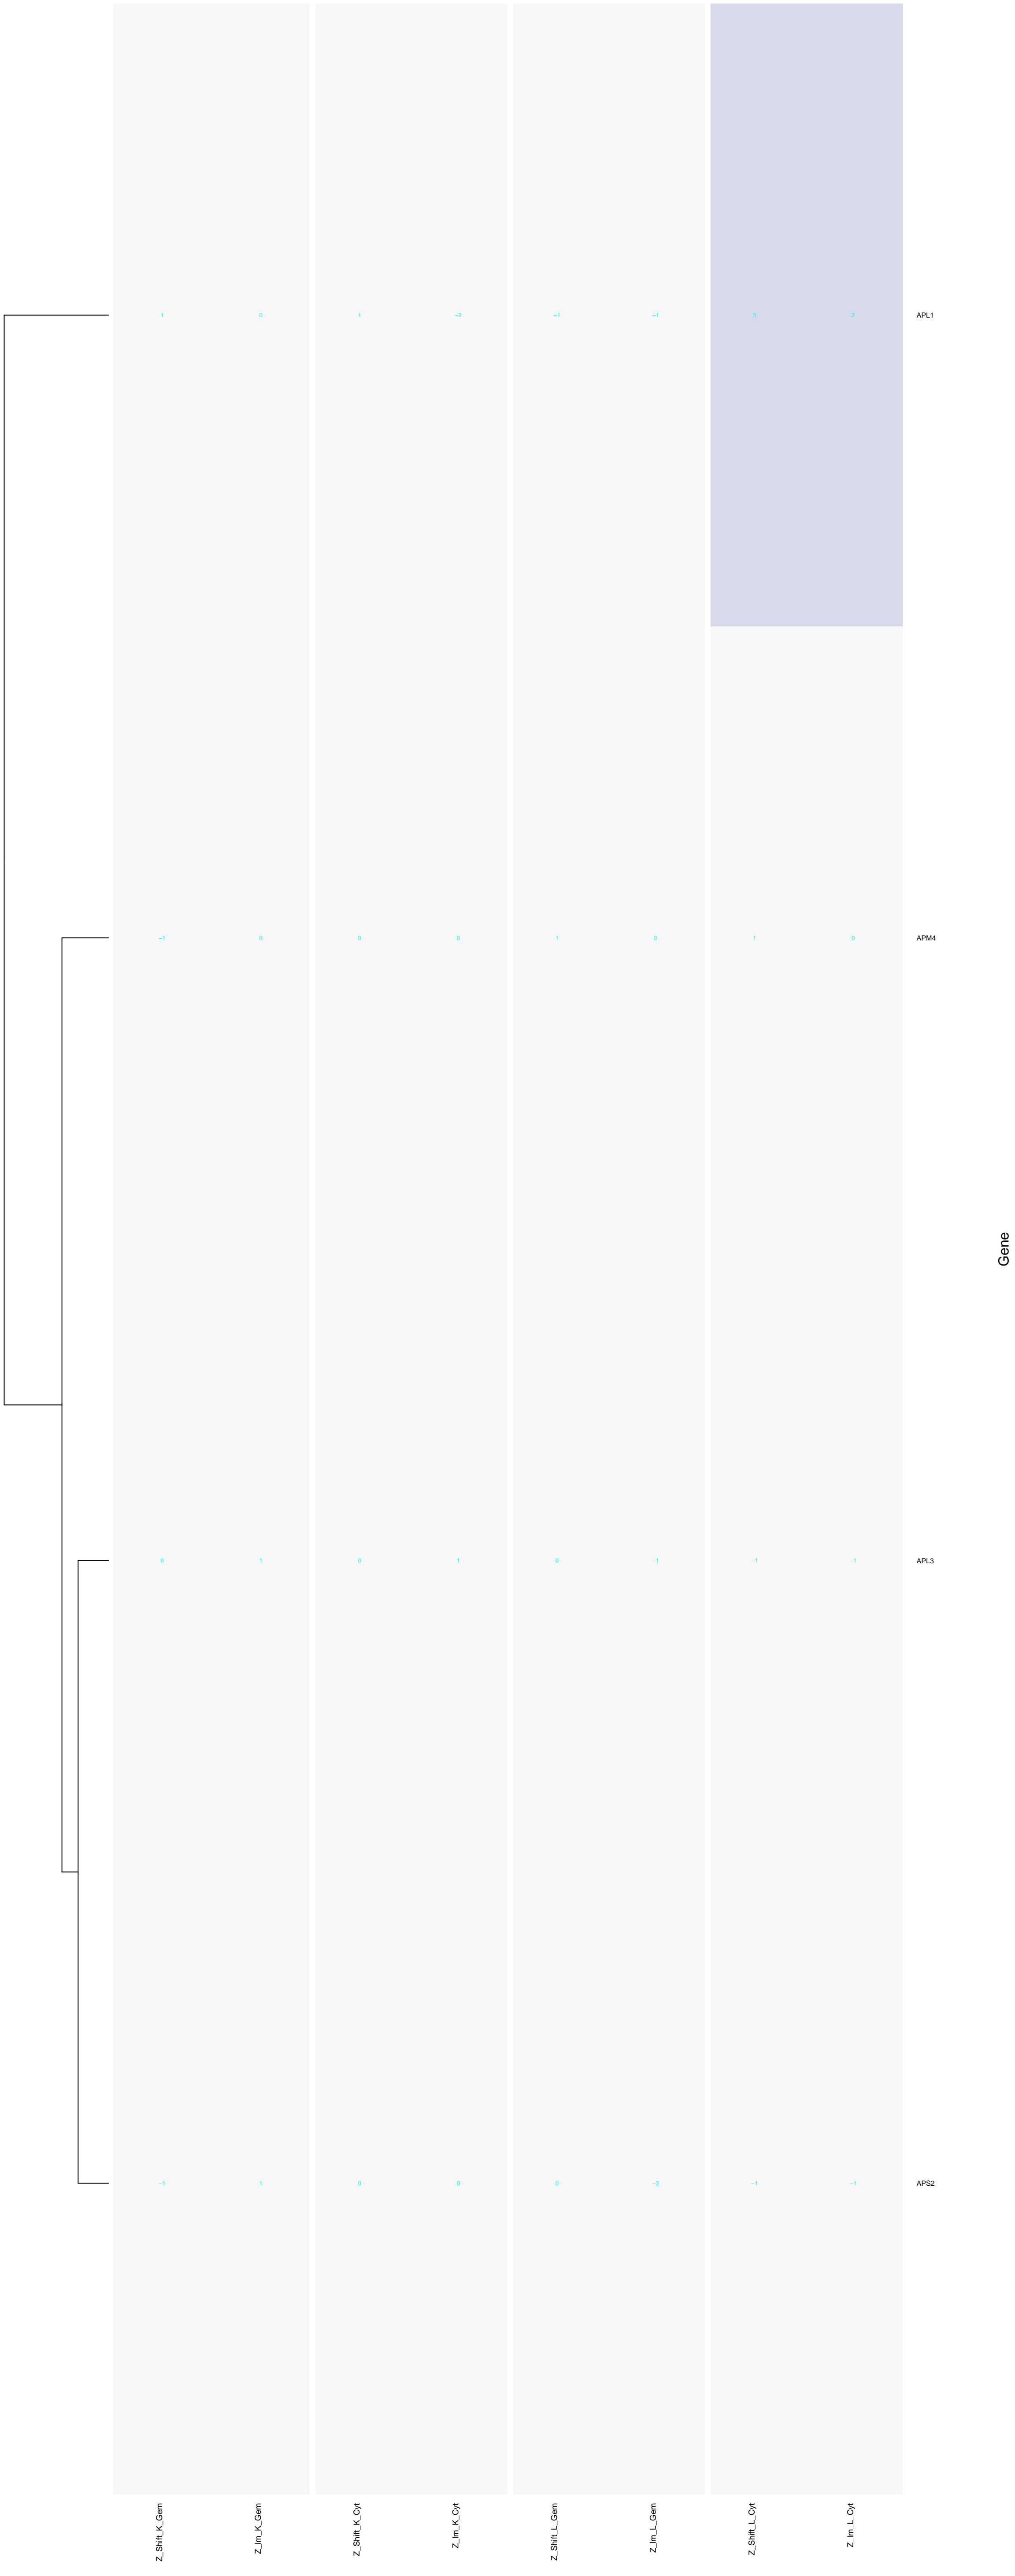

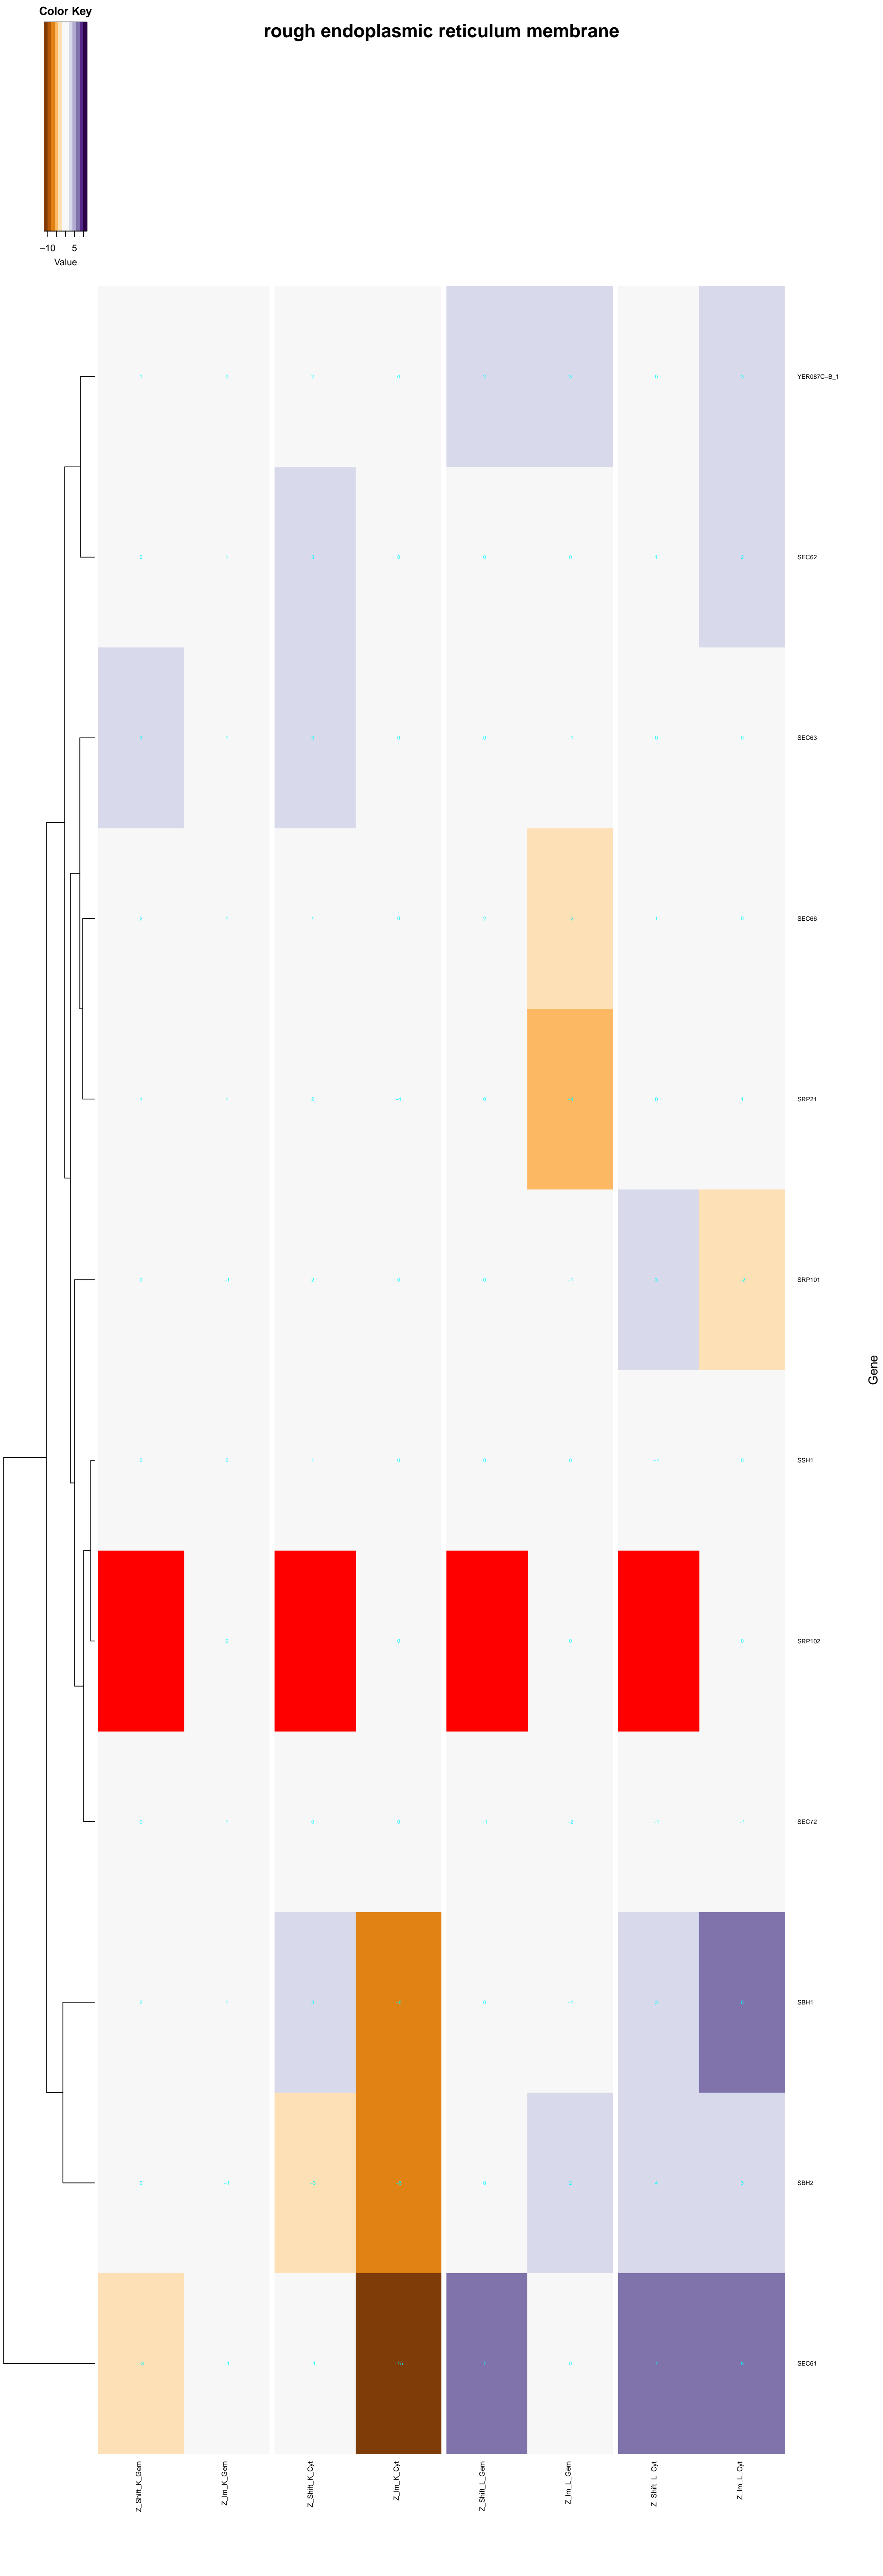

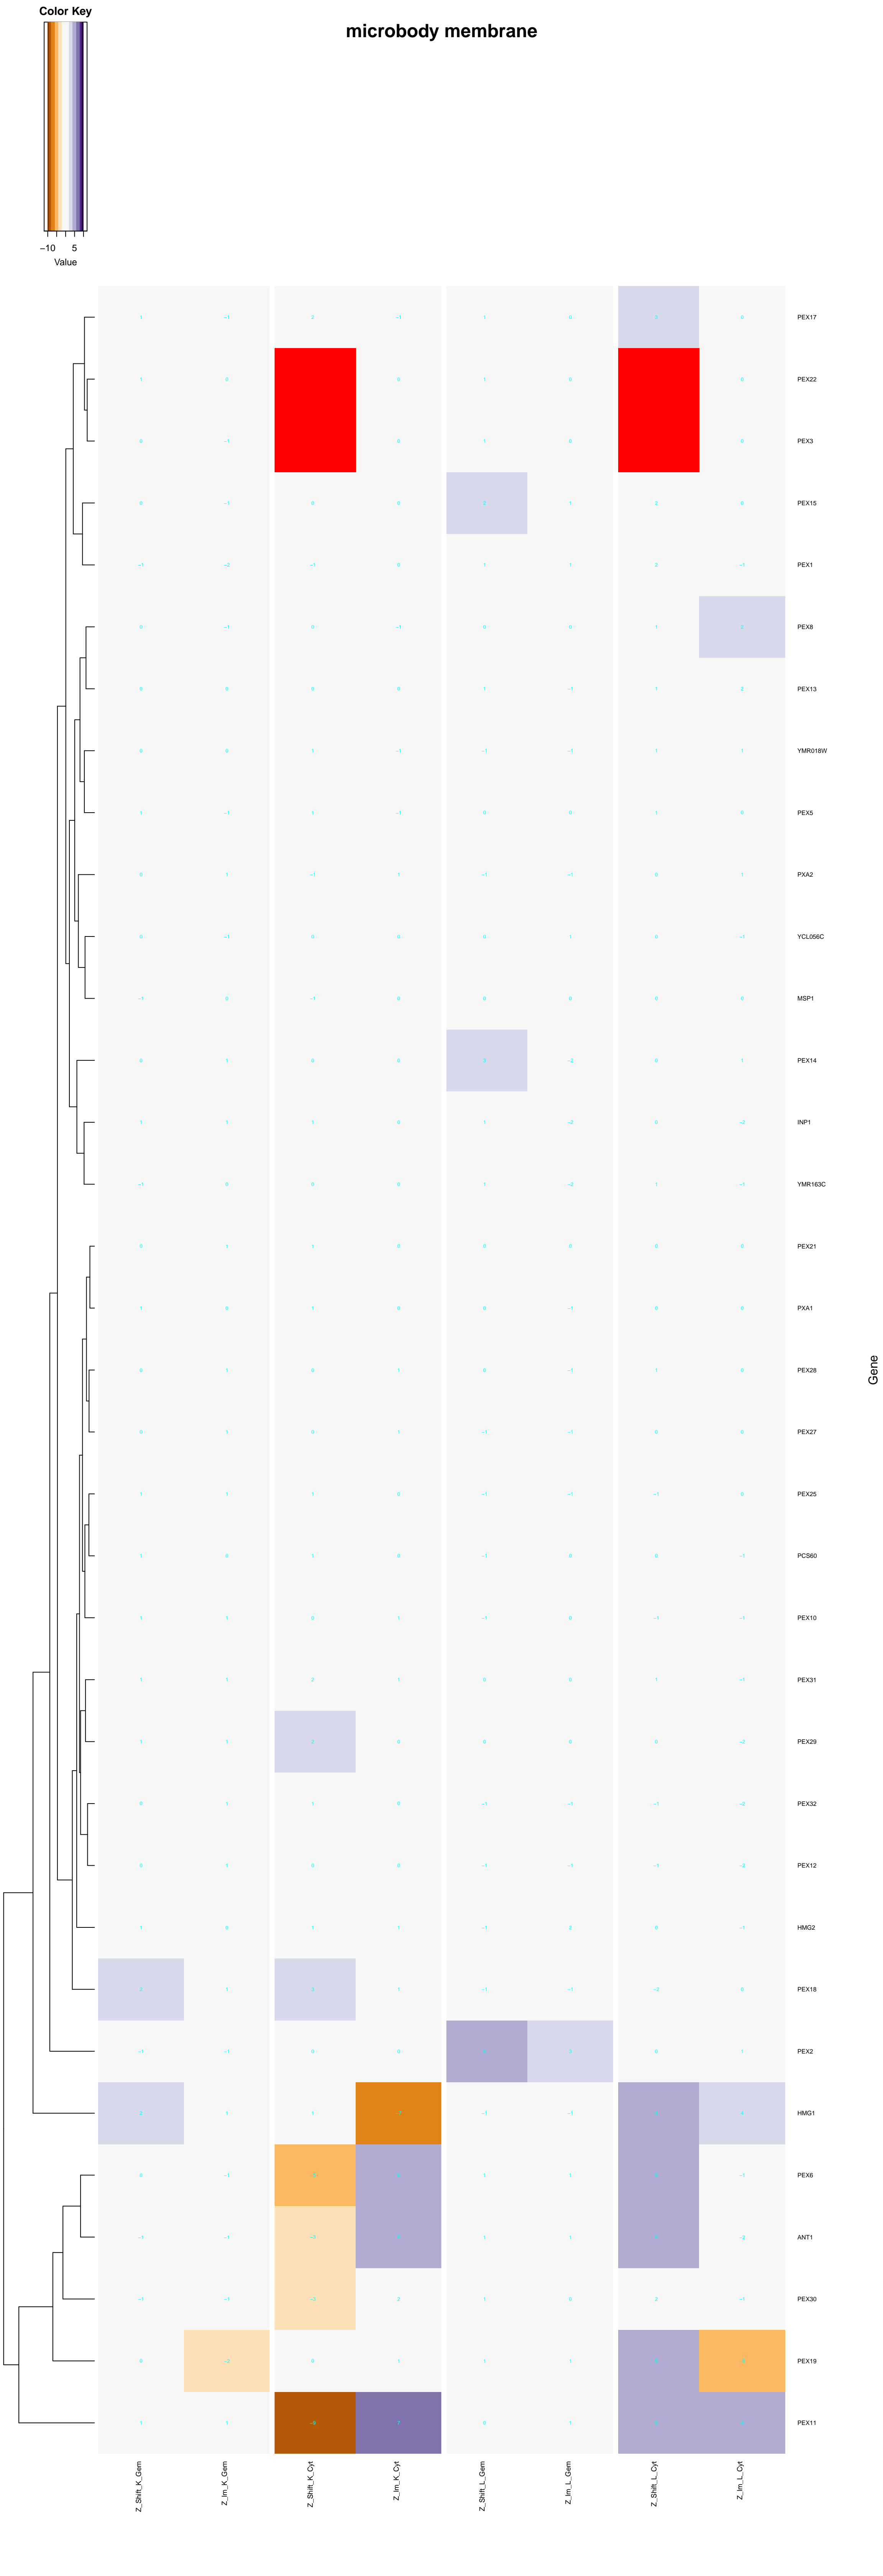

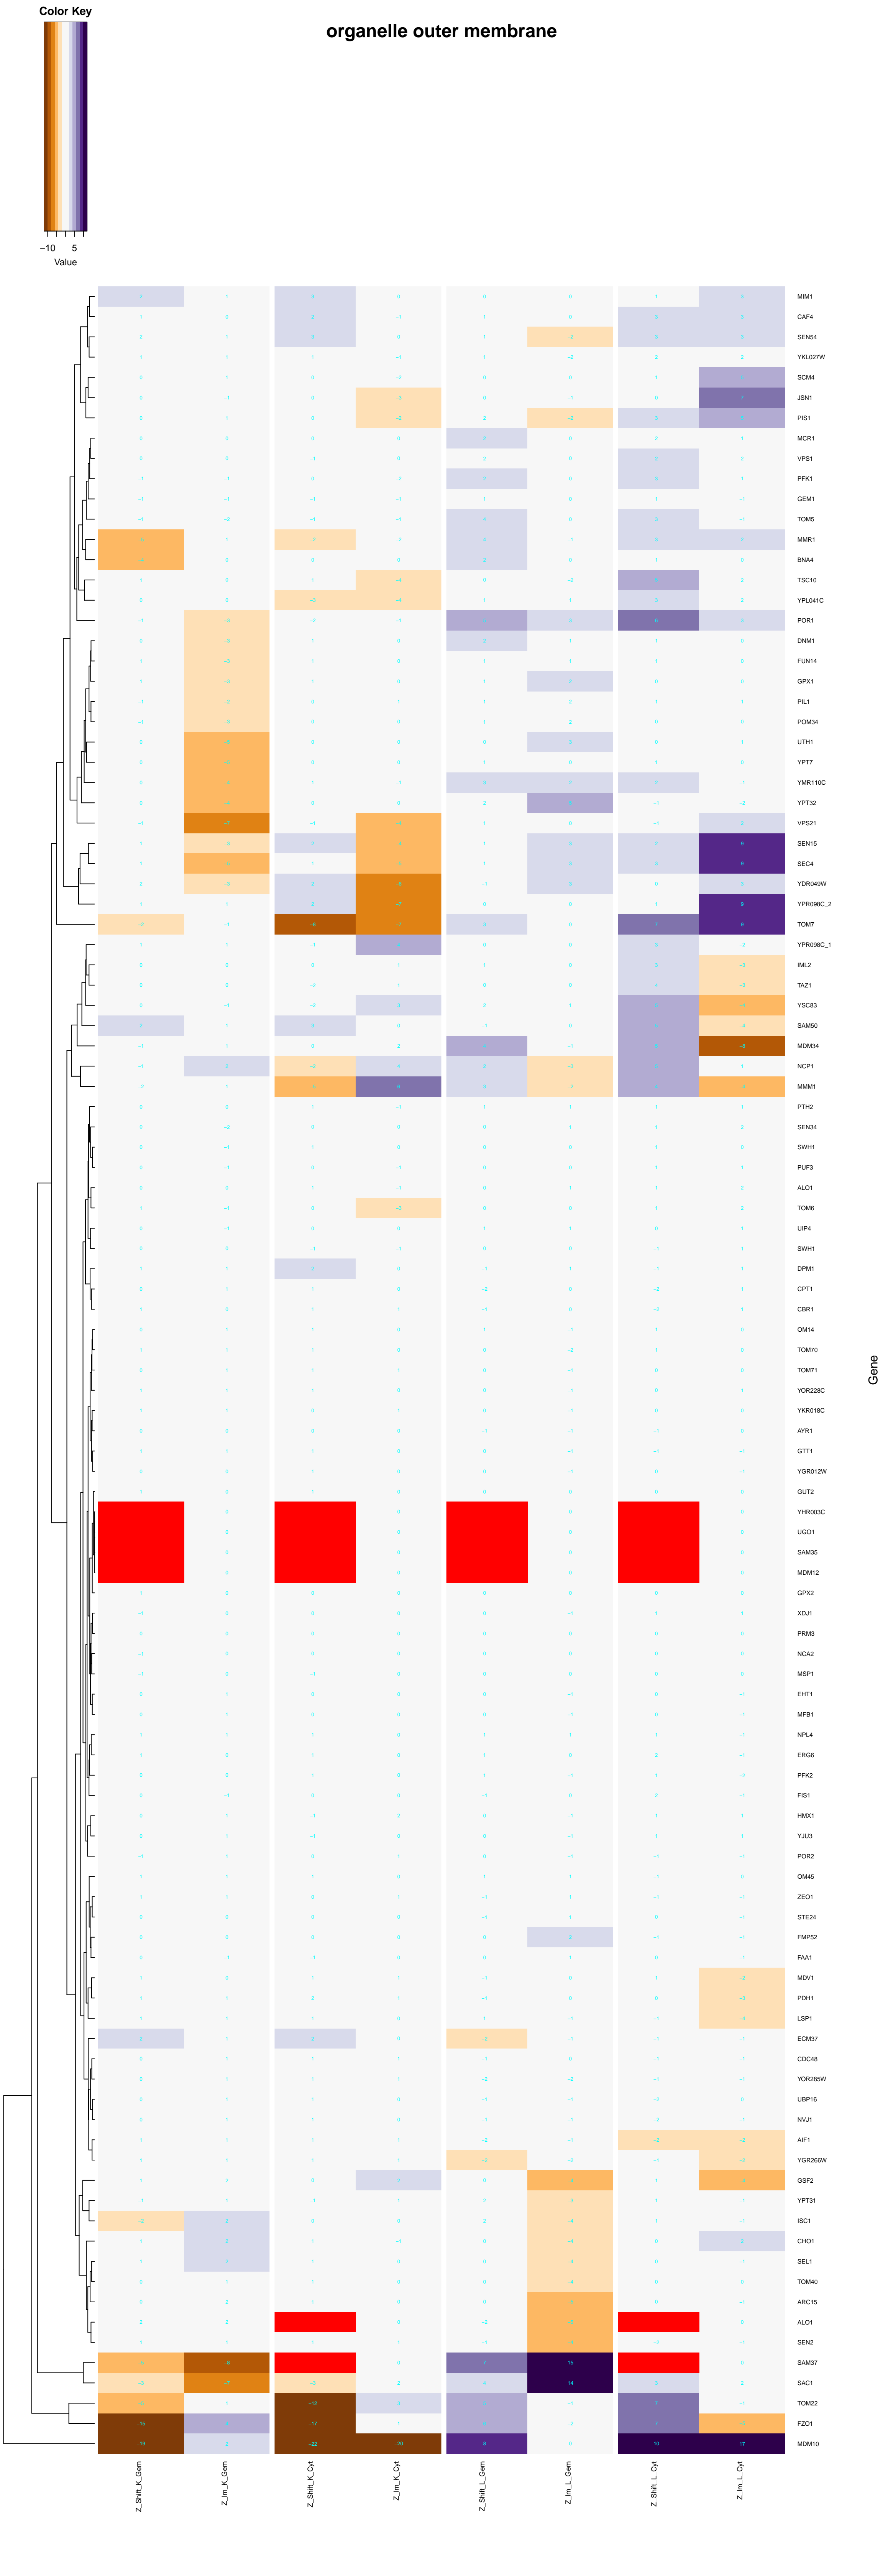

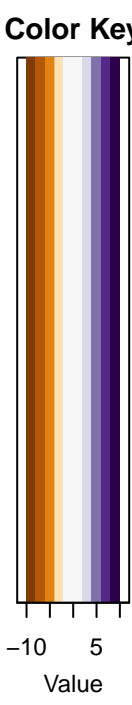

autophagosome membrane

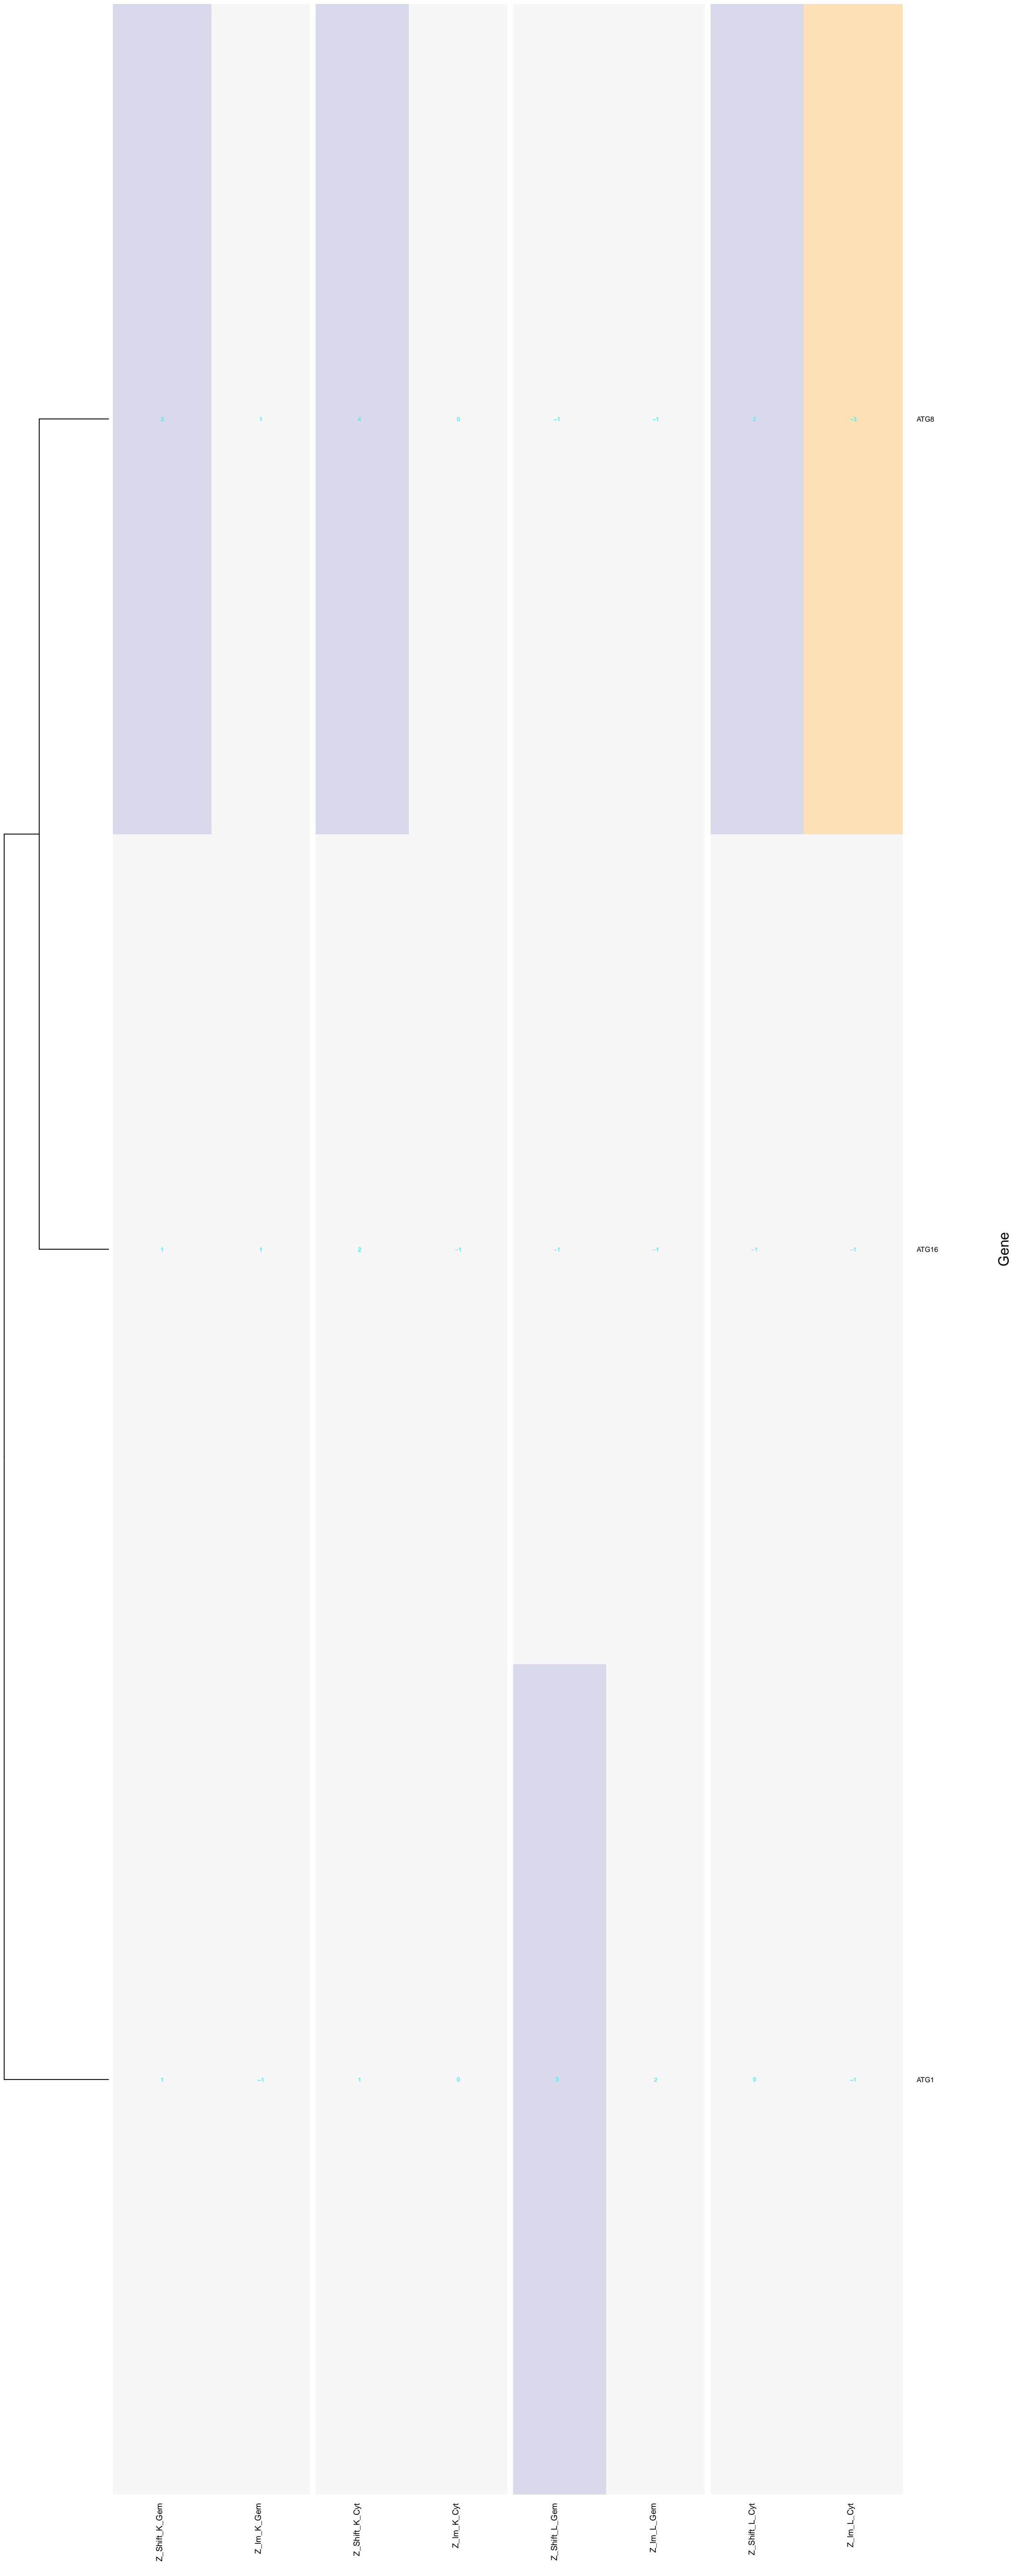

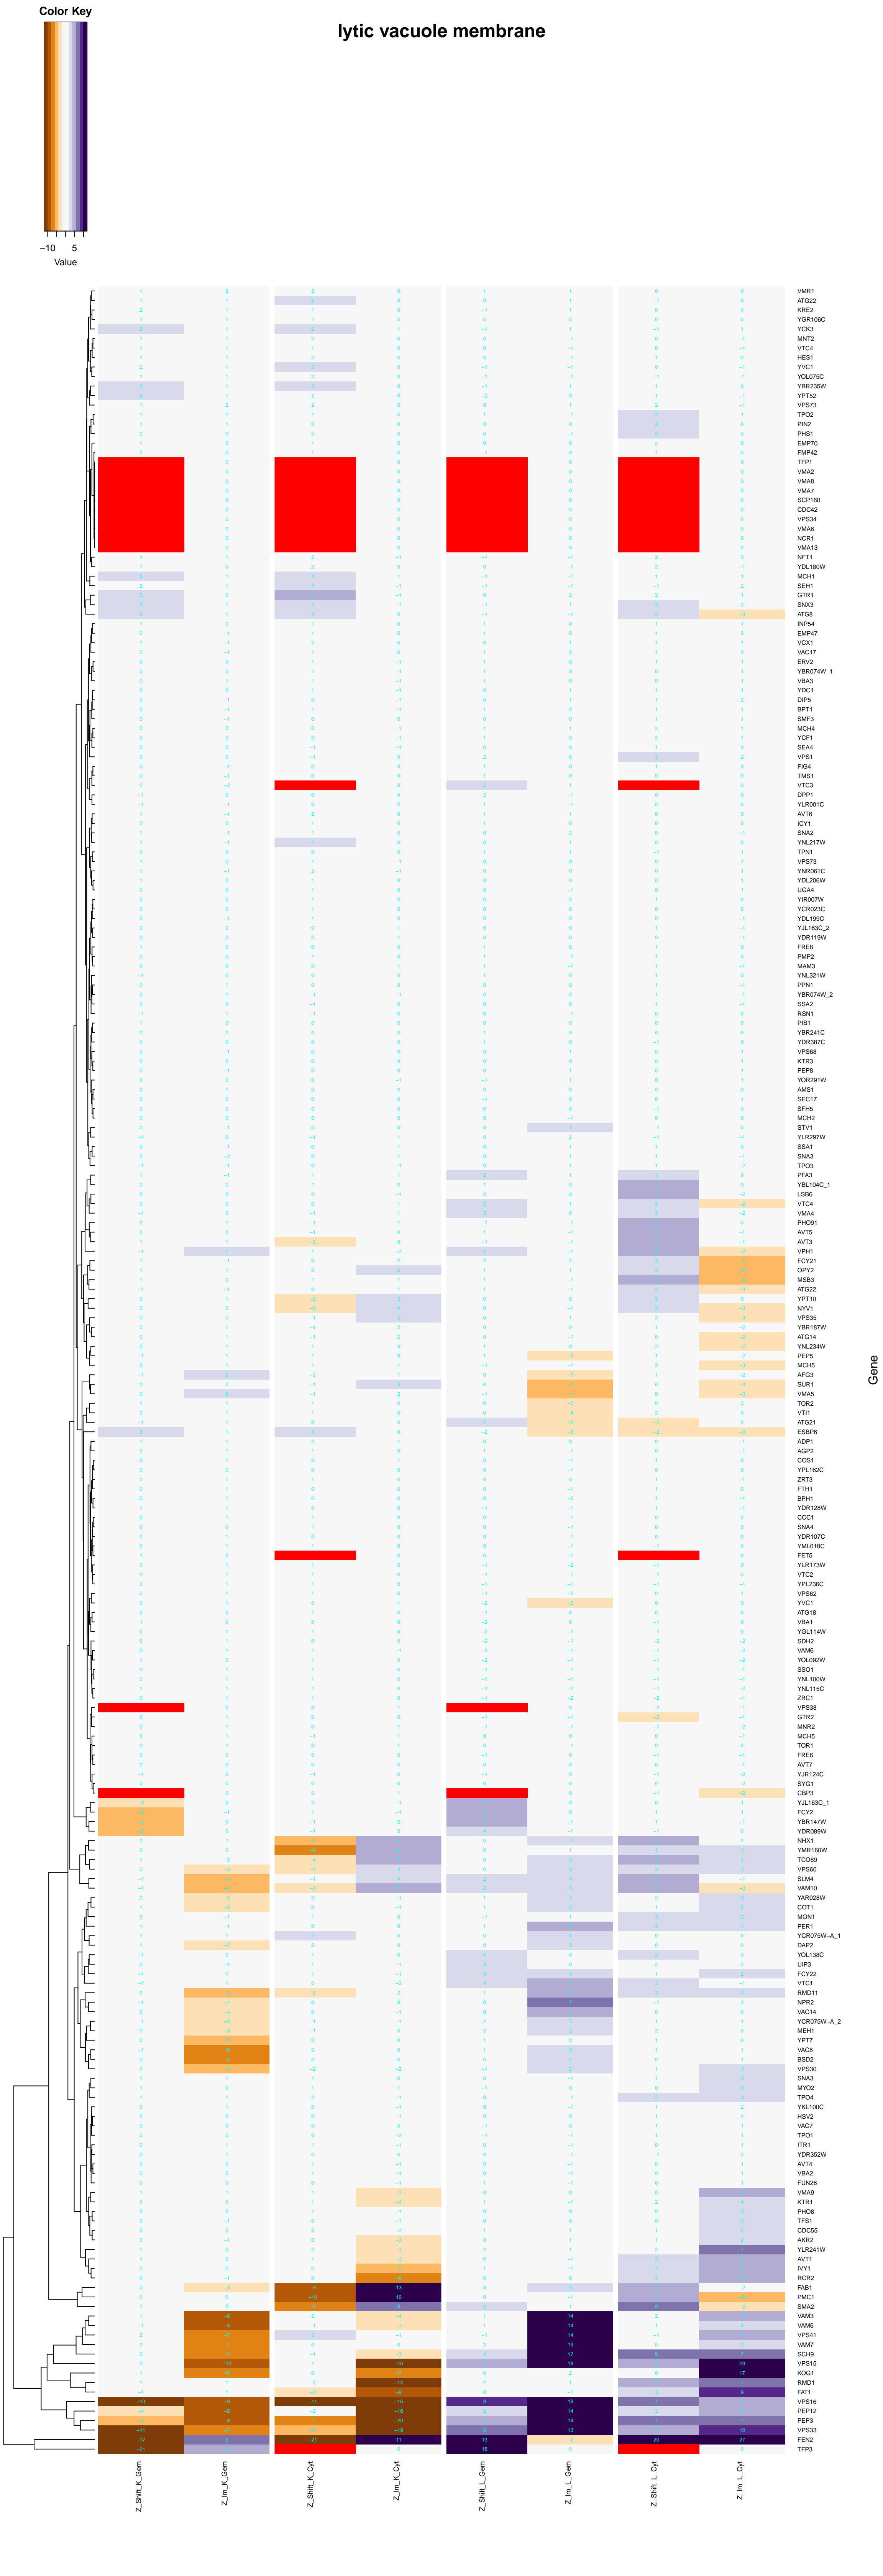

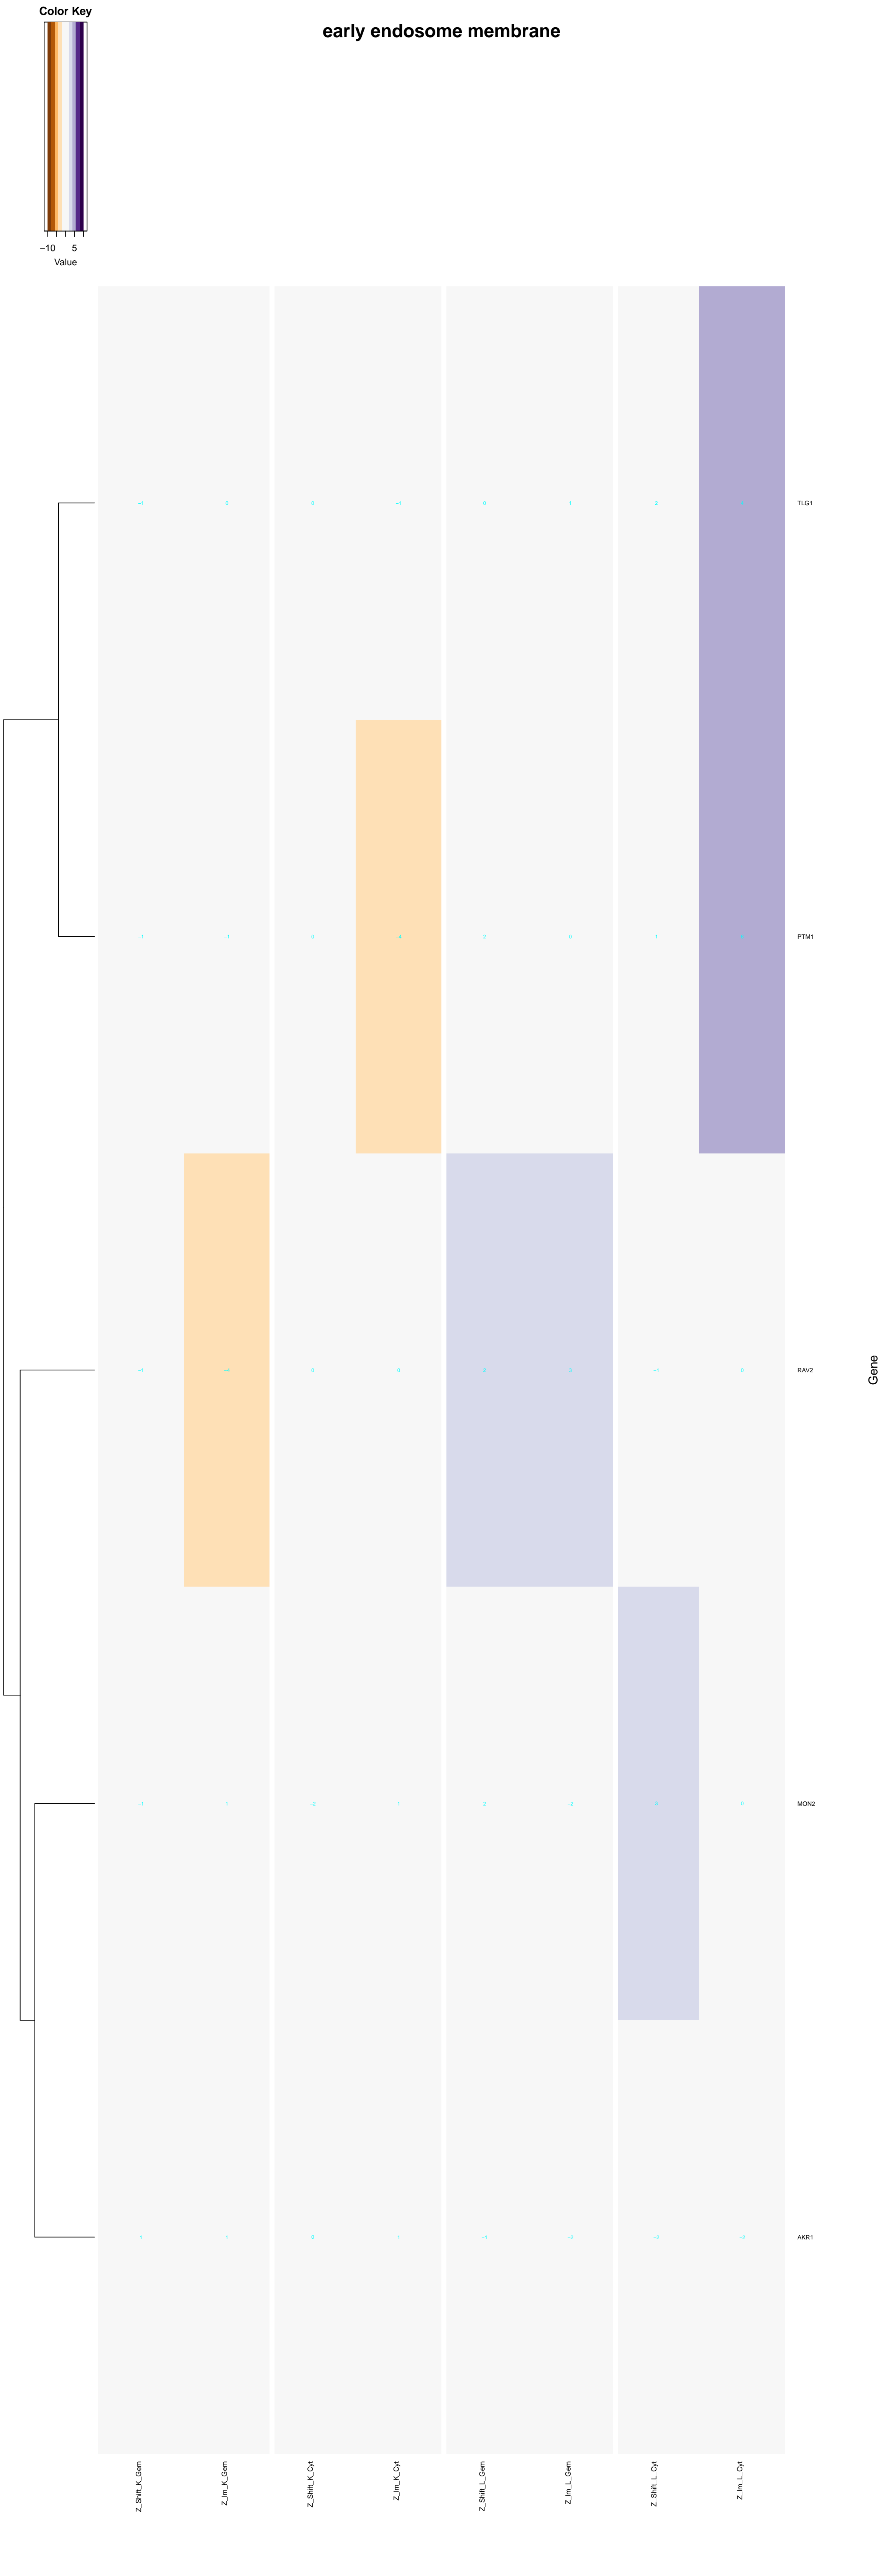

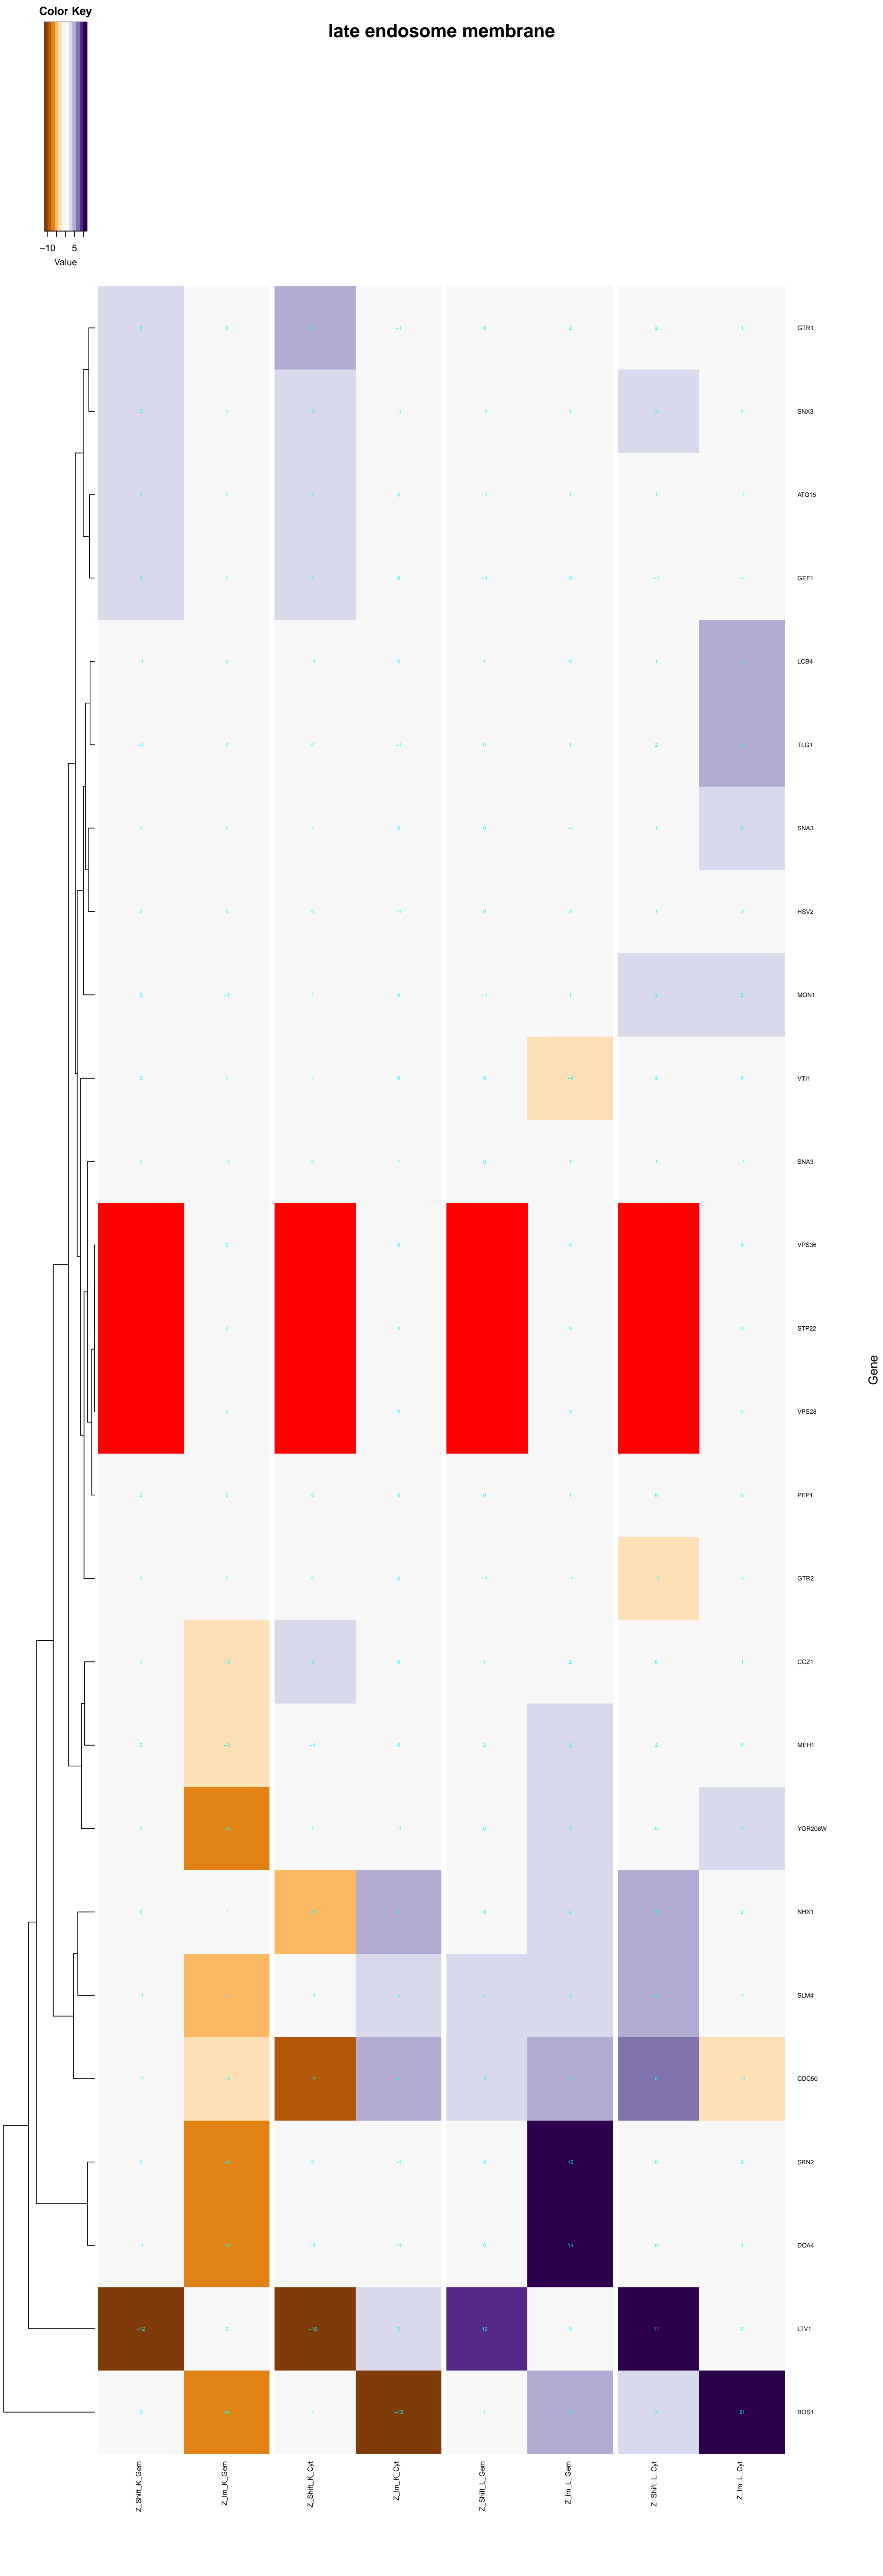

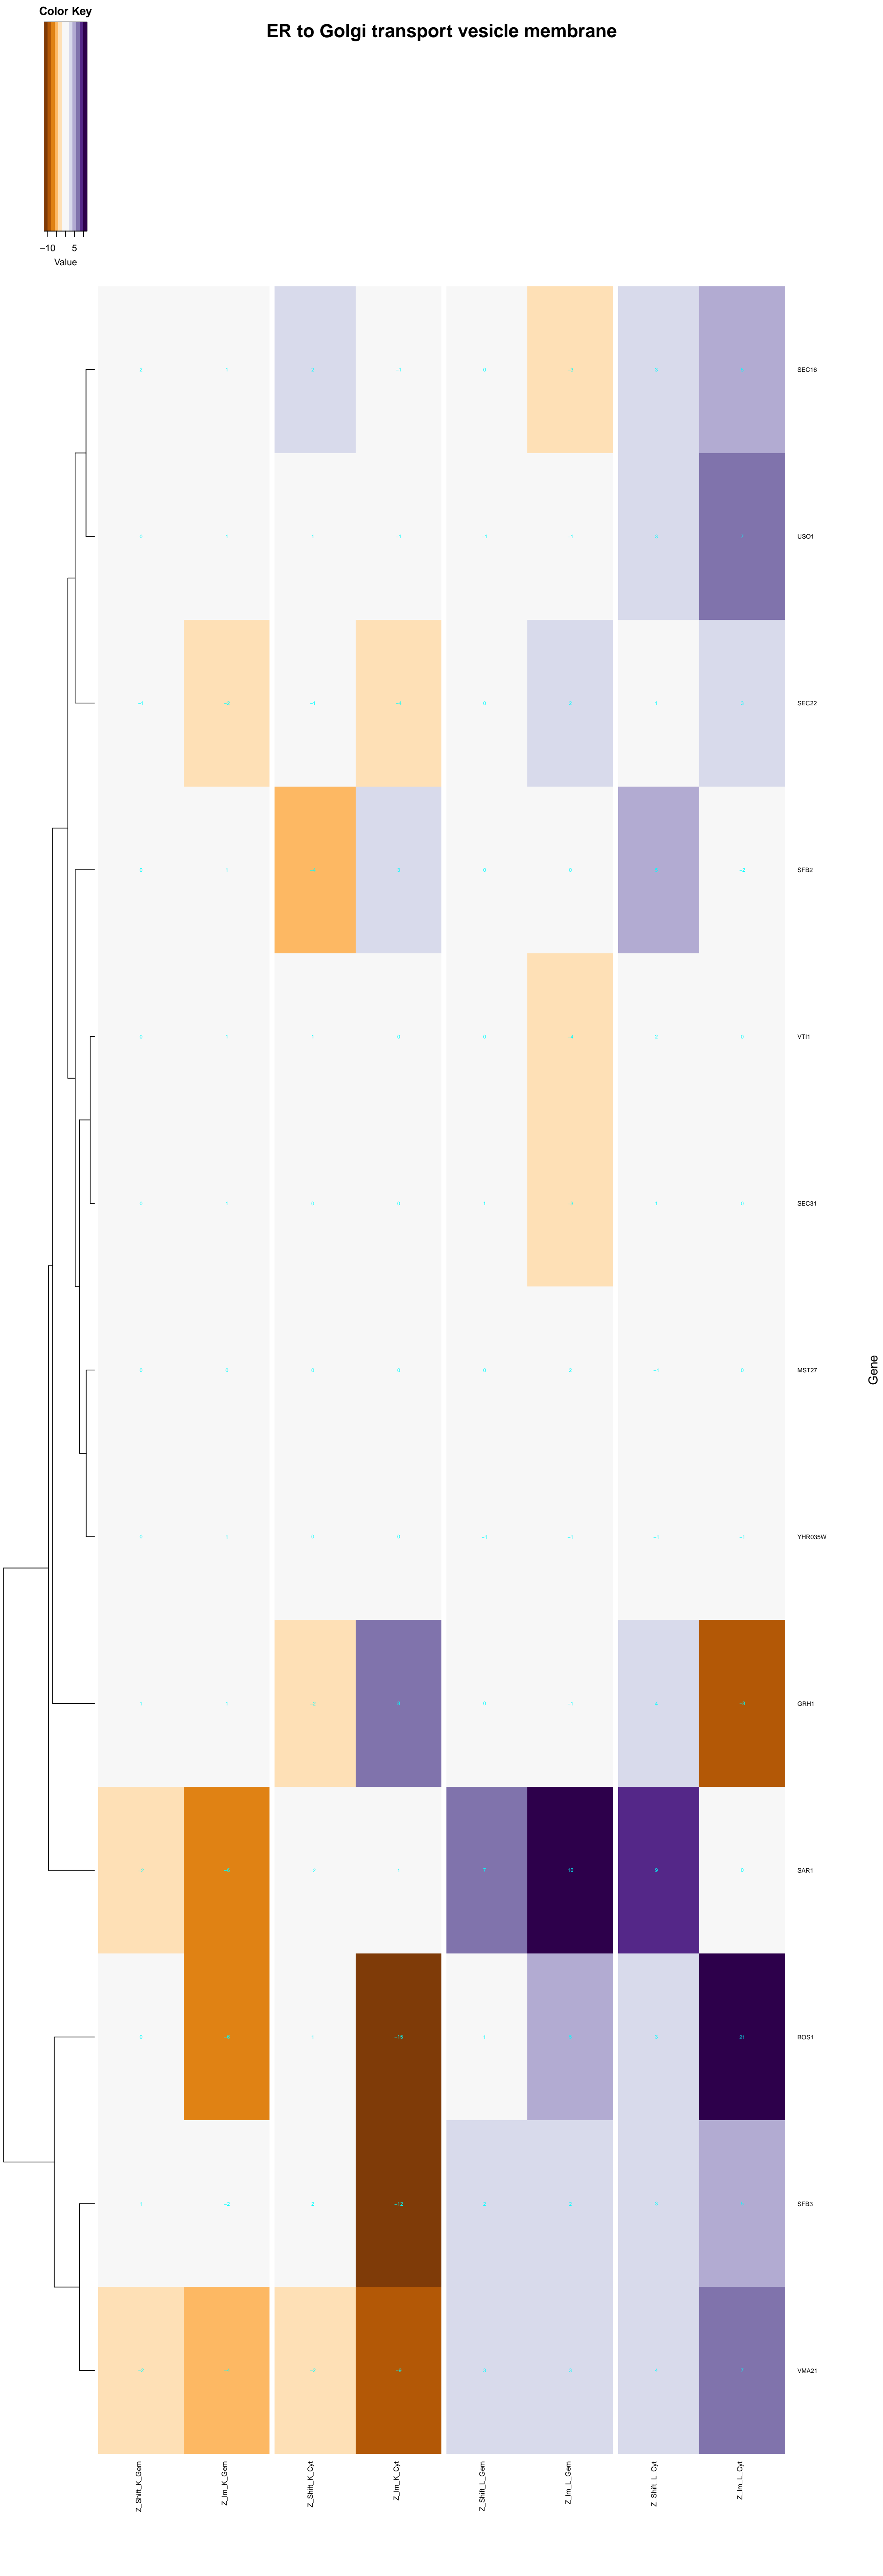

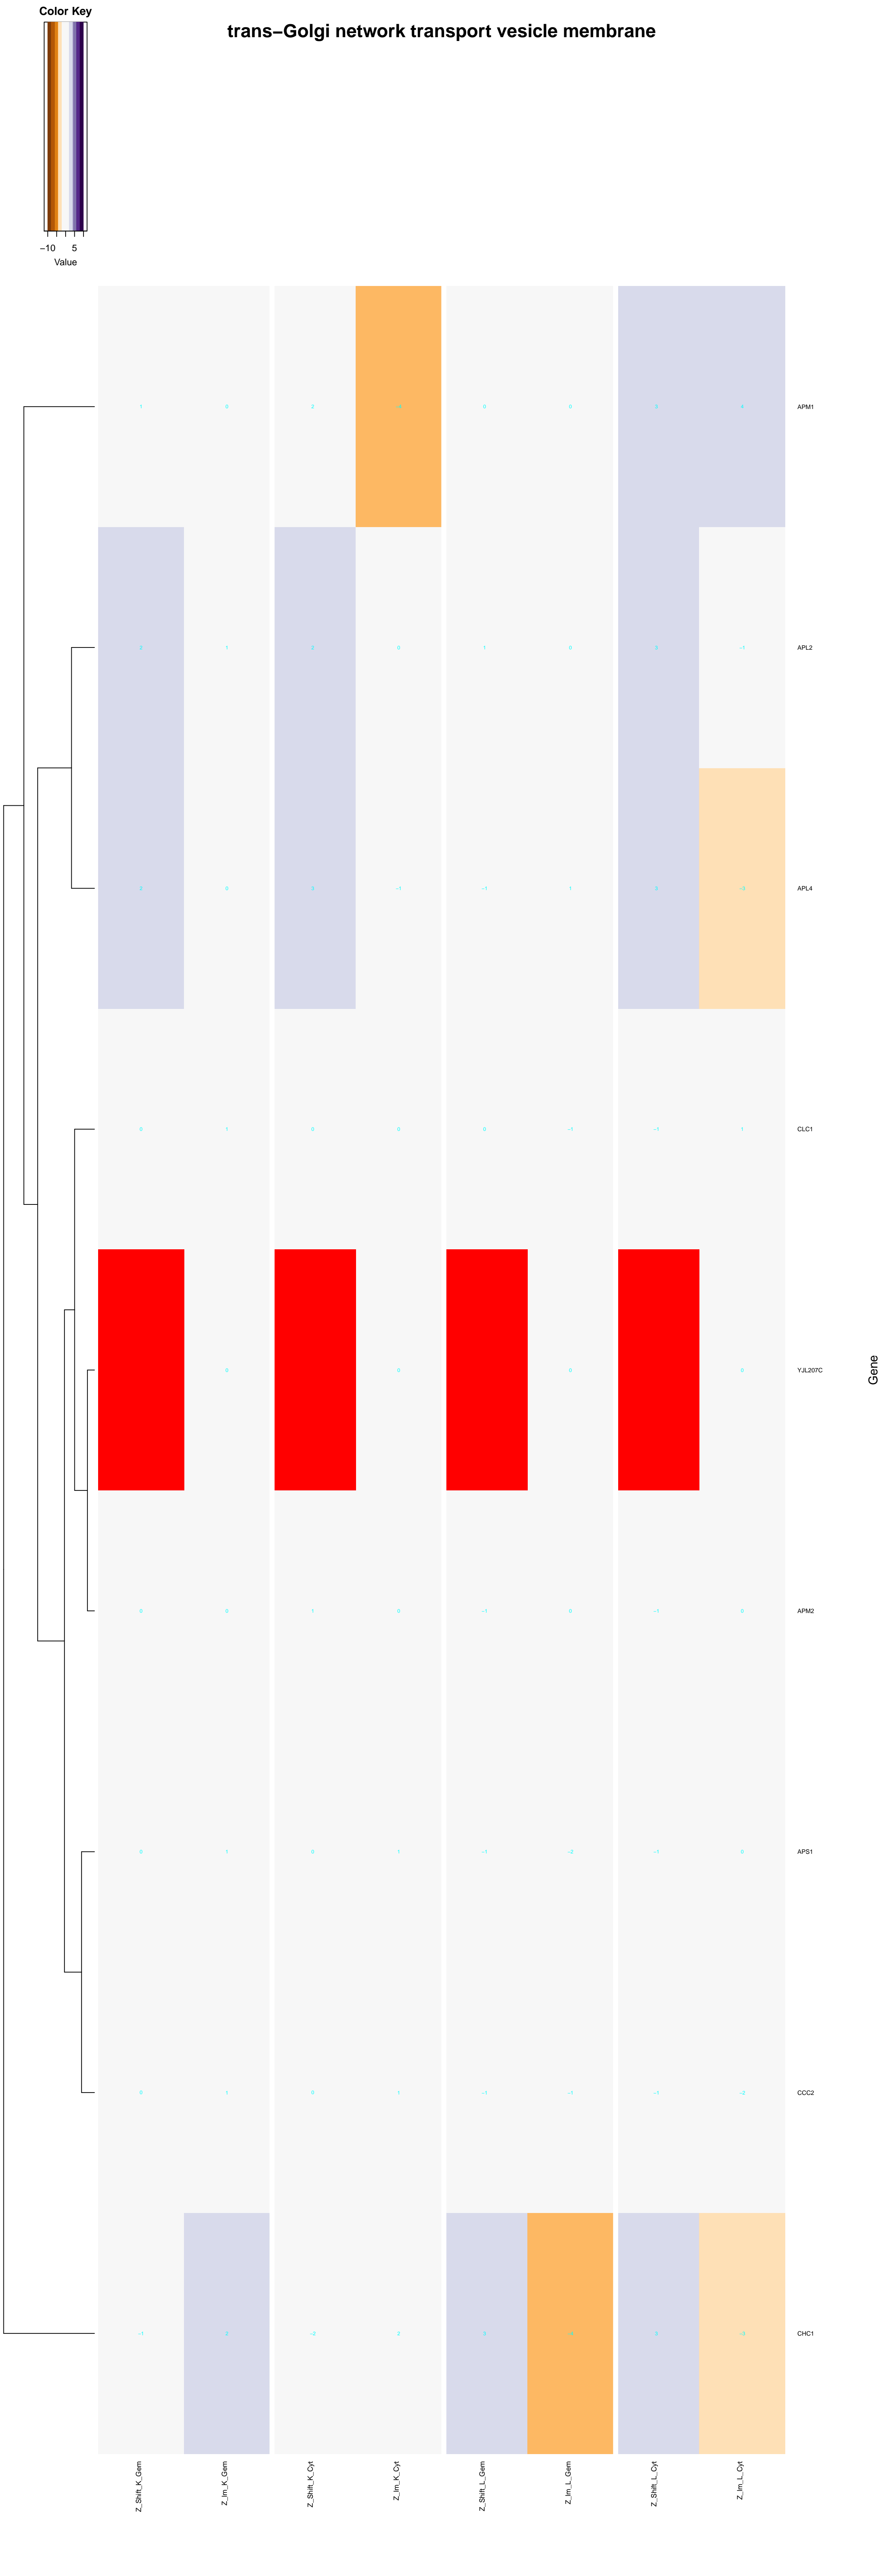

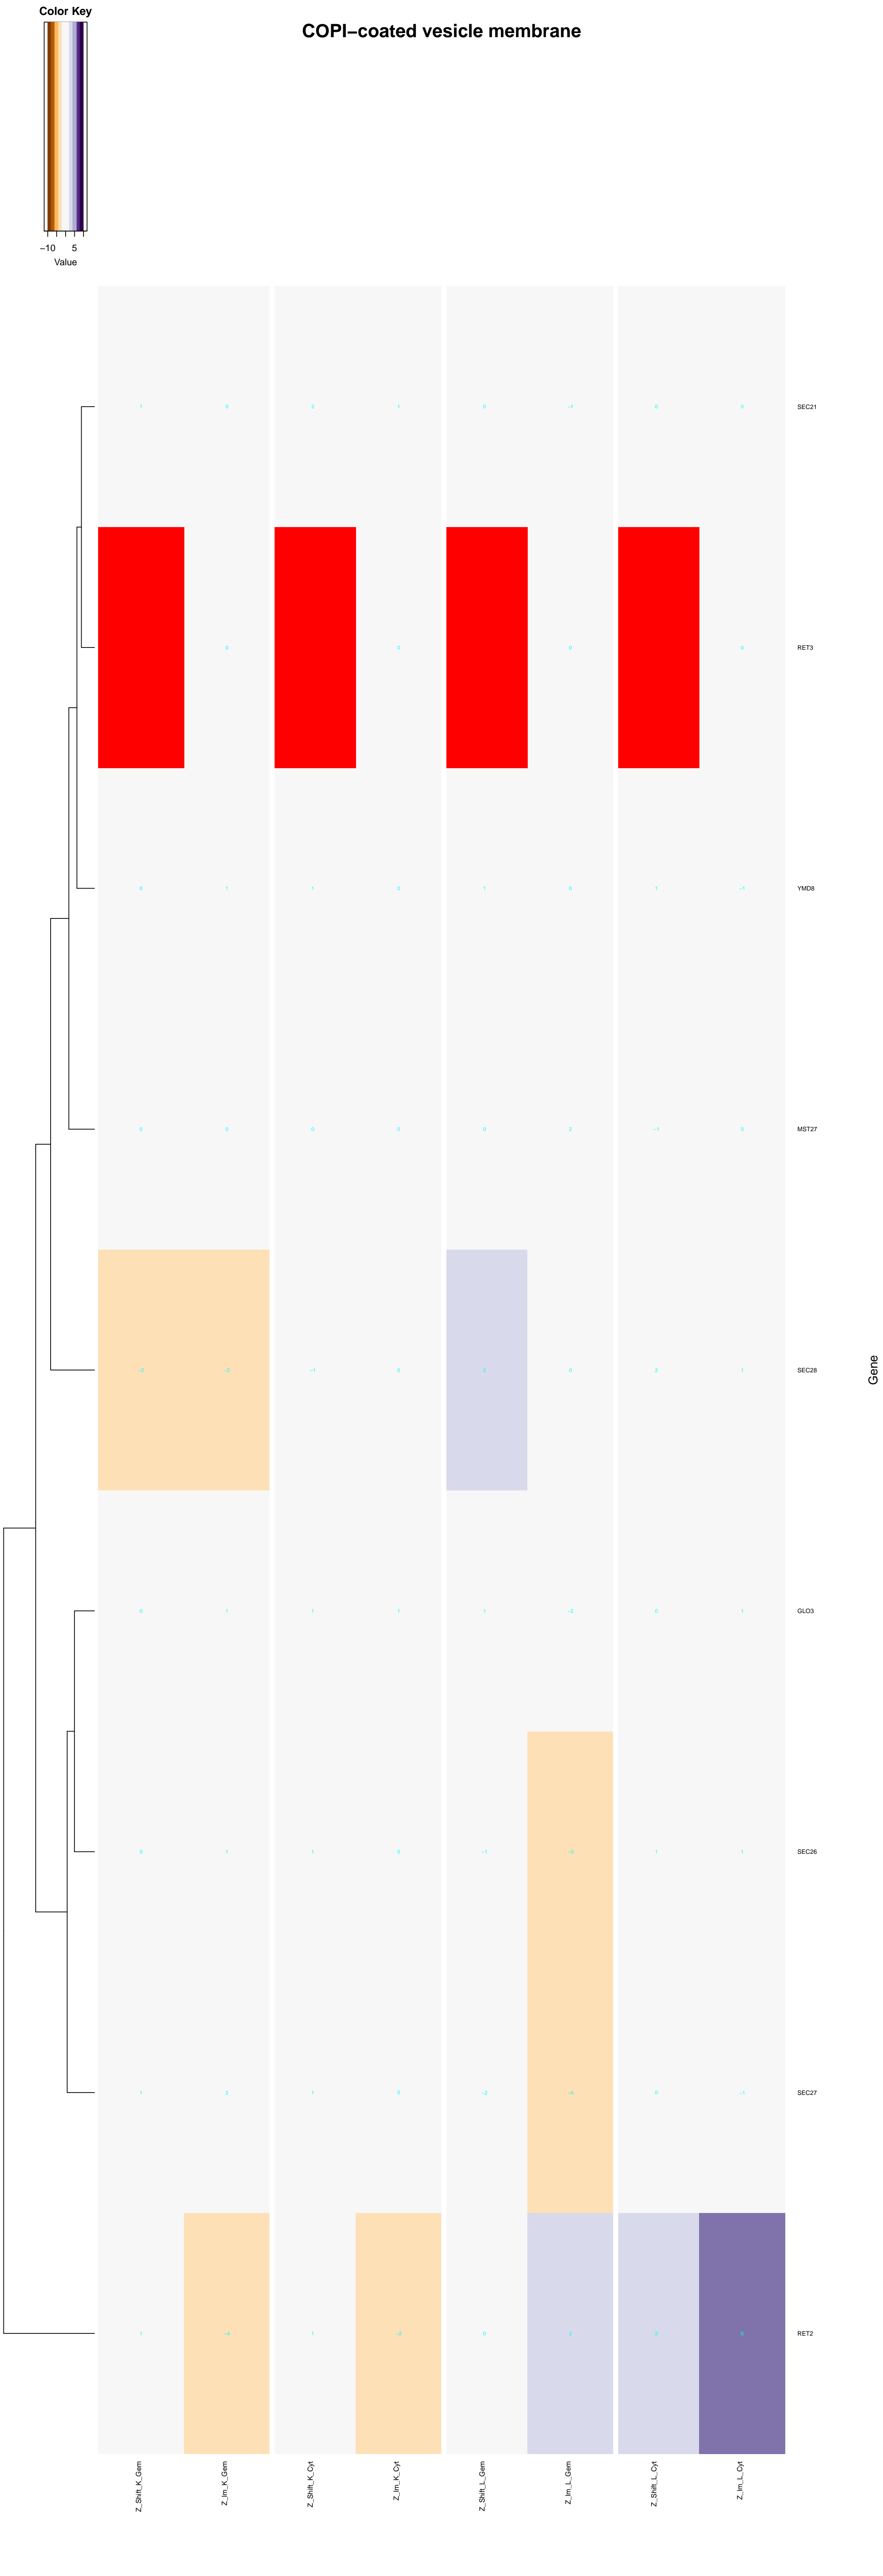

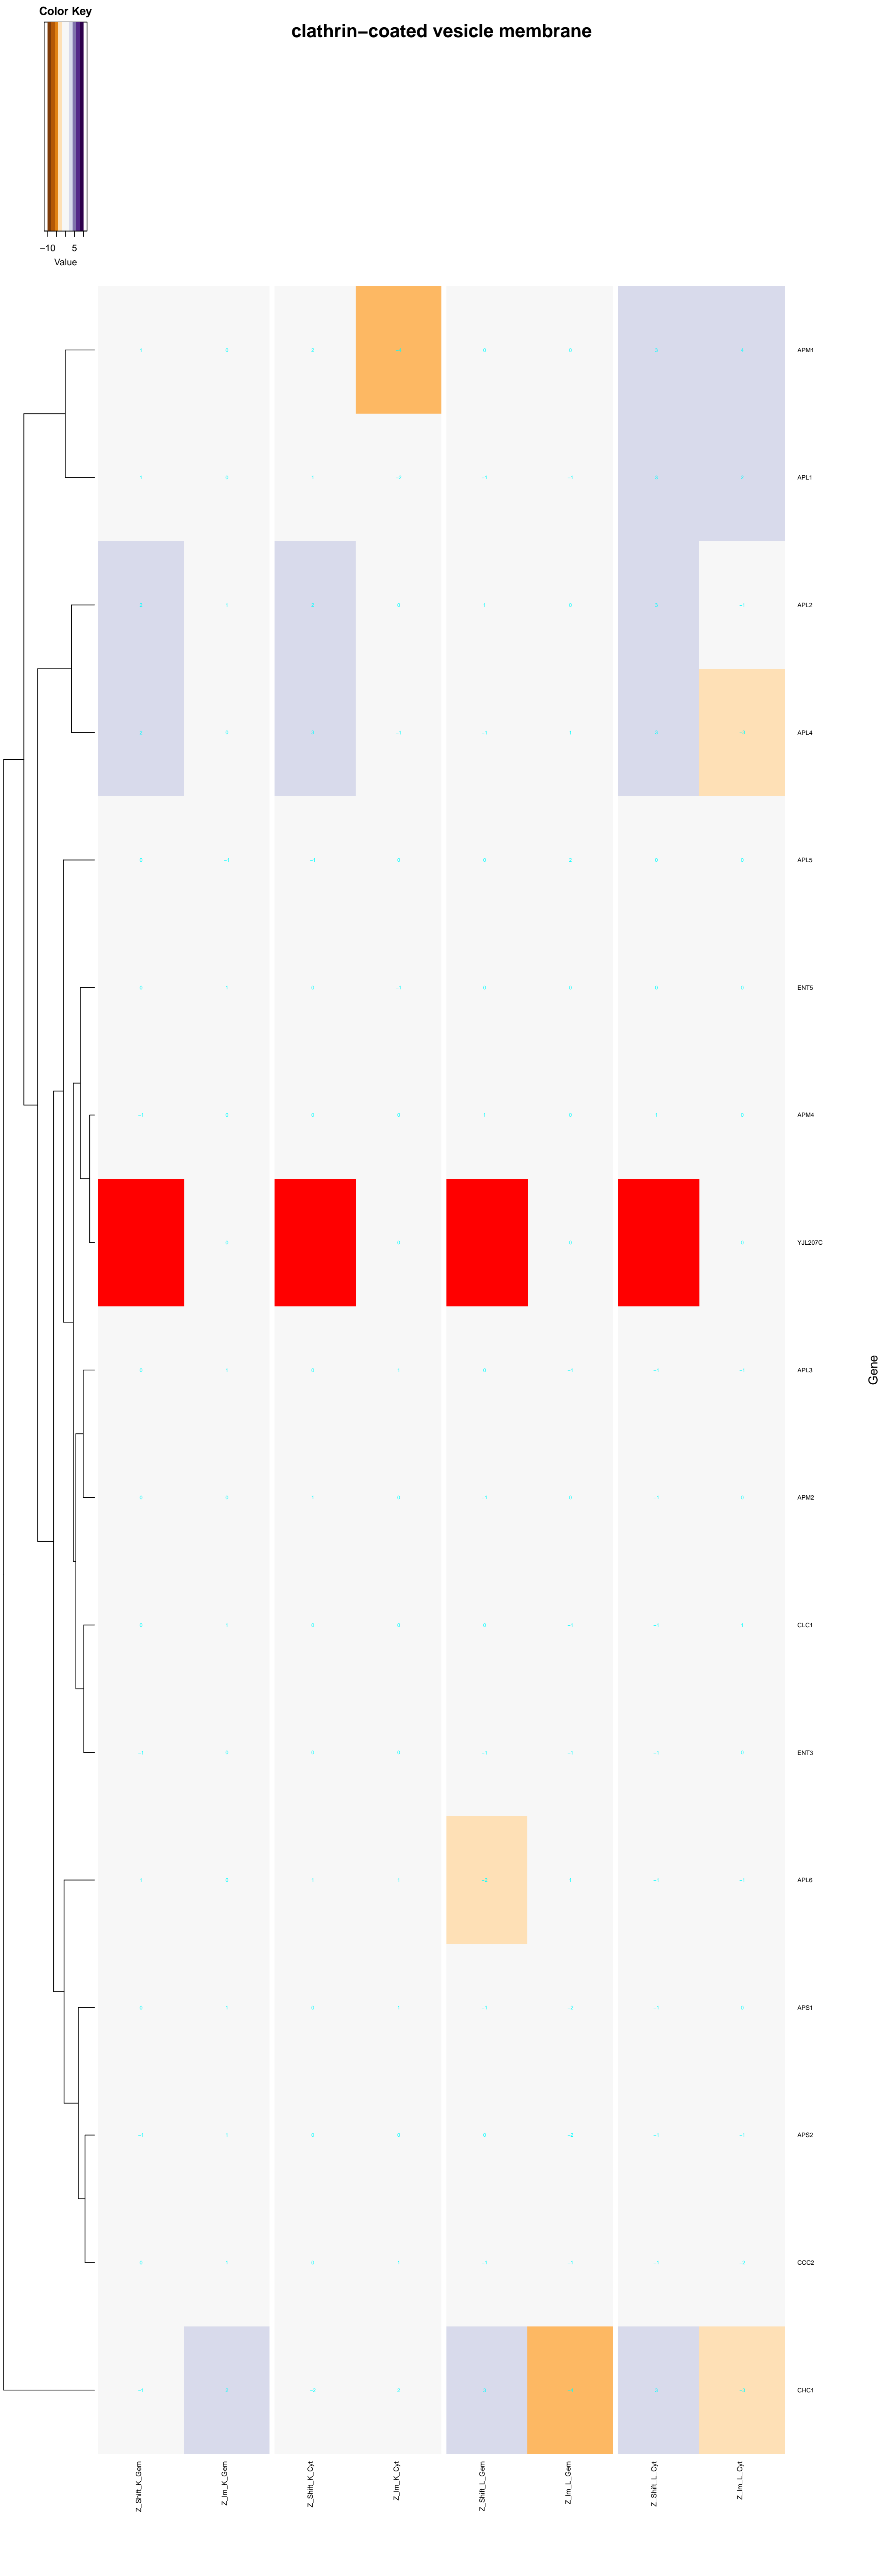

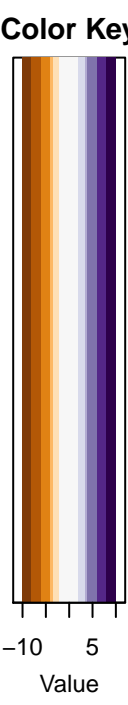

clathrin-coated endocytic vesicle membrane



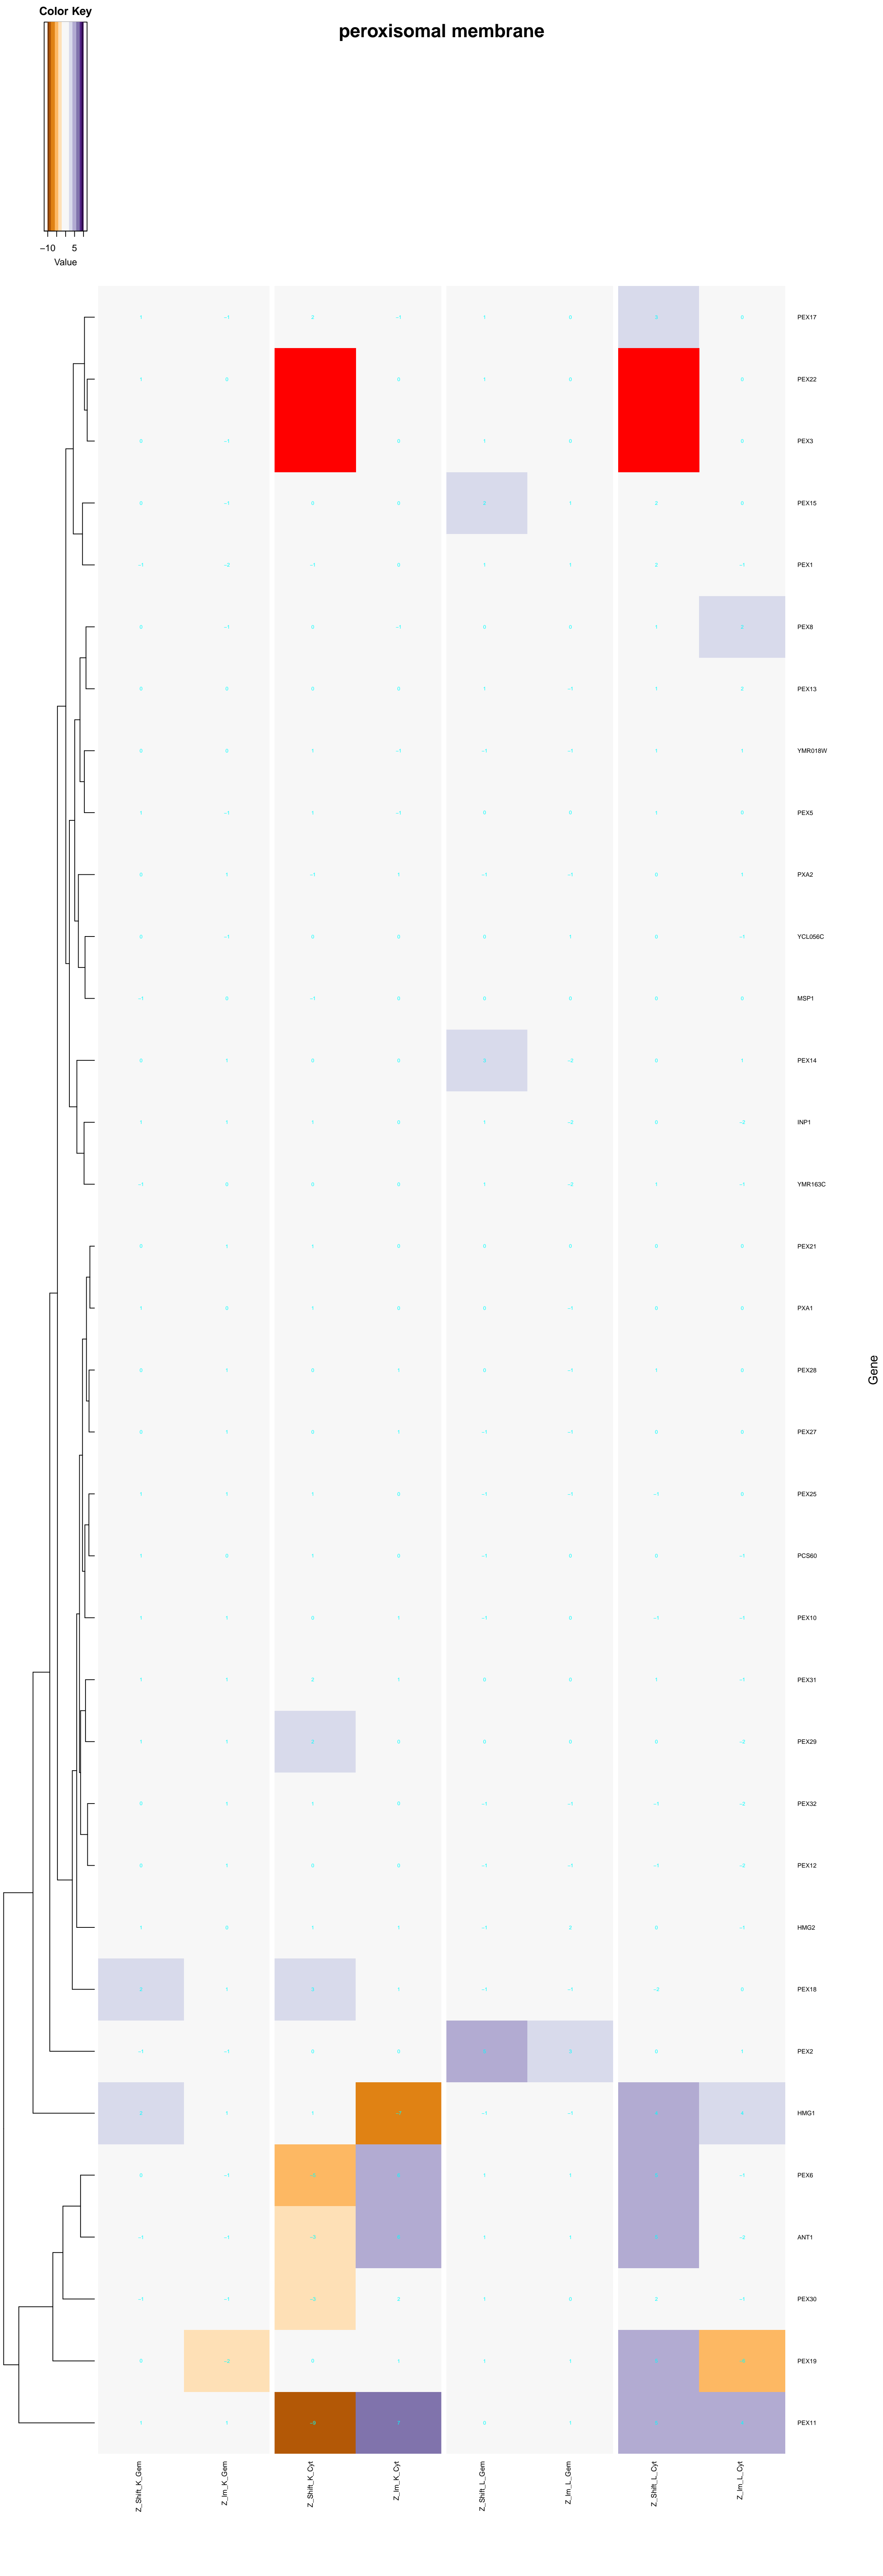

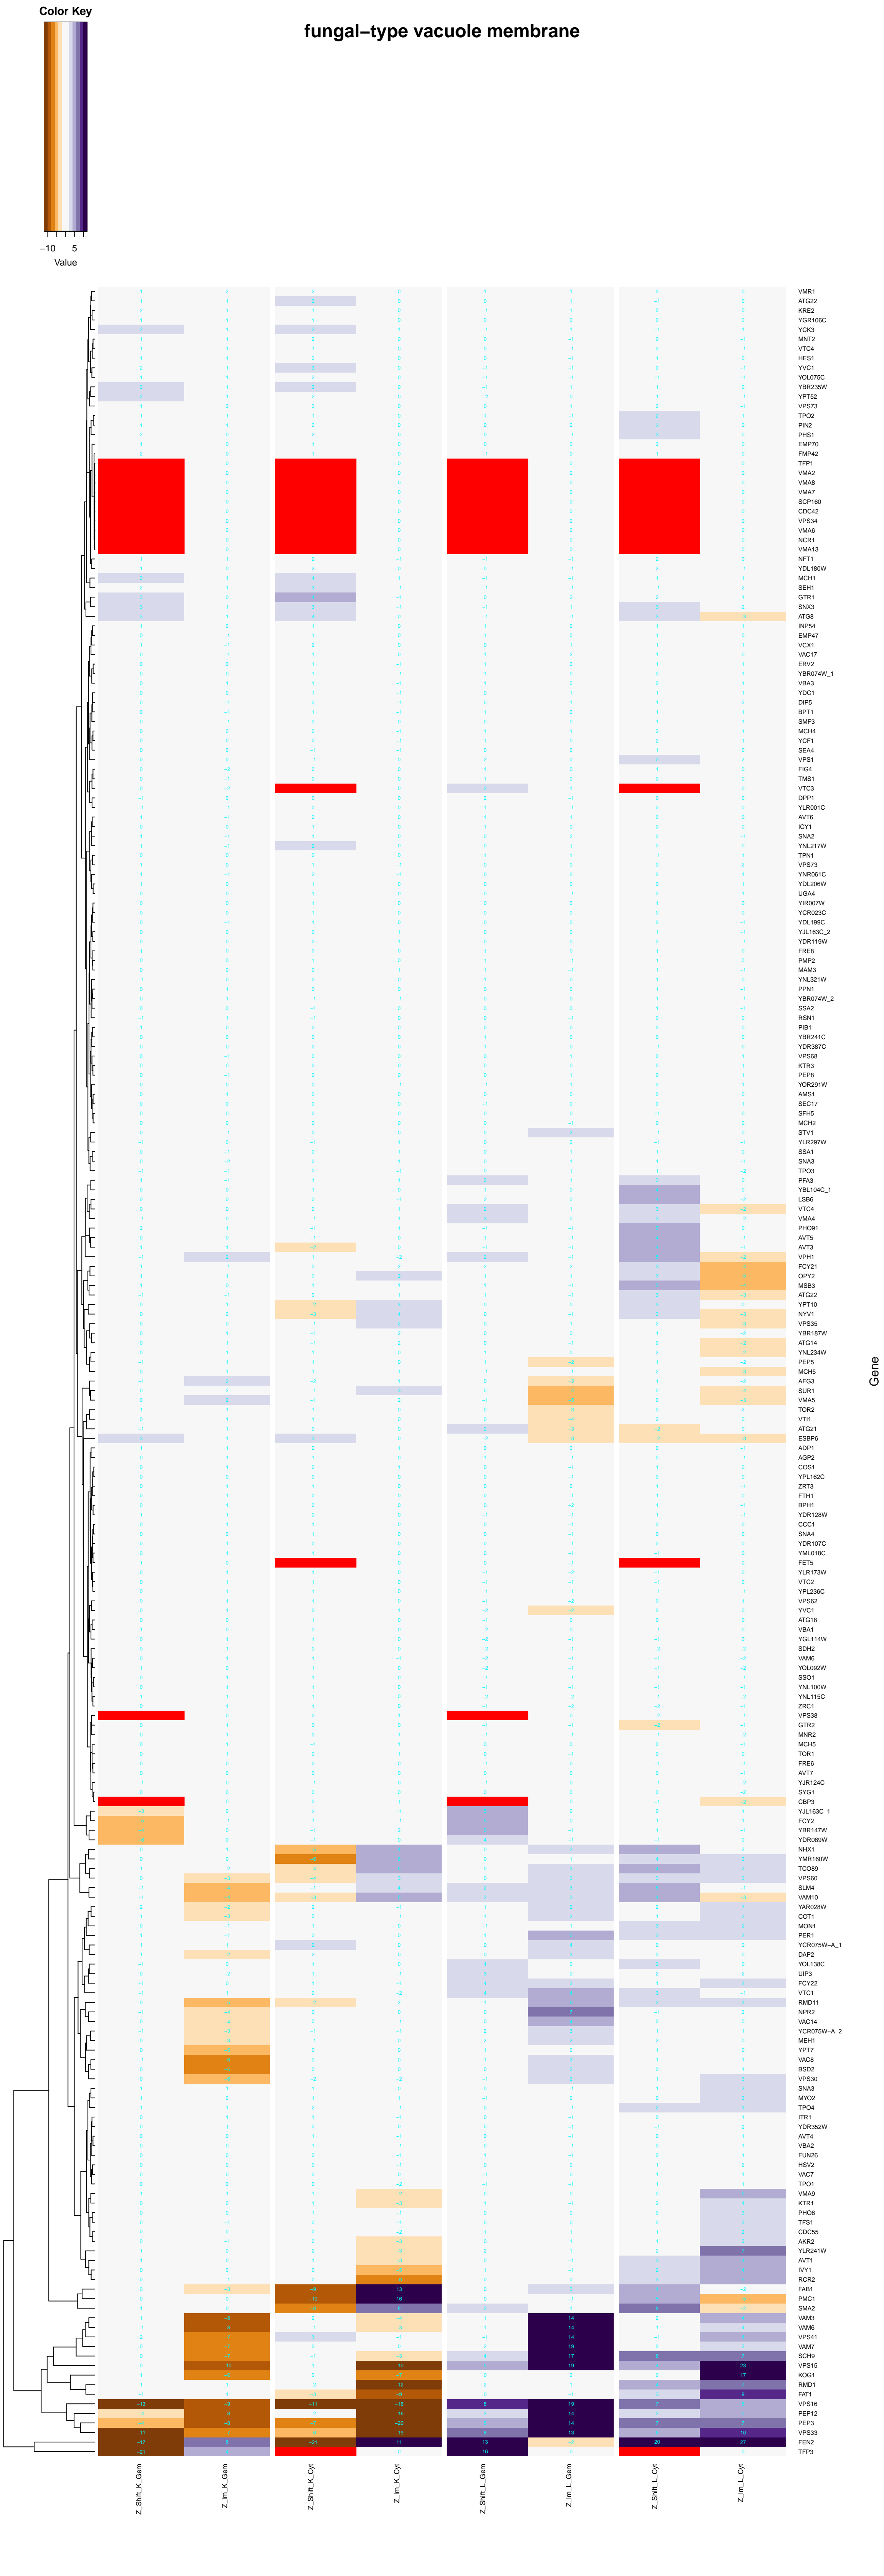

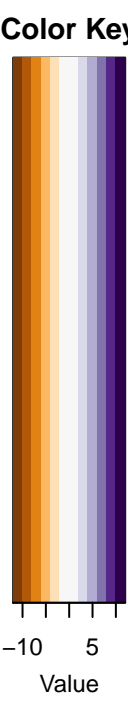

lysosomal membrane

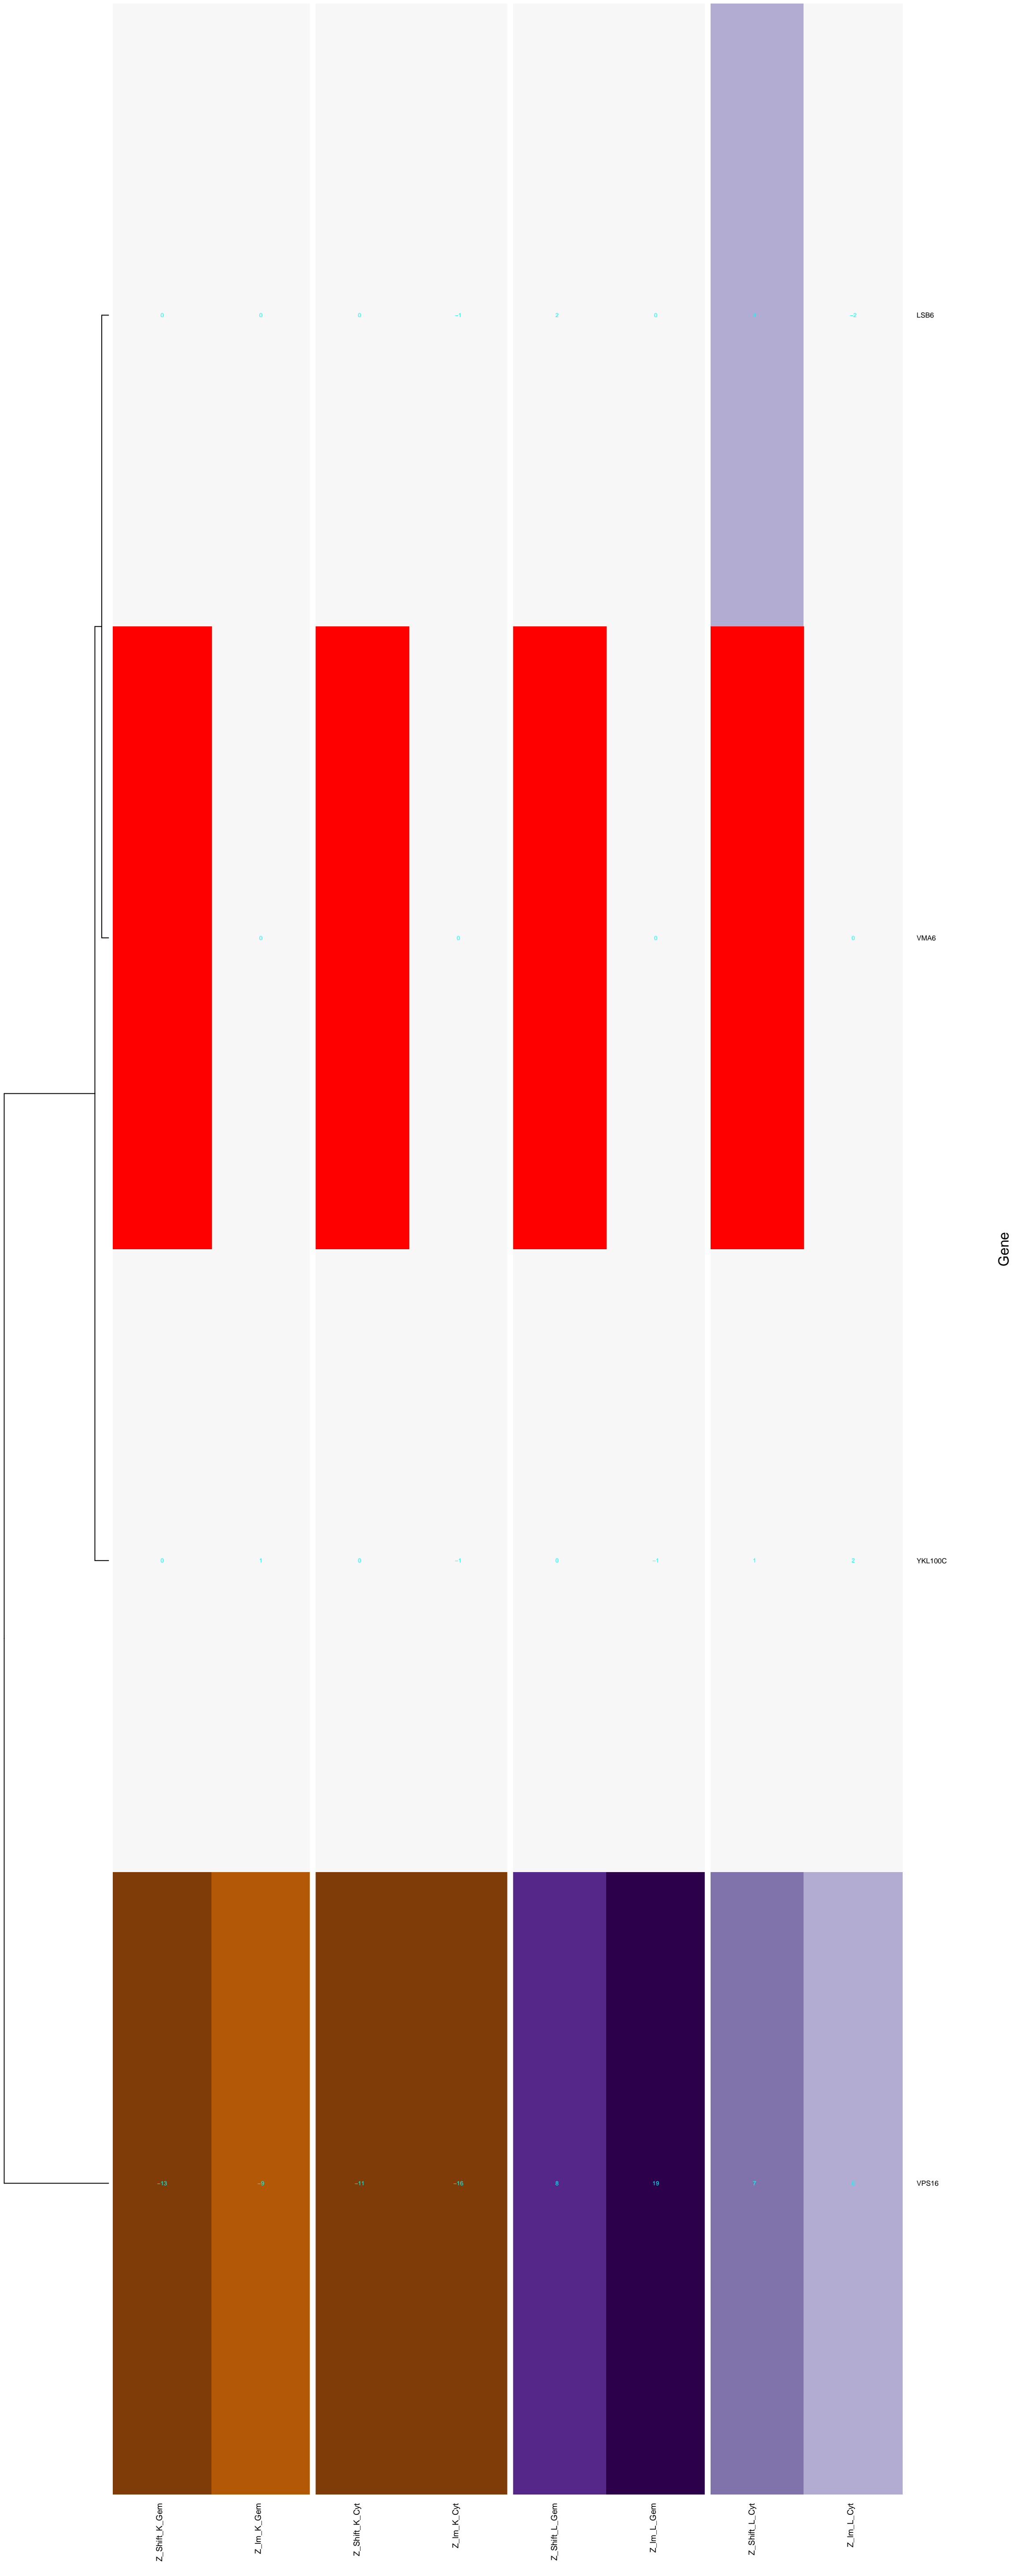

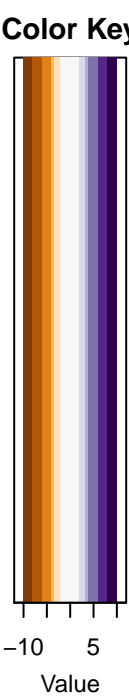

multivesicular body membrane

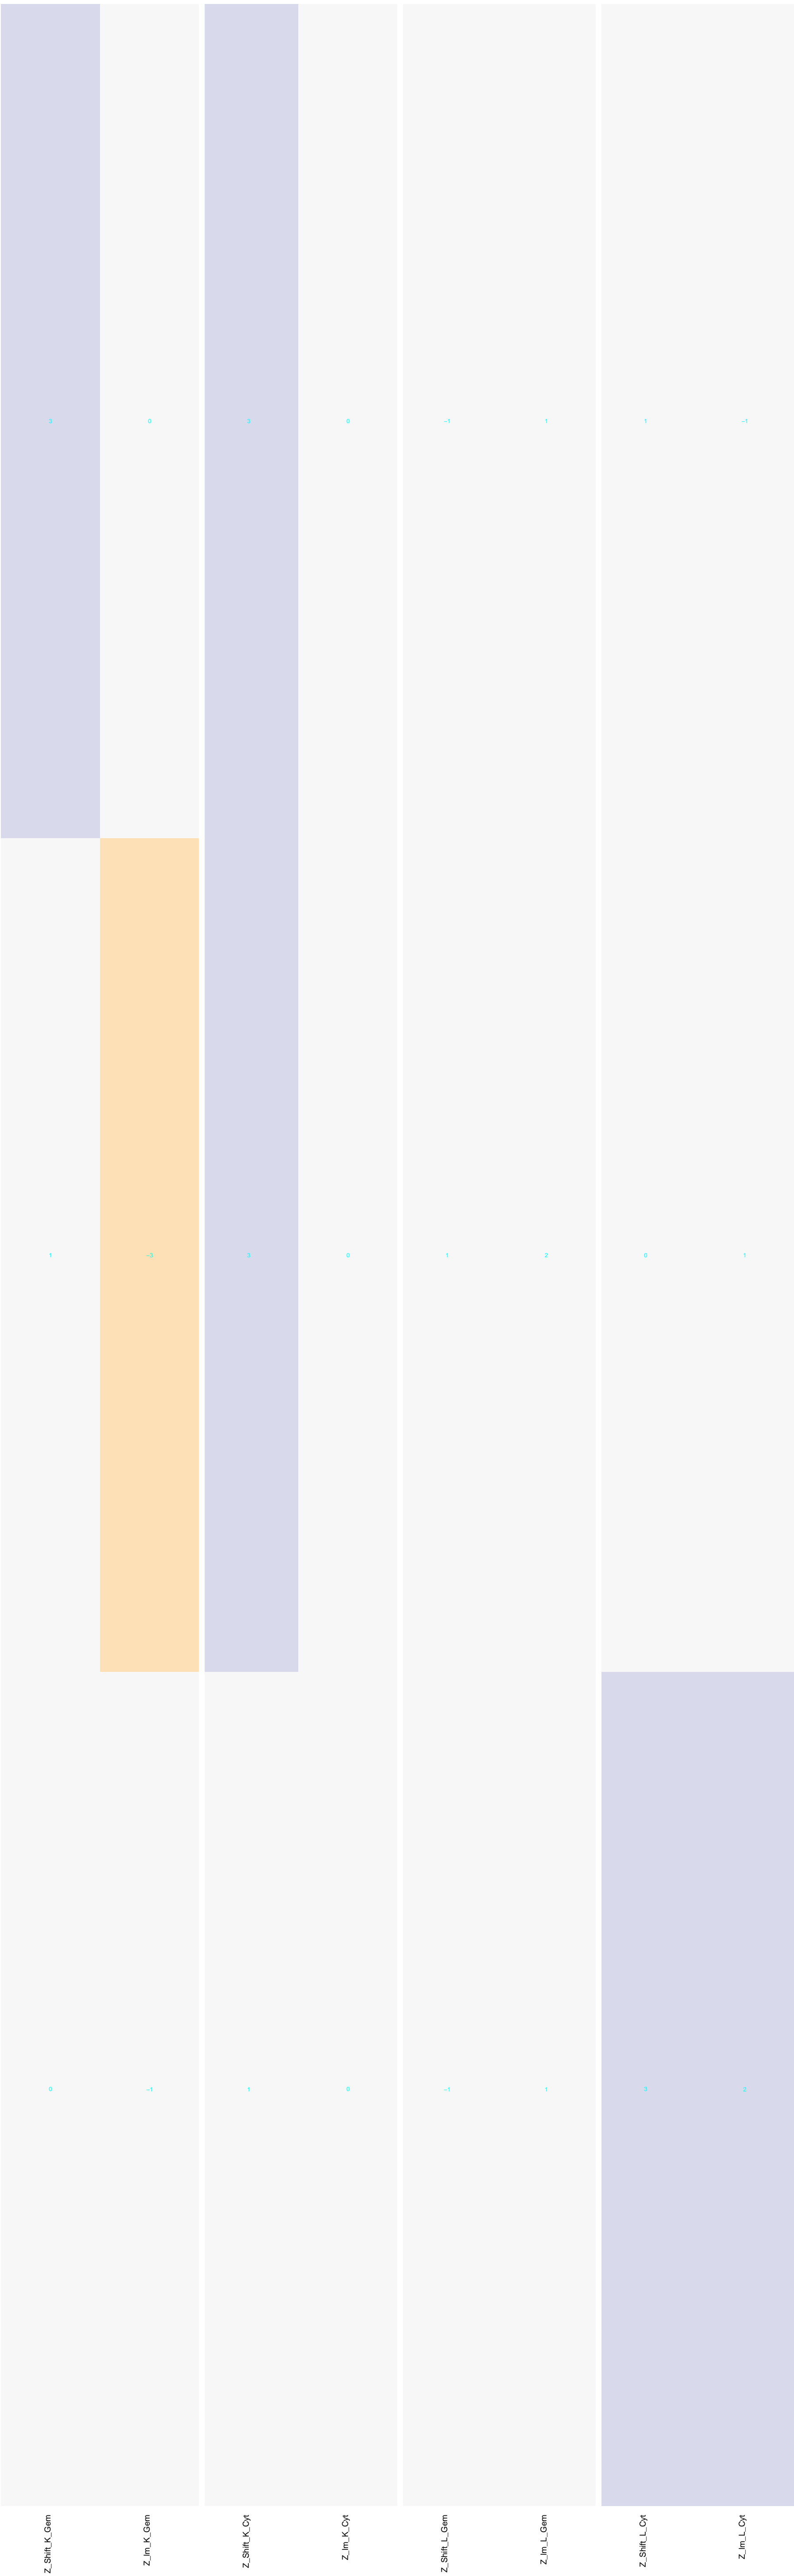

Gene
