# Supplementary material for: A Humanized Yeast Phenomic Model of Deoxycytidine Kinase to Predict Genetic Buffering of Nucleoside Analog Cytotoxicity
Source: MDPI journal article supplement (doi:10.3390/genes10100770), 2019-09-30

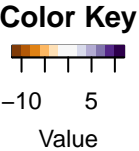

# ATP-dependent DNA helicase activity

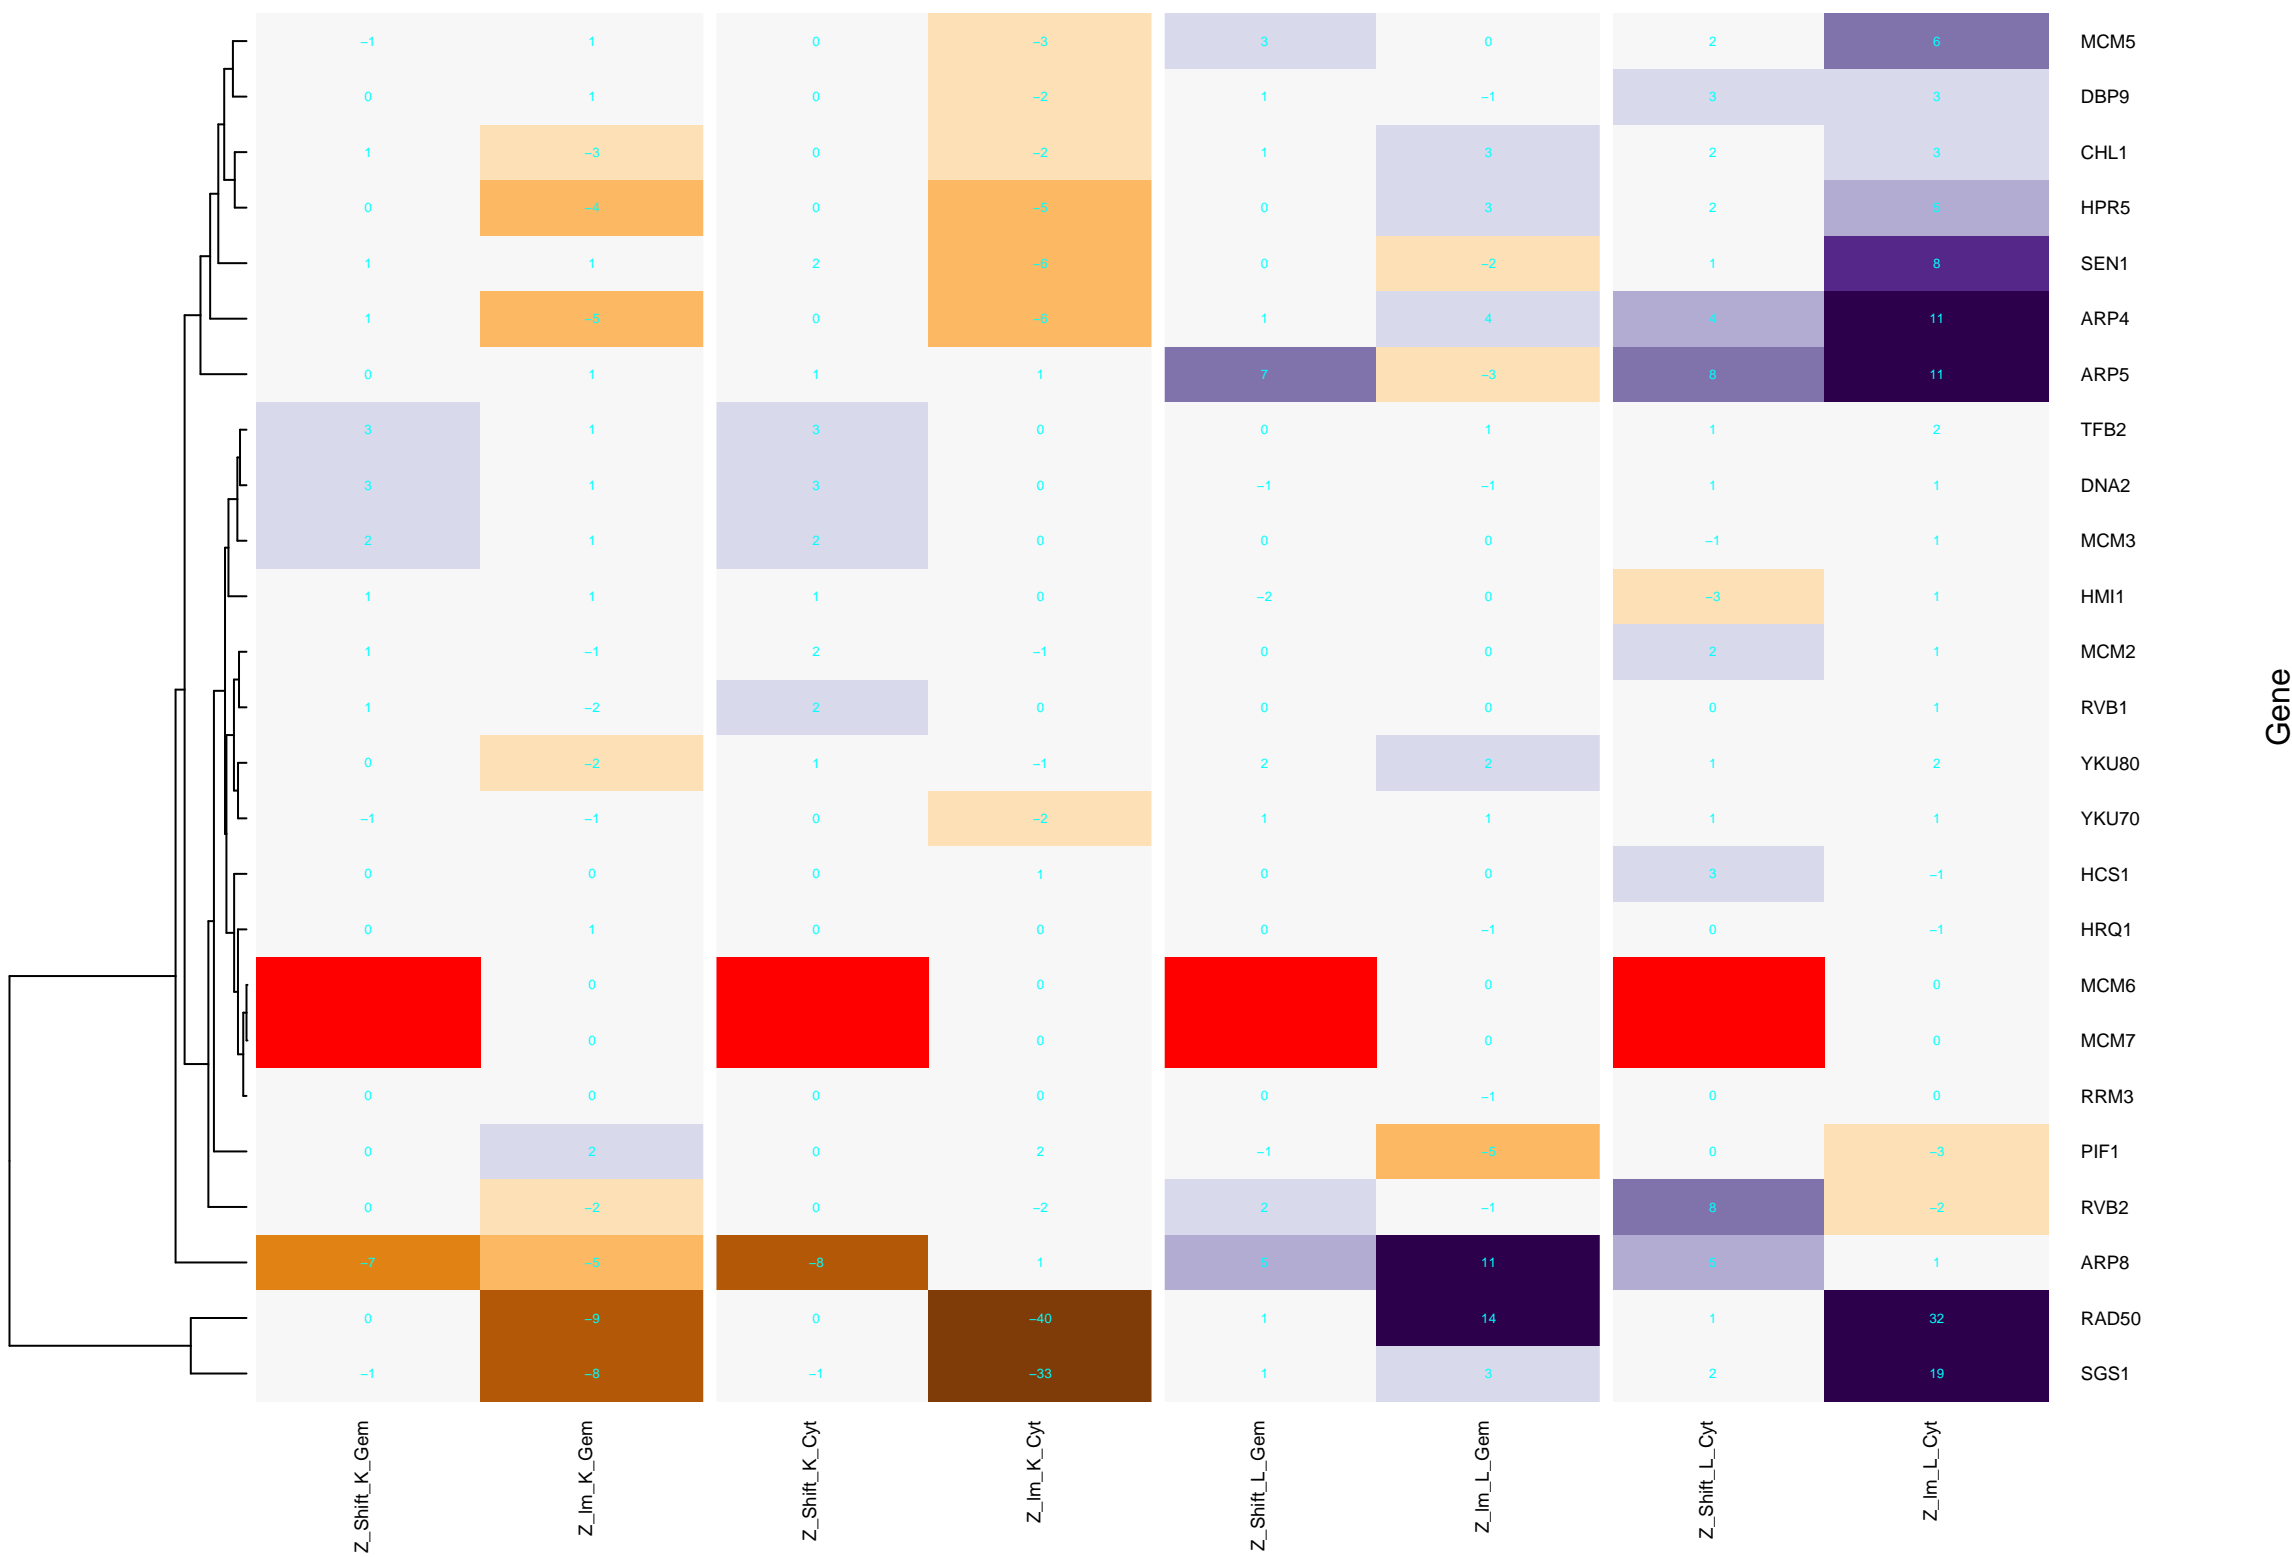

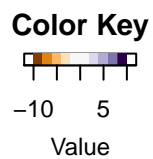

# single-stranded DNA-dependent ATP-dependent DNA helicase activity

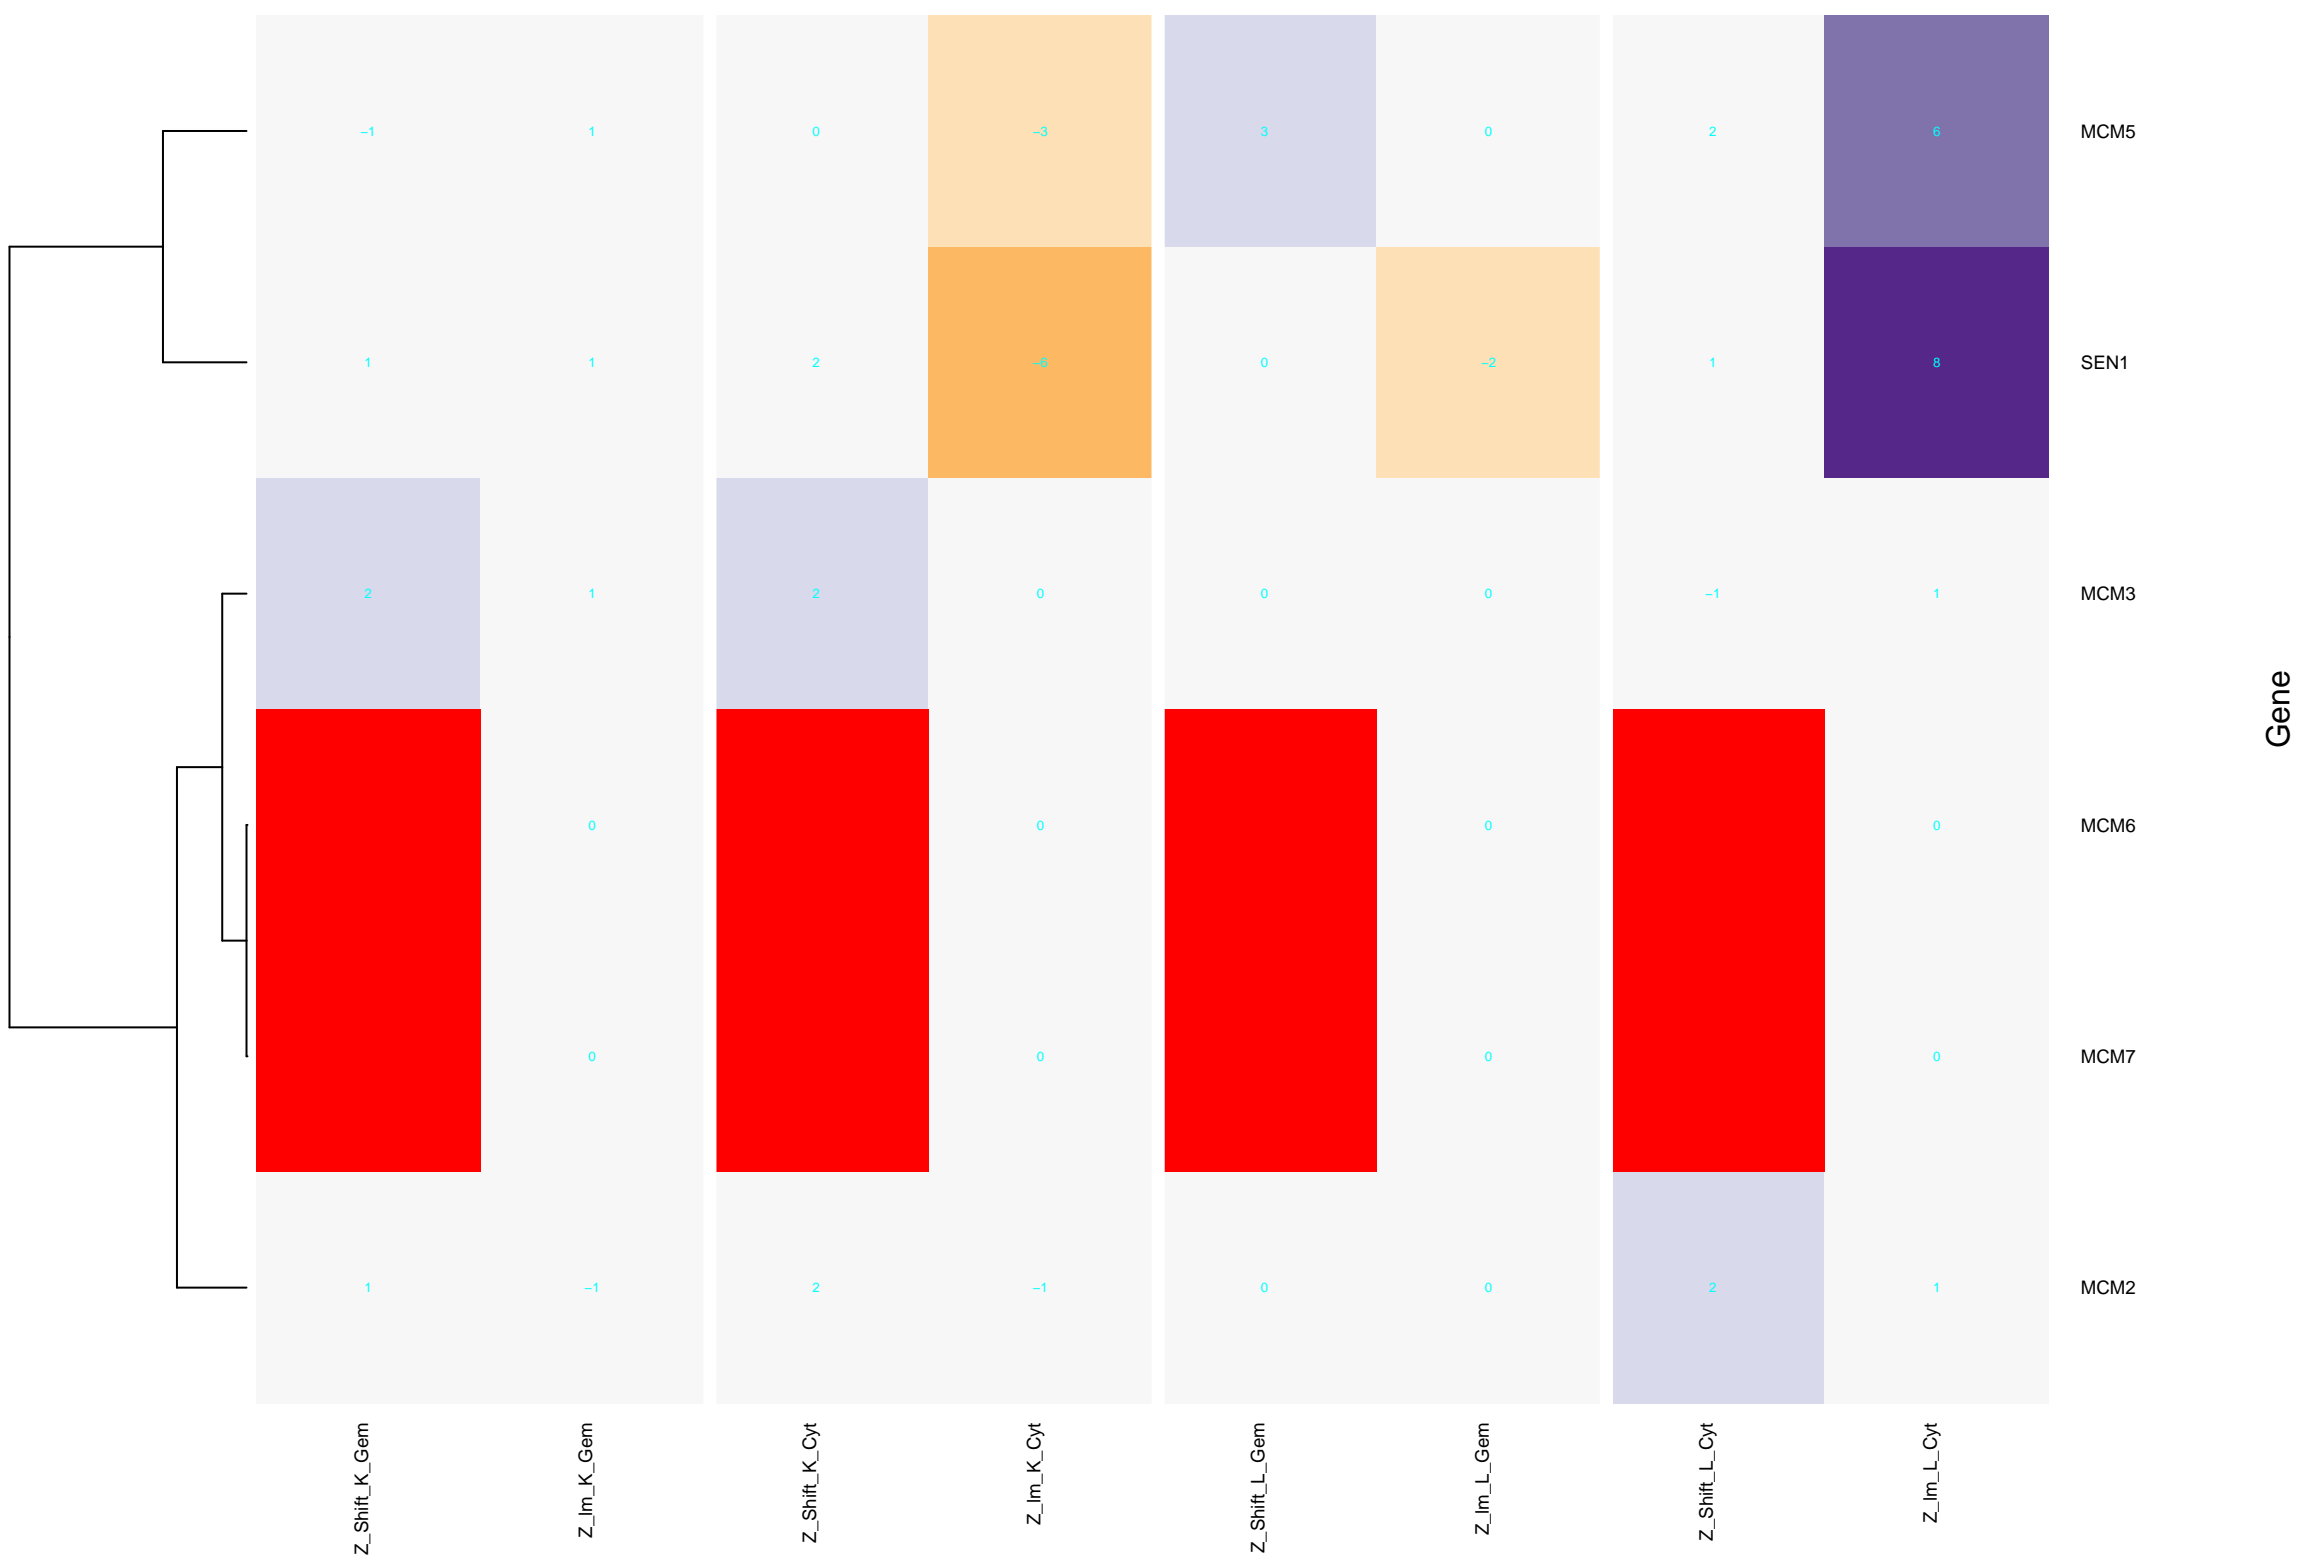

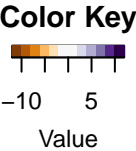

# ATP-dependent 3'-5' DNA helicase activity

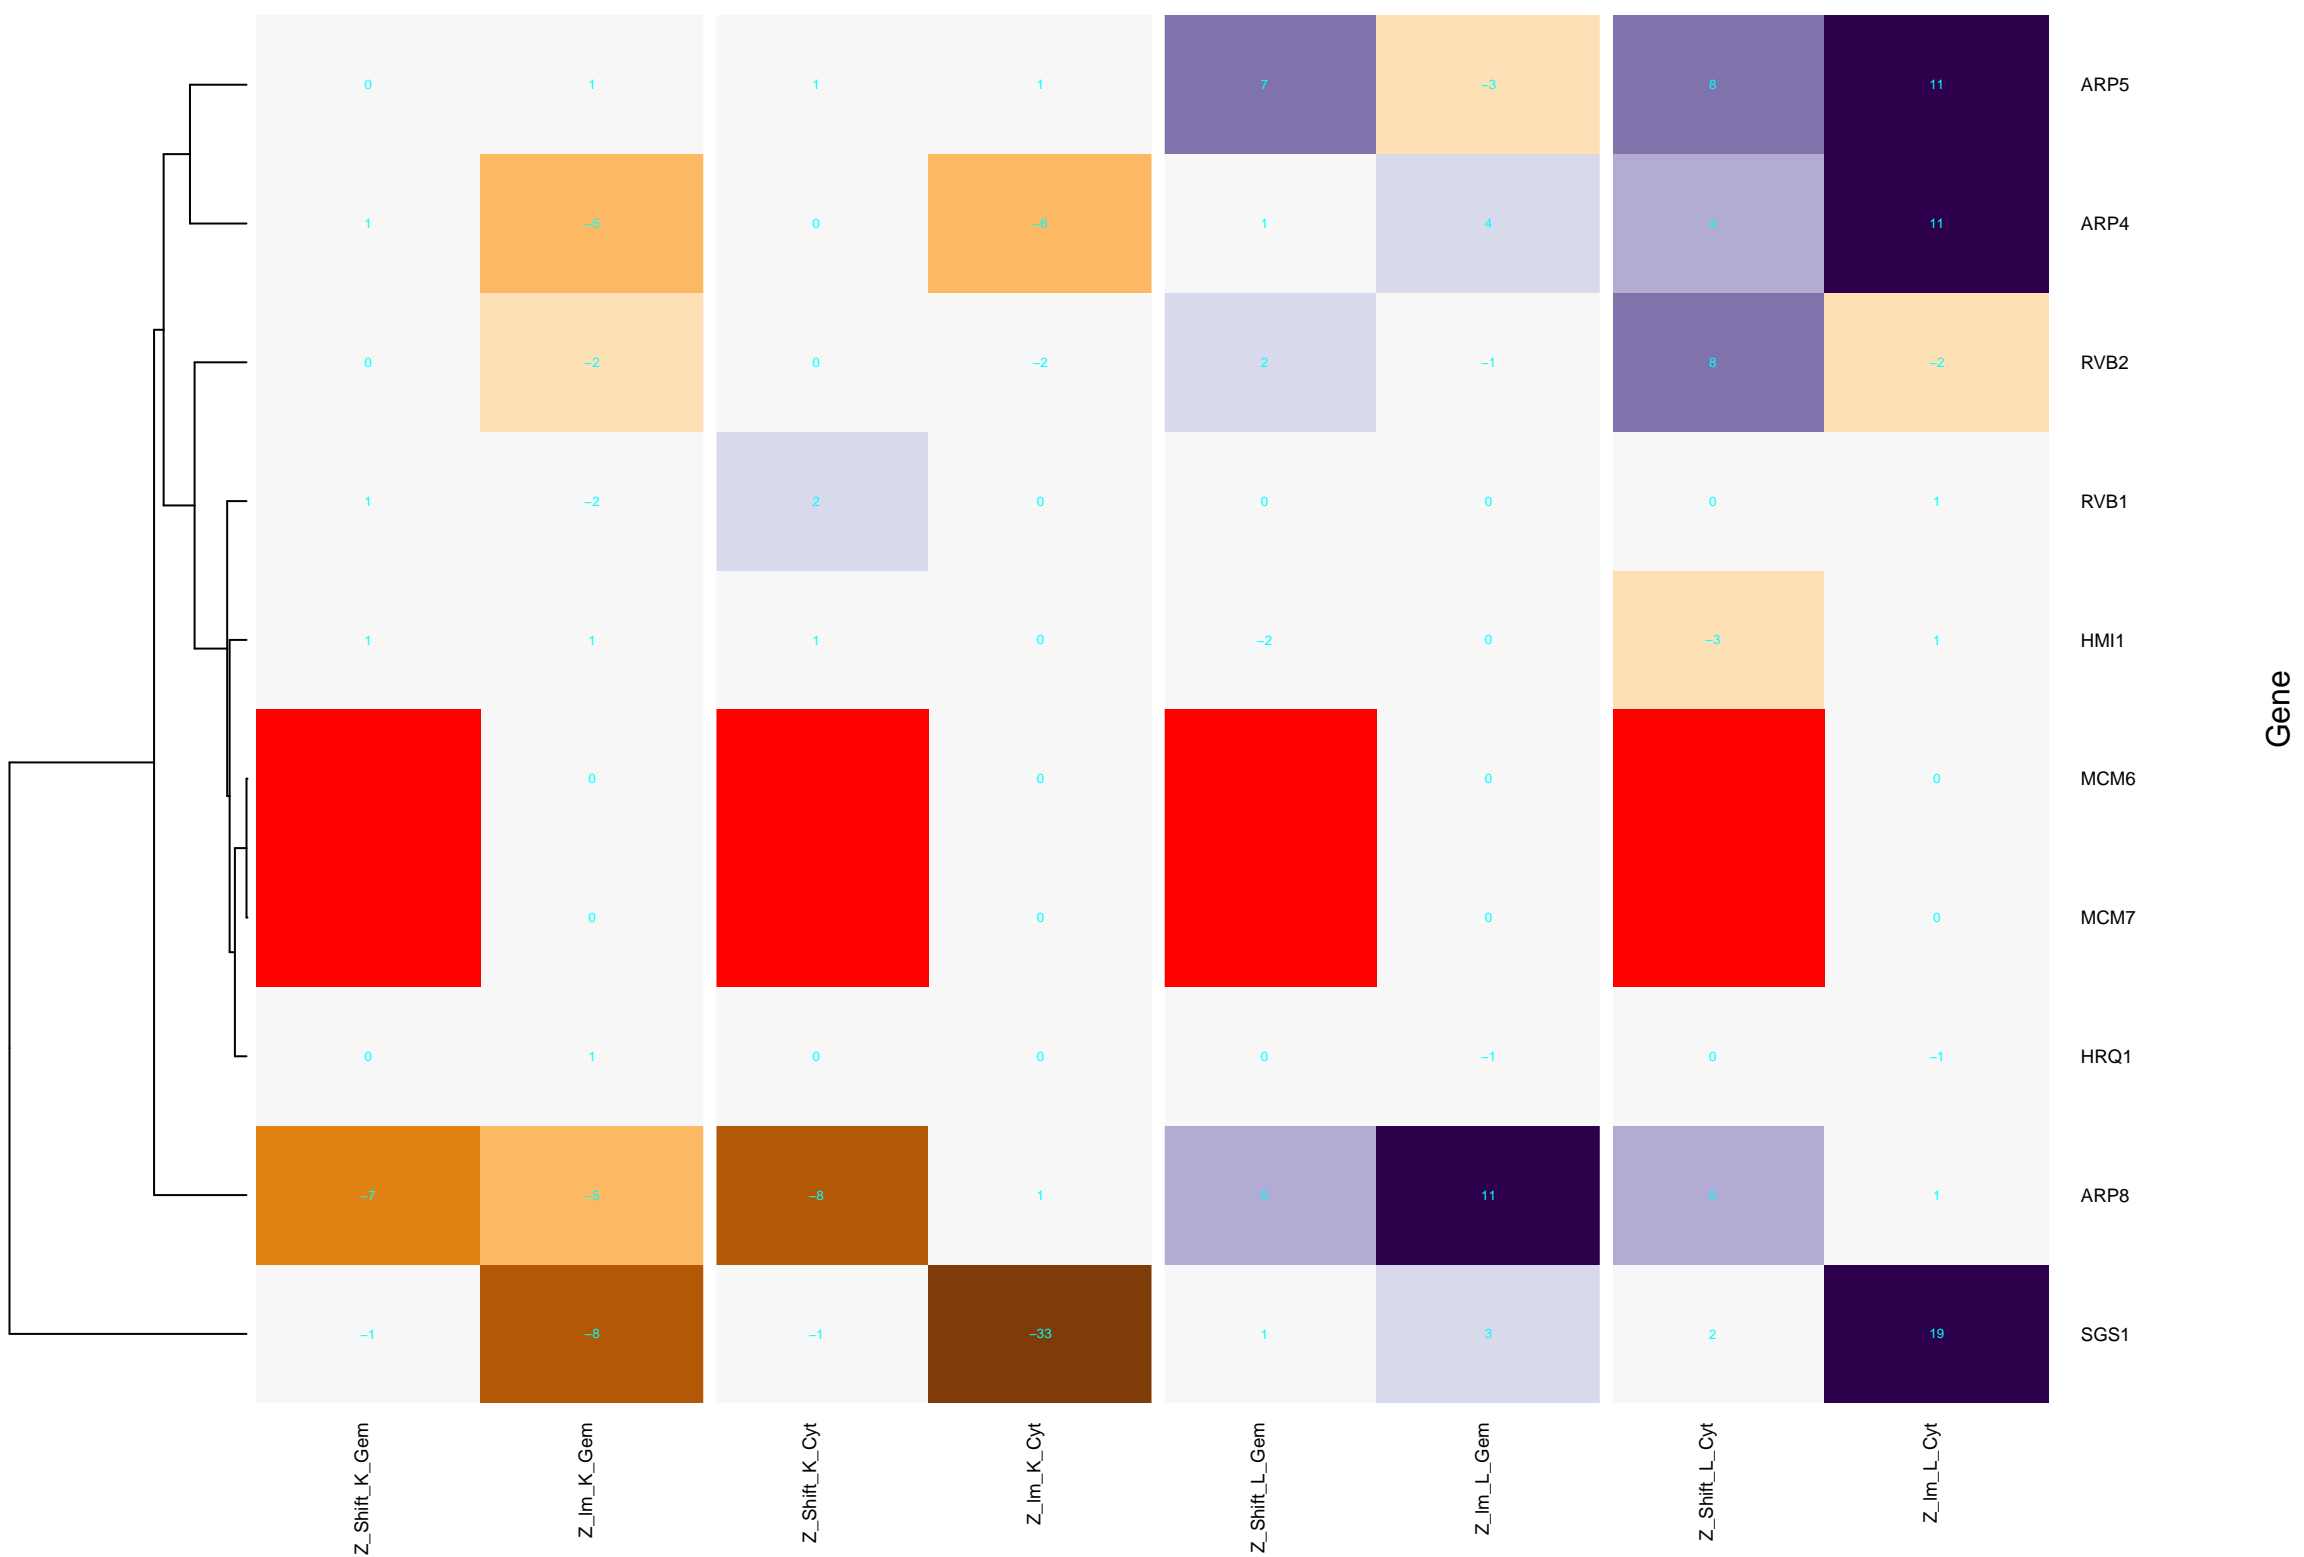

Color Key

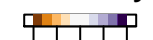

-10 5

Value

# ATP-dependent 5'-3' DNA helicase activity

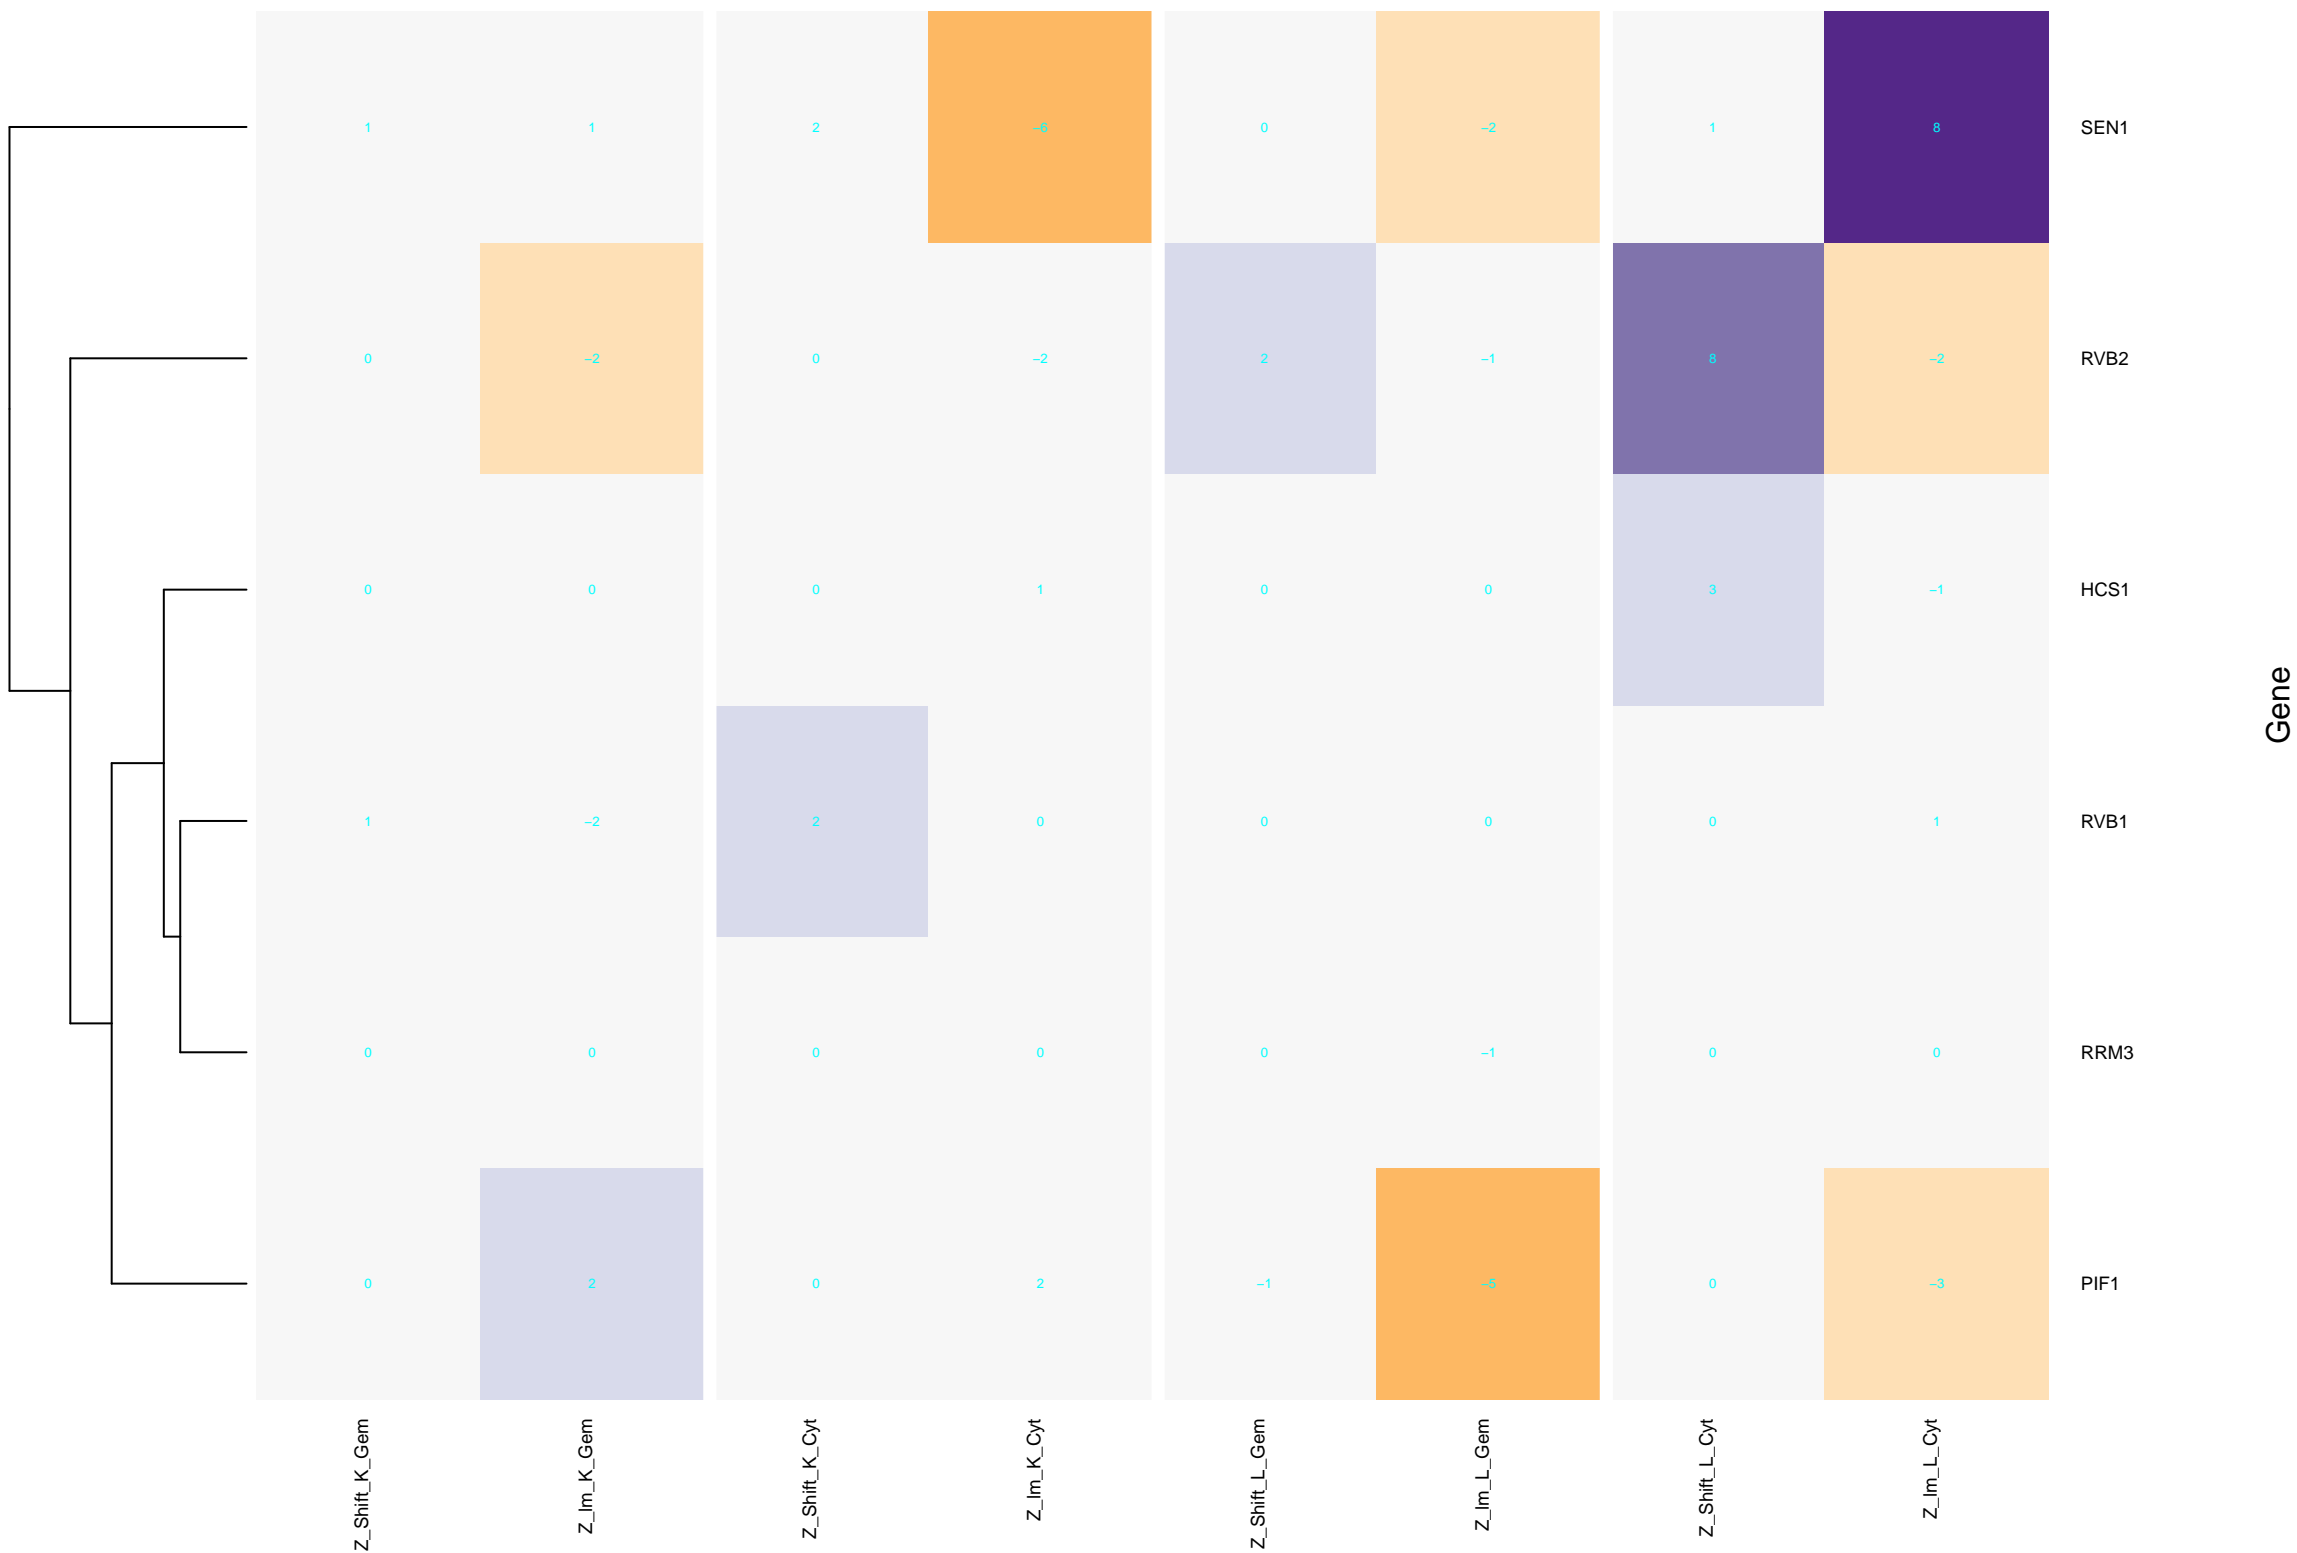

Supplement: s1 [file s1]
