# Supplementary material for: A Humanized Yeast Phenomic Model of Deoxycytidine Kinase to Predict Genetic Buffering of Nucleoside Analog Cytotoxicity
Source: MDPI journal article supplement (doi:10.3390/genes10100770), 2019-09-30

**Color Key**  
-10 5  
Value  
**repressor activity, RNA polymerase II transcription regulatory region sequence-specific binding**

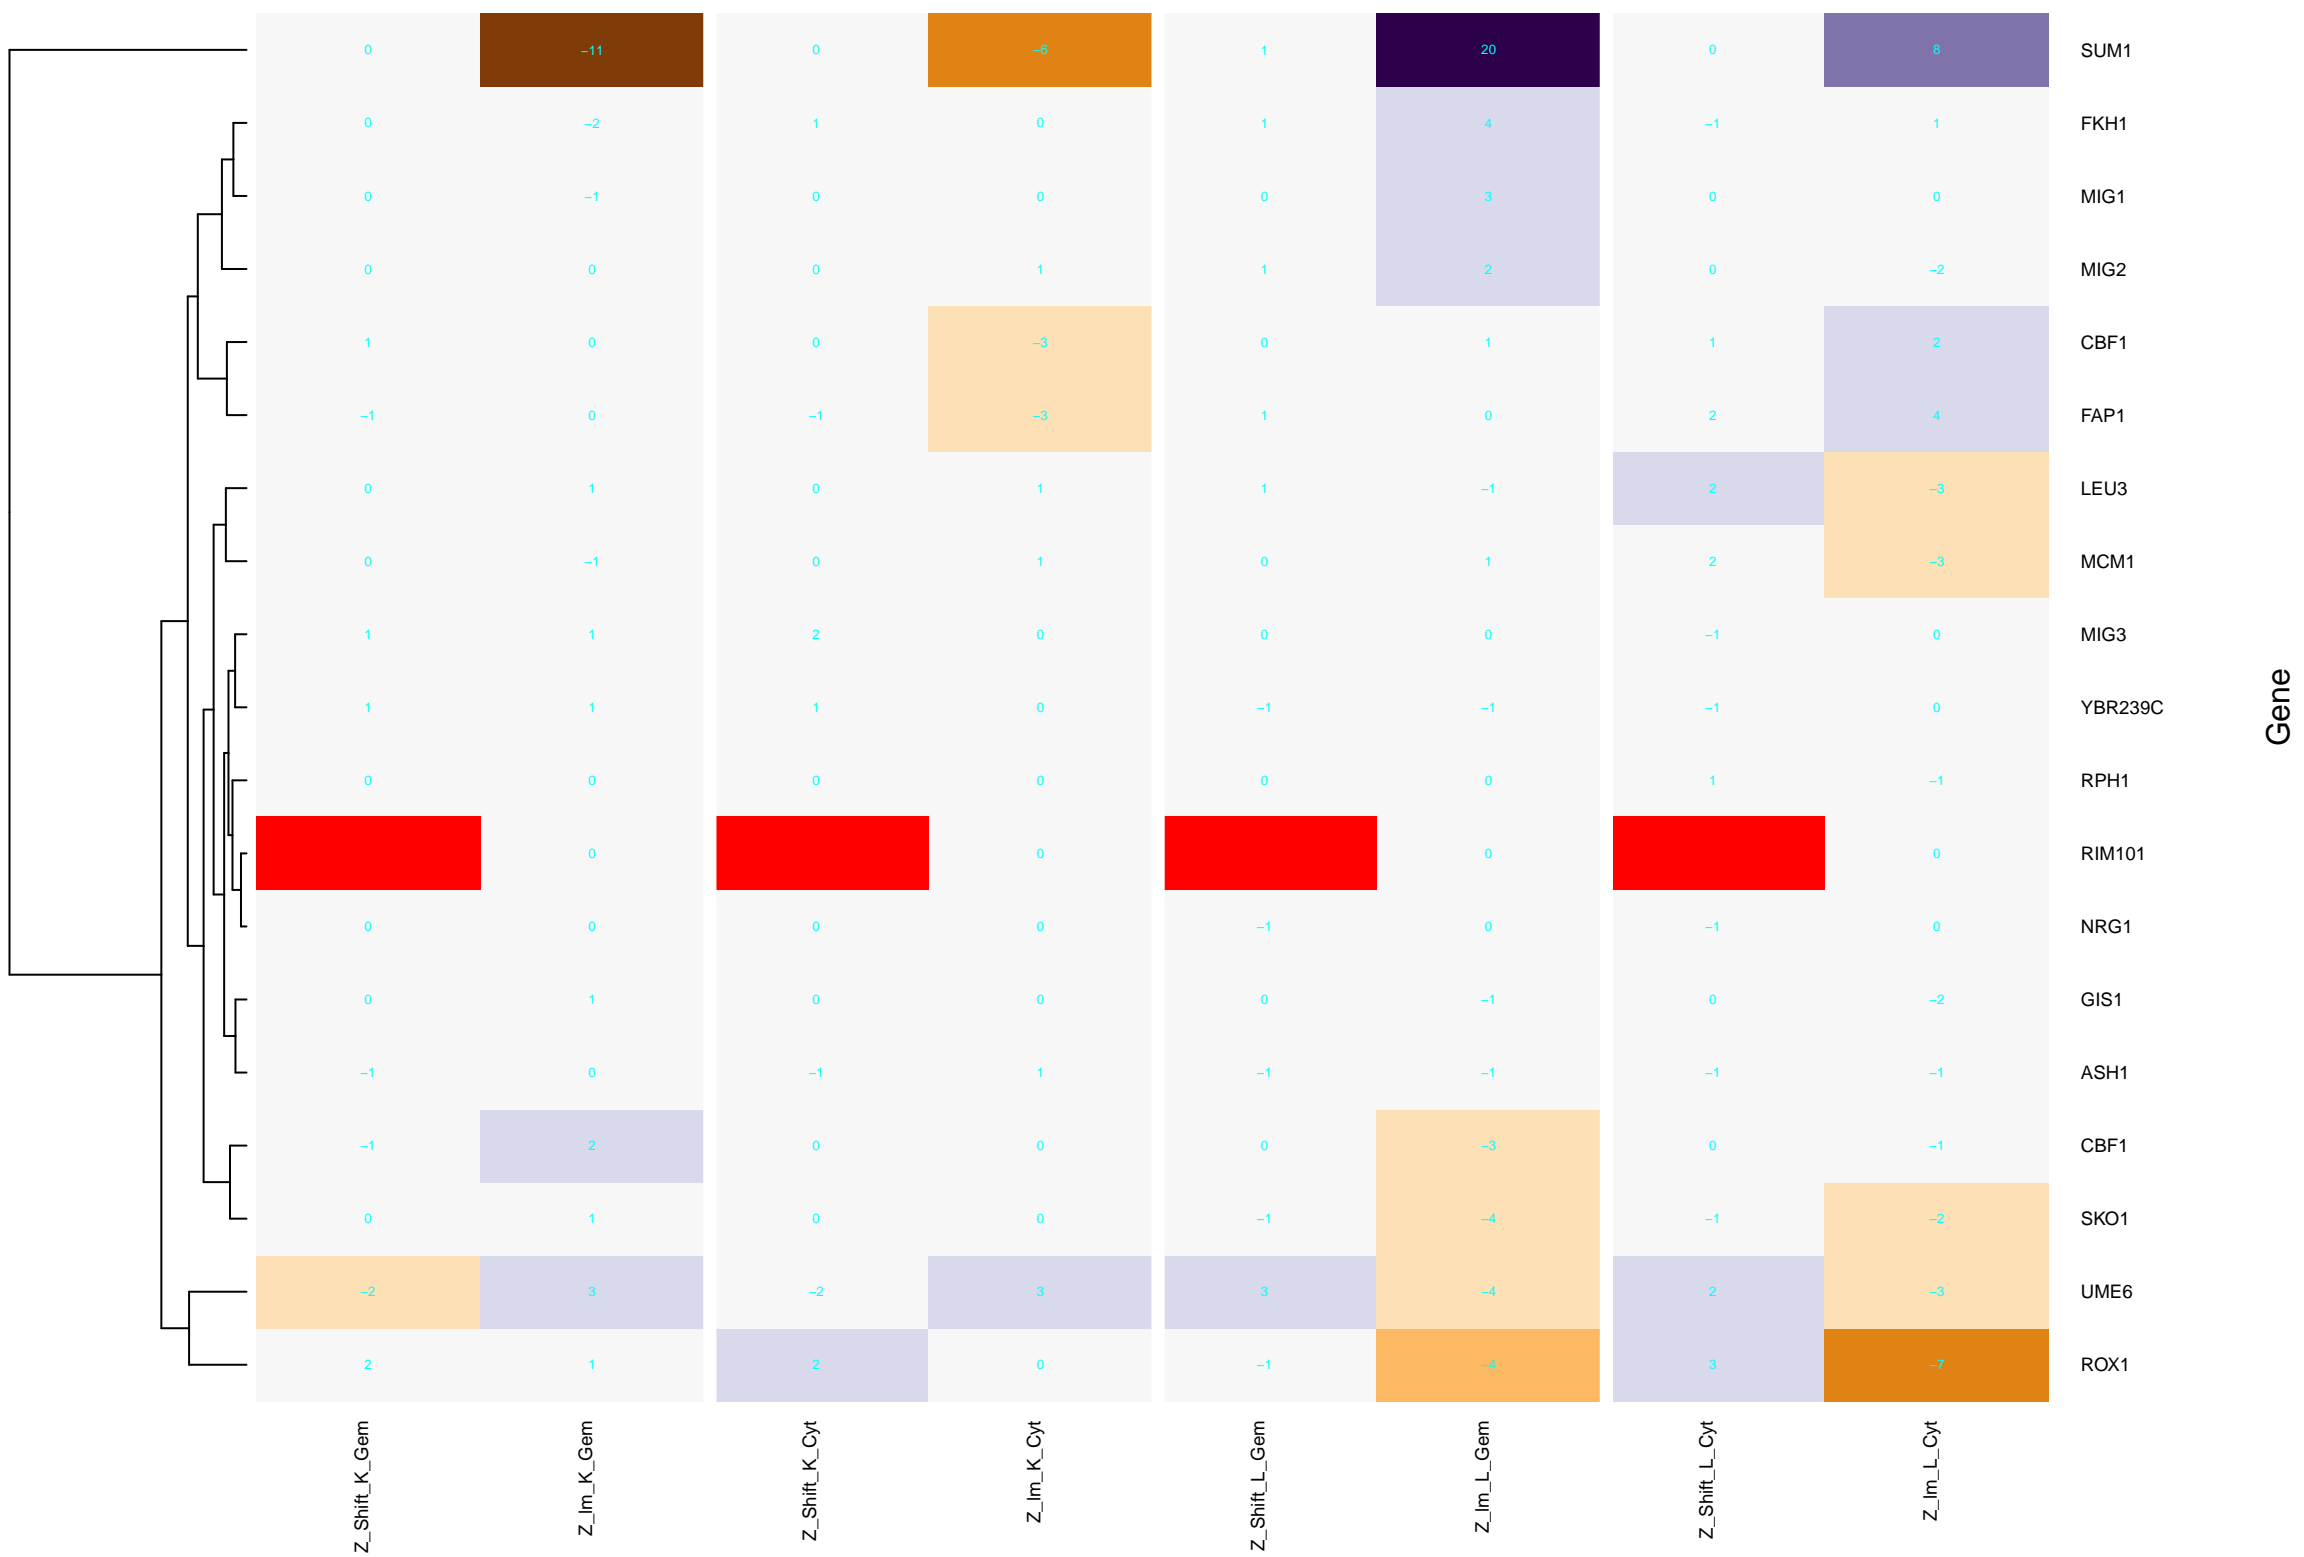

**Color Key**  
-10 5  
Value

**repressor activity, RNA polymerase II core promoter proximal region sequence-specific binding**



Supplement: s1 [file s1]
