# Supplementary material for: A Humanized Yeast Phenomic Model of Deoxycytidine Kinase to Predict Genetic Buffering of Nucleoside Analog Cytotoxicity
Source: MDPI journal article supplement (doi:10.3390/genes10100770), 2019-09-30

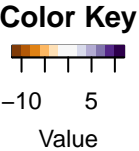

**transport vesicle membrane**

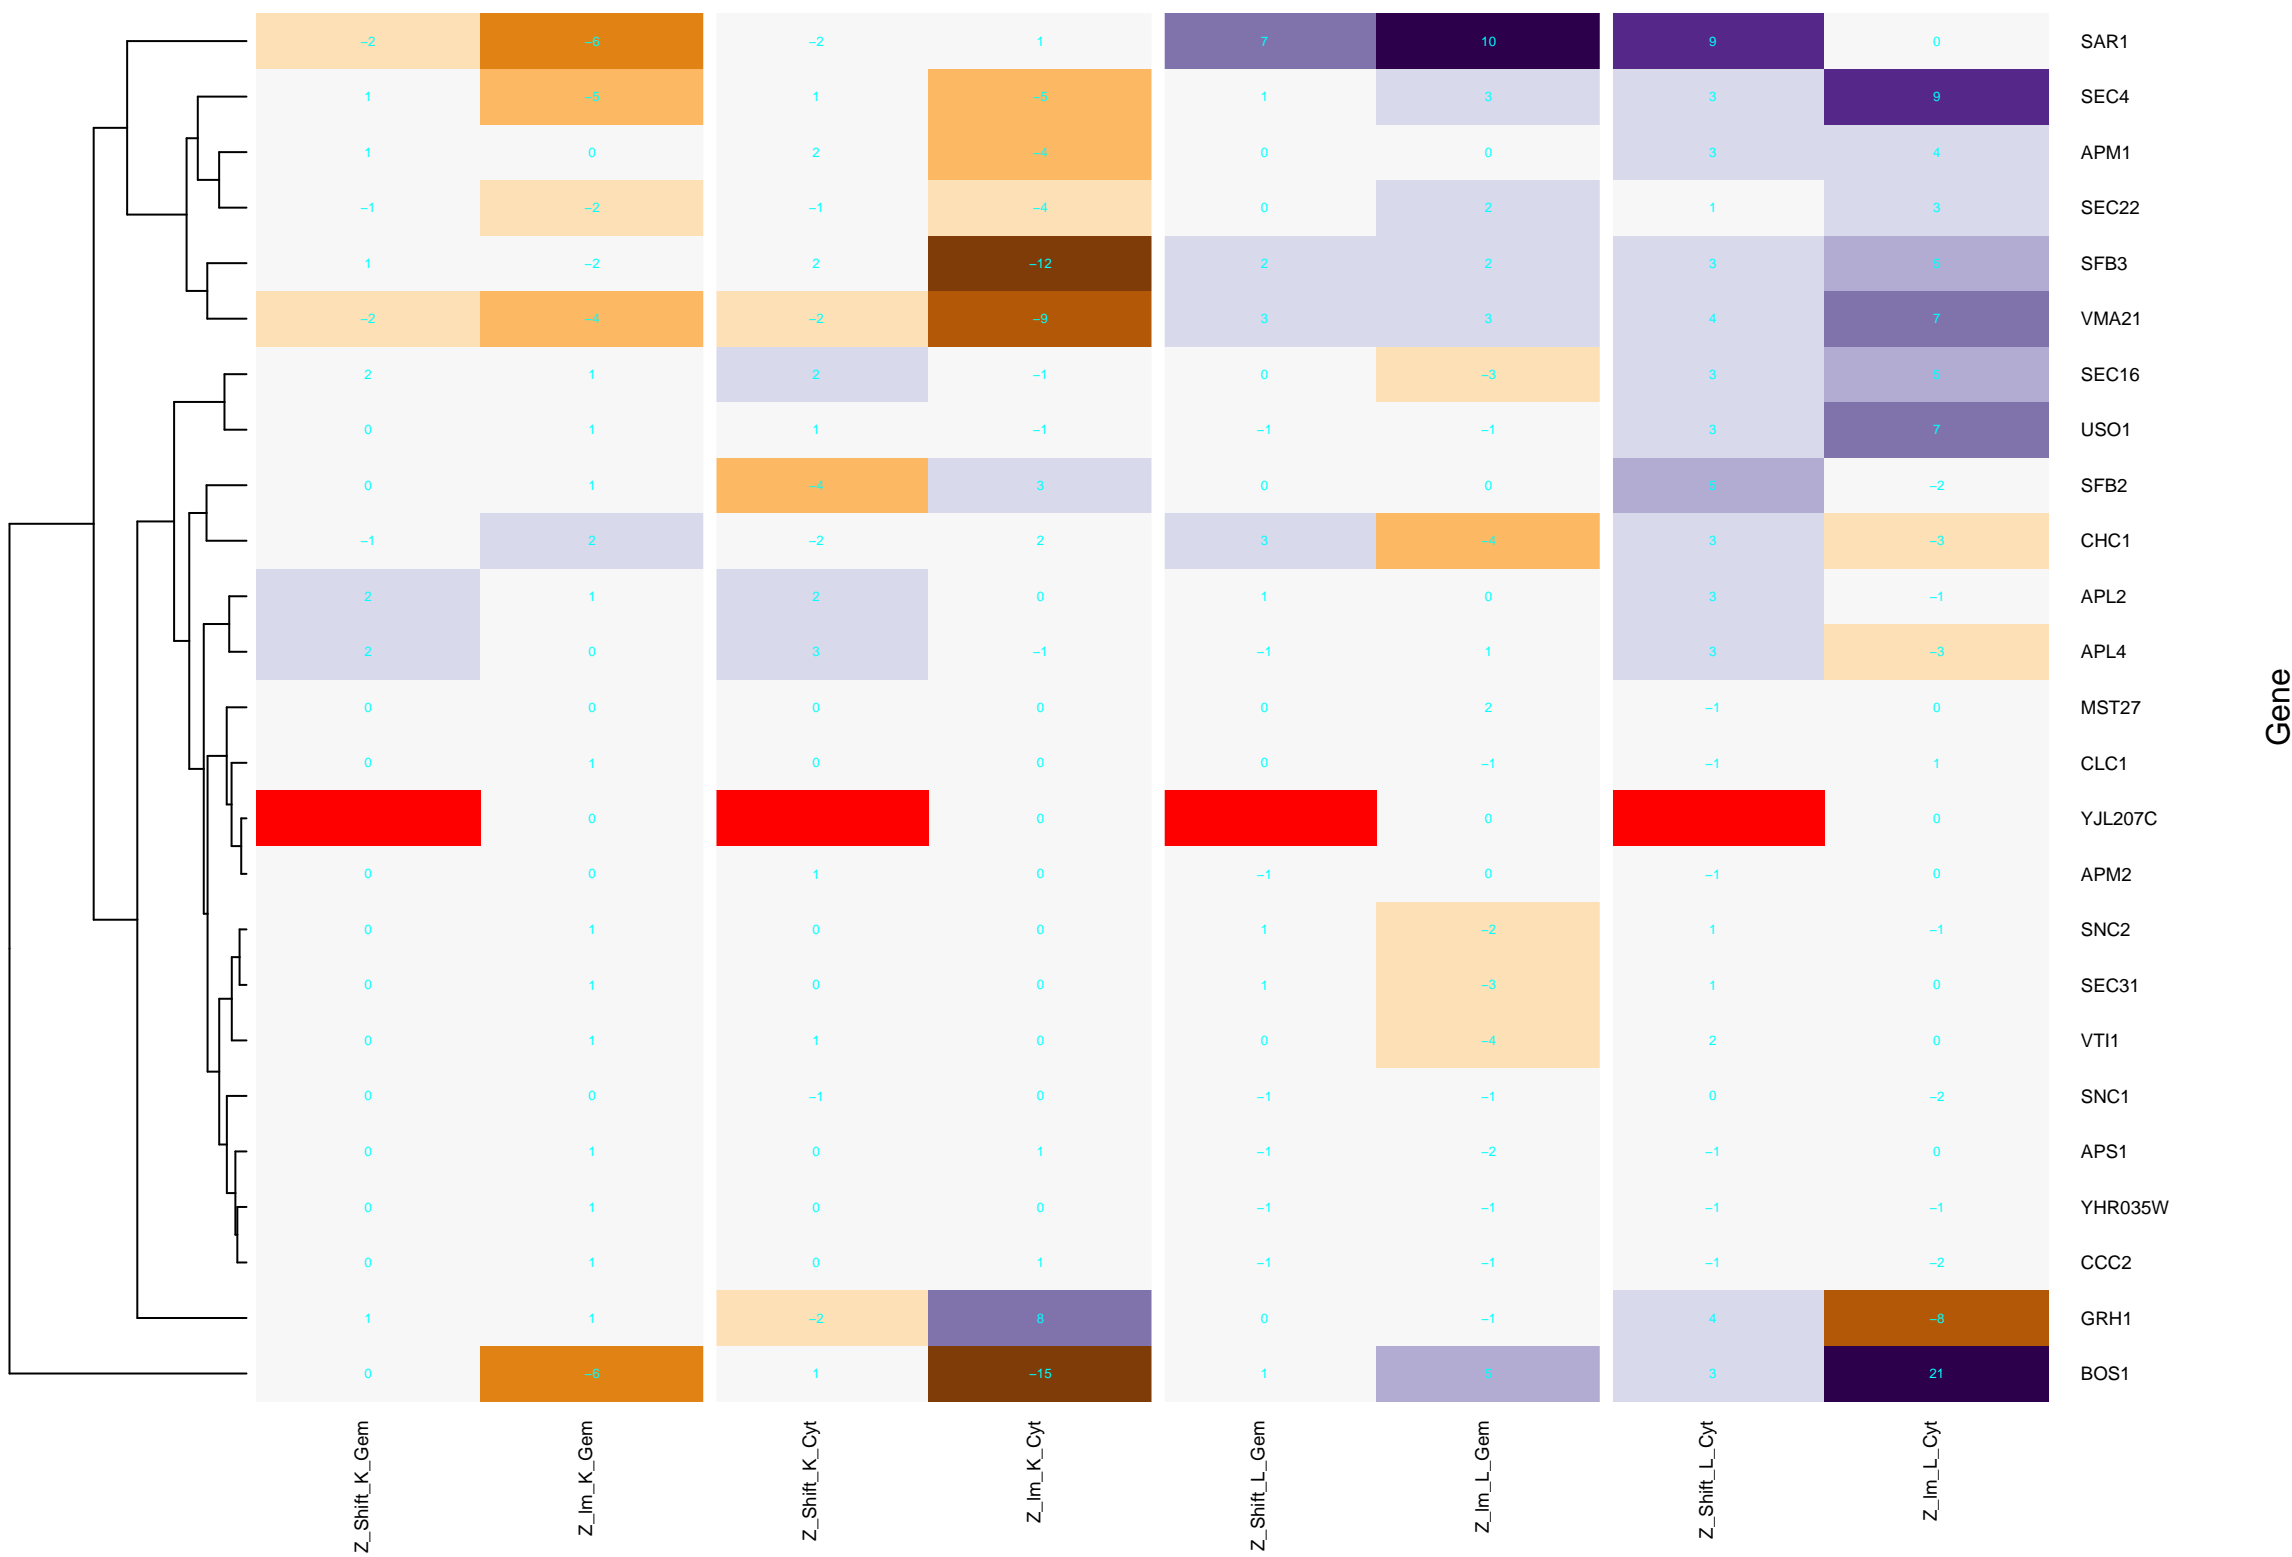

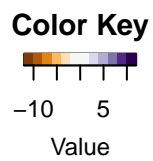

# ER to Golgi transport vesicle membrane

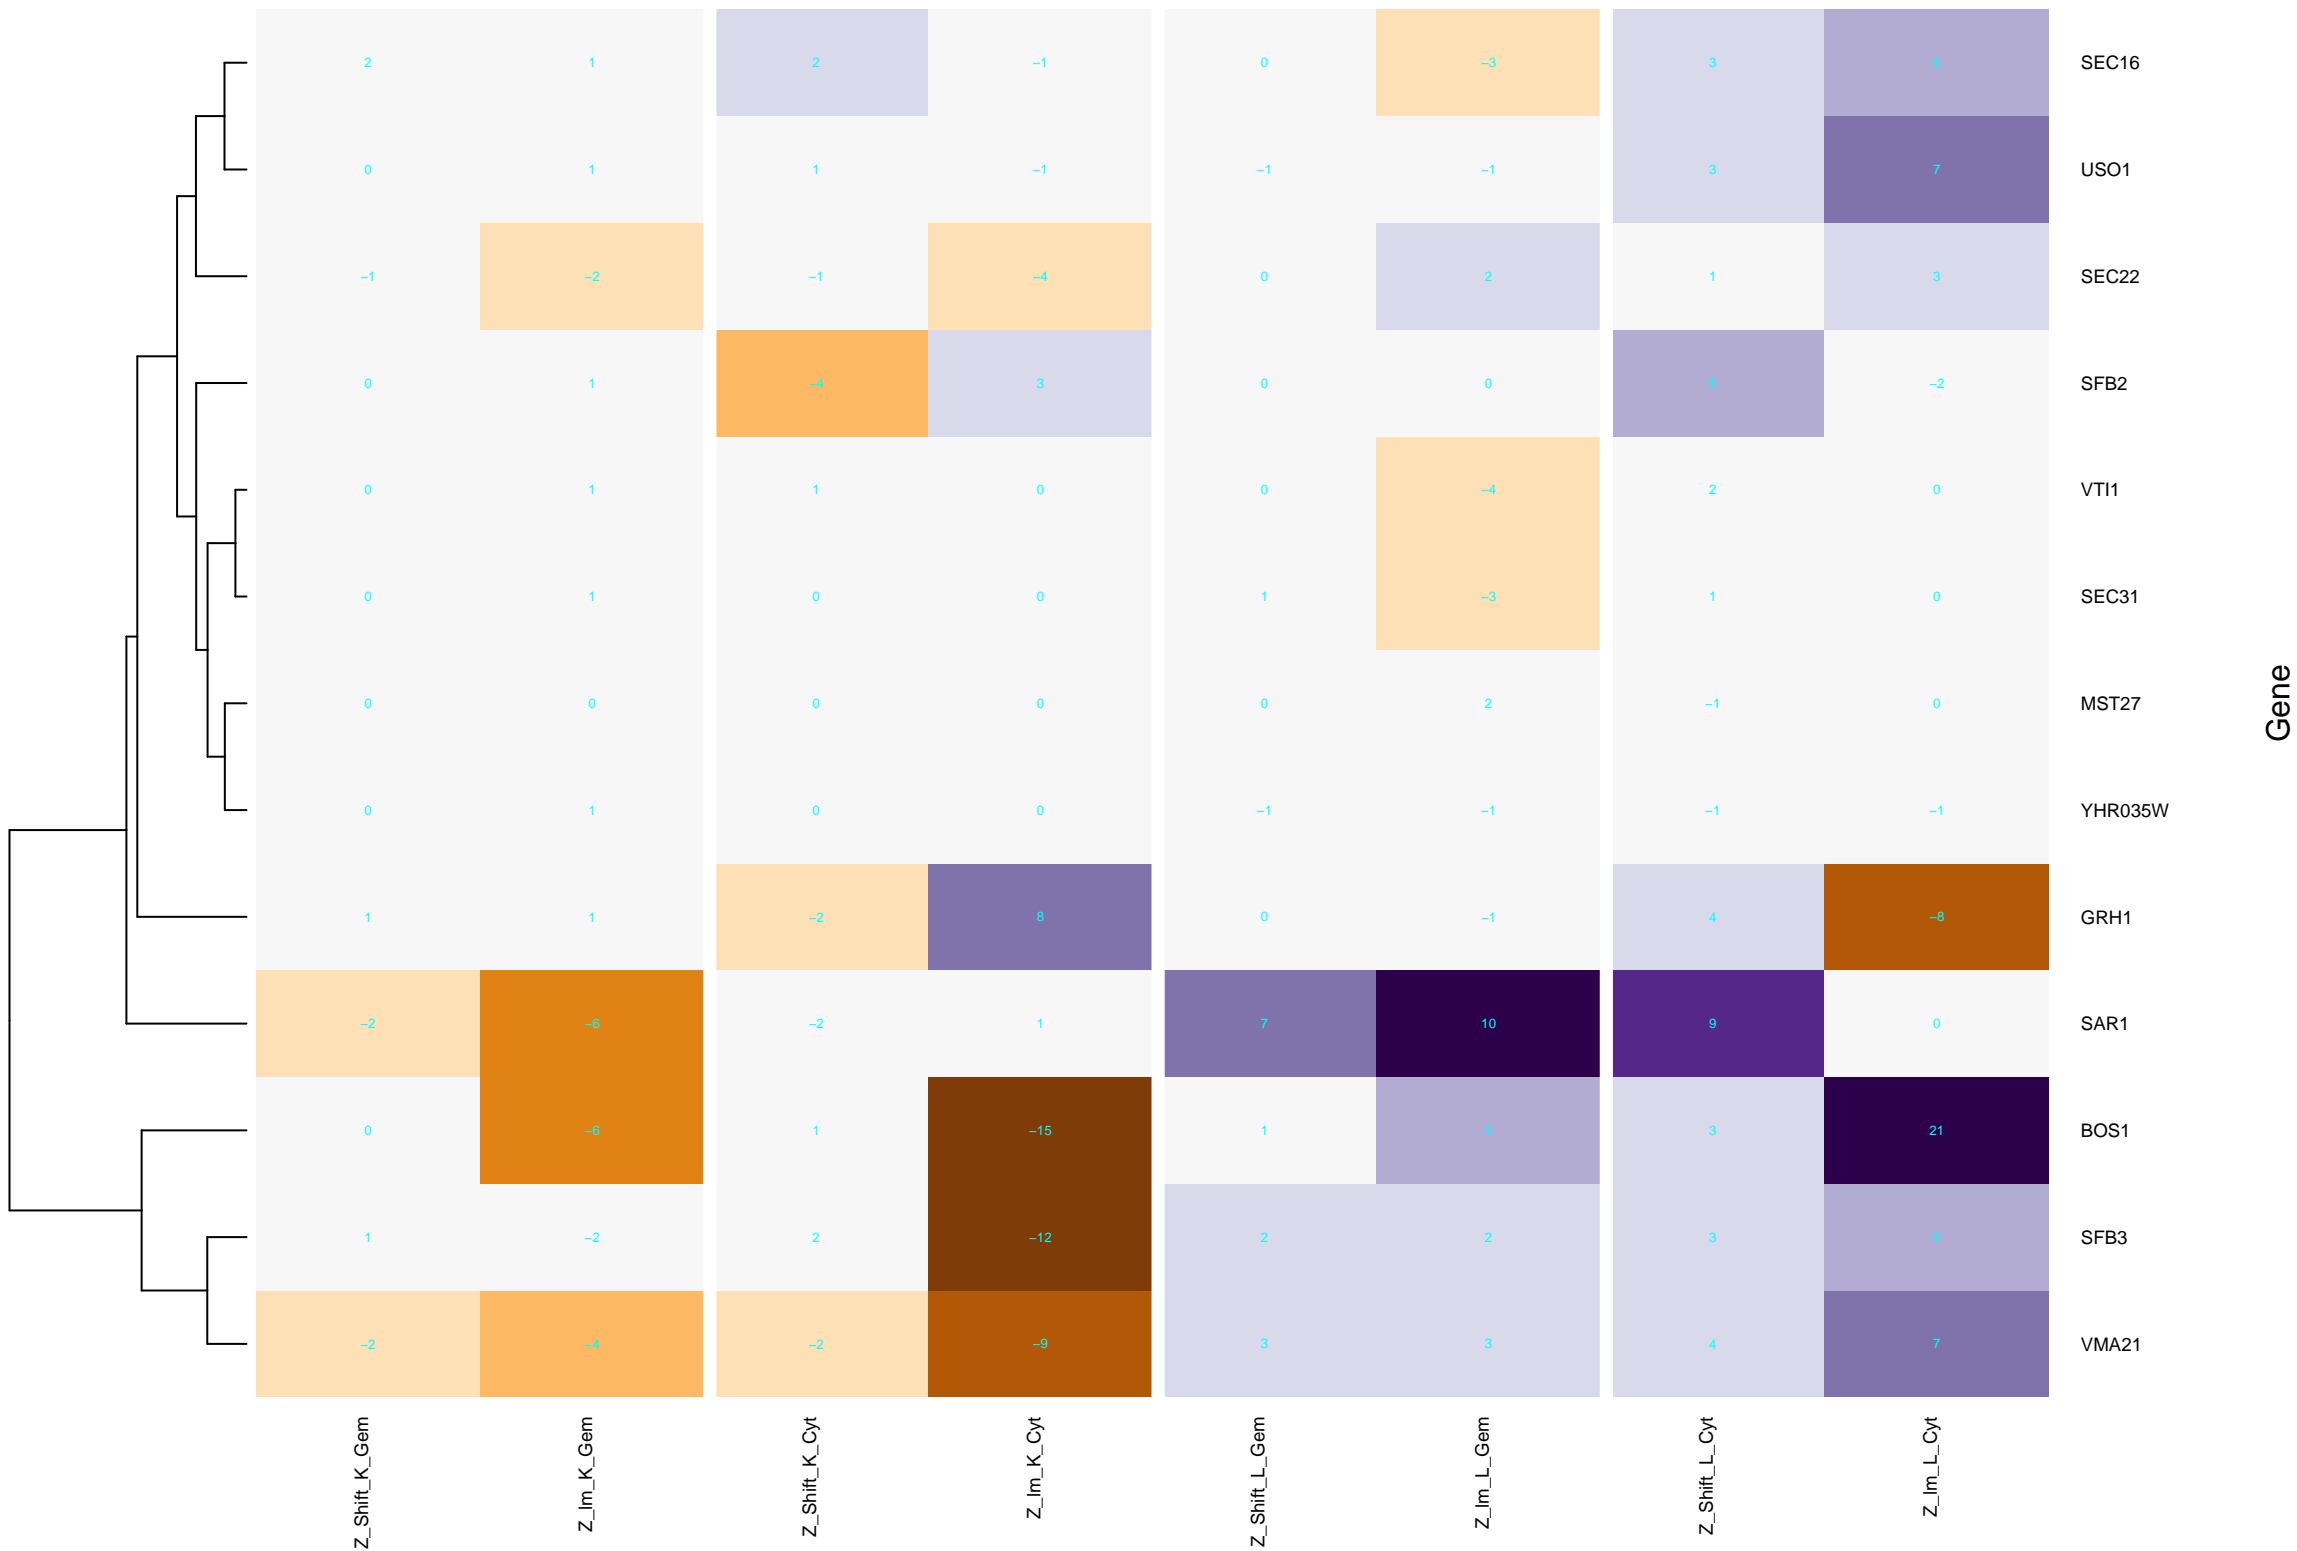

Color Key

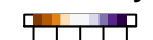

-10

5

Value

## trans-Golgi network transport vesicle membrane

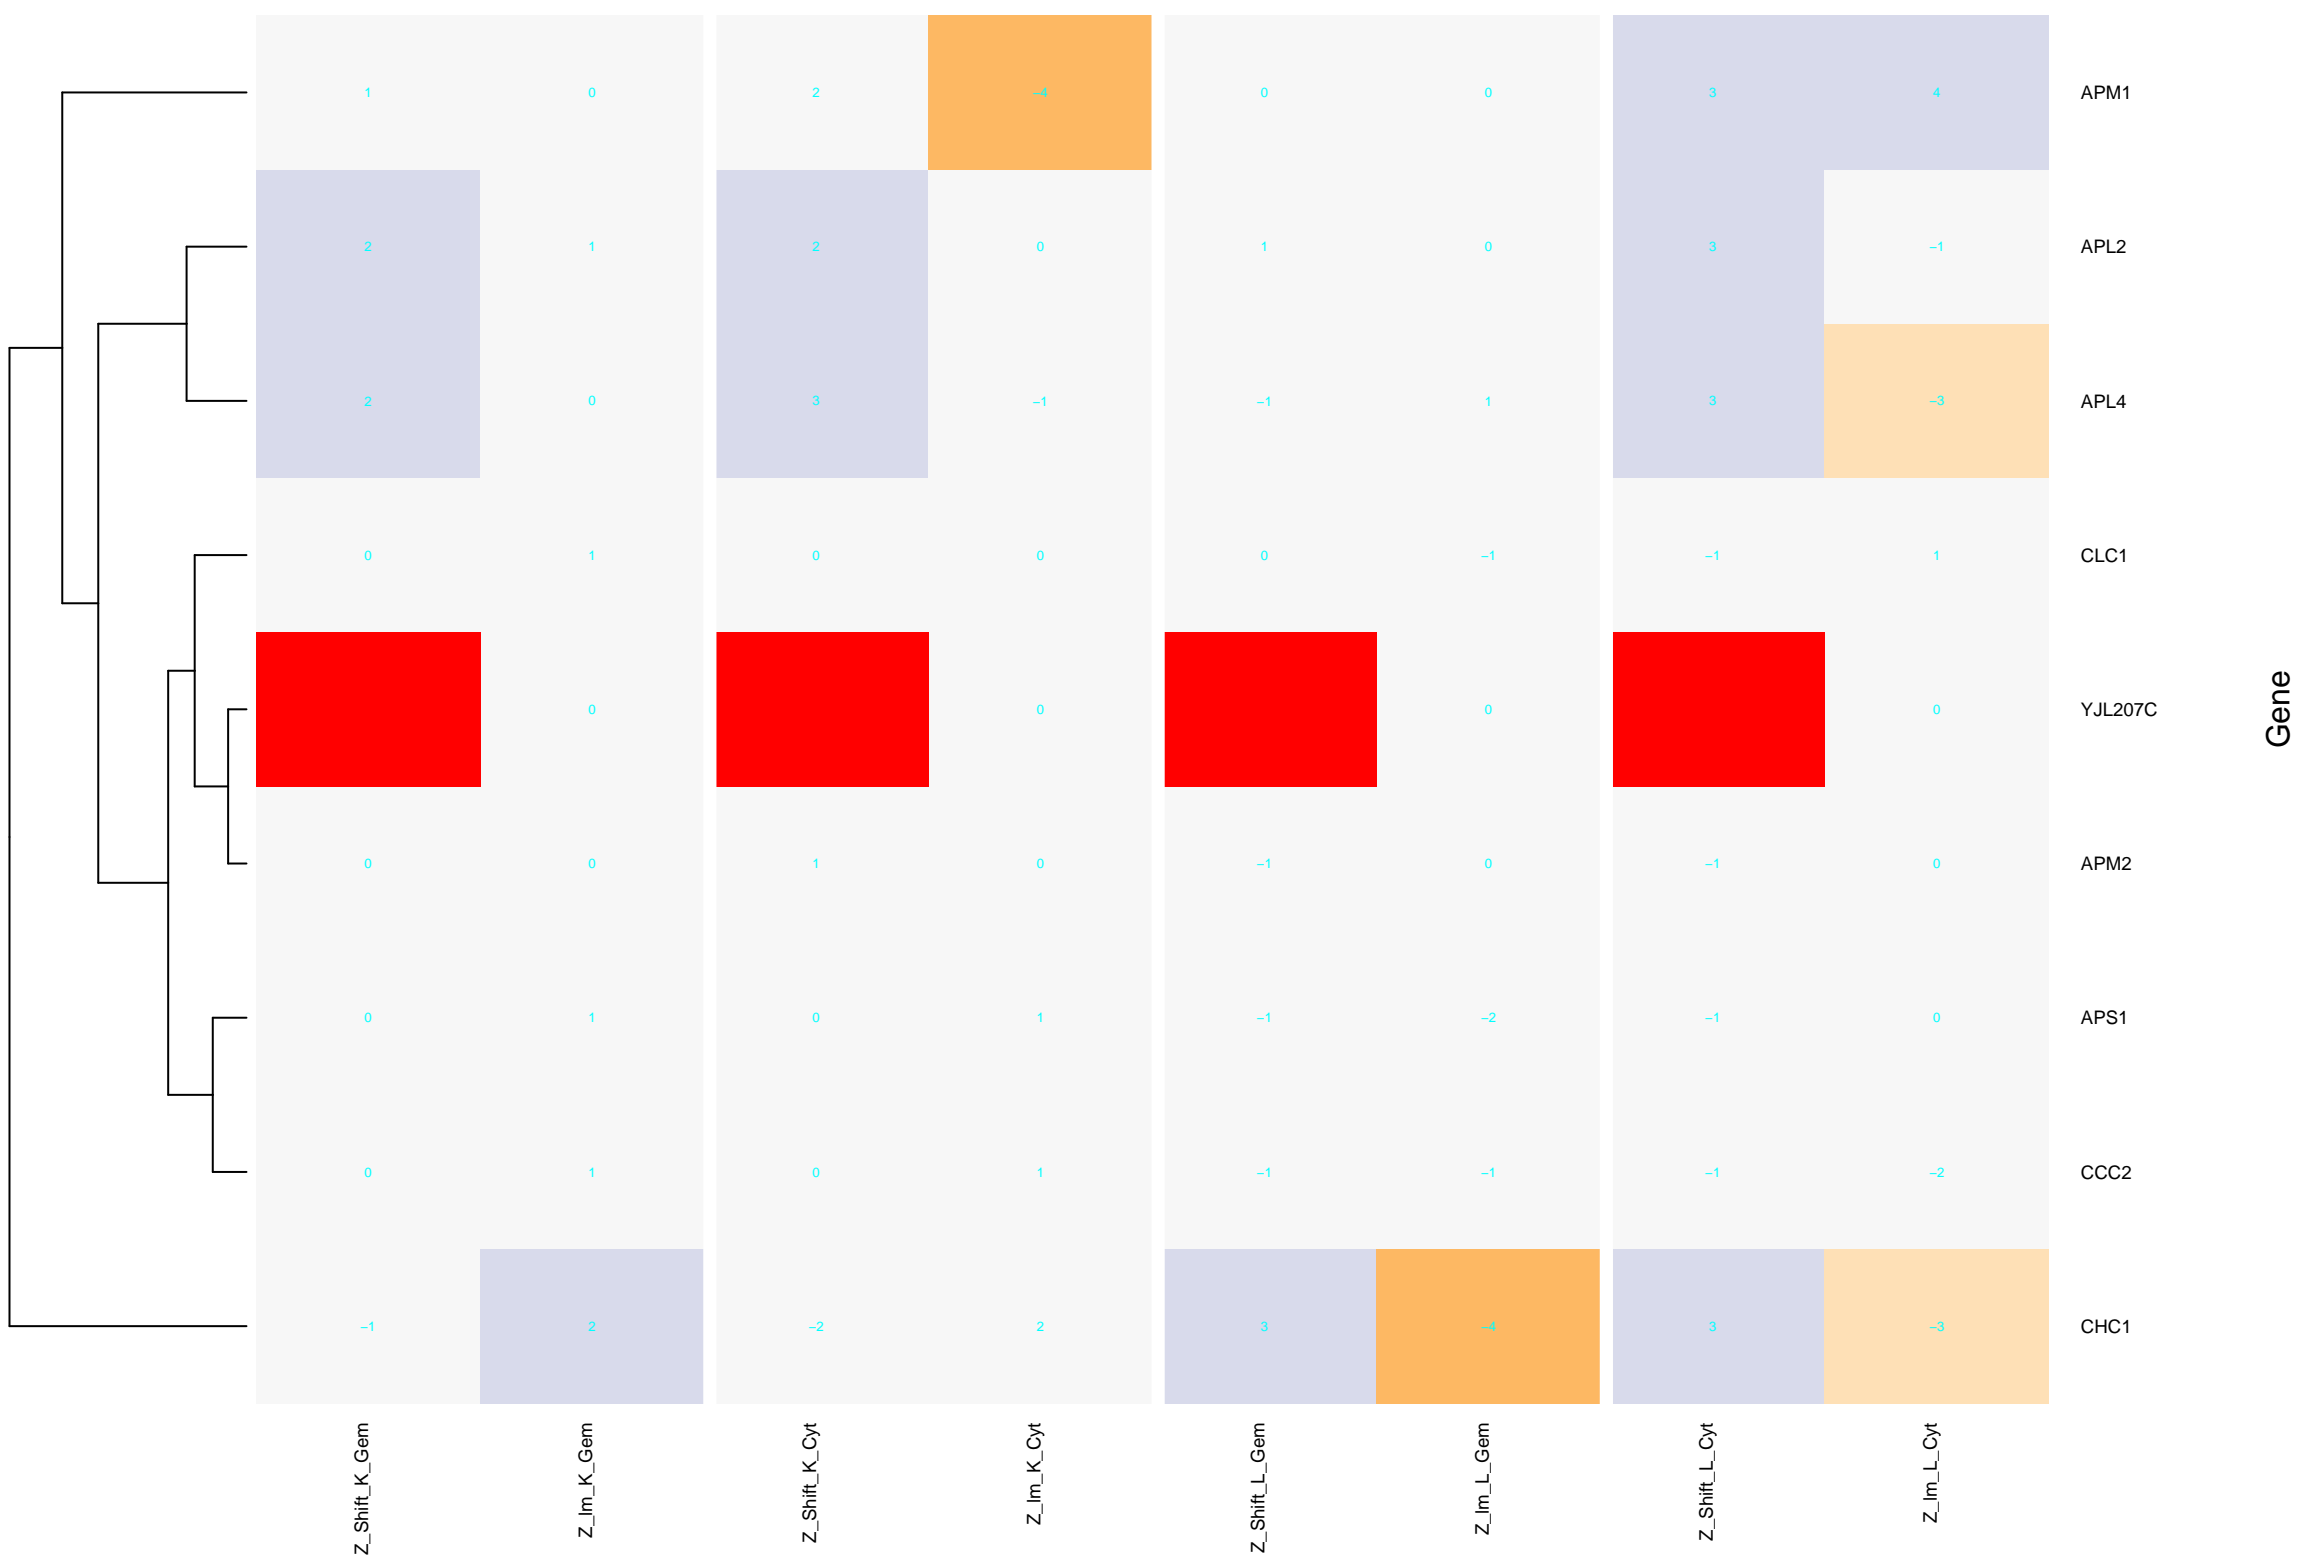

Supplement: s1 [file s1]
