# Supplementary material for: A Humanized Yeast Phenomic Model of Deoxycytidine Kinase to Predict Genetic Buffering of Nucleoside Analog Cytotoxicity
Source: MDPI journal article supplement (doi:10.3390/genes10100770), 2019-09-30
Supplement: s1 [file s1]

## RNA polymerase II transcription factor complex

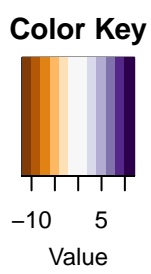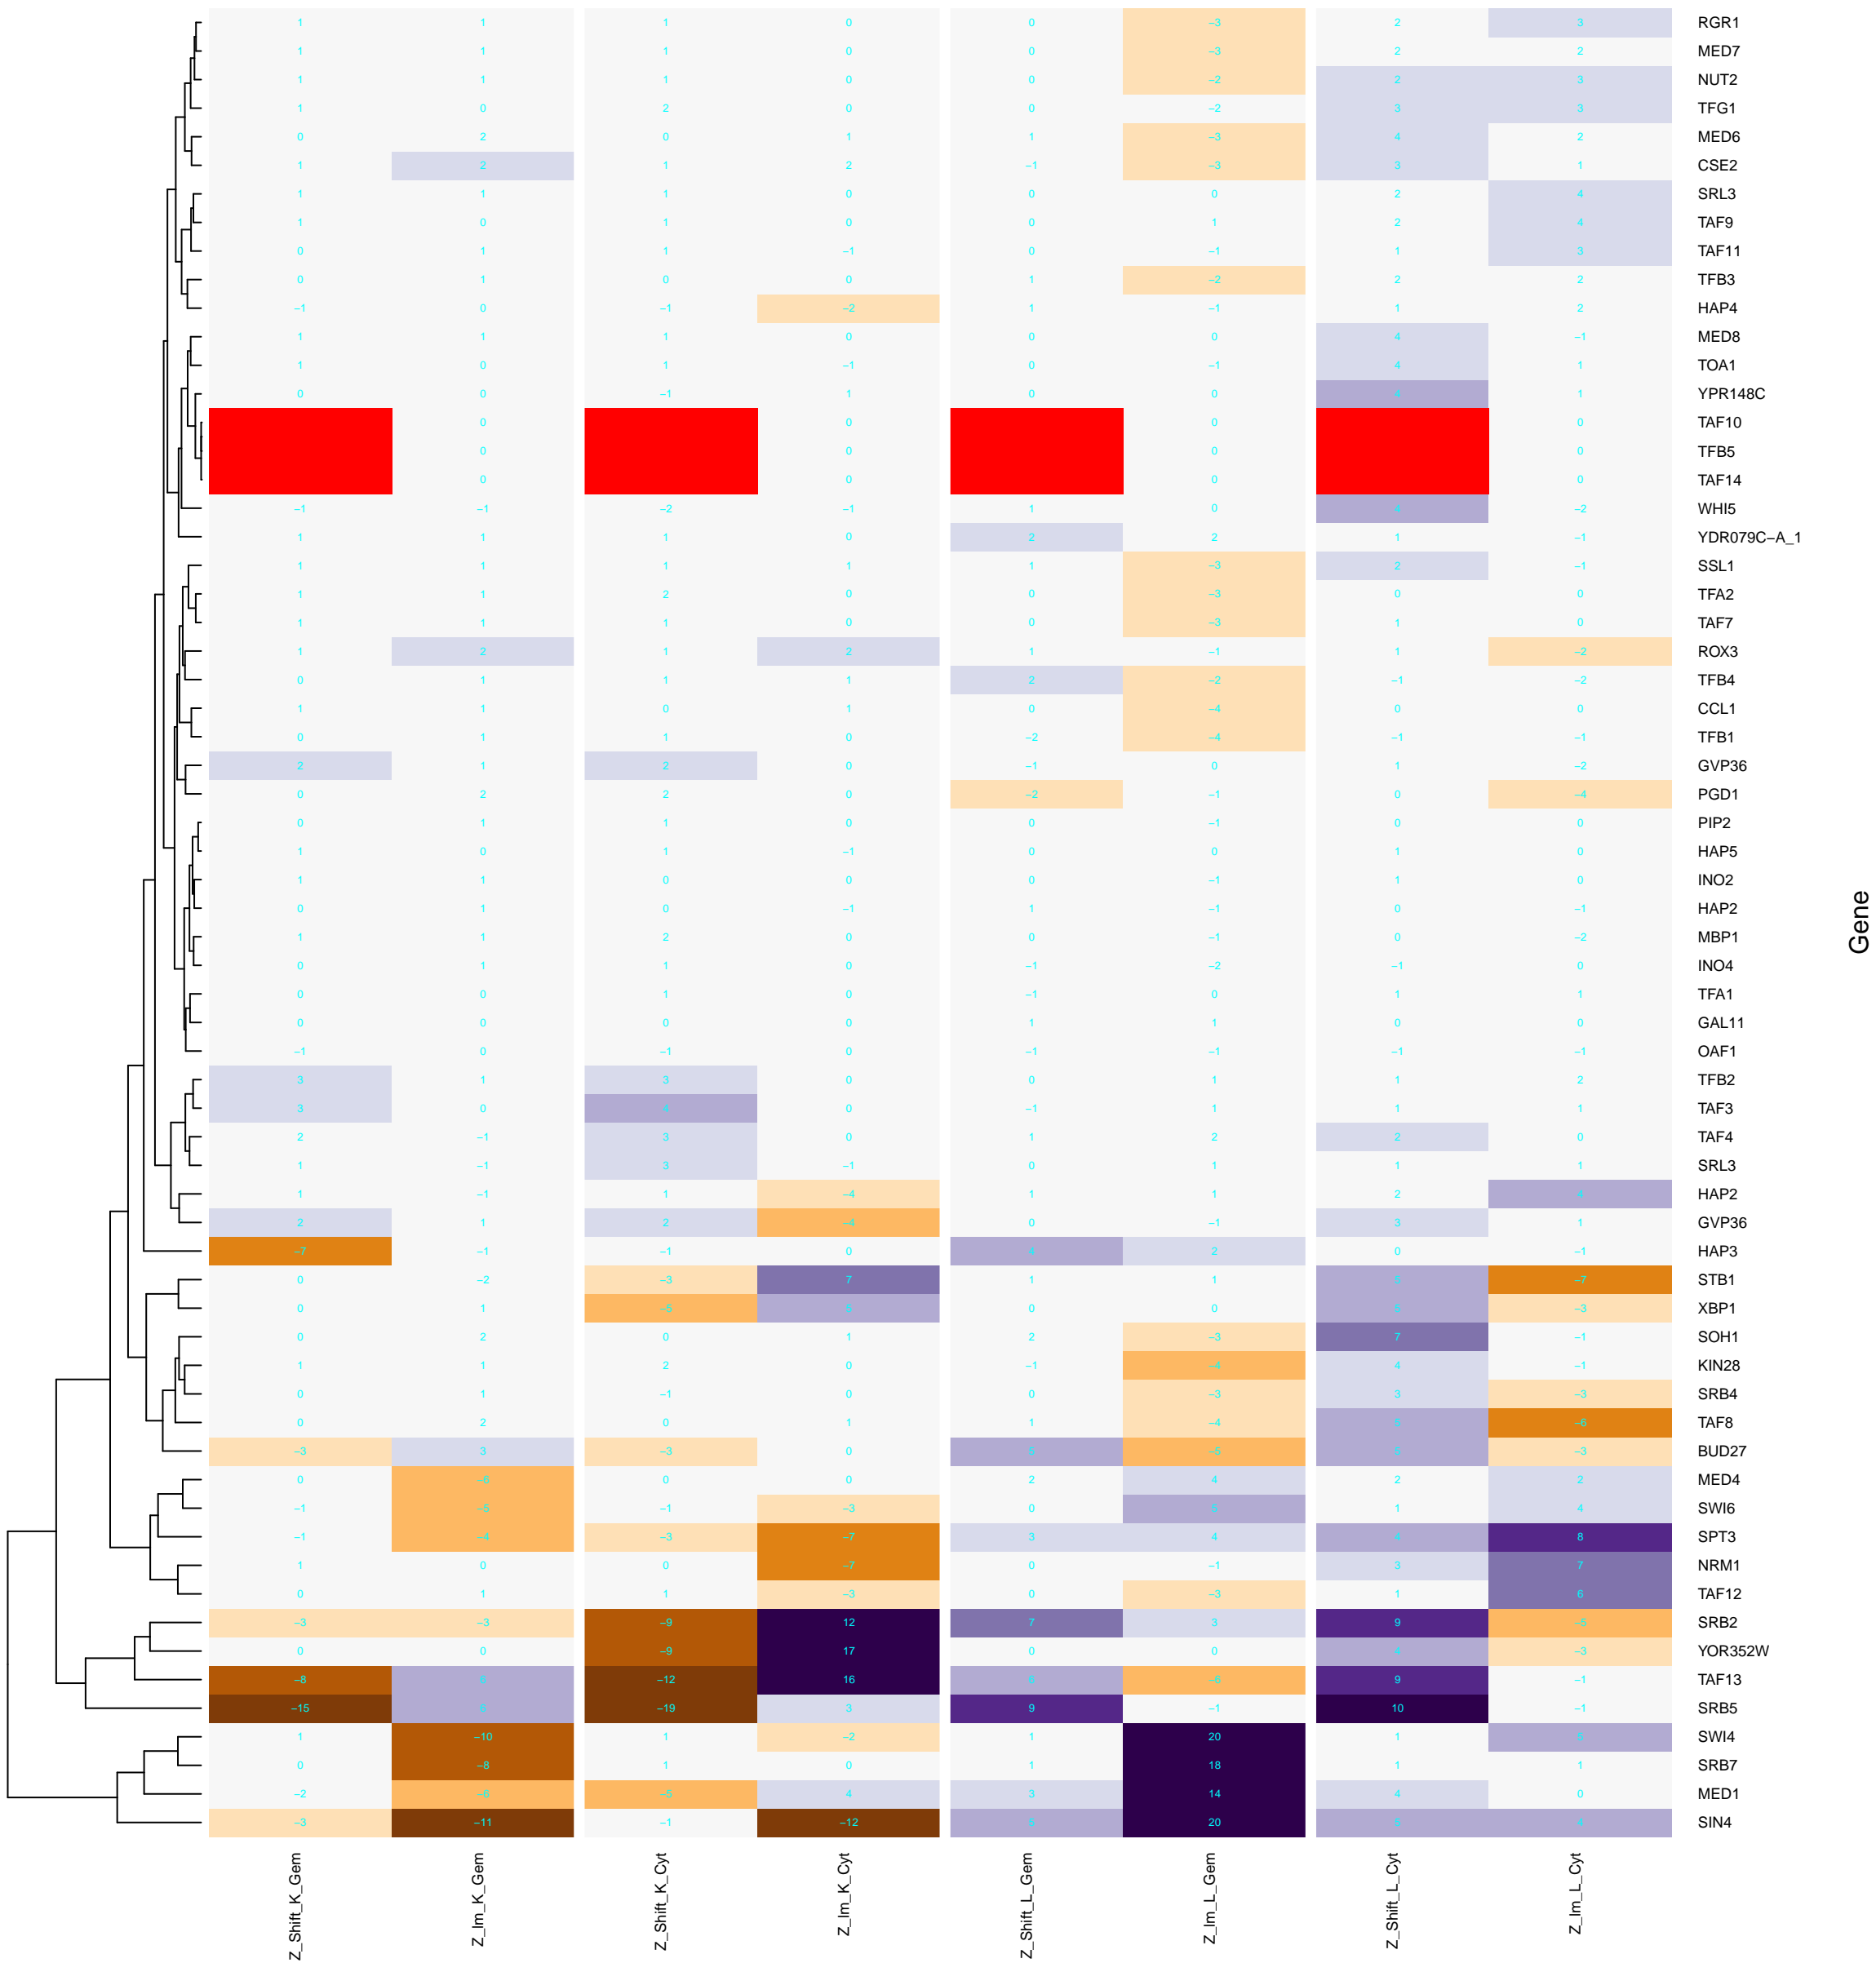

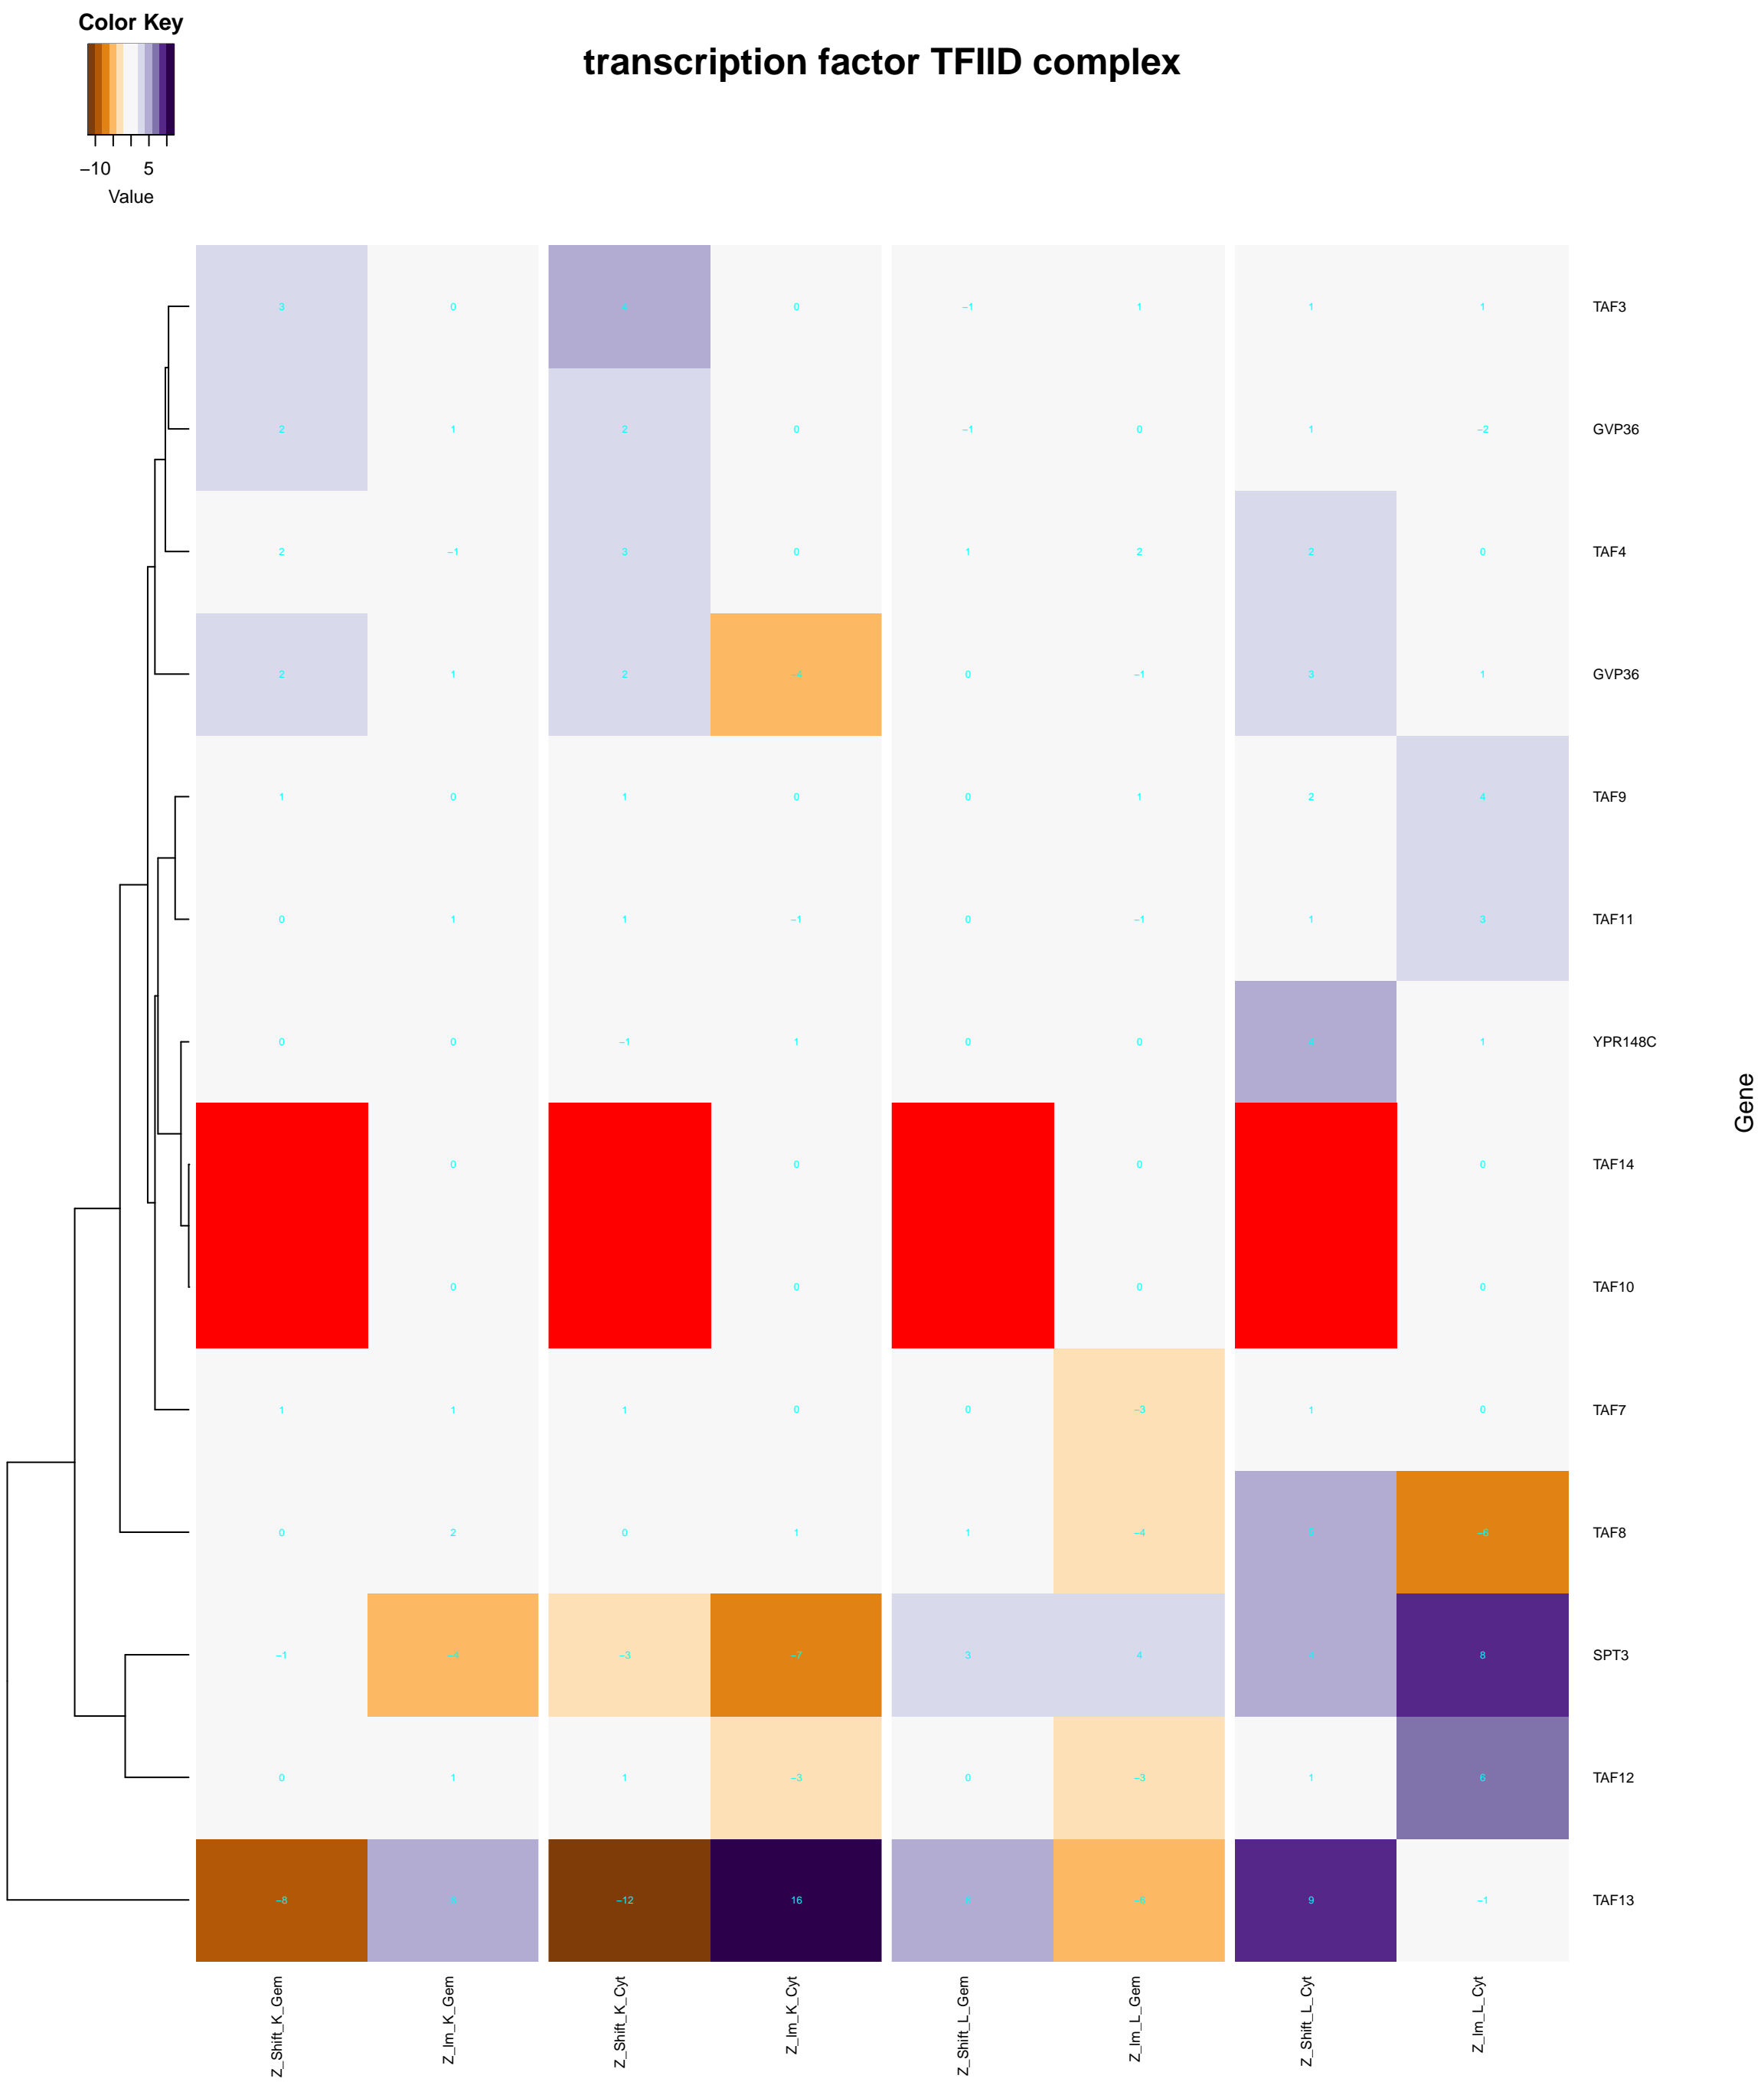

# holo TFIID complex

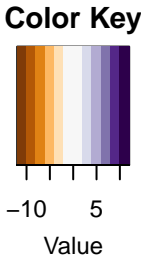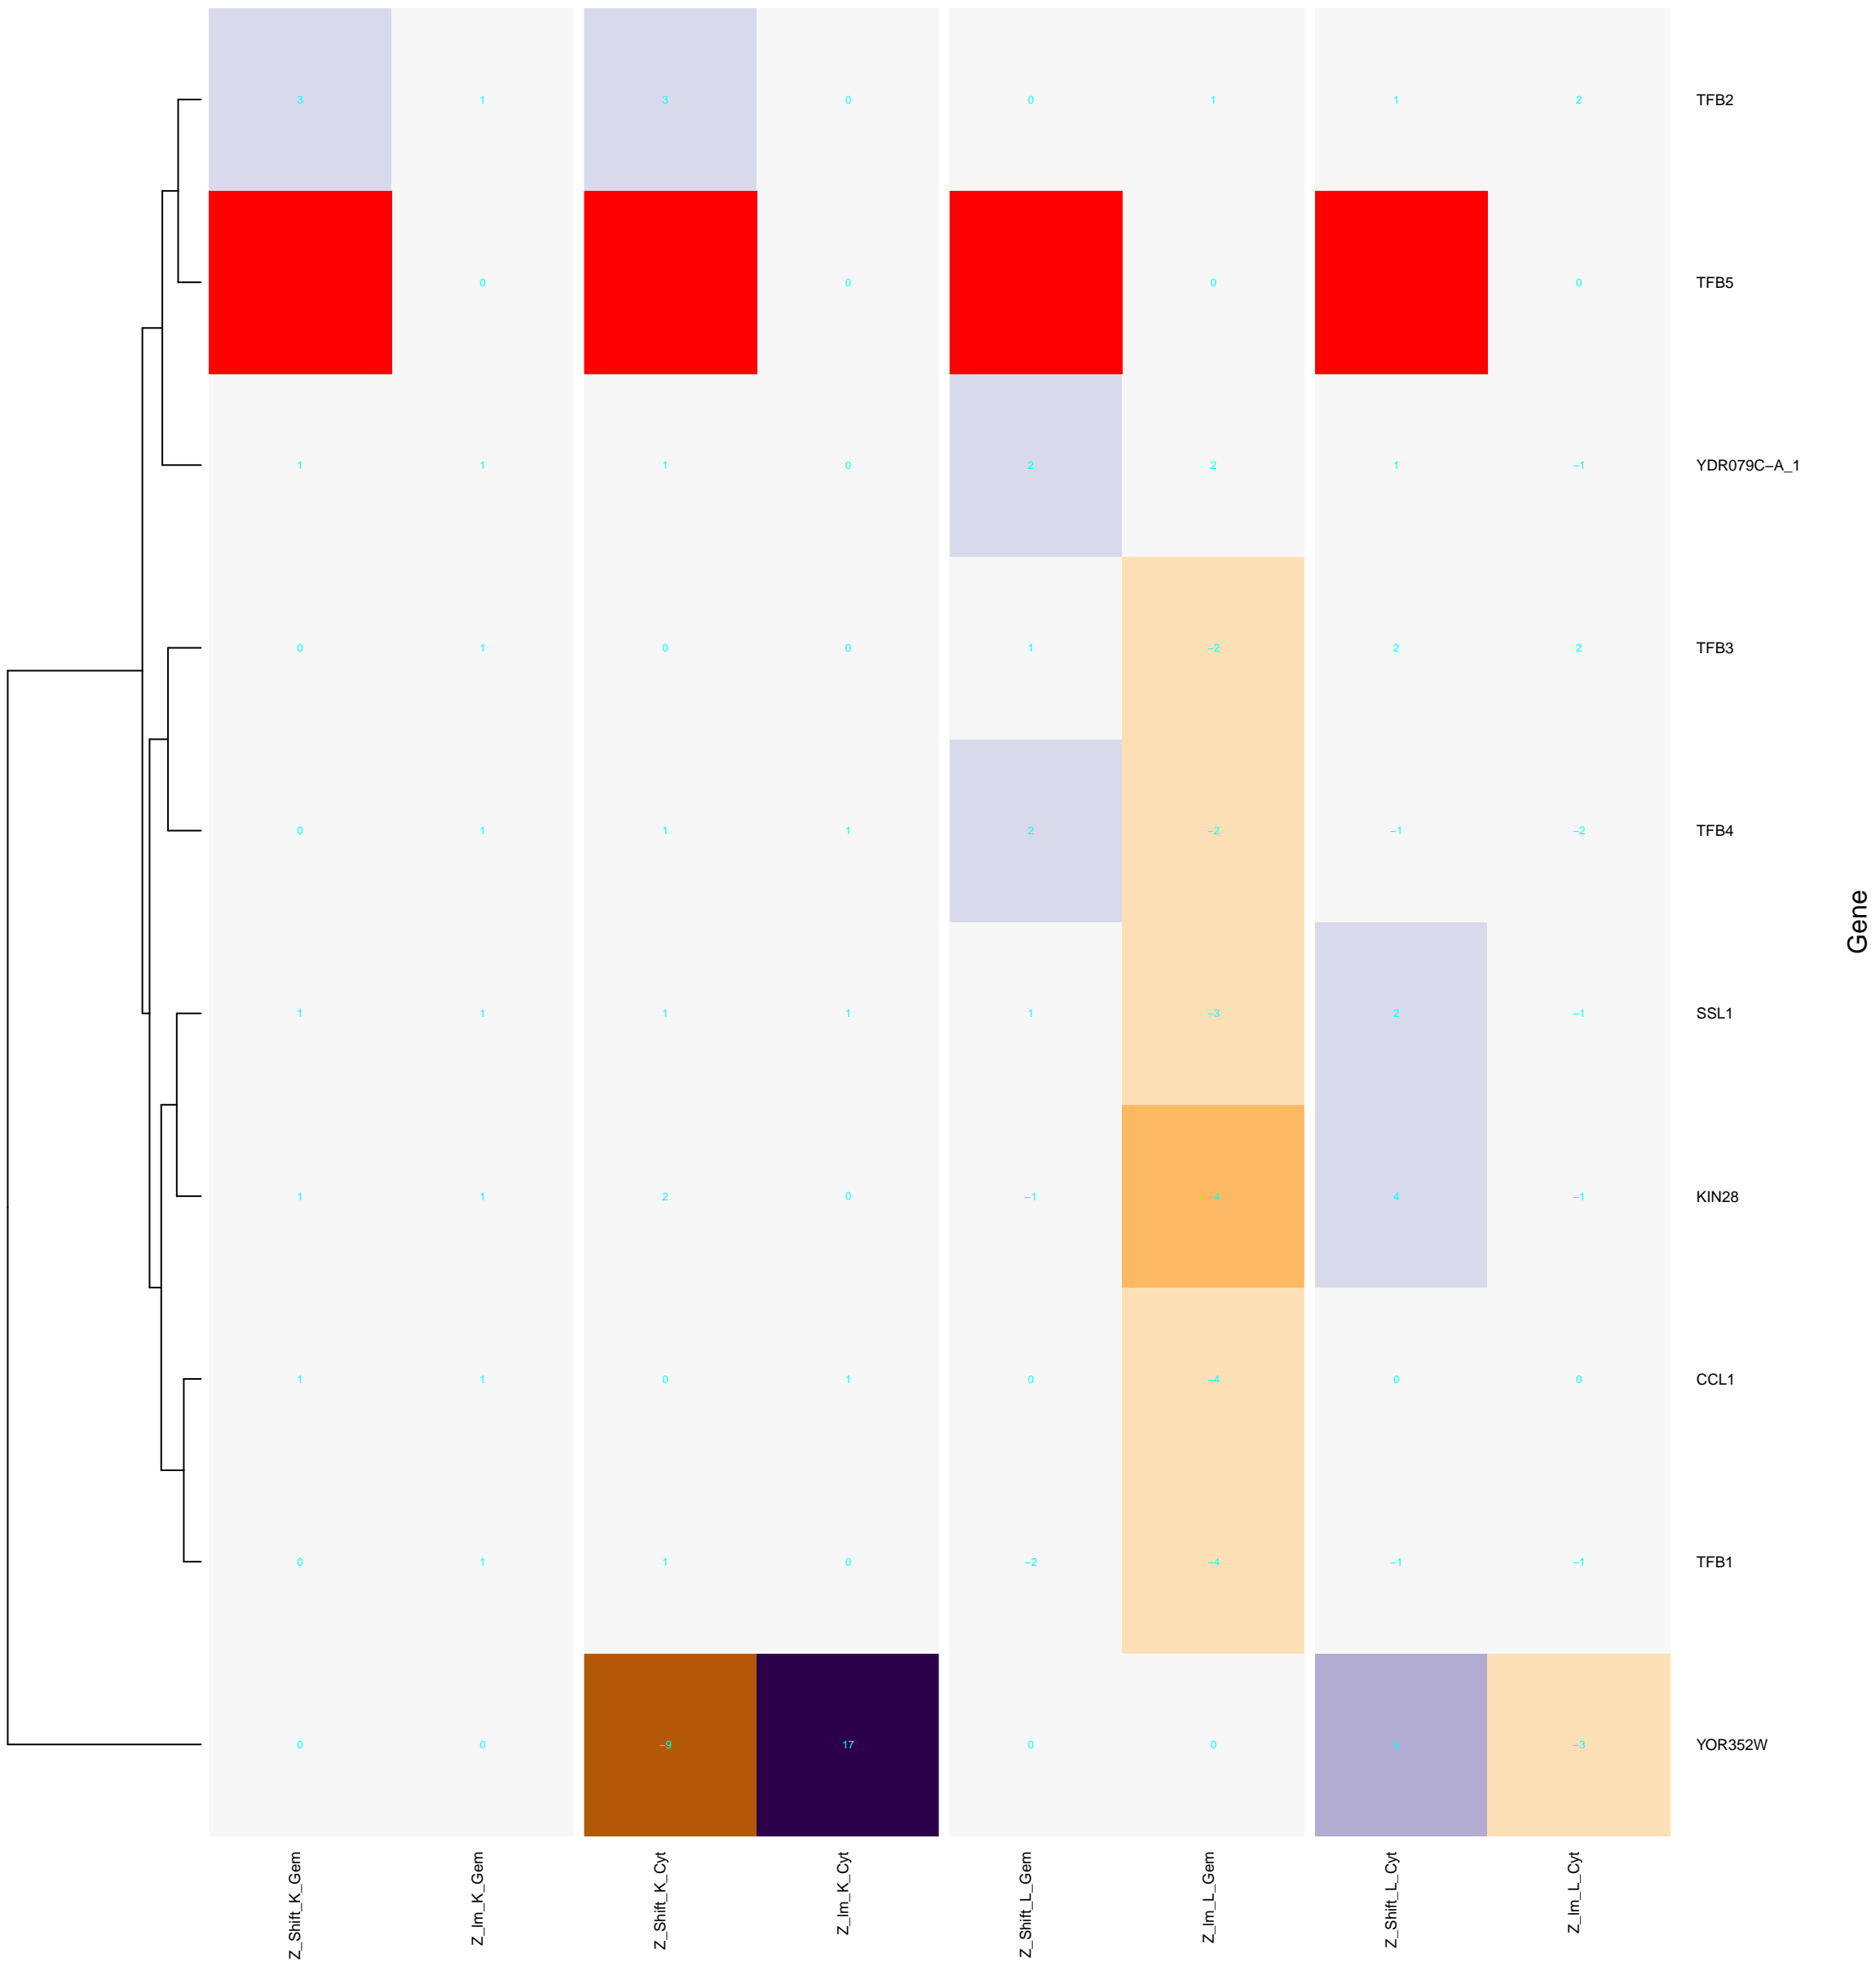

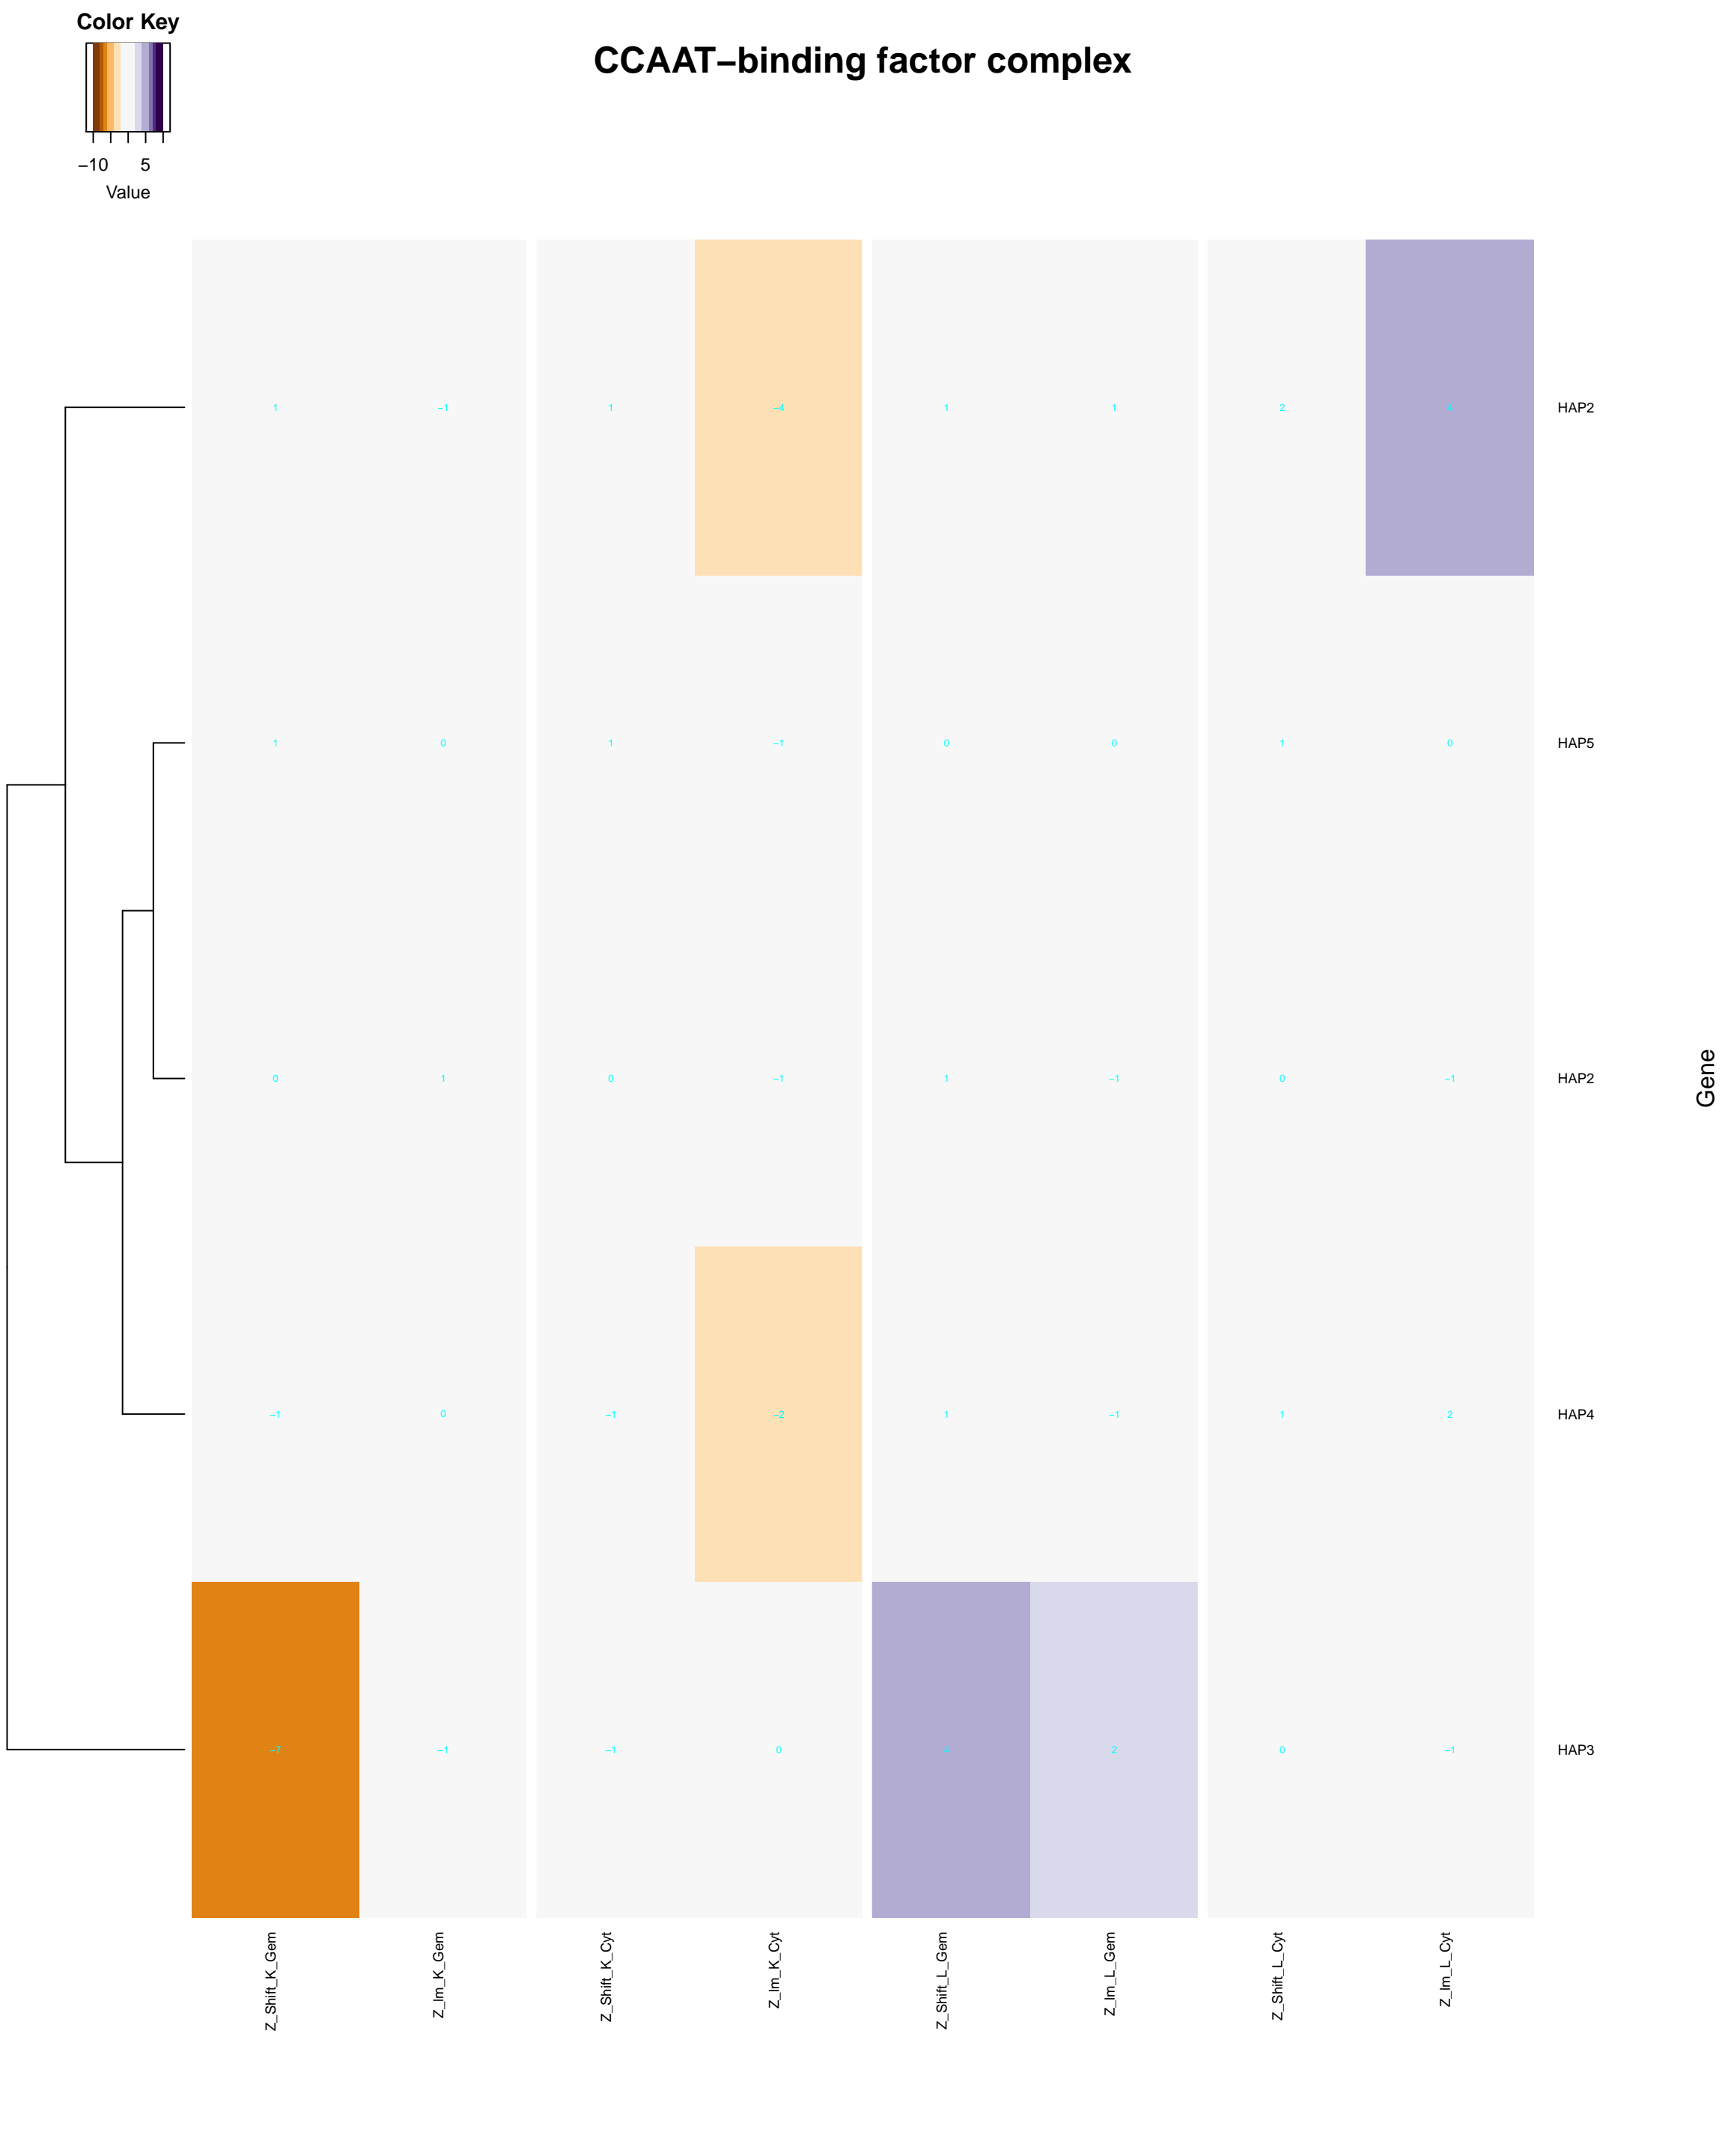

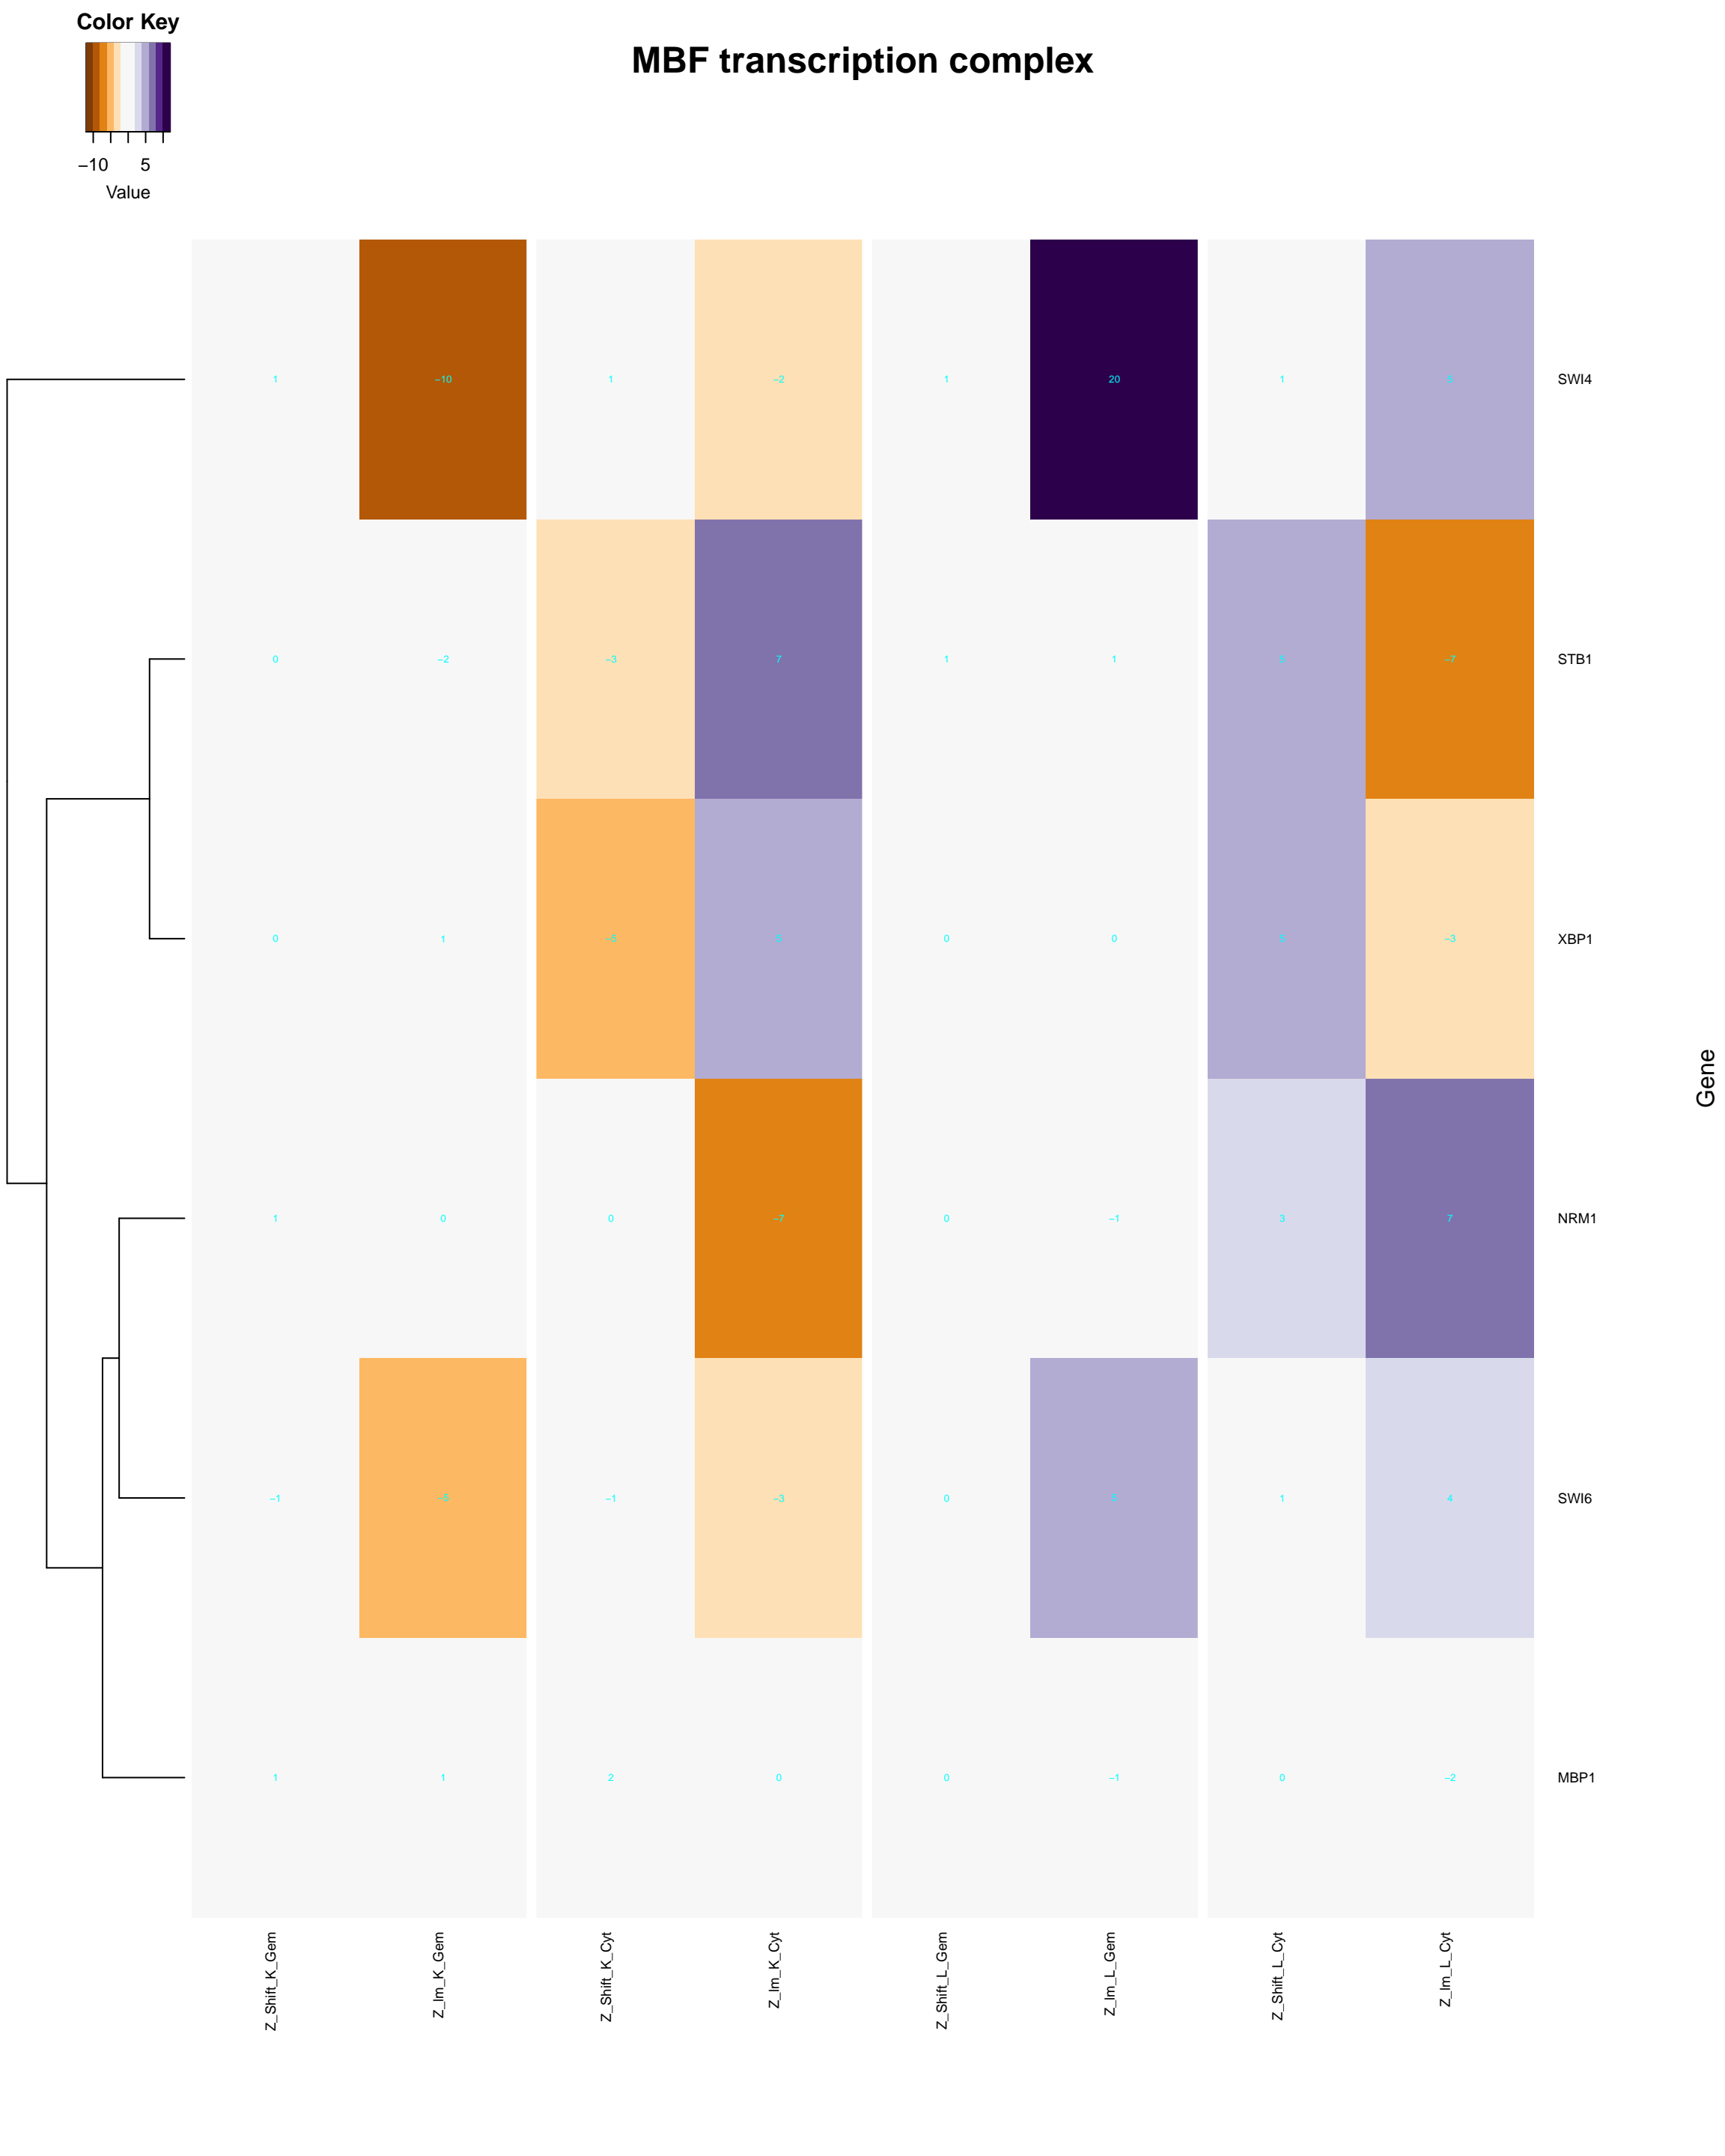

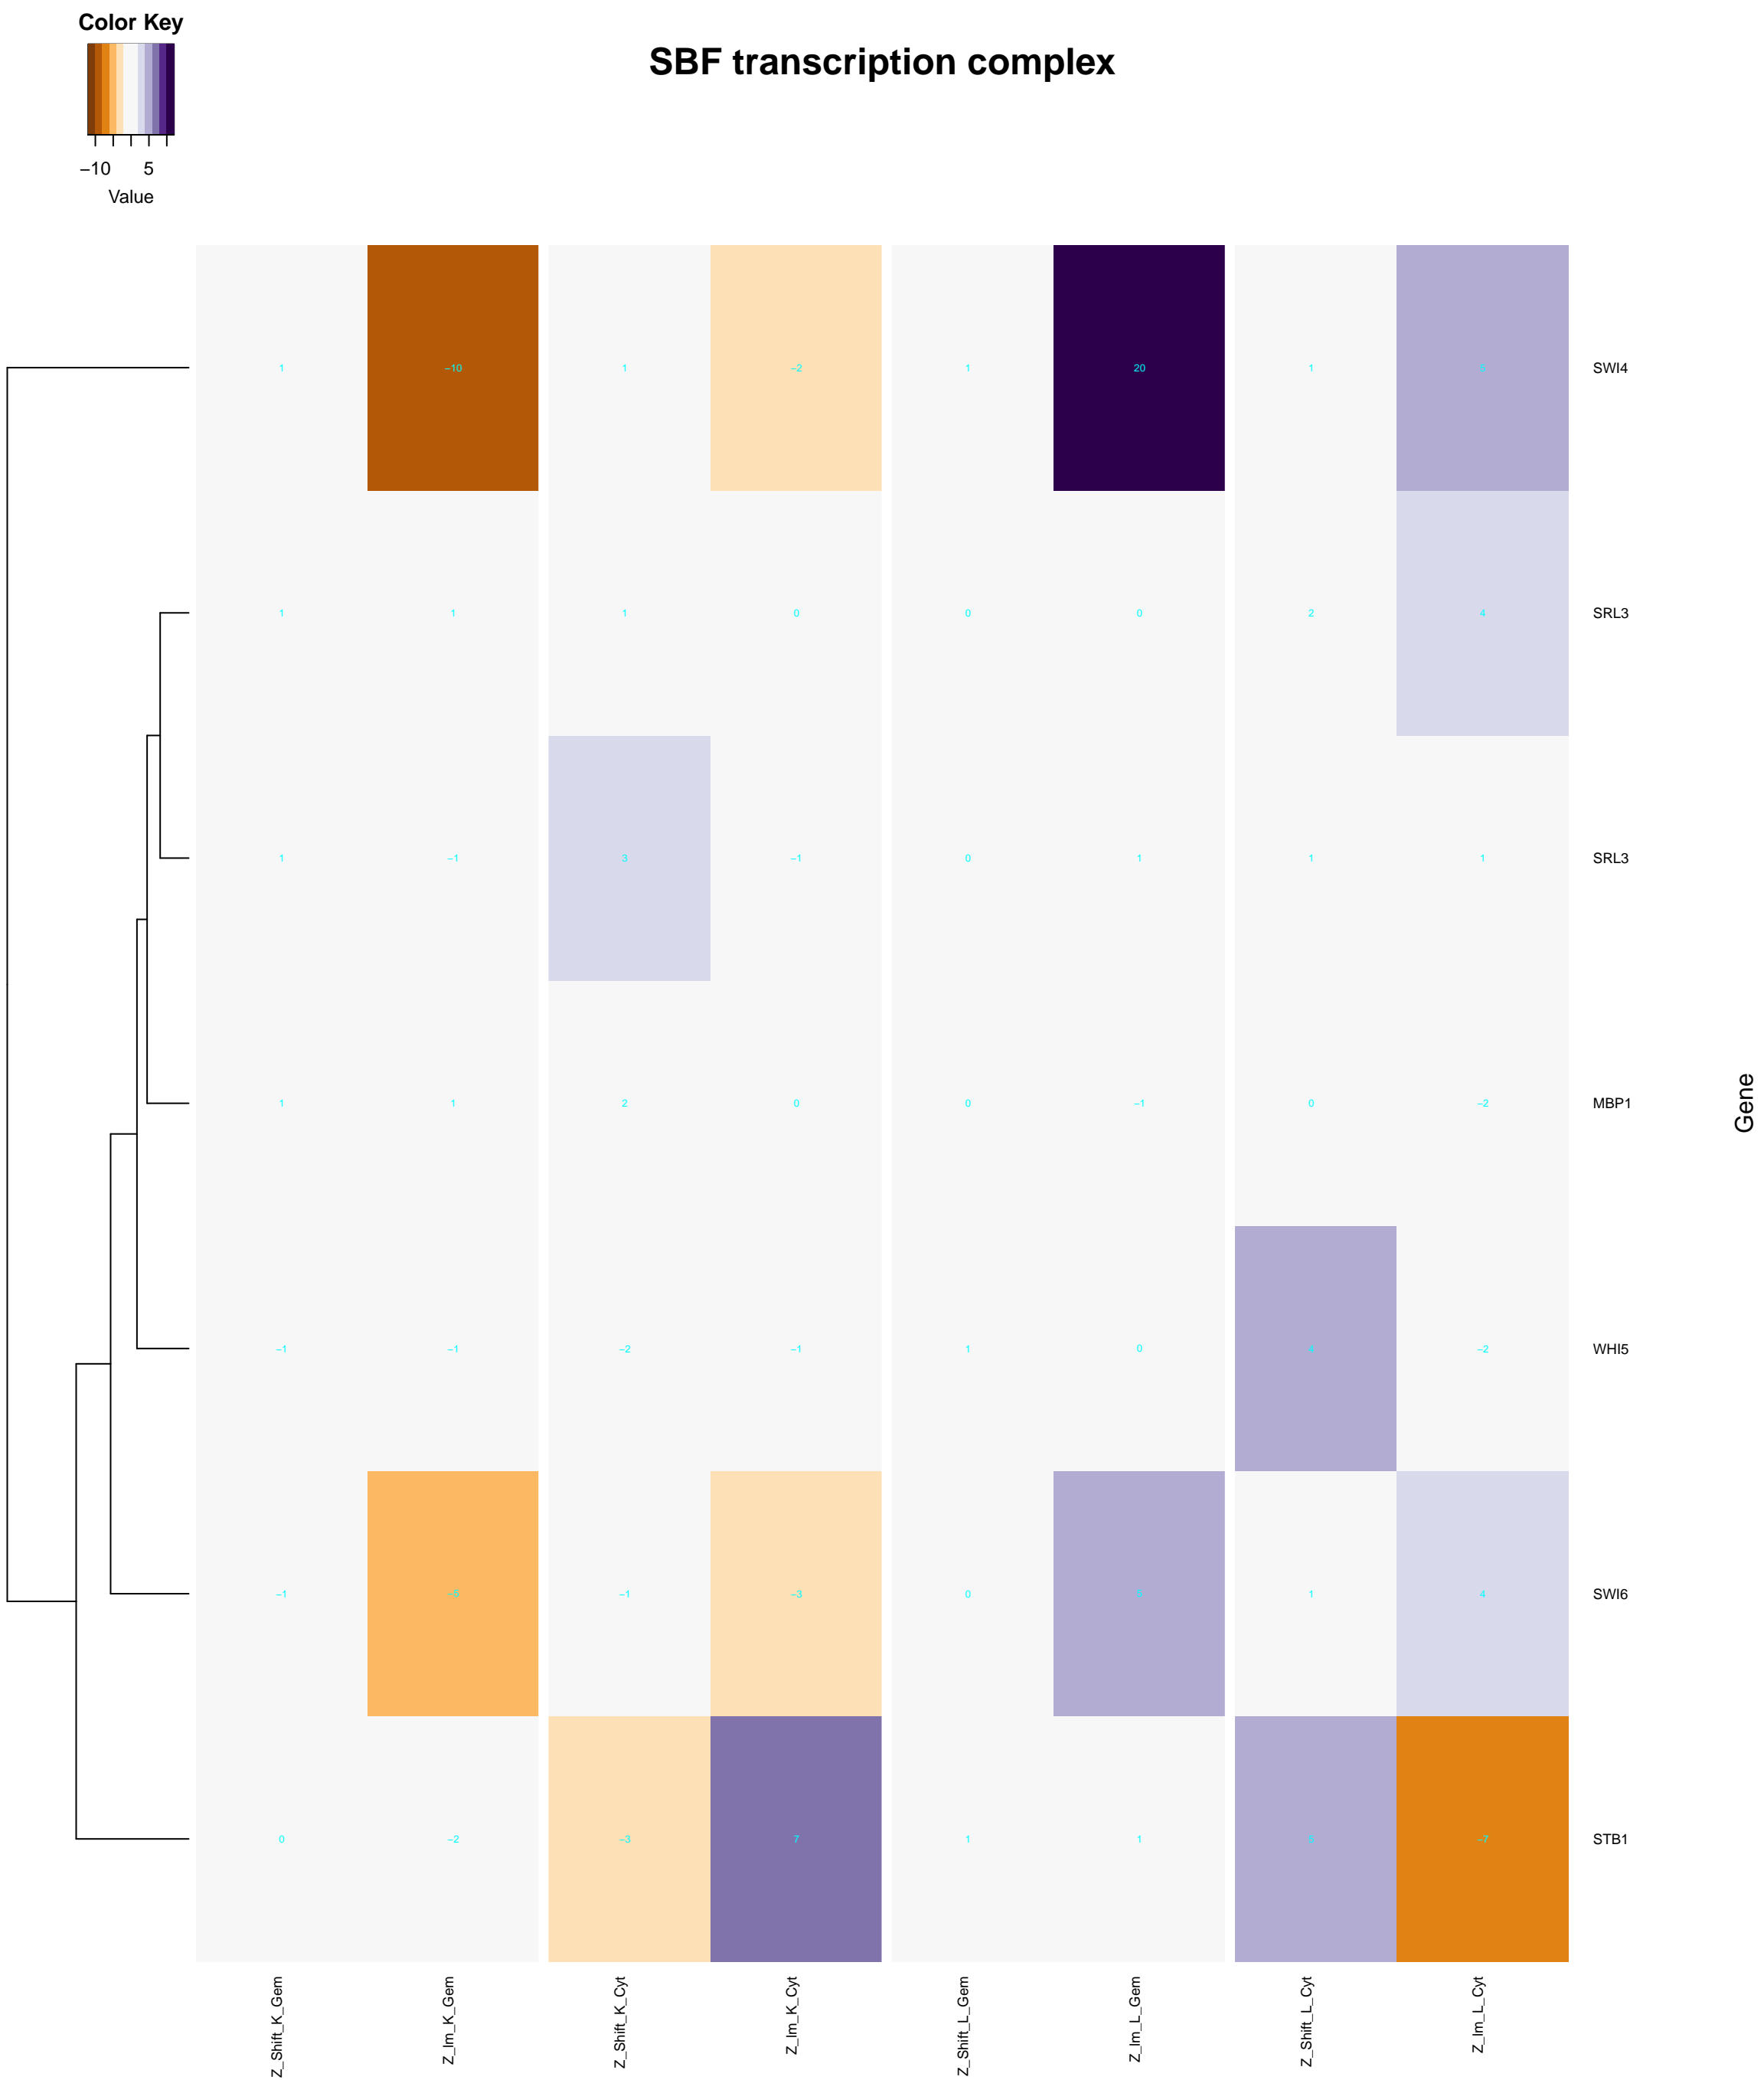

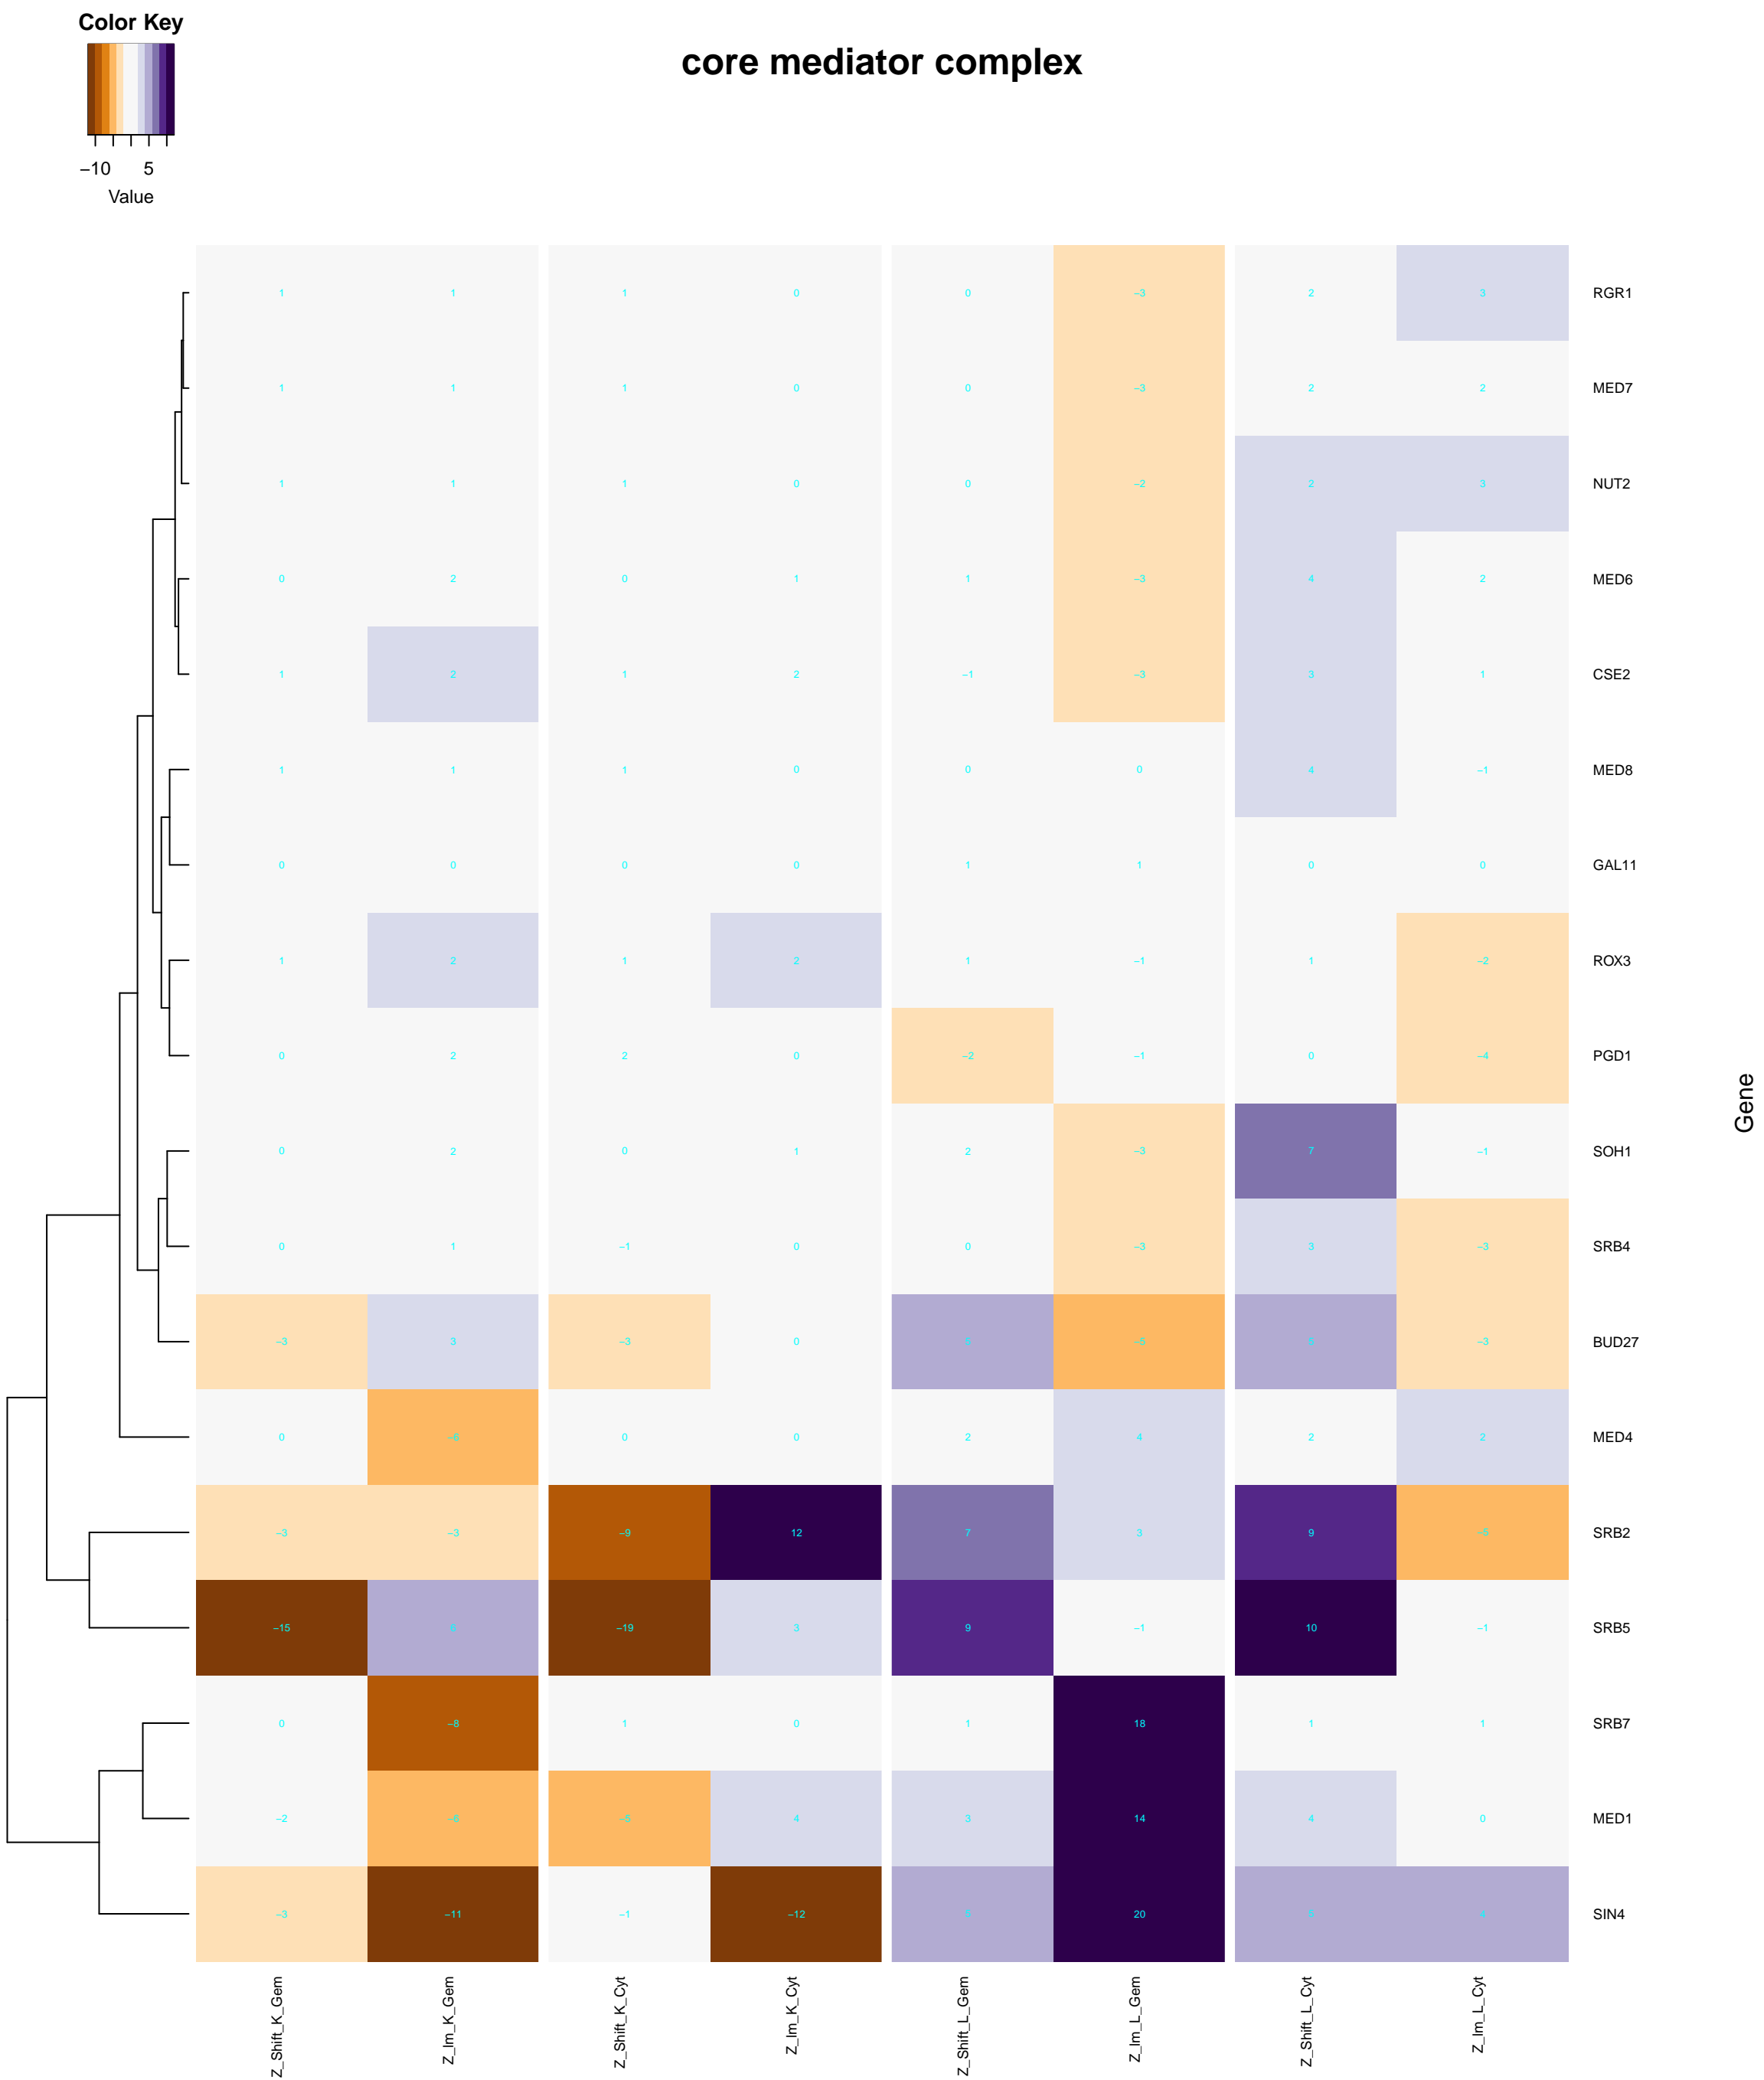

Color Key

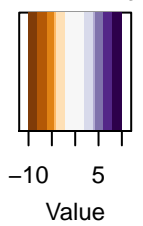

TFIIK complex

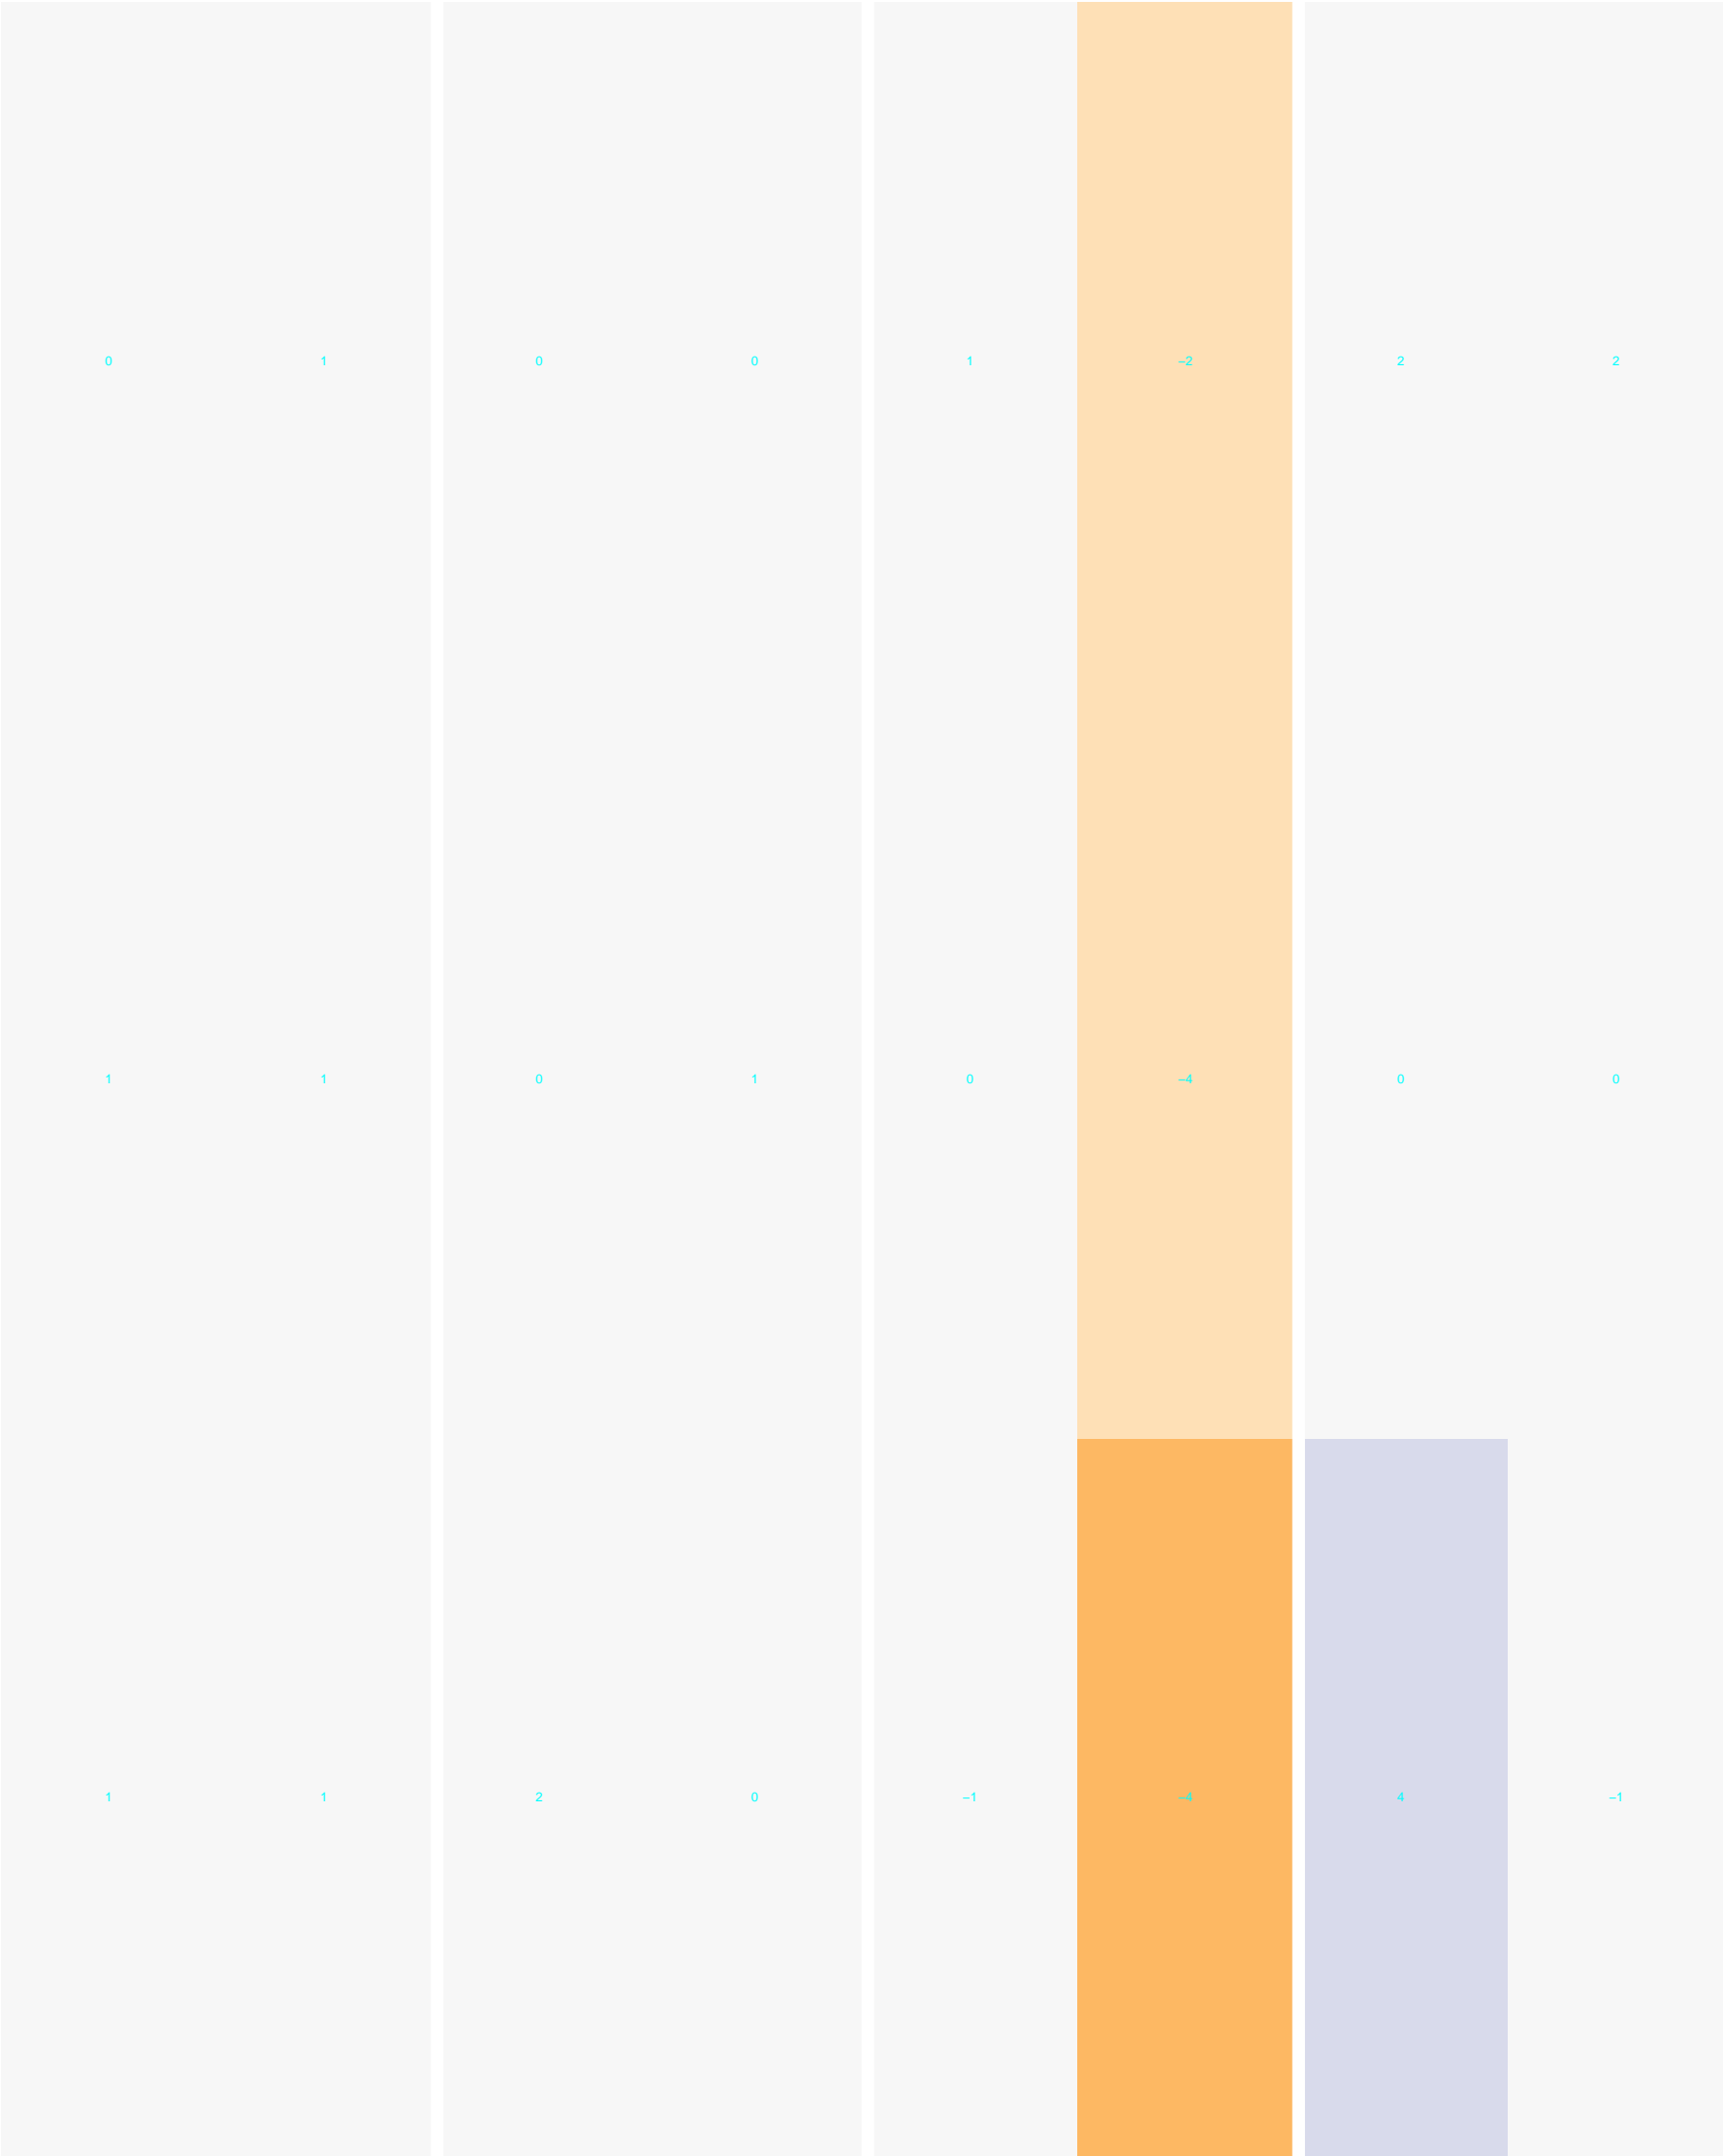

Gene
