# Supplementary material for: A Humanized Yeast Phenomic Model of Deoxycytidine Kinase to Predict Genetic Buffering of Nucleoside Analog Cytotoxicity
Source: MDPI journal article supplement (doi:10.3390/genes10100770), 2019-09-30

### Color Key

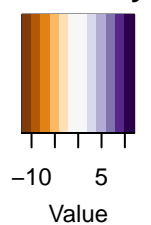

## tRNA aminoacylation

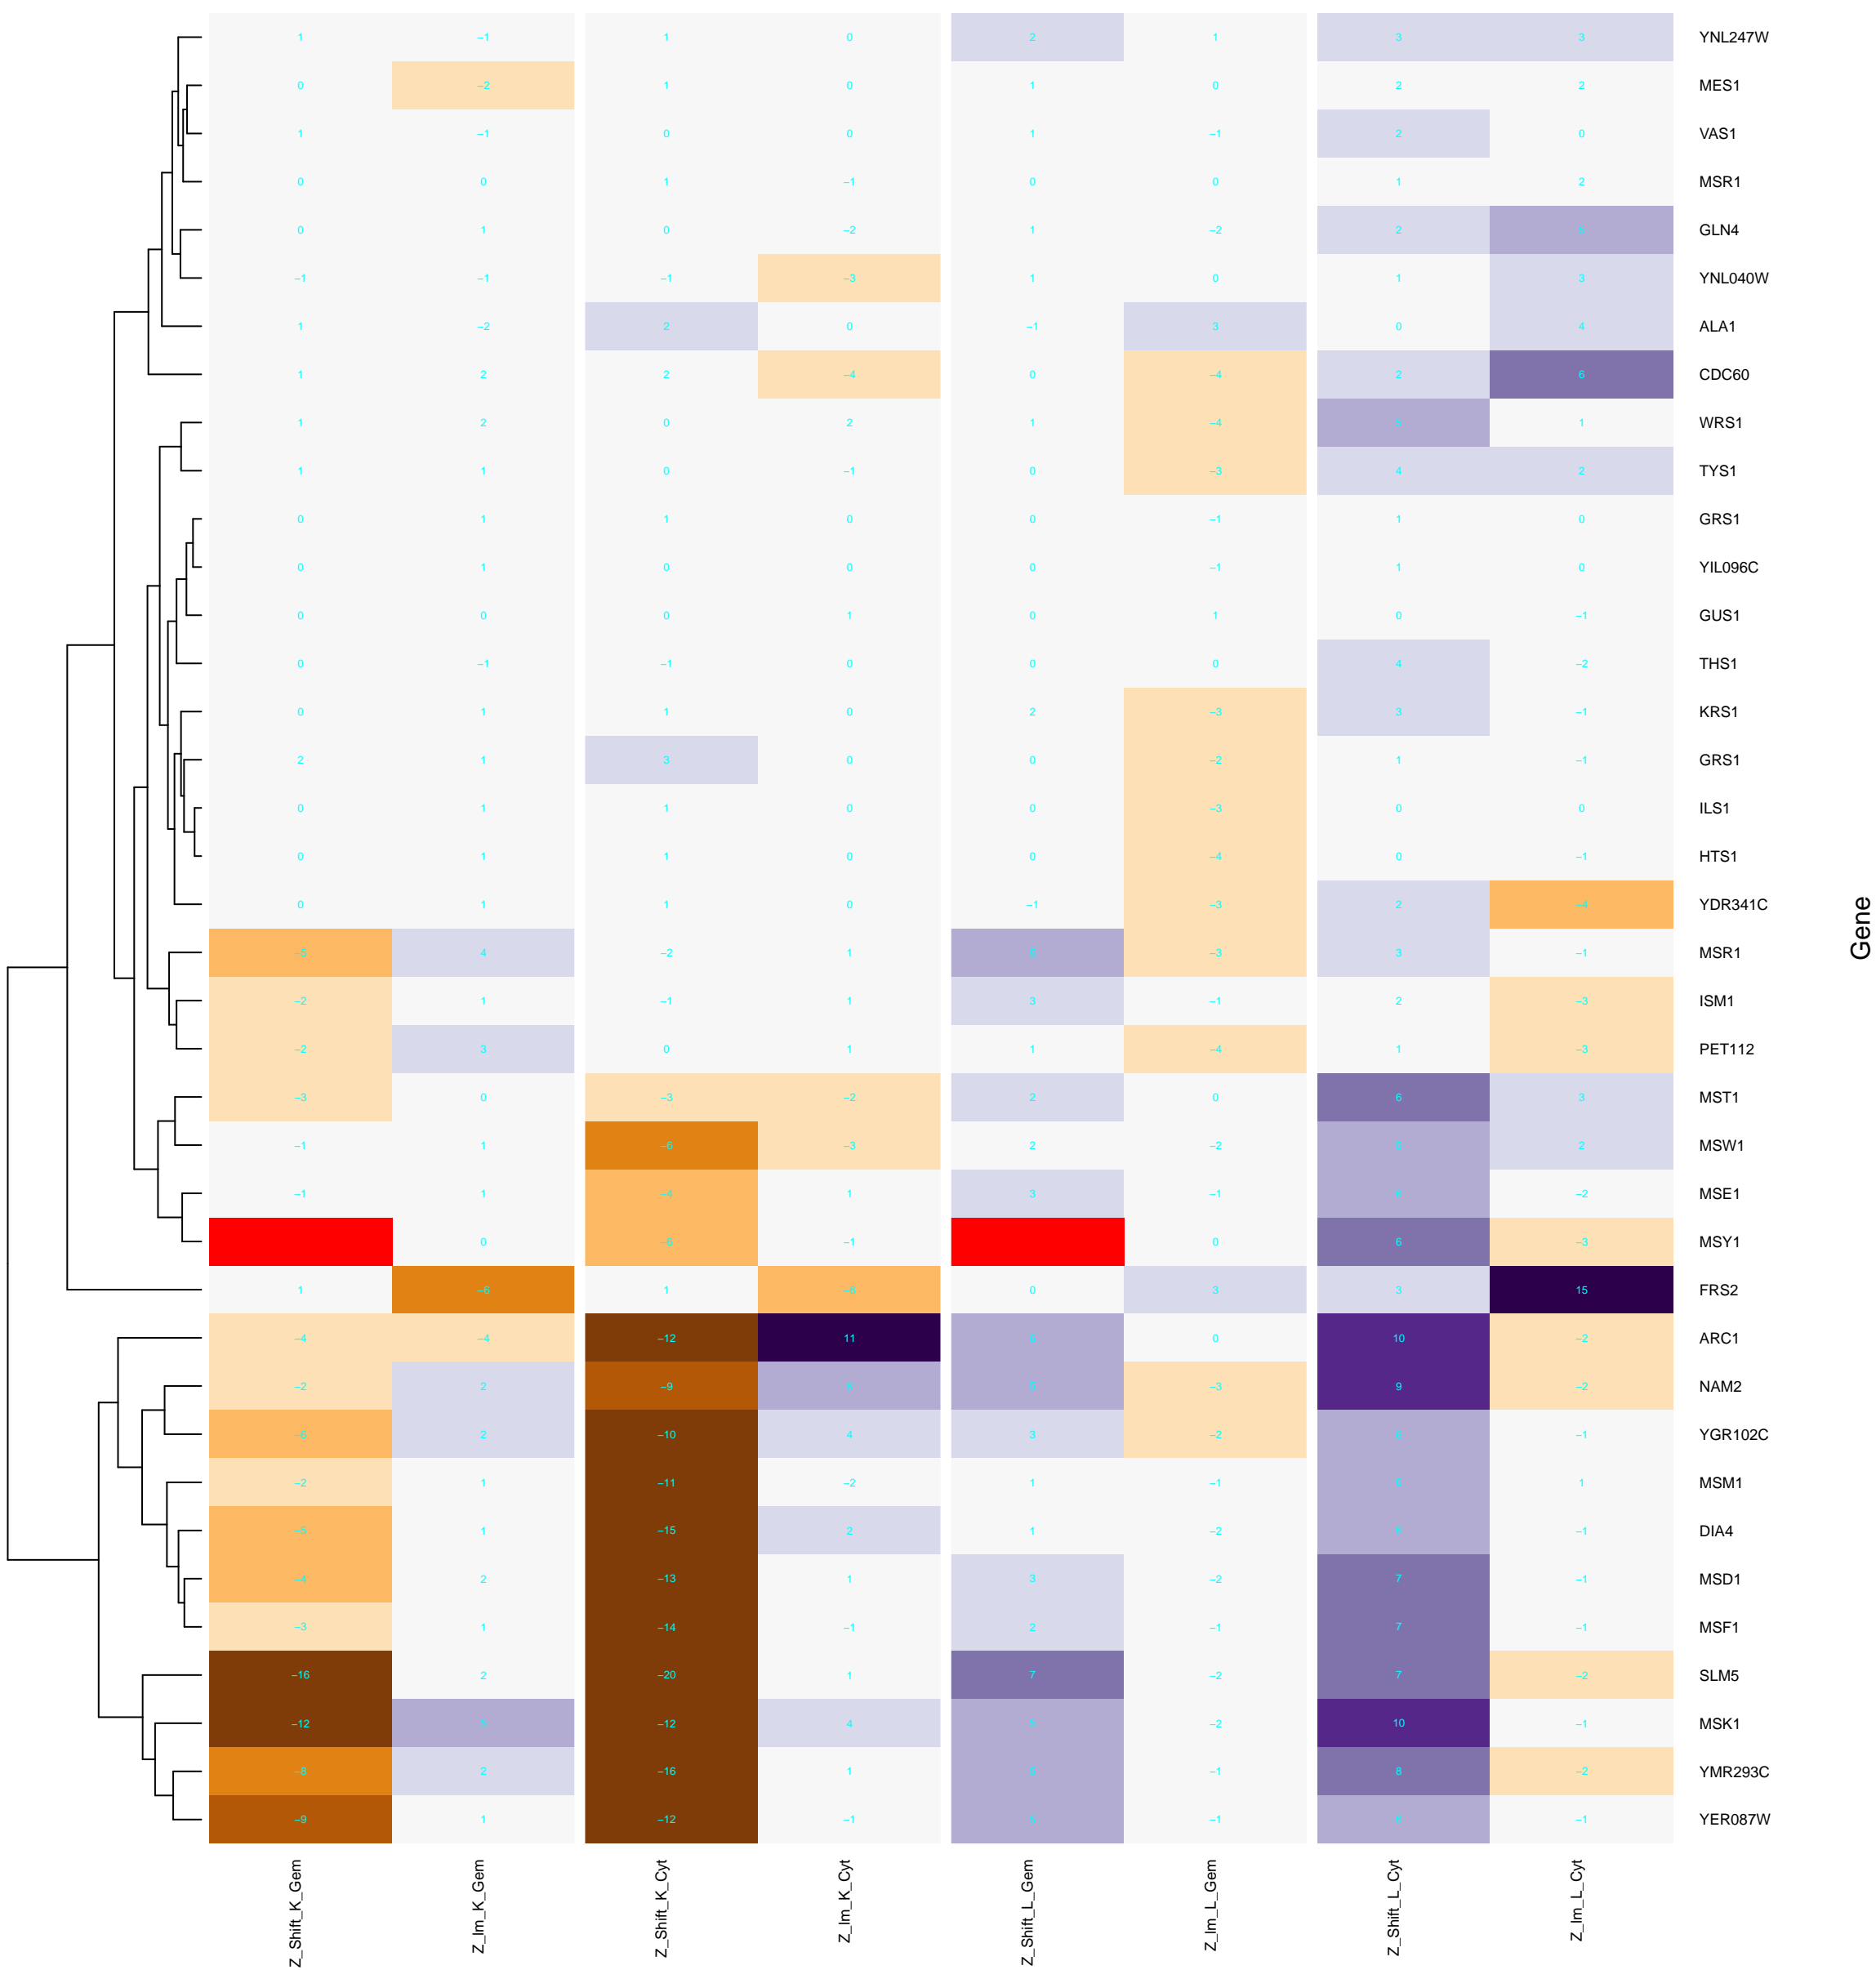

### Color Key

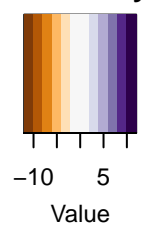

## tRNA aminoacylation for protein translation

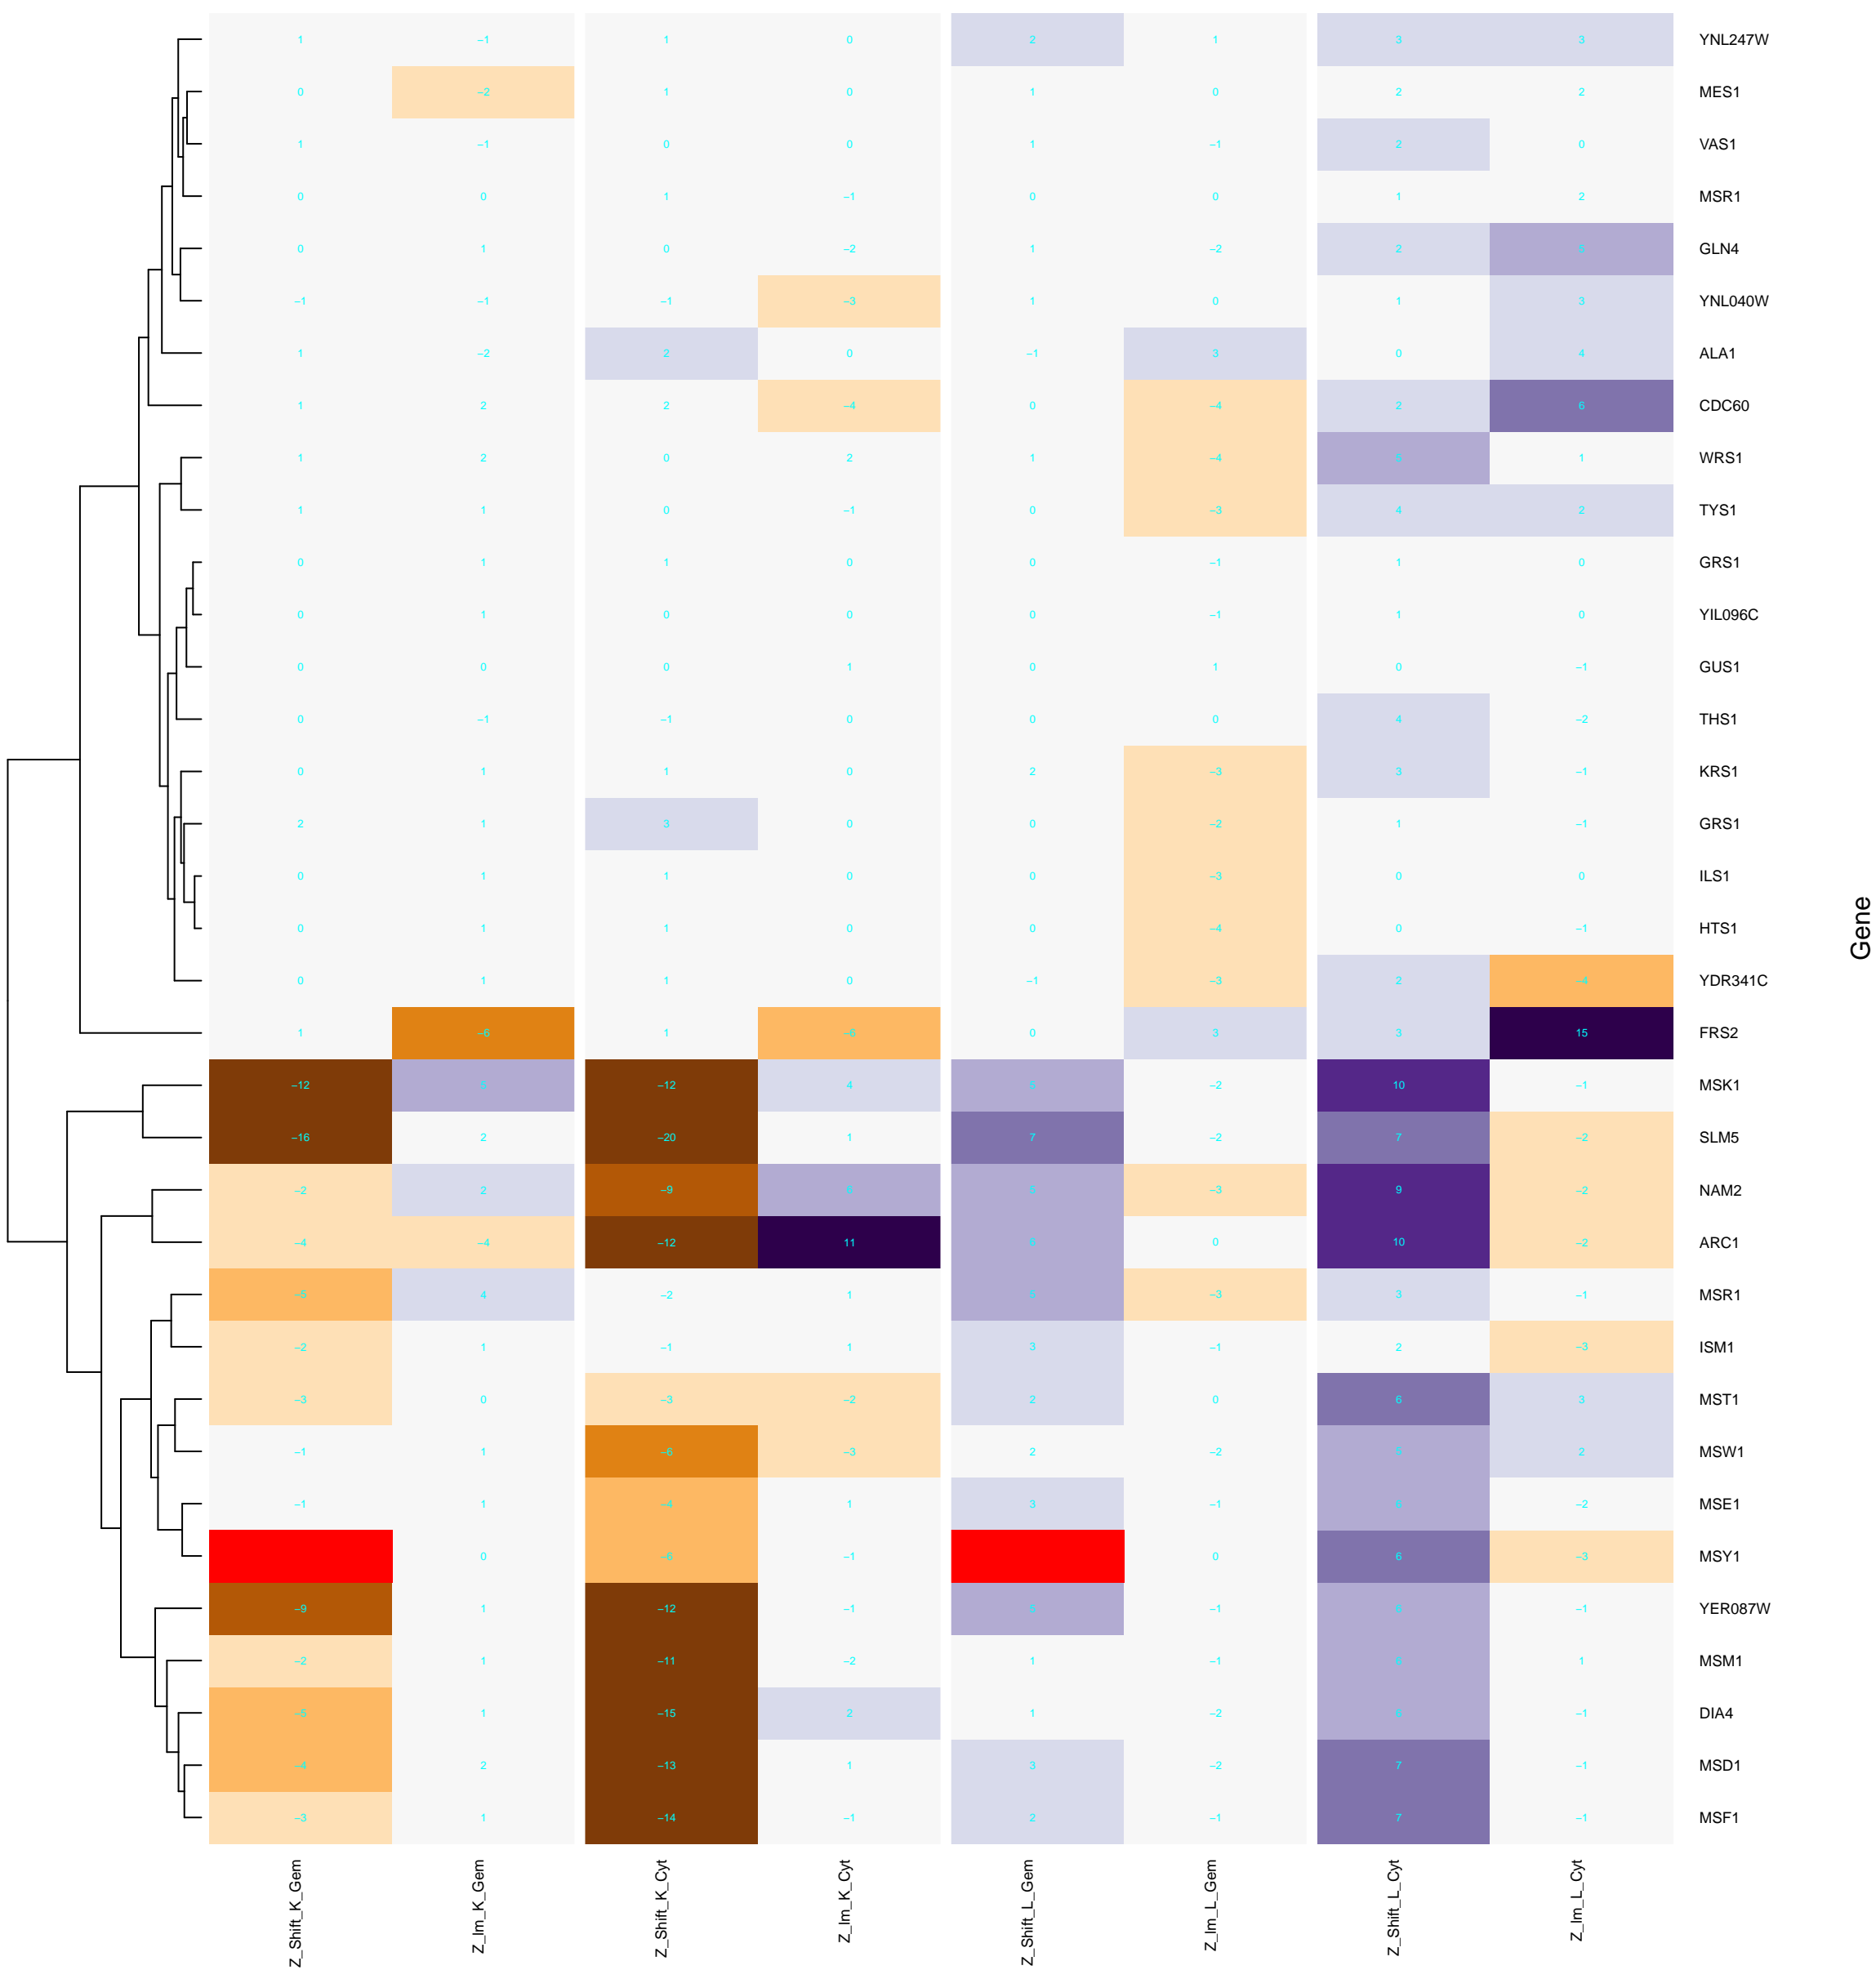

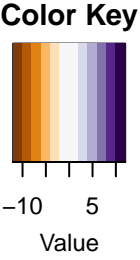

glutaminyI-tRNA<sup>Gln</sup> biosynthesis via transamidation

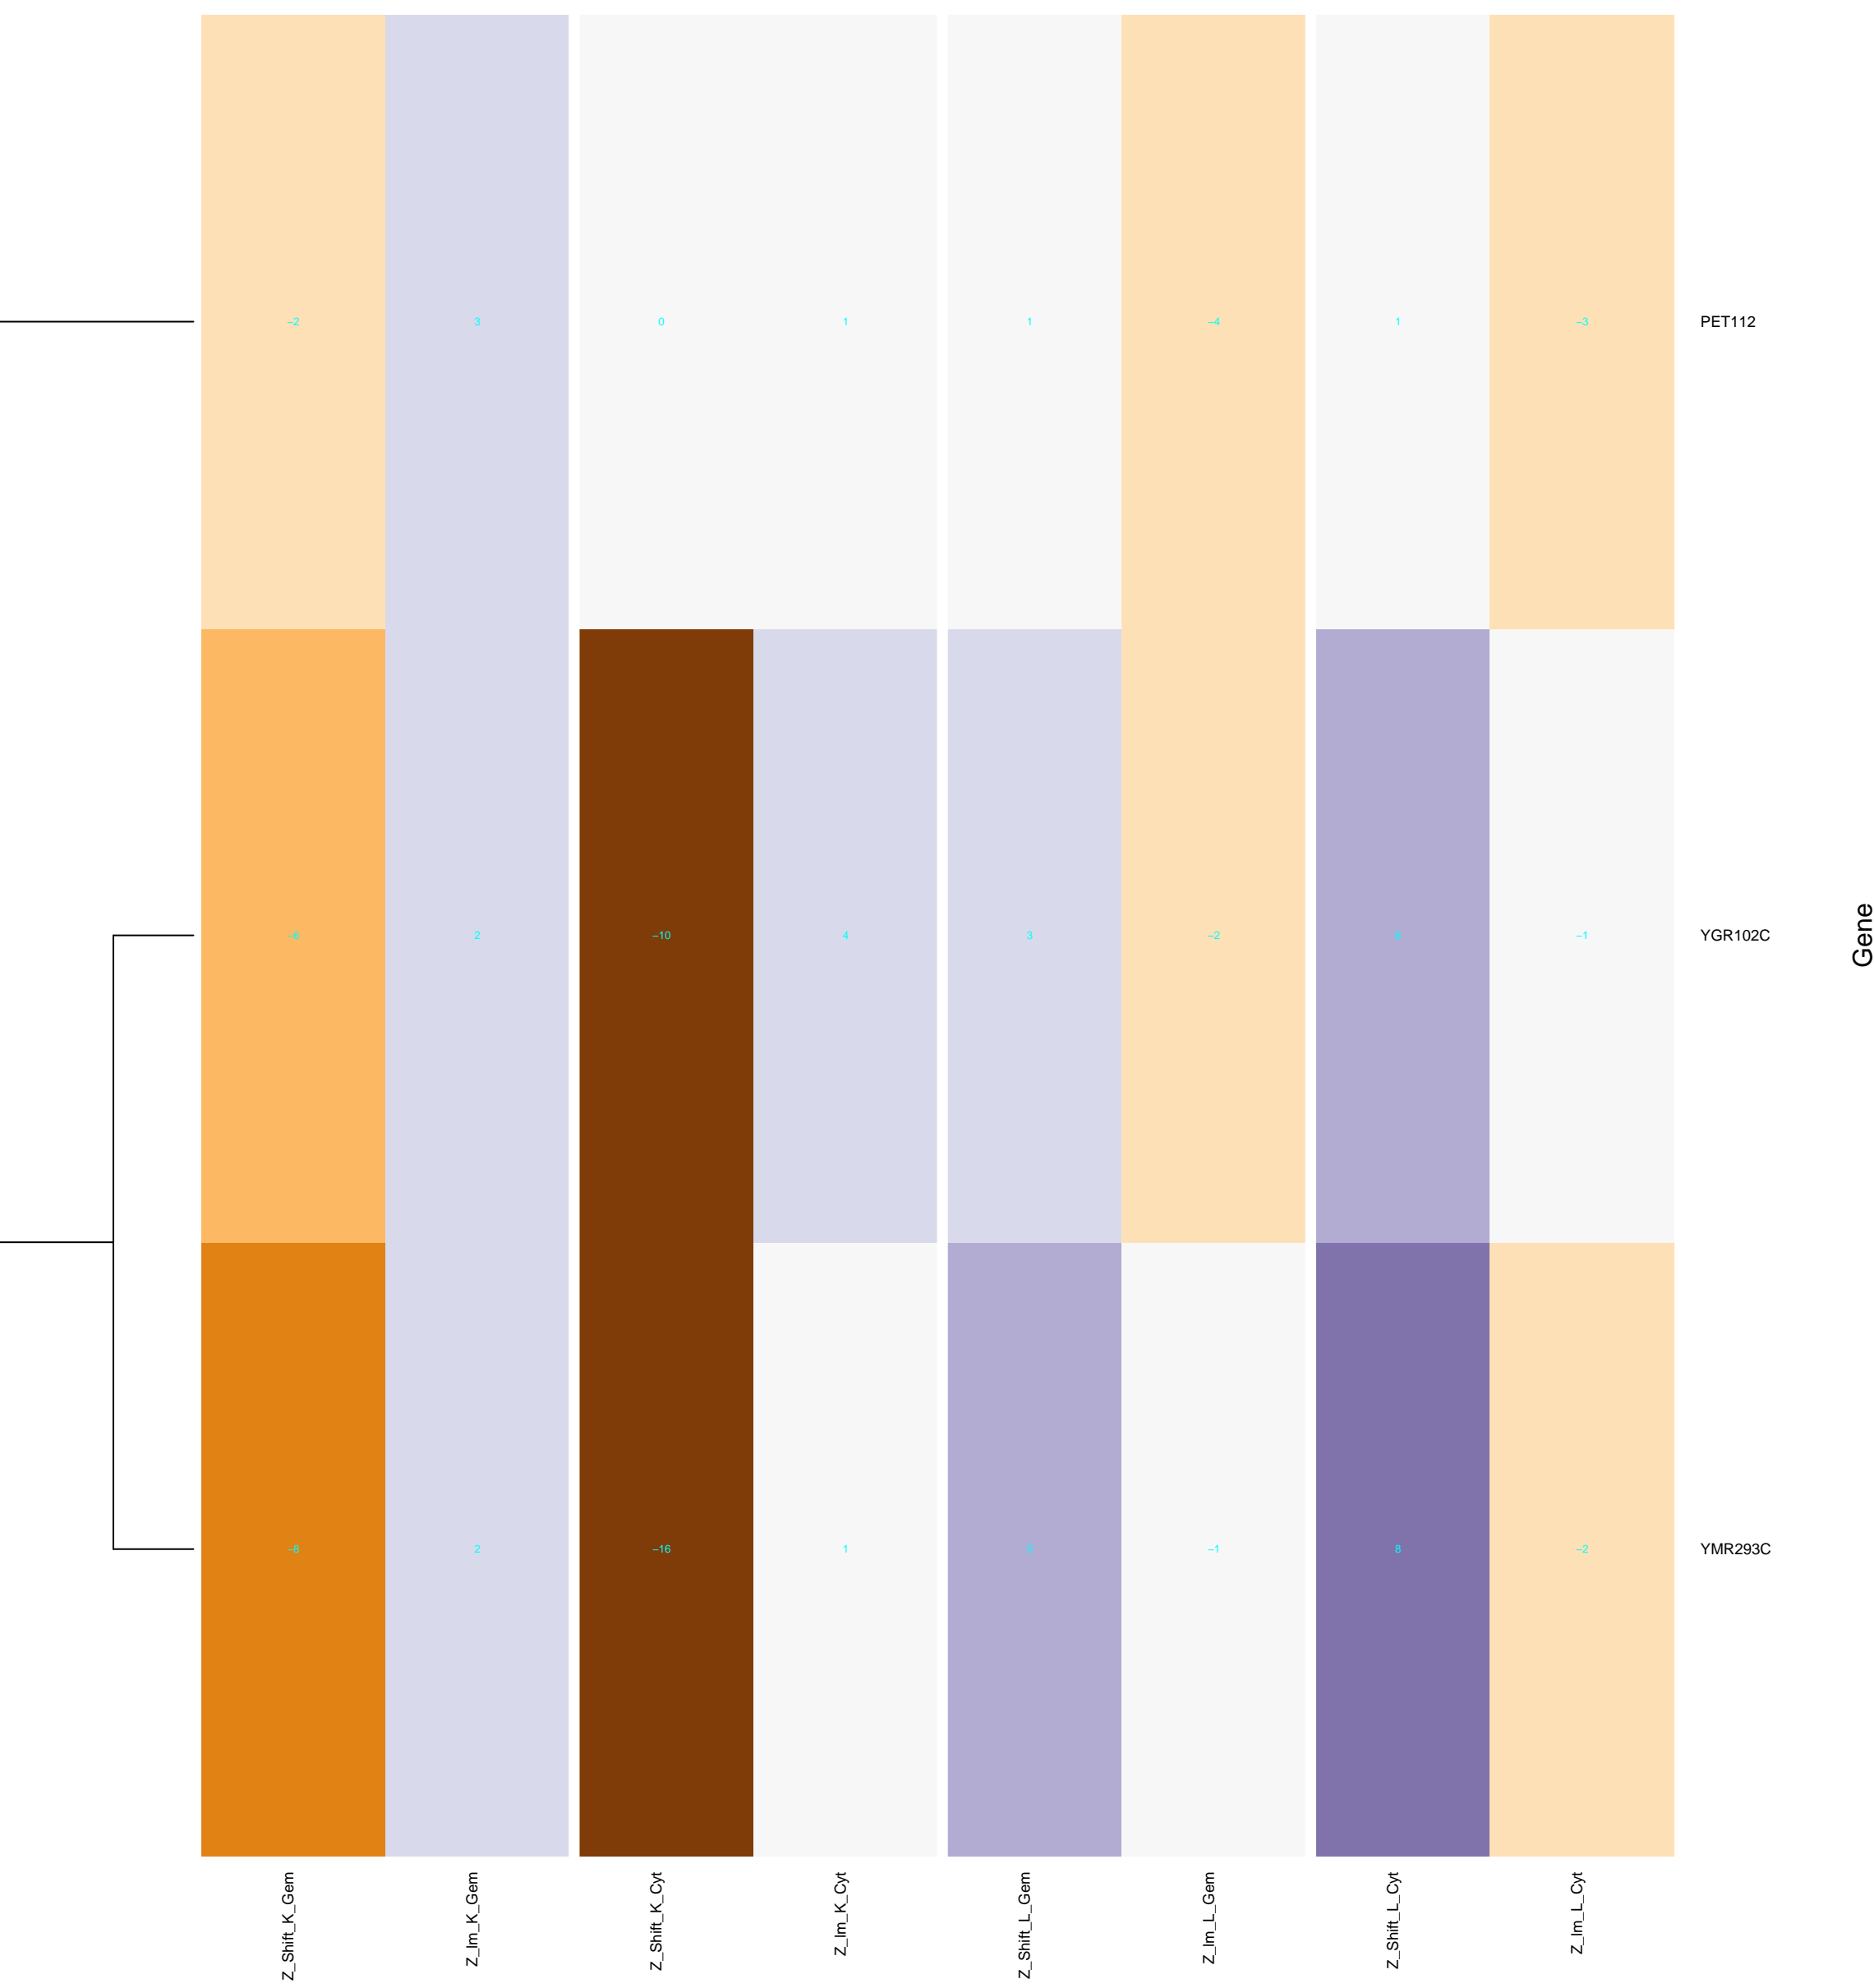

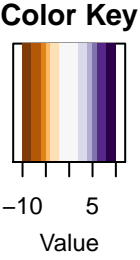

arginyl-tRNA aminoacylation

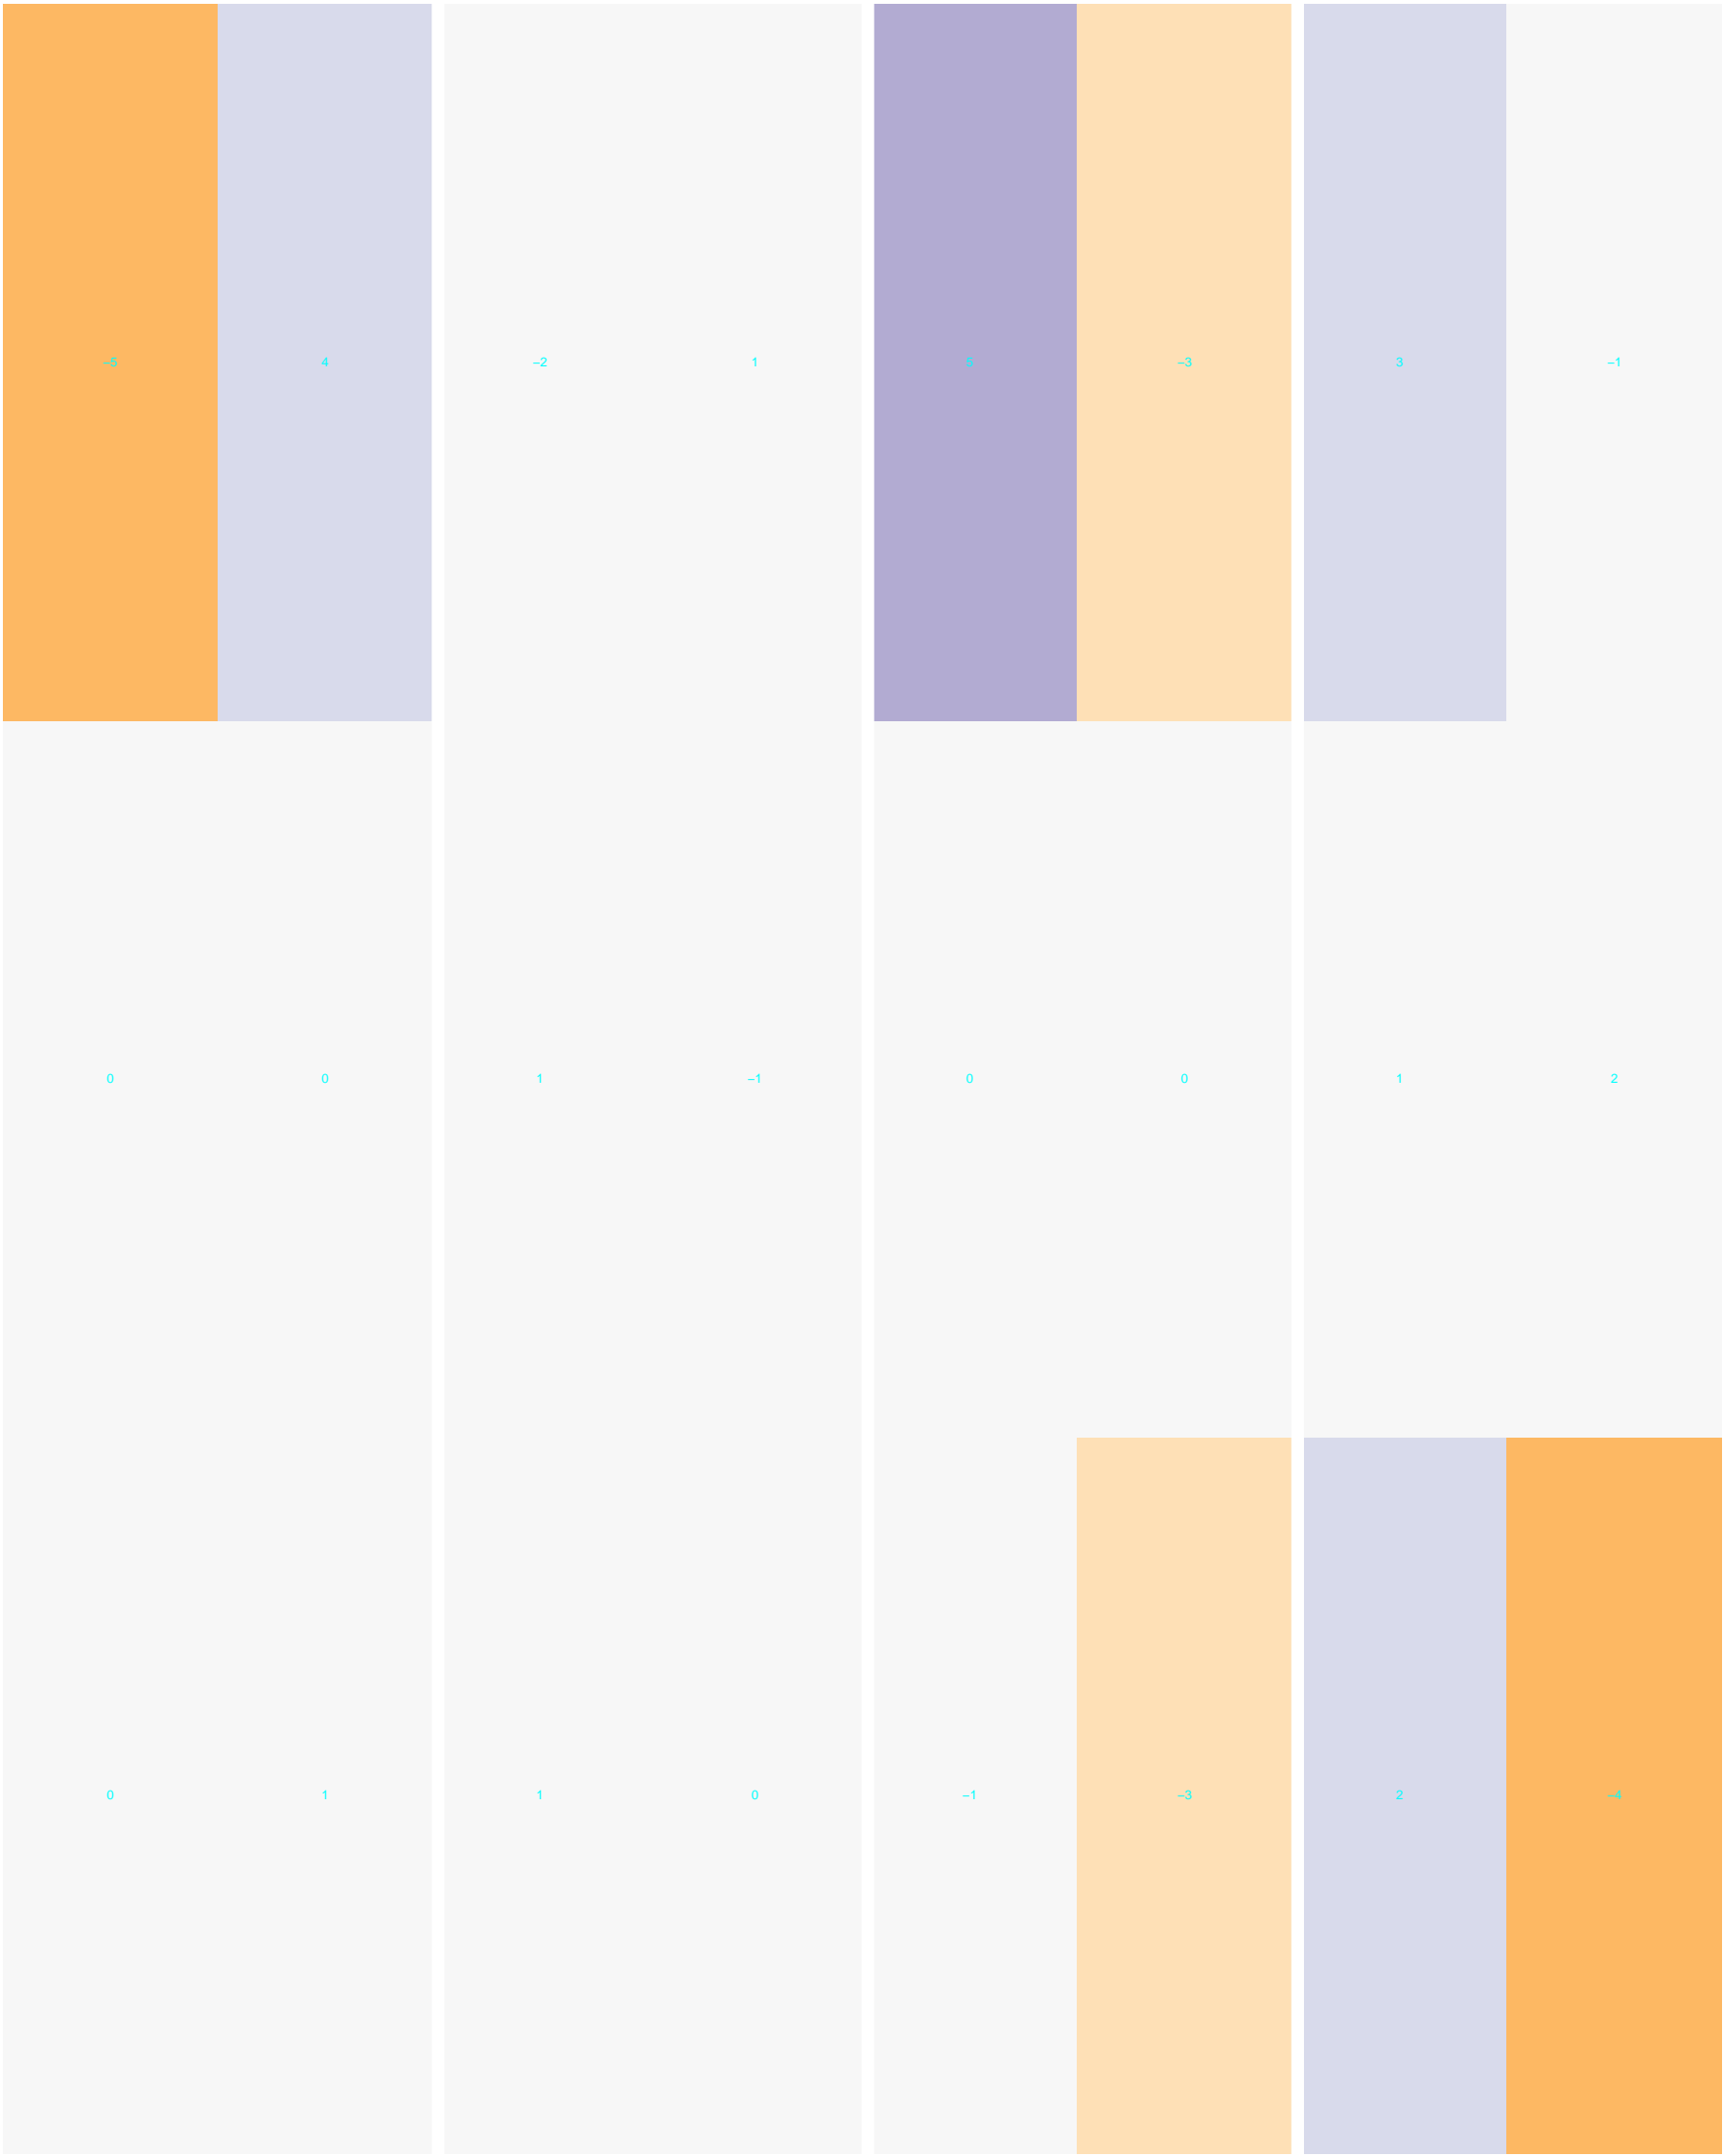

Gene

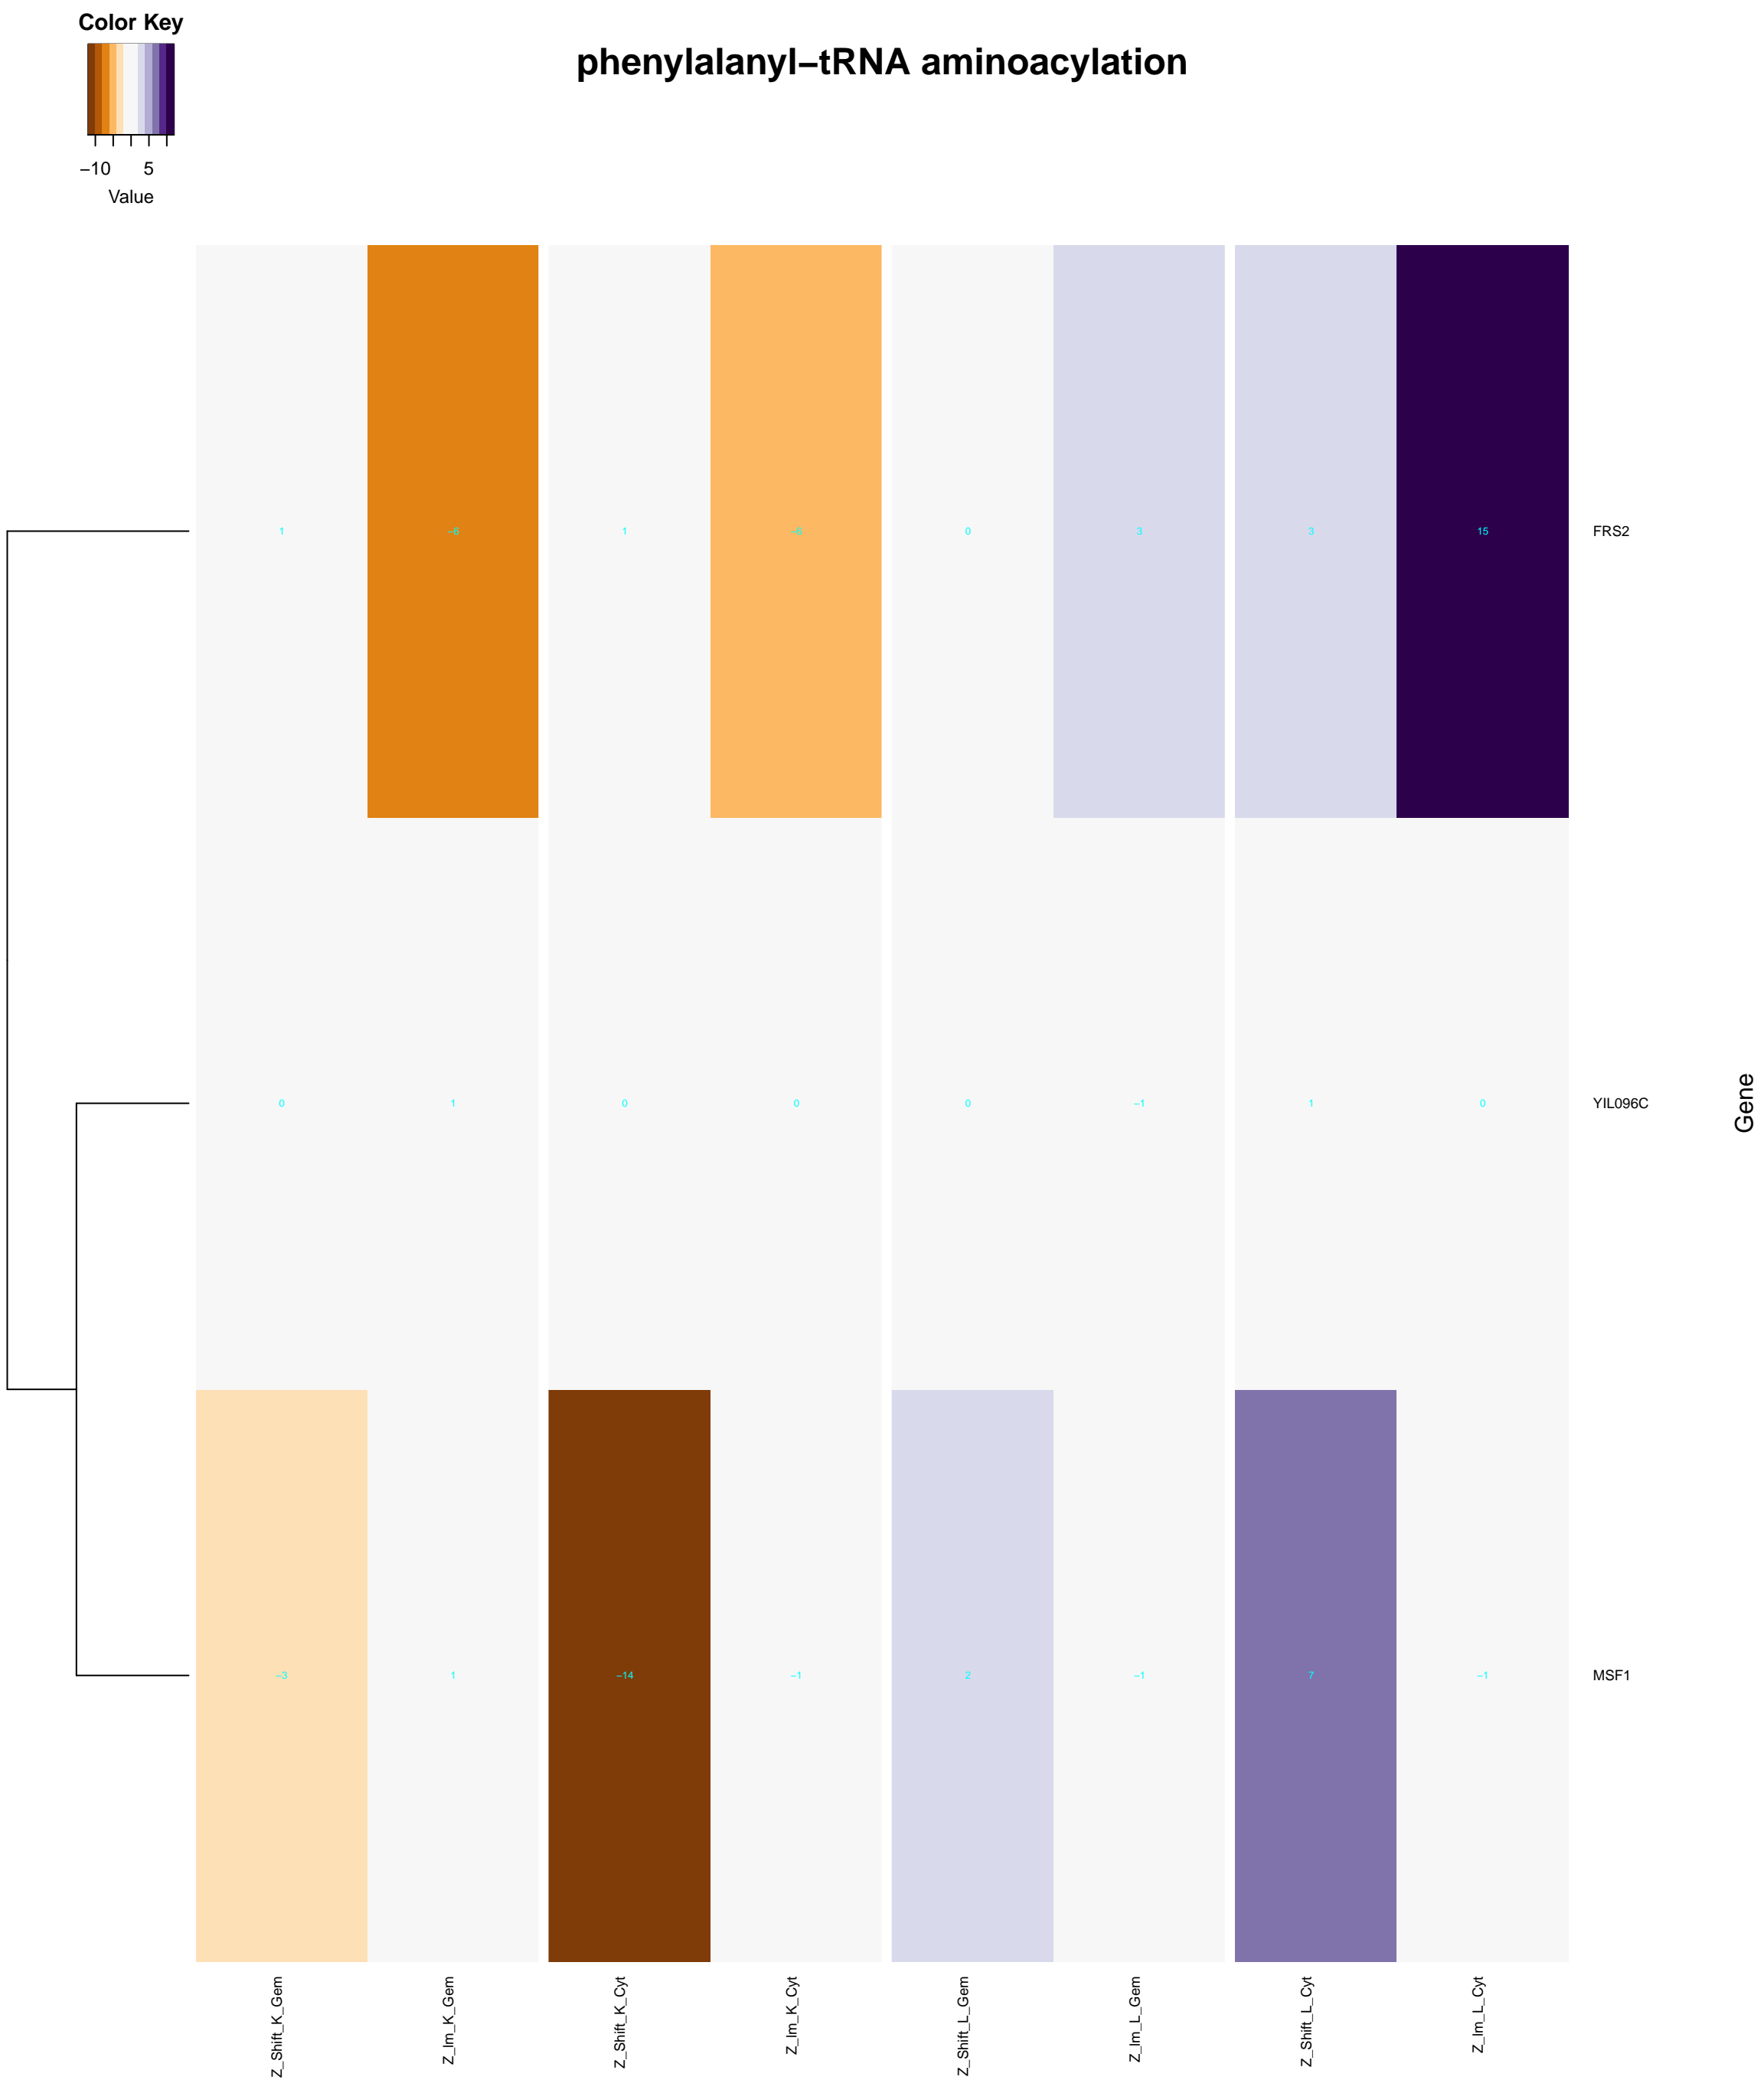

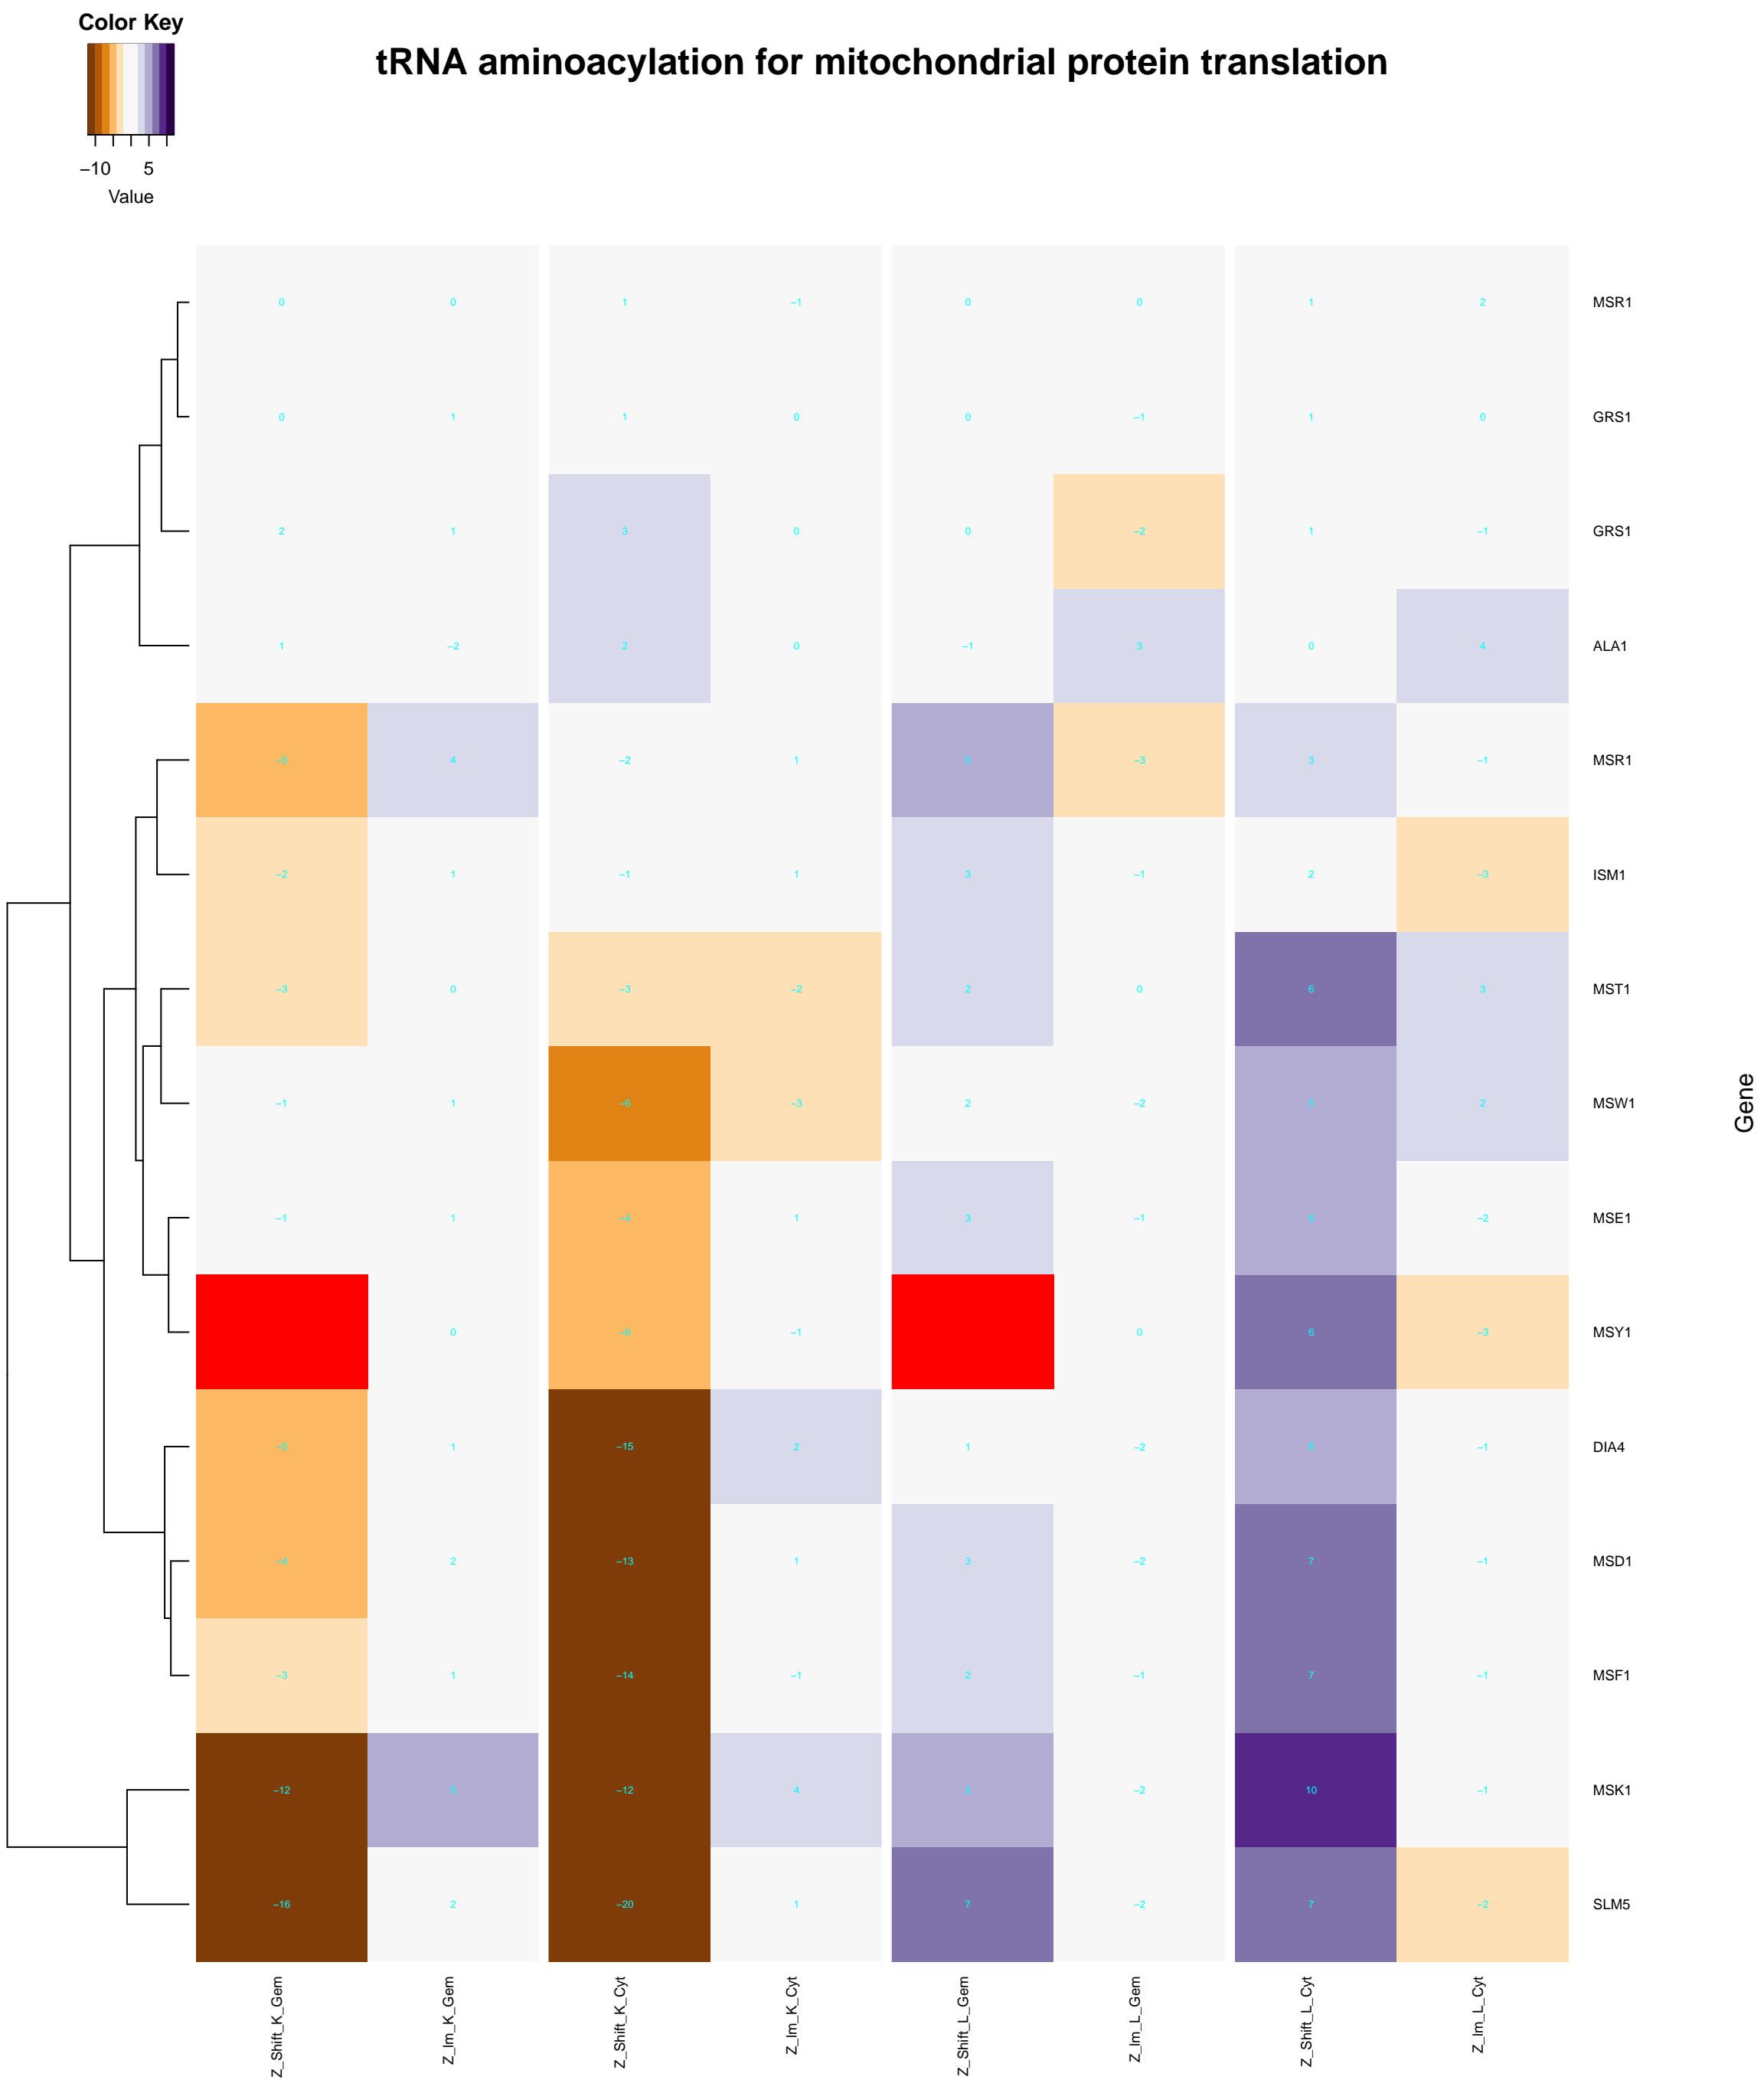

Supplement: s1 [file s1]
