# Supplementary material for: A Humanized Yeast Phenomic Model of Deoxycytidine Kinase to Predict Genetic Buffering of Nucleoside Analog Cytotoxicity
Source: MDPI journal article supplement (doi:10.3390/genes10100770), 2019-09-30

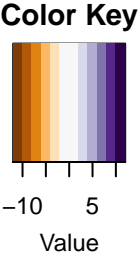

cell cycle DNA replication initiation

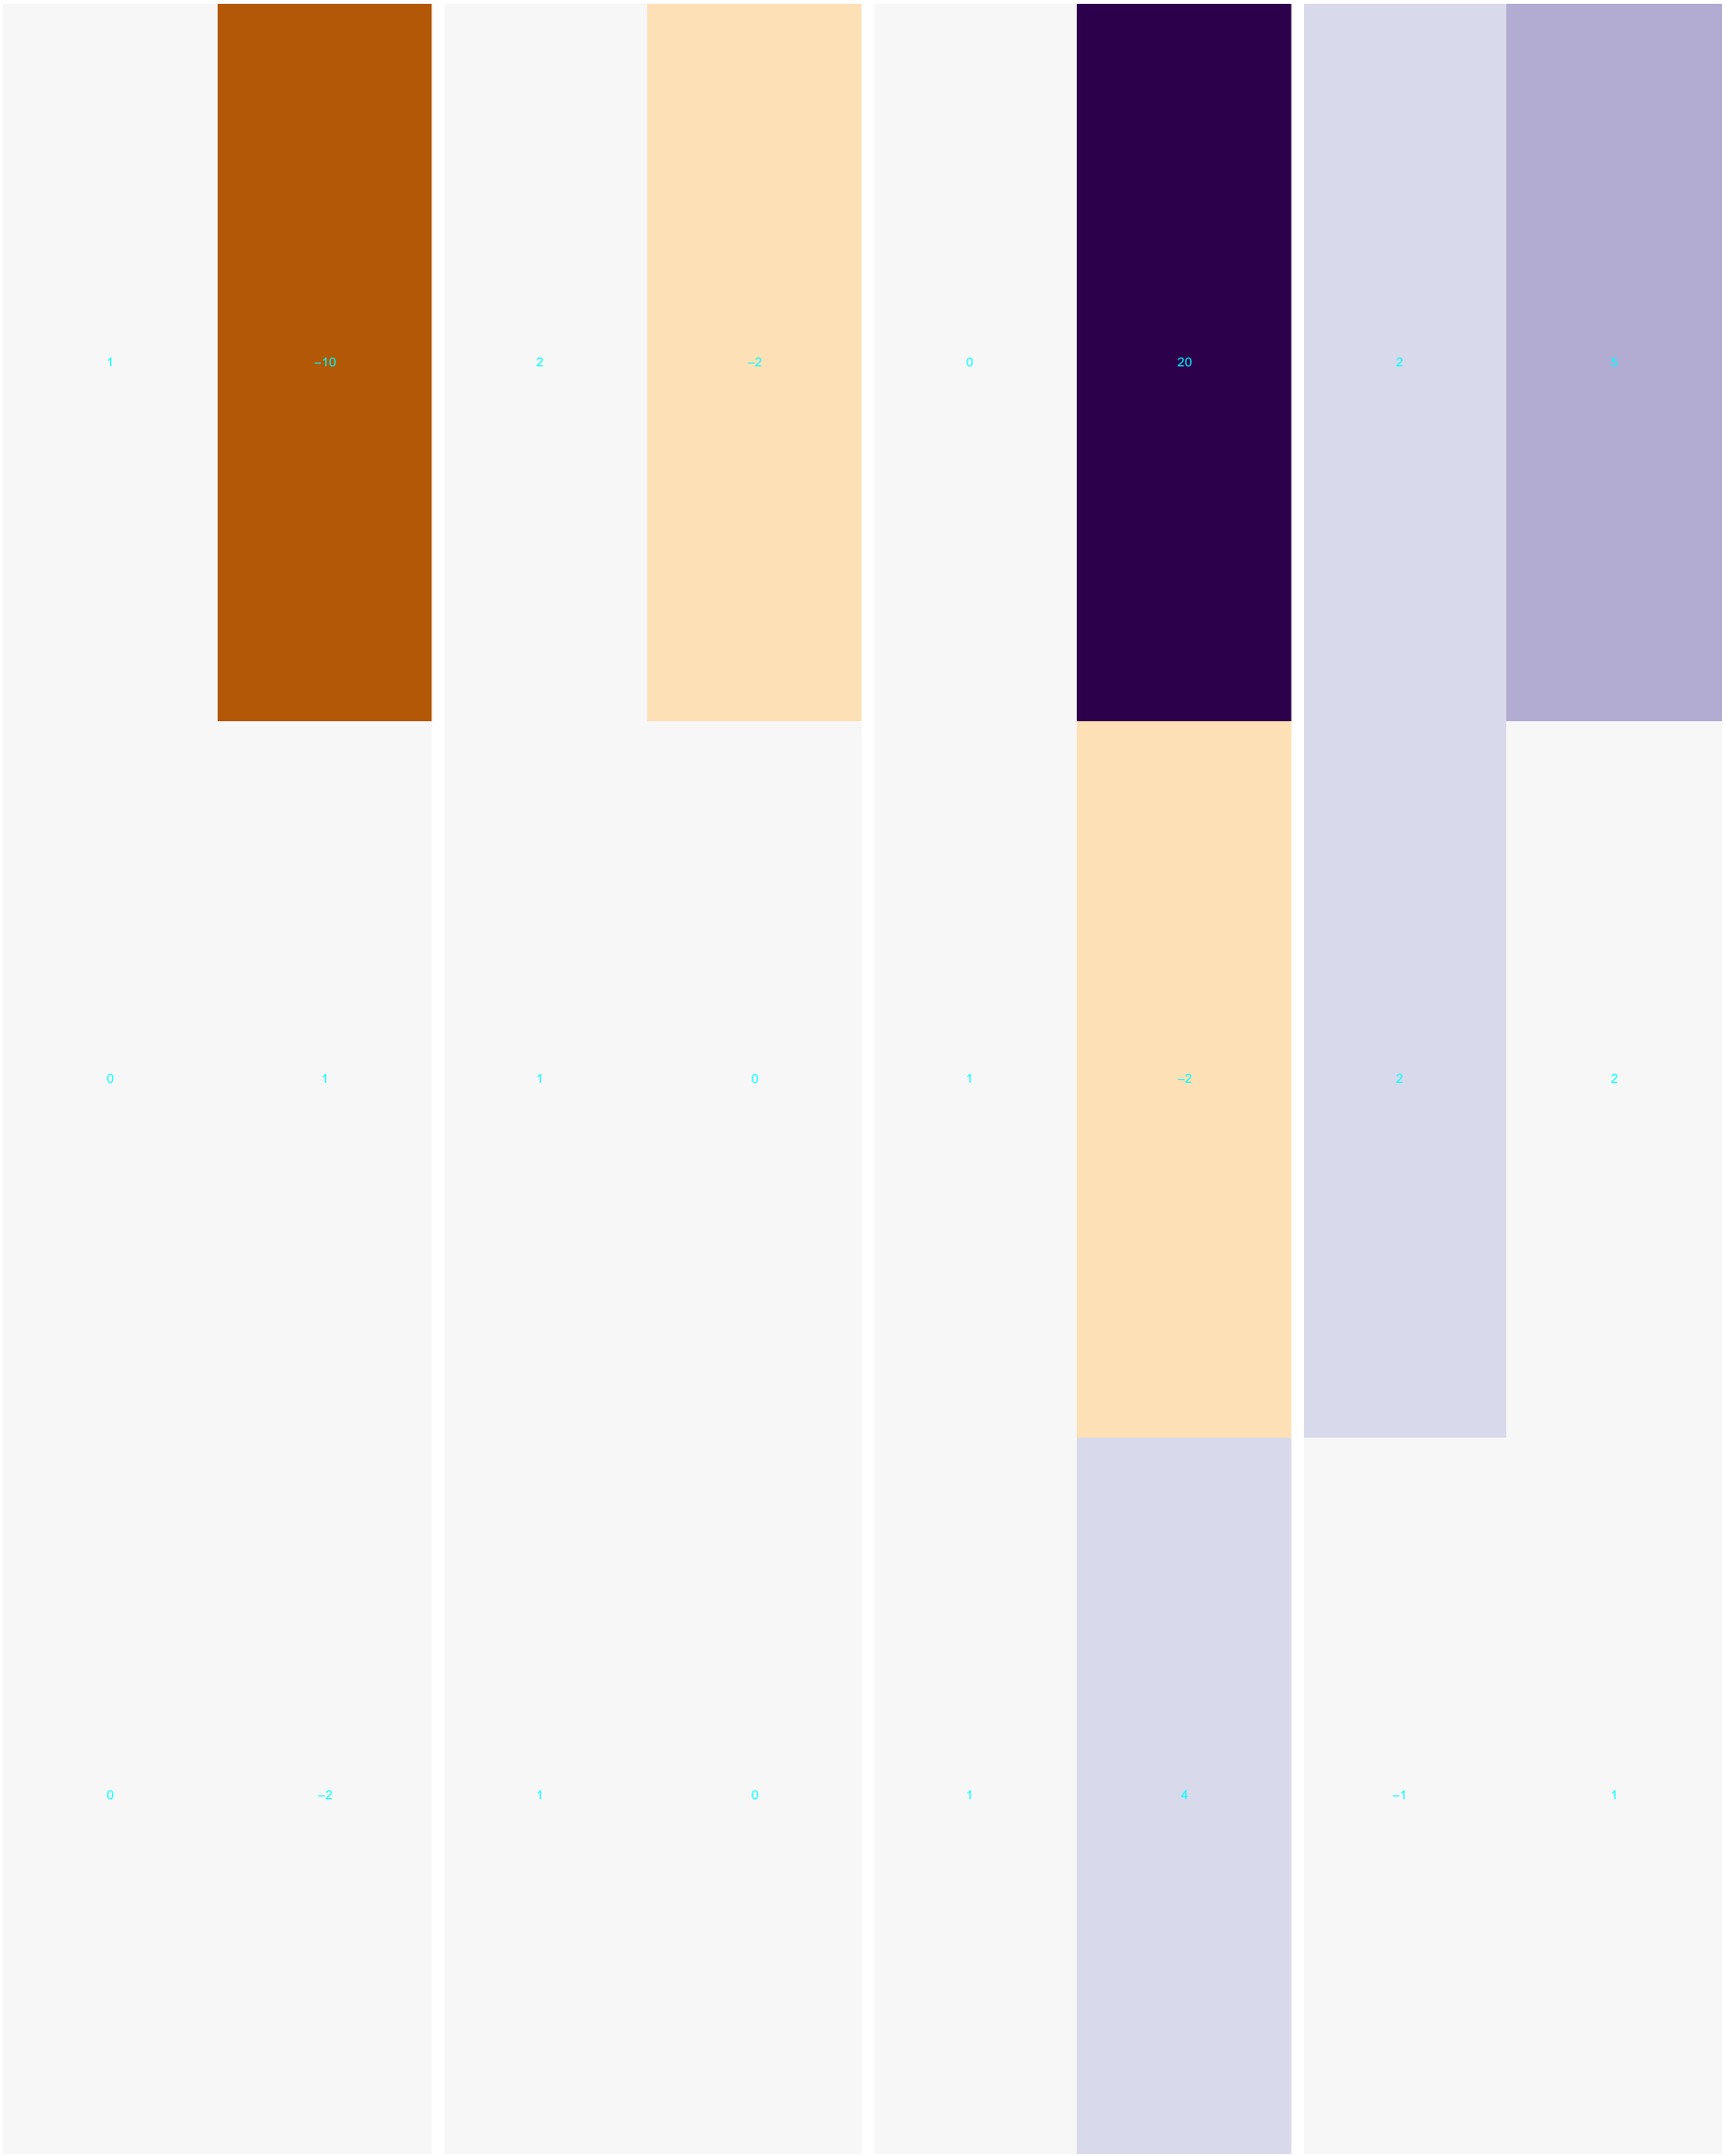

Gene



nuclear cell cycle DNA replication initiation

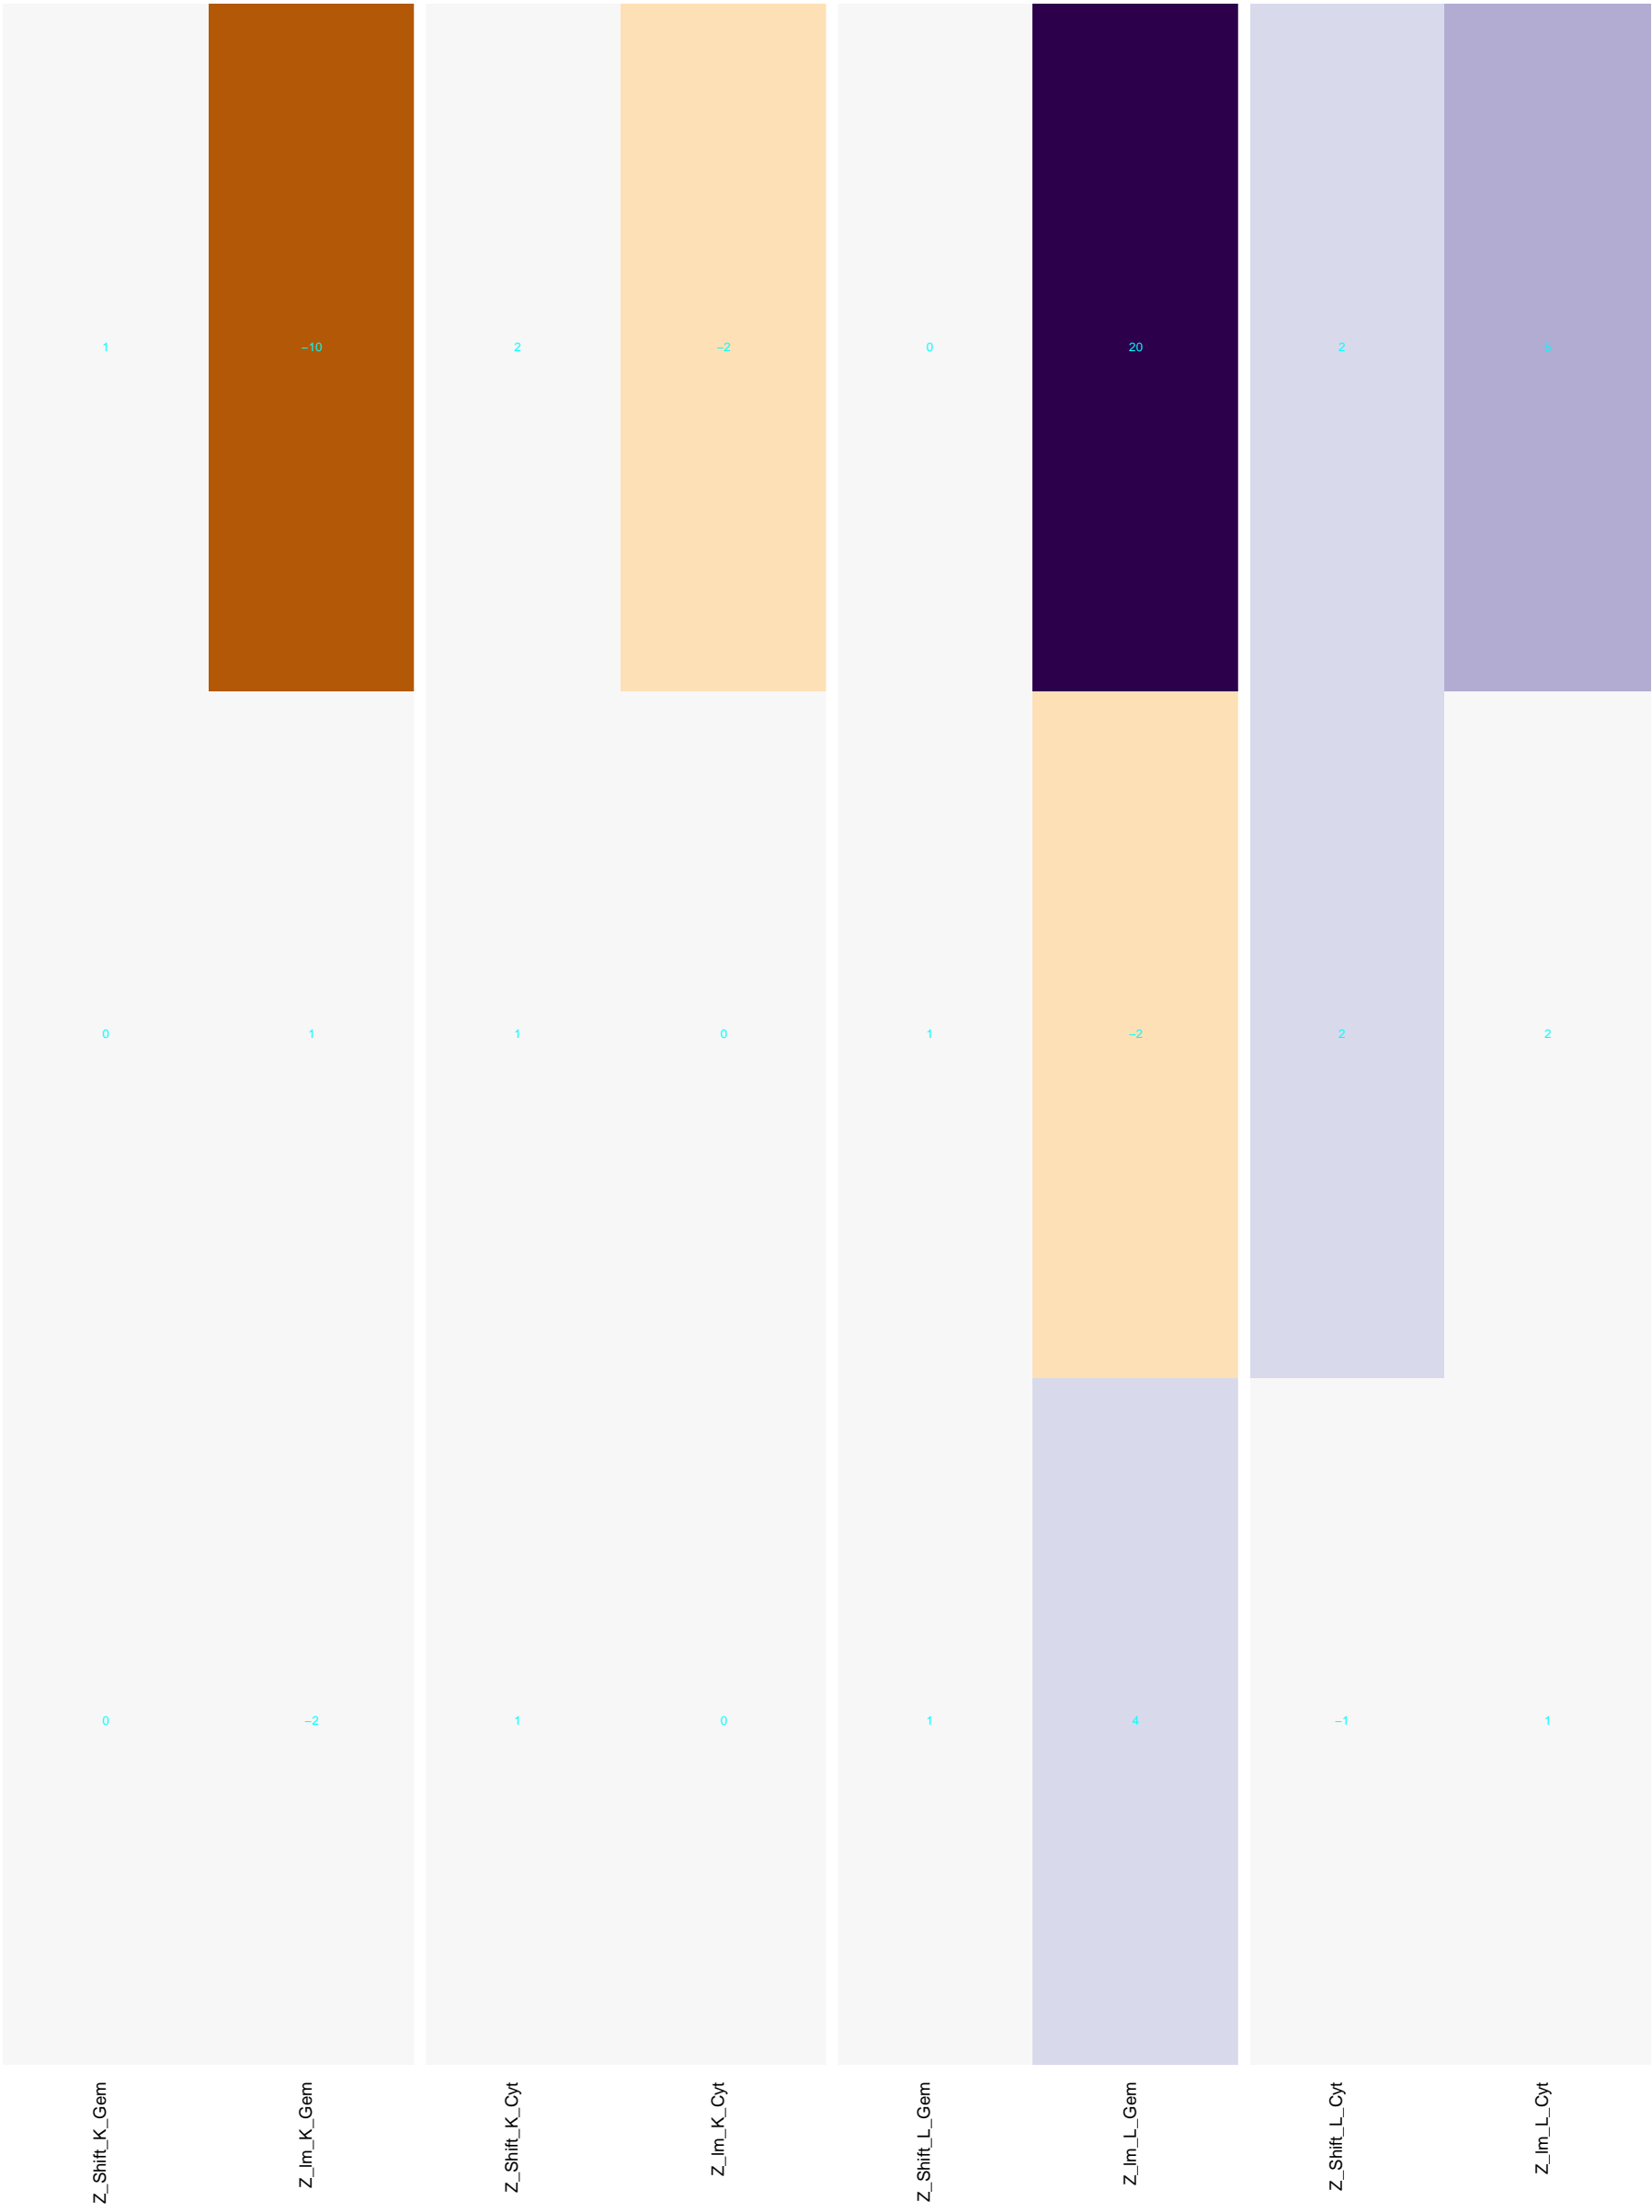

Gene



mitotic DNA replication initiation

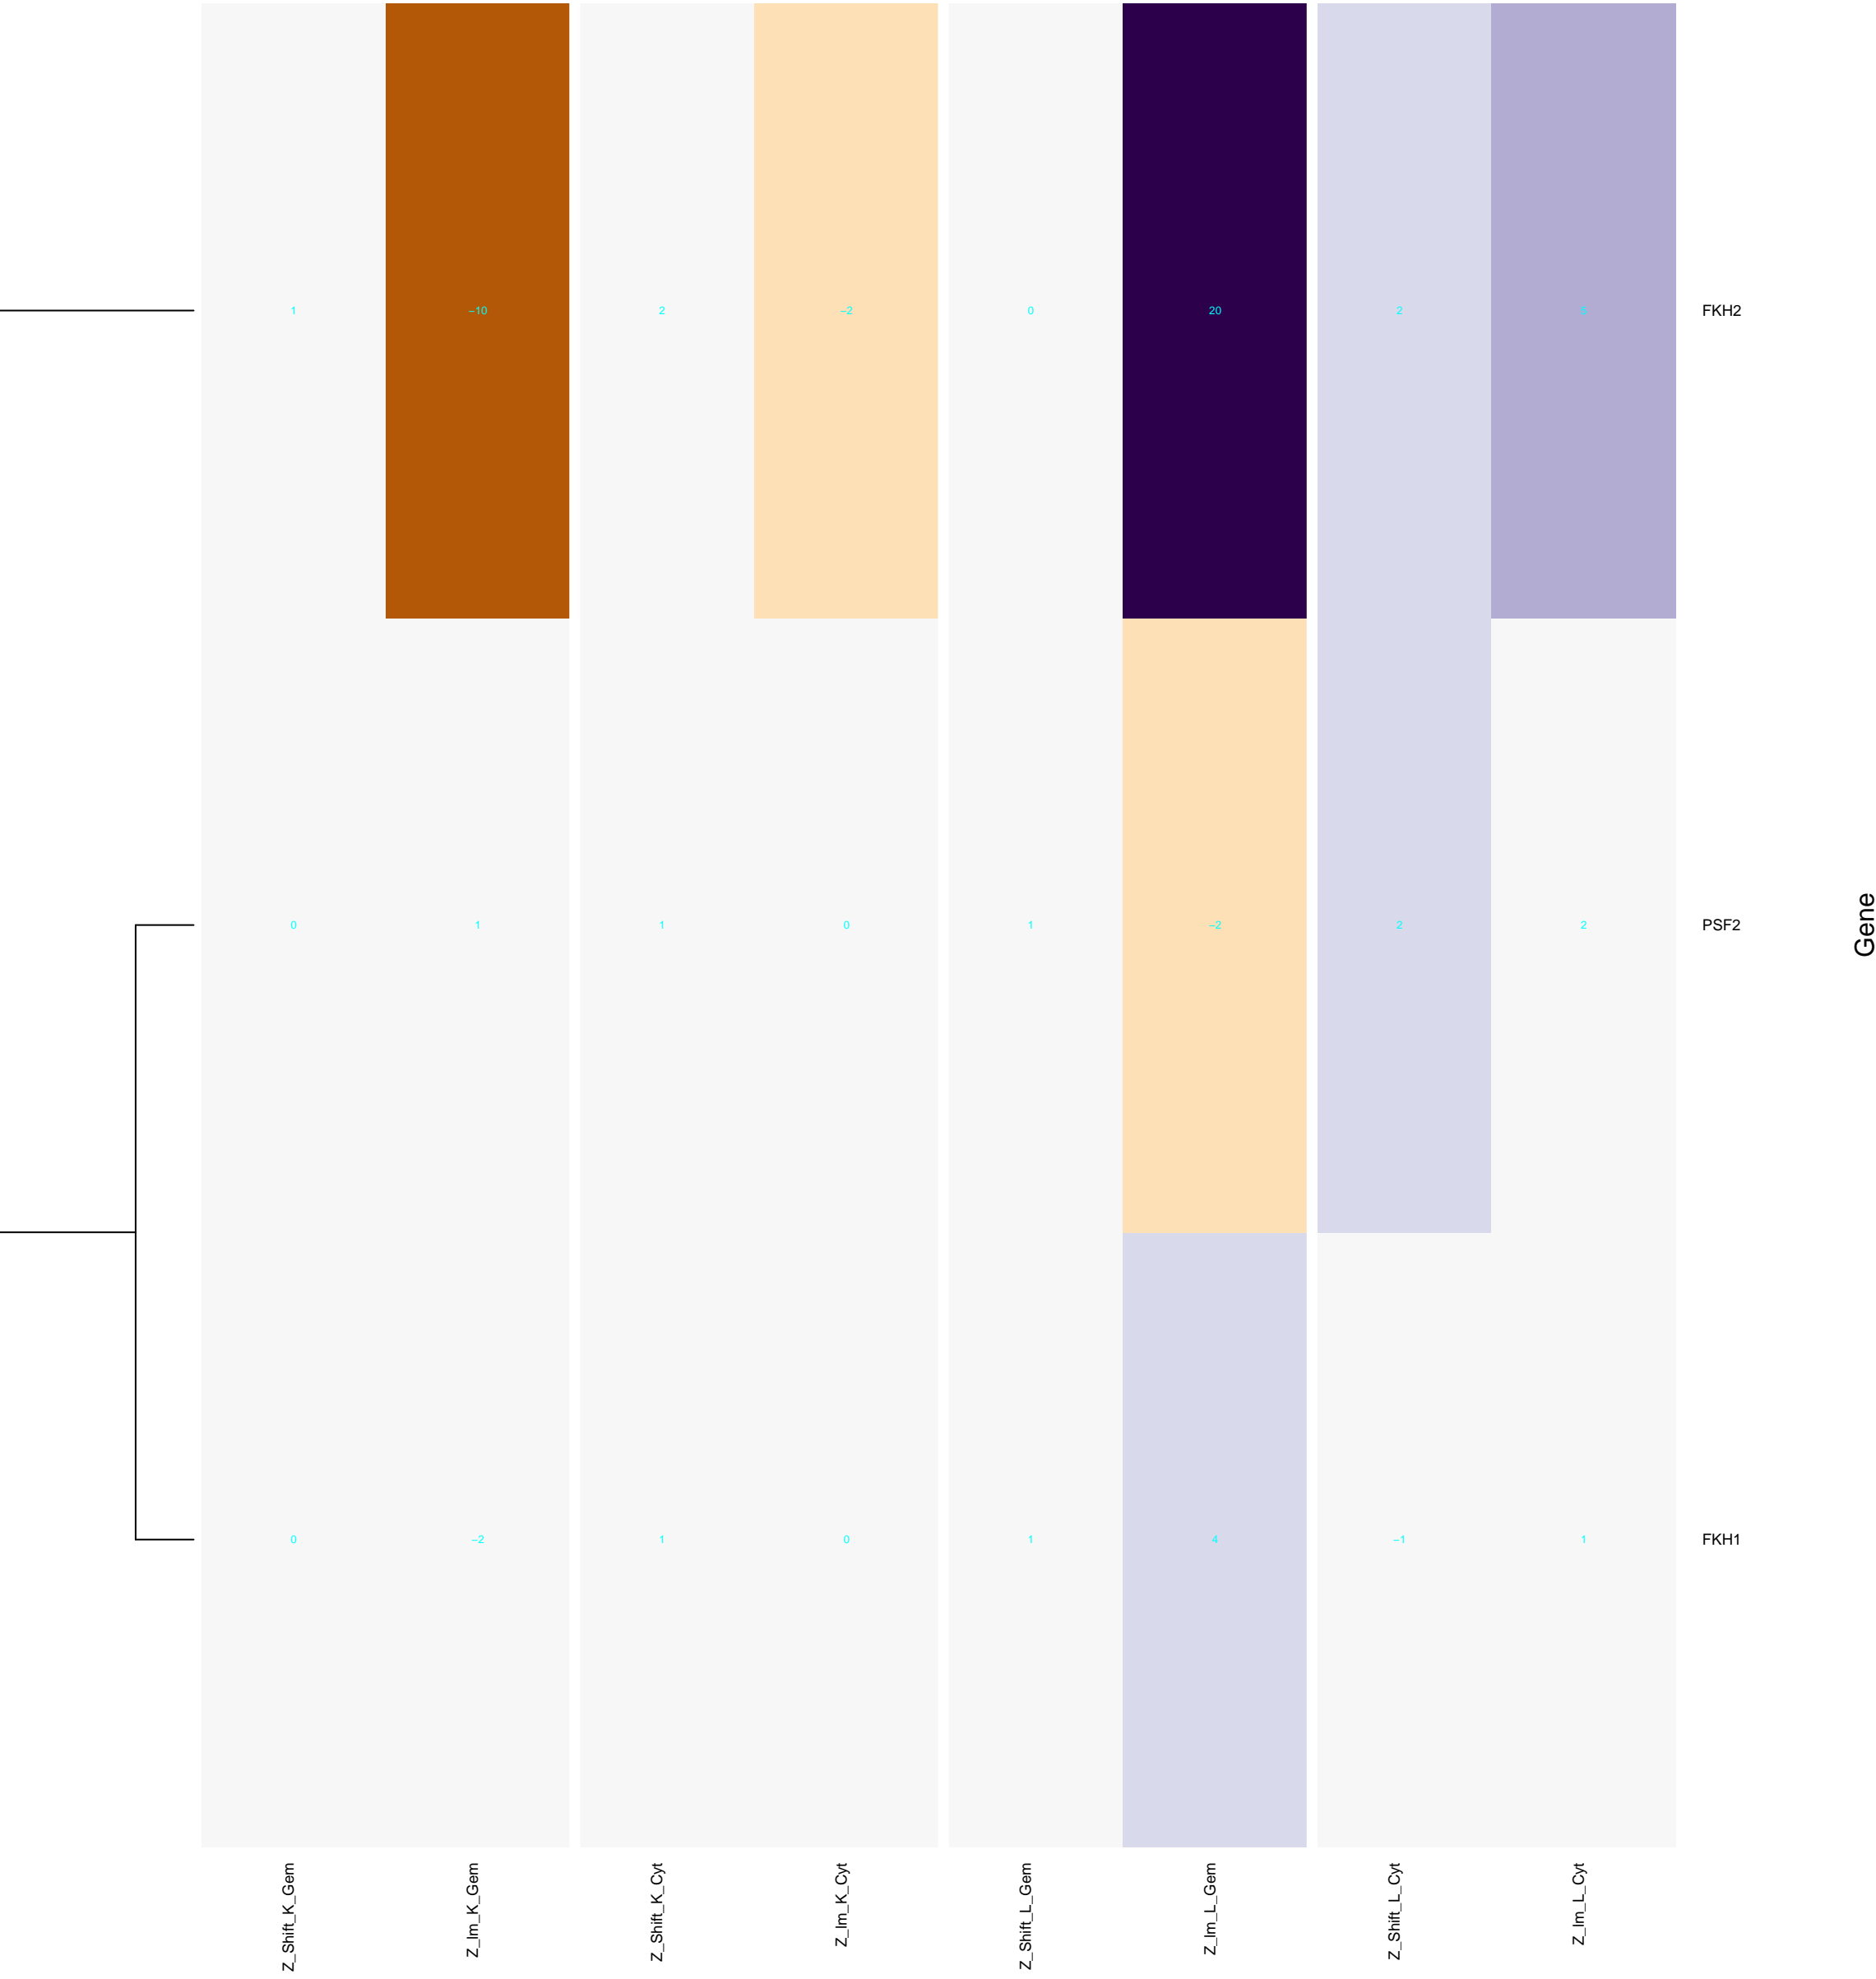

Supplement: s1 [file s1]
