# Supplementary material for: A Humanized Yeast Phenomic Model of Deoxycytidine Kinase to Predict Genetic Buffering of Nucleoside Analog Cytotoxicity
Source: MDPI journal article supplement (doi:10.3390/genes10100770), 2019-09-30

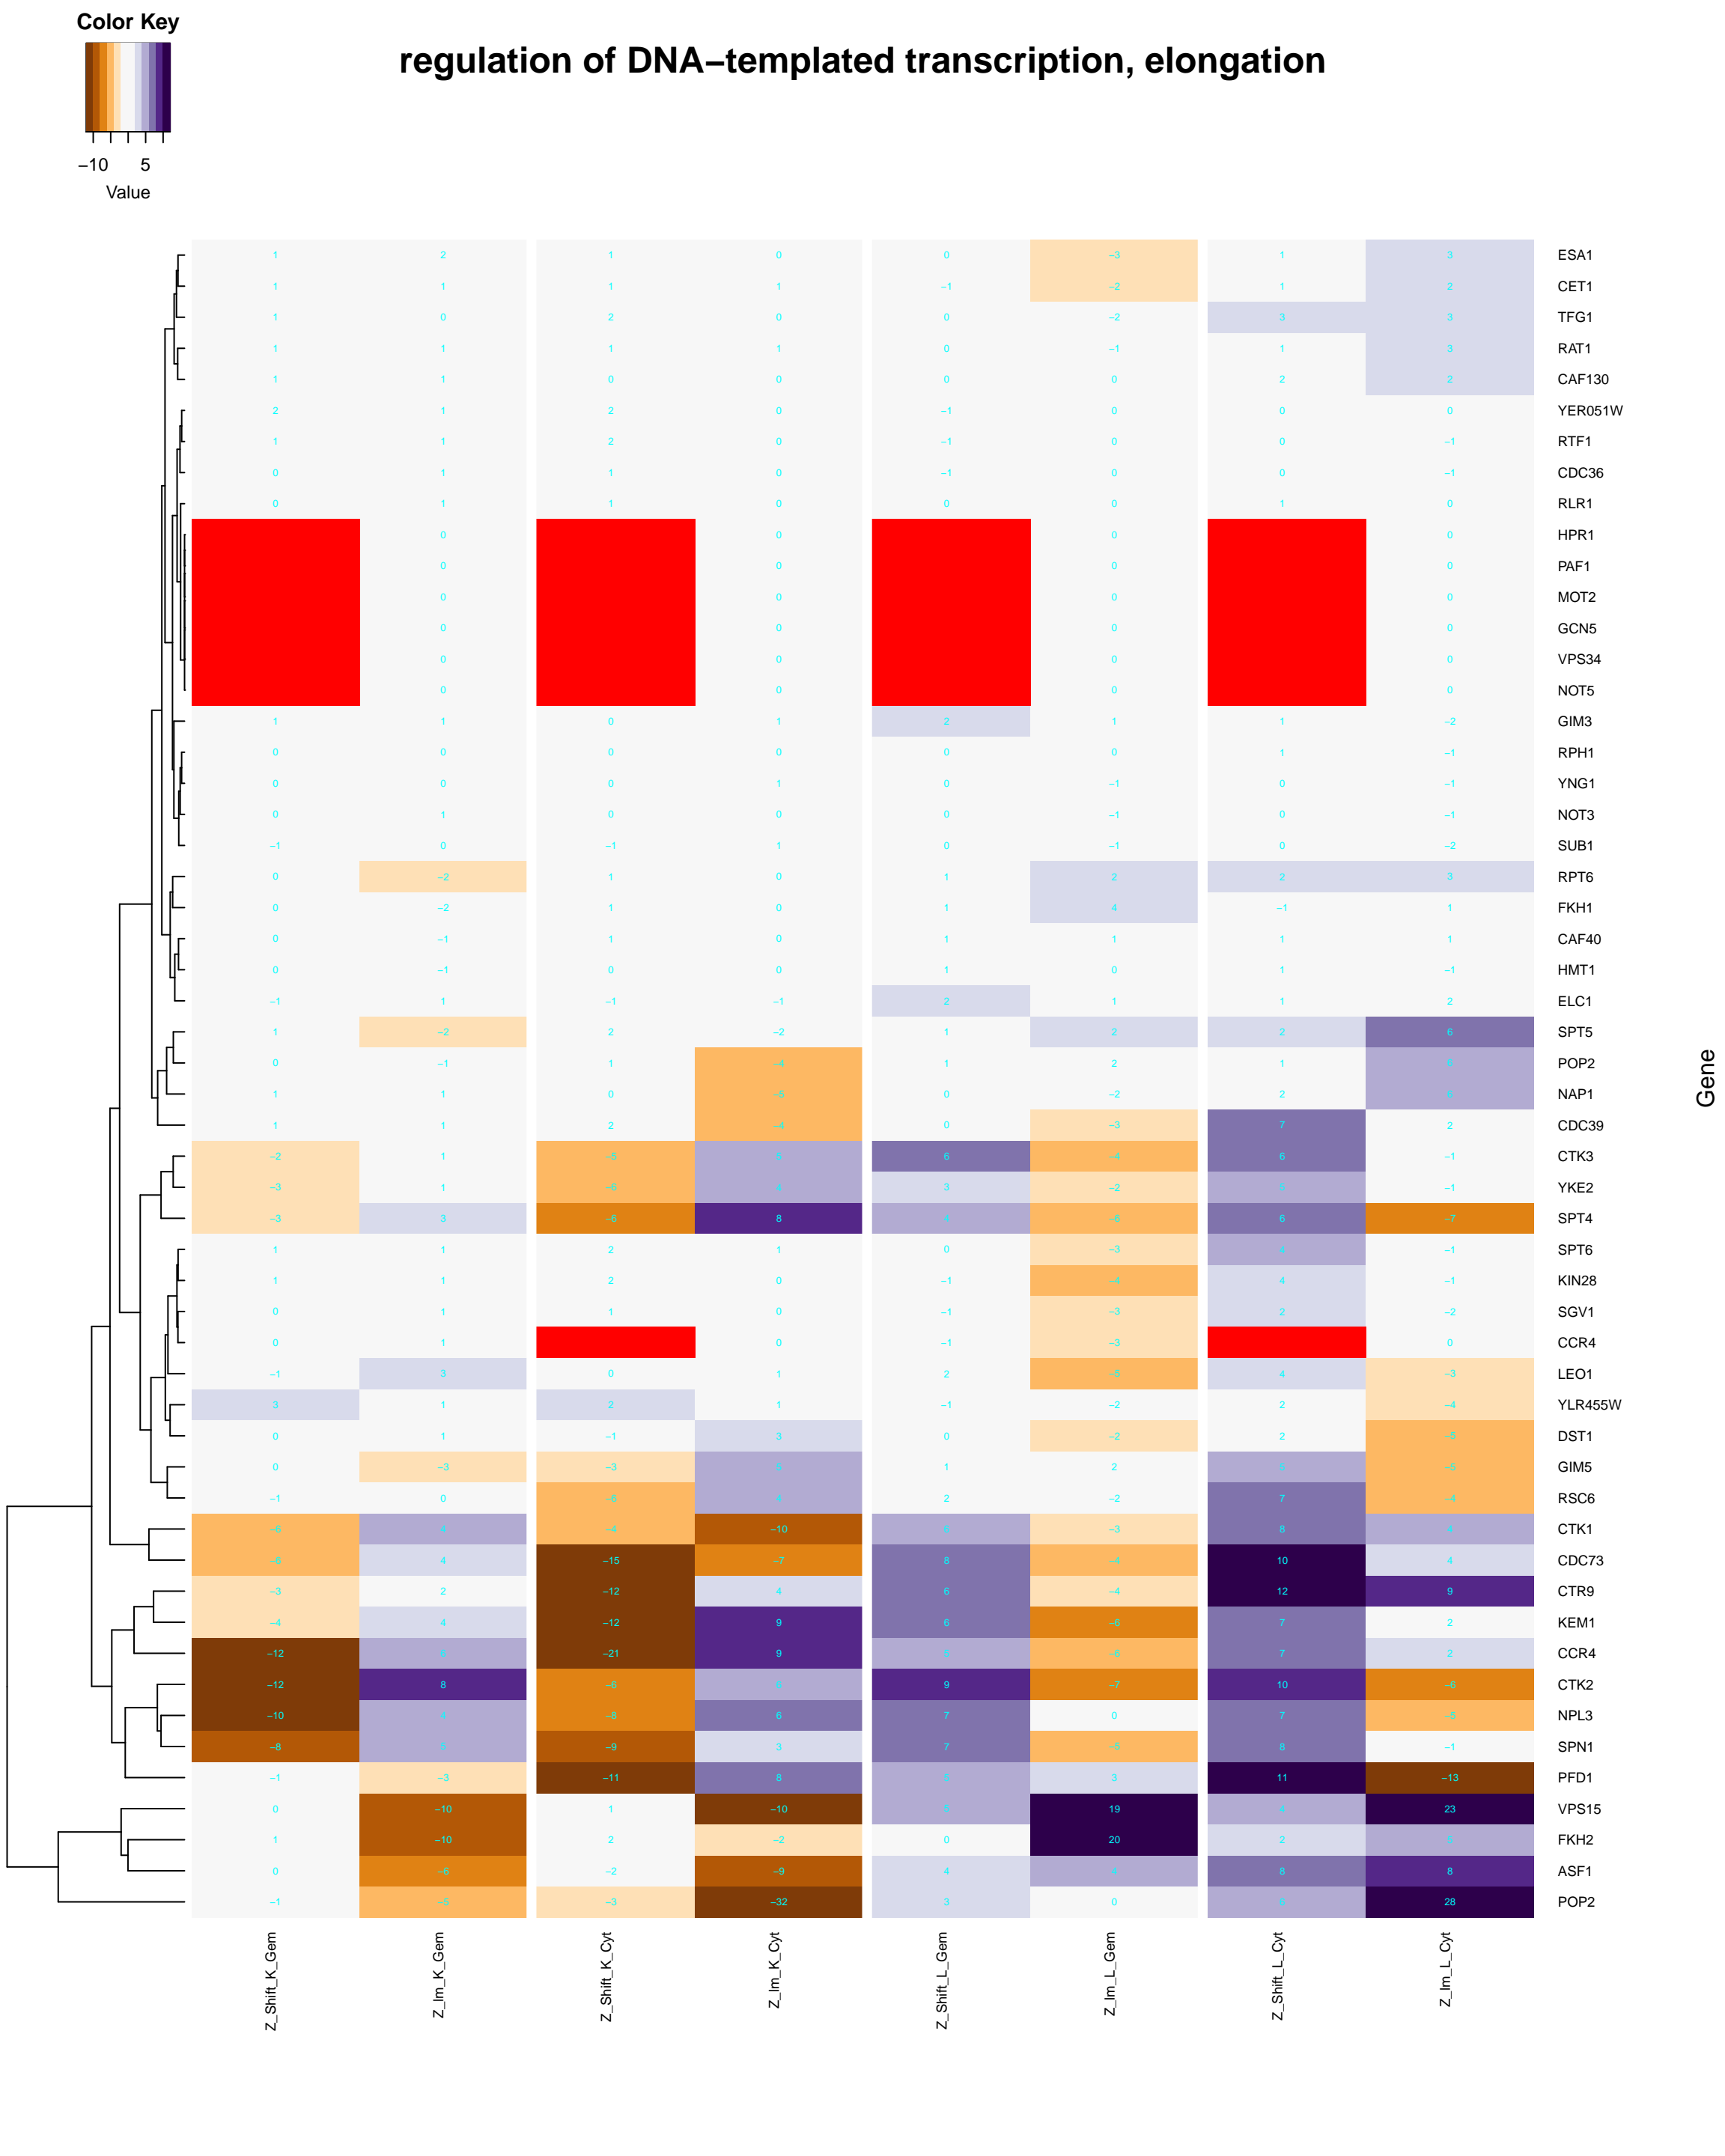

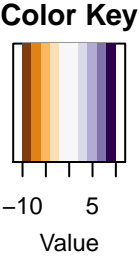

negative regulation of DNA-templated transcription, elongation

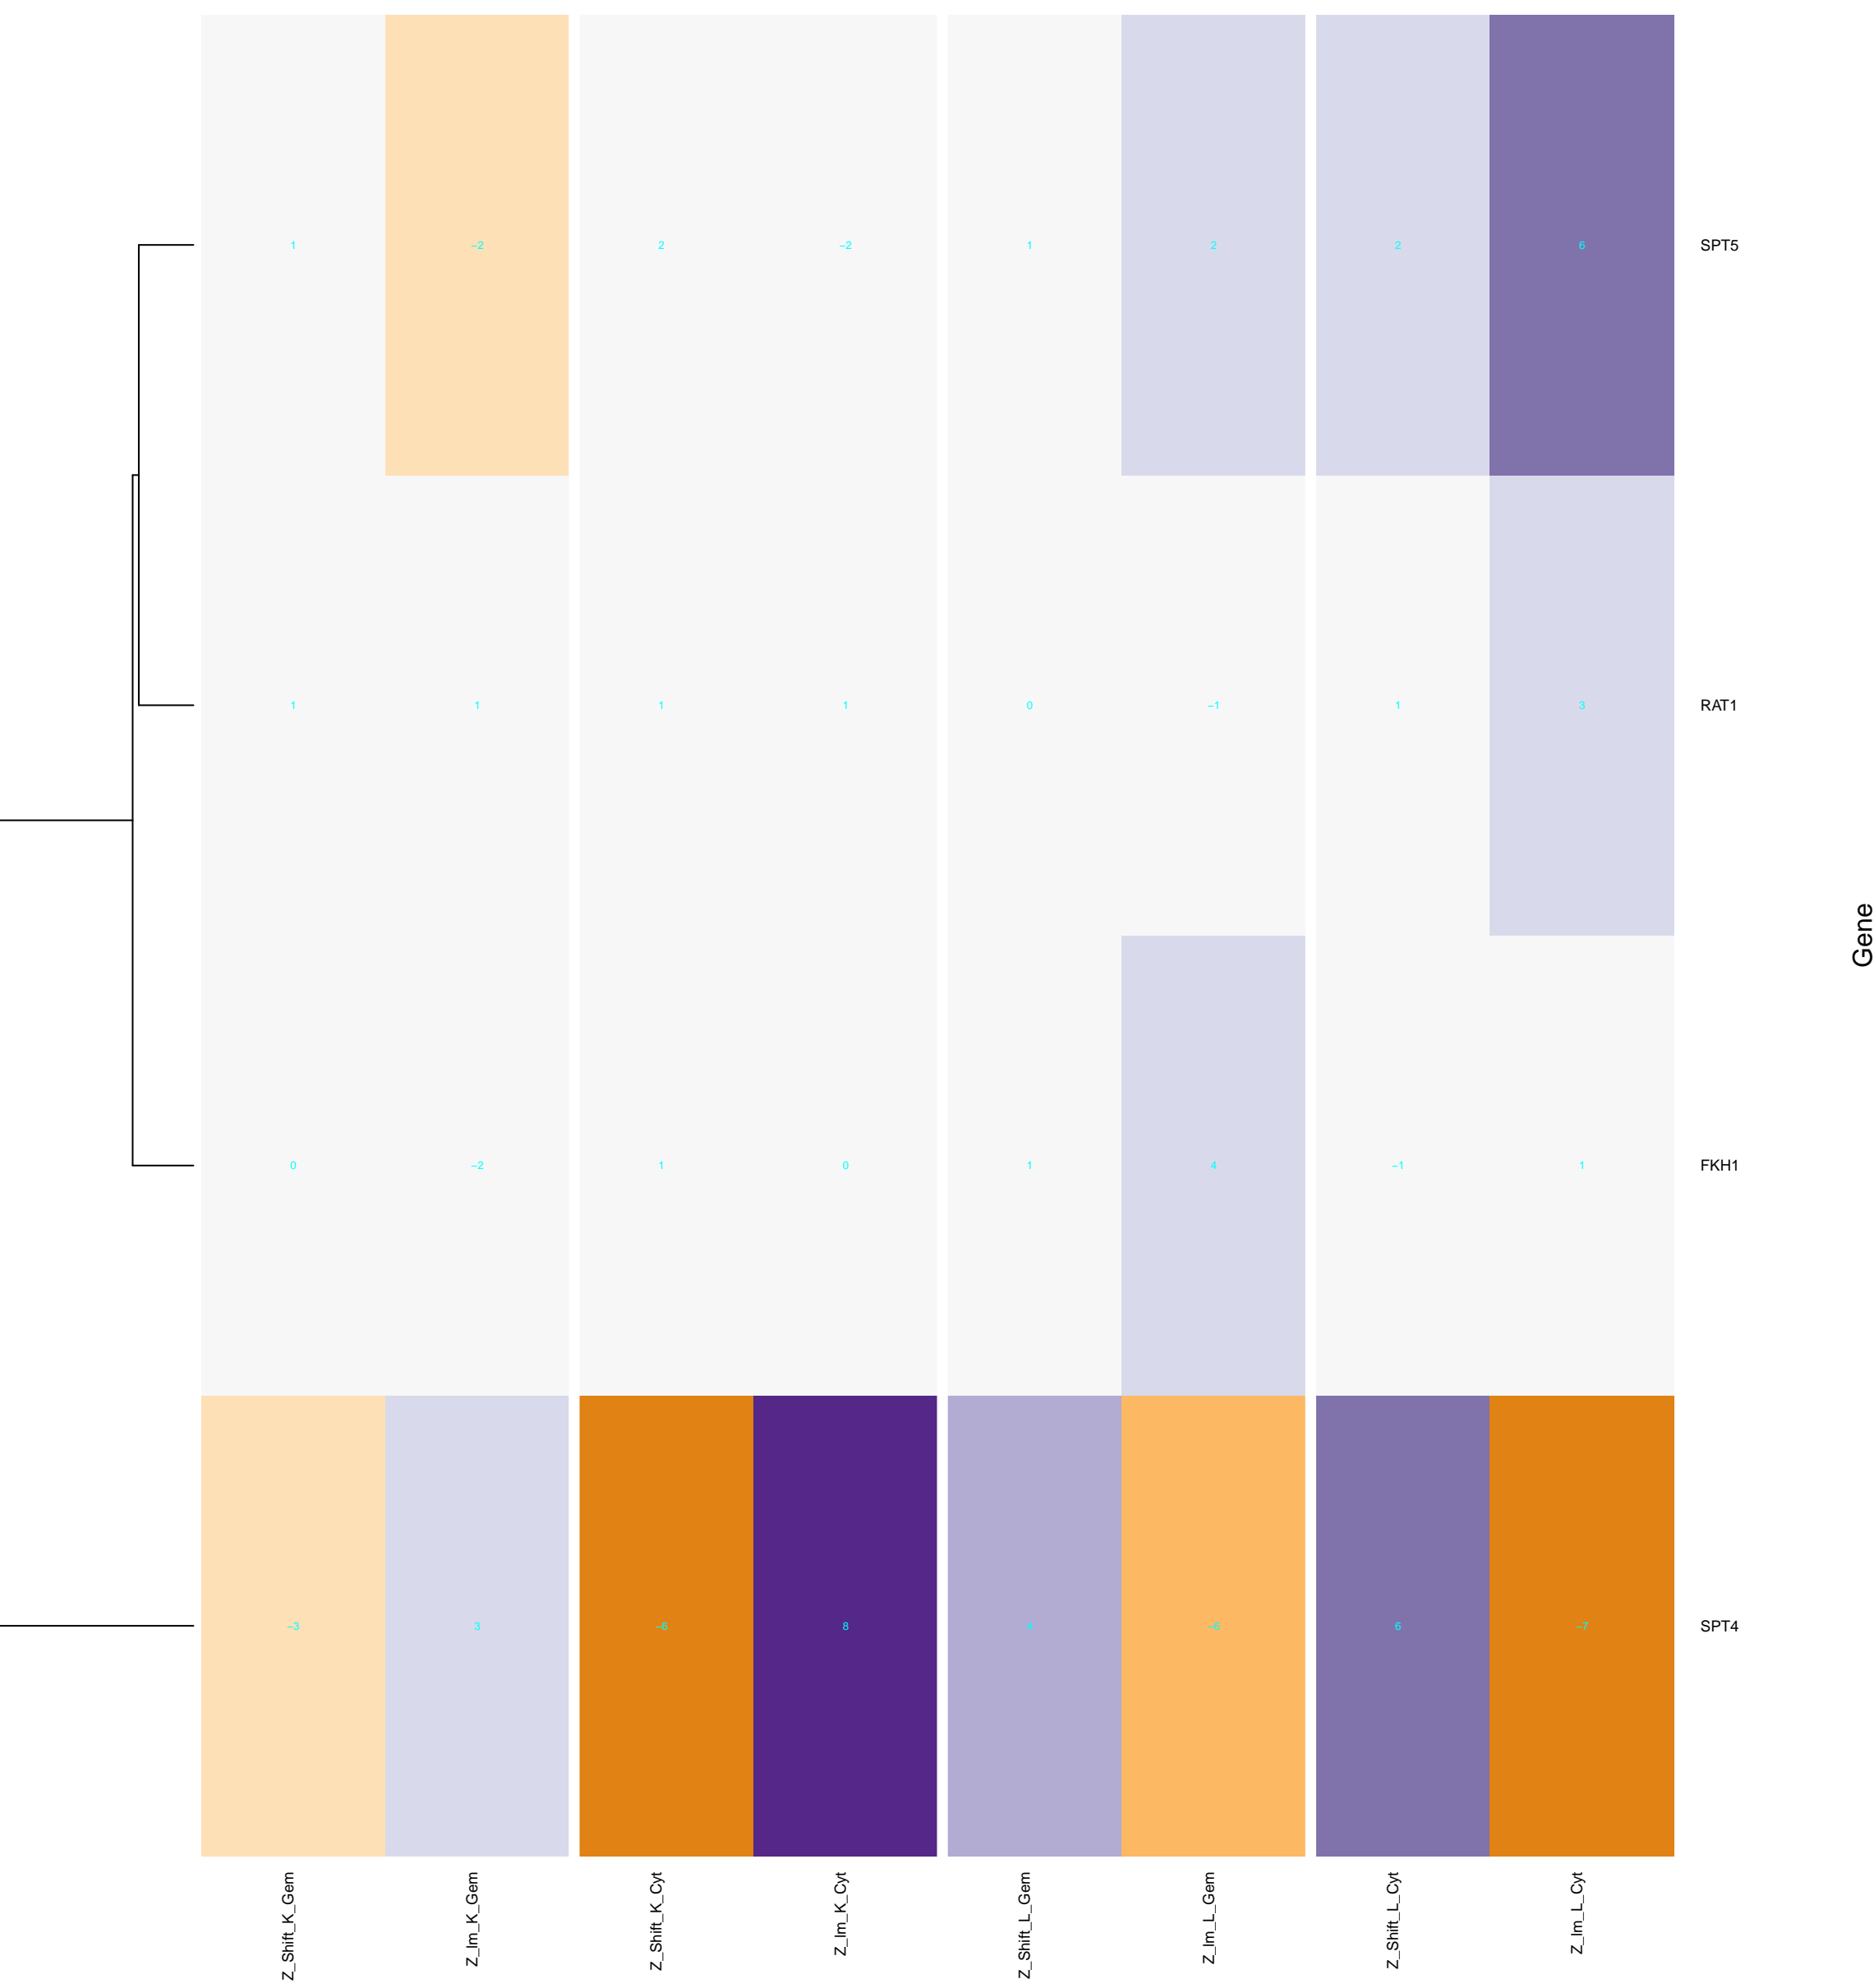

Color Key

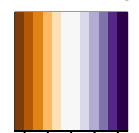

-10 5  
Value

positive regulation of DNA-templated transcription, elongation

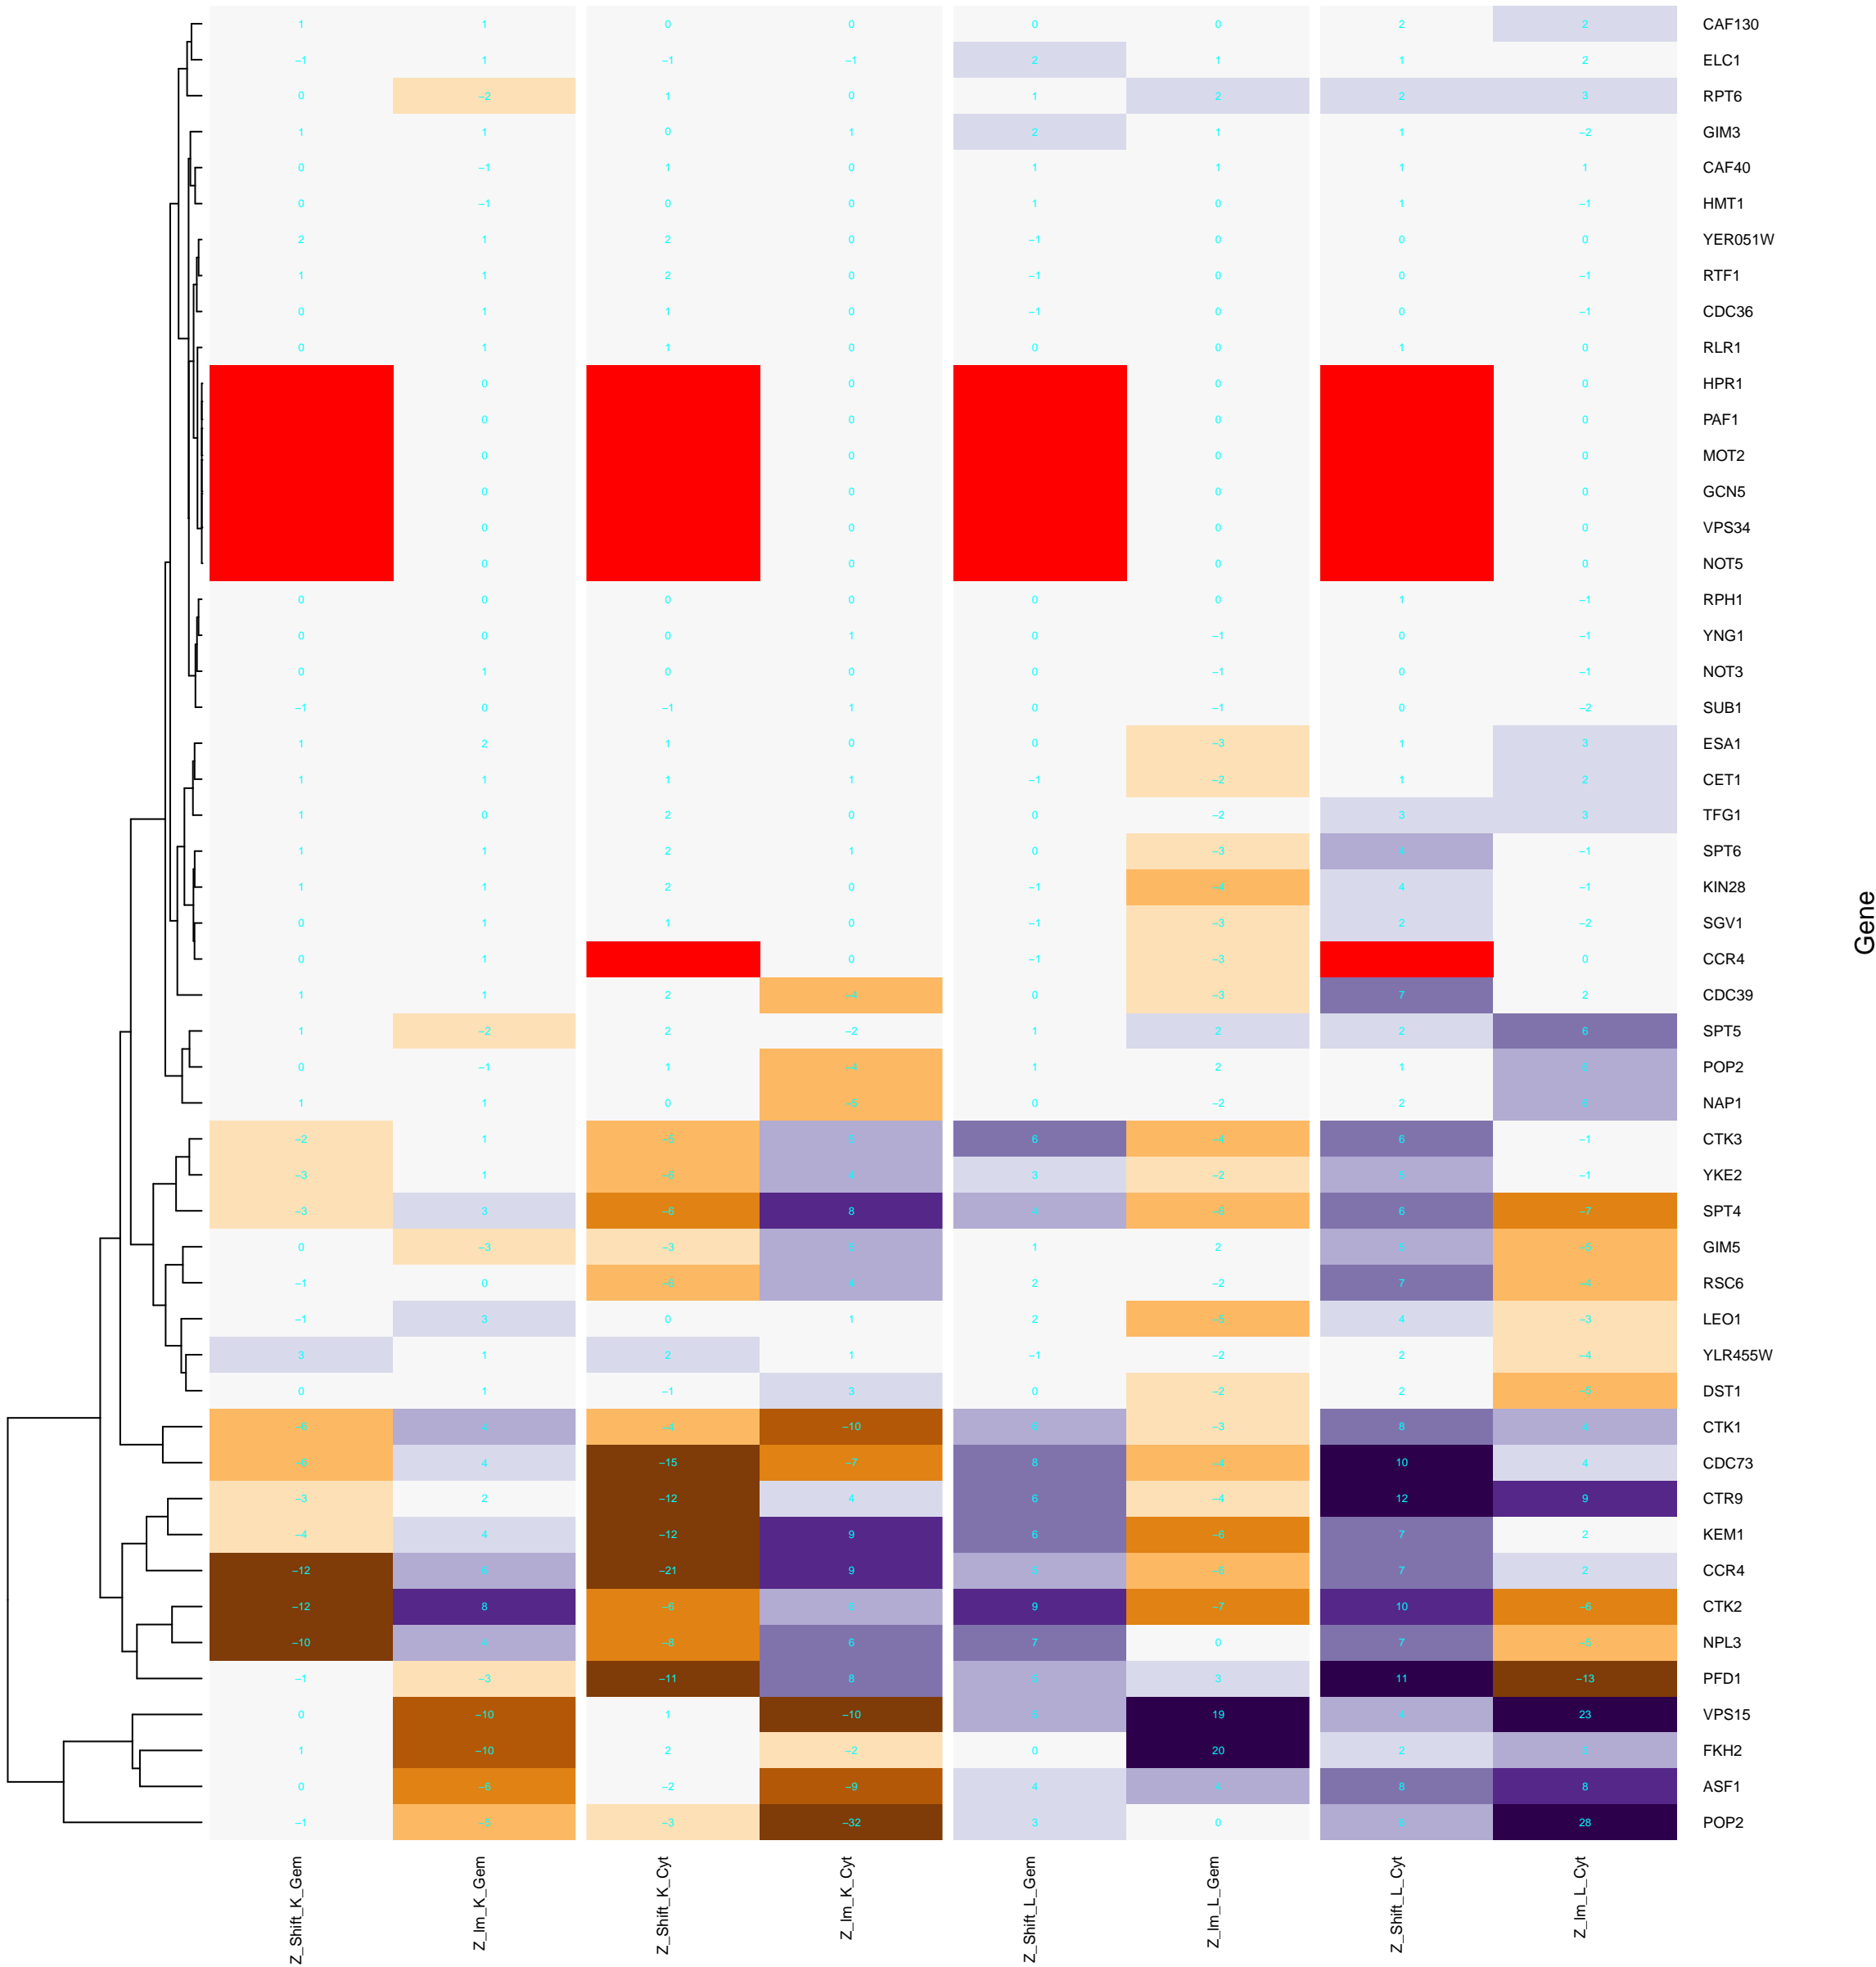

Color Key

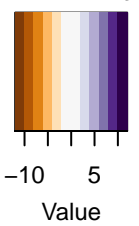

regulation of transcription elongation from RNA polymerase II promoter

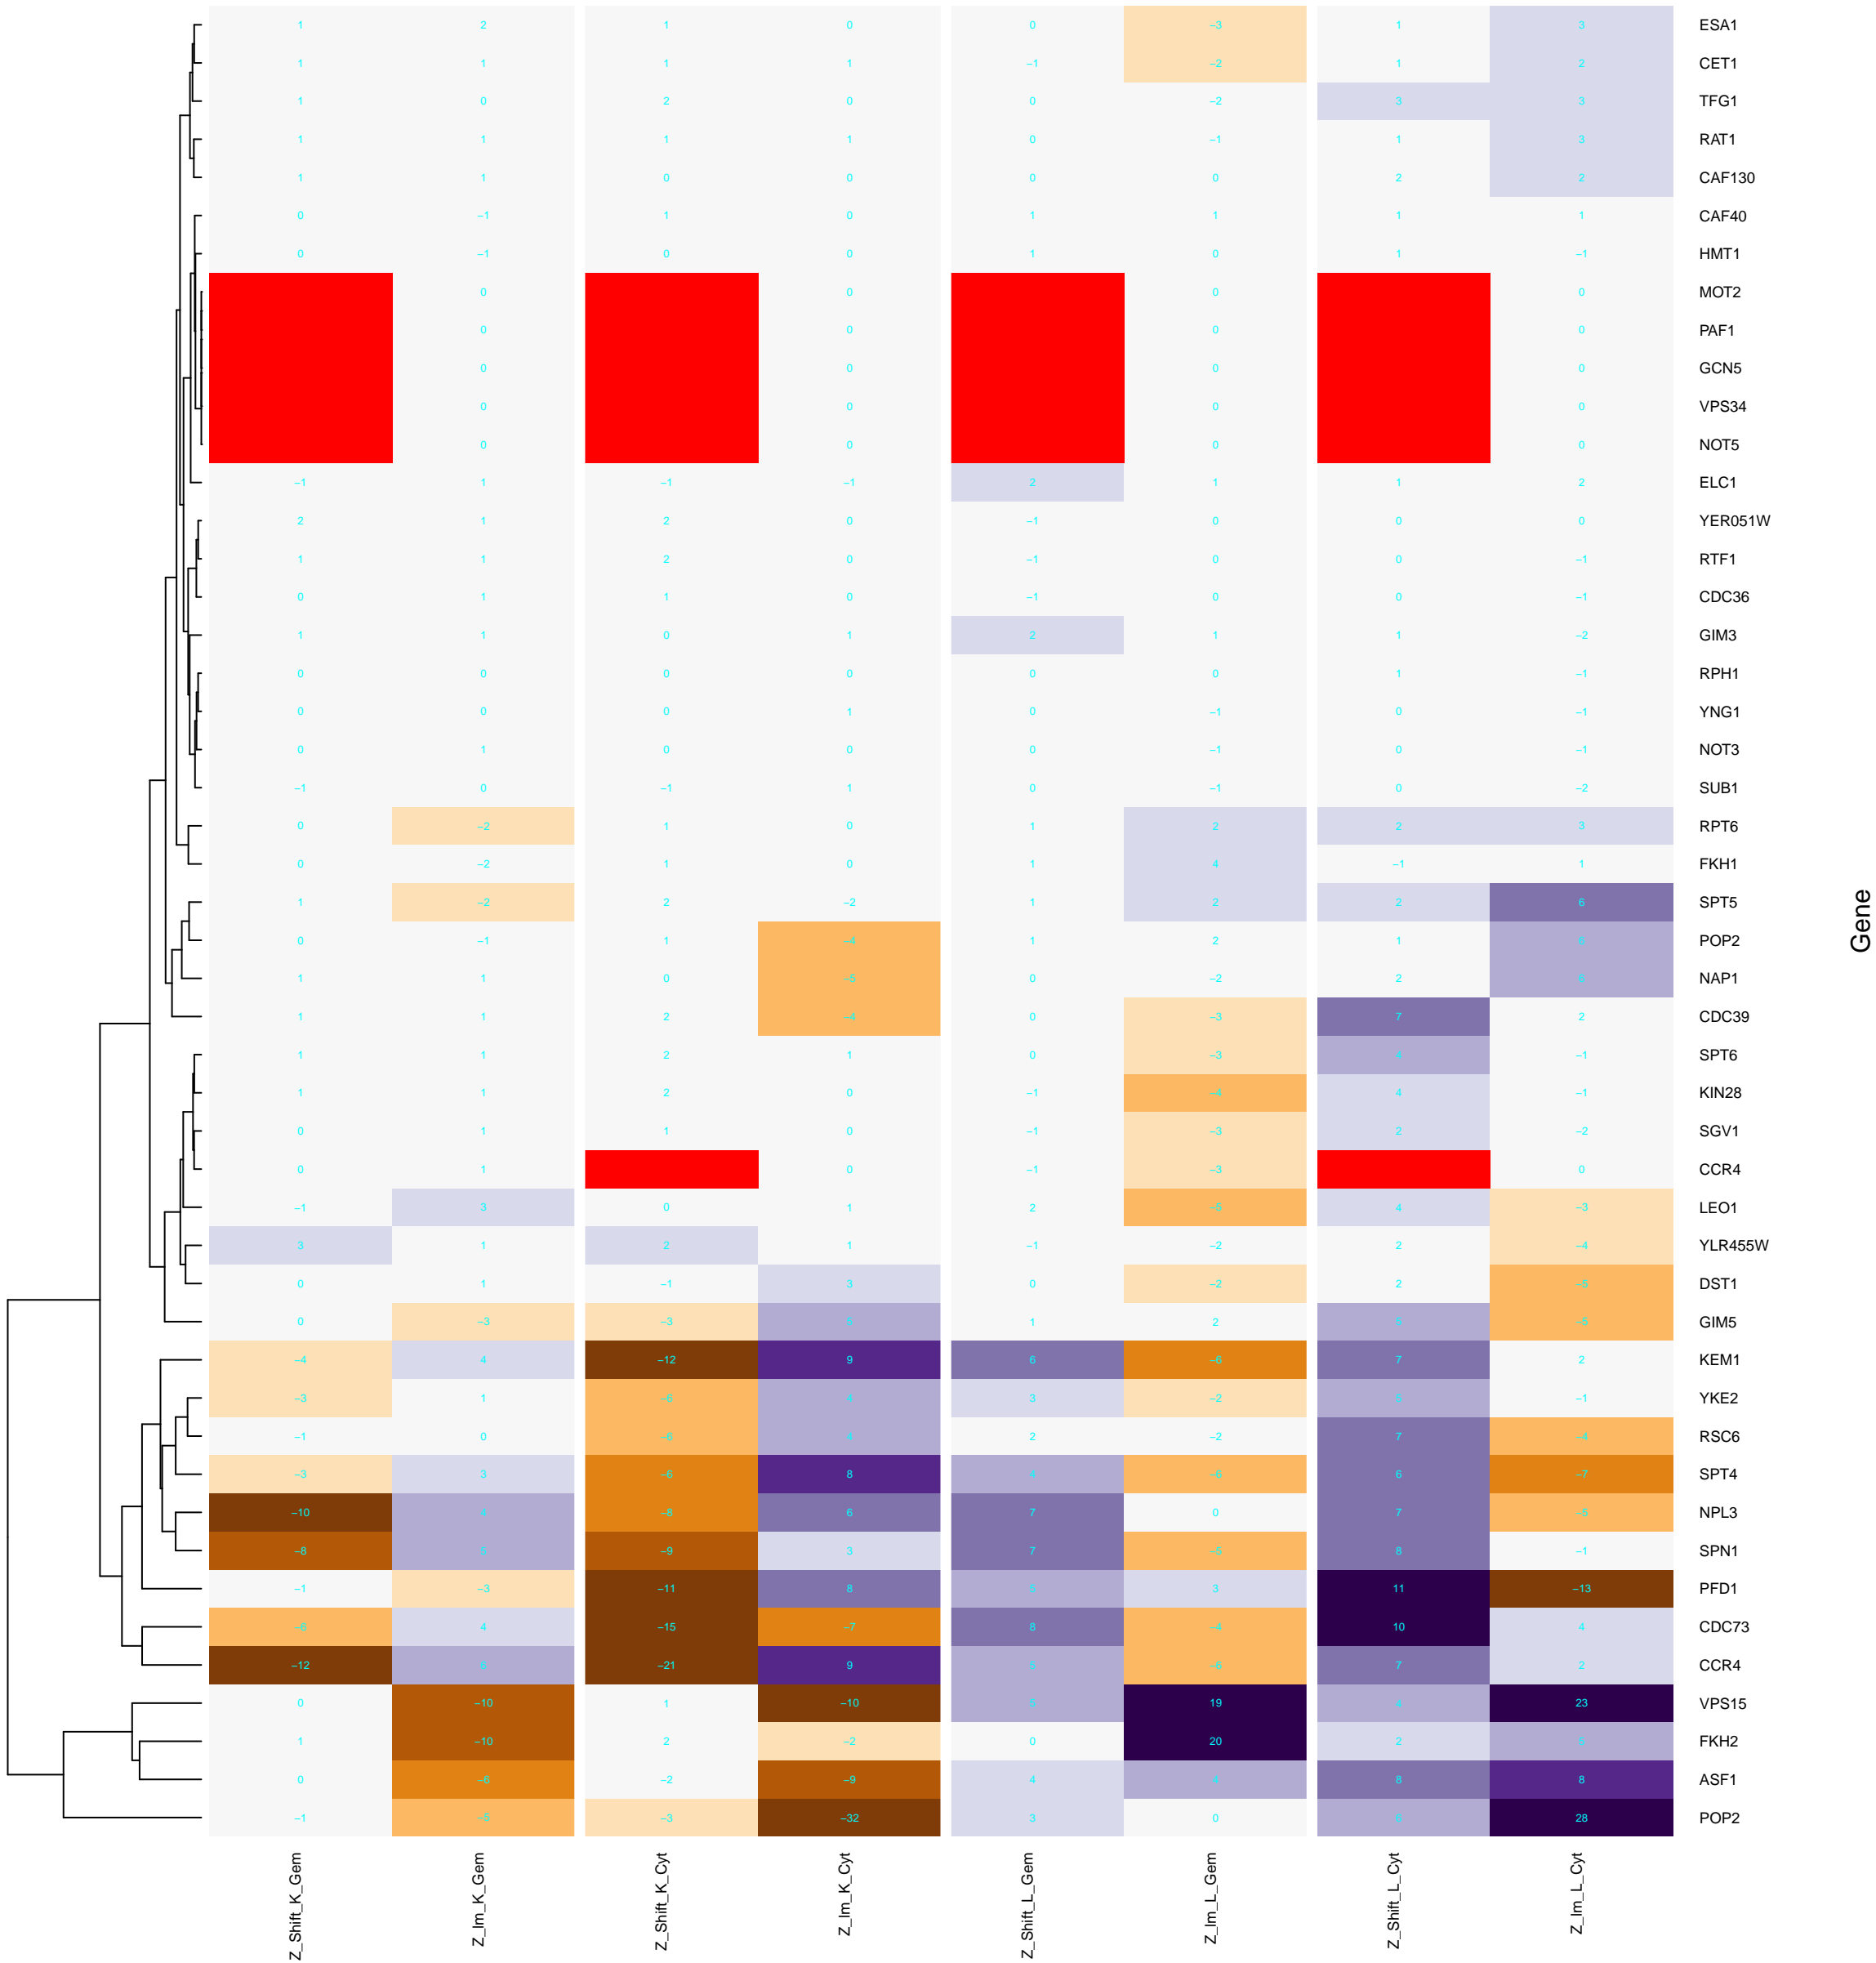

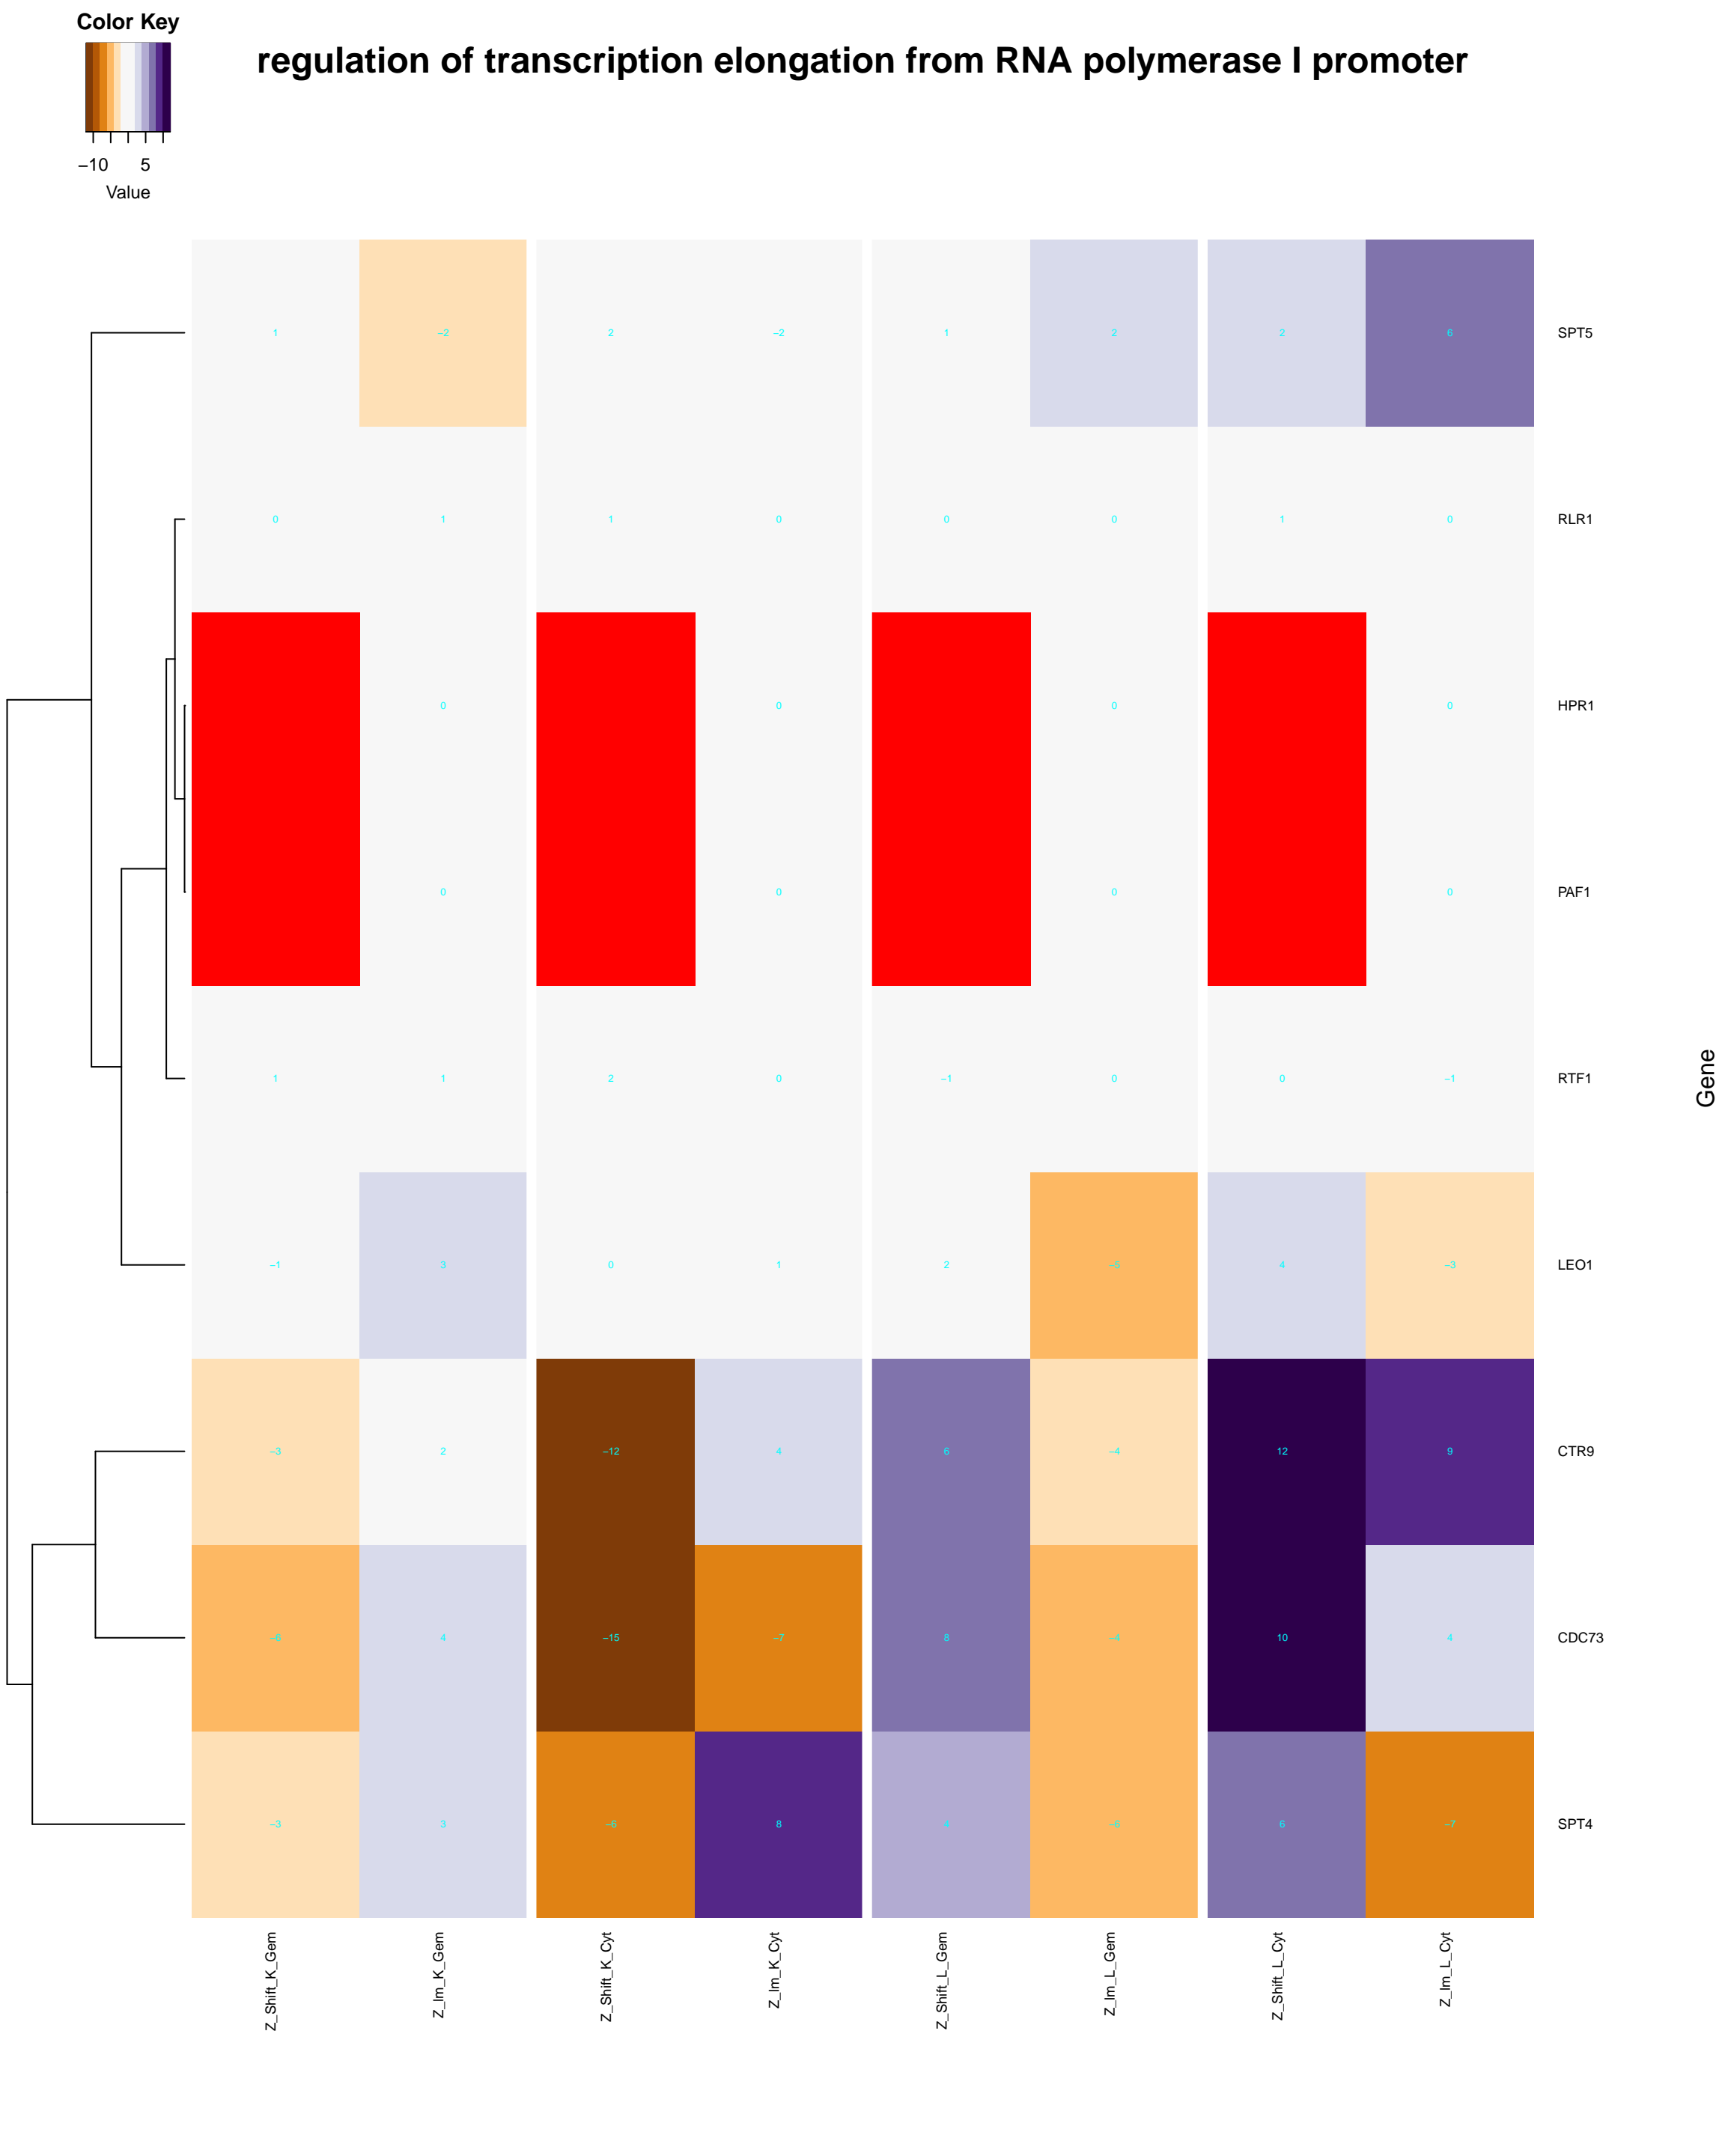

Color Key

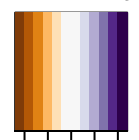

-10 5  
Value

positive regulation of transcription elongation from RNA polymerase II promoter

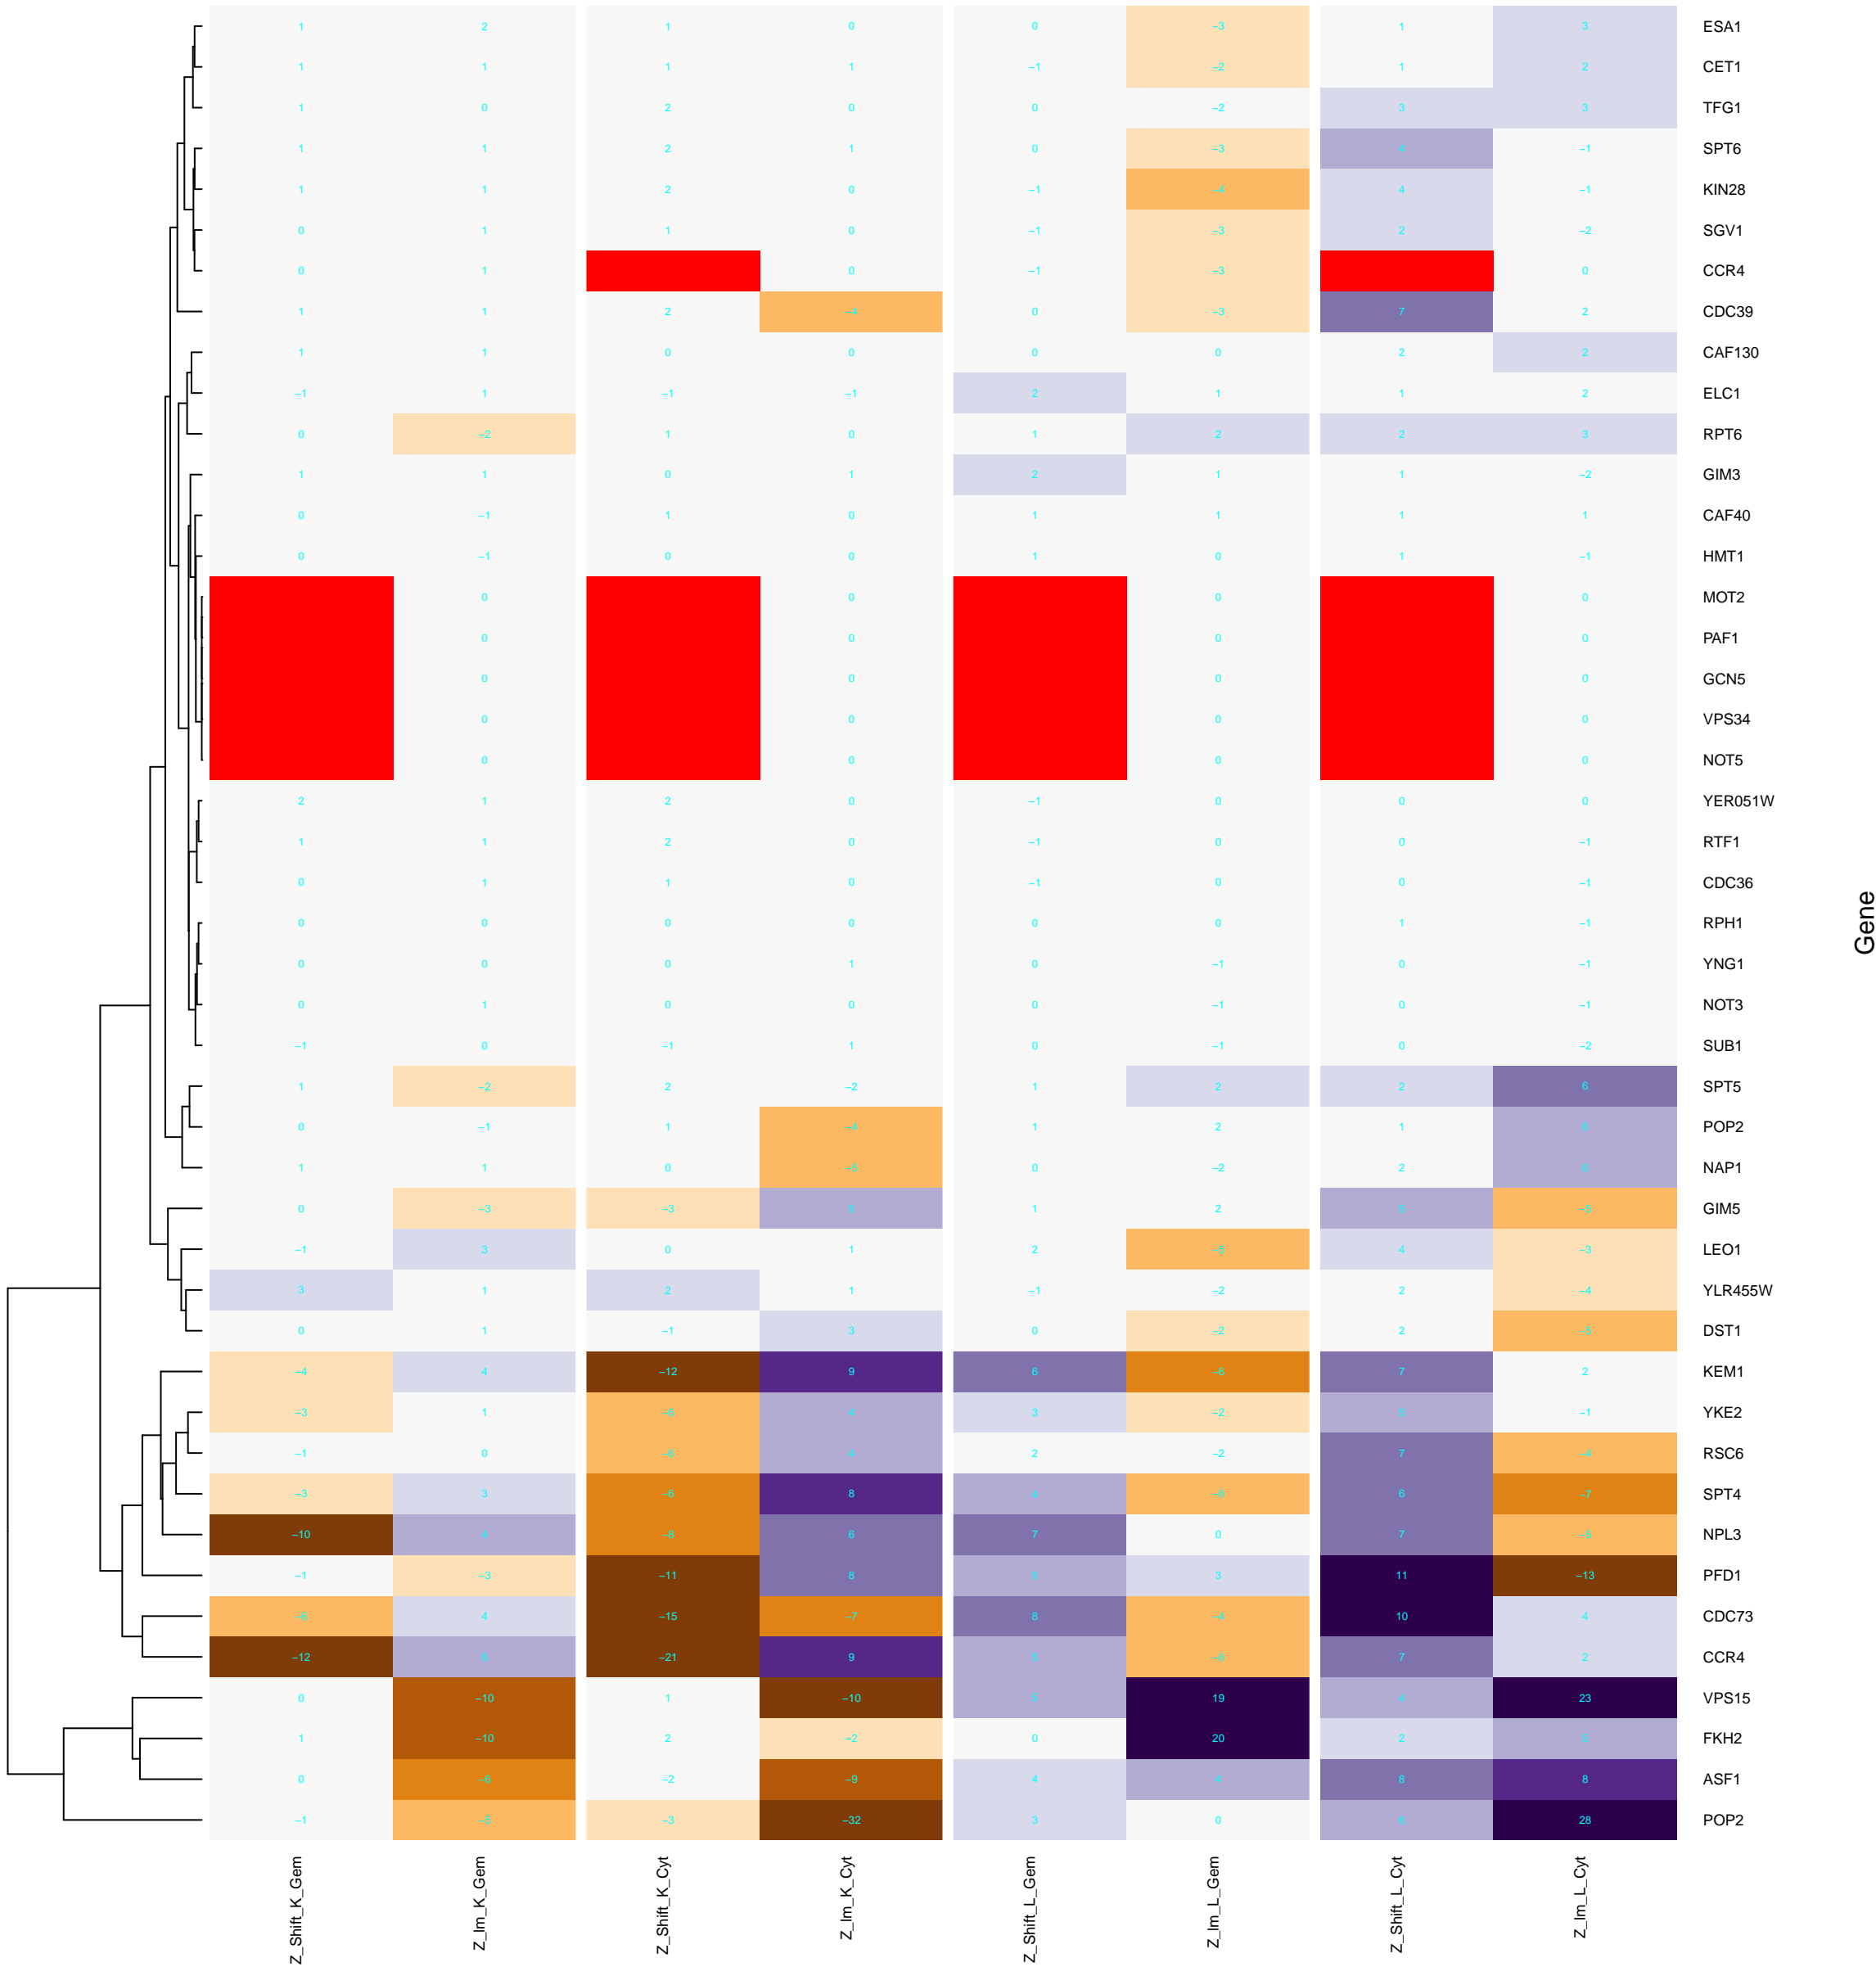

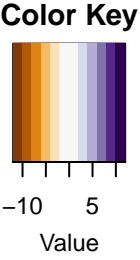

positive regulation of transcription elongation from RNA polymerase I promoter

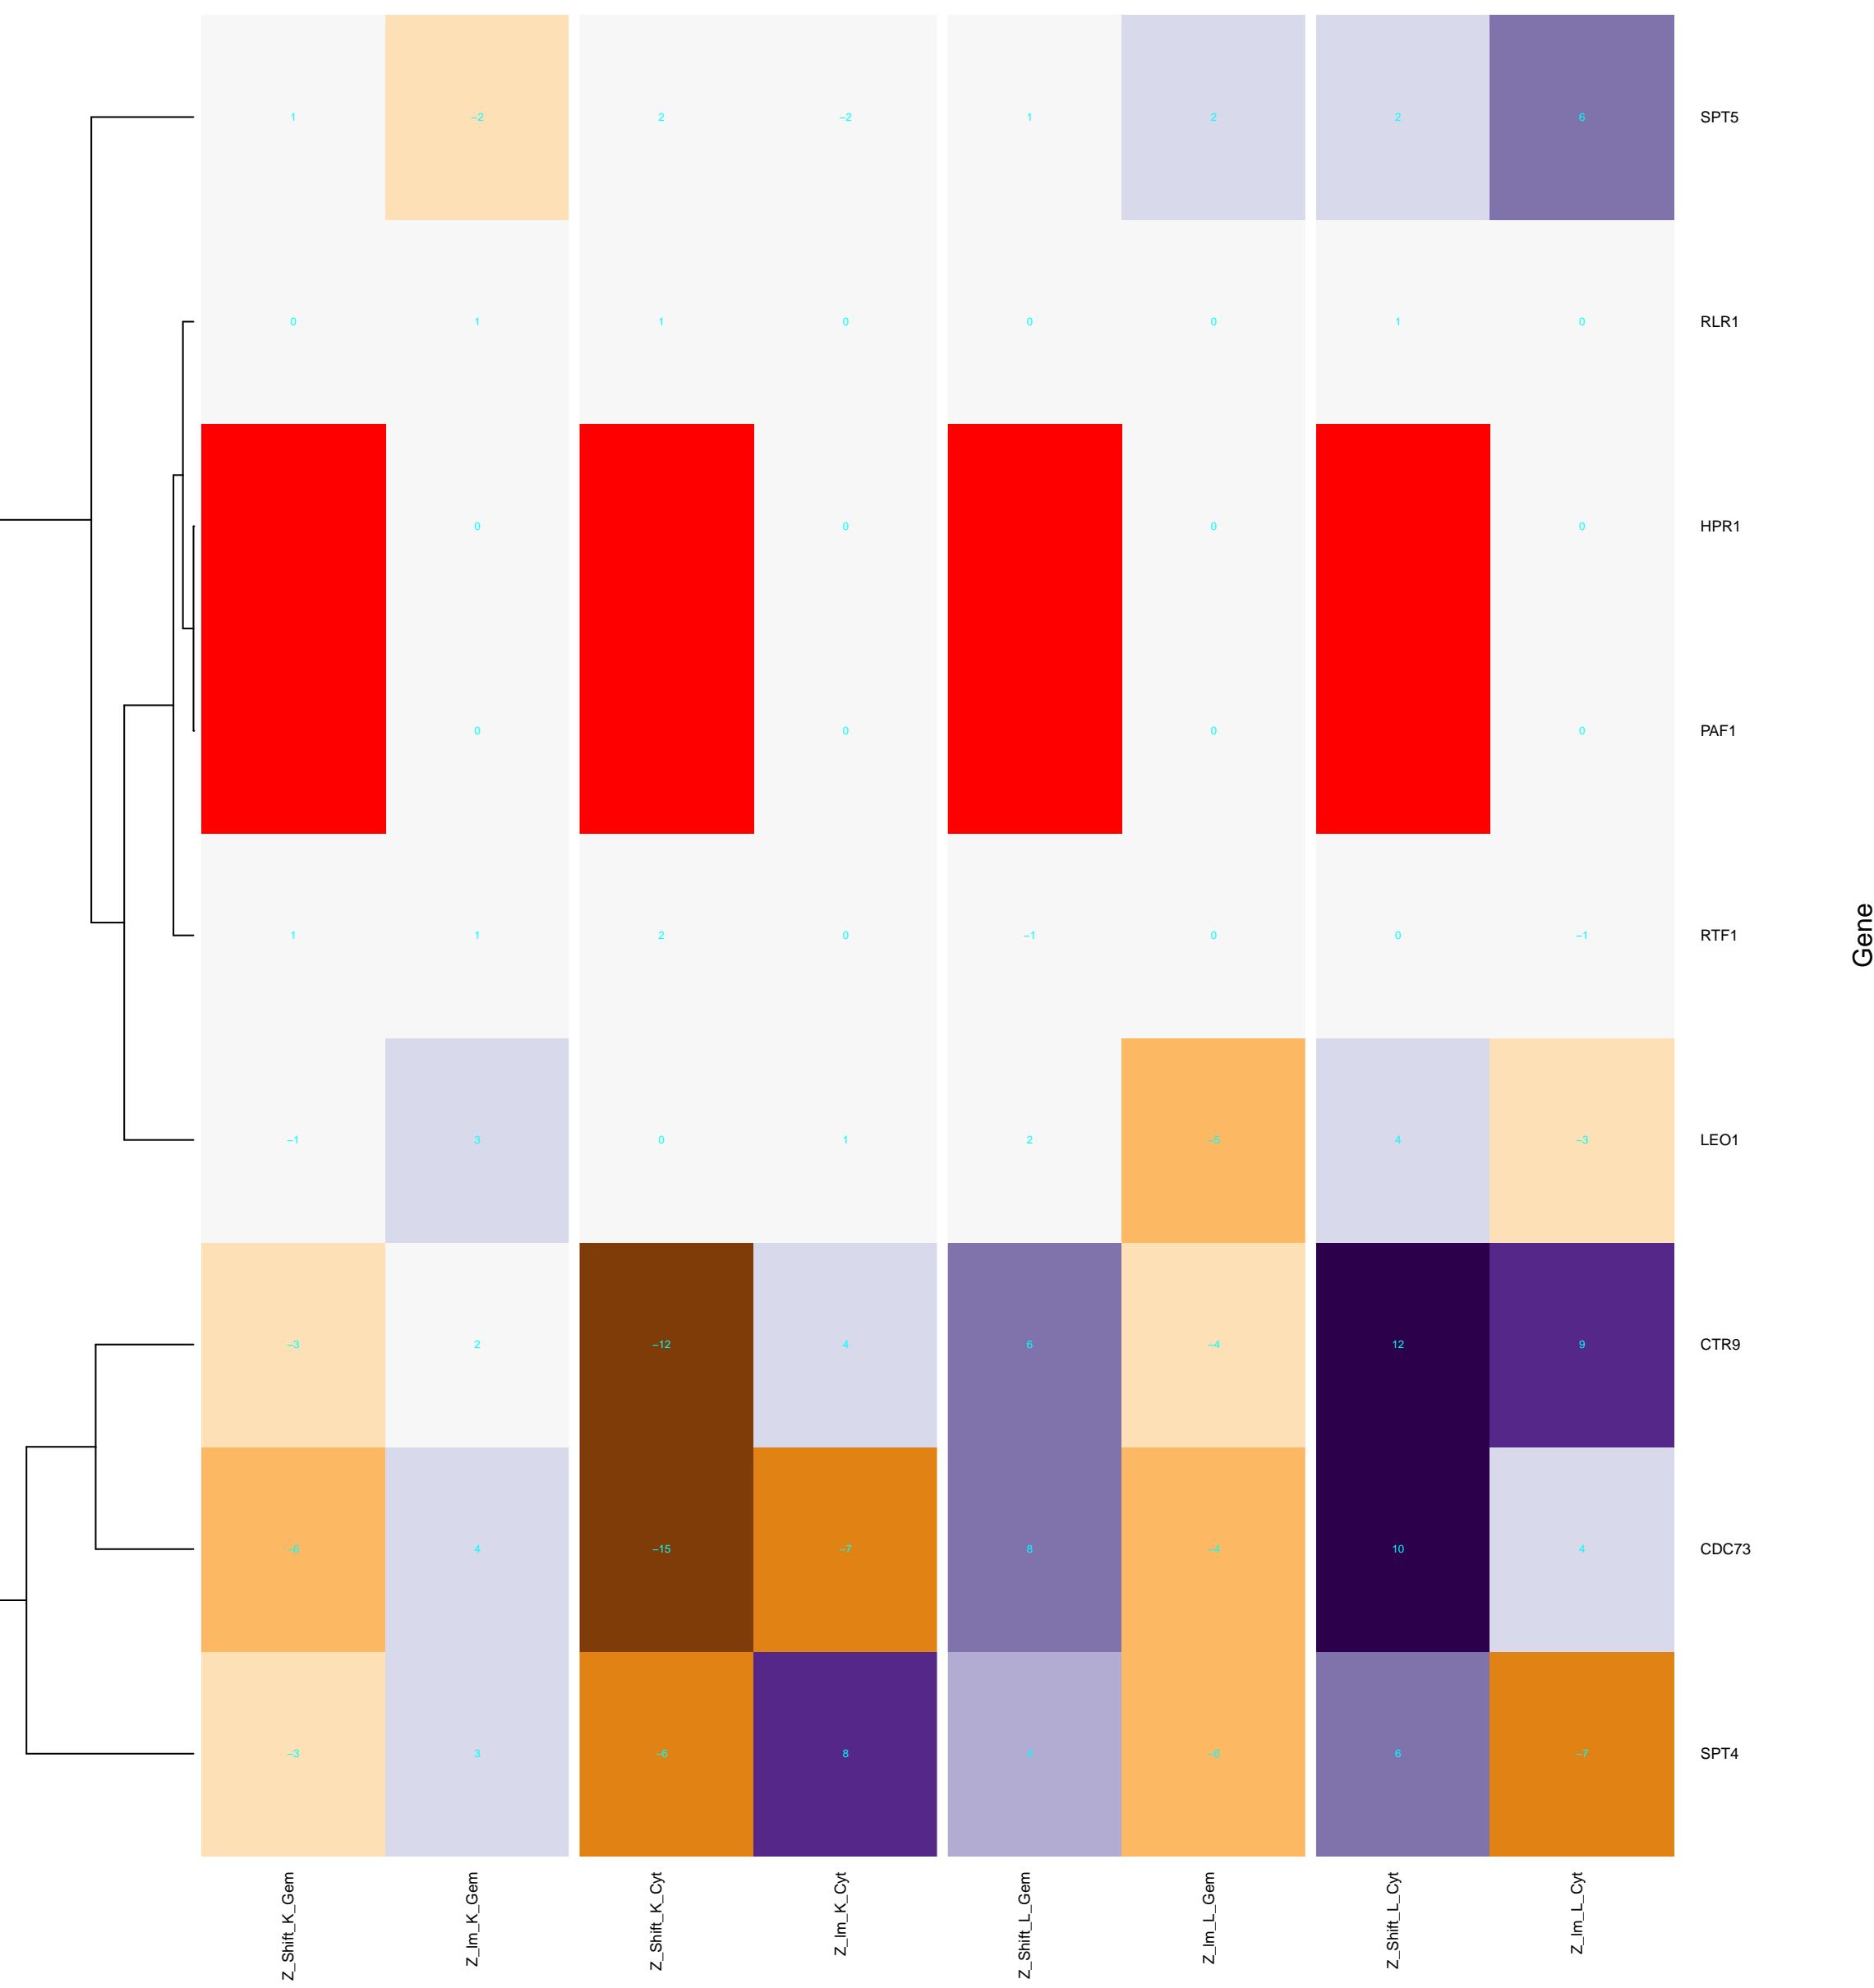

Supplement: s1 [file s1]
