# Supplementary material for: A Humanized Yeast Phenomic Model of Deoxycytidine Kinase to Predict Genetic Buffering of Nucleoside Analog Cytotoxicity
Source: MDPI journal article supplement (doi:10.3390/genes10100770), 2019-09-30

-10      5  
Value

**small nuclear ribonucleoprotein complex**

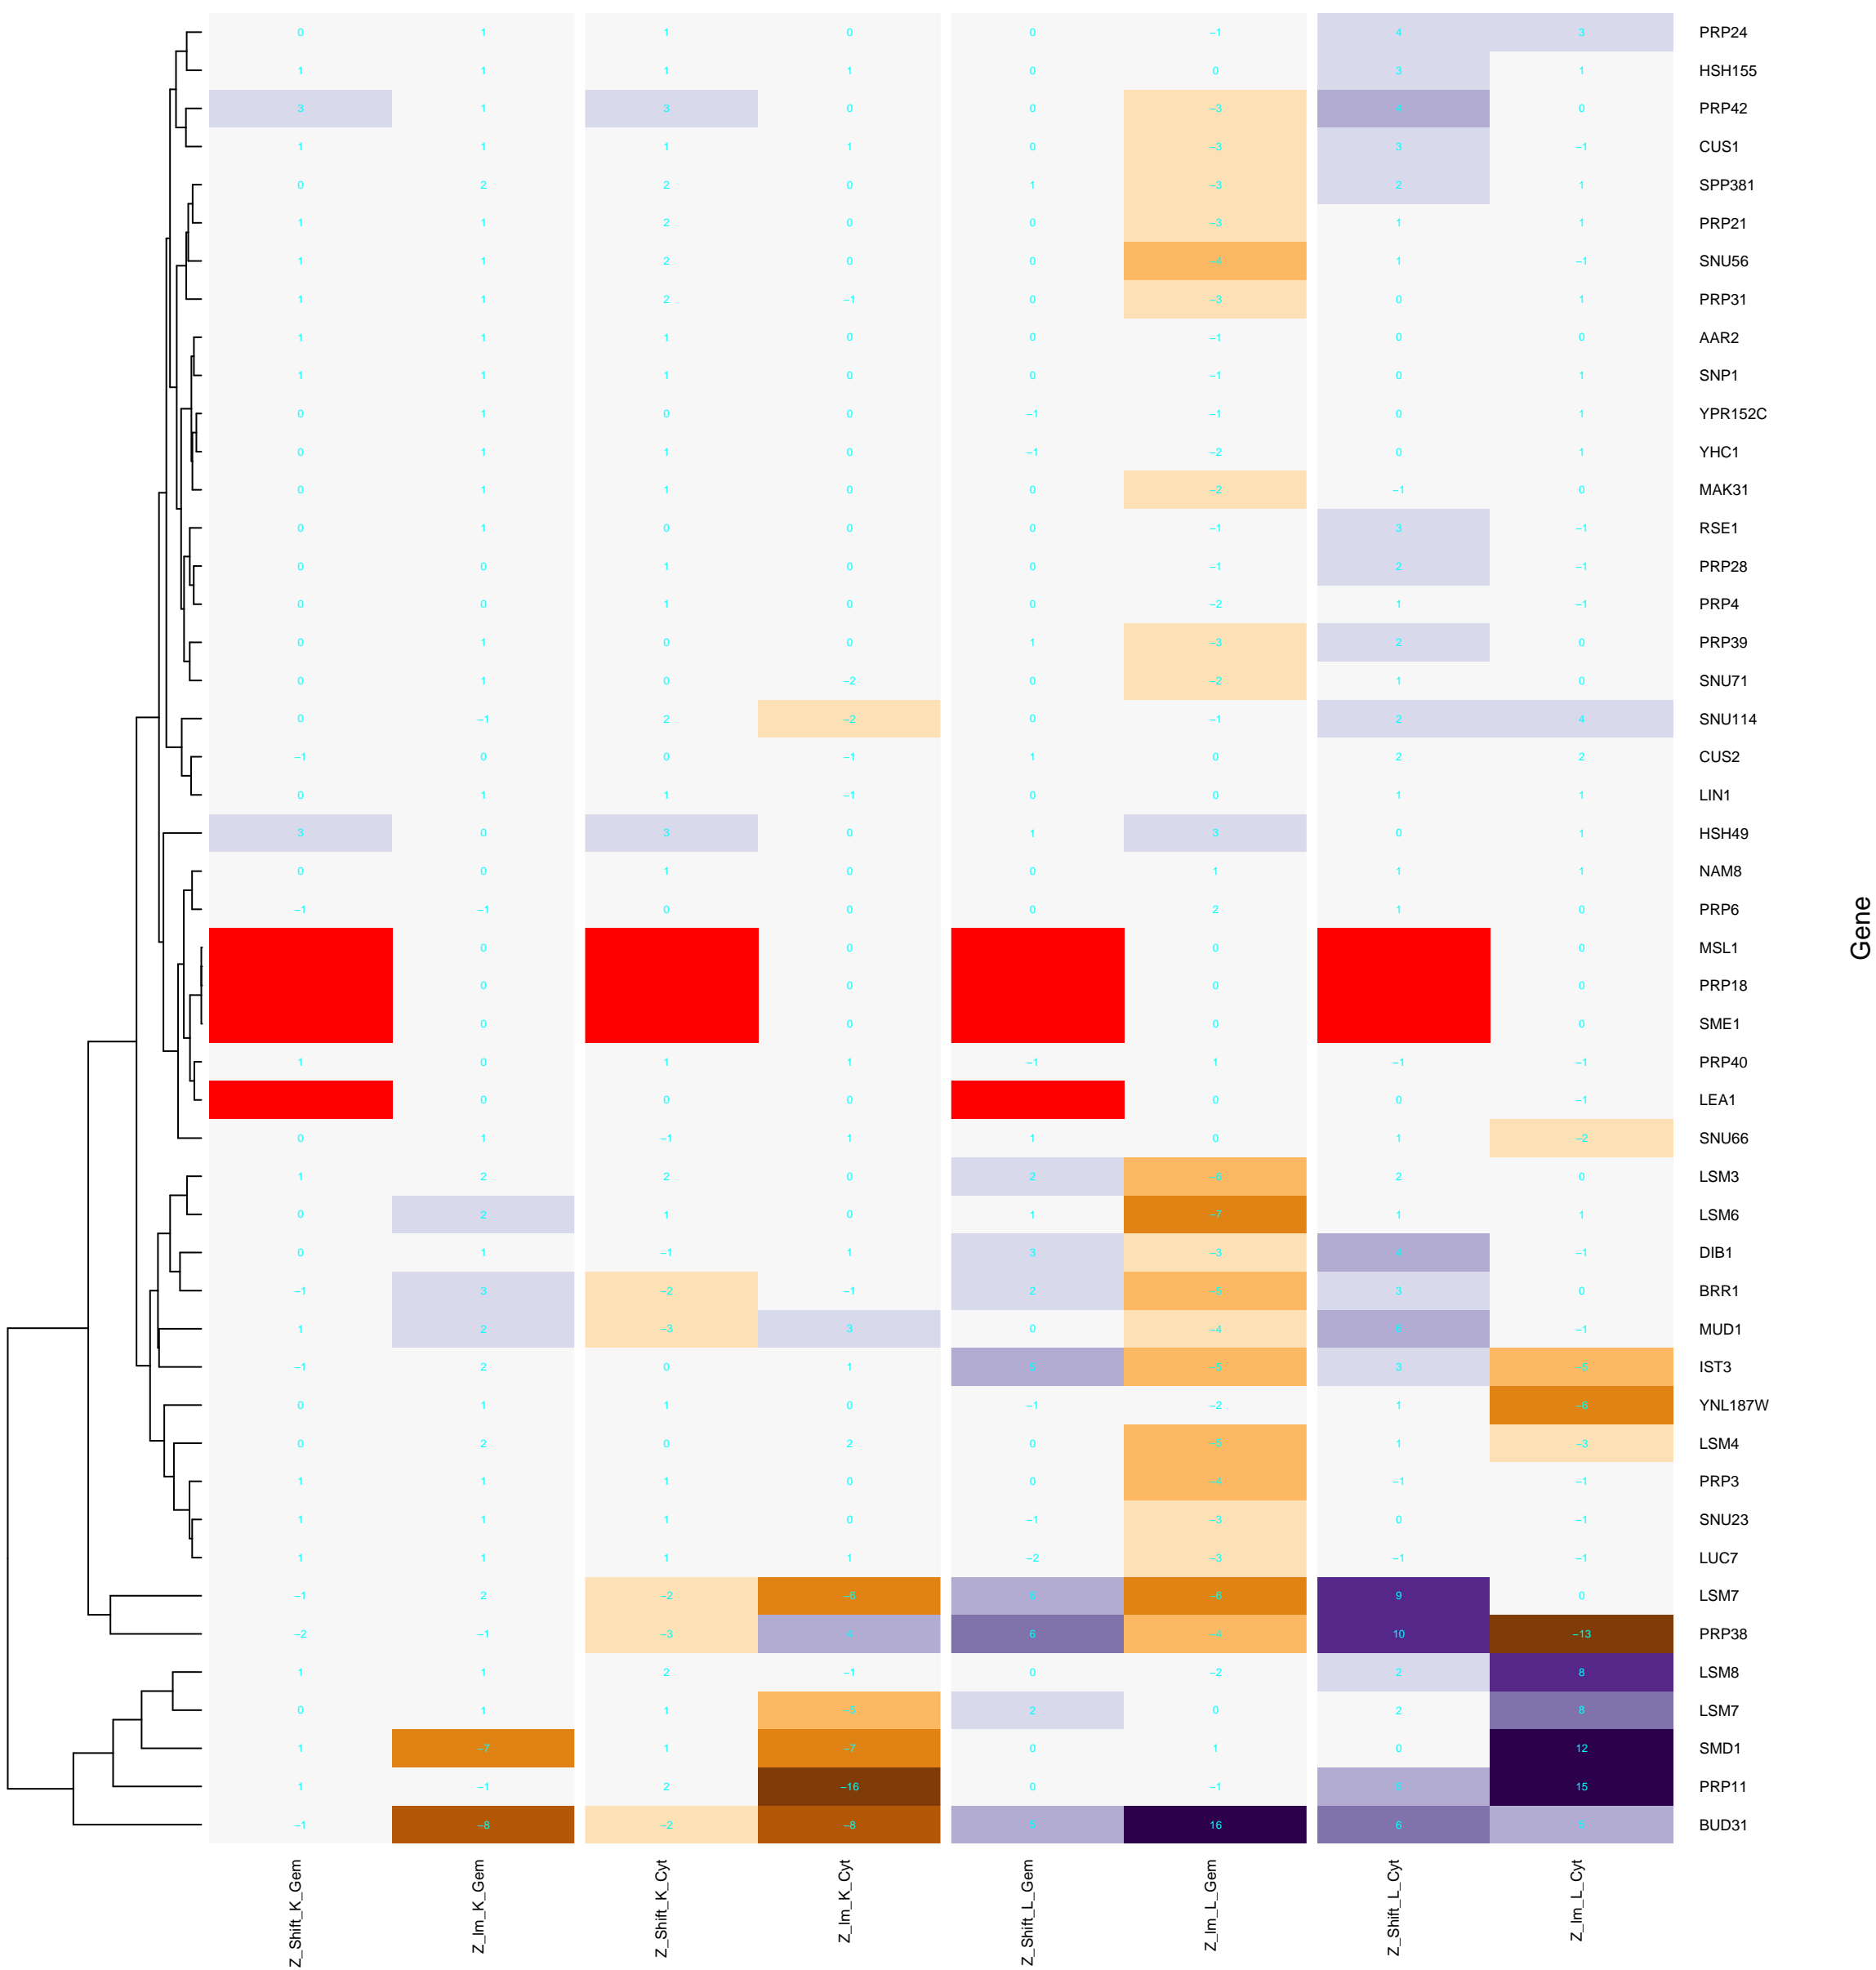

-10      5  
Value

**spliceosomal snRNP complex**

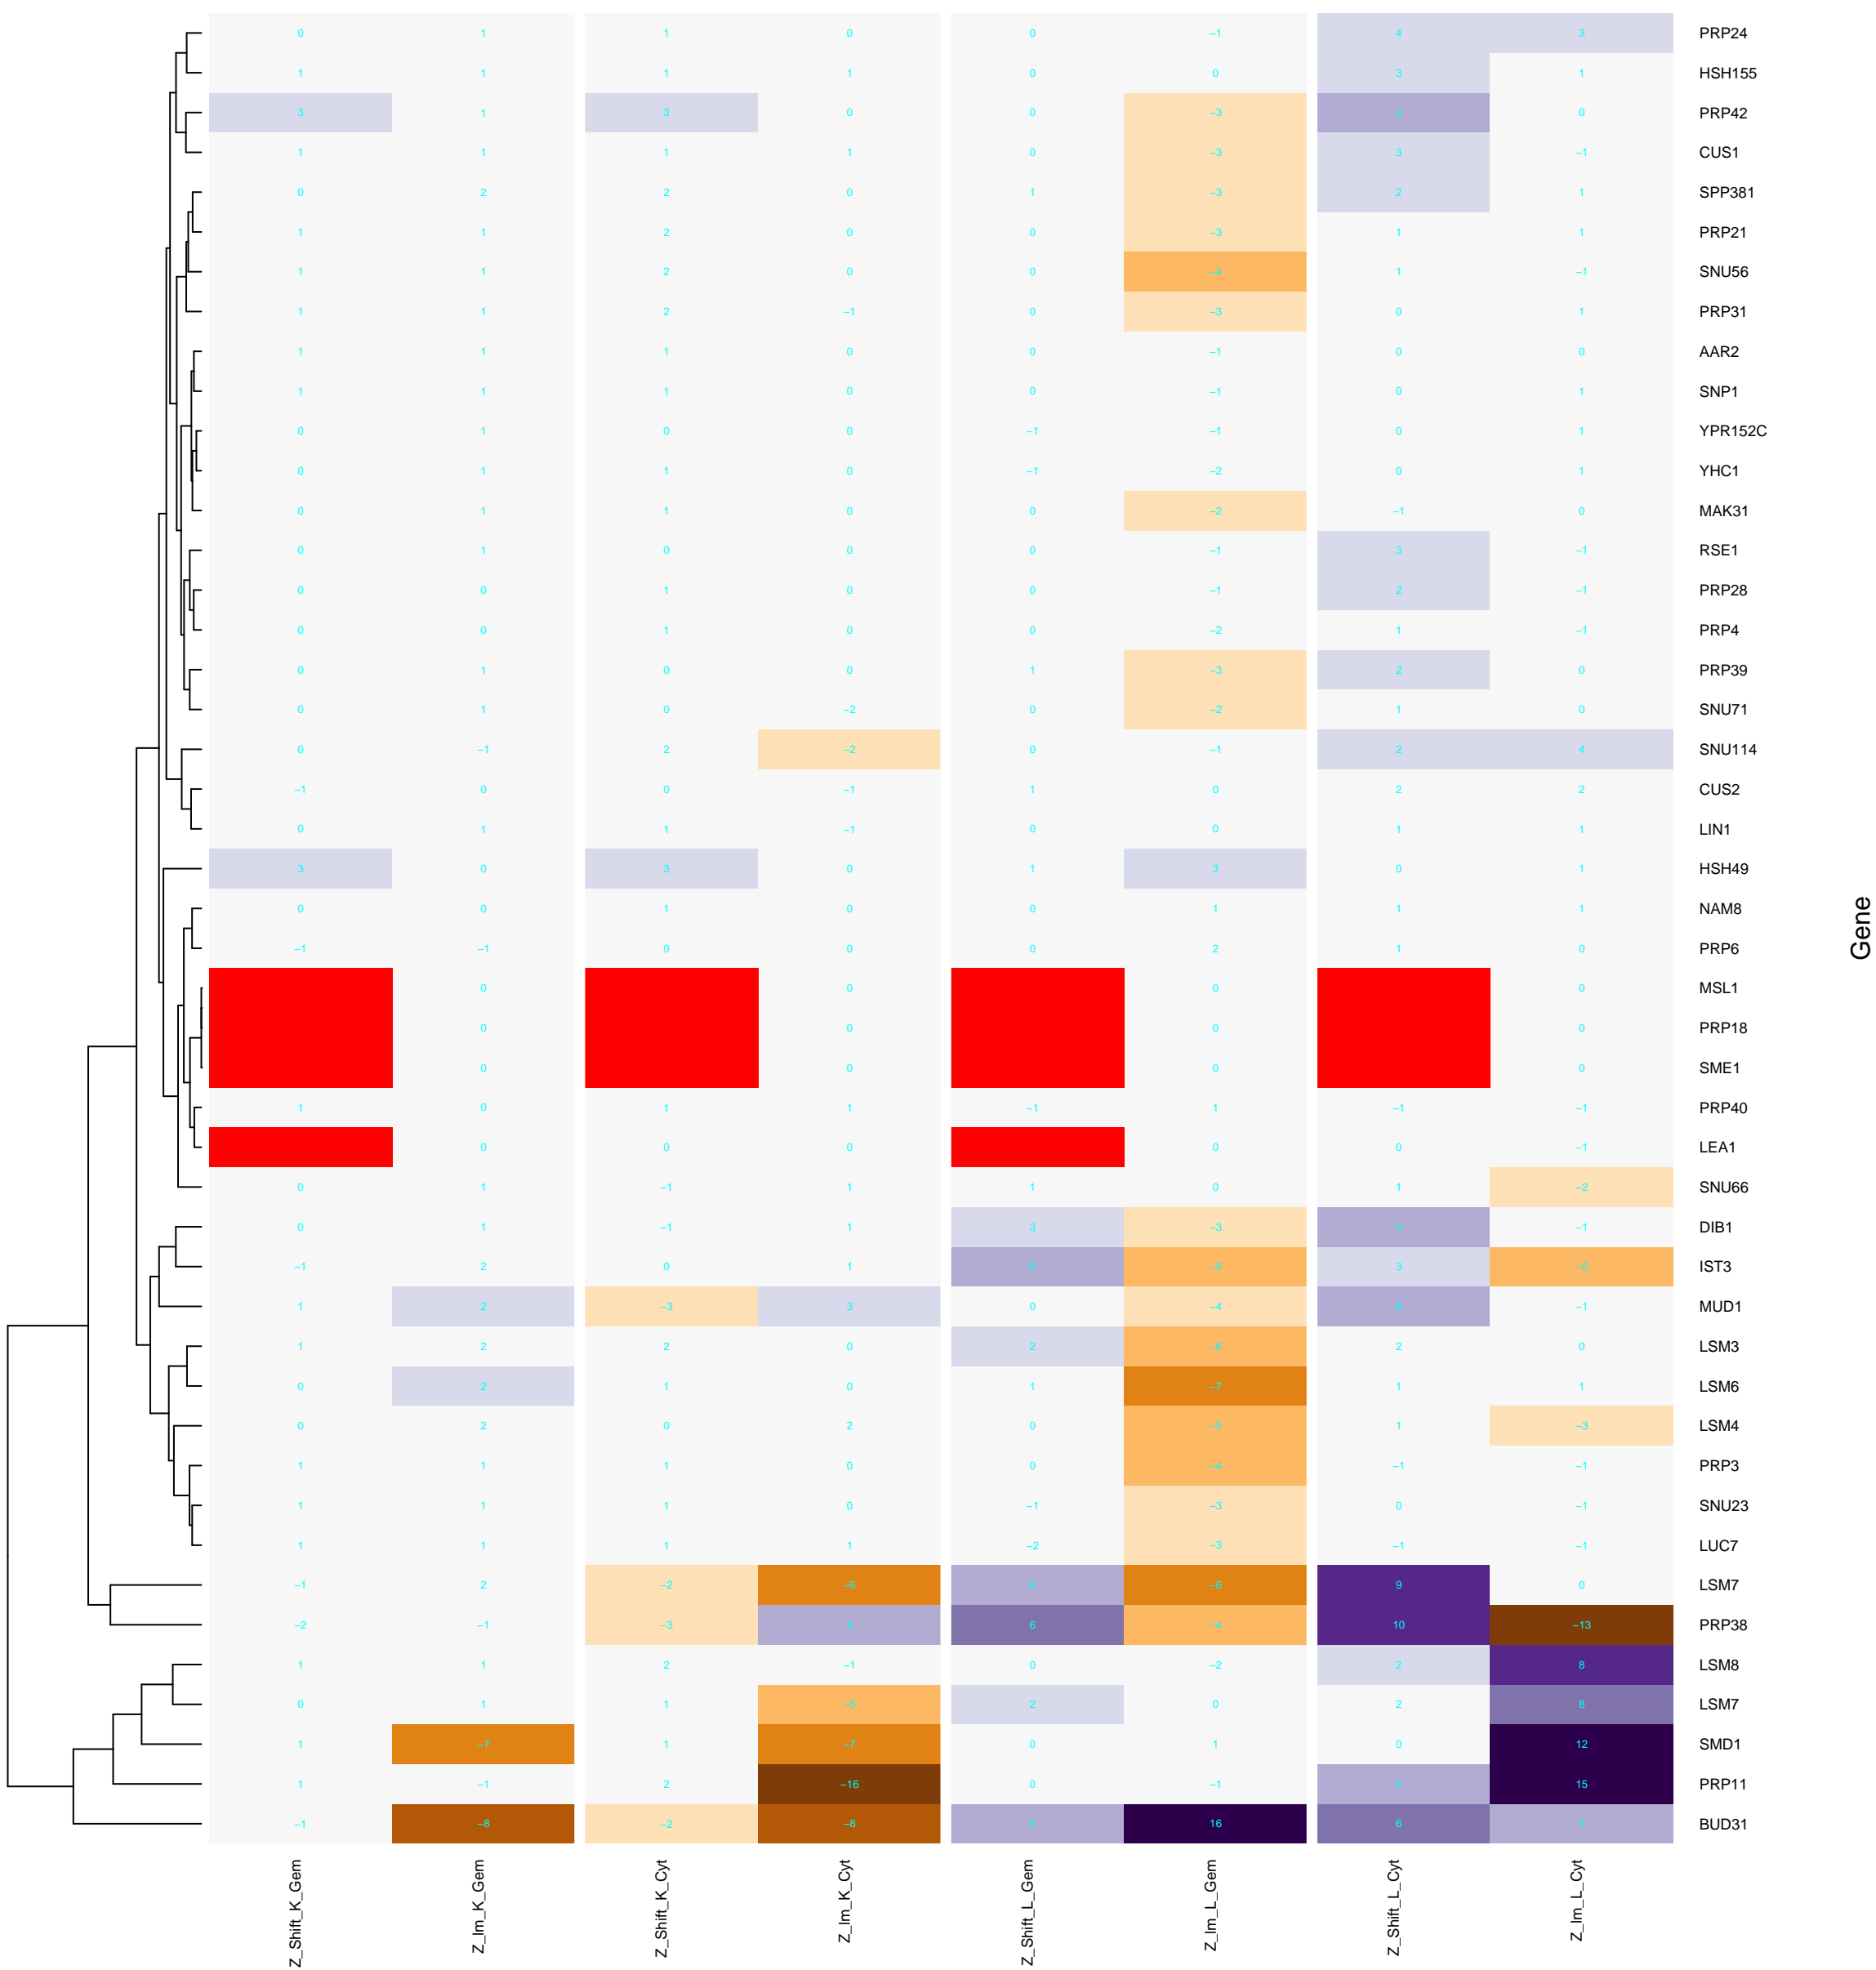

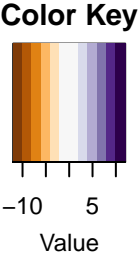

U5 snRNP

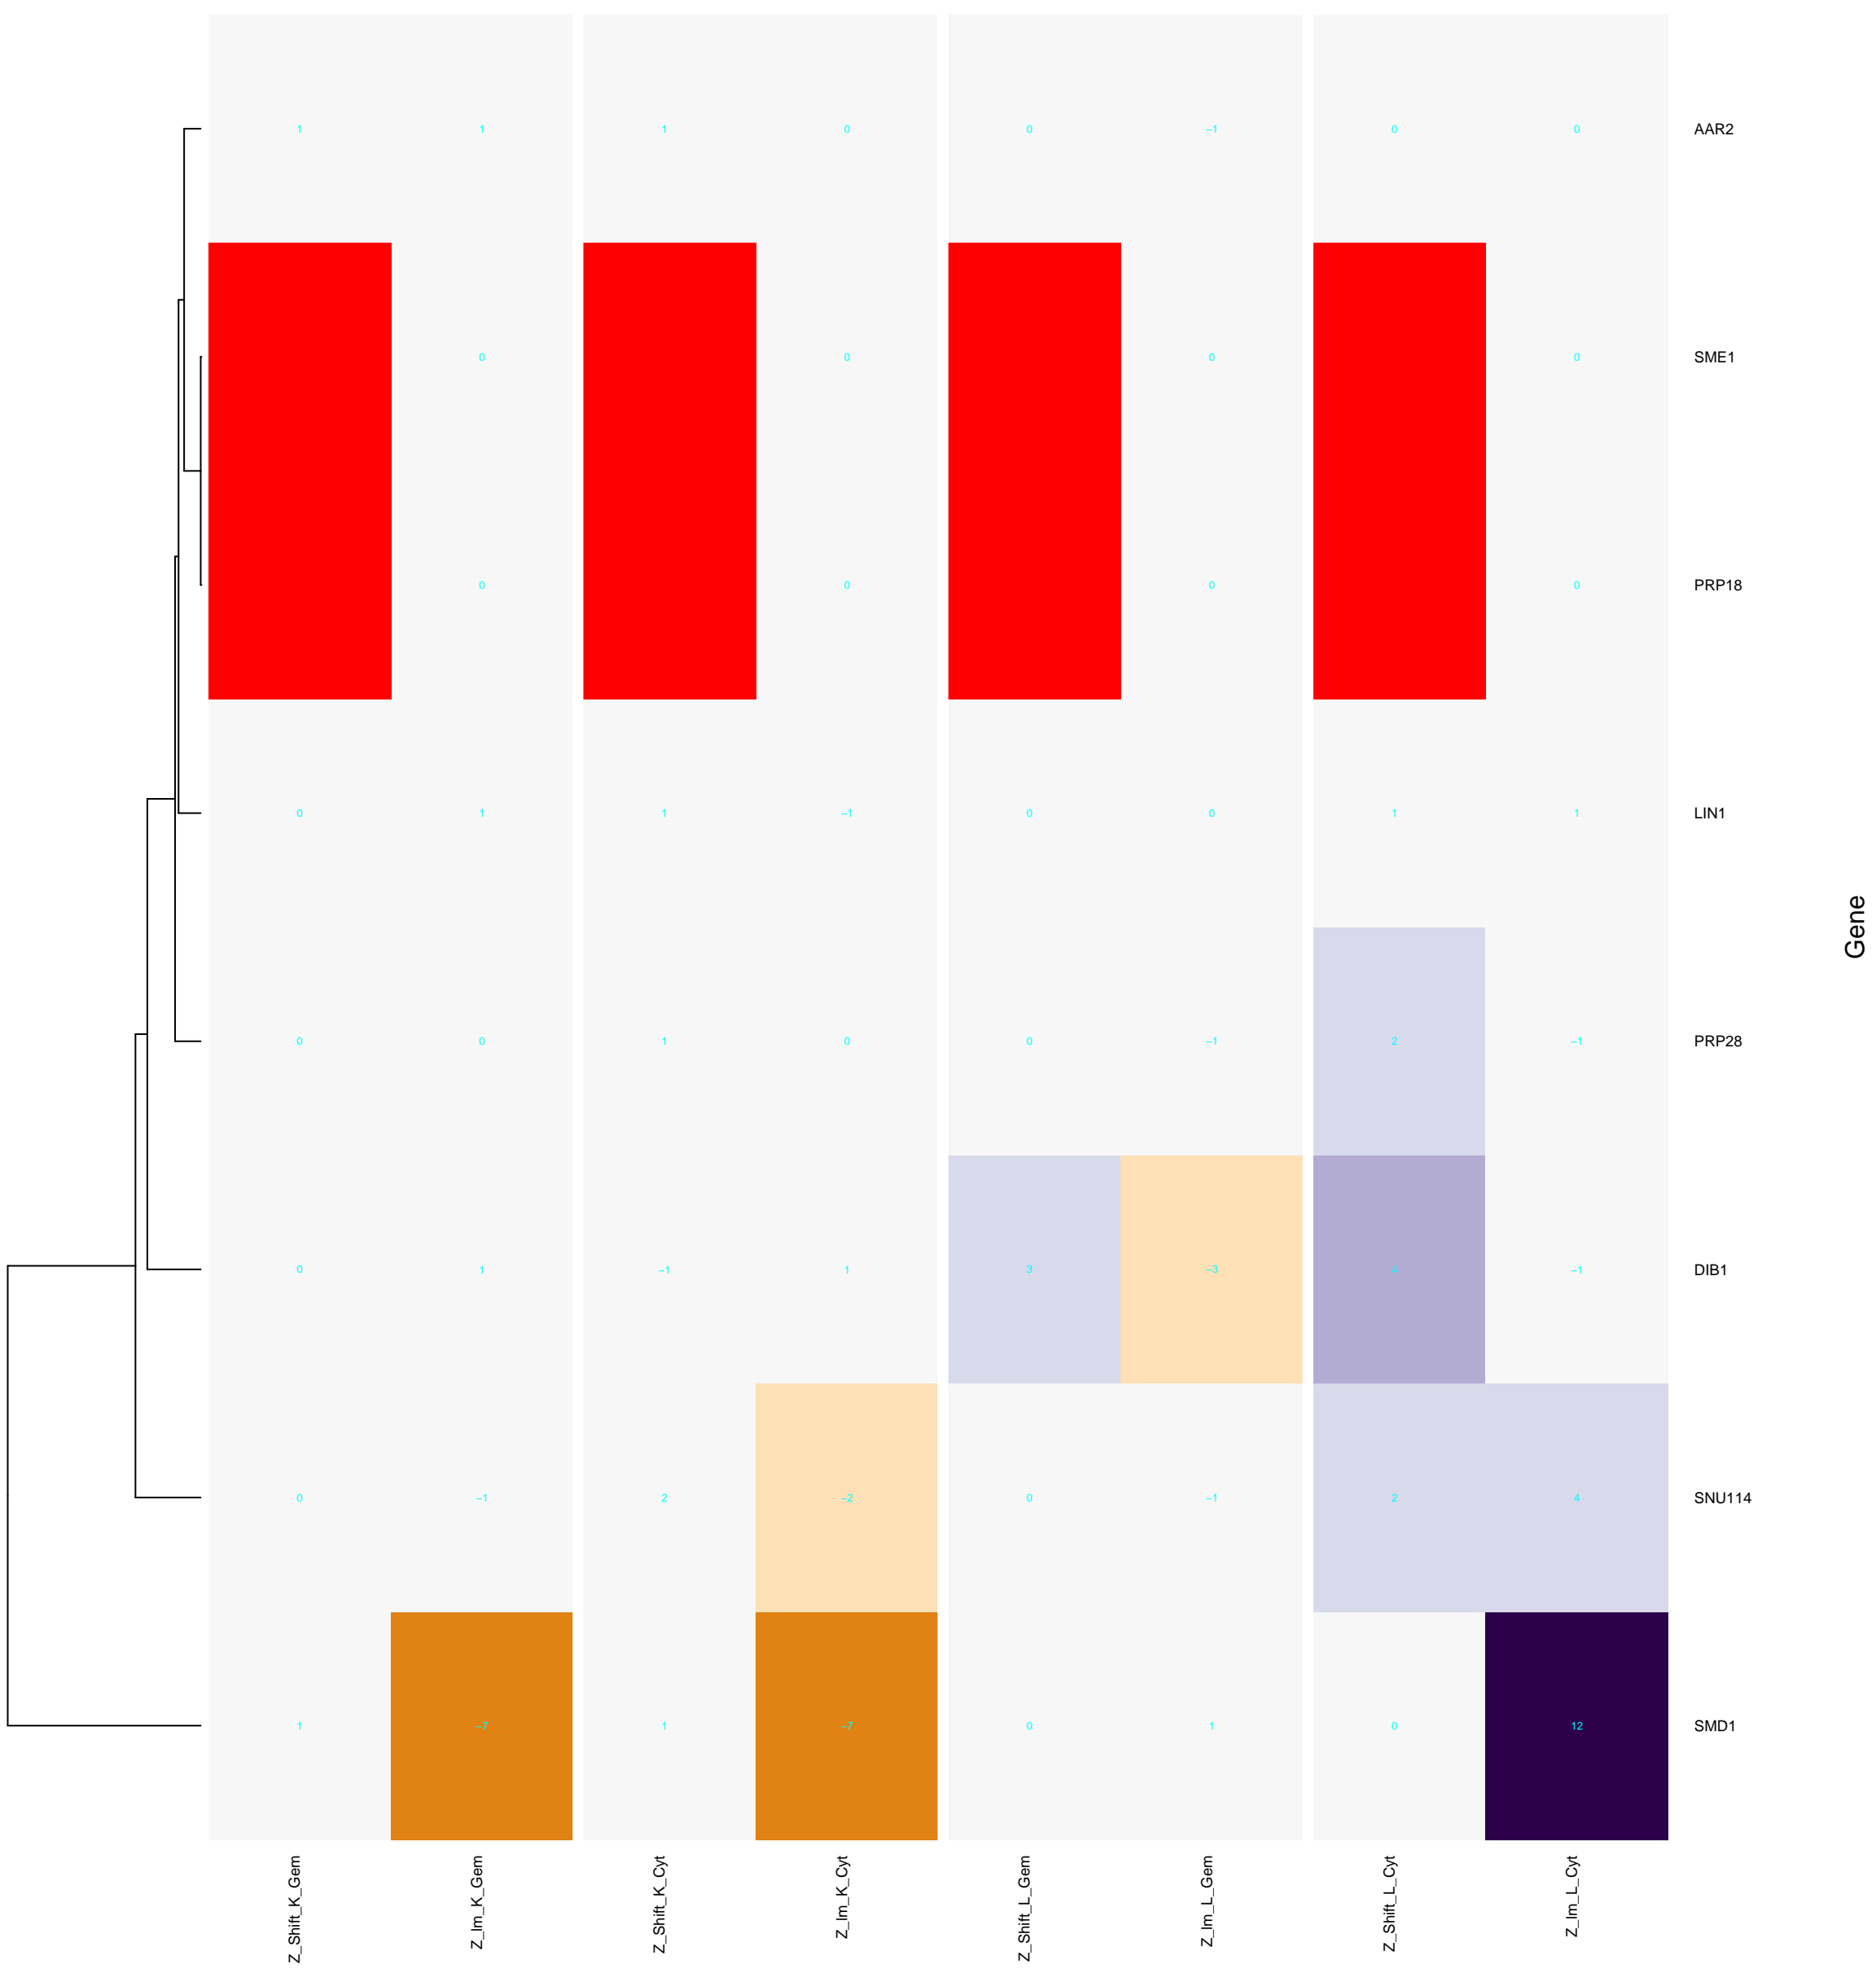

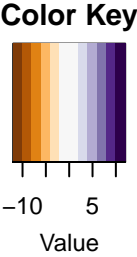

U1 snRNP

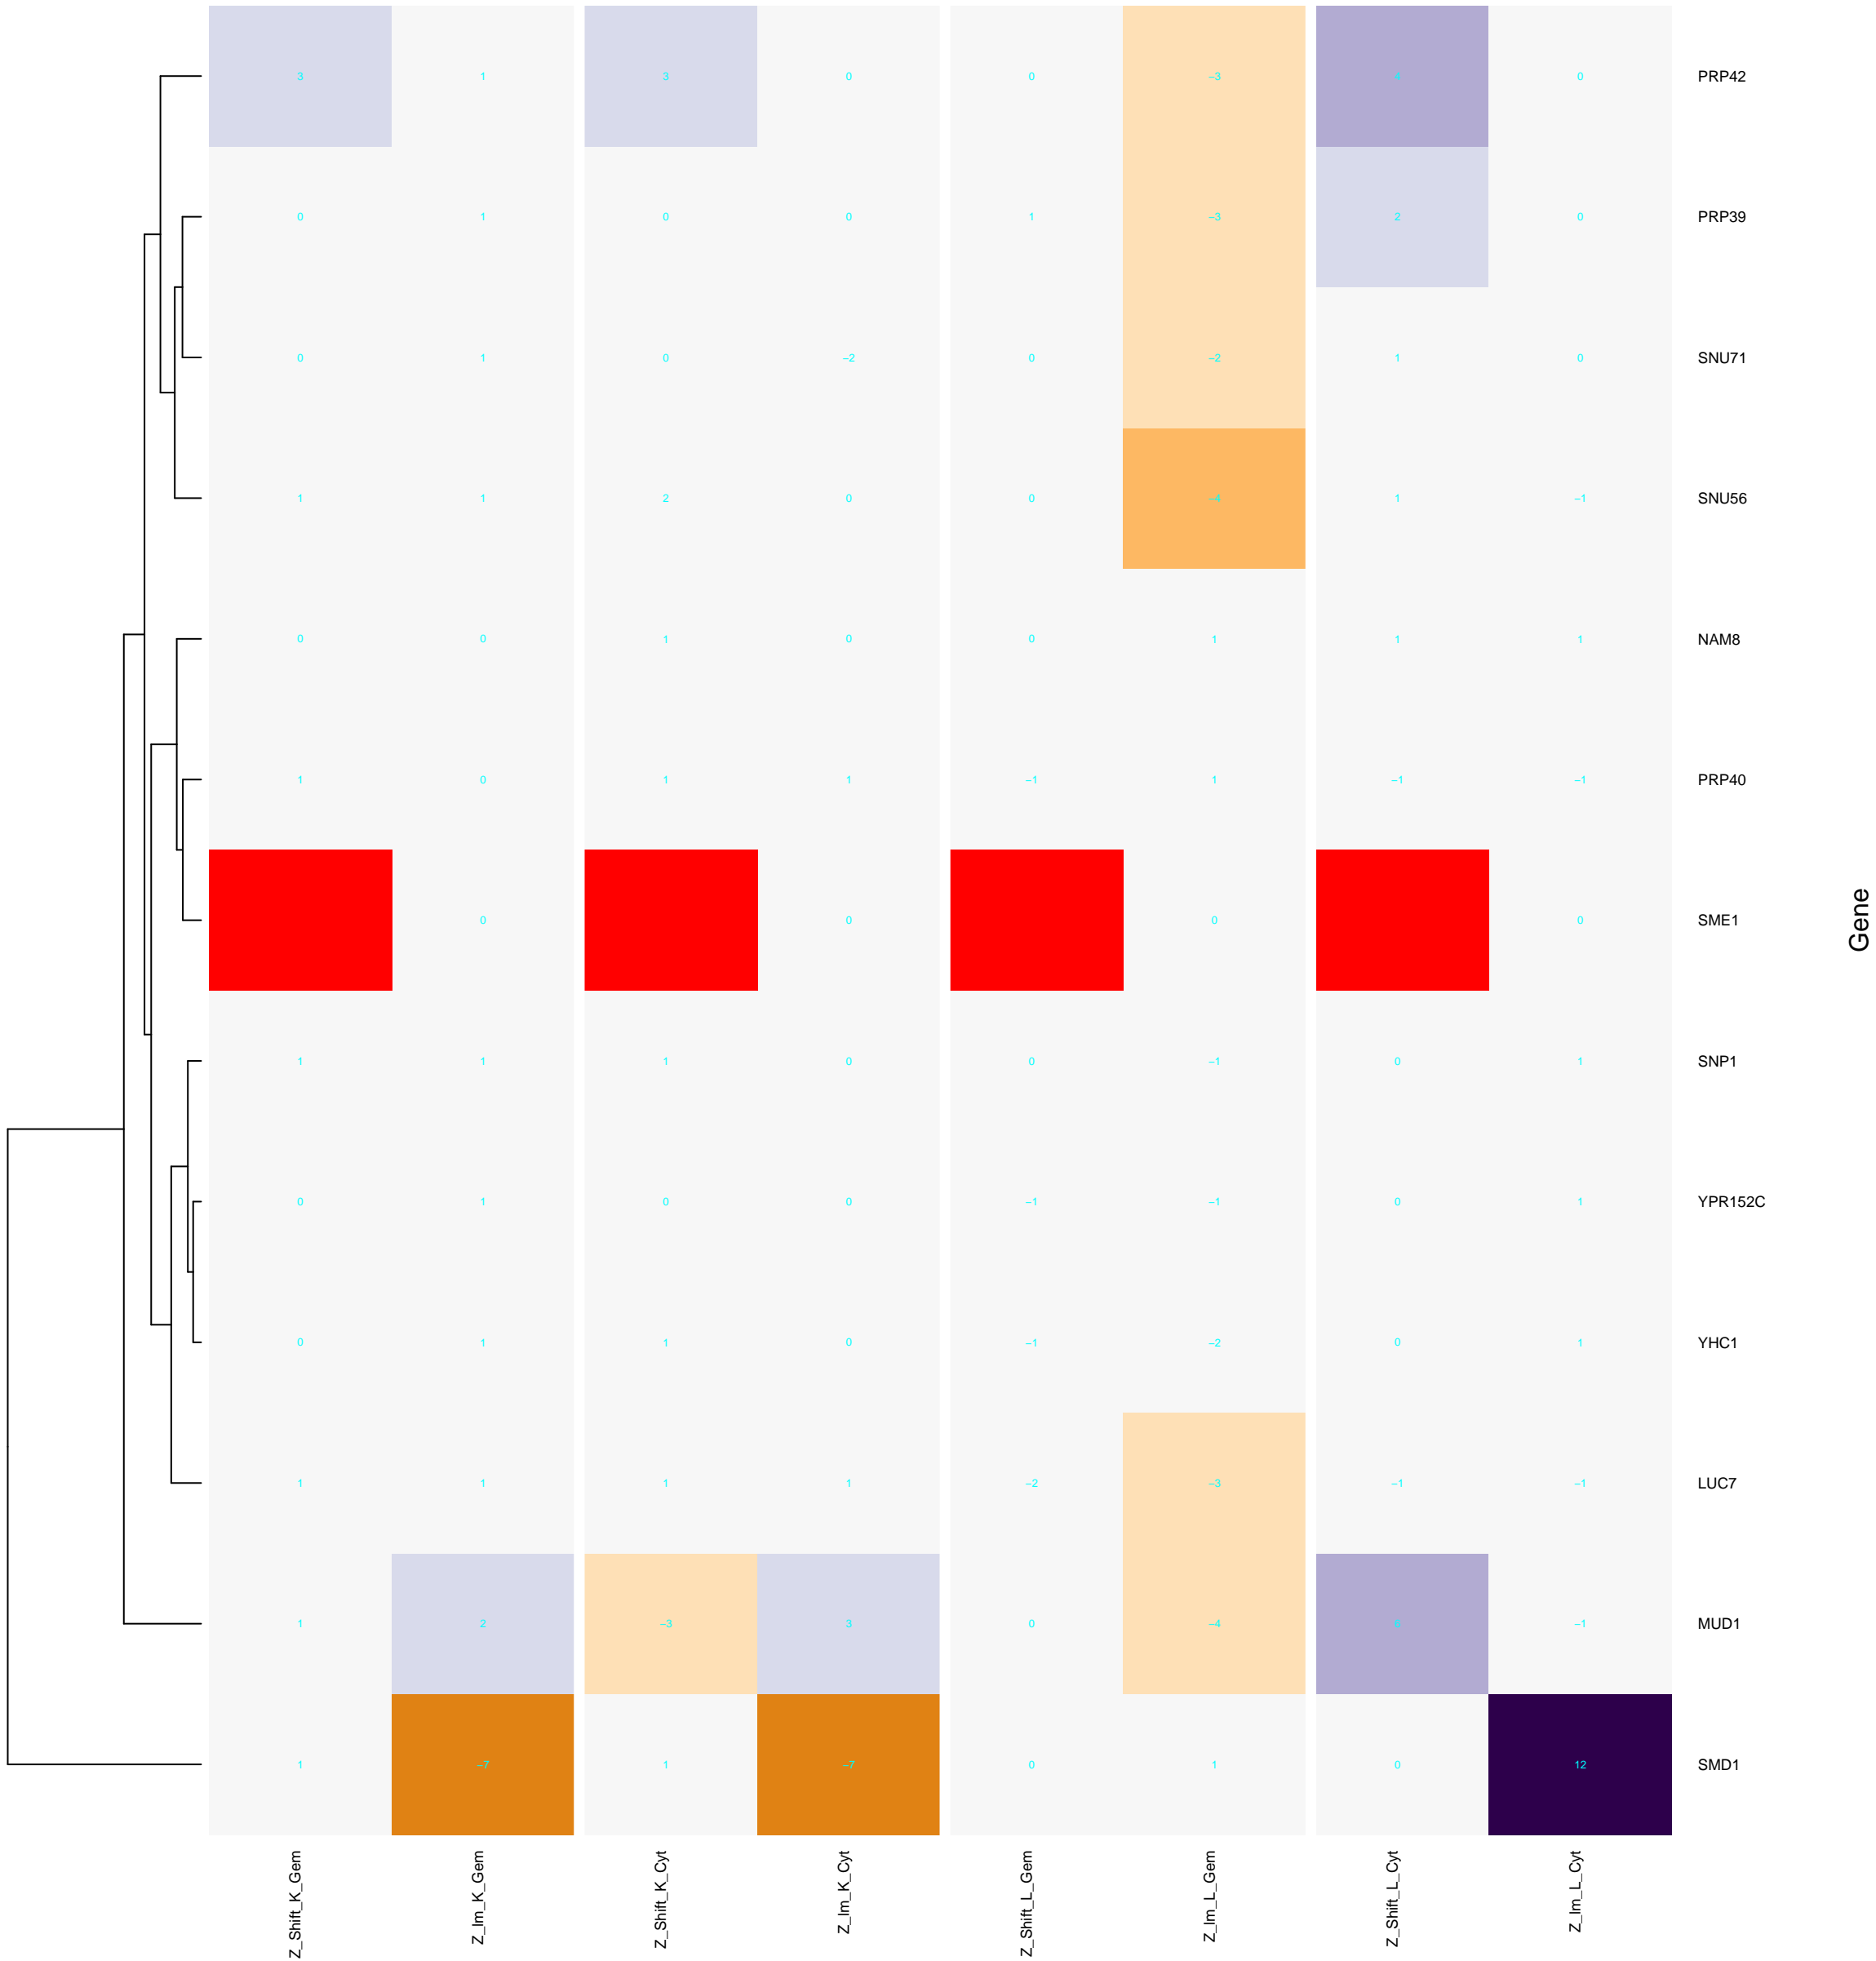

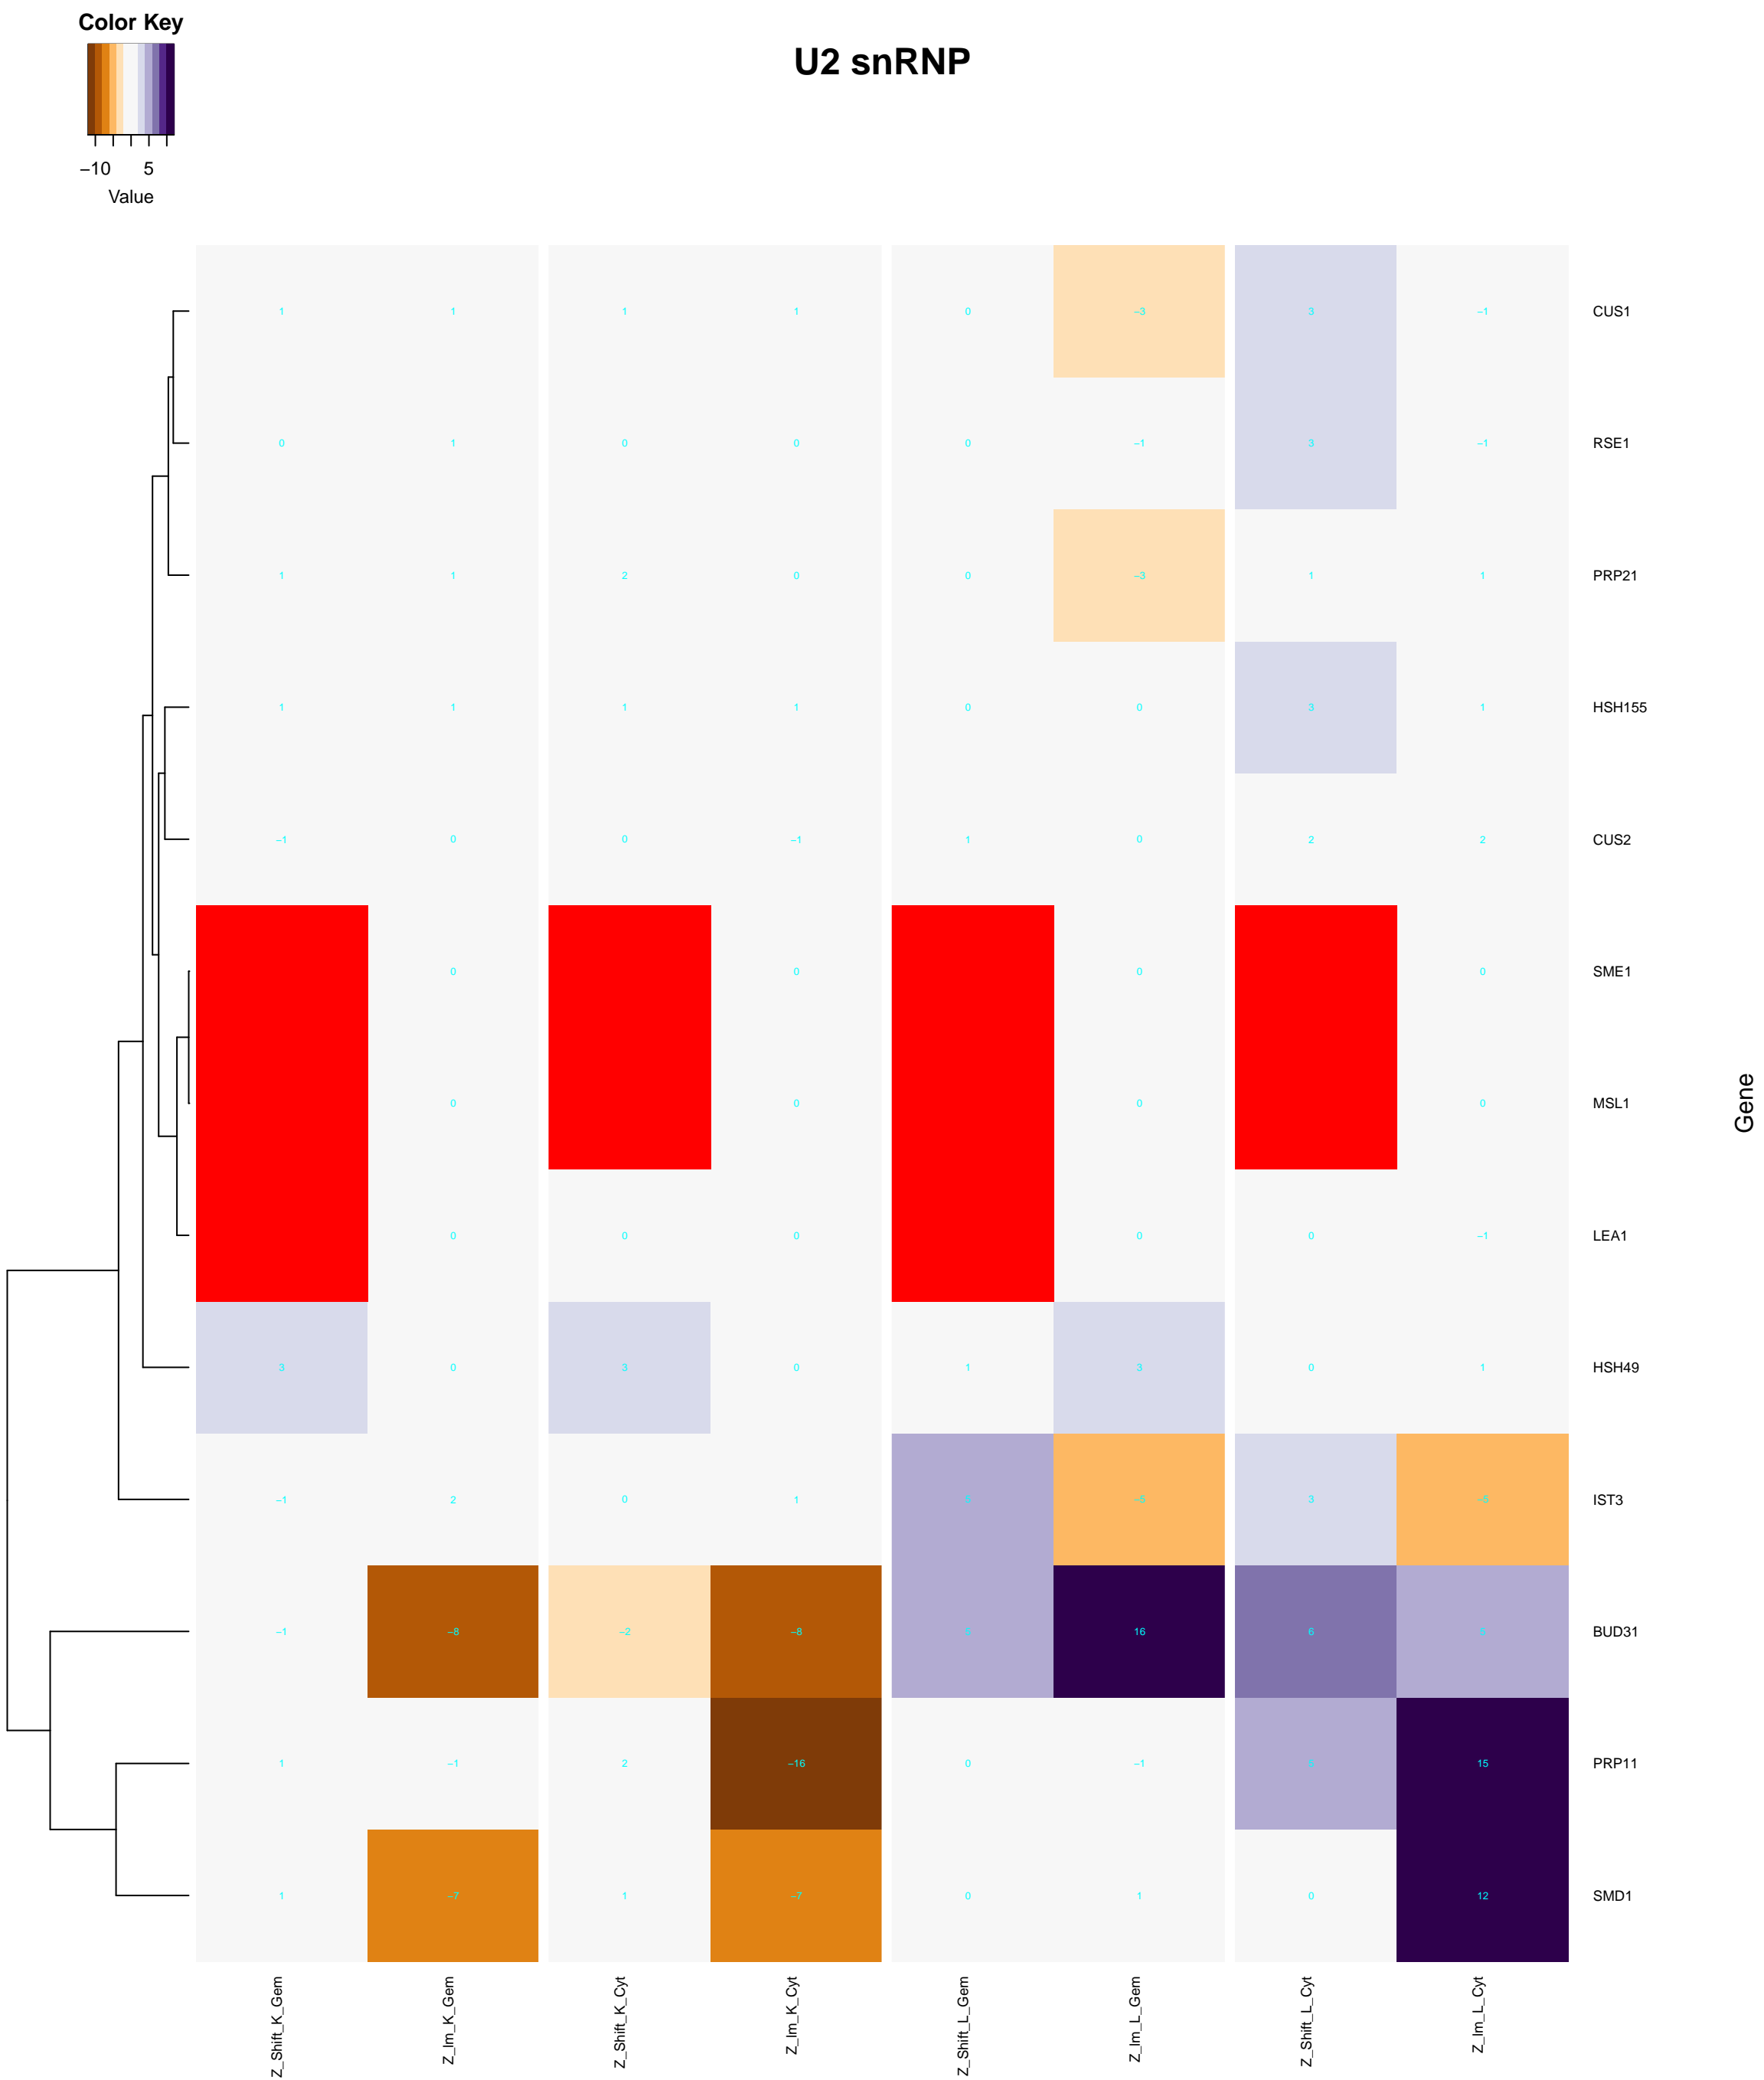



U4 snRNP

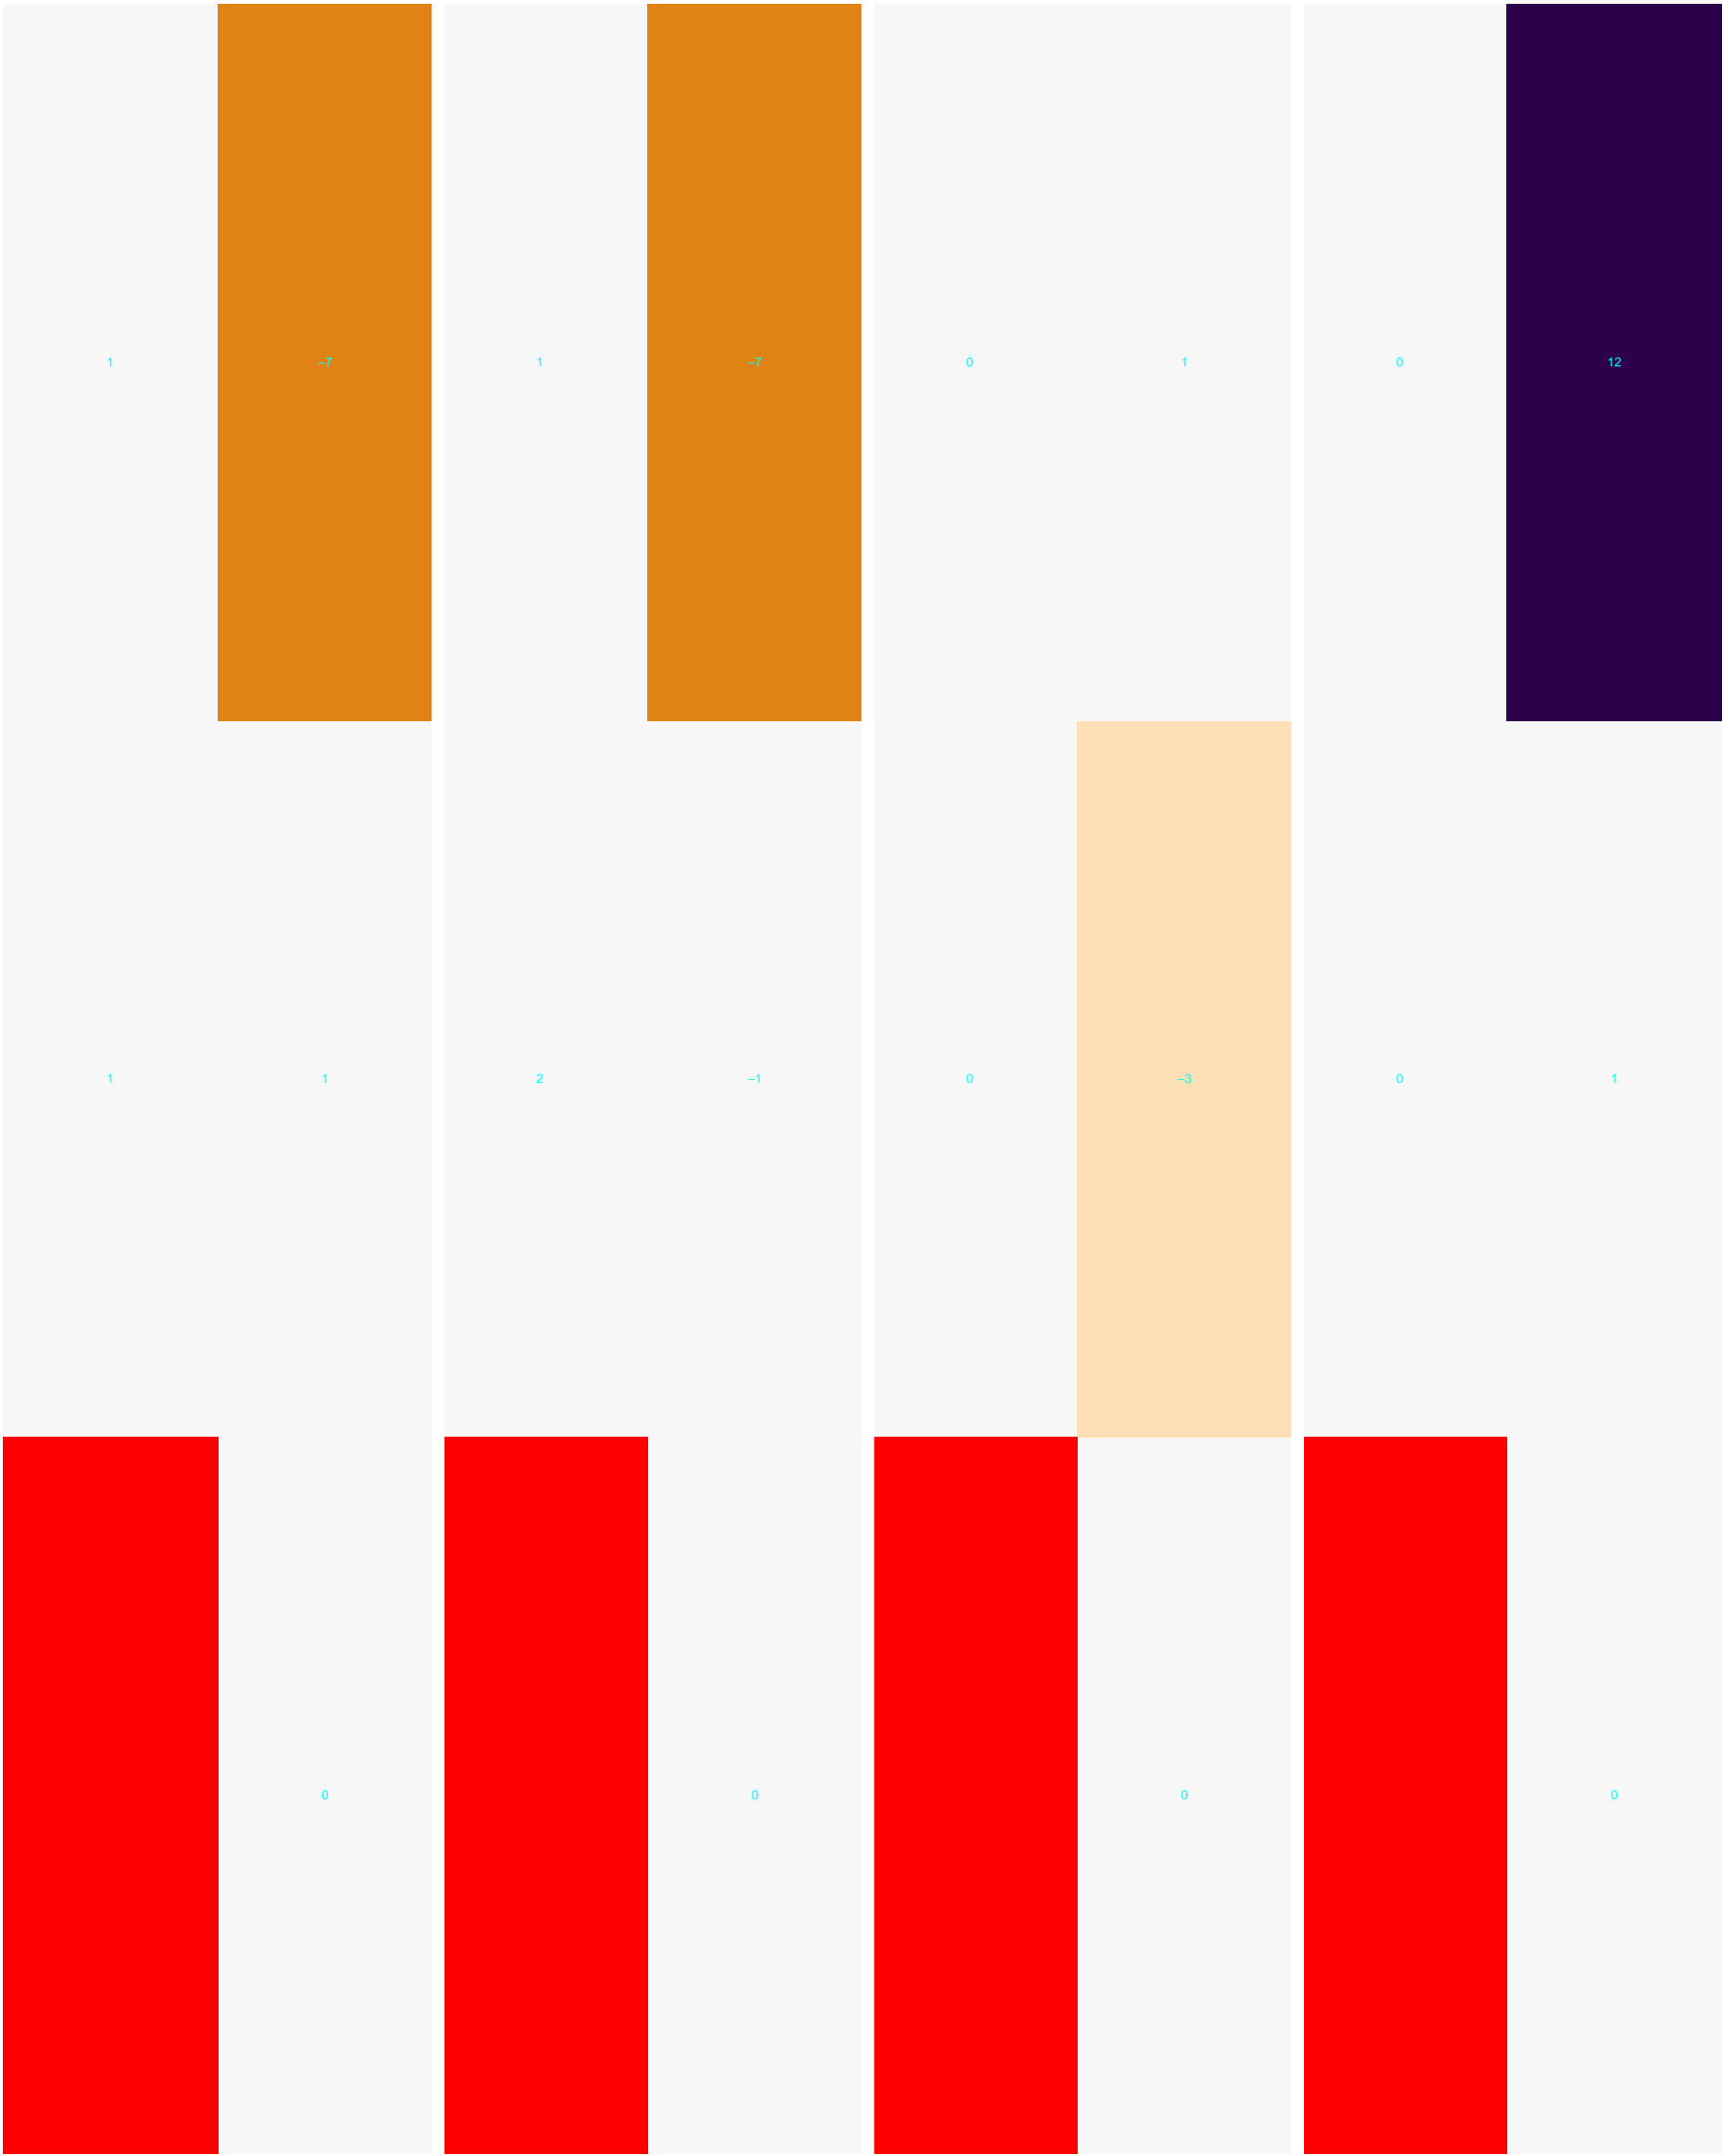

Gene

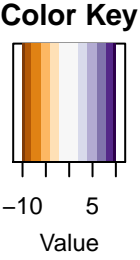

U6 snRNP

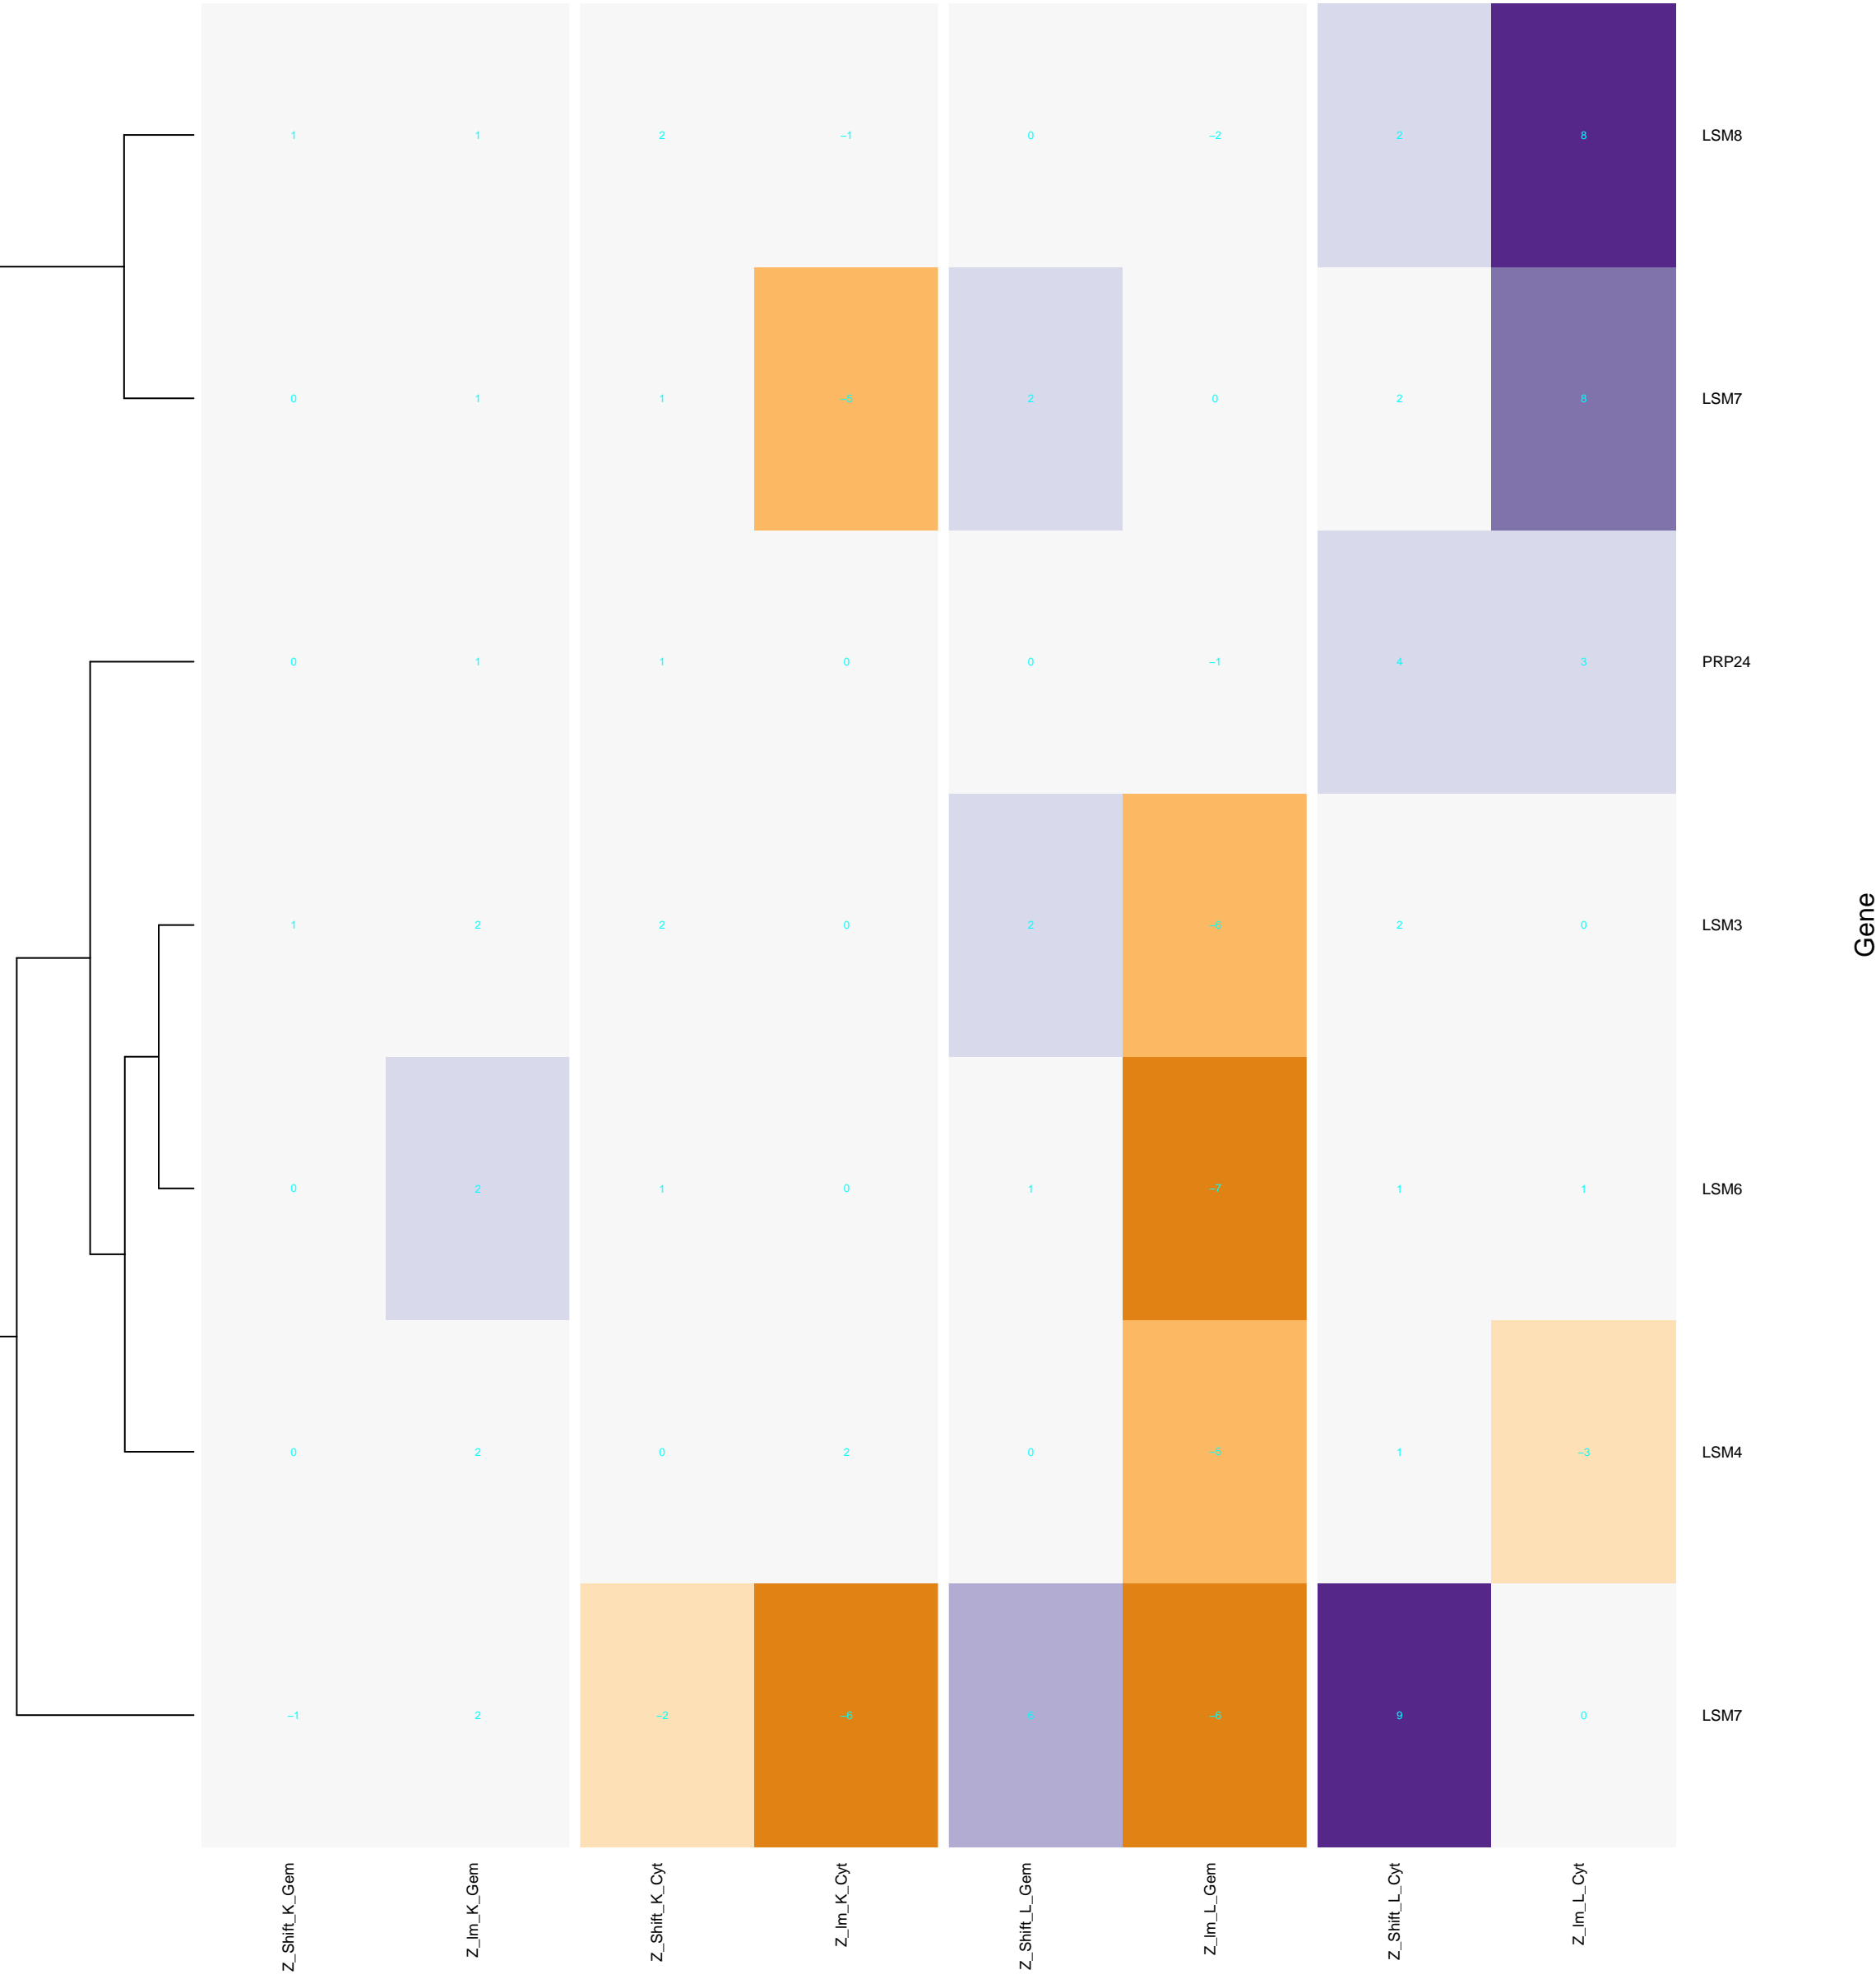

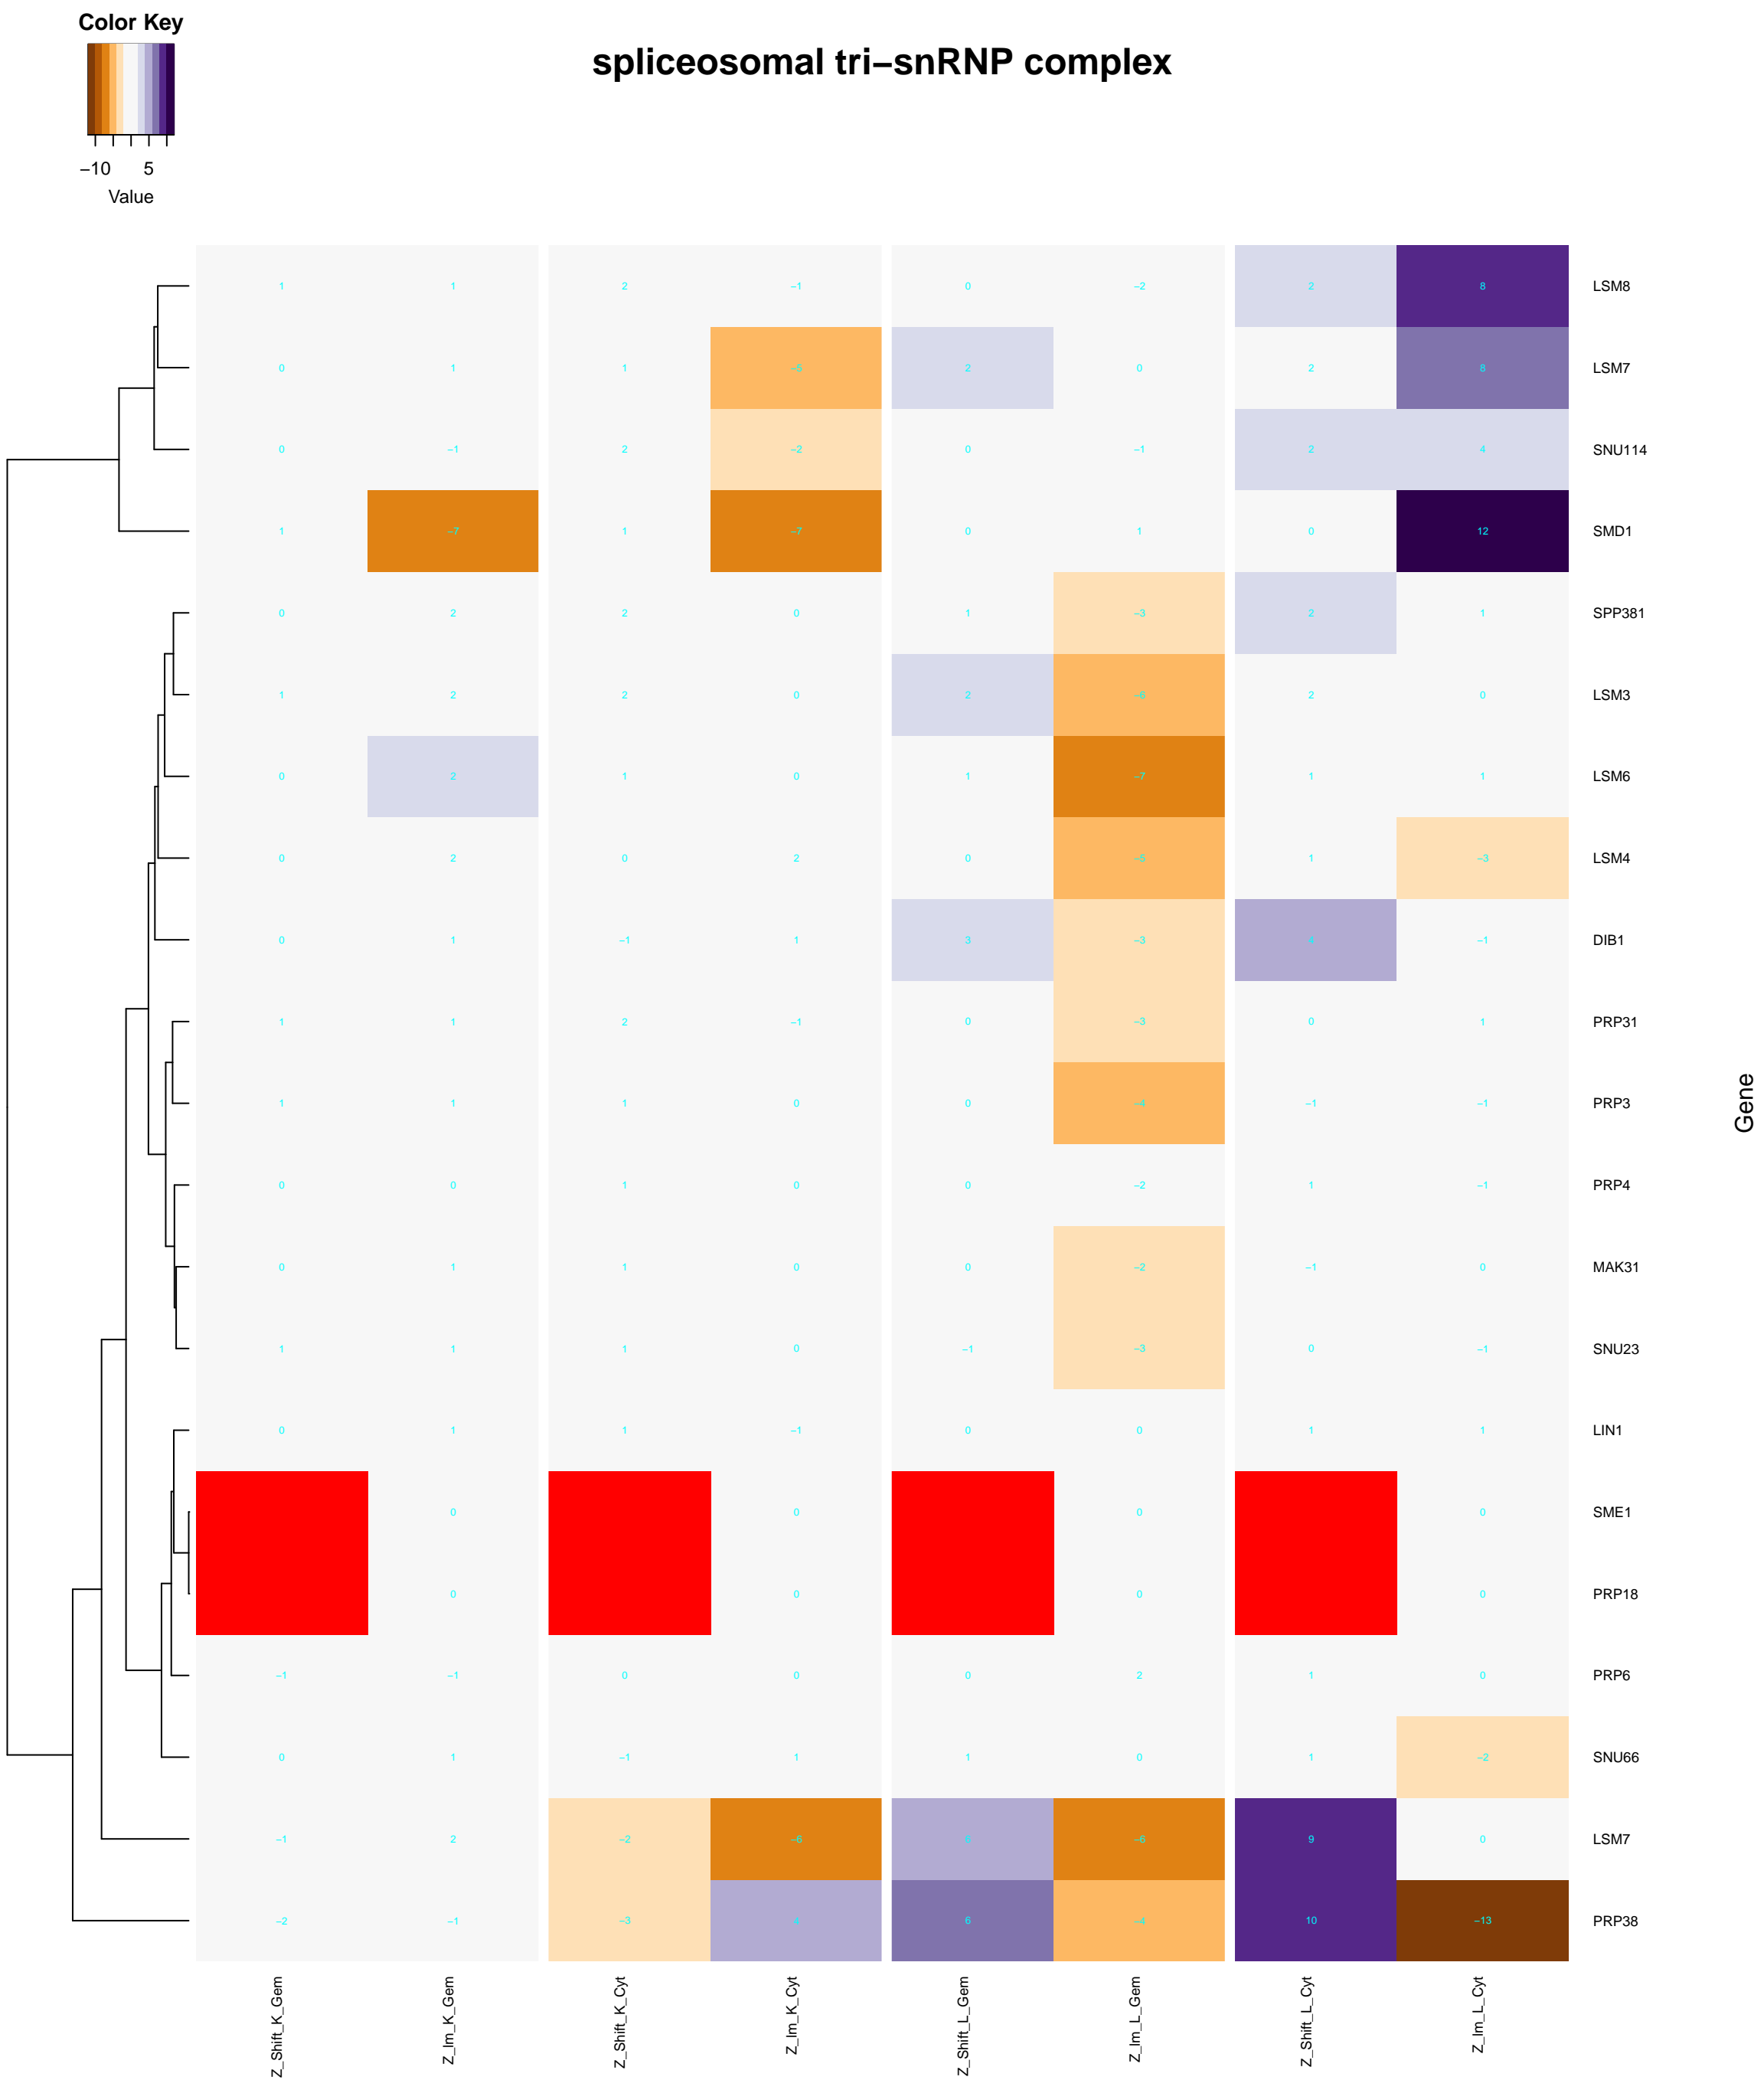

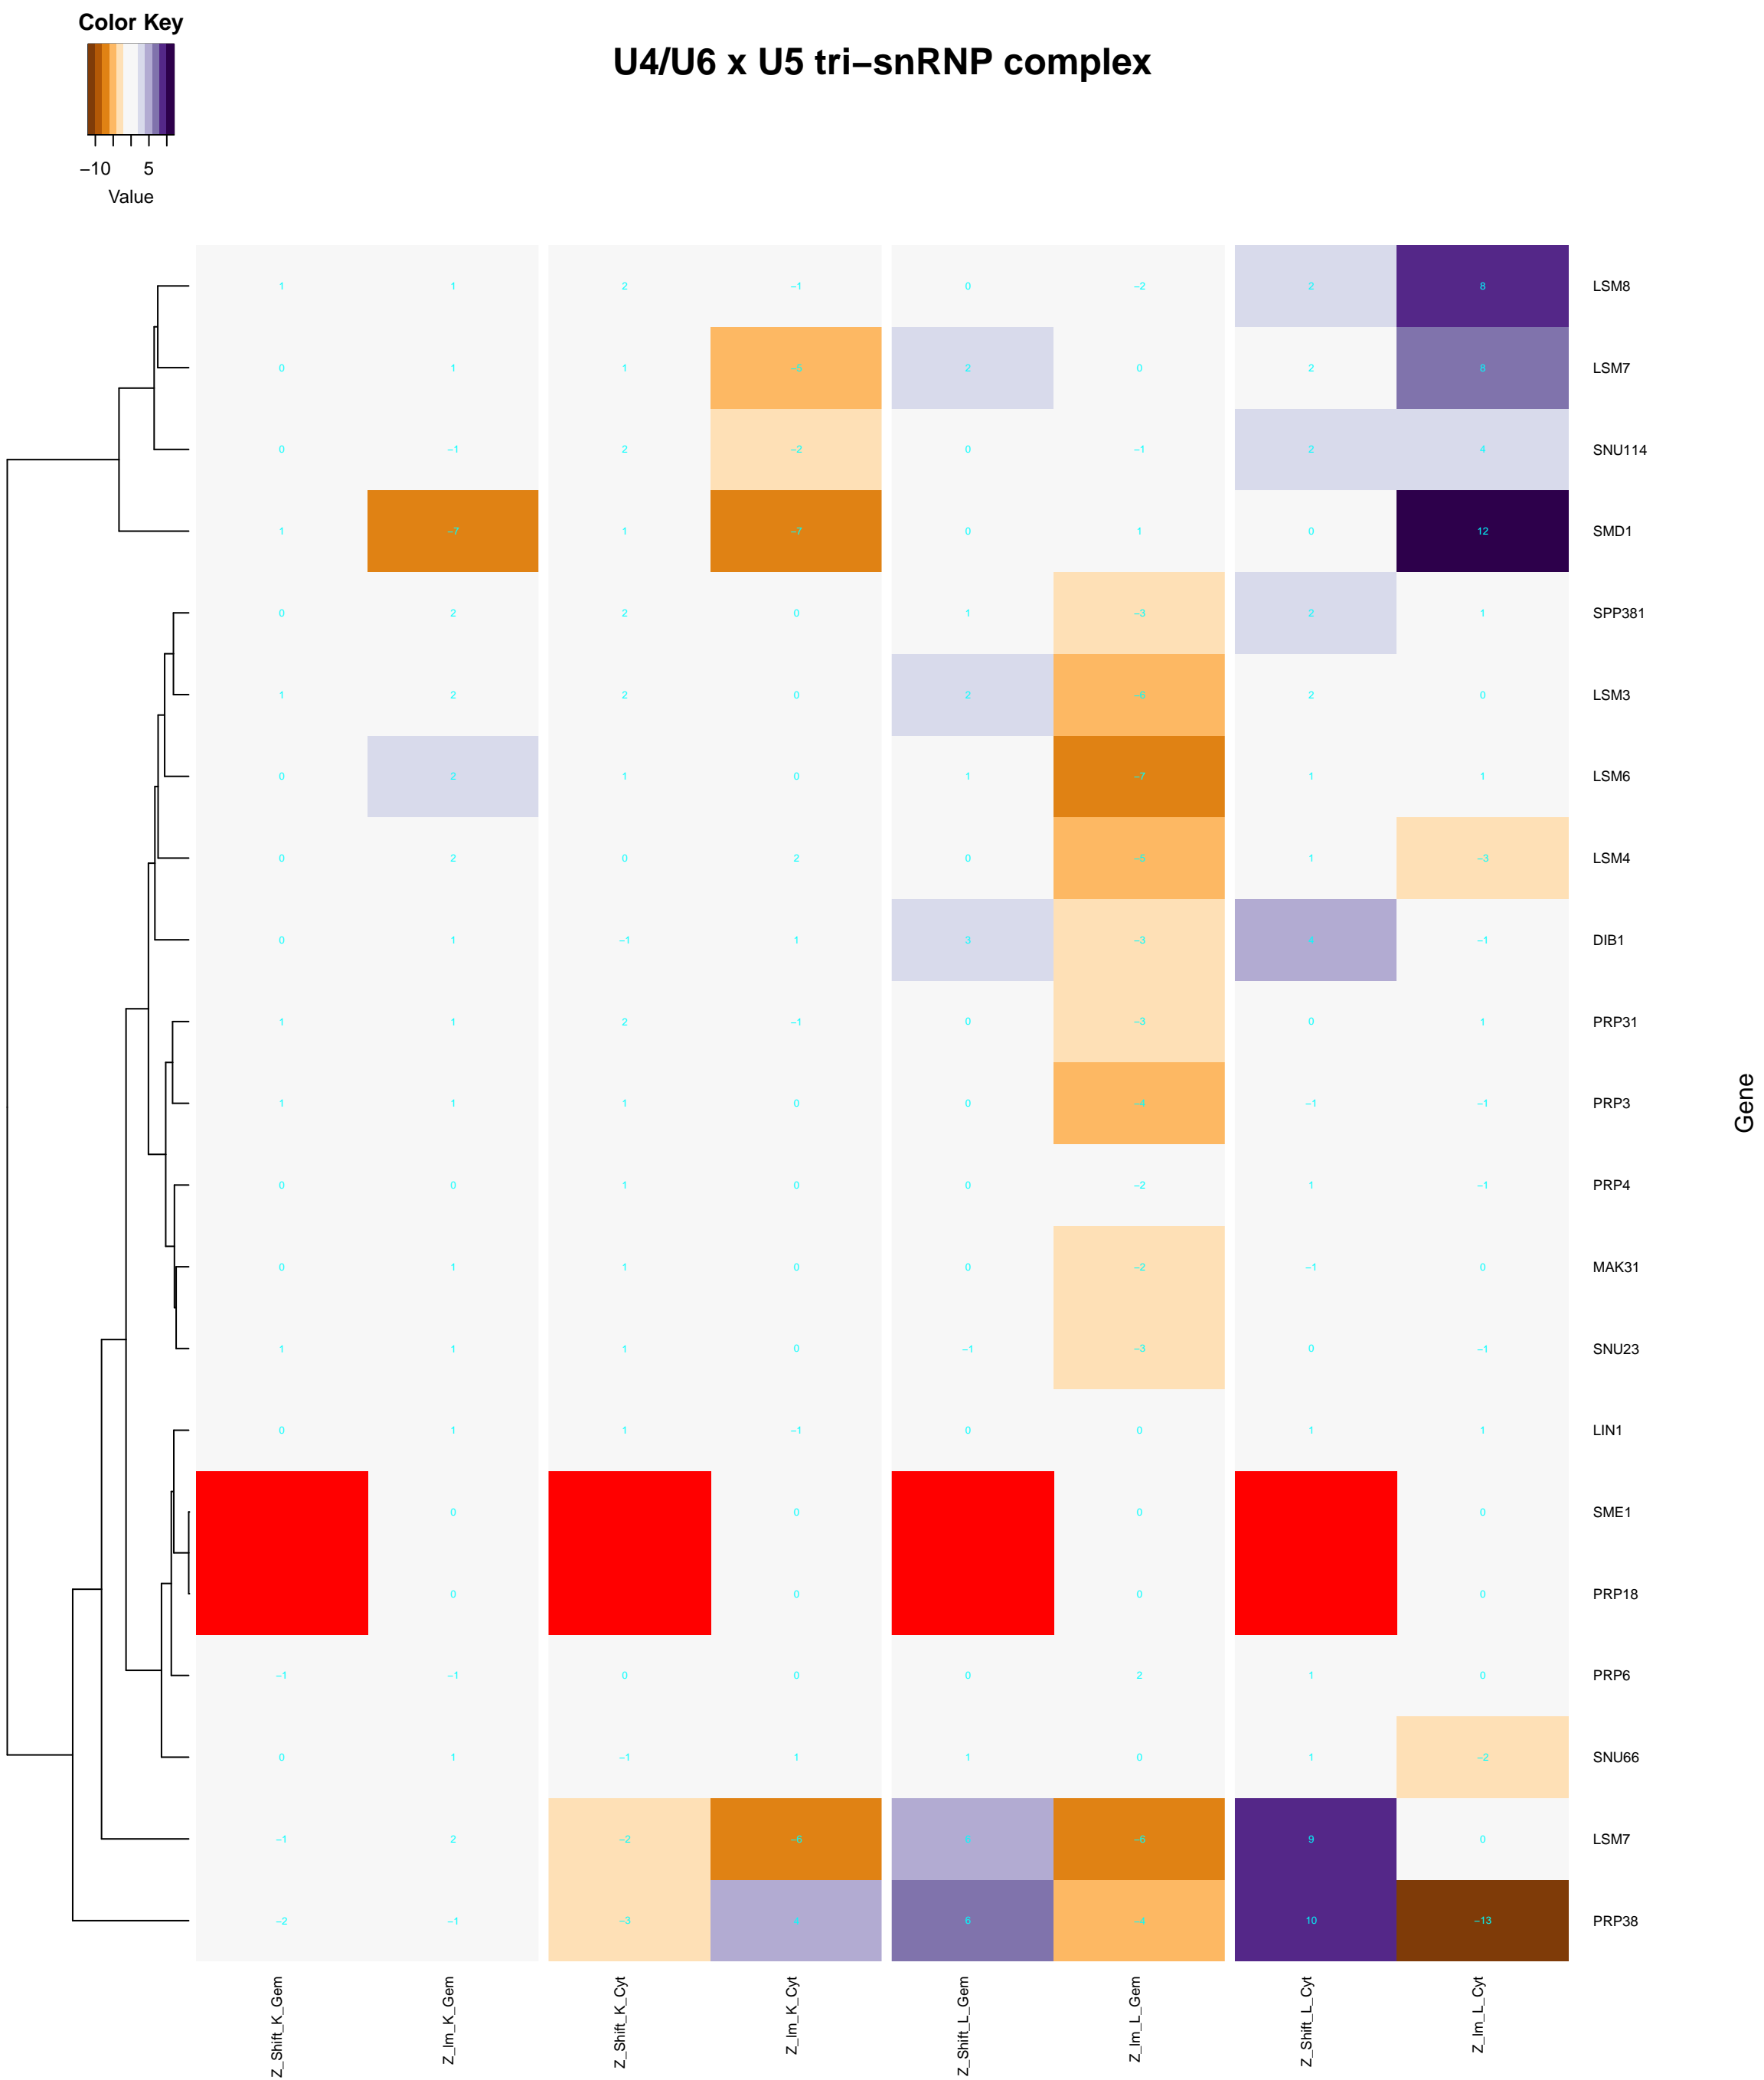

Supplement: s1 [file s1]
