# Supplementary material for: A Humanized Yeast Phenomic Model of Deoxycytidine Kinase to Predict Genetic Buffering of Nucleoside Analog Cytotoxicity
Source: MDPI journal article supplement (doi:10.3390/genes10100770), 2019-09-30

Color Key

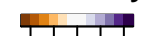

-10 5

Value

# vesicle docking

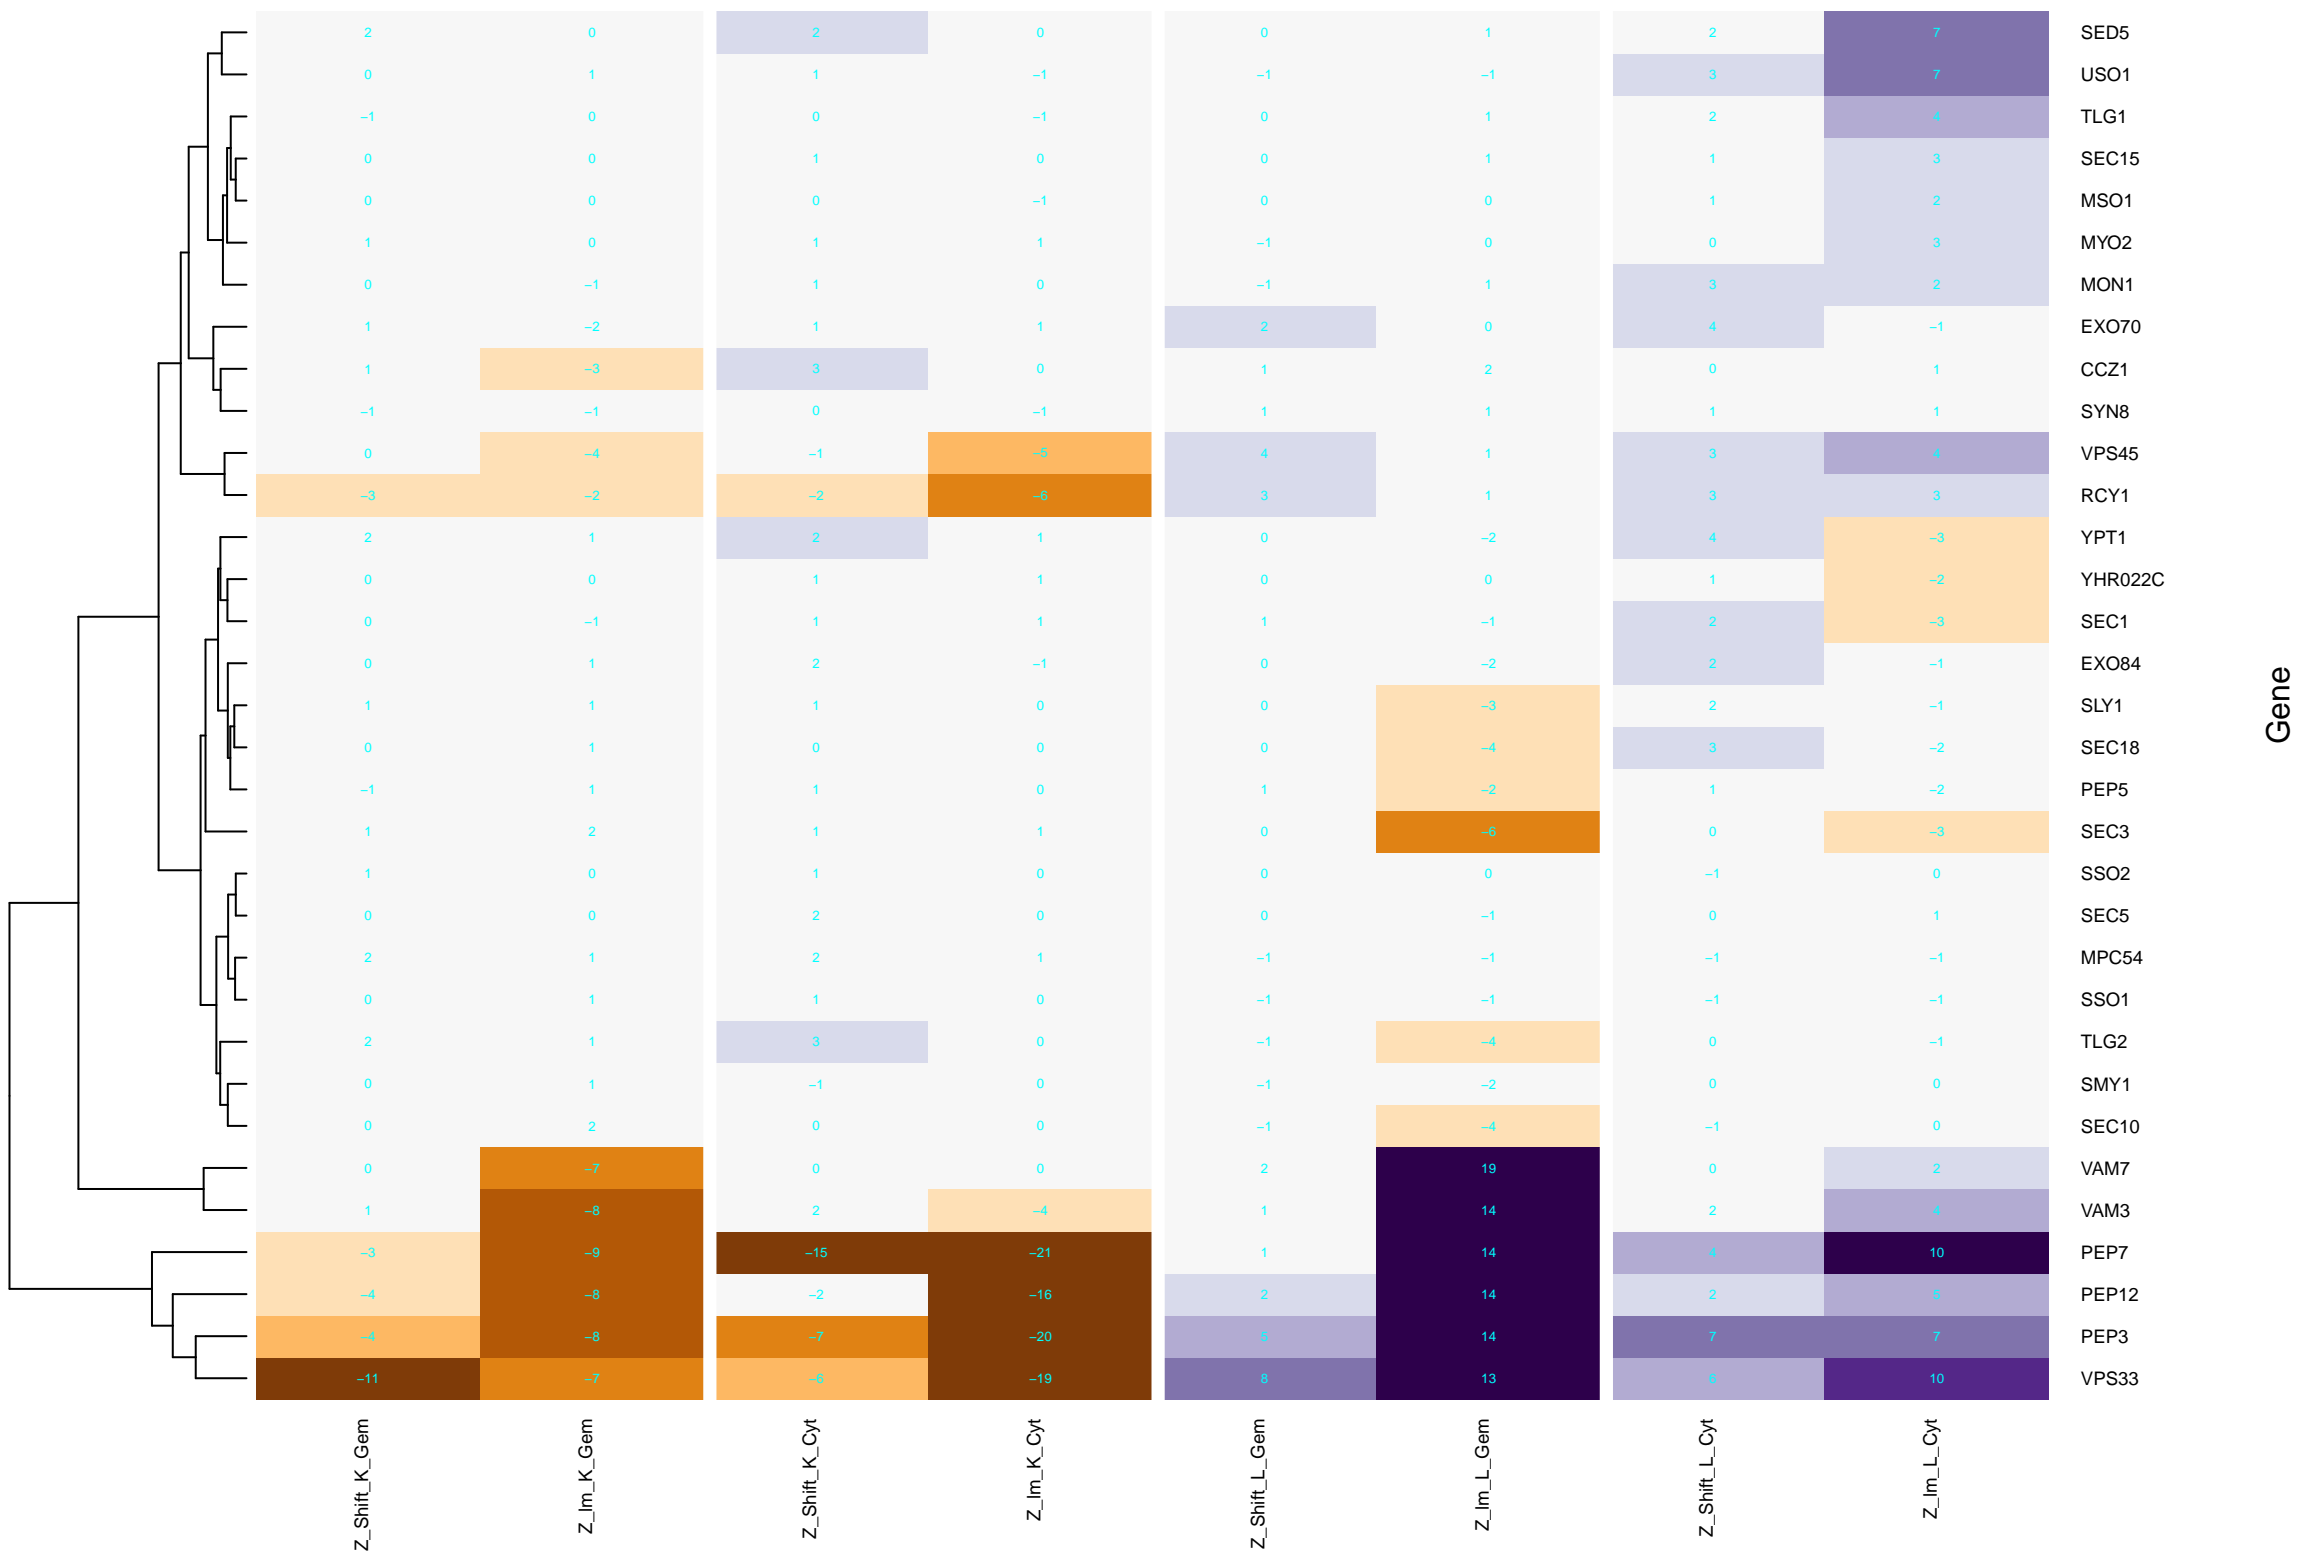

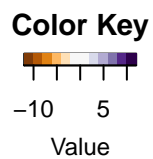

# vesicle docking involved in exocytosis

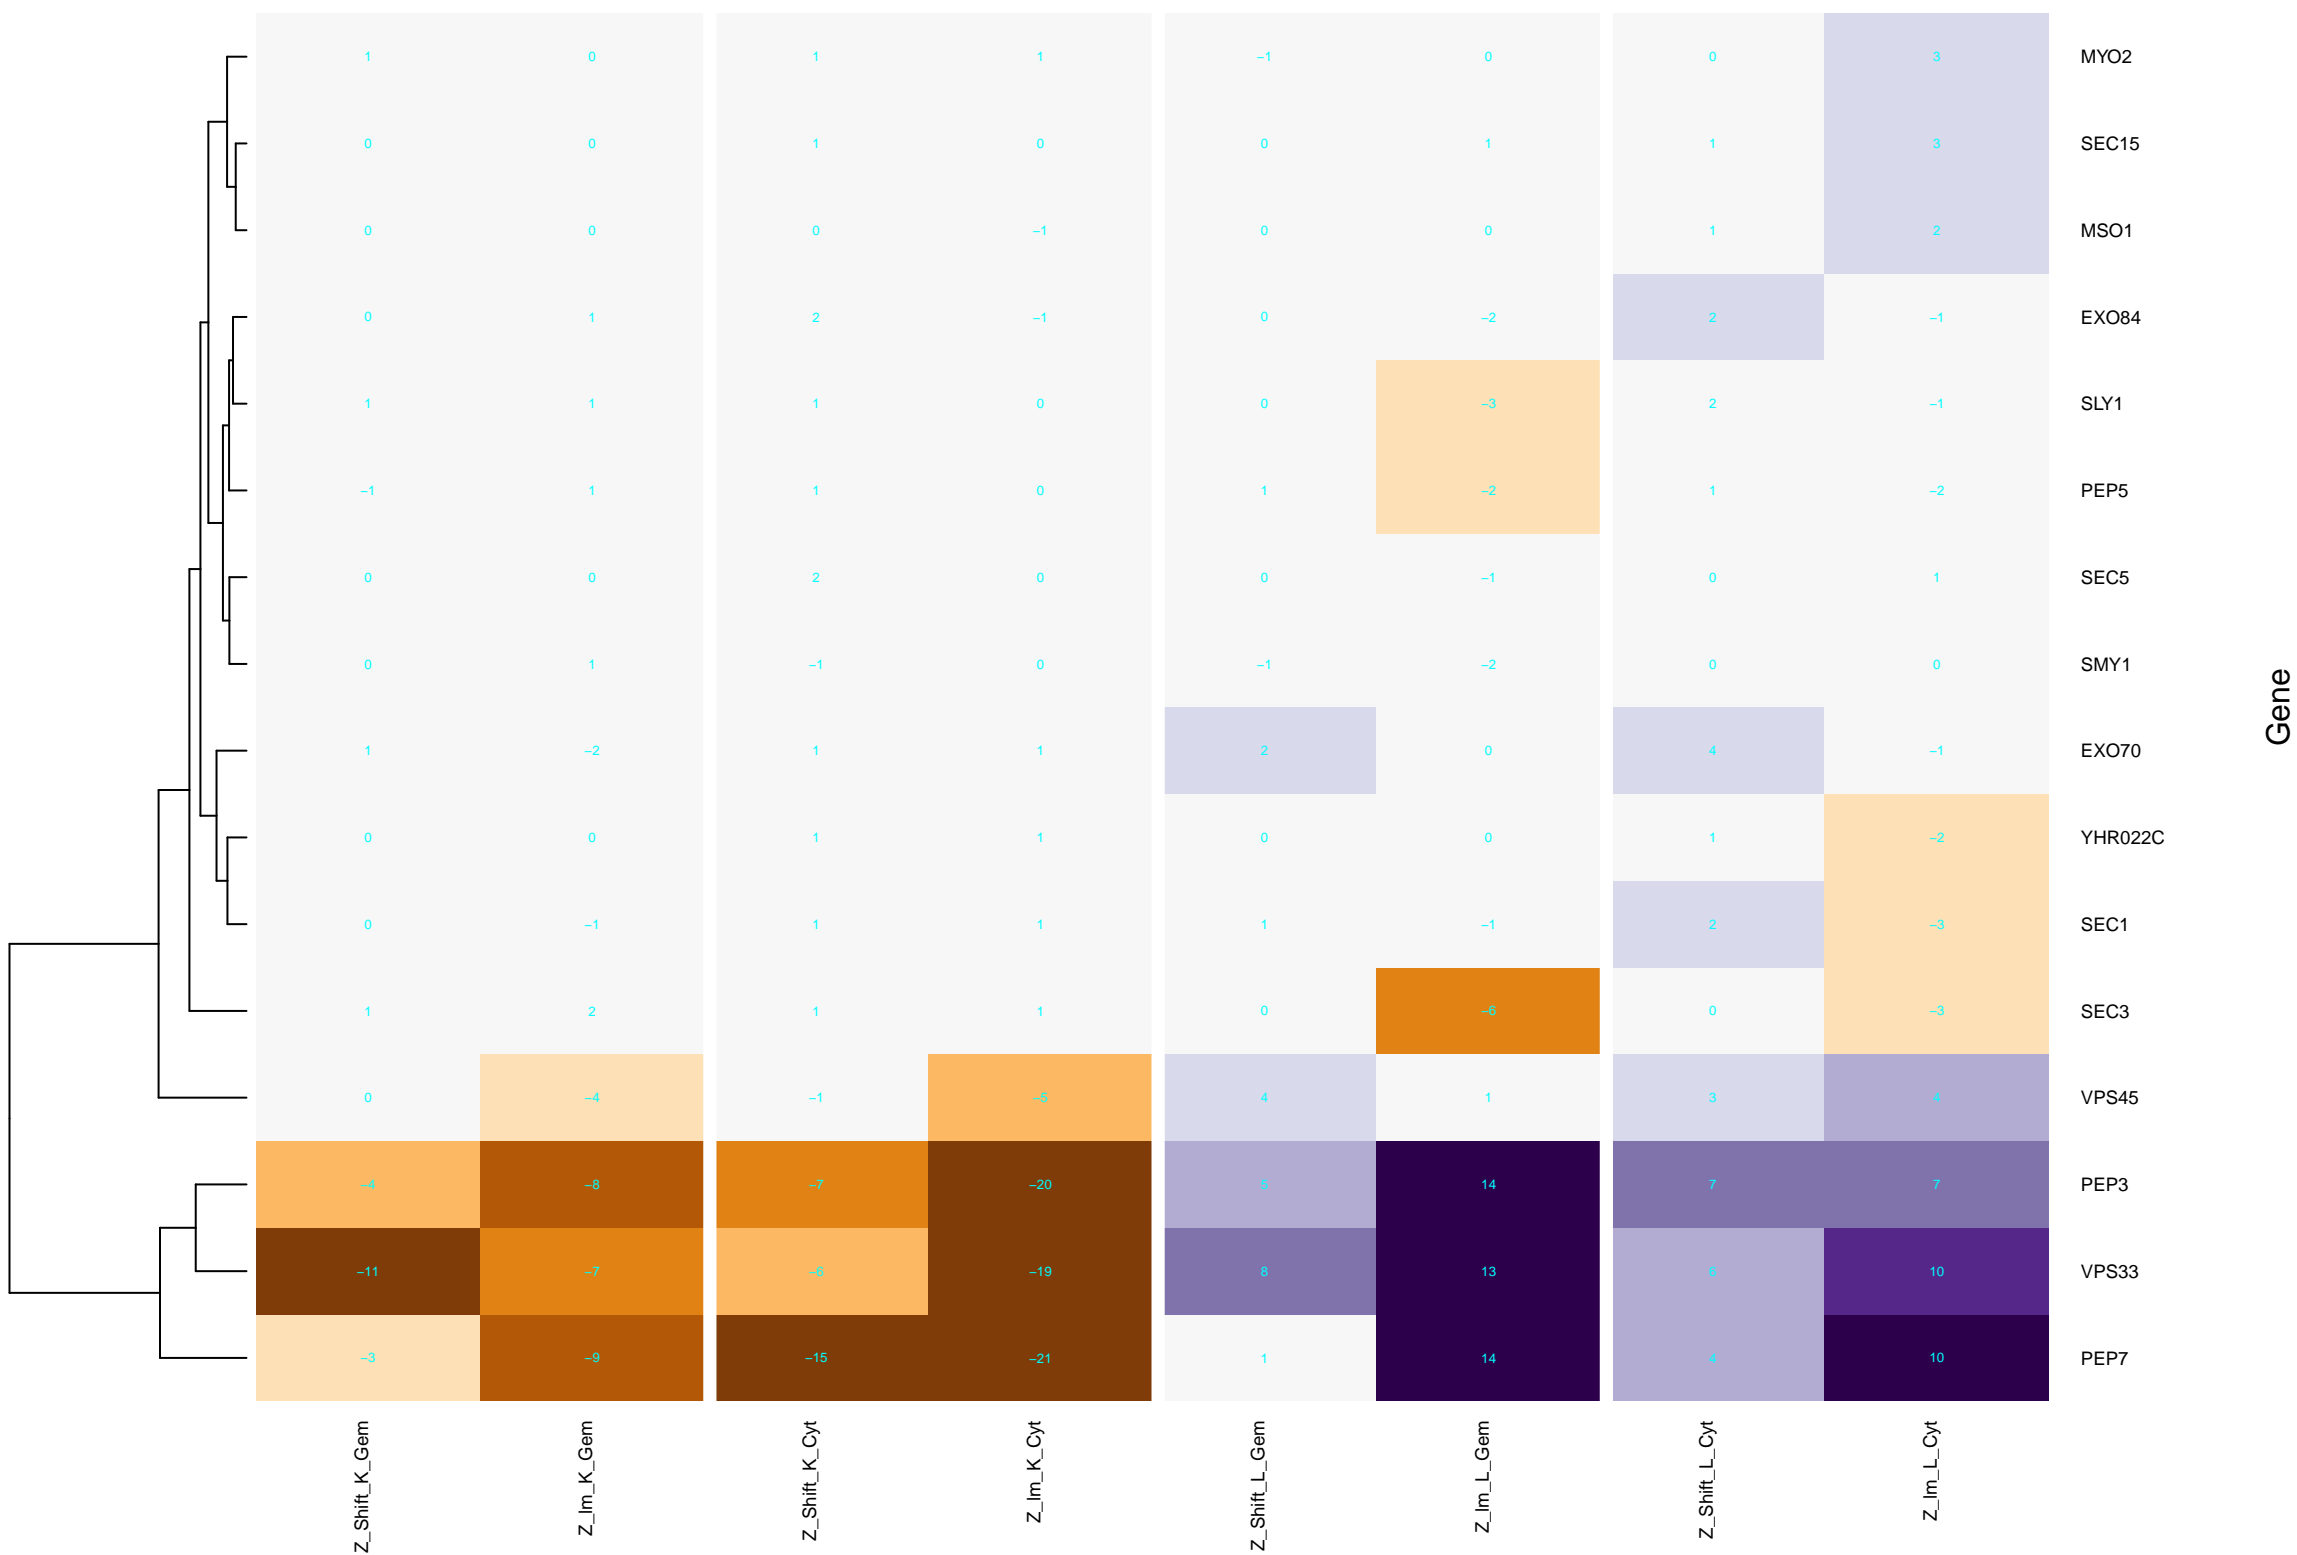

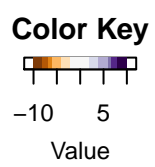

# Golgi vesicle docking

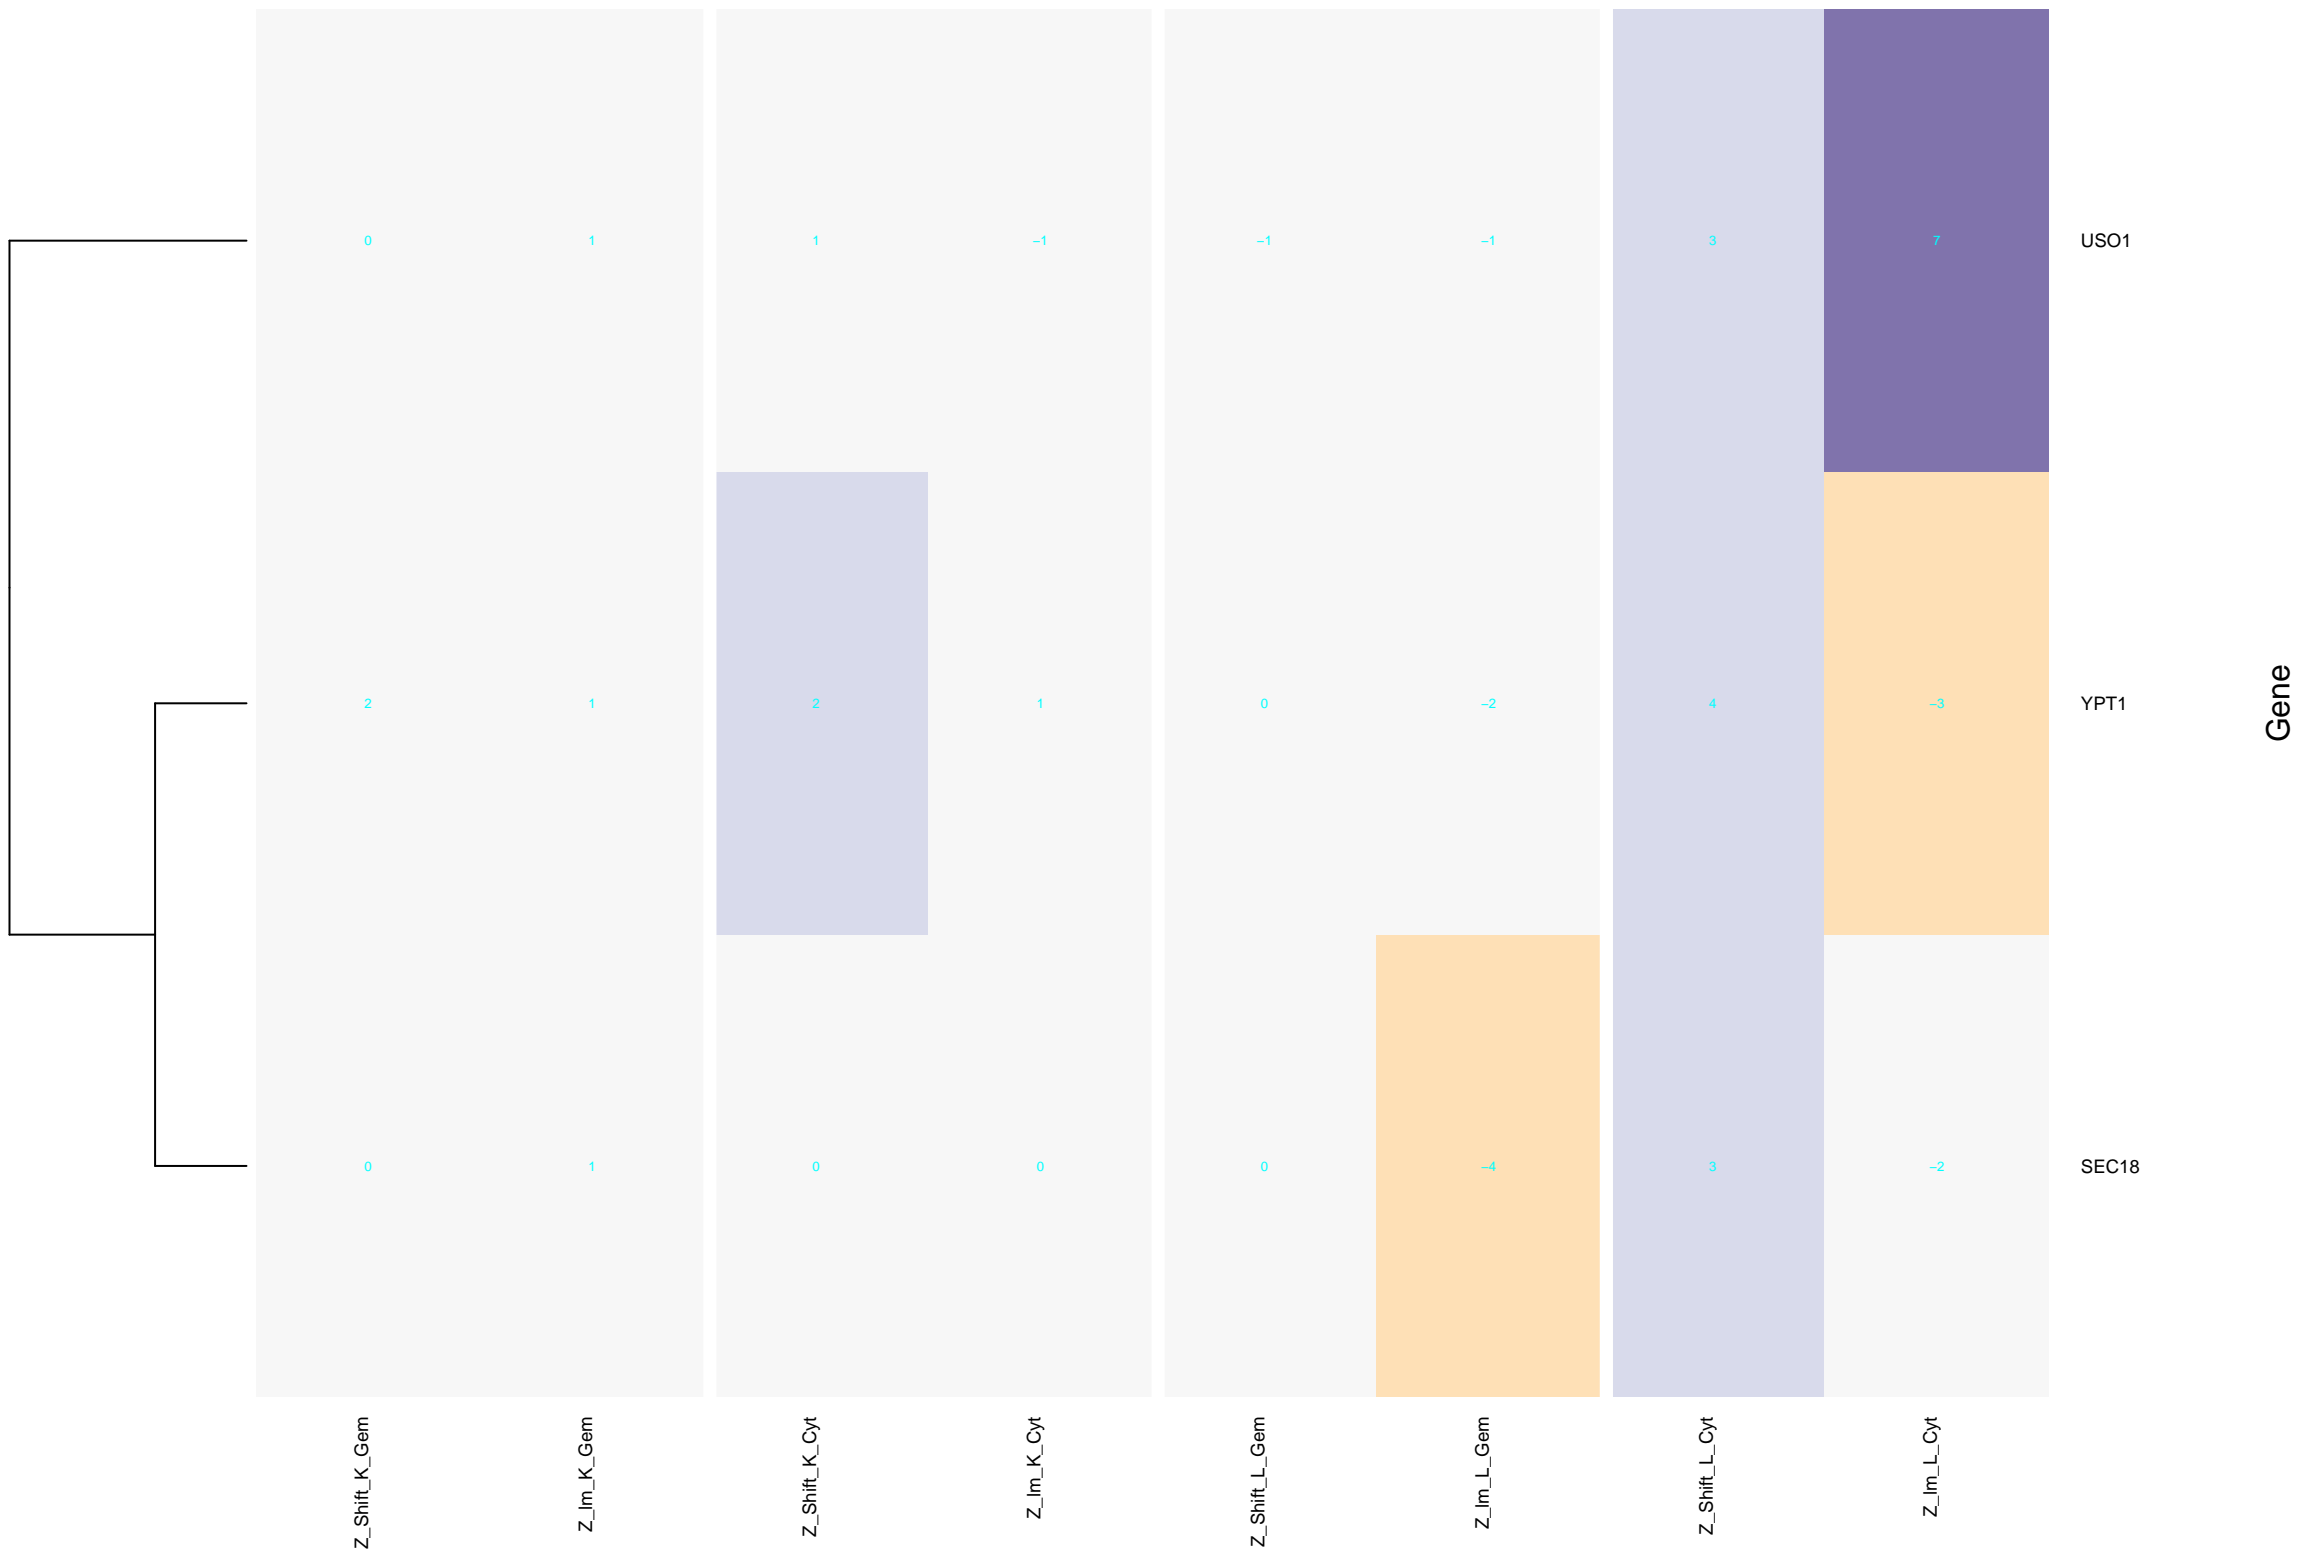

Supplement: s1 [file s1]
