# Supplementary material for: A Humanized Yeast Phenomic Model of Deoxycytidine Kinase to Predict Genetic Buffering of Nucleoside Analog Cytotoxicity
Source: MDPI journal article supplement (doi:10.3390/genes10100770), 2019-09-30
Supplement: s1 [file s1]

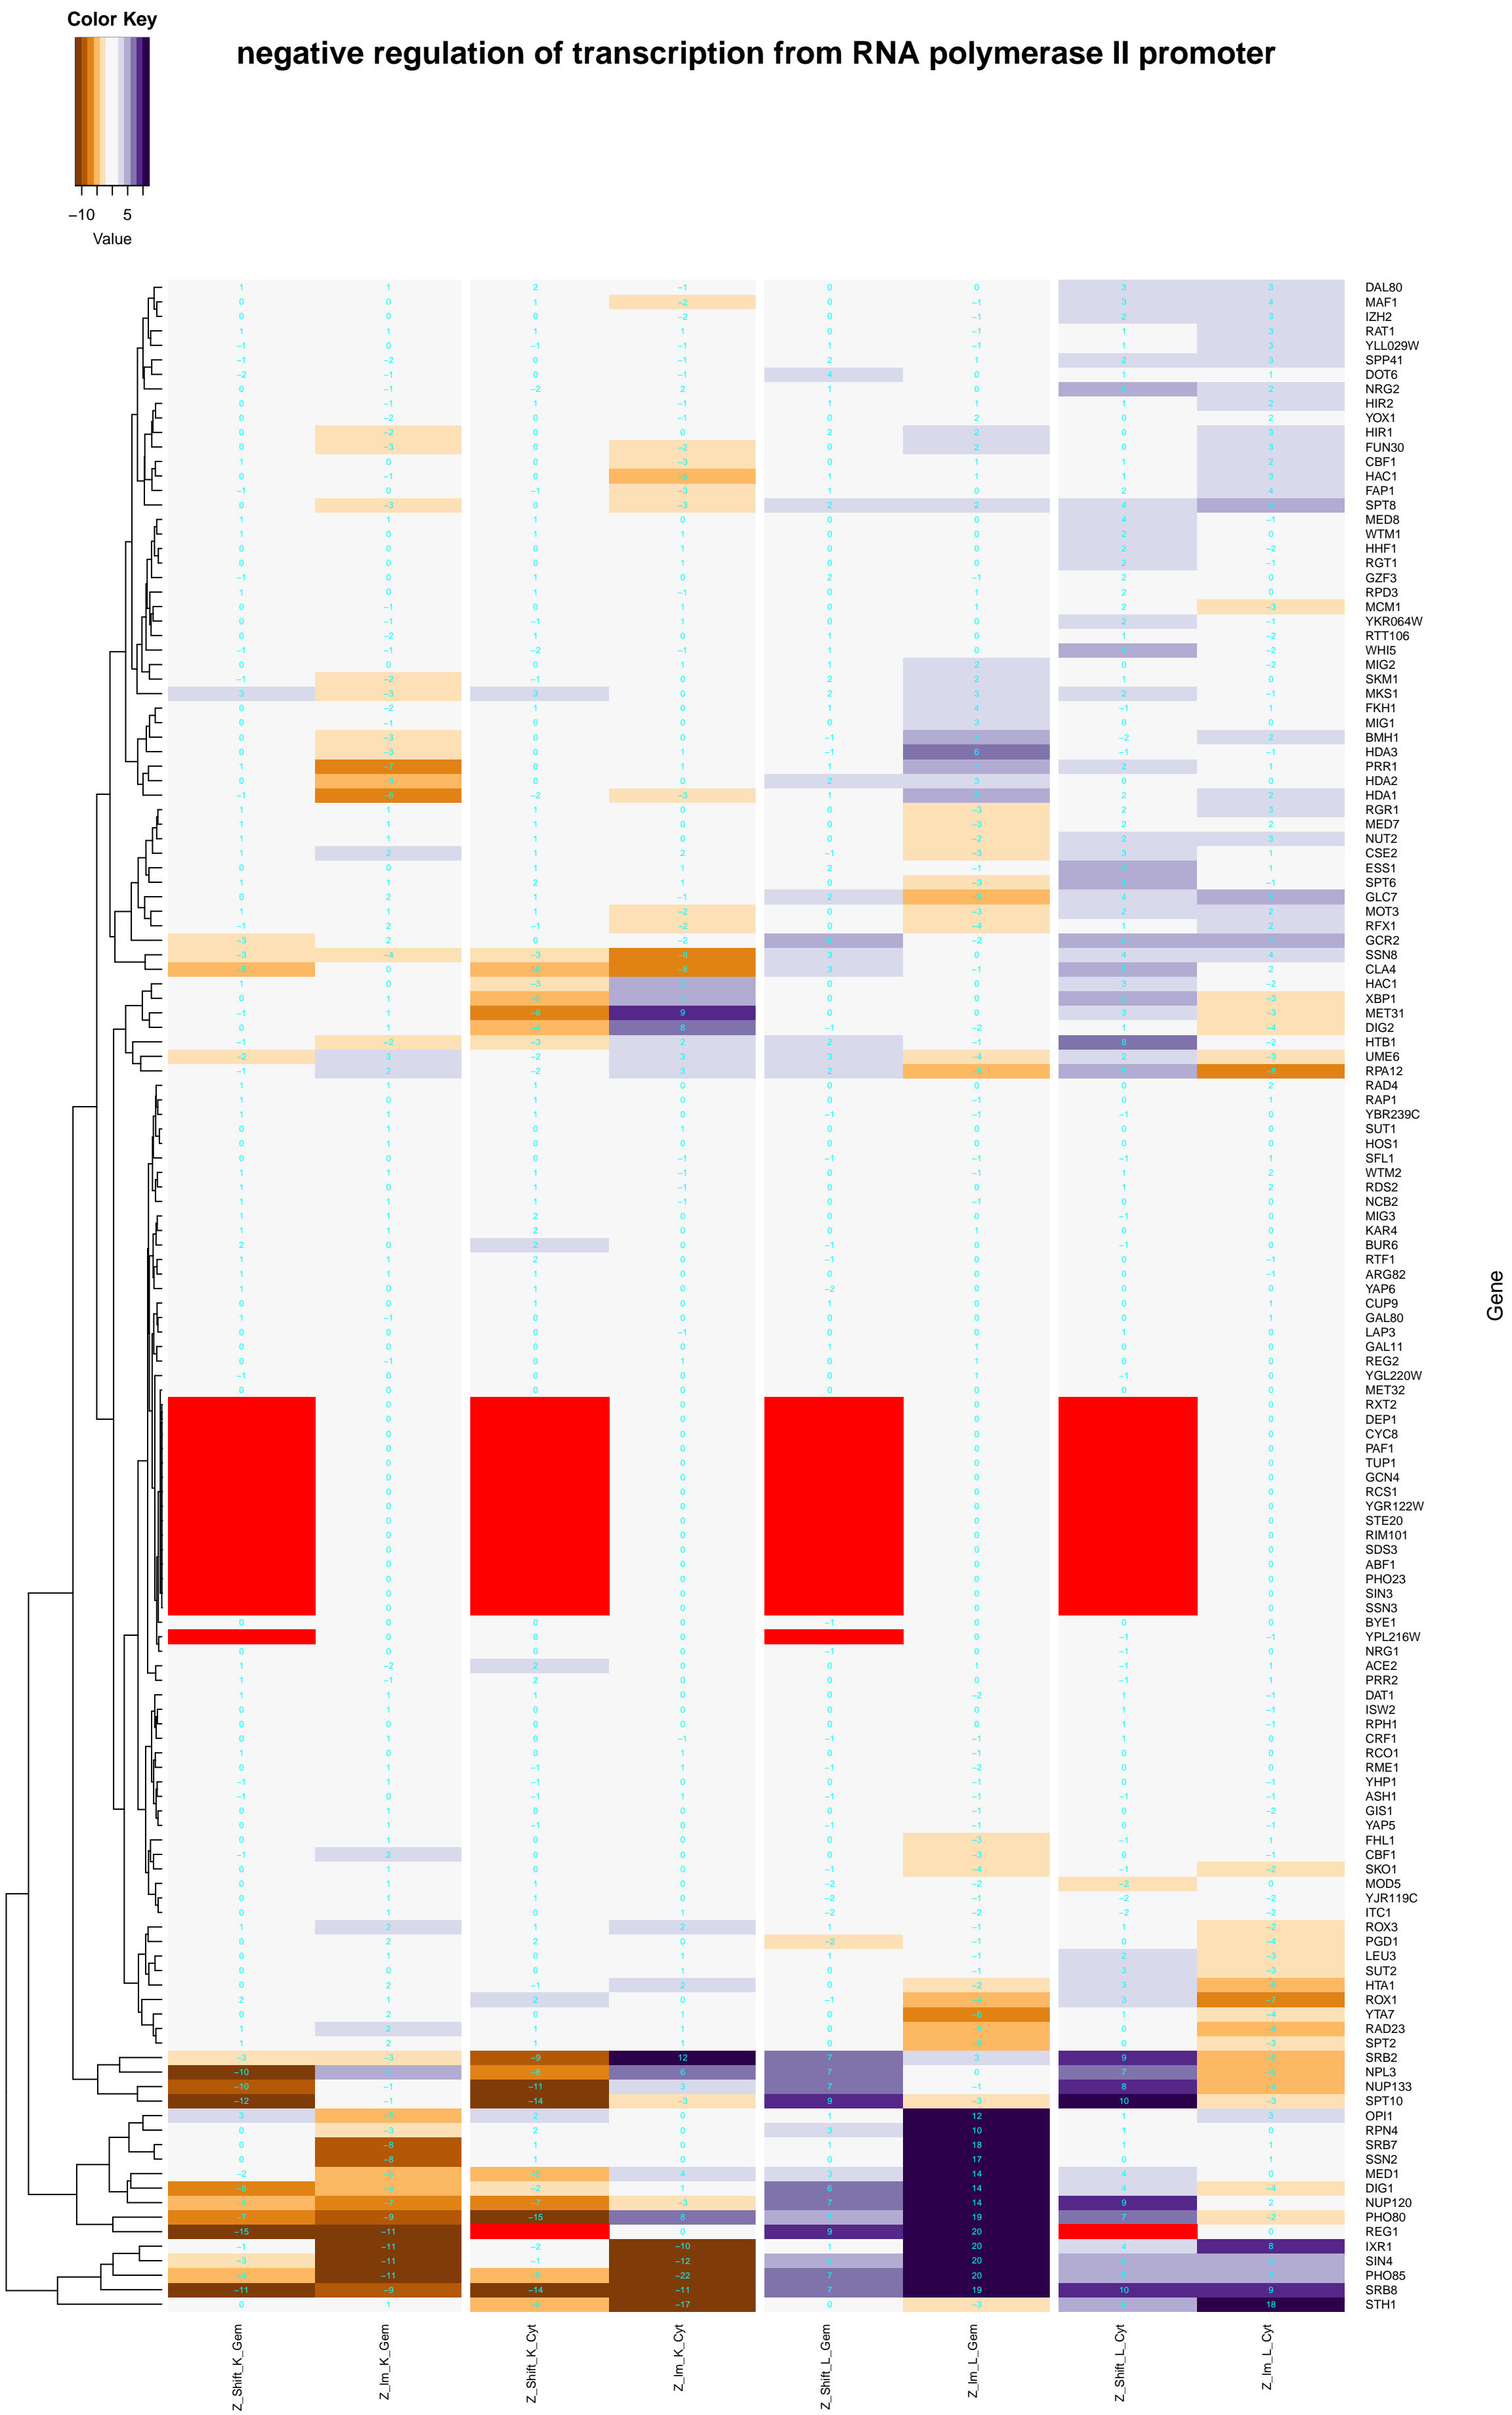

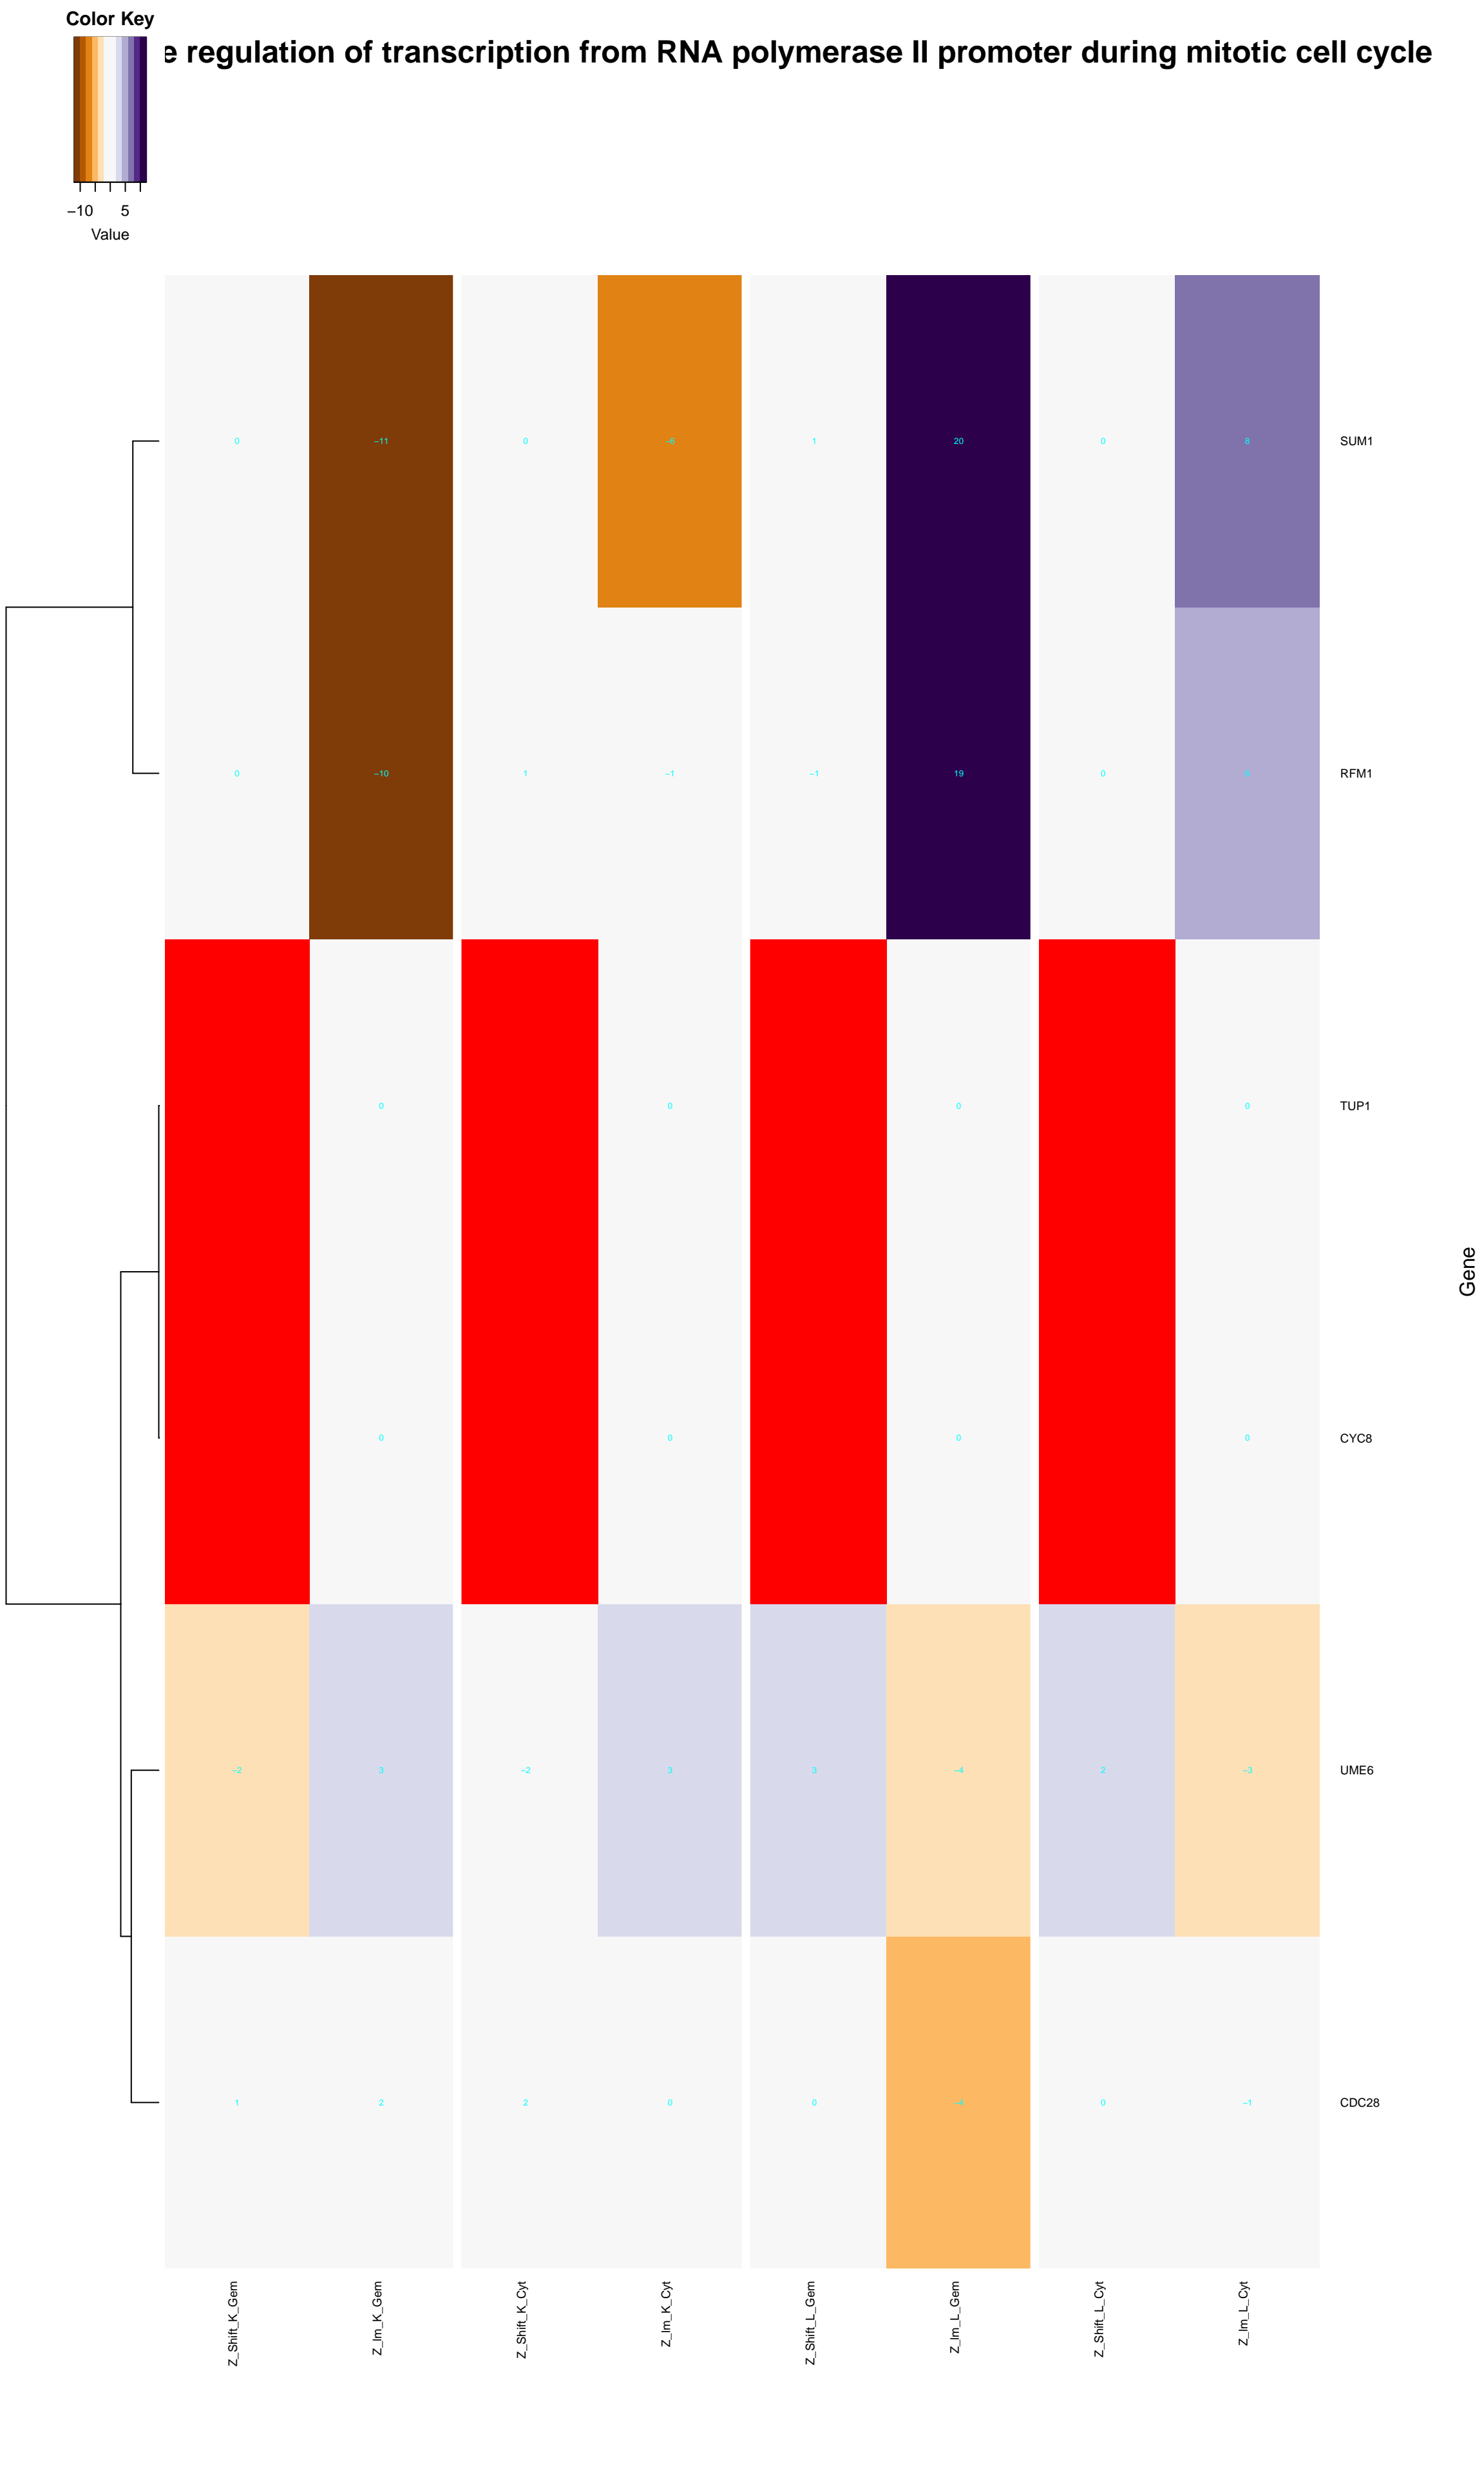

Color Key

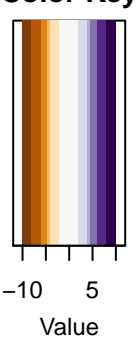

egulation of transcription from RNA polymerase II promoter involved in meiotic cell cycle

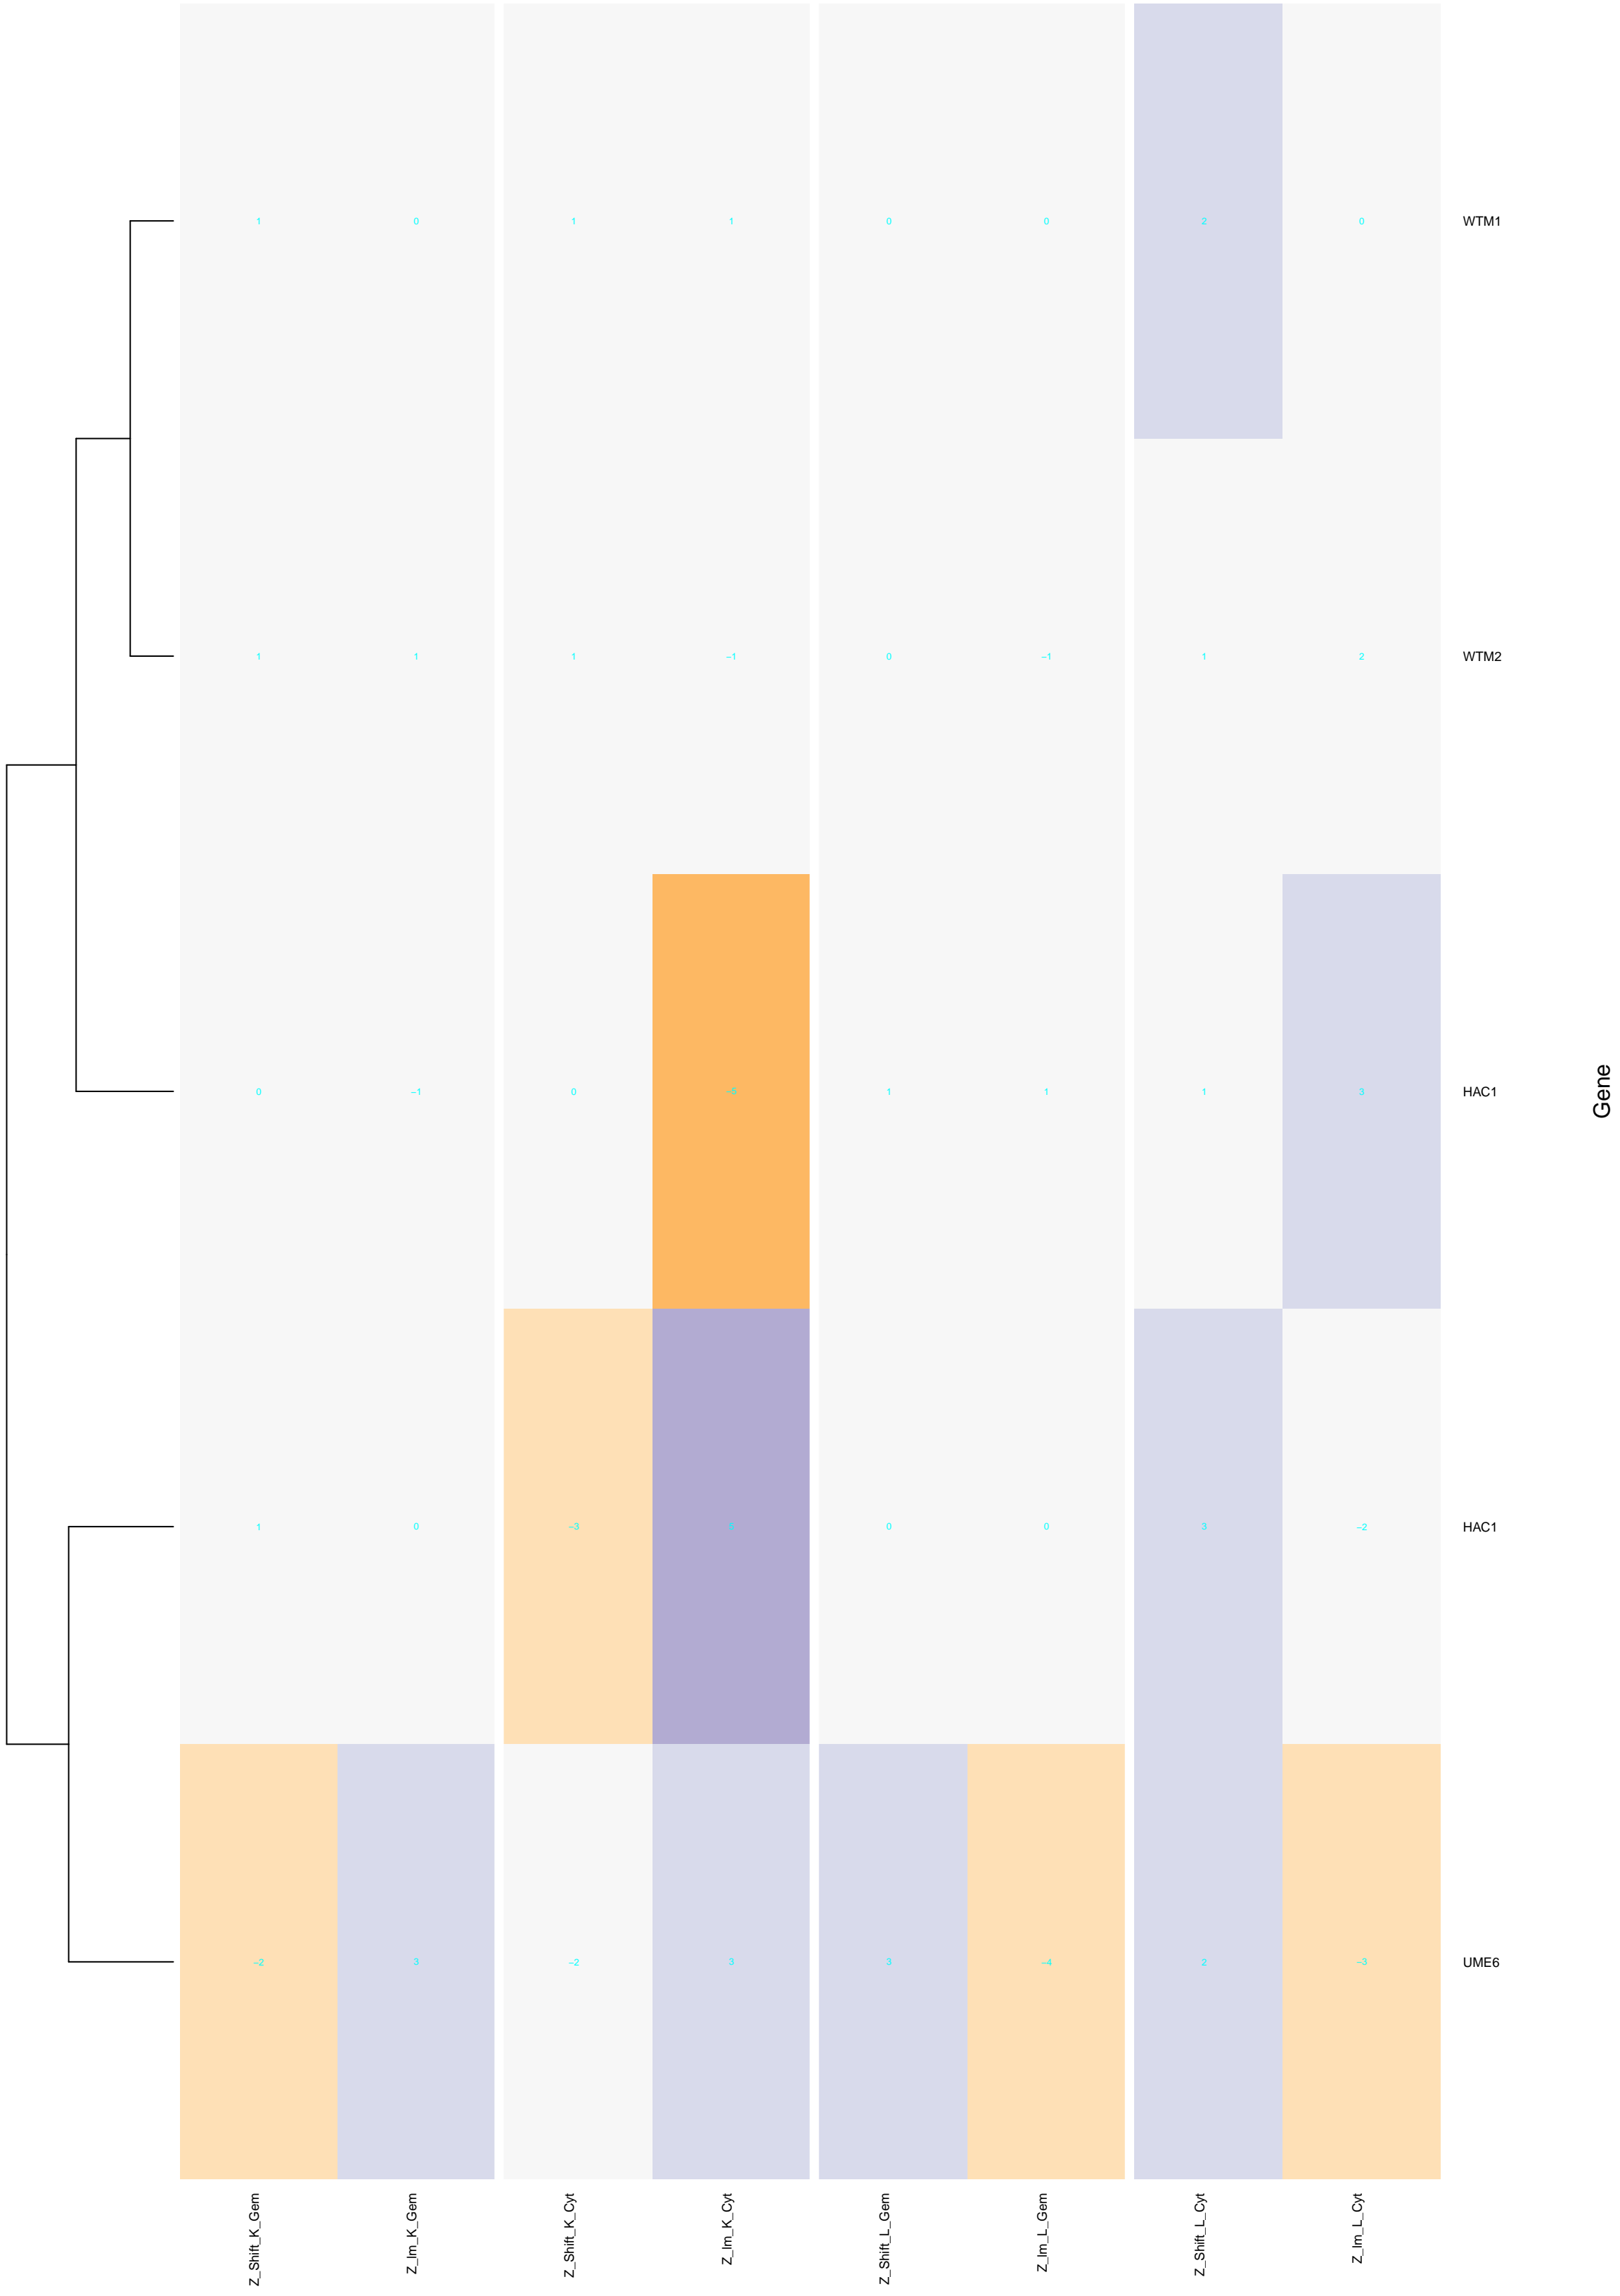

Color Key

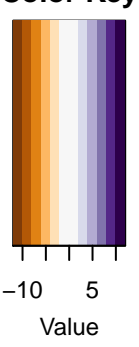

e regulation of ribosomal protein gene transcription from RNA polymerase II promoter

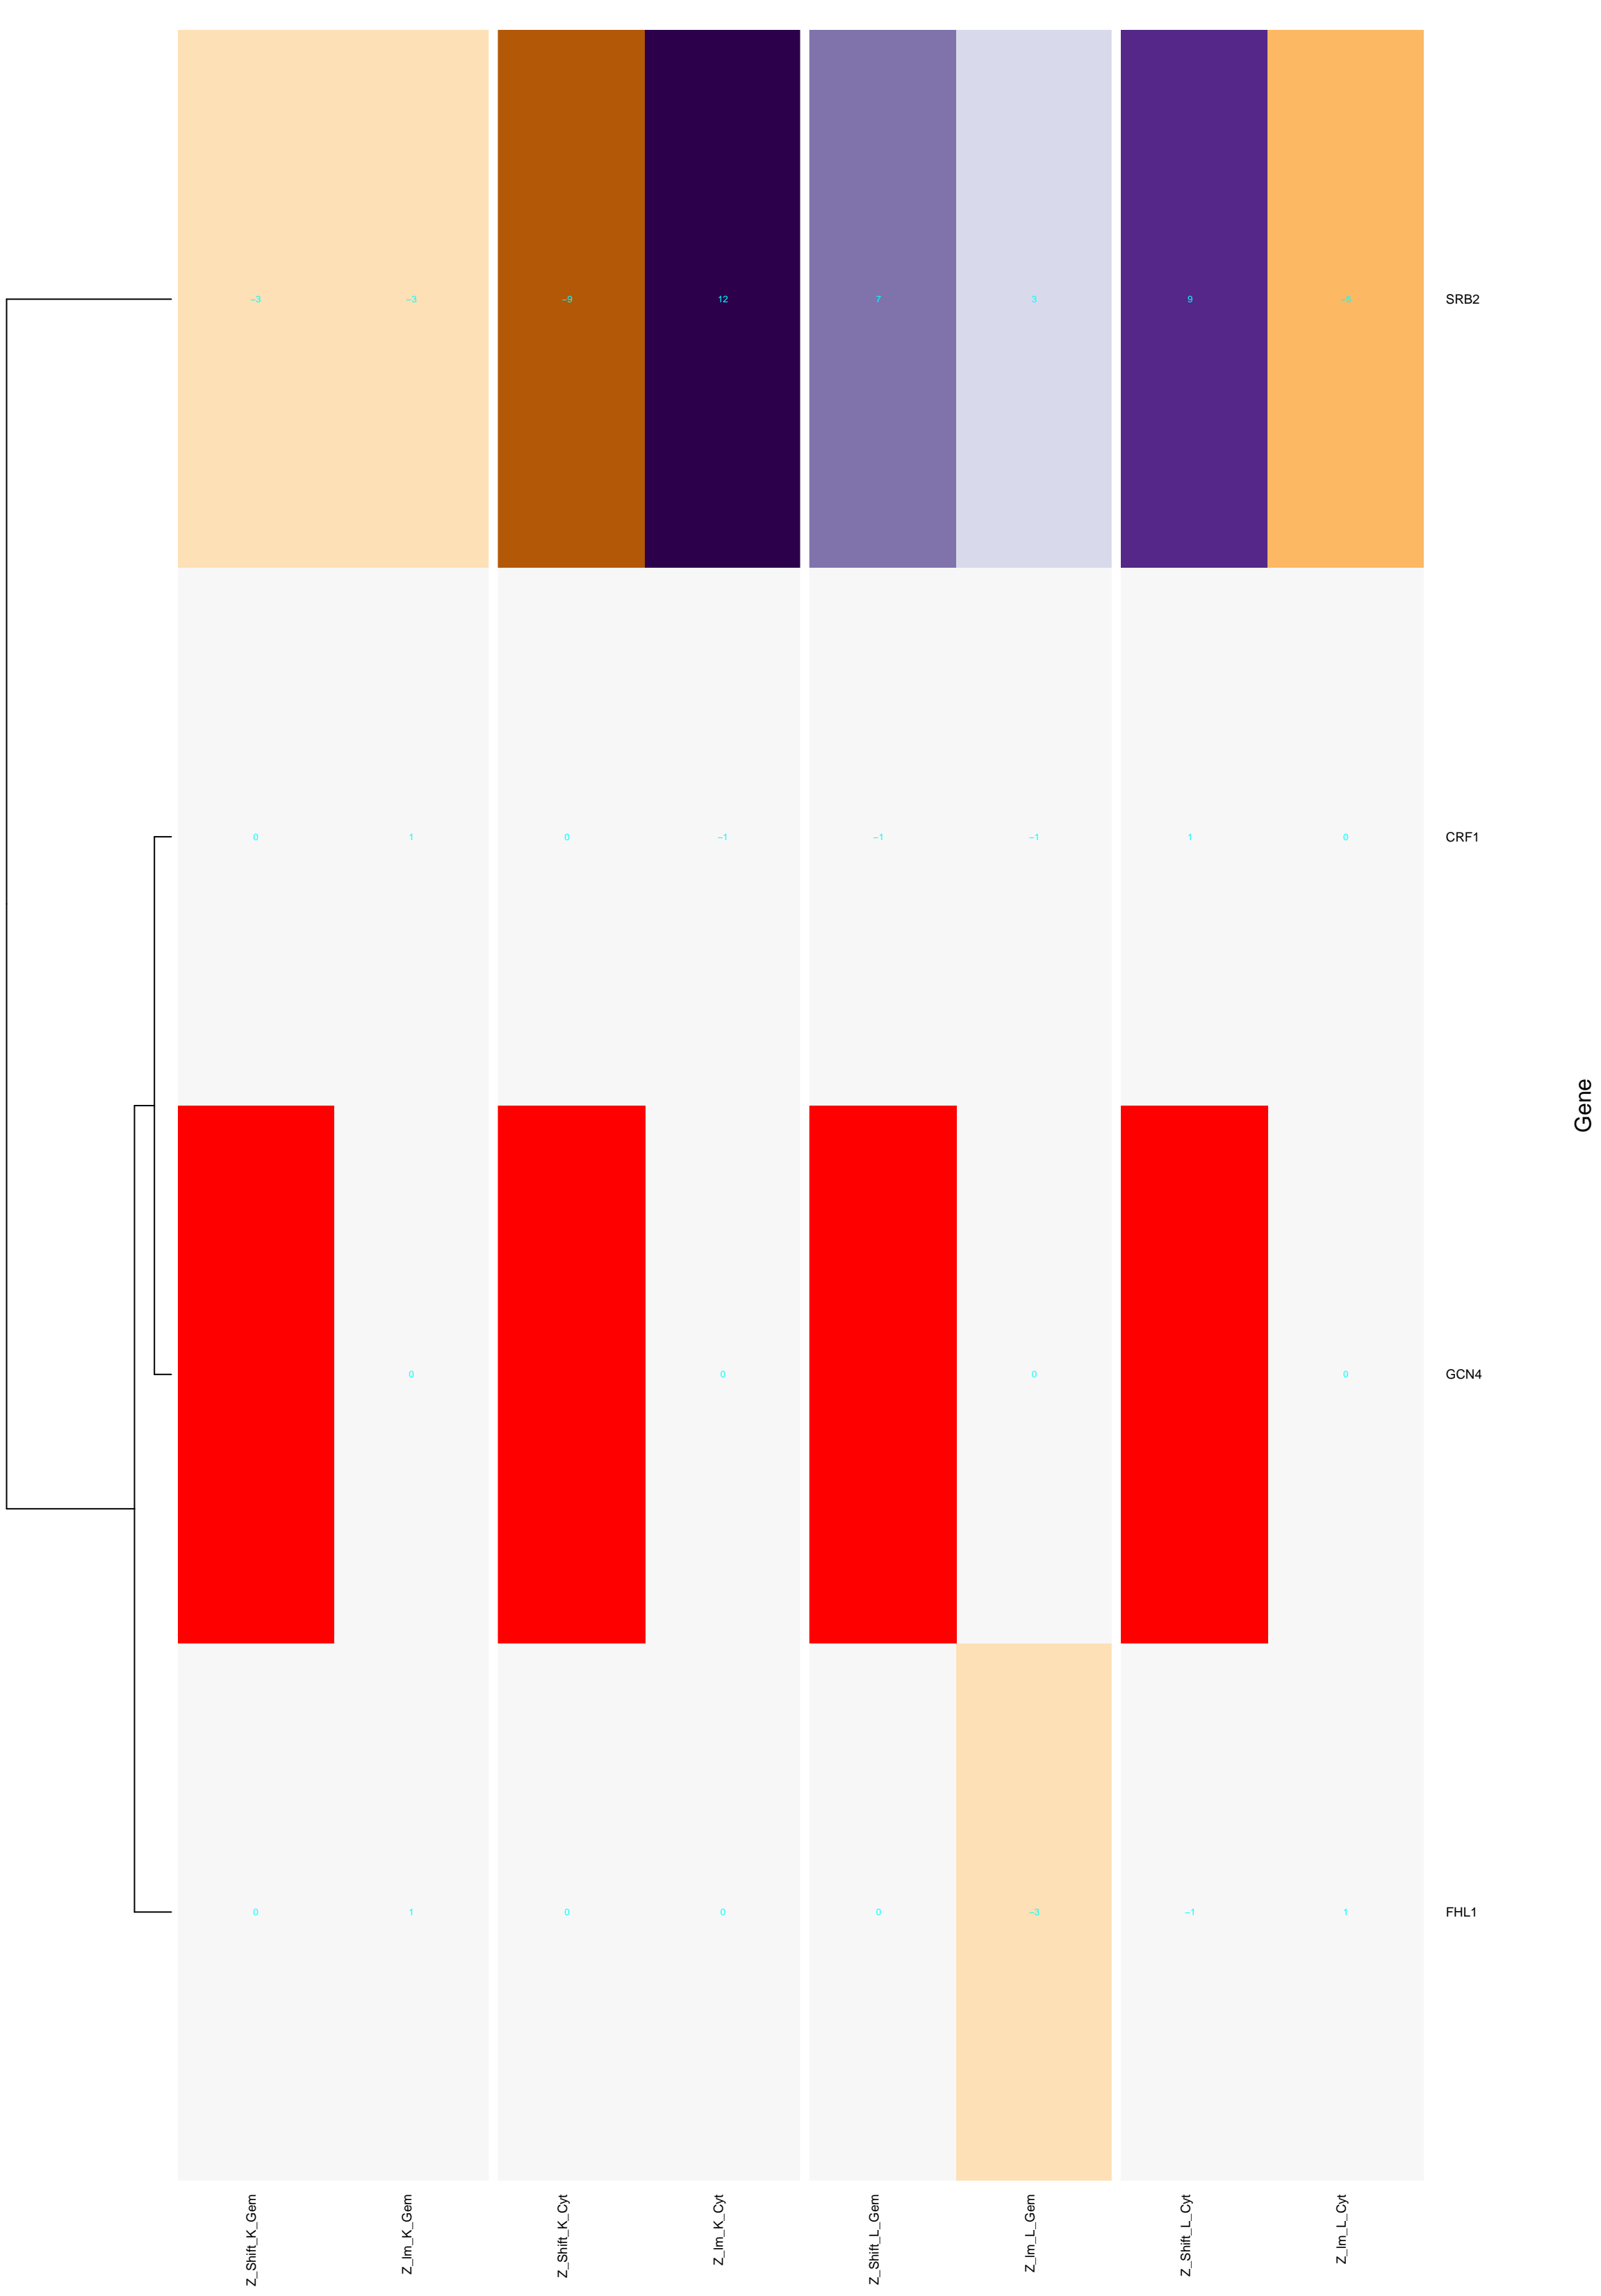

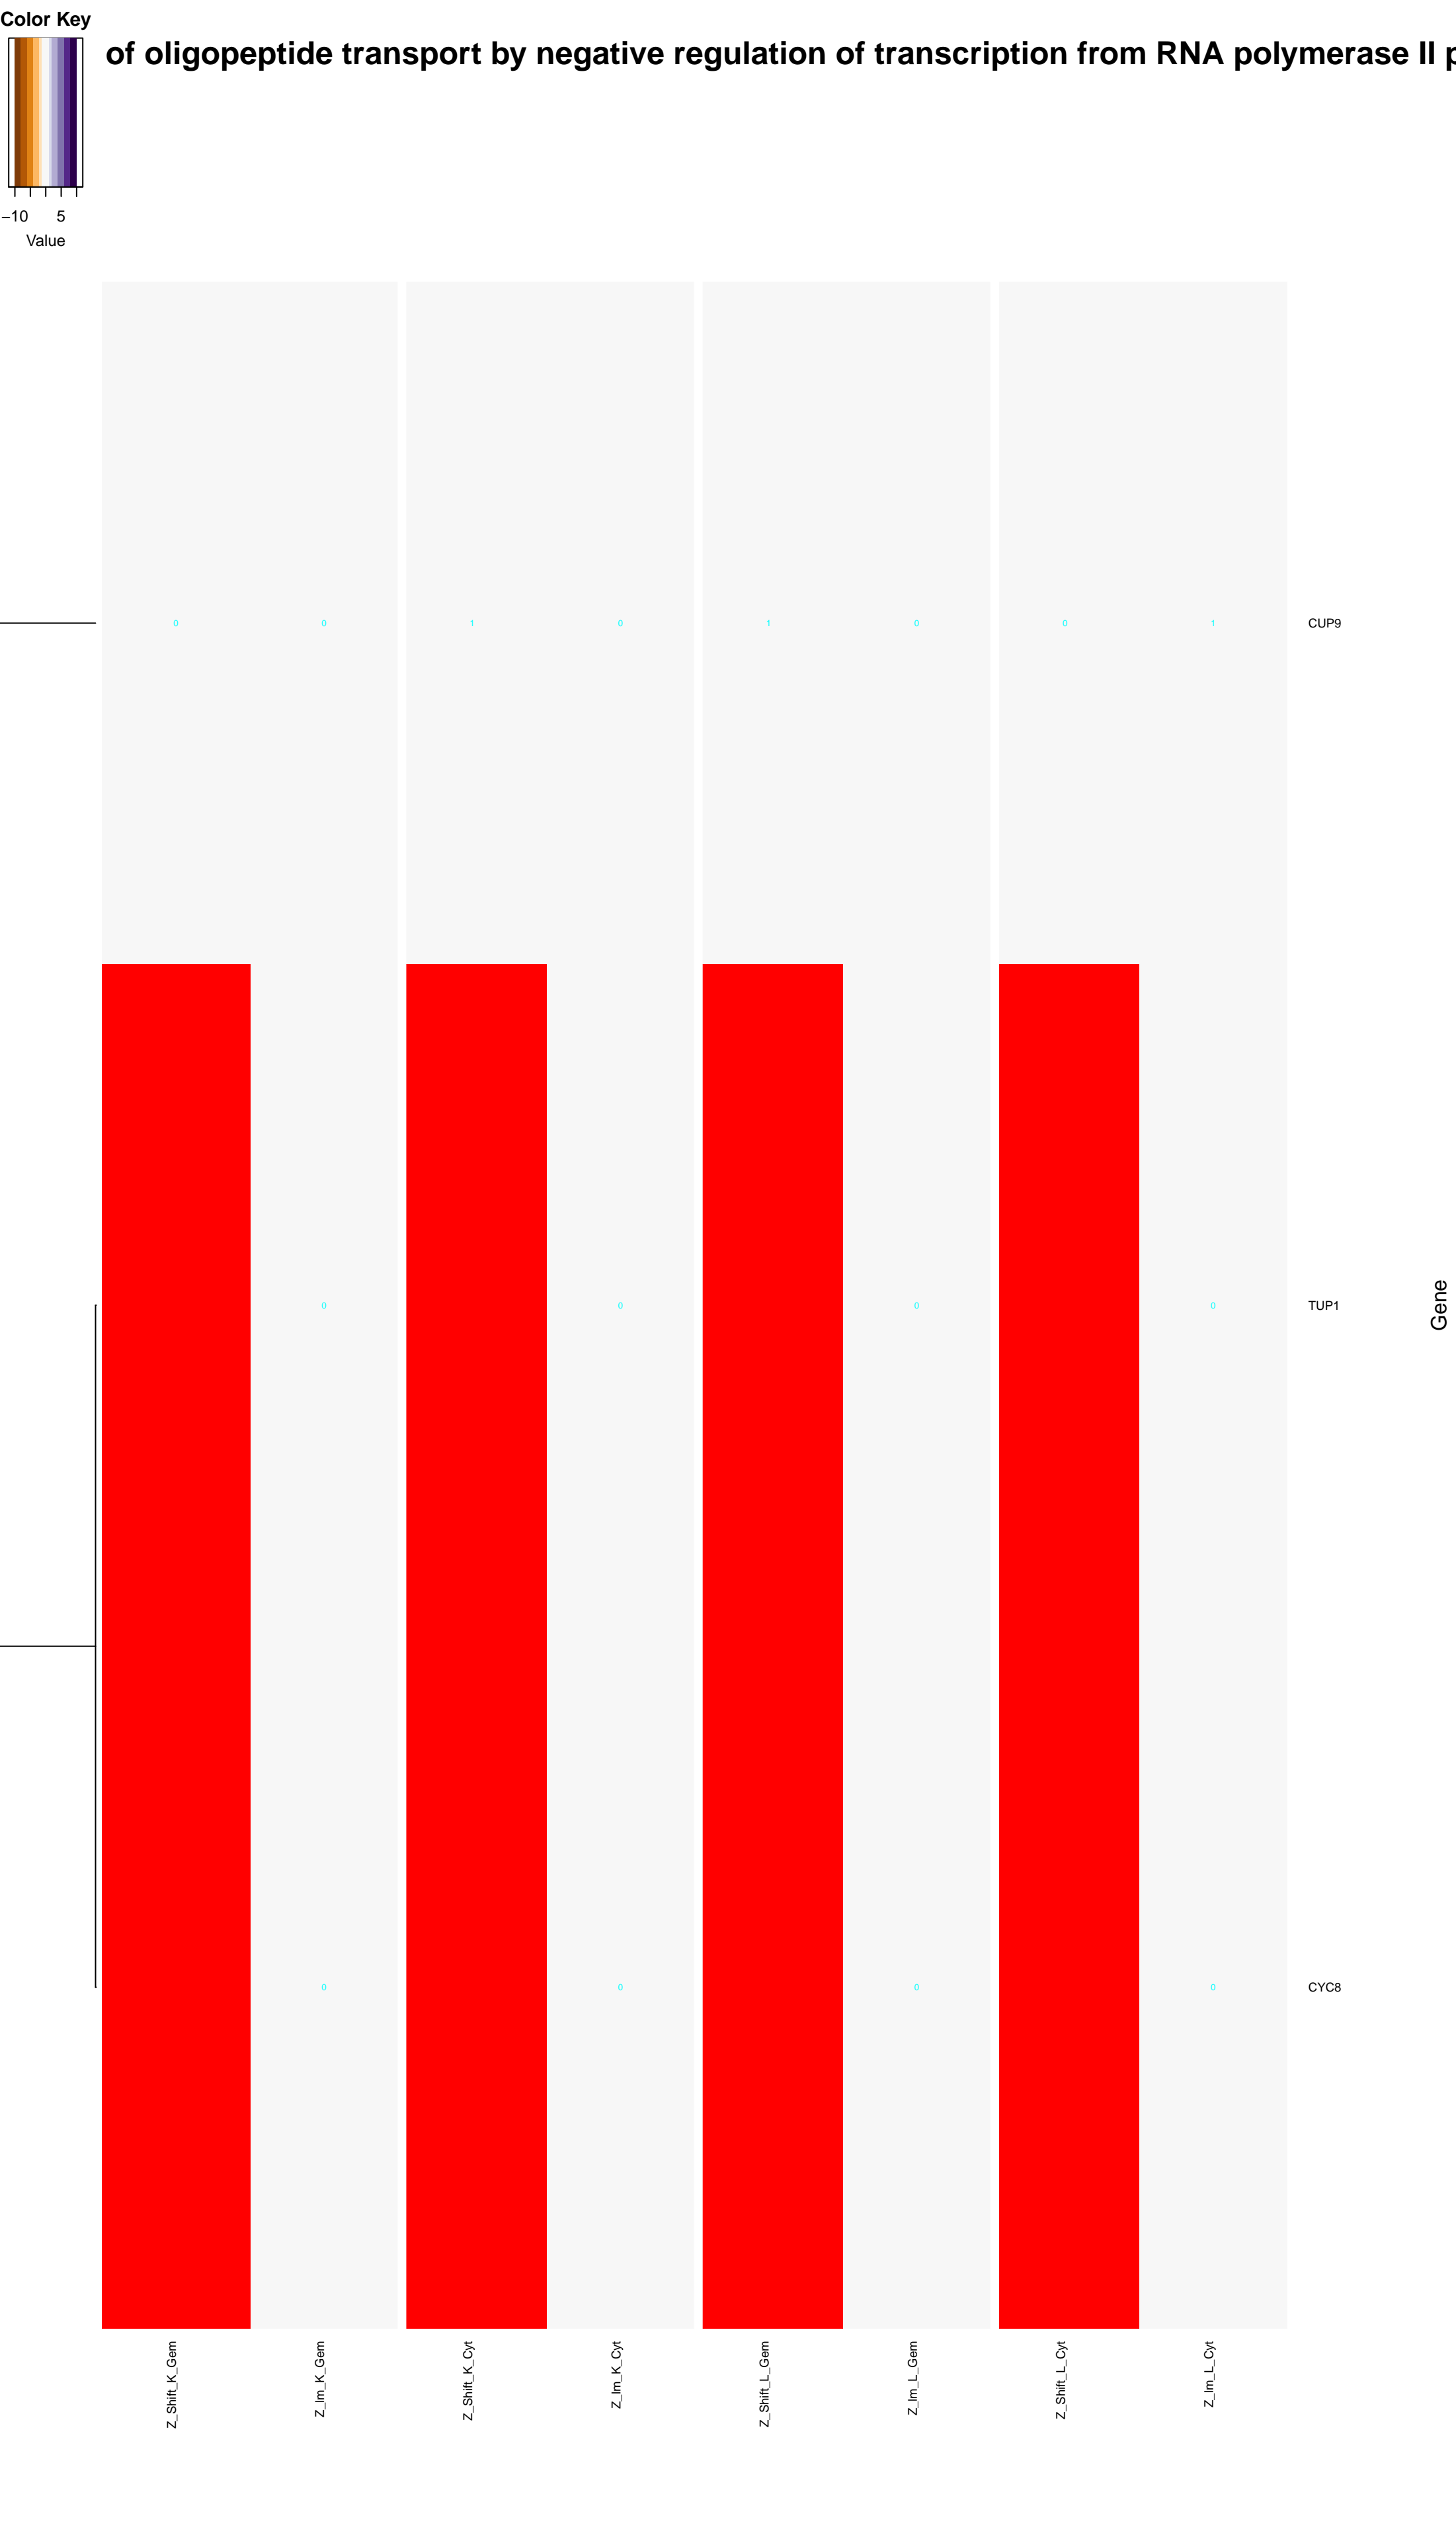

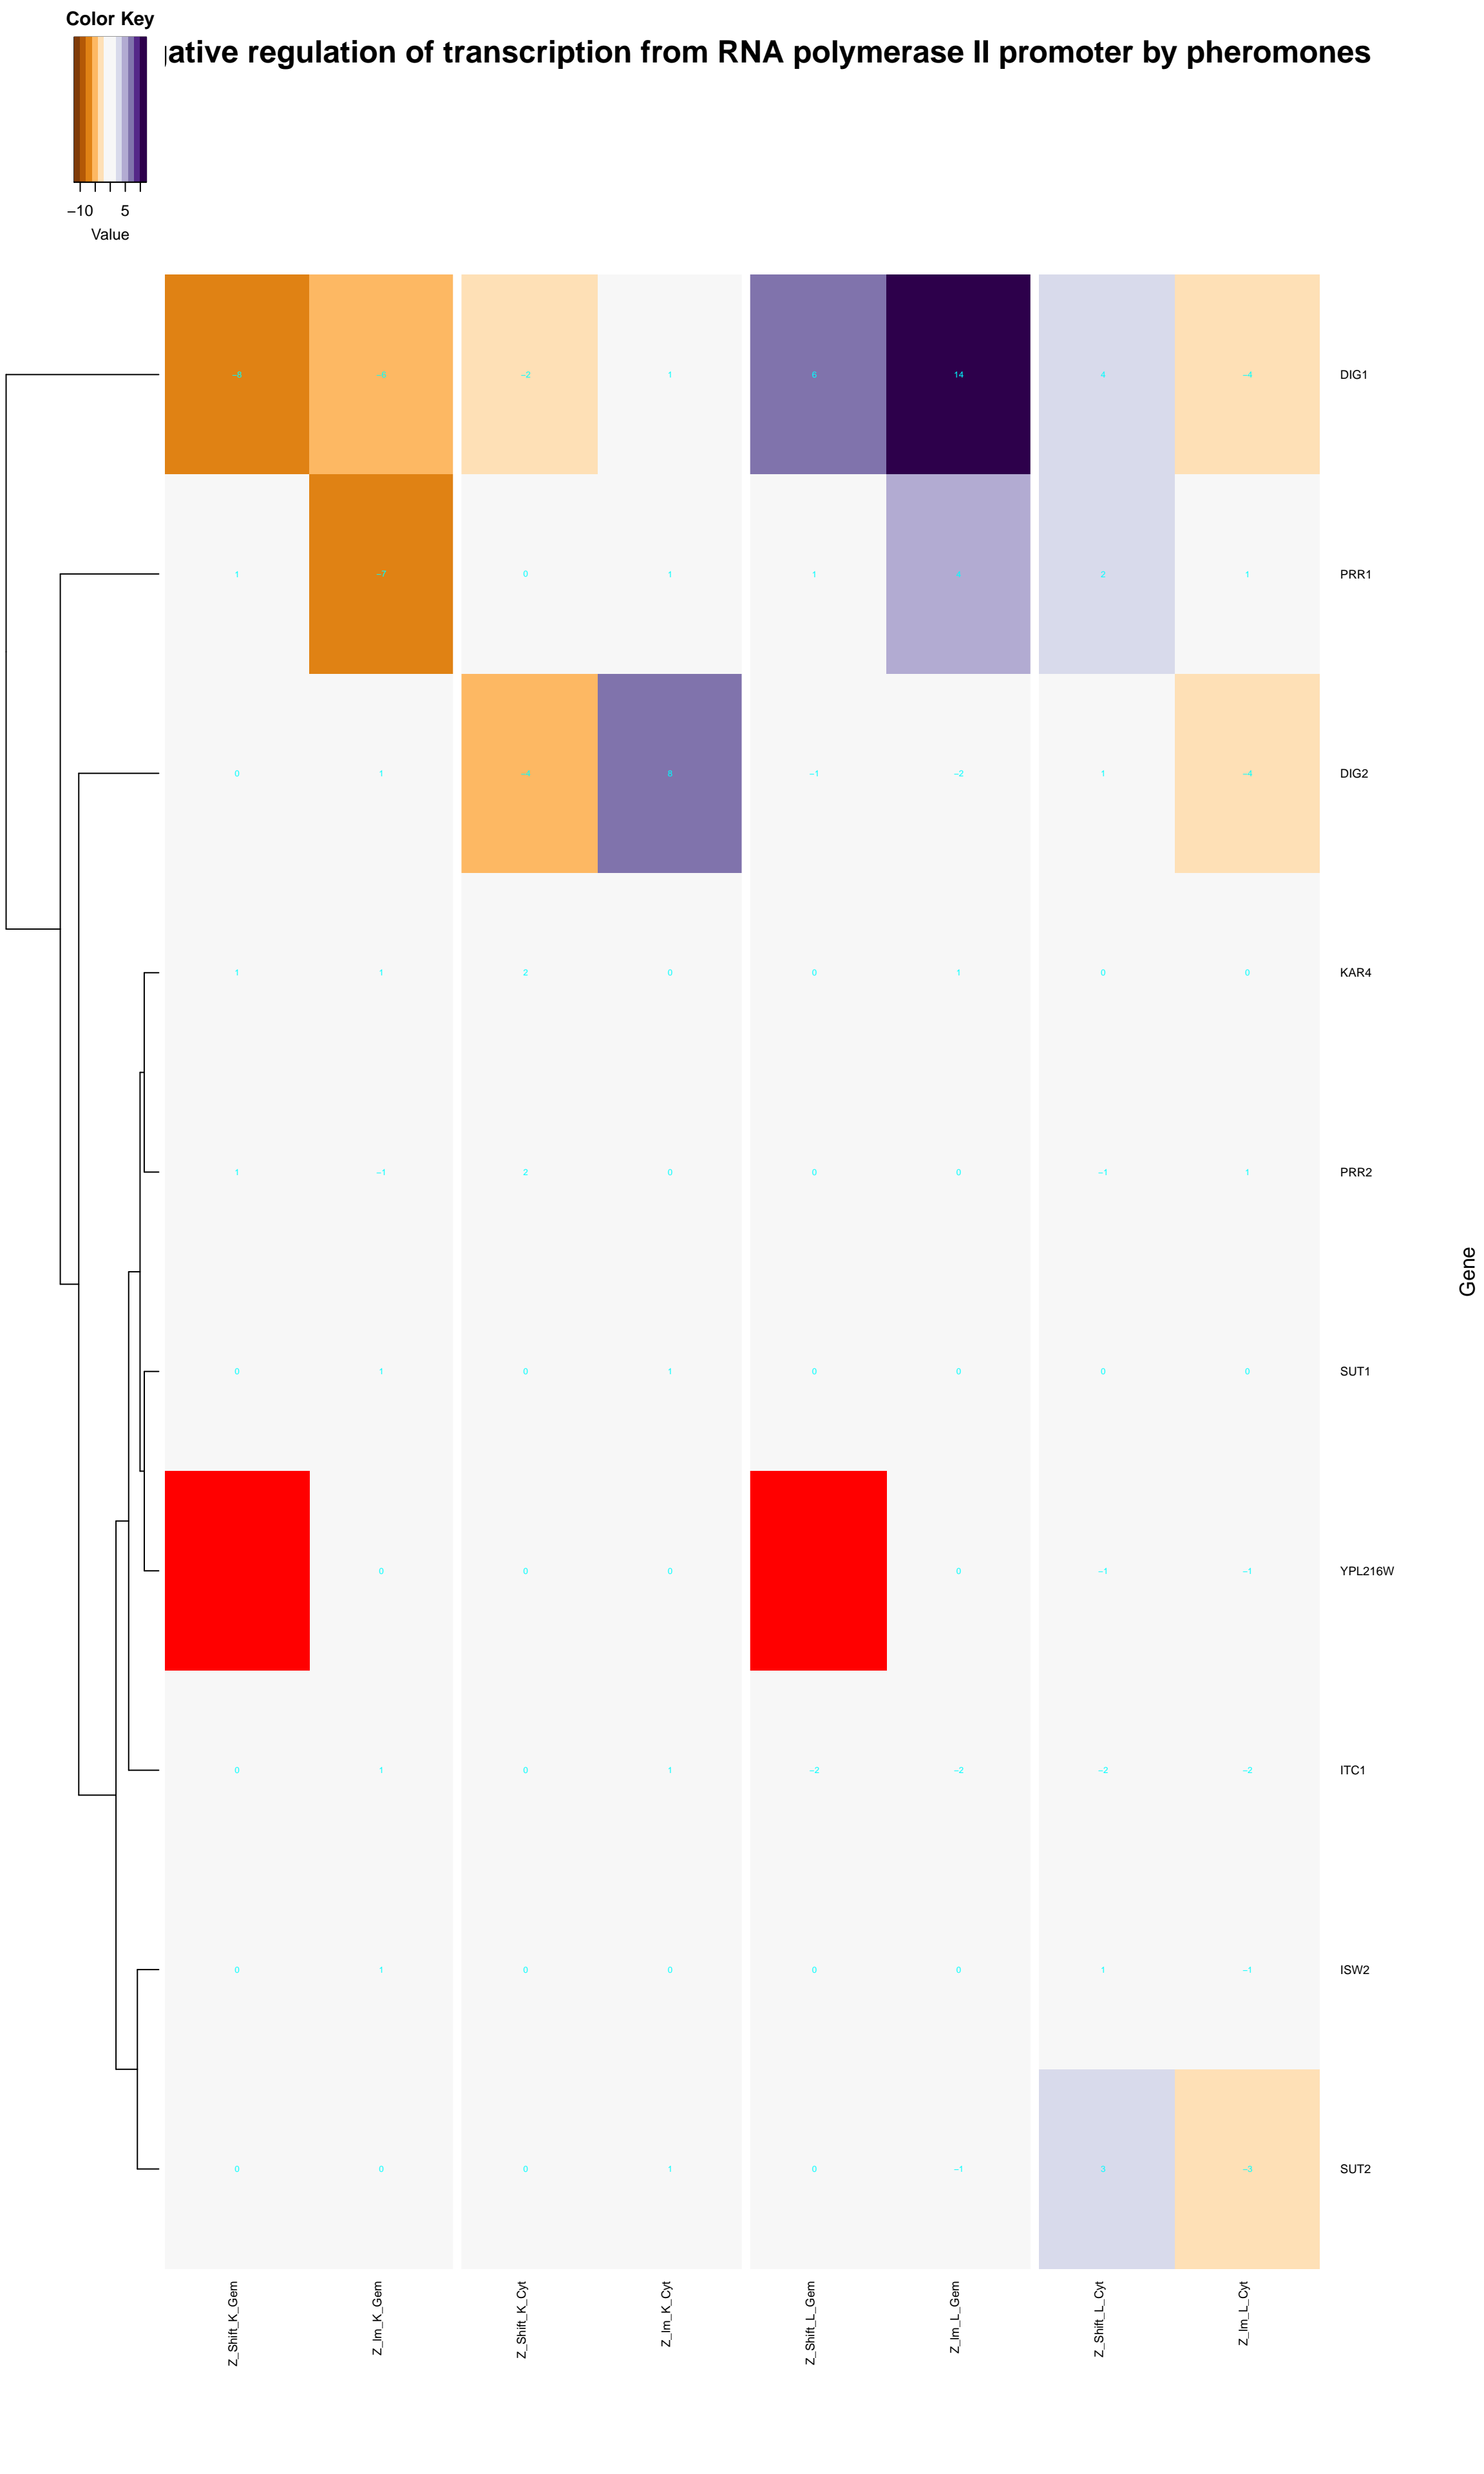

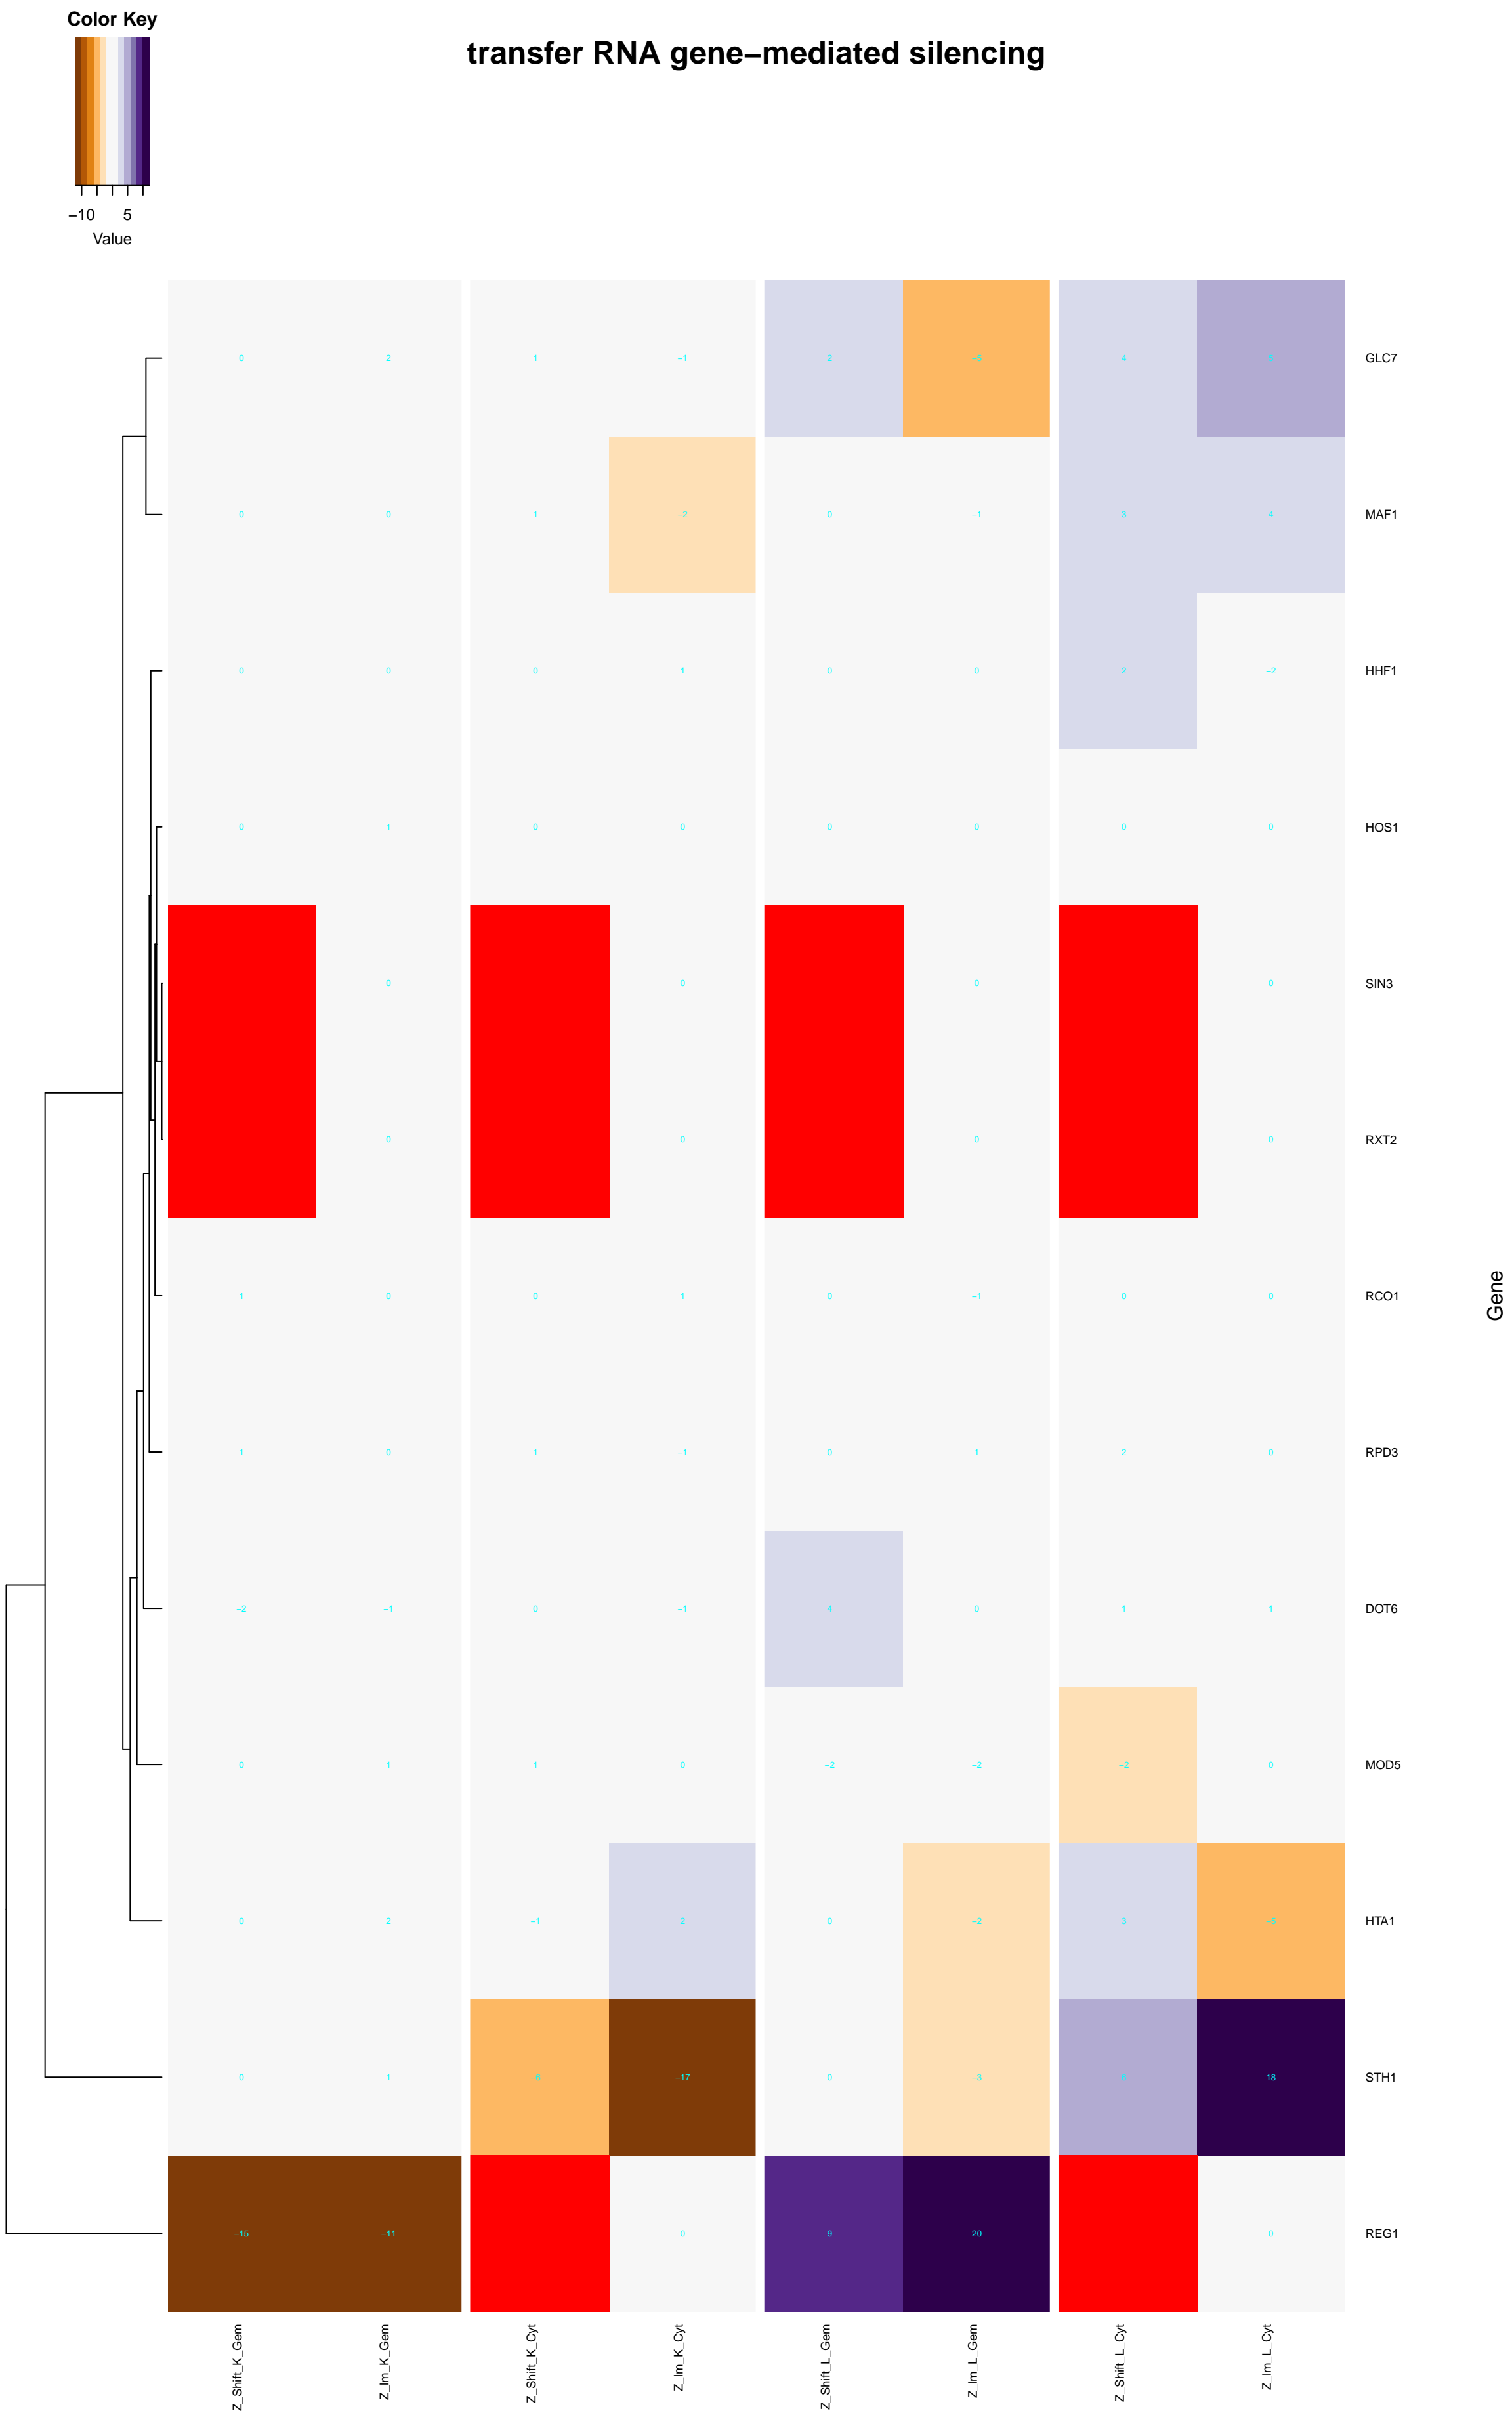

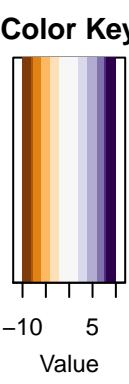

of lipid transport by negative regulation of transcription from RNA polymerase II promoter

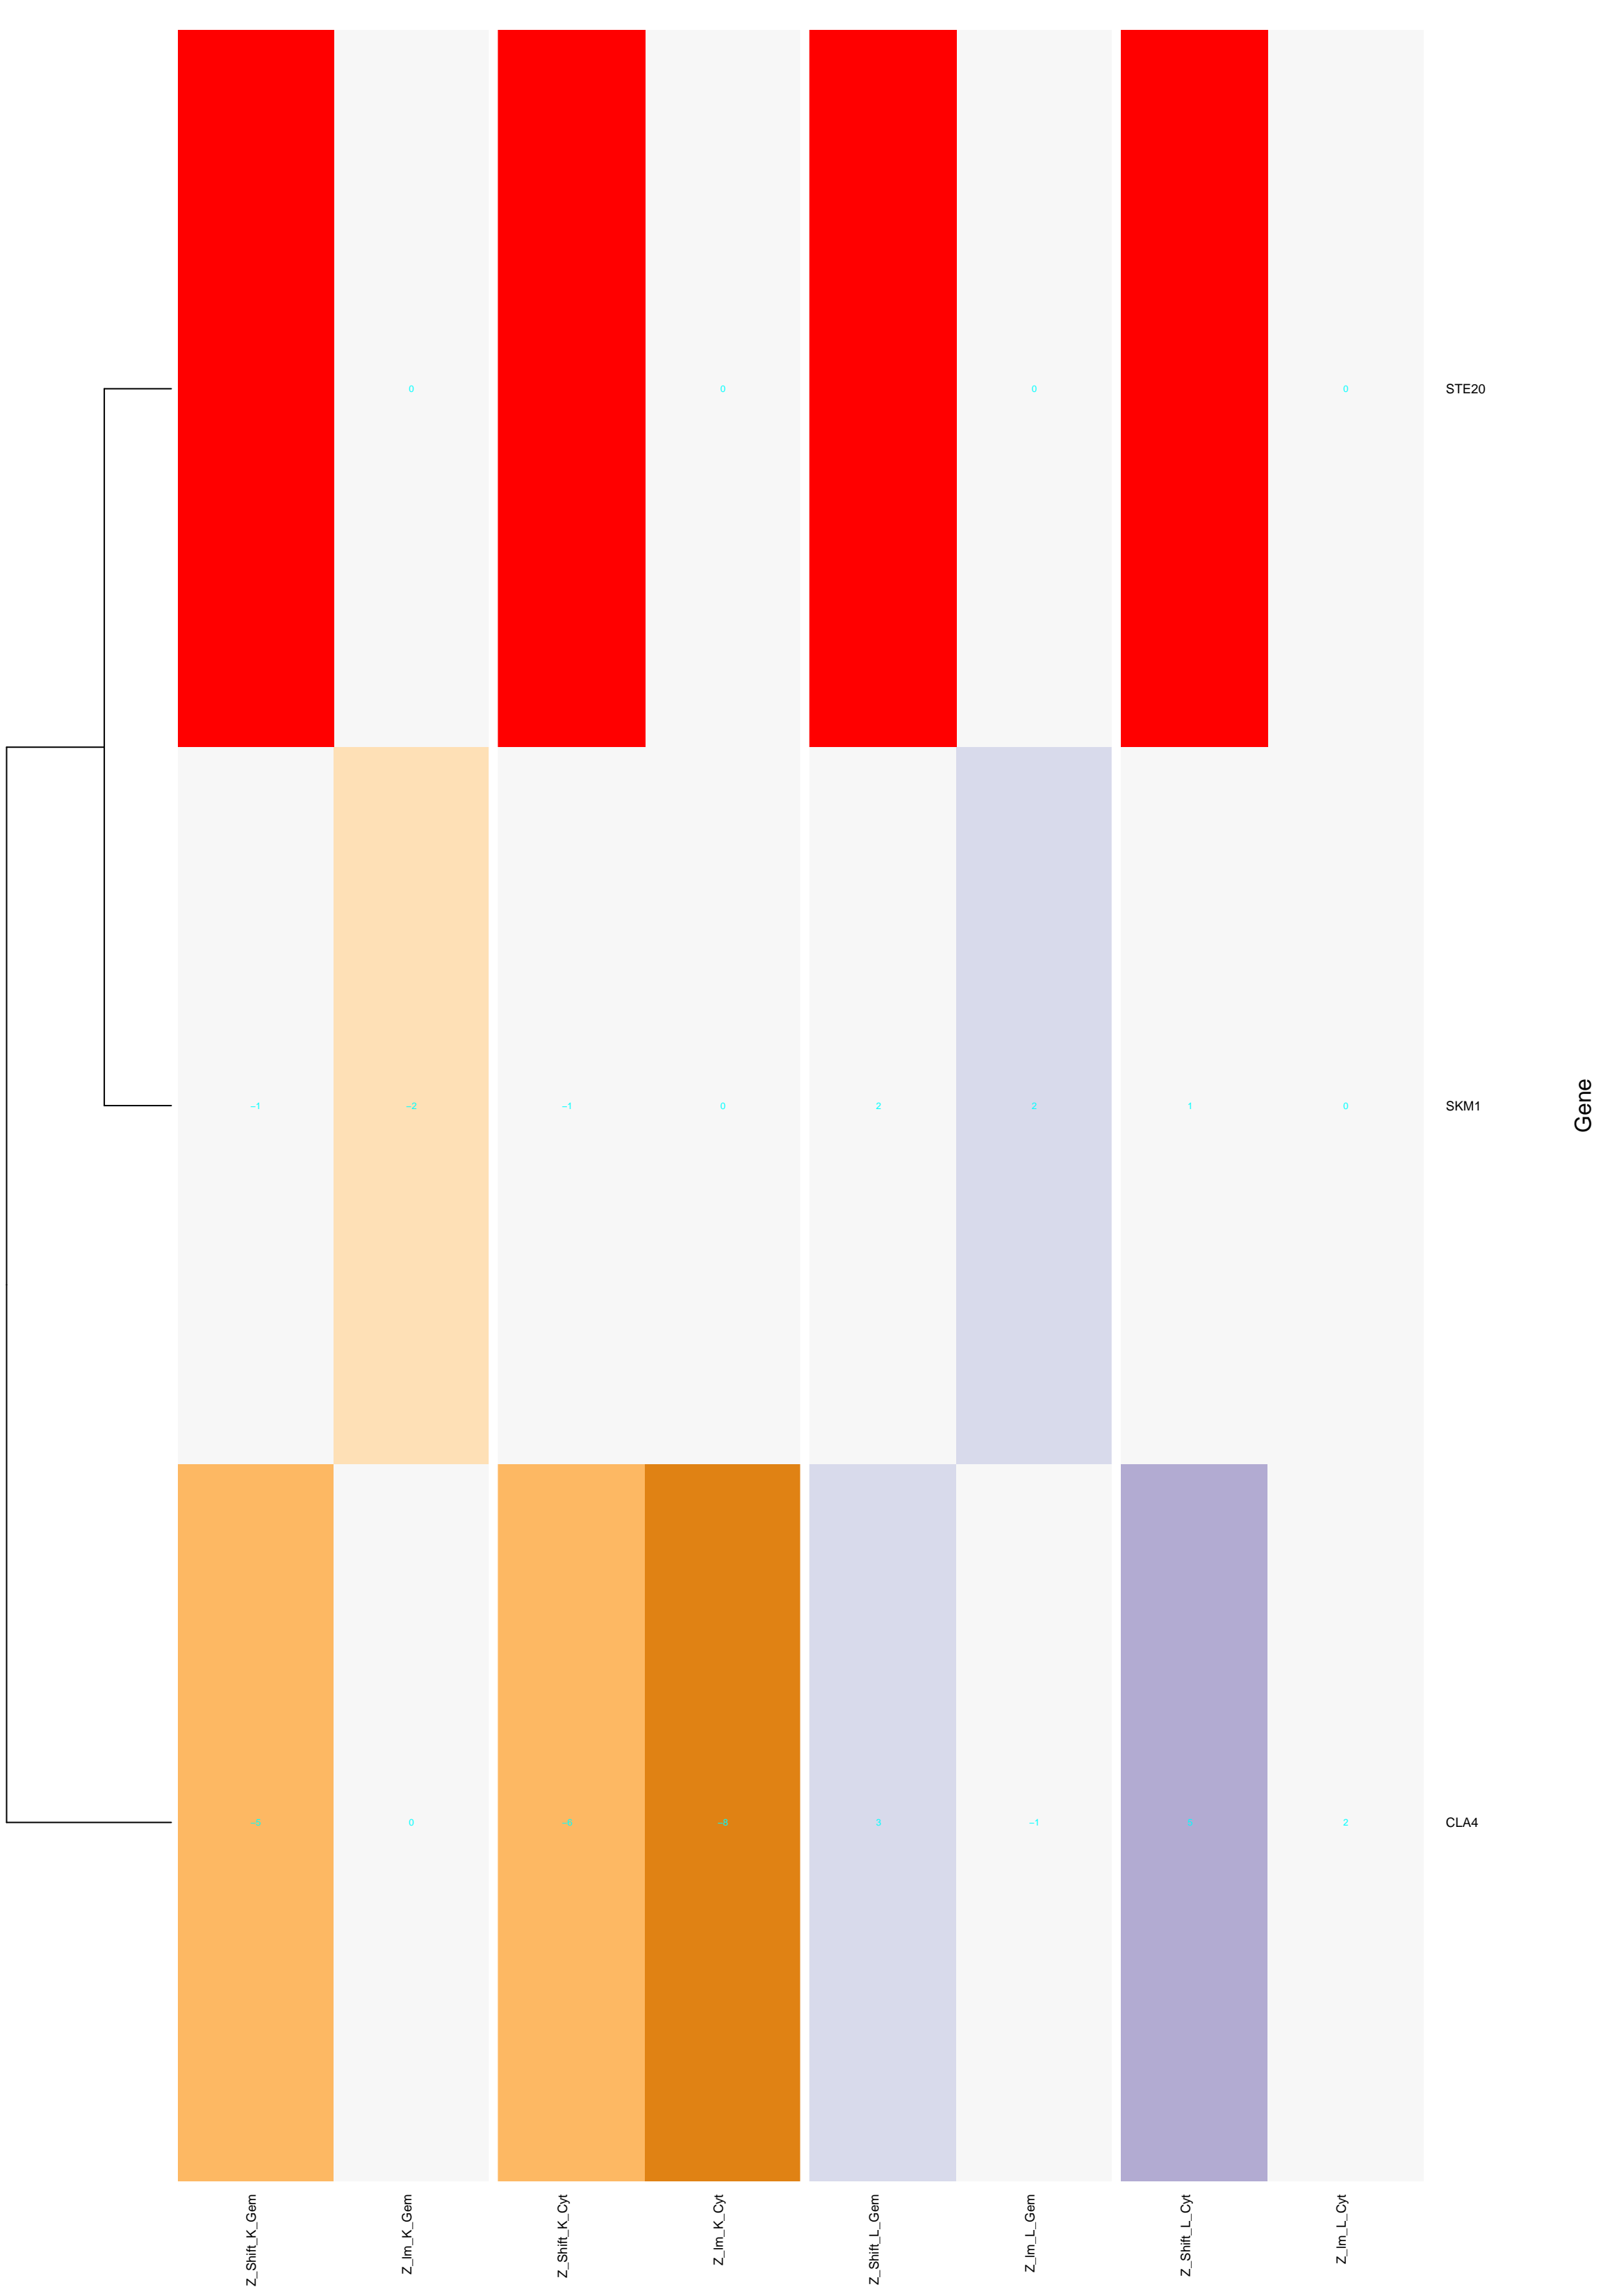

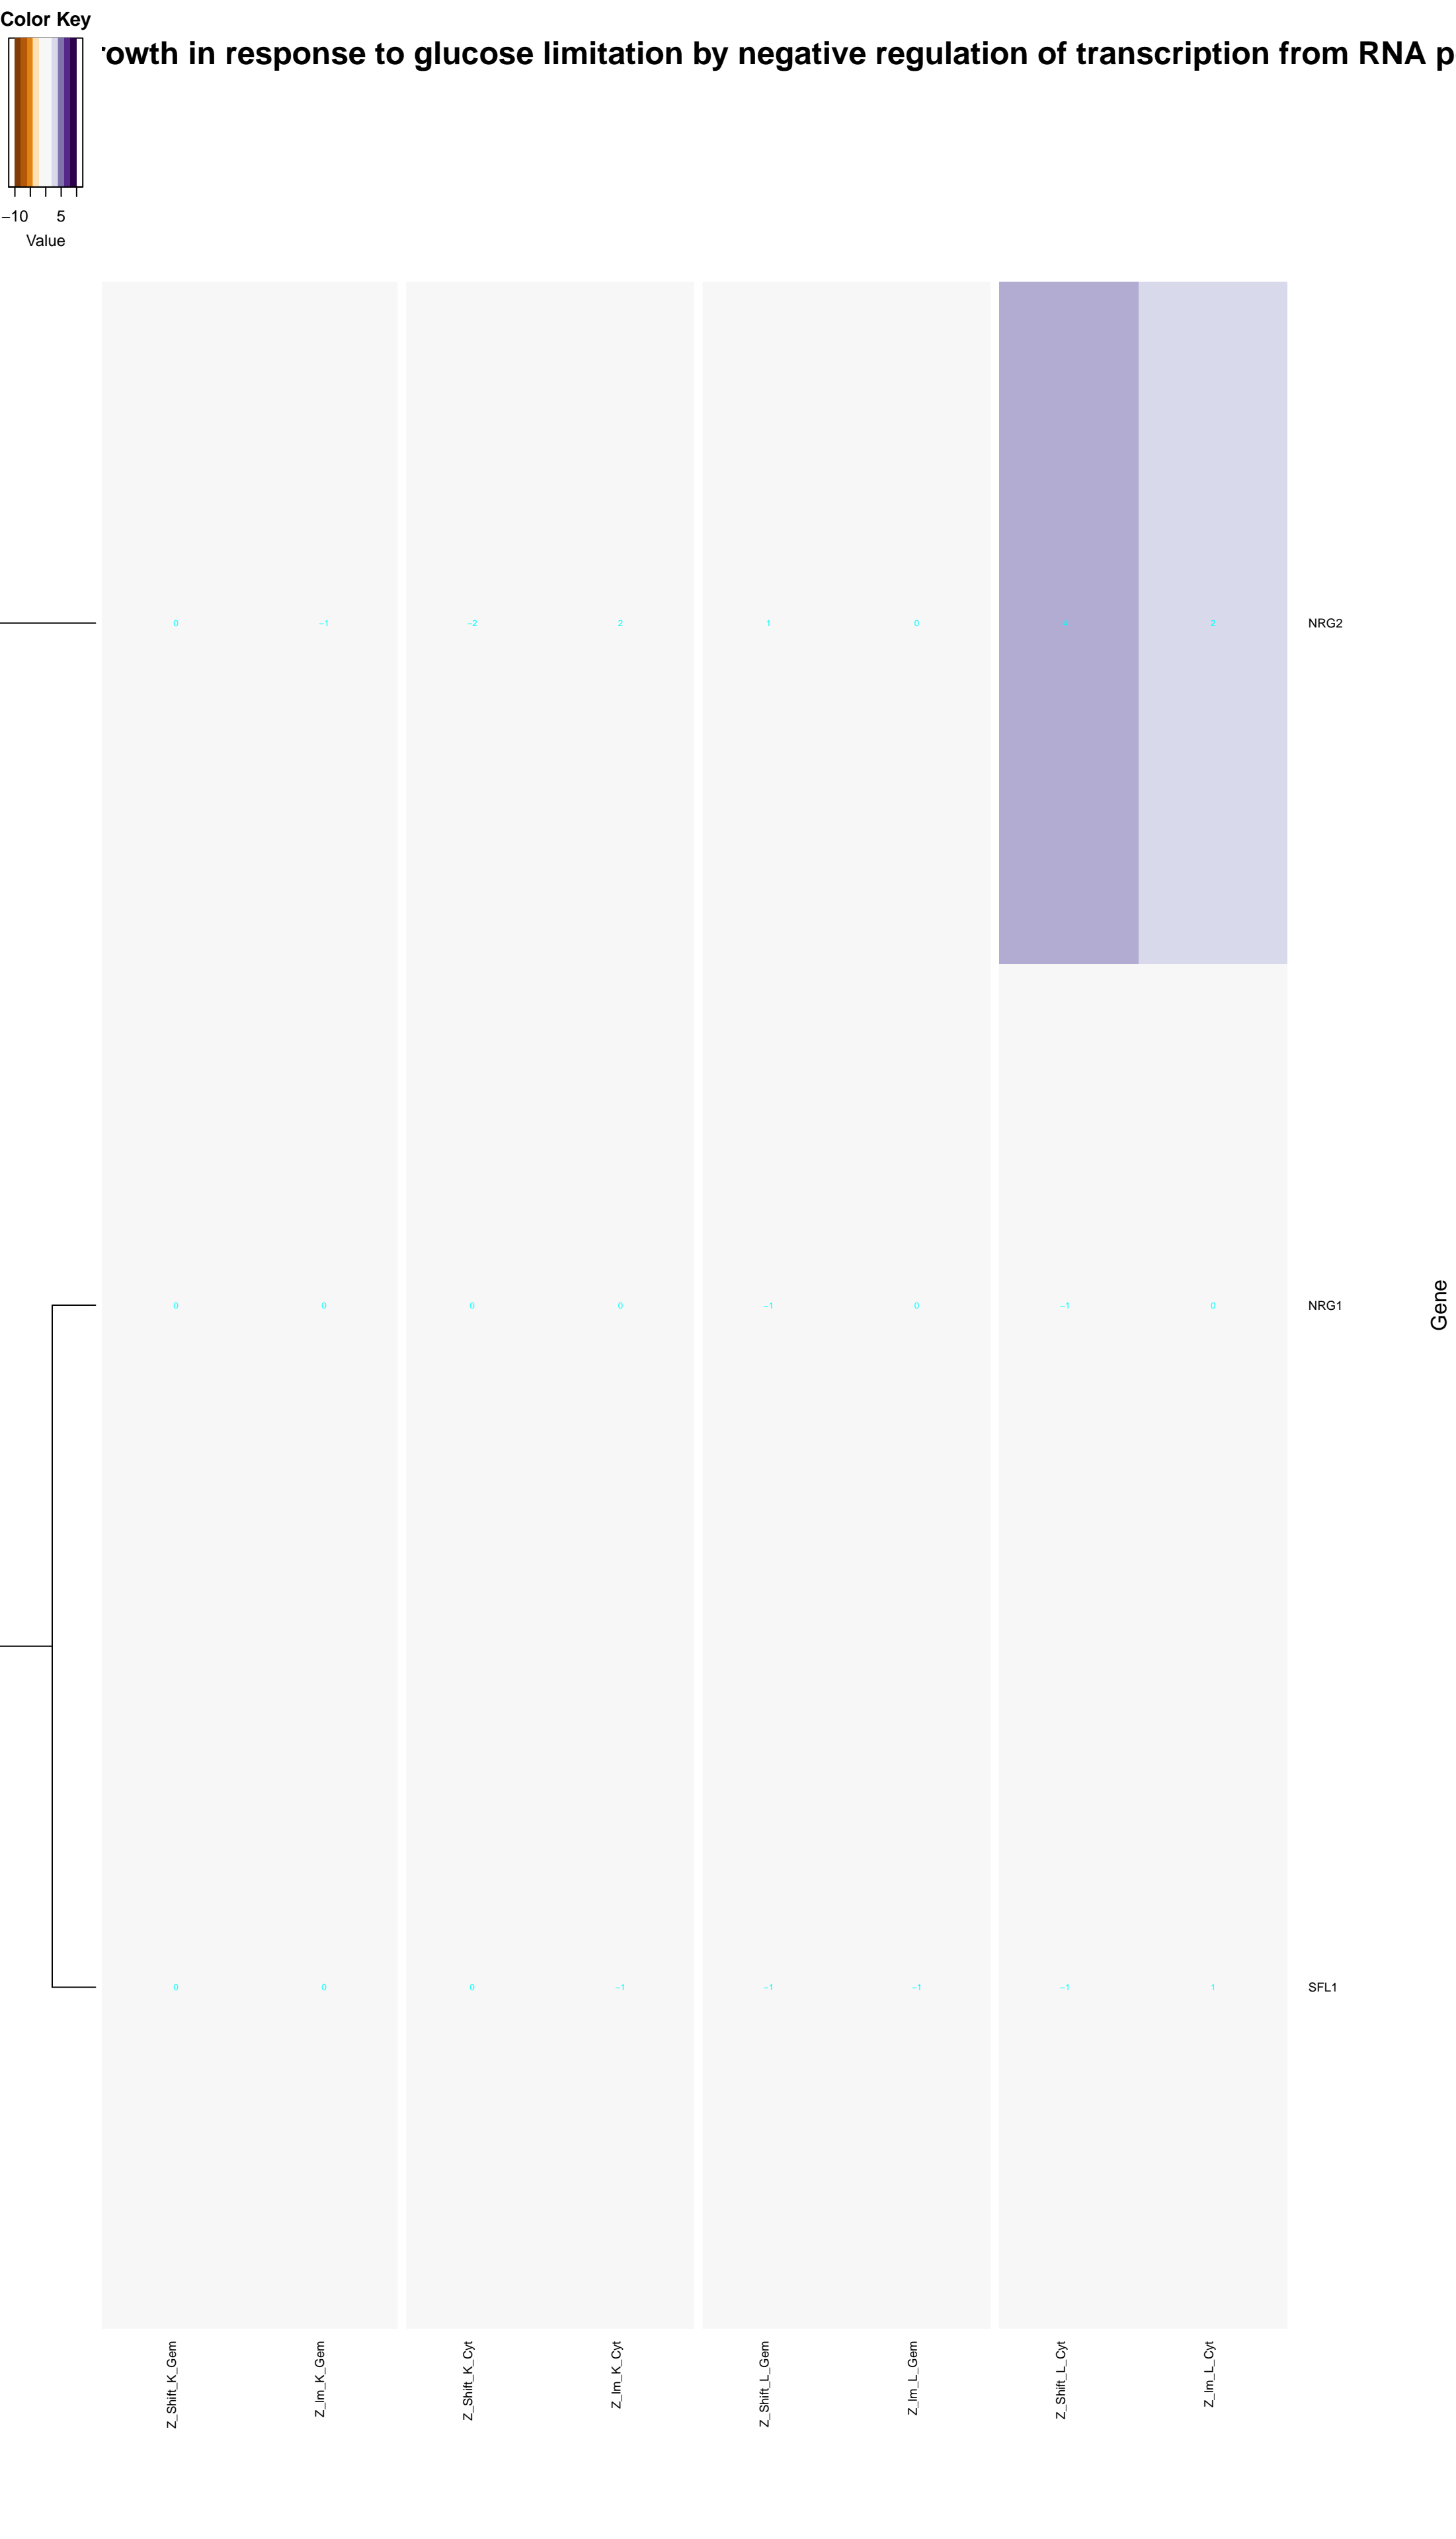

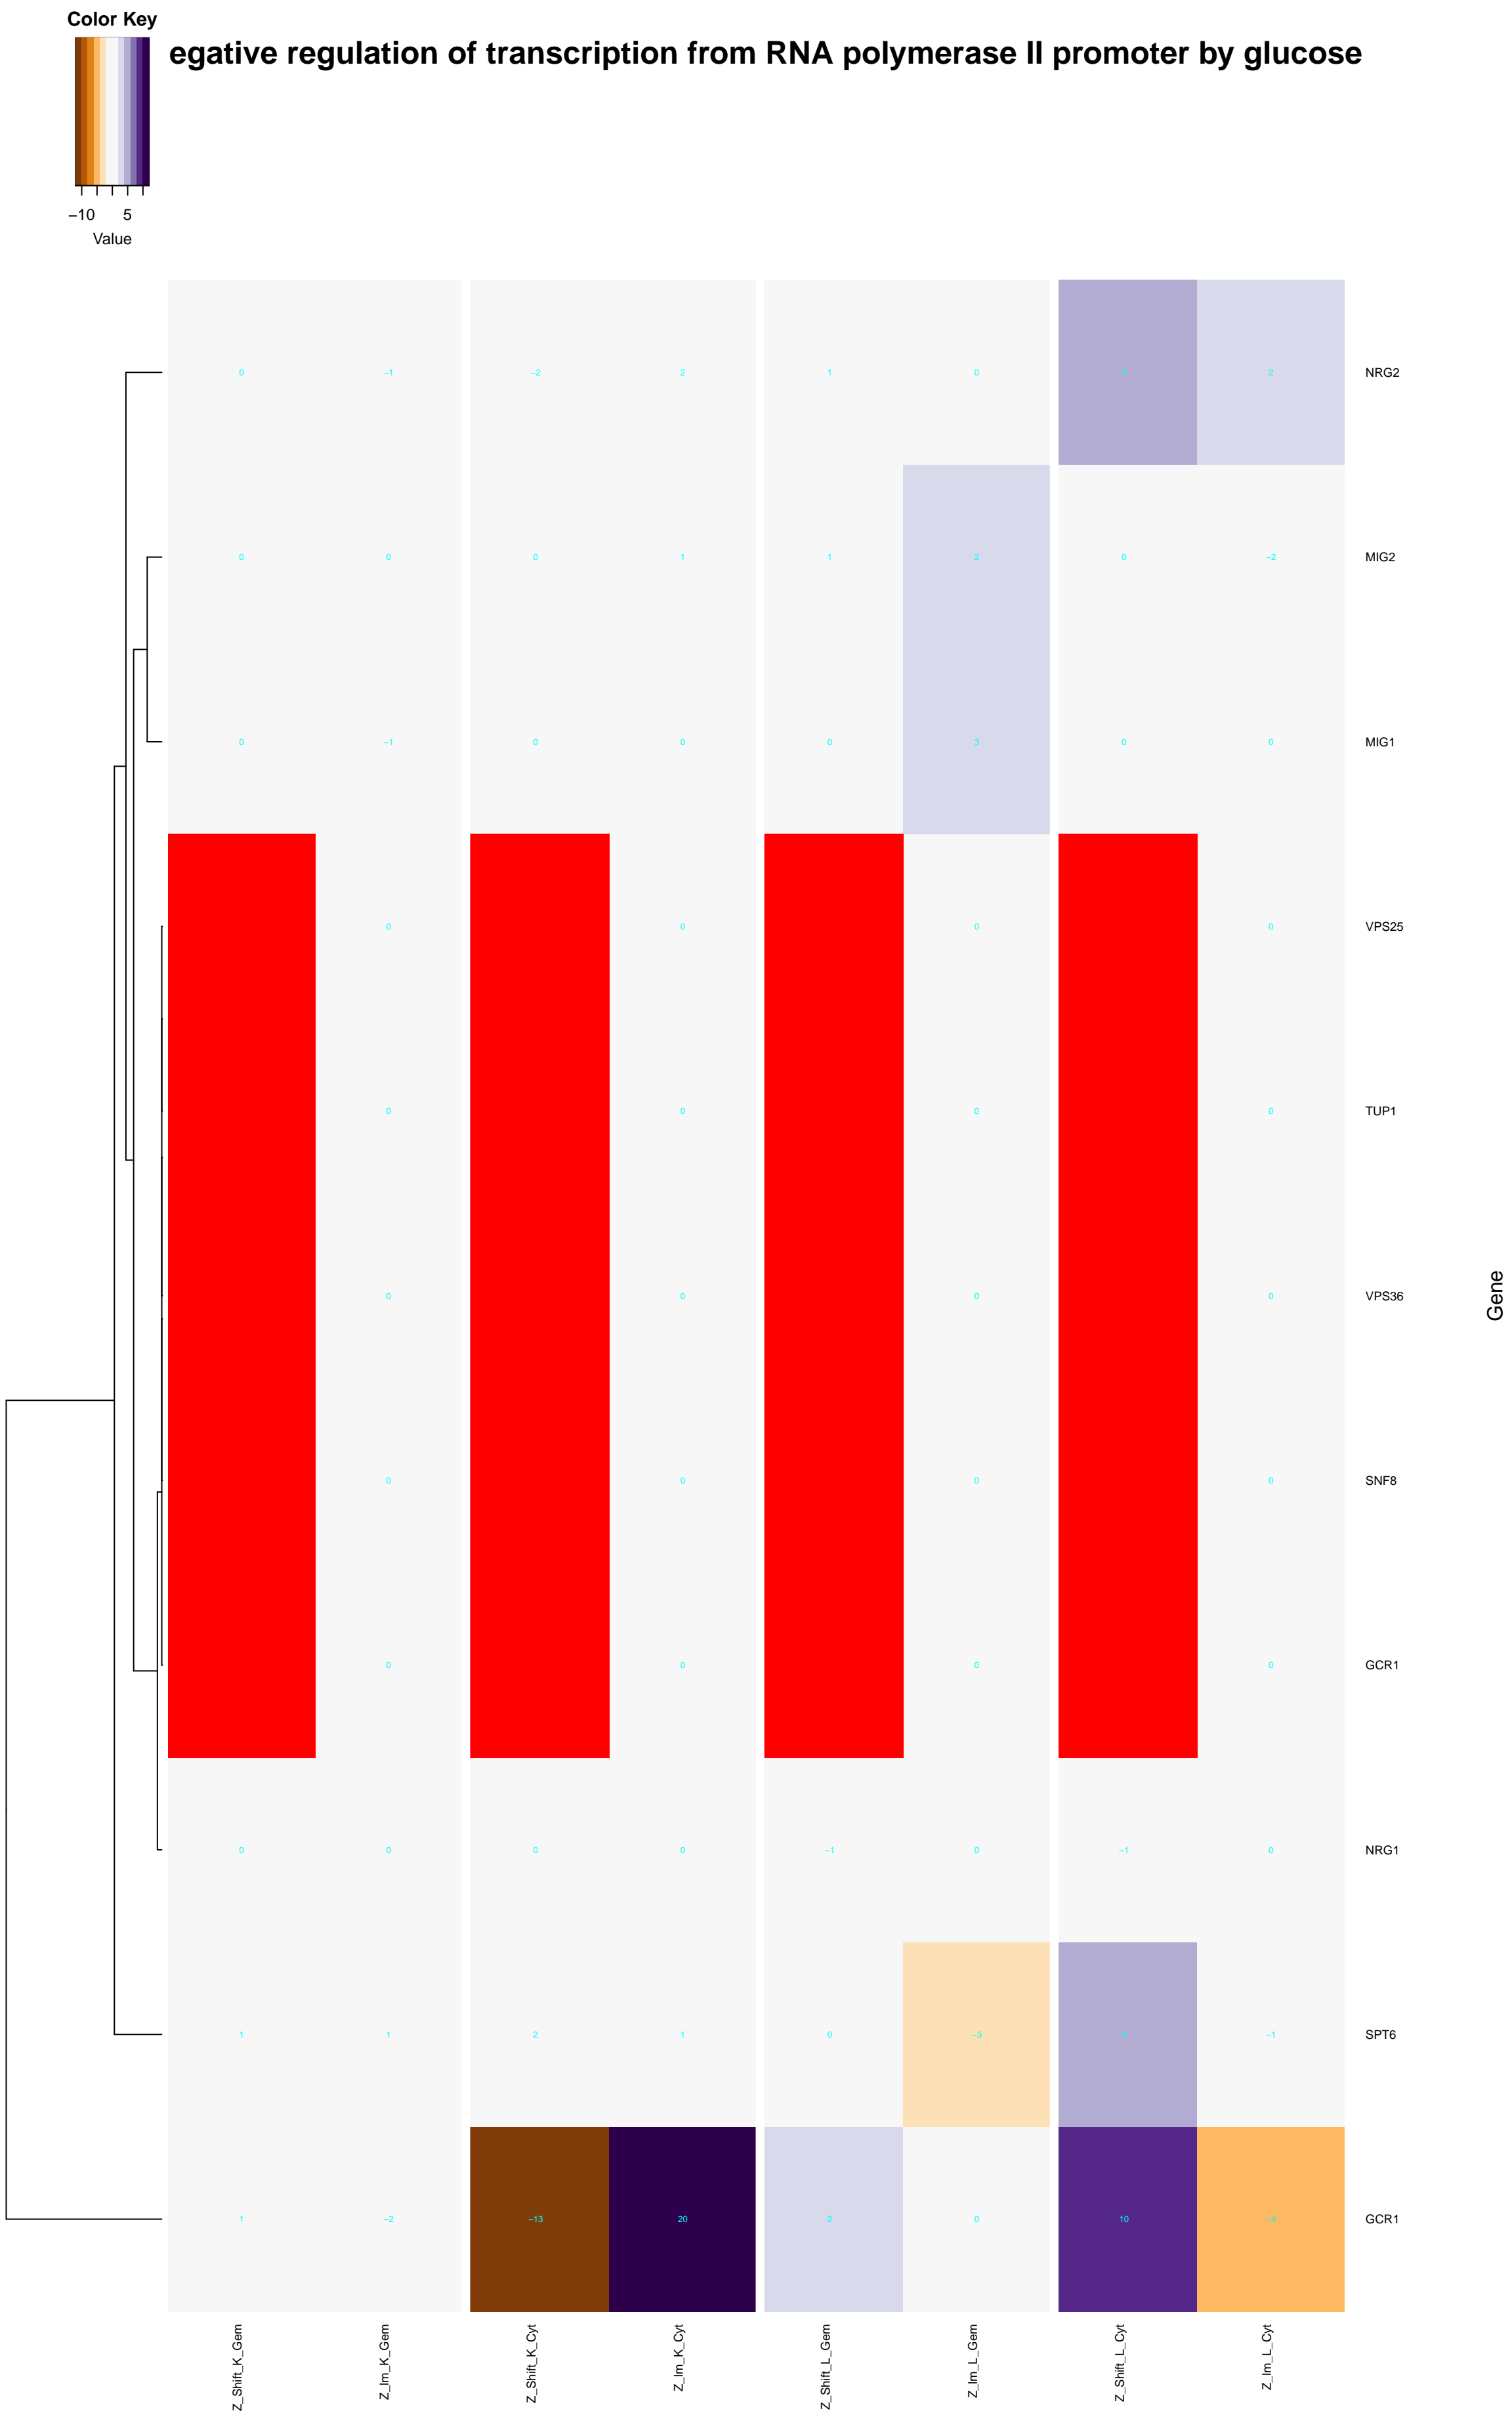

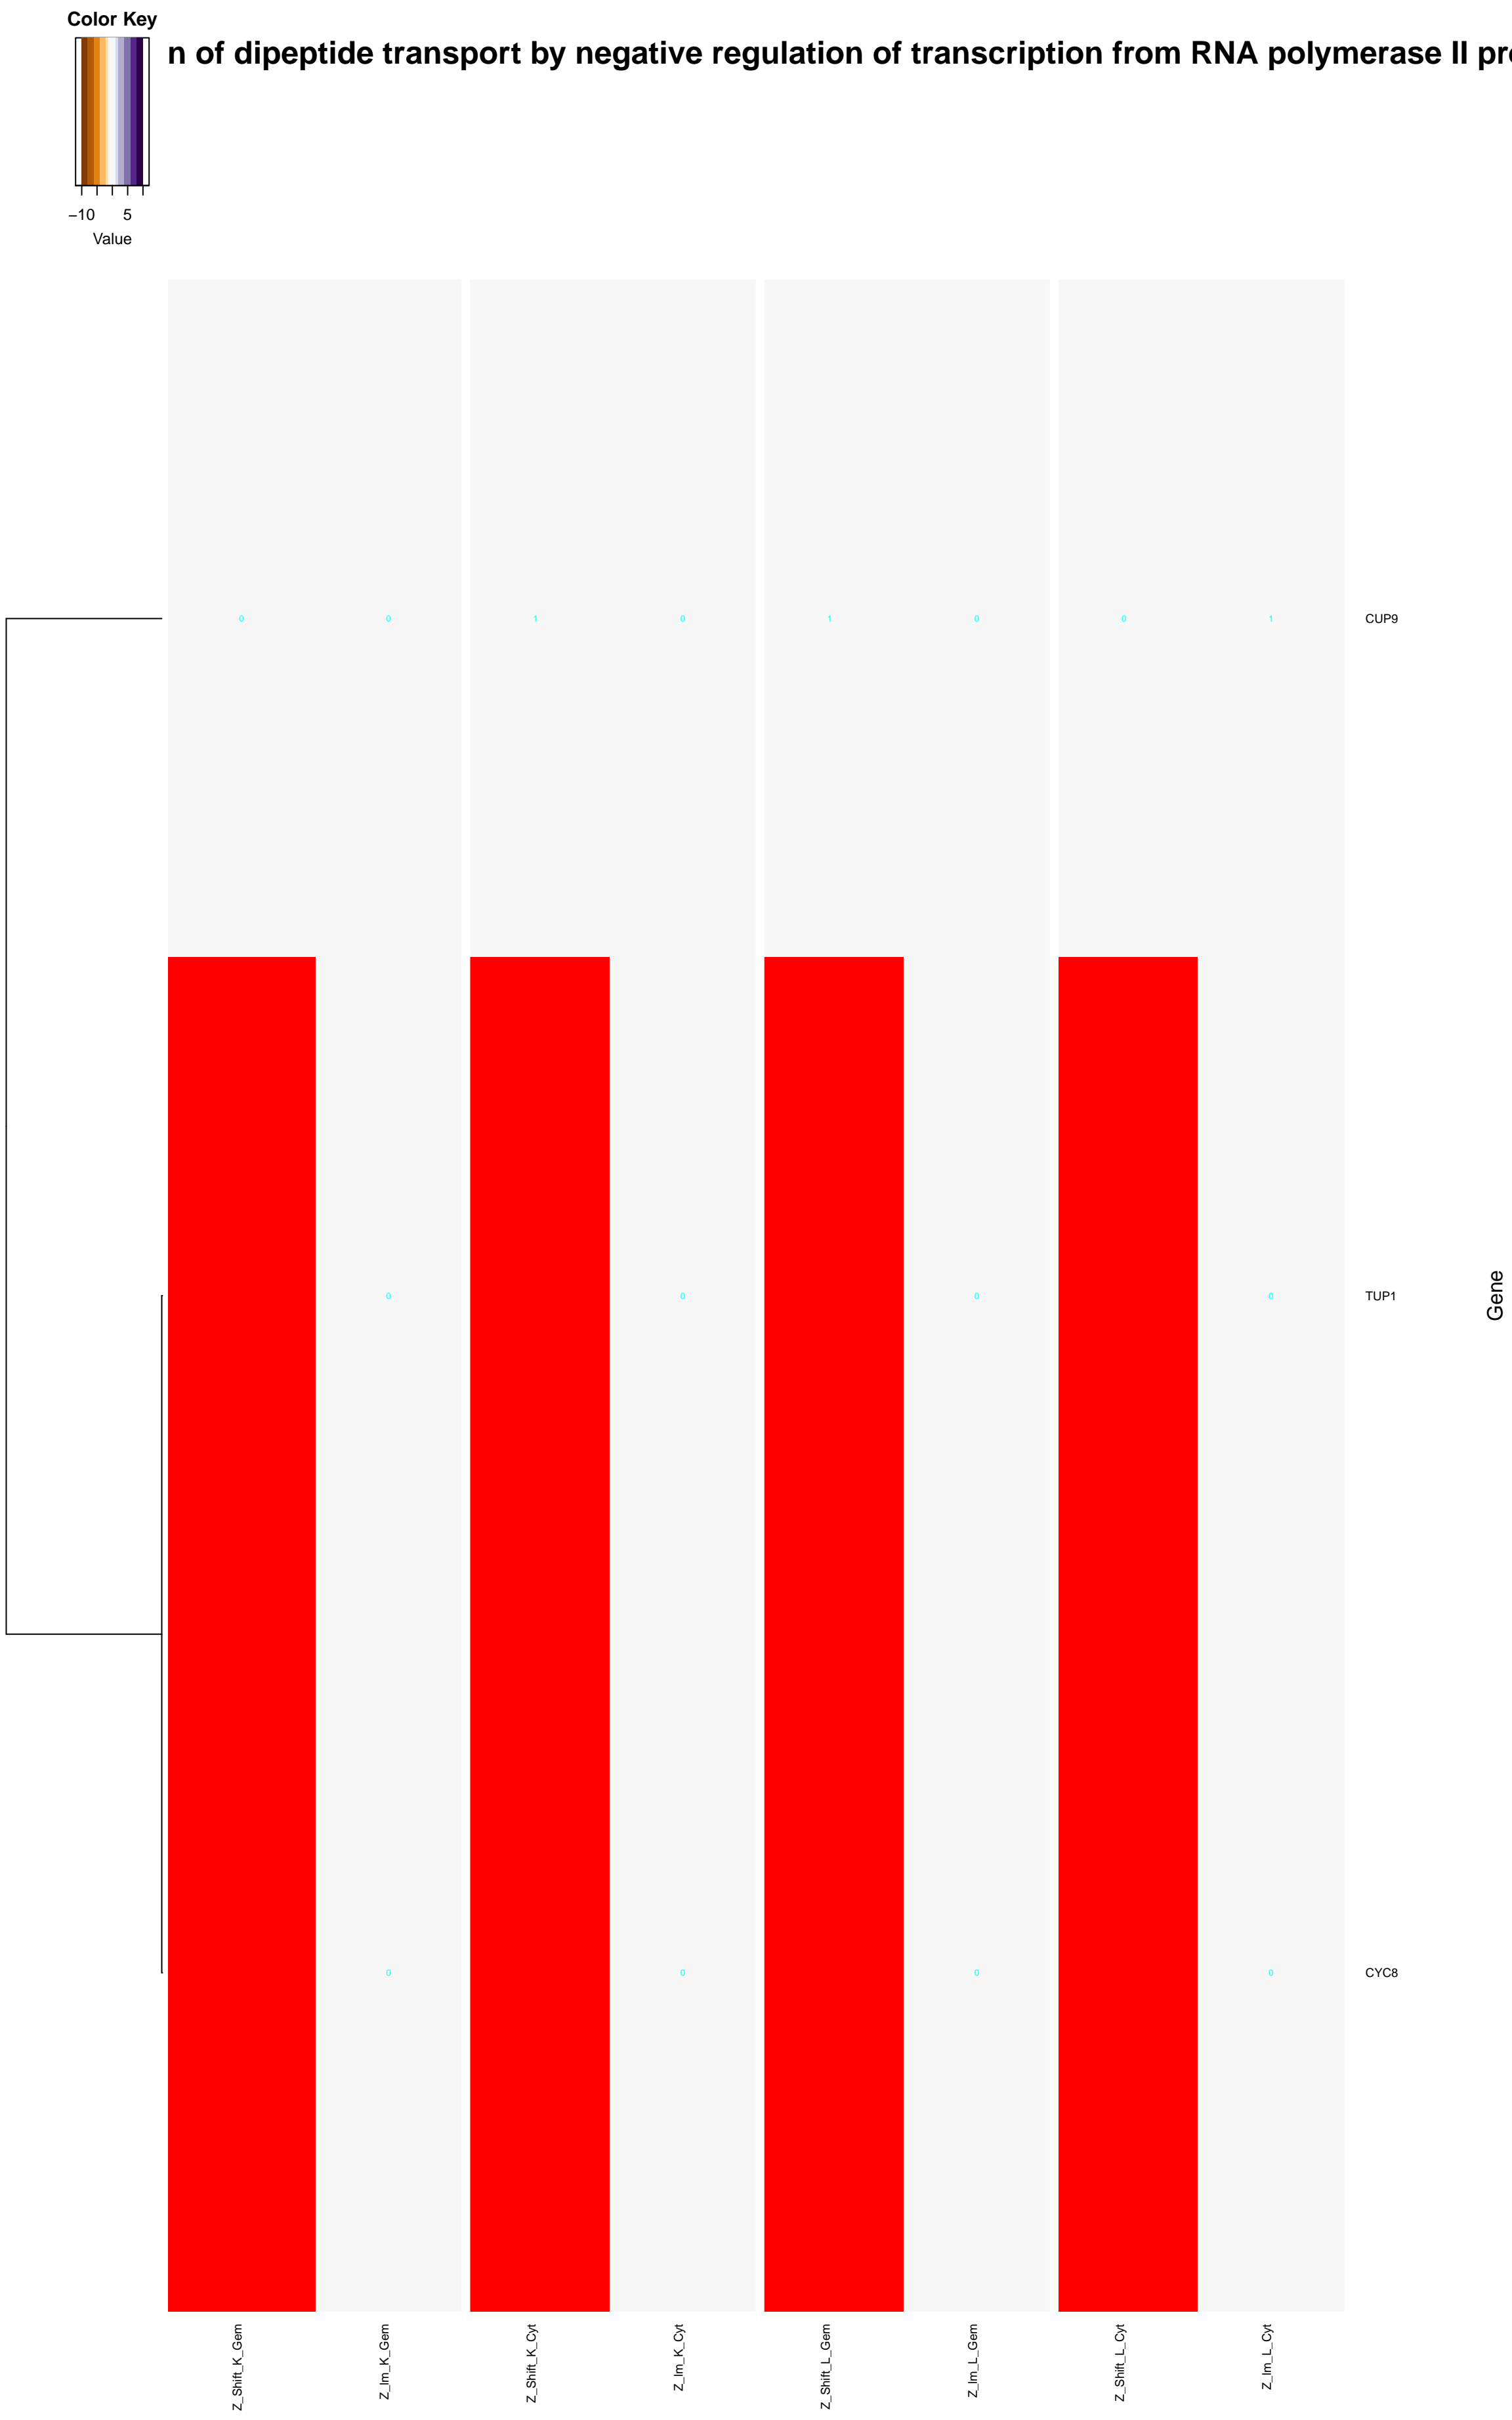



ation of sterol import by negative regulation of transcription from RNA polymerase II promoter



Gene
