# Supplementary material for: A Humanized Yeast Phenomic Model of Deoxycytidine Kinase to Predict Genetic Buffering of Nucleoside Analog Cytotoxicity
Source: MDPI journal article supplement (doi:10.3390/genes10100770), 2019-09-30

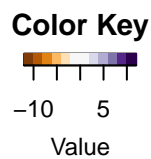

# nuclear-transcribed mRNA catabolic process, exonucleolytic

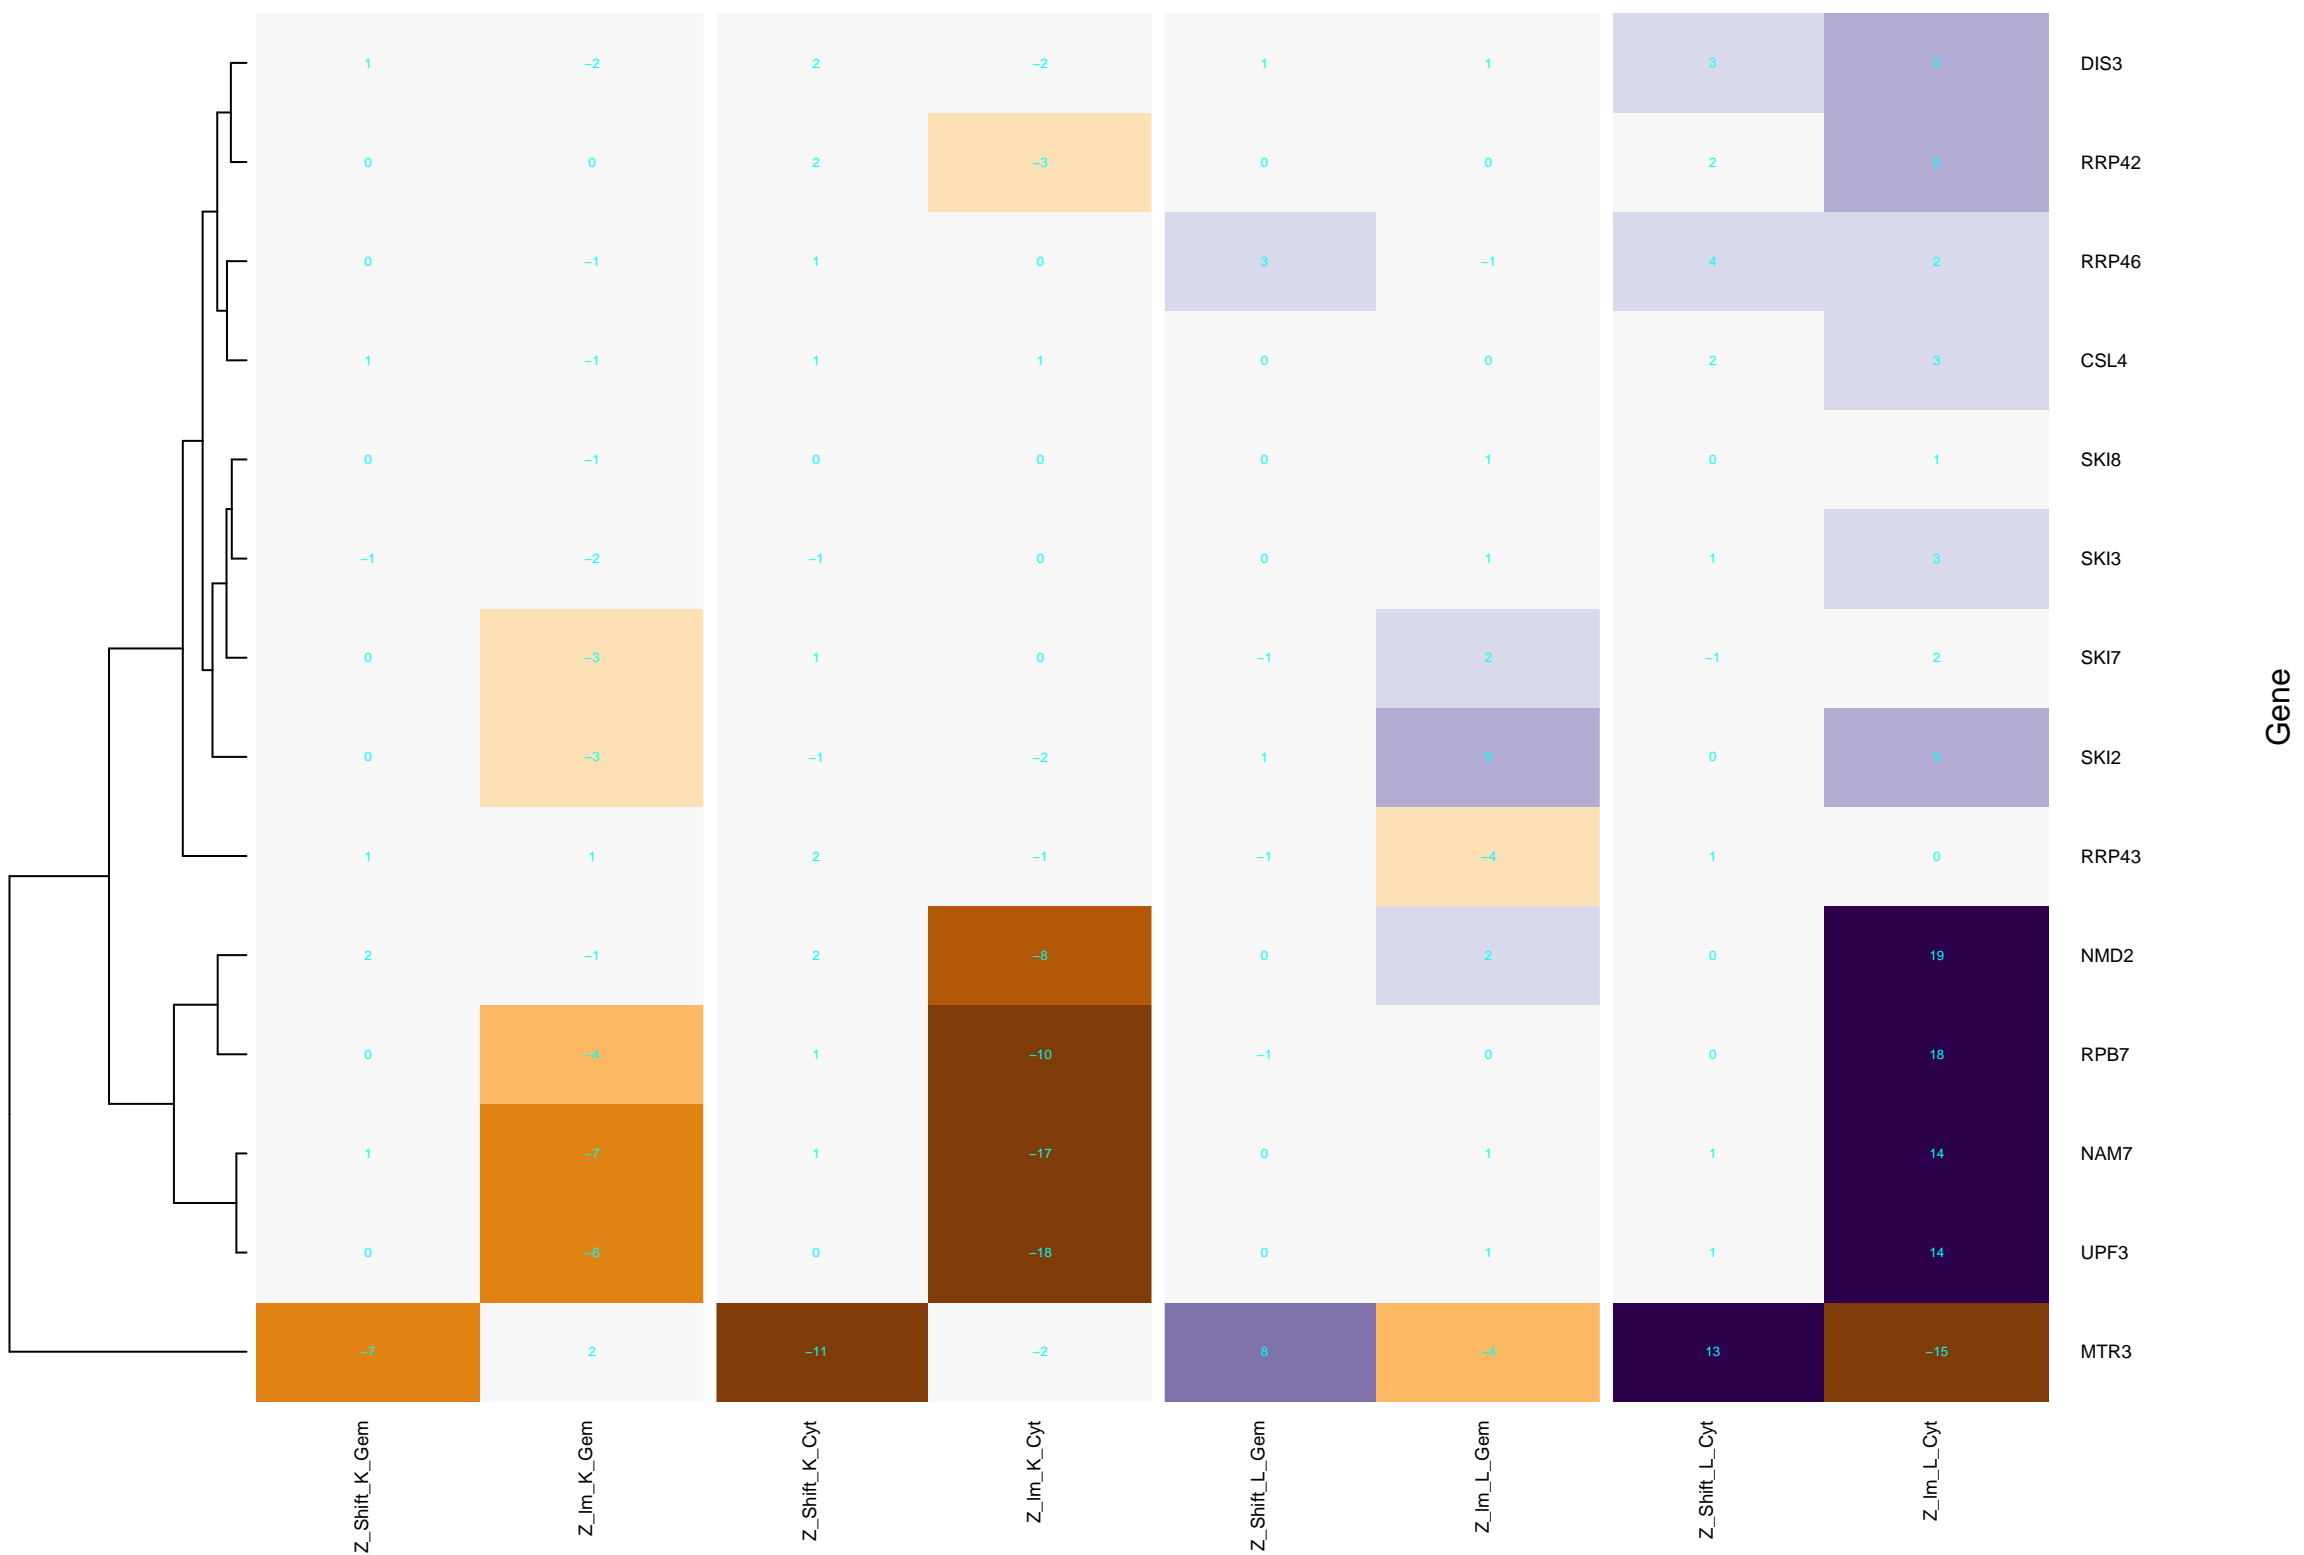

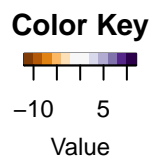

# nuclear-transcribed mRNA catabolic process, exonucleolytic, 3'-5'

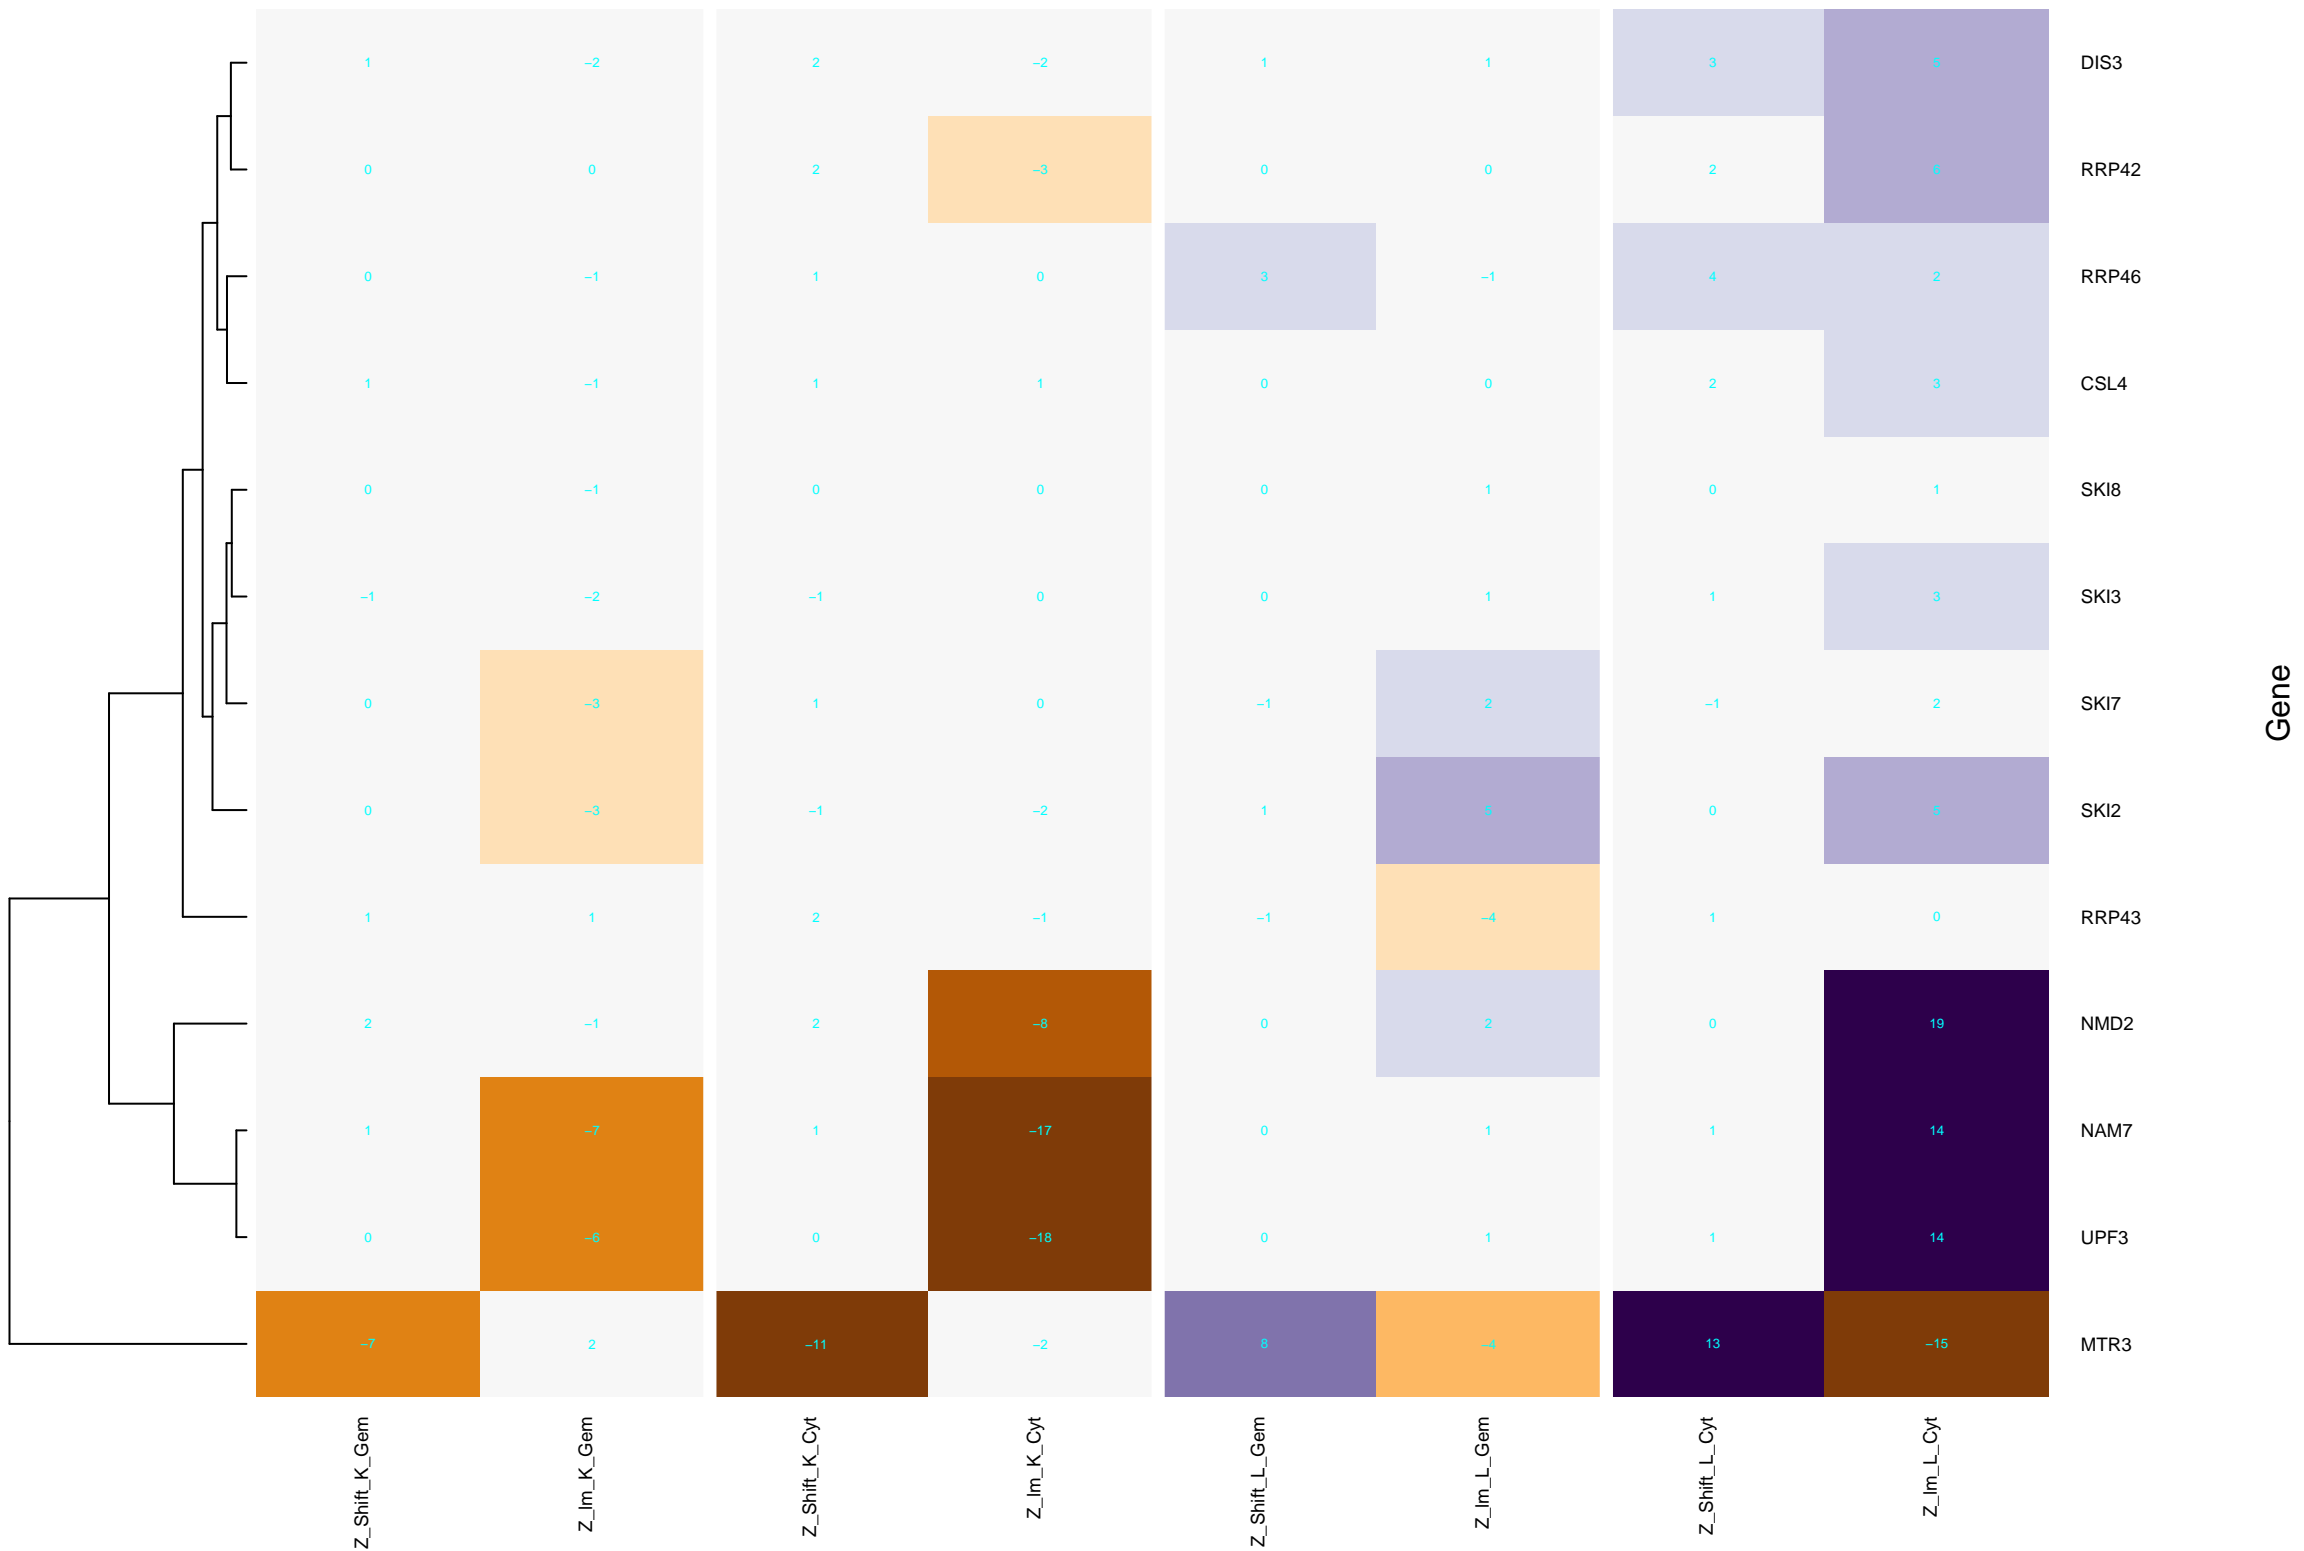

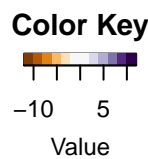

# c nuclear-transcribed mRNA catabolic process involved in deadenylation-dependent decapping

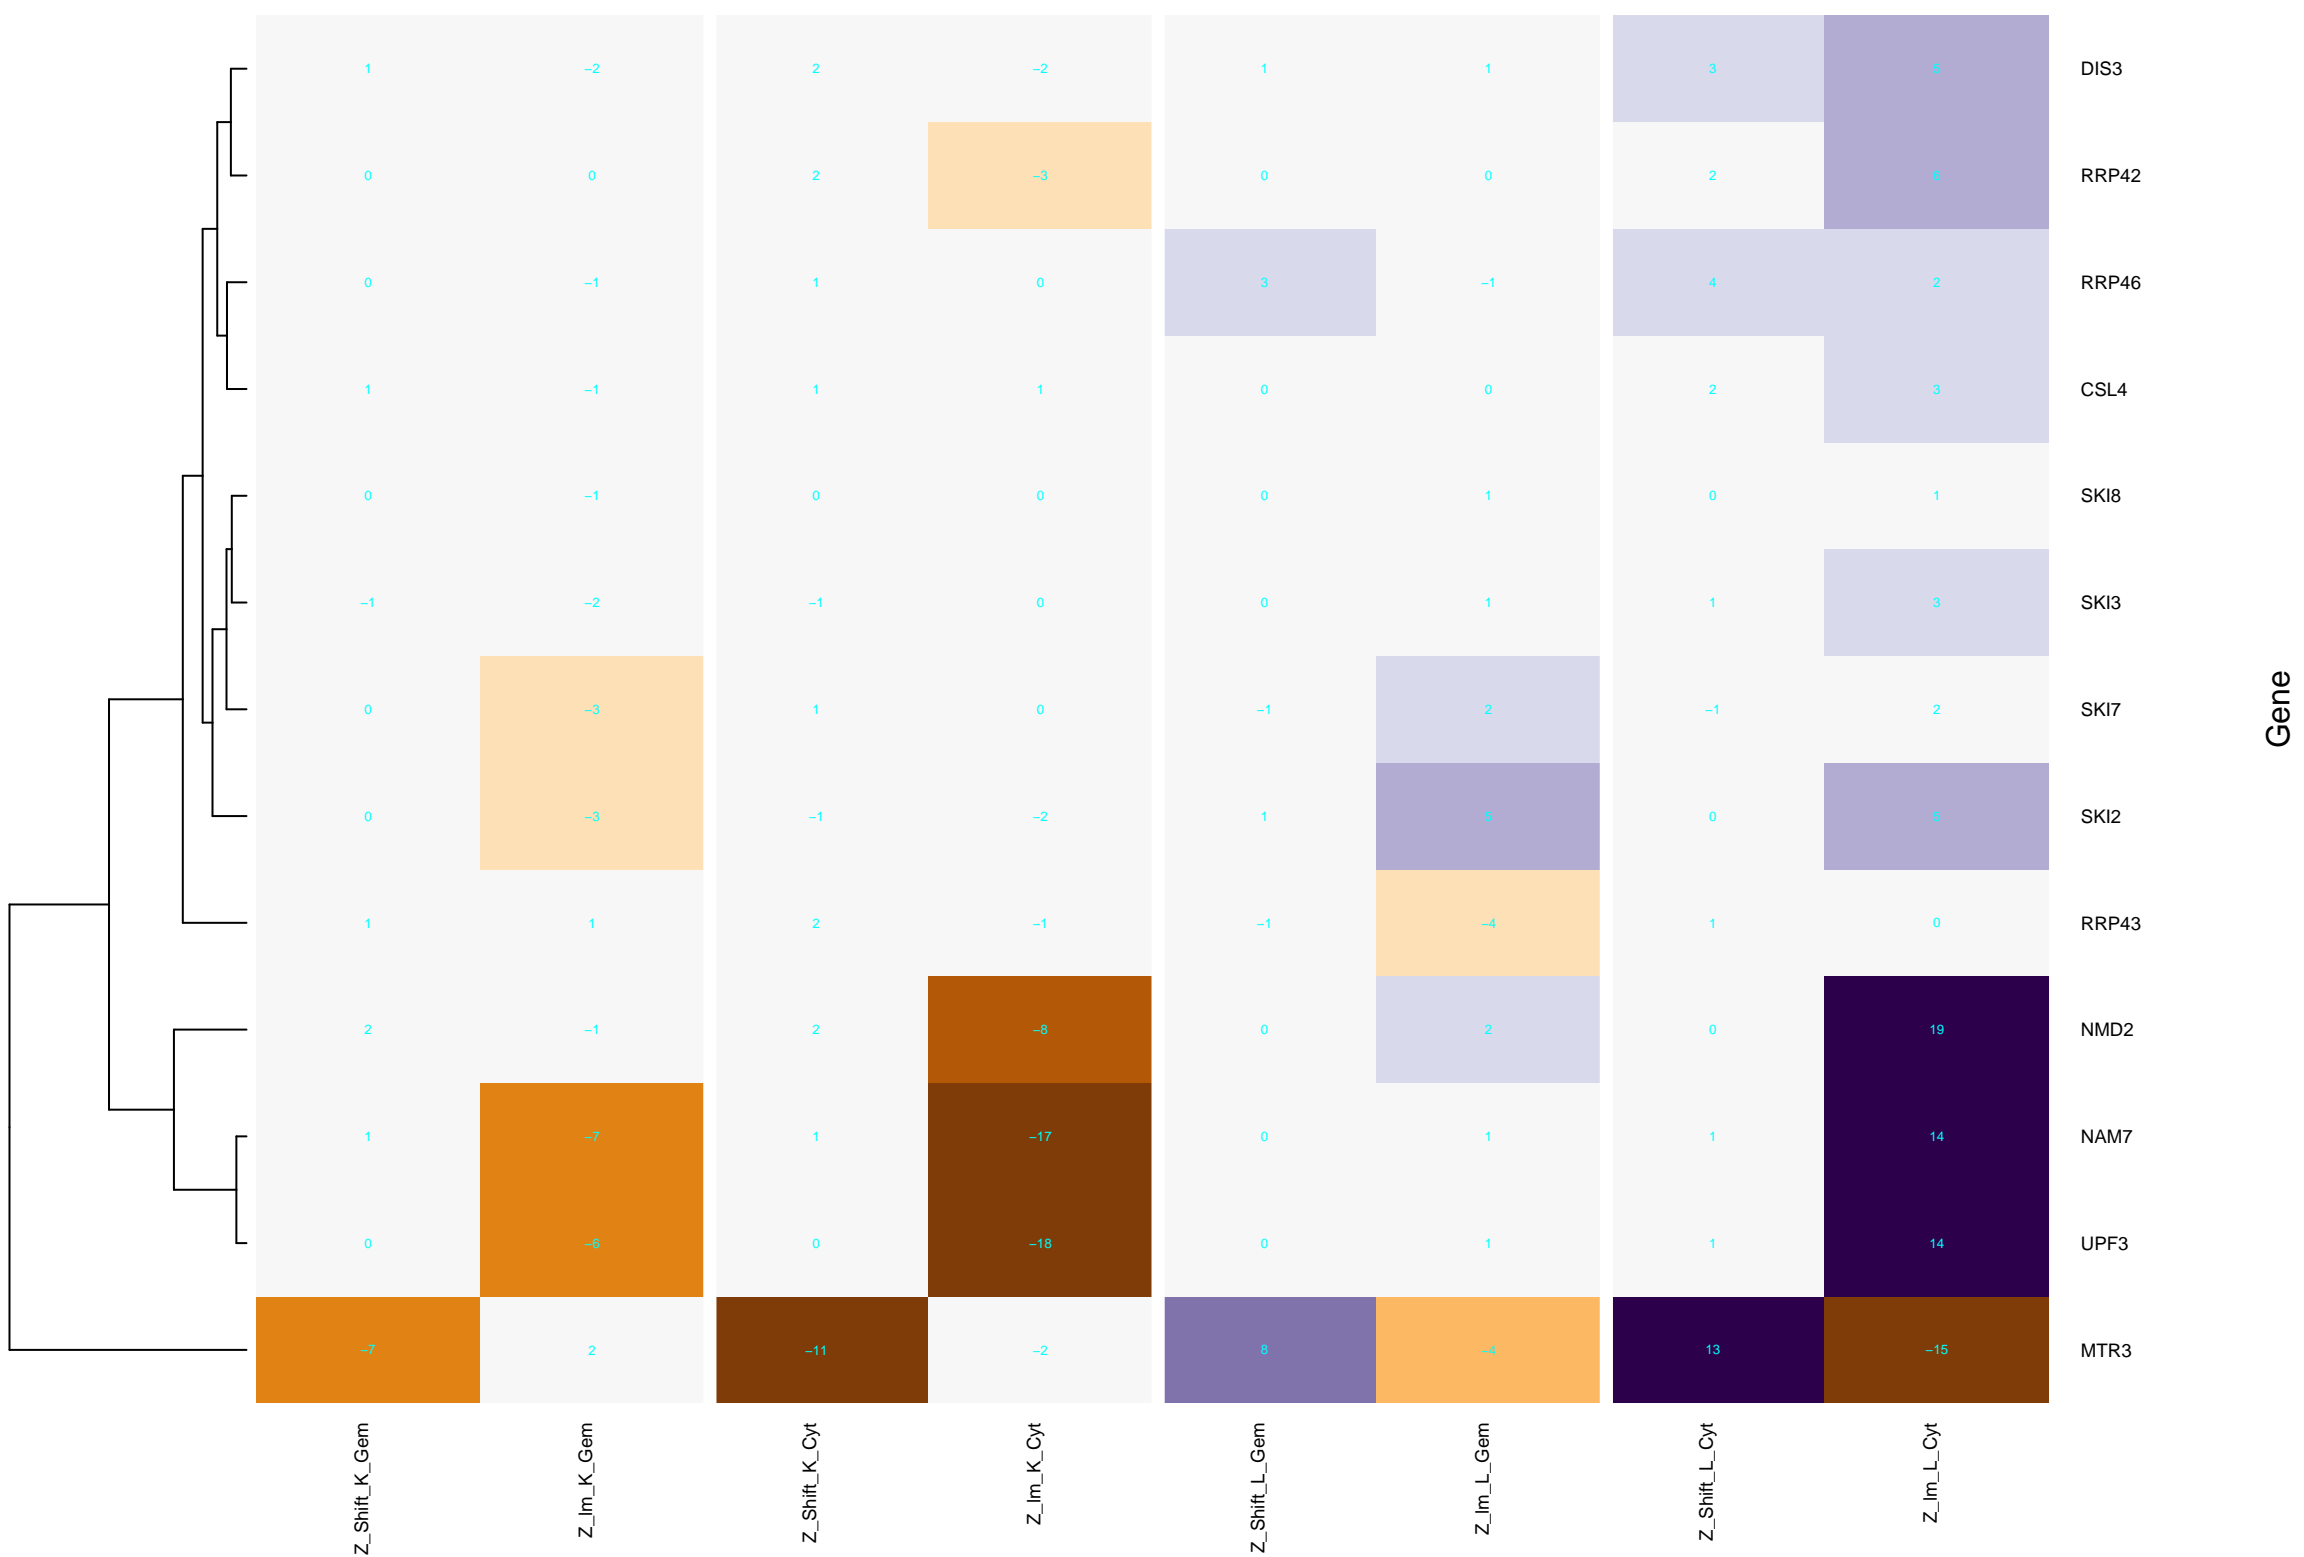

Color Key

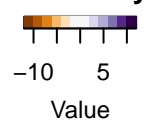

# -transcribed mRNA catabolic process, 3'-5' exonucleolytic nonsense-mediated decay

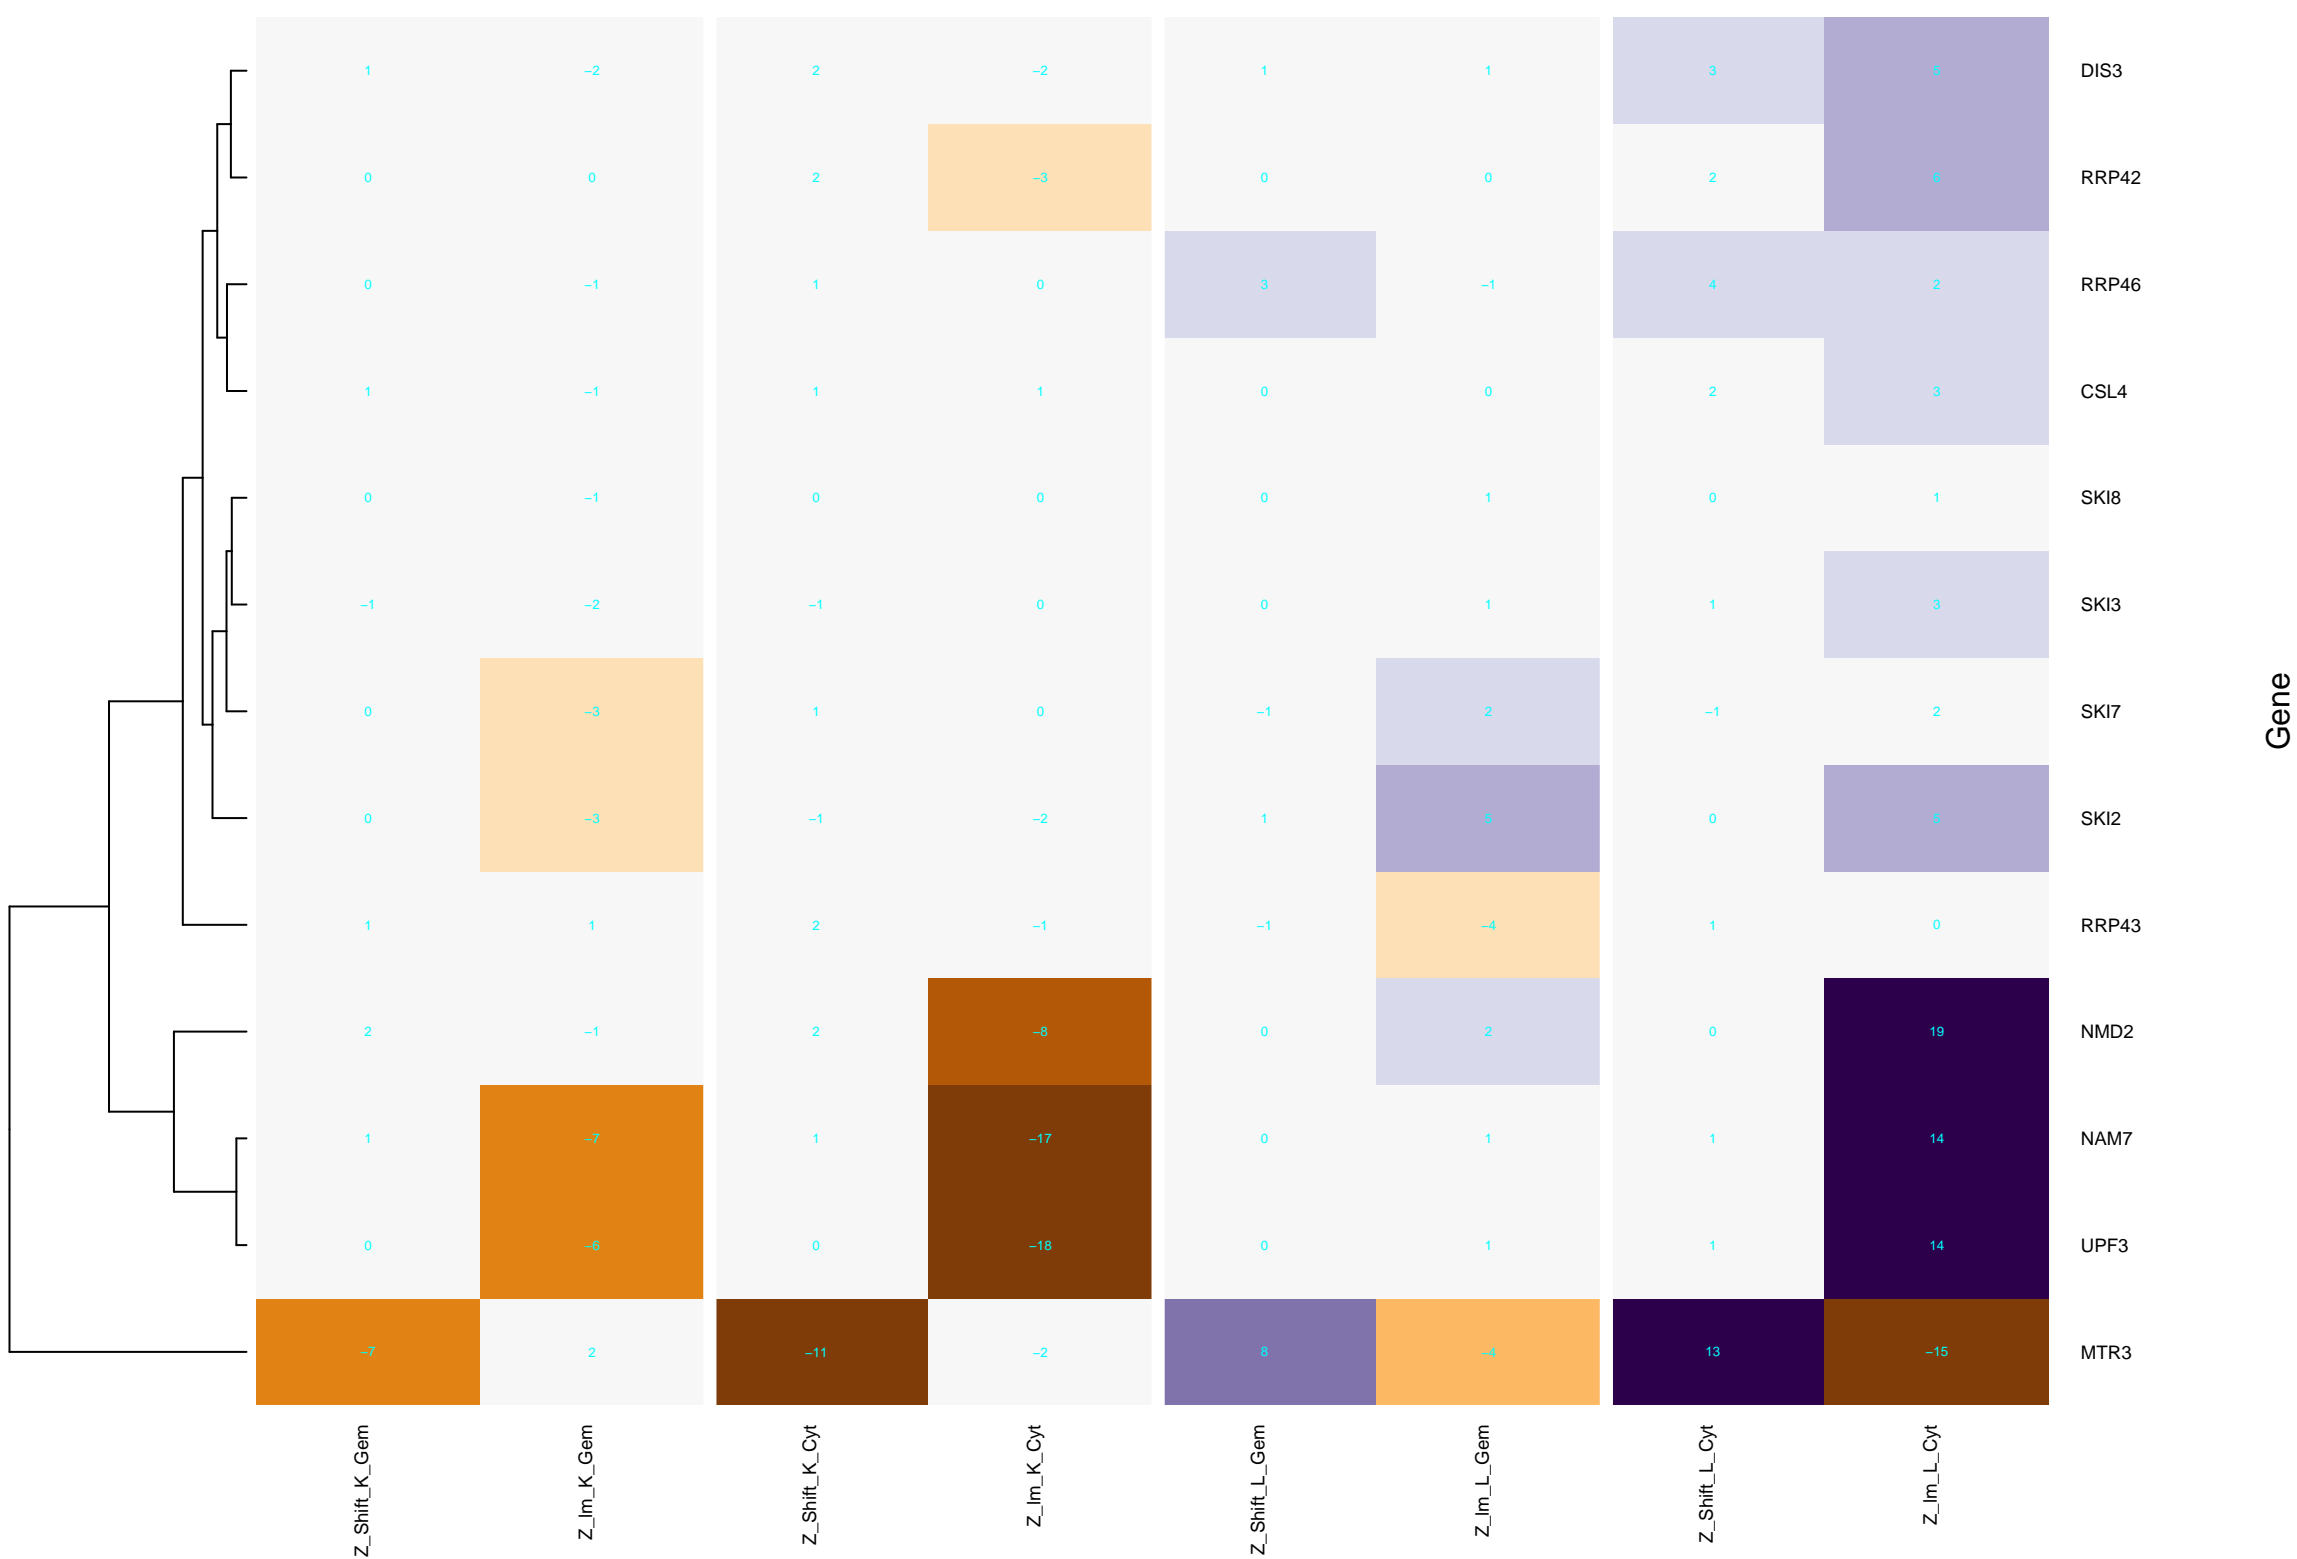

Supplement: s1 [file s1]
