# Supplementary material for: A Humanized Yeast Phenomic Model of Deoxycytidine Kinase to Predict Genetic Buffering of Nucleoside Analog Cytotoxicity
Source: MDPI journal article supplement (doi:10.3390/genes10100770), 2019-09-30

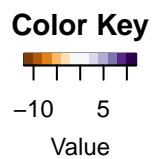

# carbon-nitrogen ligase activity, with glutamine as amido-N-donor

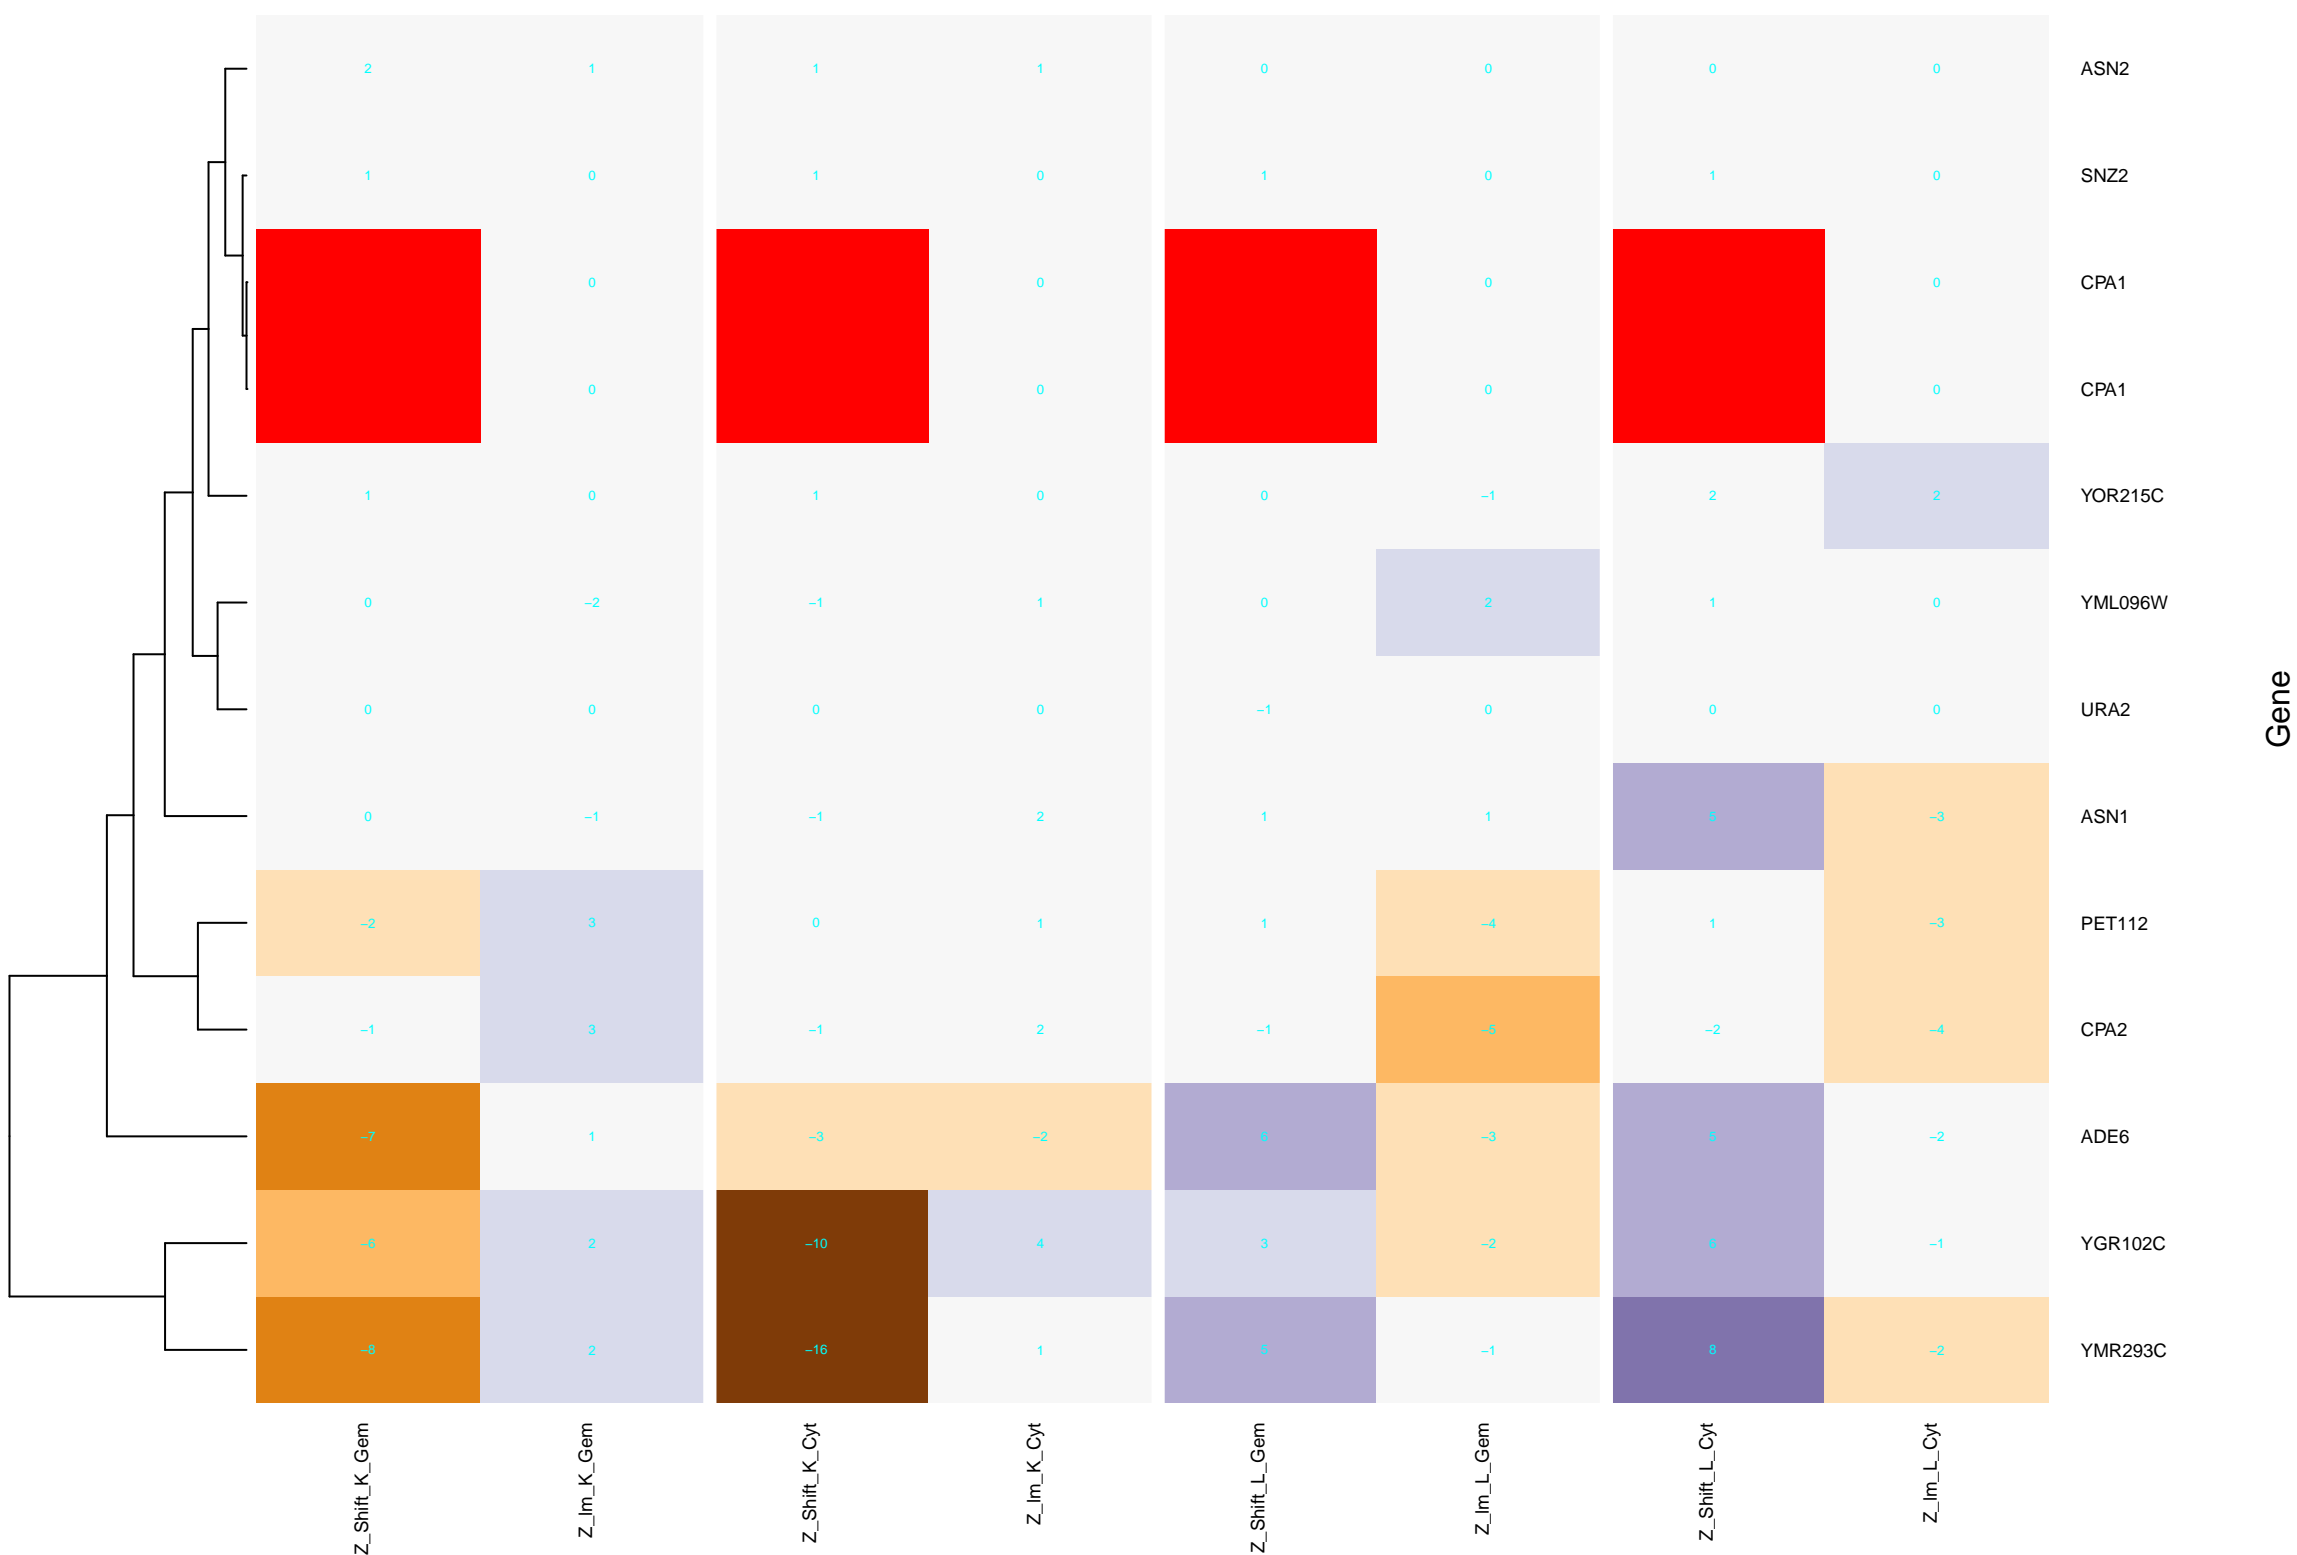

Color Key

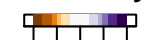

-10 5

Value

# asparagine synthase (glutamine-hydrolyzing) activity

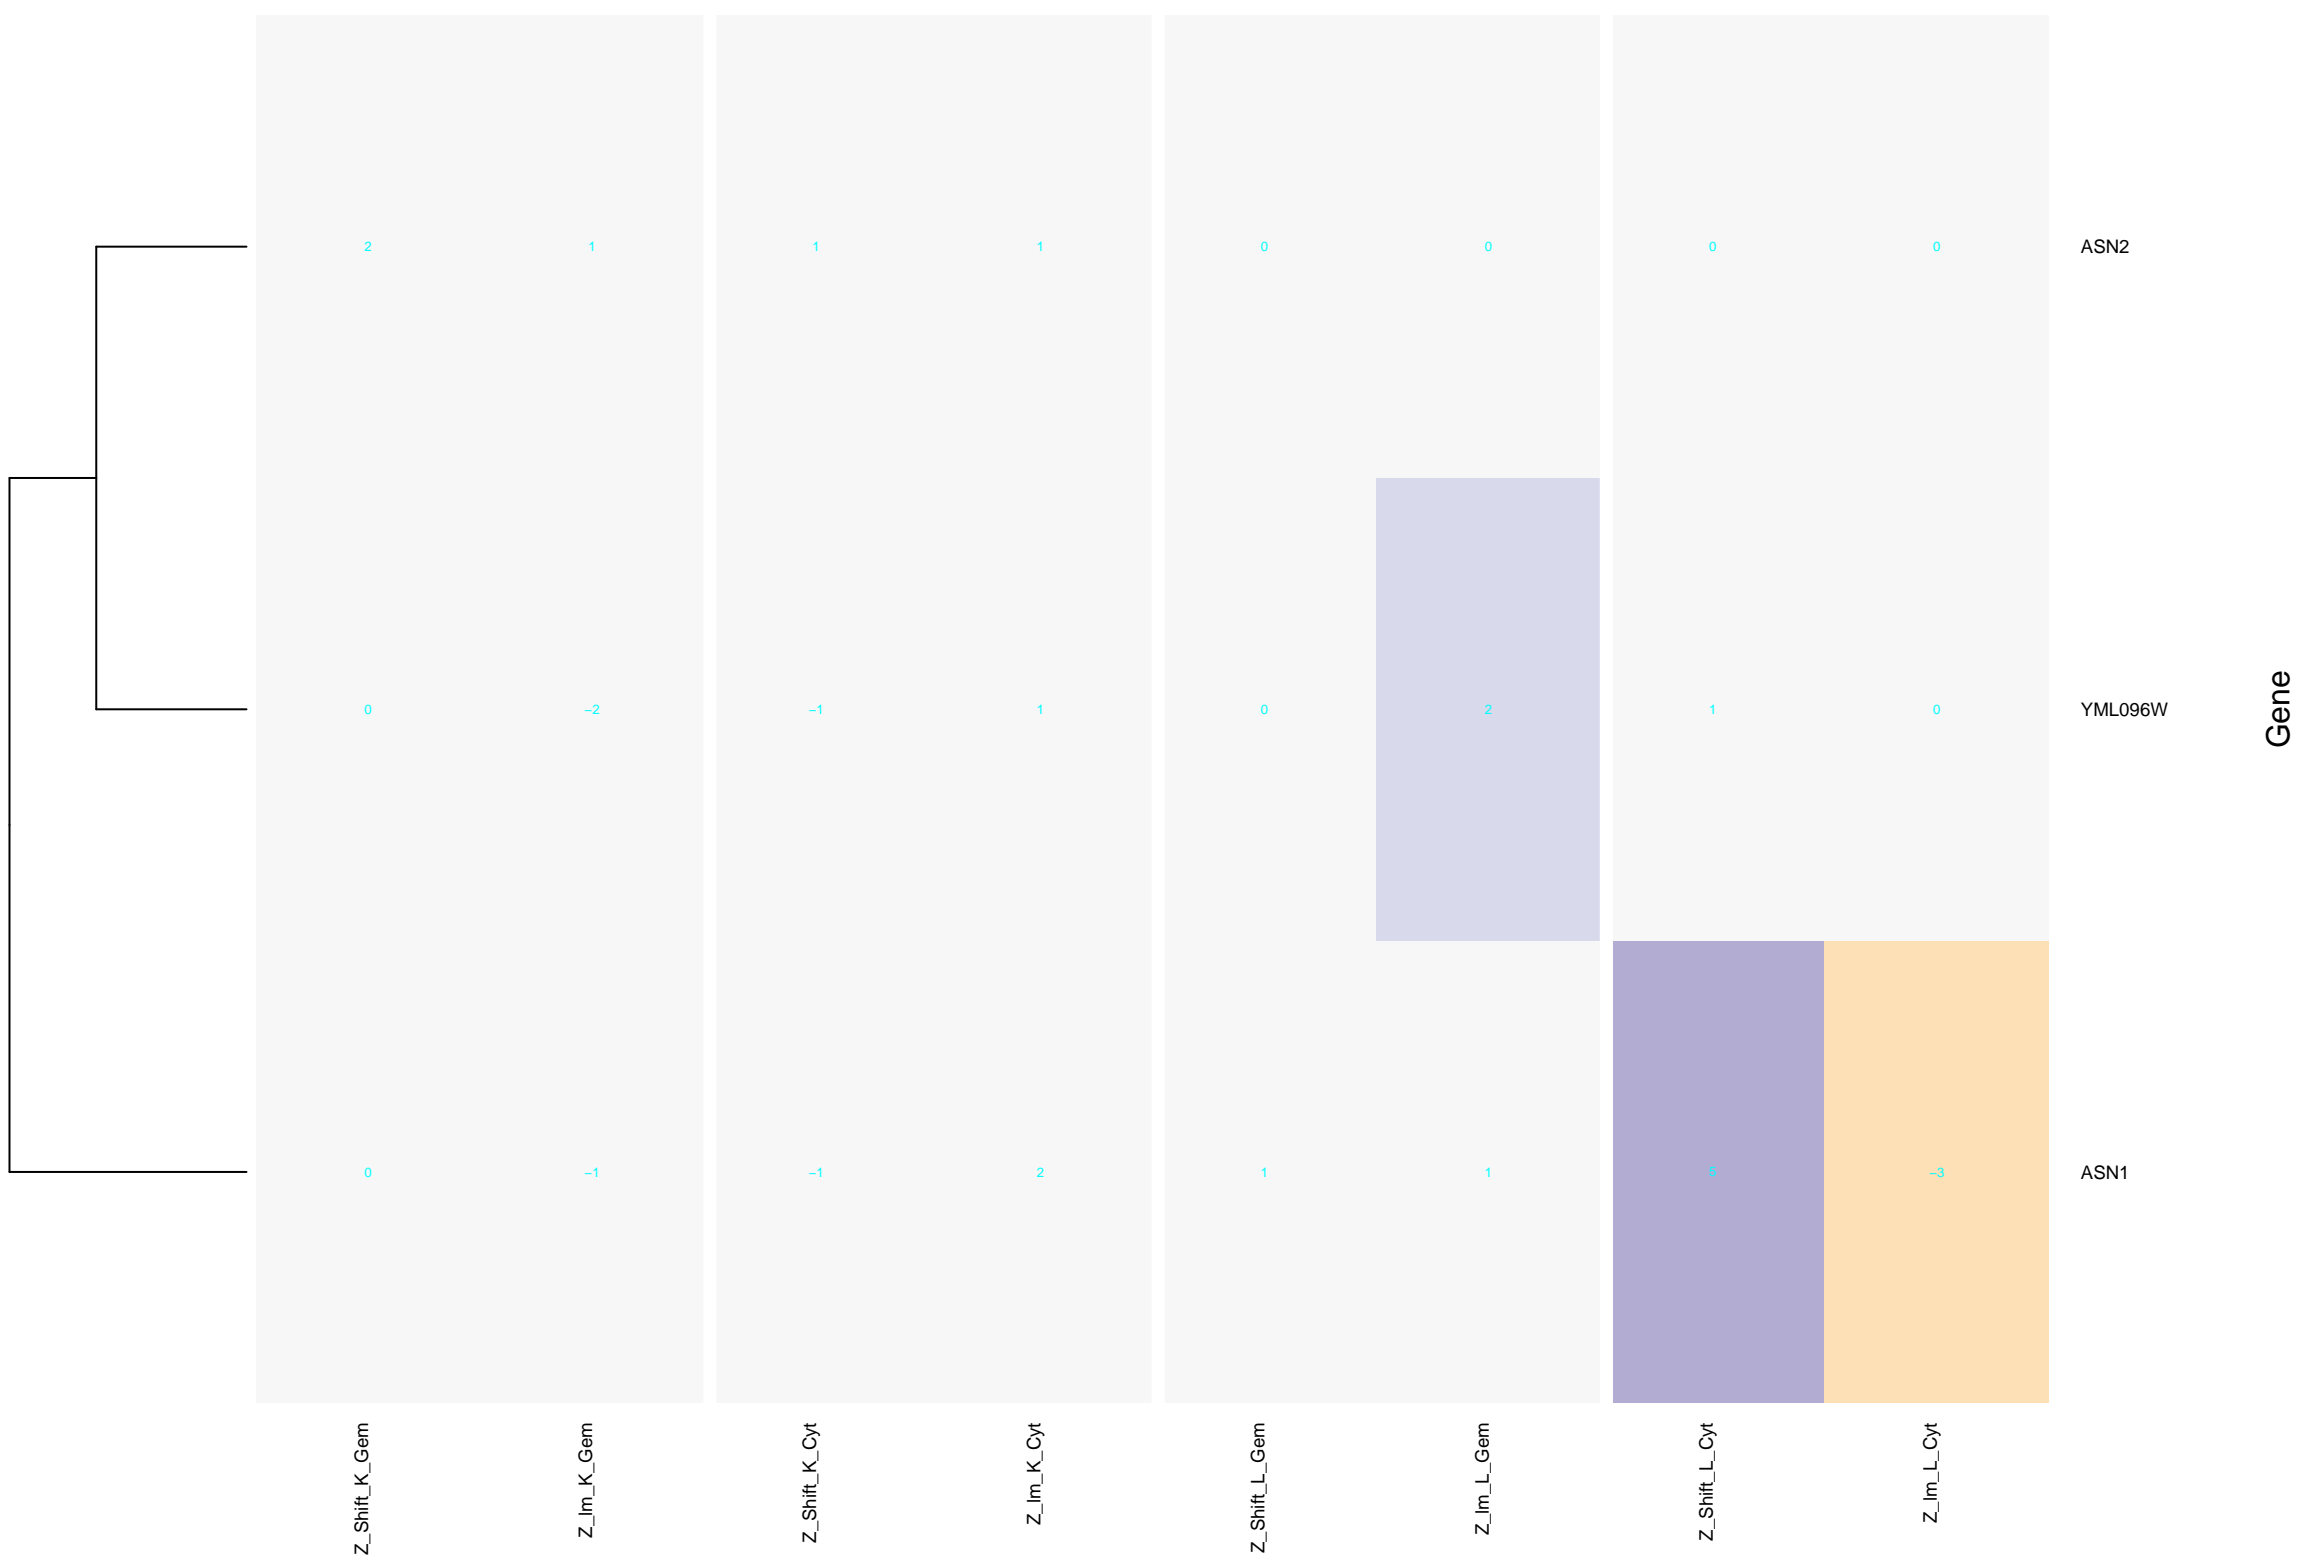

Color Key

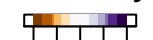

-10 5

Value

# carbamoyl-phosphate synthase (glutamine-hydrolyzing) activity

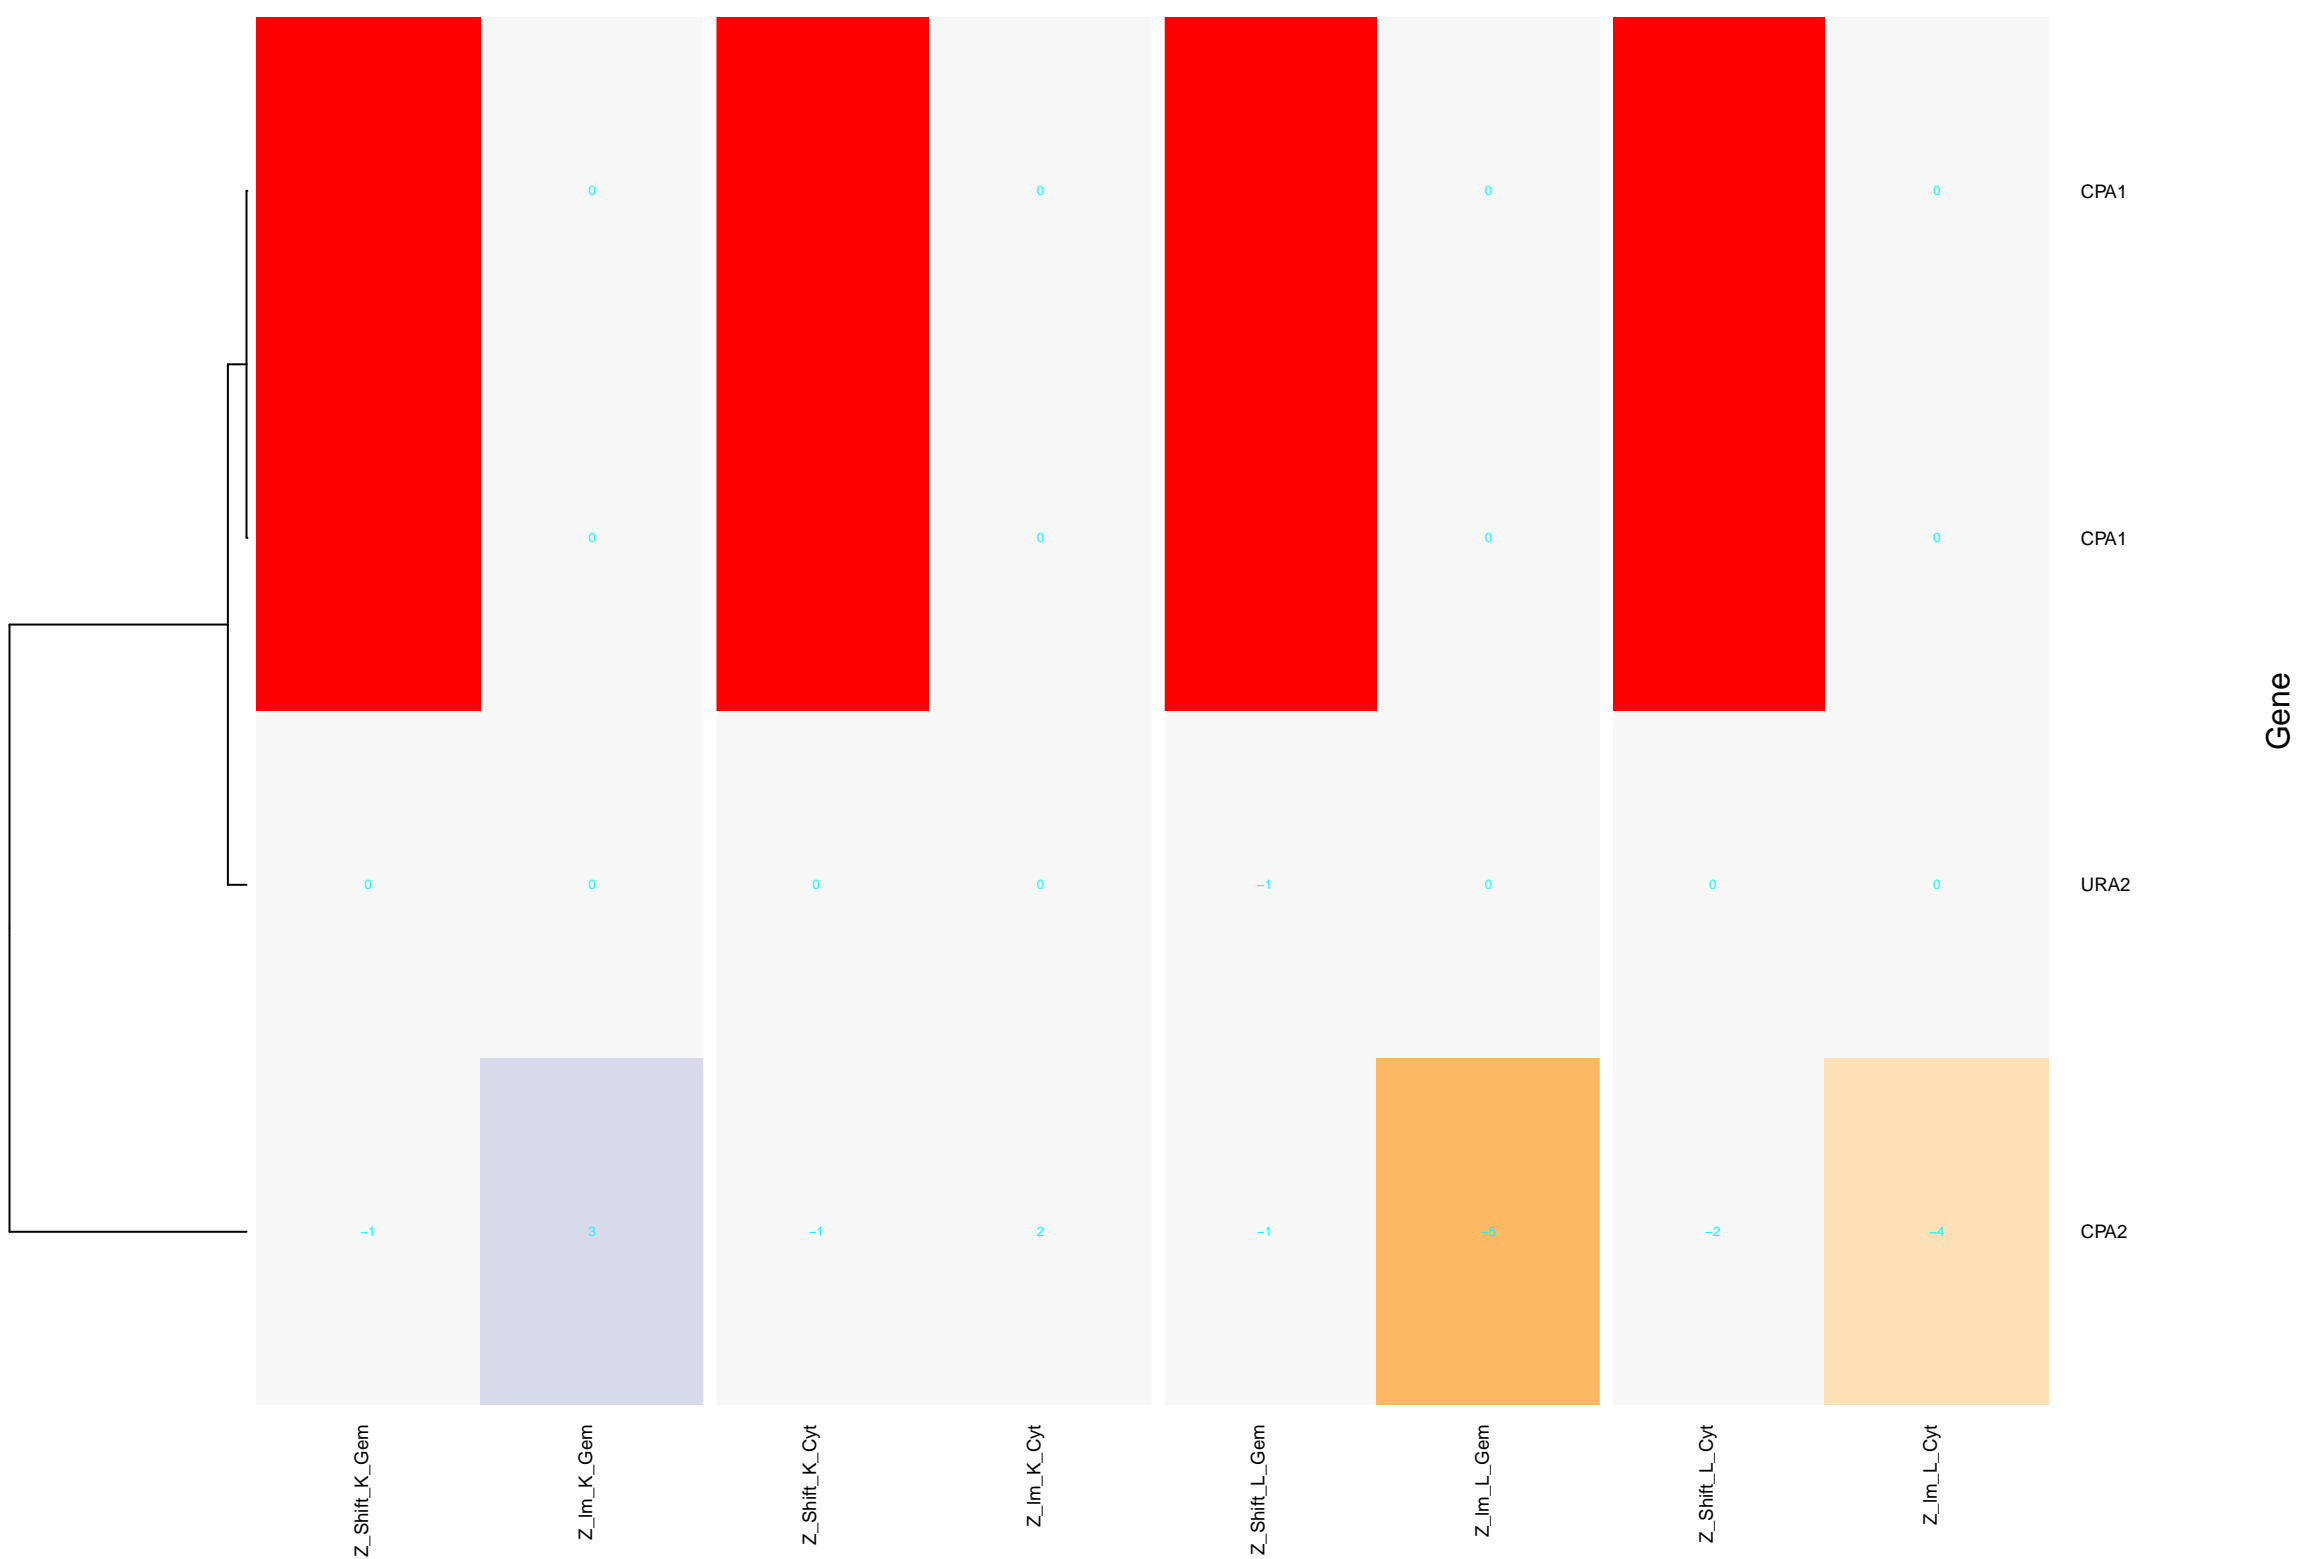



# glutaminyl-tRNA synthase (glutamine-hydrolyzing) activity

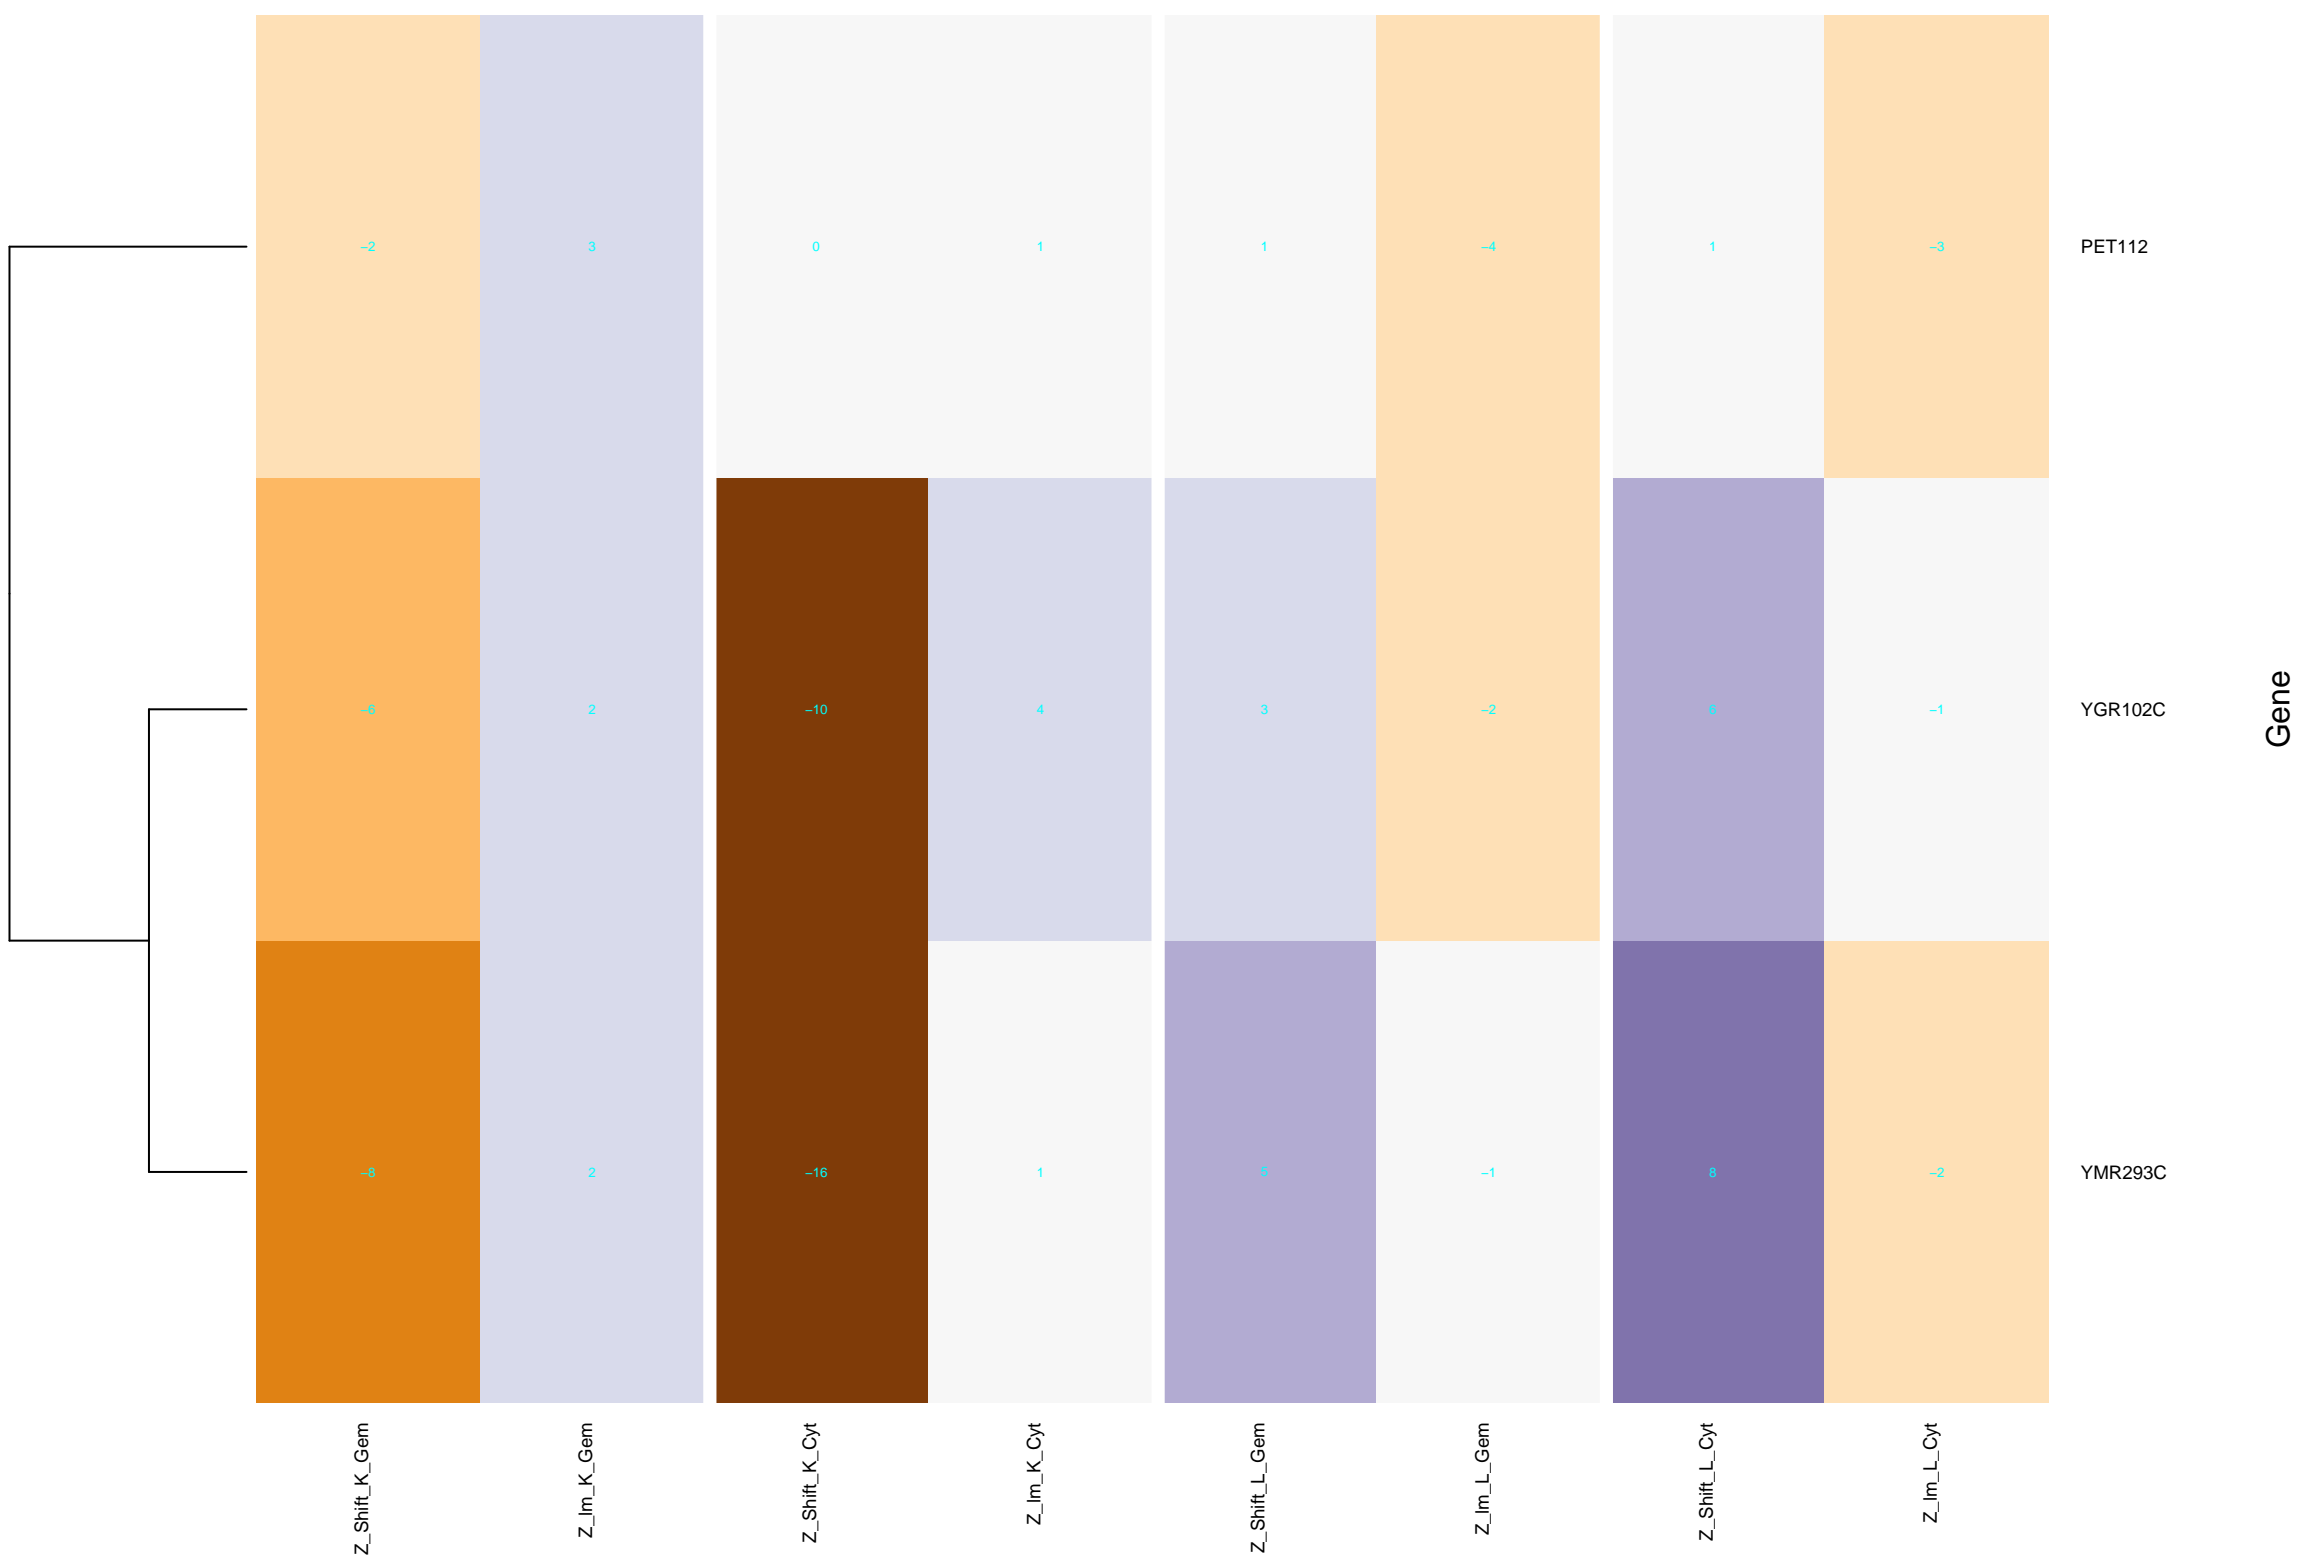

Supplement: s1 [file s1]
