# Supplementary material for: A Humanized Yeast Phenomic Model of Deoxycytidine Kinase to Predict Genetic Buffering of Nucleoside Analog Cytotoxicity
Source: MDPI journal article supplement (doi:10.3390/genes10100770), 2019-09-30

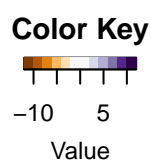

# spindle organization

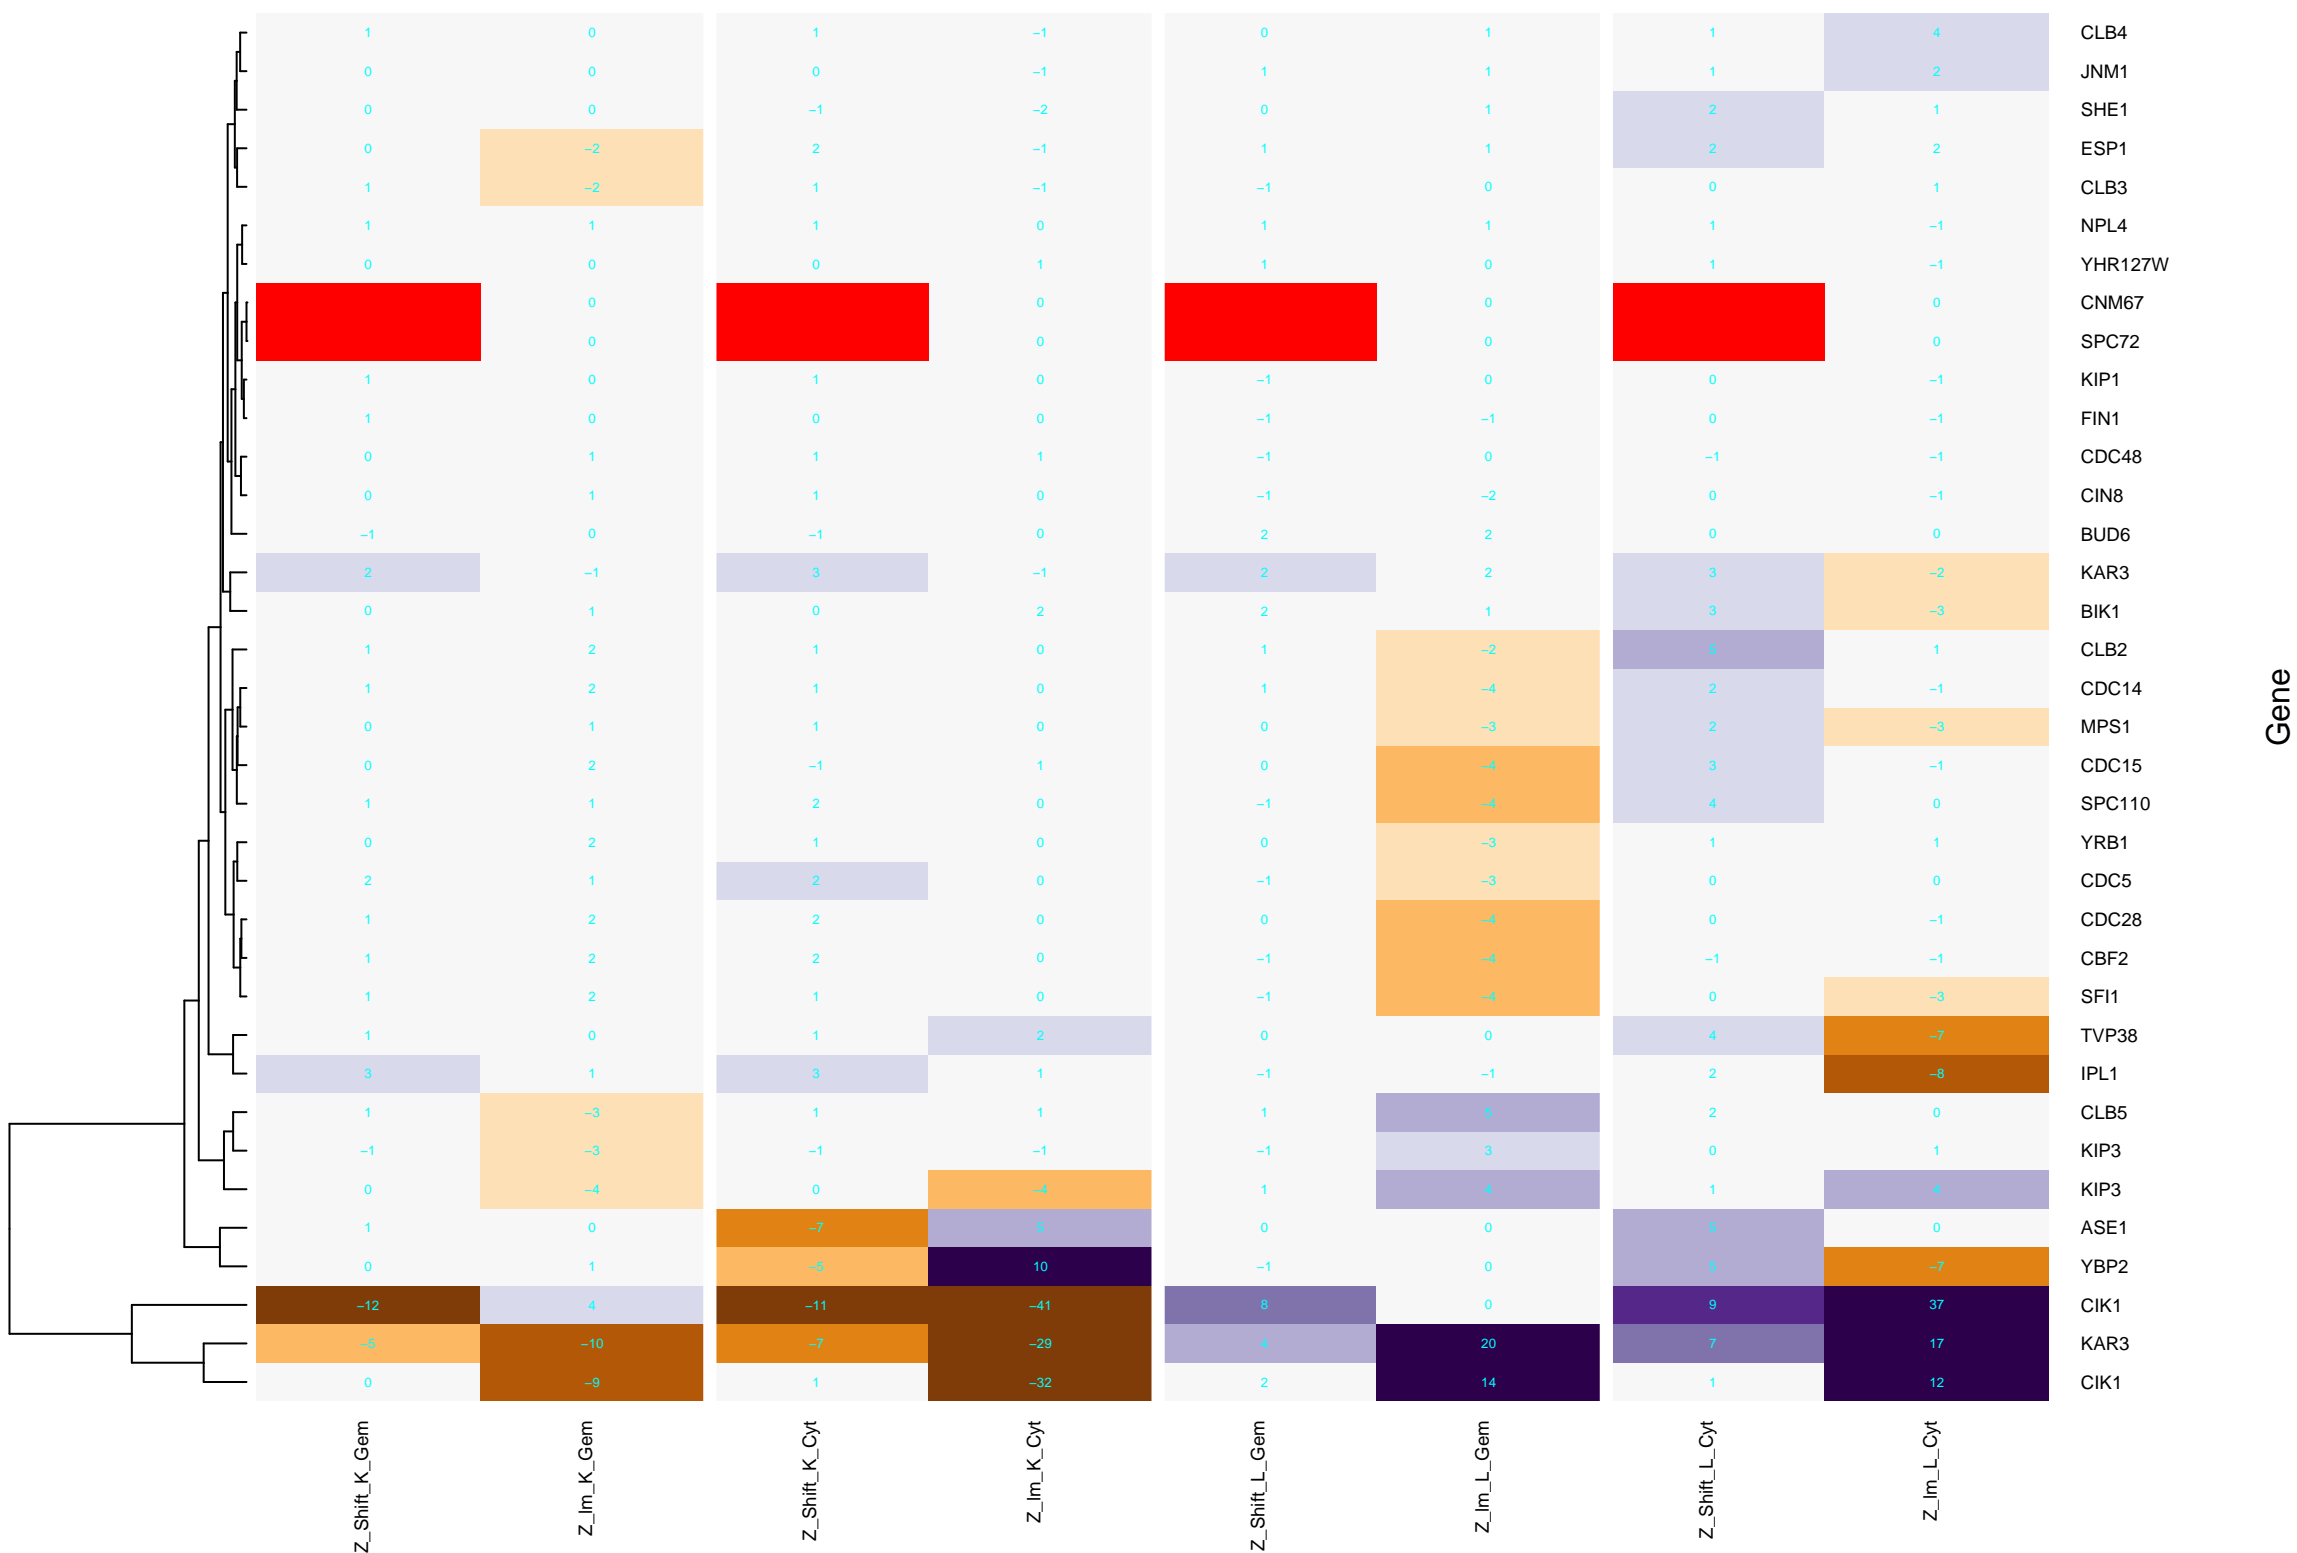

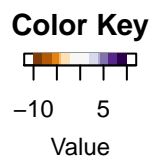

# meiotic spindle organization

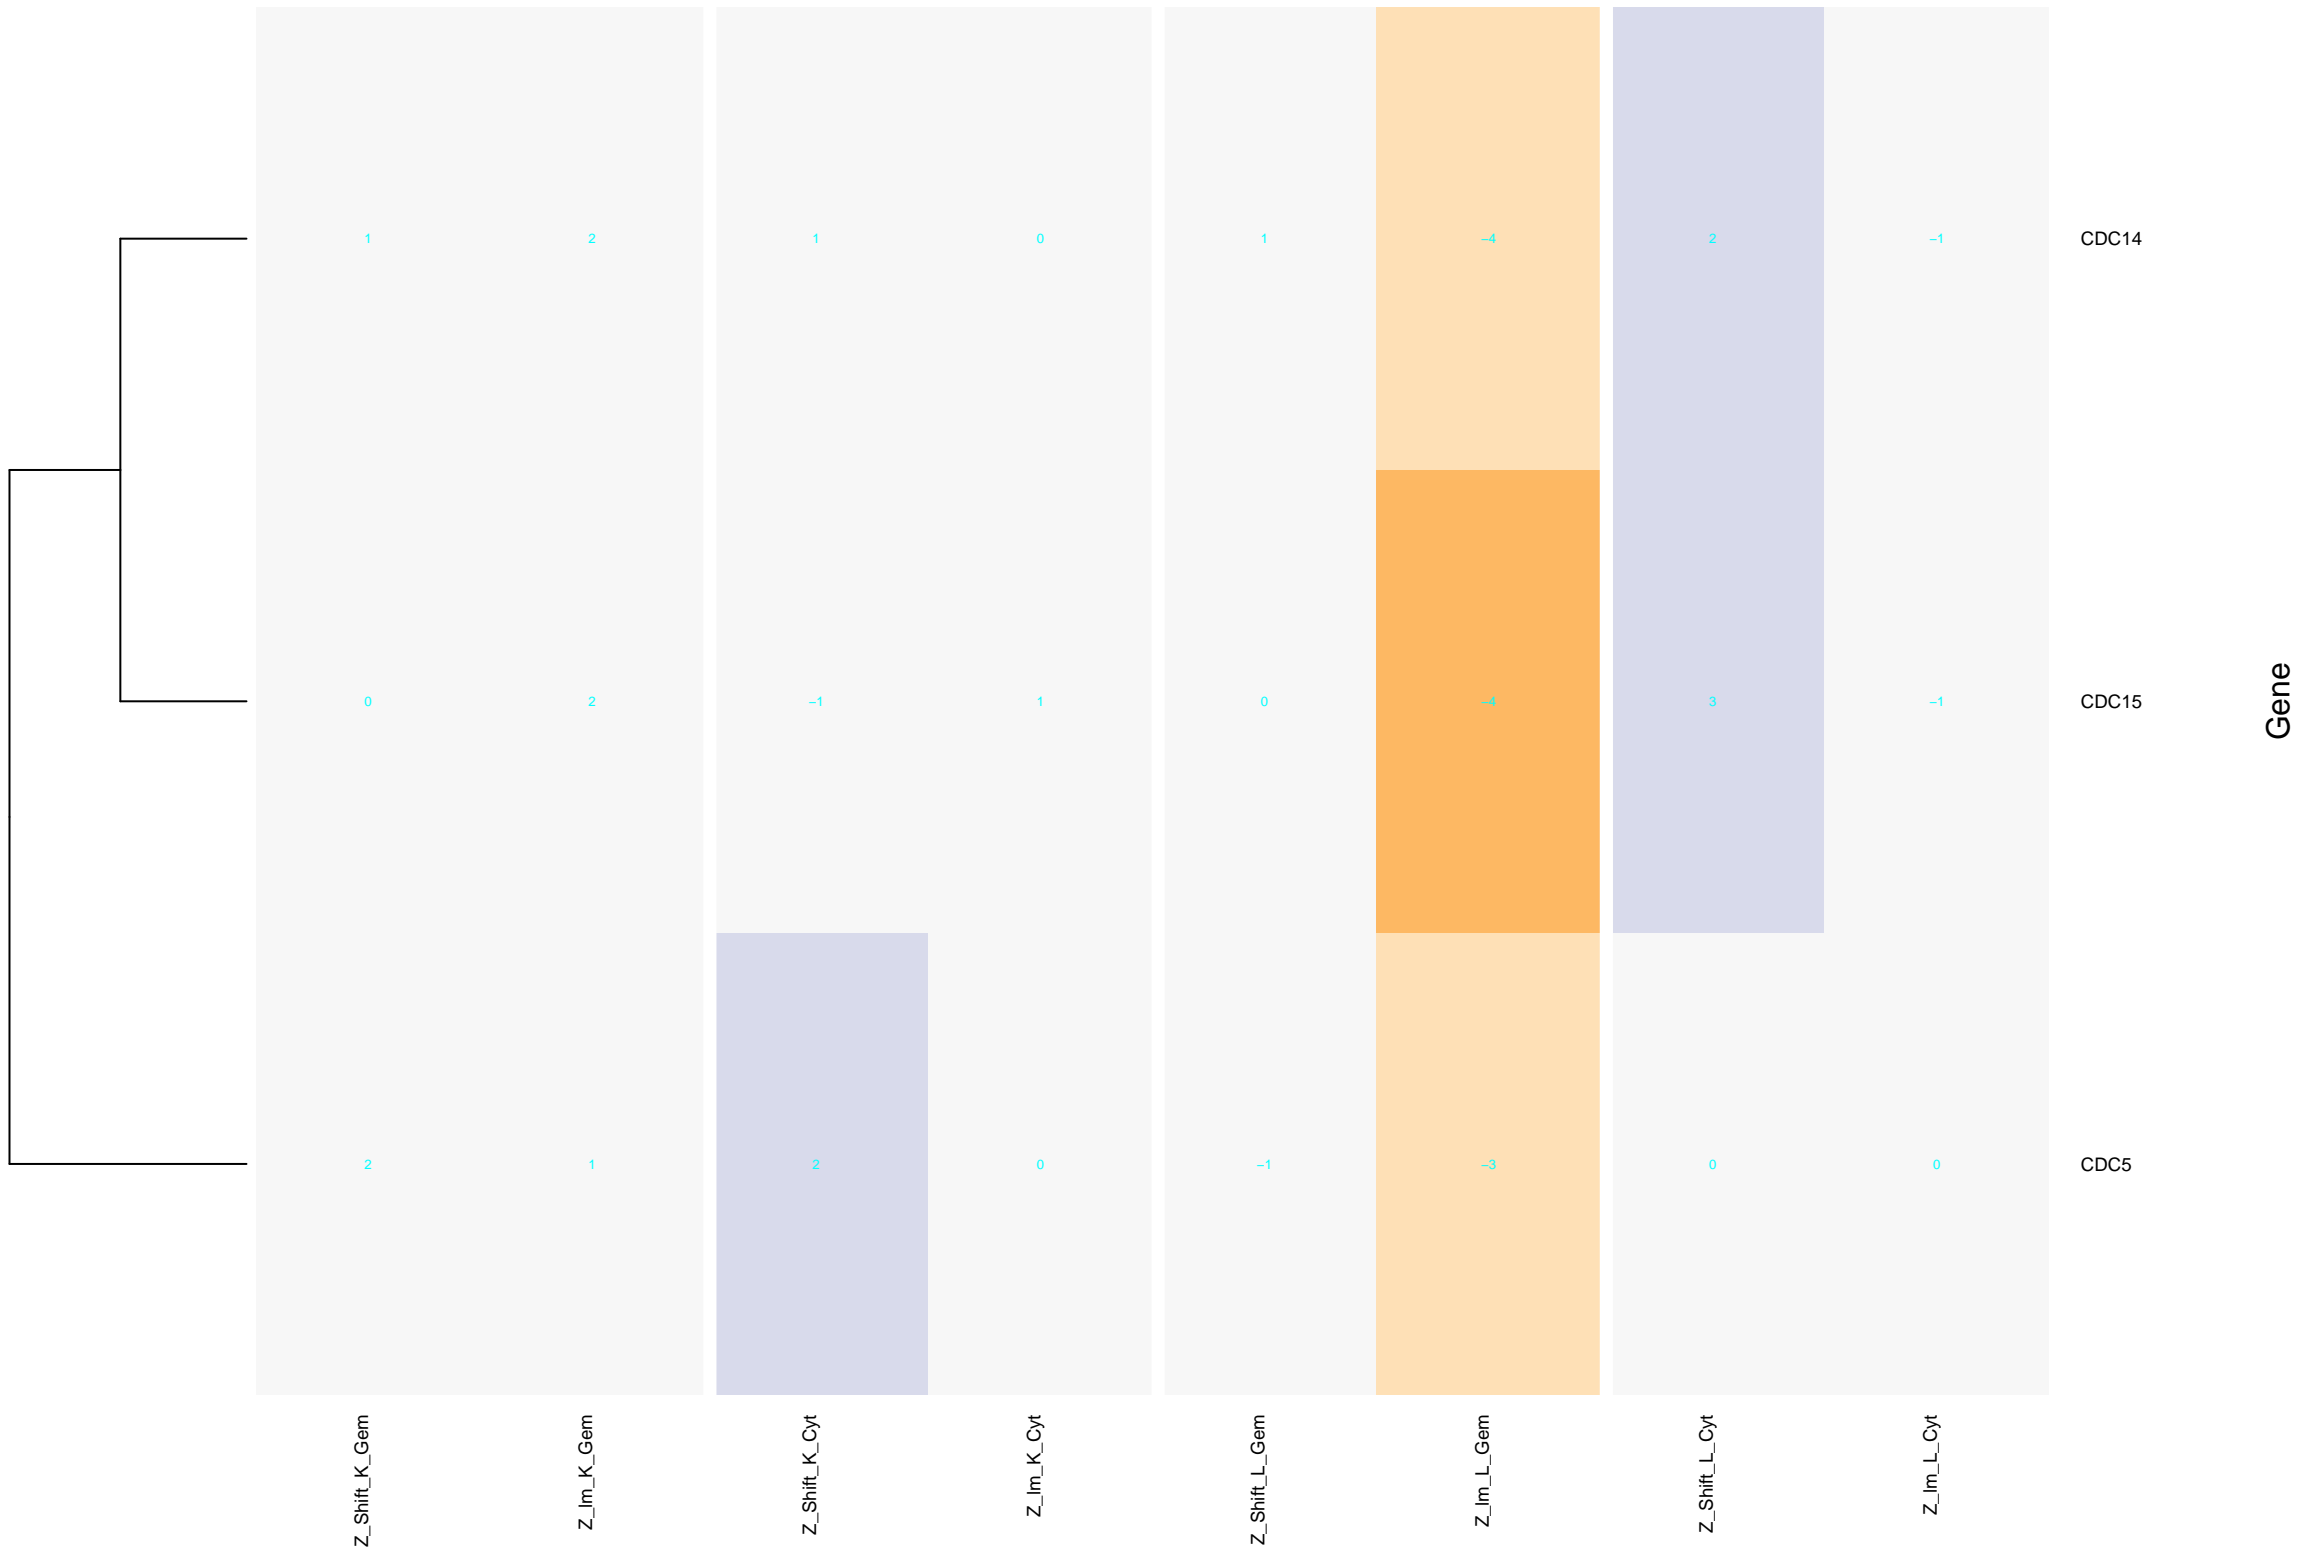

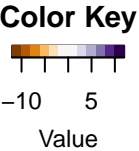

mitotic spindle organization

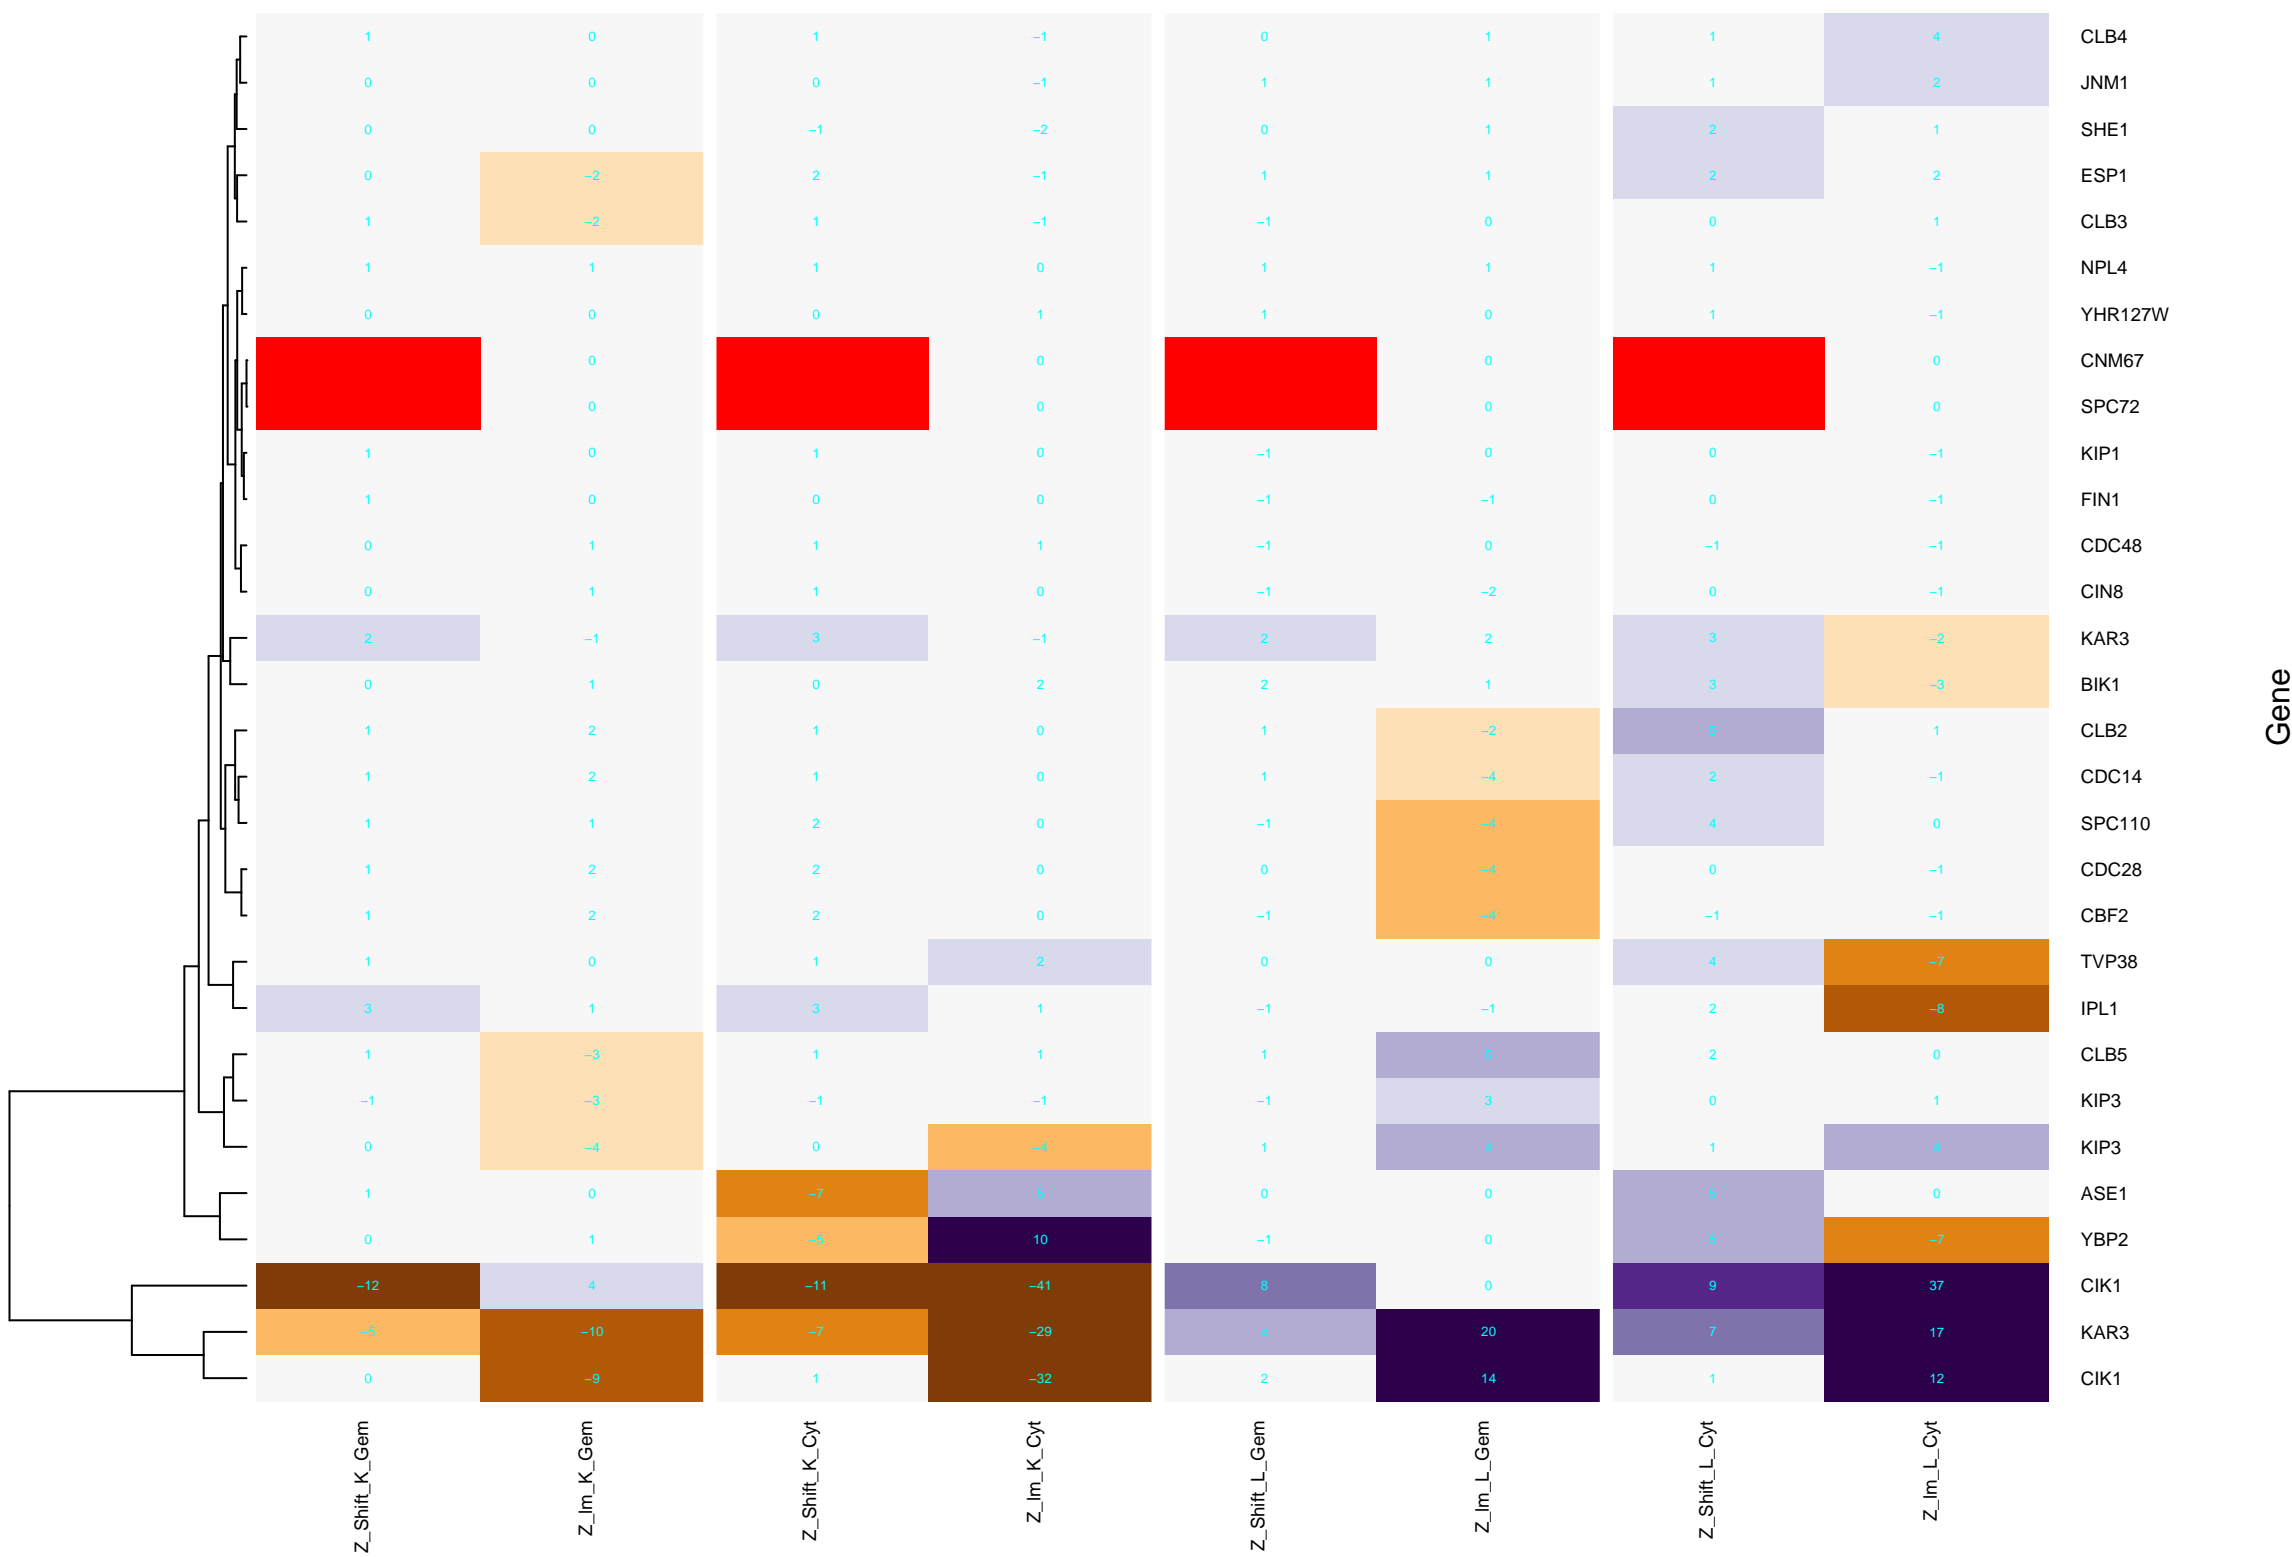

# spindle assembly

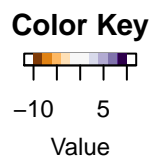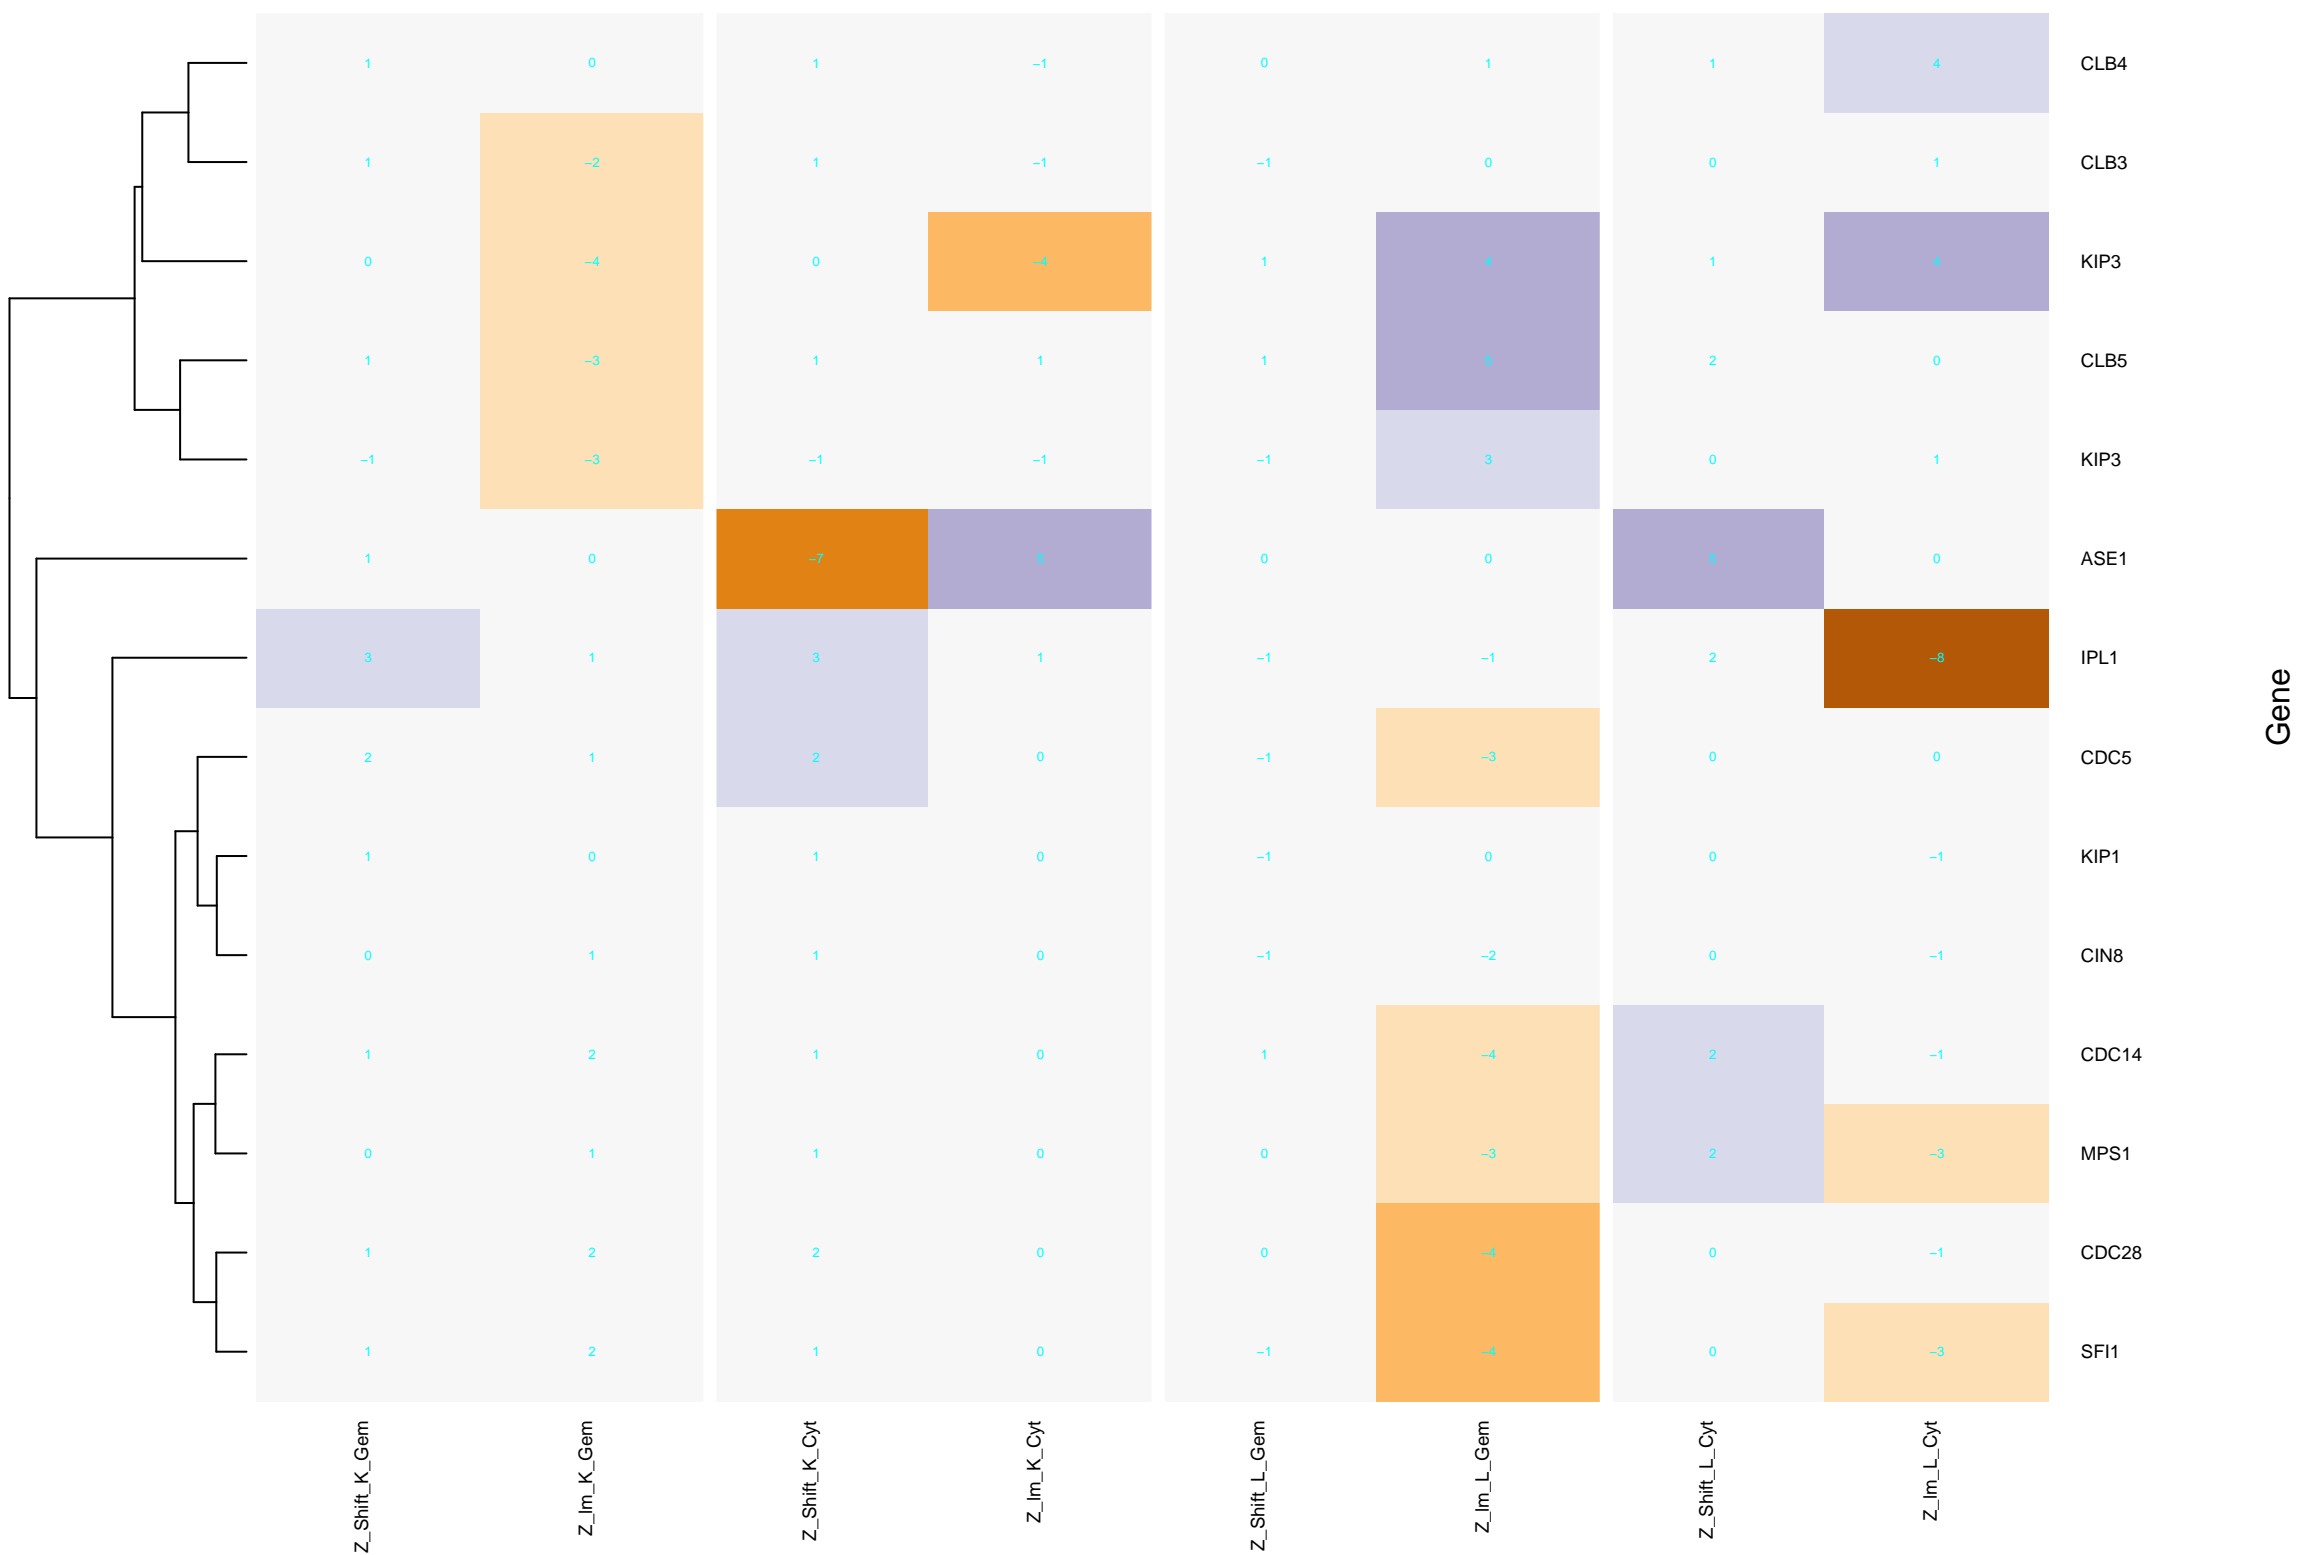

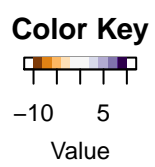

# spindle disassembly

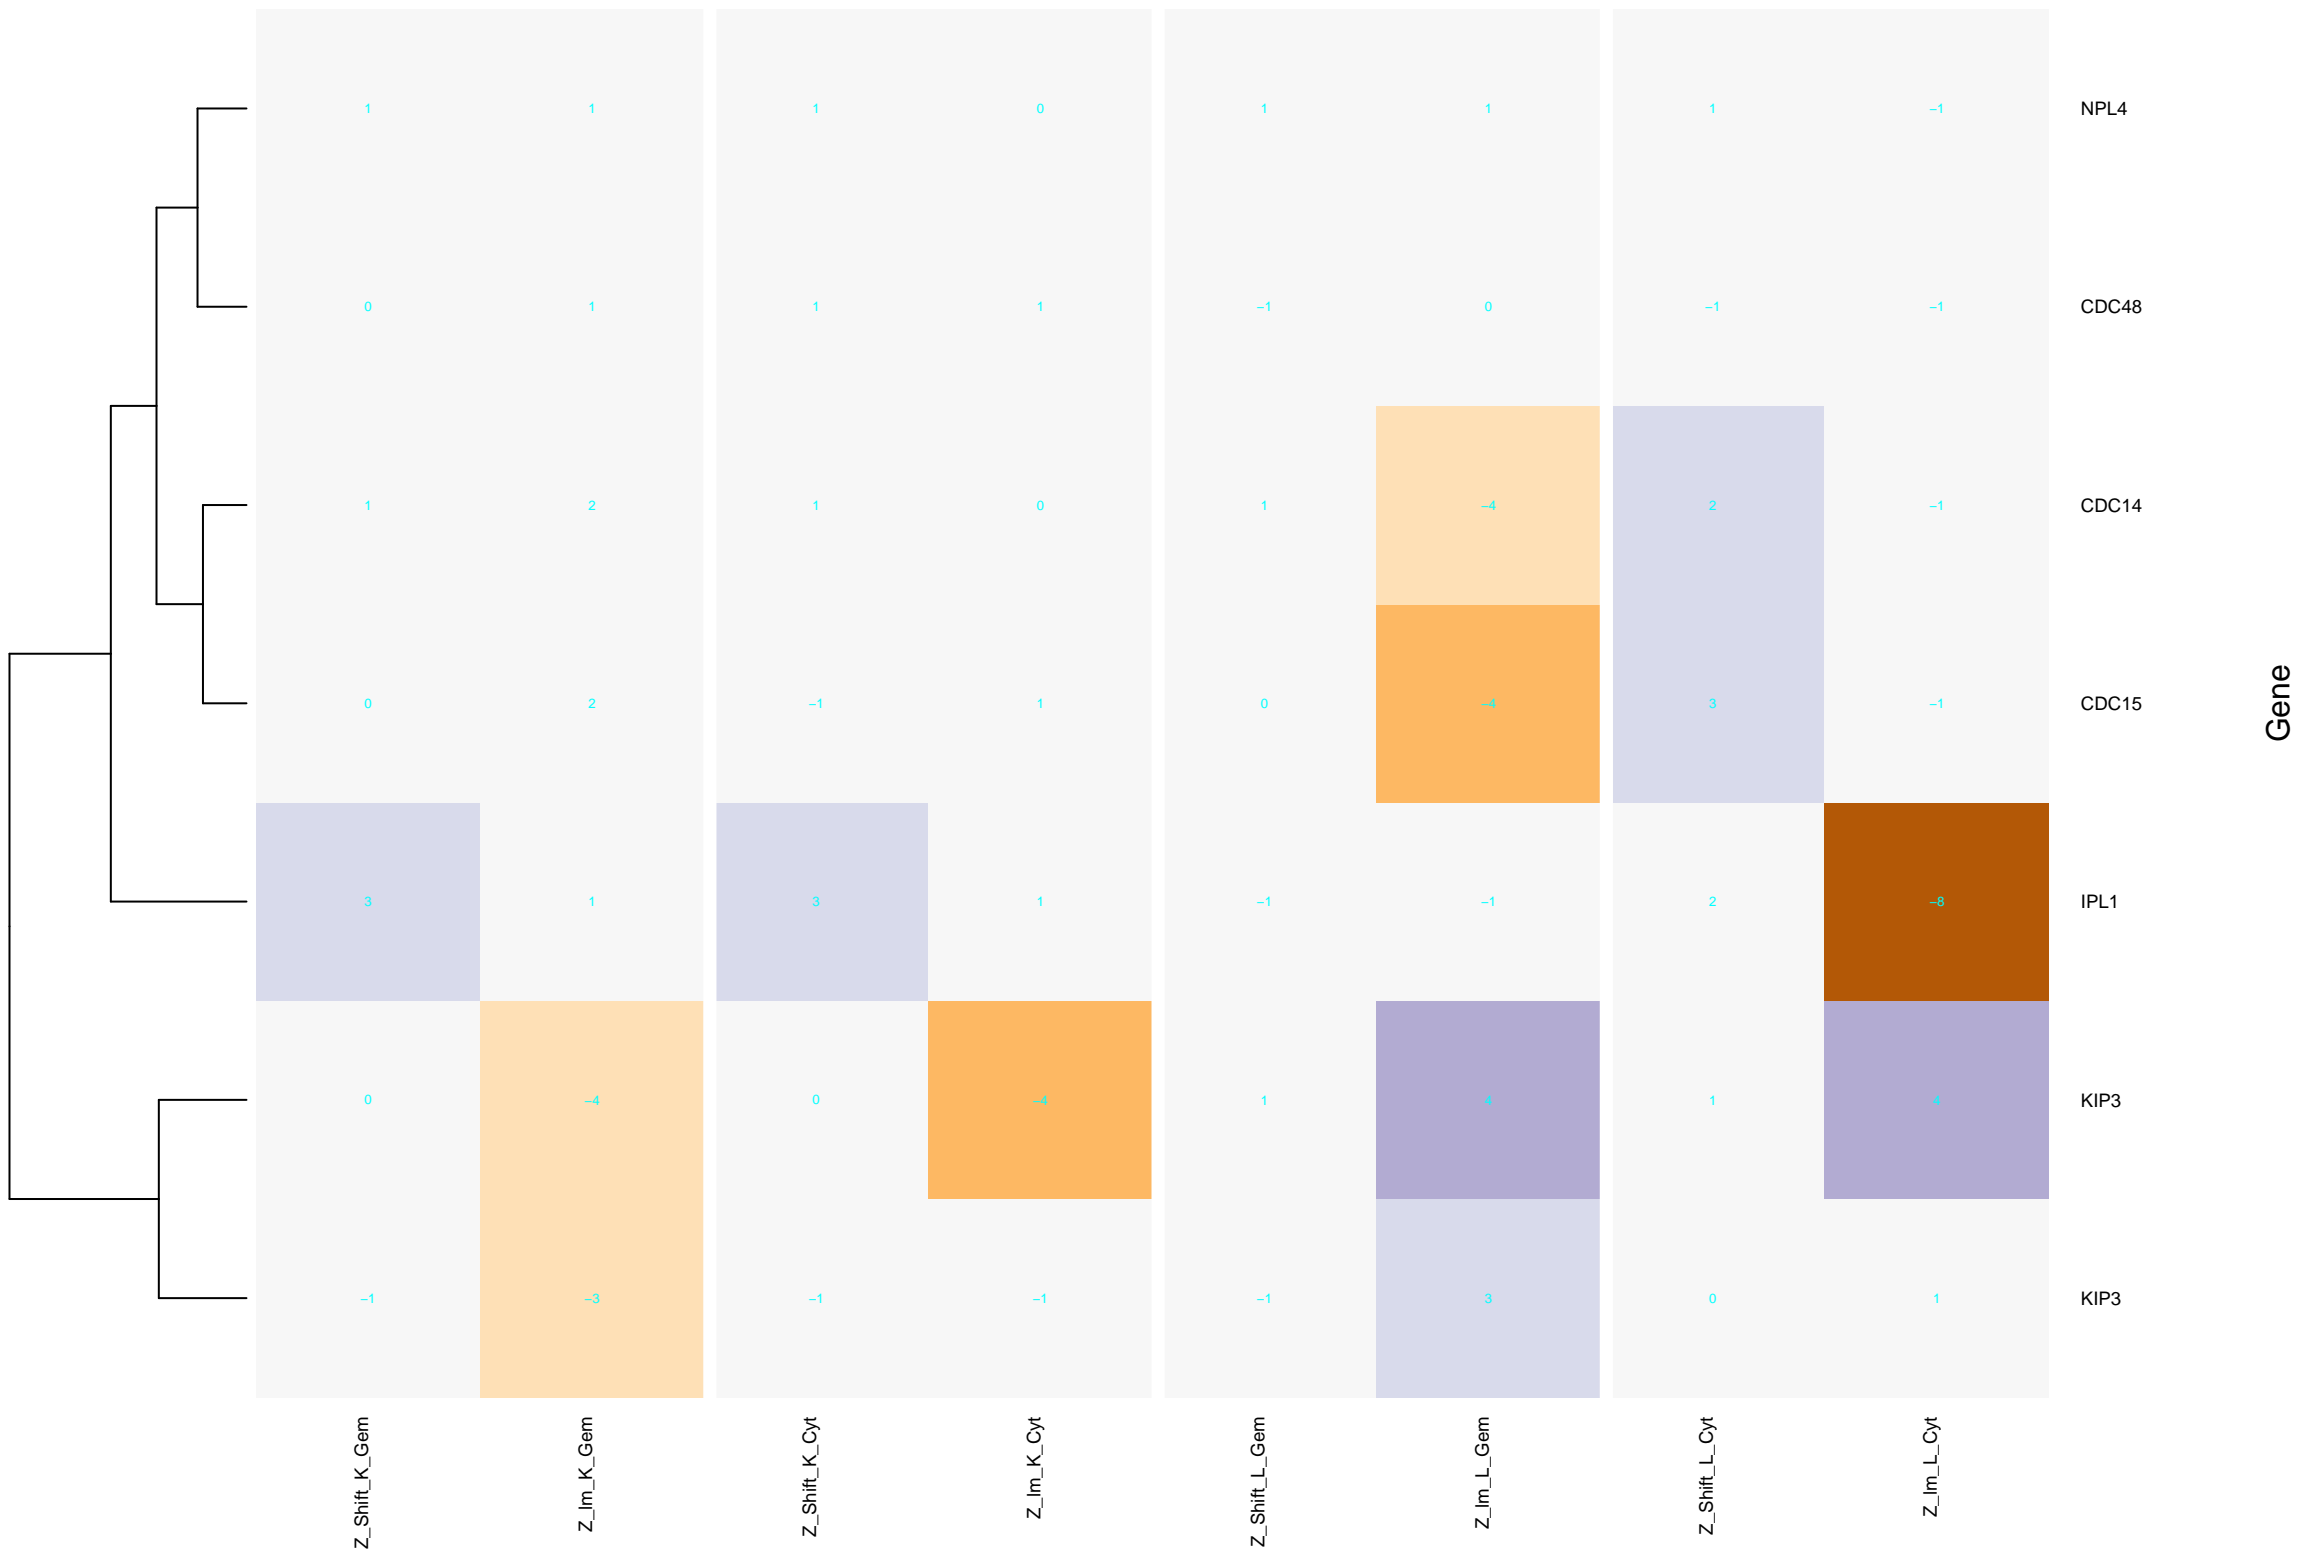

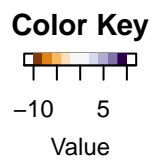

# mitotic spindle disassembly

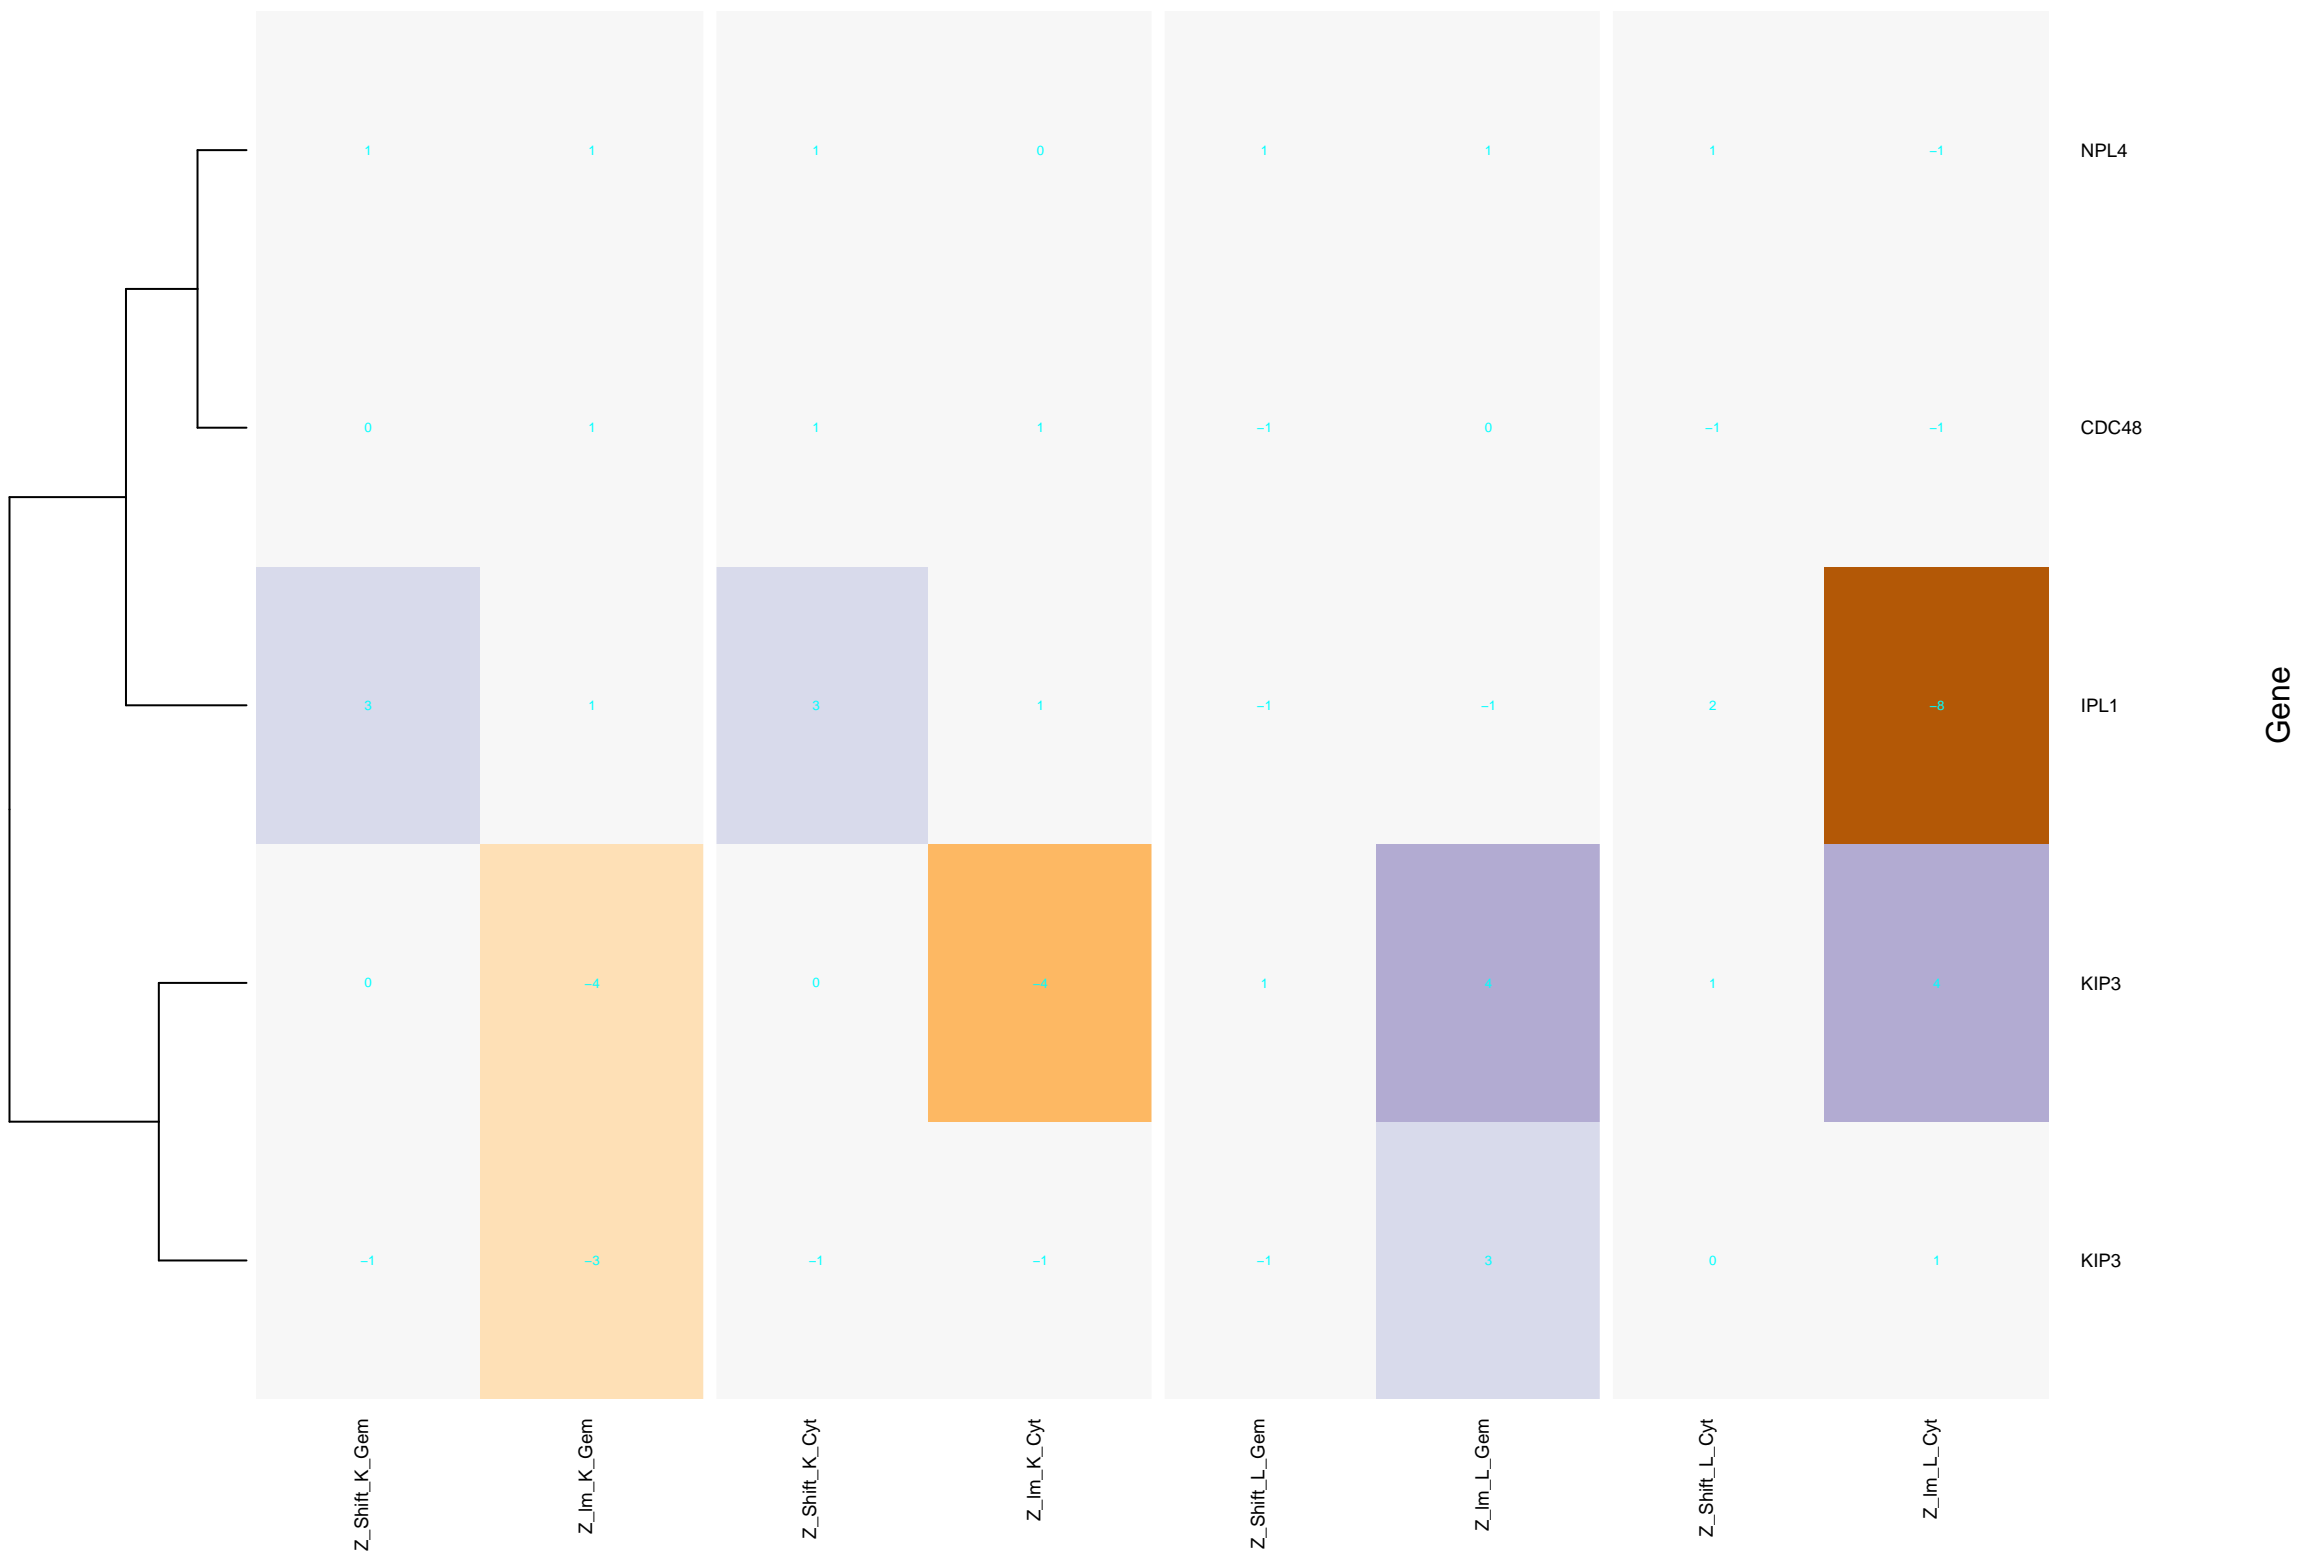



# mitotic spindle assembly

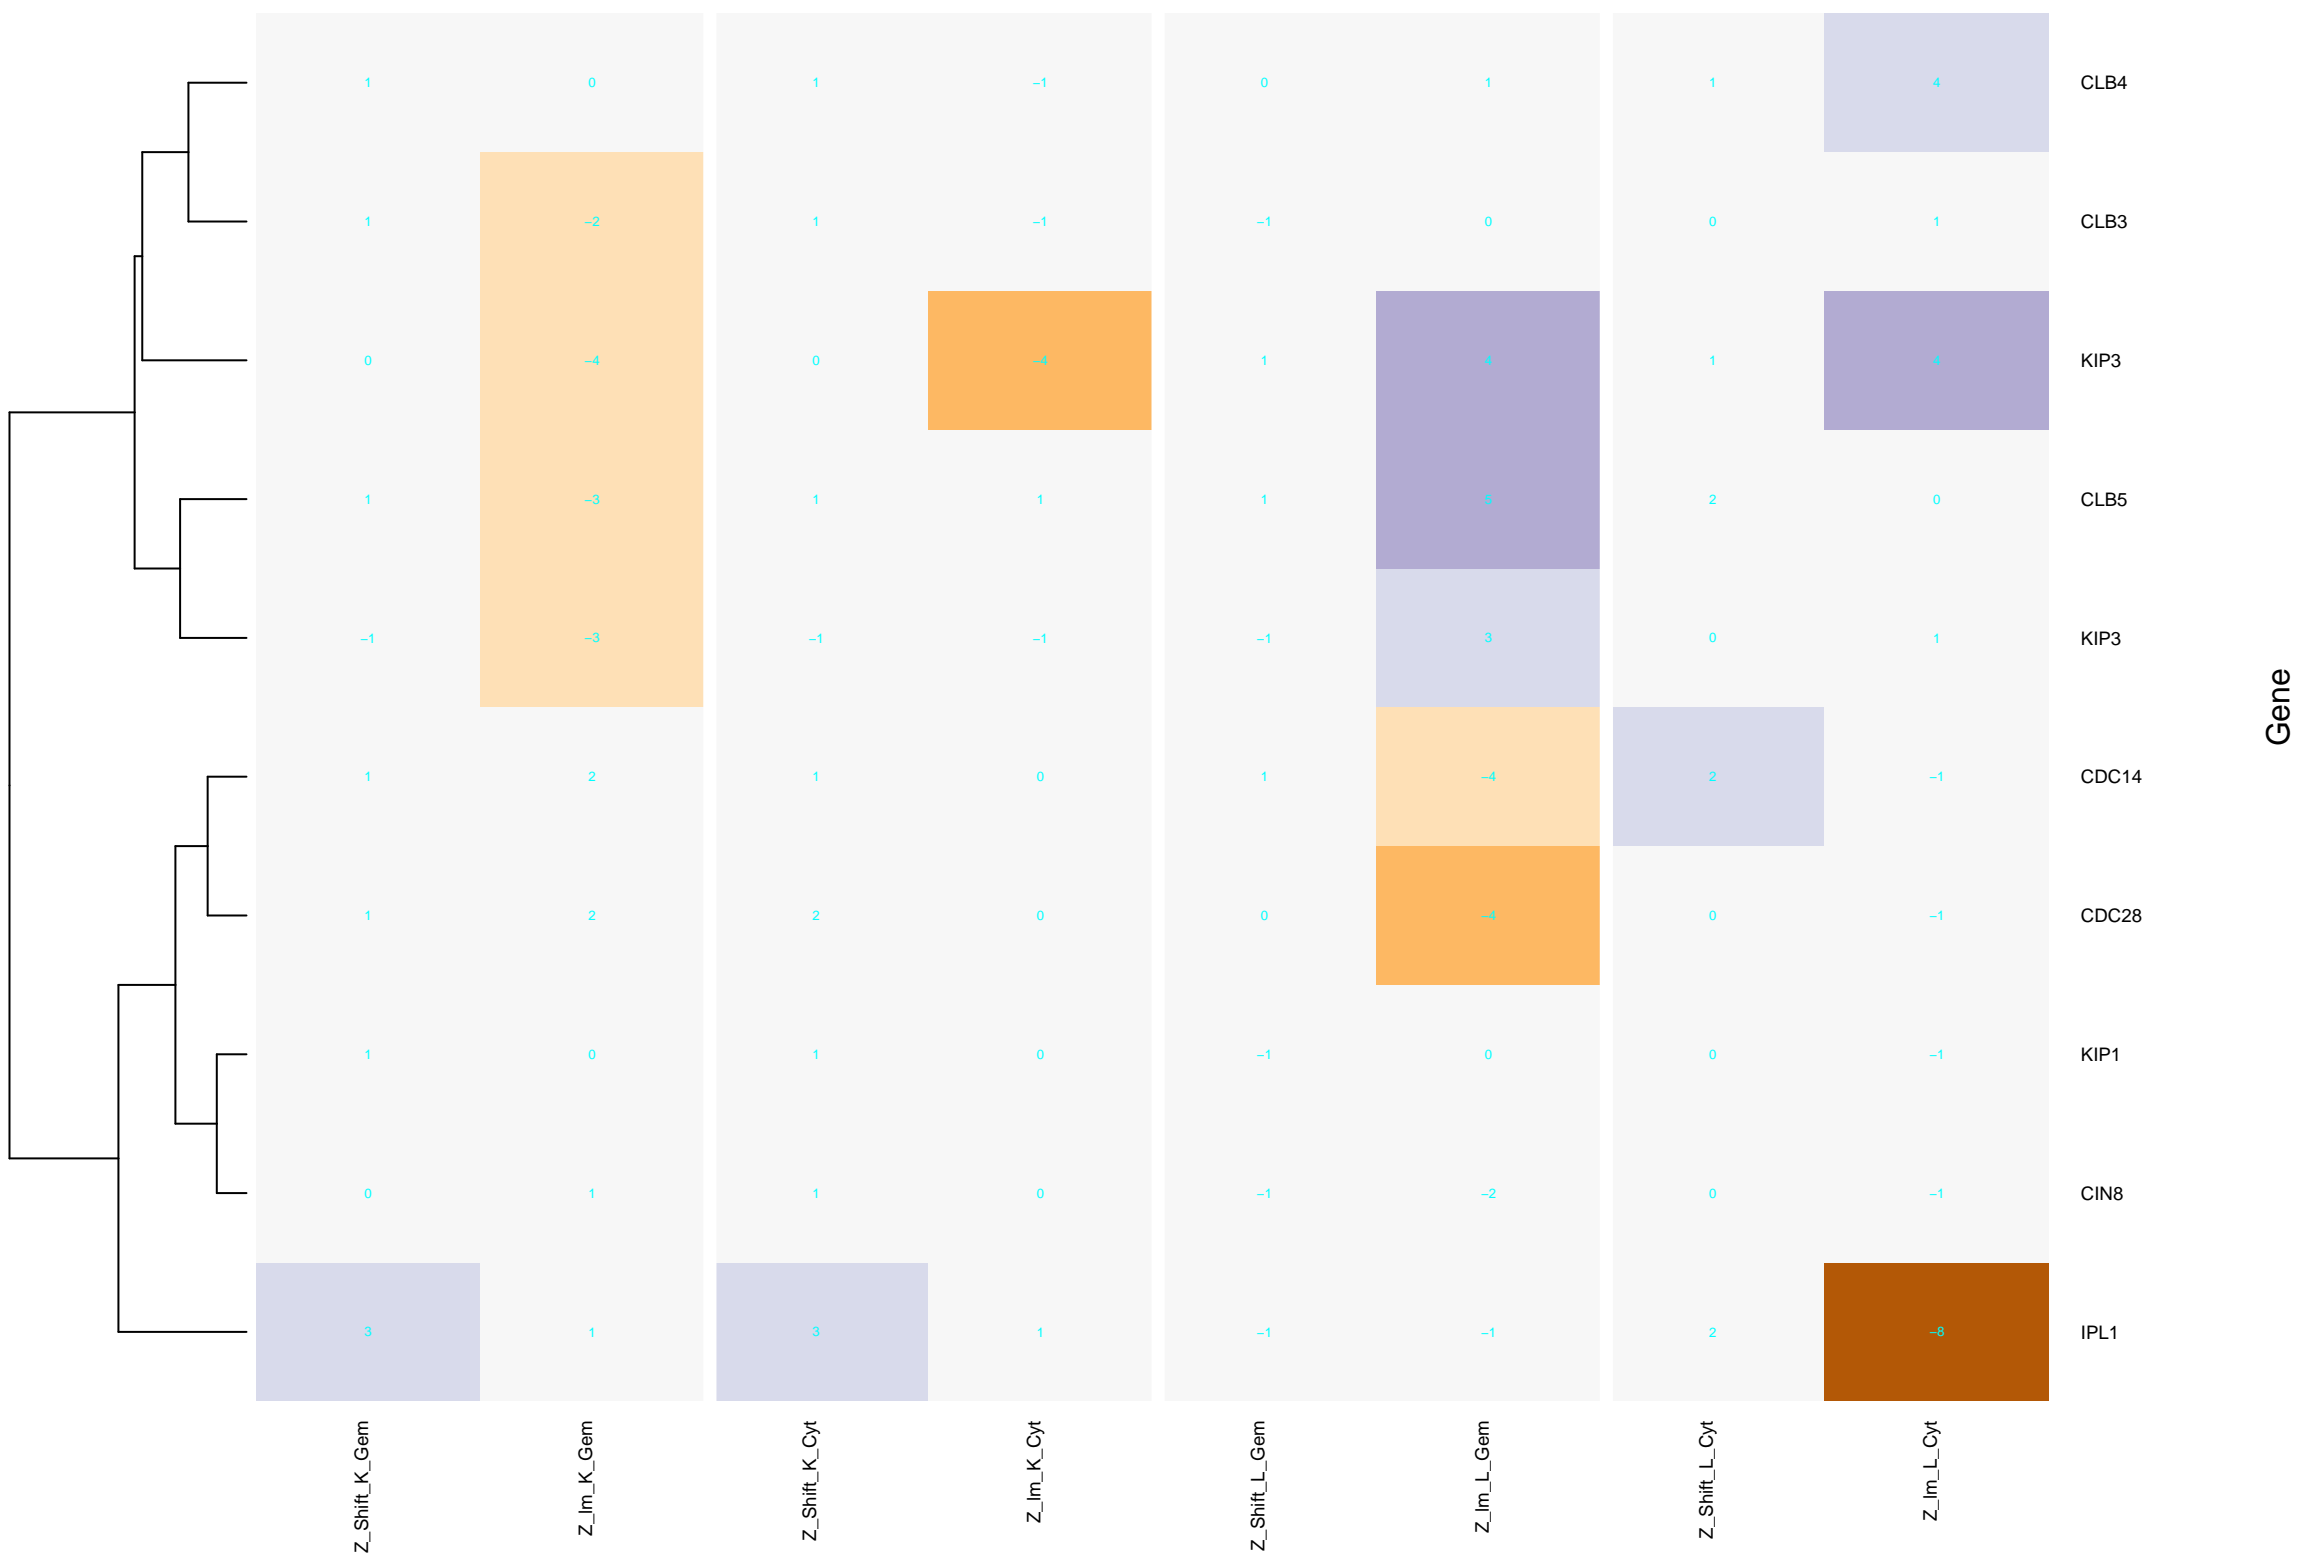

Supplement: s1 [file s1]
