# Supplementary material for: A Humanized Yeast Phenomic Model of Deoxycytidine Kinase to Predict Genetic Buffering of Nucleoside Analog Cytotoxicity
Source: MDPI journal article supplement (doi:10.3390/genes10100770), 2019-09-30

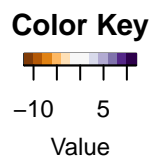

# transcription factor activity, core RNA polymerase binding

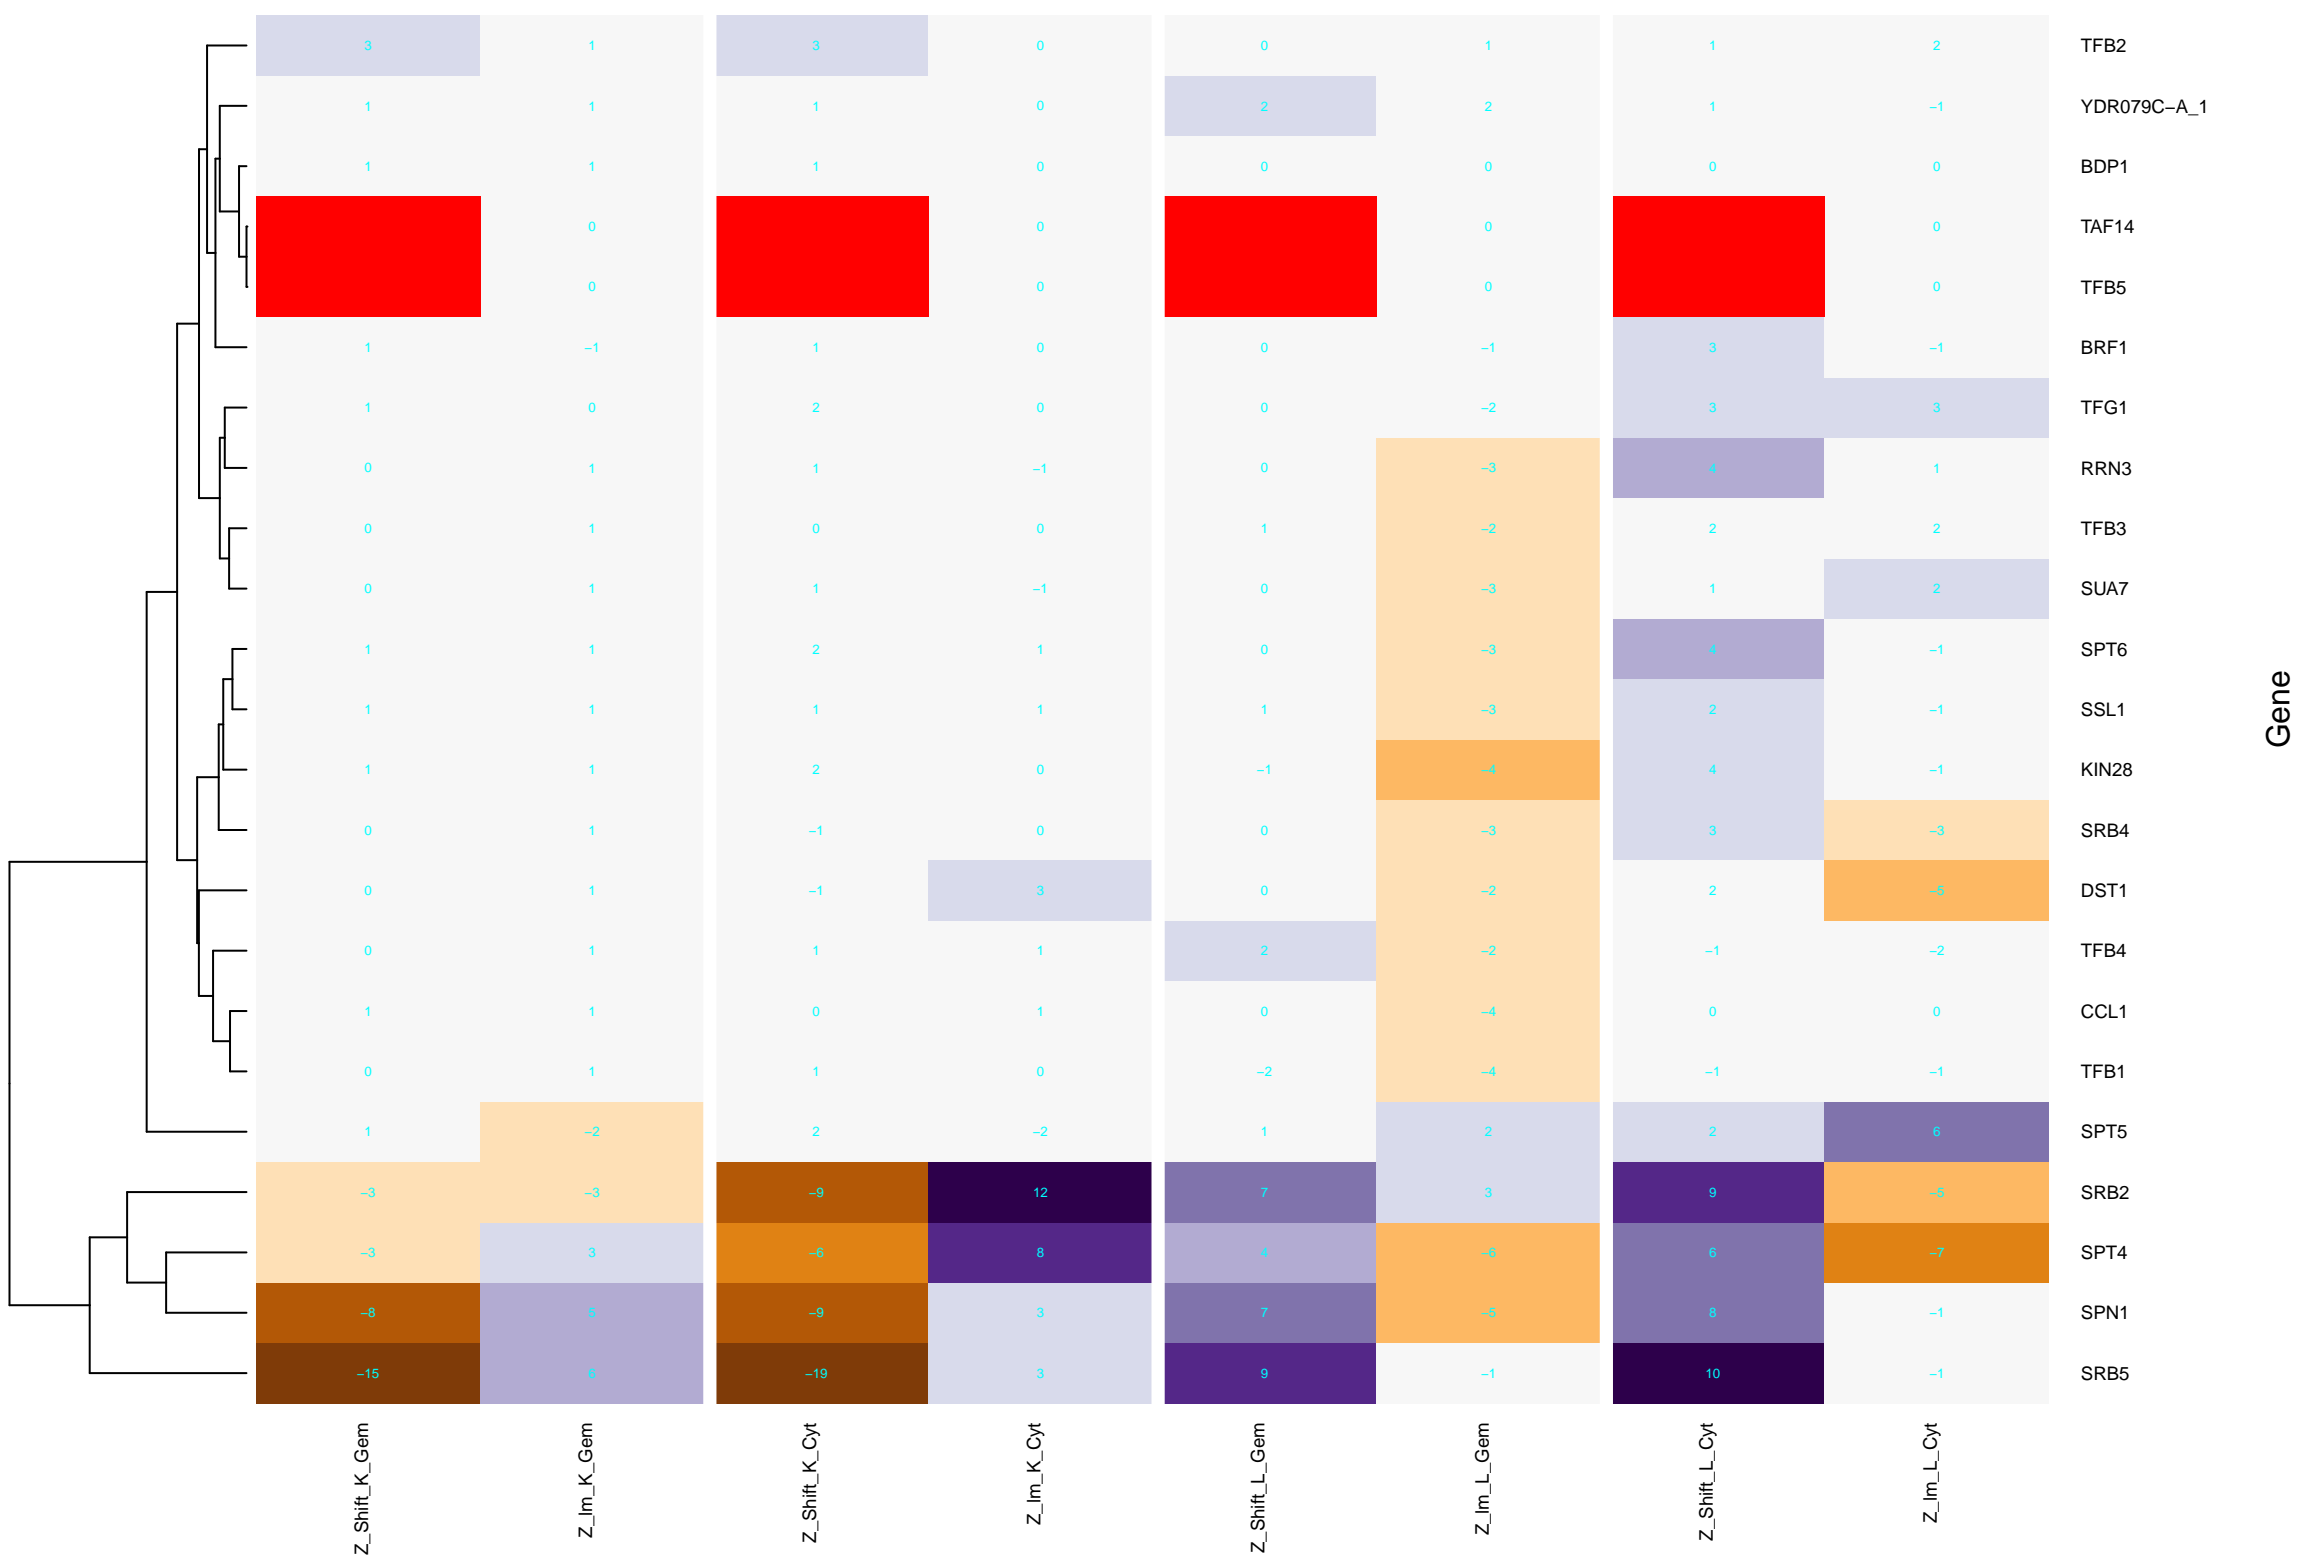

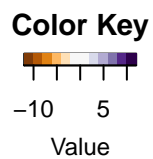

# transcription factor activity, core RNA polymerase II binding

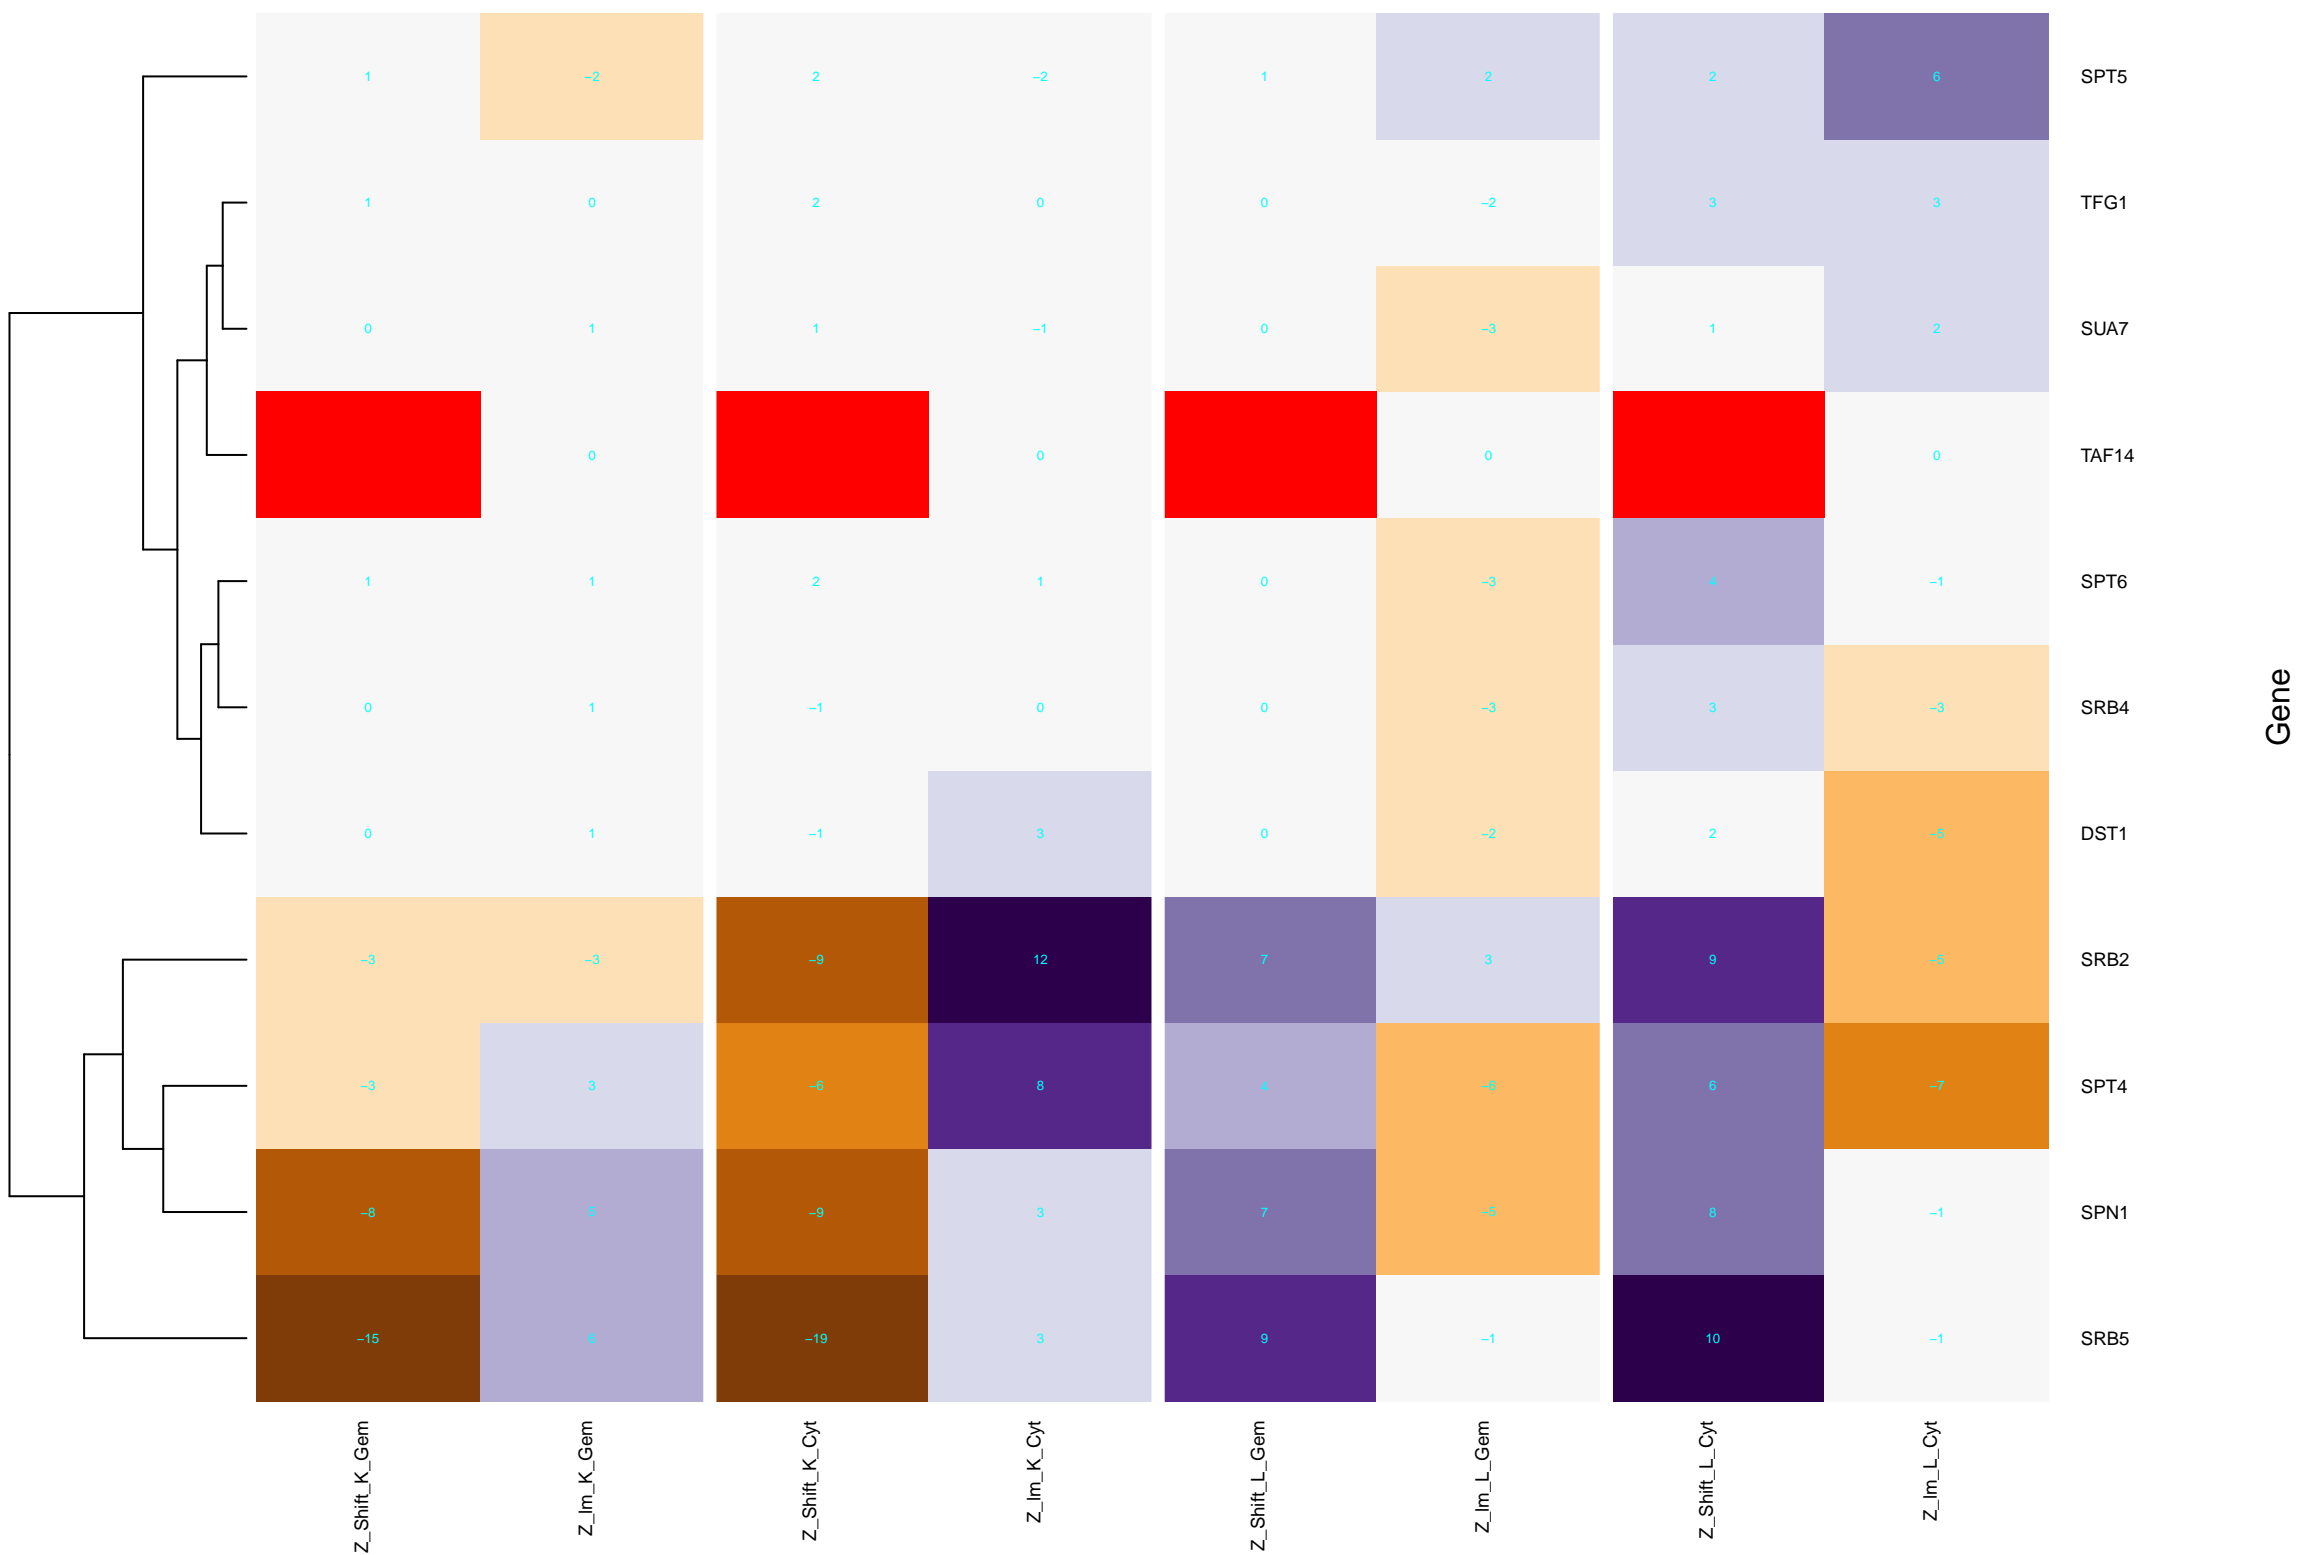

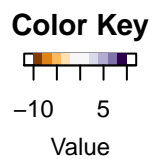

# transcription factor activity, core RNA polymerase I binding

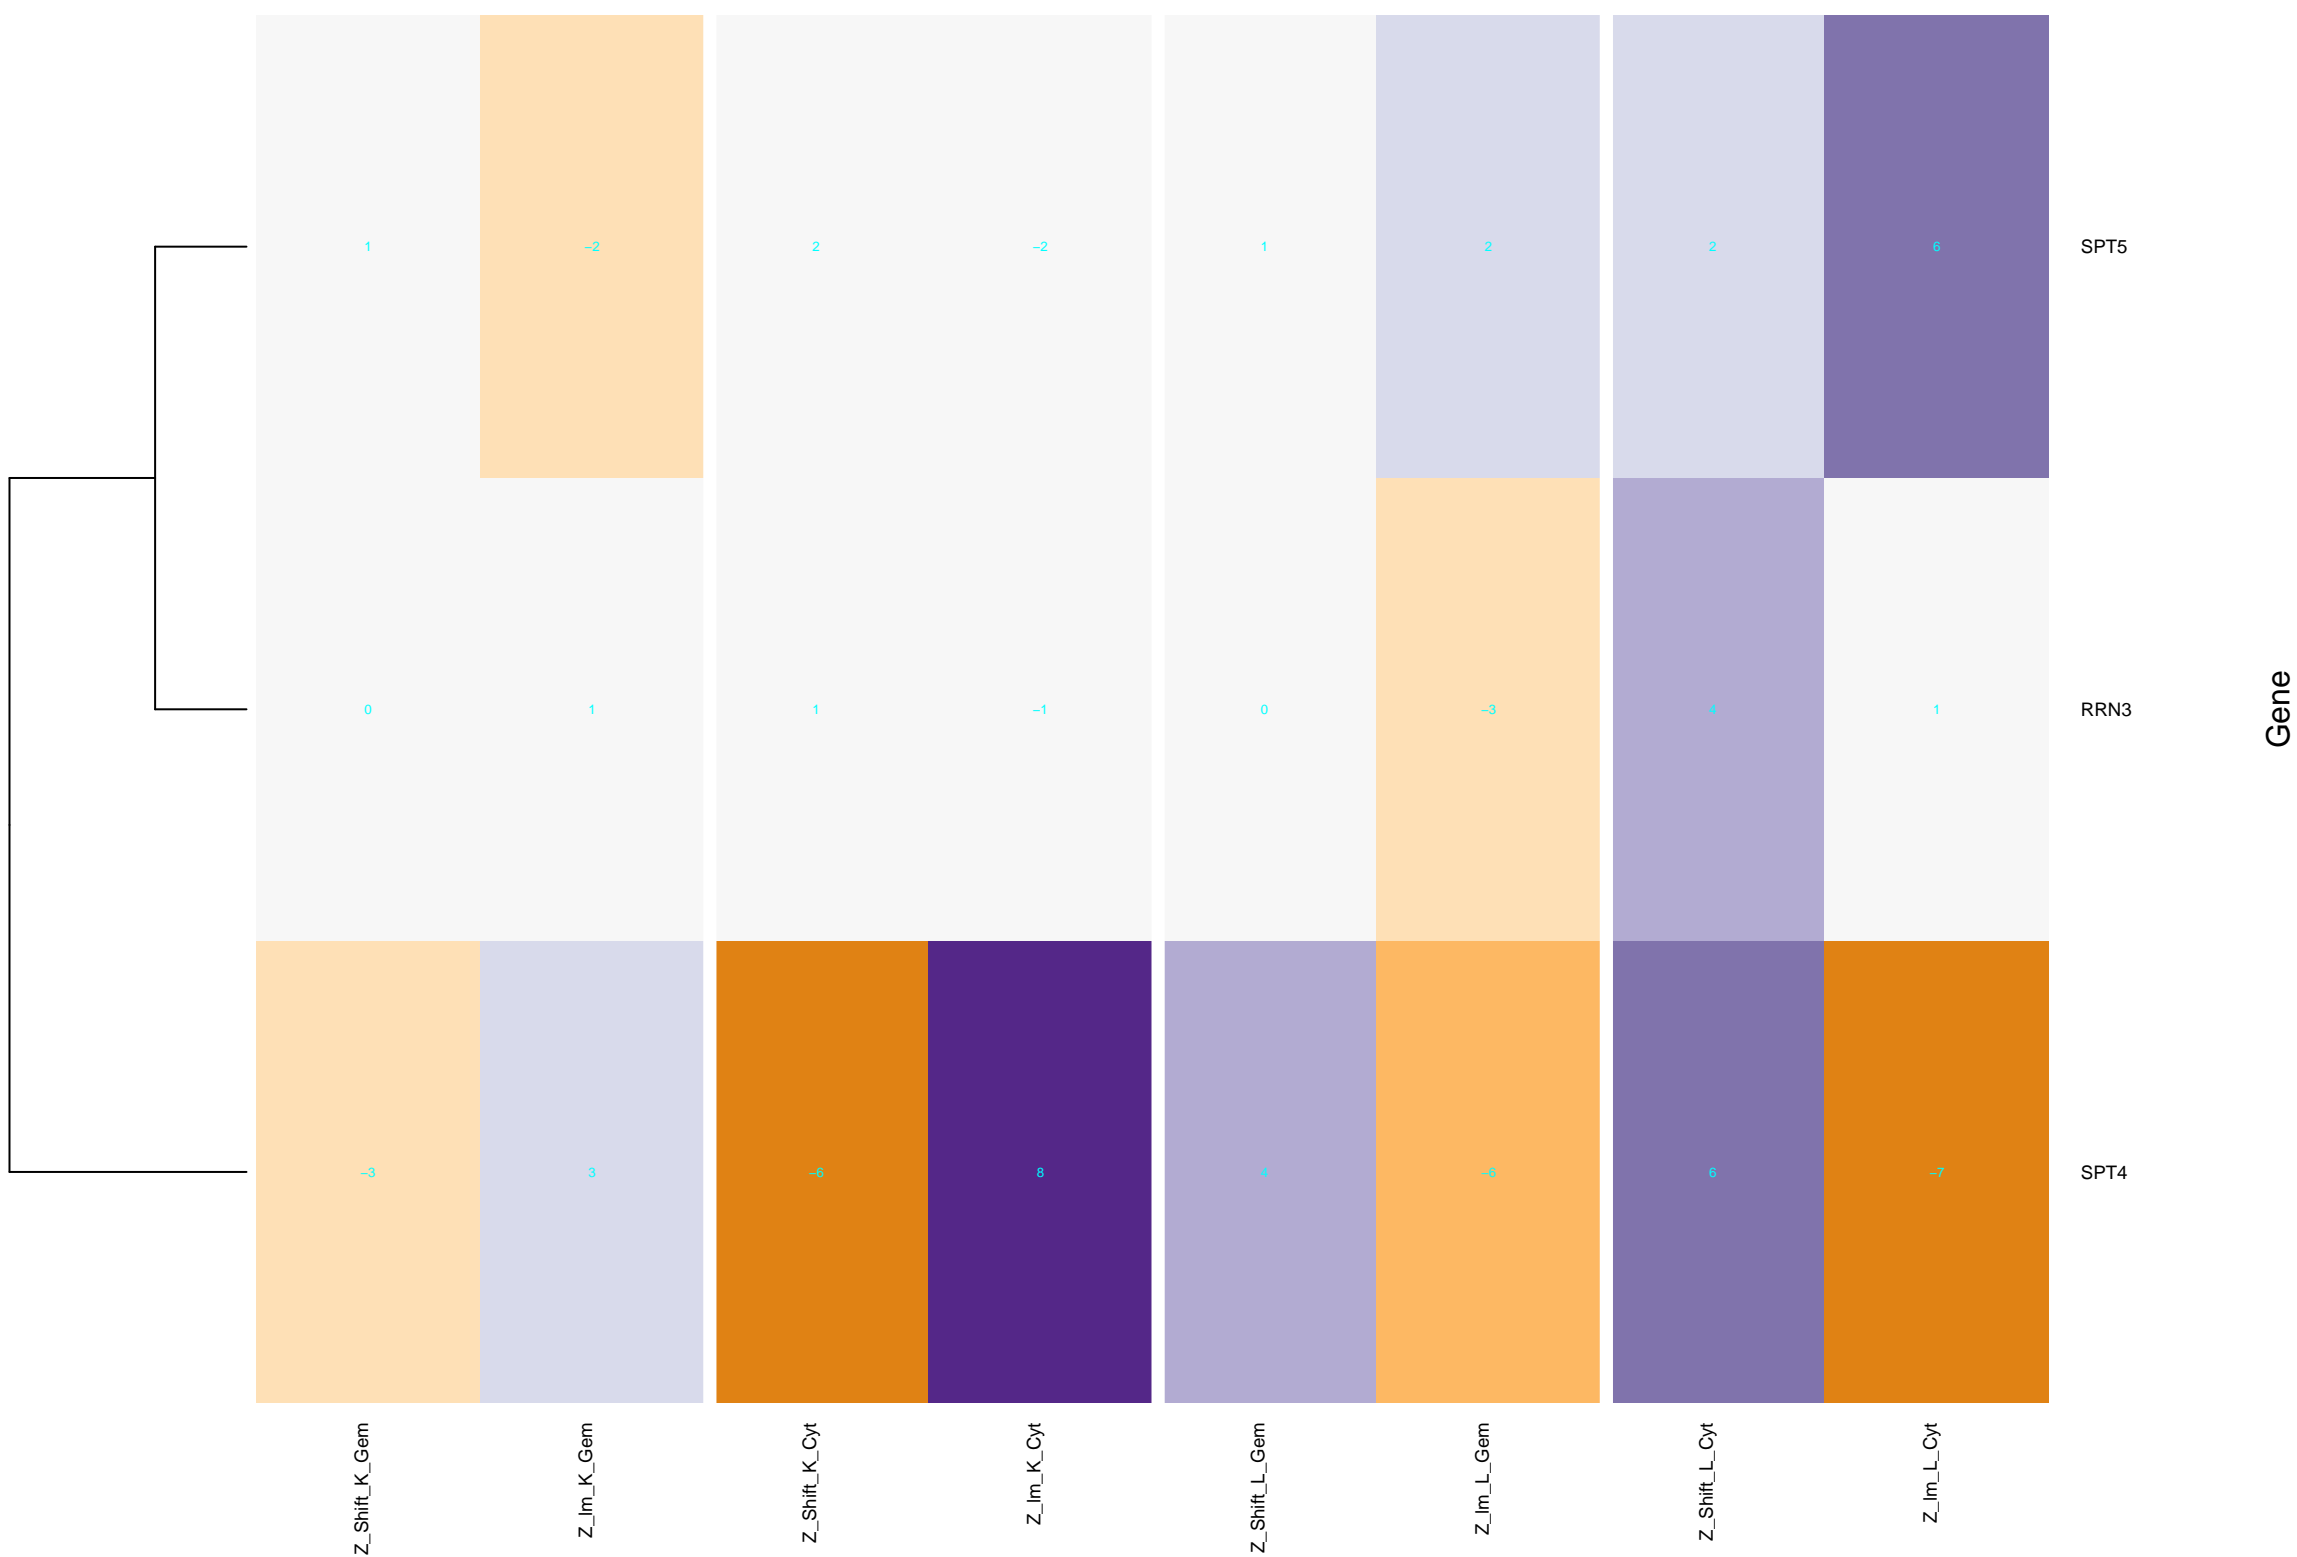

Color Key

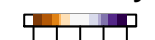

-10 5

Value

# transcription factor activity, core RNA polymerase II recruiting

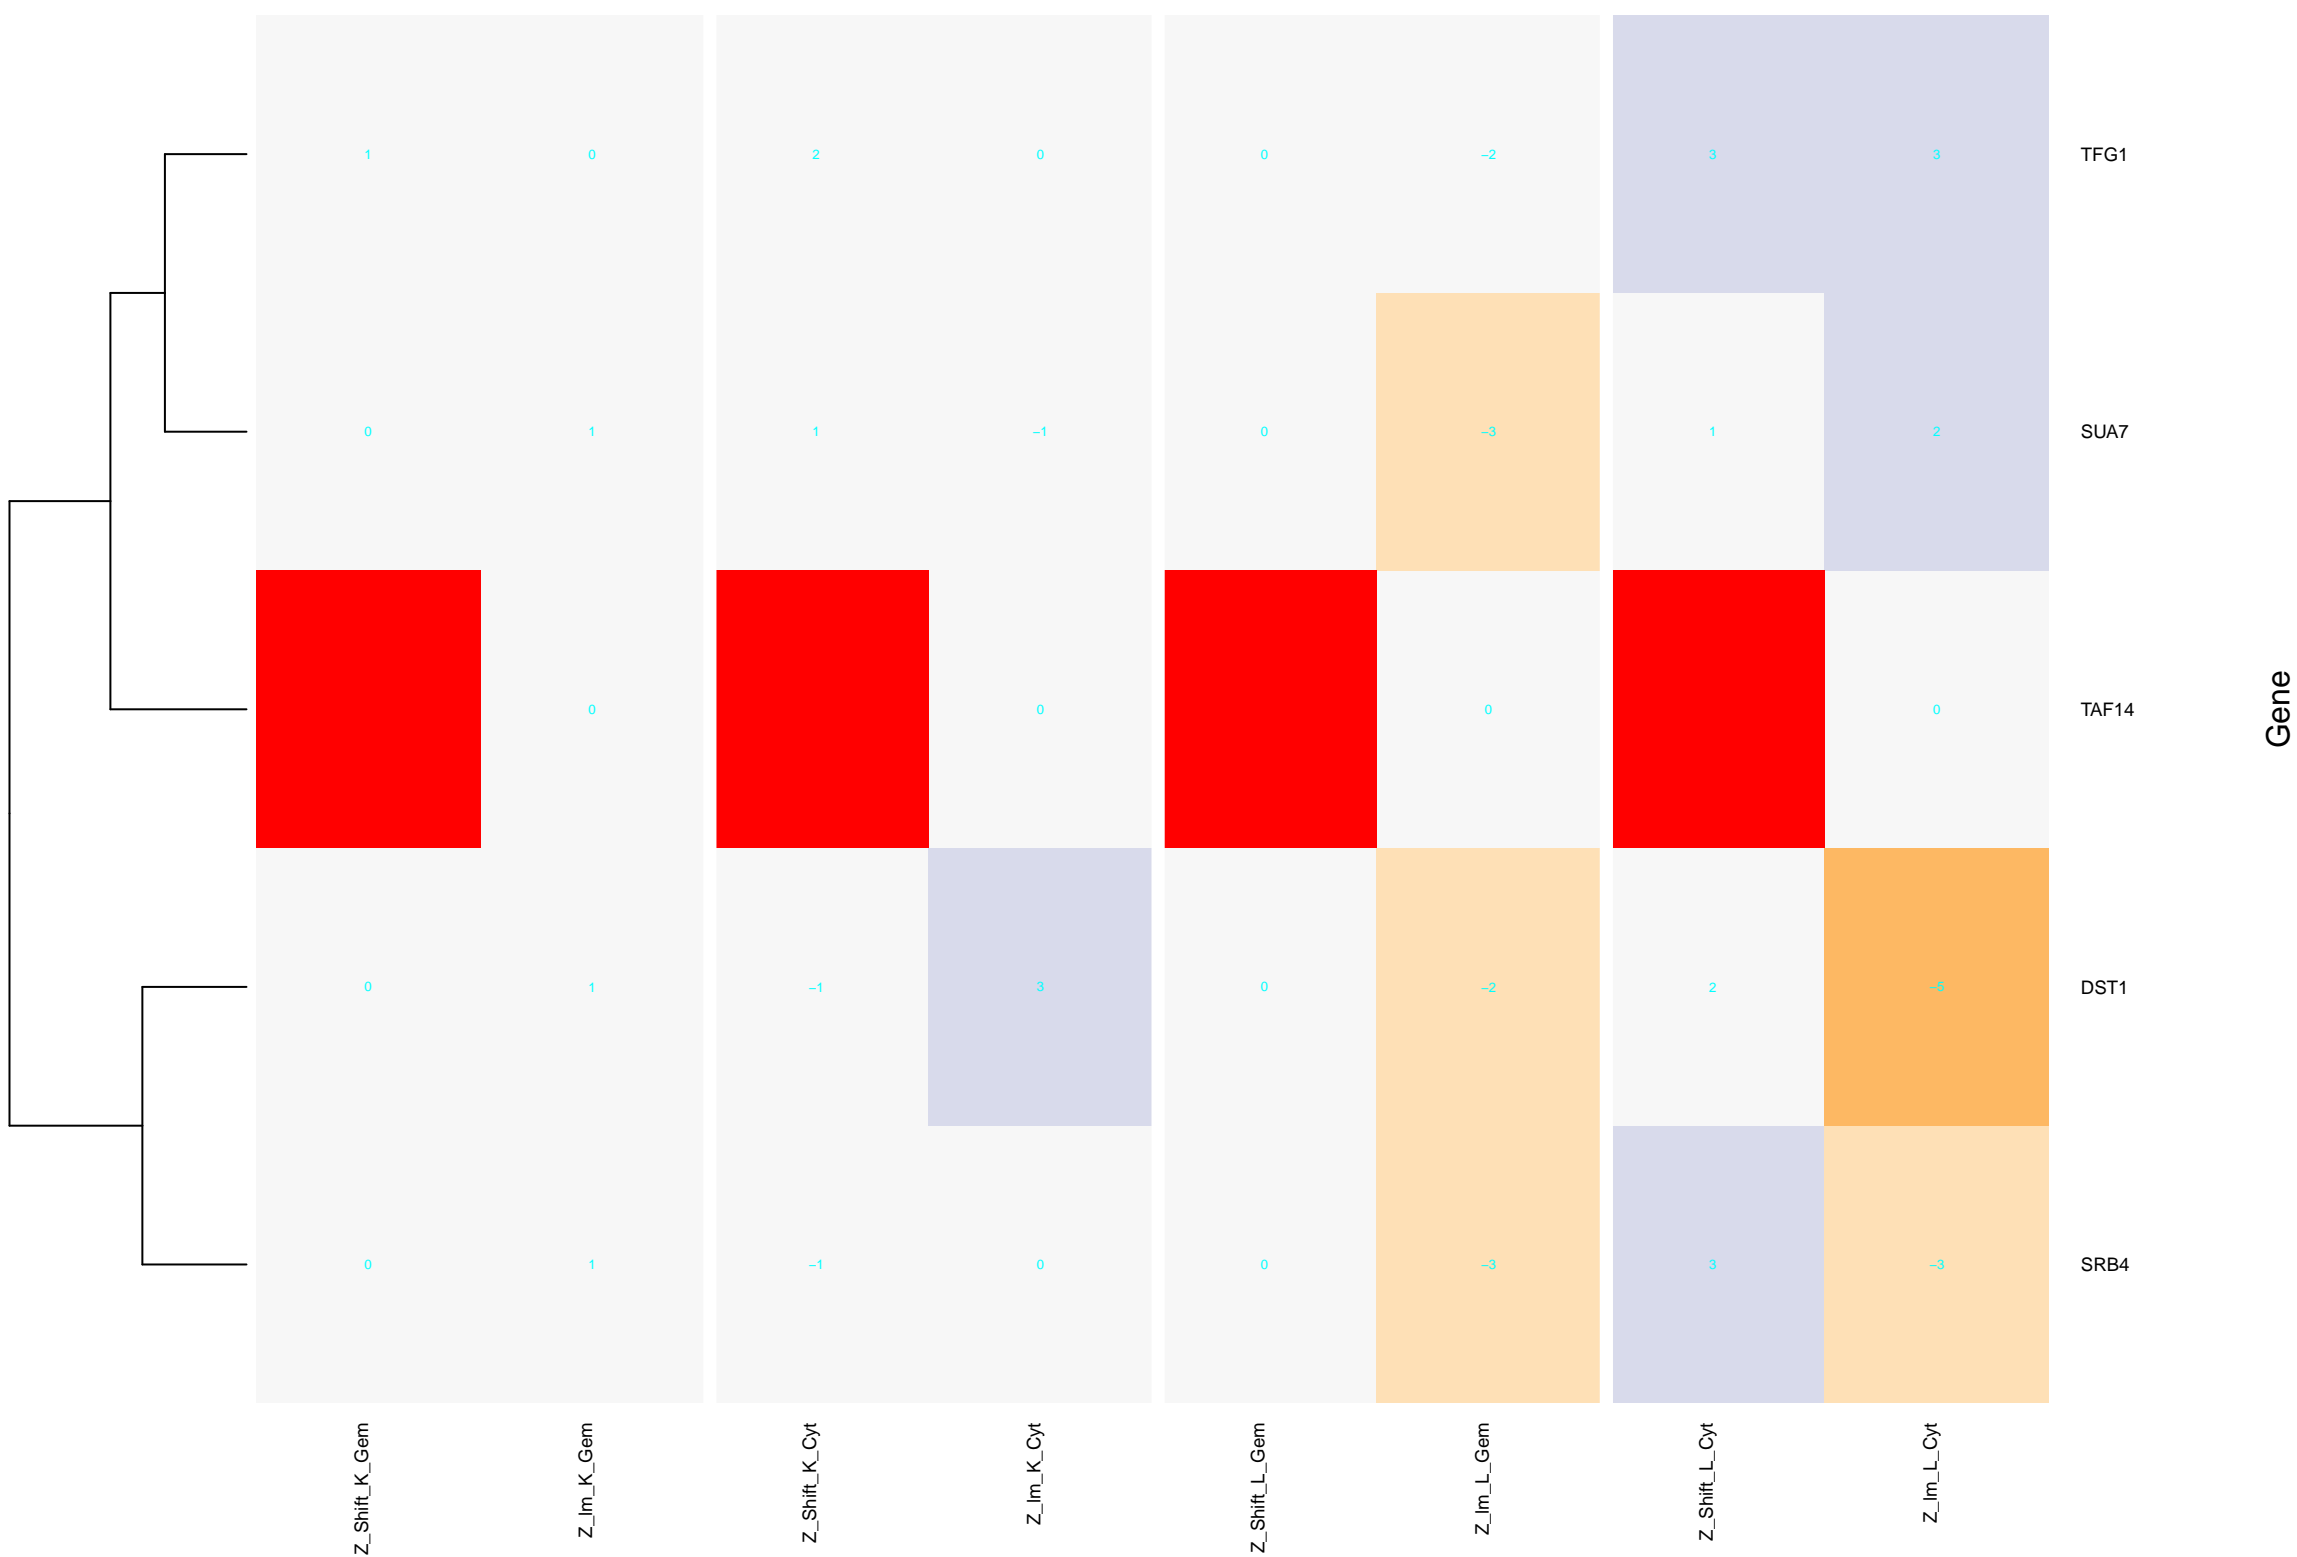

Supplement: s1 [file s1]
