# Supplementary material for: A Humanized Yeast Phenomic Model of Deoxycytidine Kinase to Predict Genetic Buffering of Nucleoside Analog Cytotoxicity
Source: MDPI journal article supplement (doi:10.3390/genes10100770), 2019-09-30

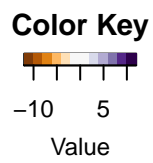

# transcription elongation factor complex

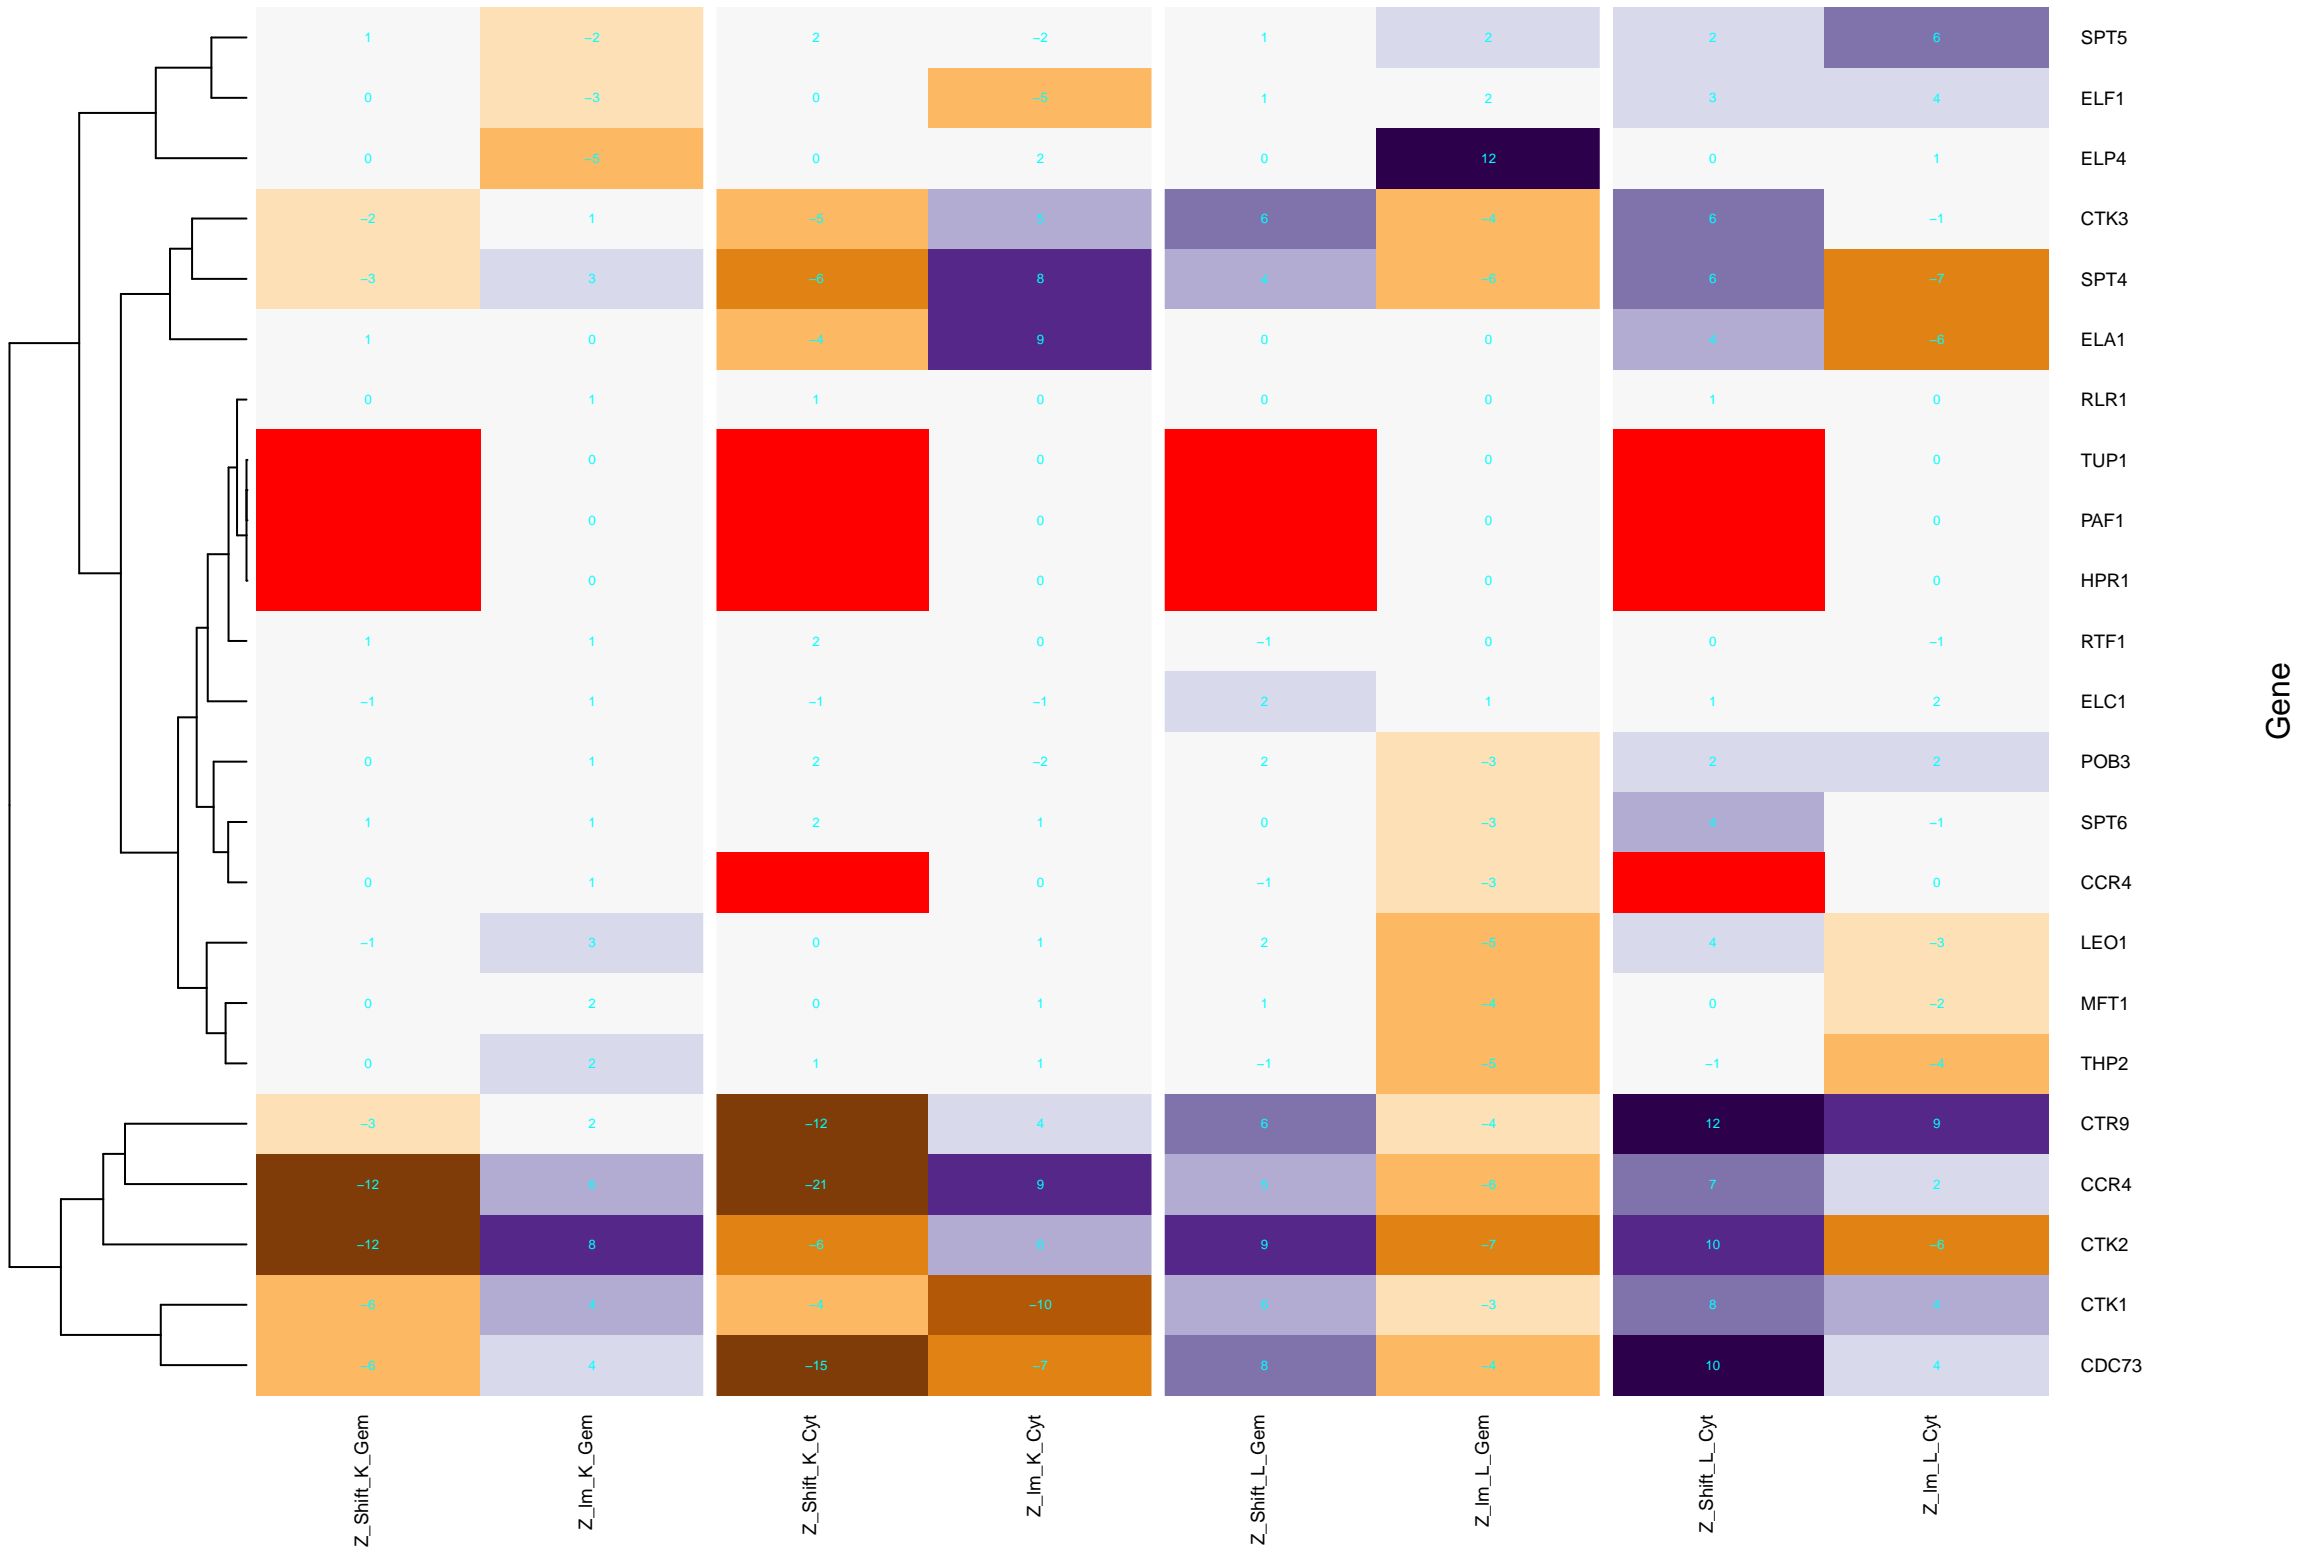

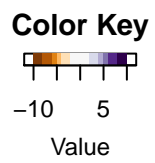

# nucleoplasmic THO complex

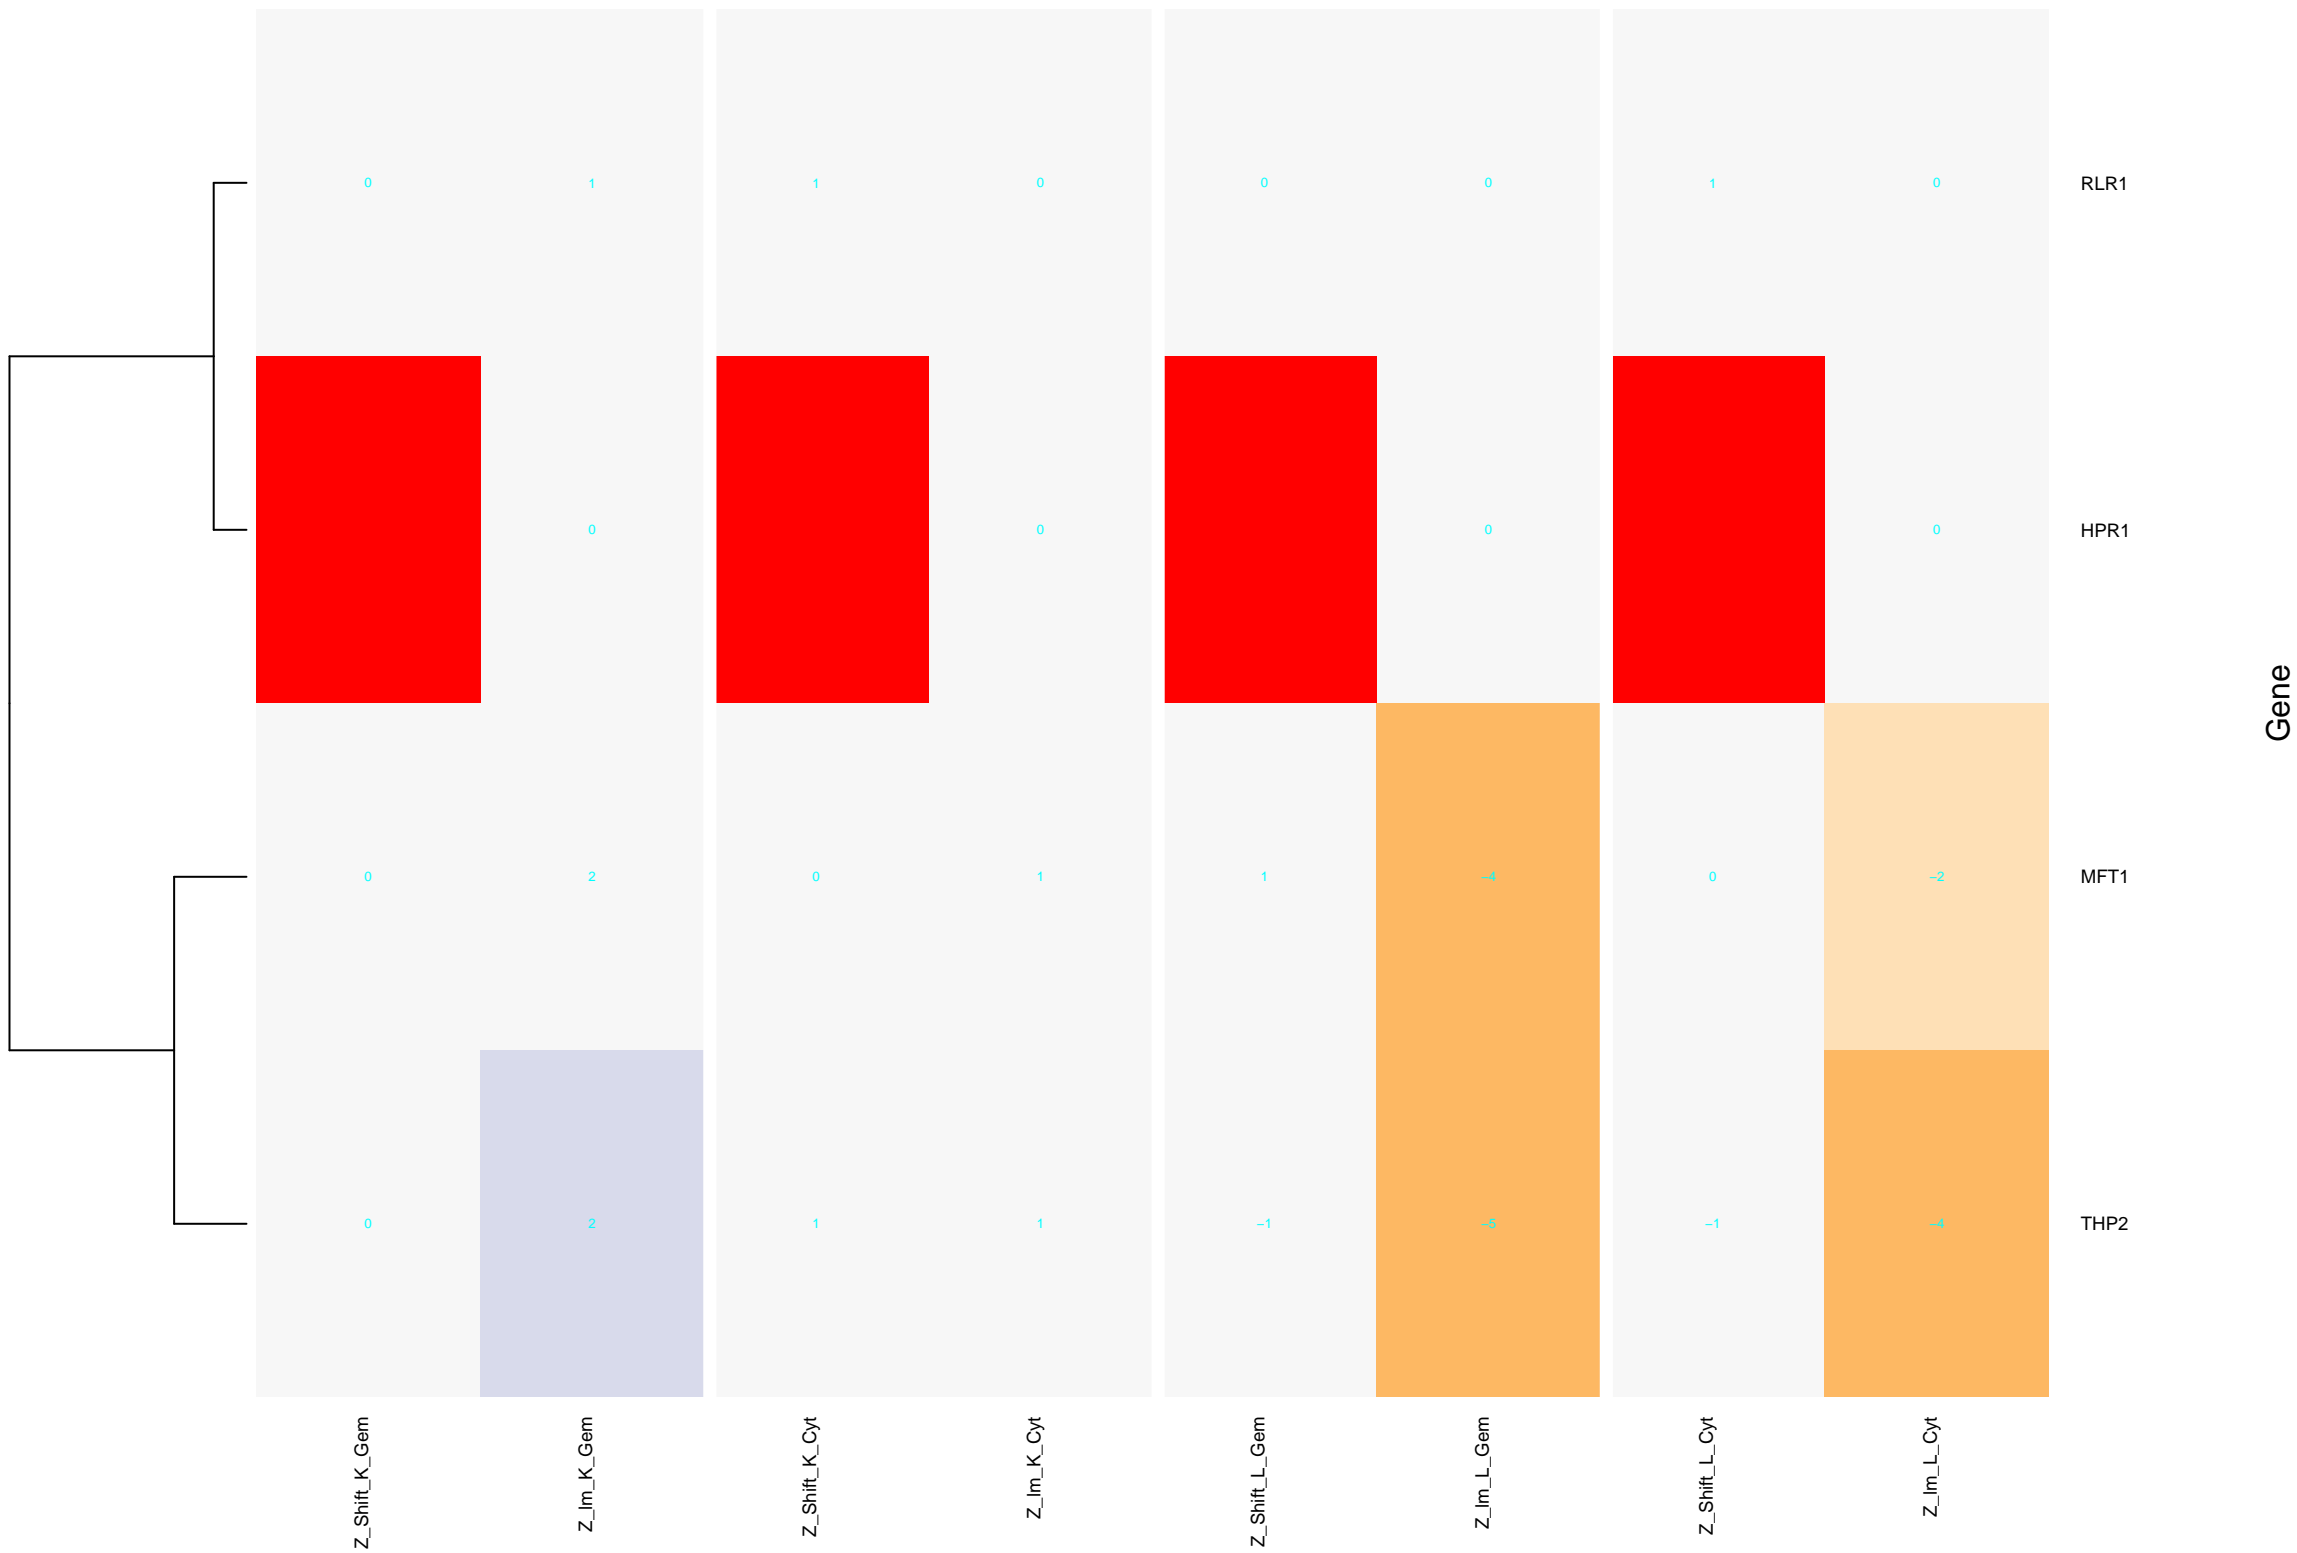

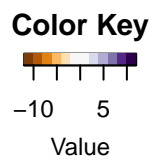

# cyclin/CDK positive transcription elongation factor complex

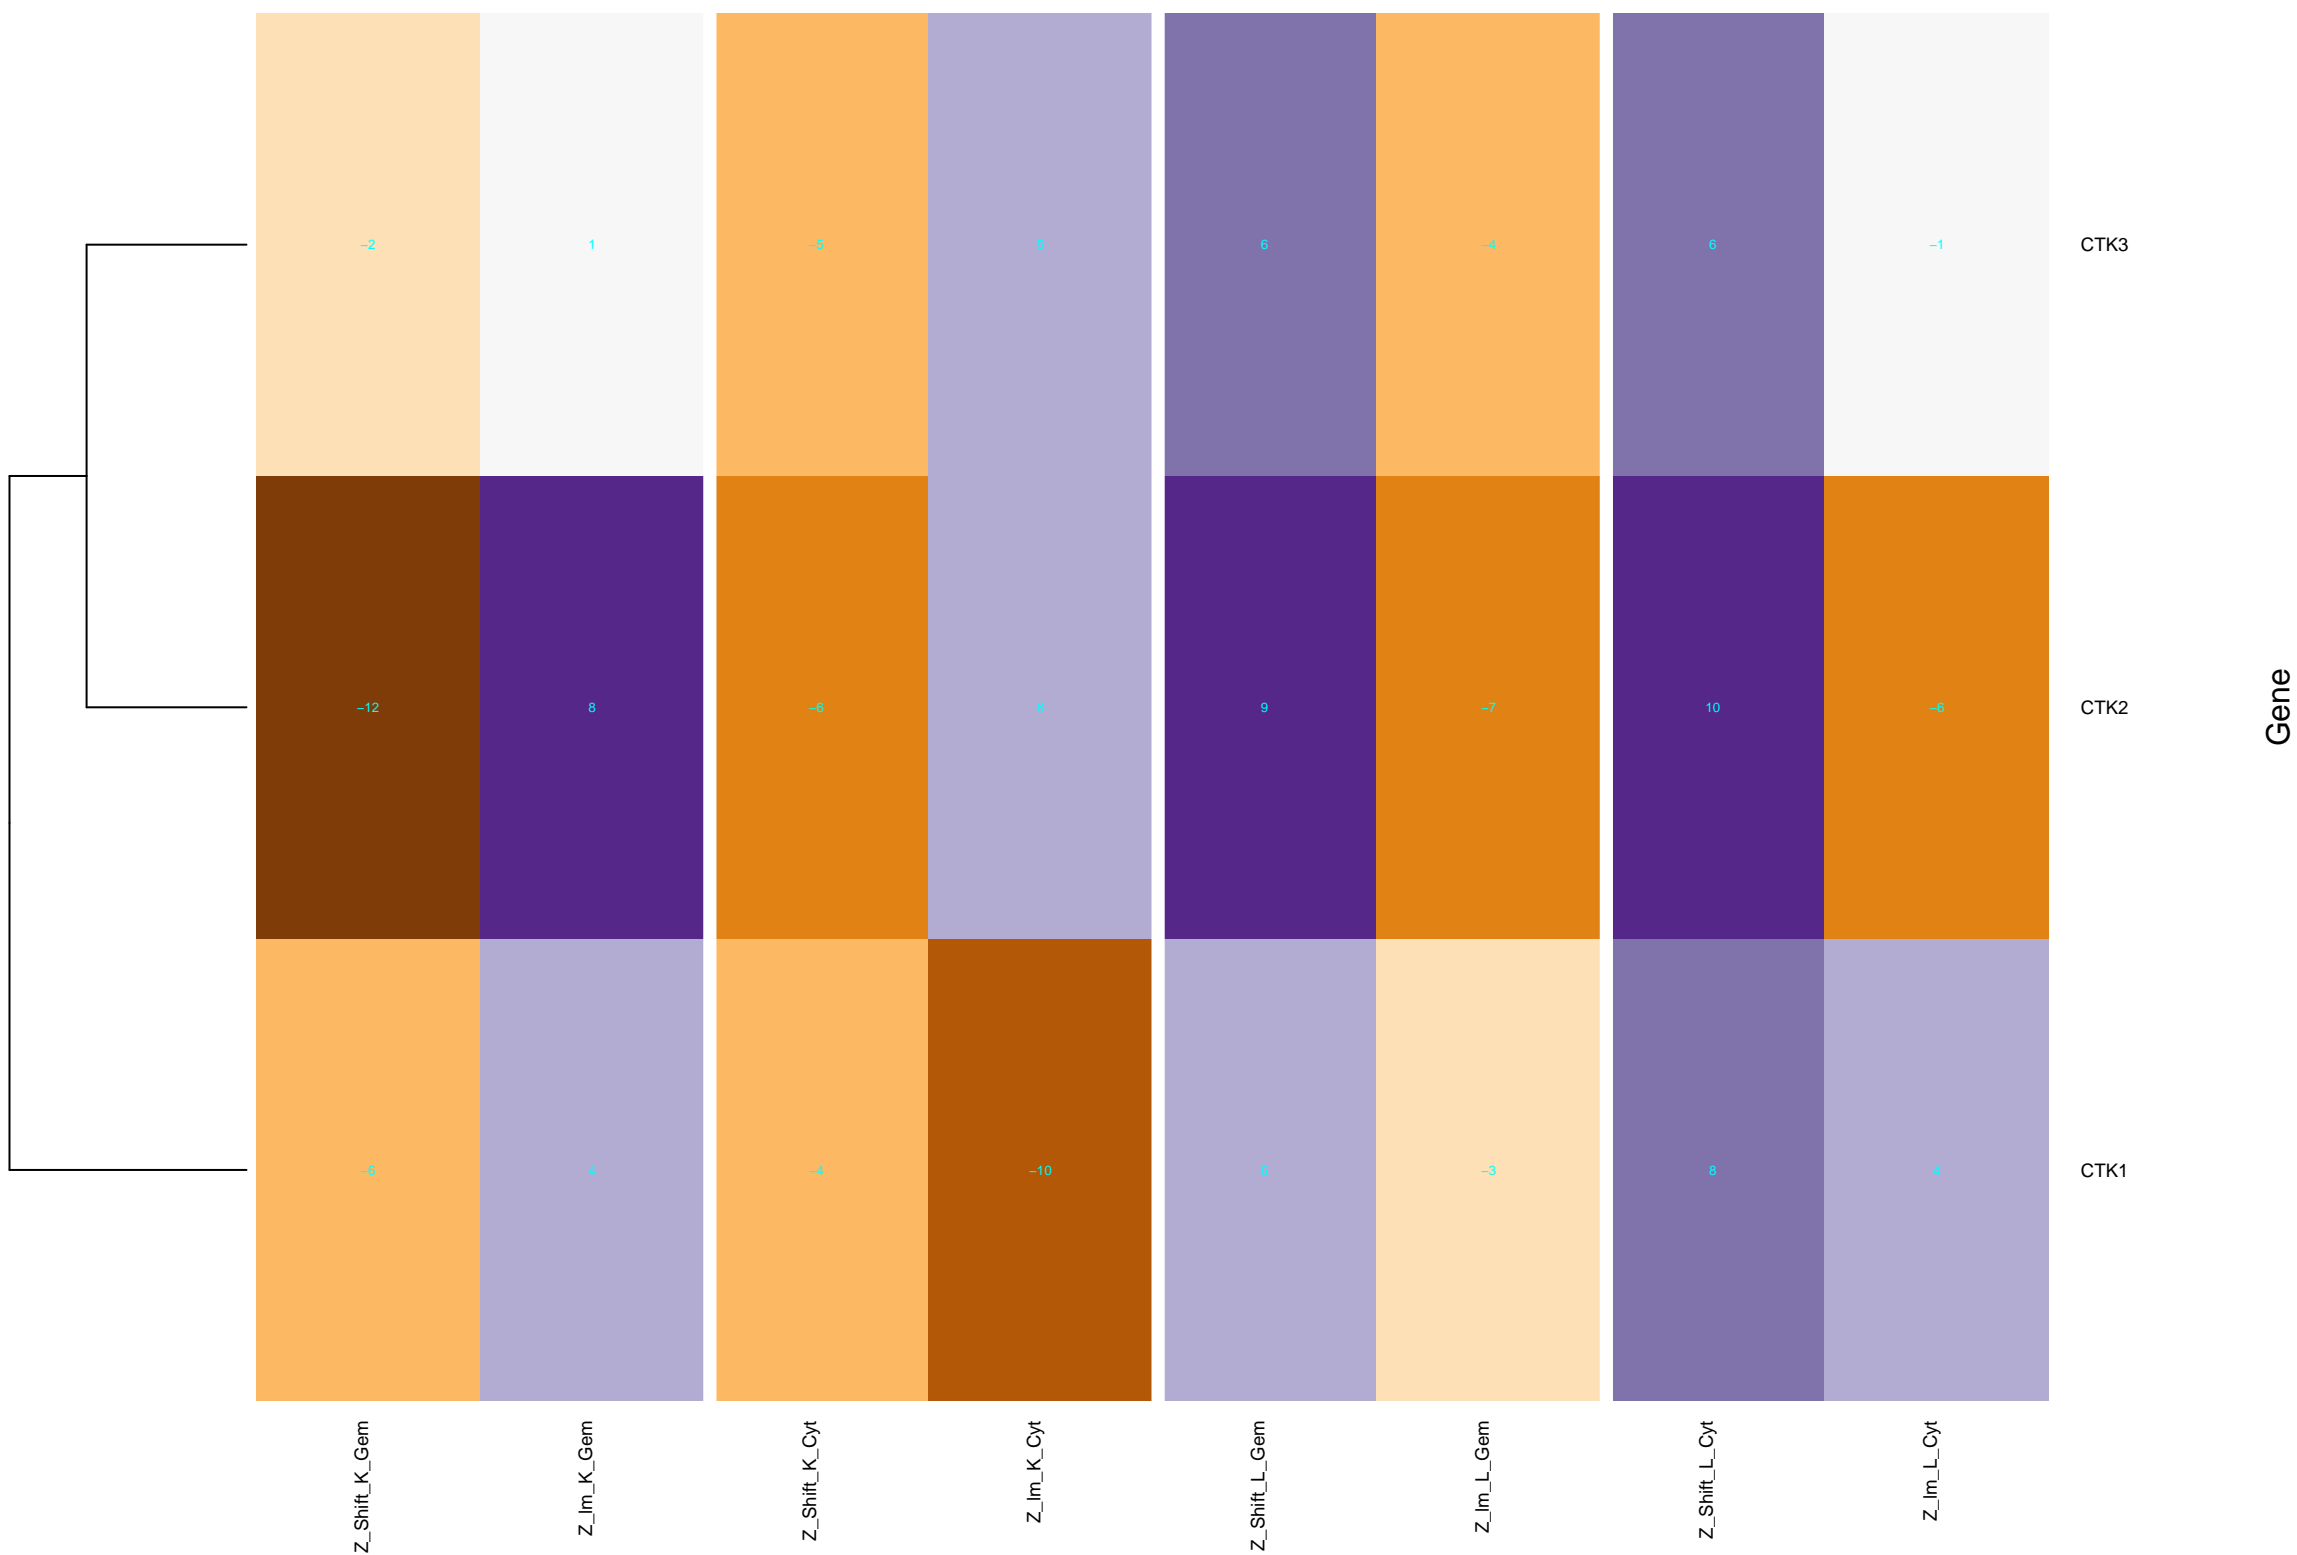

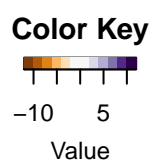

# Cdc73/Paf1 complex

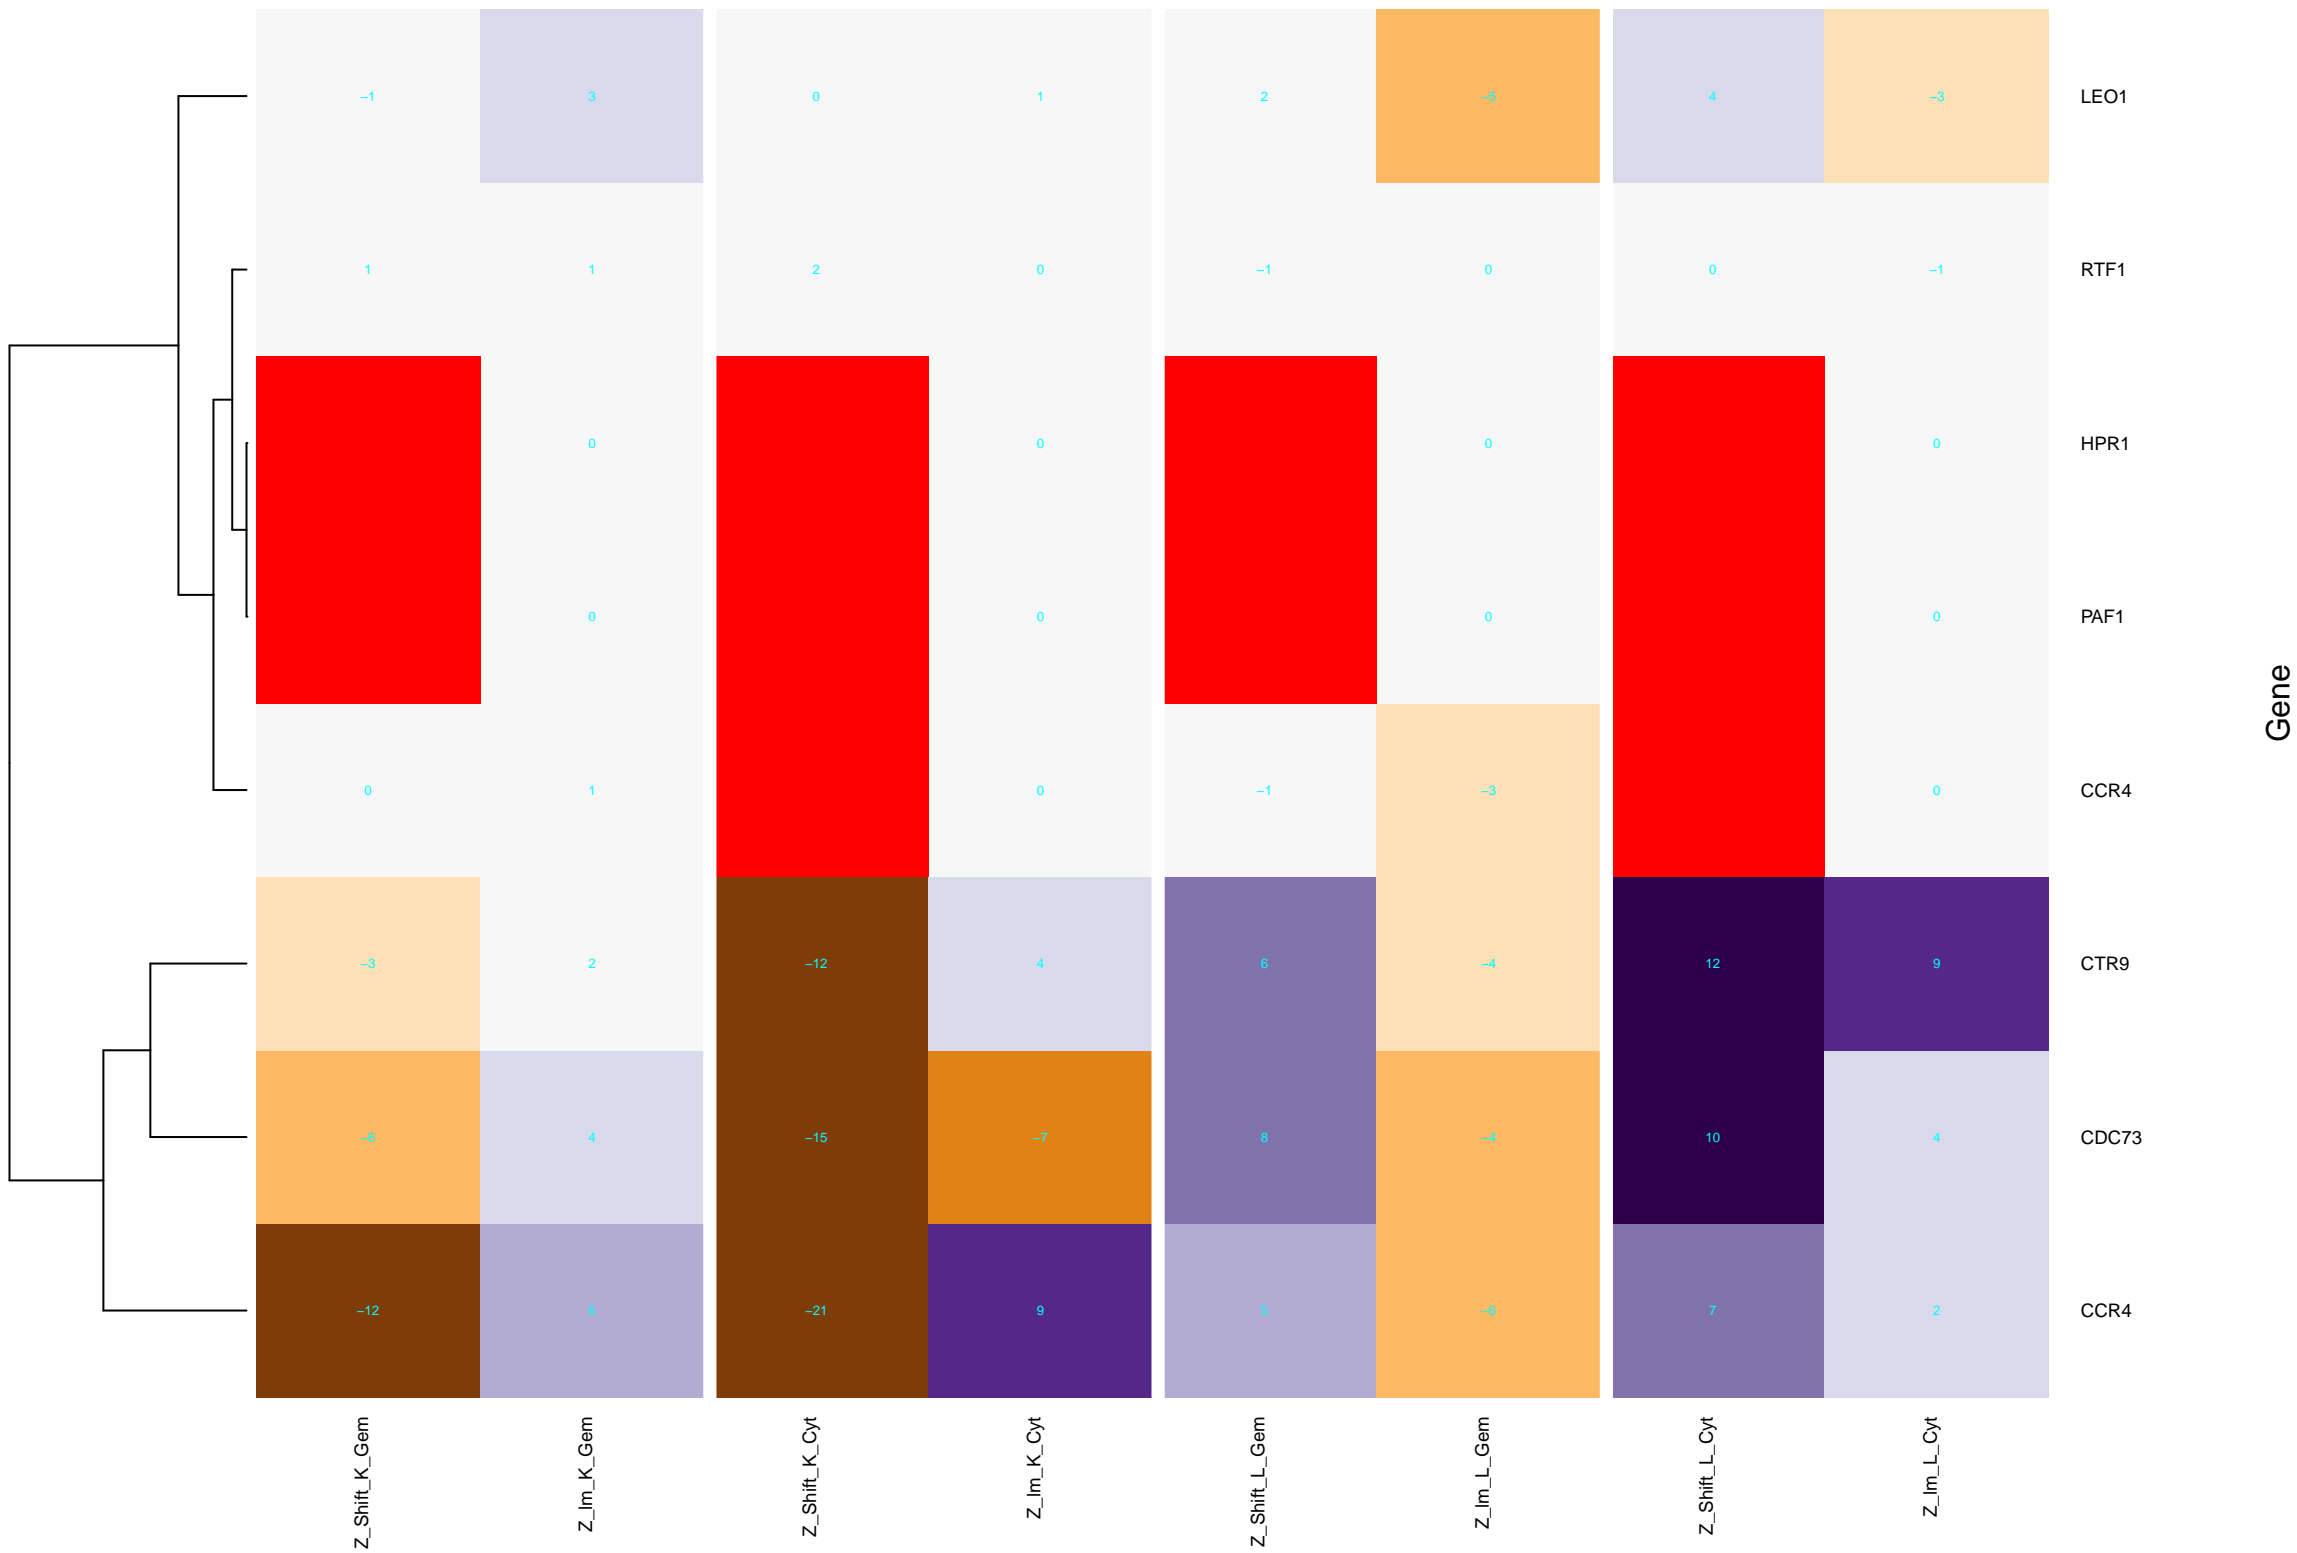

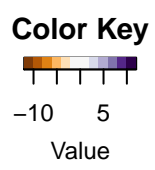

# CTDK-1 complex

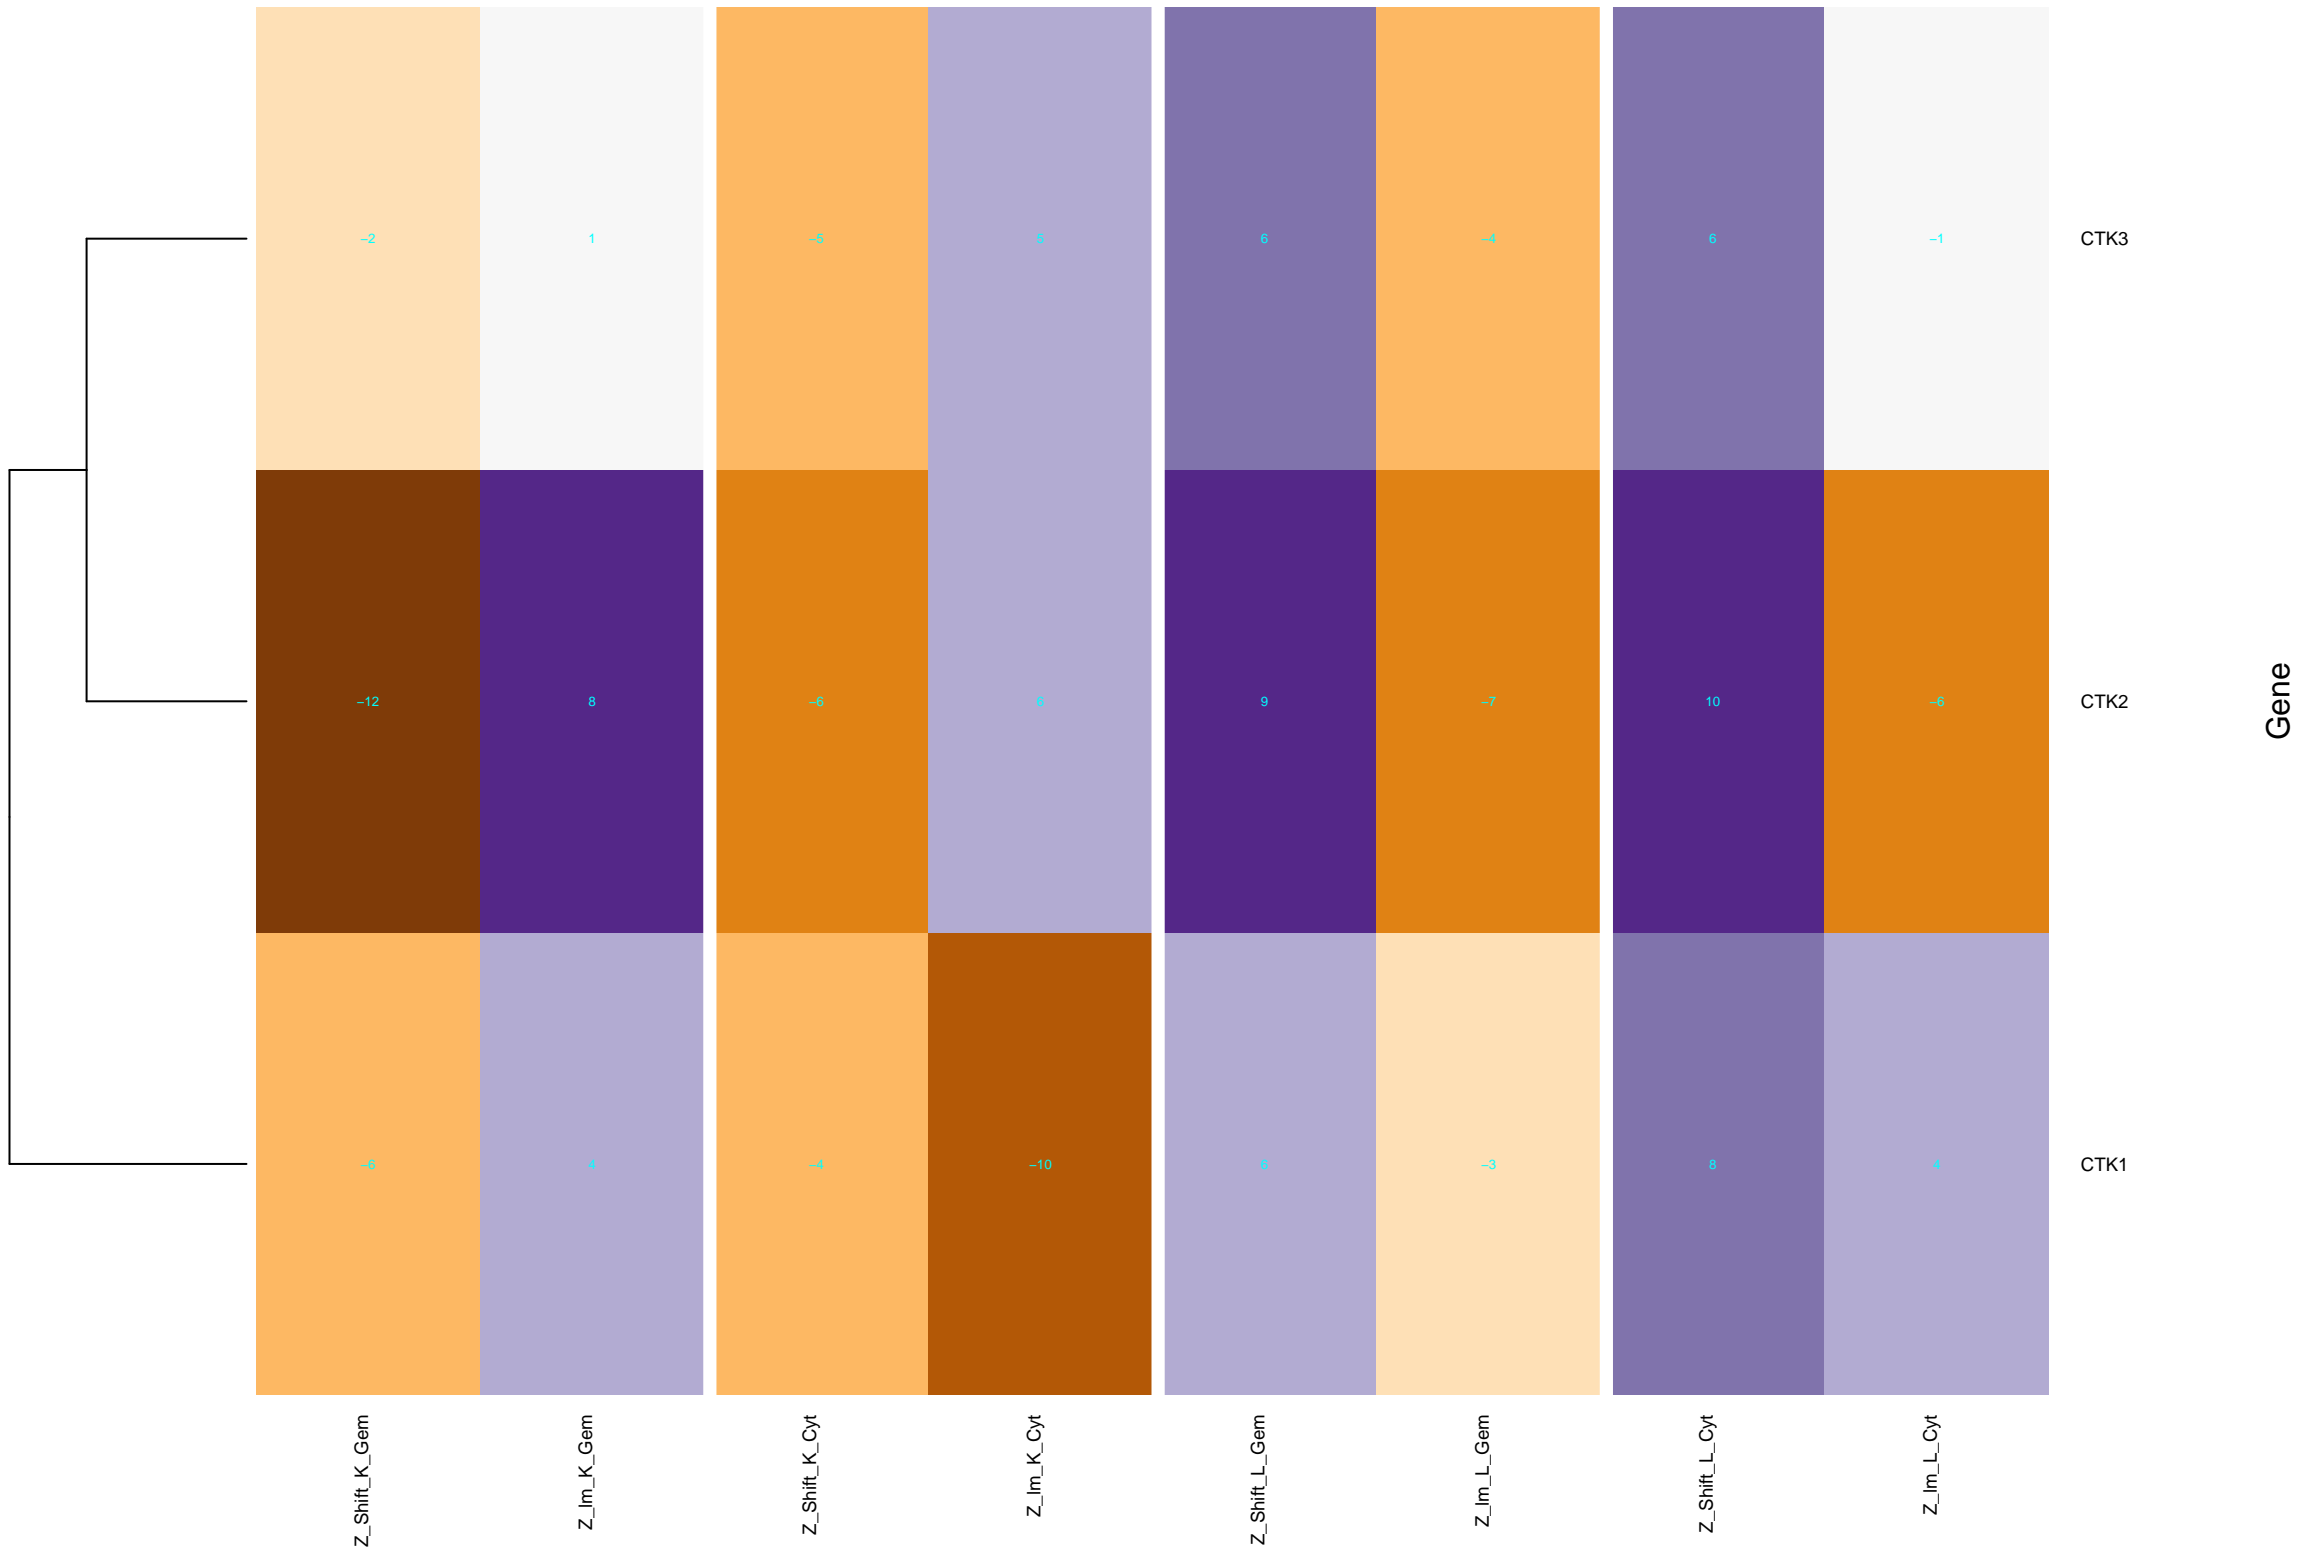

Supplement: s1 [file s1]
