# Supplementary figures and images for: A Humanized Yeast Phenomic Model of Deoxycytidine Kinase to Predict Genetic Buffering of Nucleoside Analog Cytotoxicity (part 4 of 4)
Source: MDPI journal article supplement (doi:10.3390/genes10100770), 2019-09-30

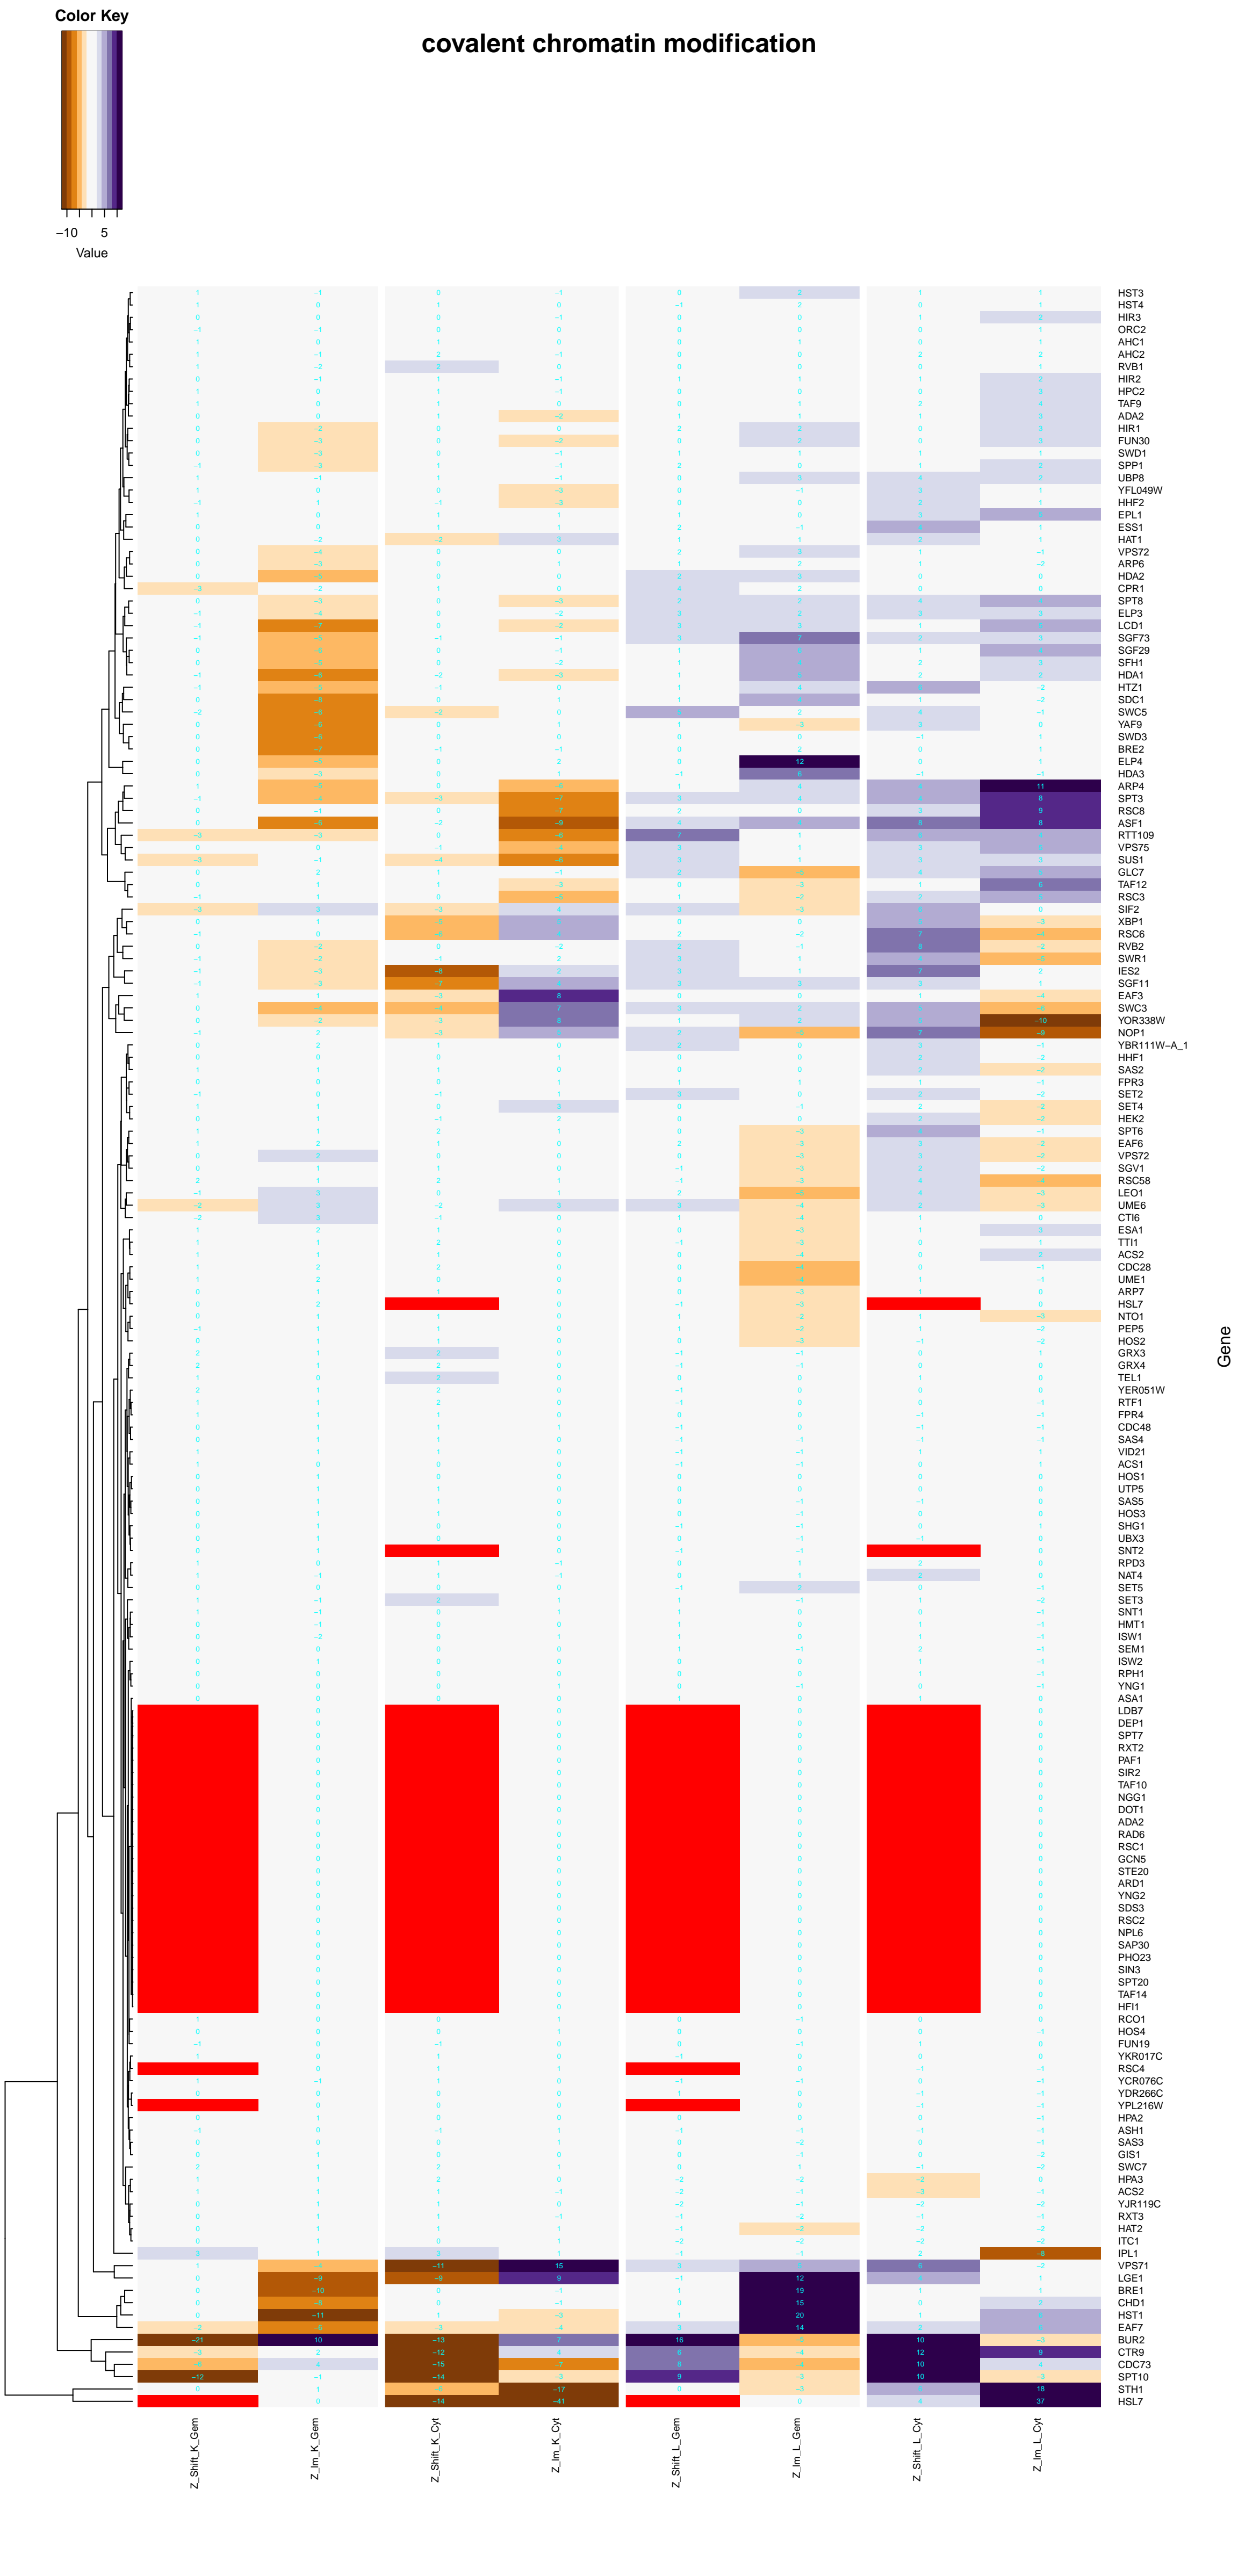



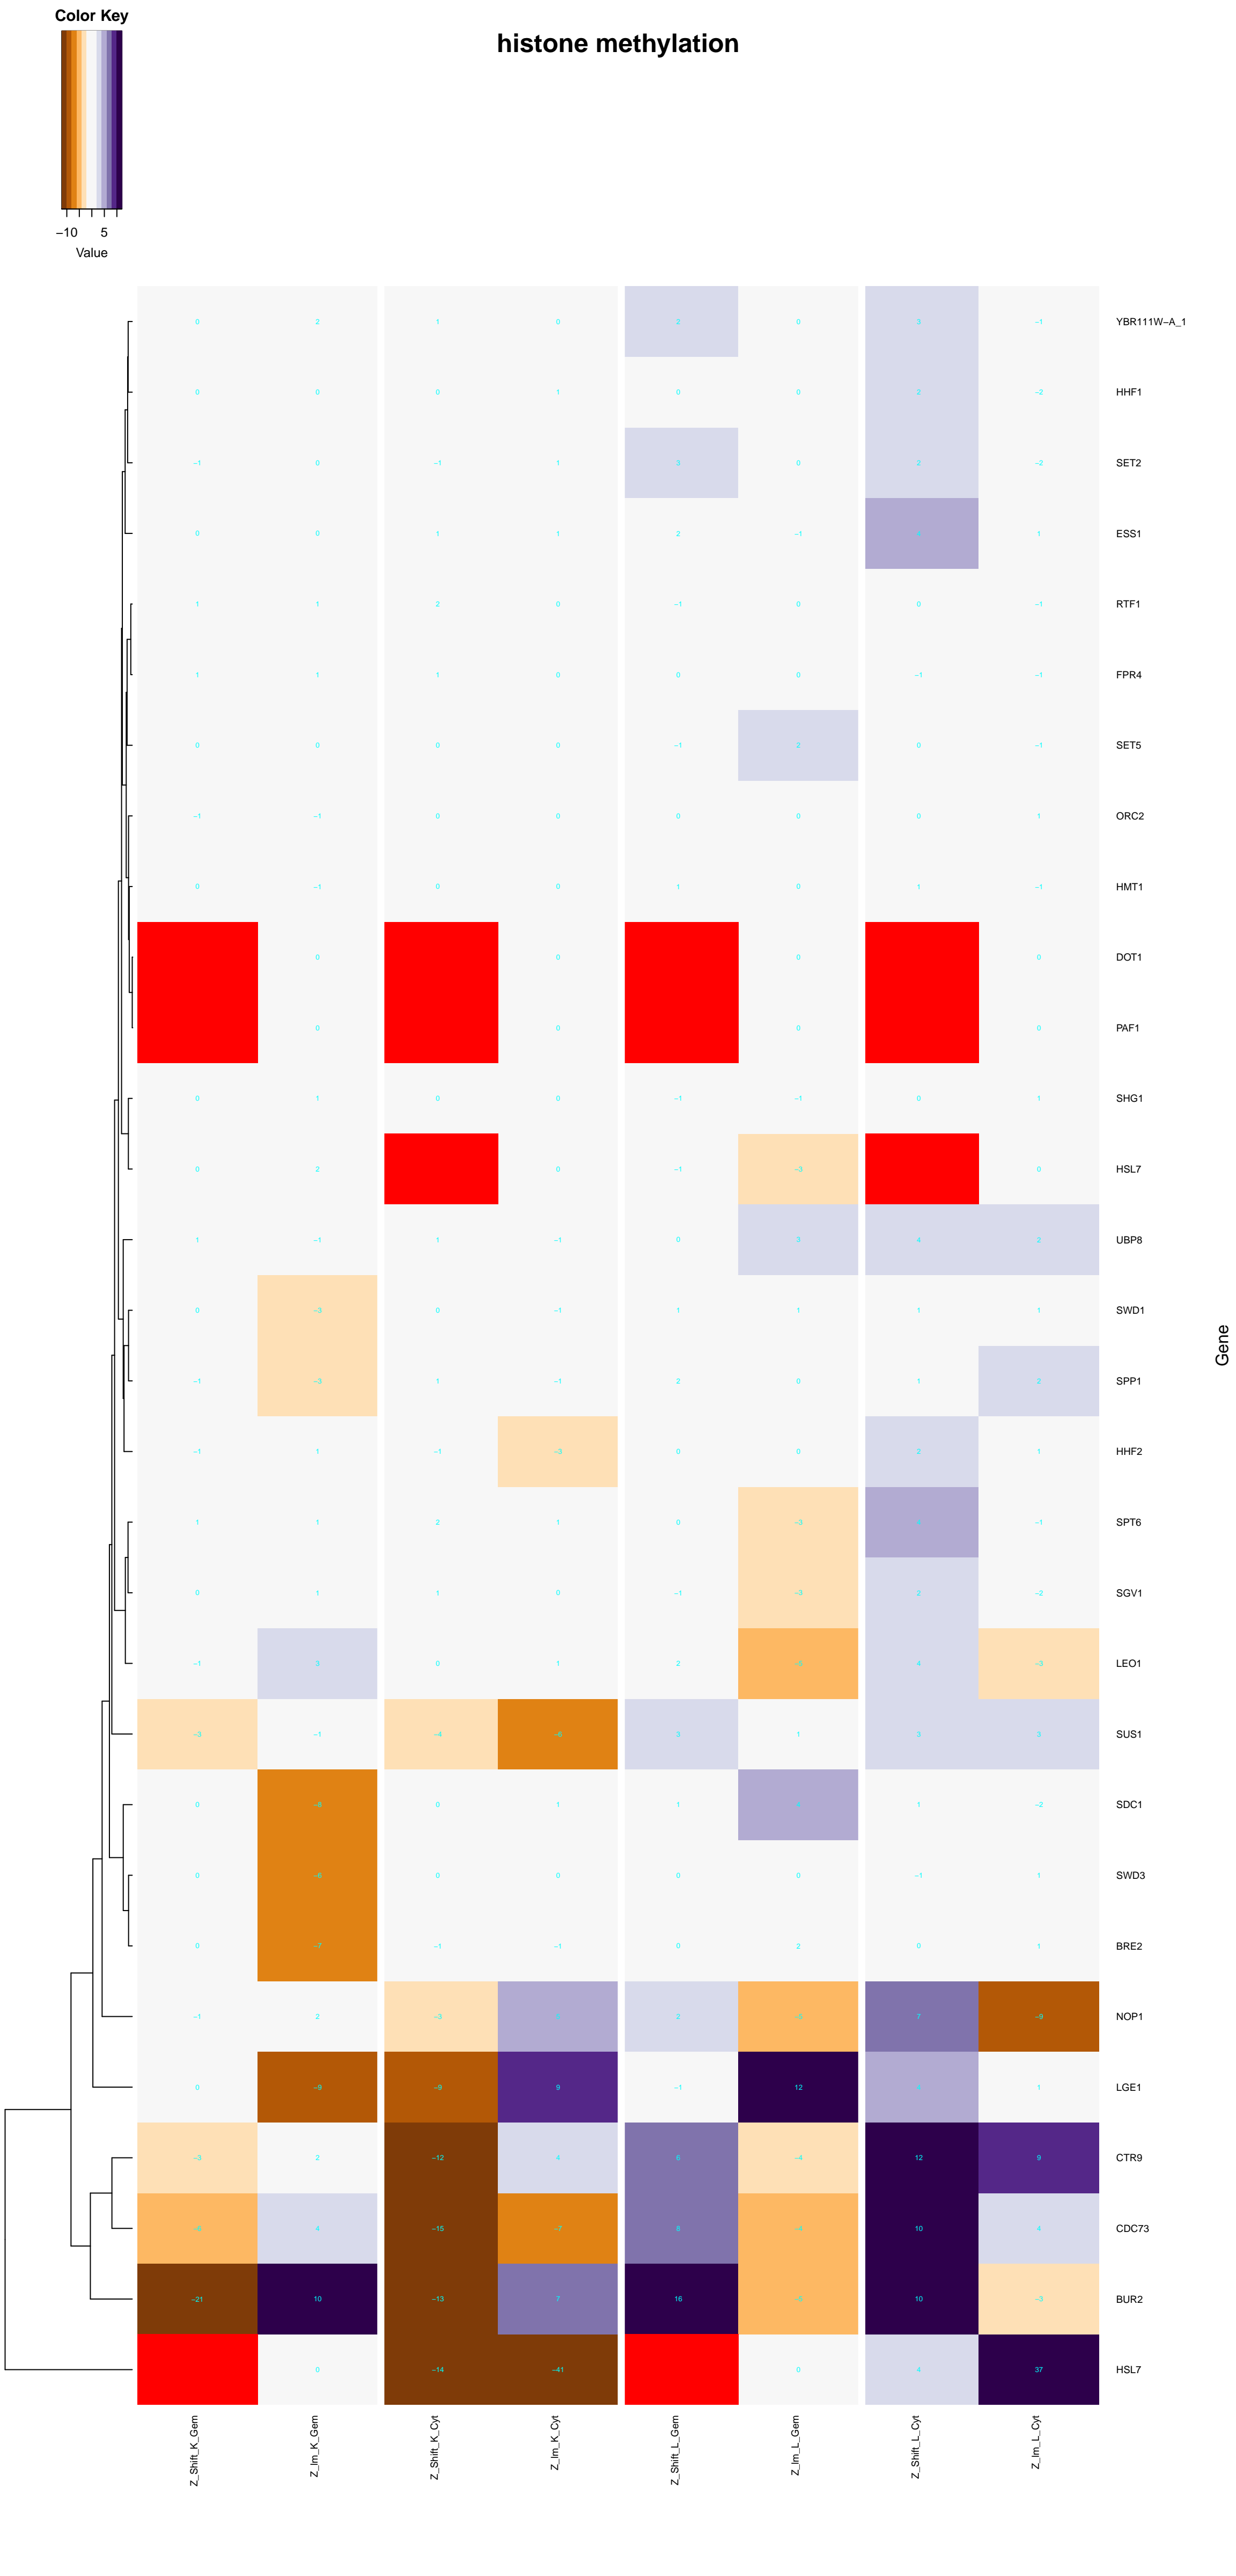

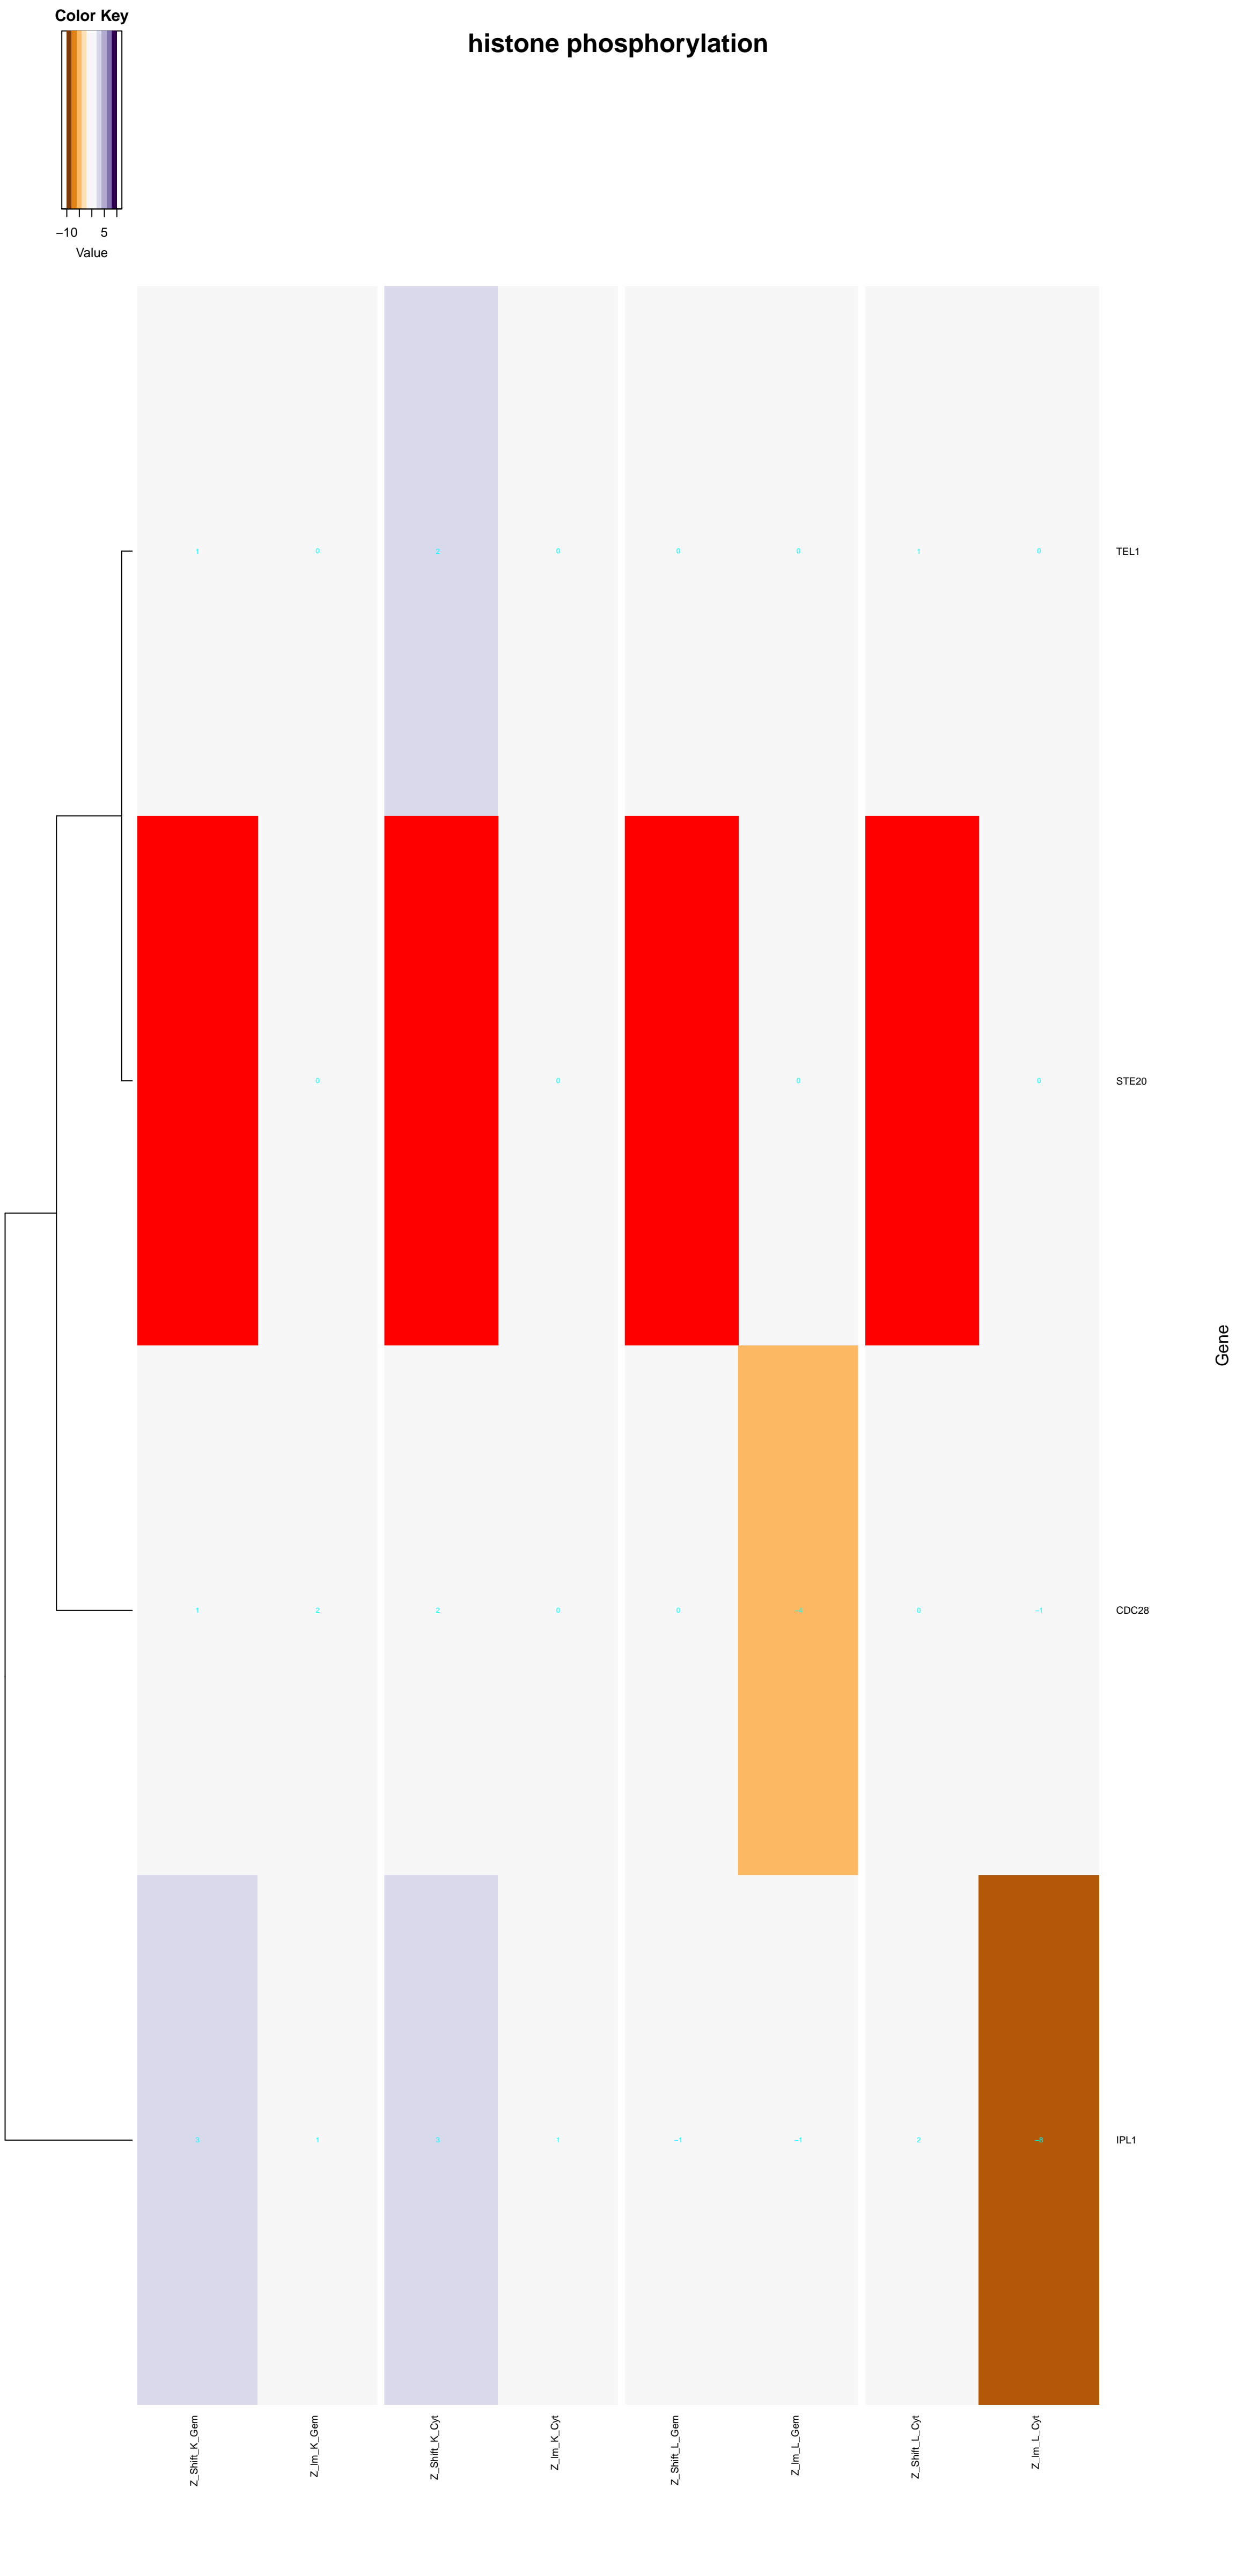

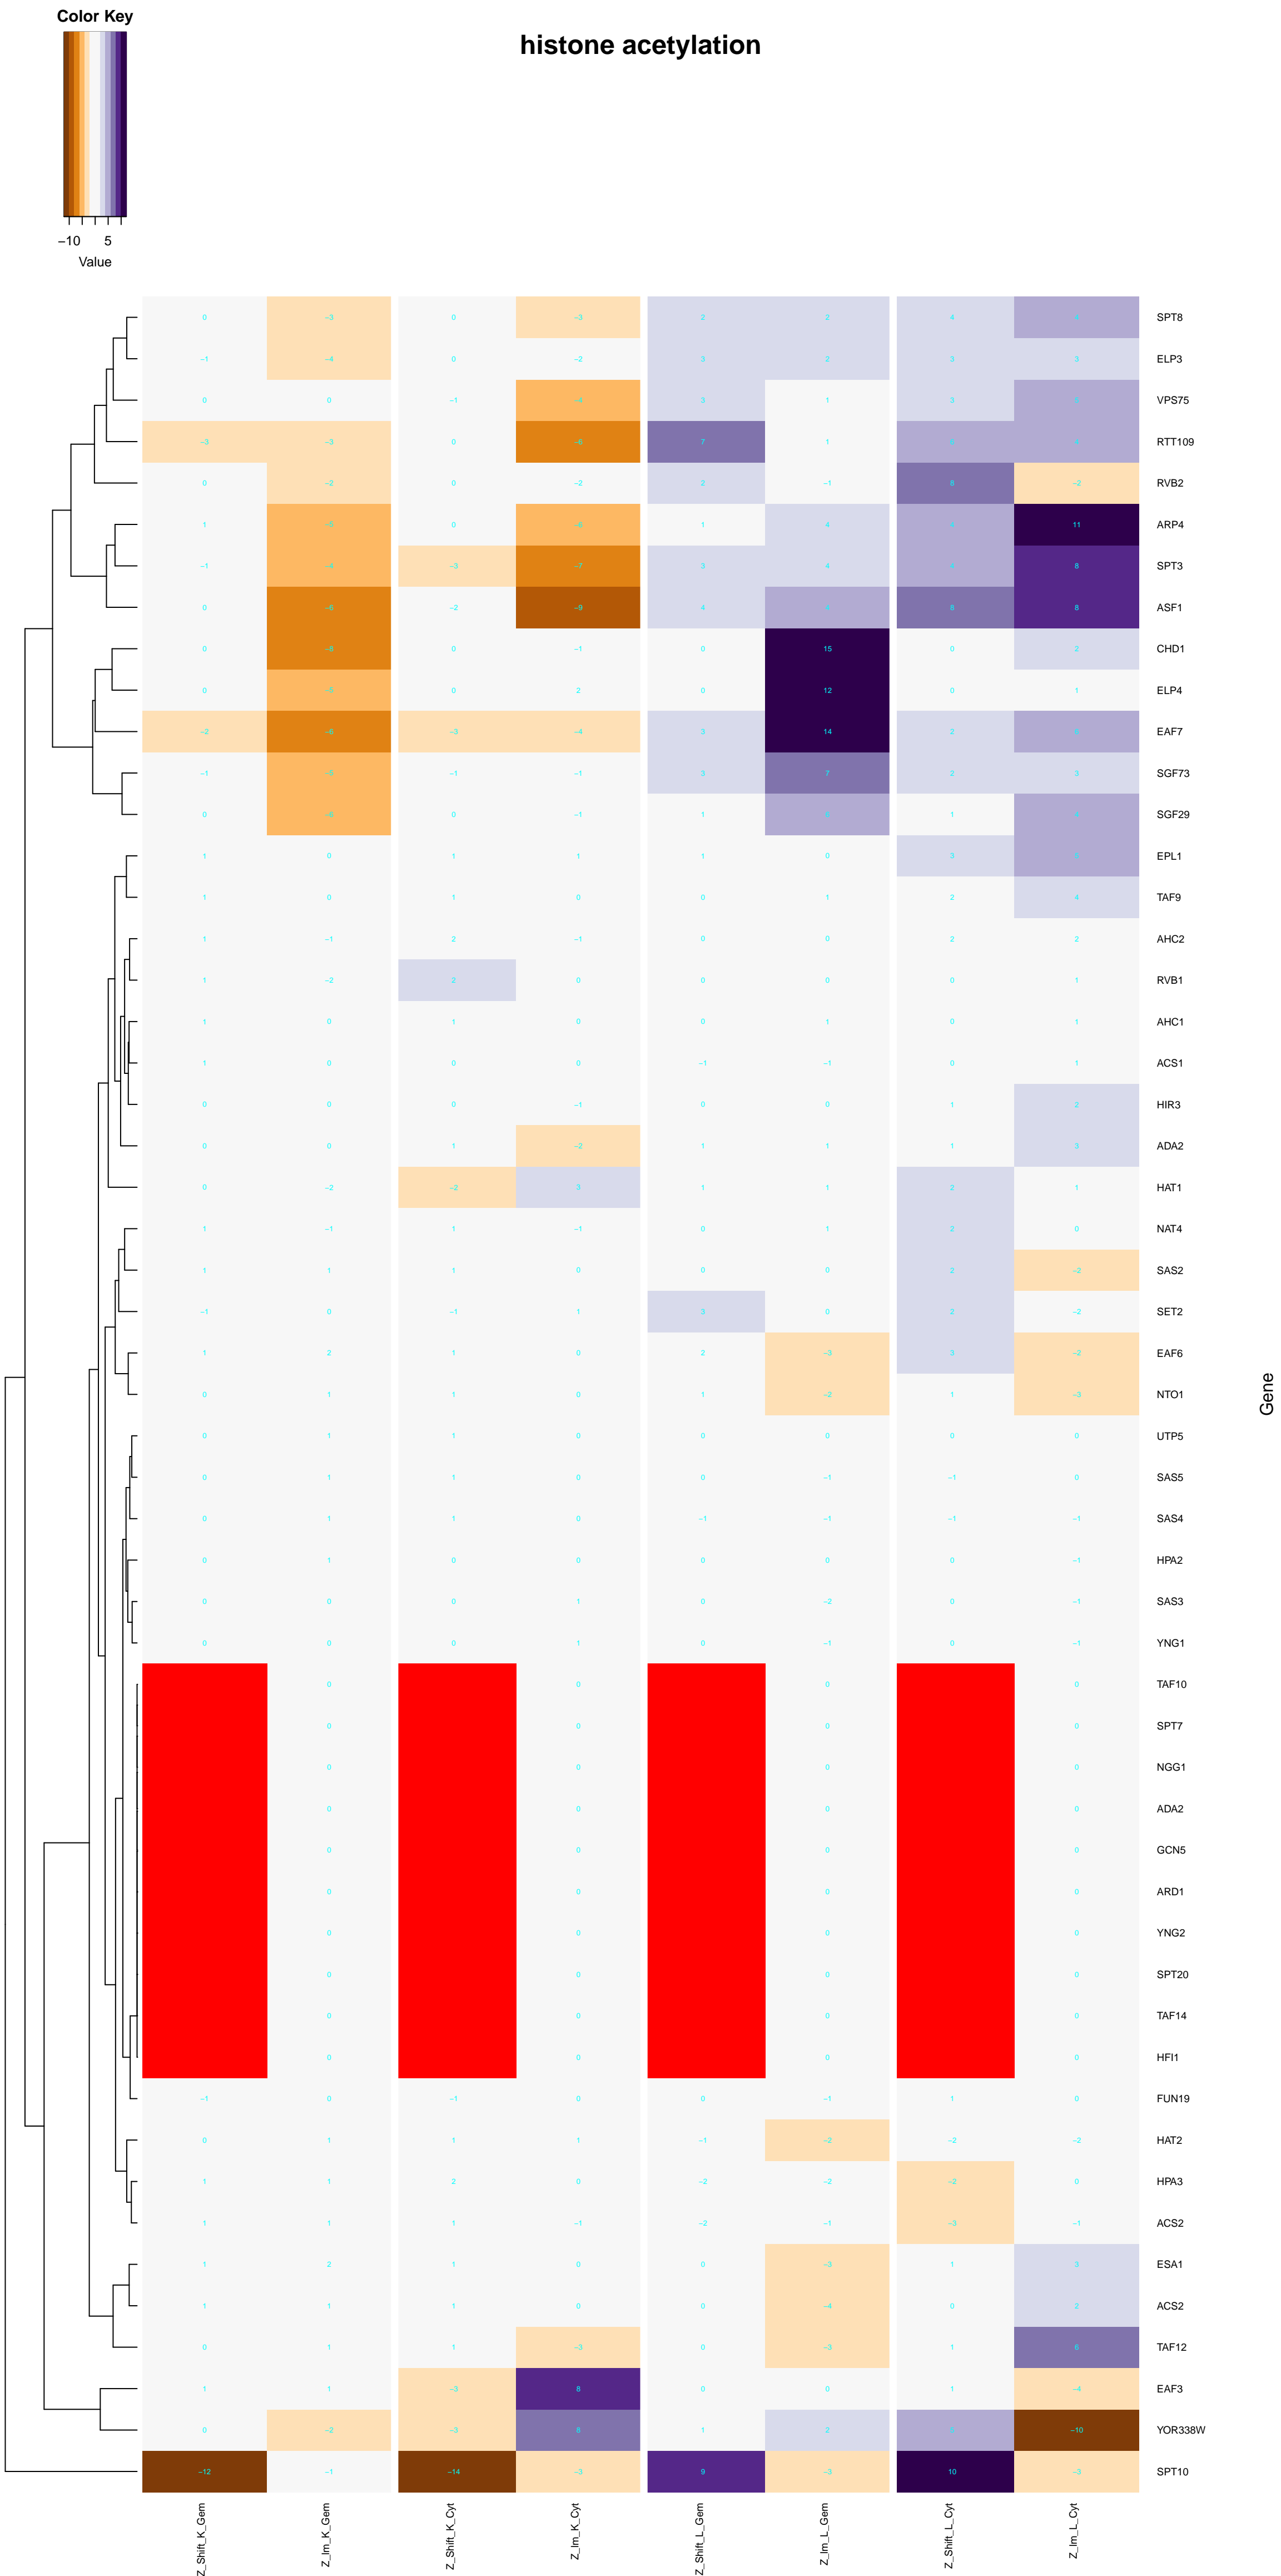

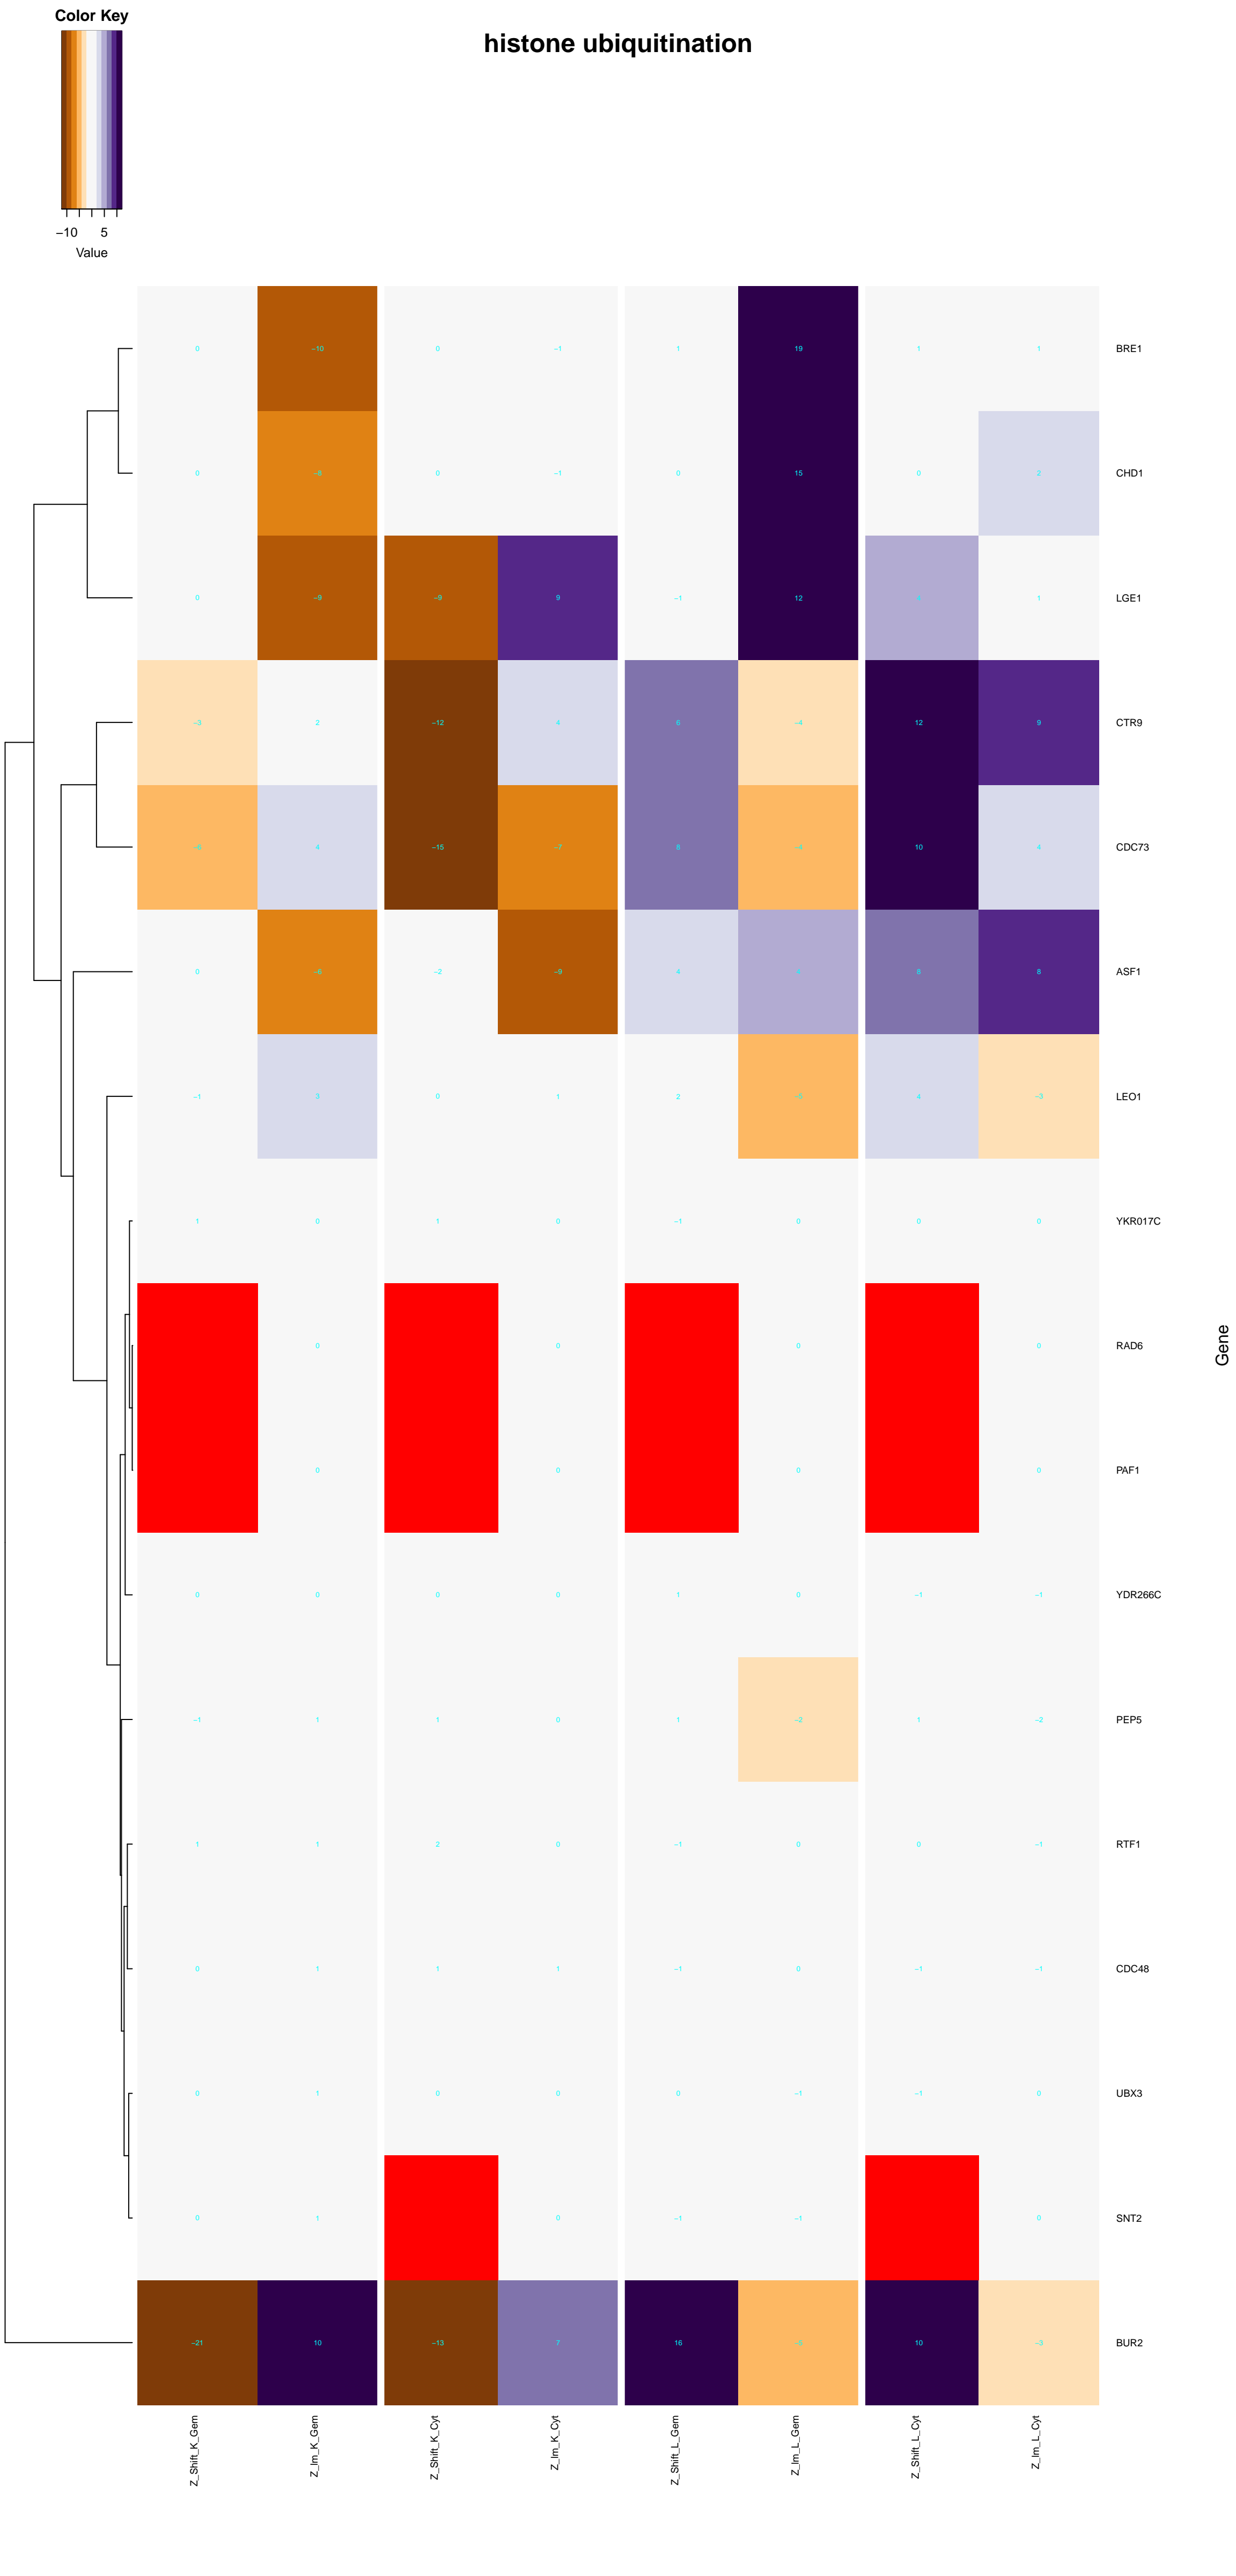

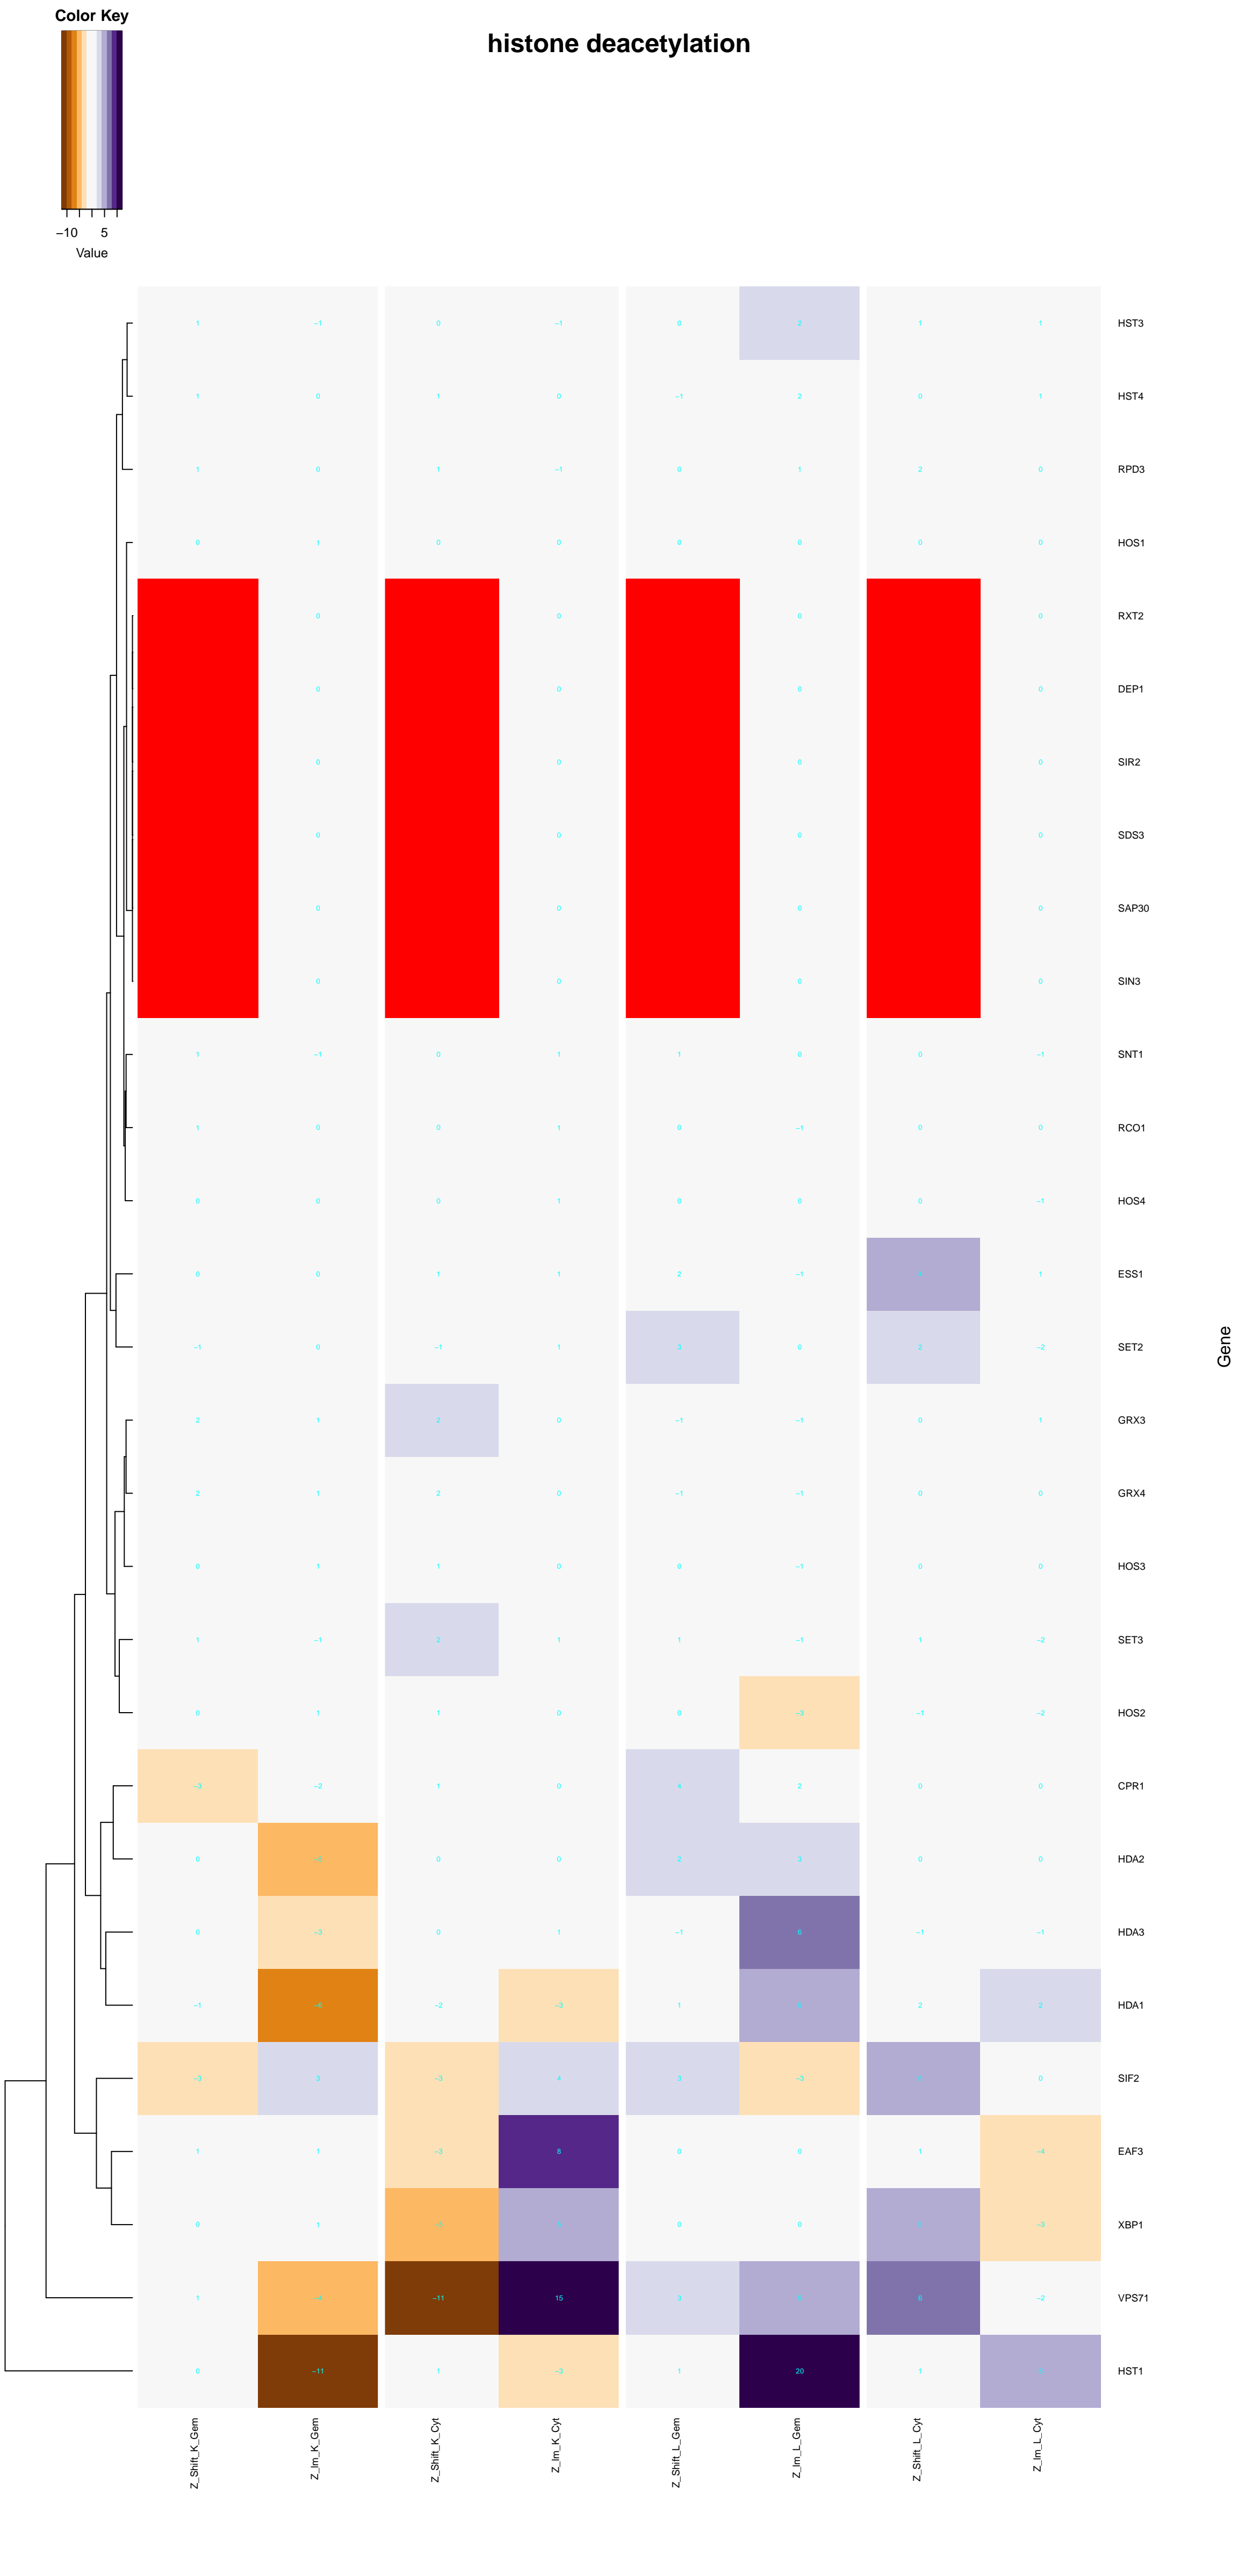

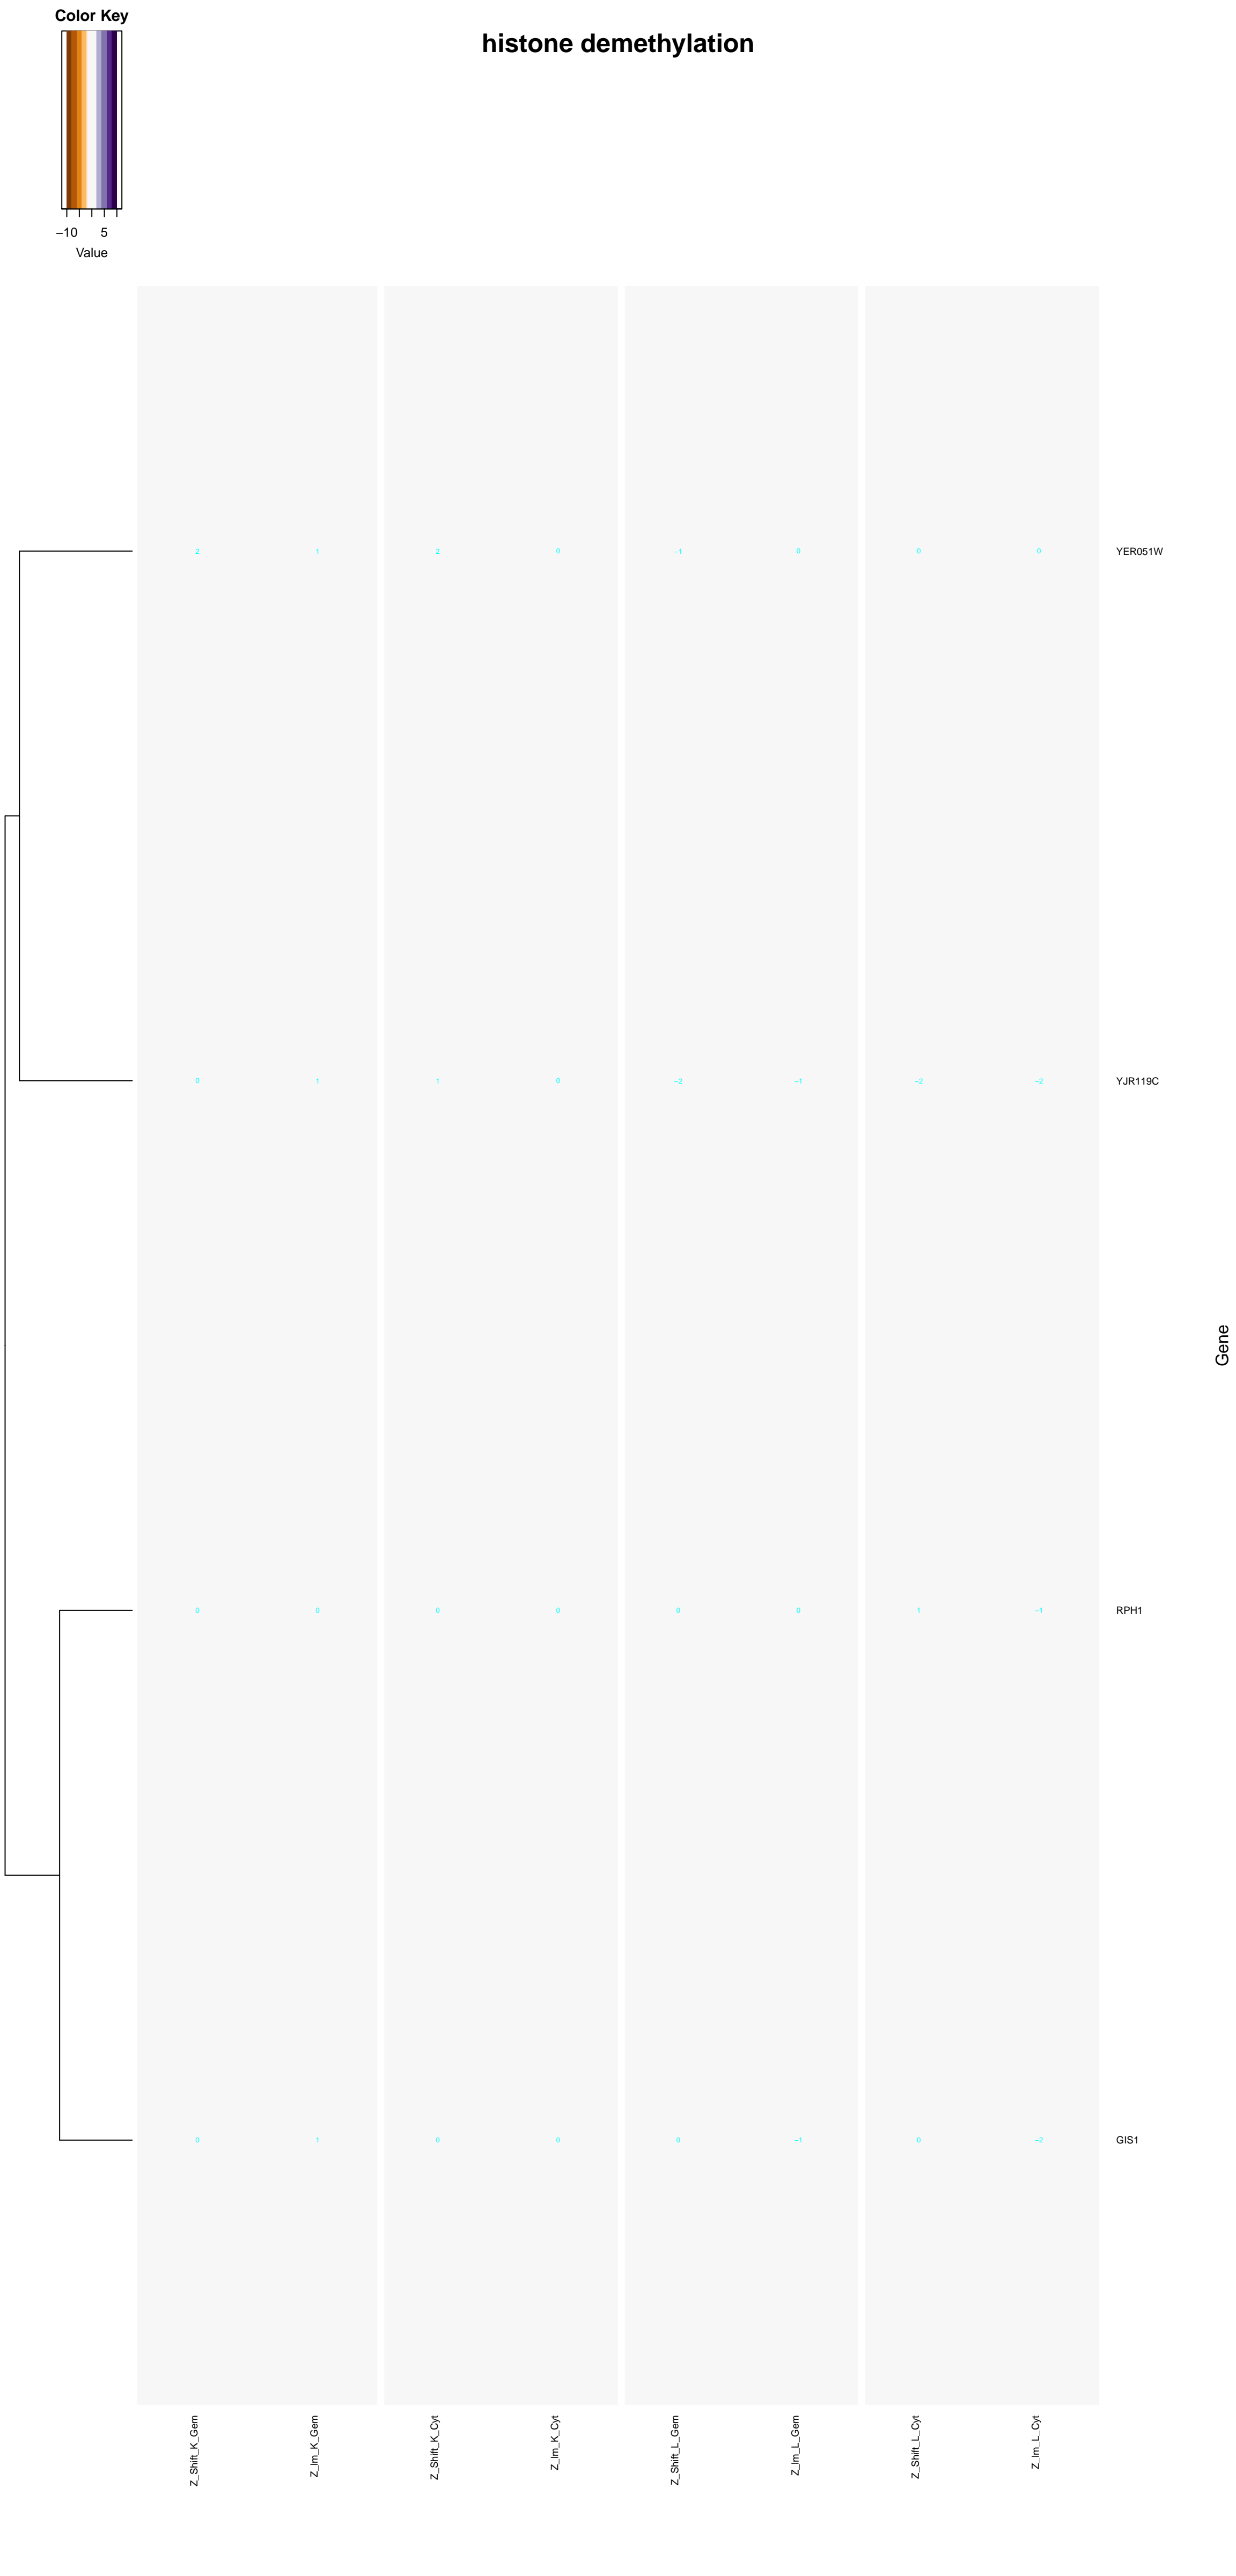

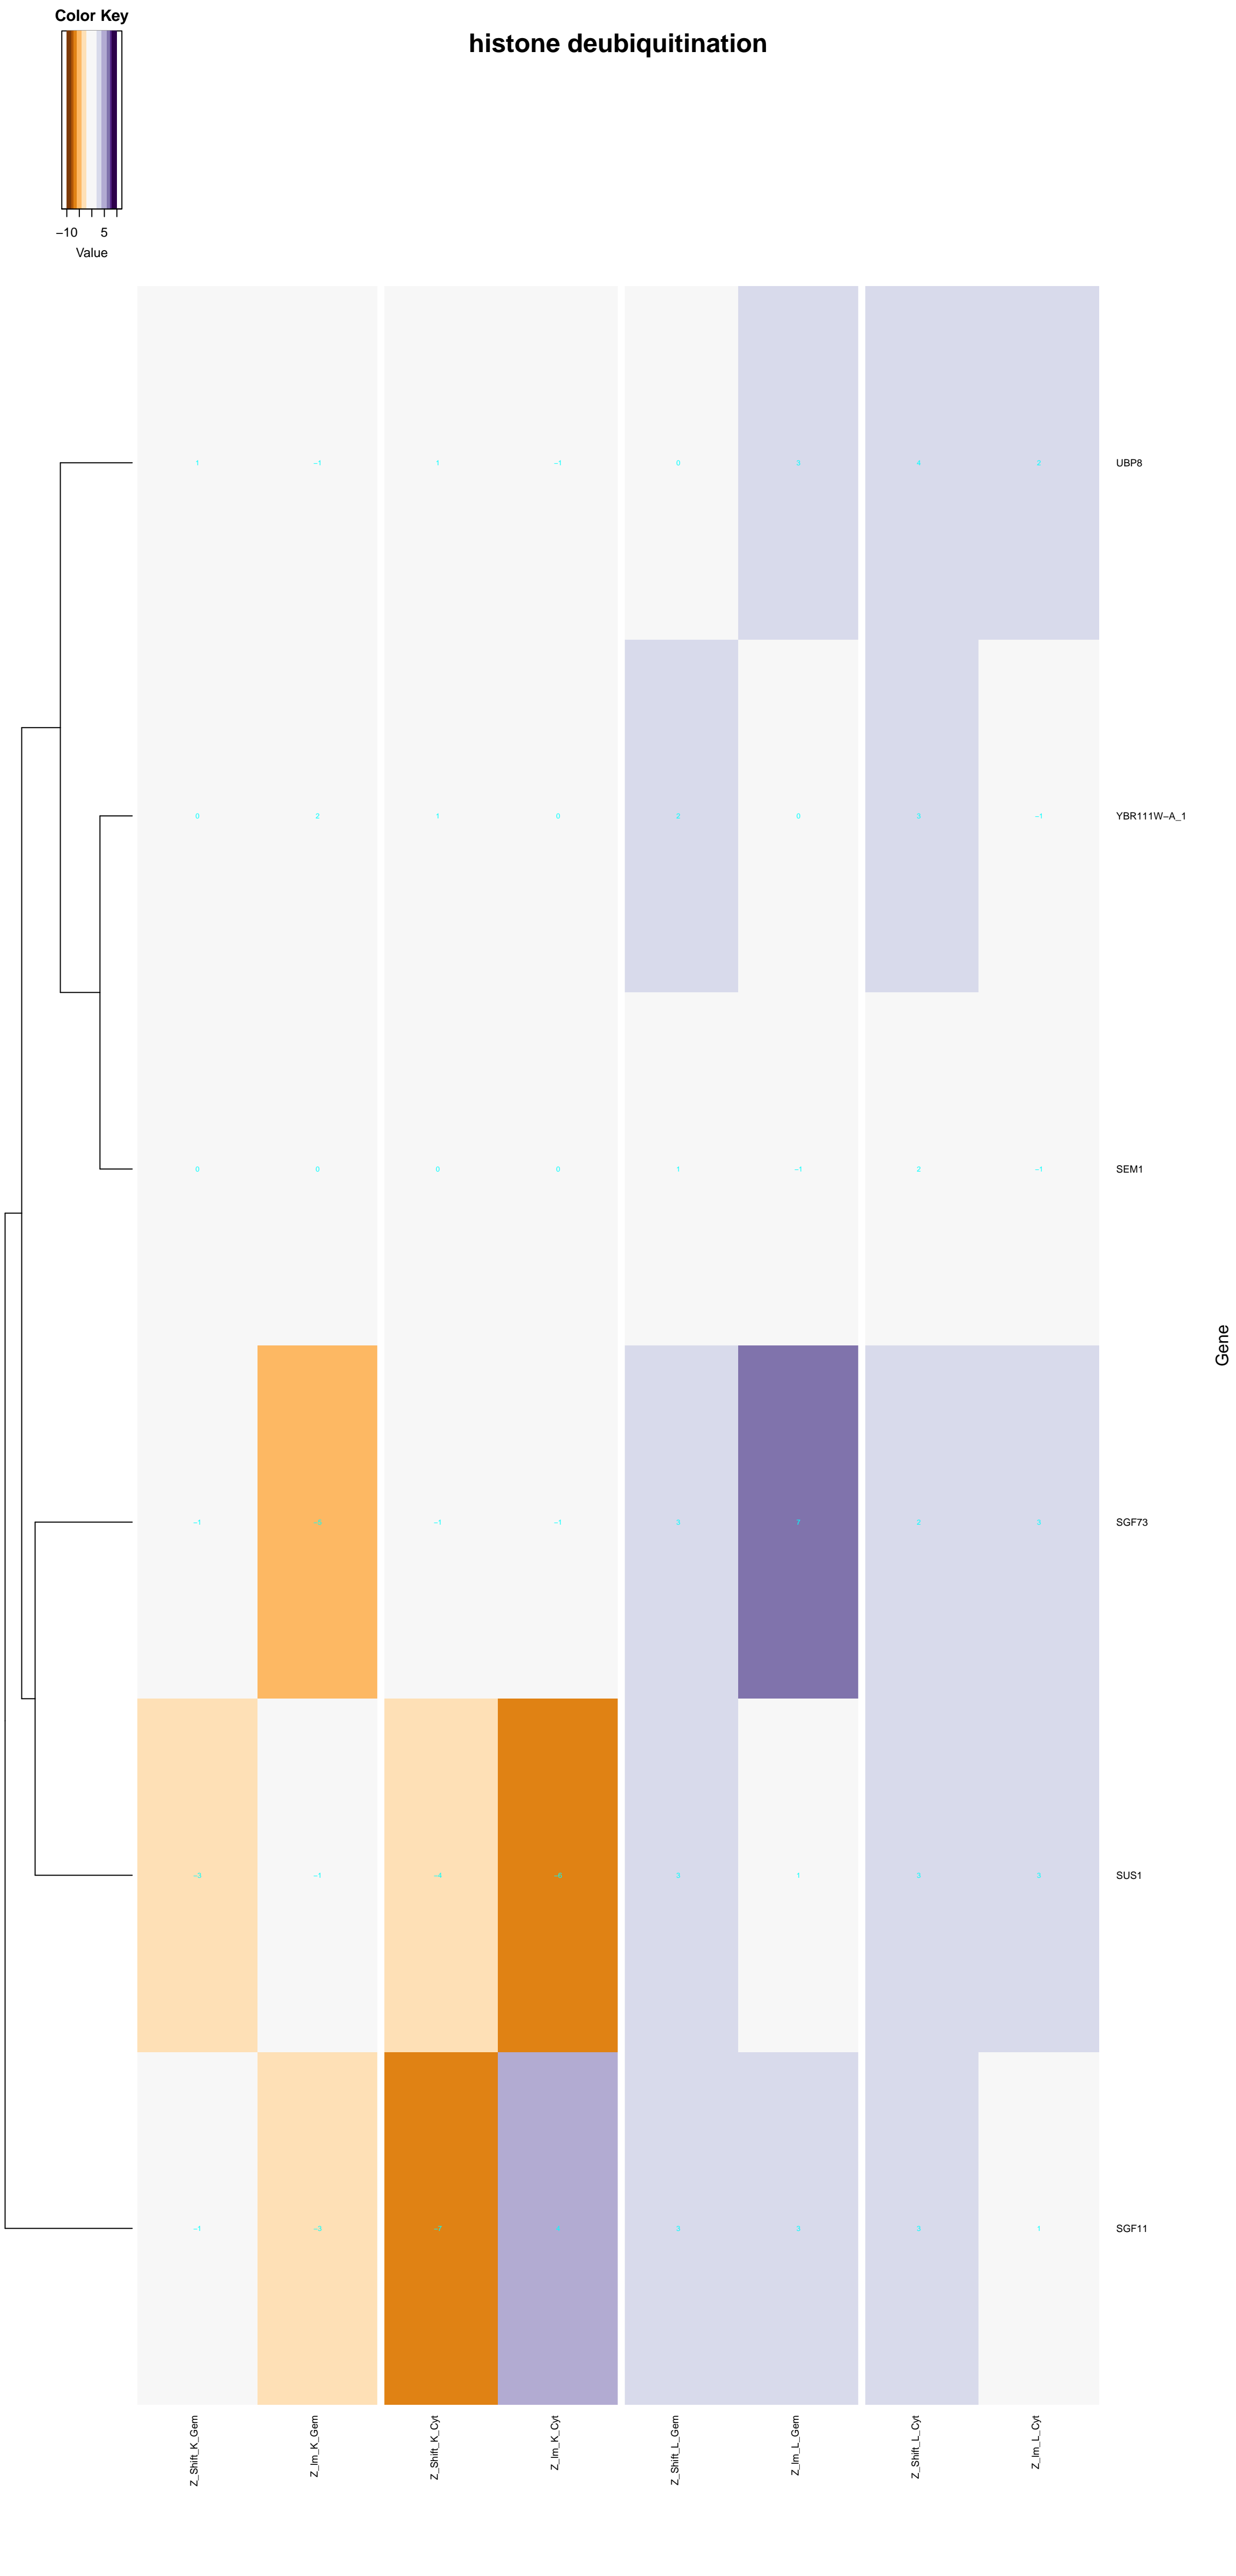

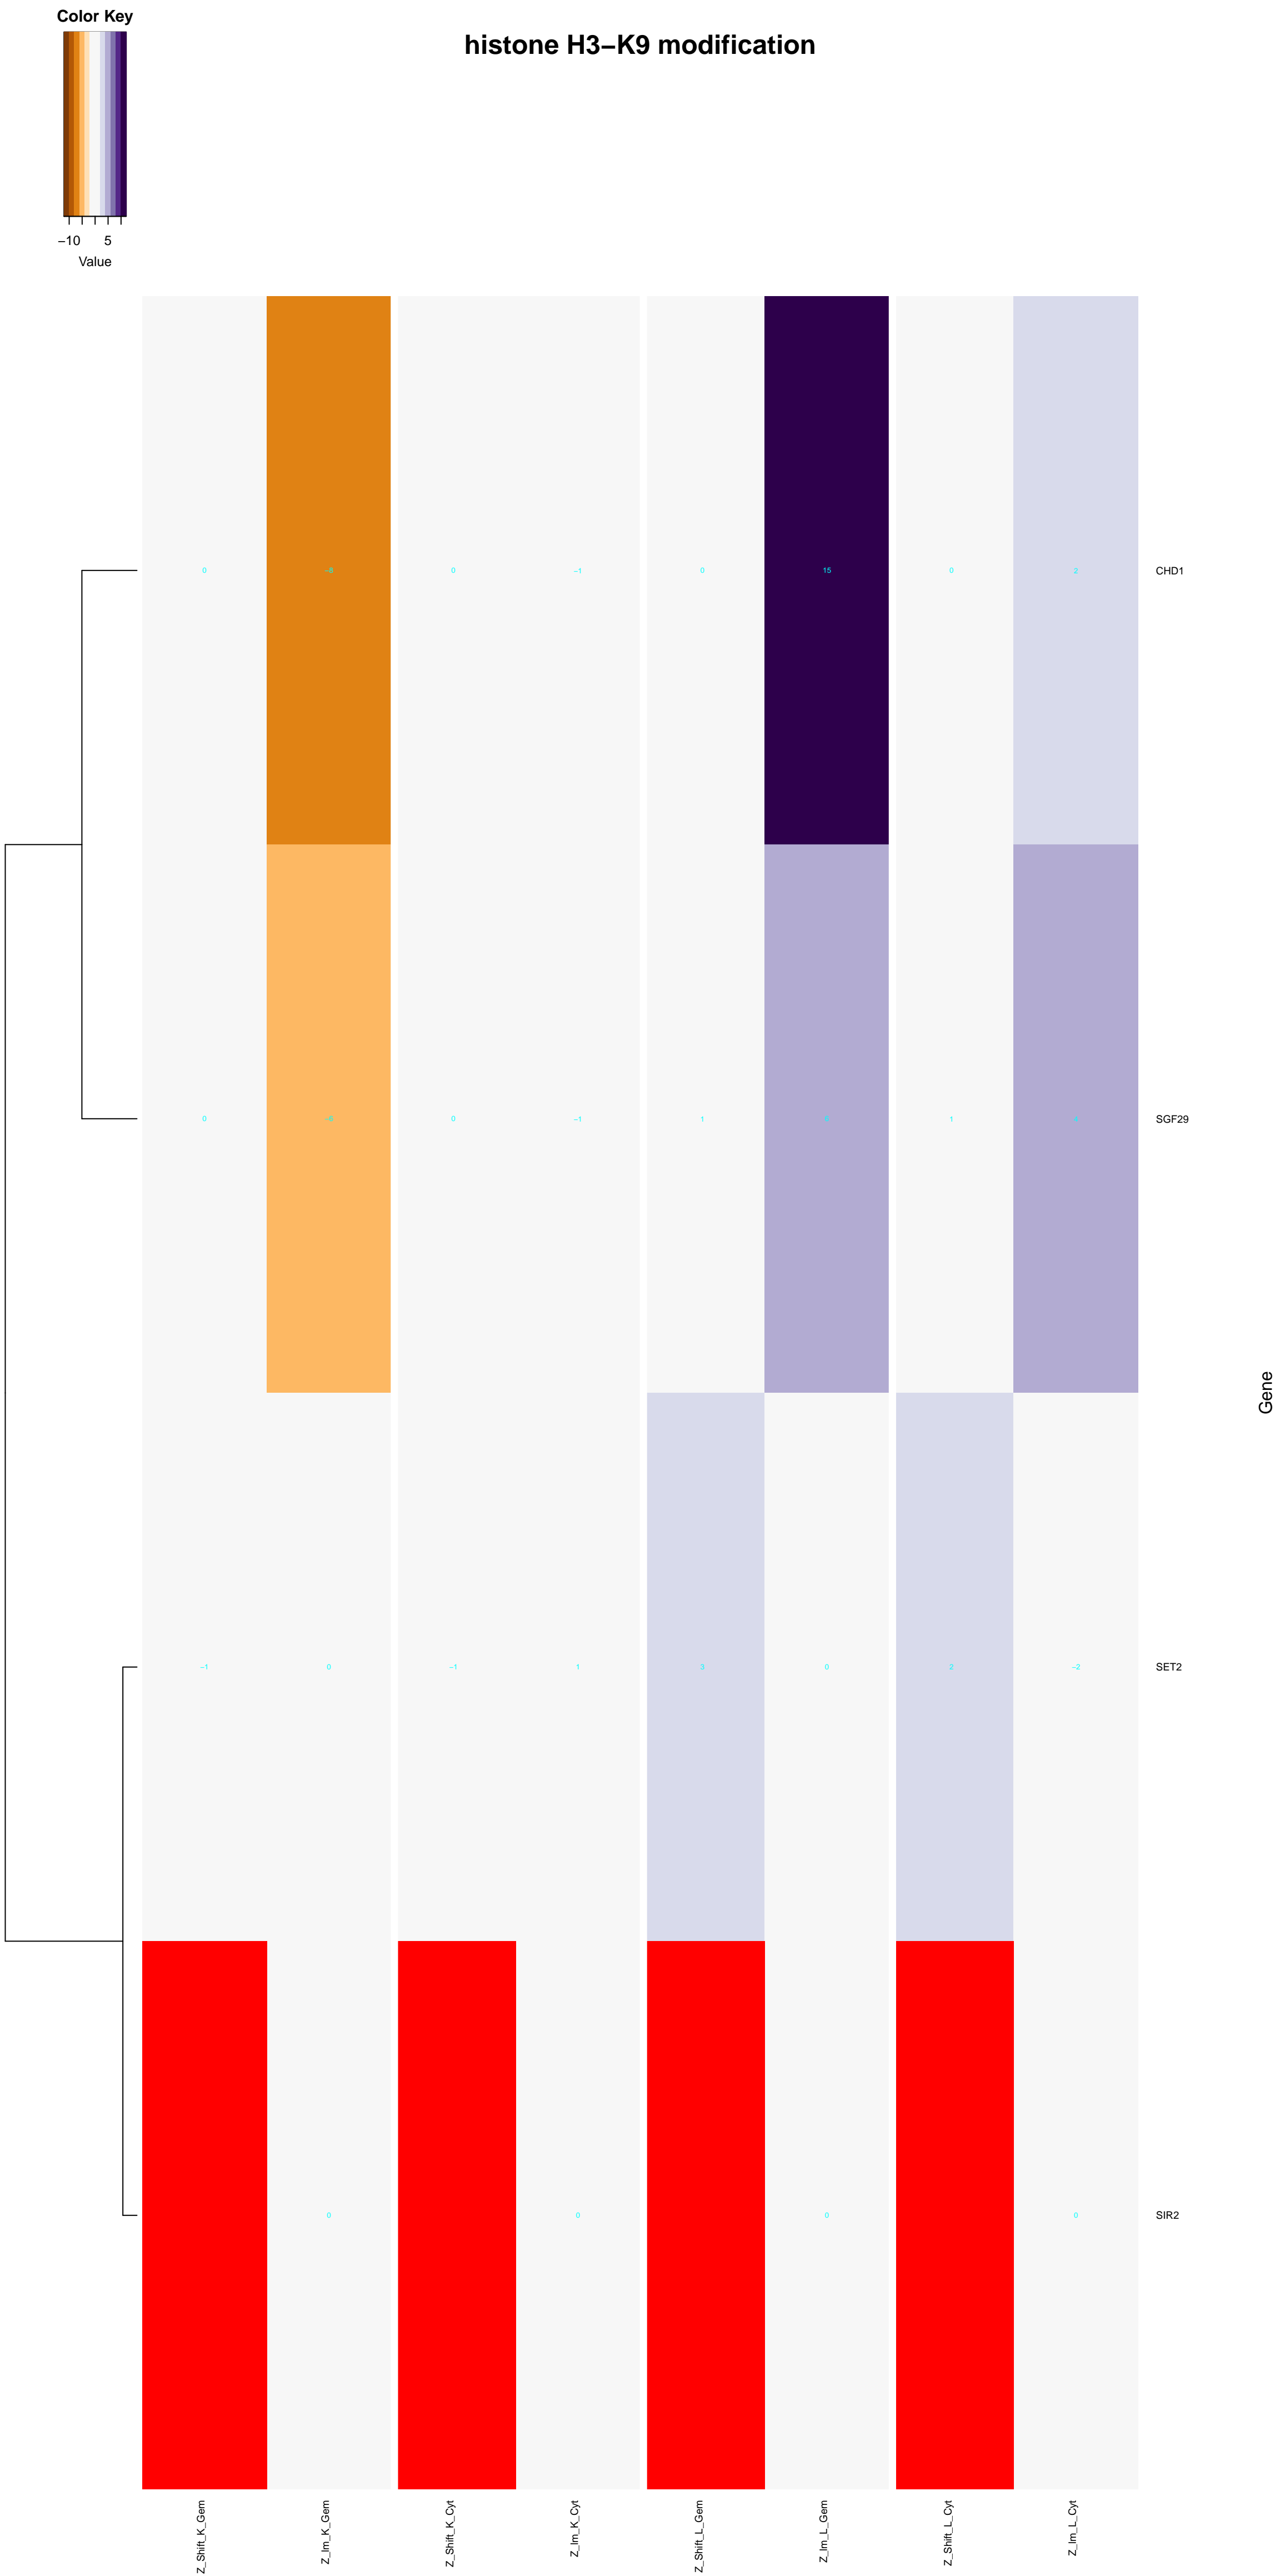

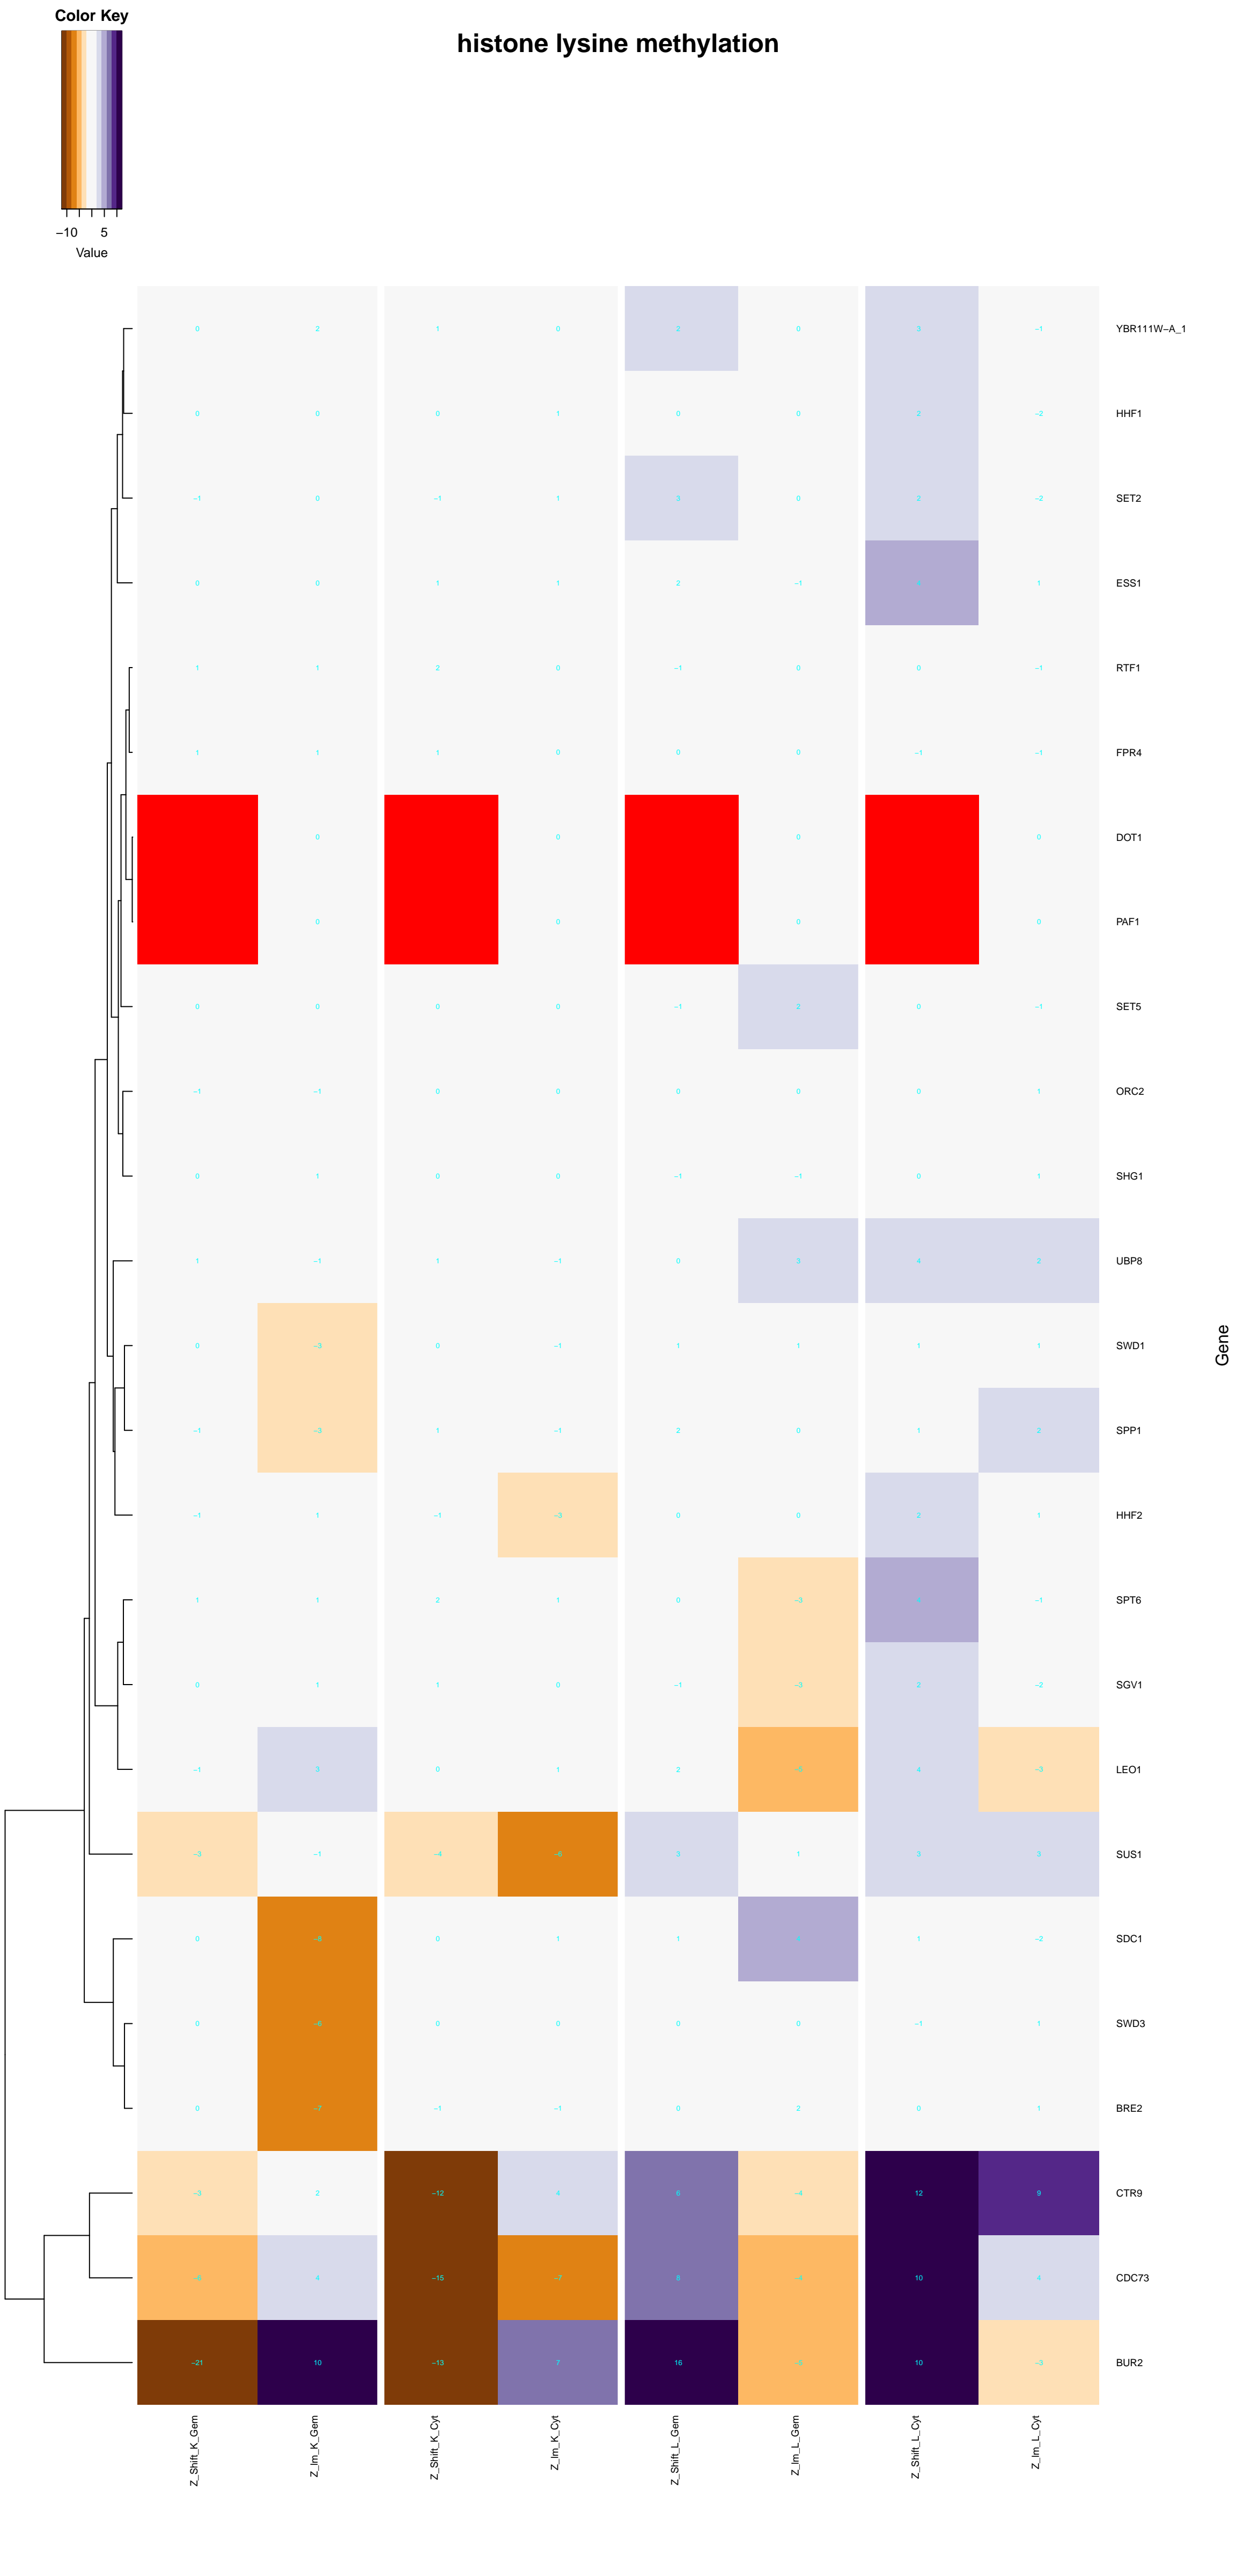

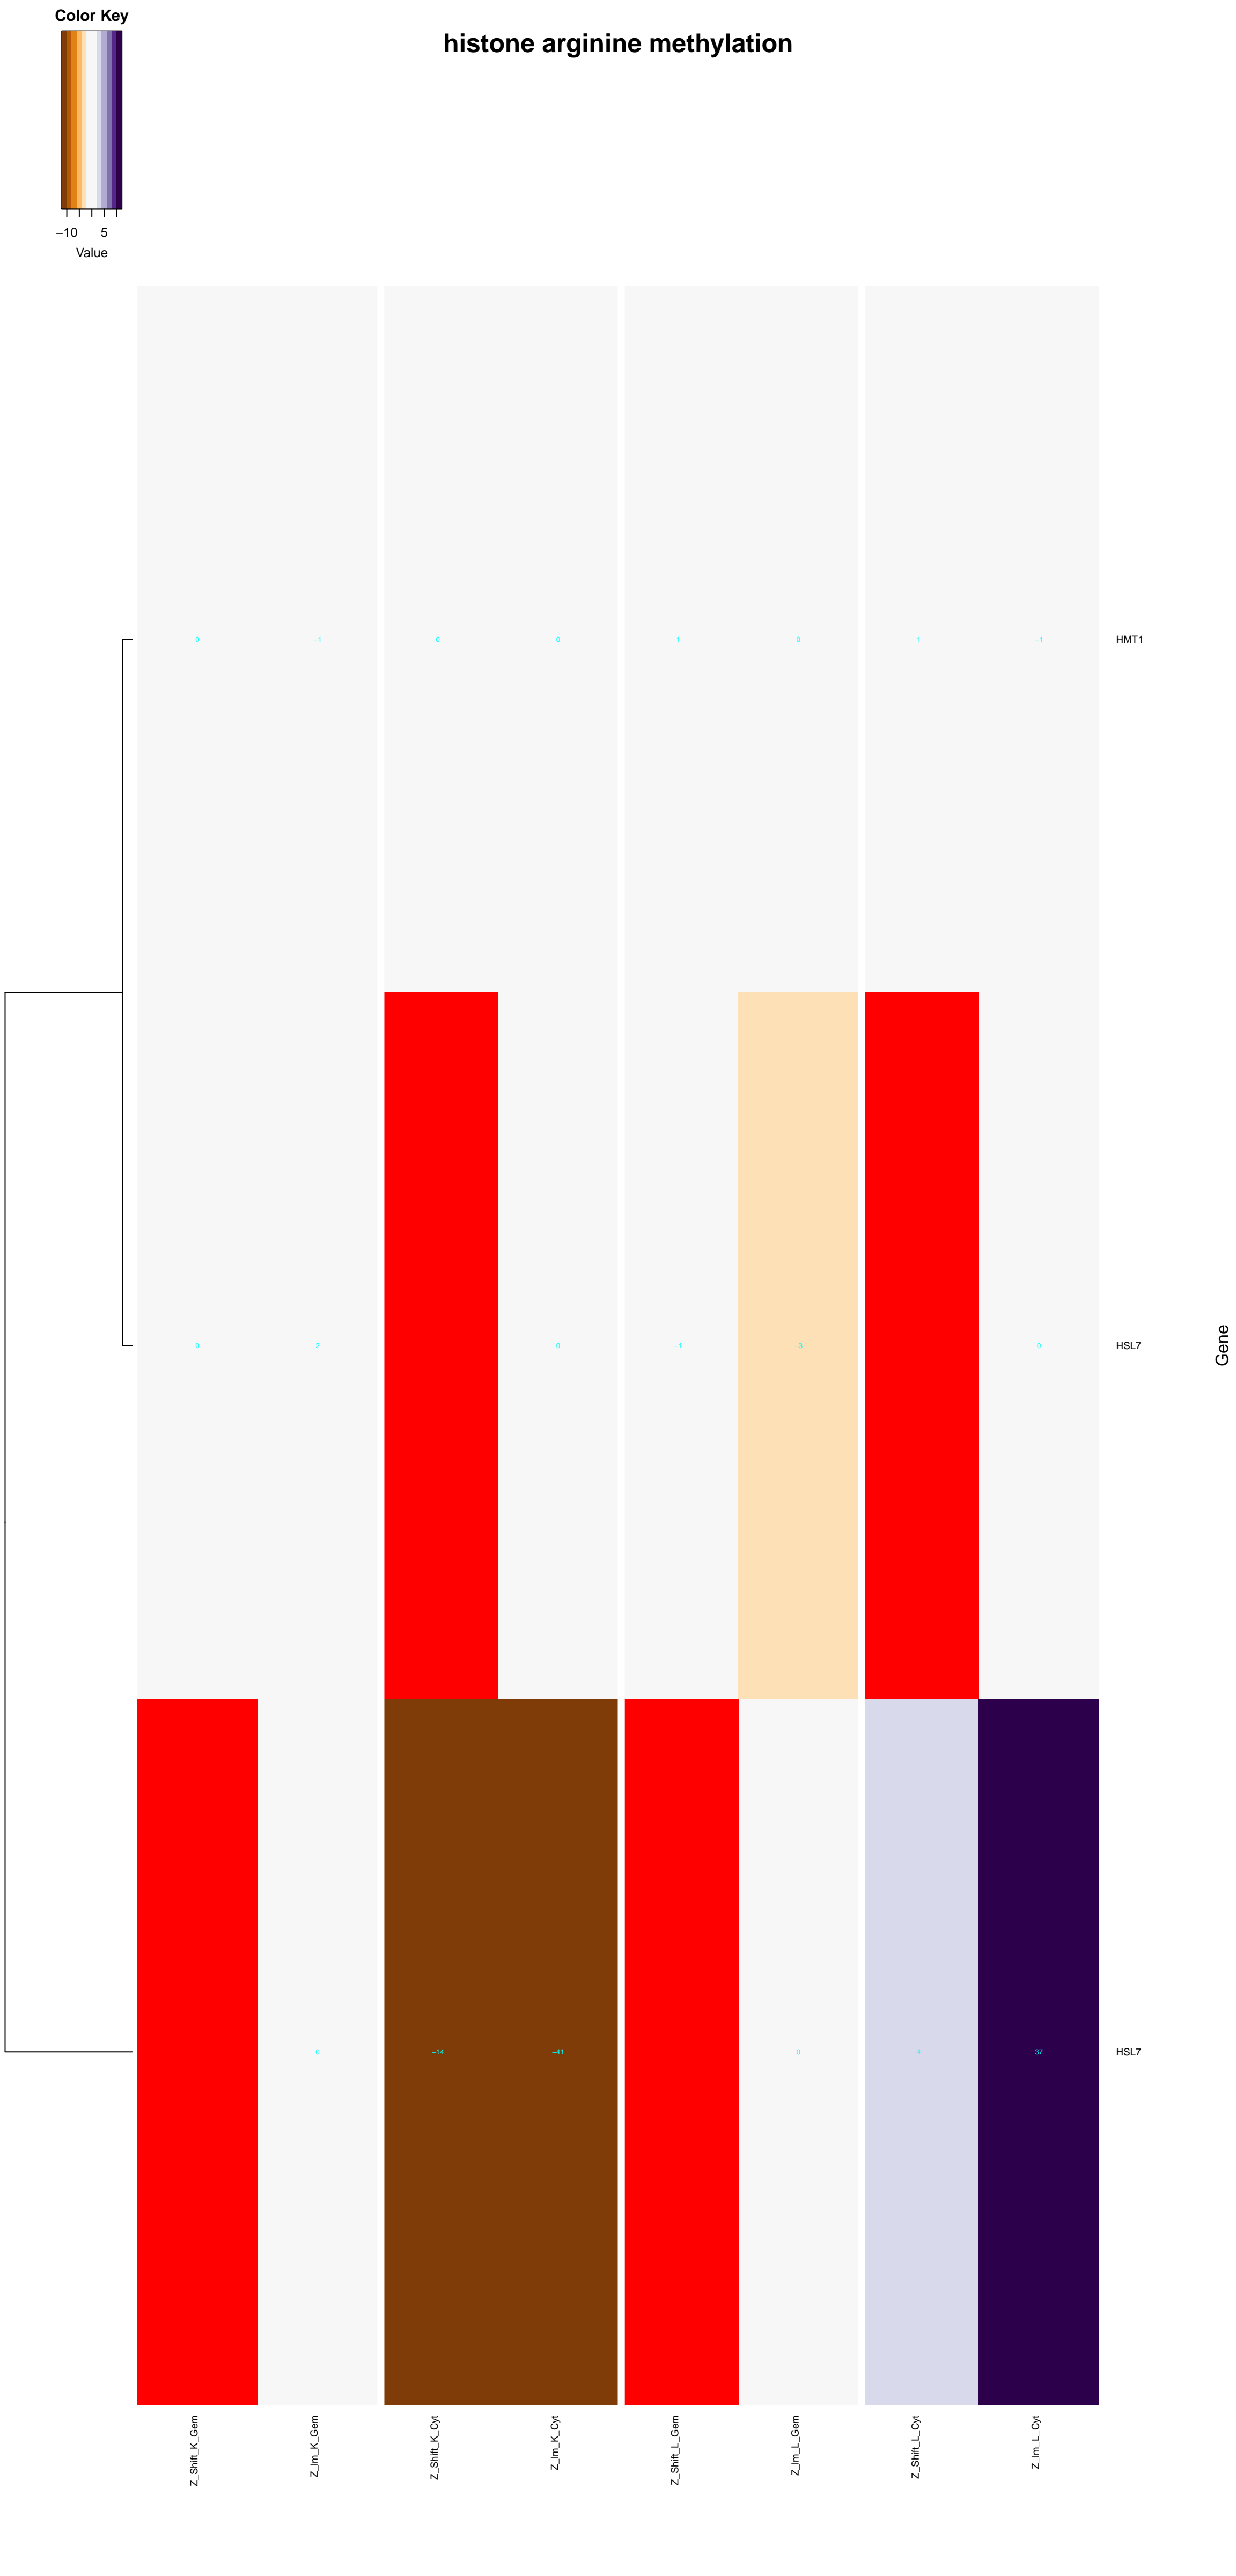

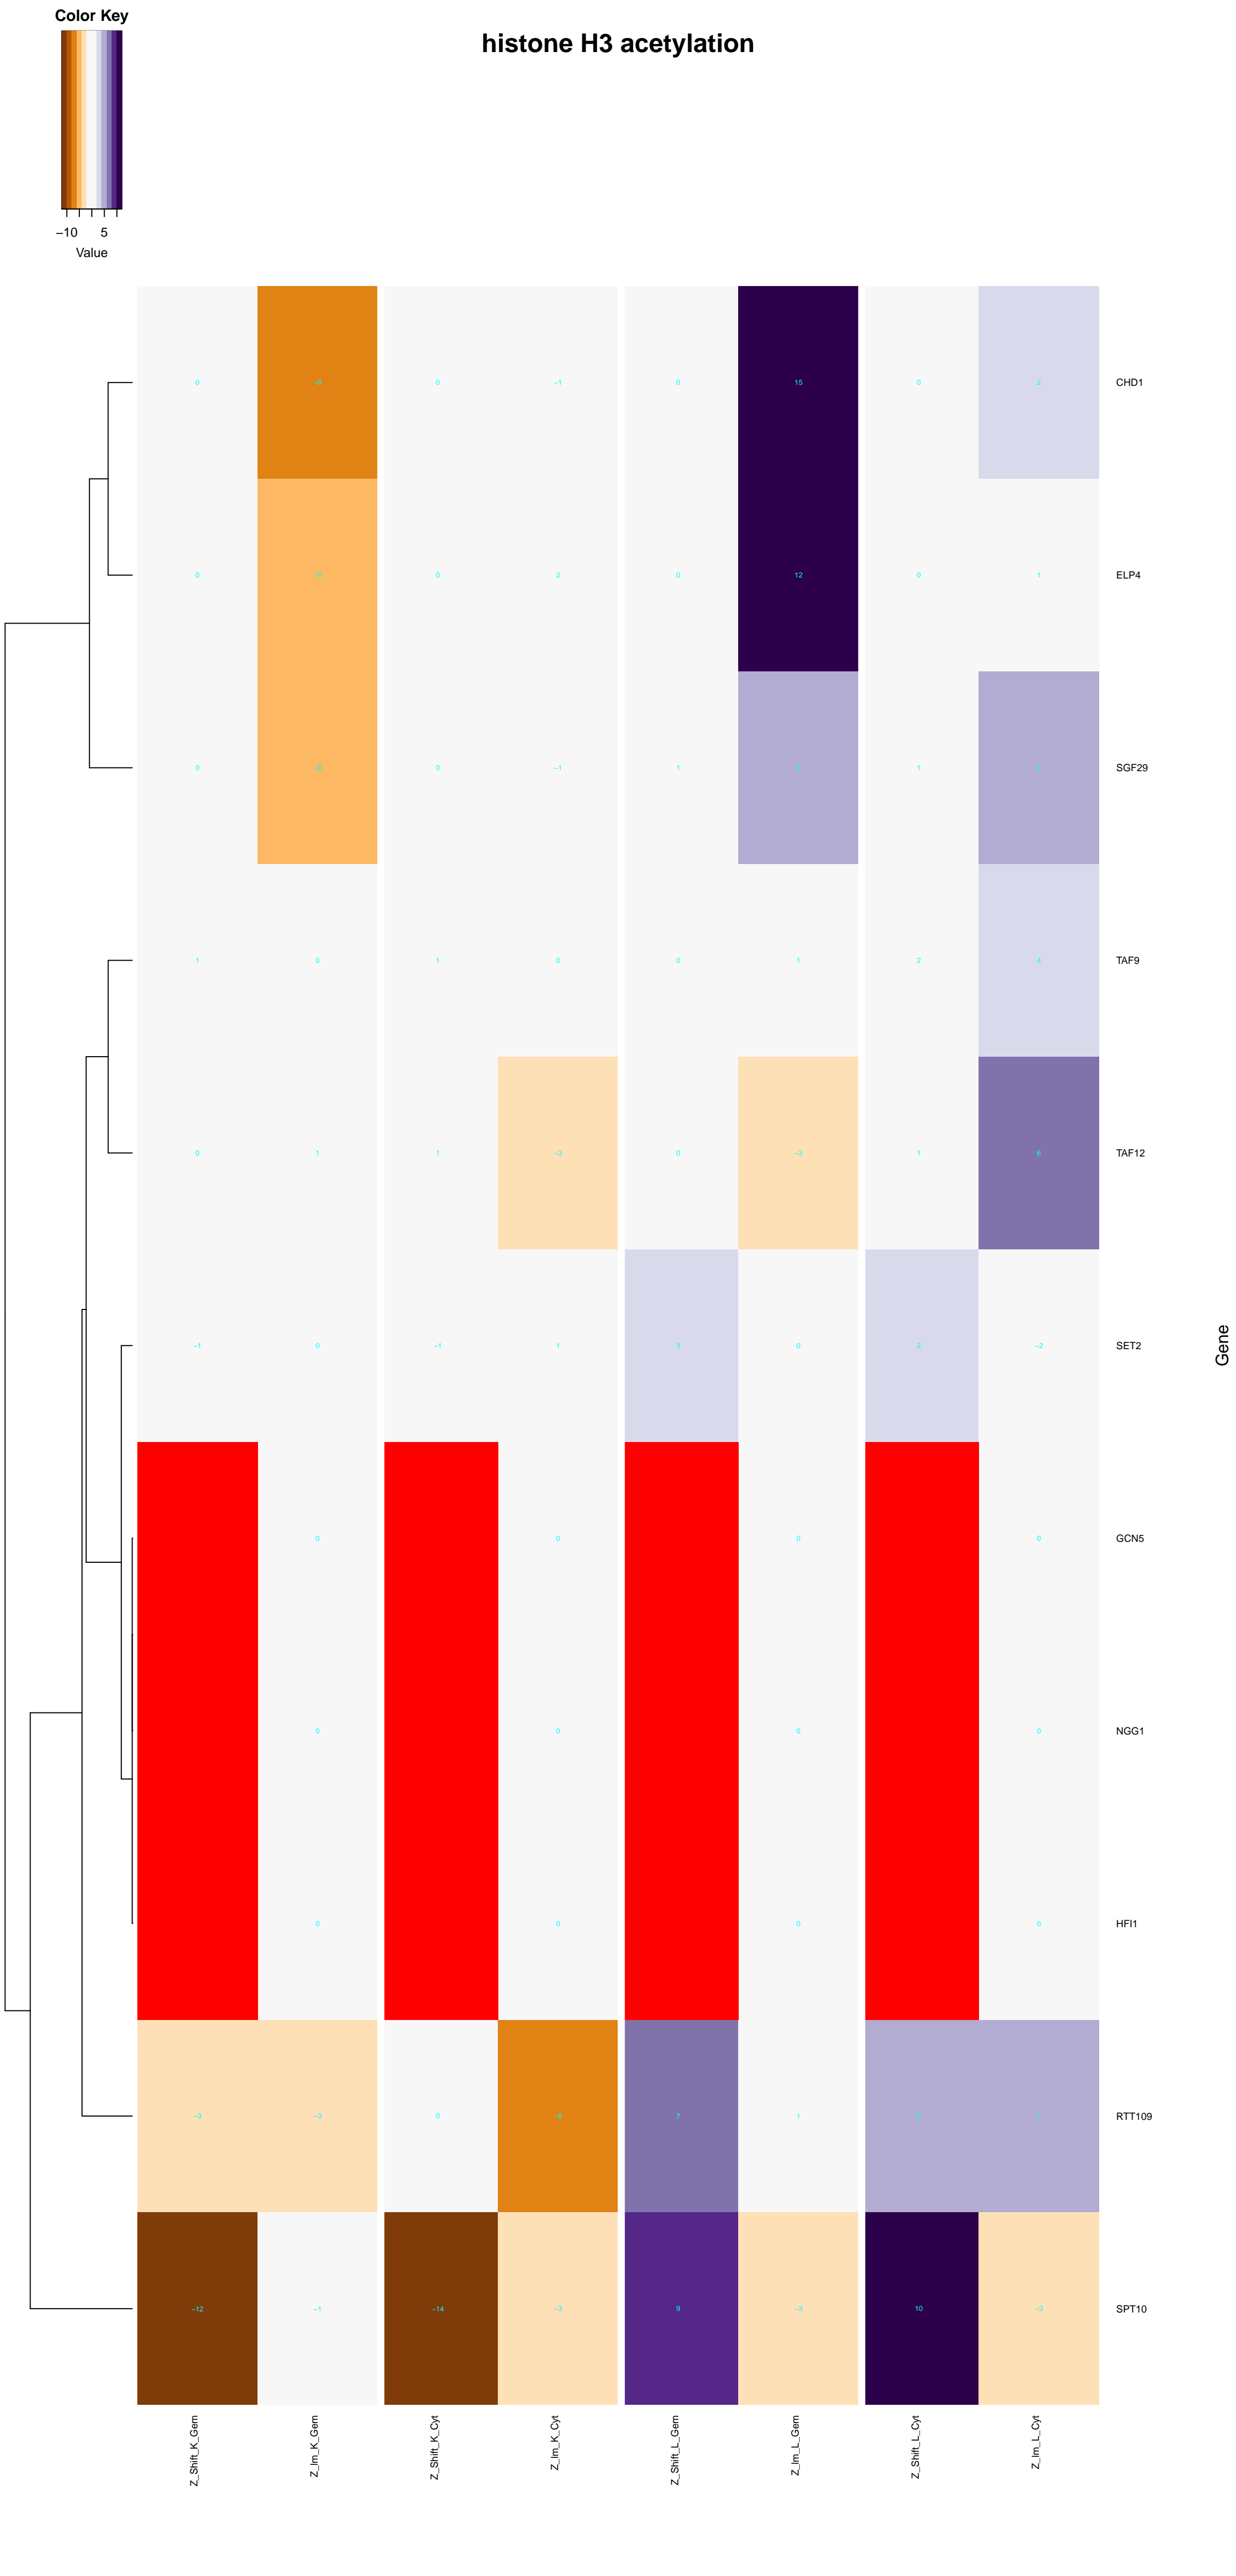

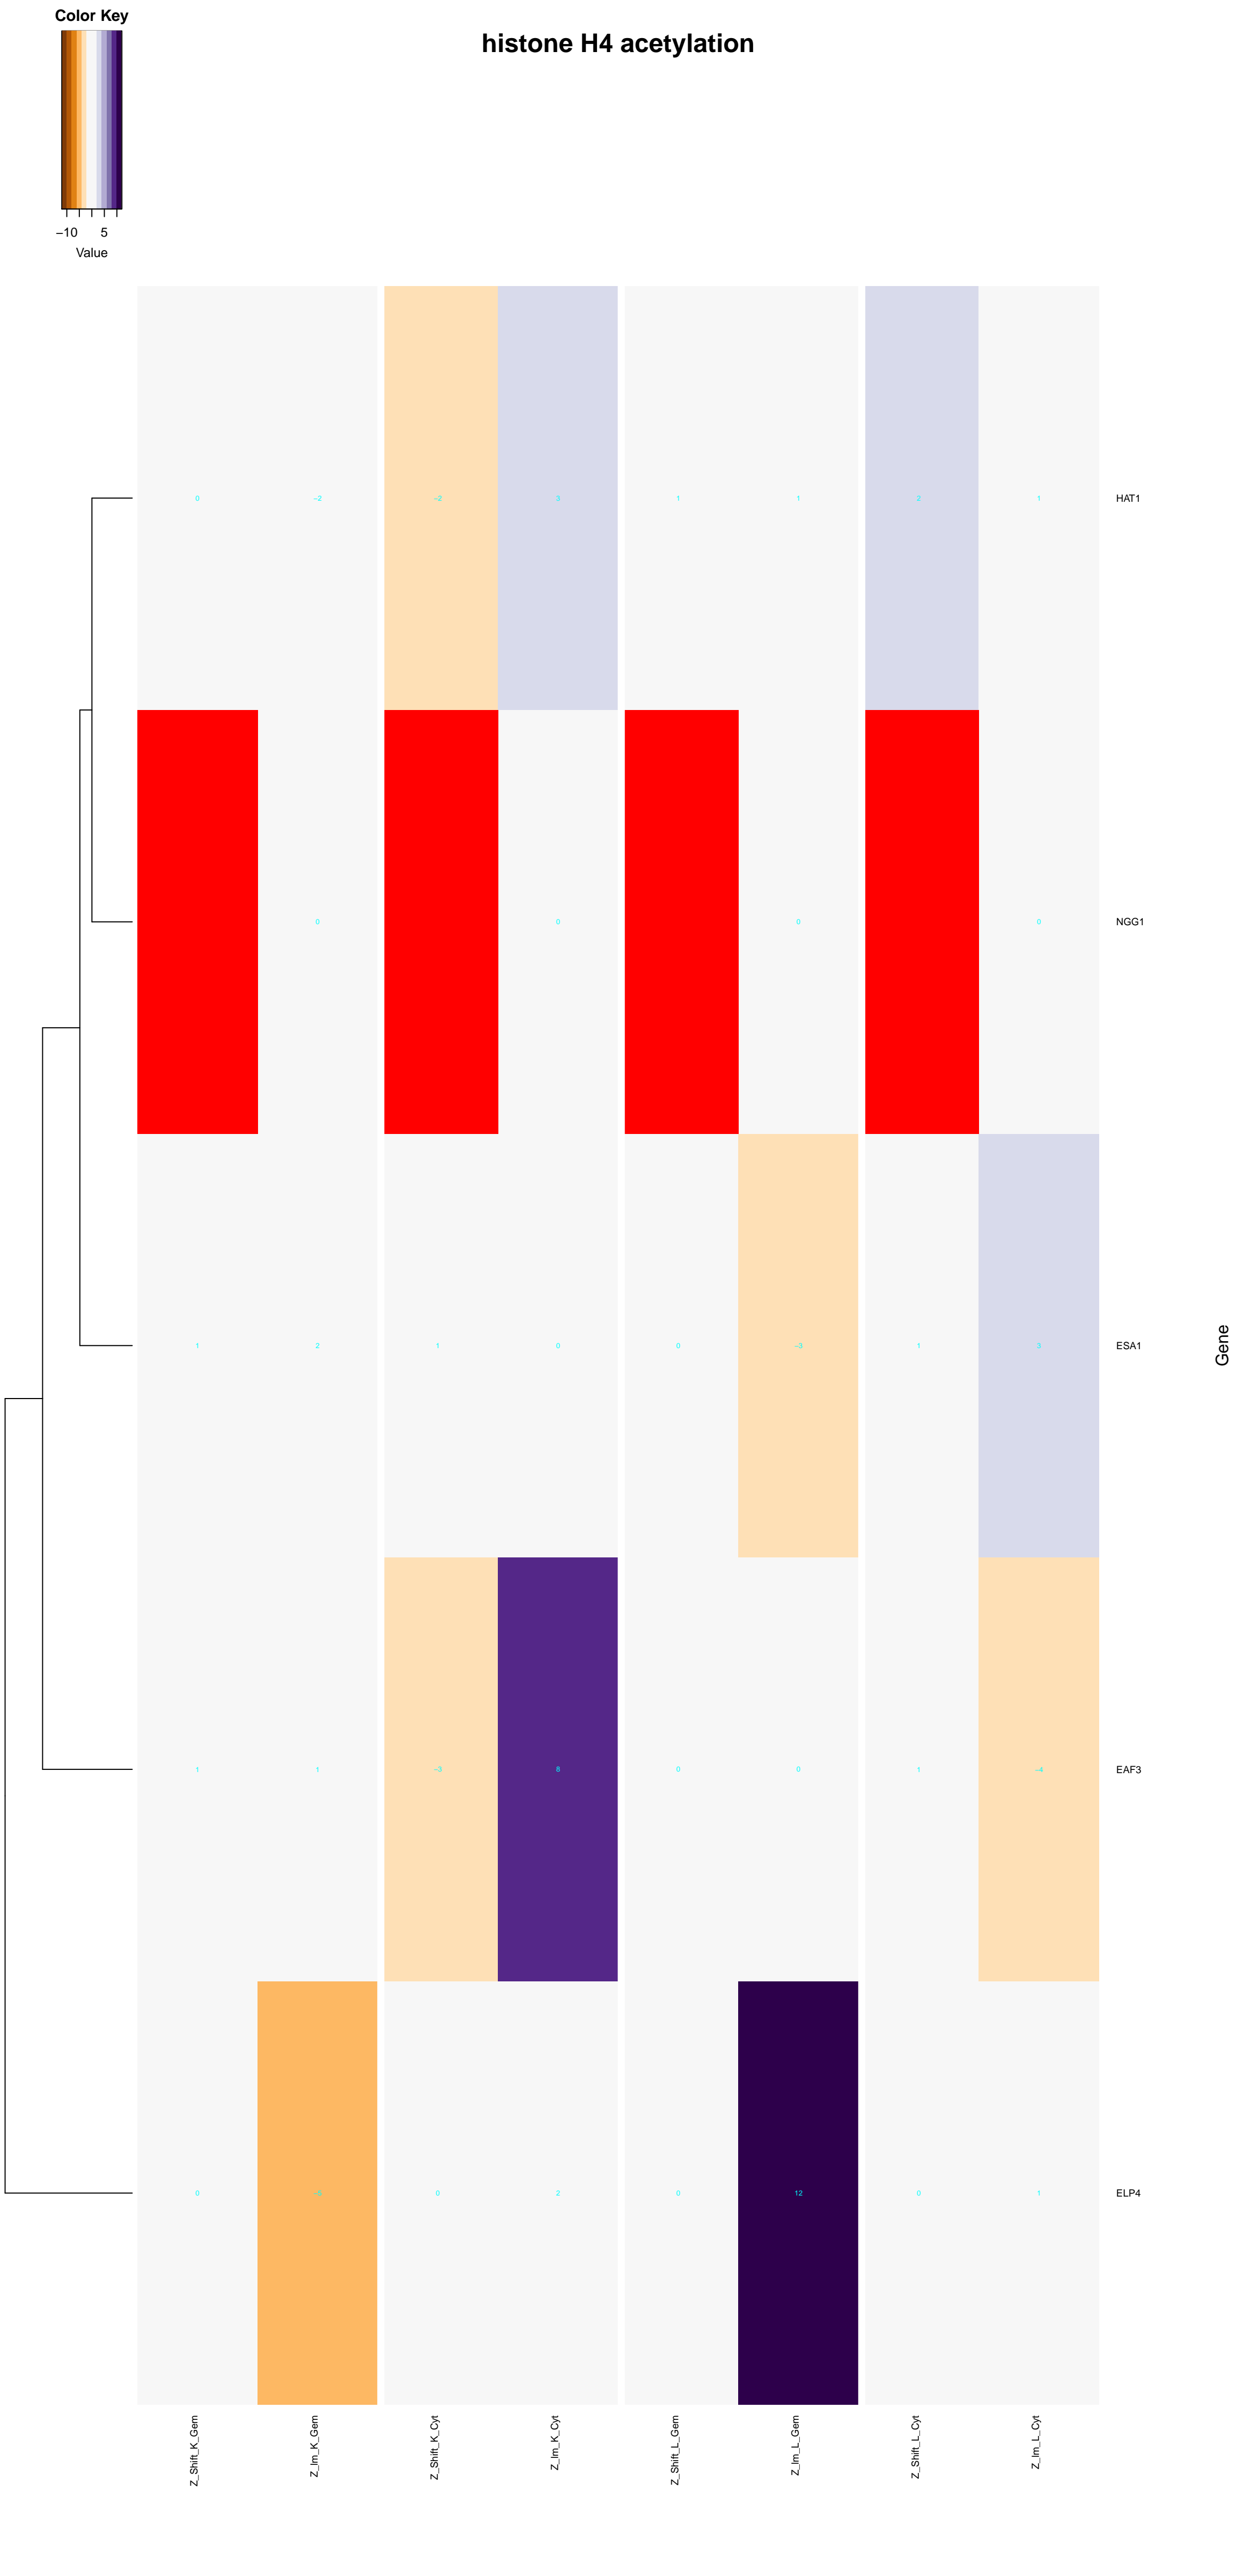

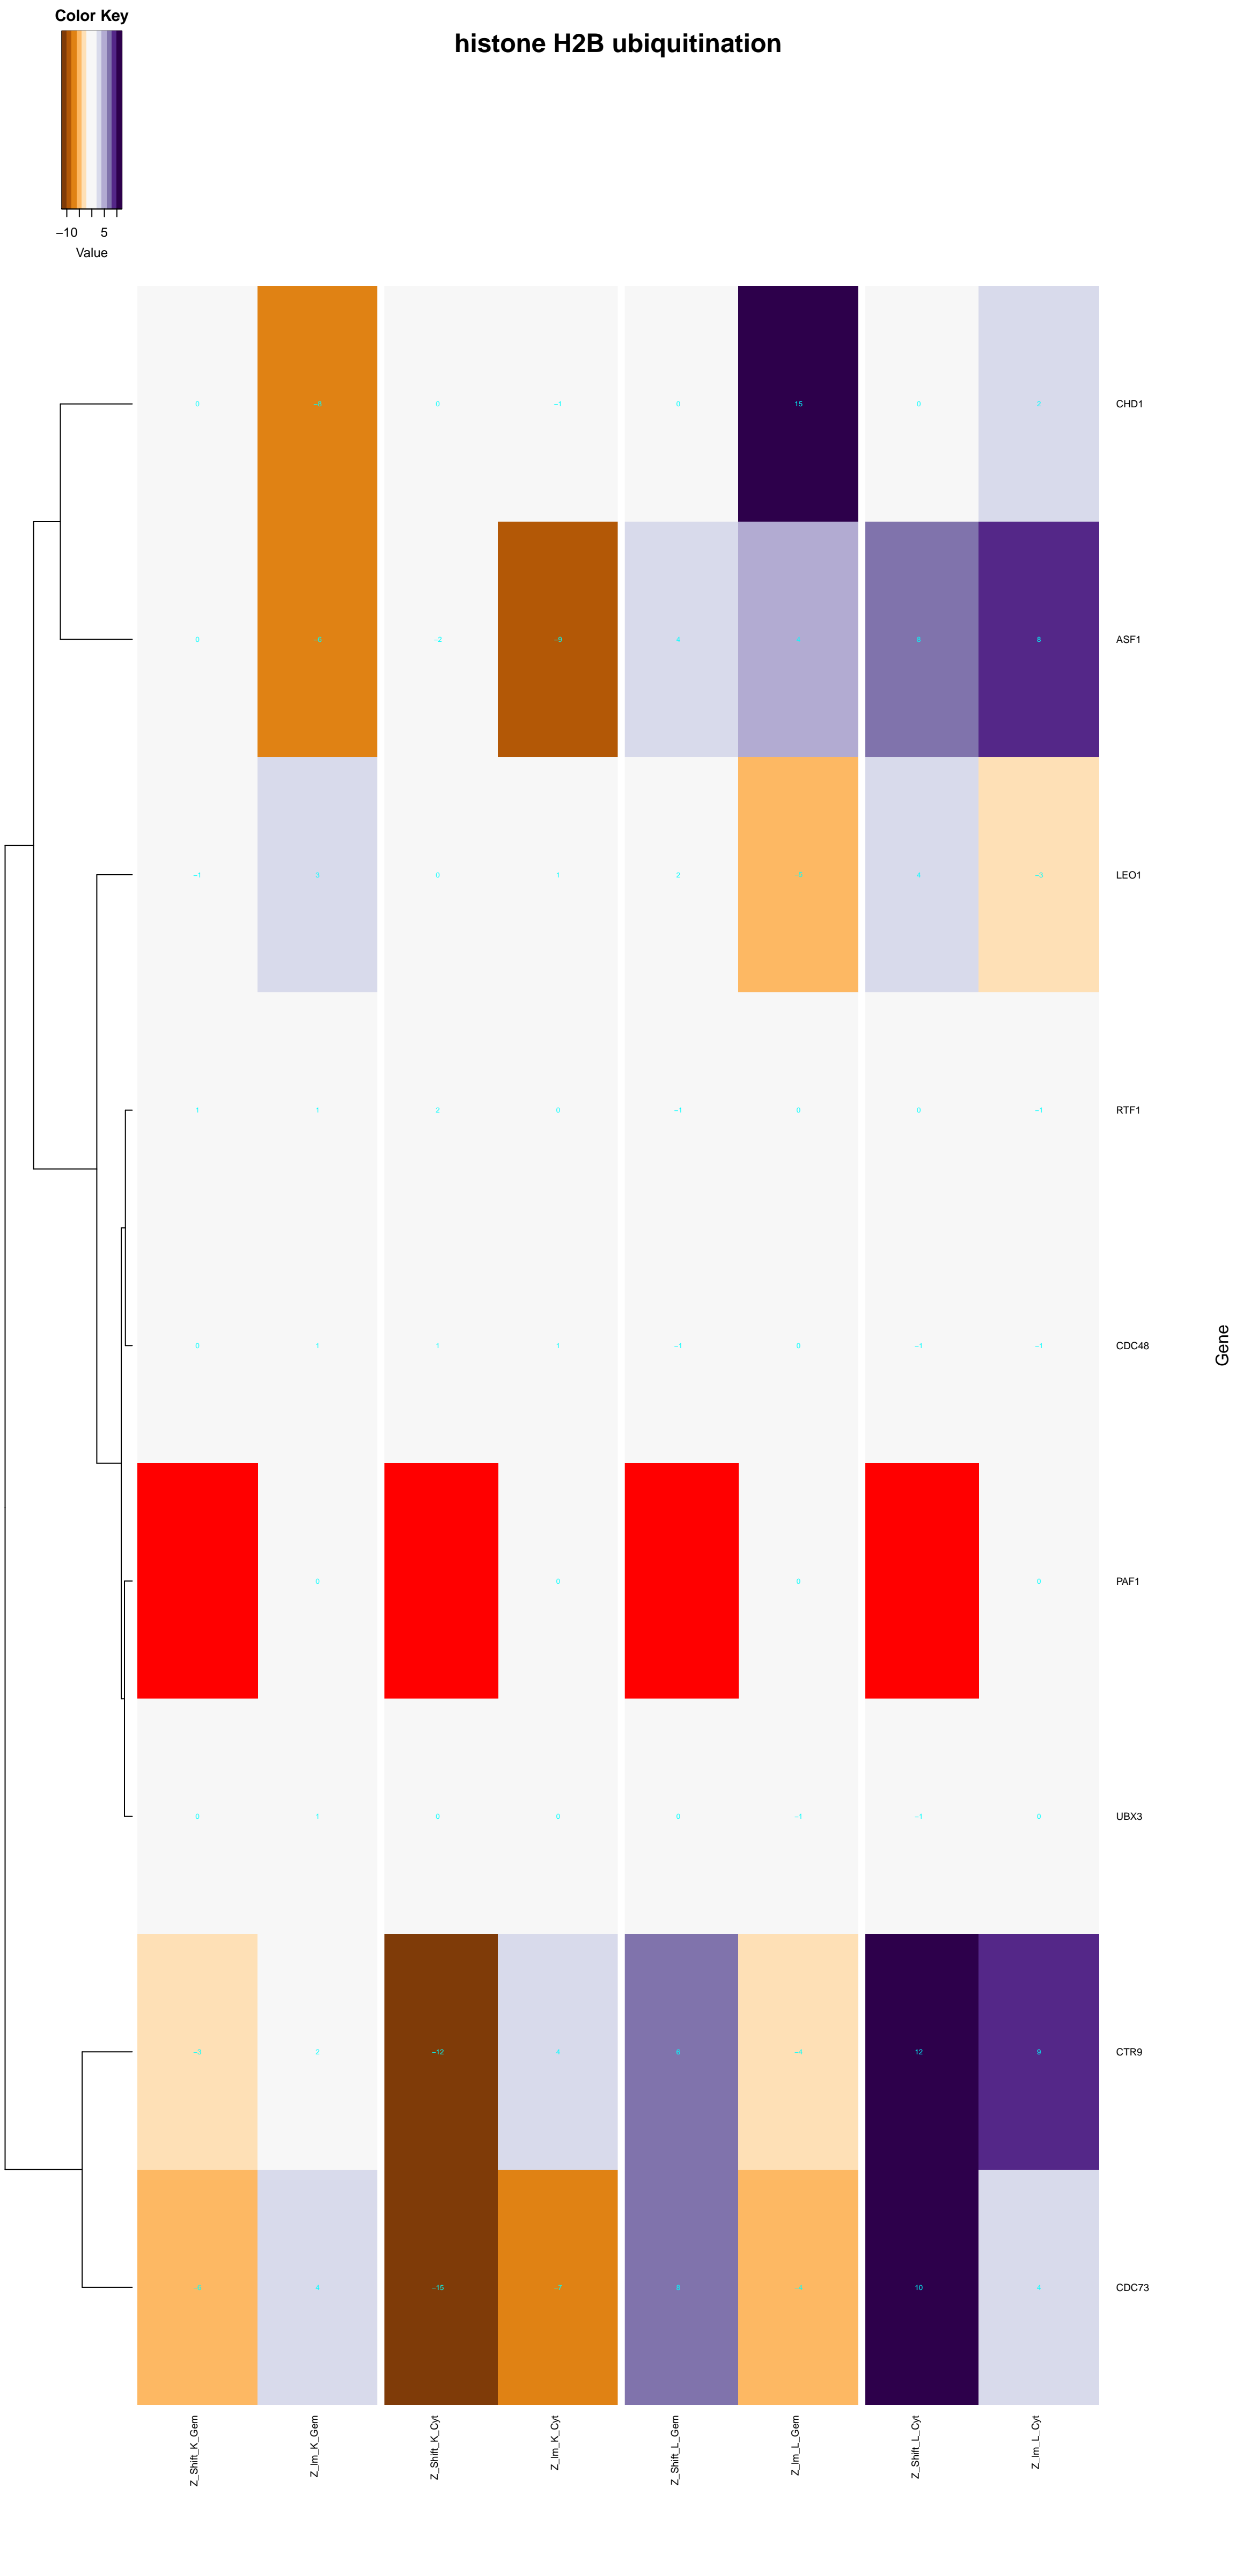

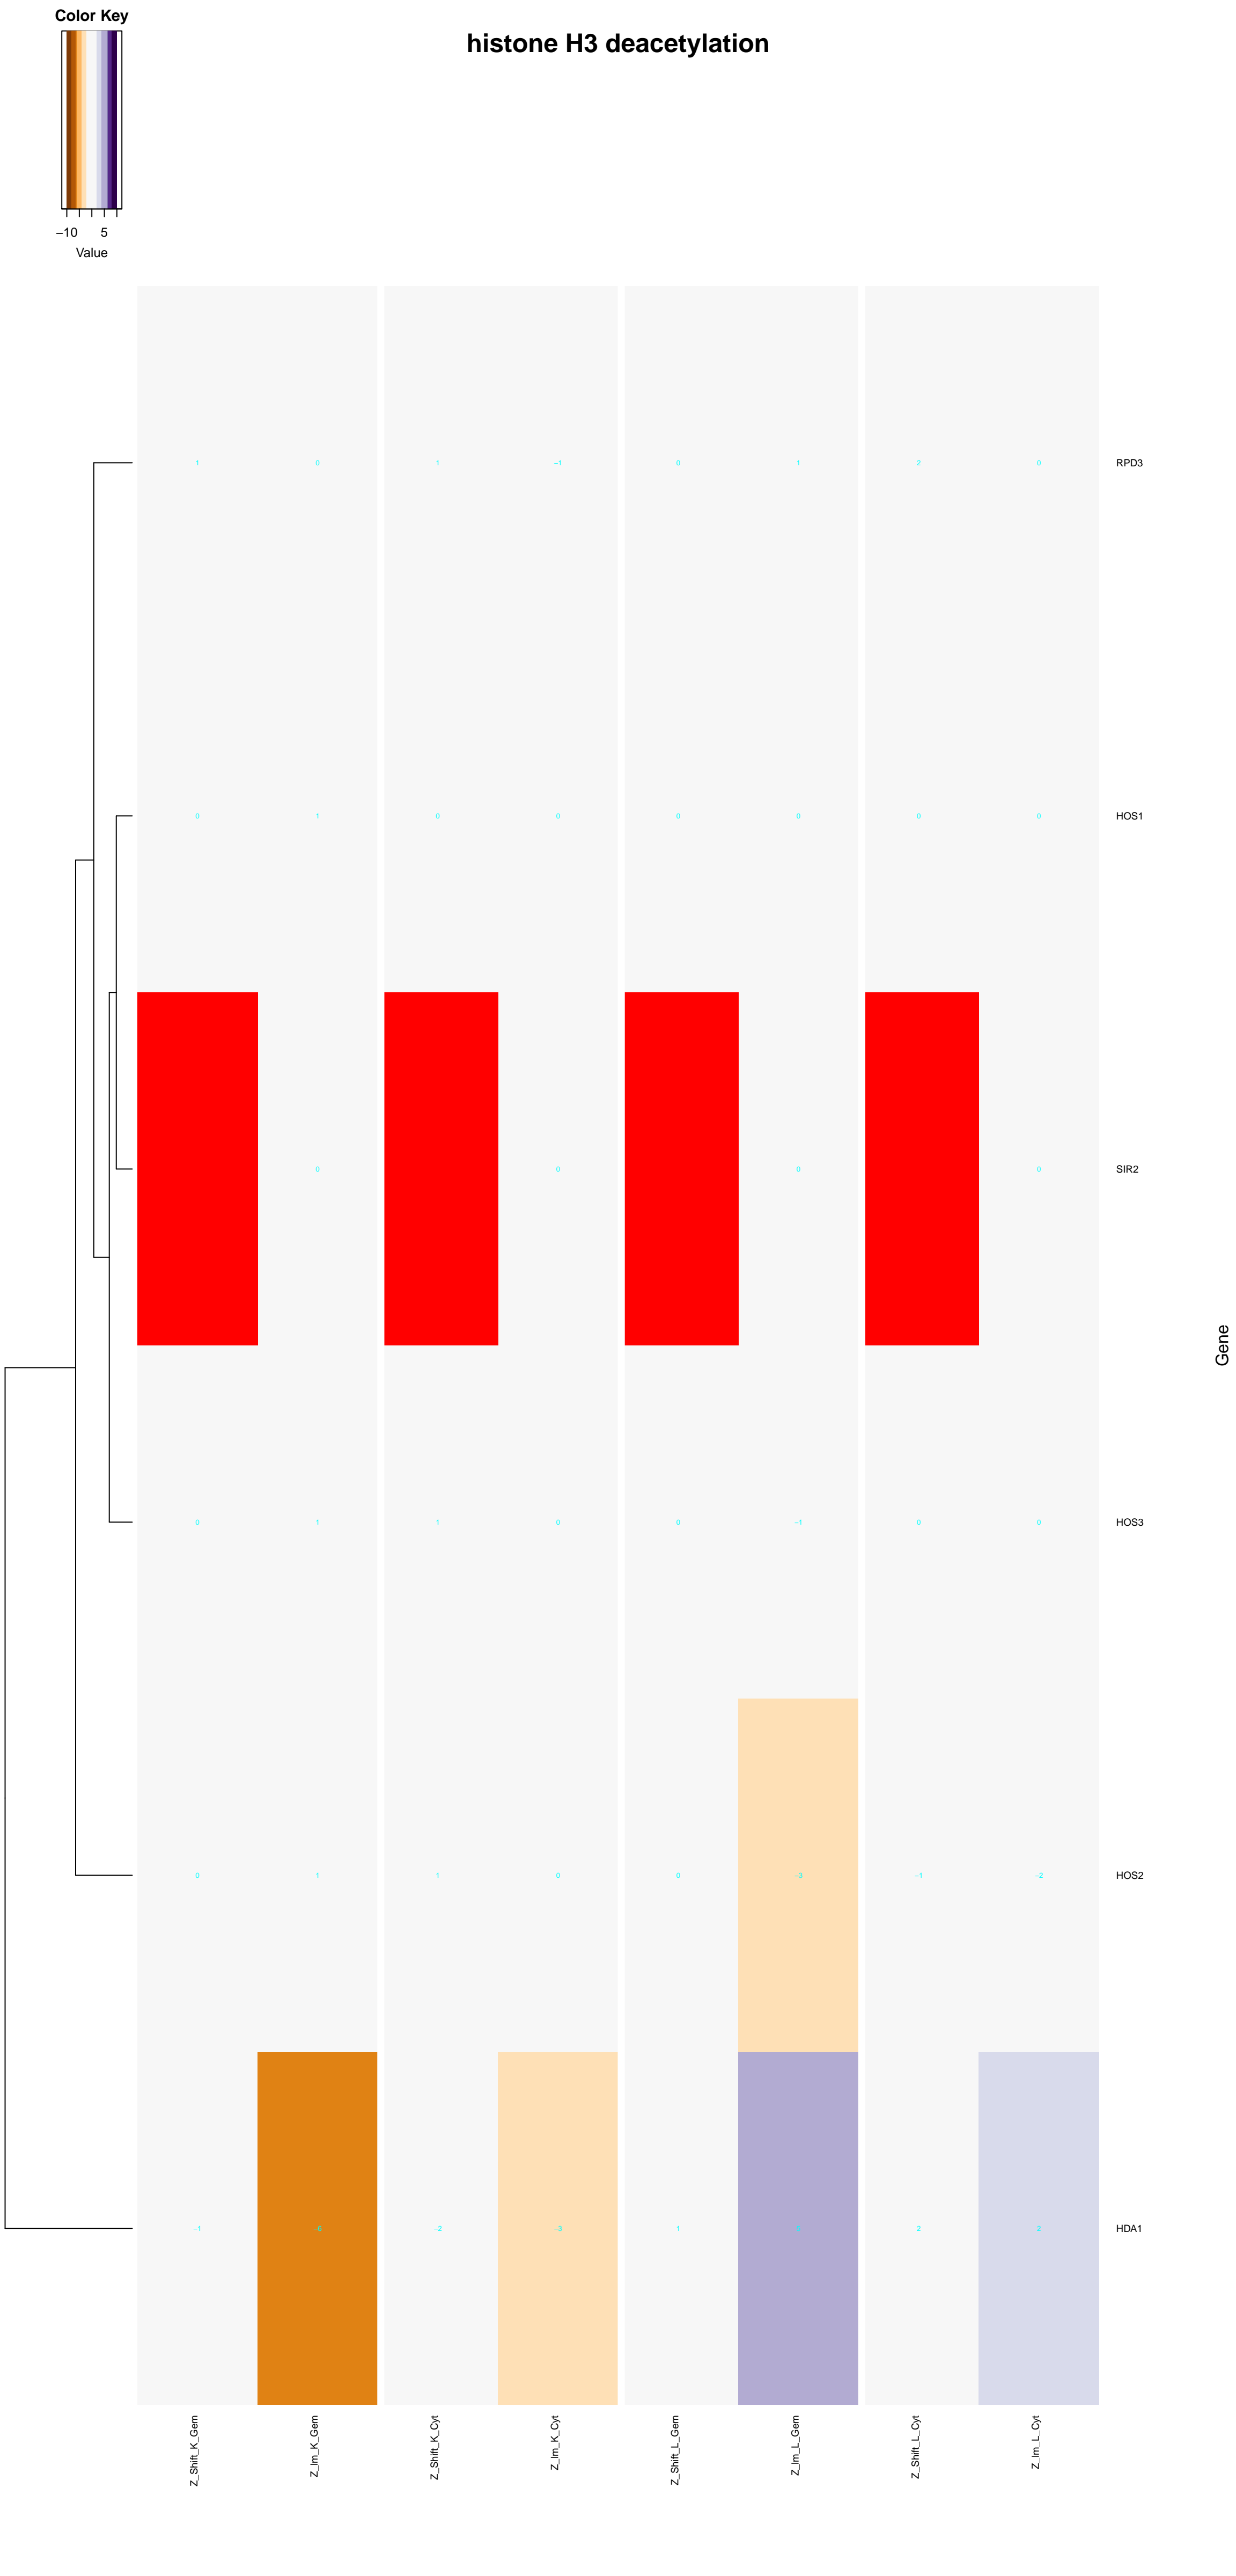

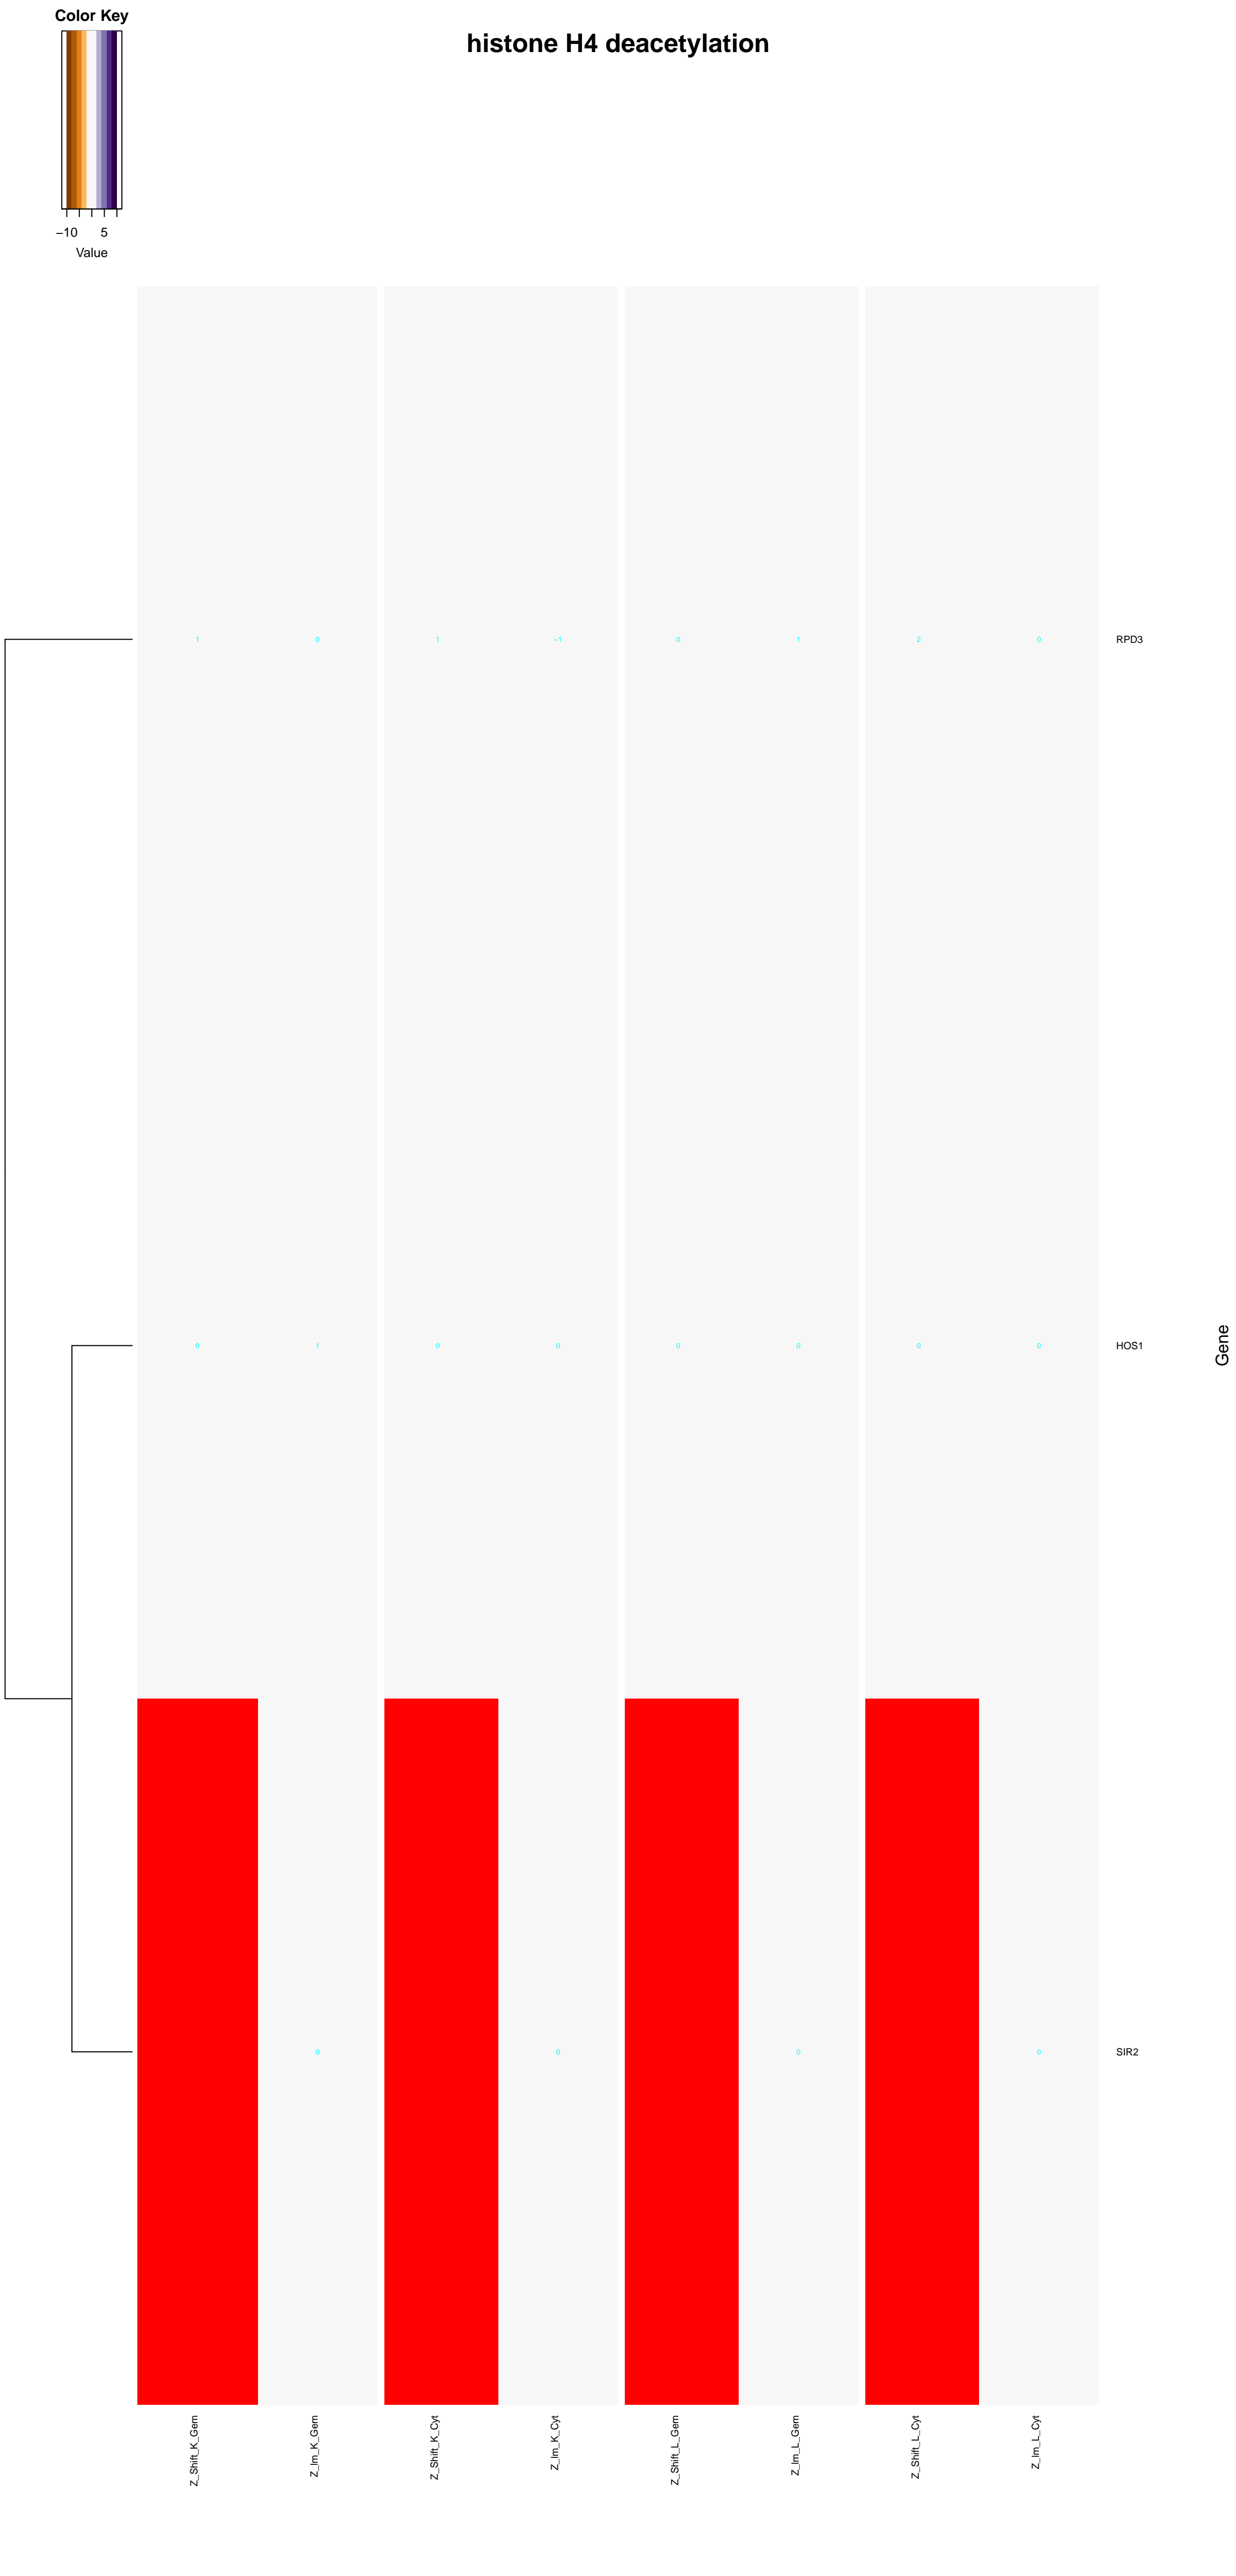

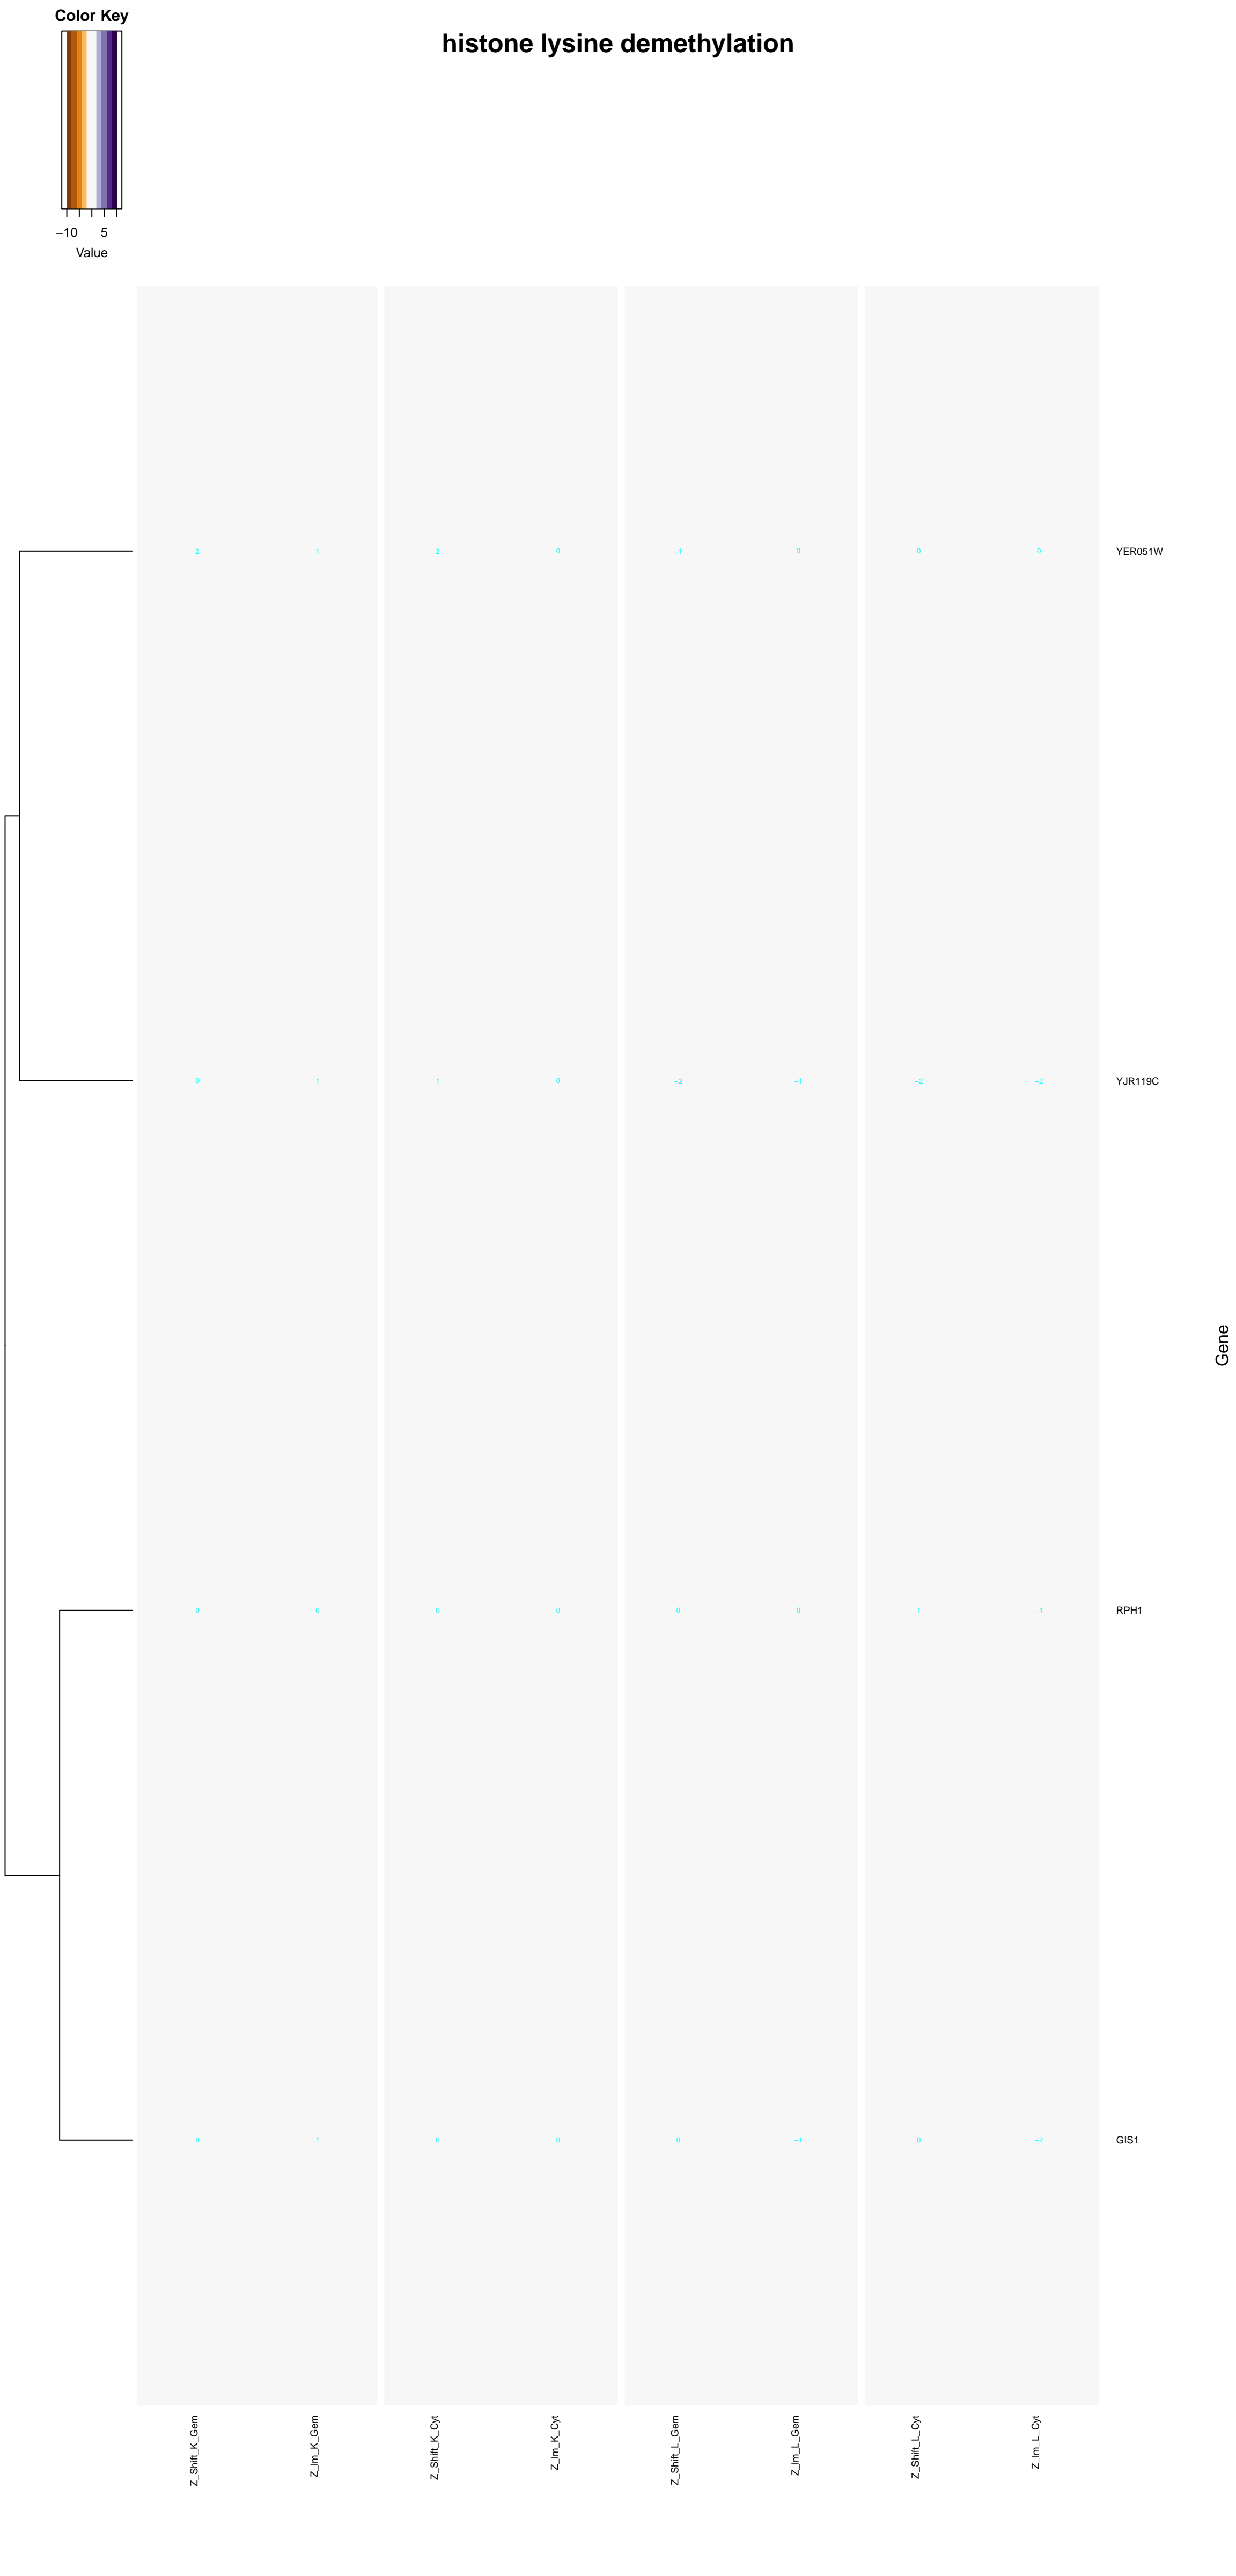

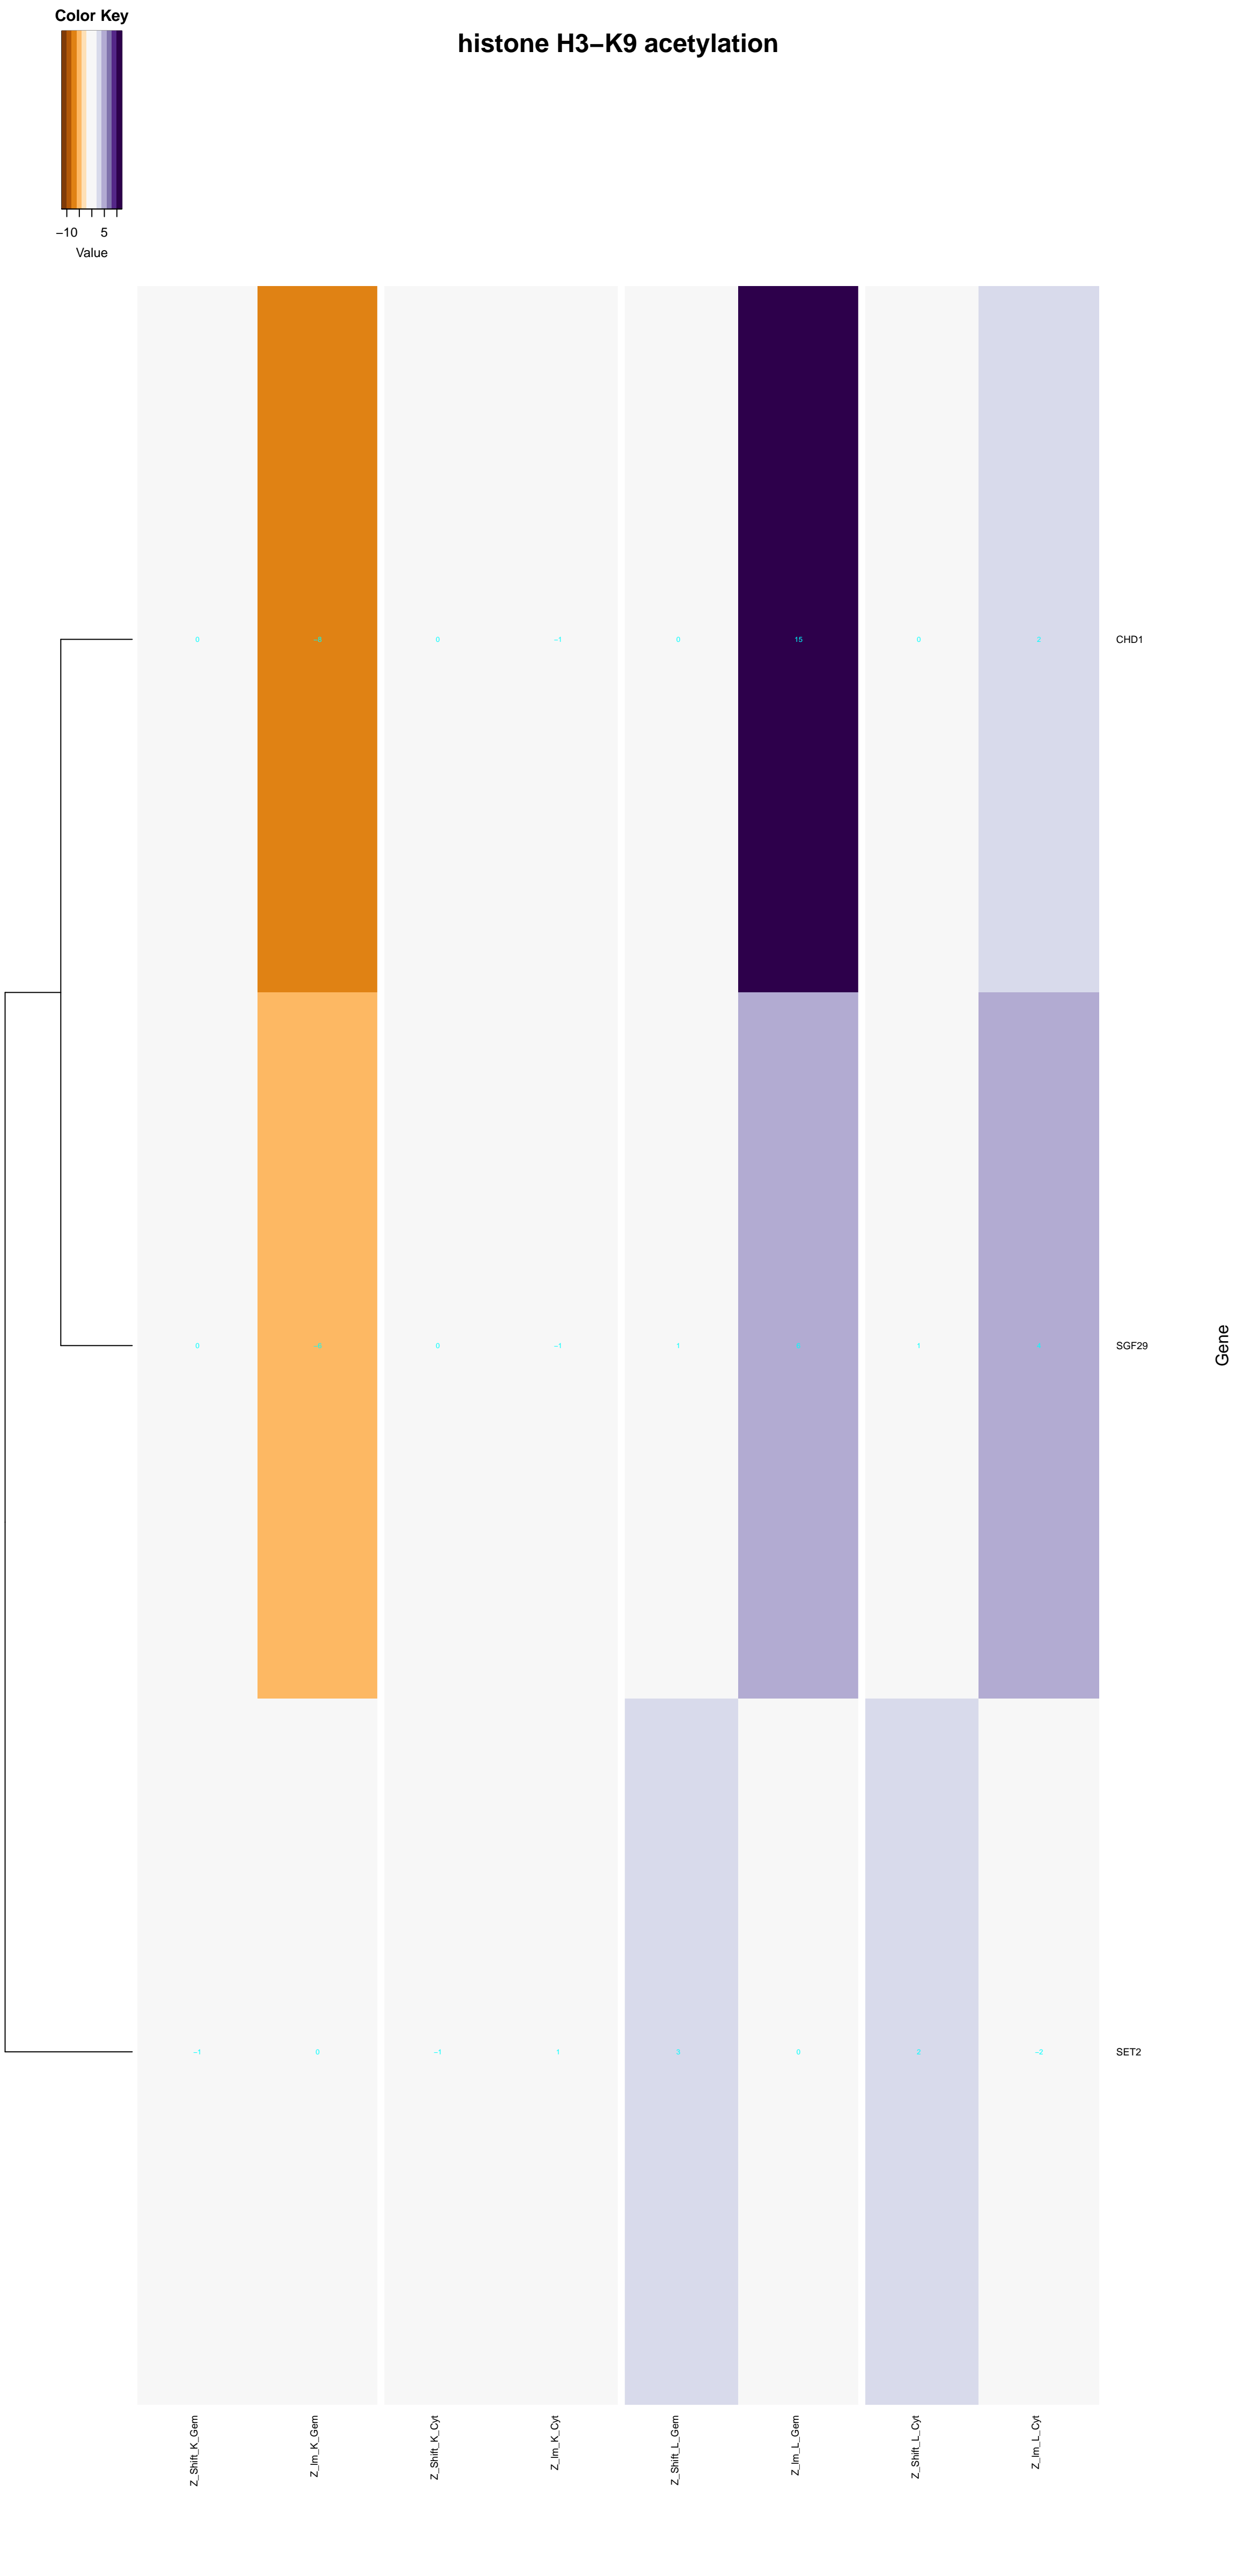

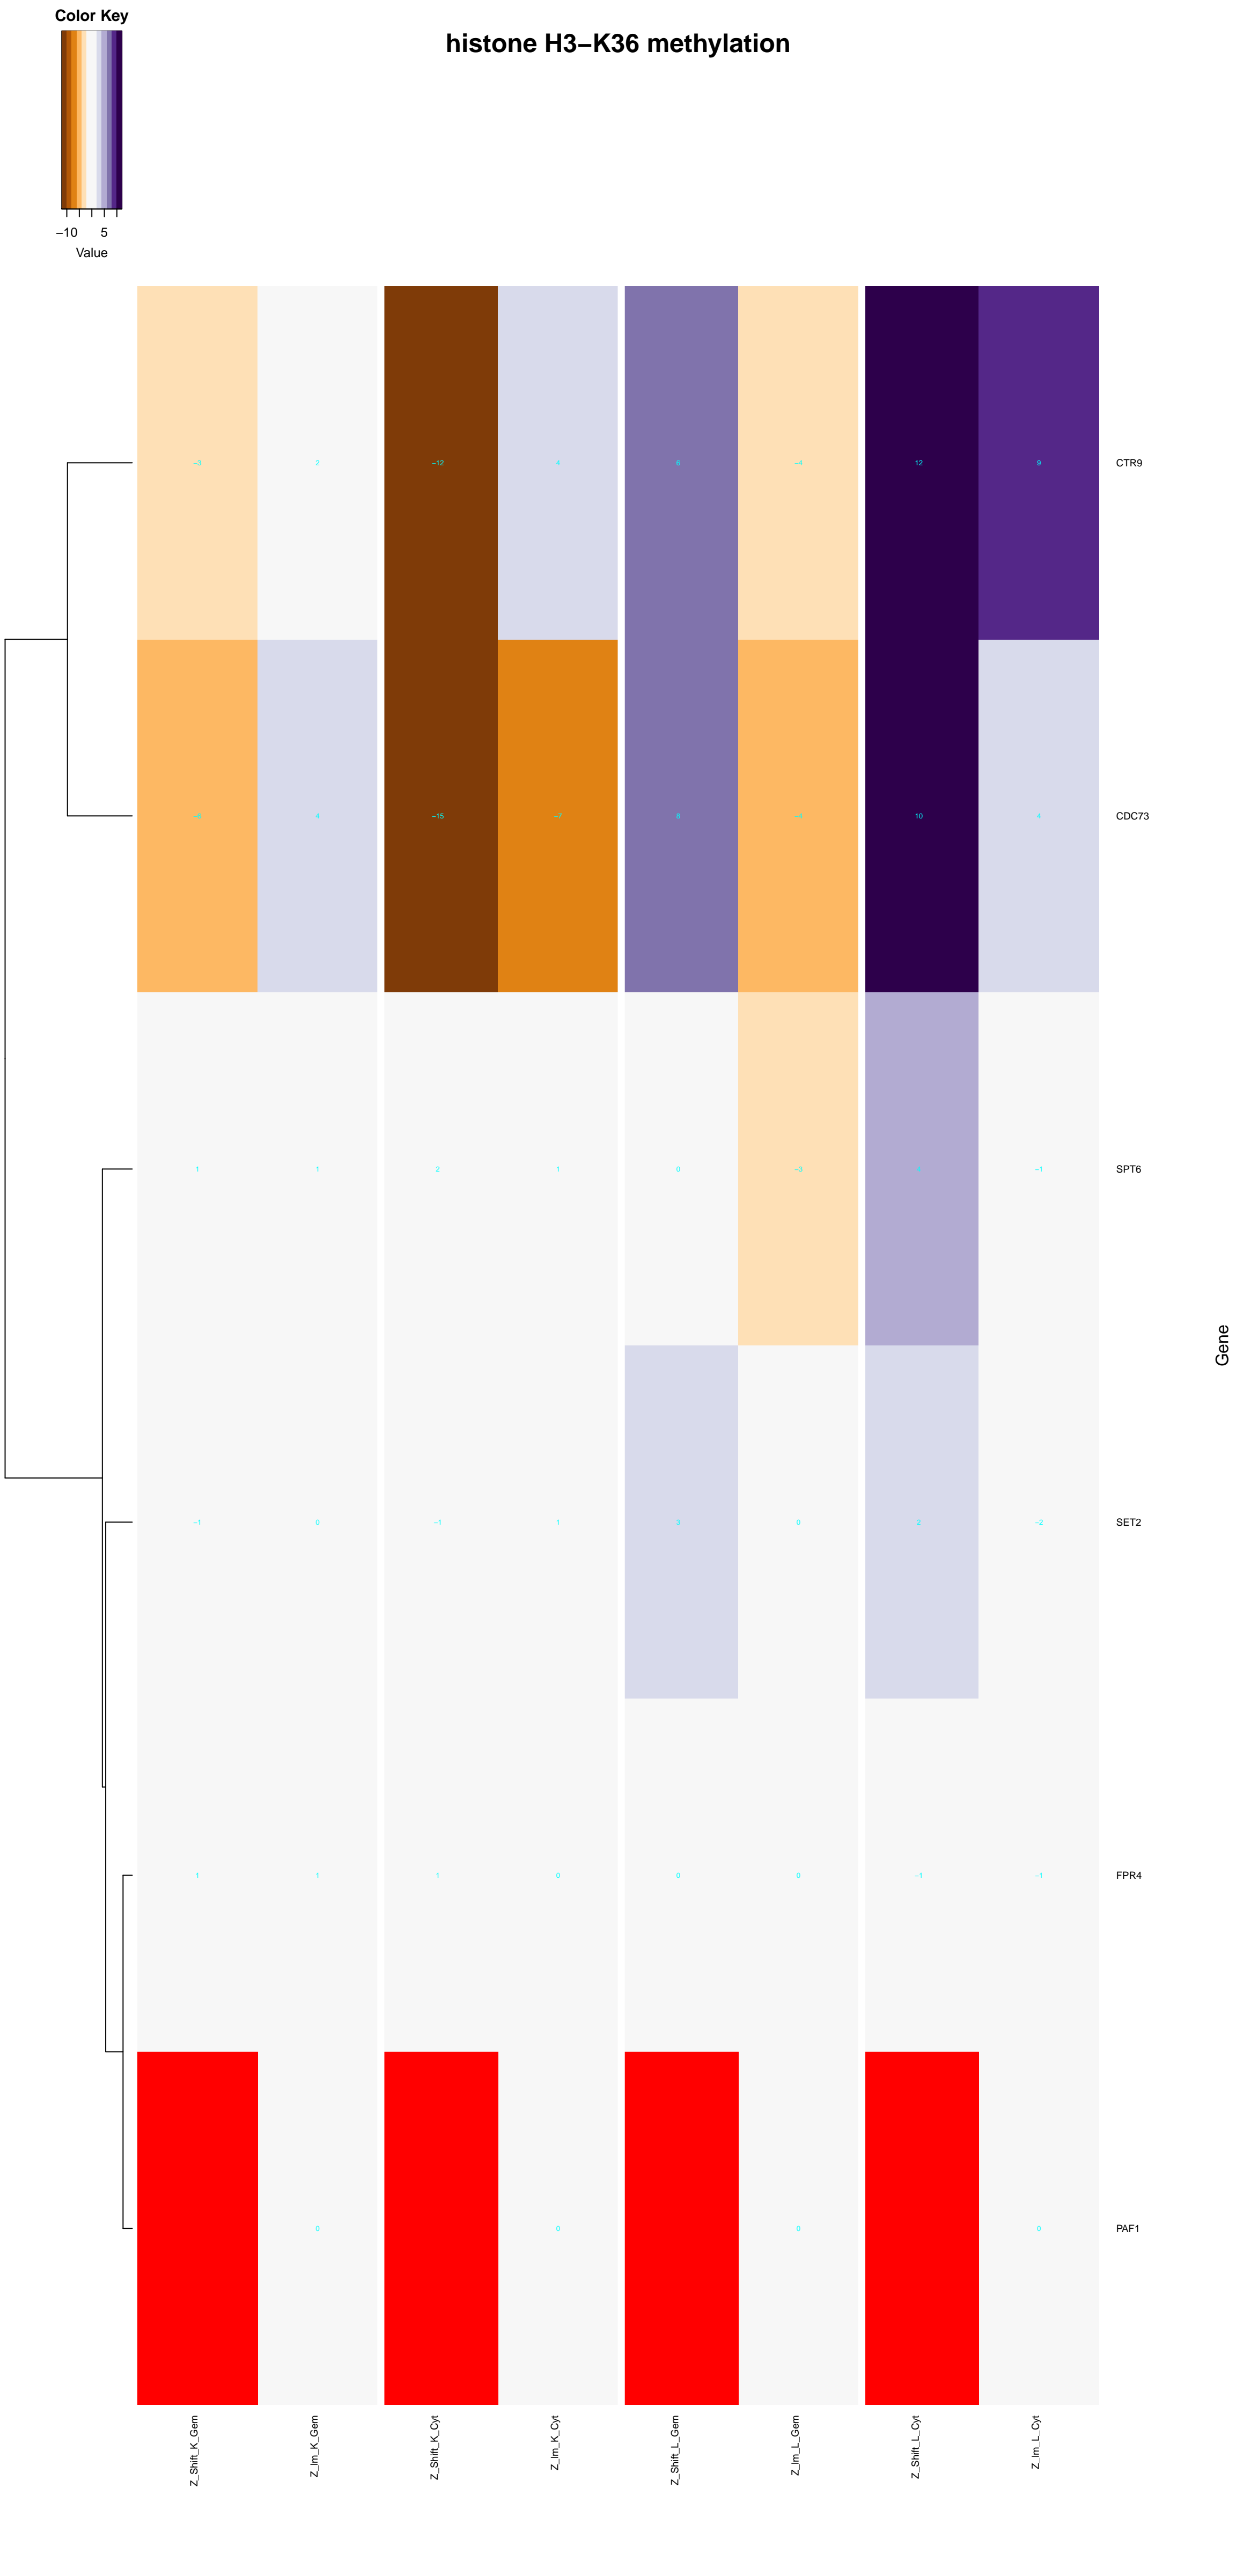

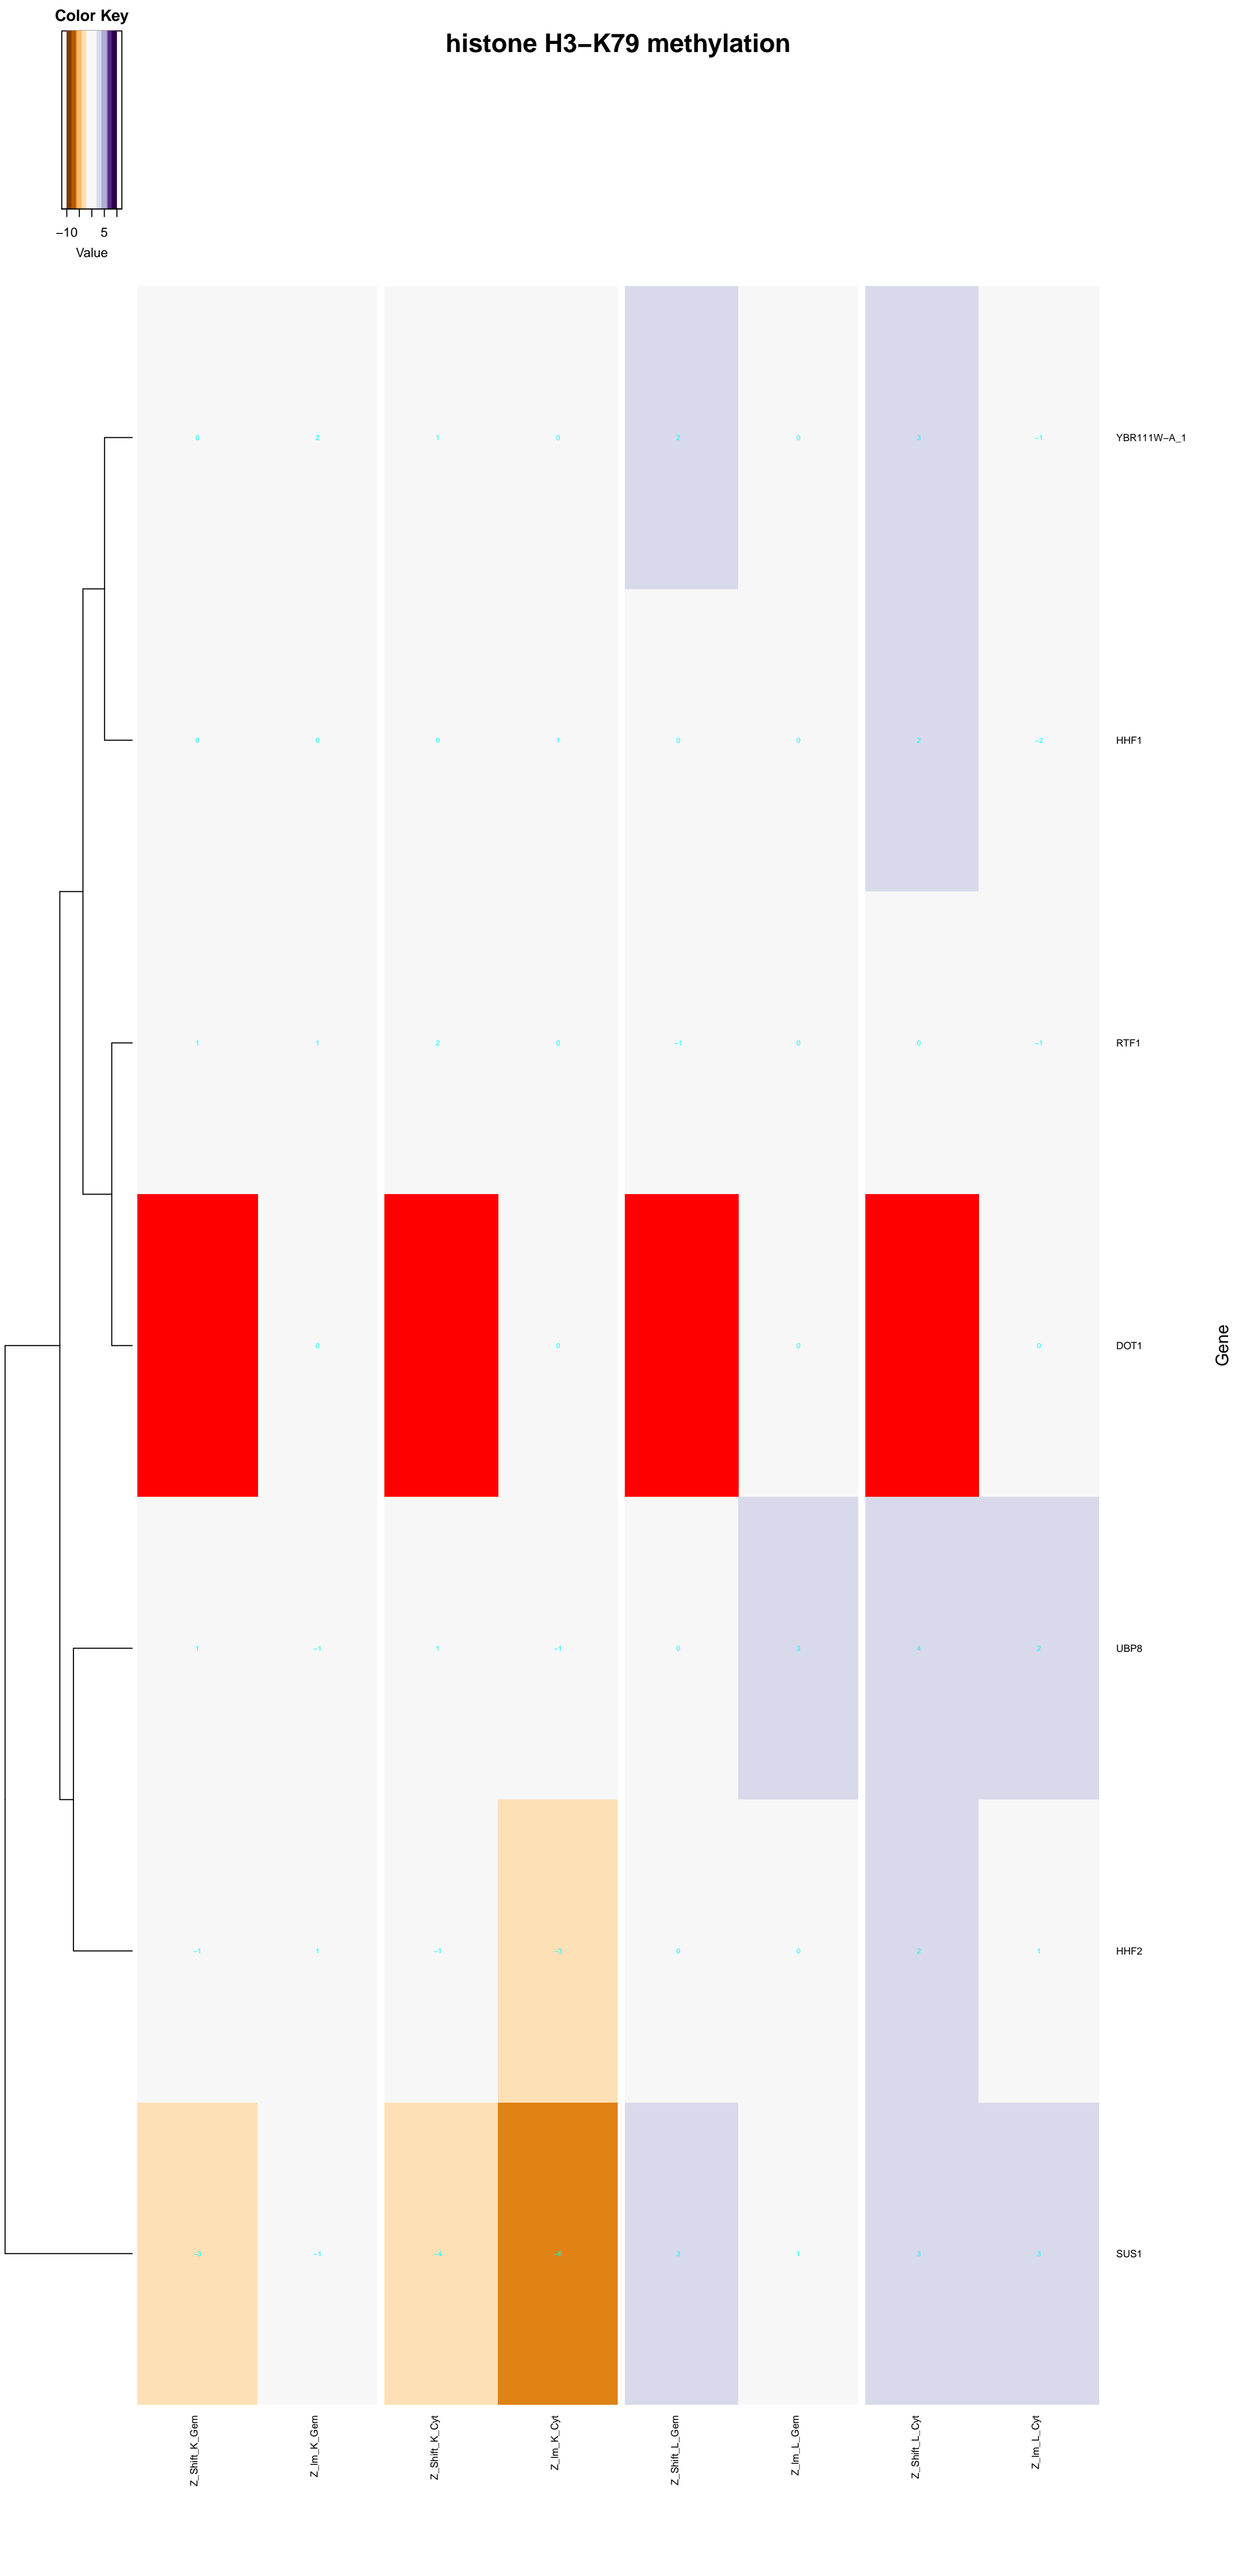

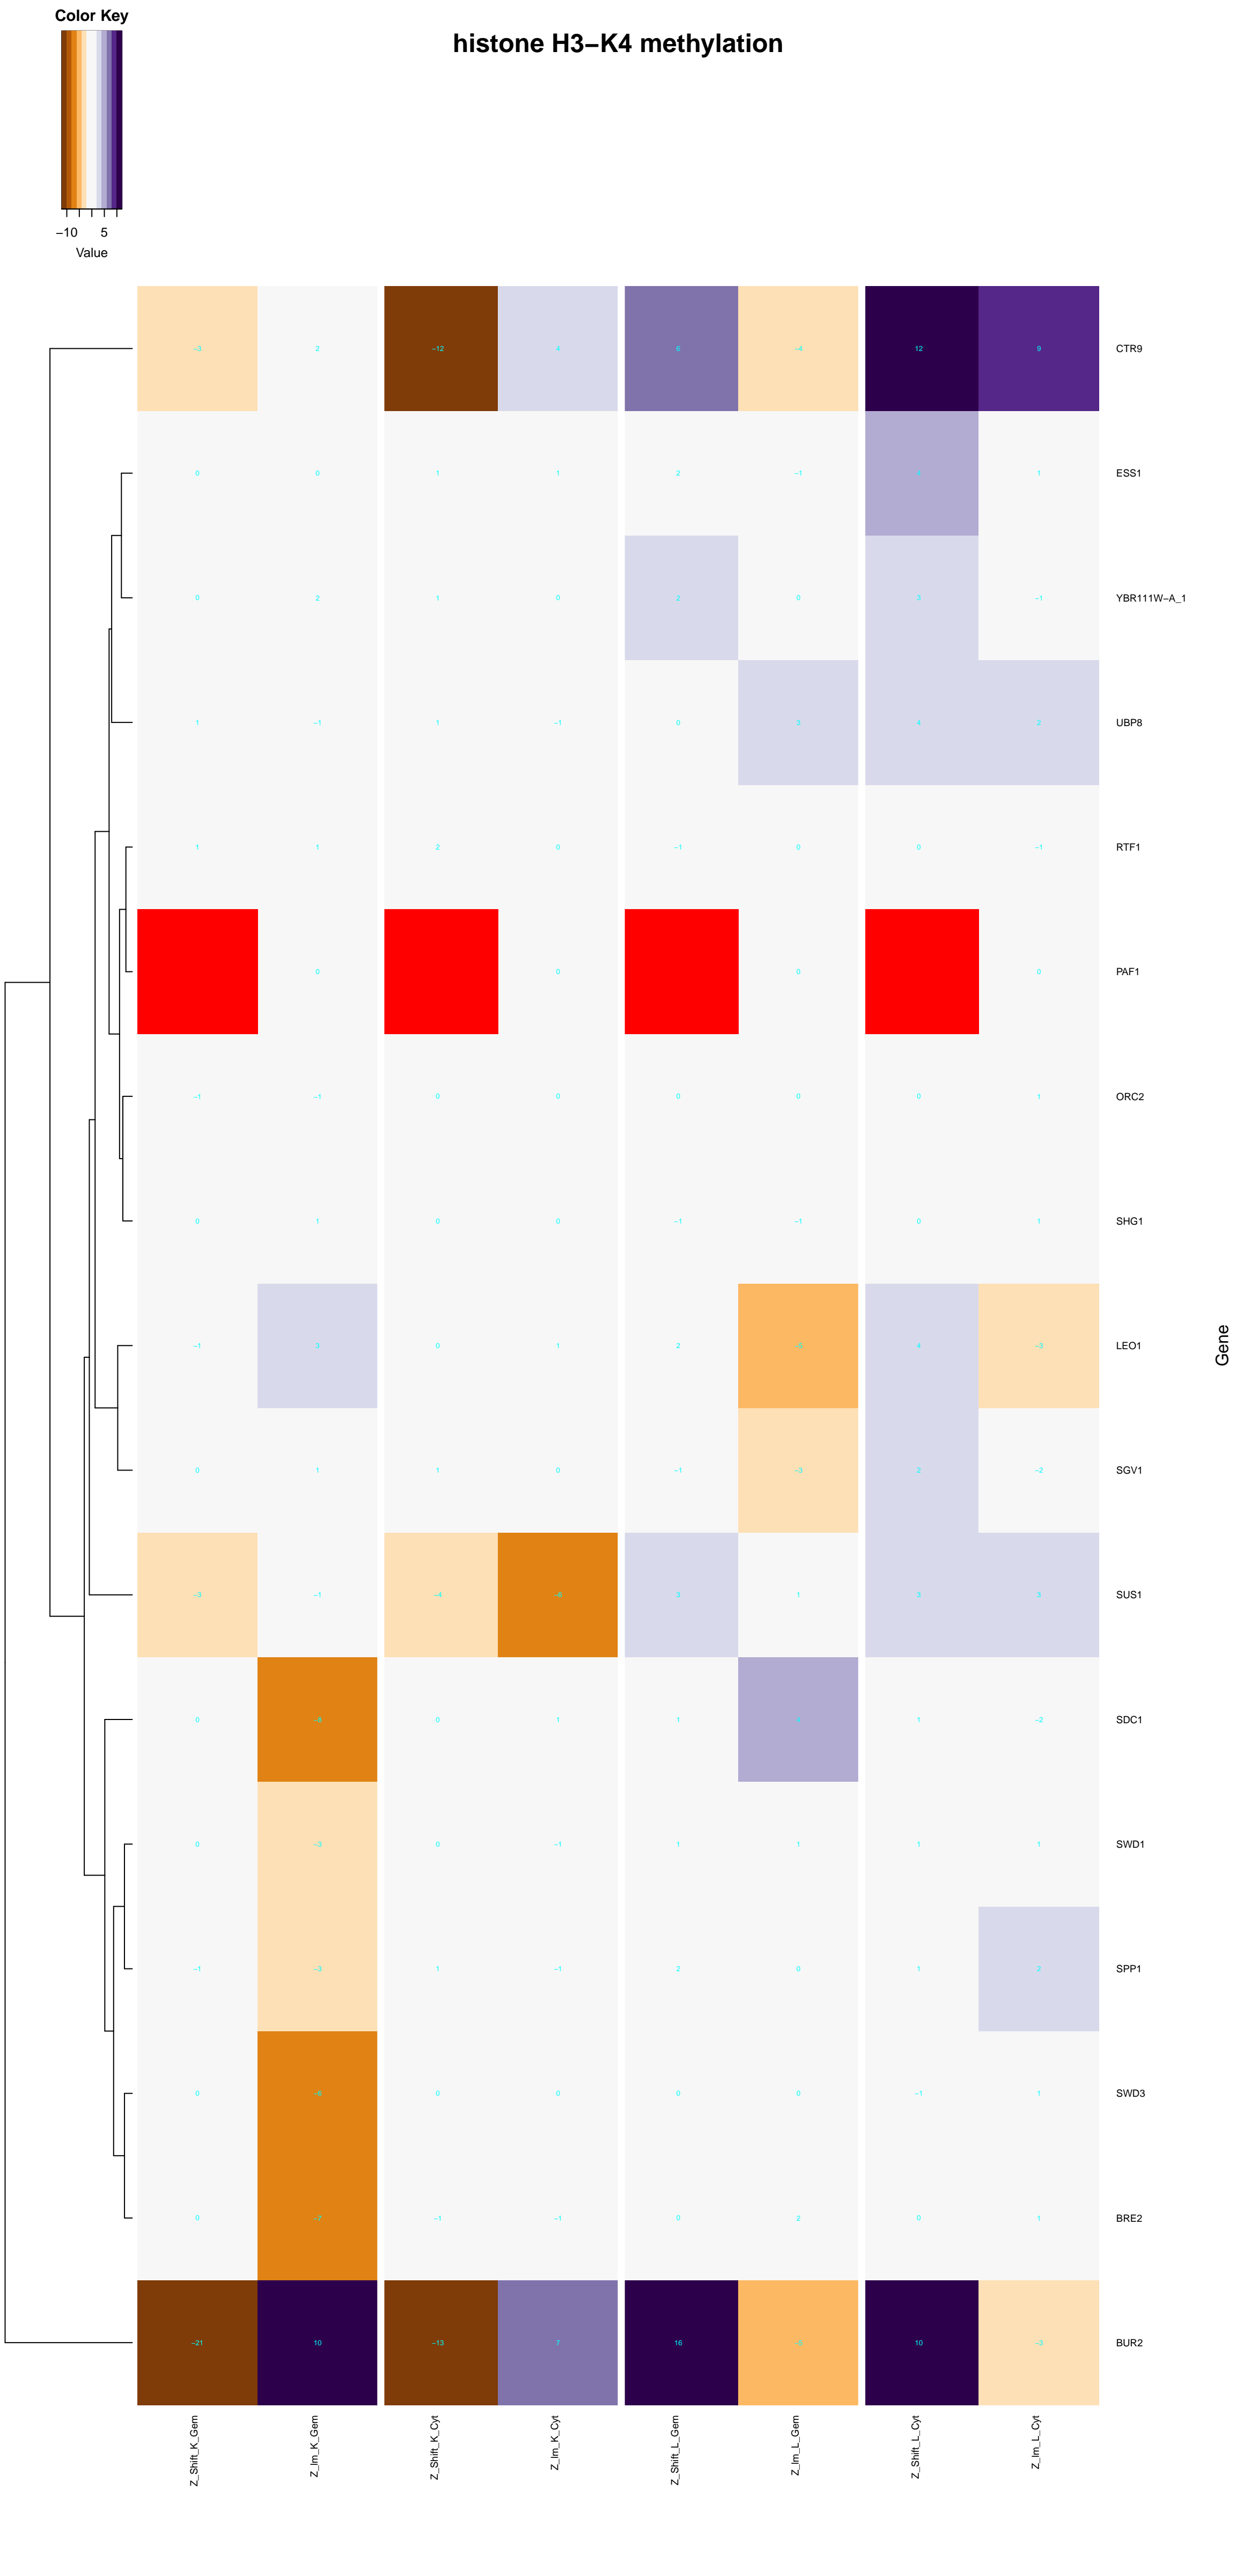

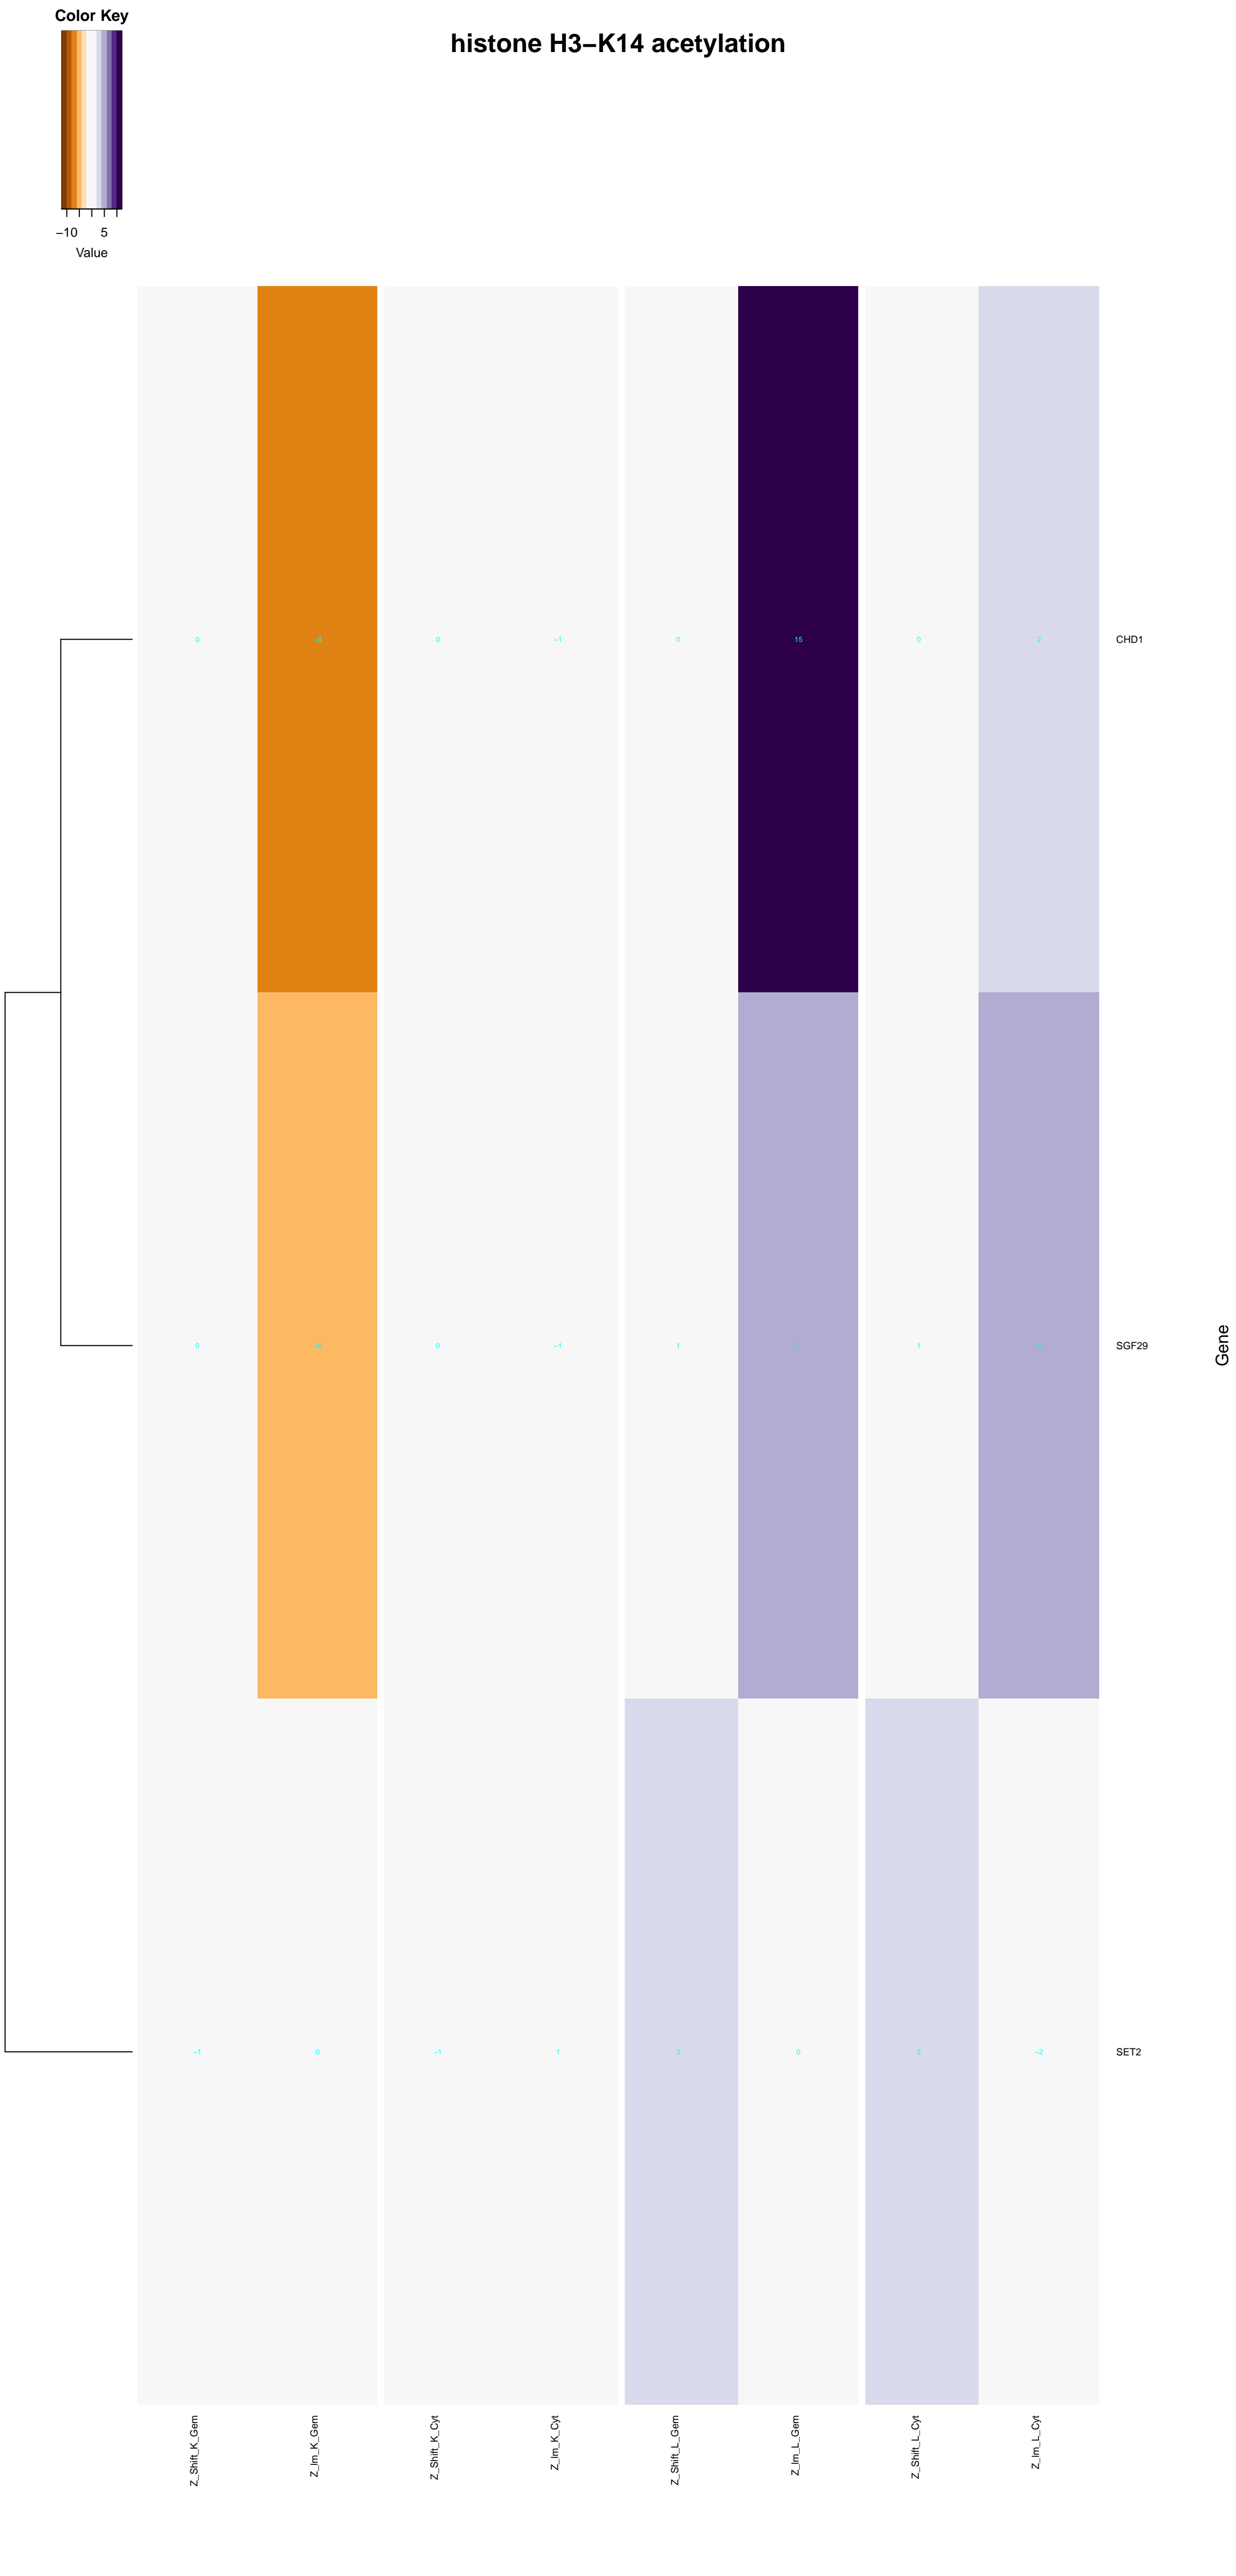

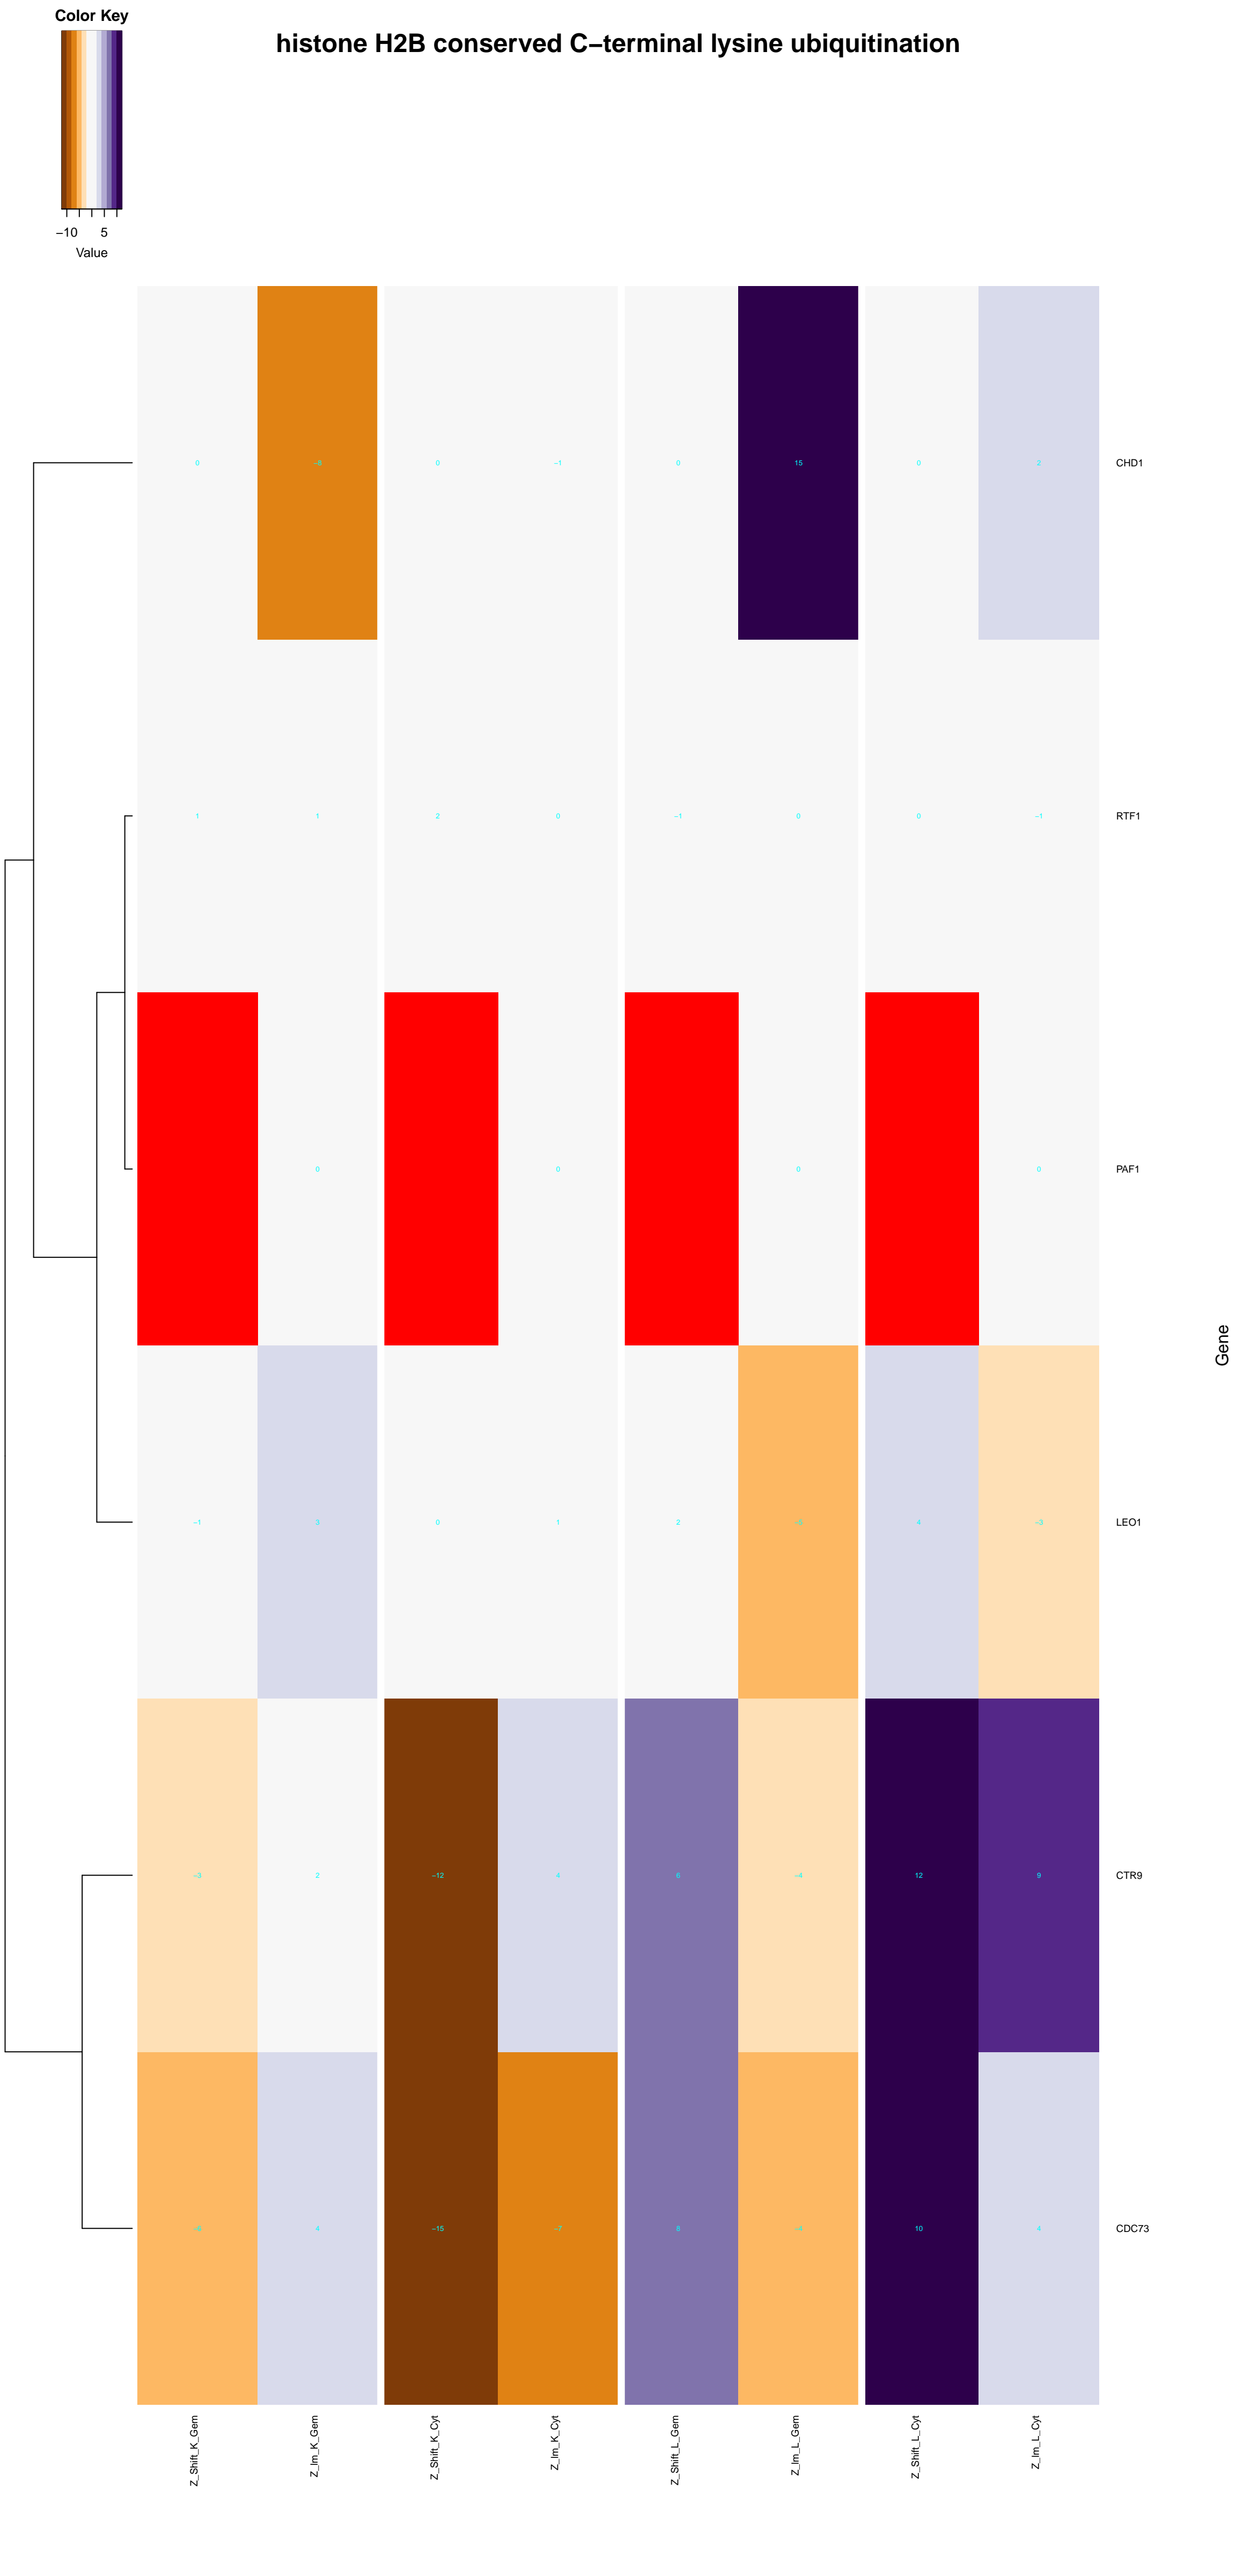

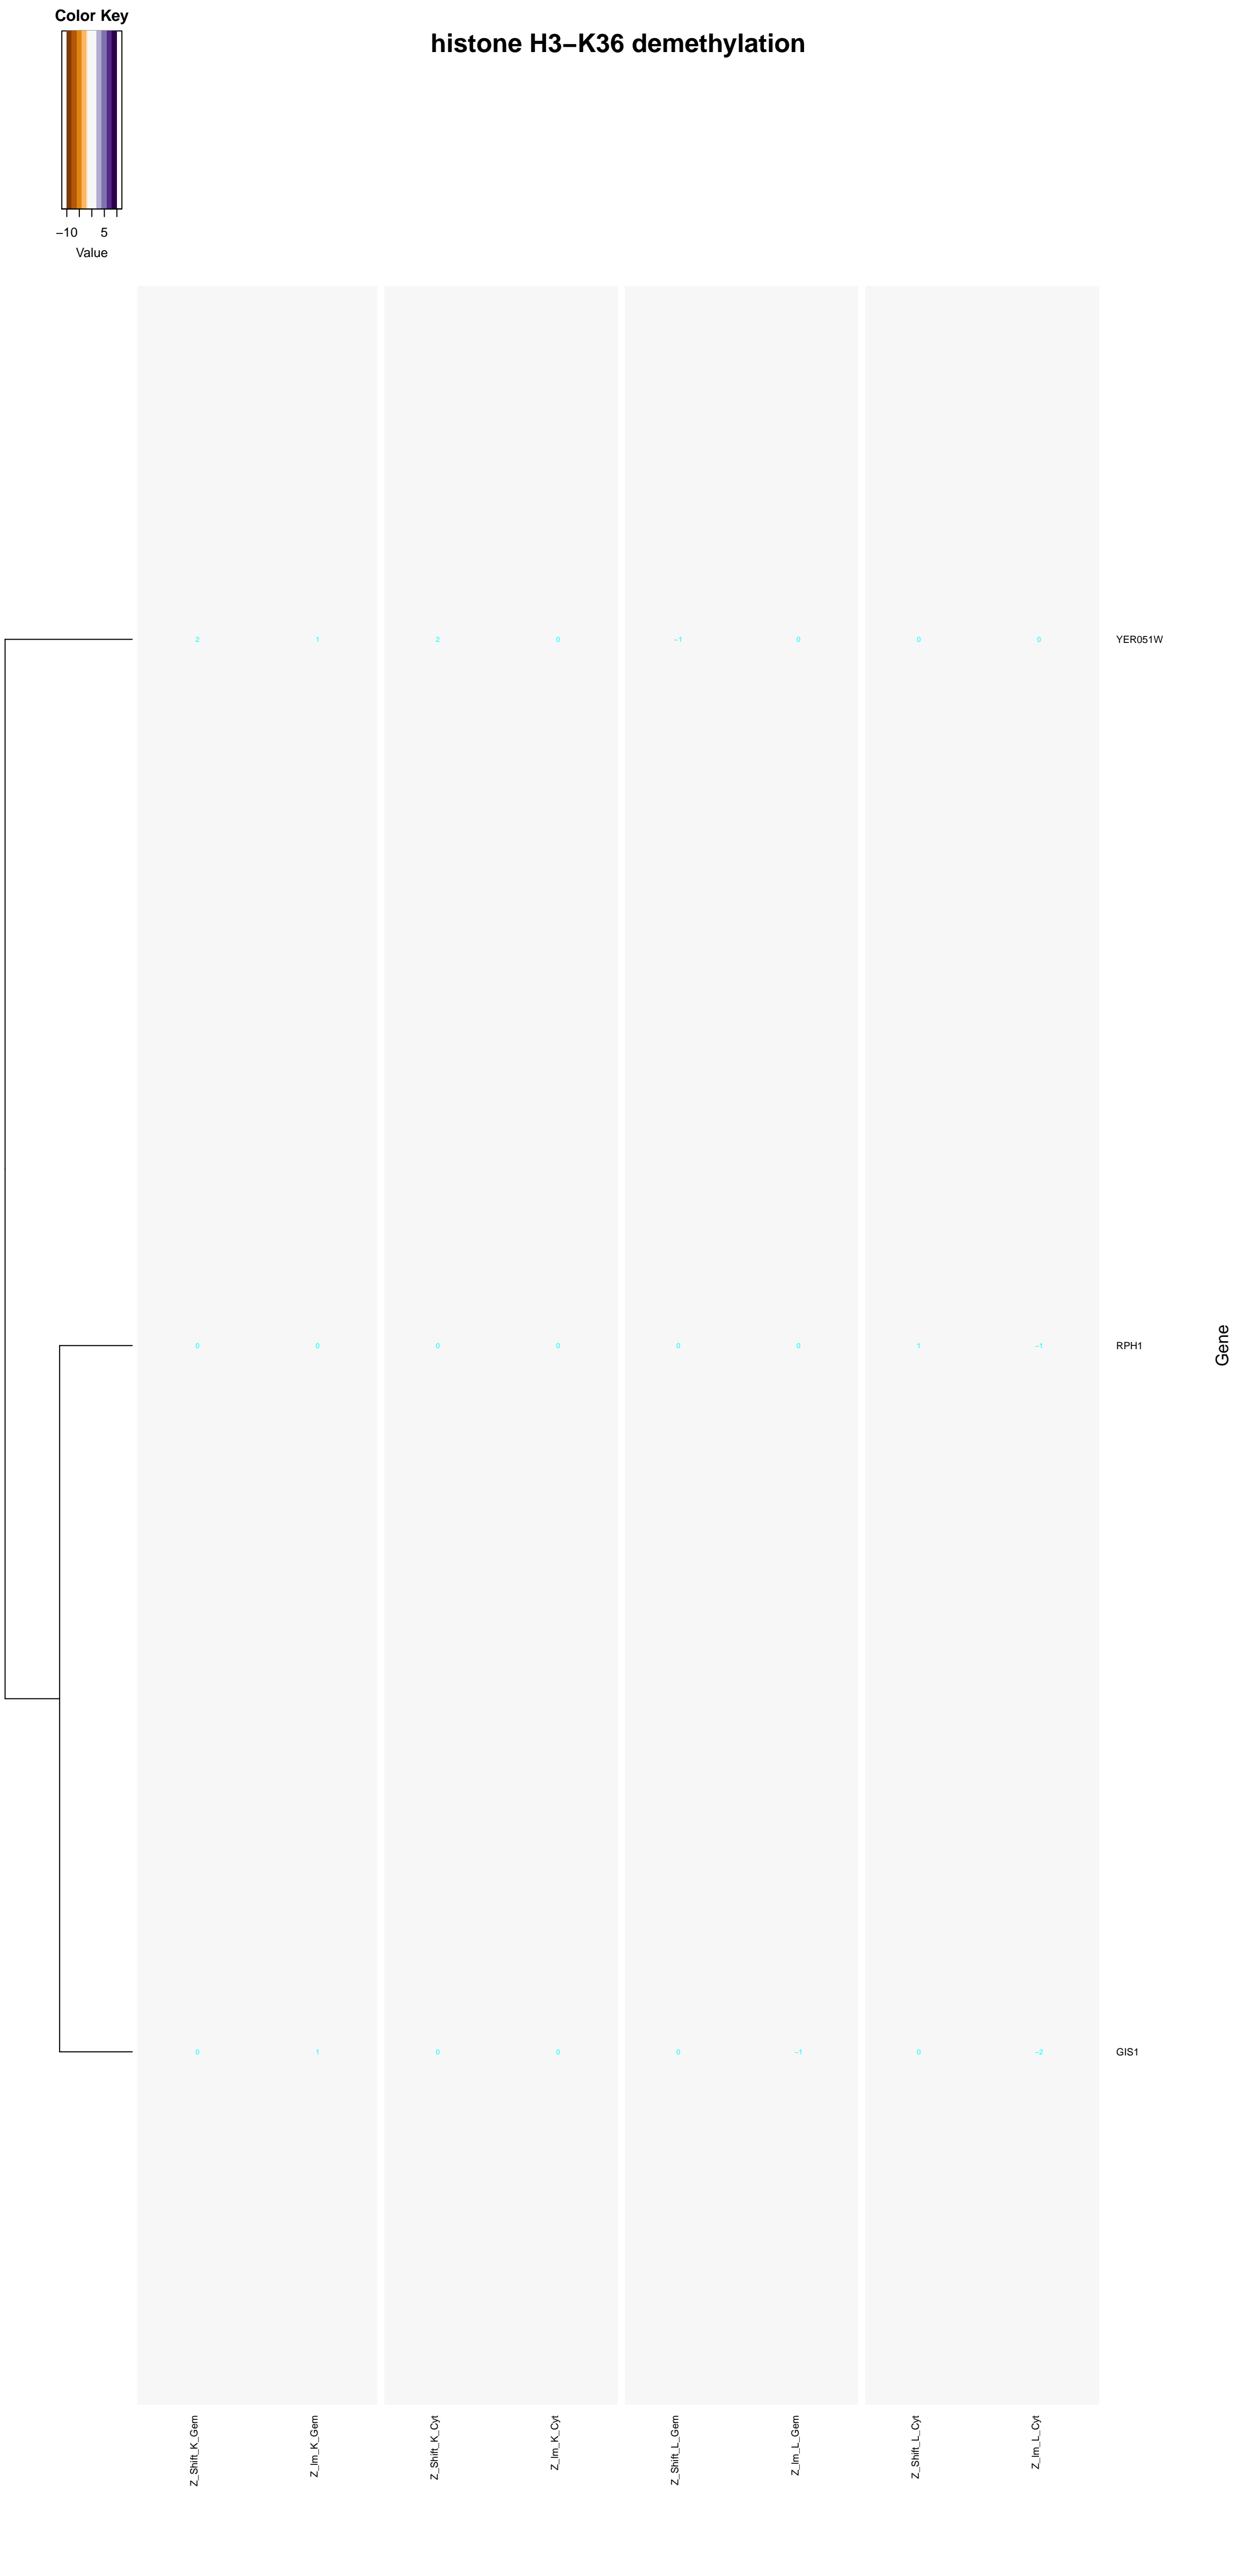

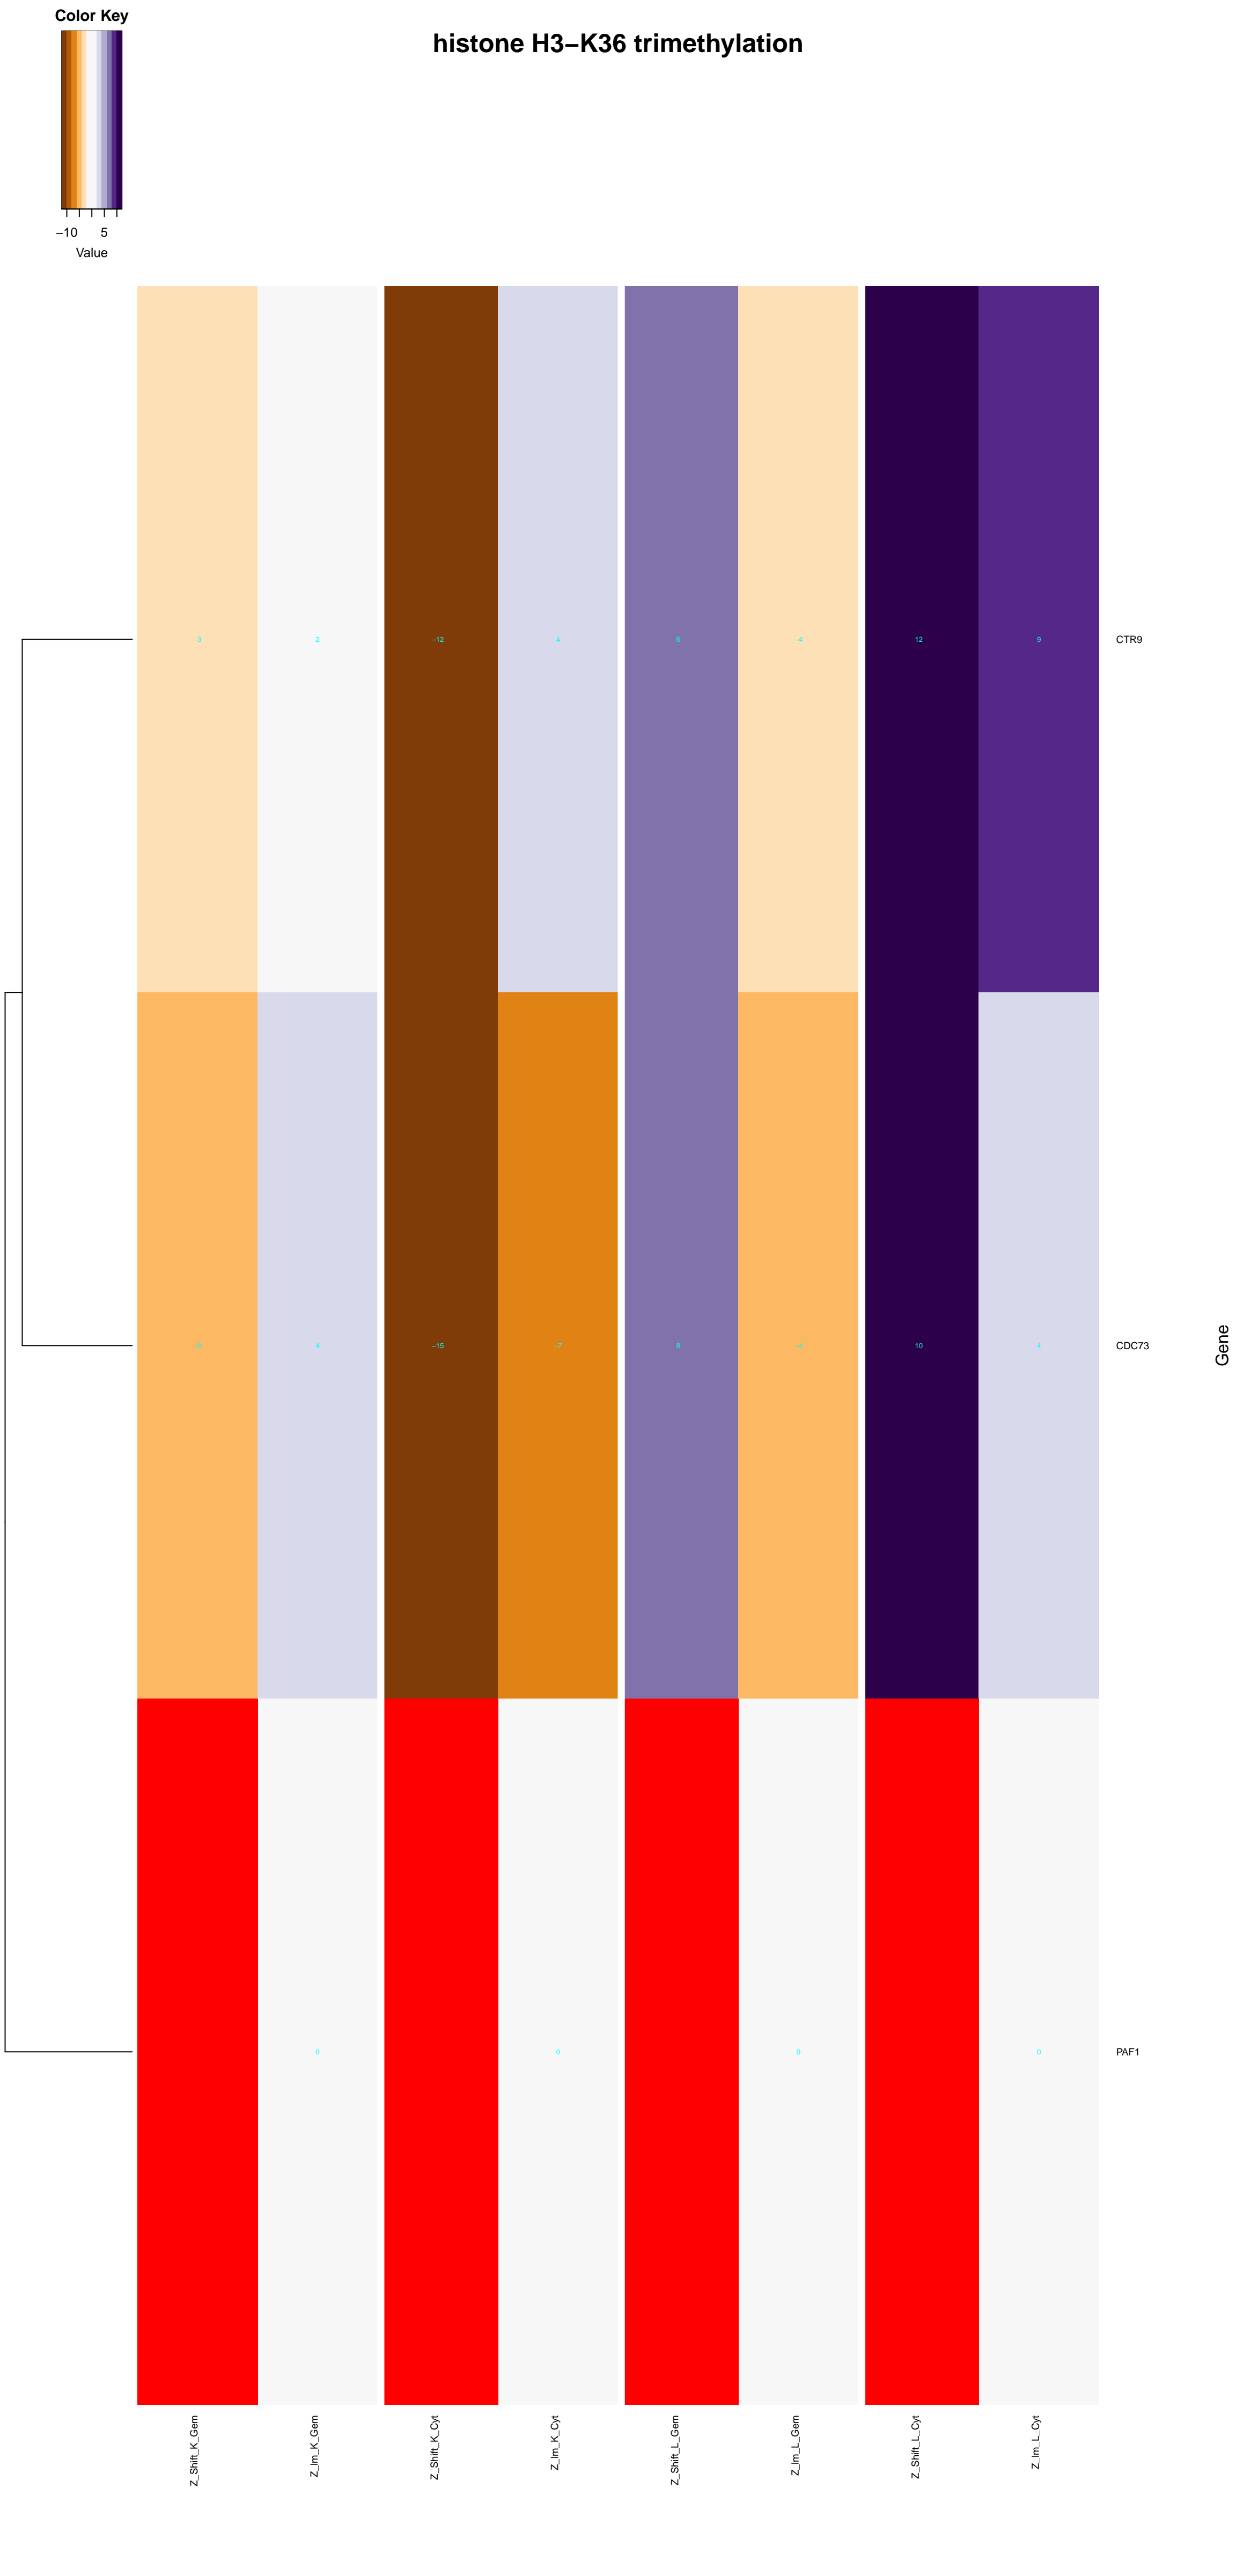

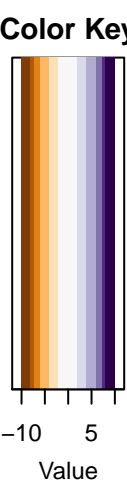

histone H3–K4 trimethylation

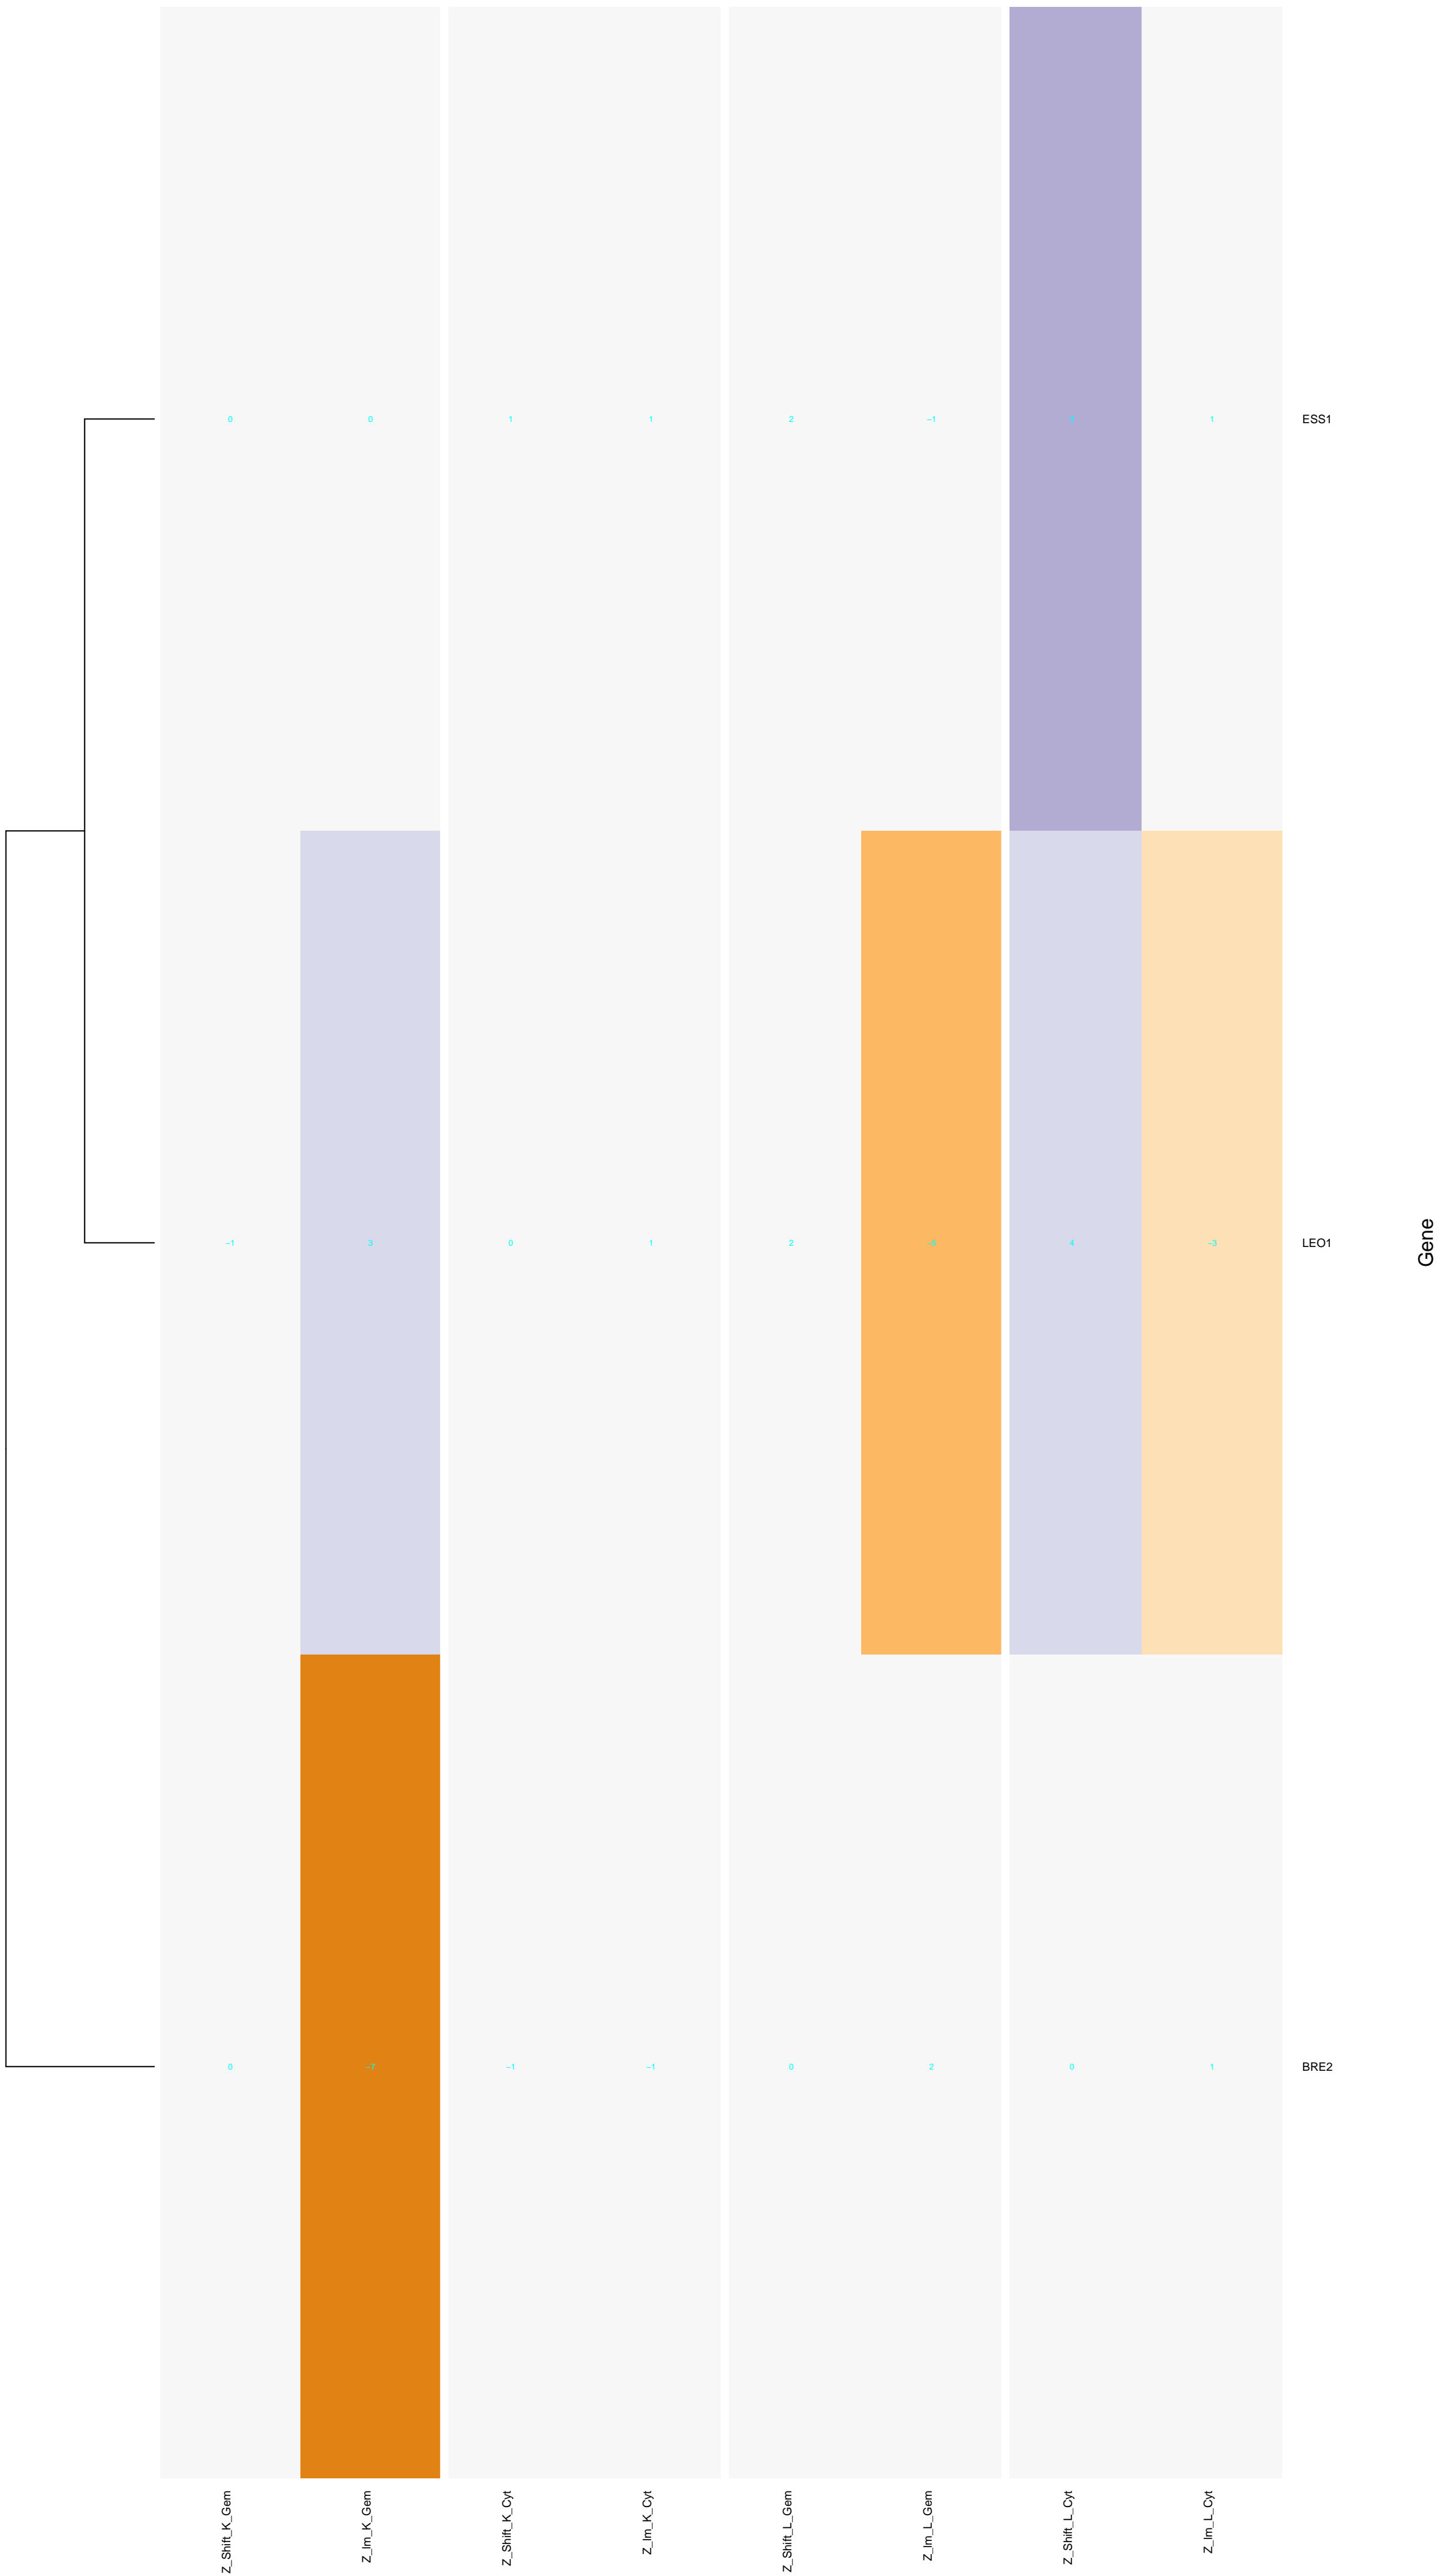

Supplement: s1 [file s1]

Color Key

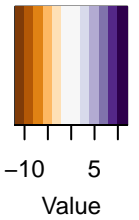

single-stranded DNA binding

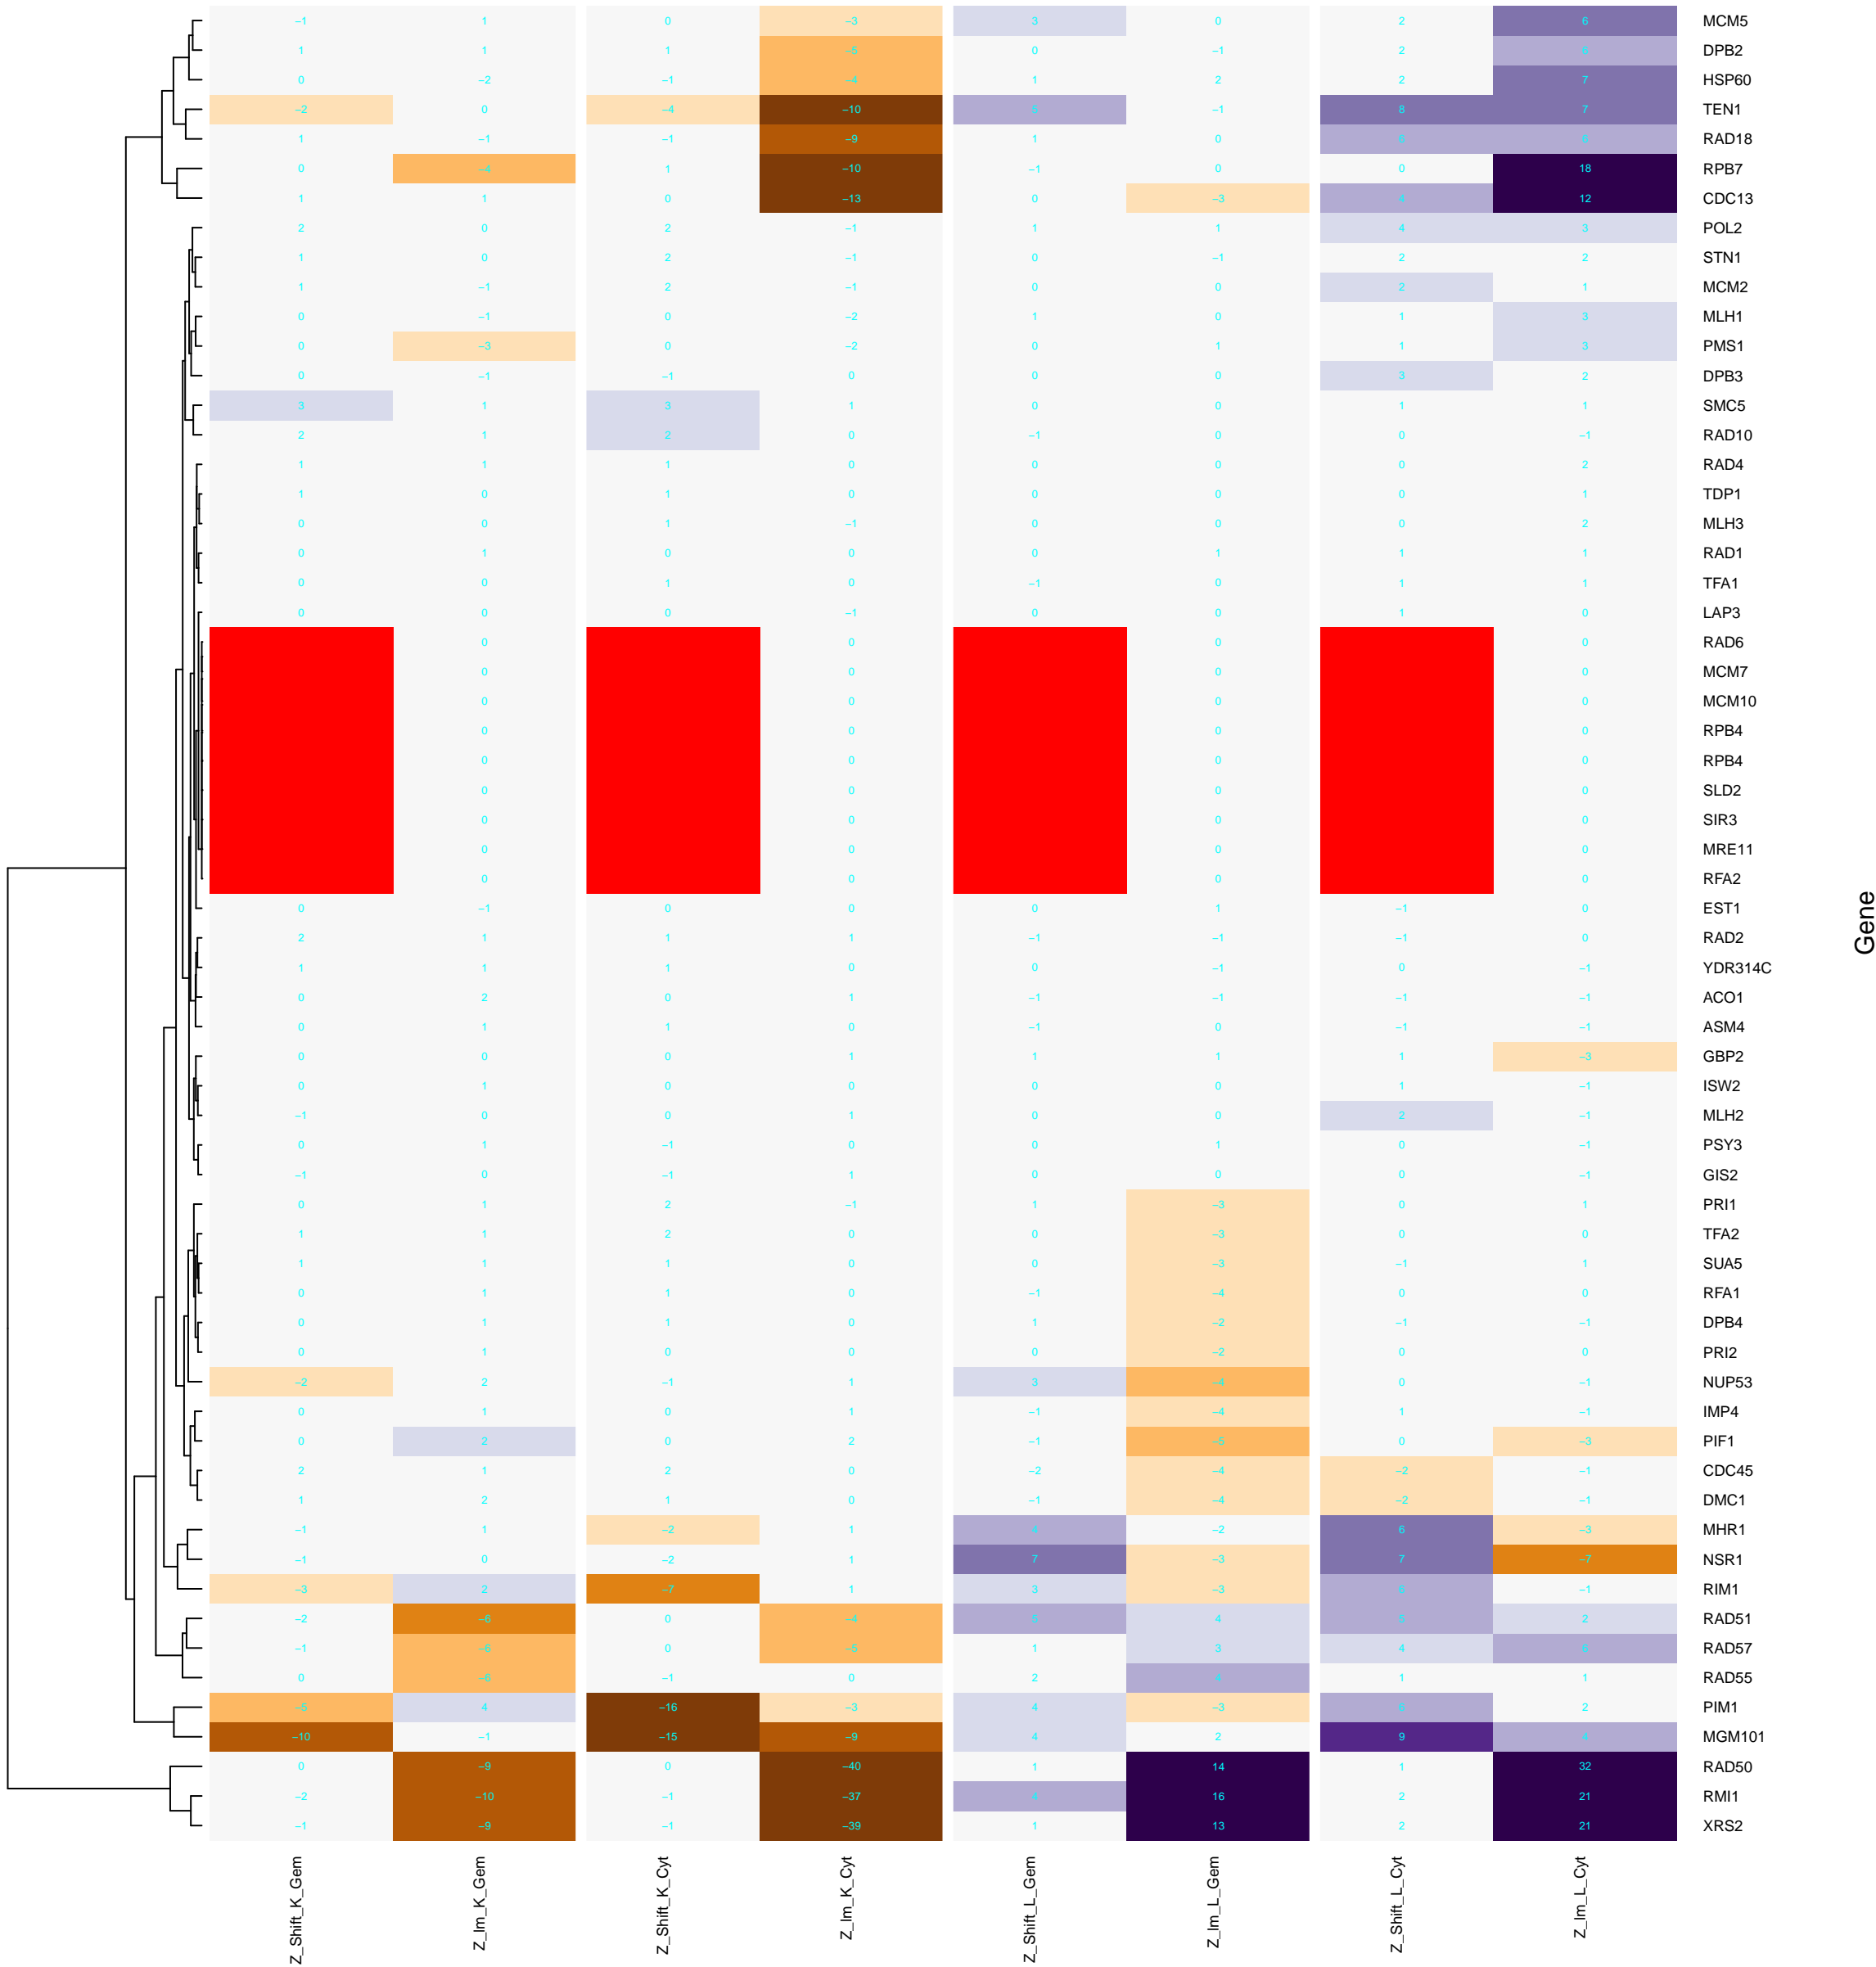

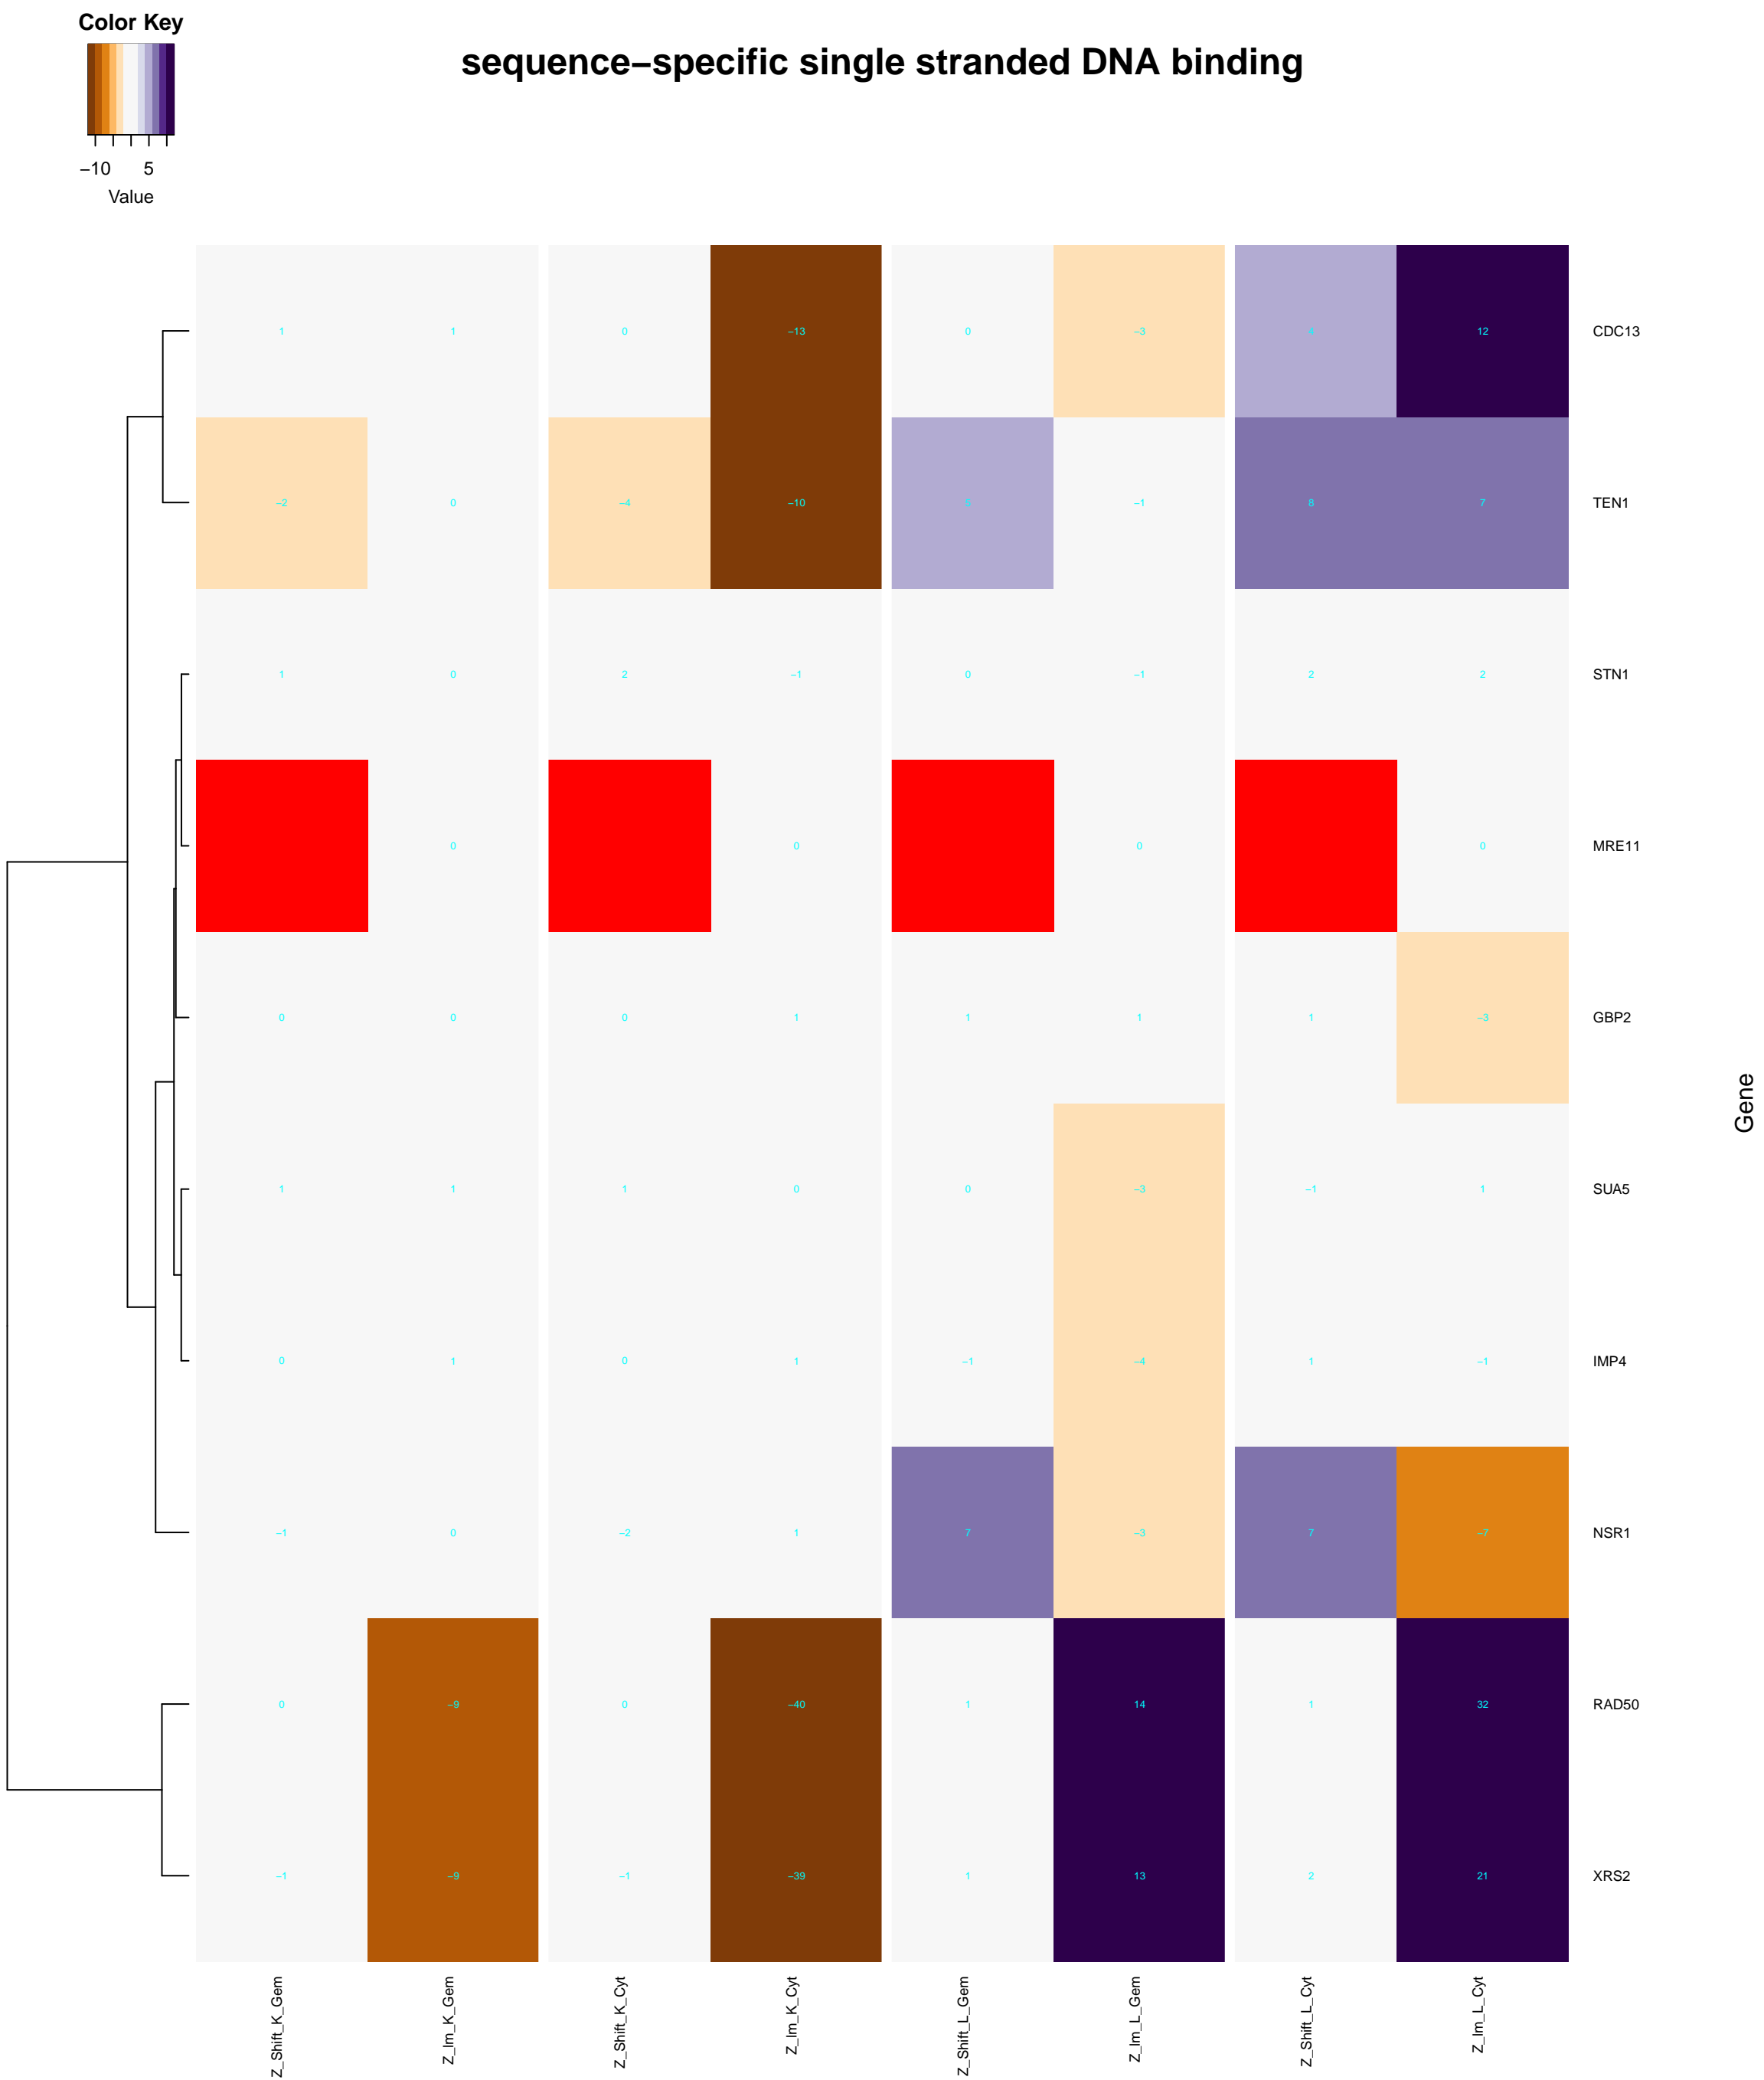

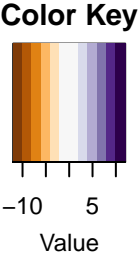

single-stranded telomeric DNA binding

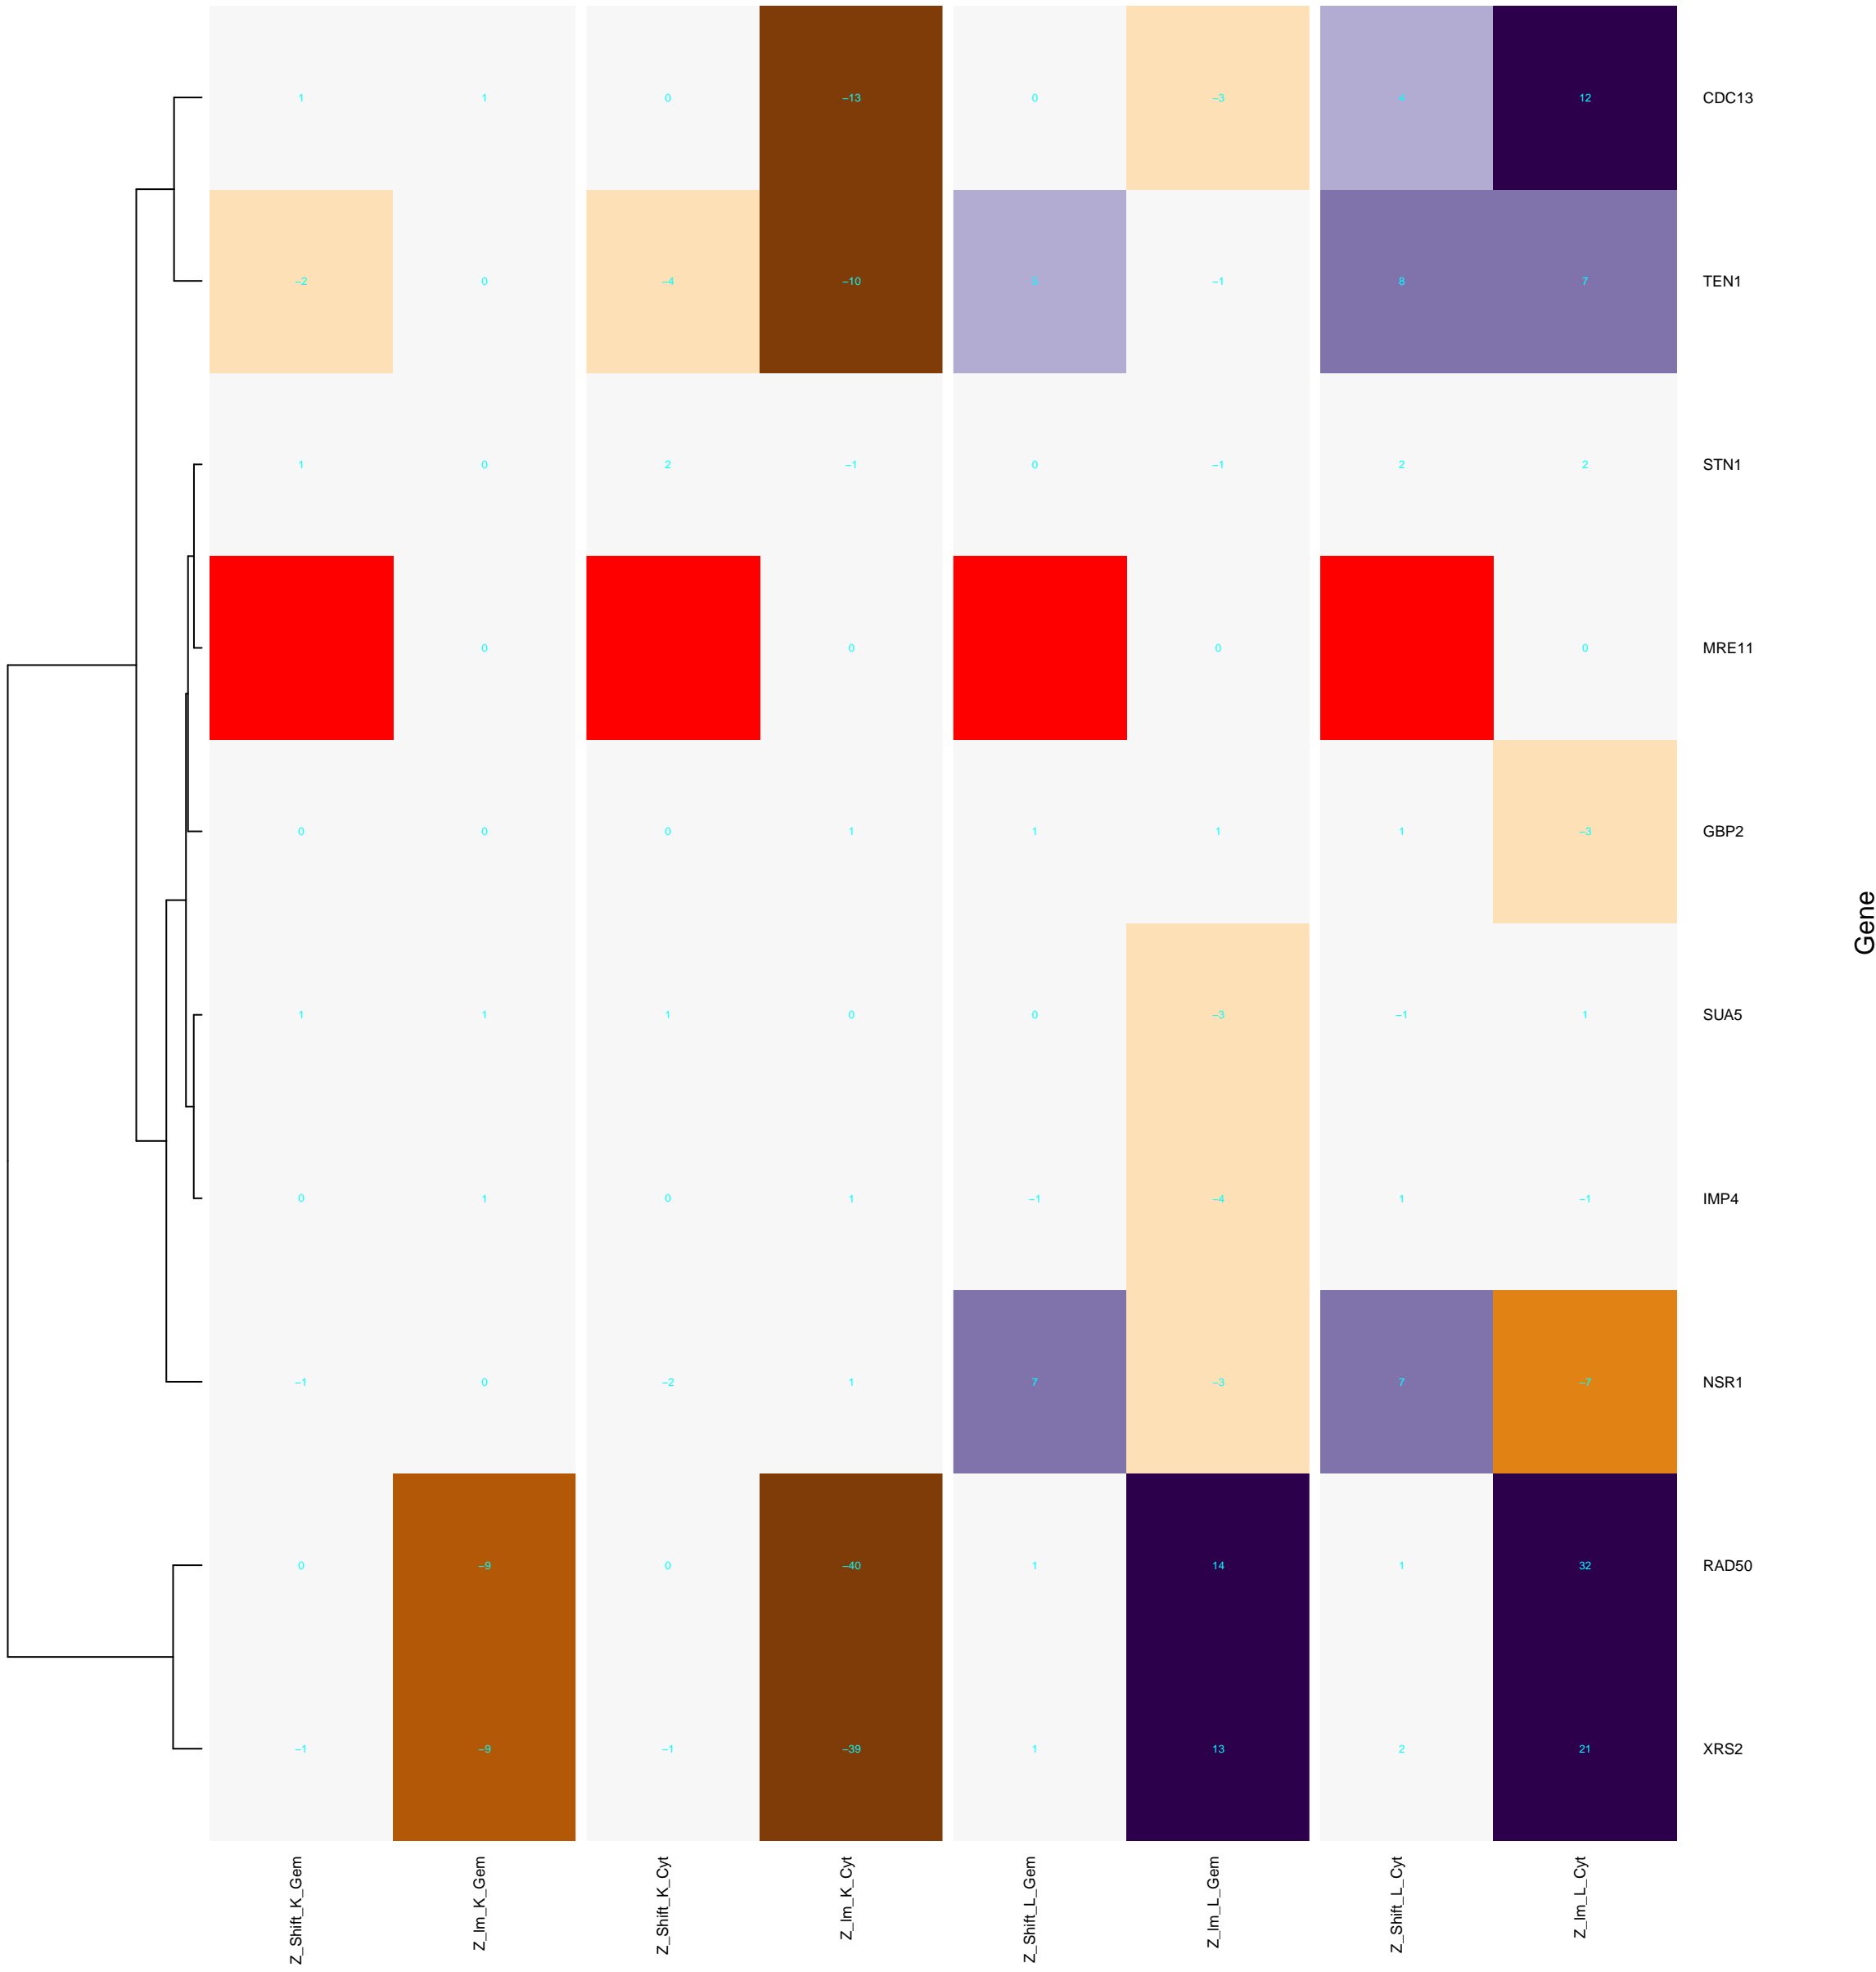

Supplement: s1 [file s1]

DNA packaging

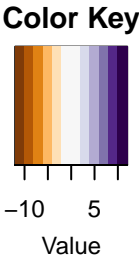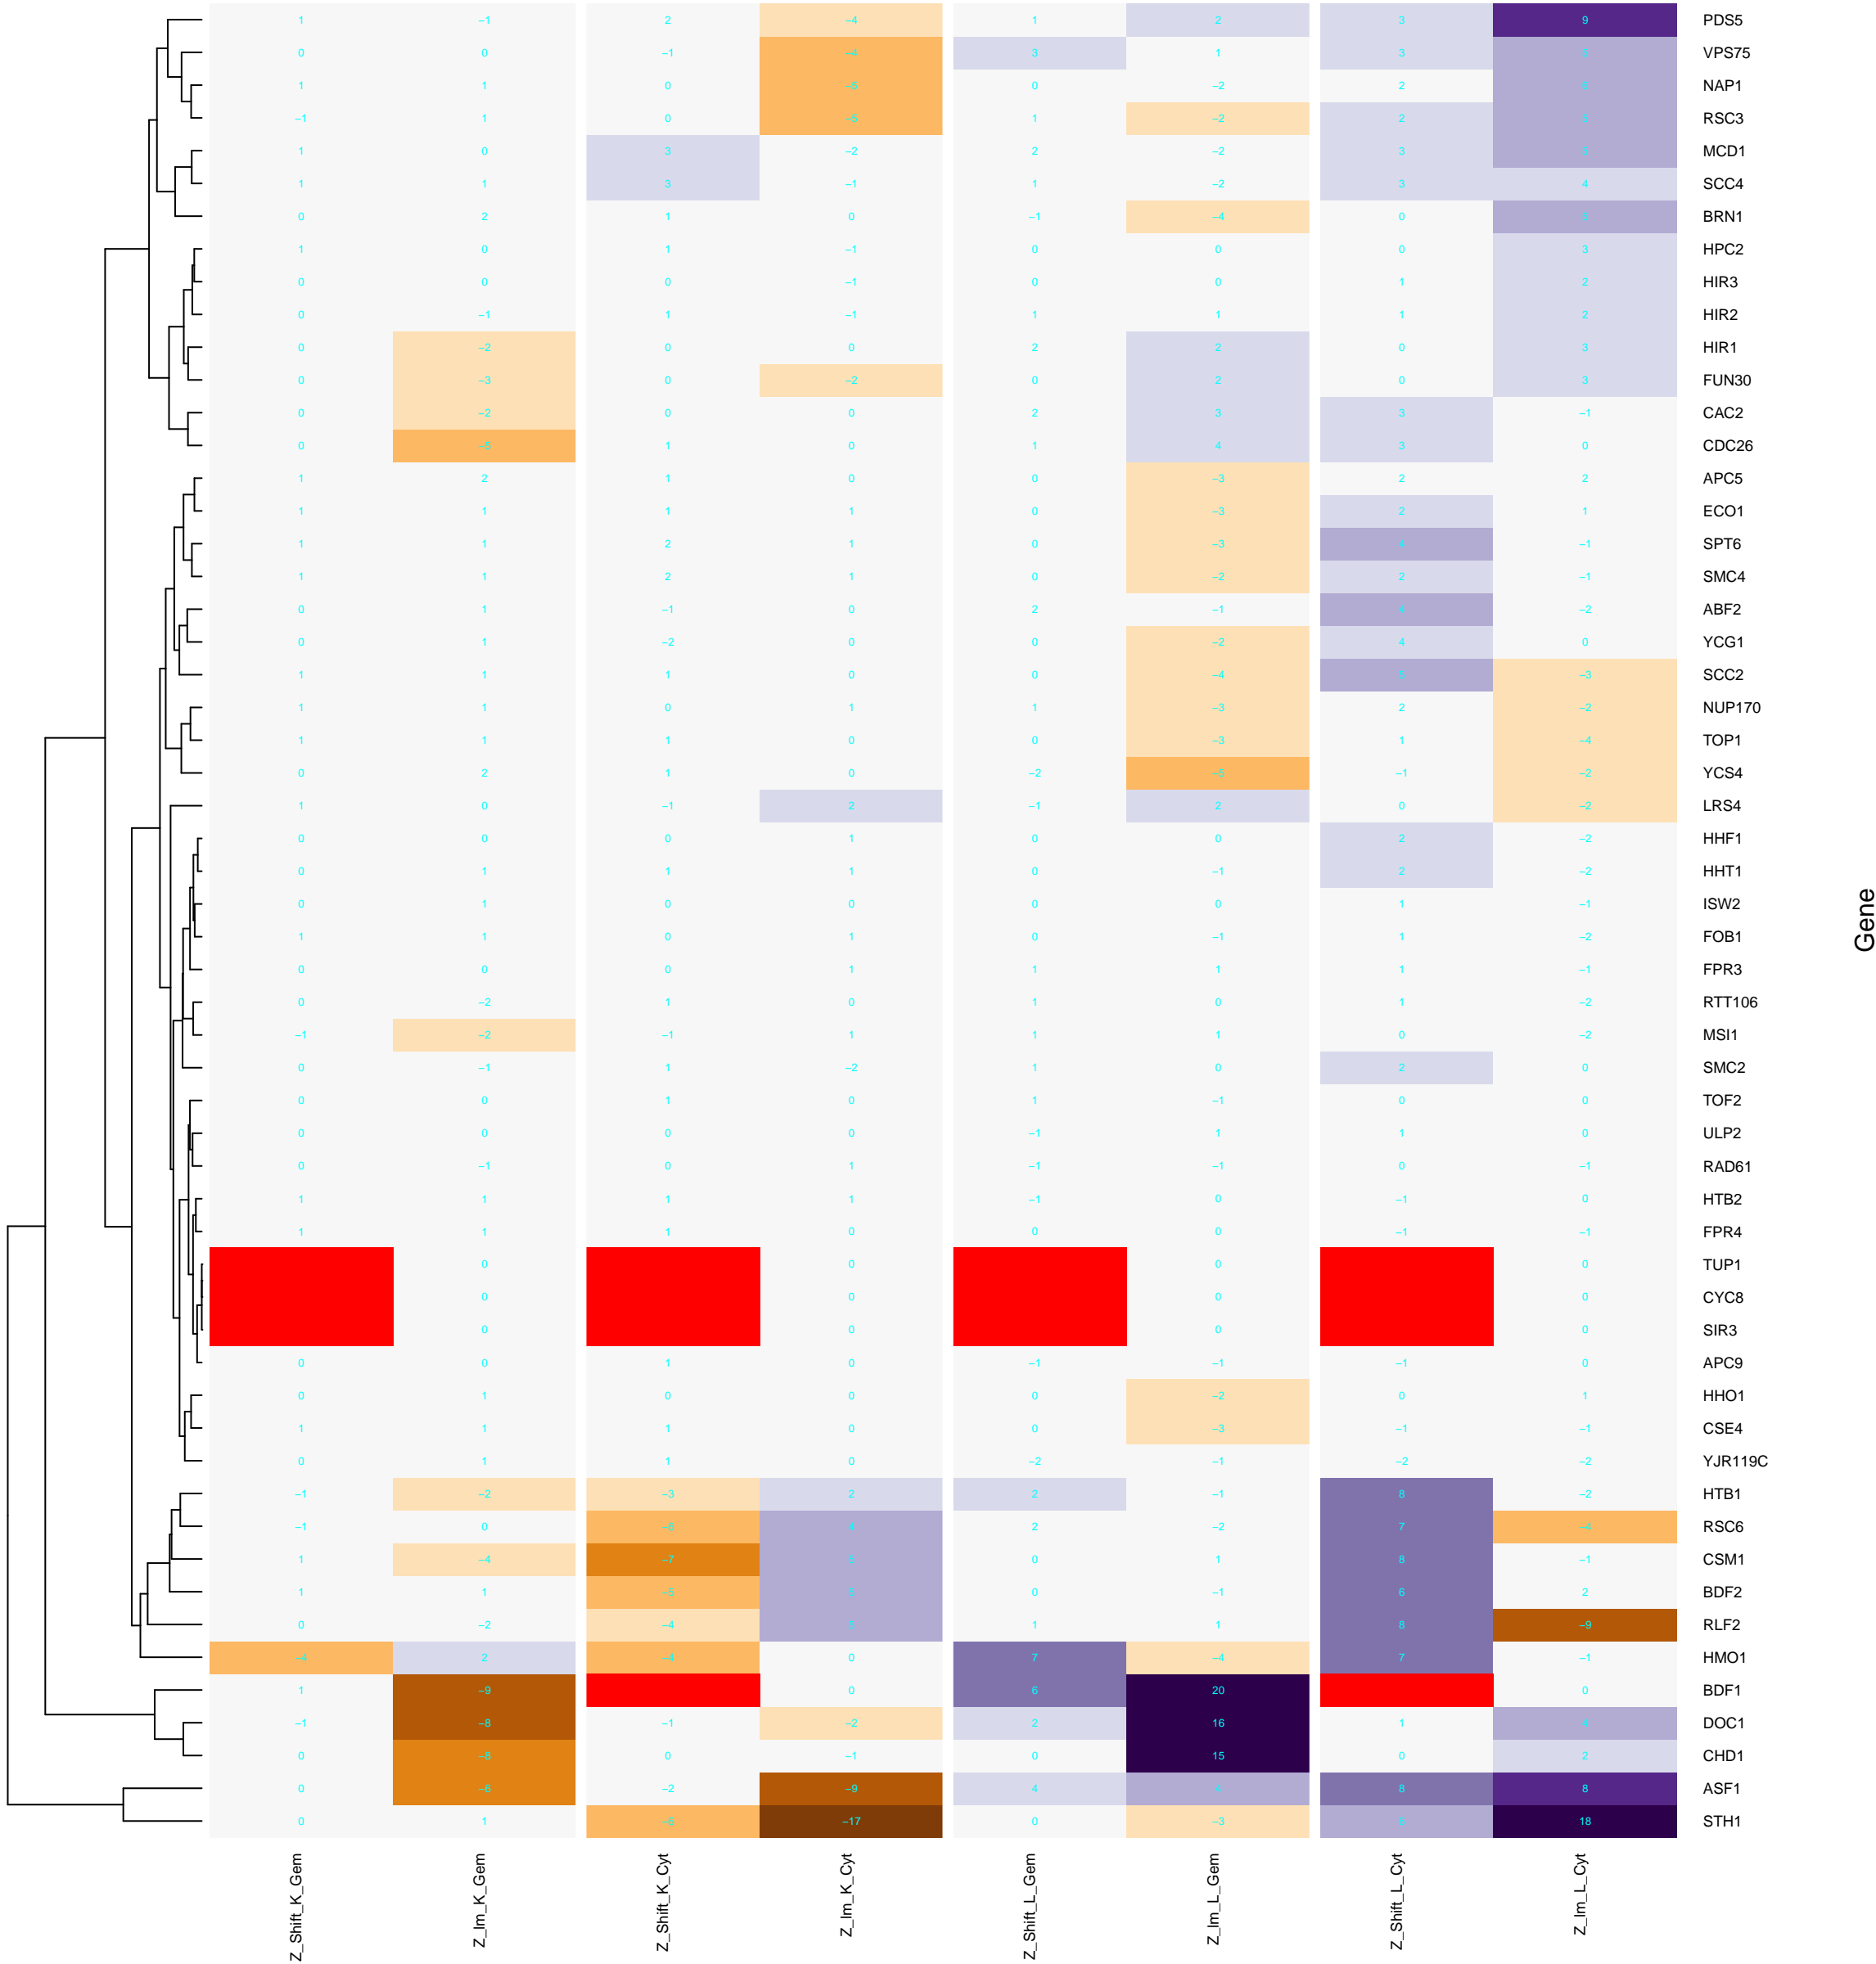

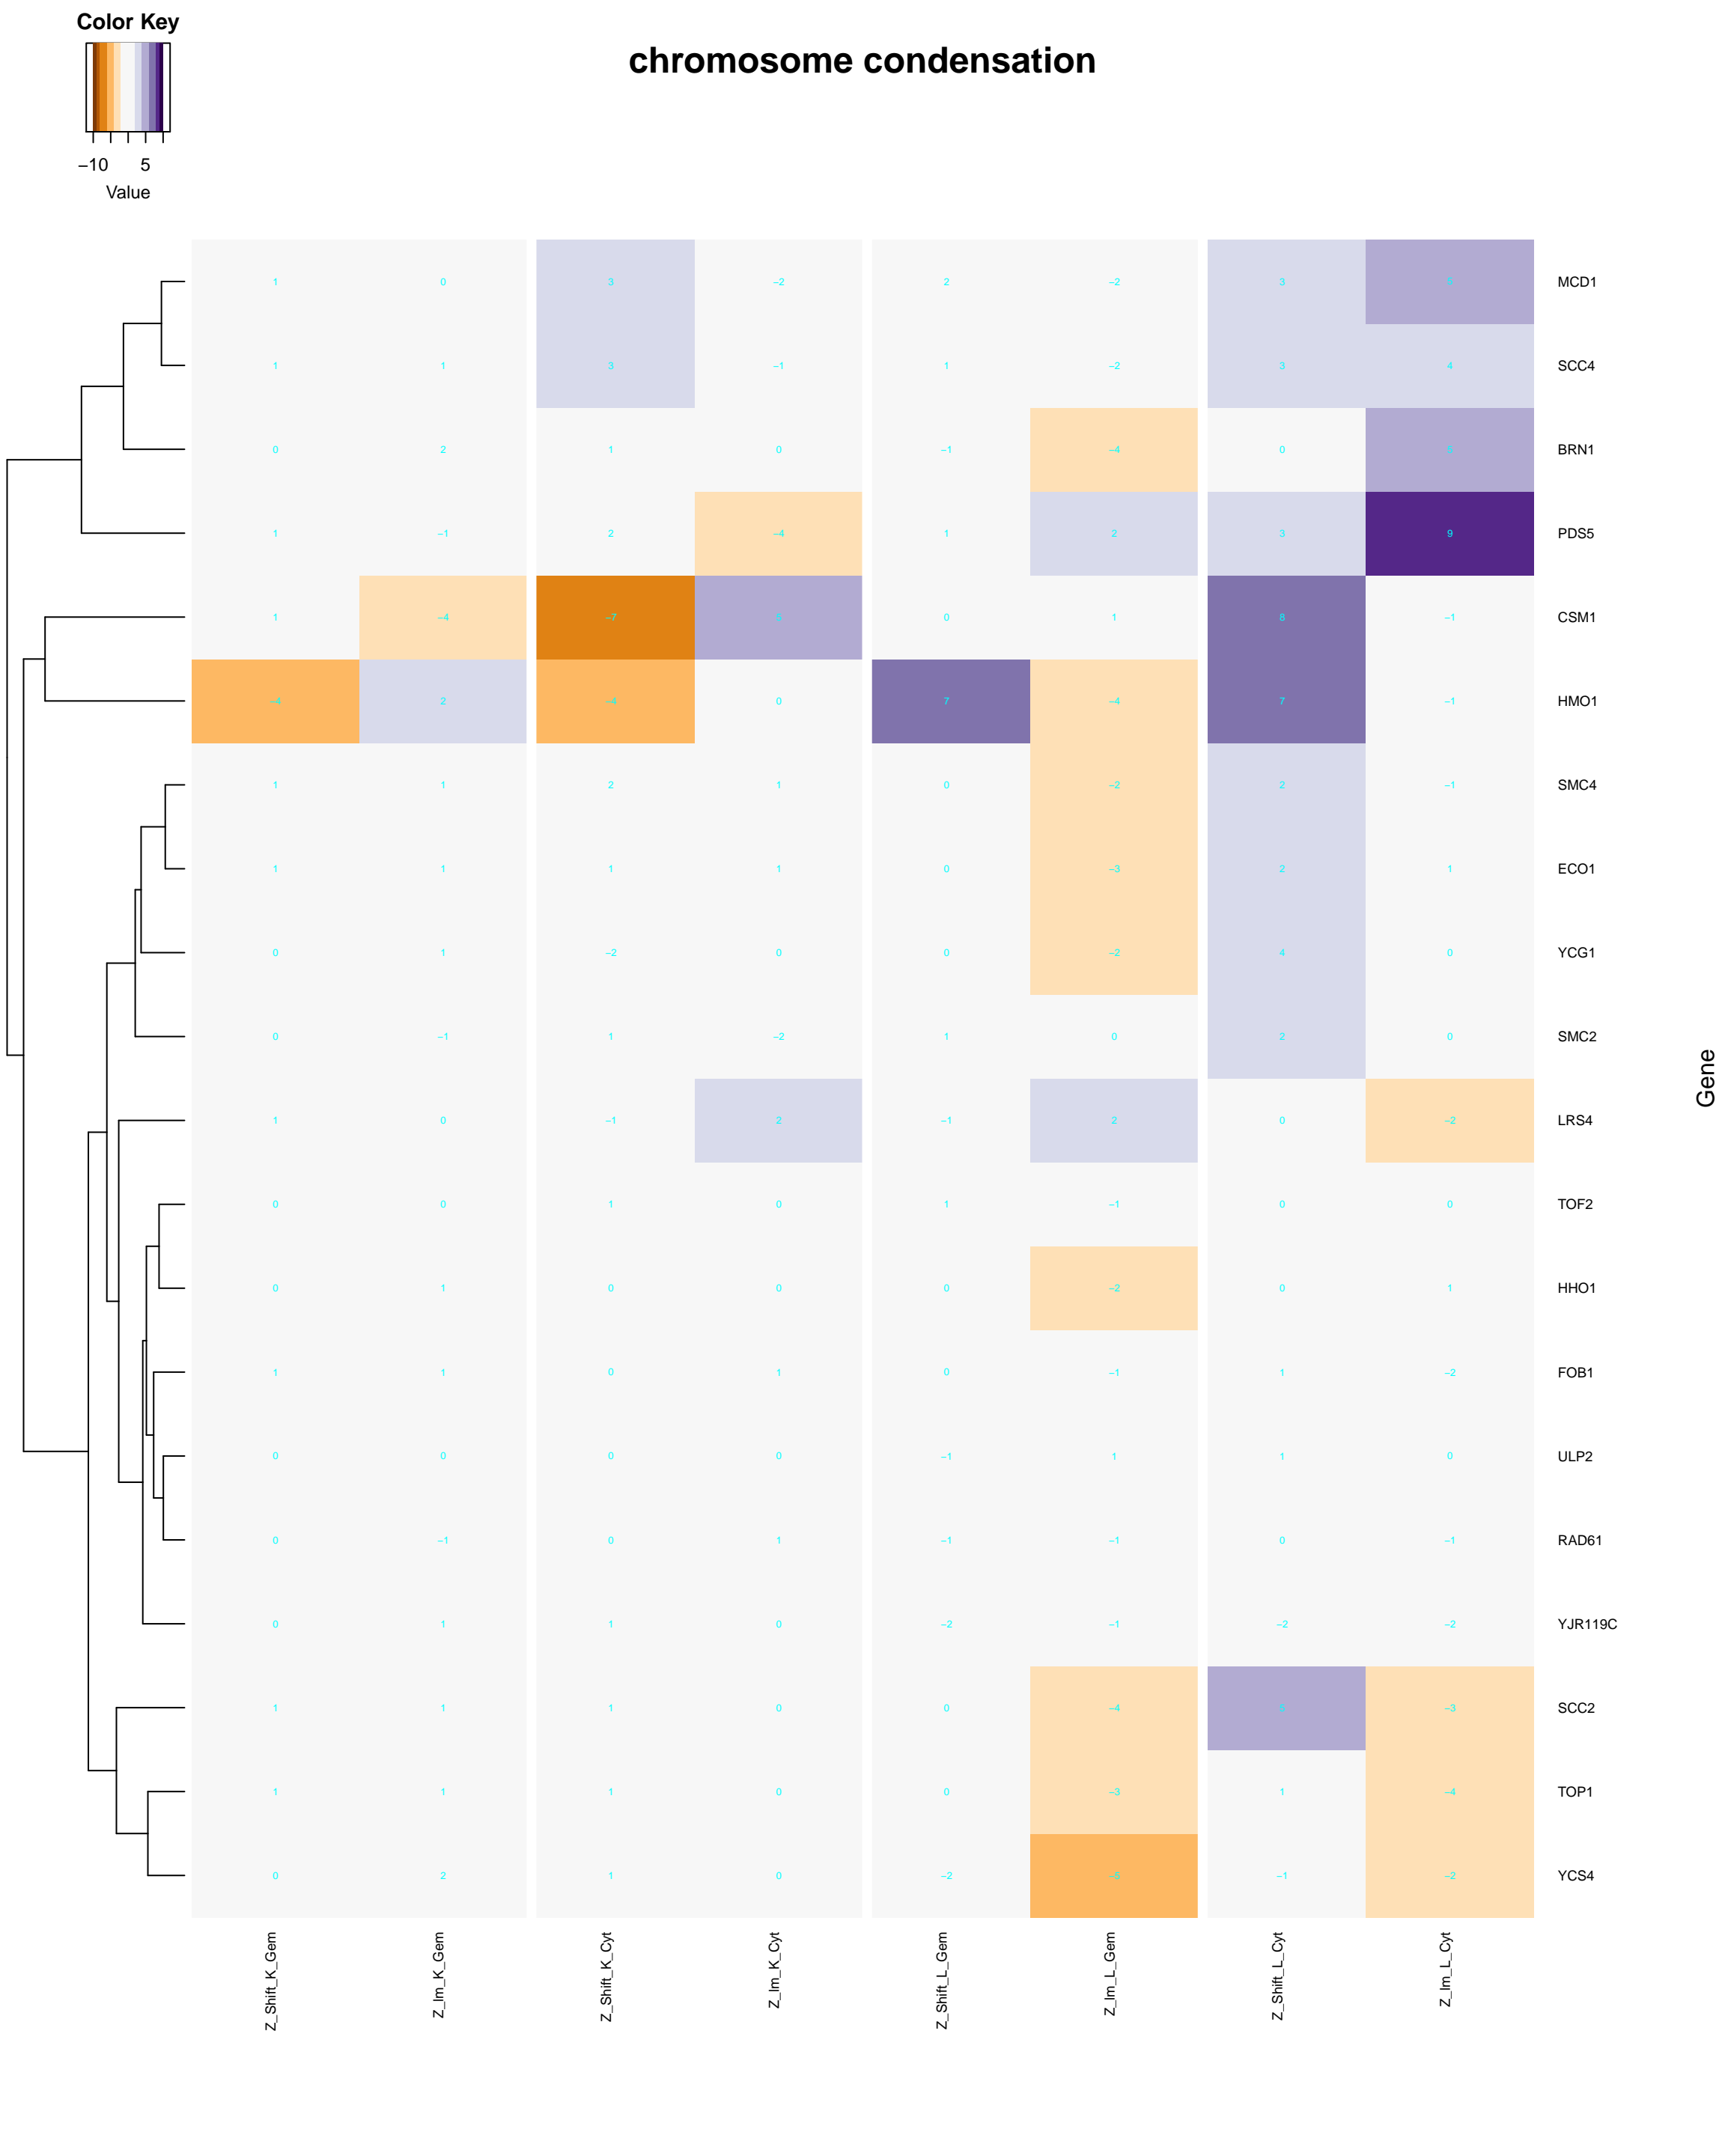

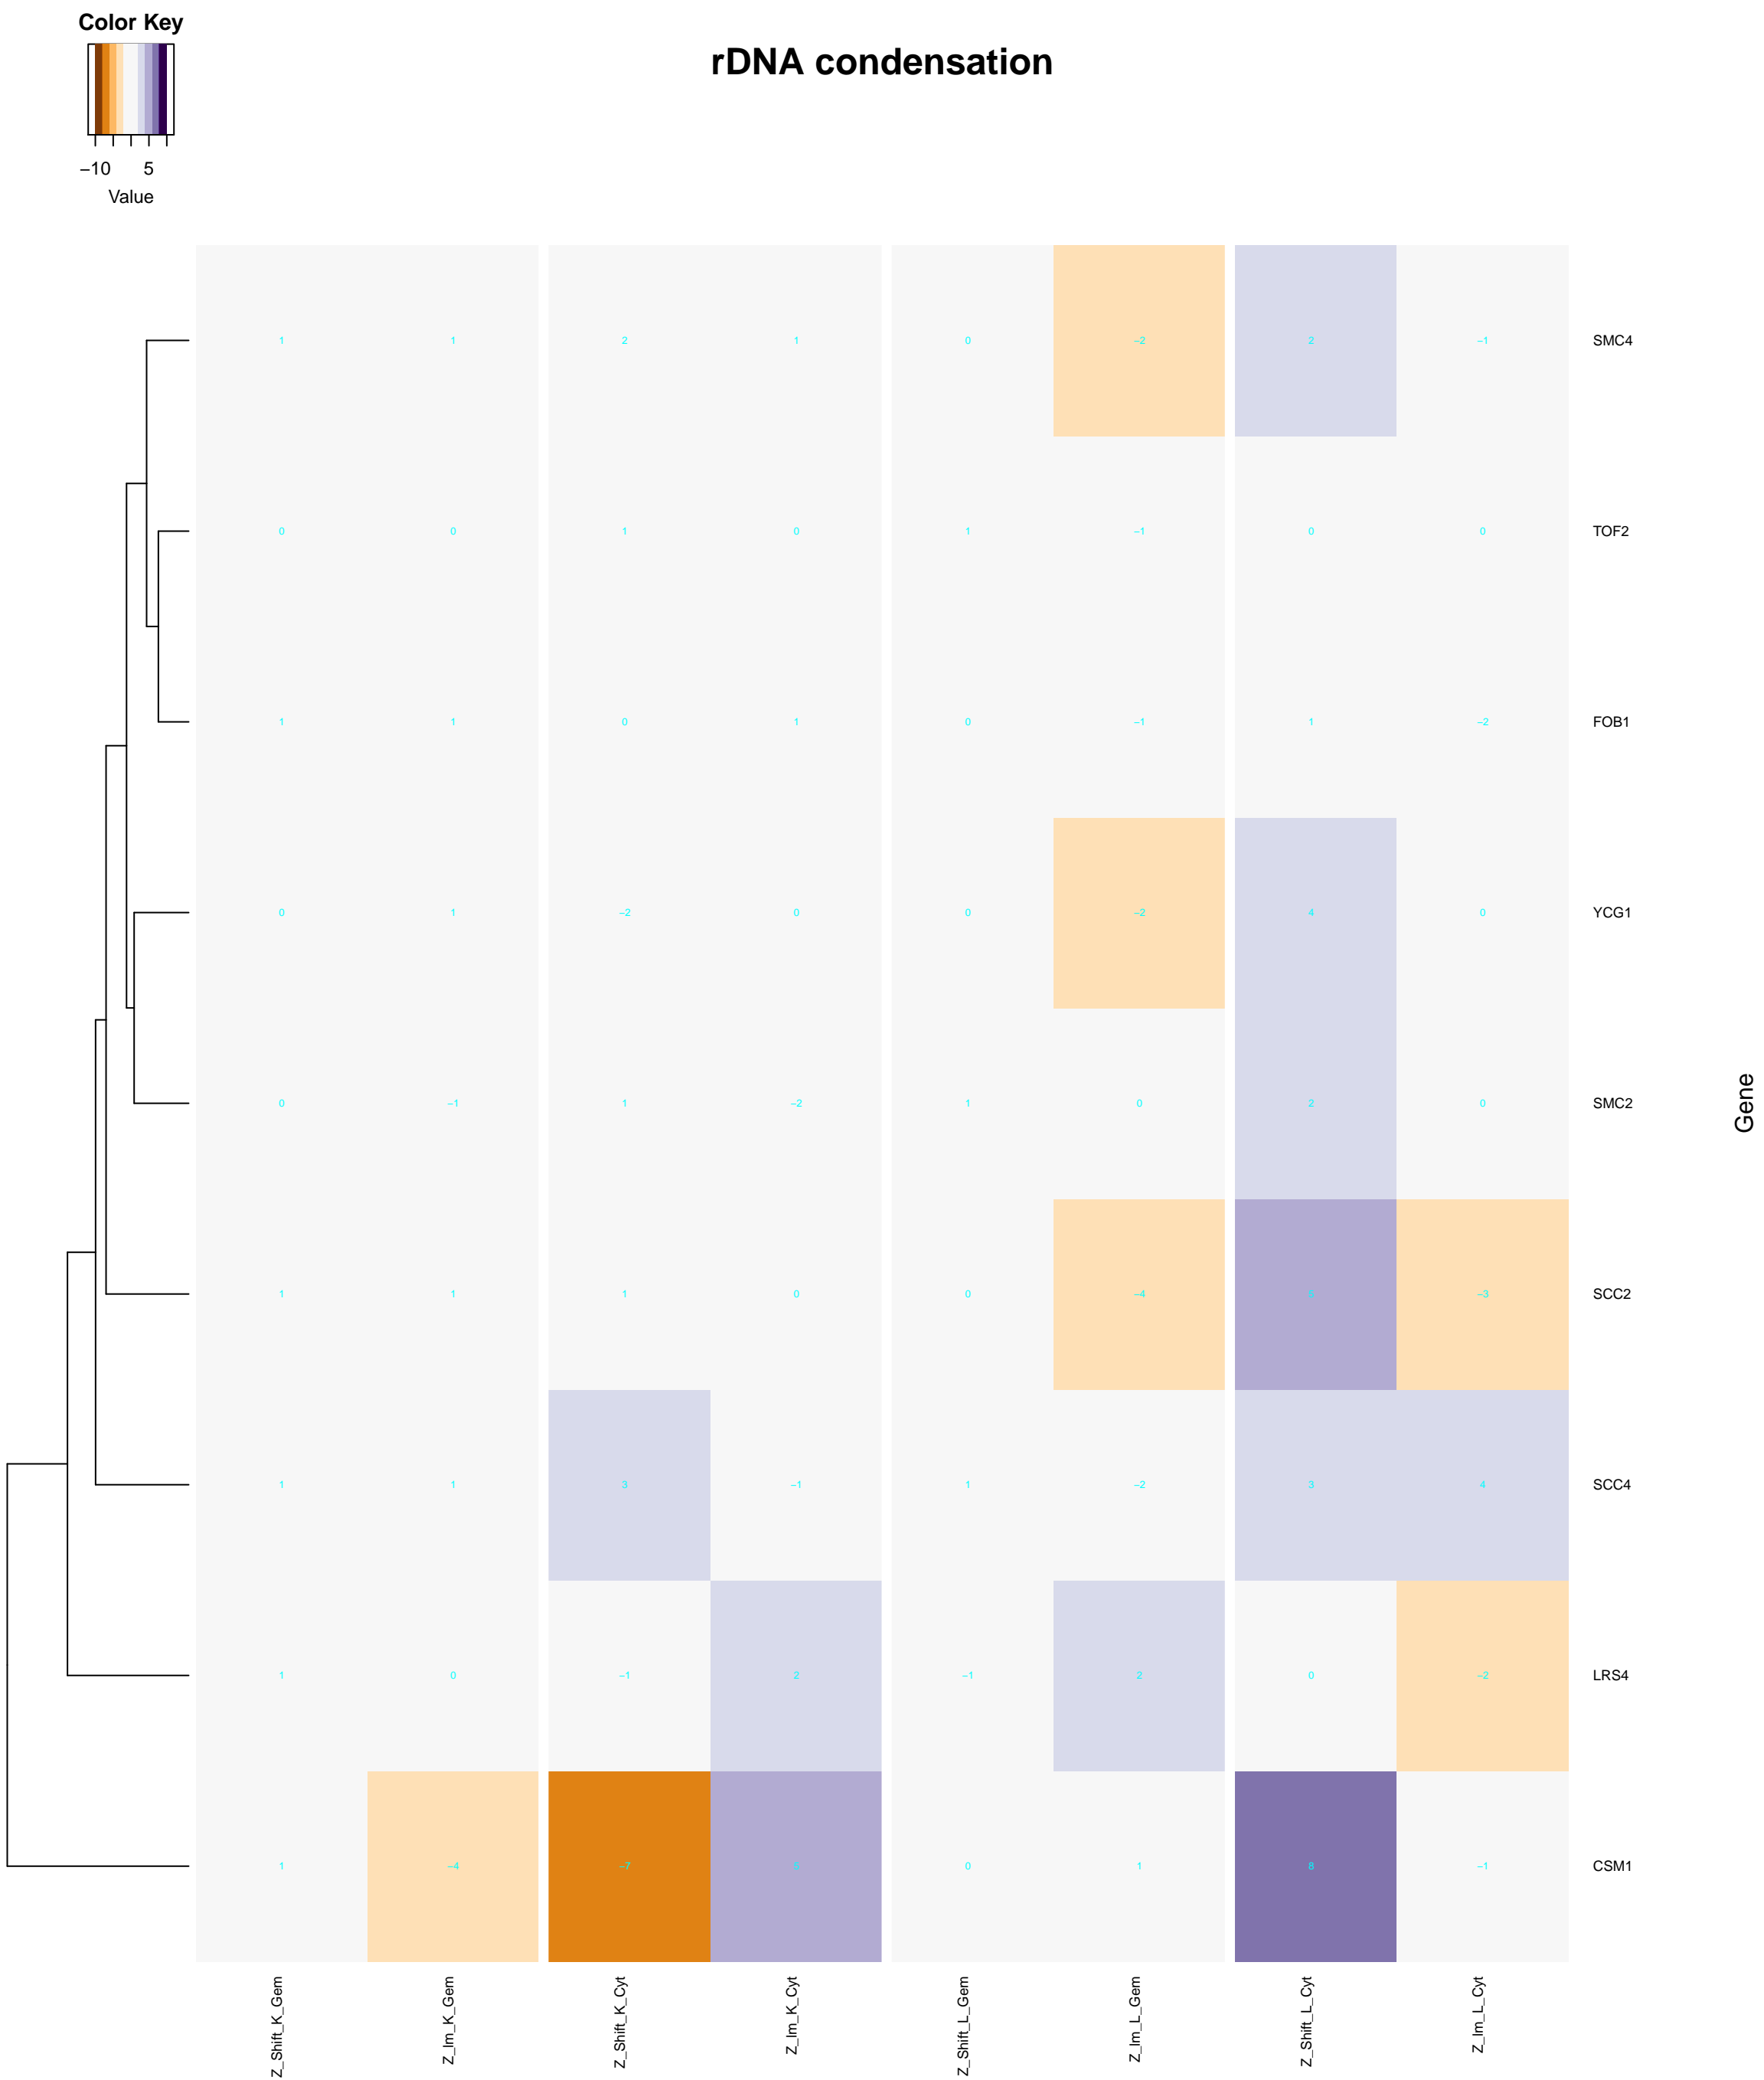

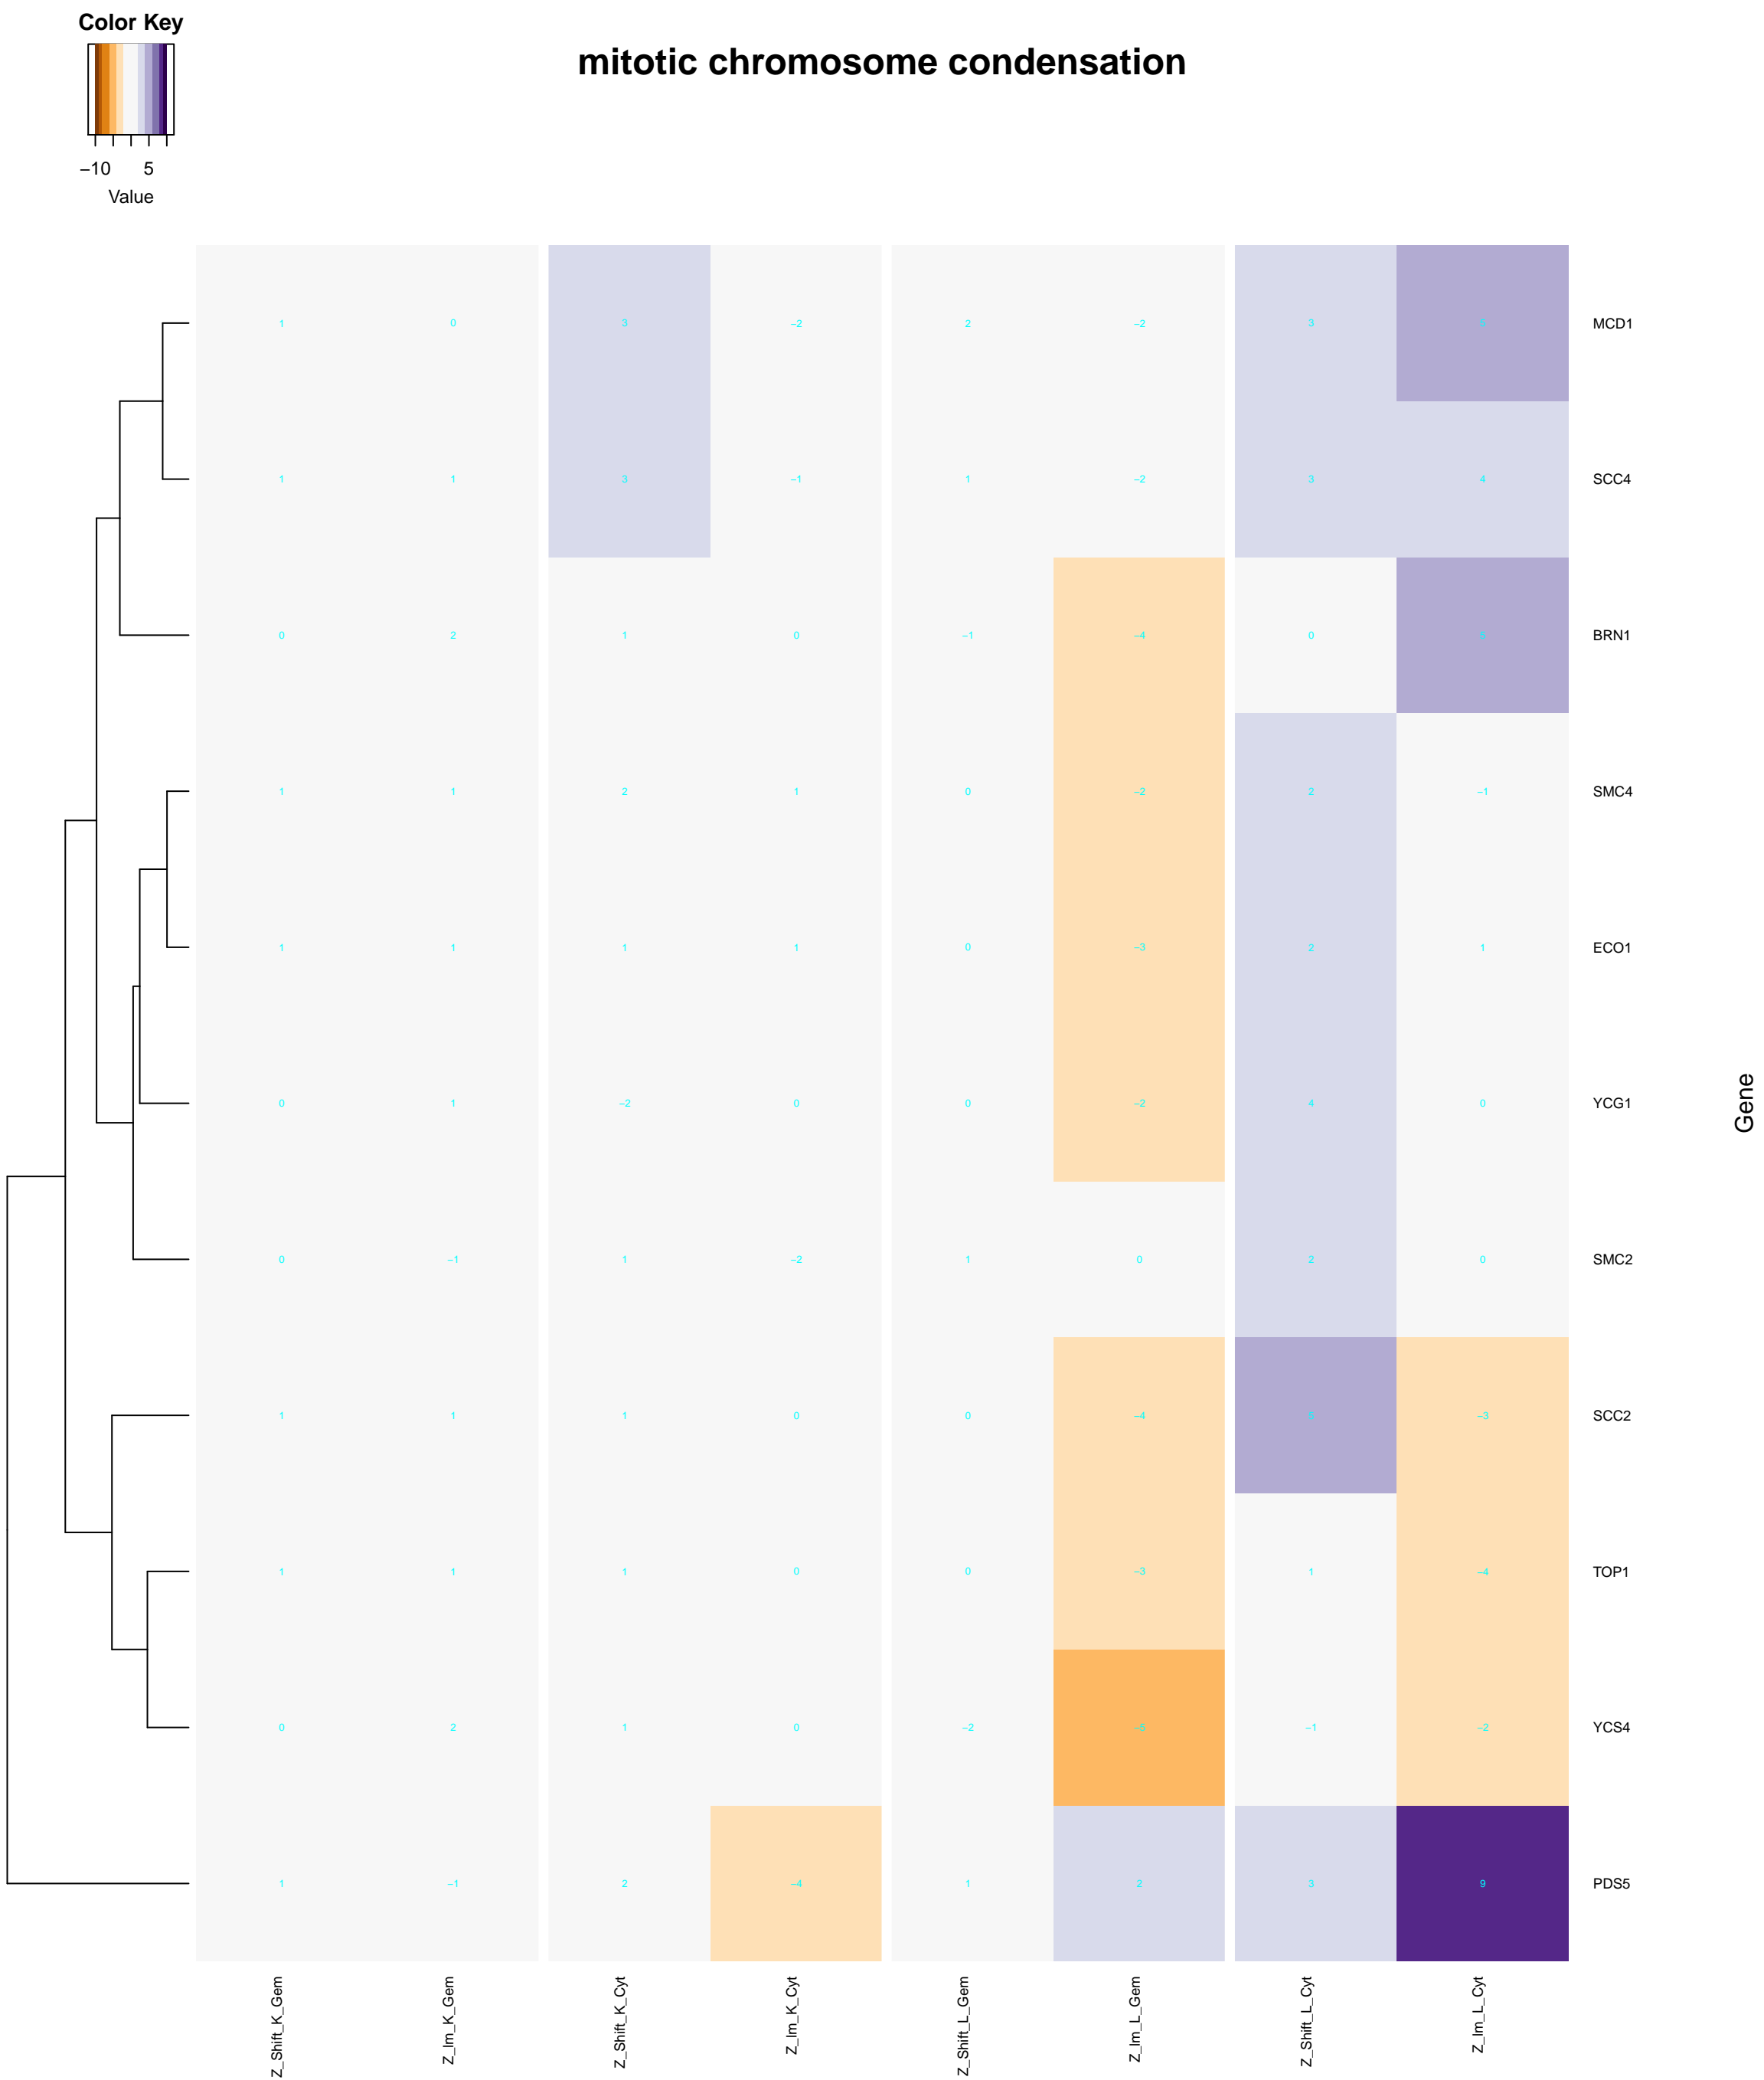

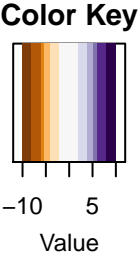

meiotic chromosome condensation

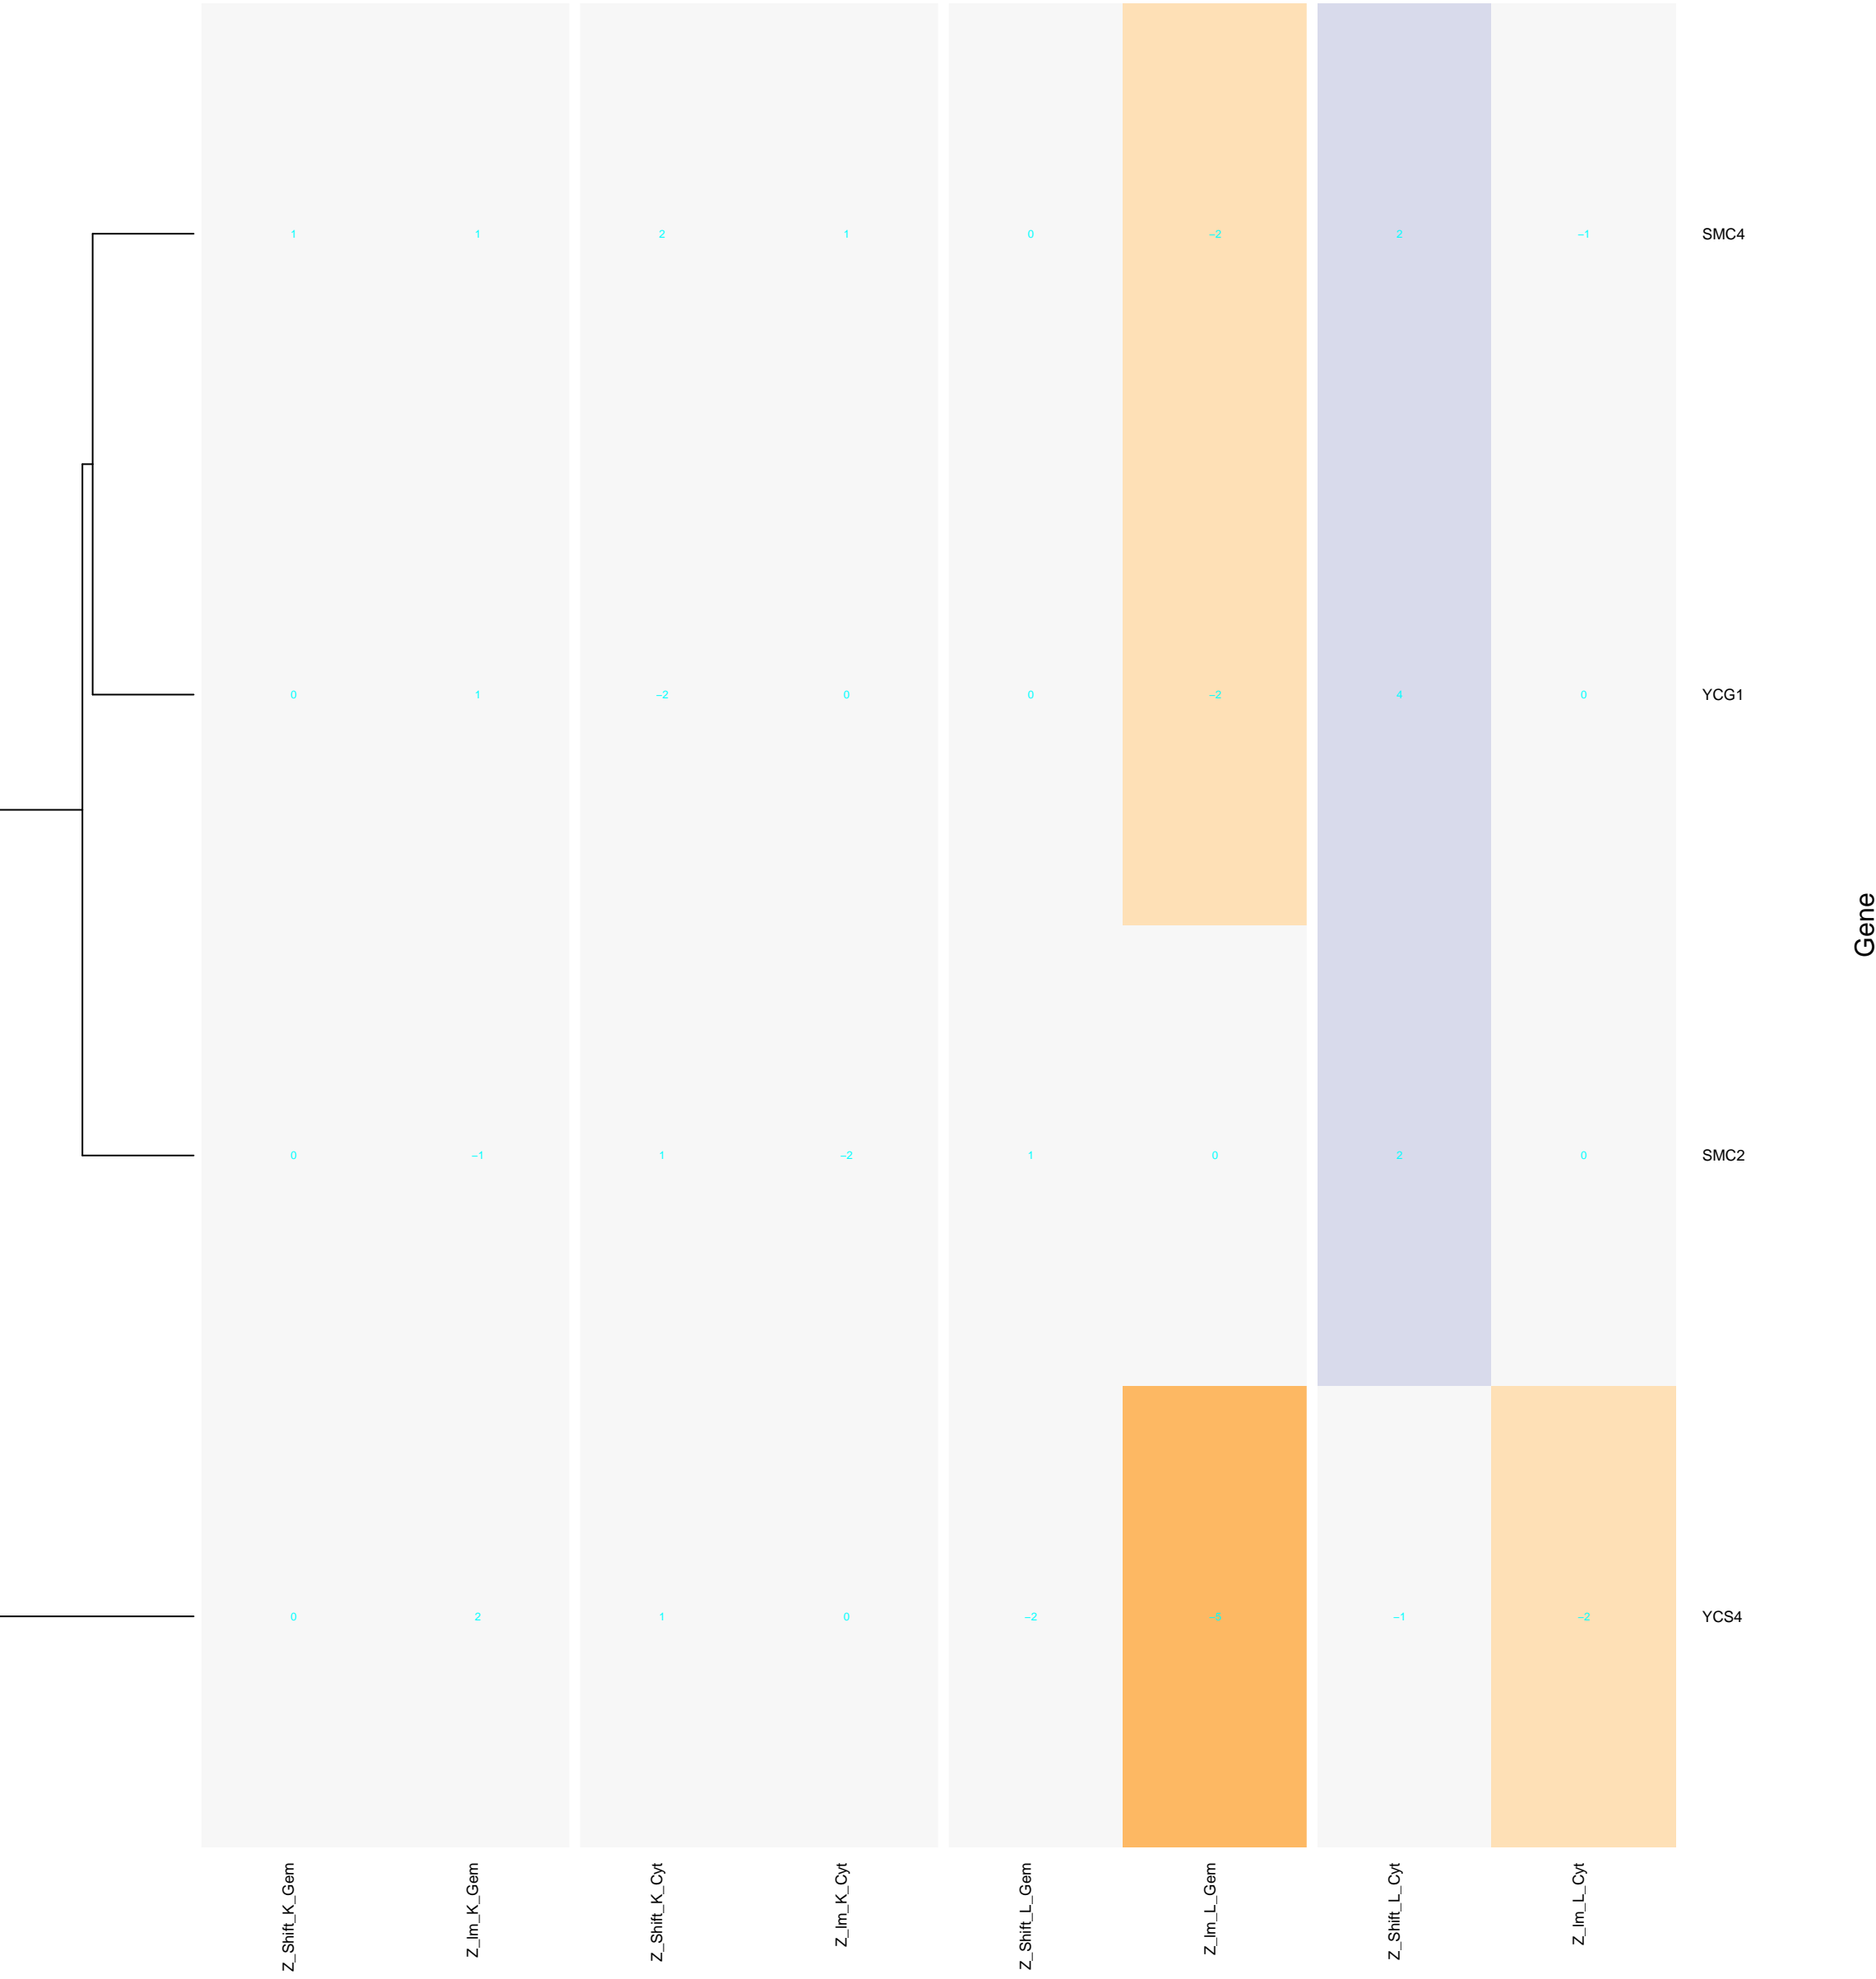

Supplement: s1 [file s1]

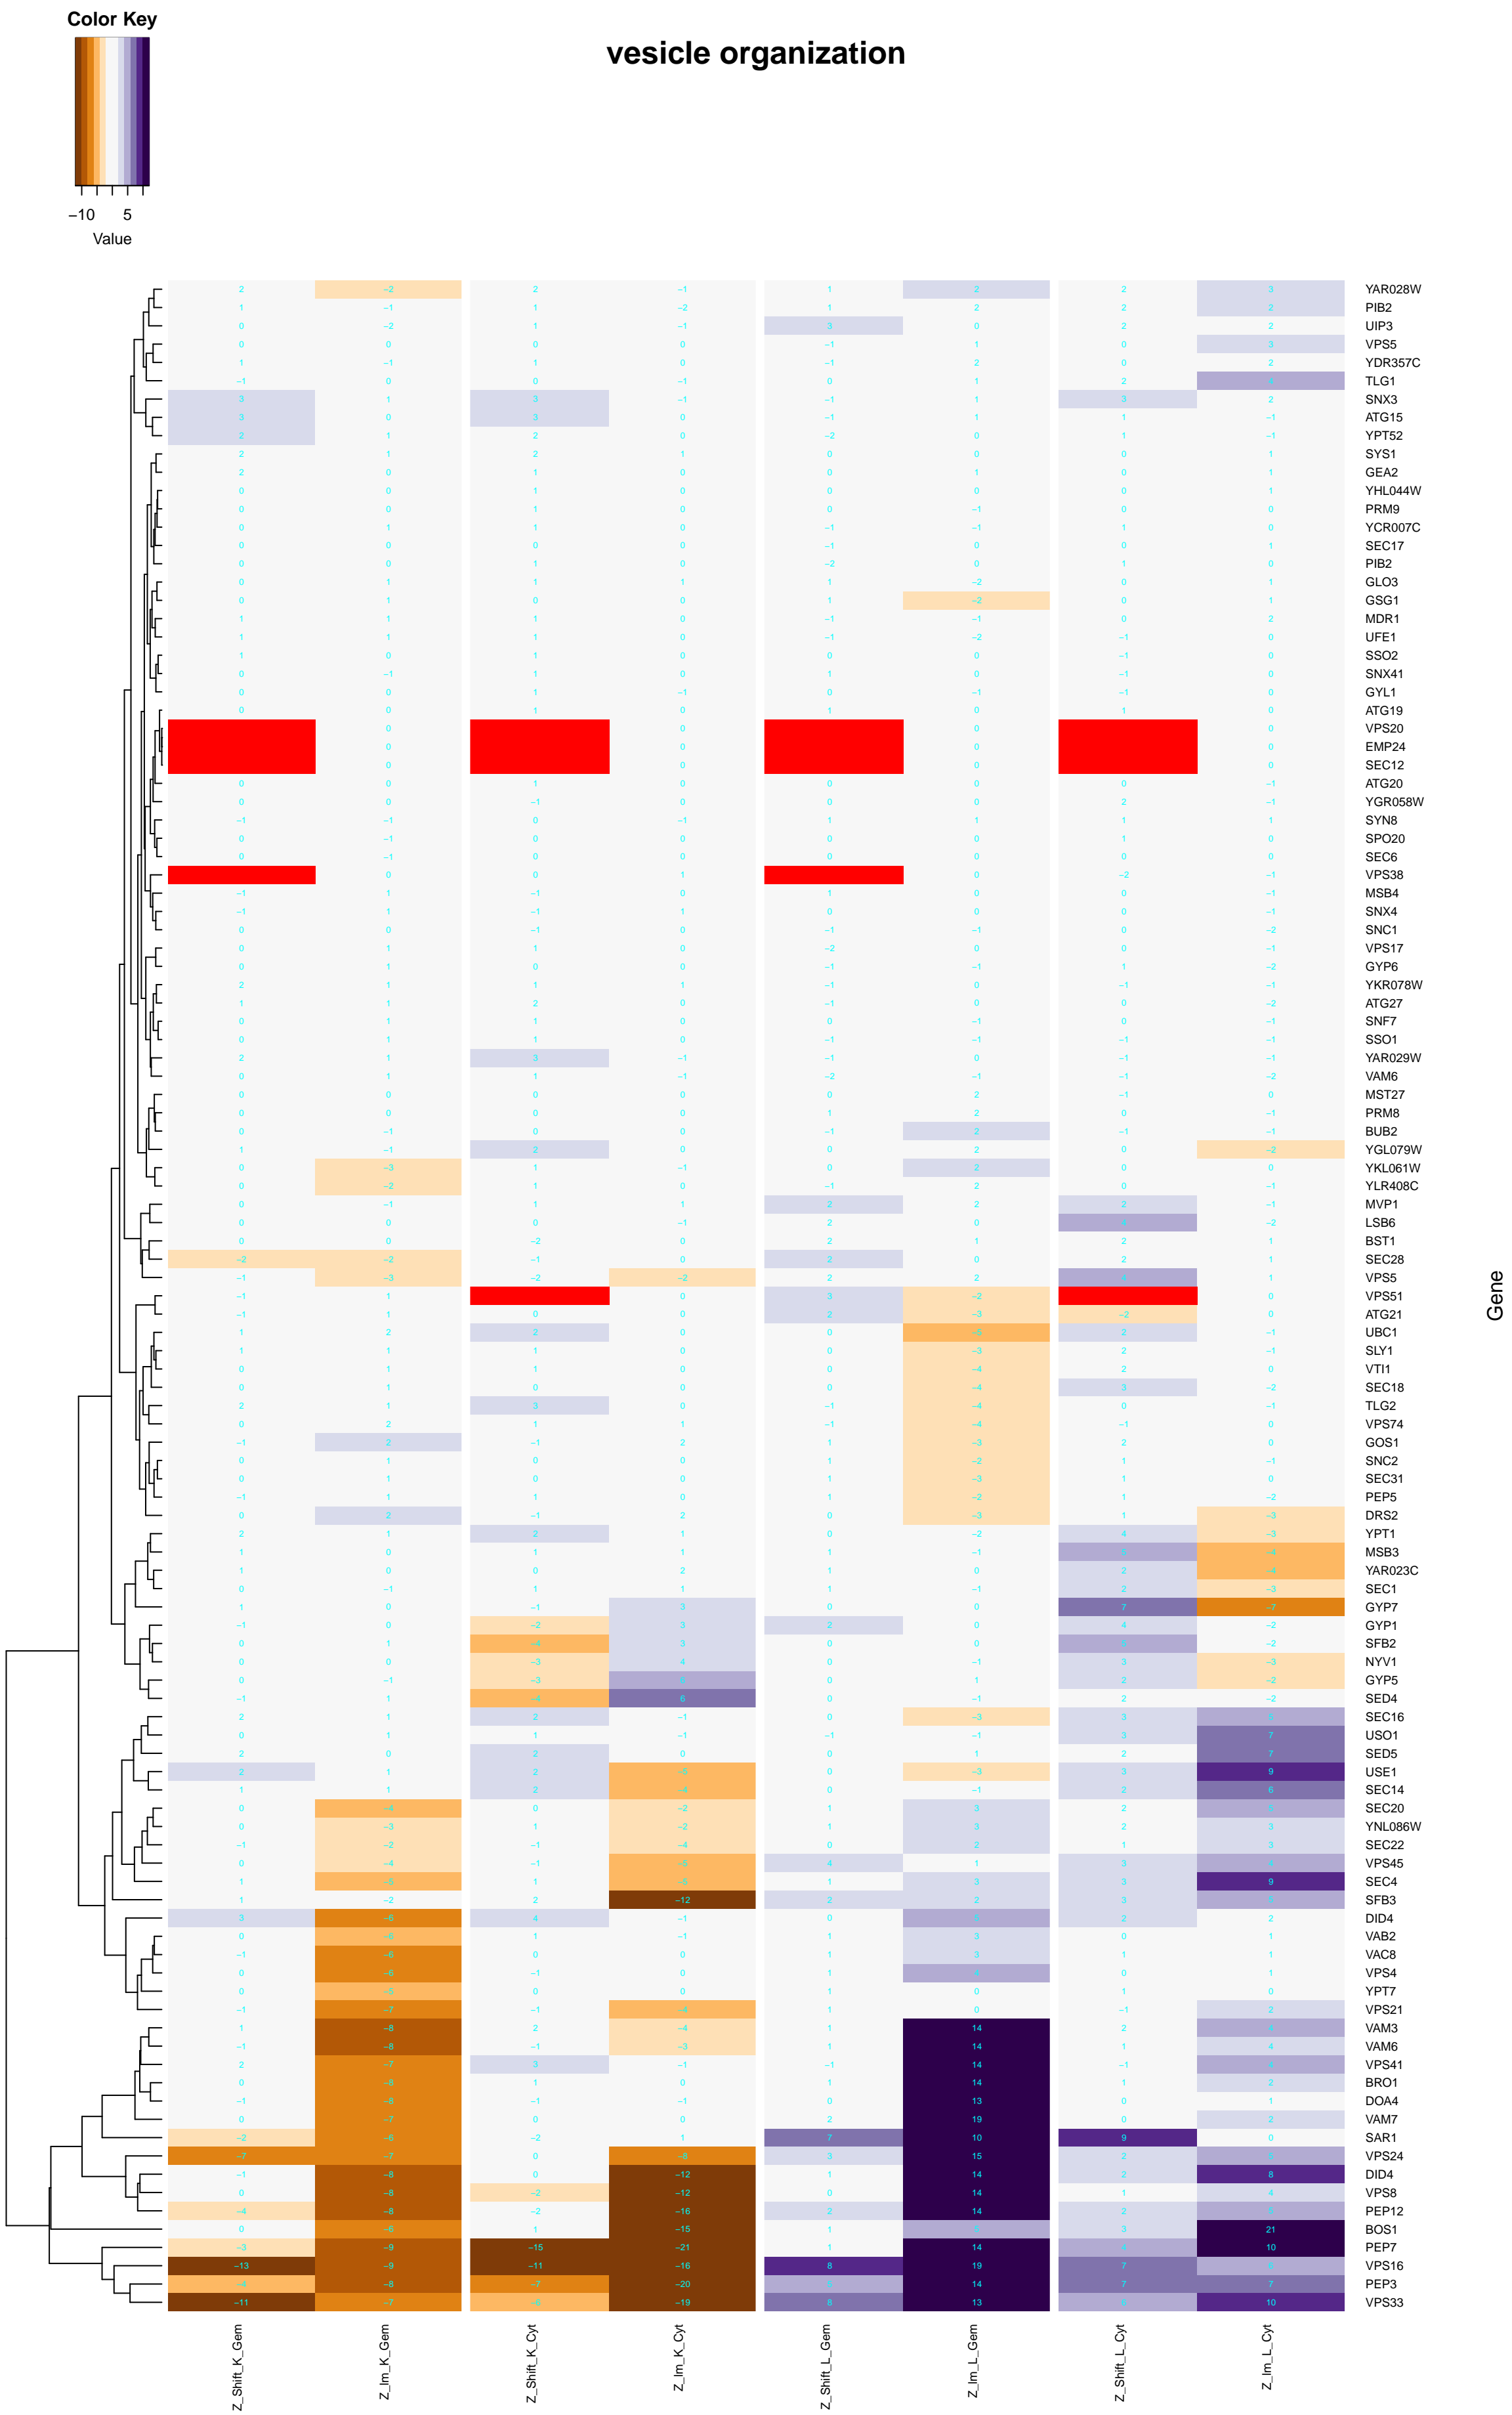

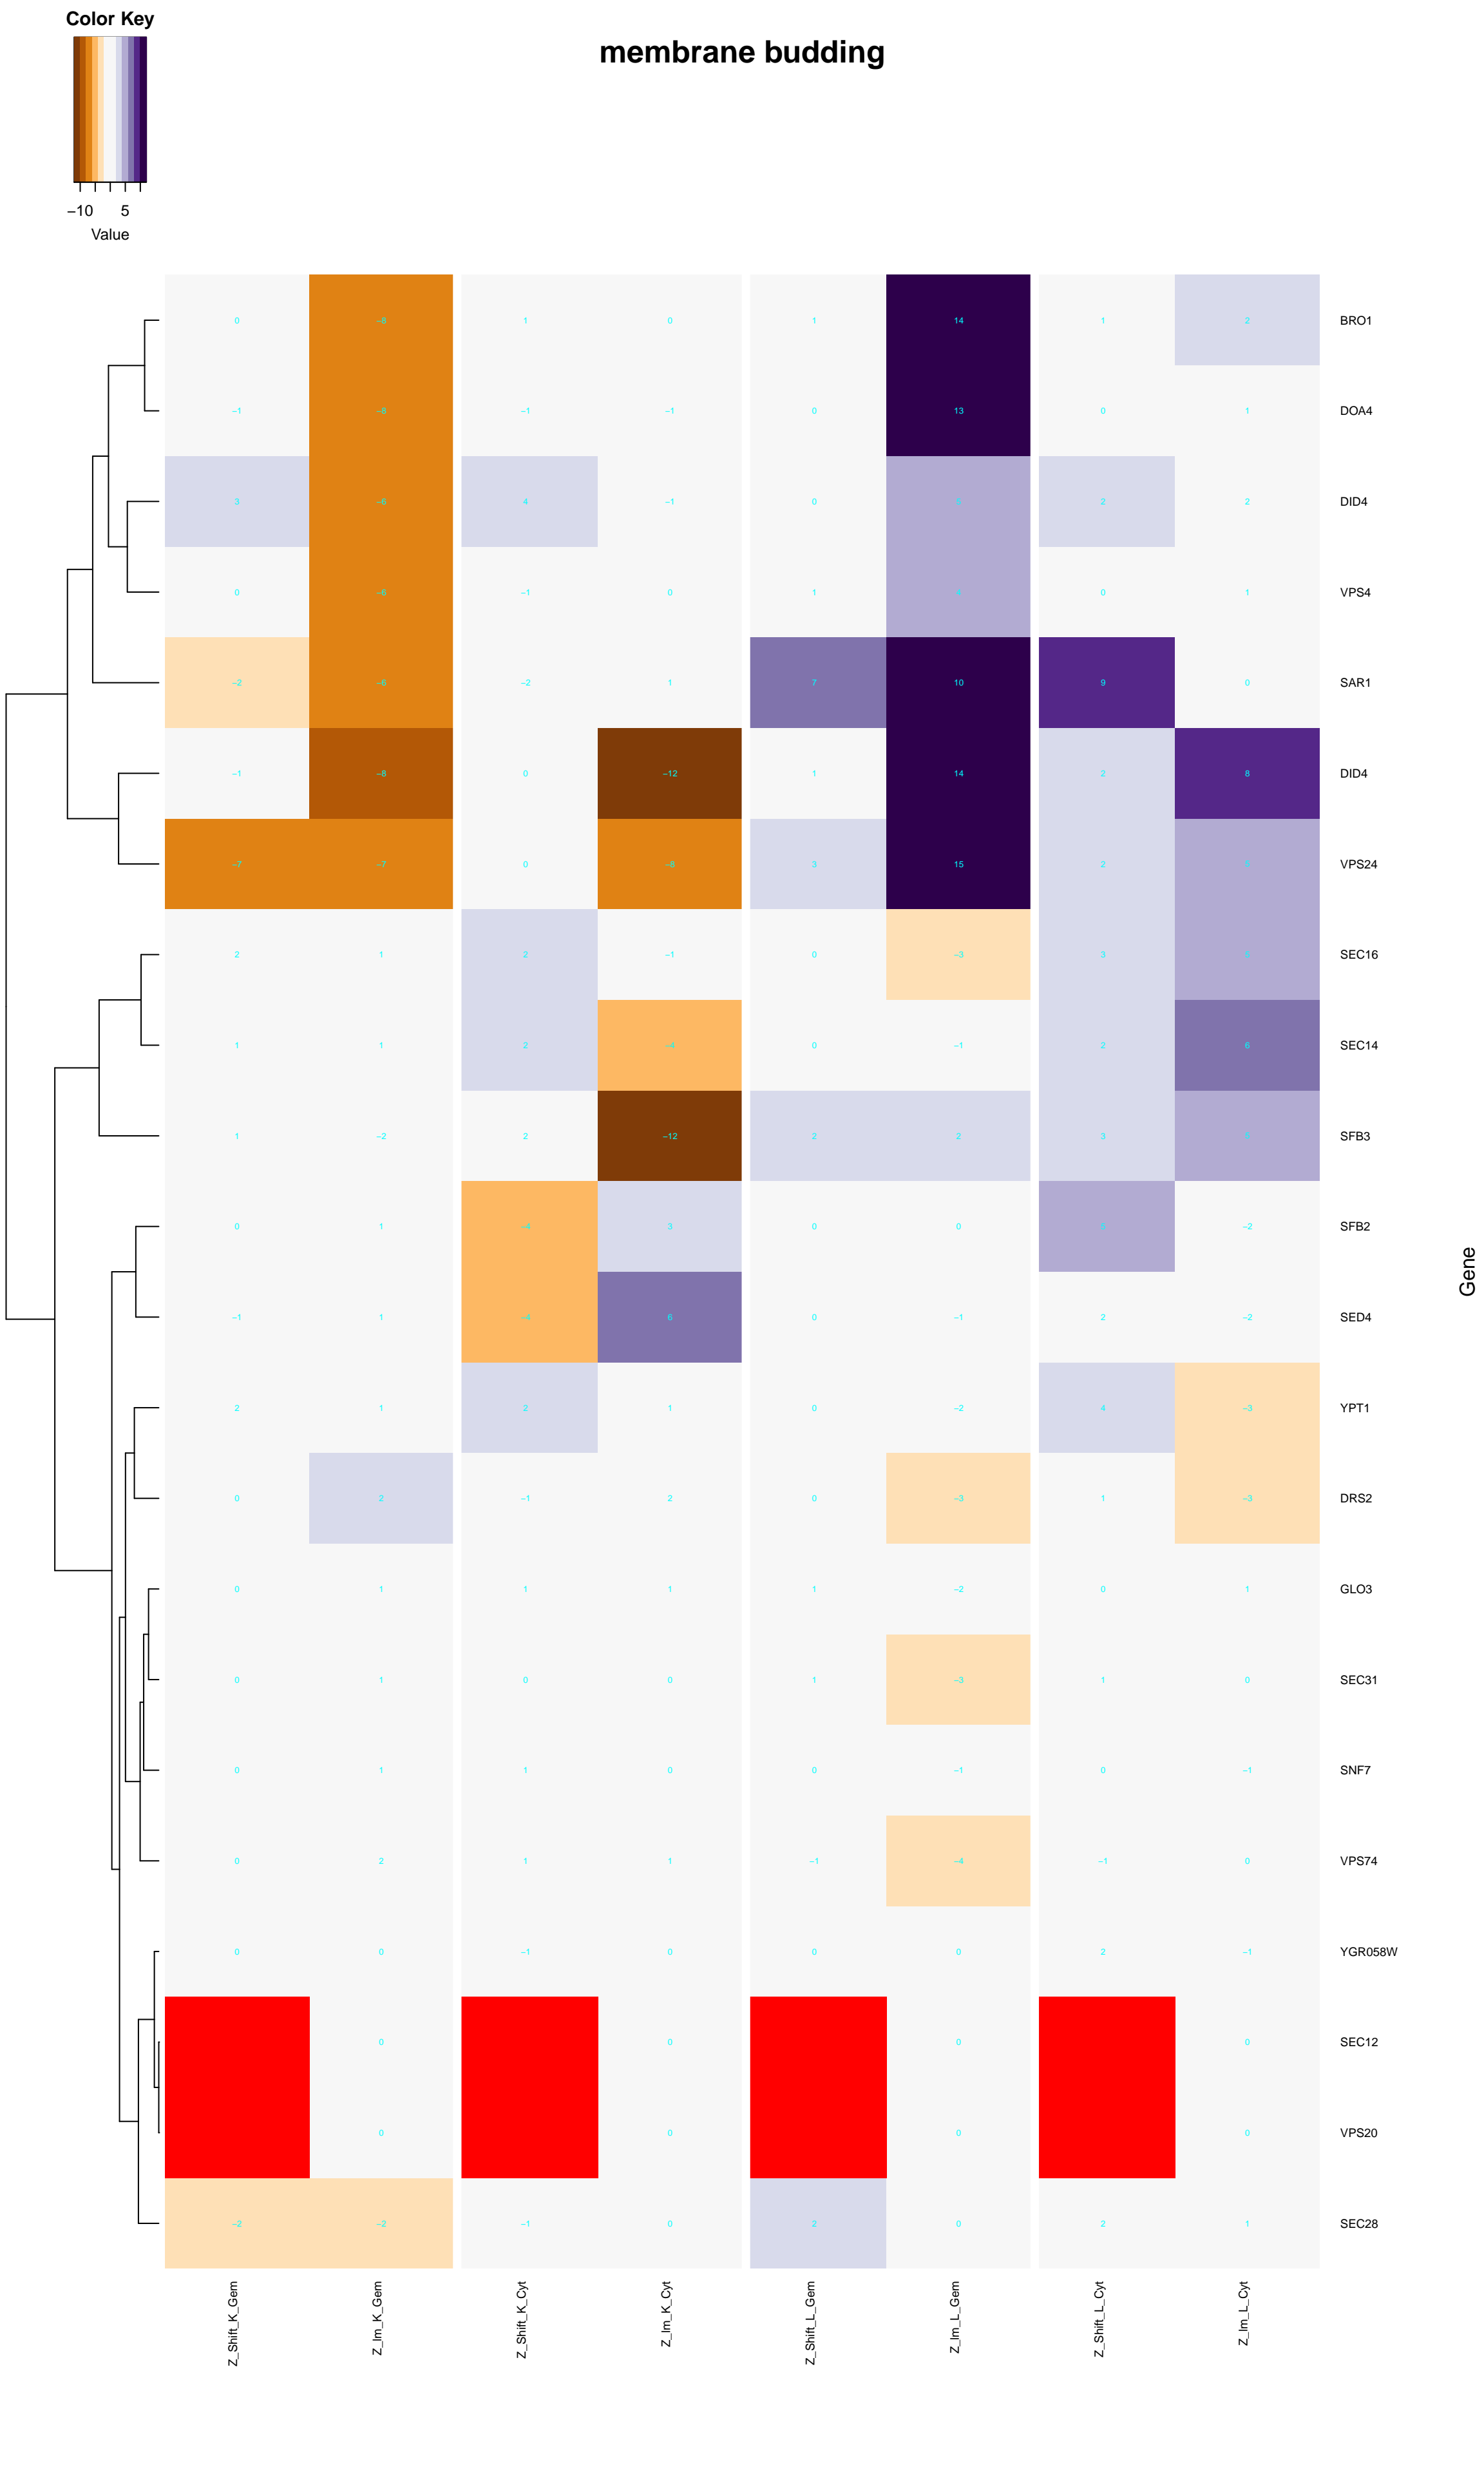

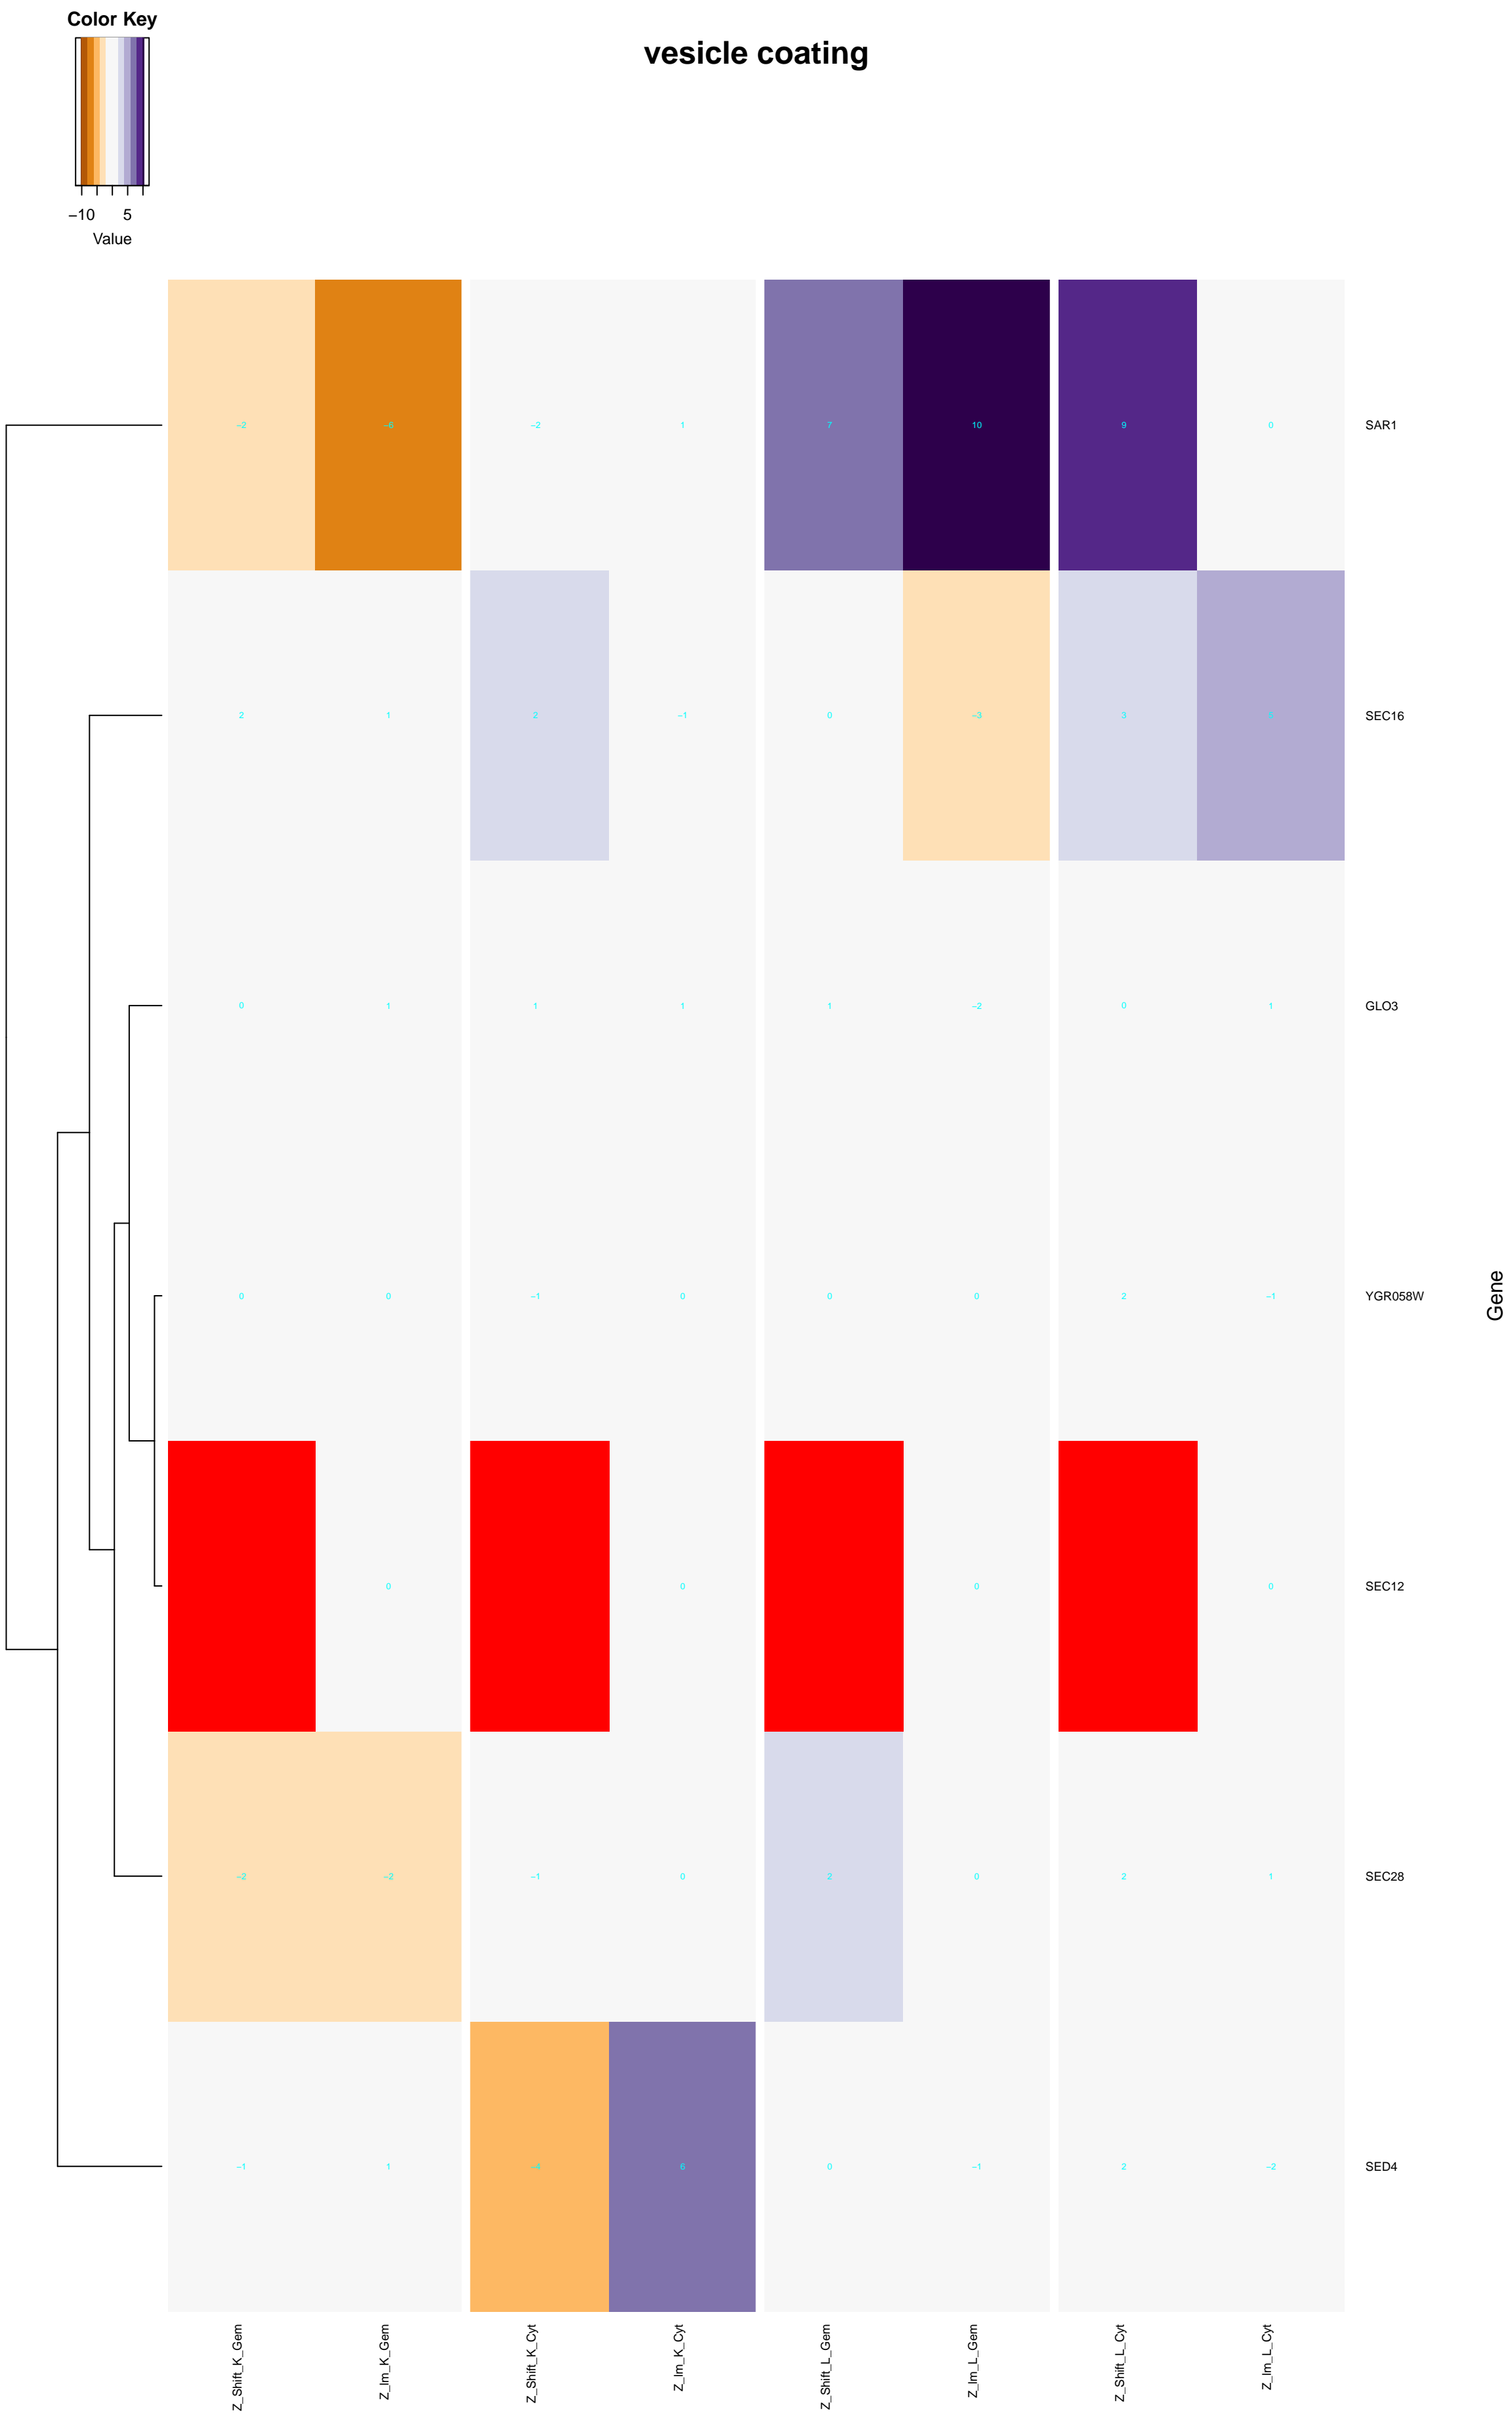

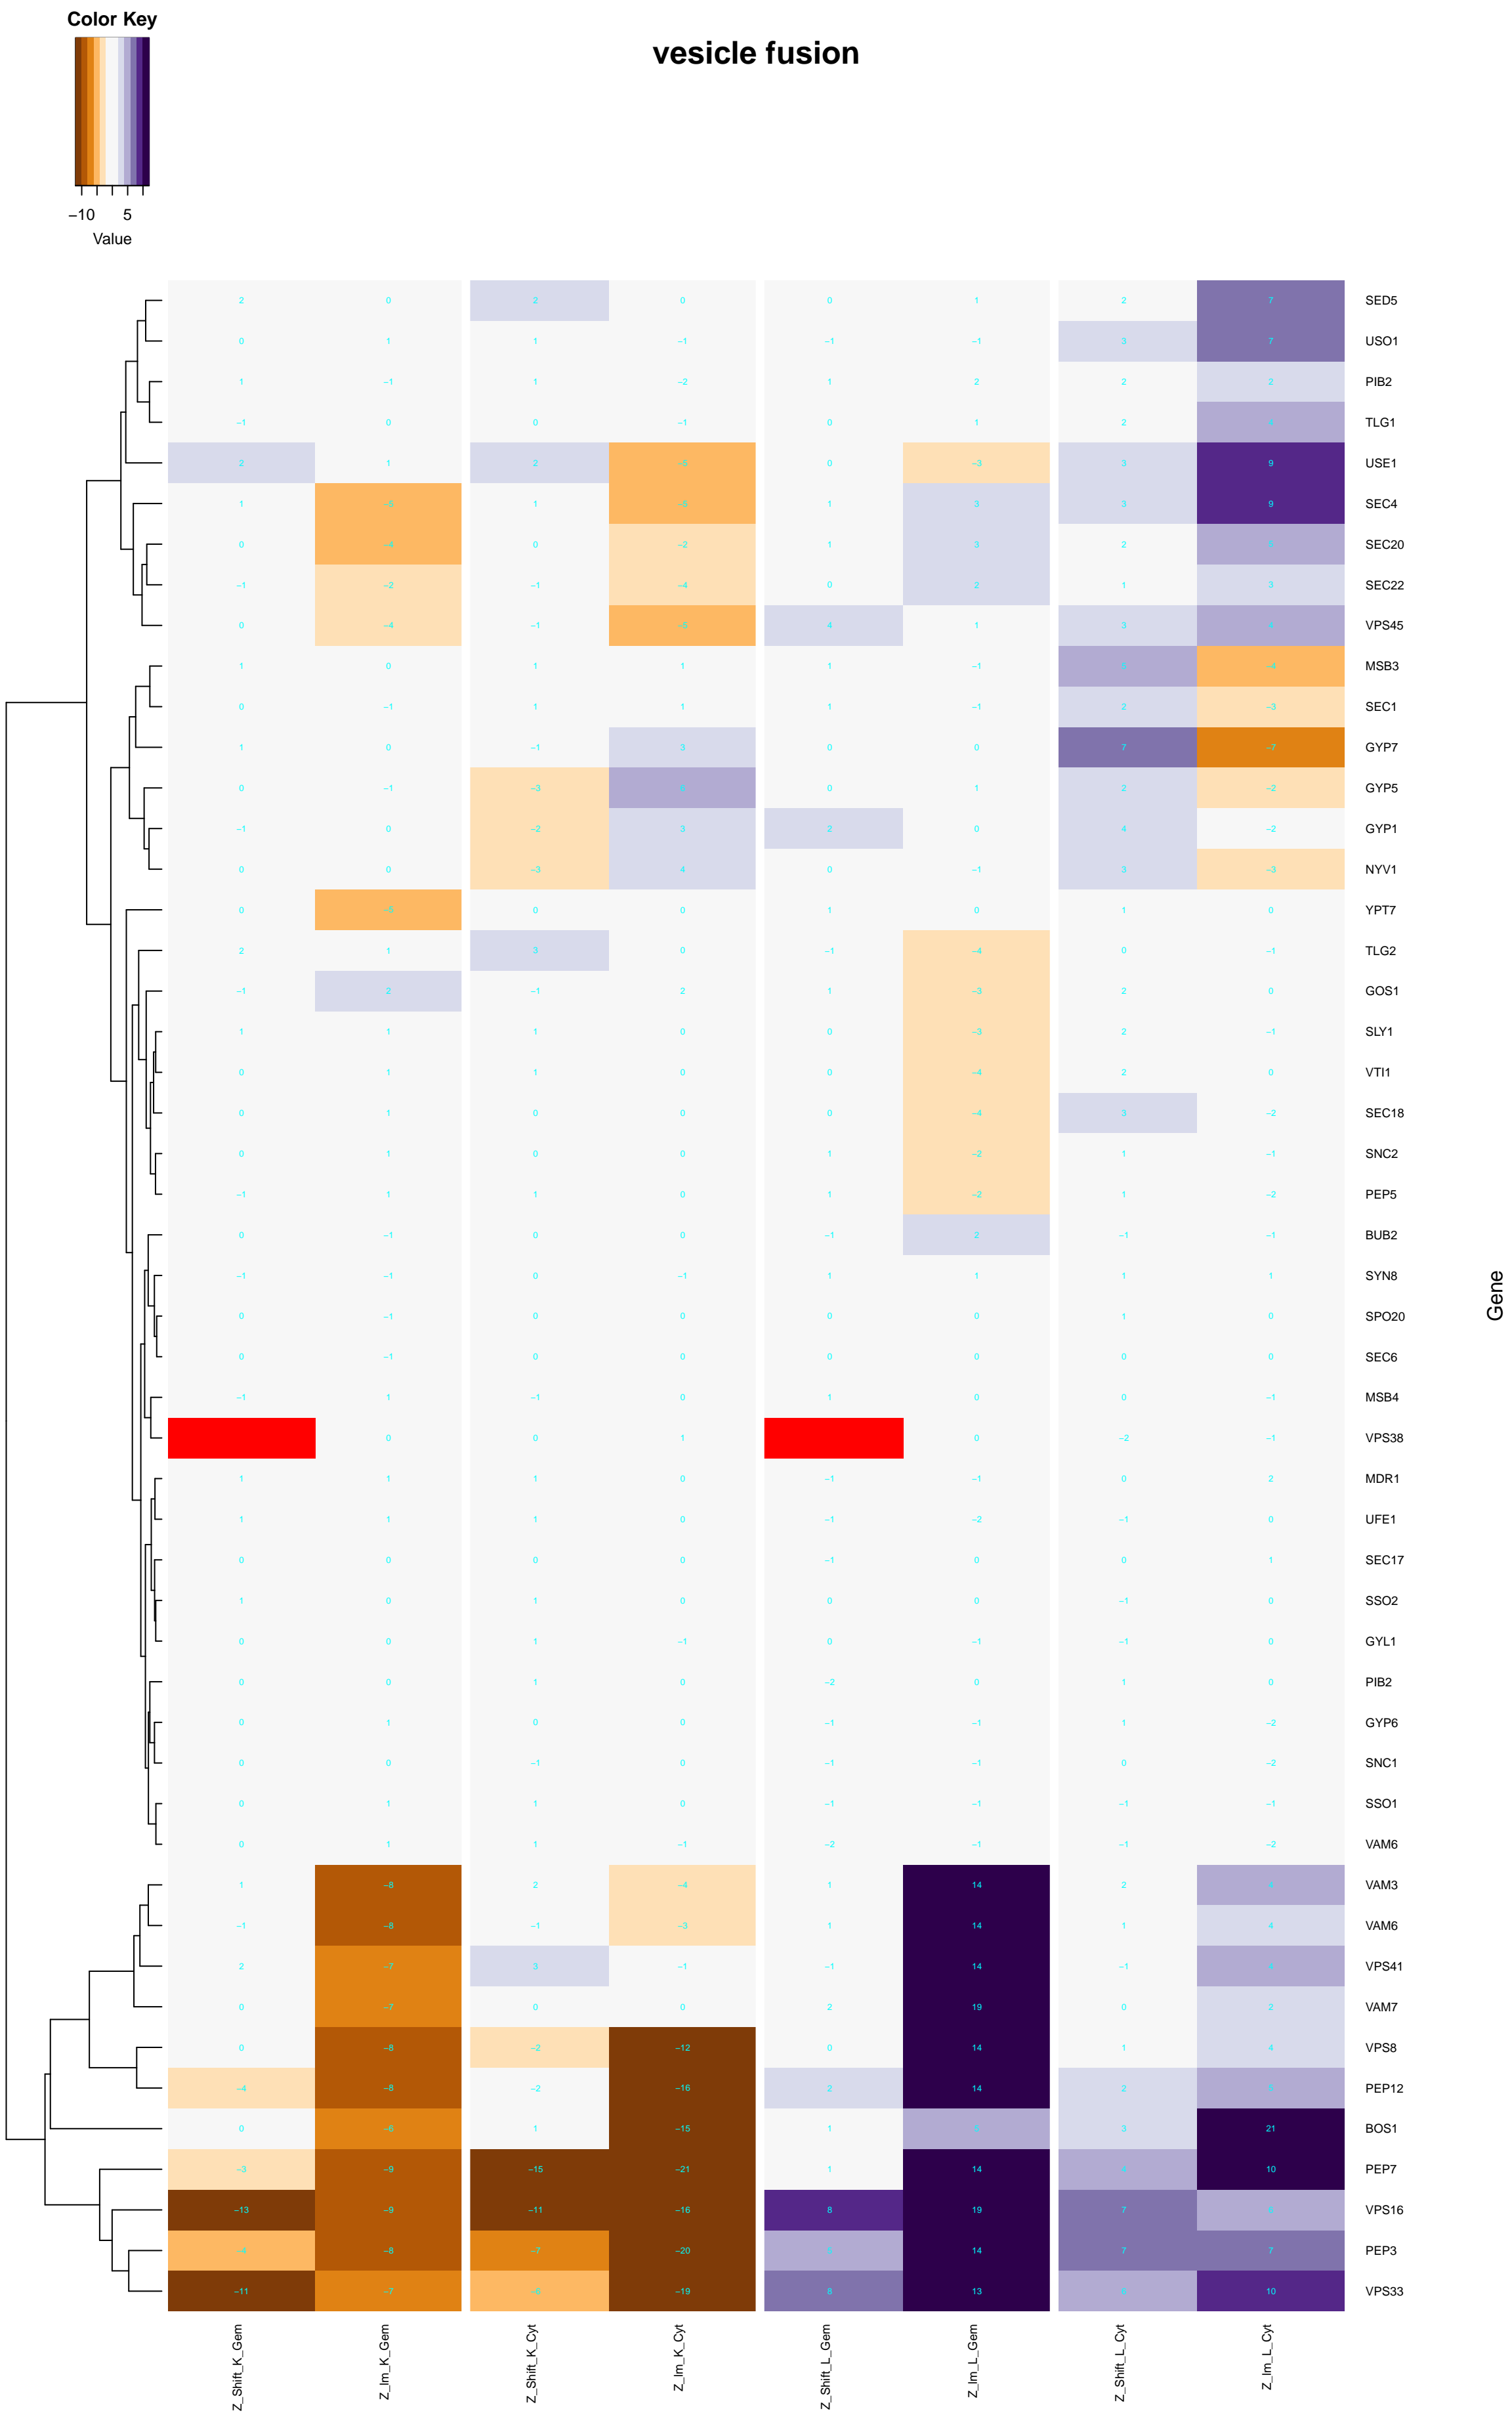

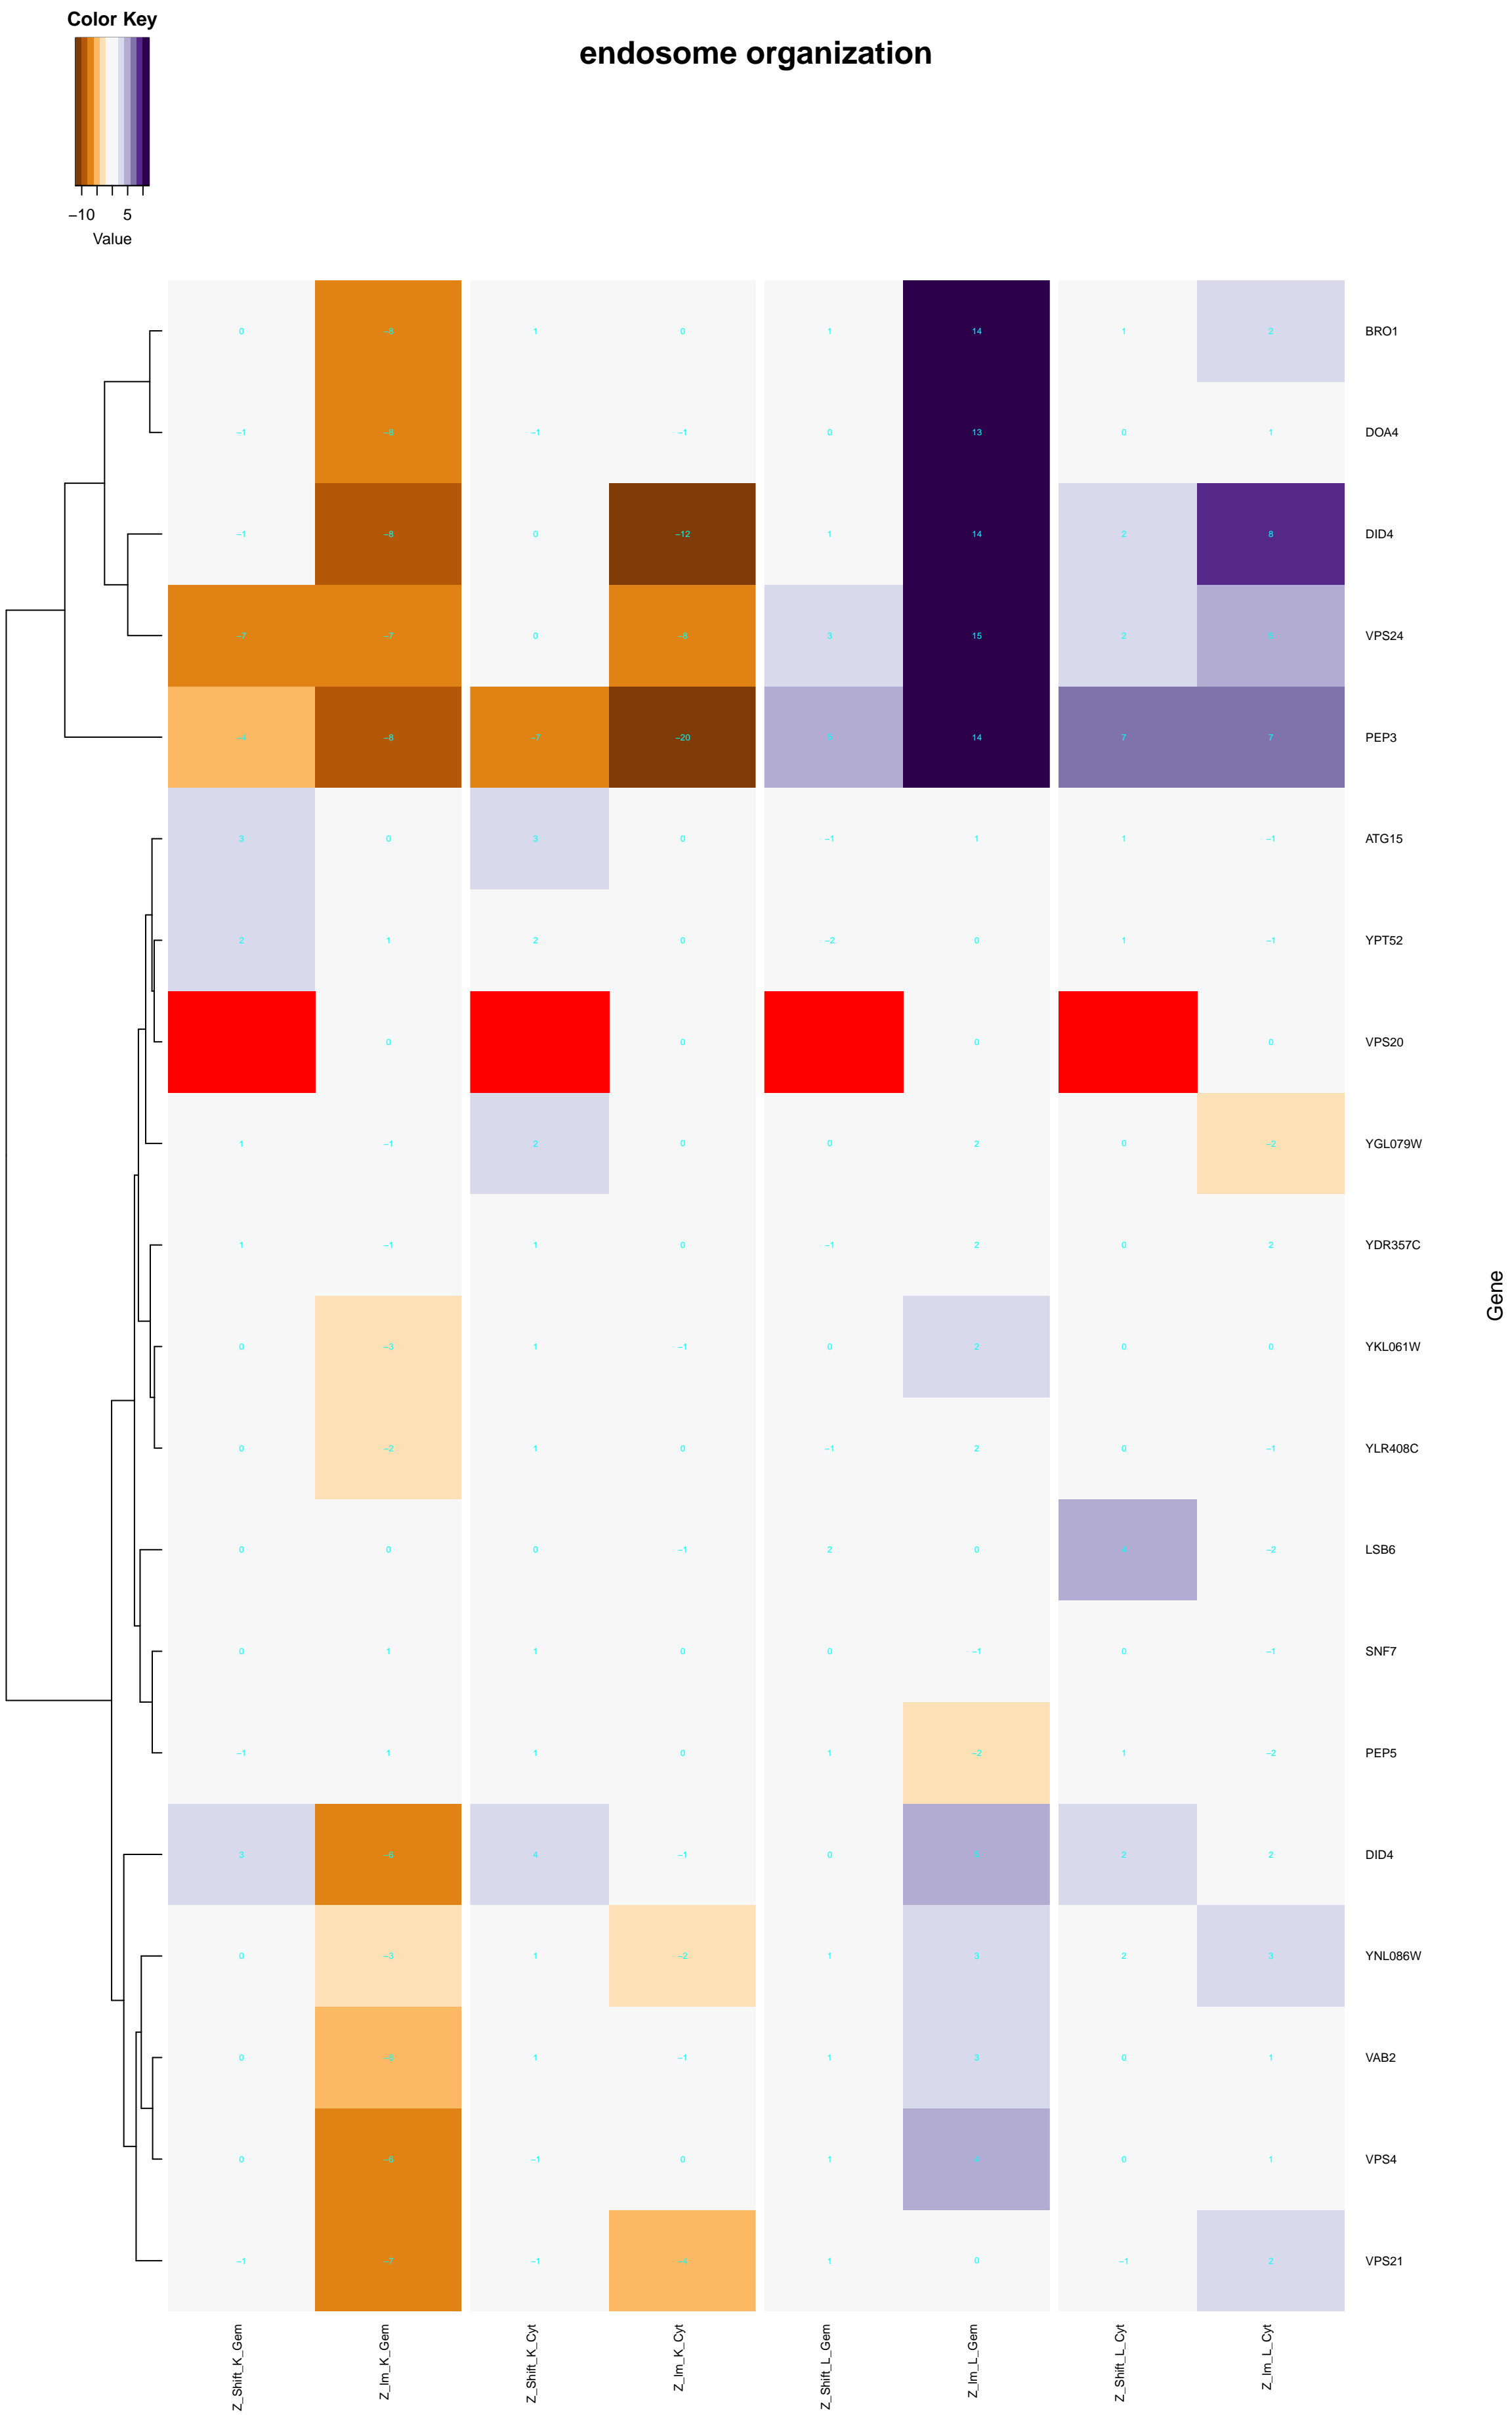

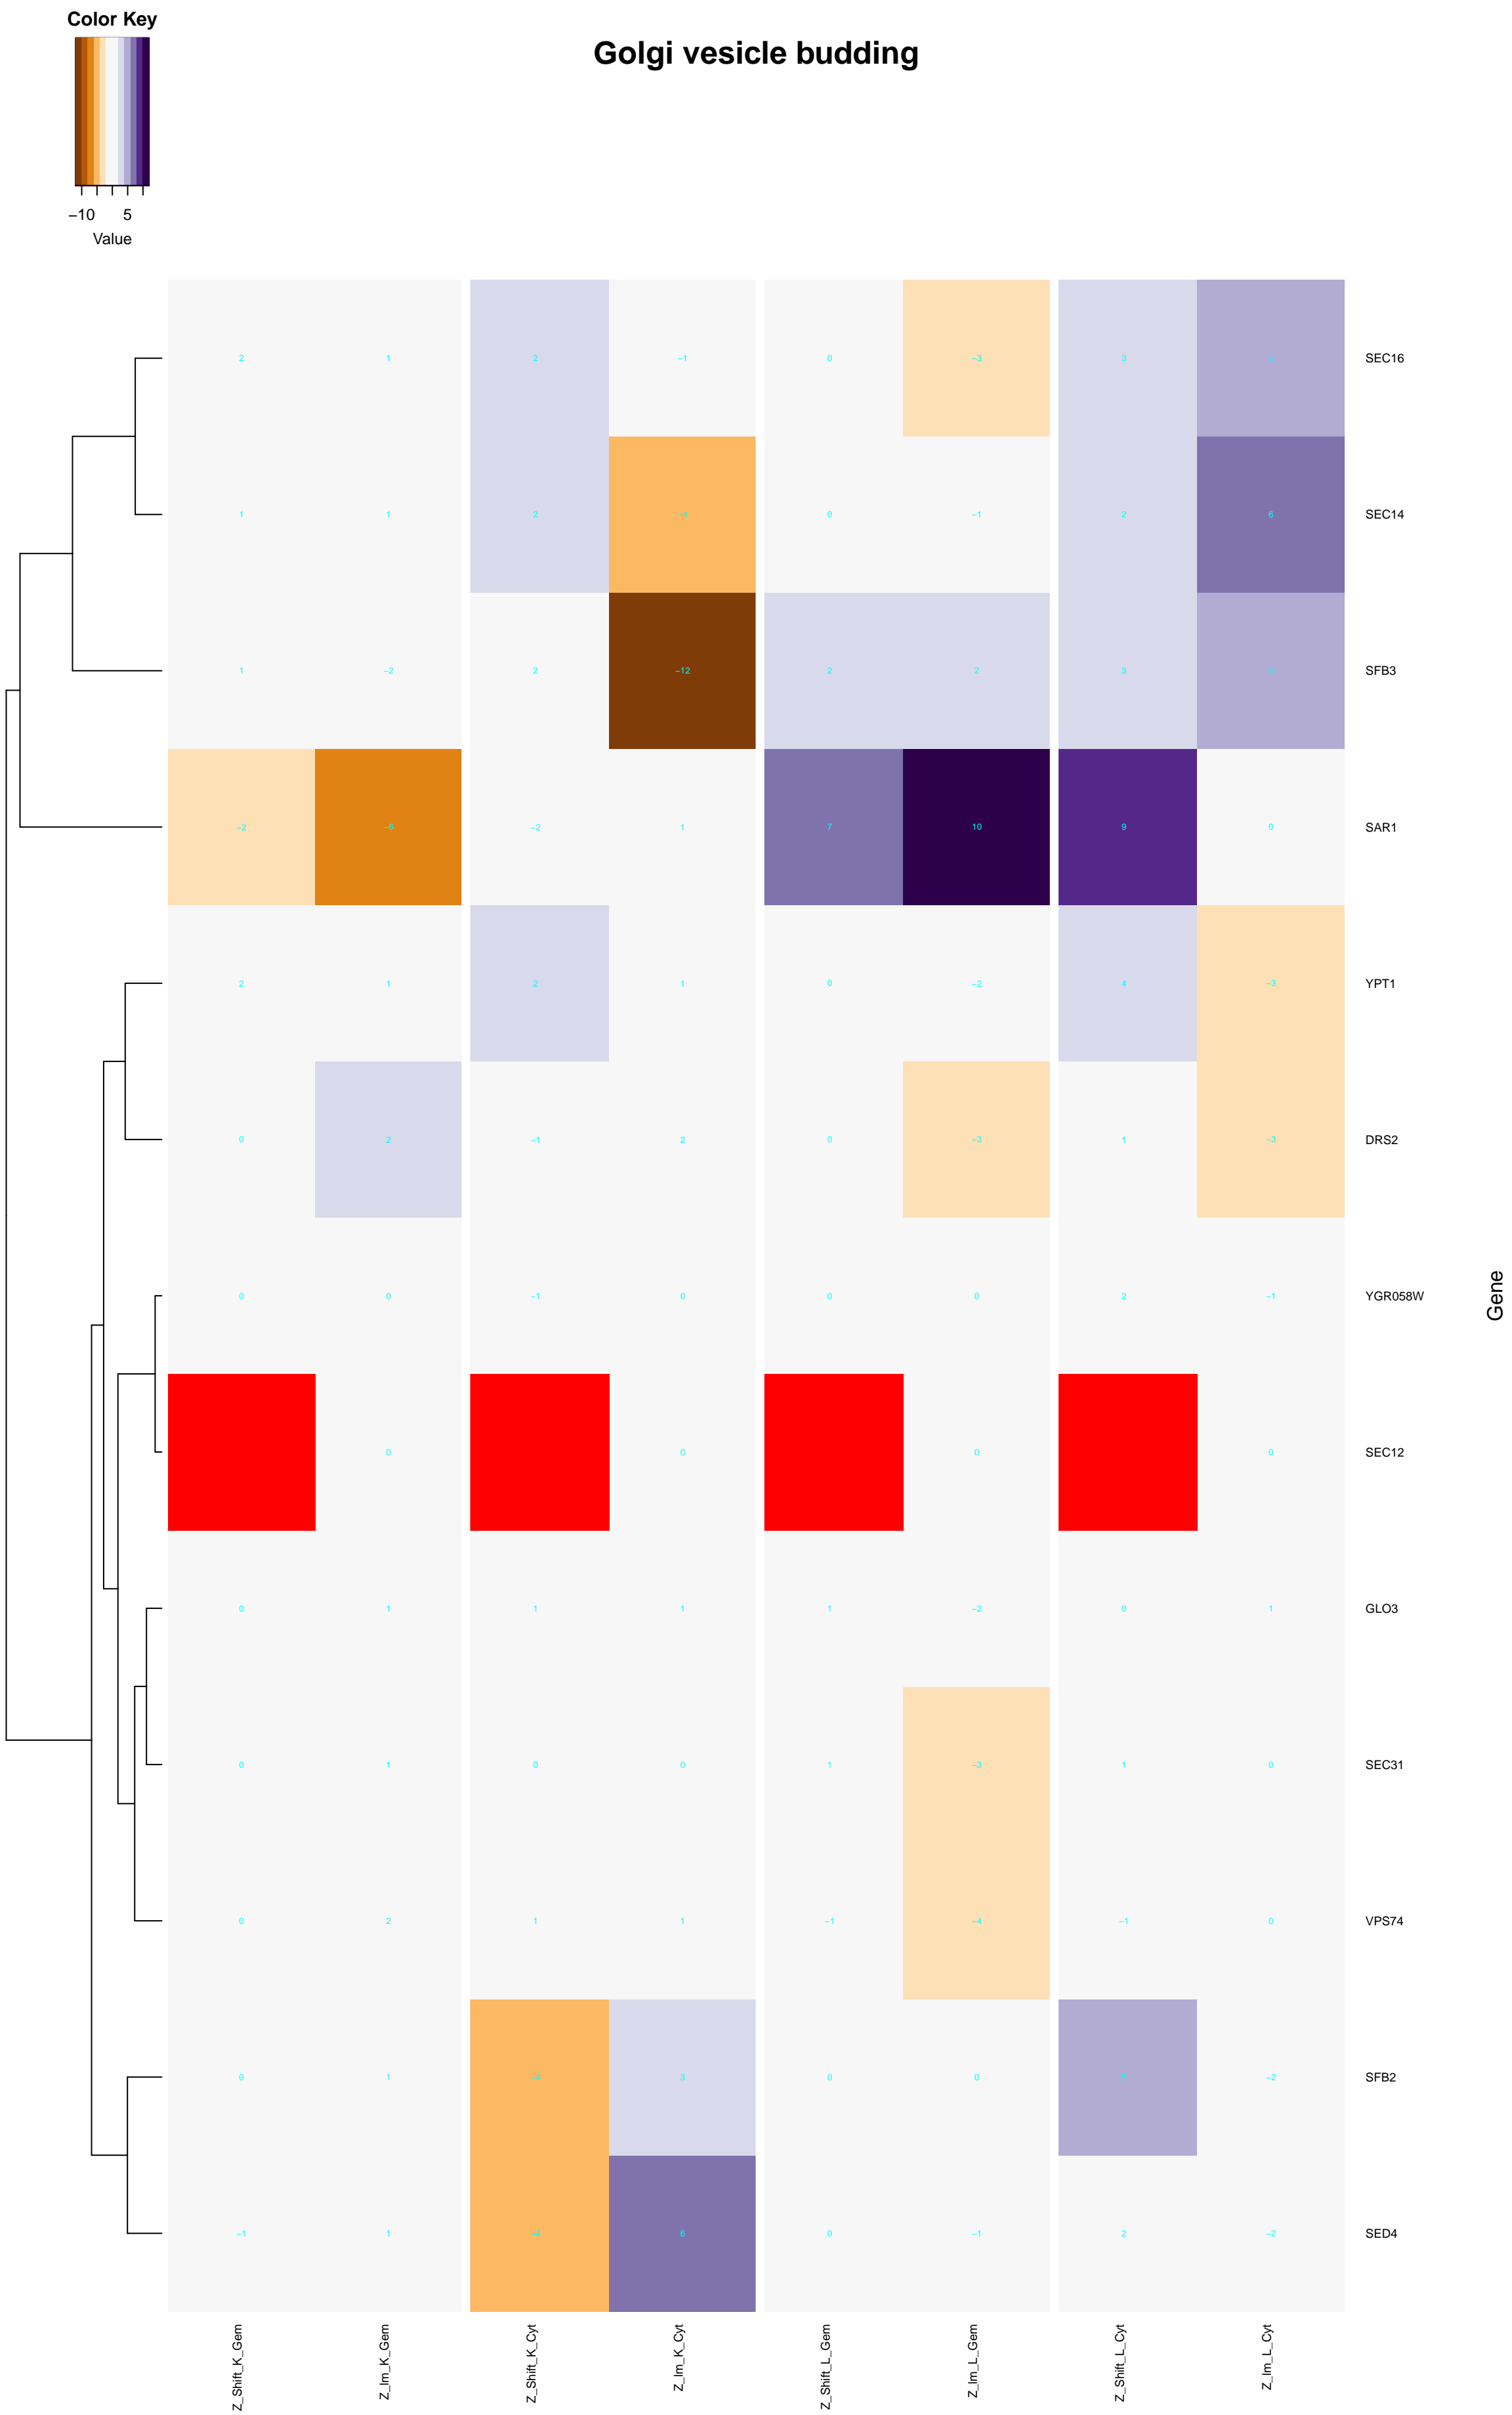

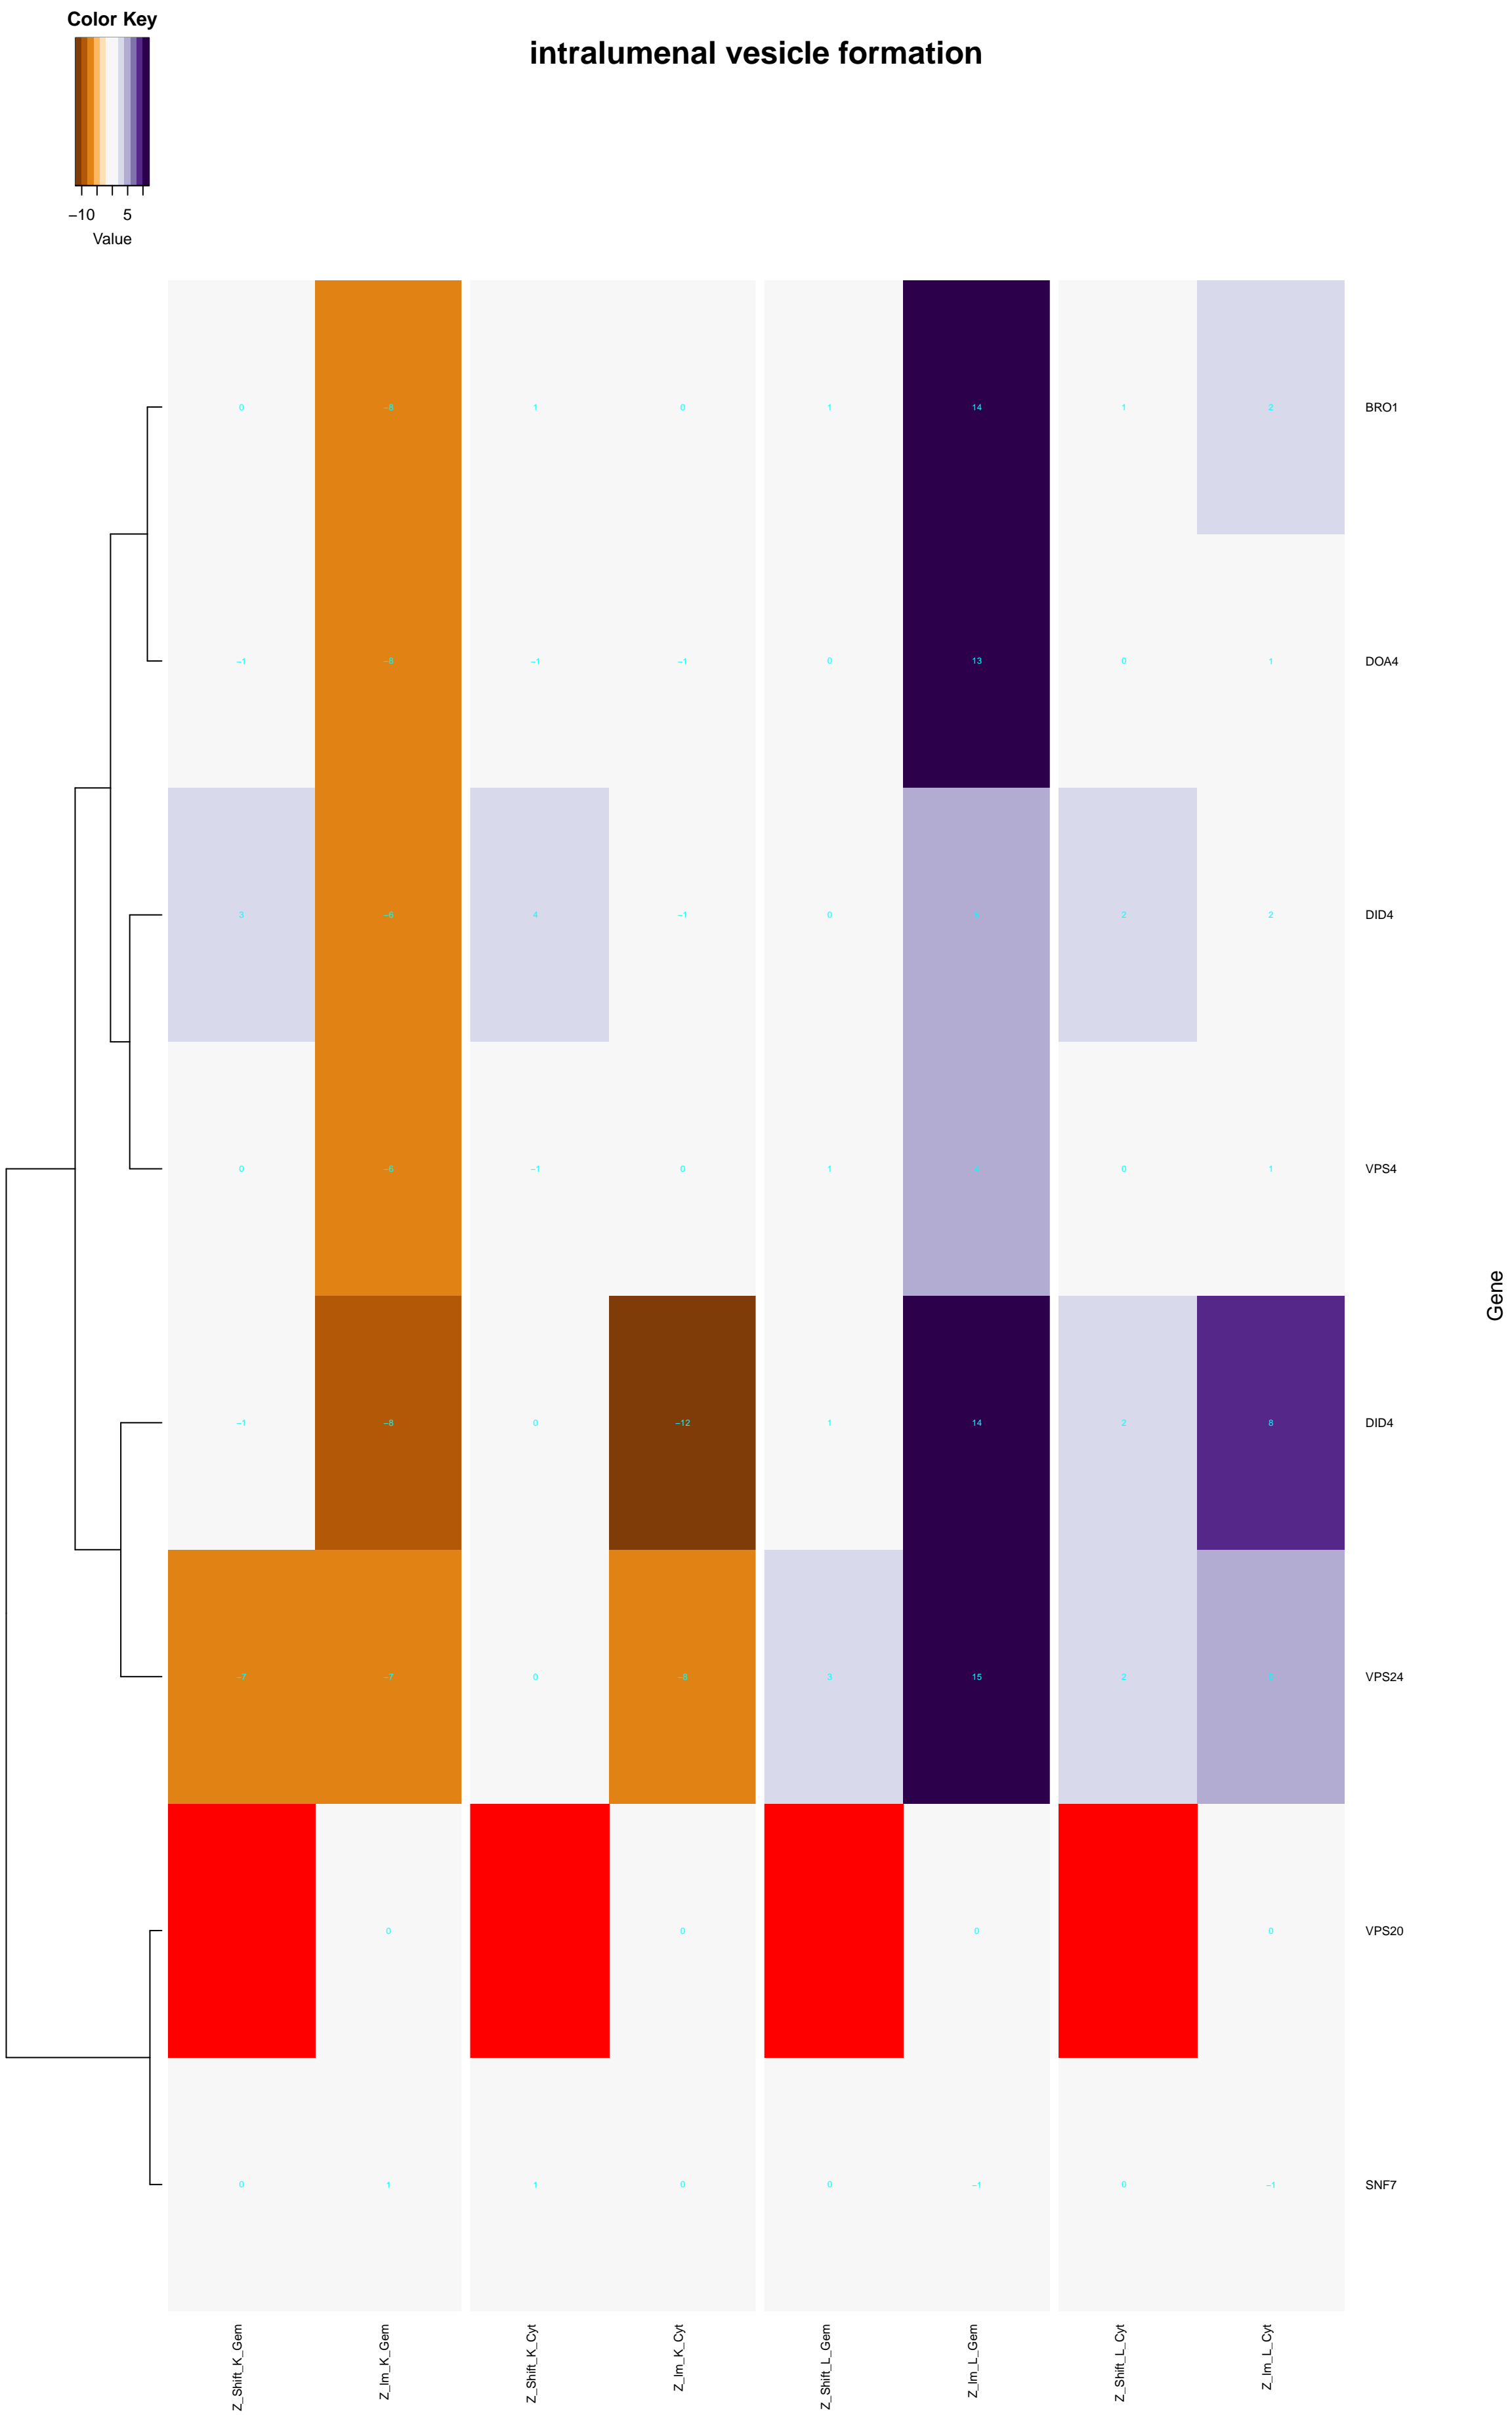

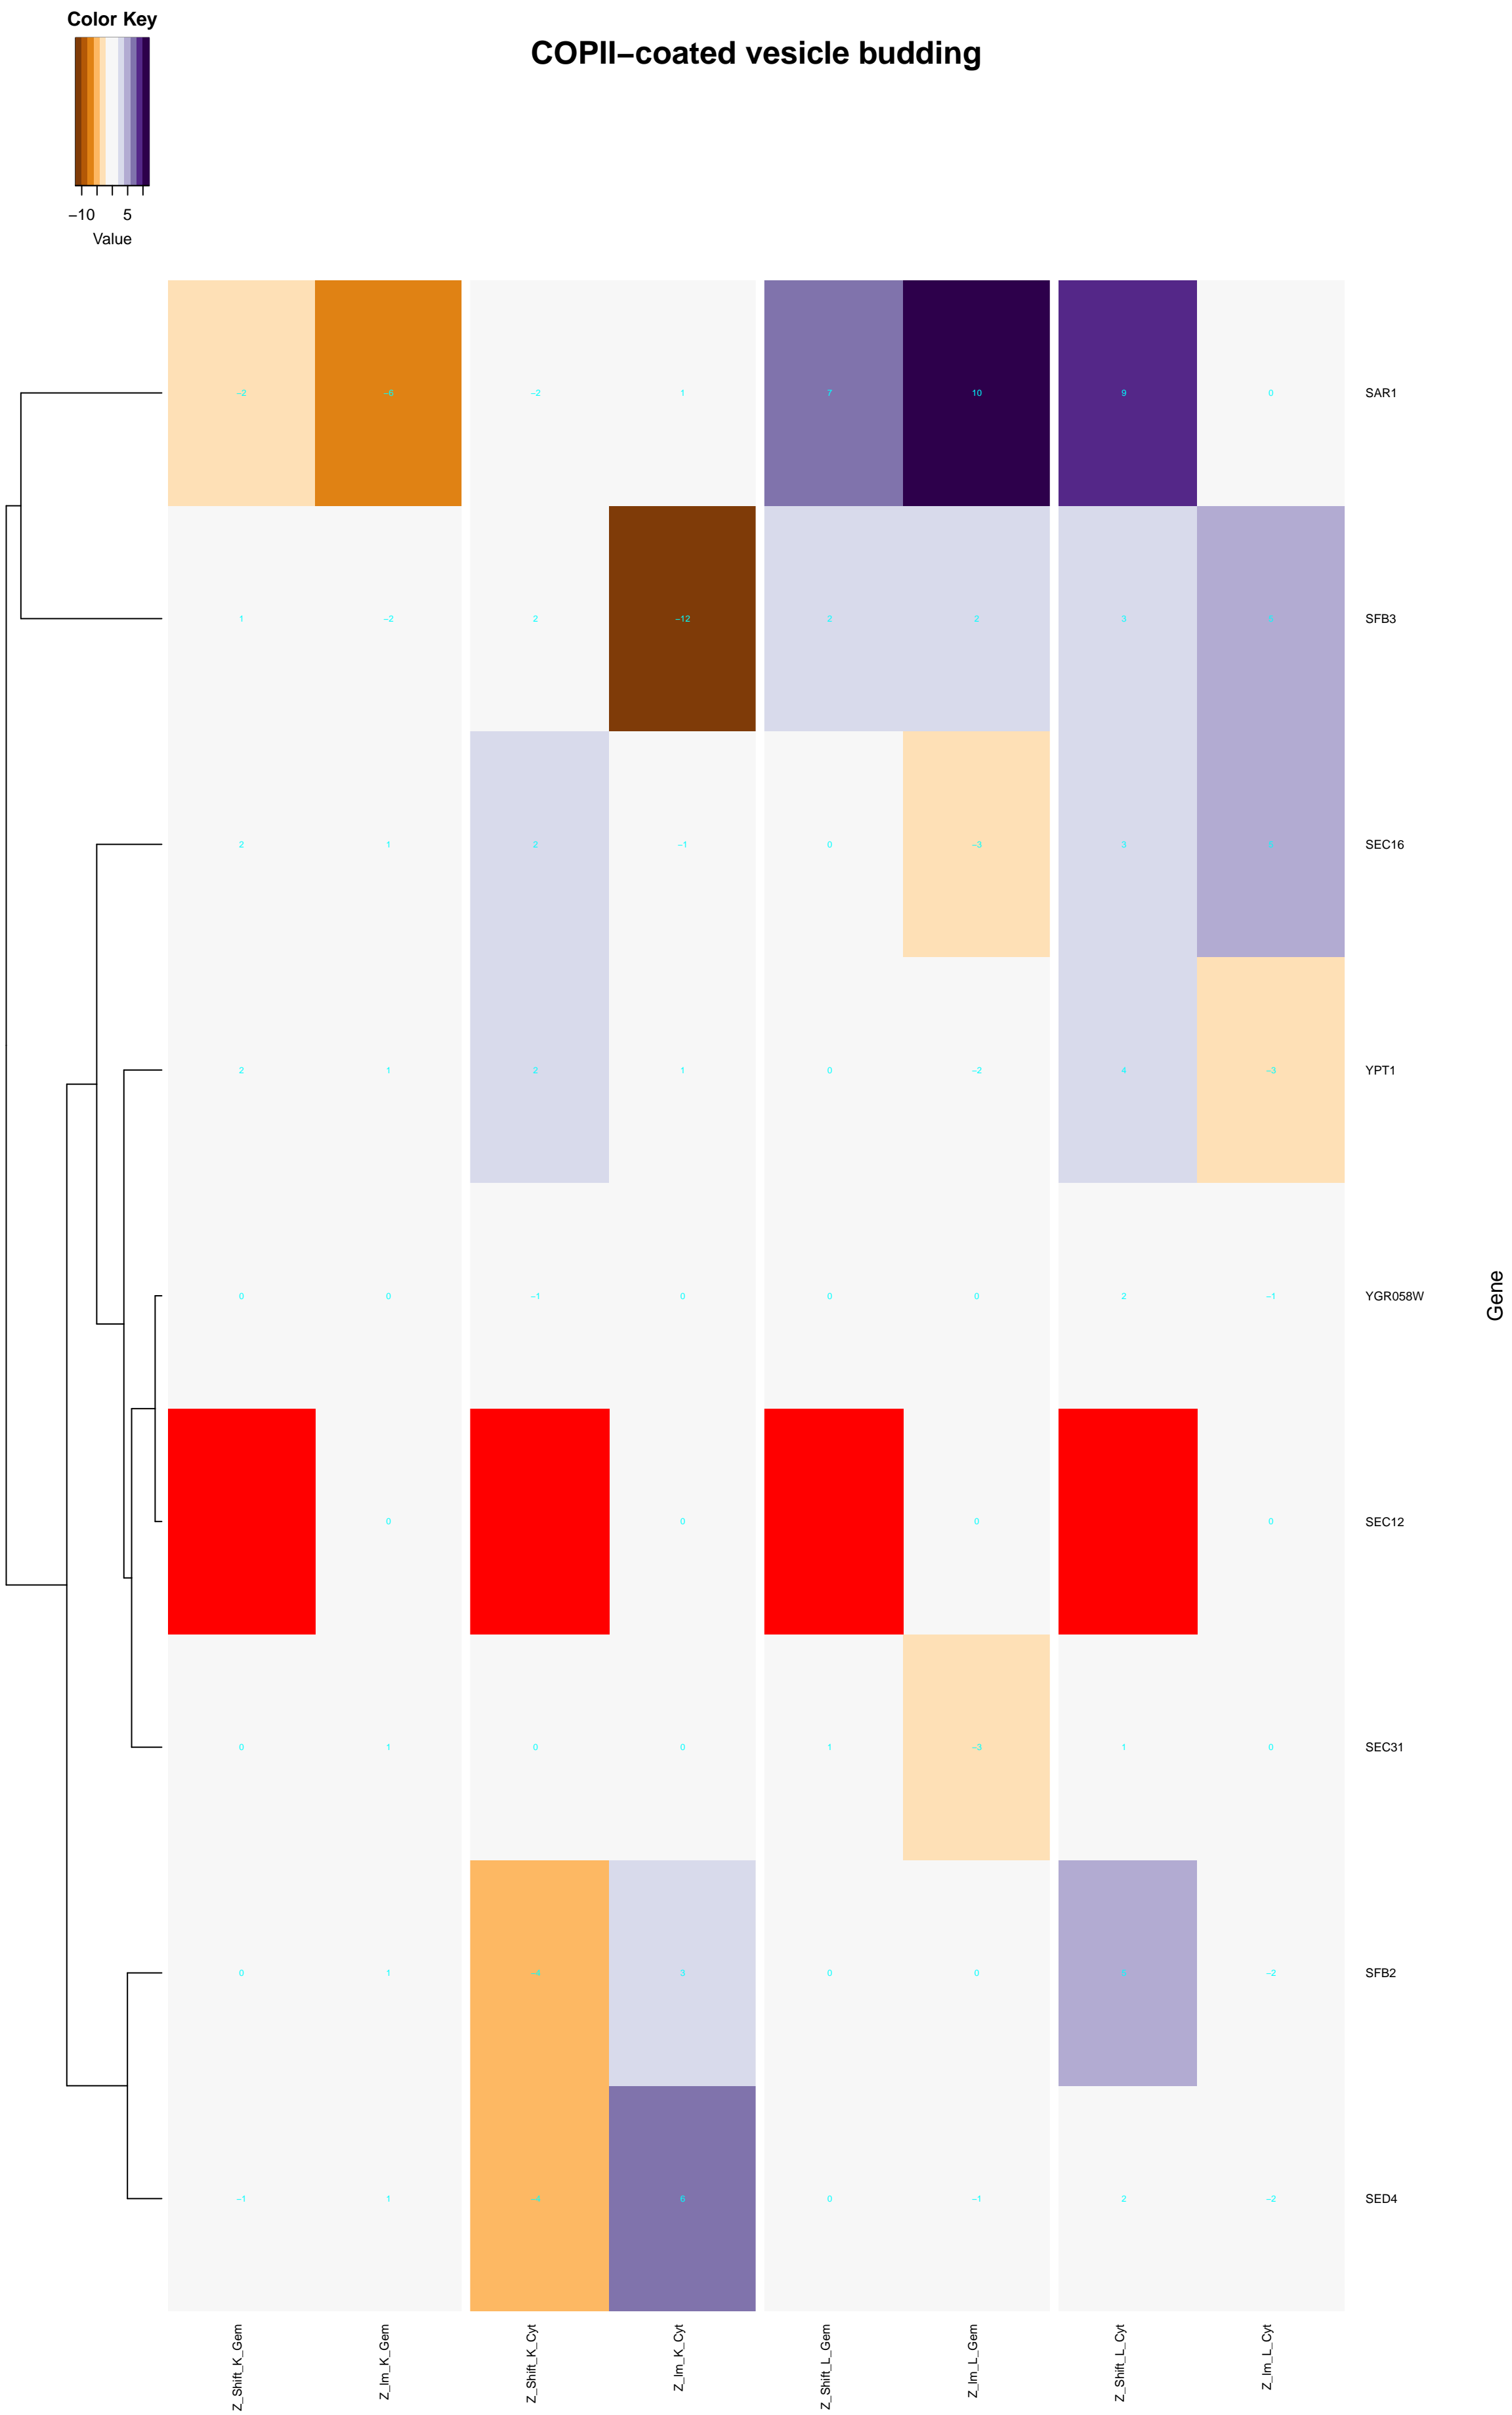



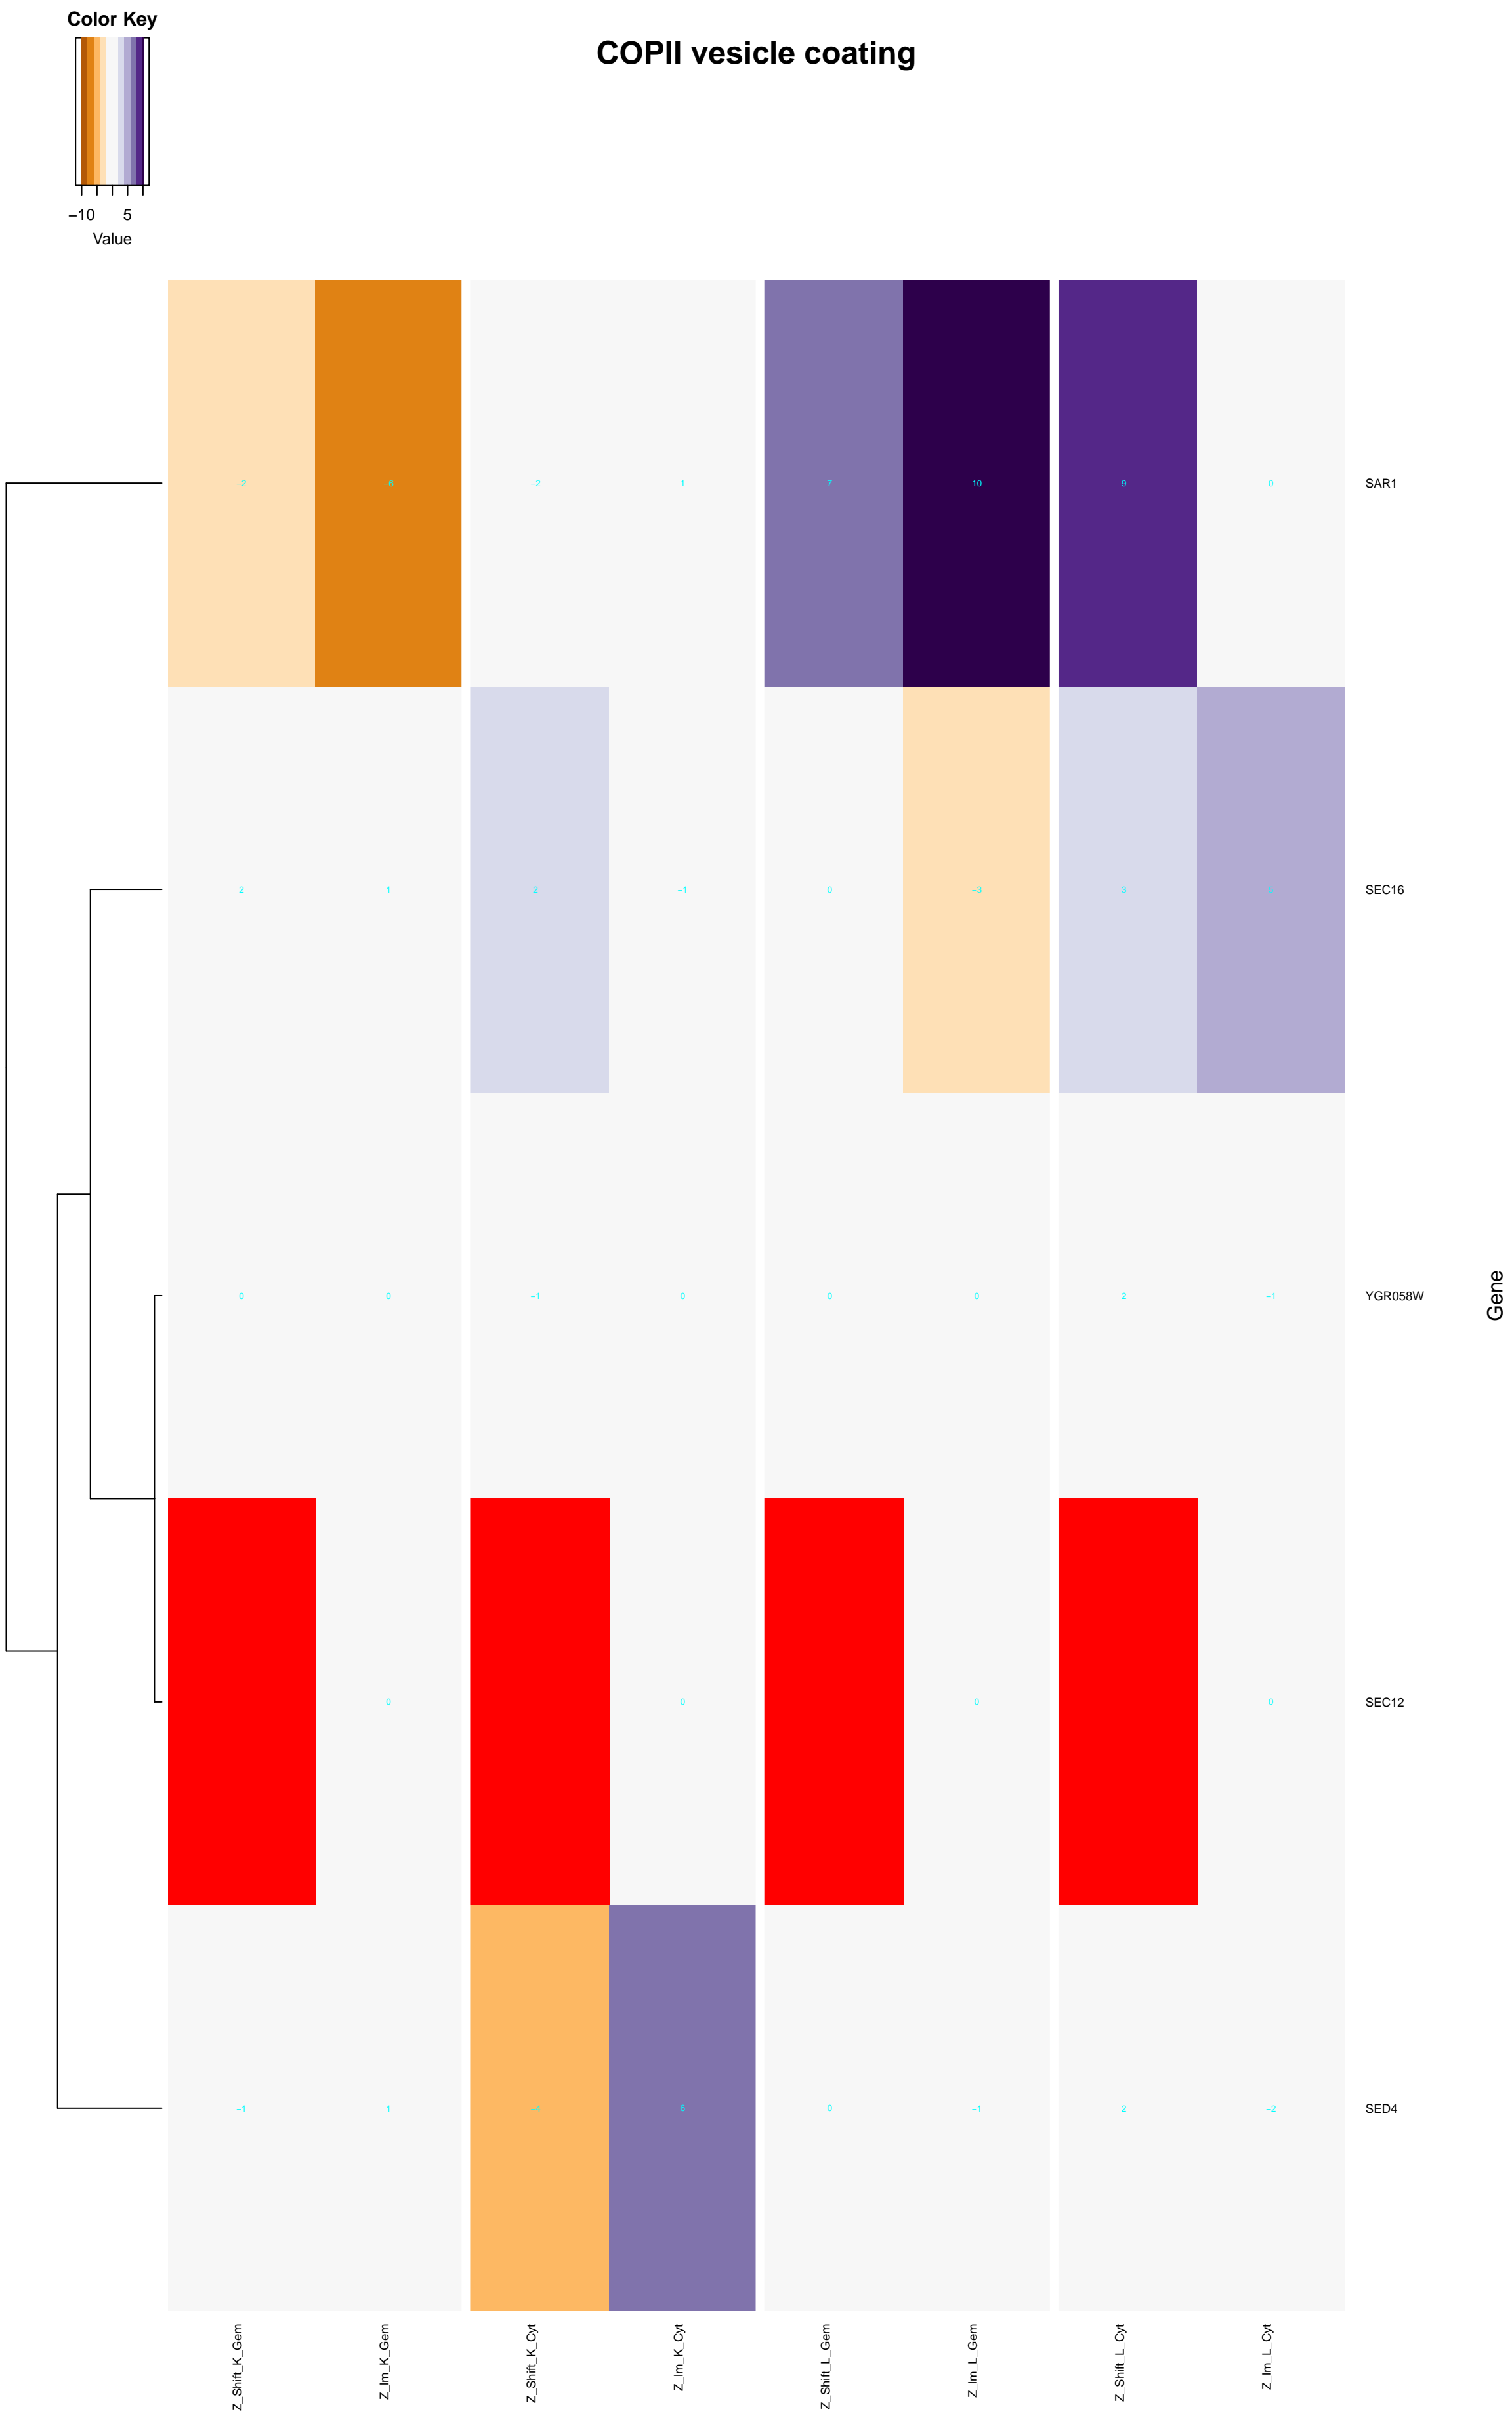

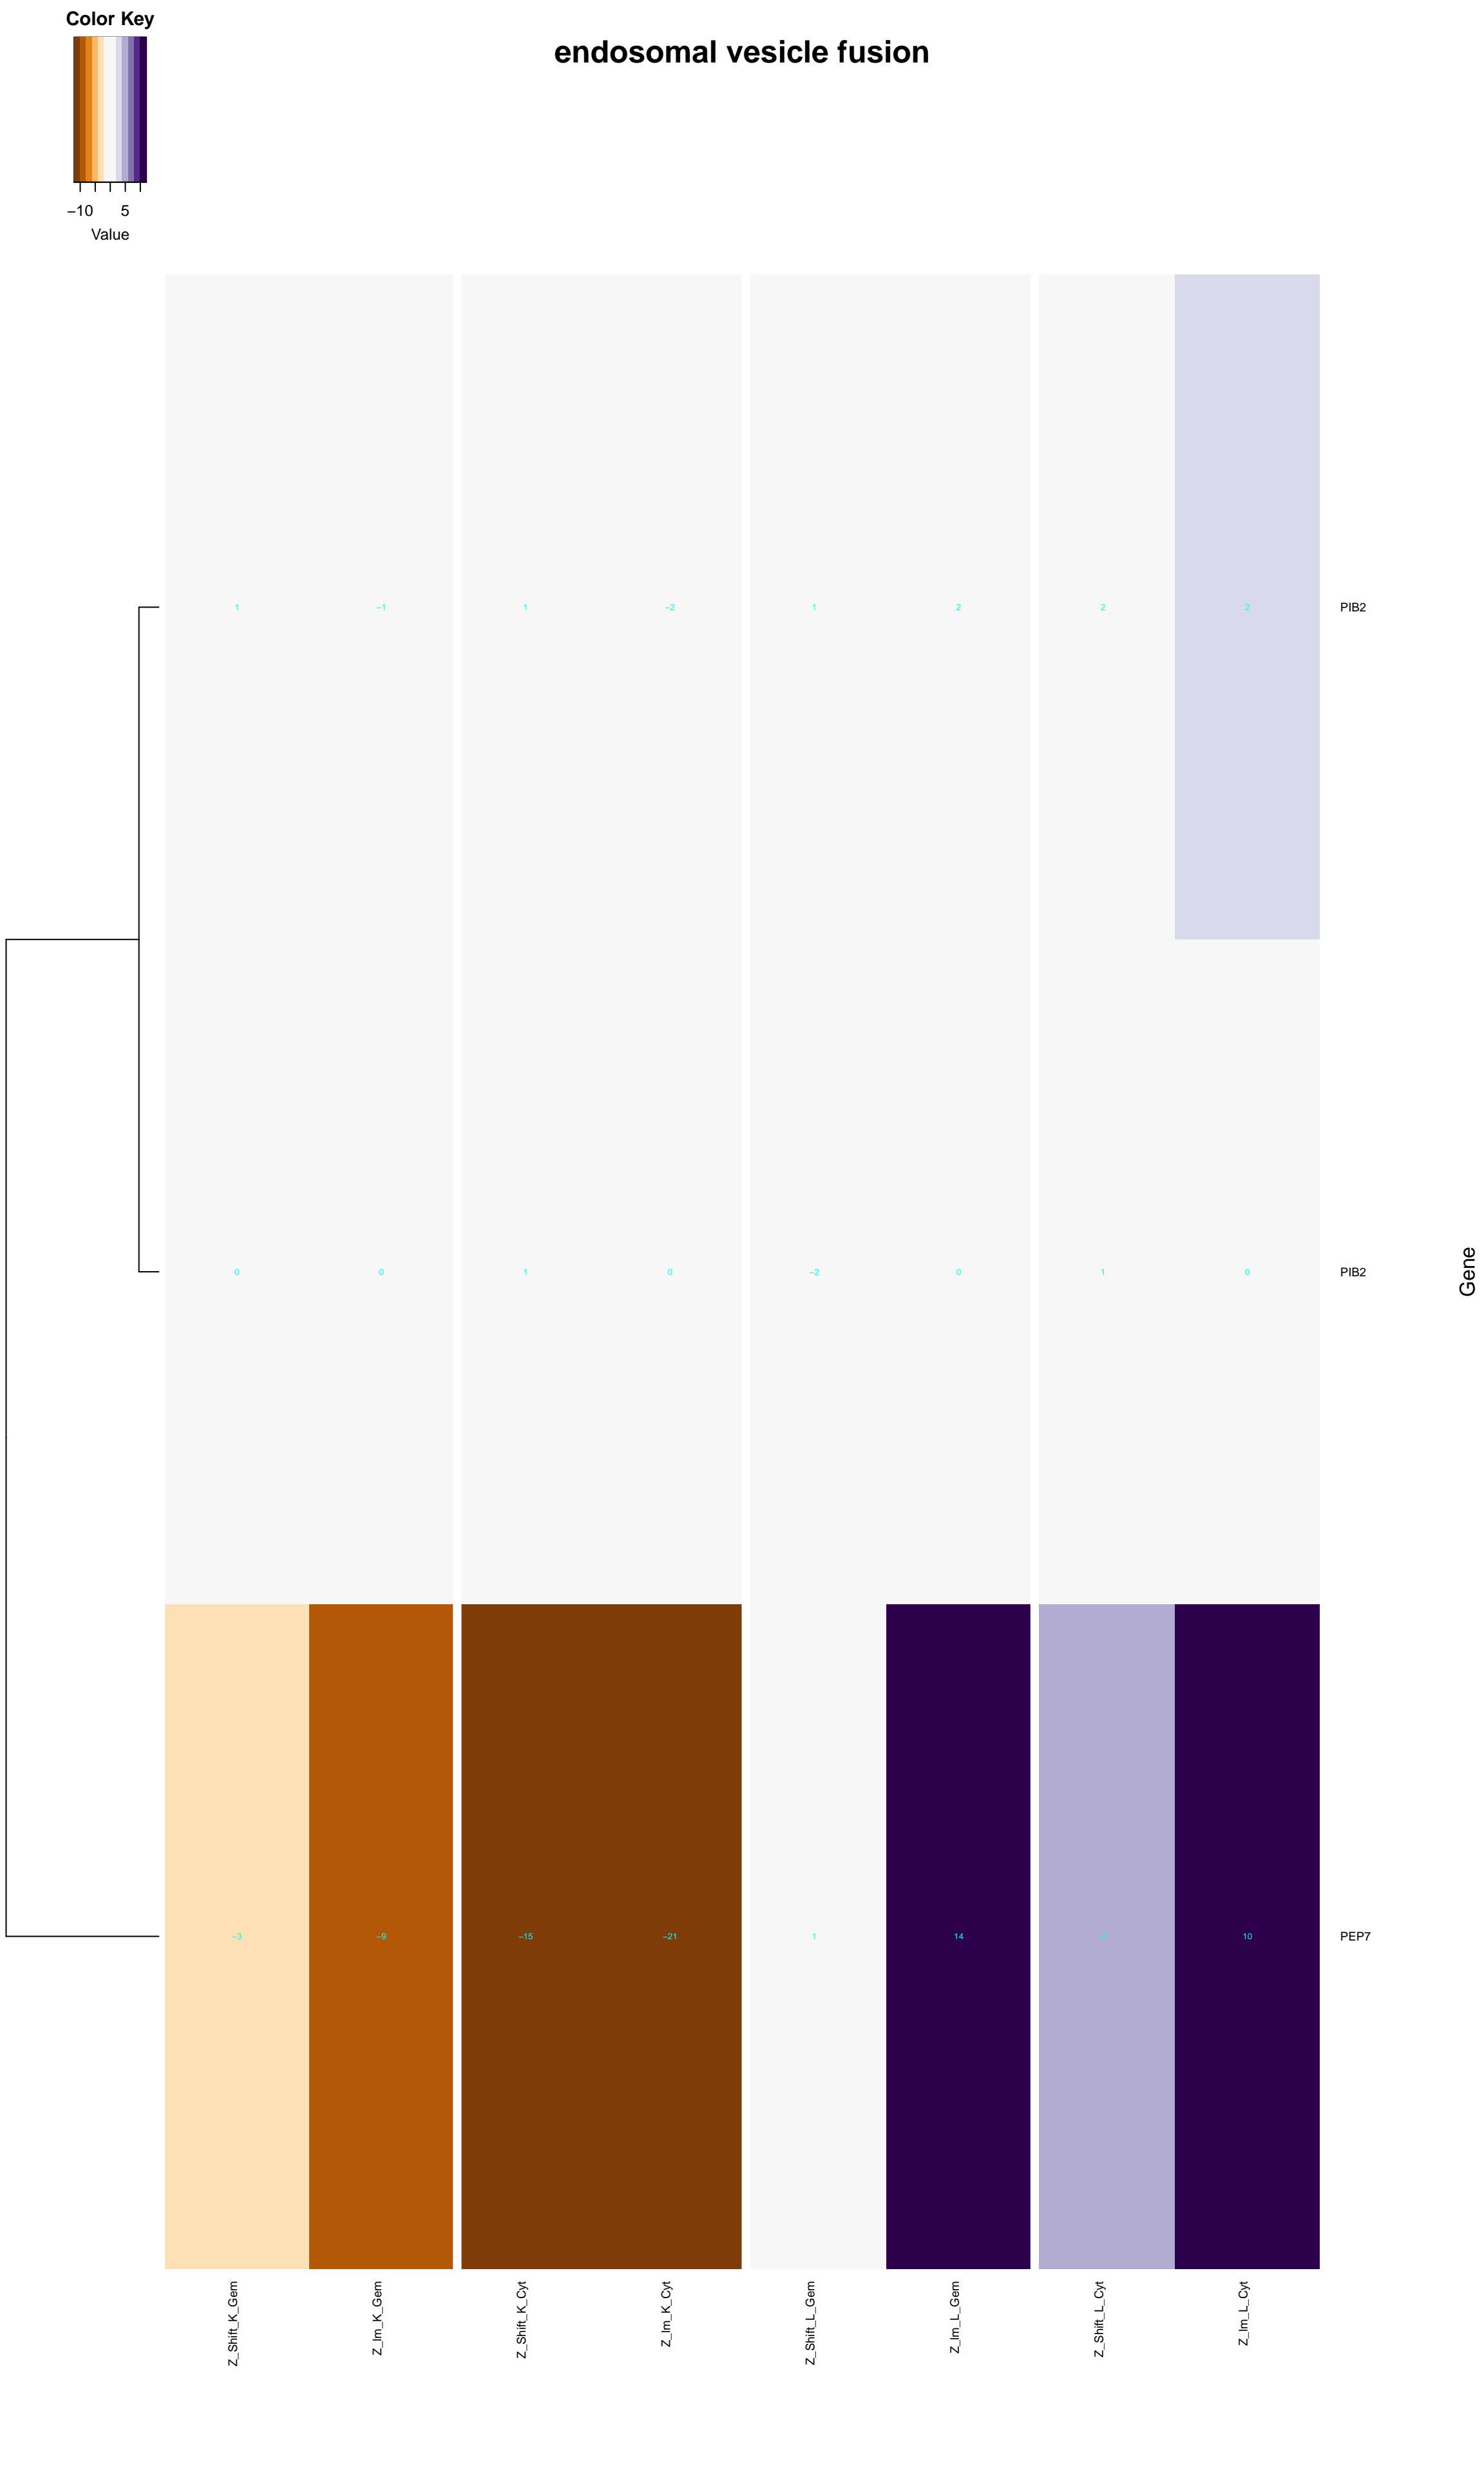

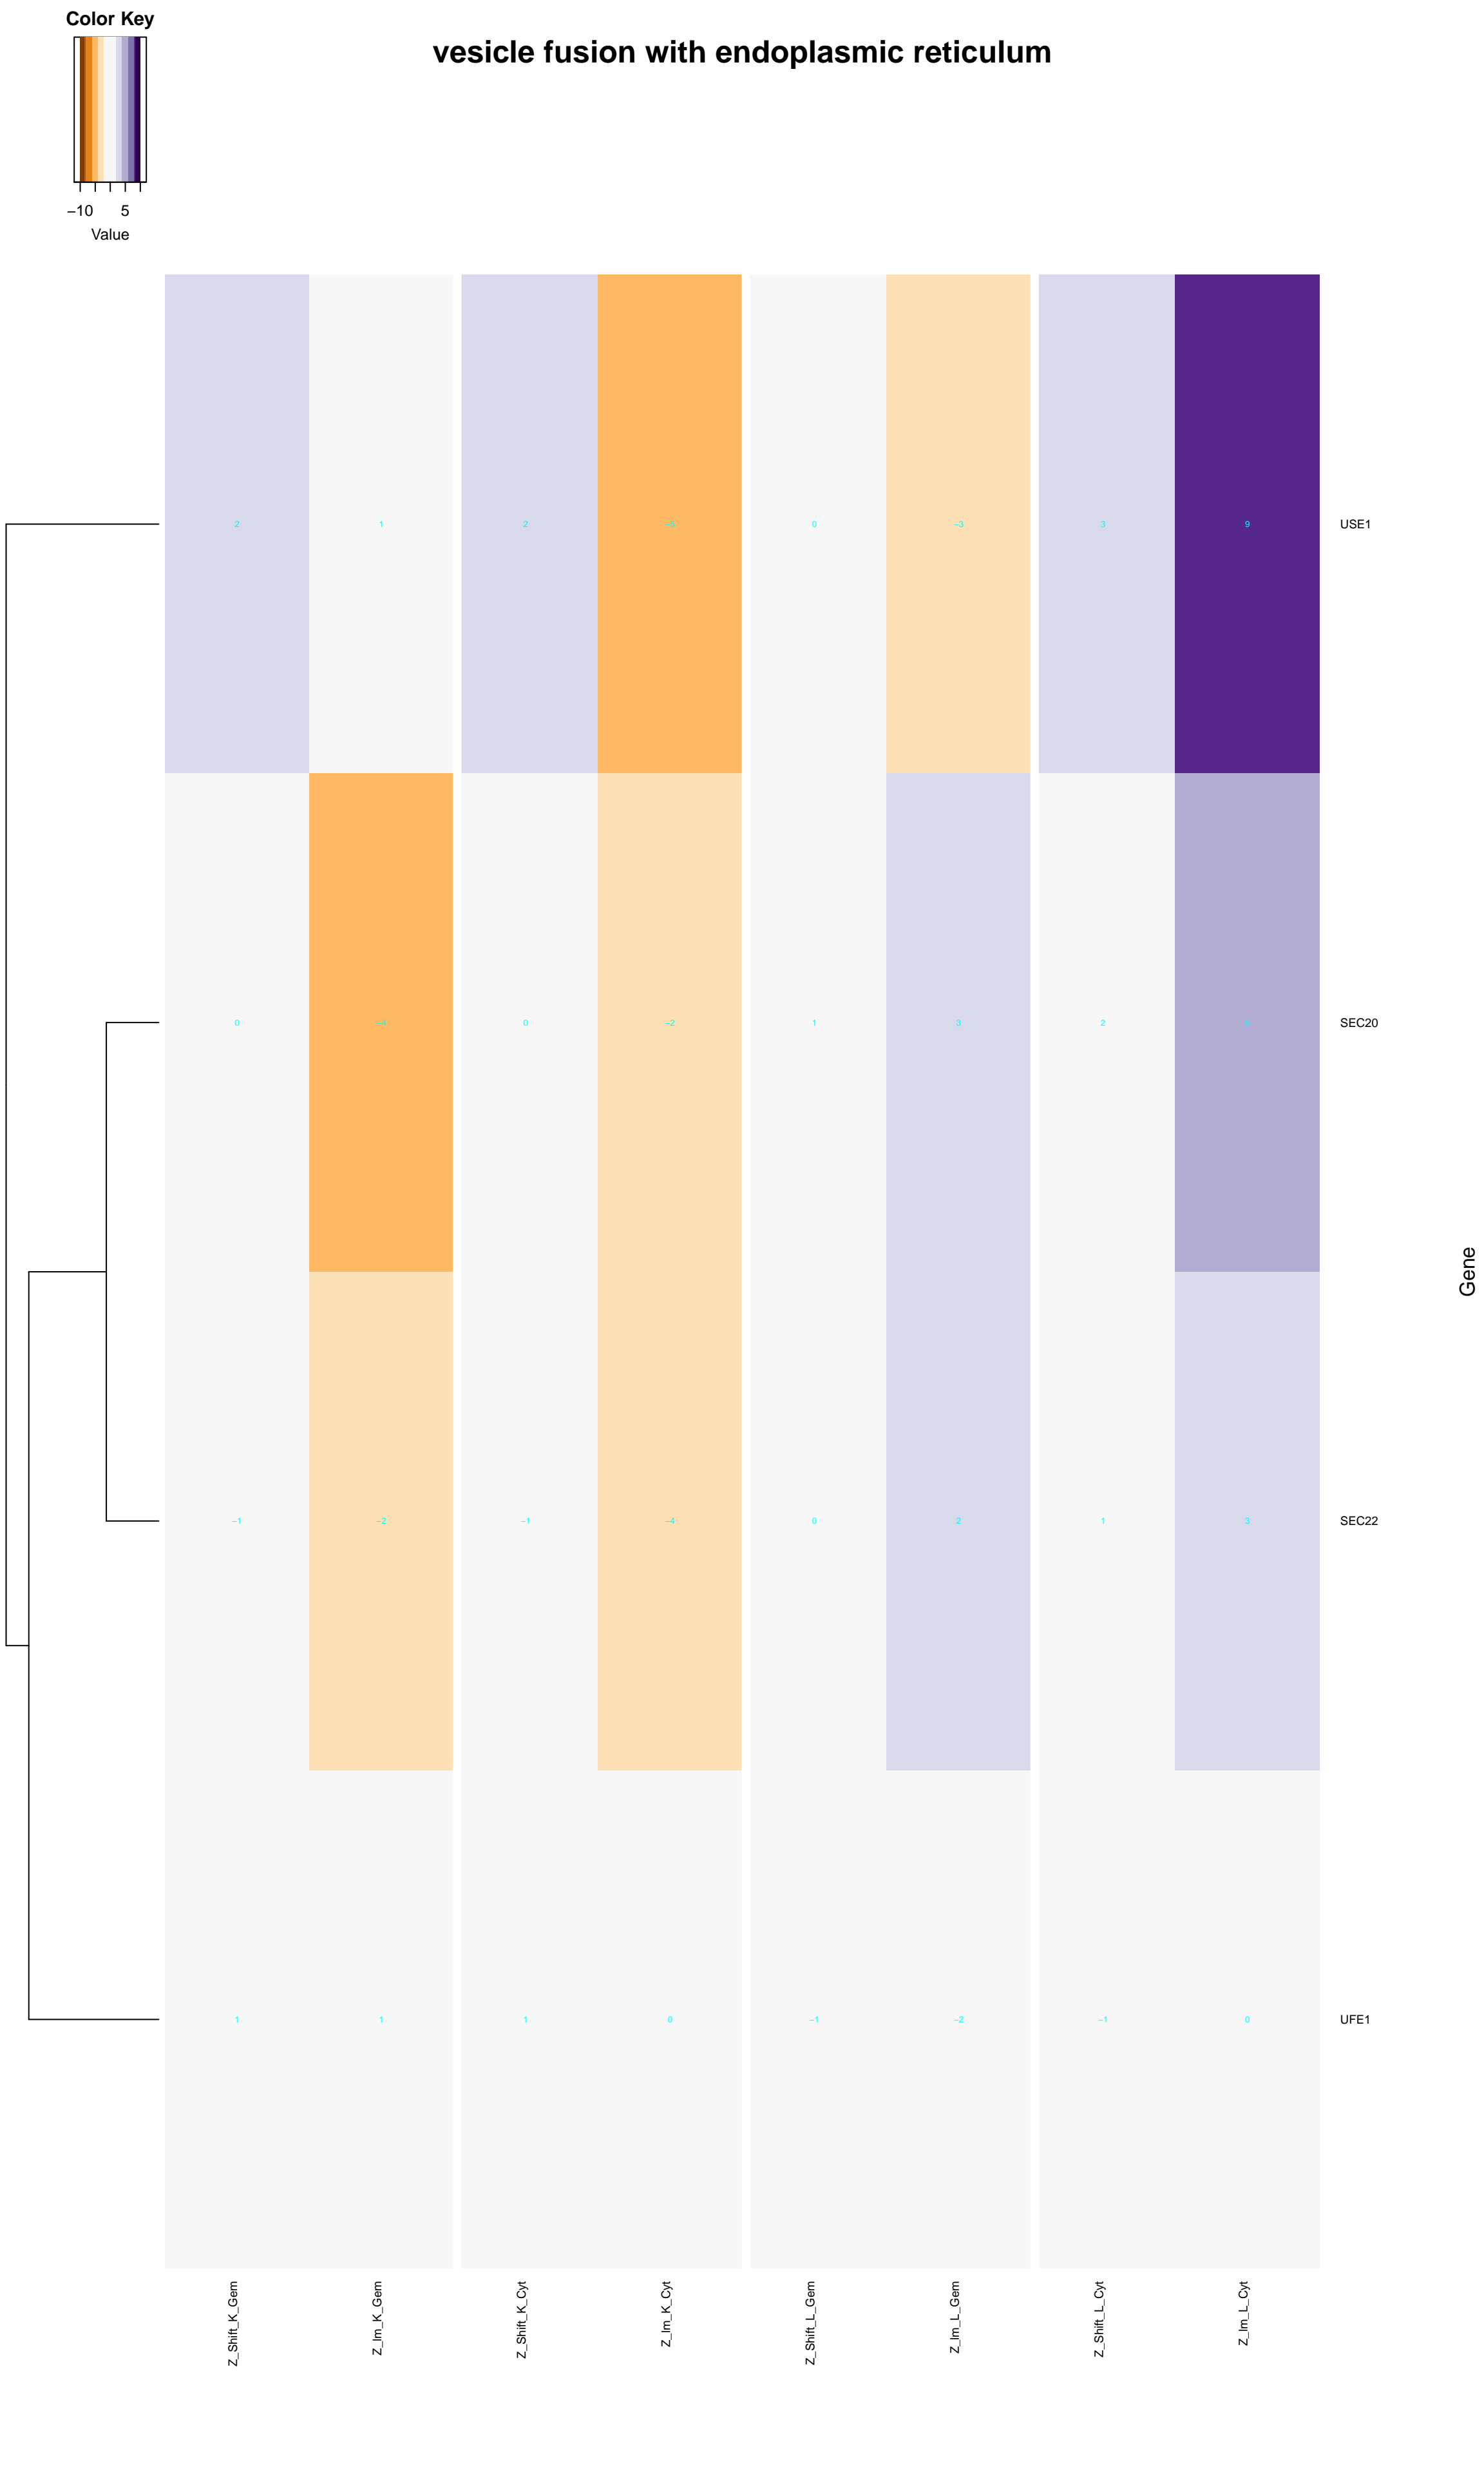

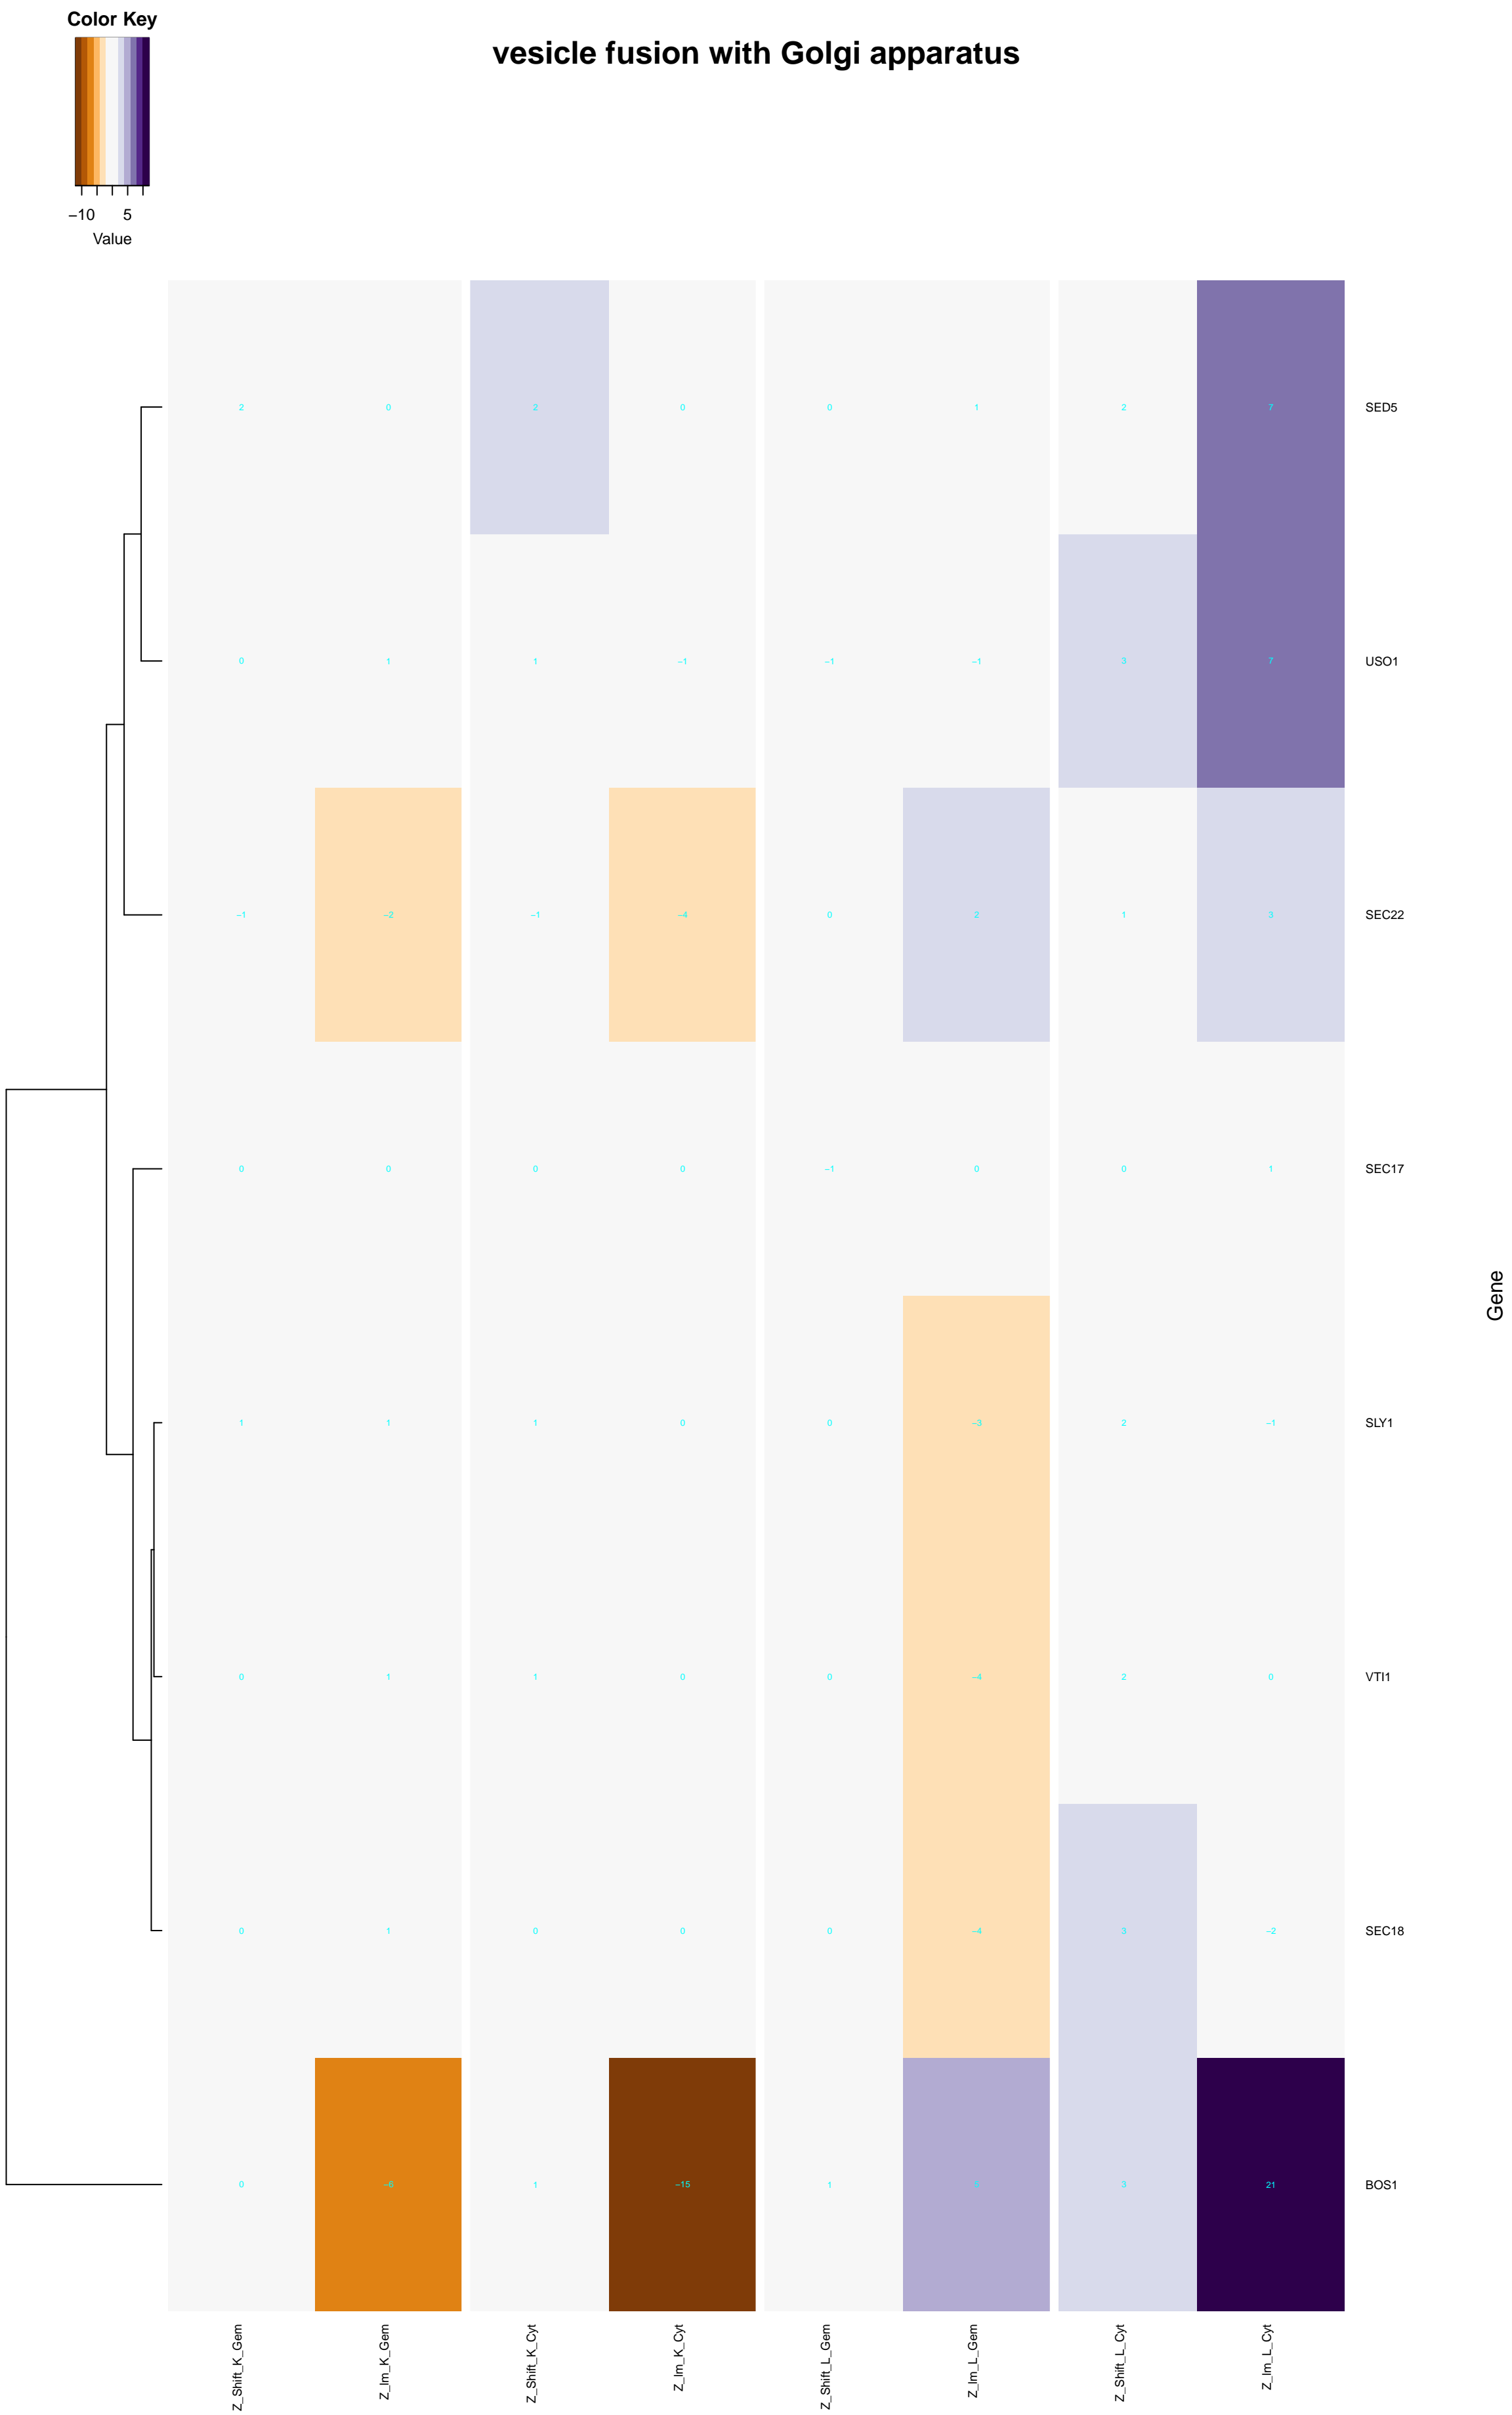

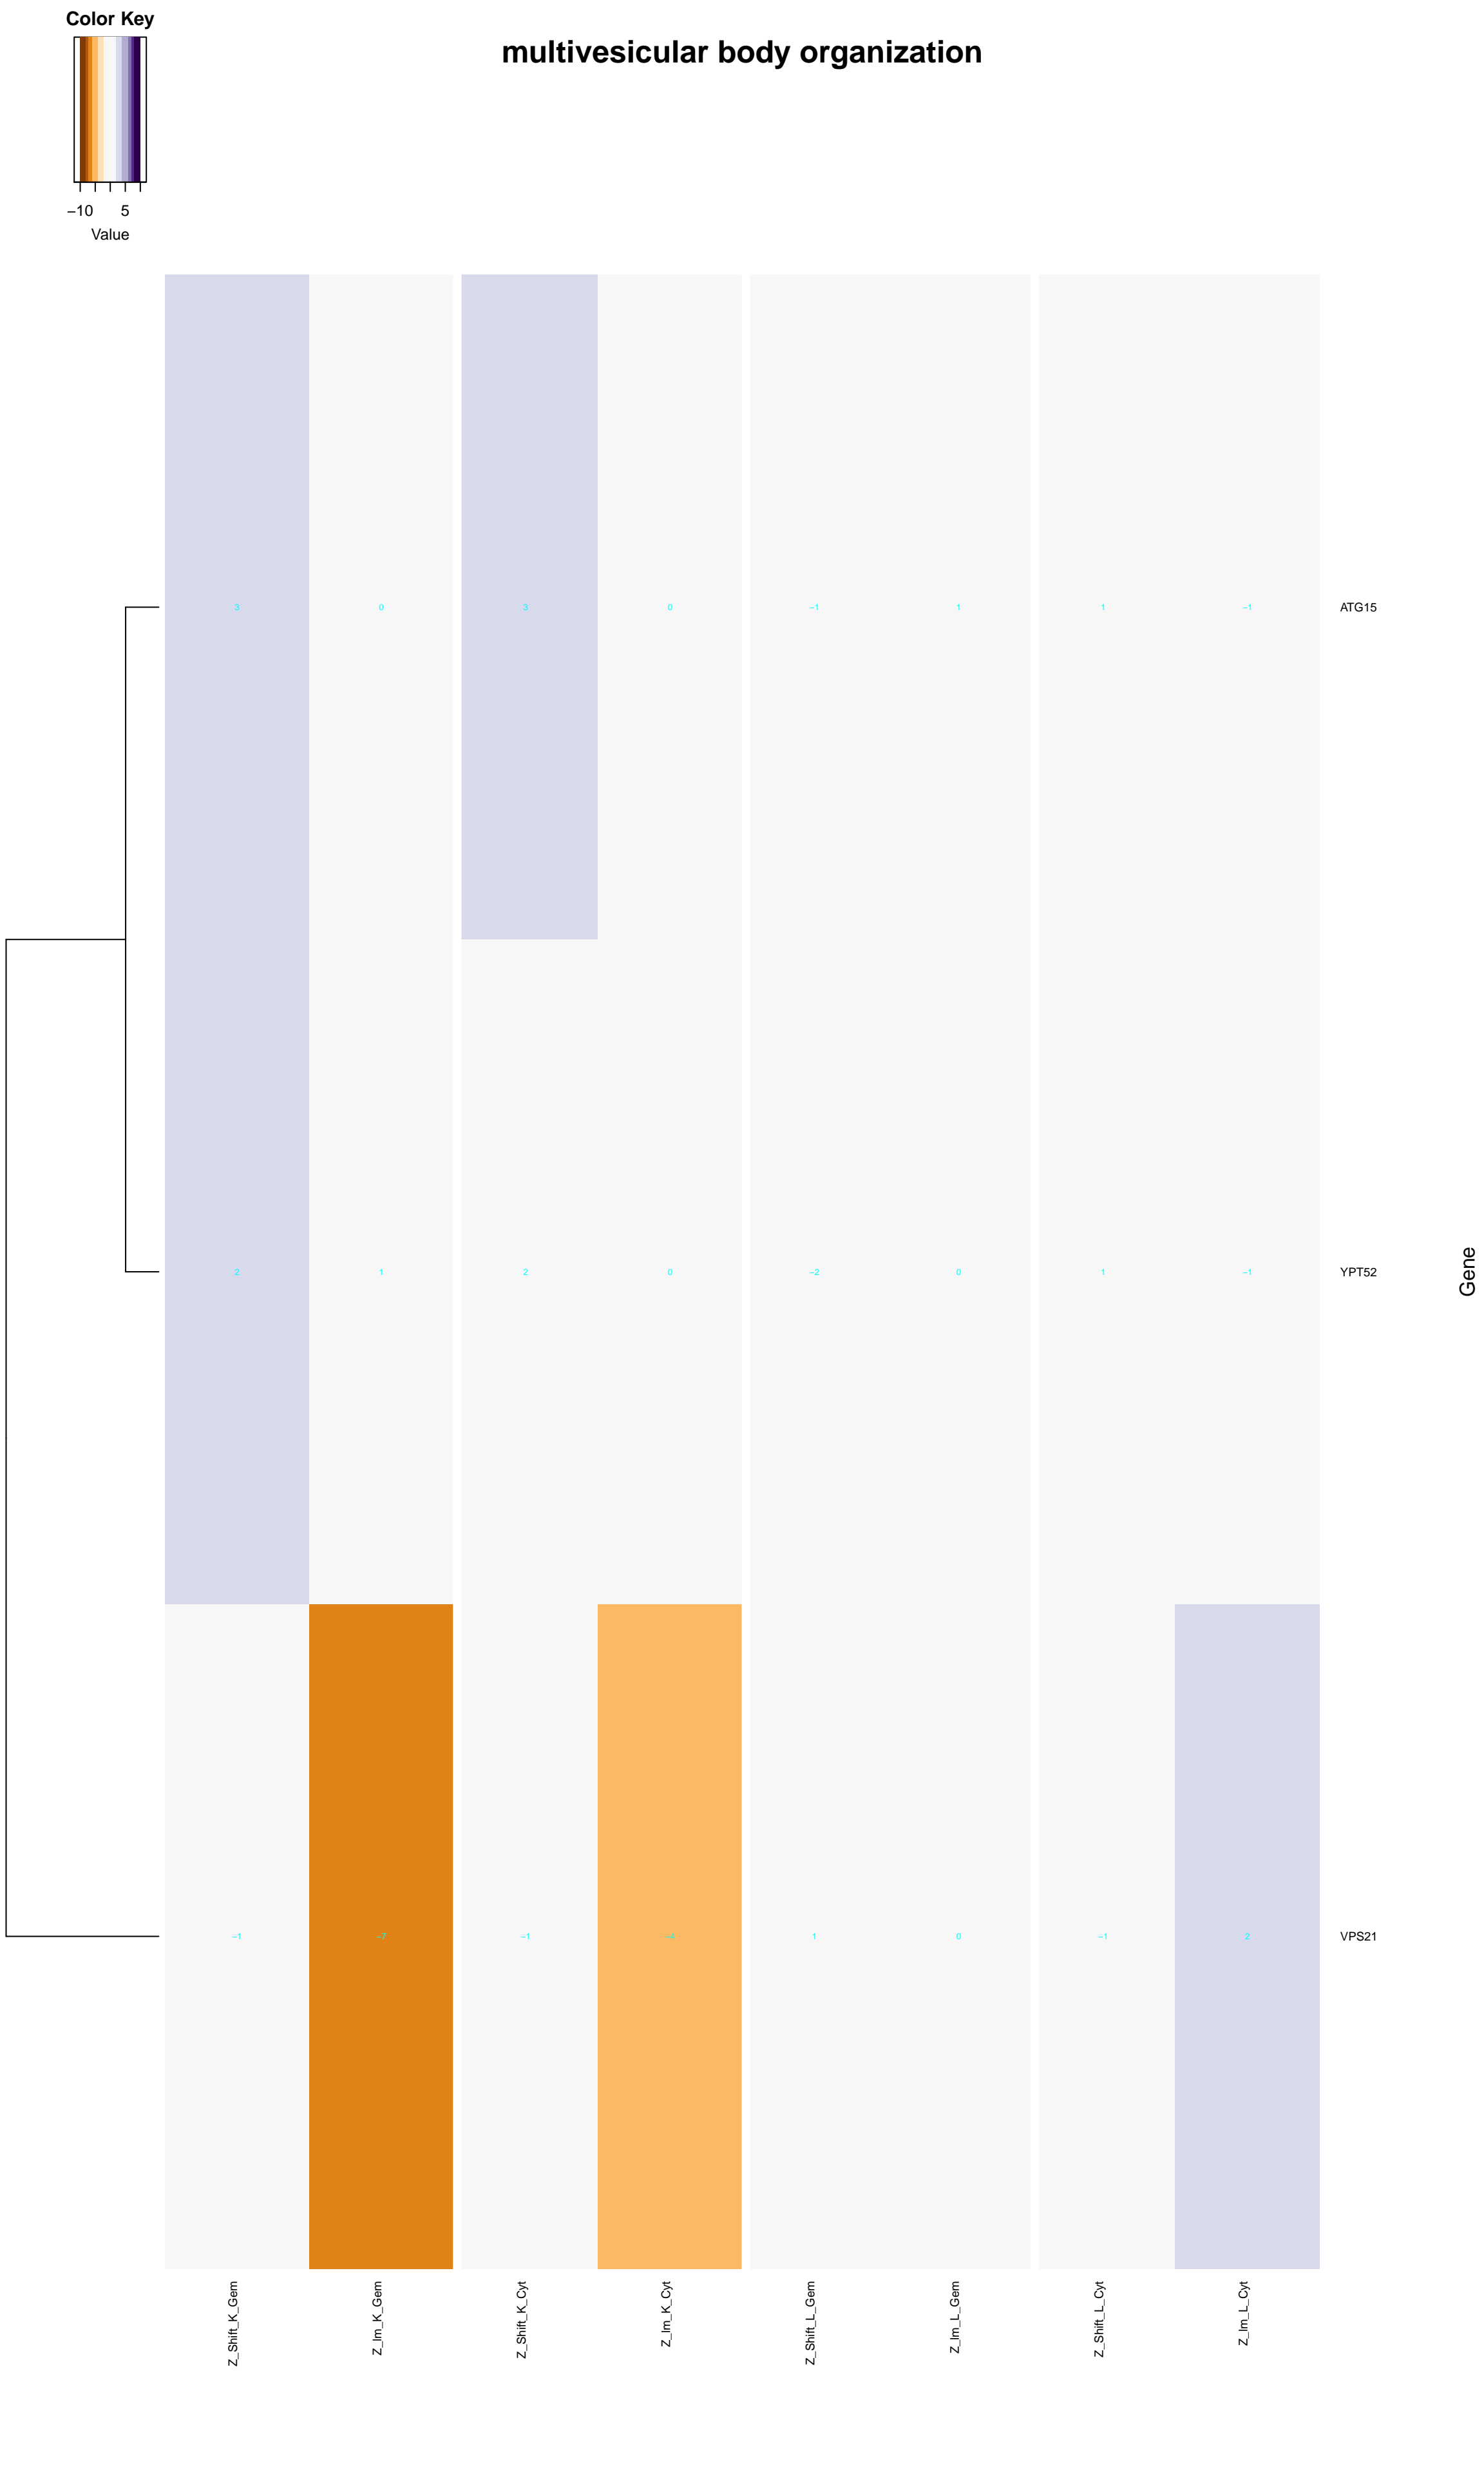

Supplement: s1 [file s1]

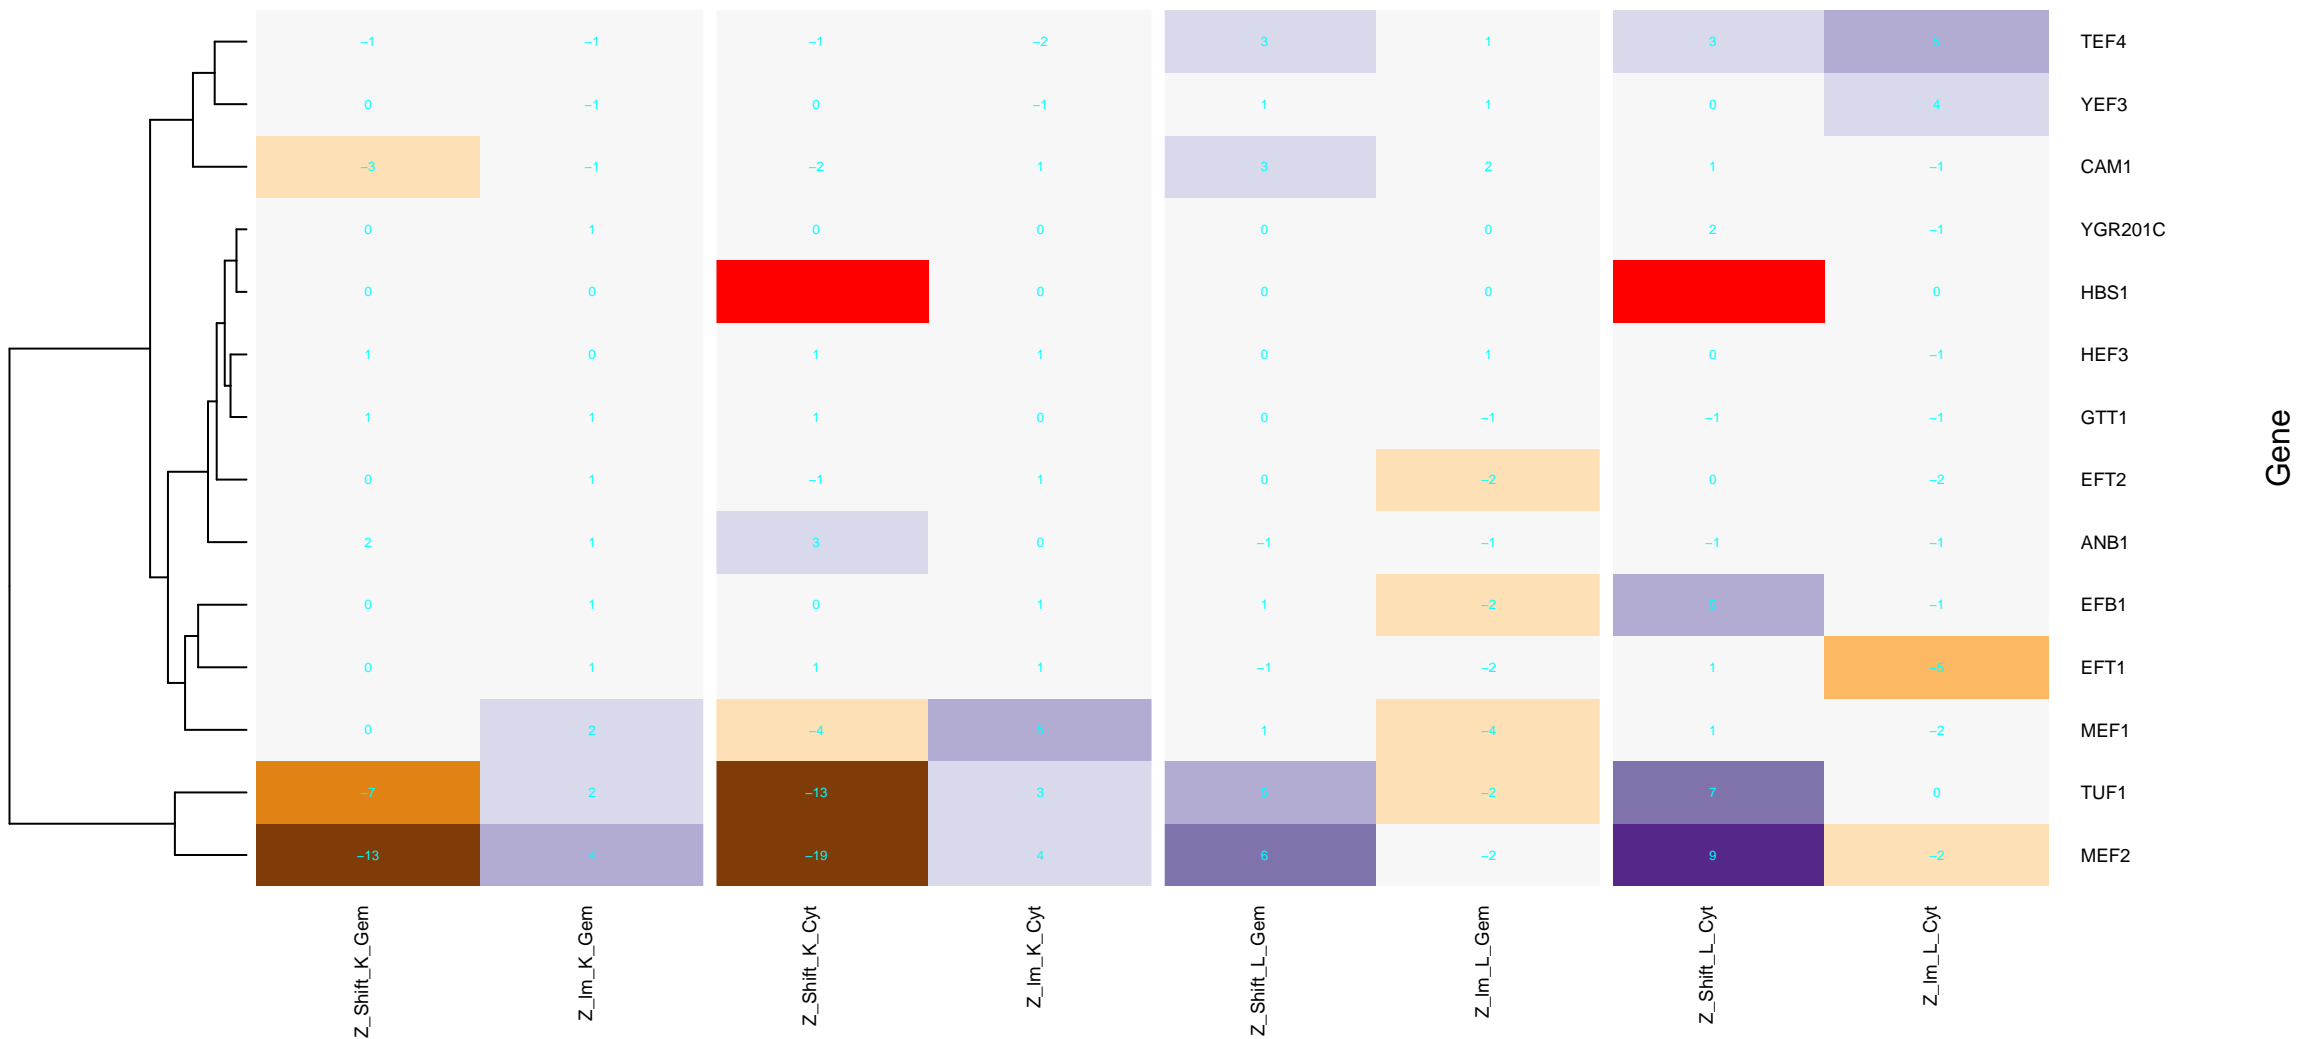

Supplement: s1 [file s1]

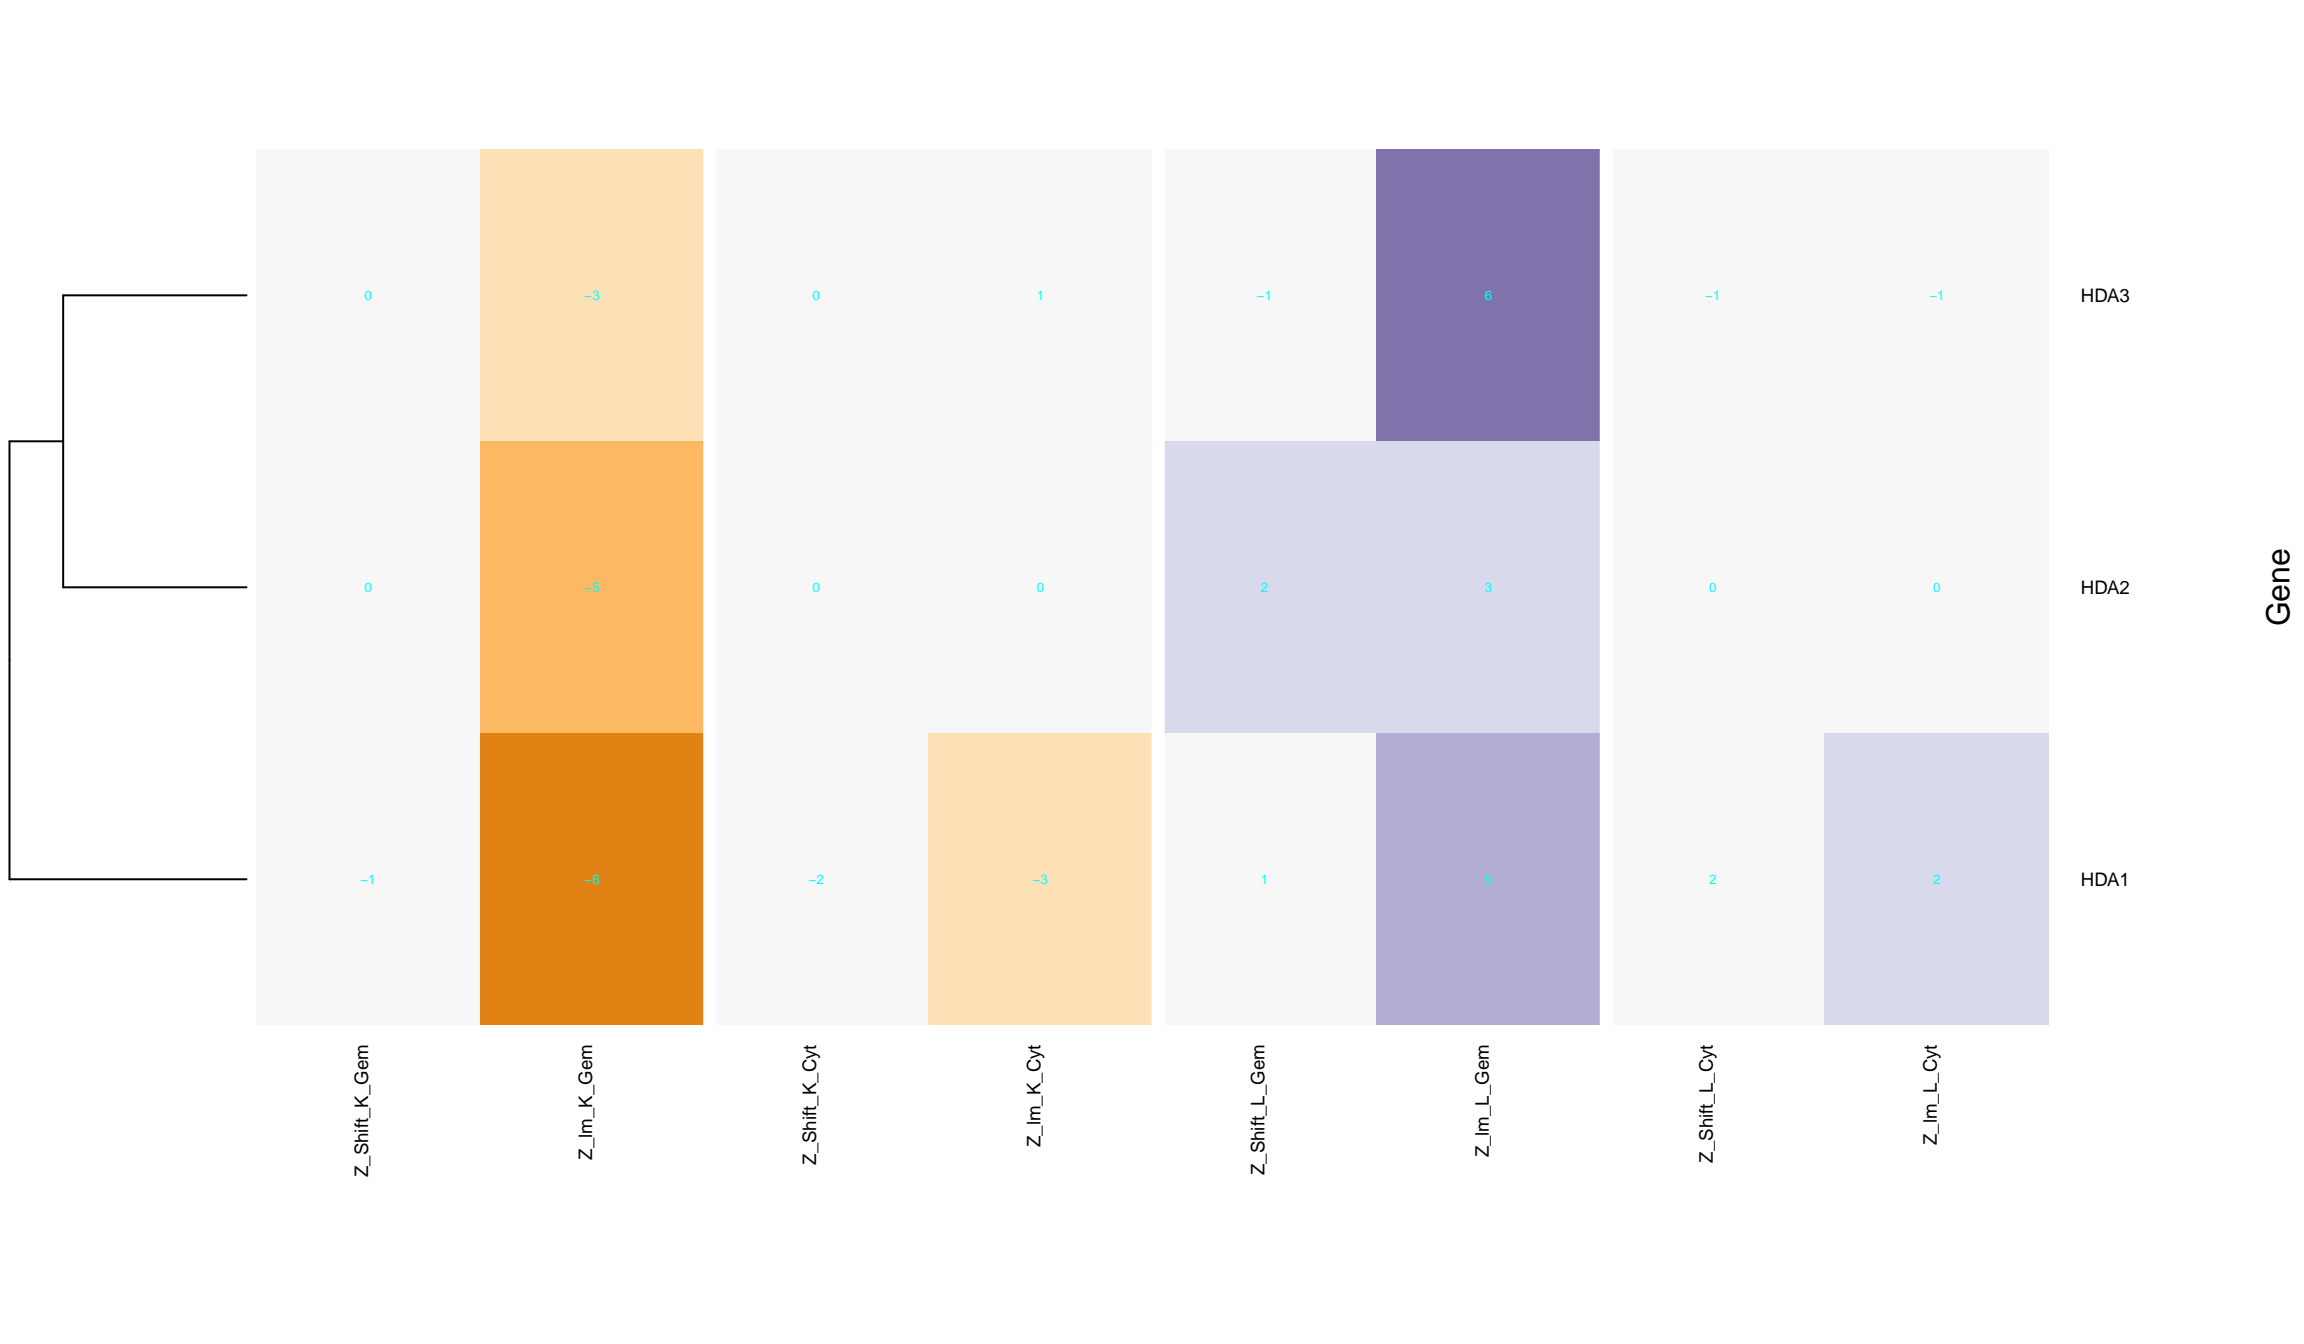

Supplement: s1 [file s1]

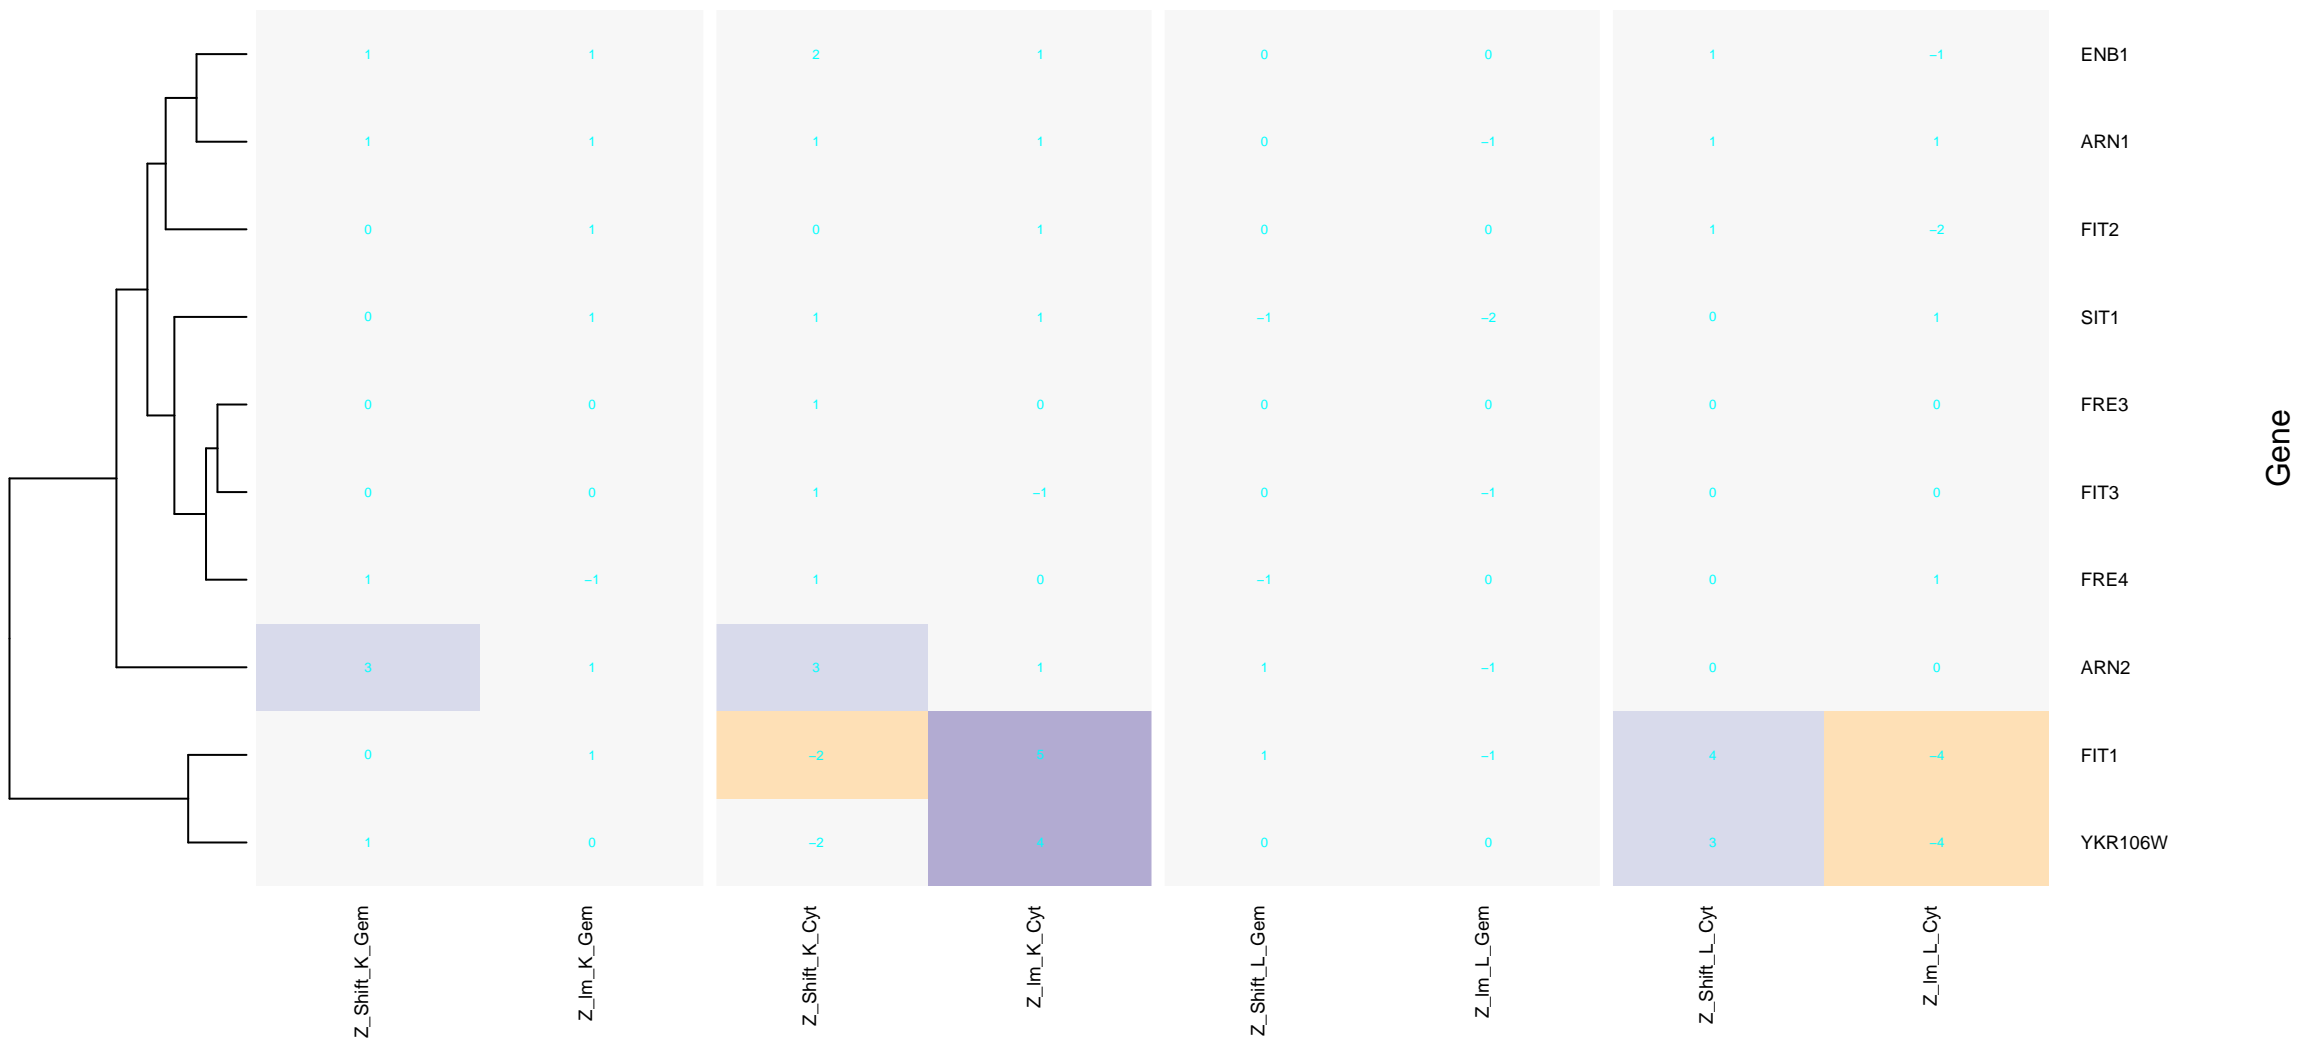

Supplement: s1 [file s1]

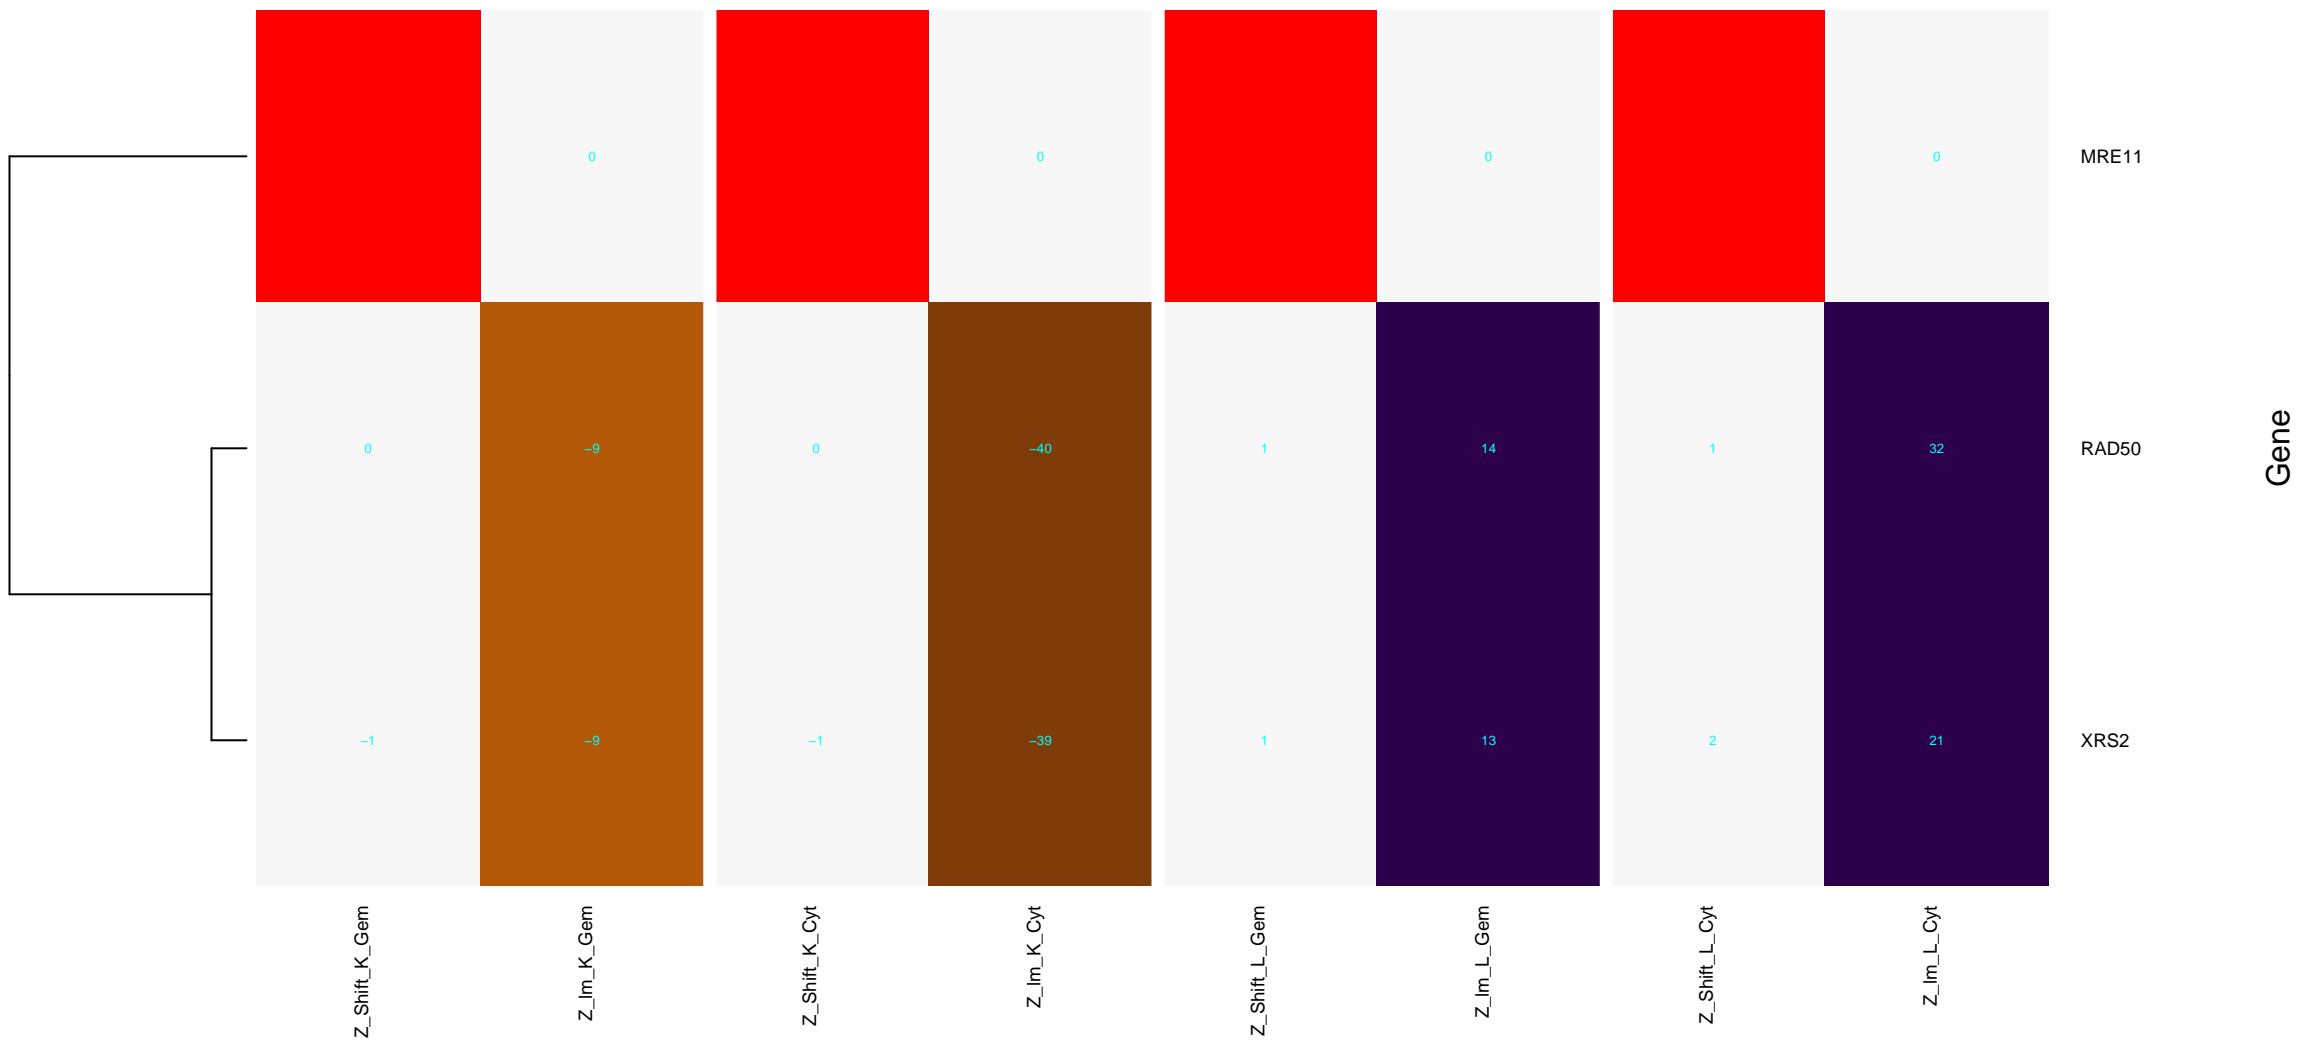

Supplement: s1 [file s1]

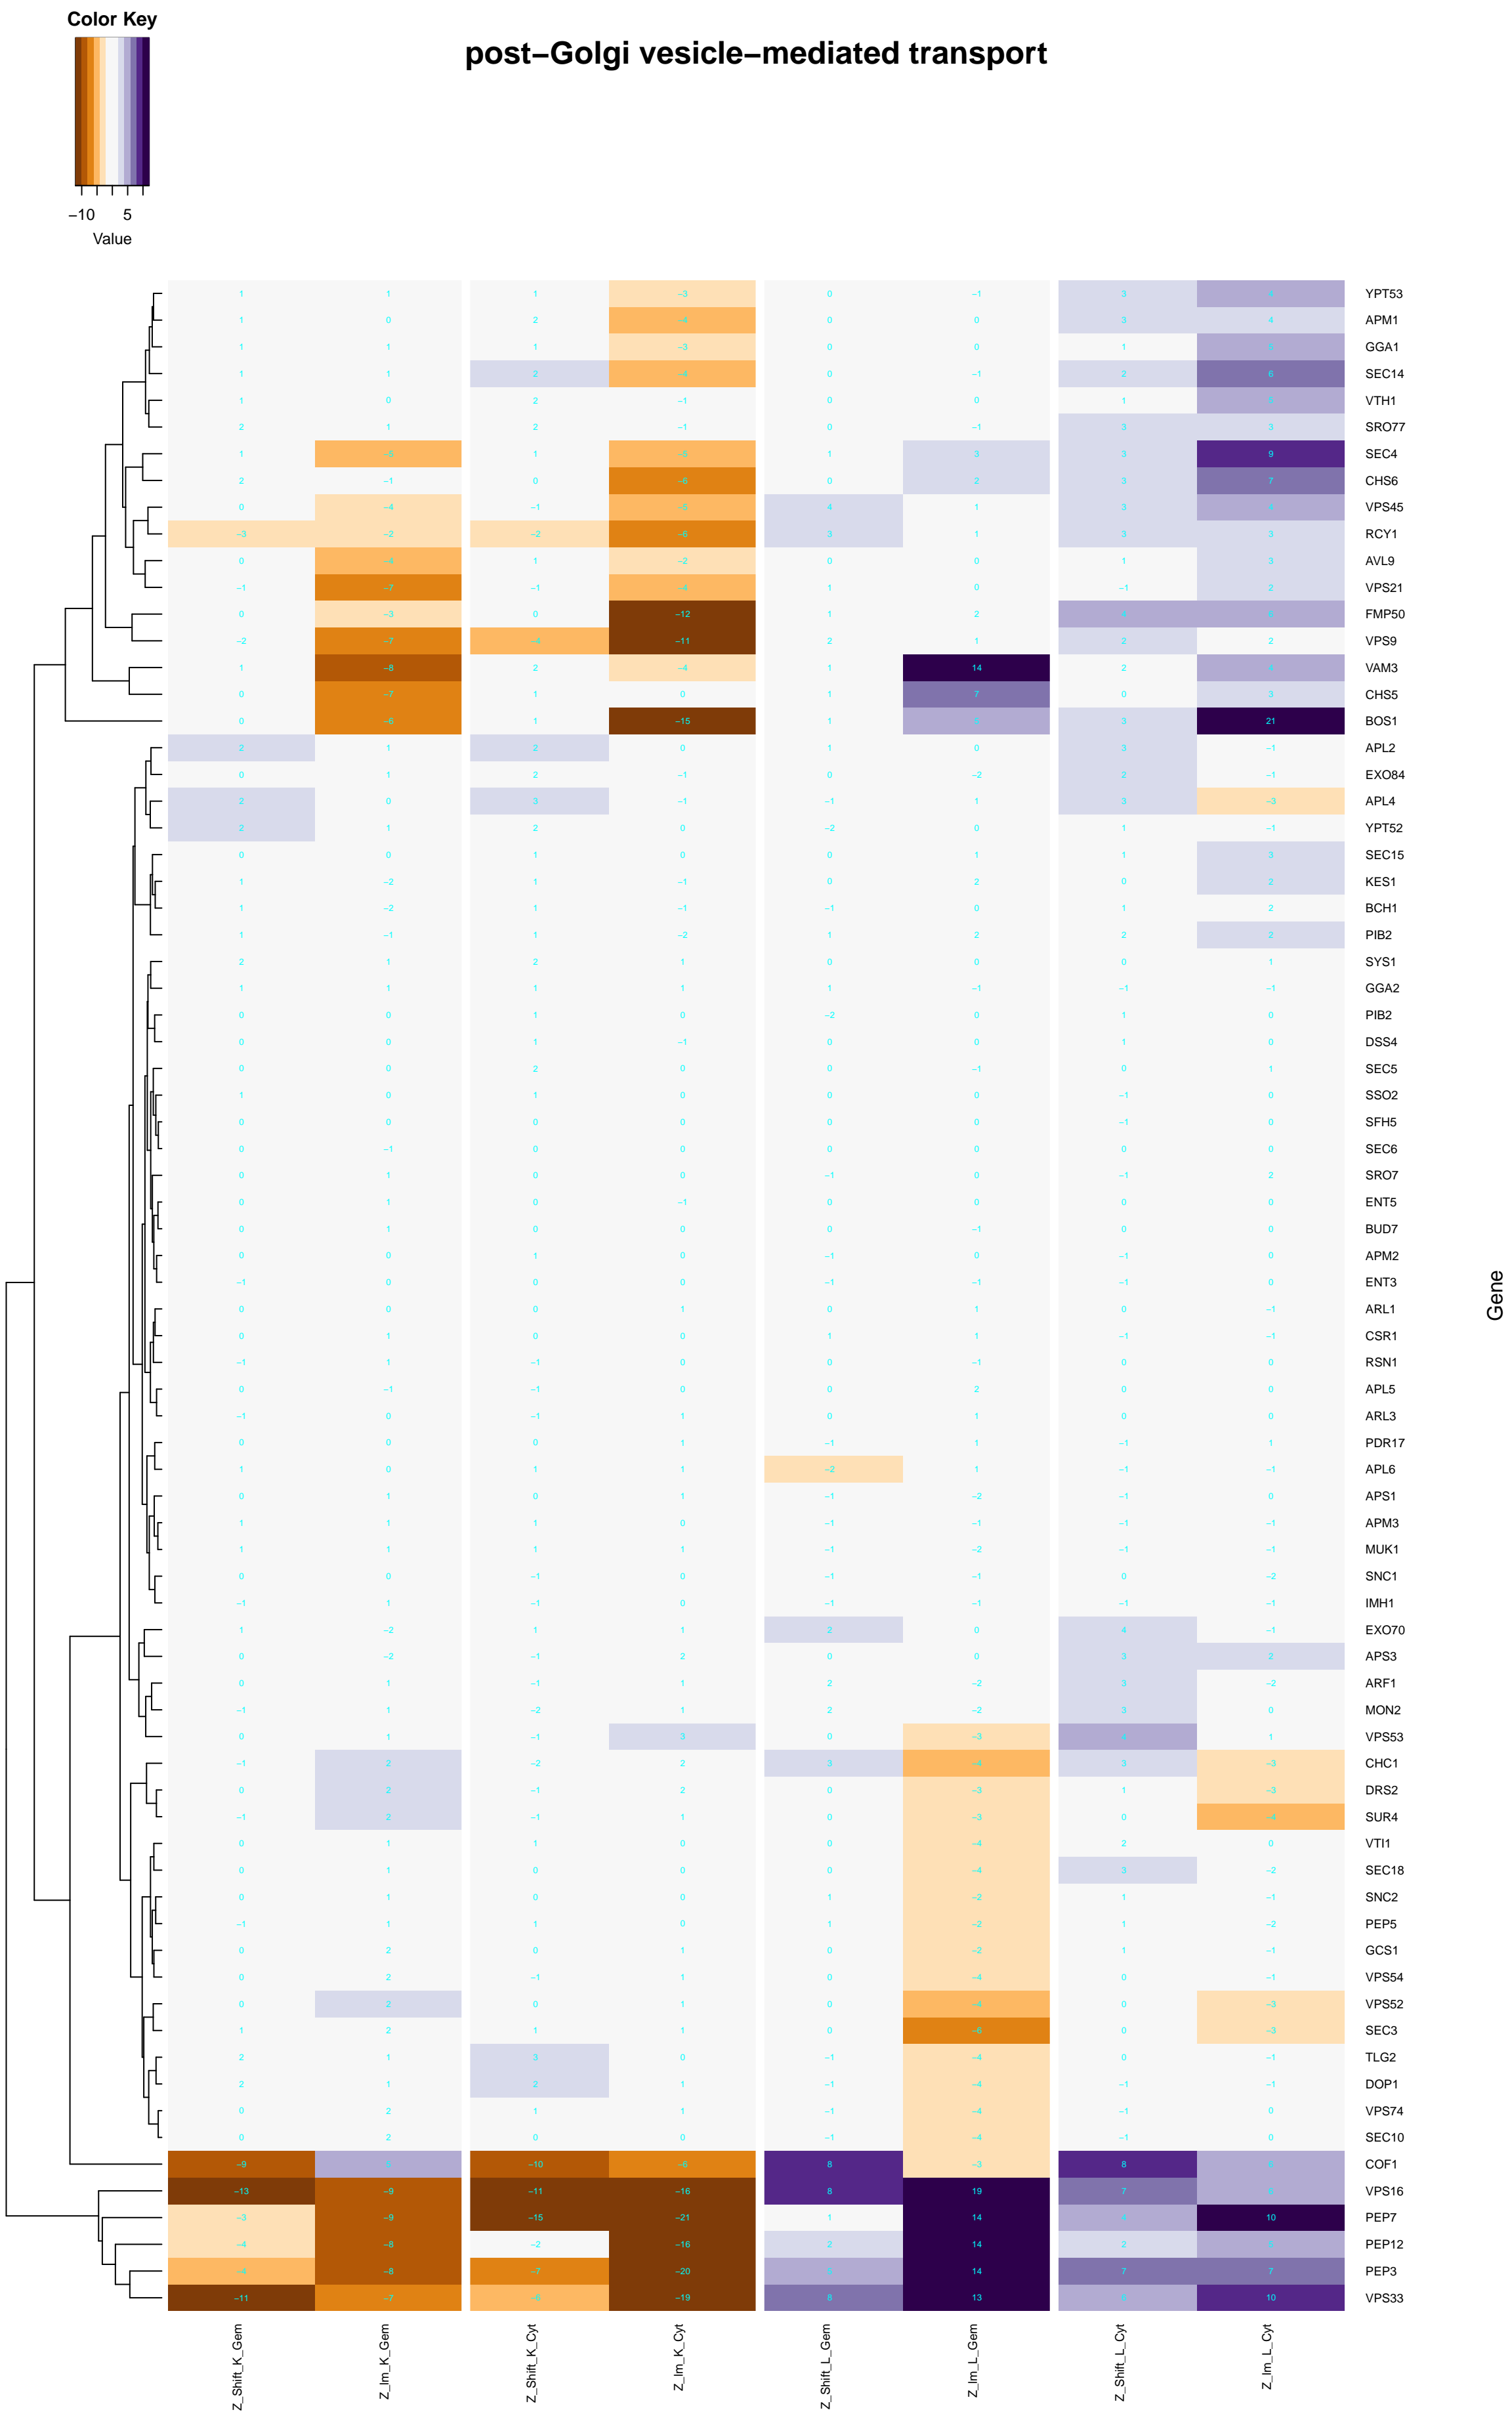

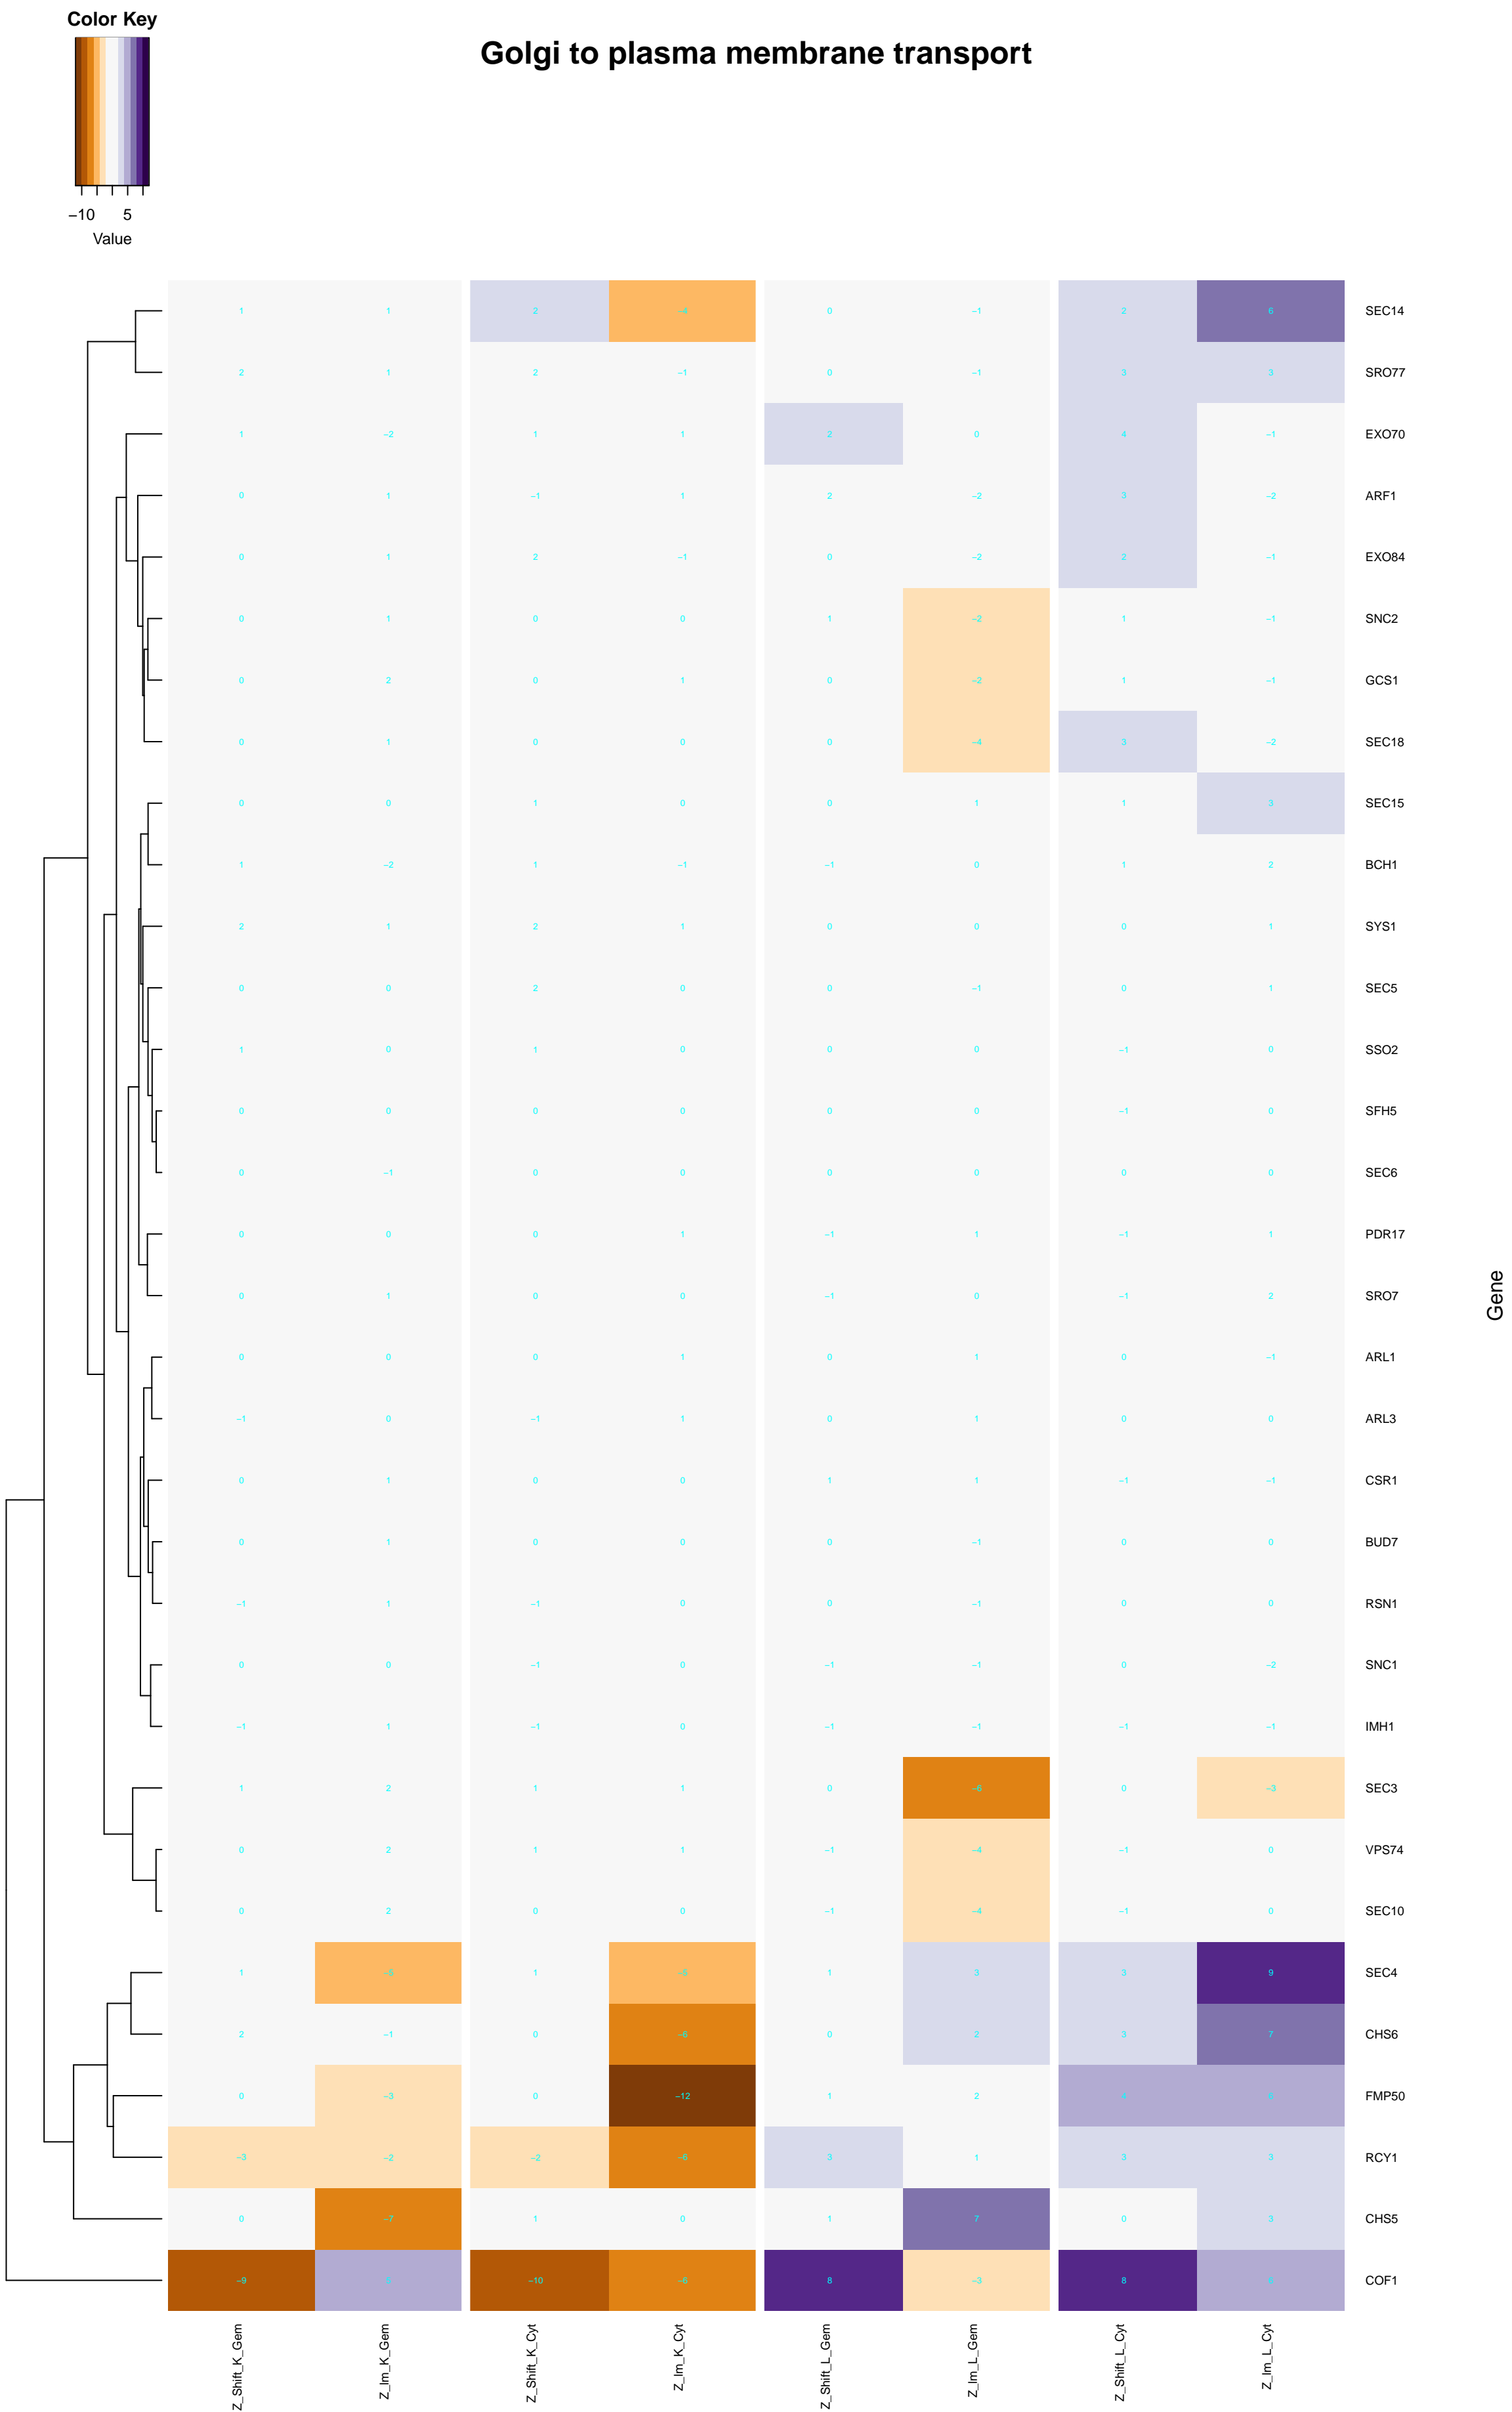

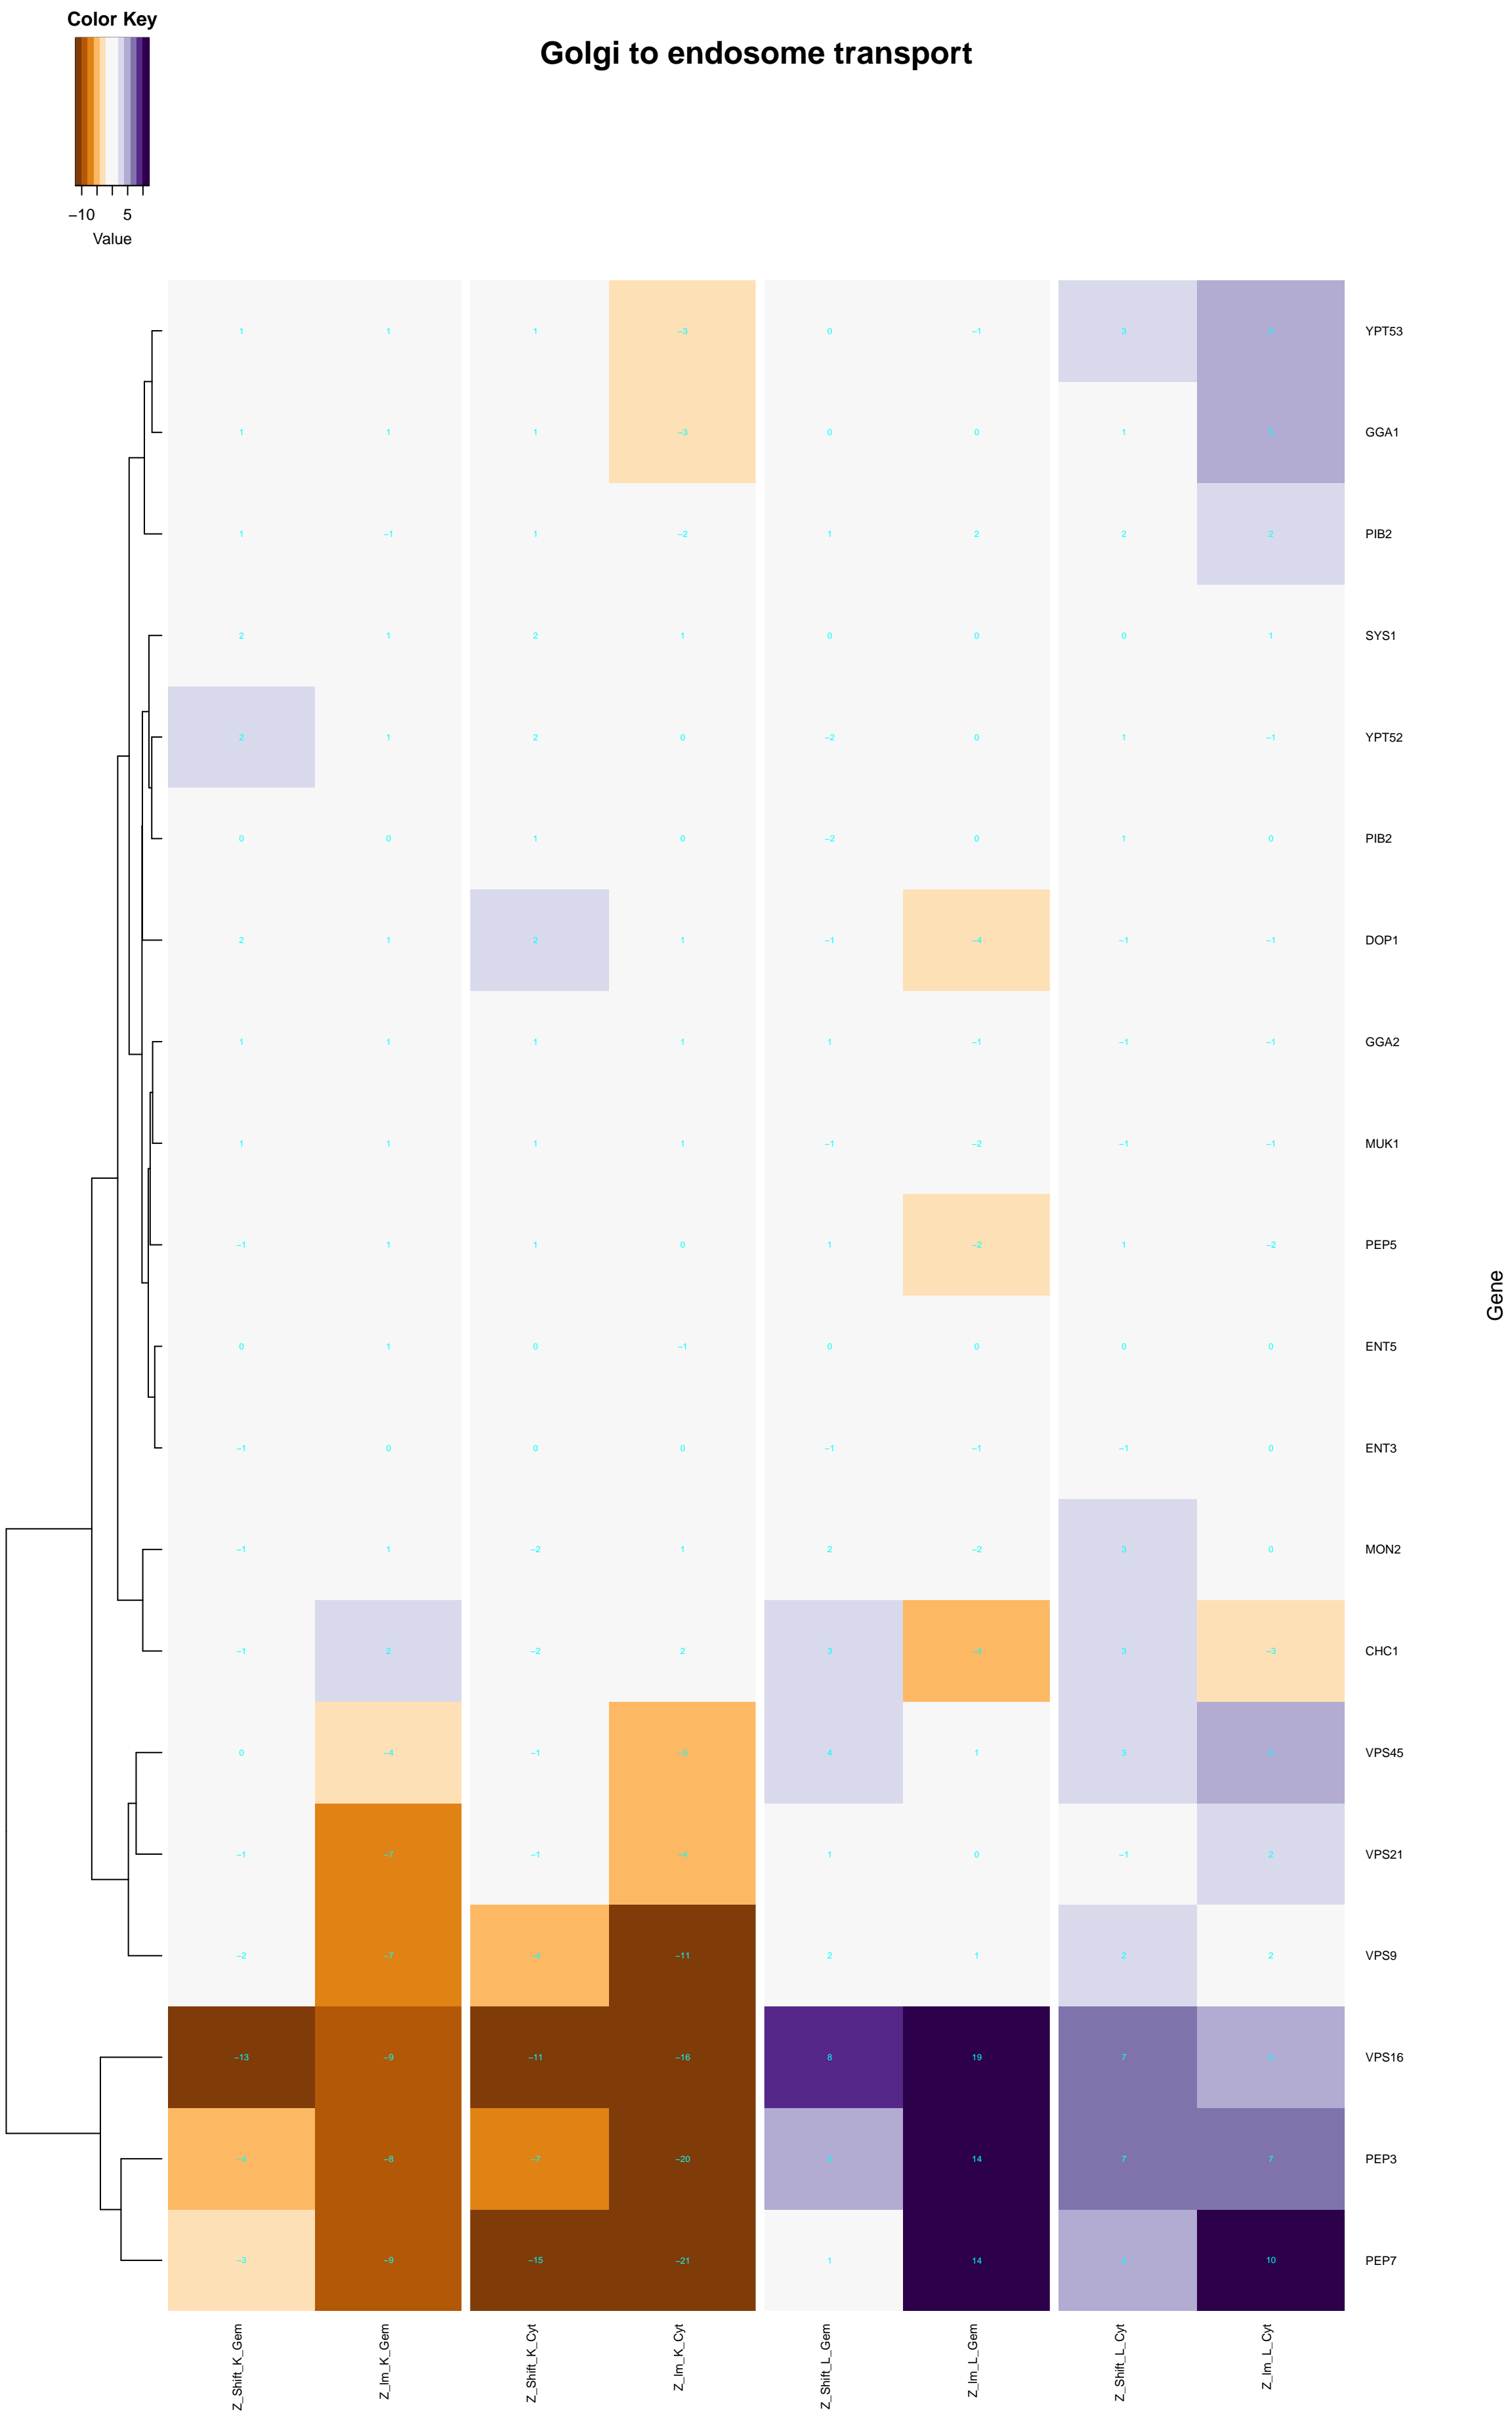

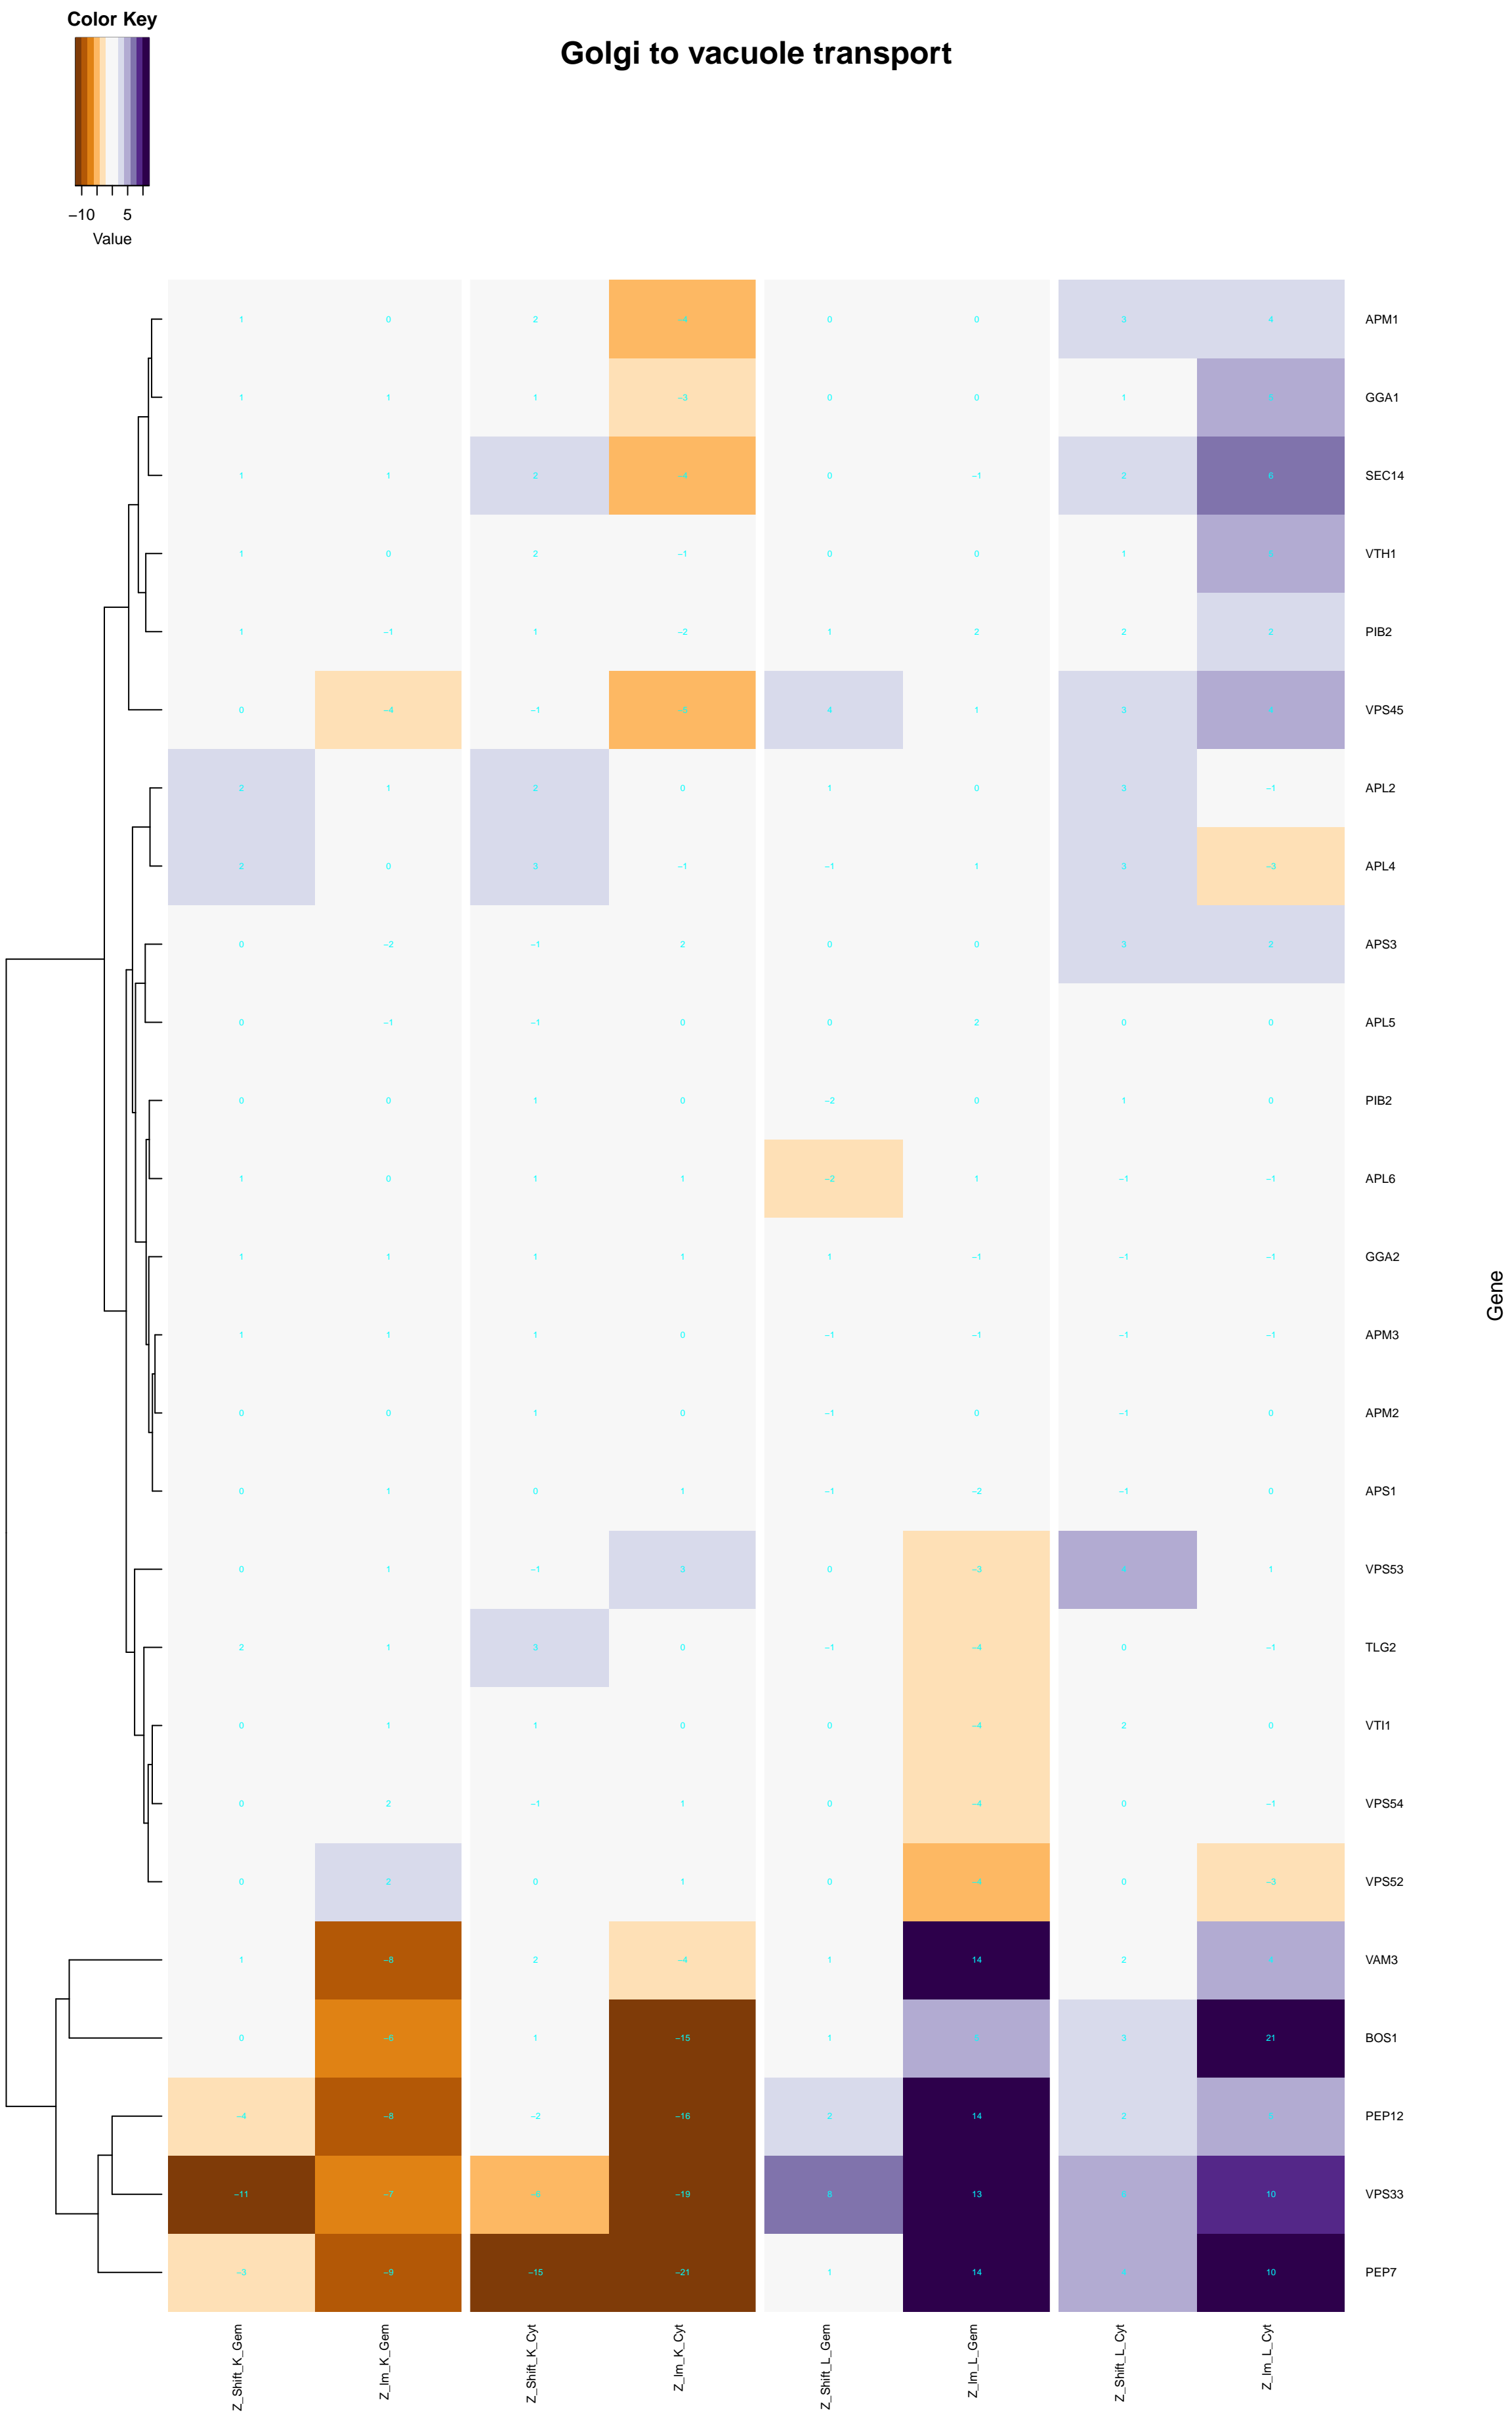

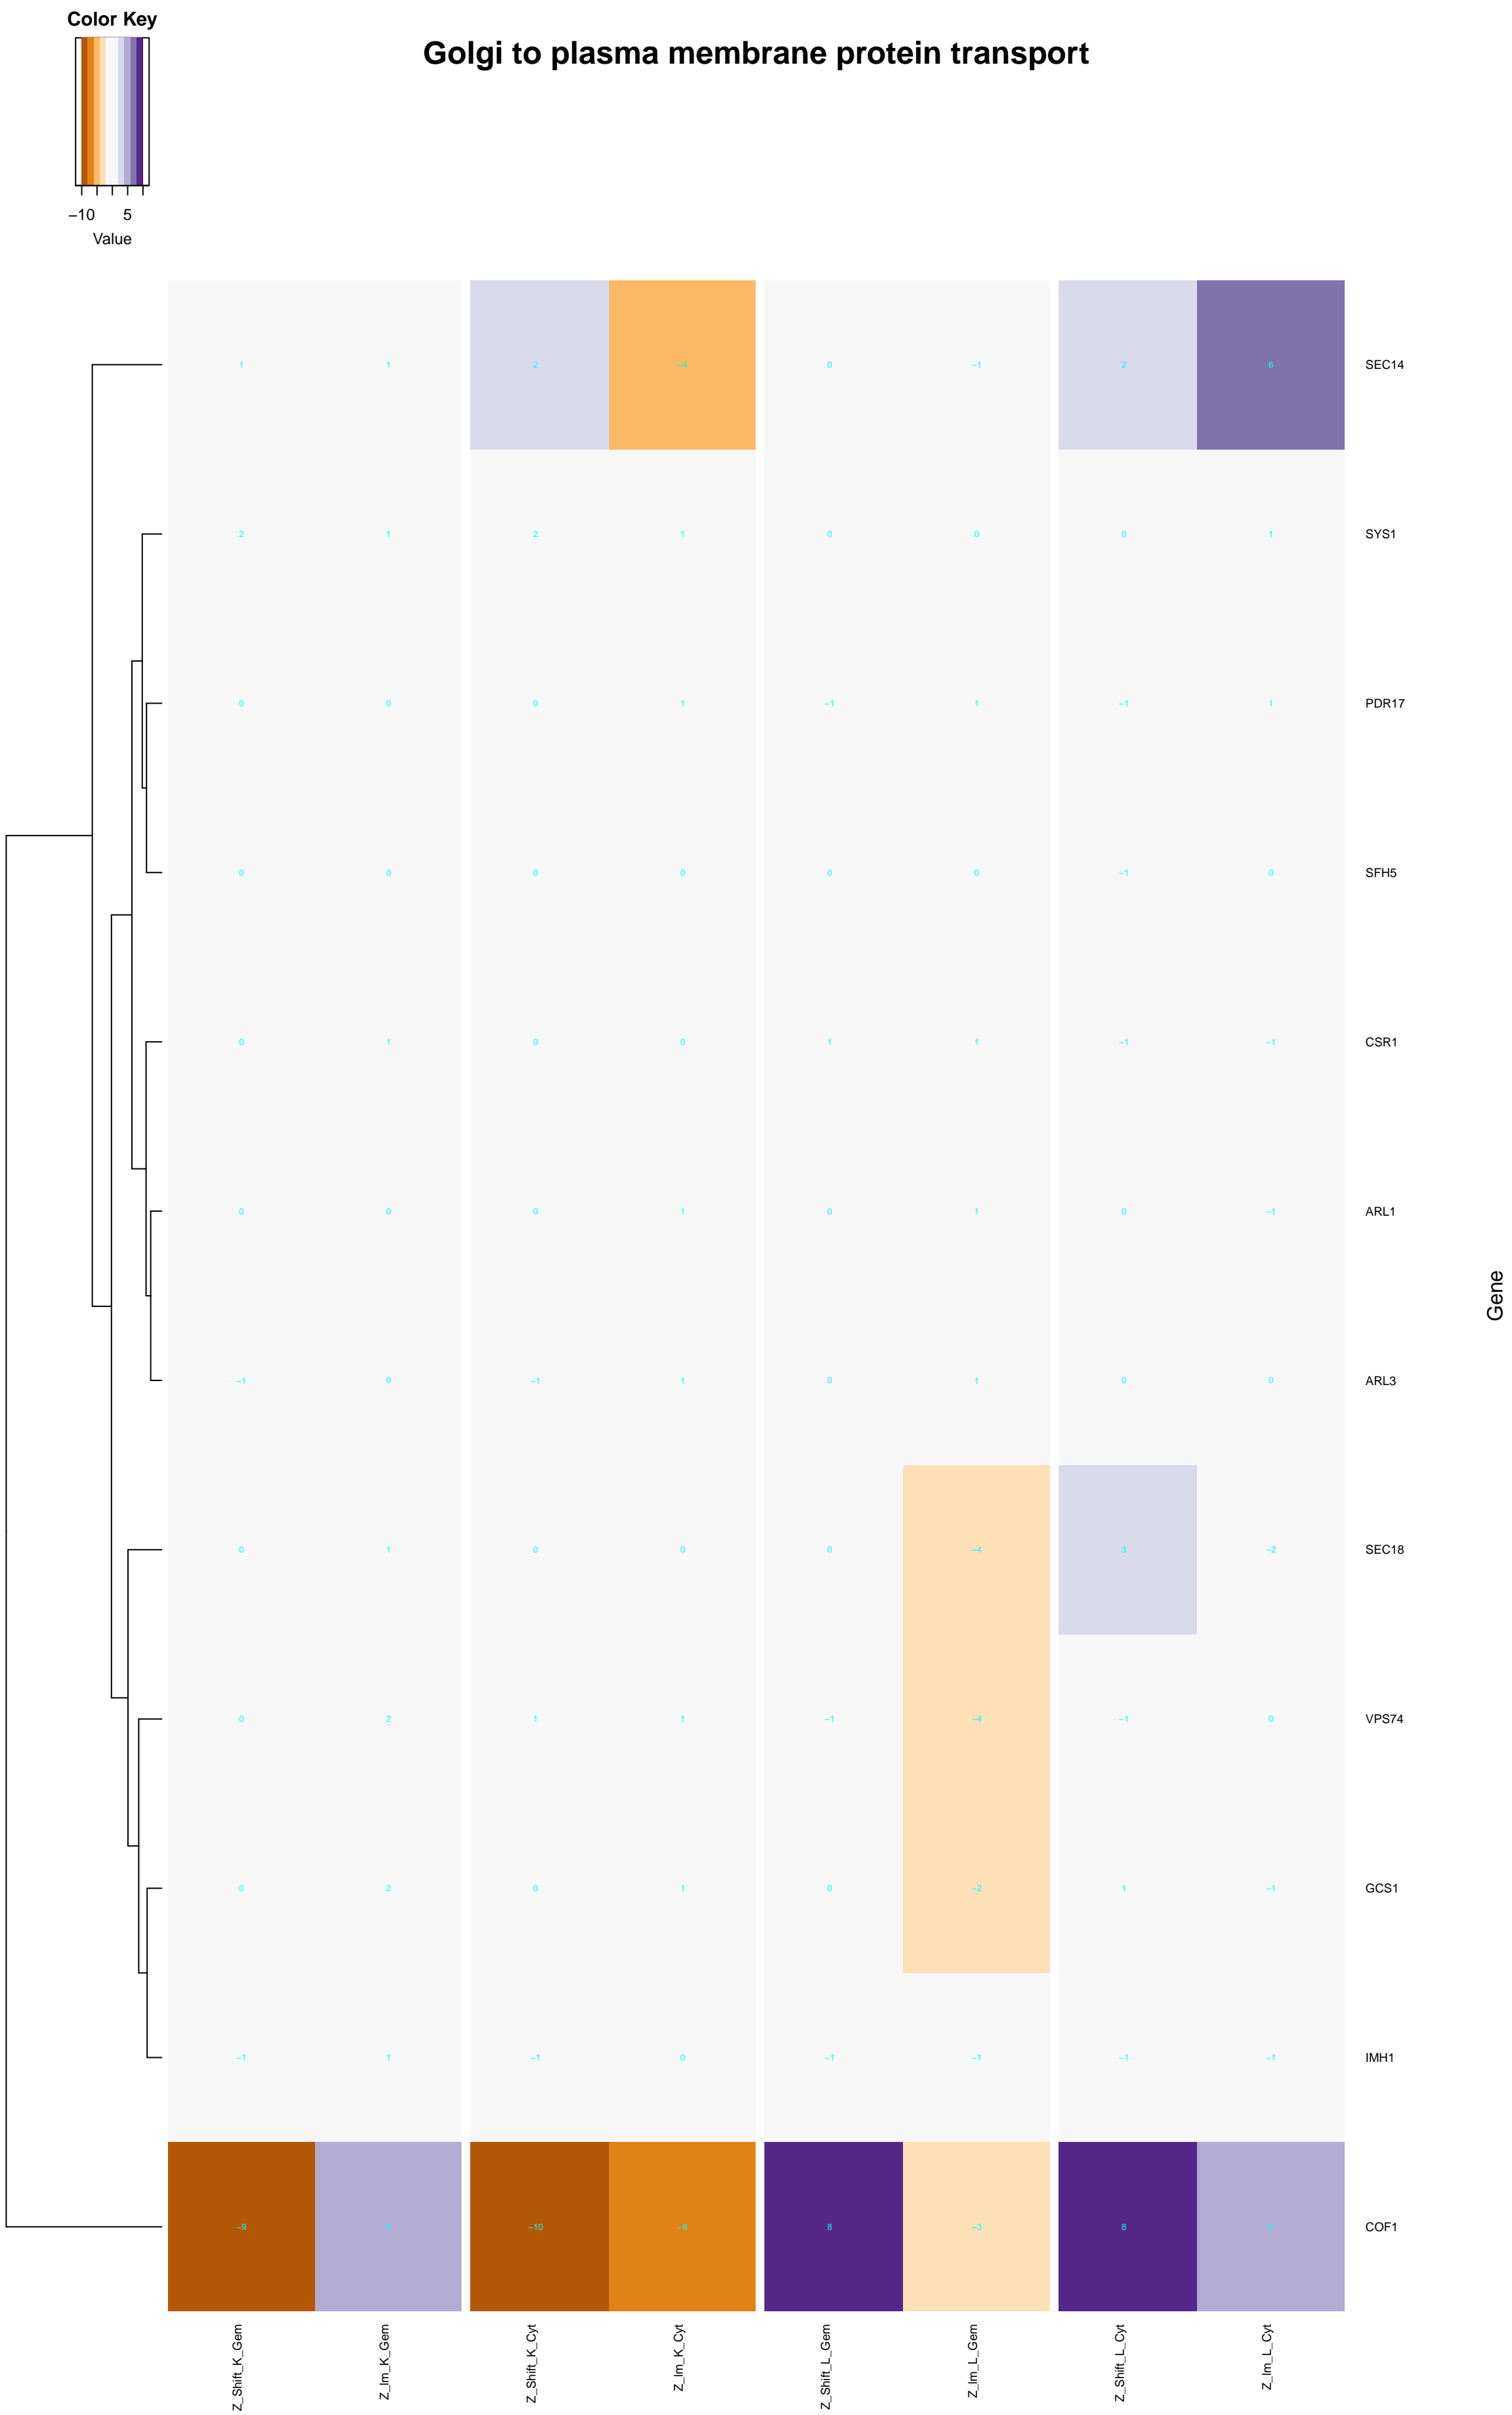

Supplement: s1 [file s1]

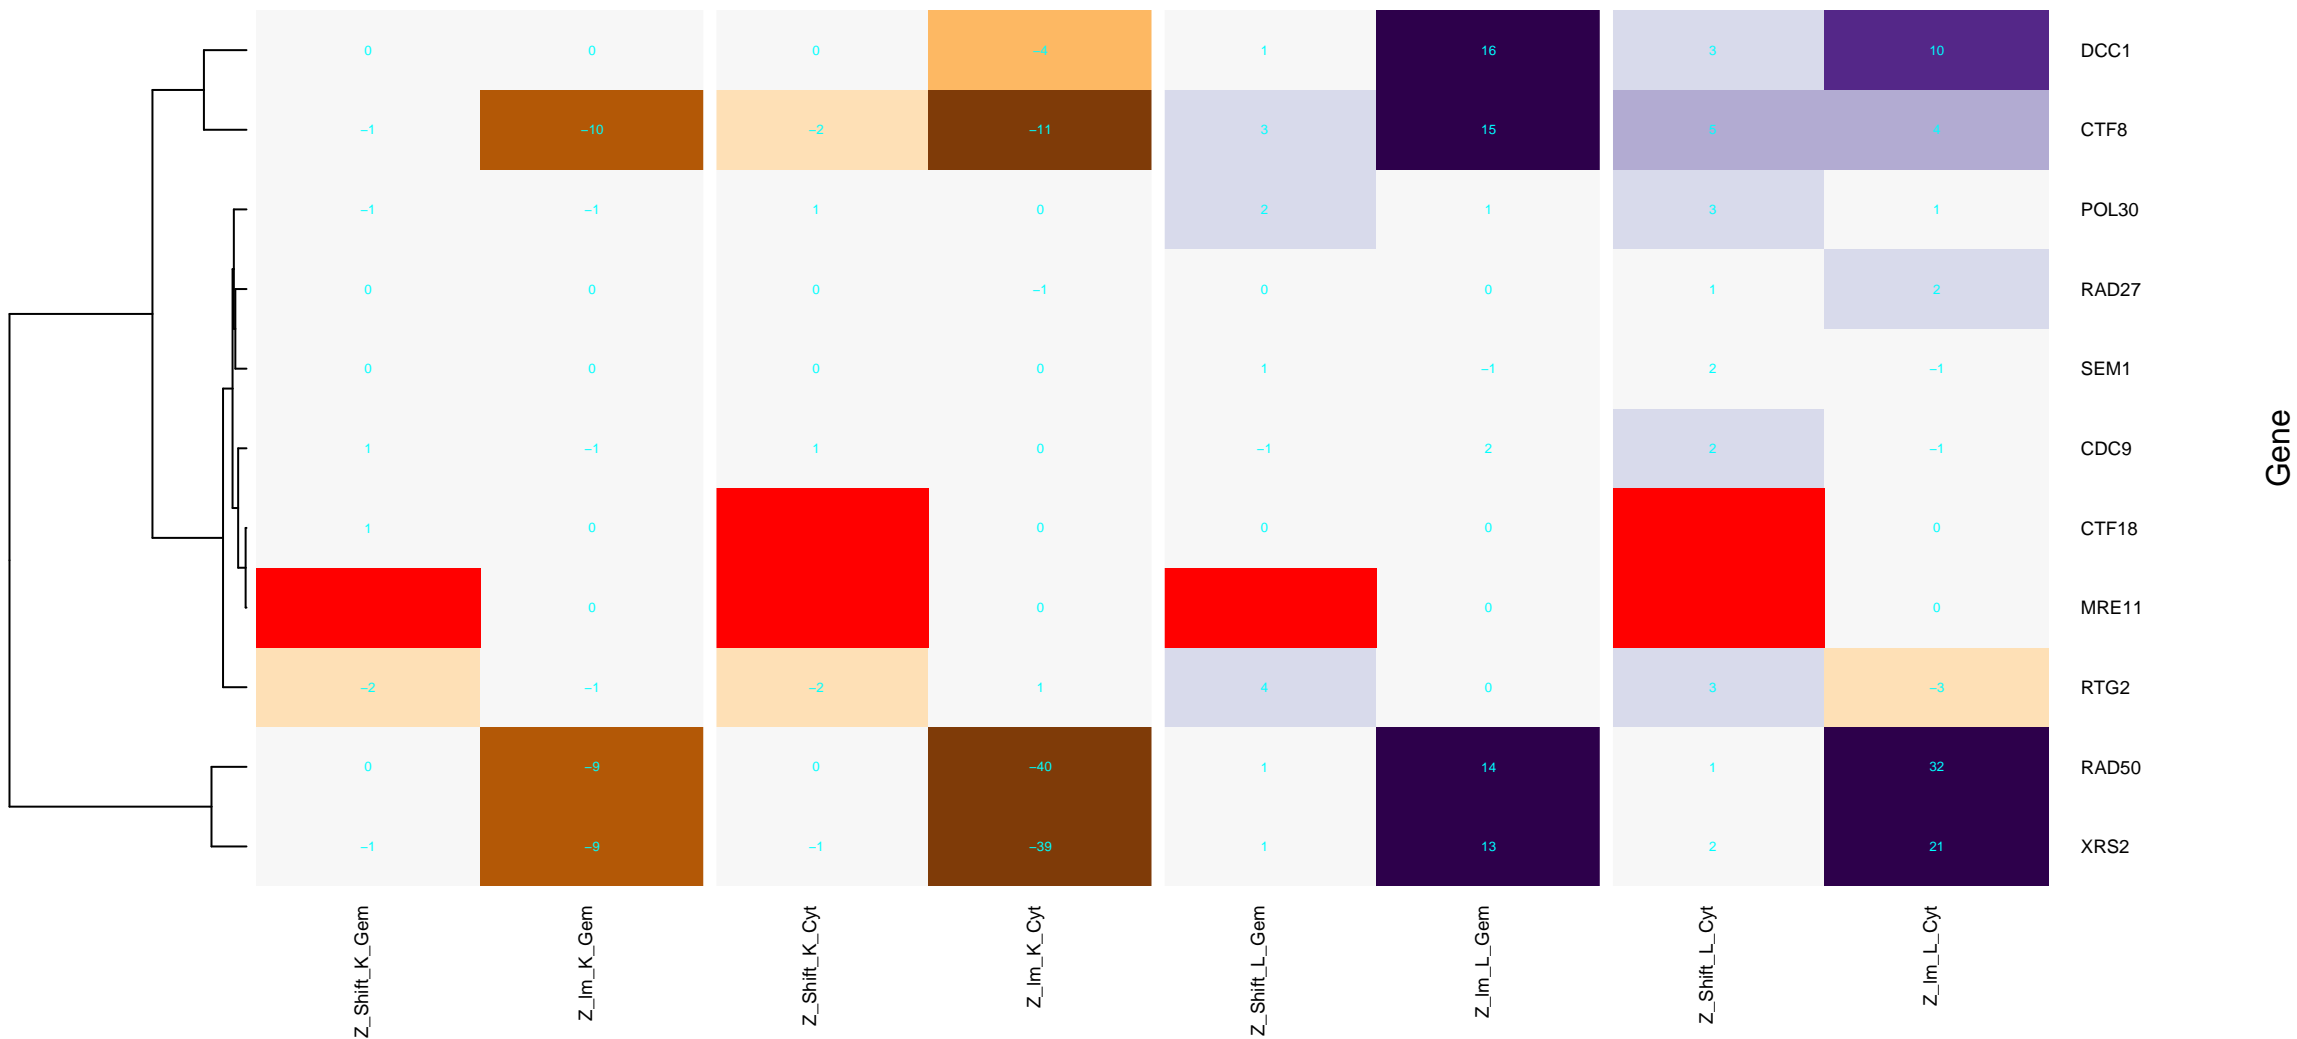

Supplement: s1 [file s1]

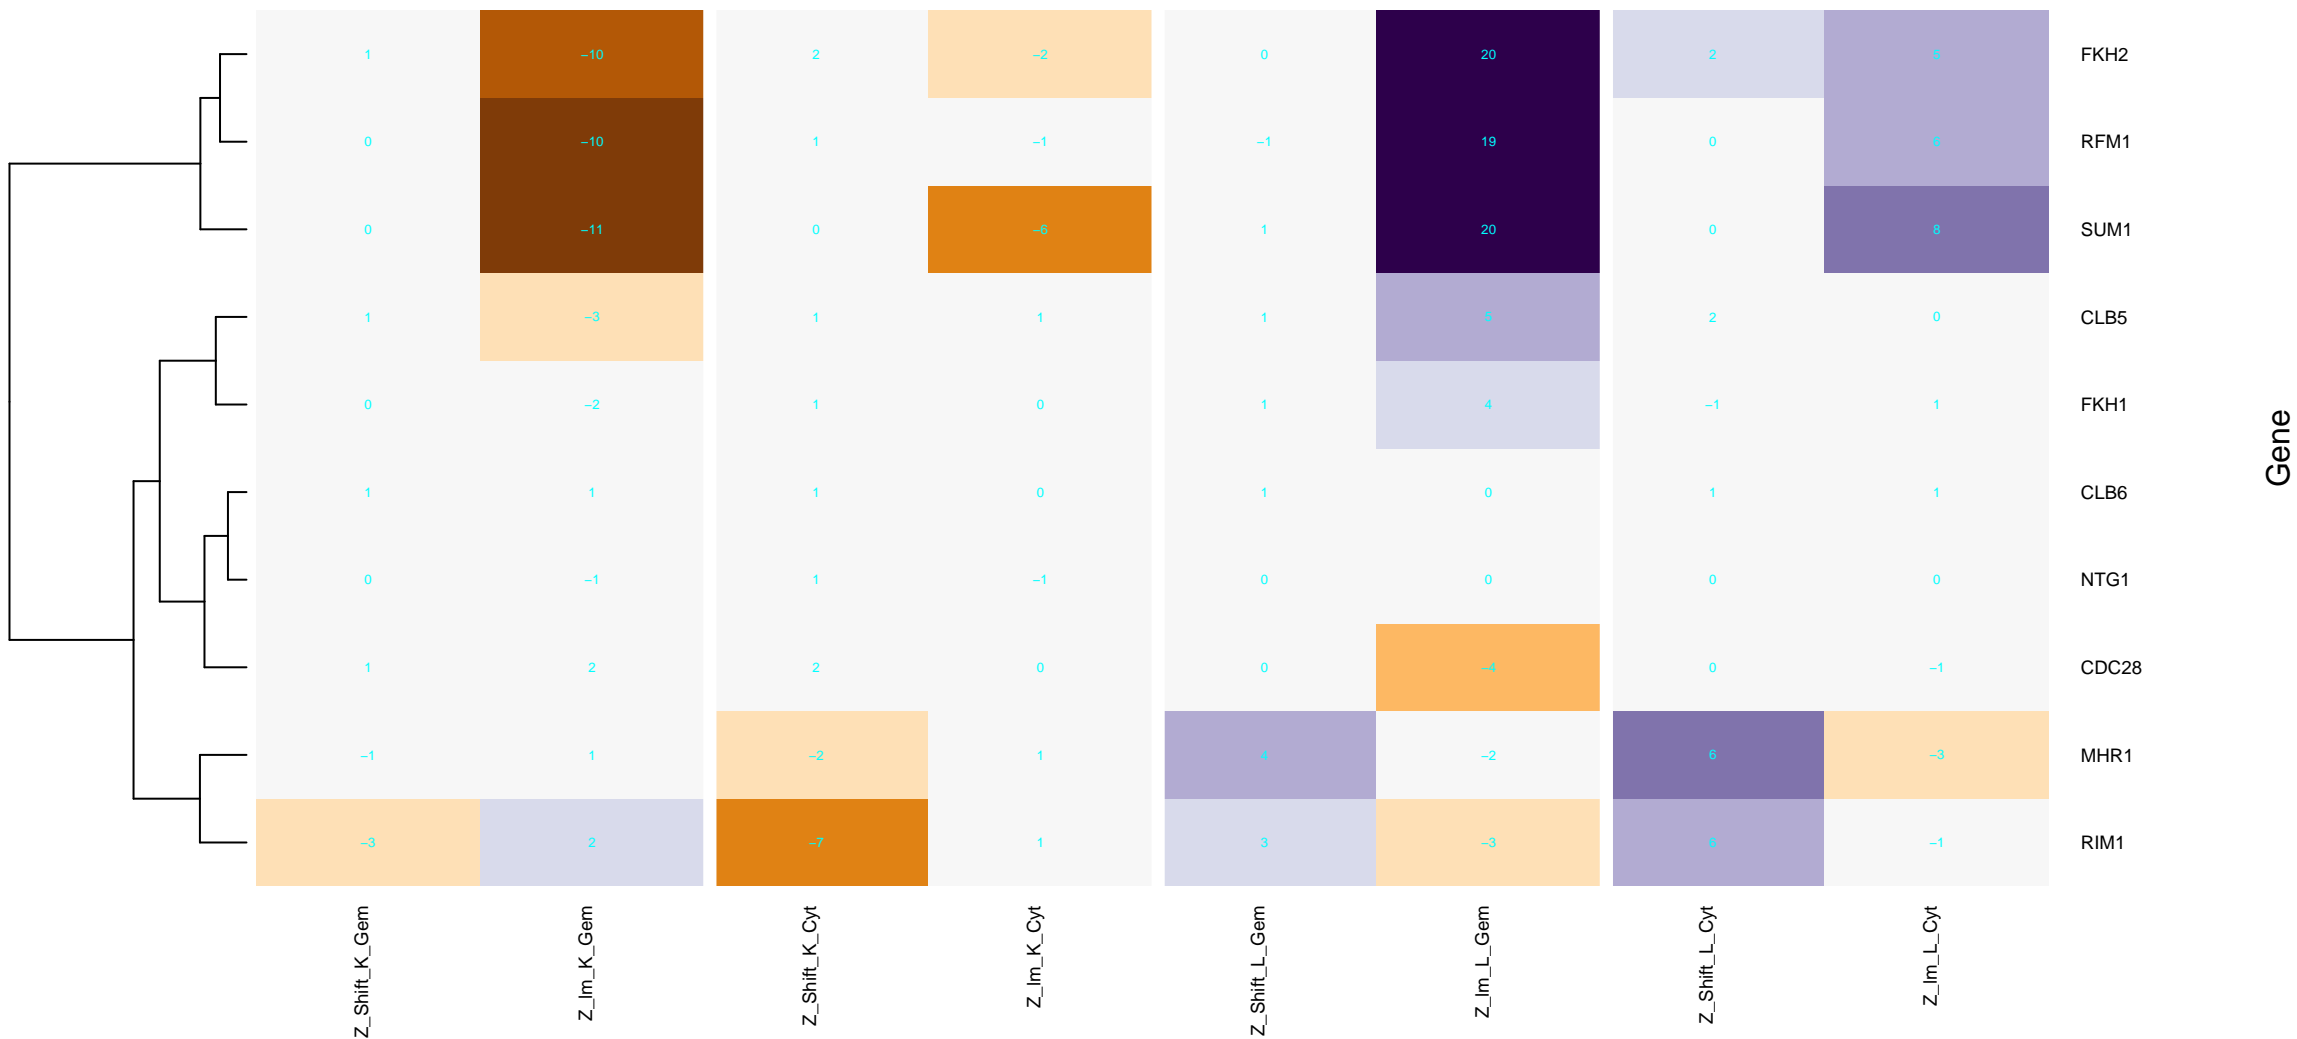

Supplement: s1 [file s1]

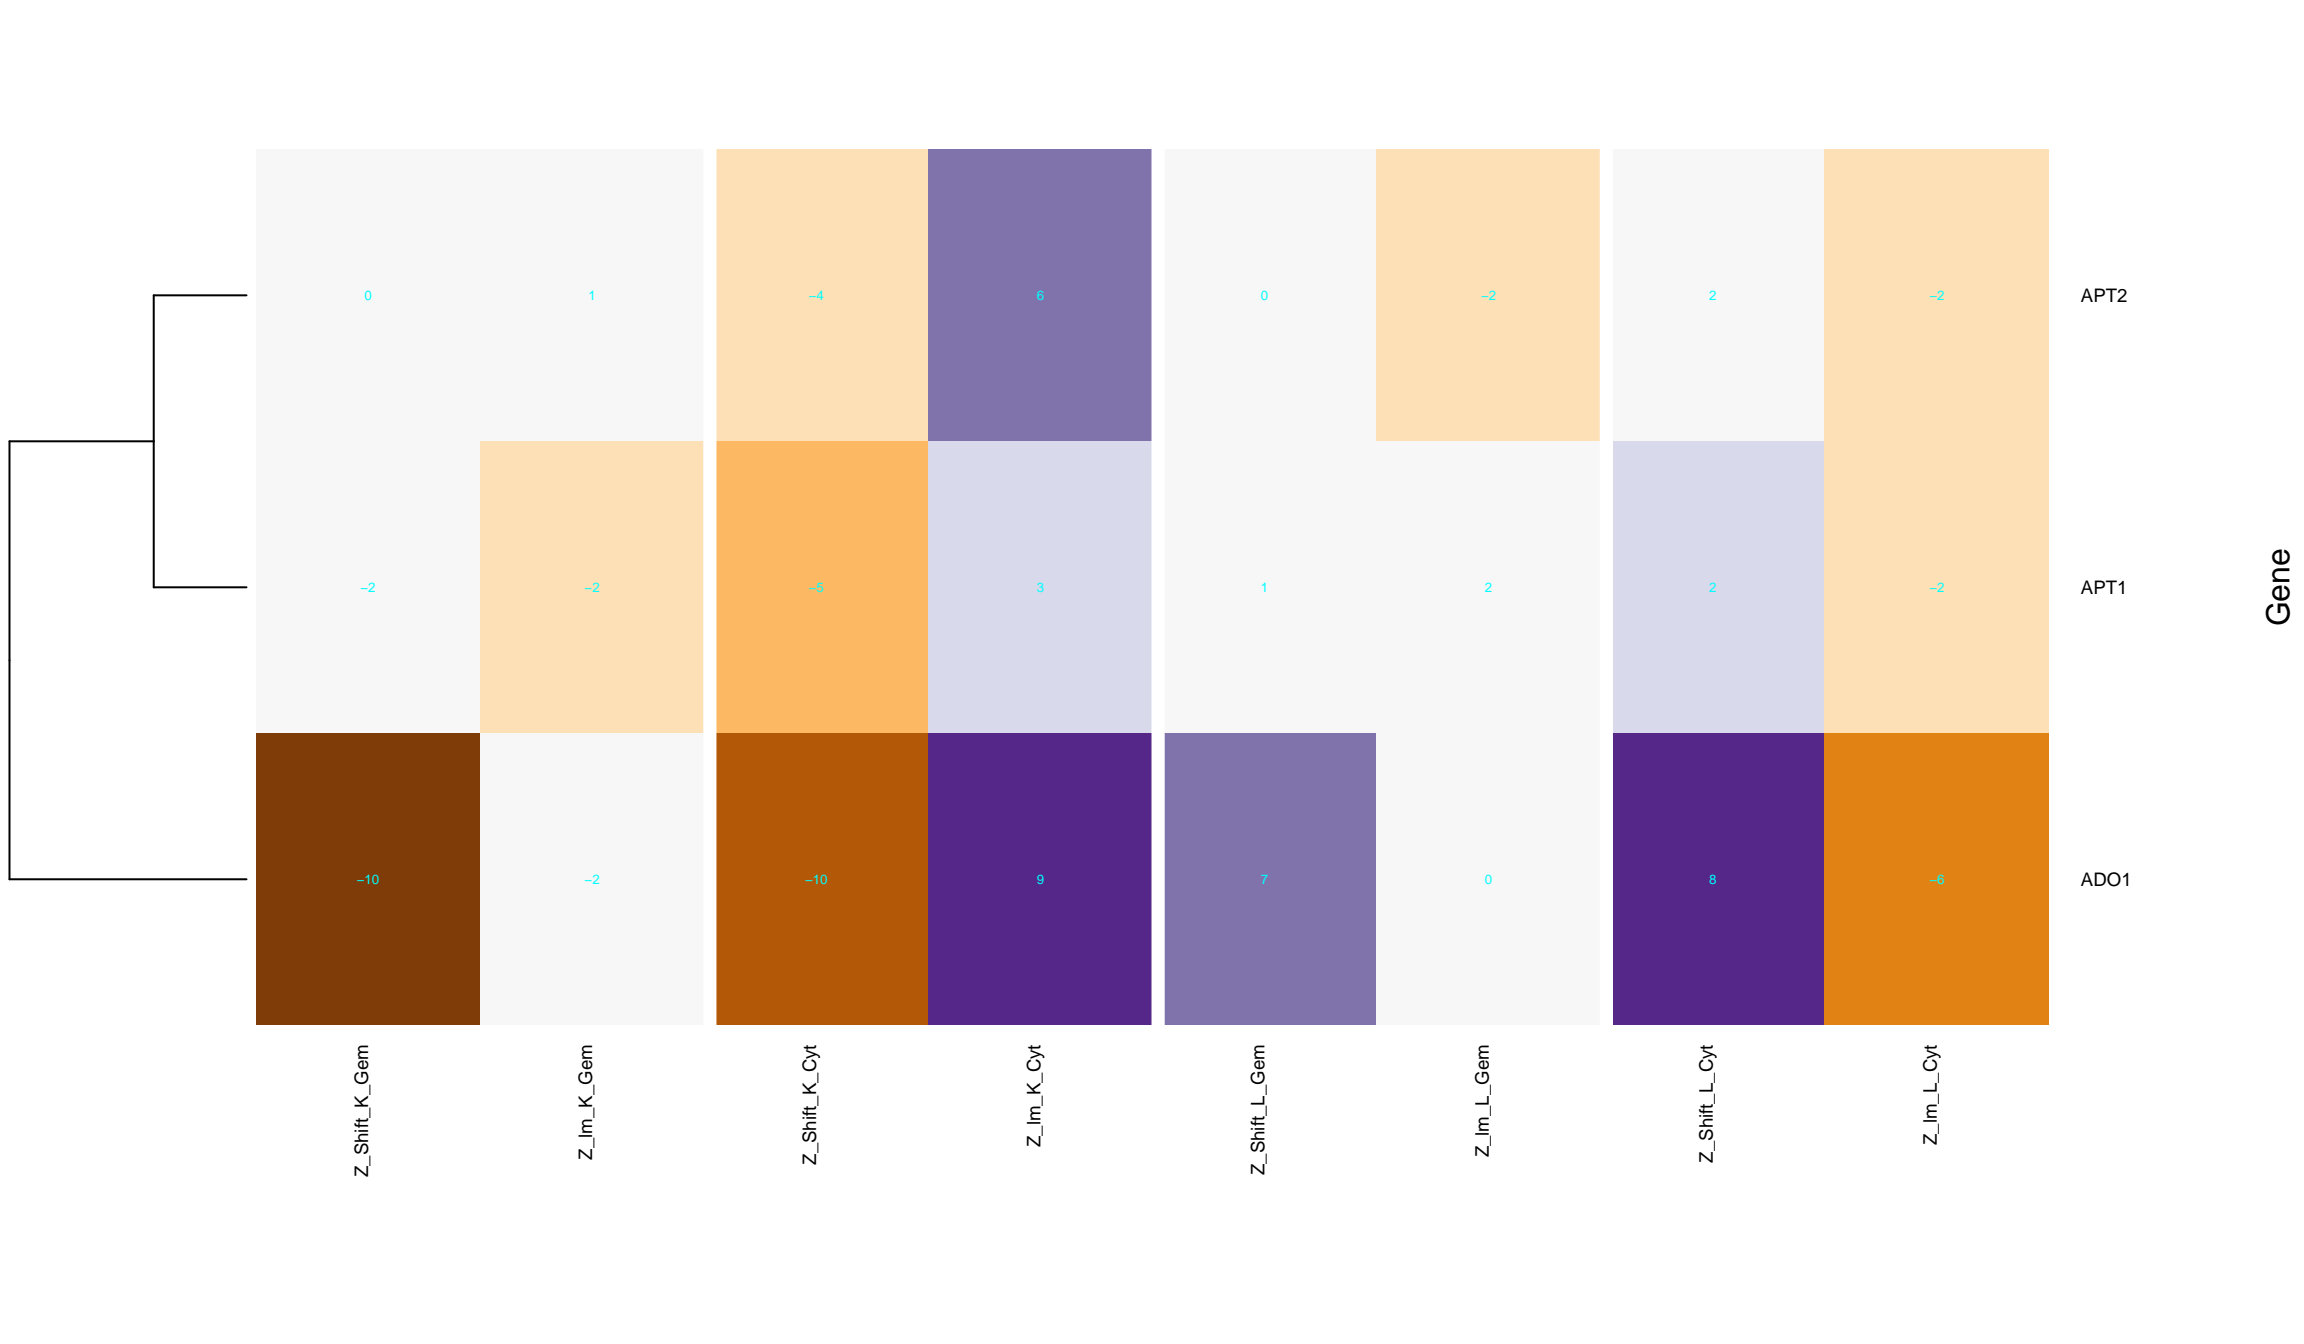

Supplement: s1 [file s1]

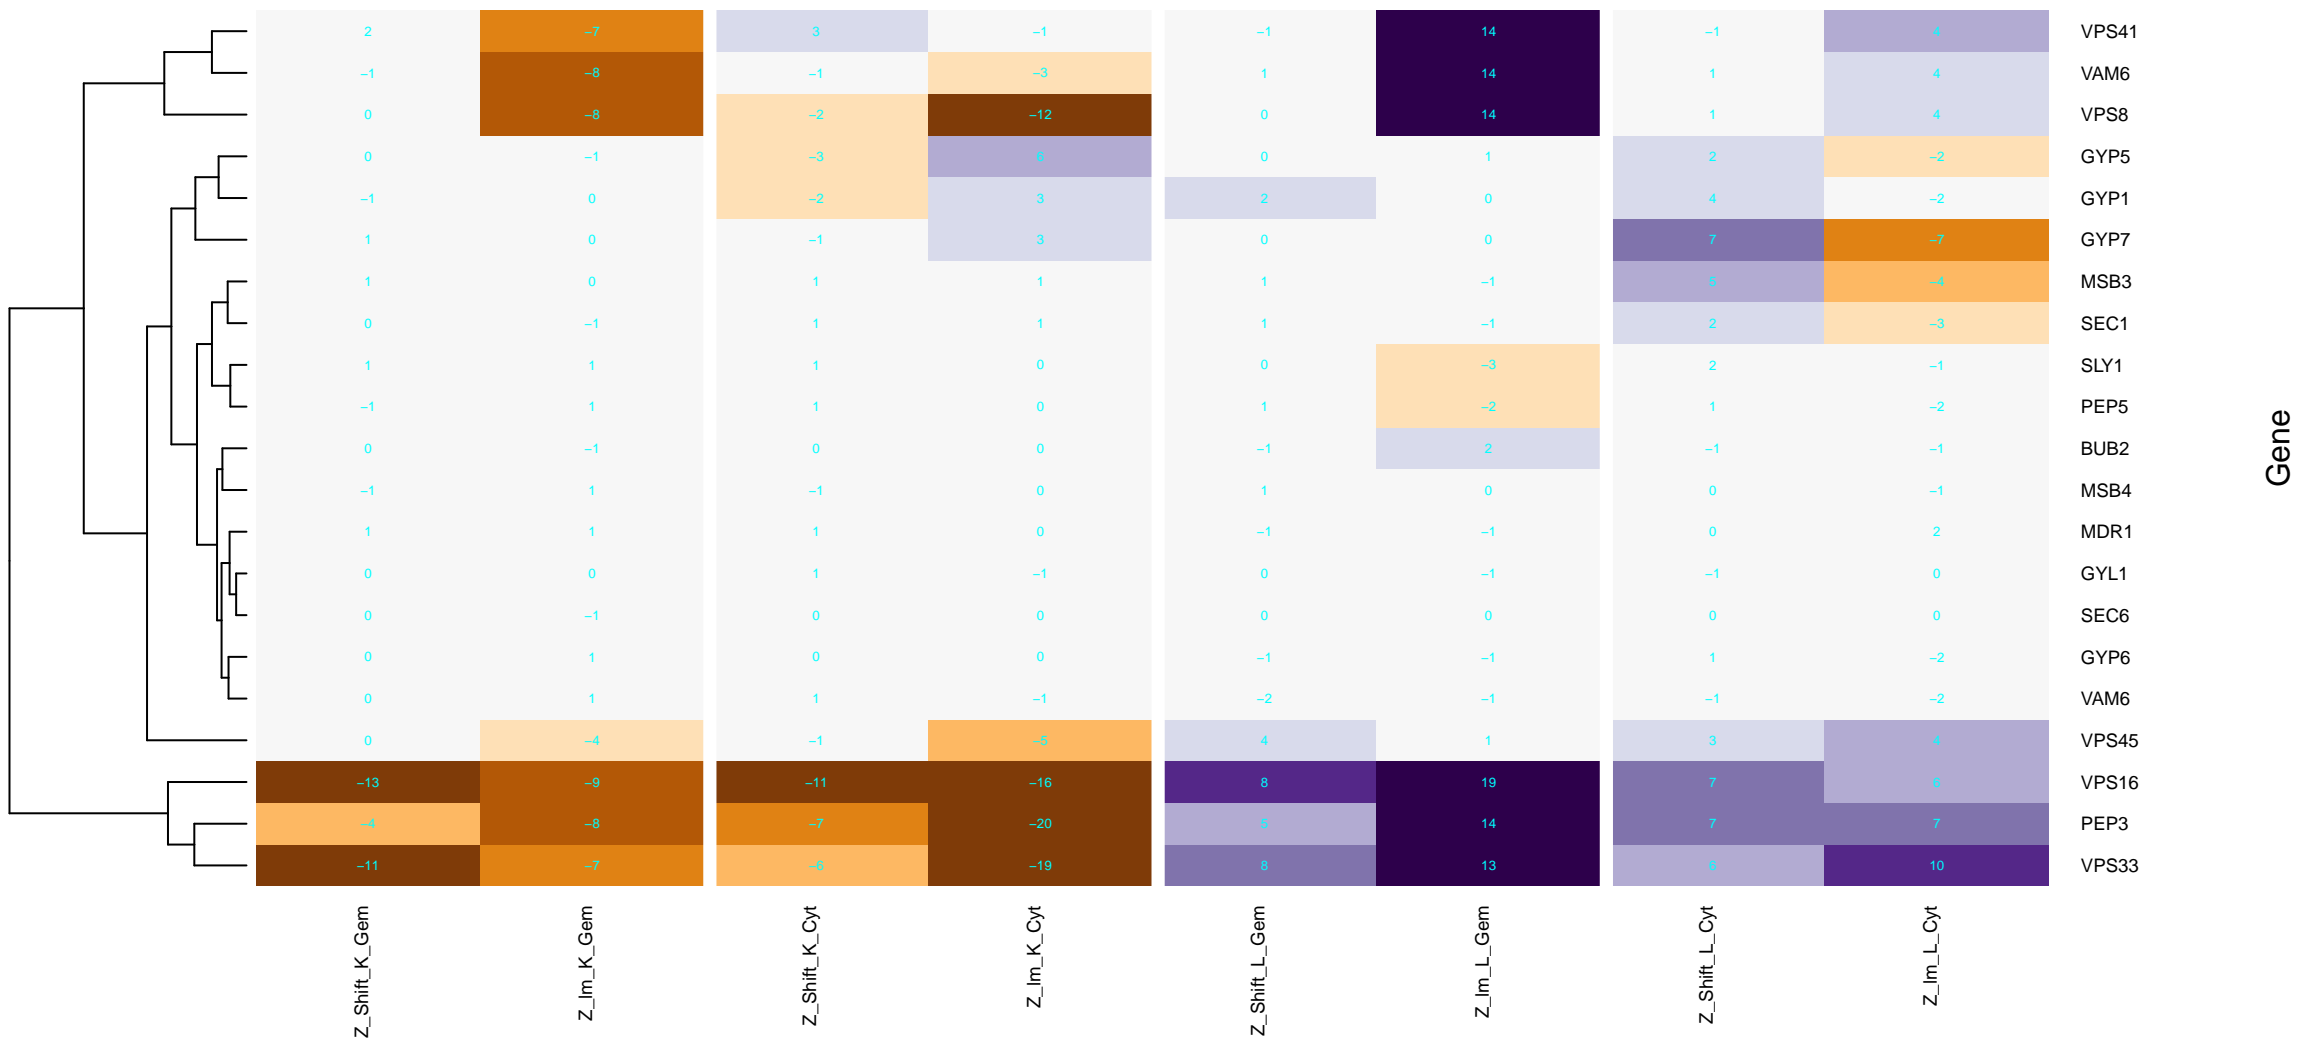

Supplement: s1 [file s1]
