# Supplementary figures and images for: A Humanized Yeast Phenomic Model of Deoxycytidine Kinase to Predict Genetic Buffering of Nucleoside Analog Cytotoxicity (part 1 of 4)
Source: MDPI journal article supplement (doi:10.3390/genes10100770), 2019-09-30

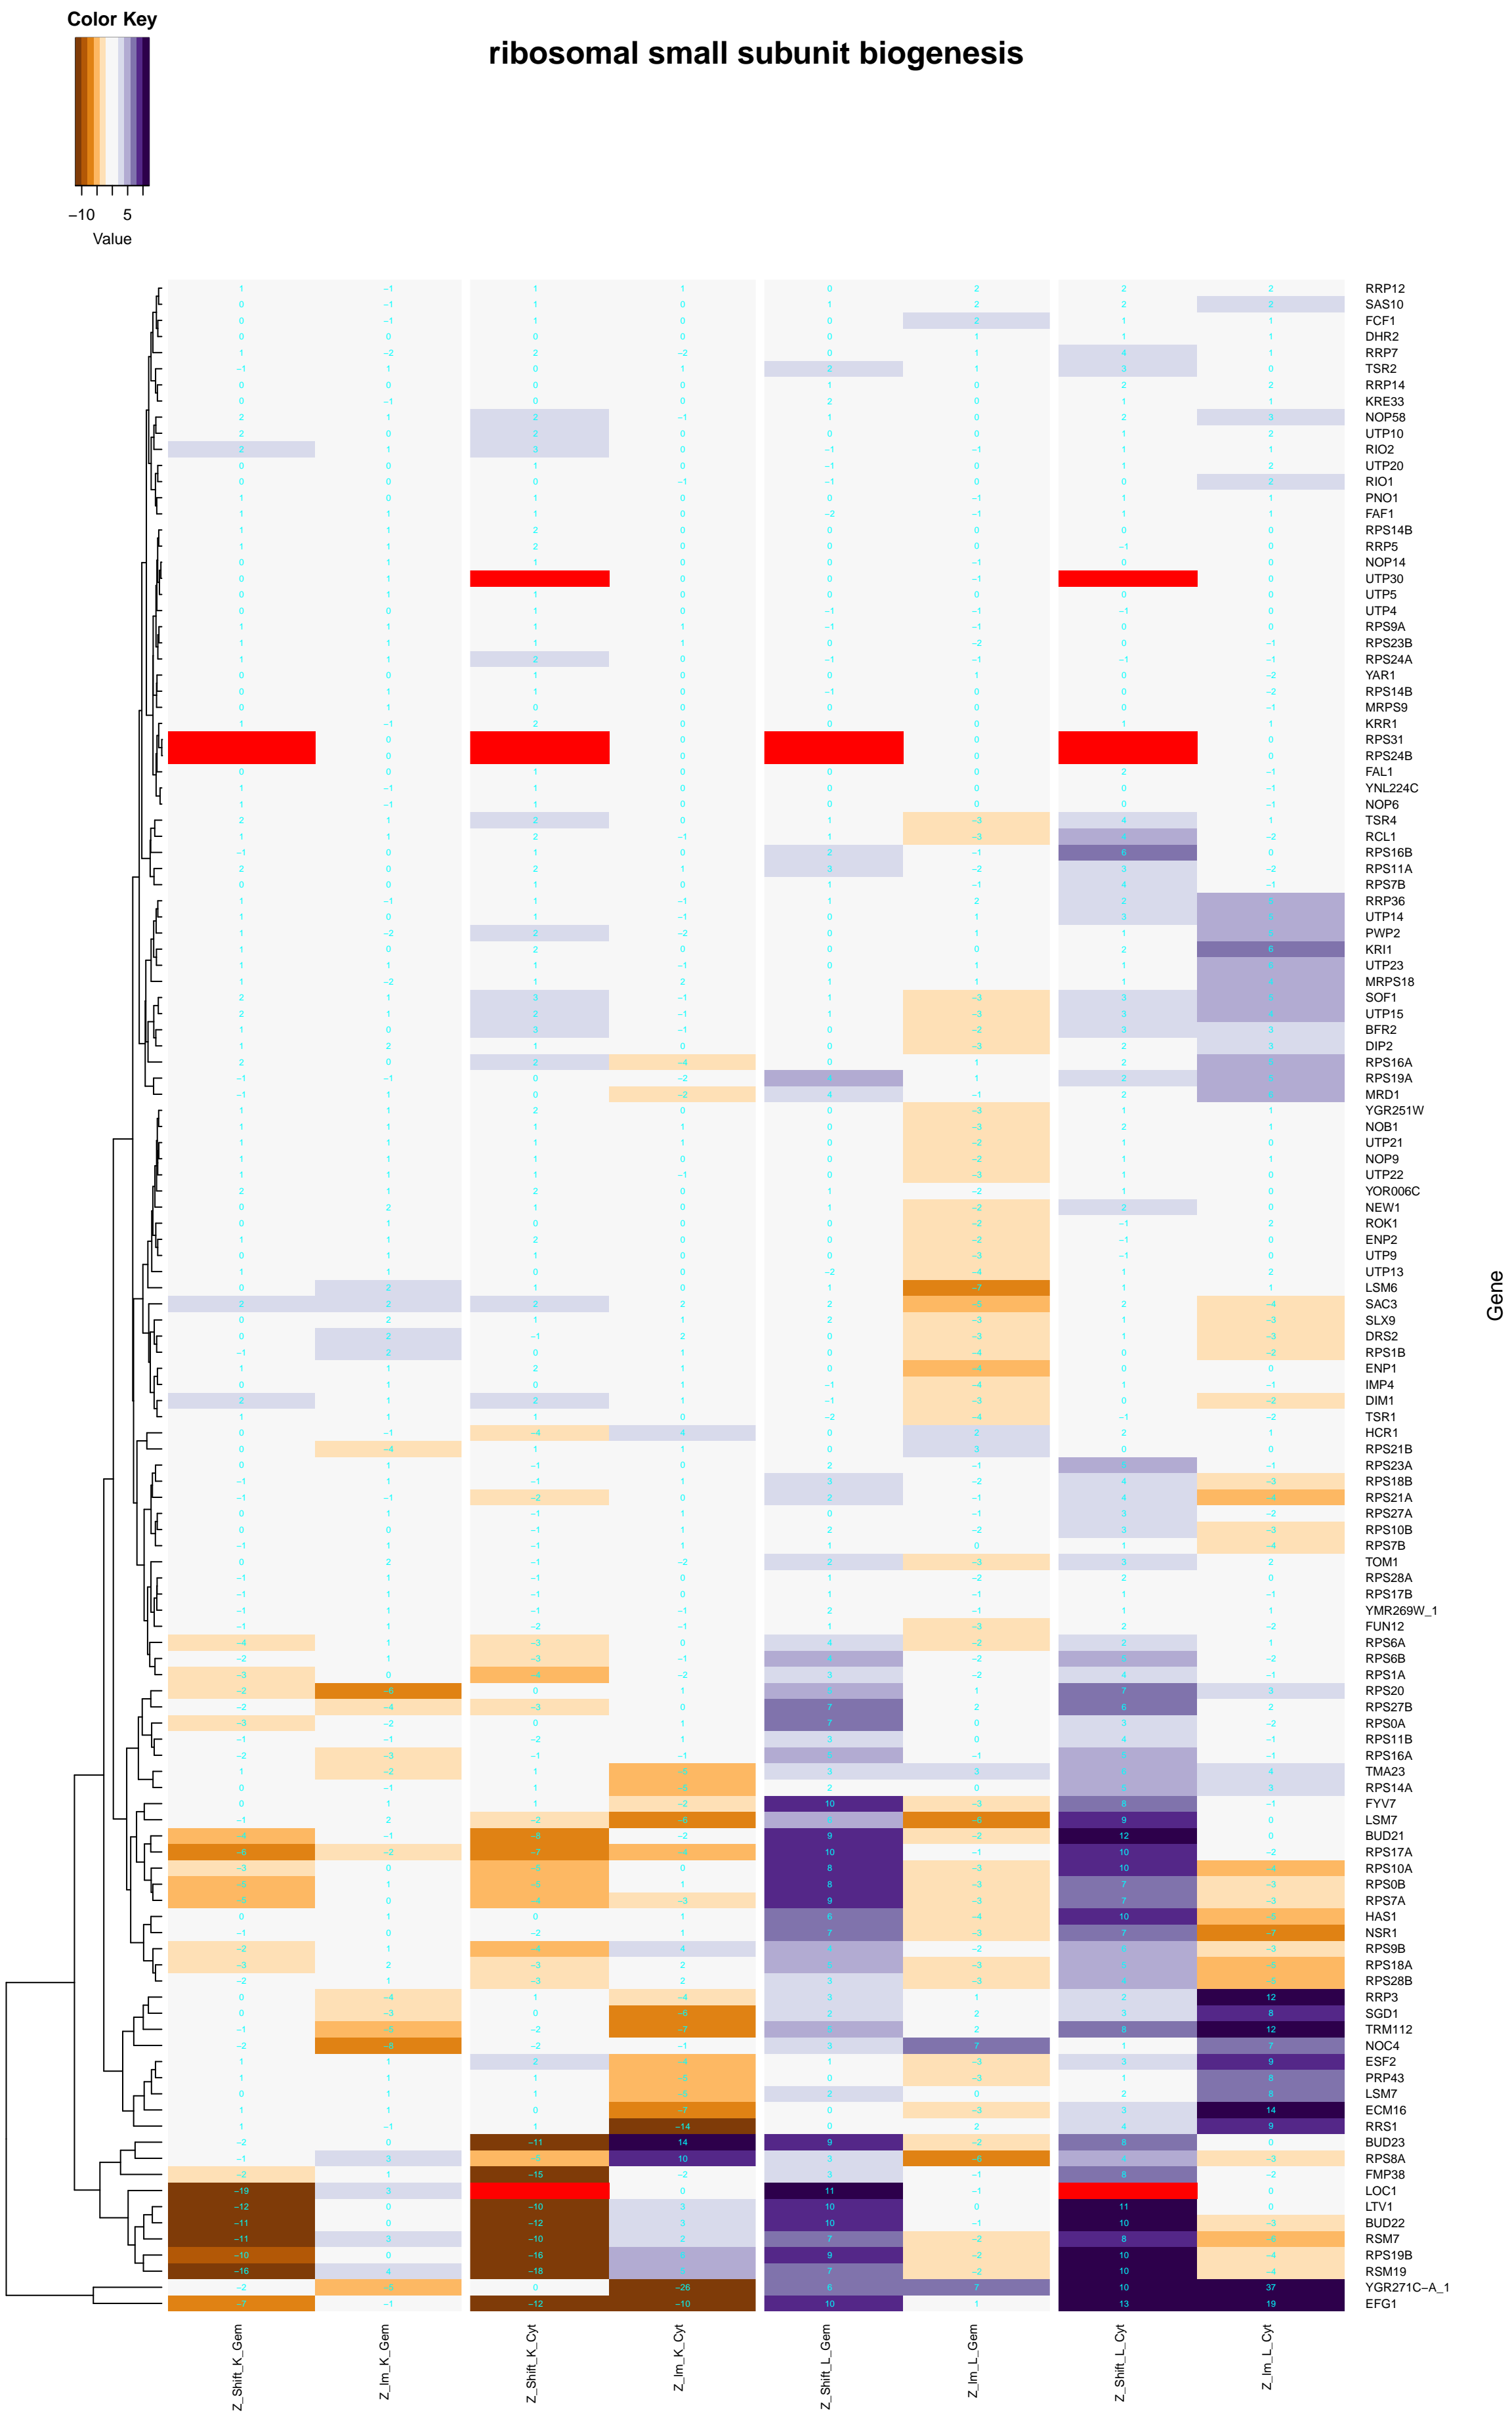

Supplement: s1 [file s1]

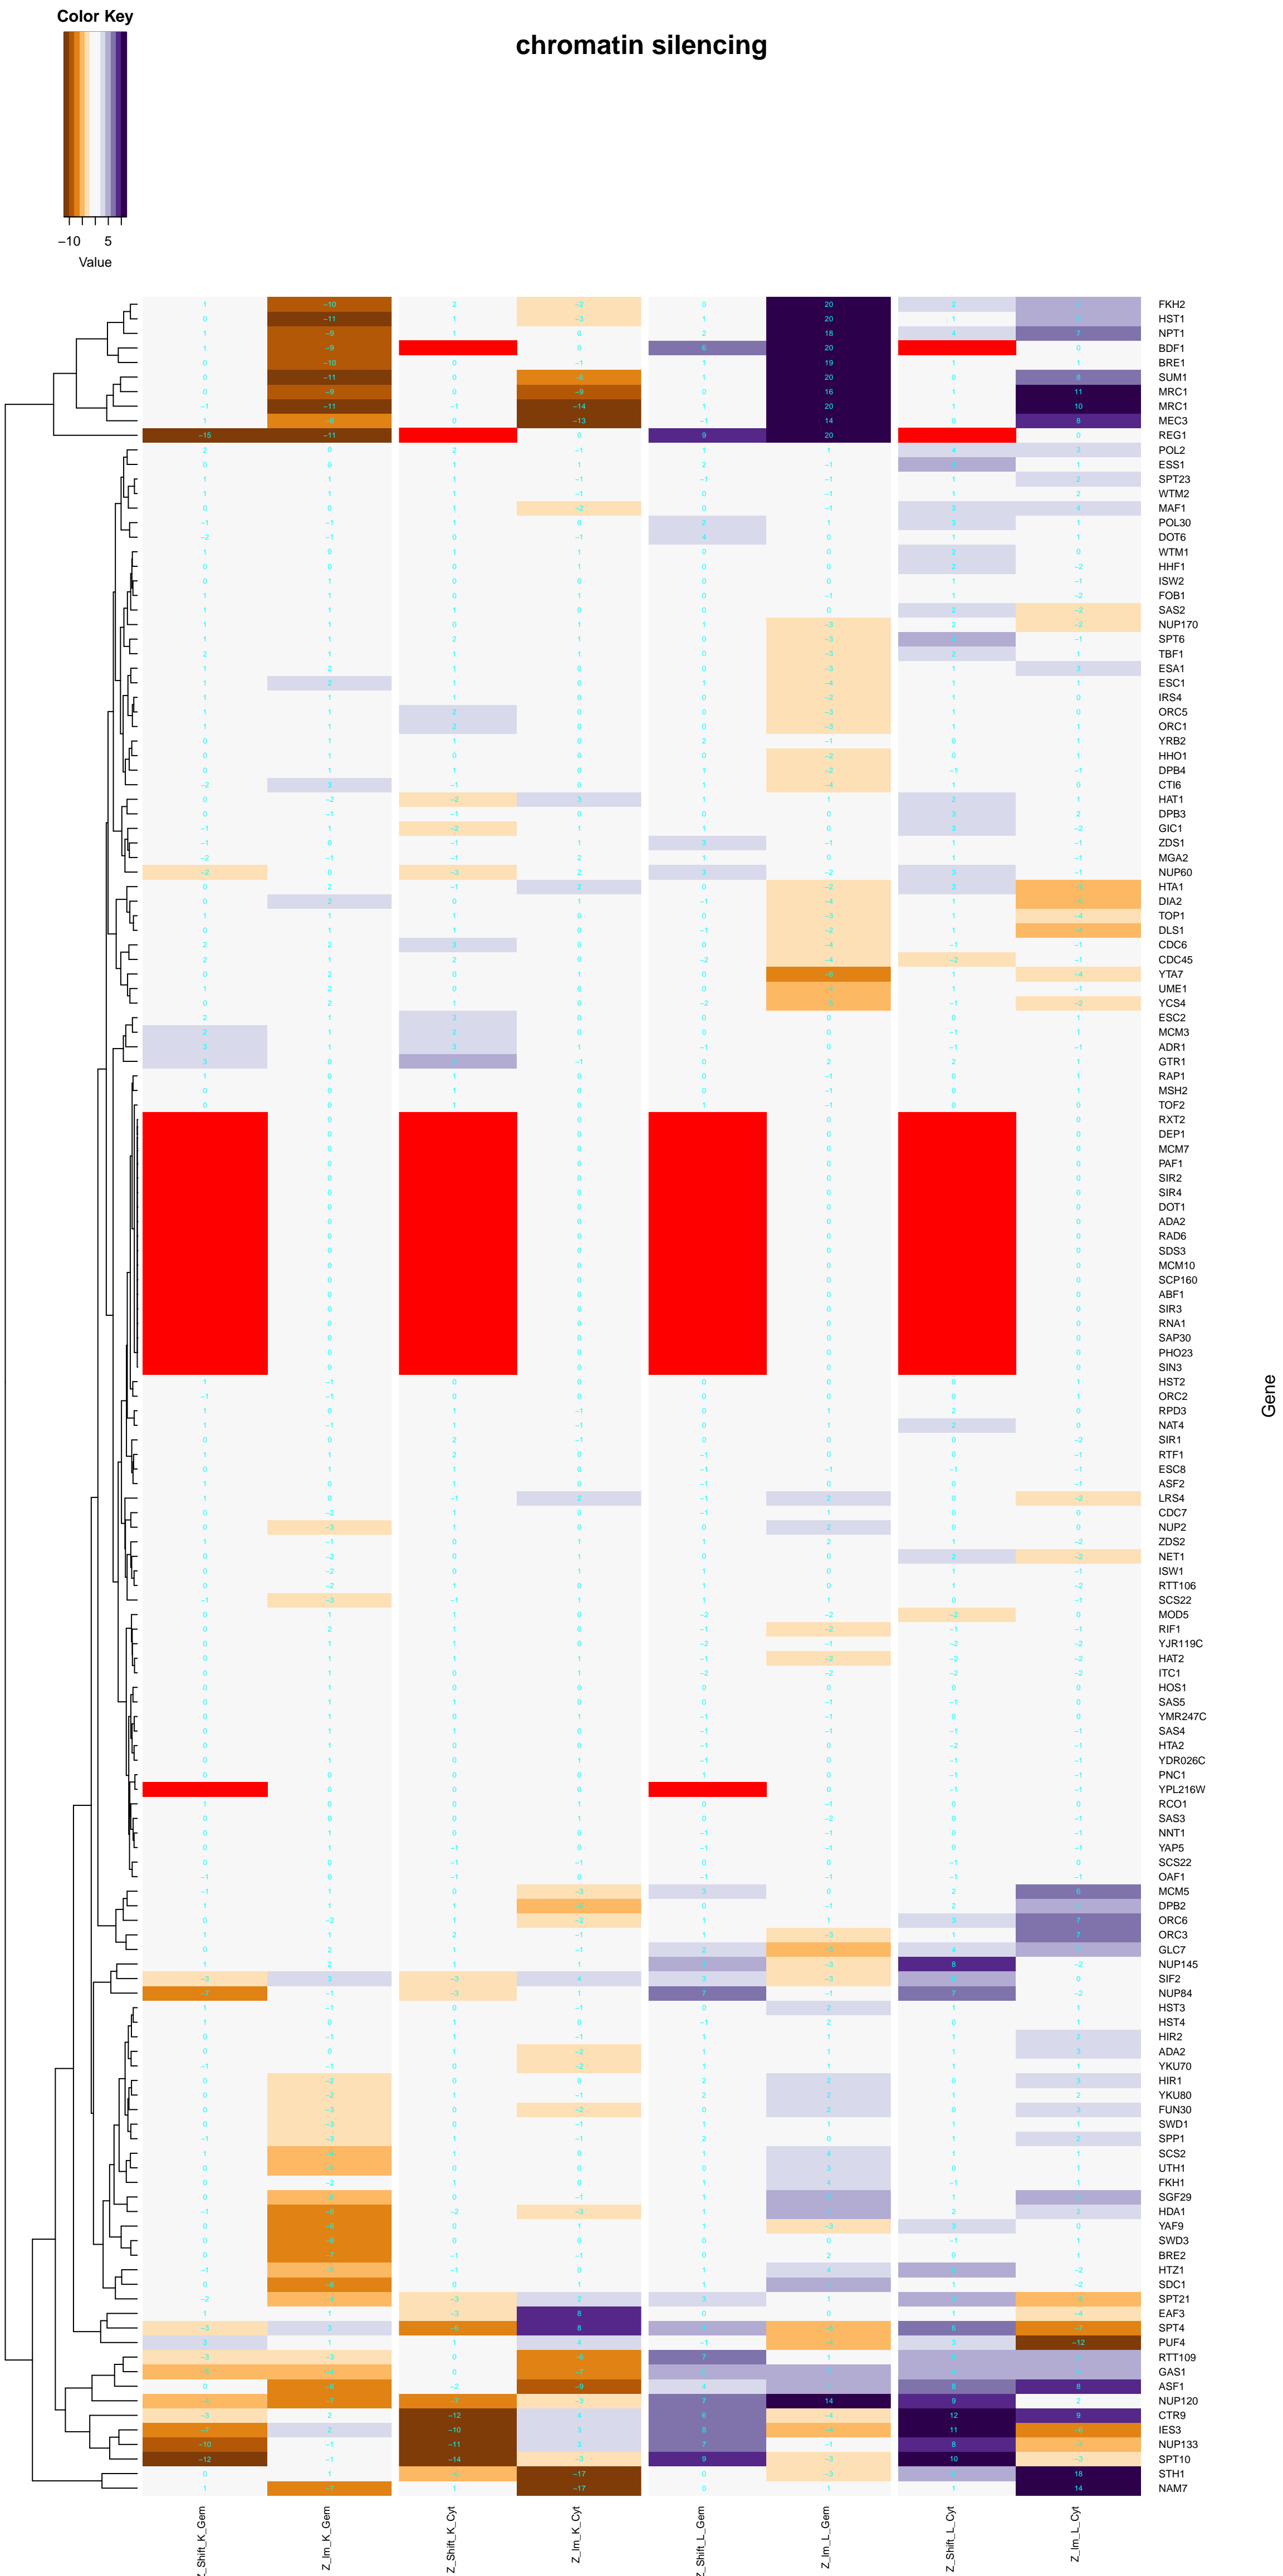

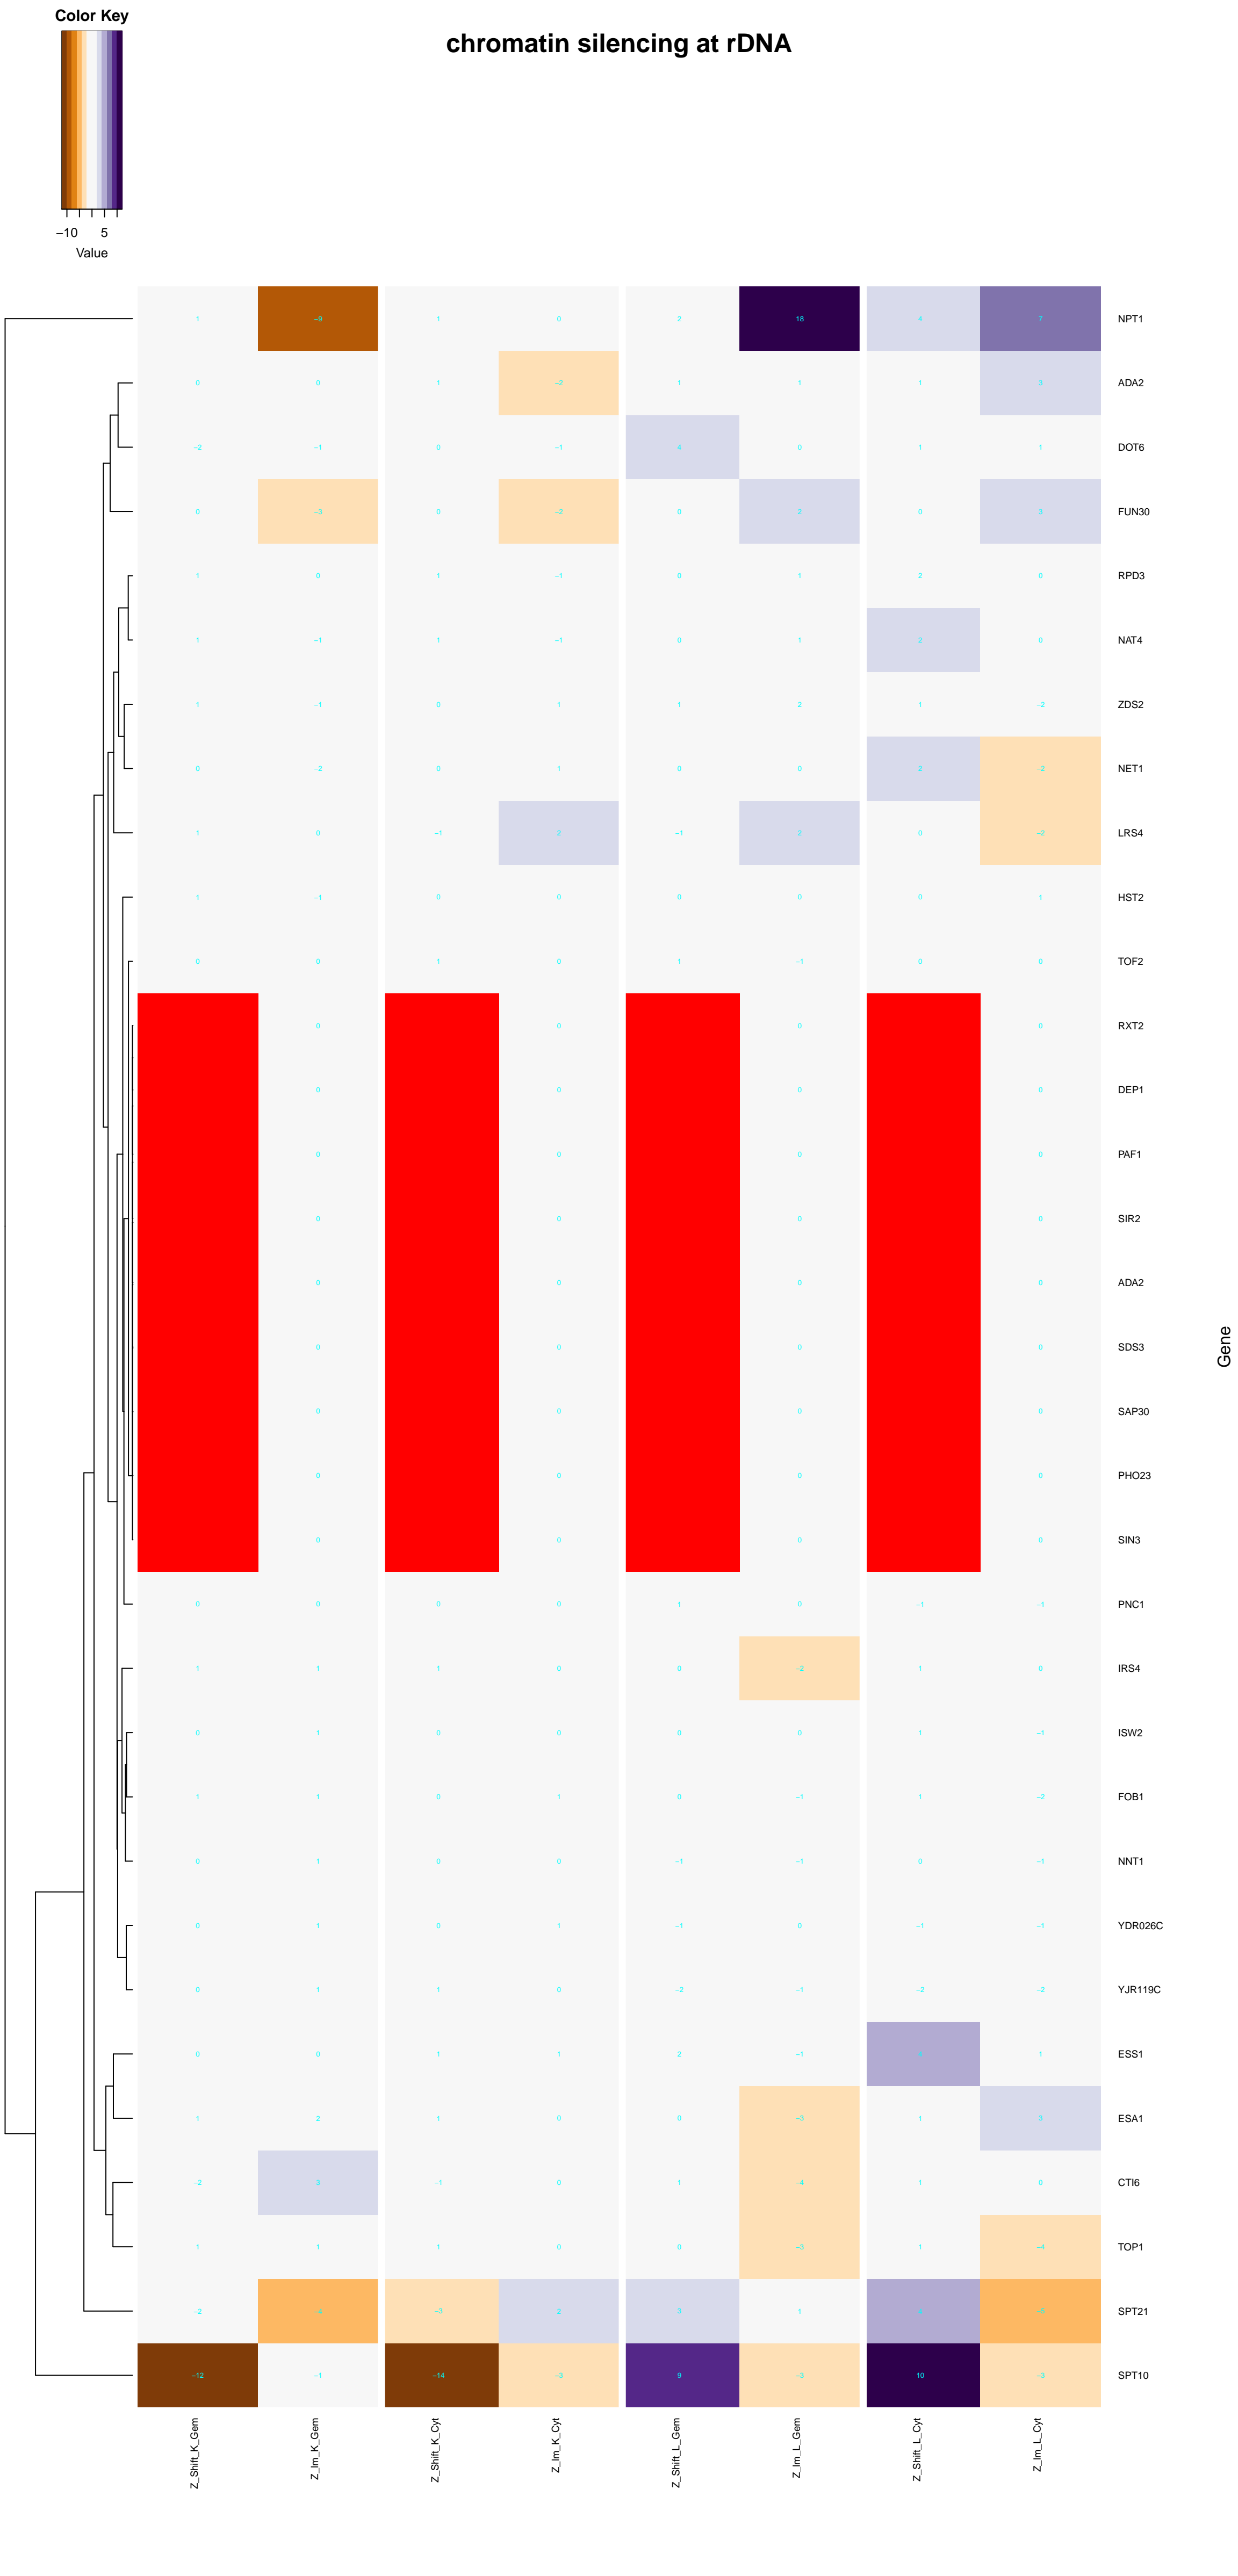

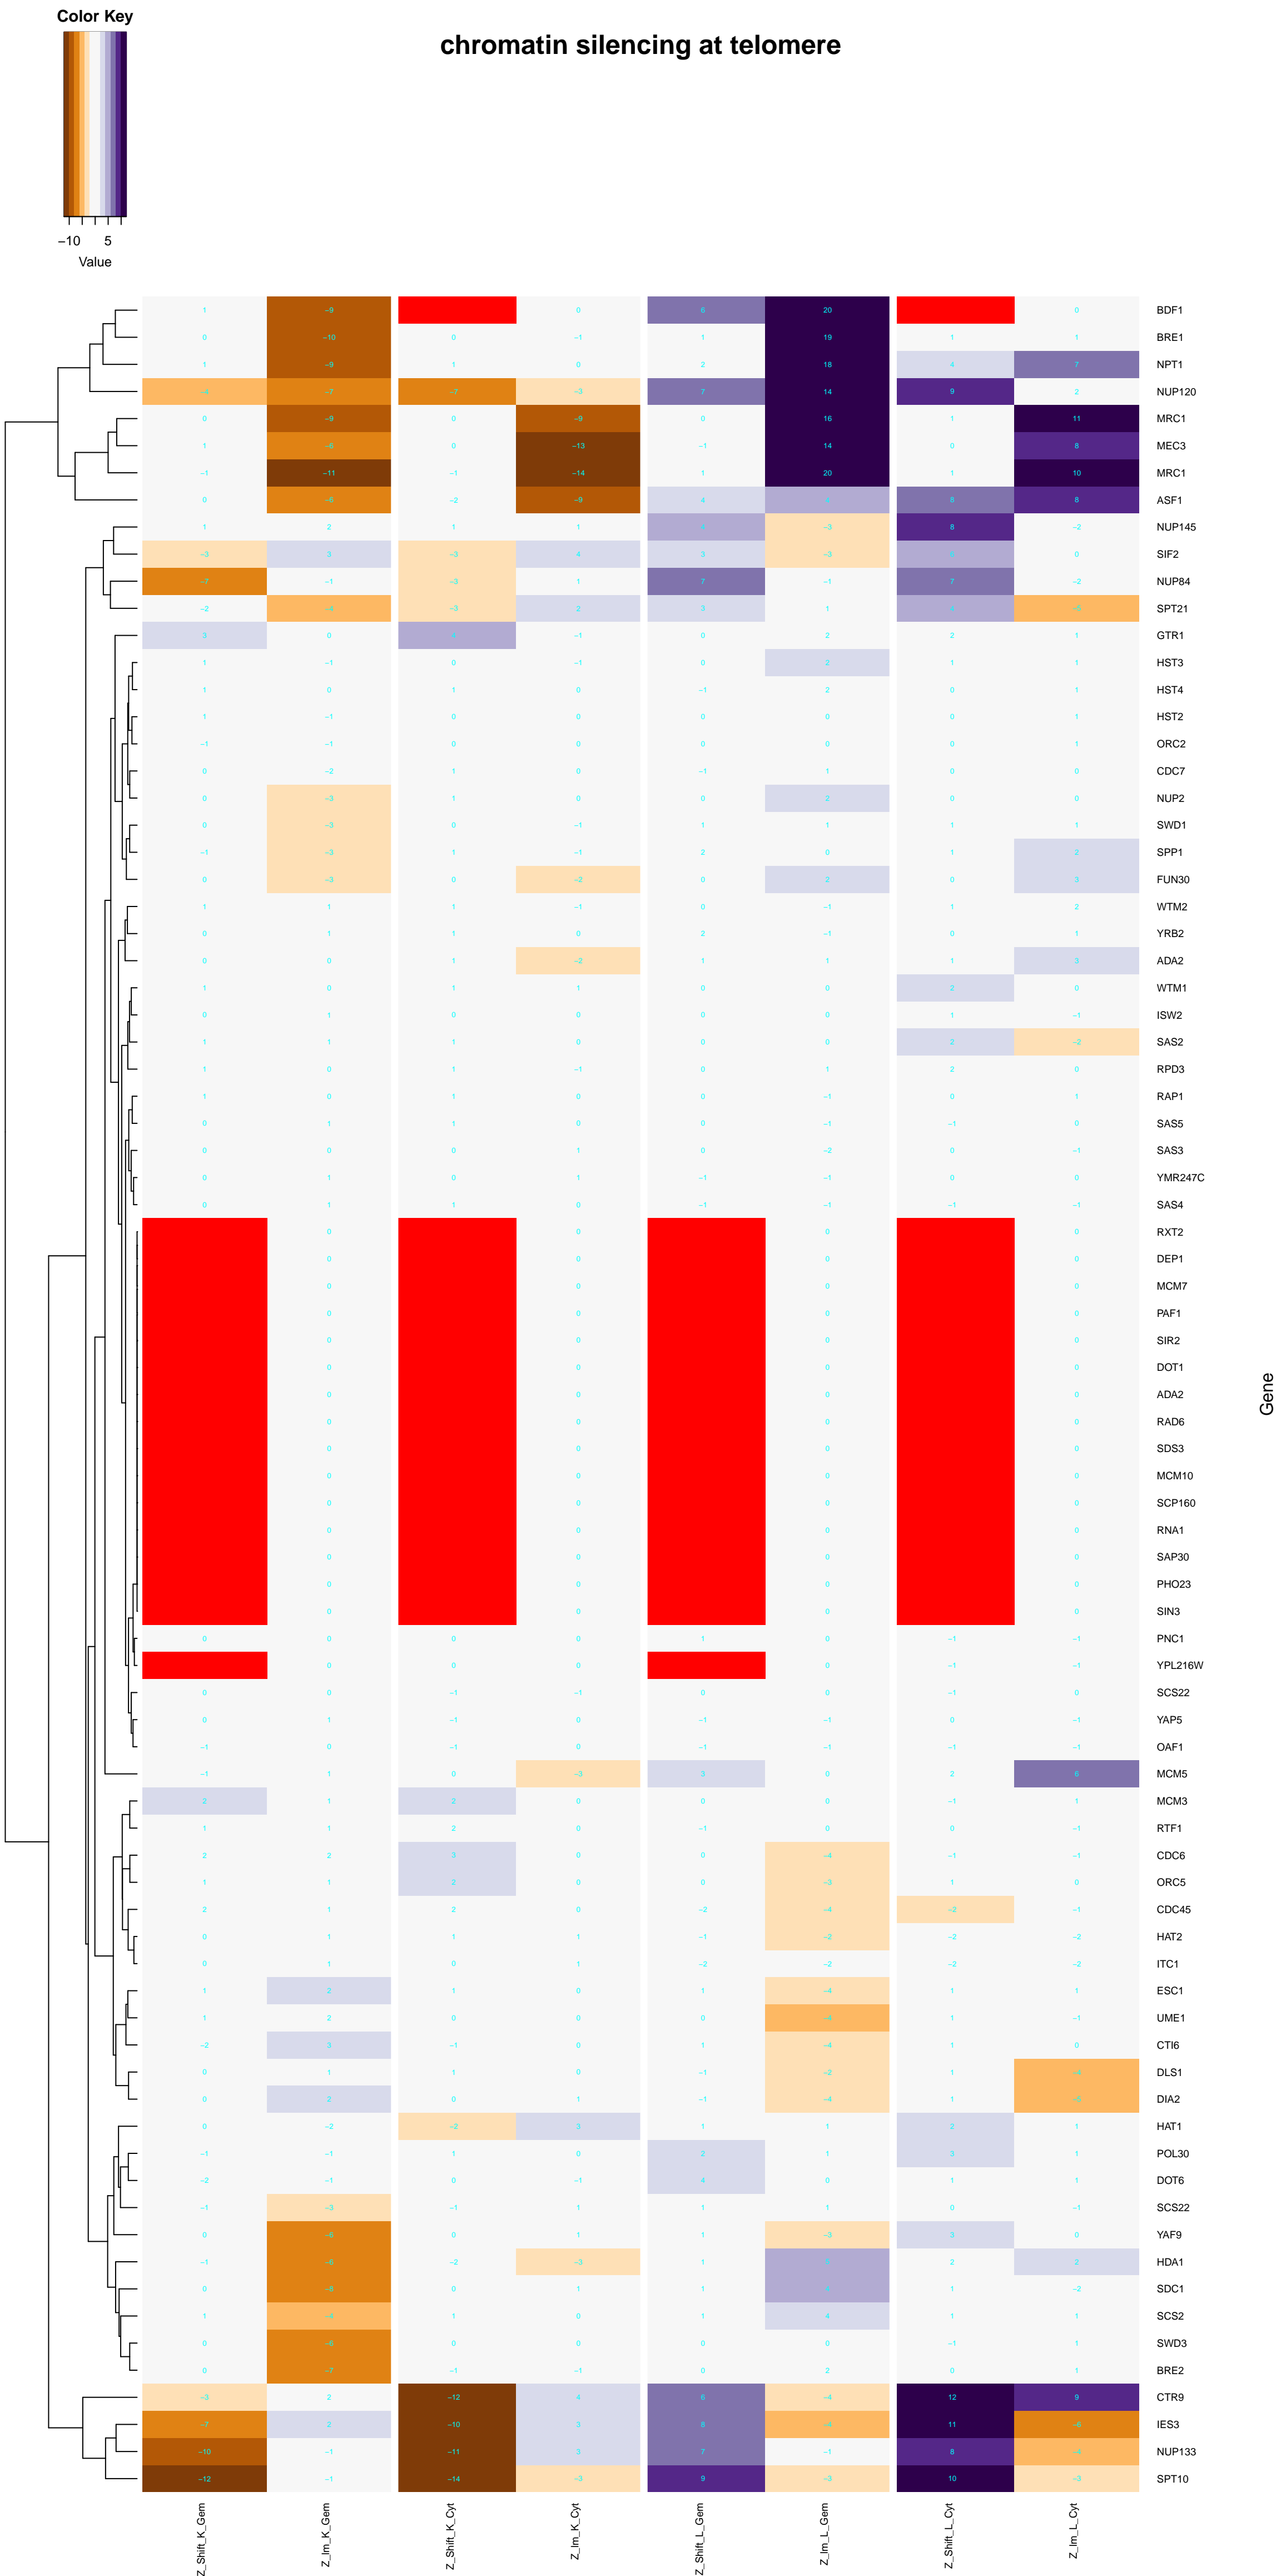

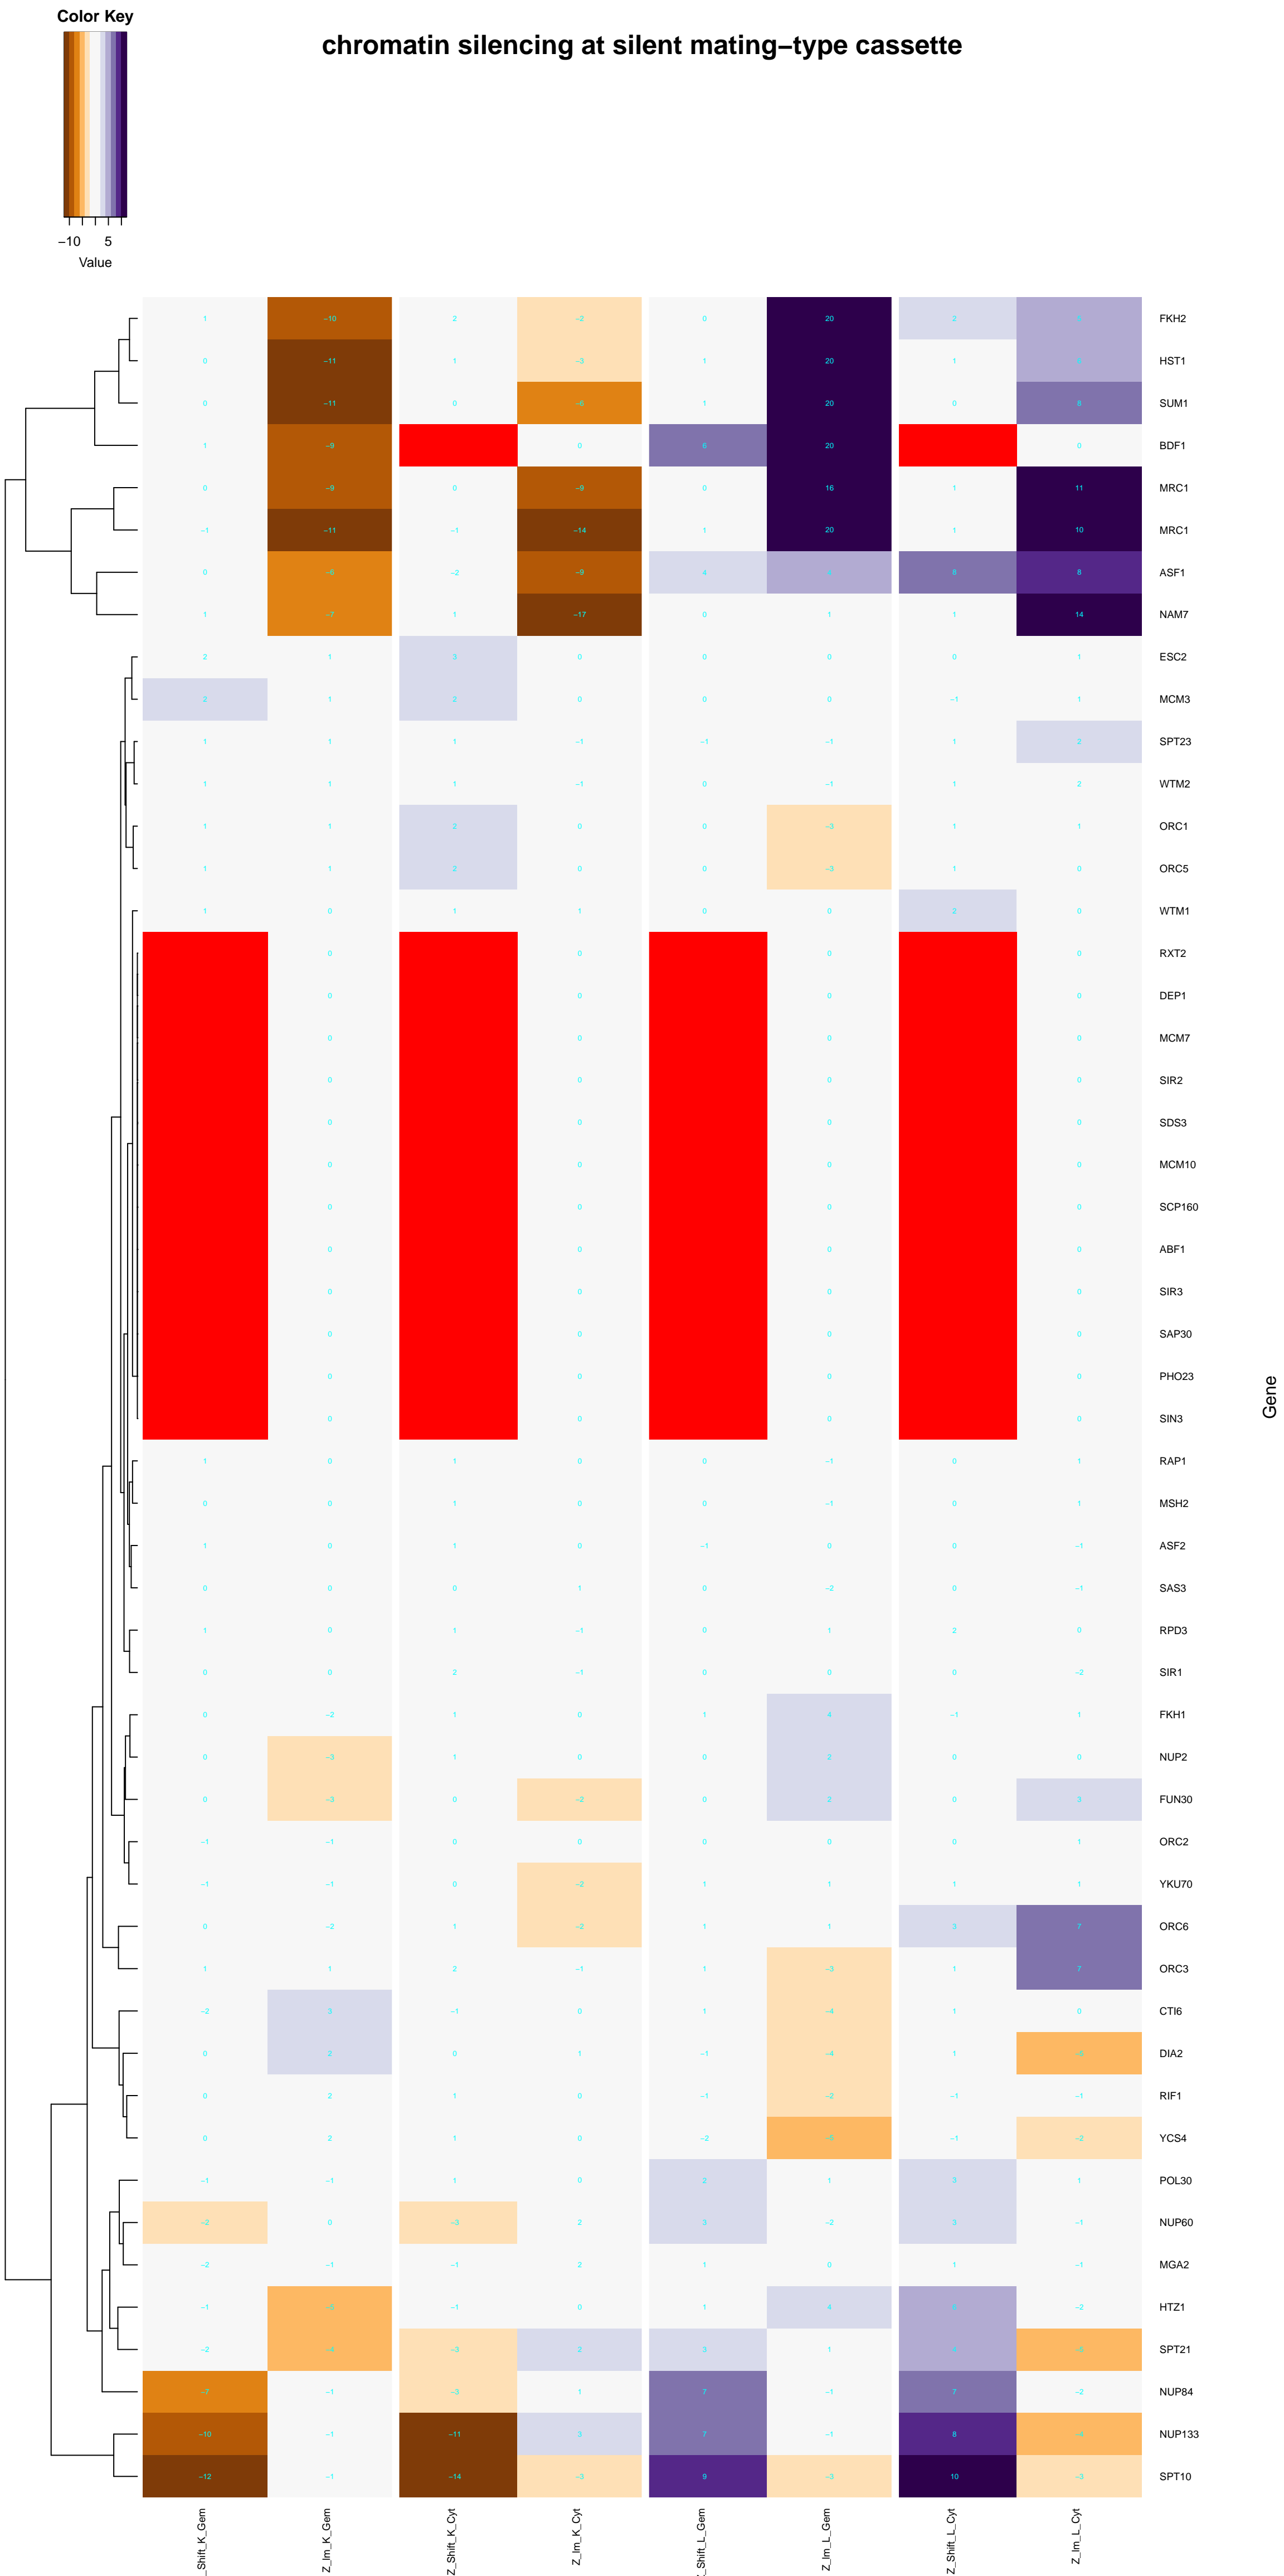

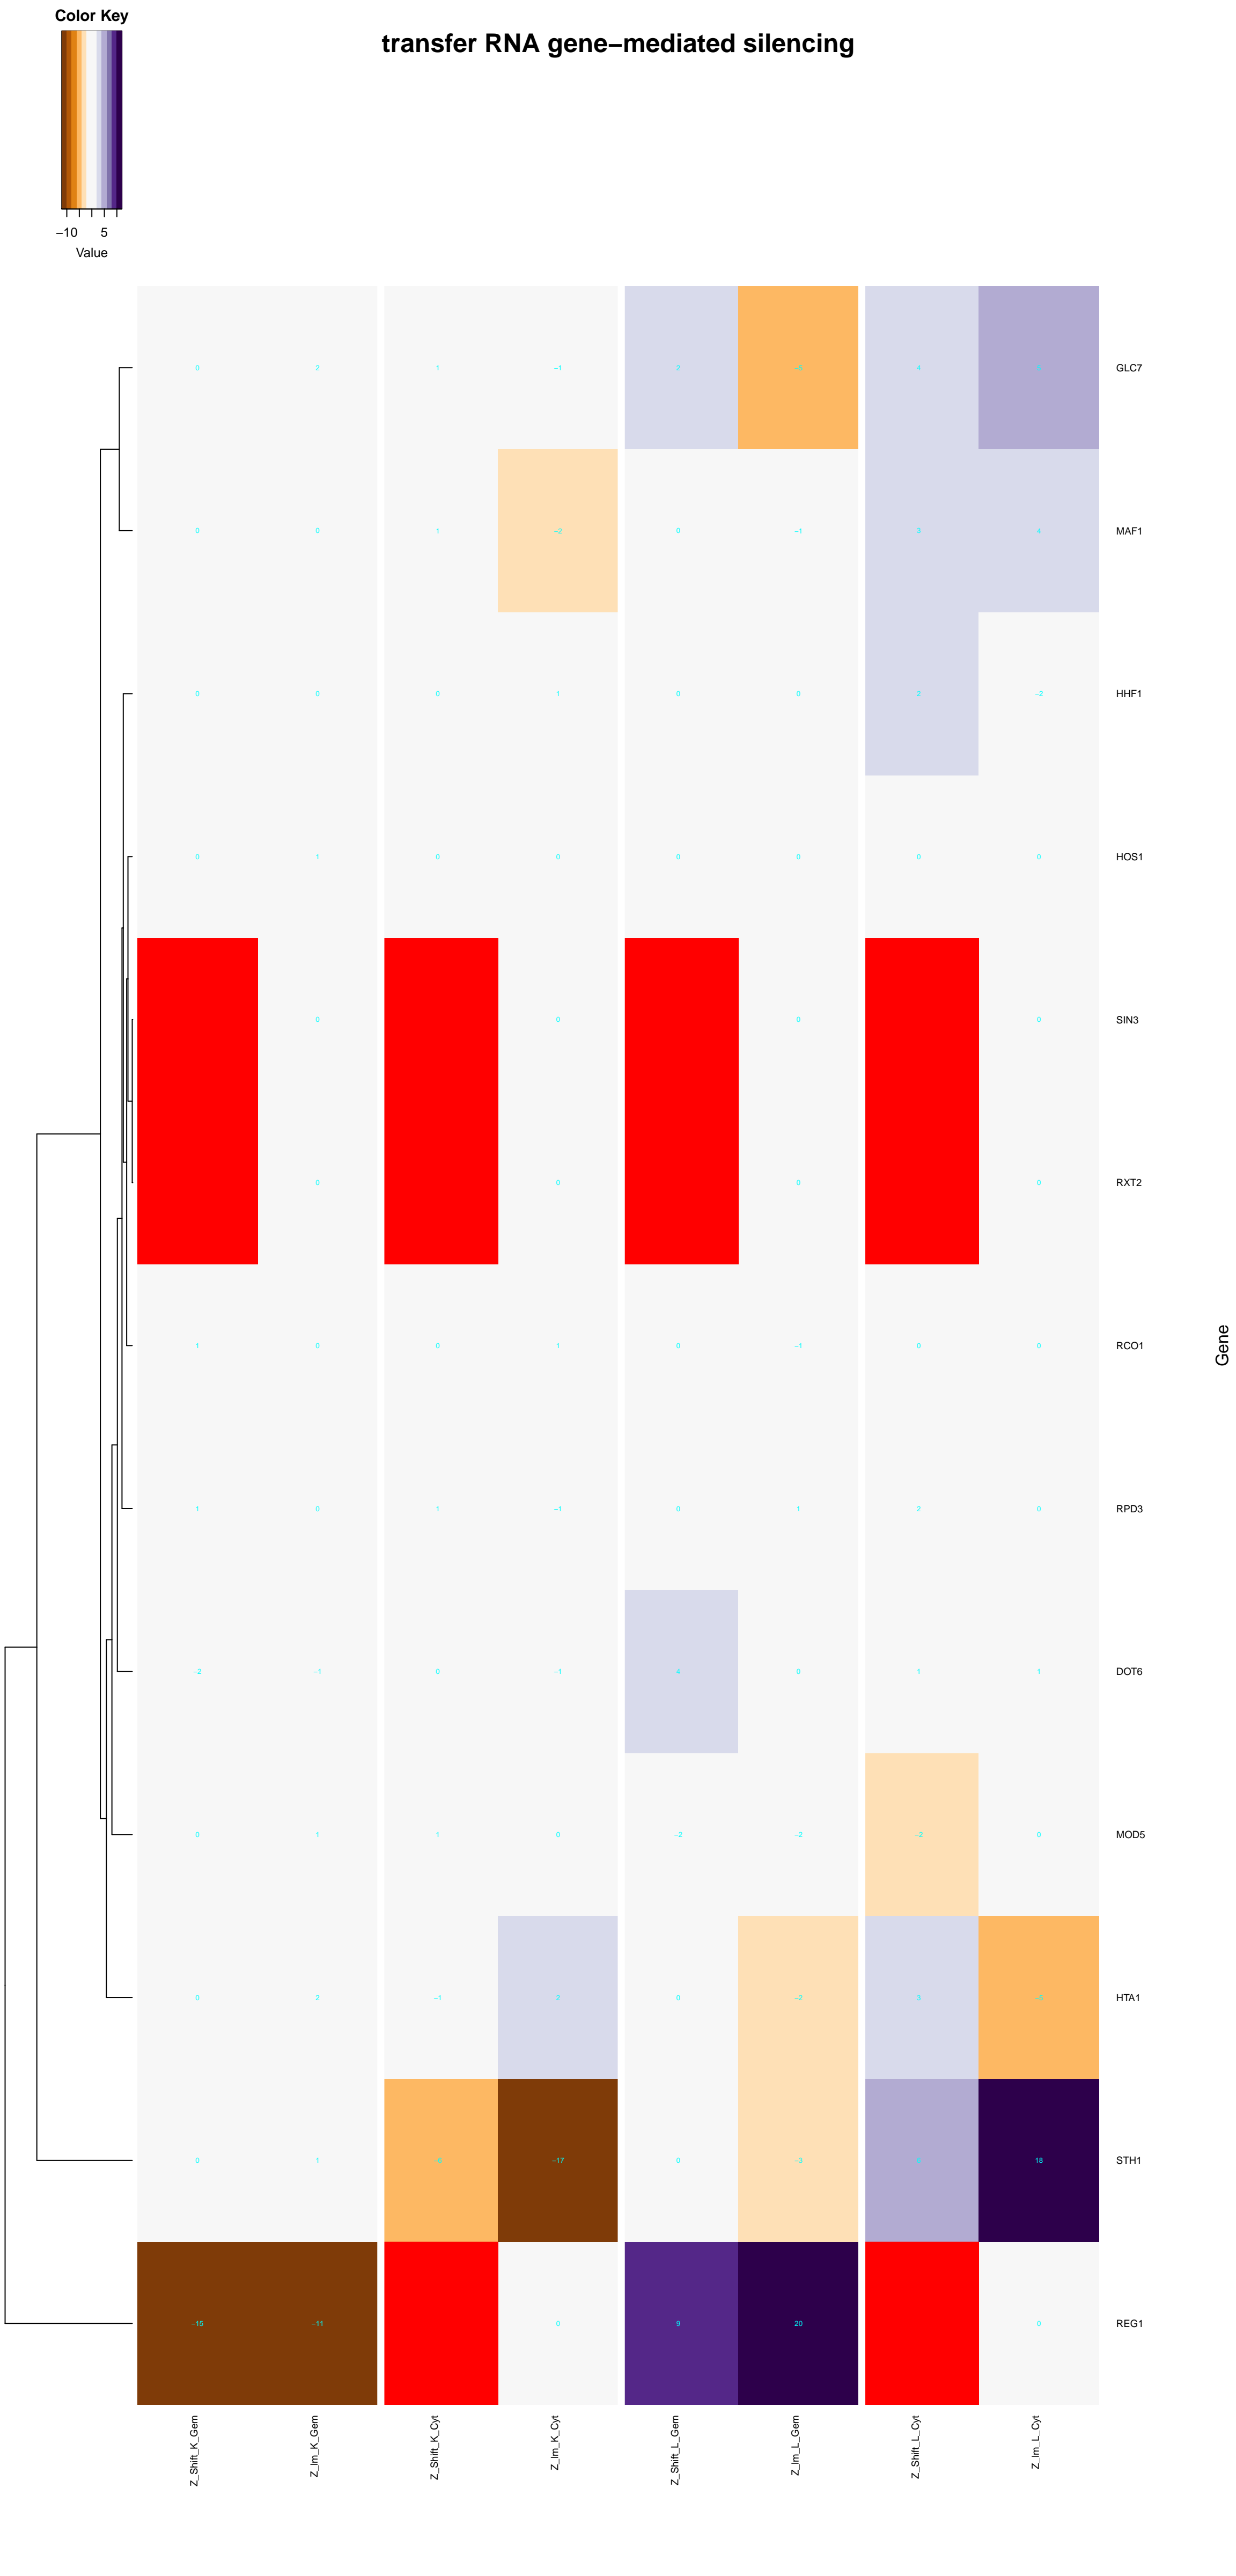

Supplement: s1 [file s1]

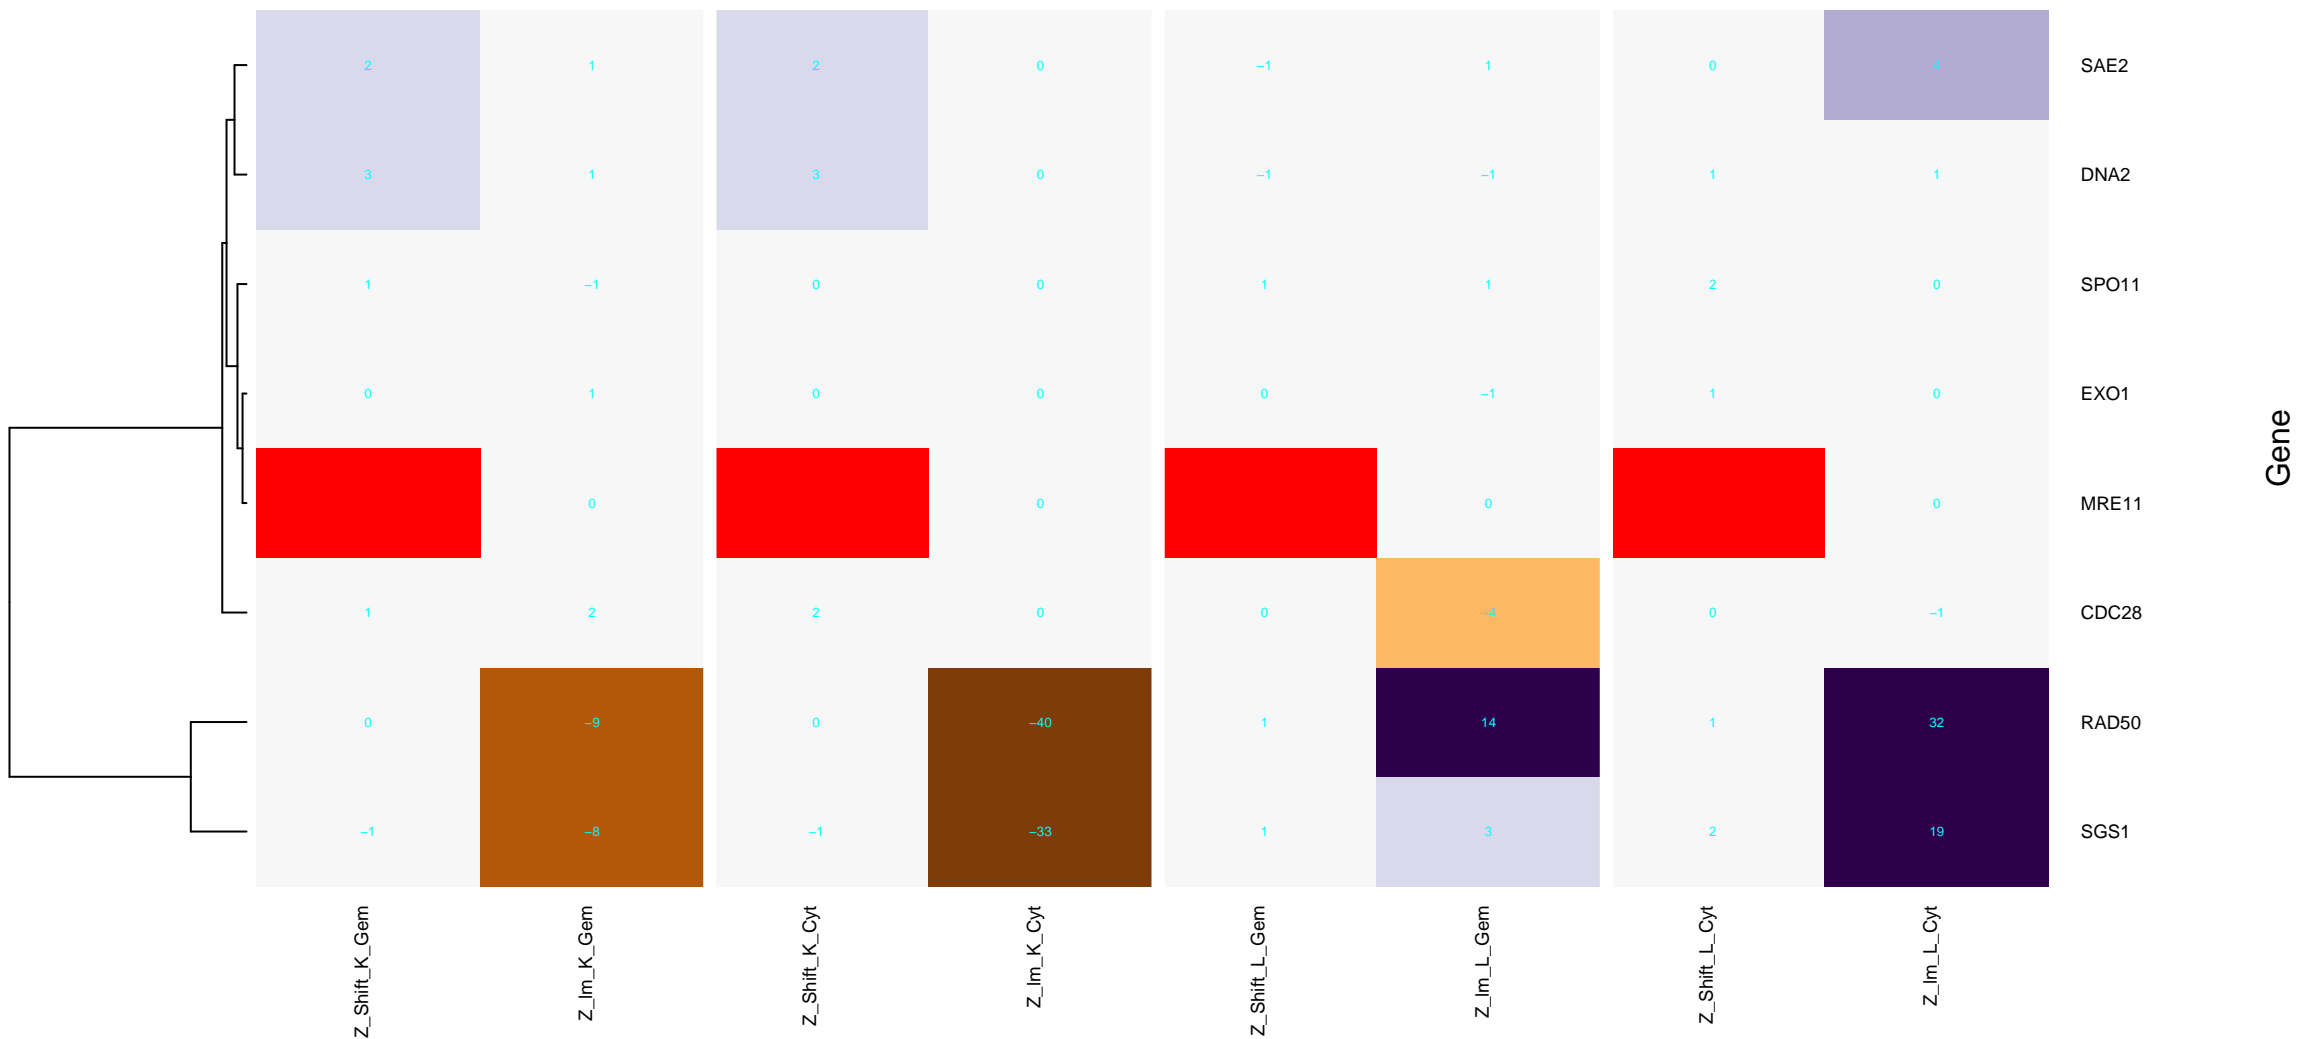

Supplement: s1 [file s1]

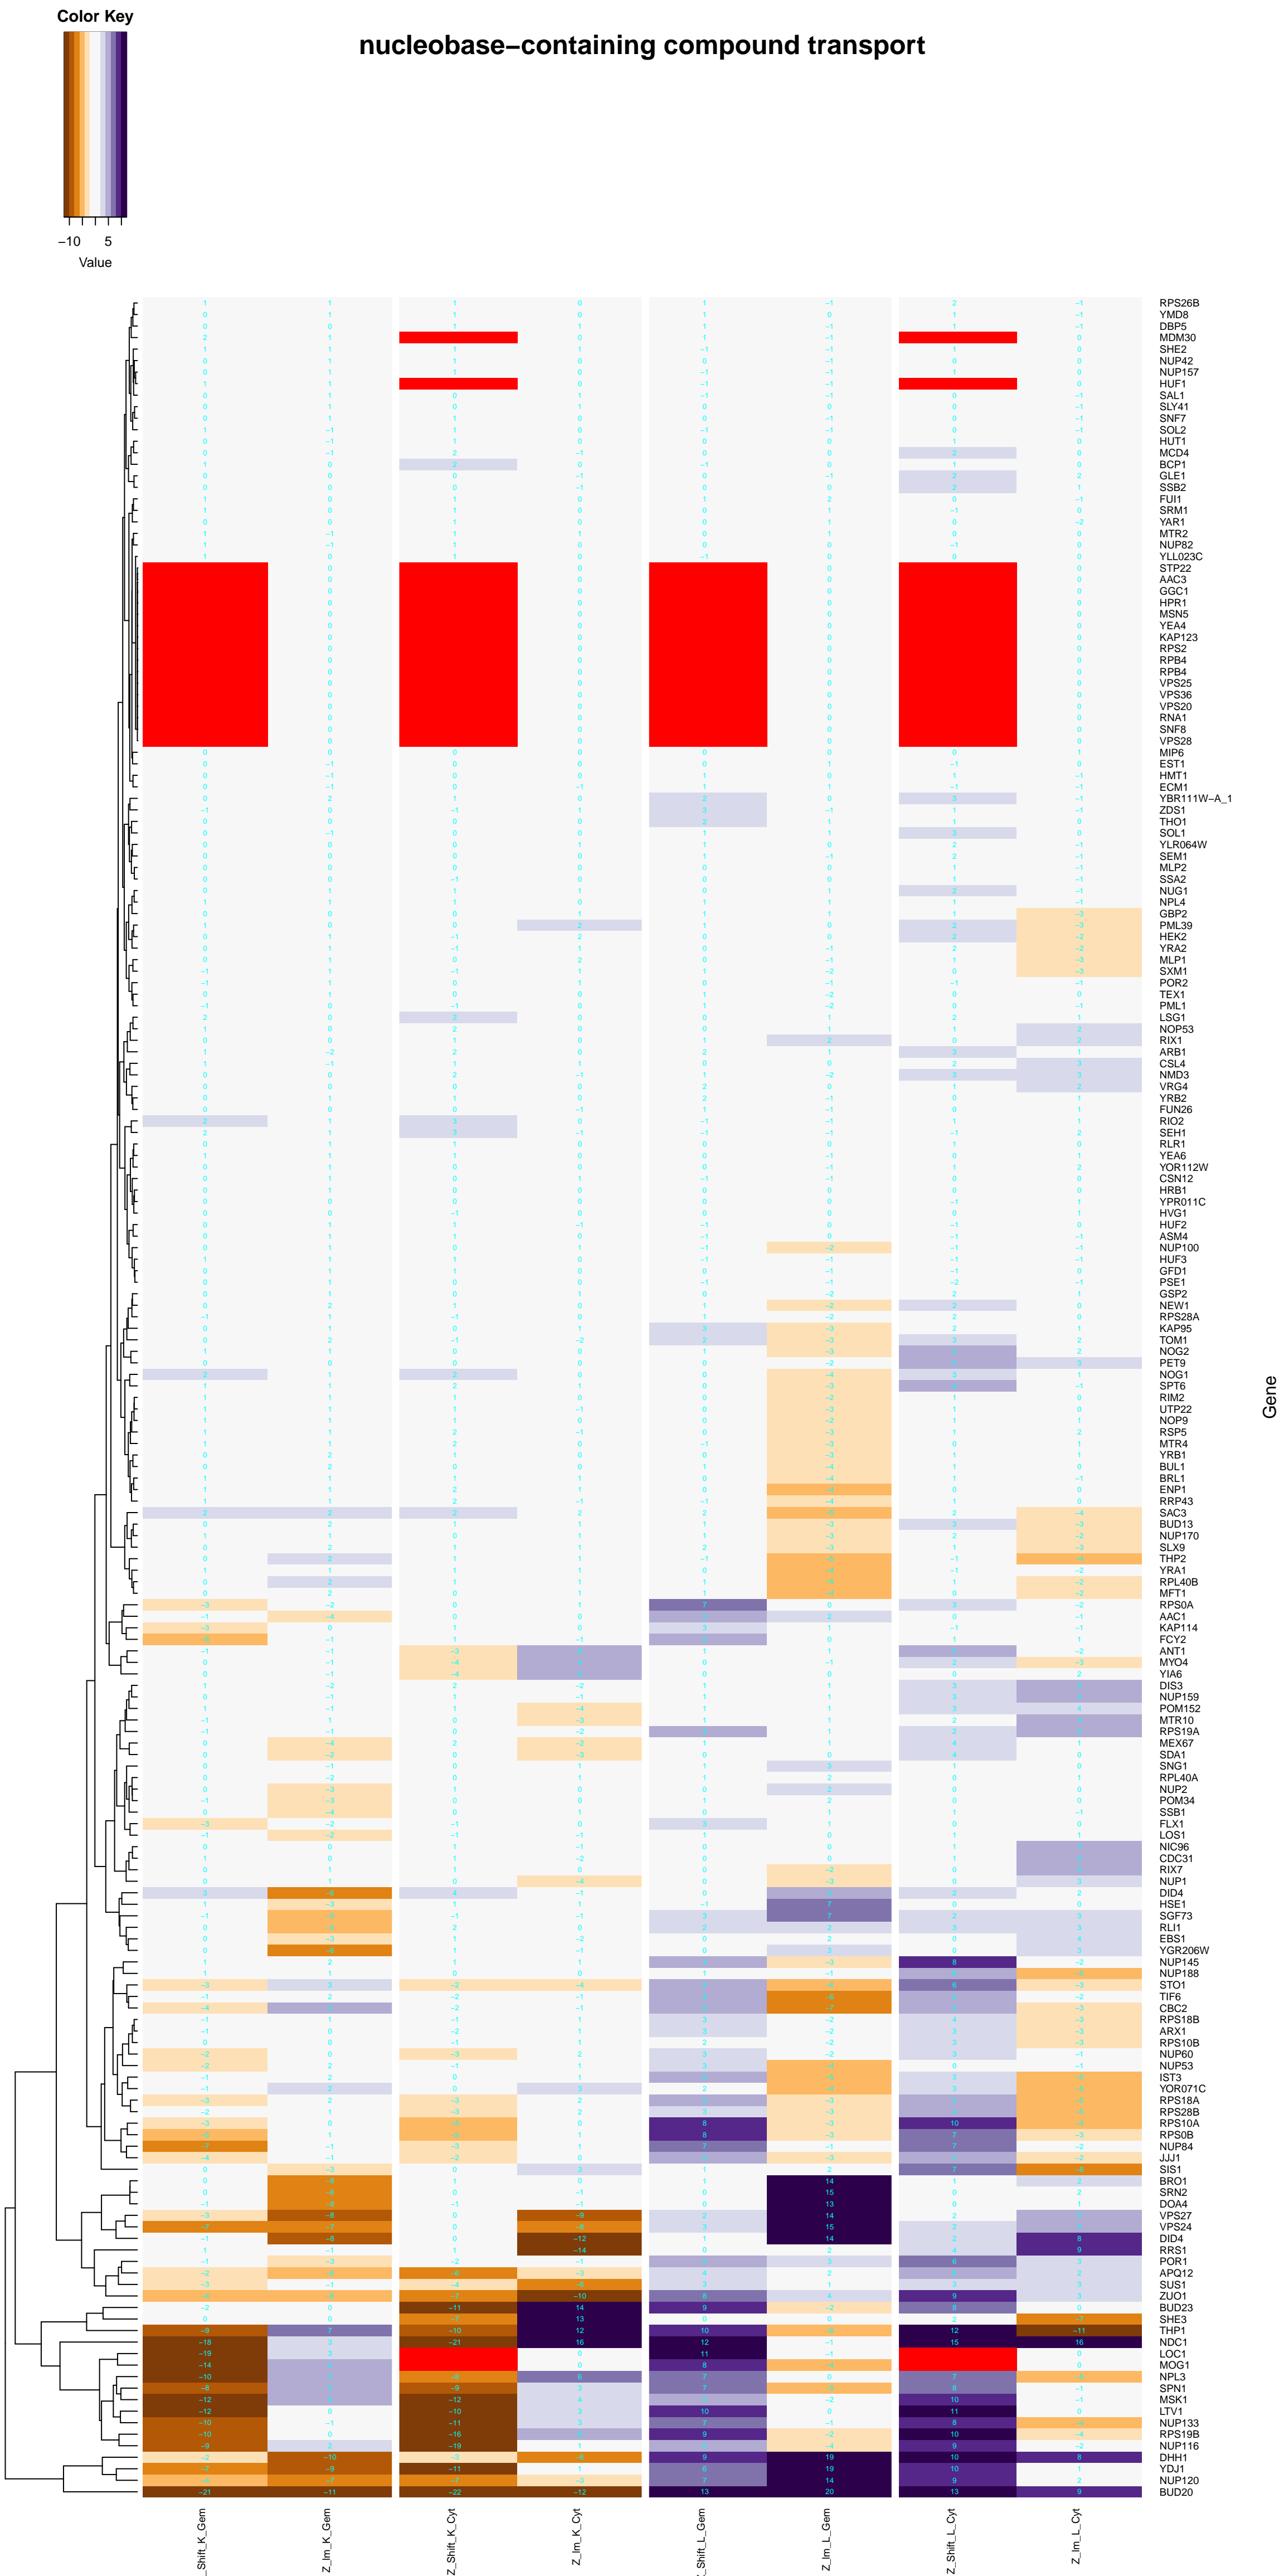

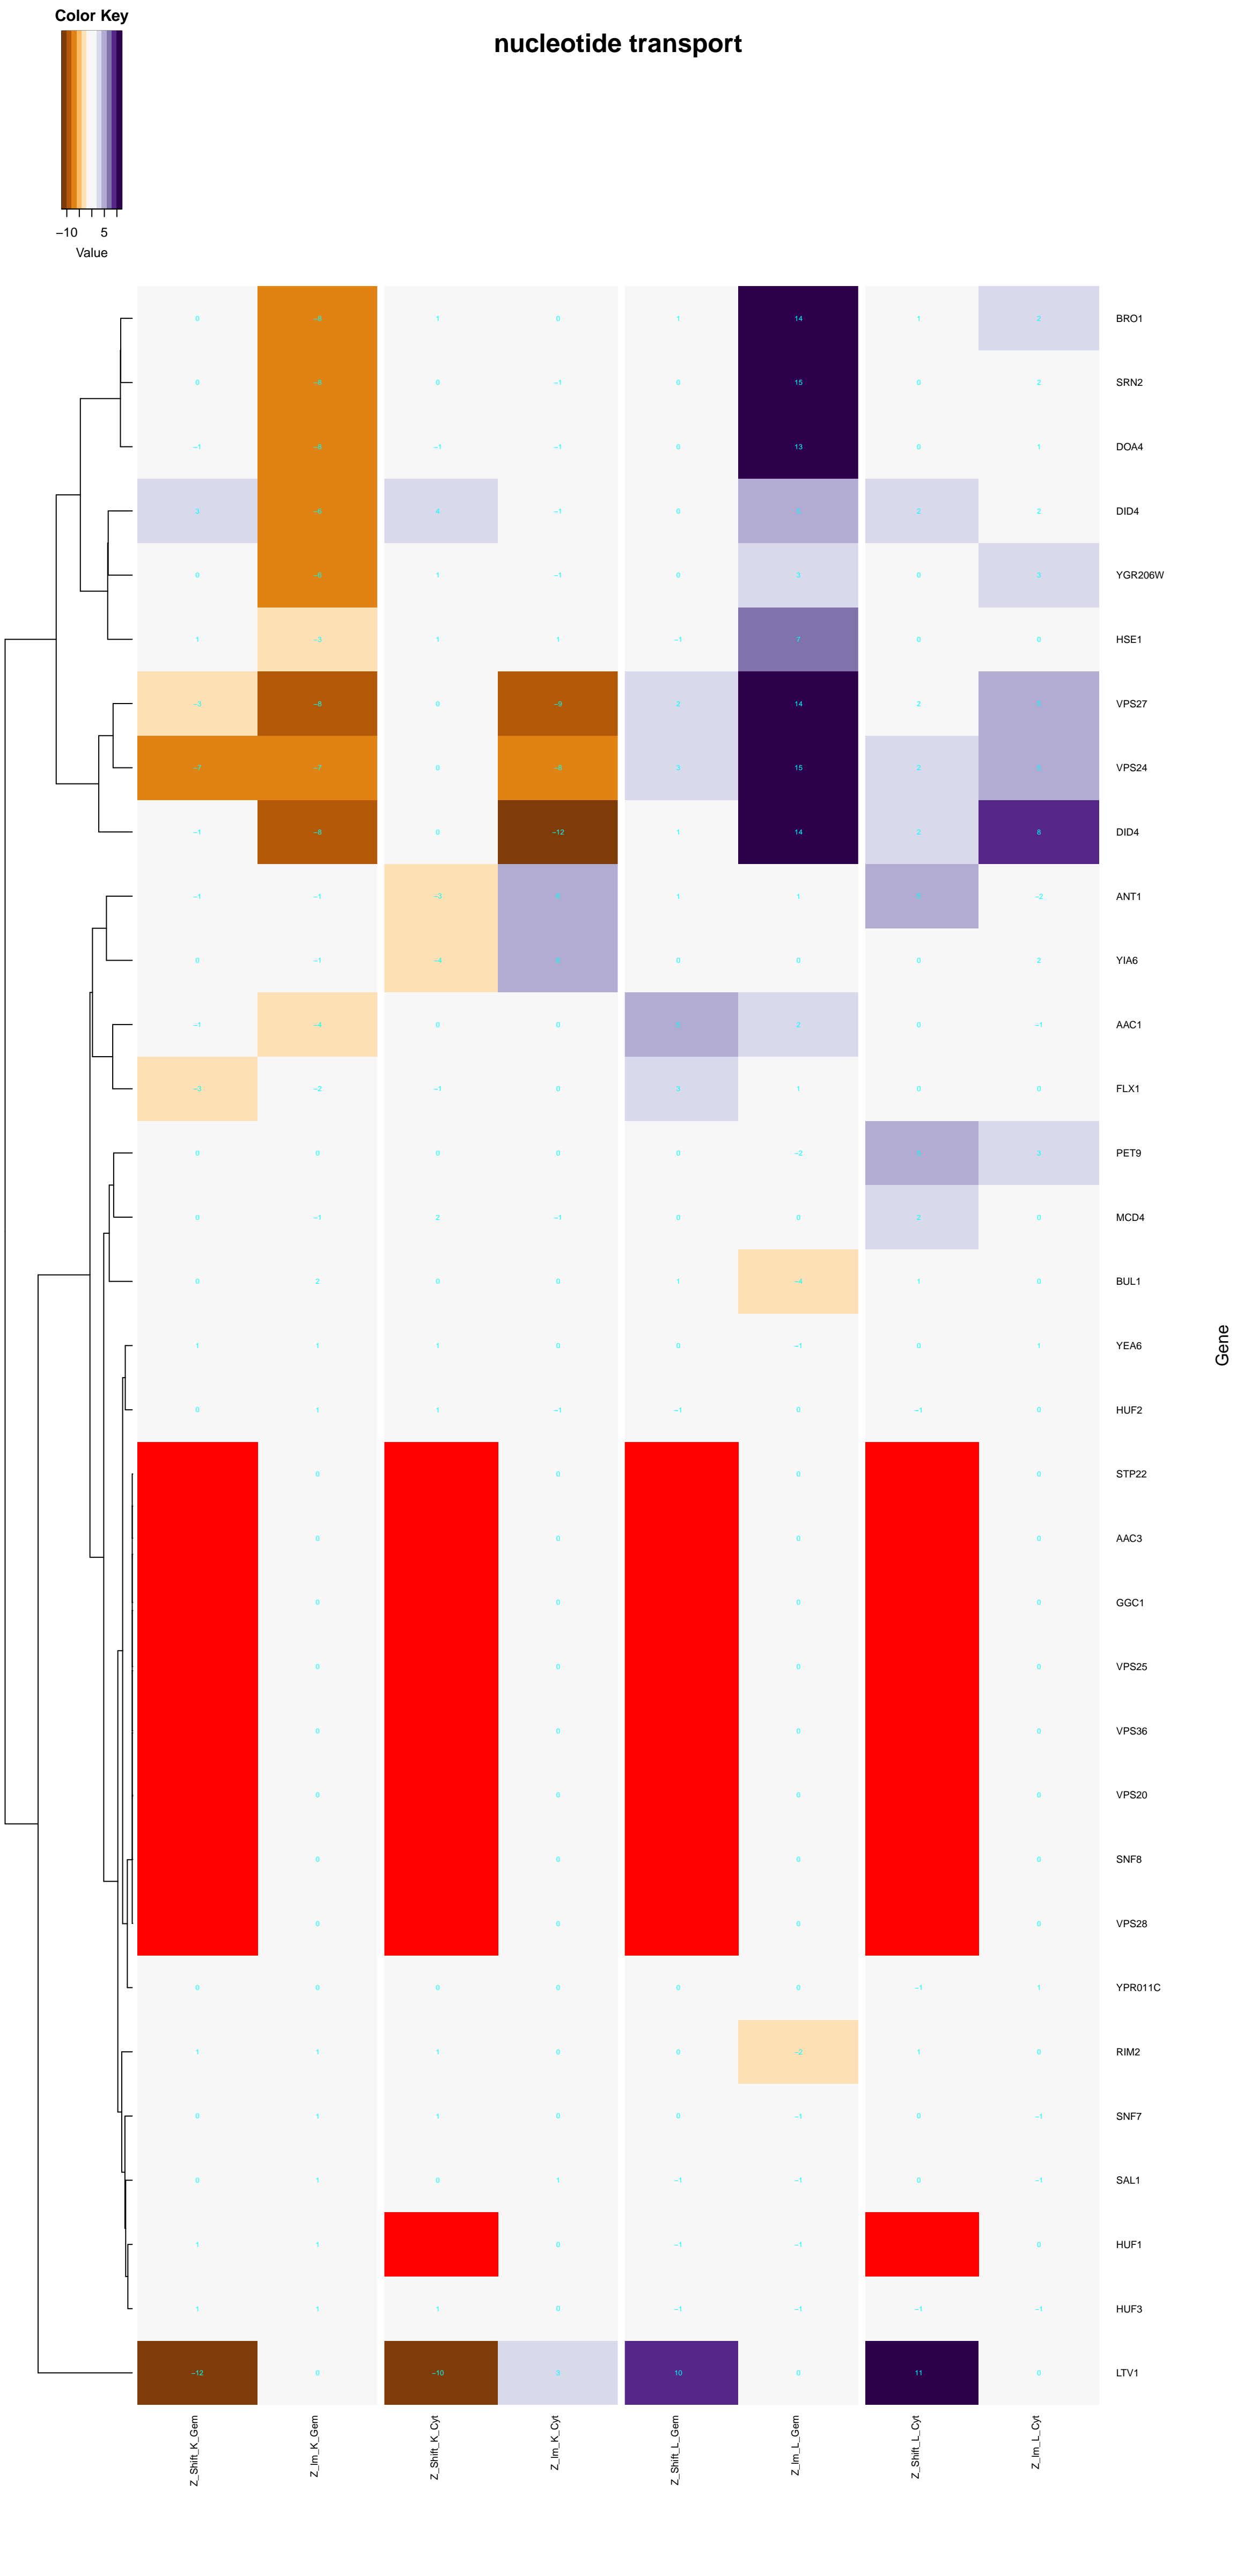

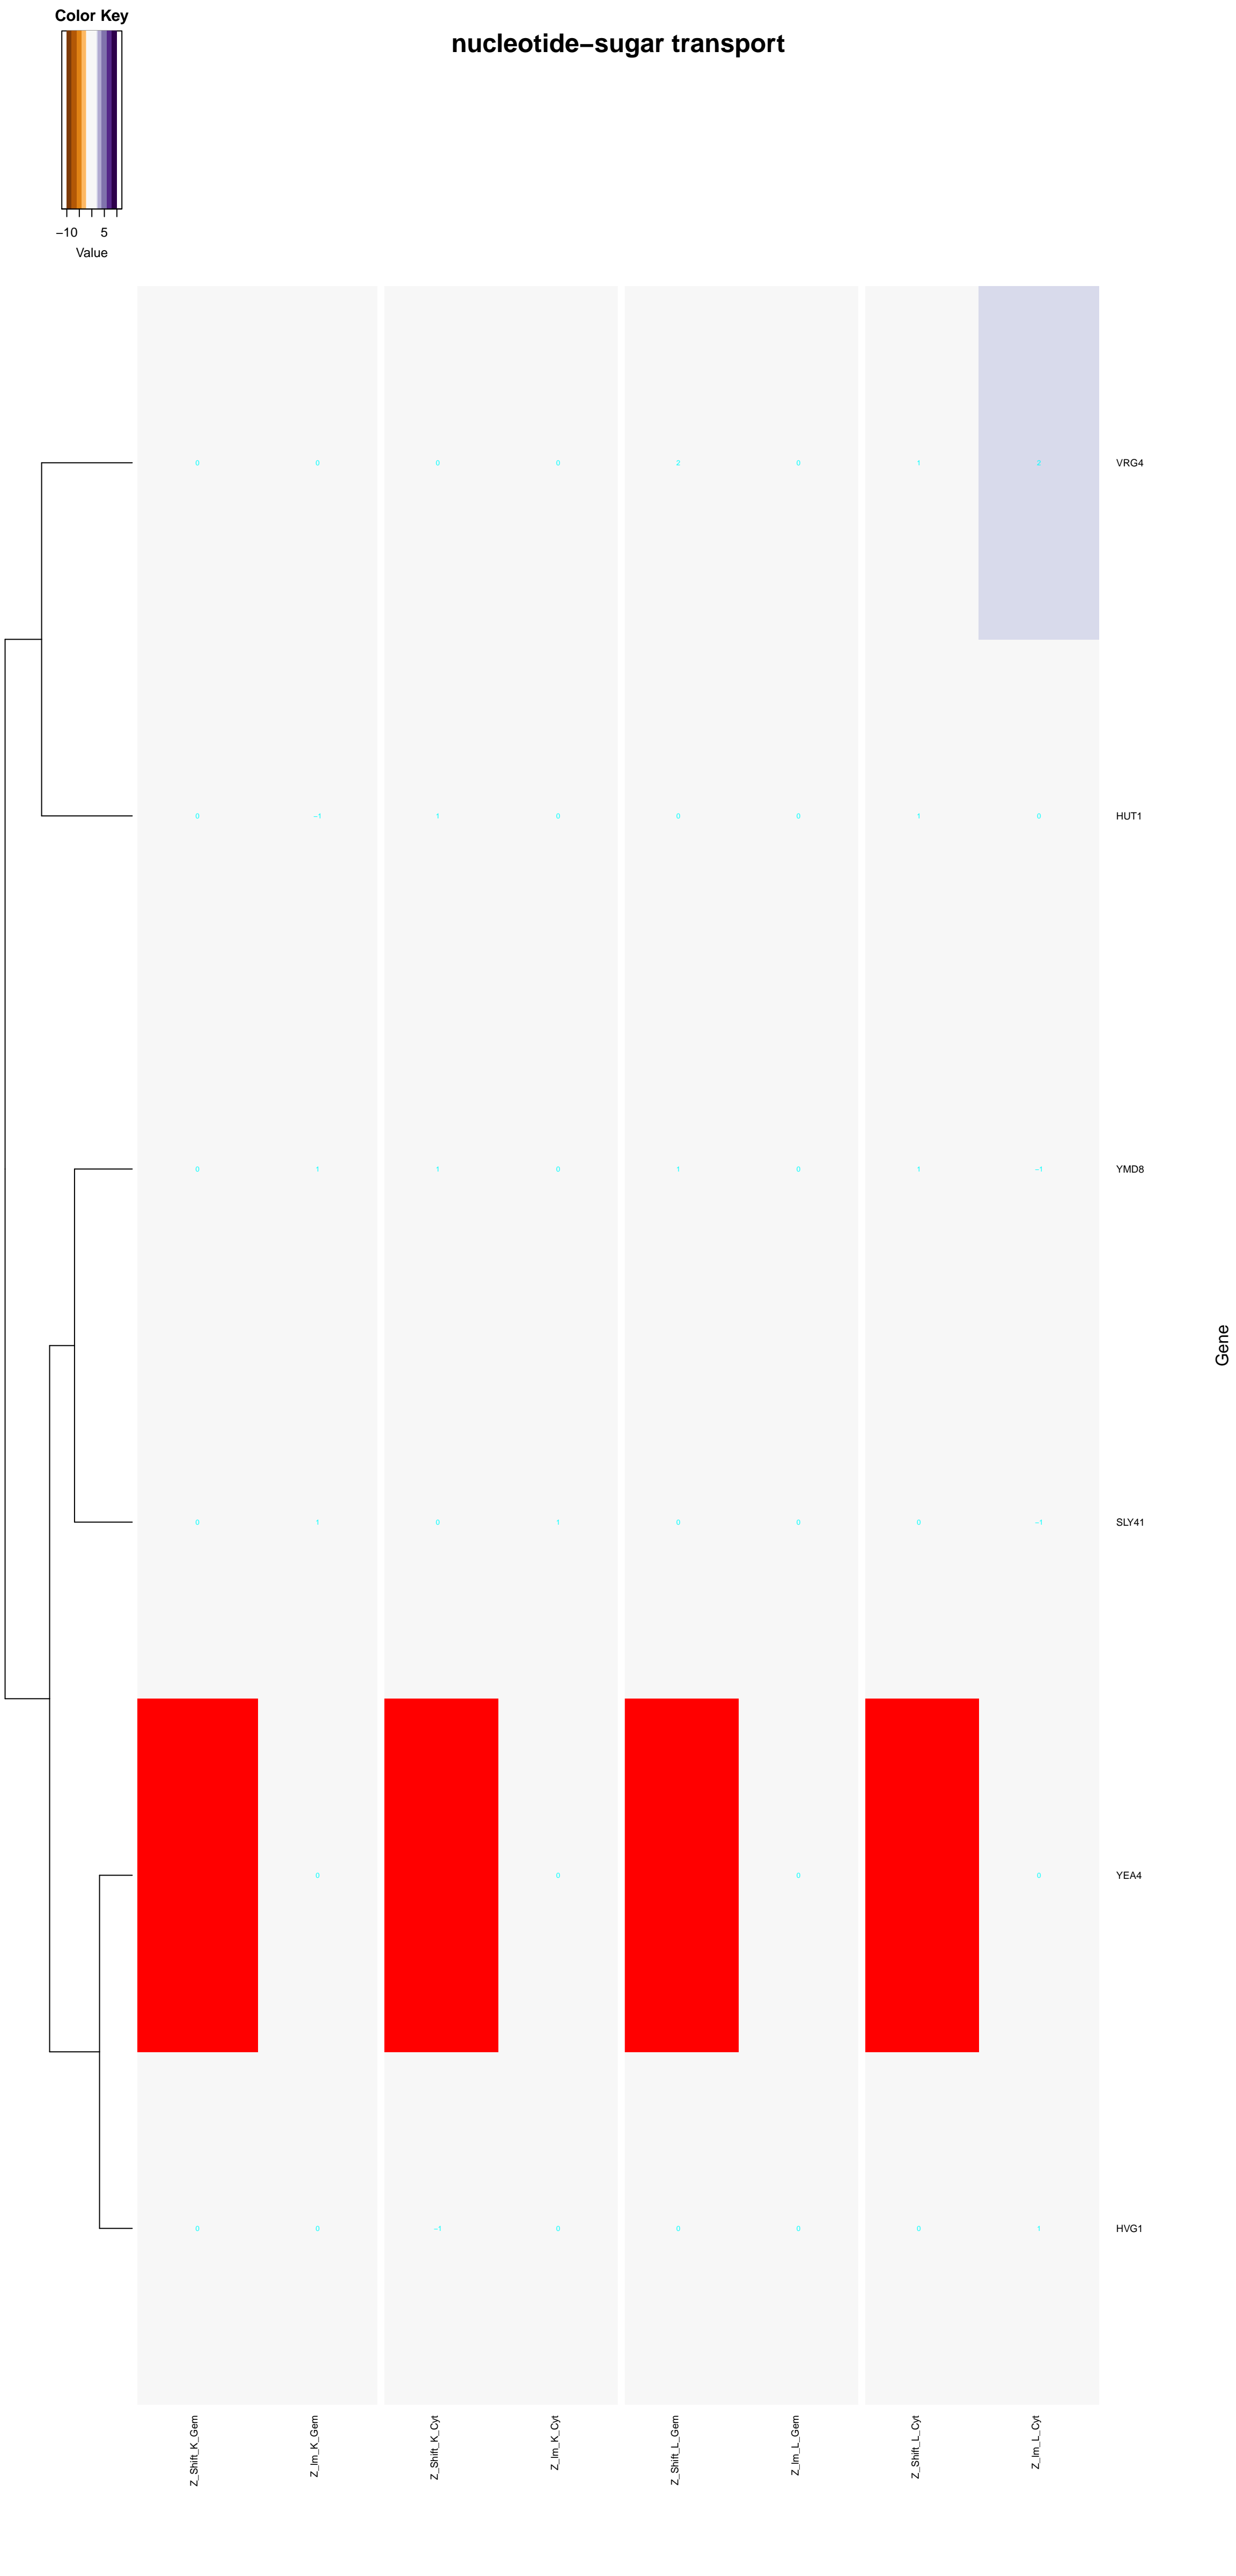

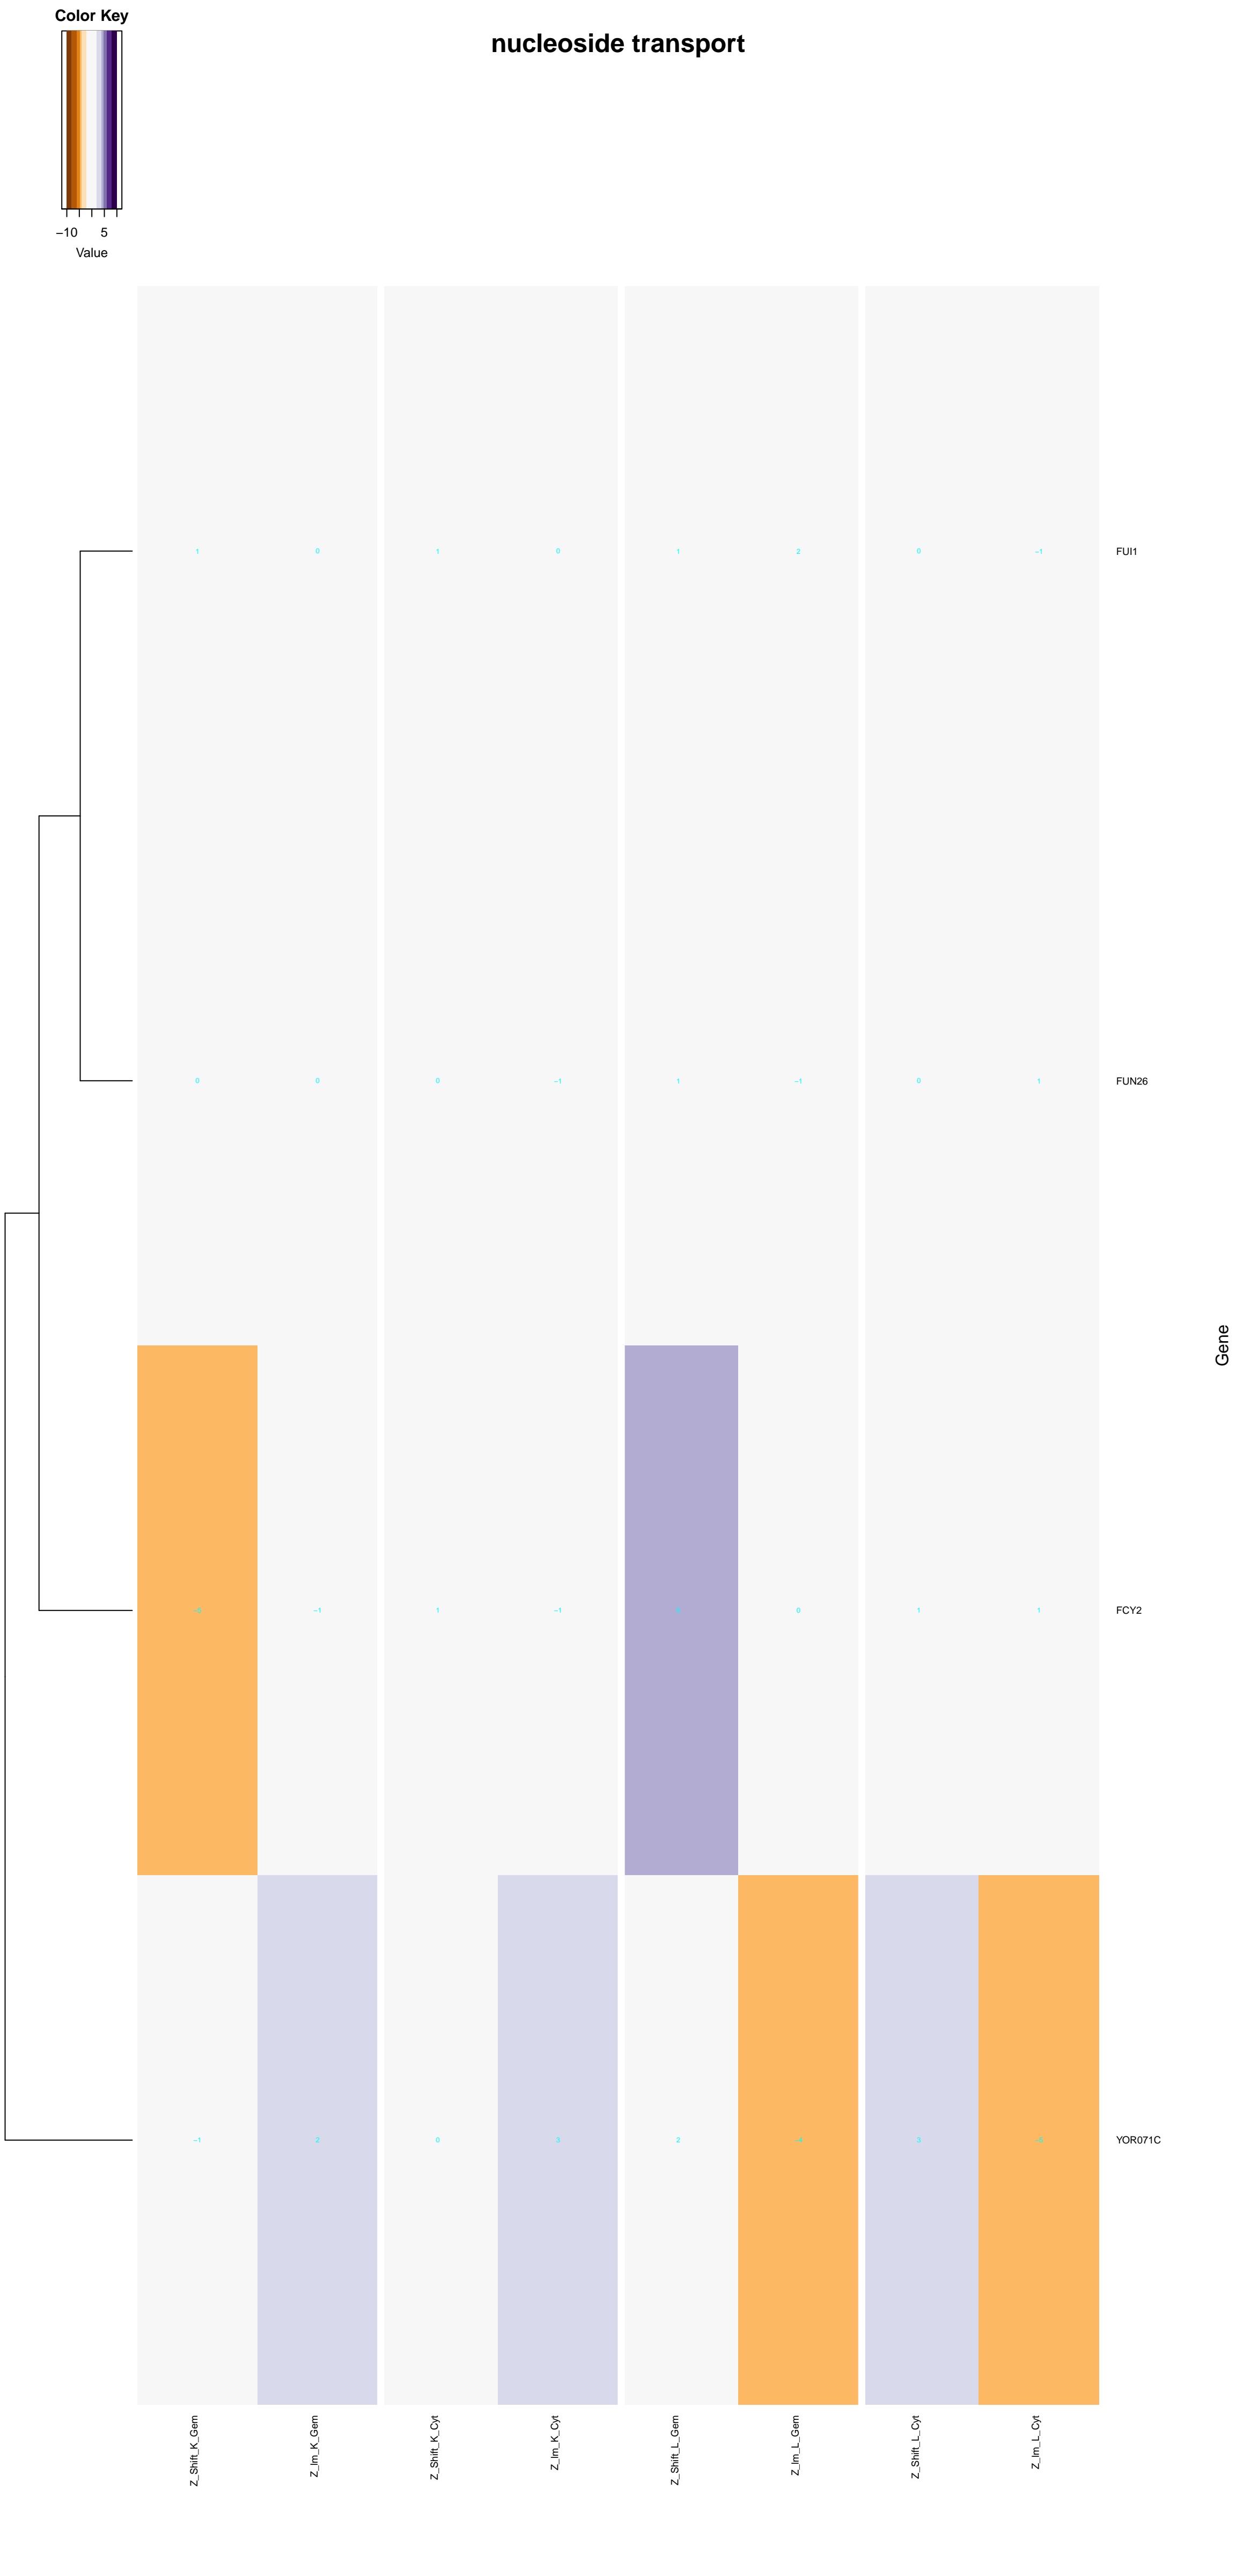

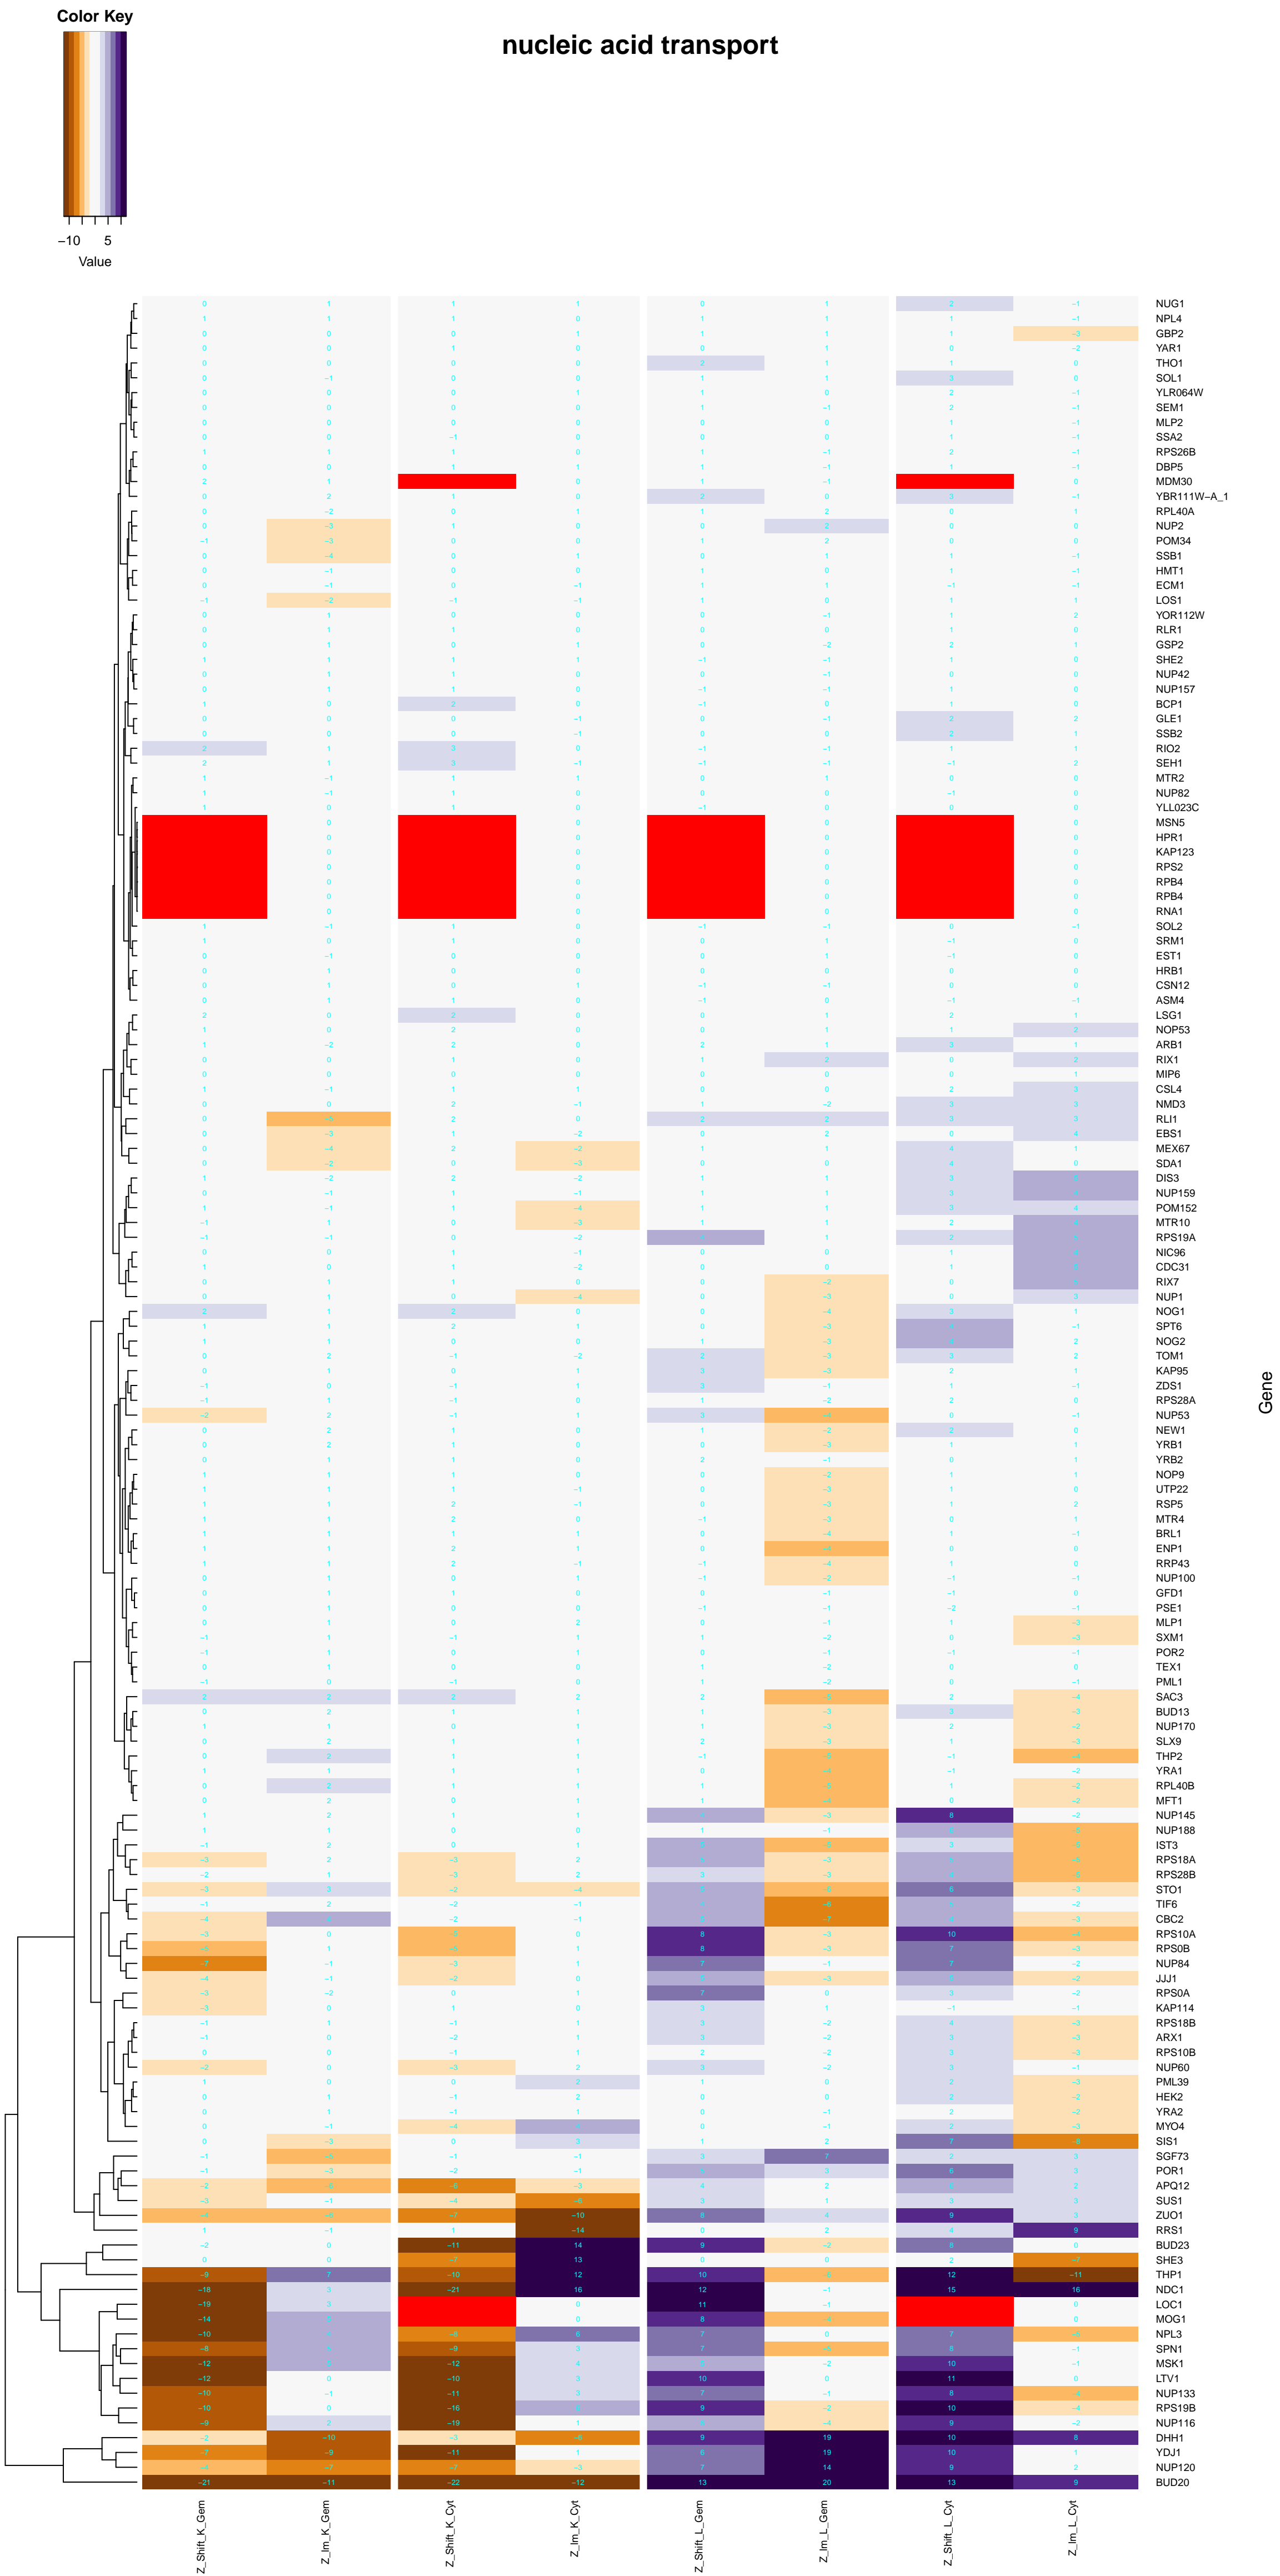

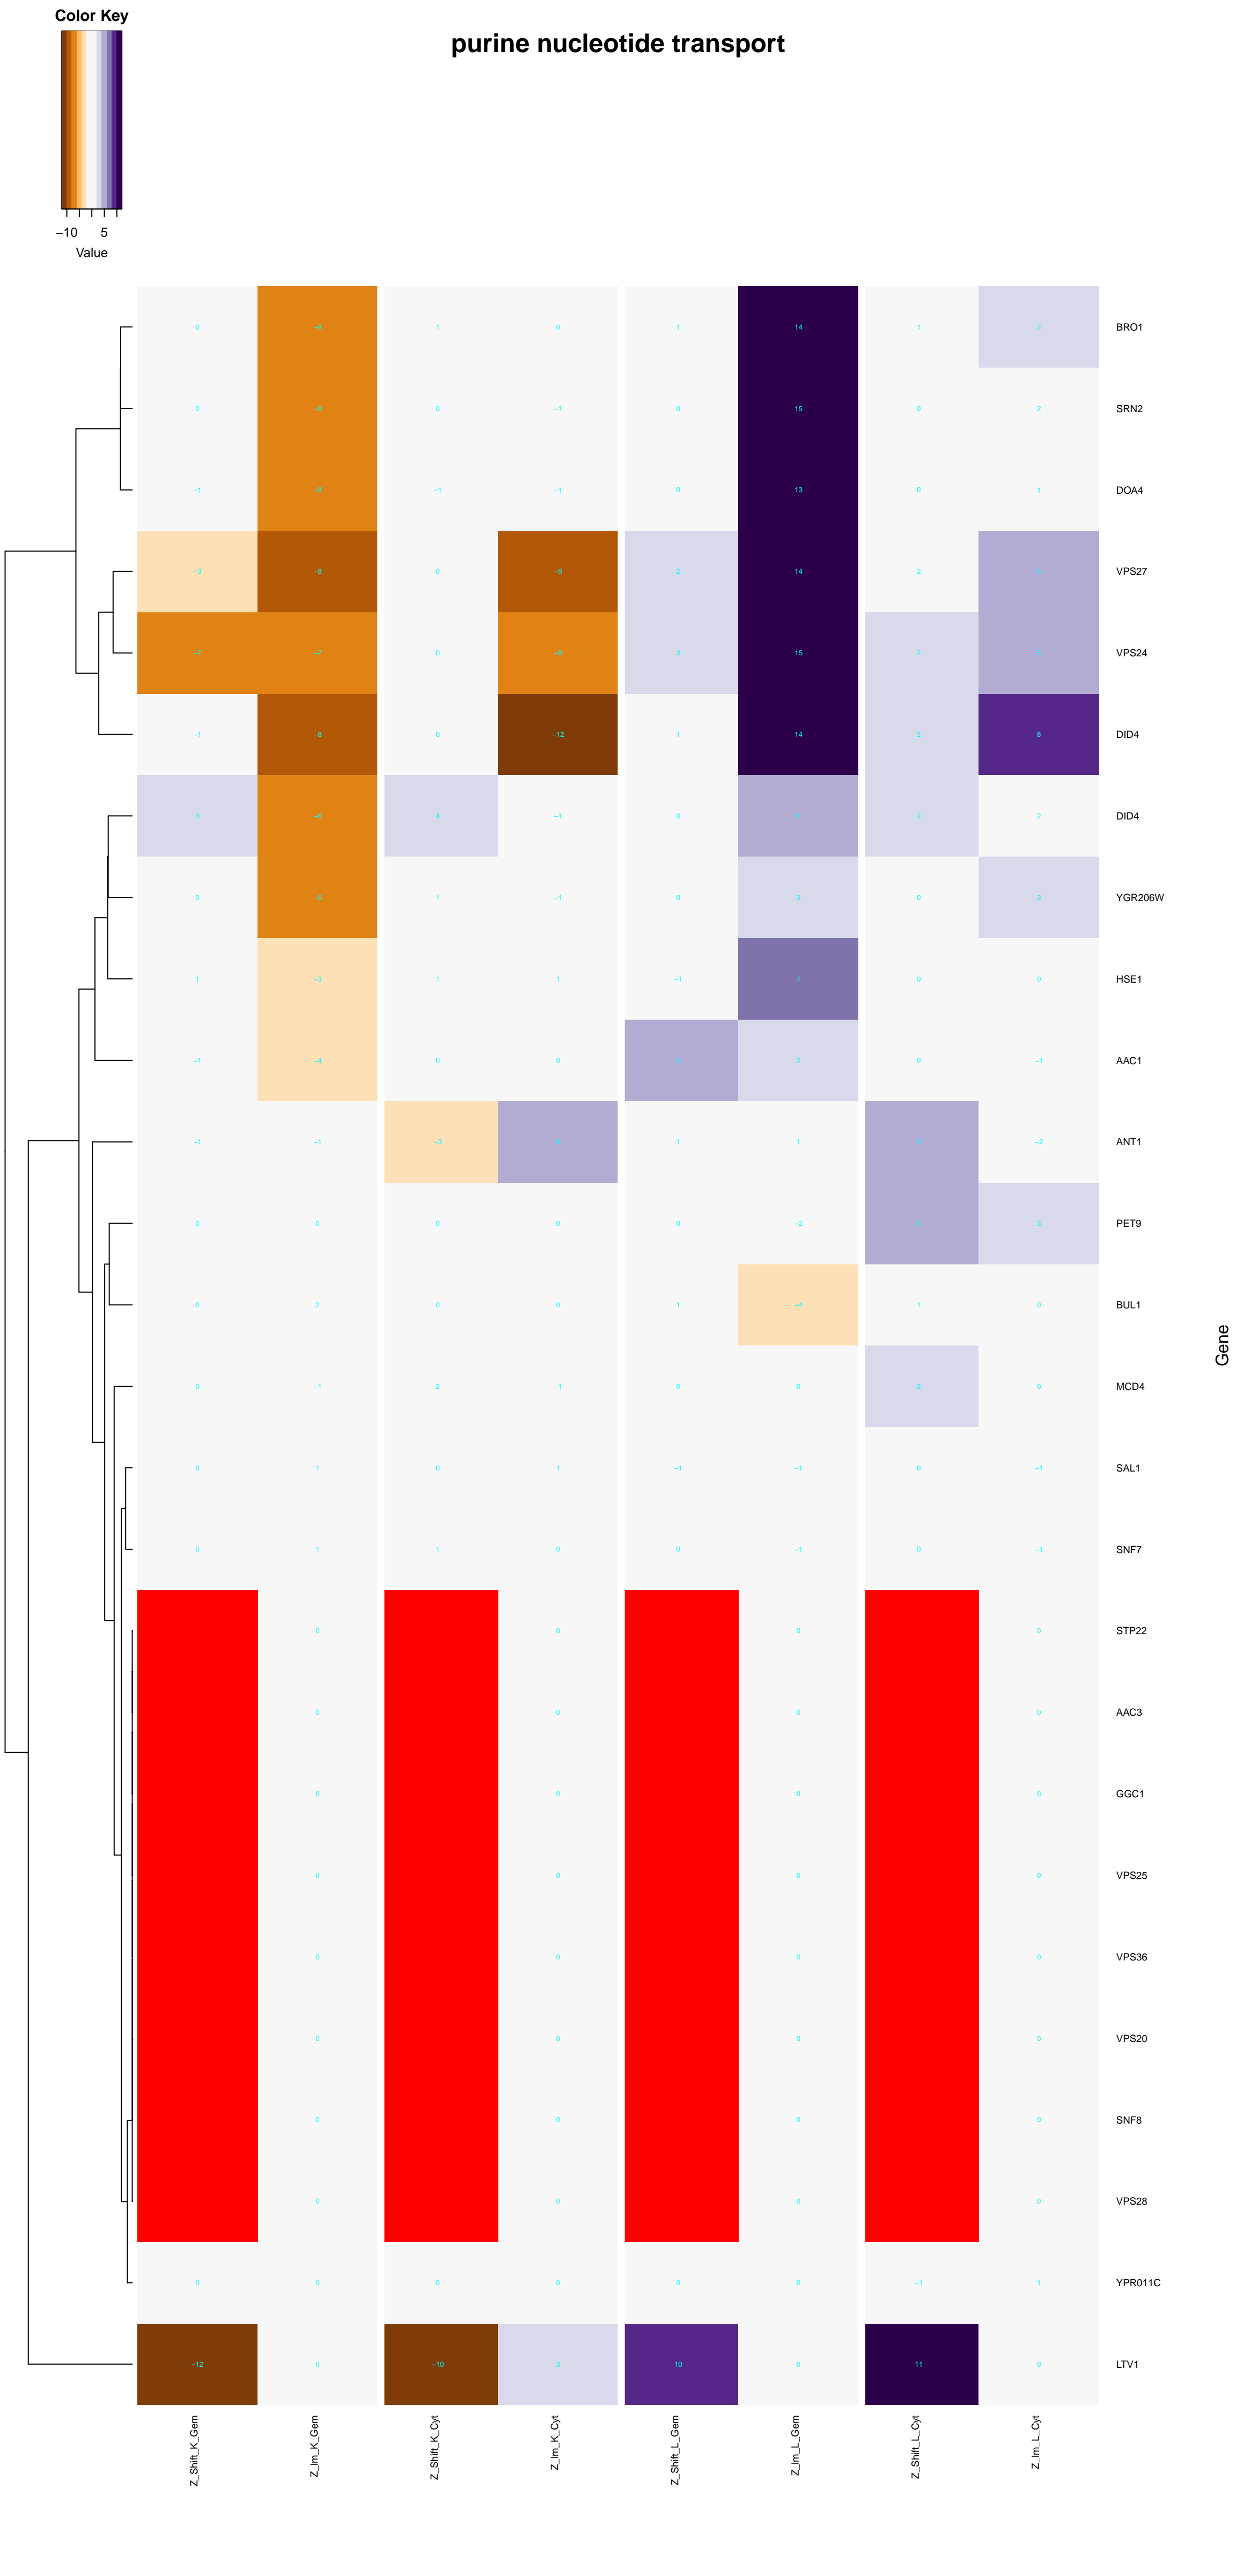

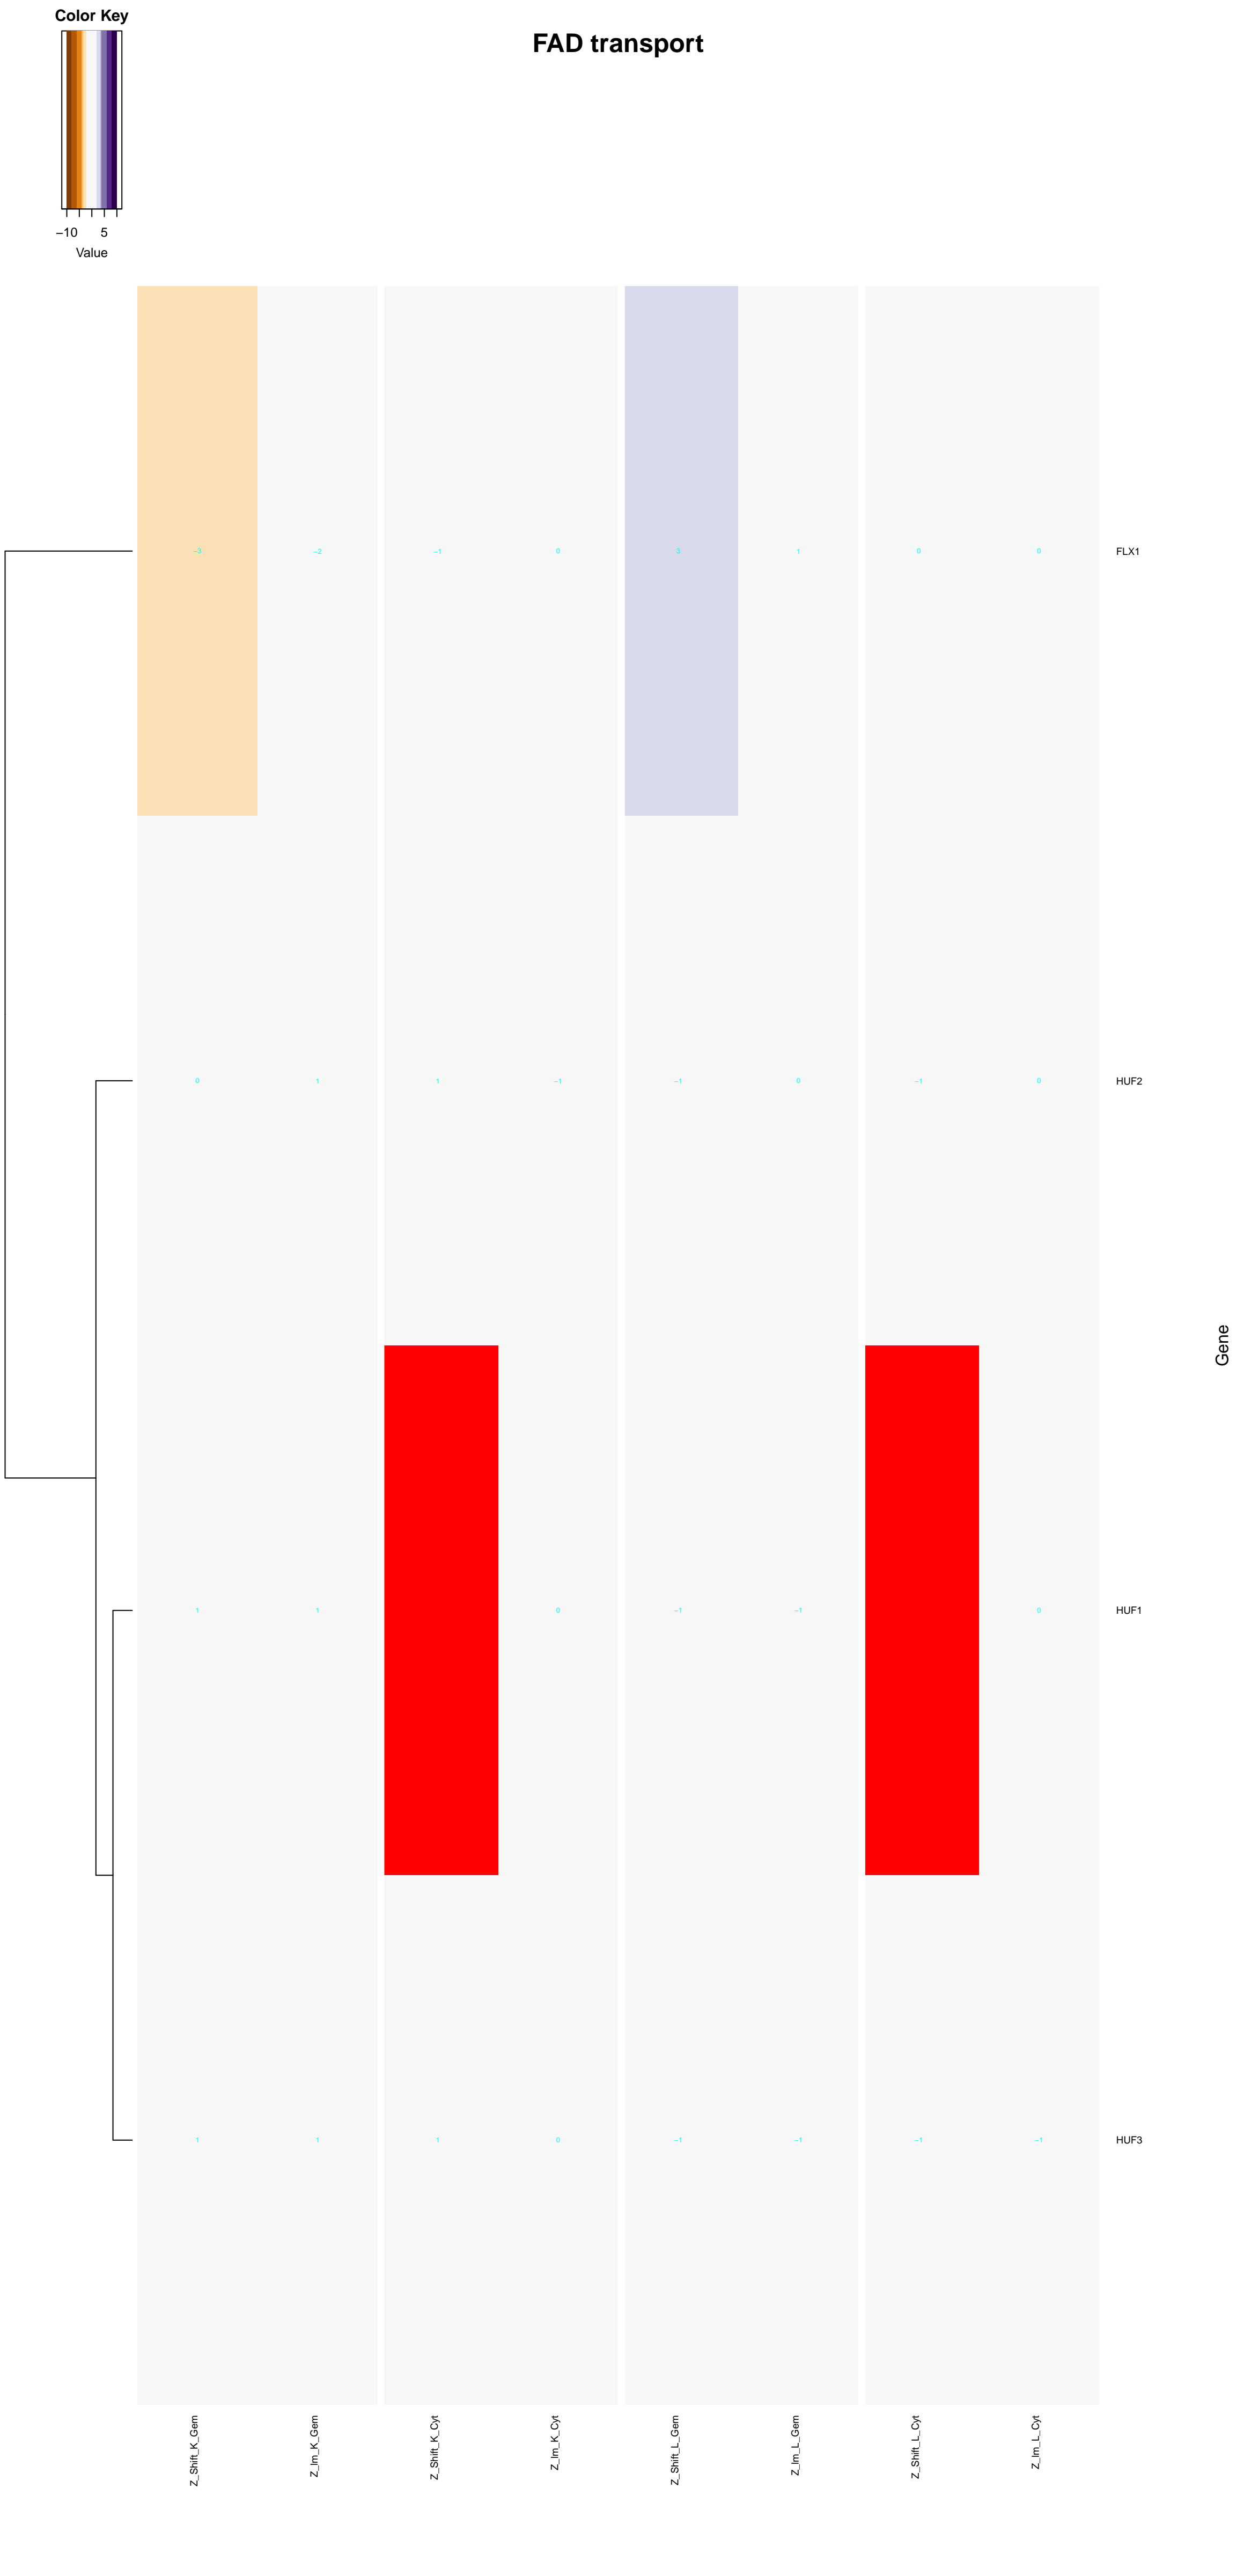

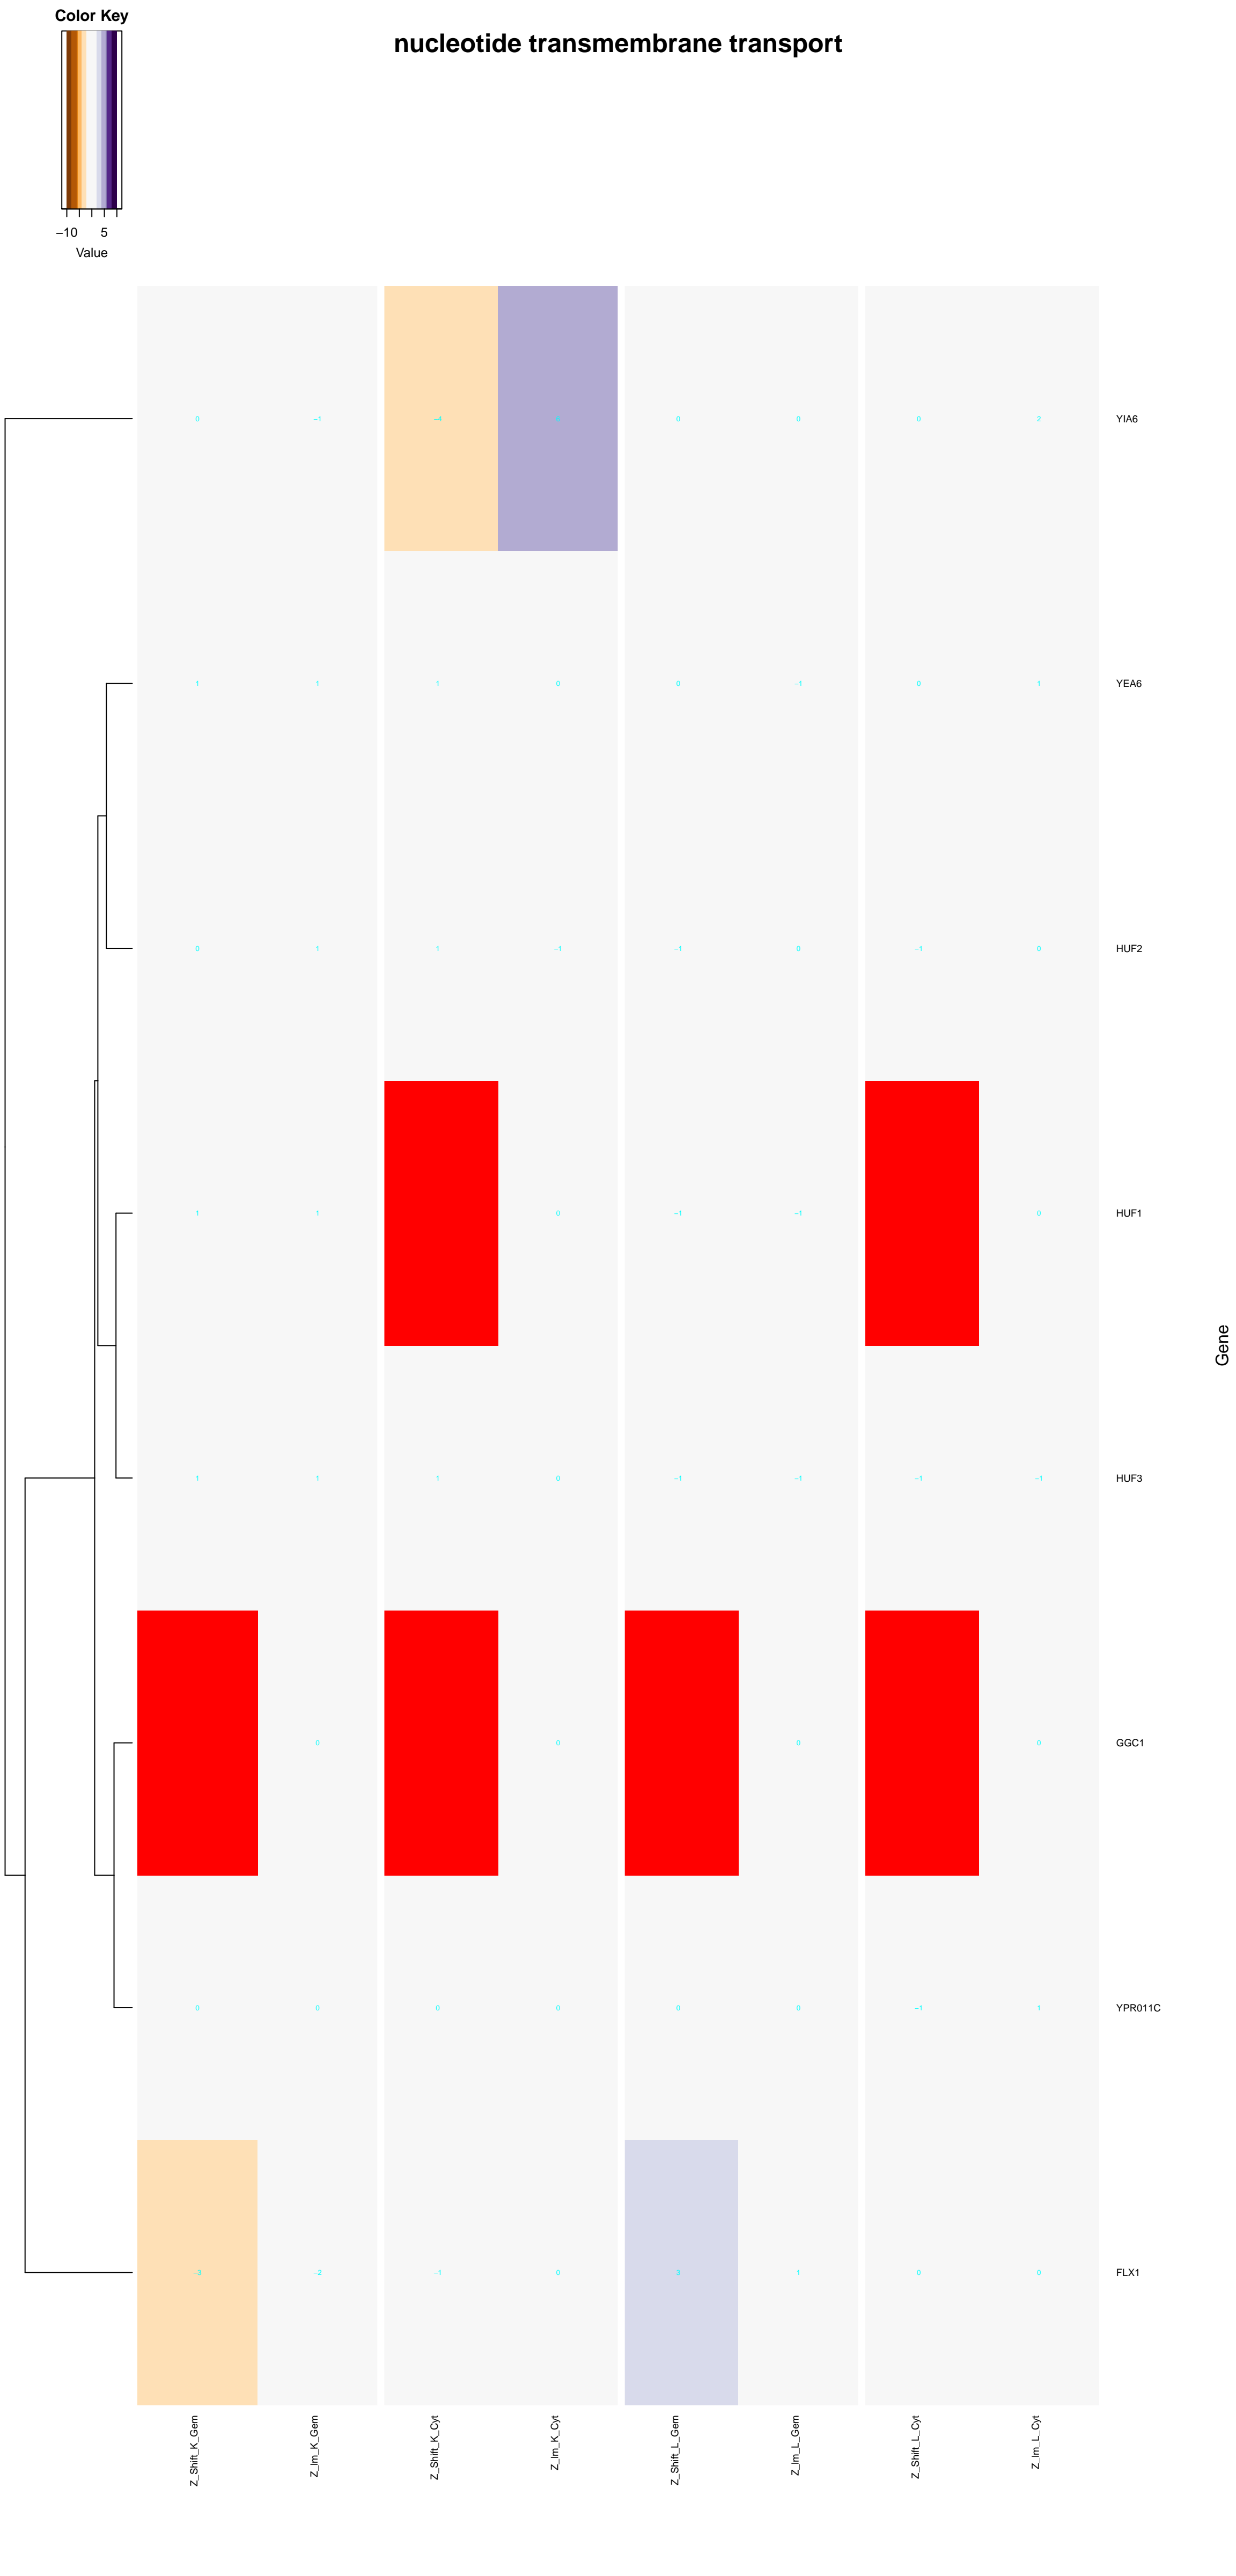



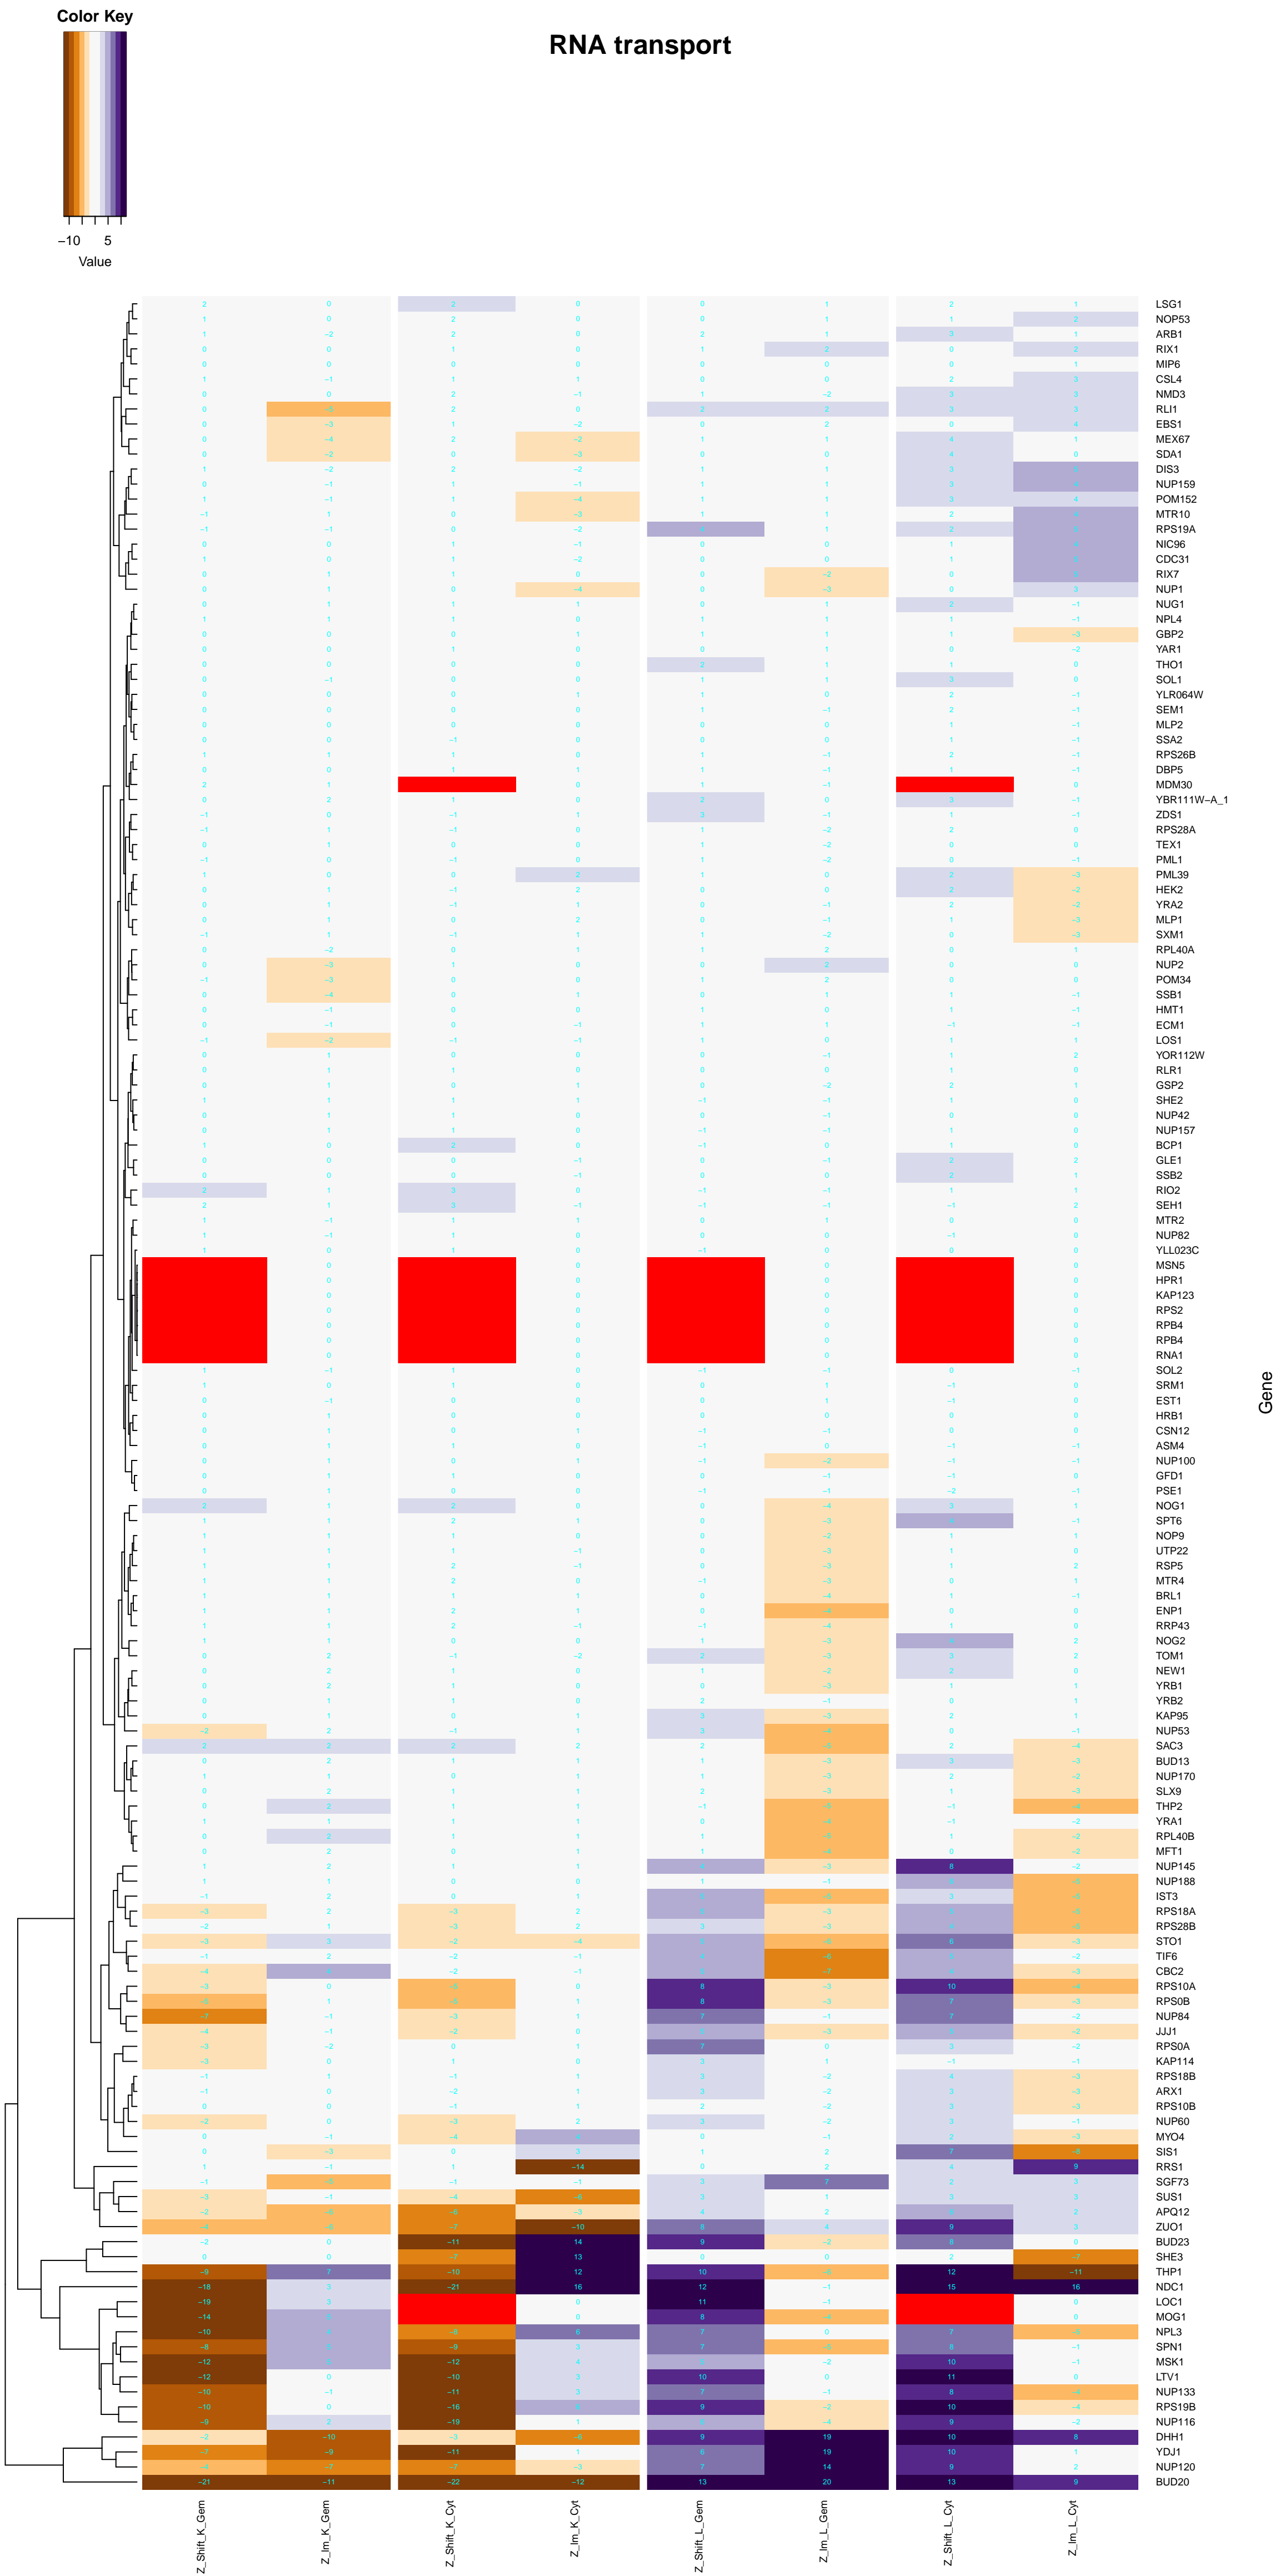

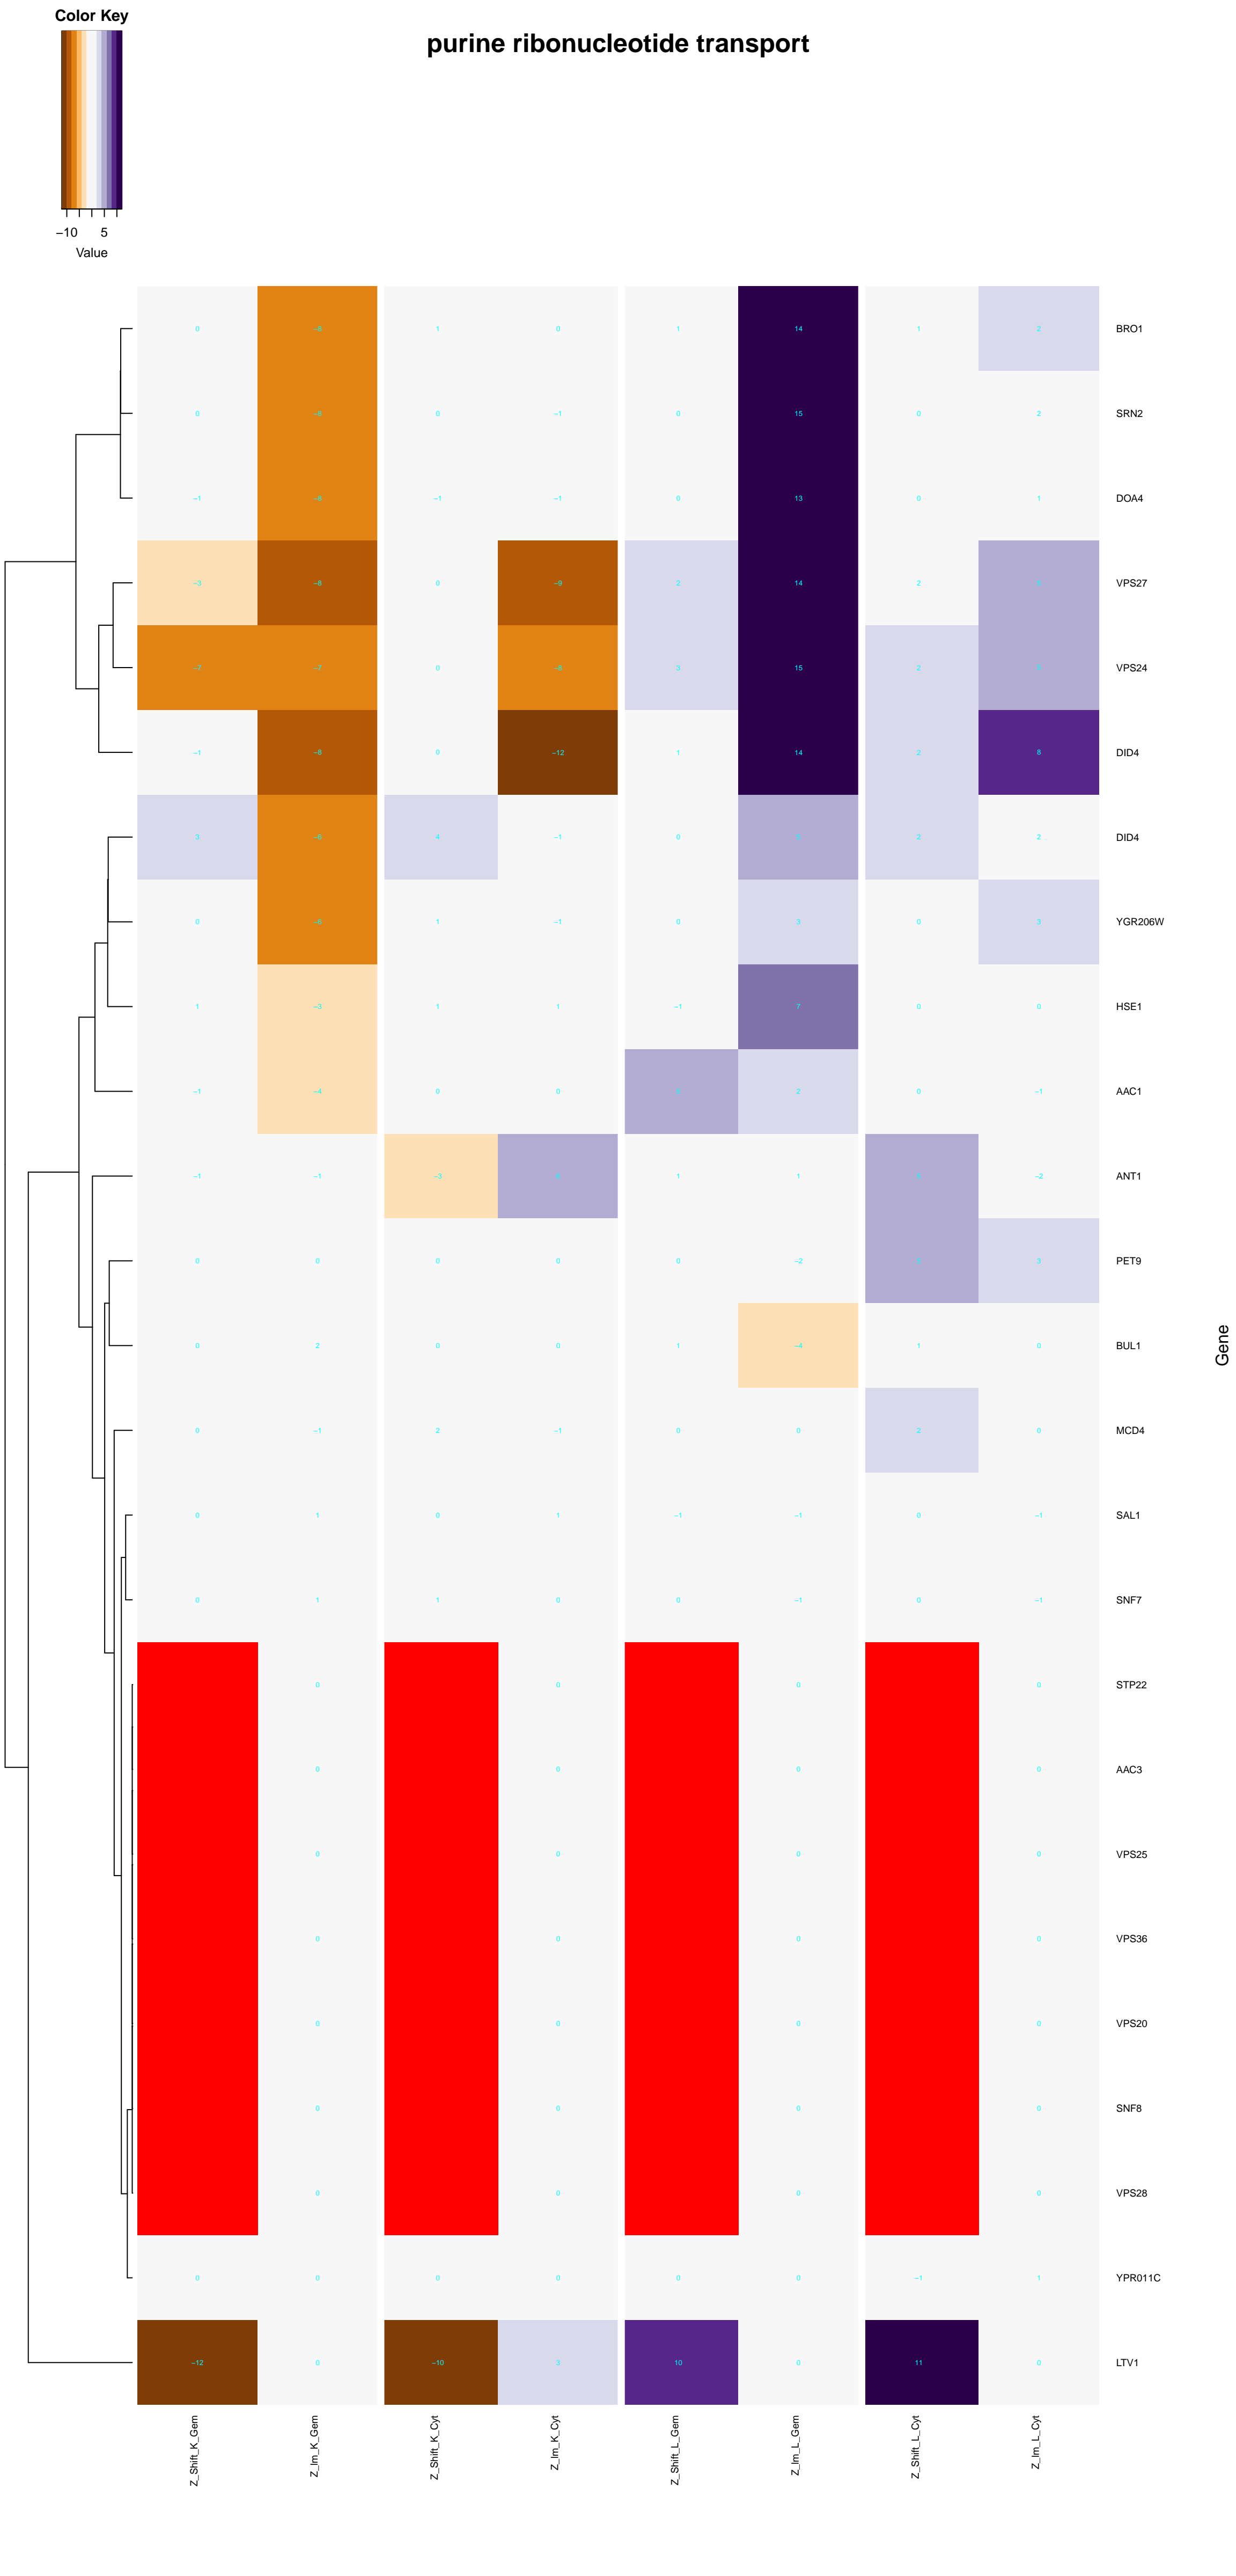

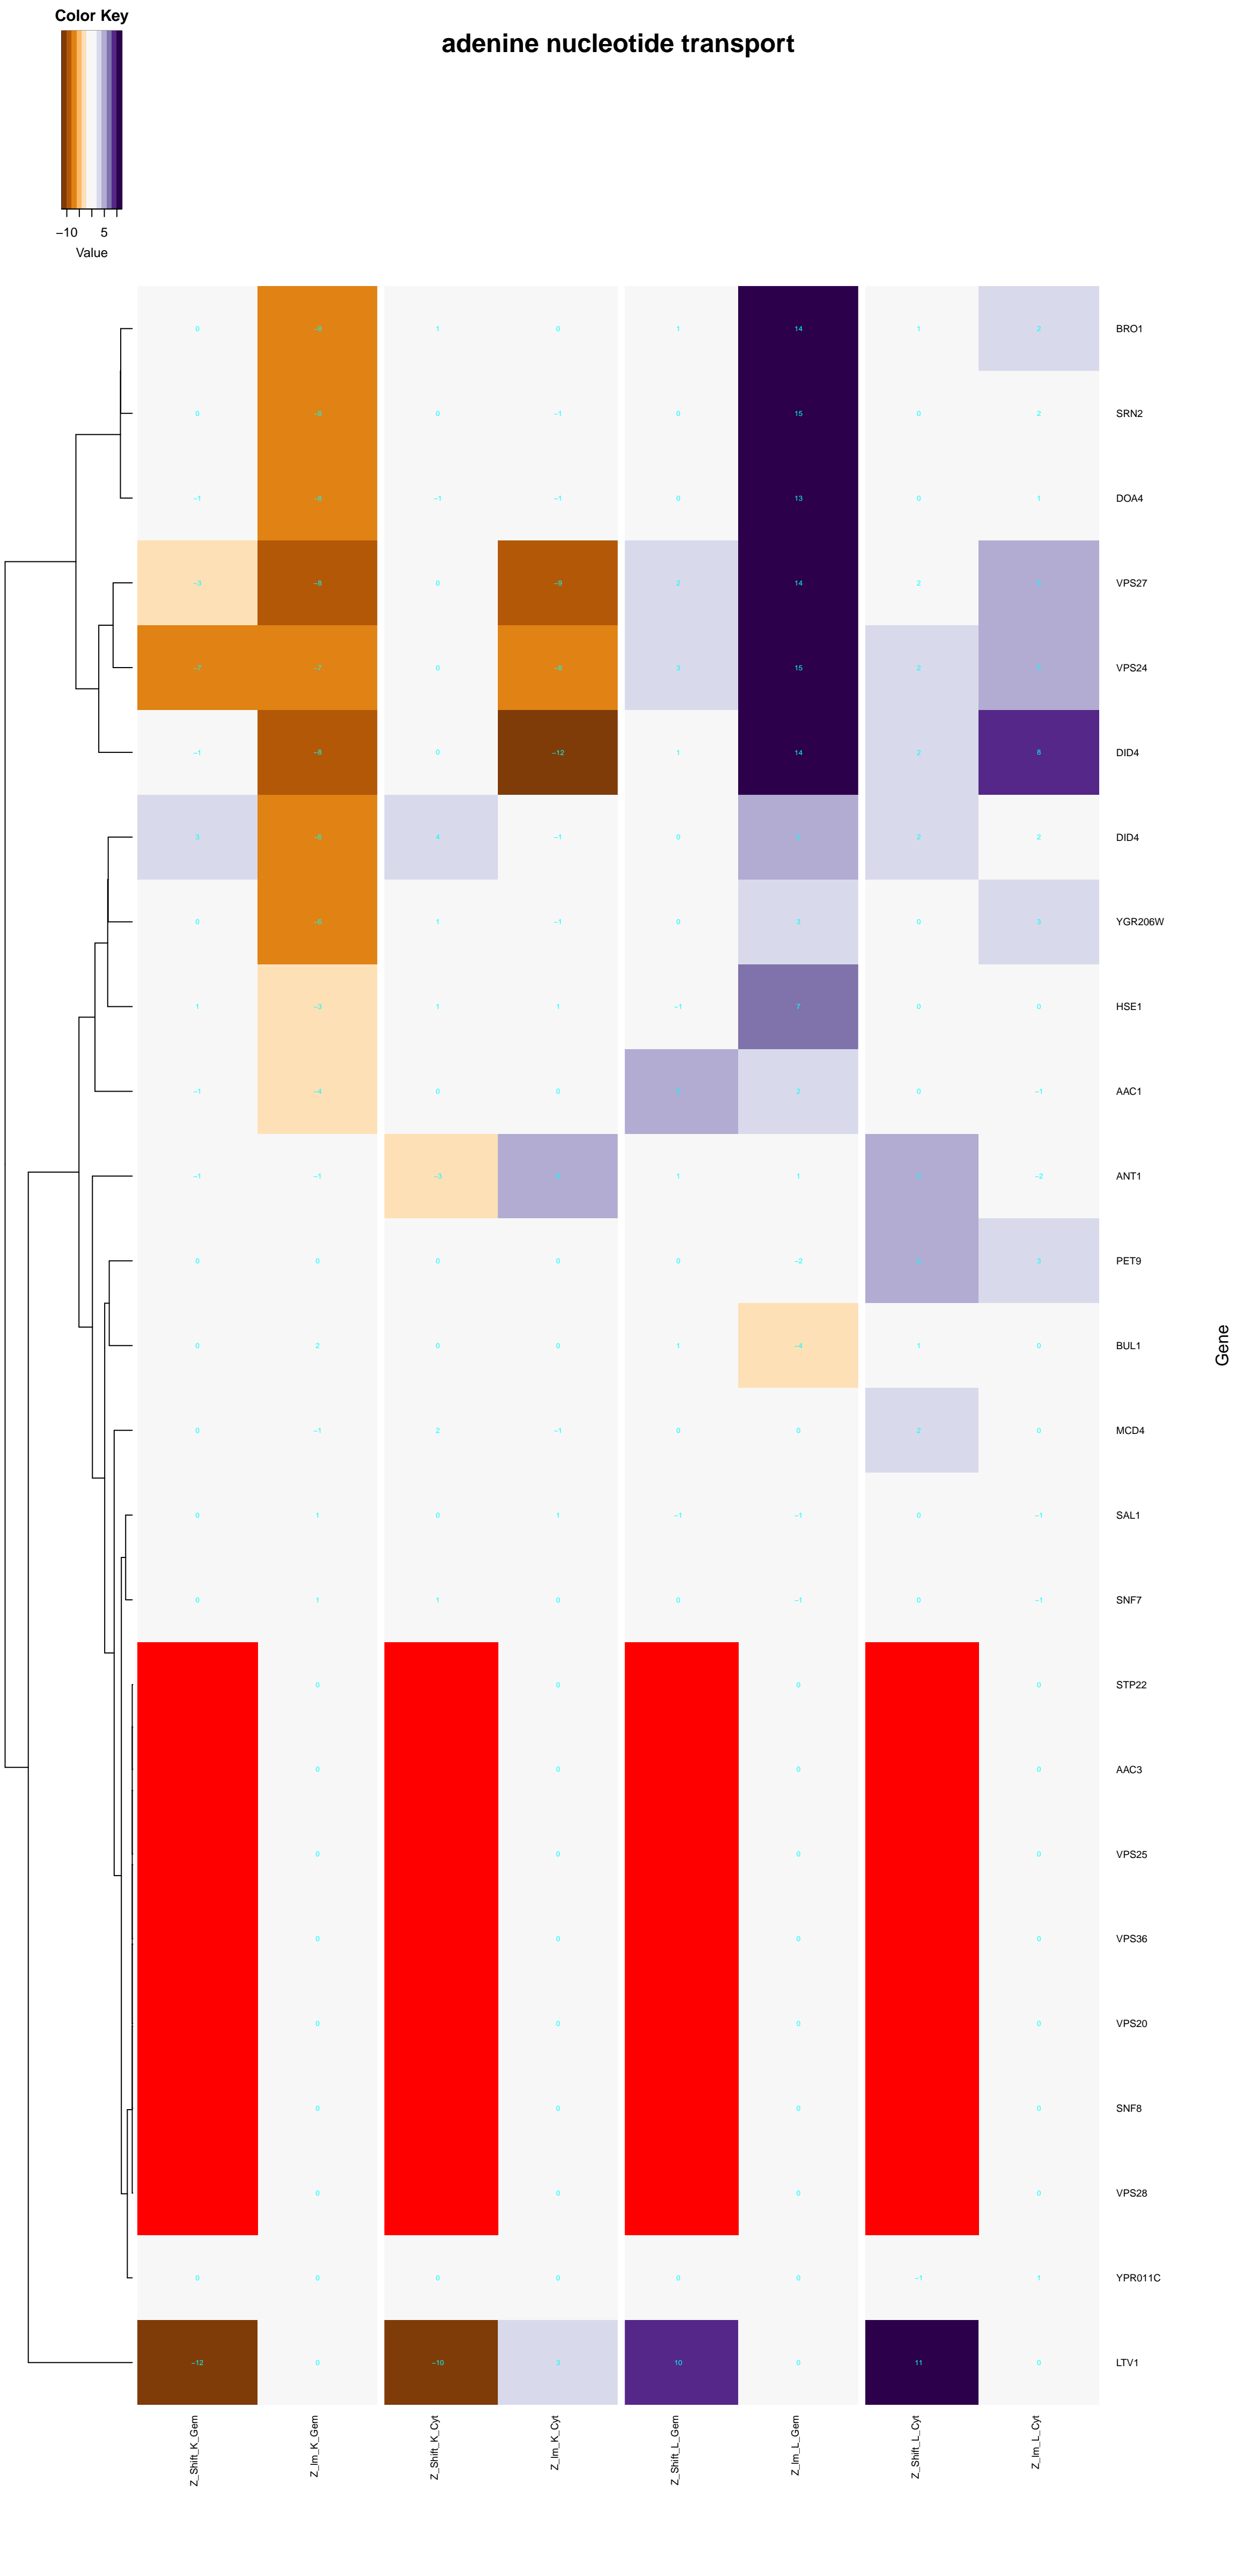

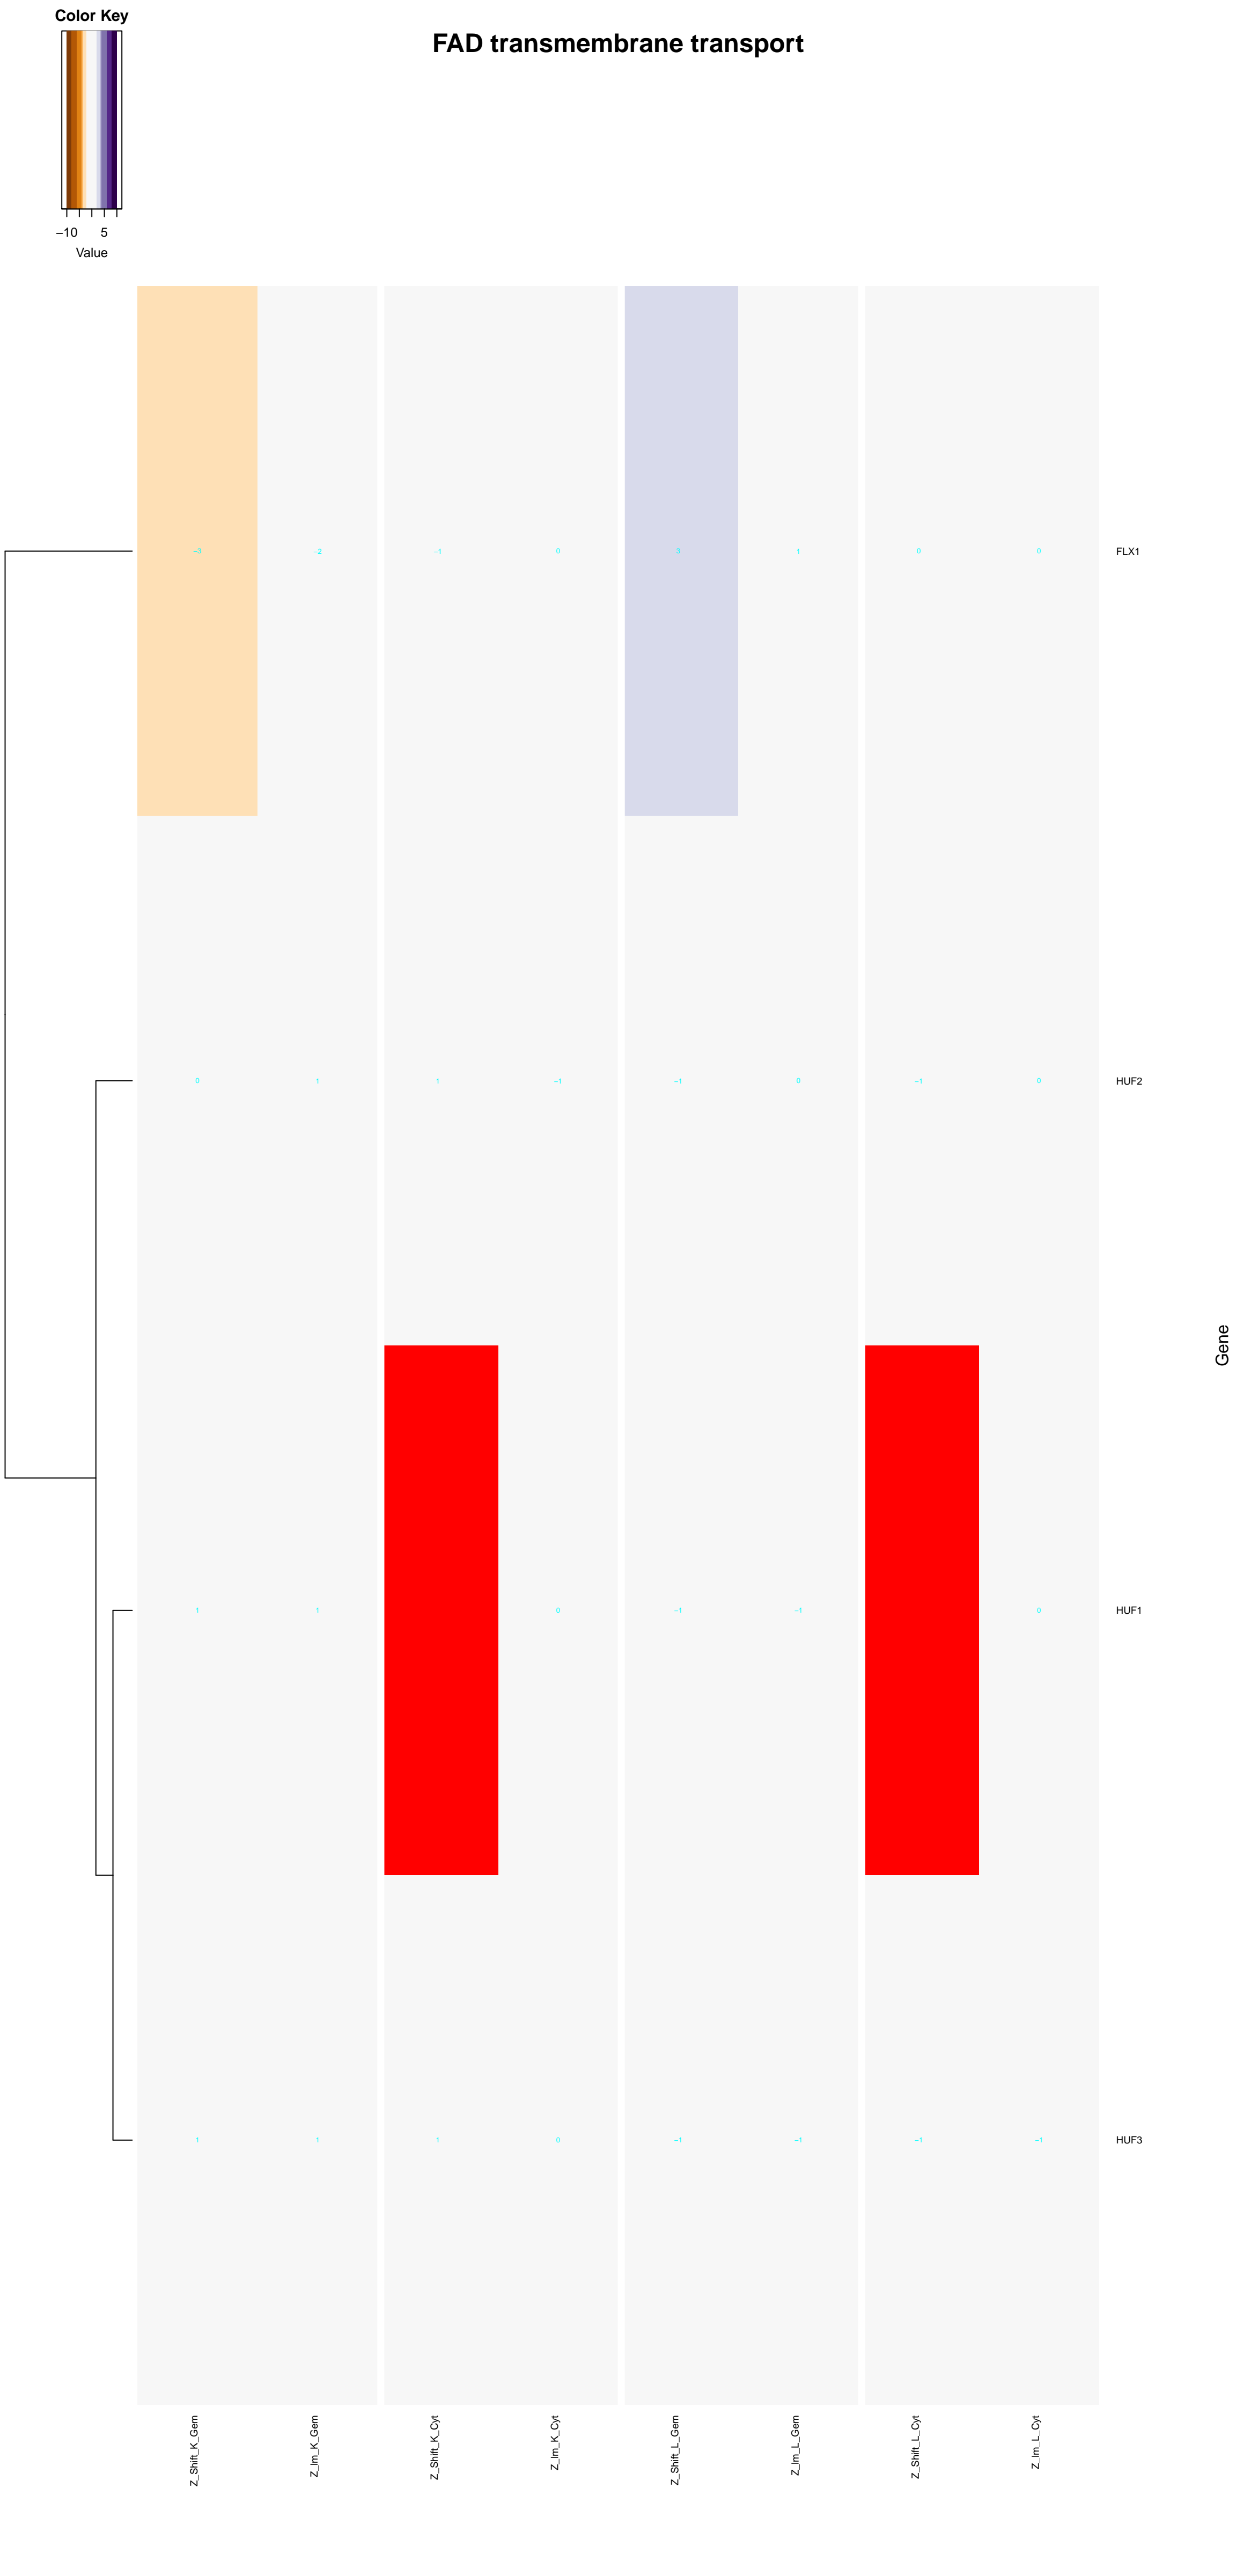

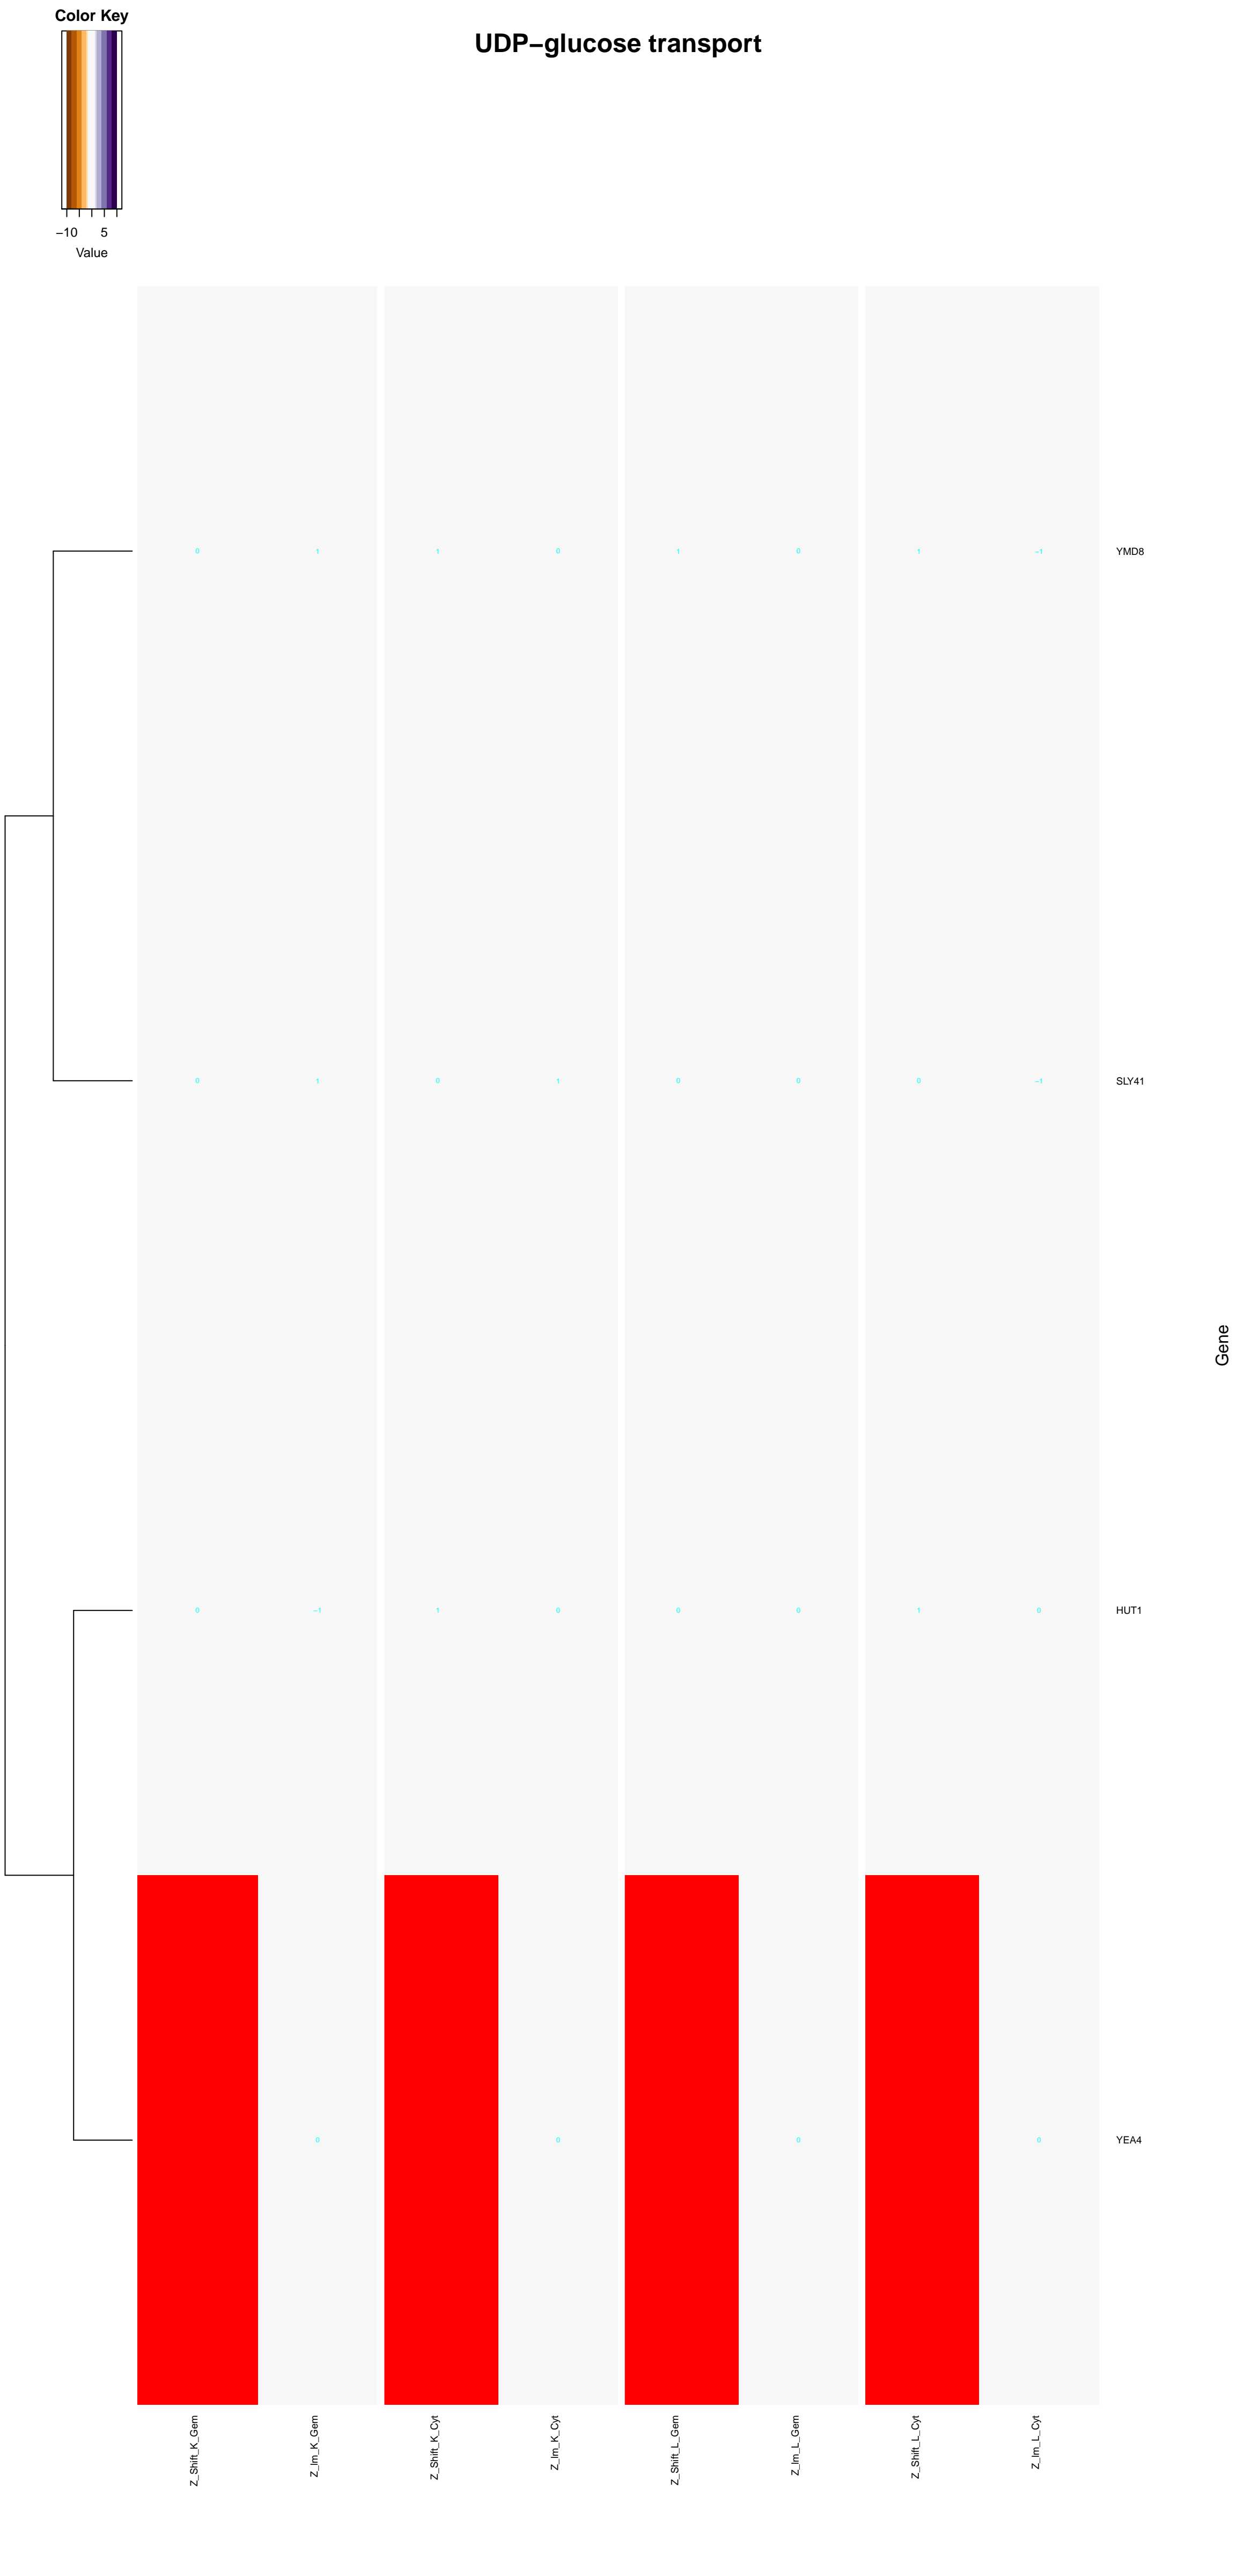

## pyrimidine nucleotide-sugar transmembrane transport

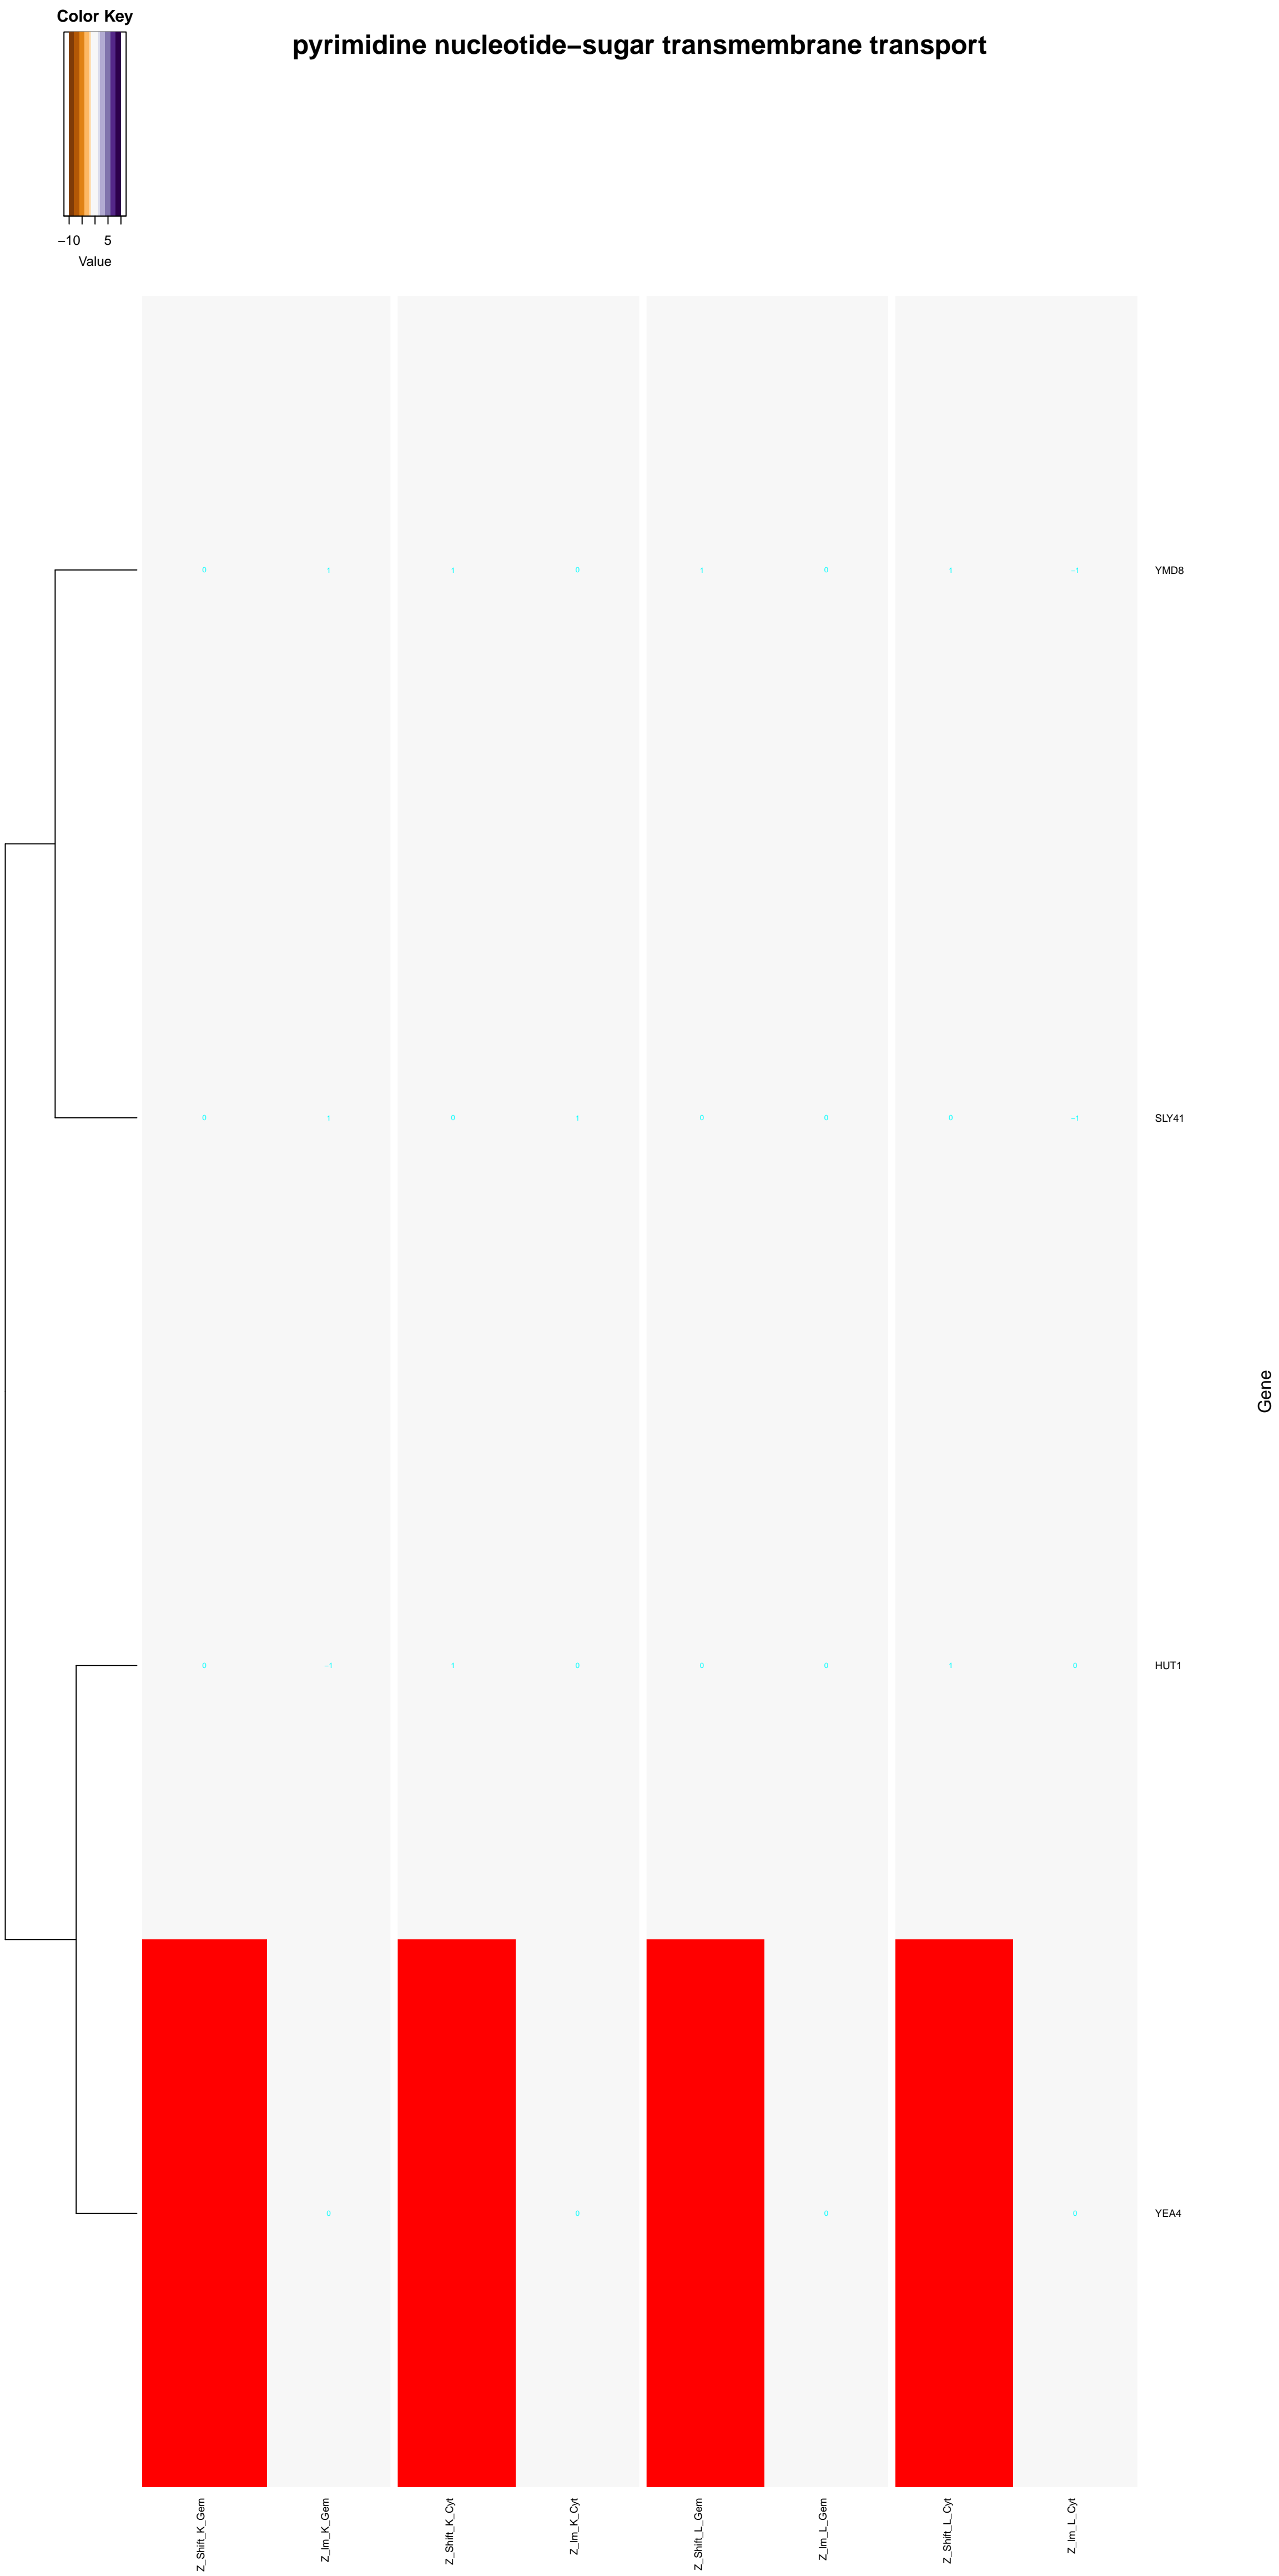

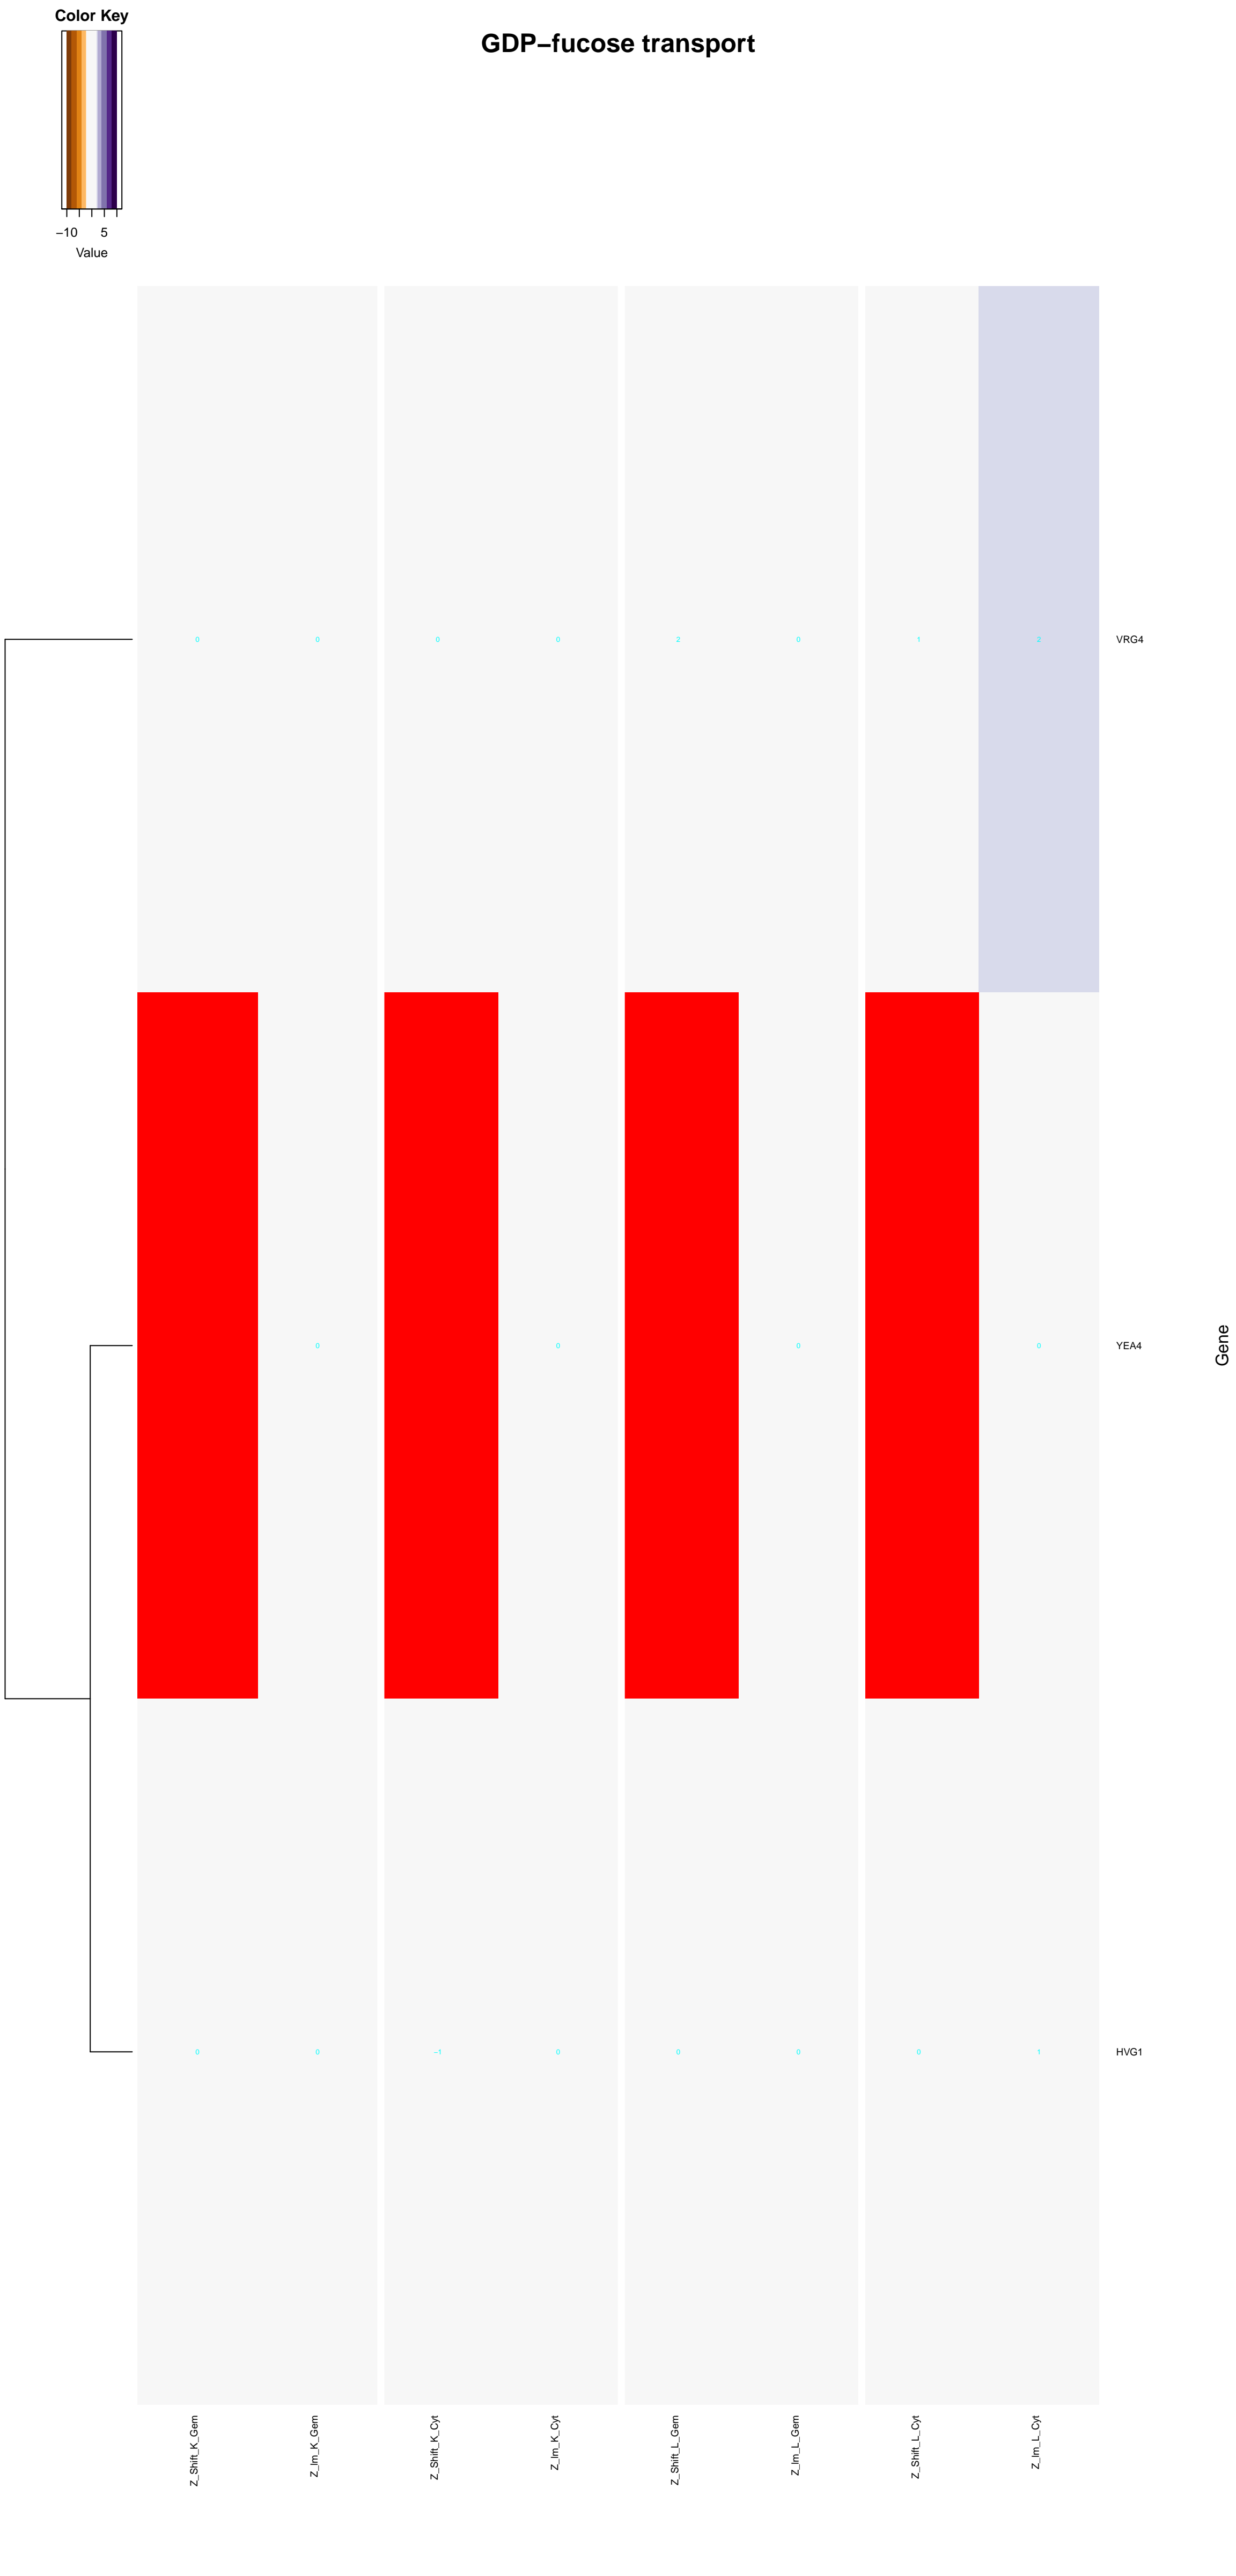

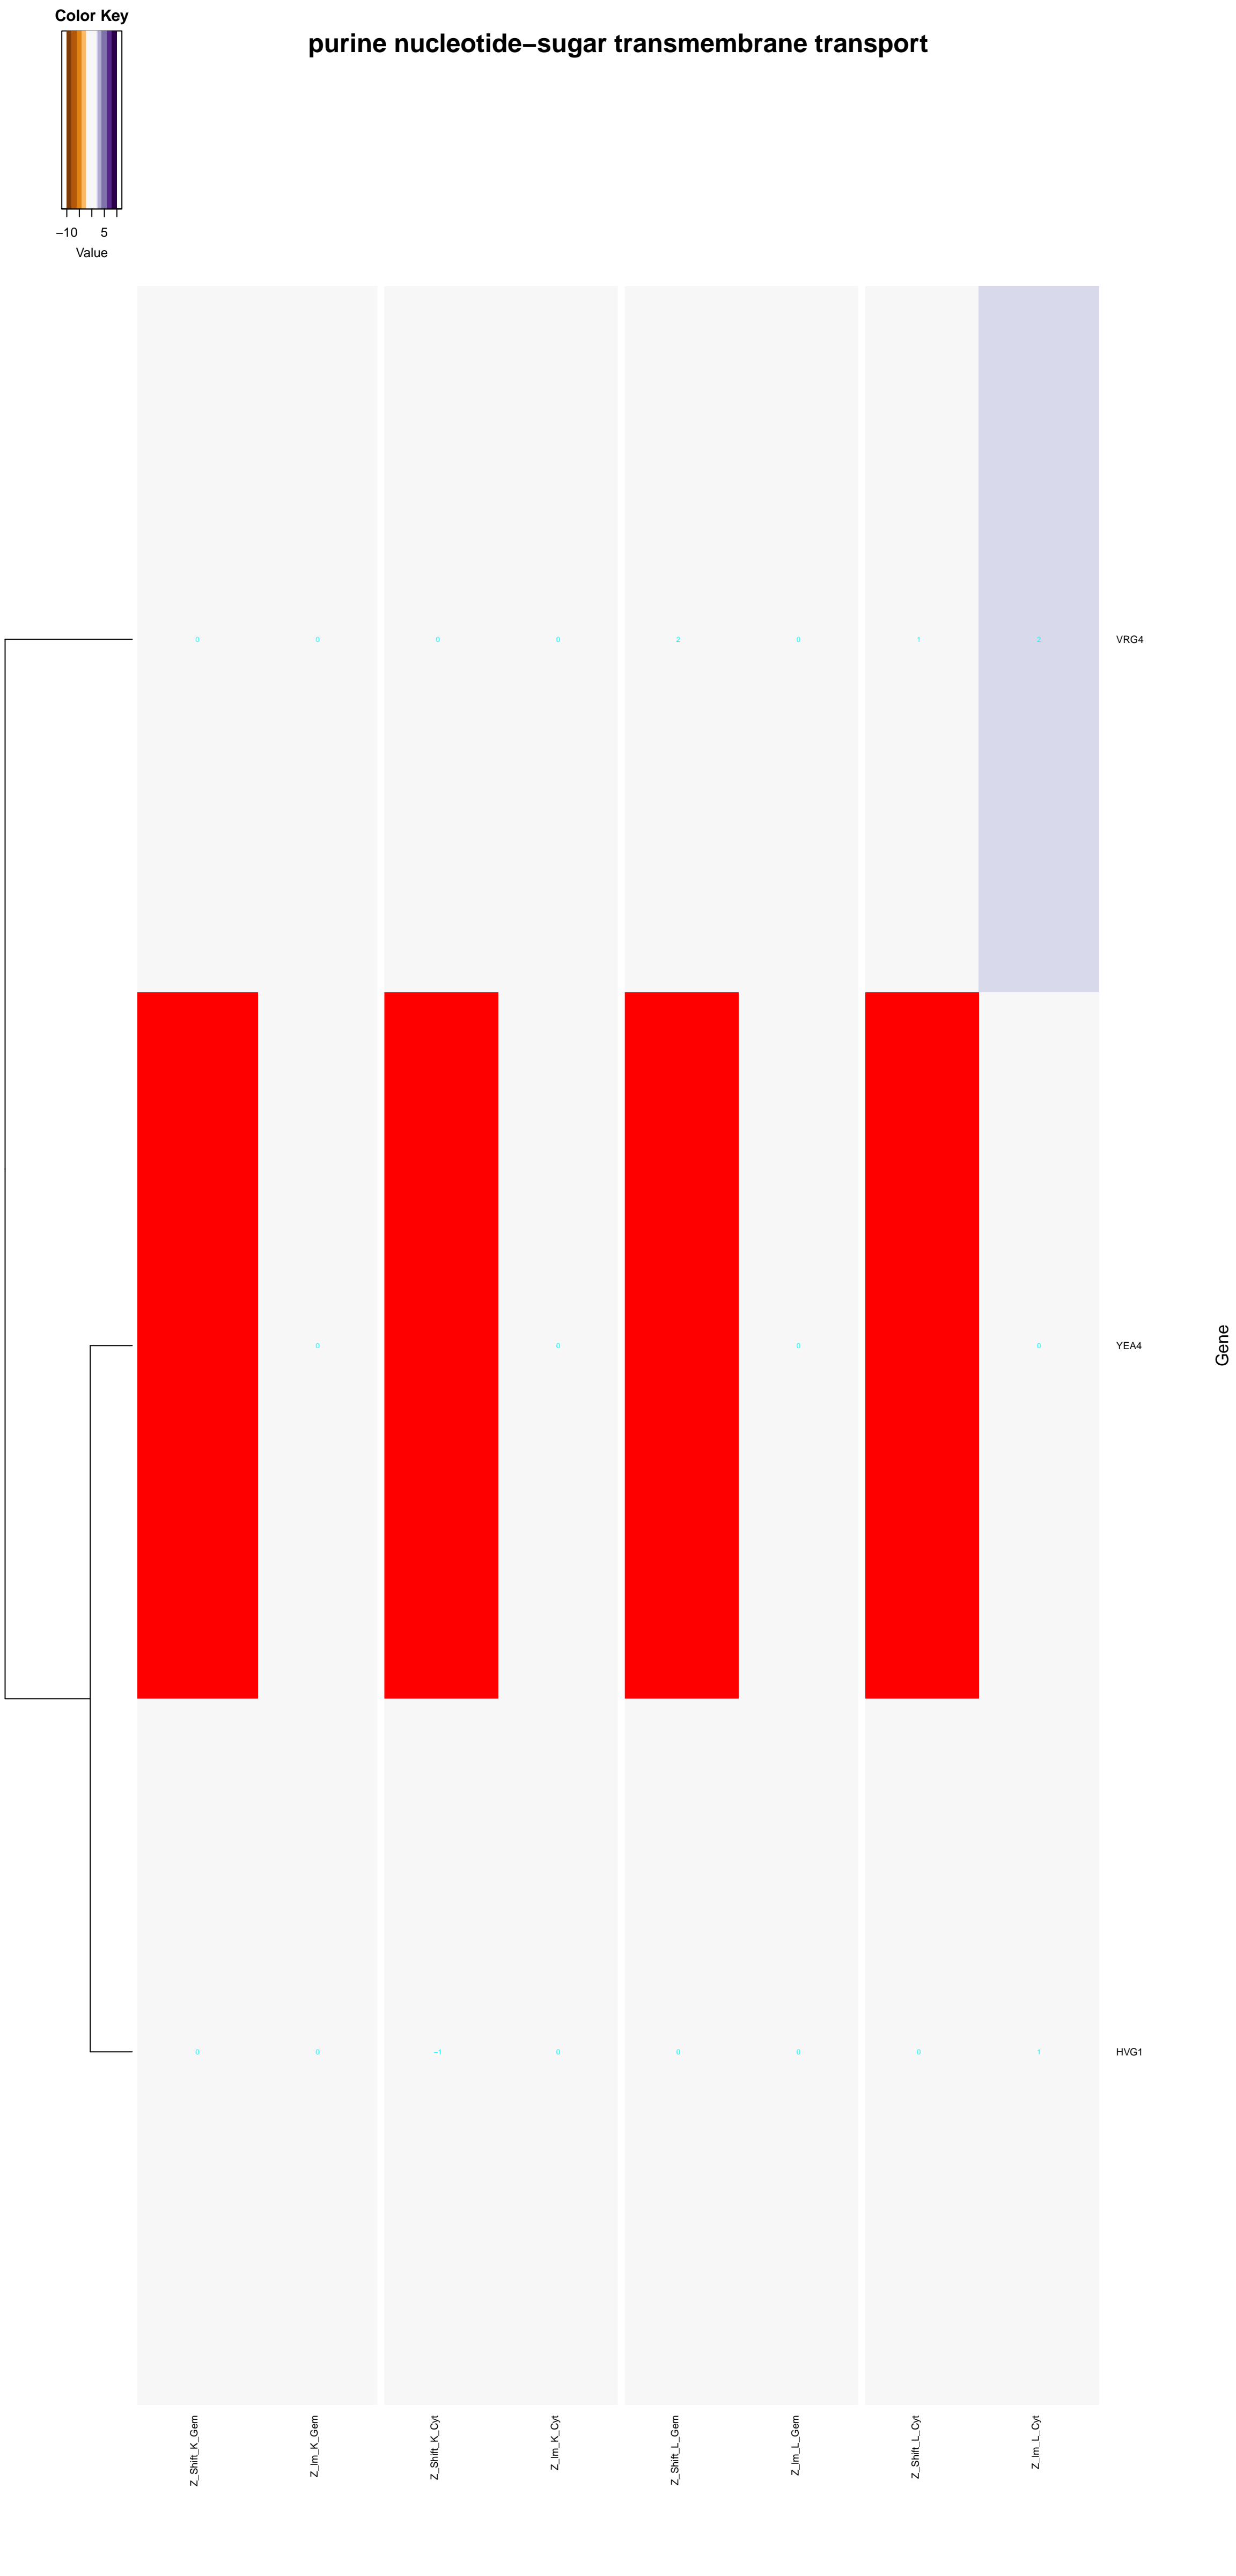



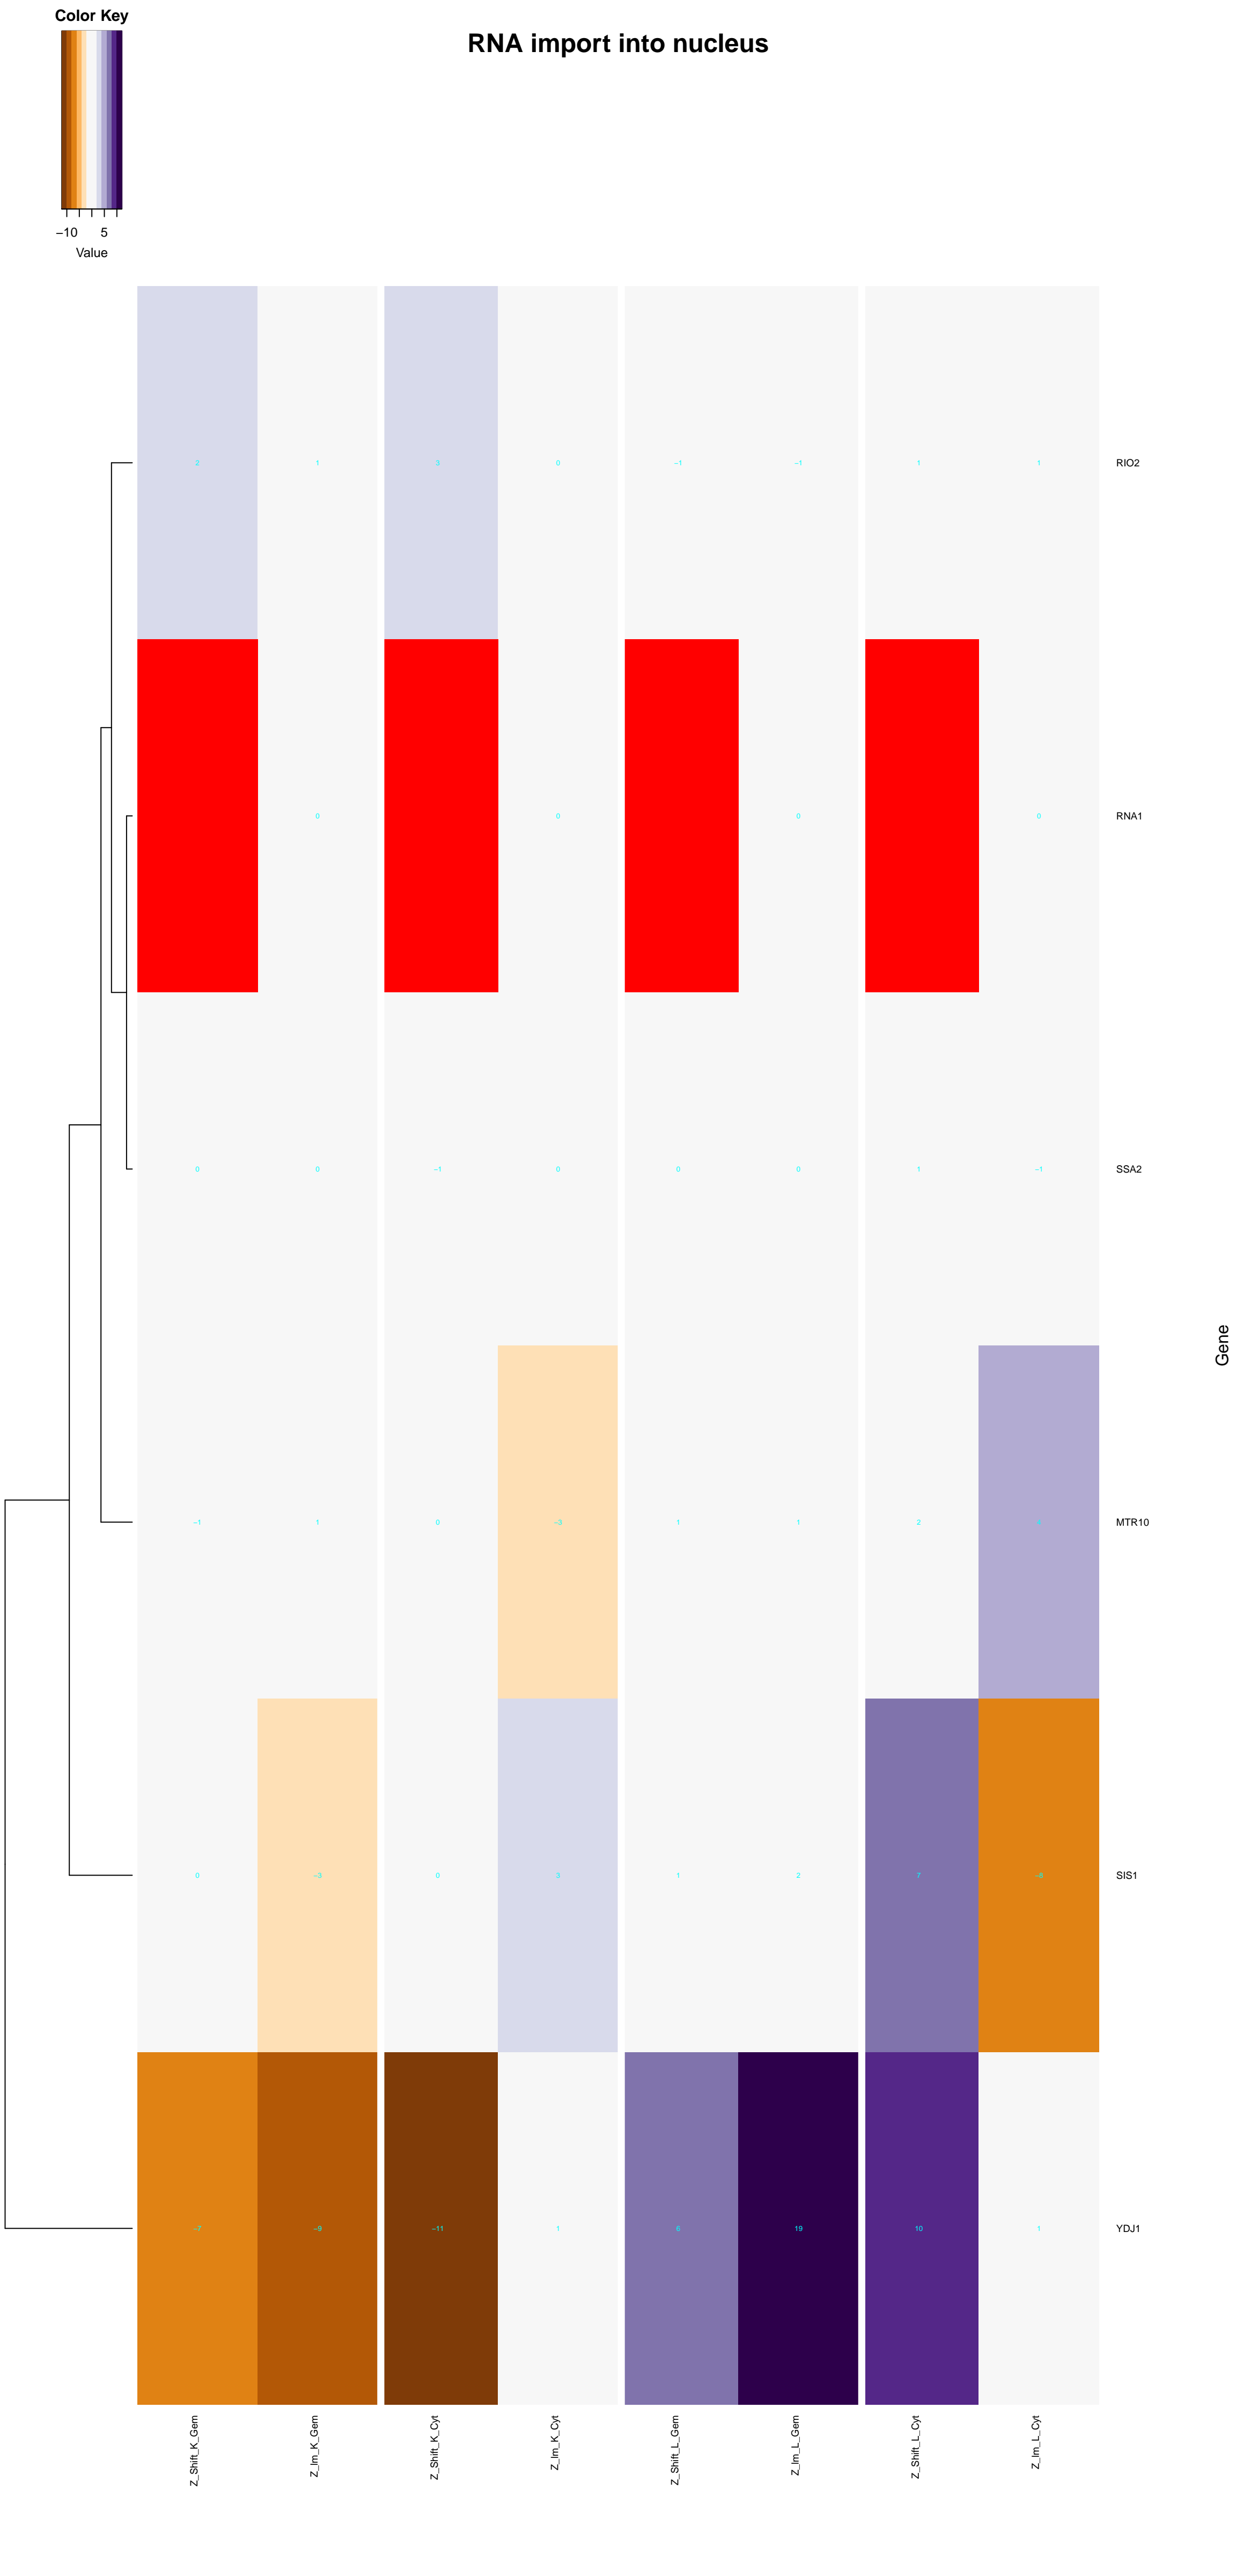

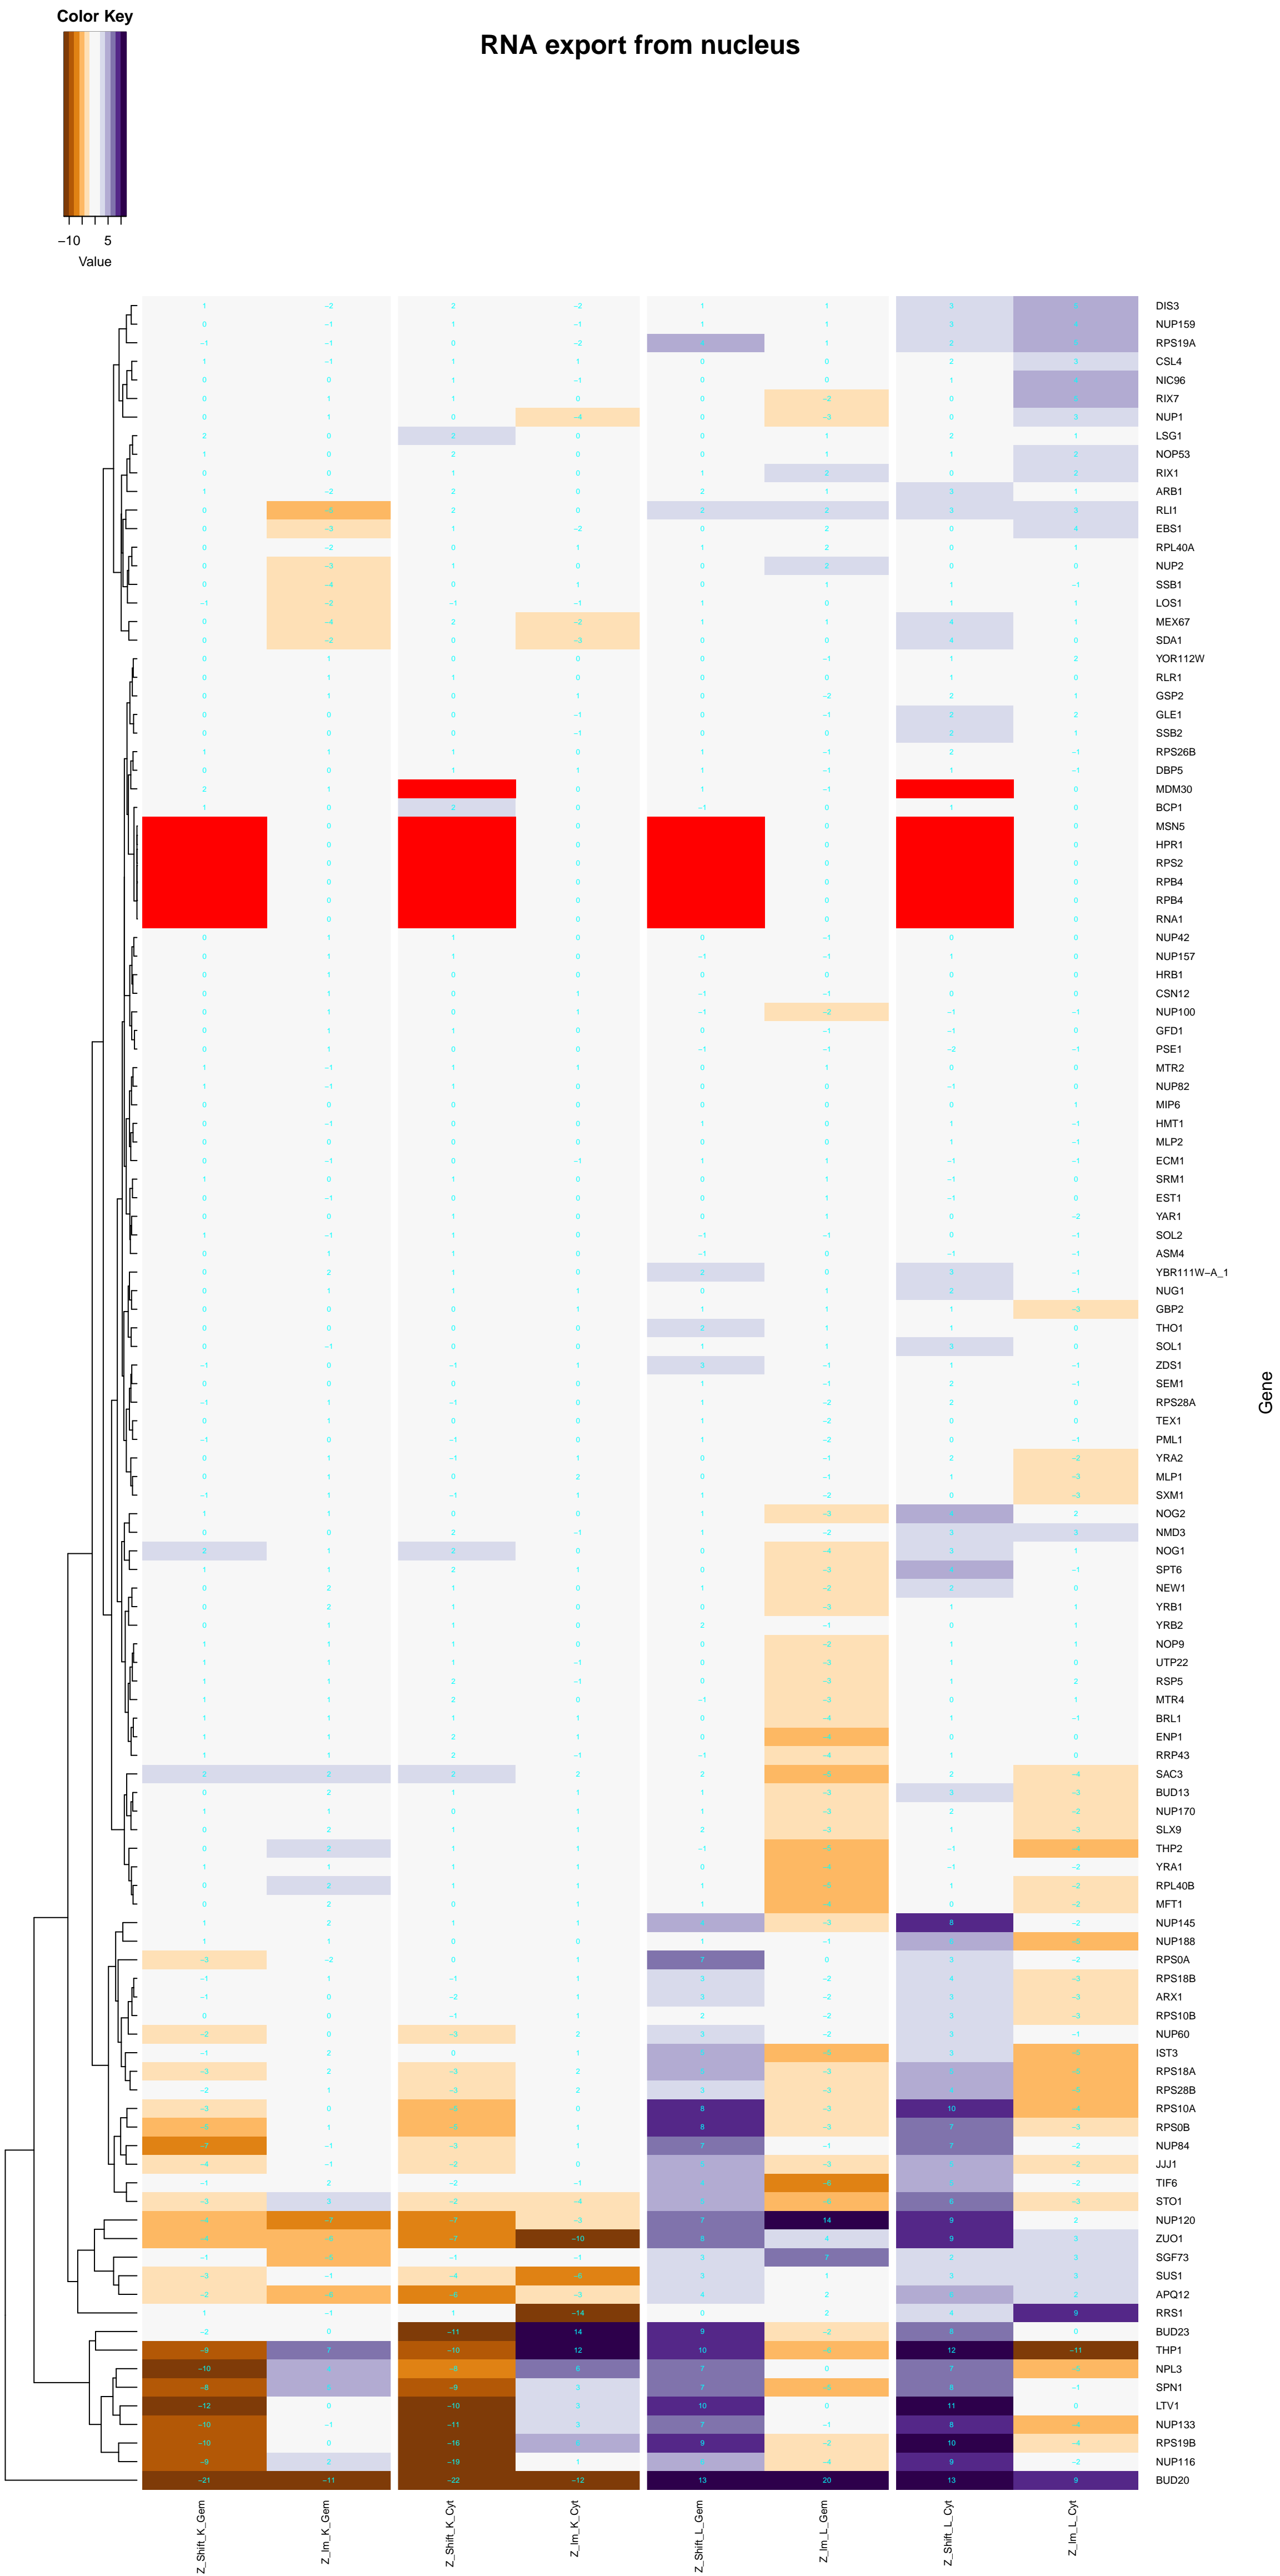

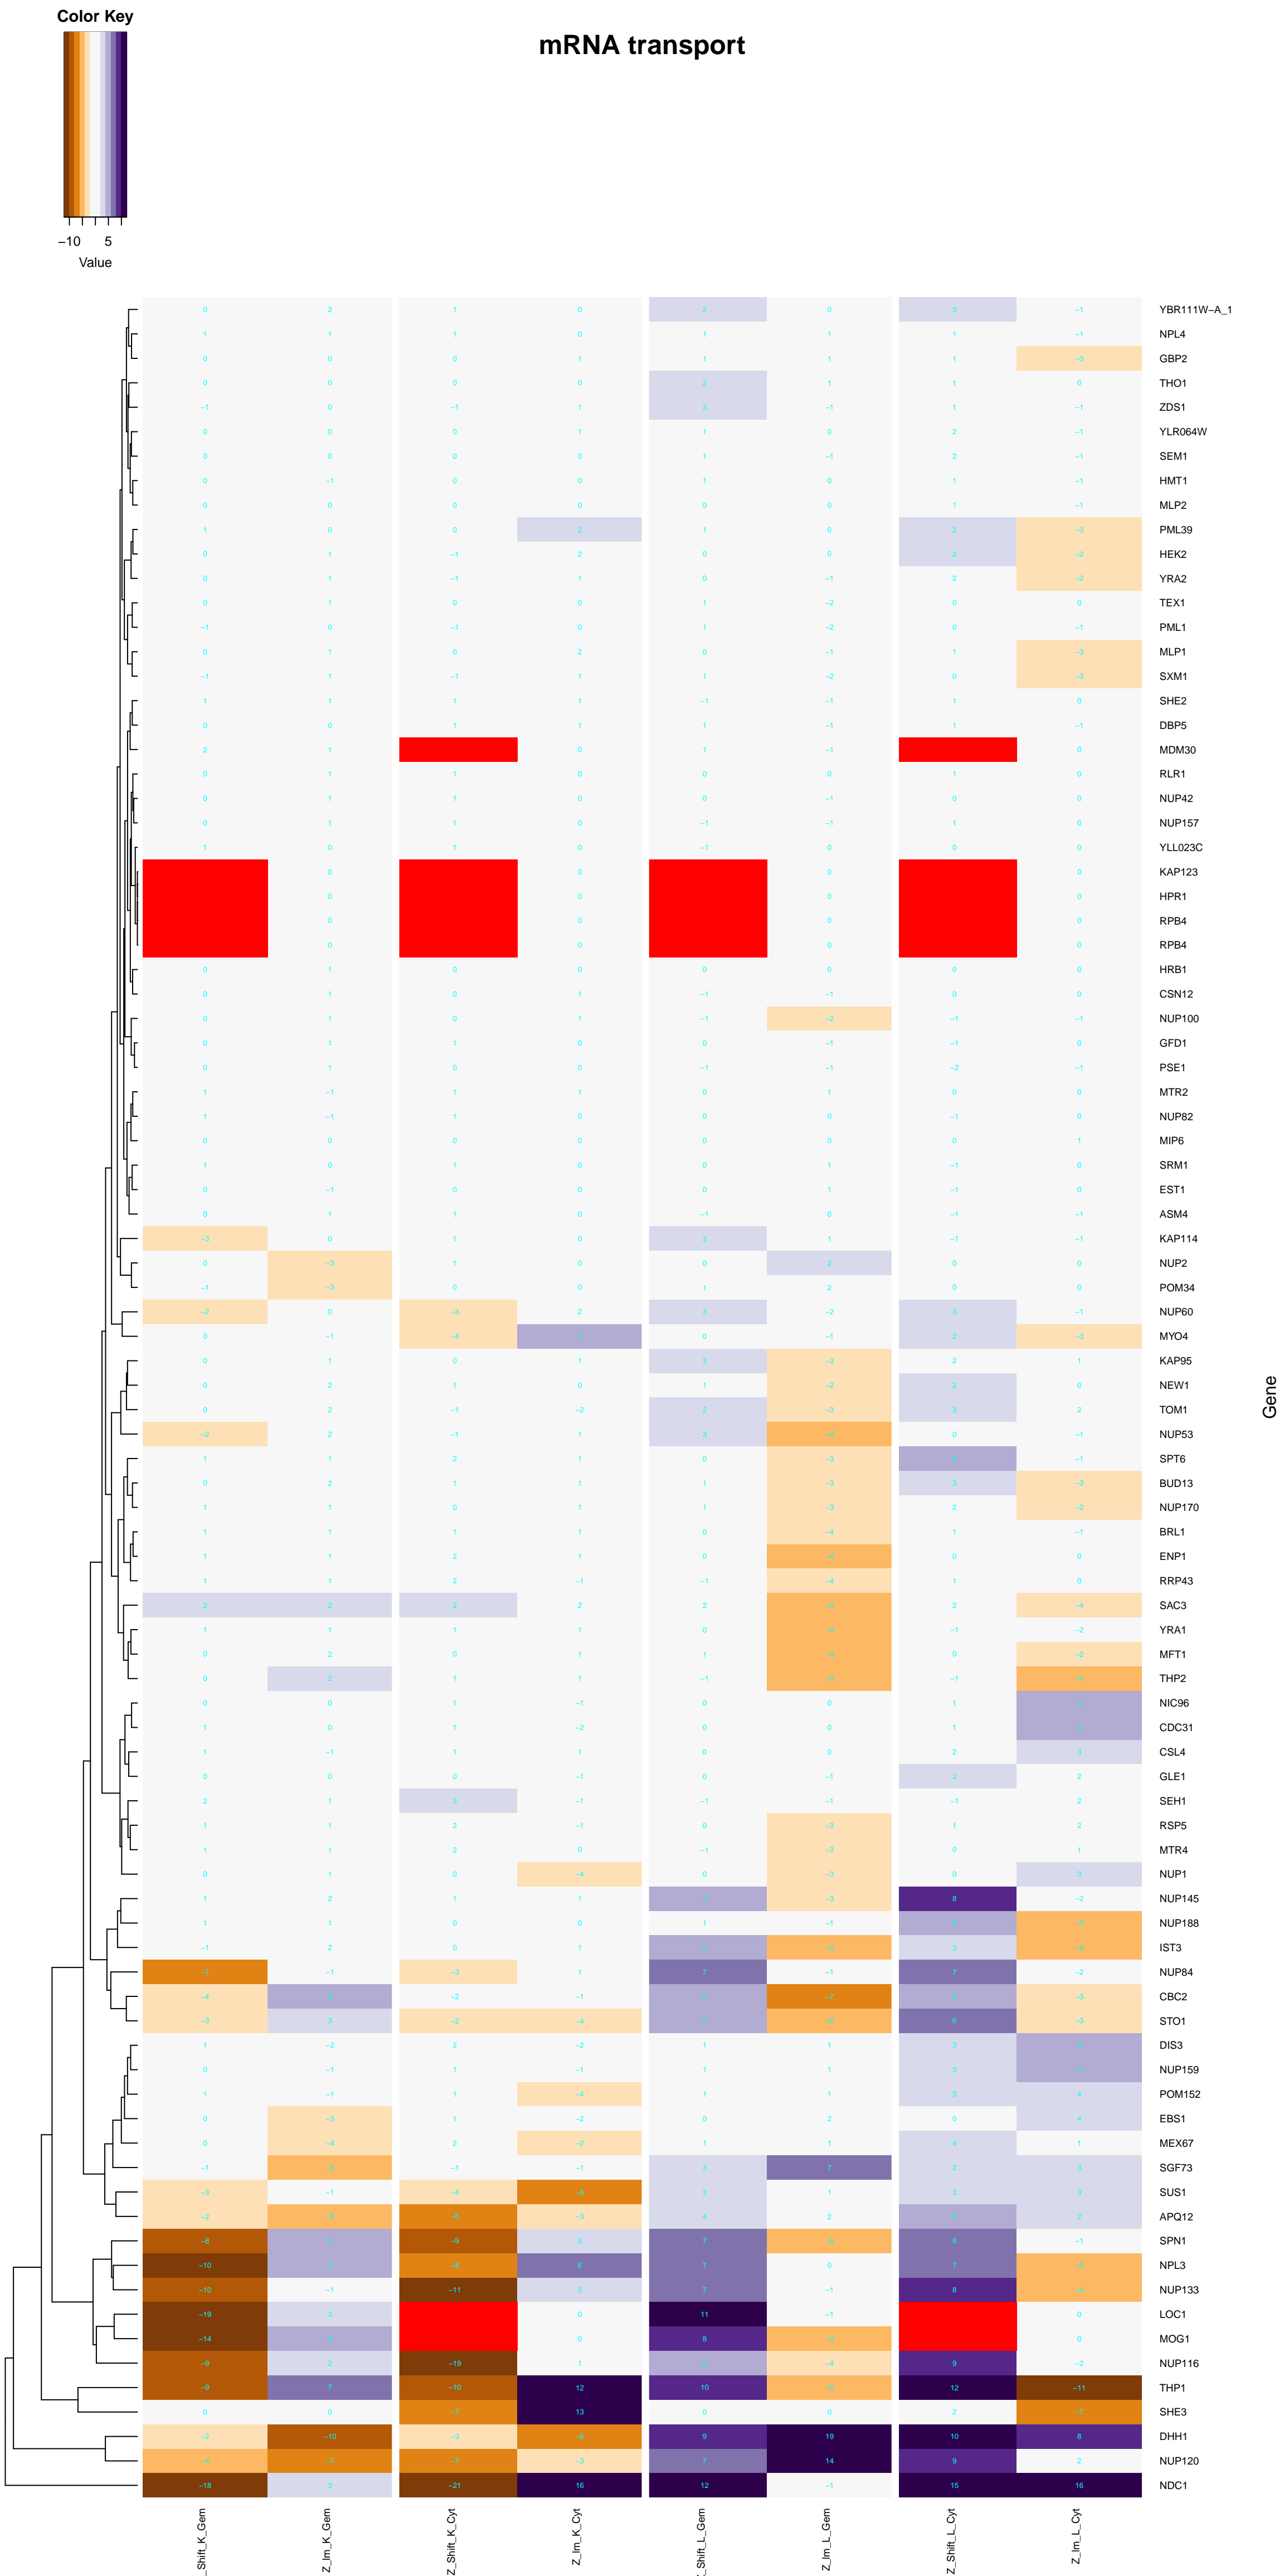

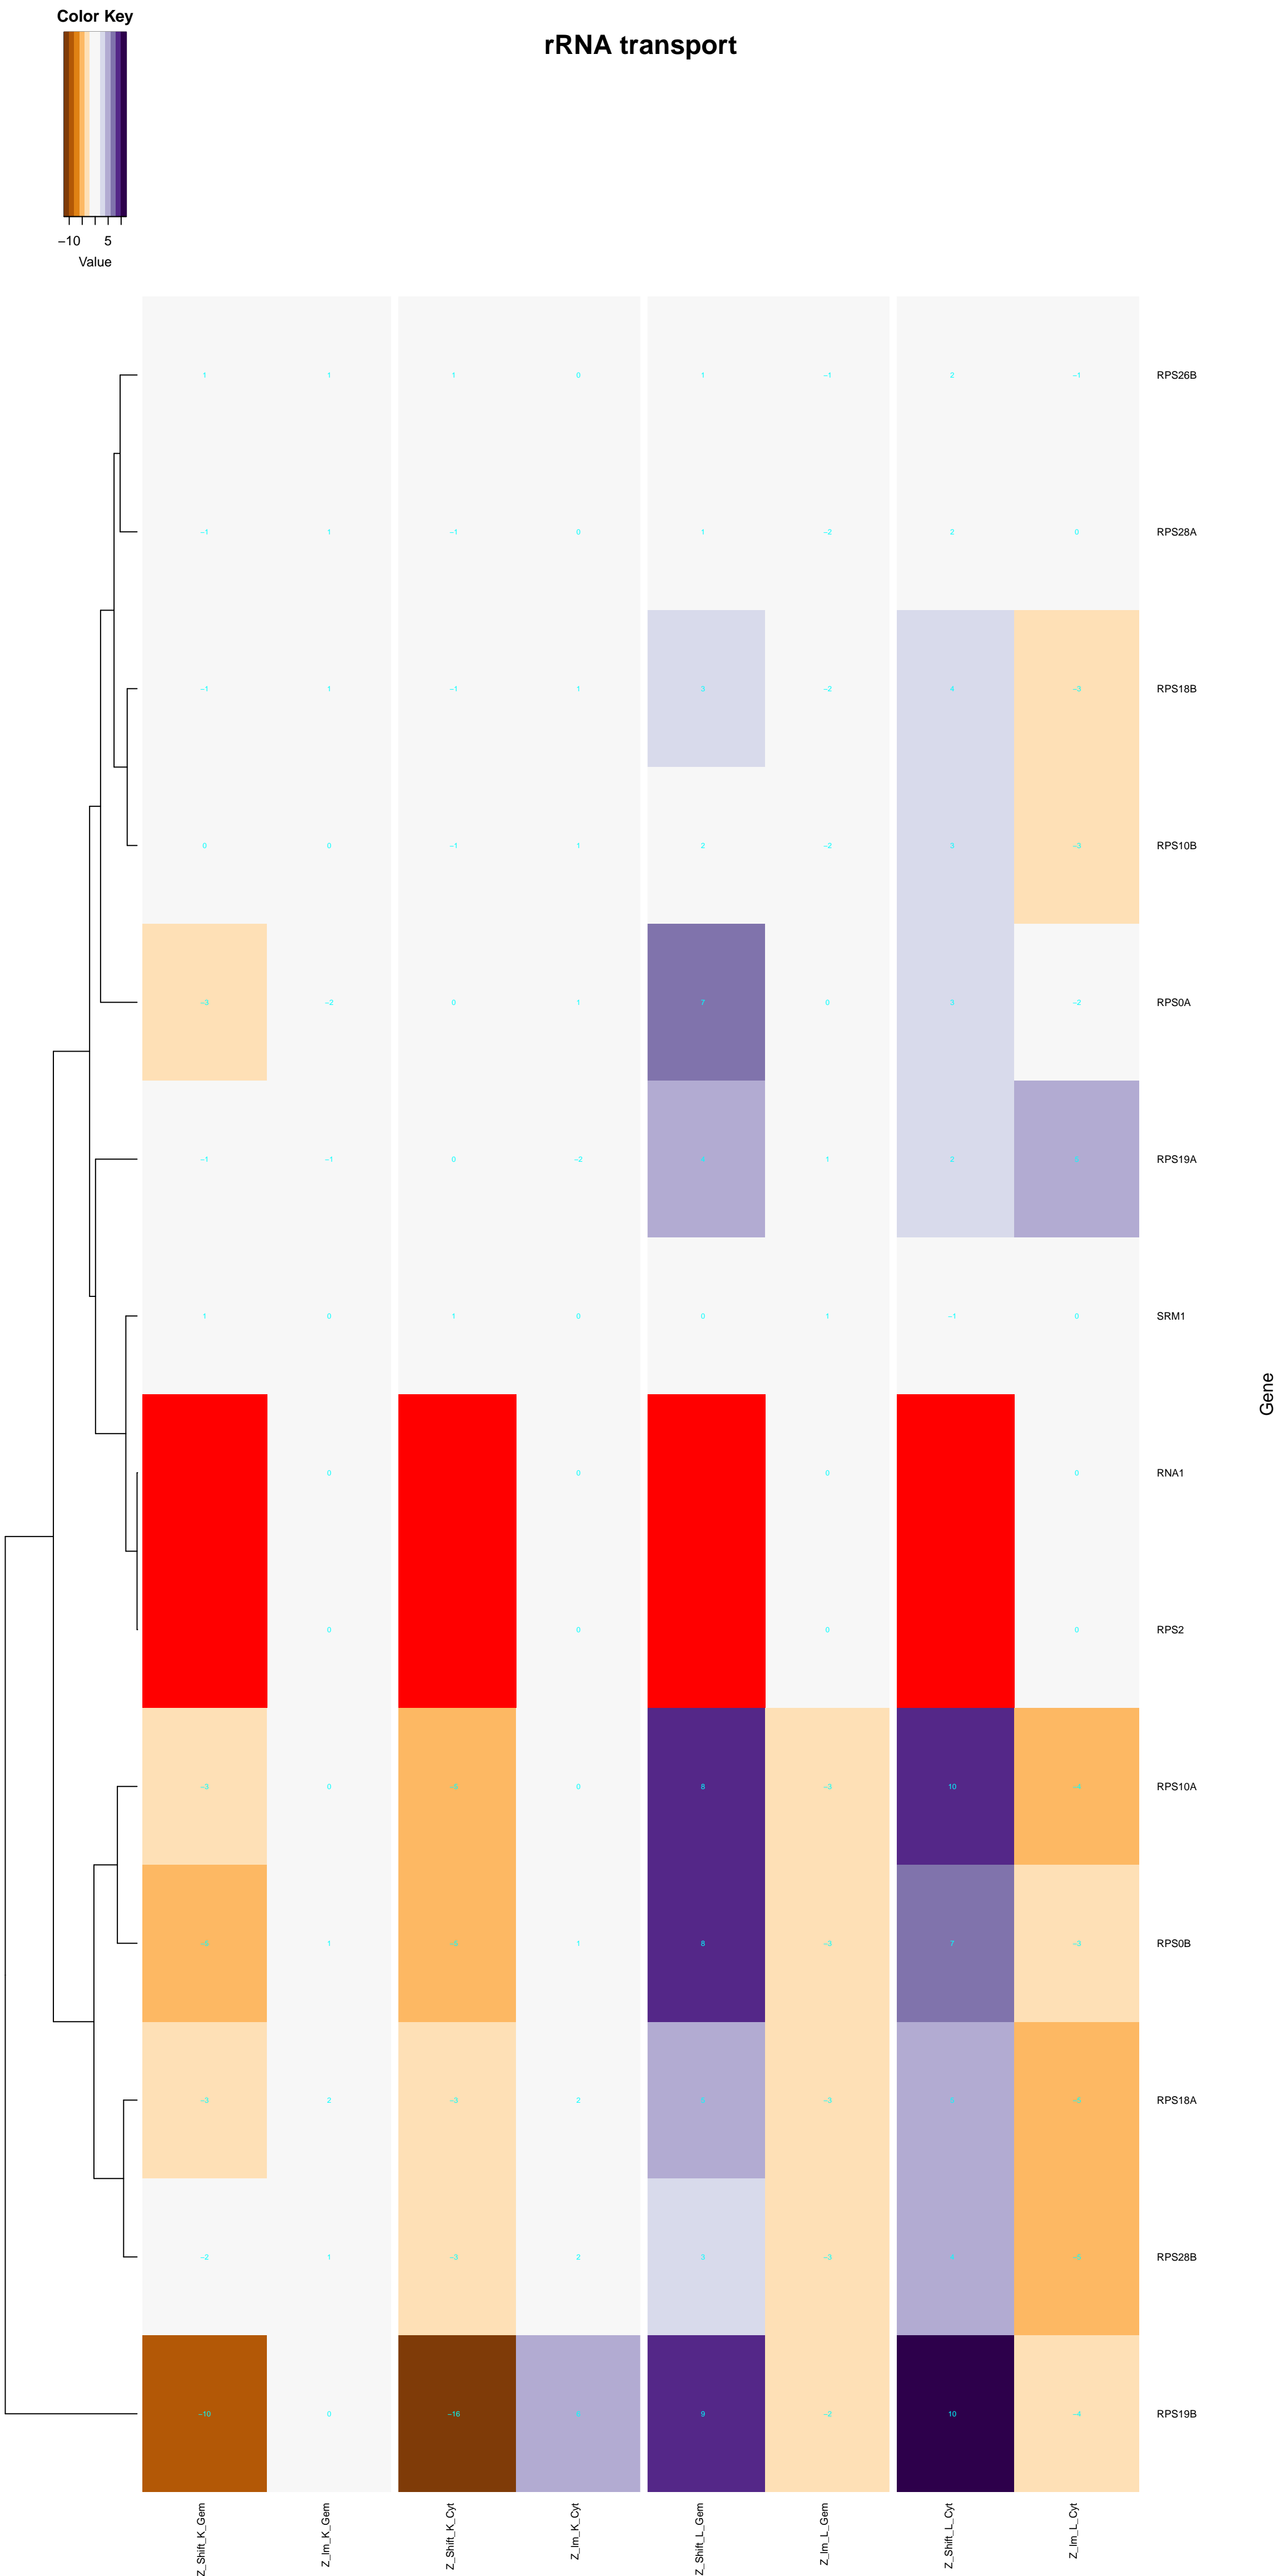

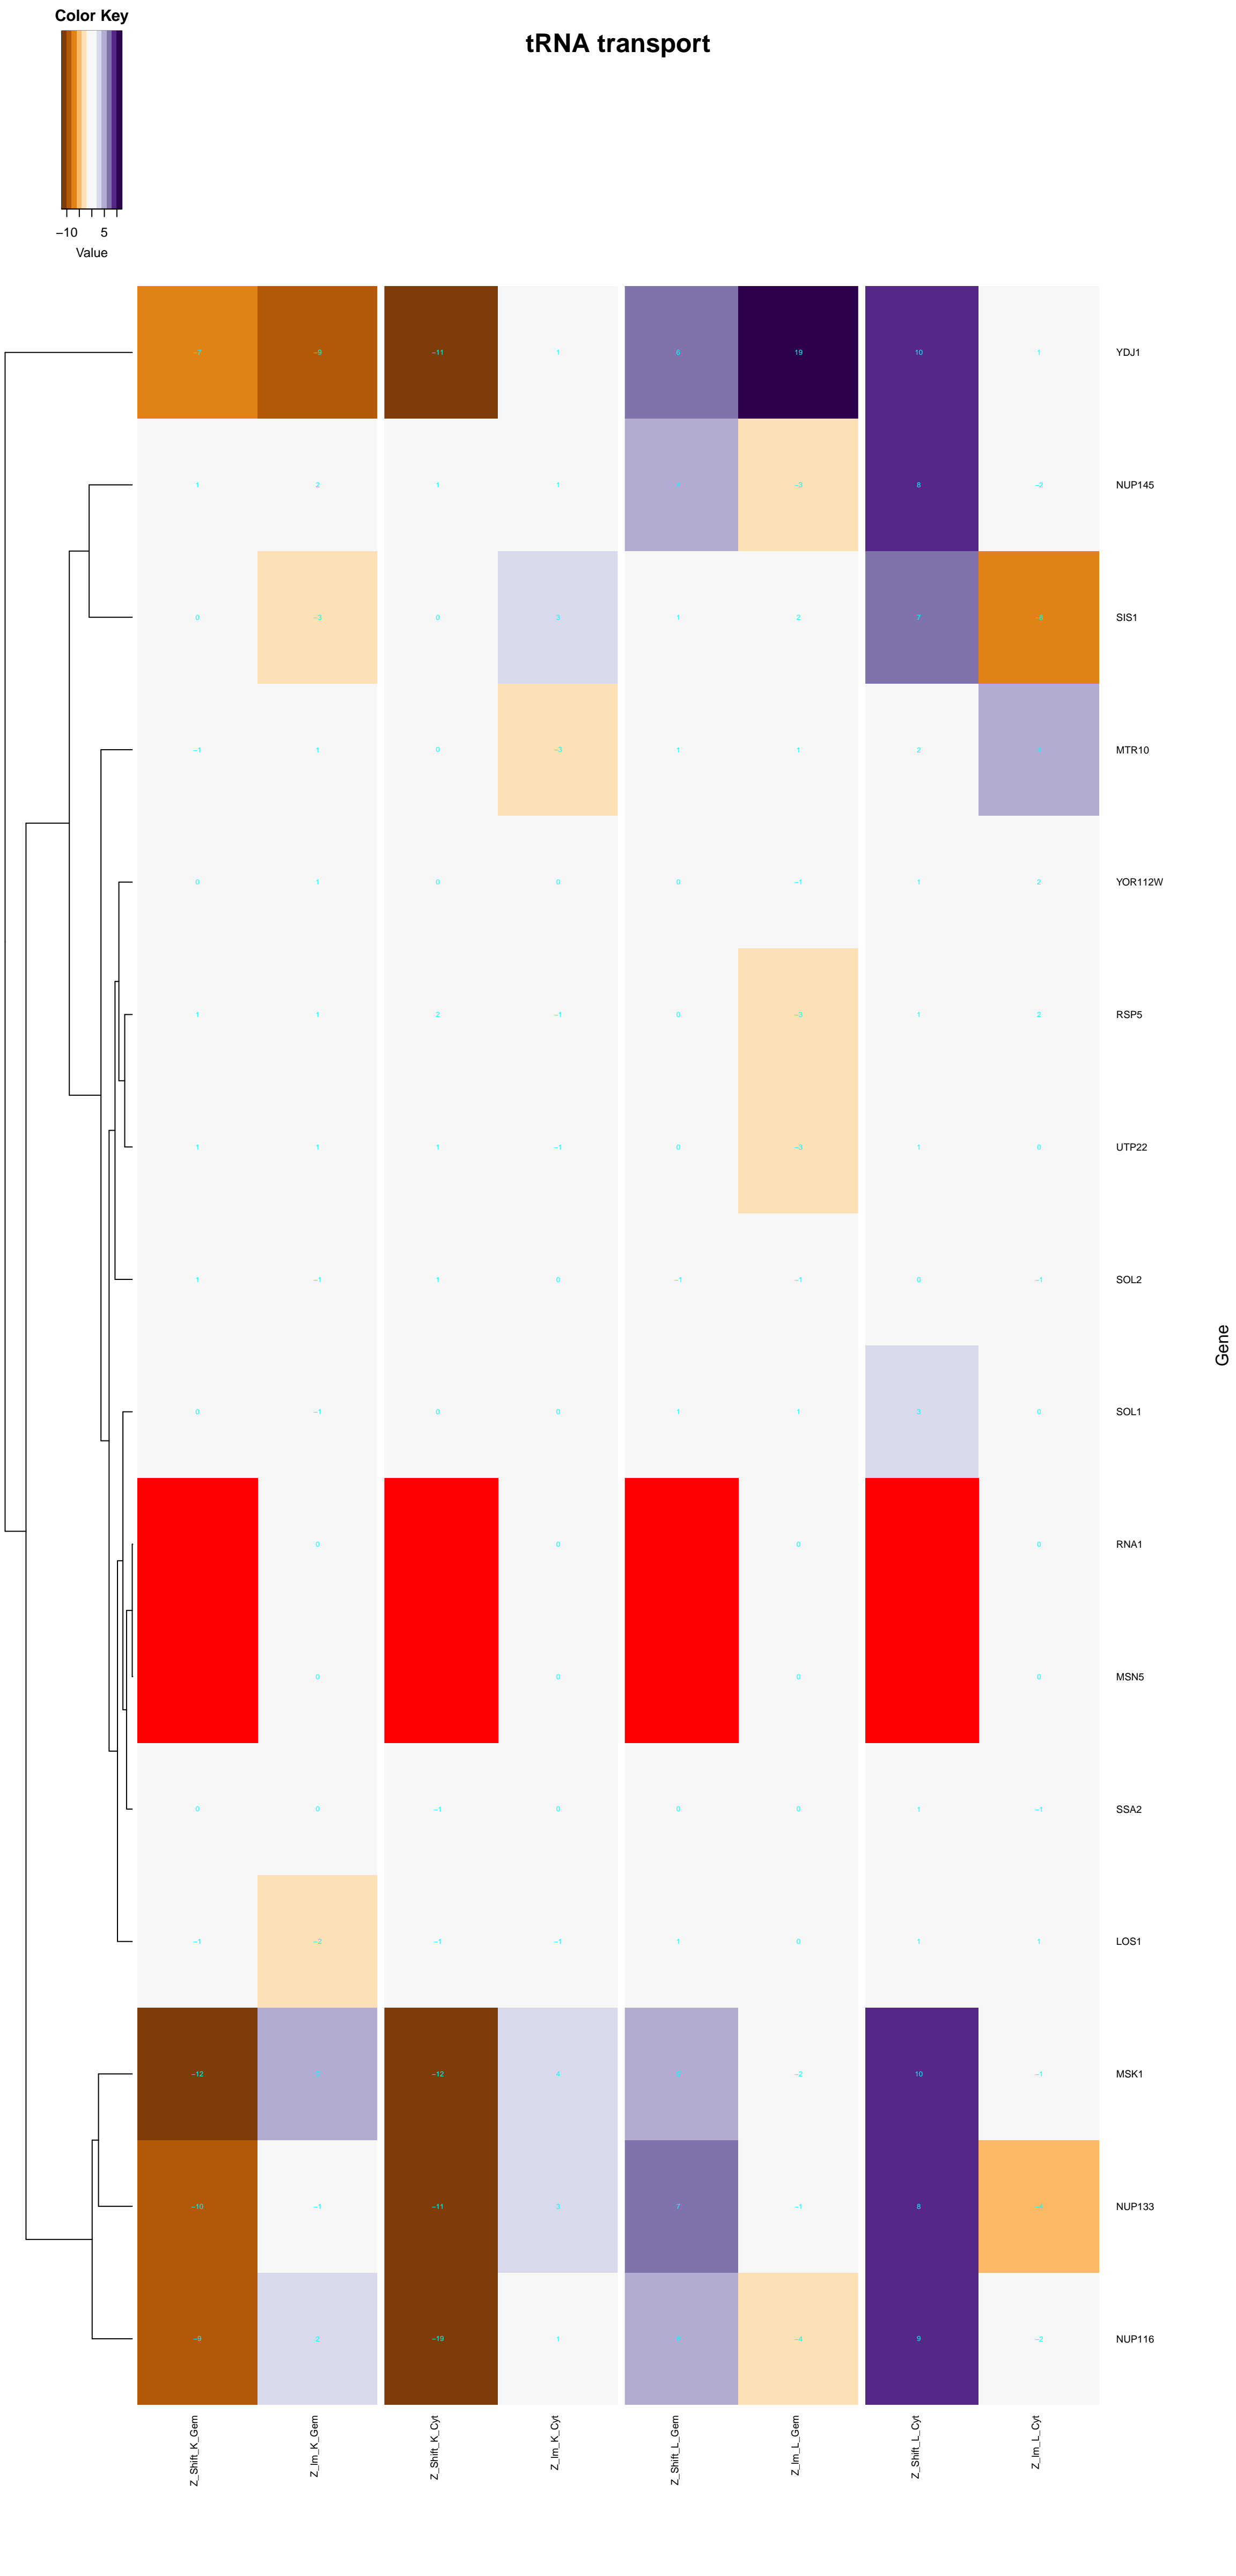

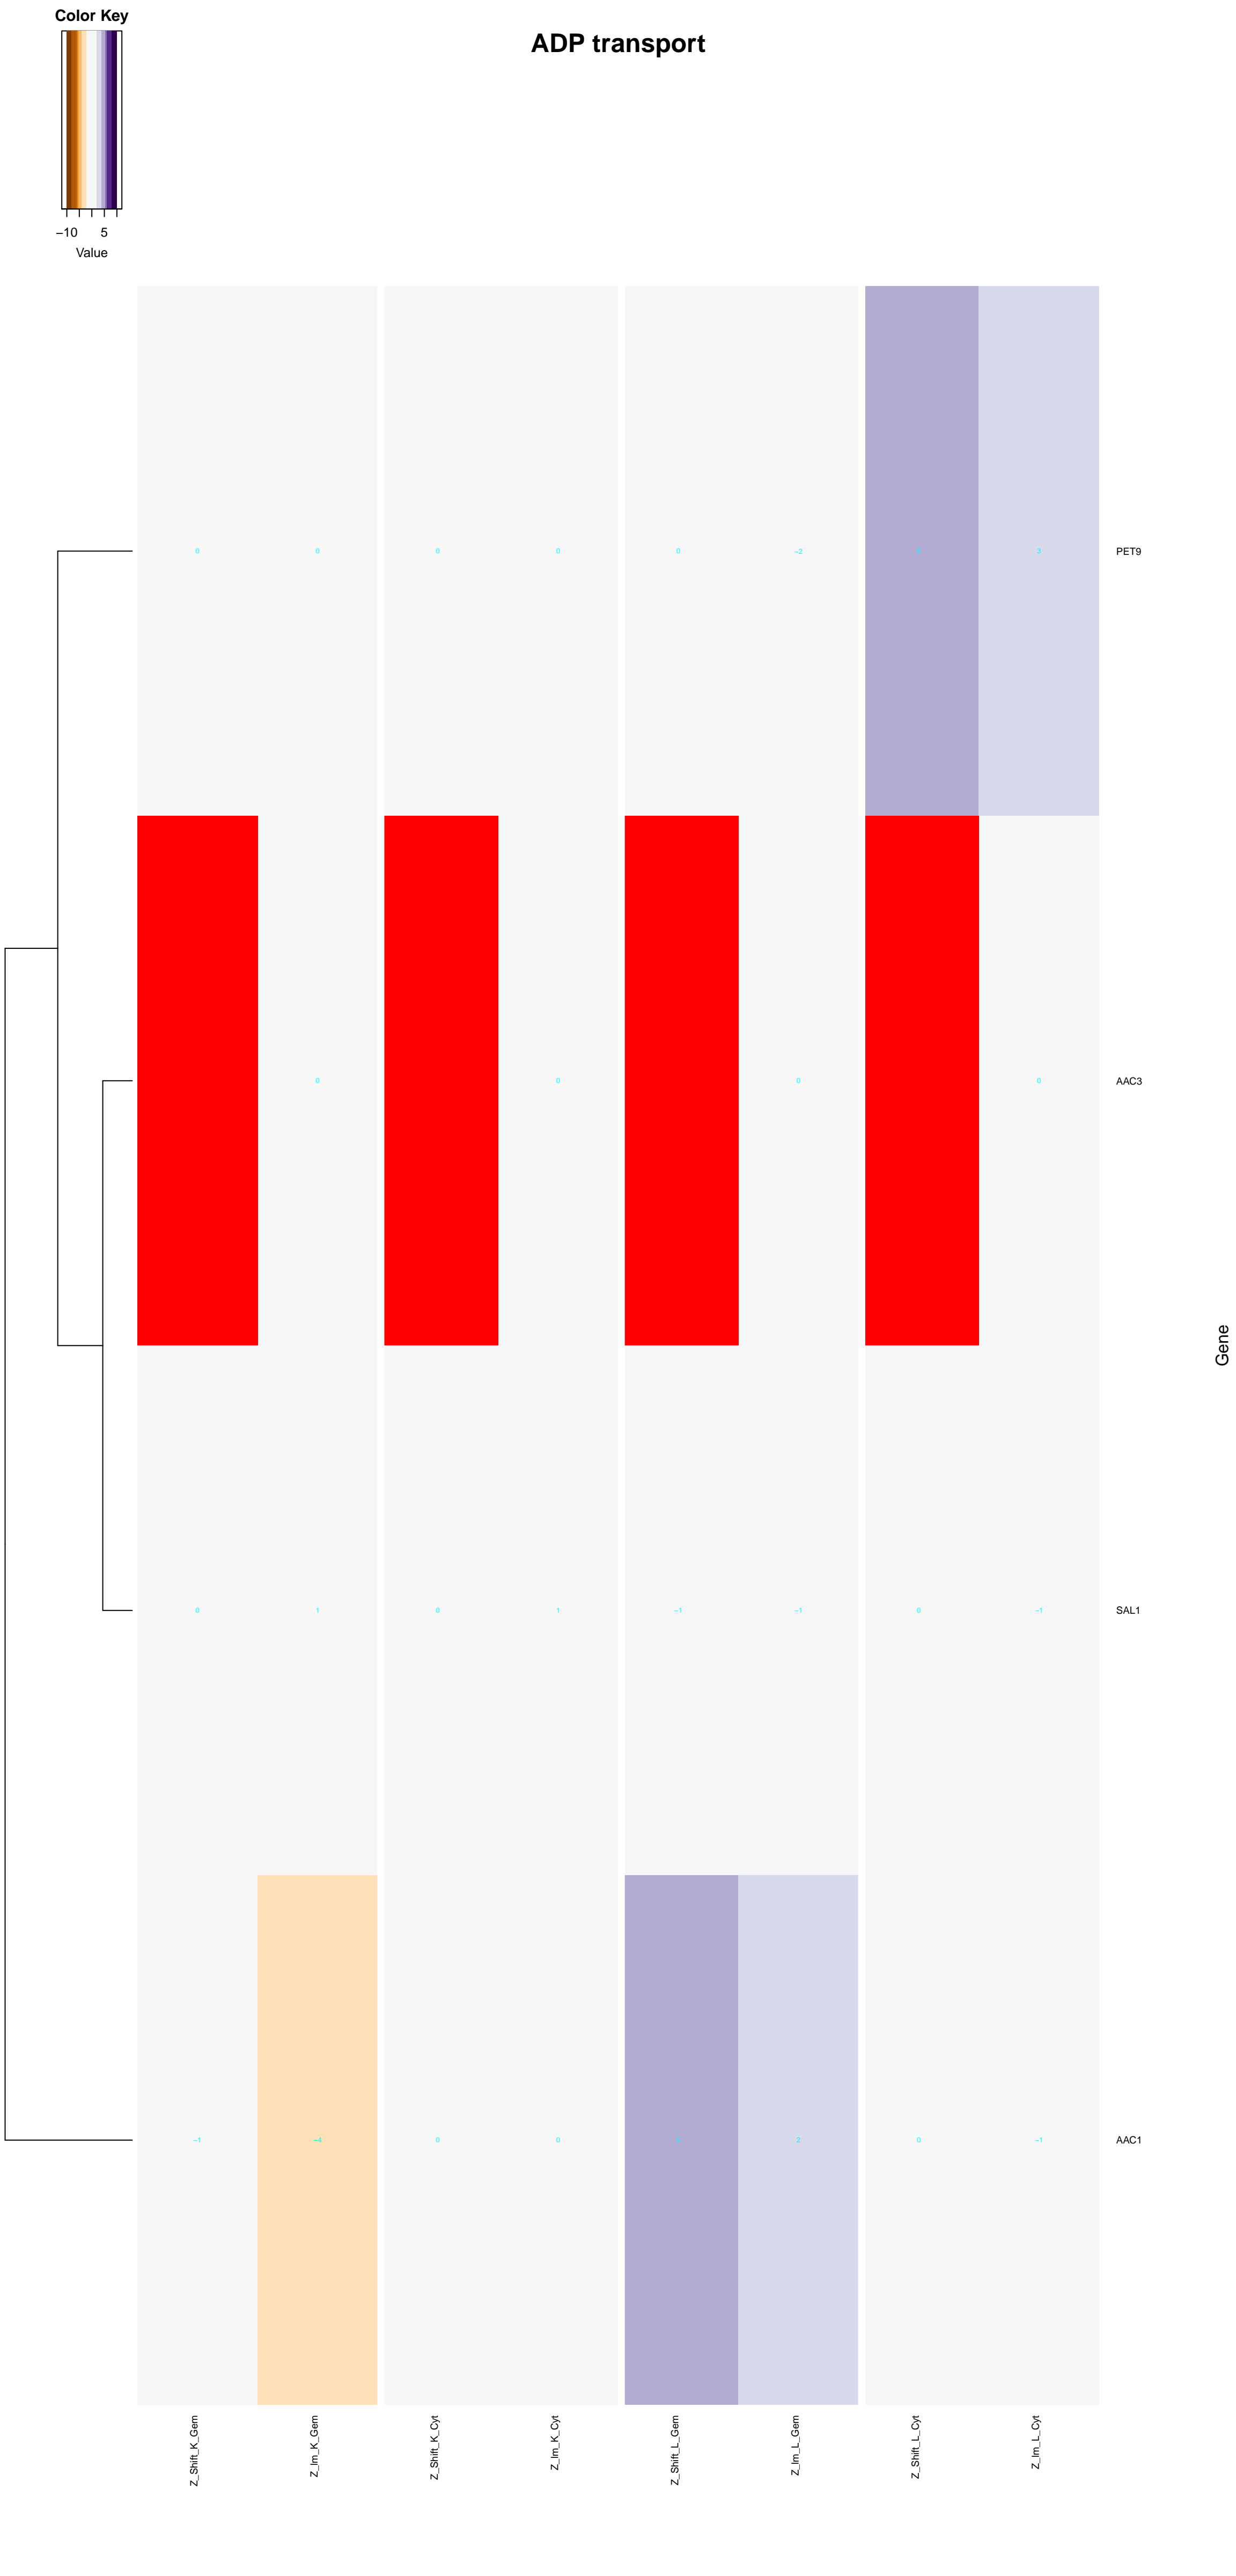

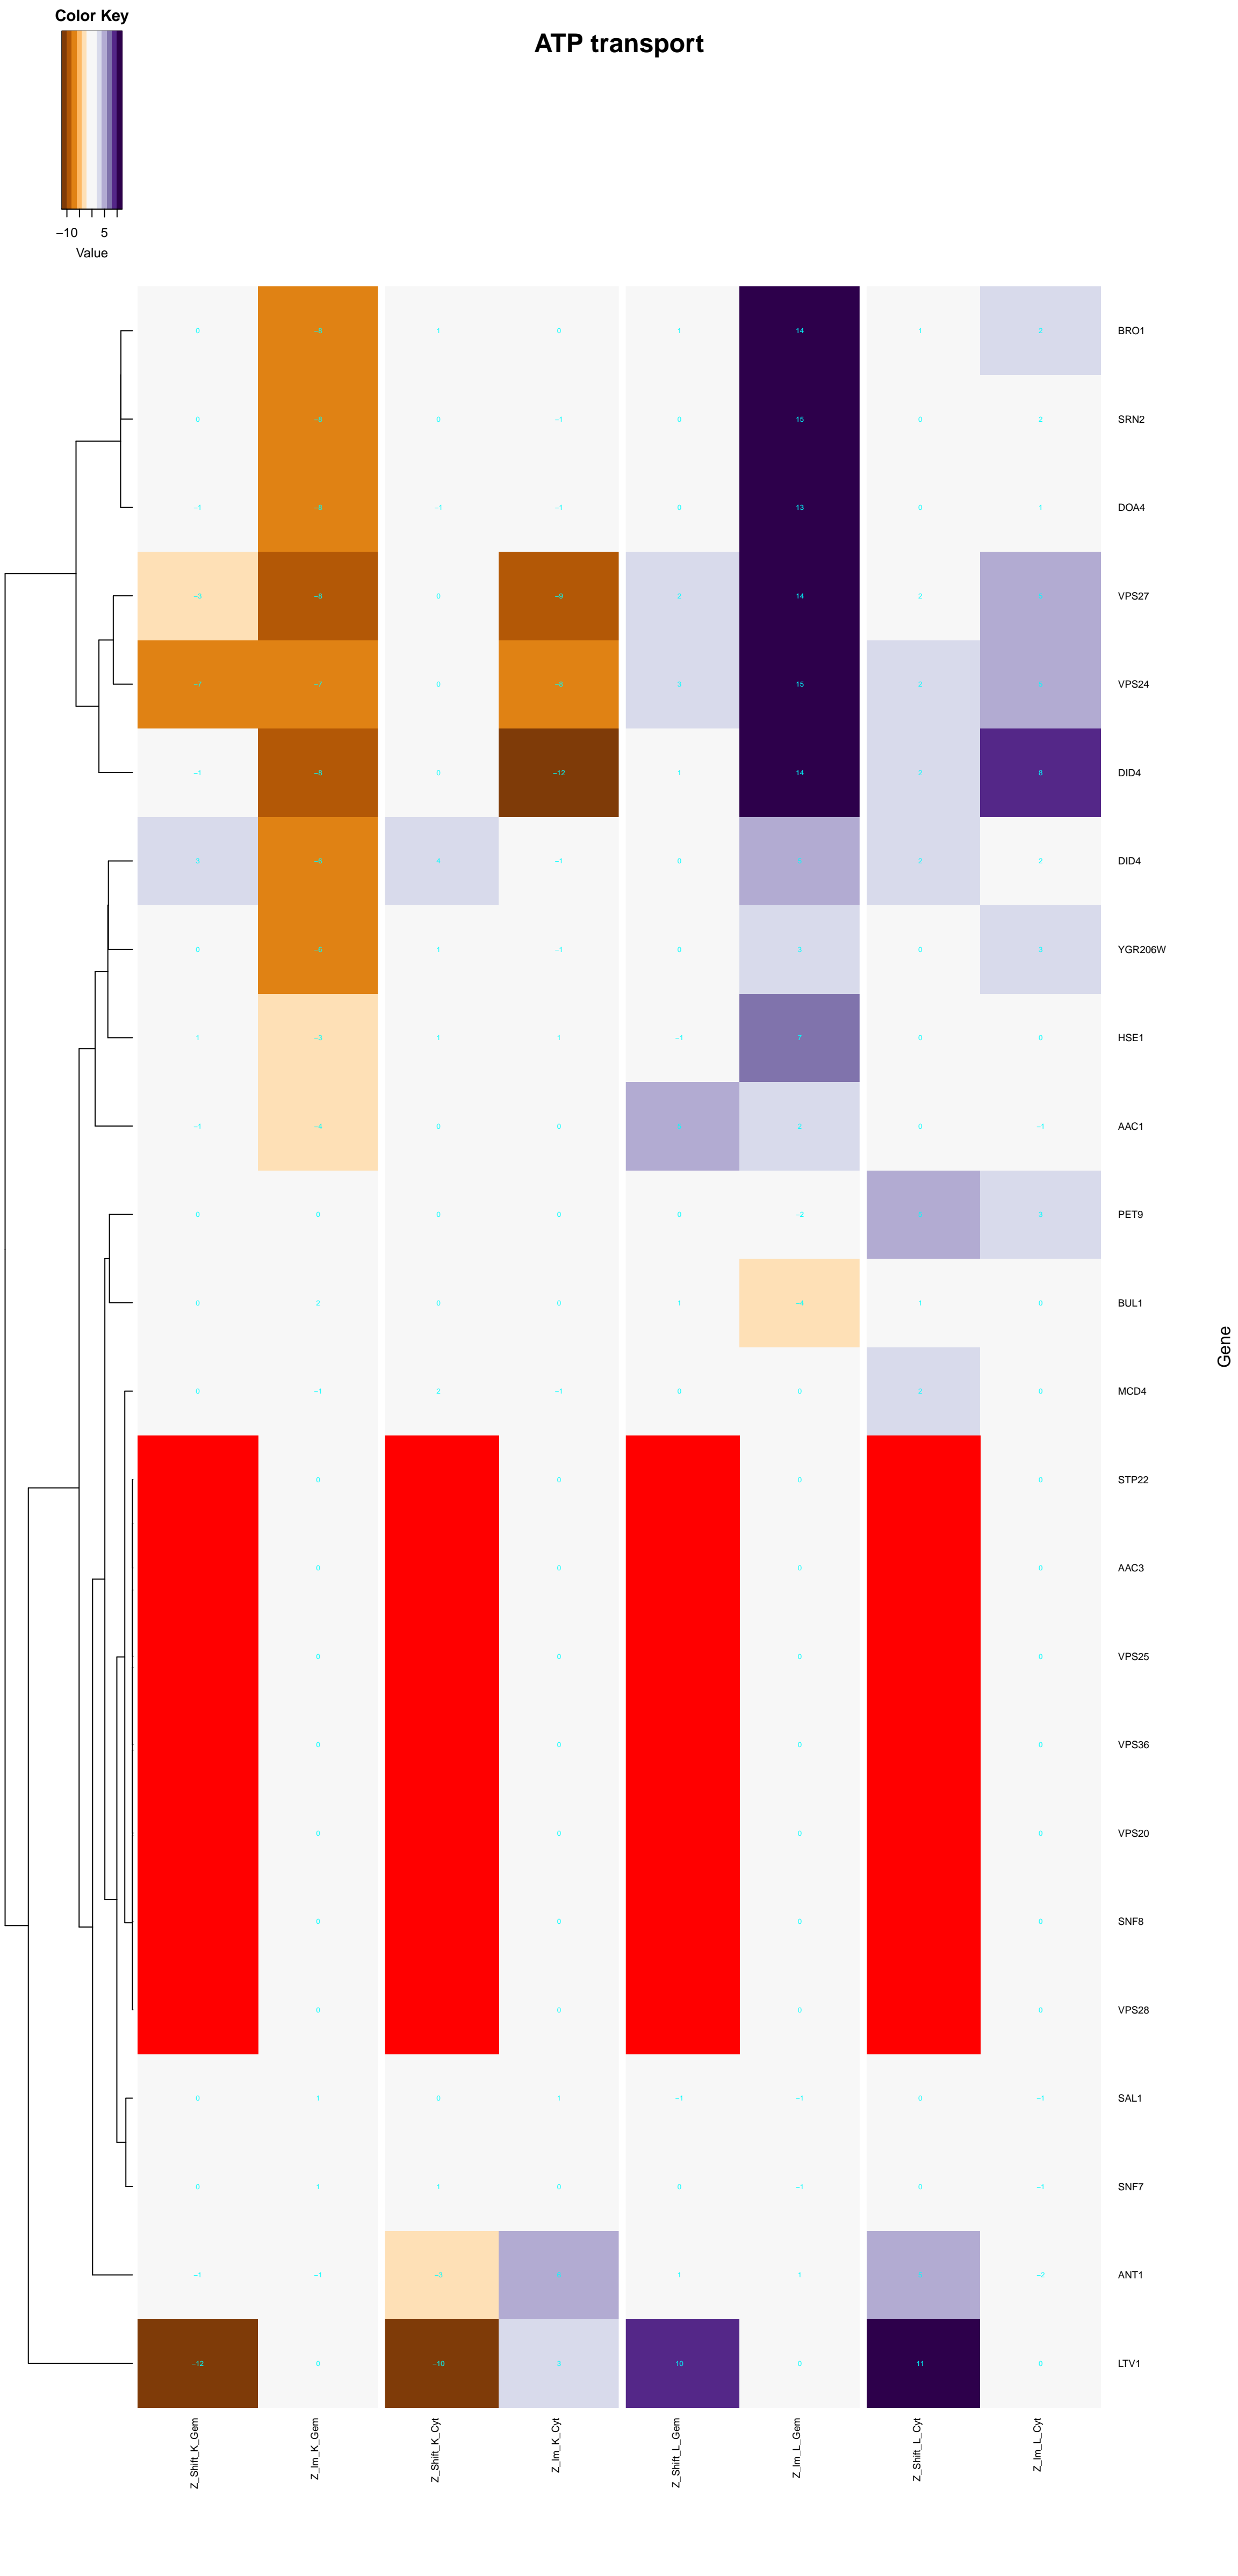

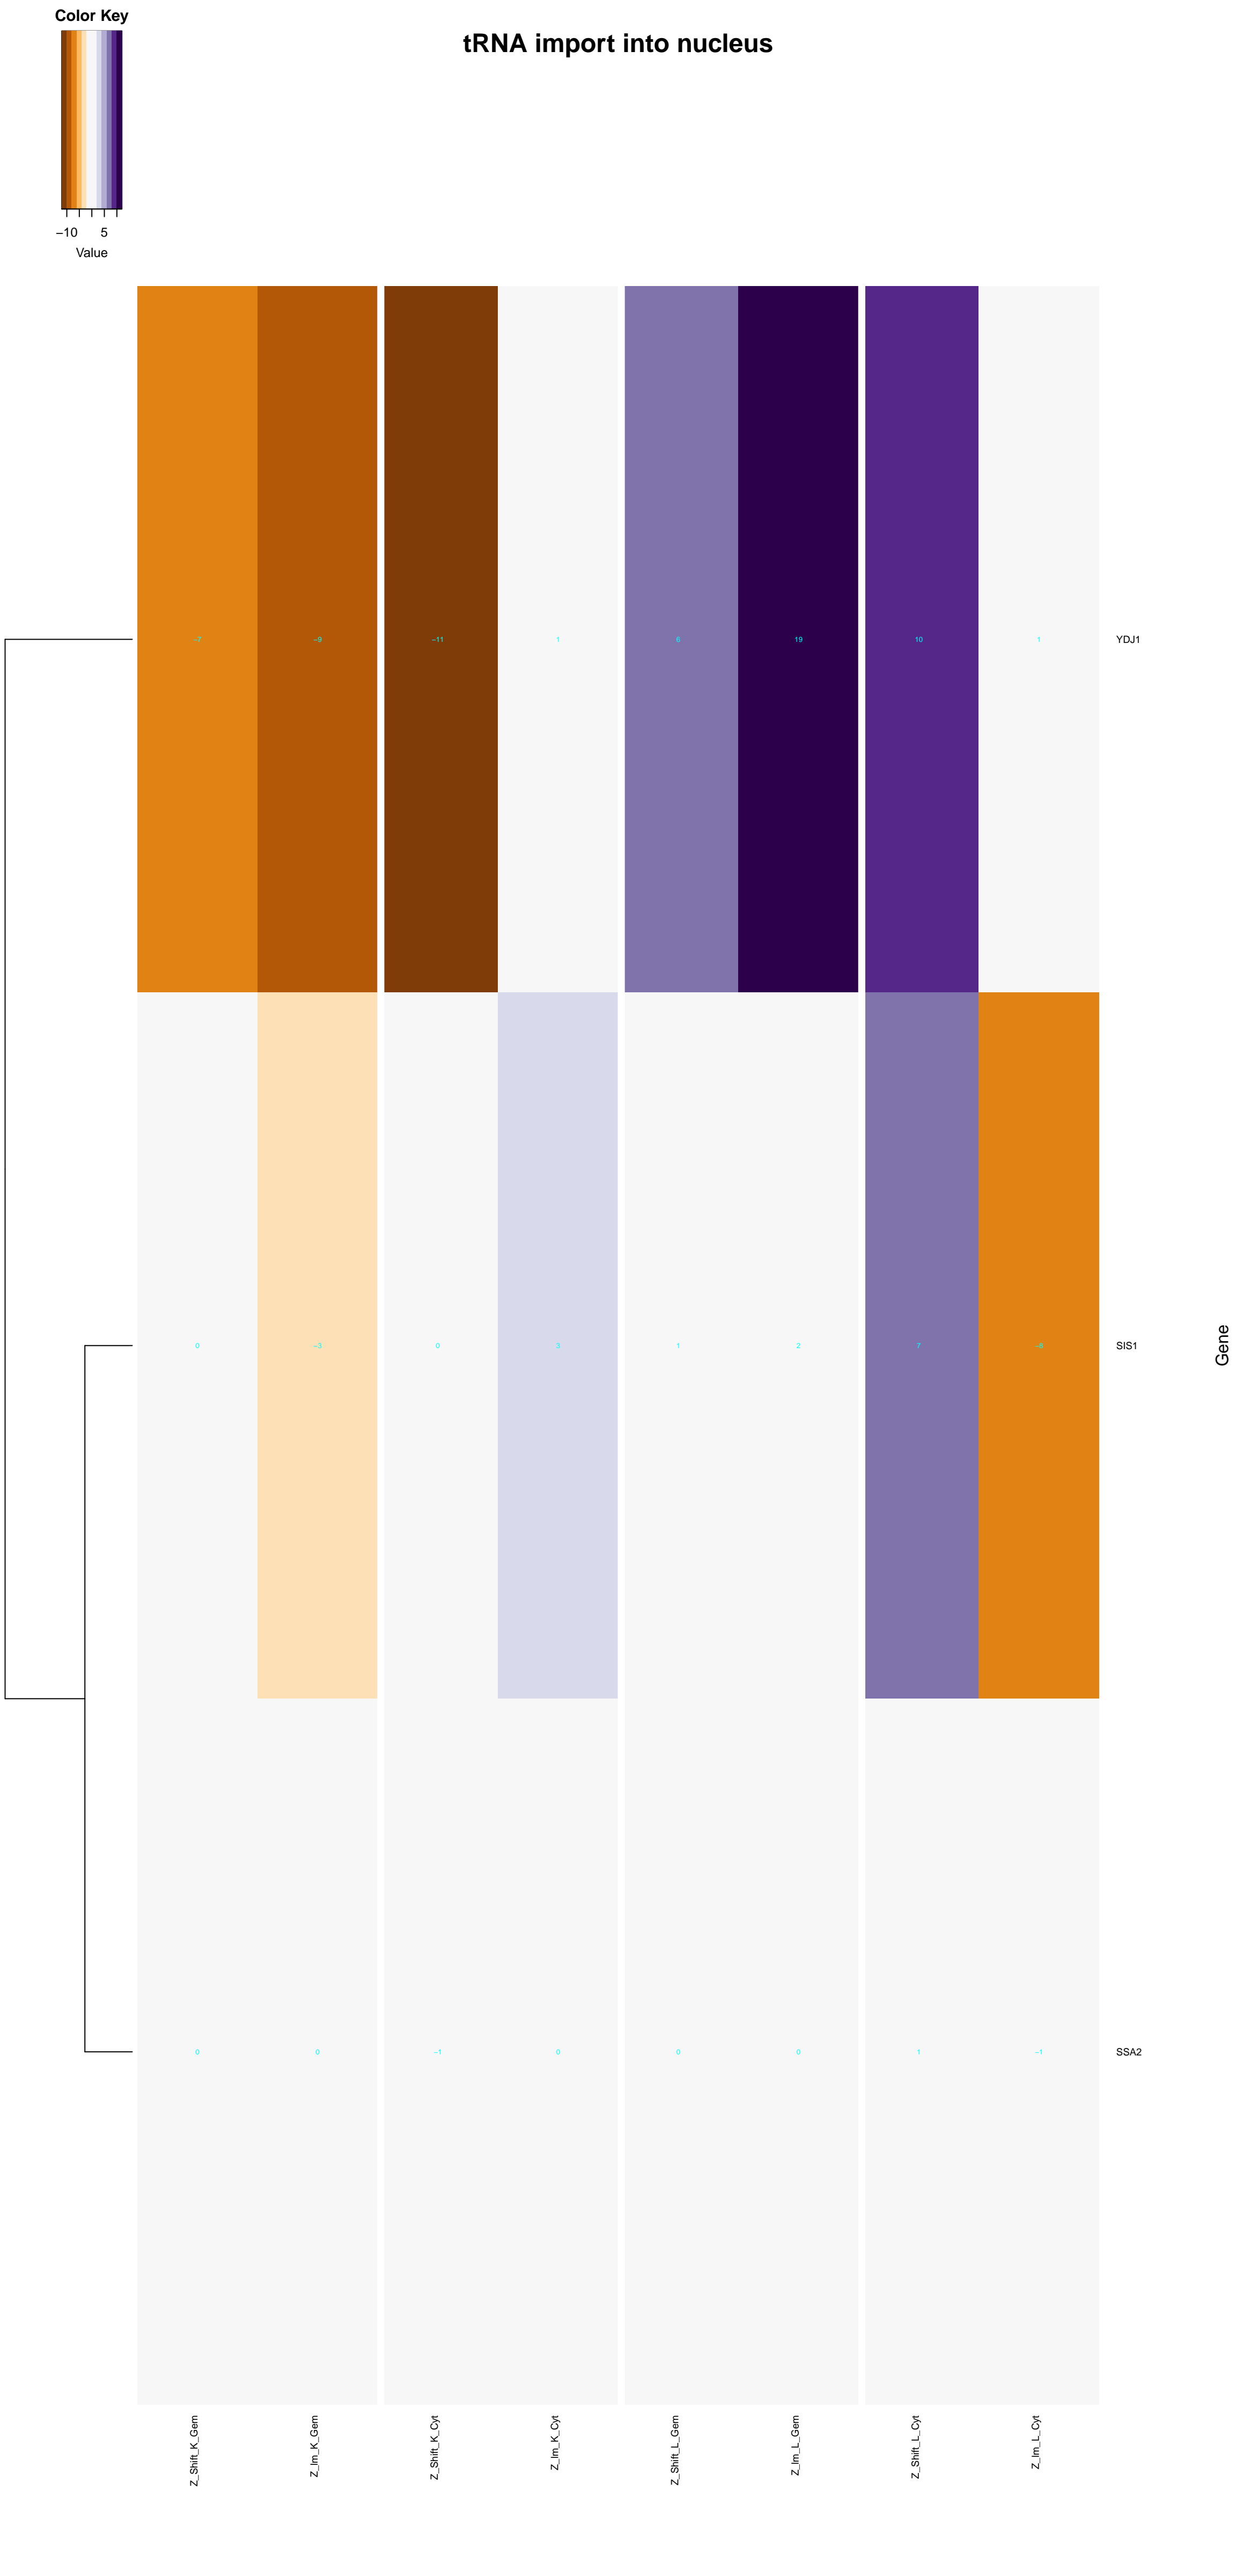



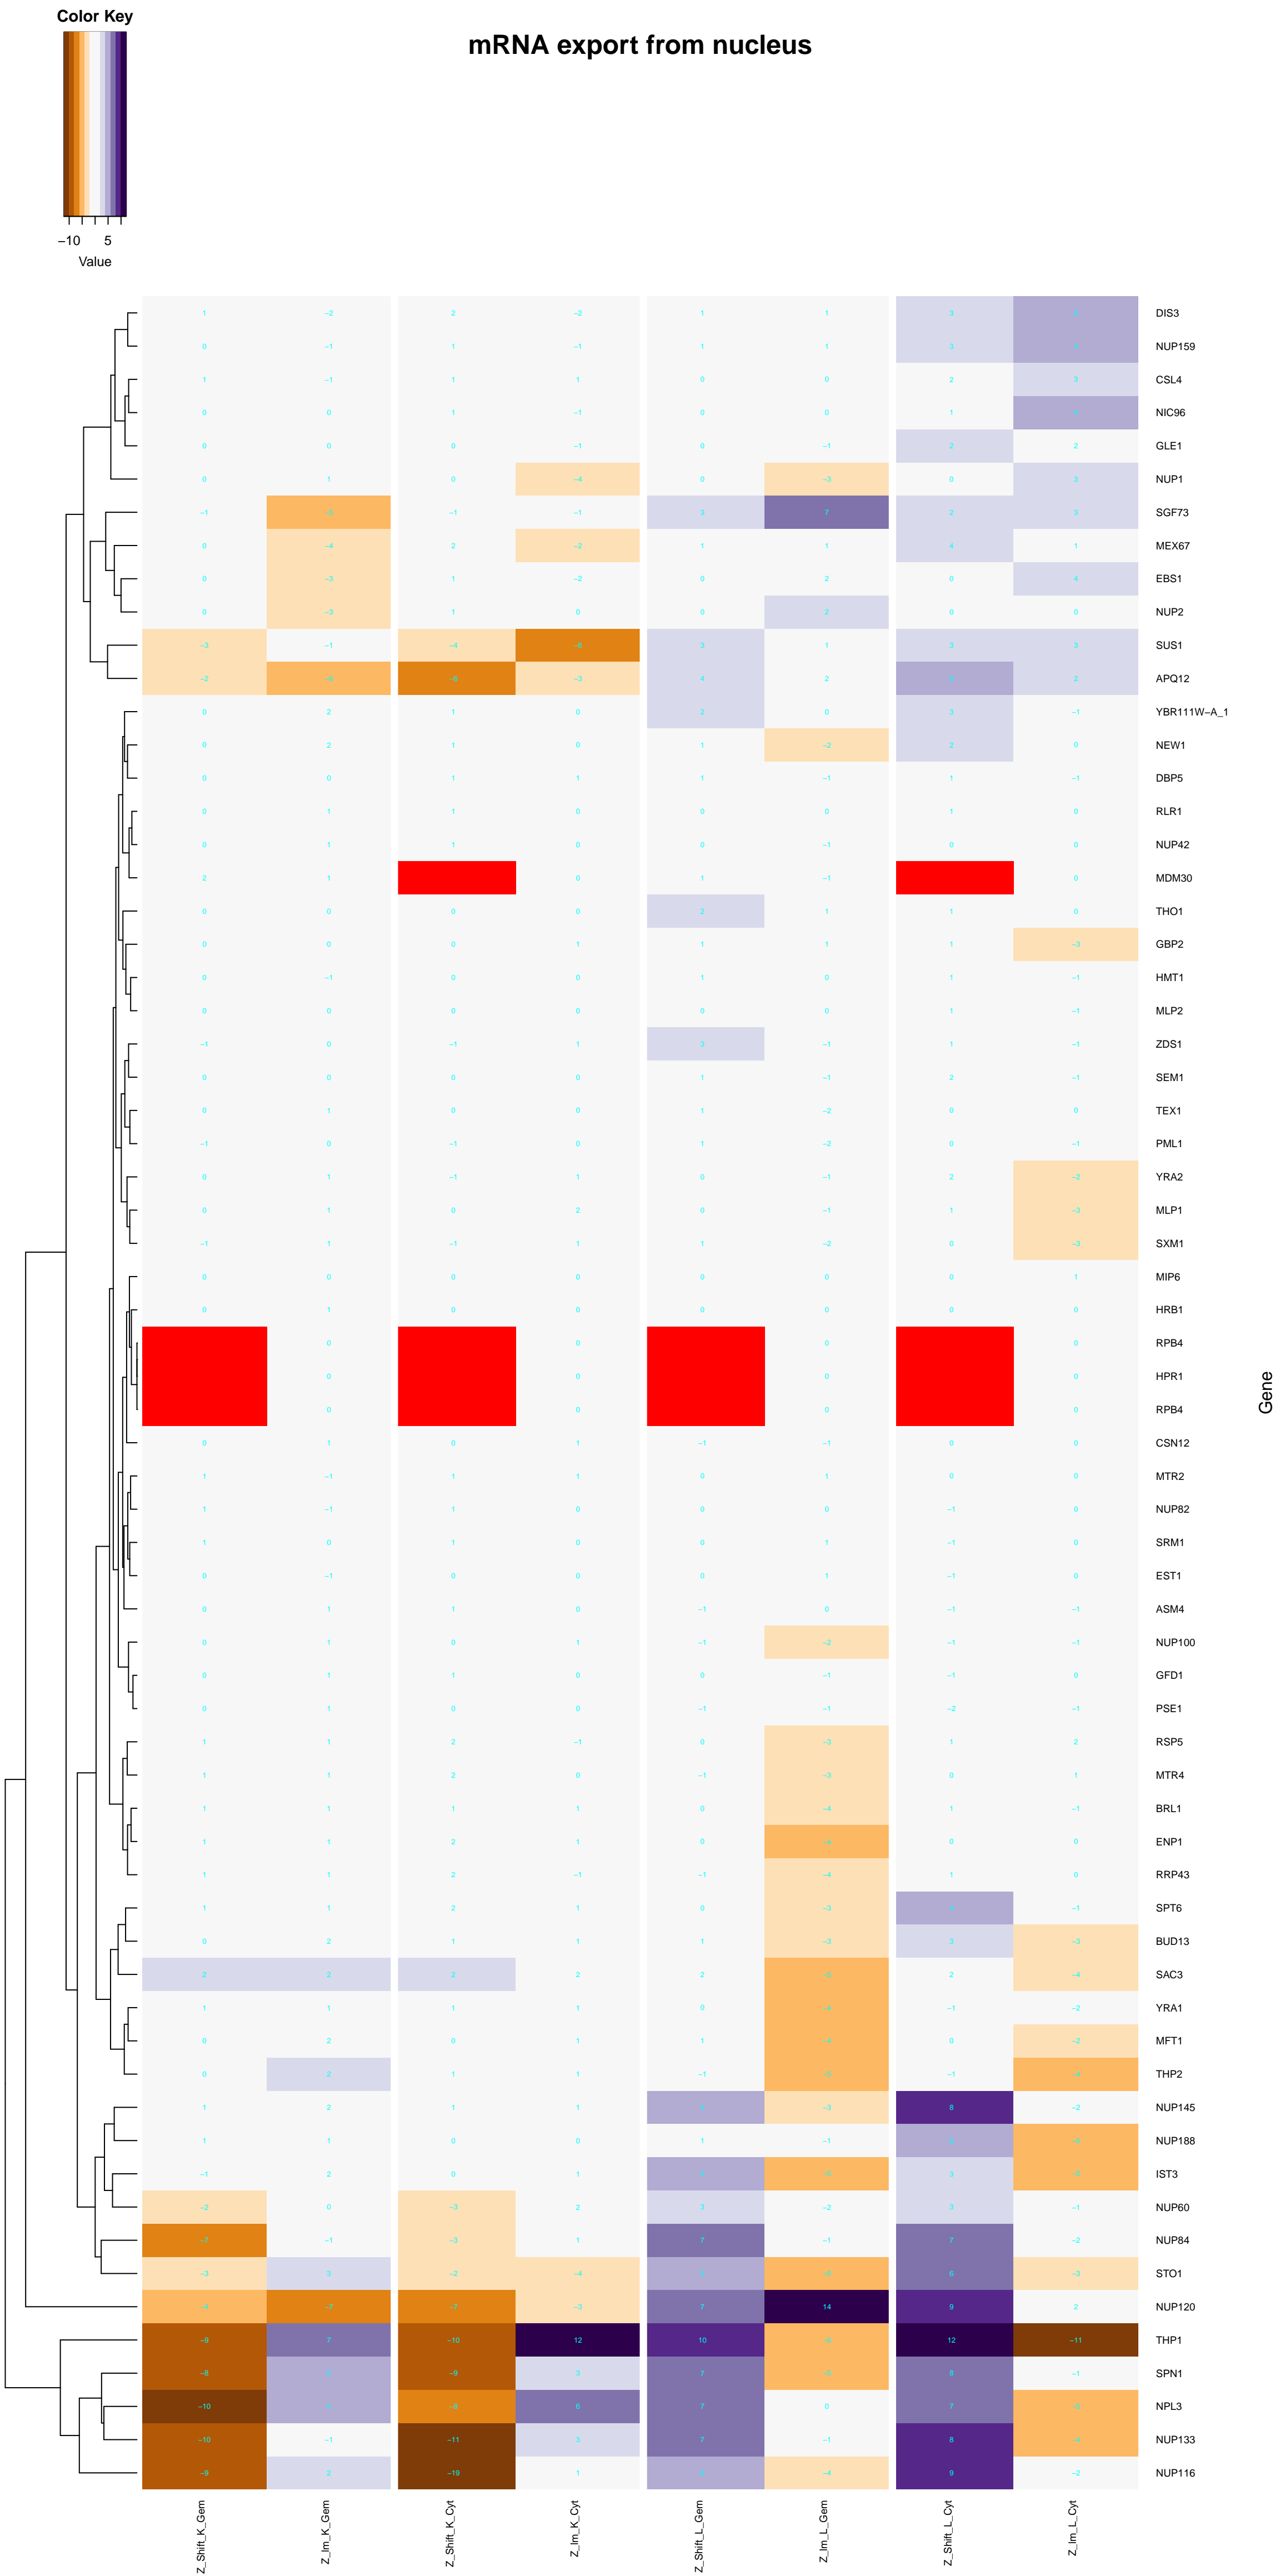

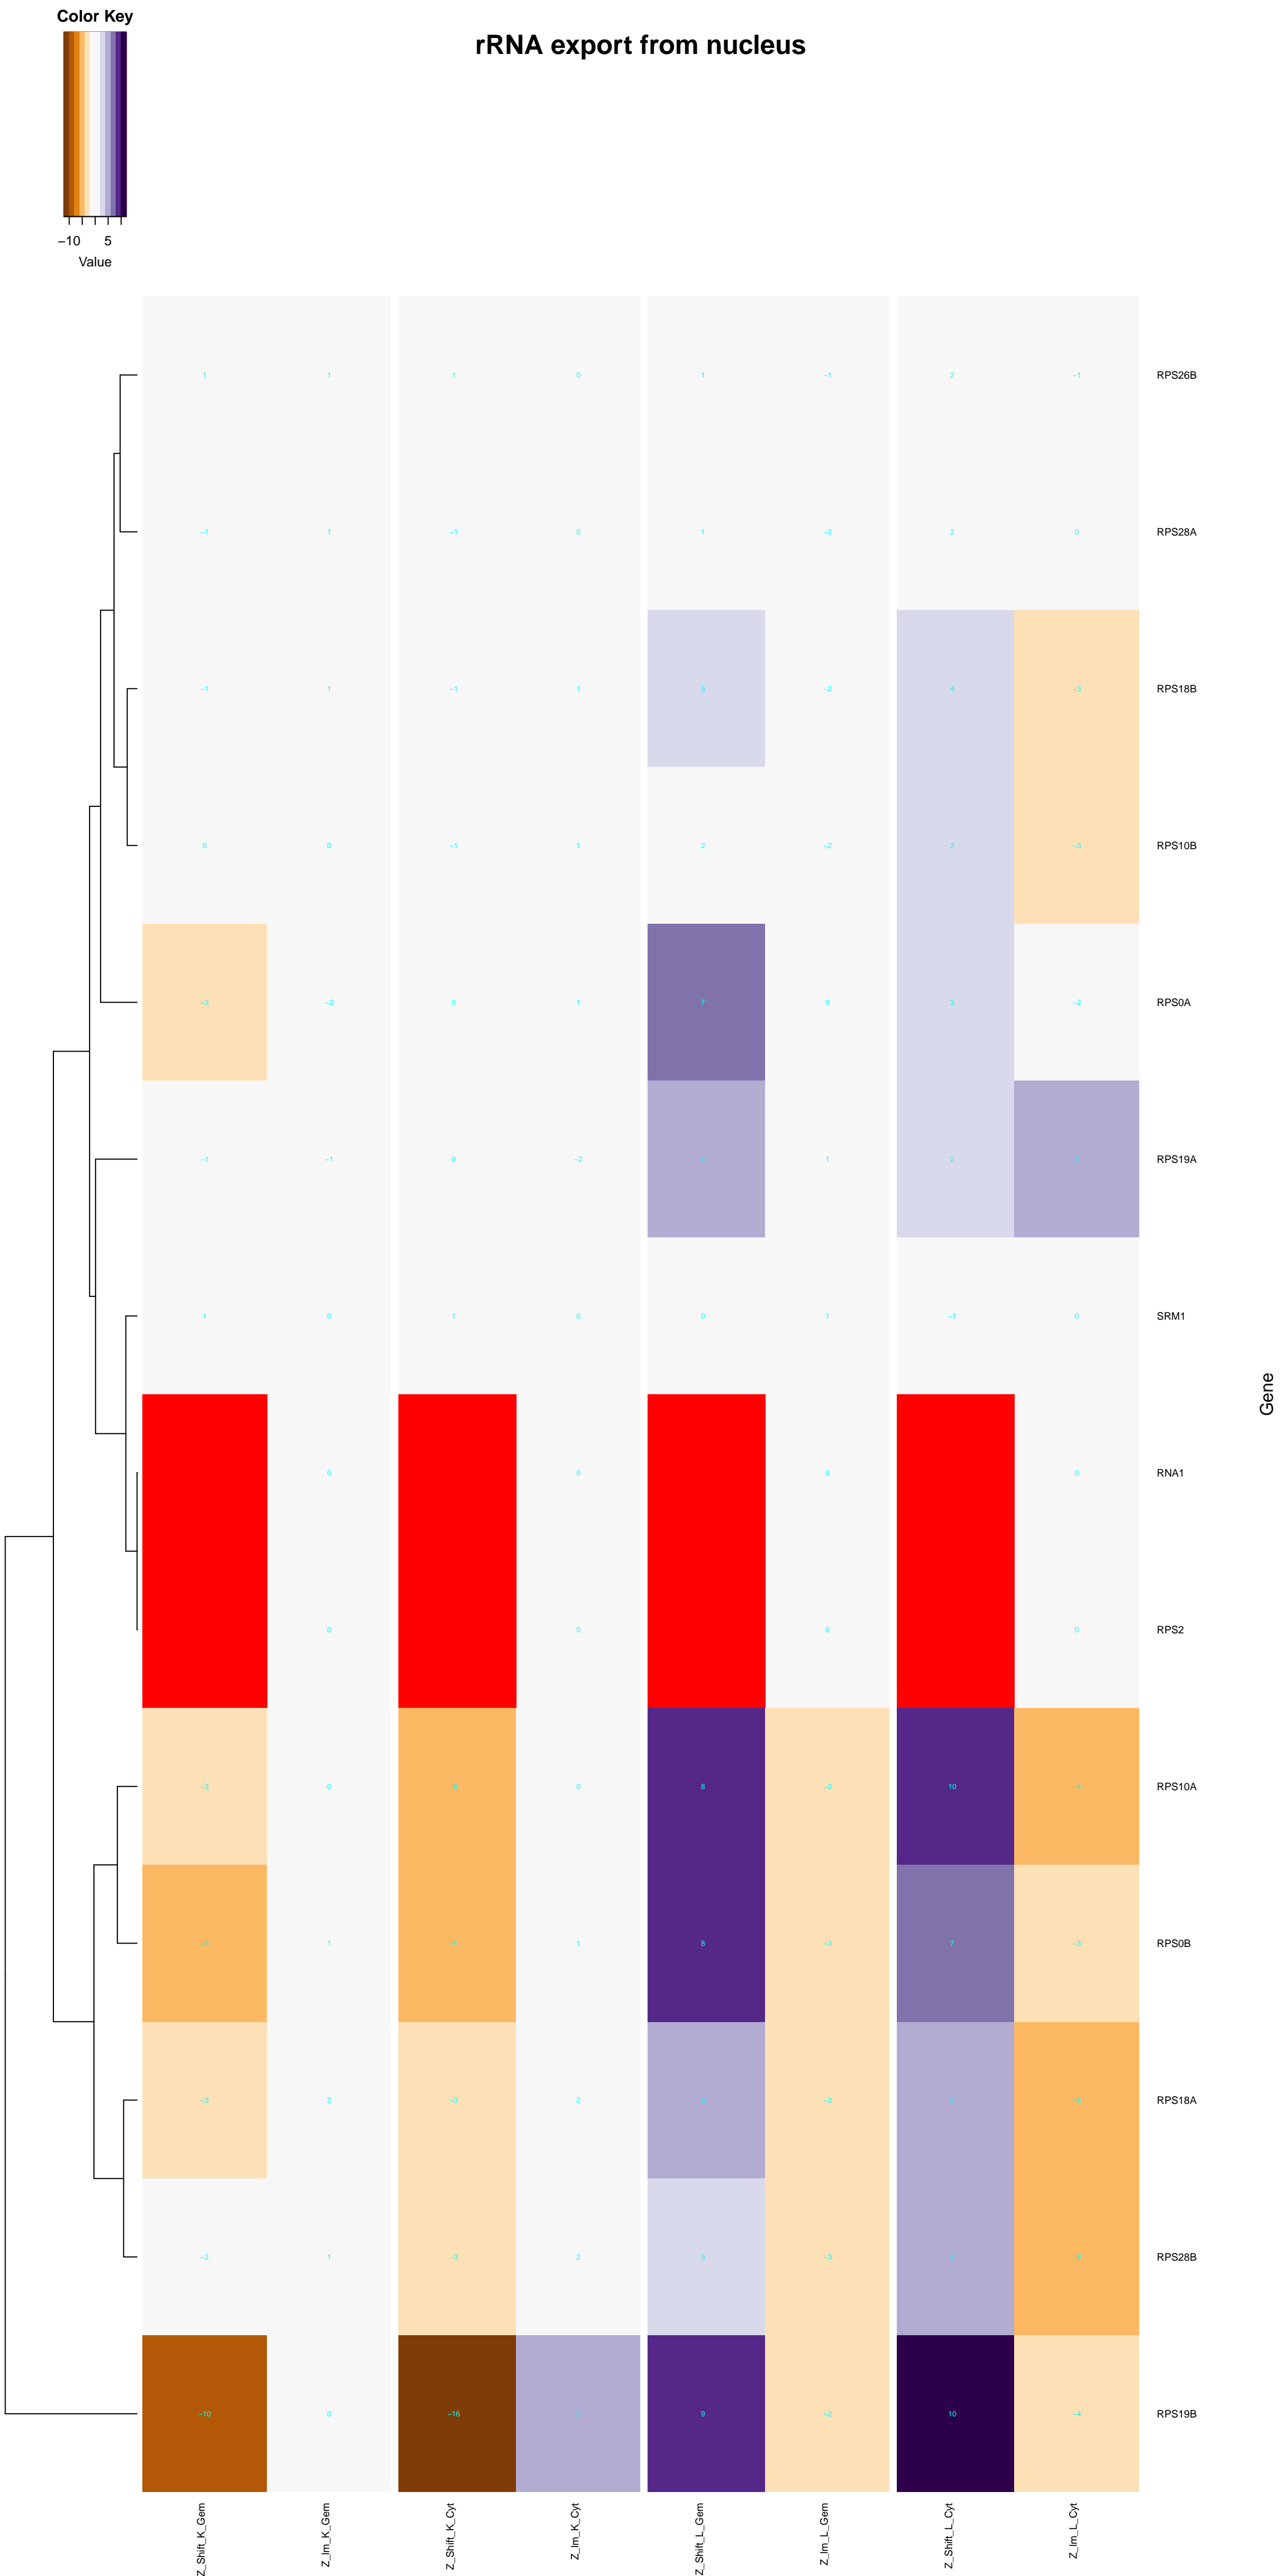

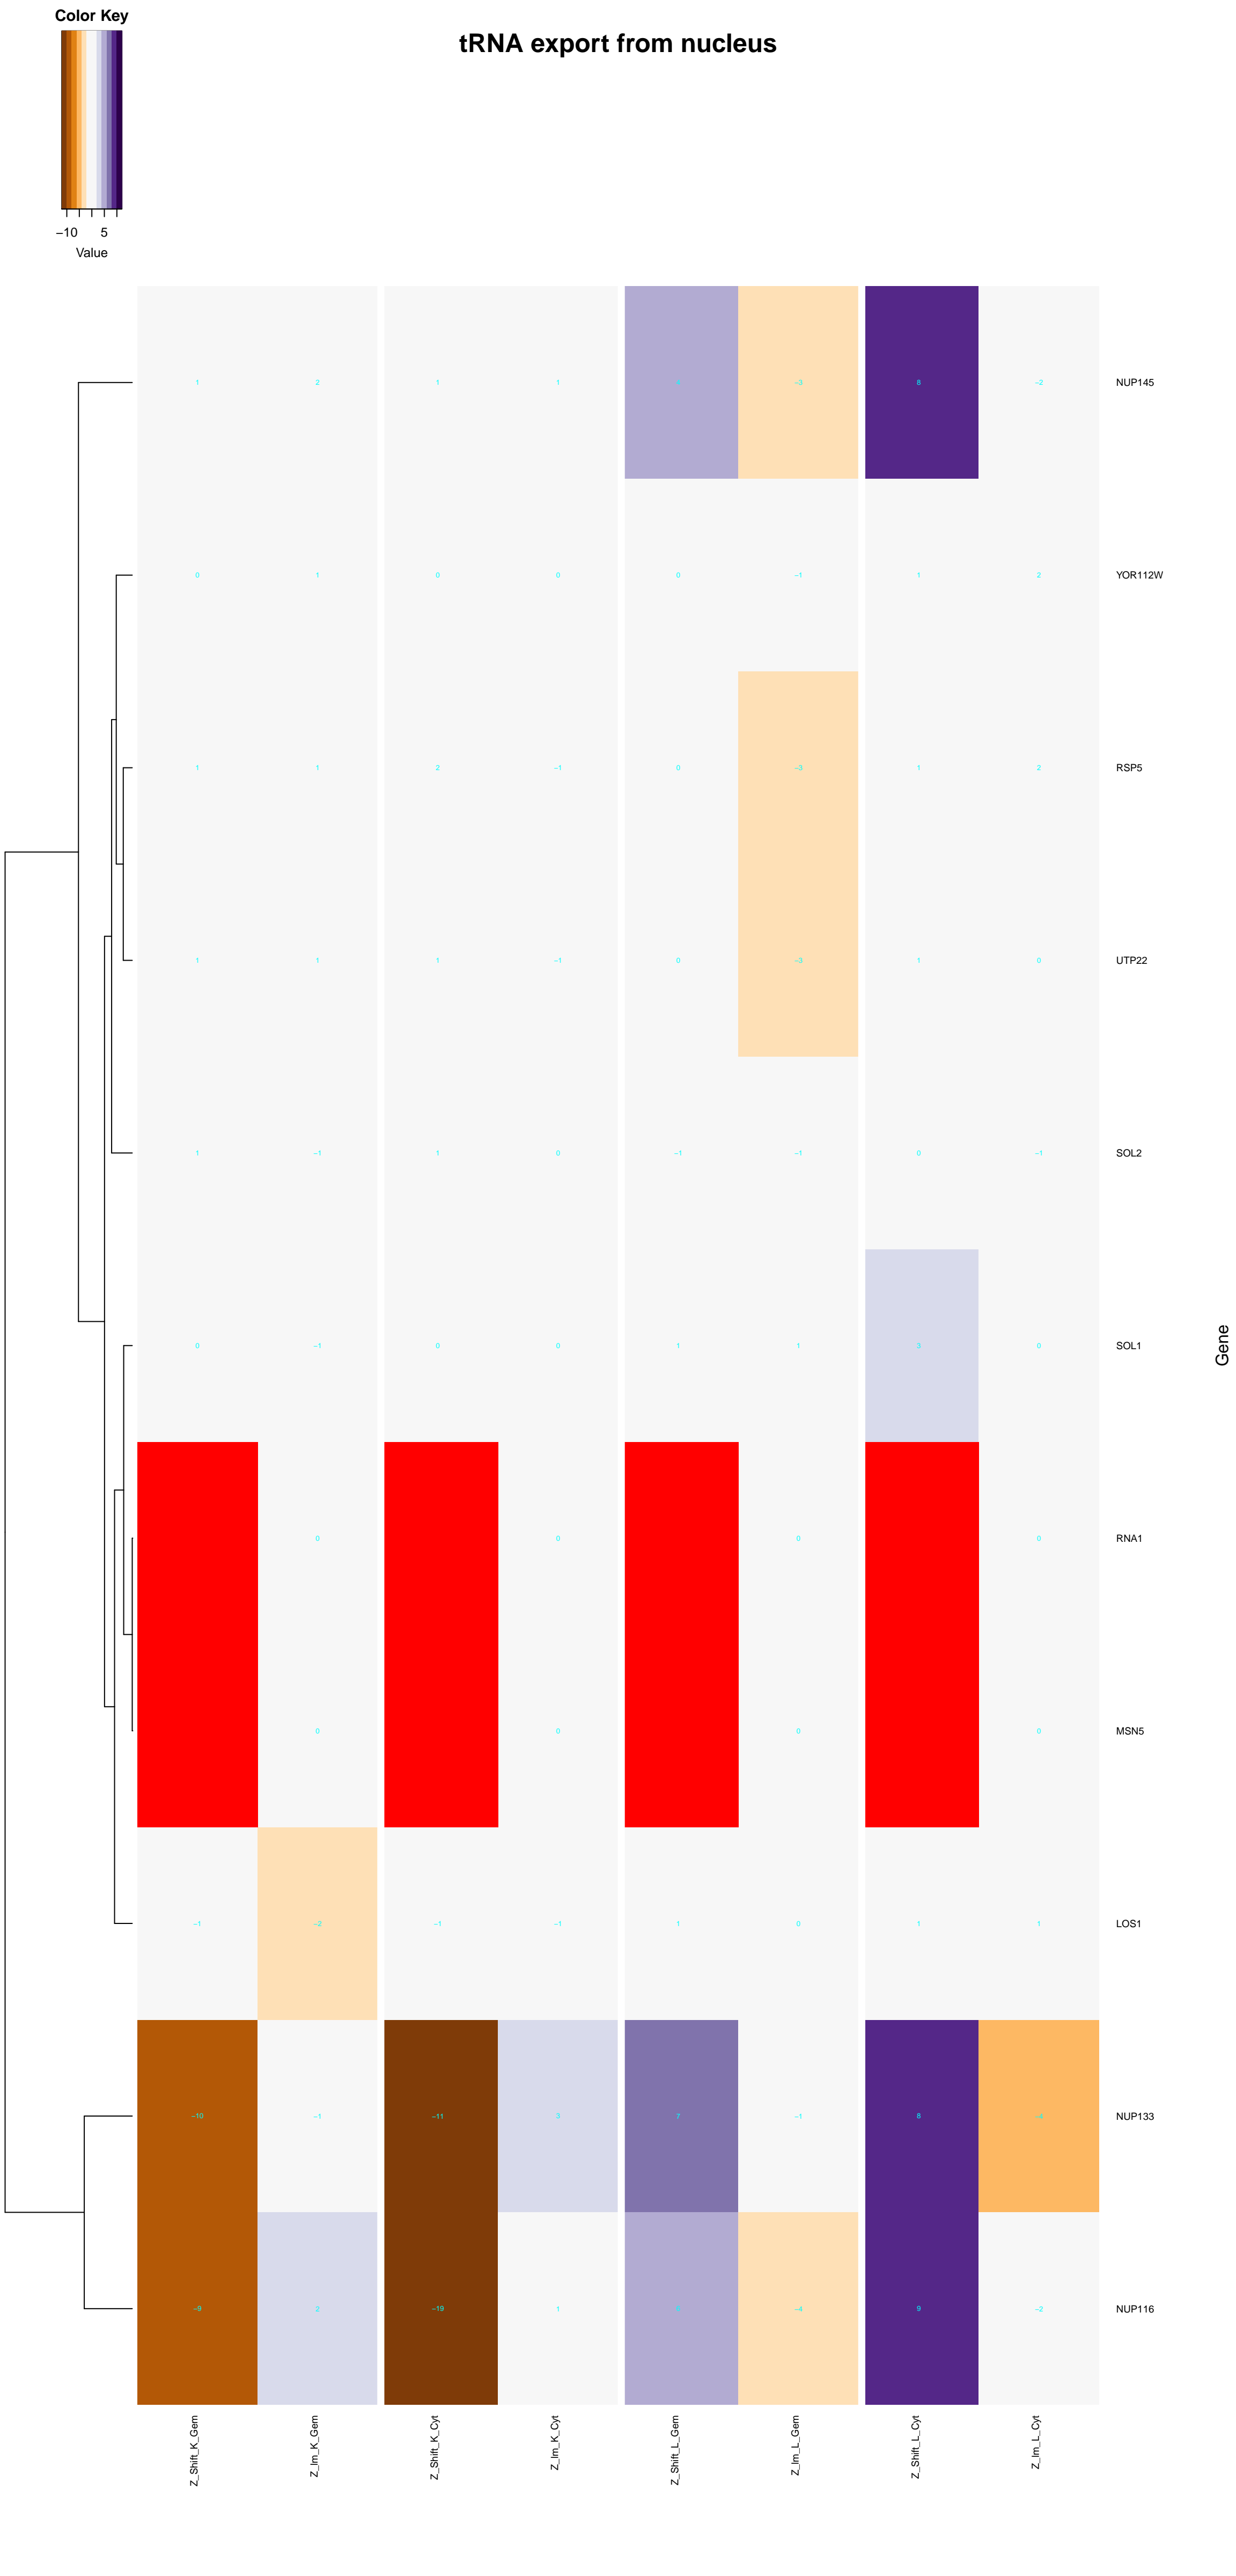

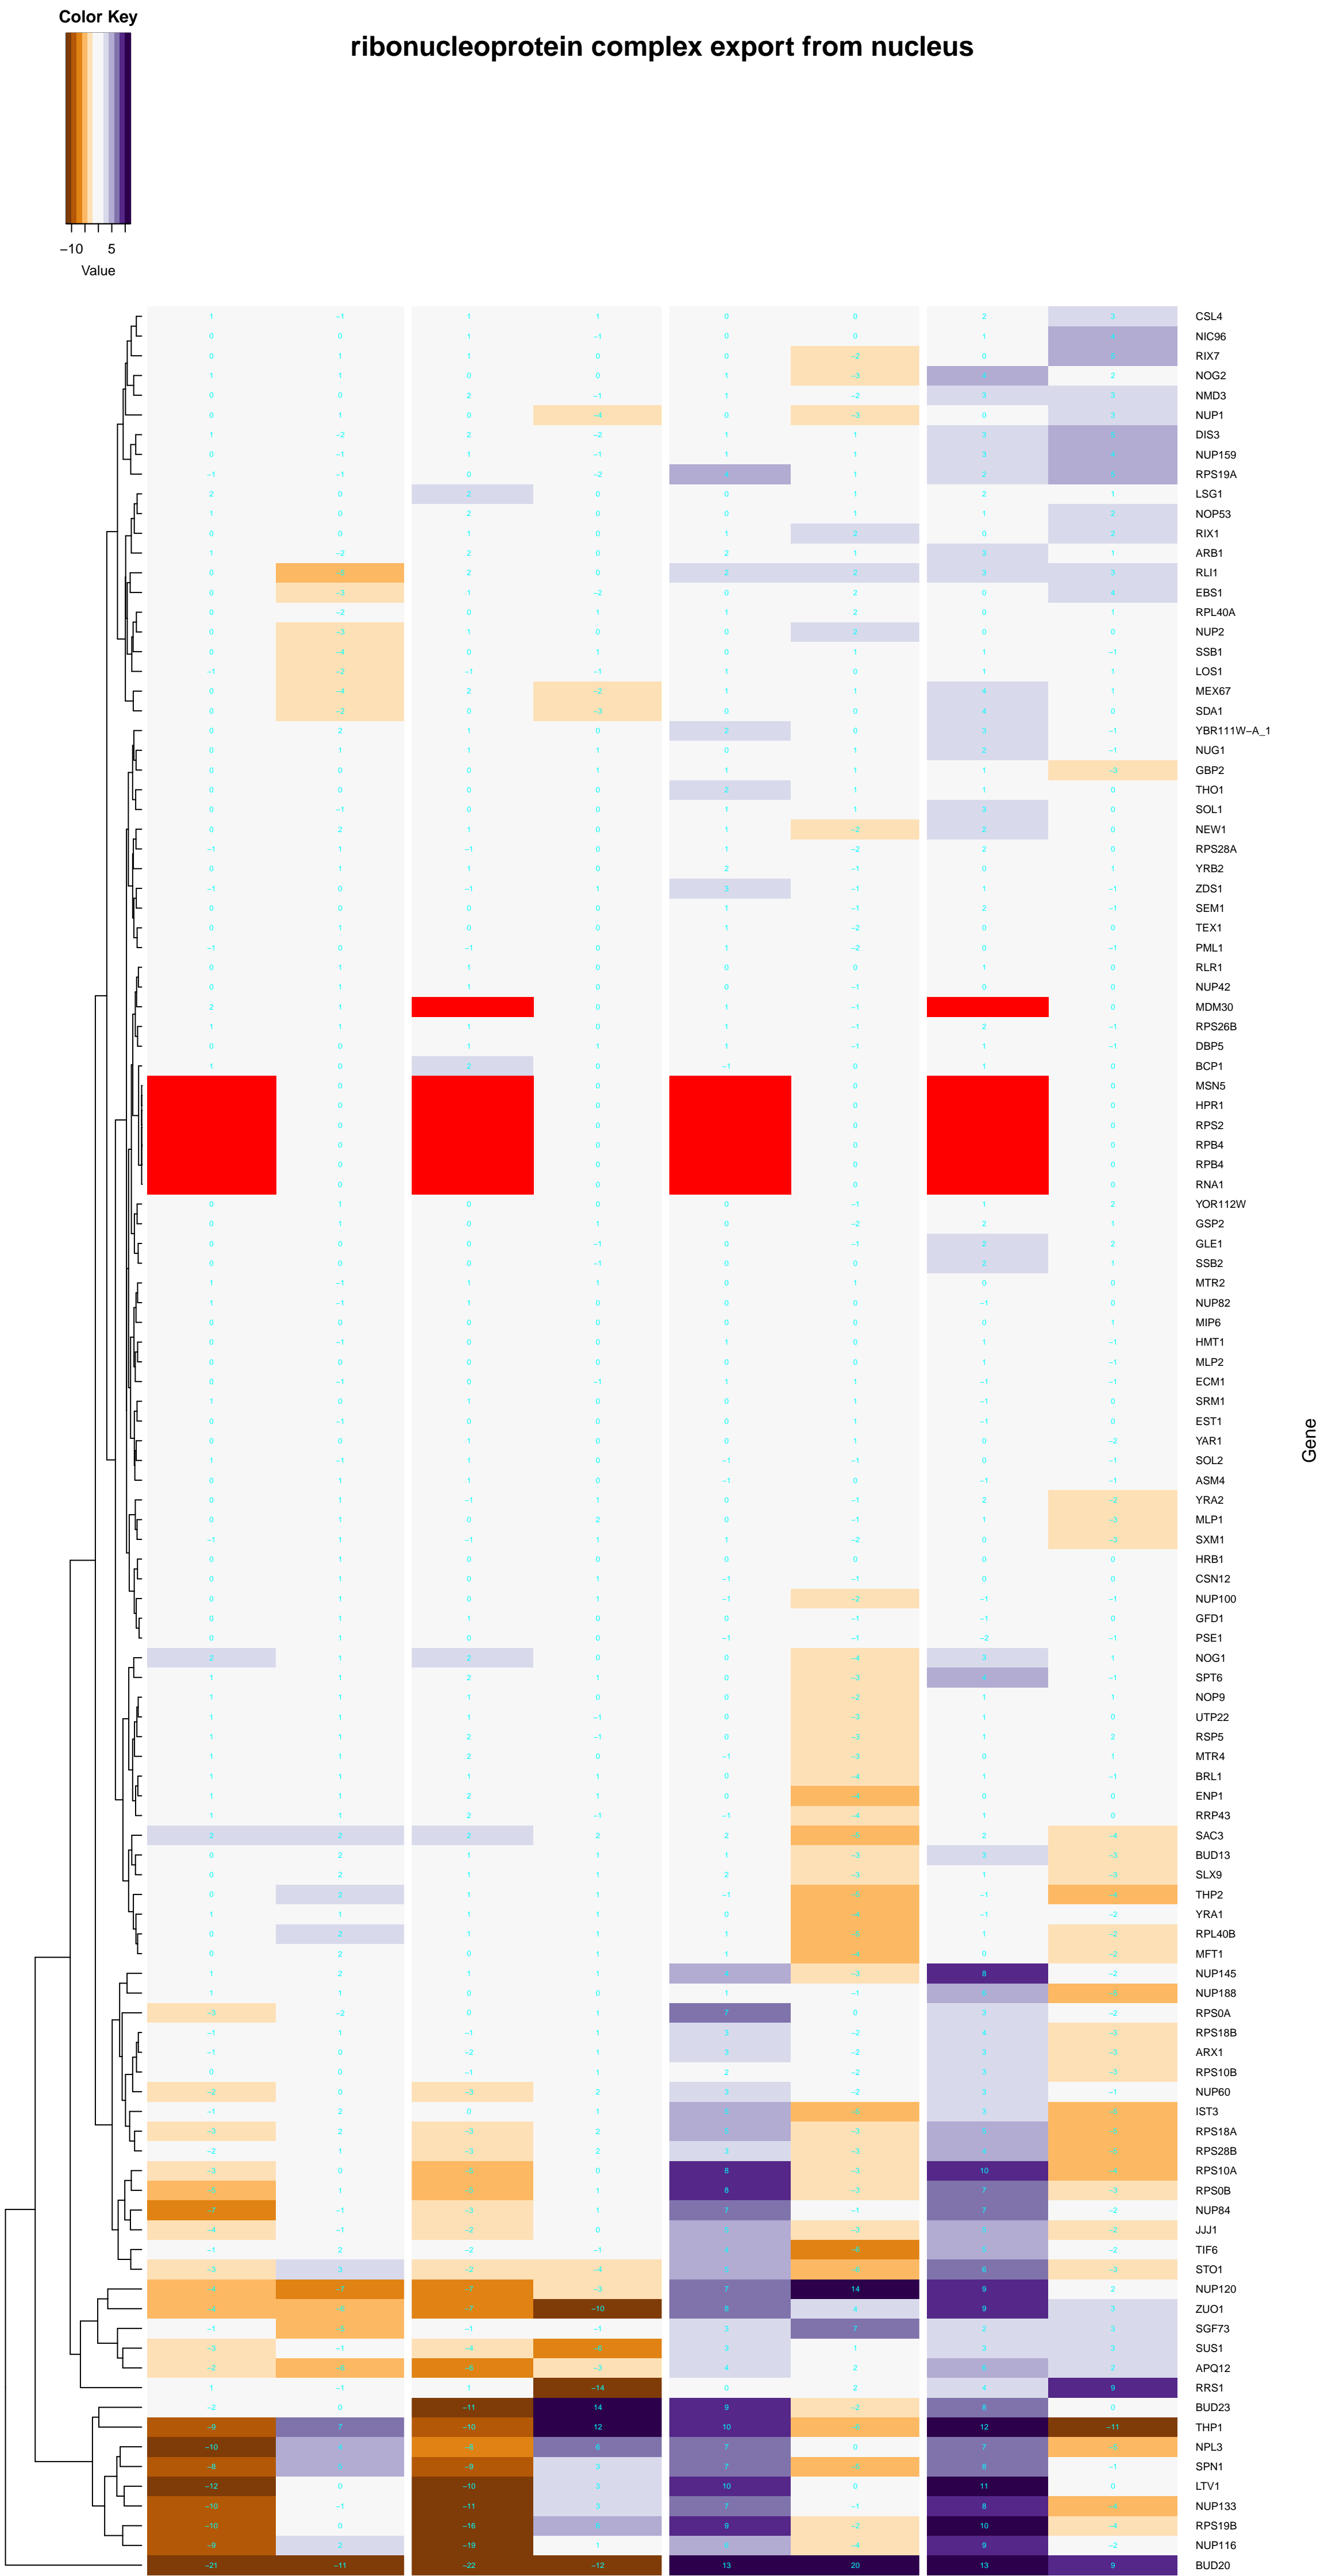

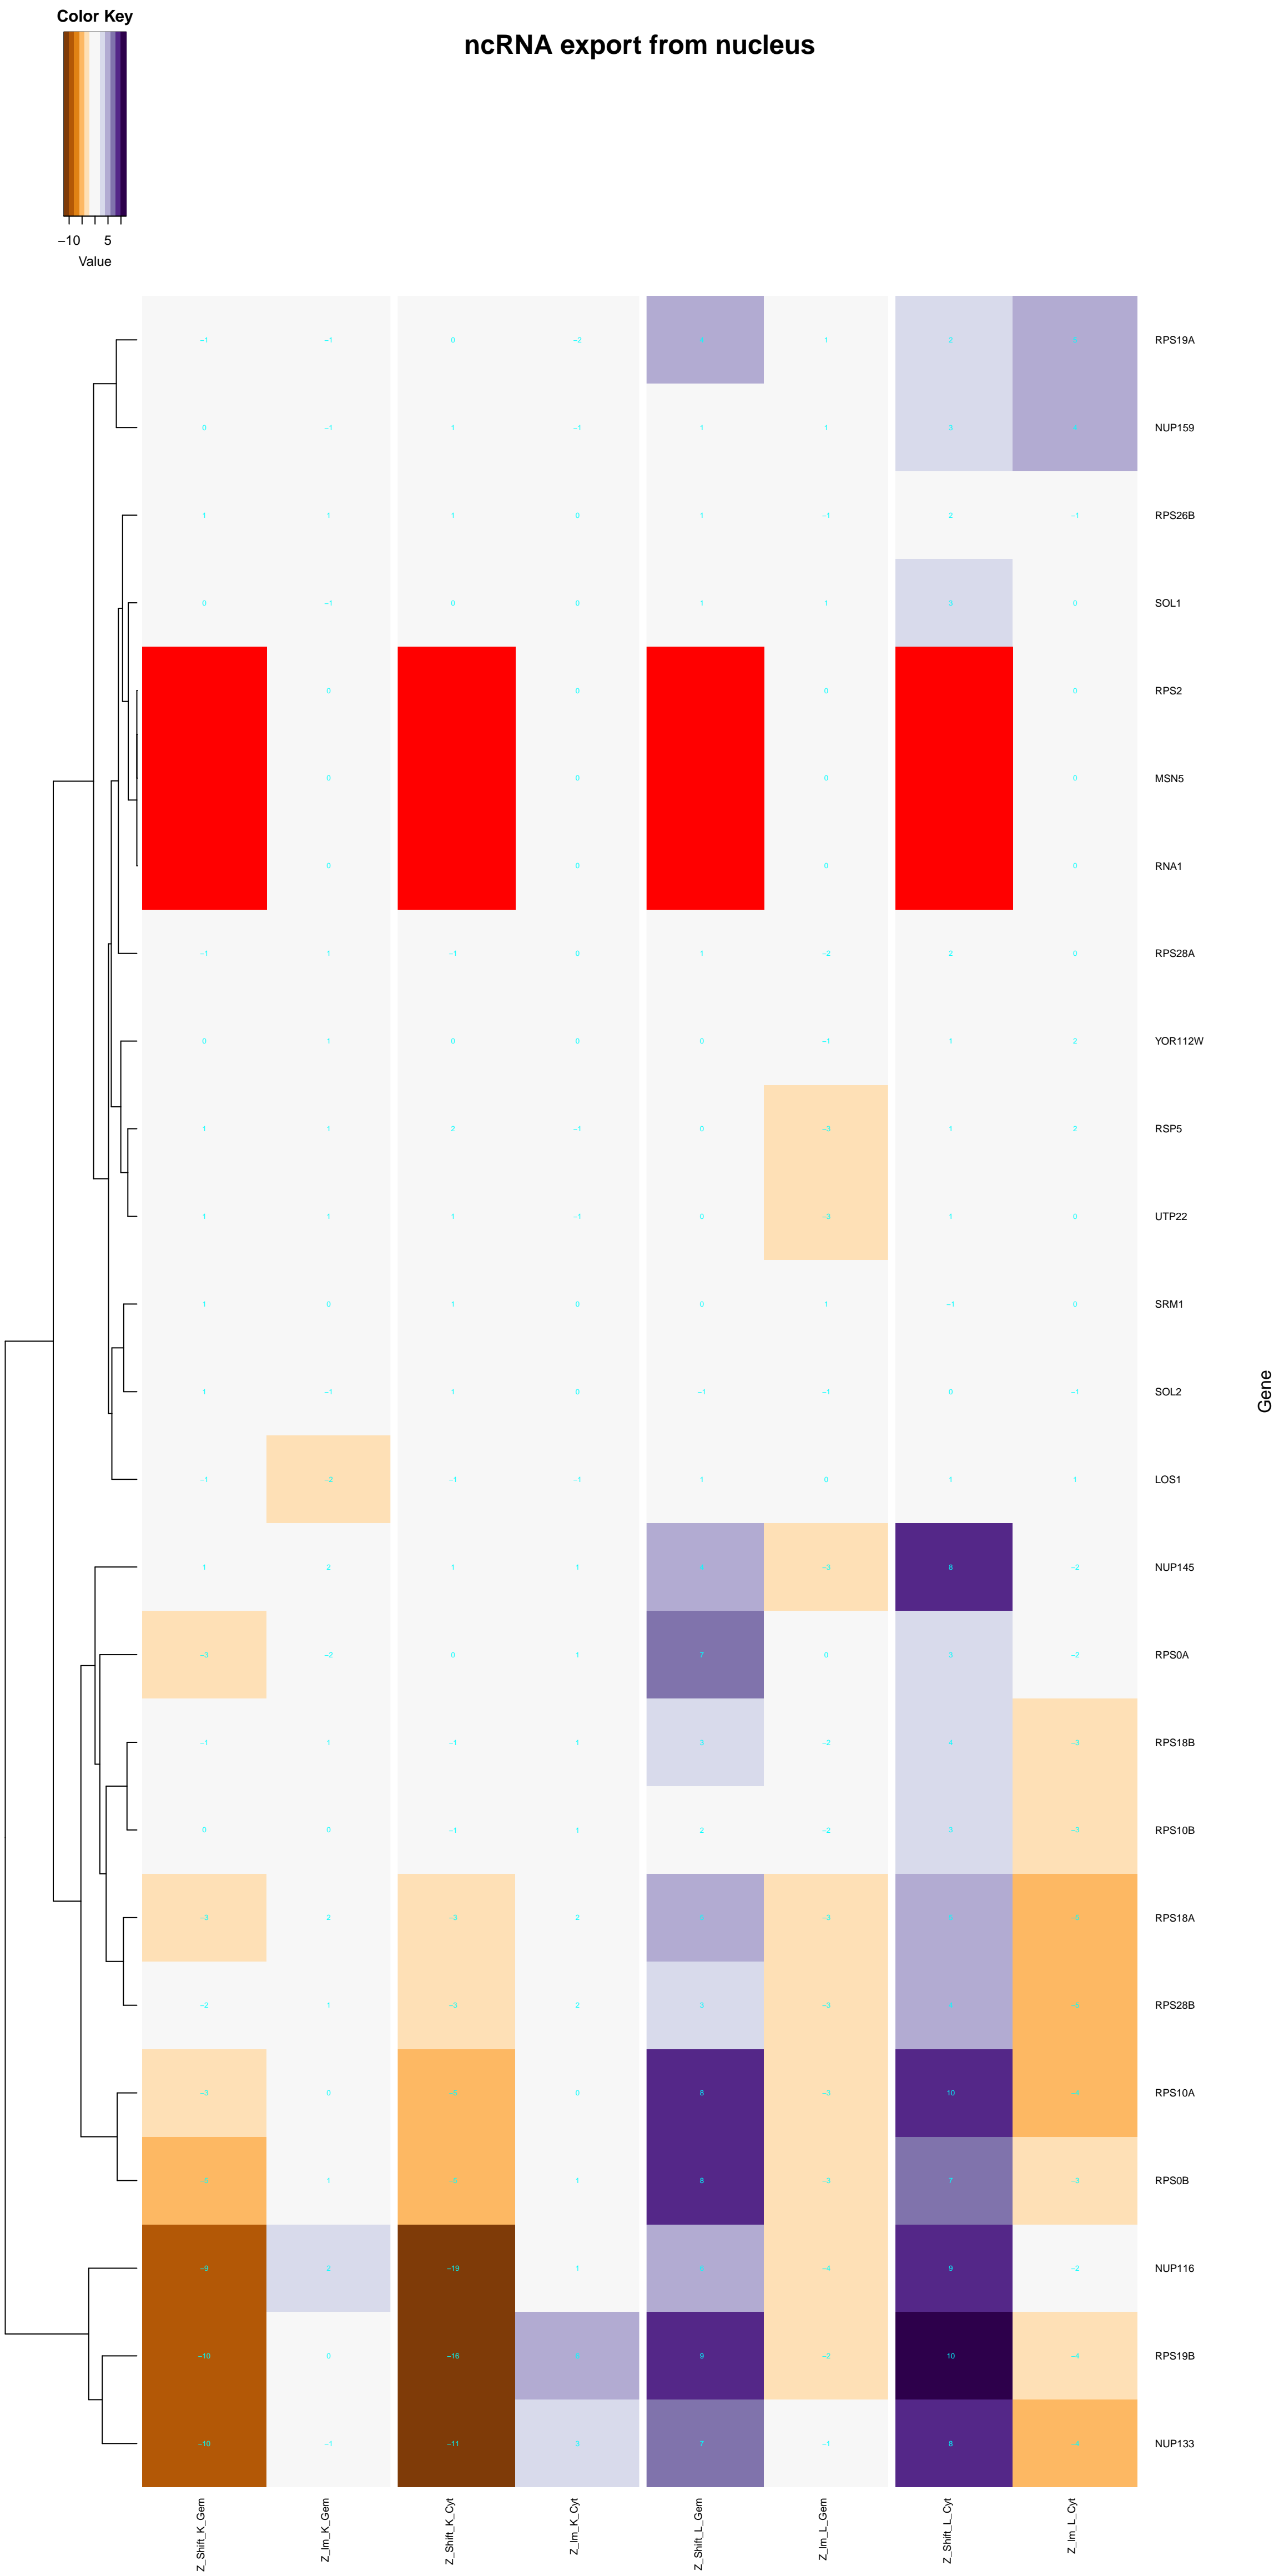

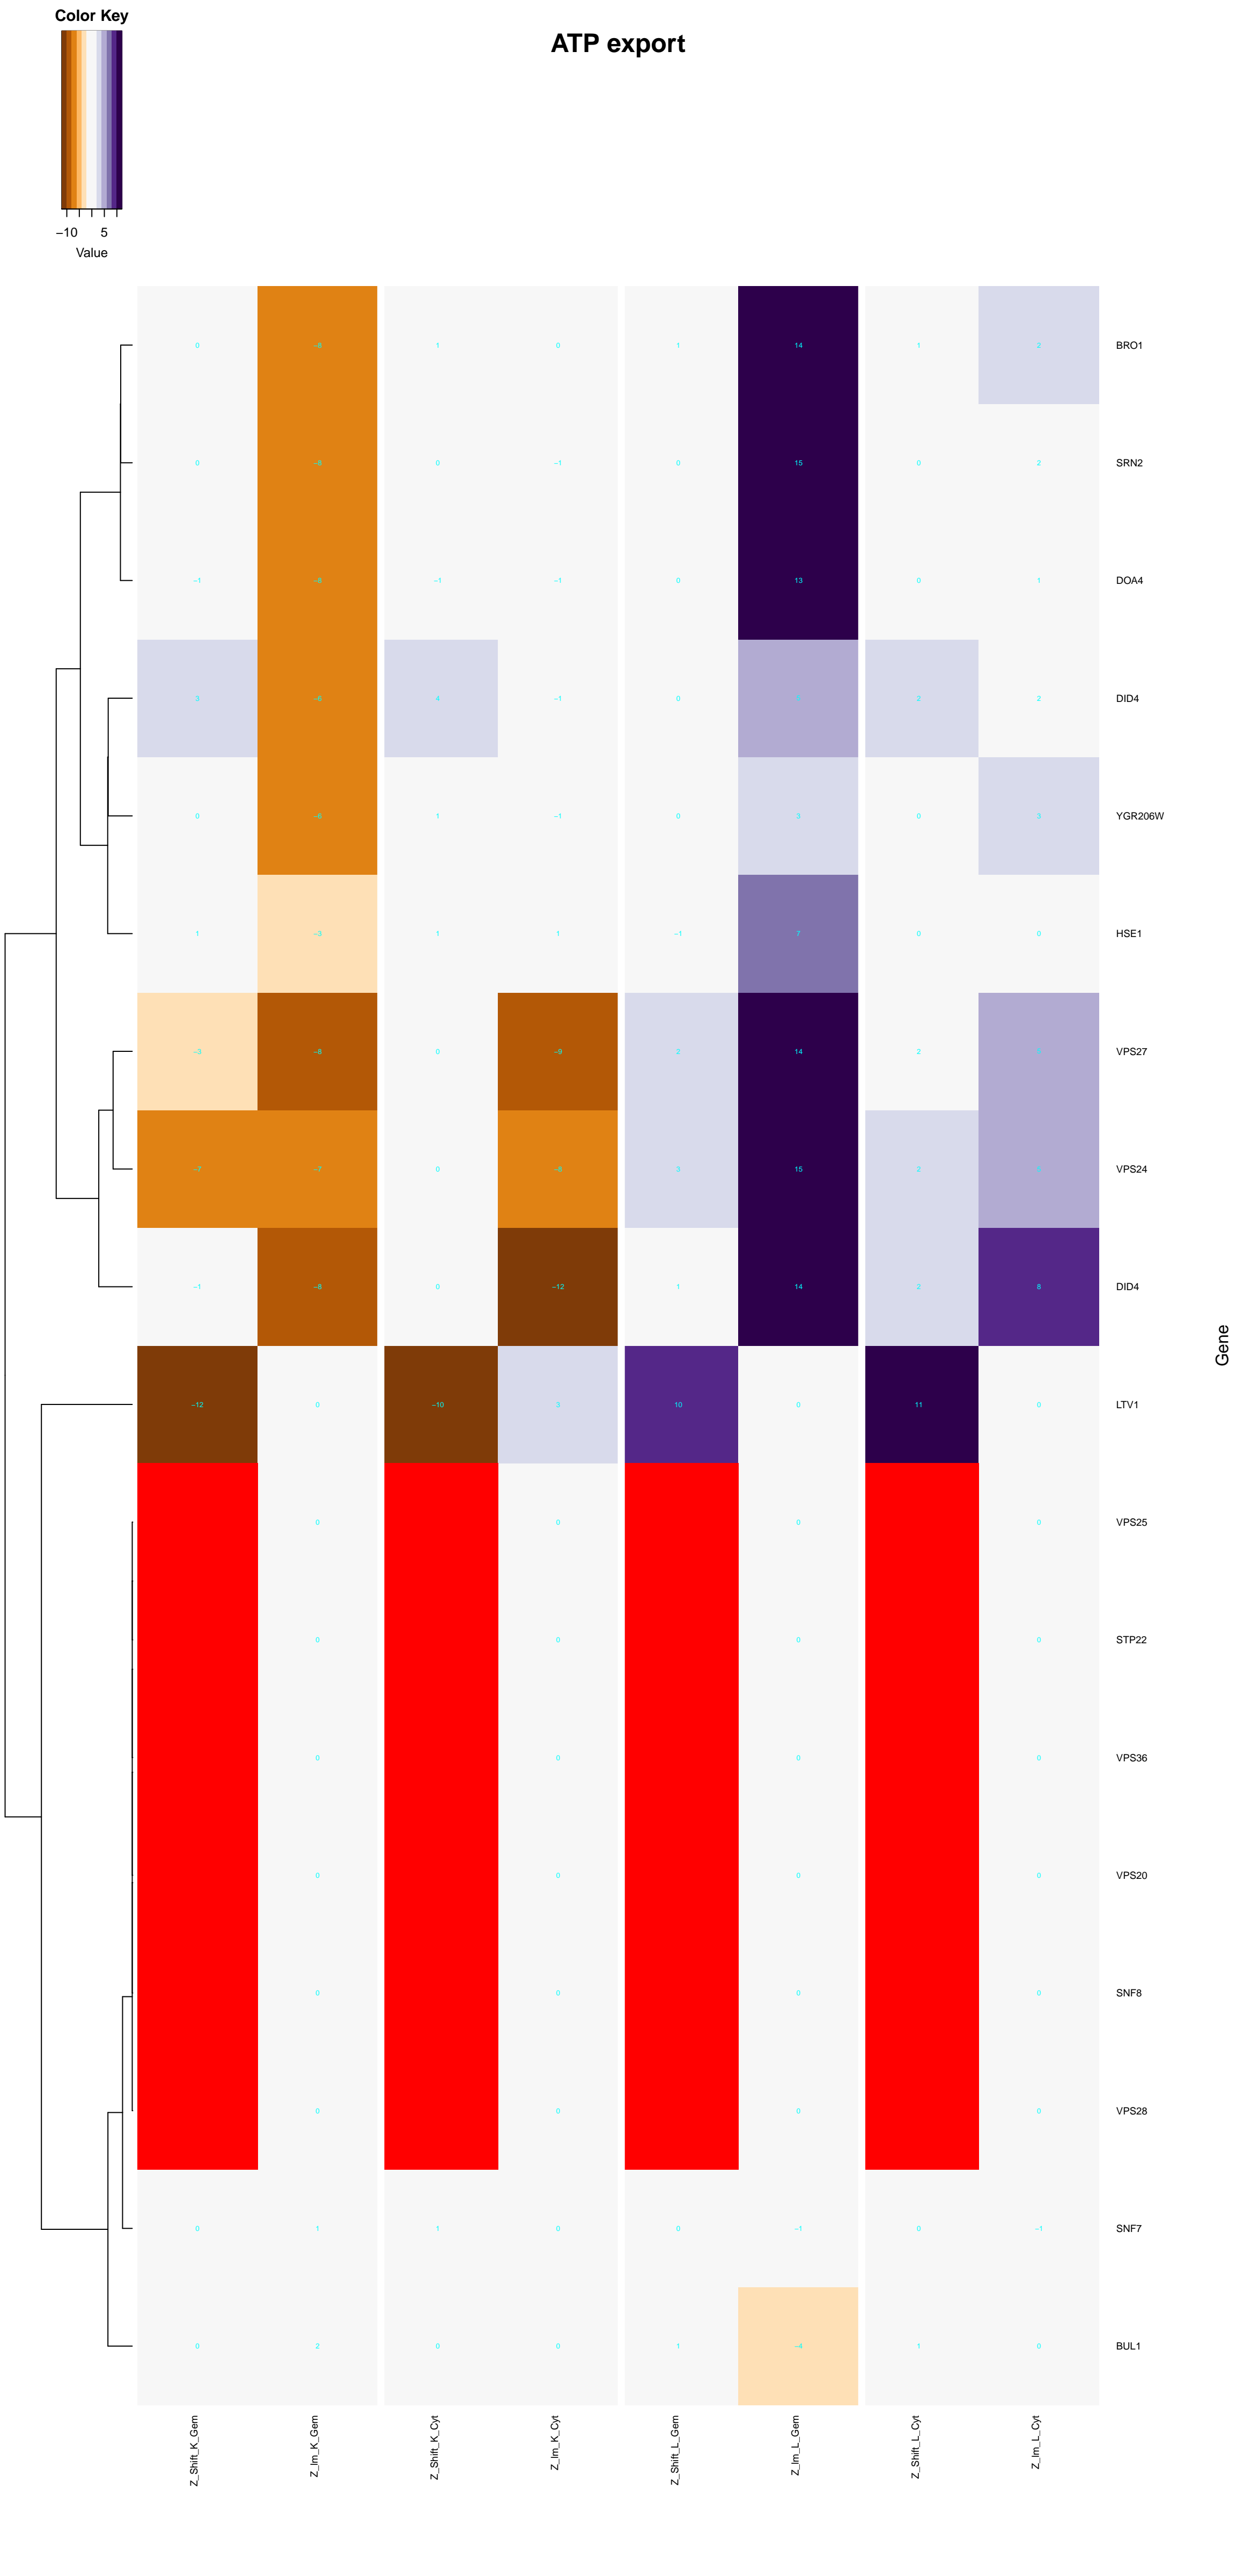

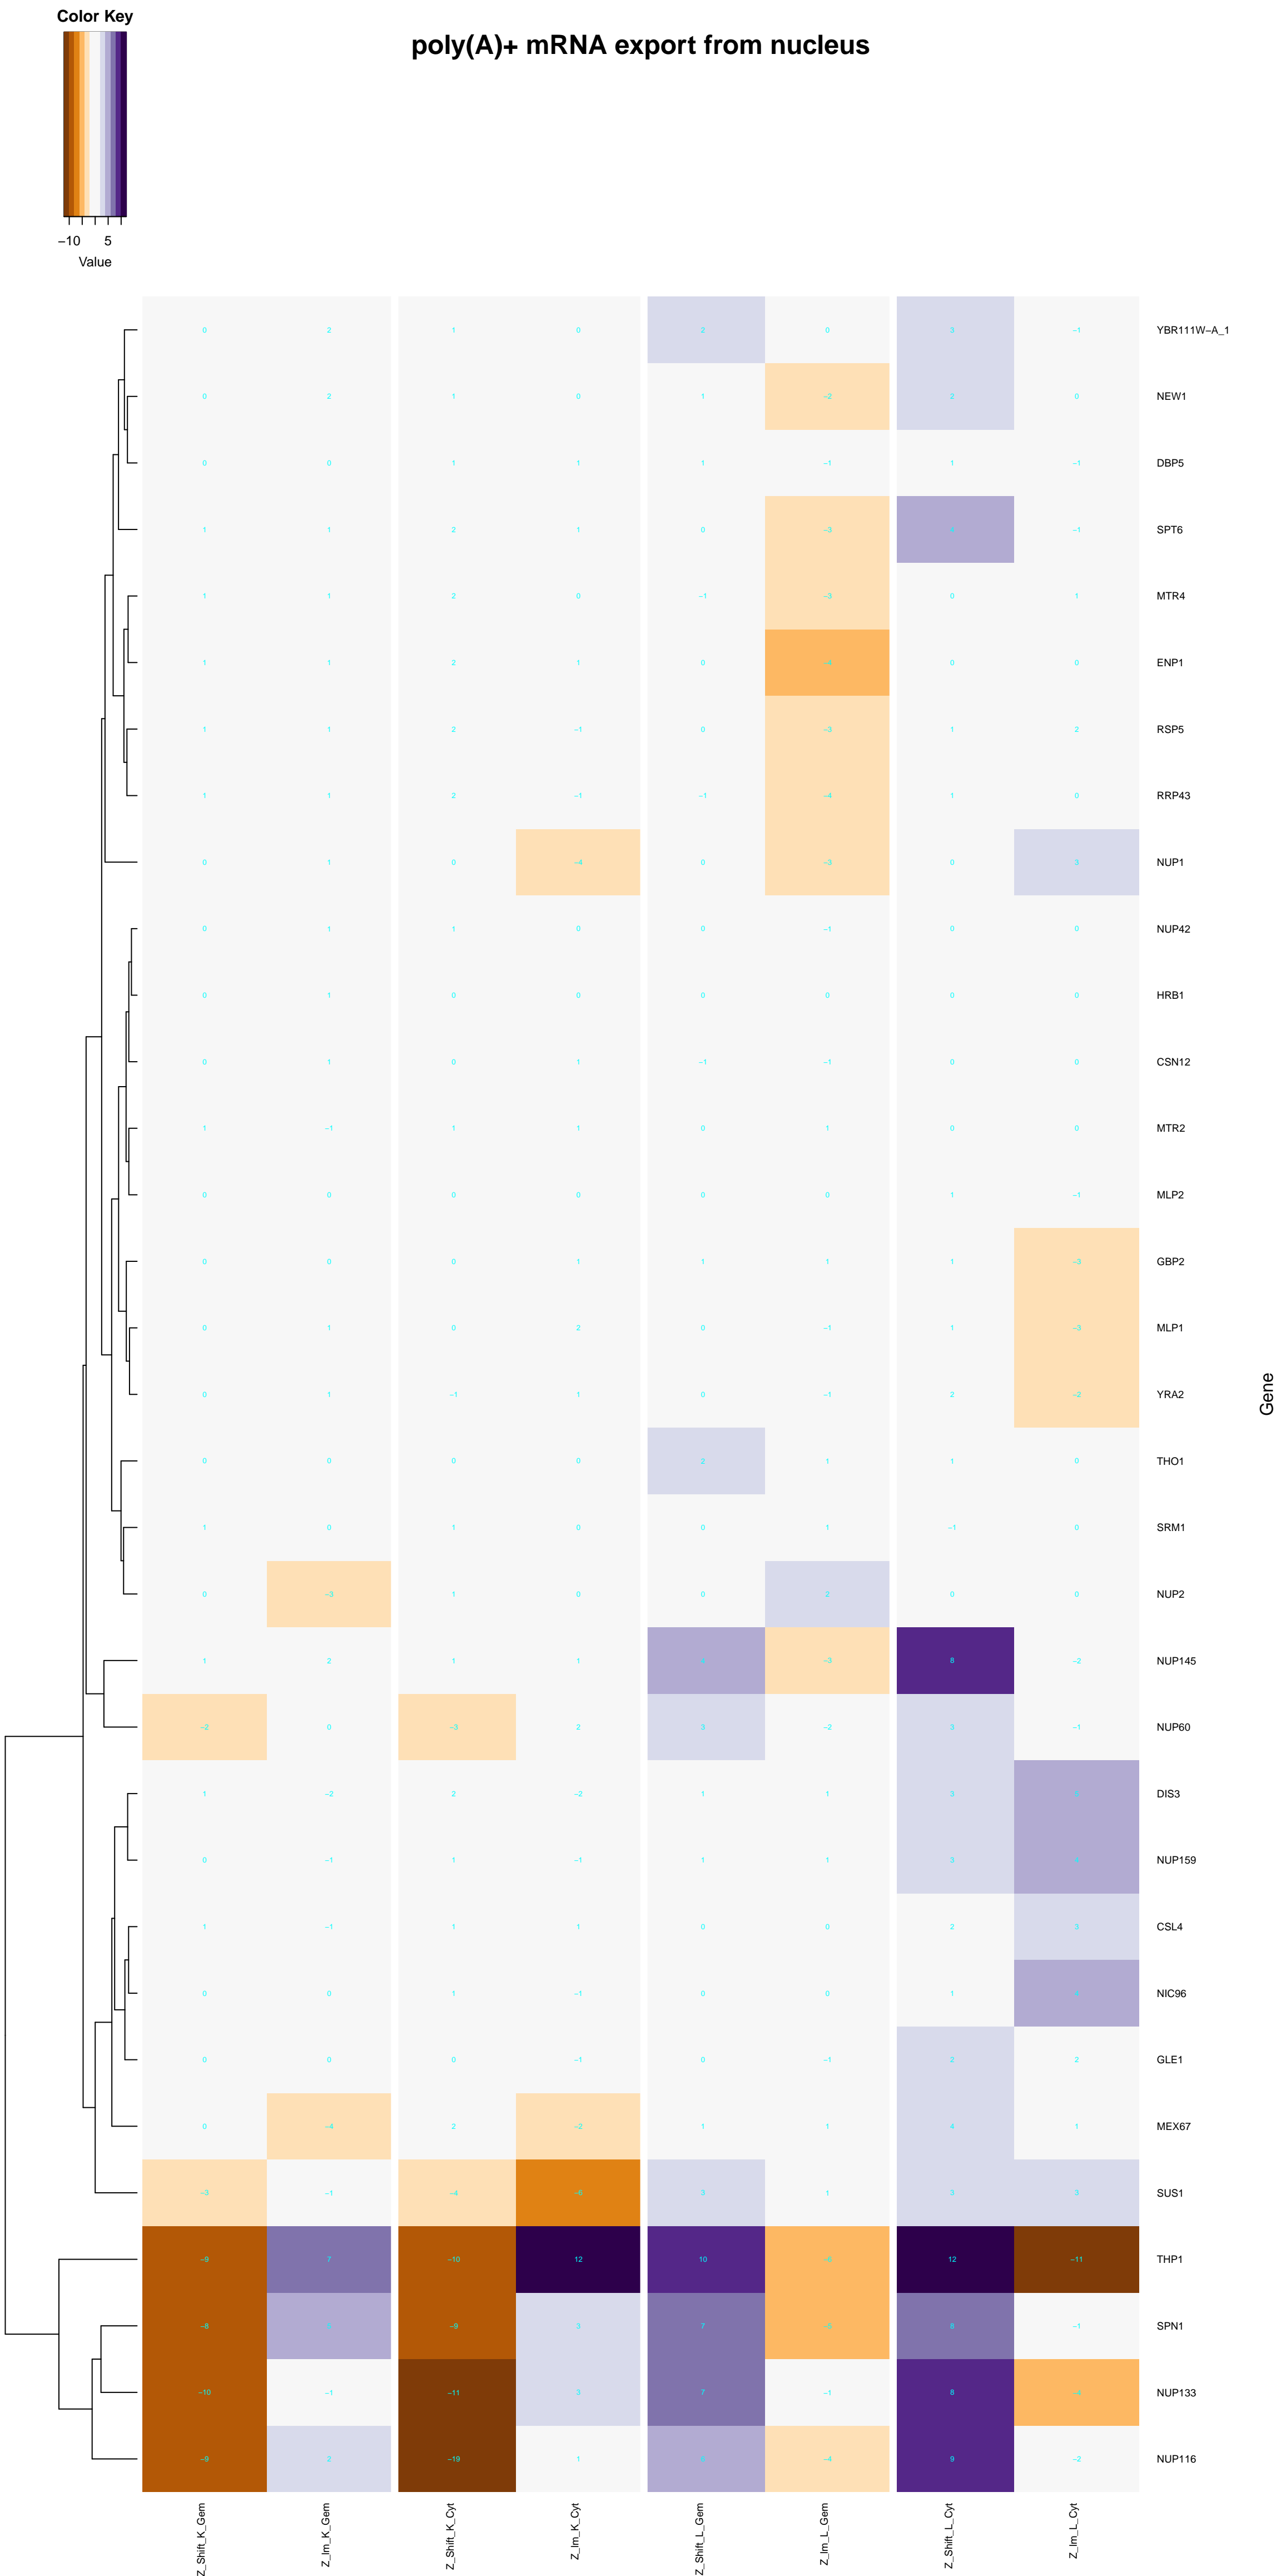

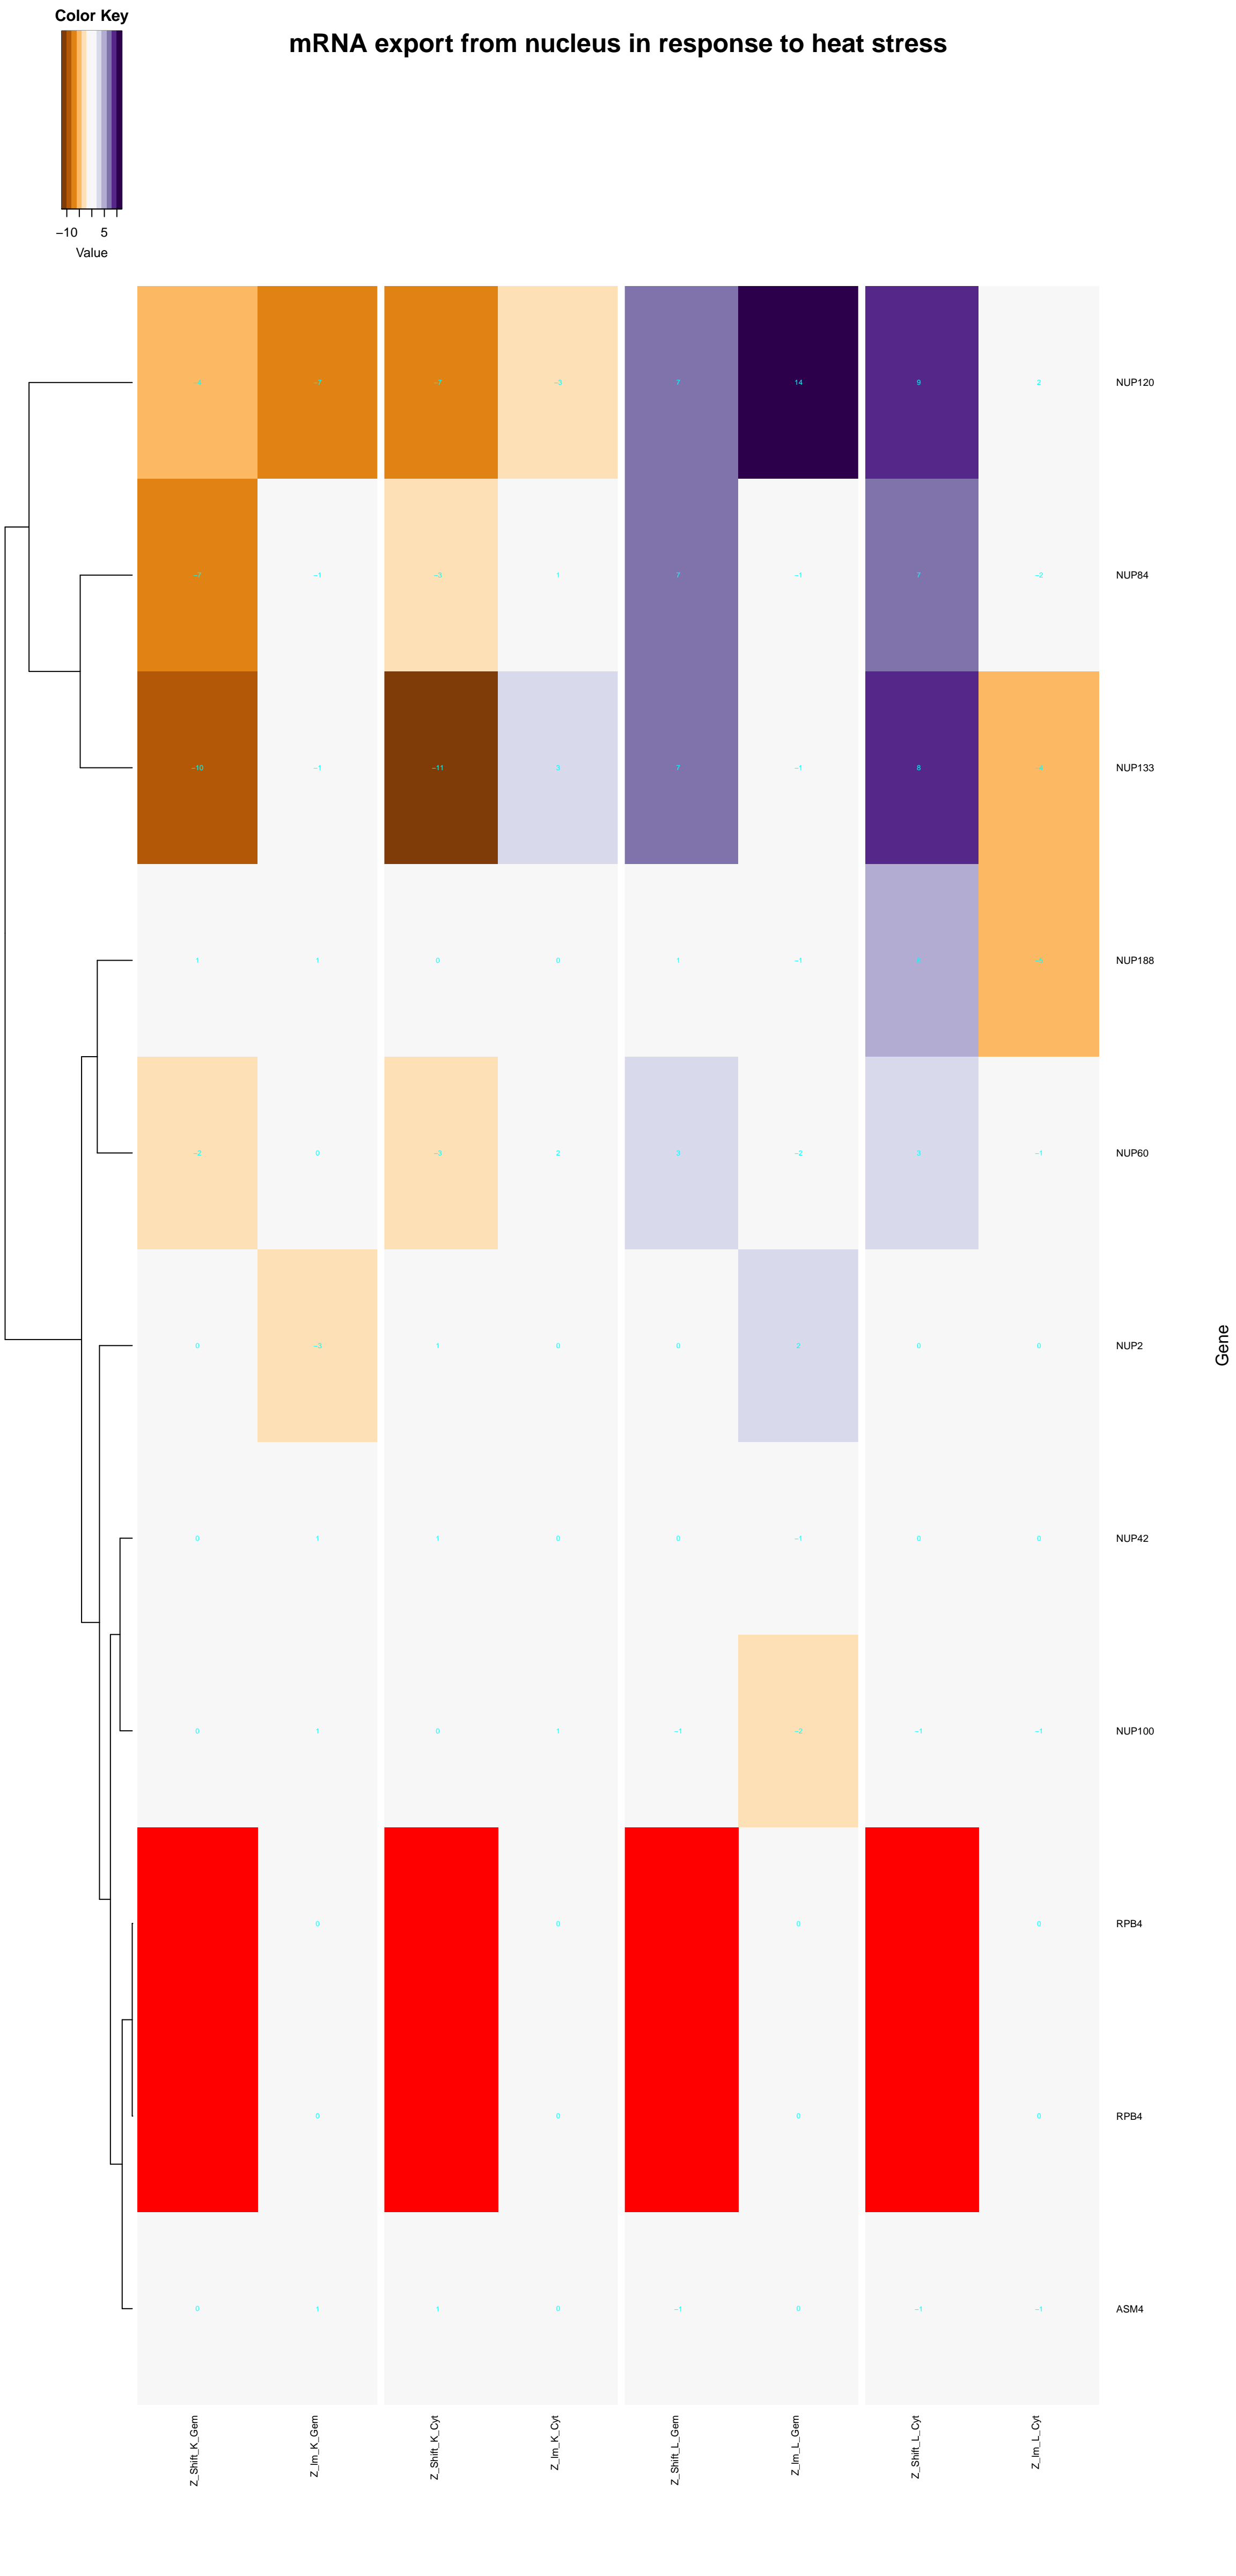



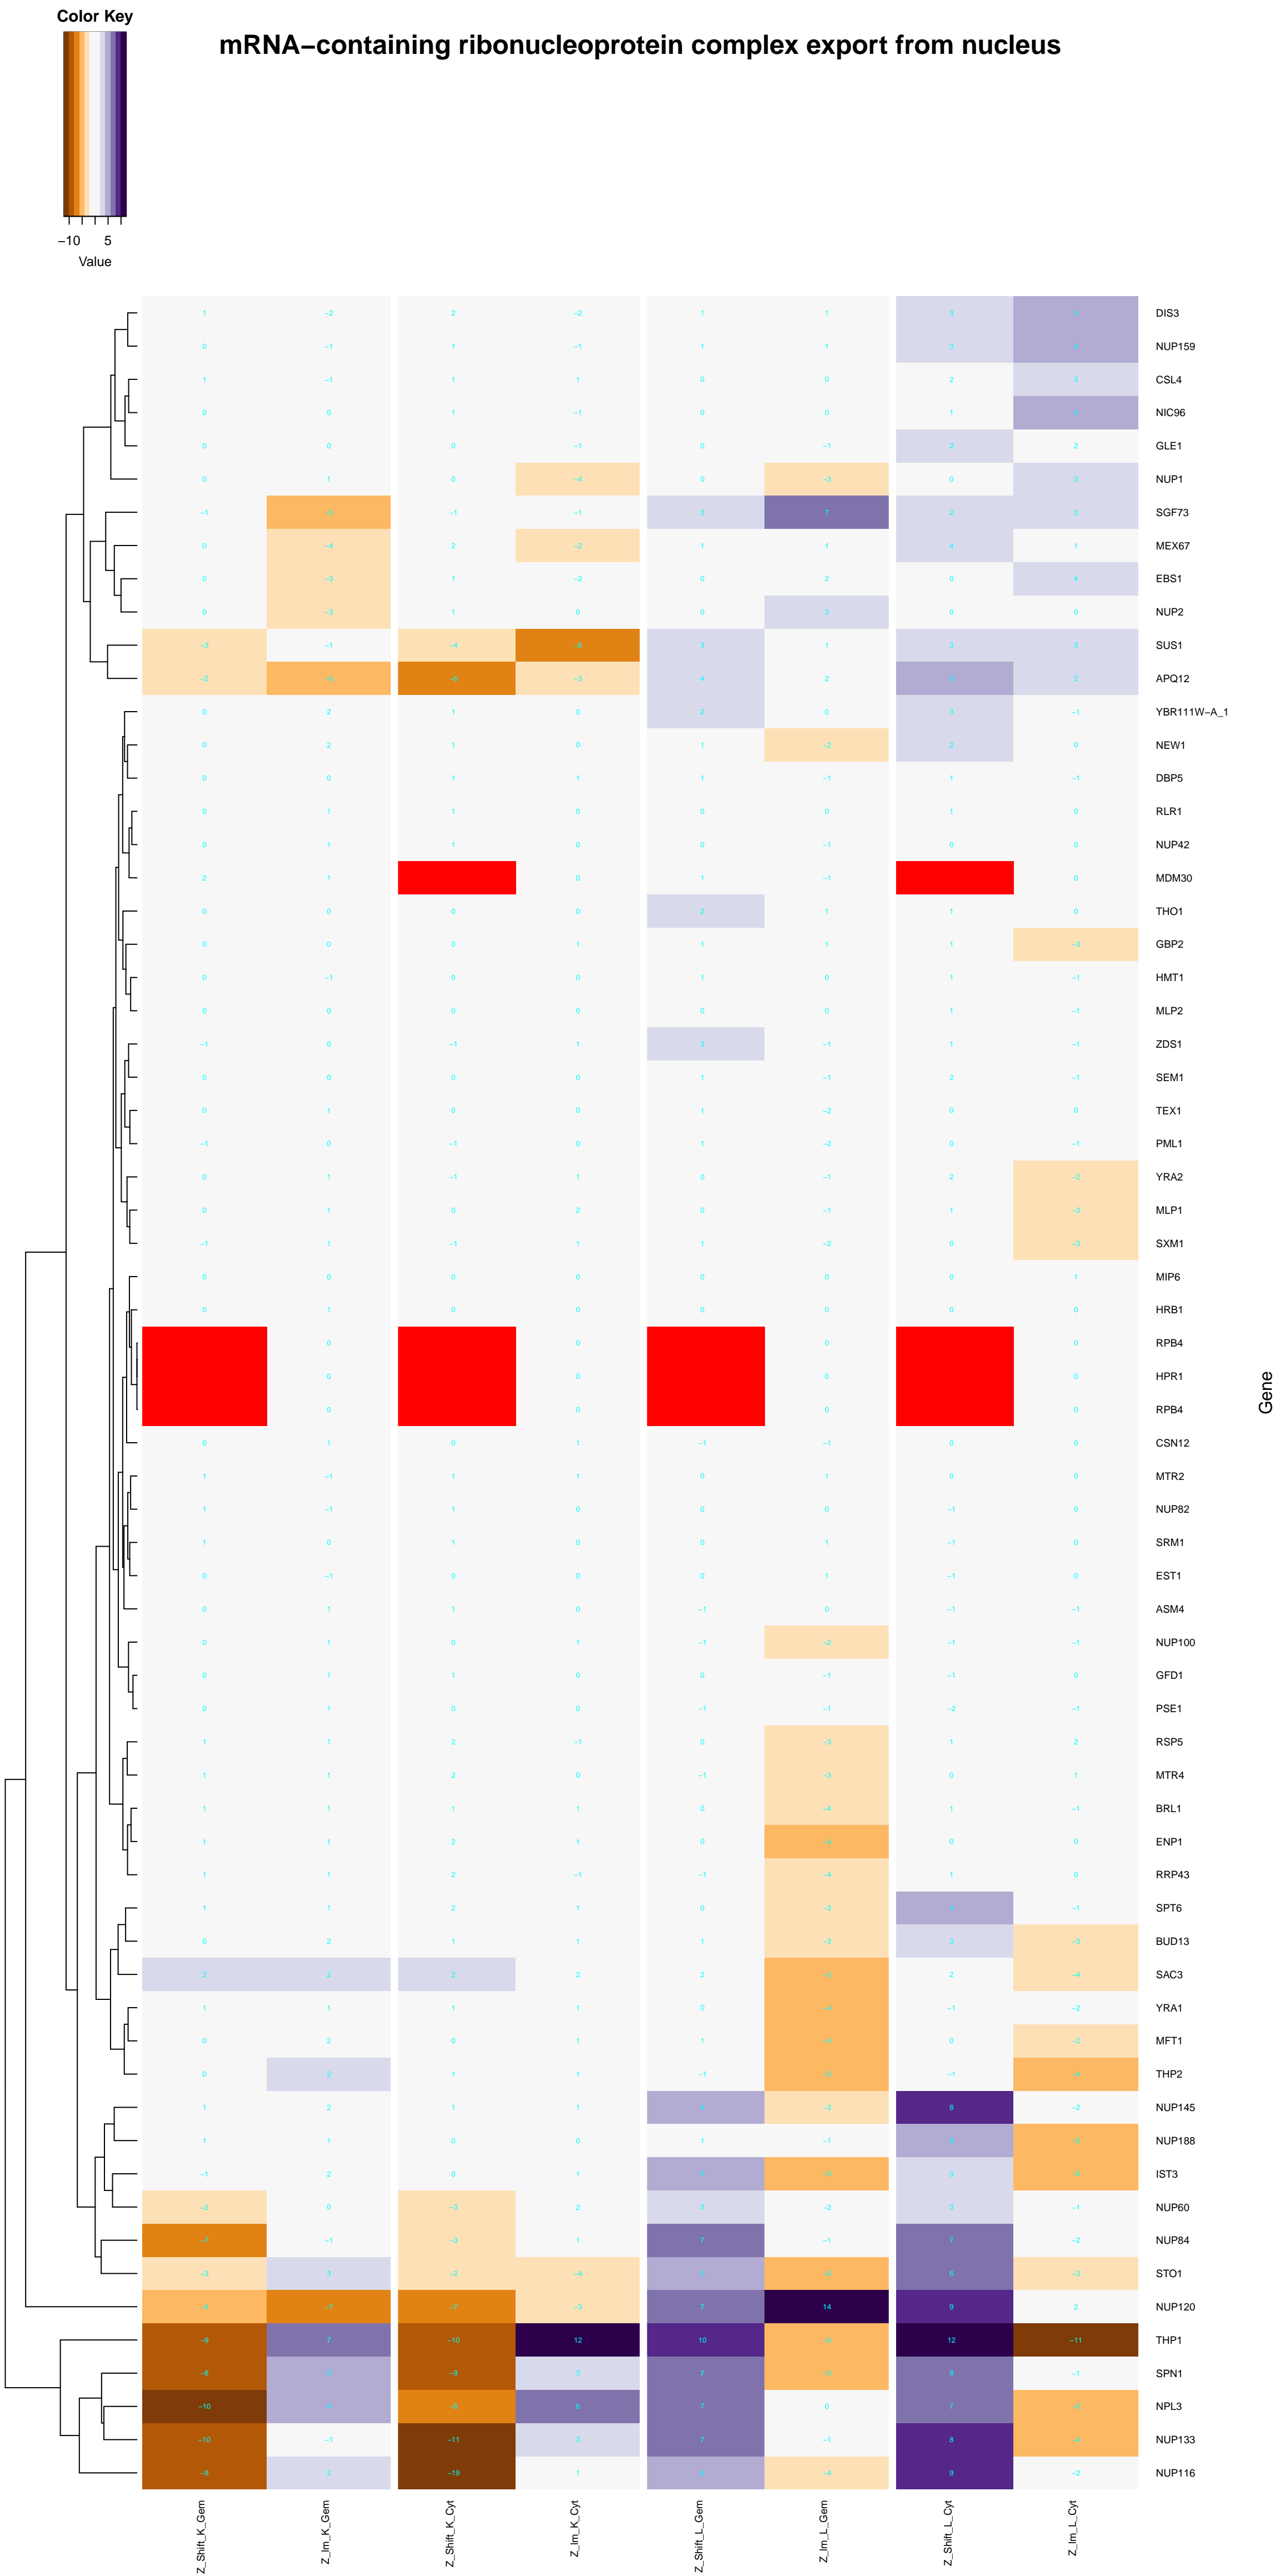

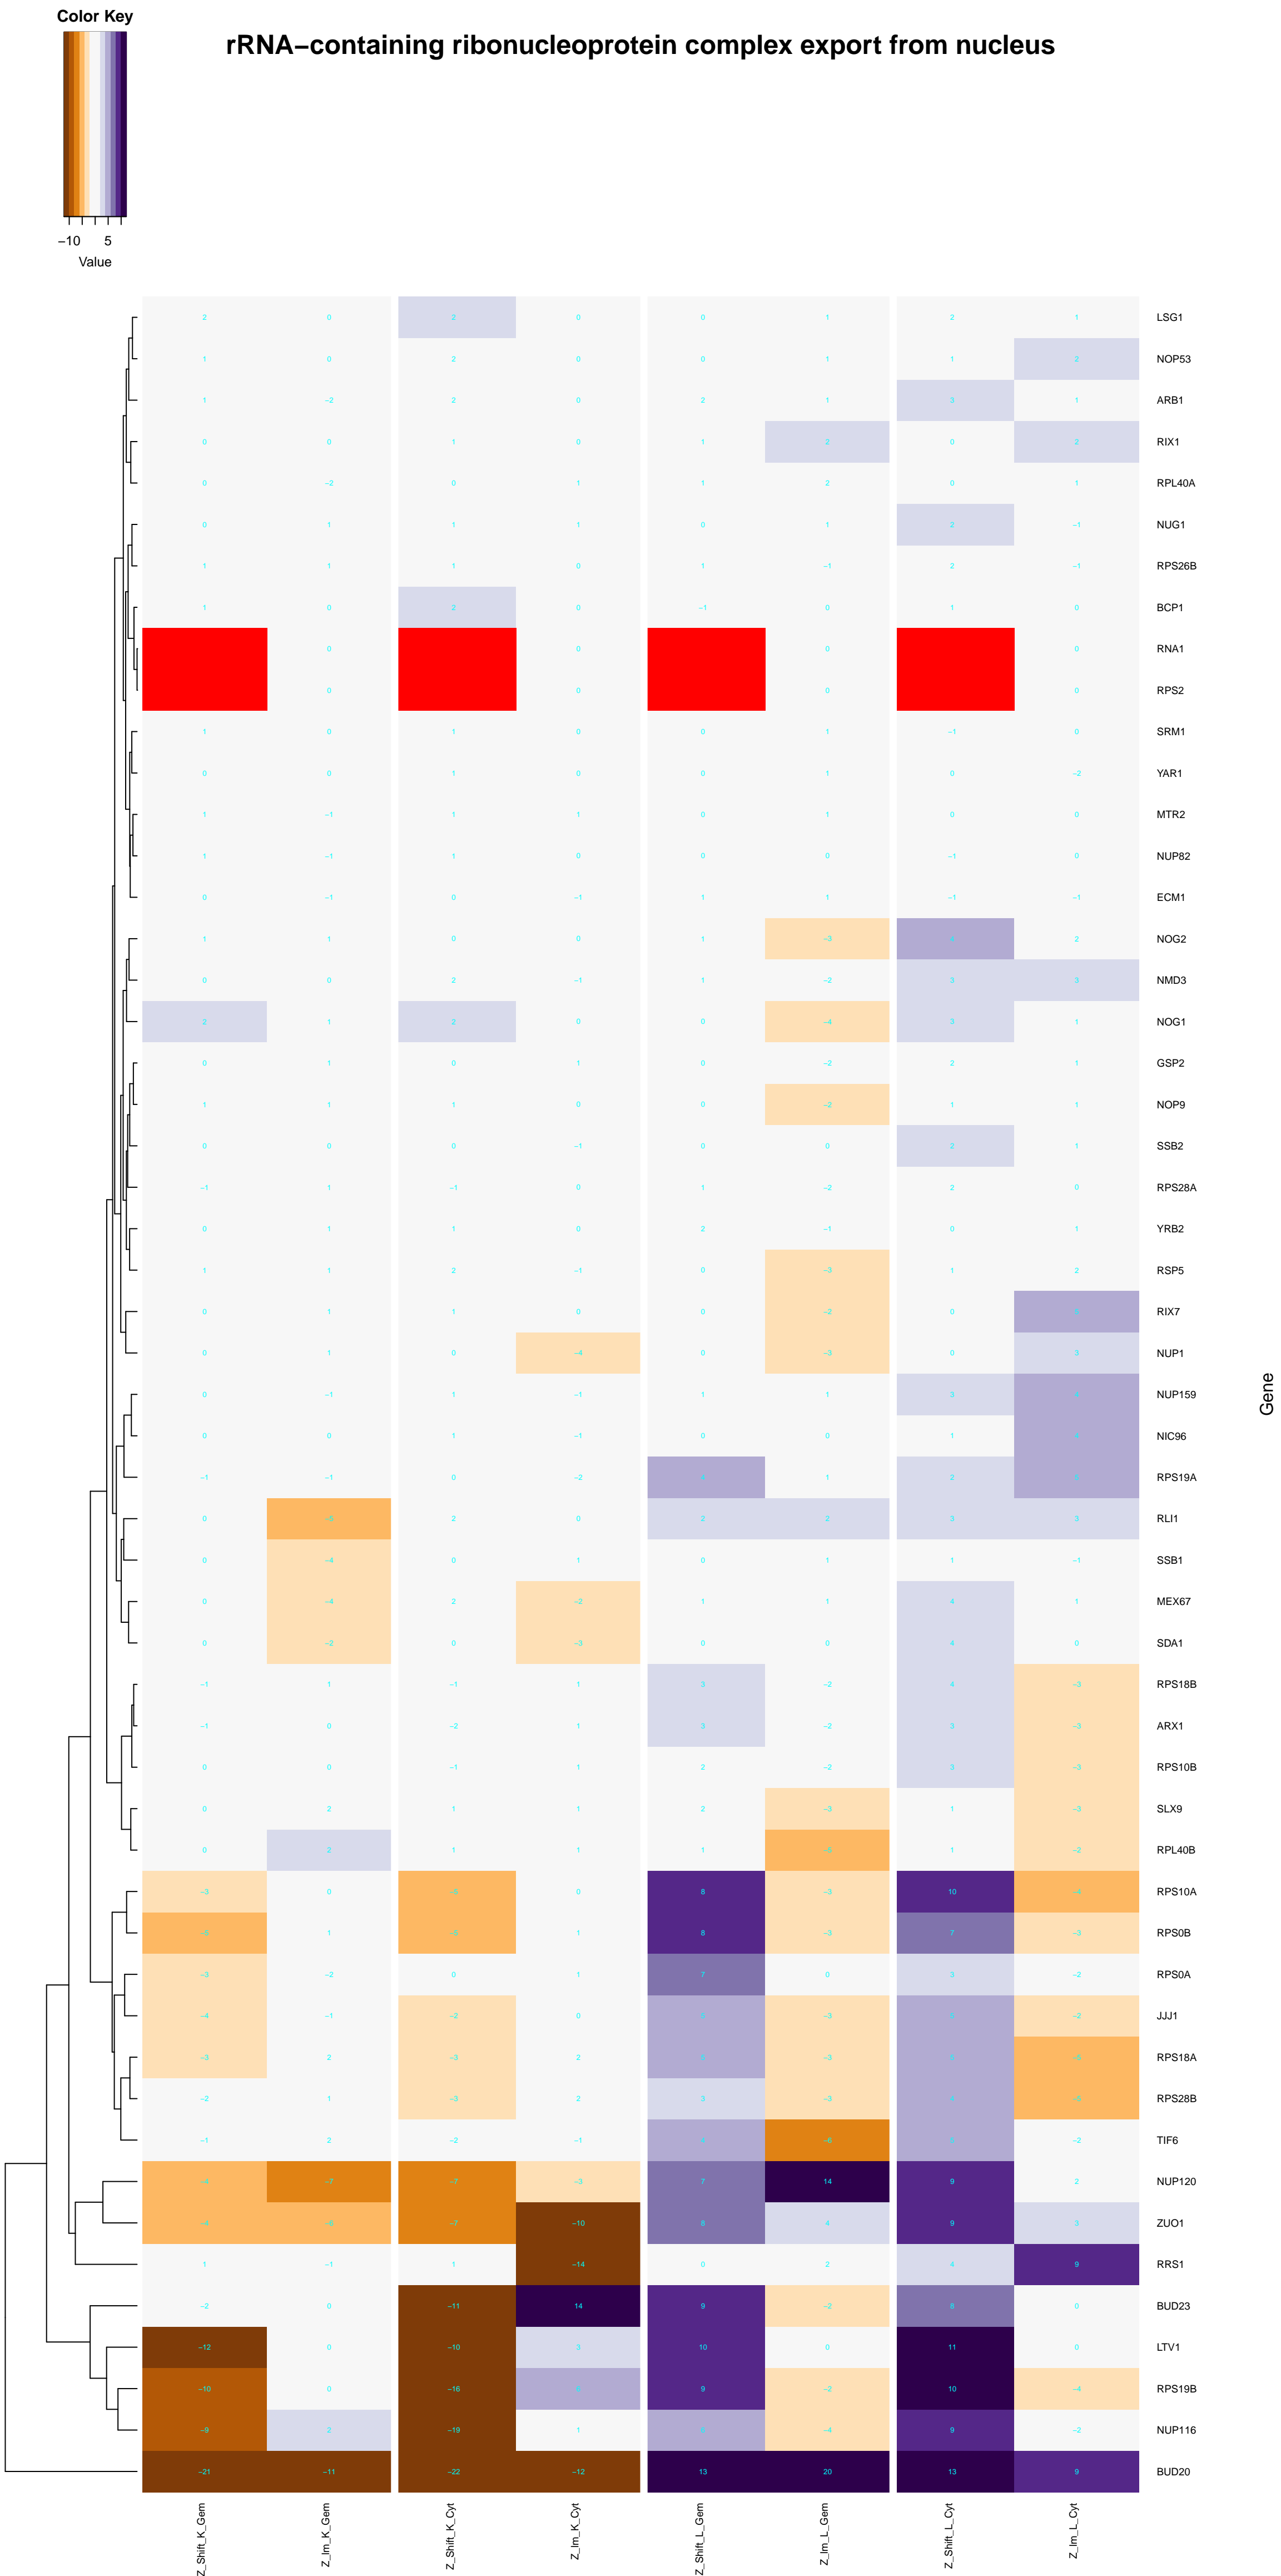

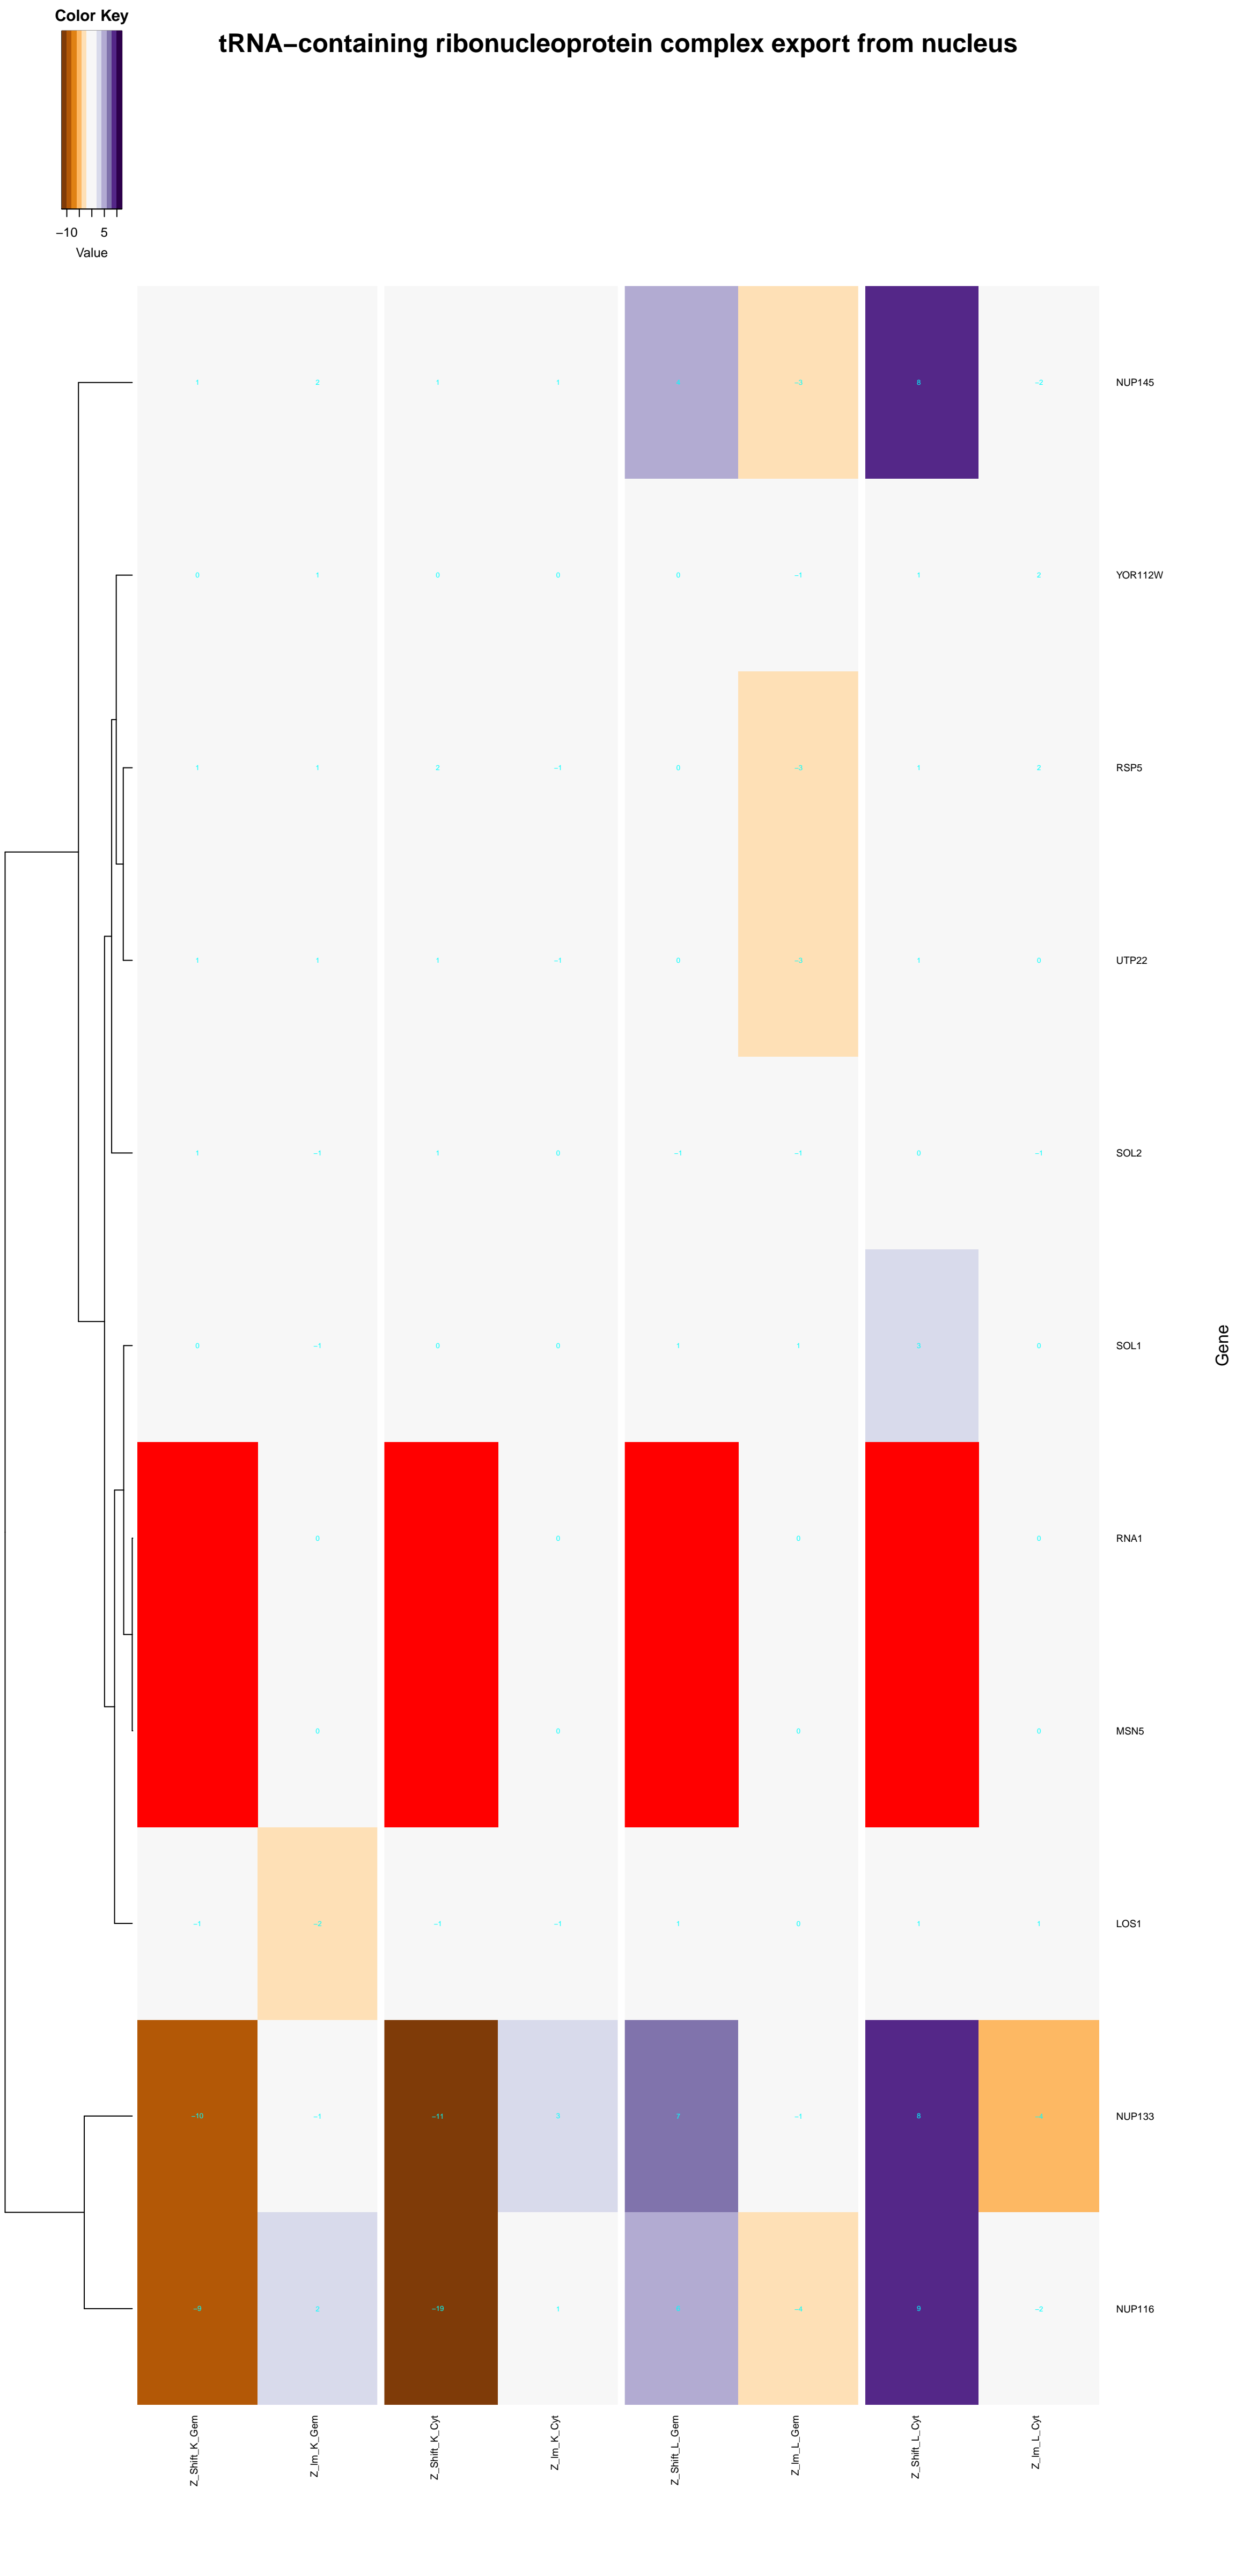

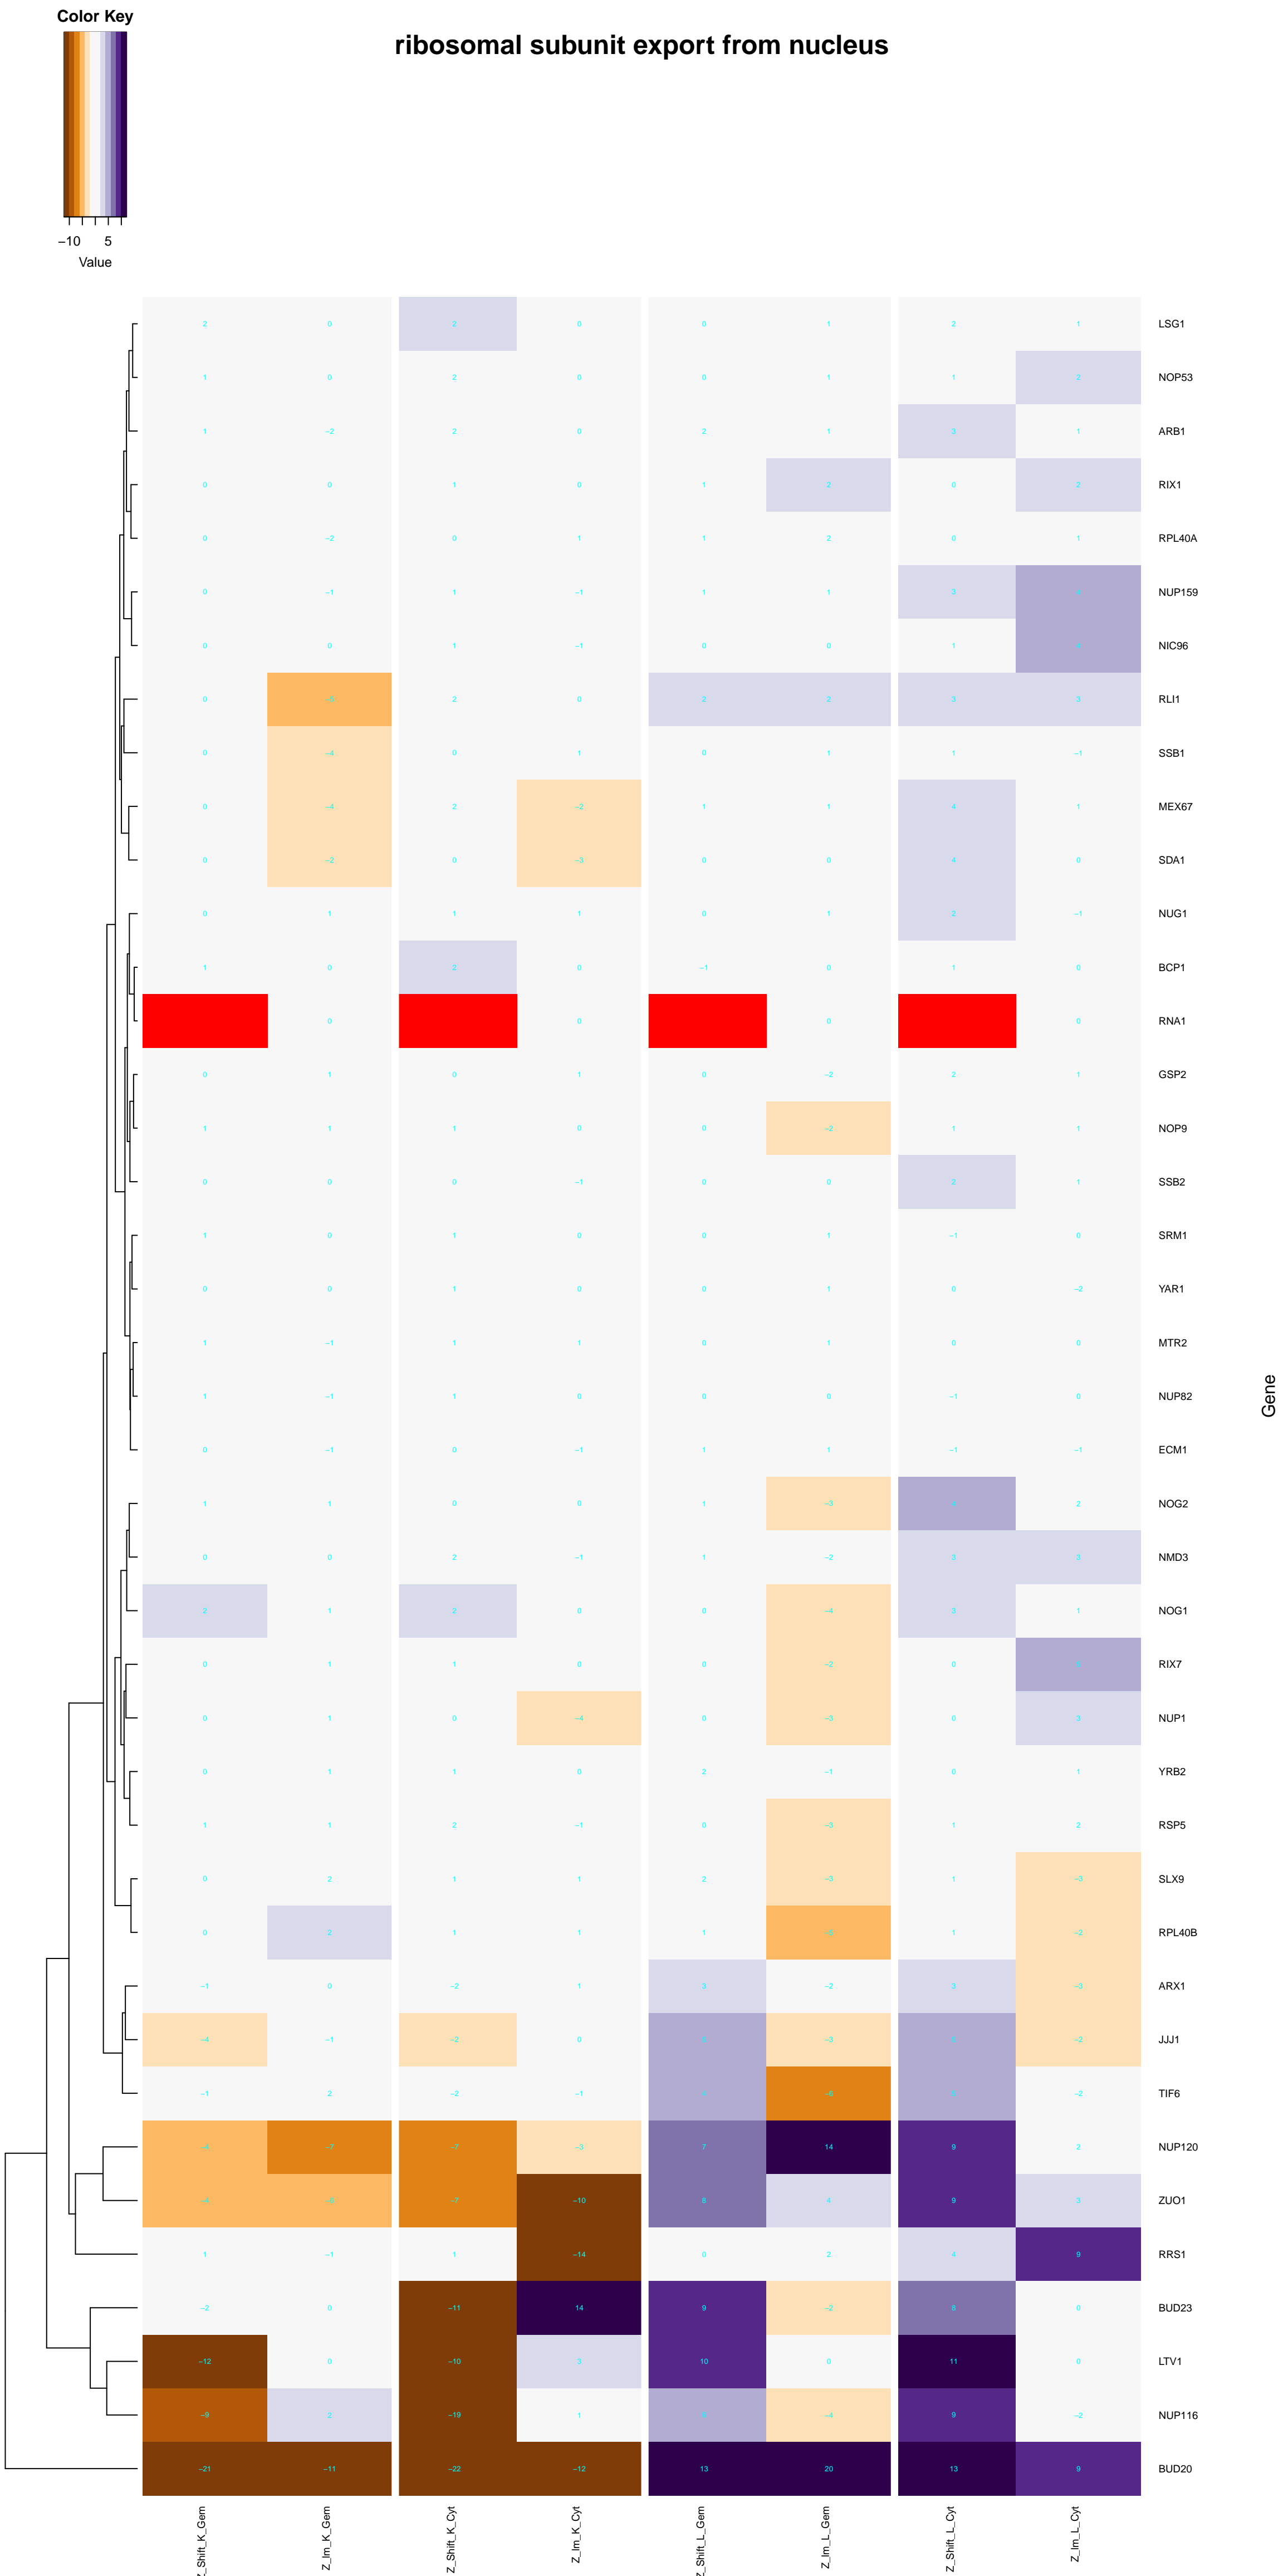

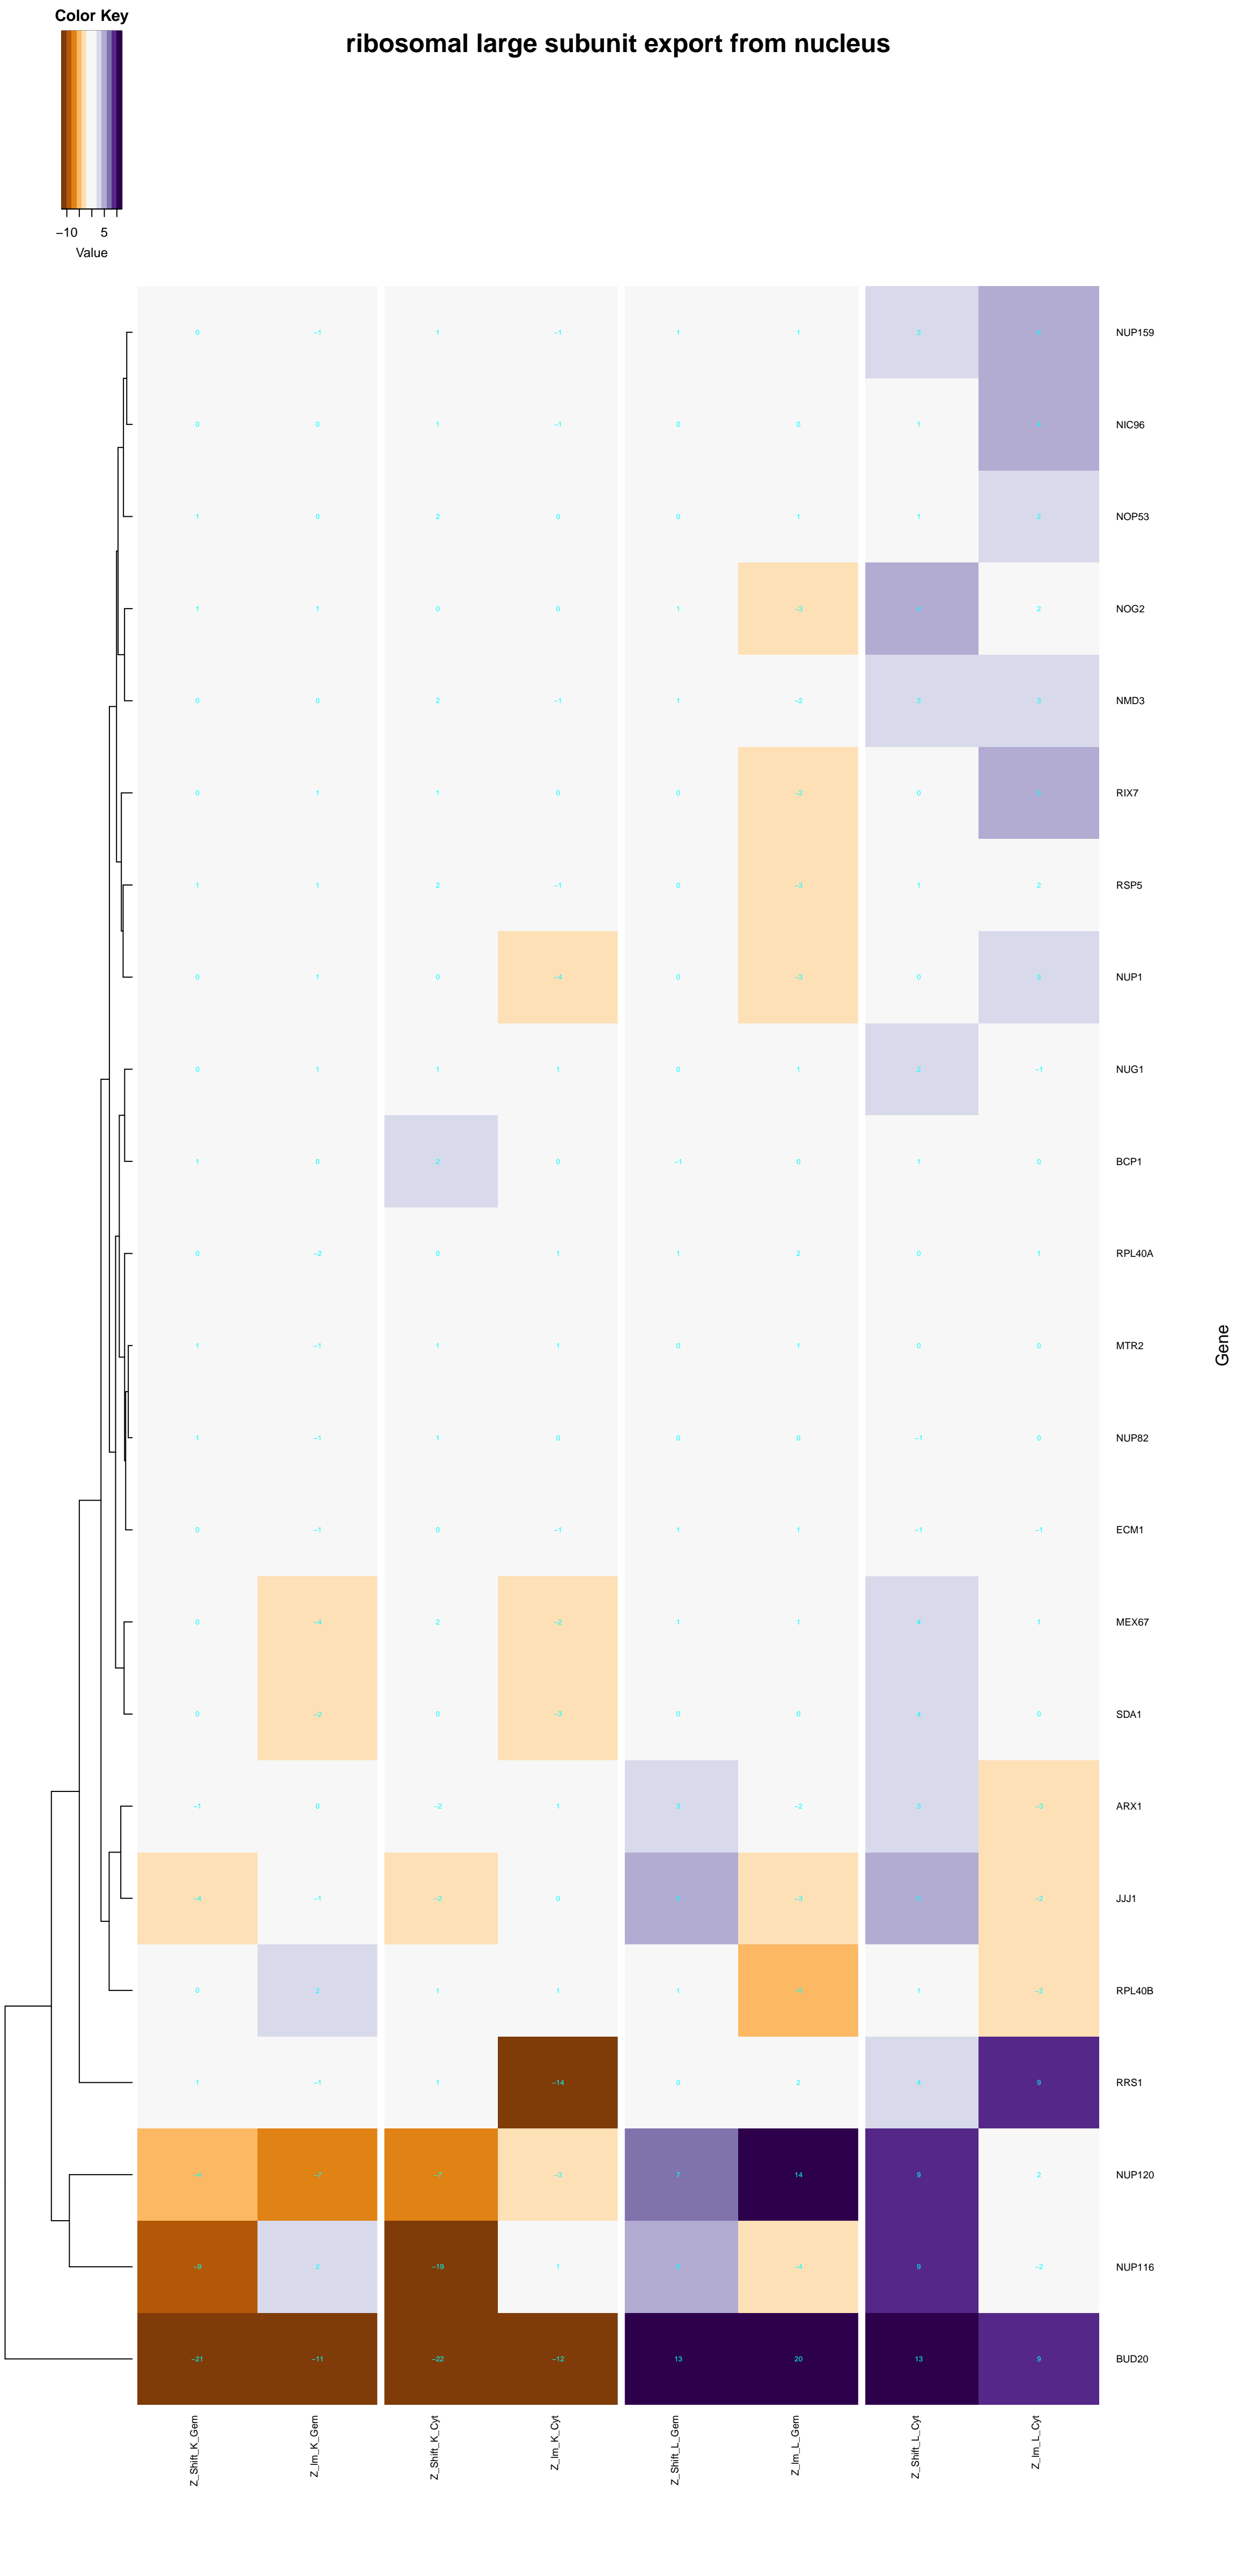

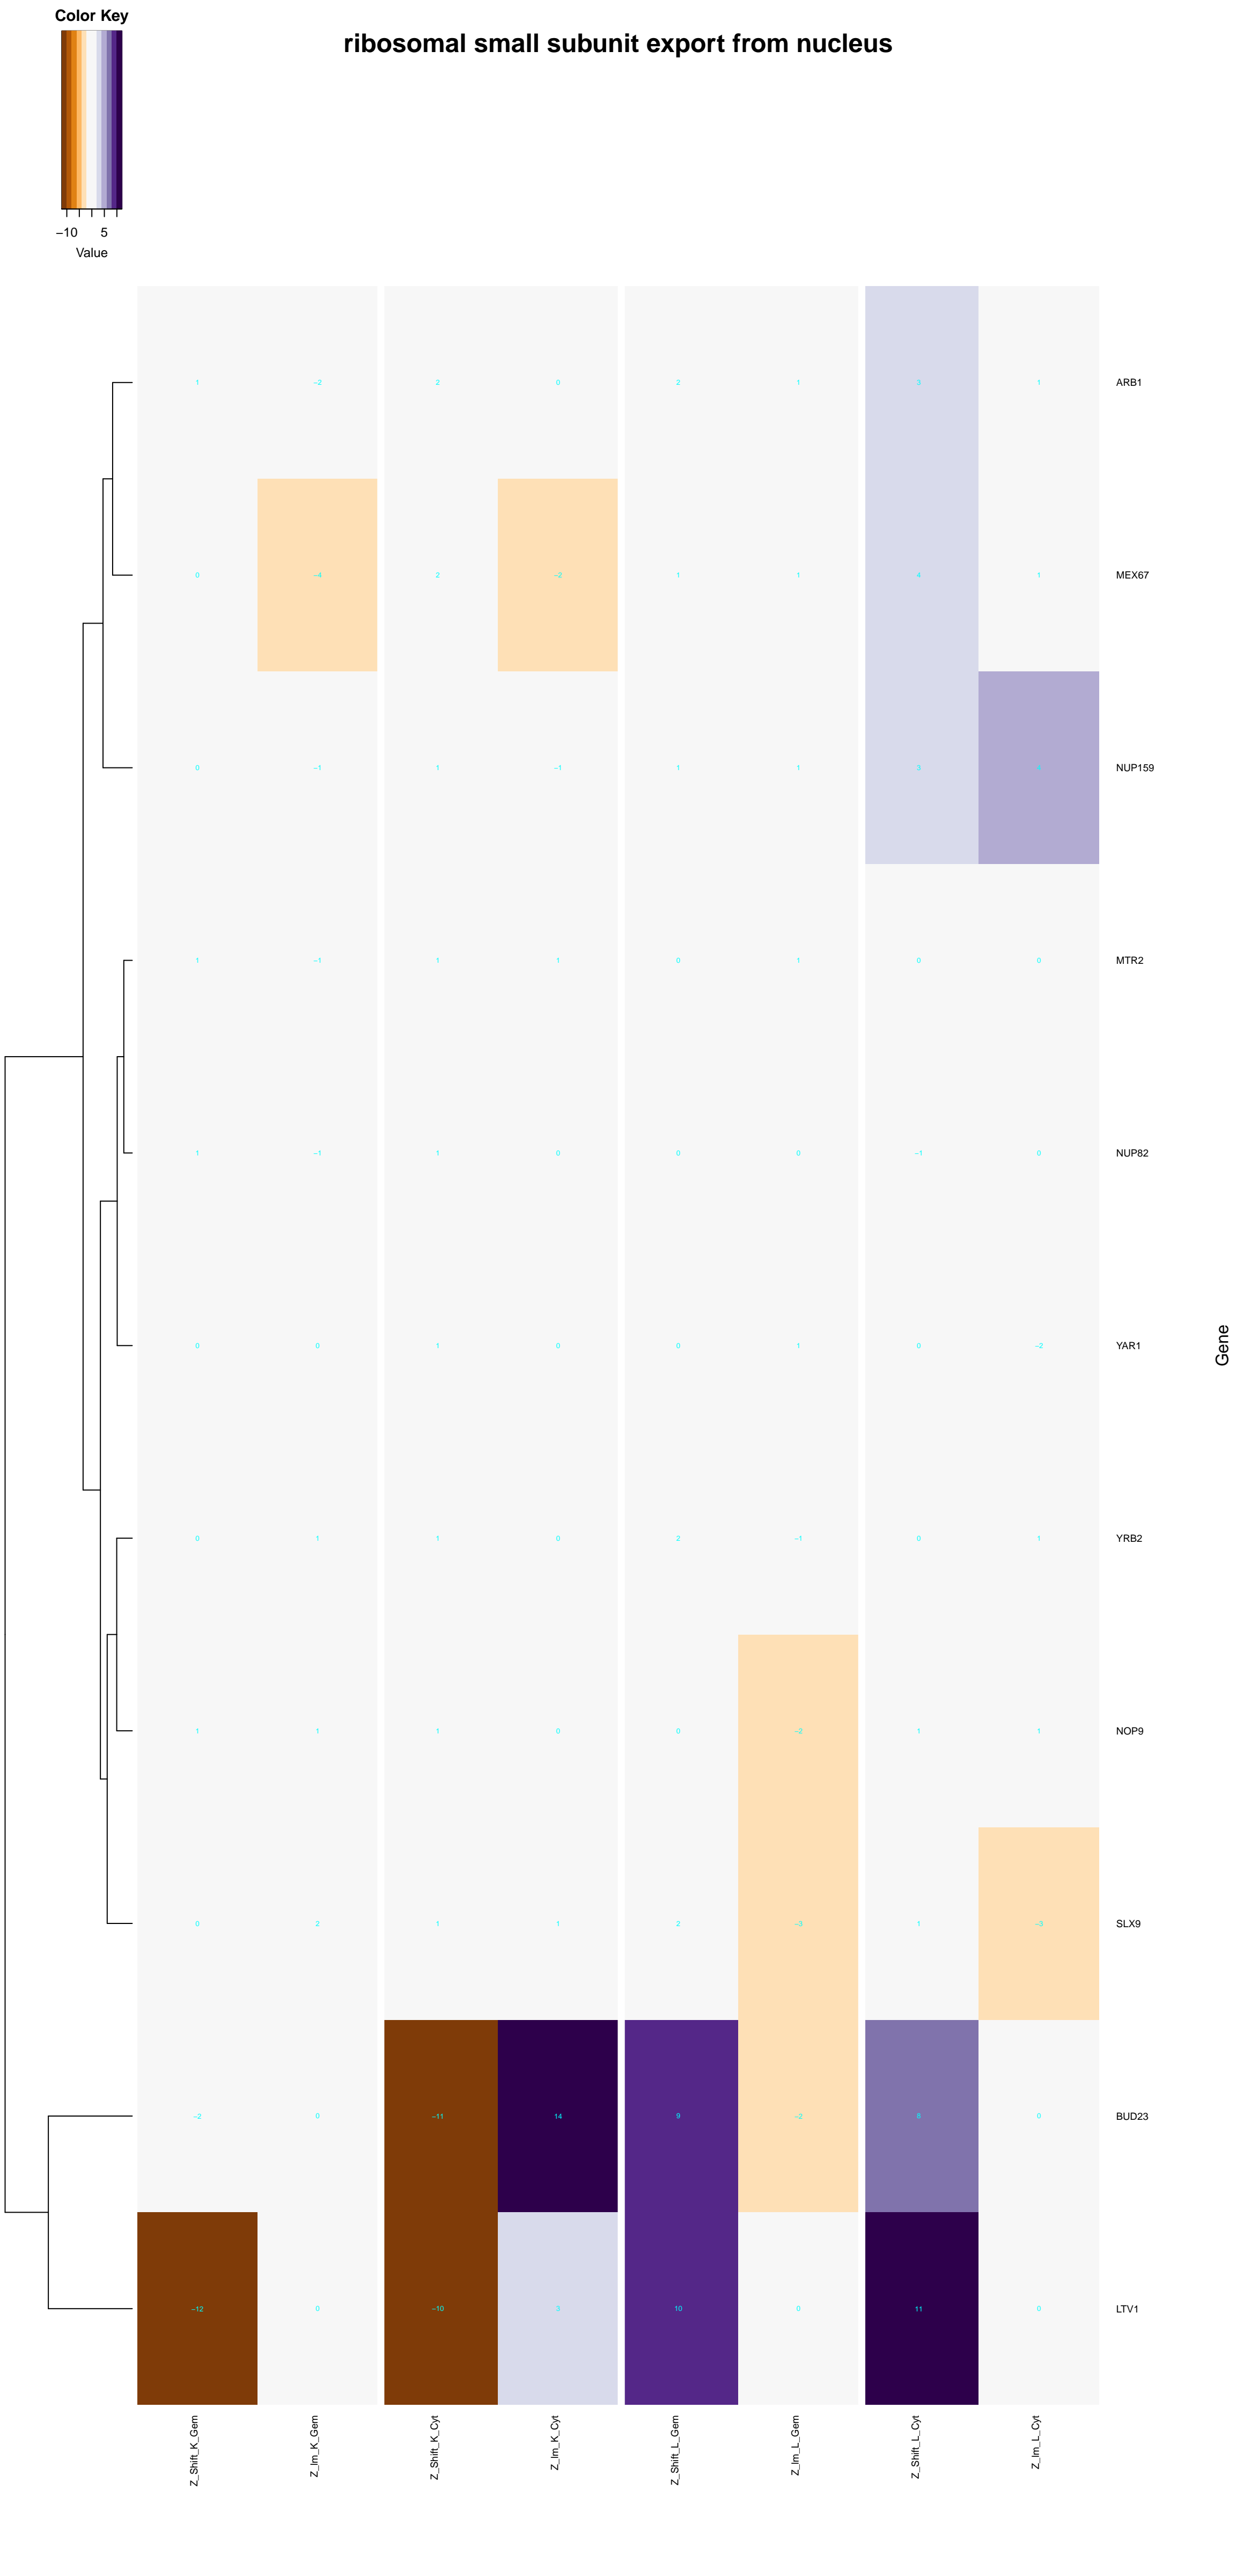

Supplement: s1 [file s1]

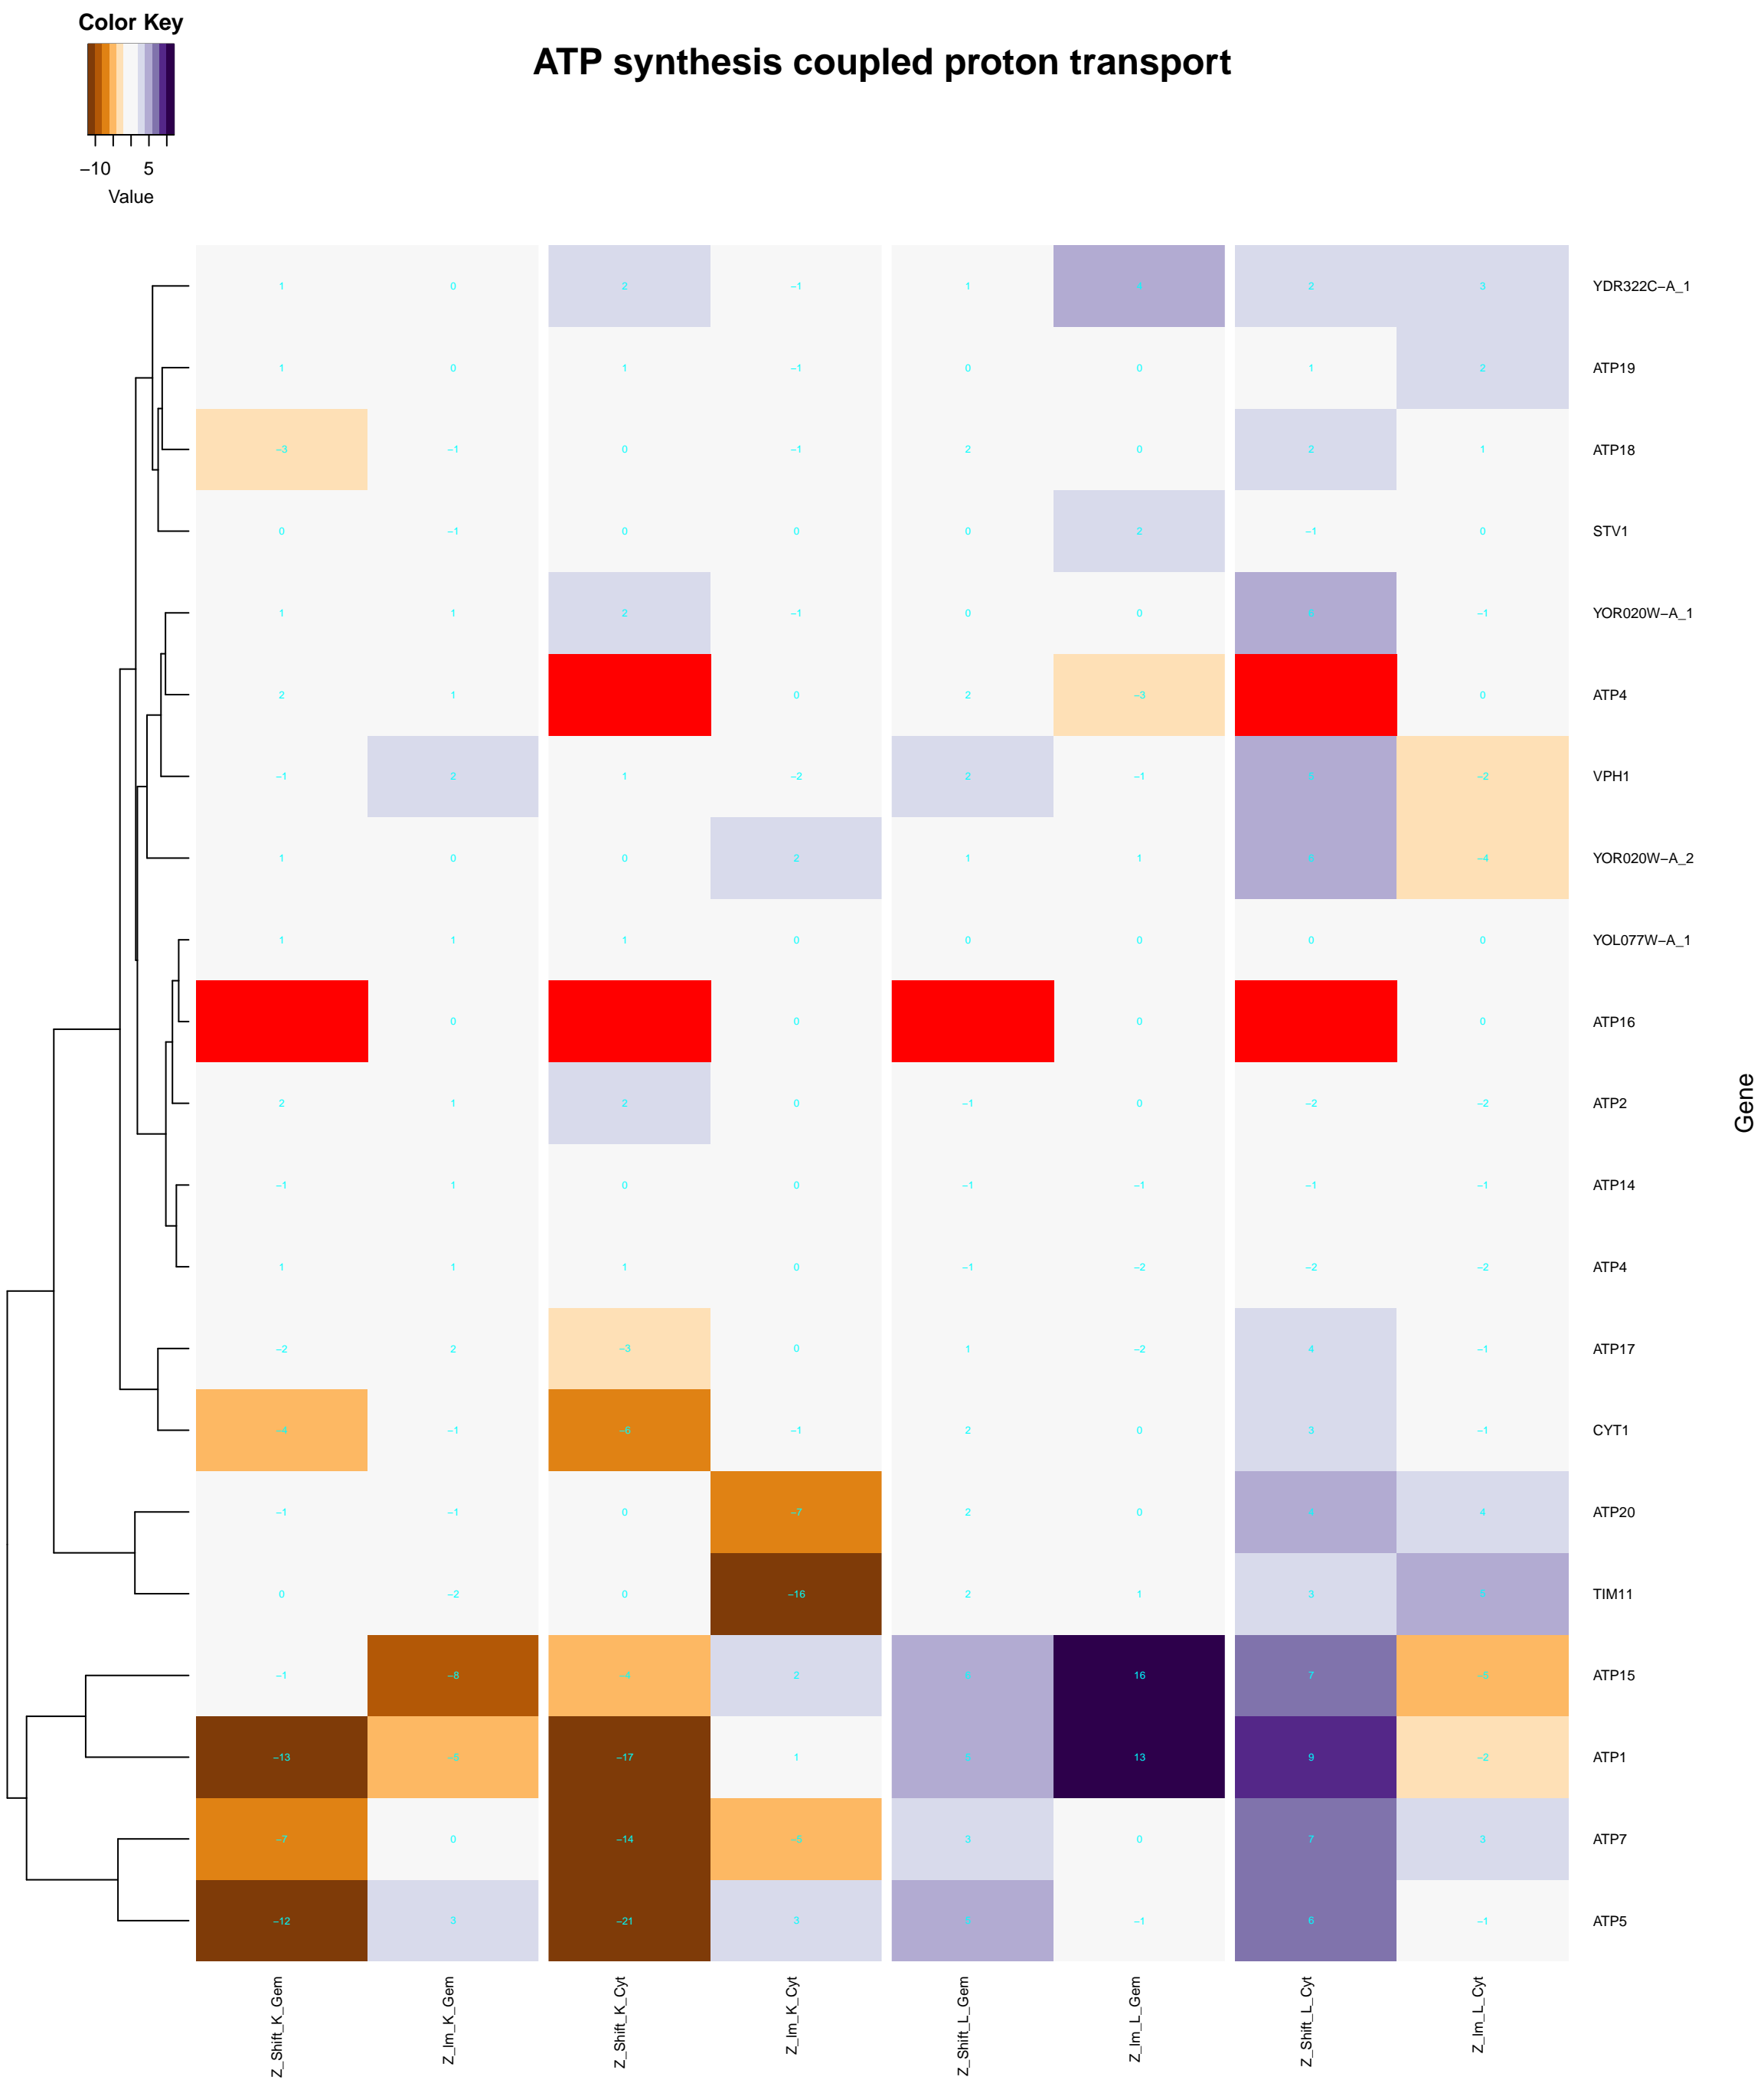

Supplement: s1 [file s1]

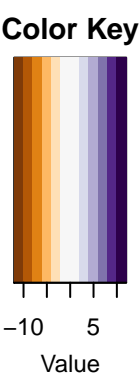

ion of SSU-rRNA from tricistronic rRNA transcript (SSU-rRNA, 5.8S rRNA, LSU-rRNA)

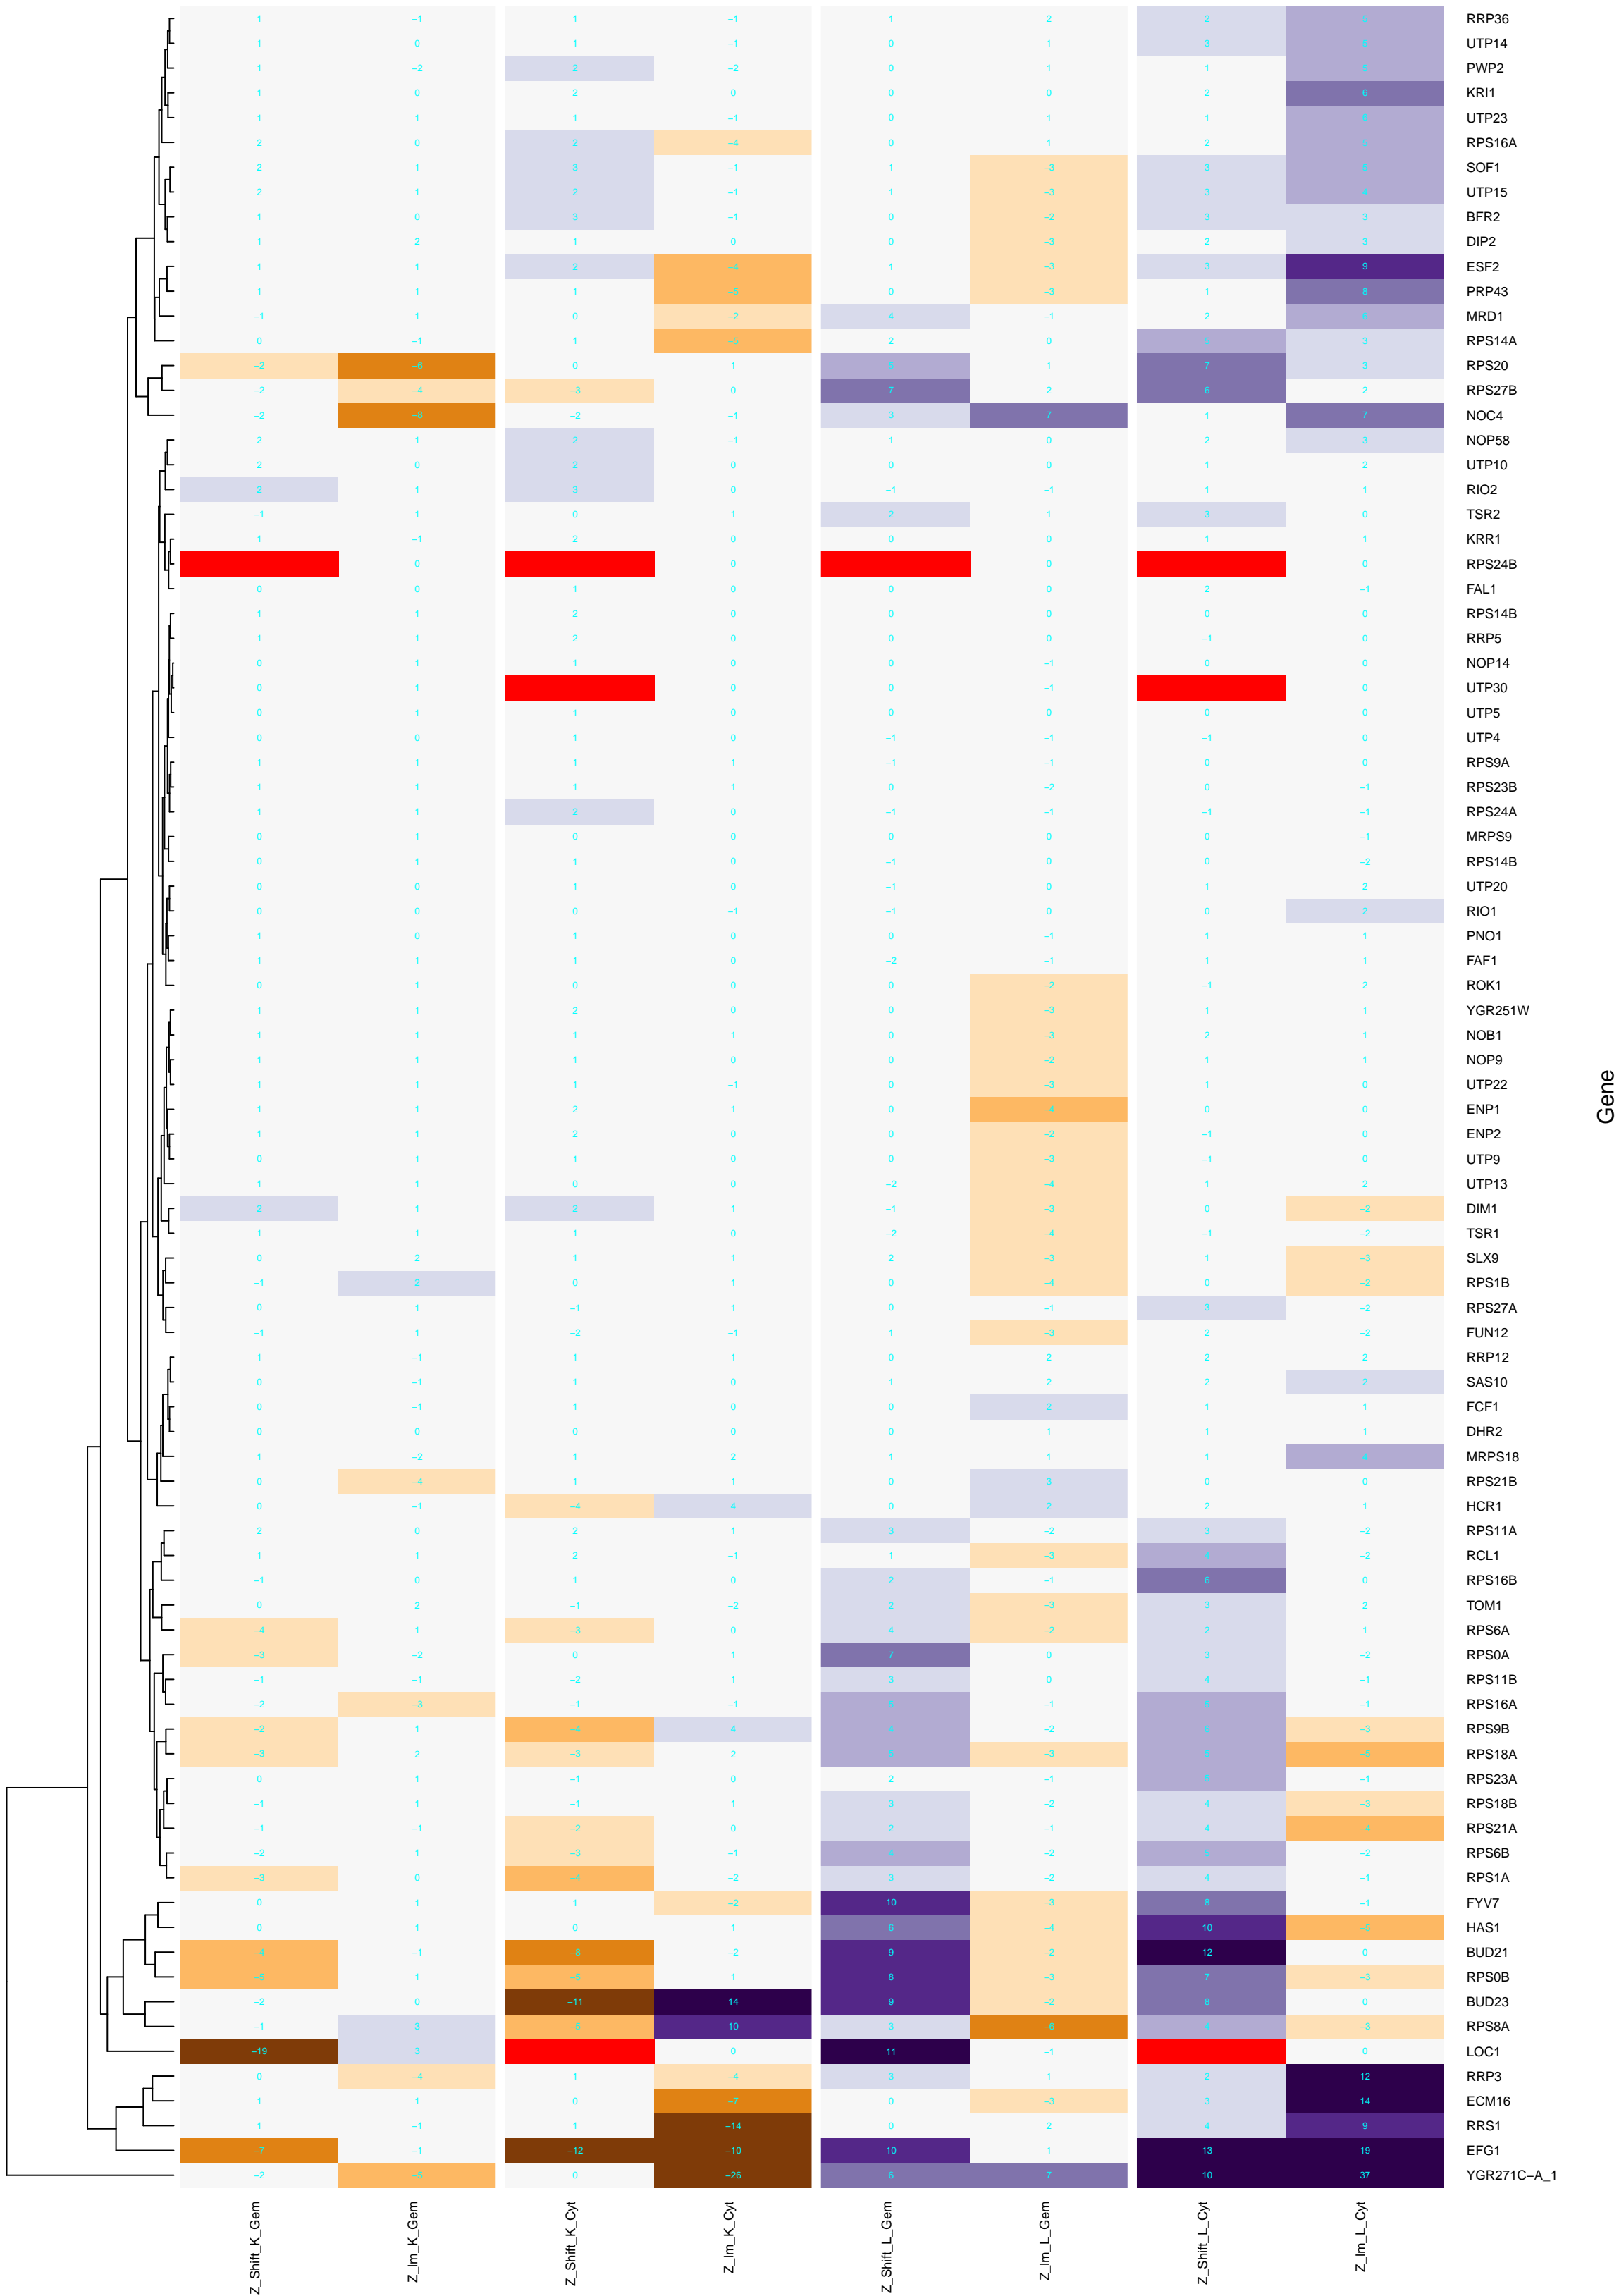

Supplement: s1 [file s1]

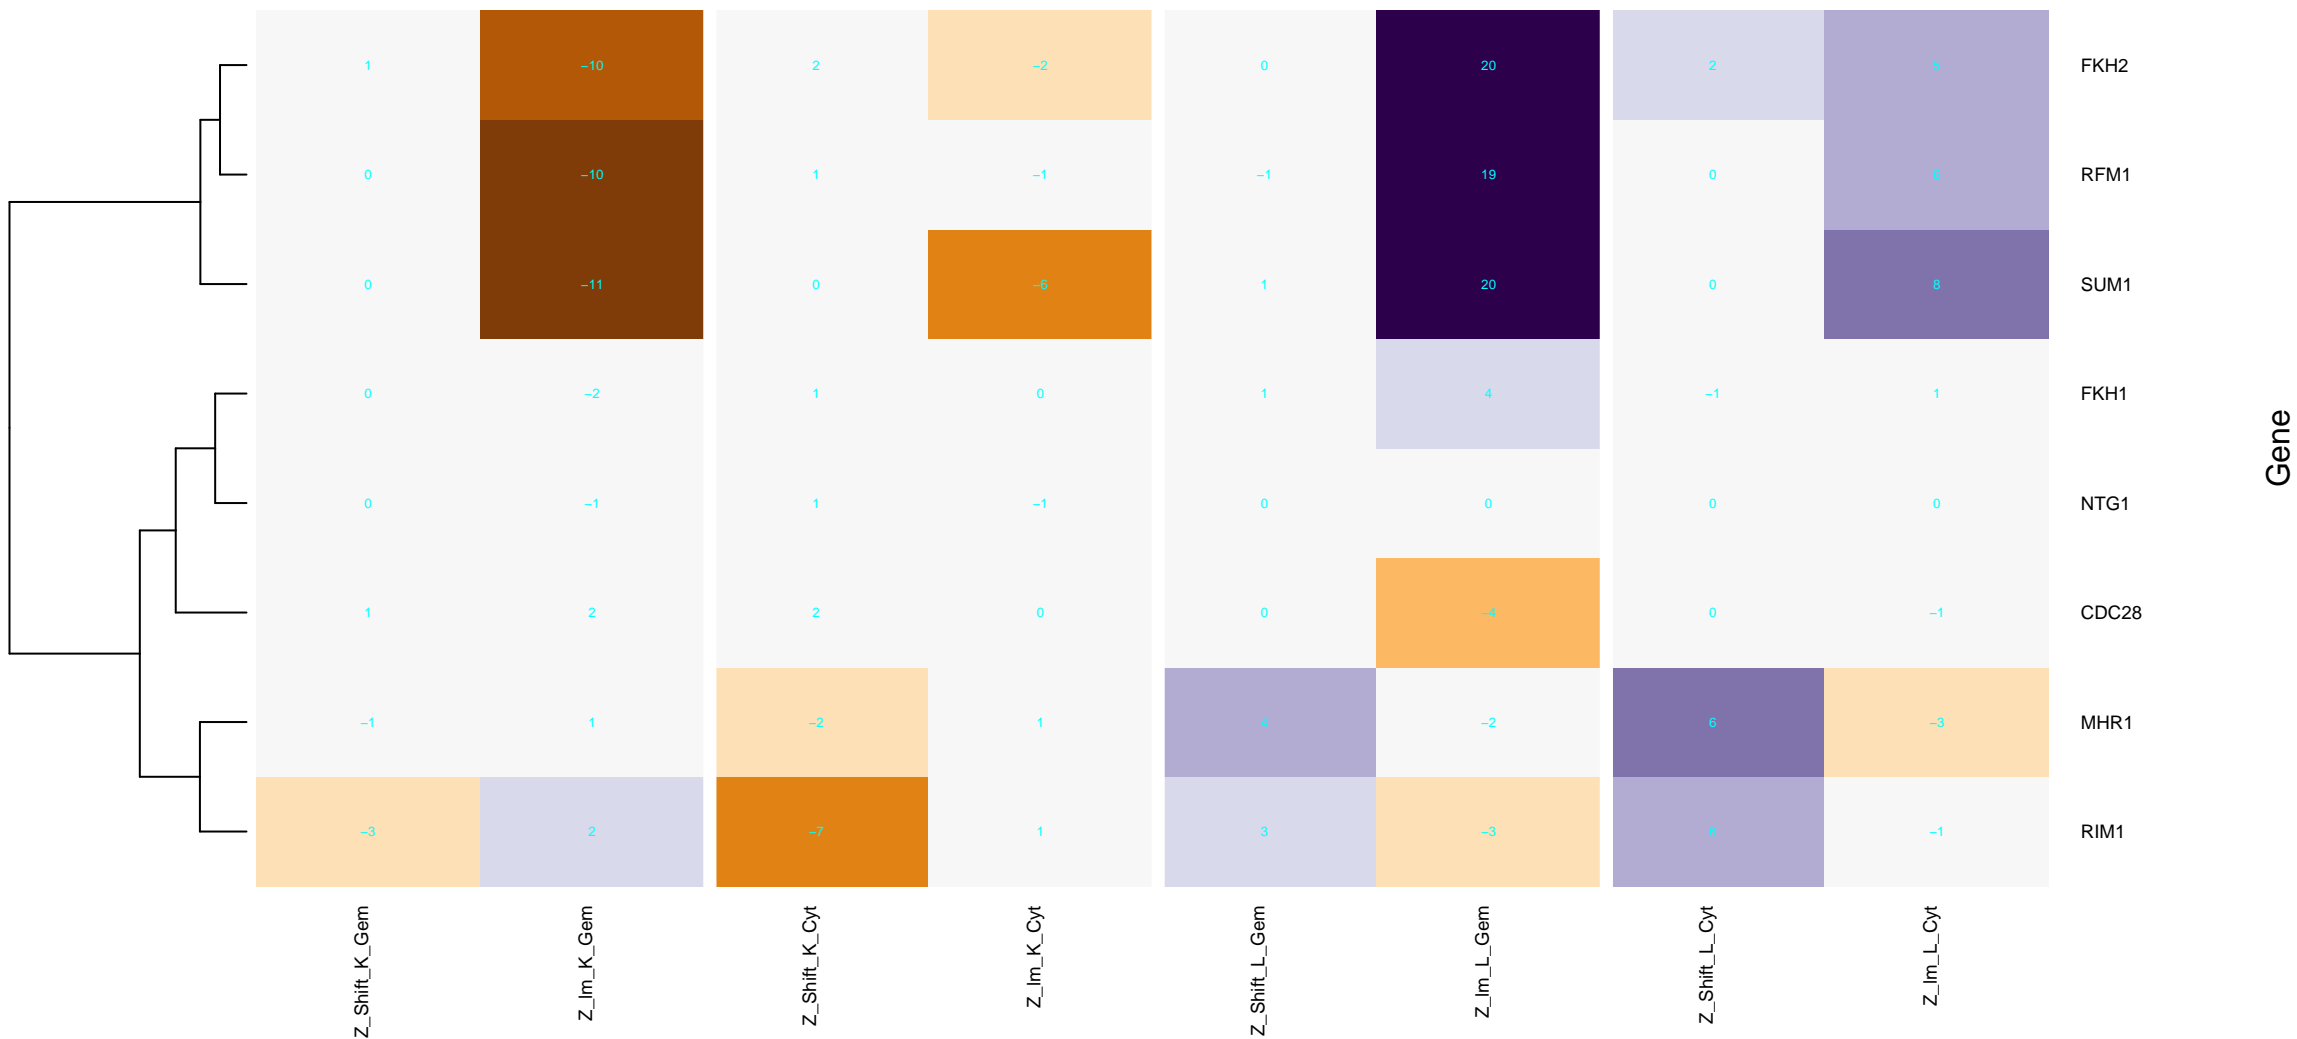

Supplement: s1 [file s1]

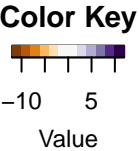

**vacuole fusion, non-autophagic**

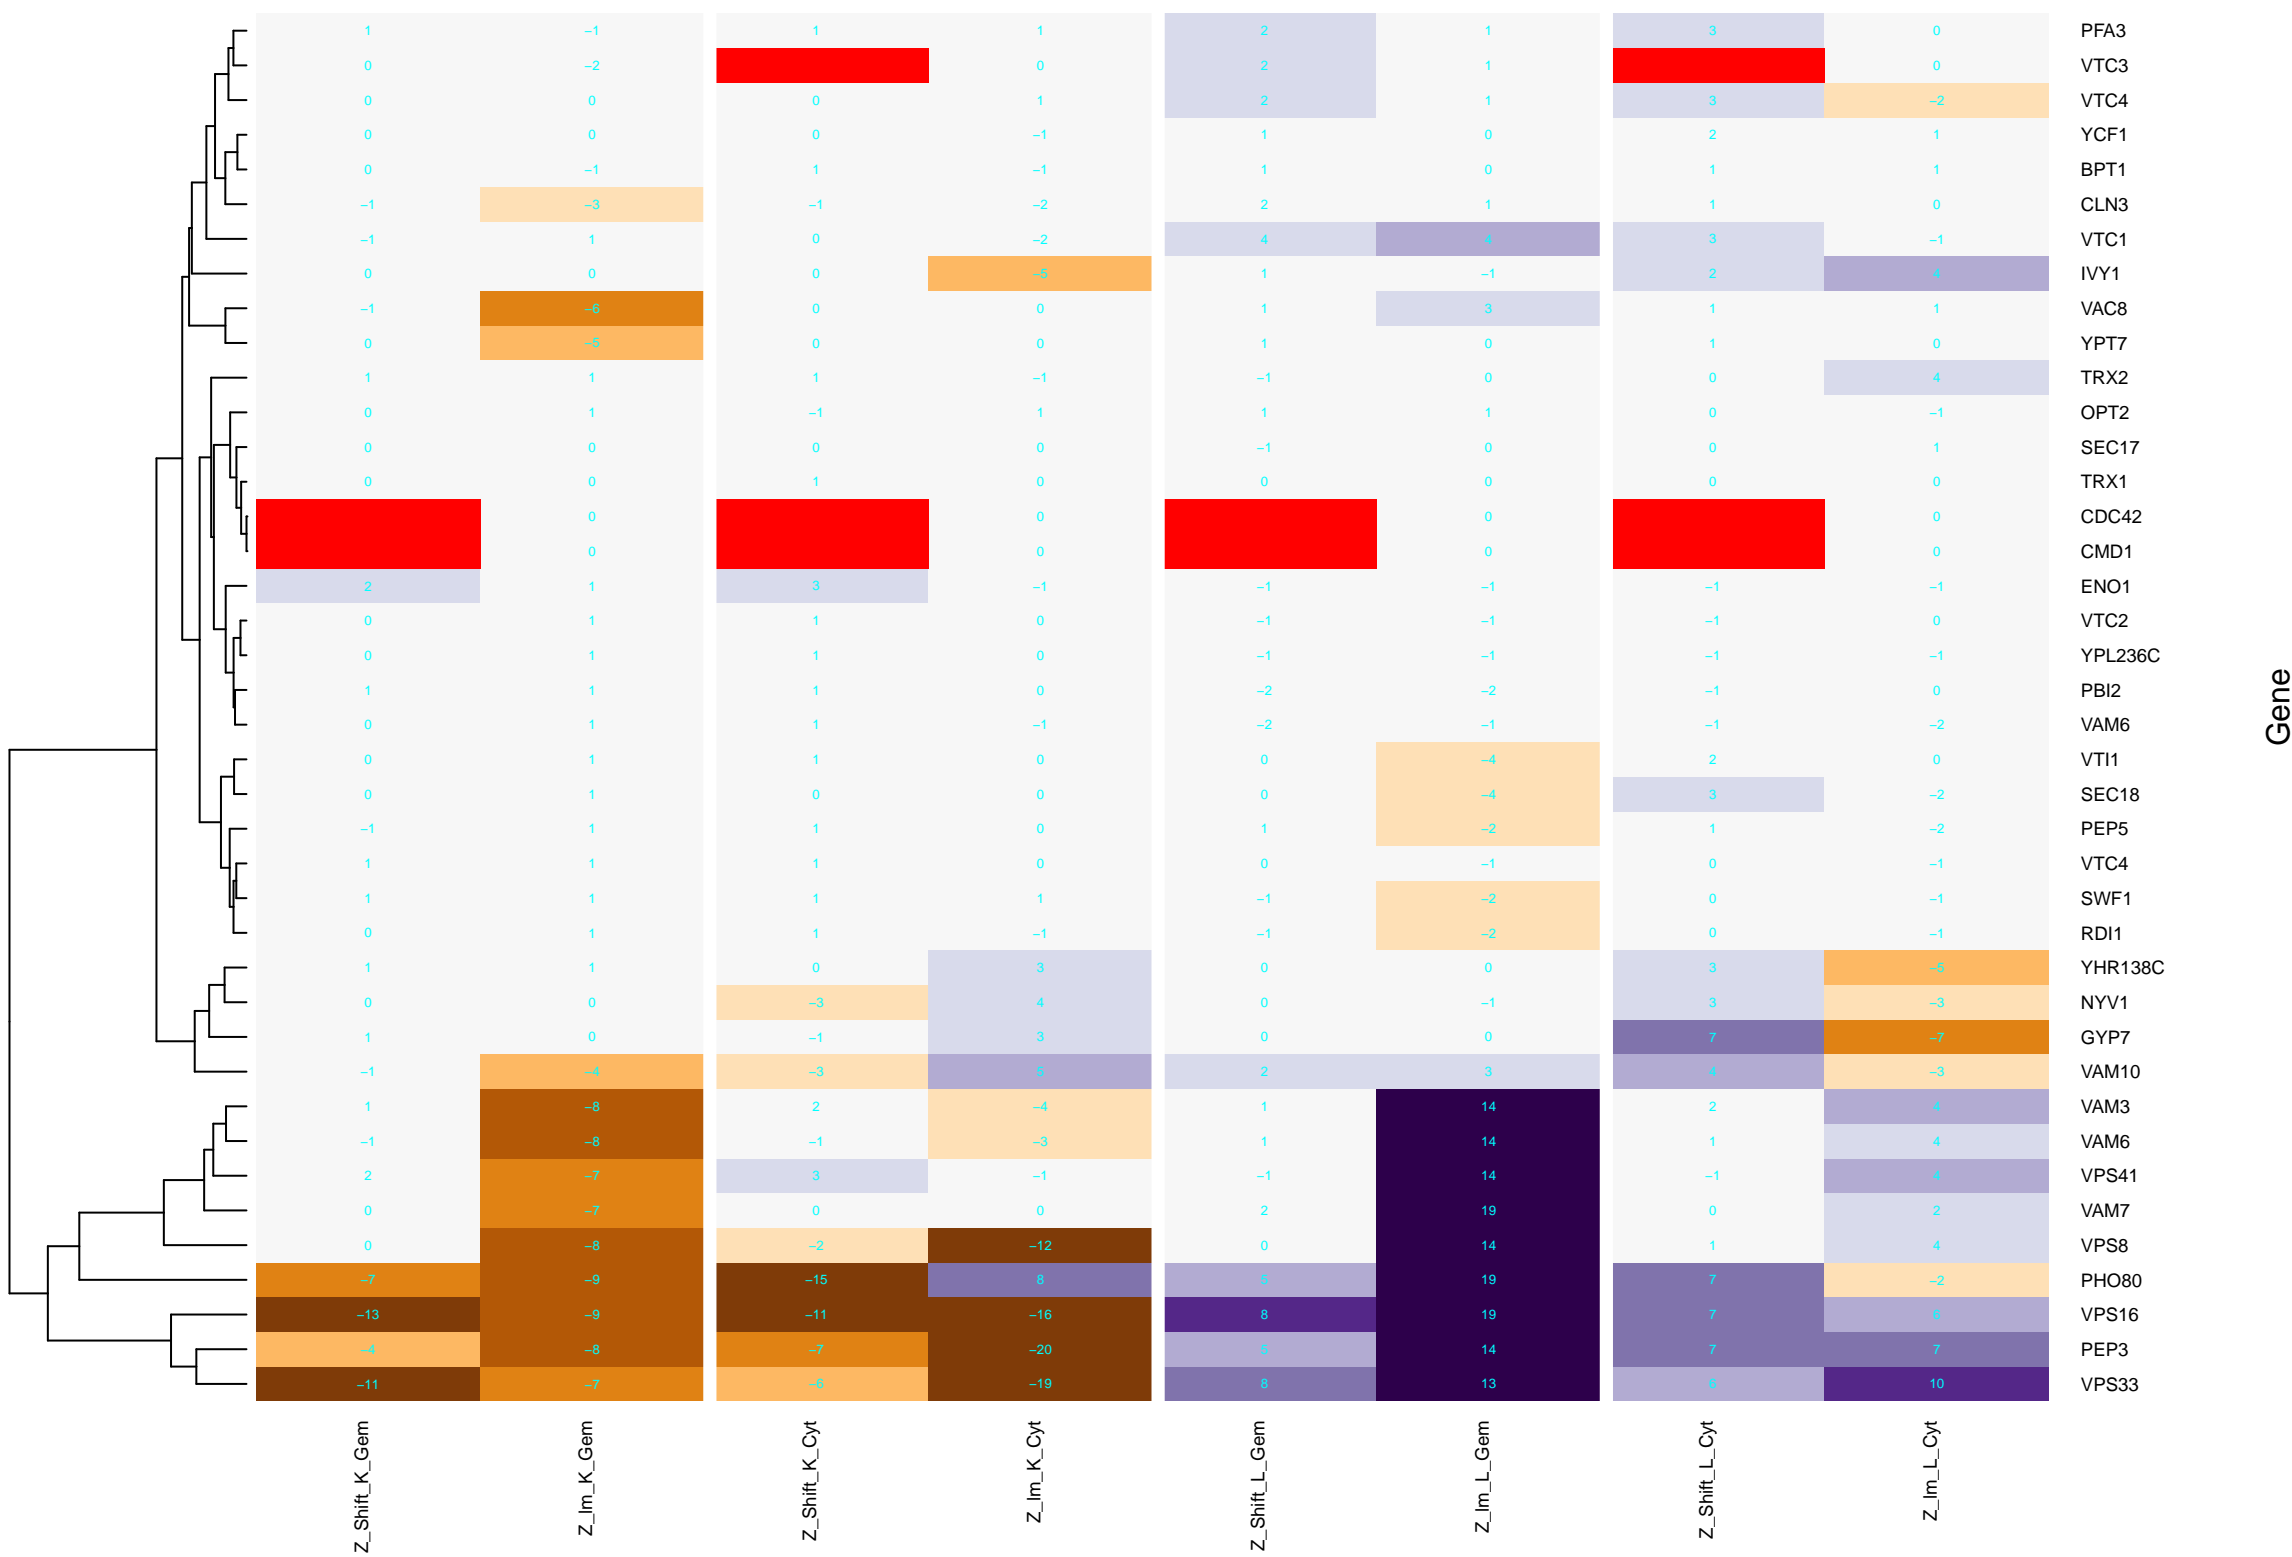

Supplement: s1 [file s1]

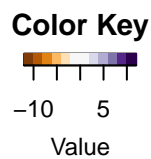

# cytosolic proteasome complex

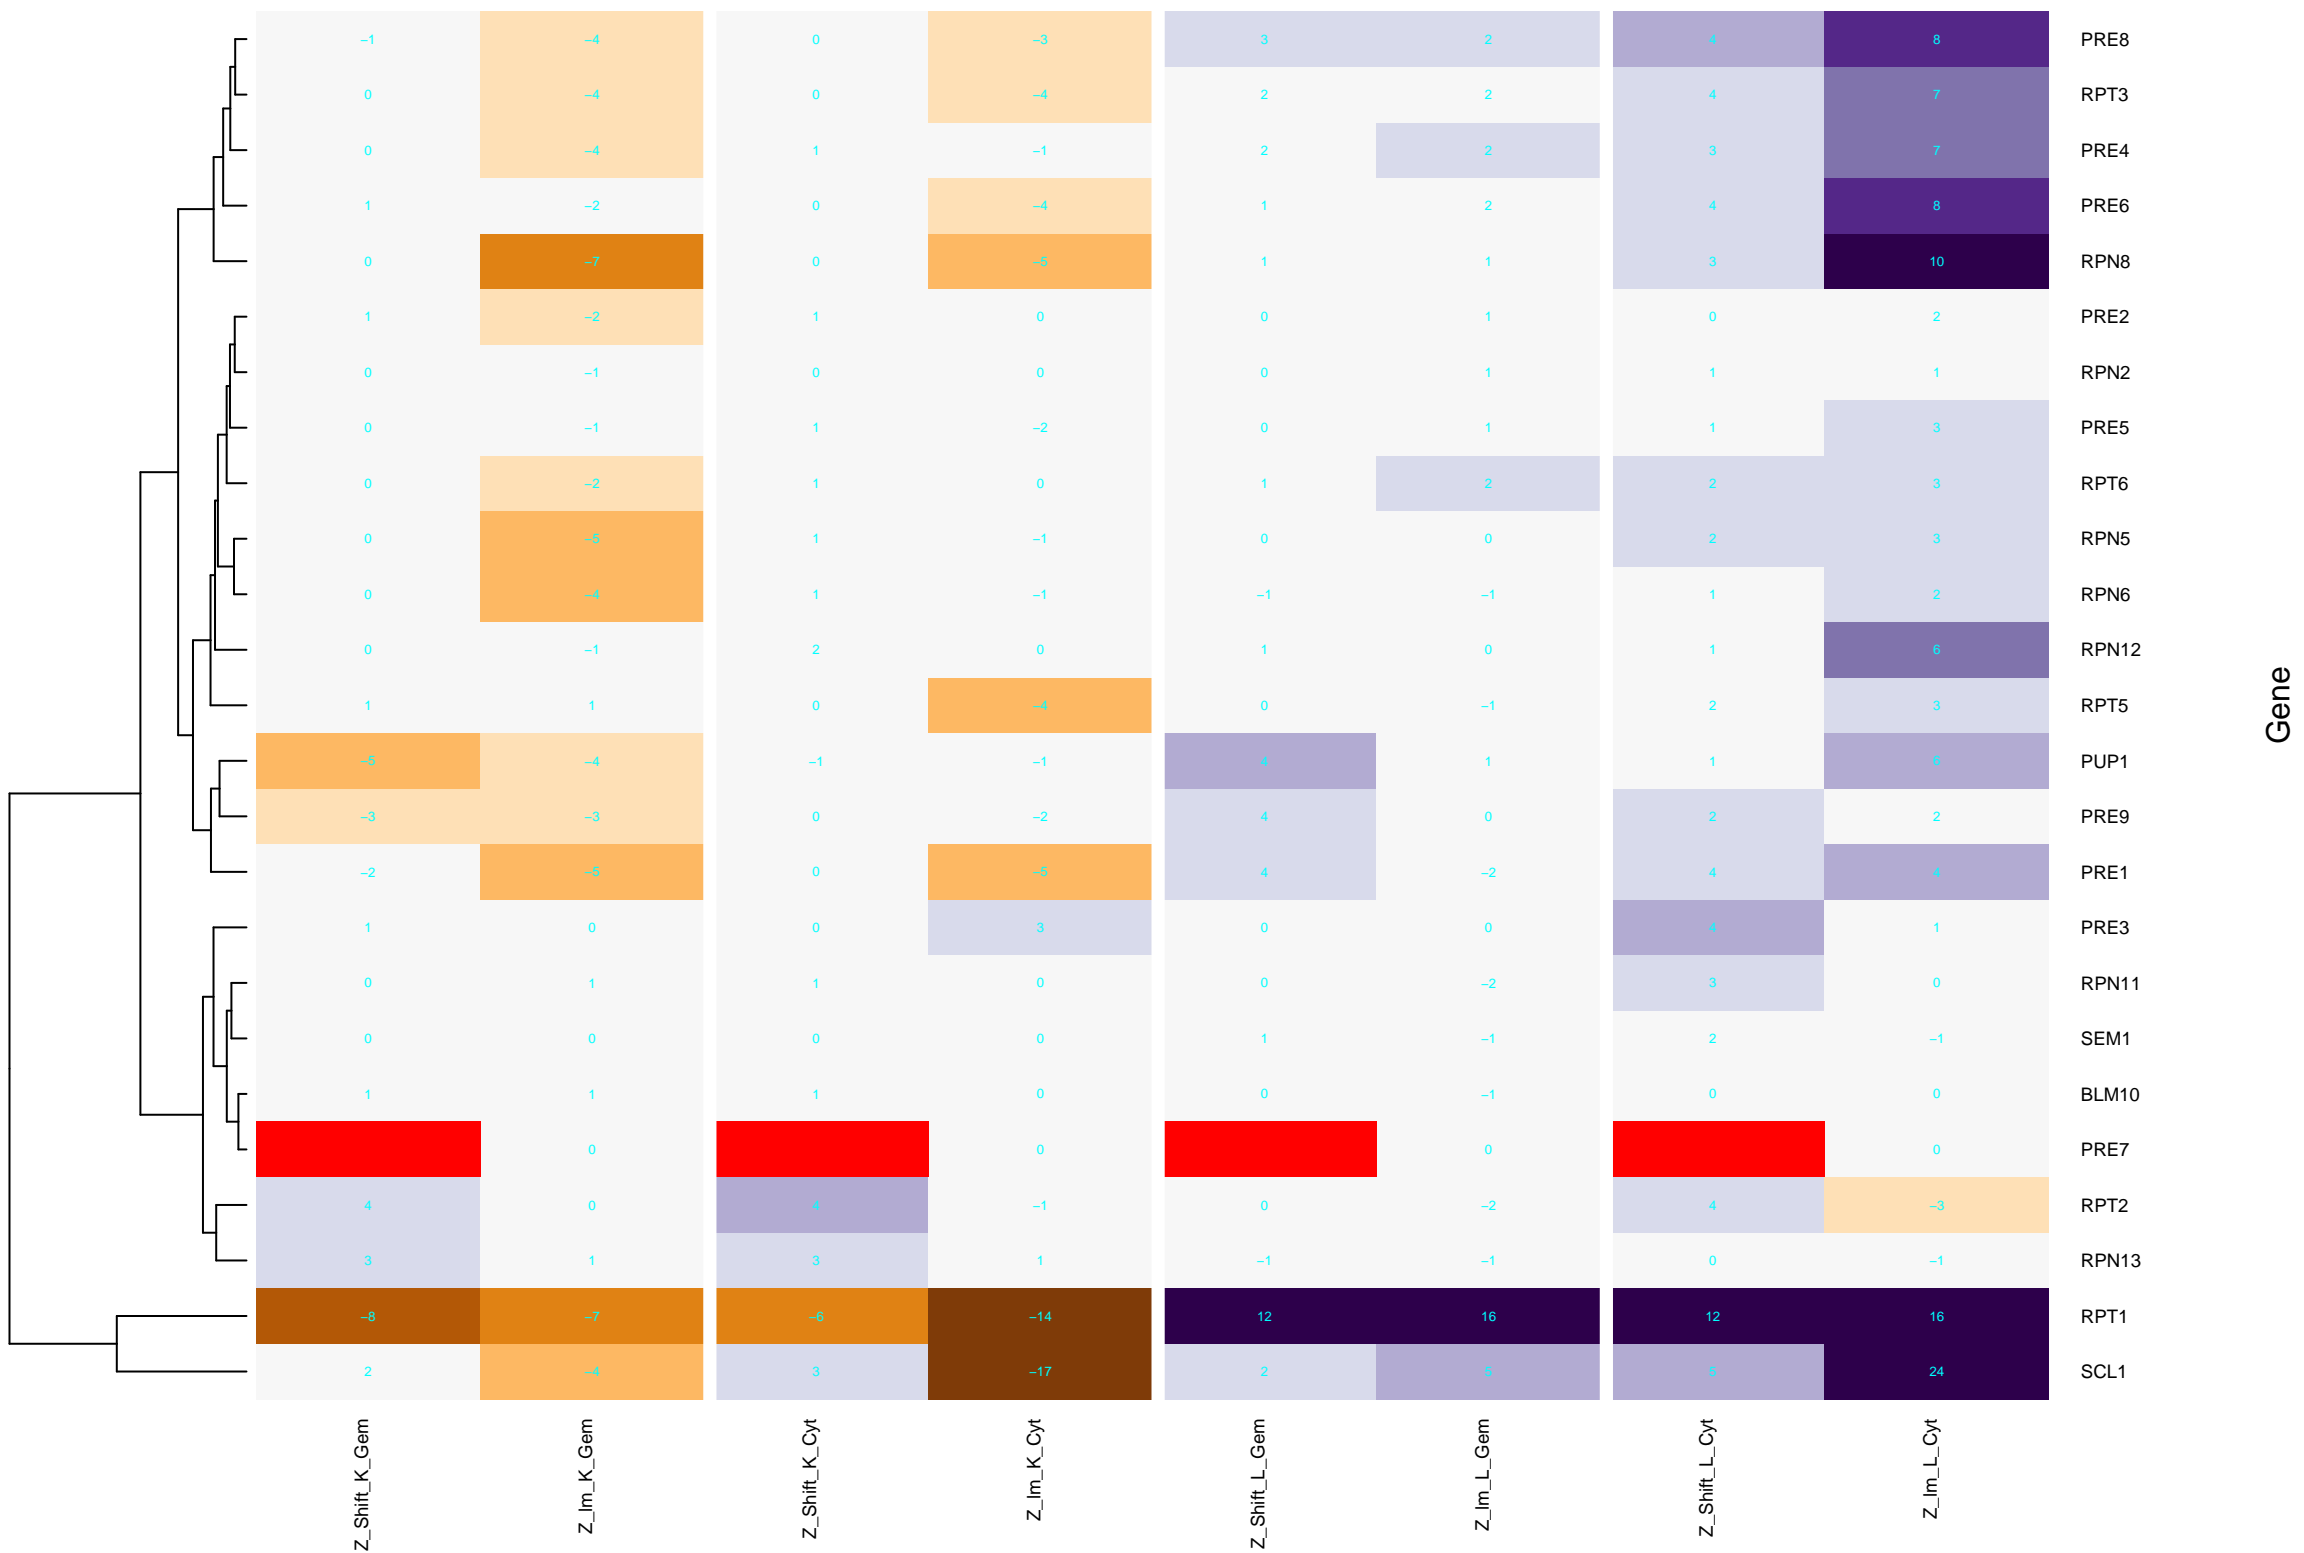



# proteasome storage granule

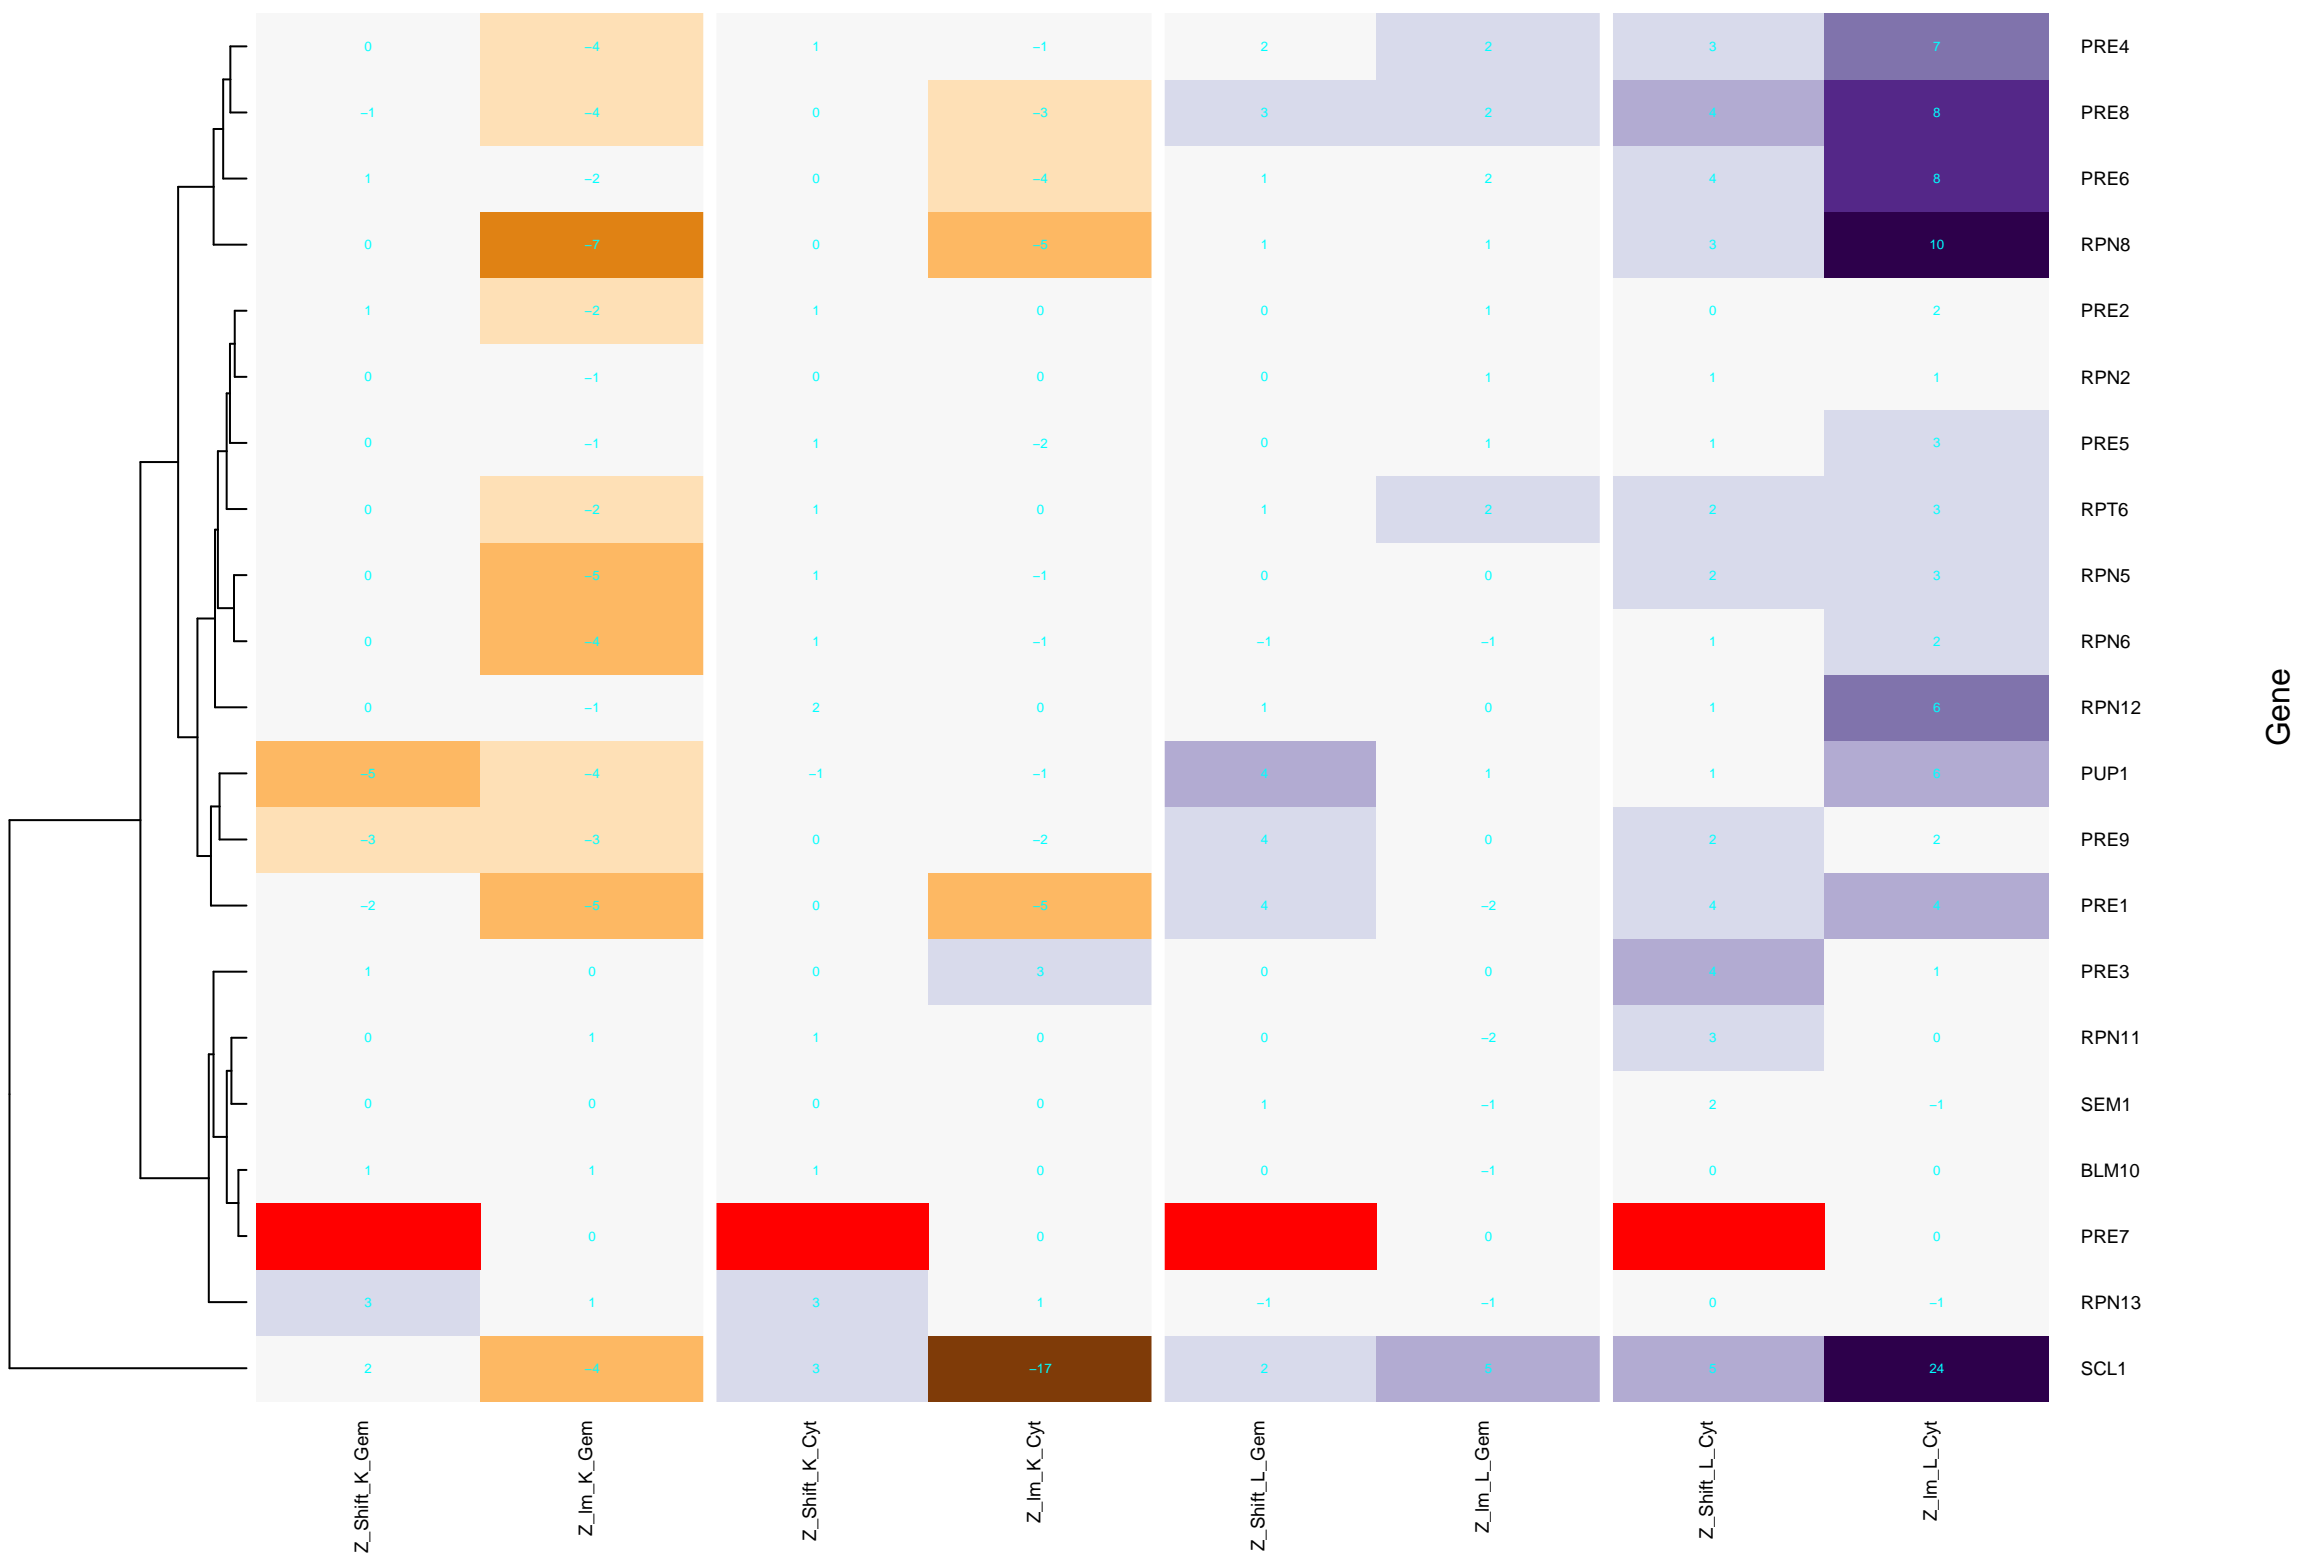

Supplement: s1 [file s1]

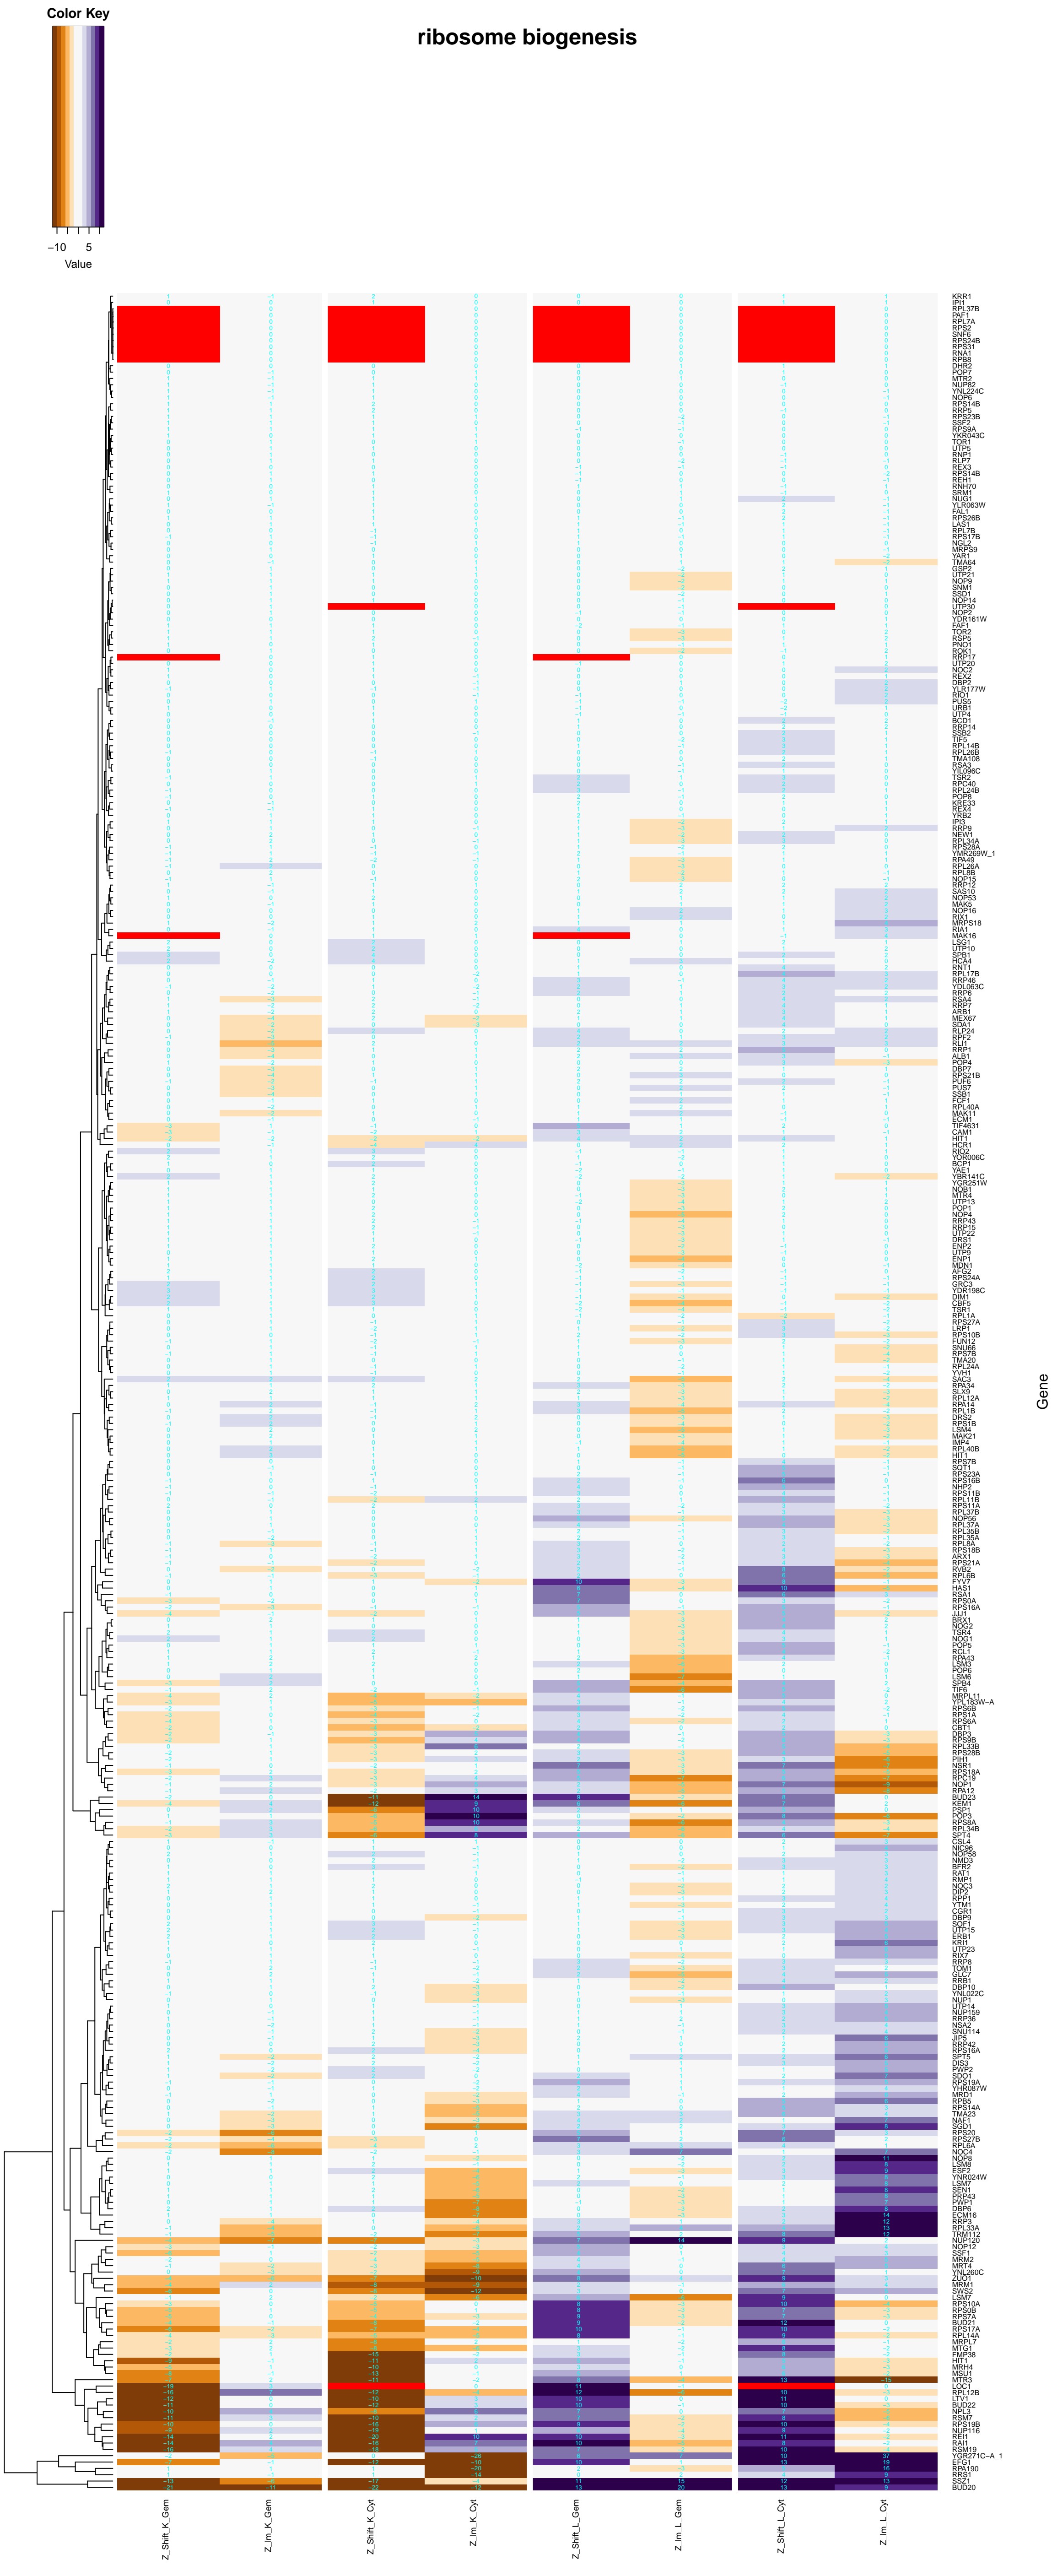

Supplement: s1 [file s1]

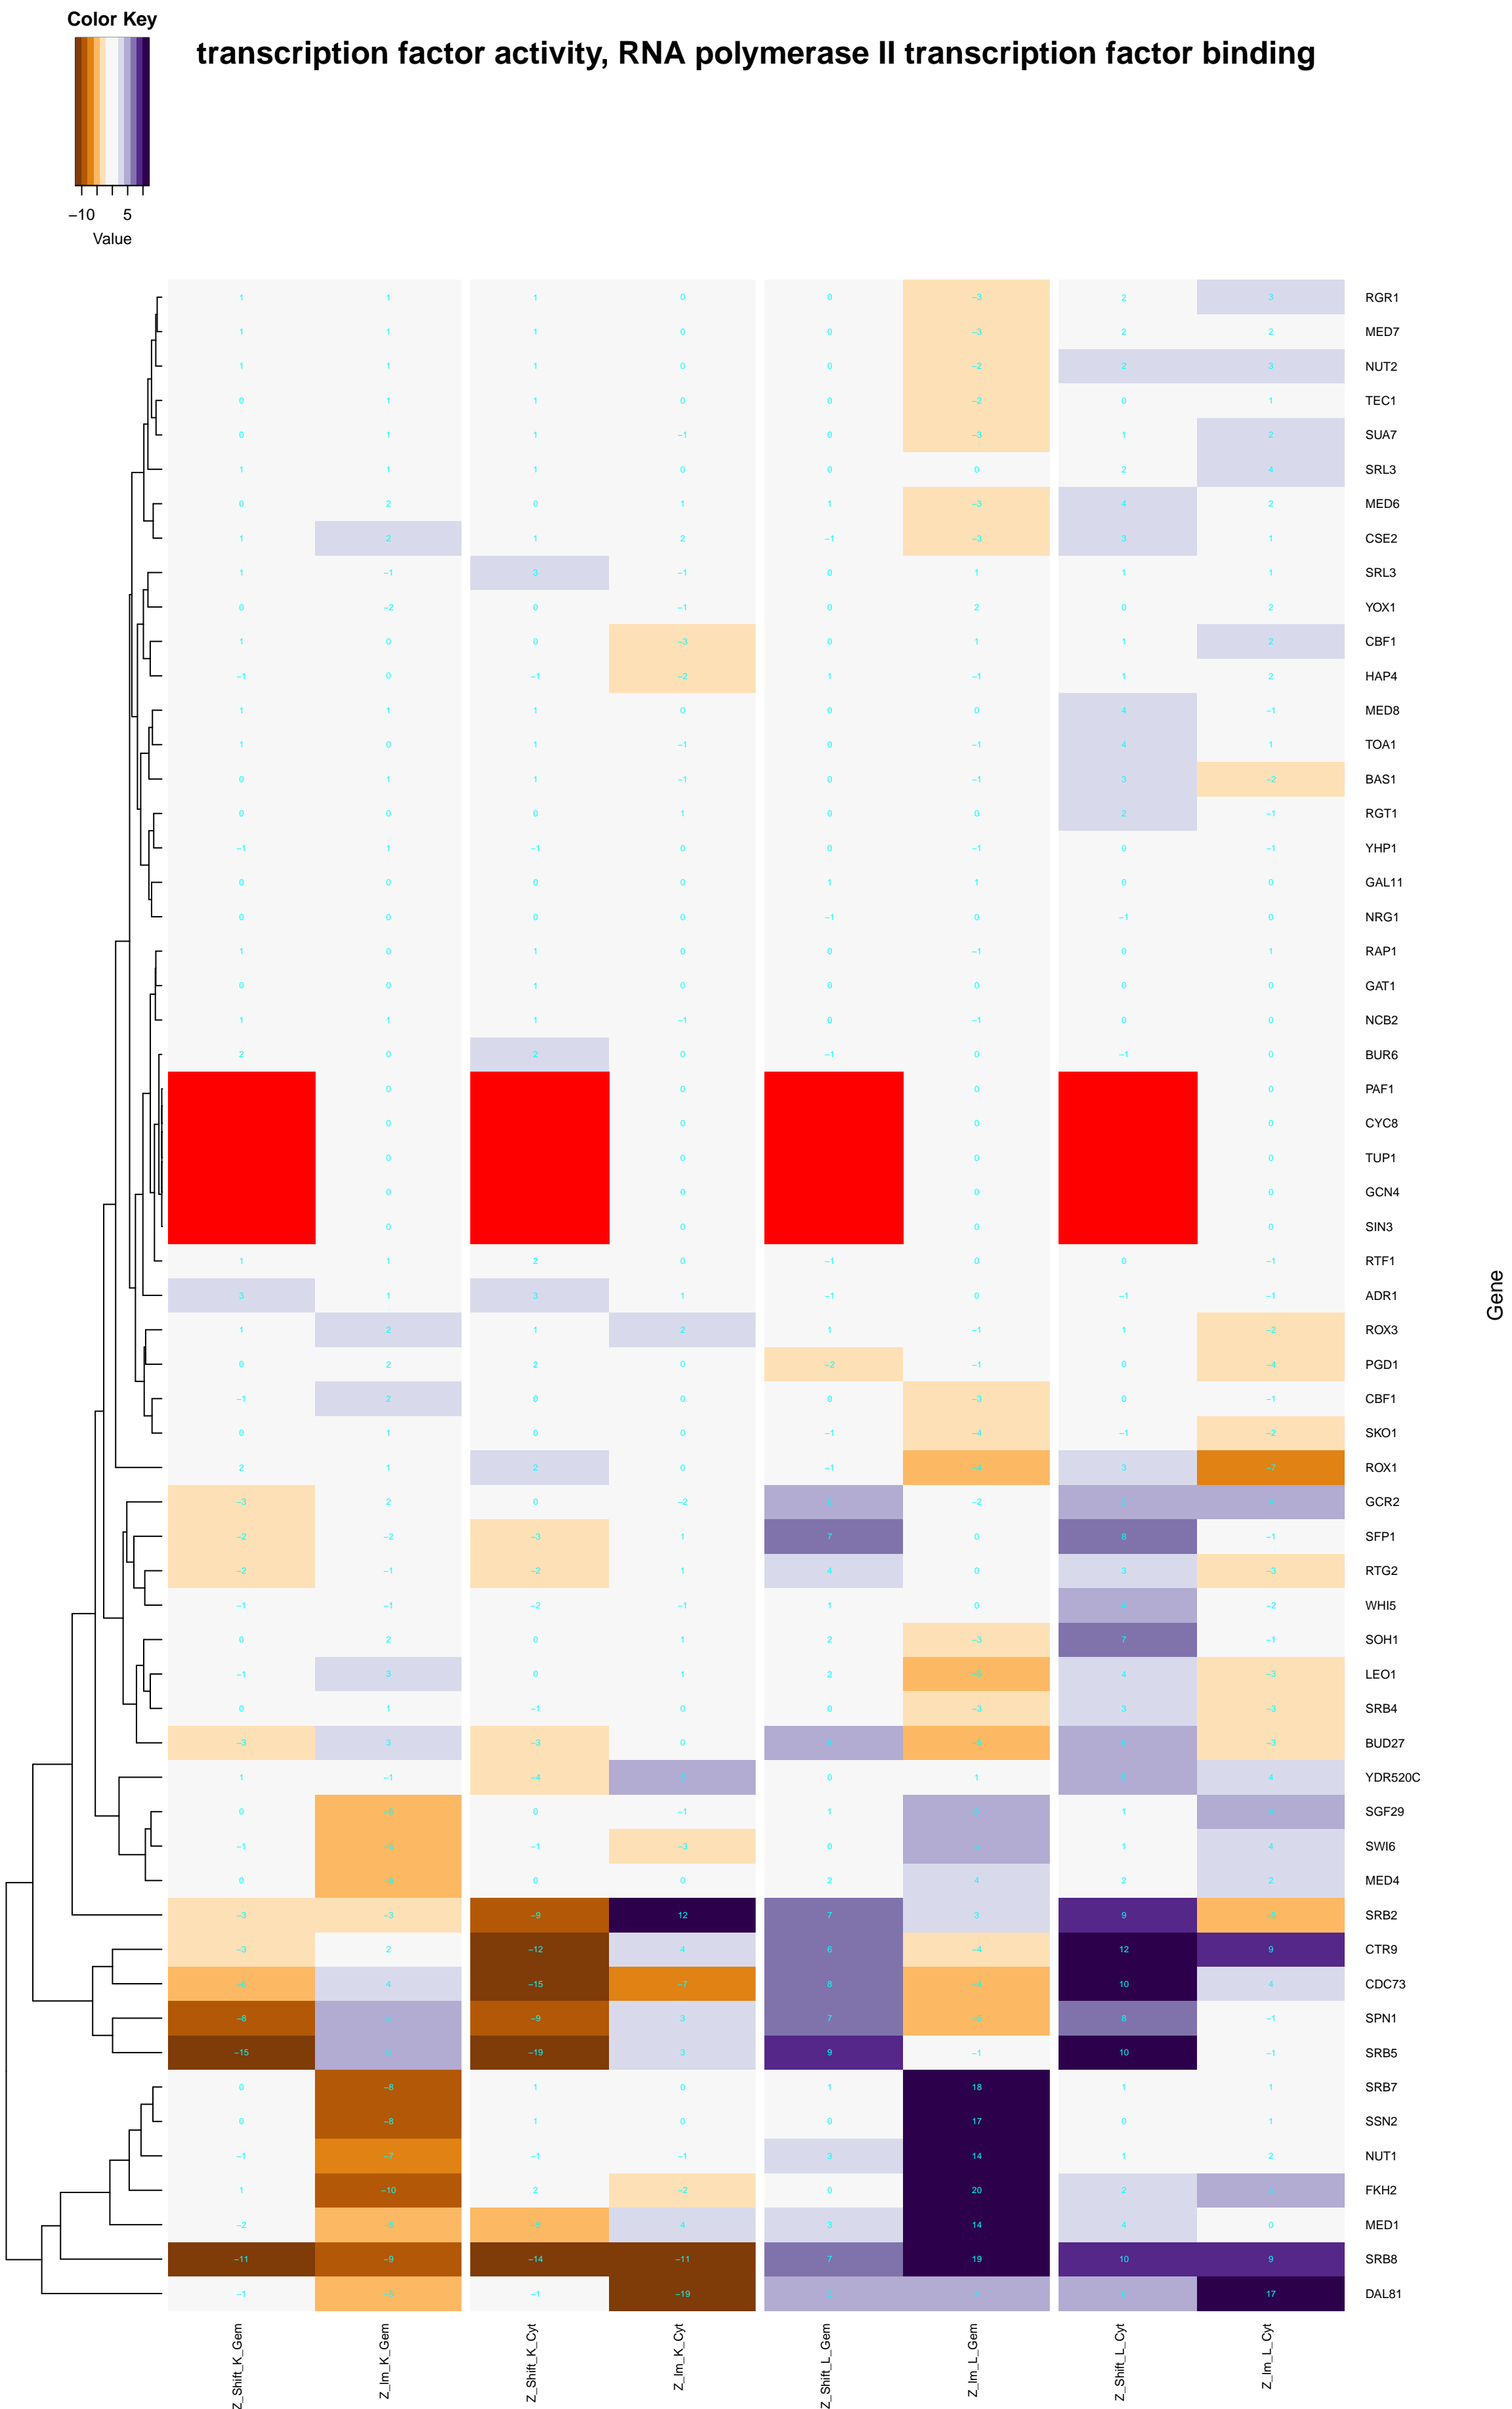

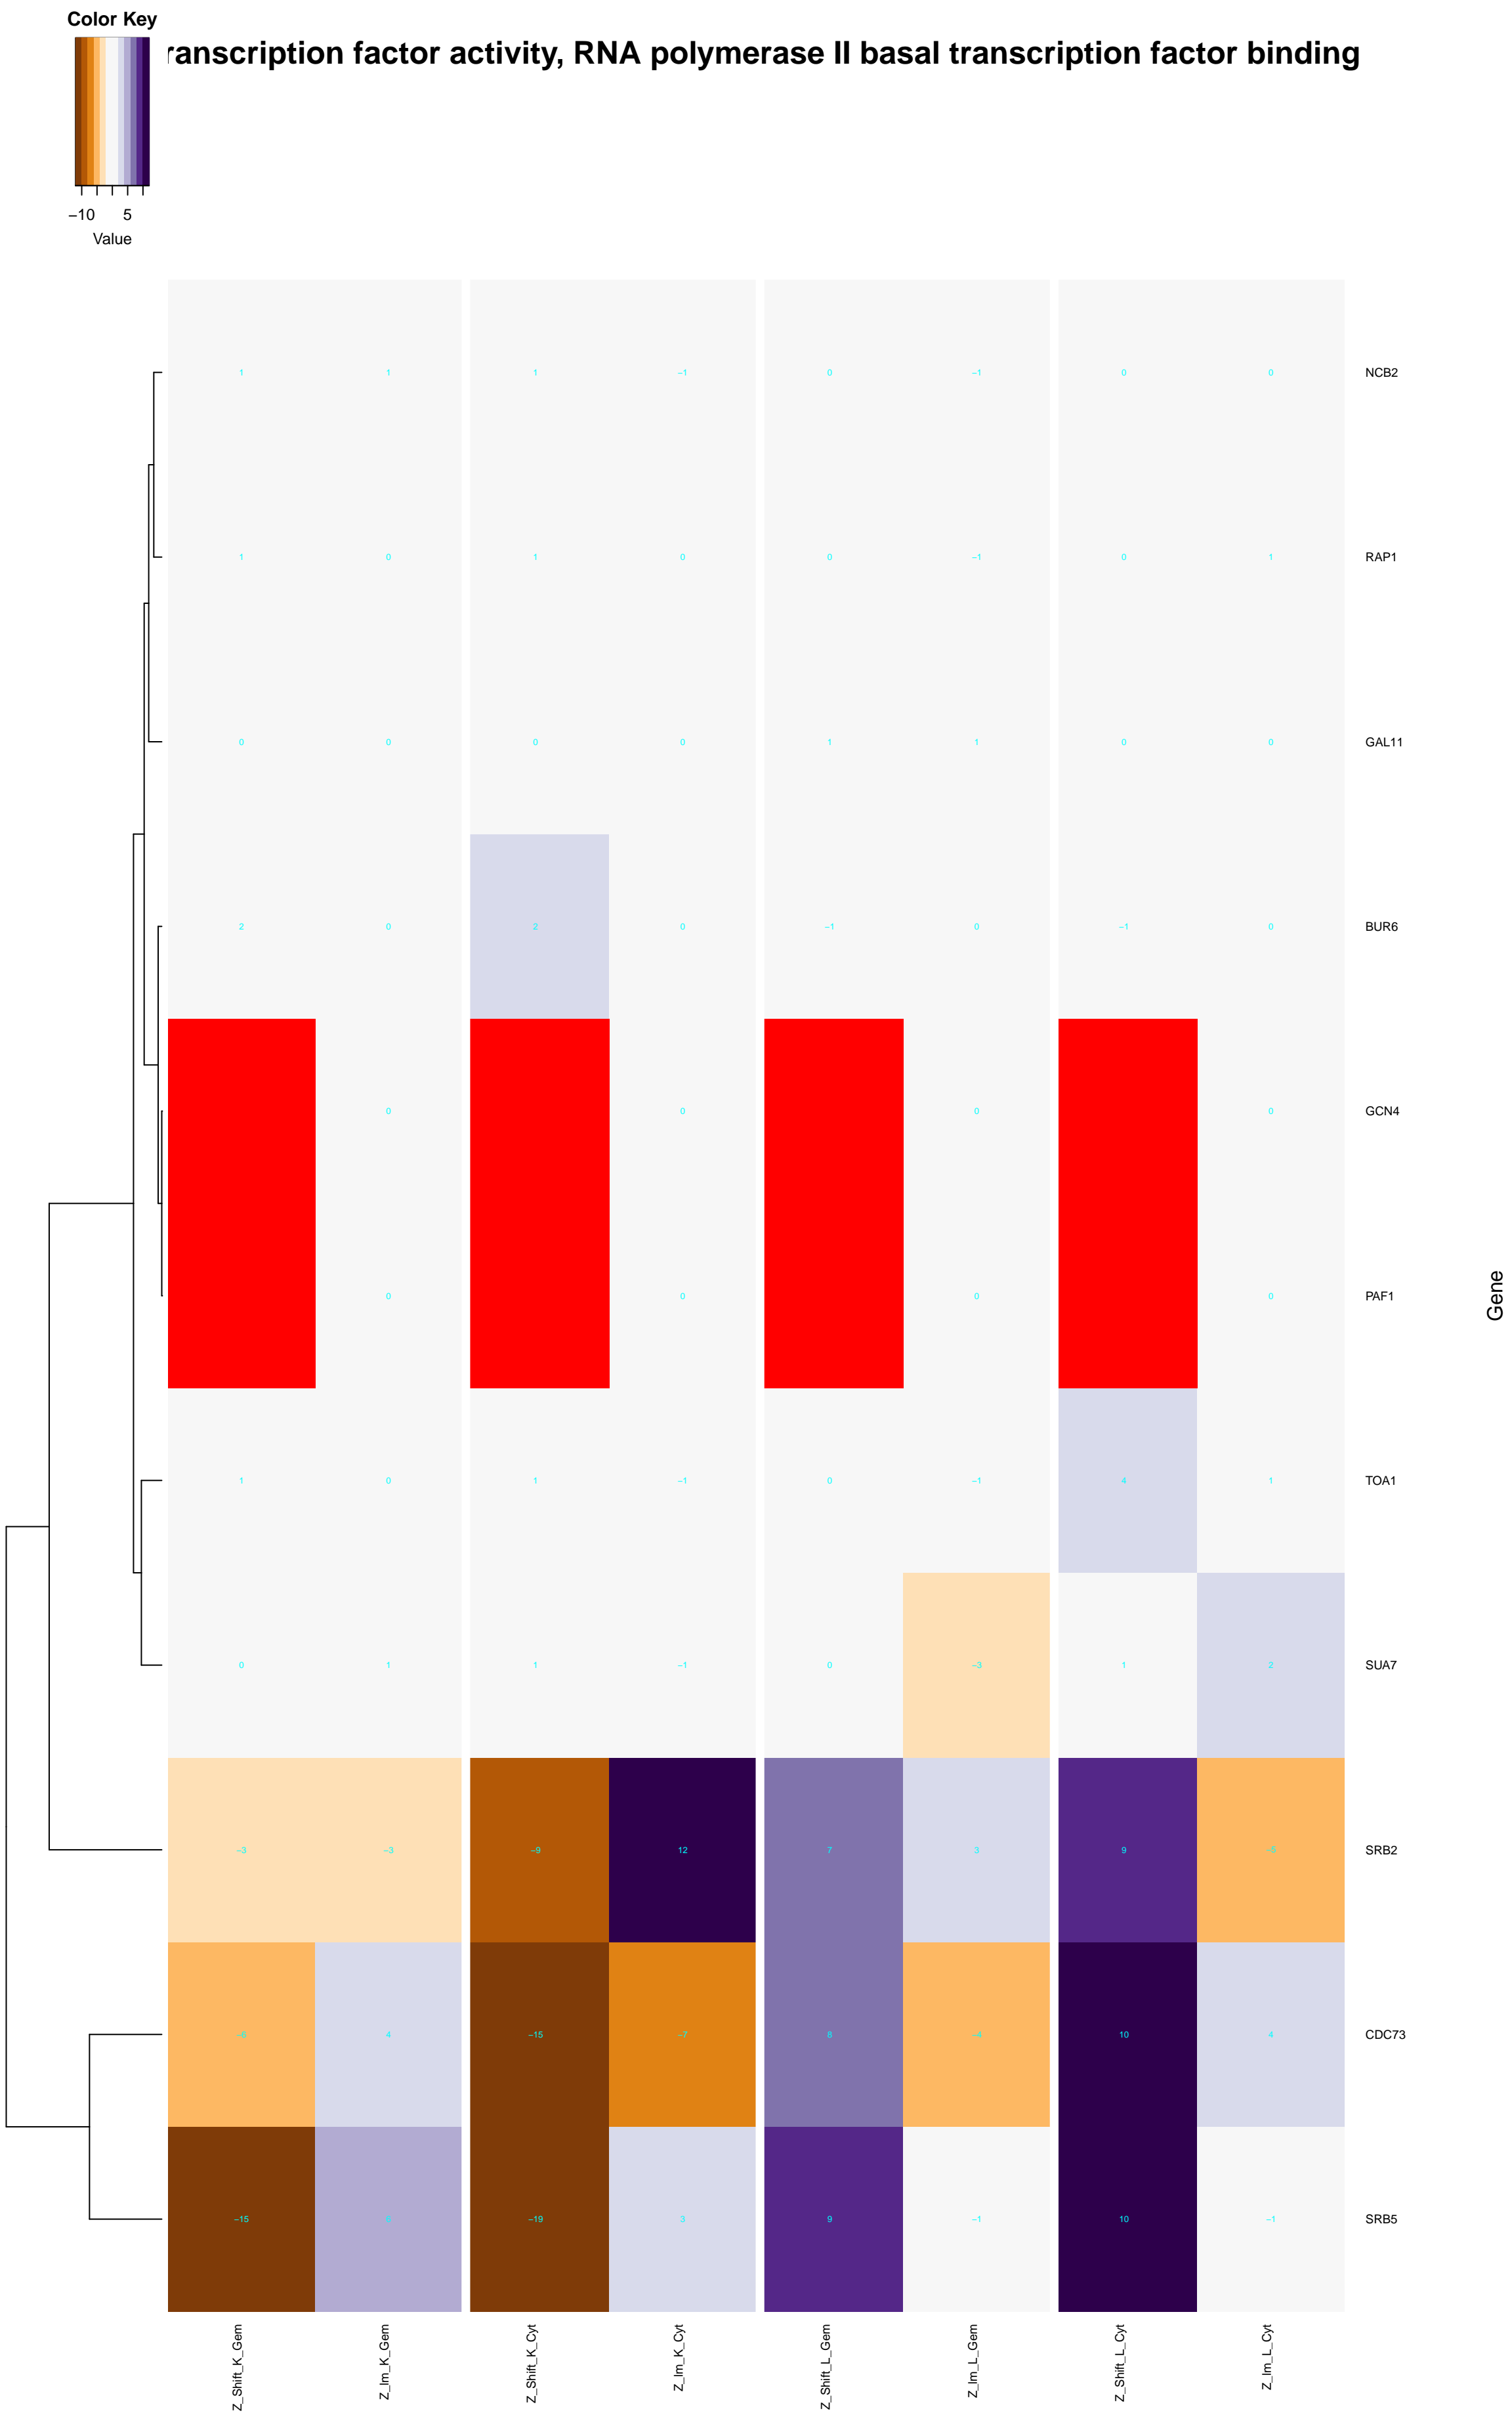

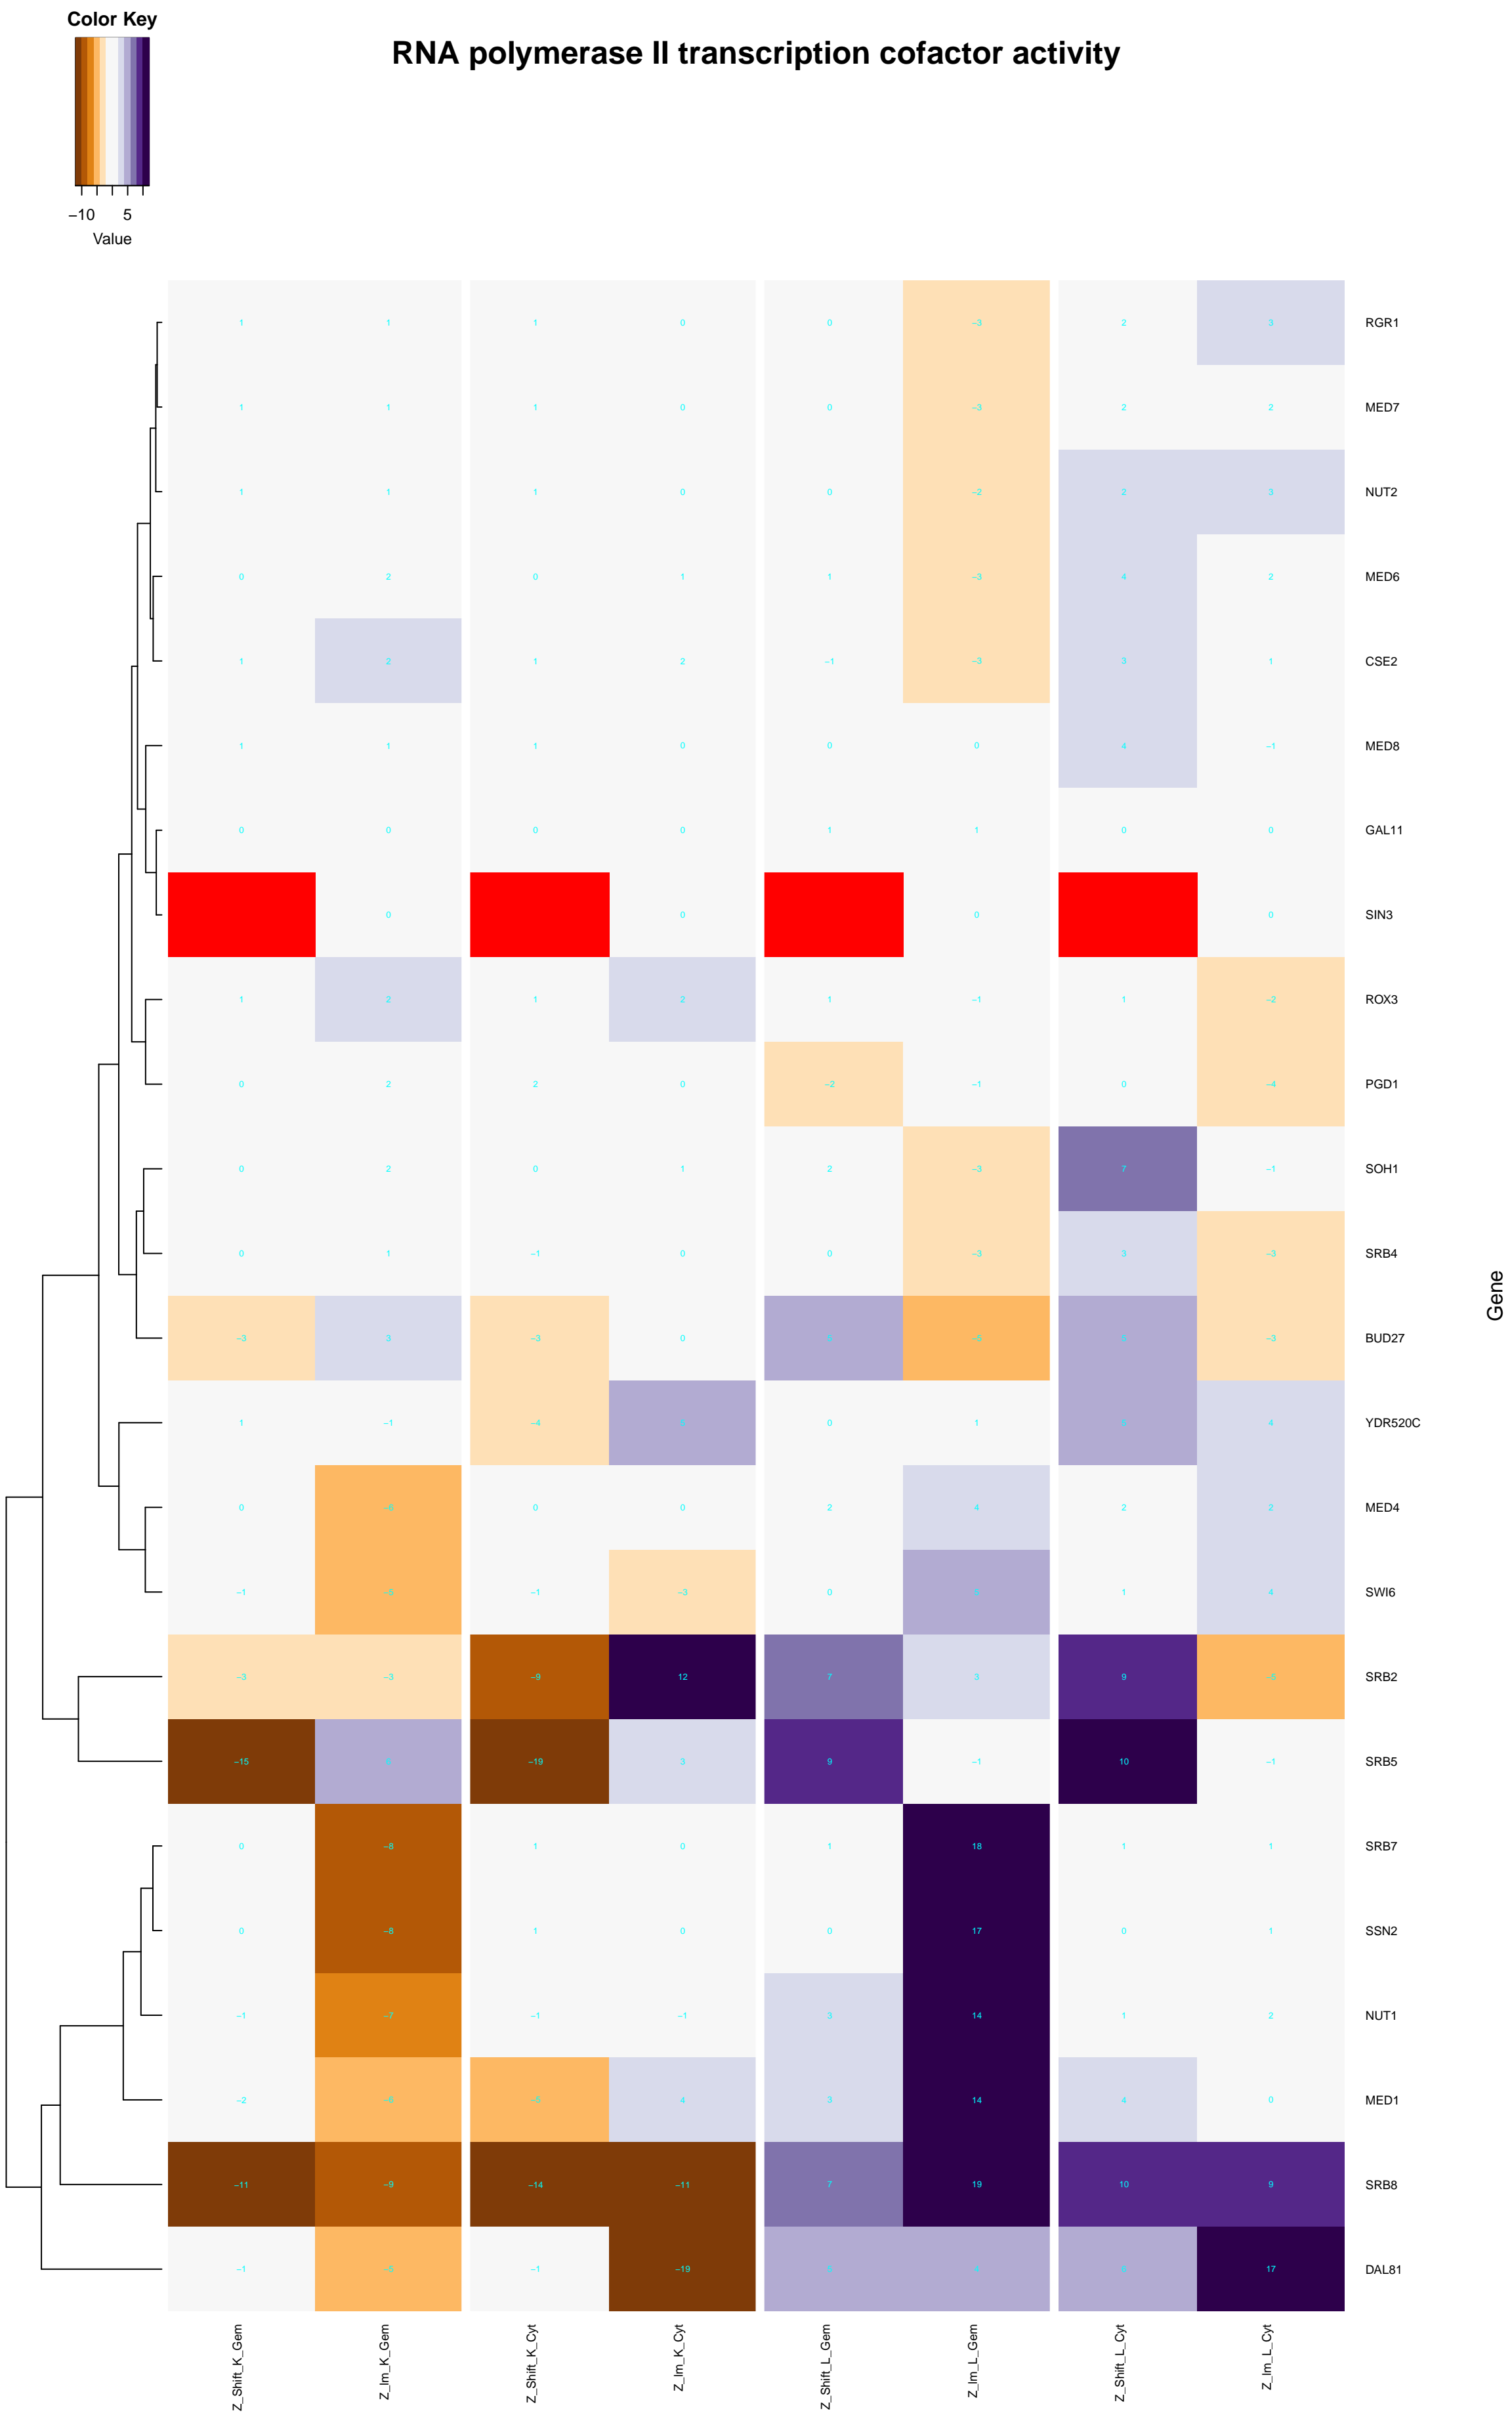

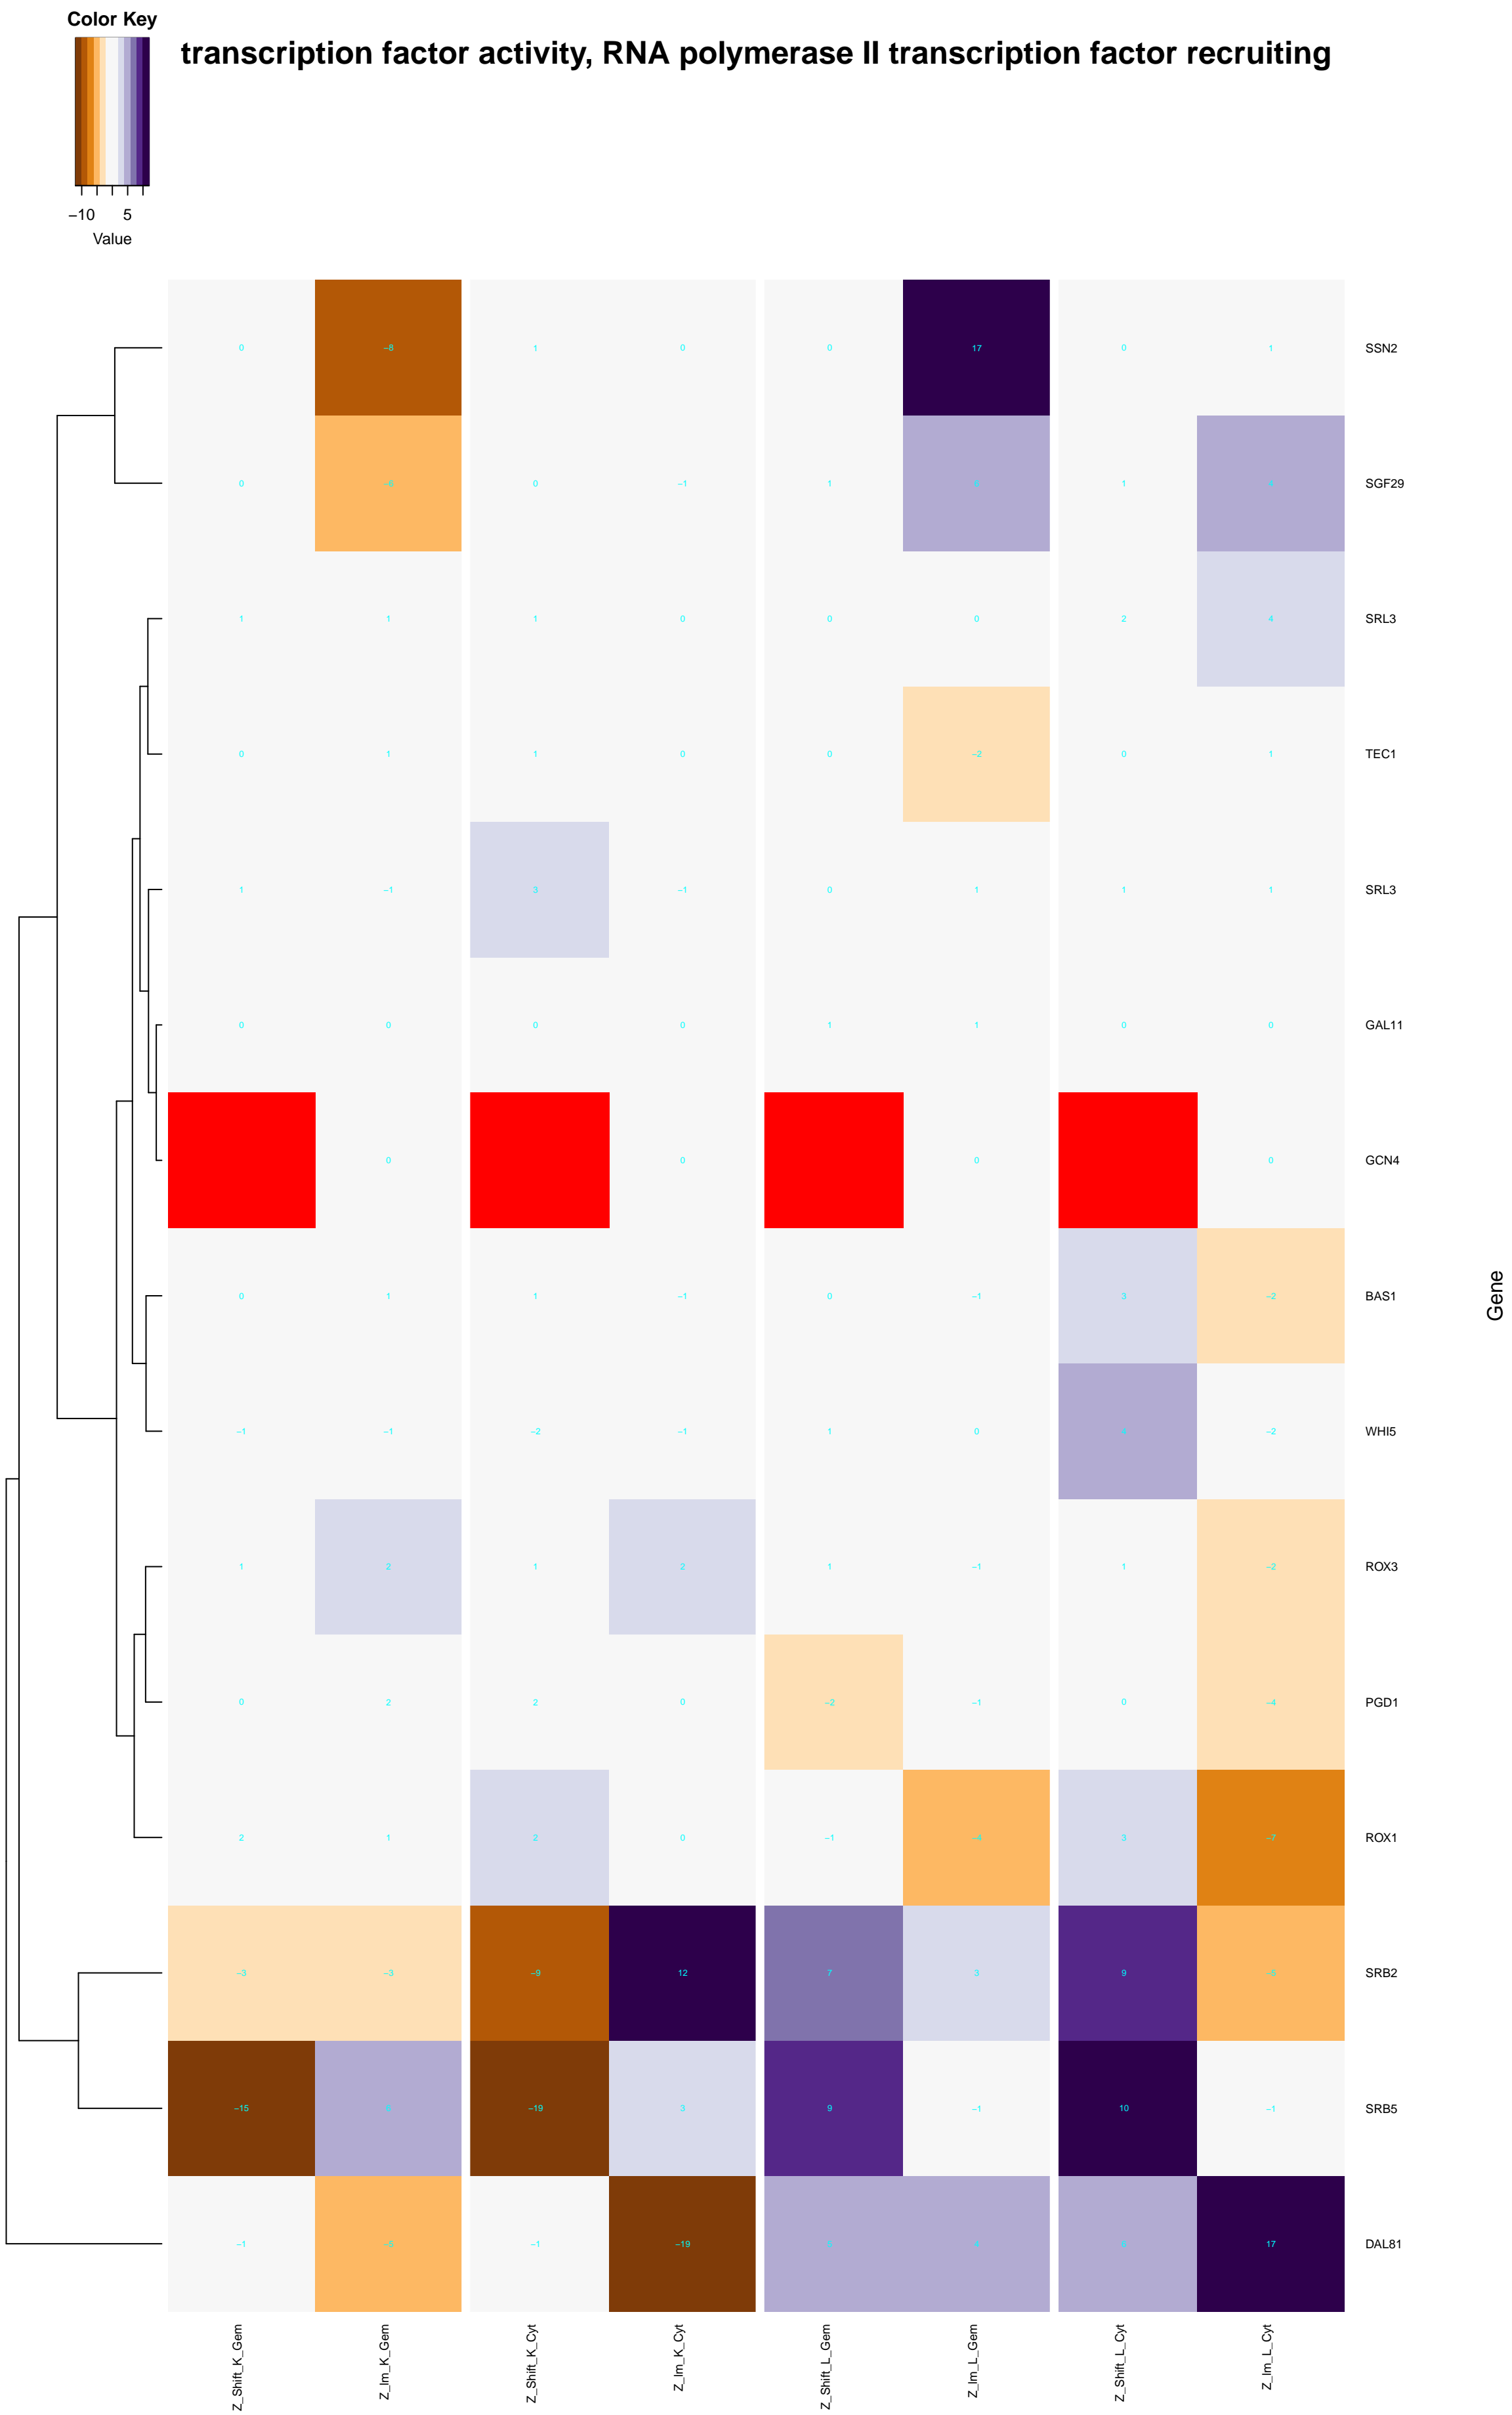

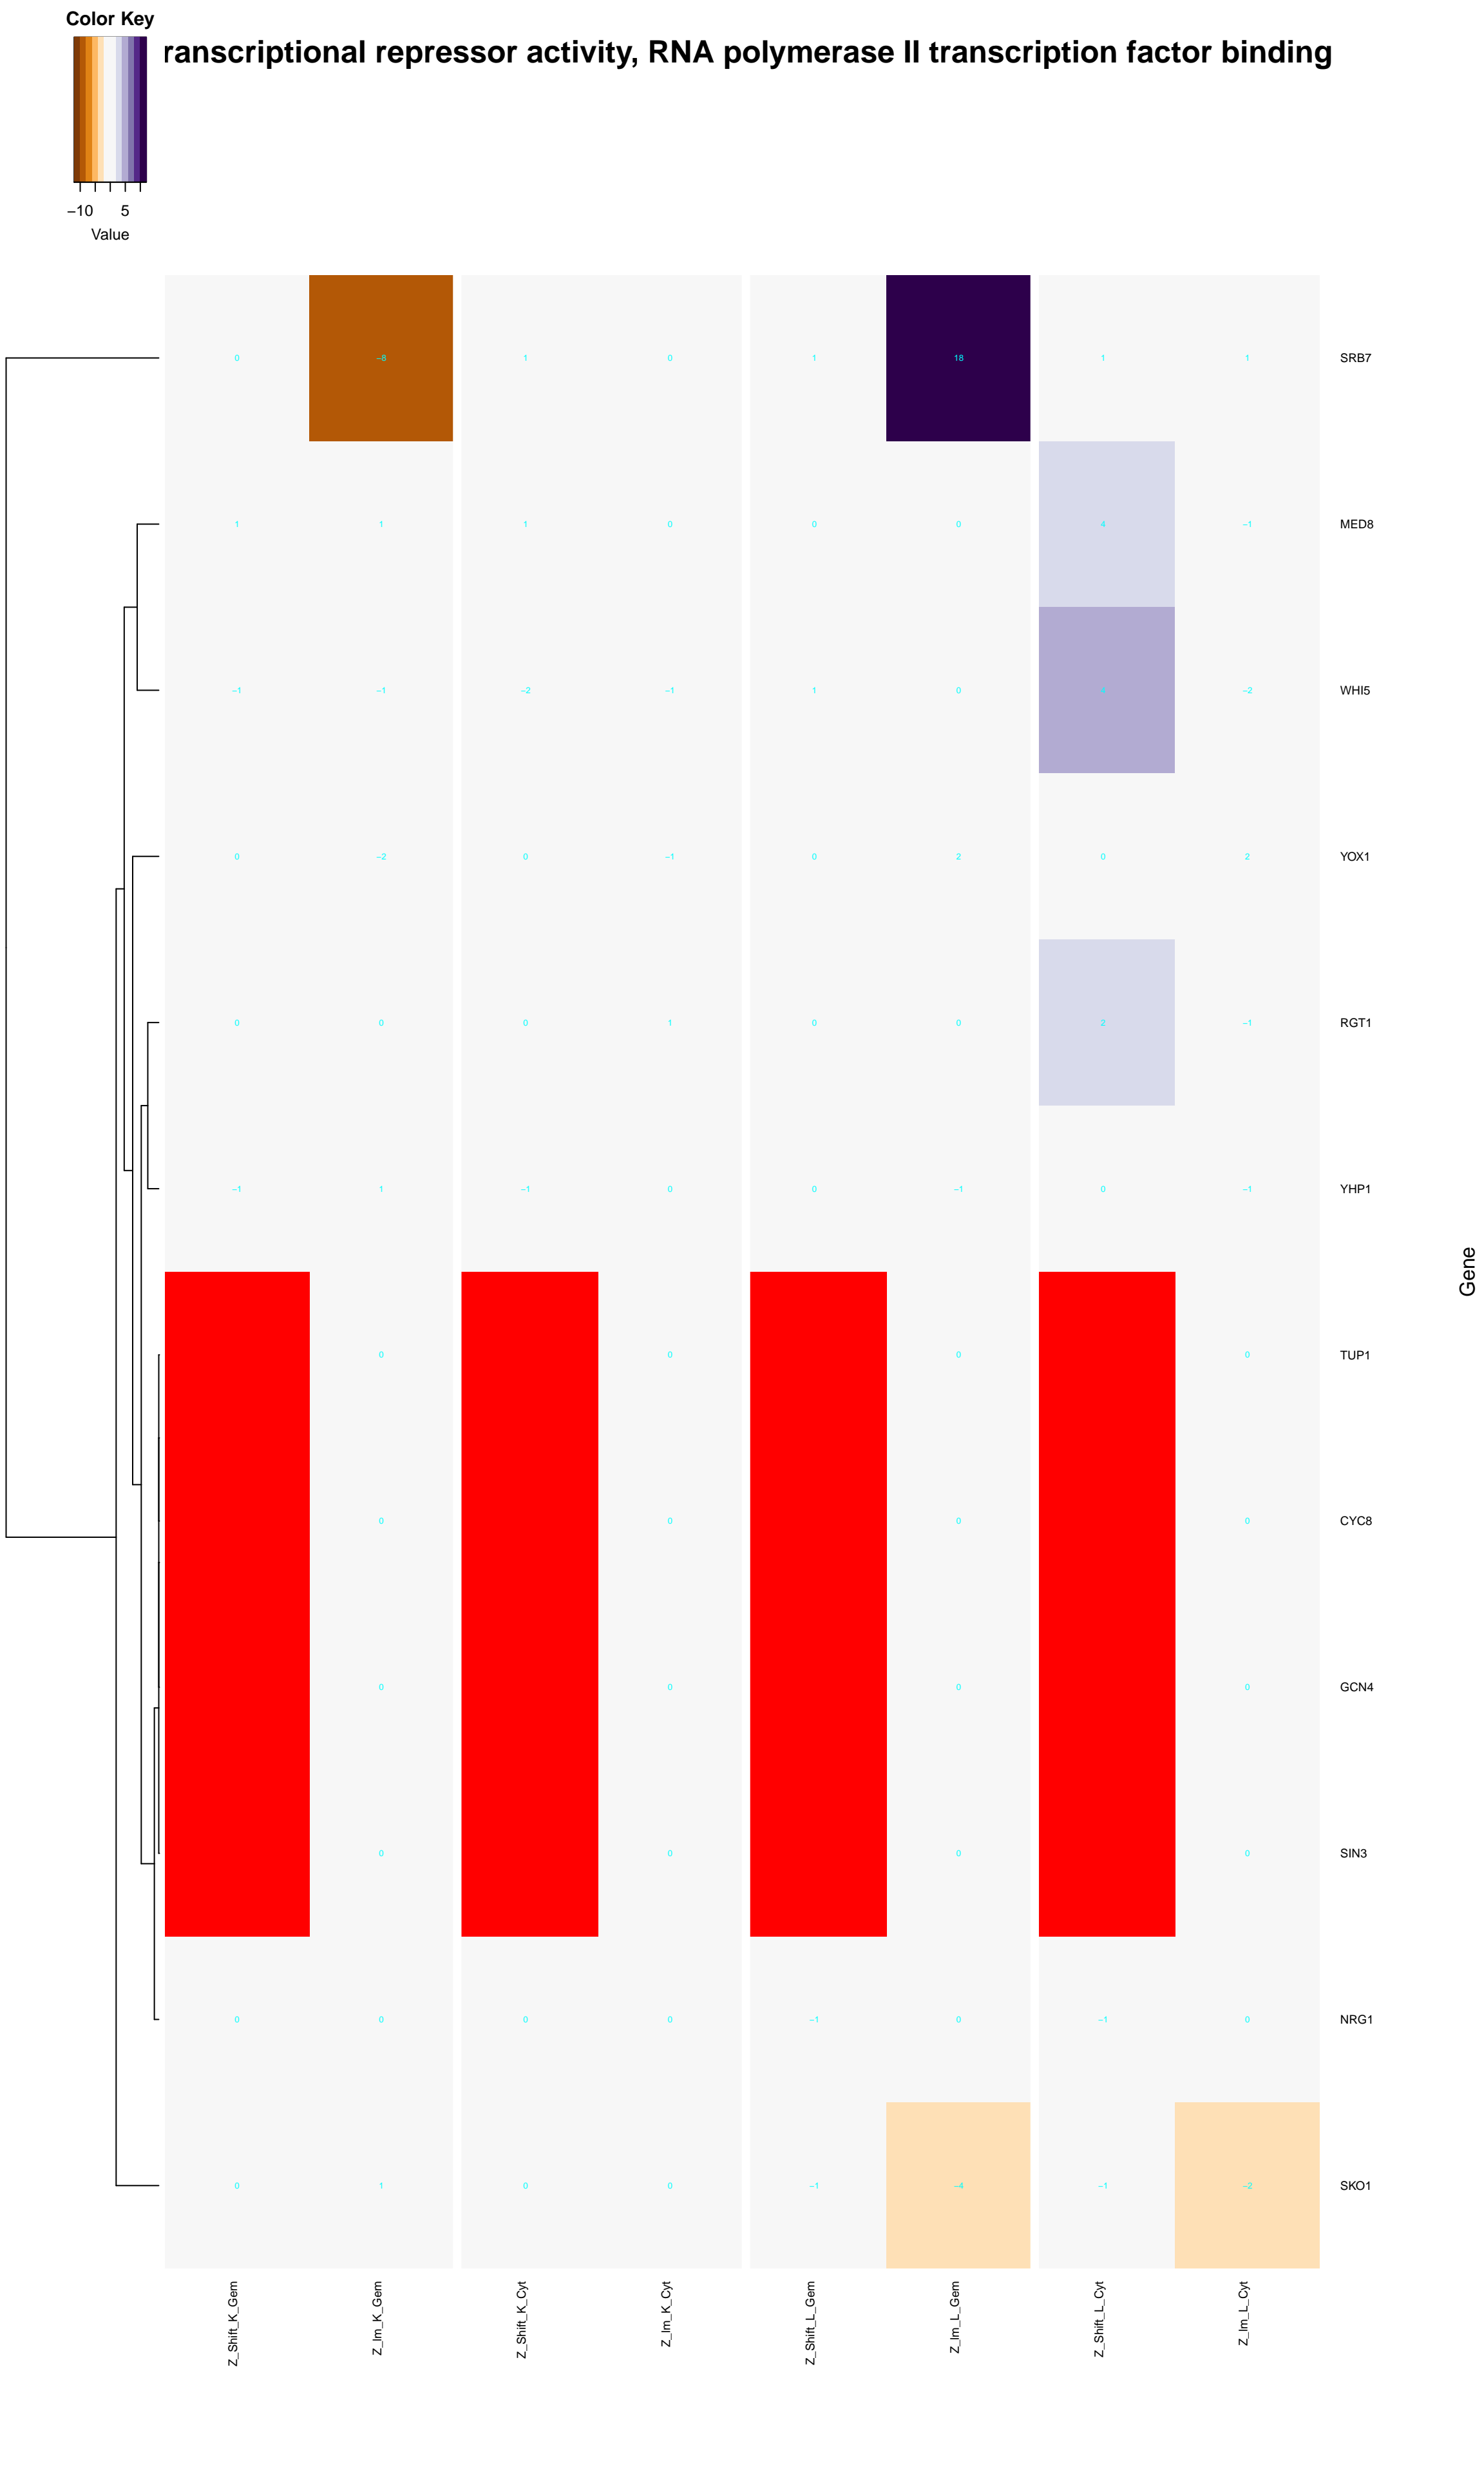

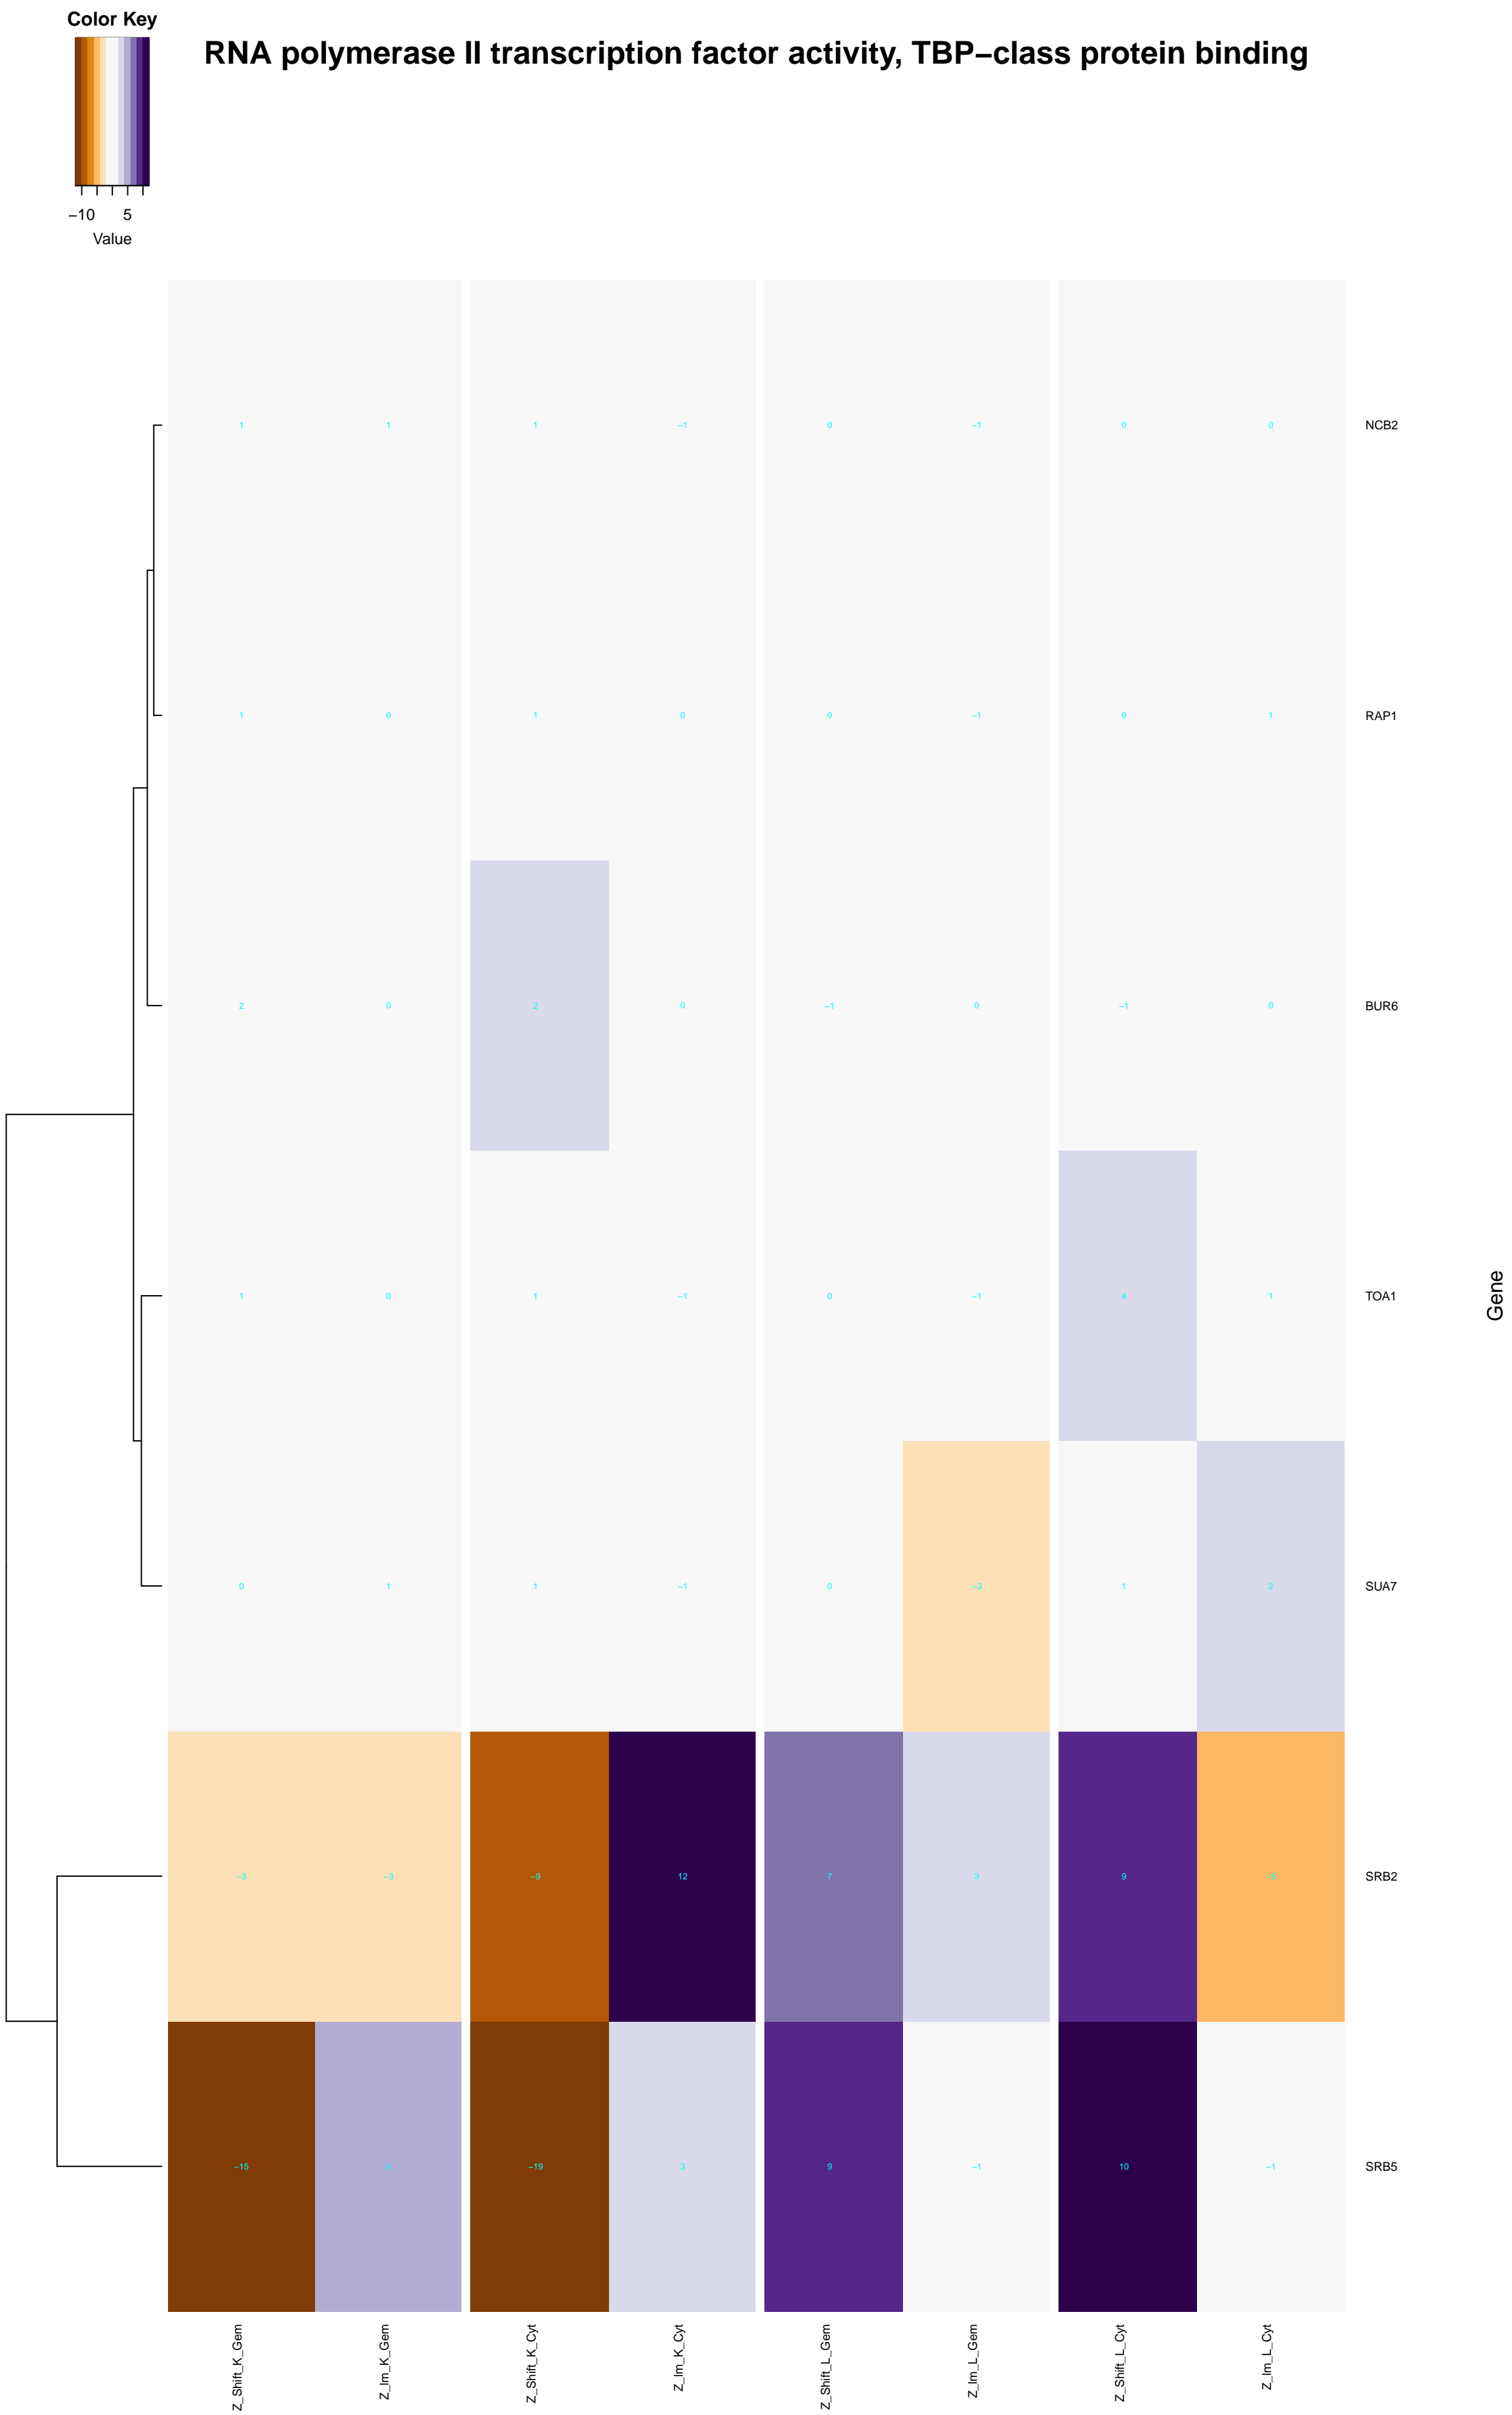

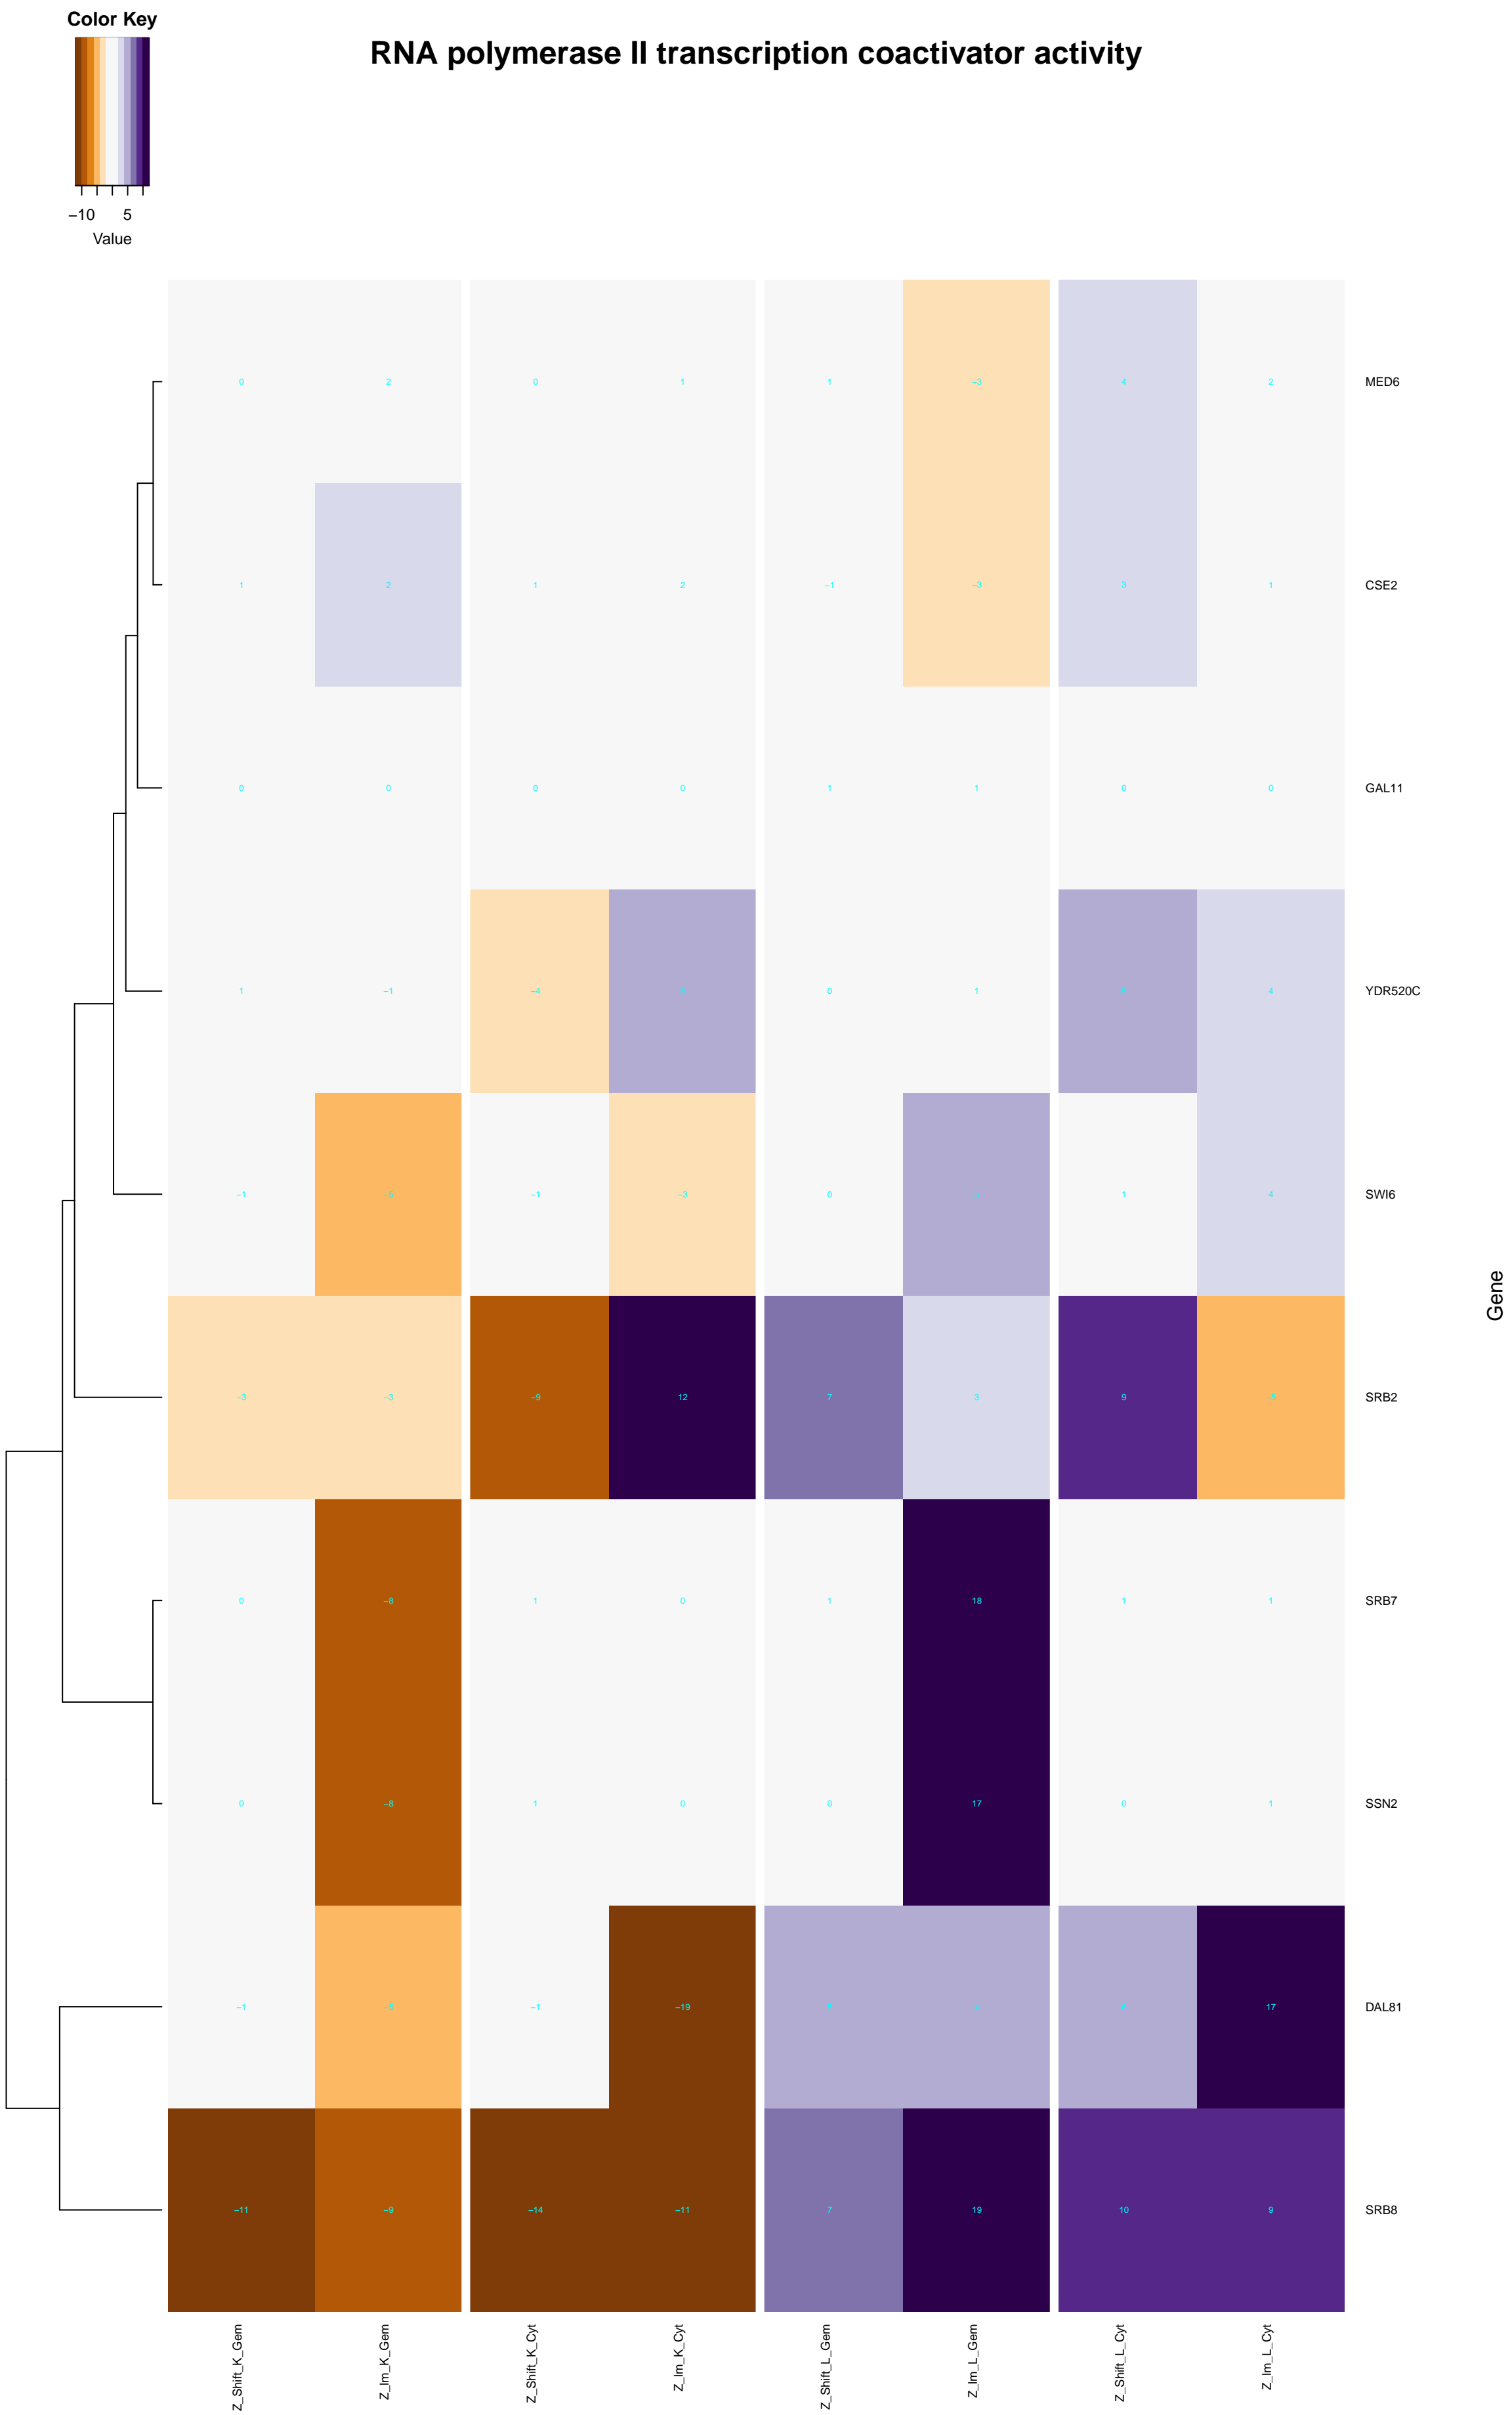

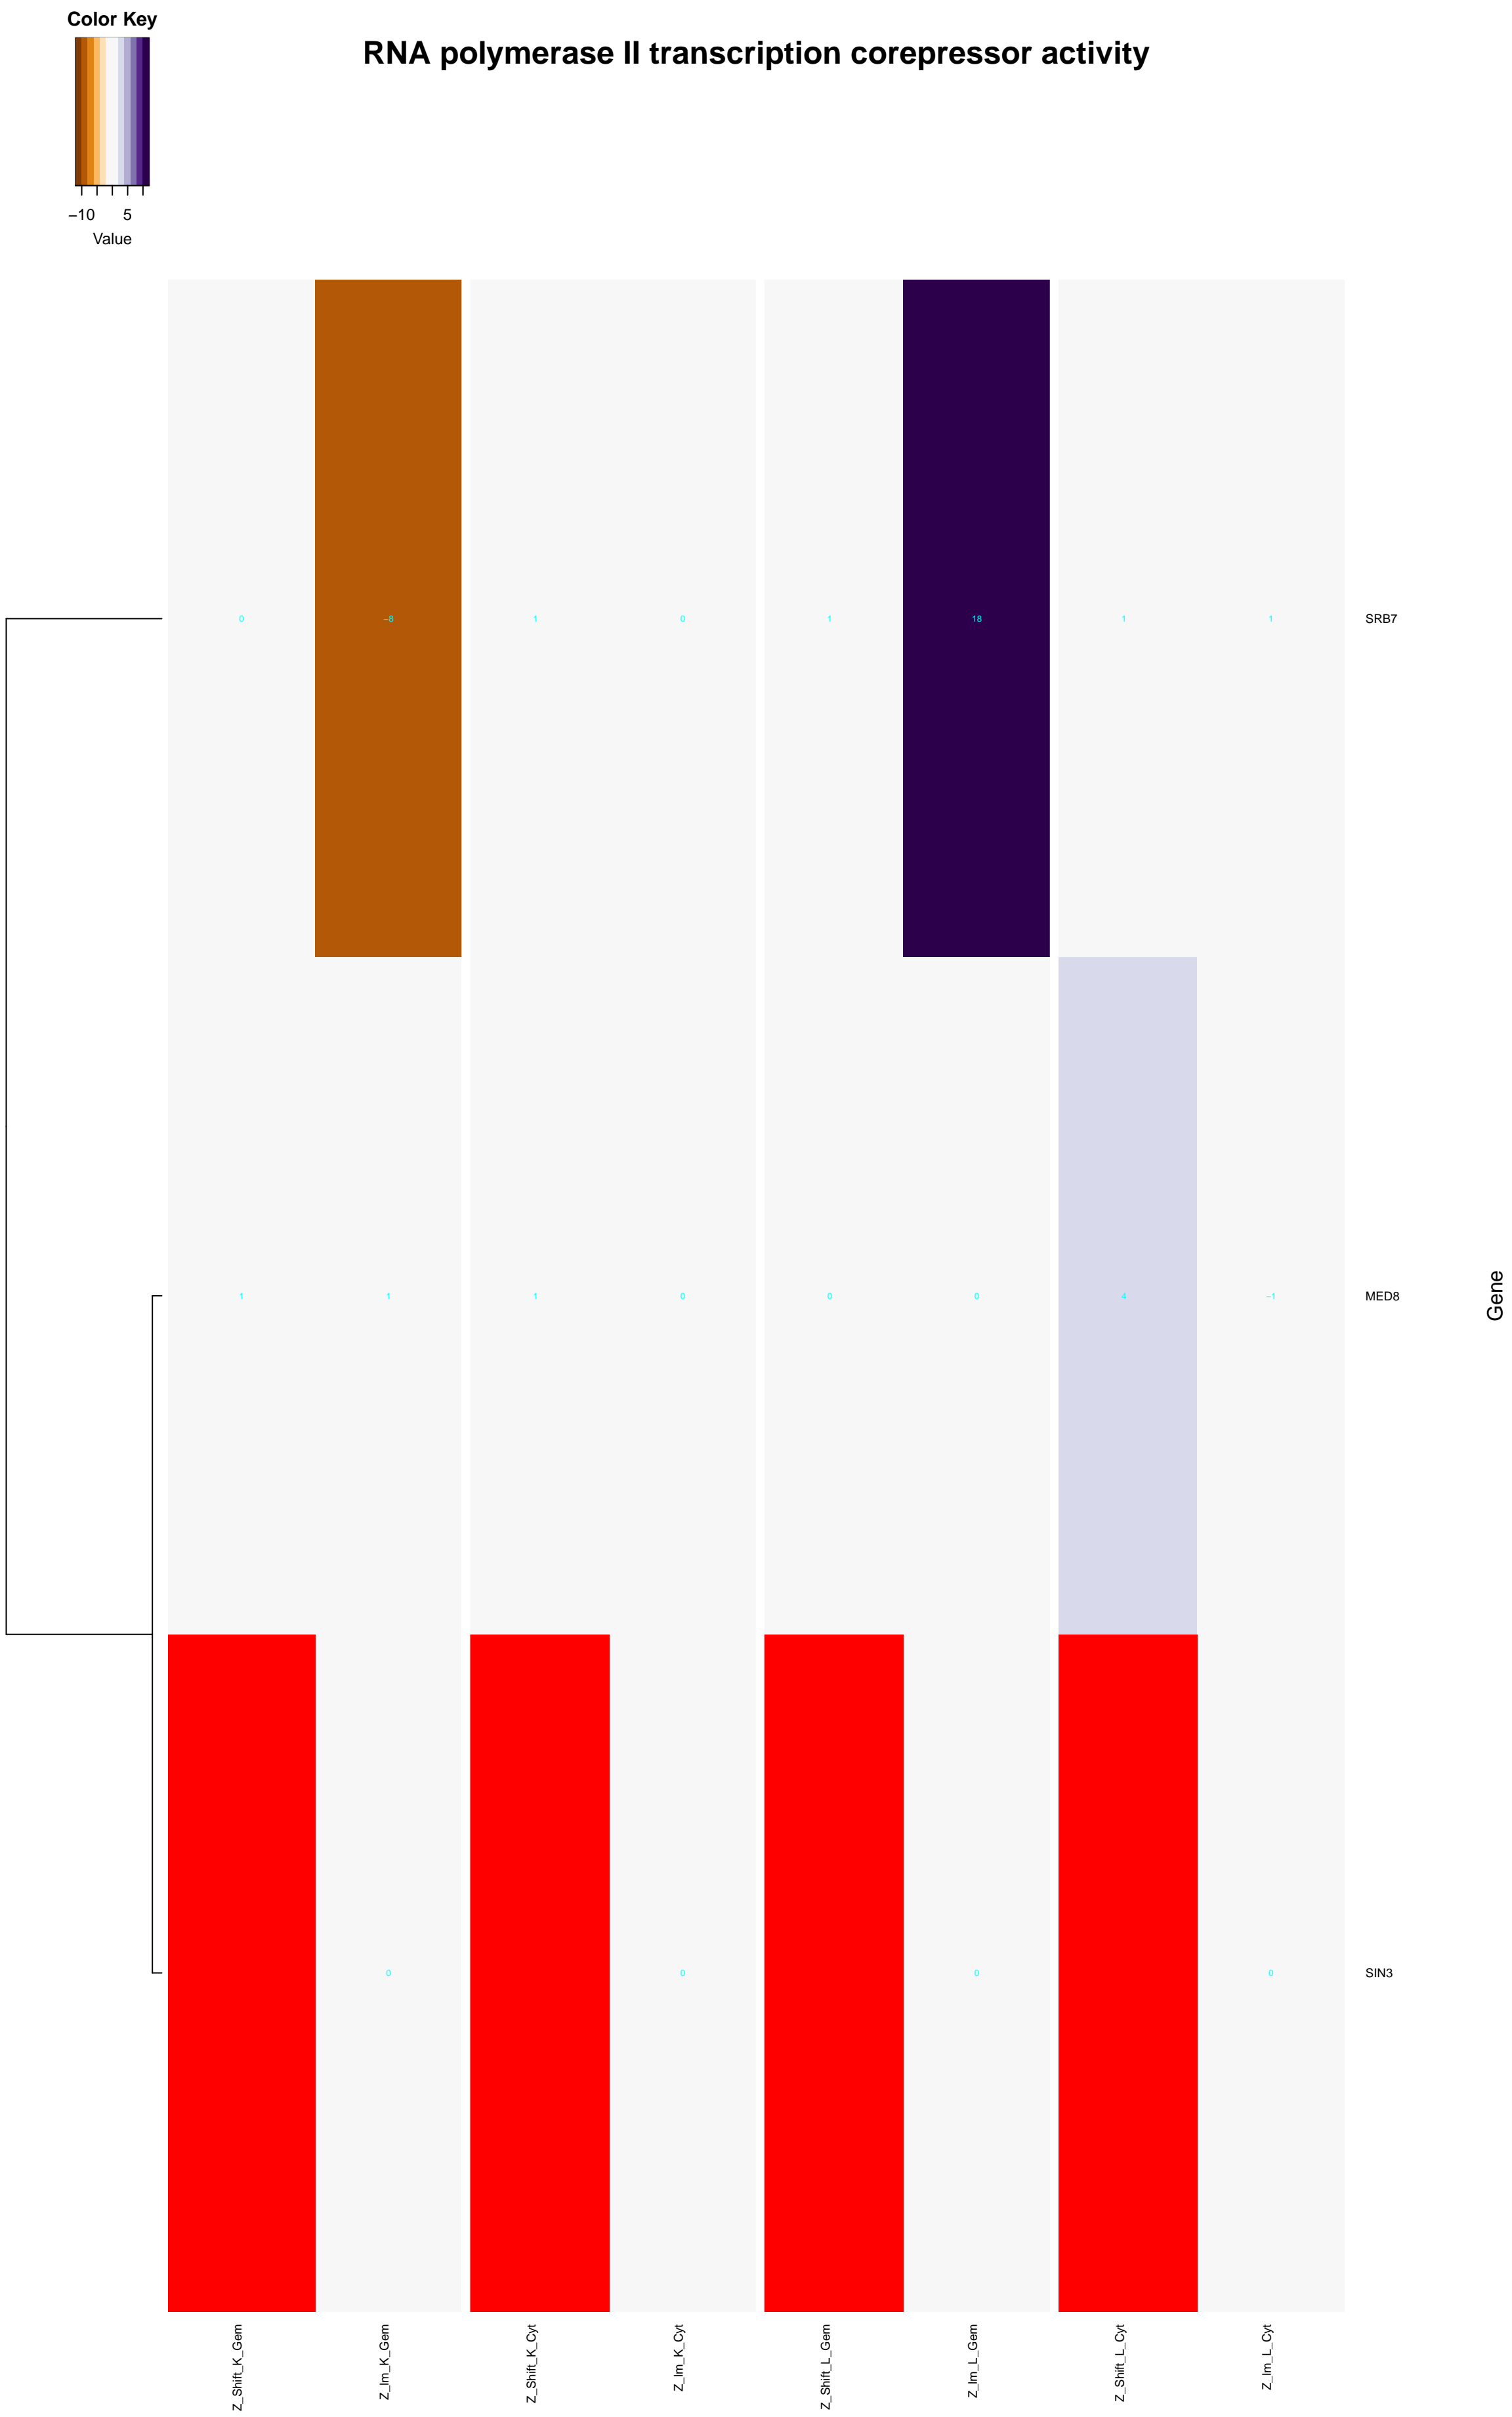



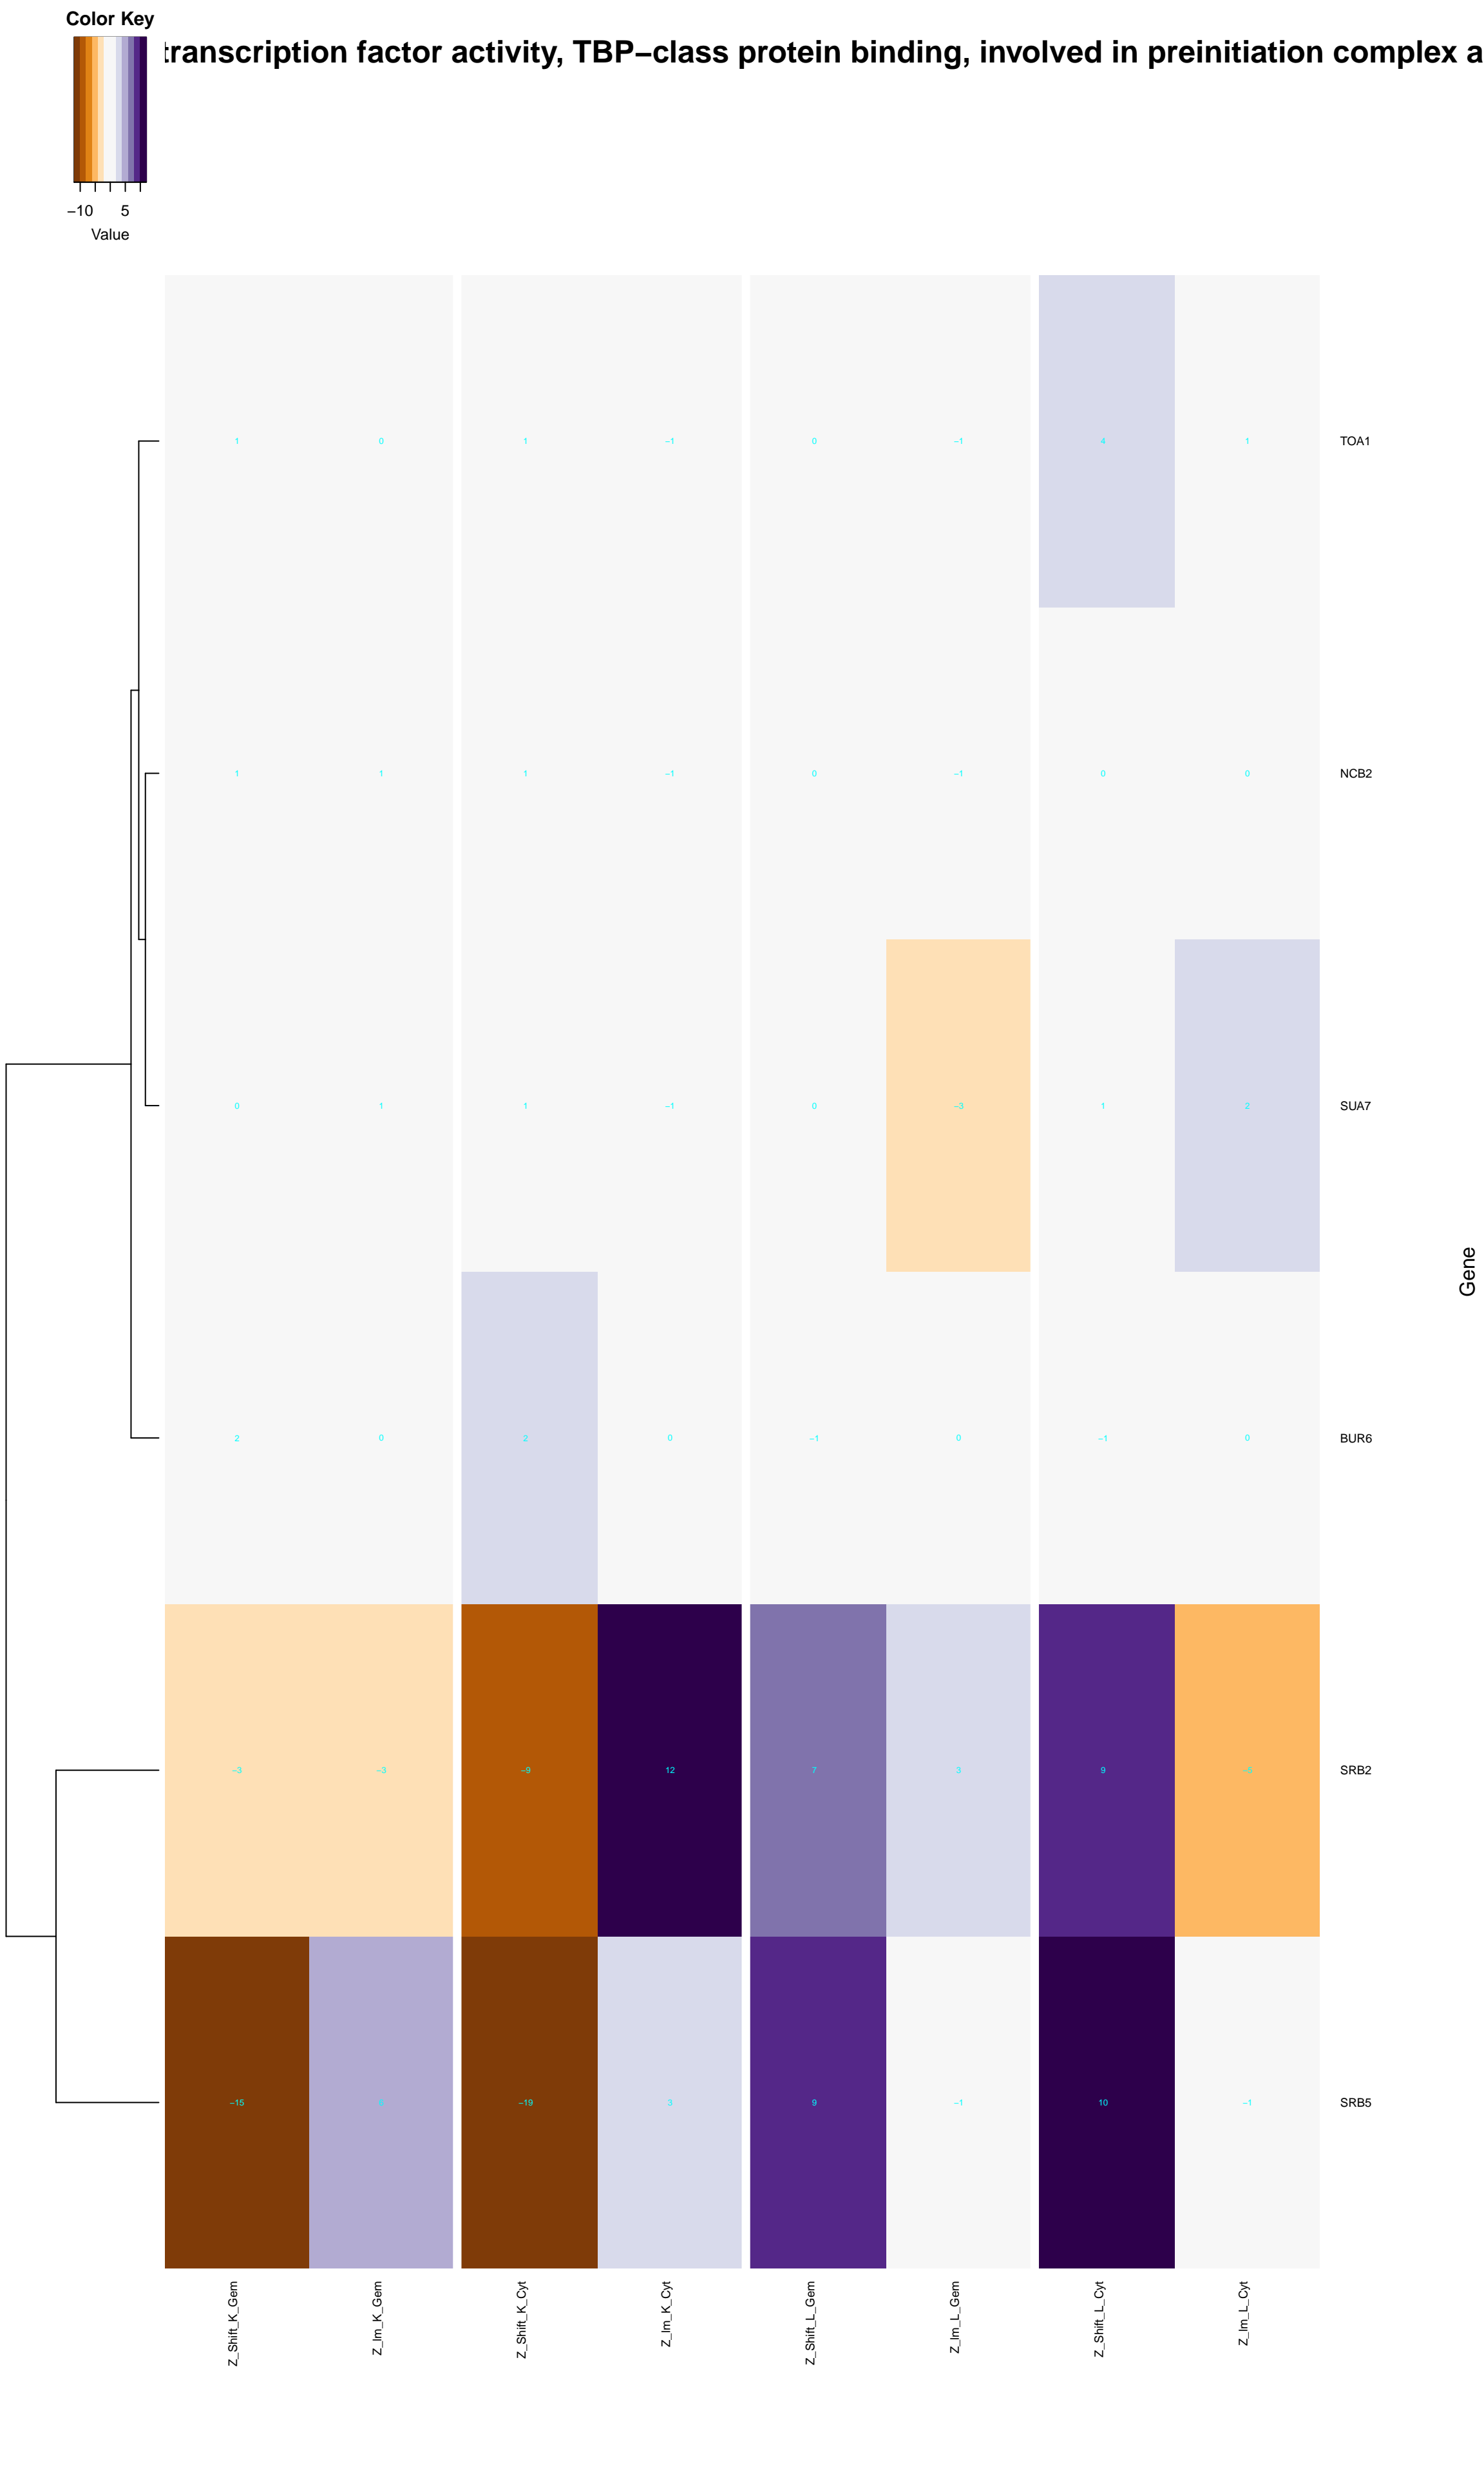

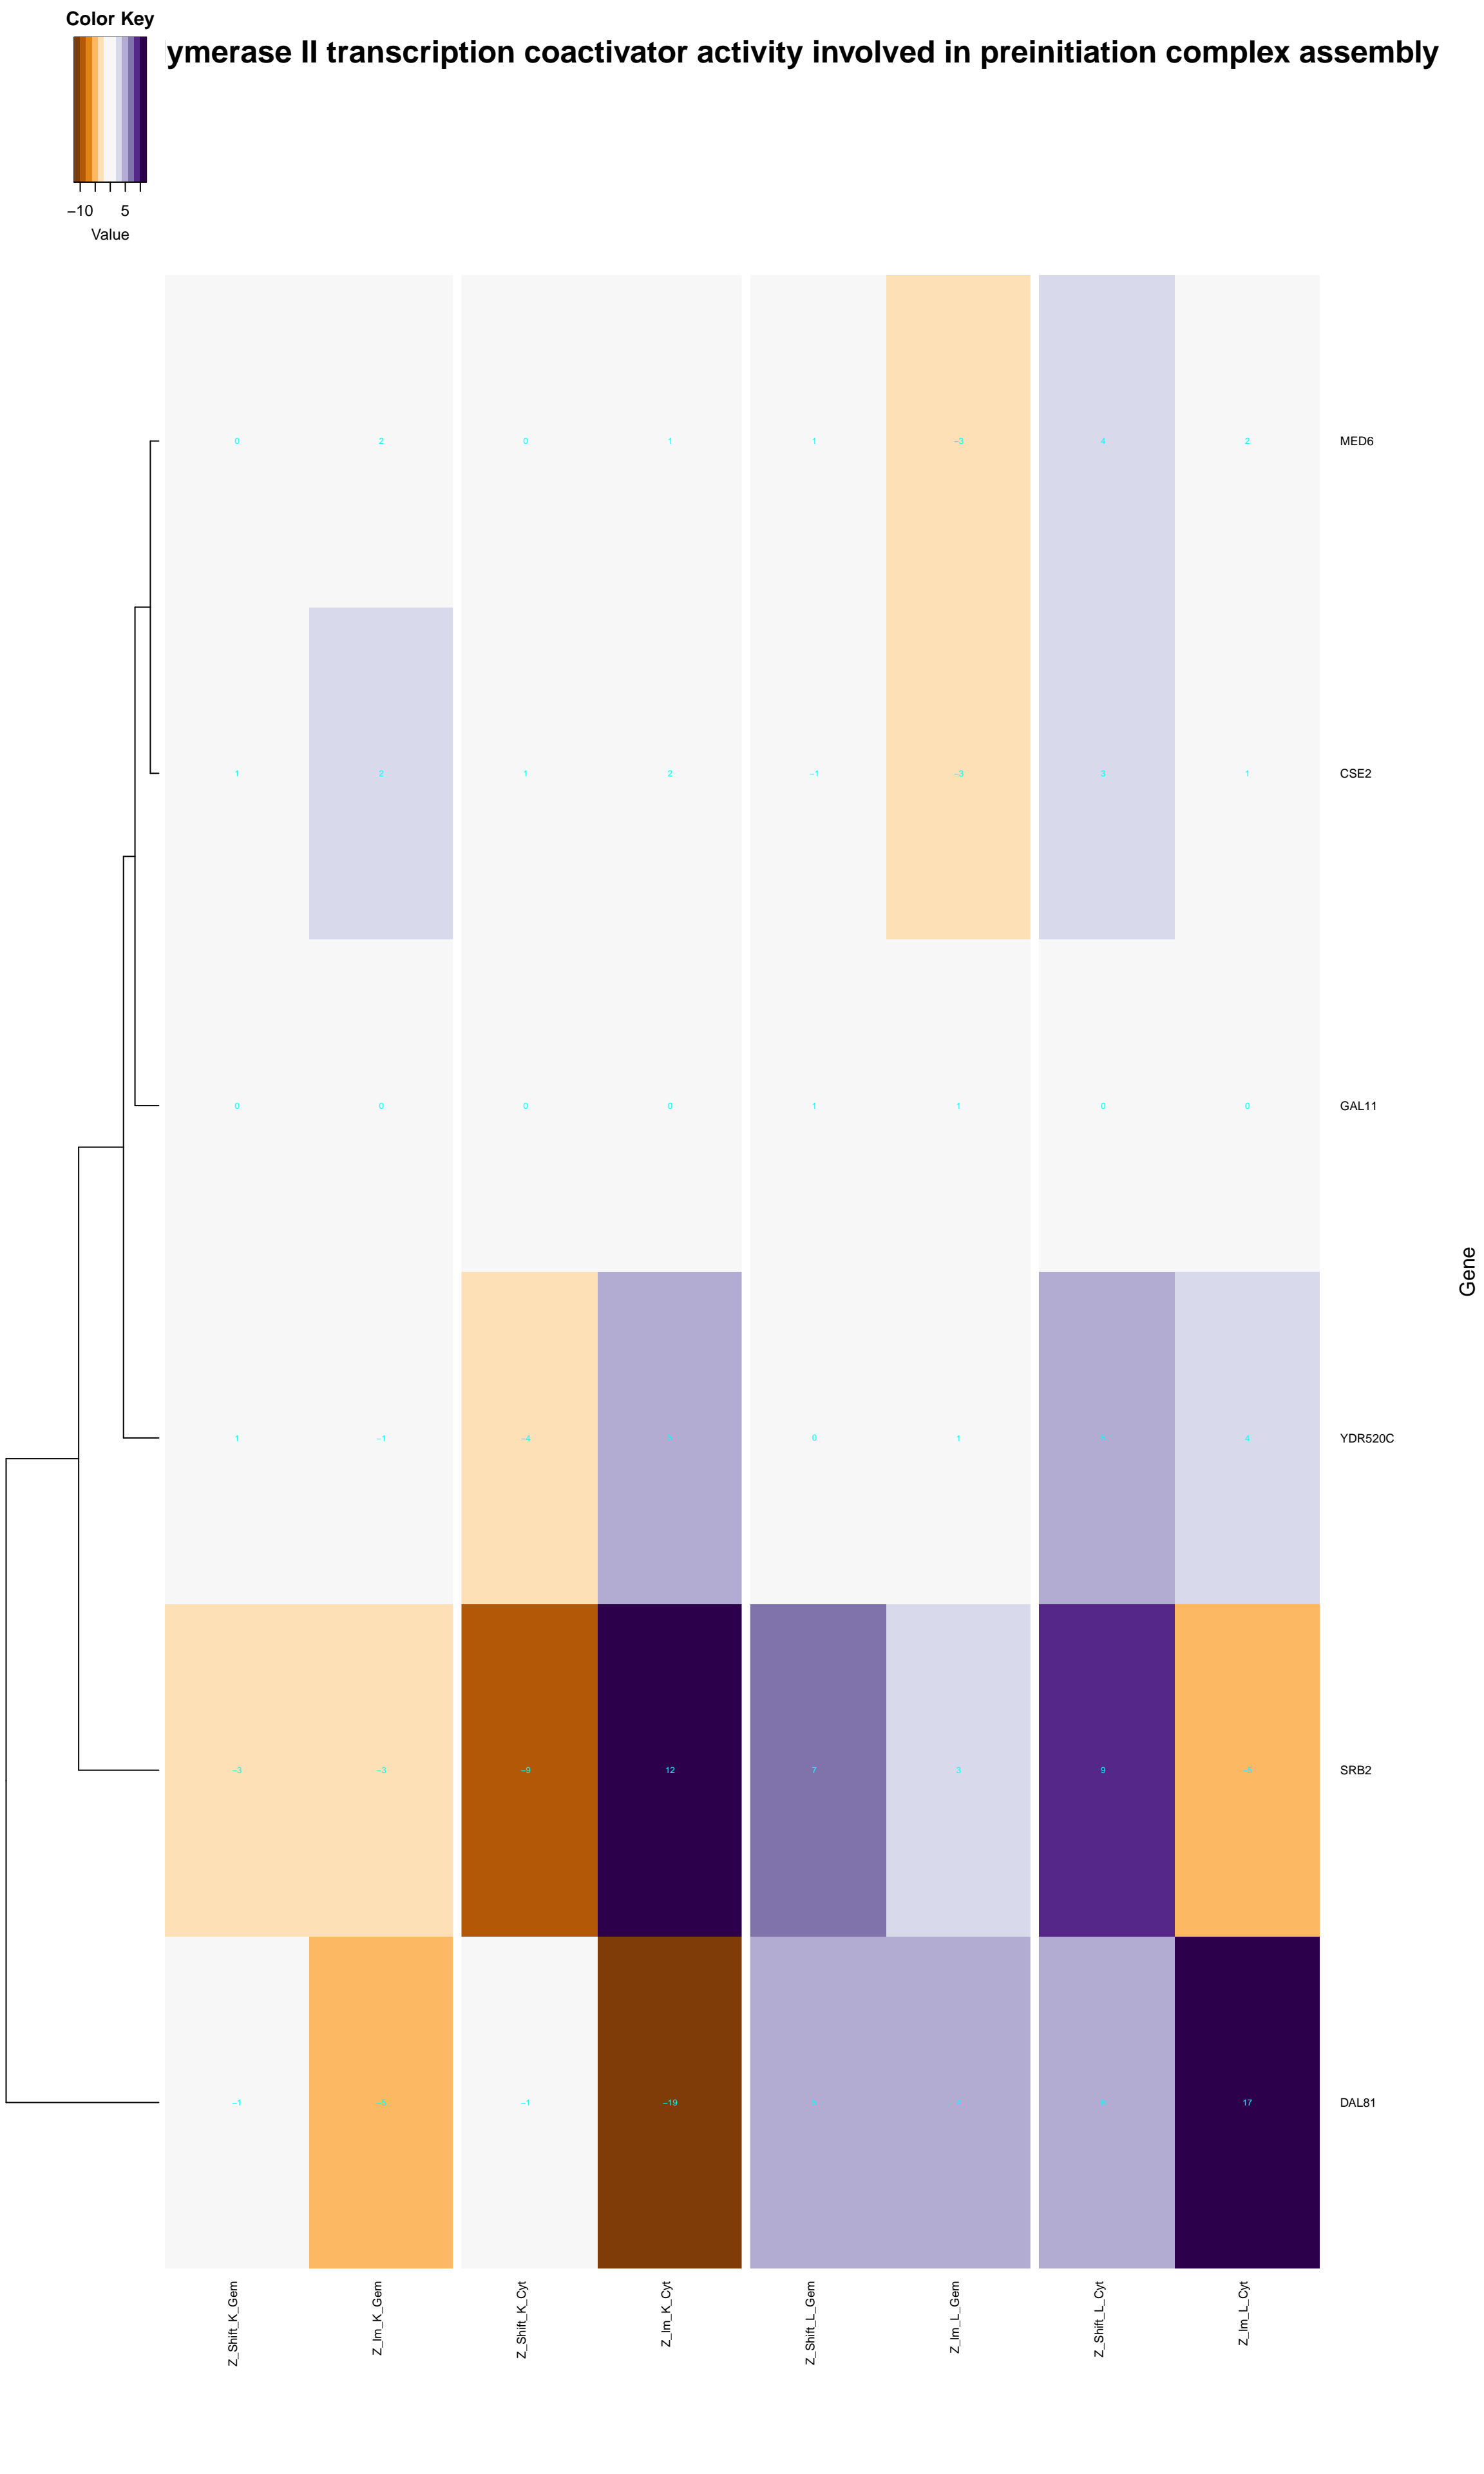

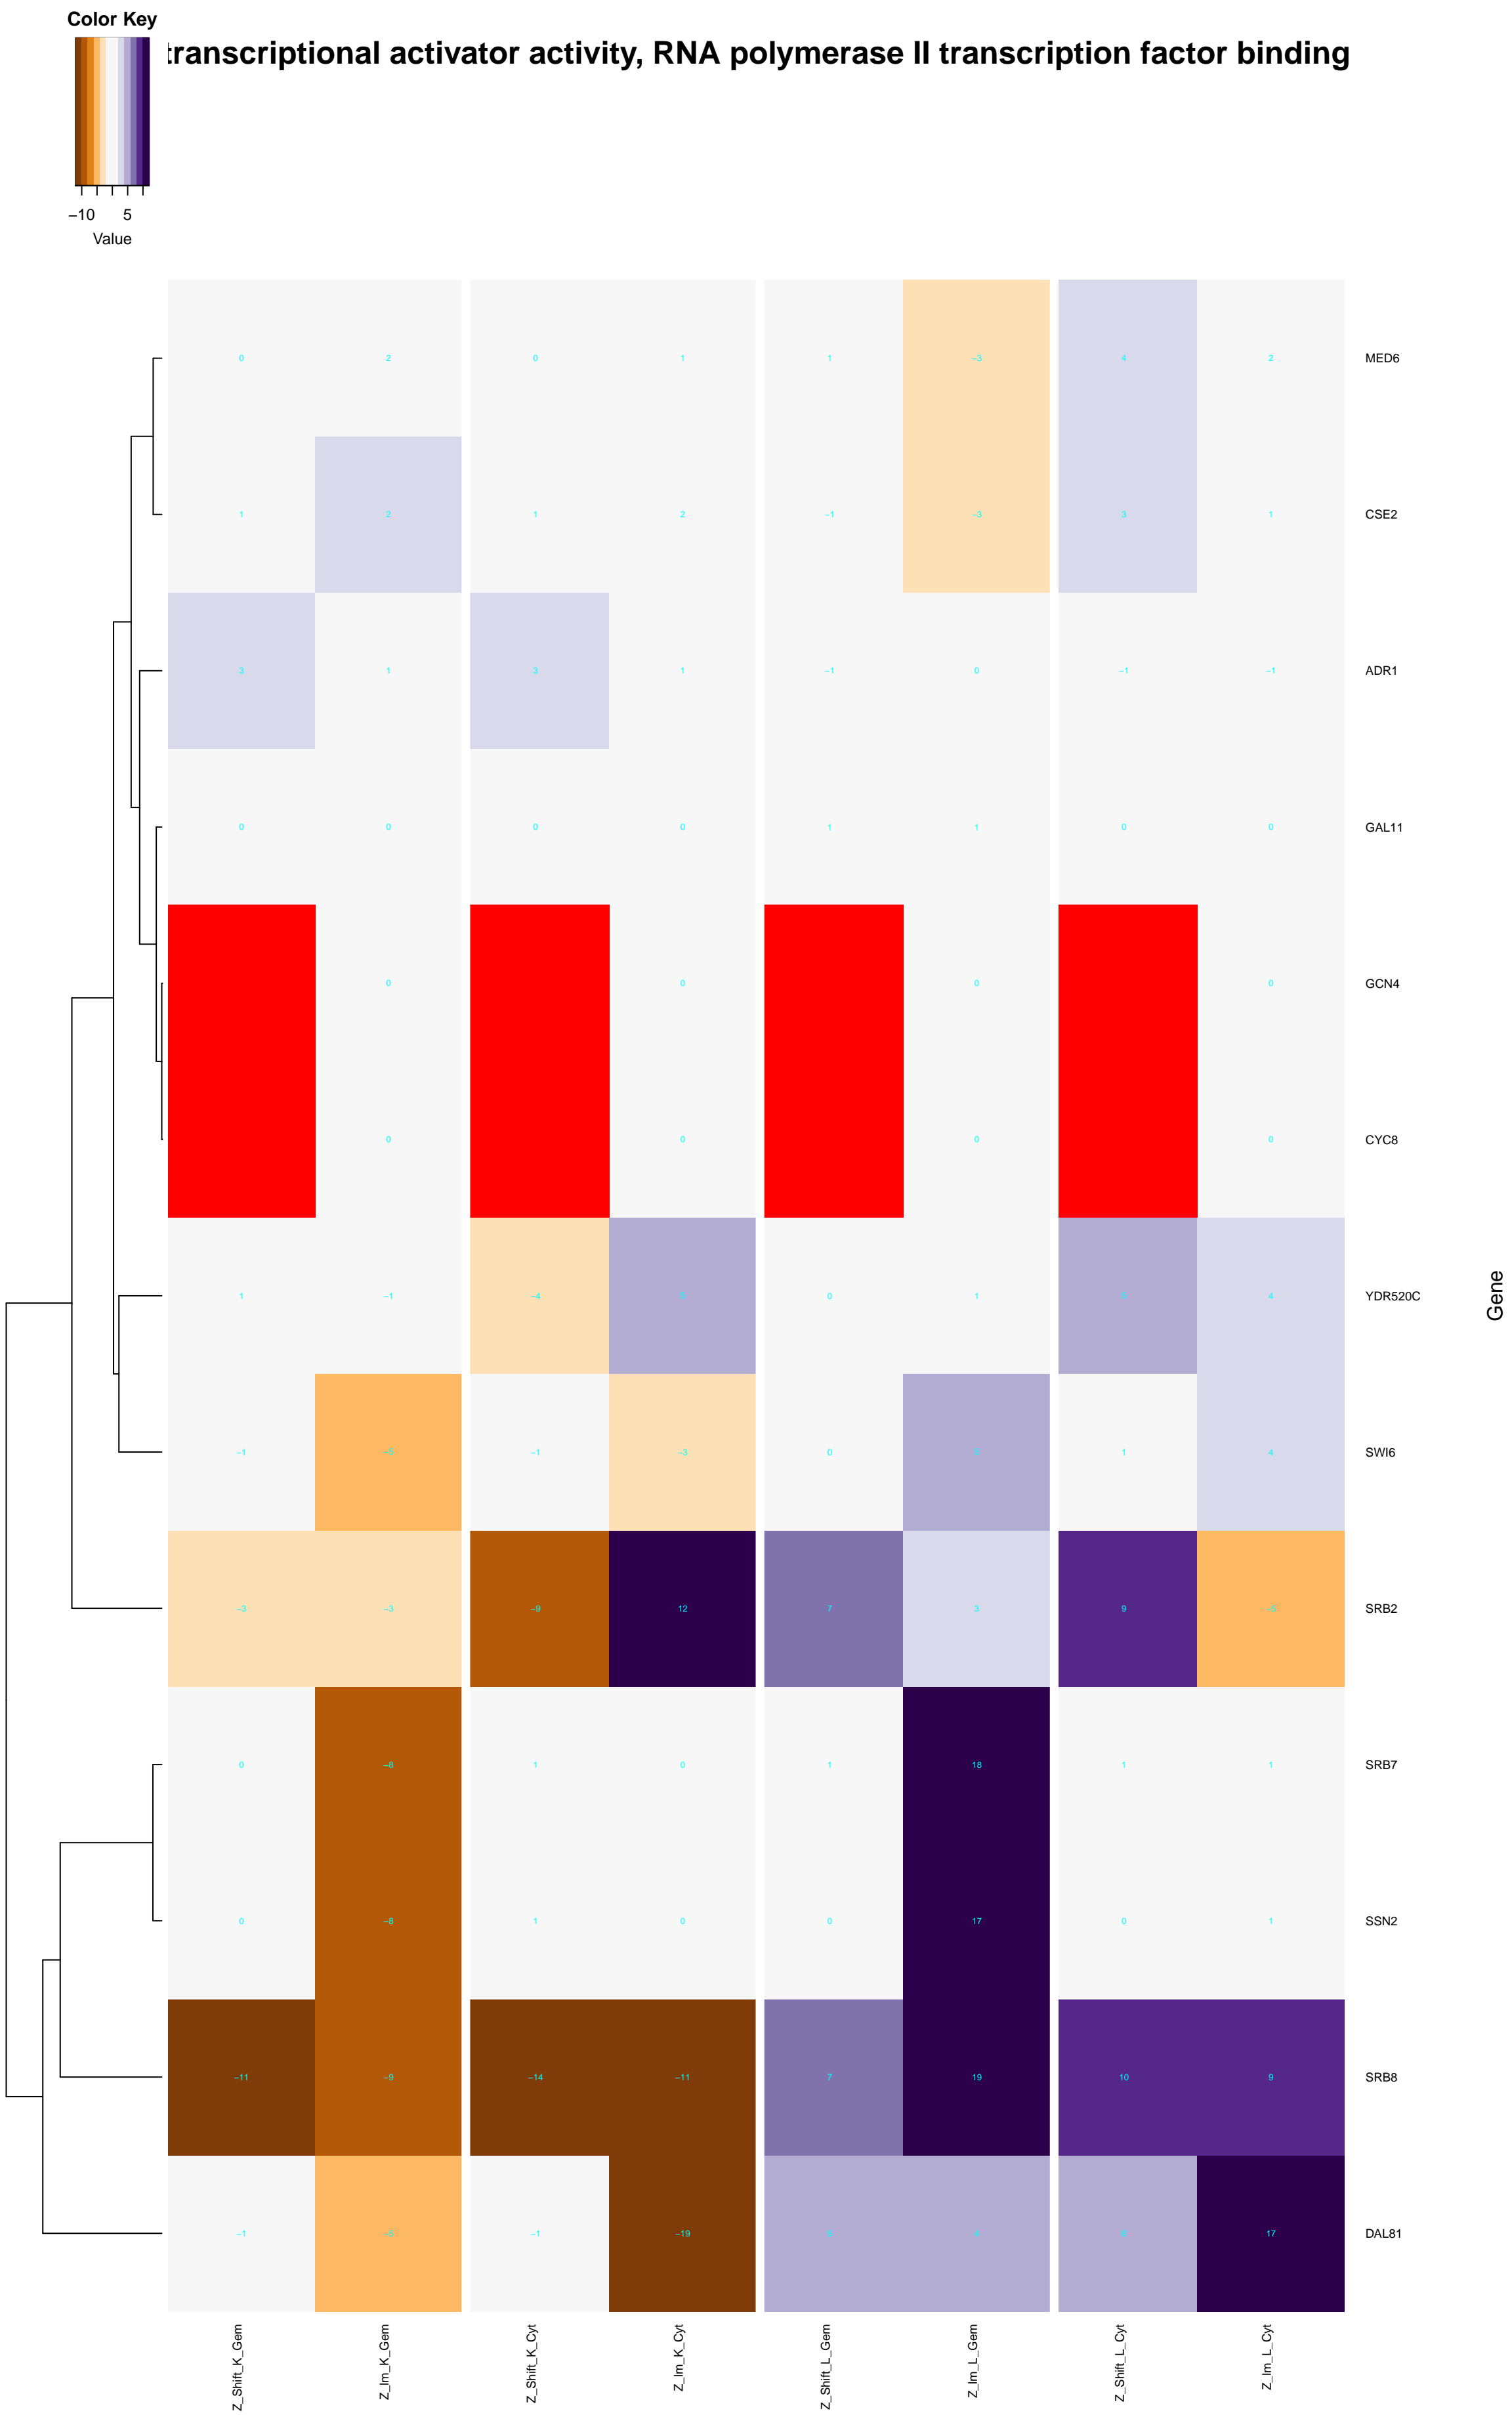





Supplement: s1 [file s1]

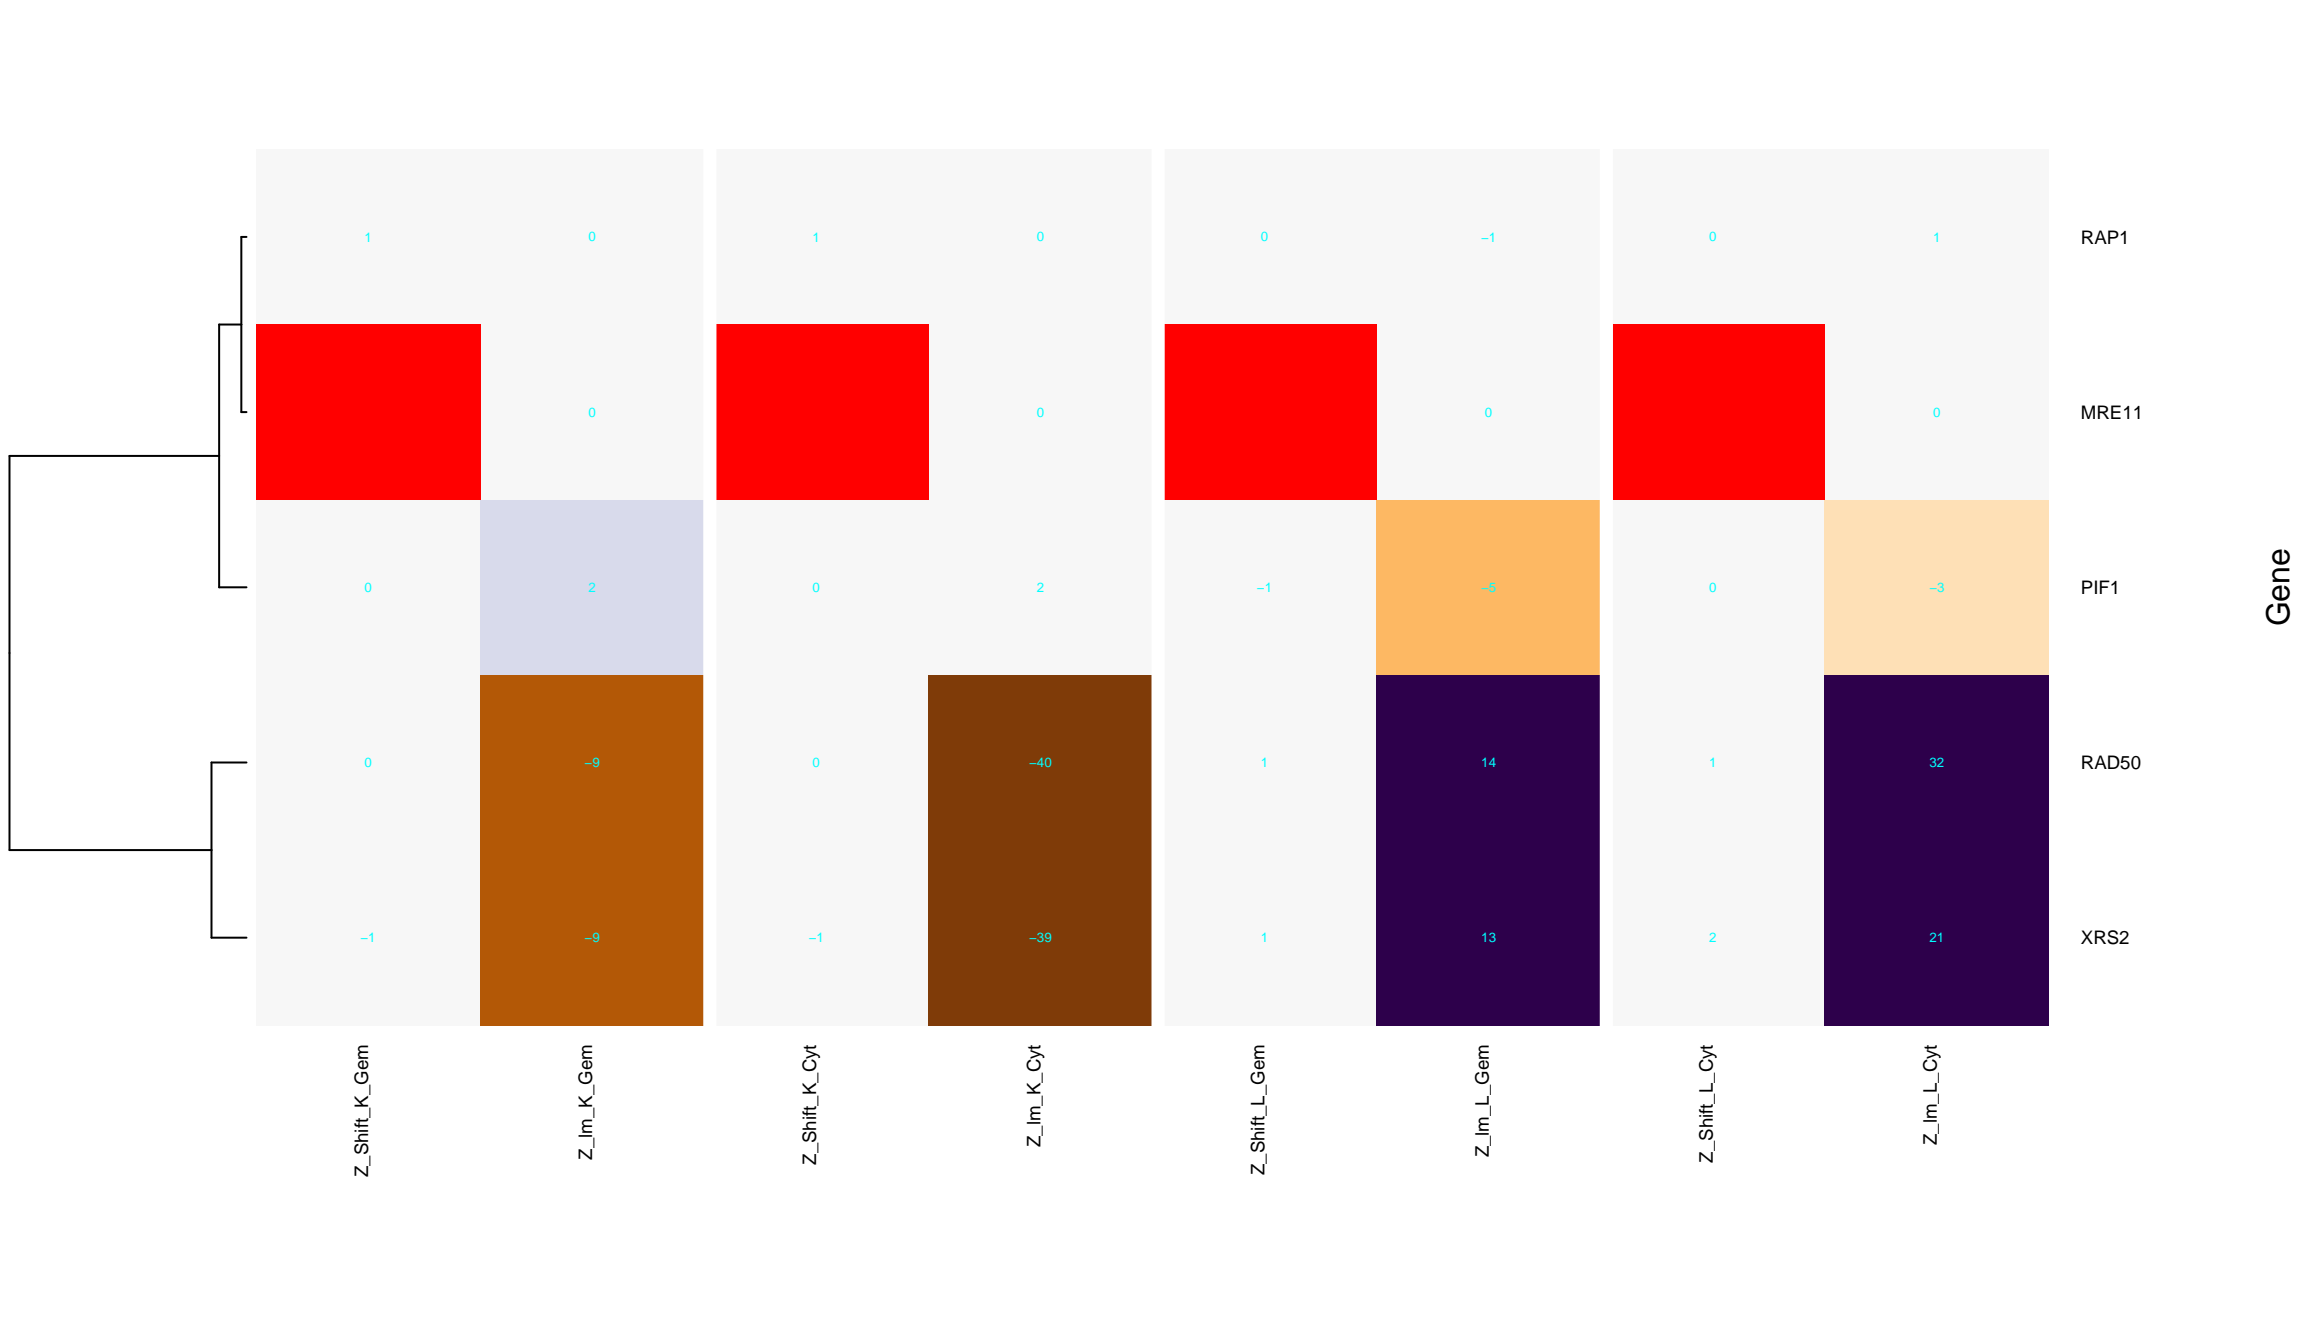

Supplement: s1 [file s1]

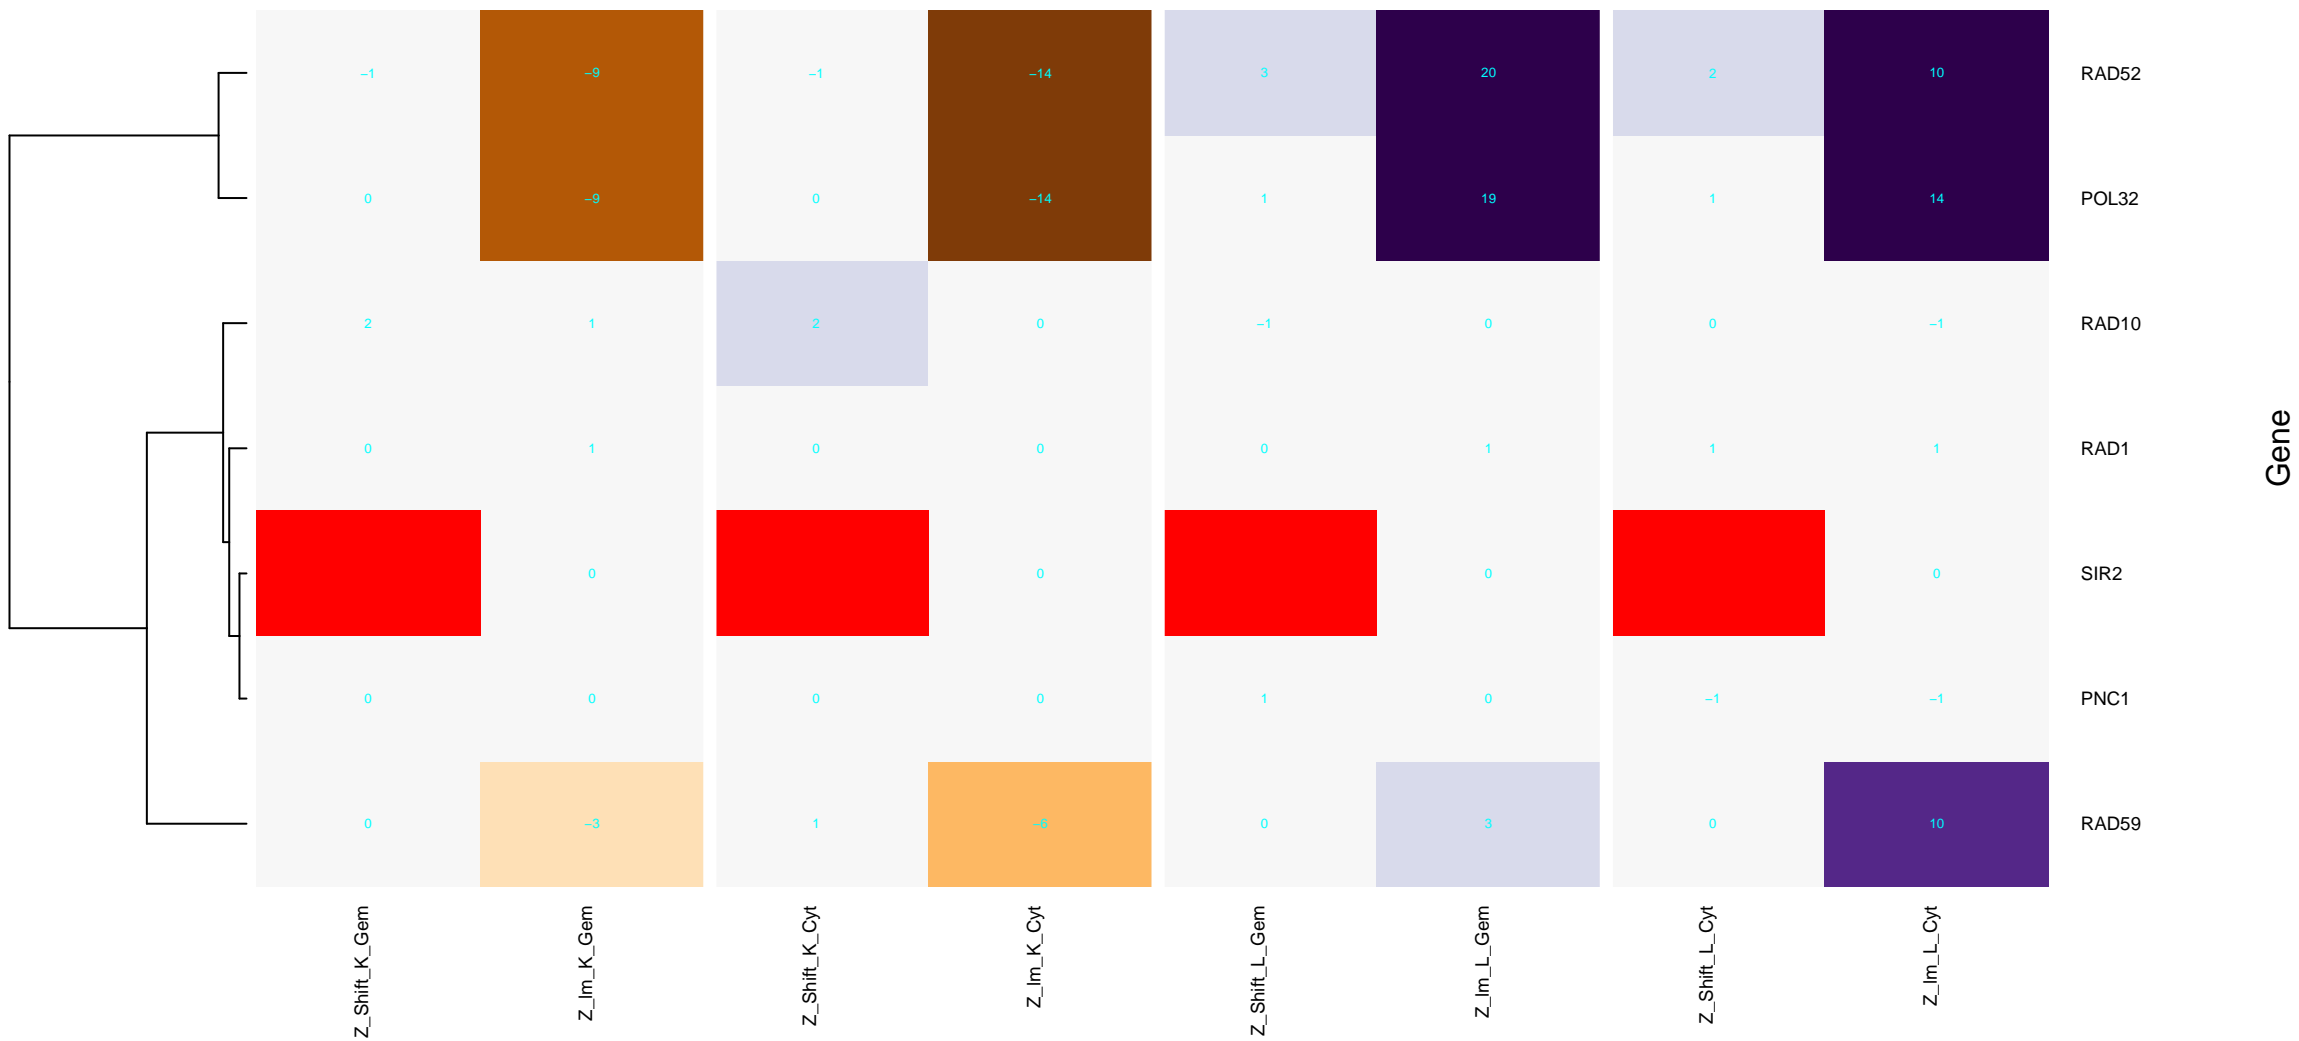

Supplement: s1 [file s1]

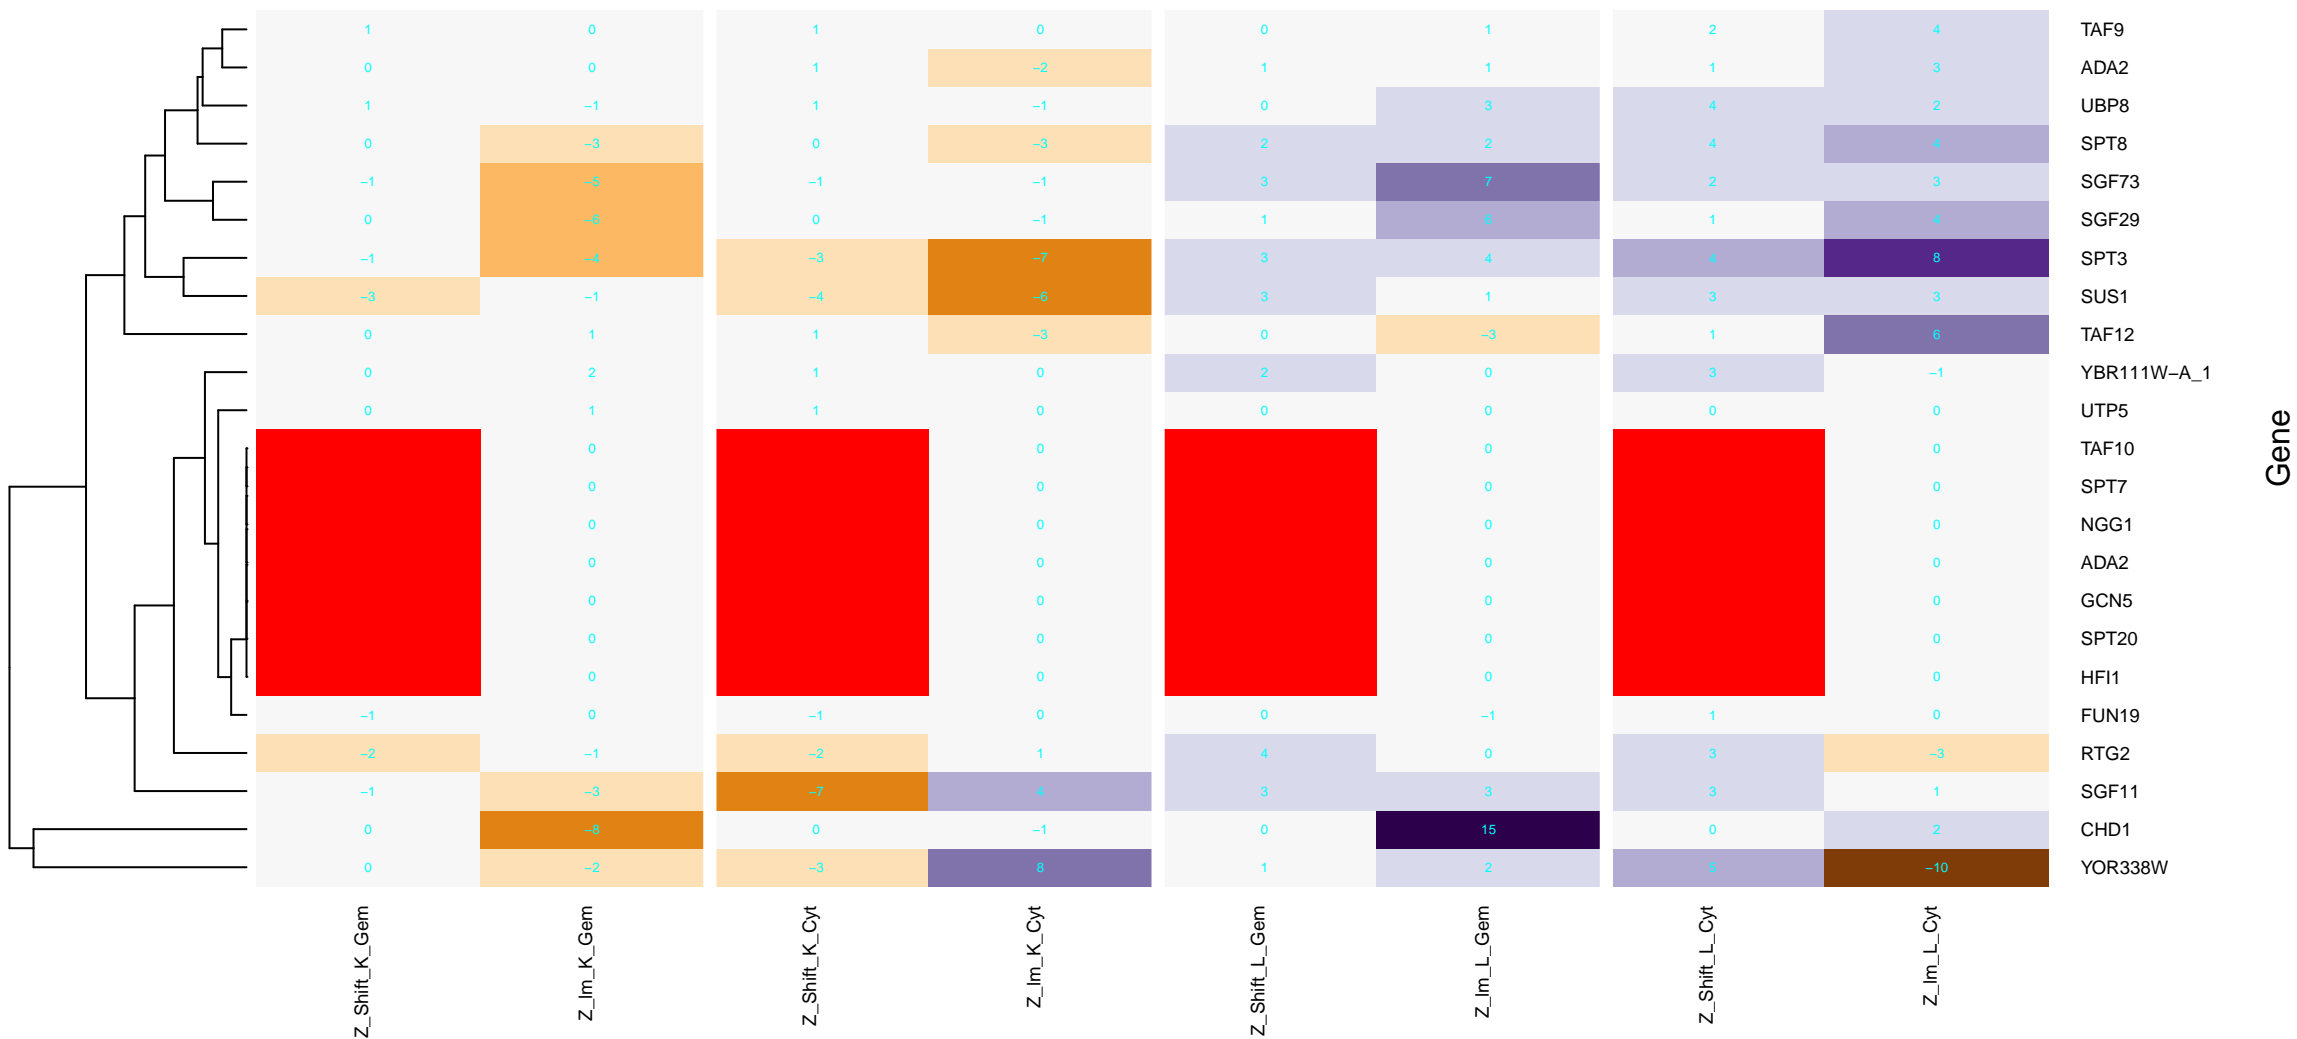

Supplement: s1 [file s1]

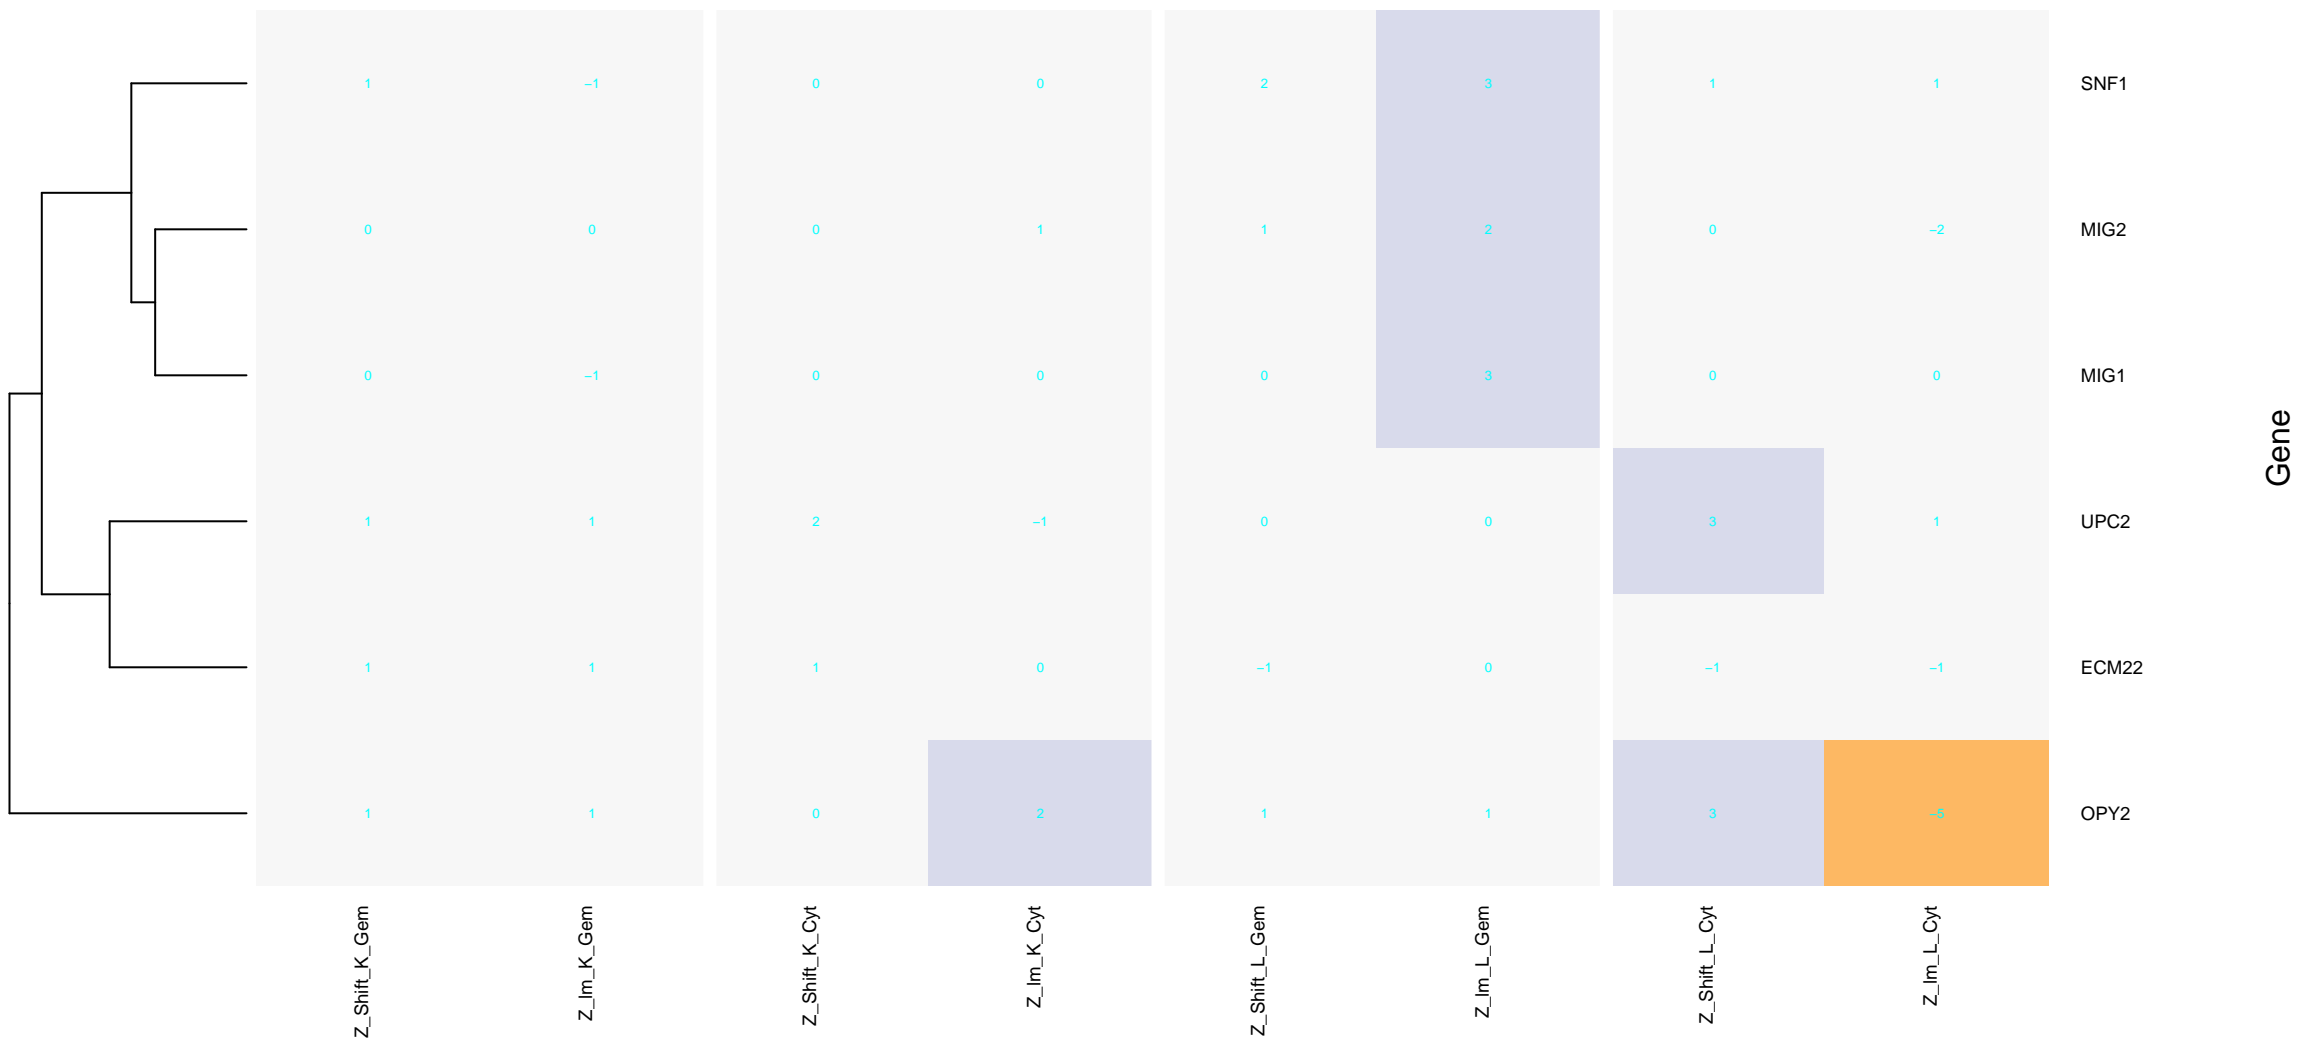

Supplement: s1 [file s1]

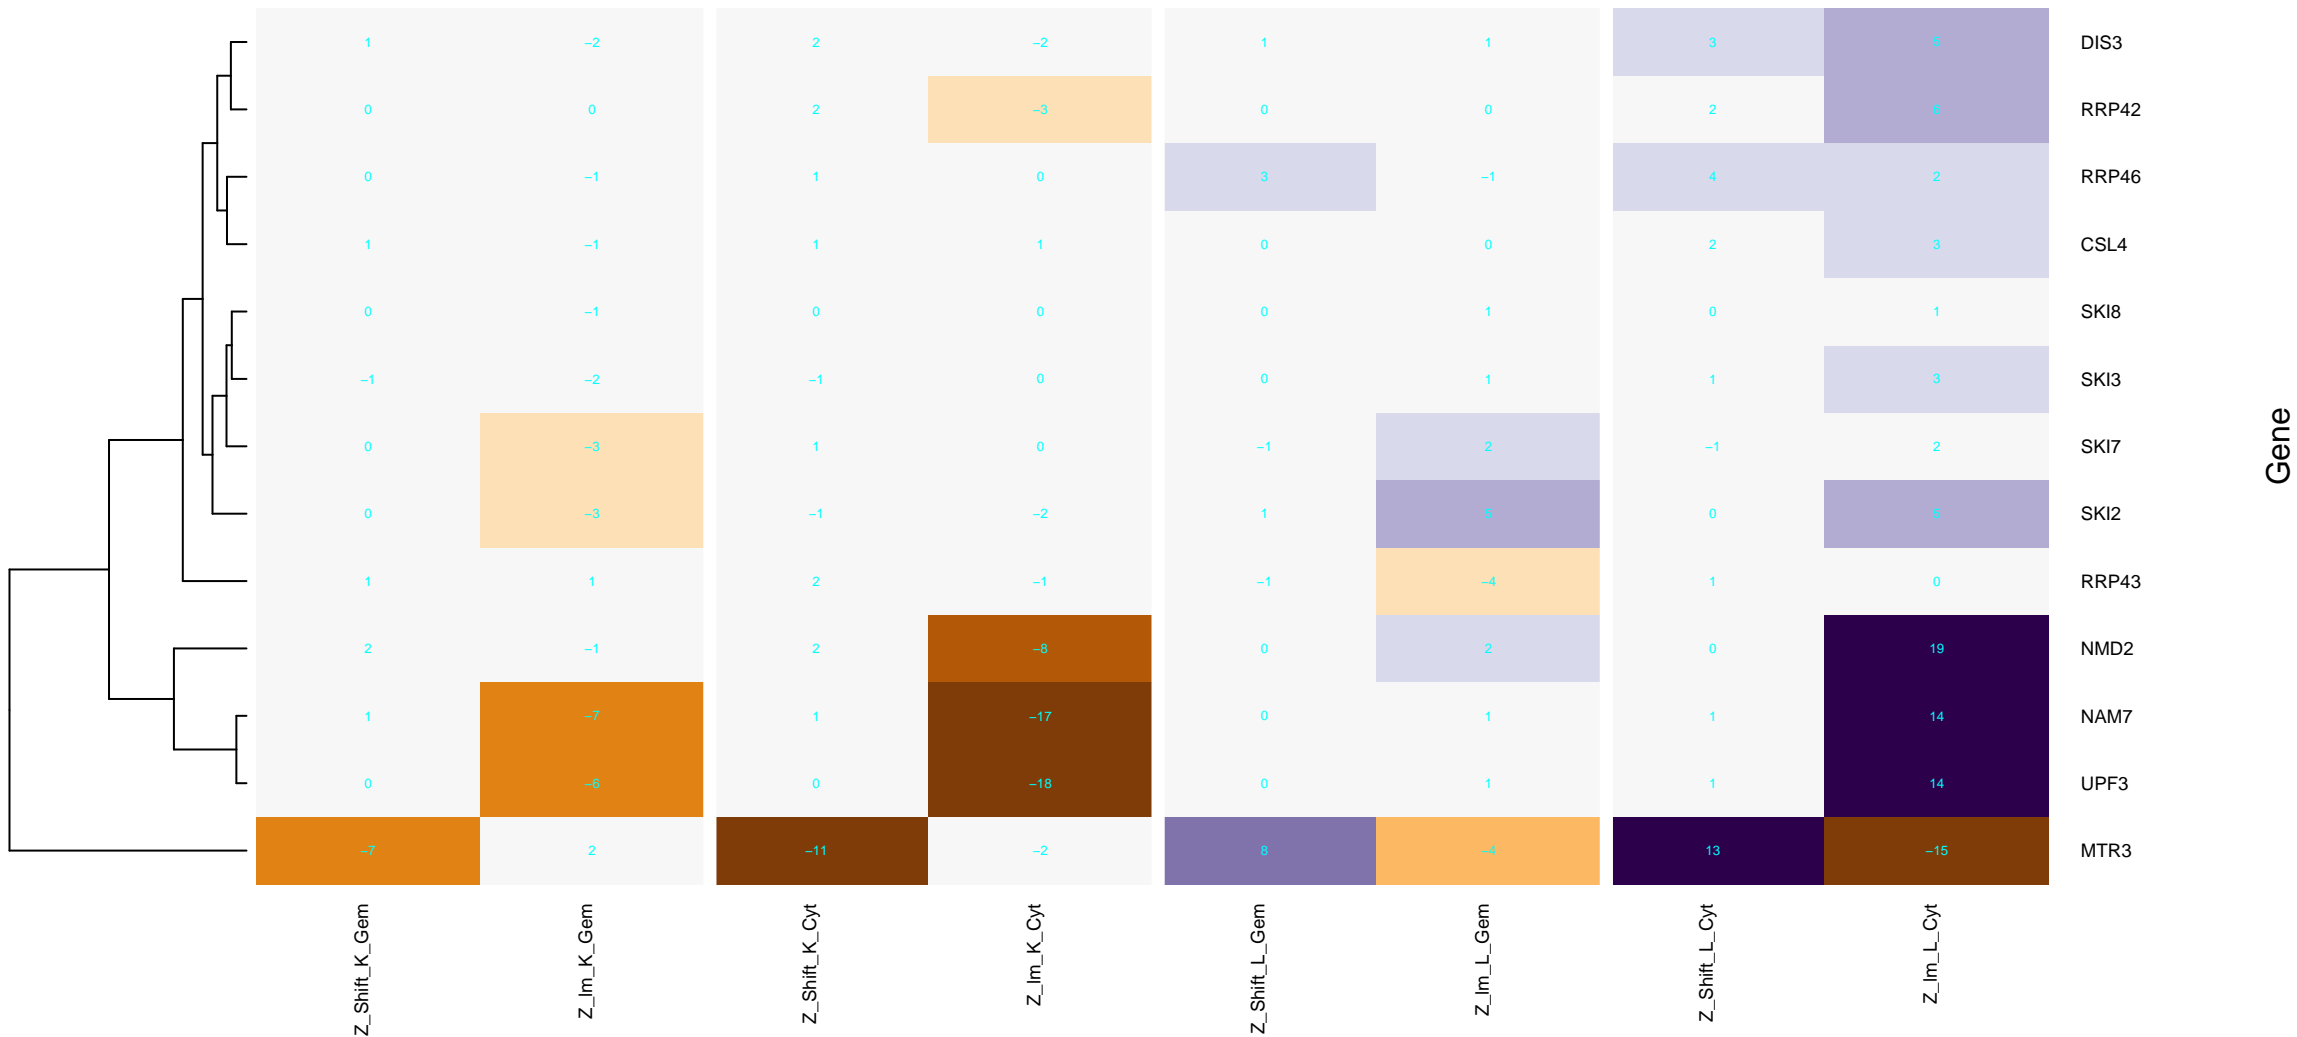

Supplement: s1 [file s1]

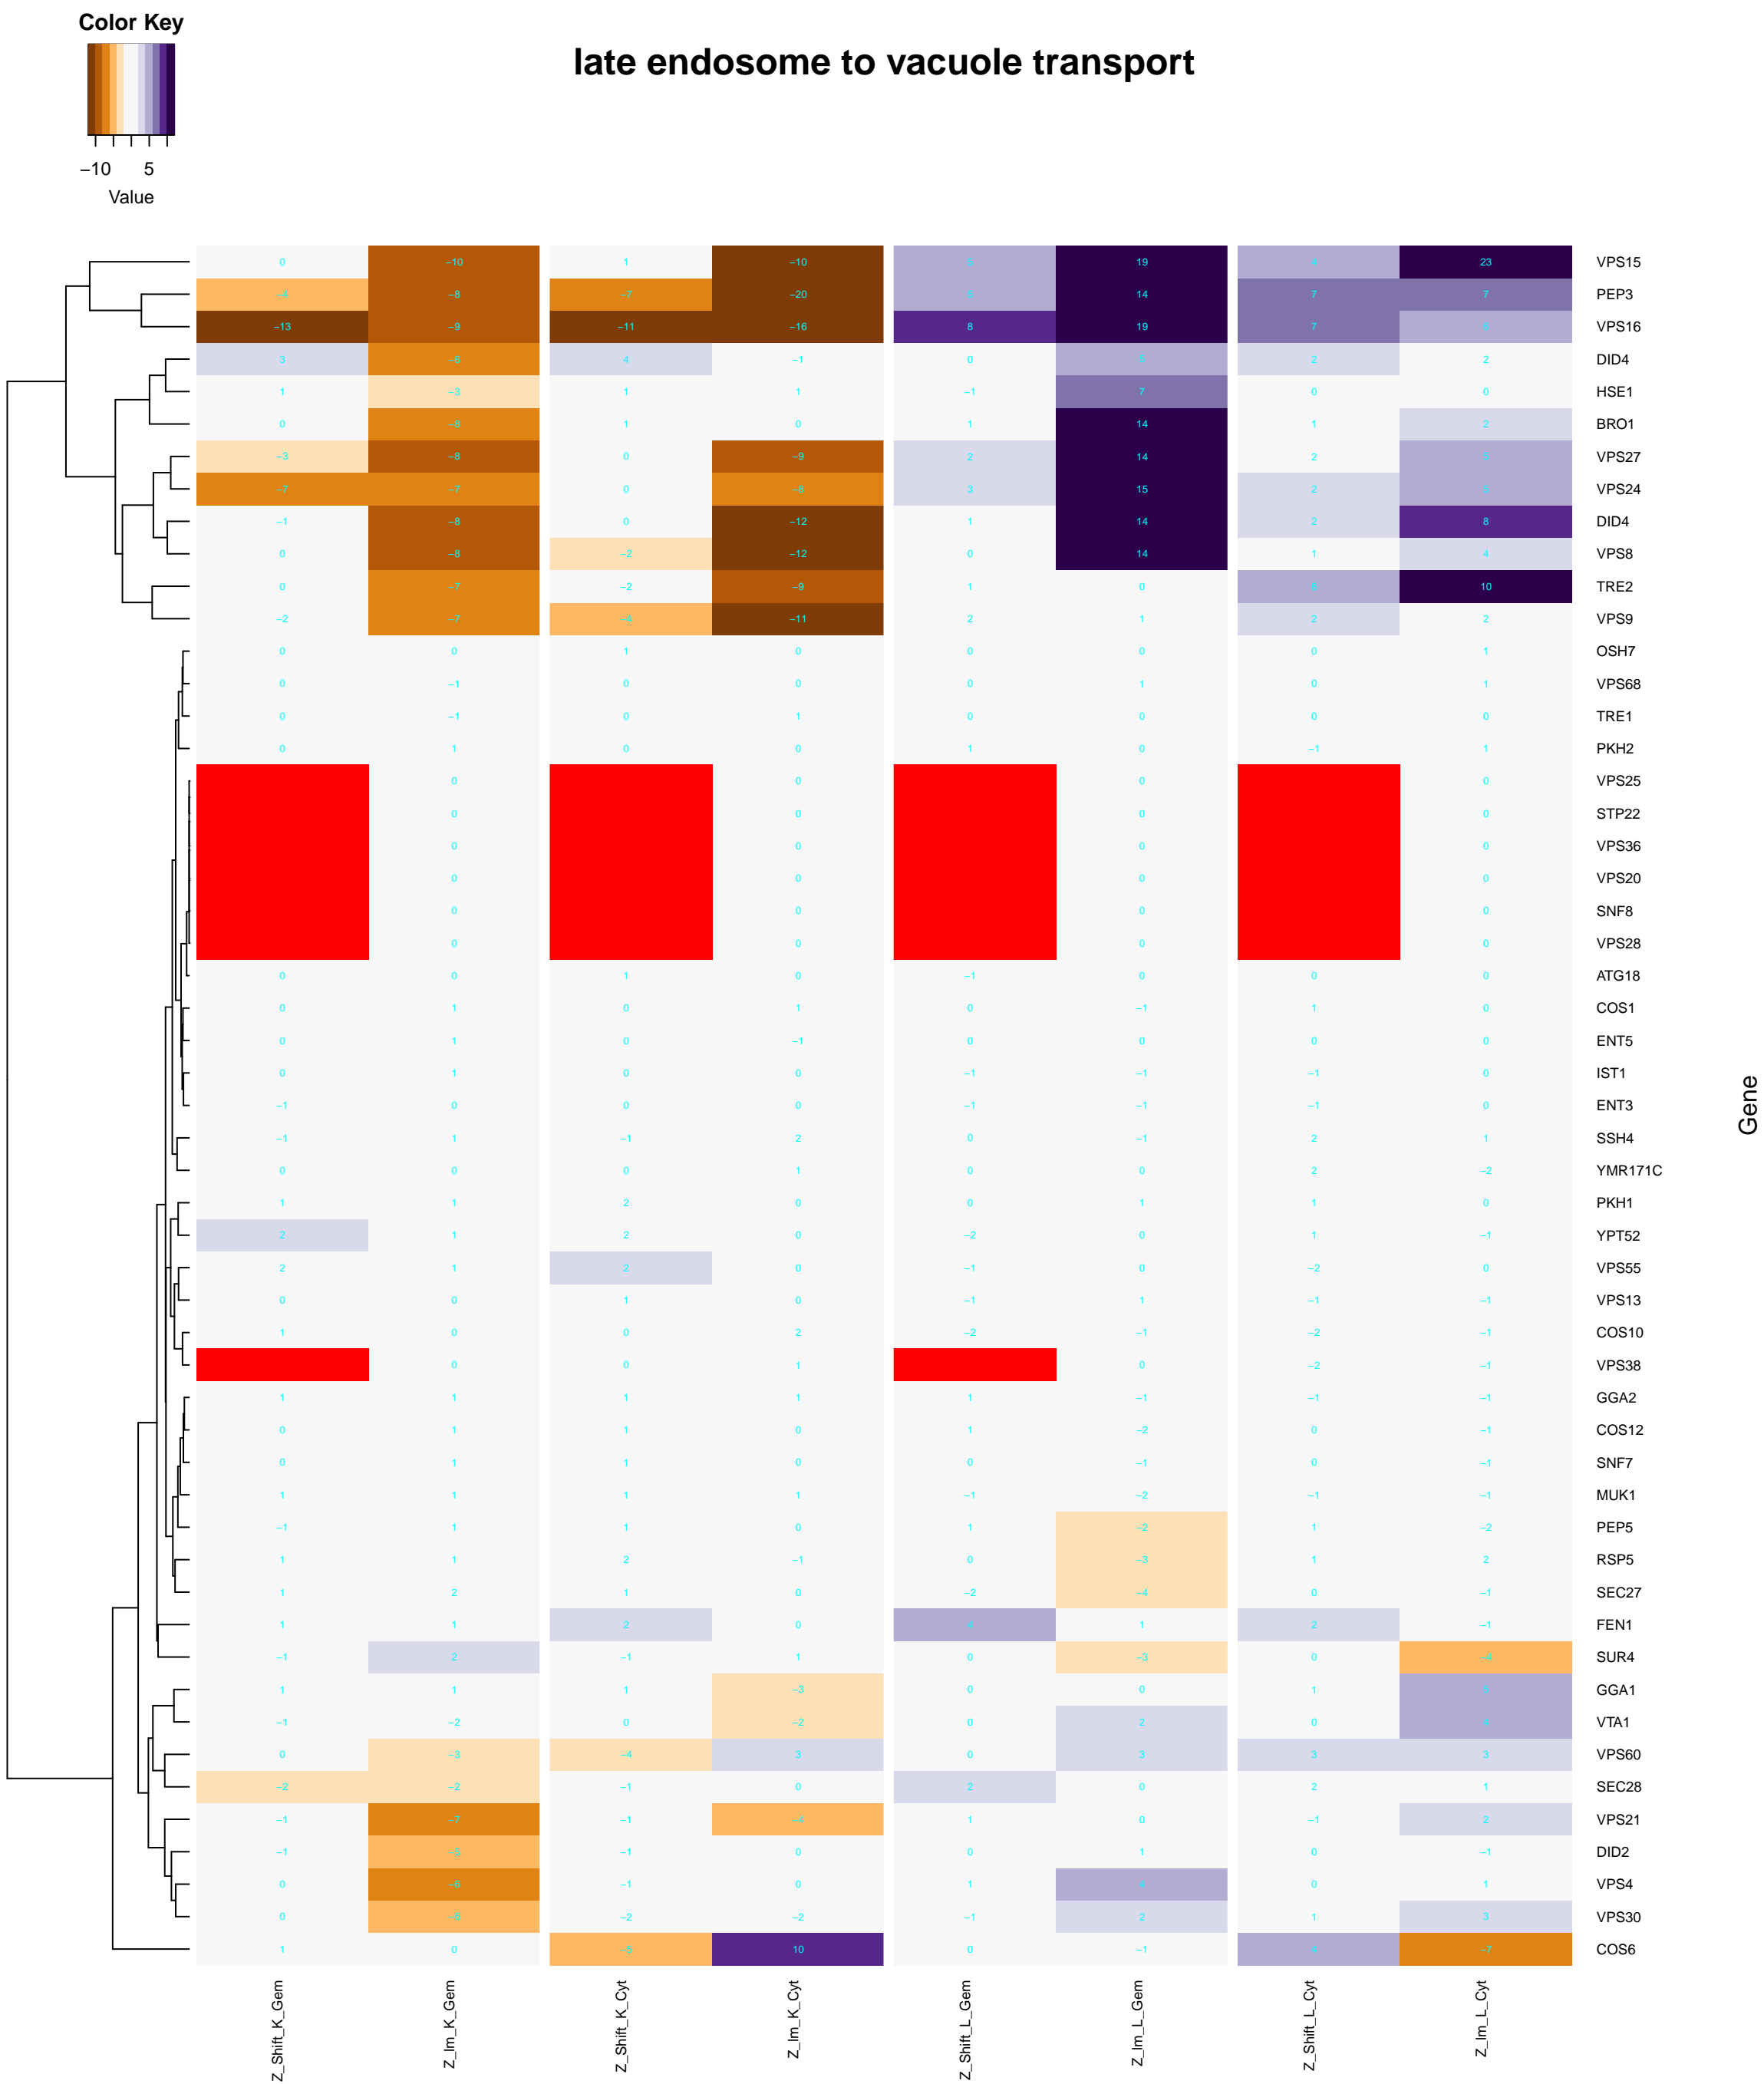

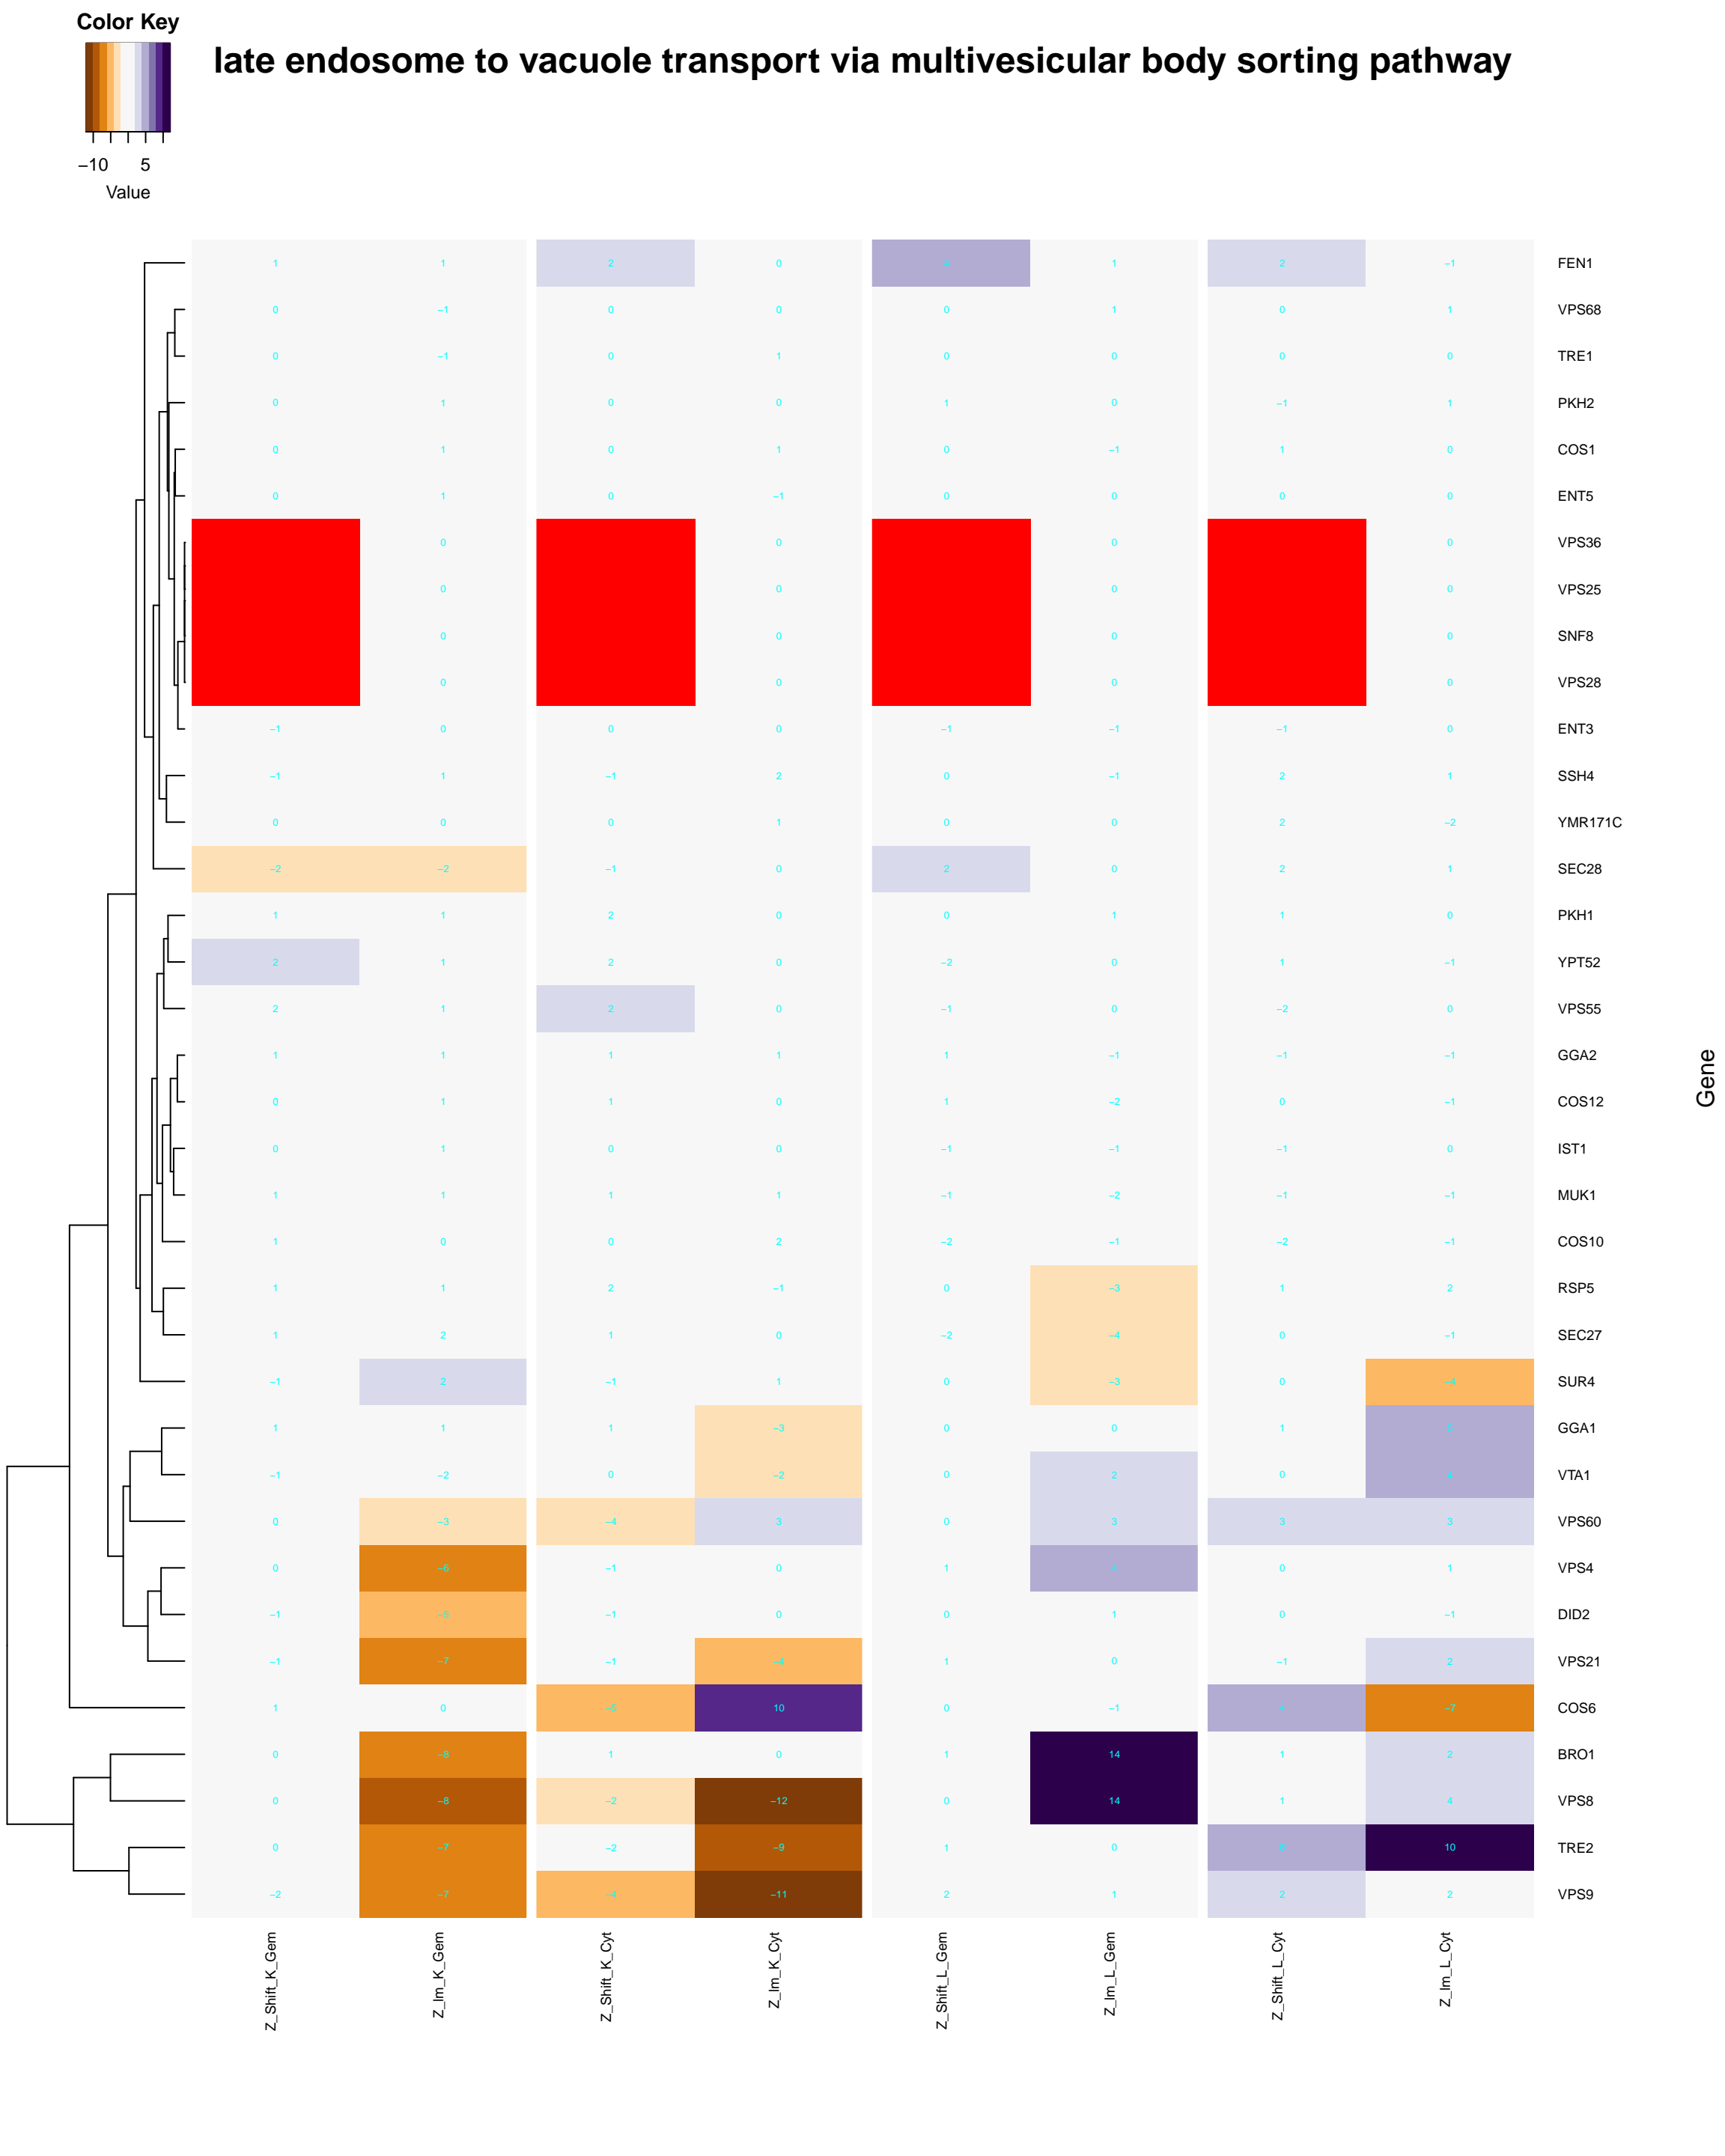

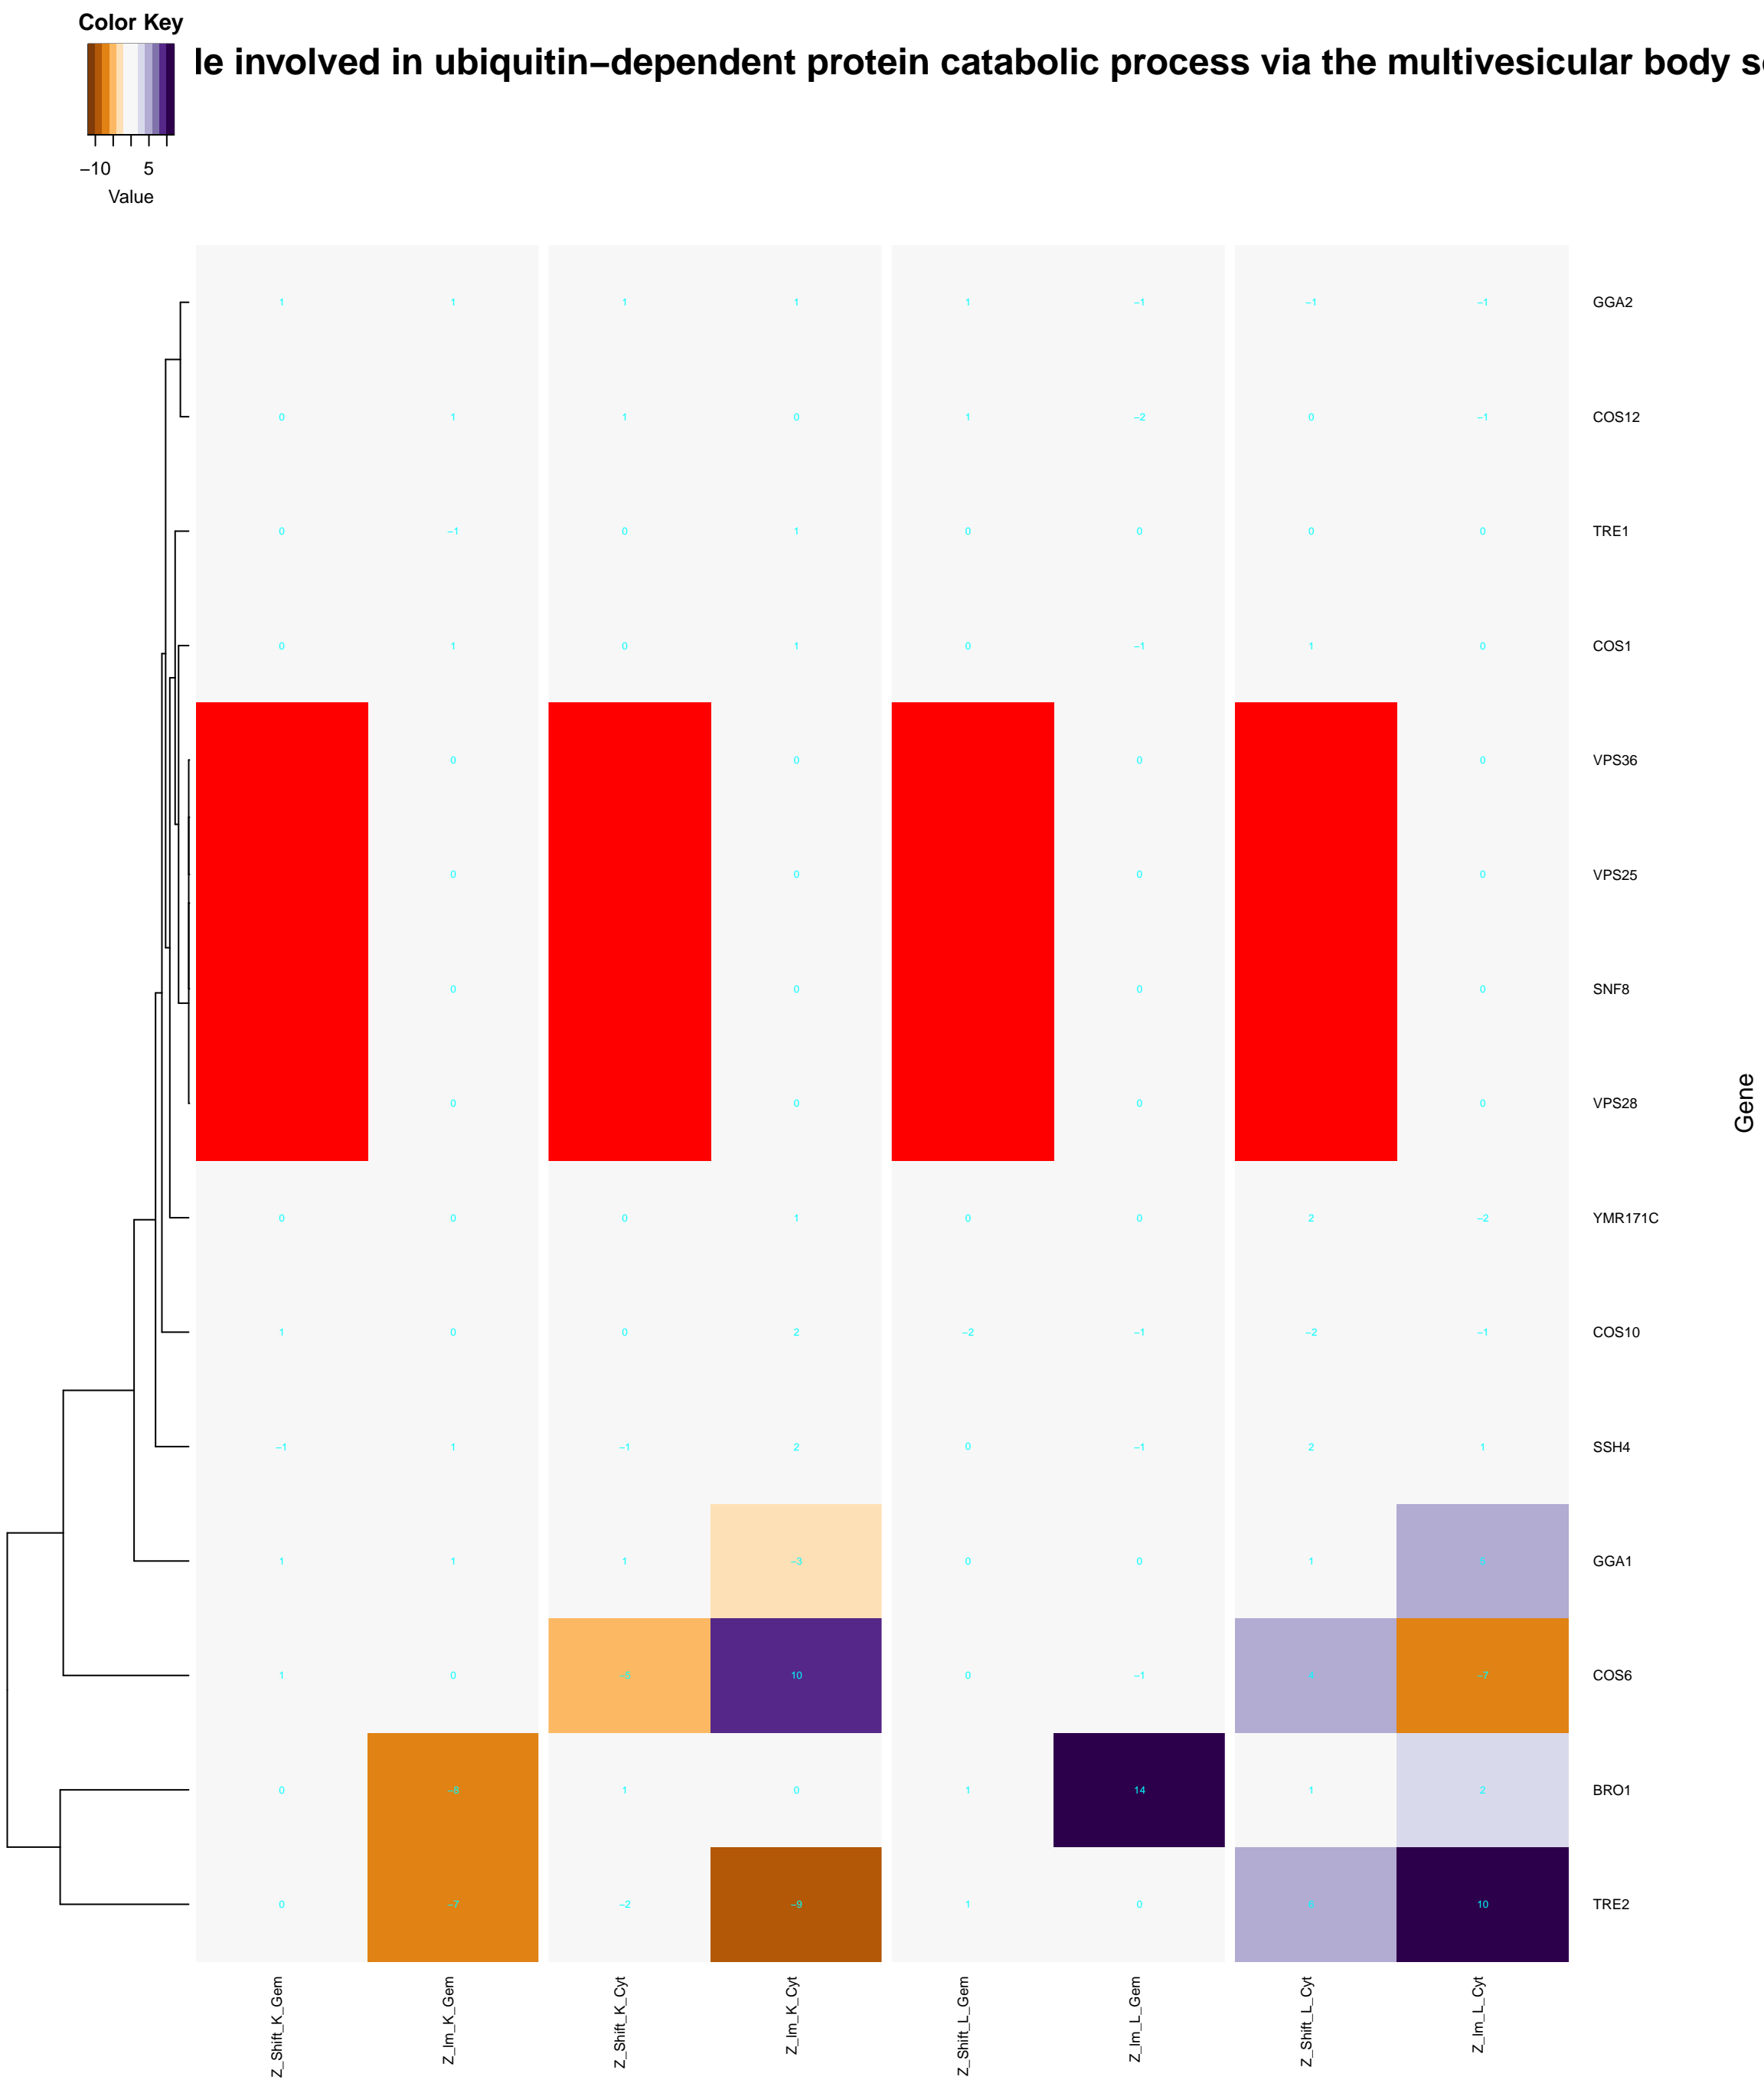

Supplement: s1 [file s1]

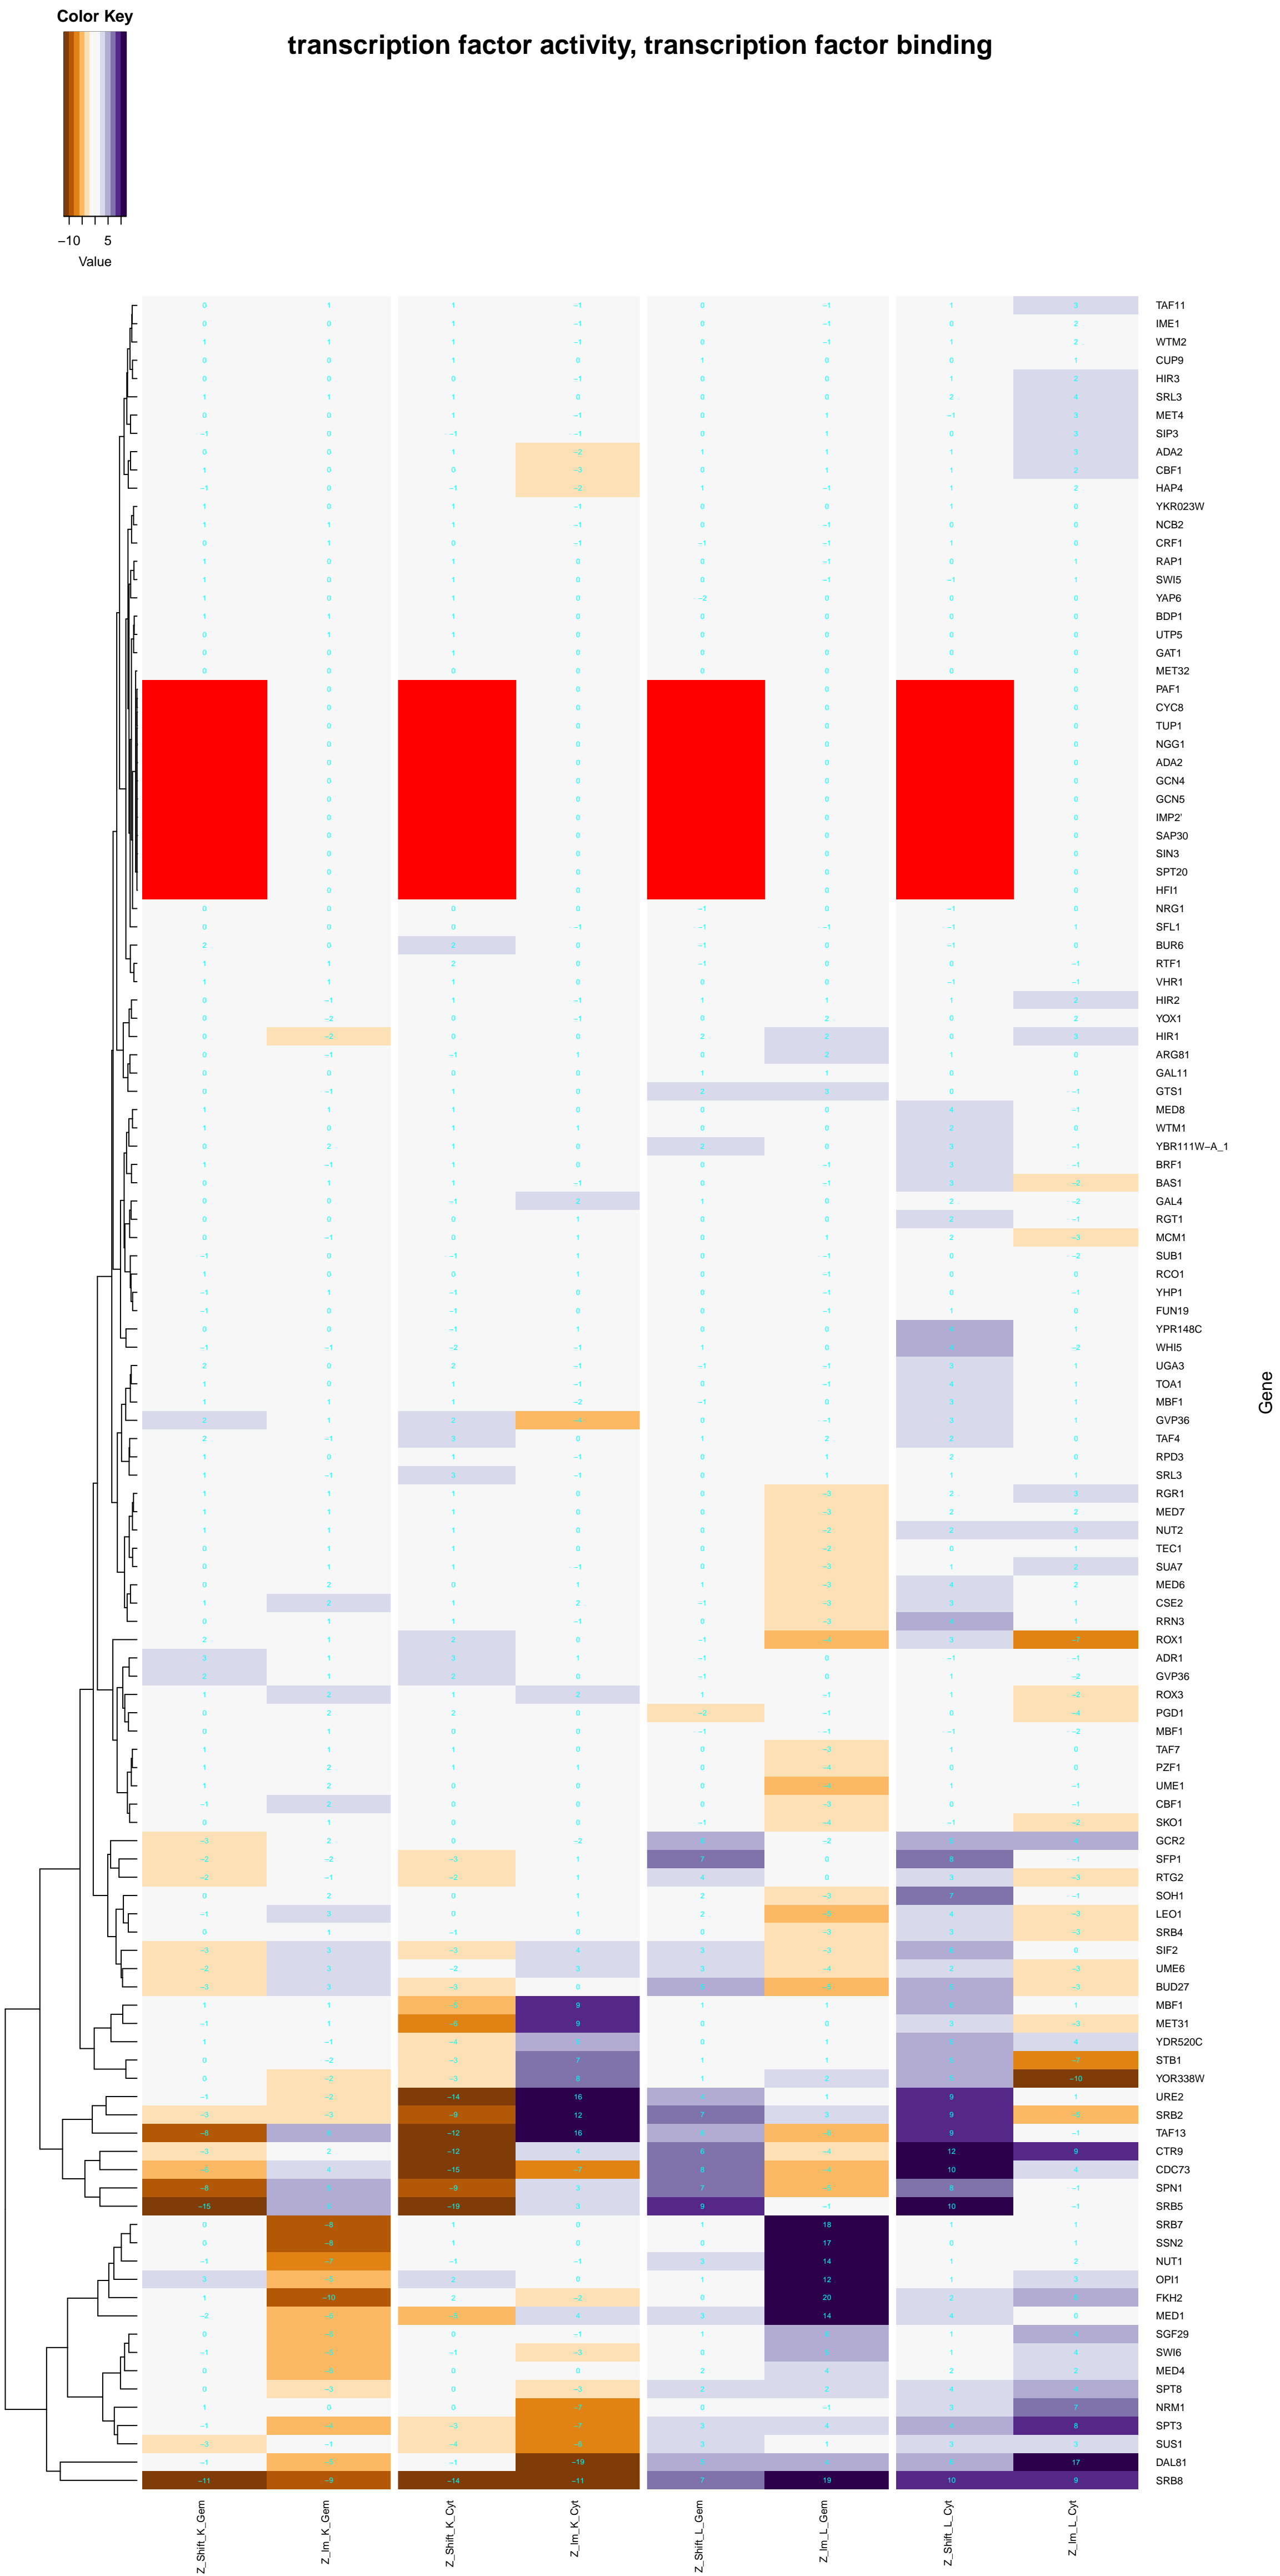

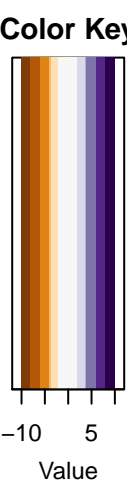

transcription factor activity, RNA polymerase III transcription factor binding

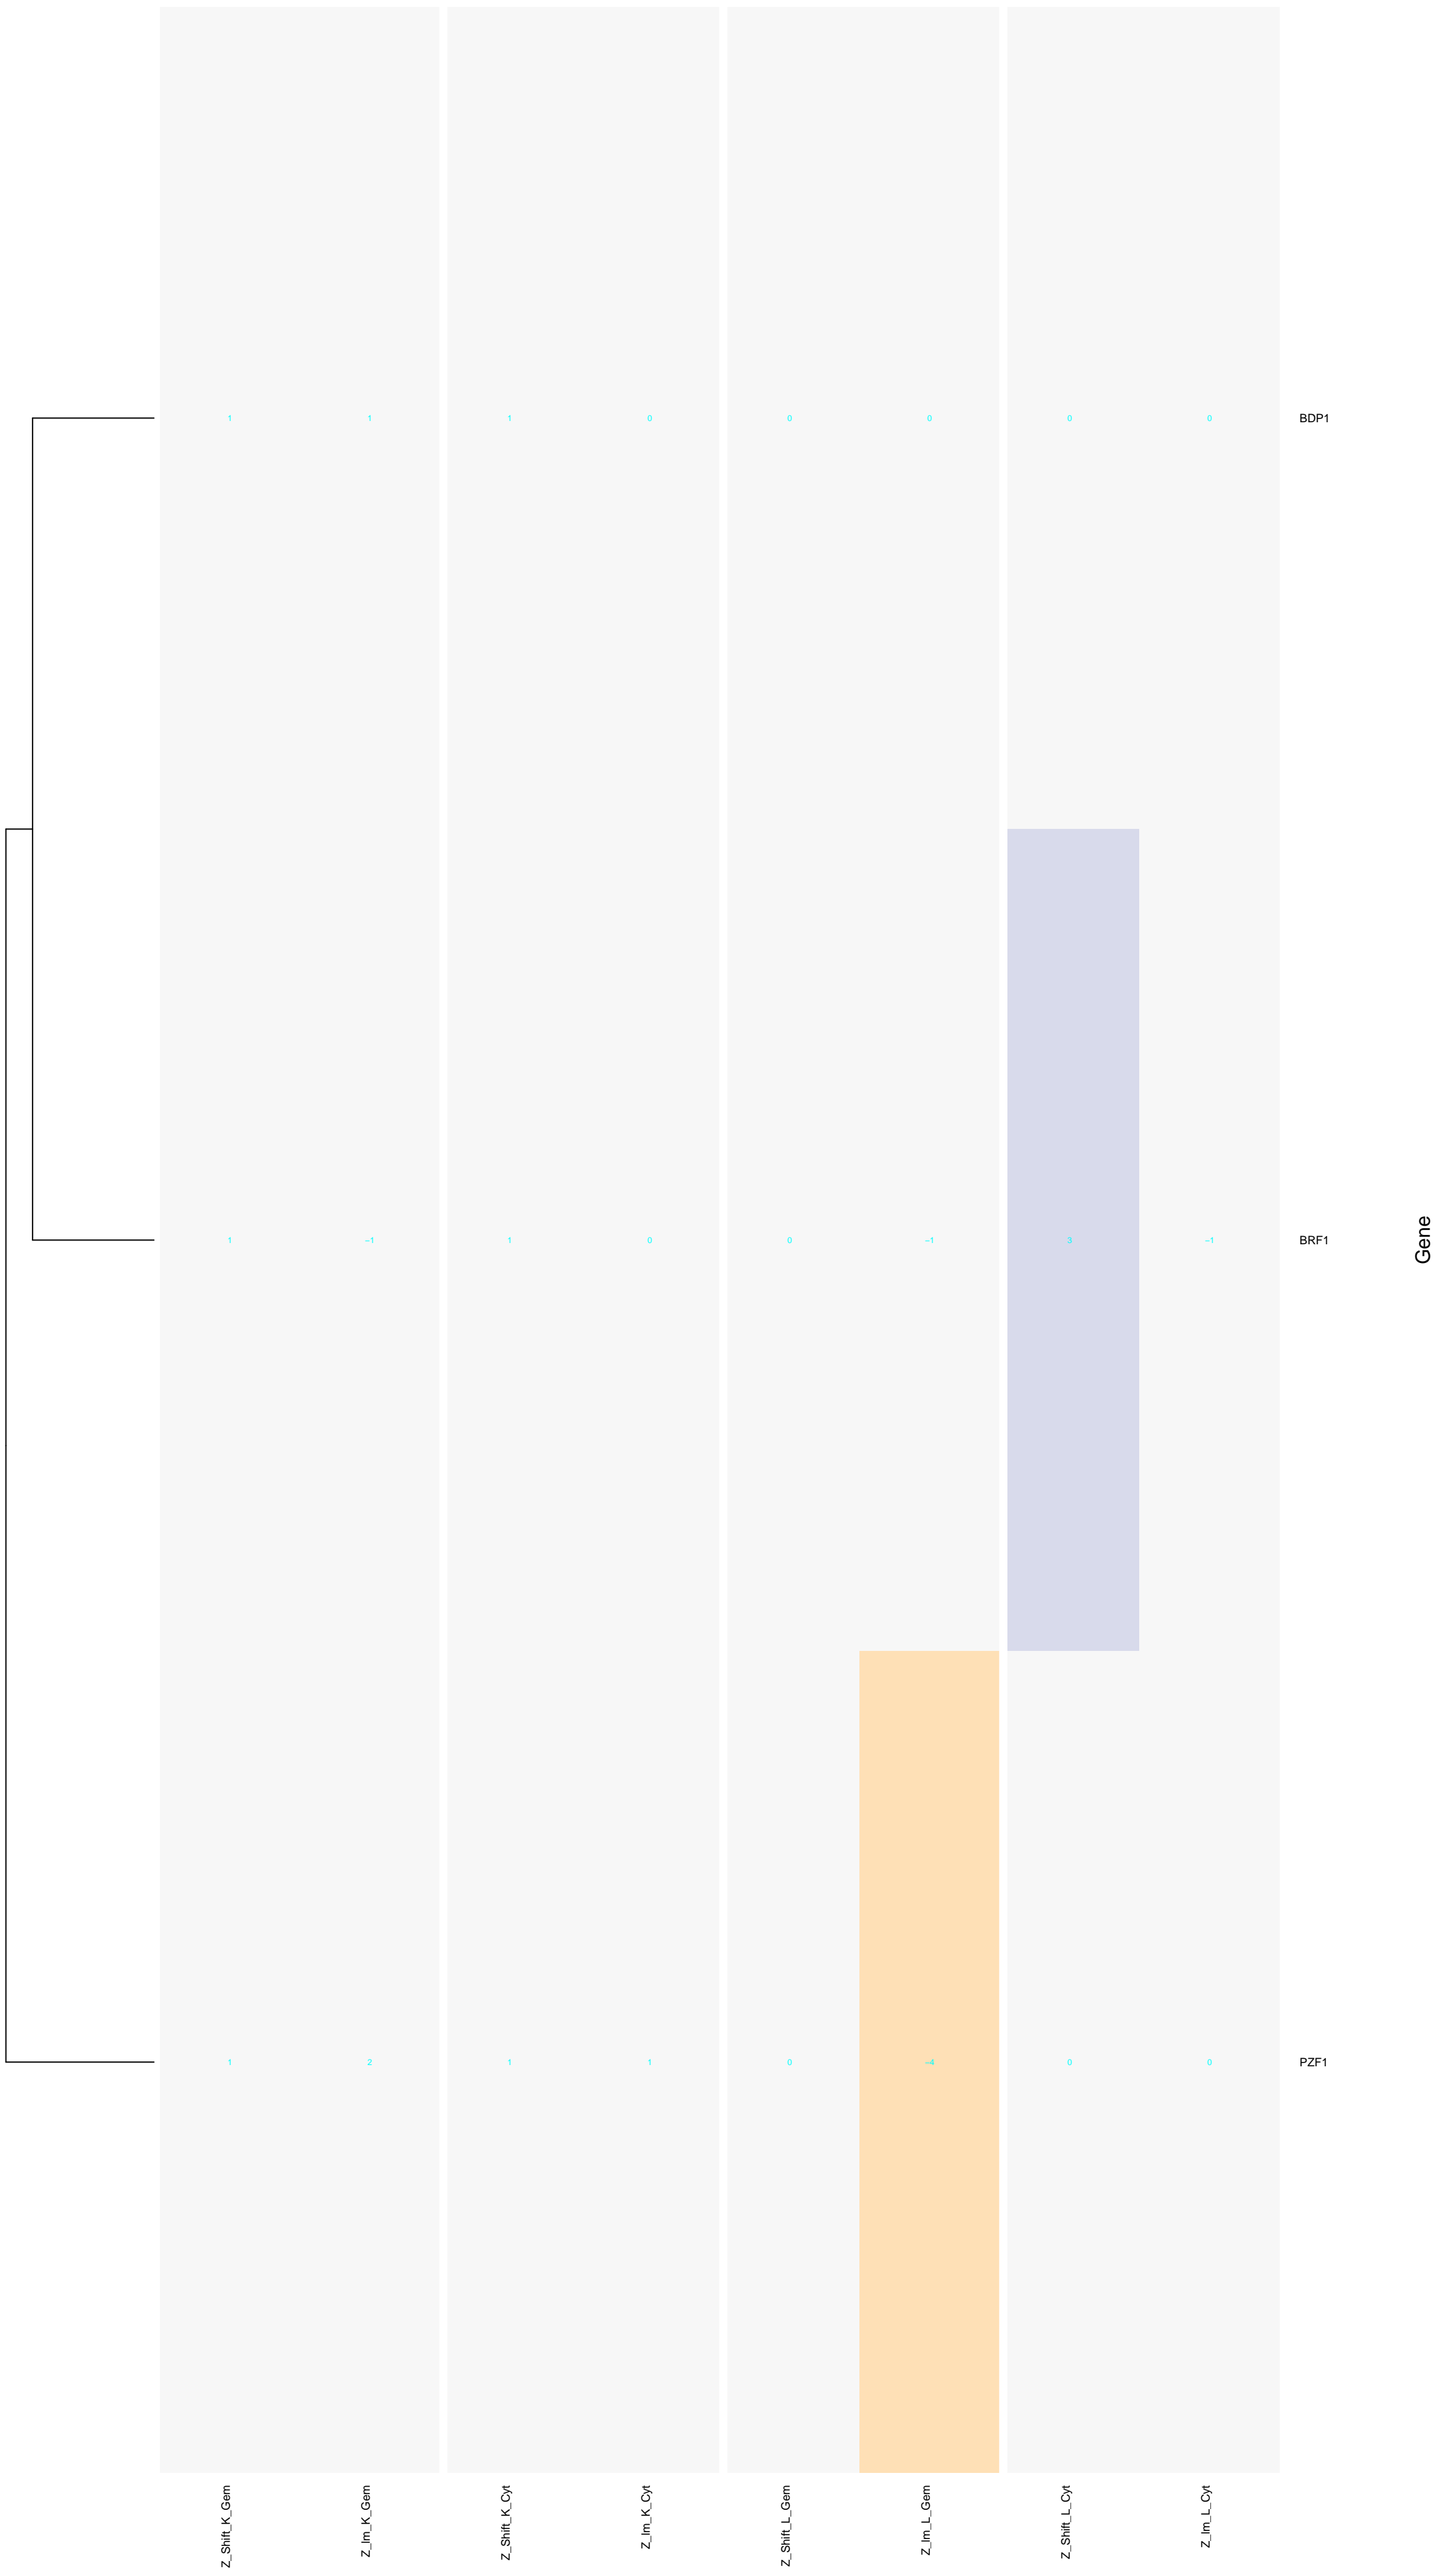

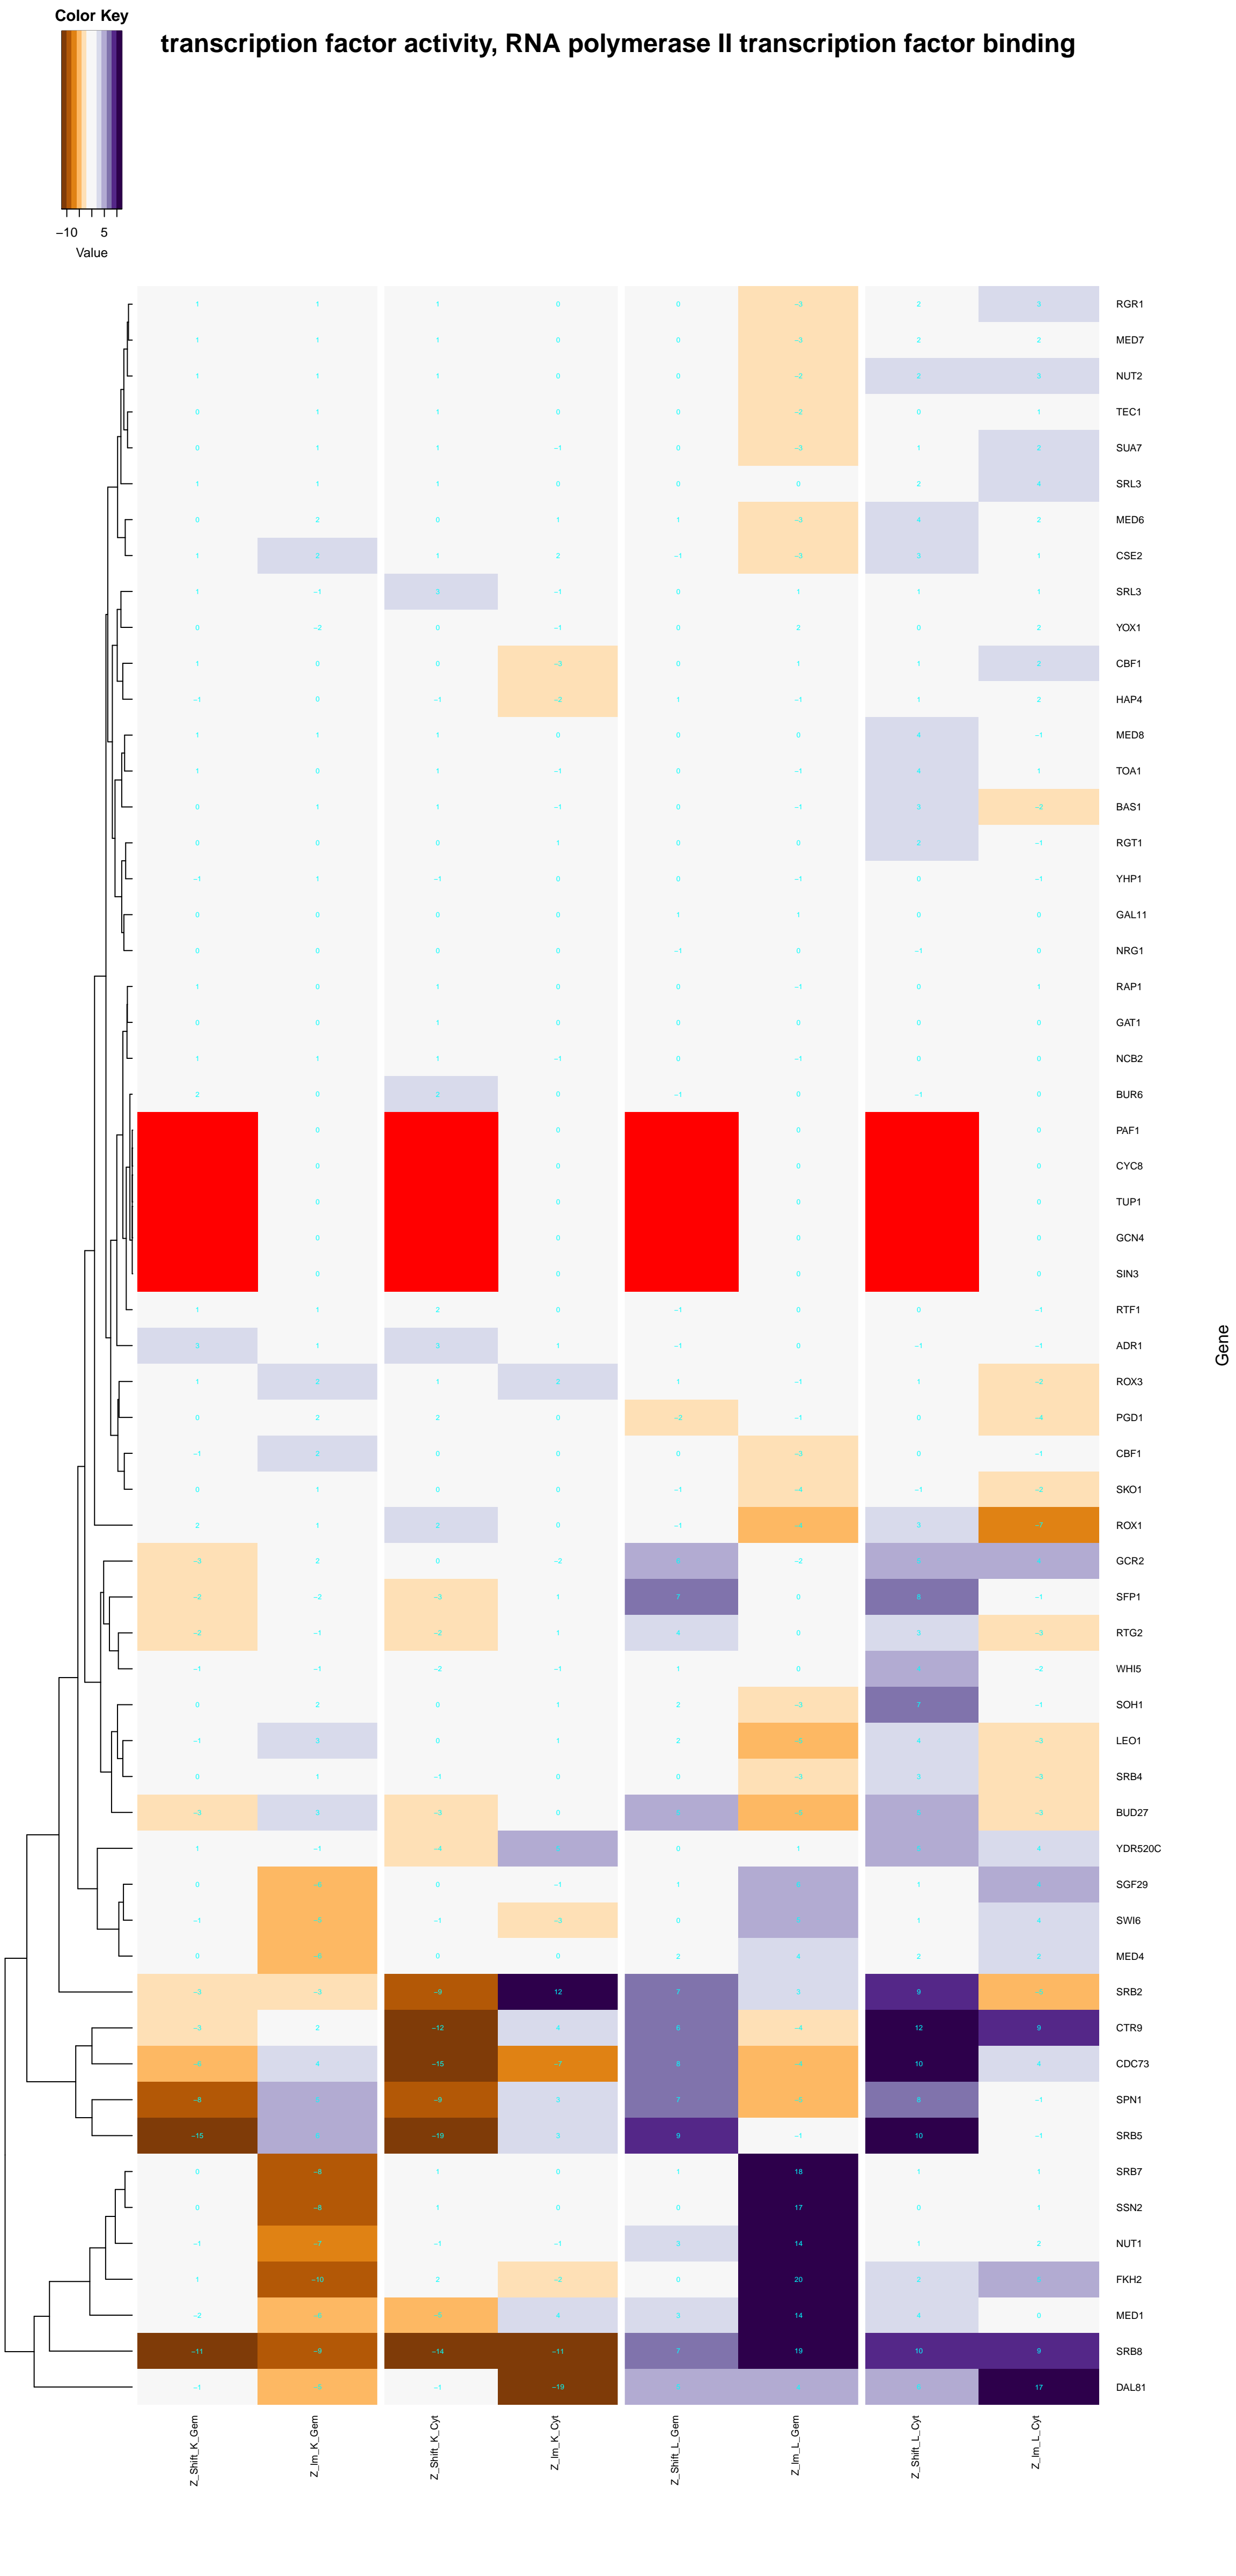

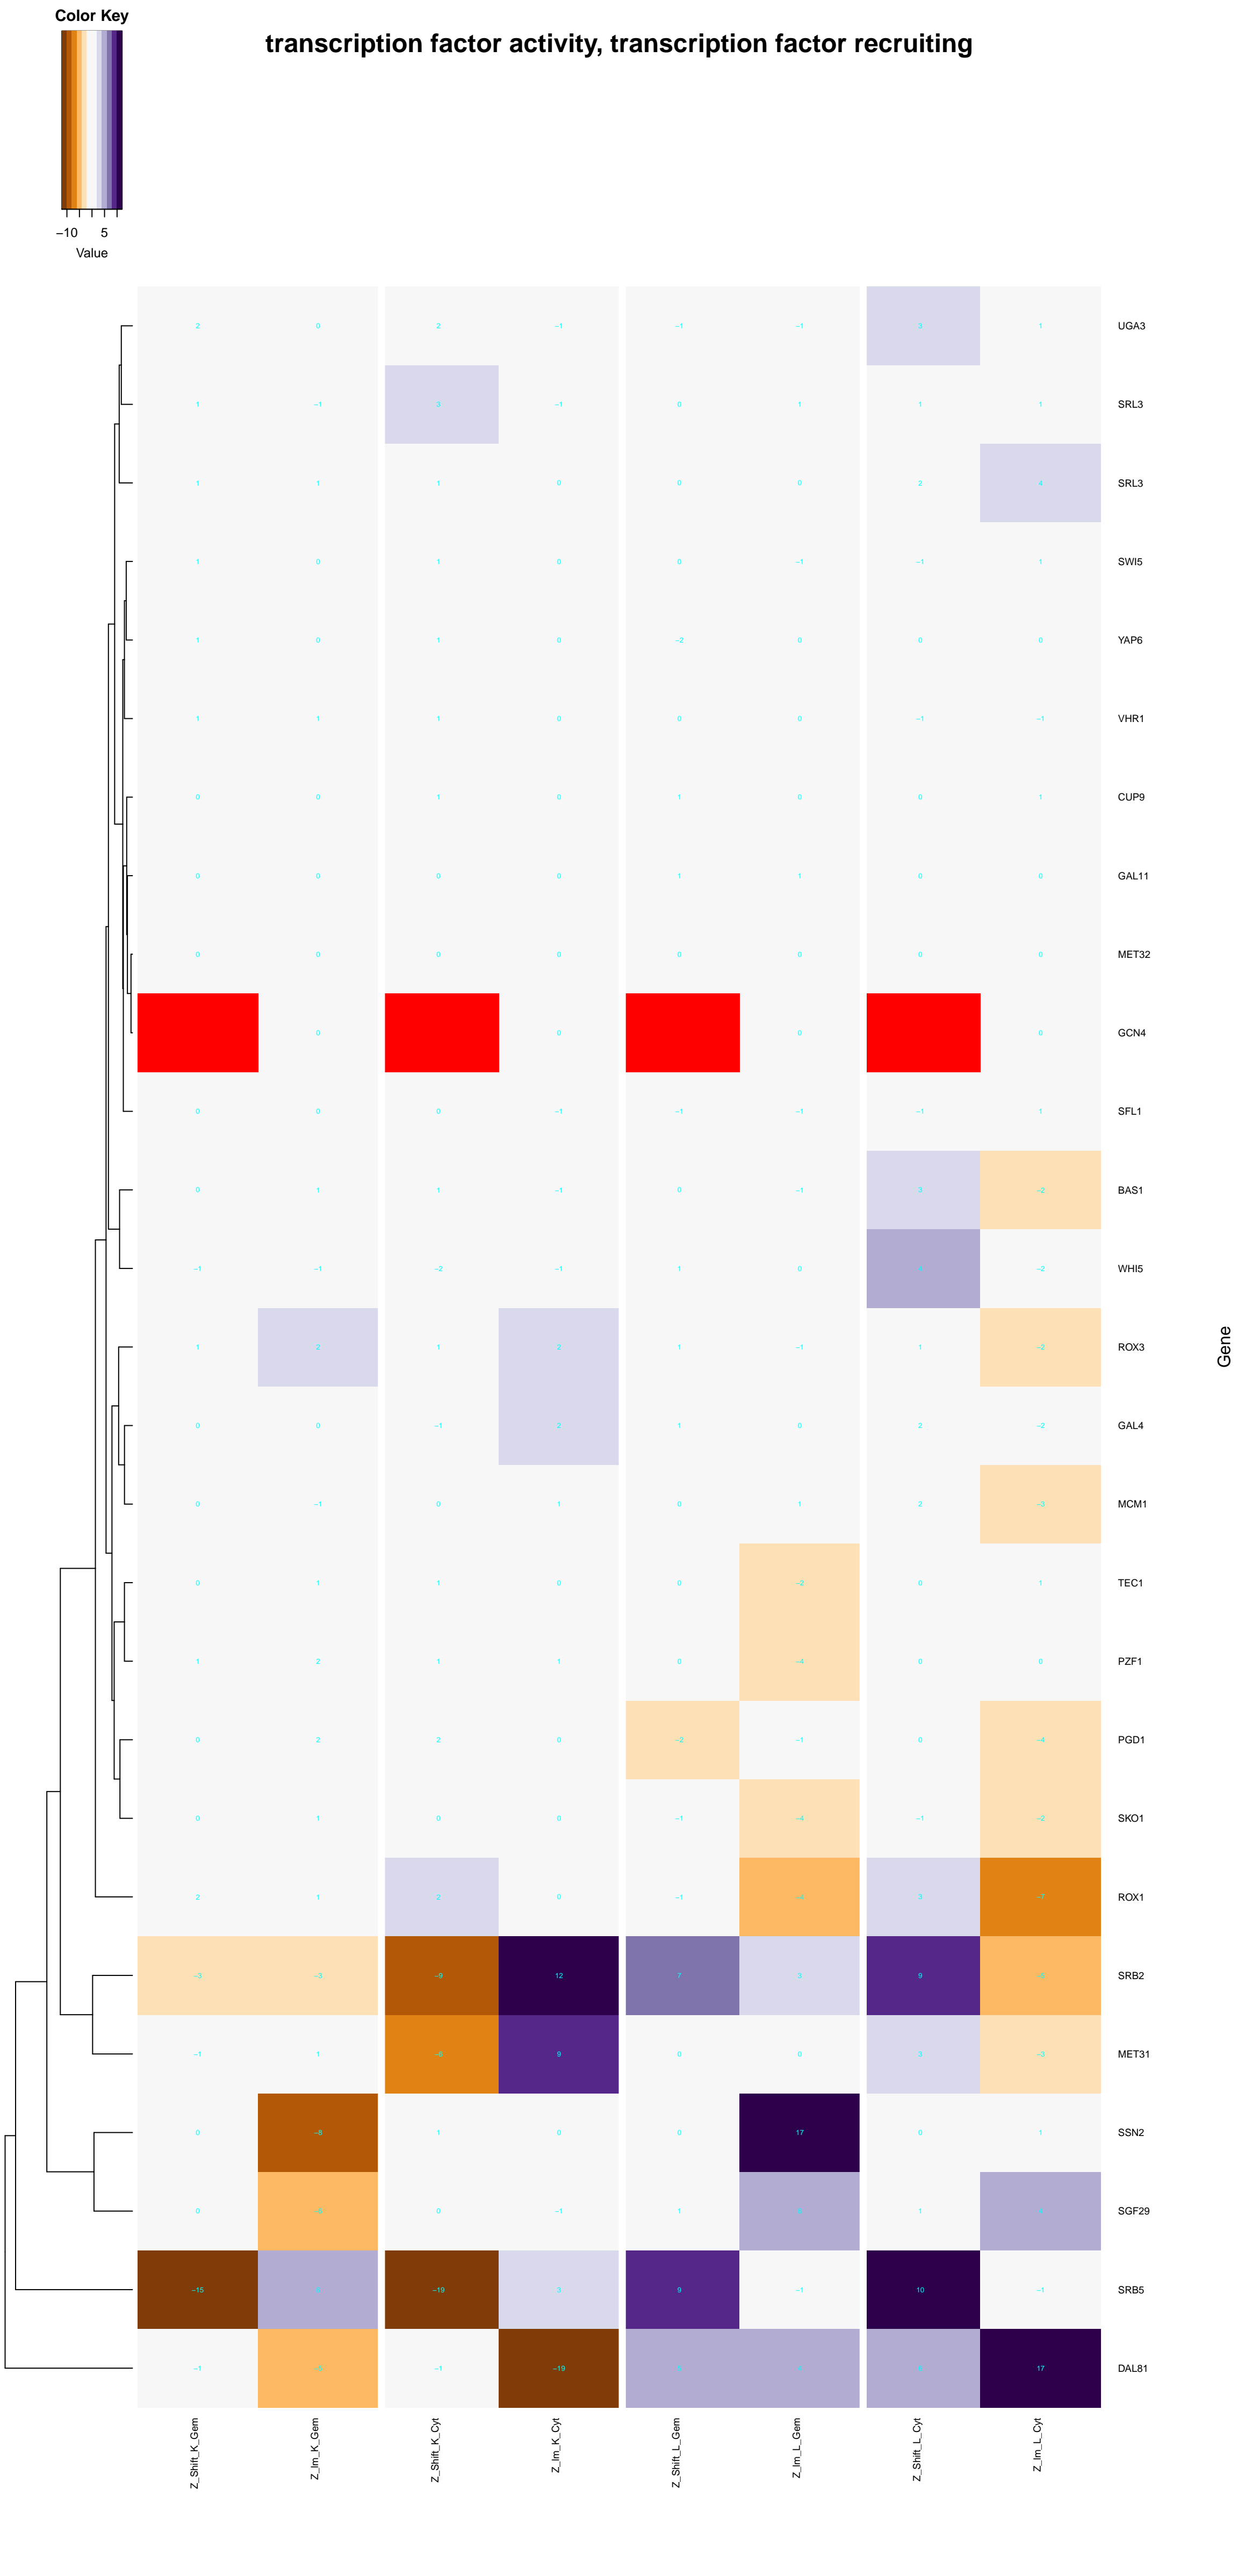



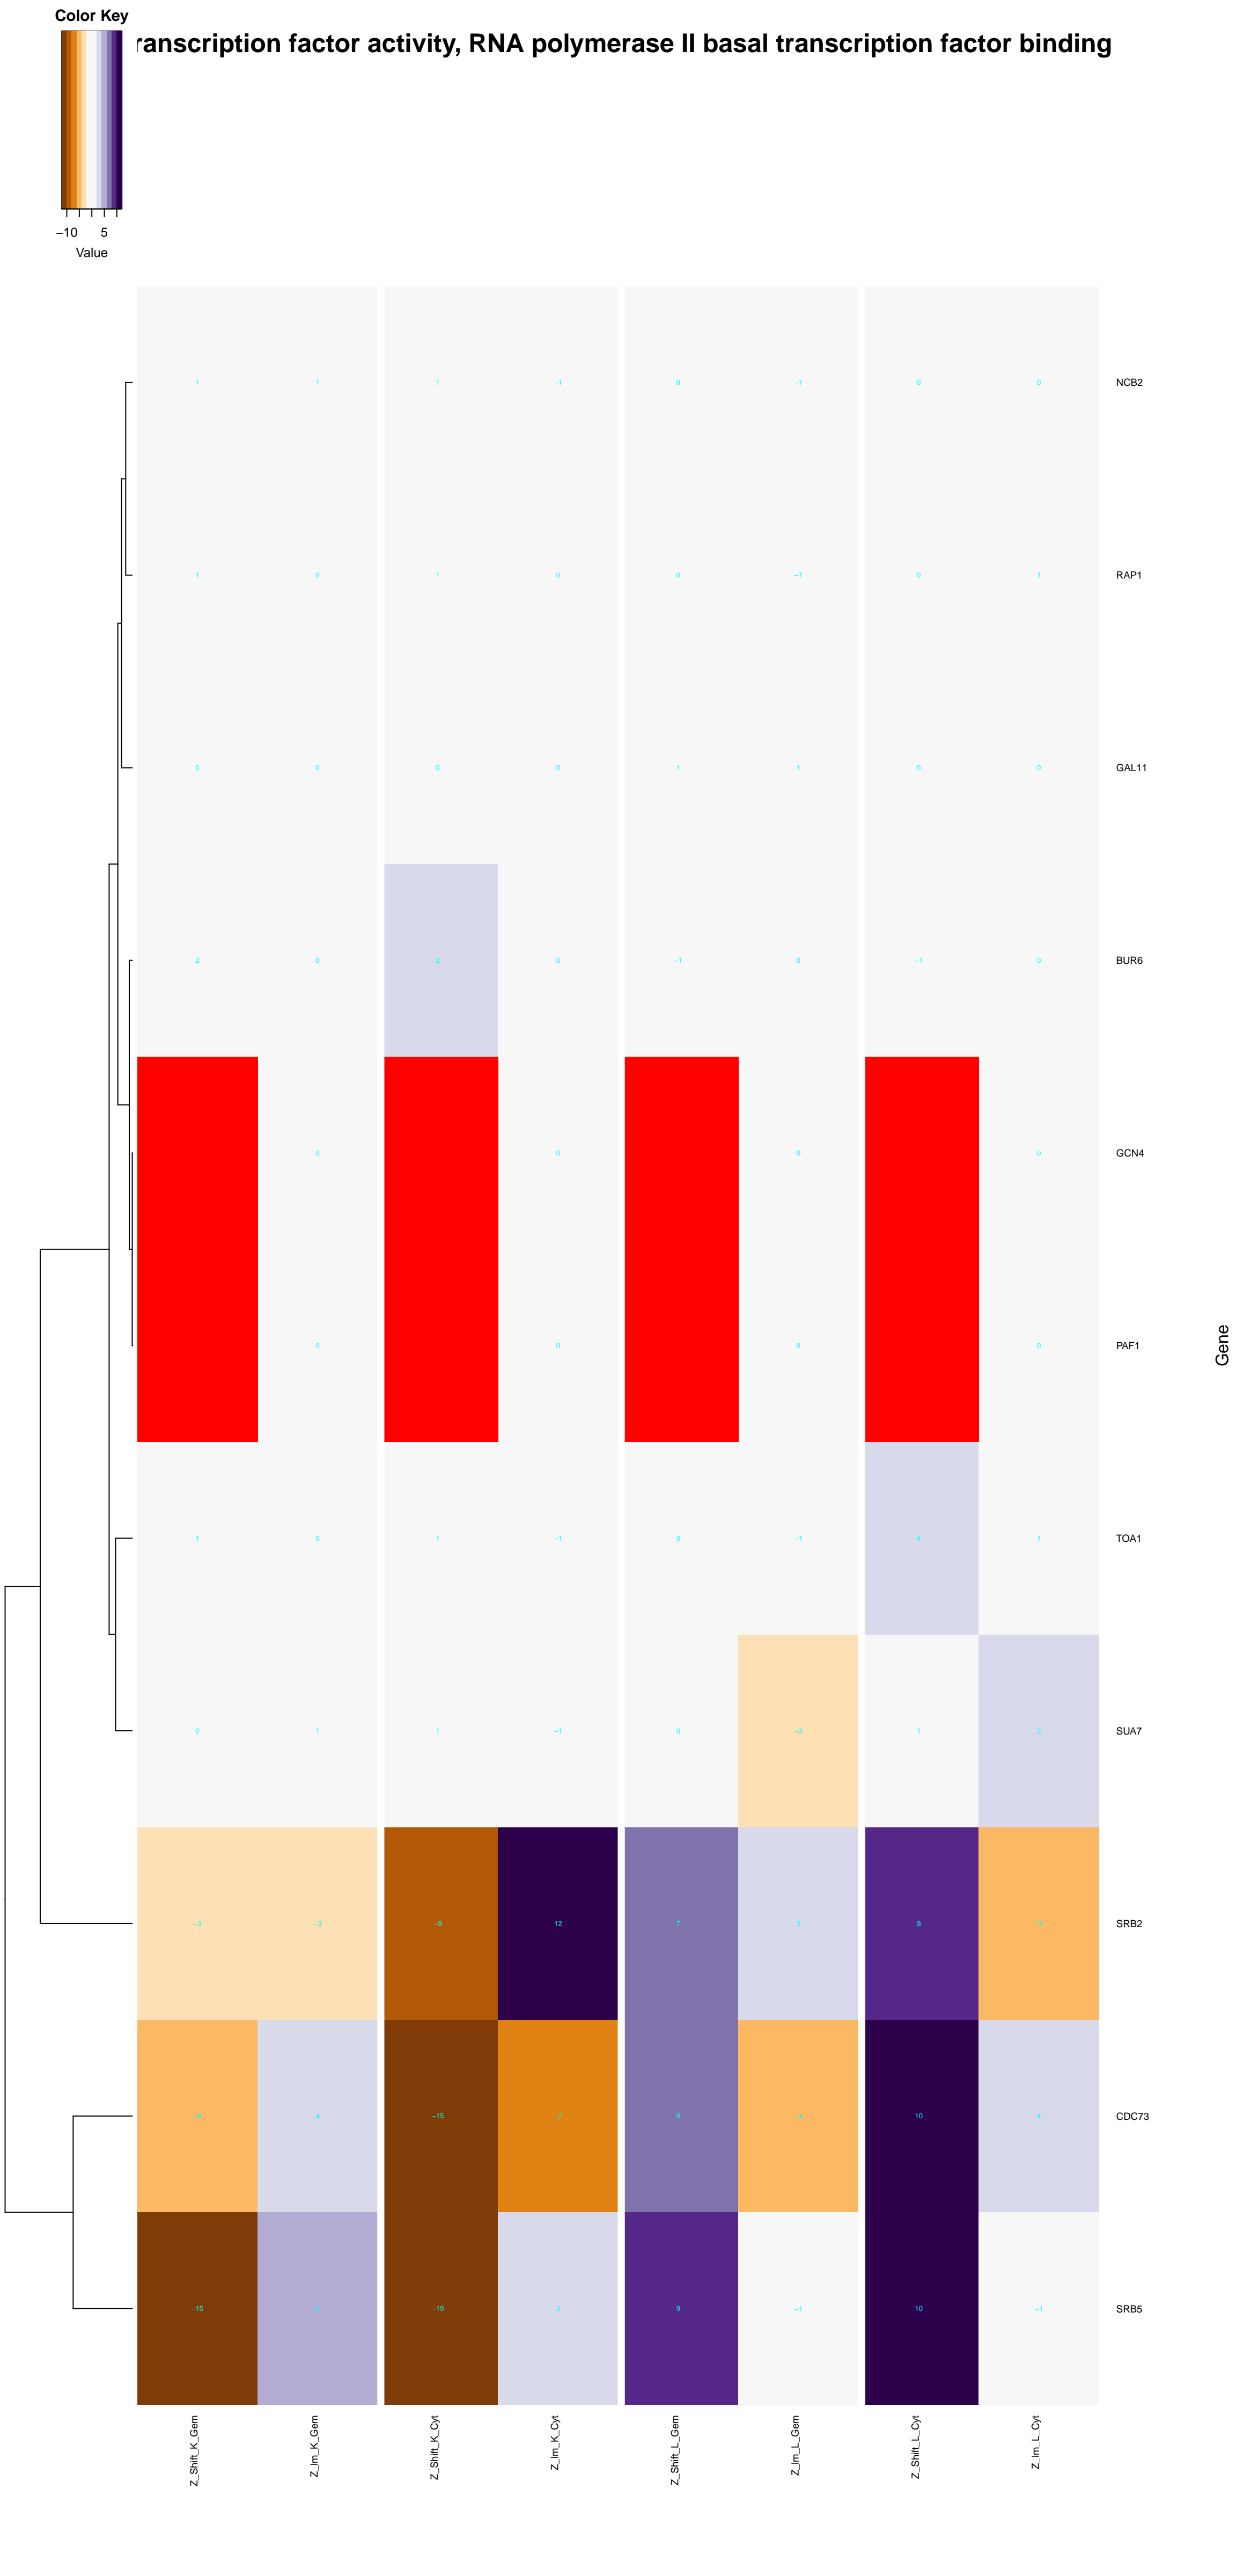

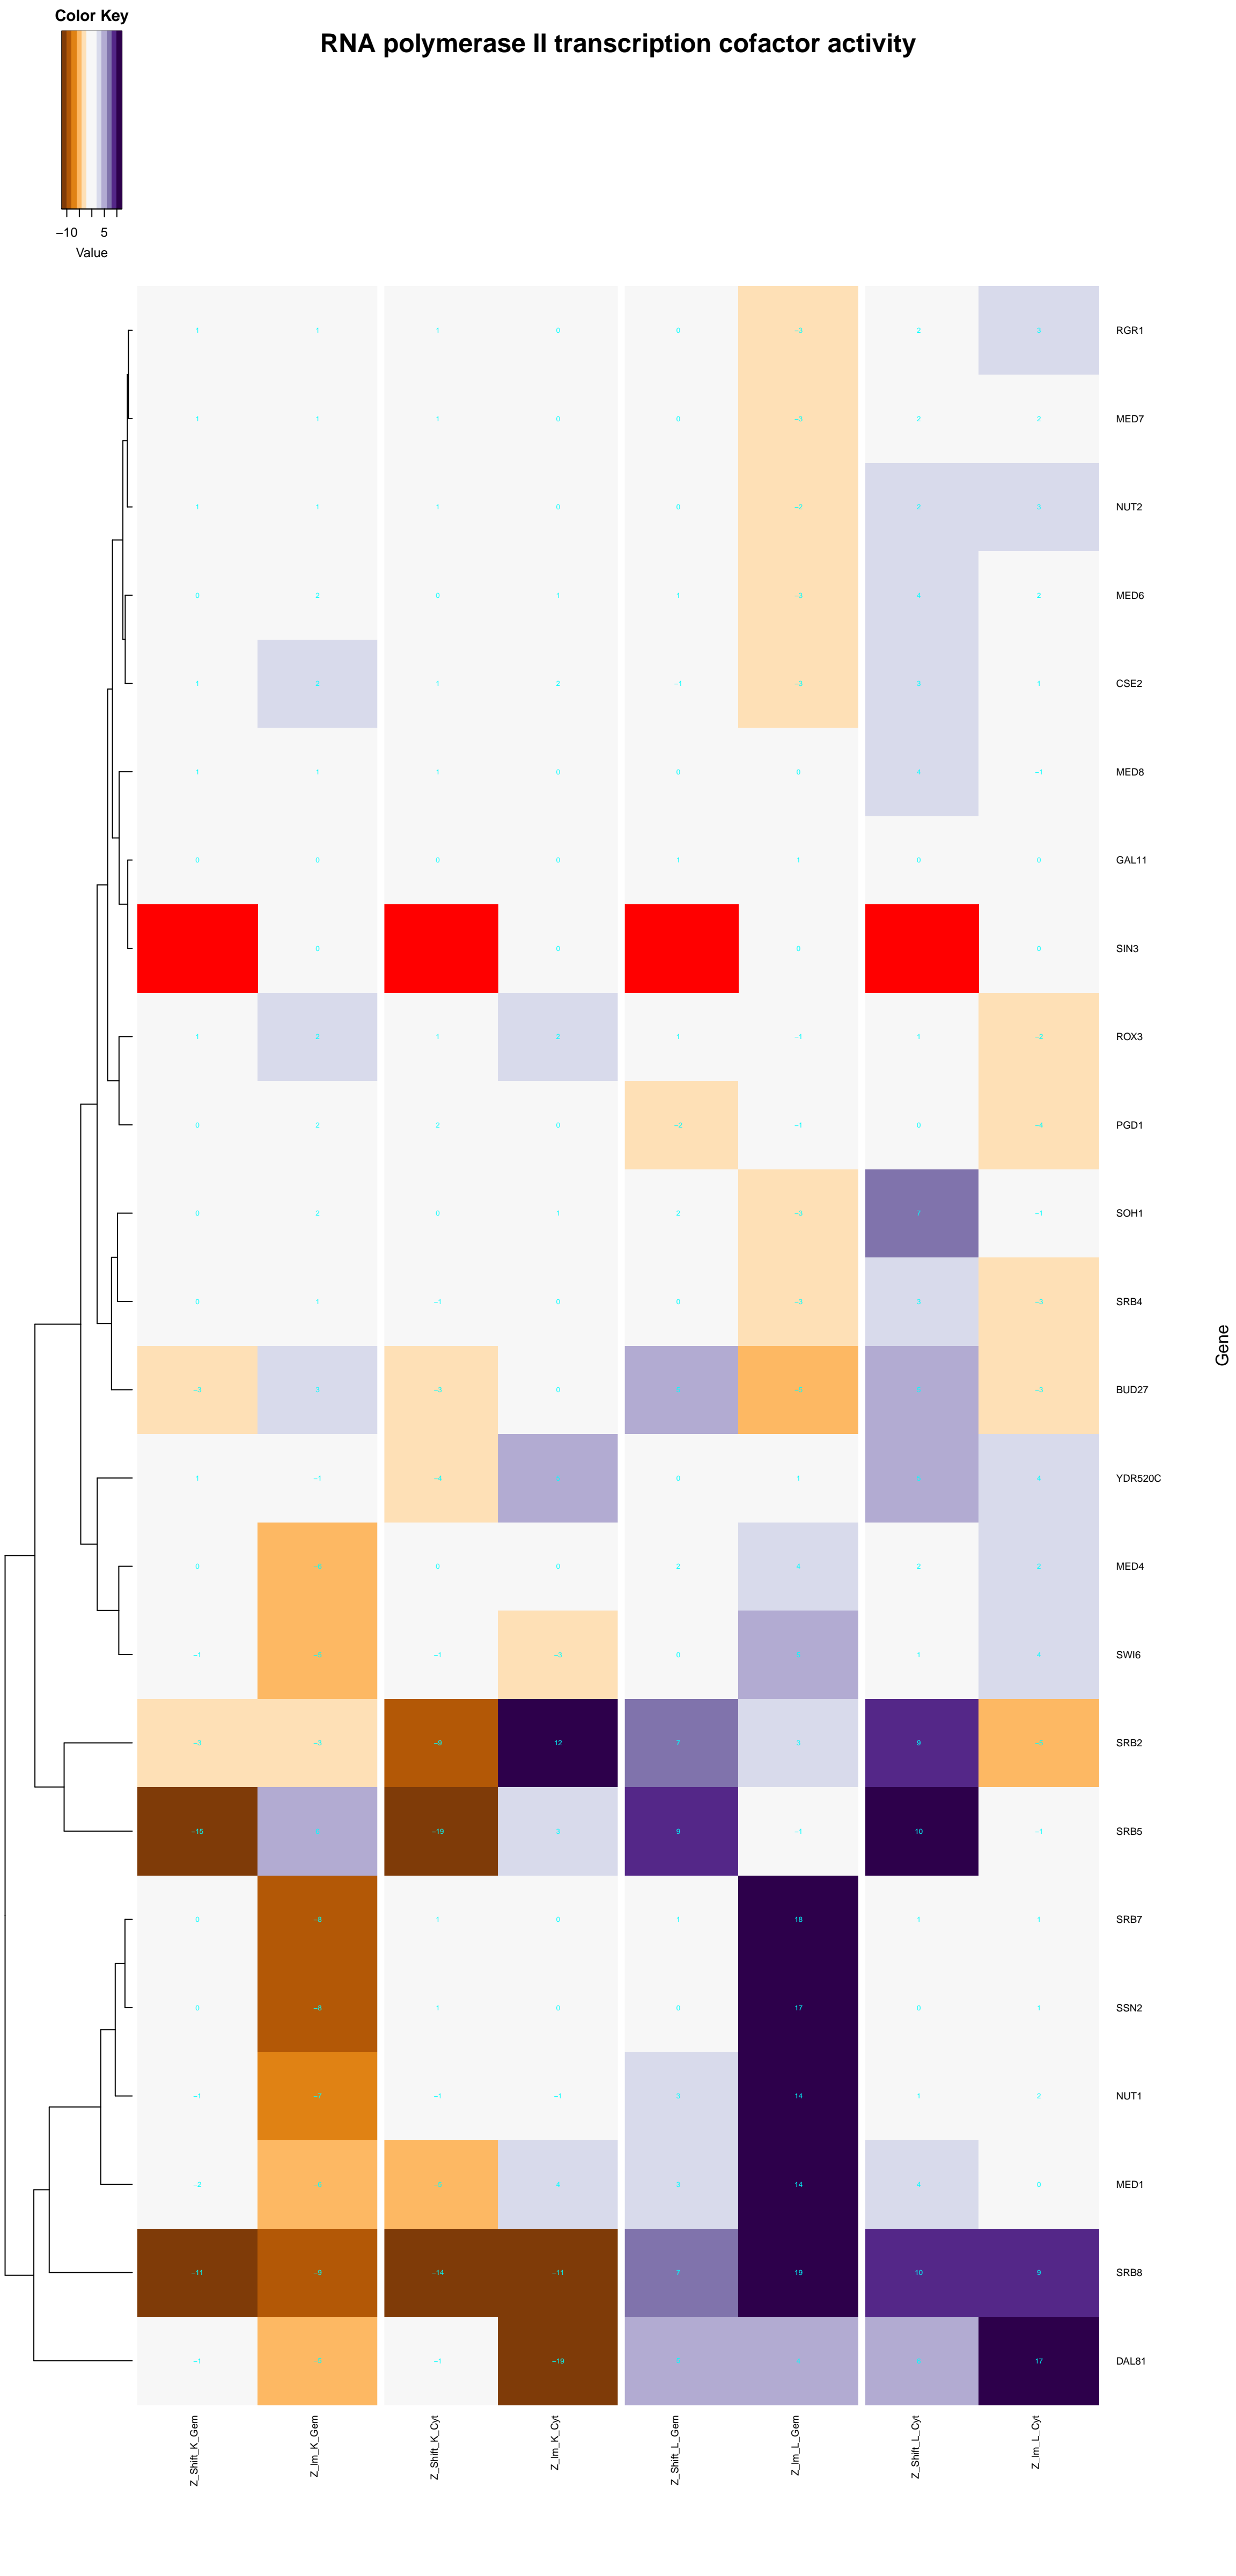

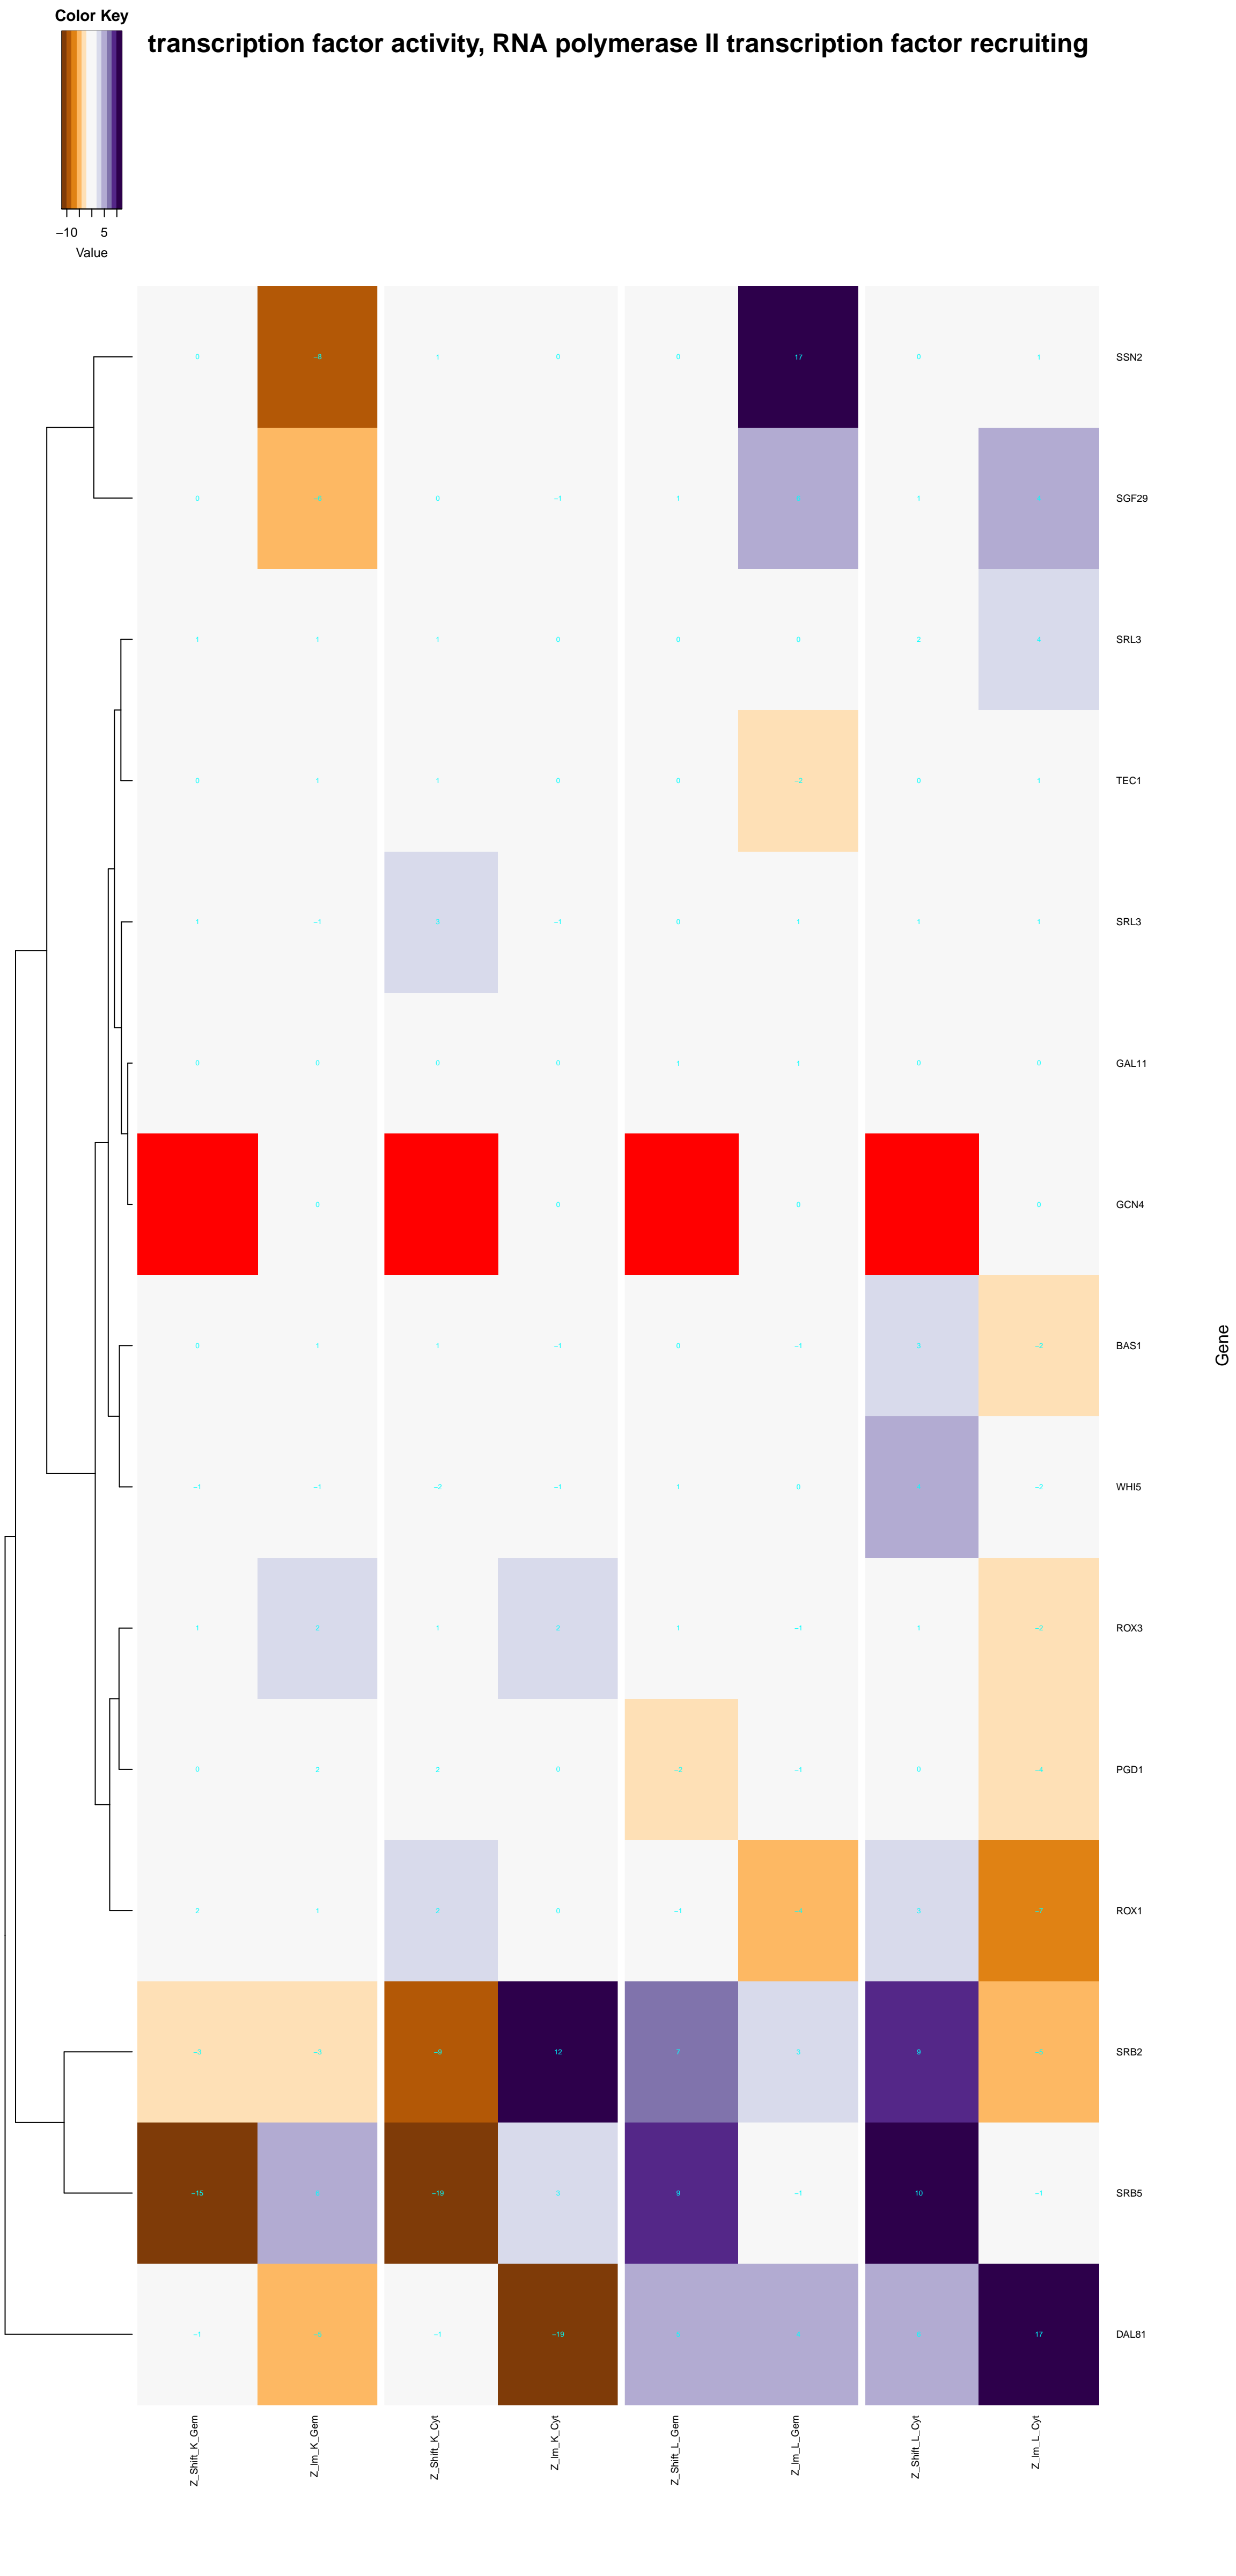



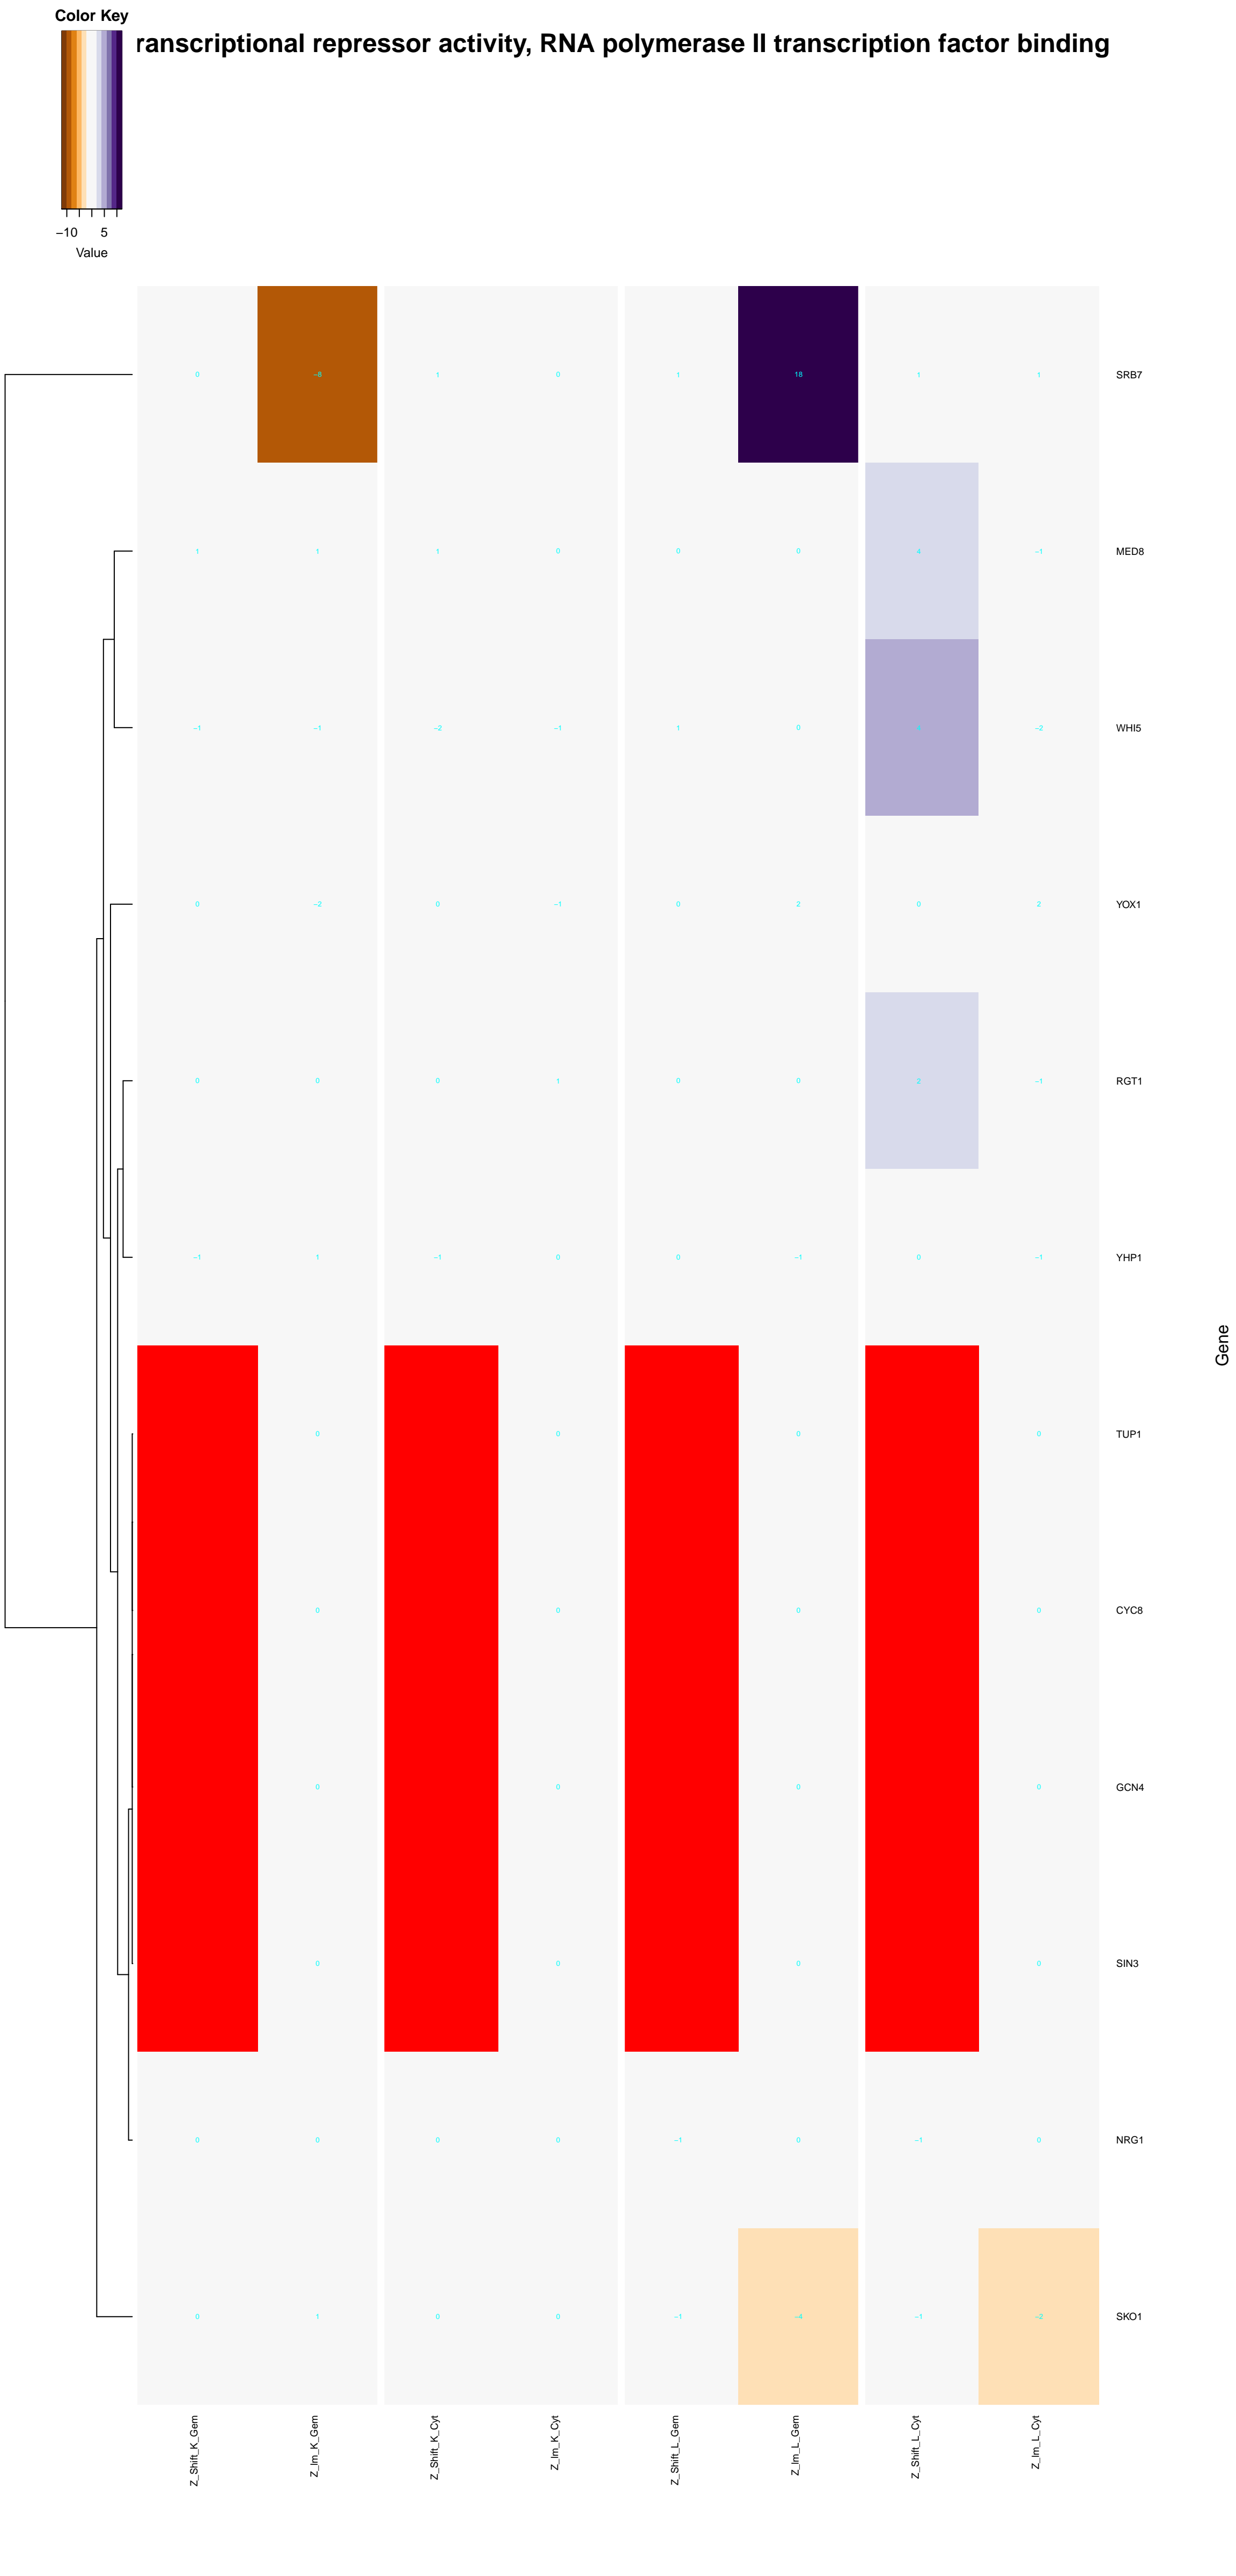

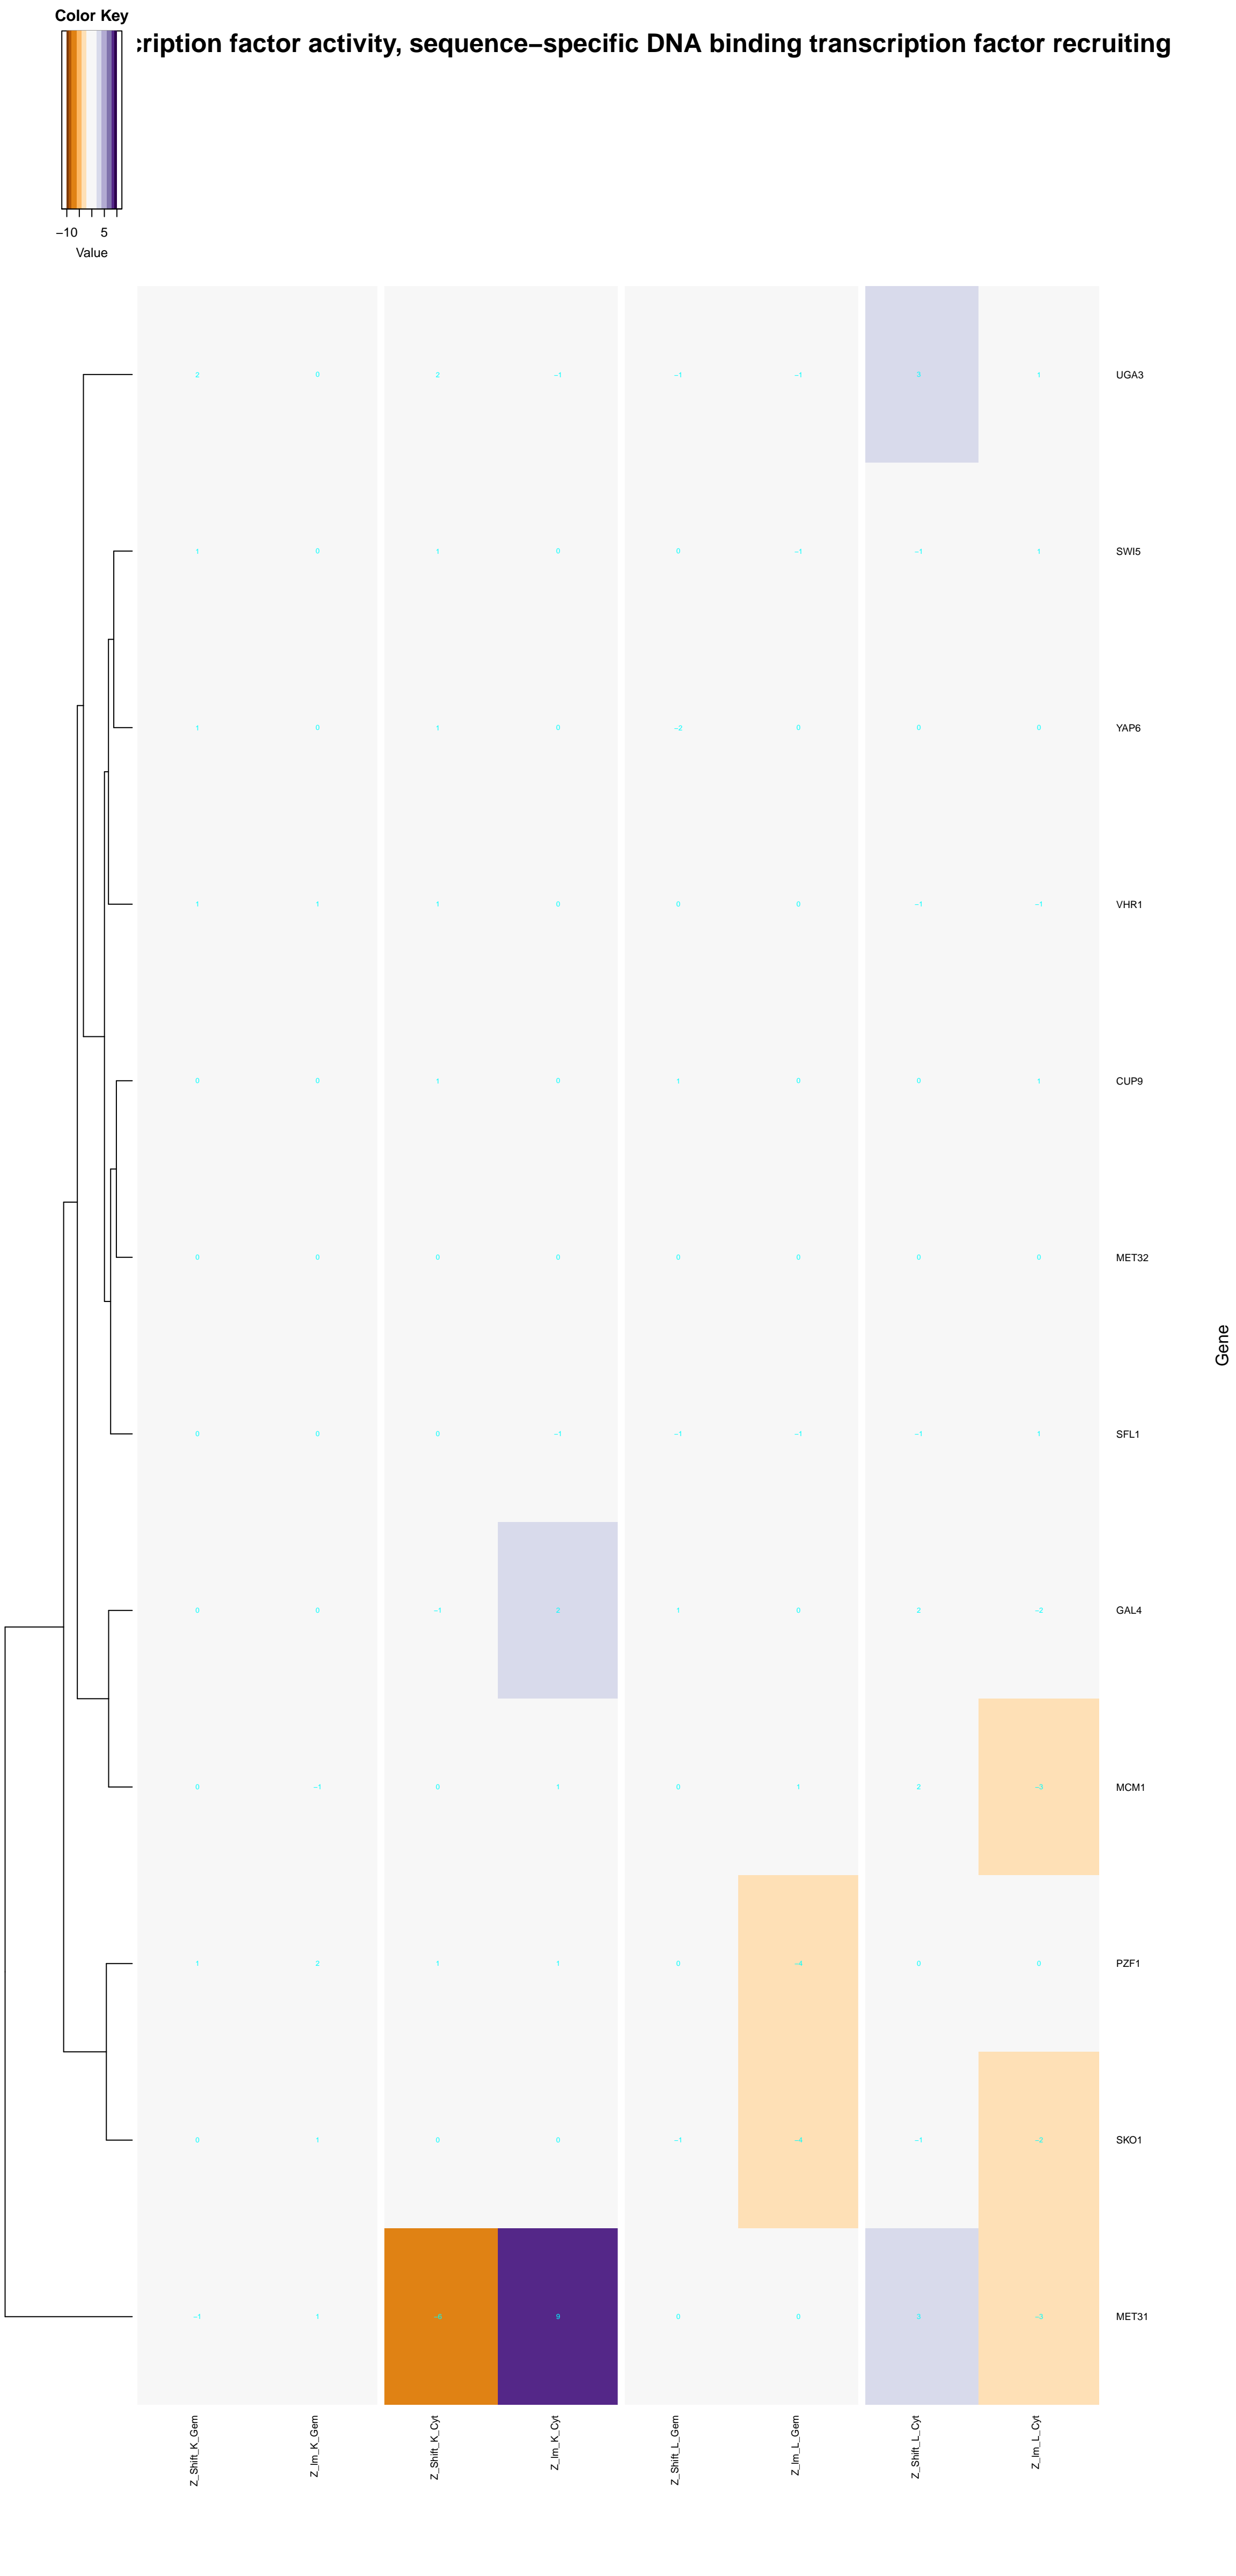

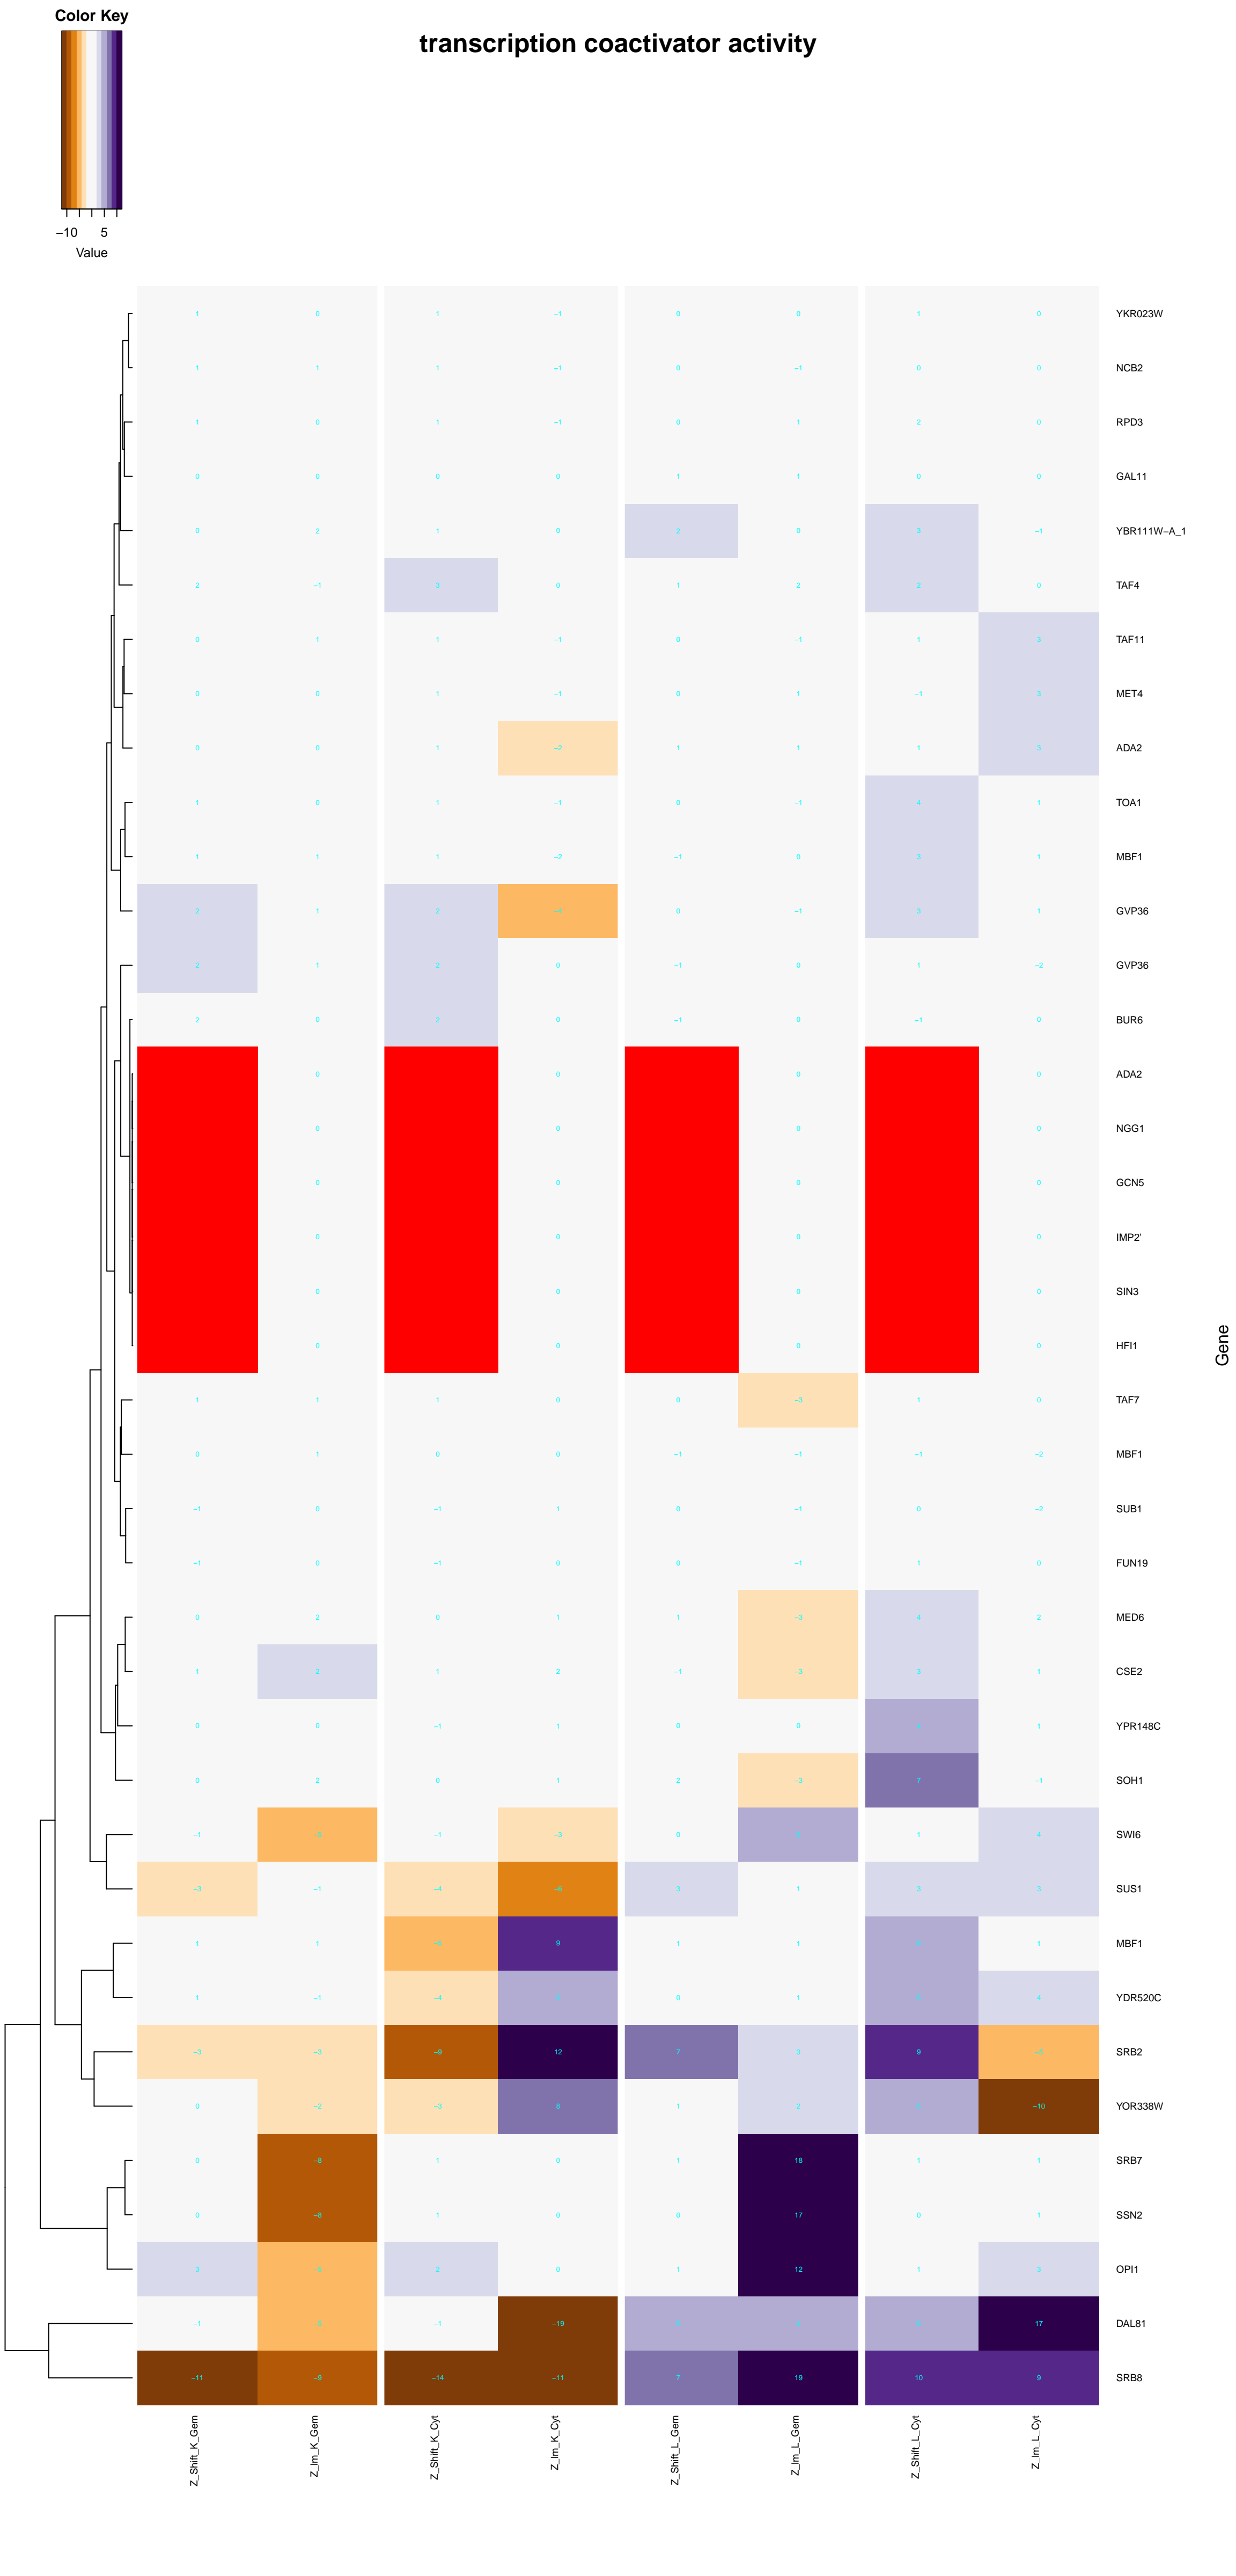

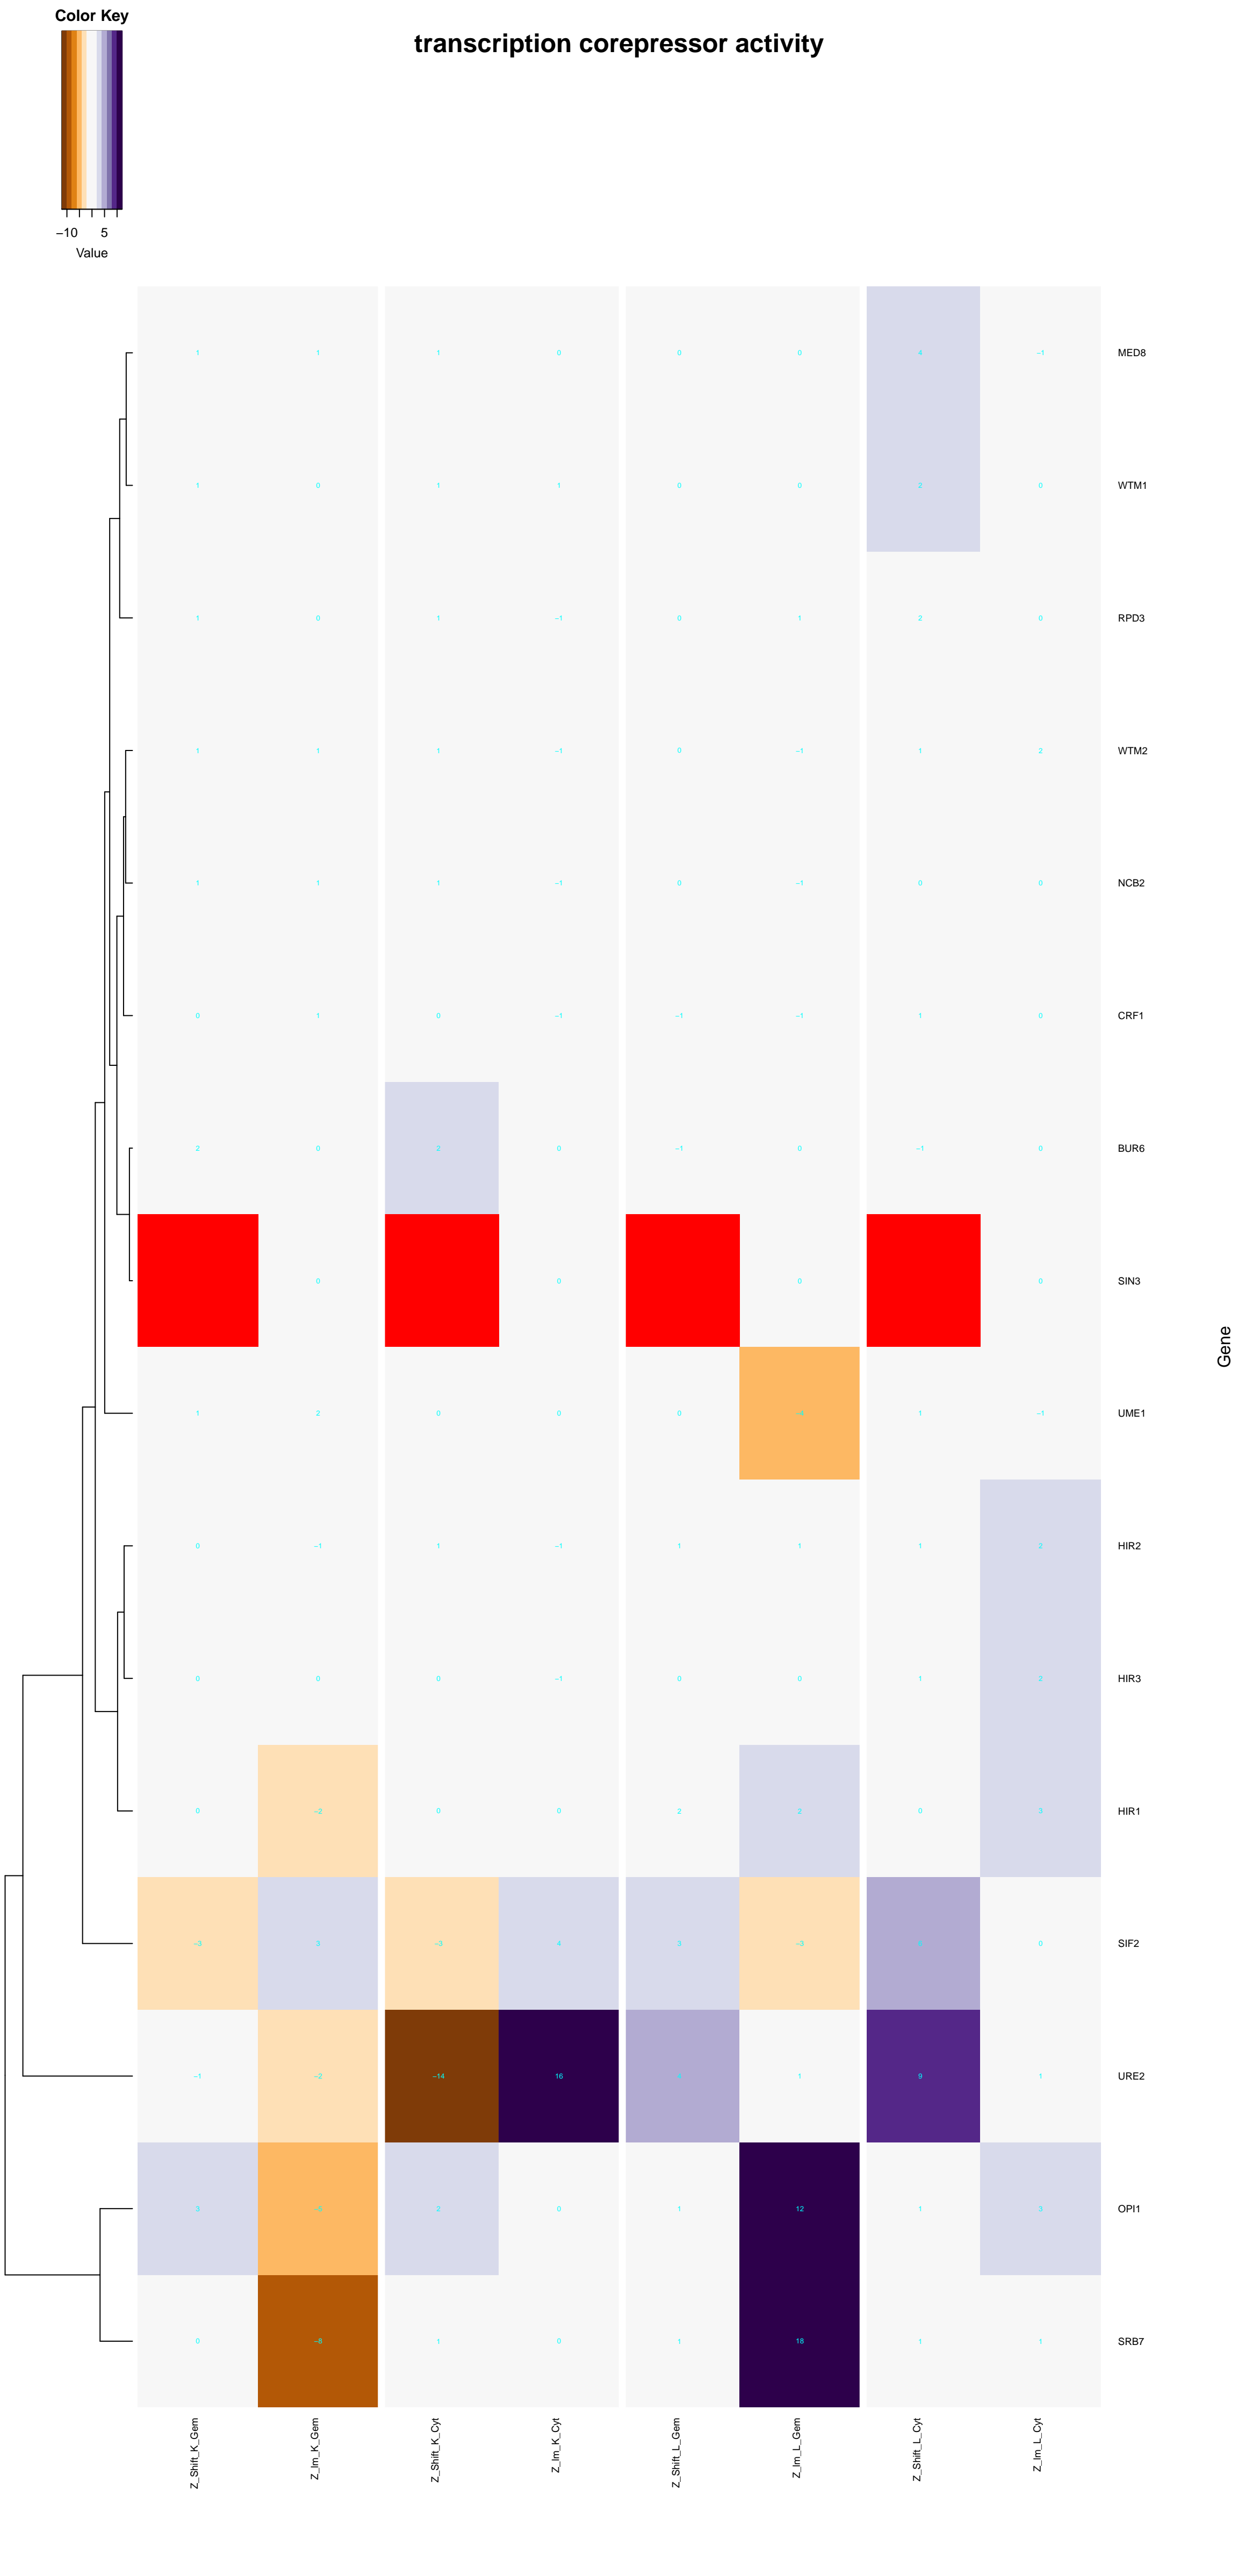

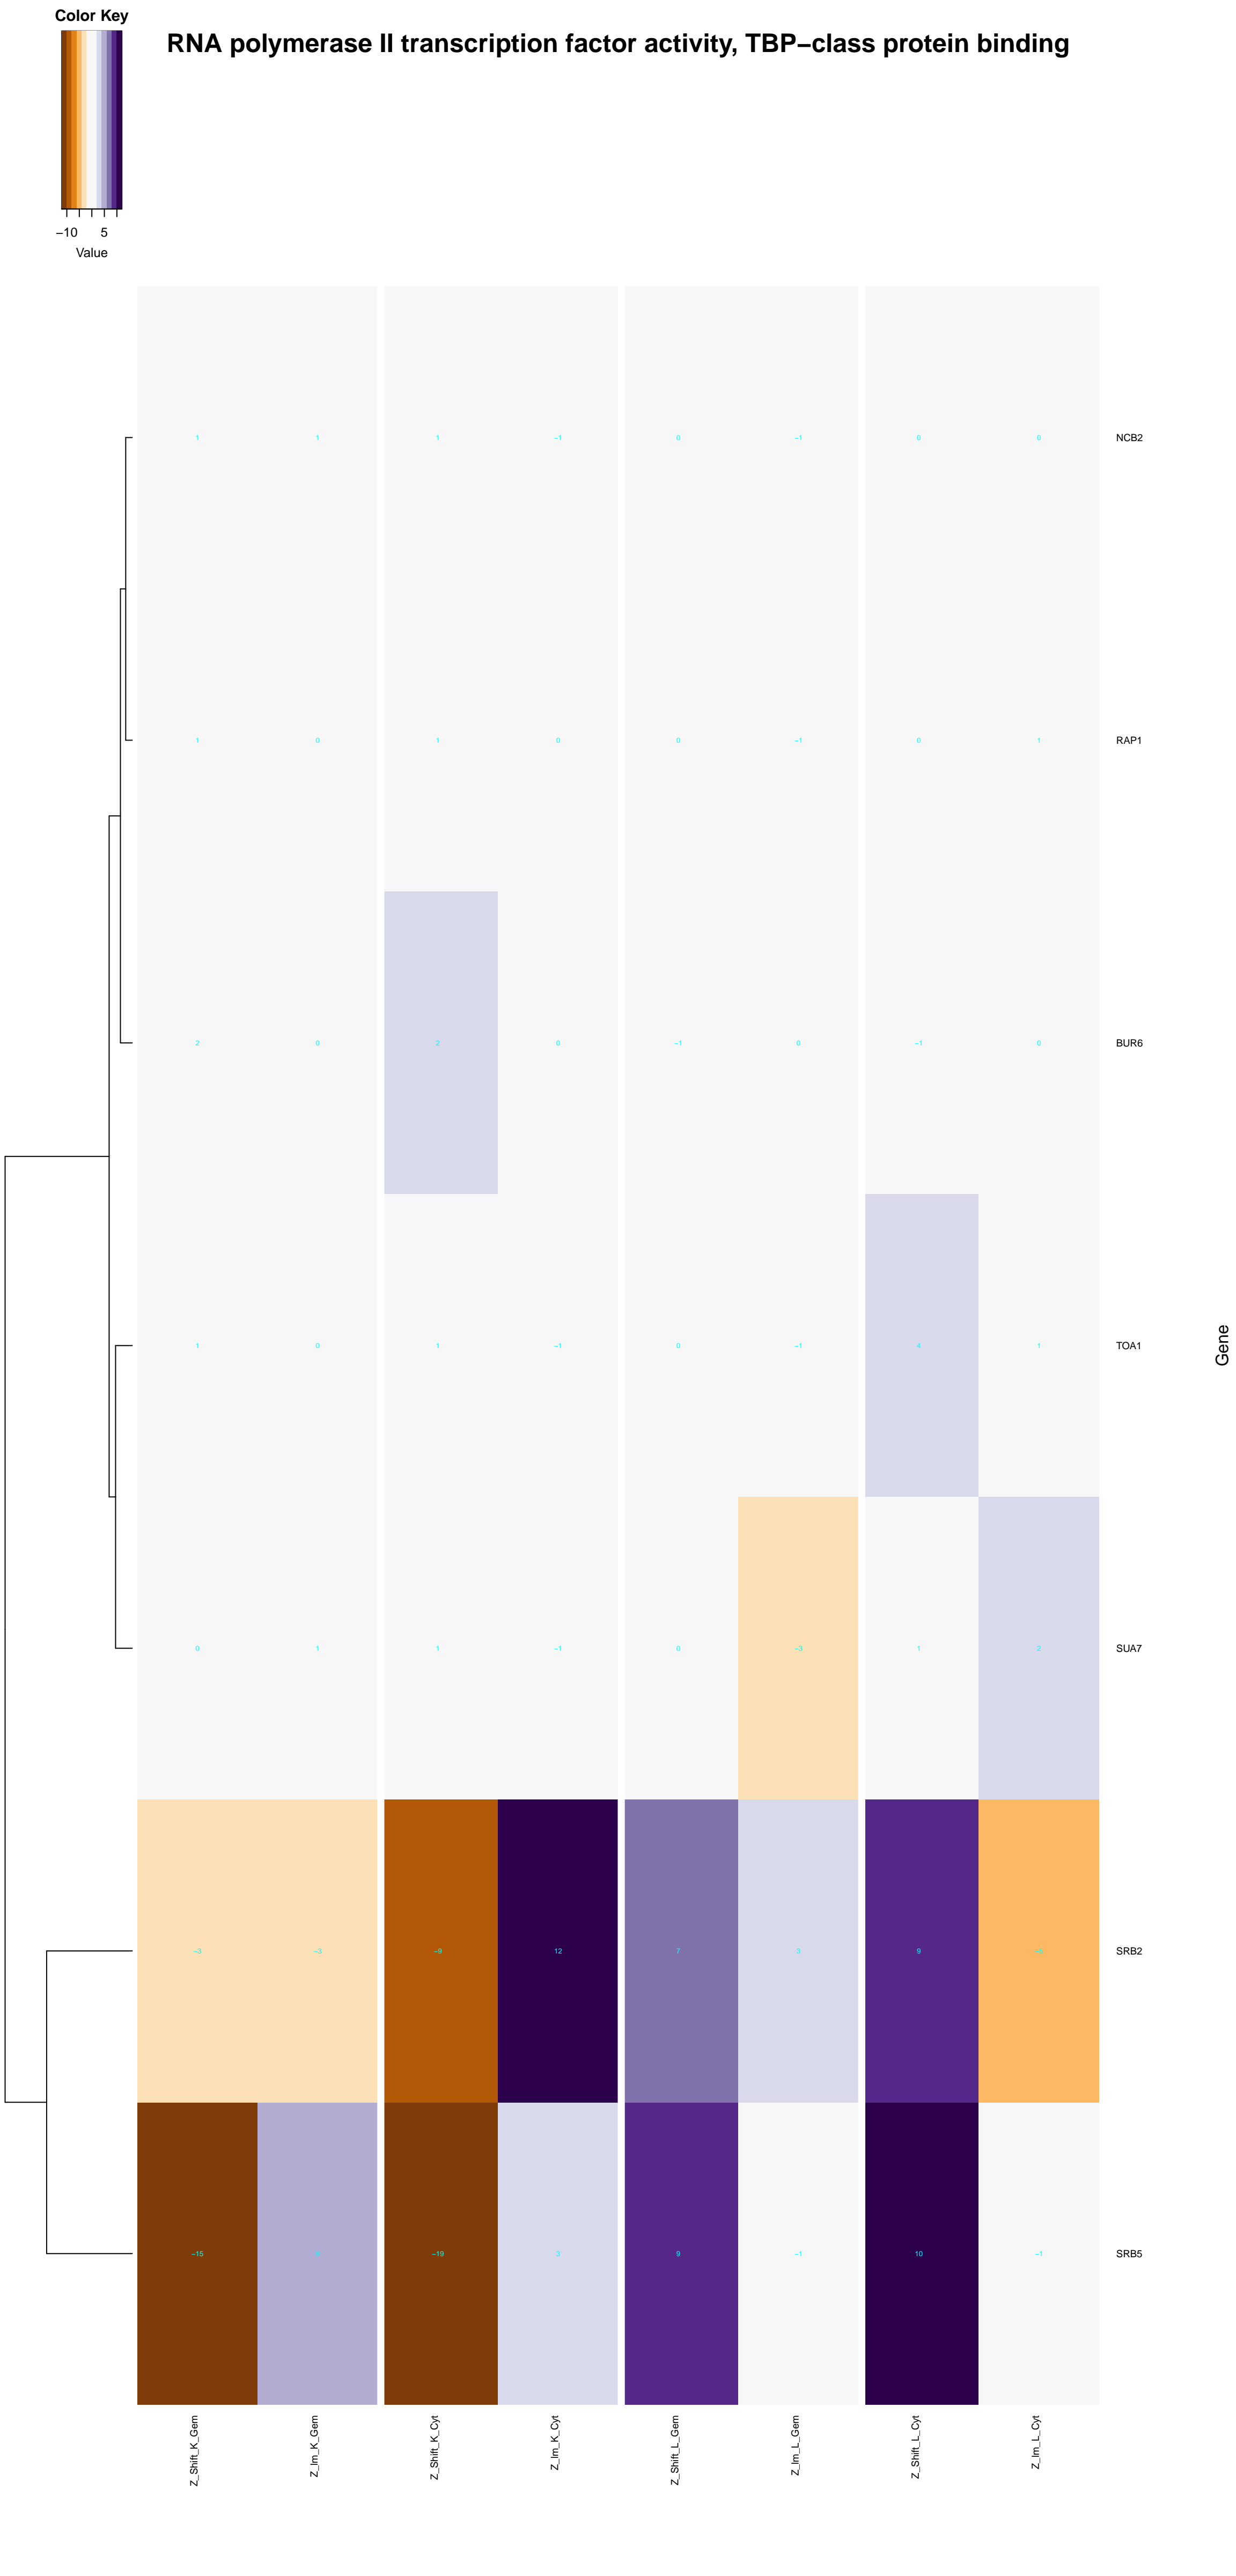

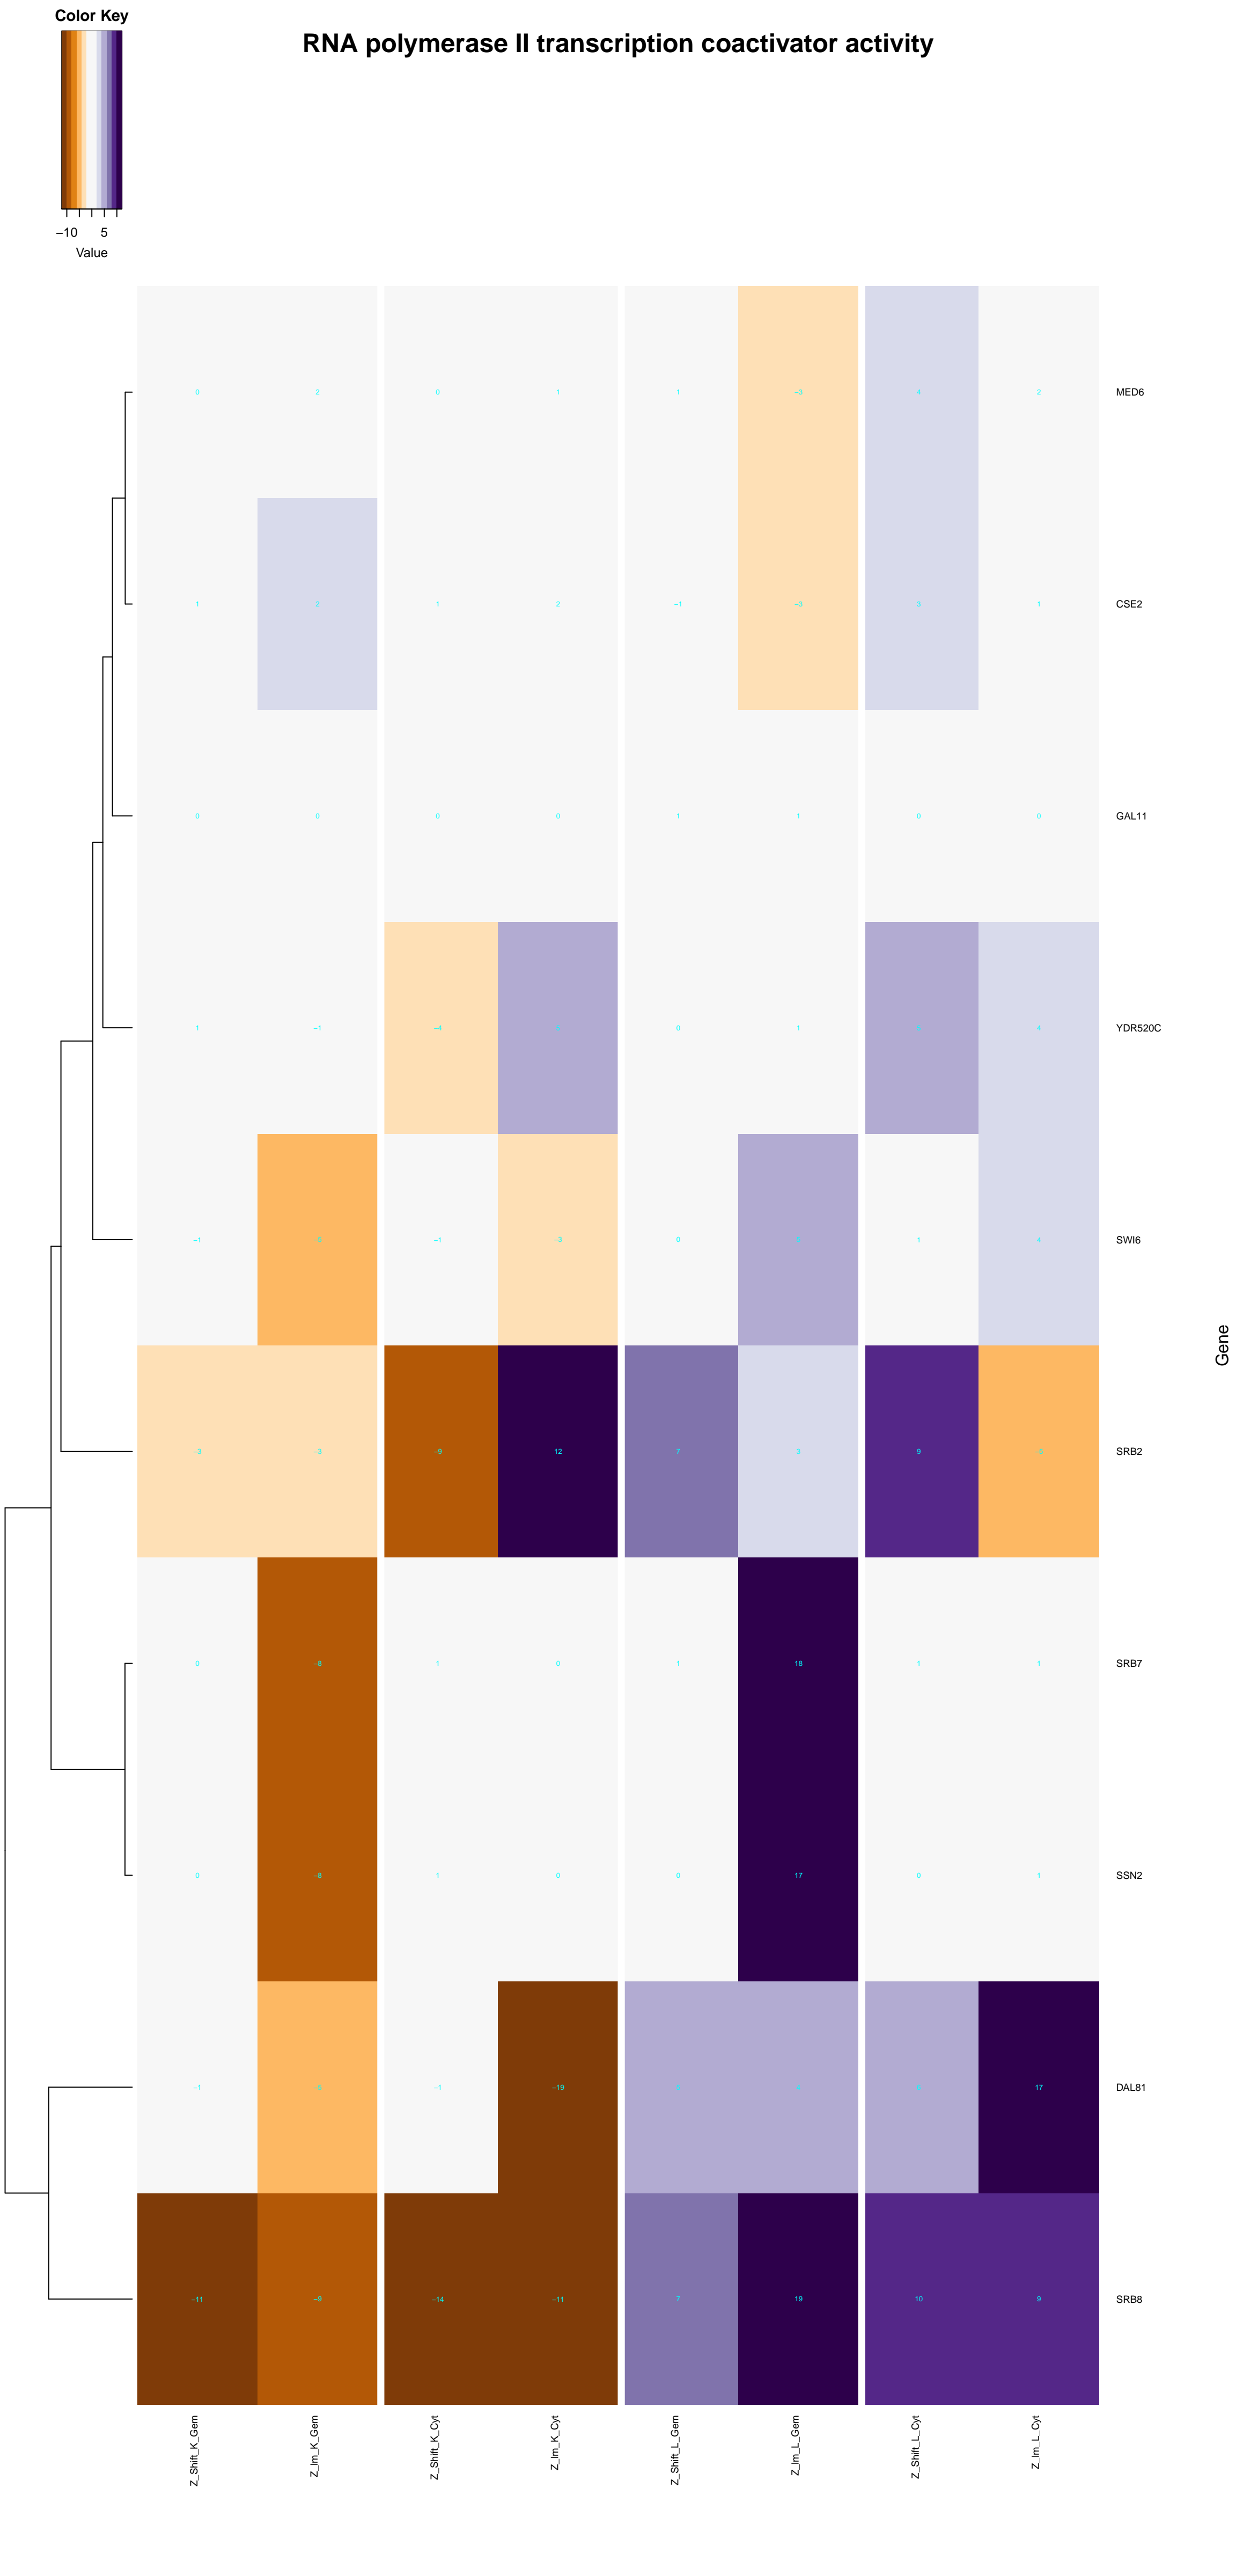

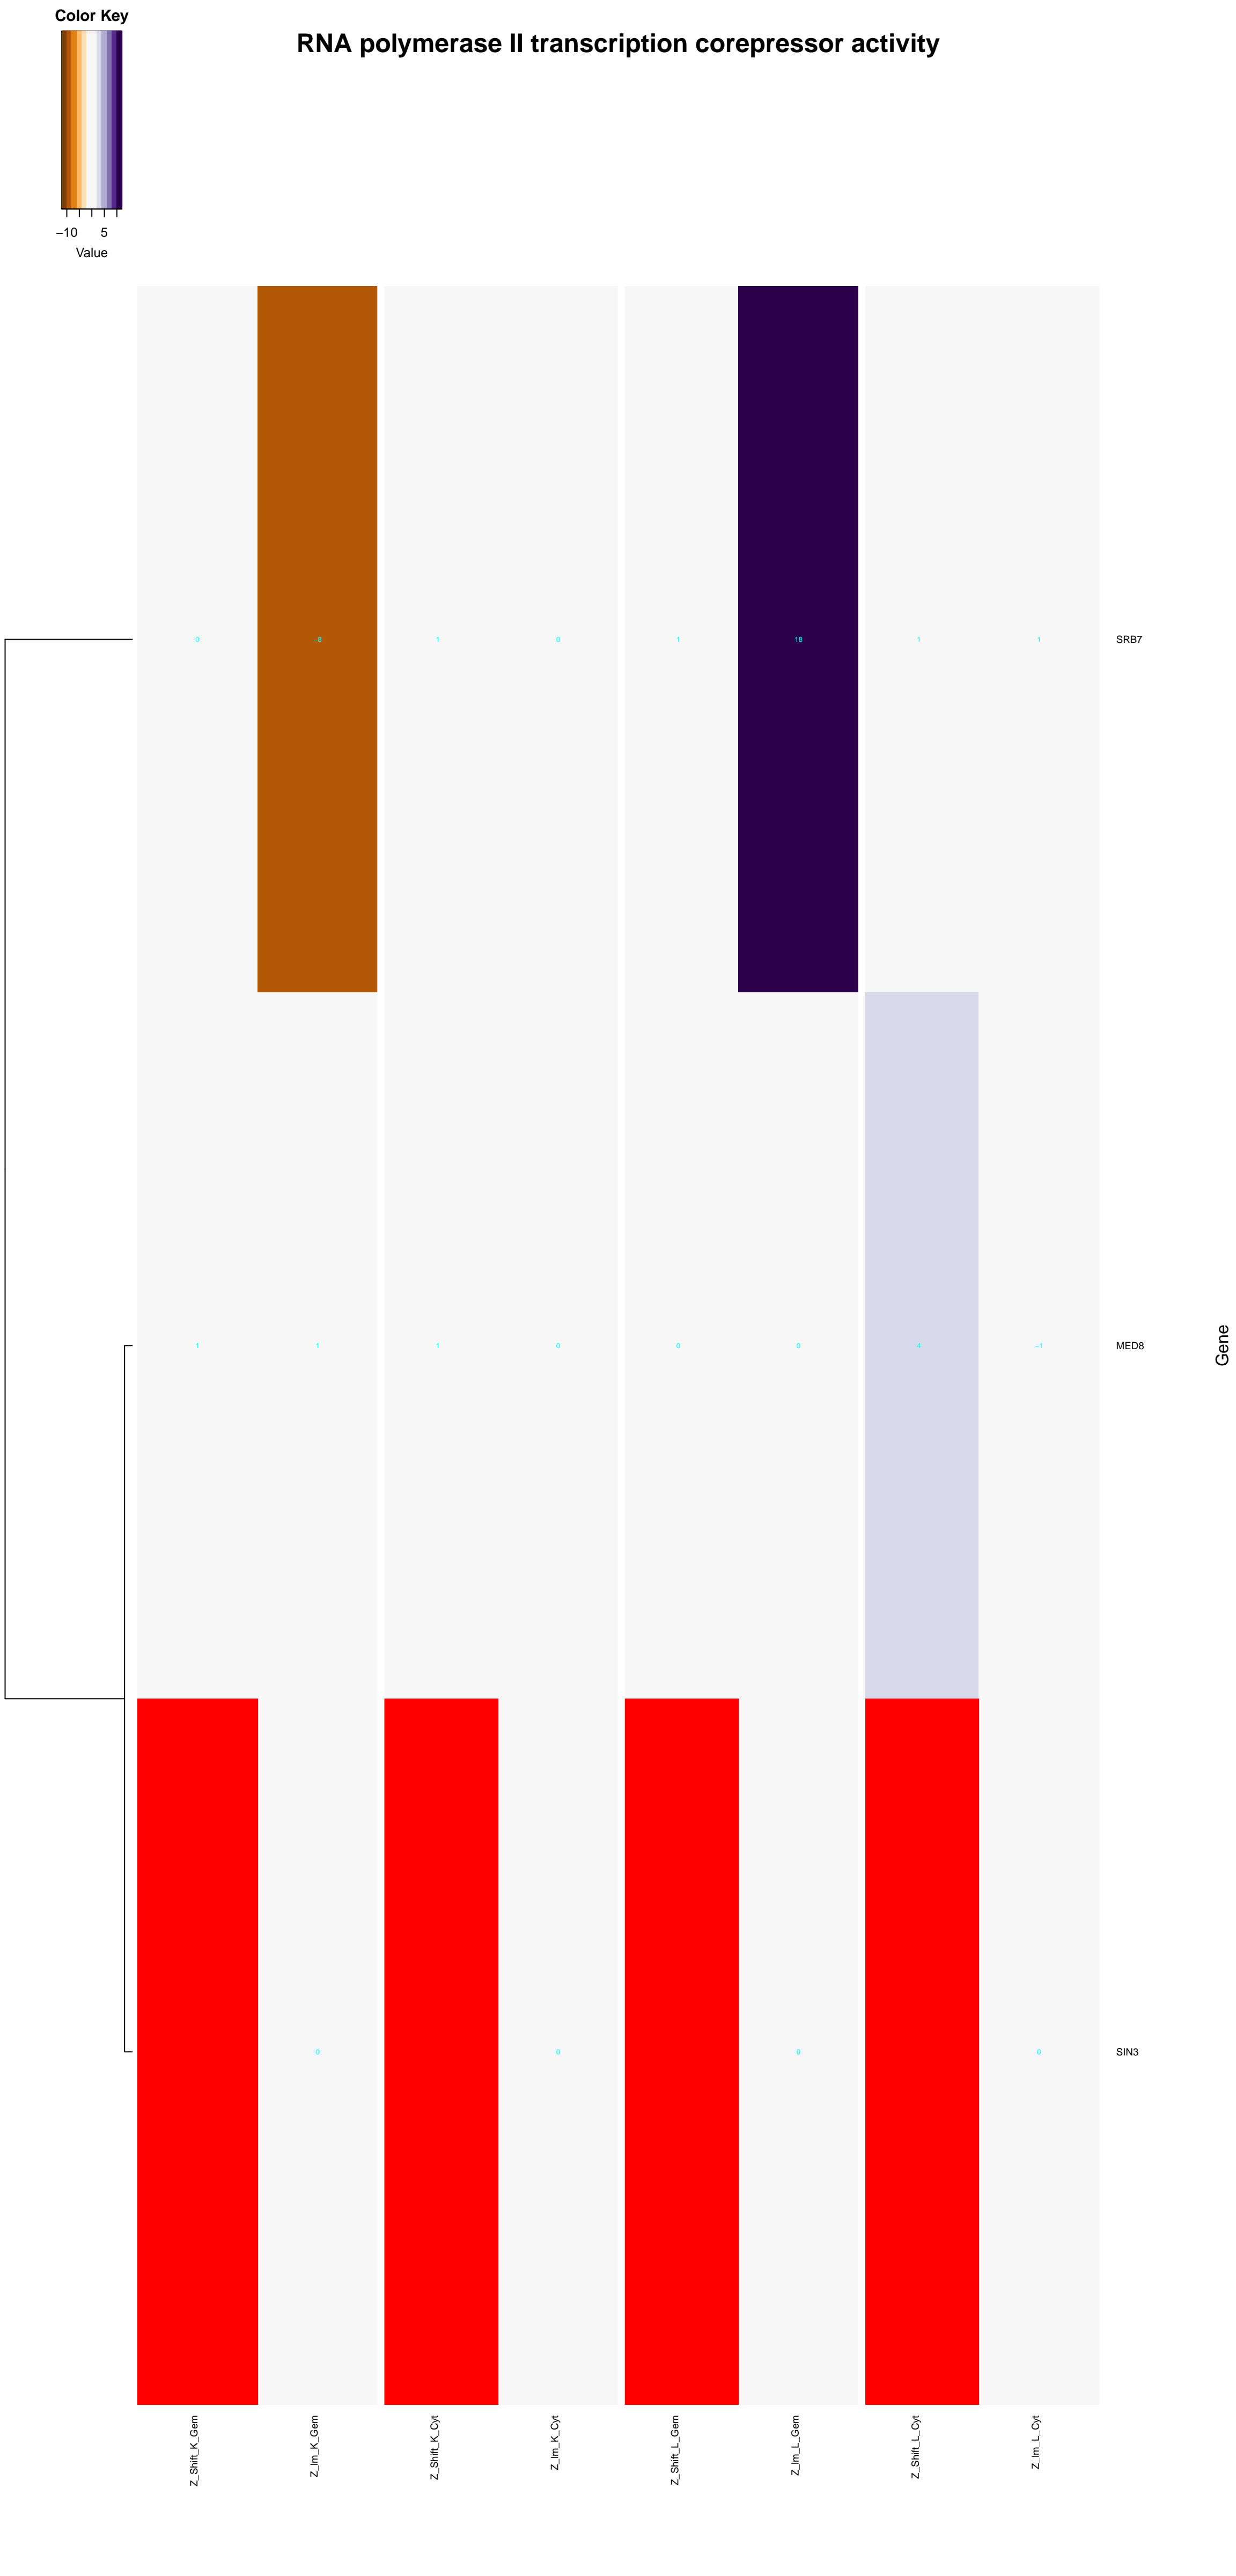

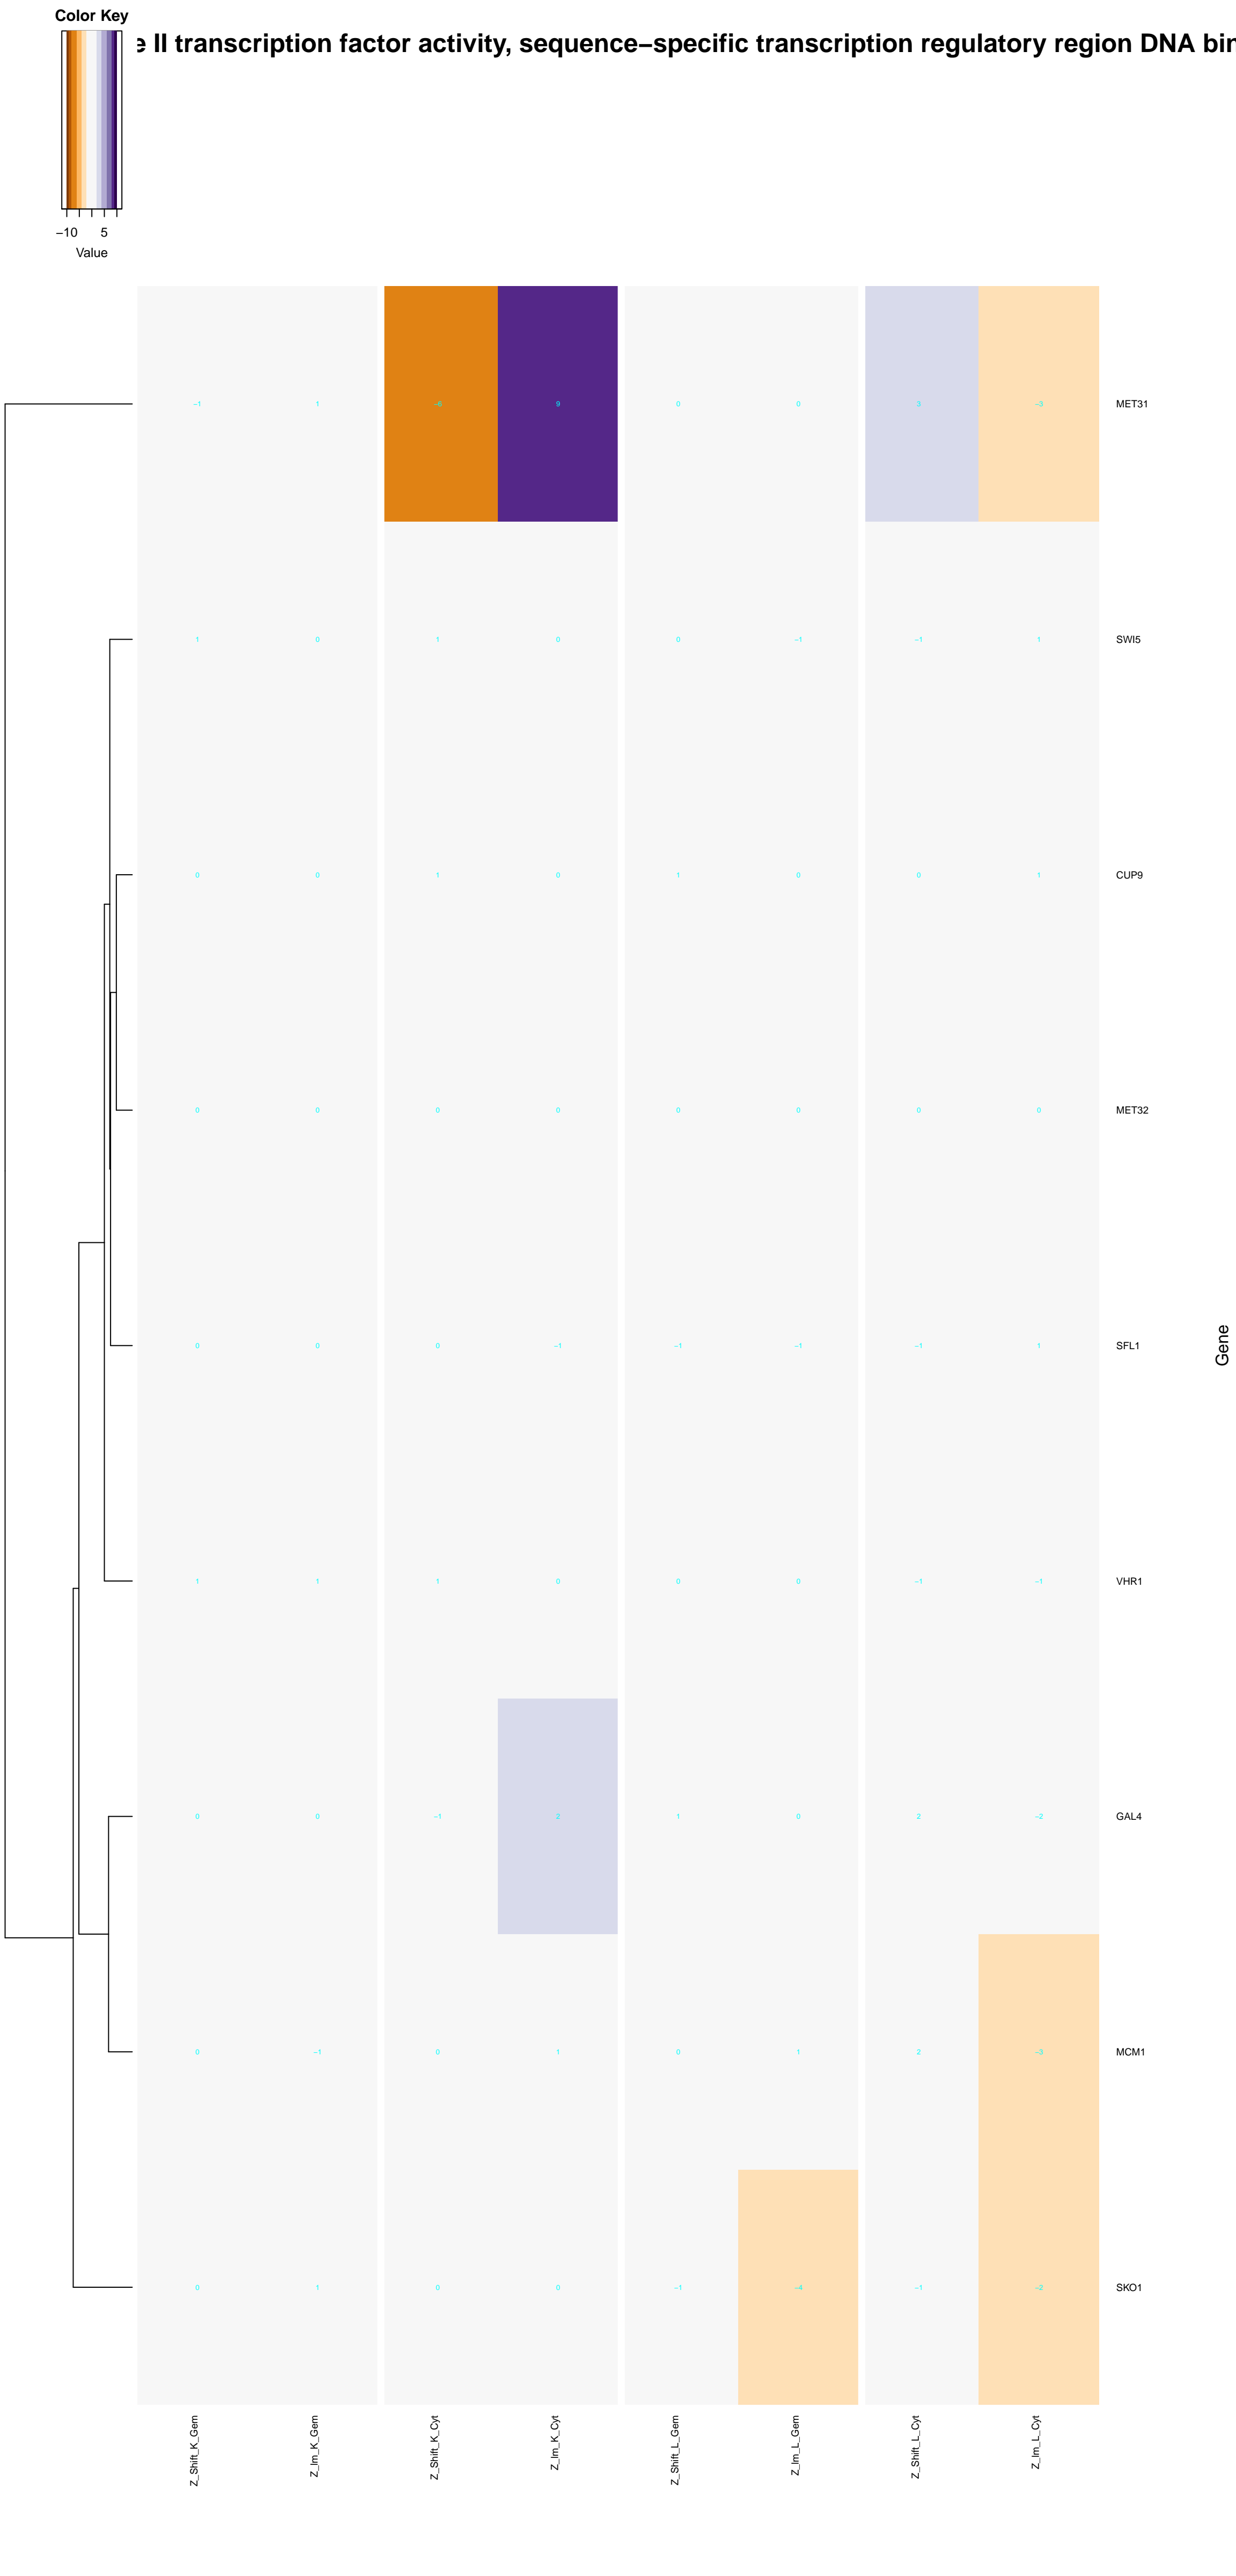



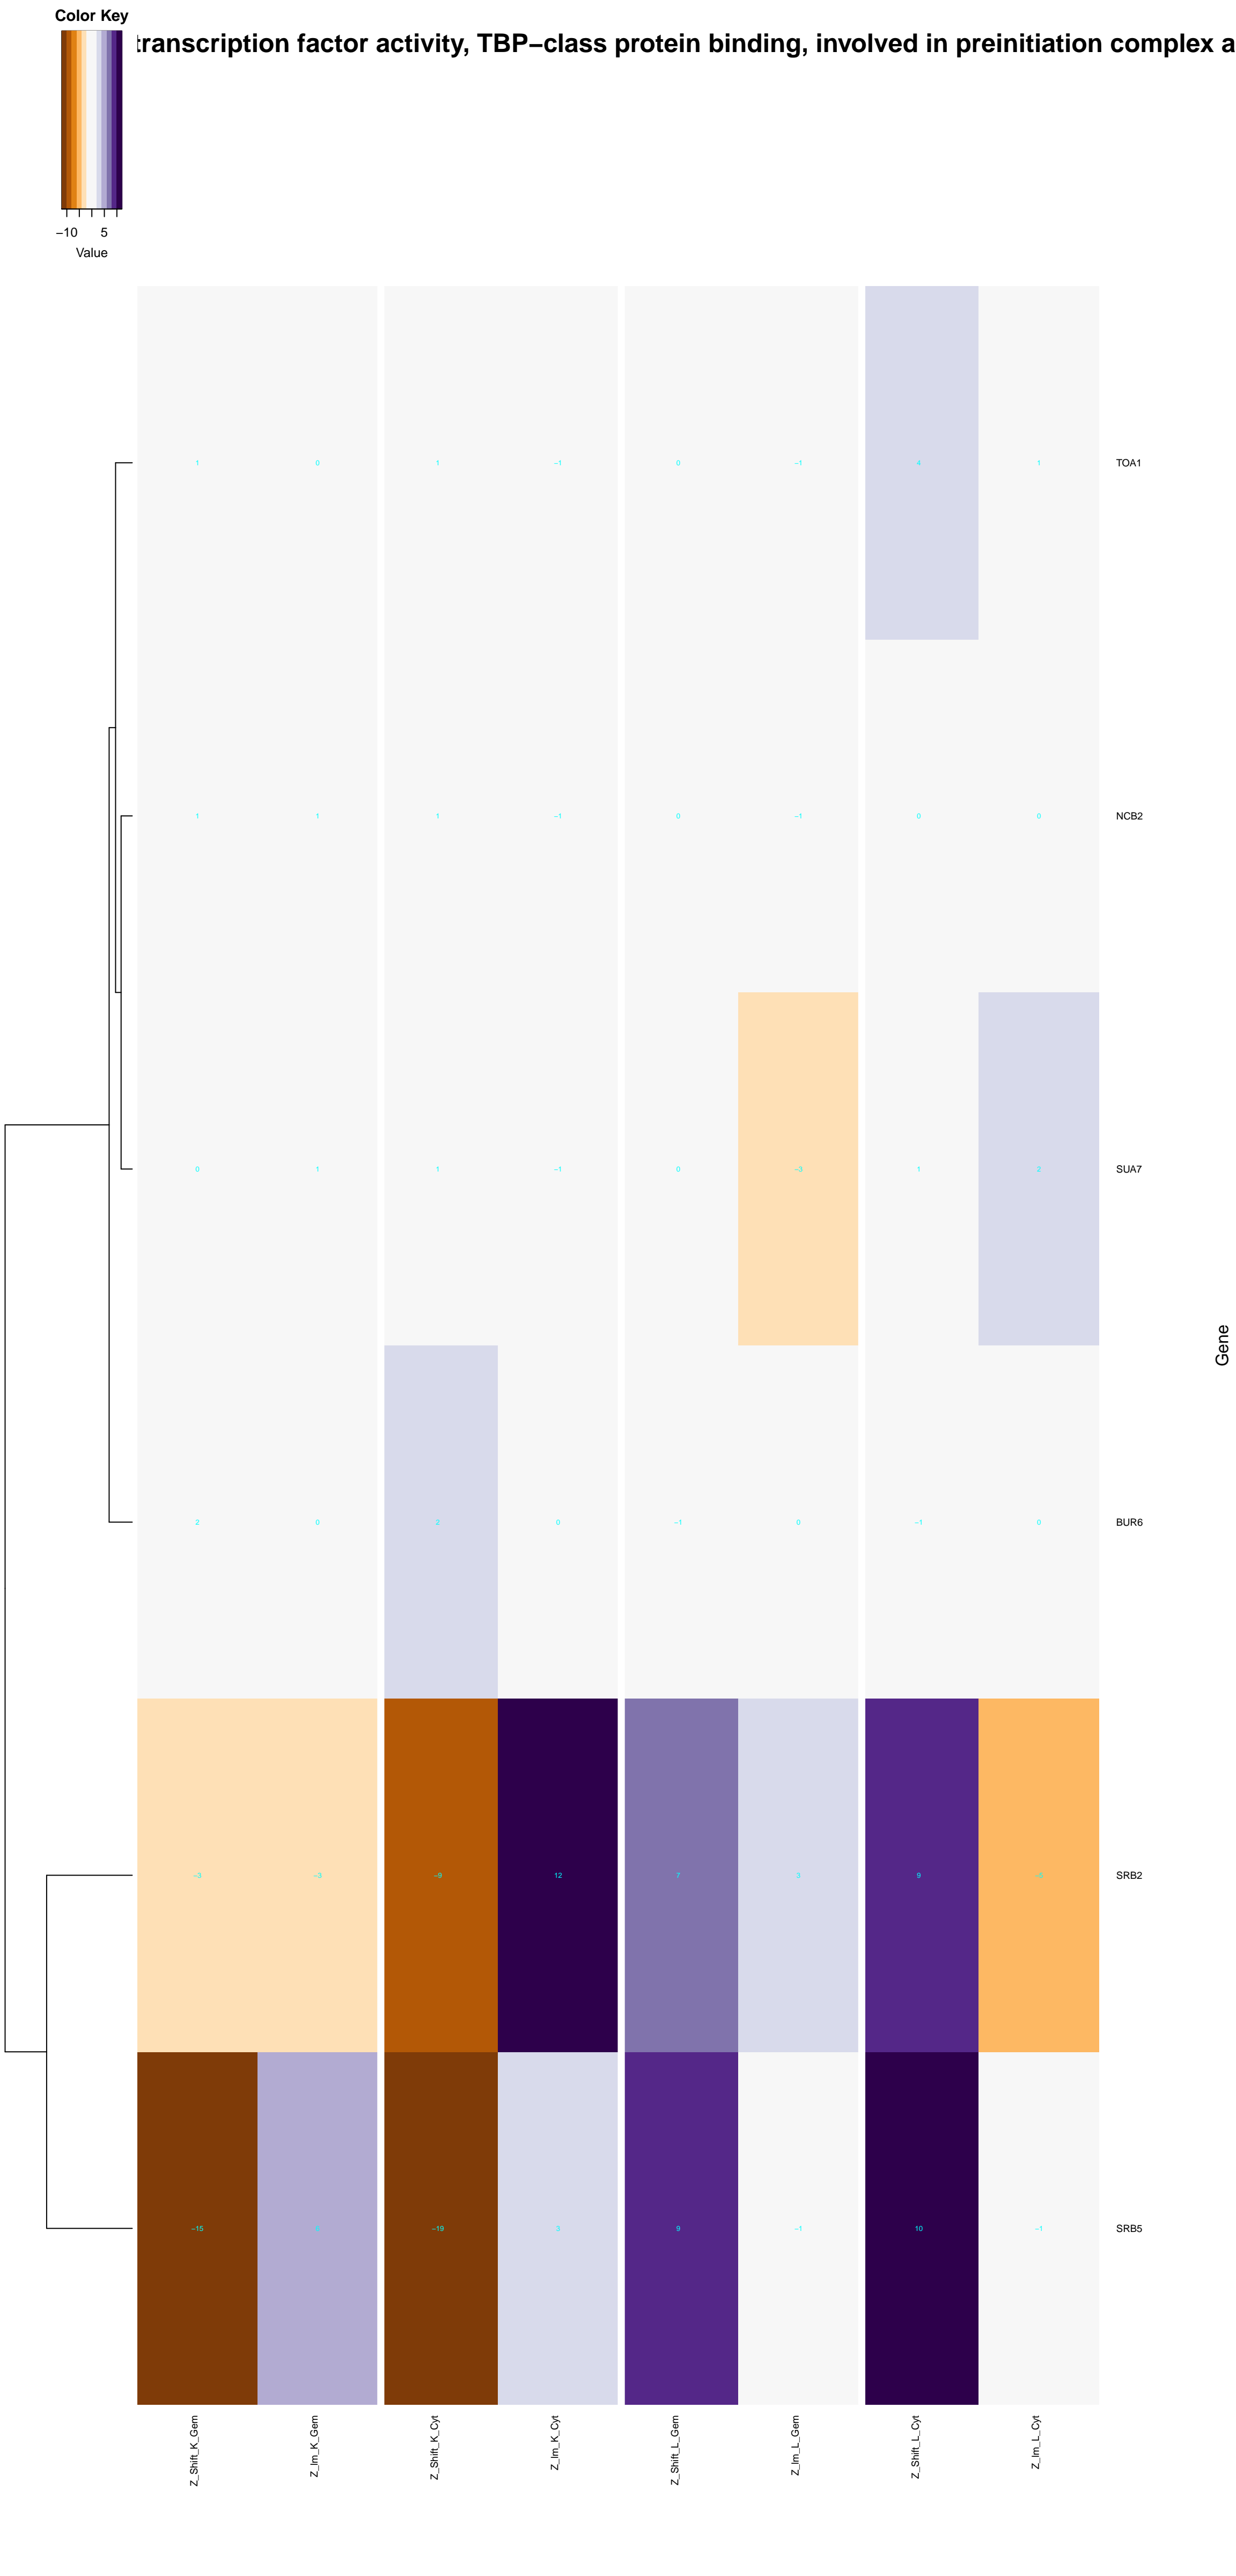

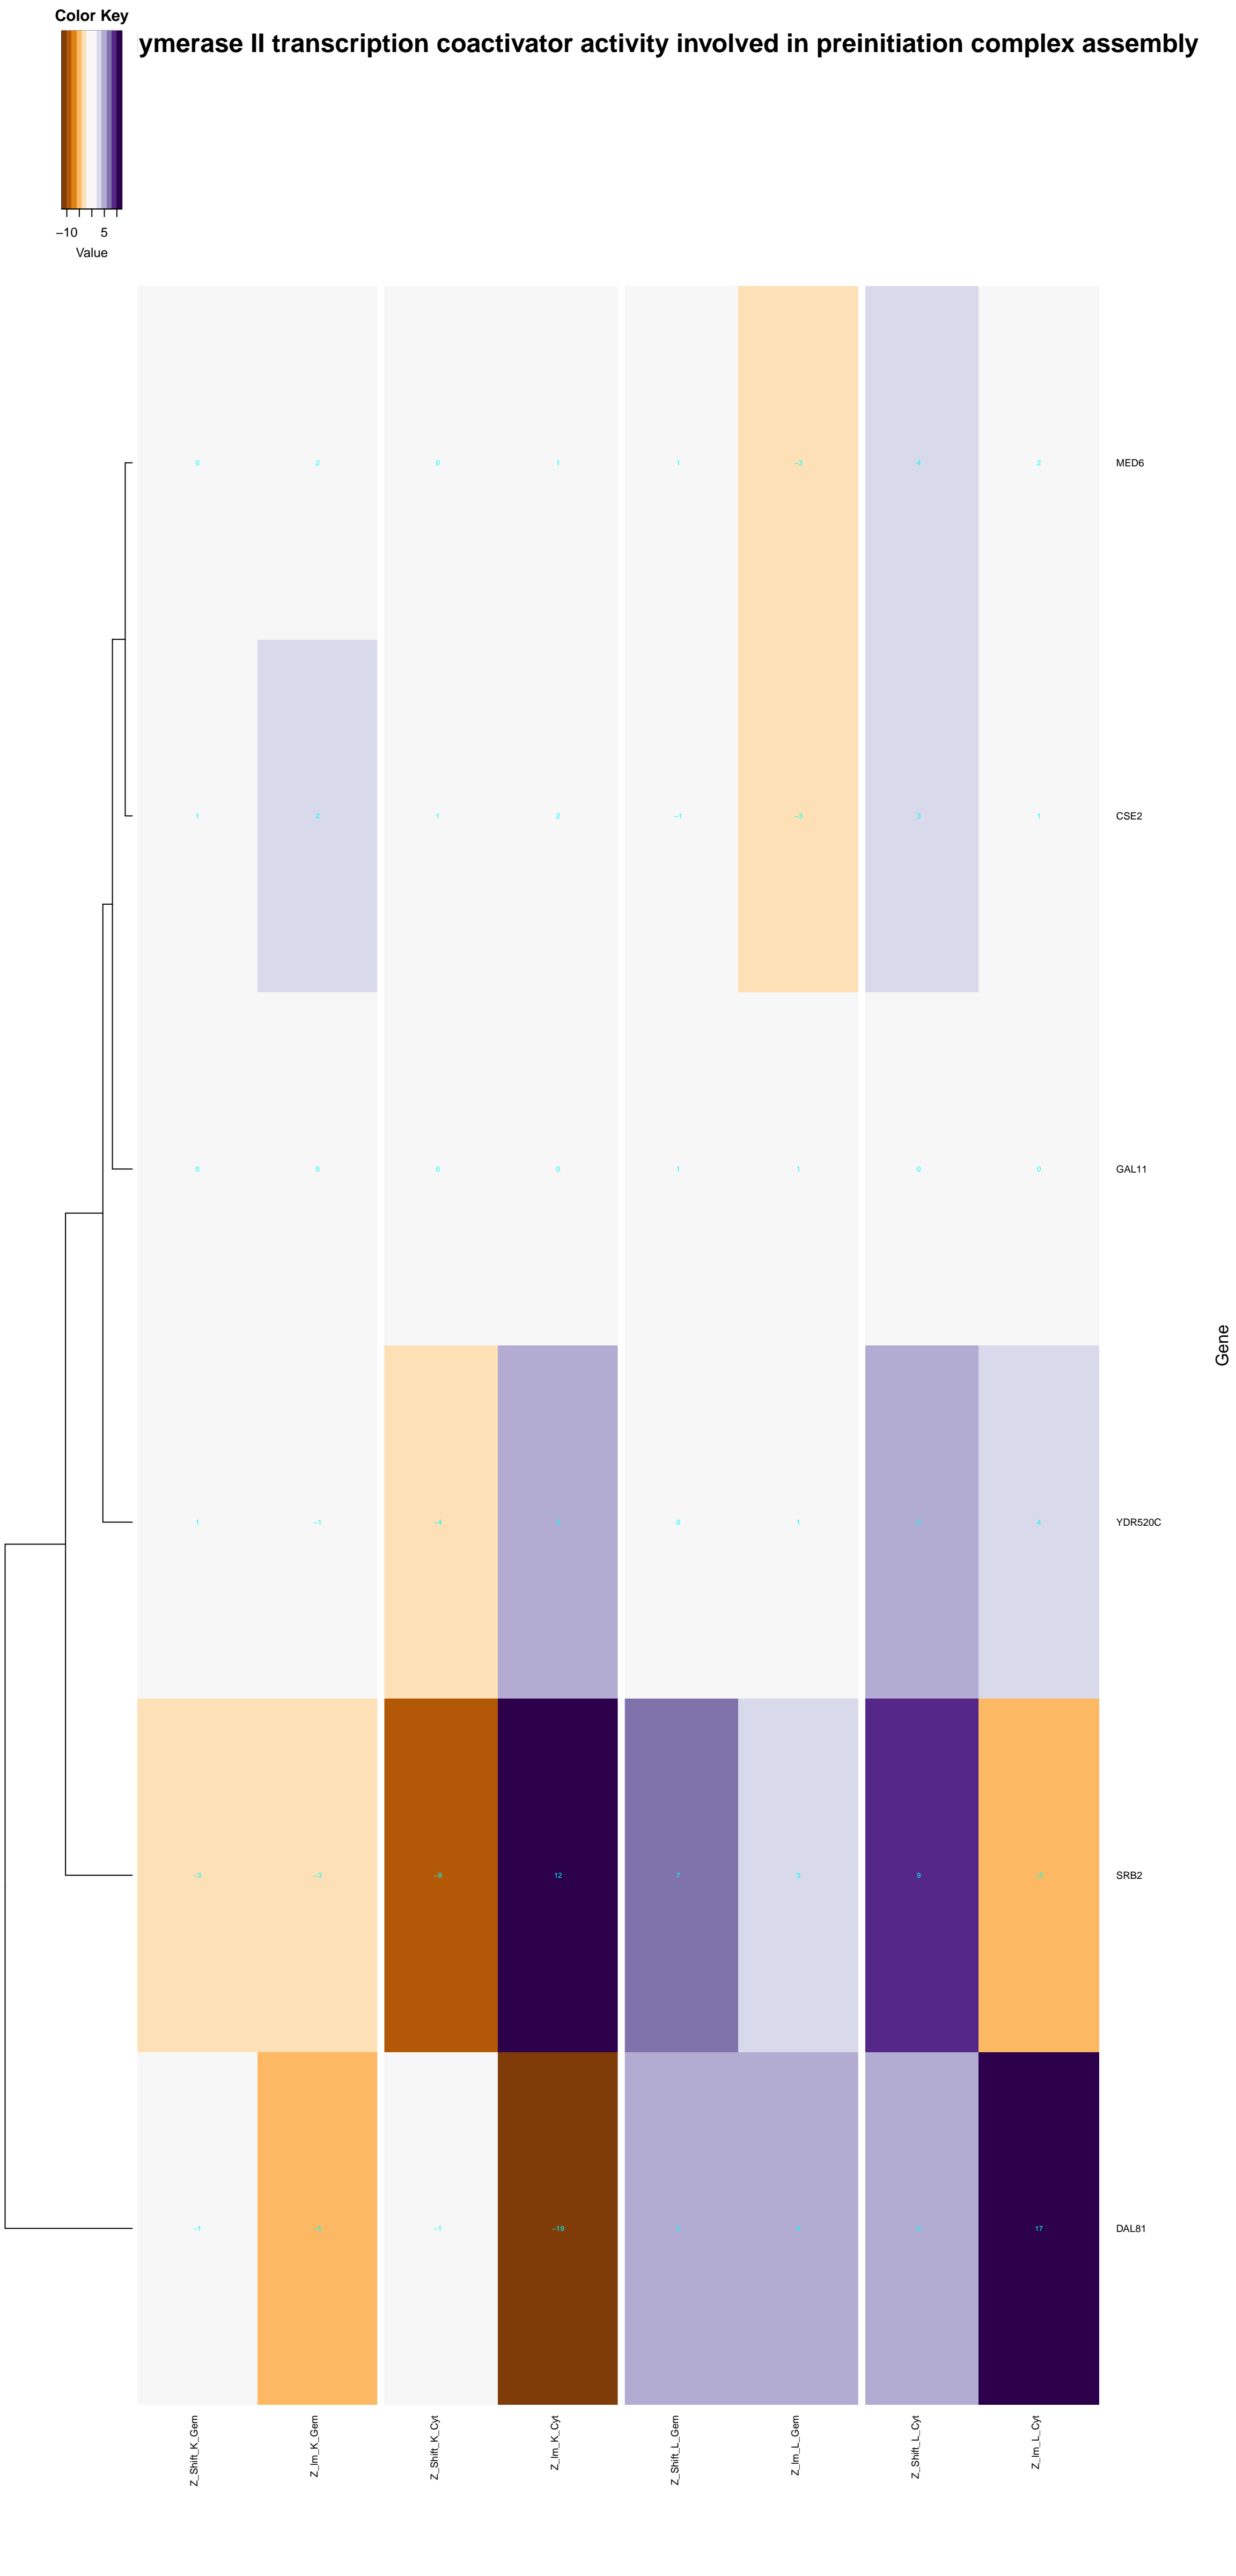

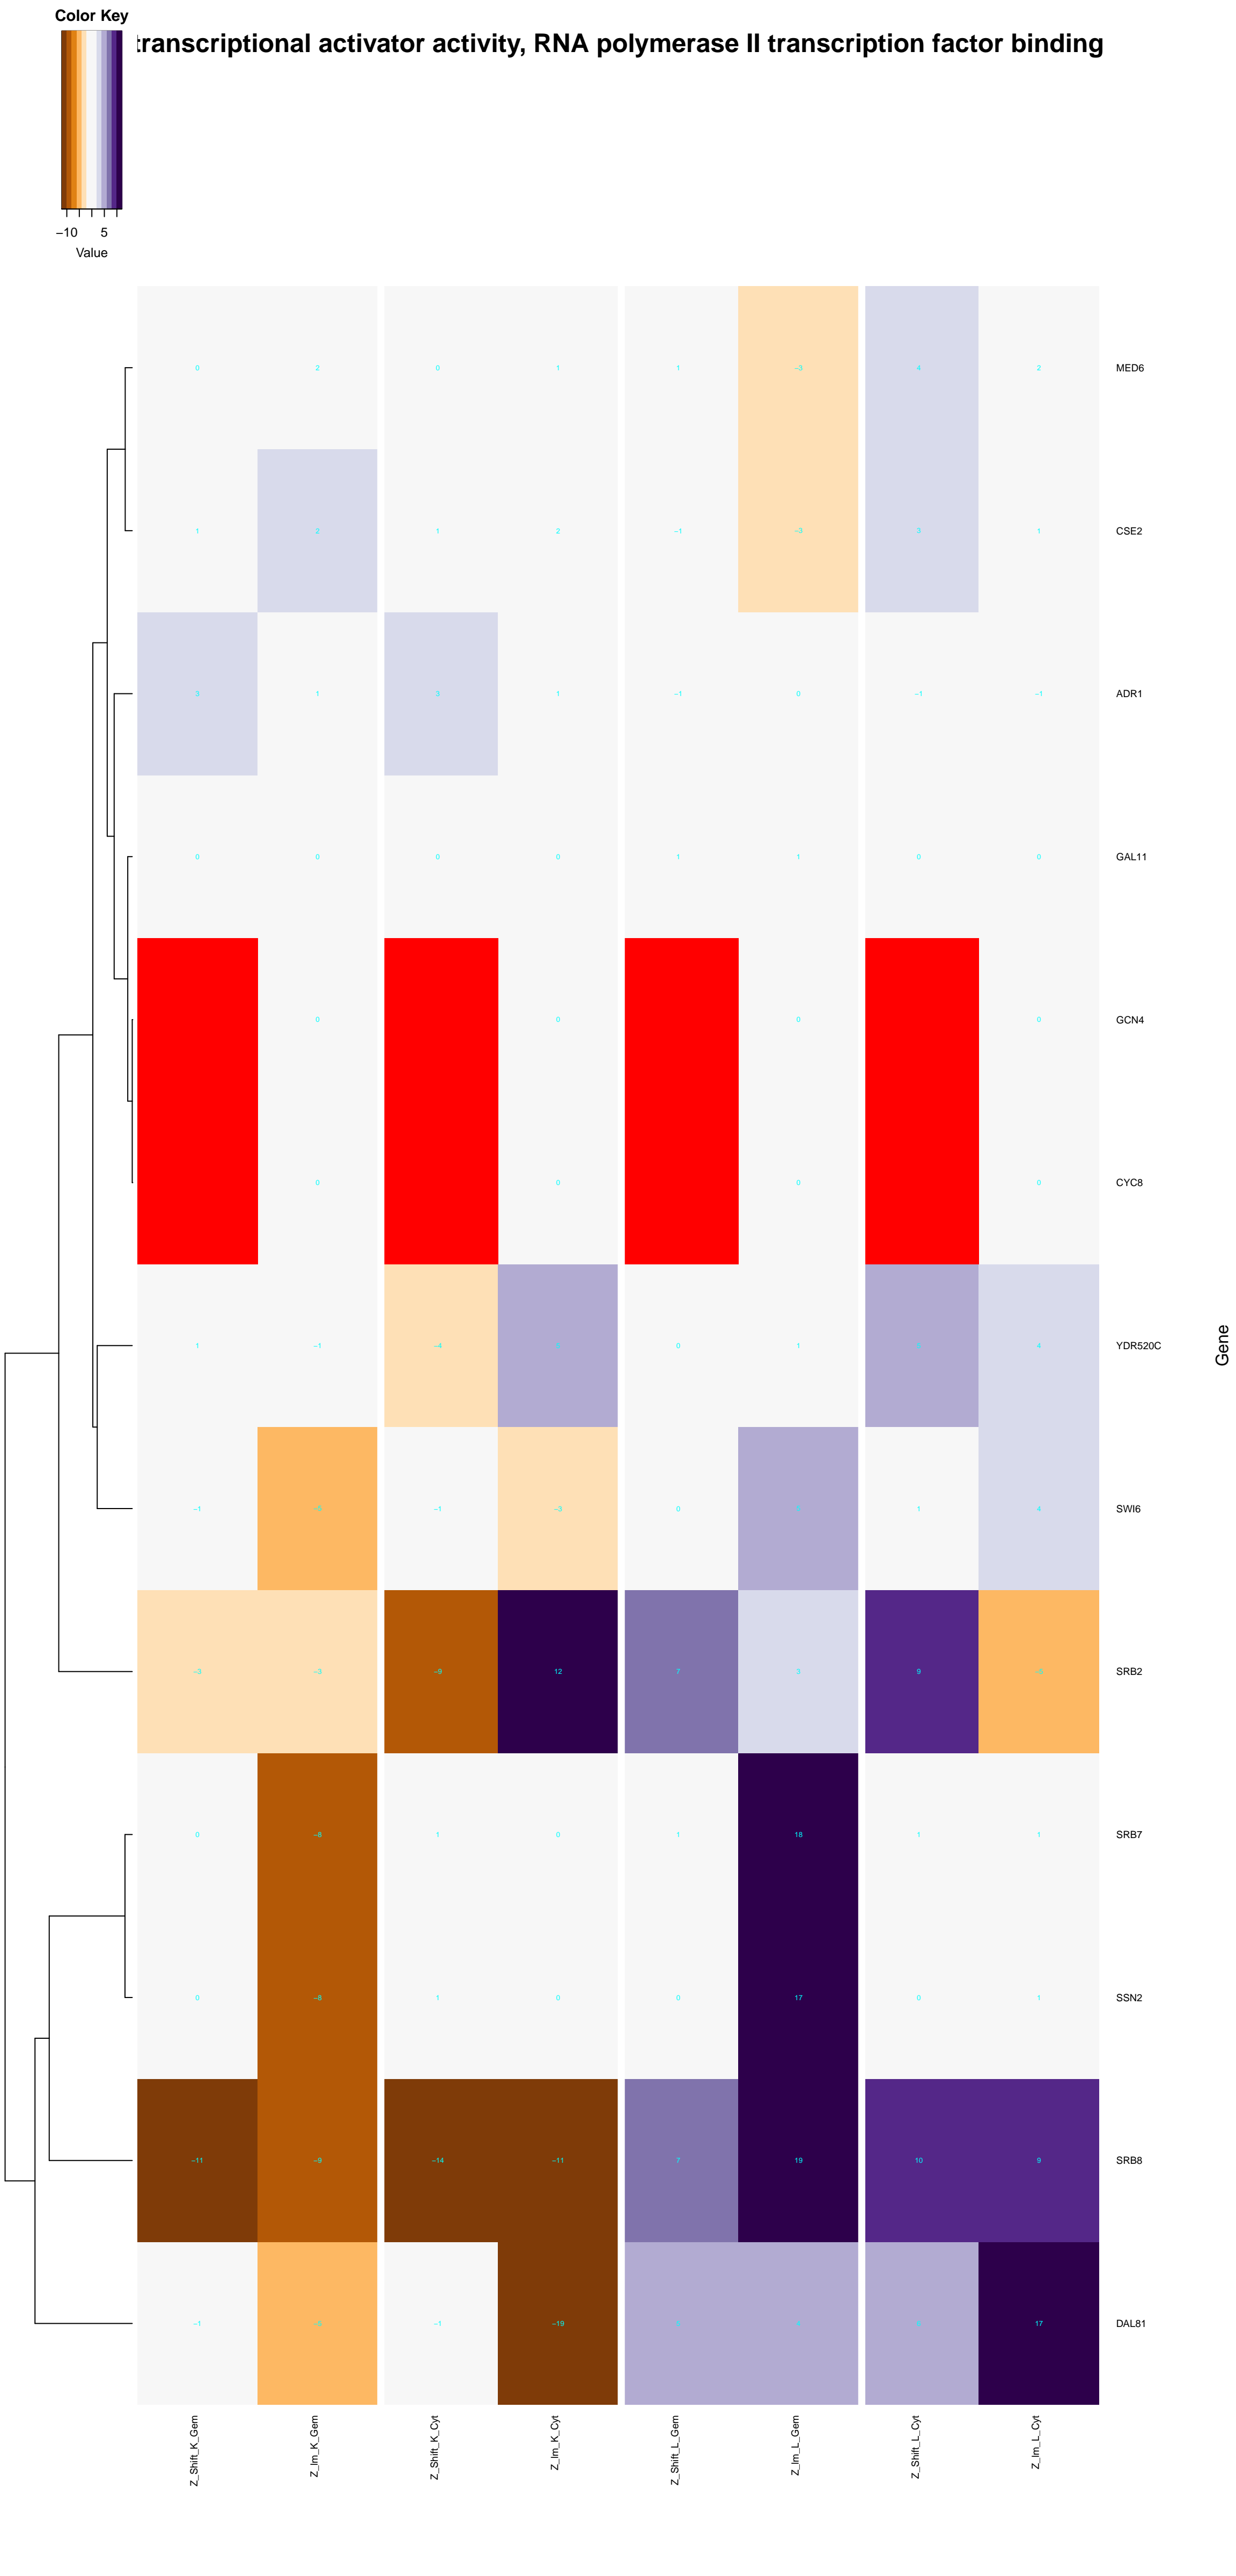





Supplement: s1 [file s1]

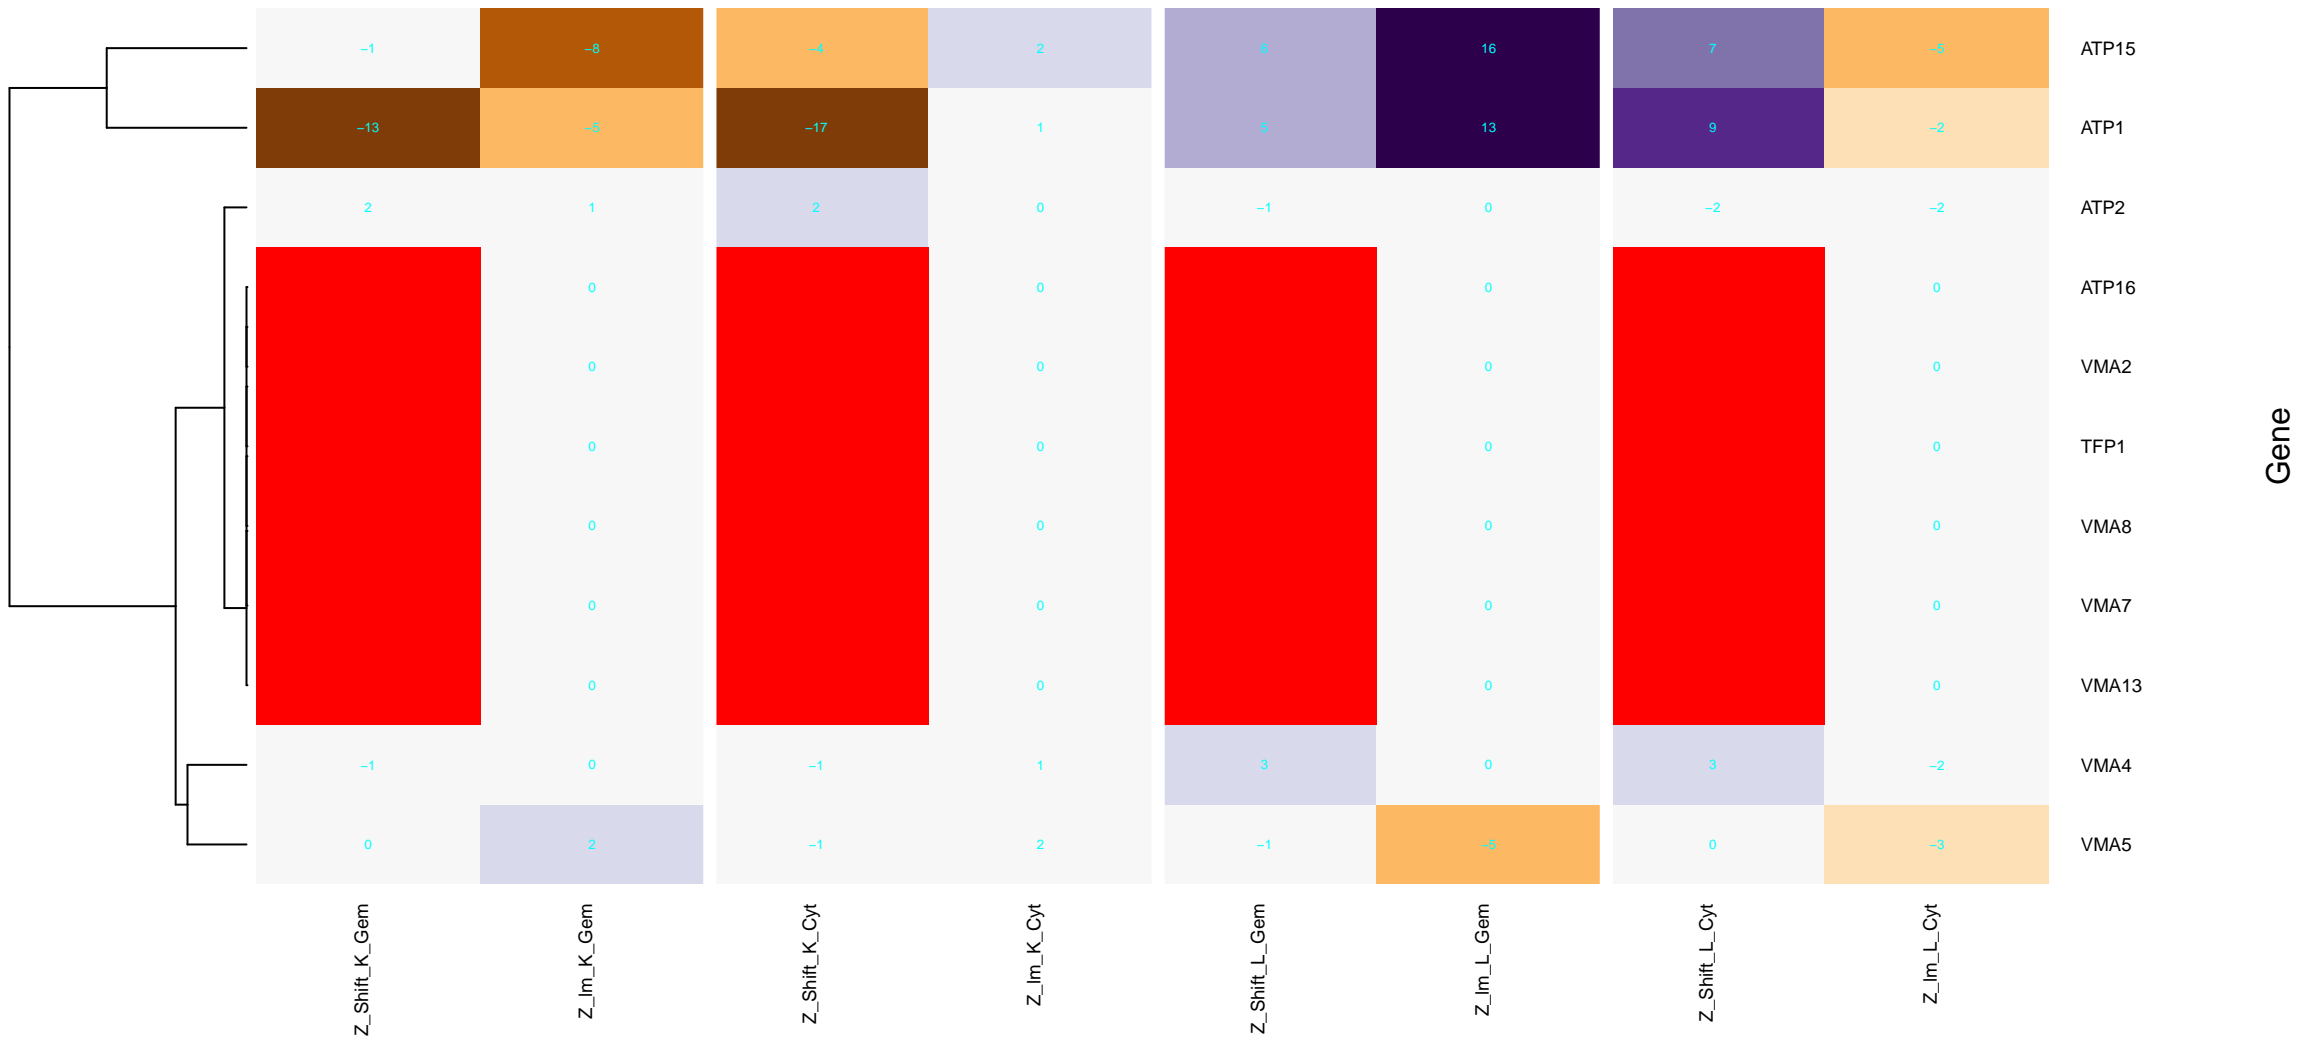

Supplement: s1 [file s1]

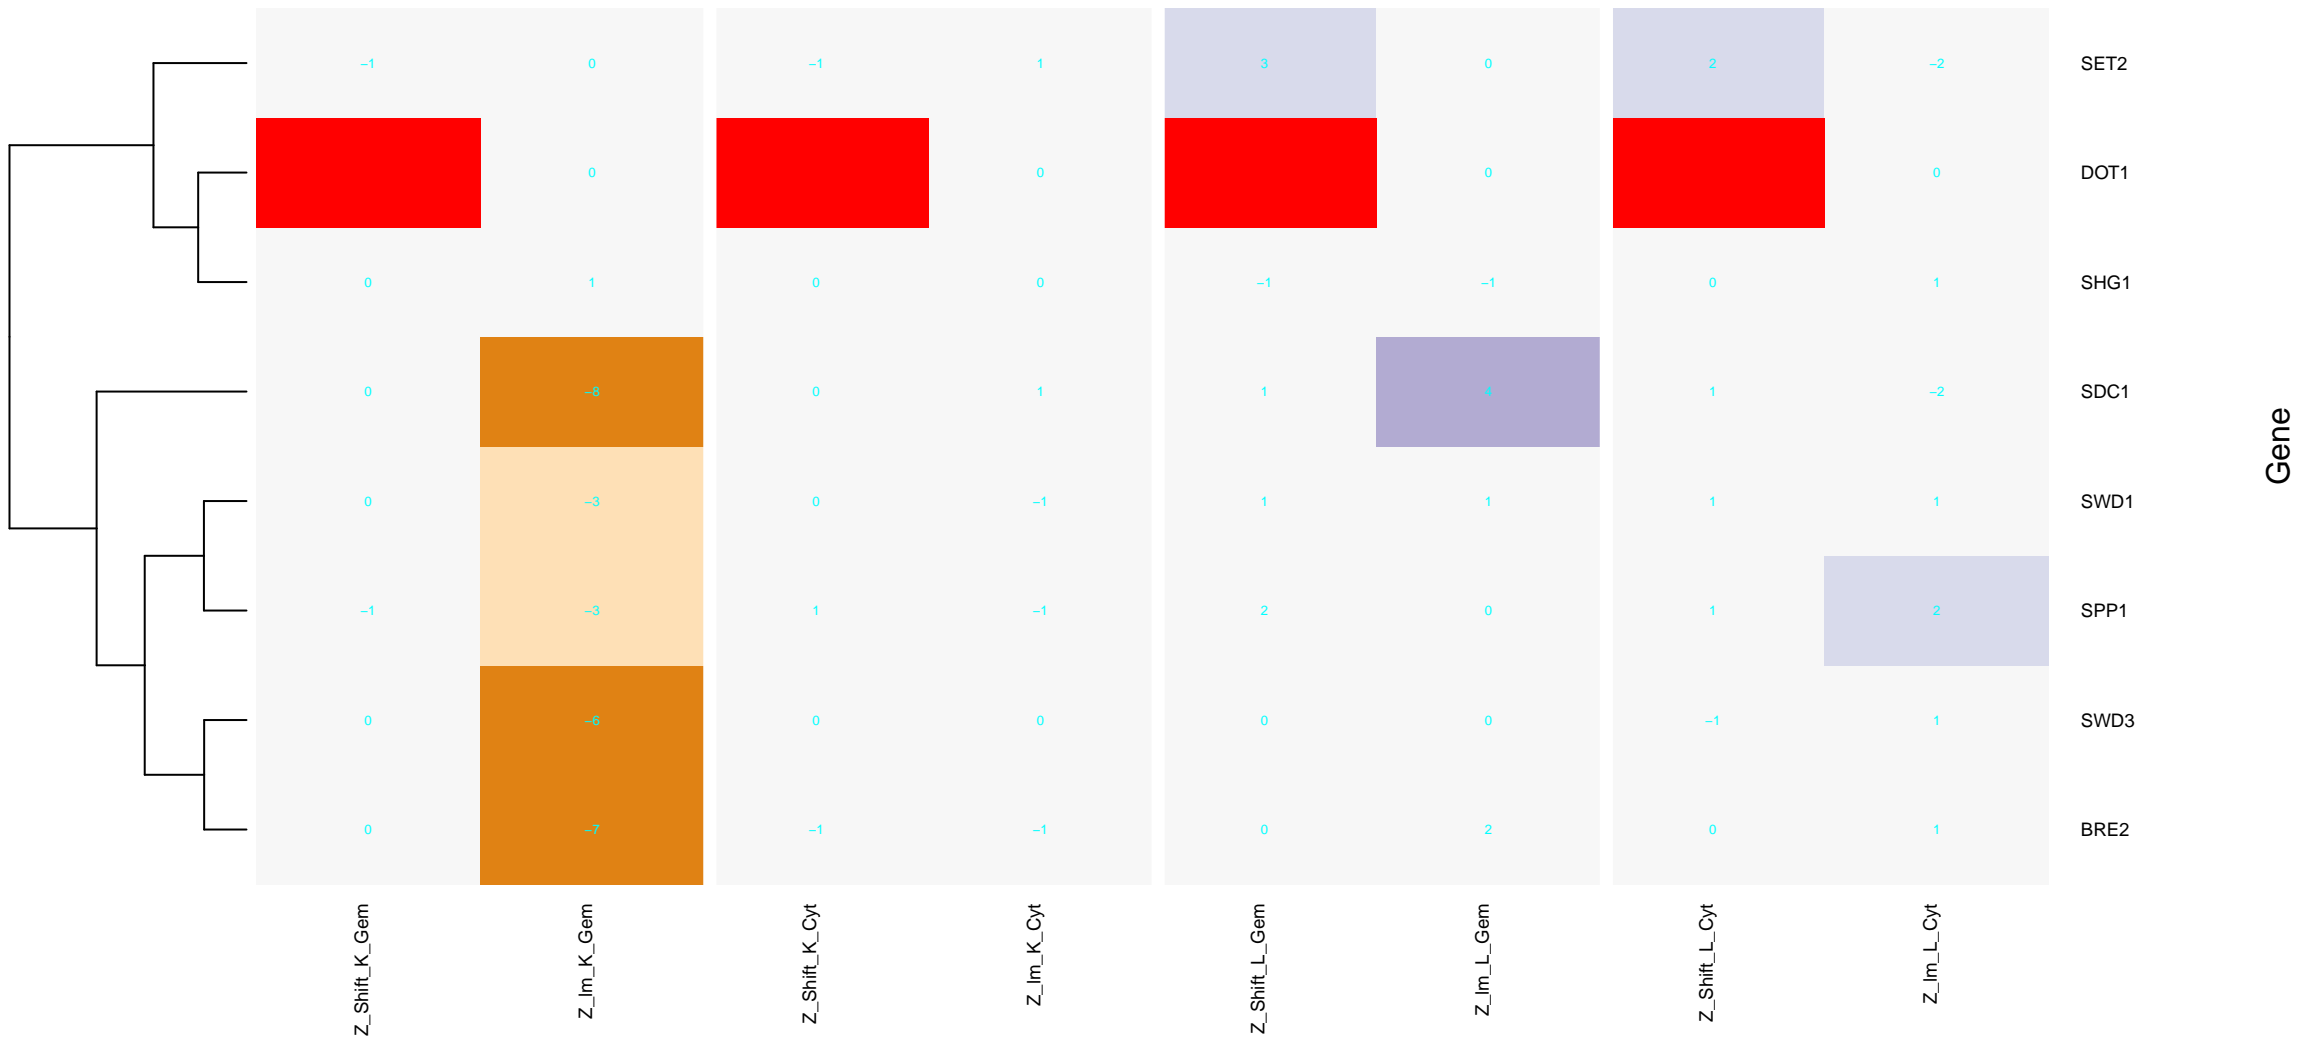

Supplement: s1 [file s1]

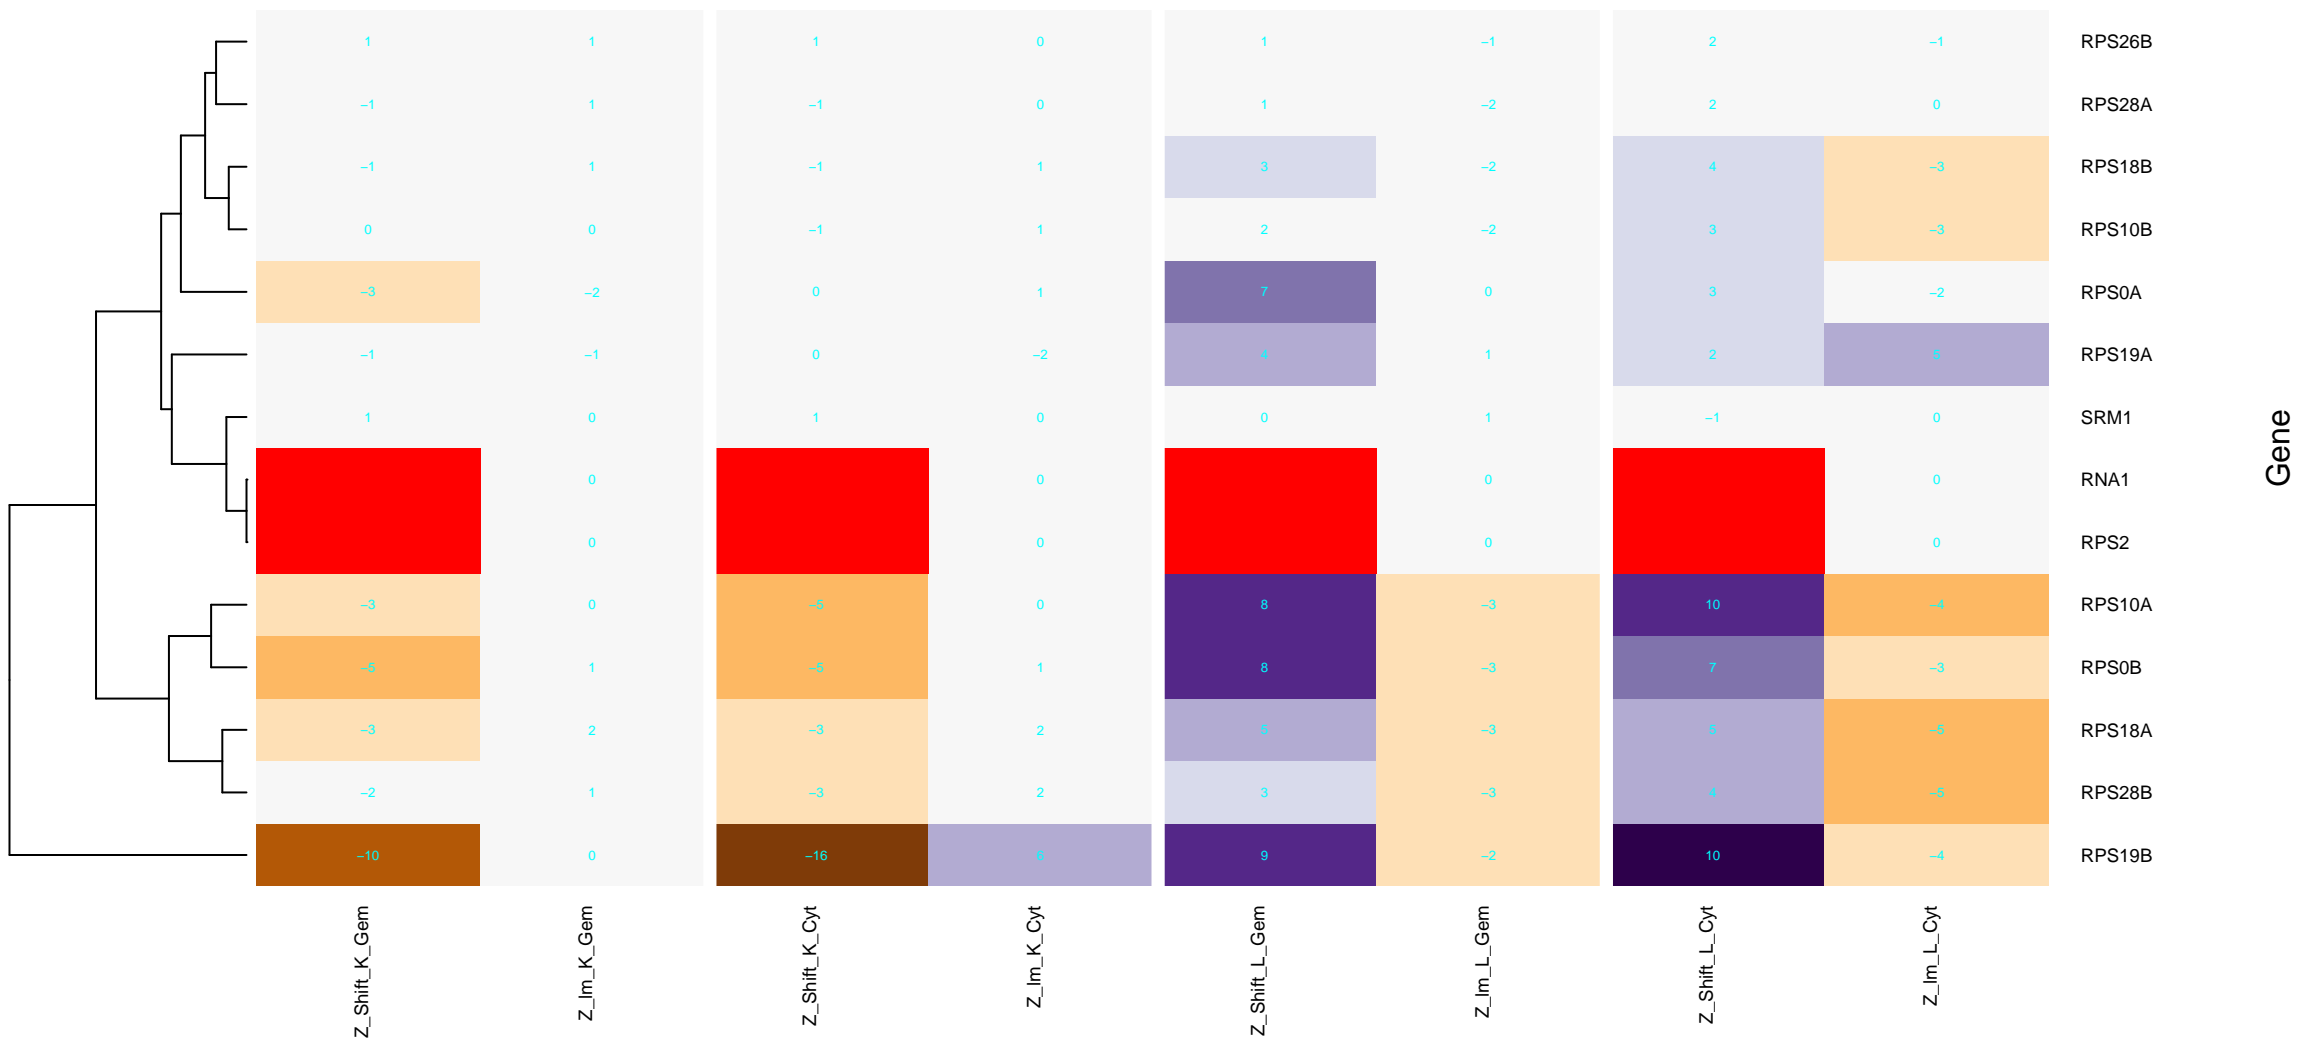

Supplement: s1 [file s1]

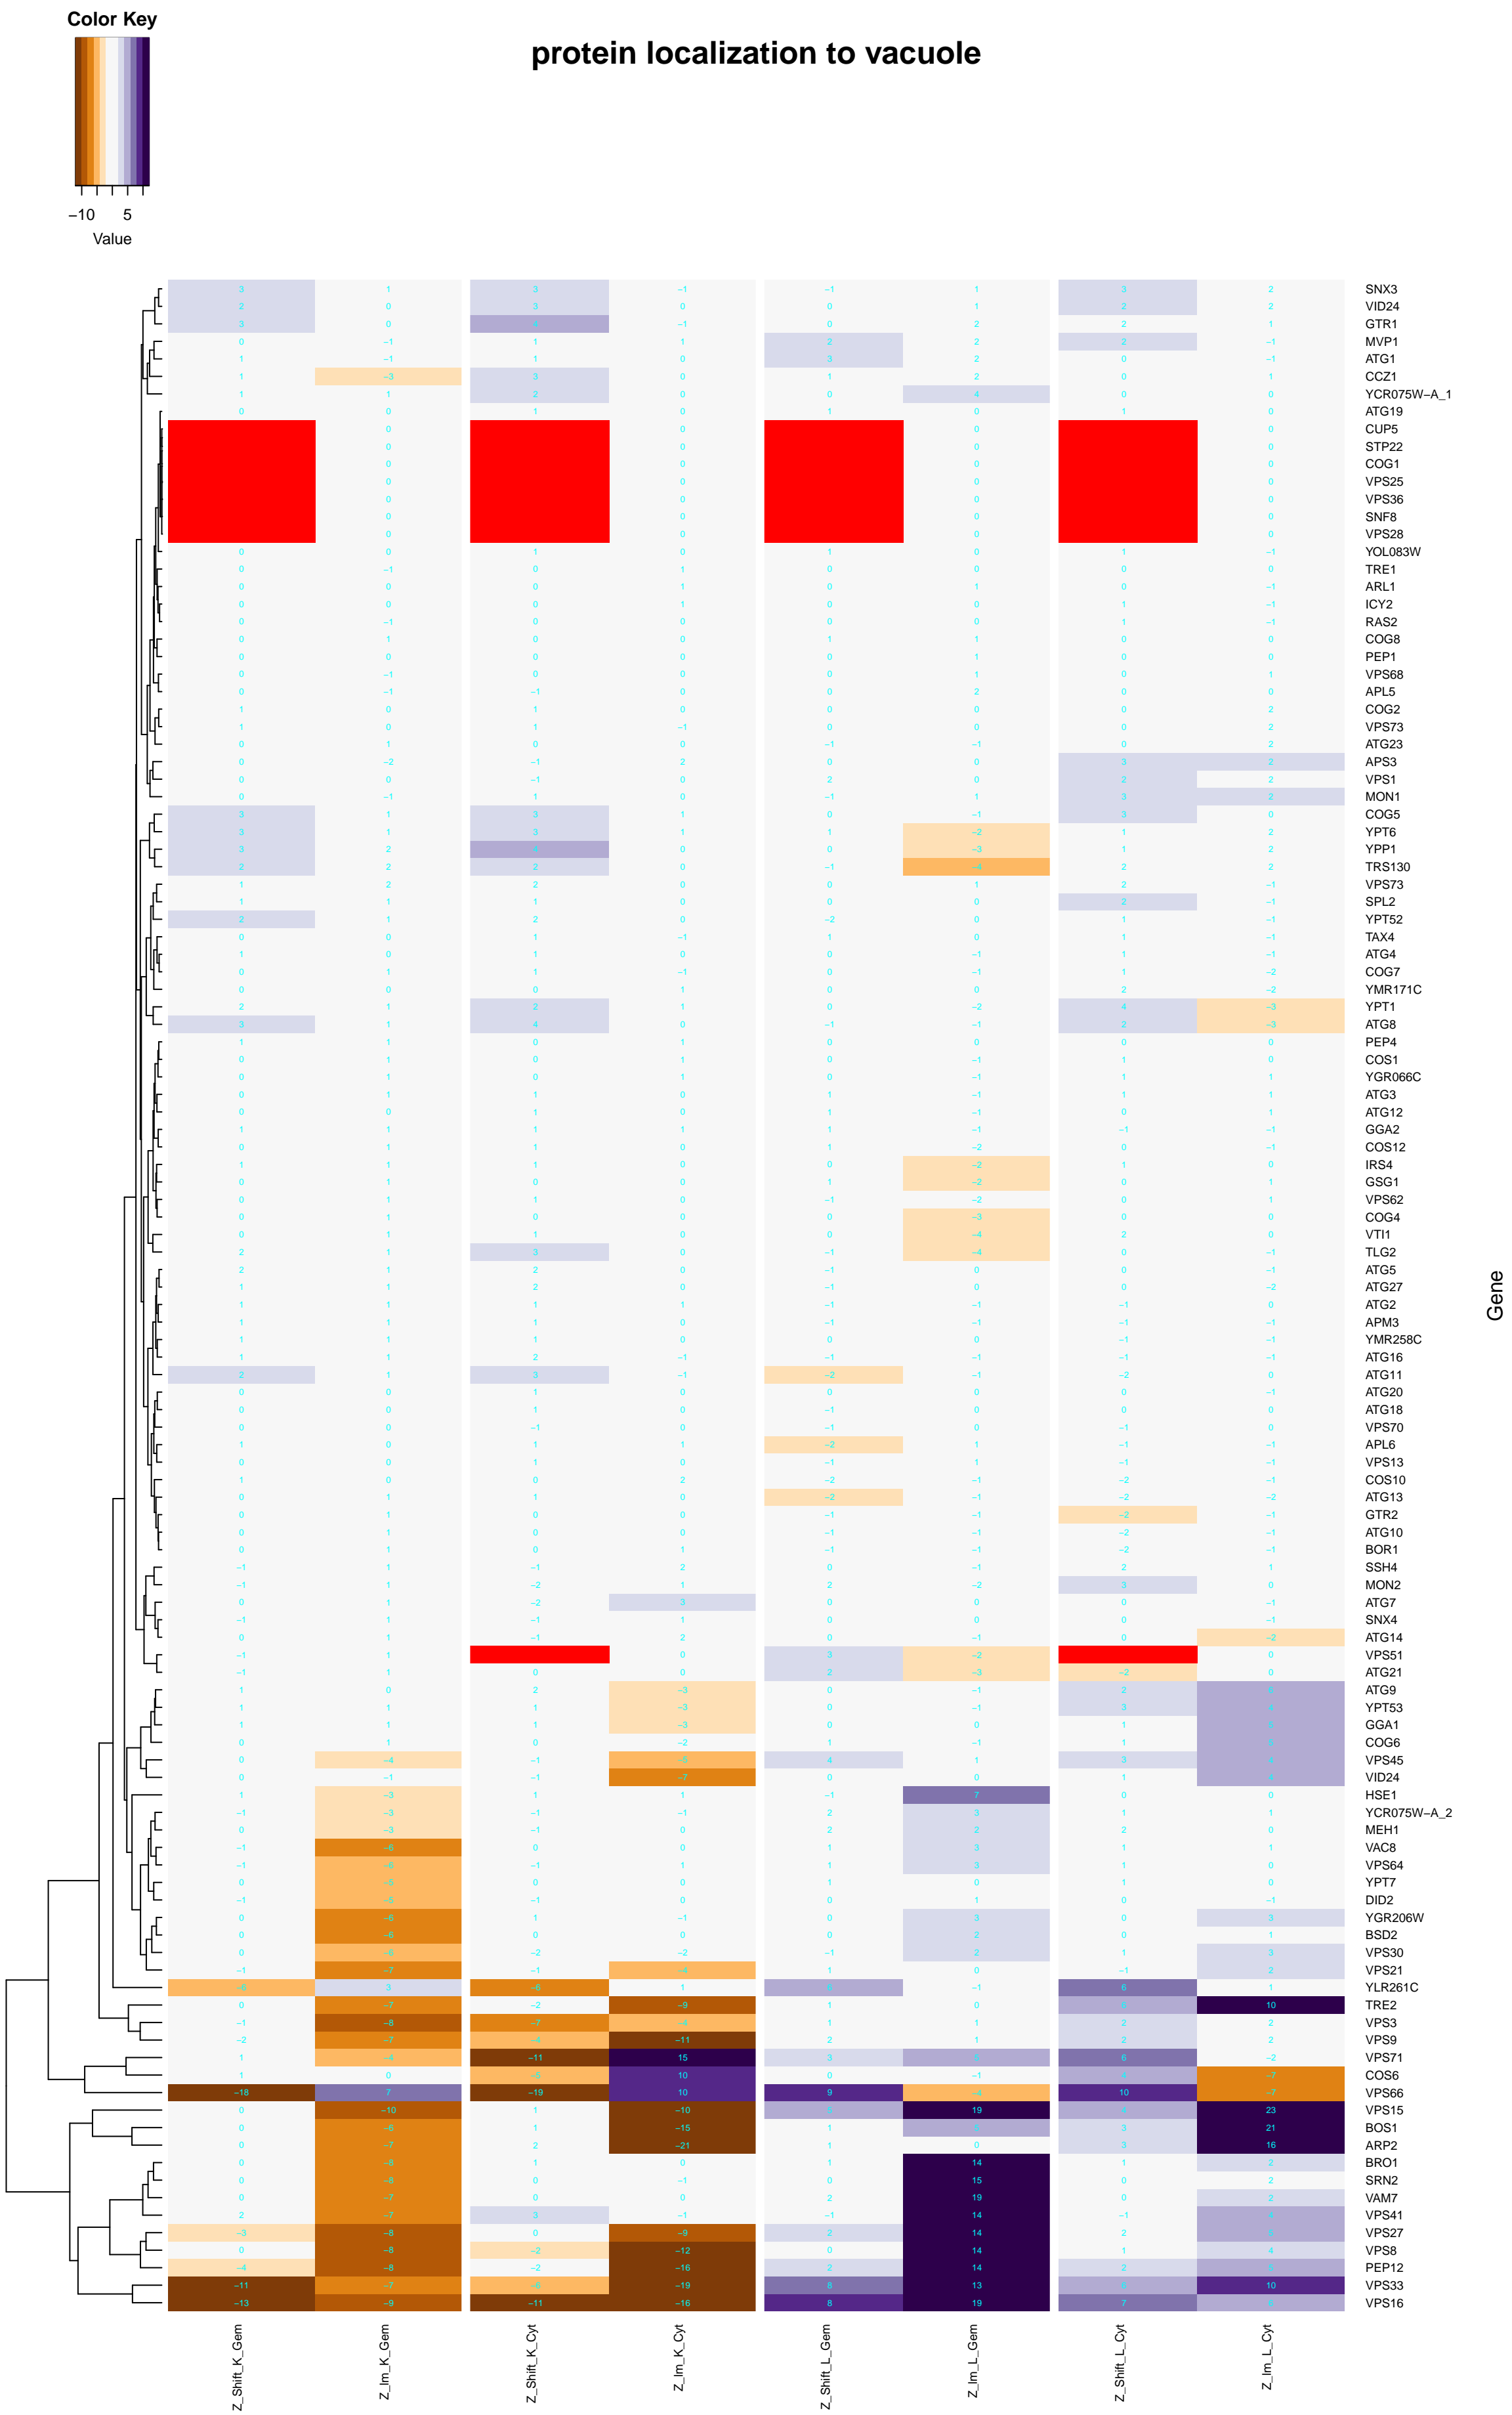

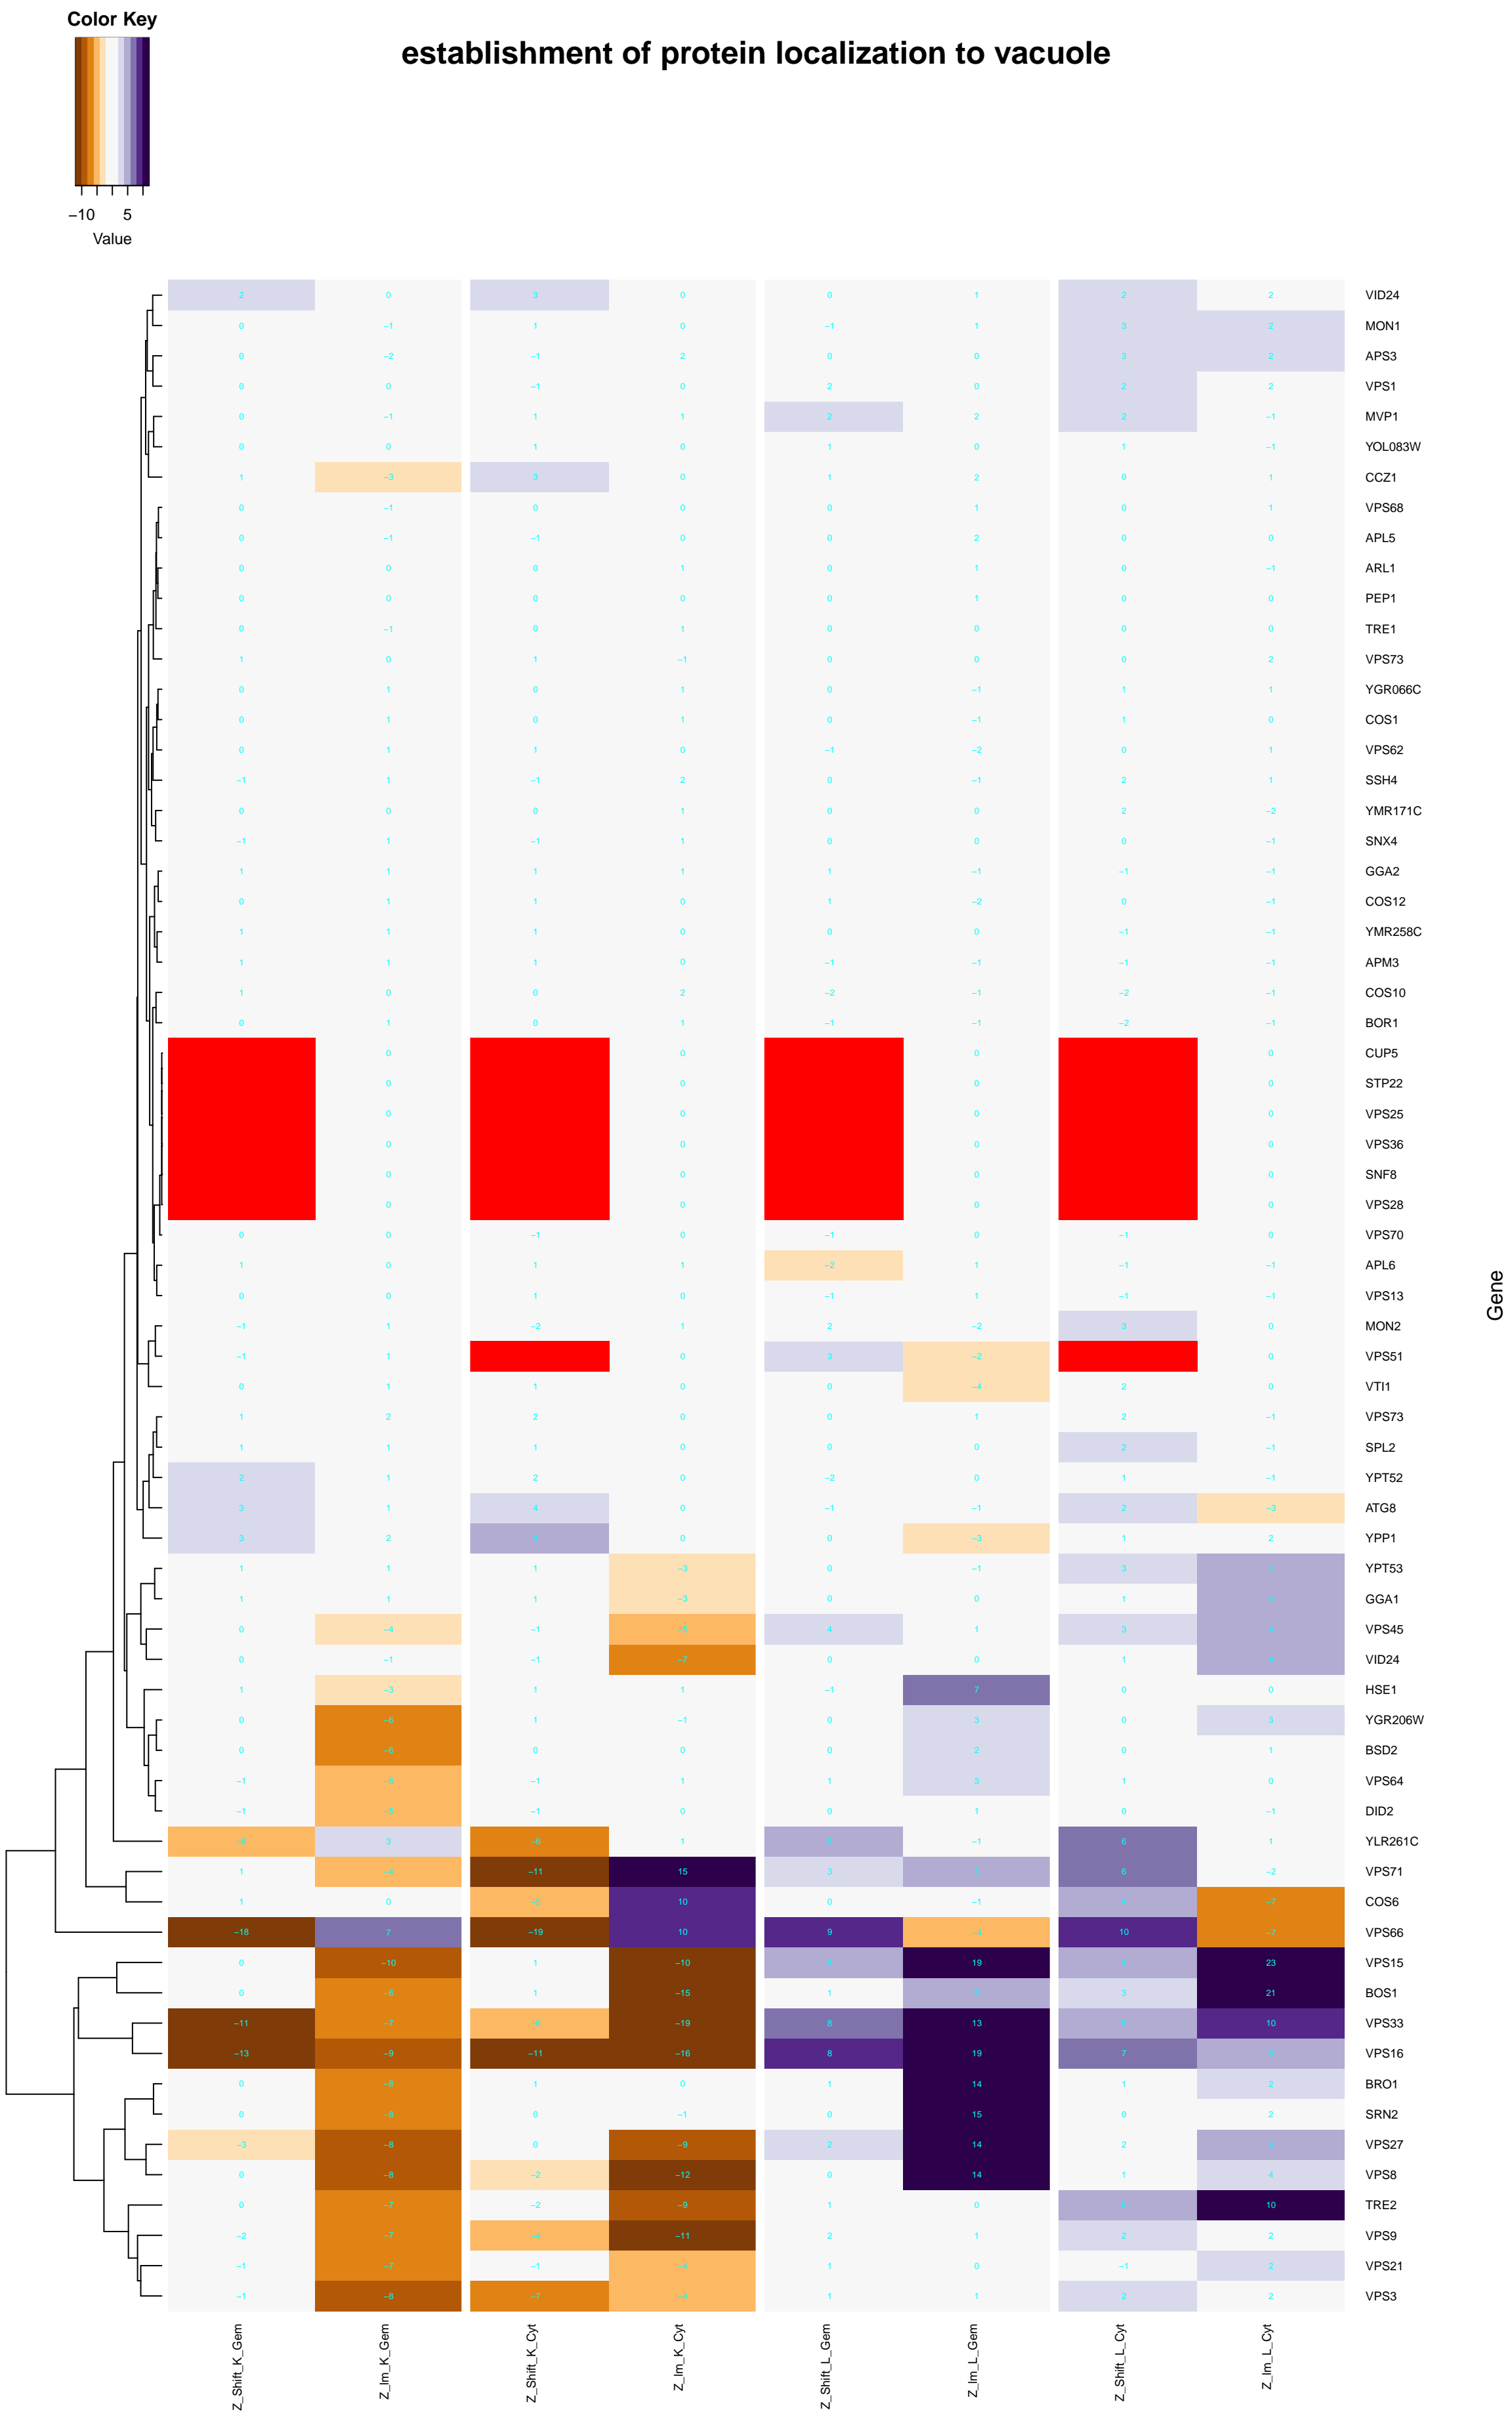

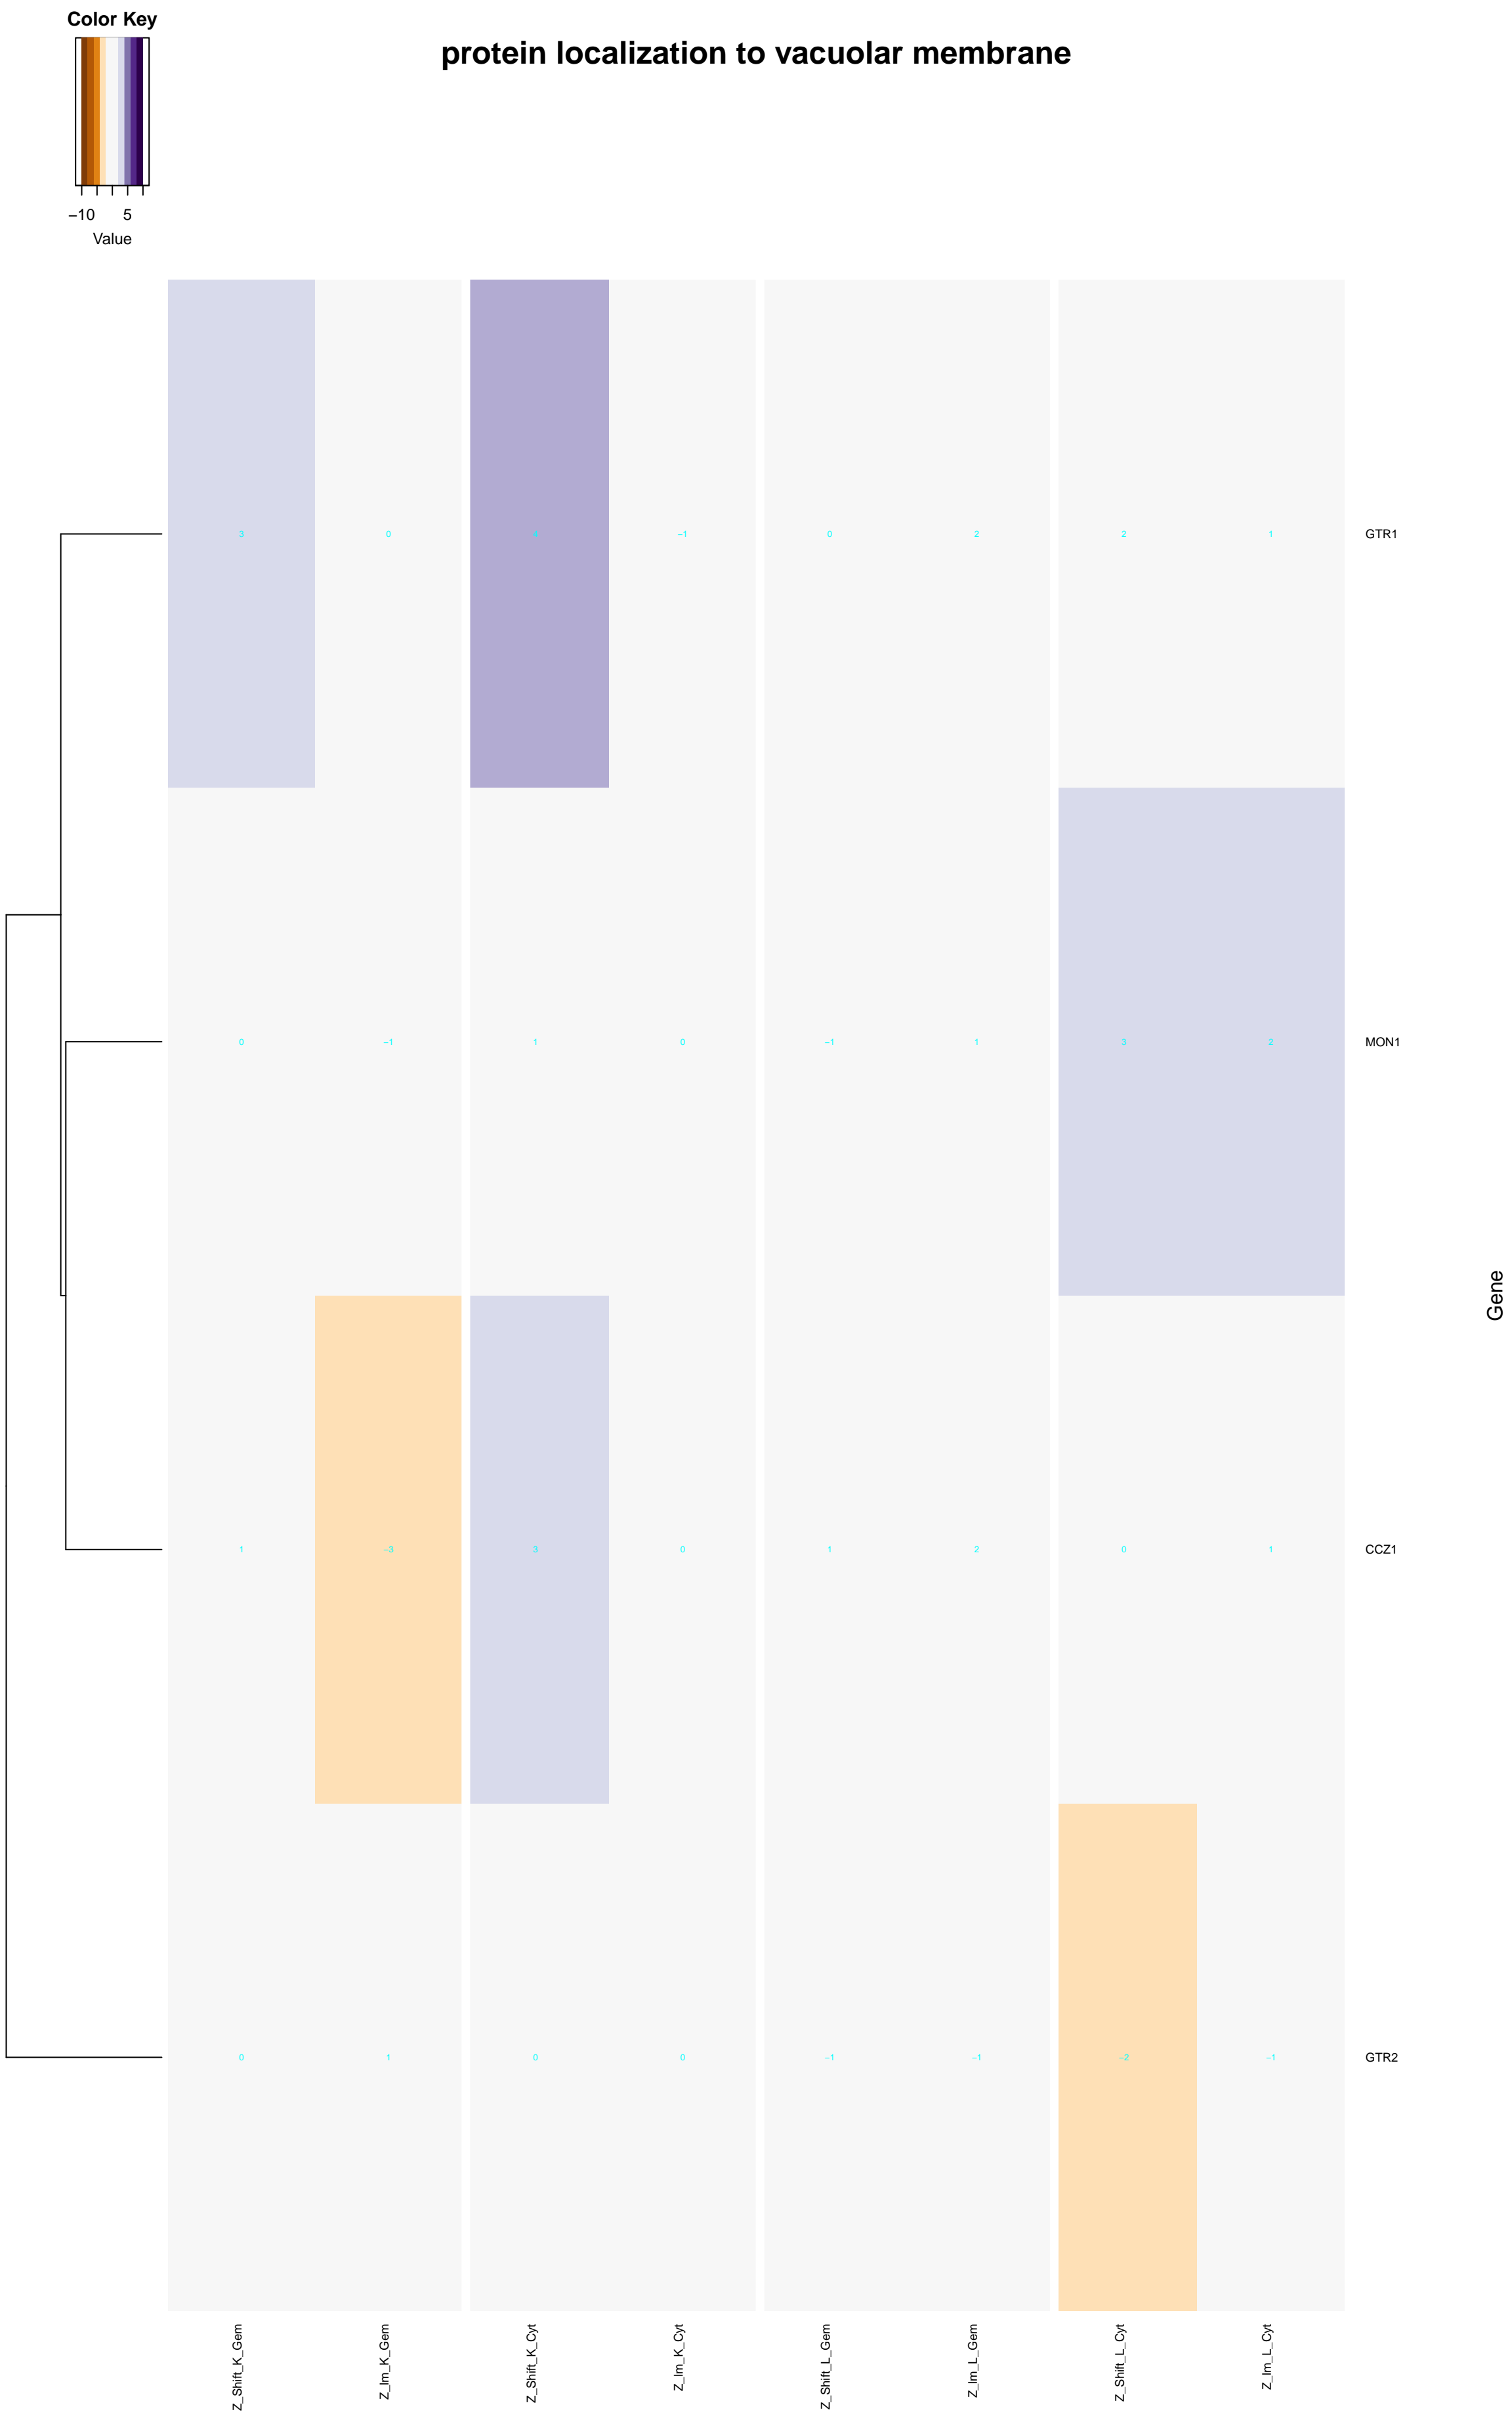

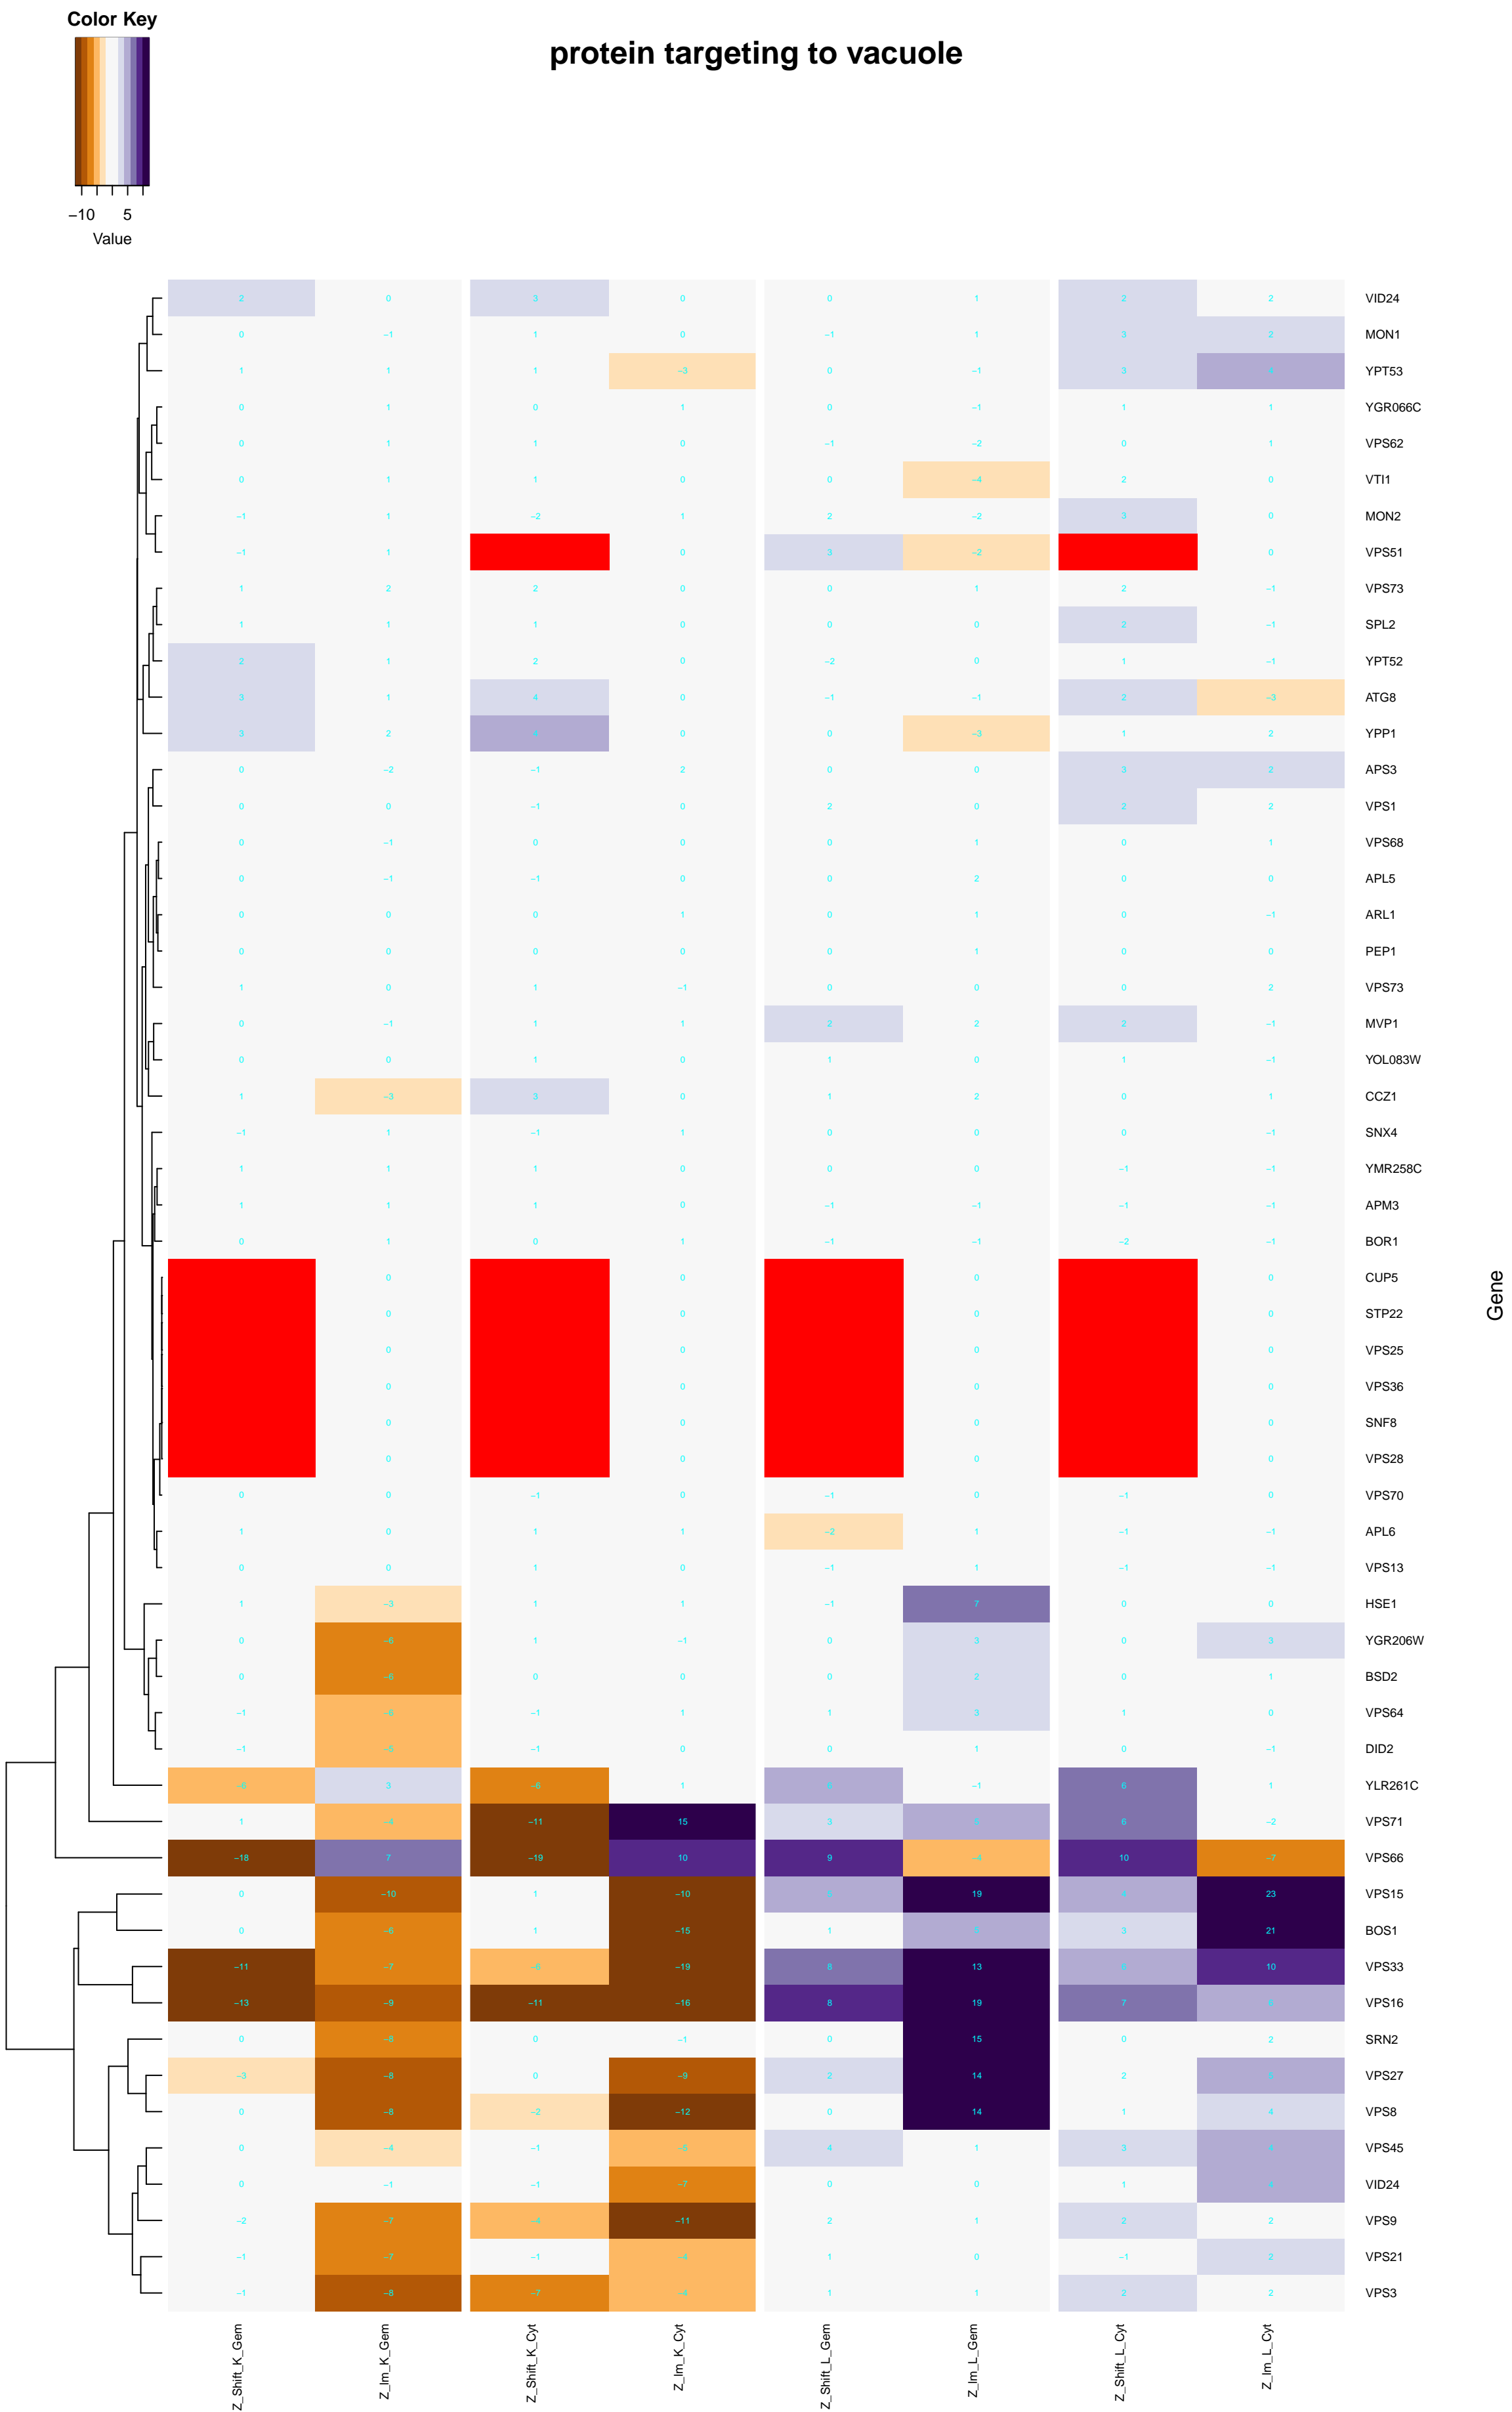

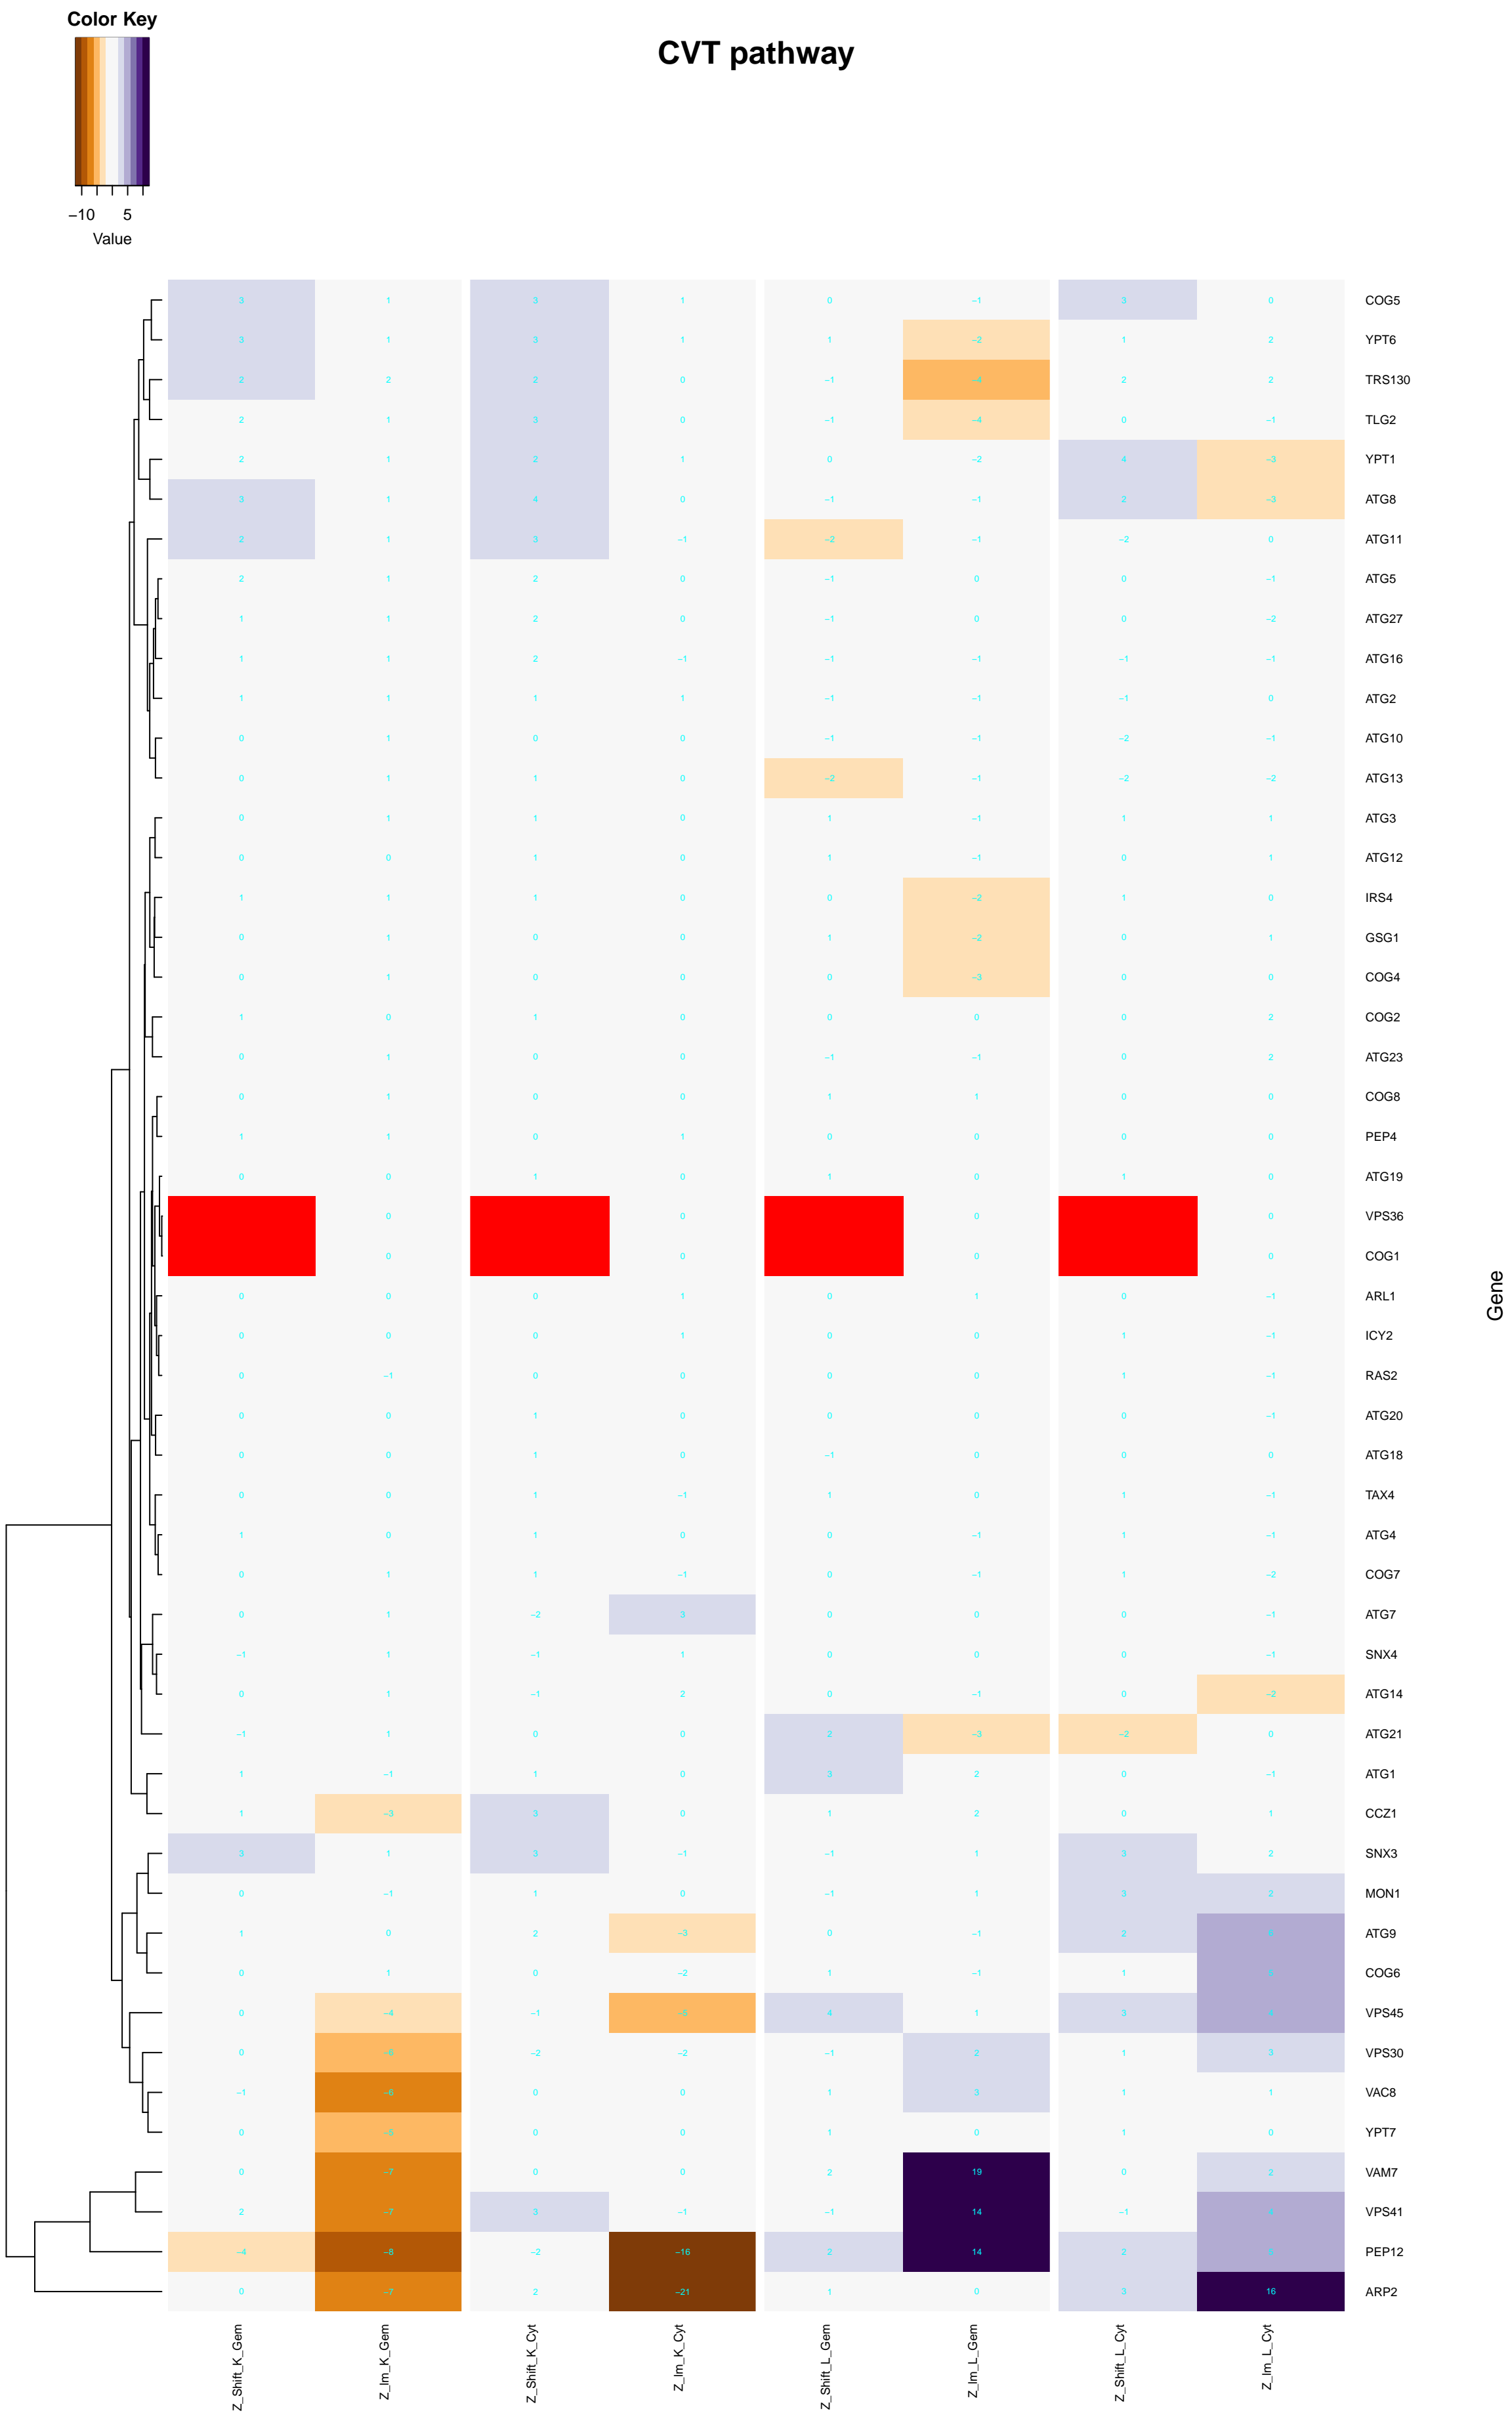

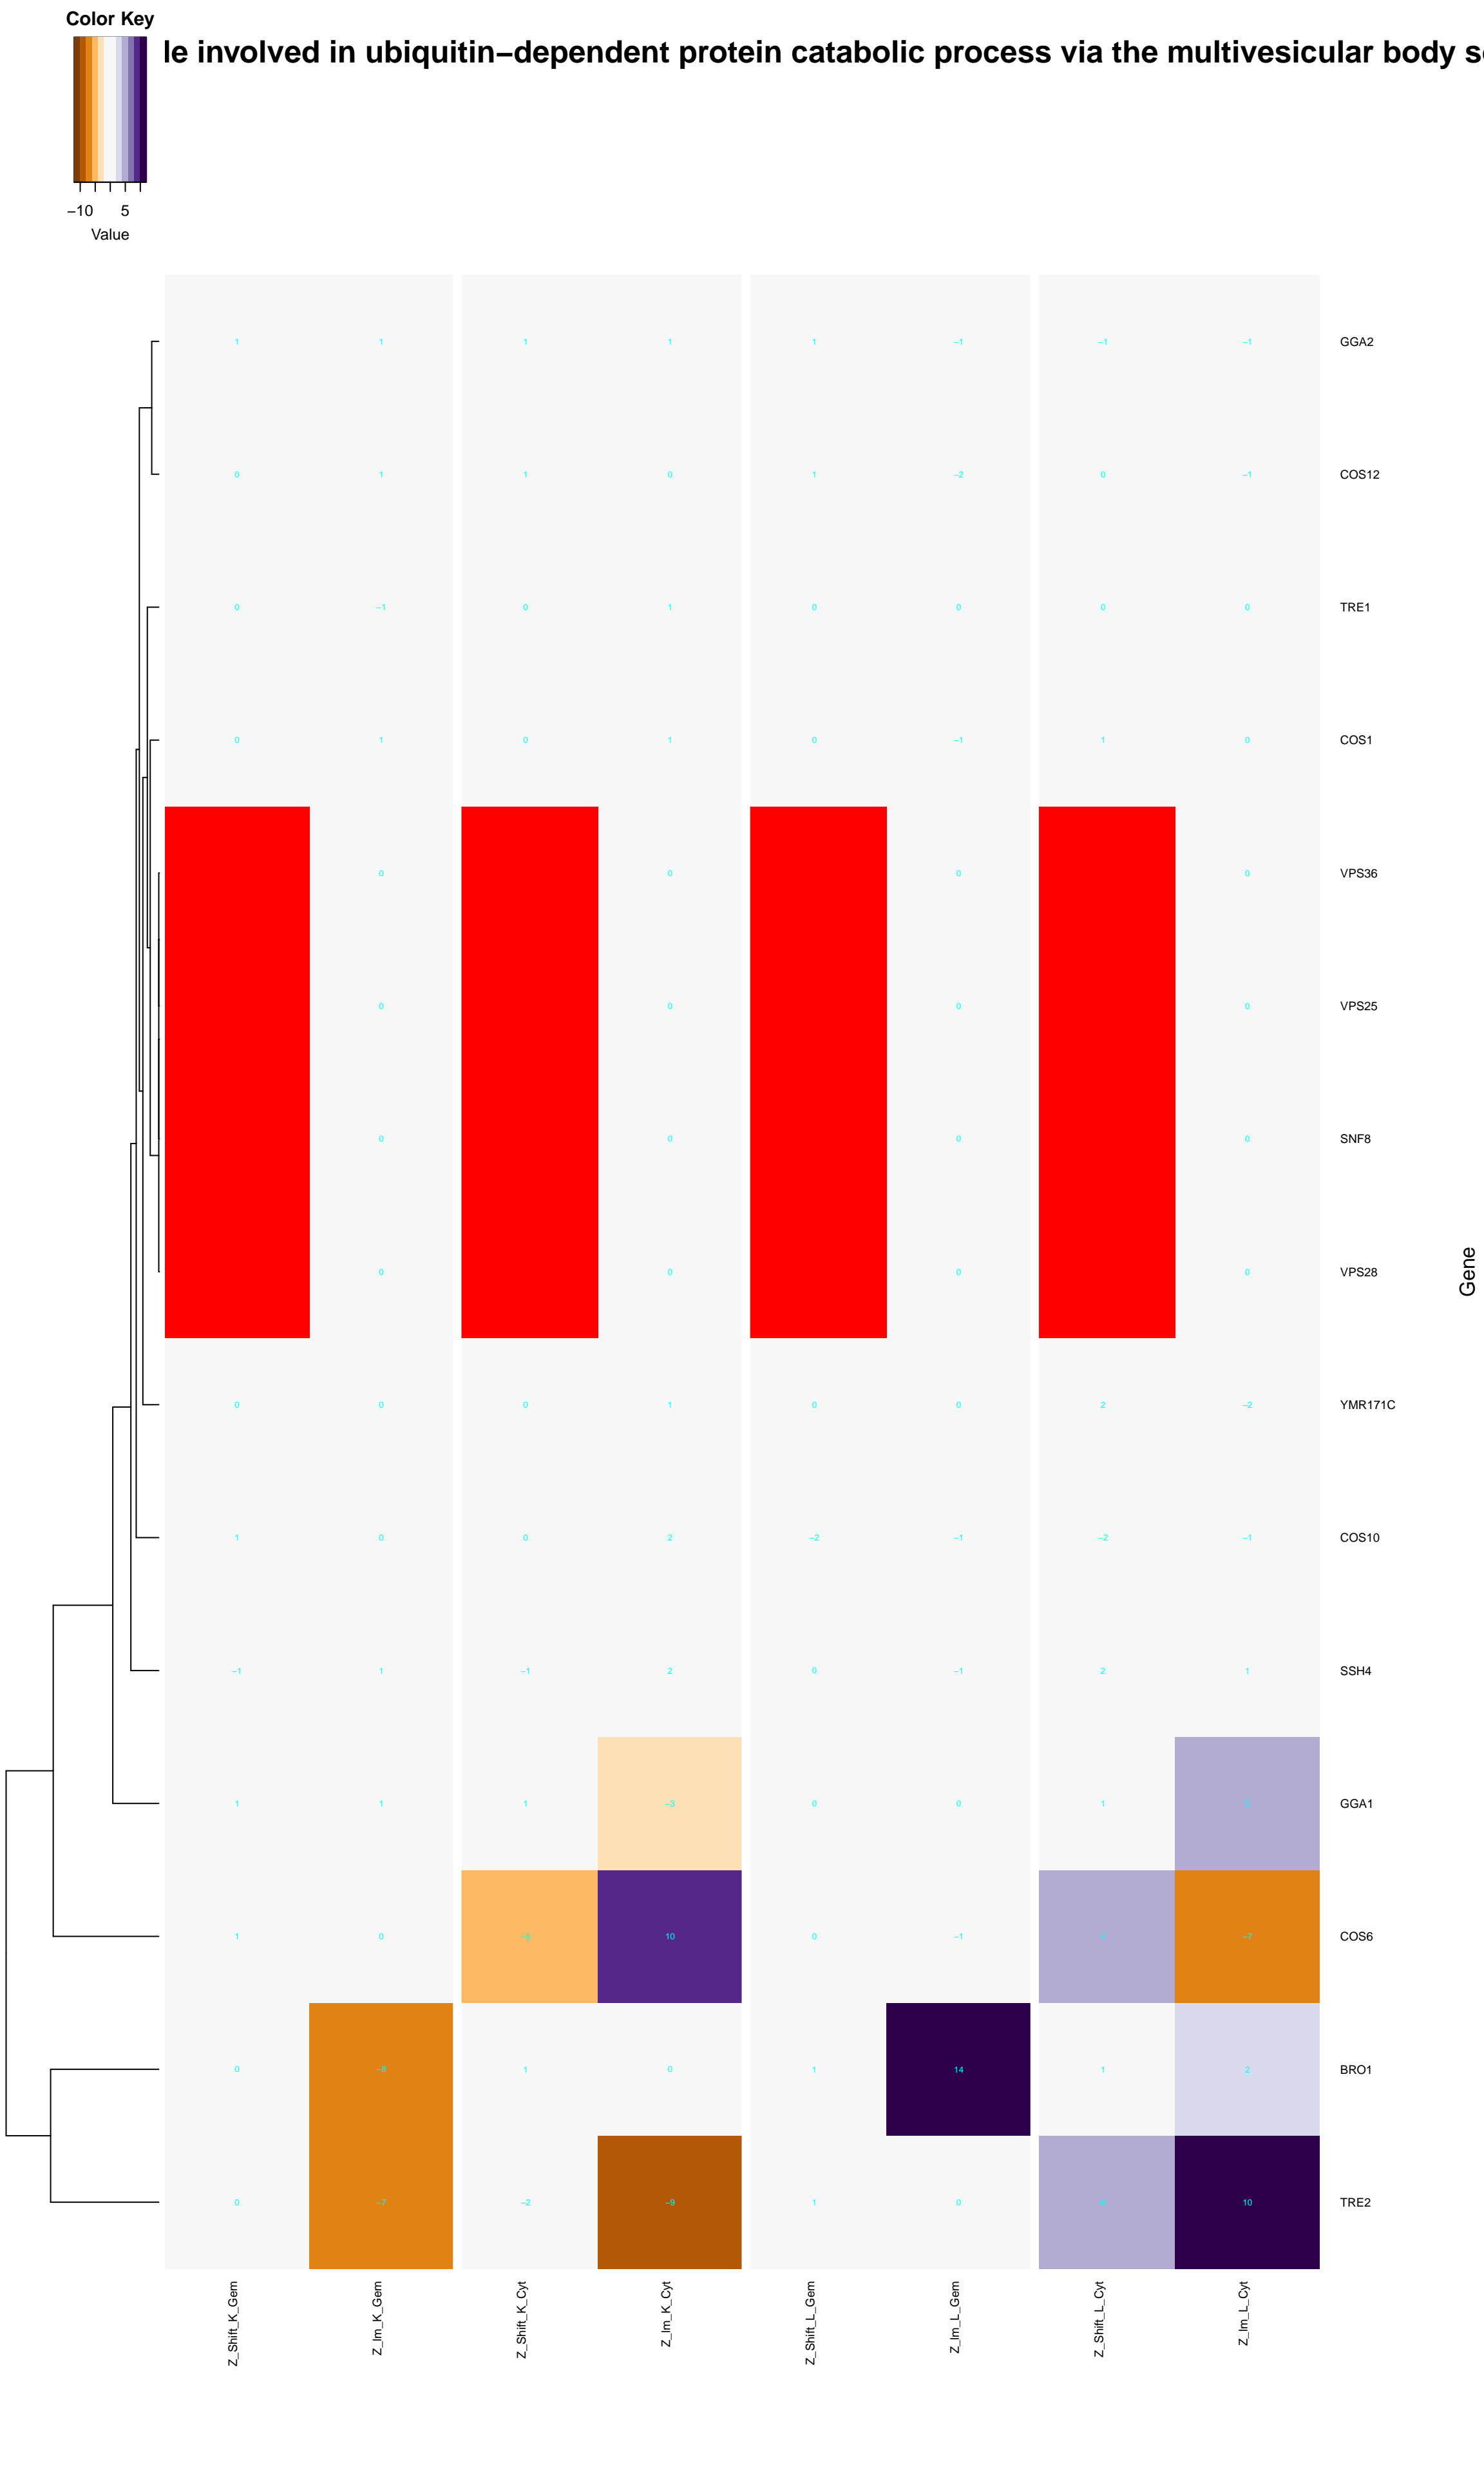

Supplement: s1 [file s1]

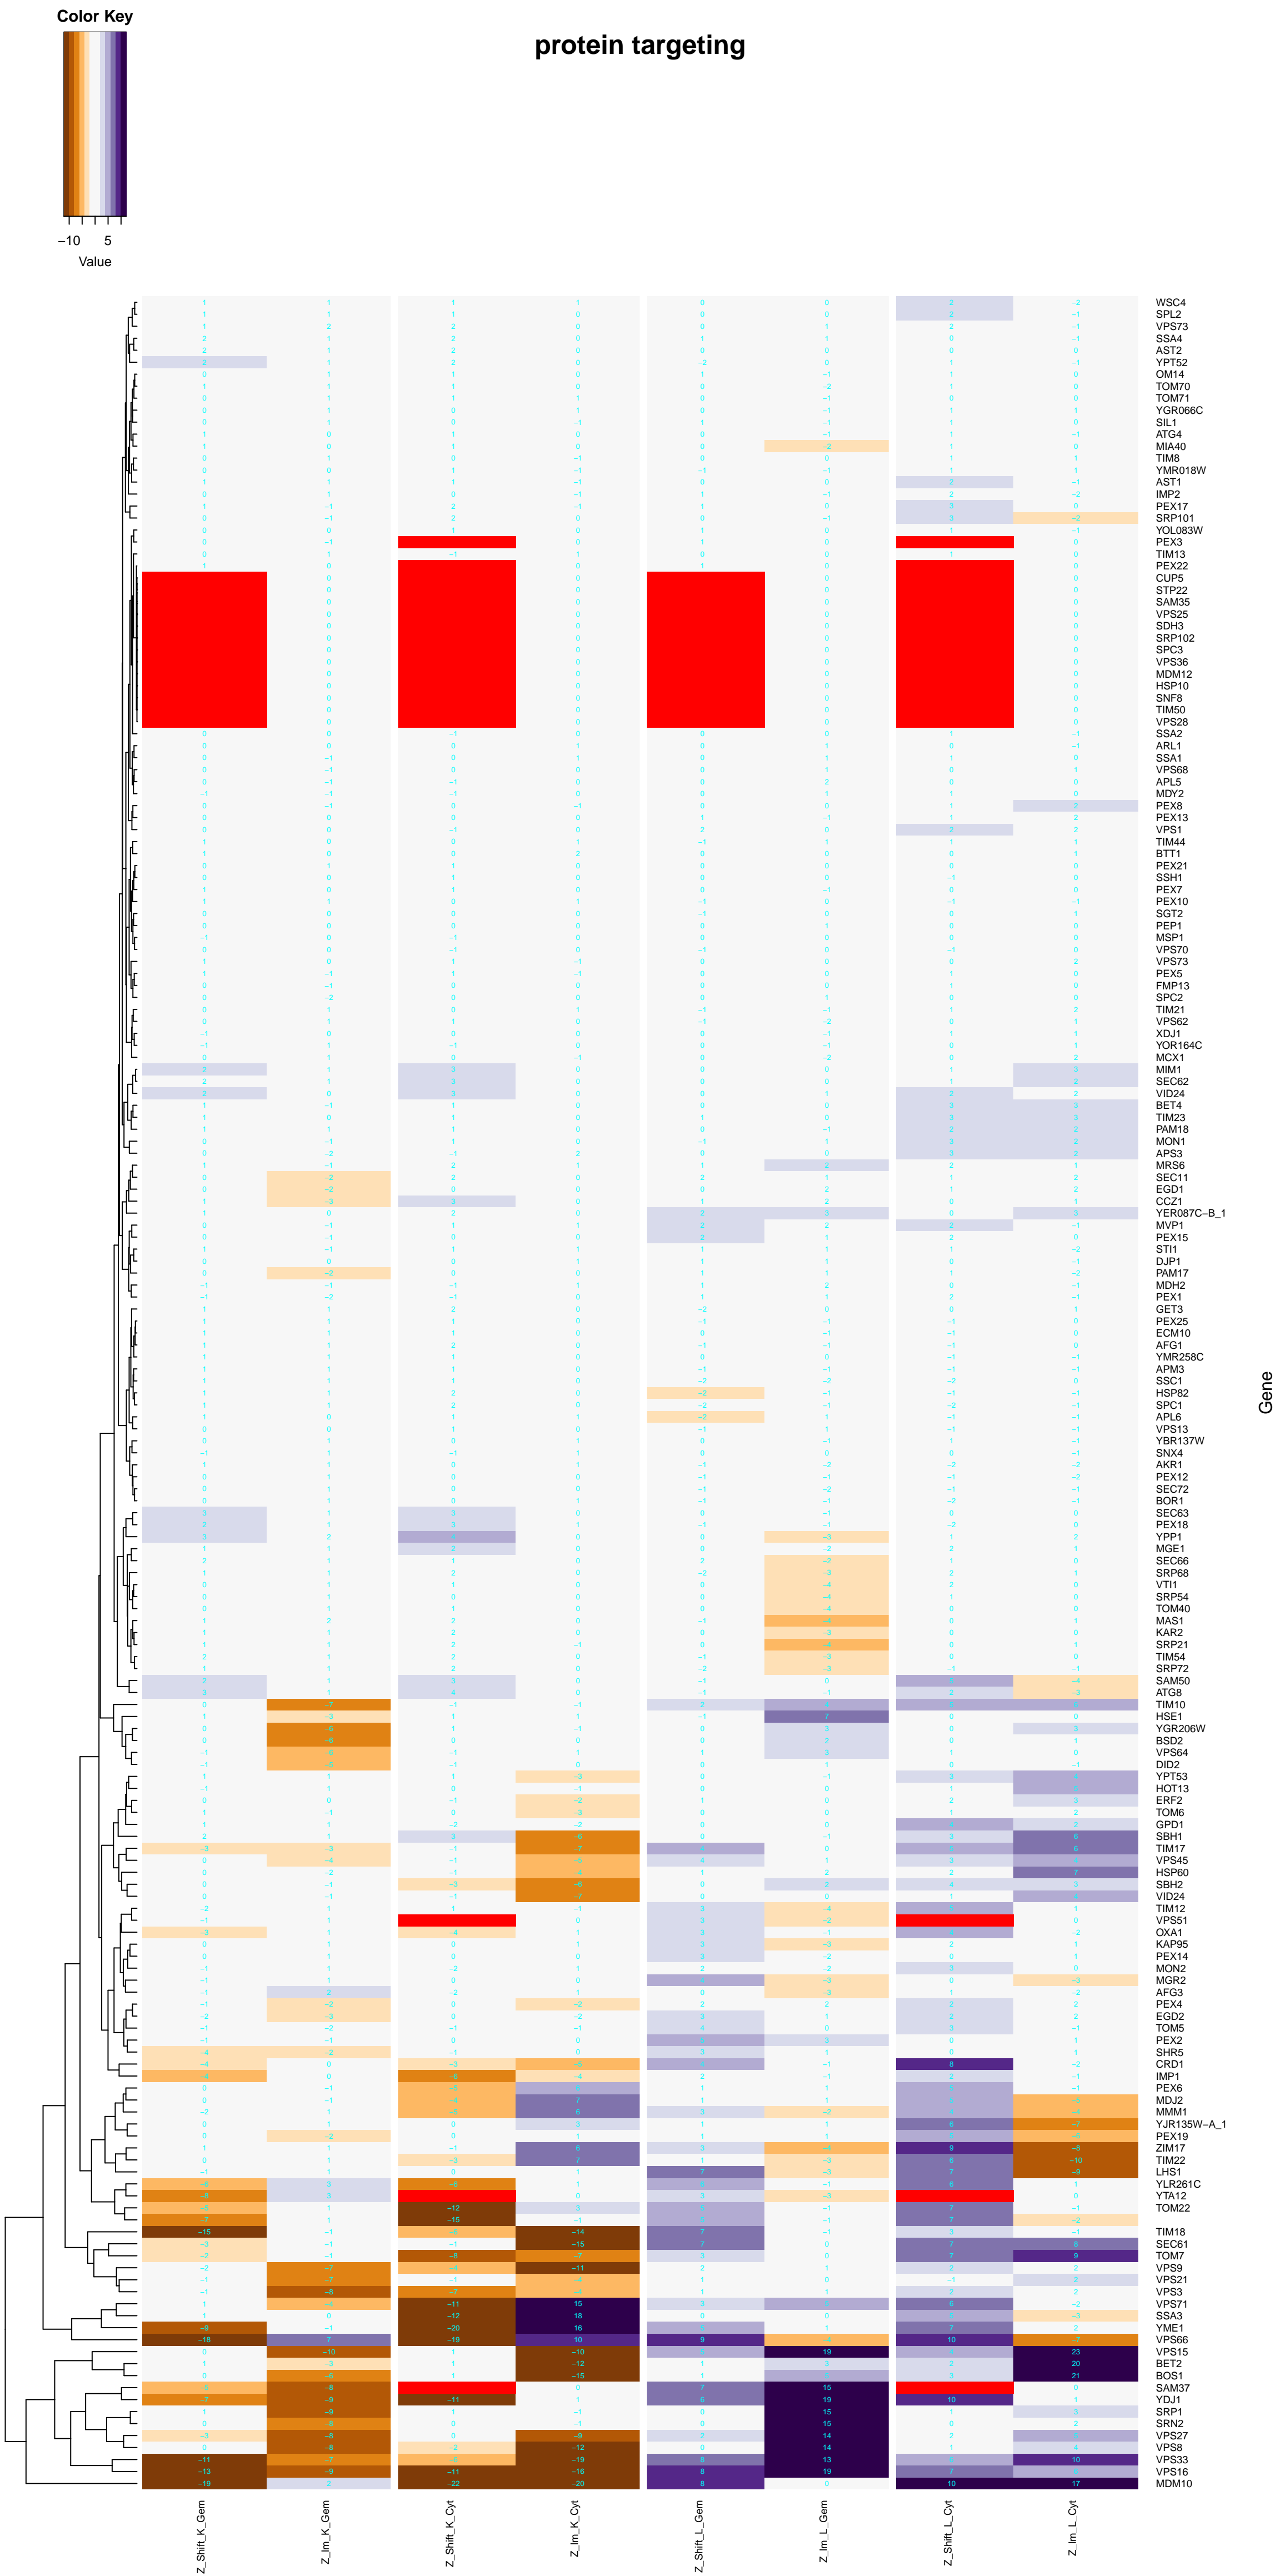

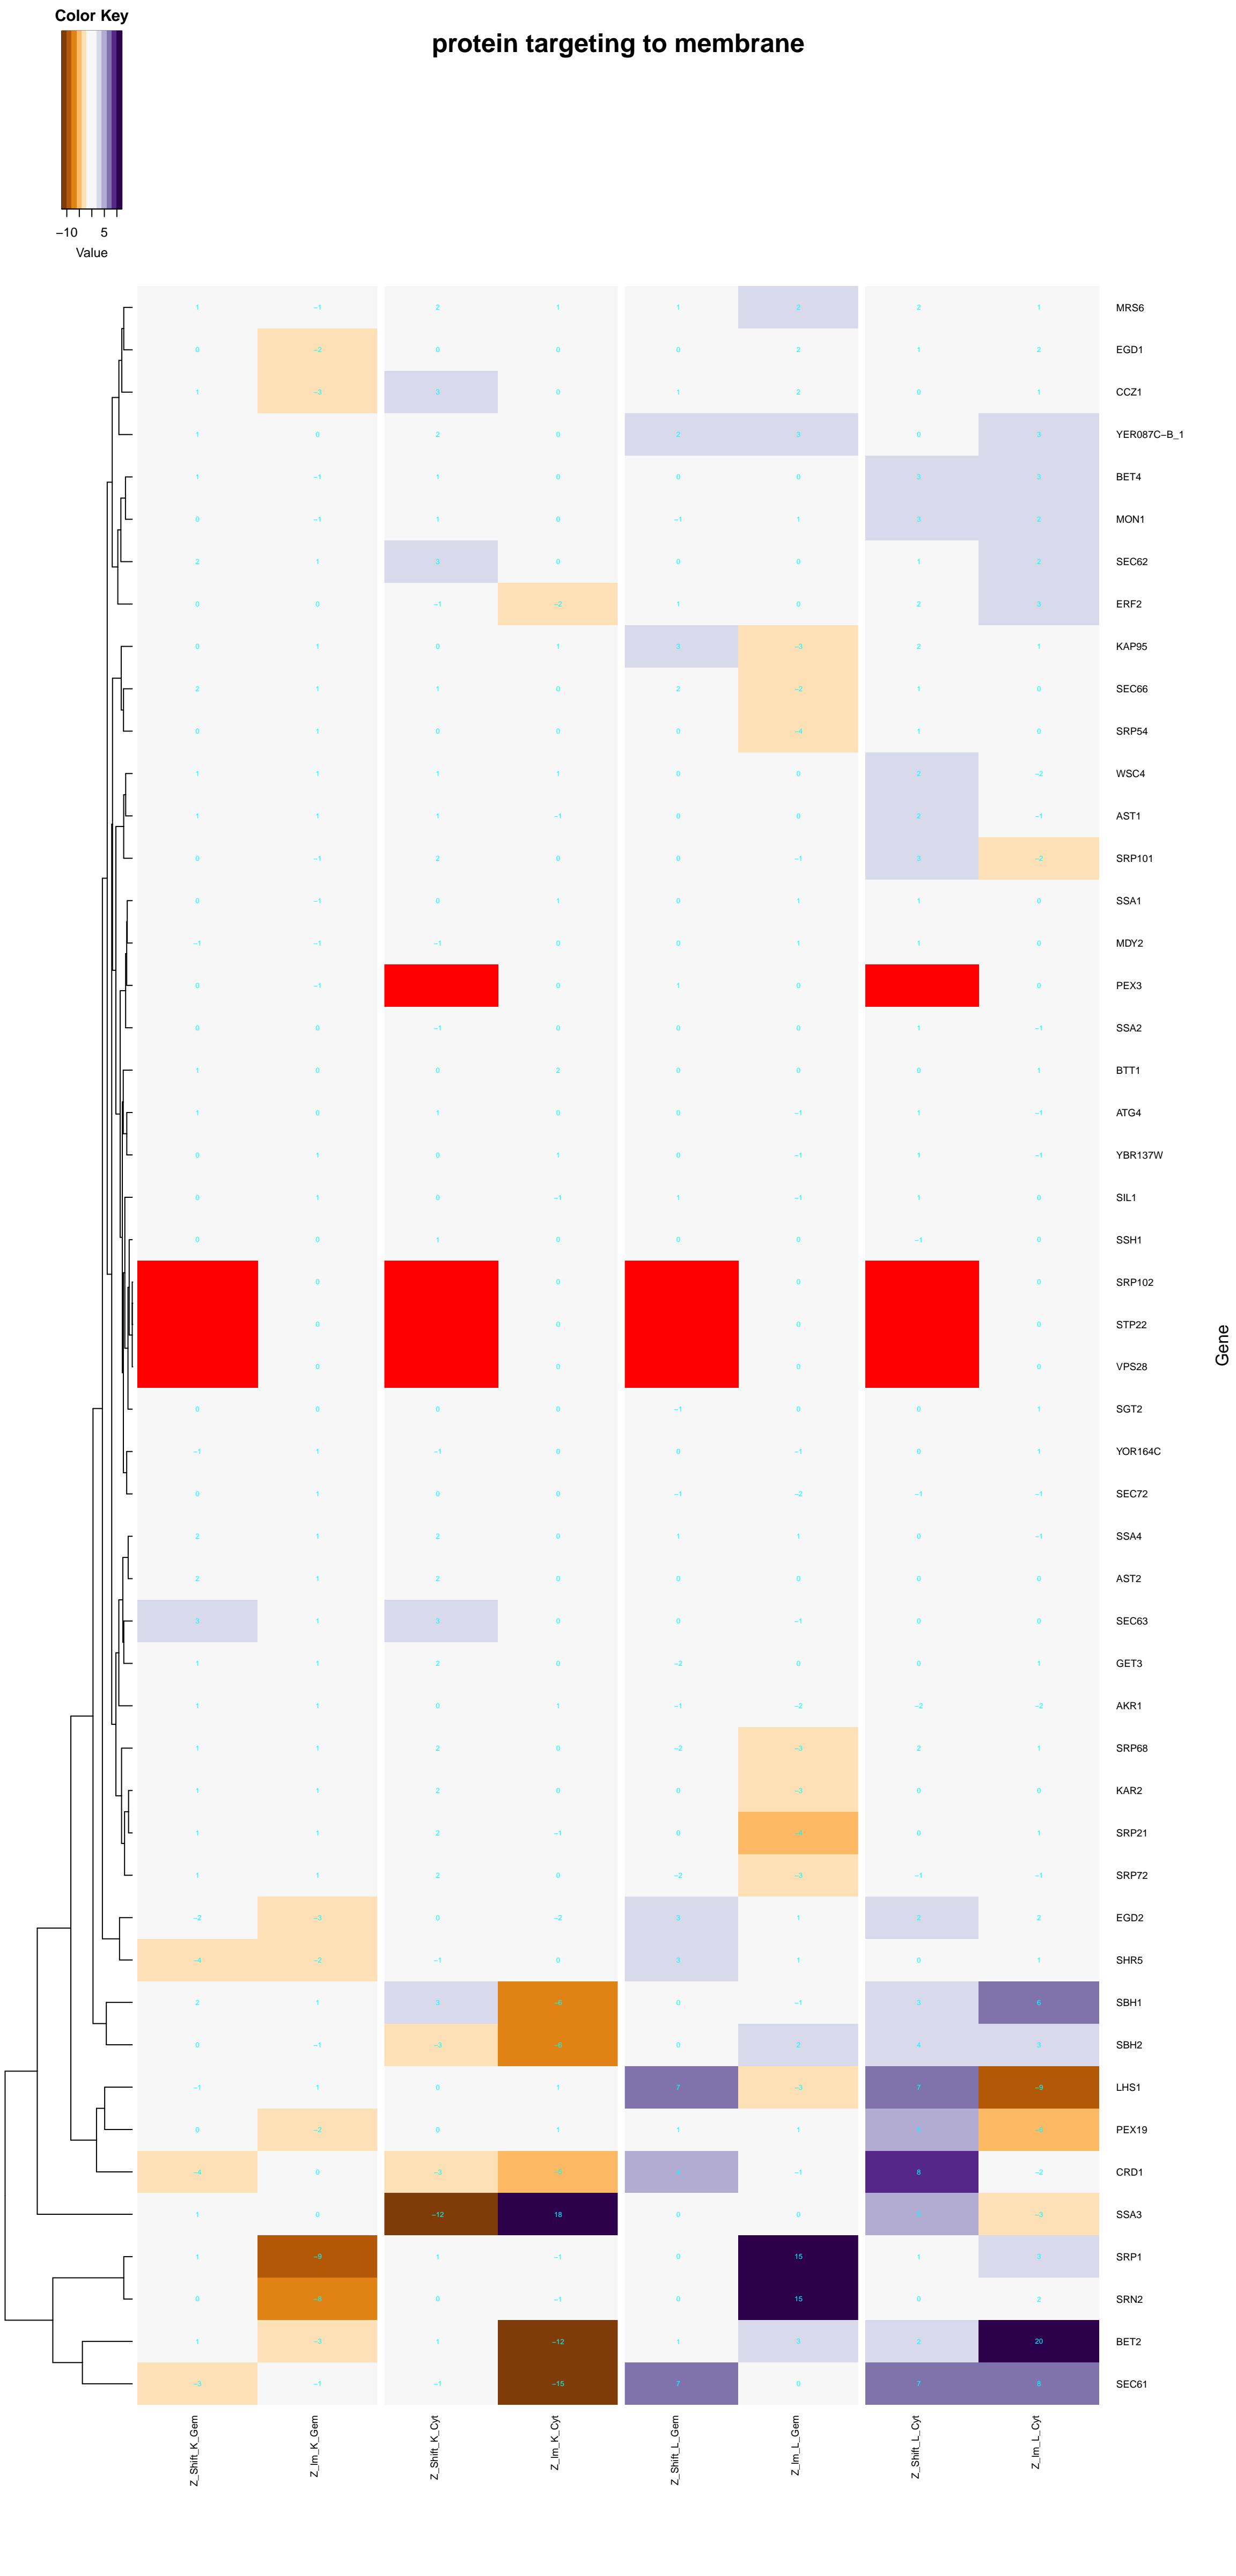

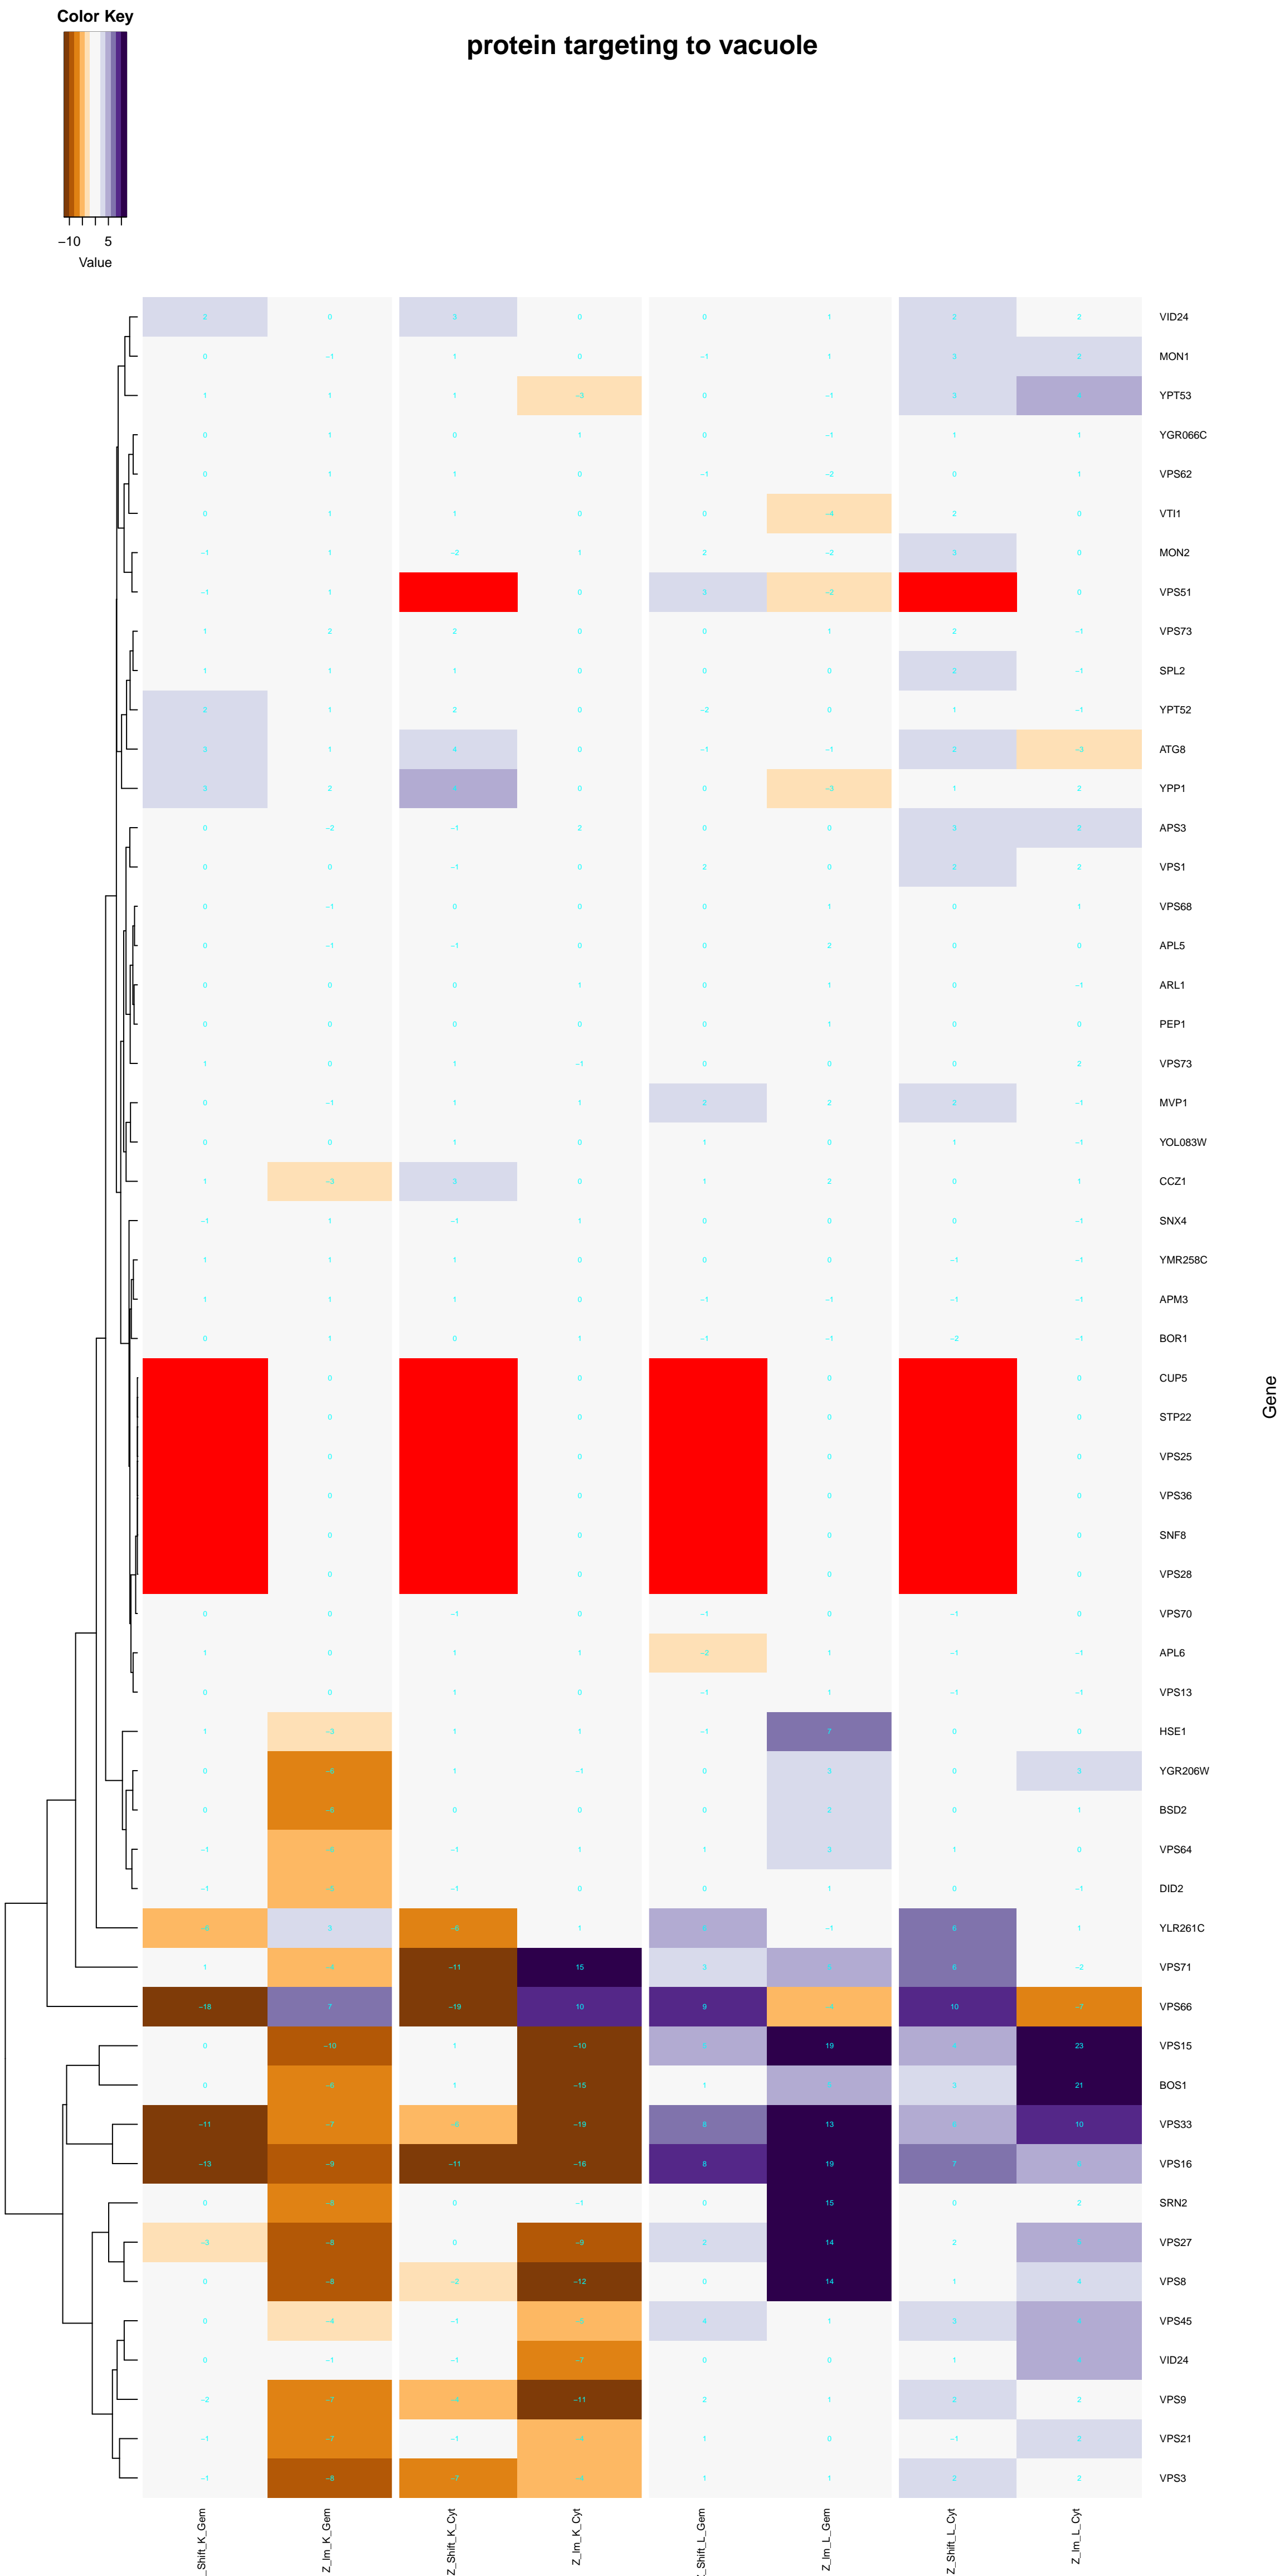

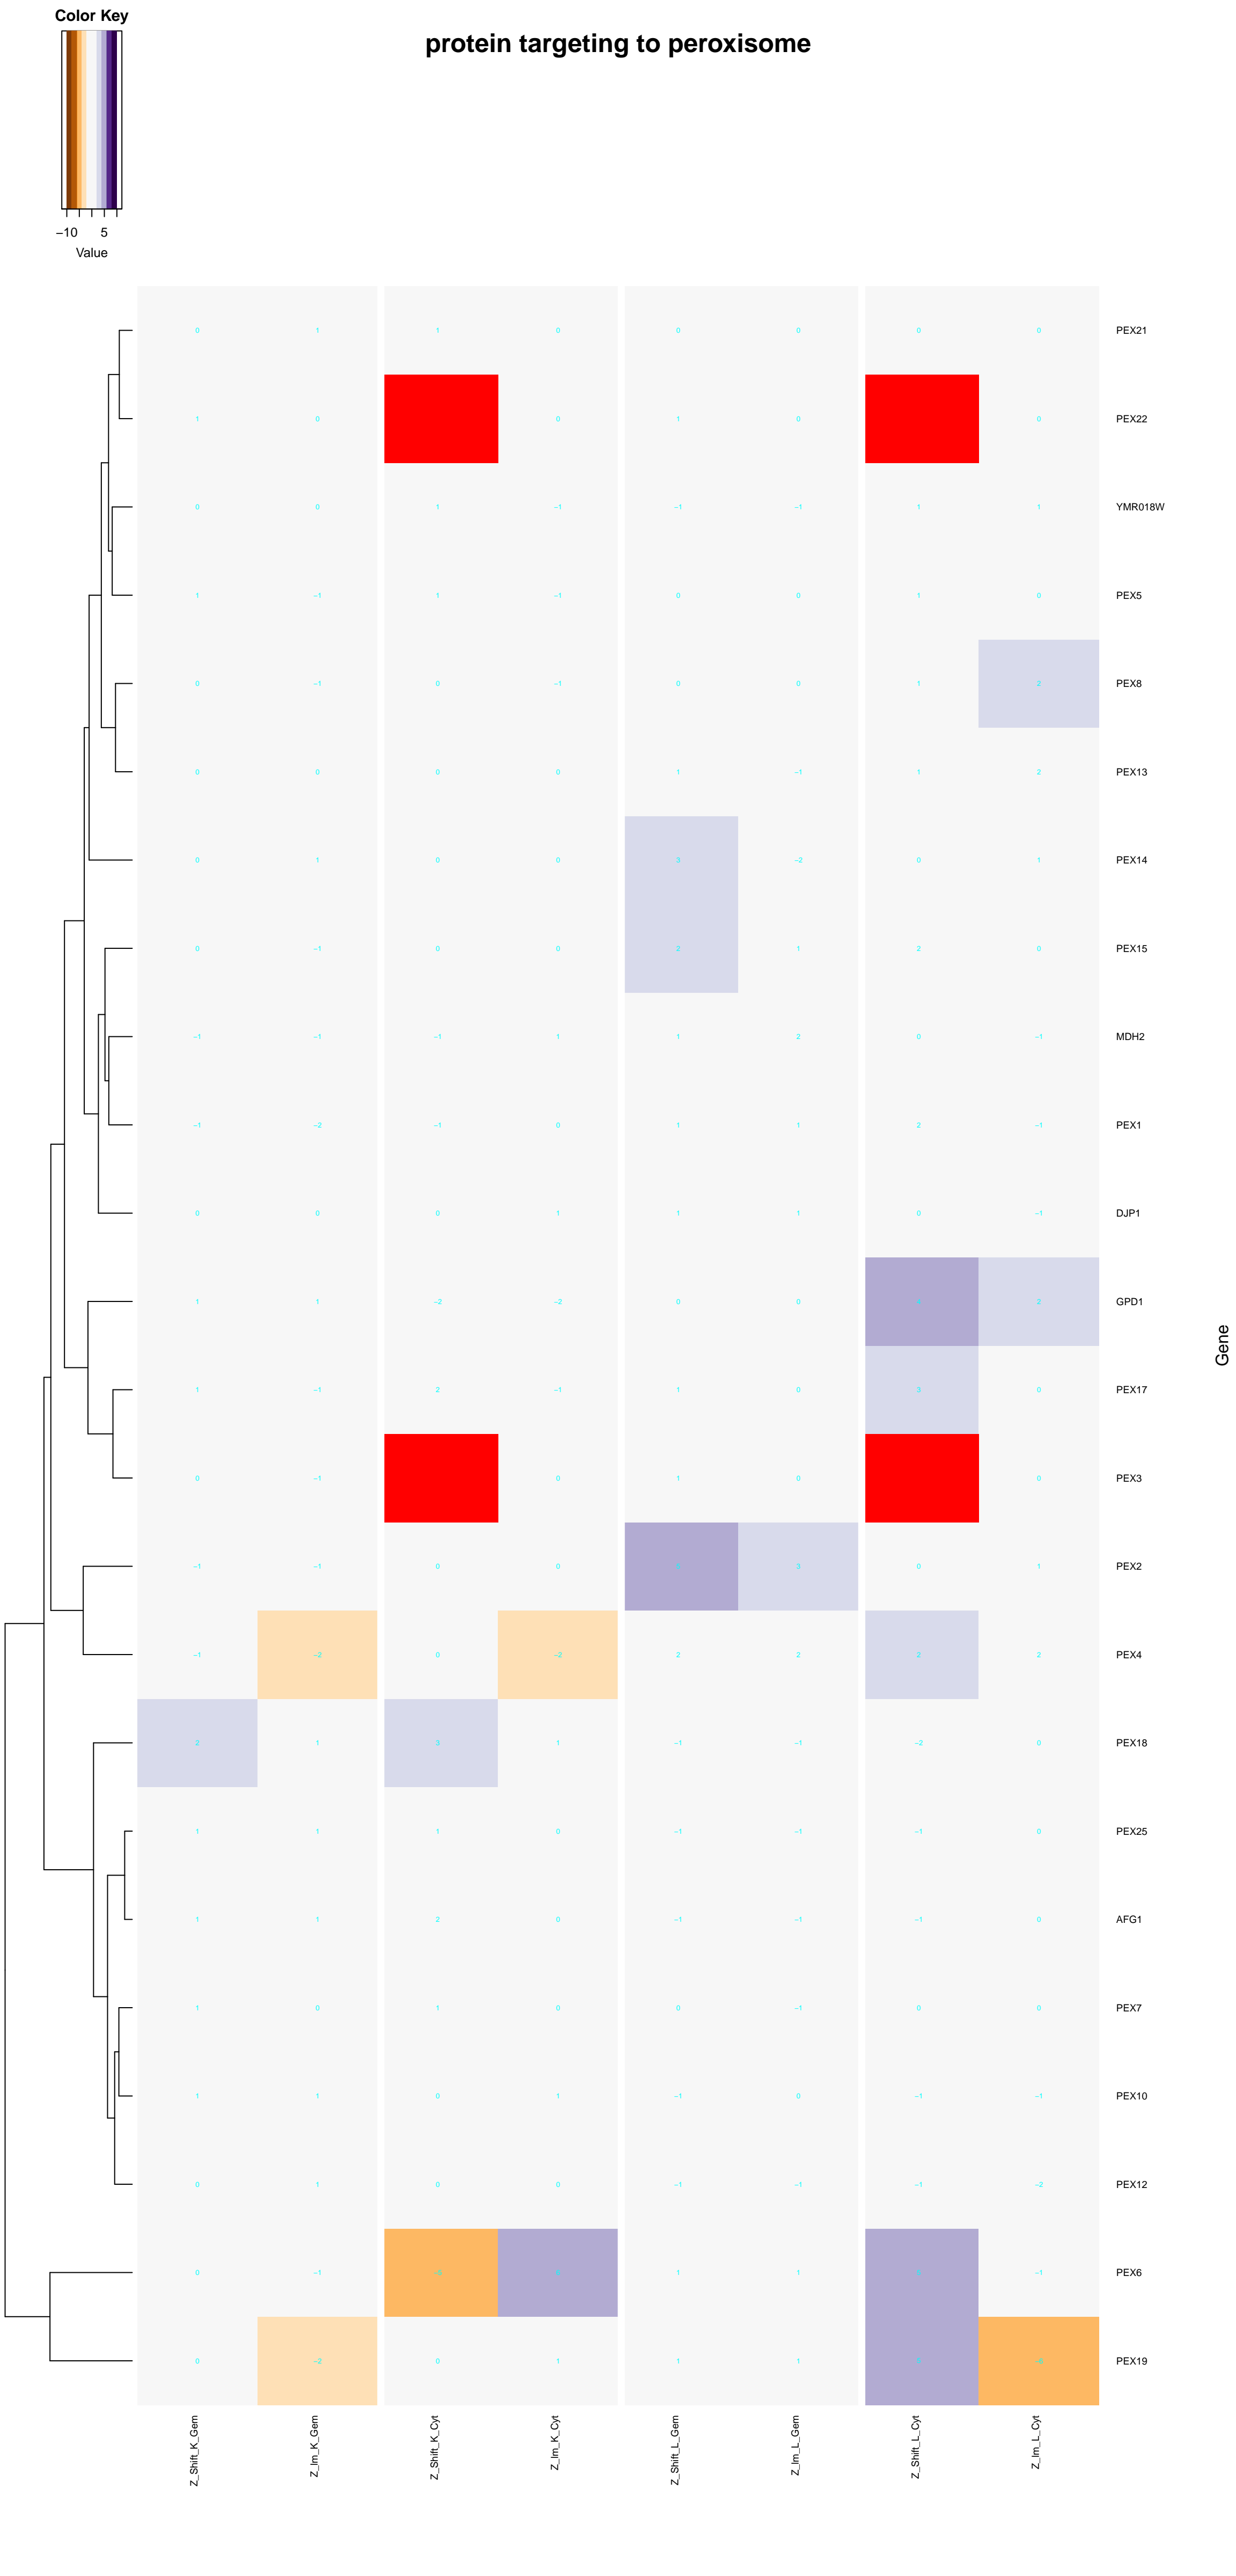

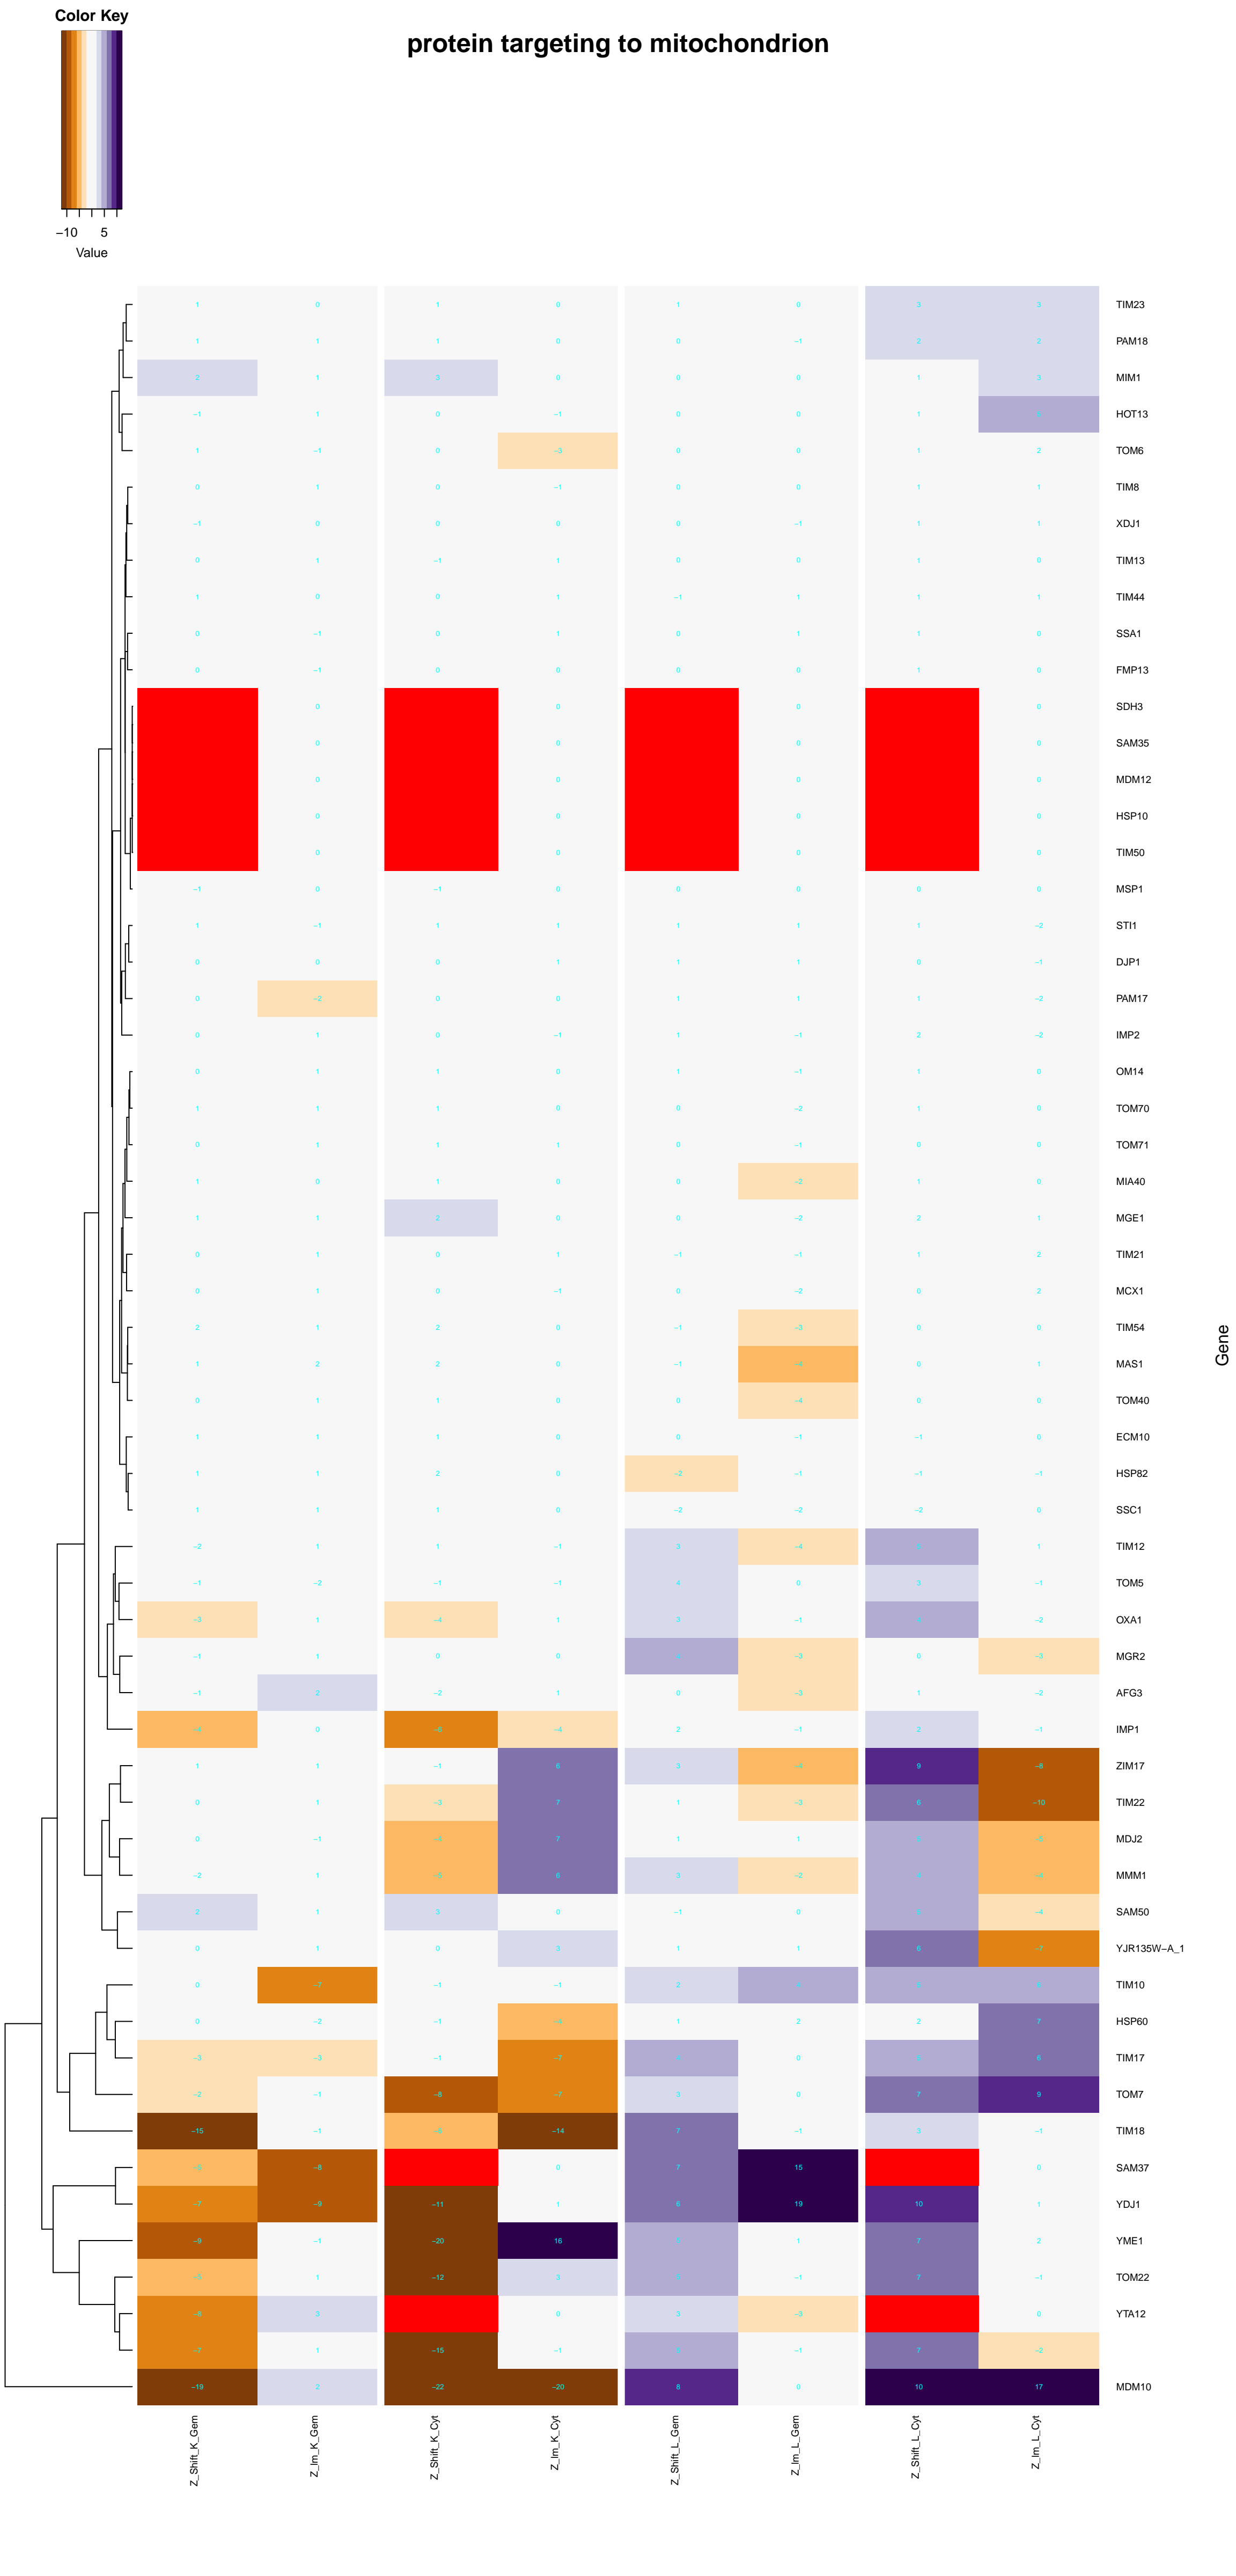

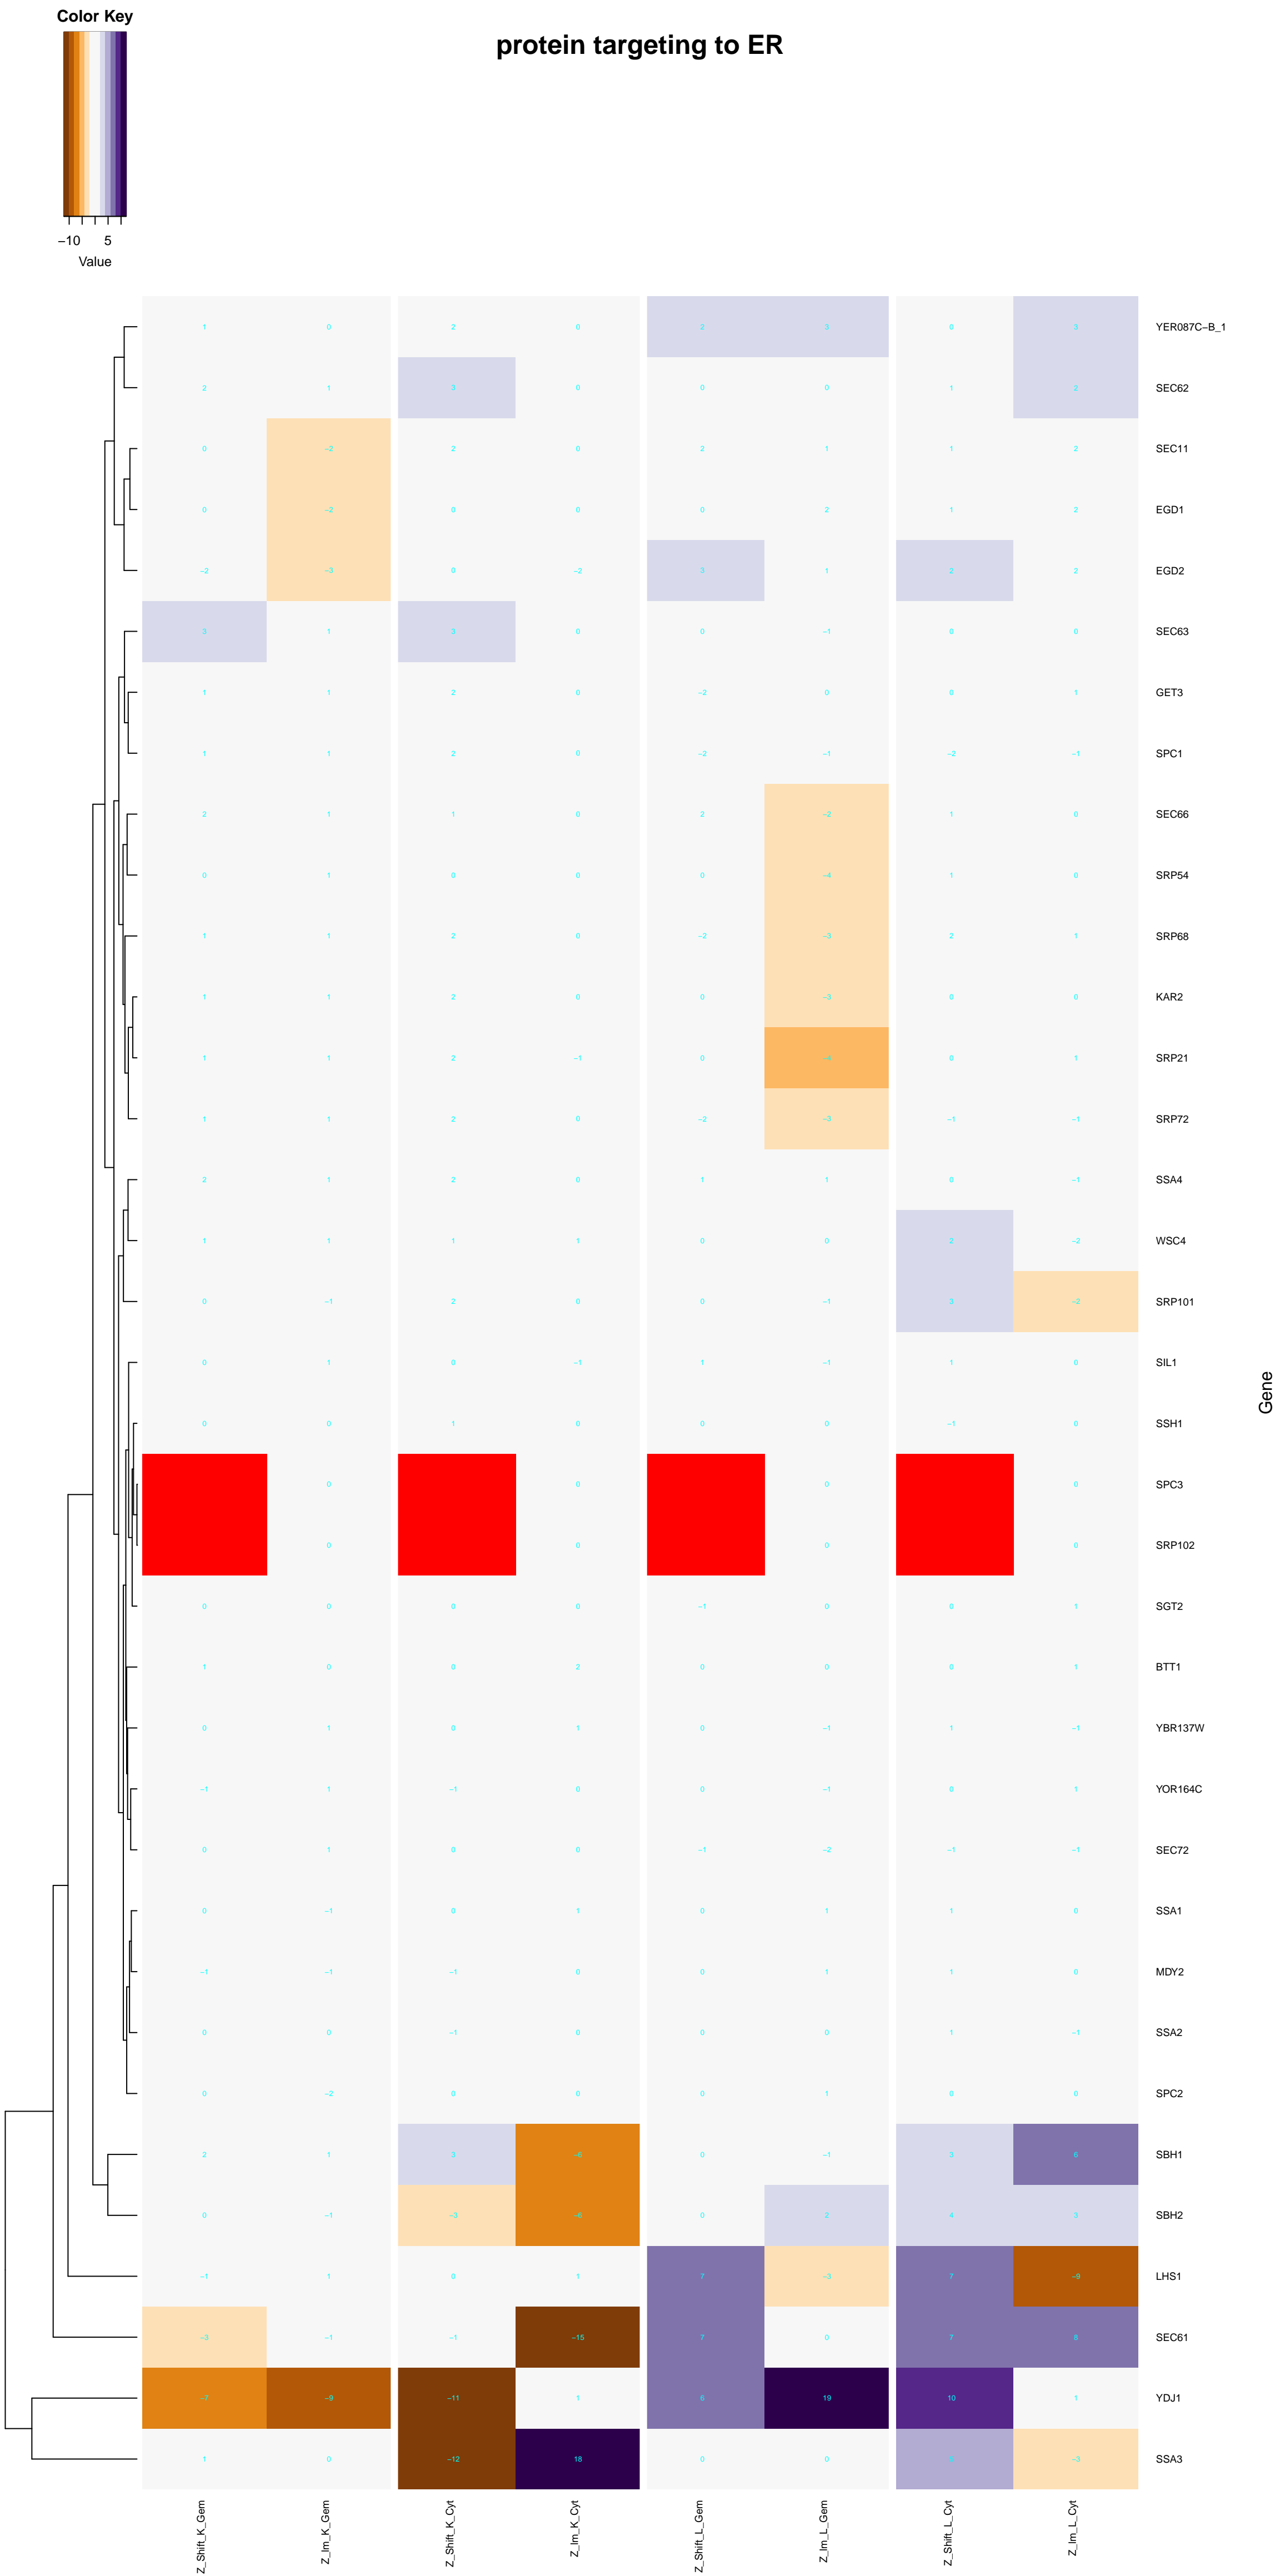

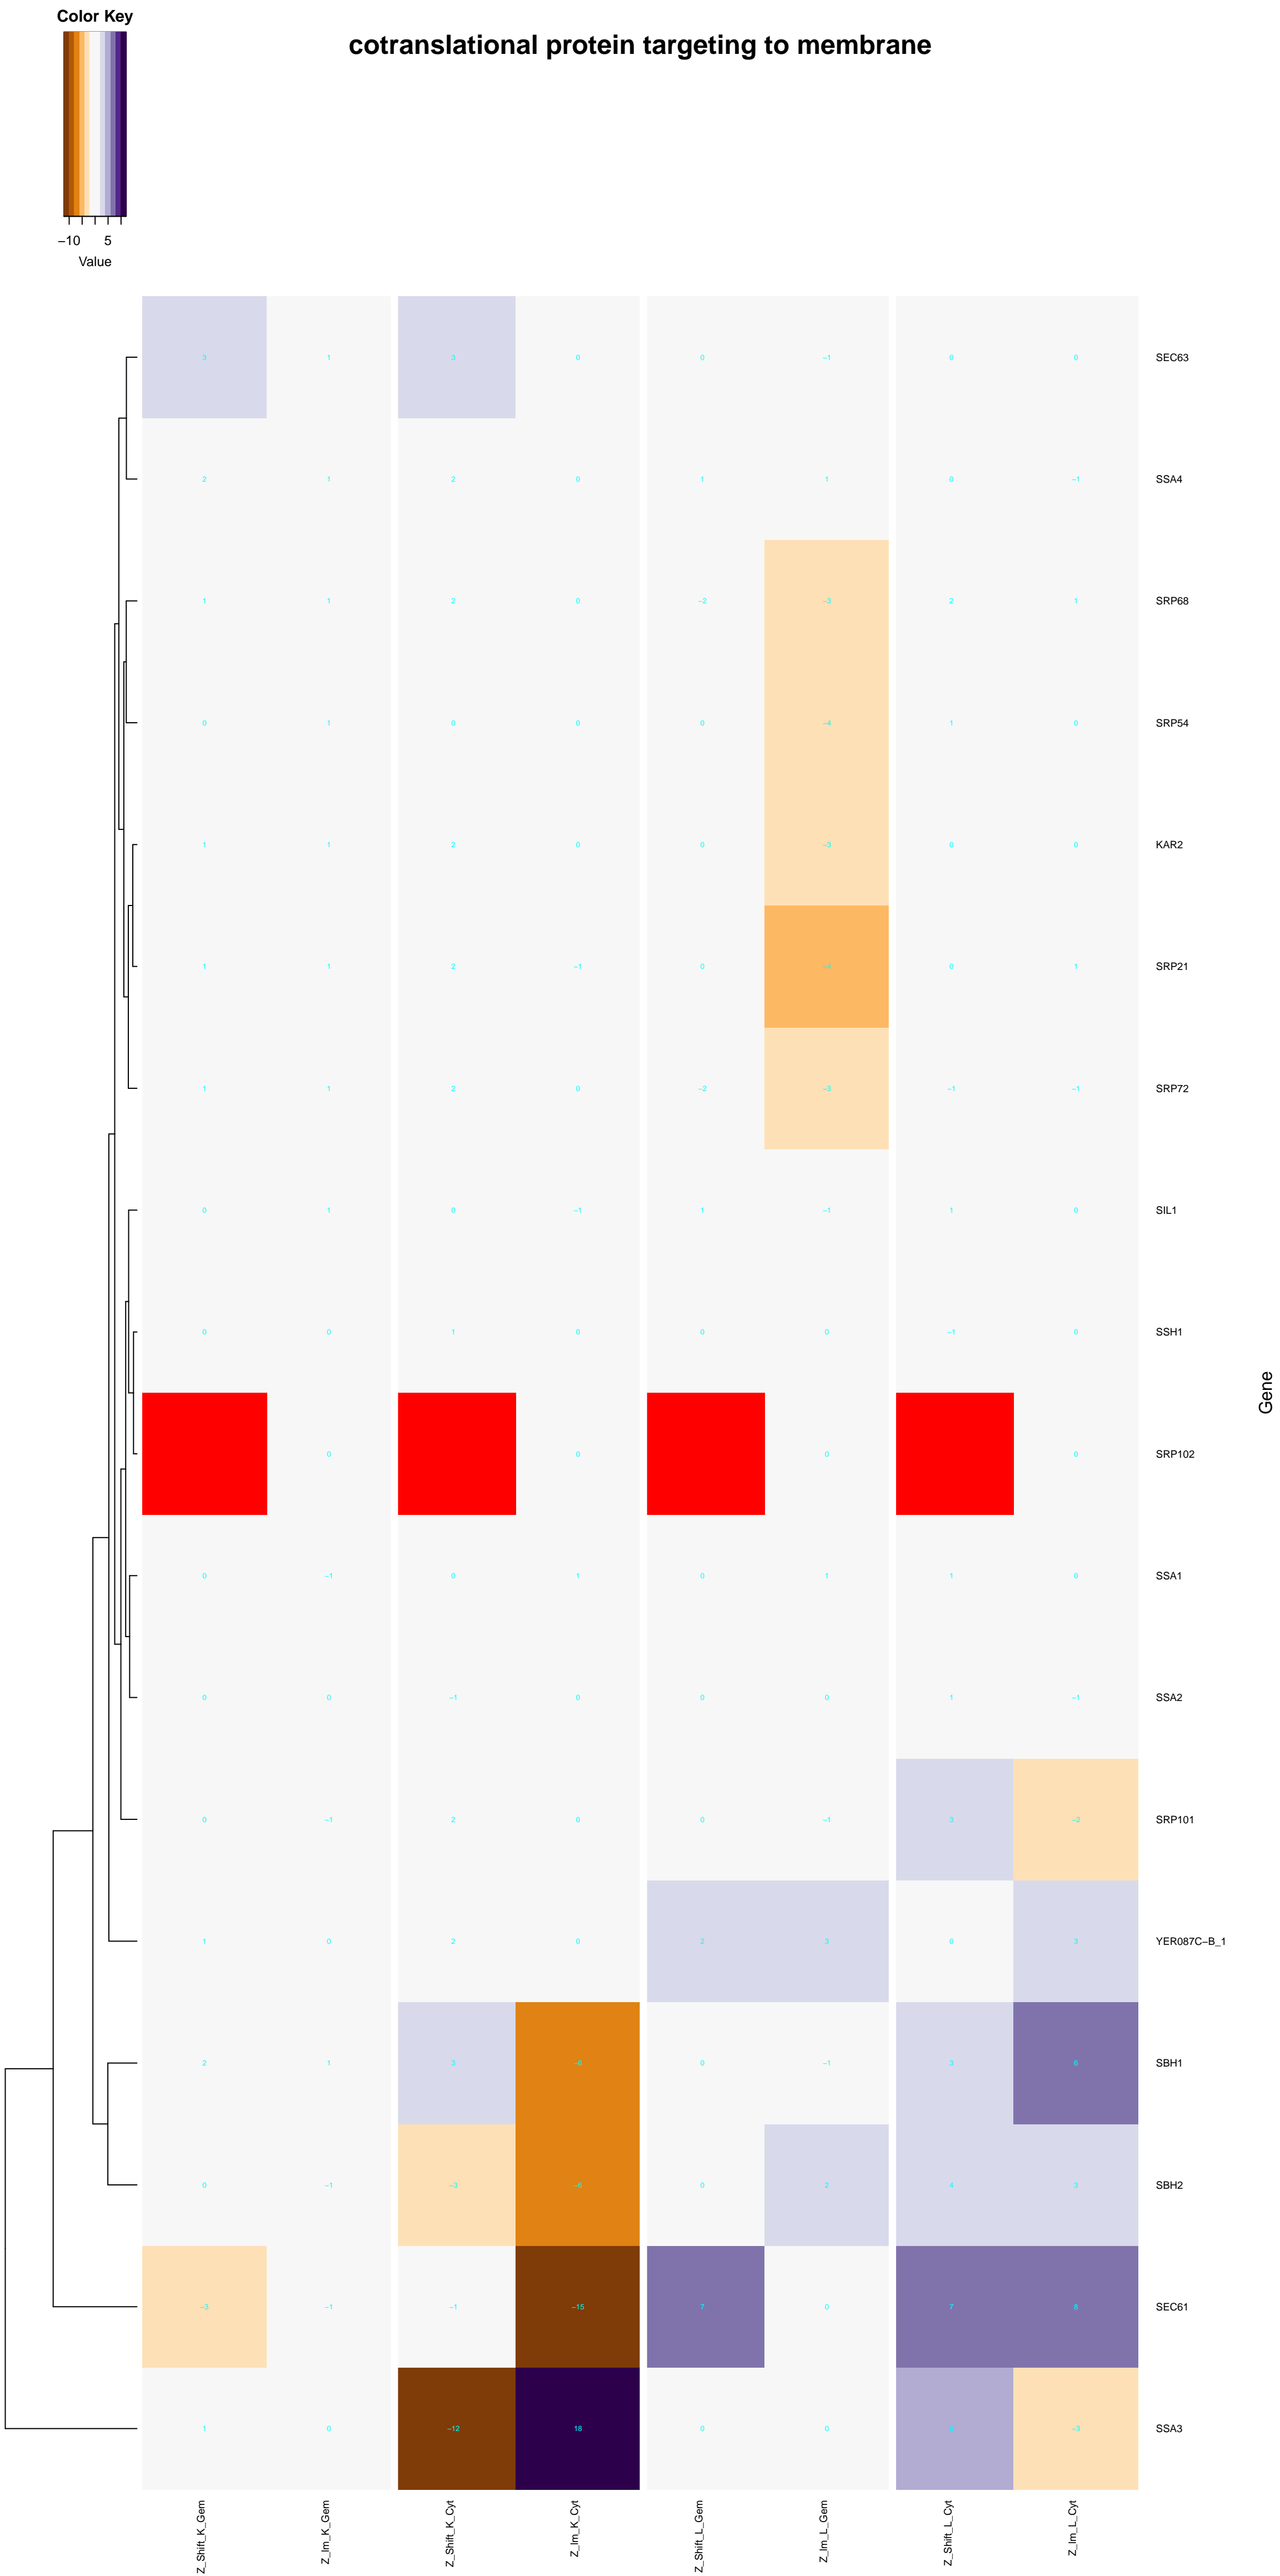

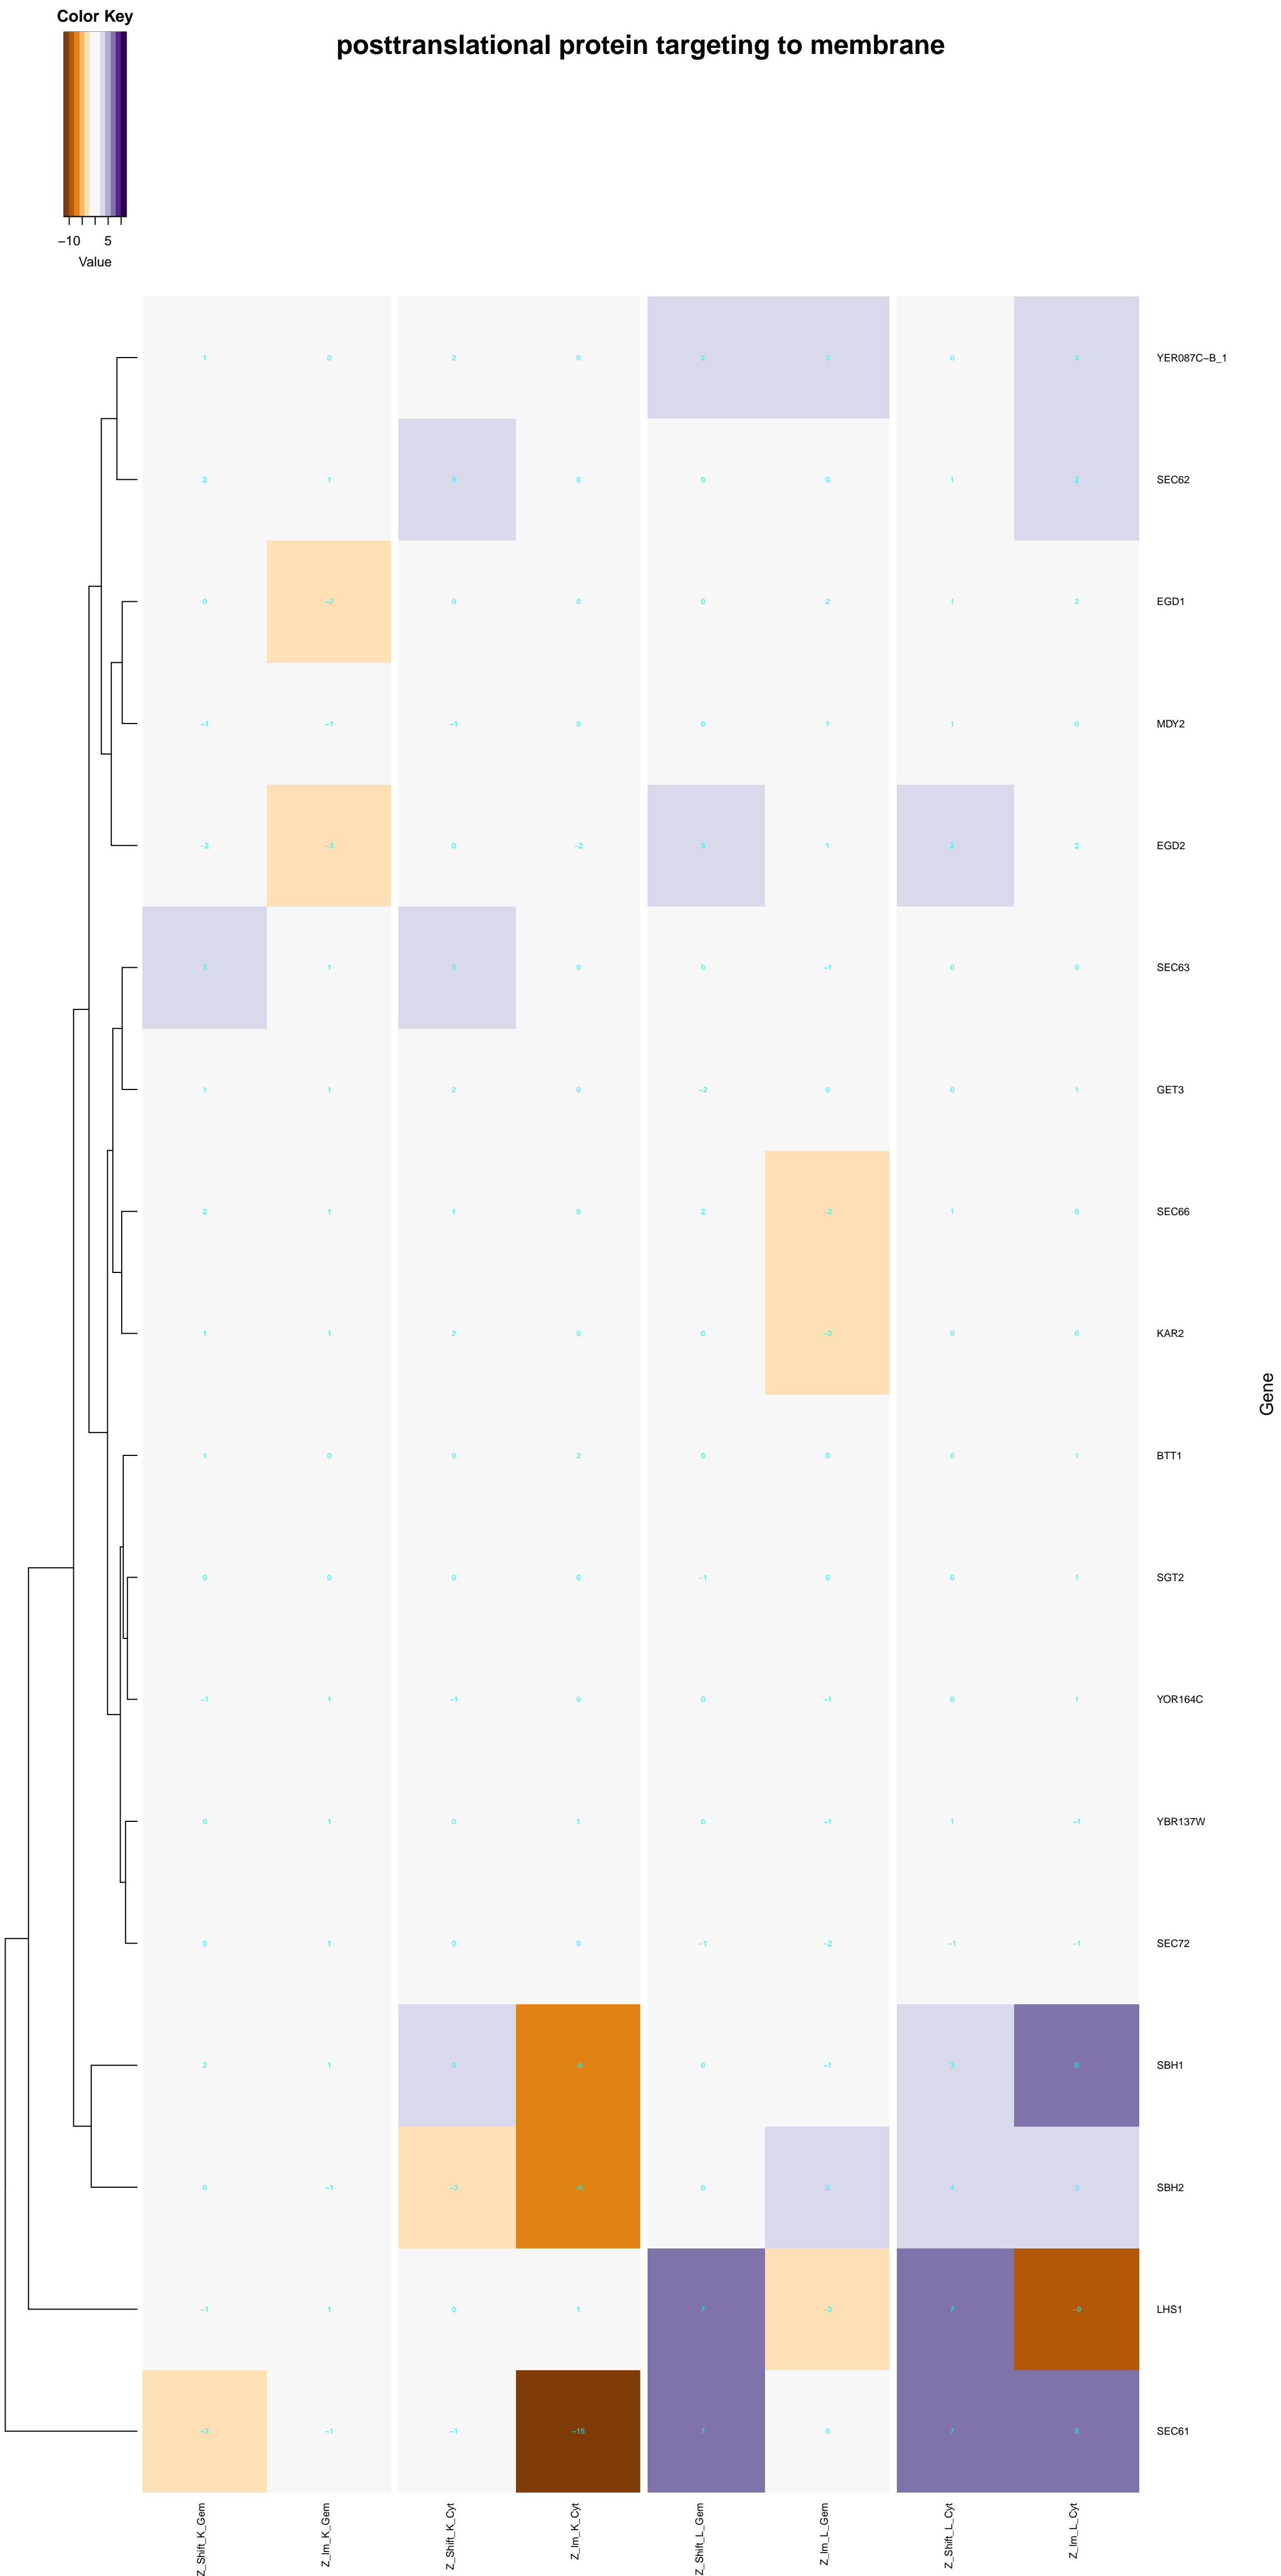

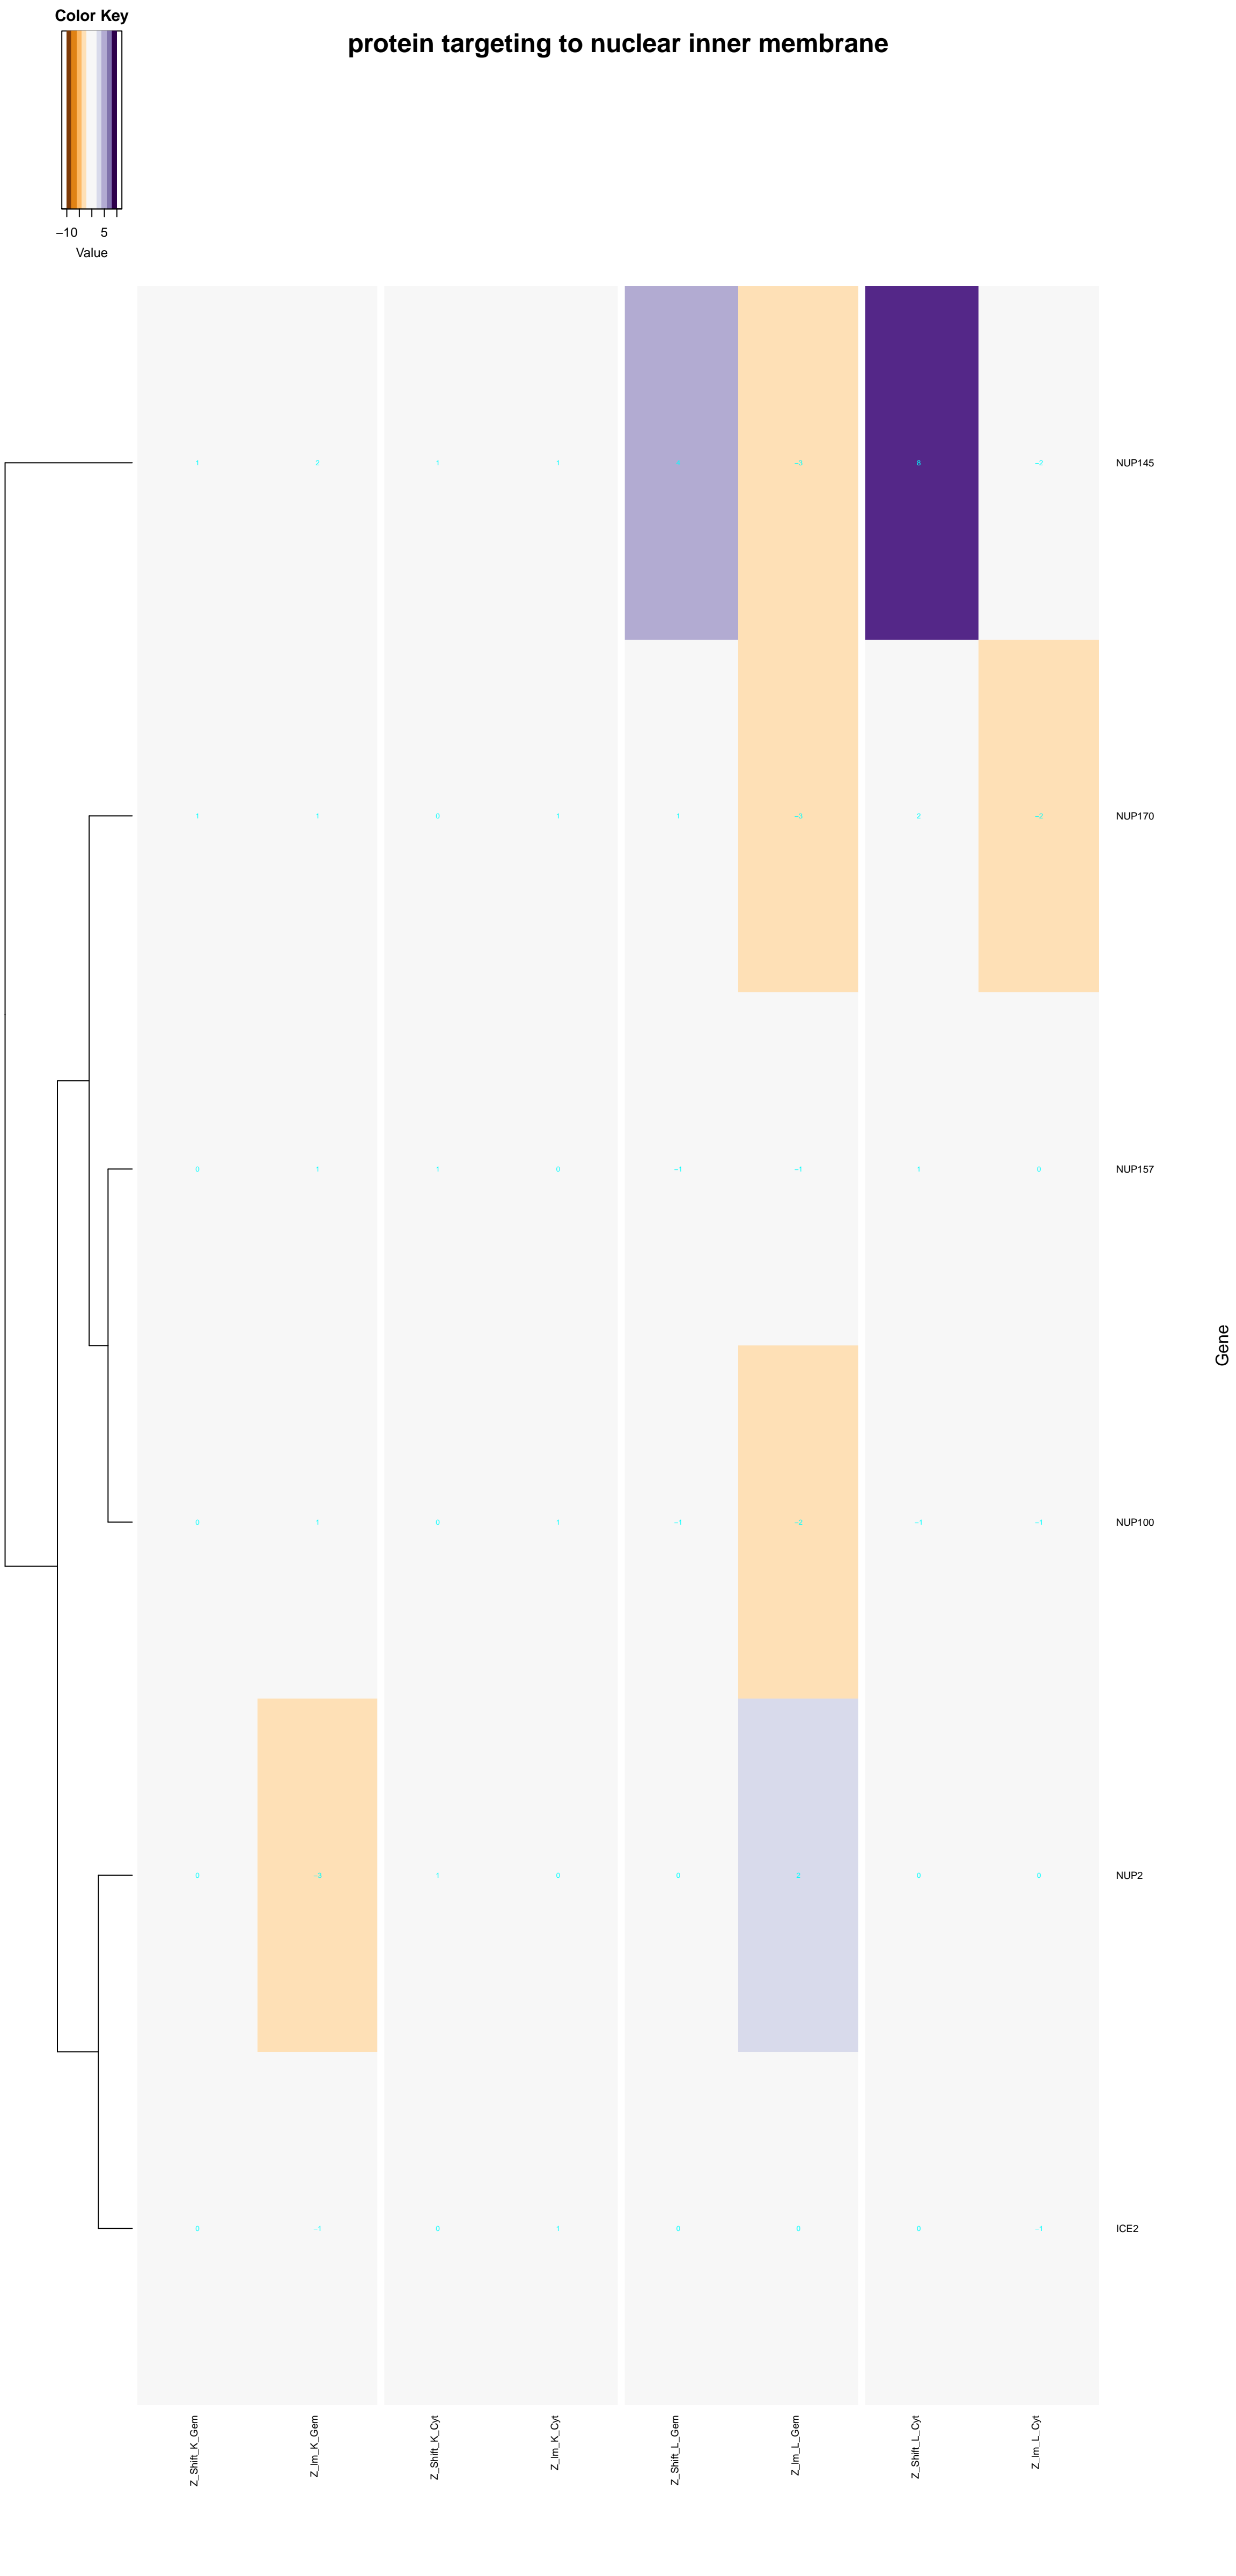

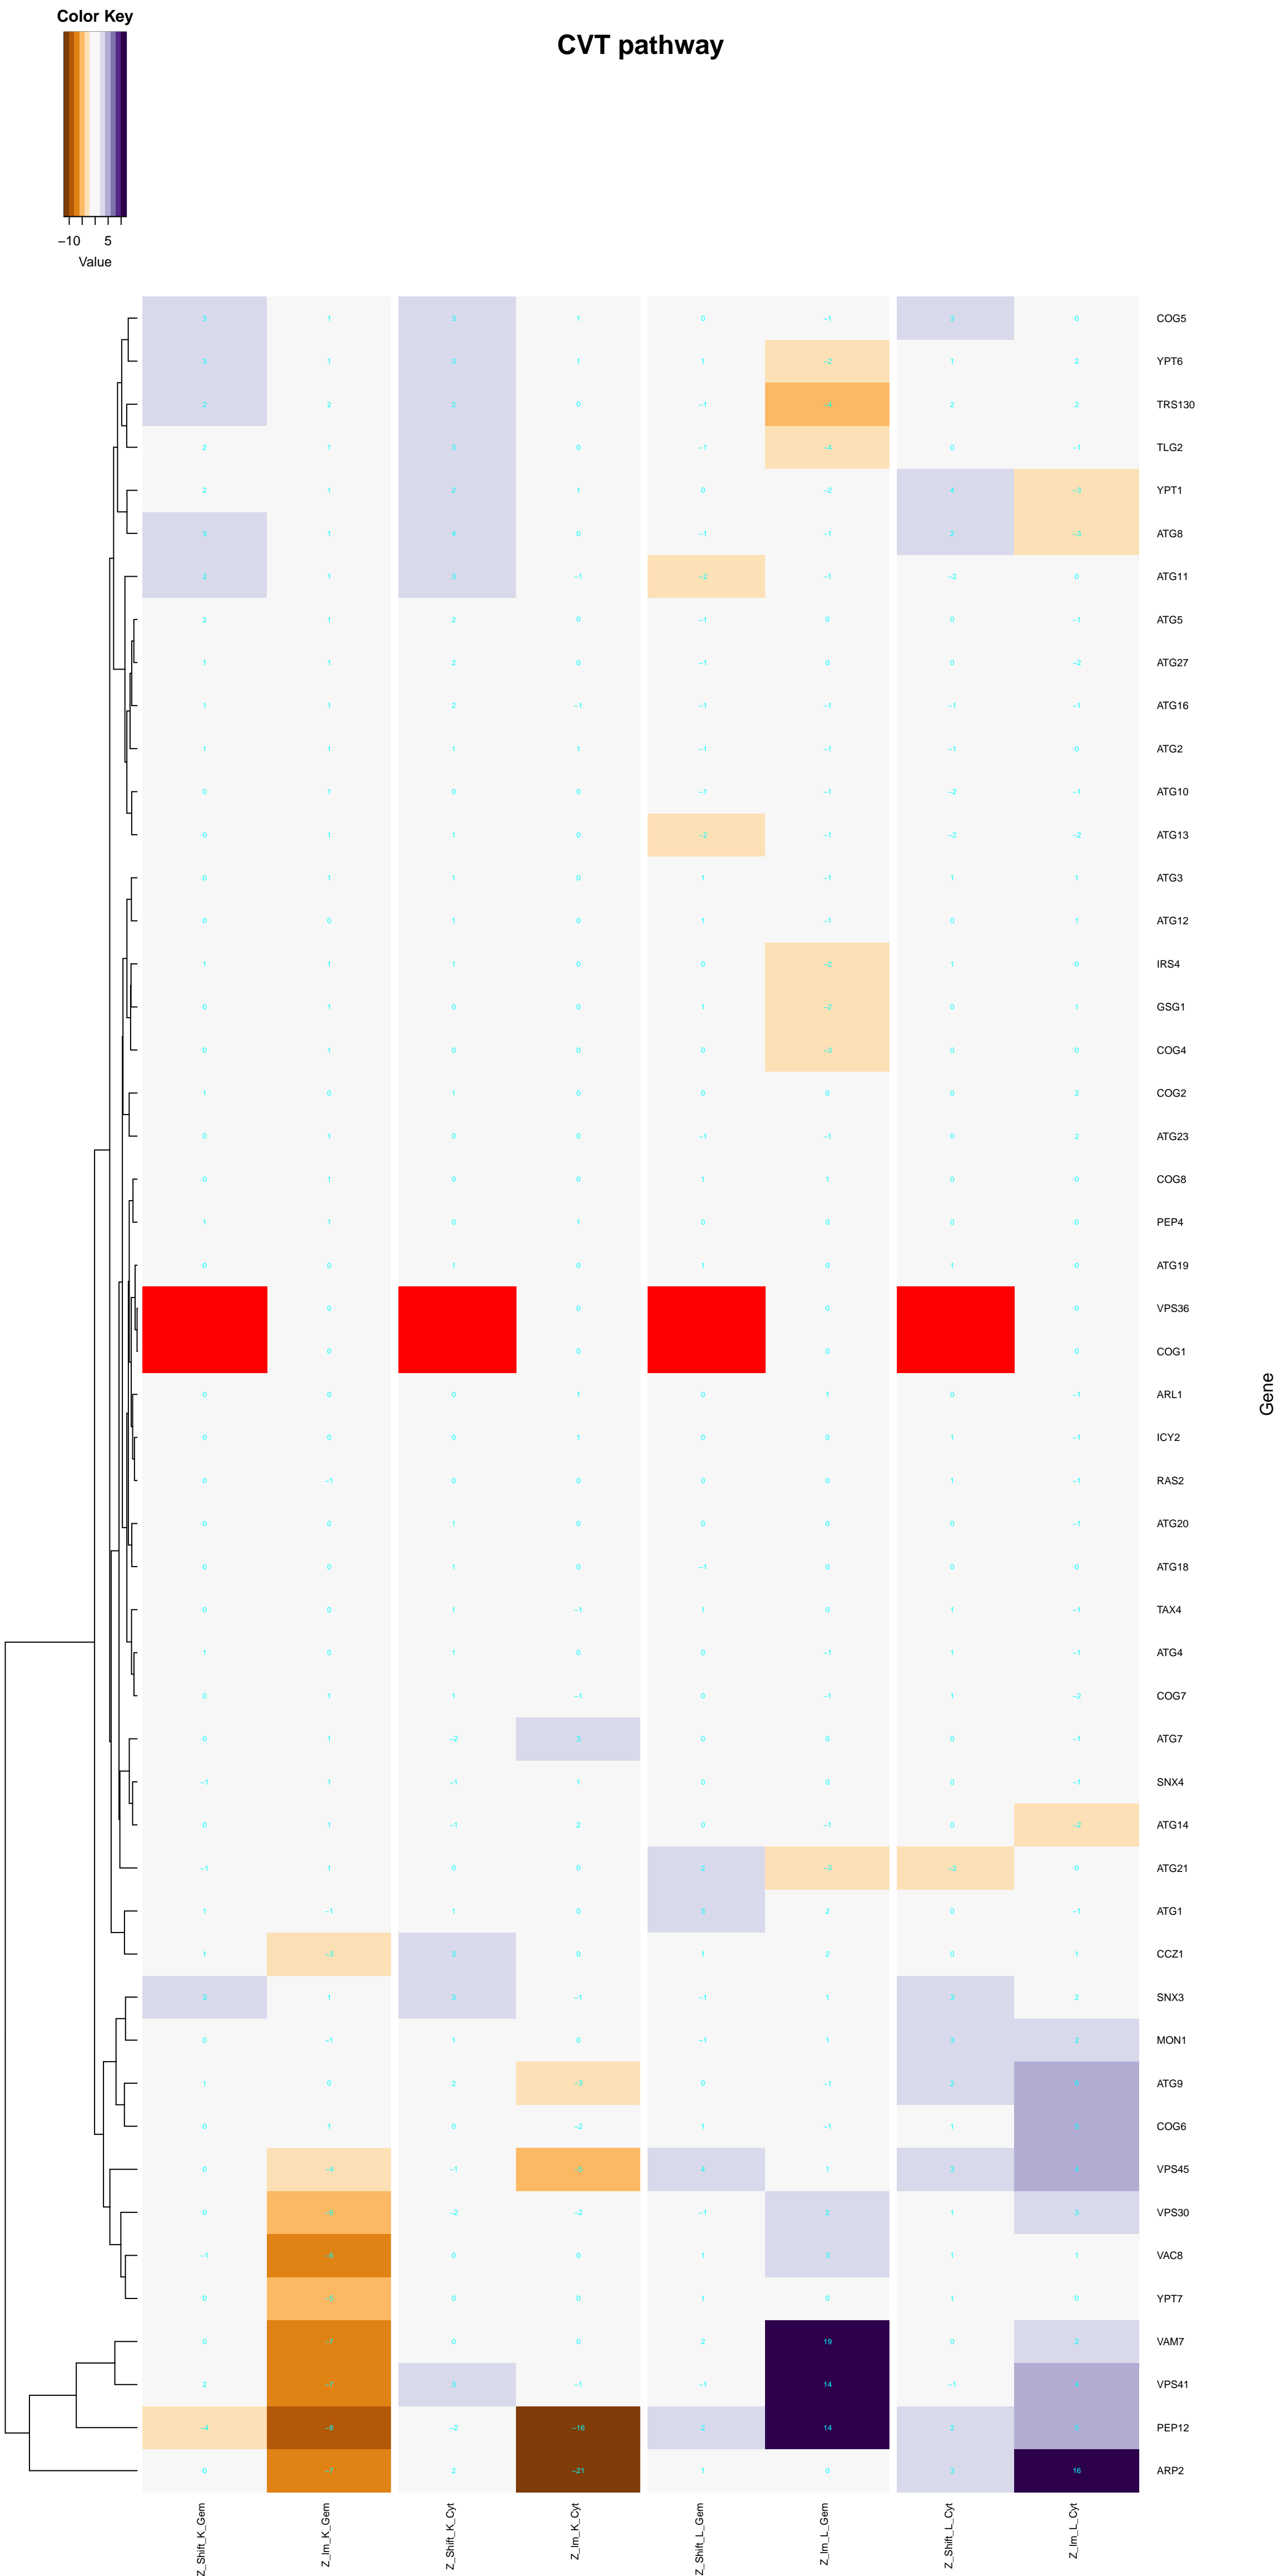

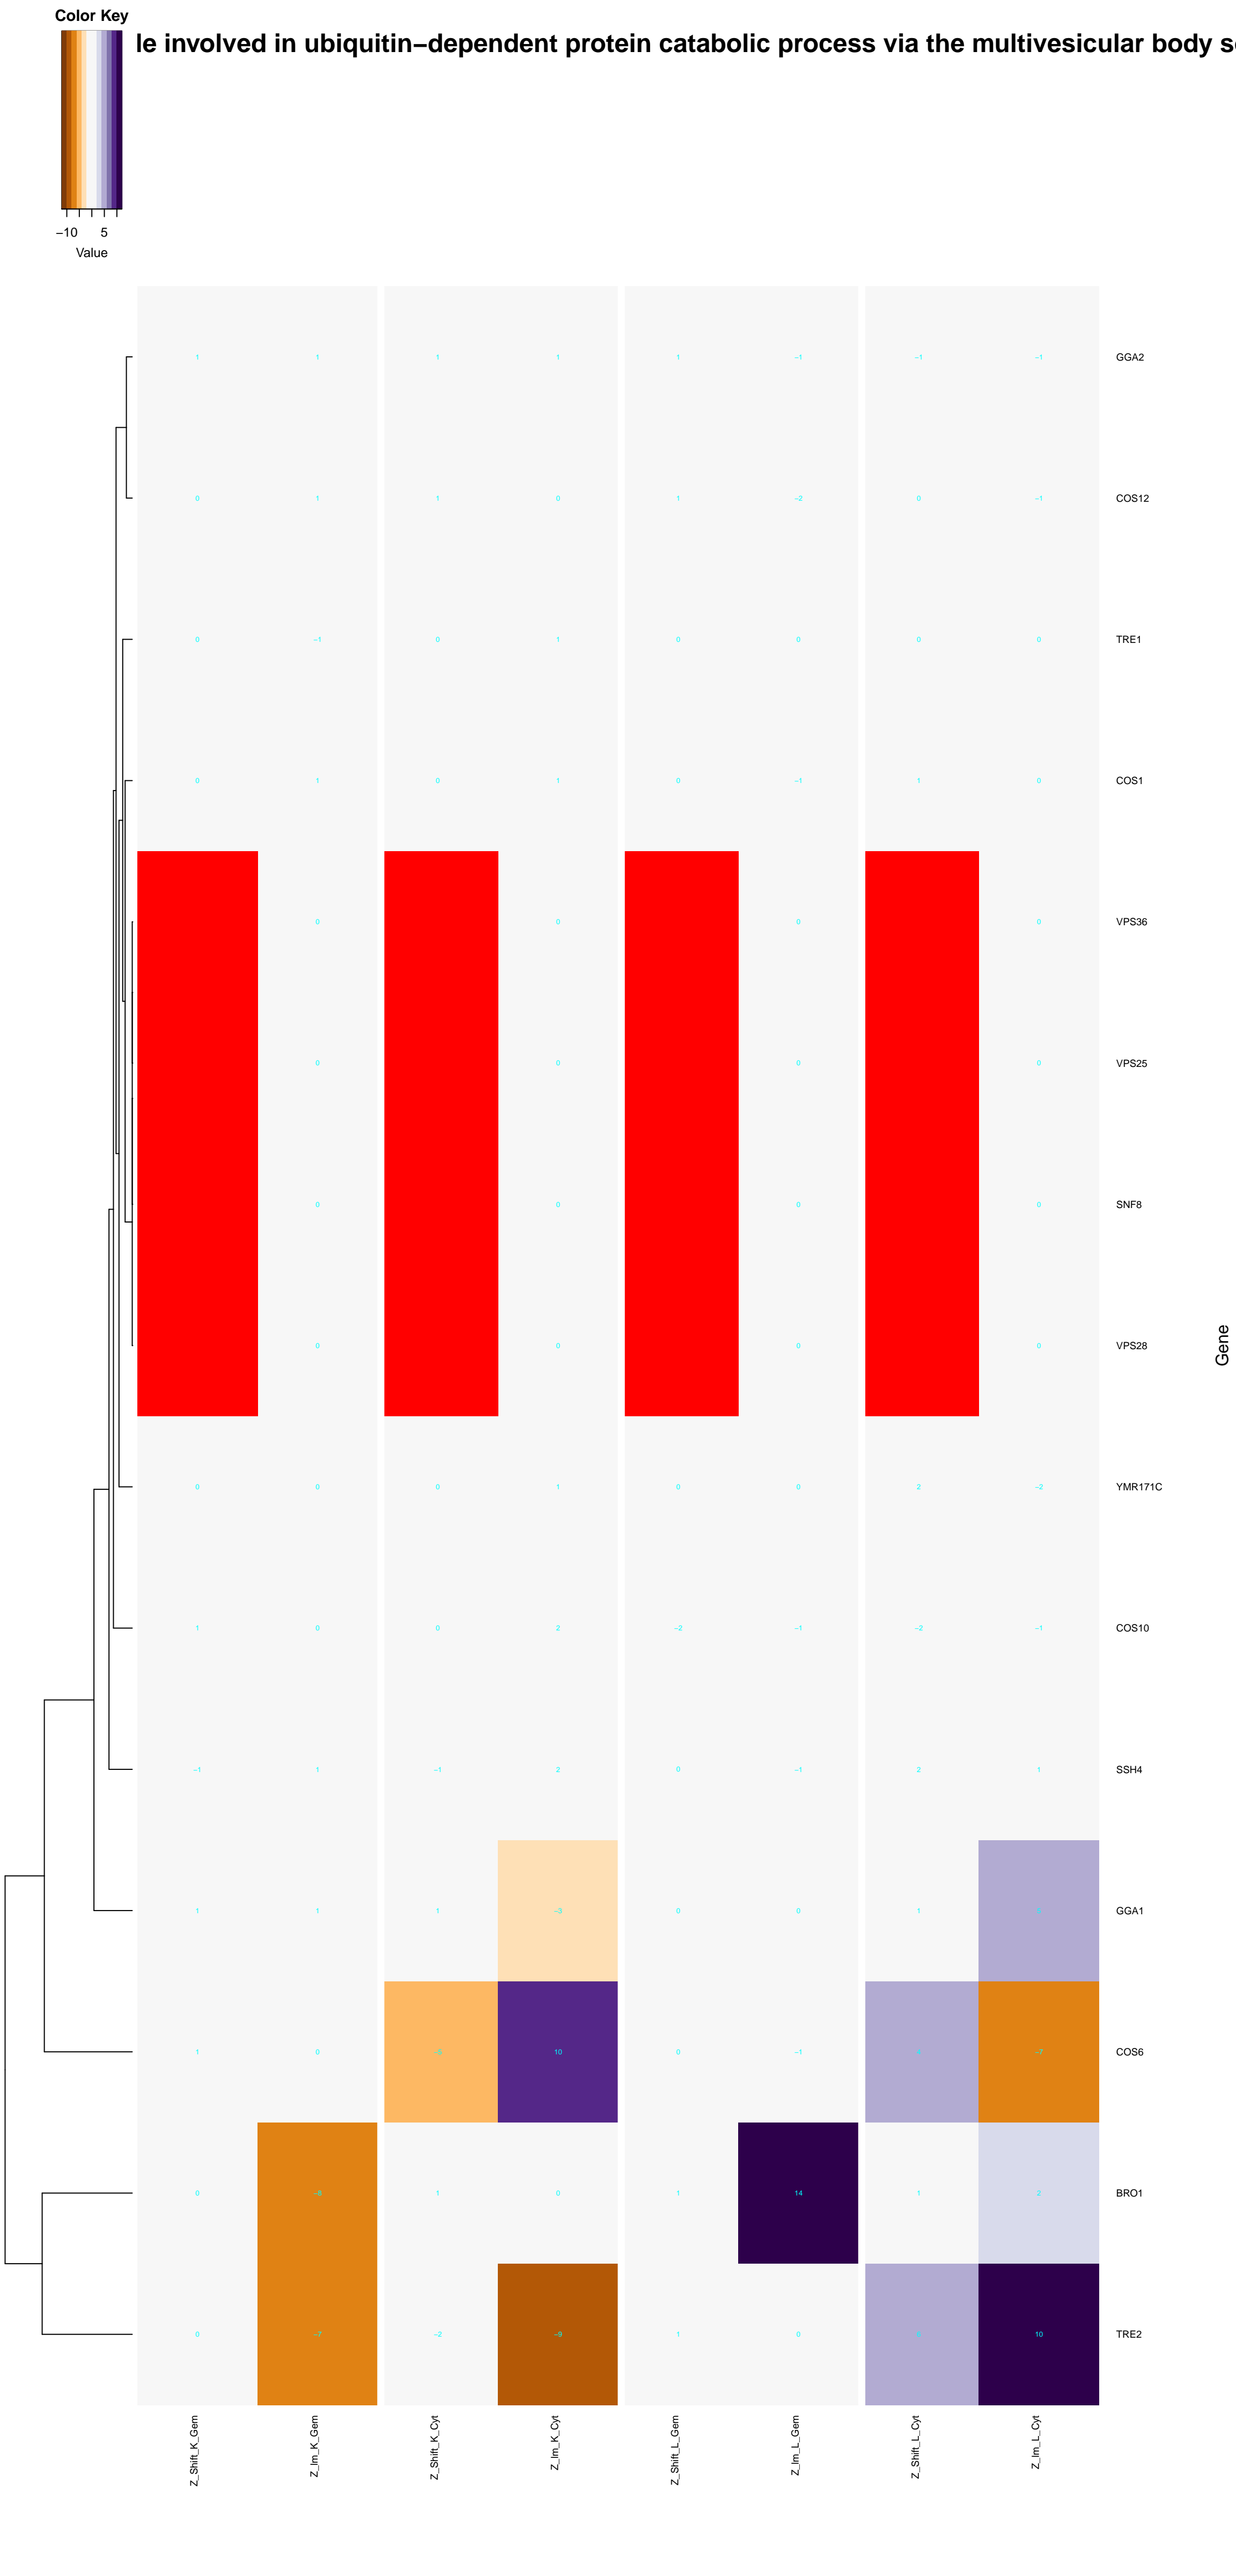

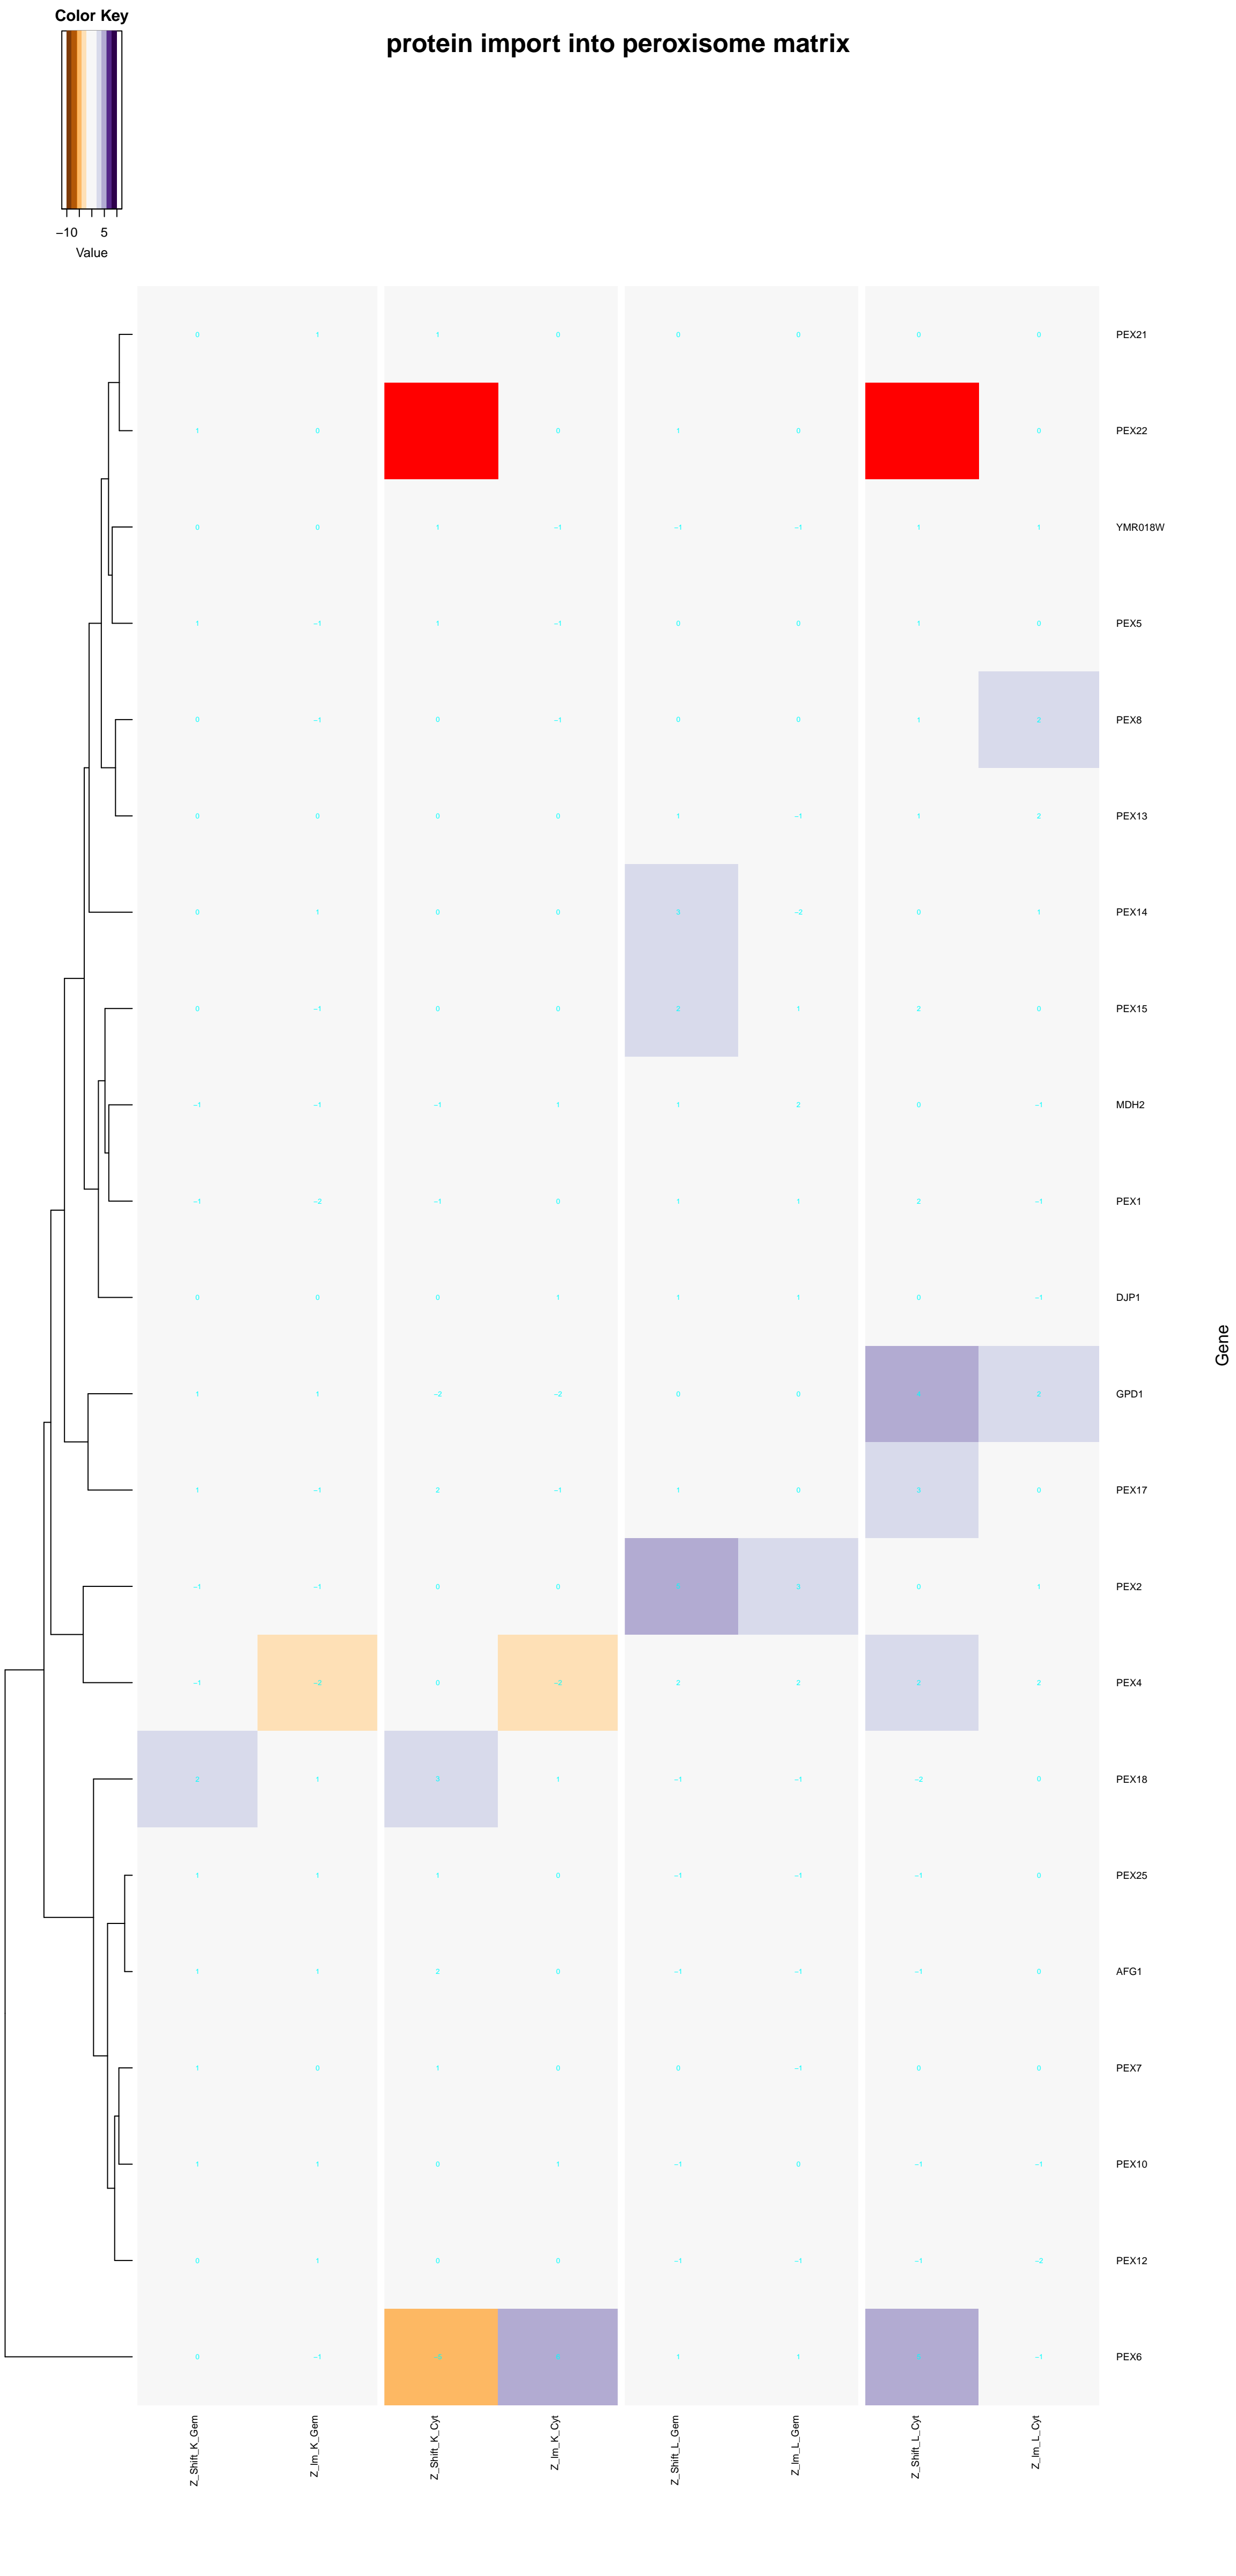

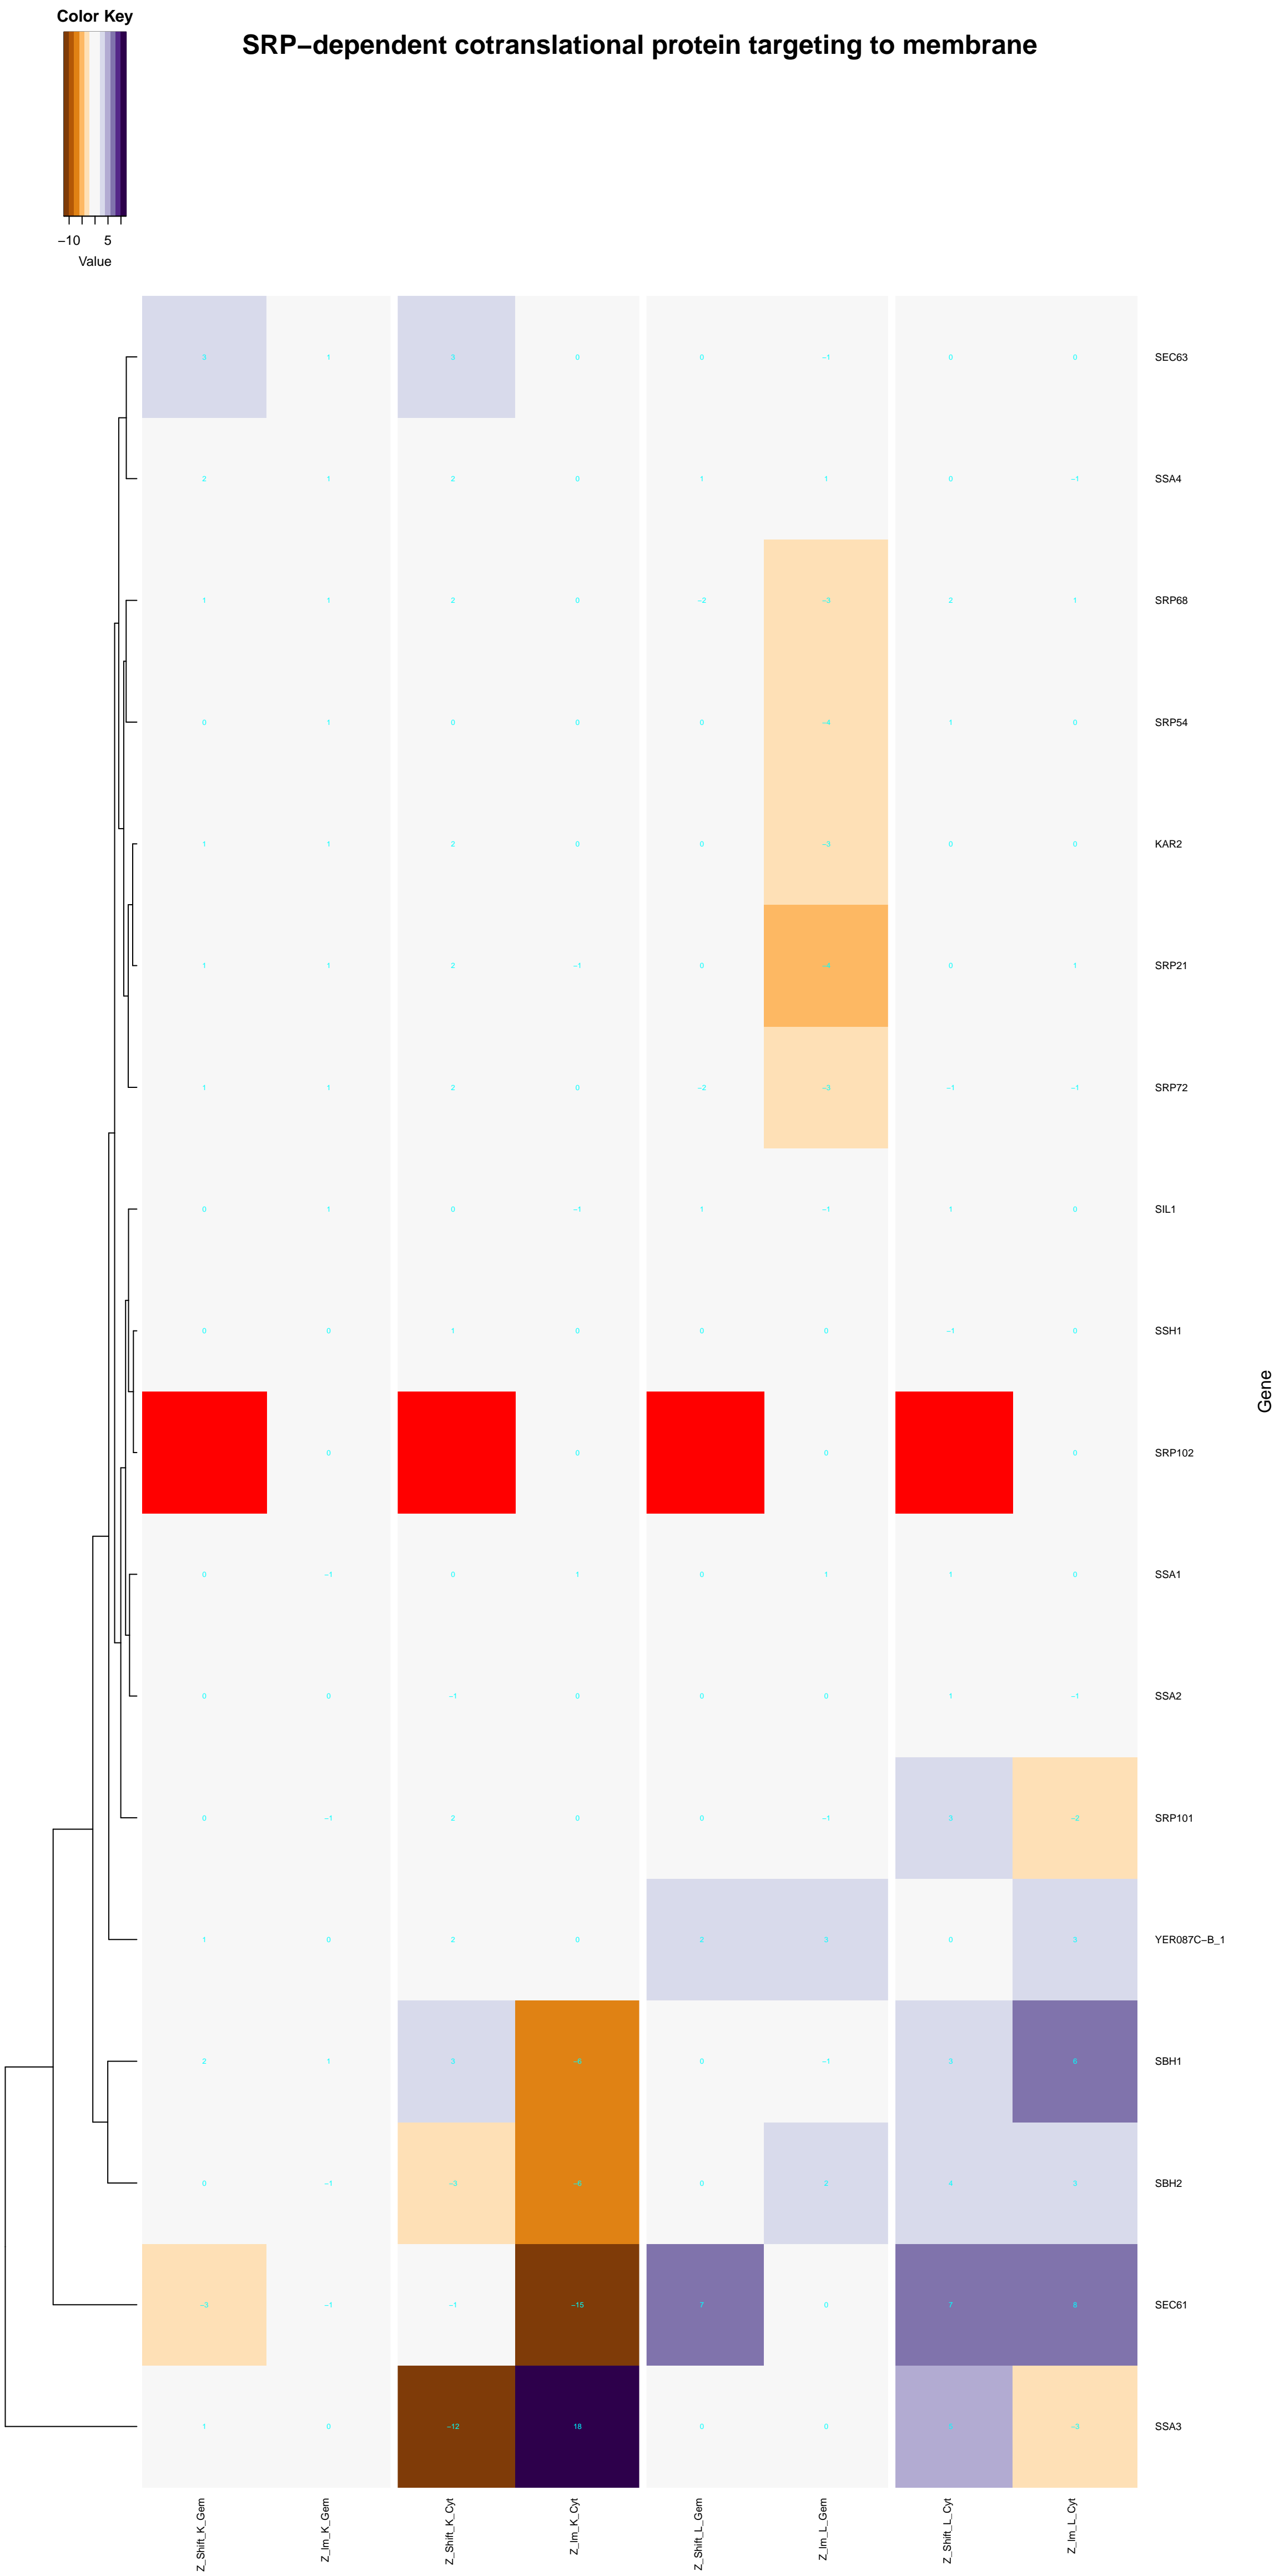

Supplement: s1 [file s1]

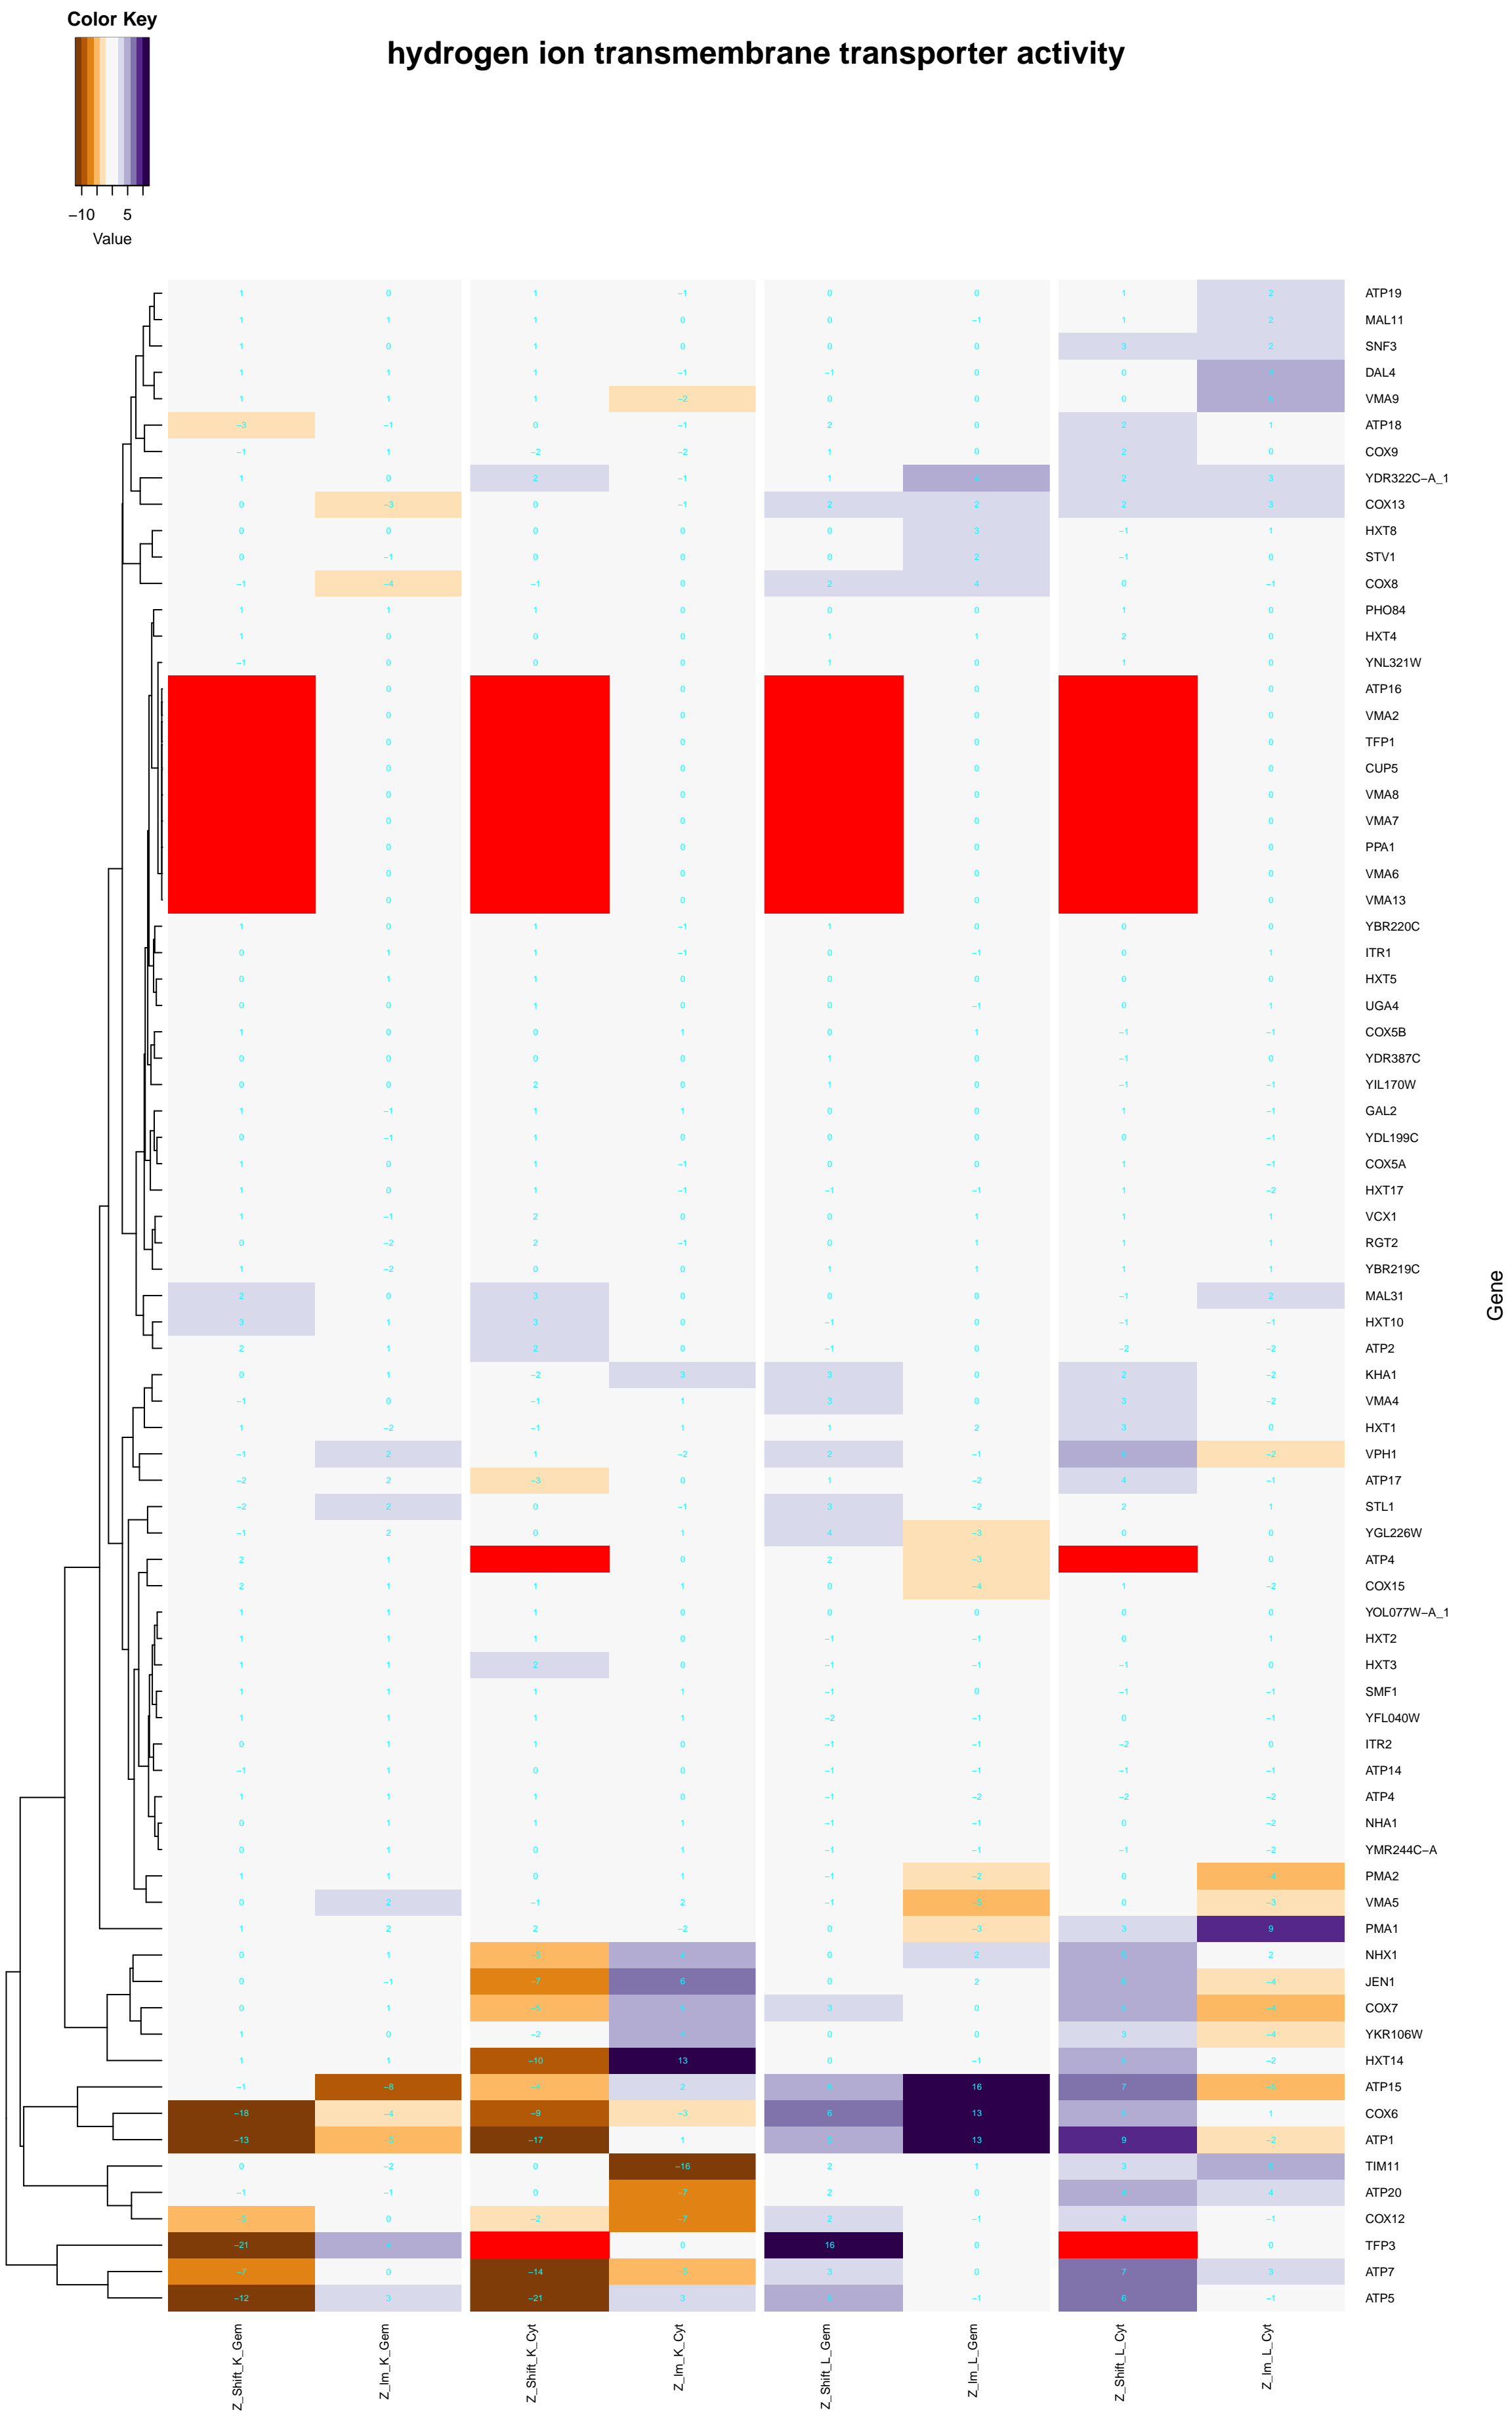

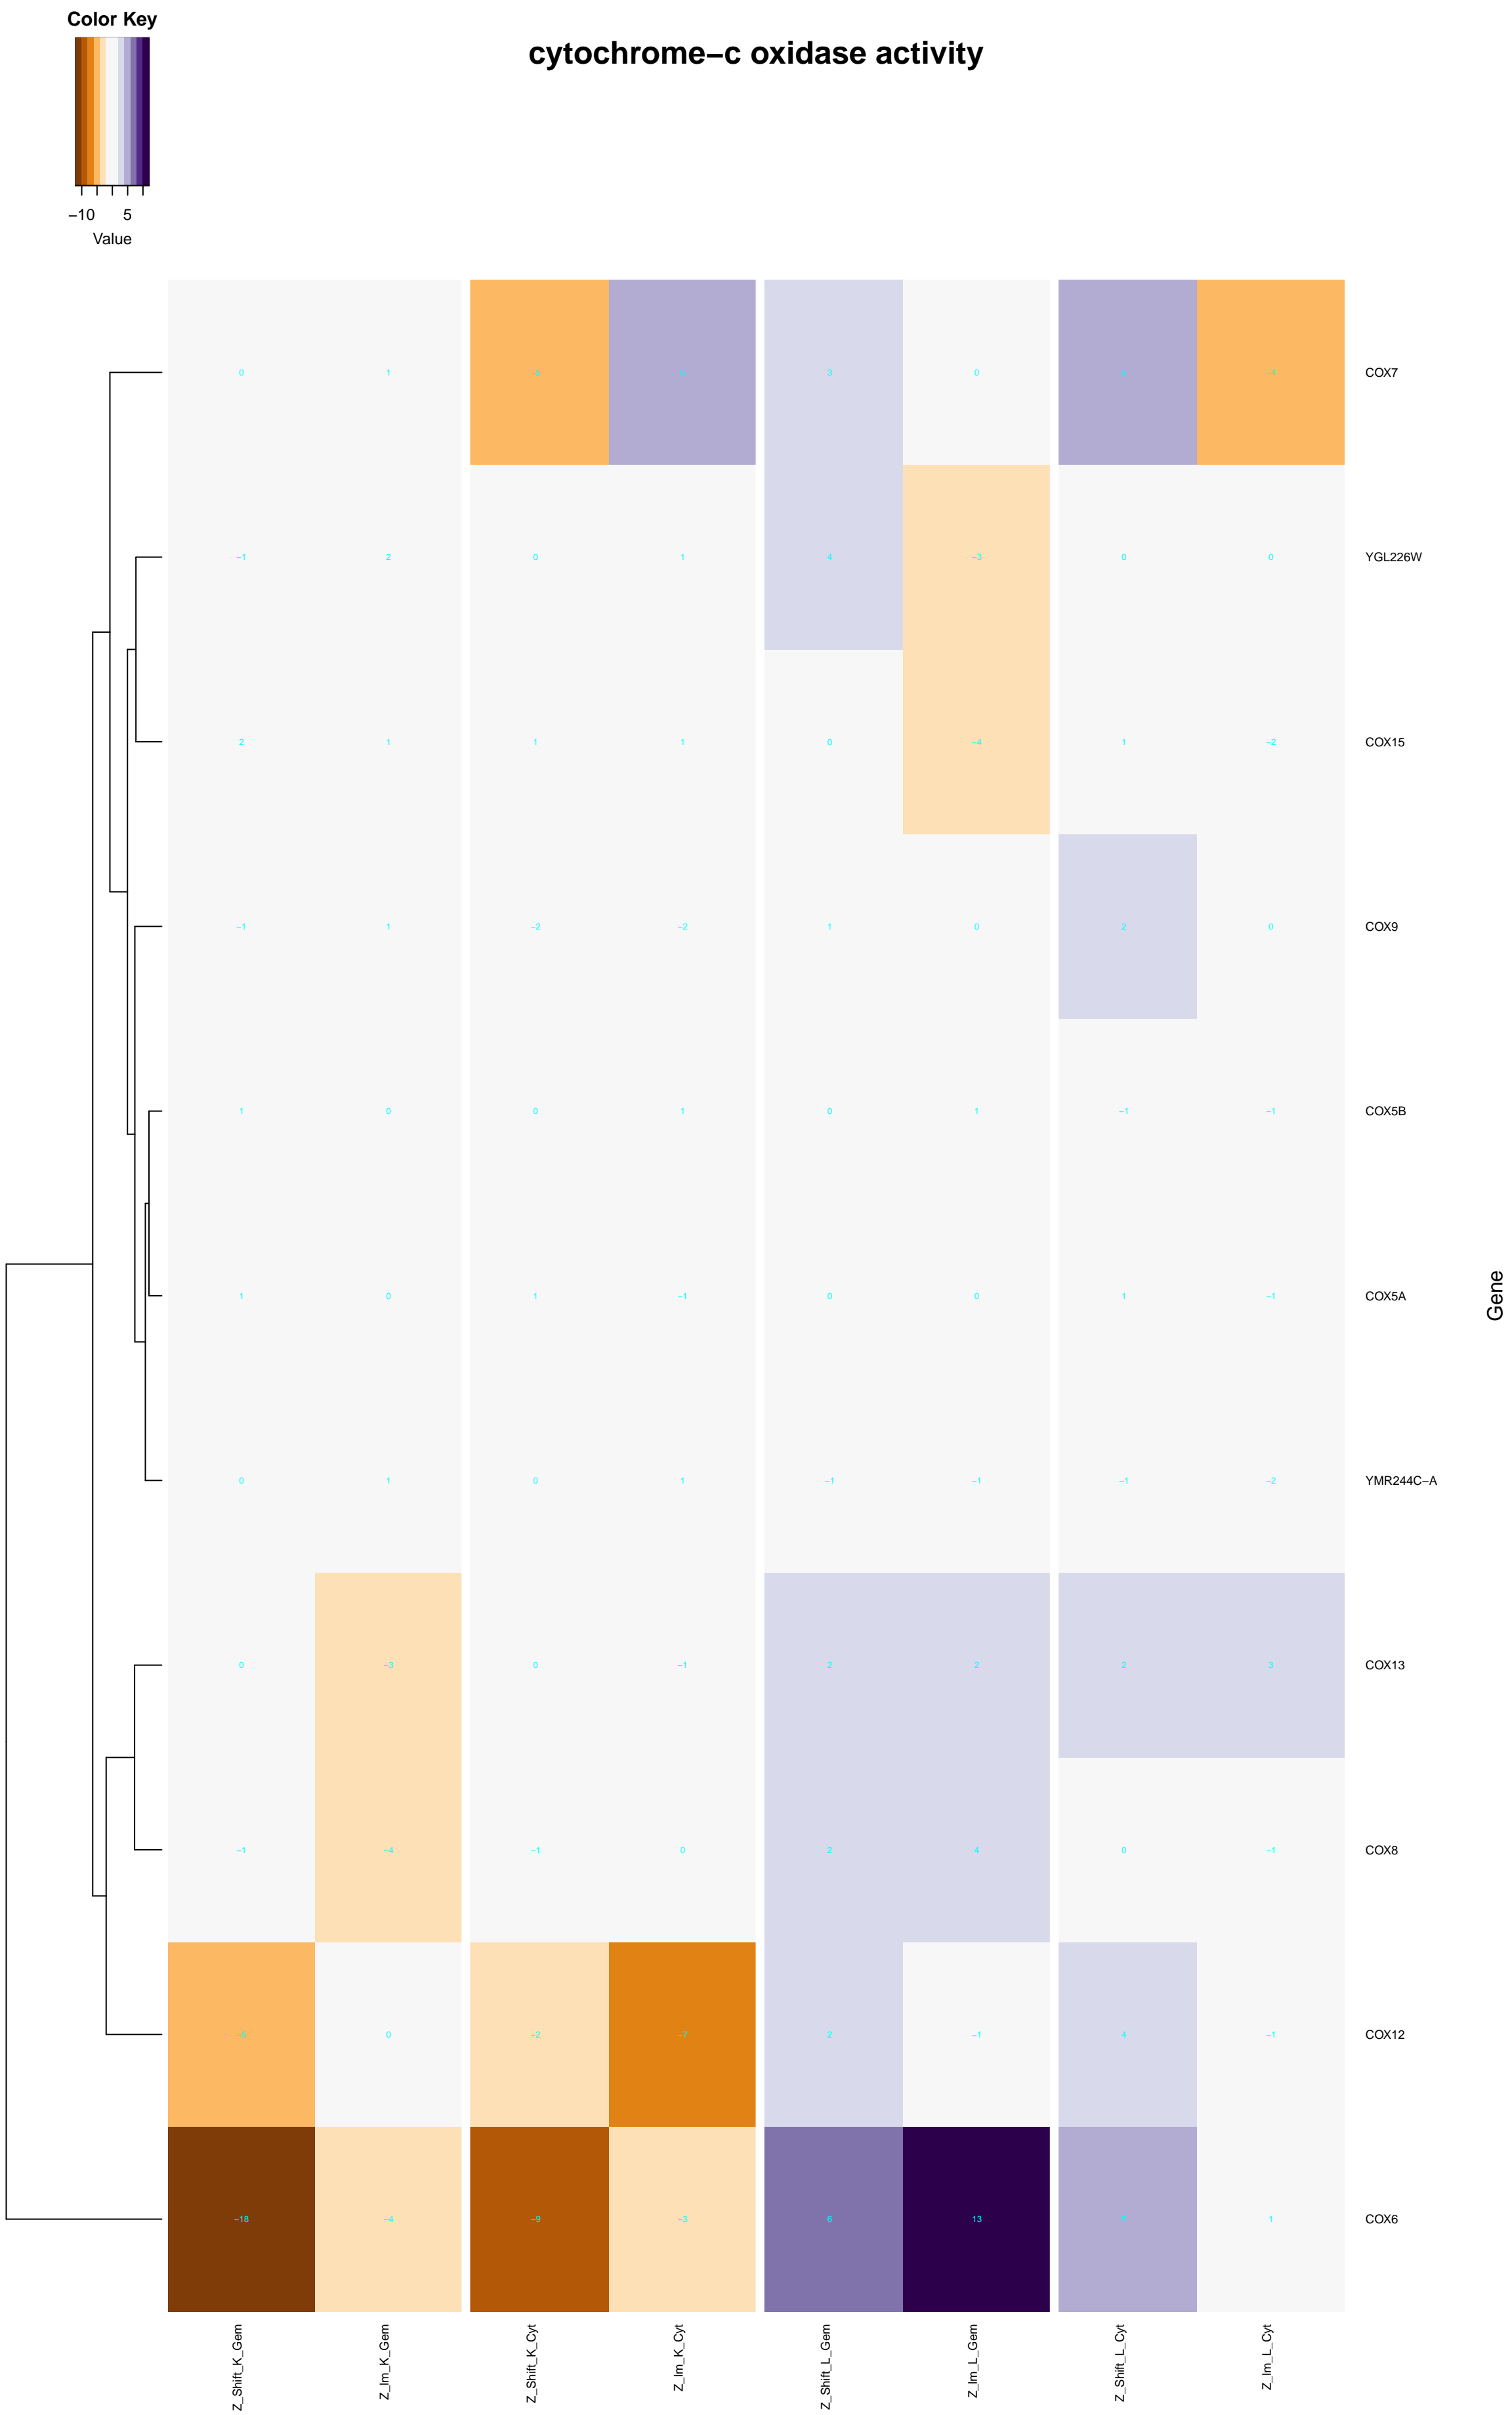

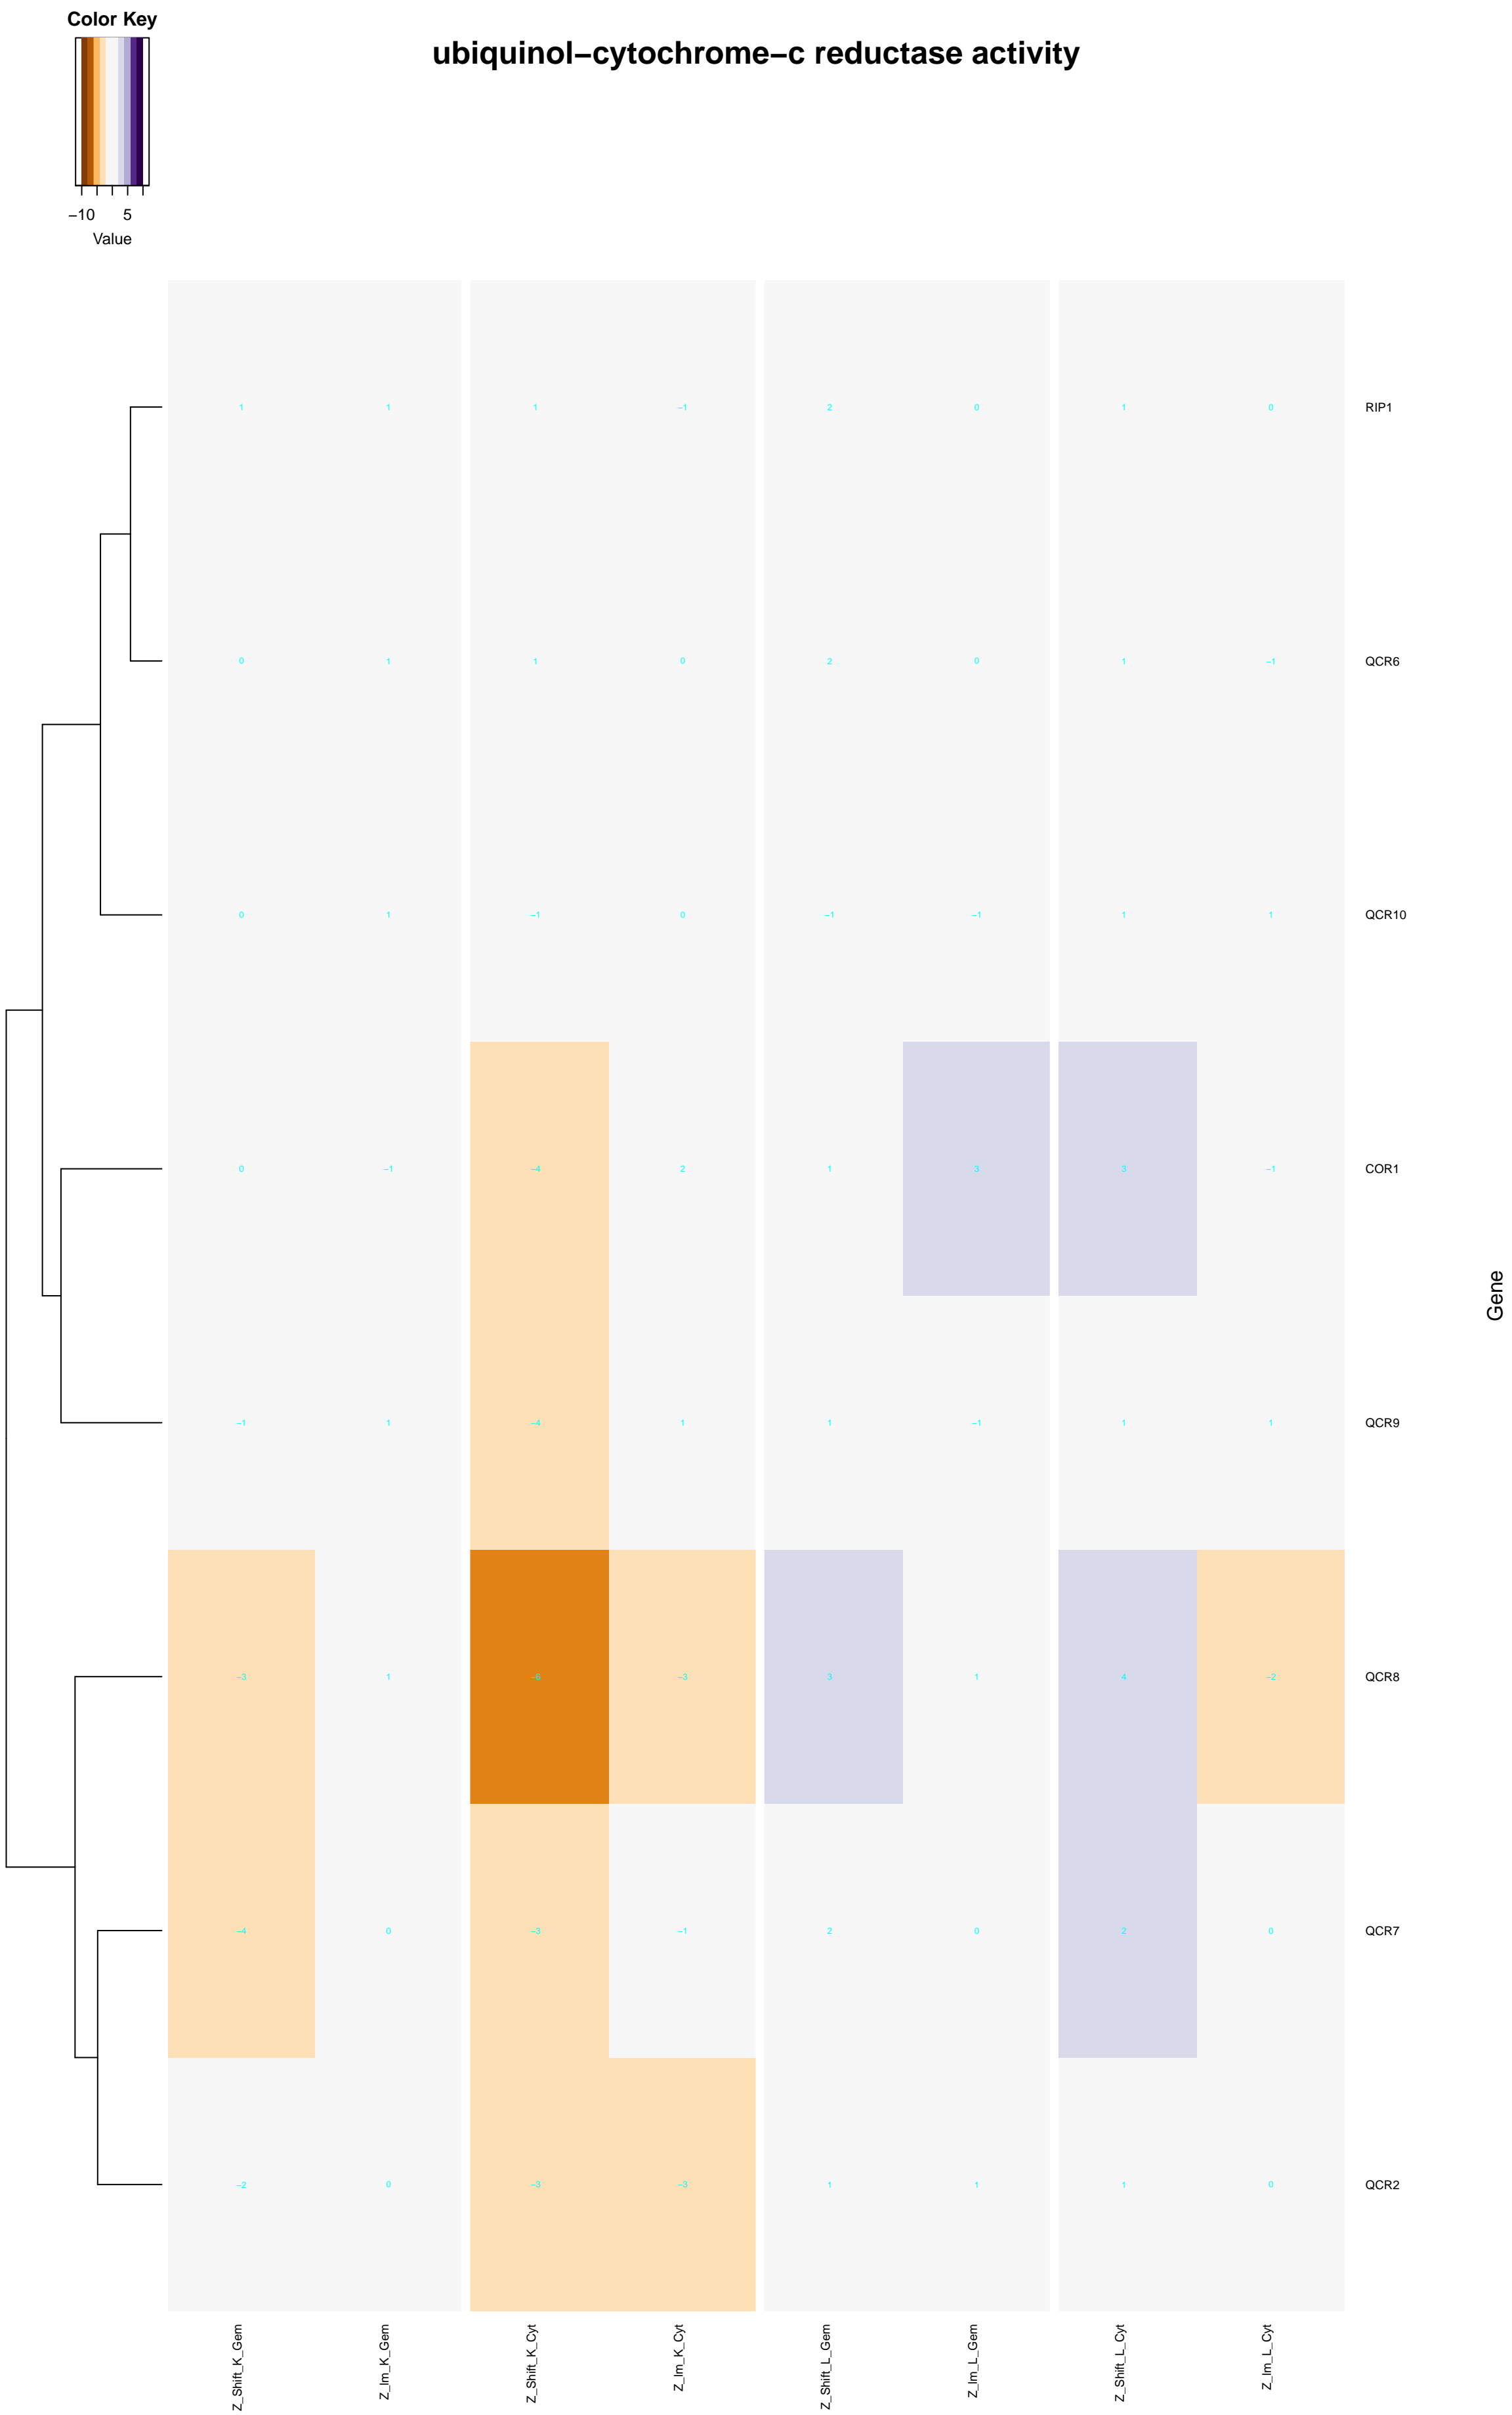

Color Key

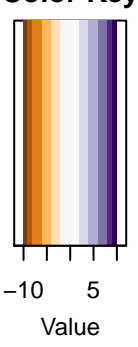

hydrogen-exporting ATPase activity, phosphorylative mechanism

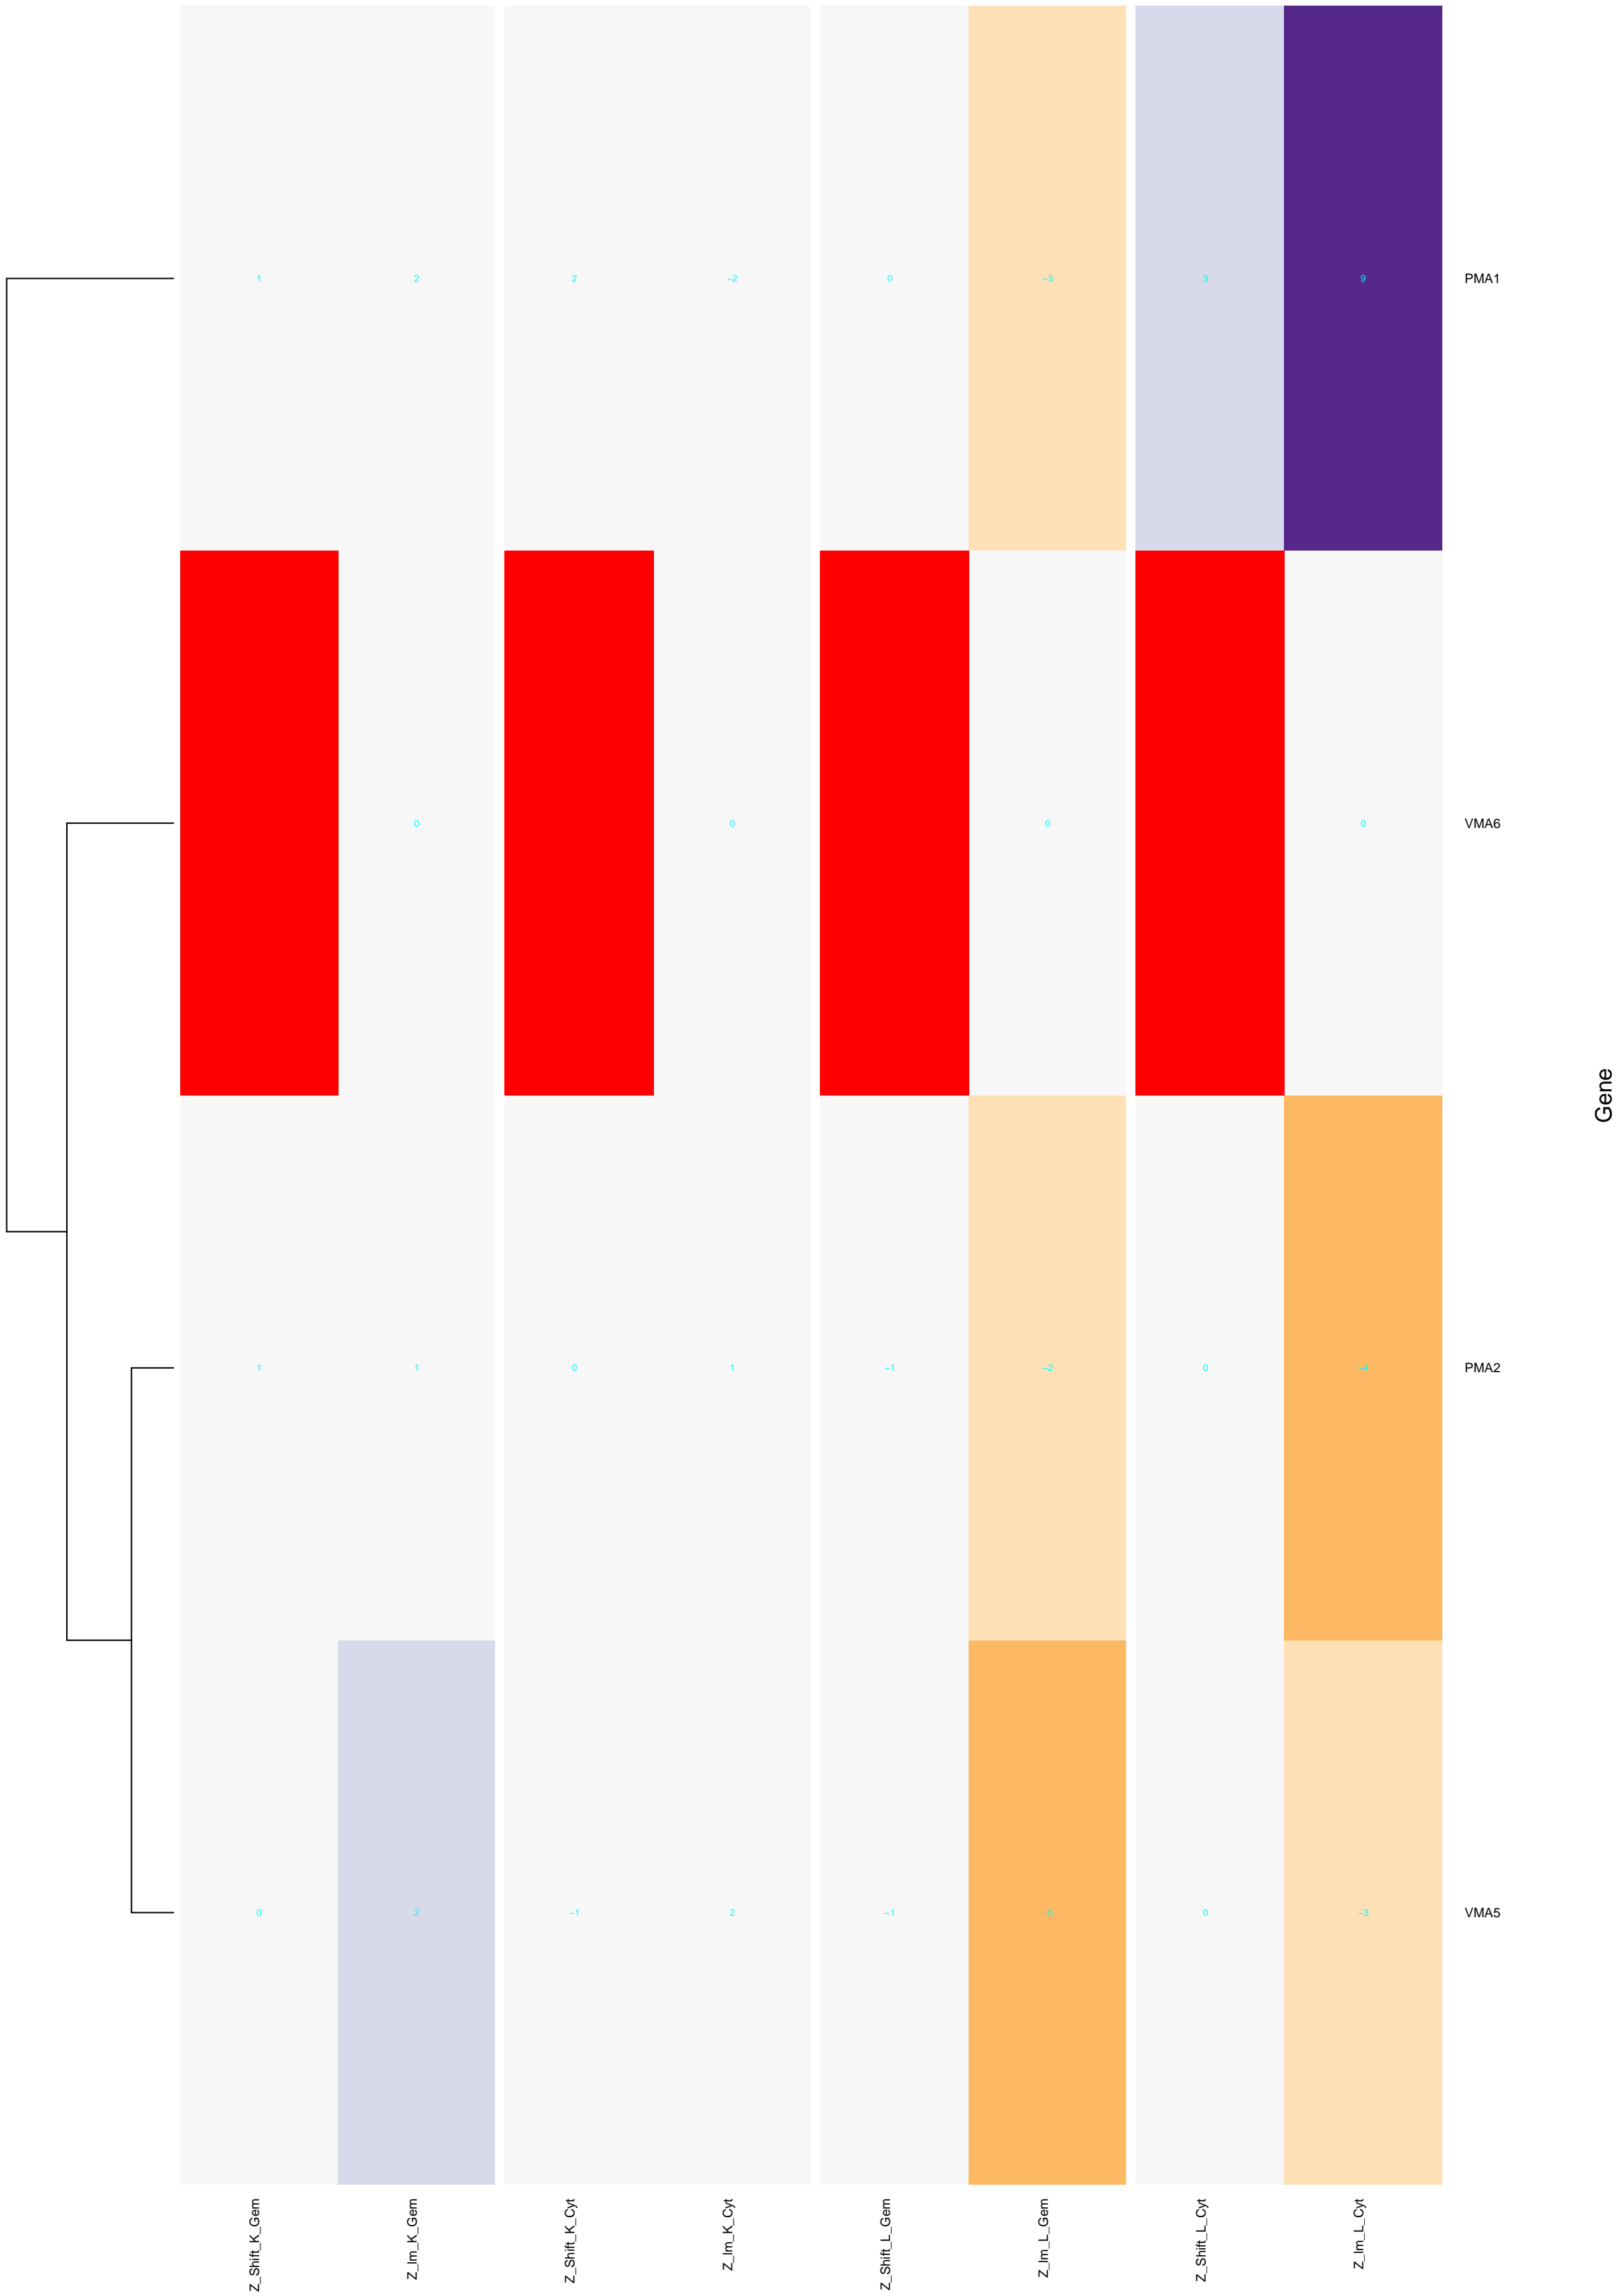

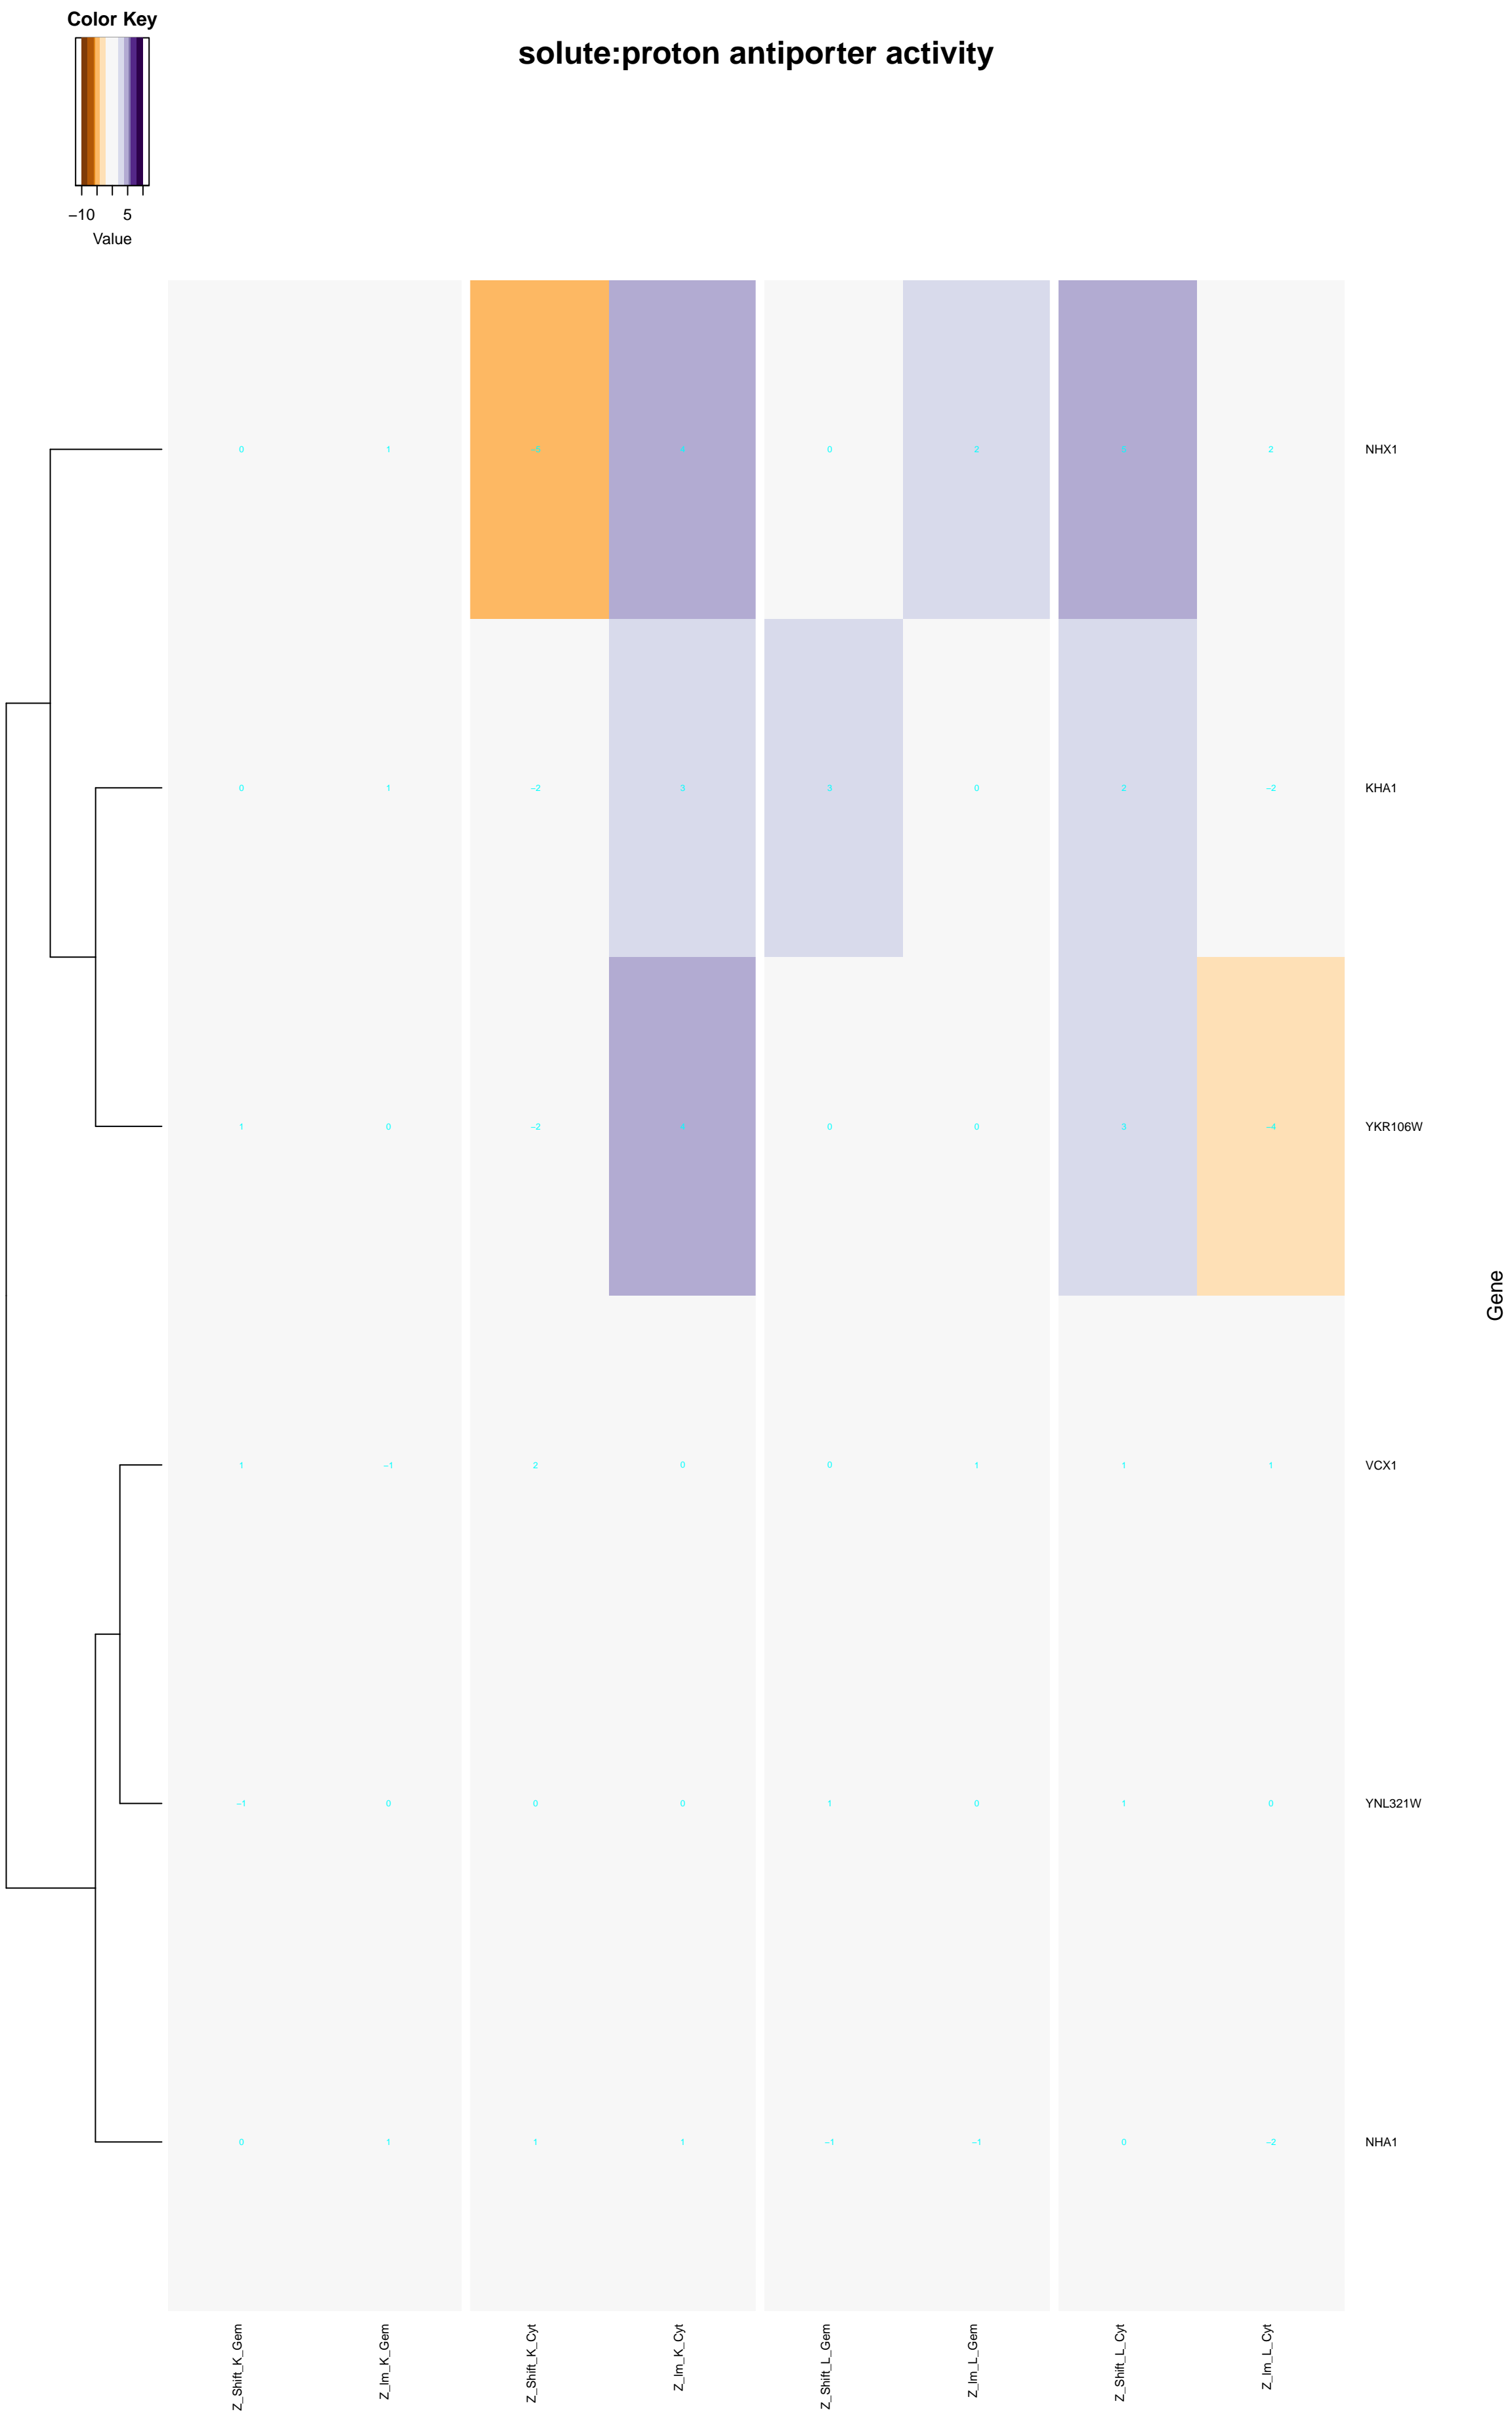

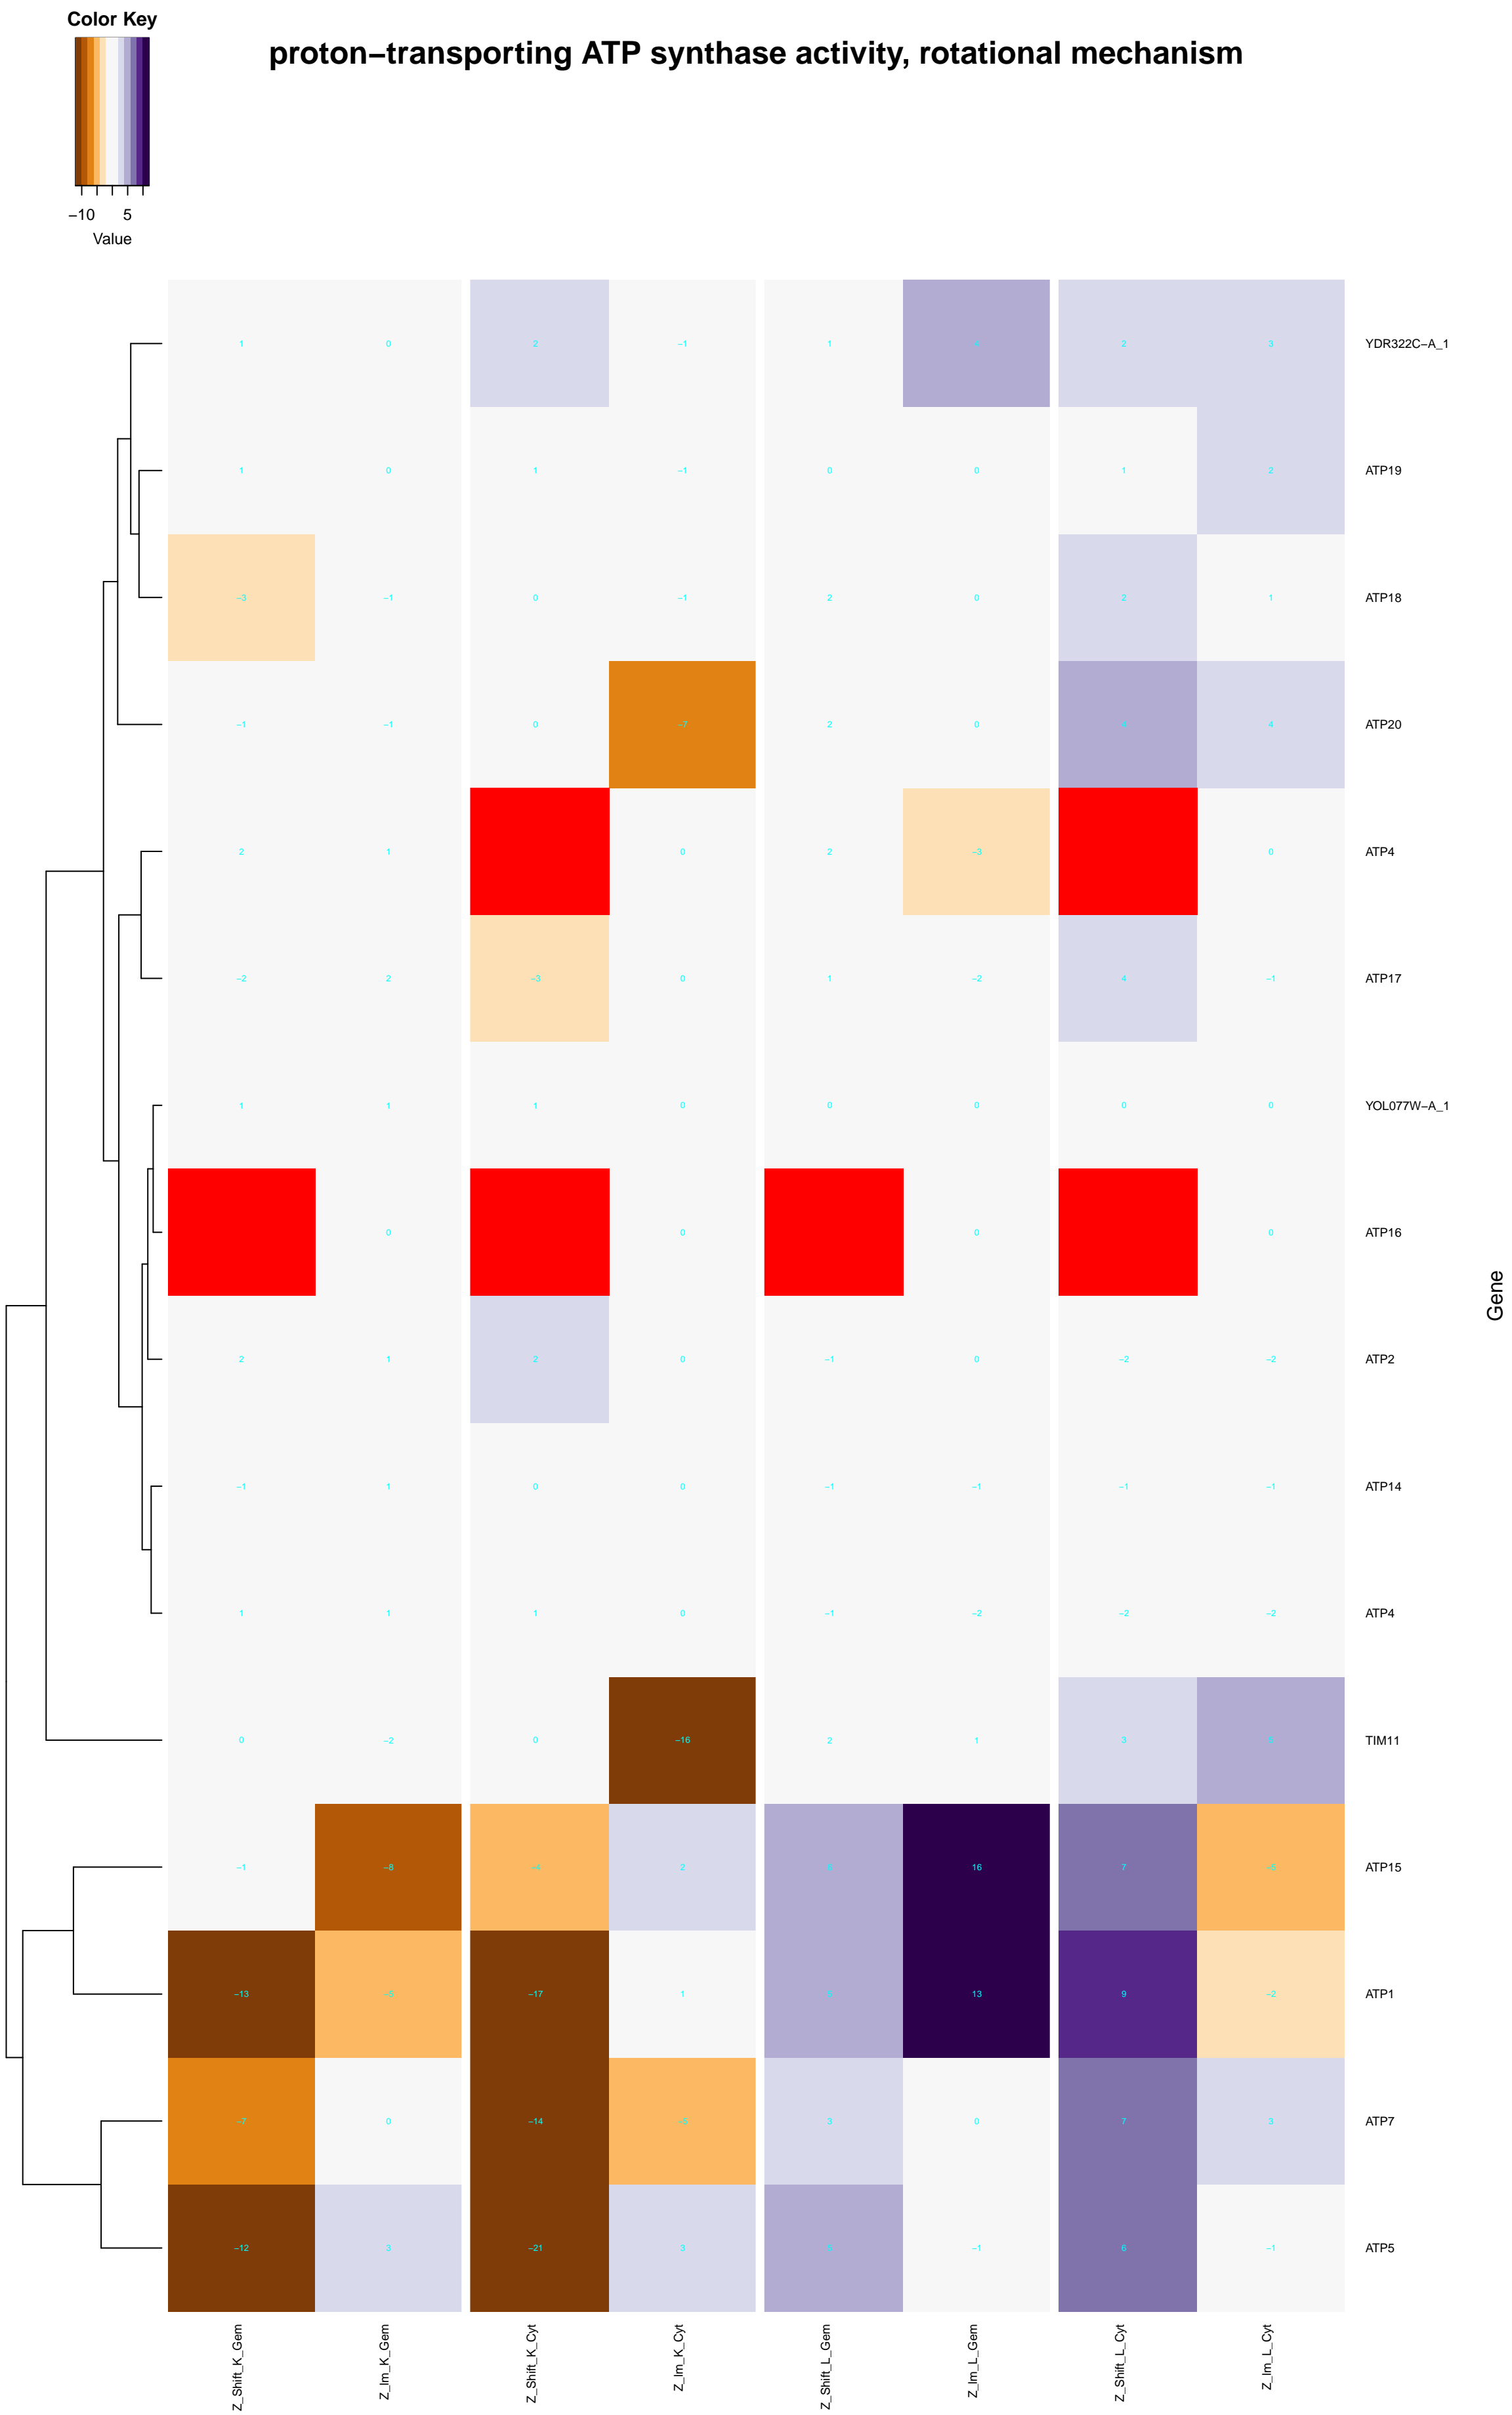

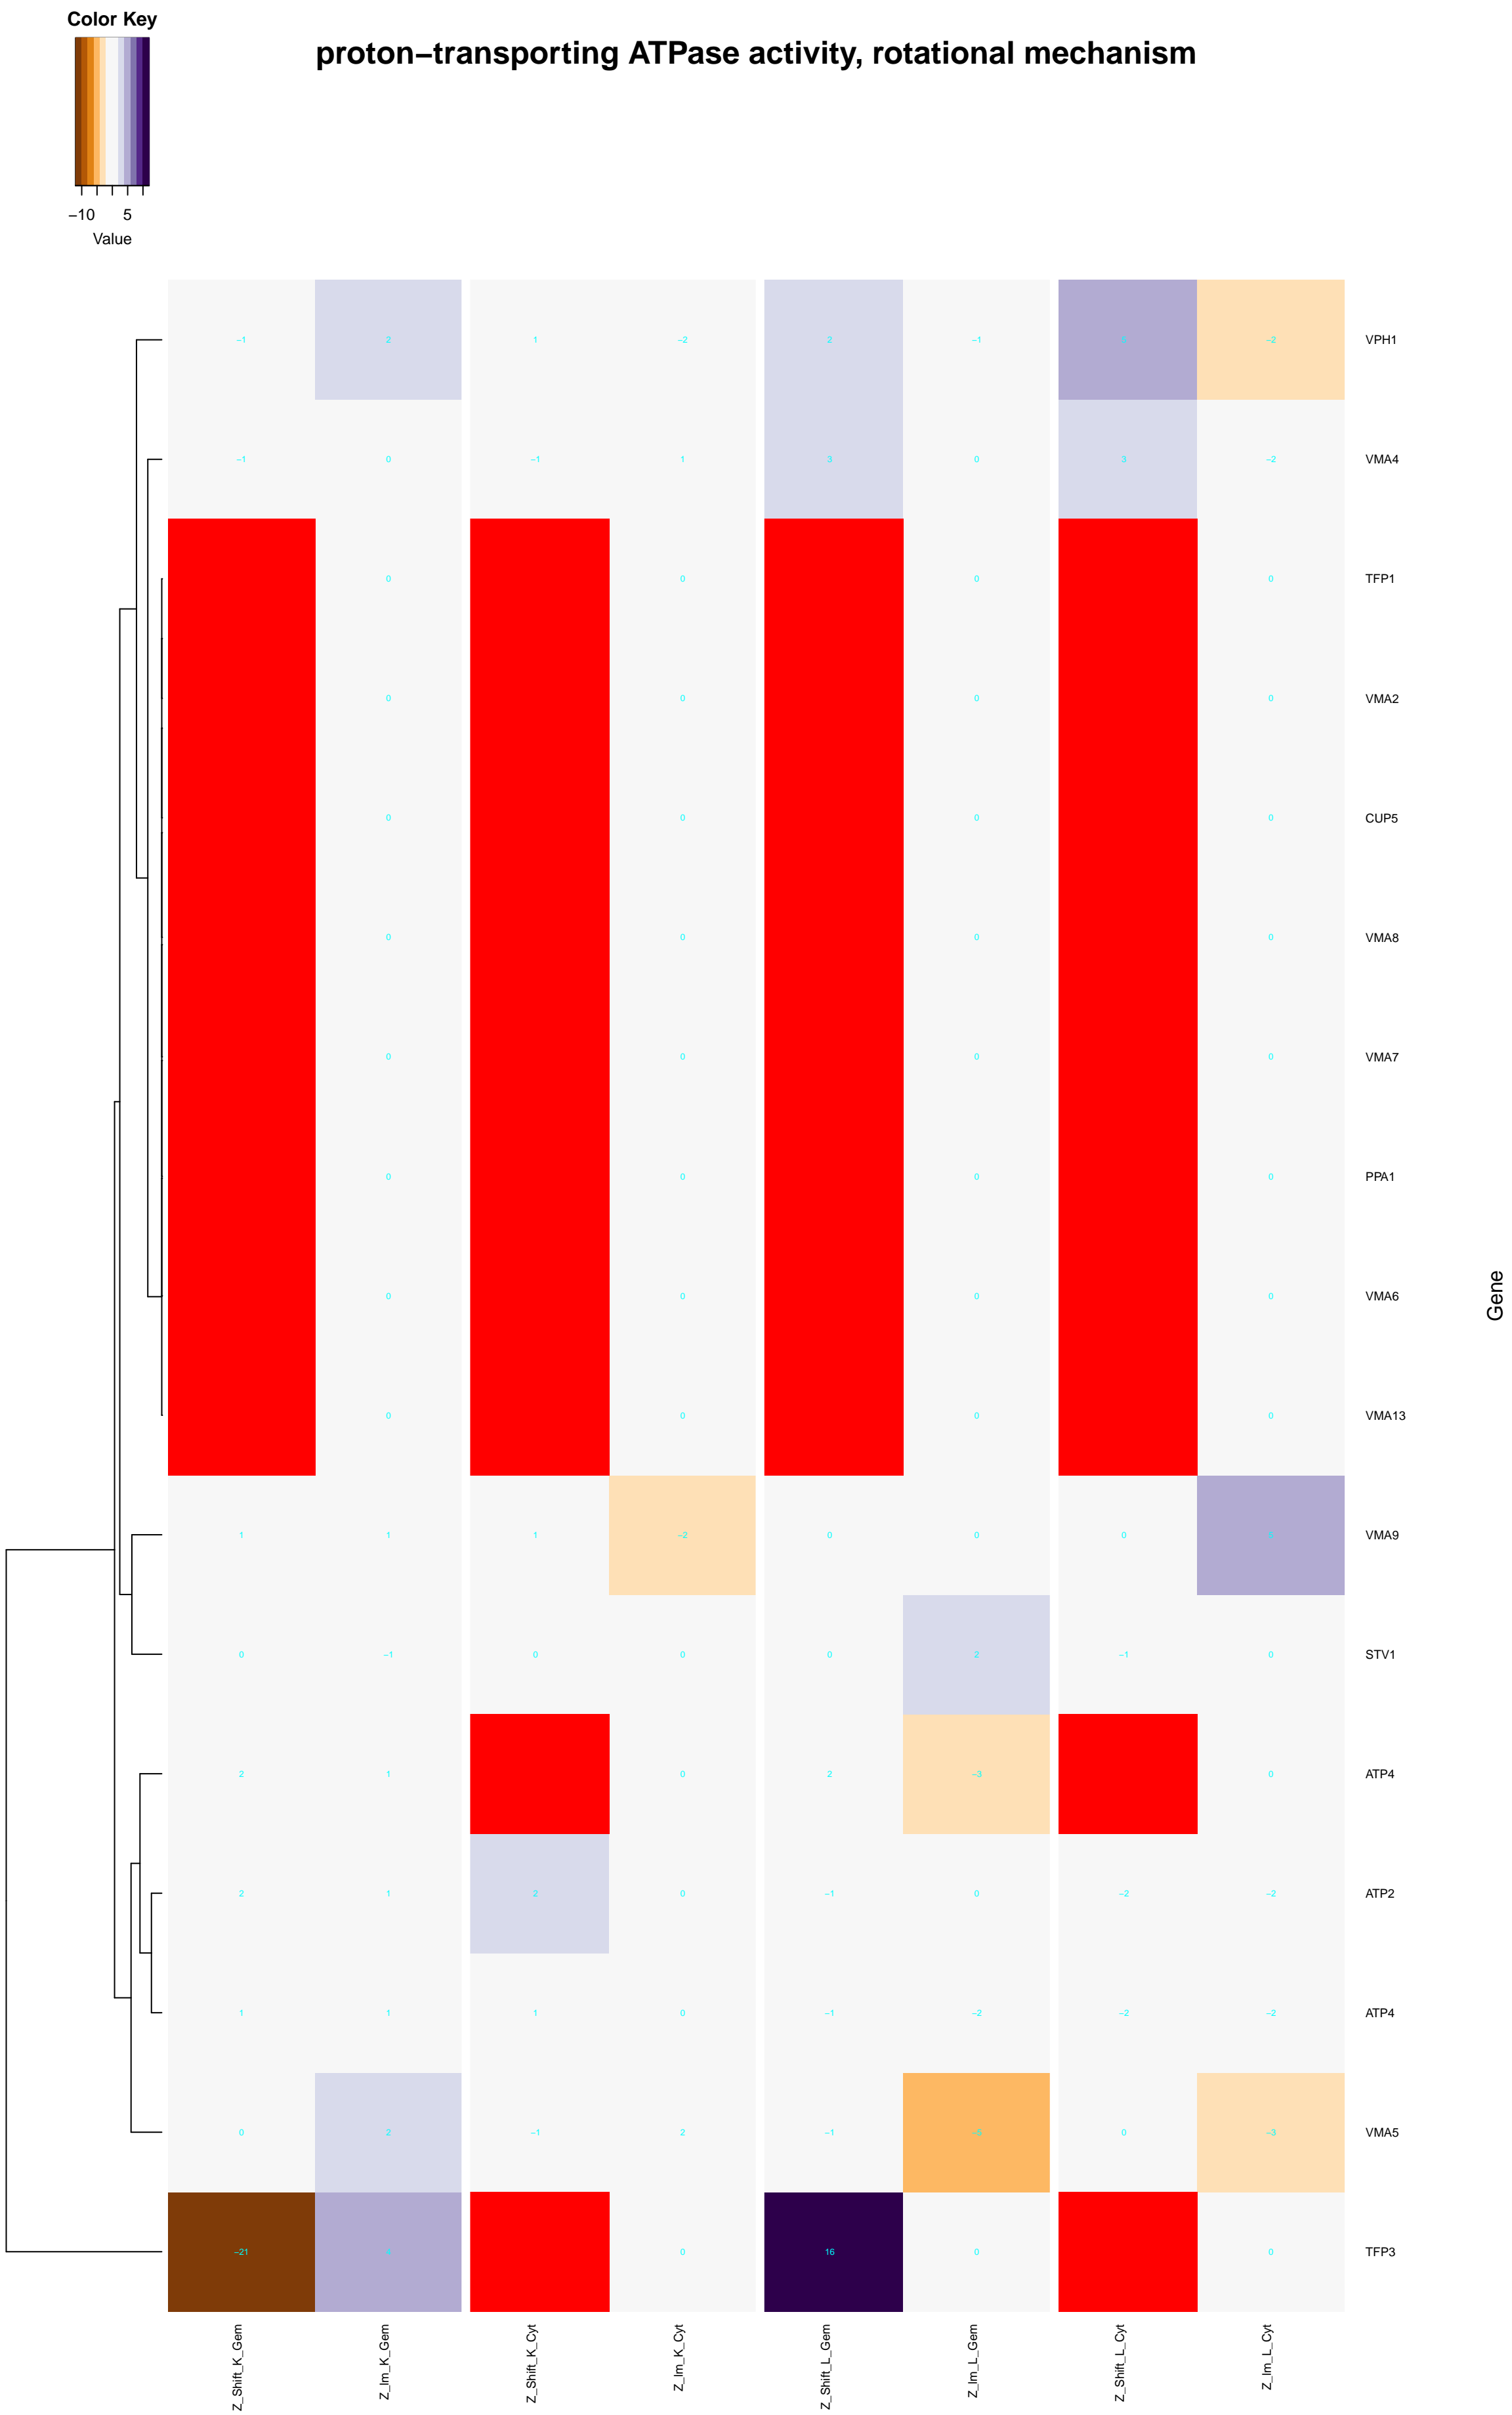

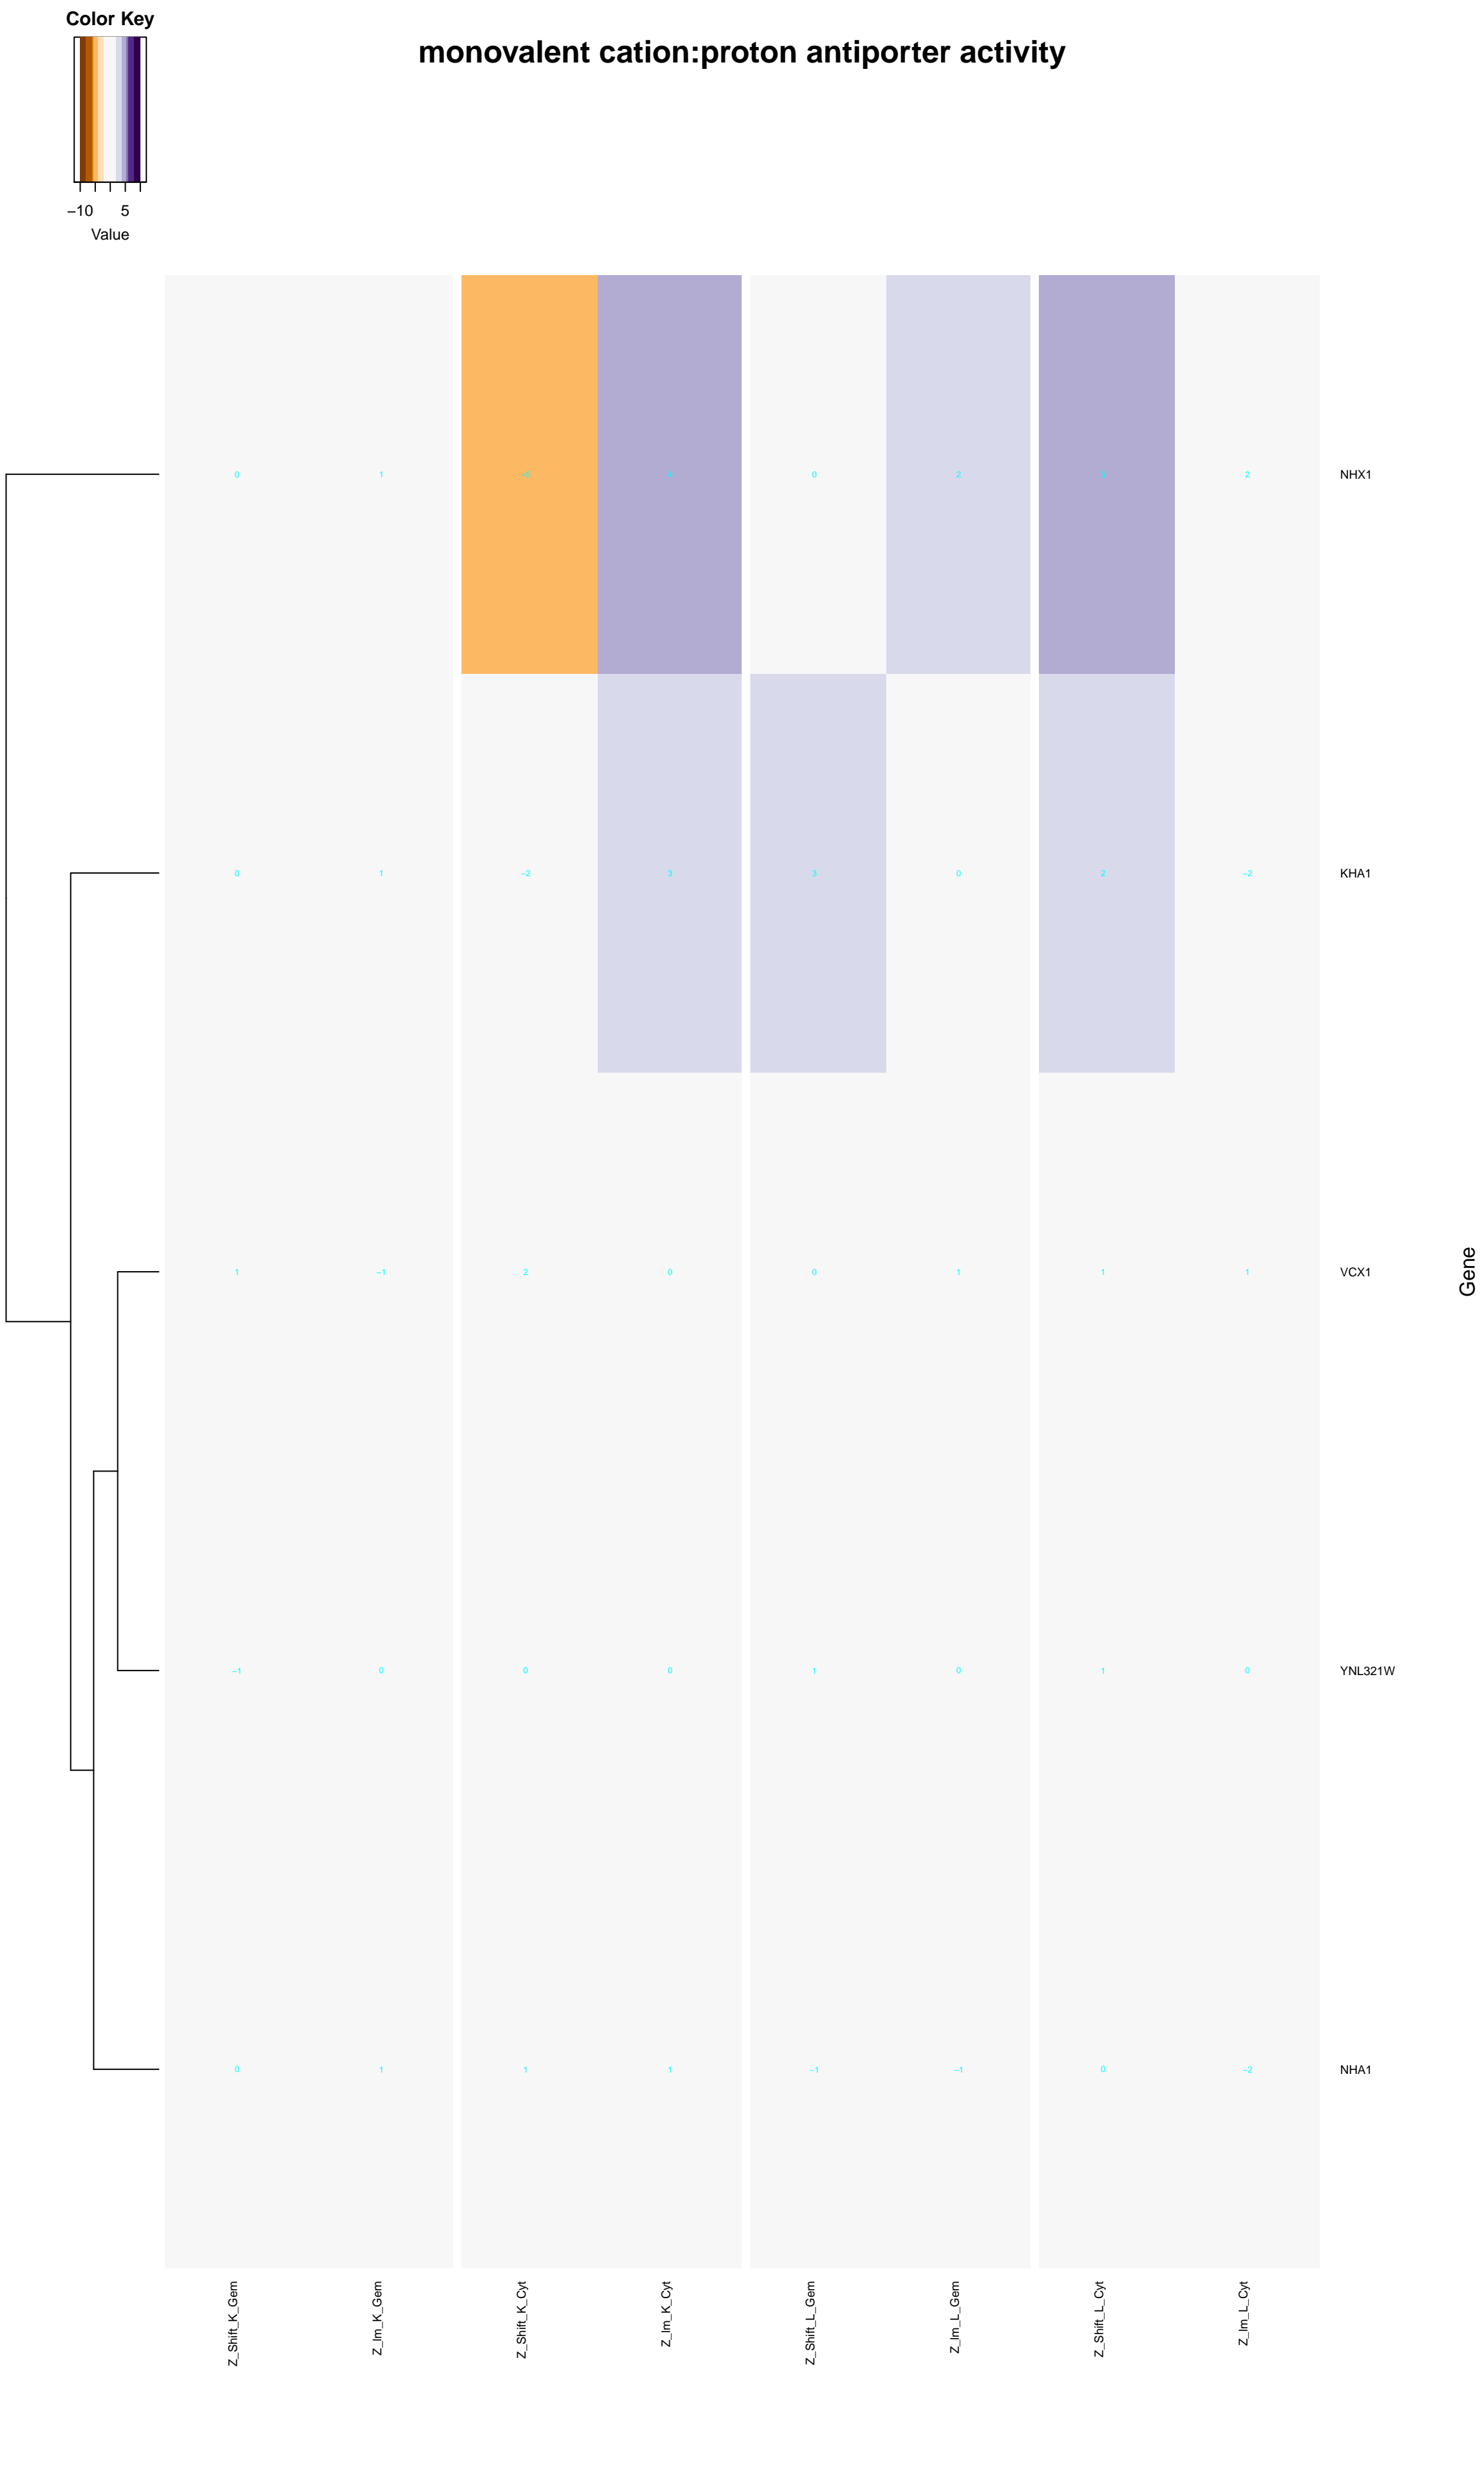



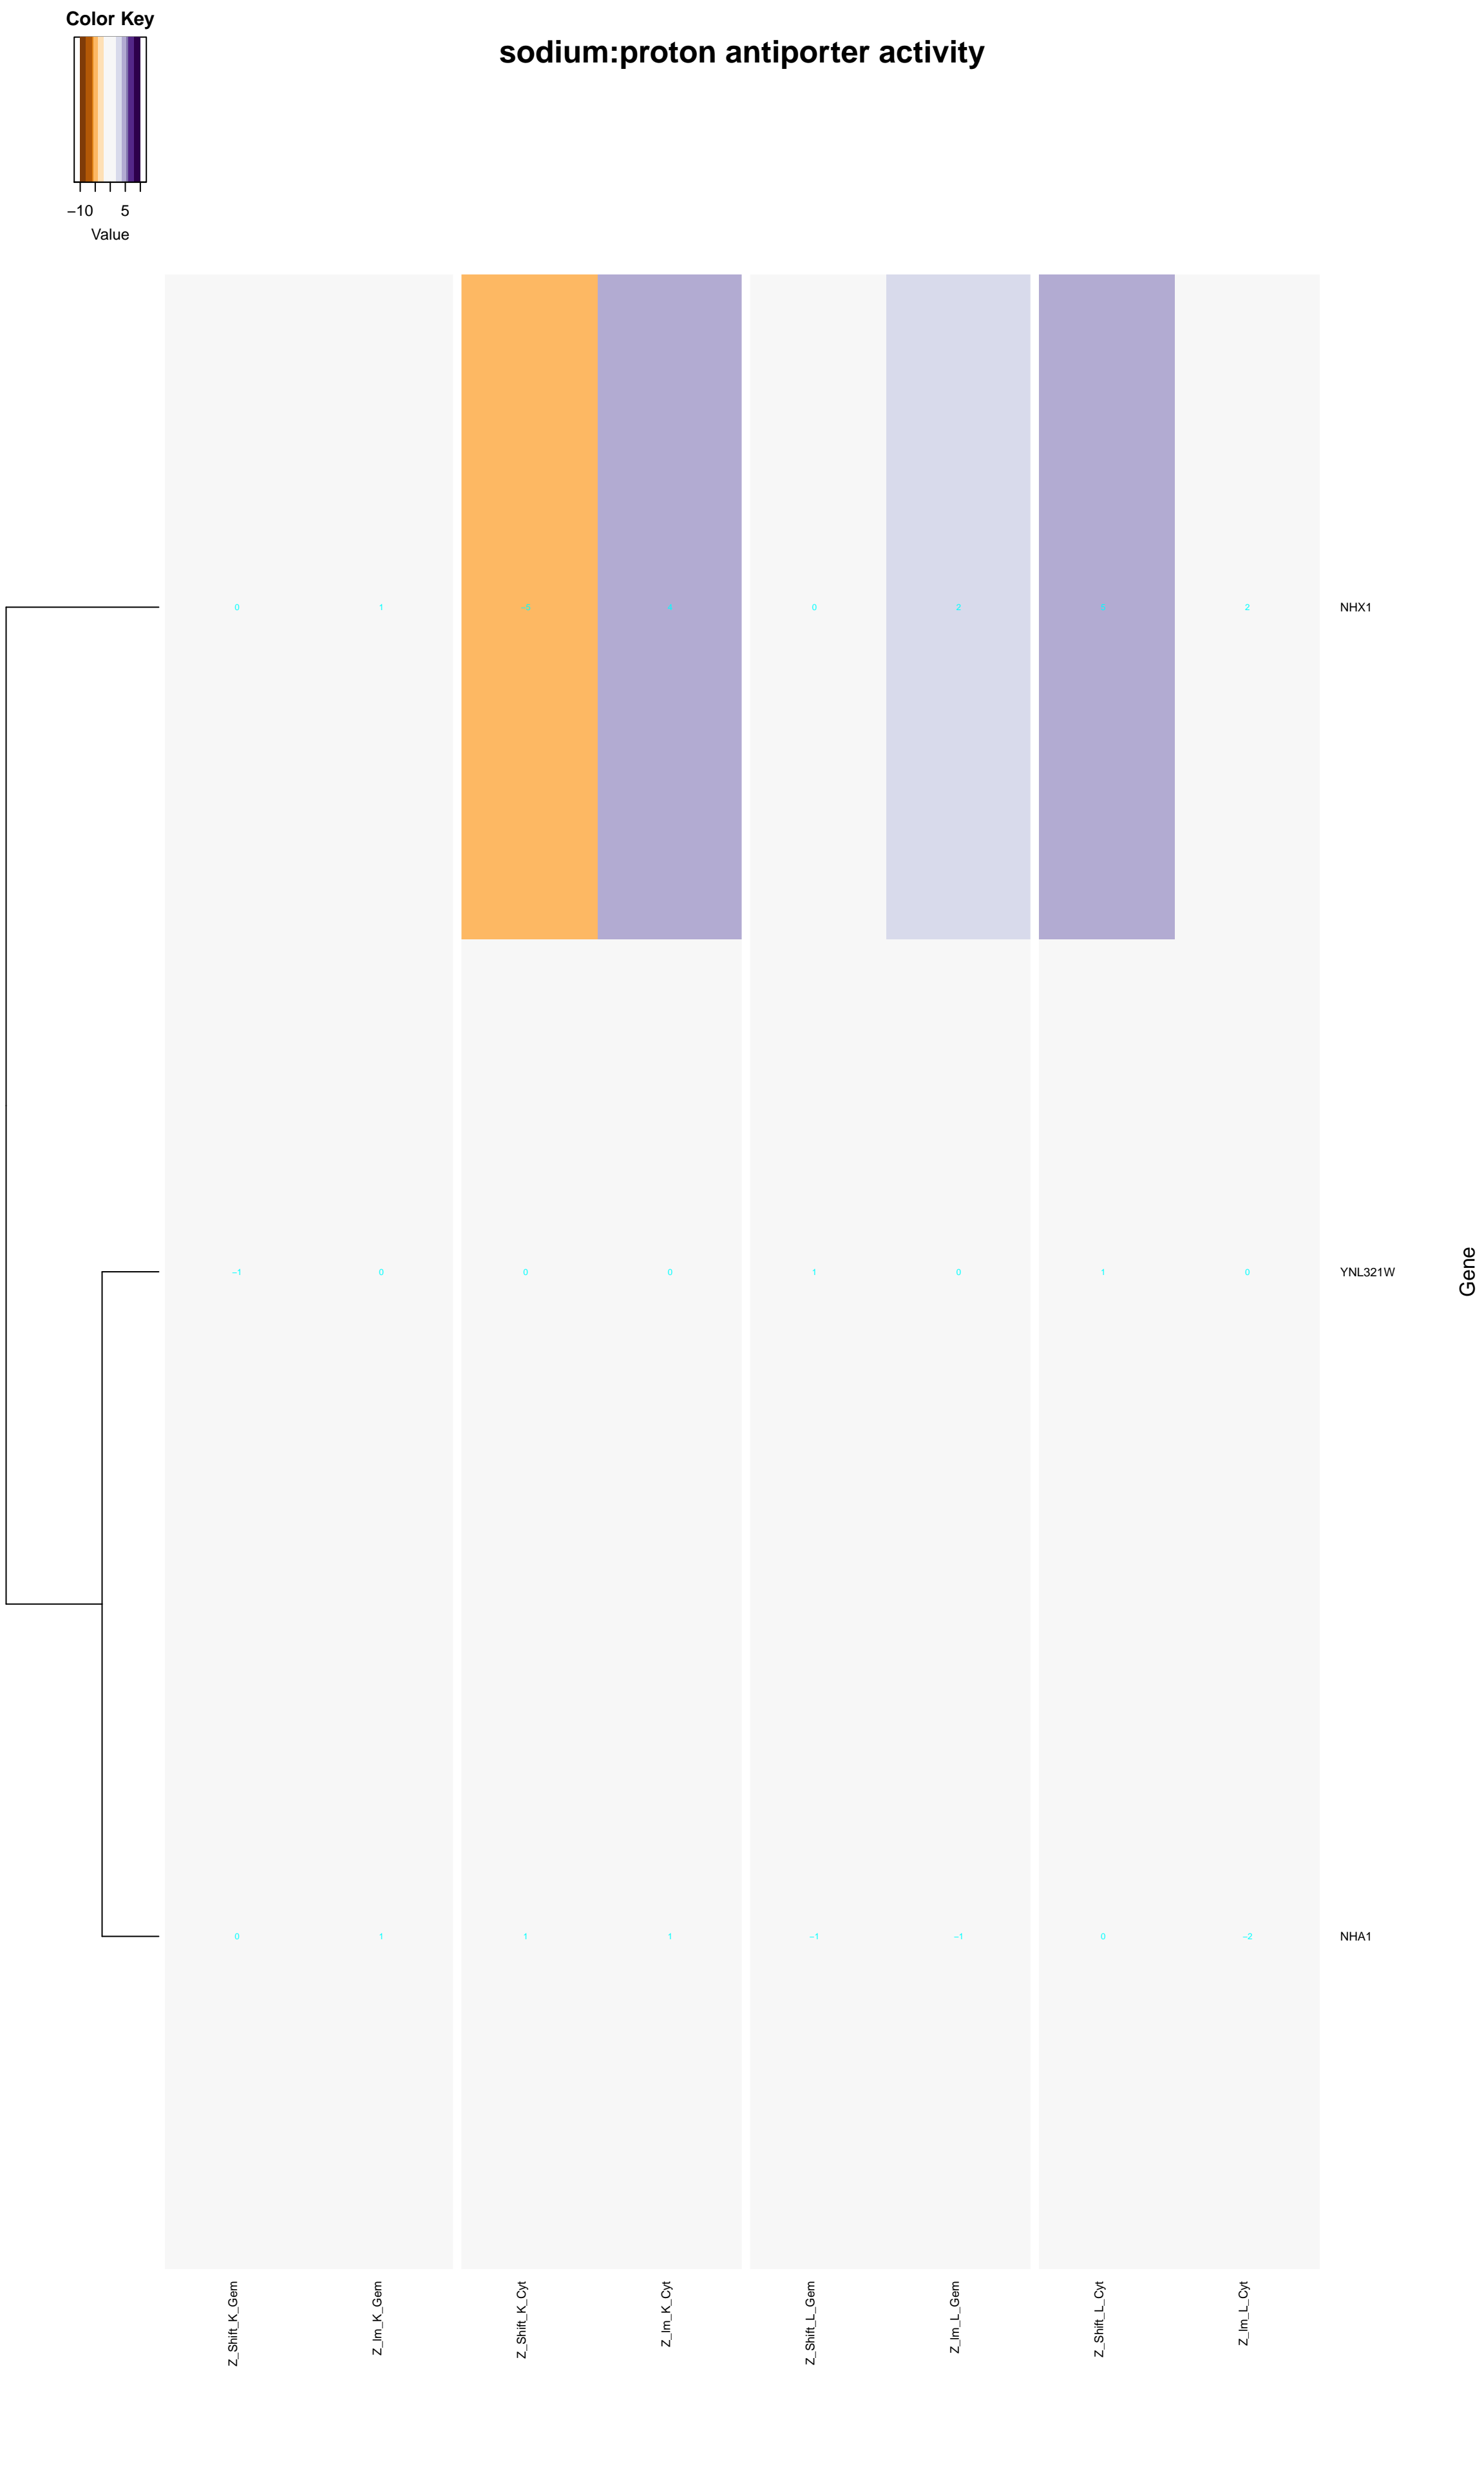

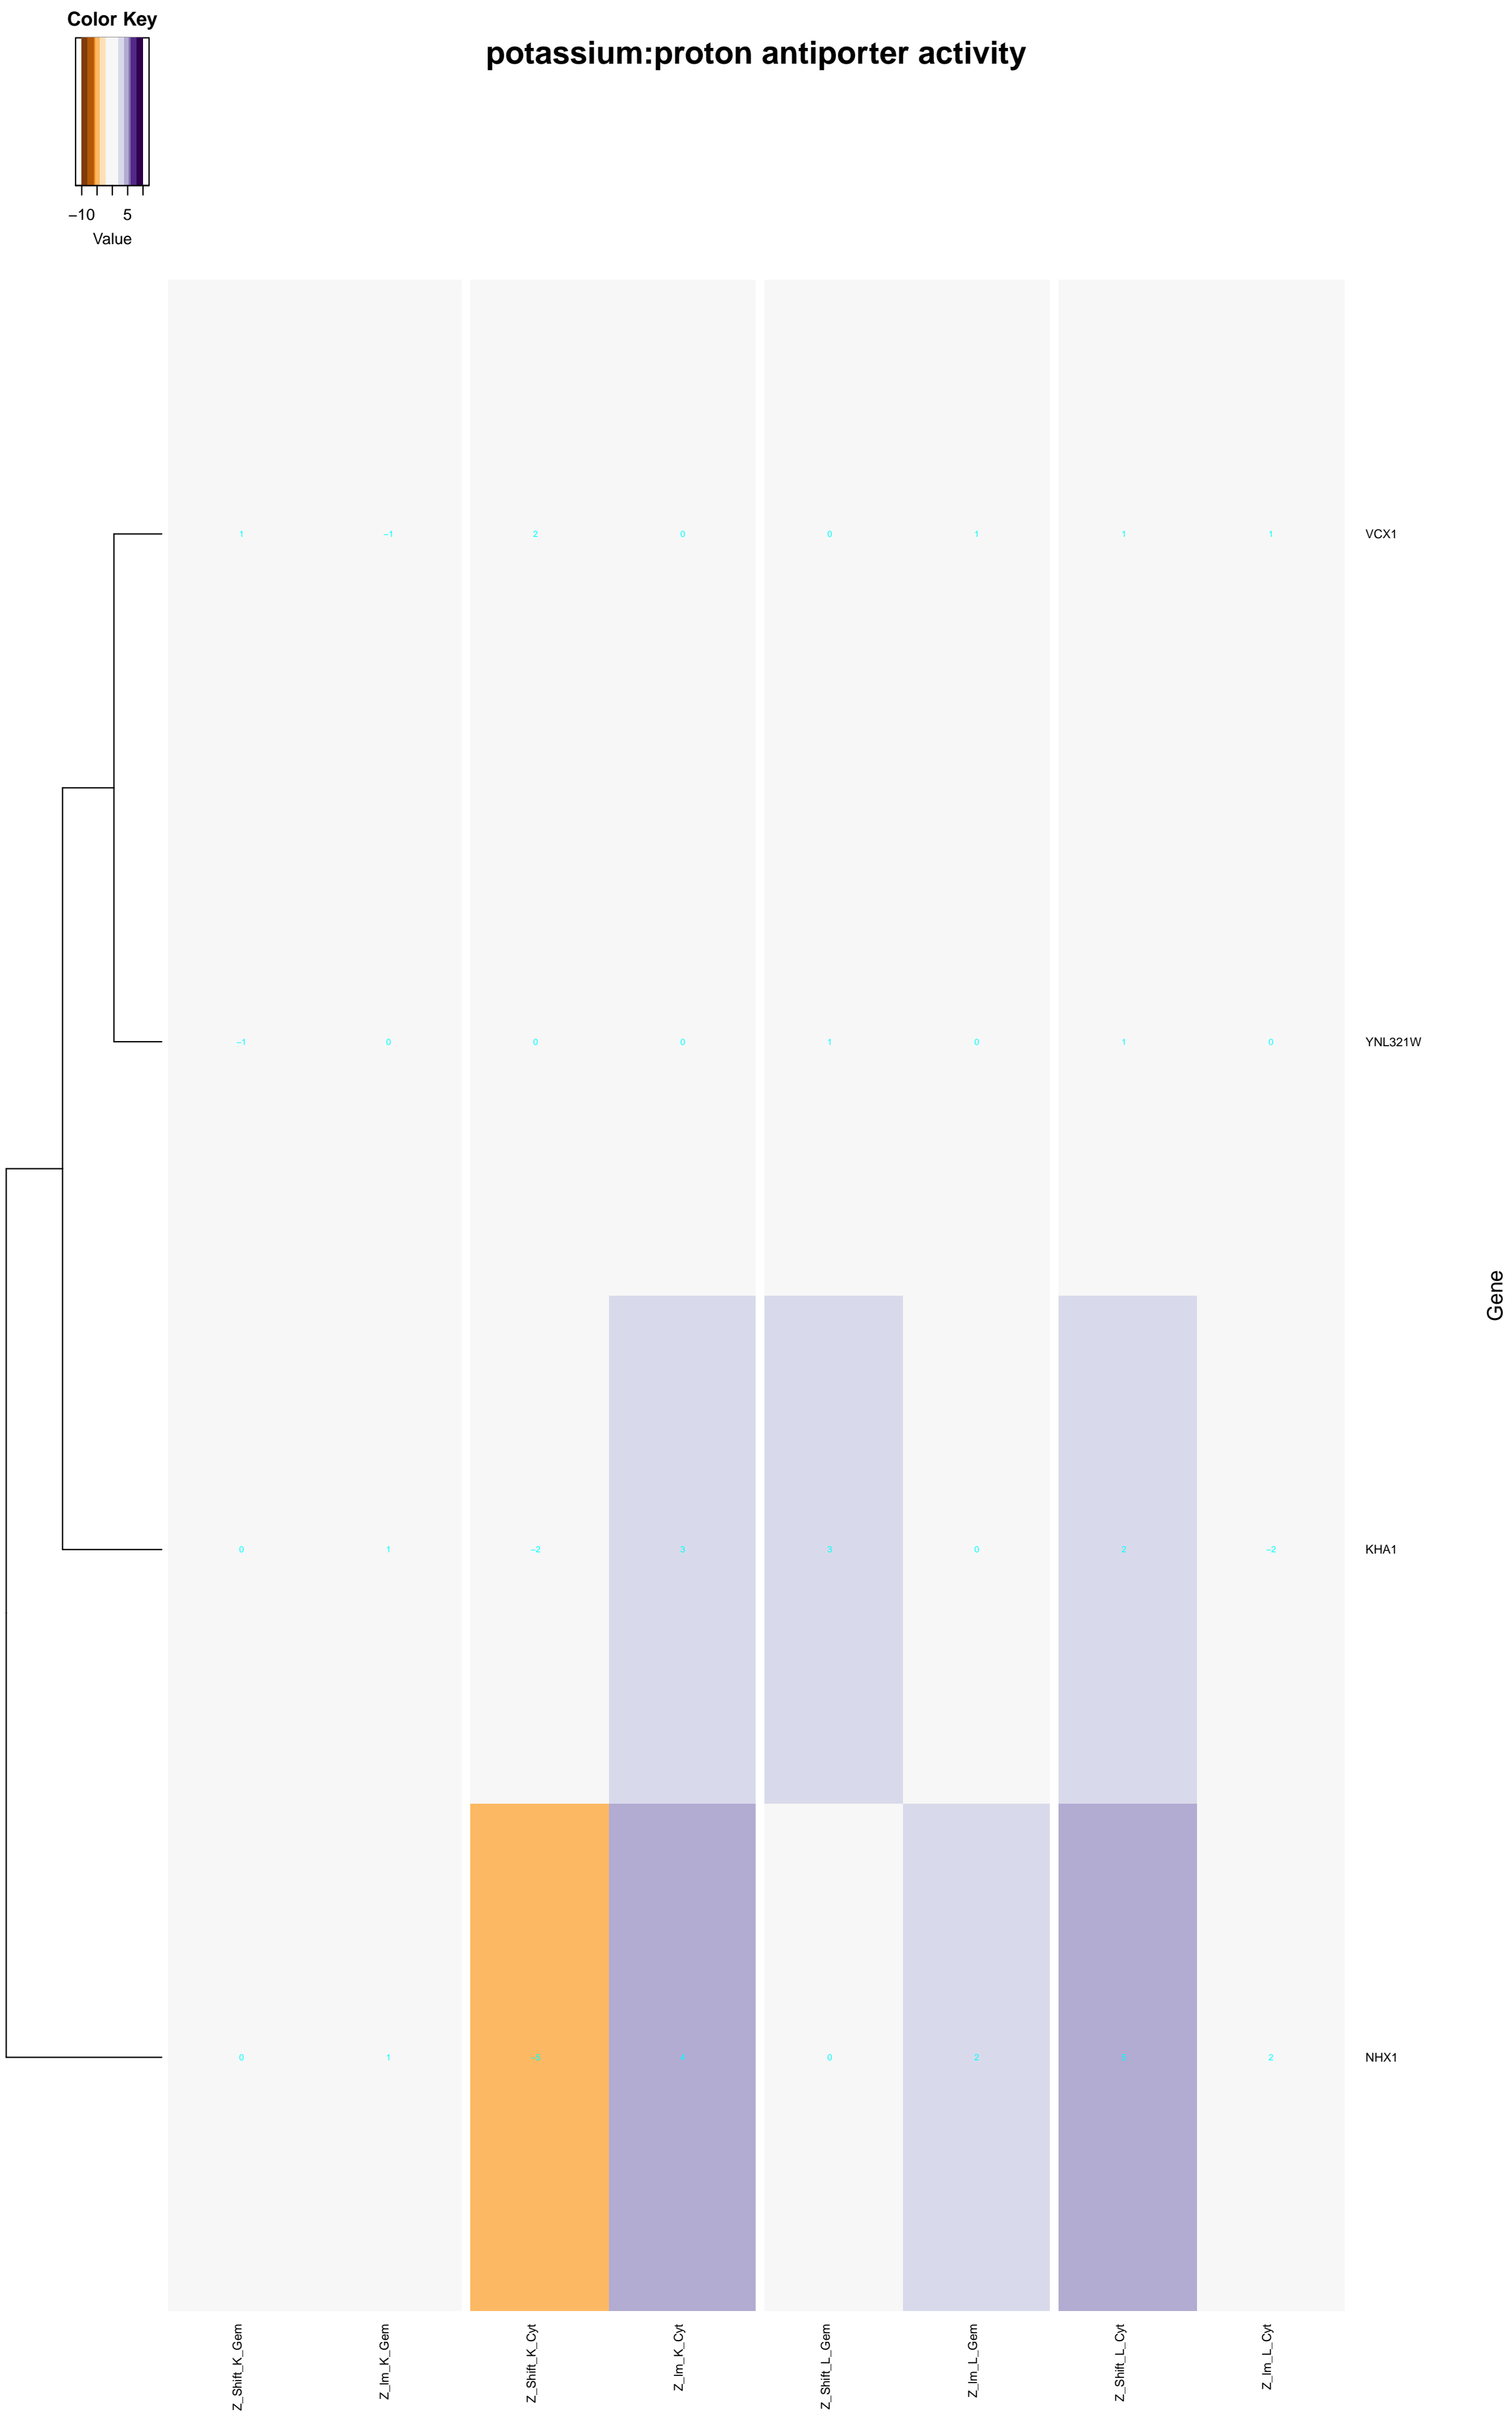

Supplement: s1 [file s1]

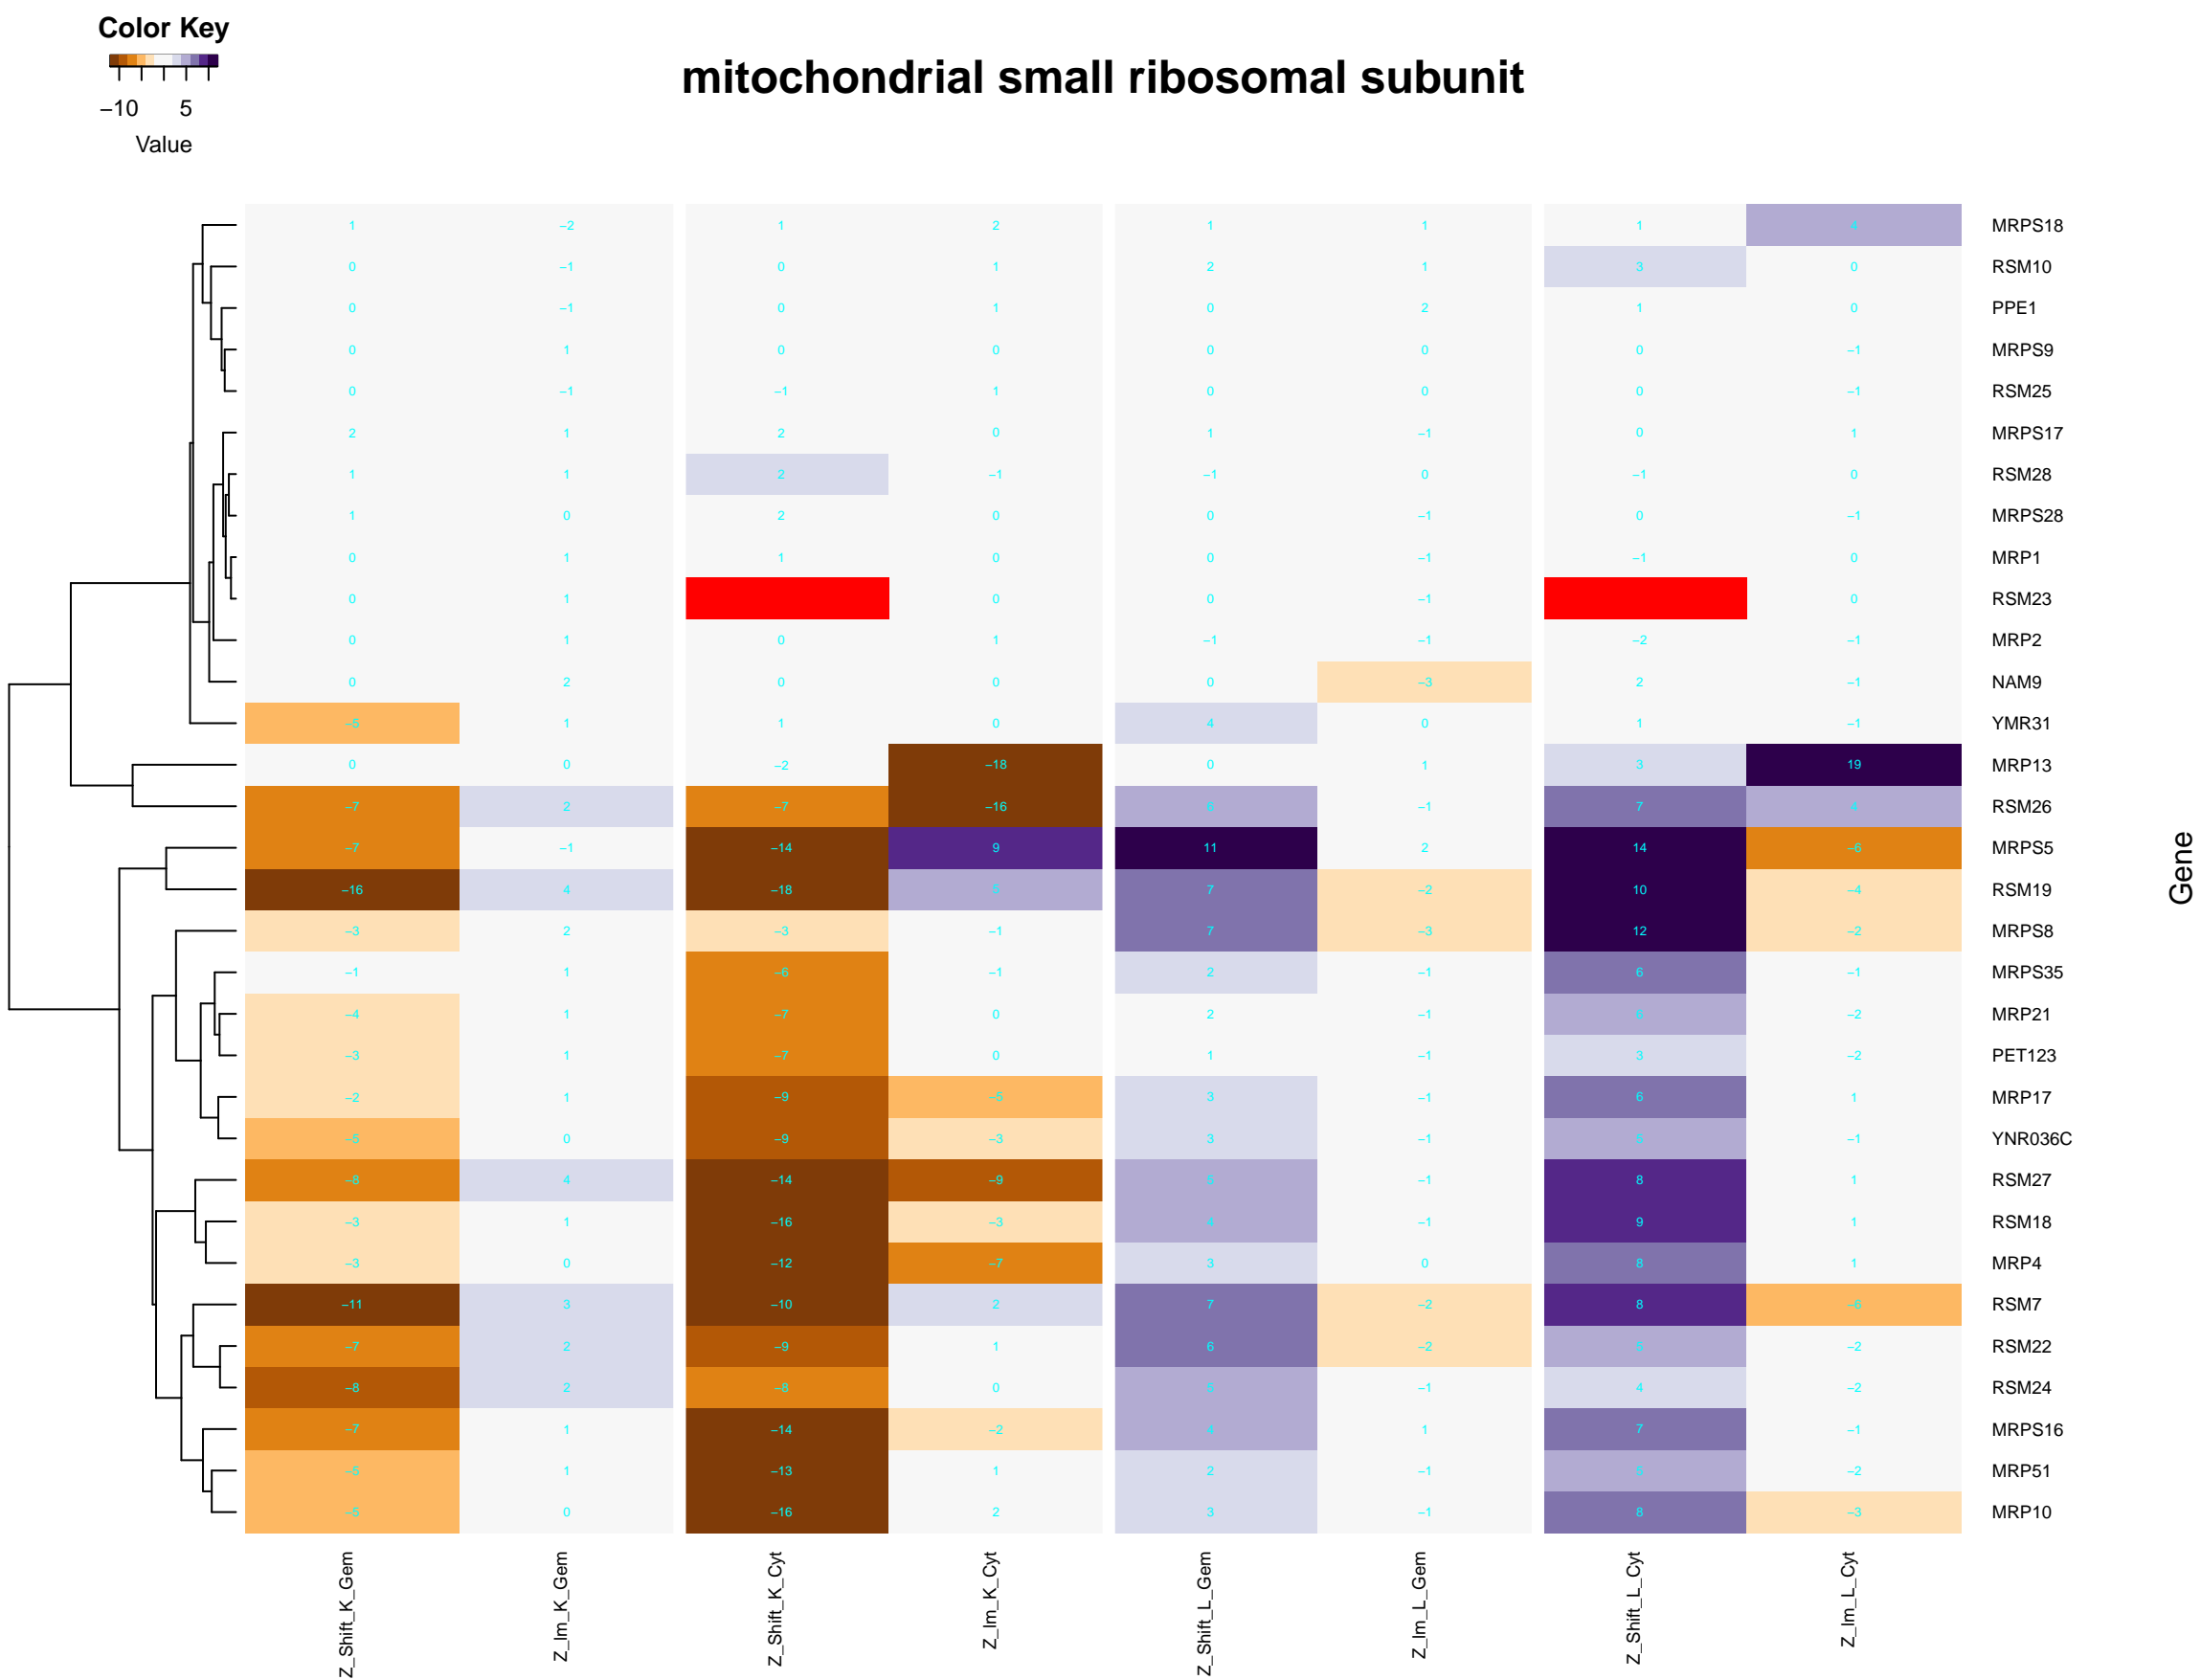

Supplement: s1 [file s1]

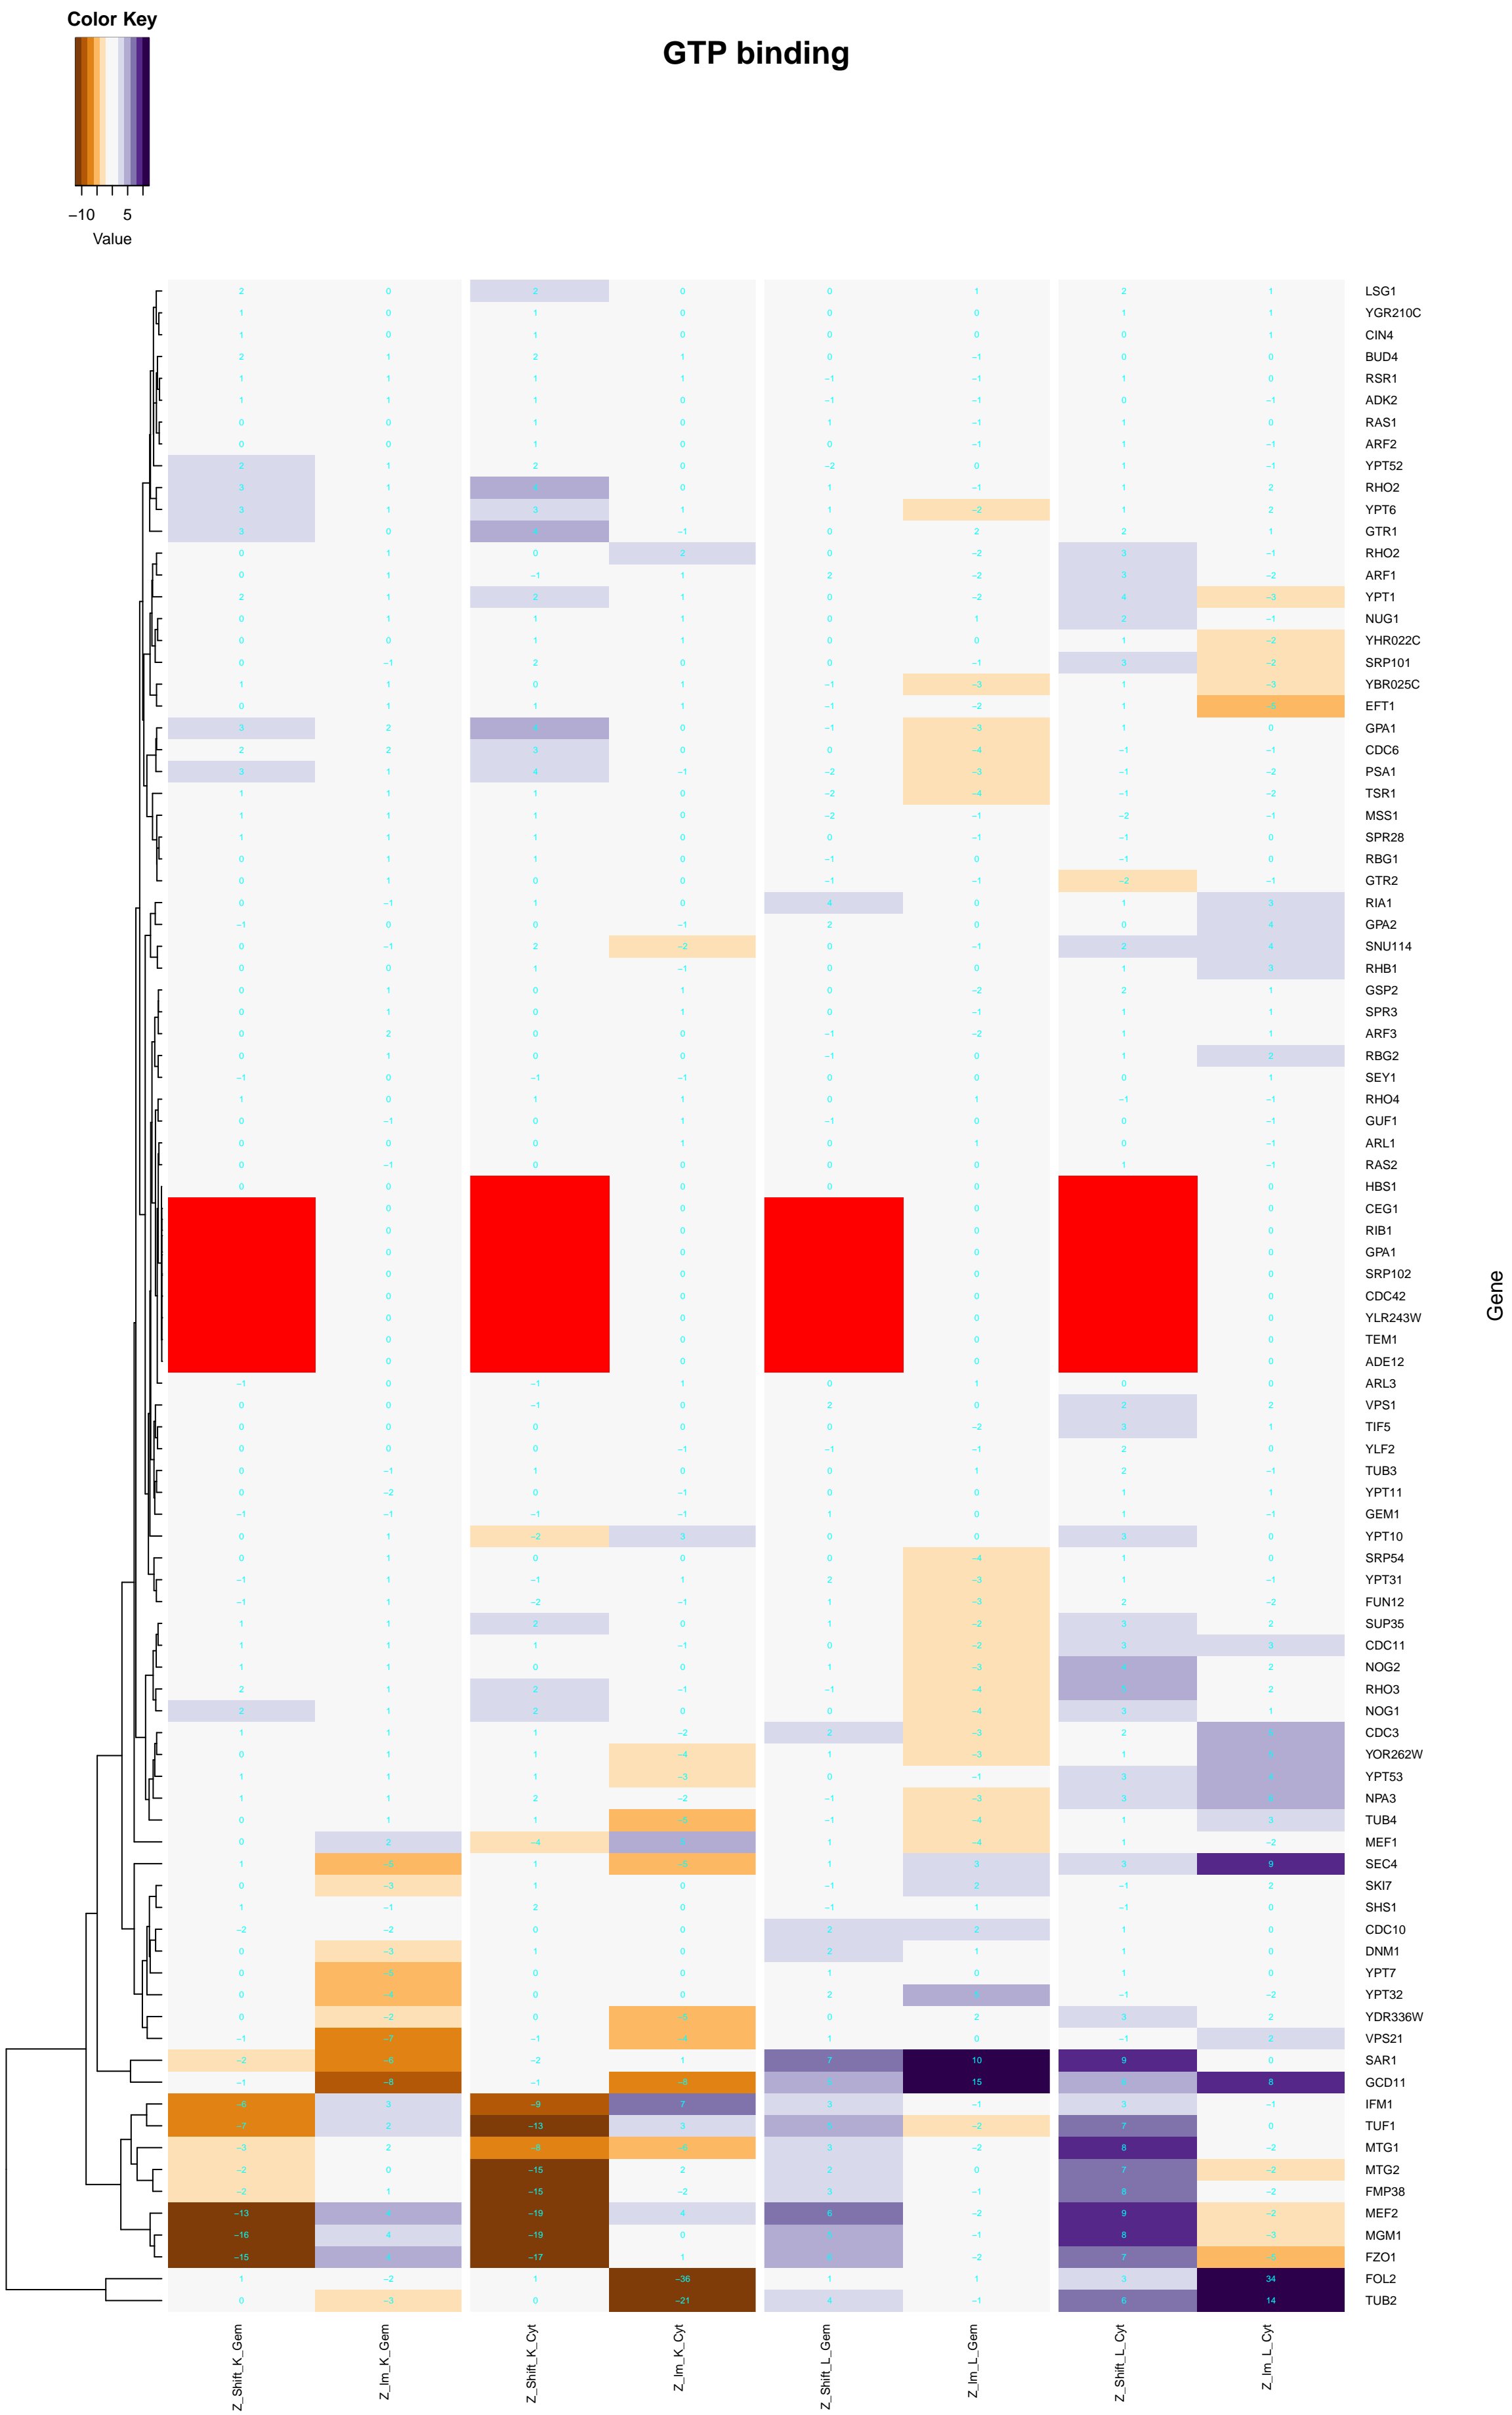

Supplement: s1 [file s1]

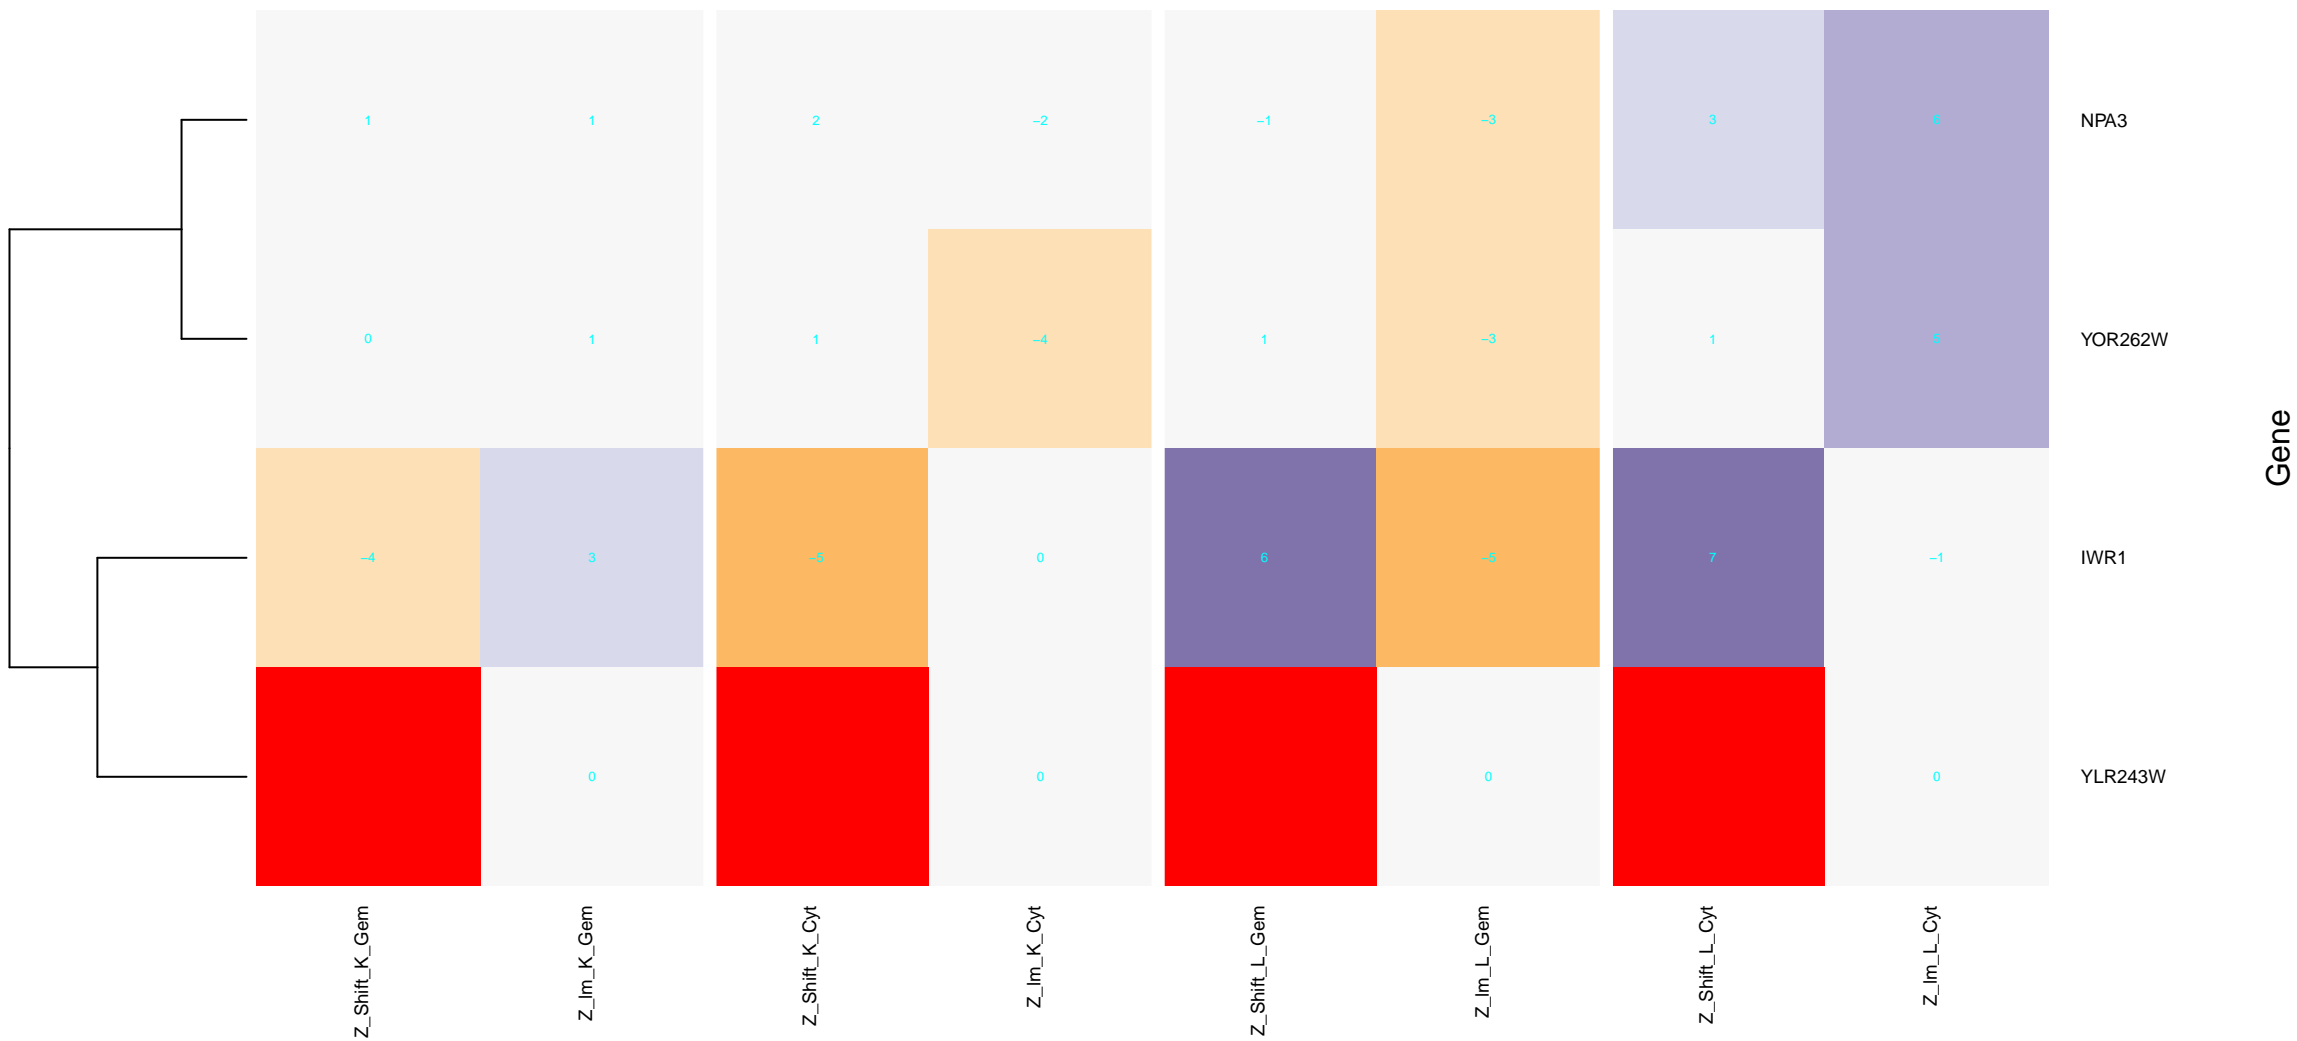

Supplement: s1 [file s1]

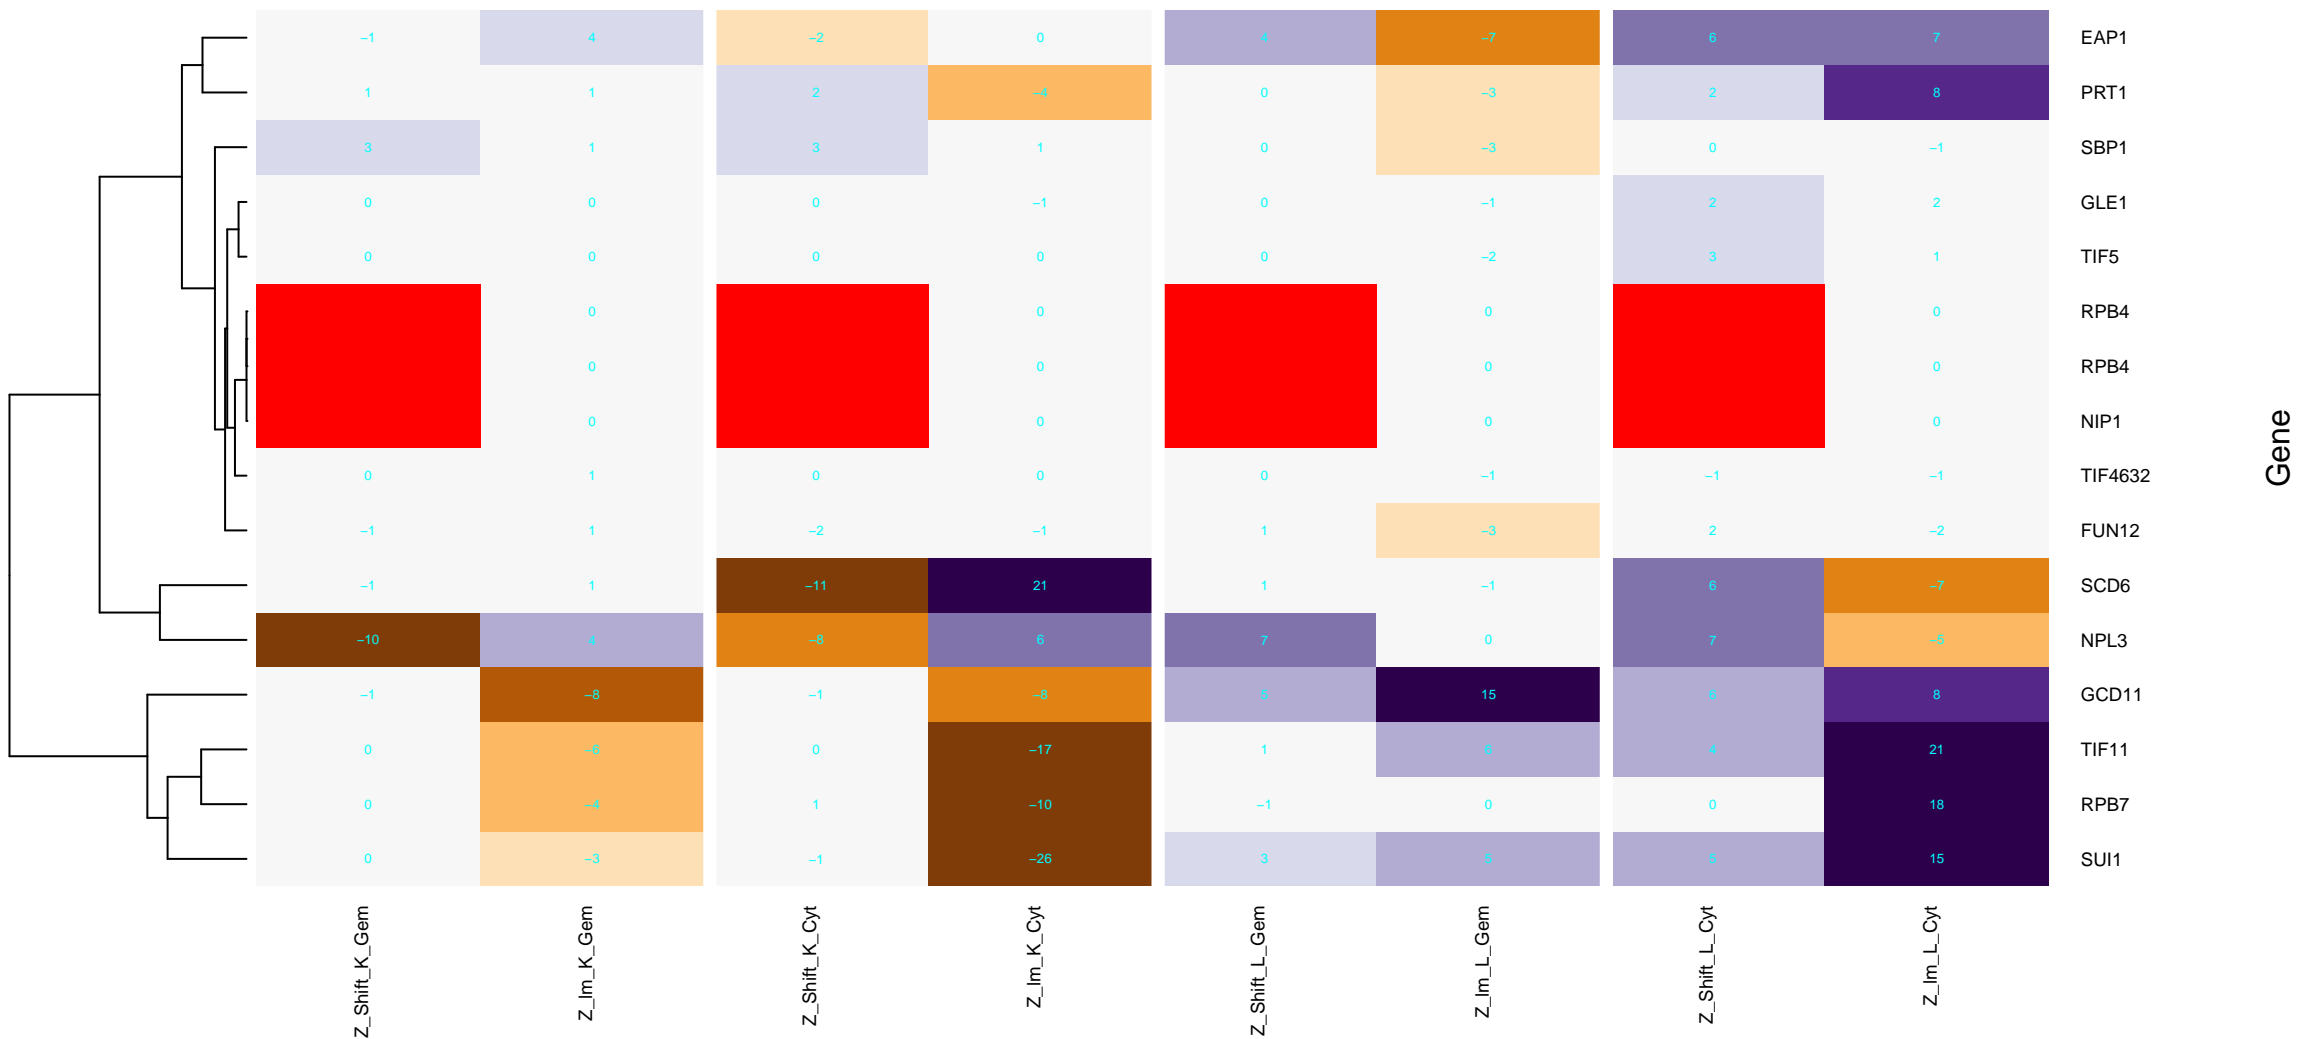

Supplement: s1 [file s1]

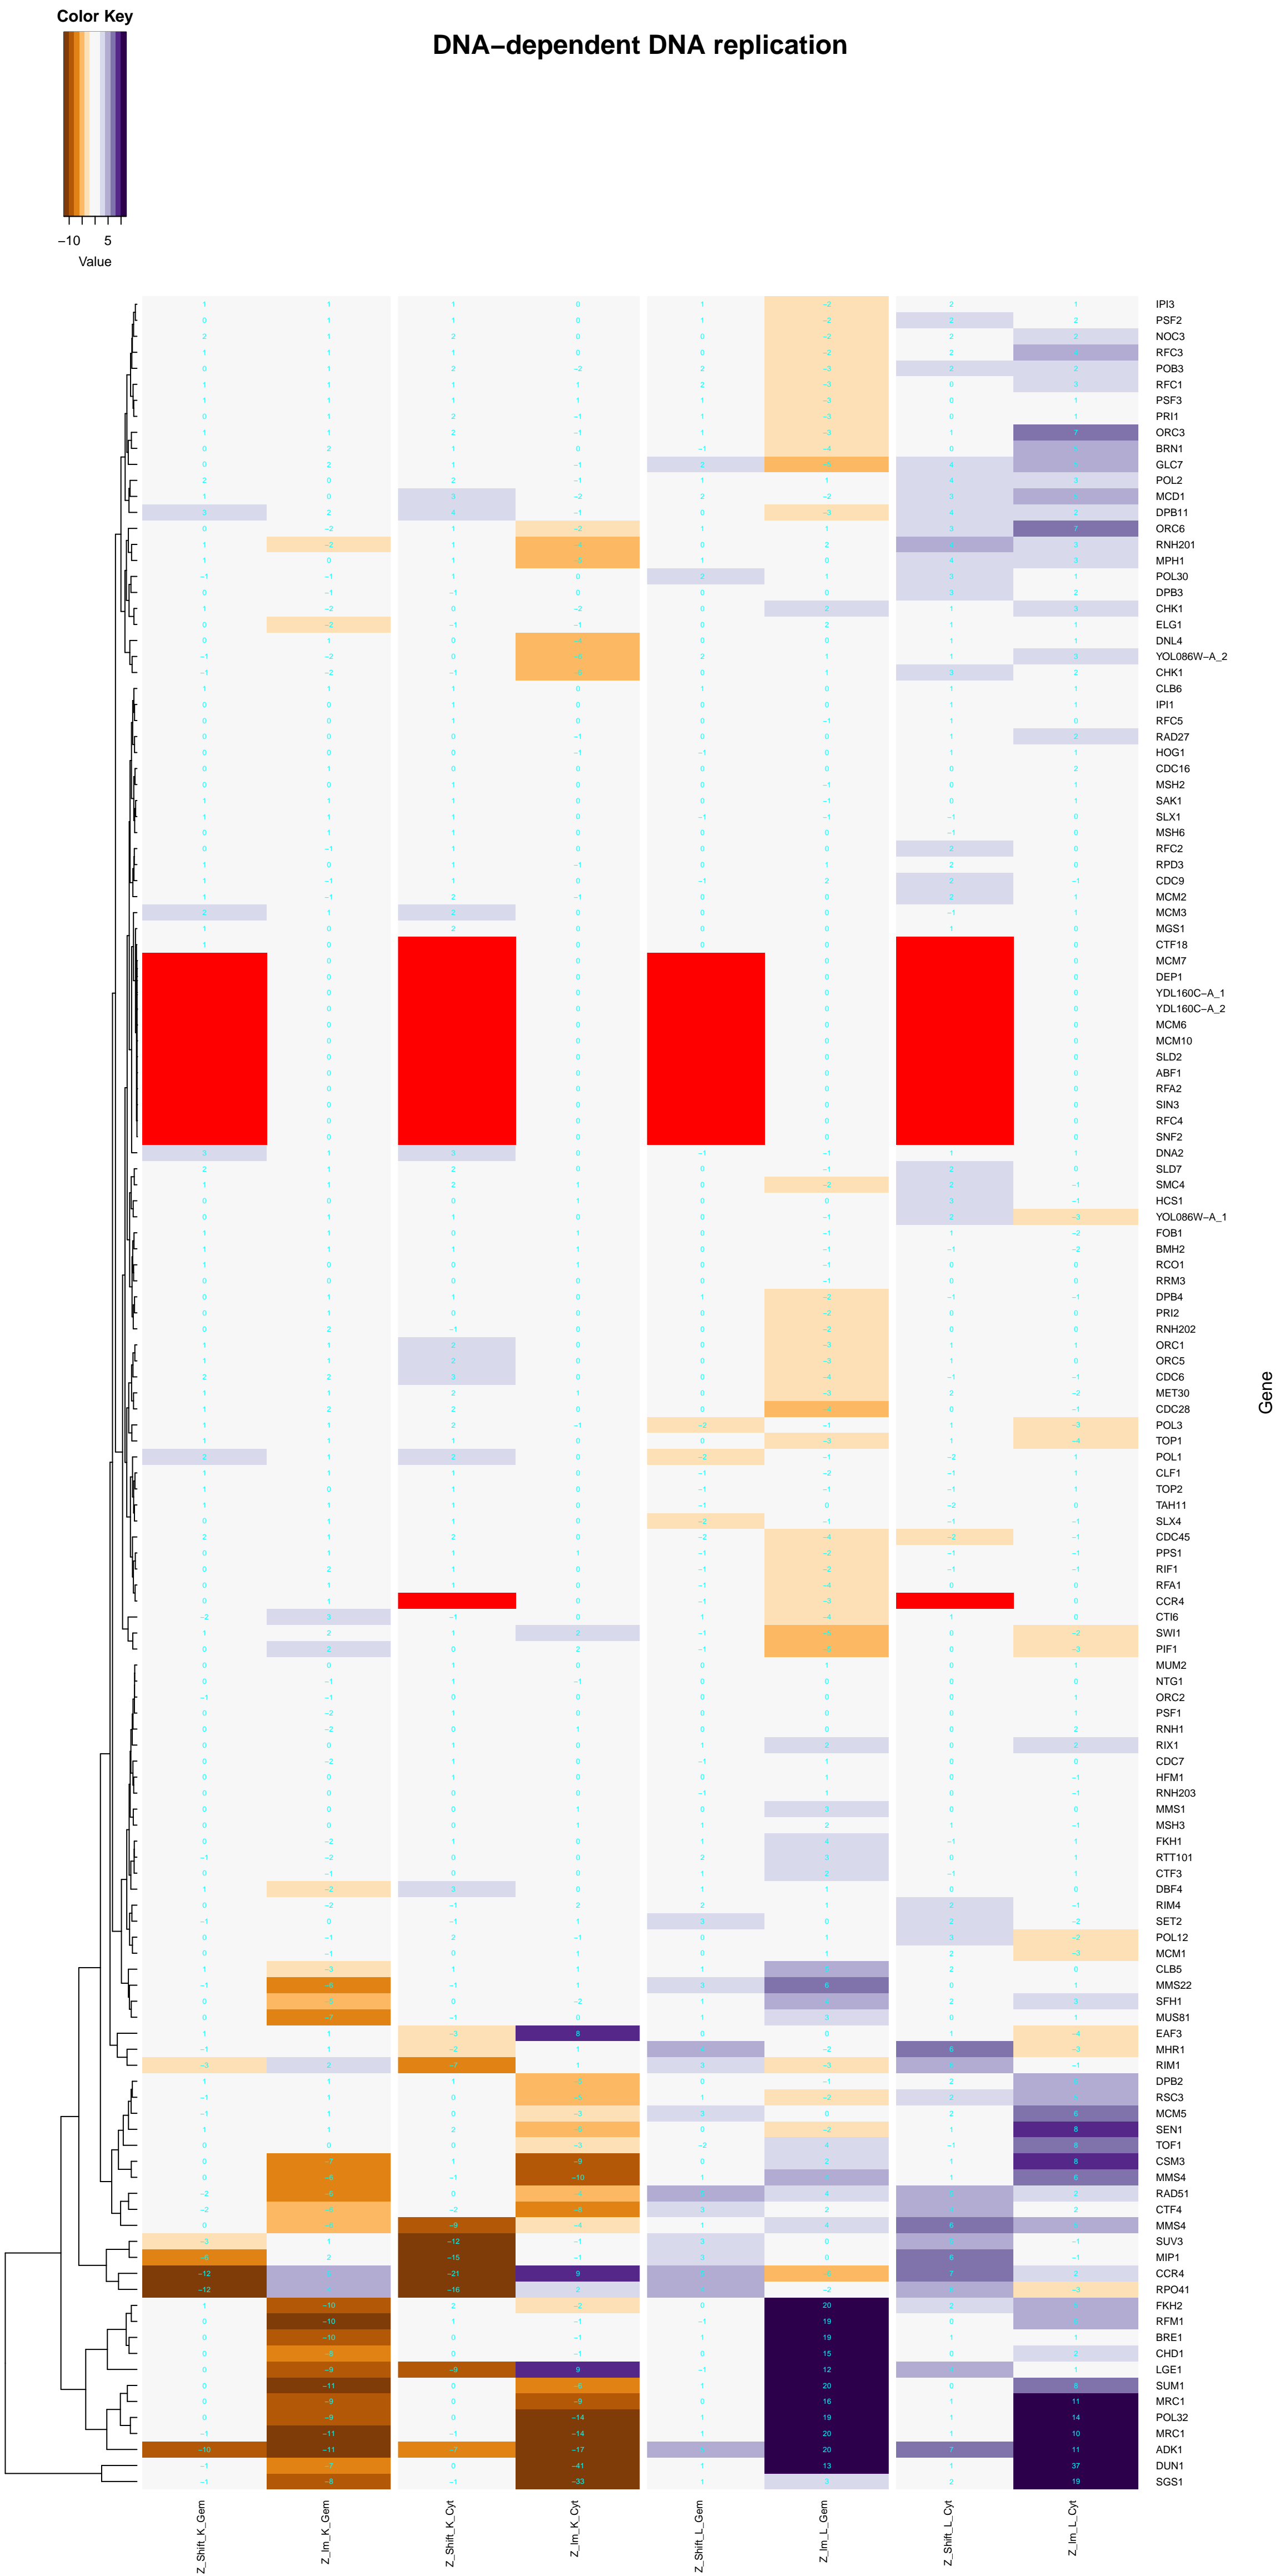

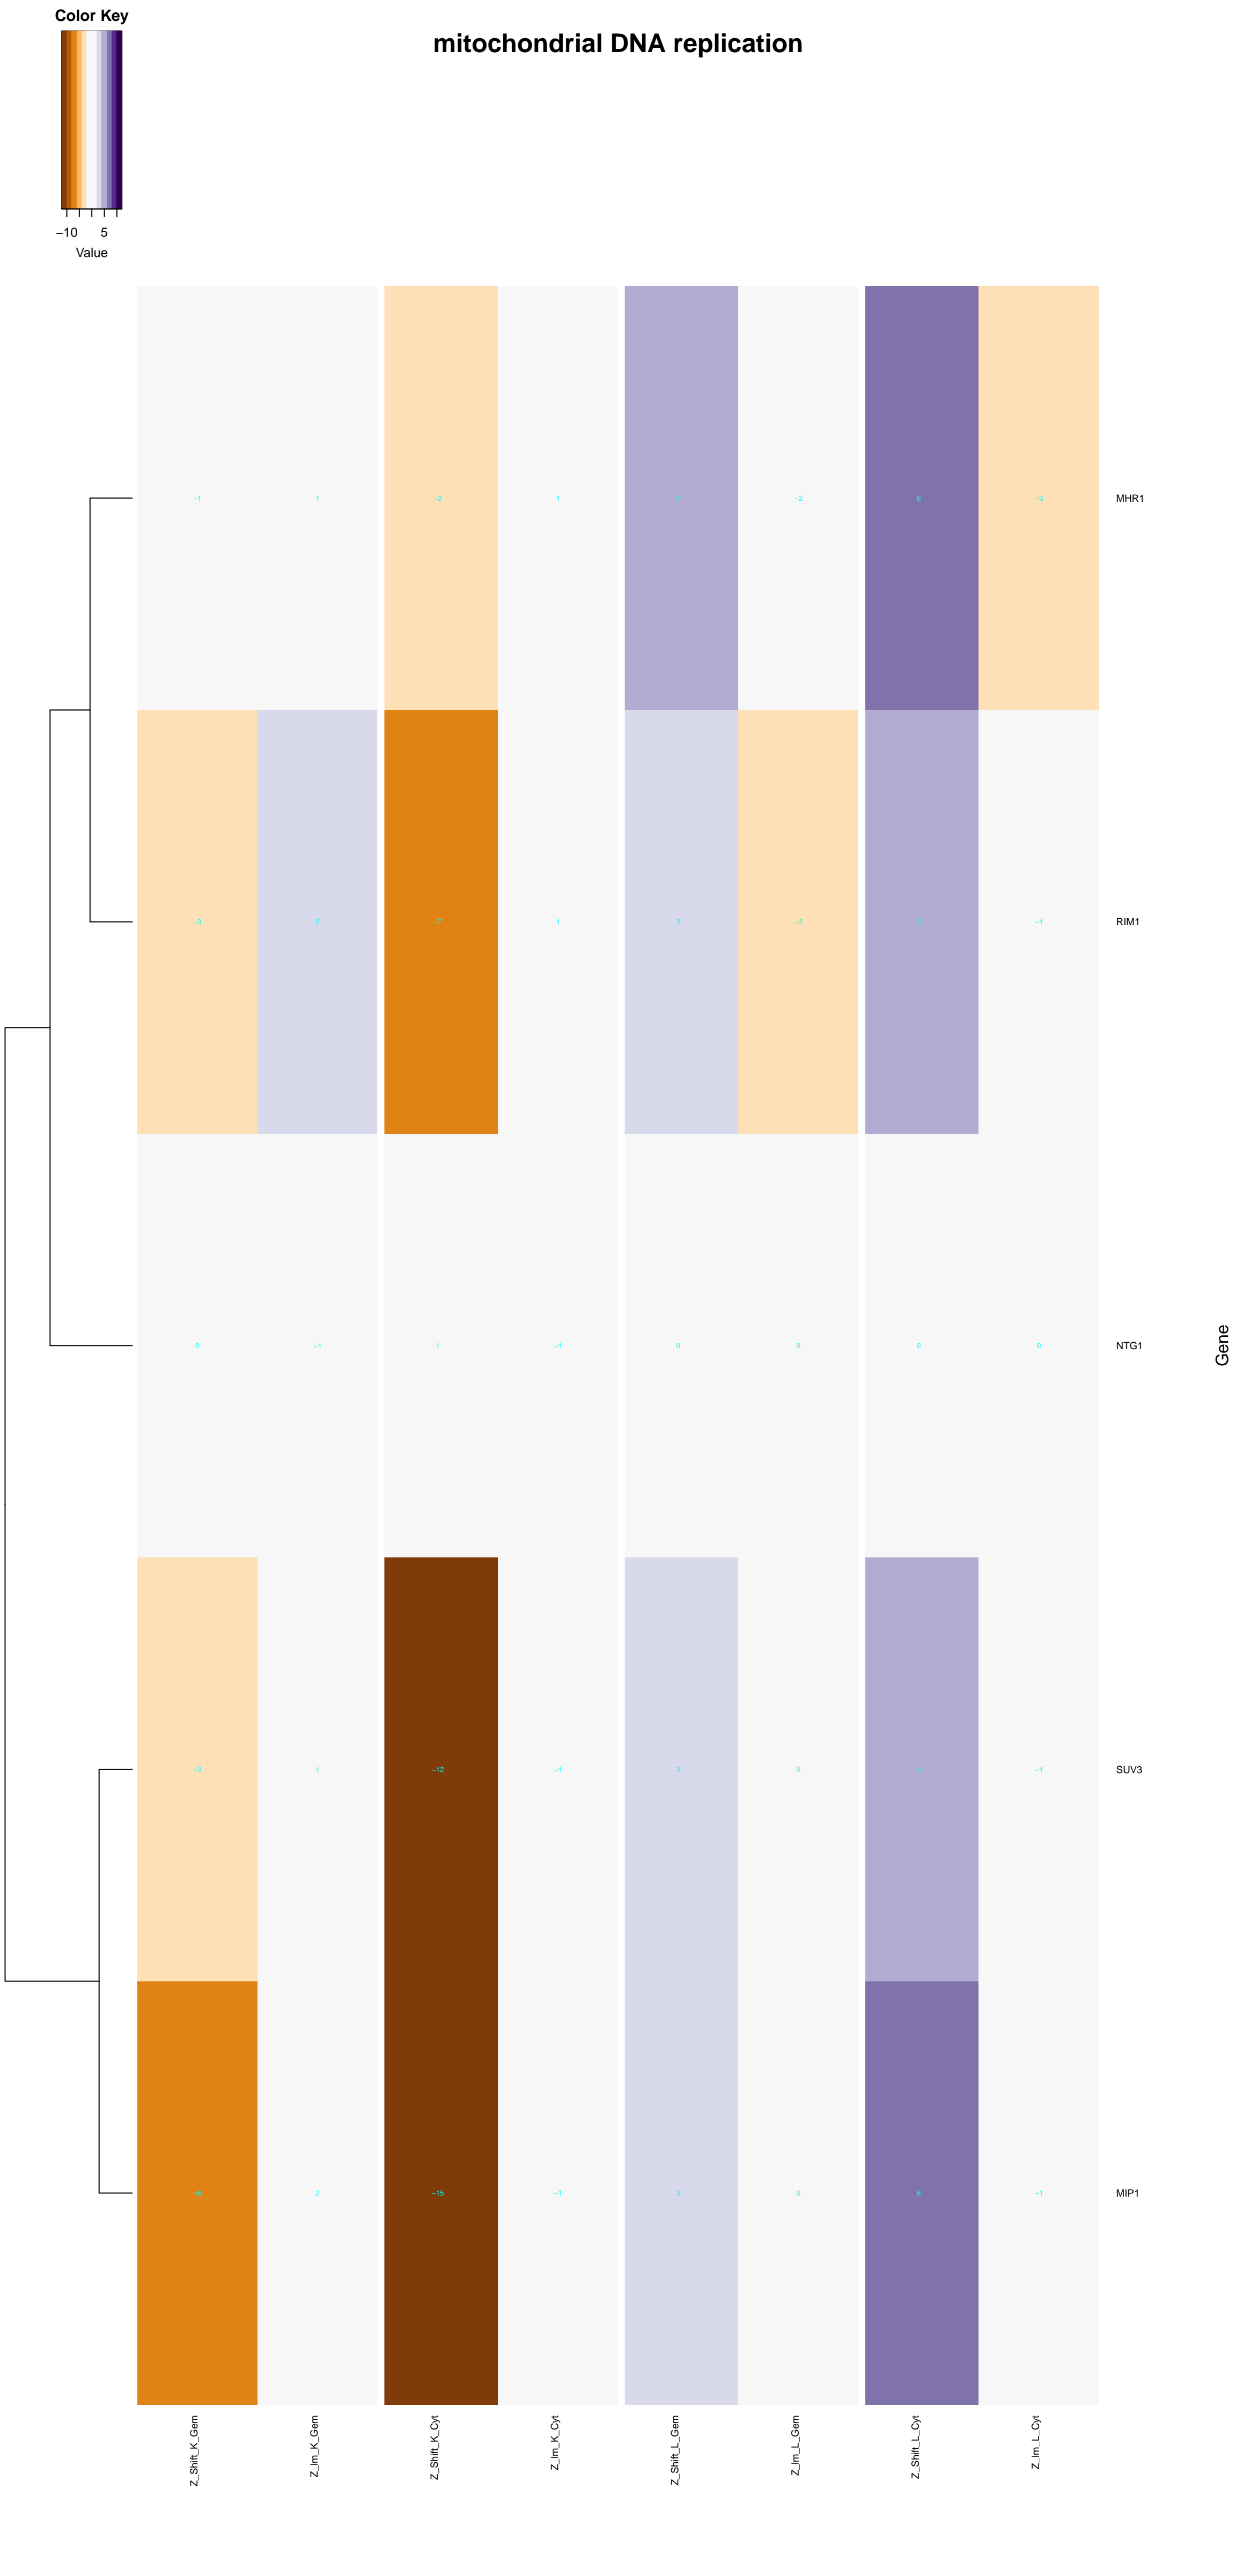

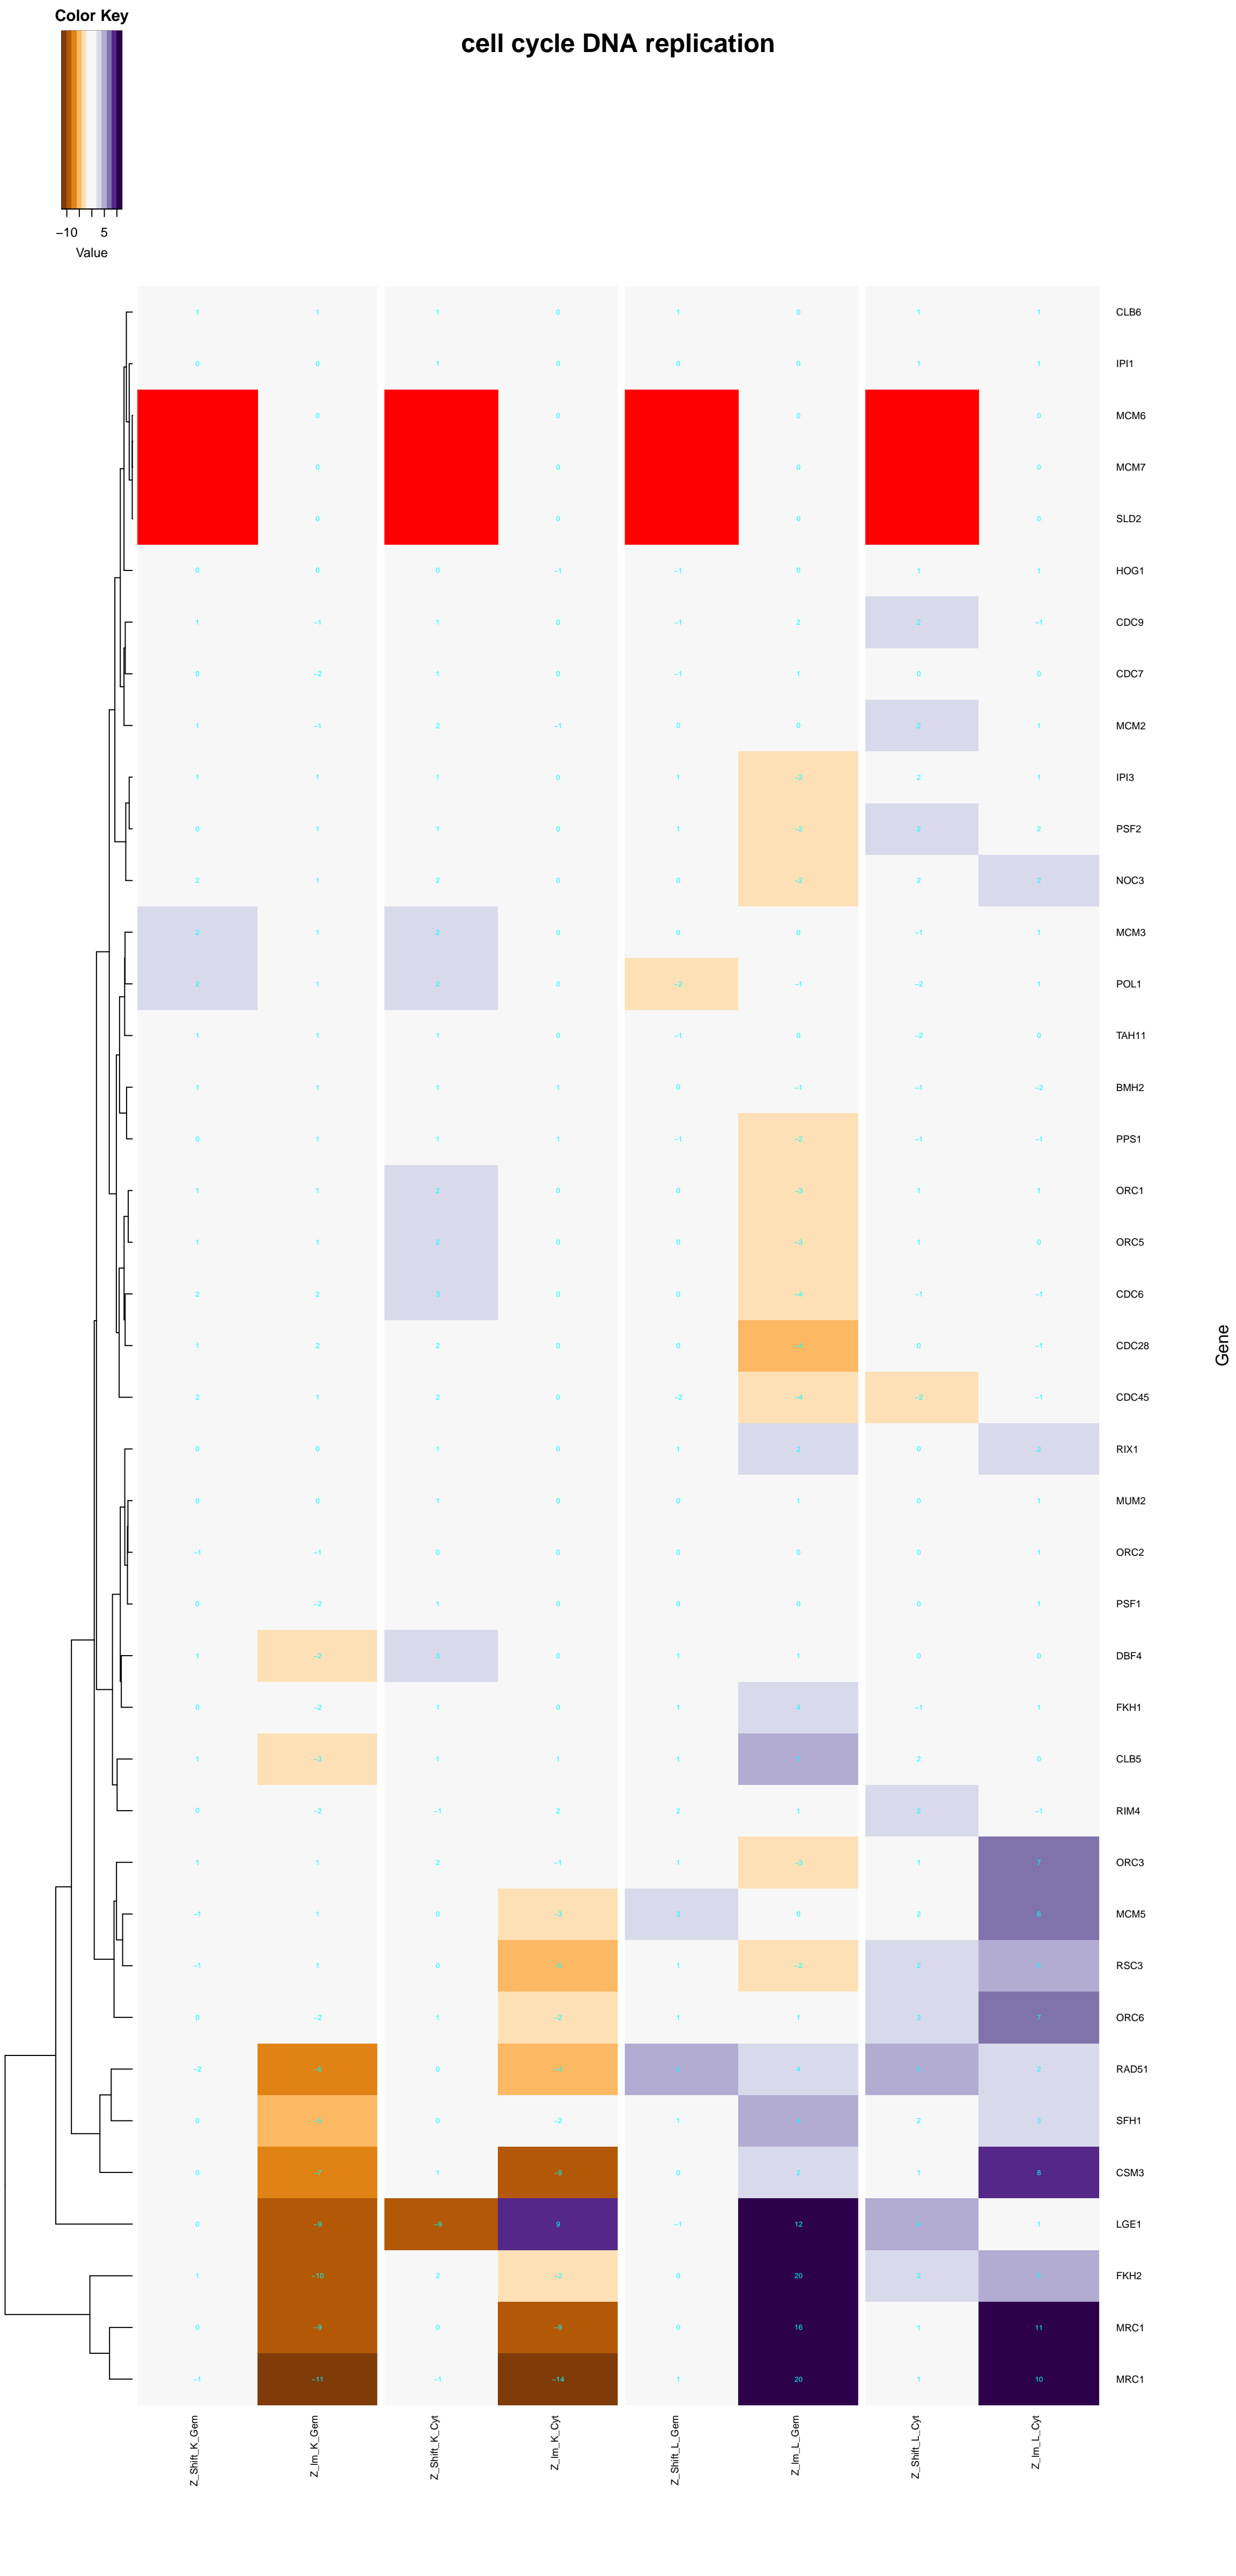

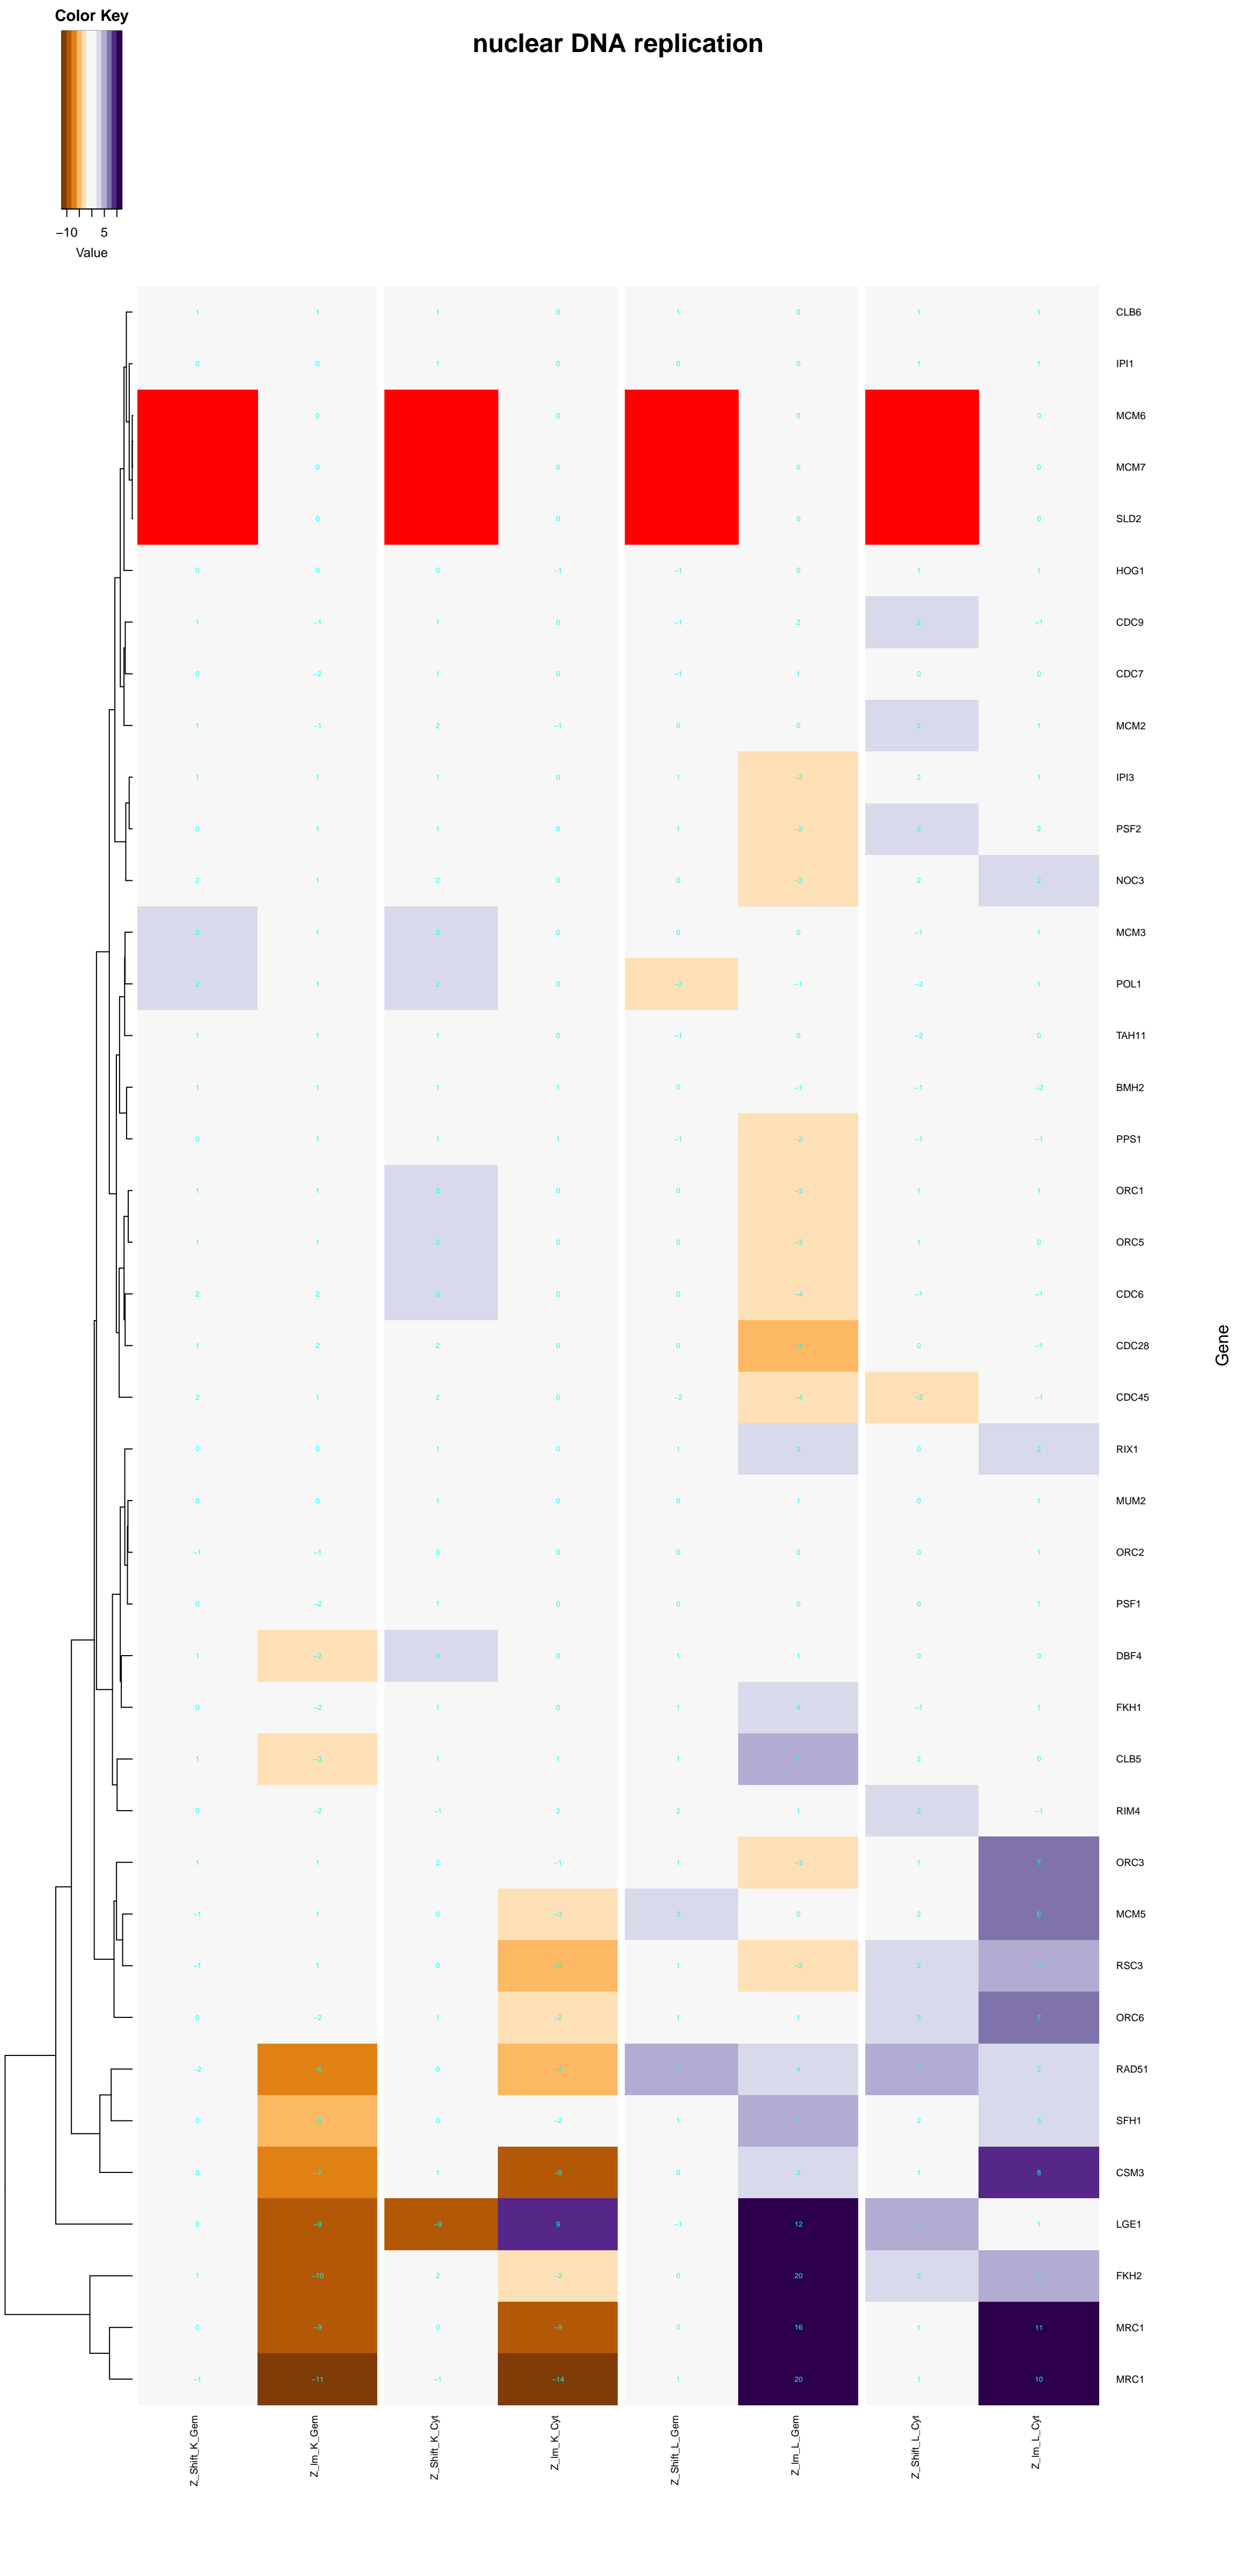

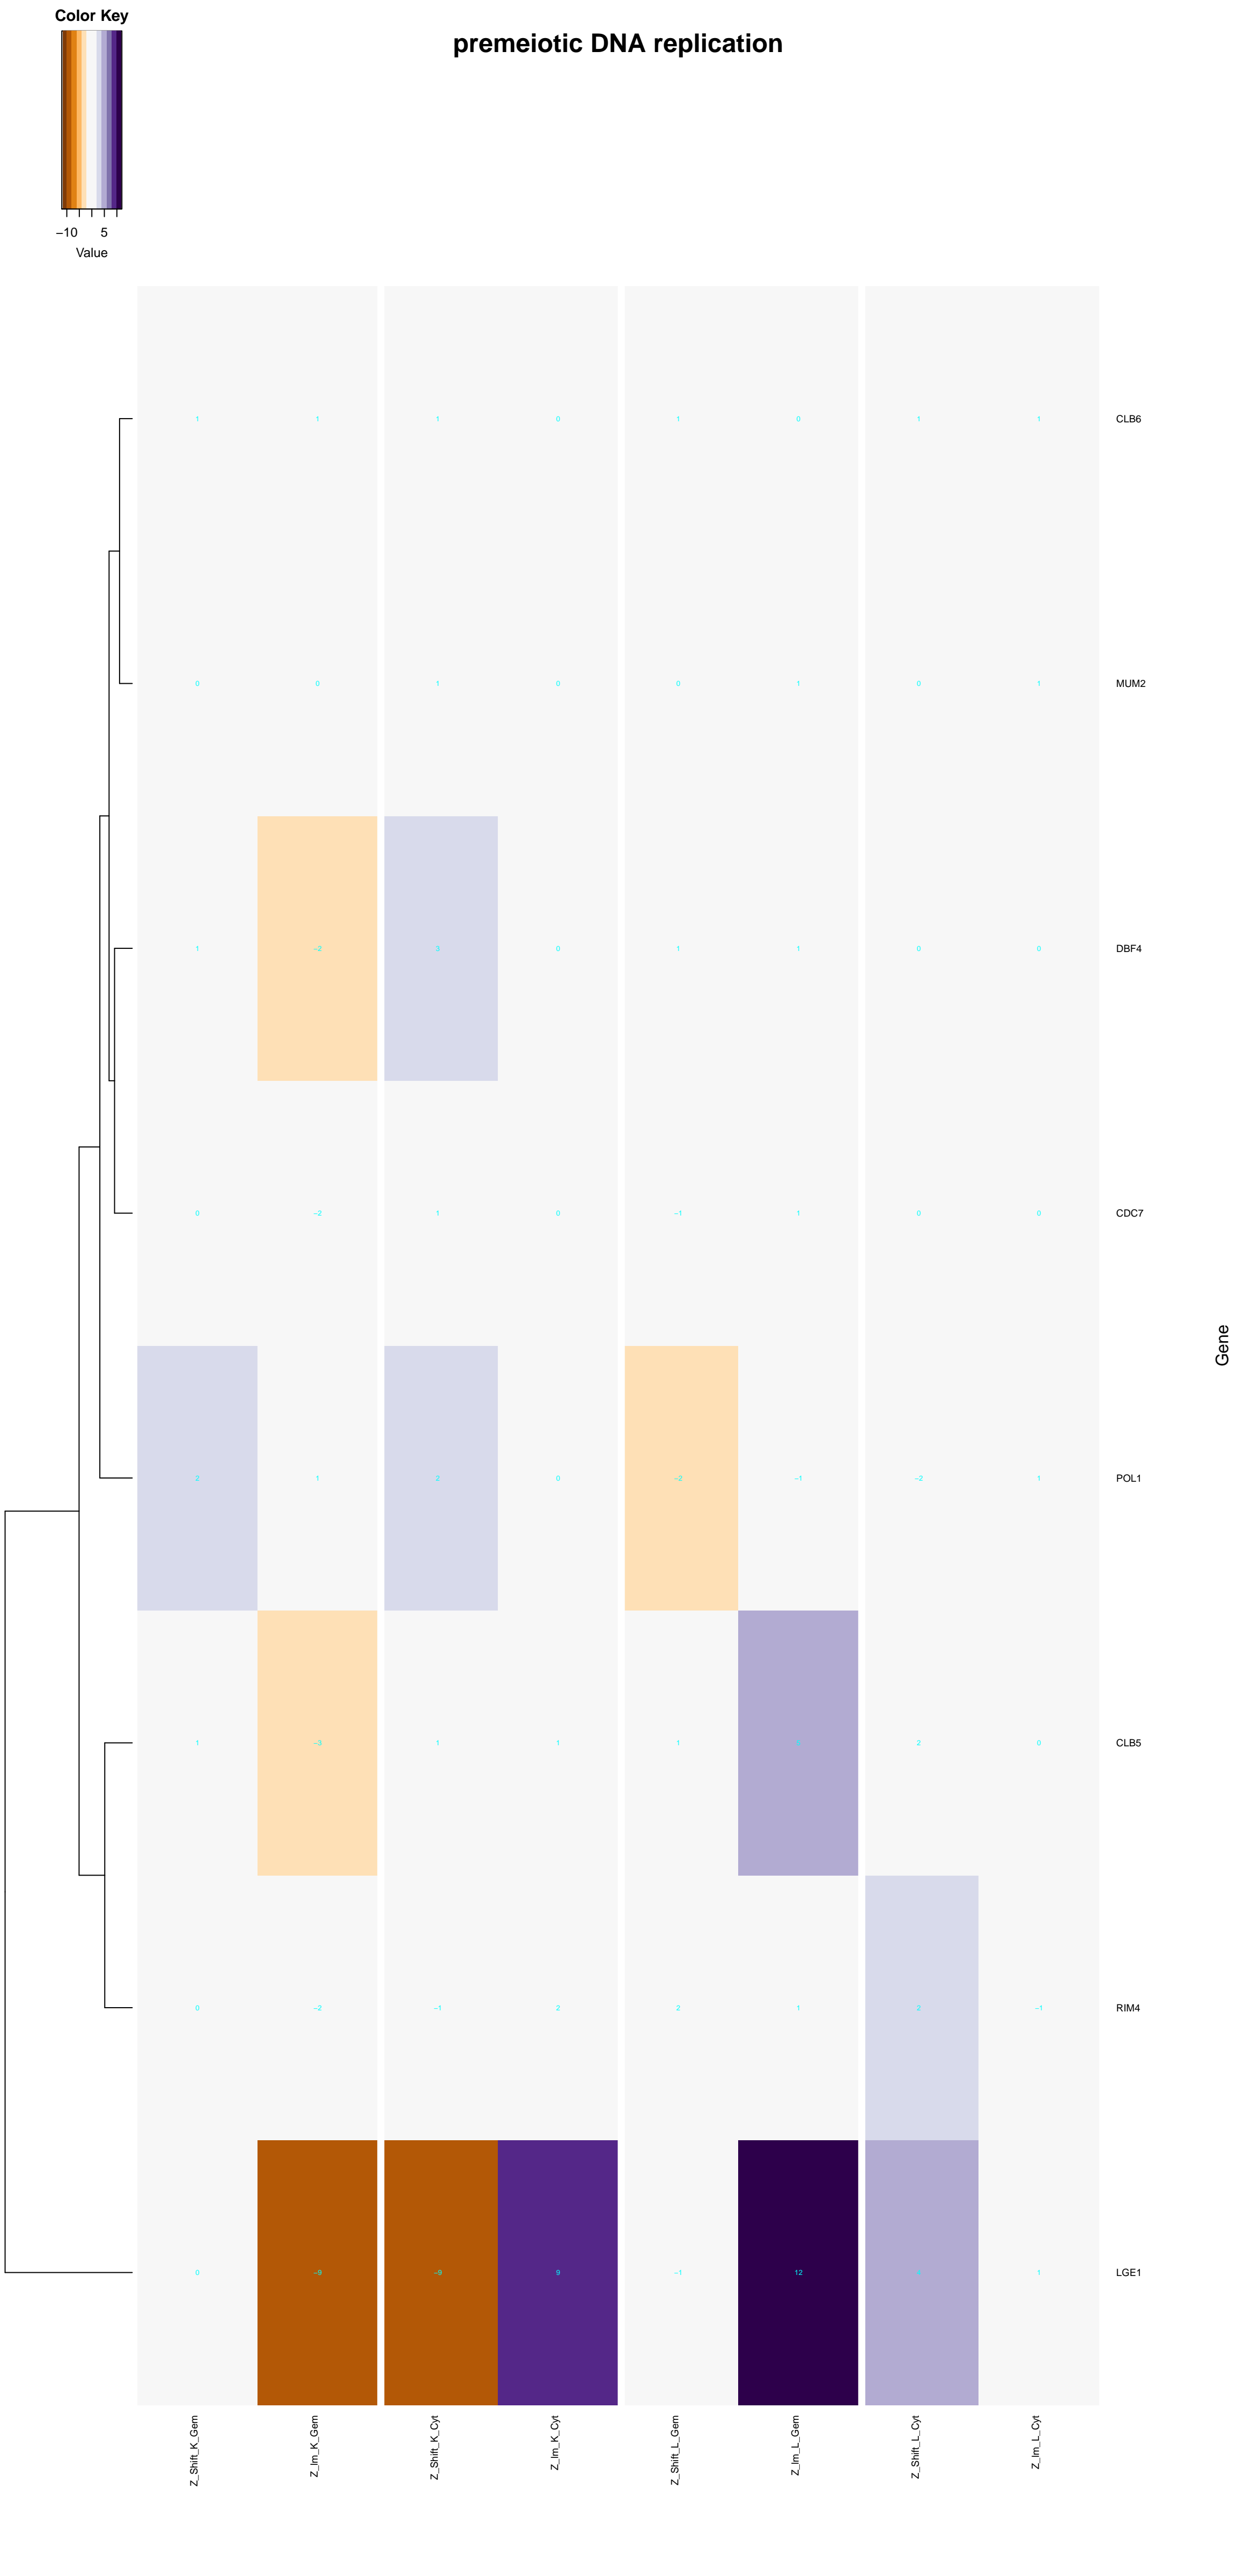

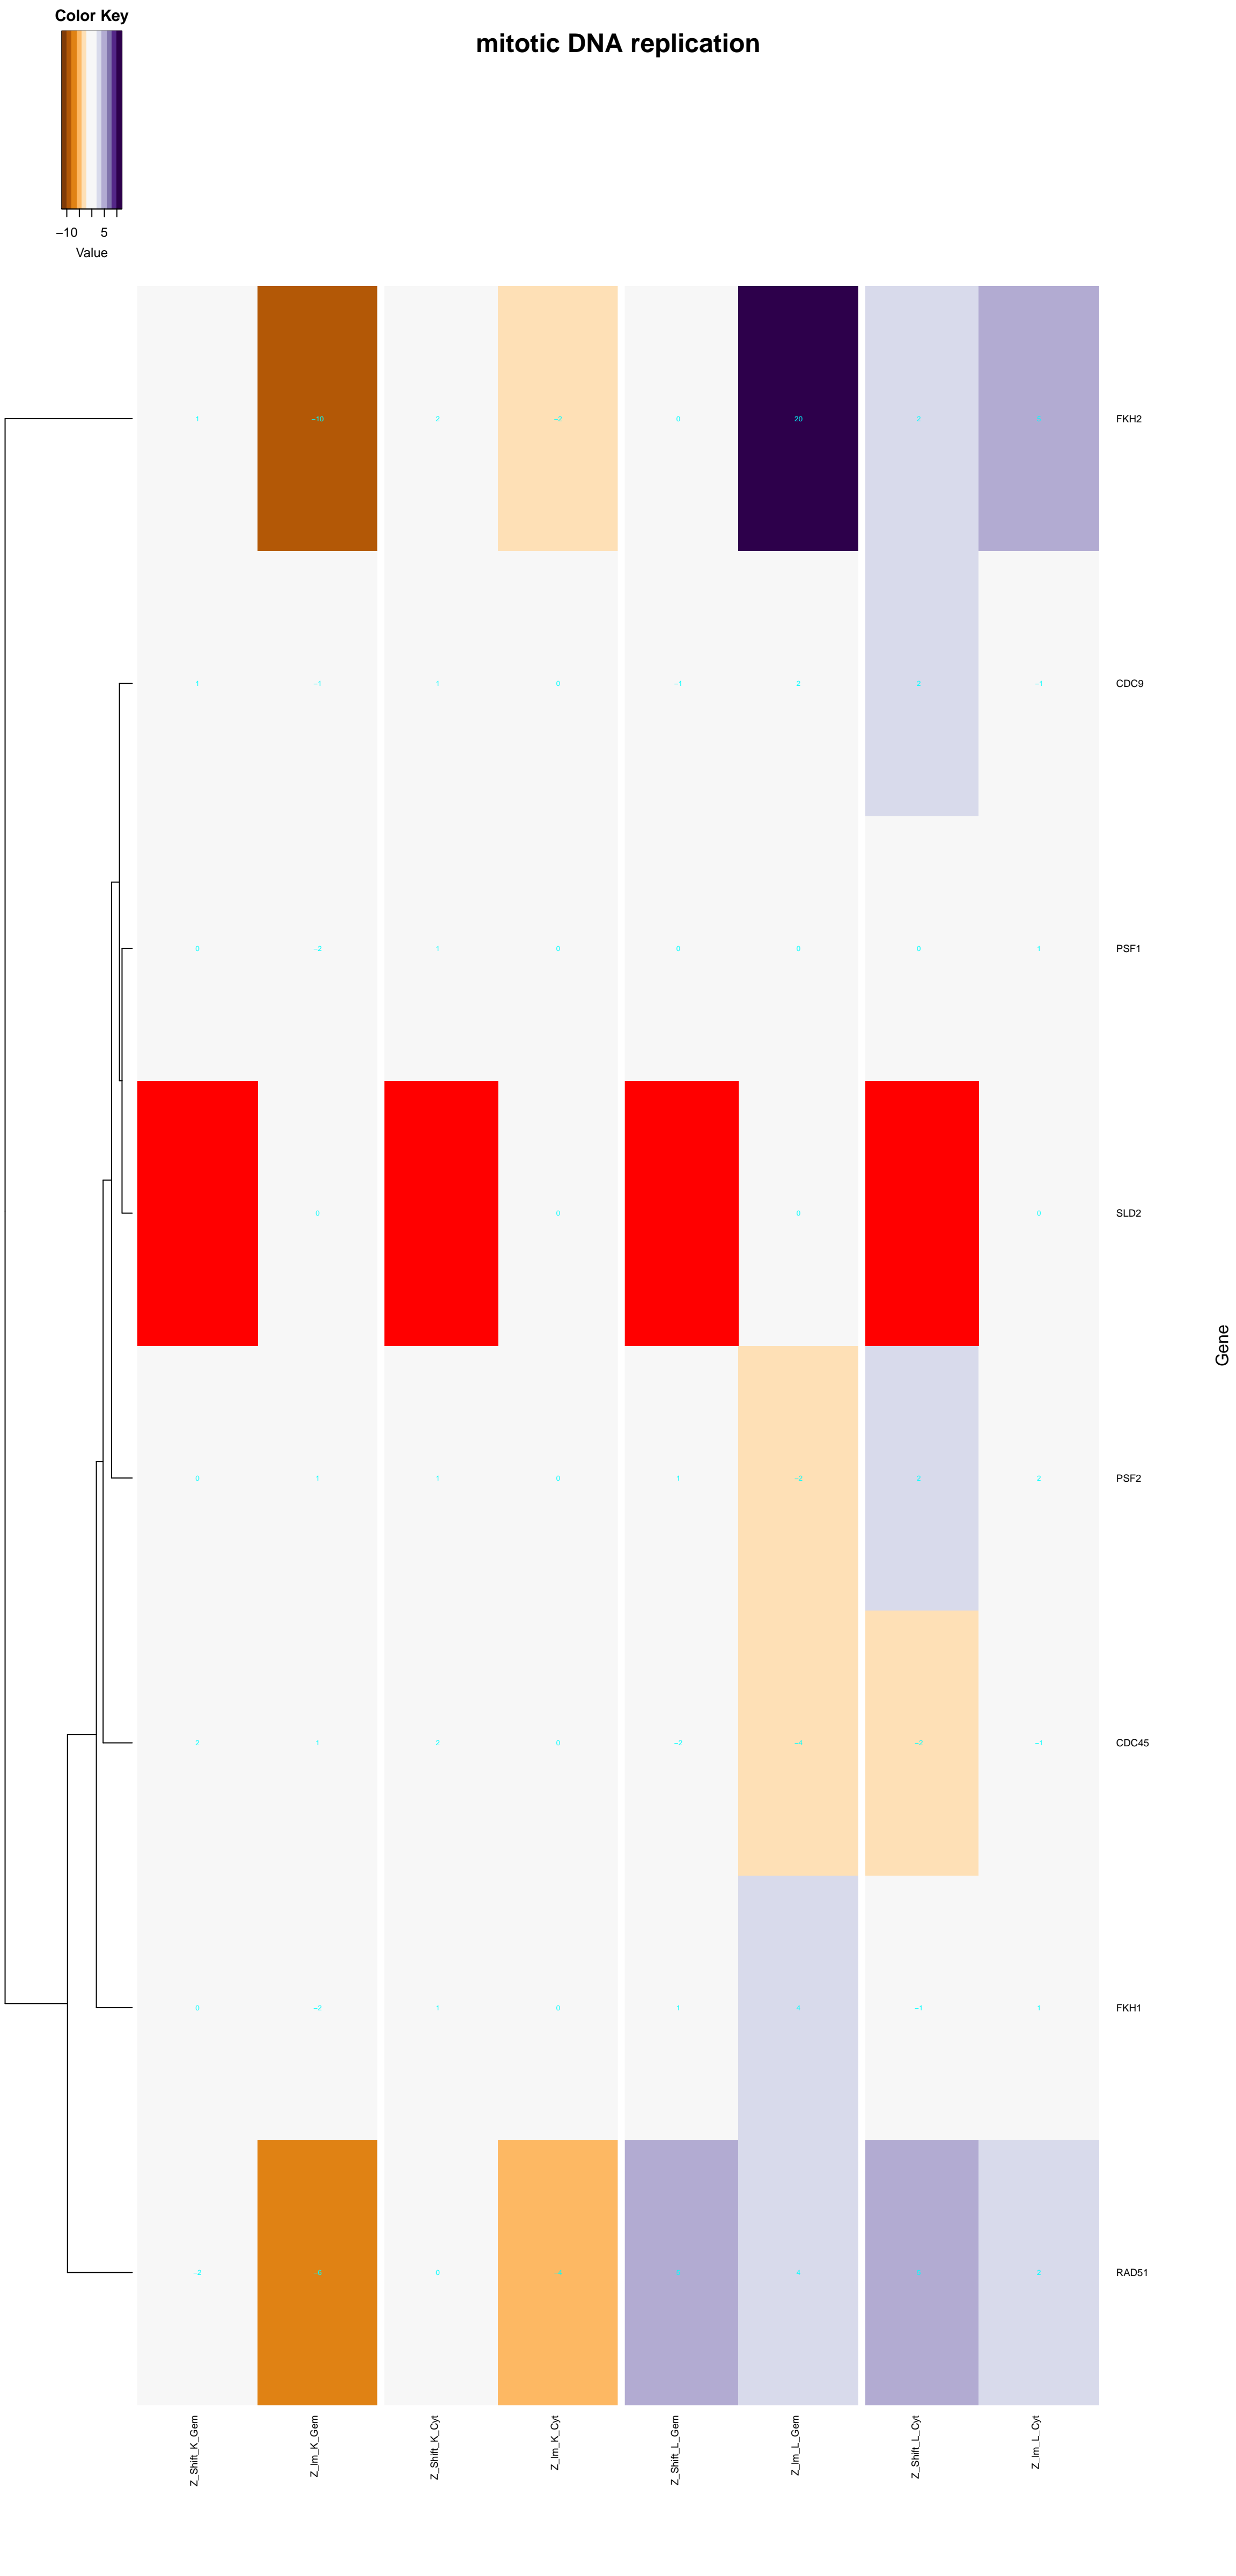

Supplement: s1 [file s1]

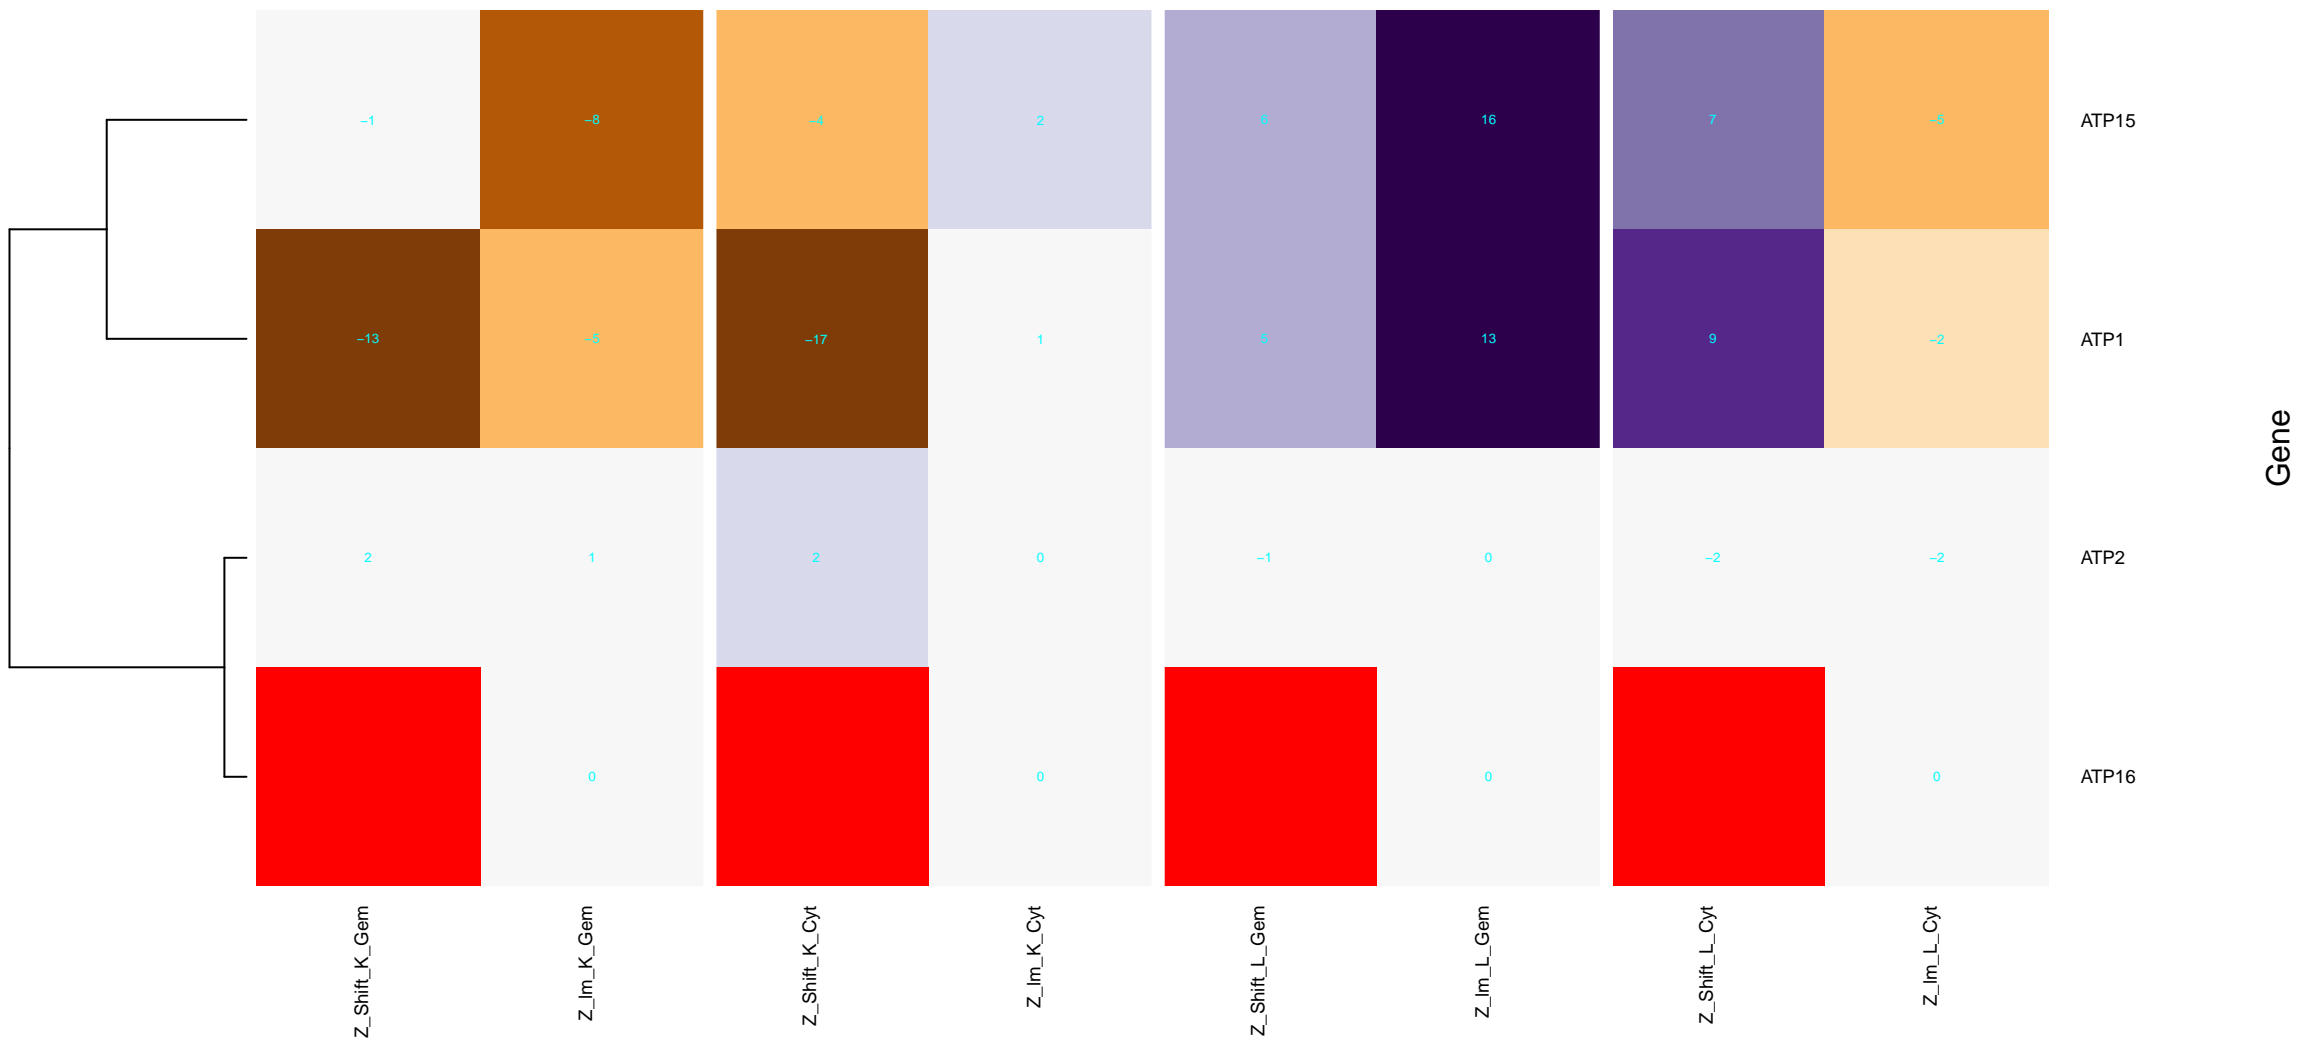

Supplement: s1 [file s1]

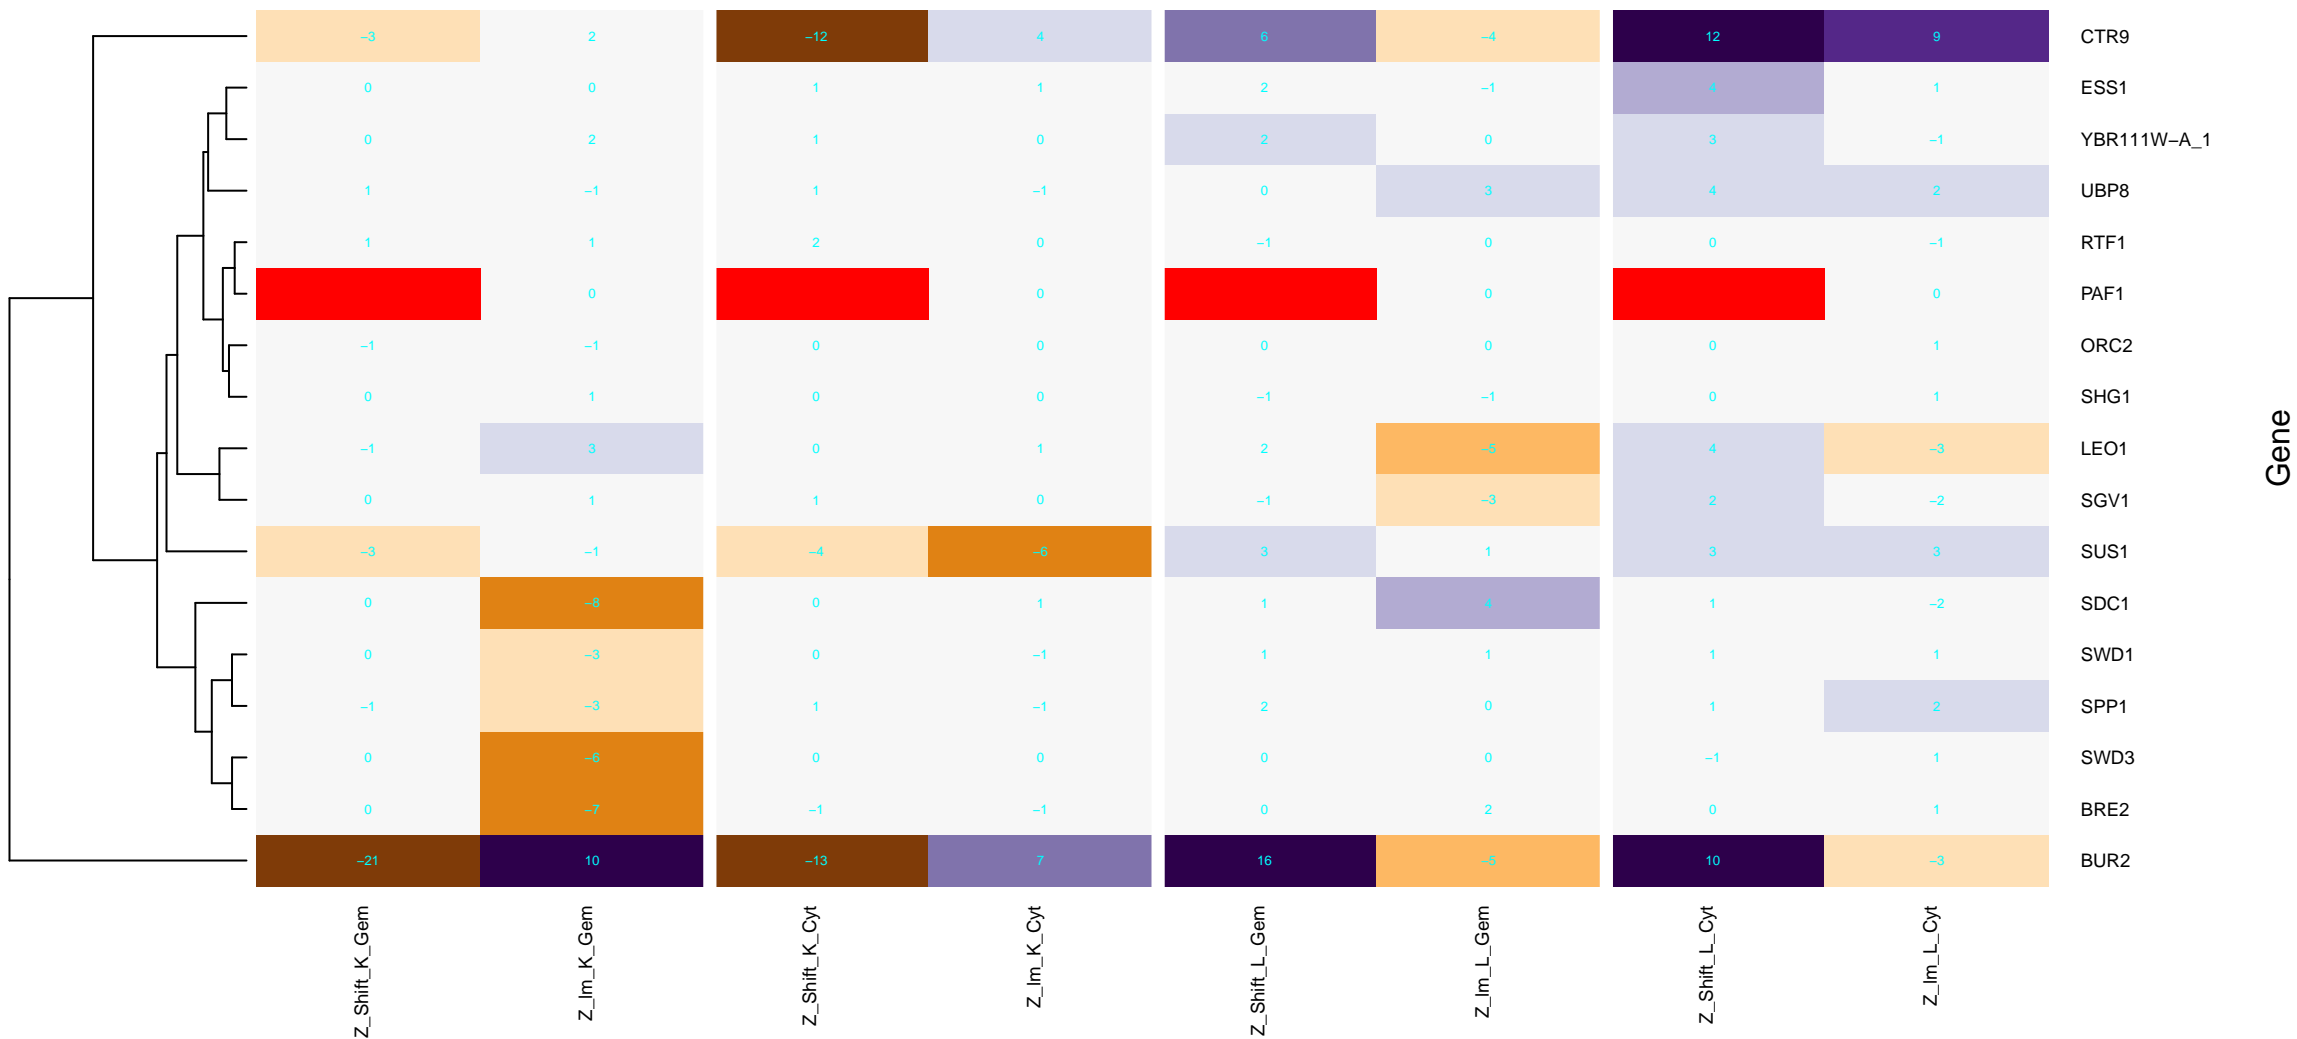

Supplement: s1 [file s1]

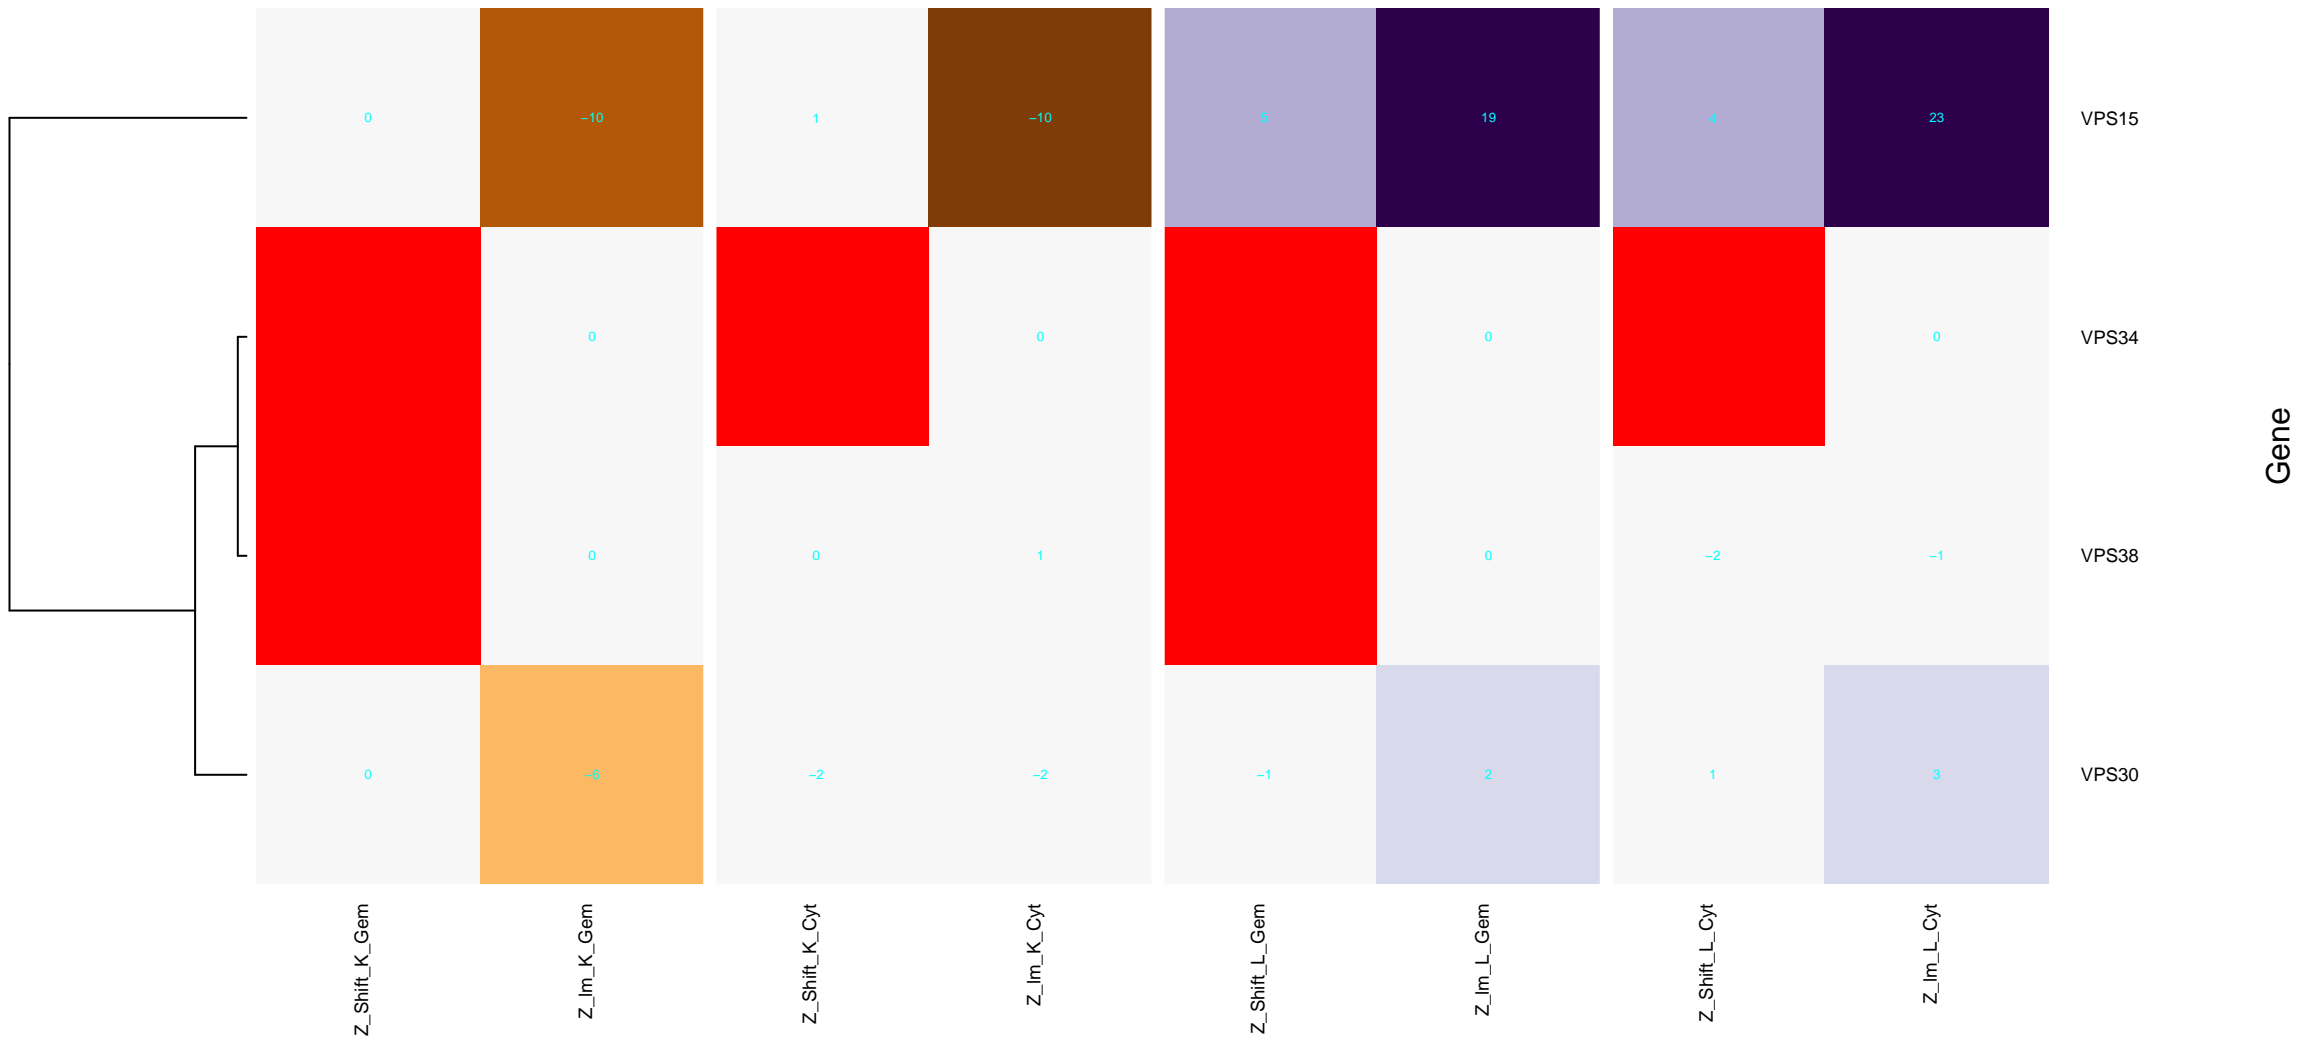

Supplement: s1 [file s1]

Color Key

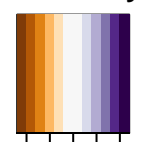

-10 5  
Value

Position of 5.8S rRNA from tricistronic rRNA transcript (SSU-rRNA, 5.8S rRNA, LSU-rRNA)

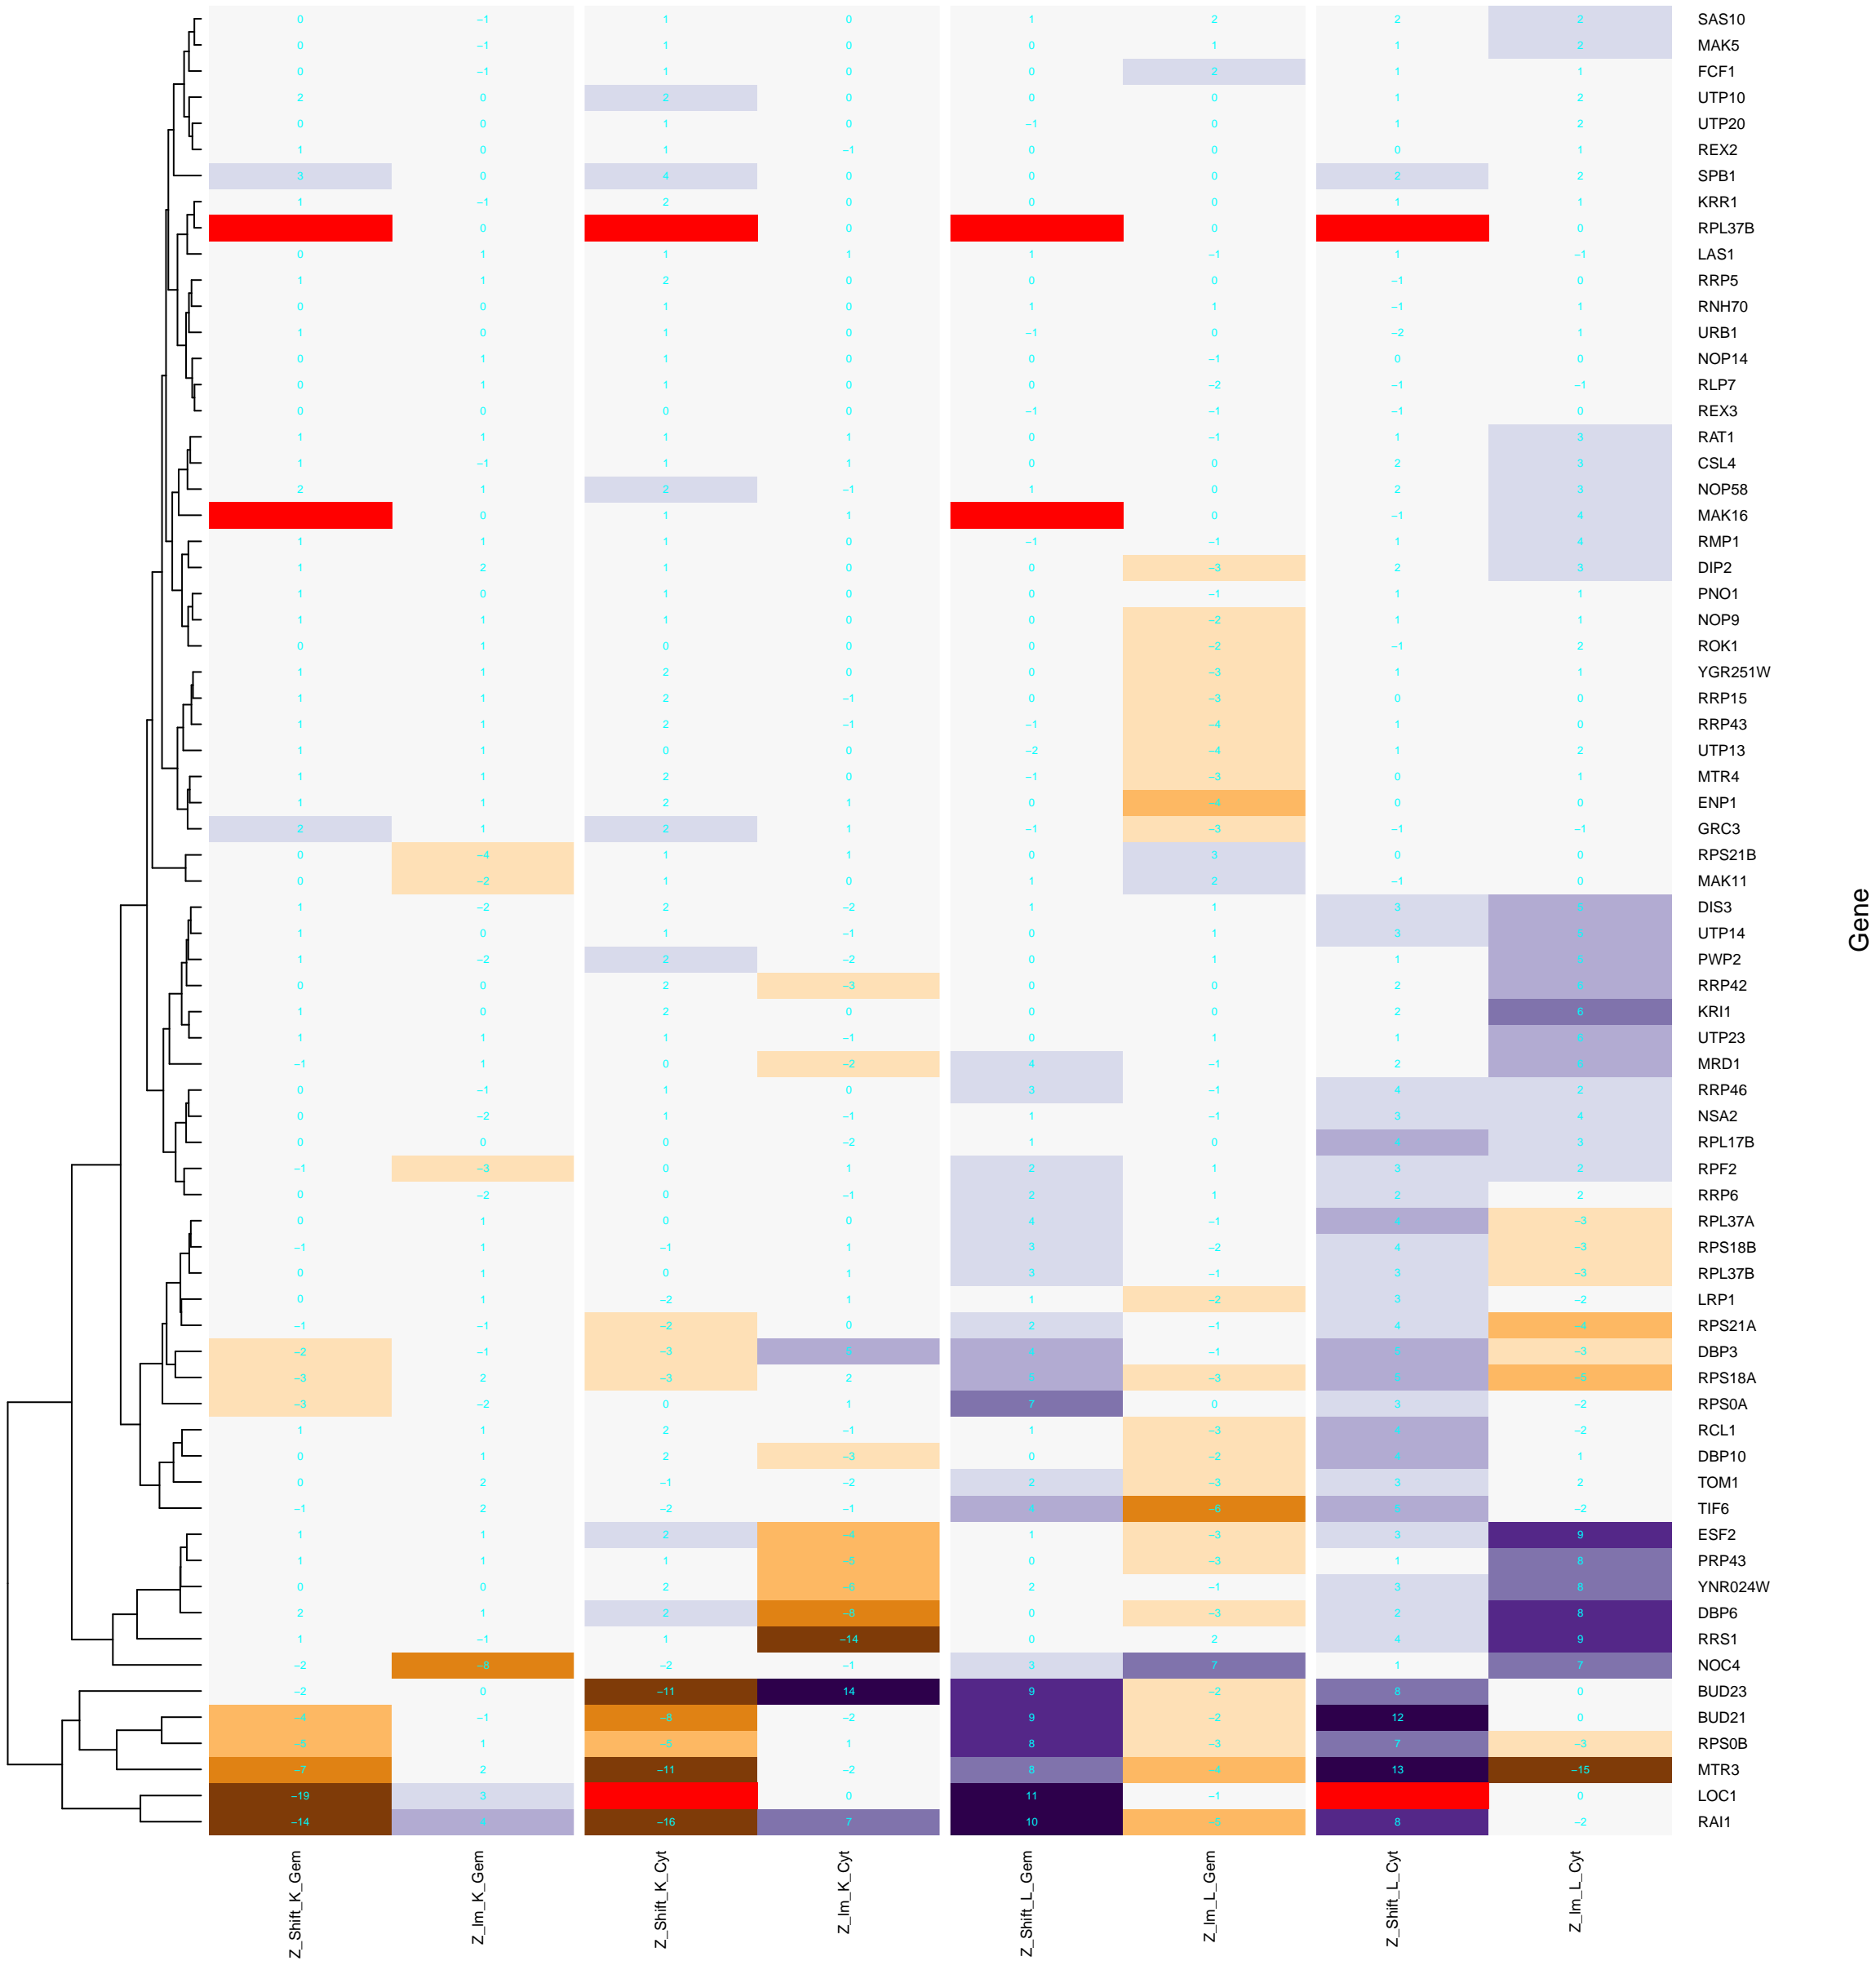

Supplement: s1 [file s1]

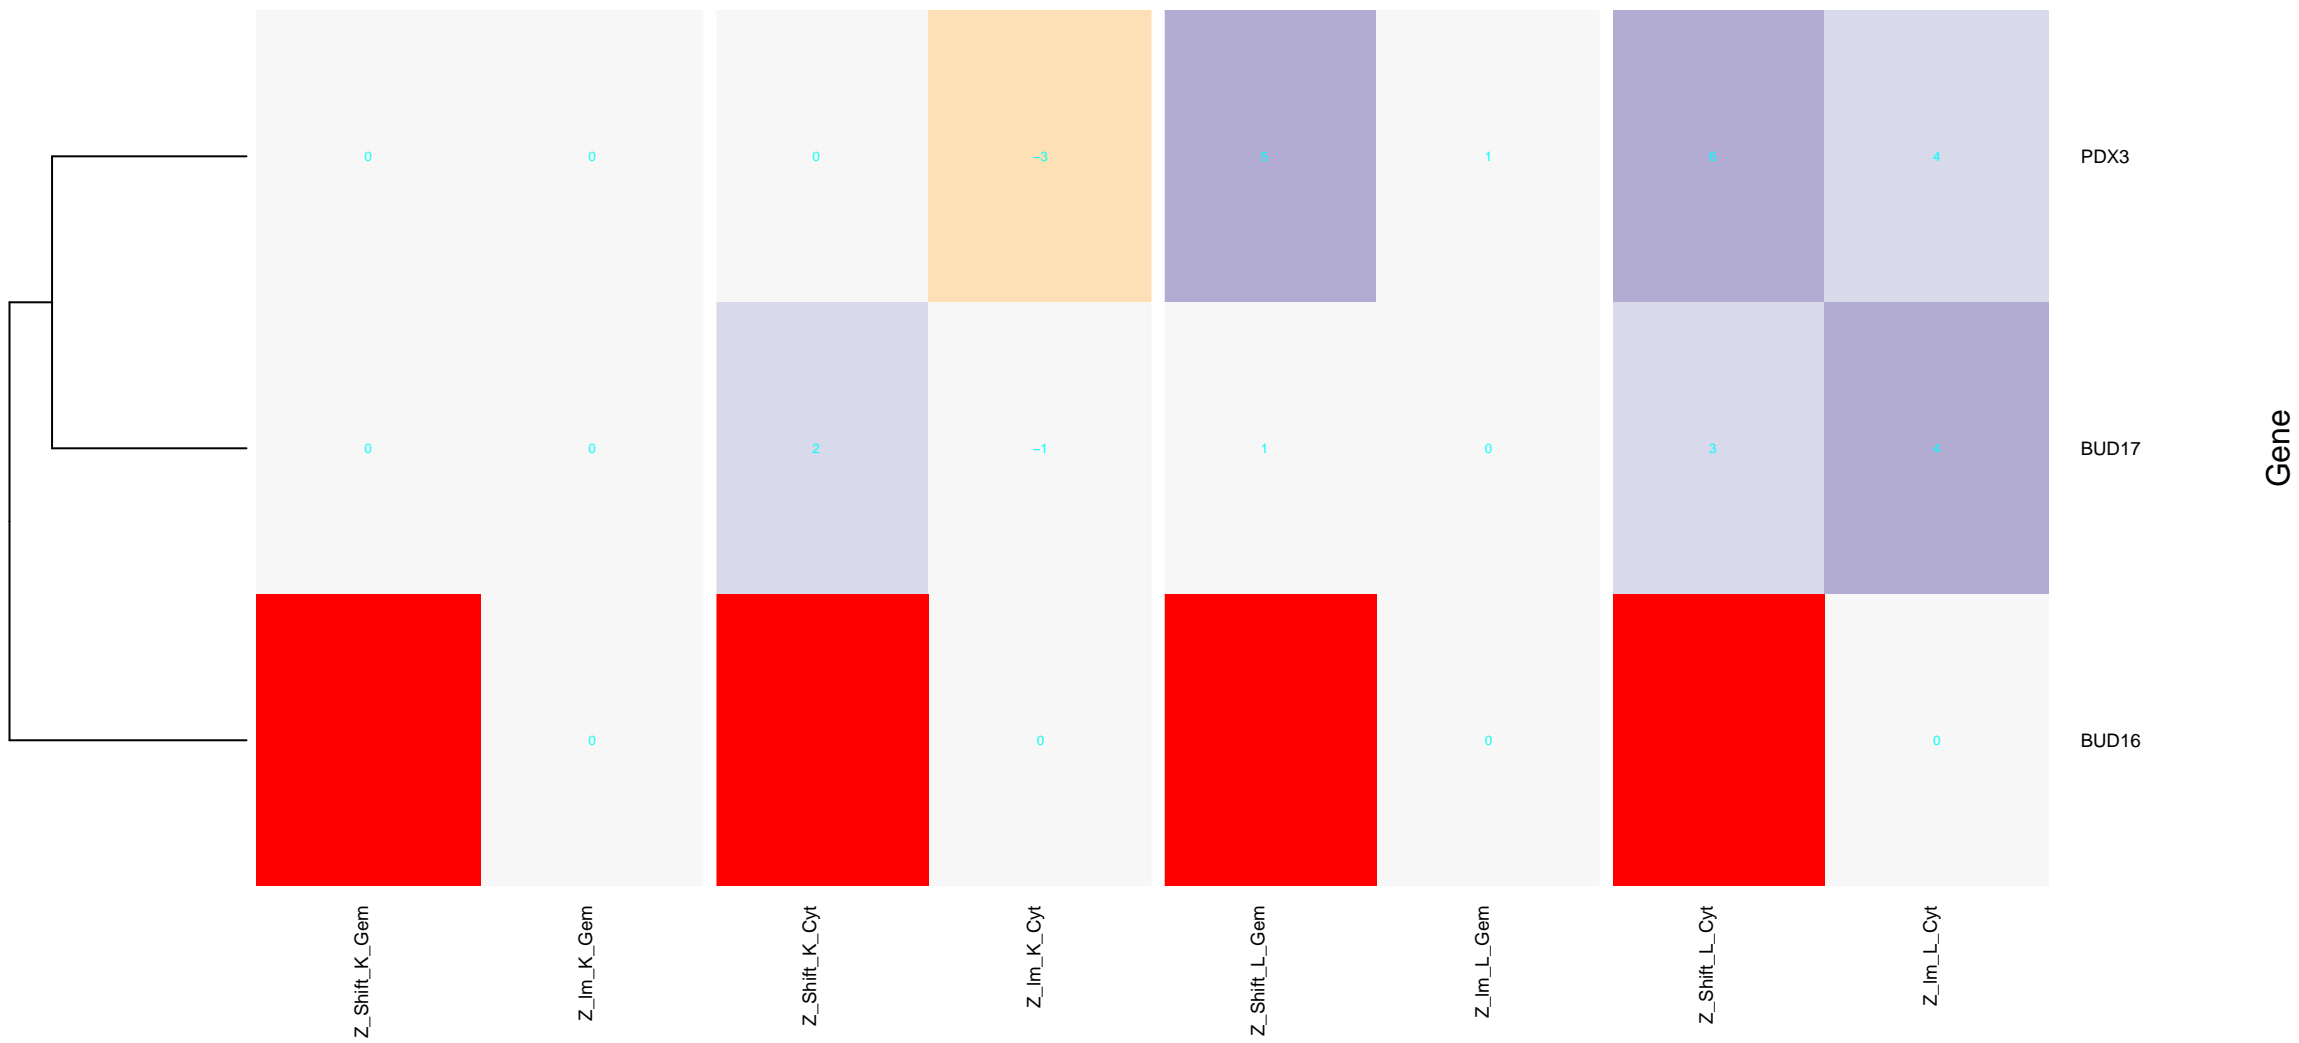

Supplement: s1 [file s1]

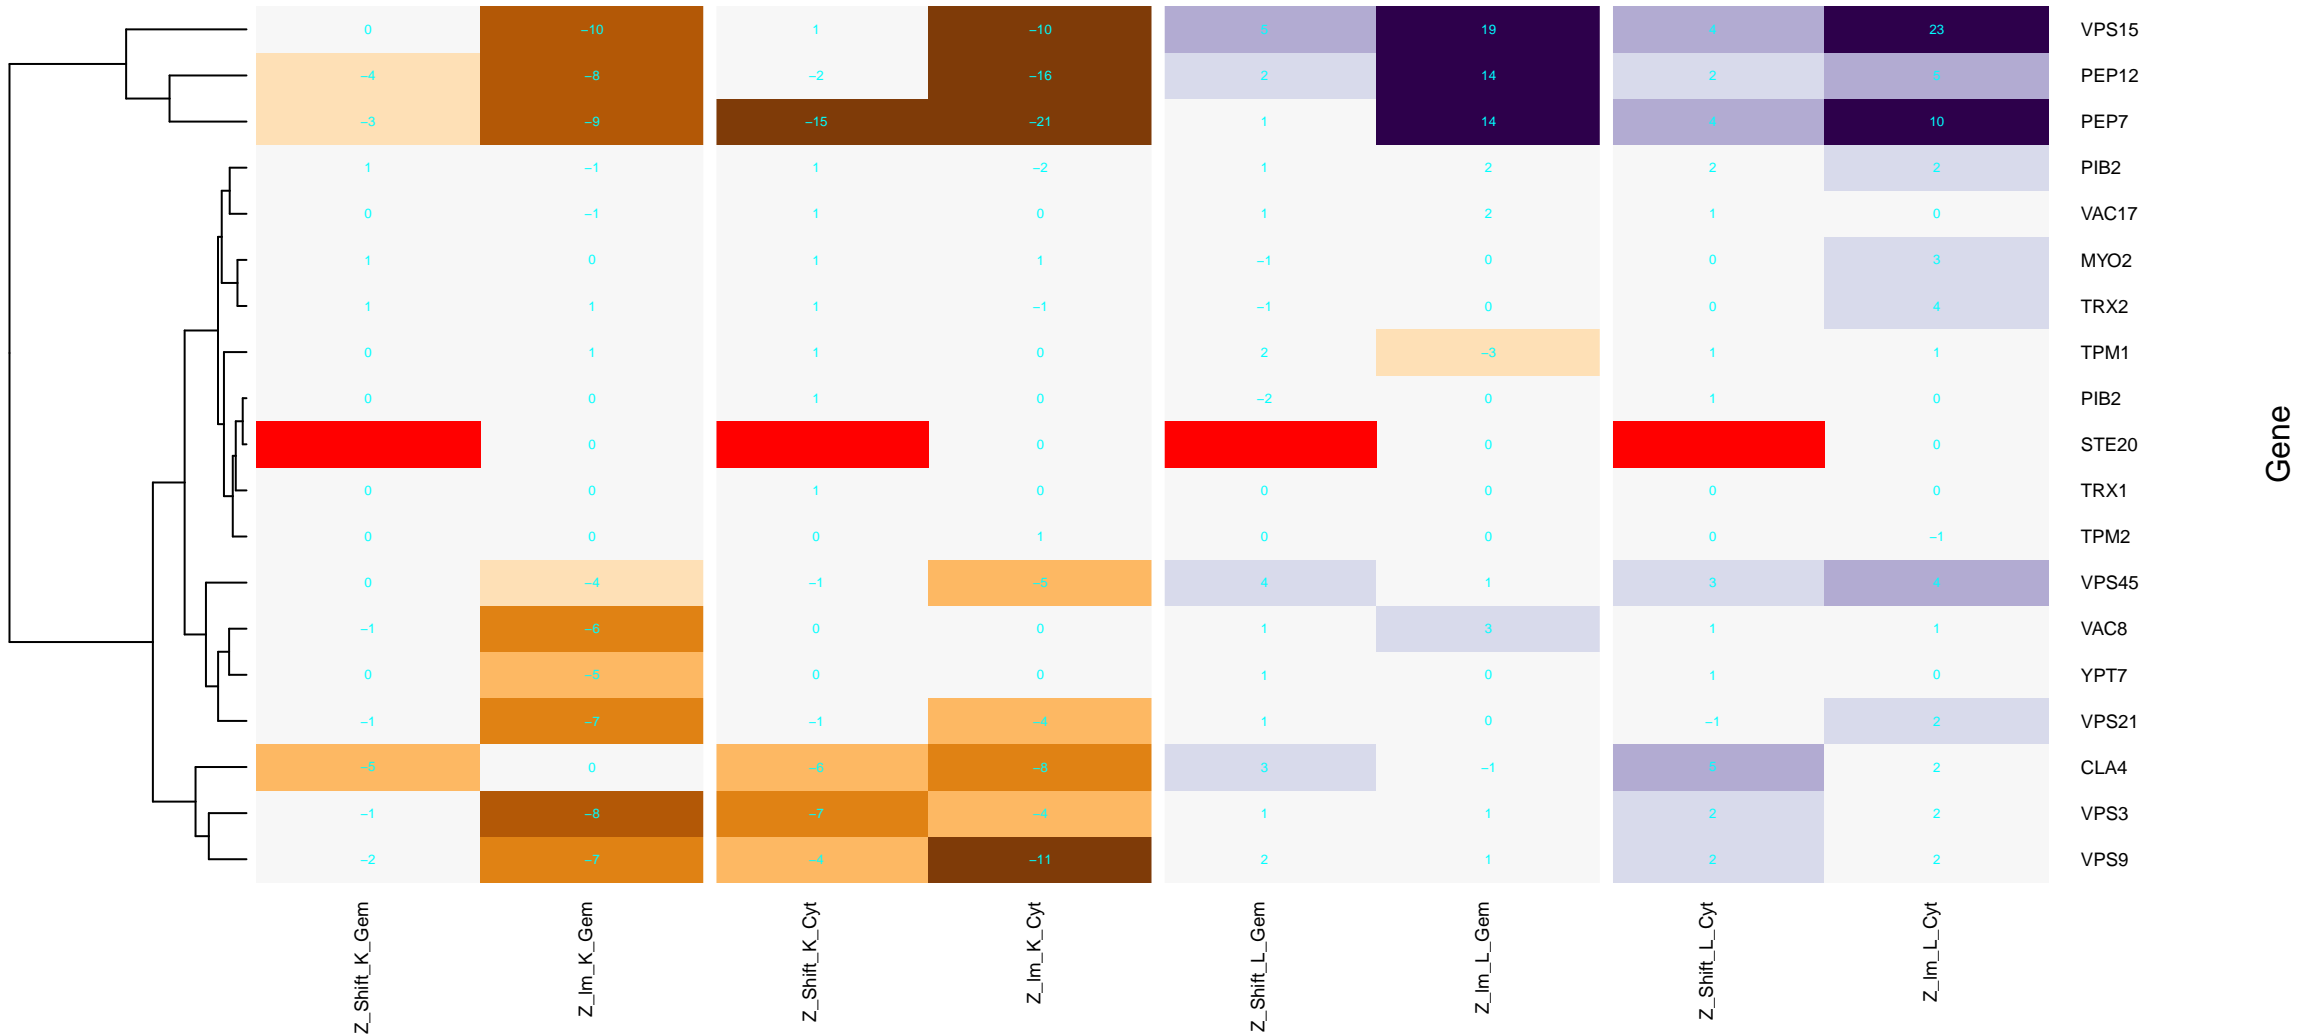

Supplement: s1 [file s1]

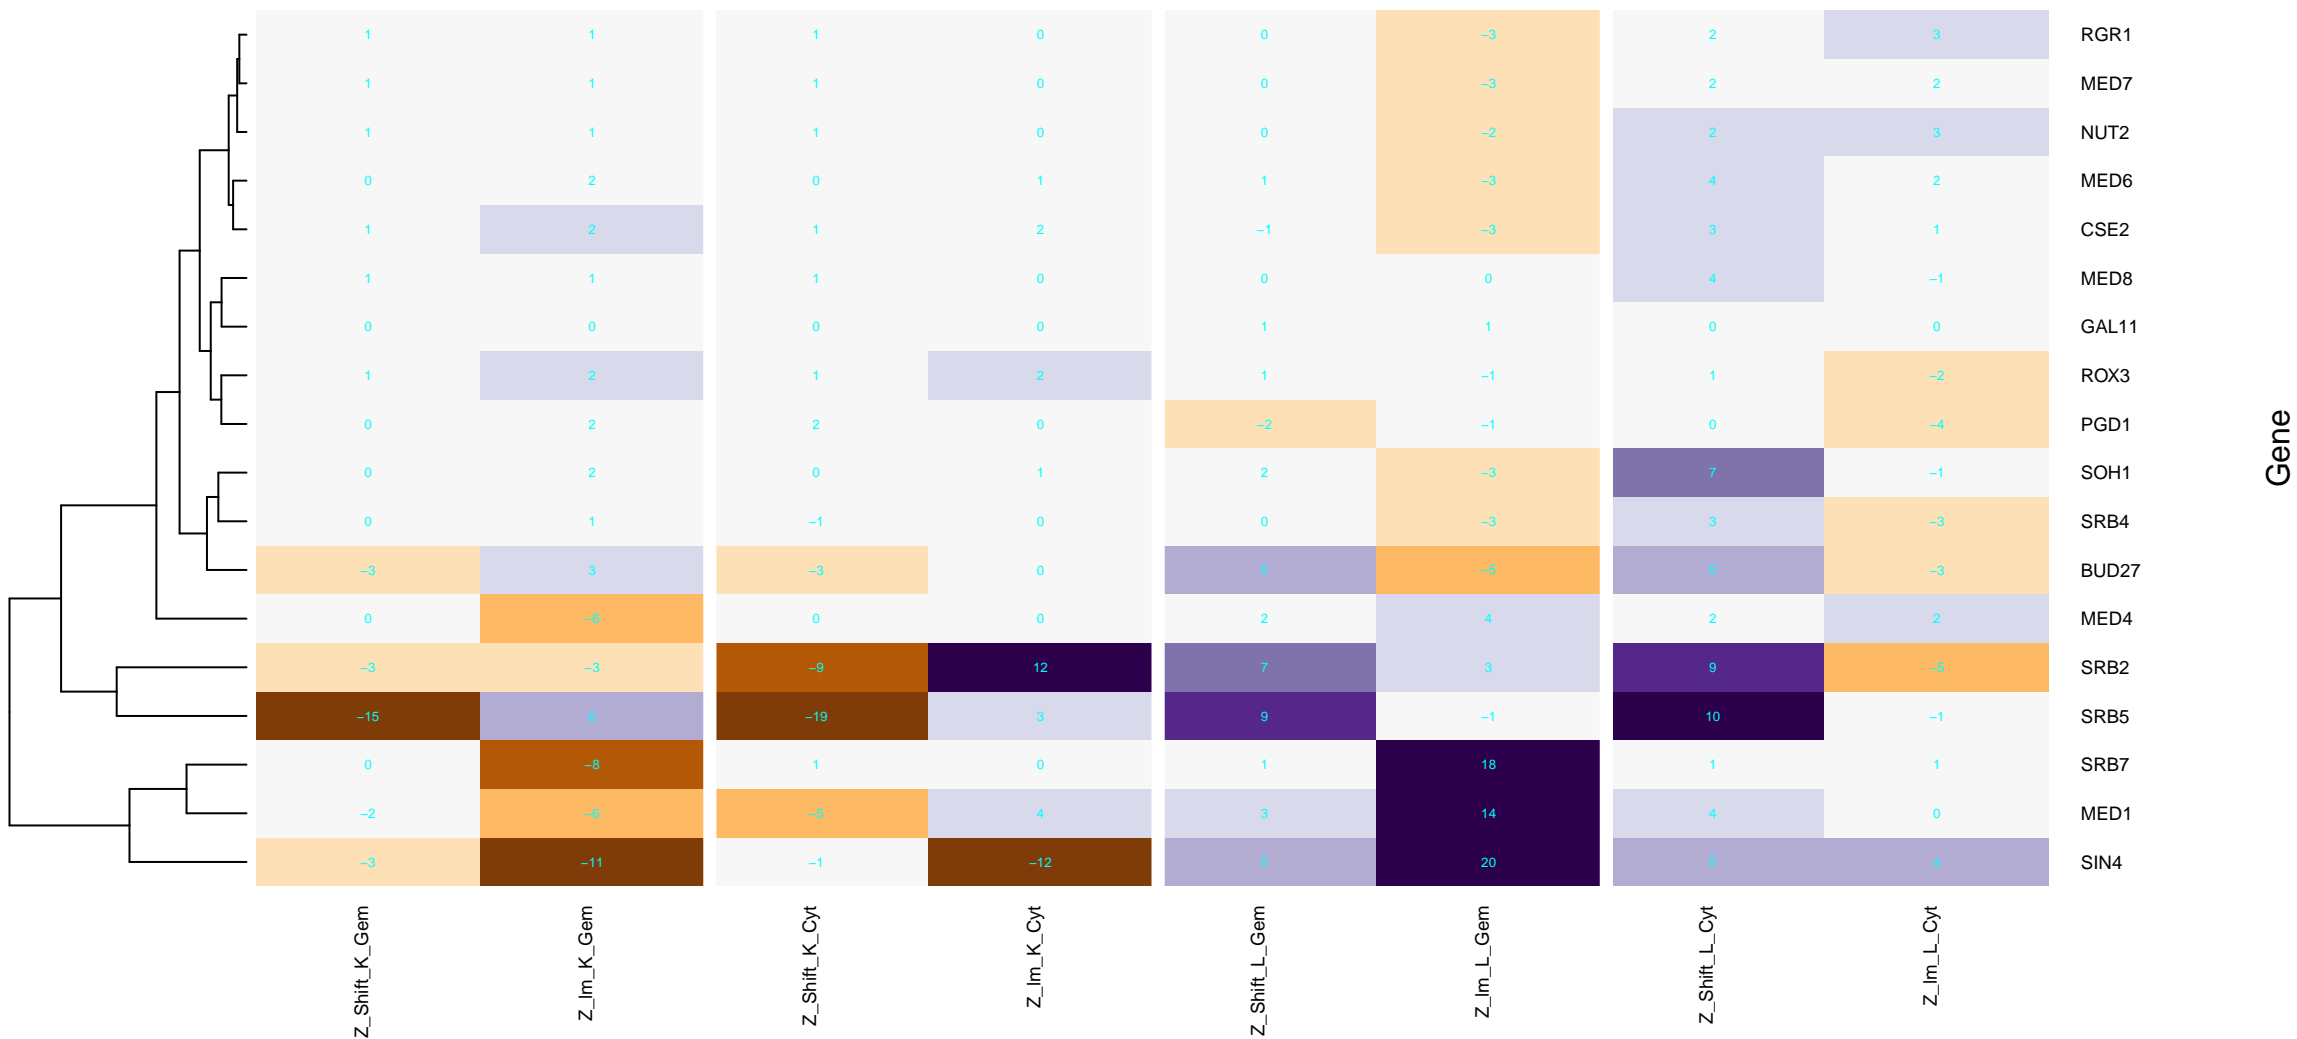

Supplement: s1 [file s1]

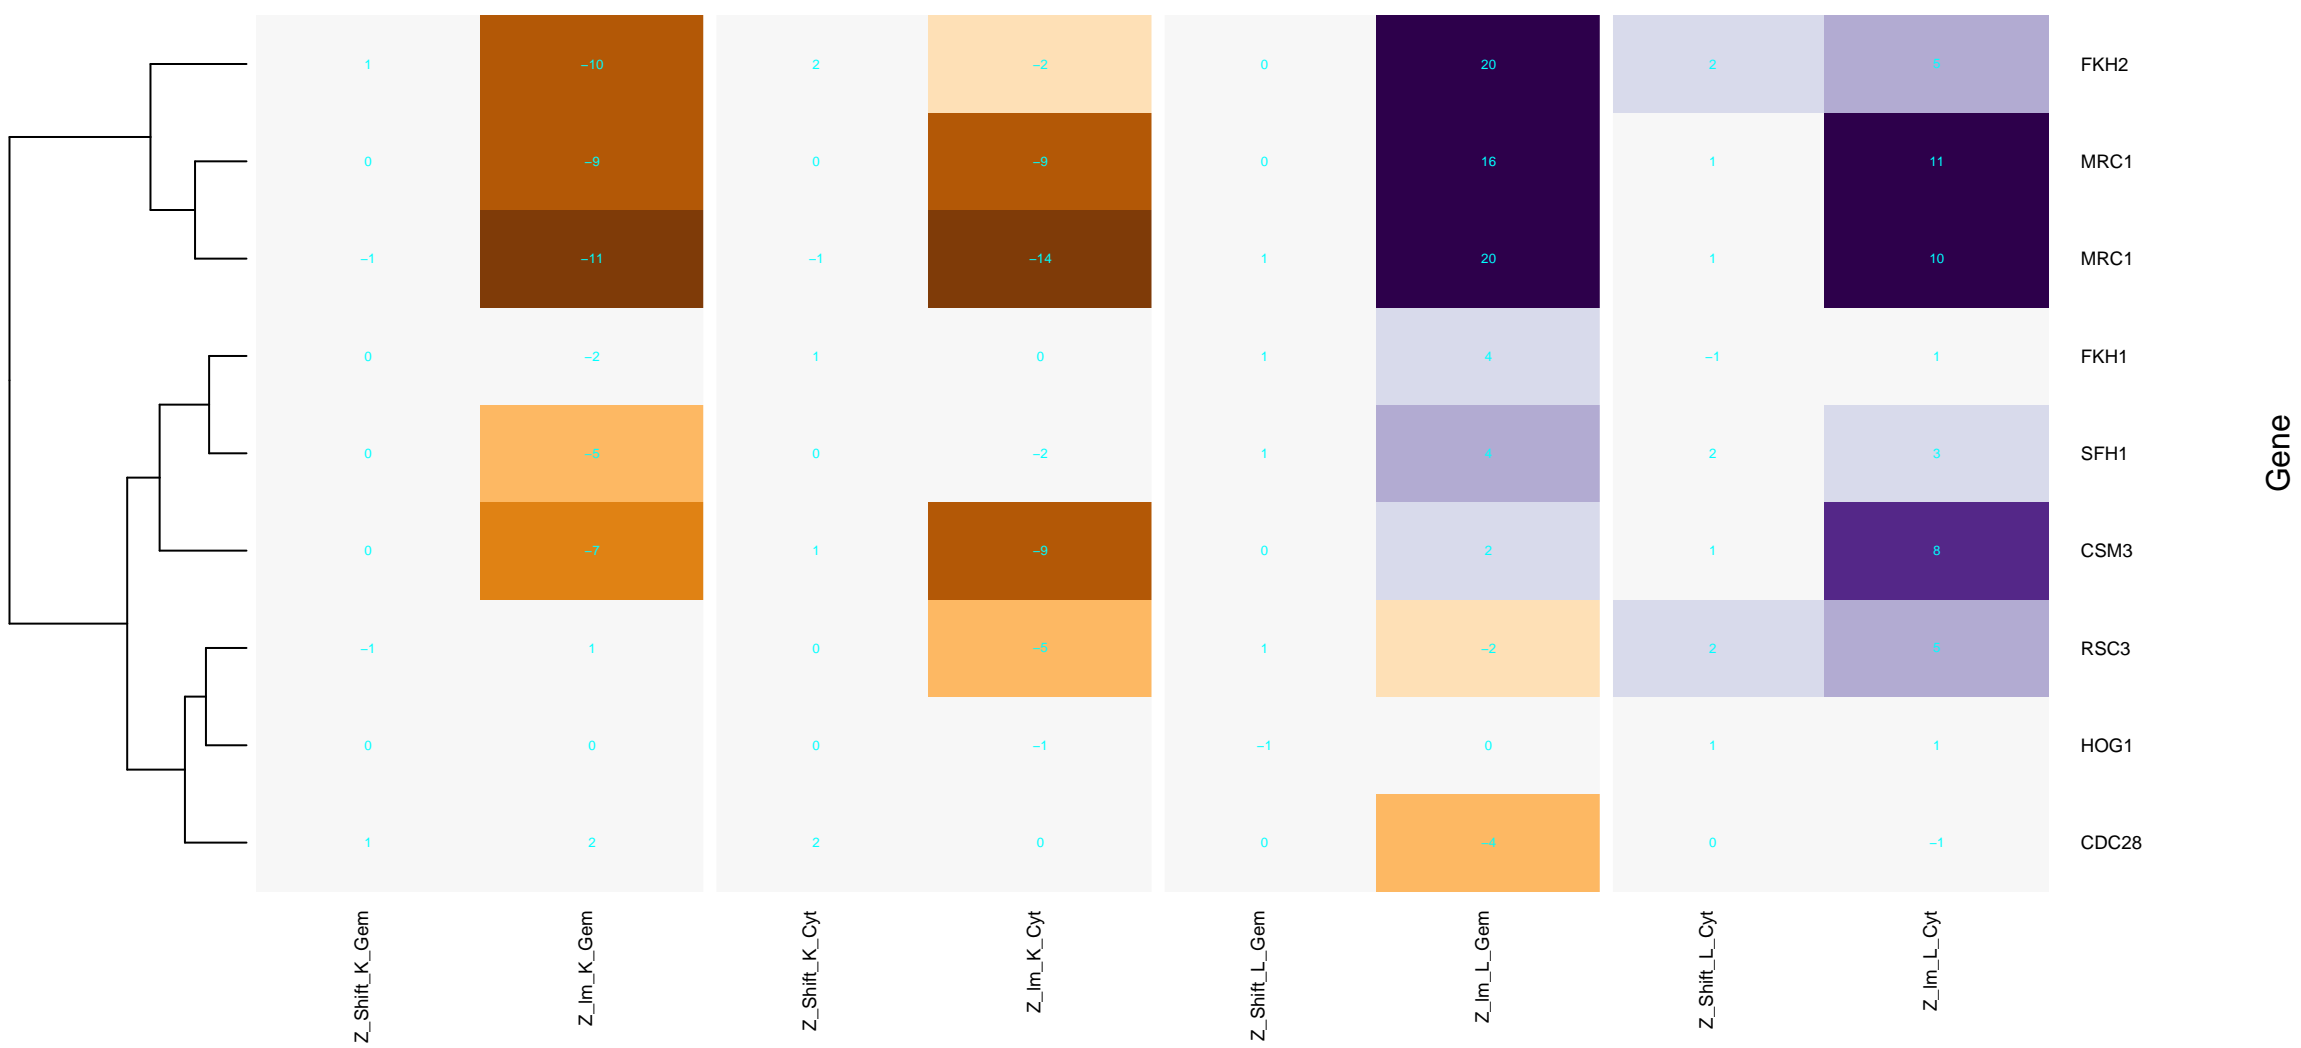

Supplement: s1 [file s1]

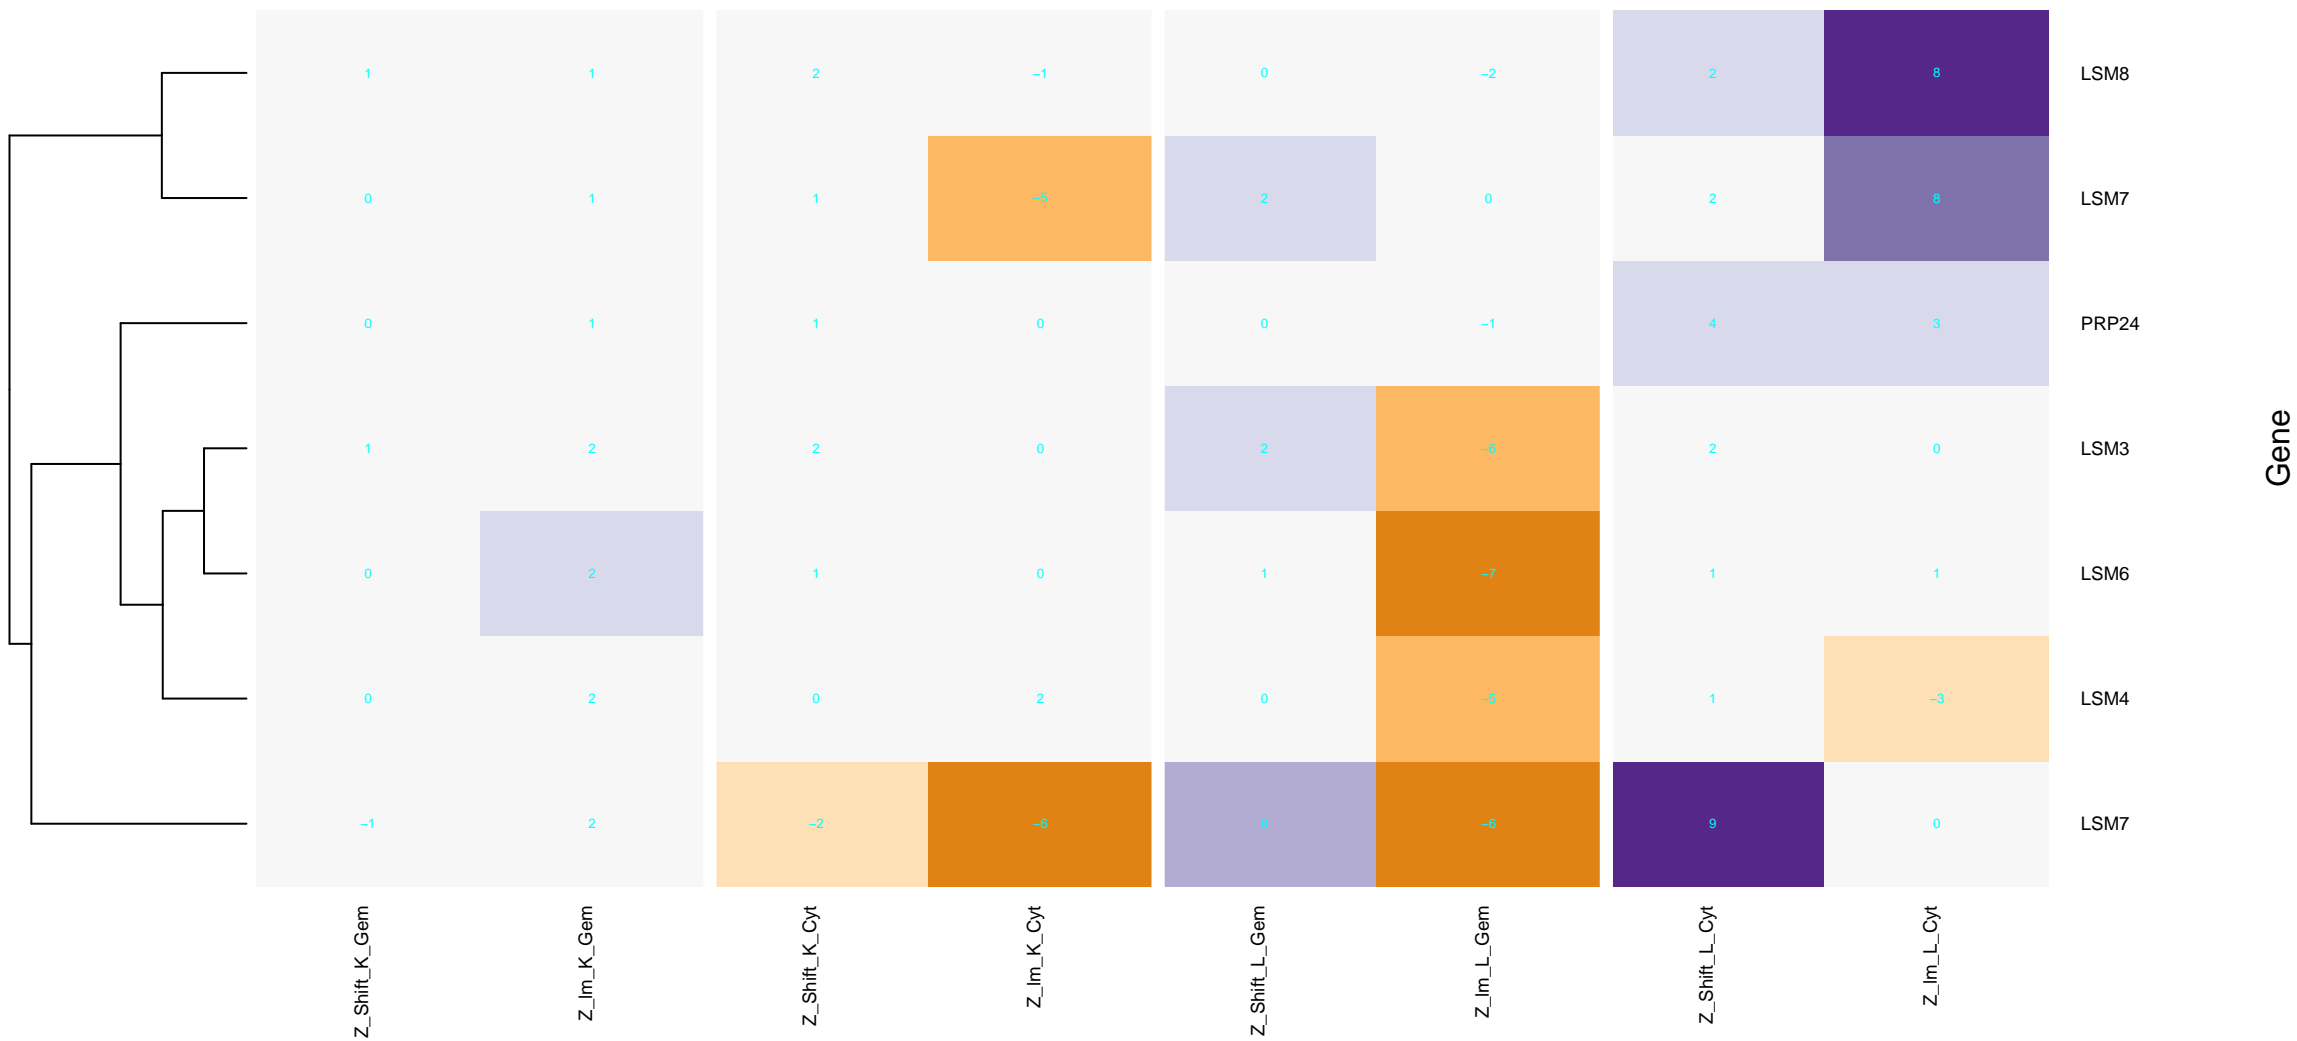

Supplement: s1 [file s1]

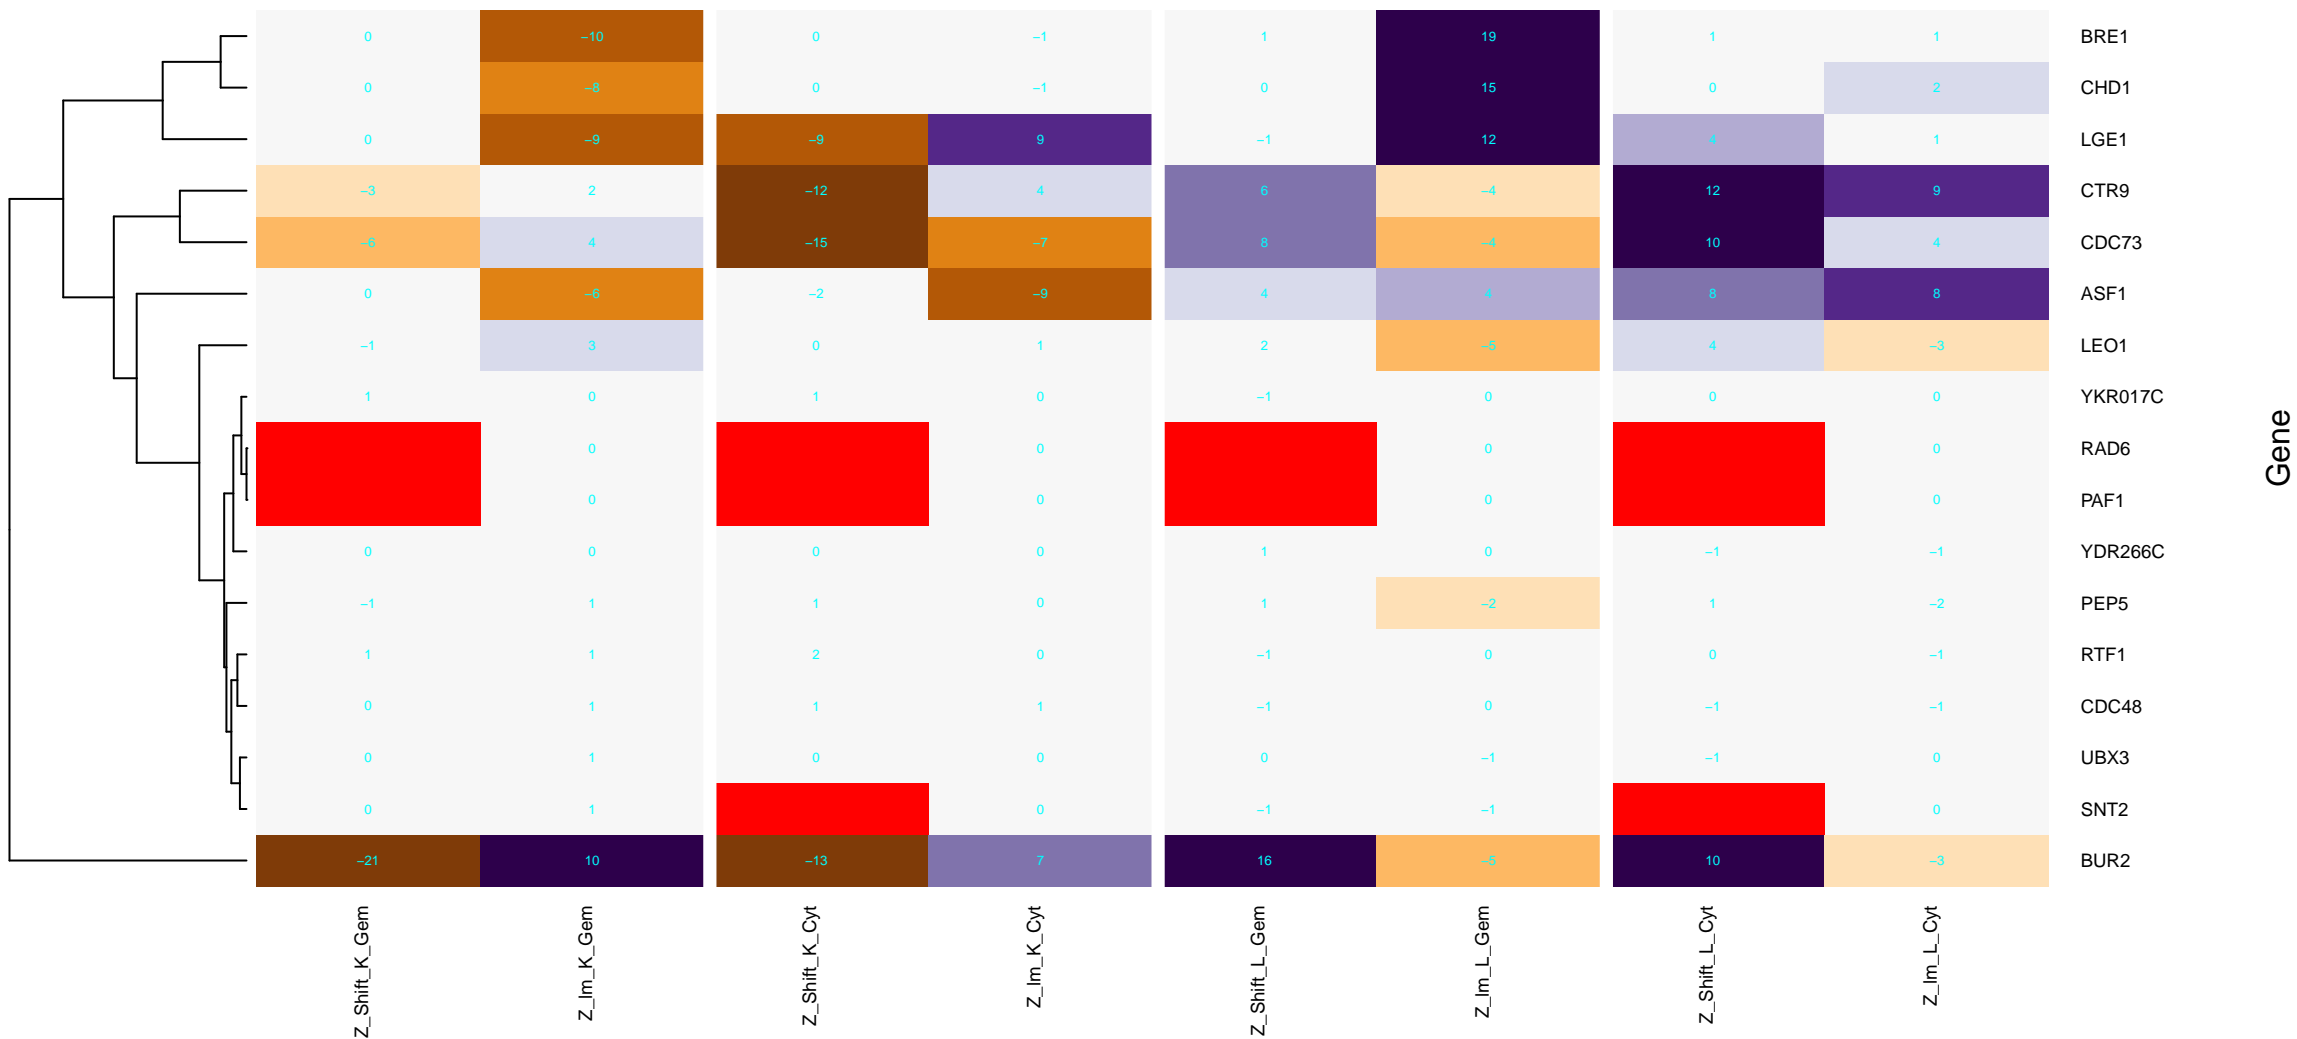

Supplement: s1 [file s1]

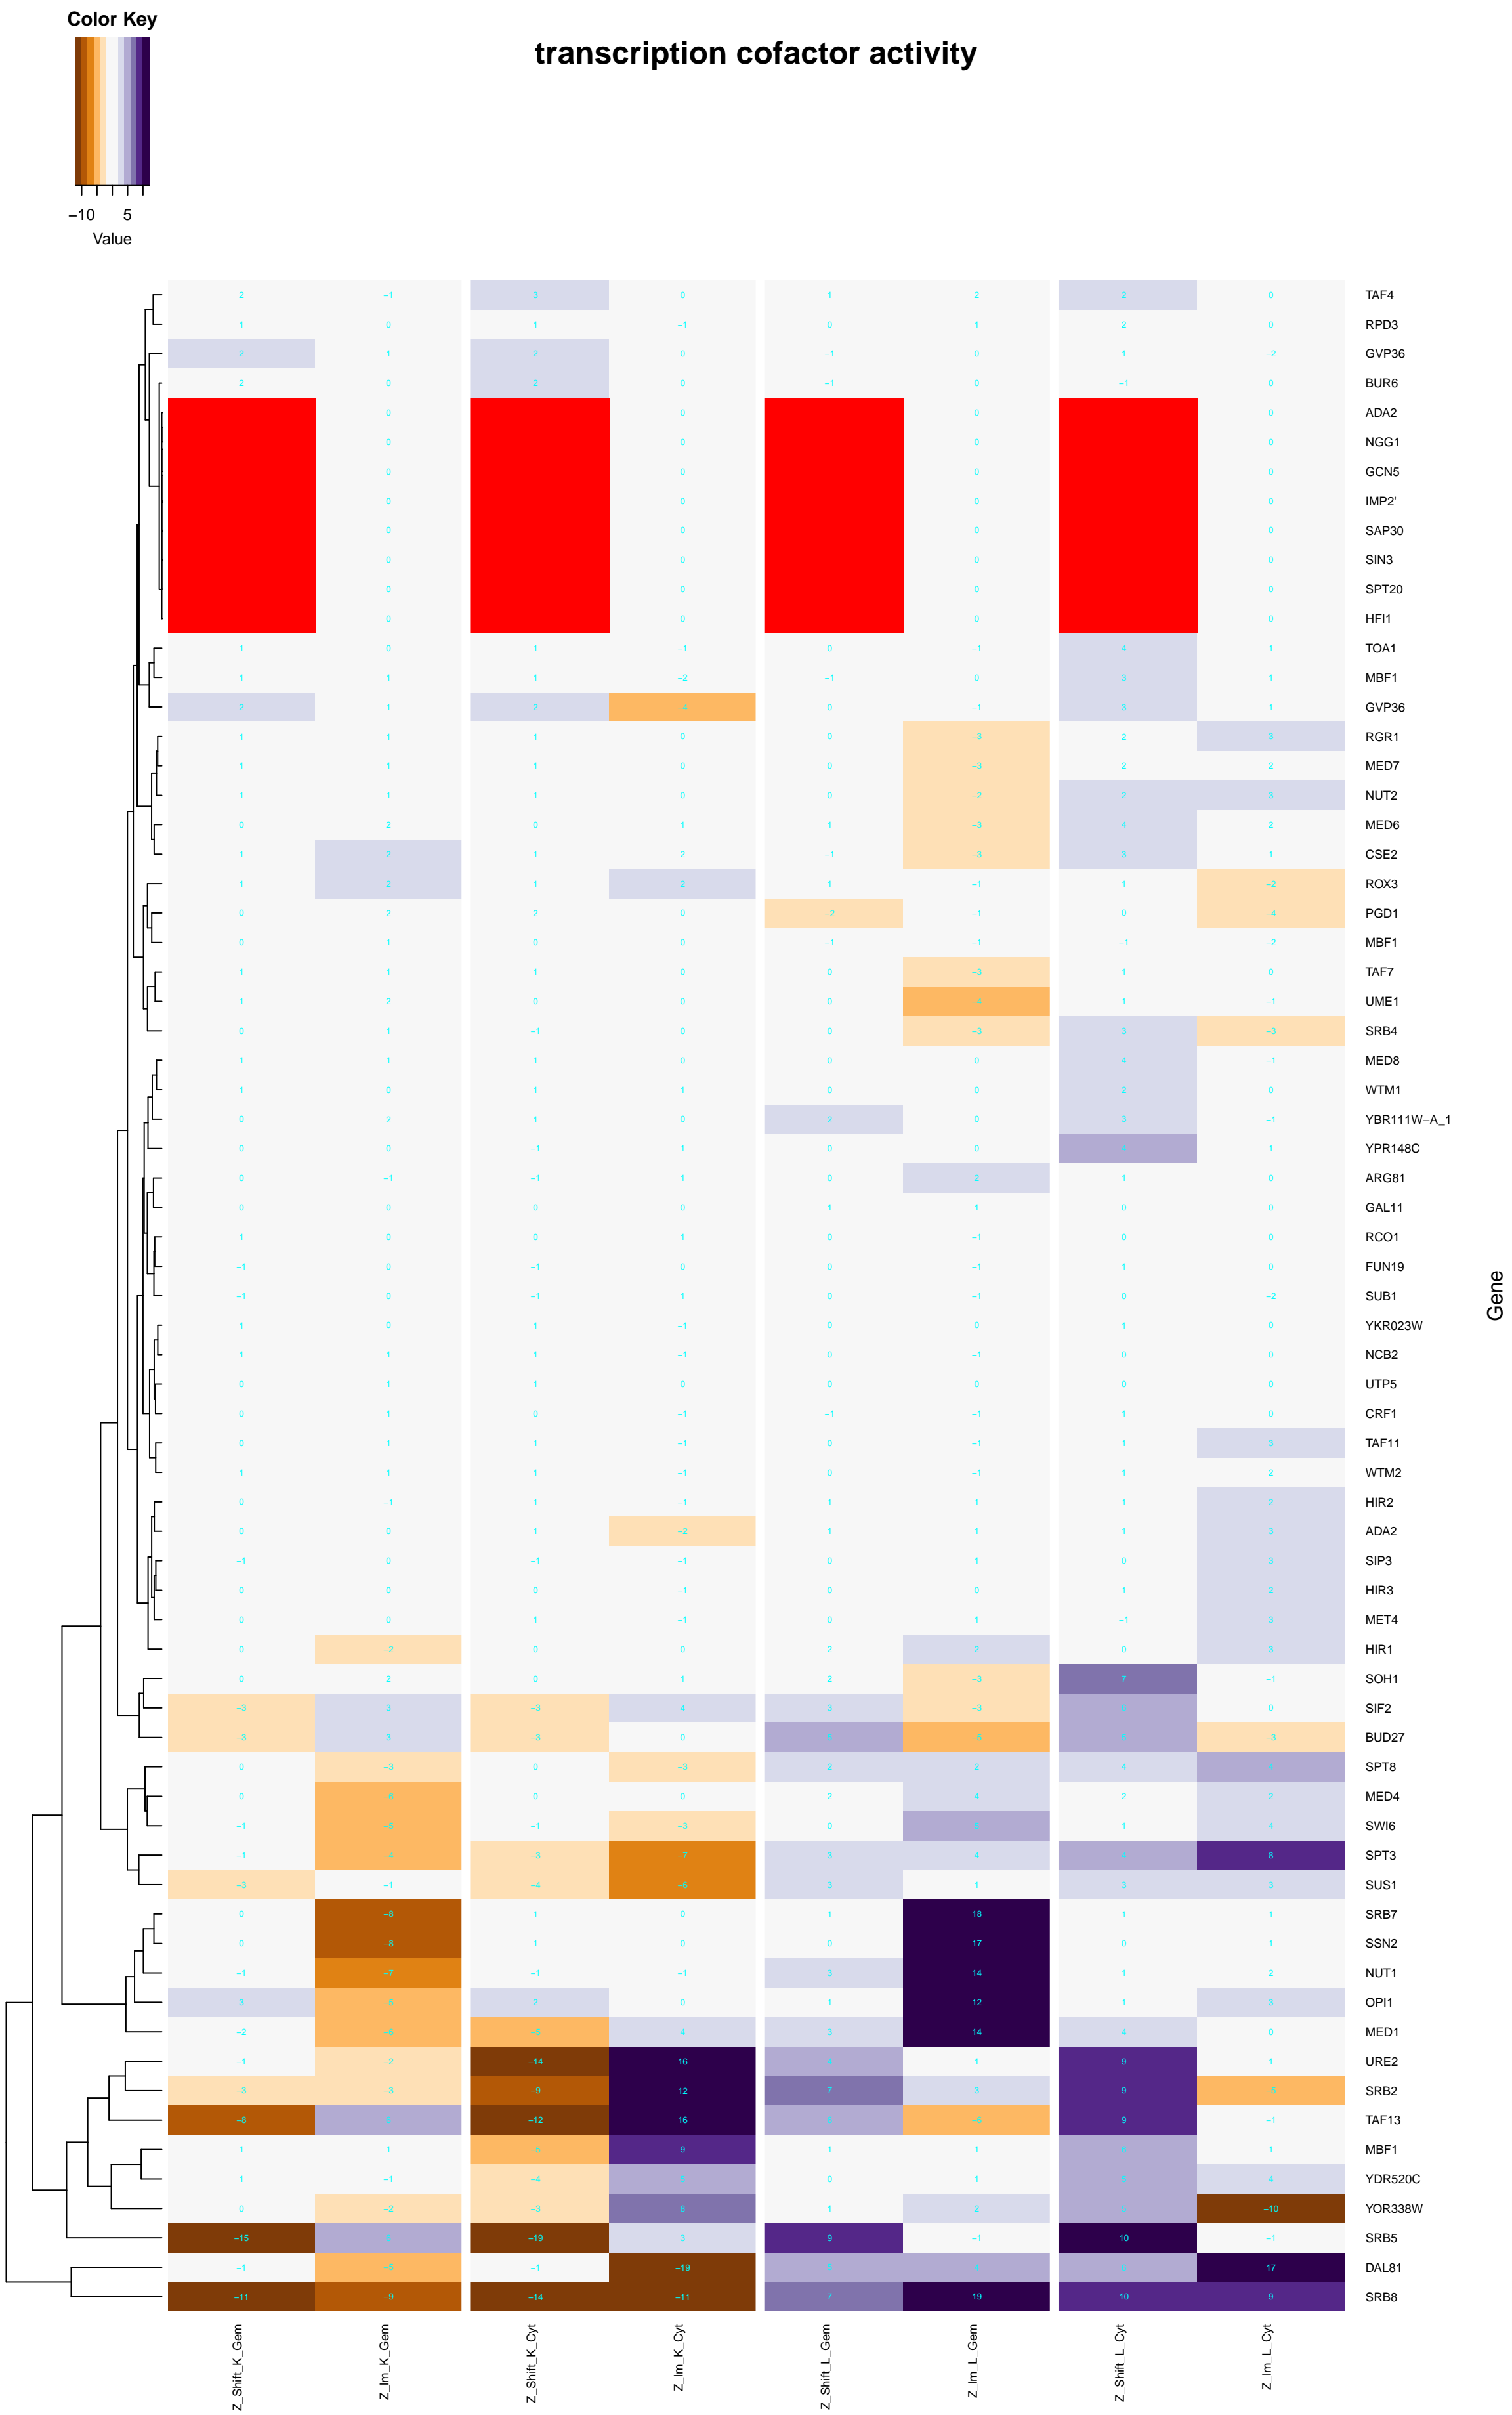

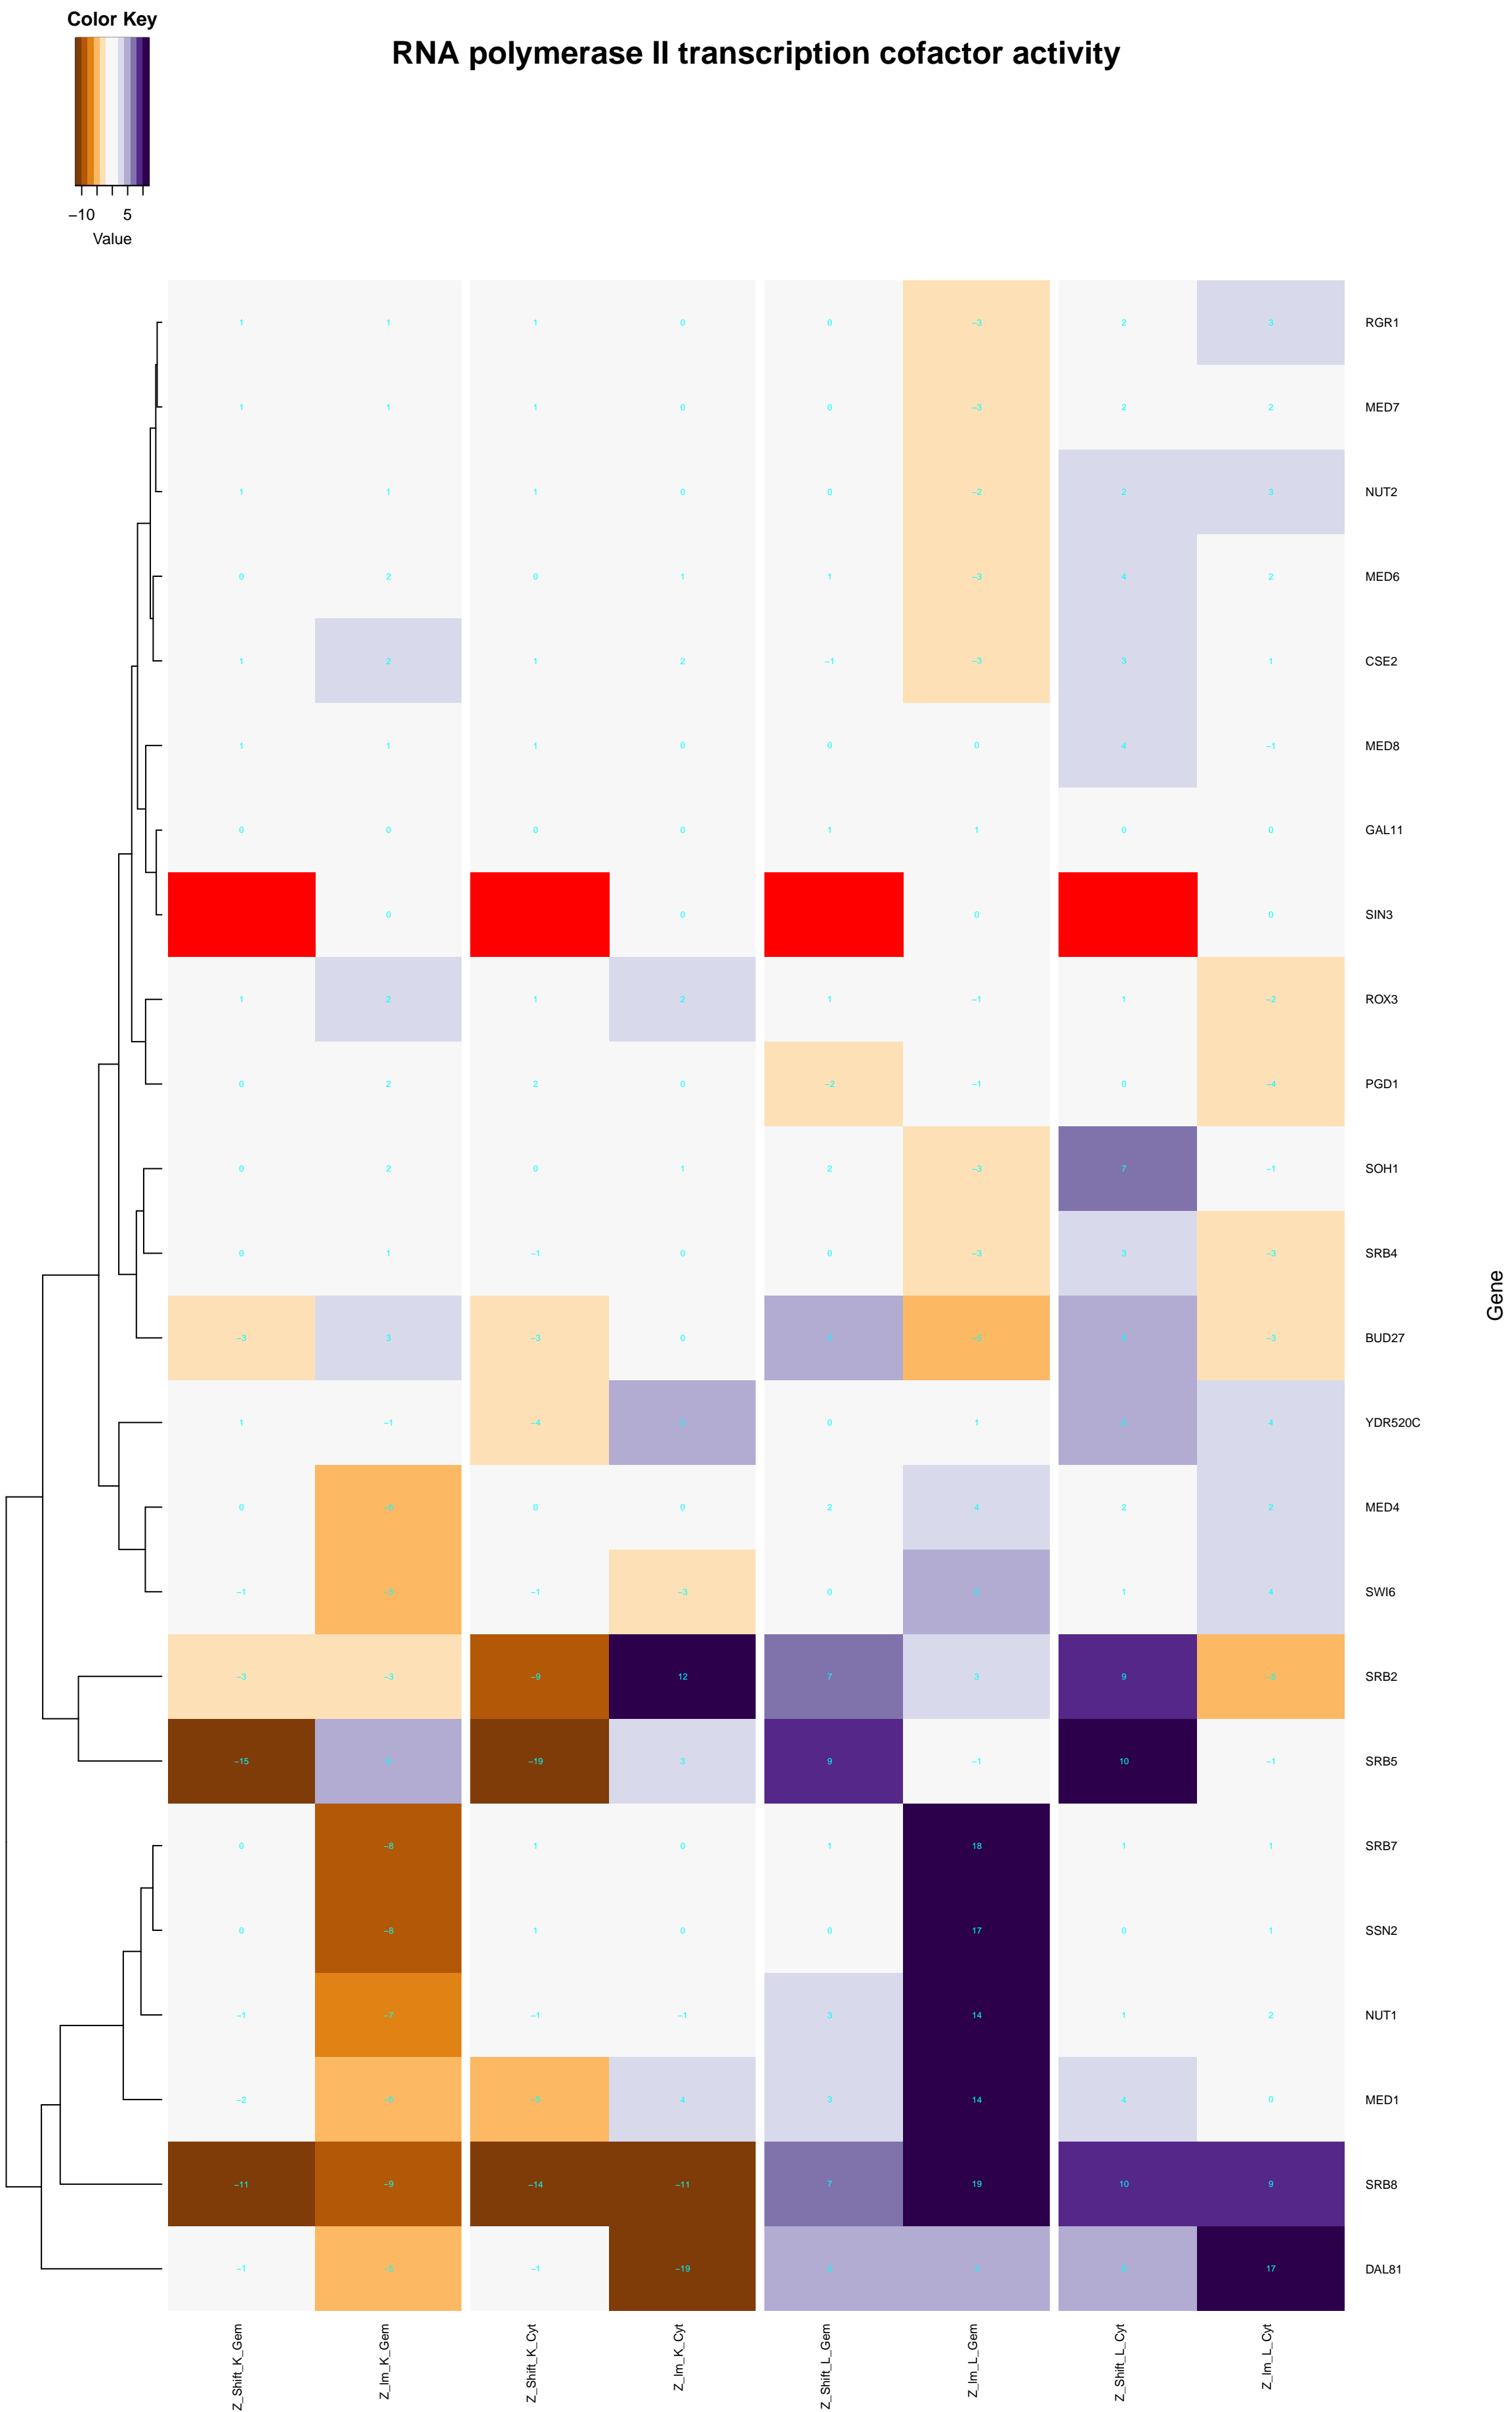

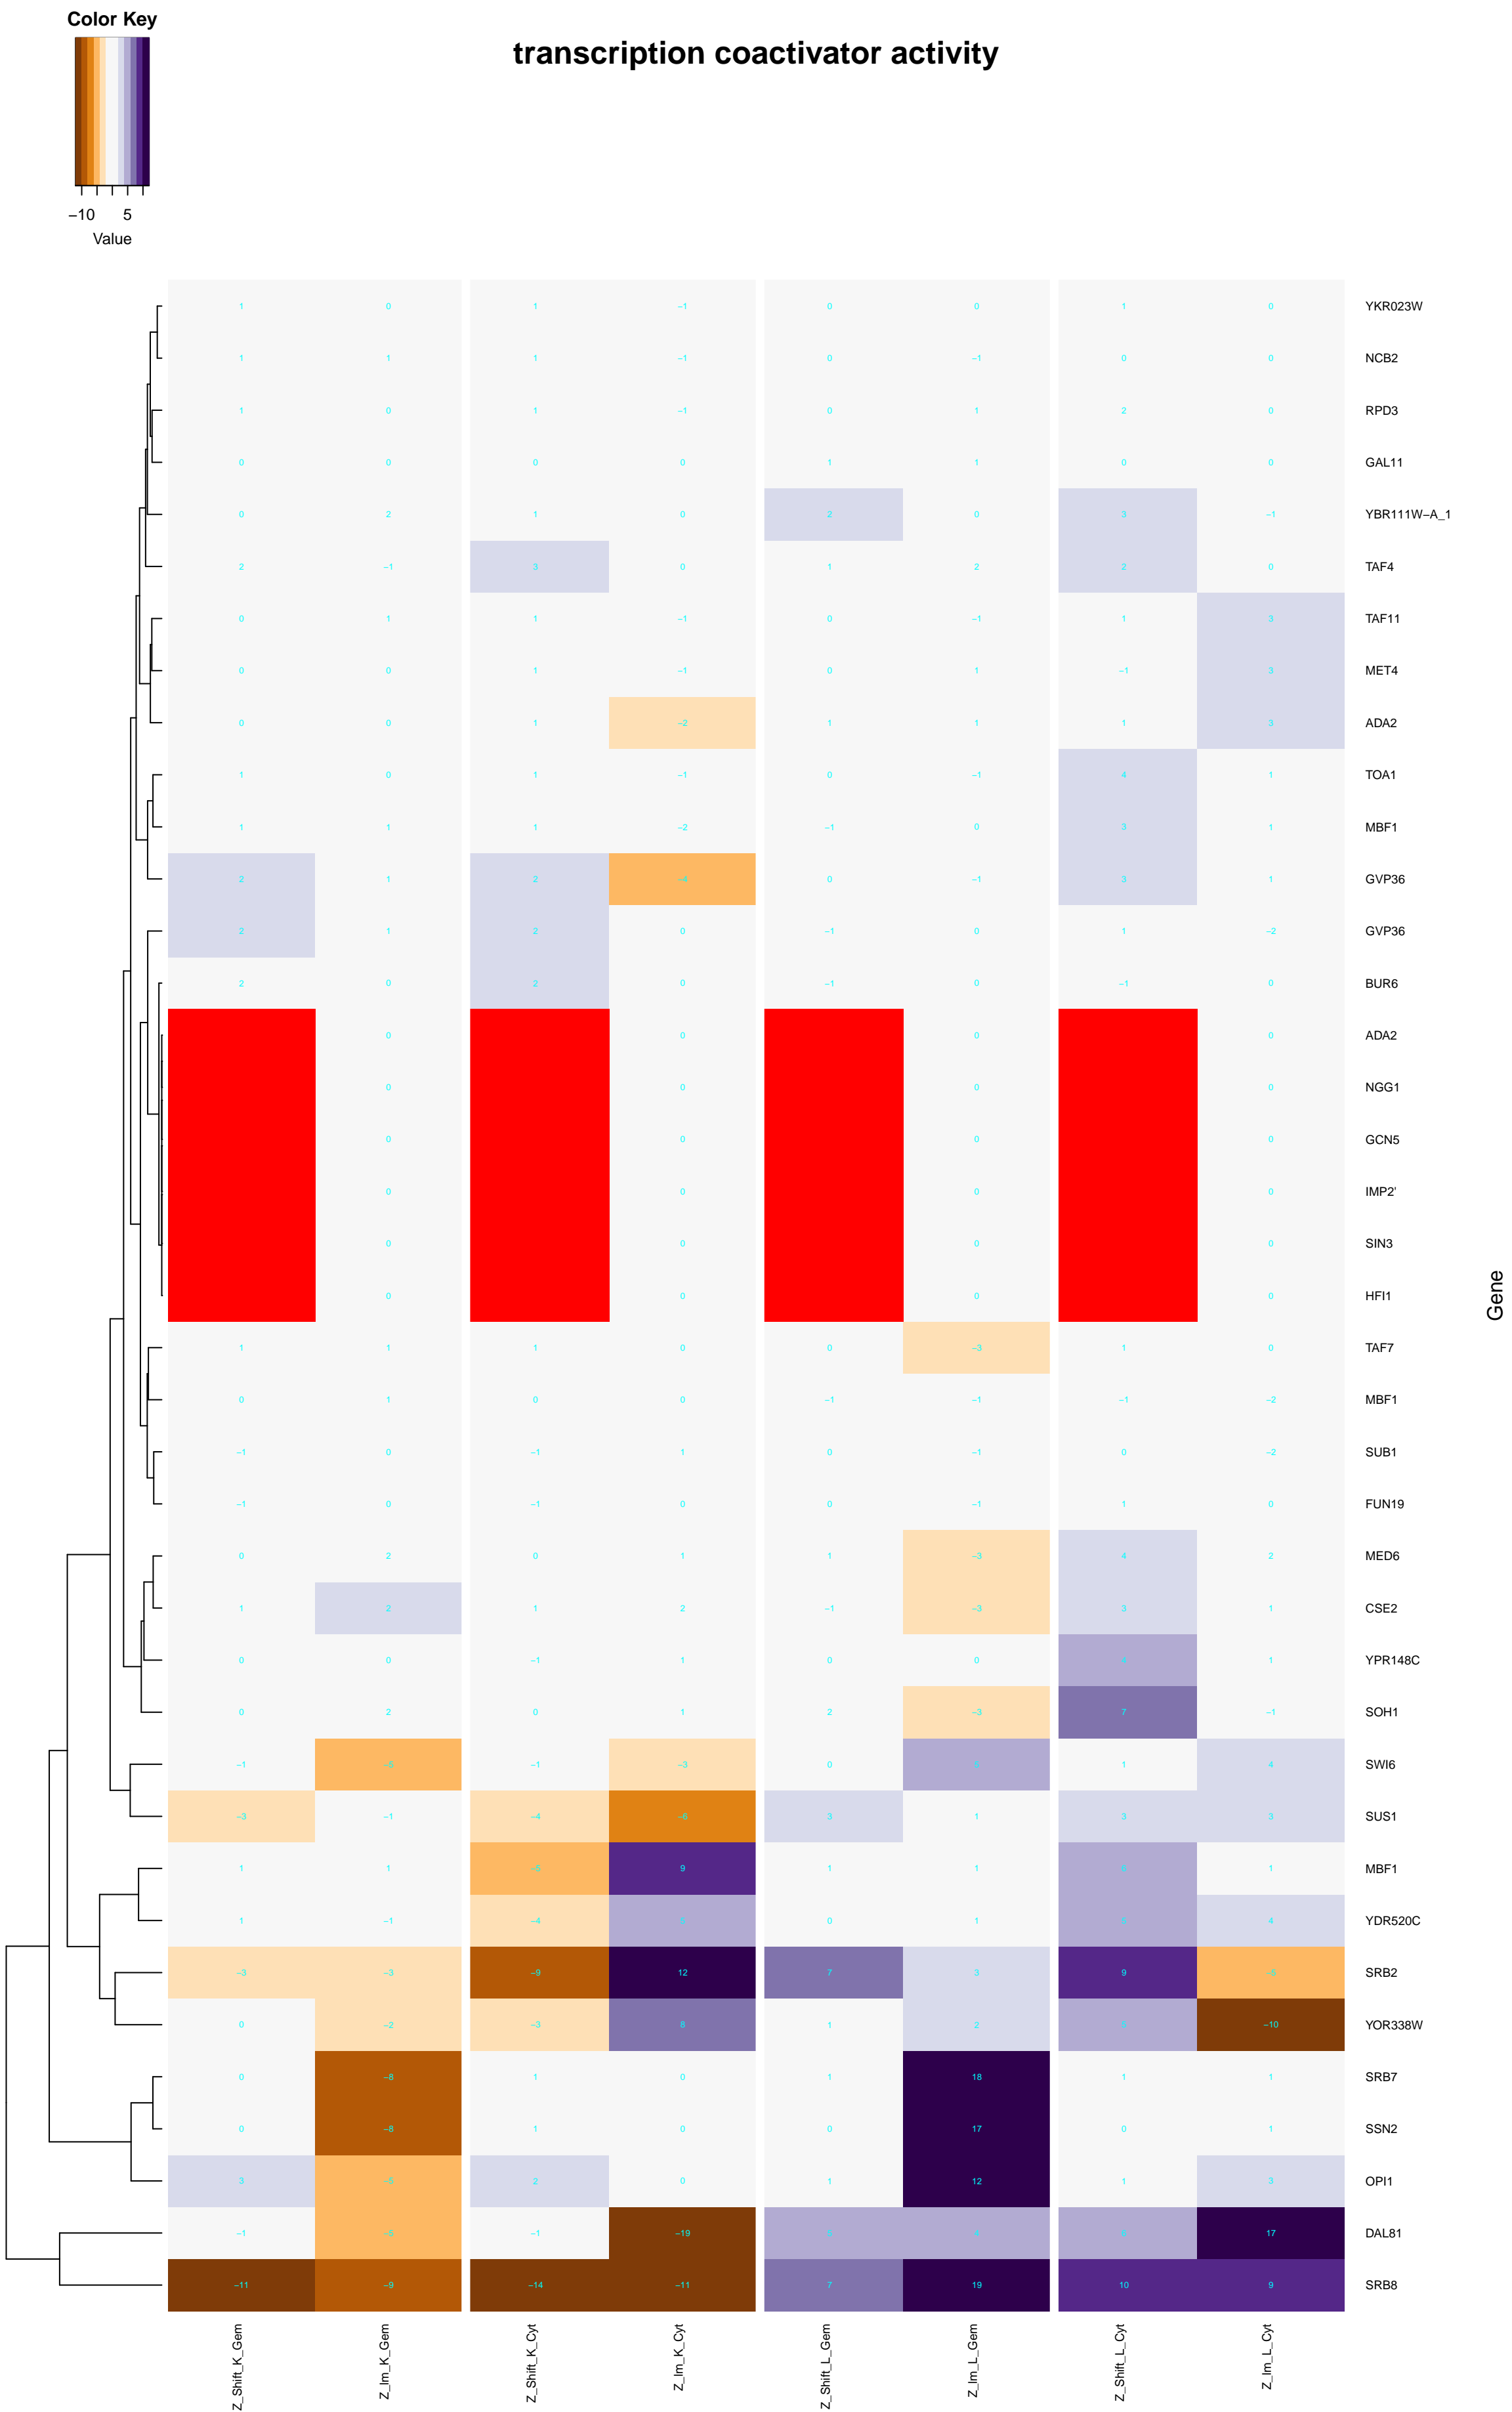

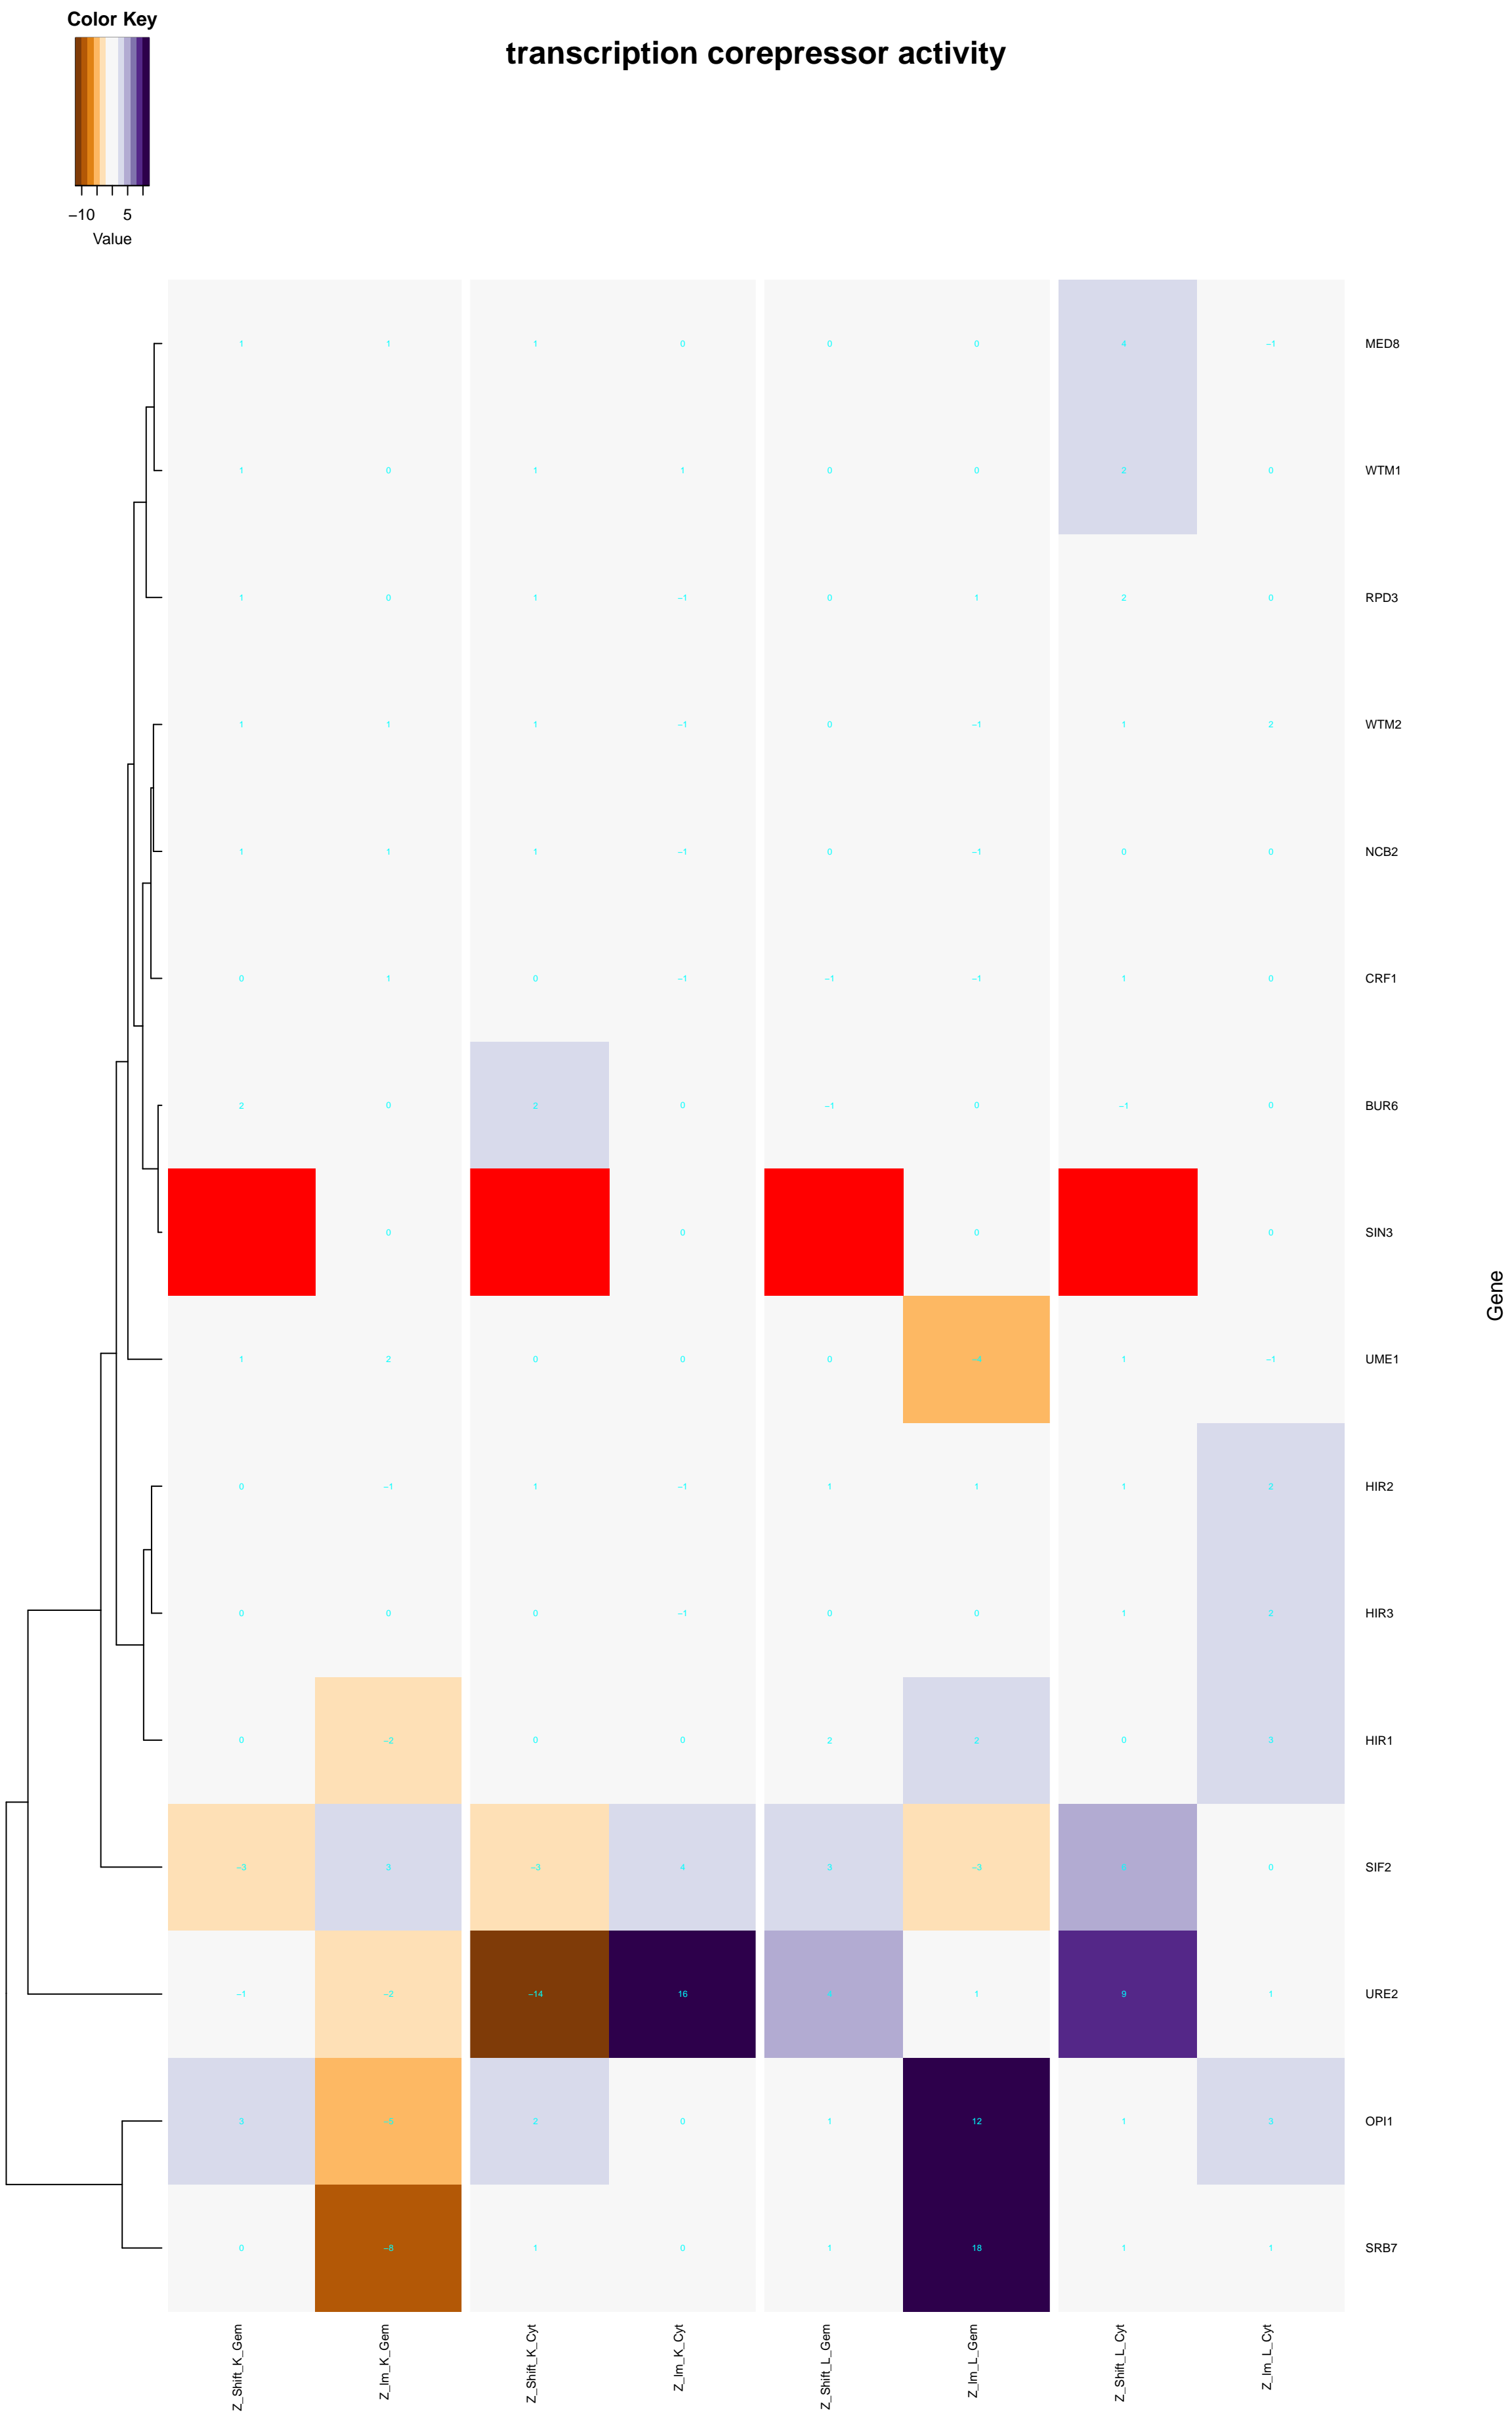



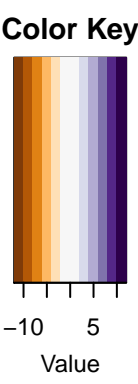

RNA polymerase II transcription corepressor activity

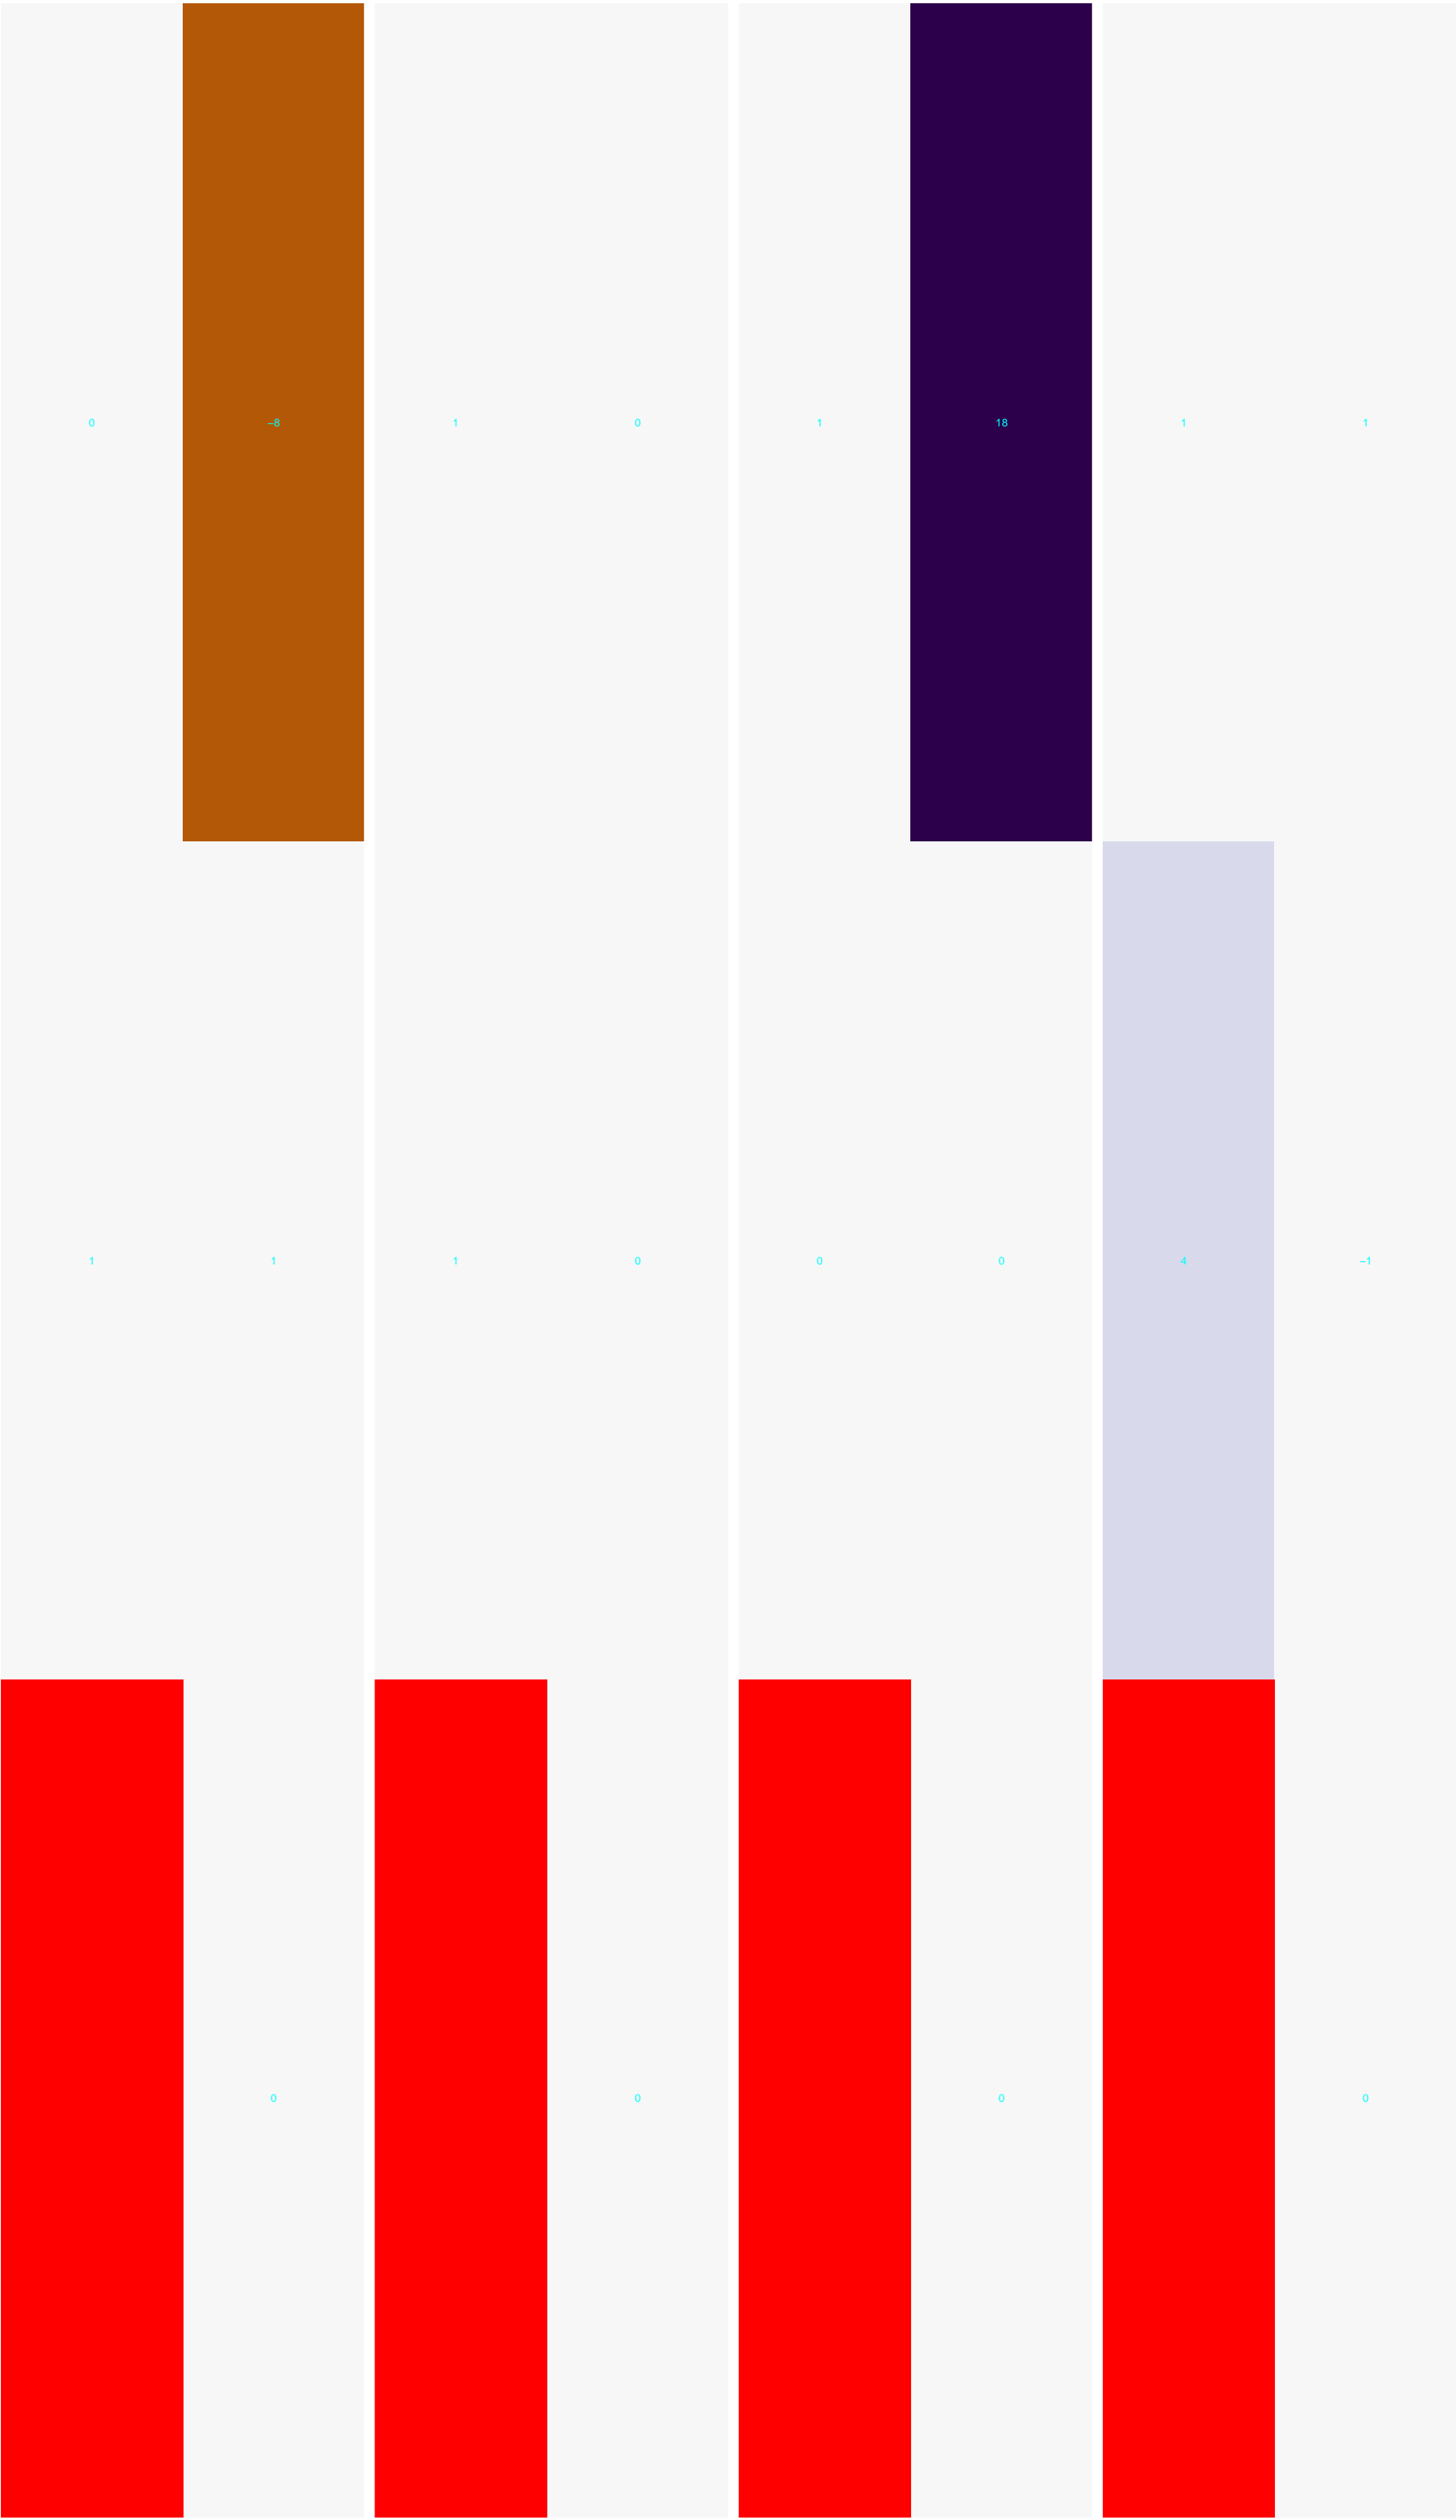

Gene



Supplement: s1 [file s1]

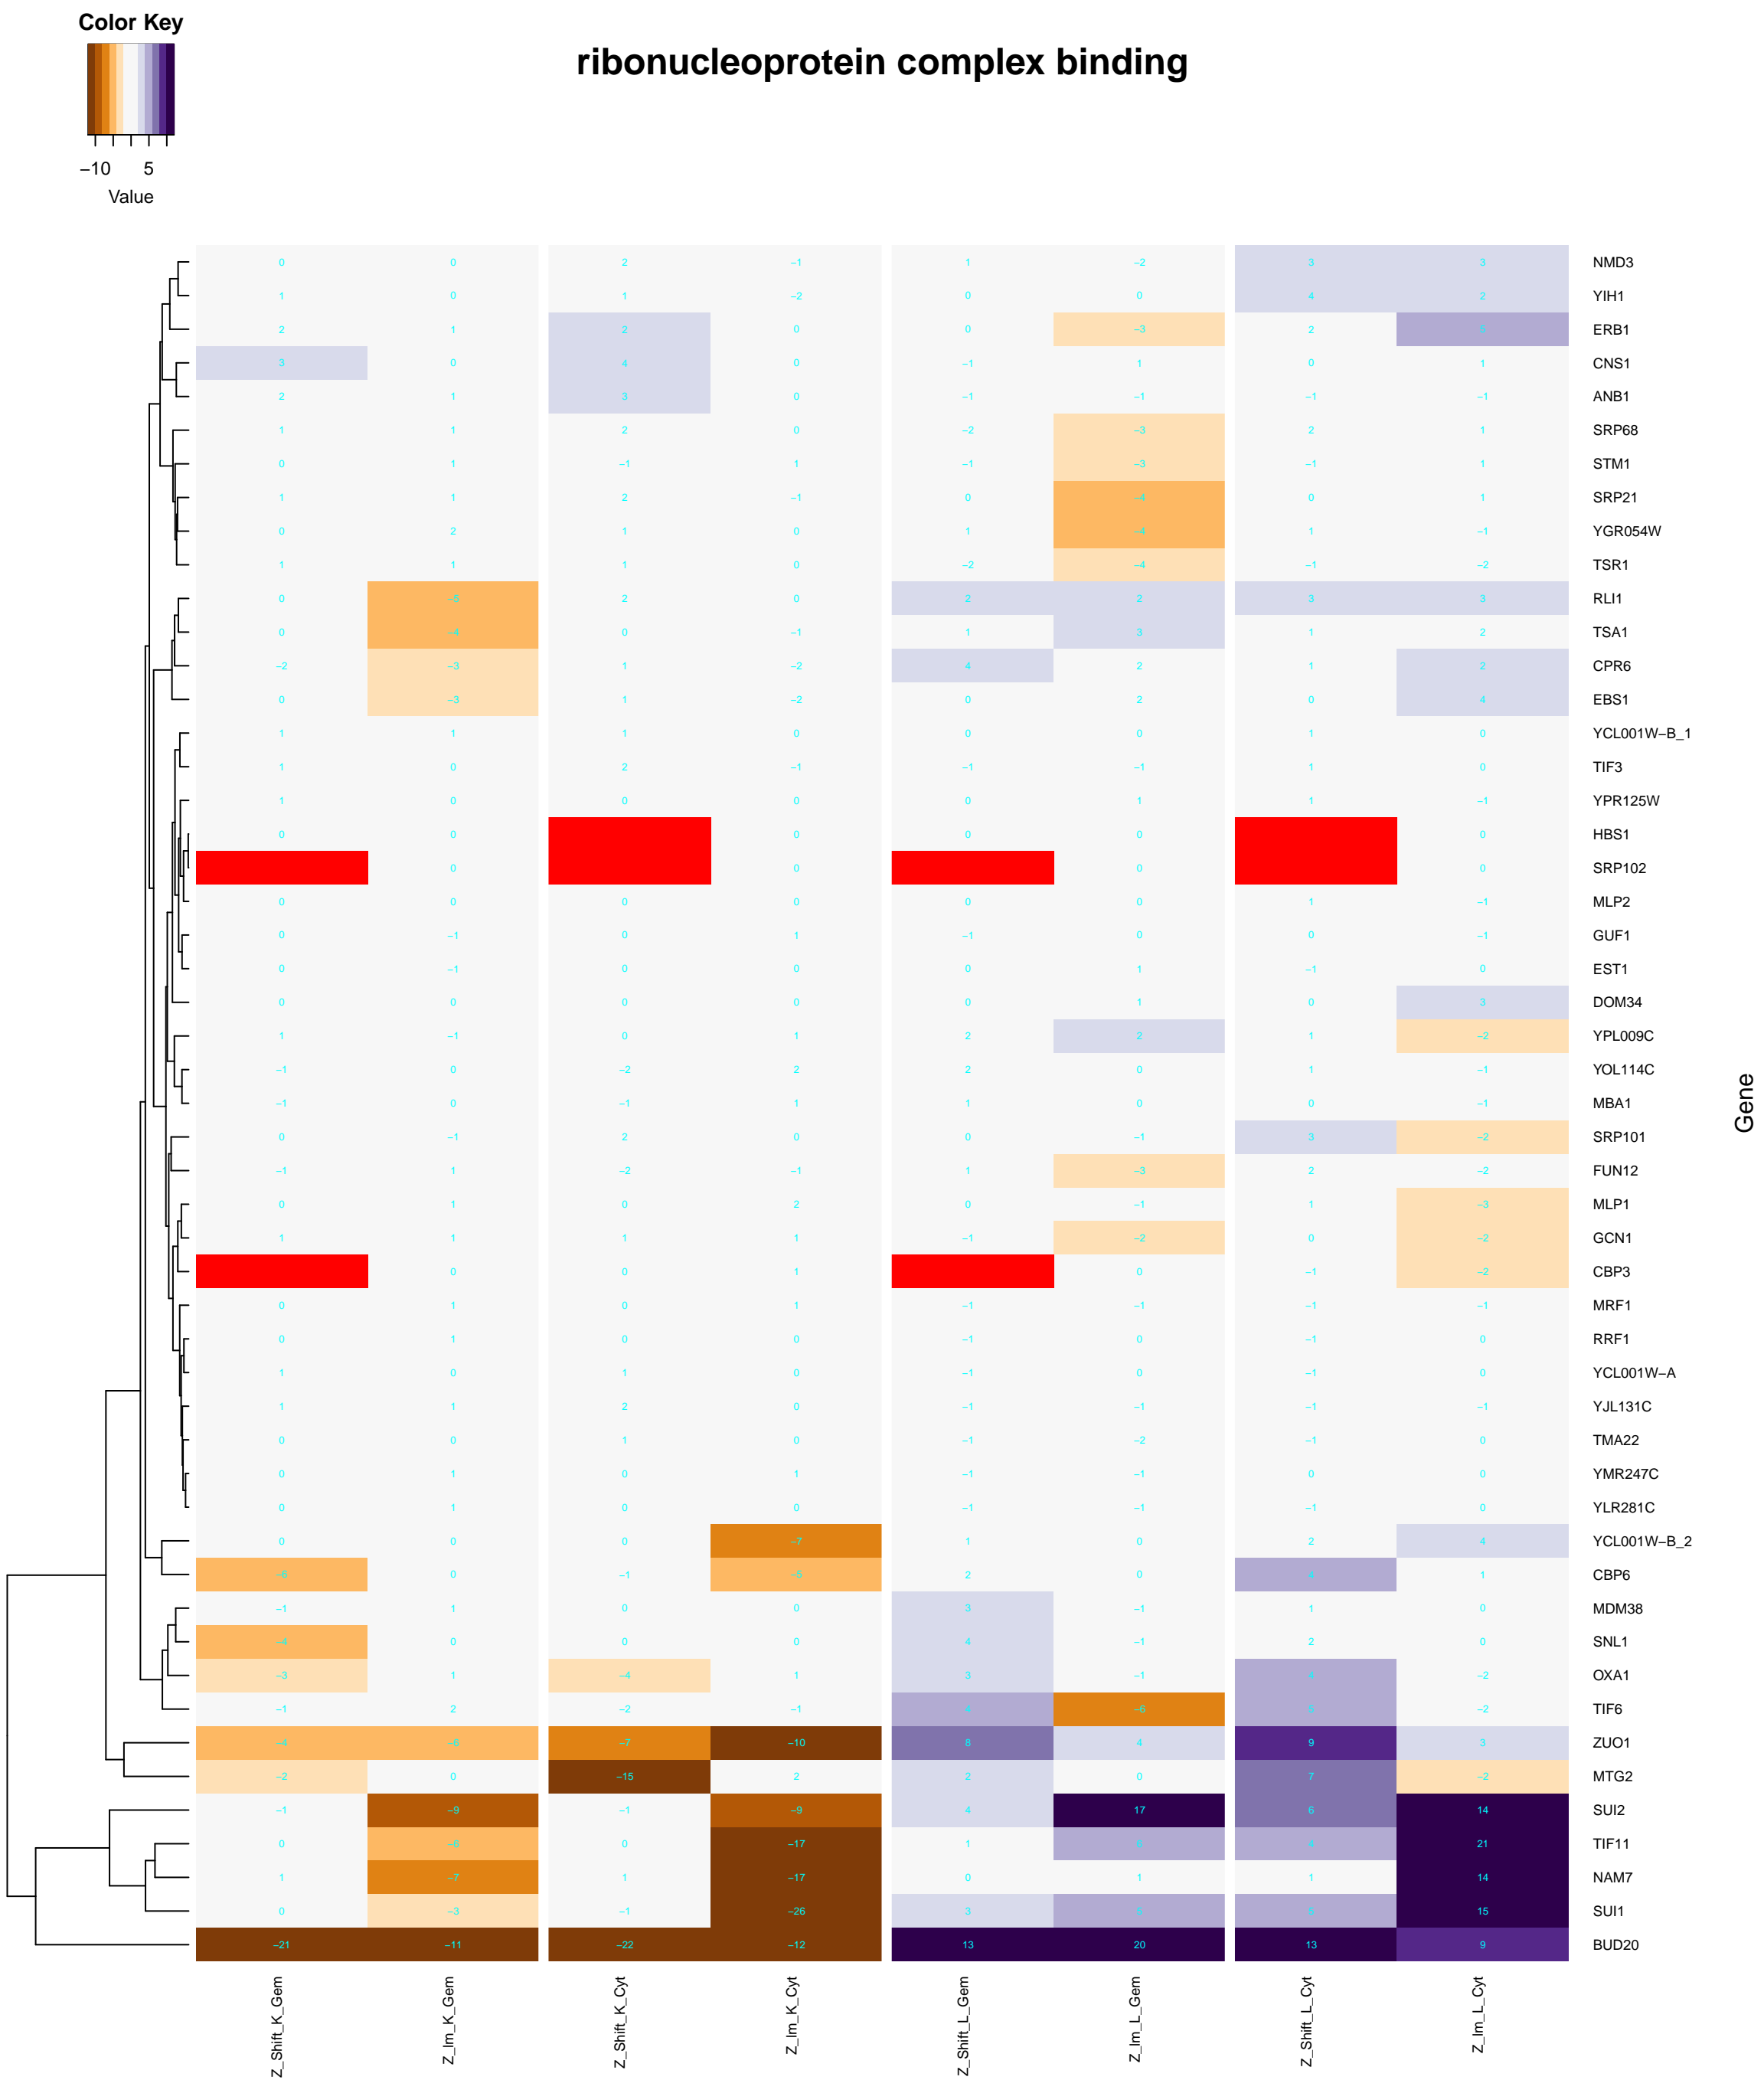

**signal recognition particle binding**

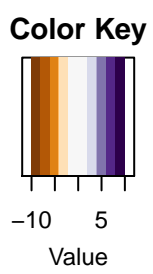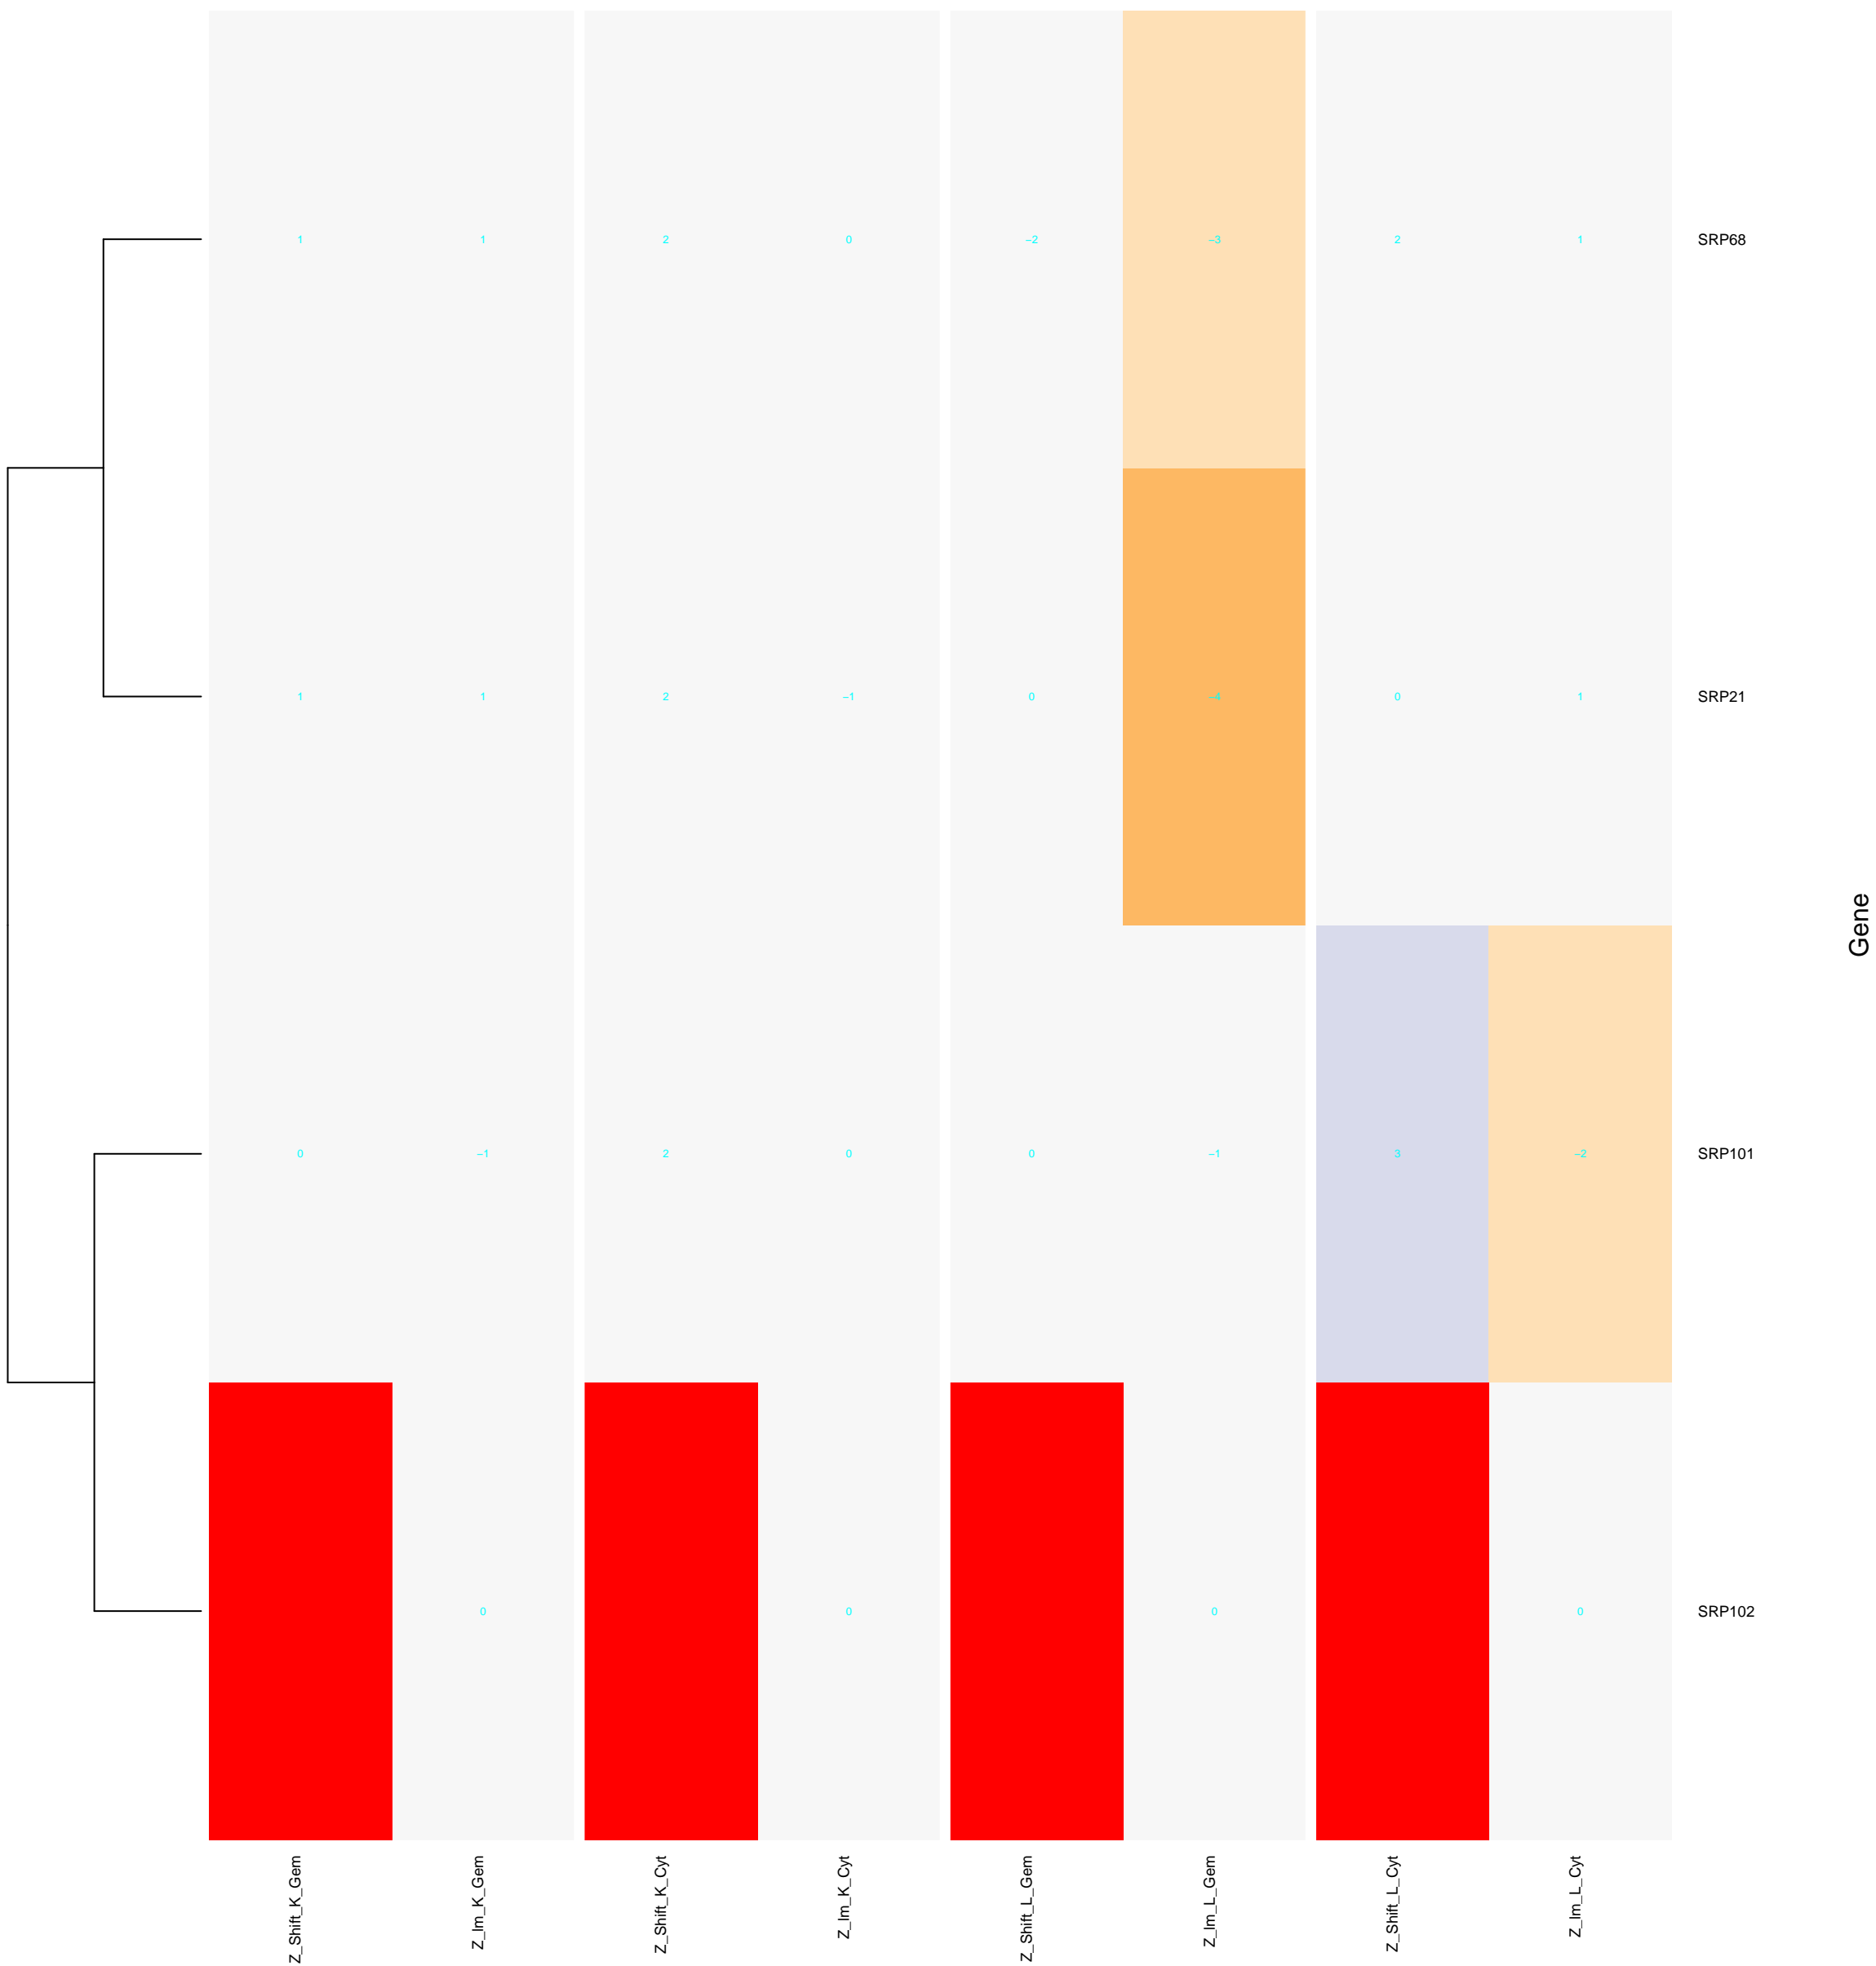

ribosome binding

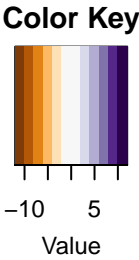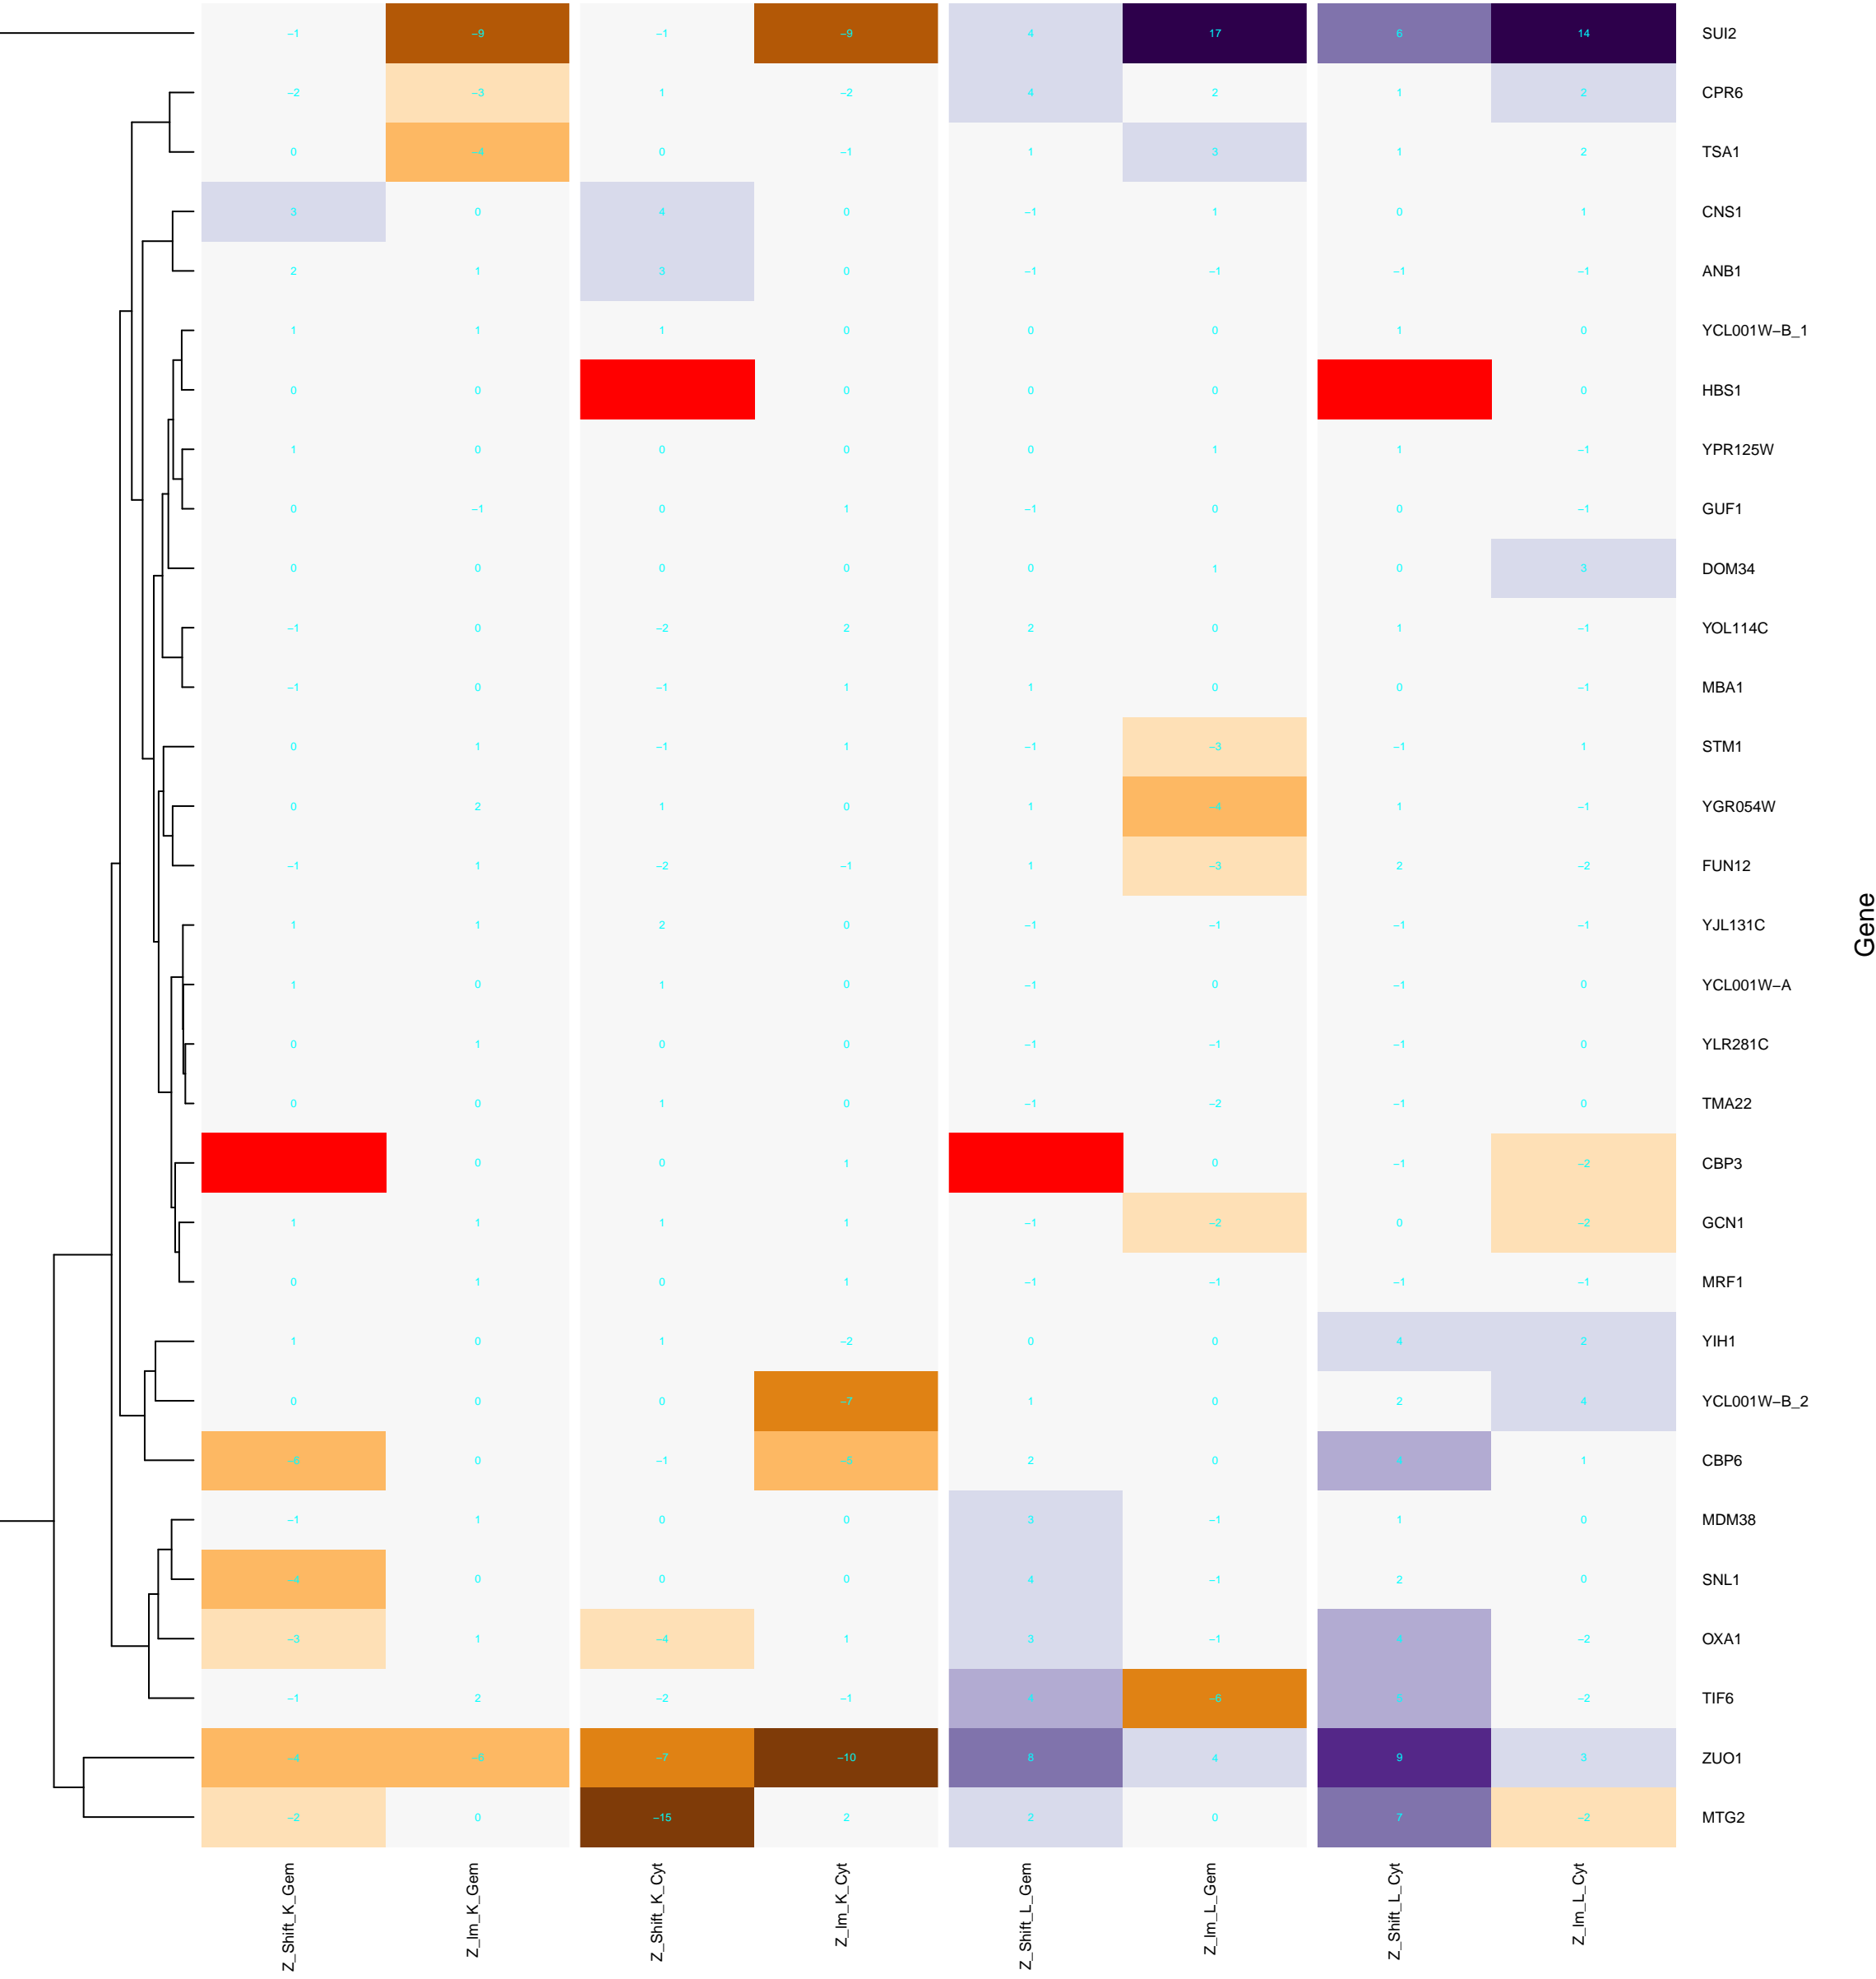

Gene

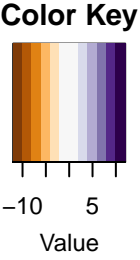

ribosomal large subunit binding

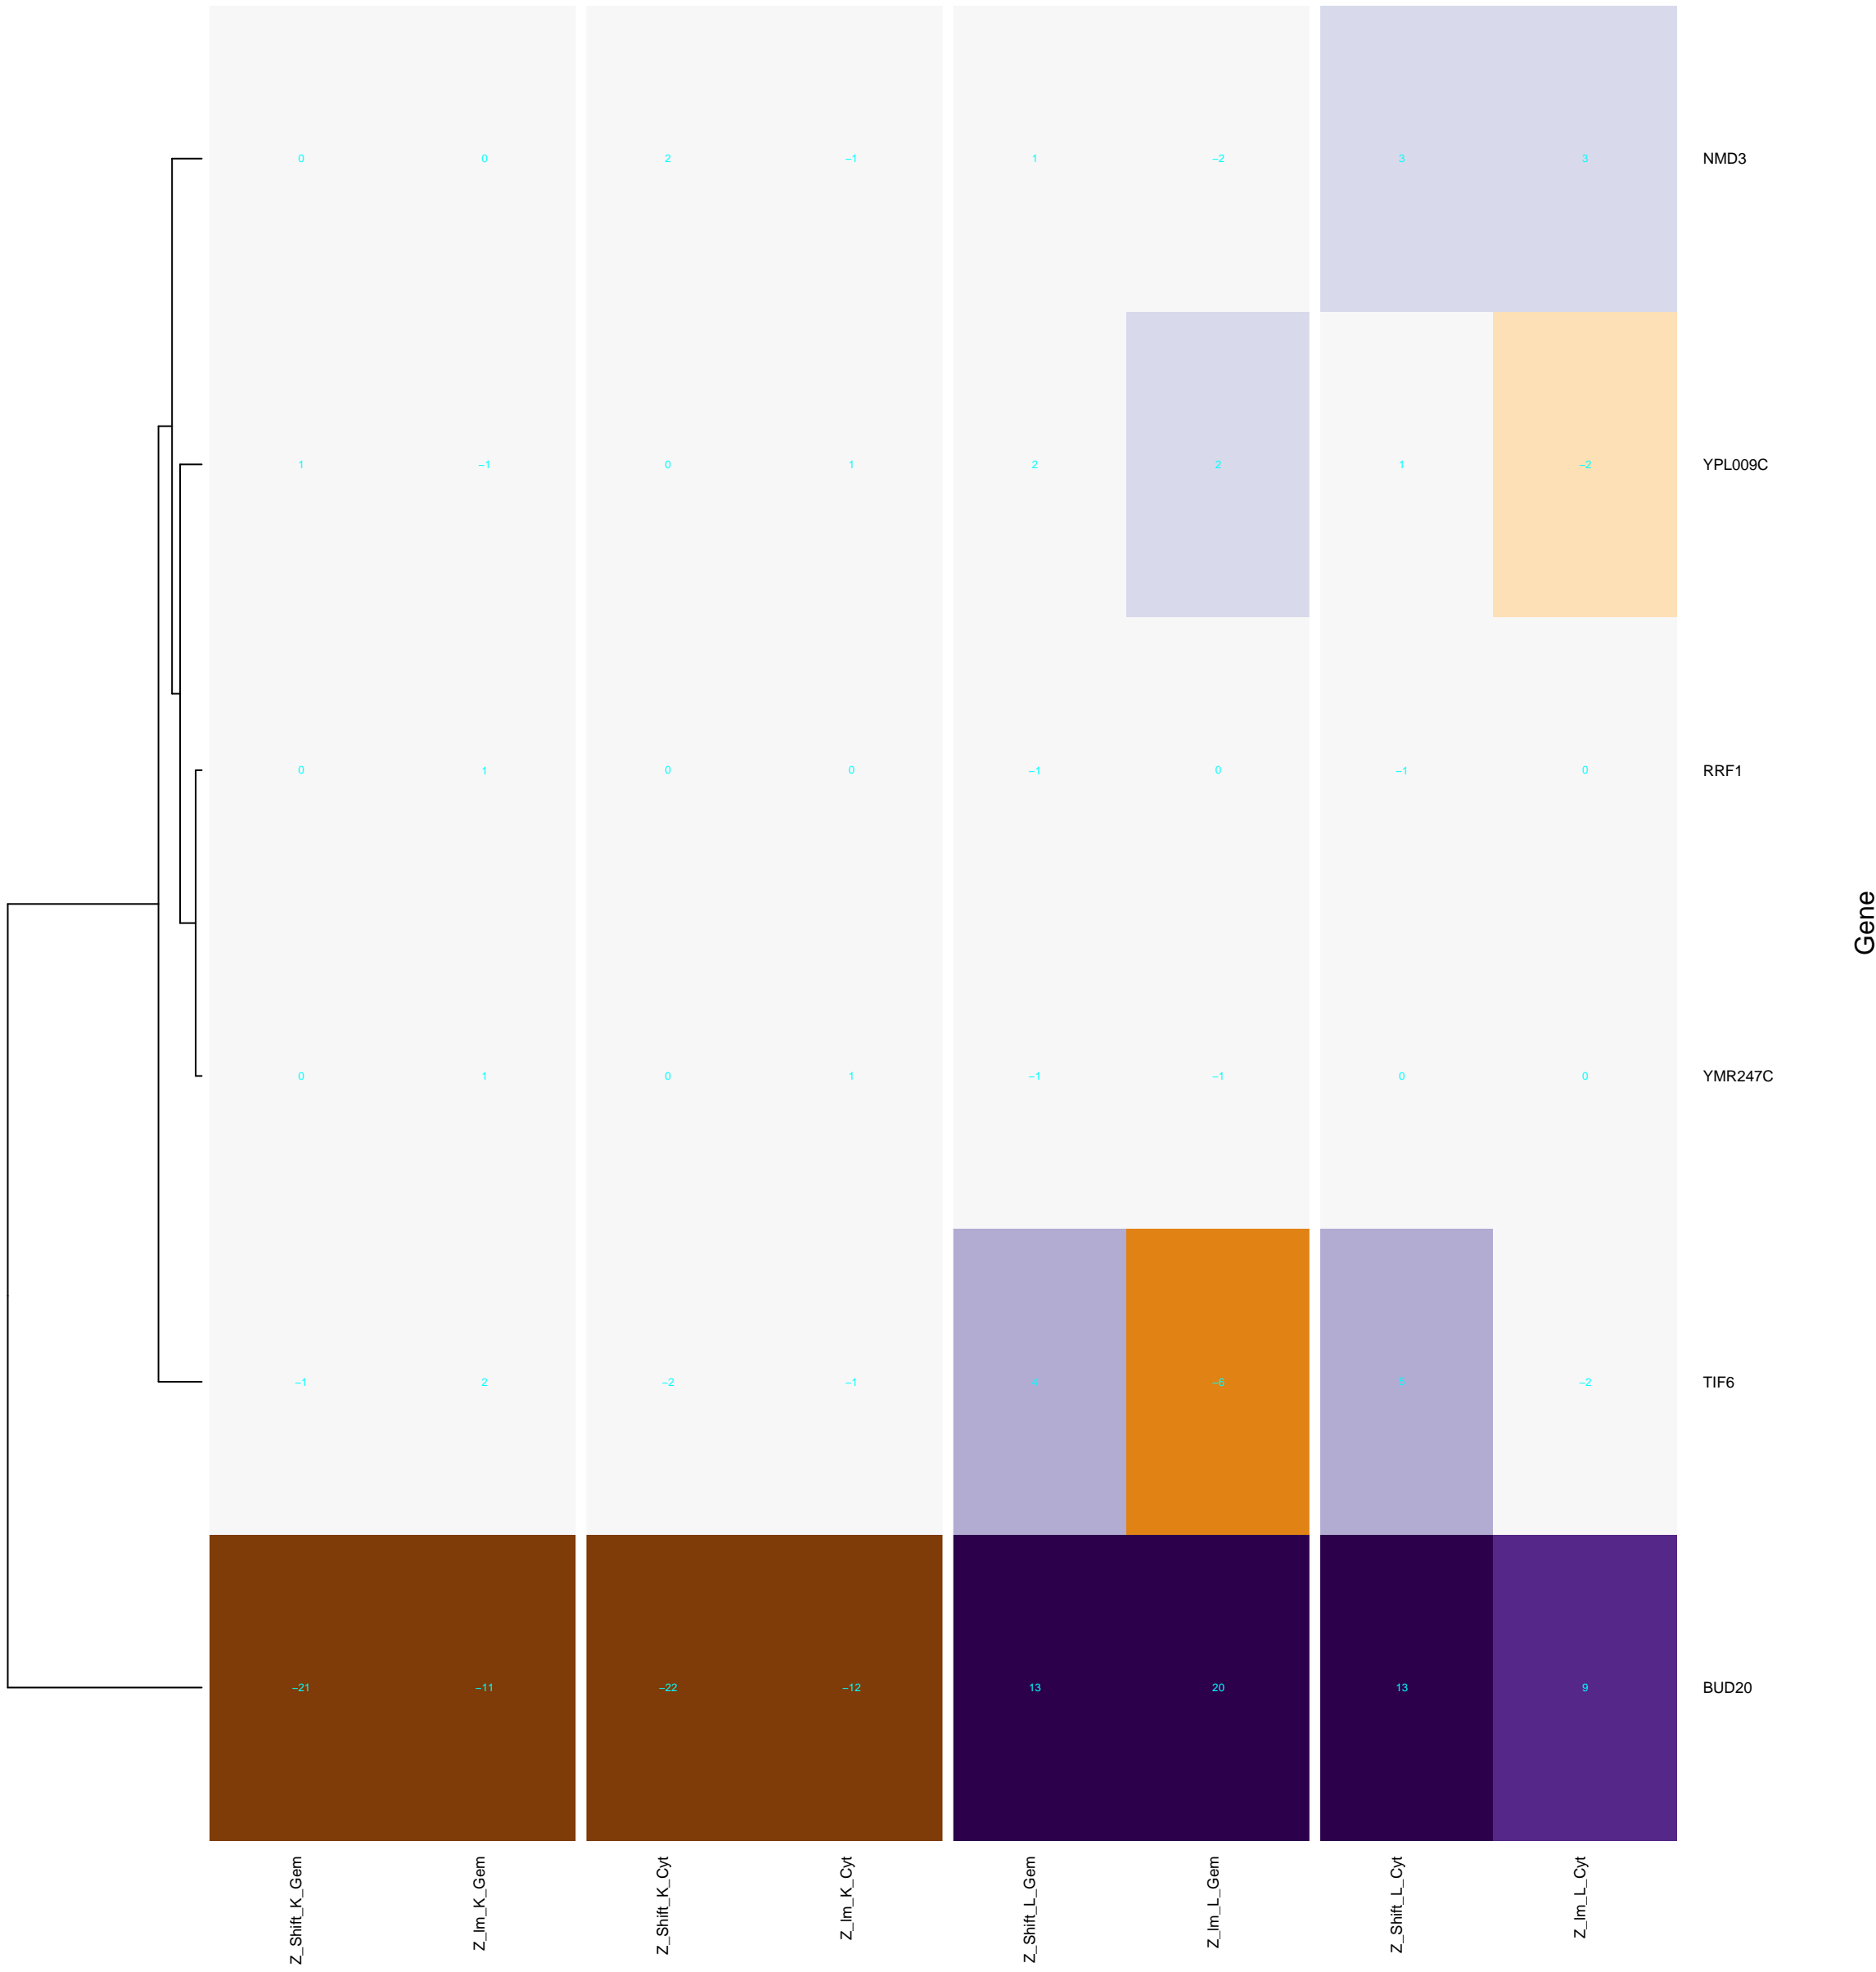

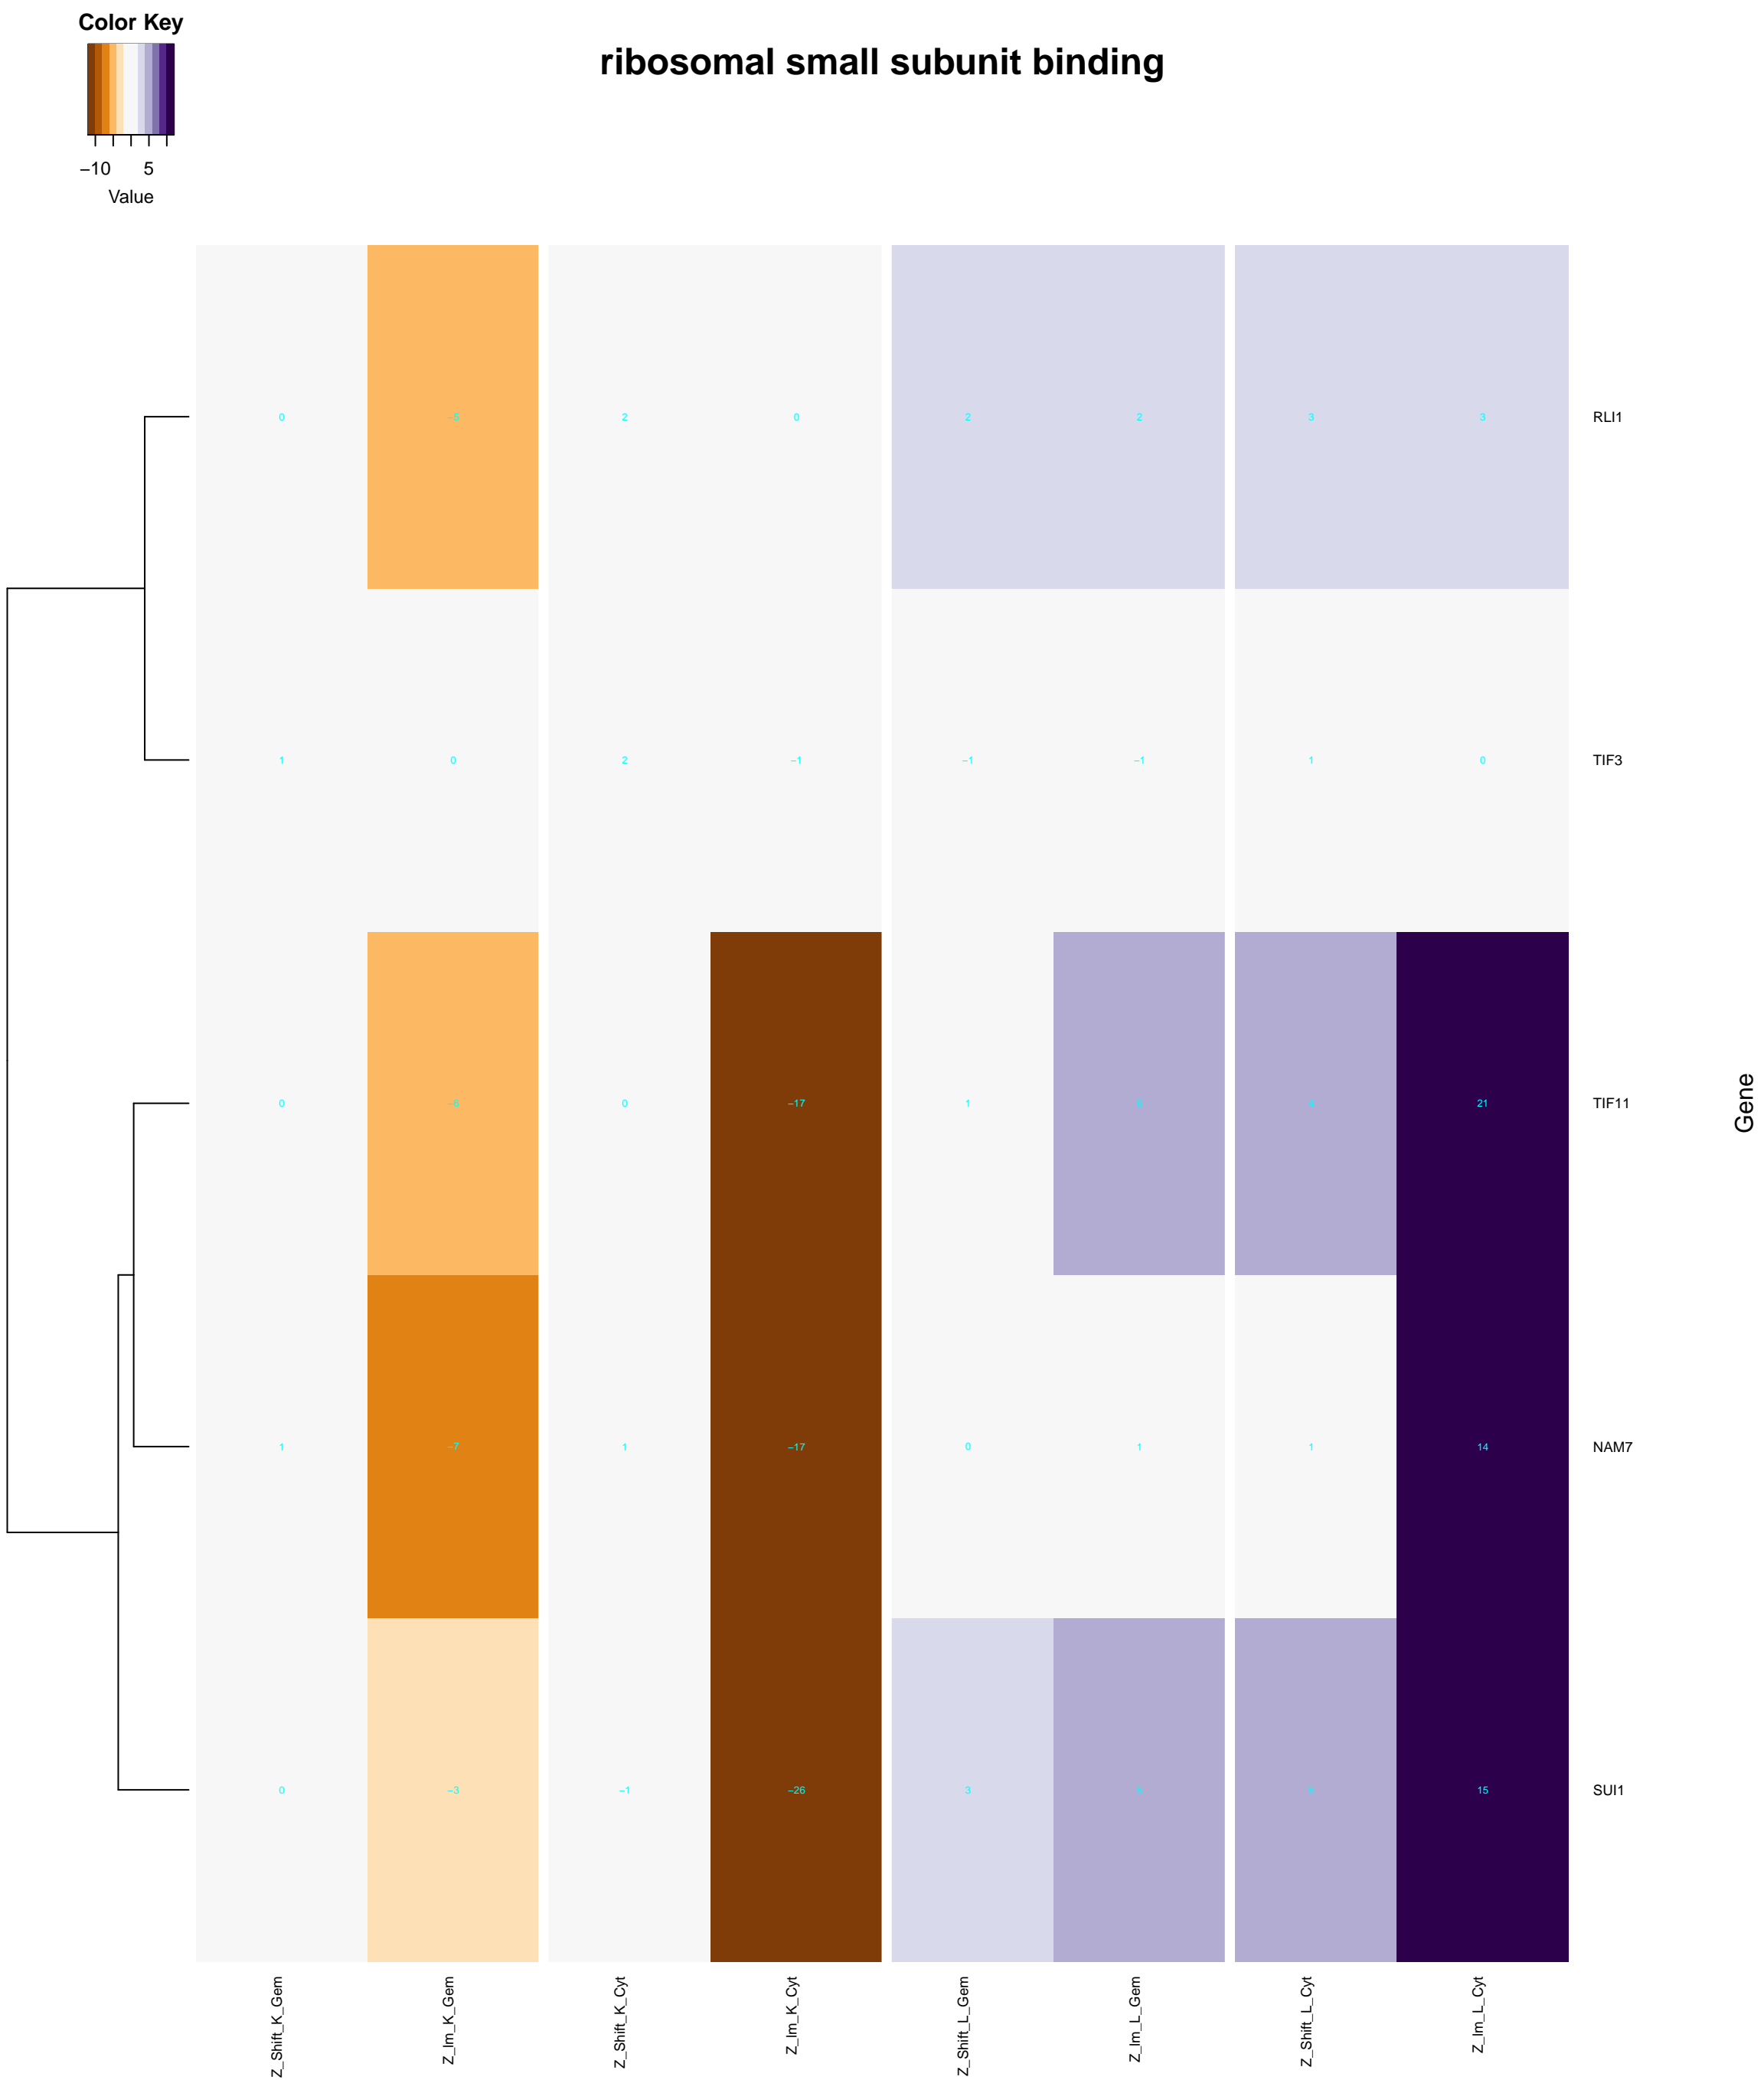

Supplement: s1 [file s1]

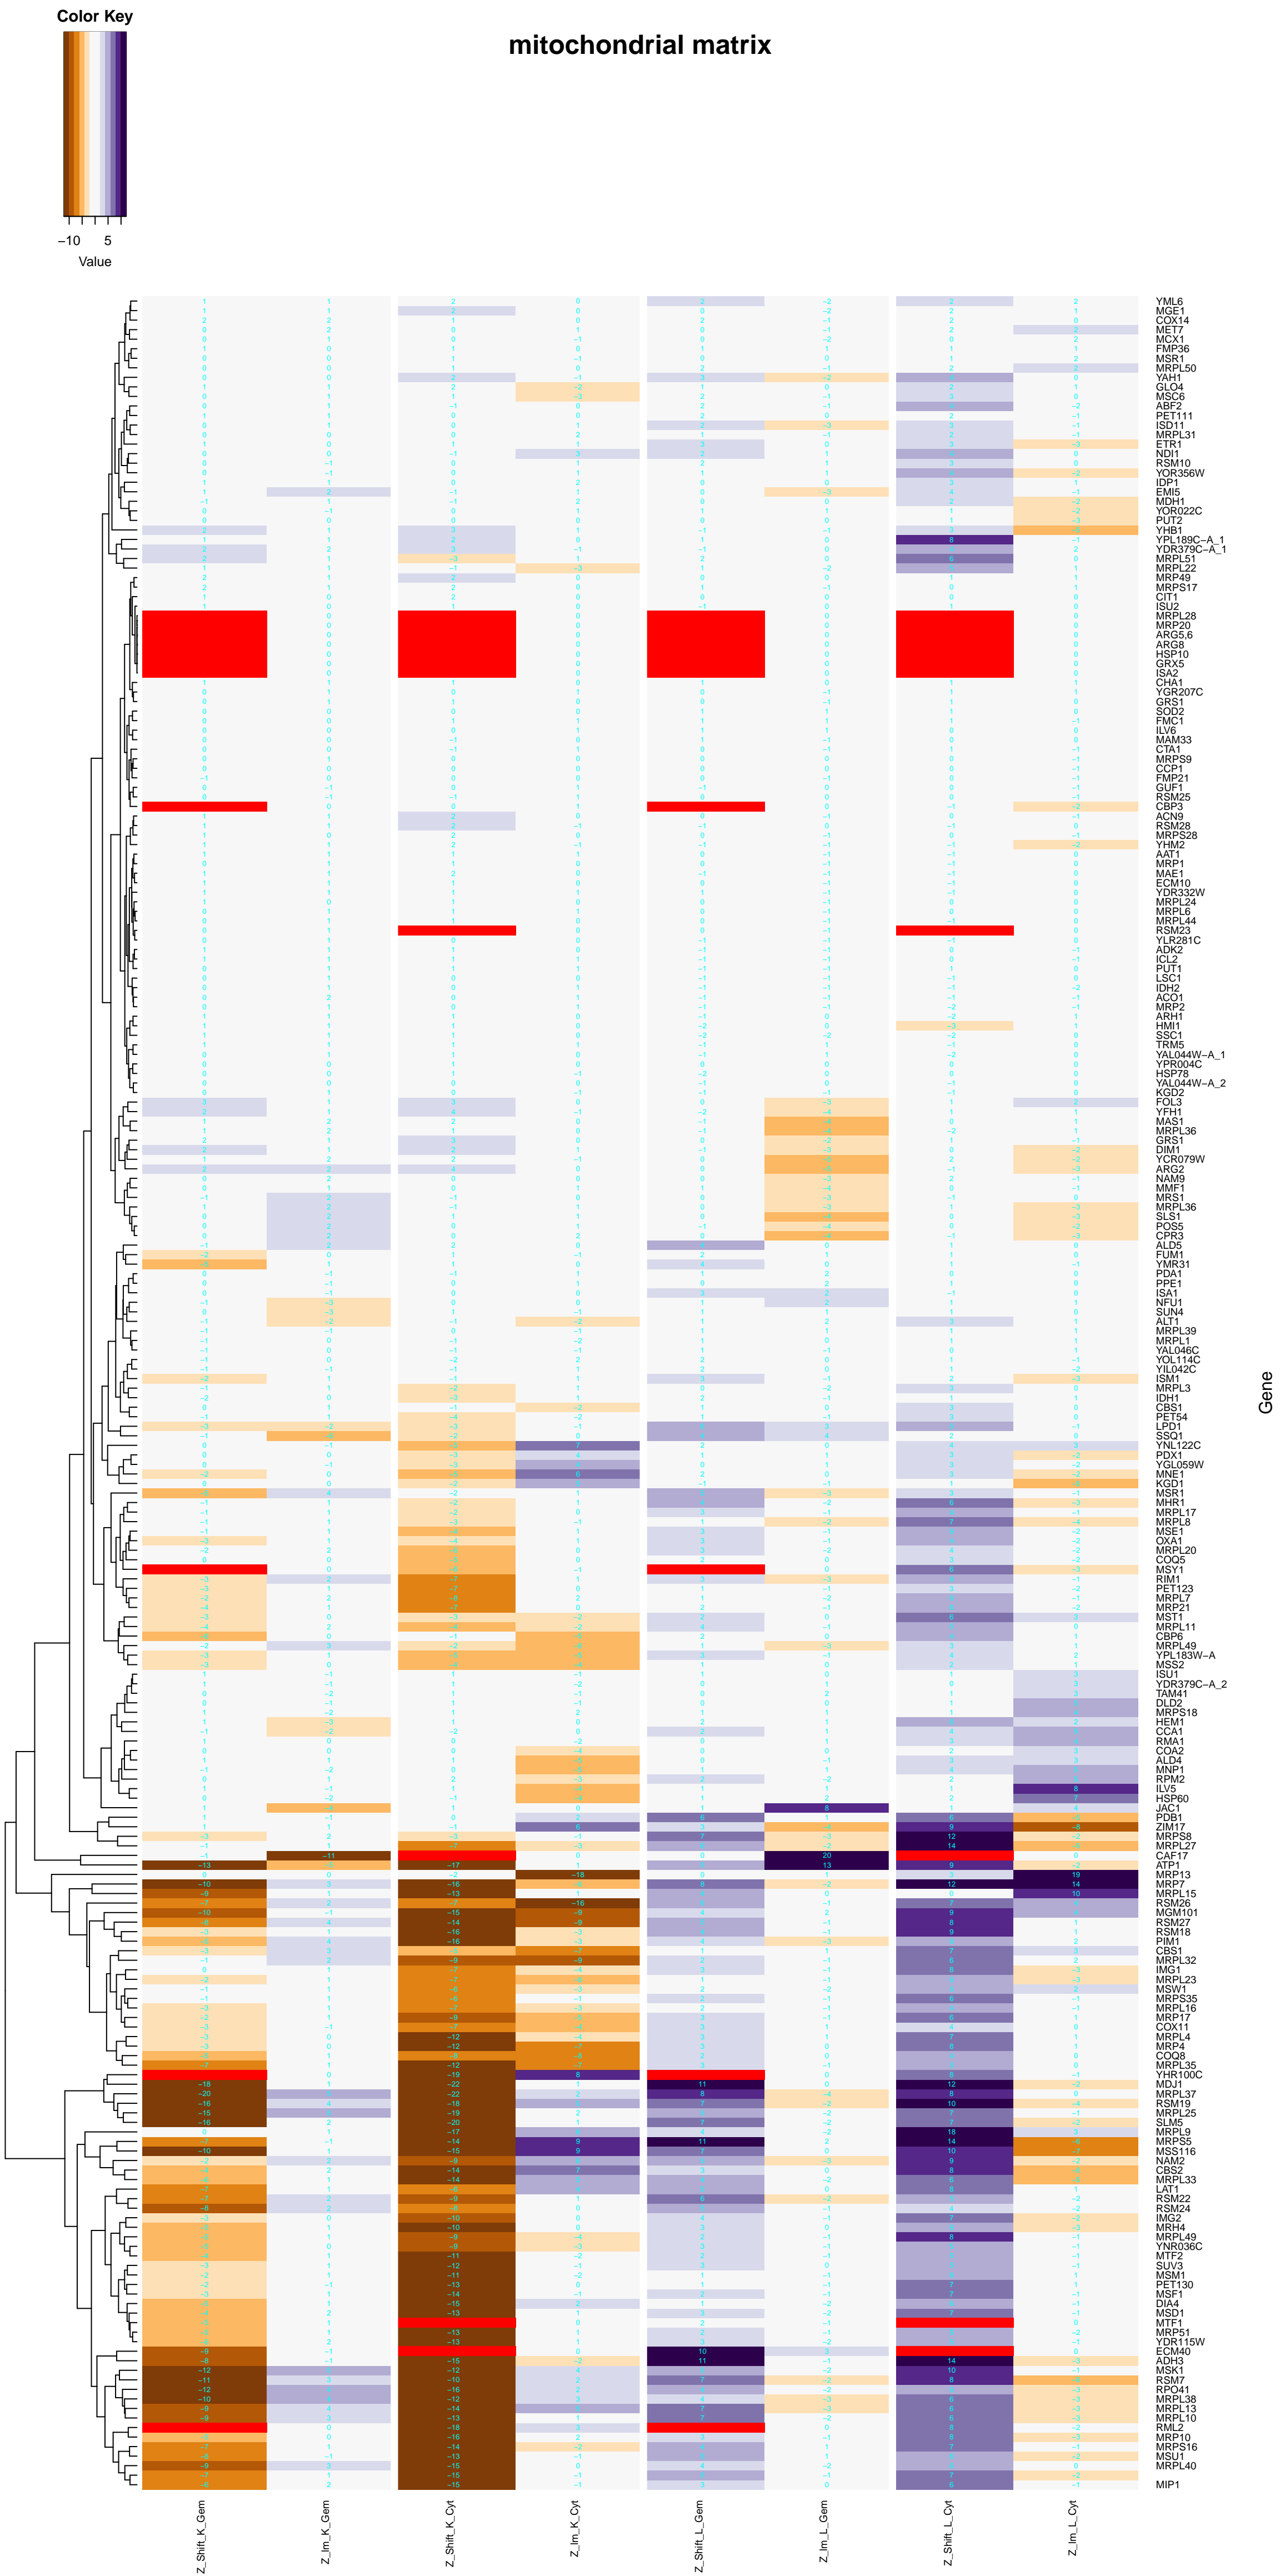

Supplement: s1 [file s1]

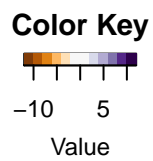

# mitotic G1 DNA damage checkpoint

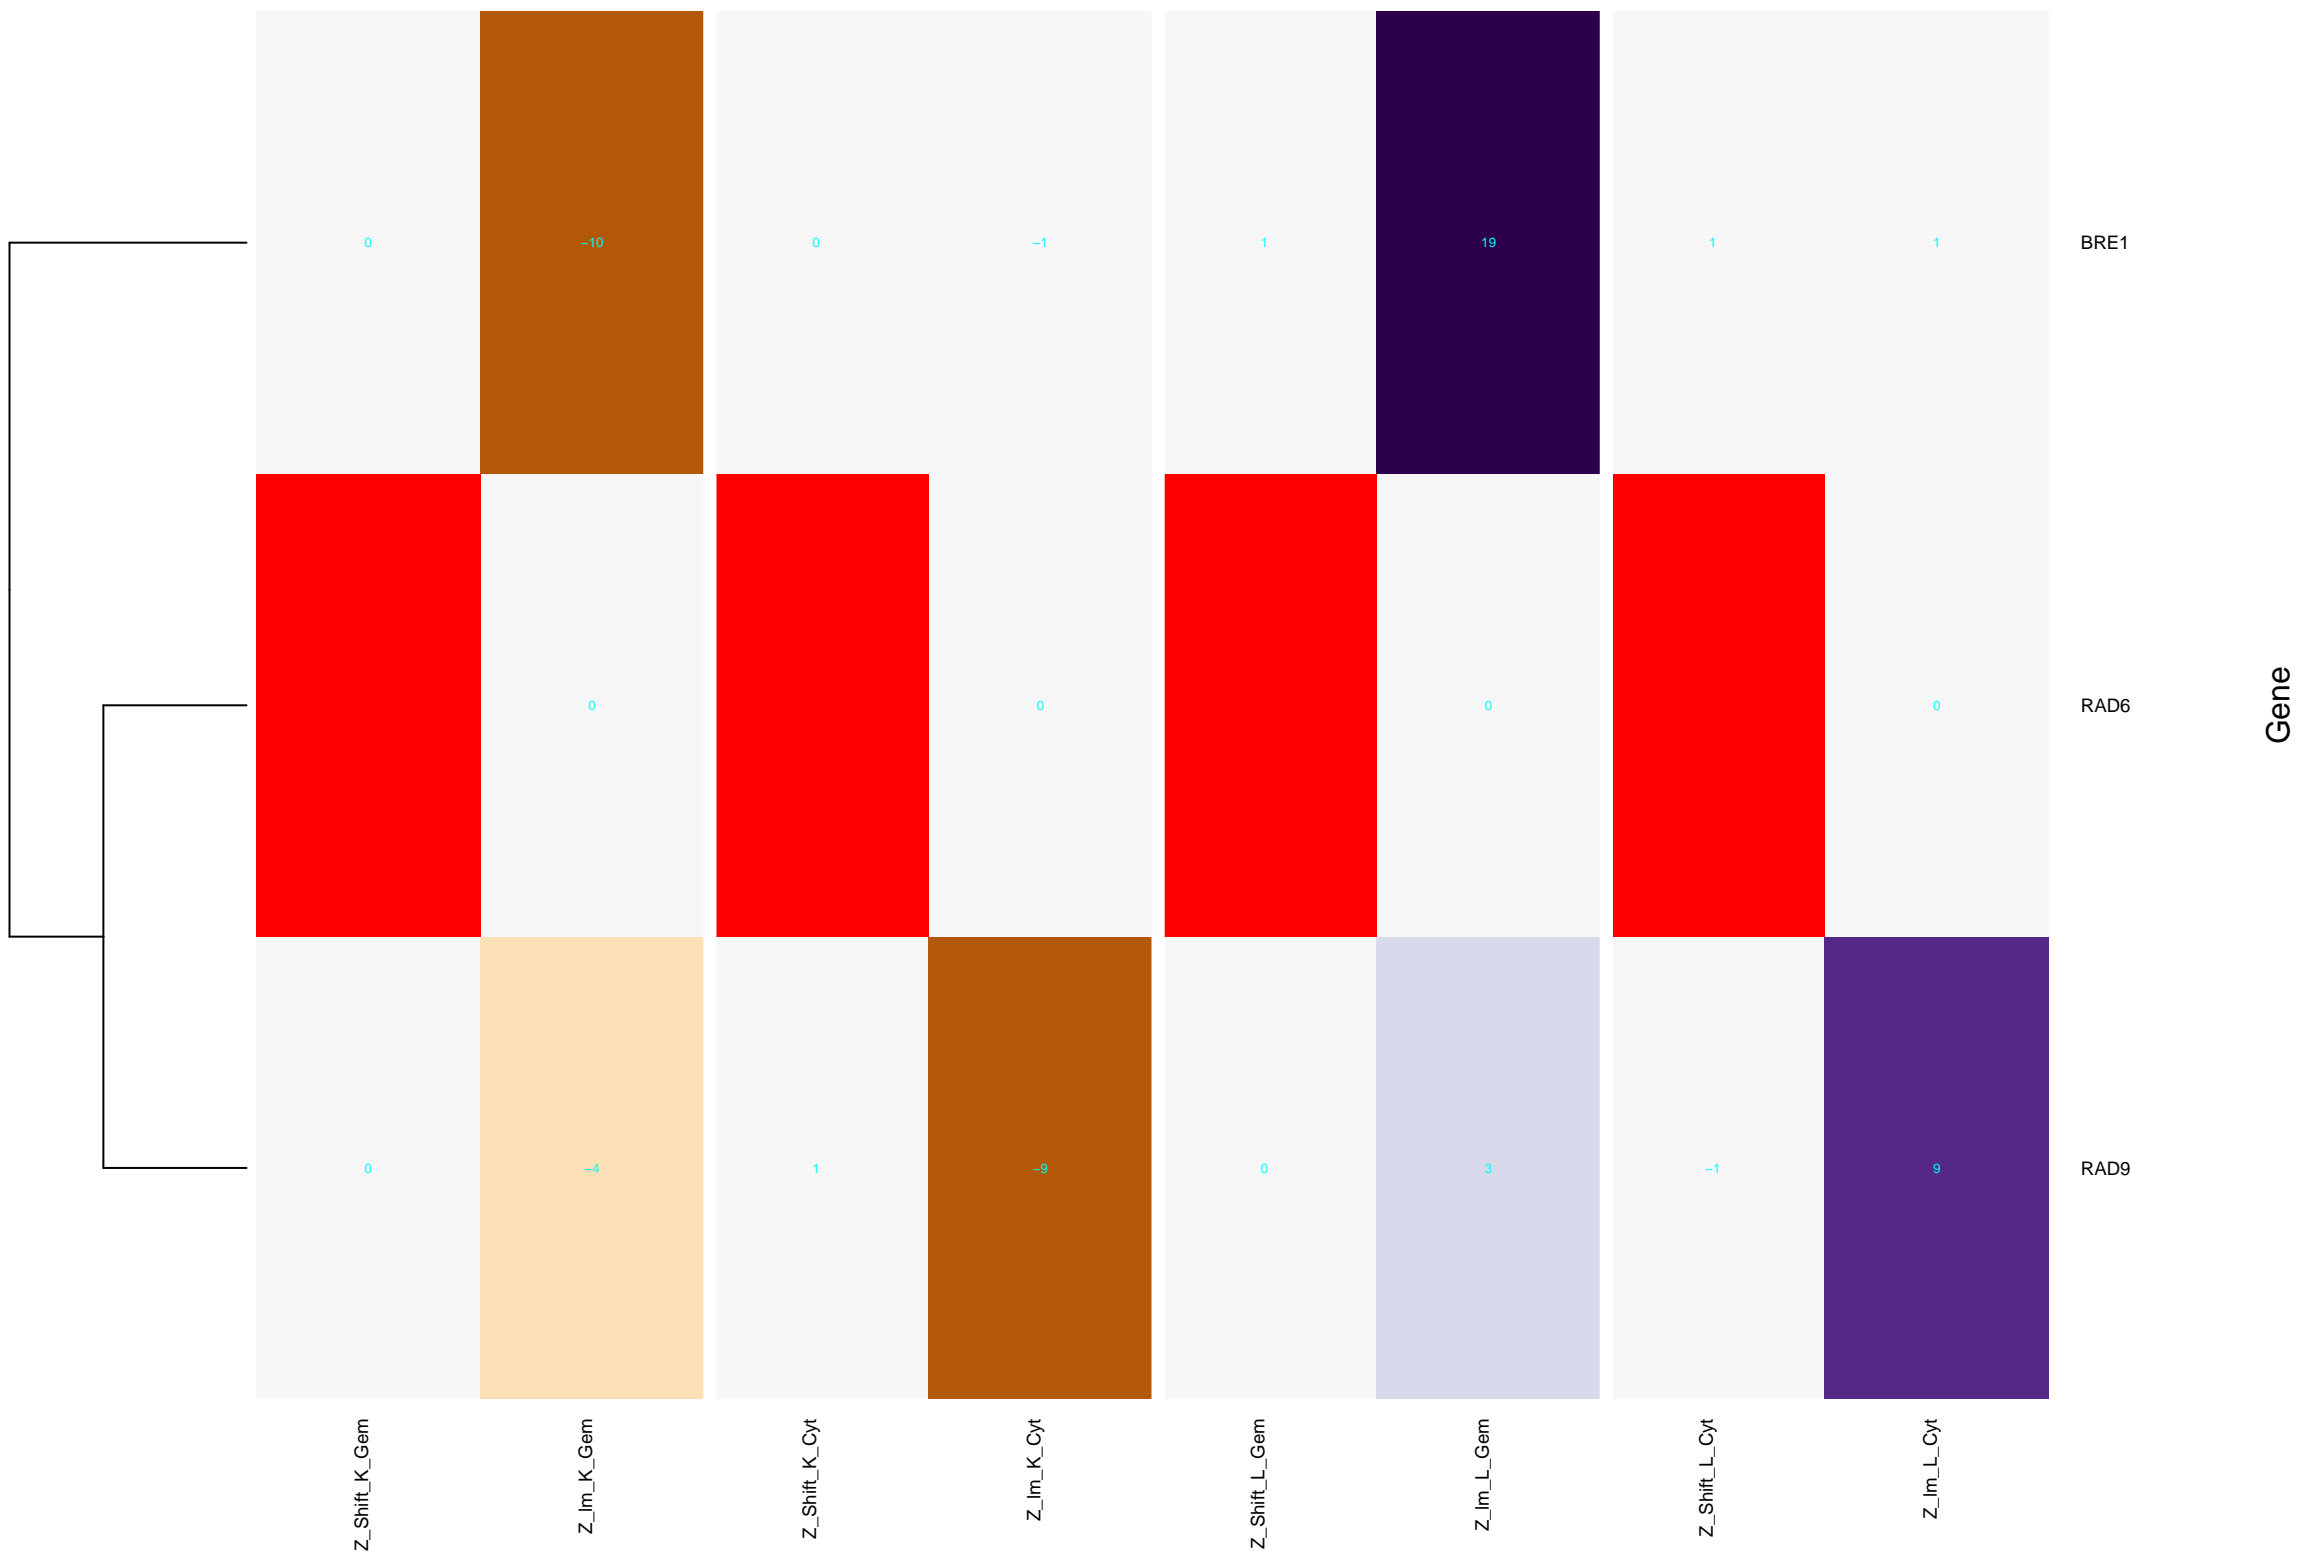

Supplement: s1 [file s1]

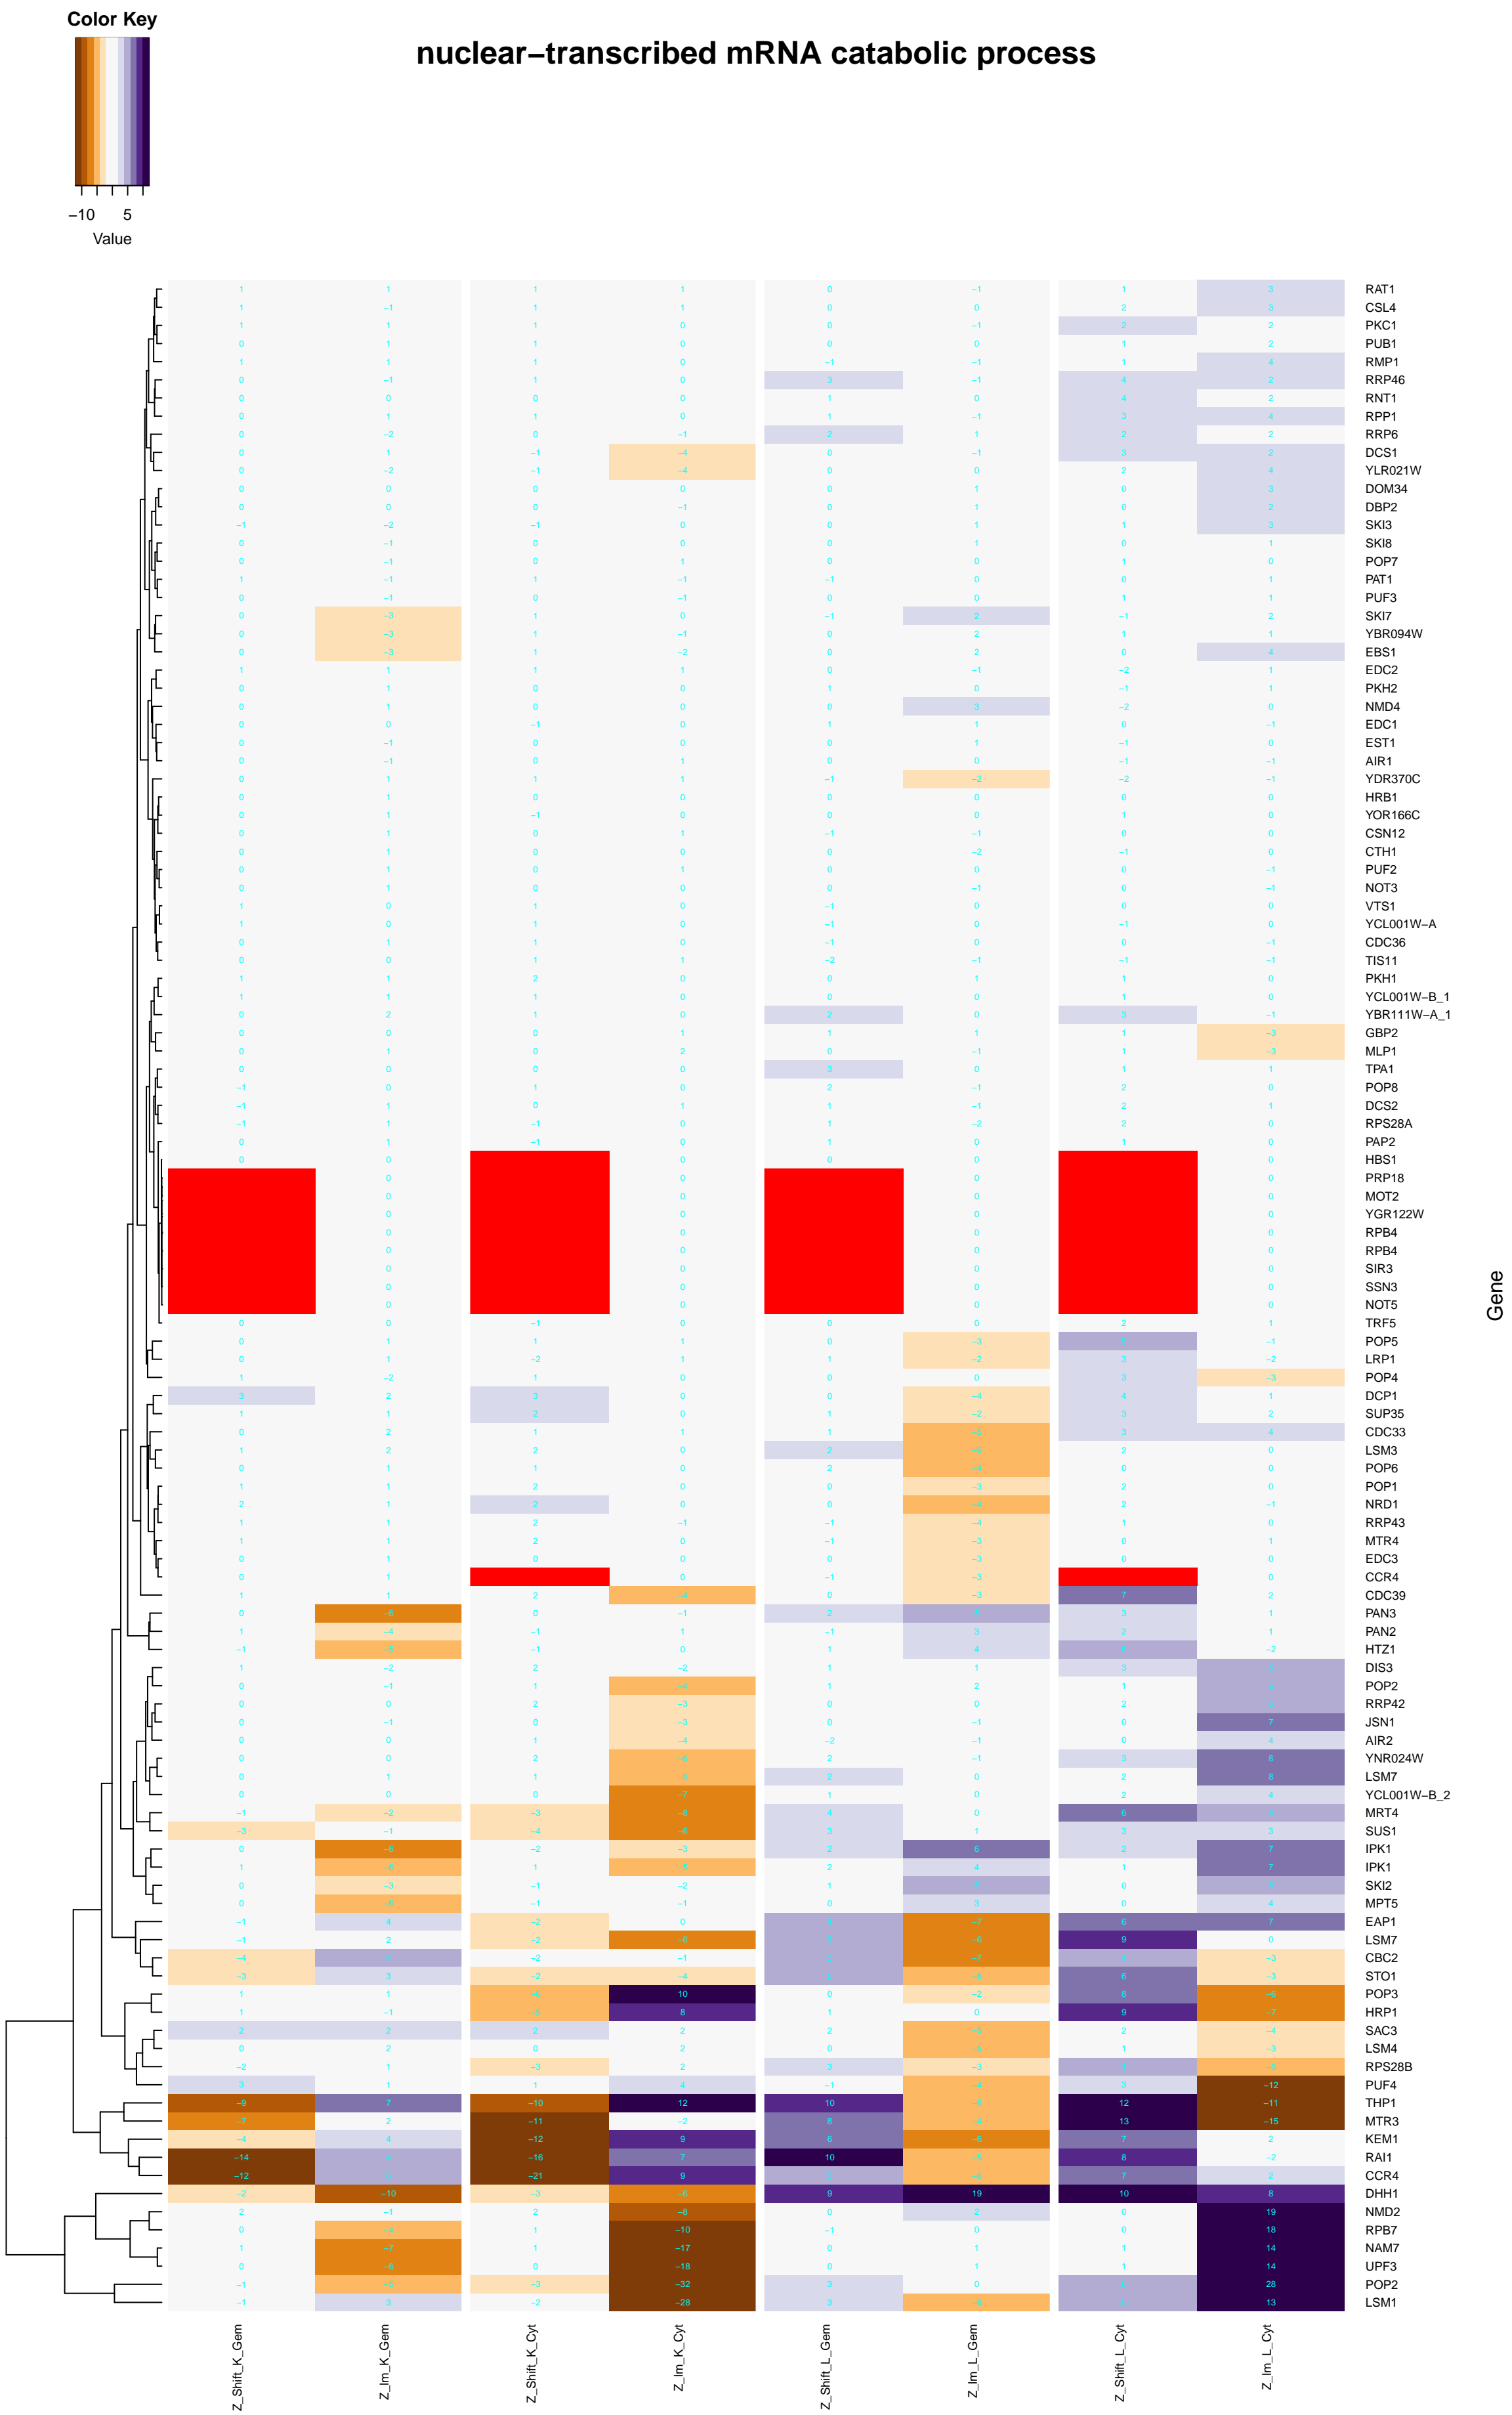

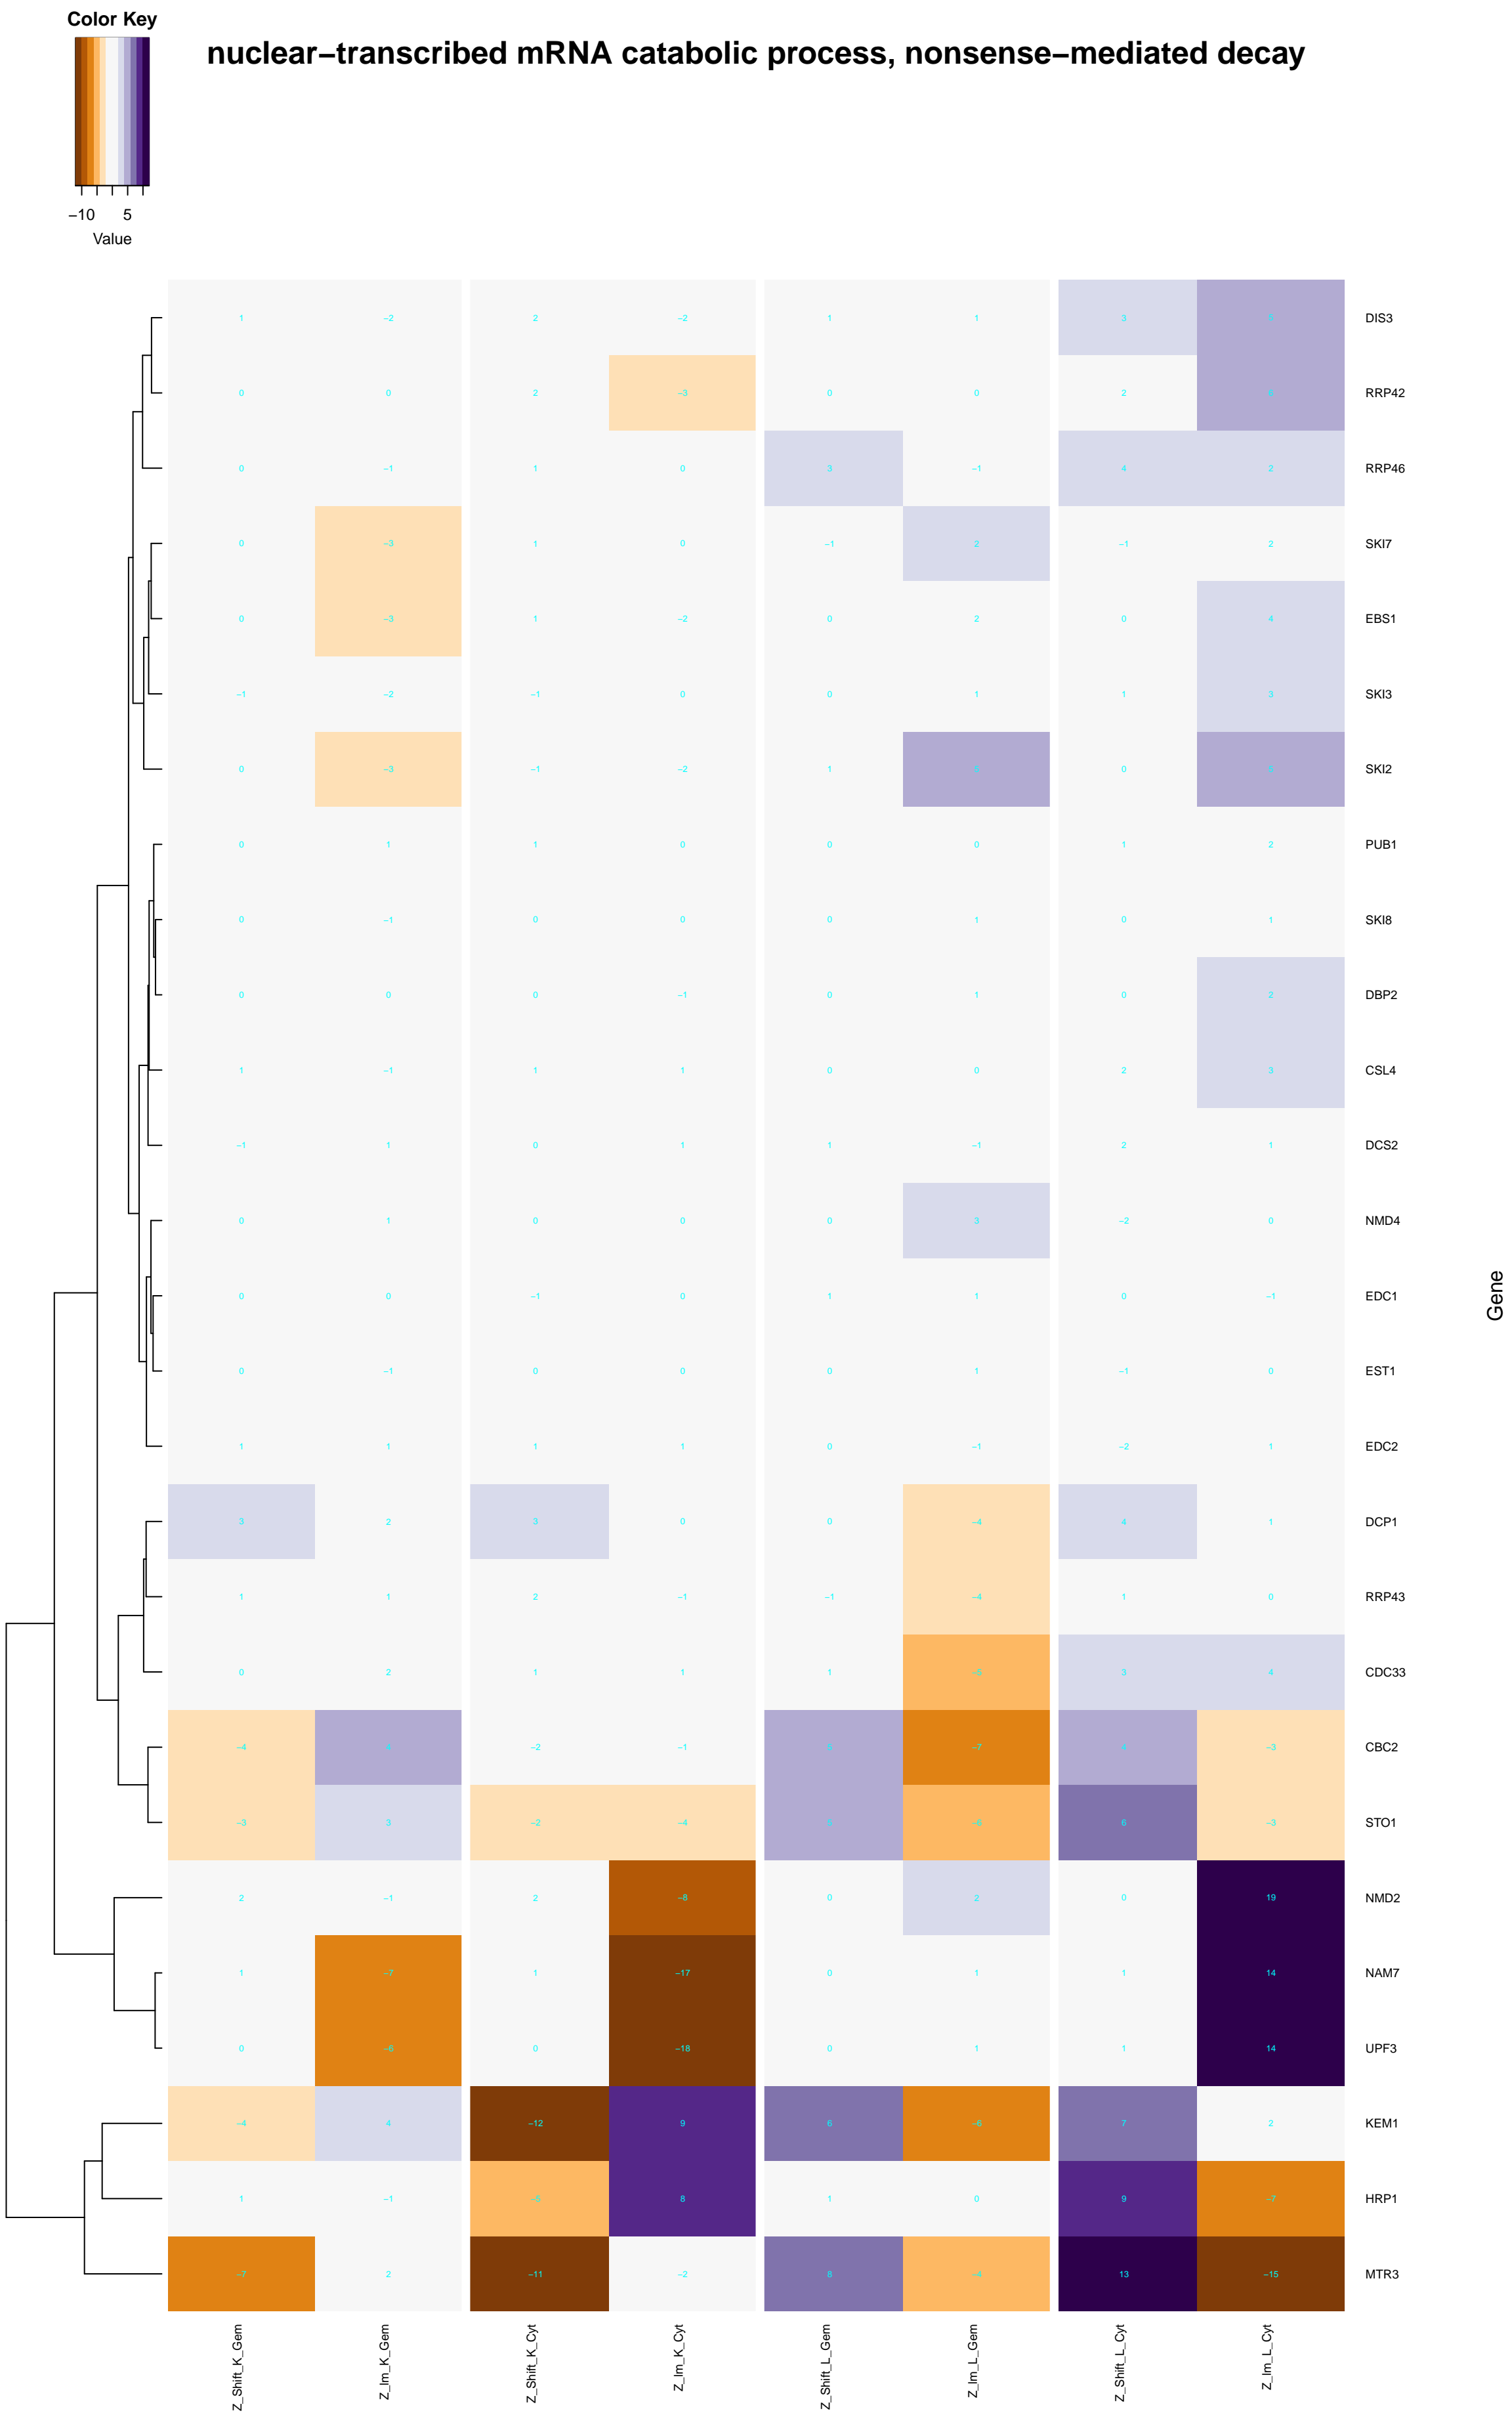

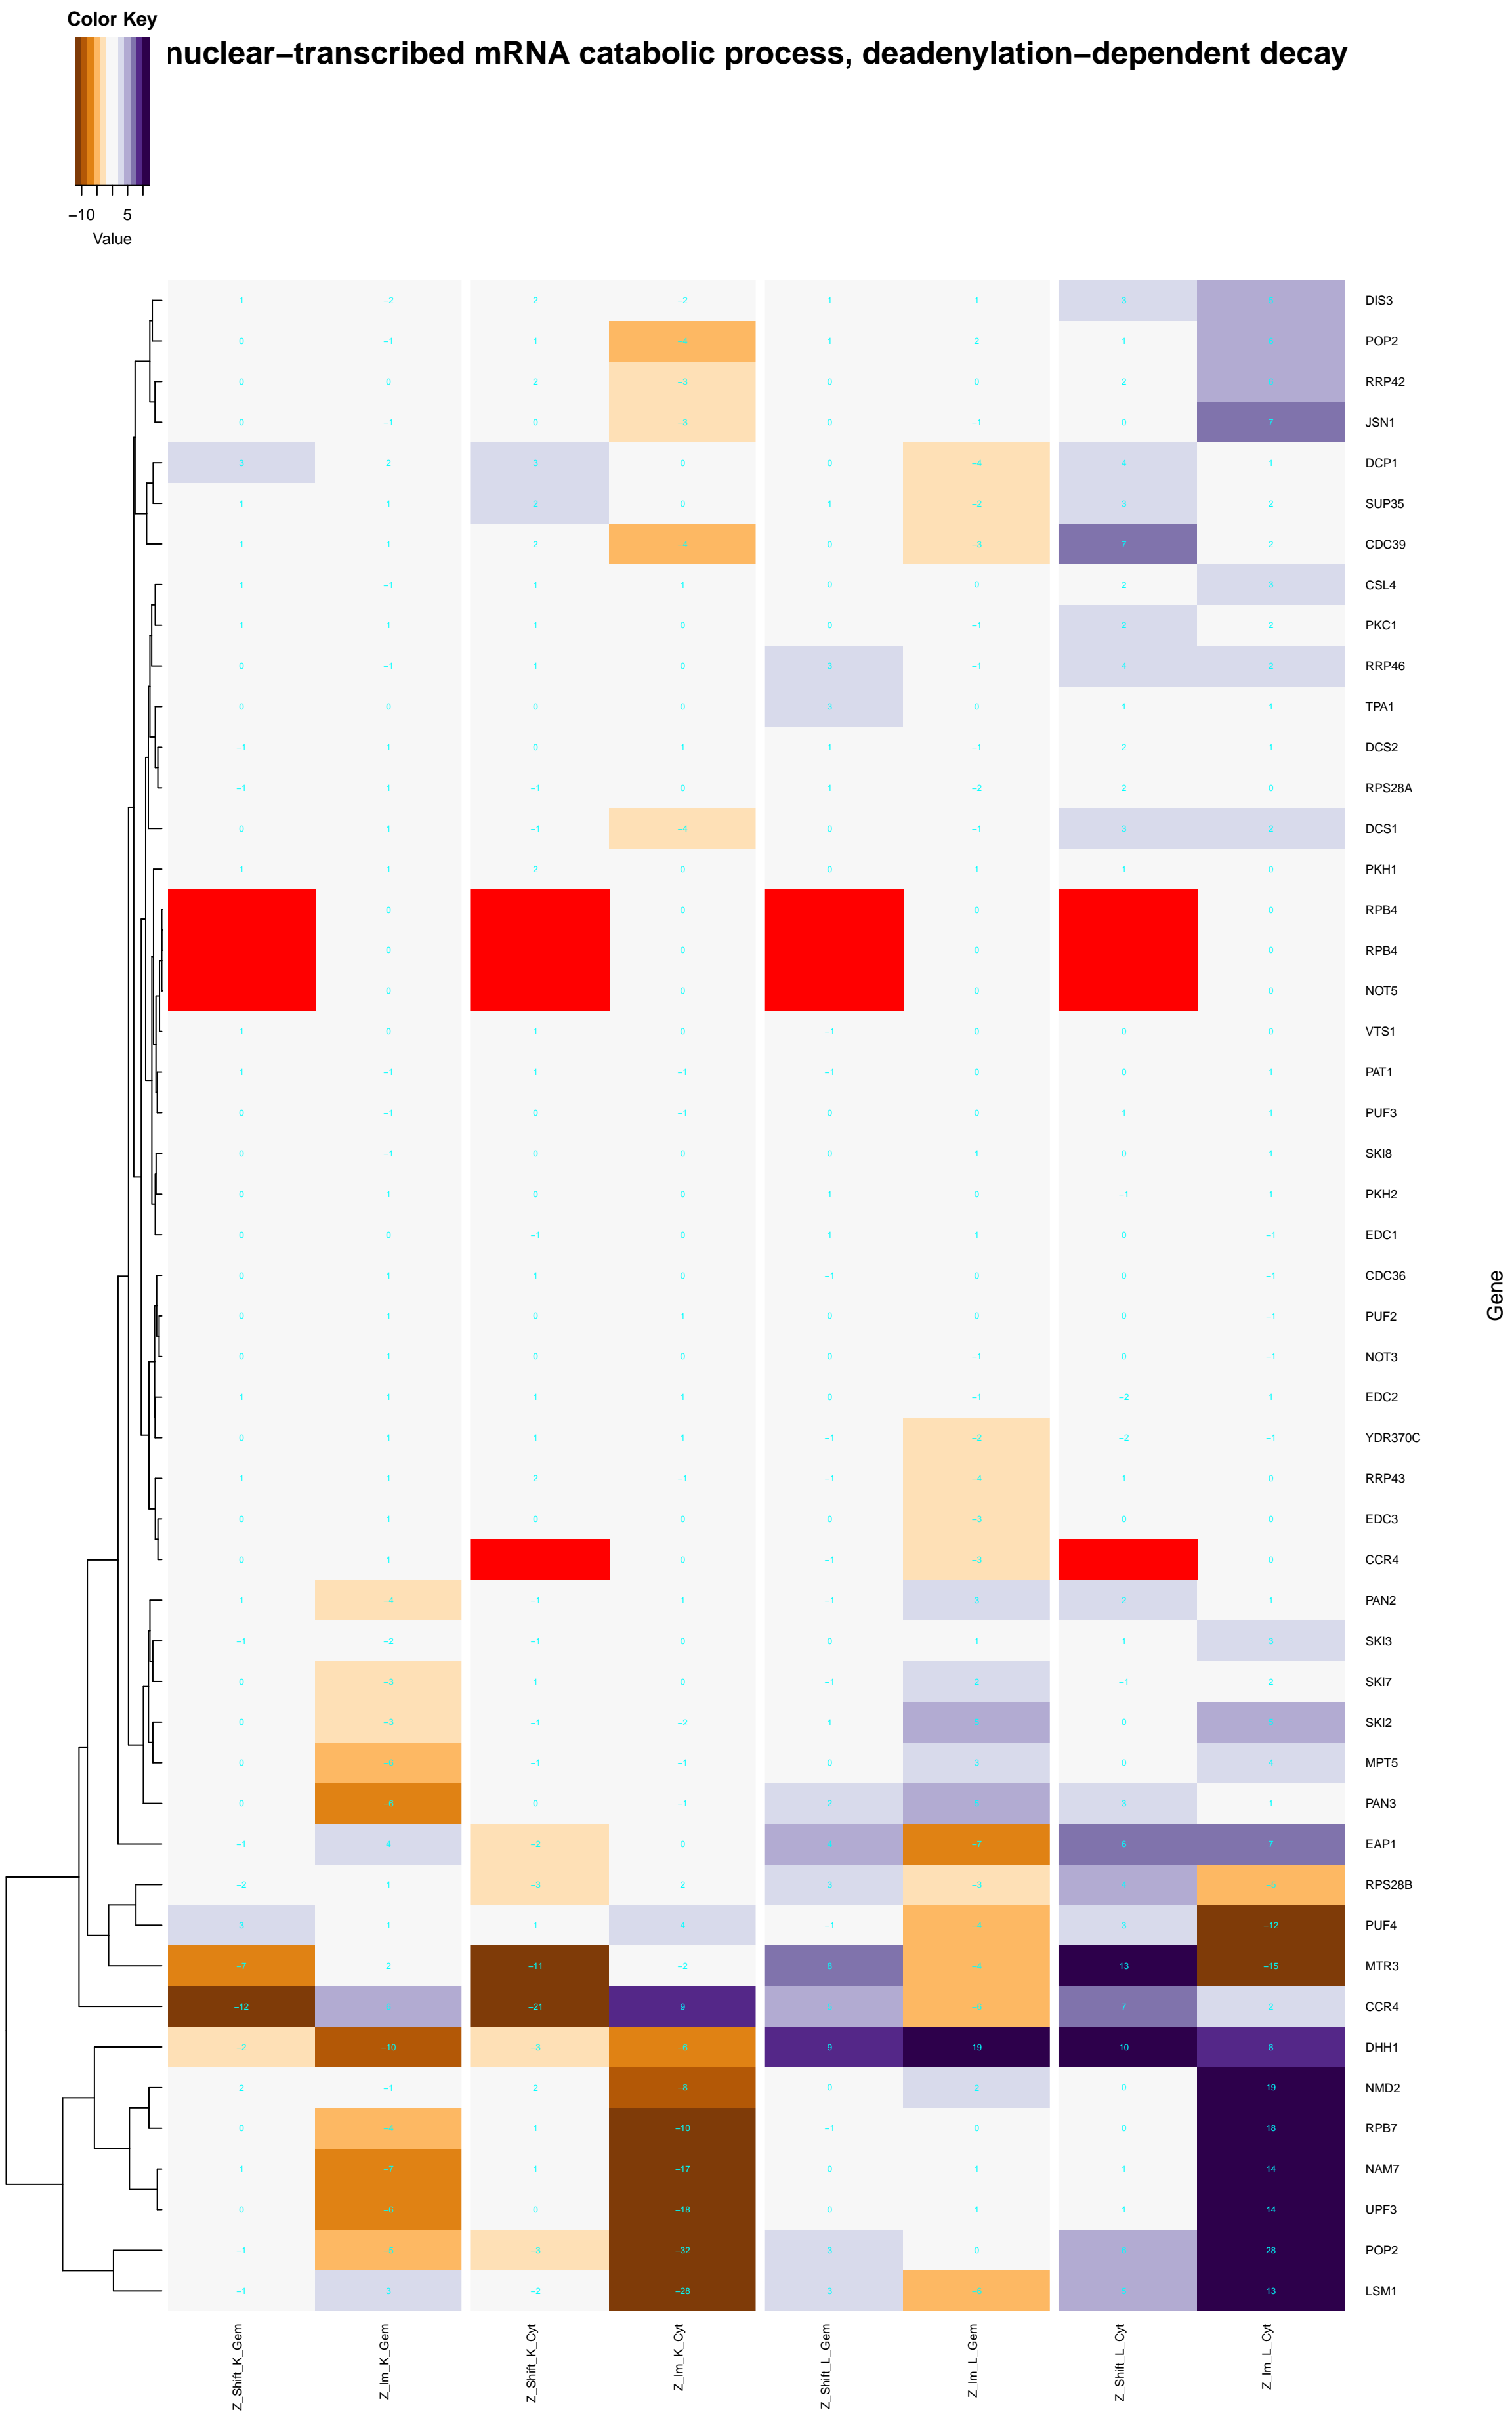

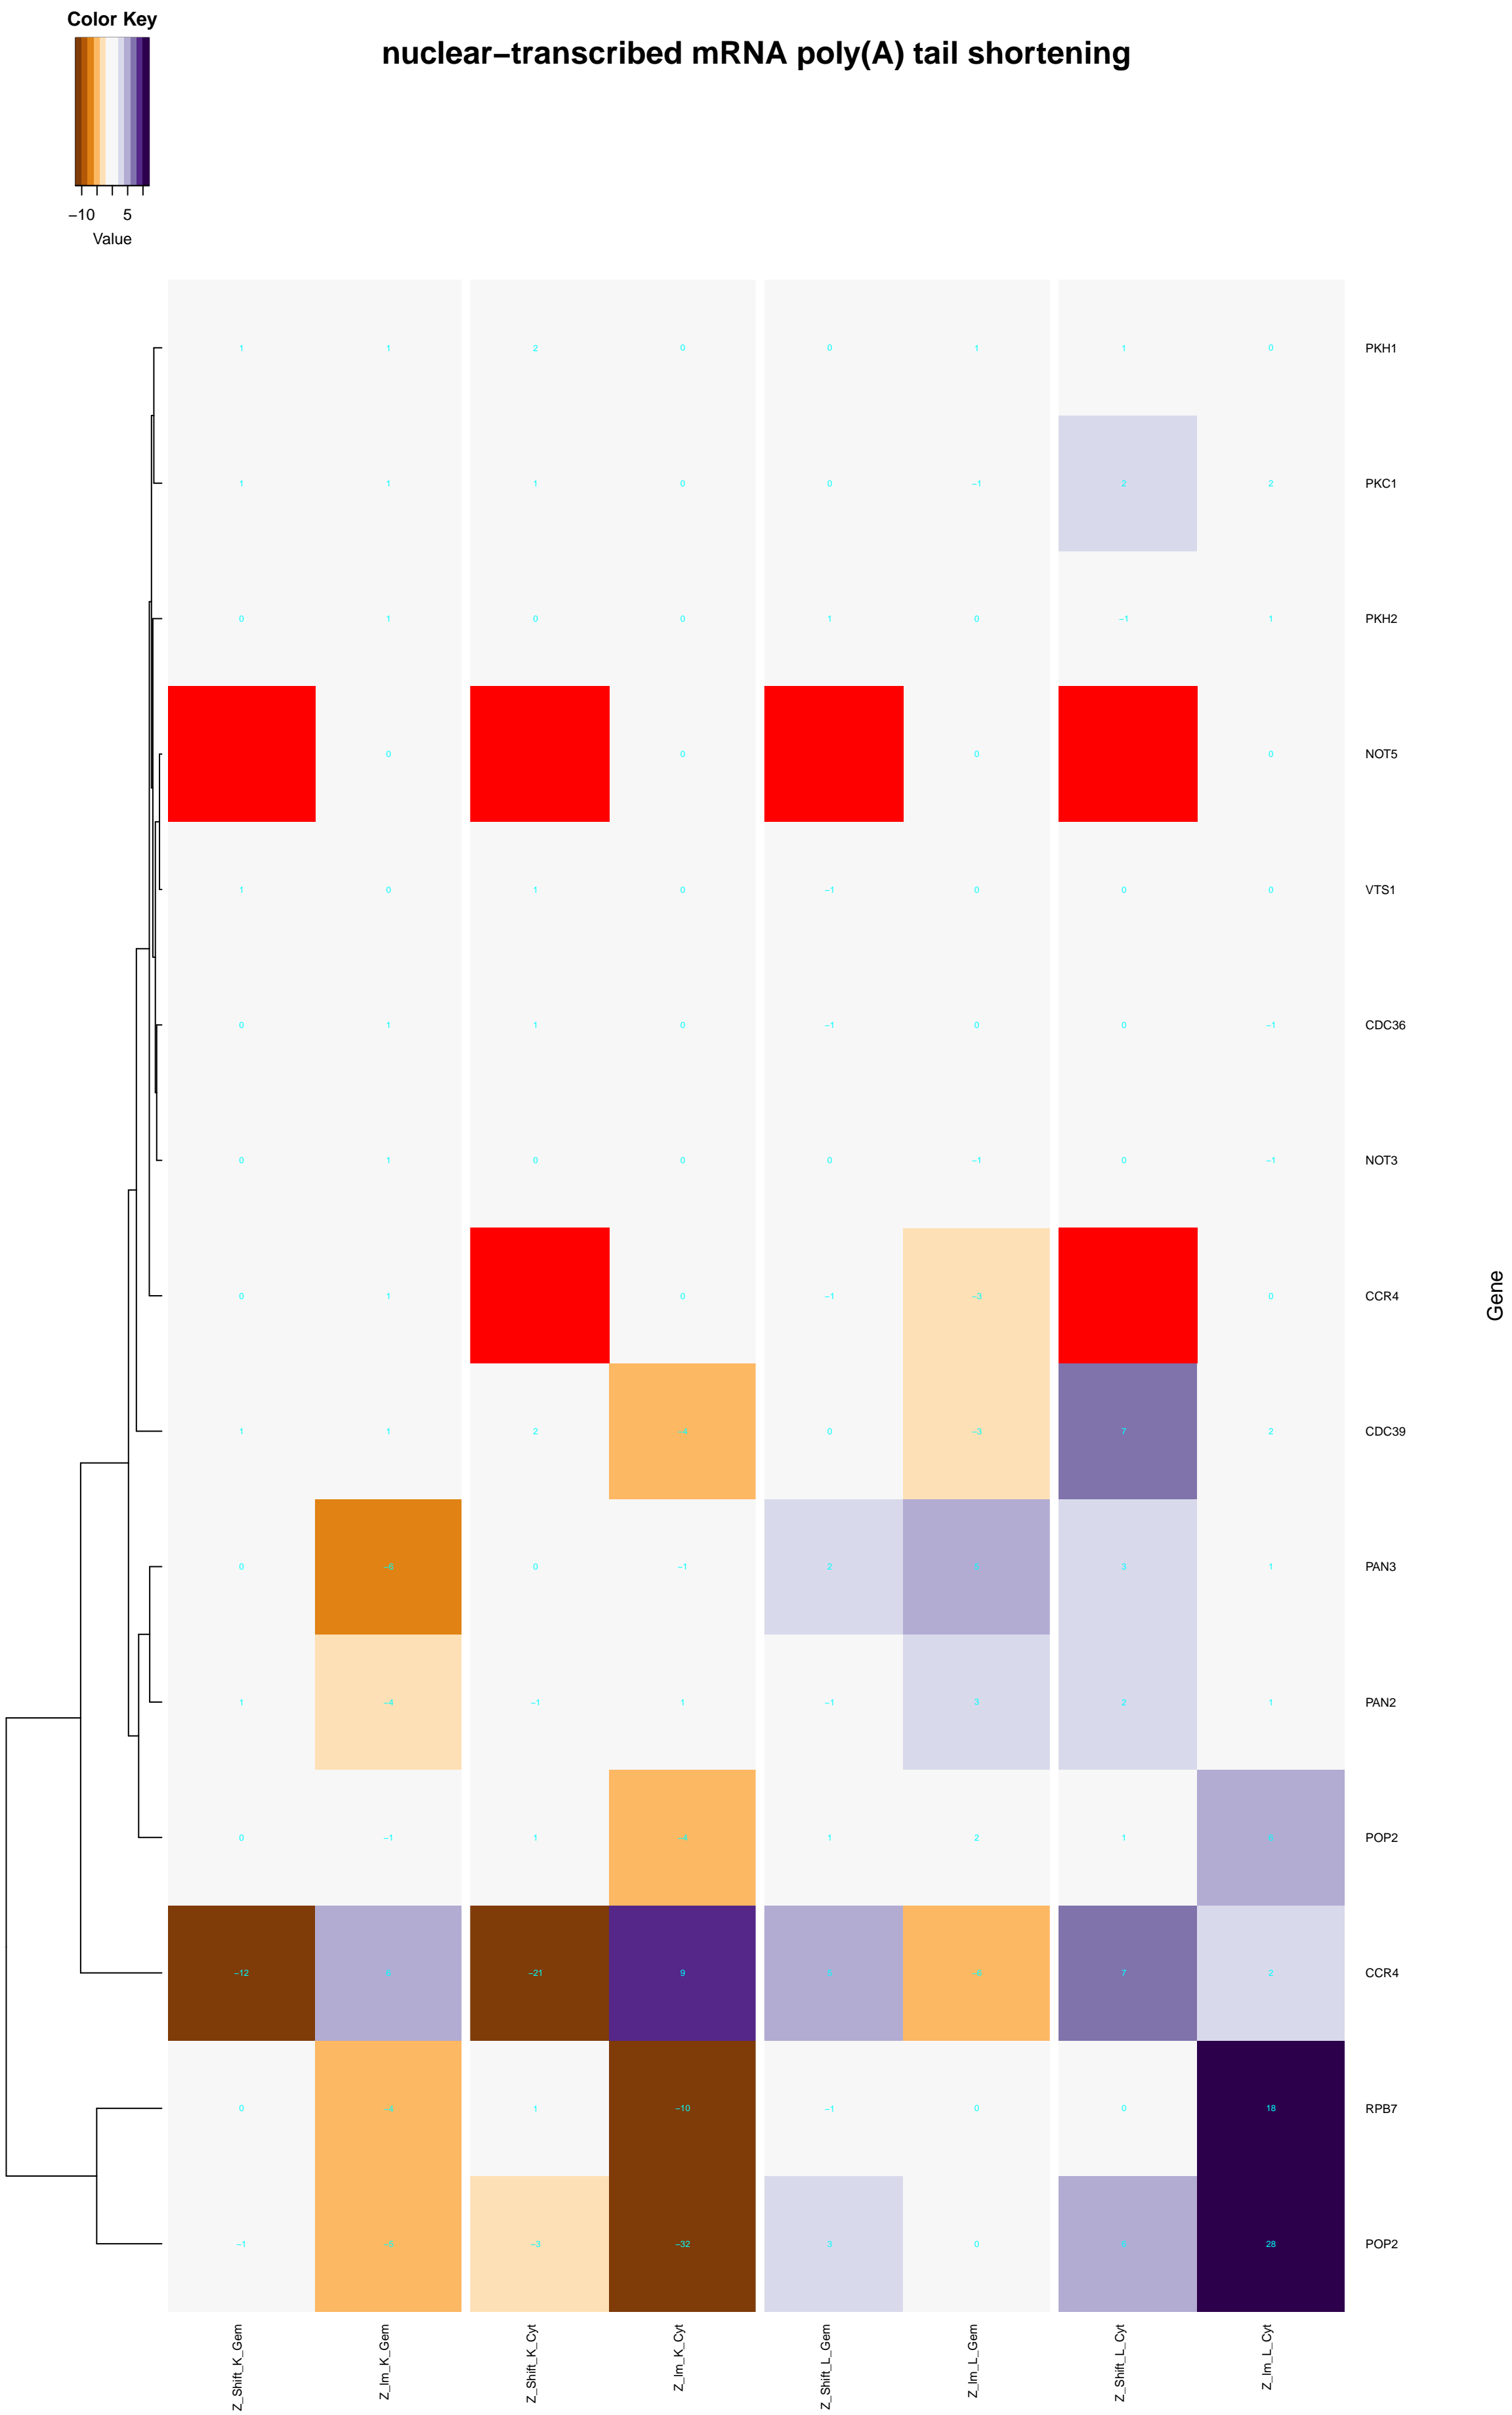

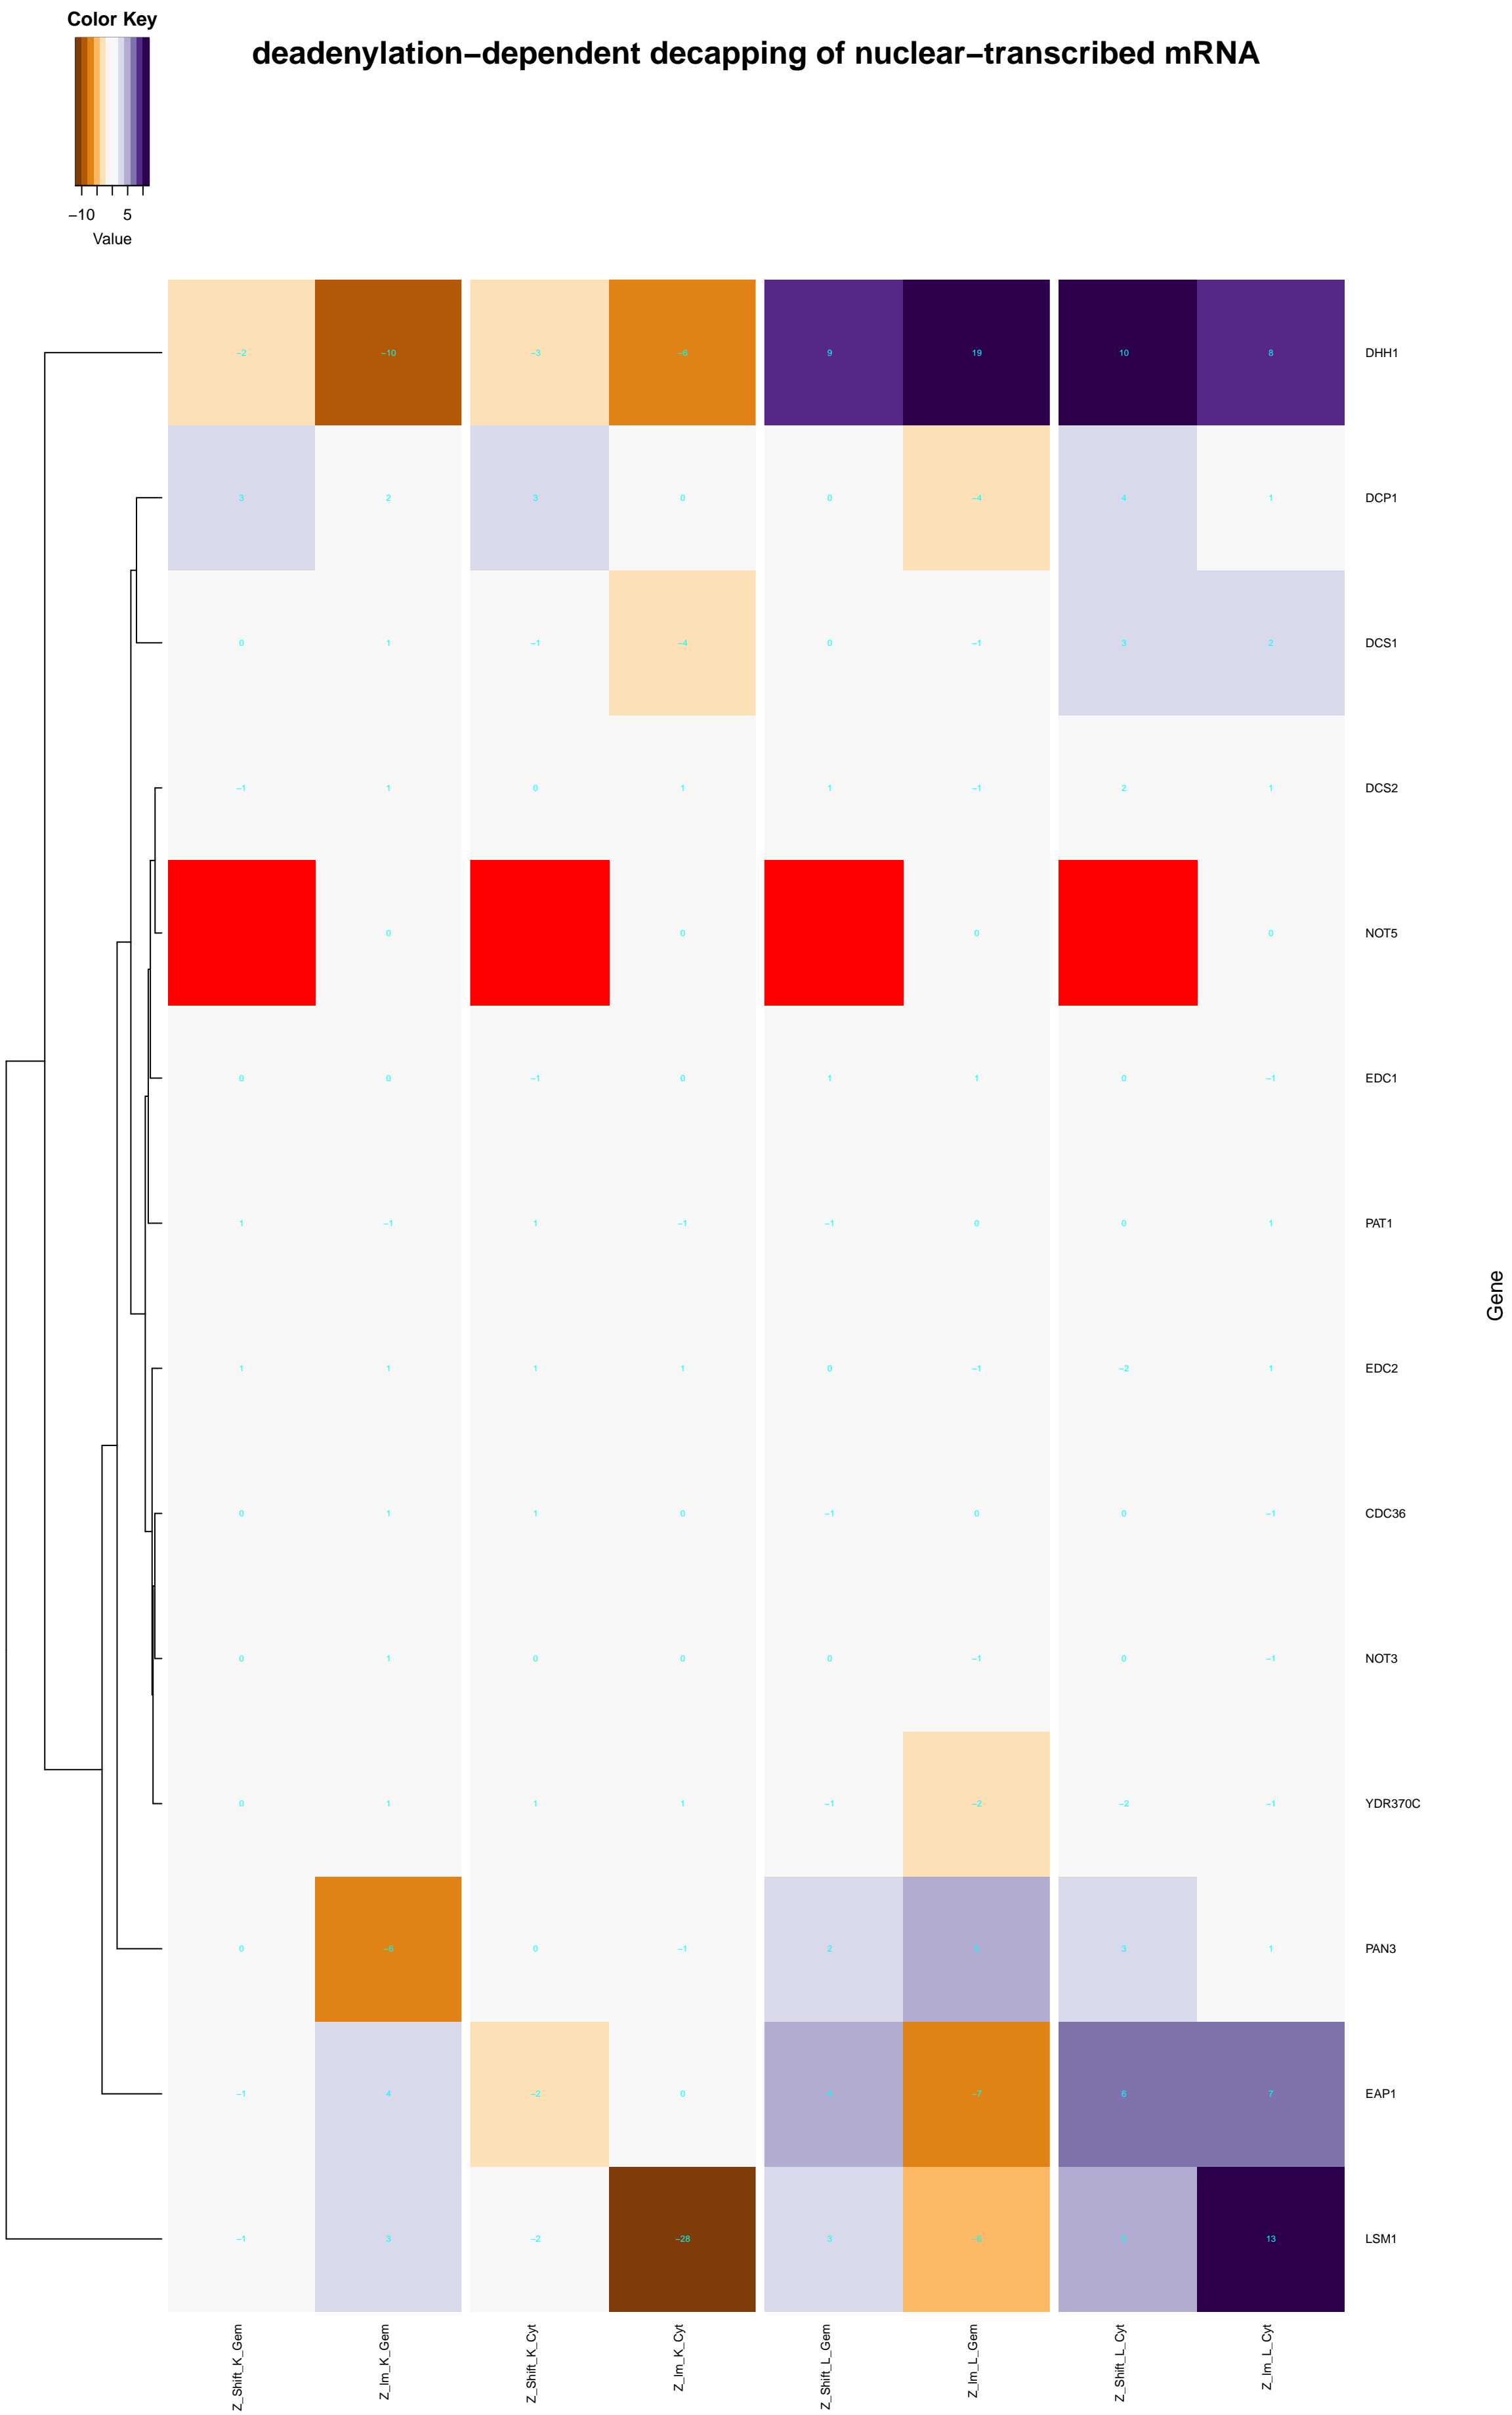

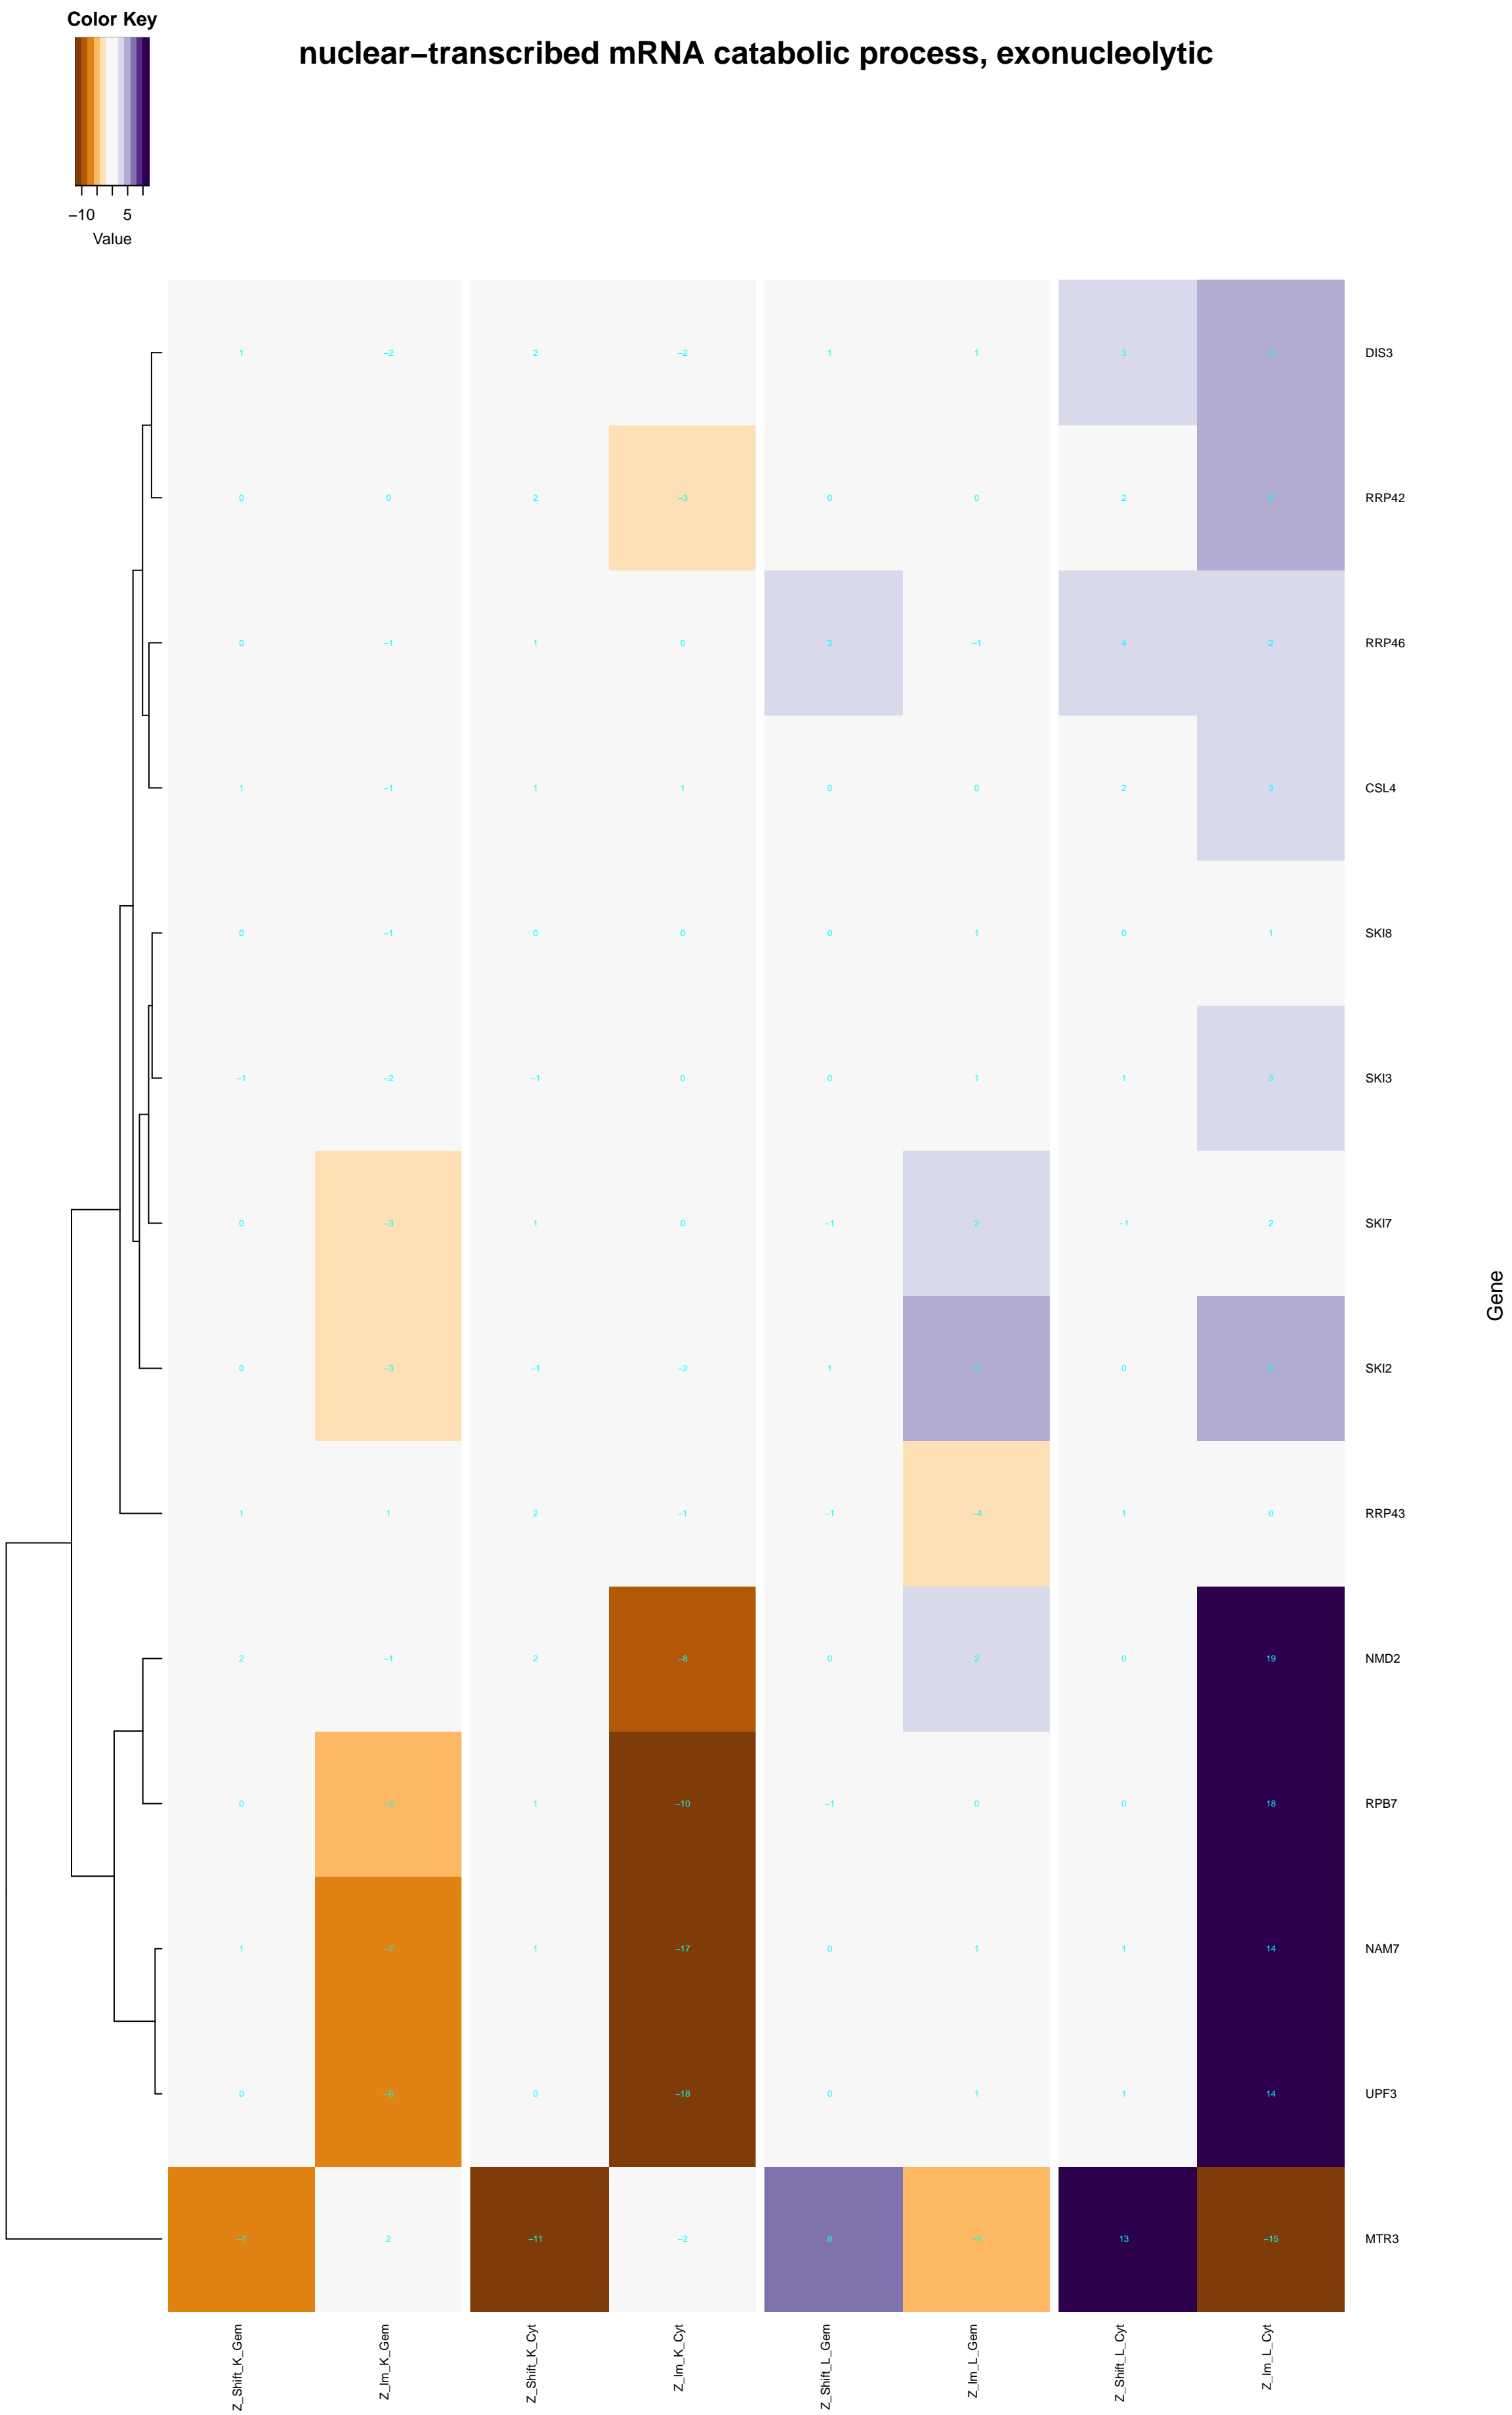

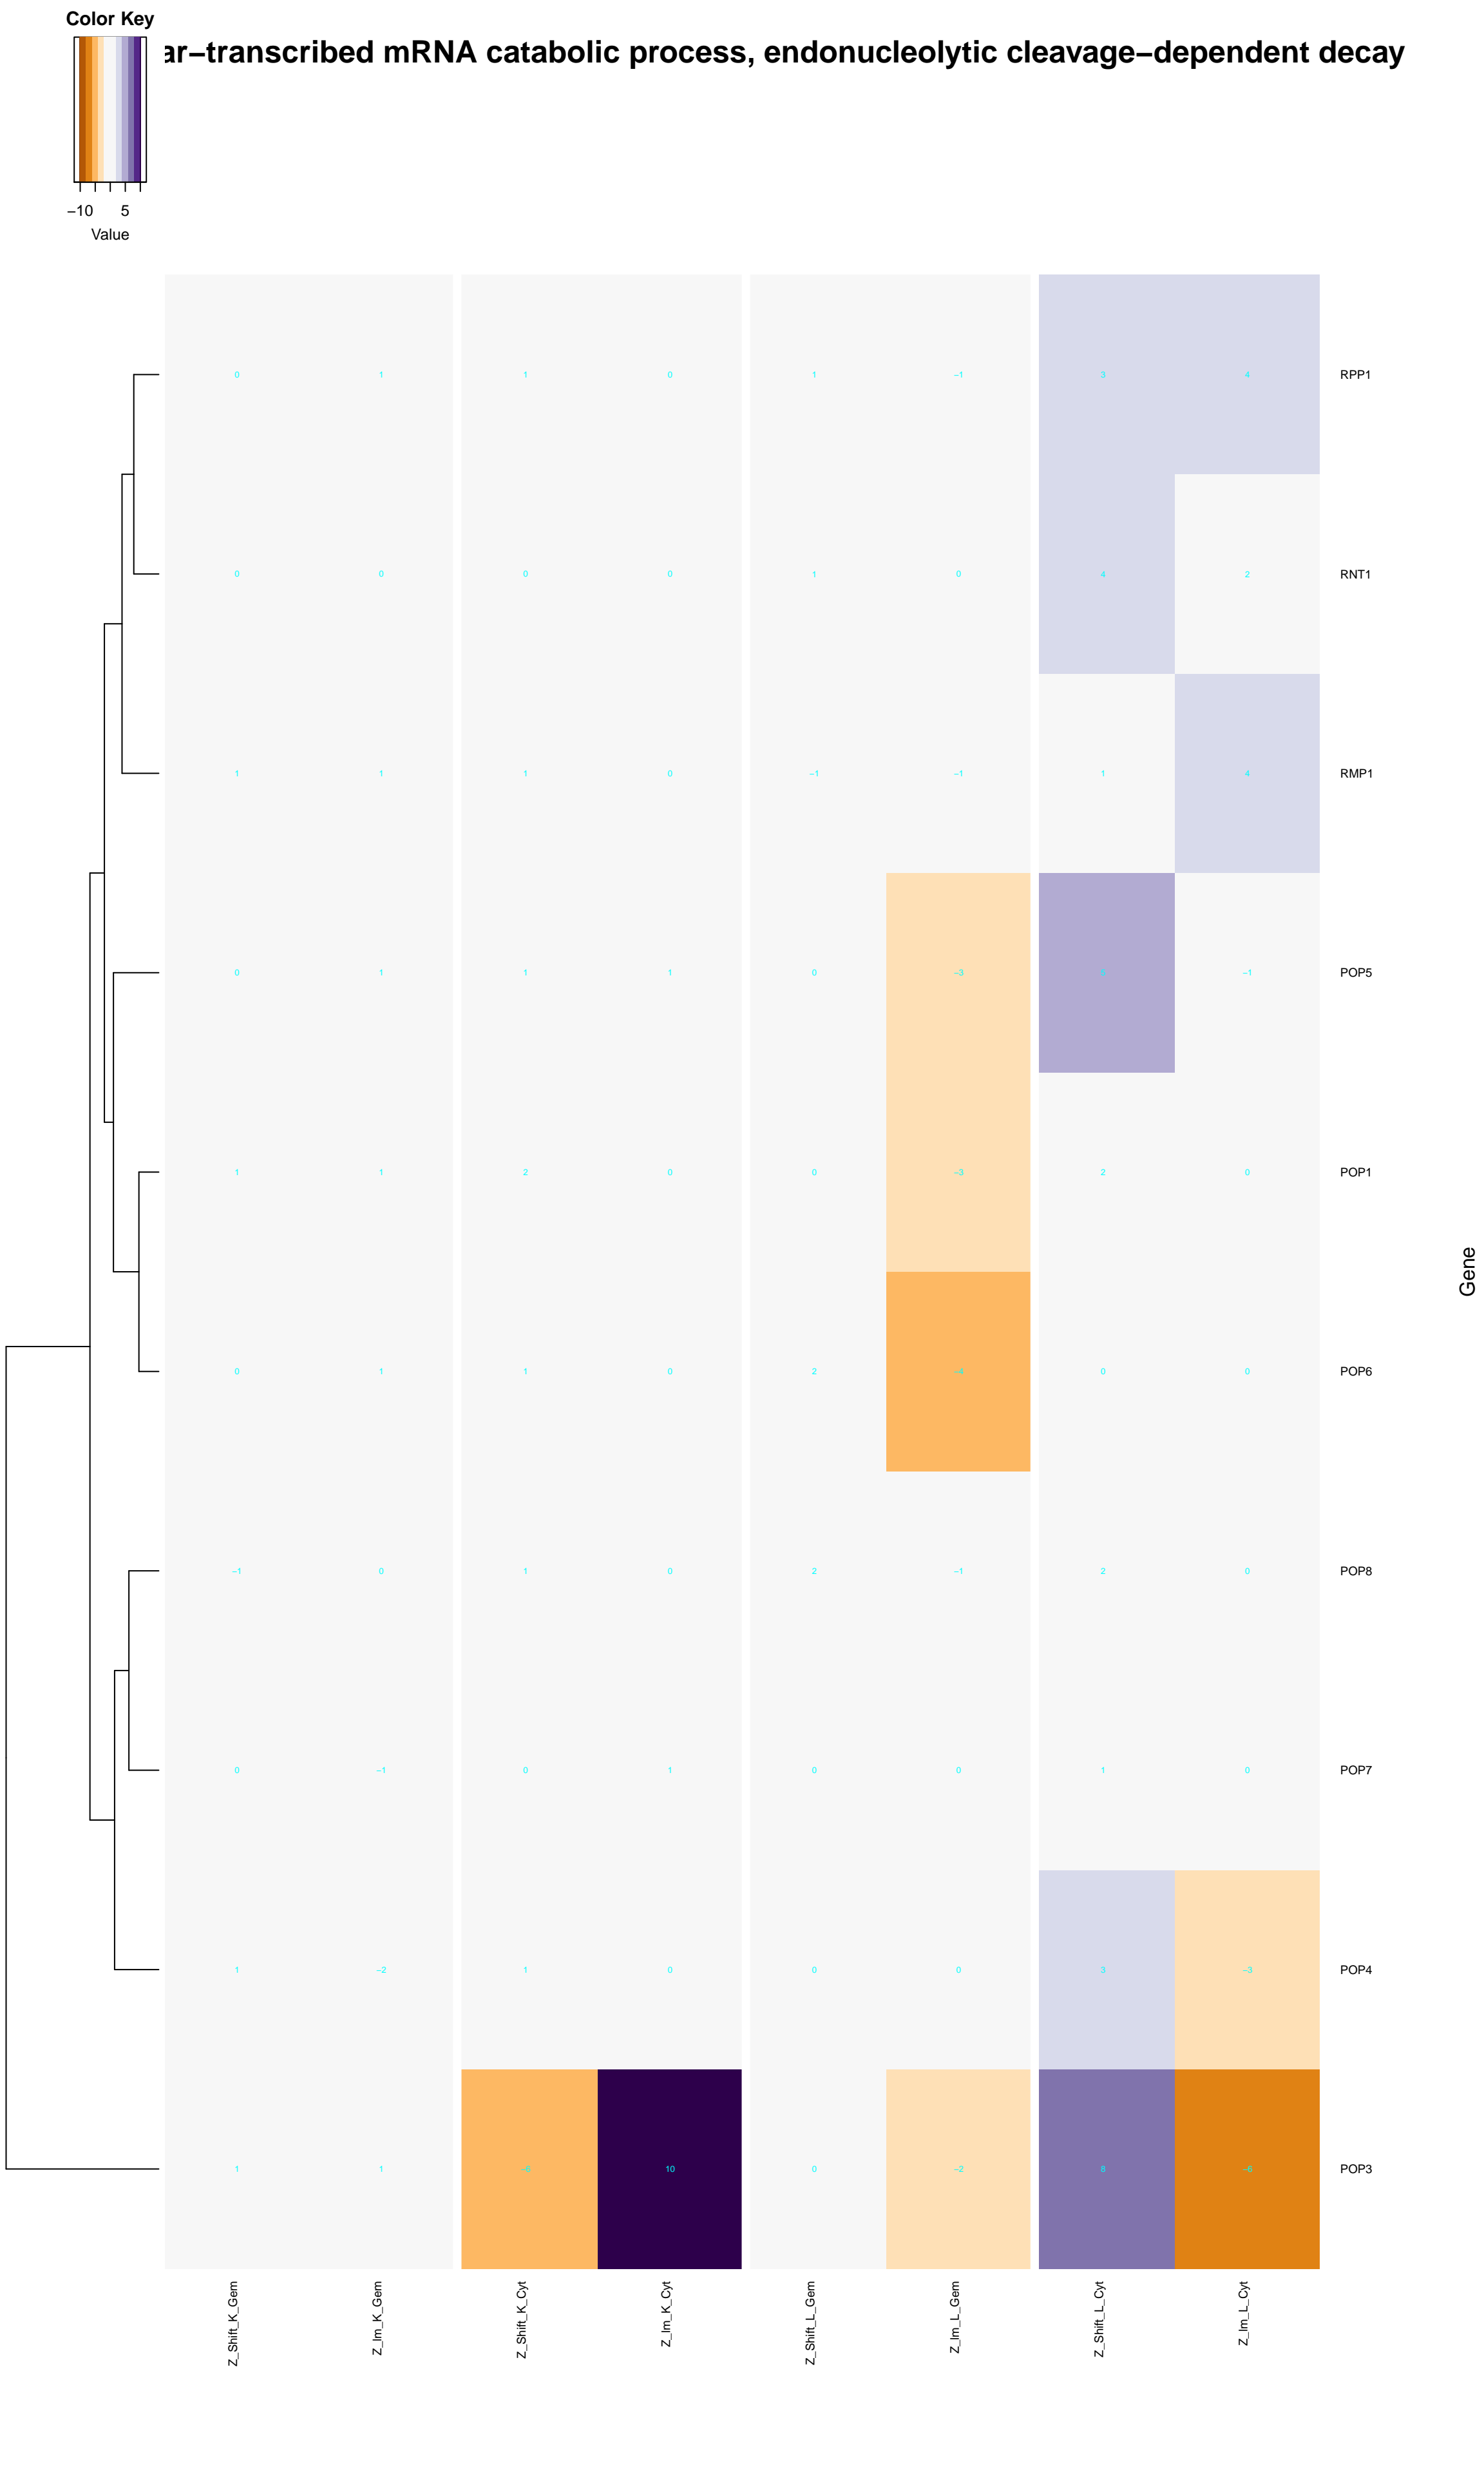

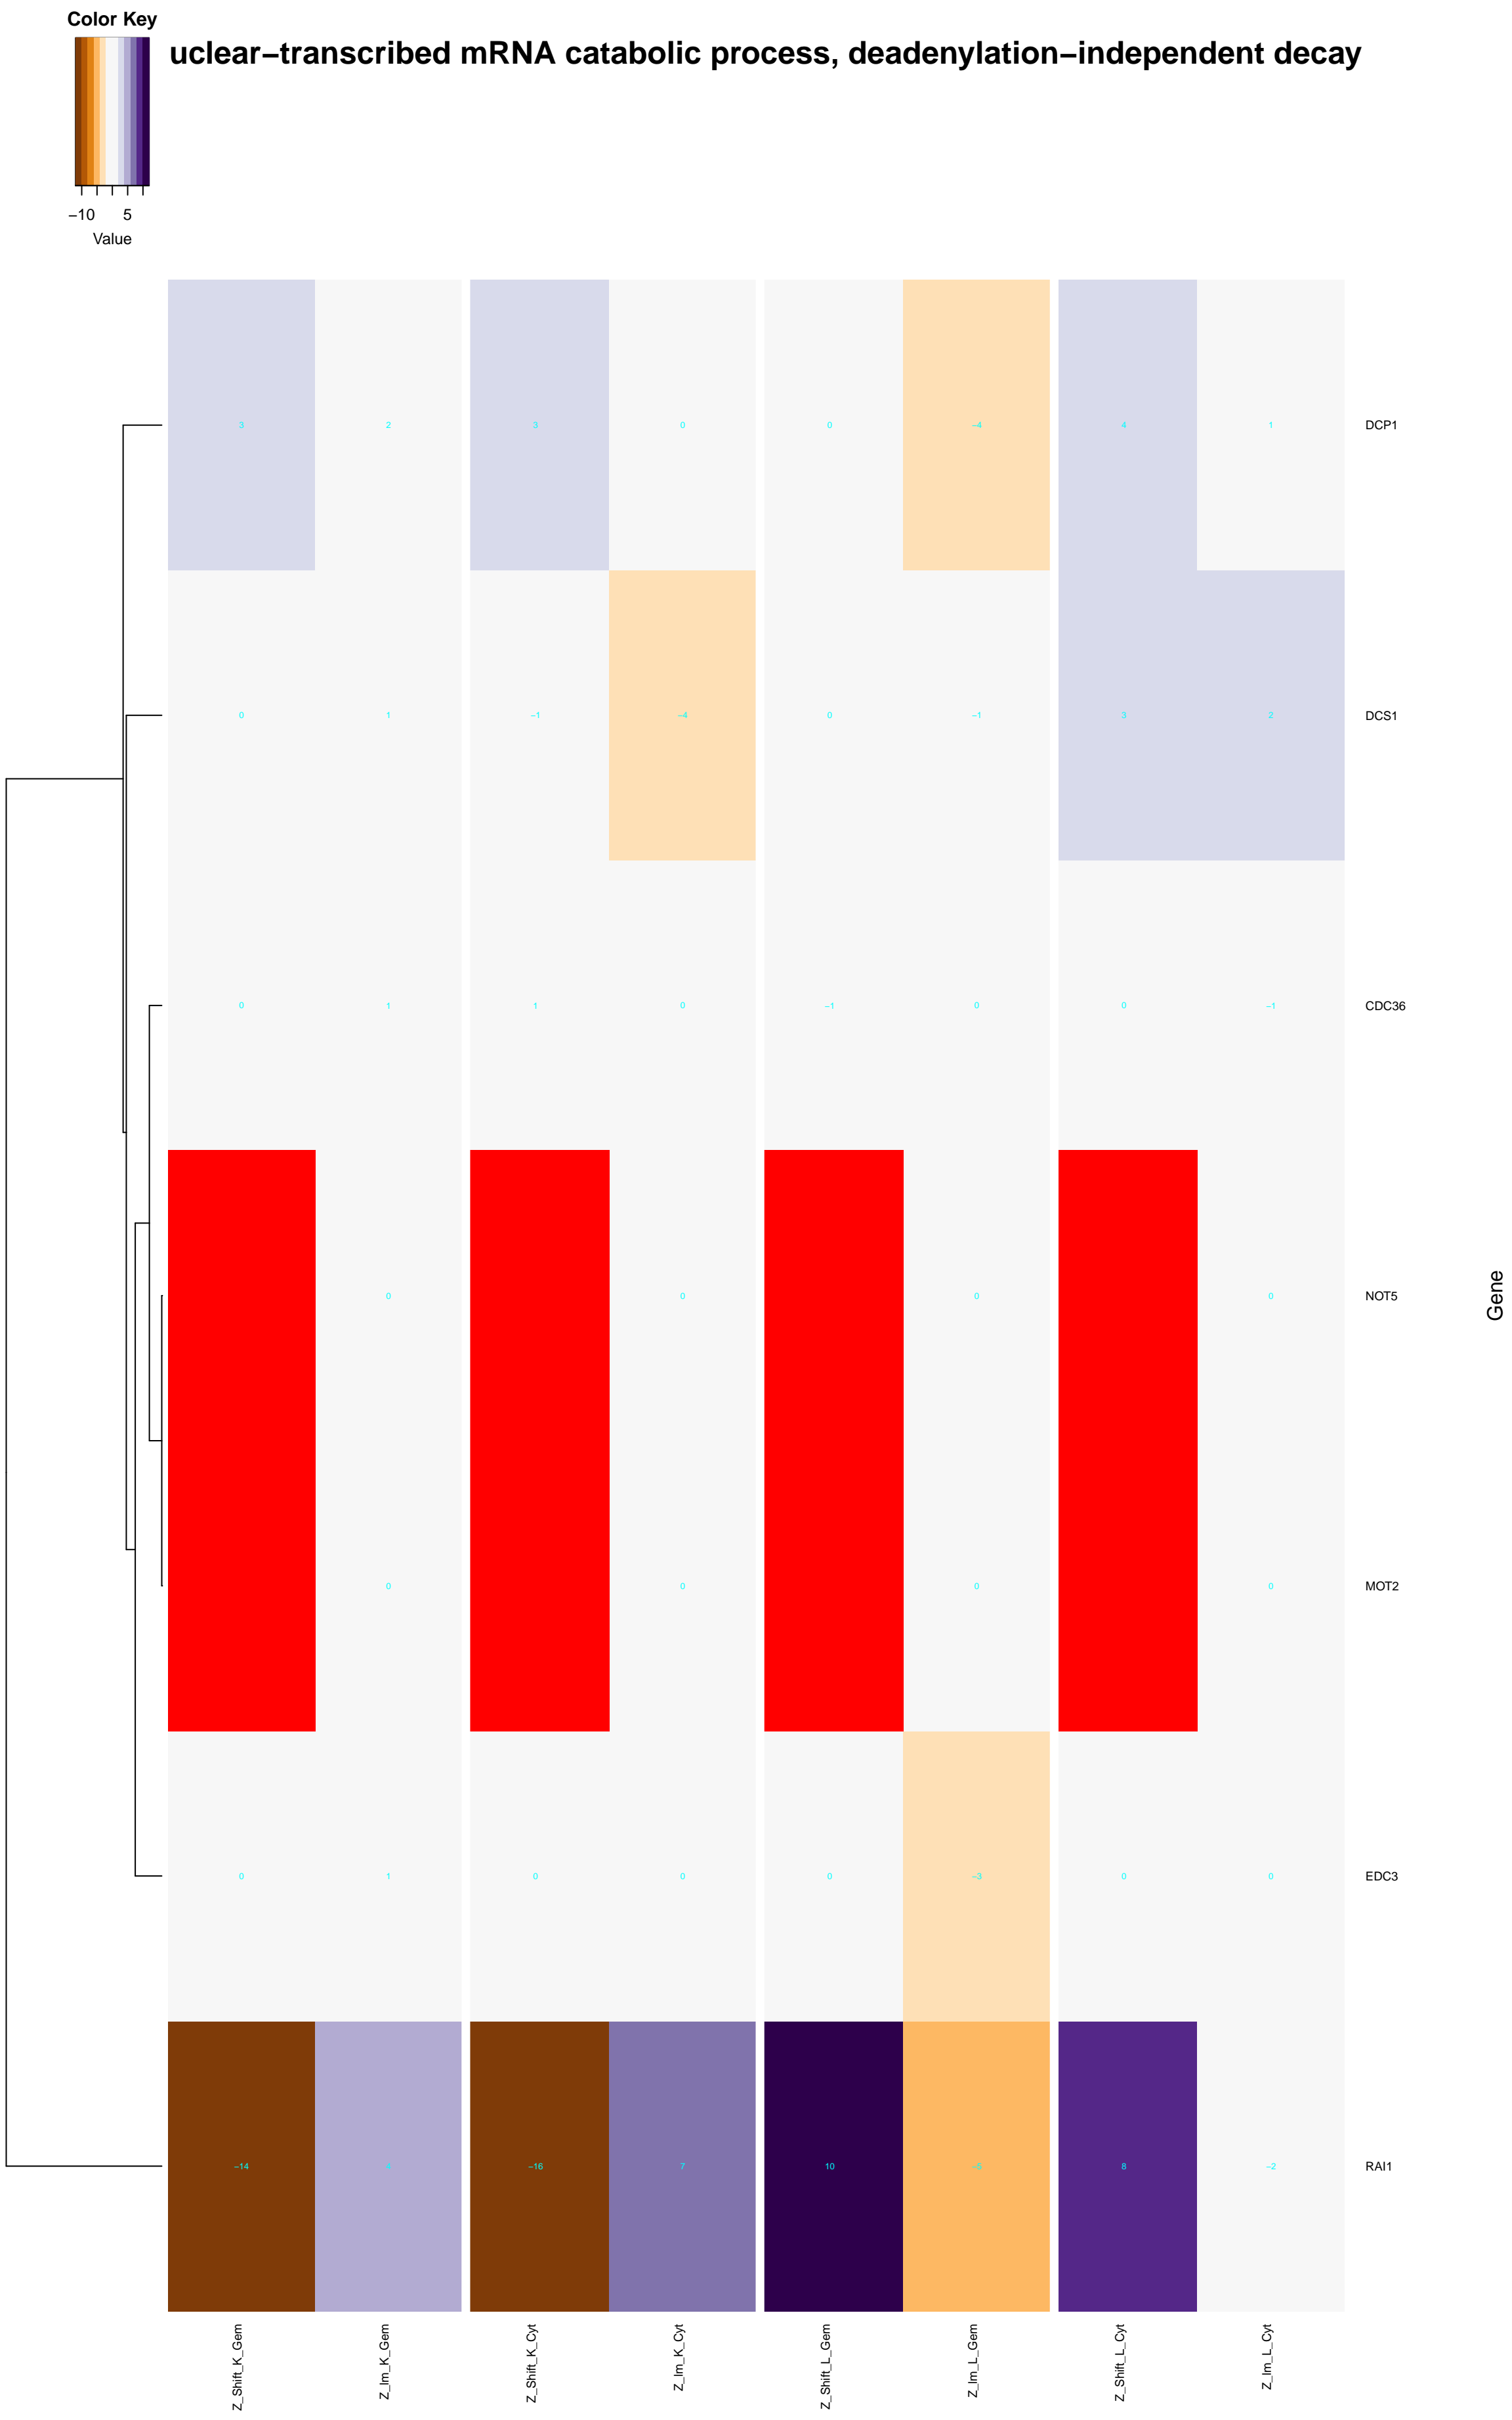

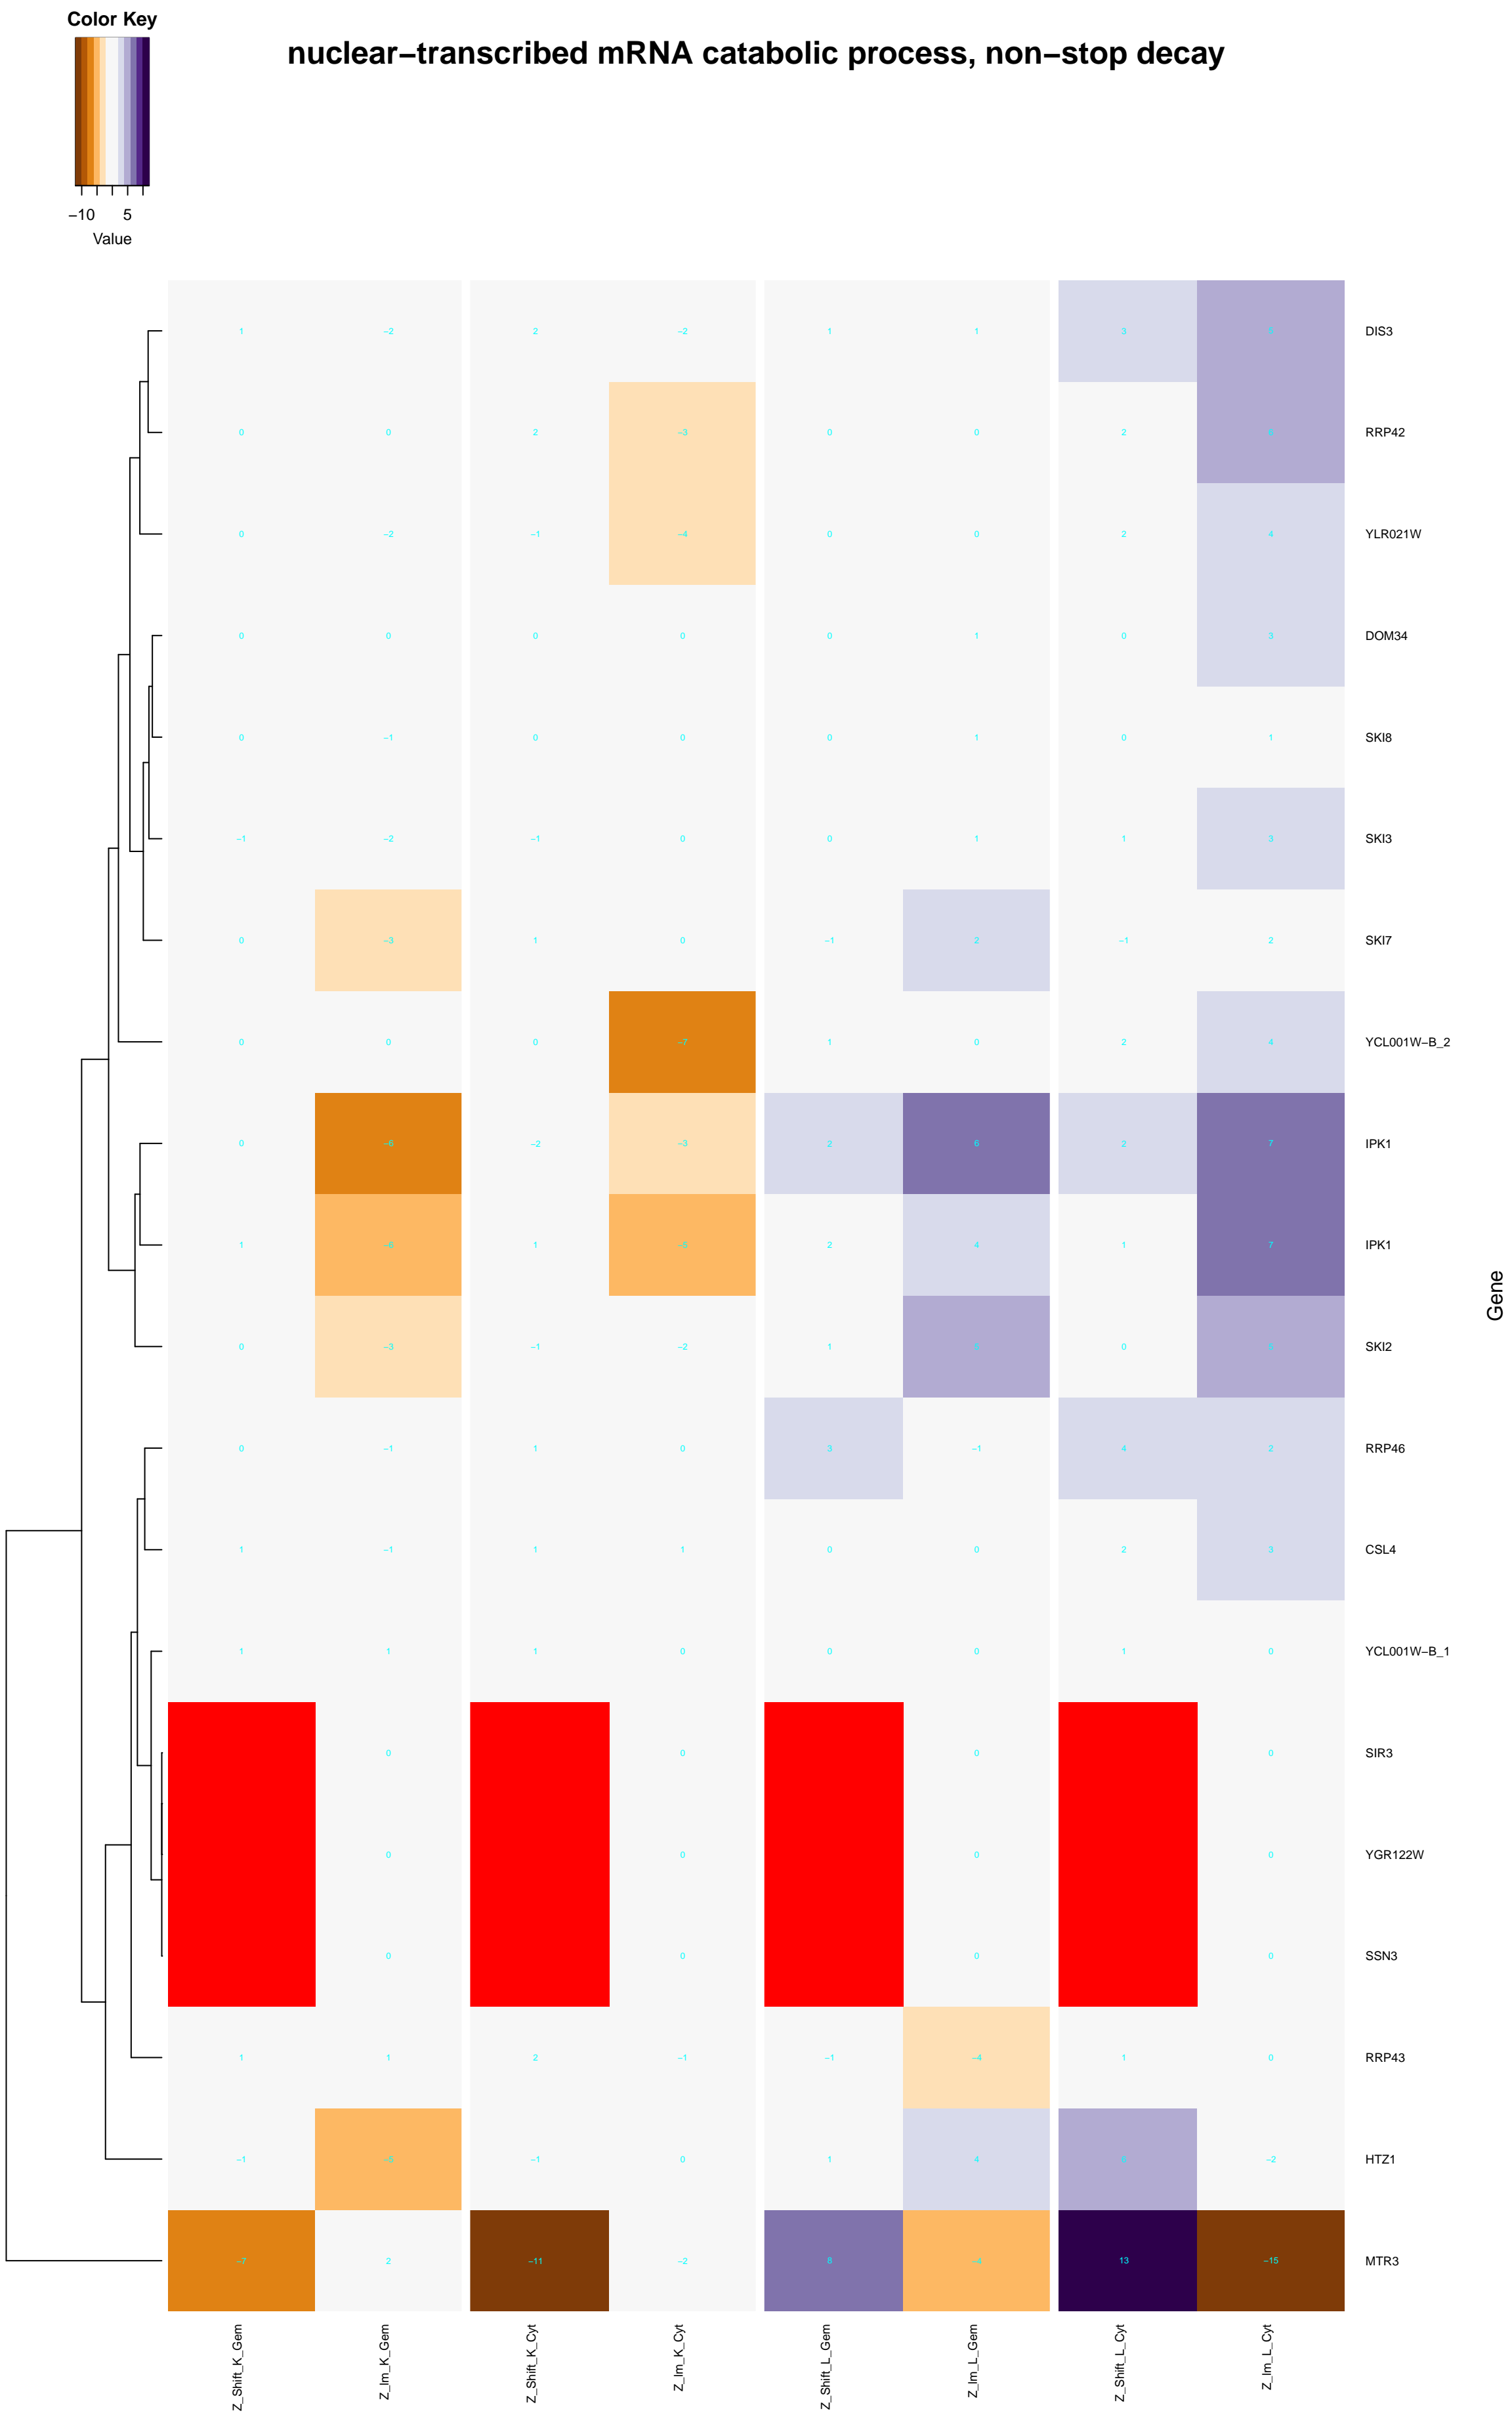

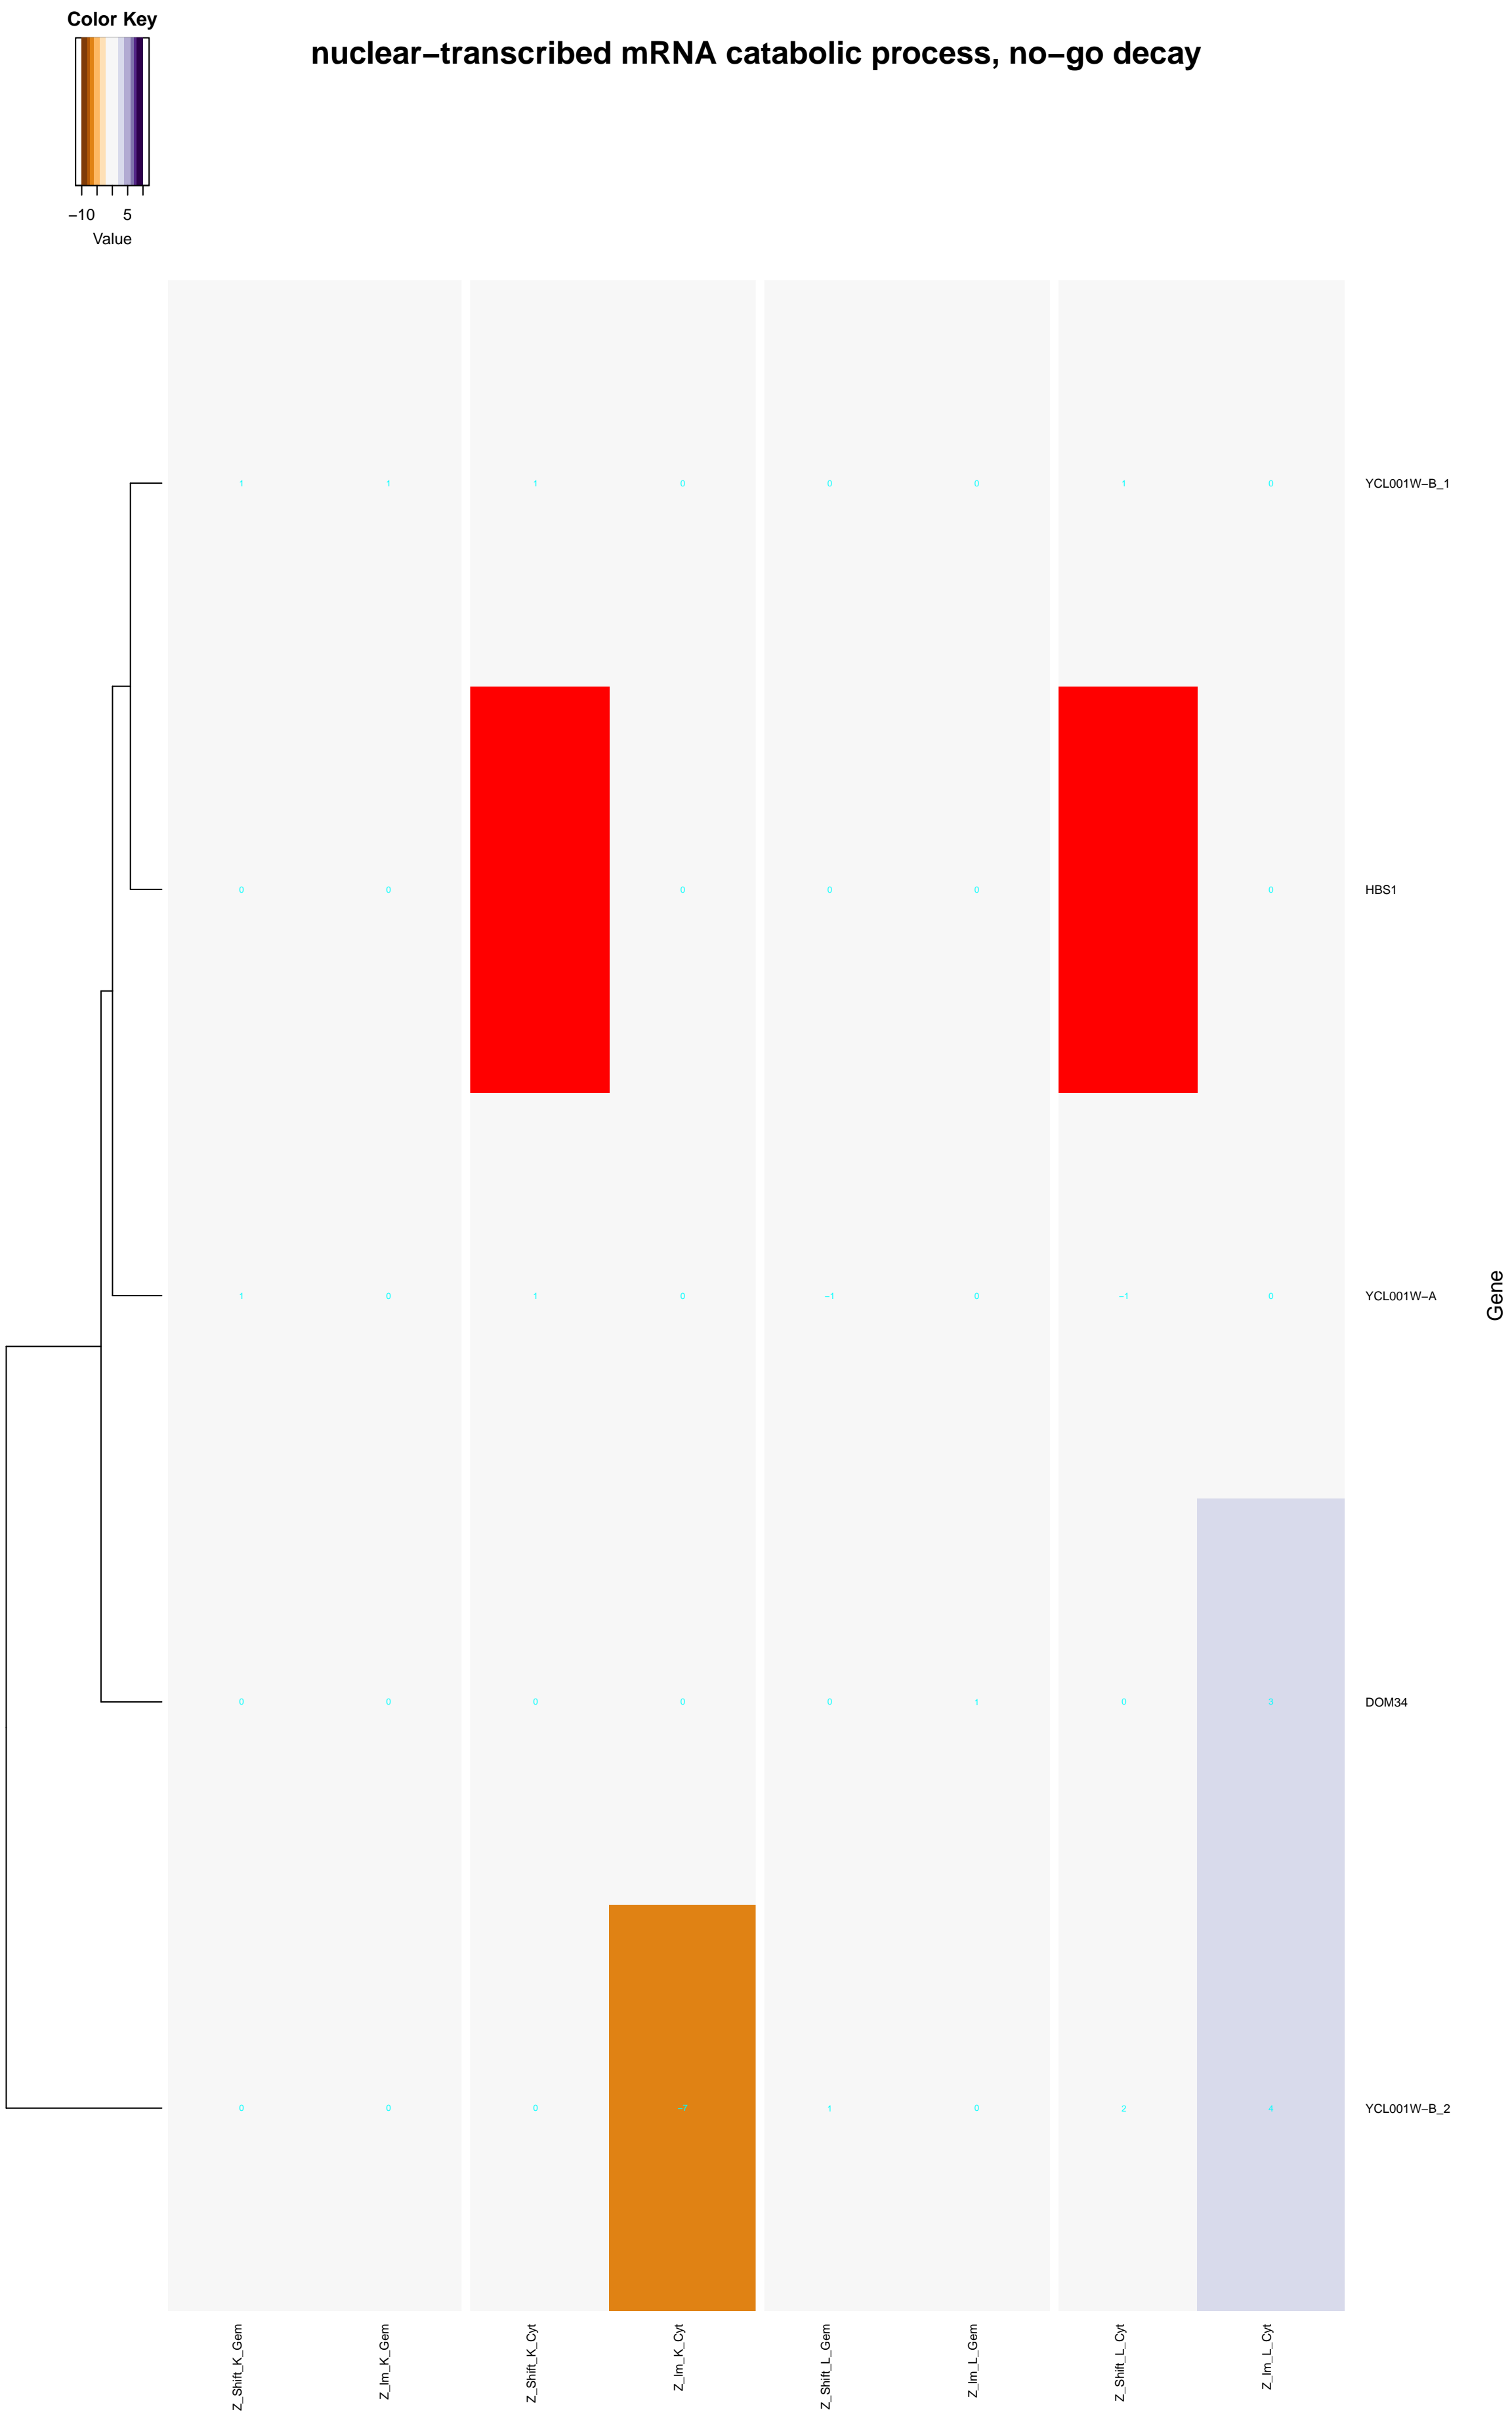

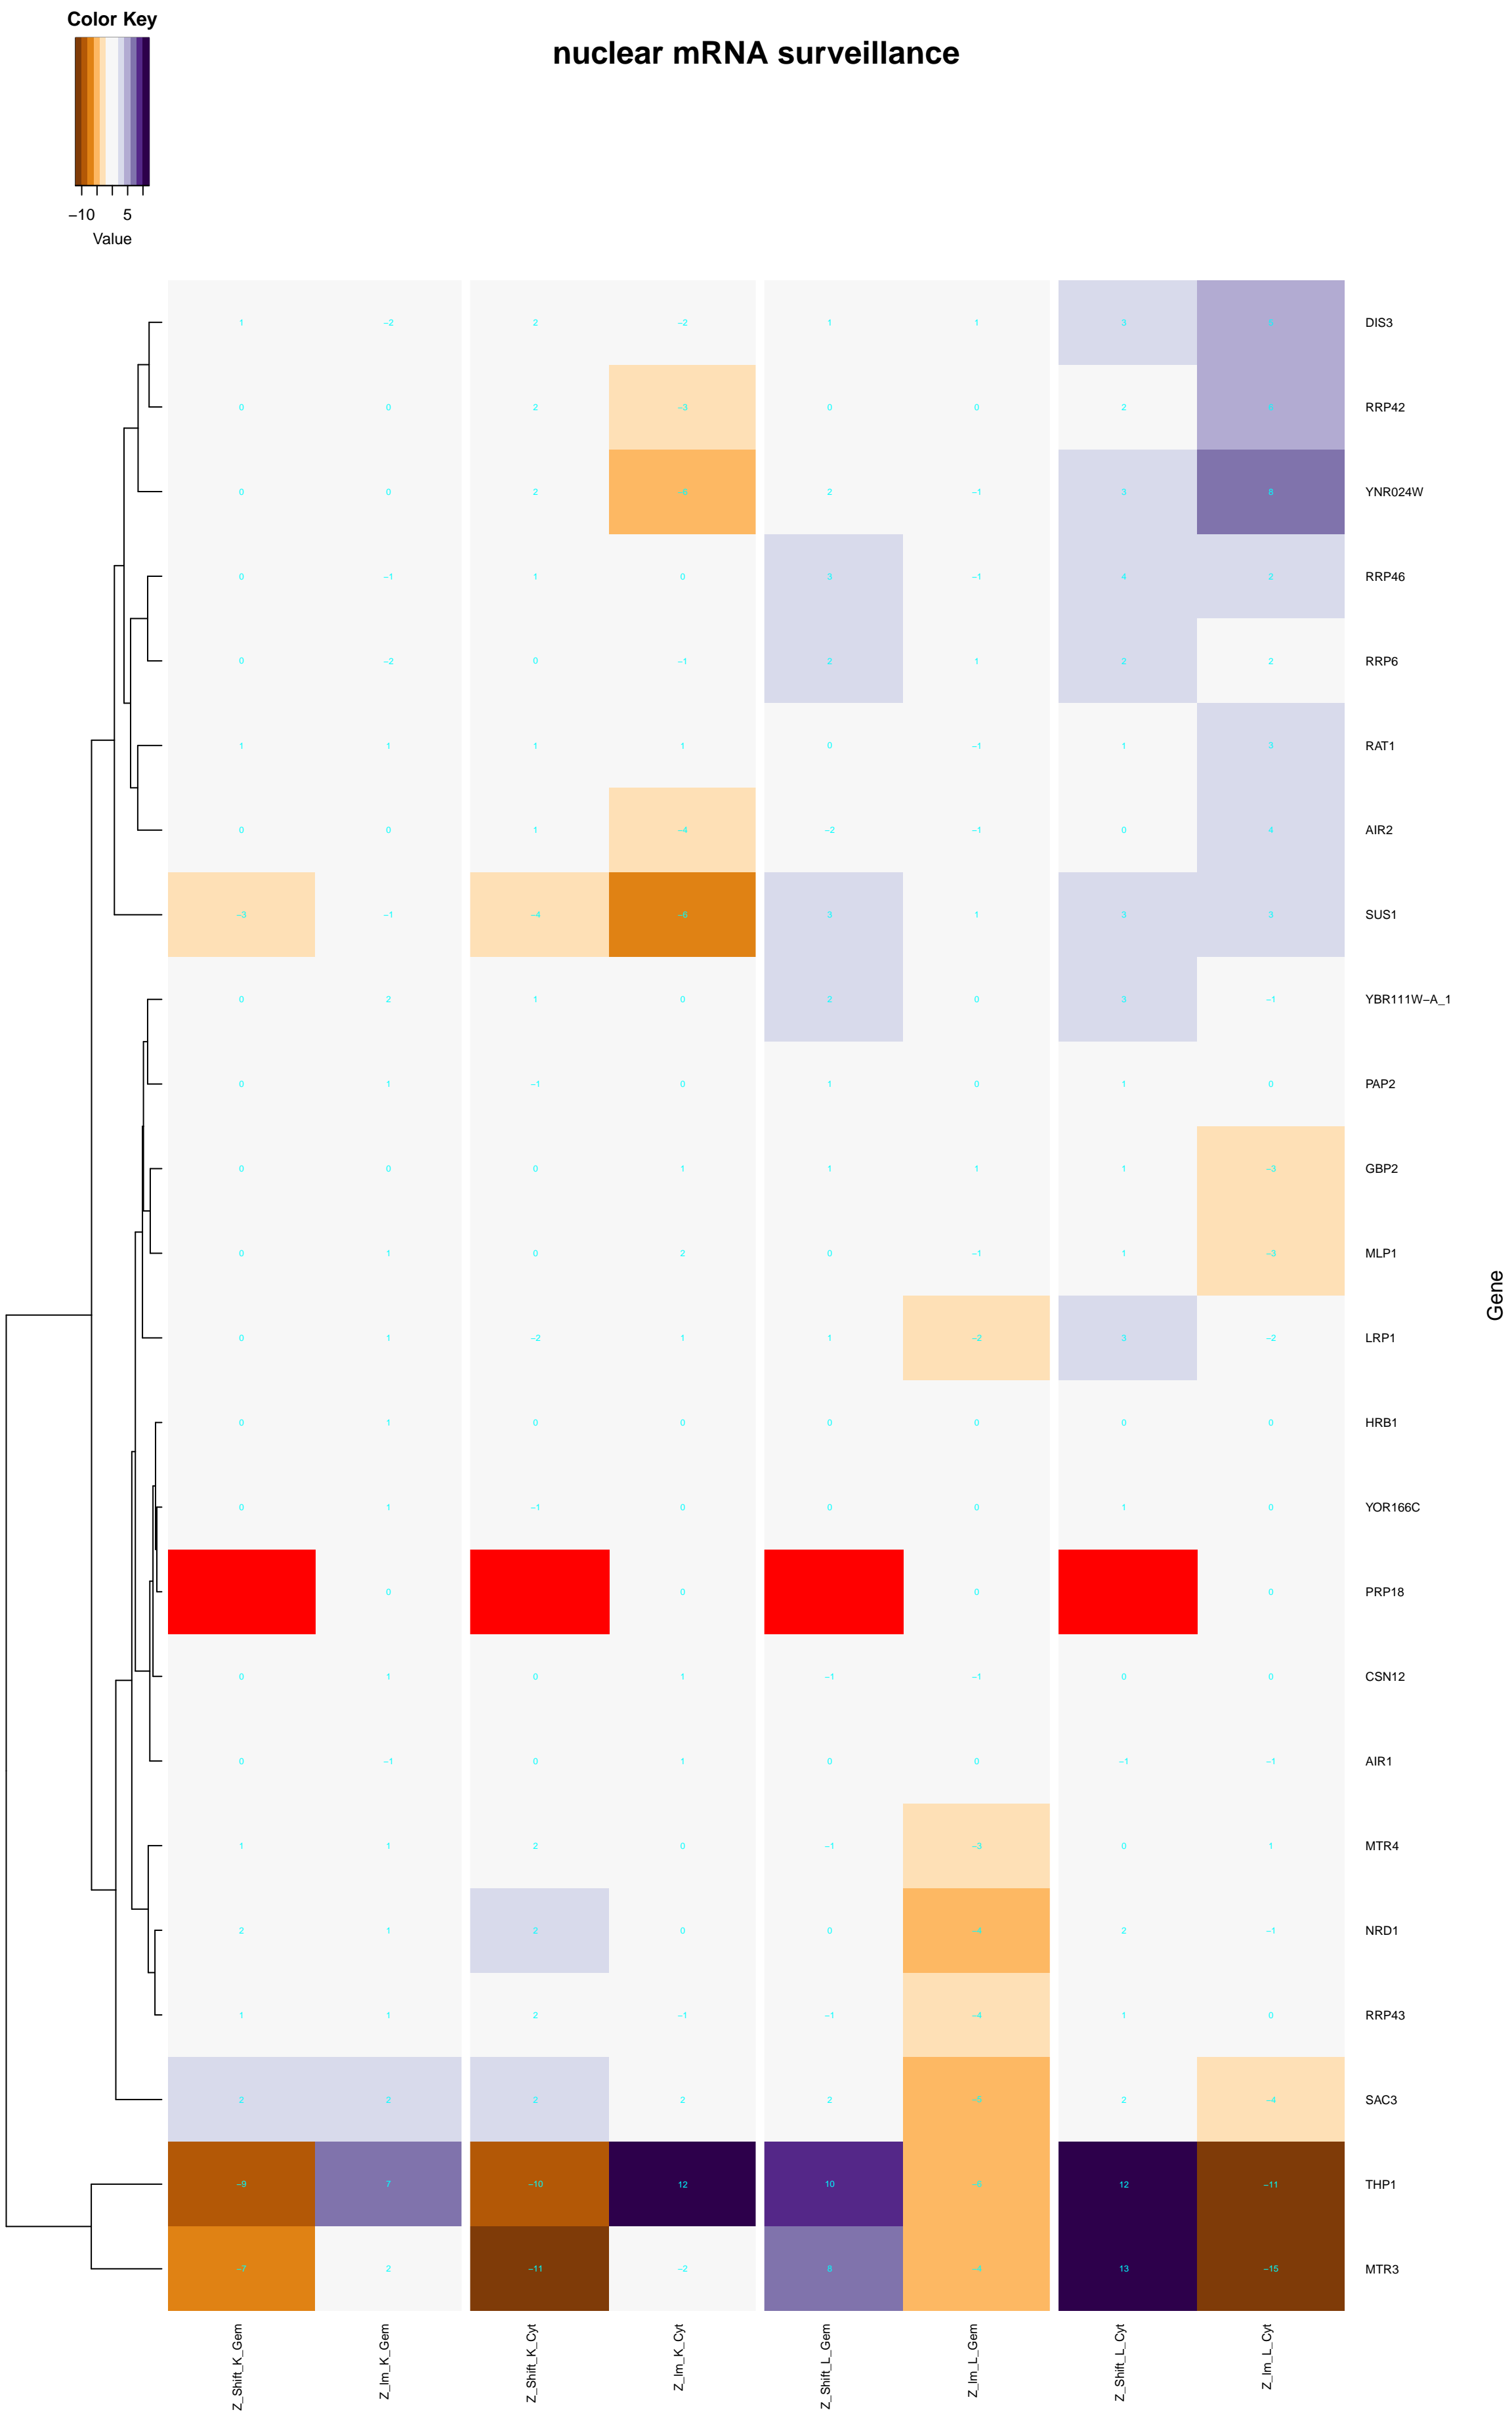

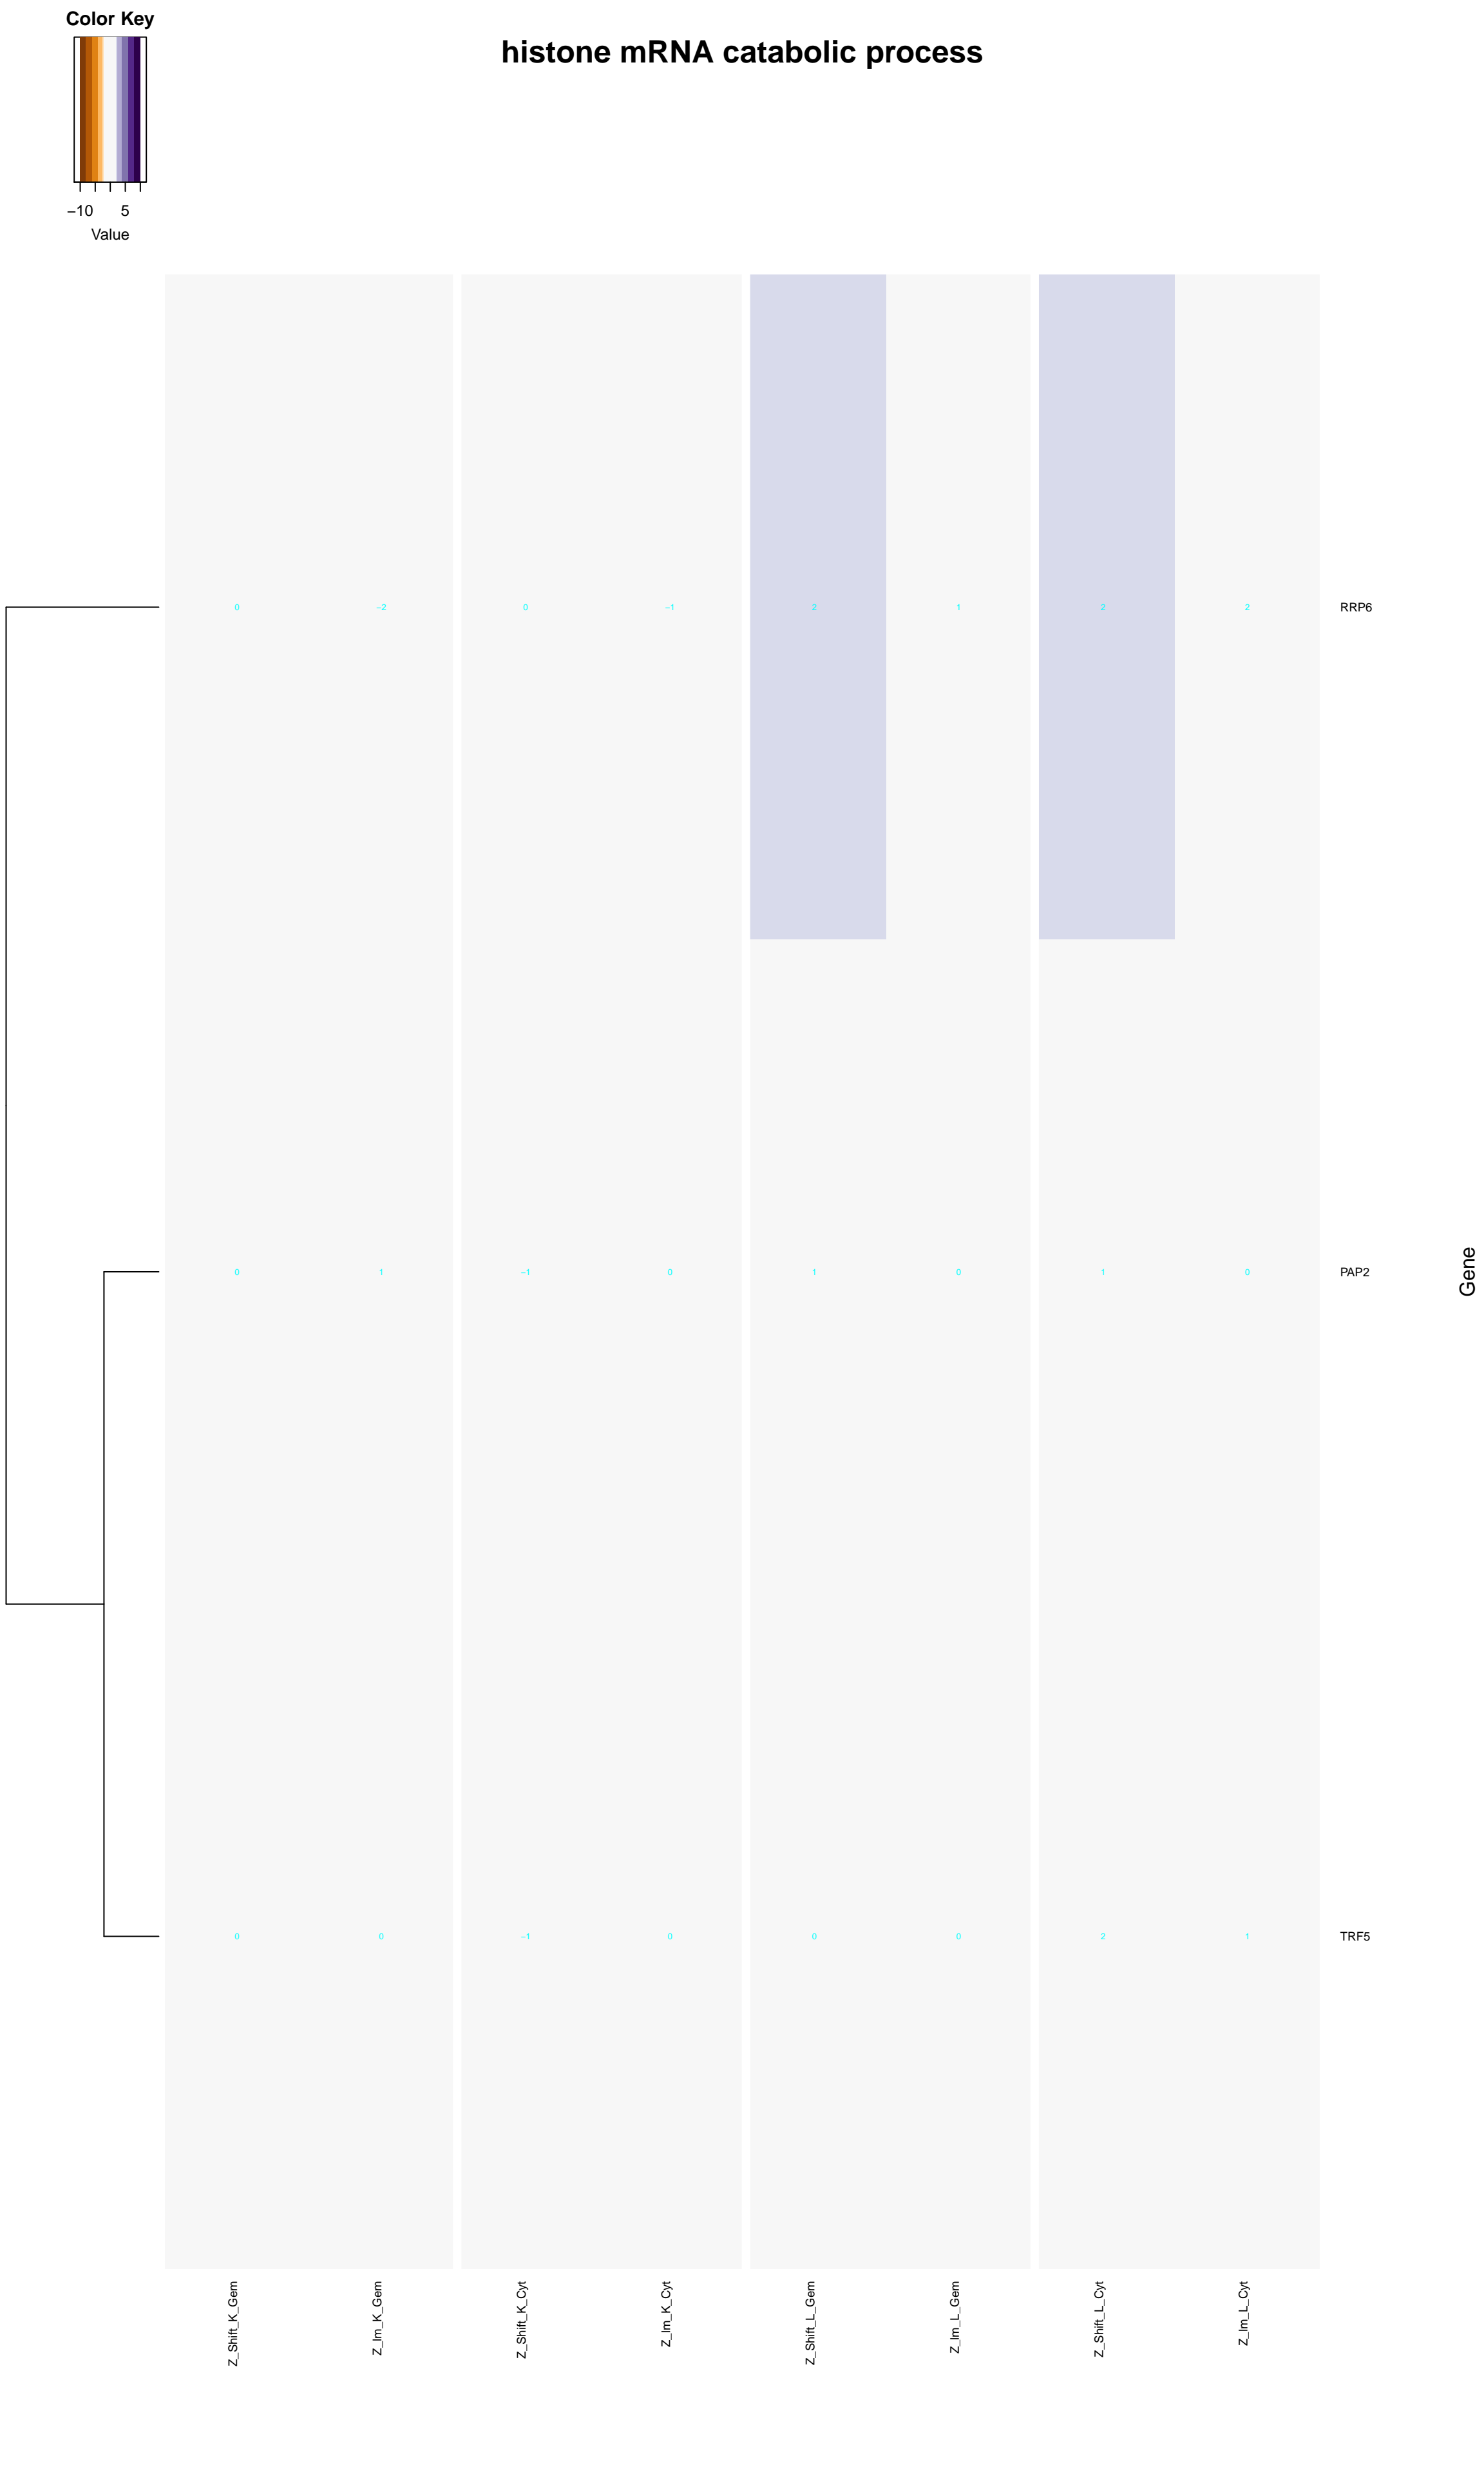

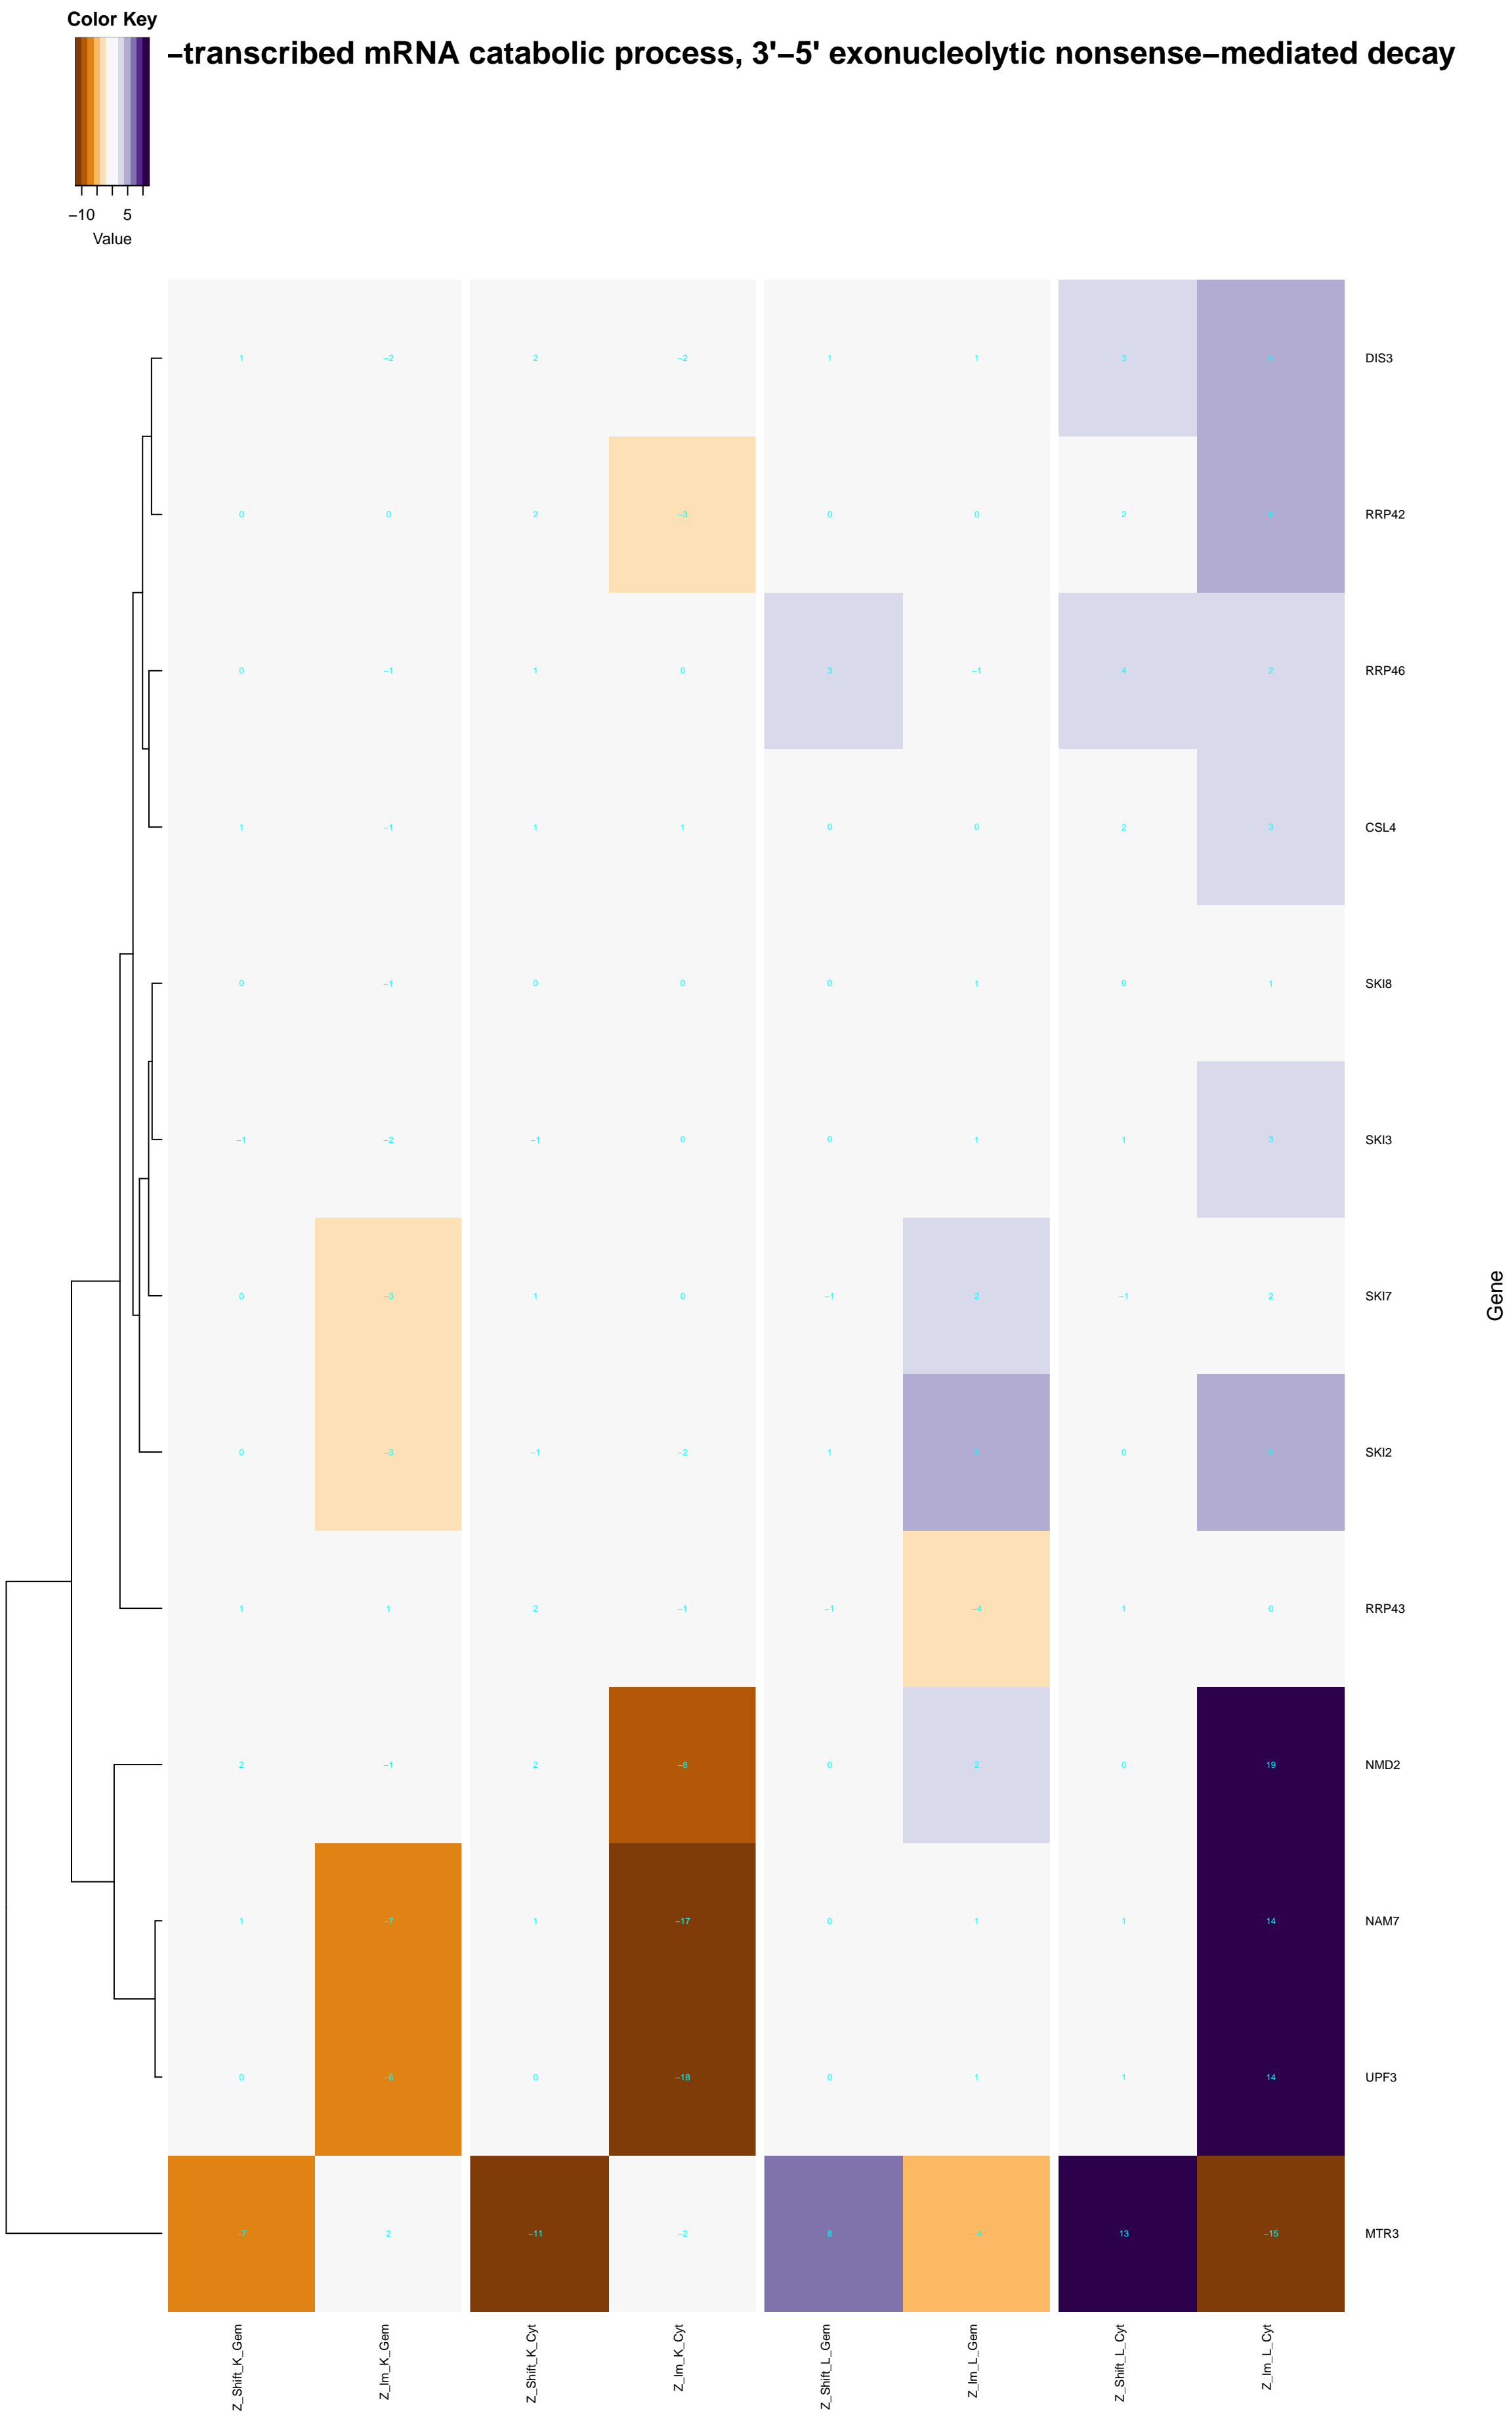

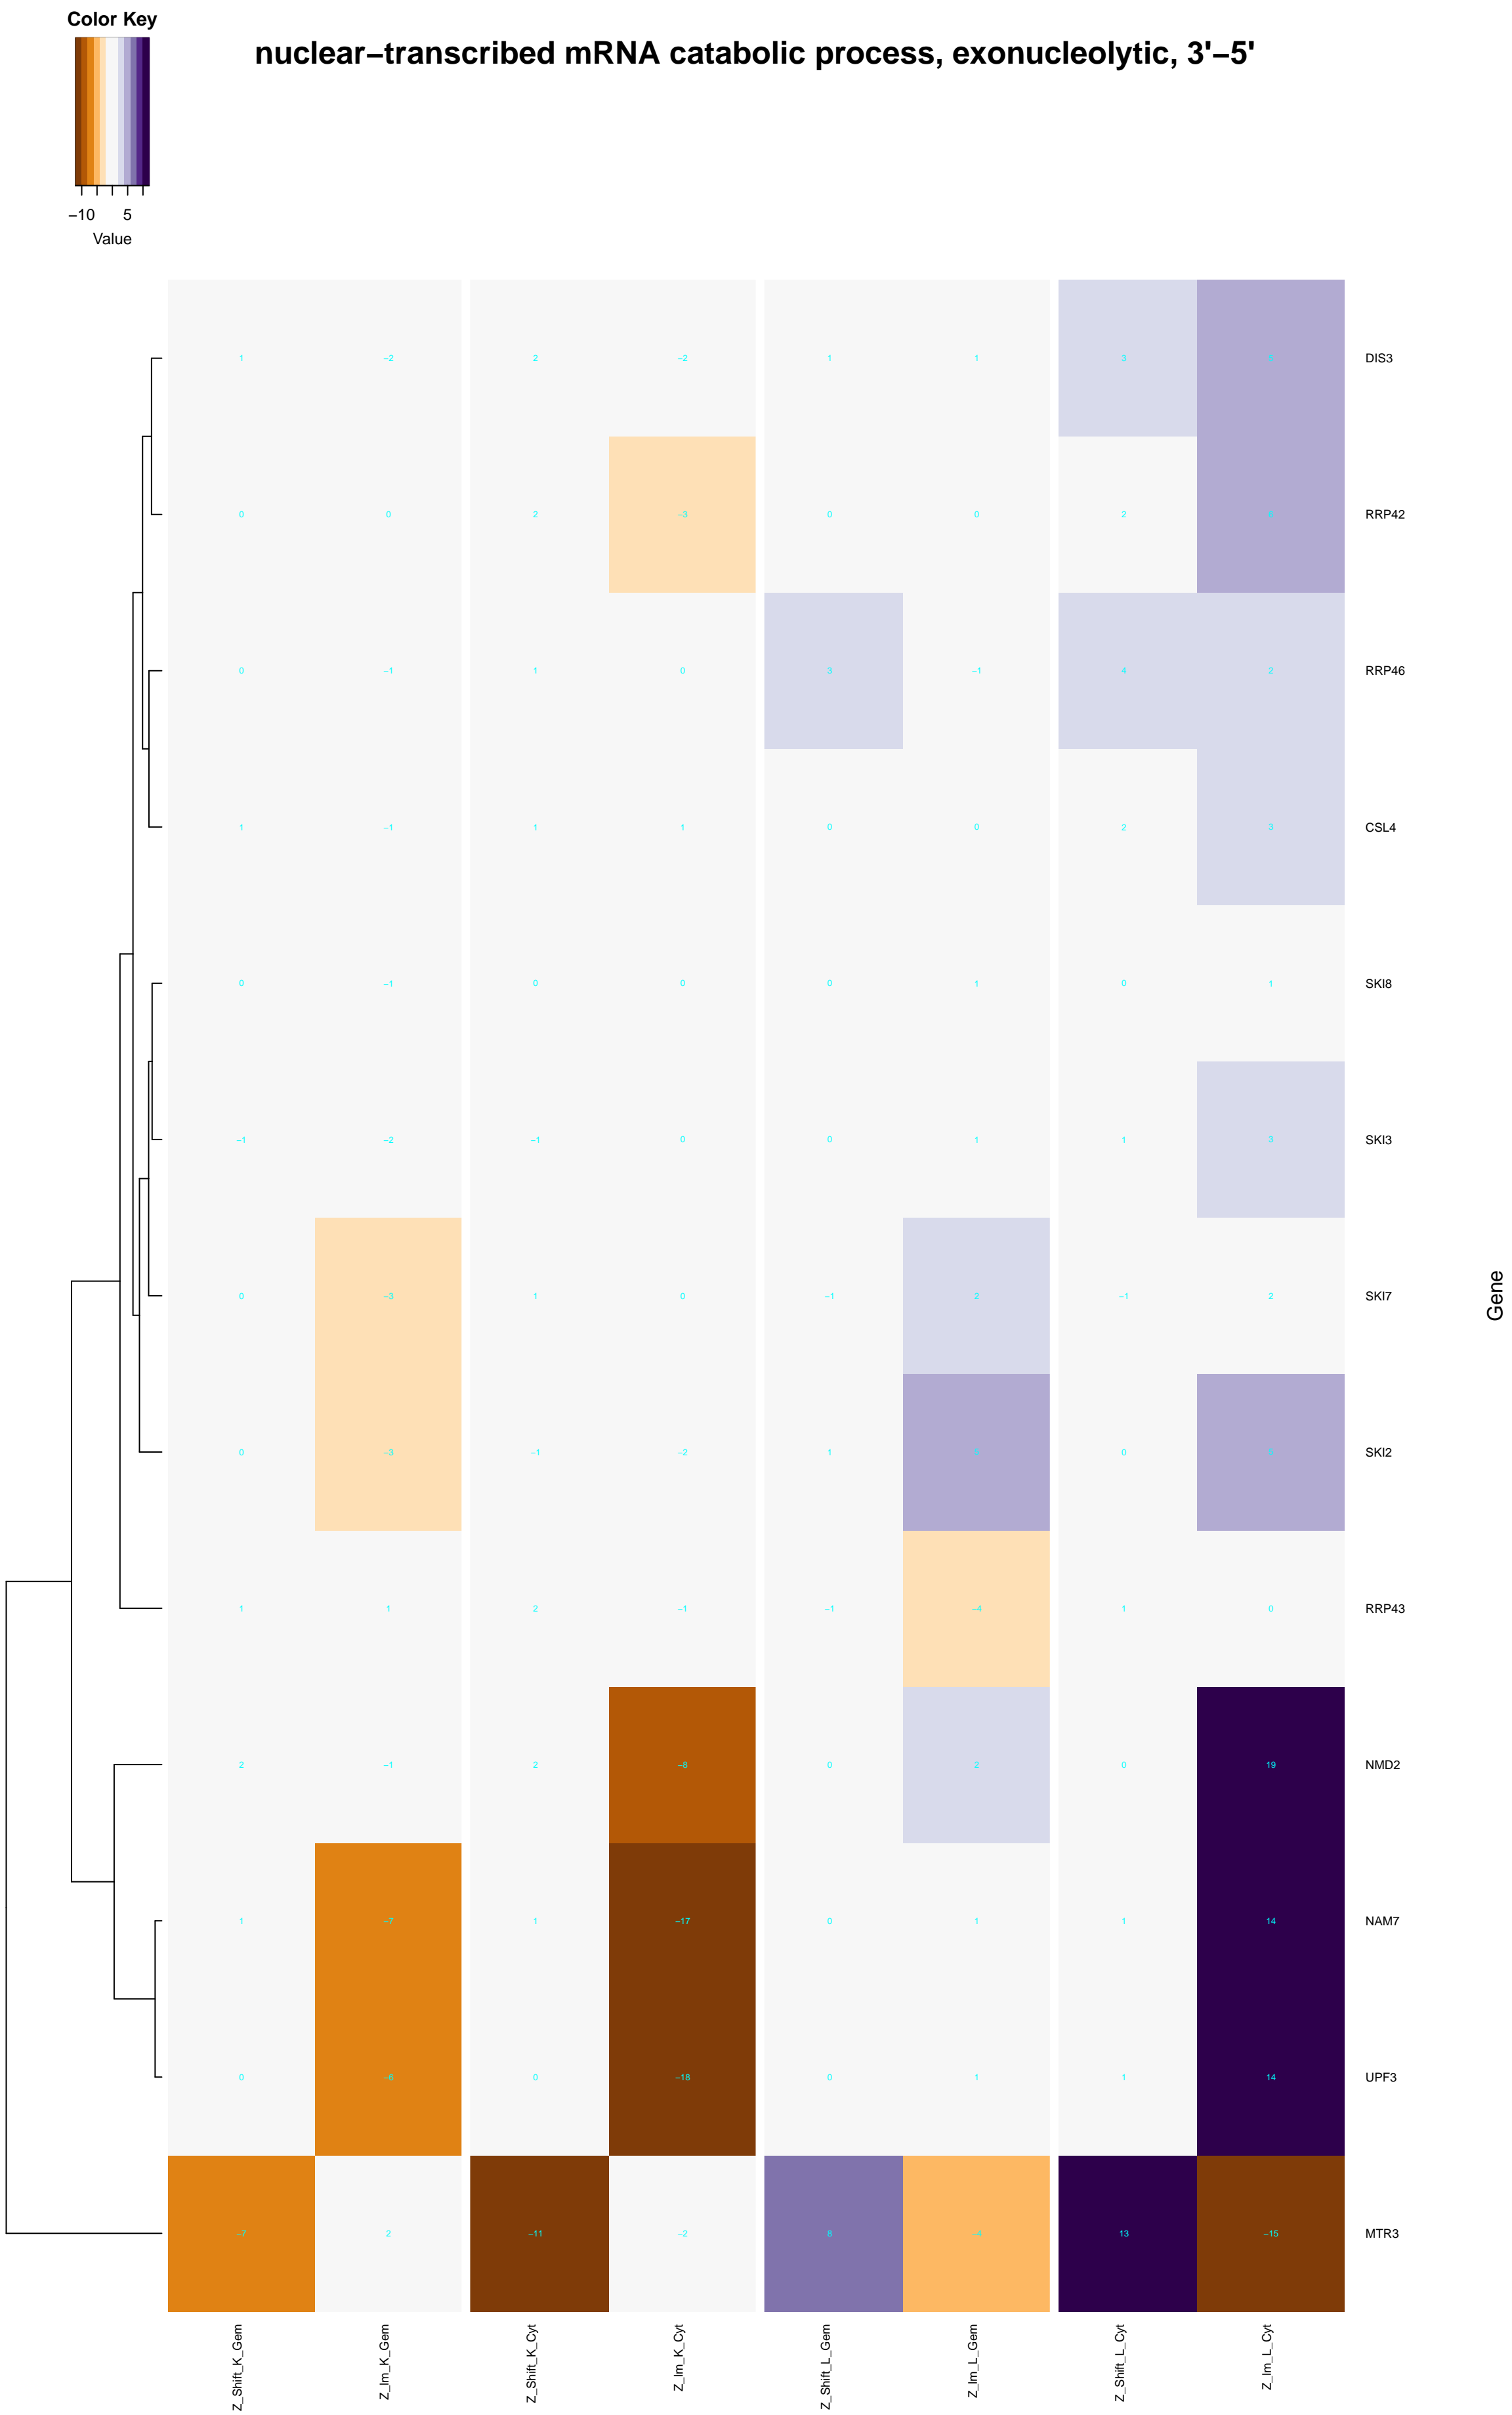

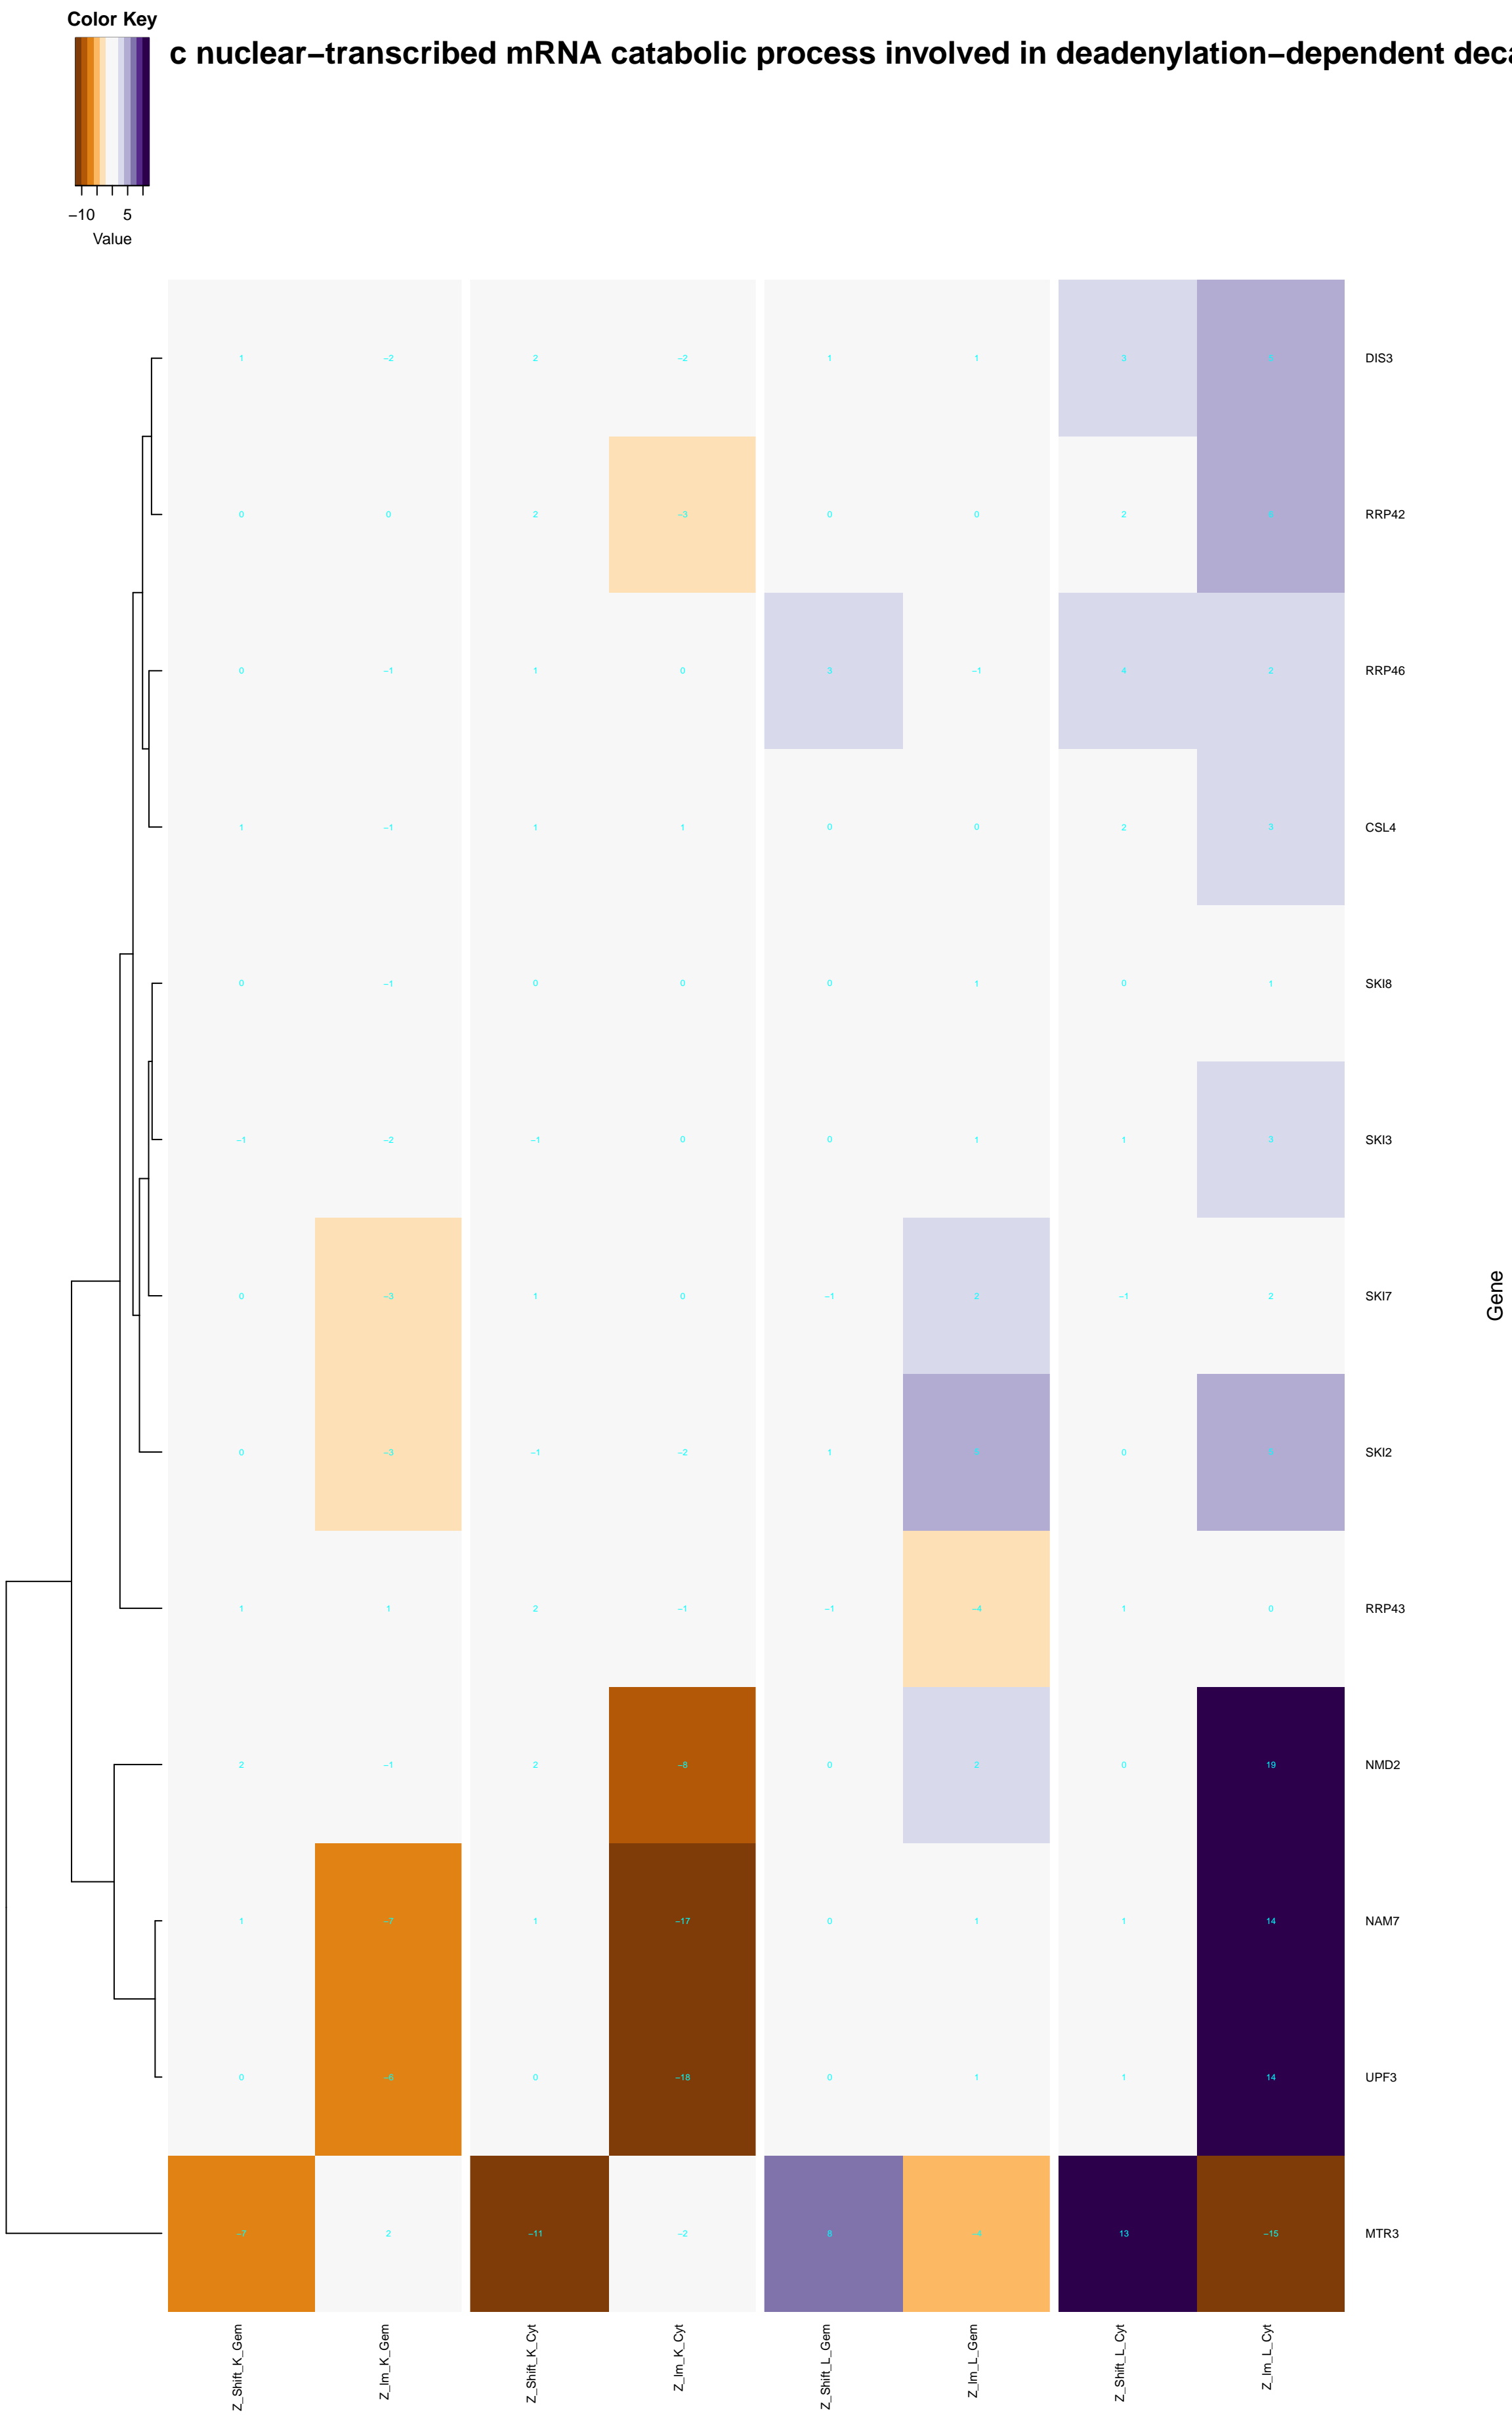

Color Key

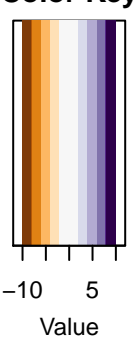

nuclear mRNA surveillance of spliceosomal pre-mRNA splicing

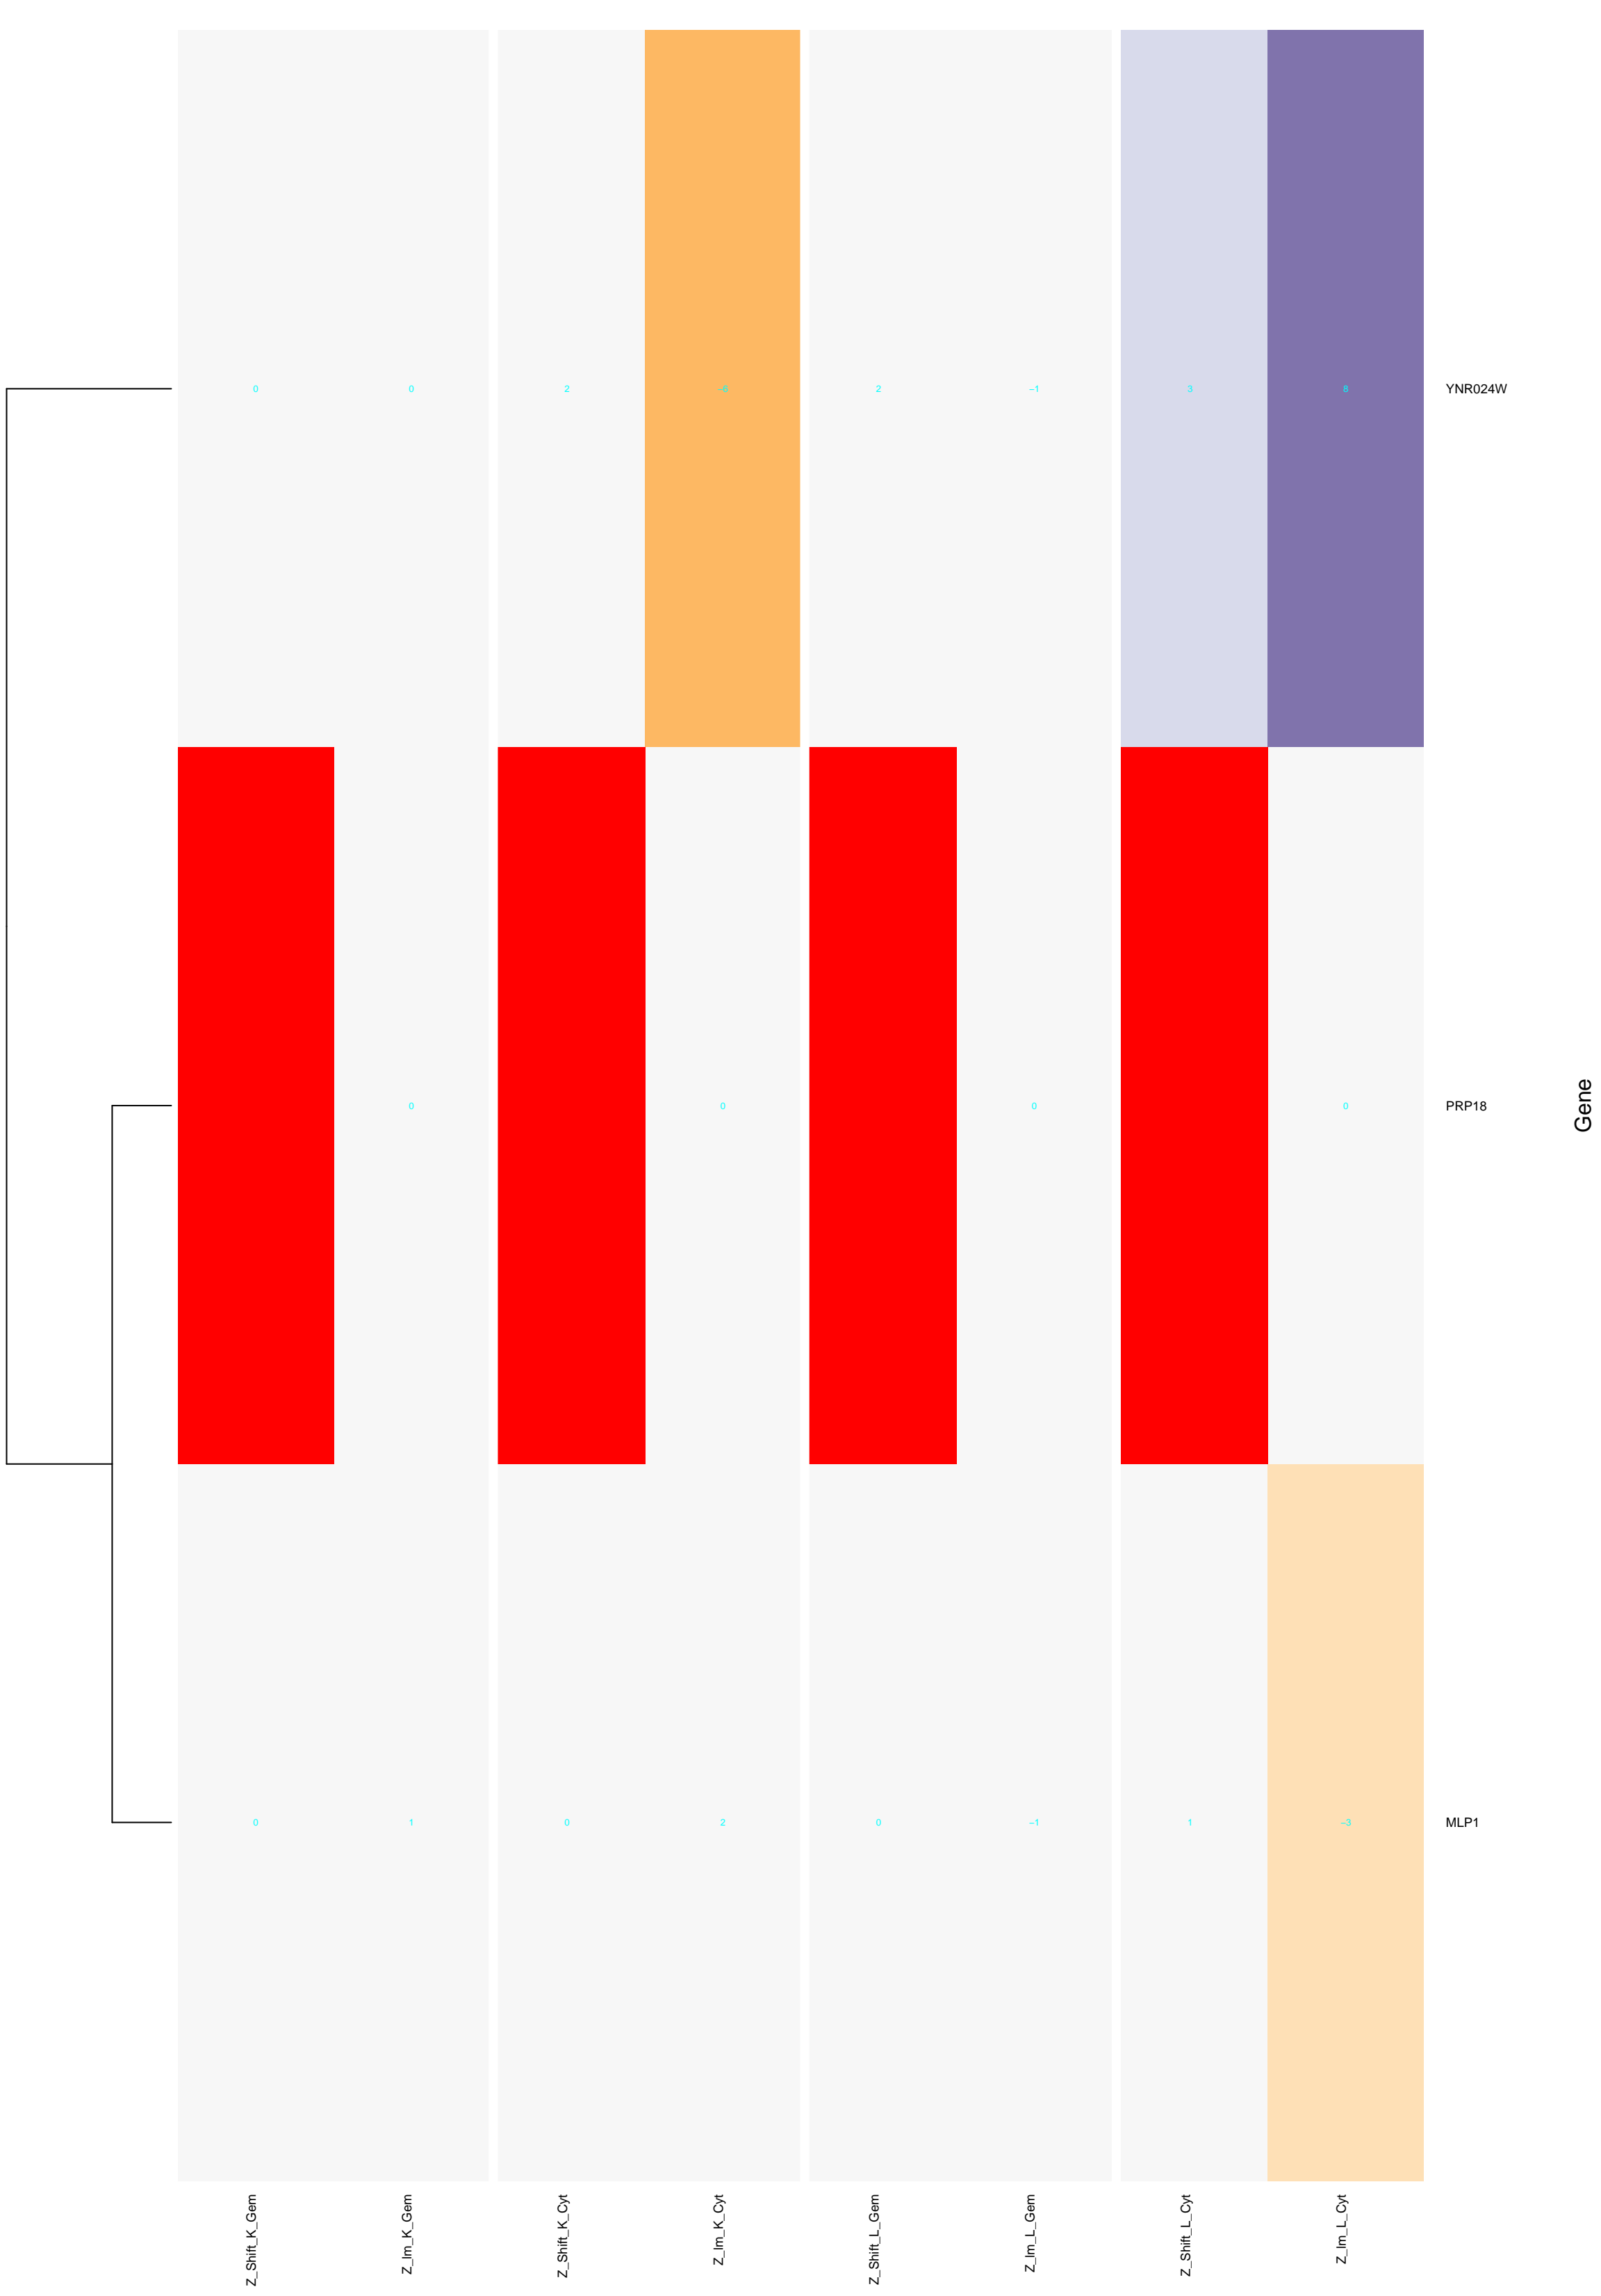

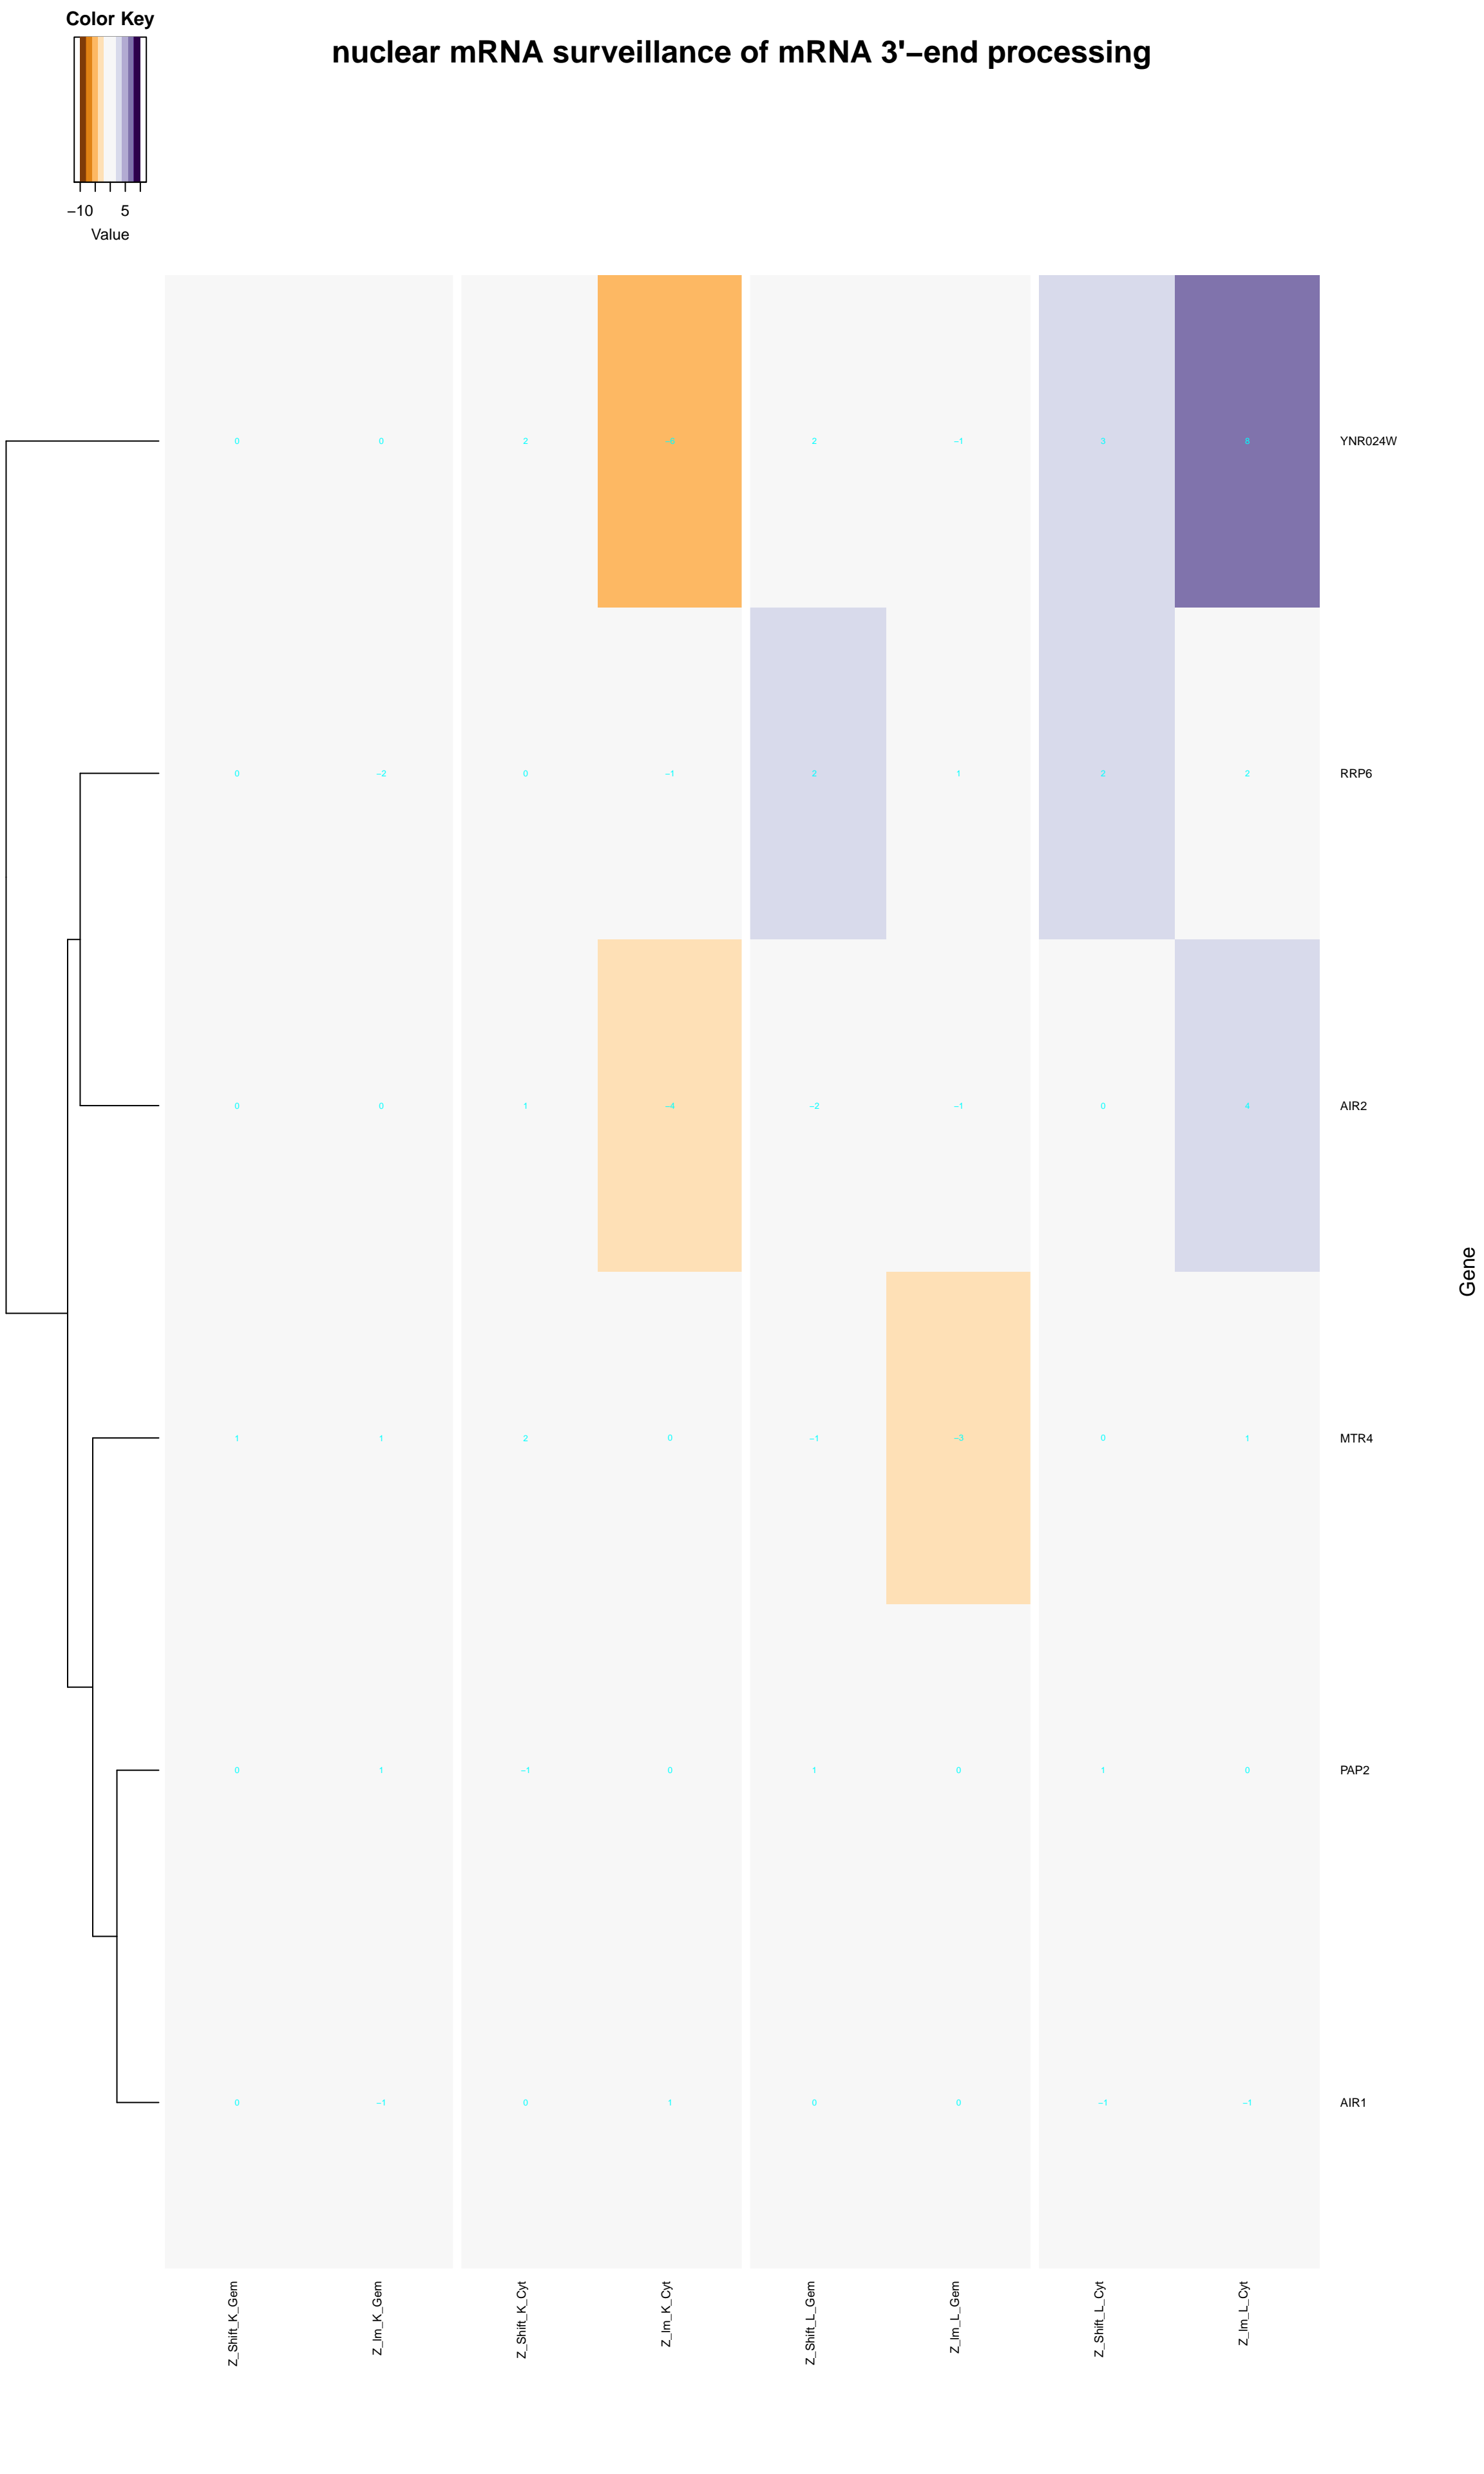

Supplement: s1 [file s1]

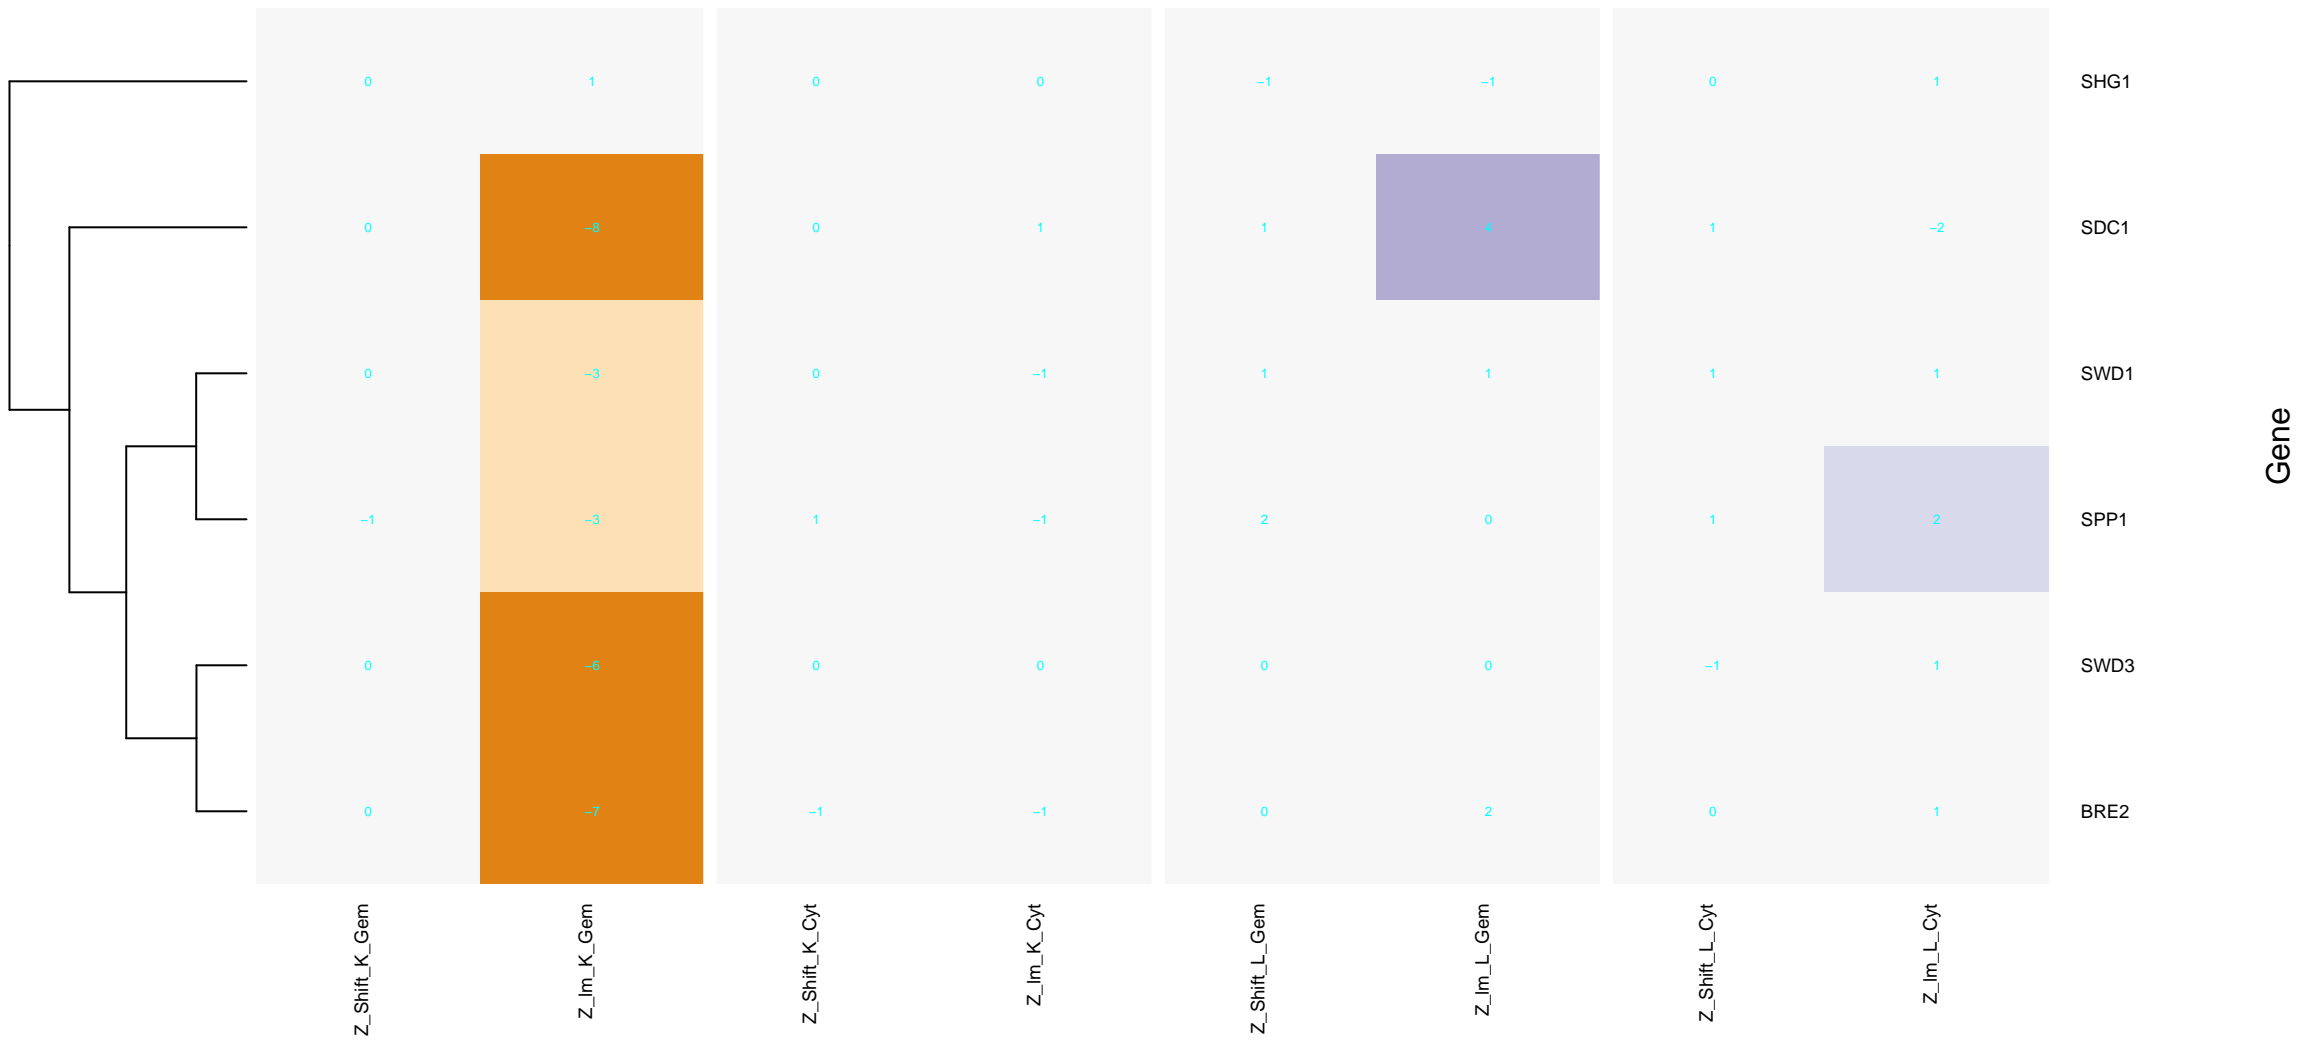

Supplement: s1 [file s1]

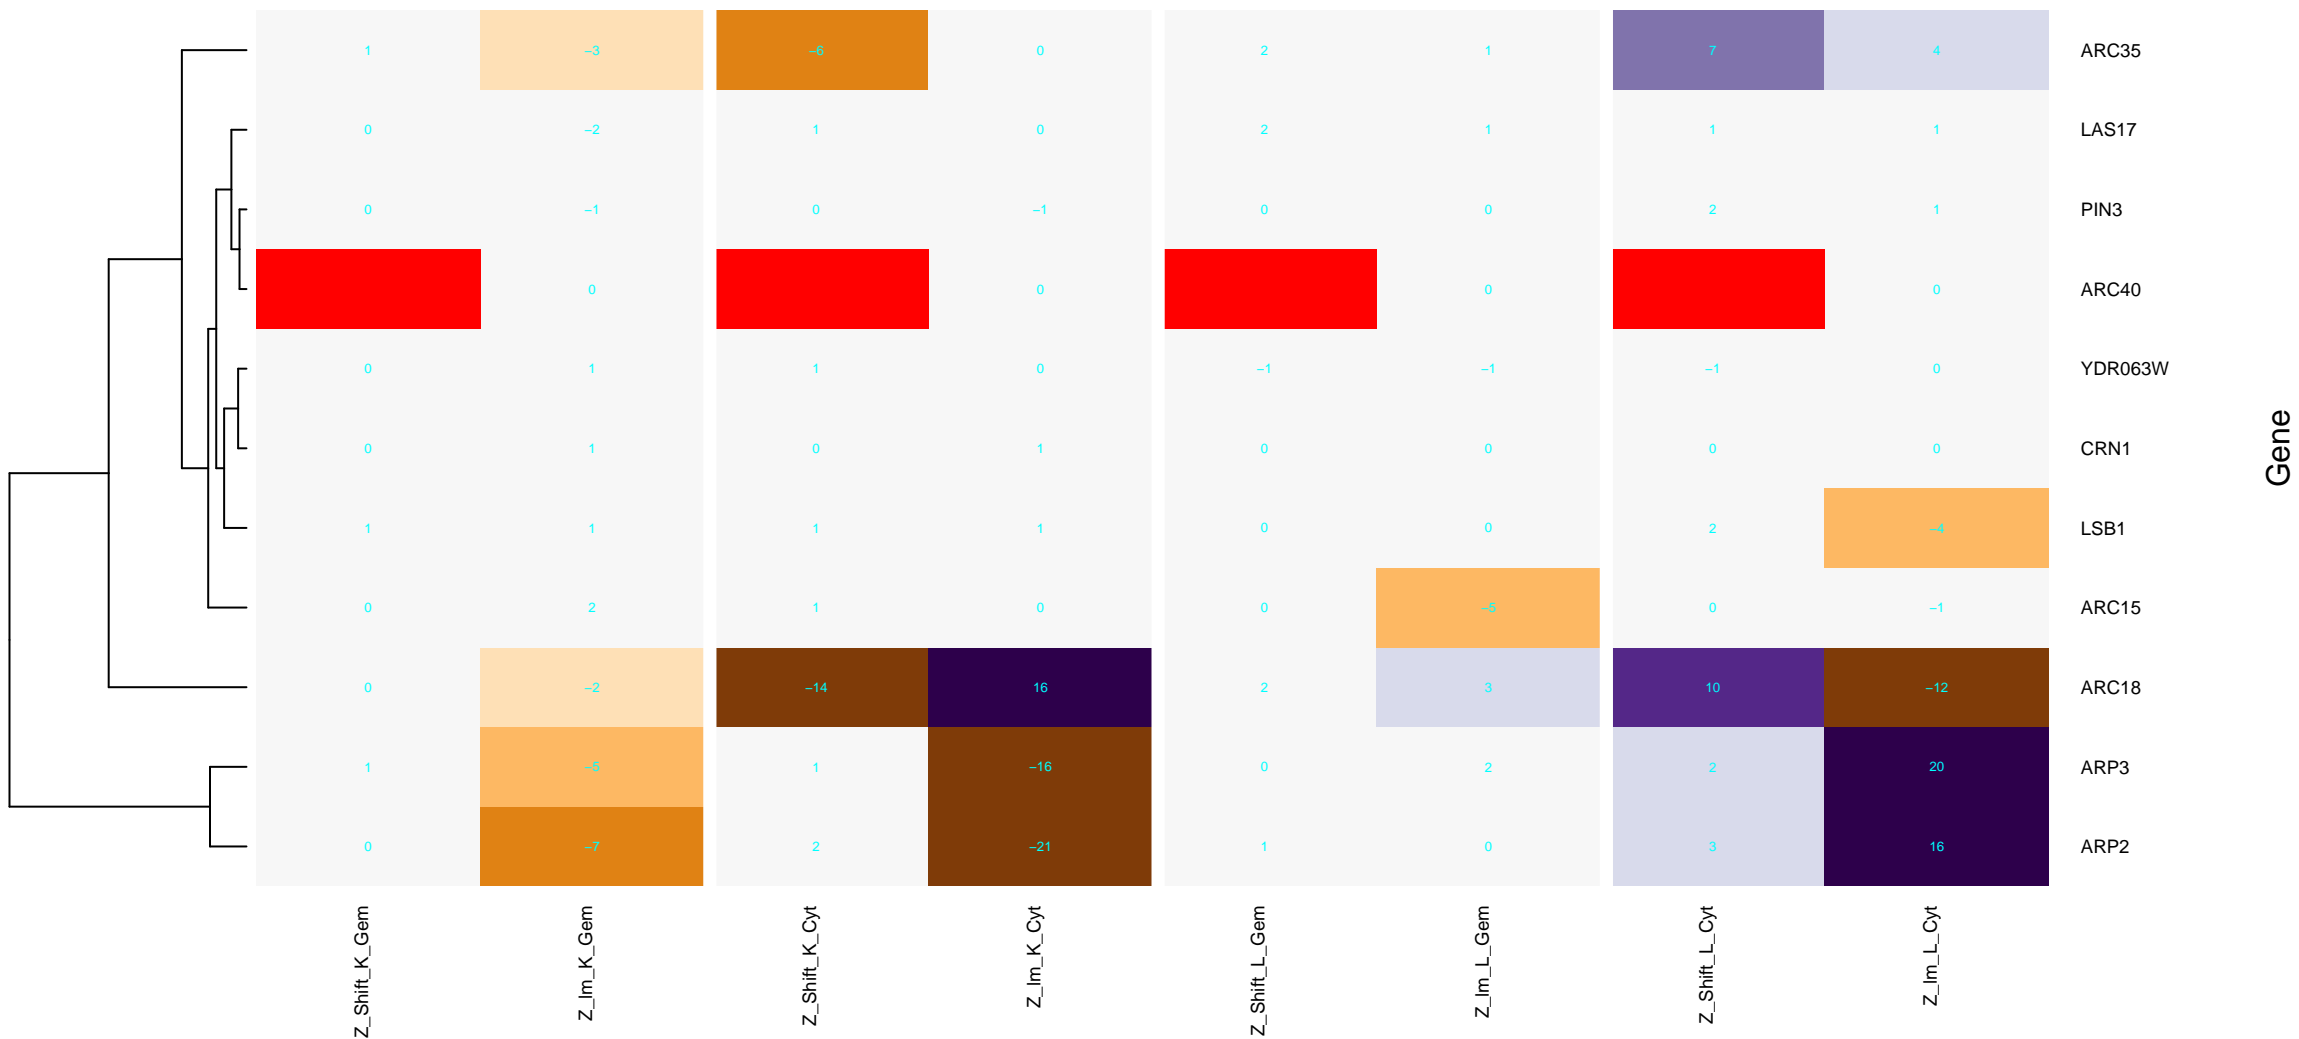

Supplement: s1 [file s1]

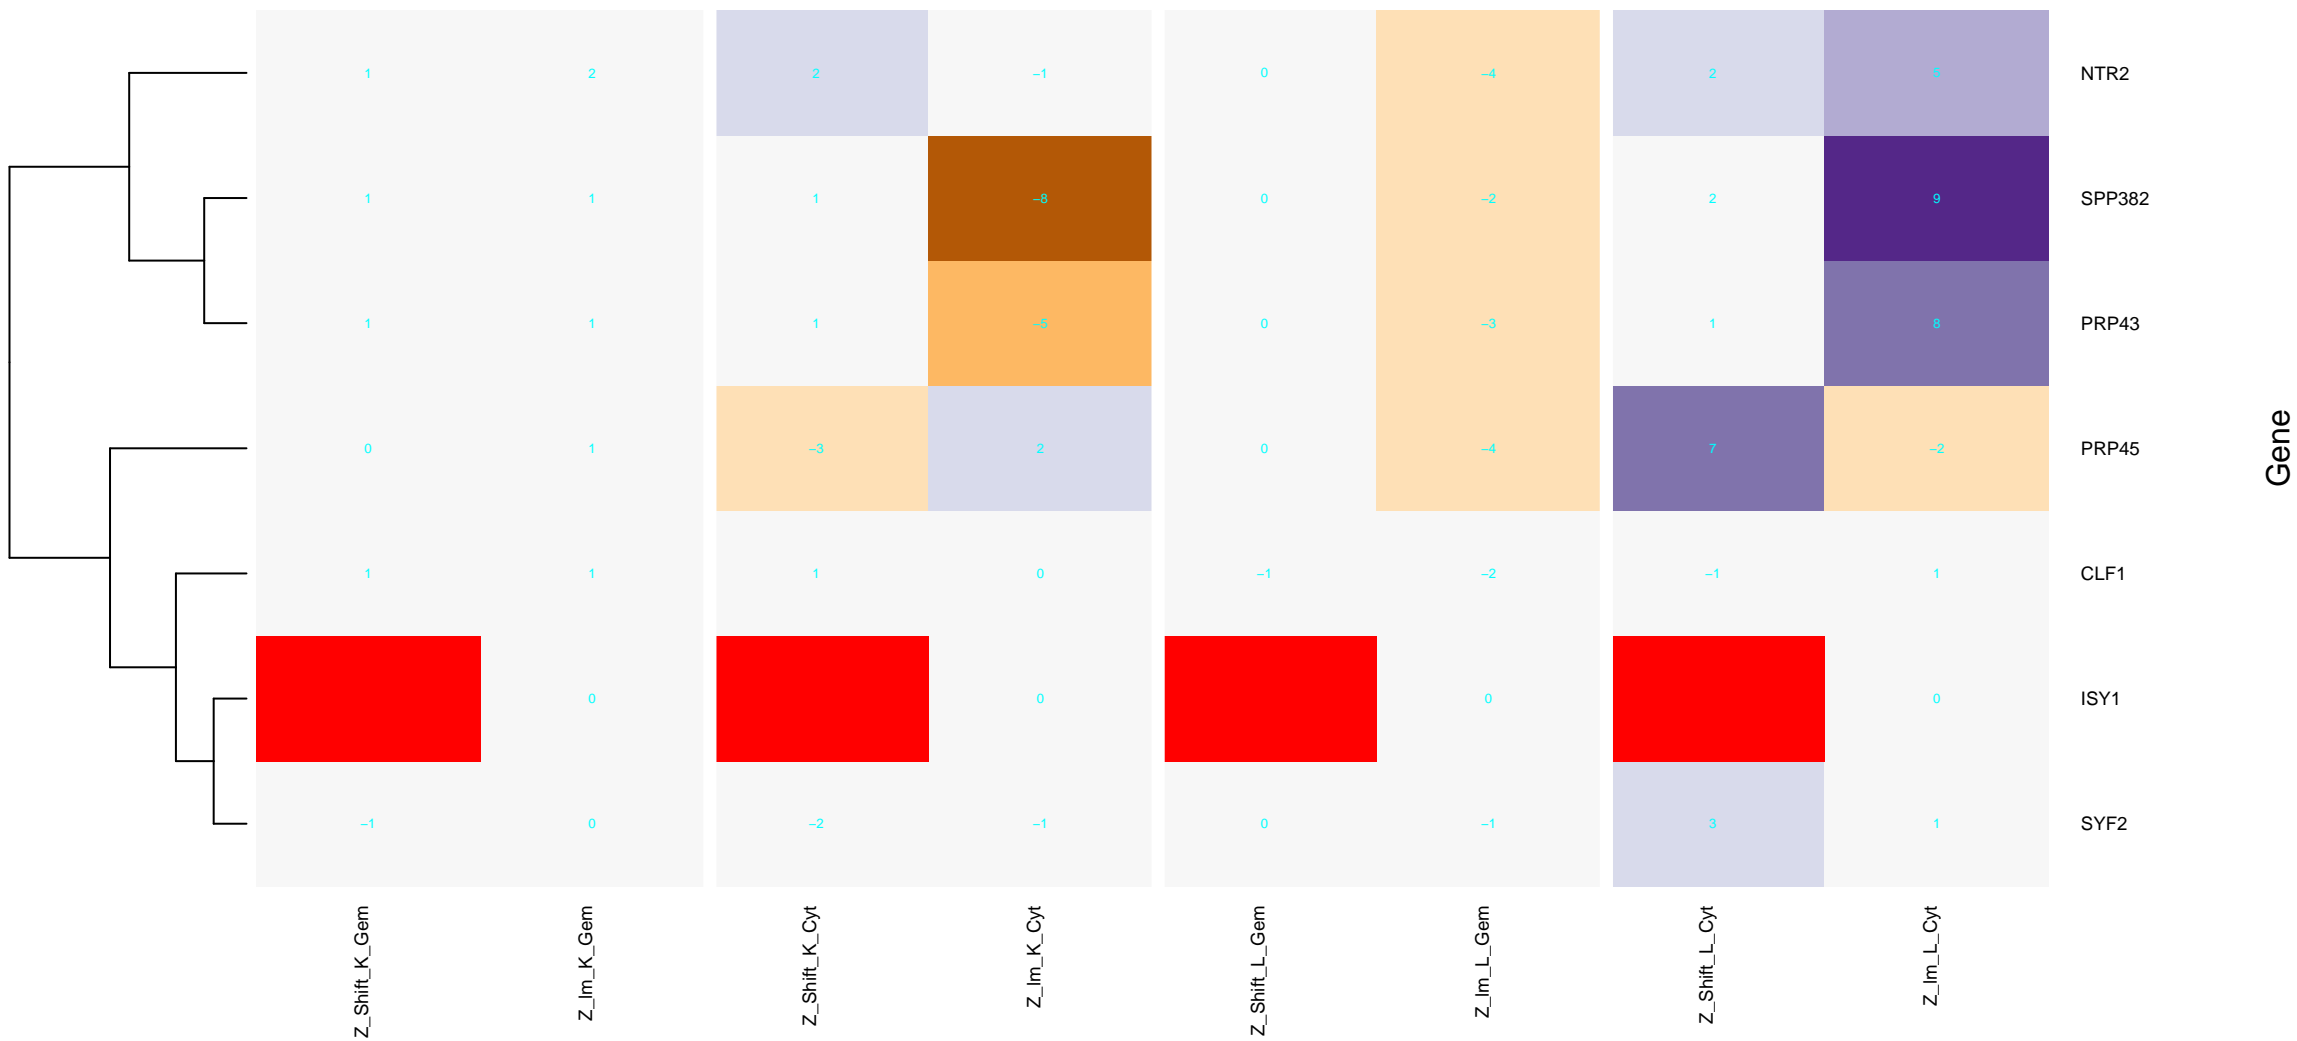

Supplement: s1 [file s1]

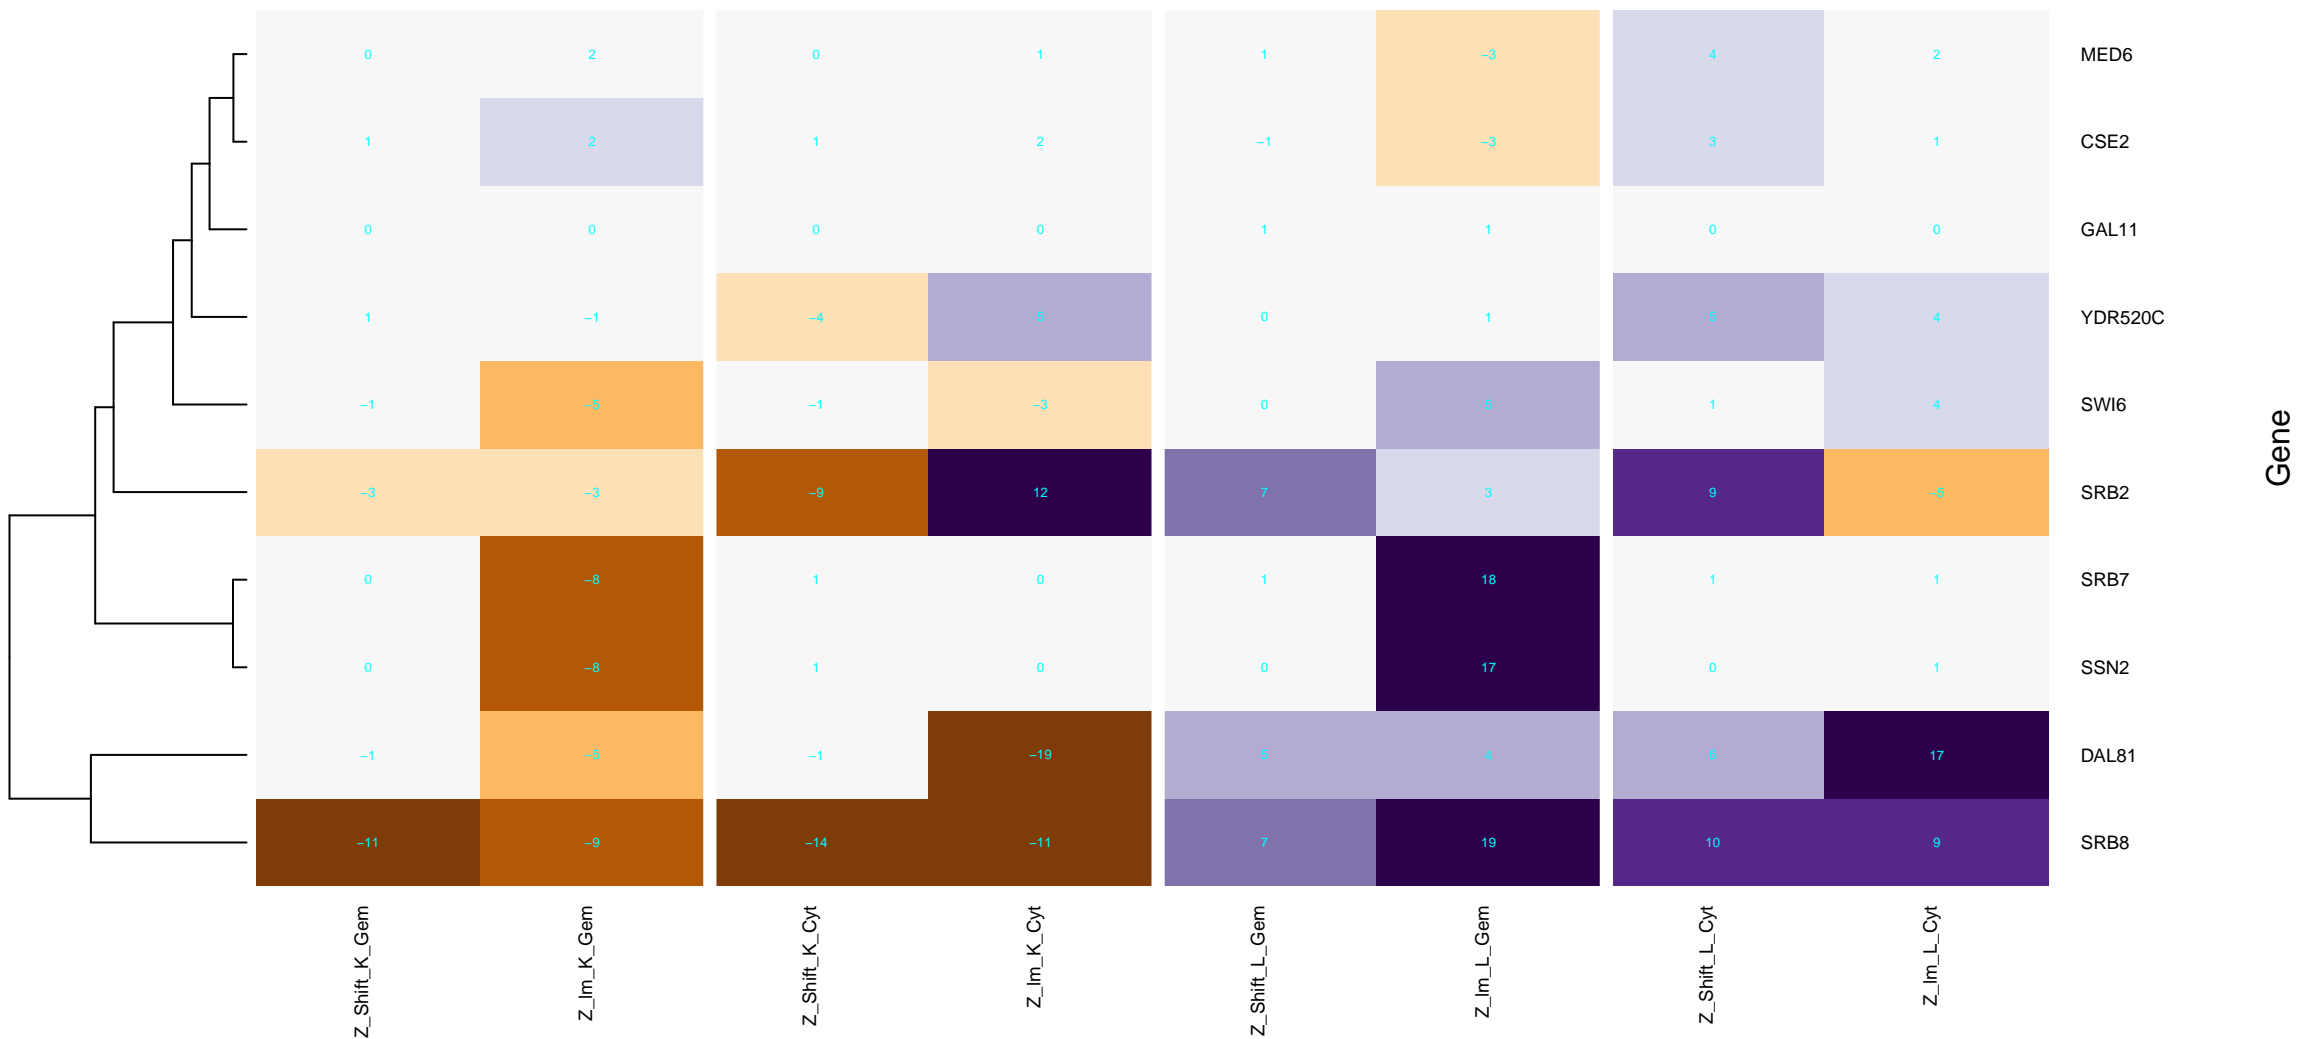

Supplement: s1 [file s1]

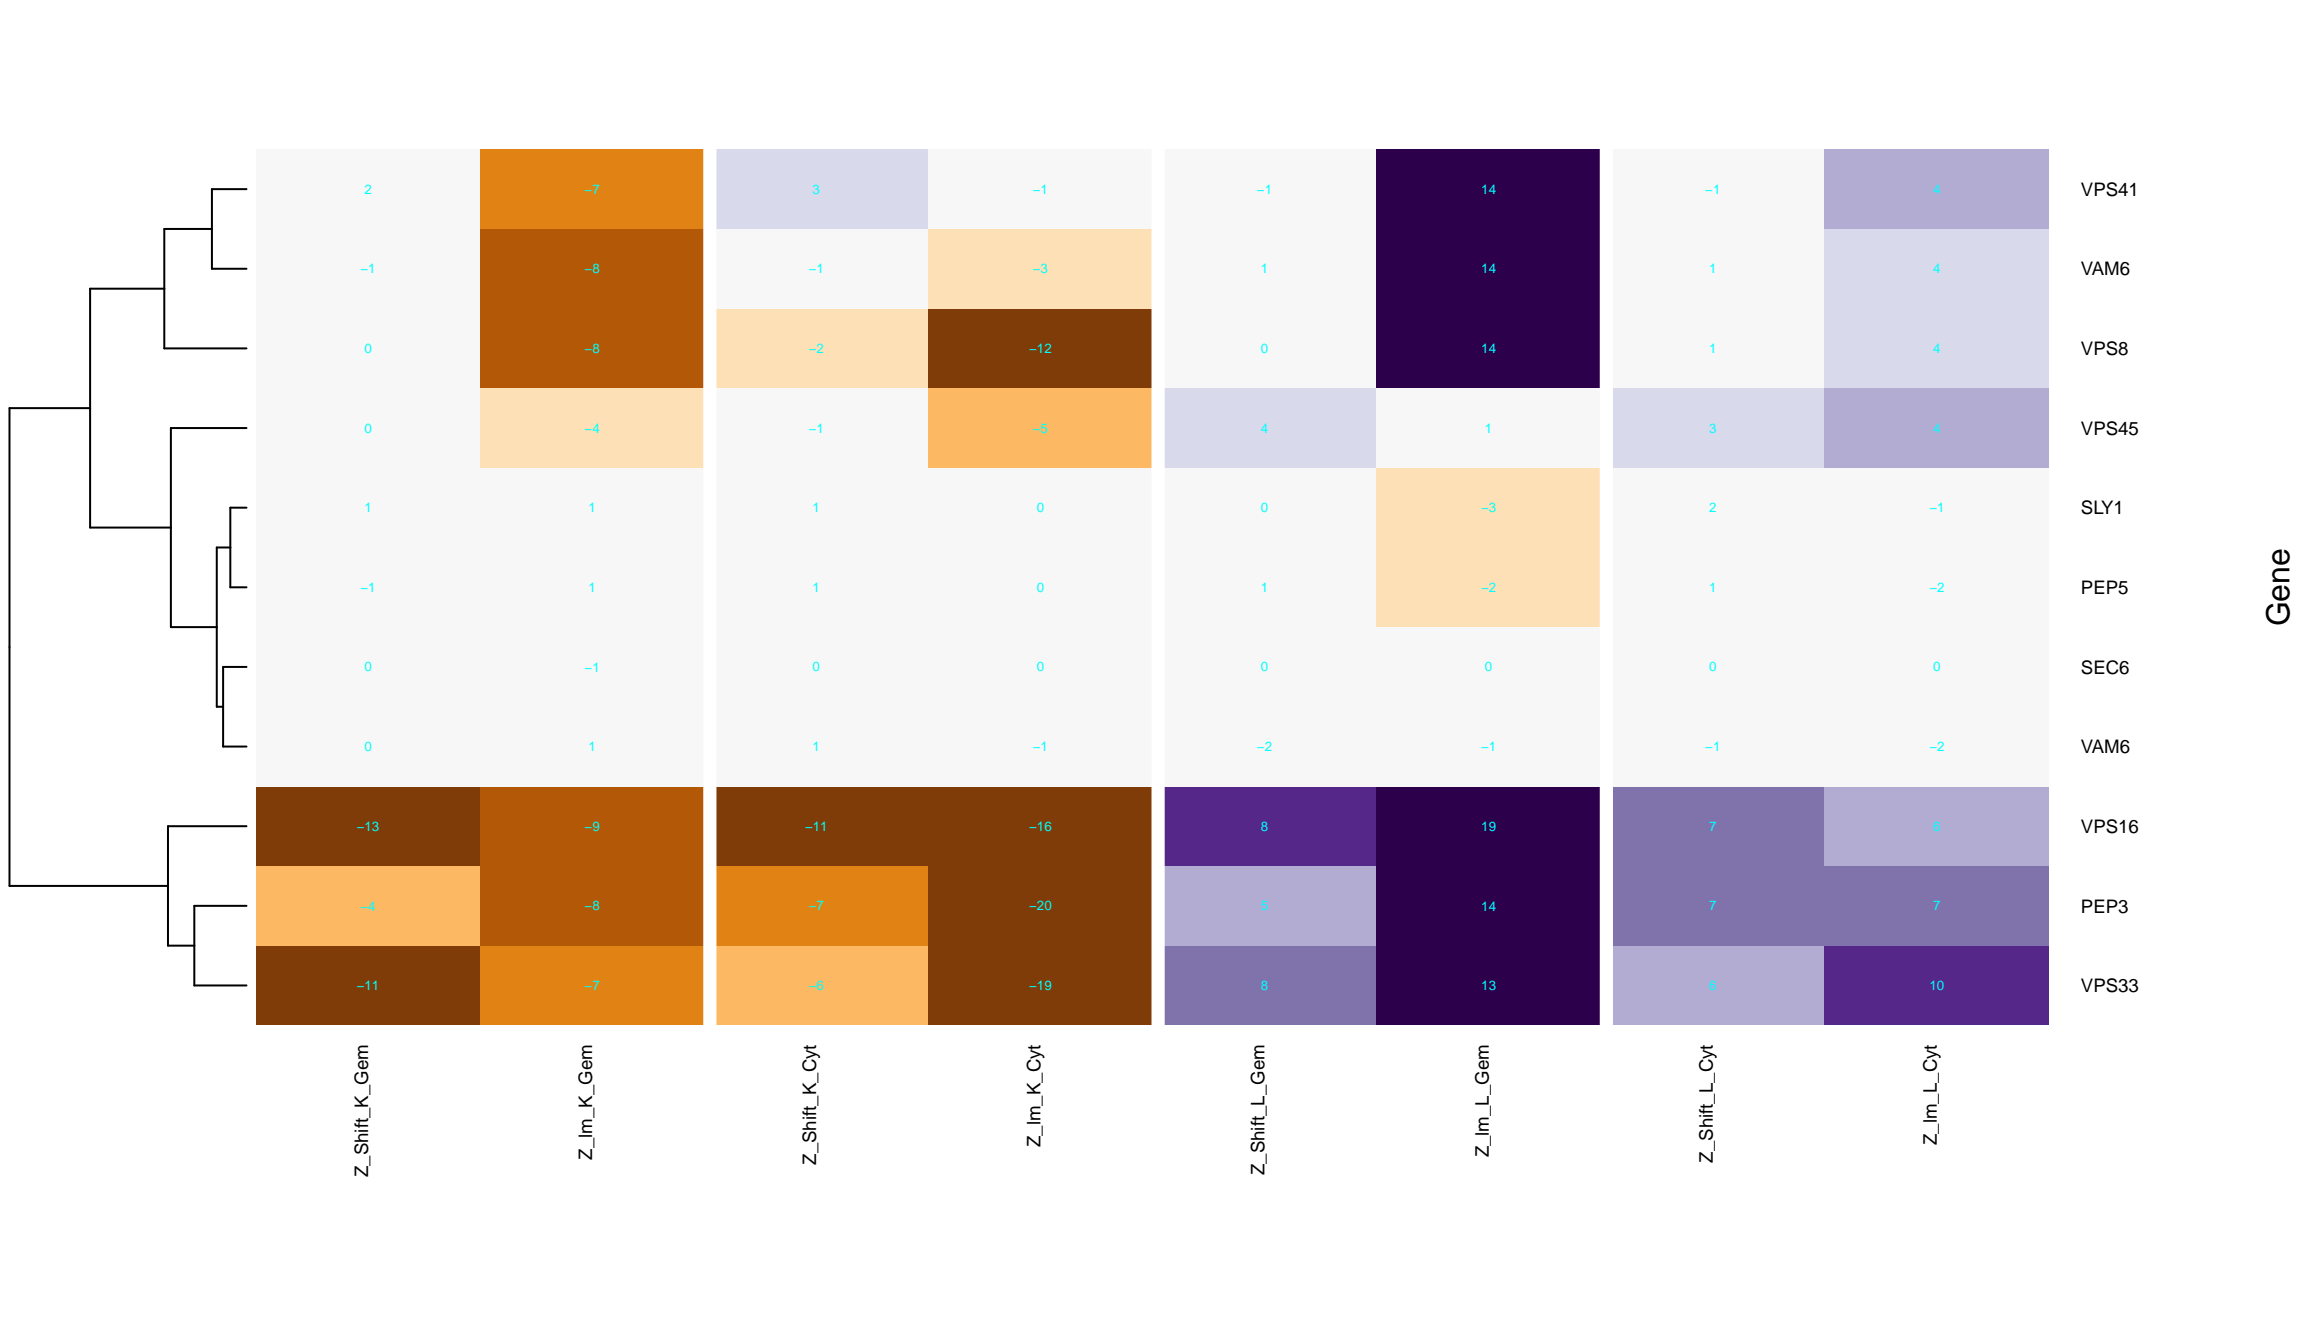

Supplement: s1 [file s1]

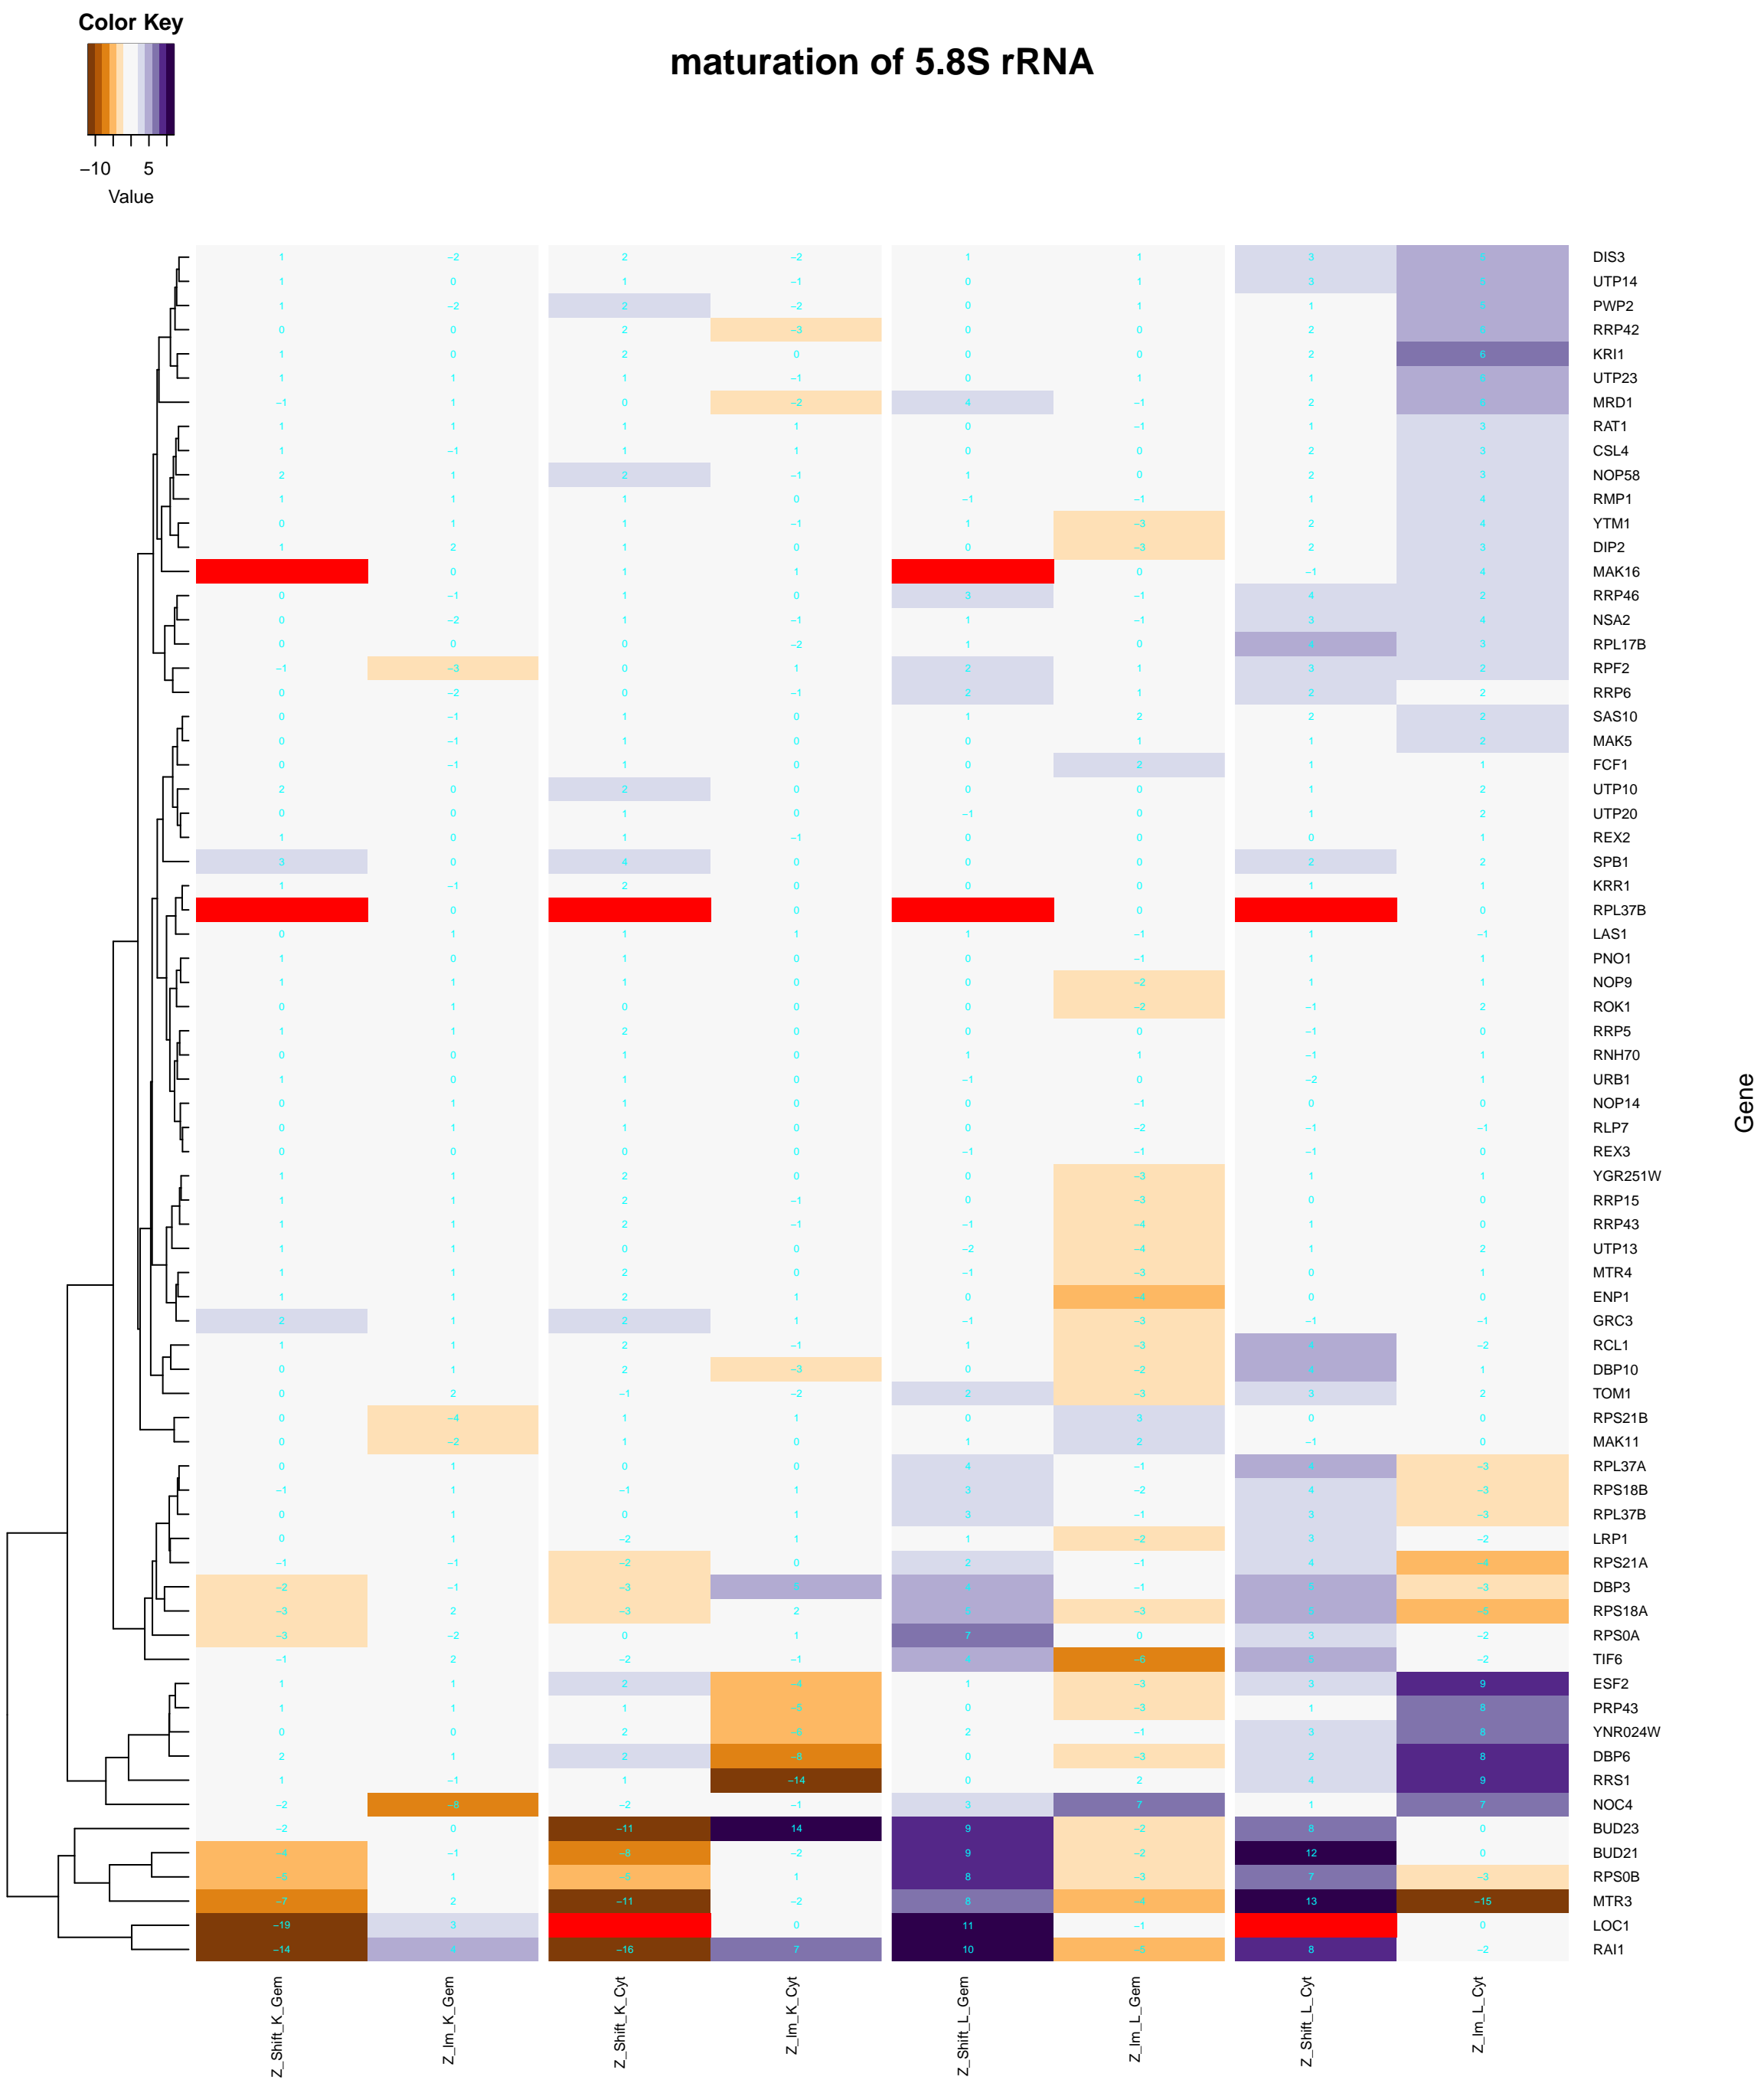

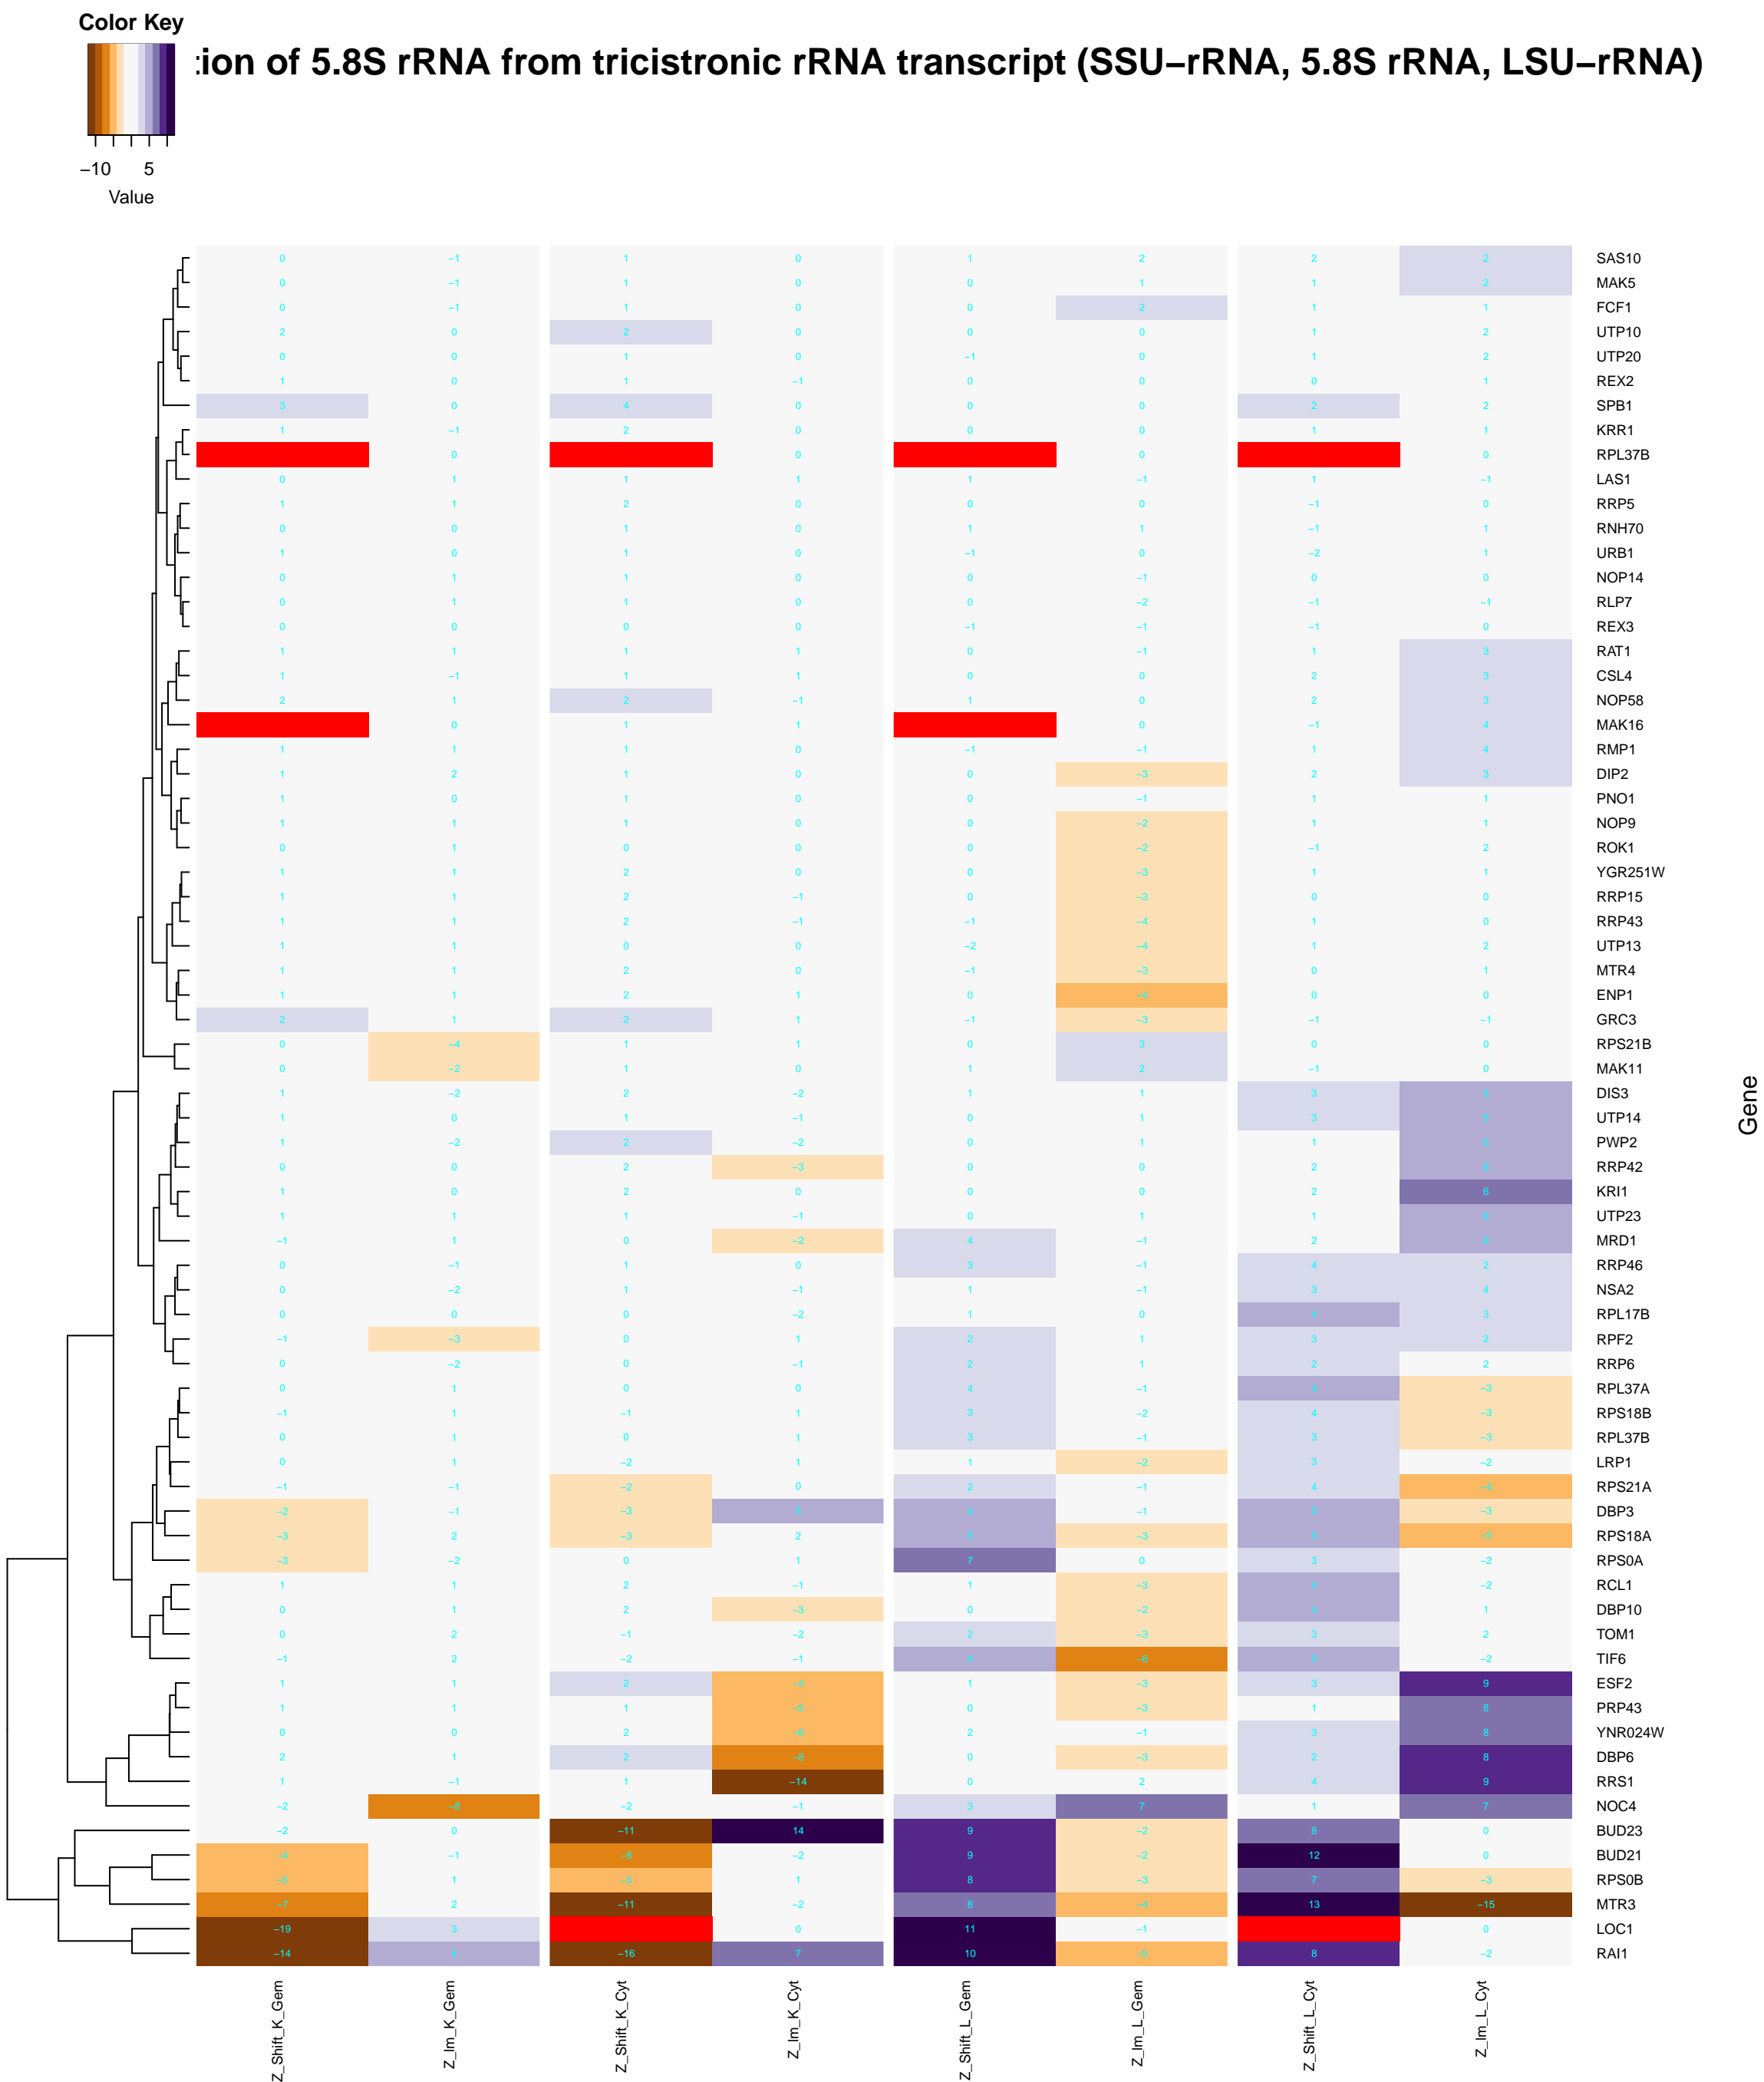

Supplement: s1 [file s1]

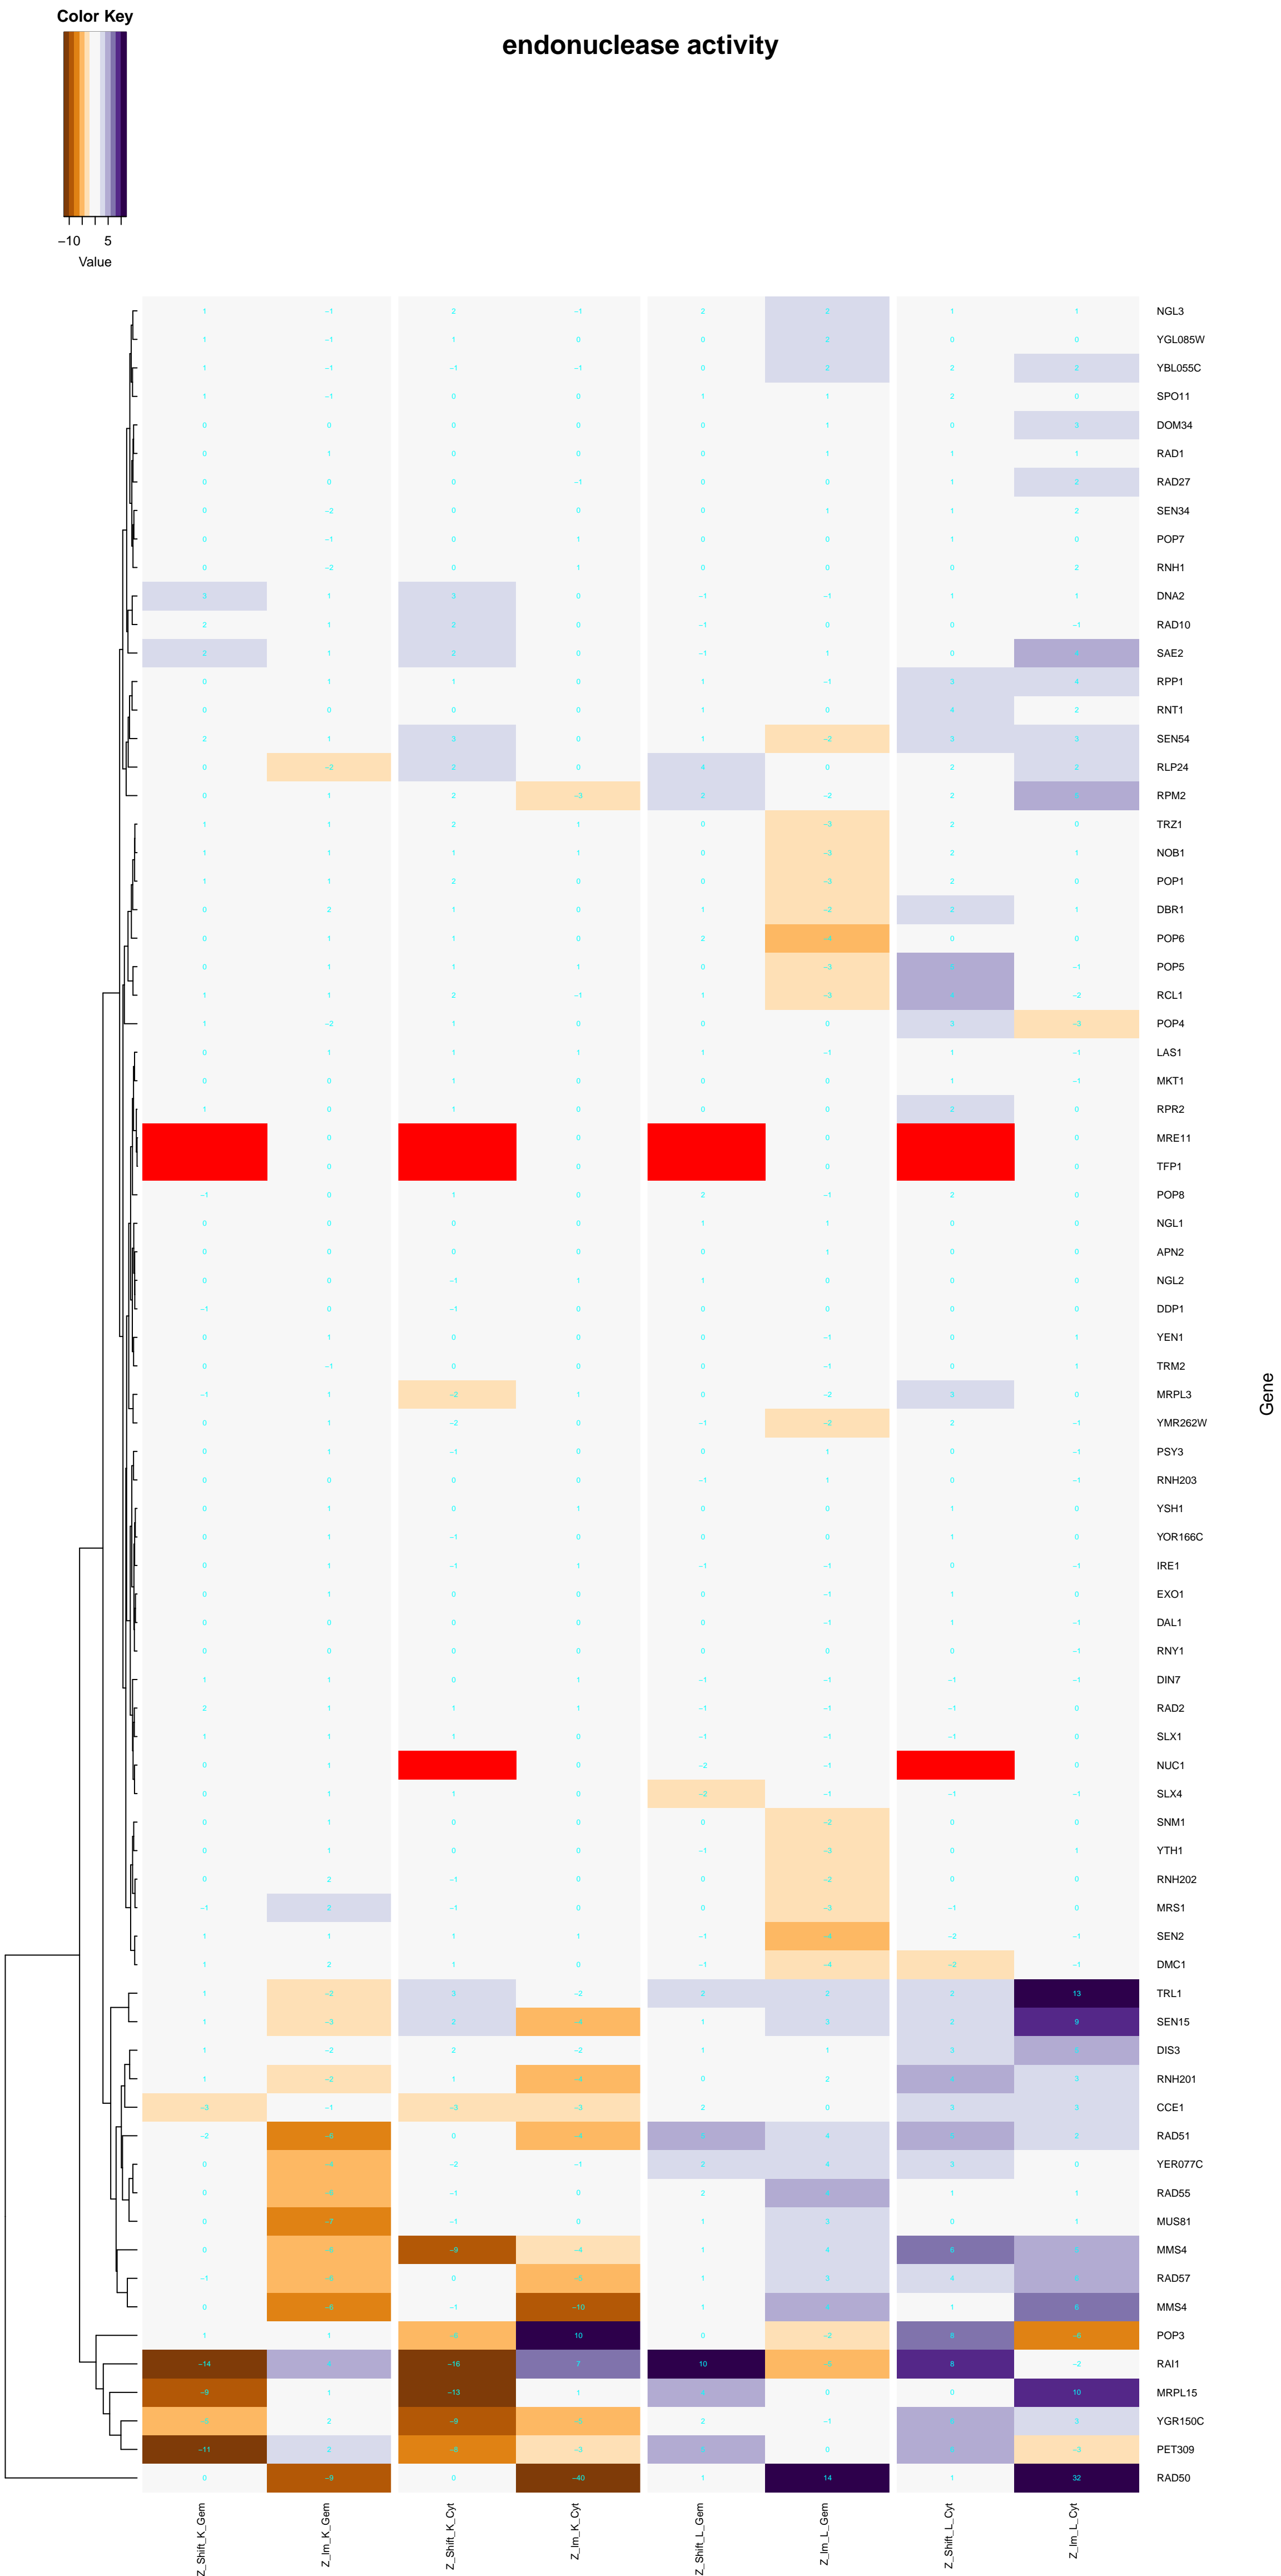

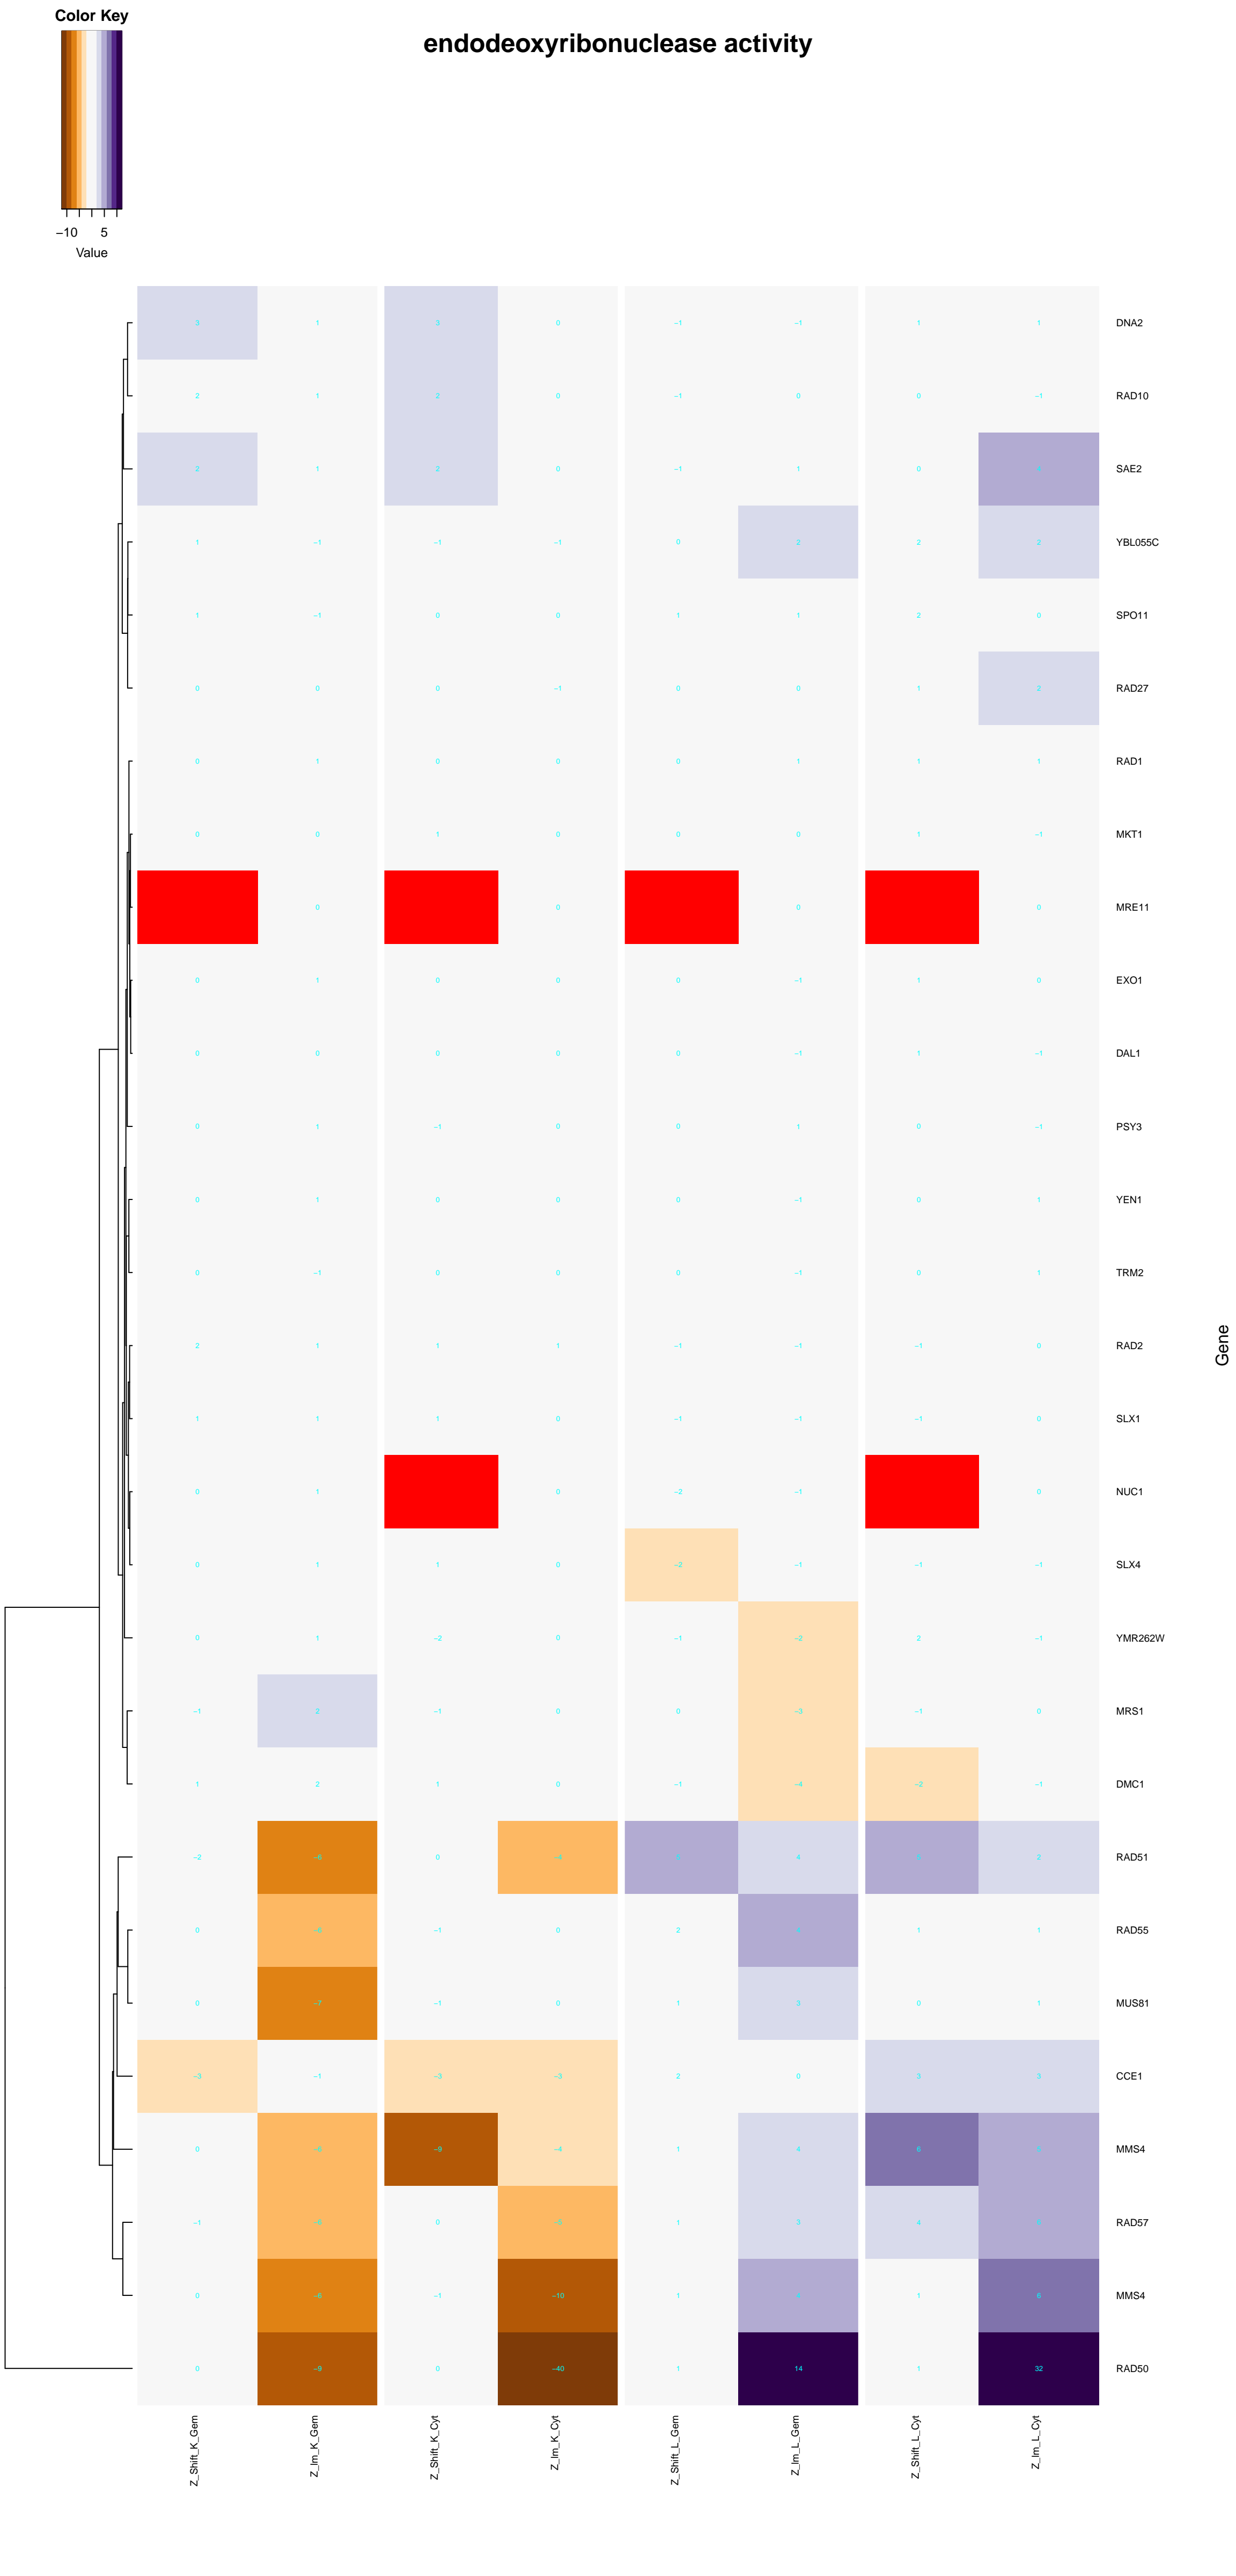

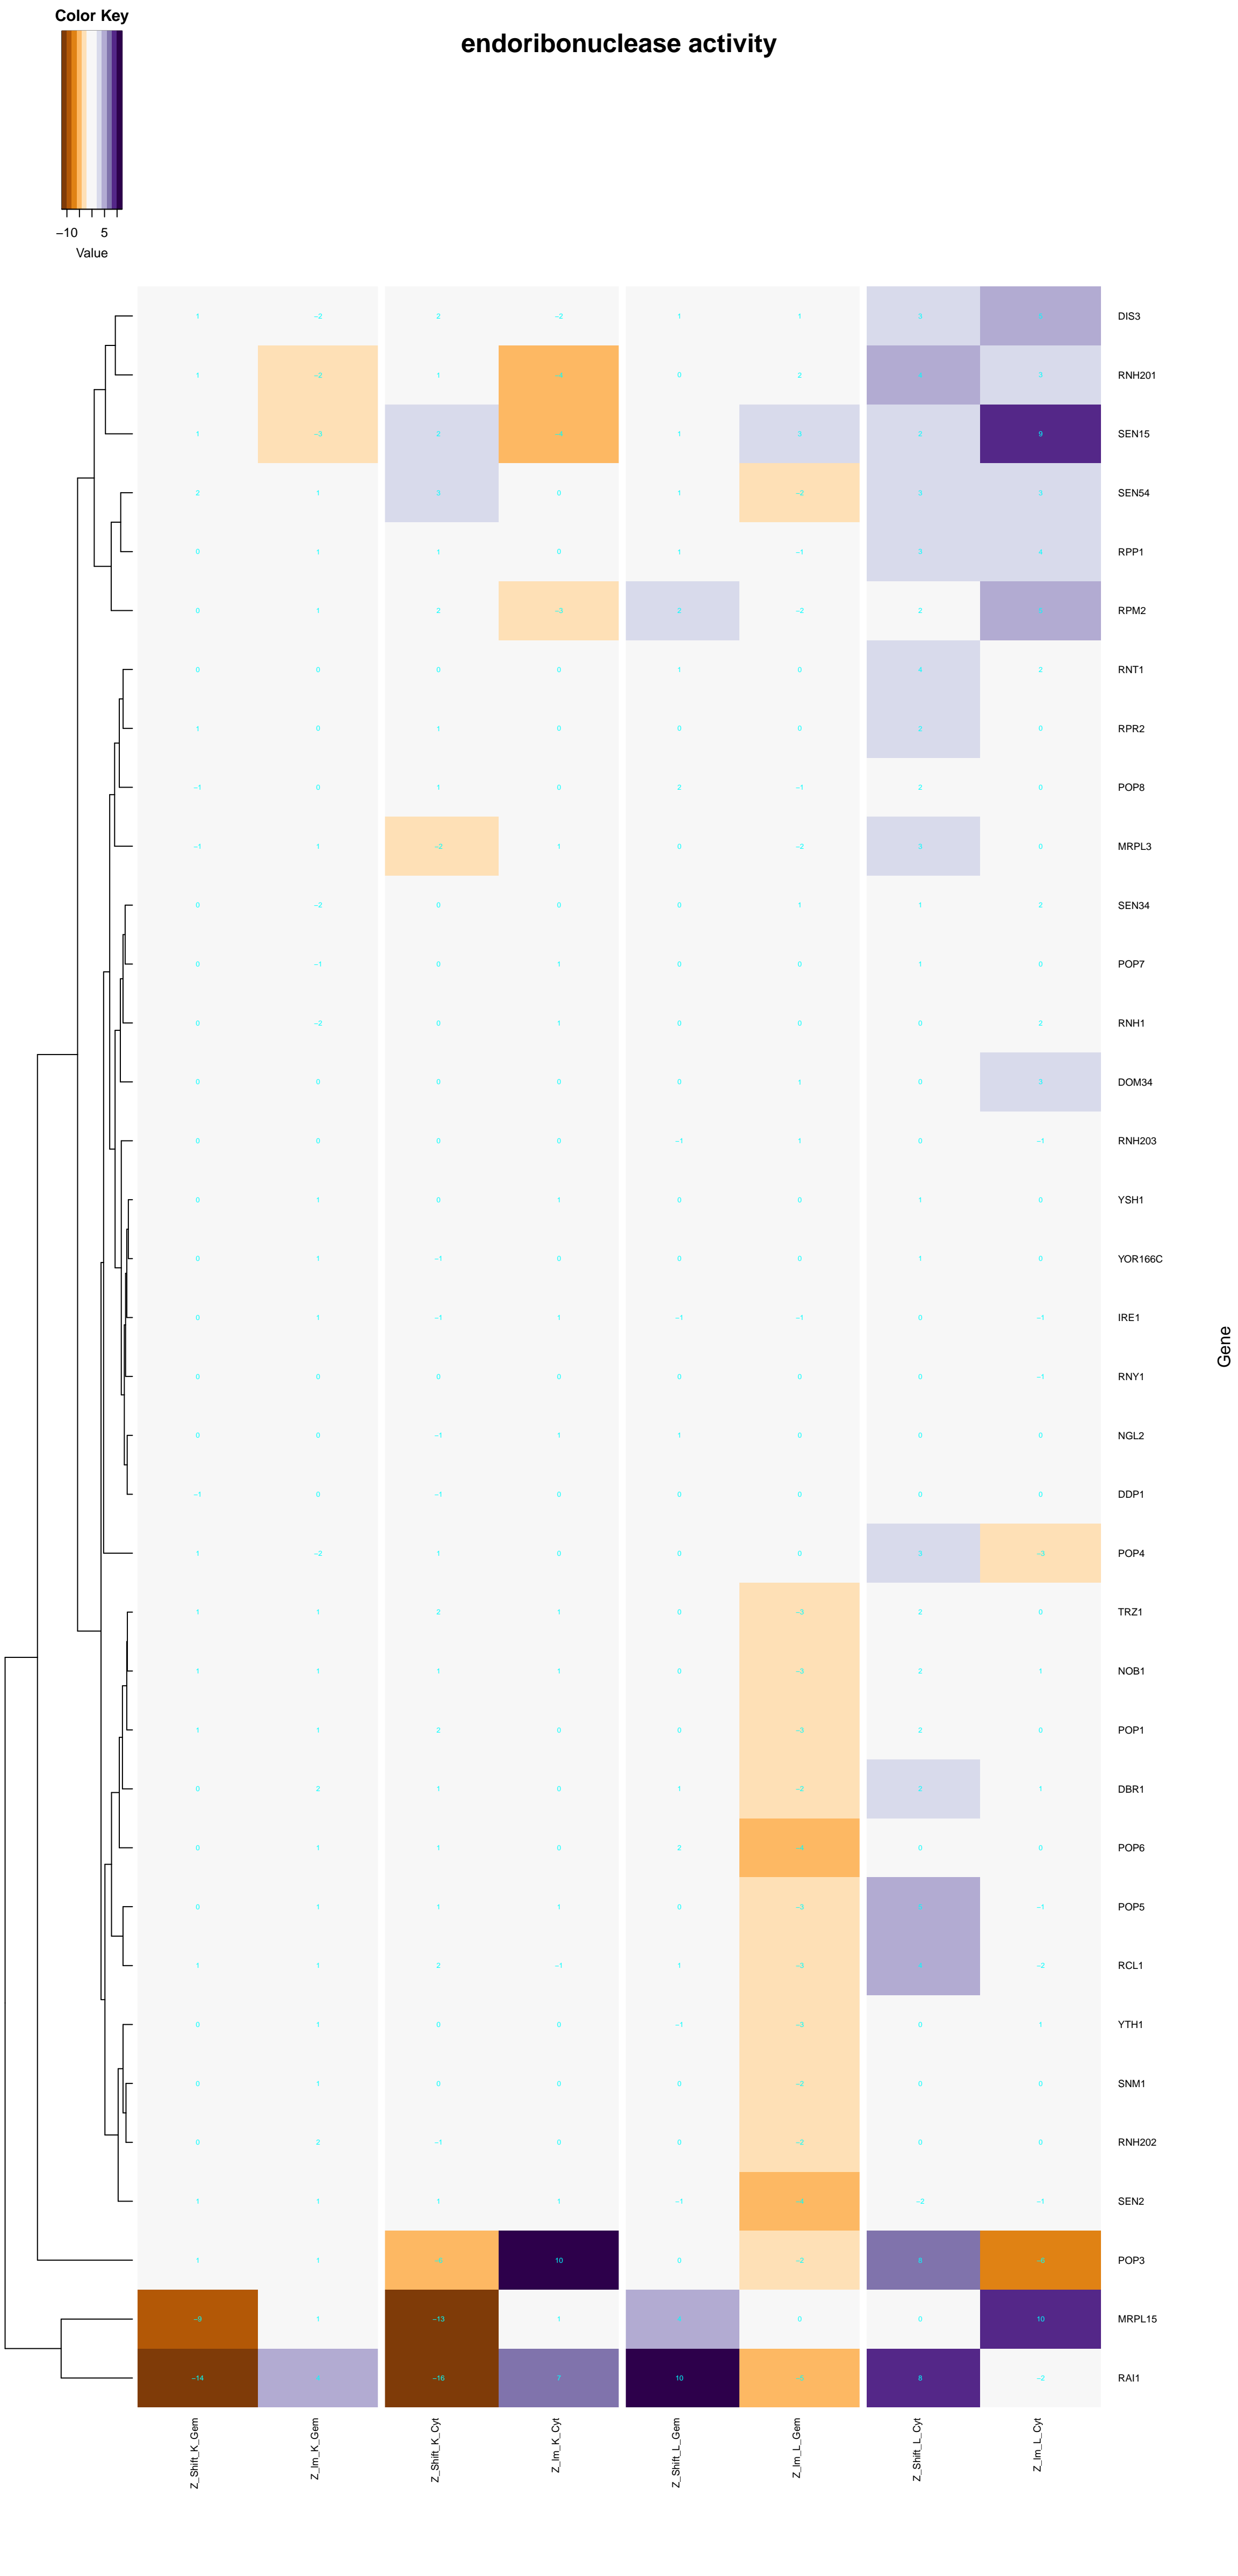

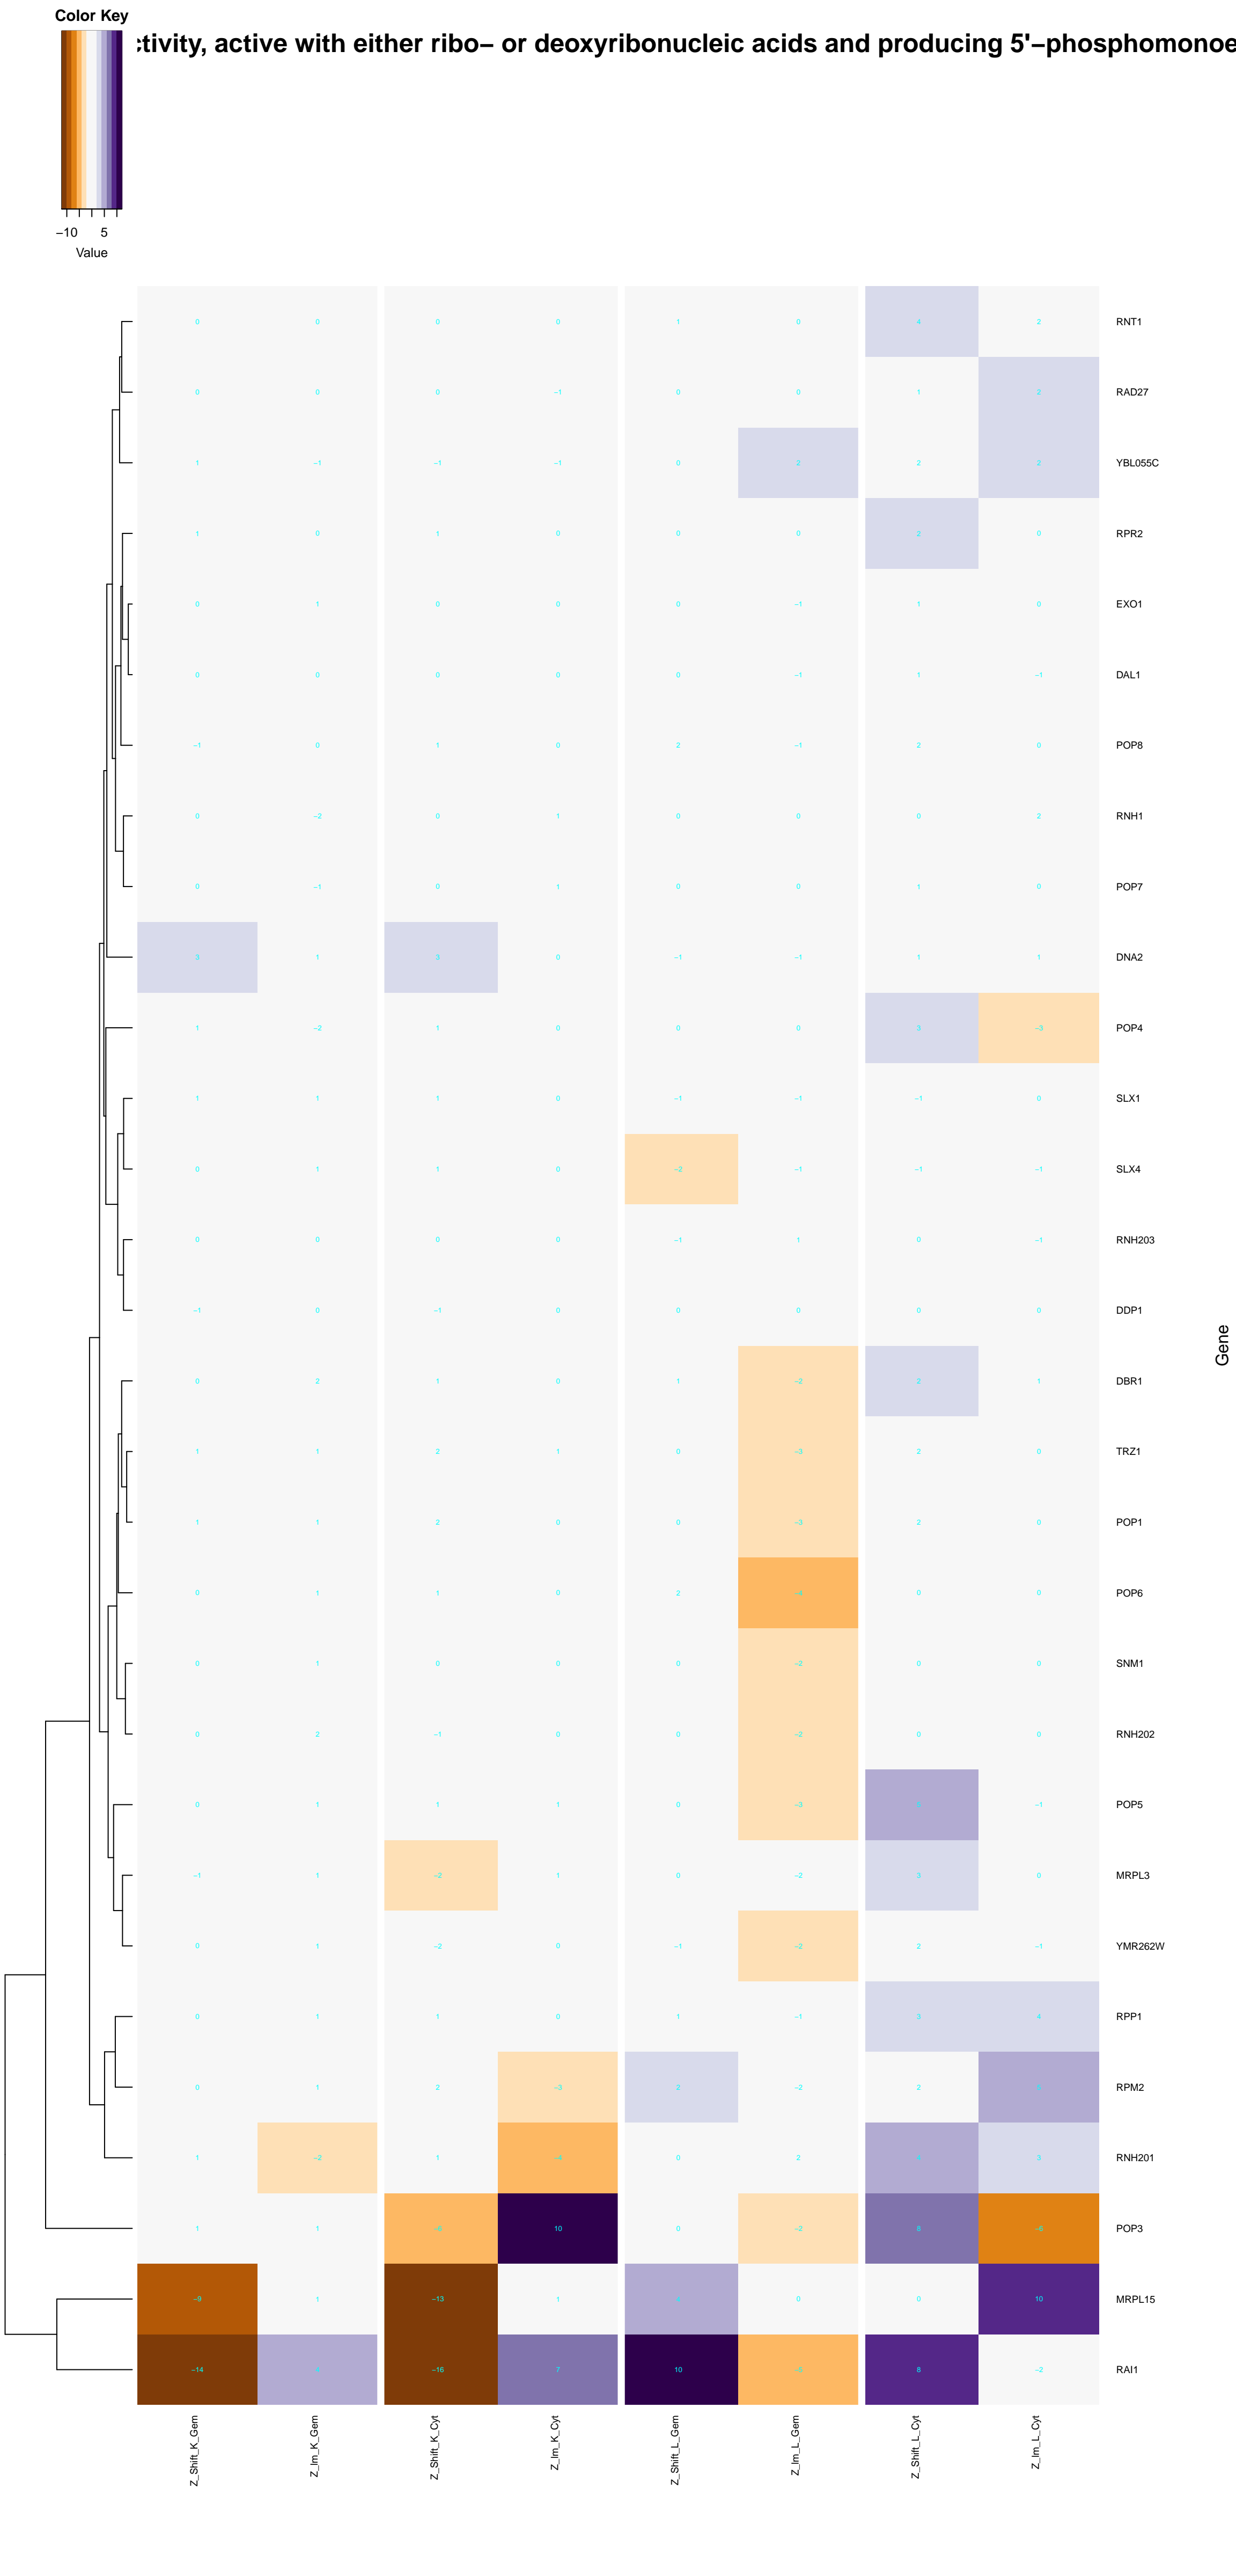

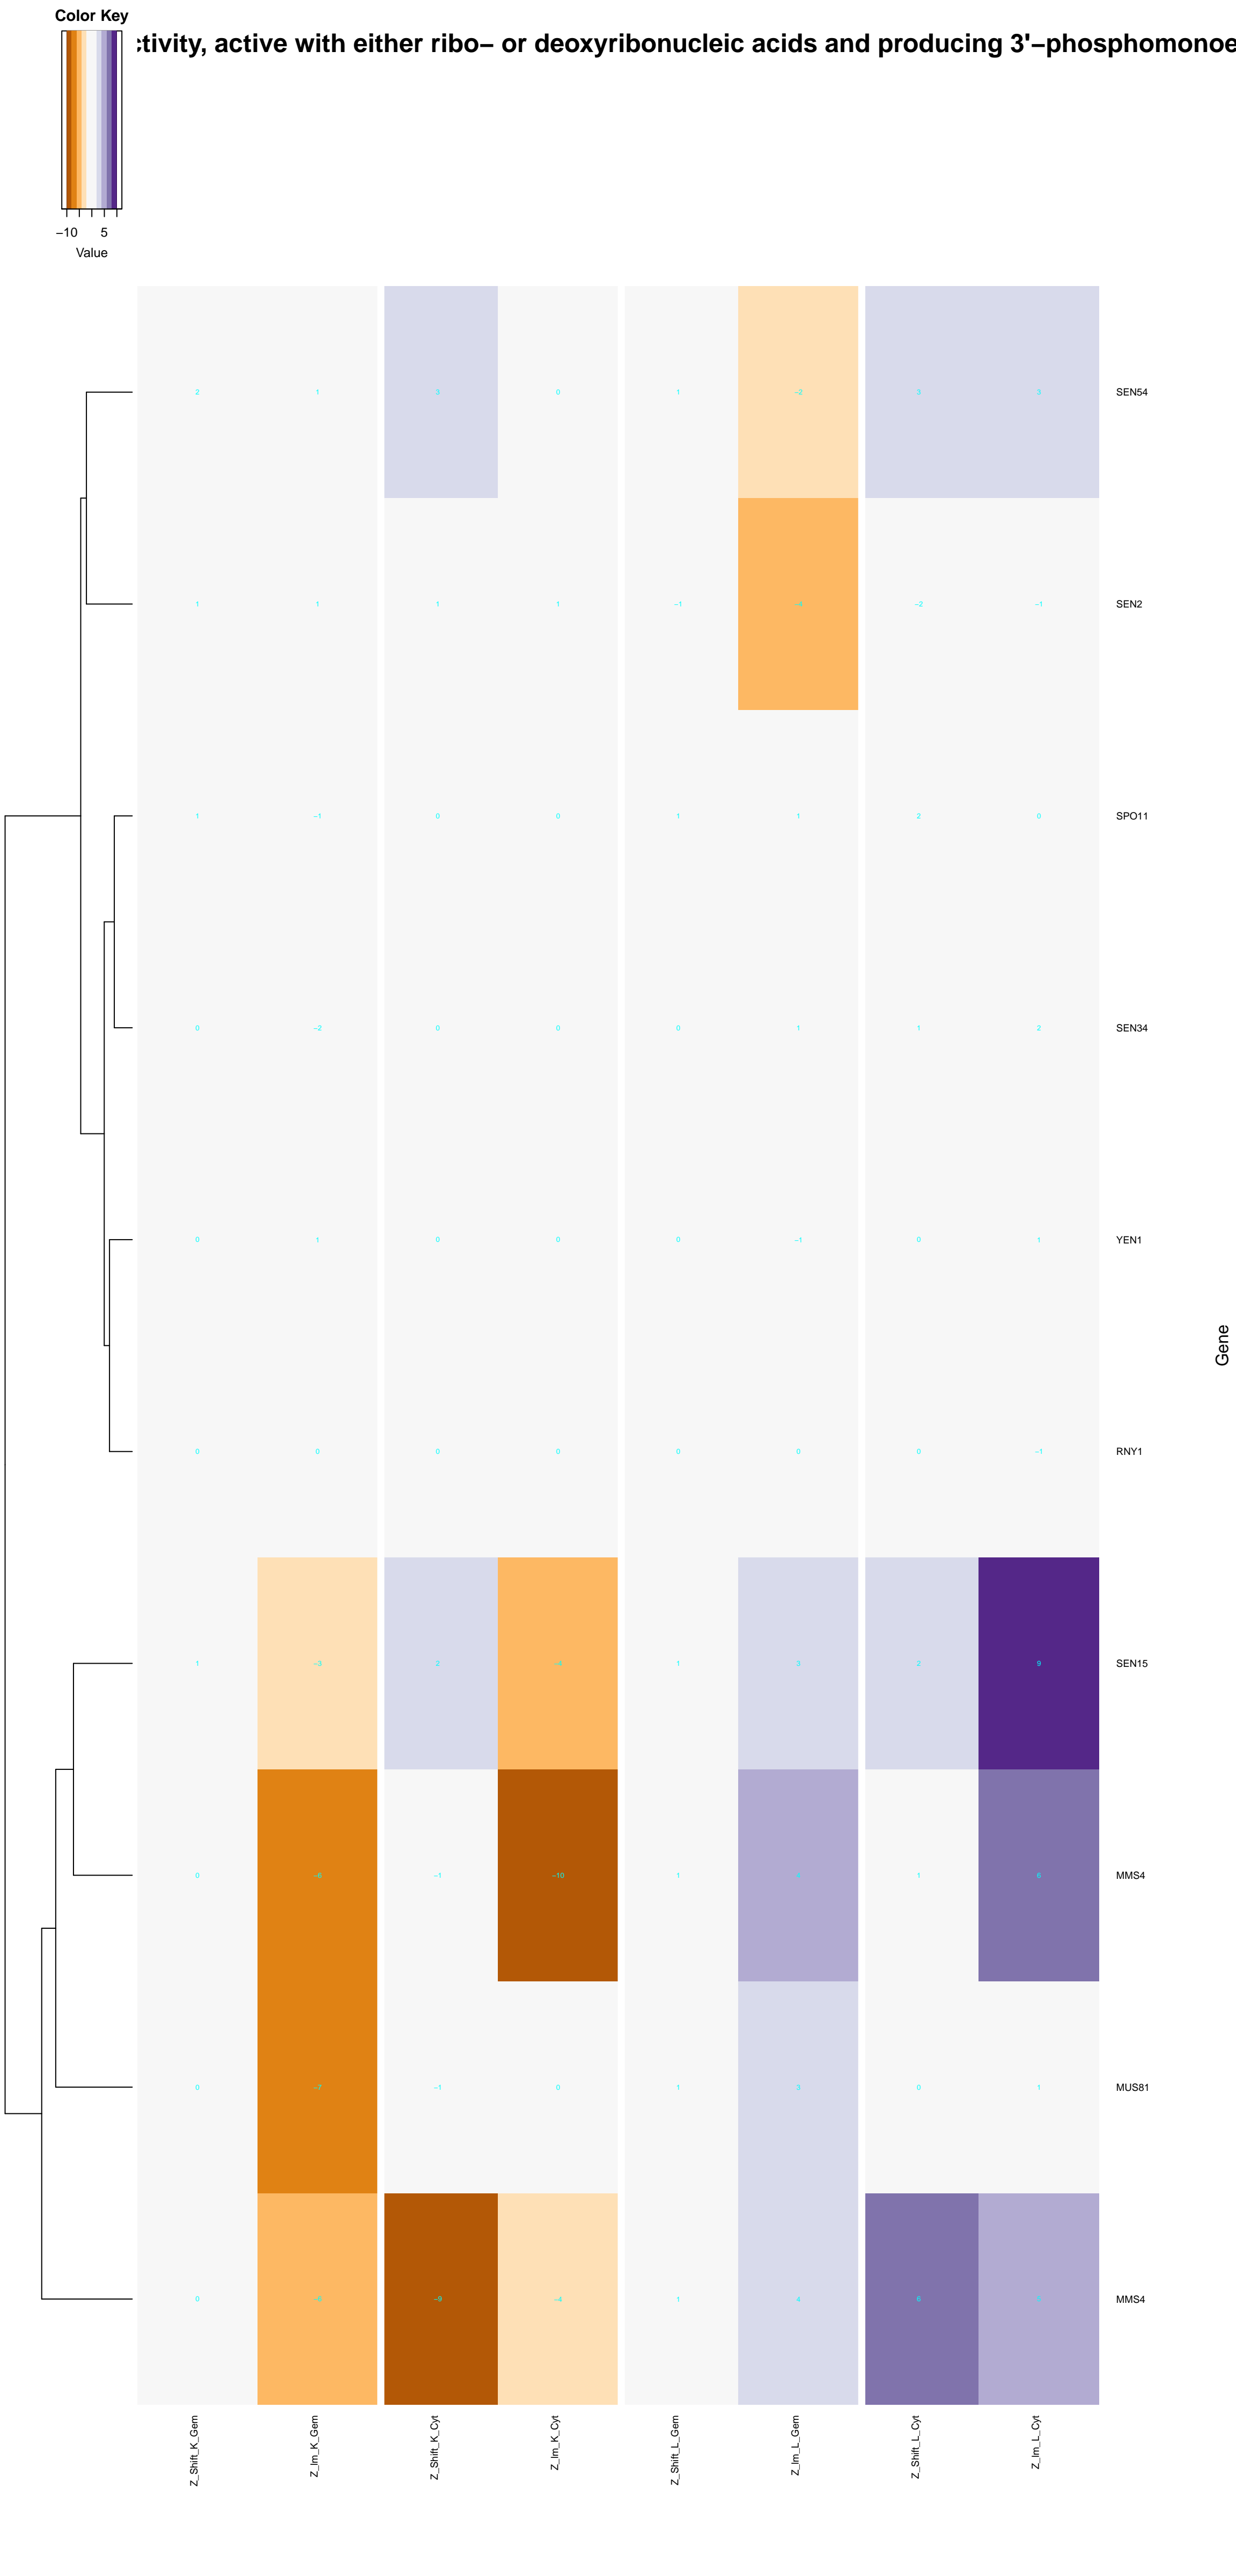

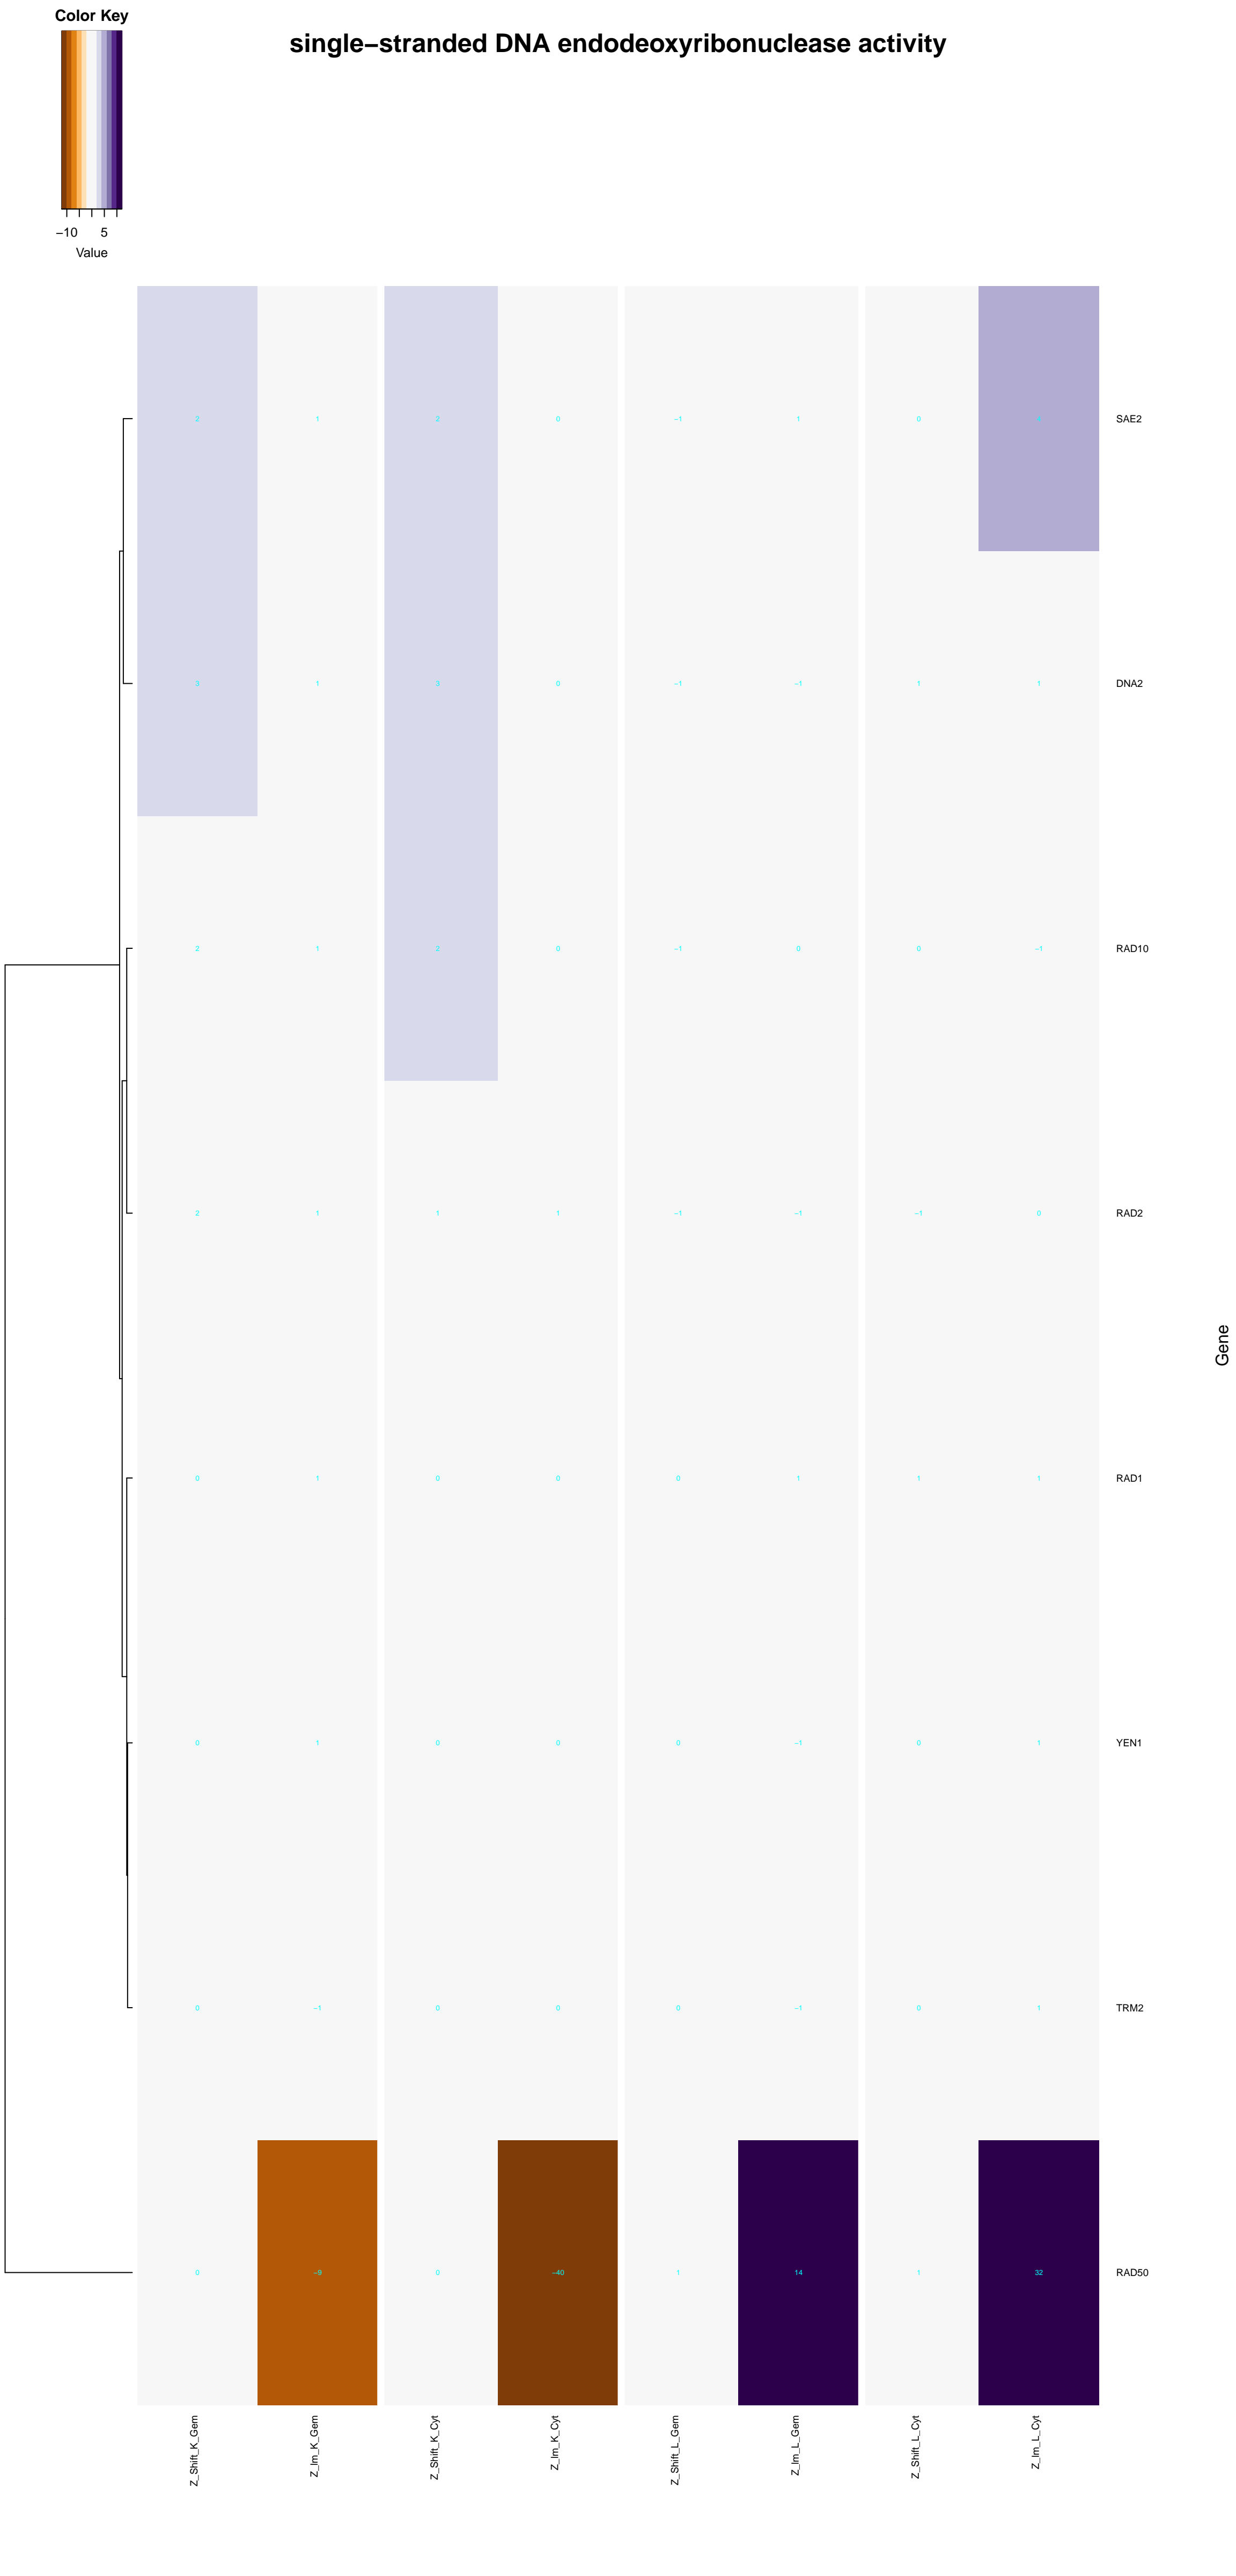

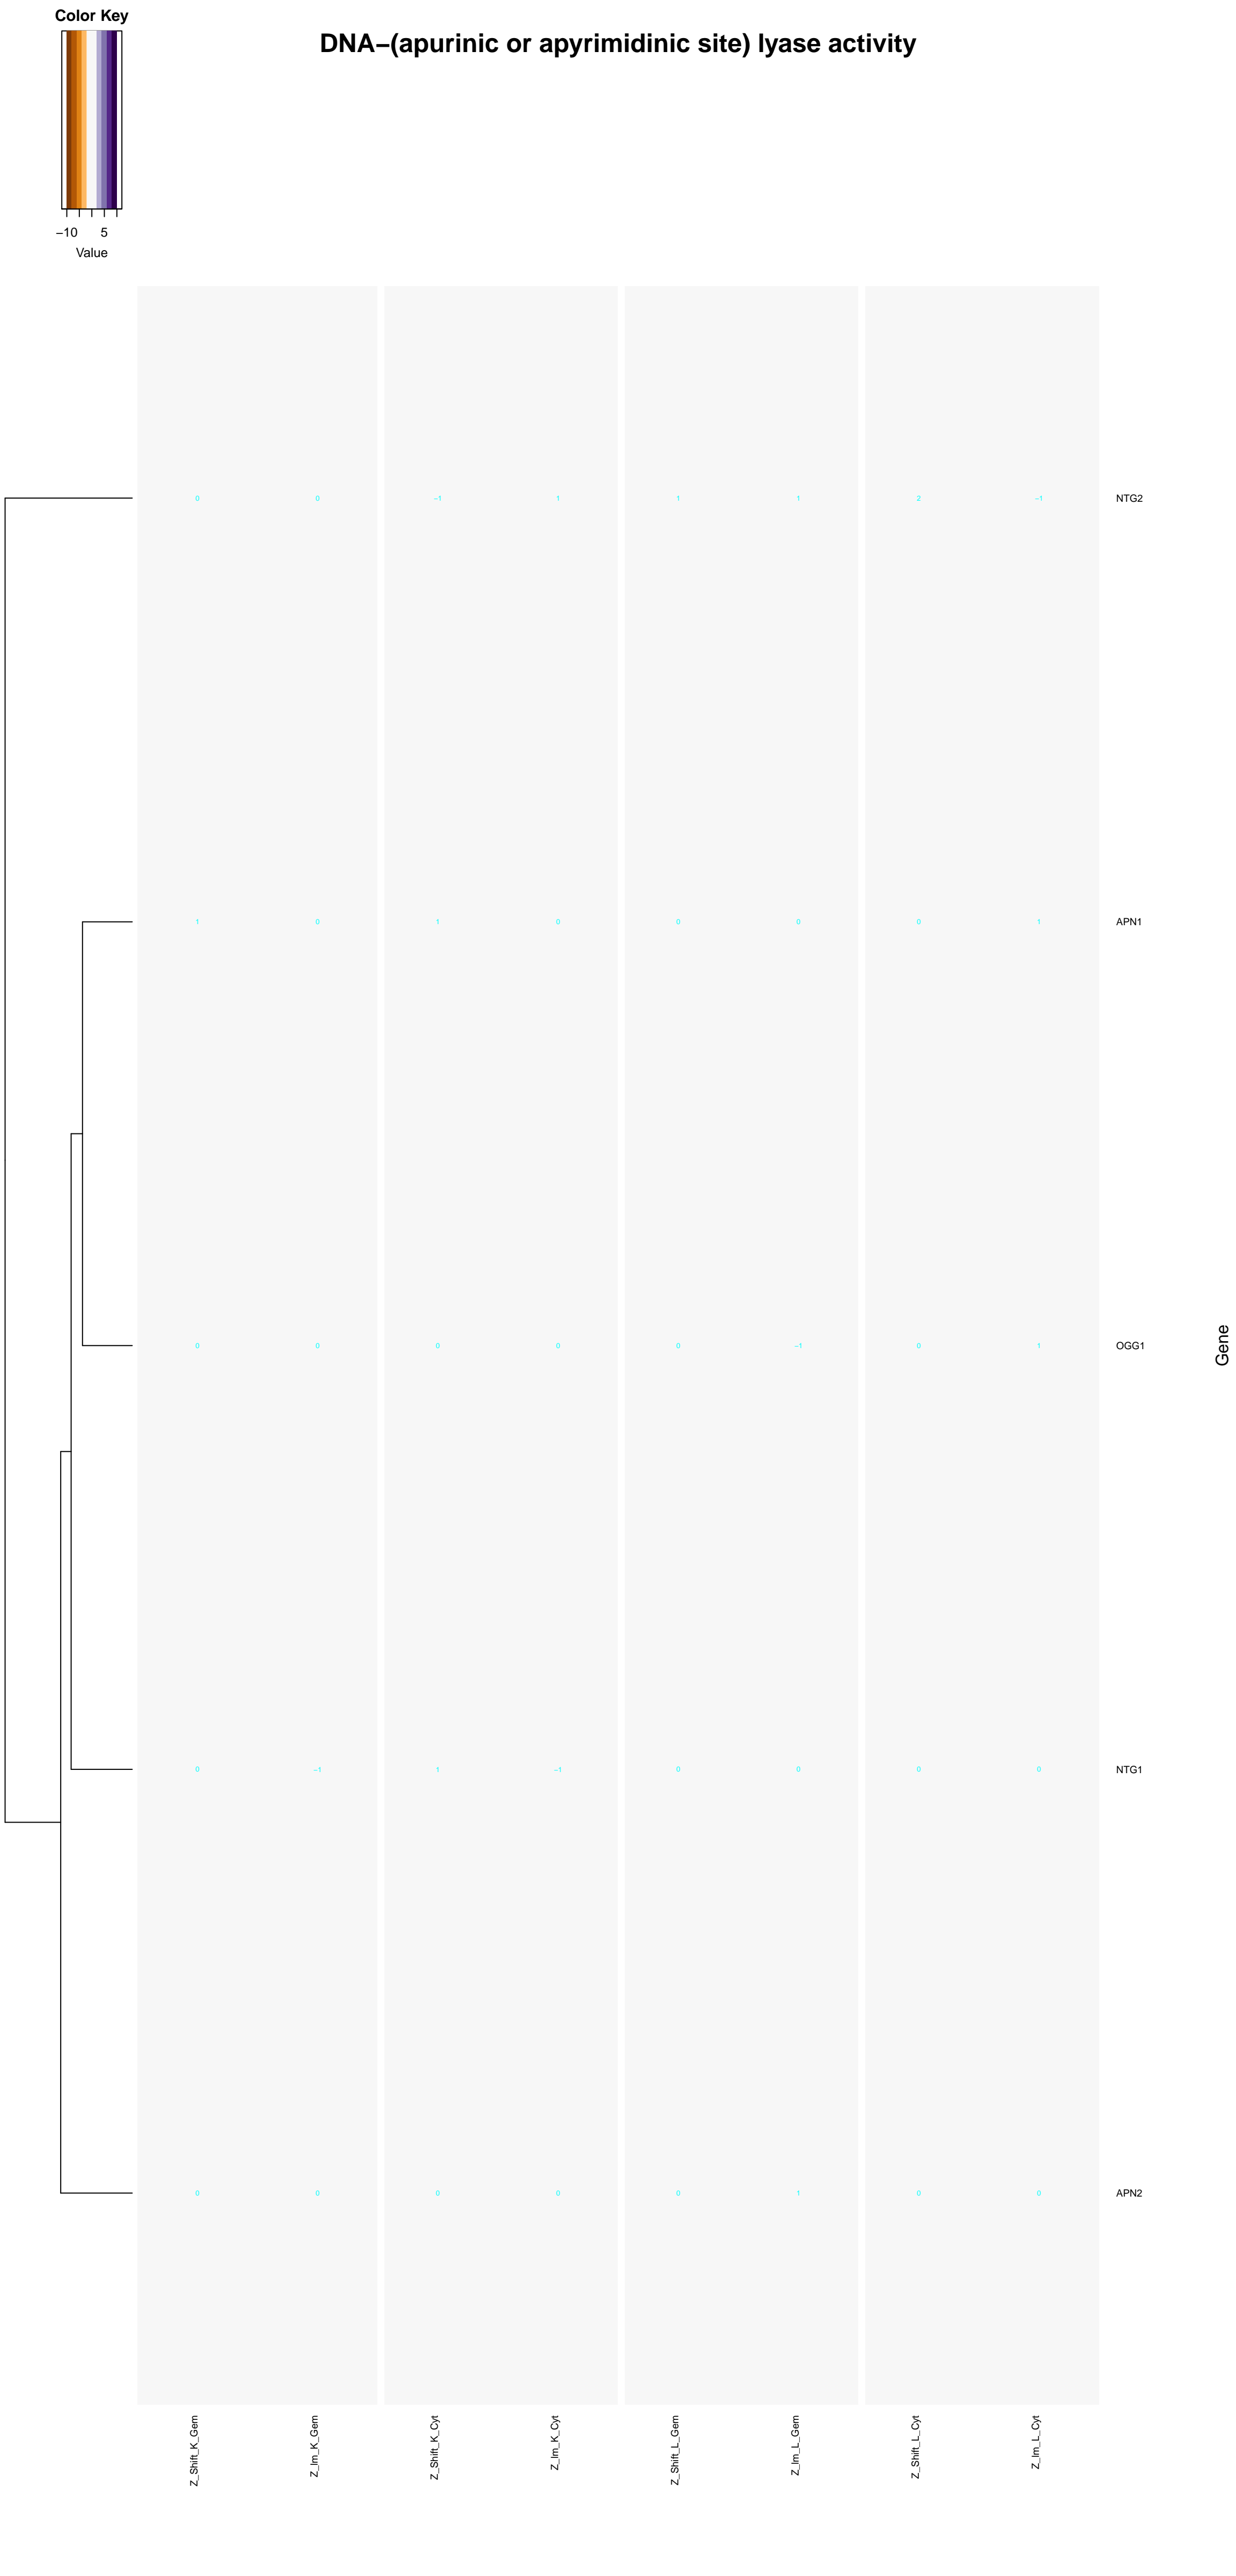

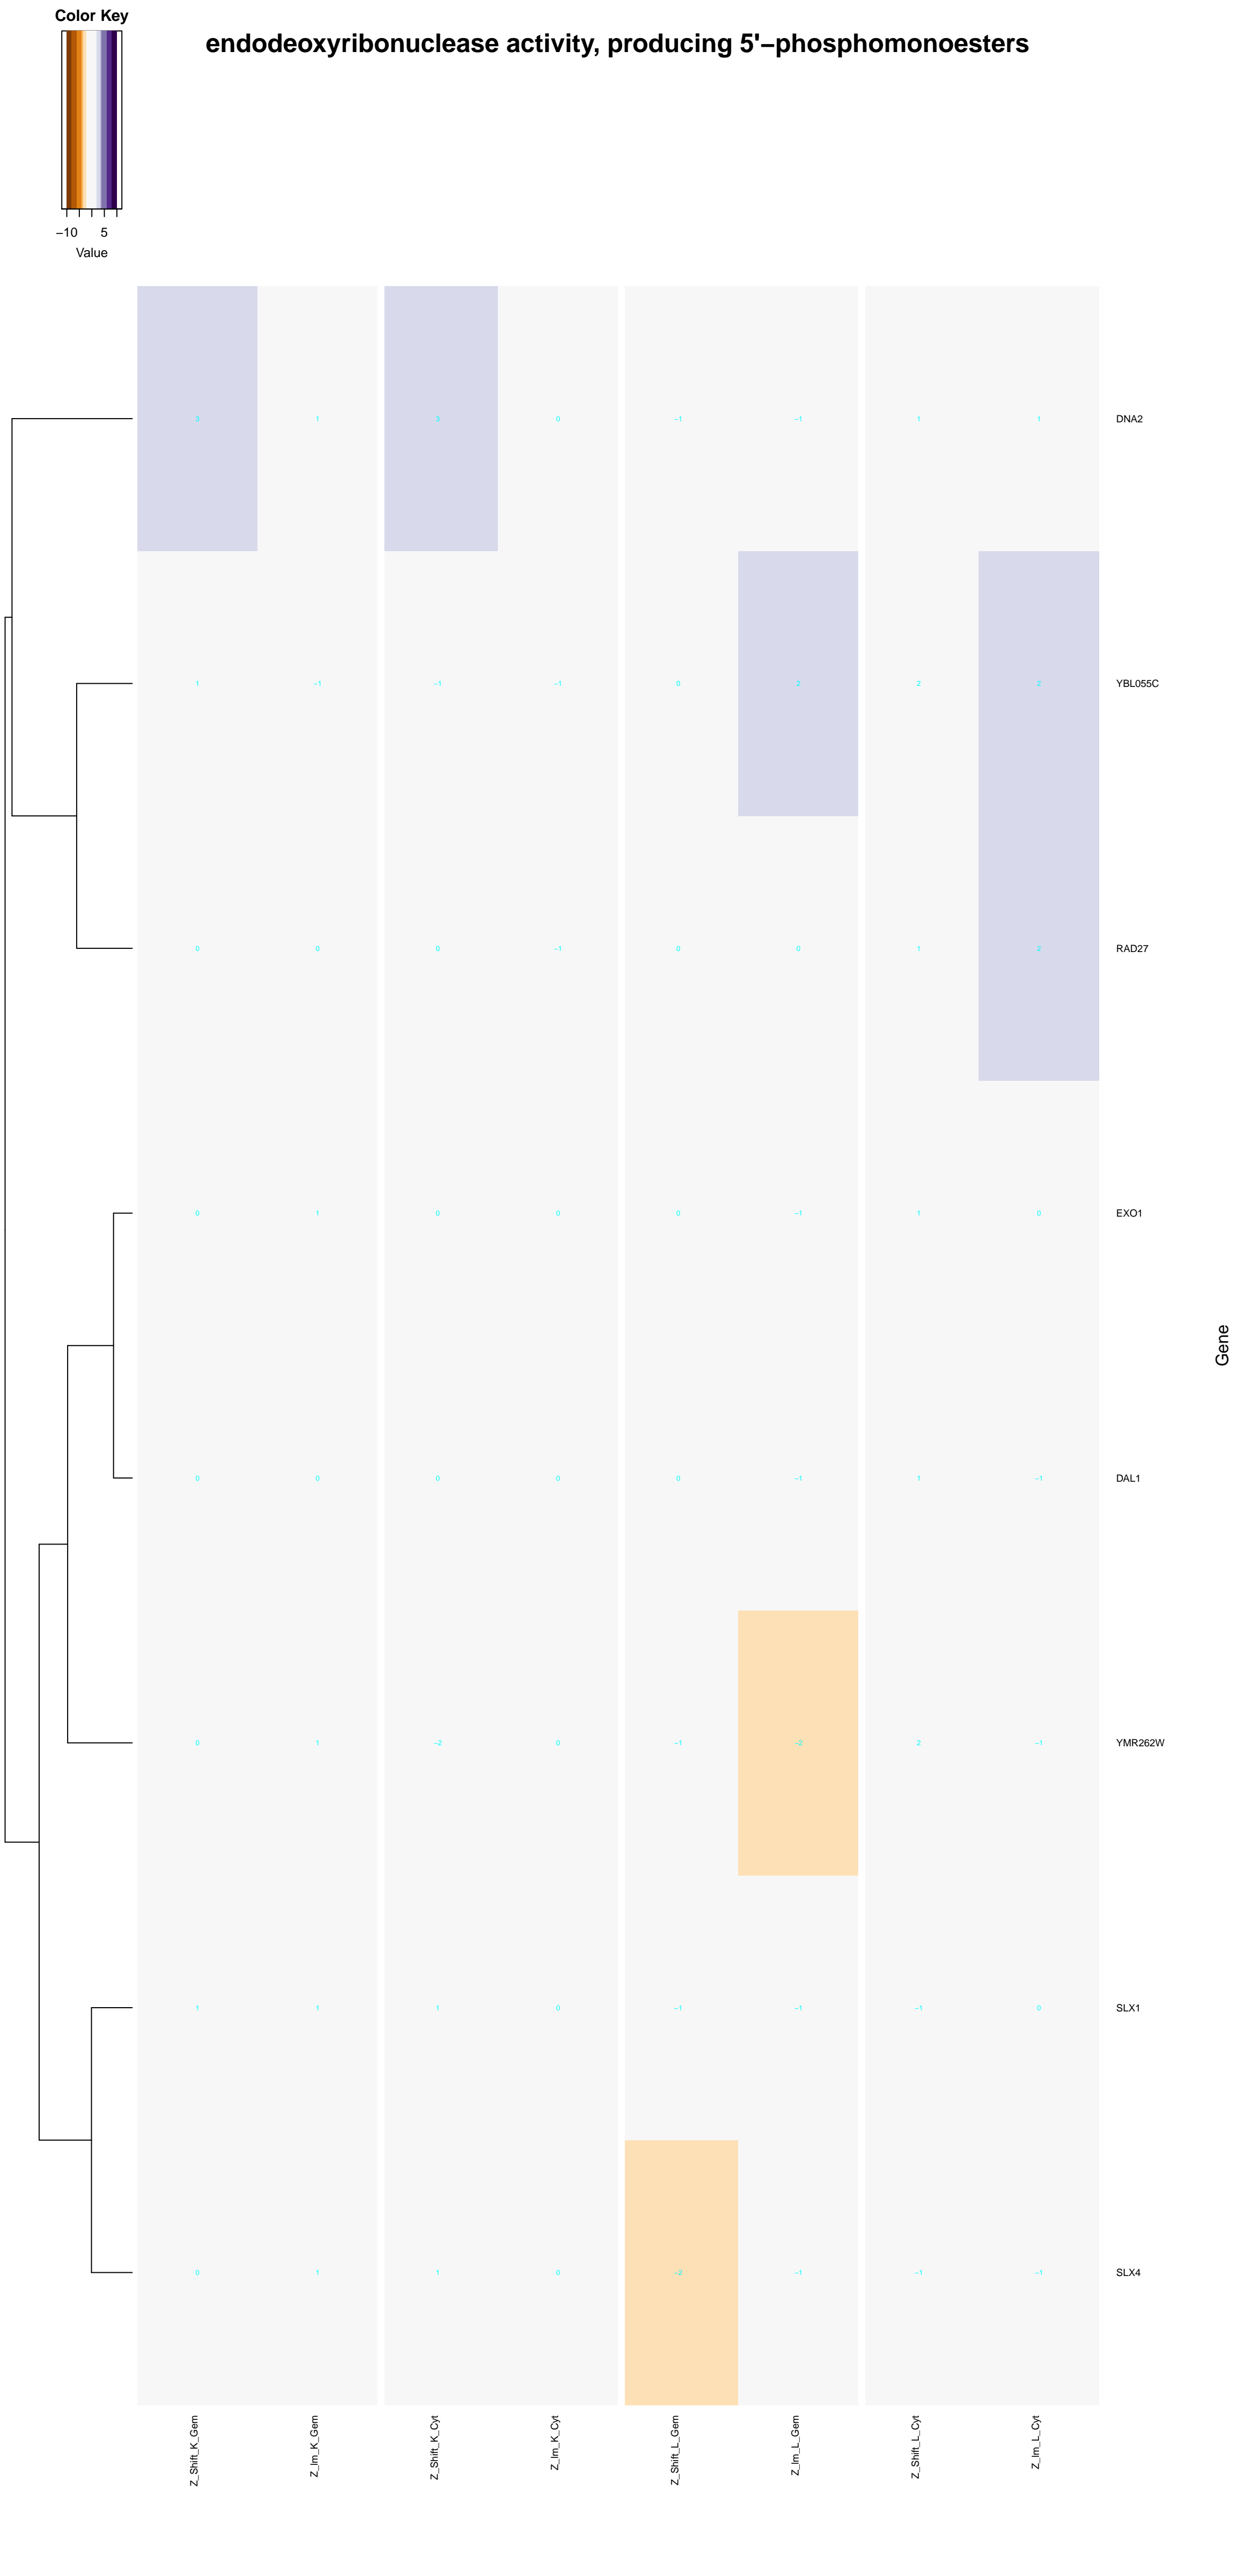



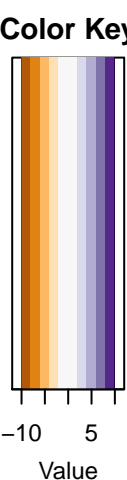

endodeoxyribonuclease activity, producing 3'-phosphomonoesters

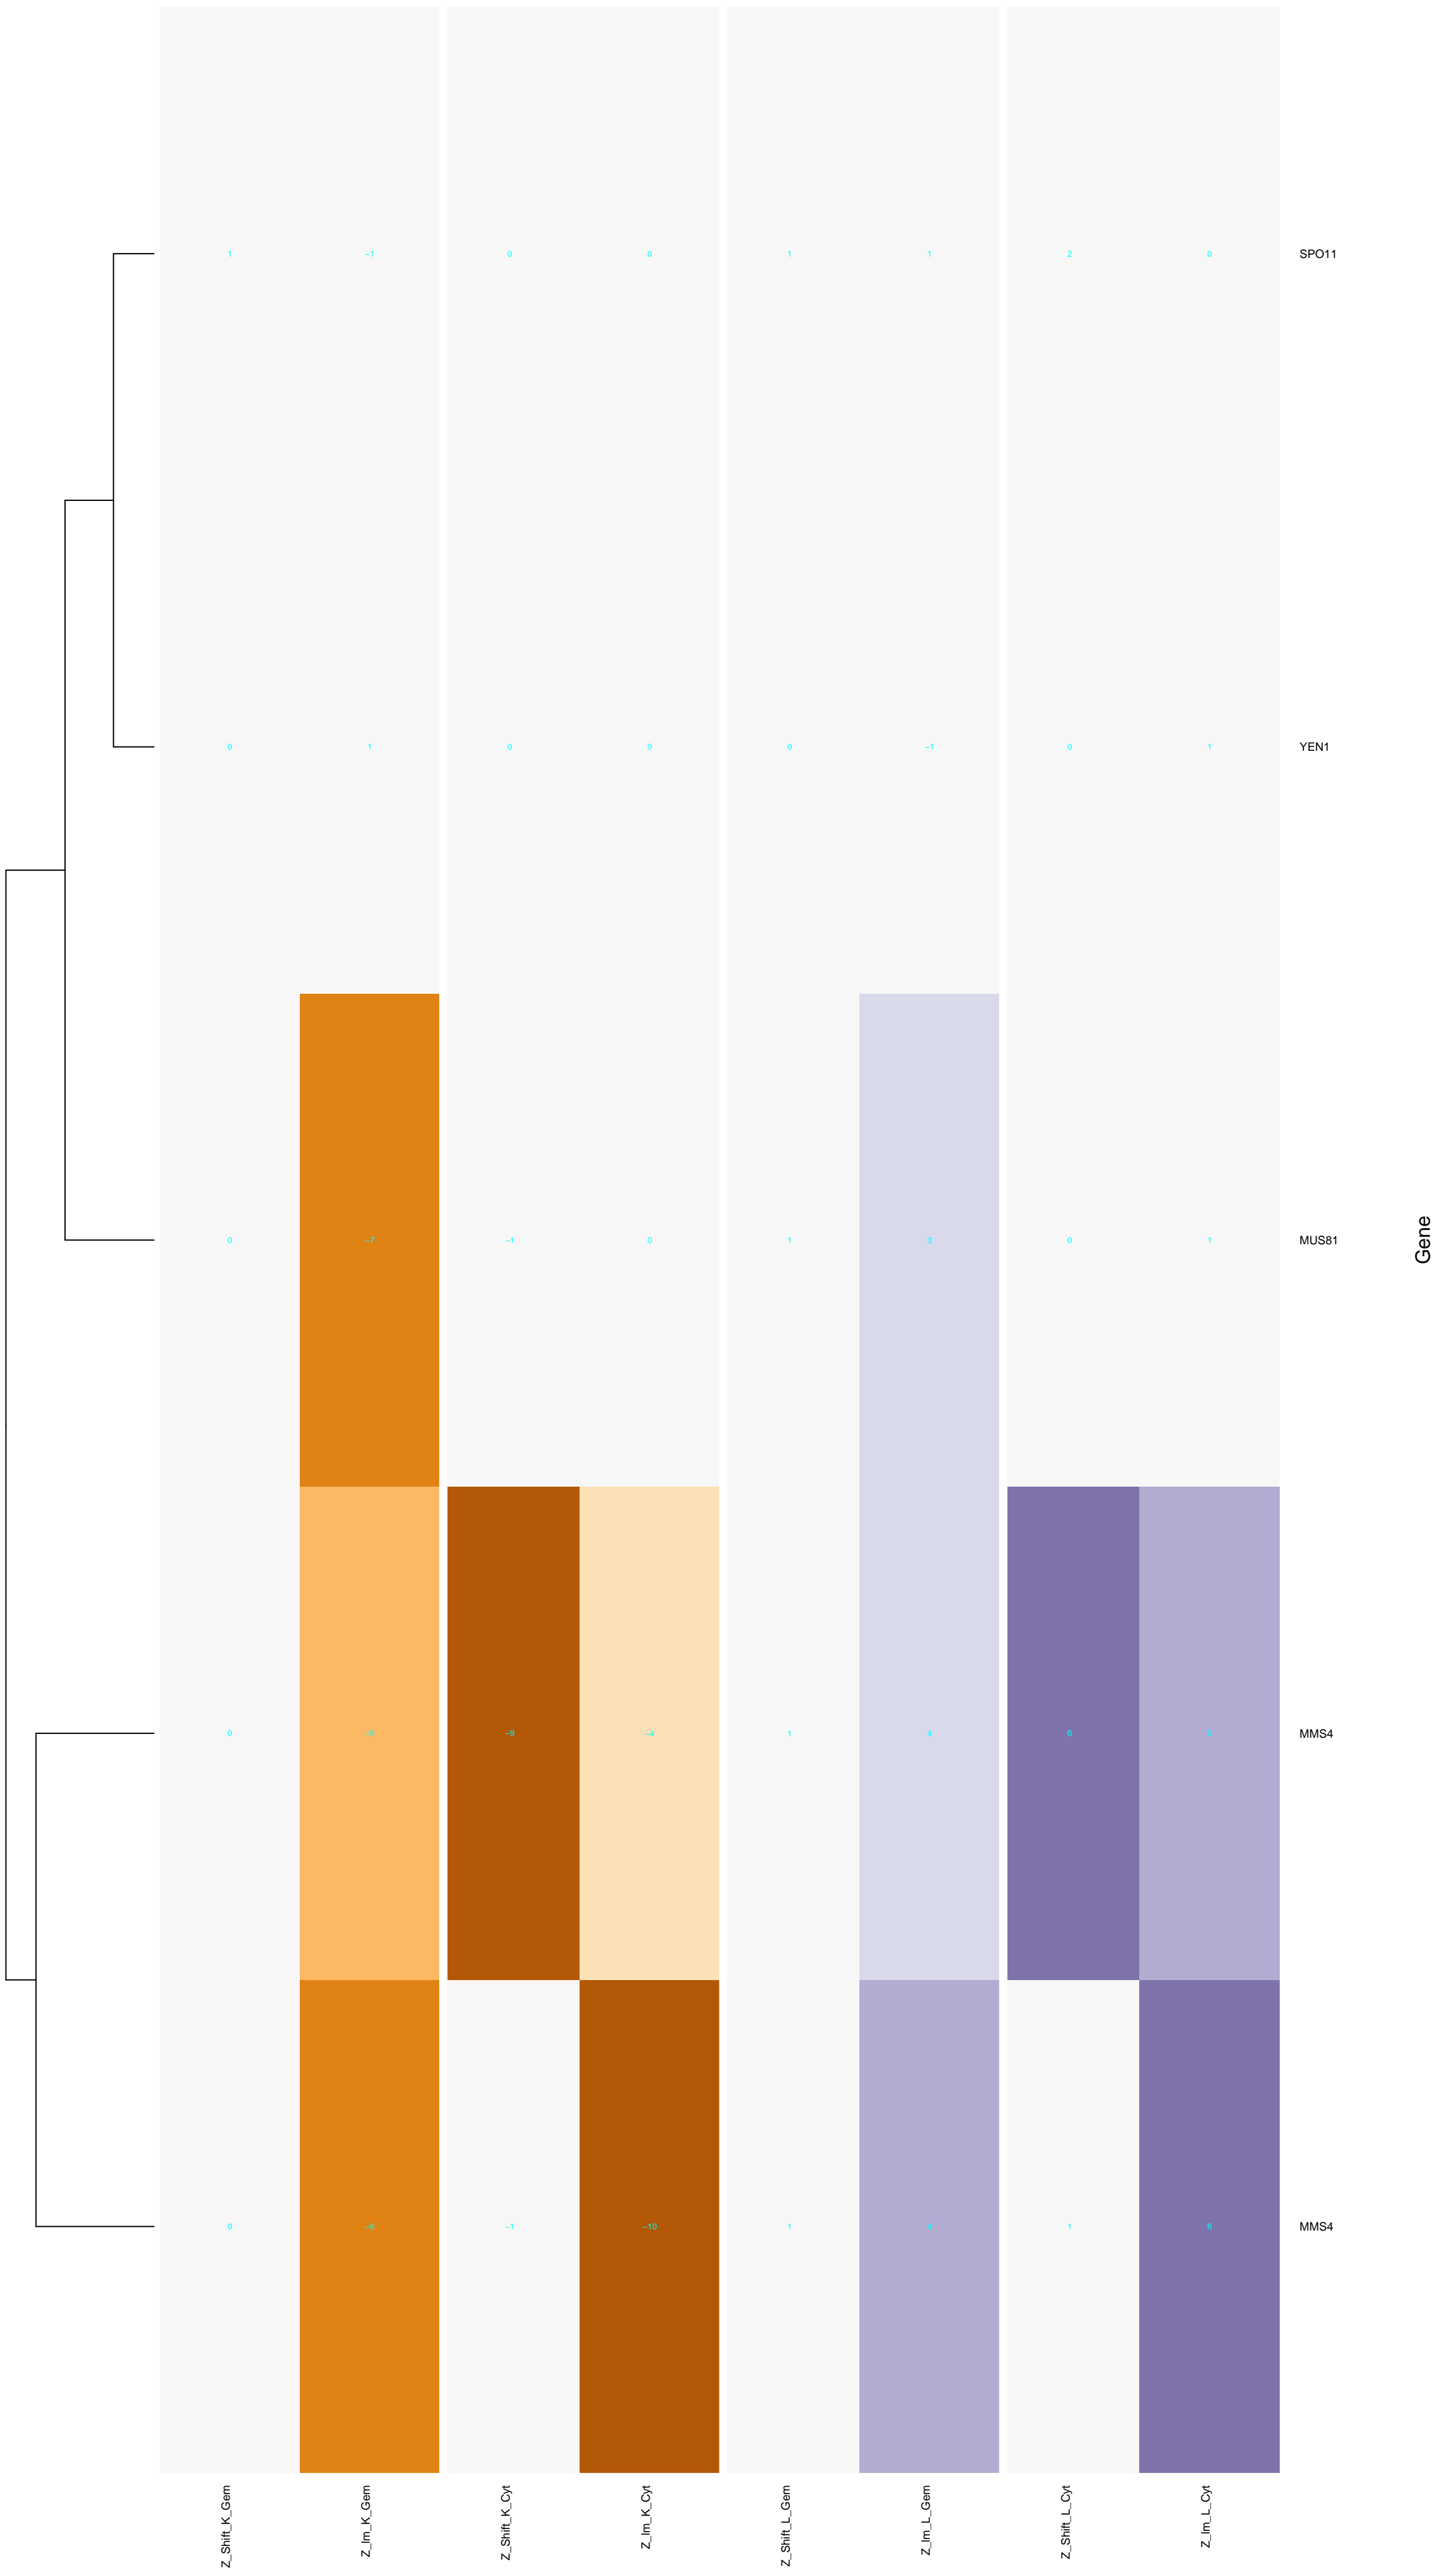

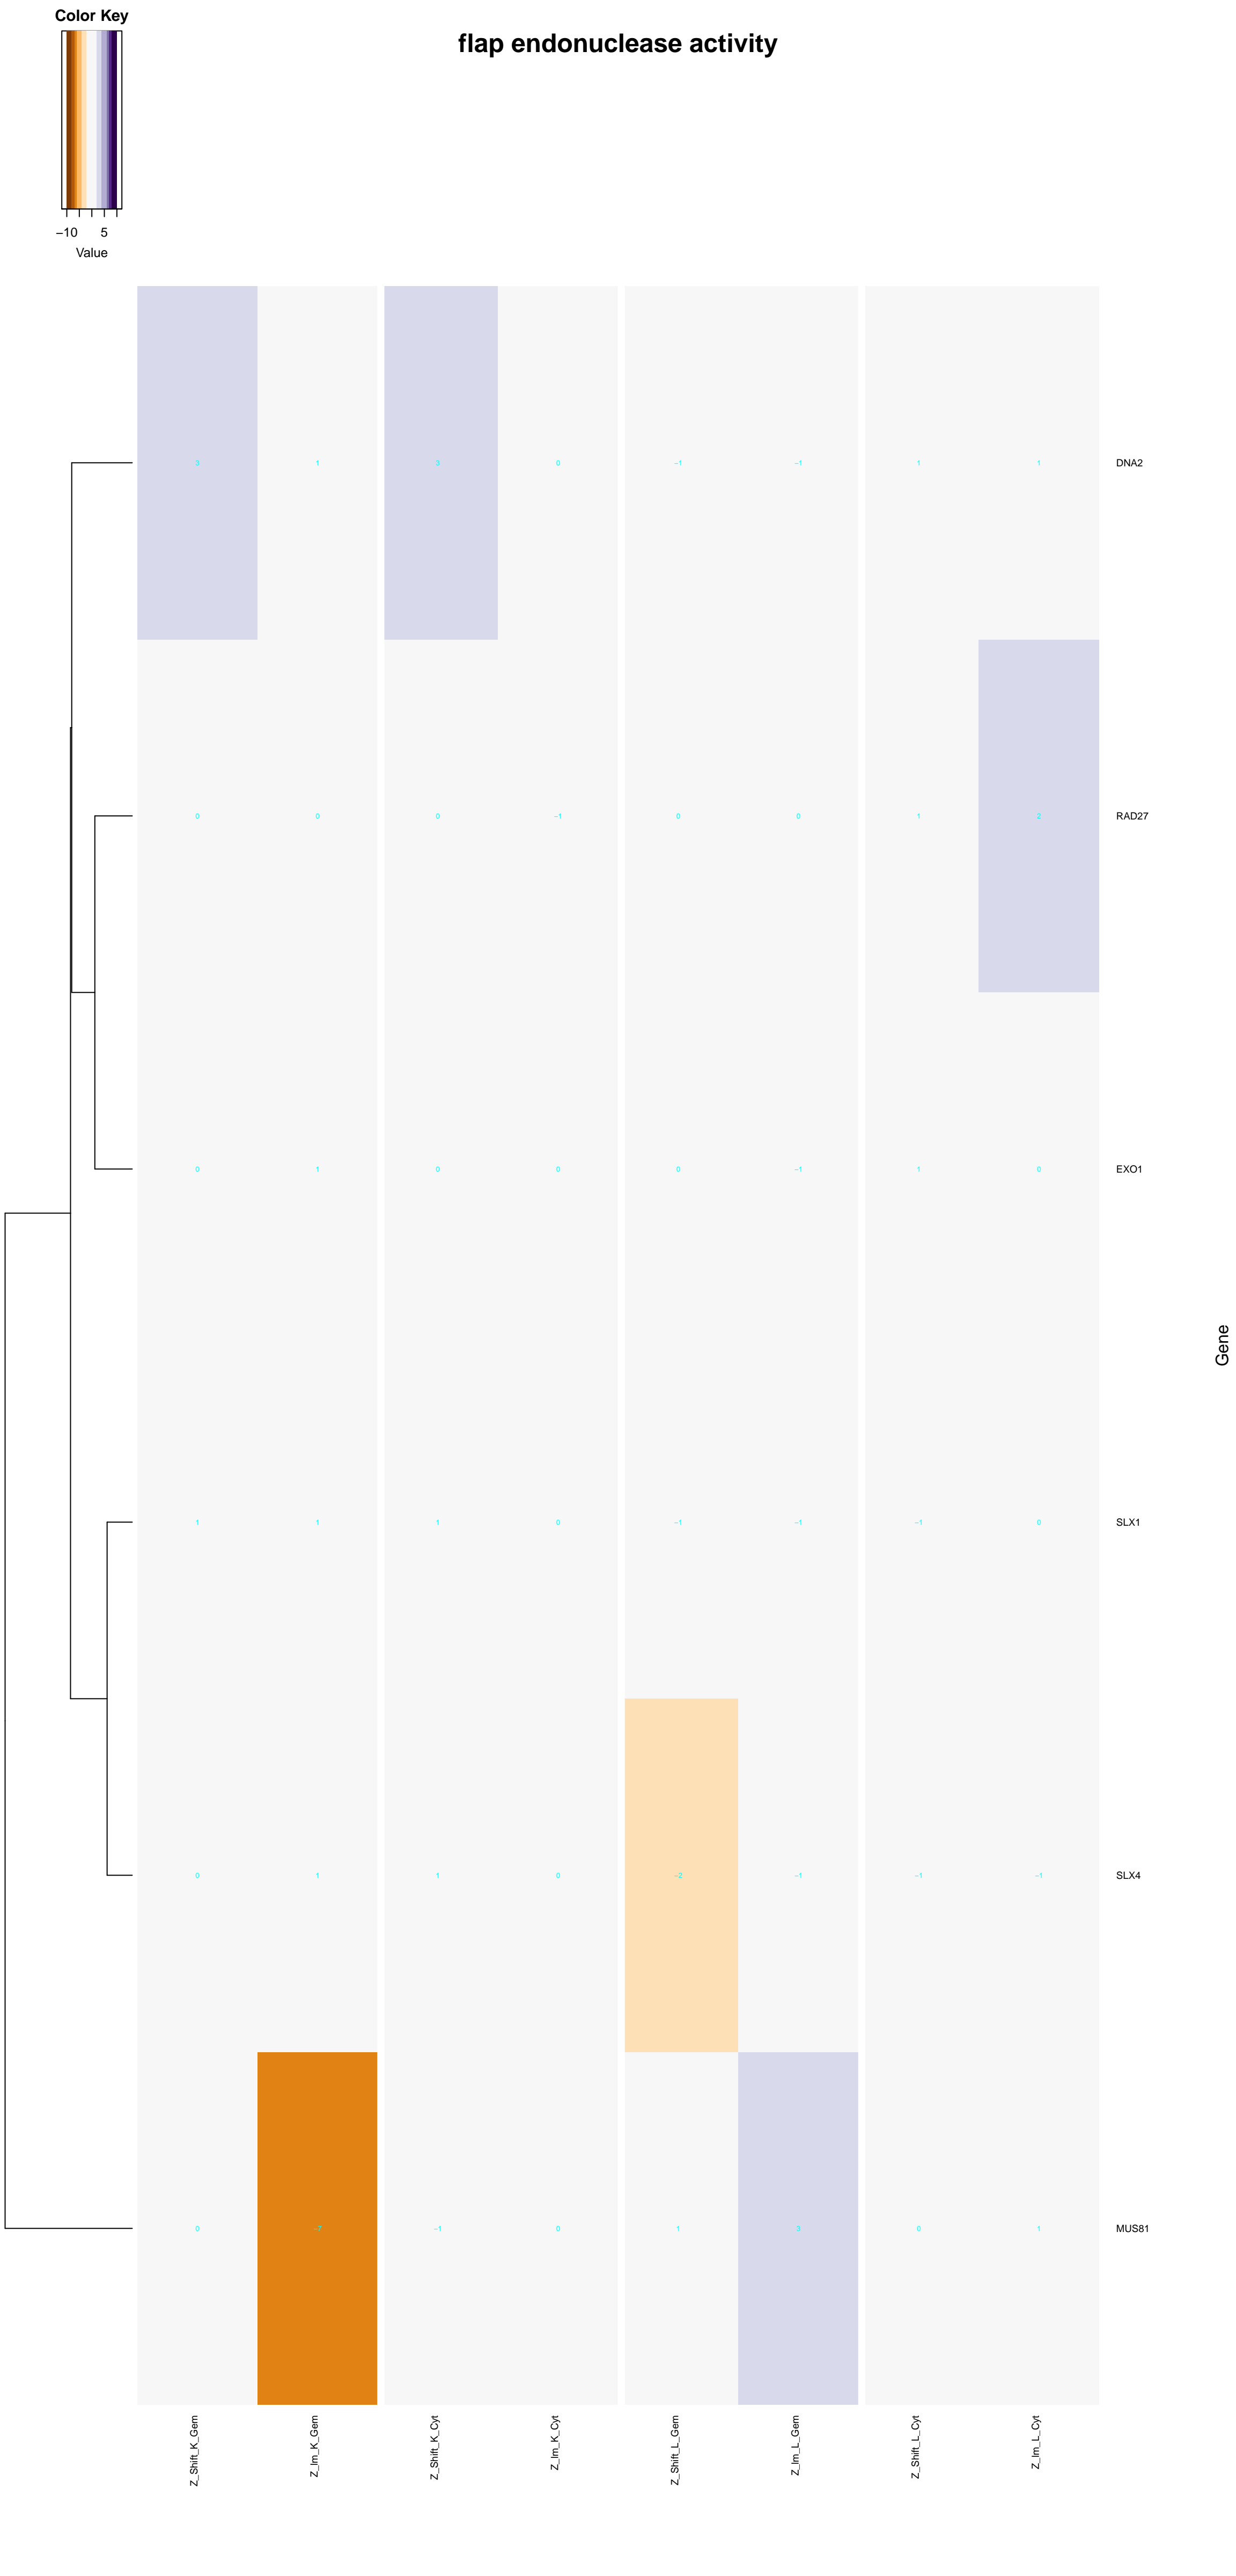

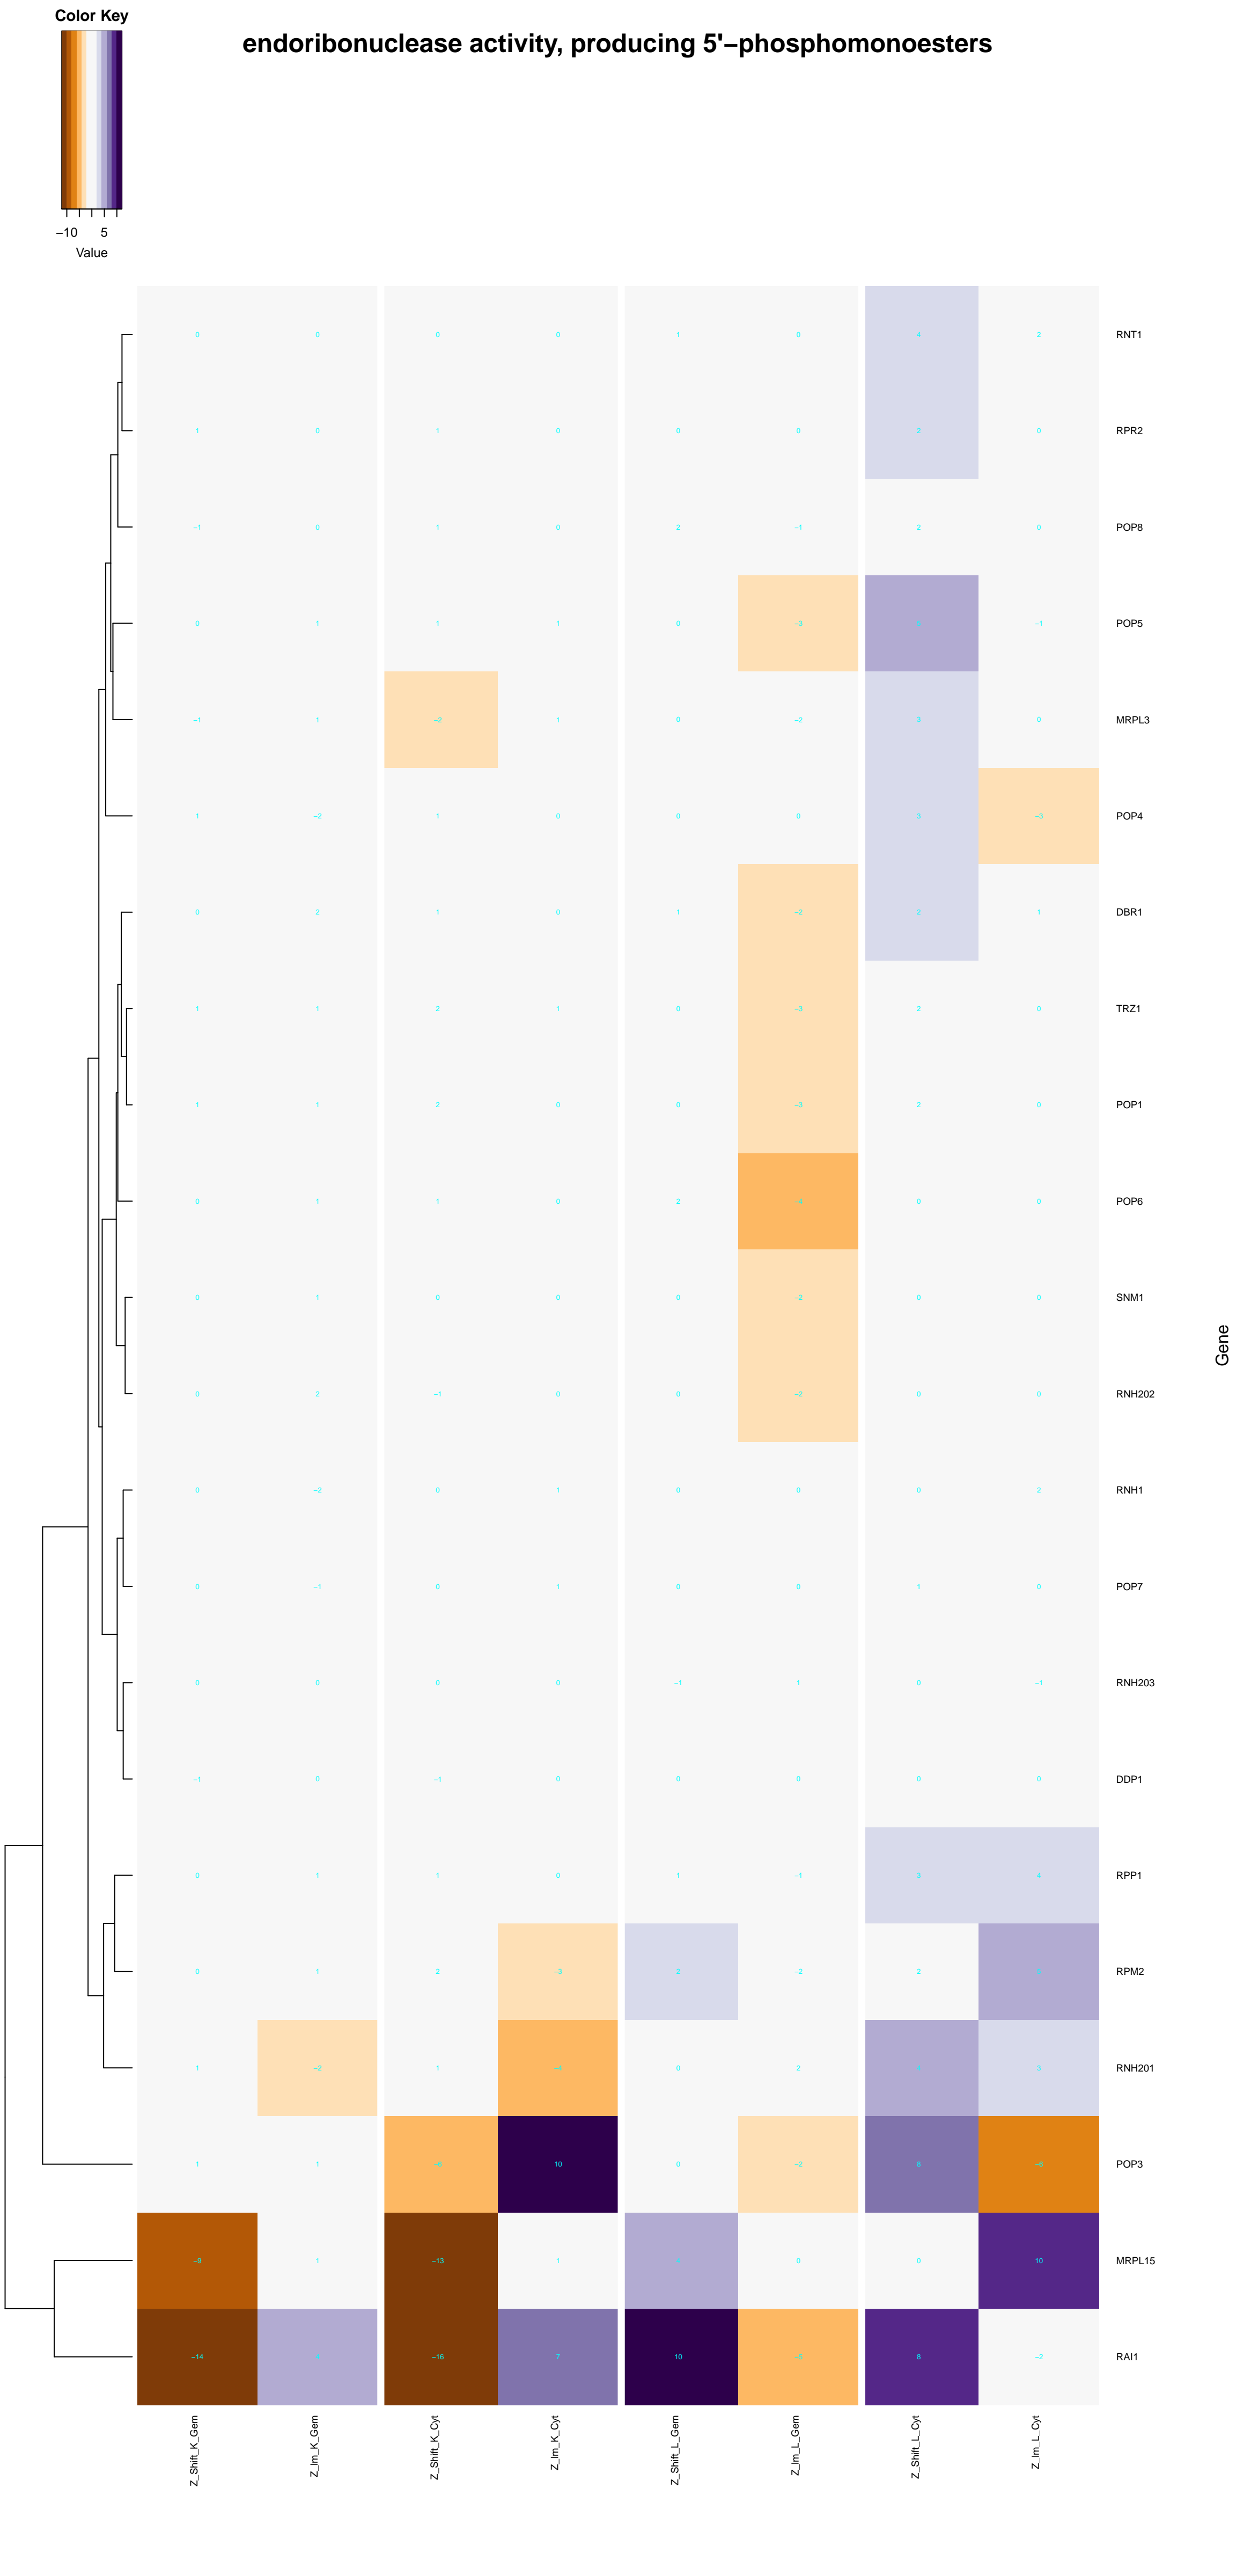

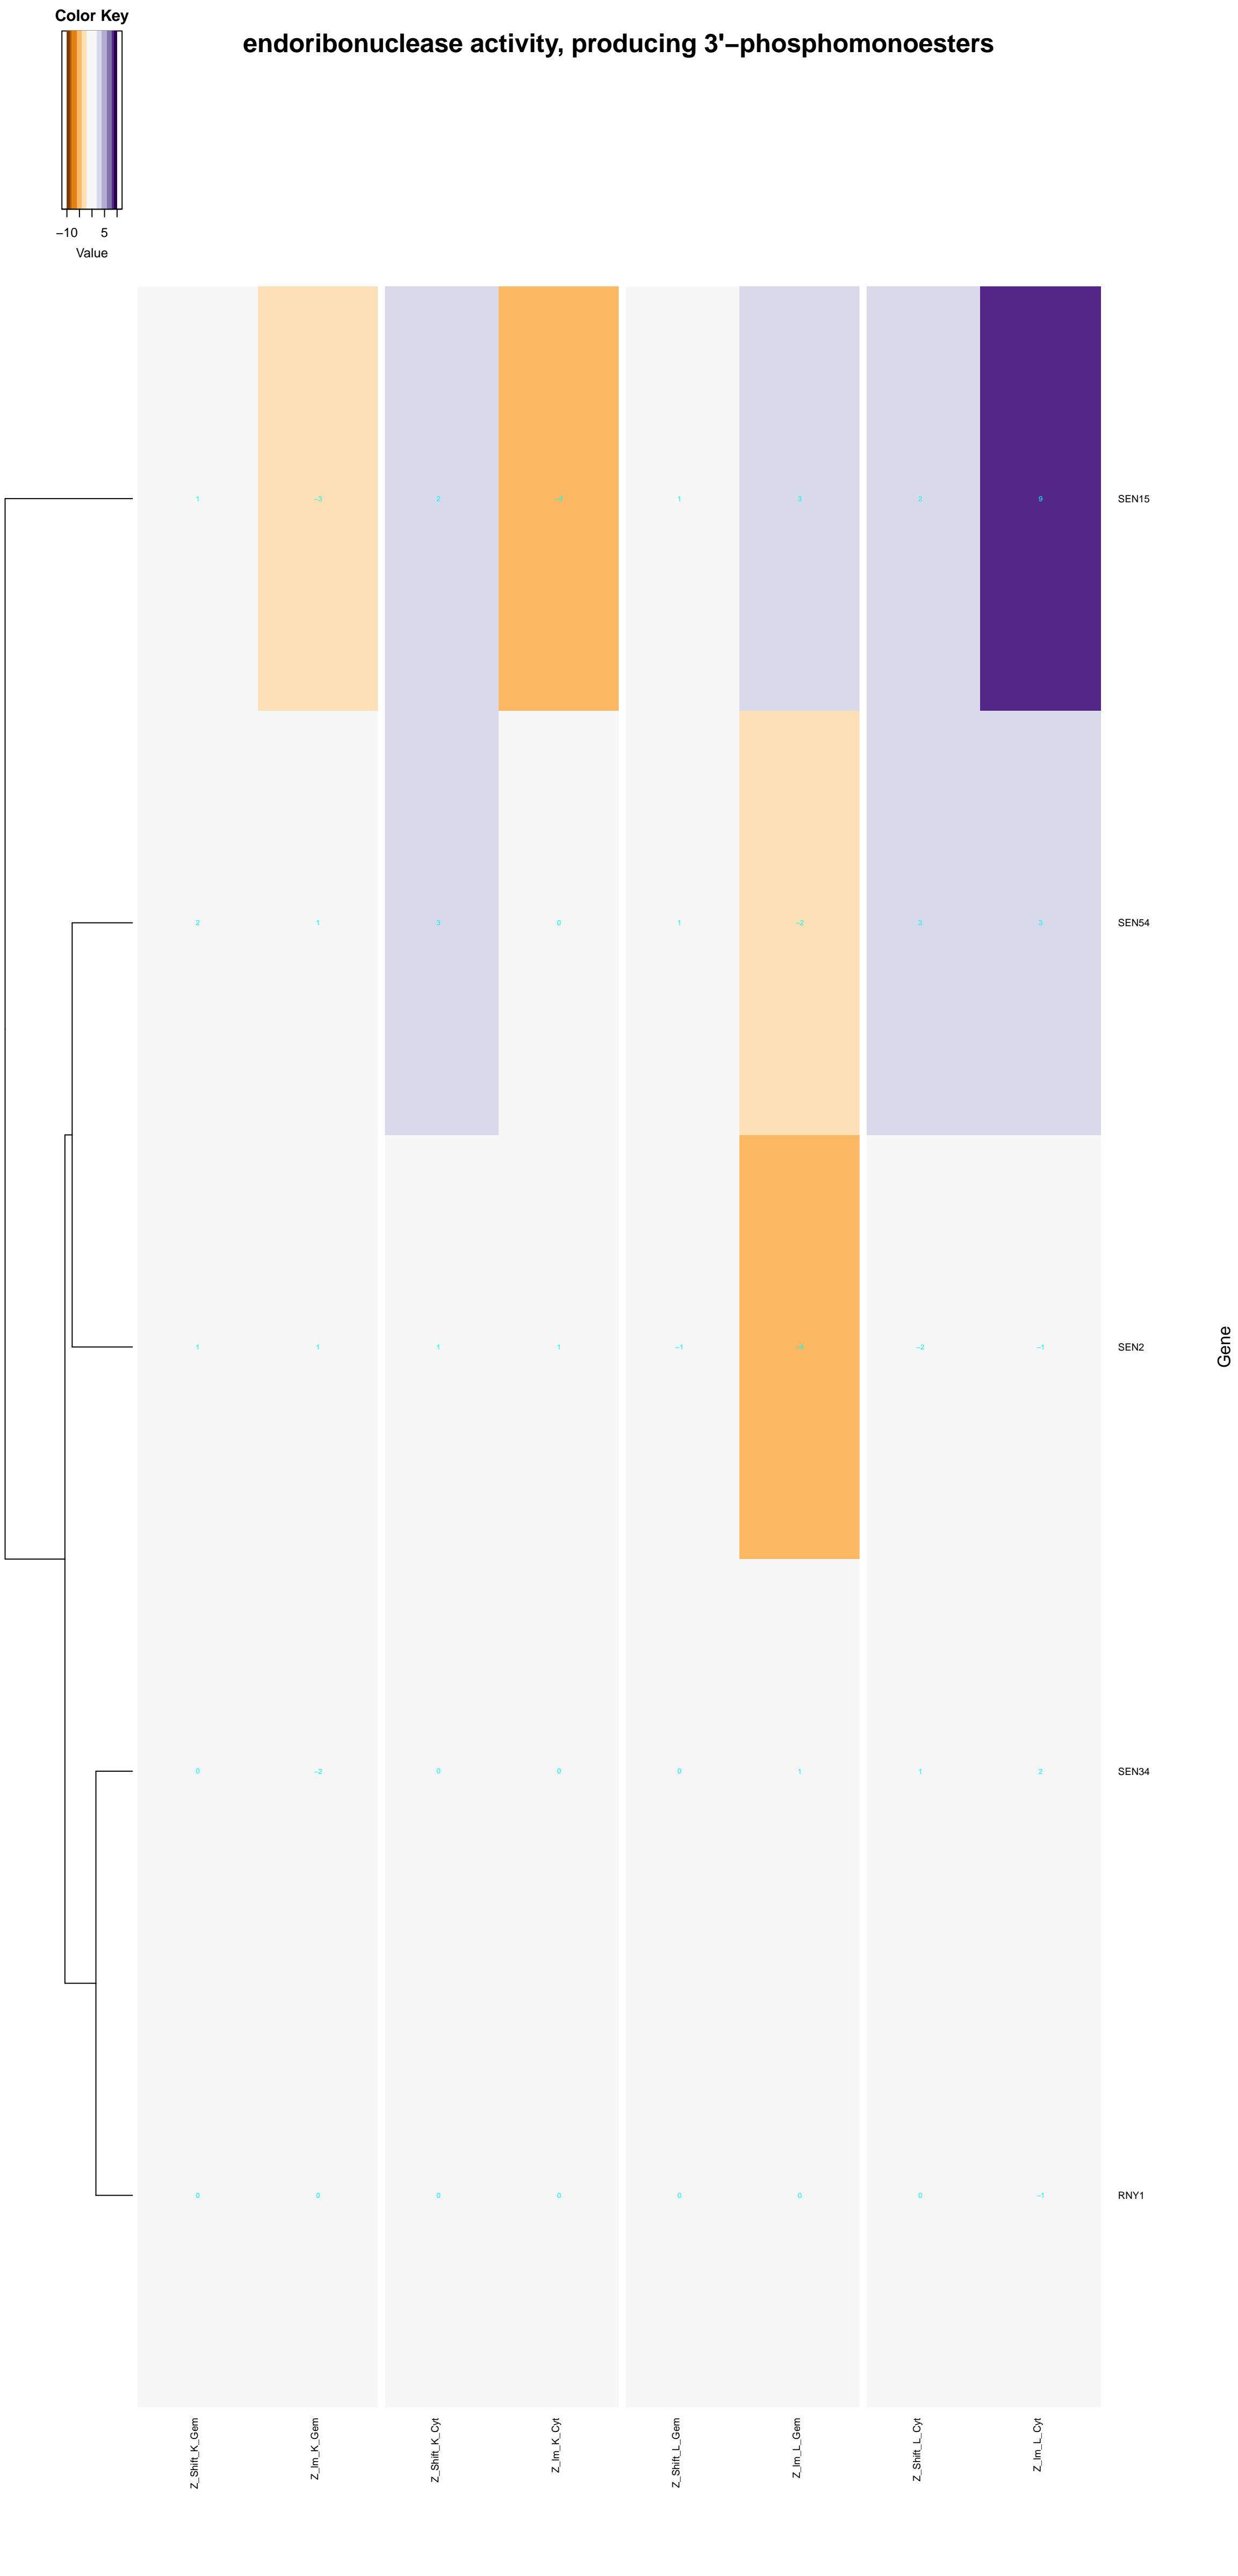

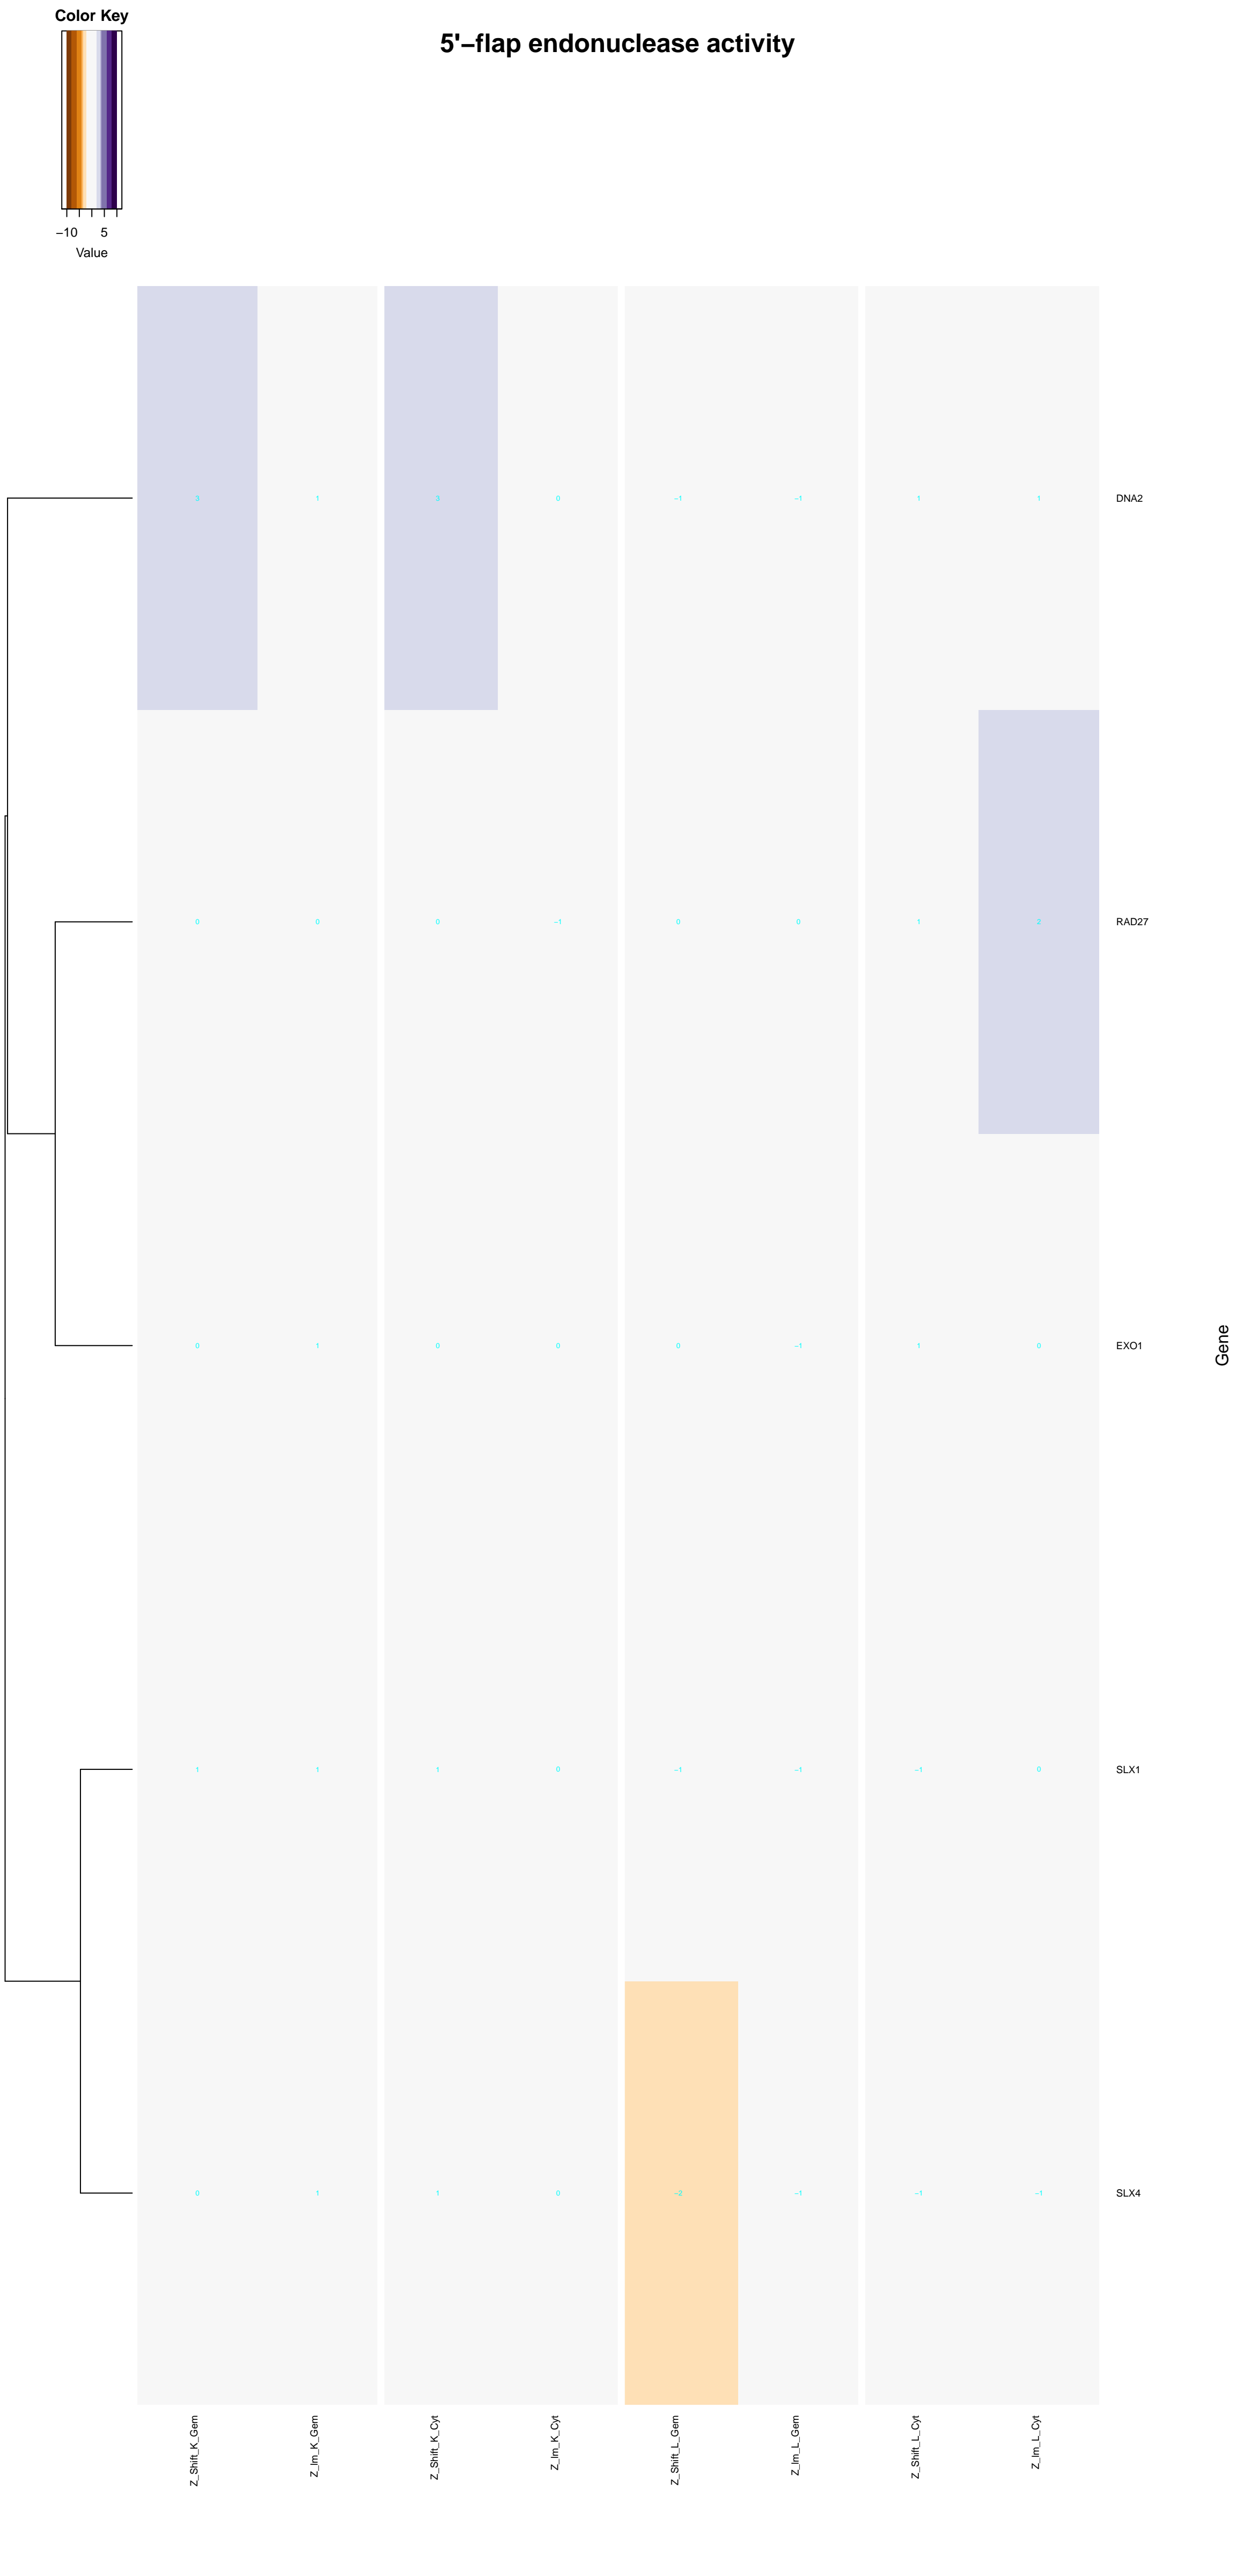

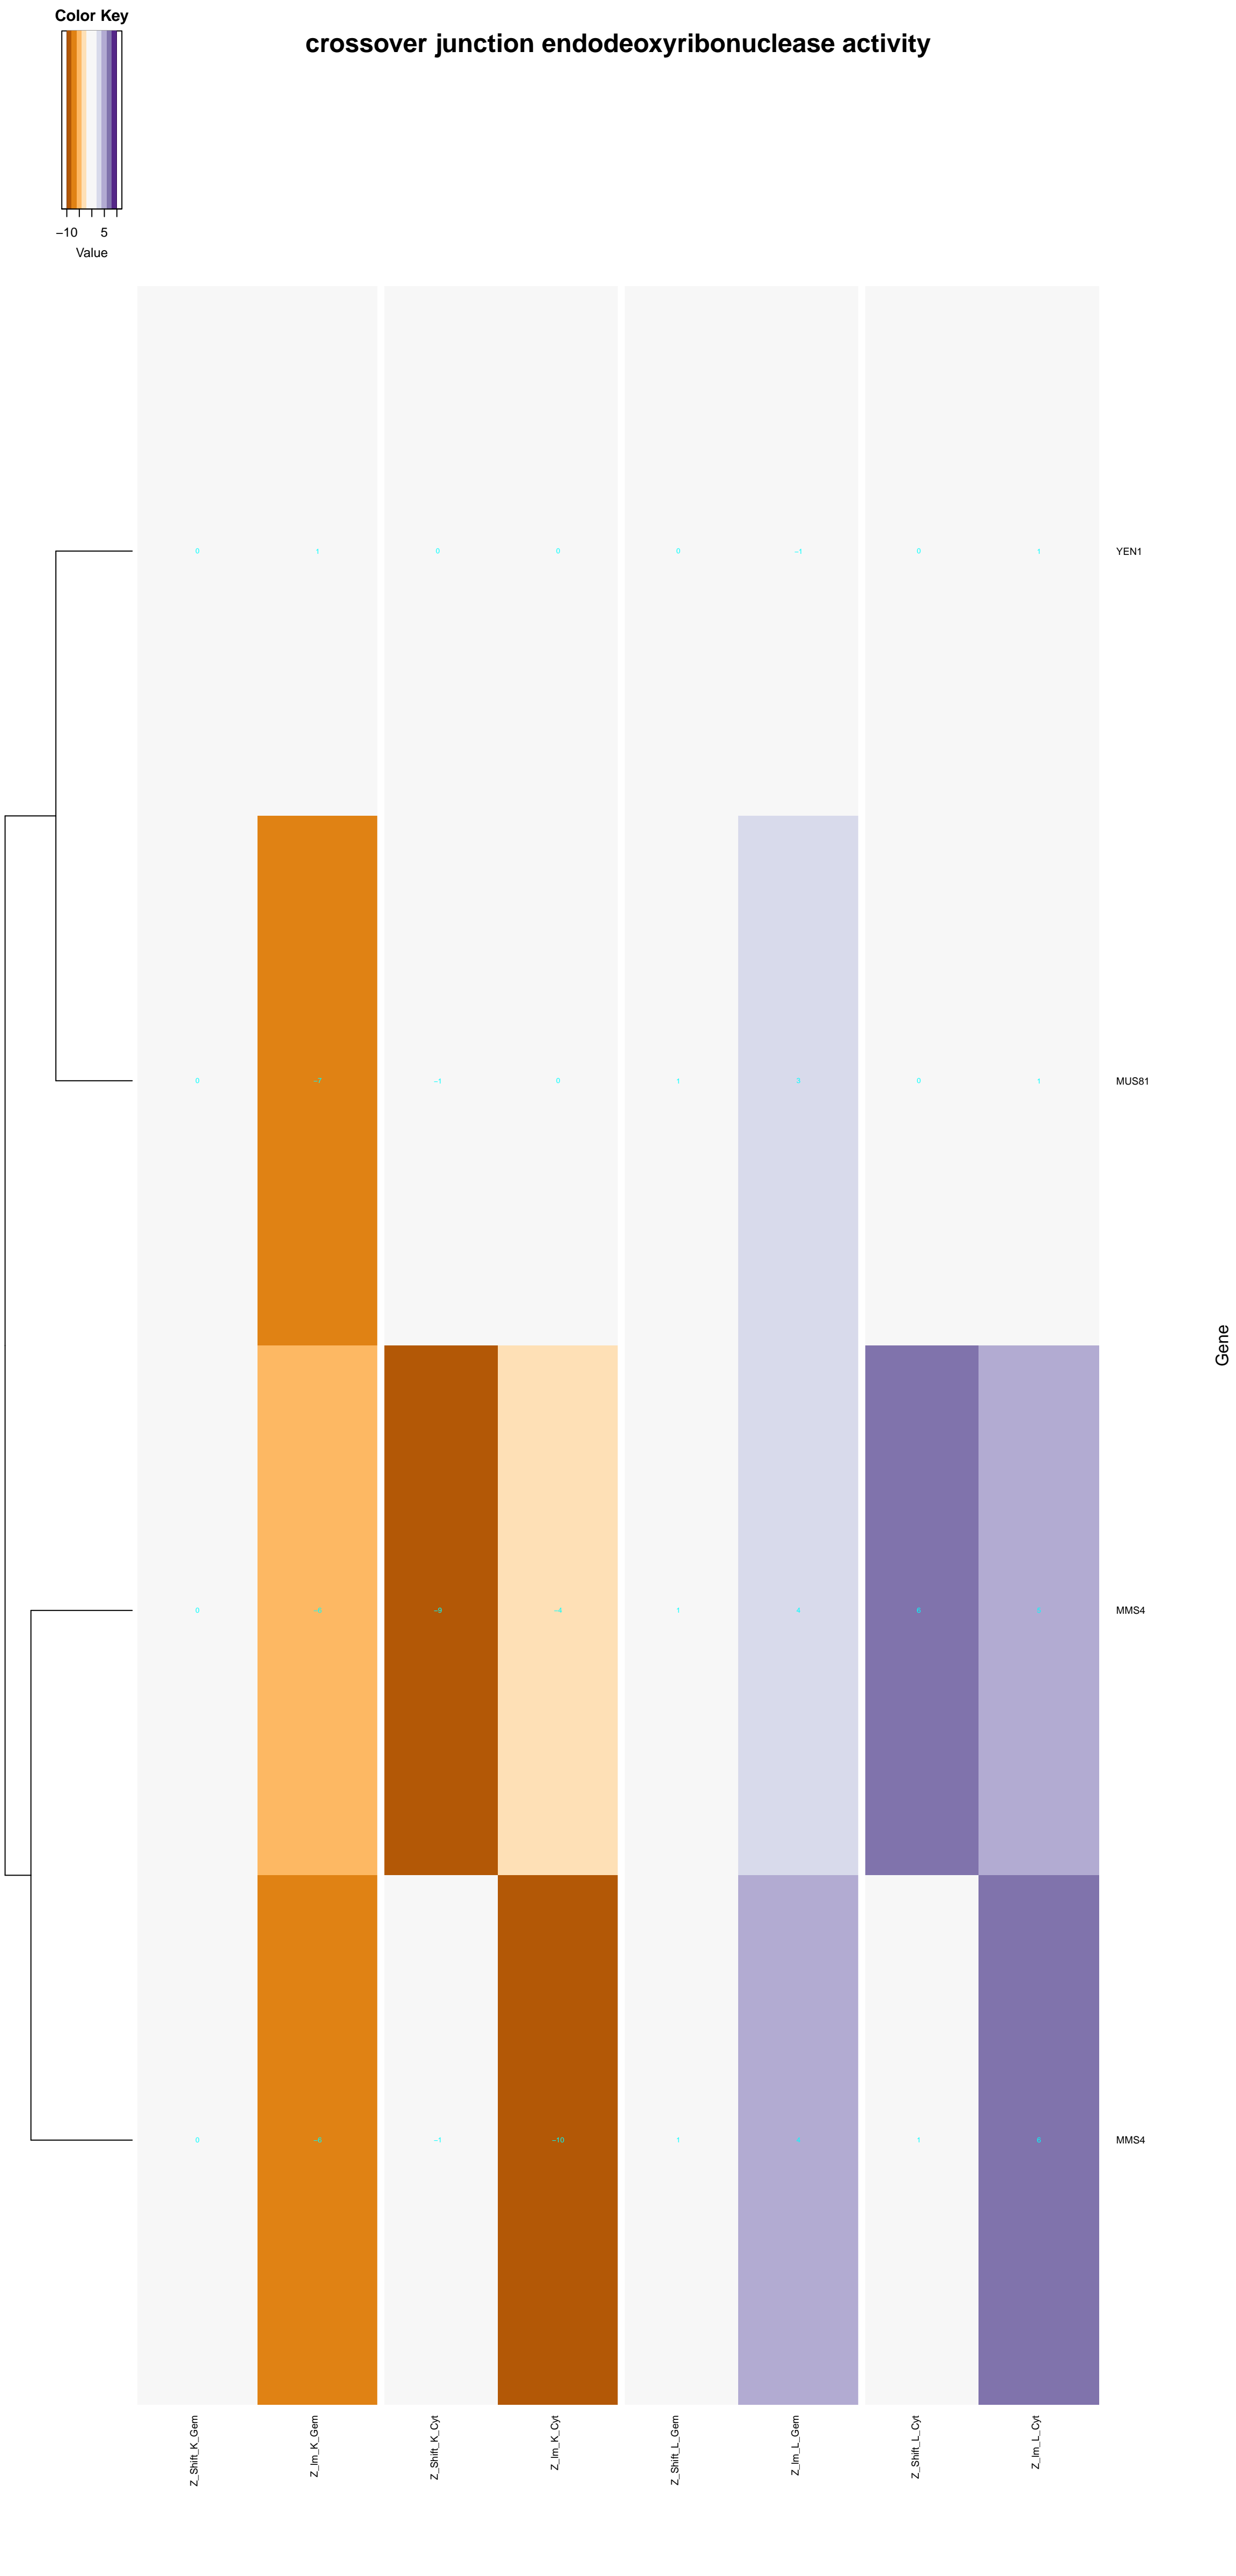

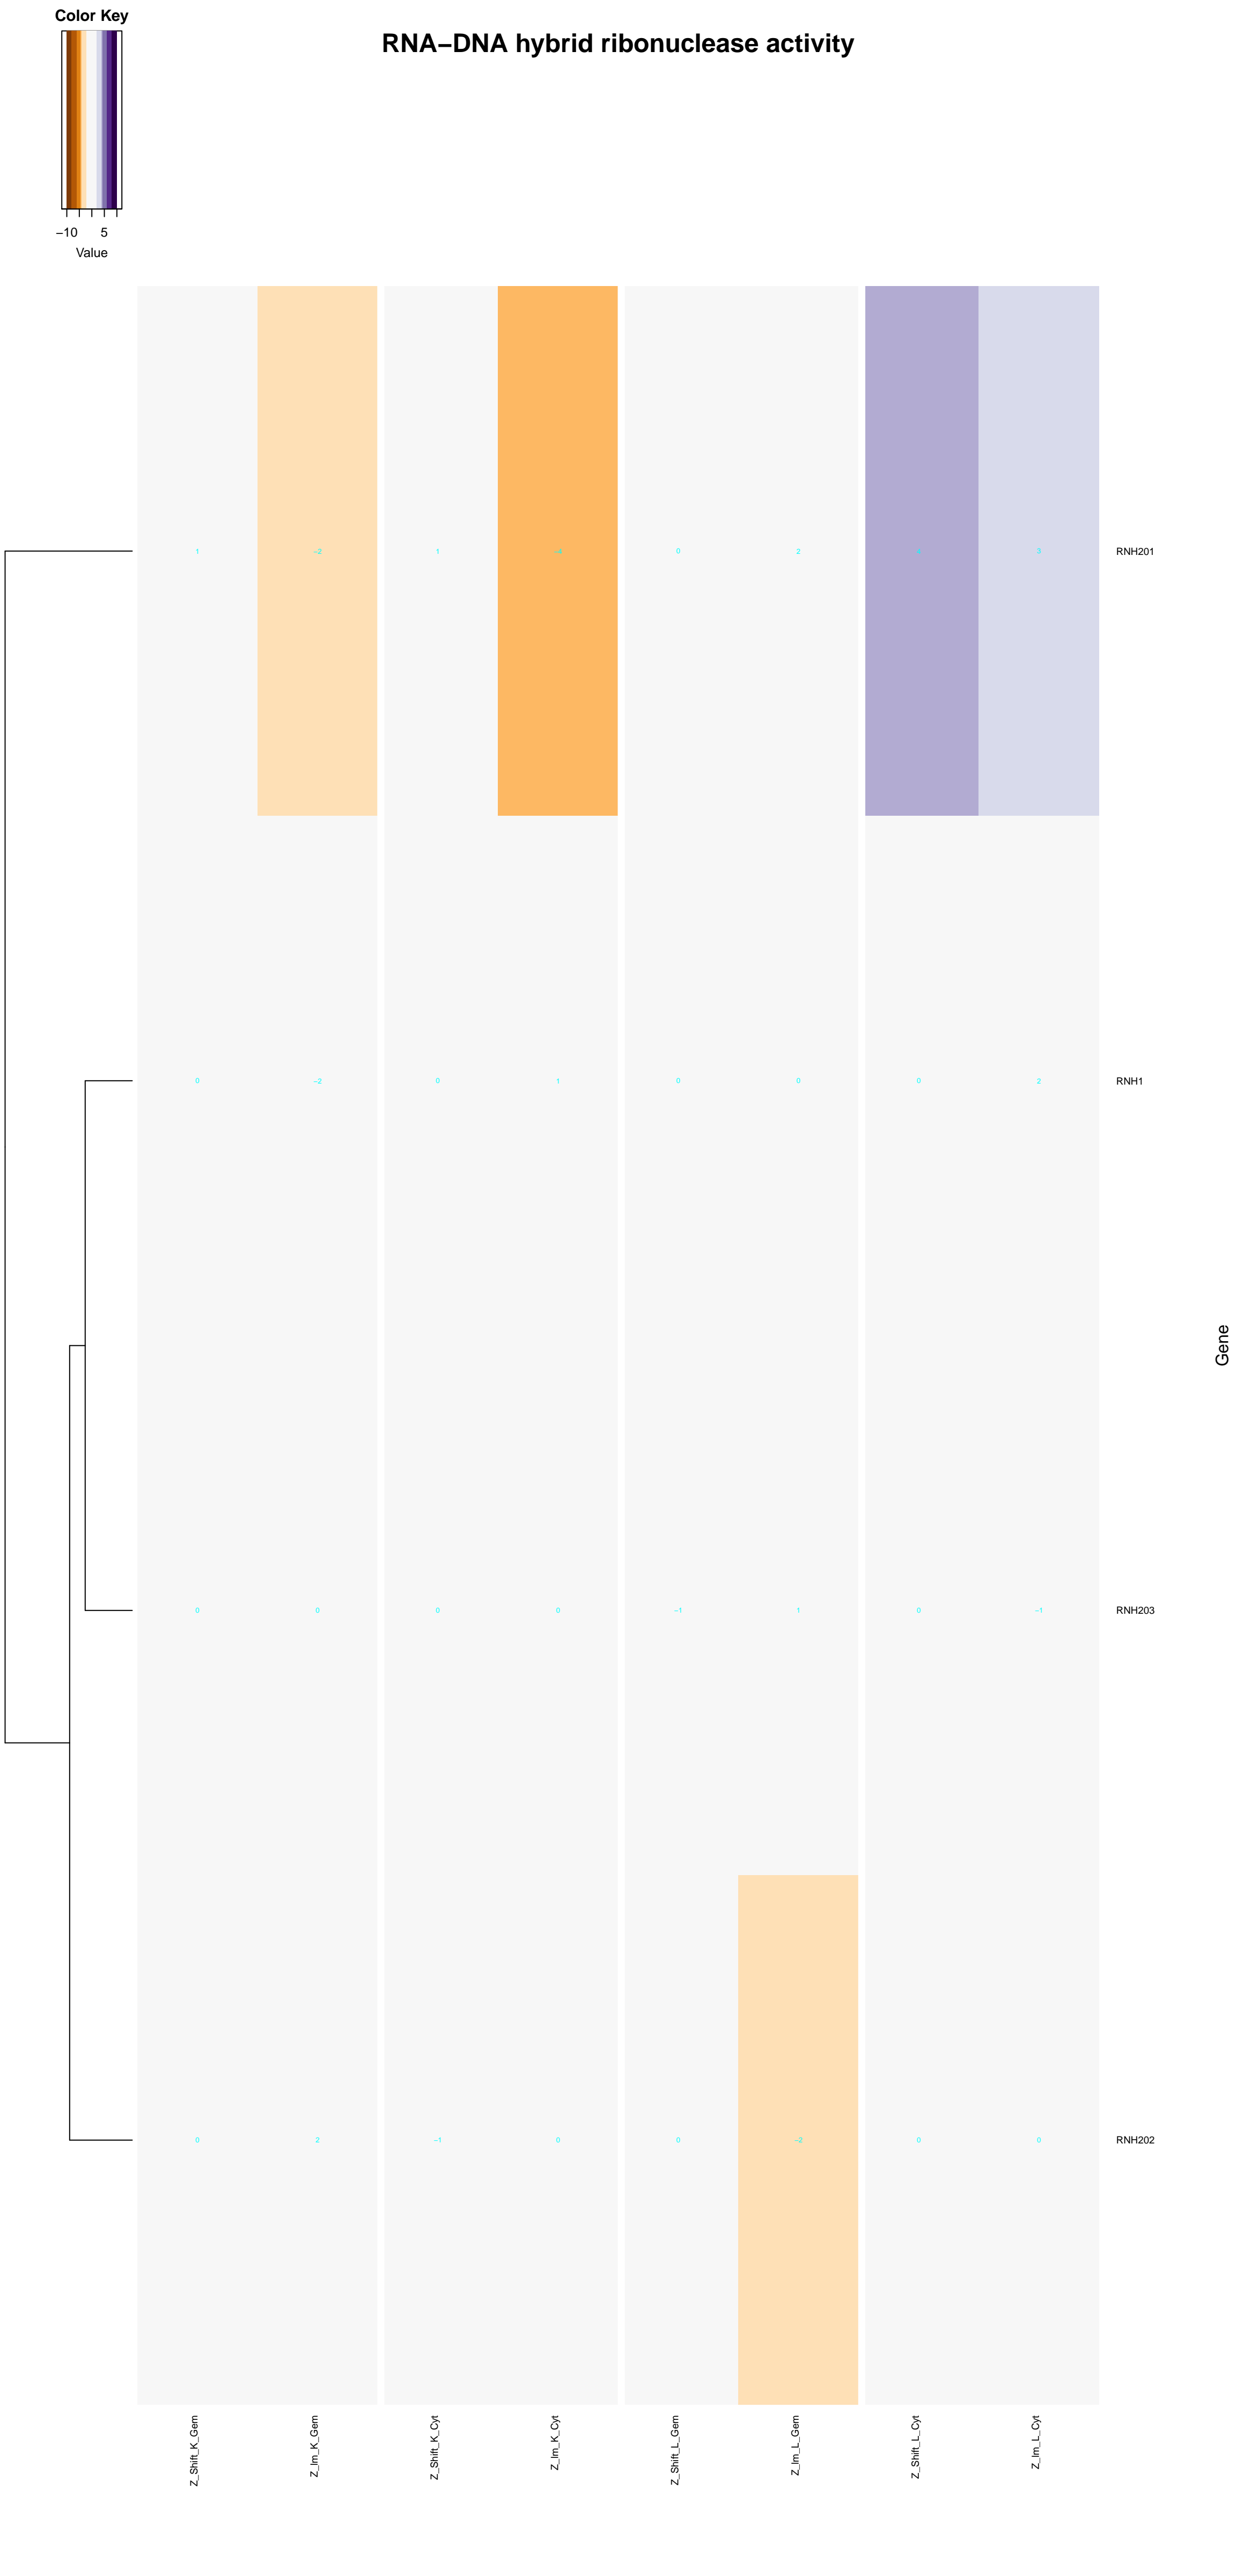

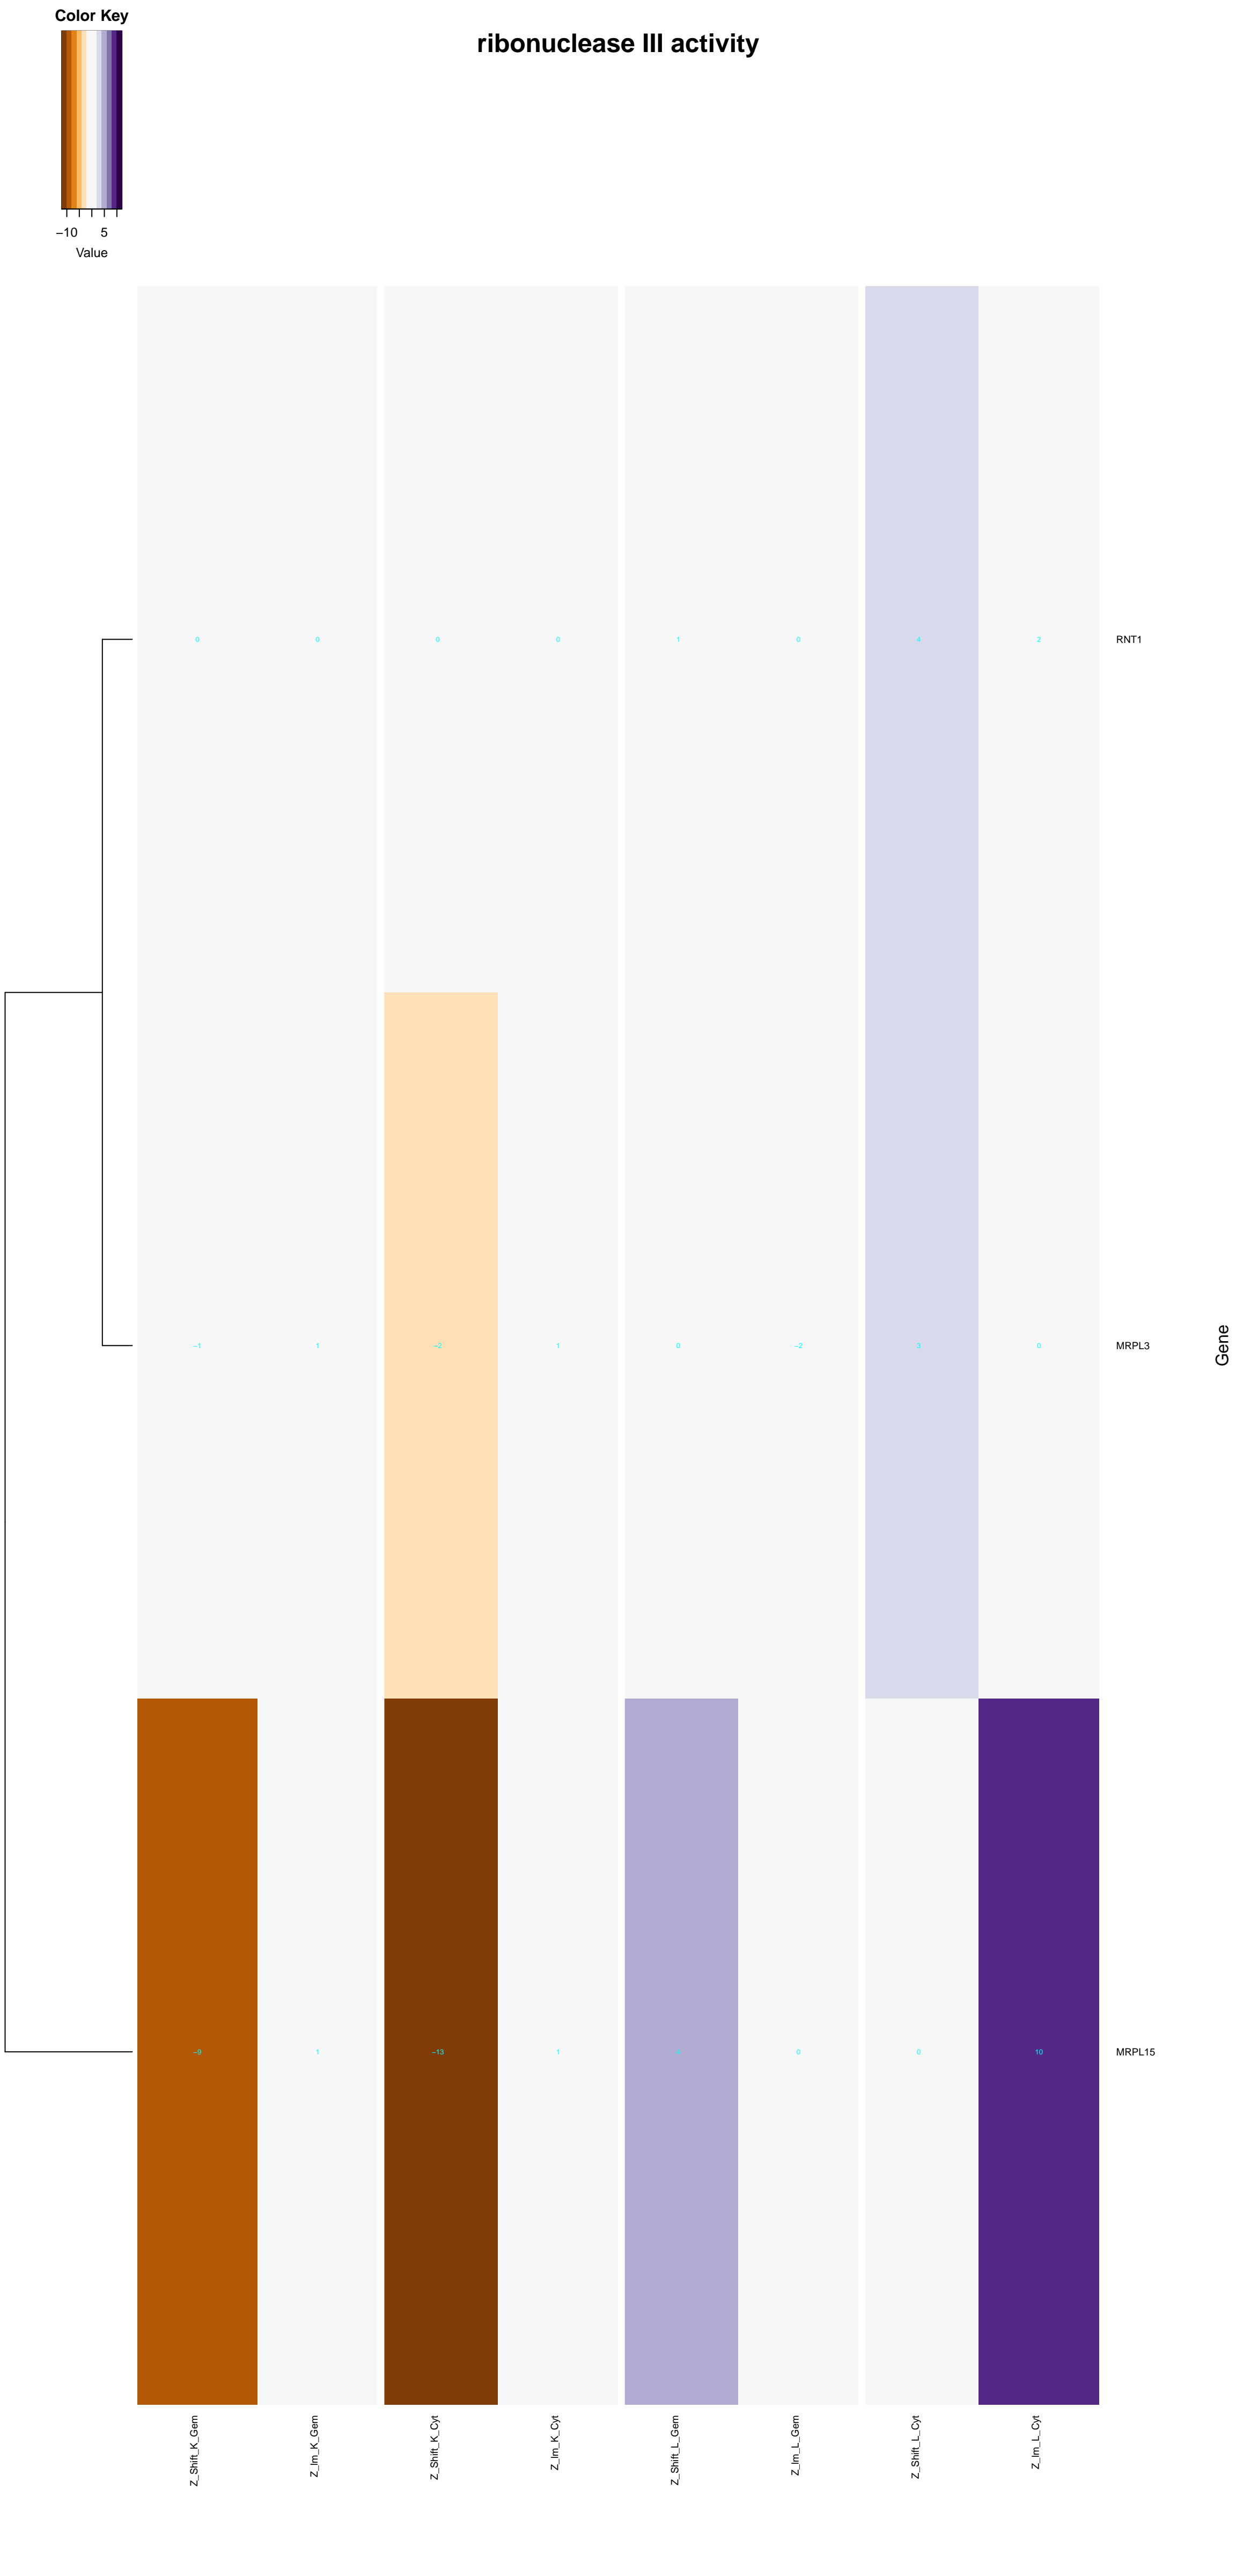



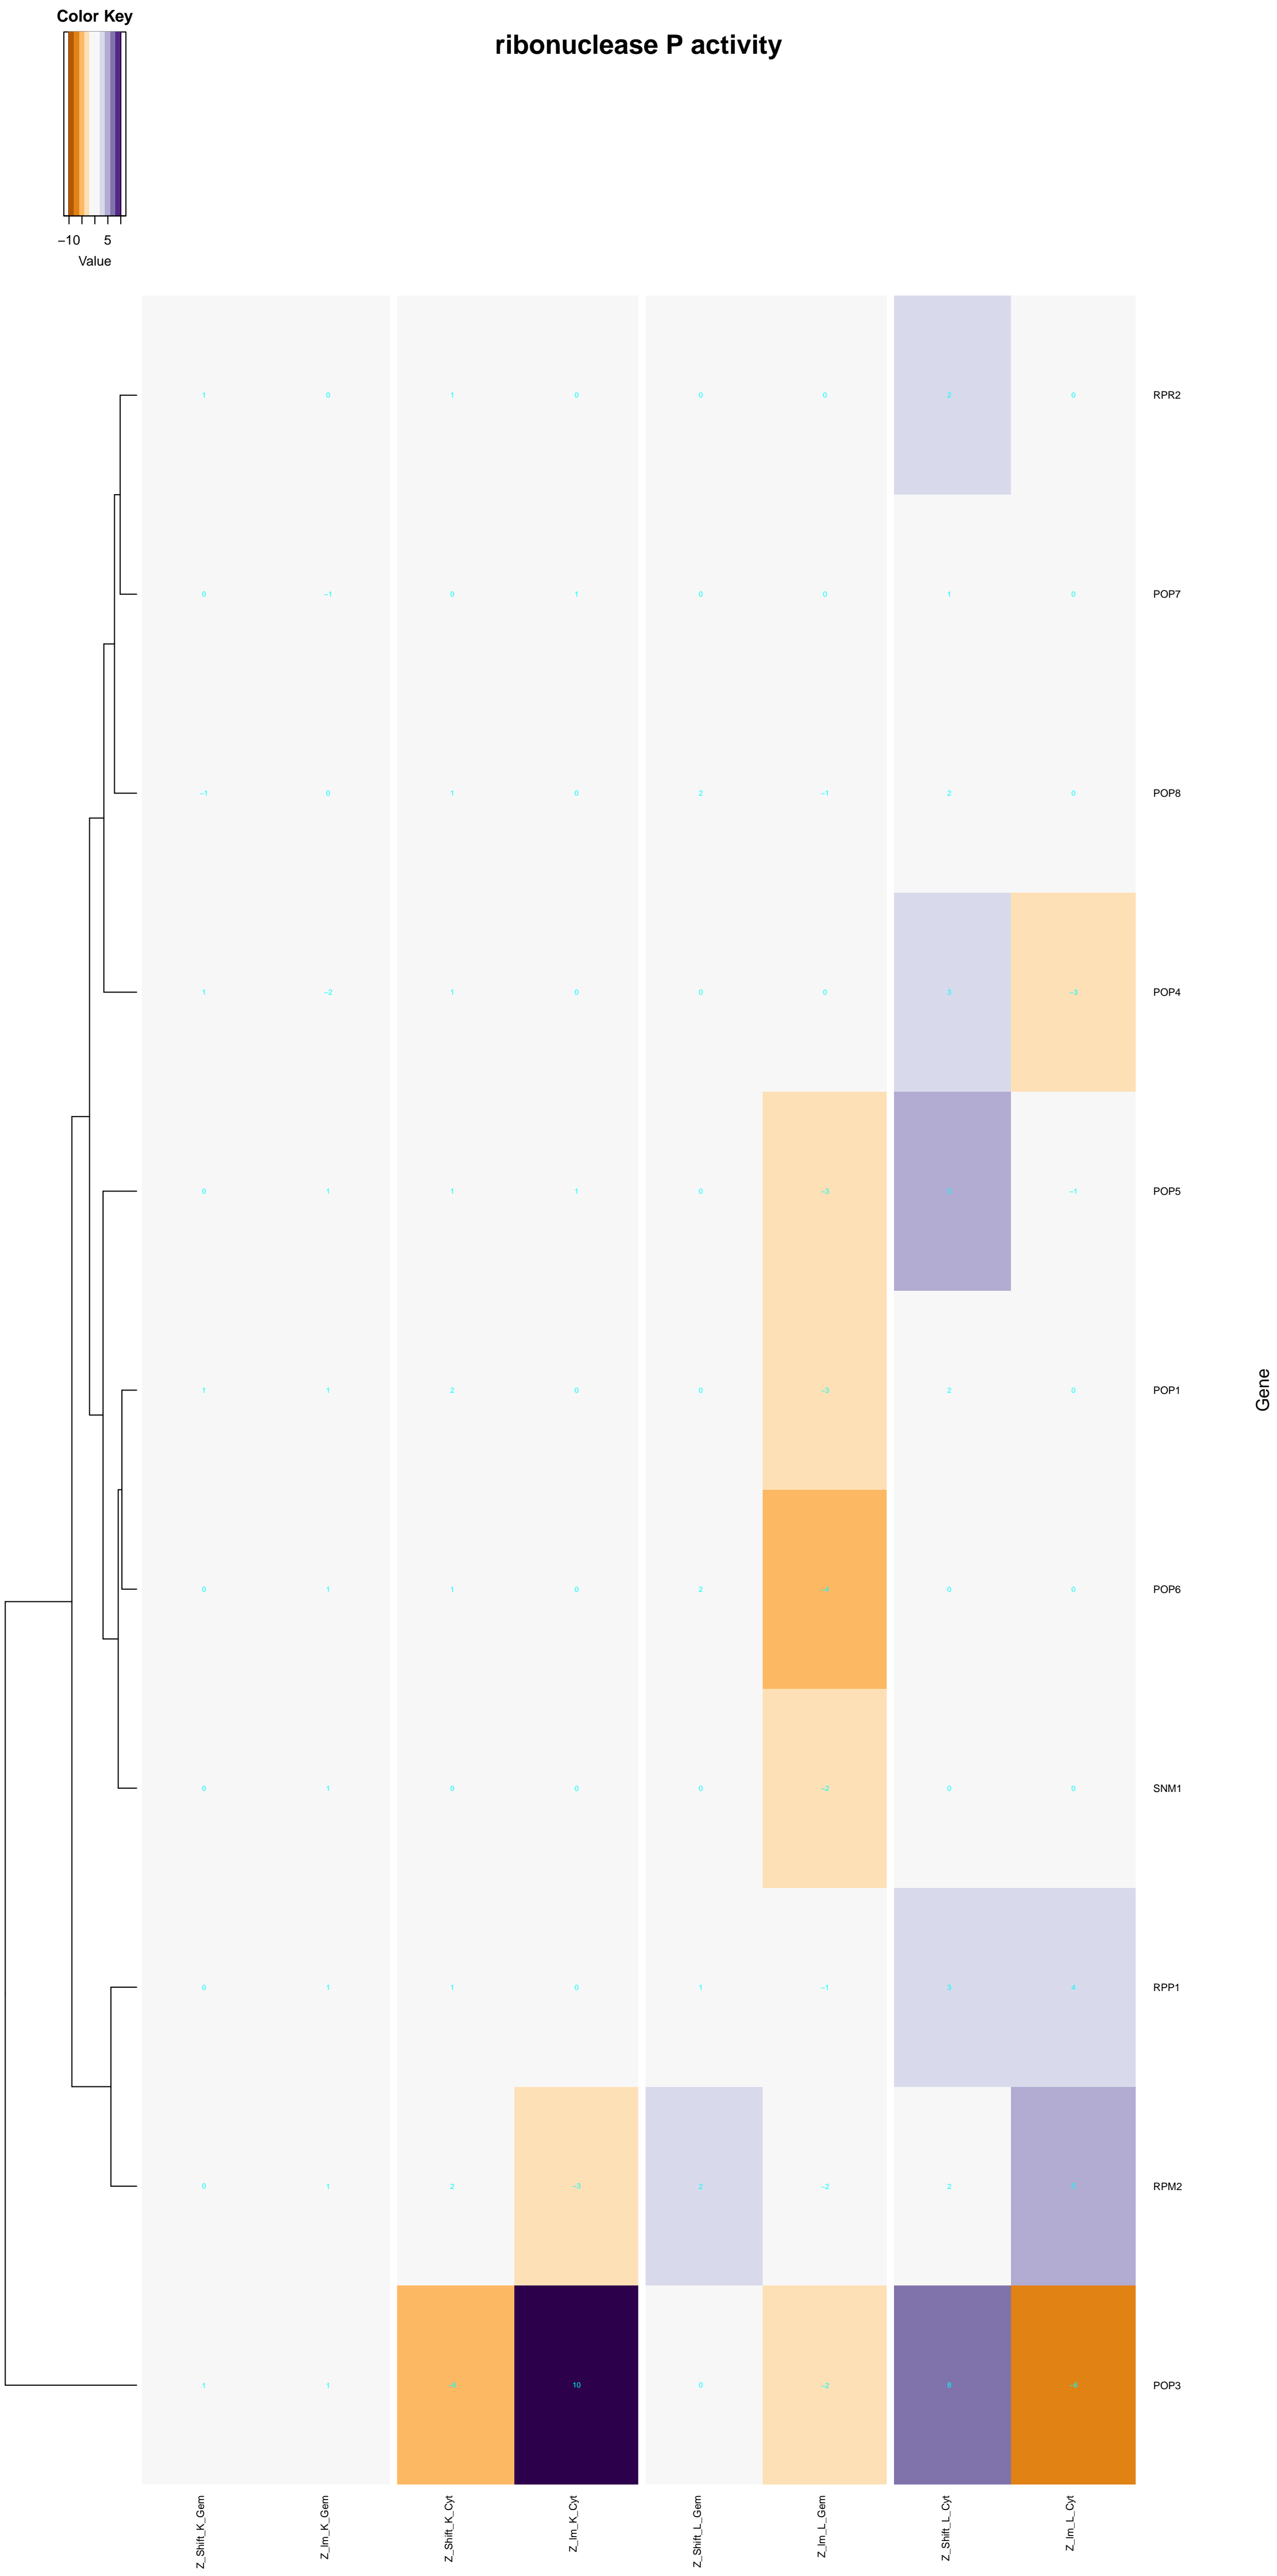

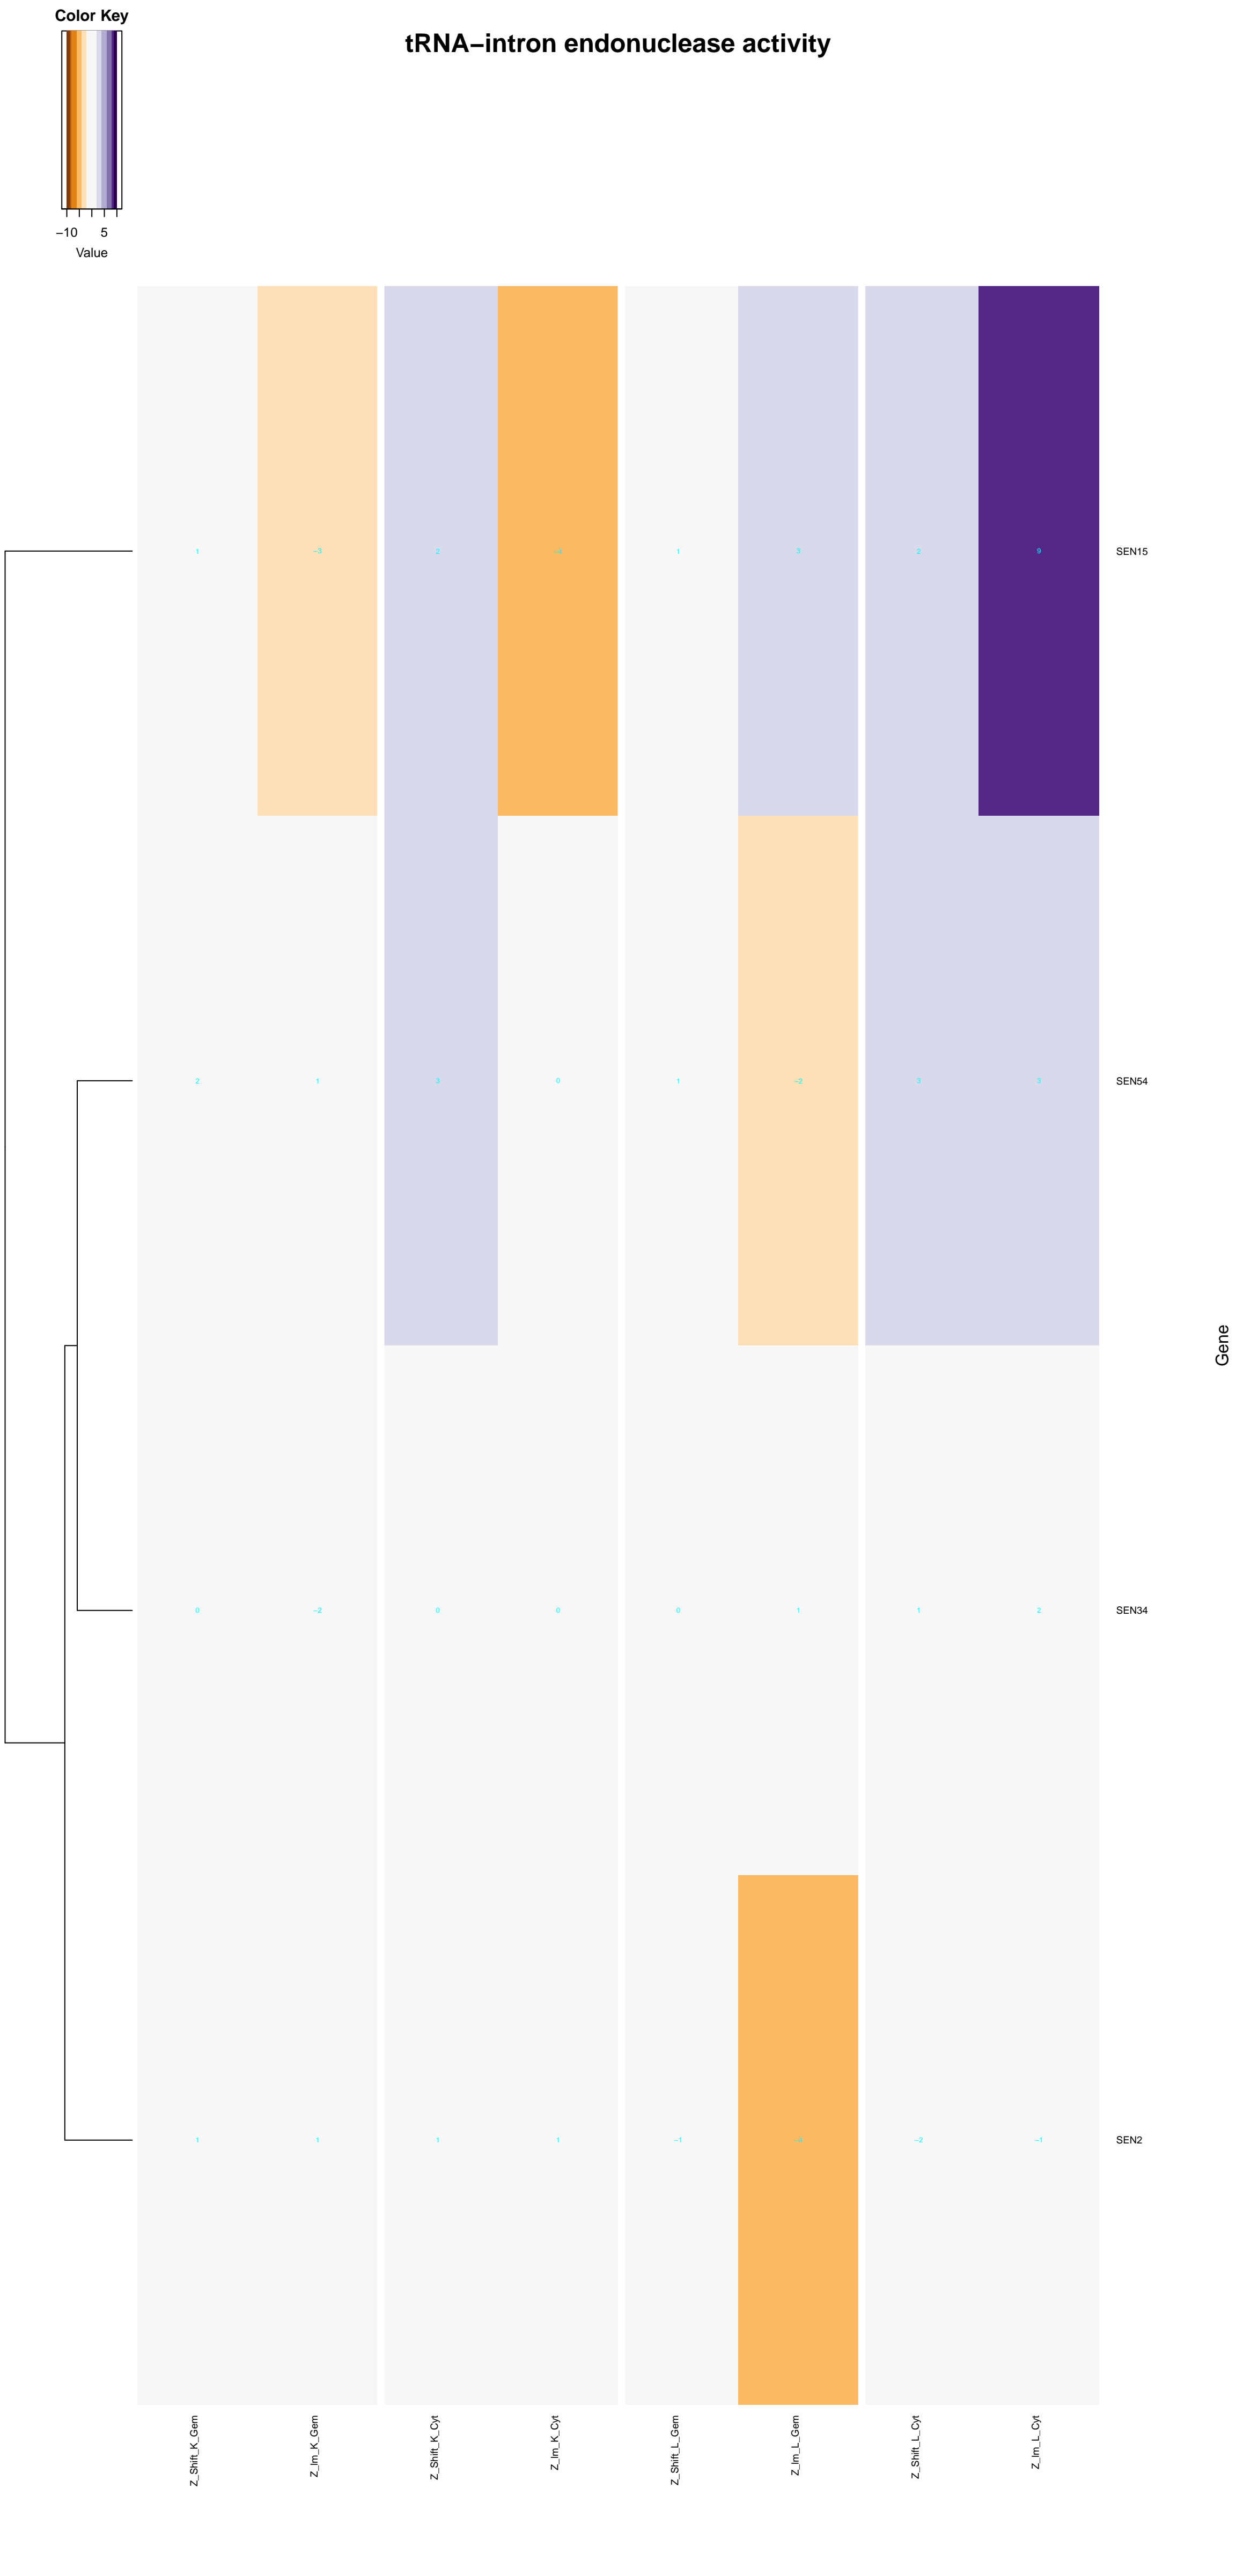

Supplement: s1 [file s1]

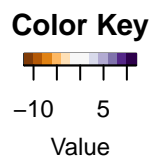

# proteasome core complex

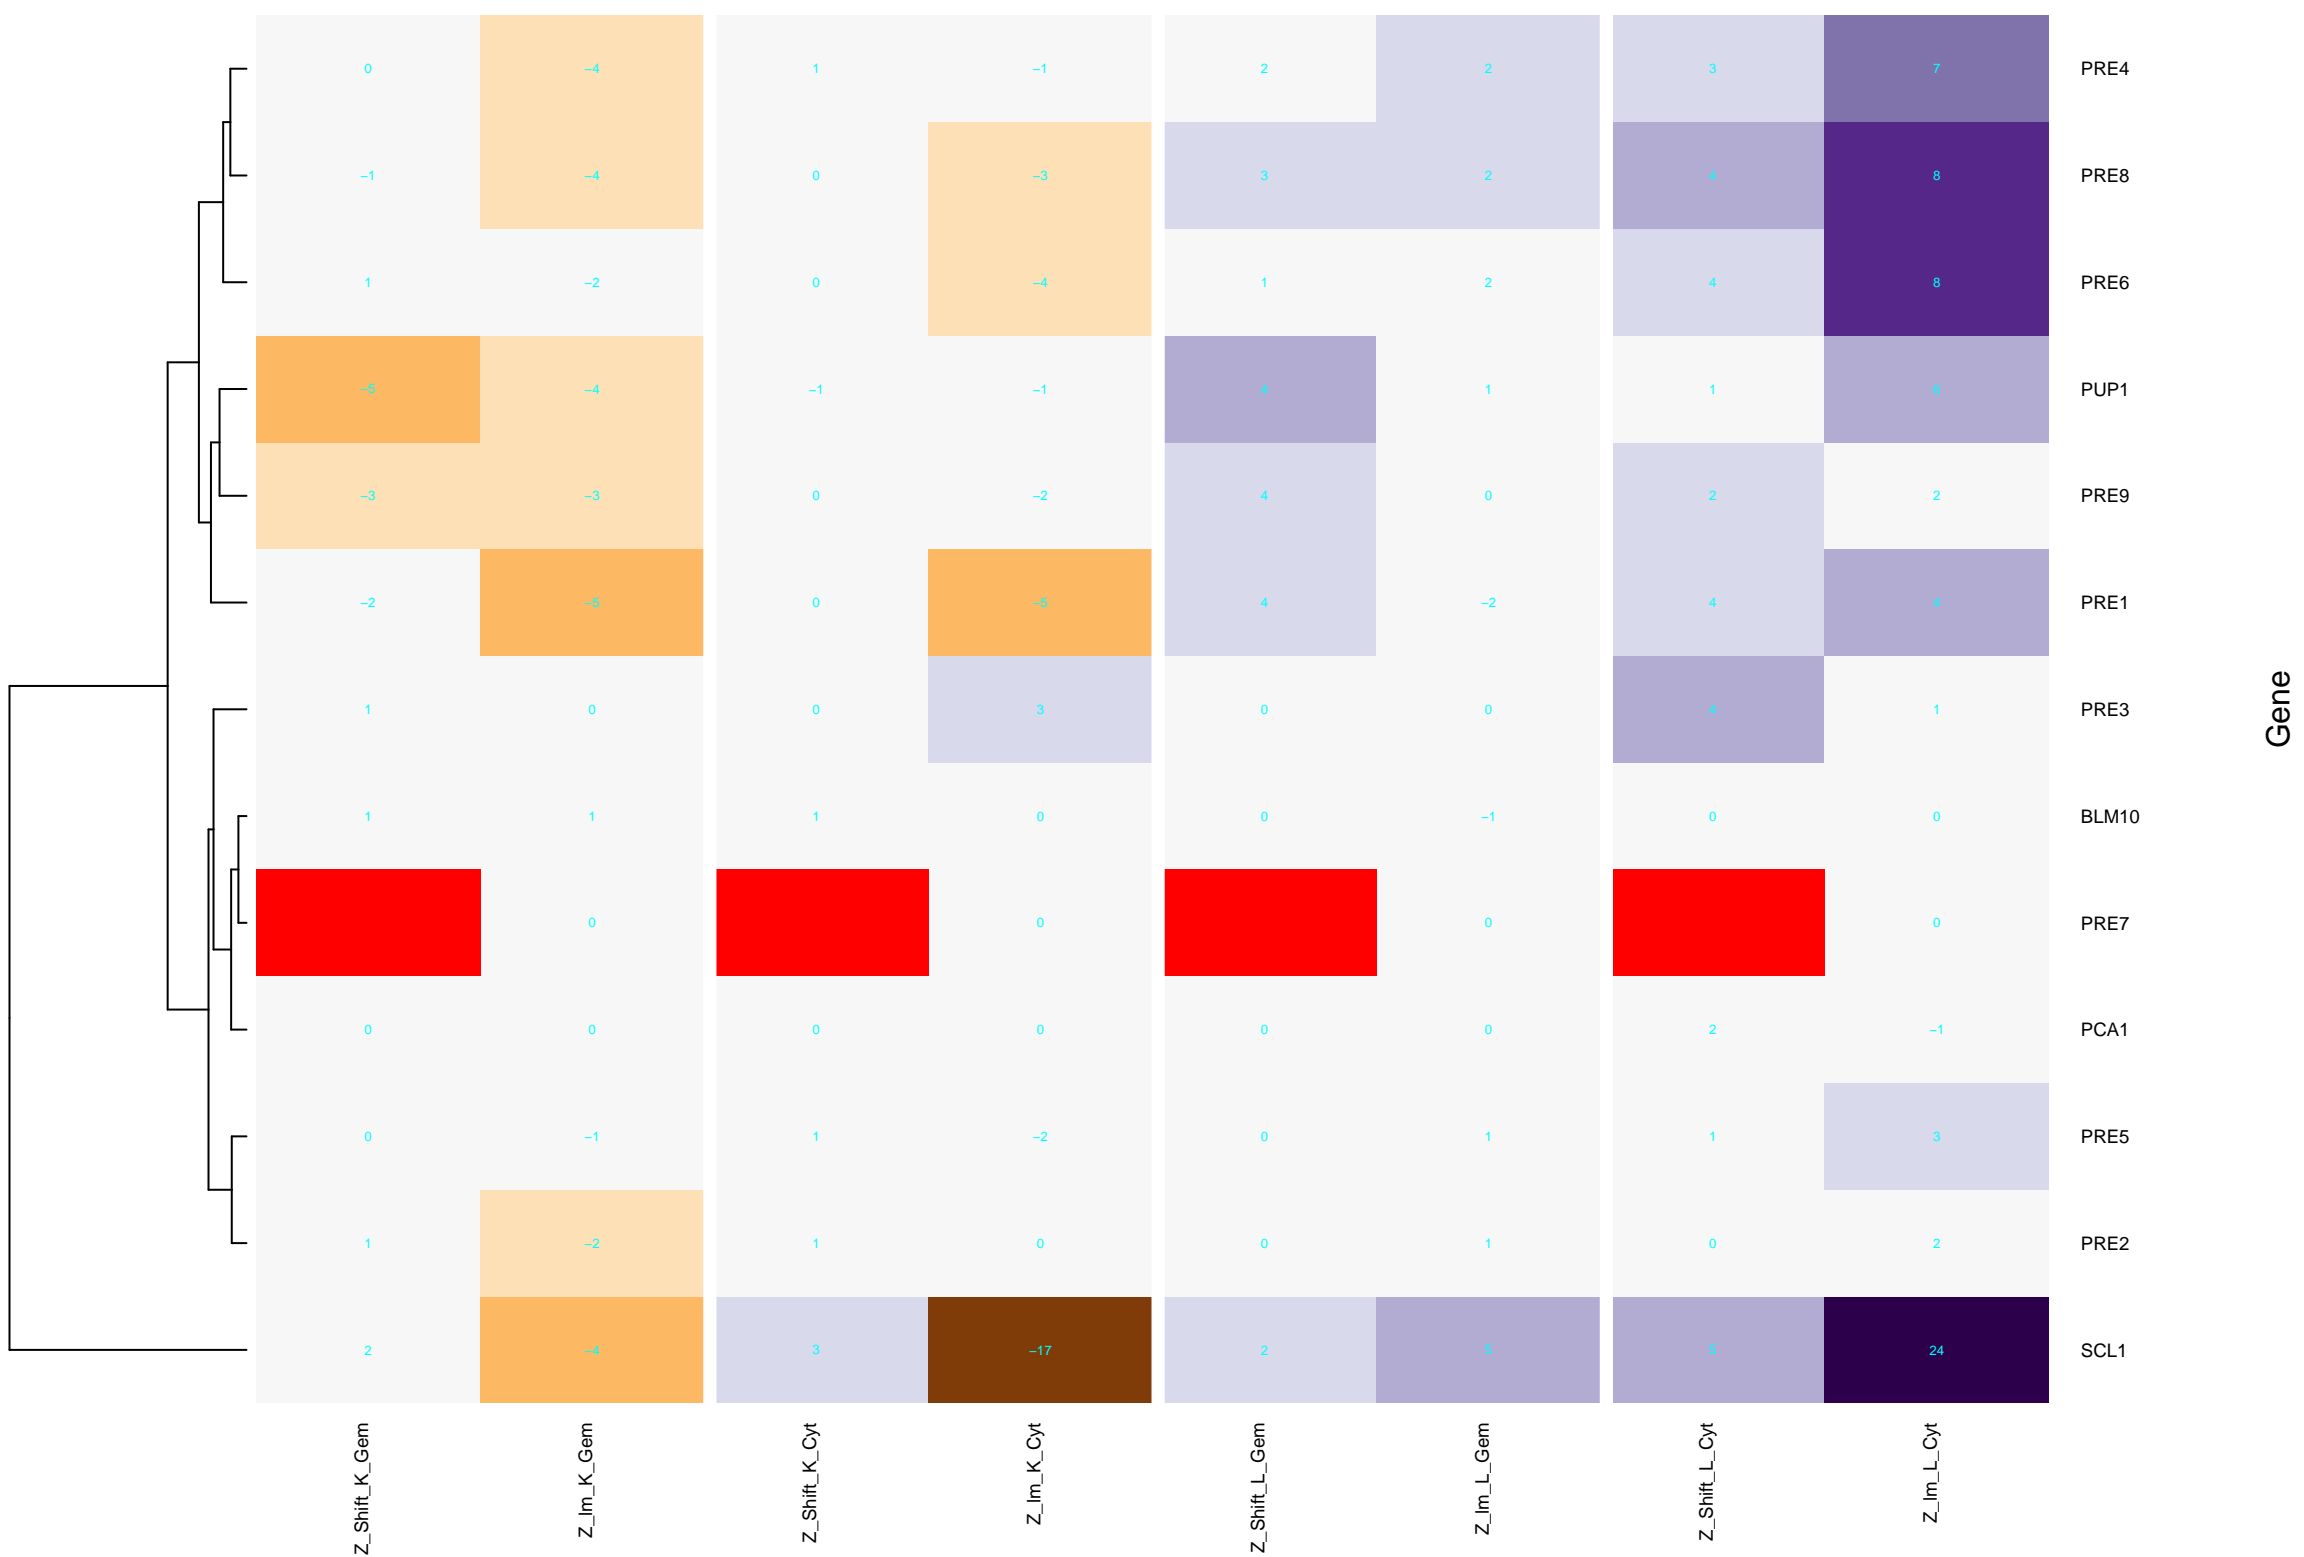

Supplement: s1 [file s1]

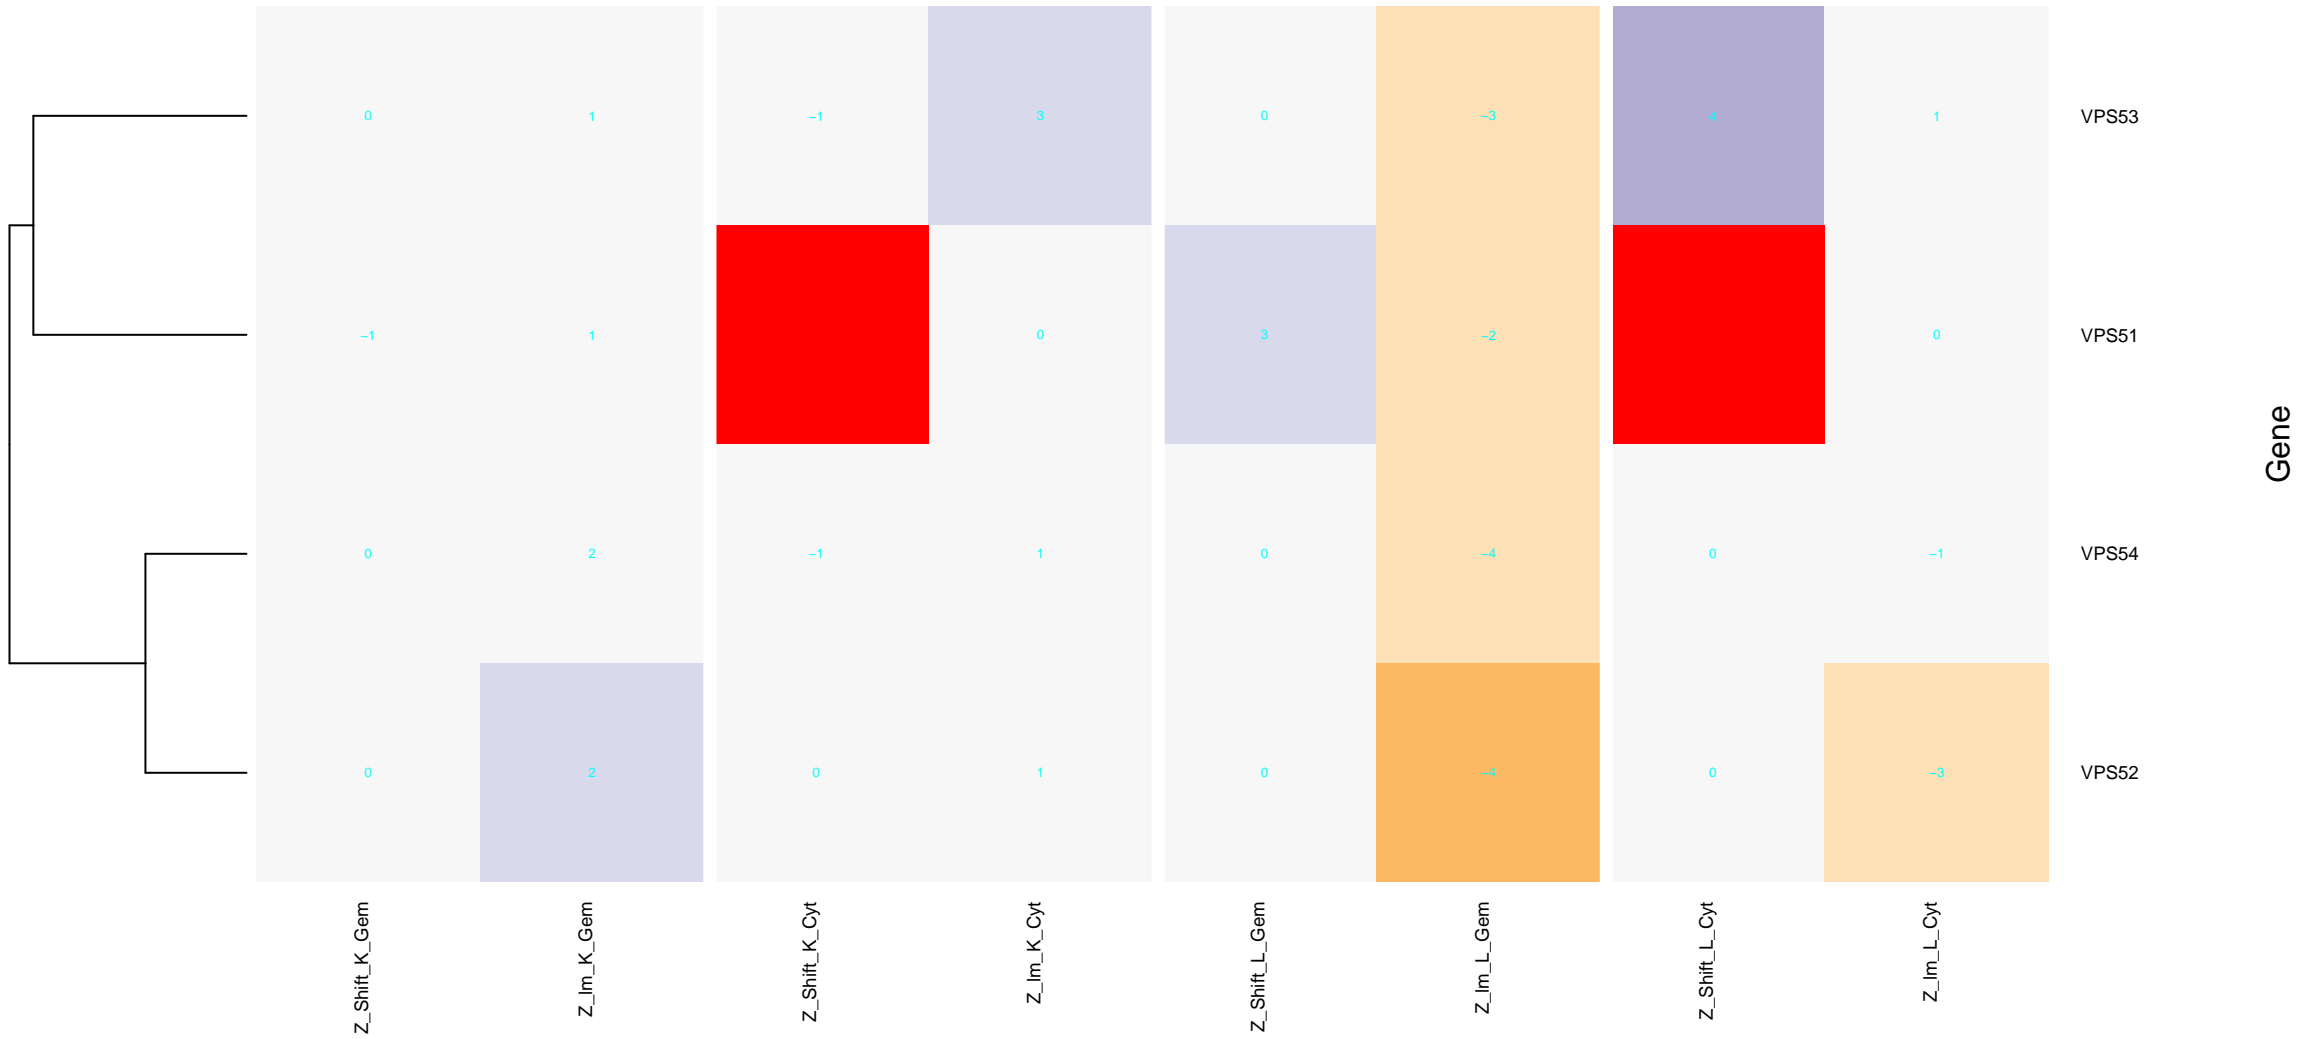

Supplement: s1 [file s1]

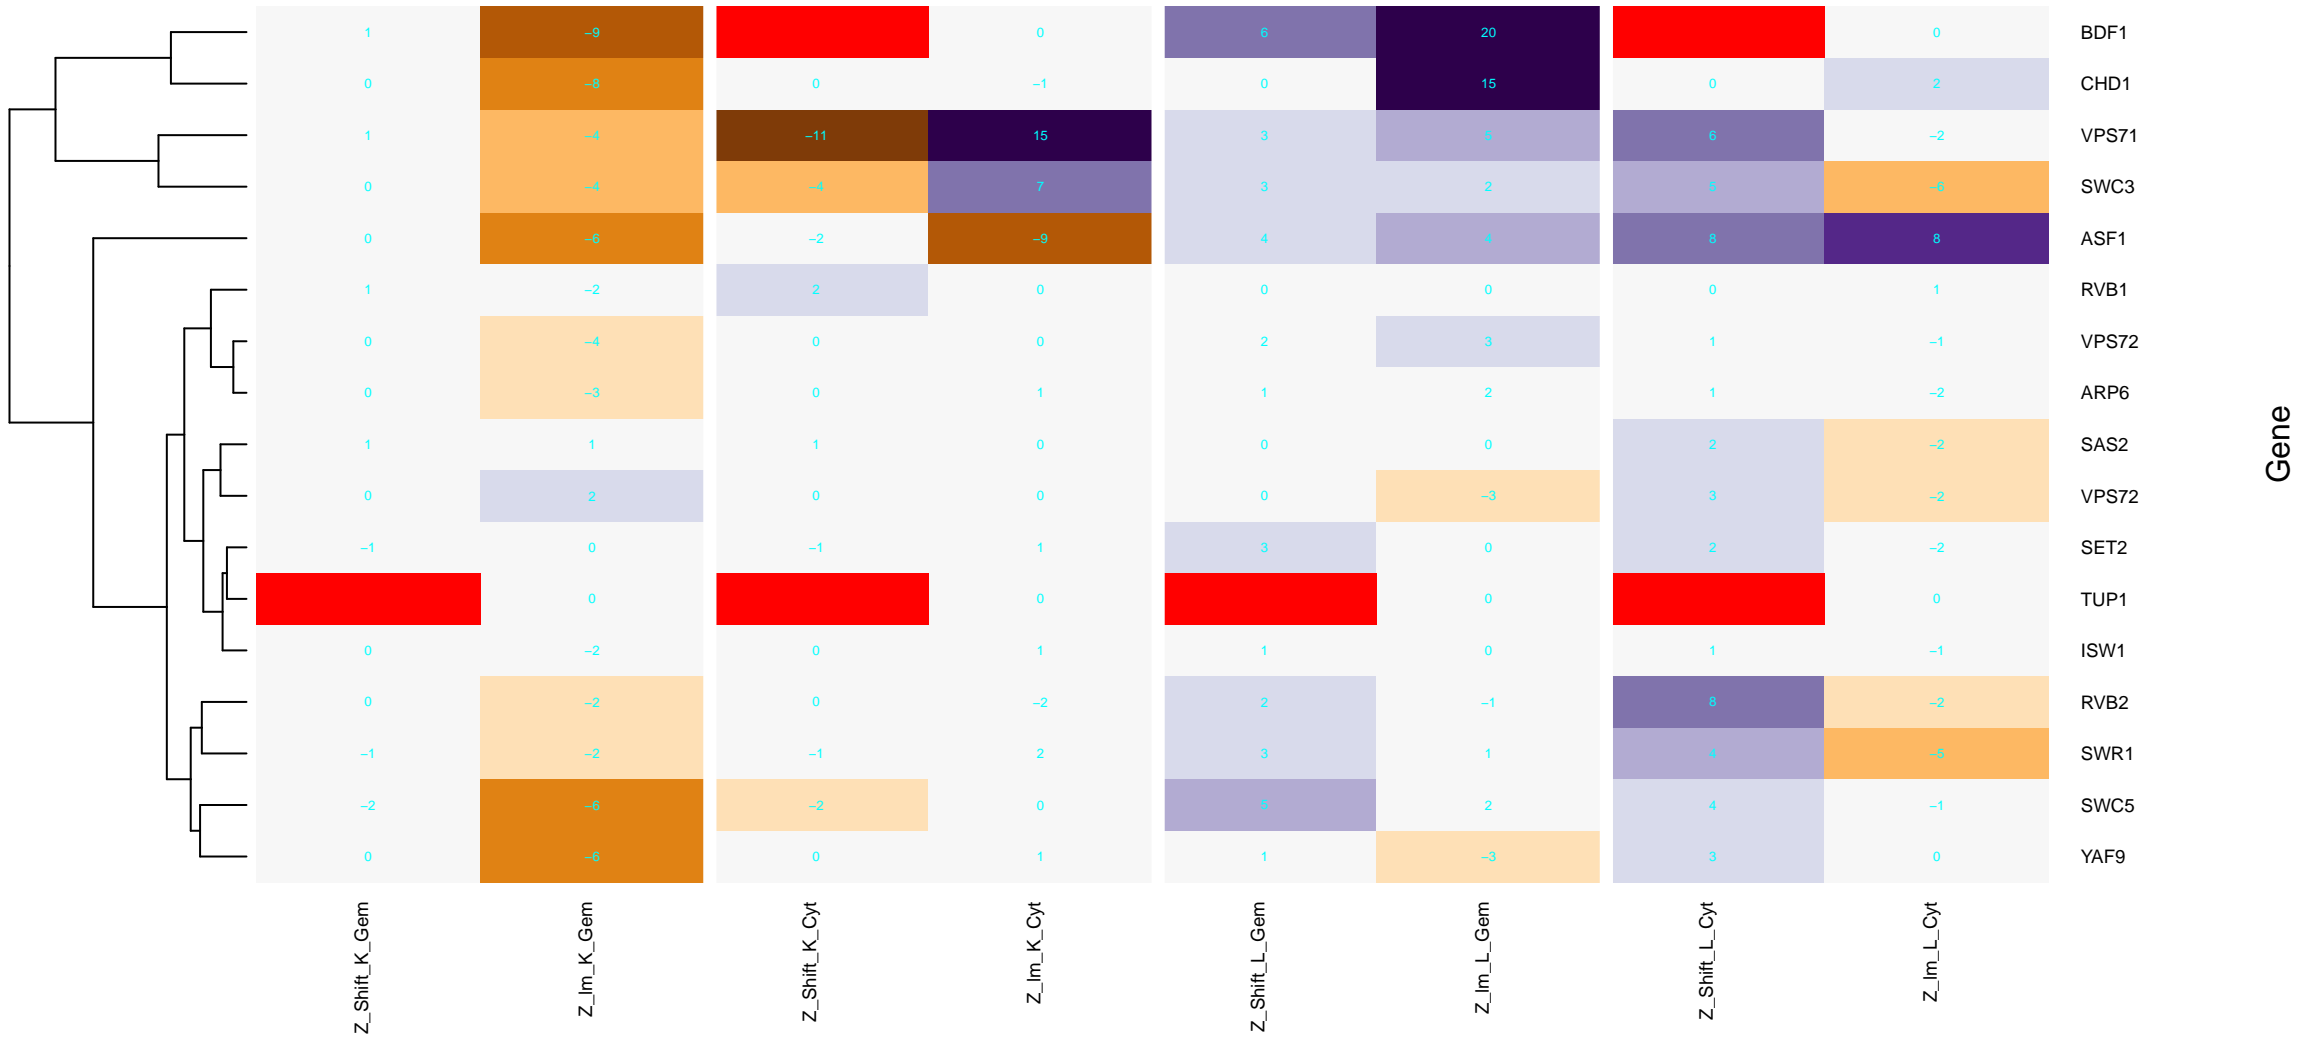

Supplement: s1 [file s1]

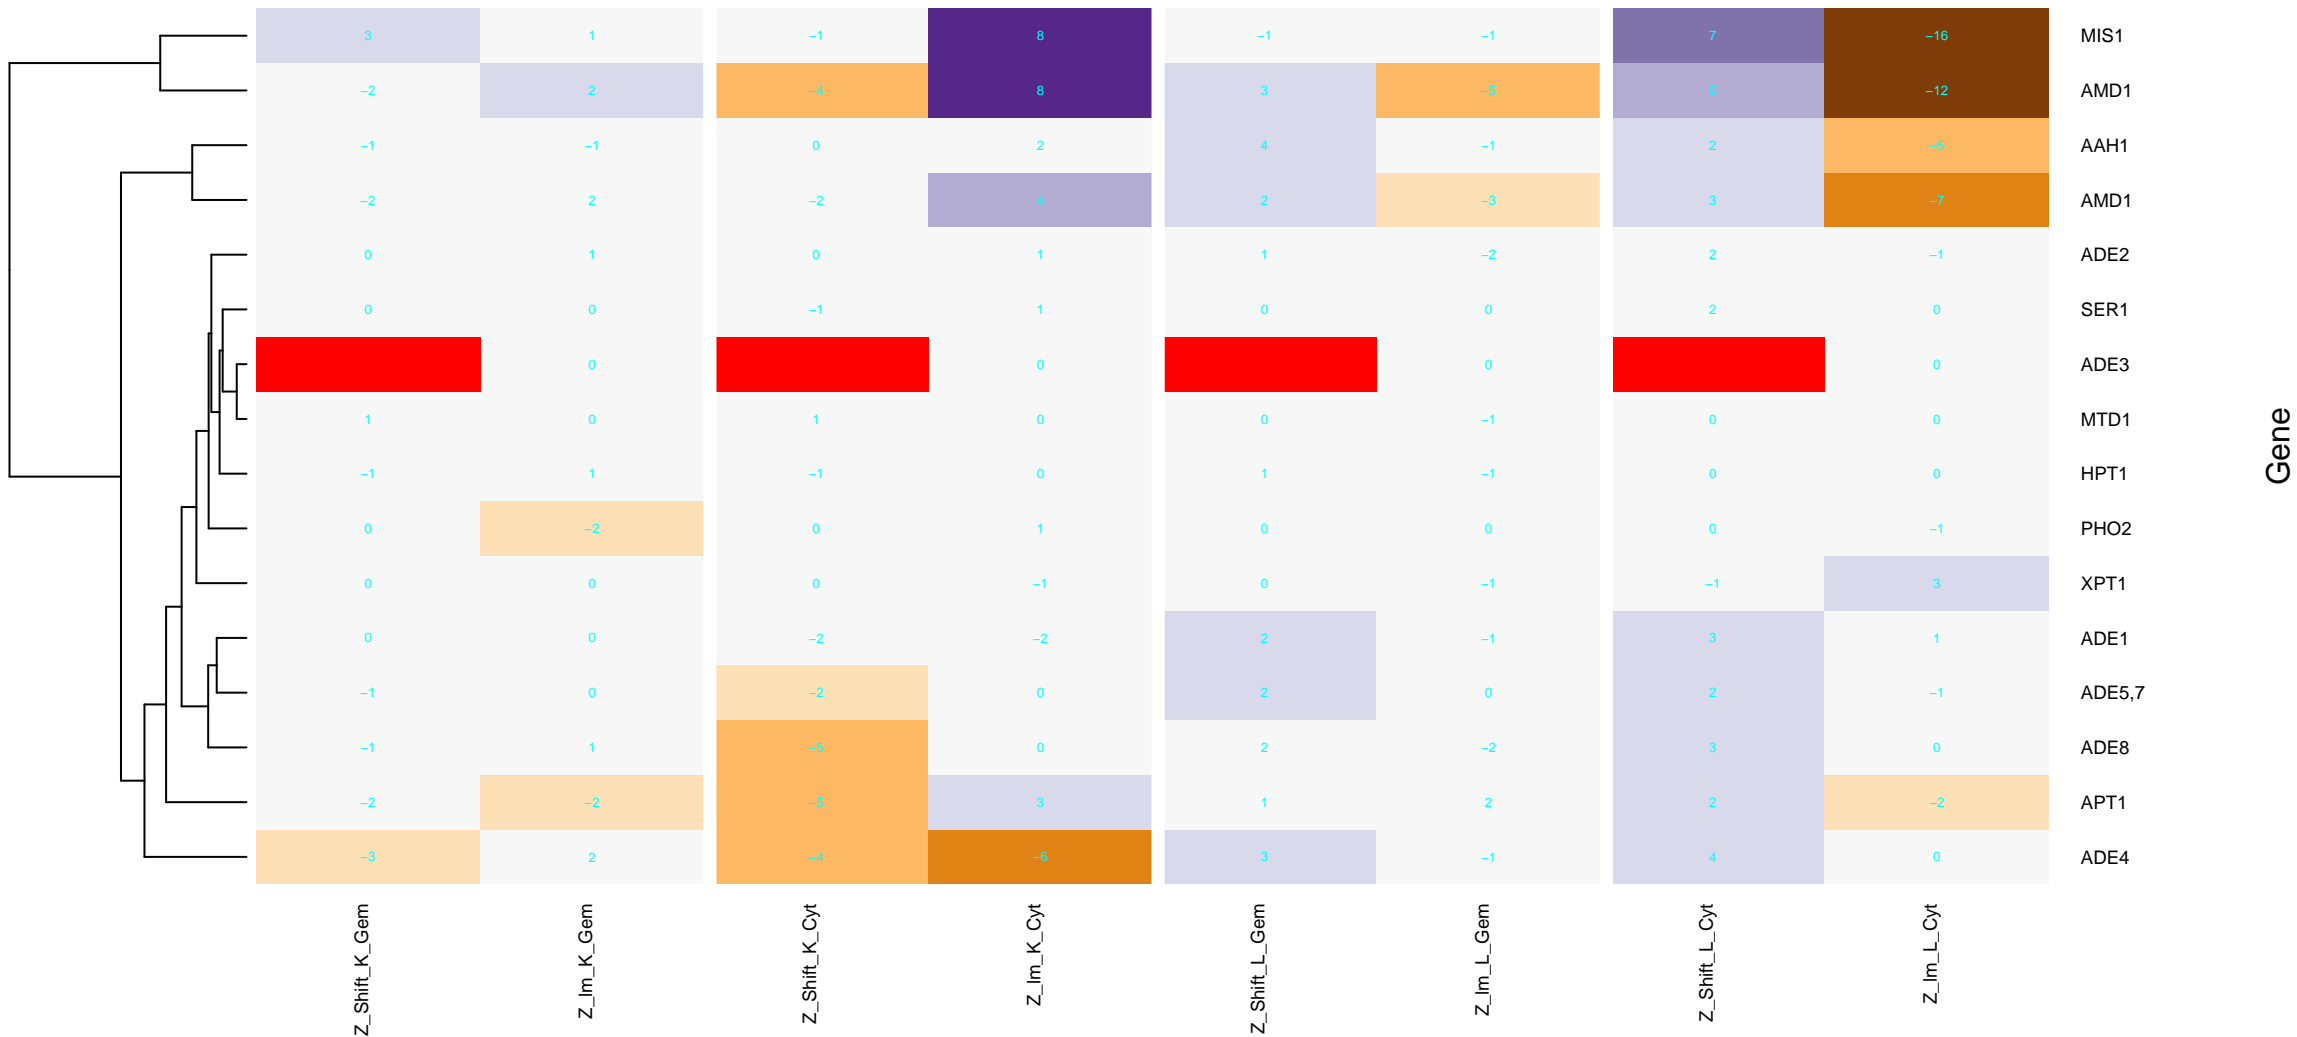

Supplement: s1 [file s1]



# telomere maintenance via recombination

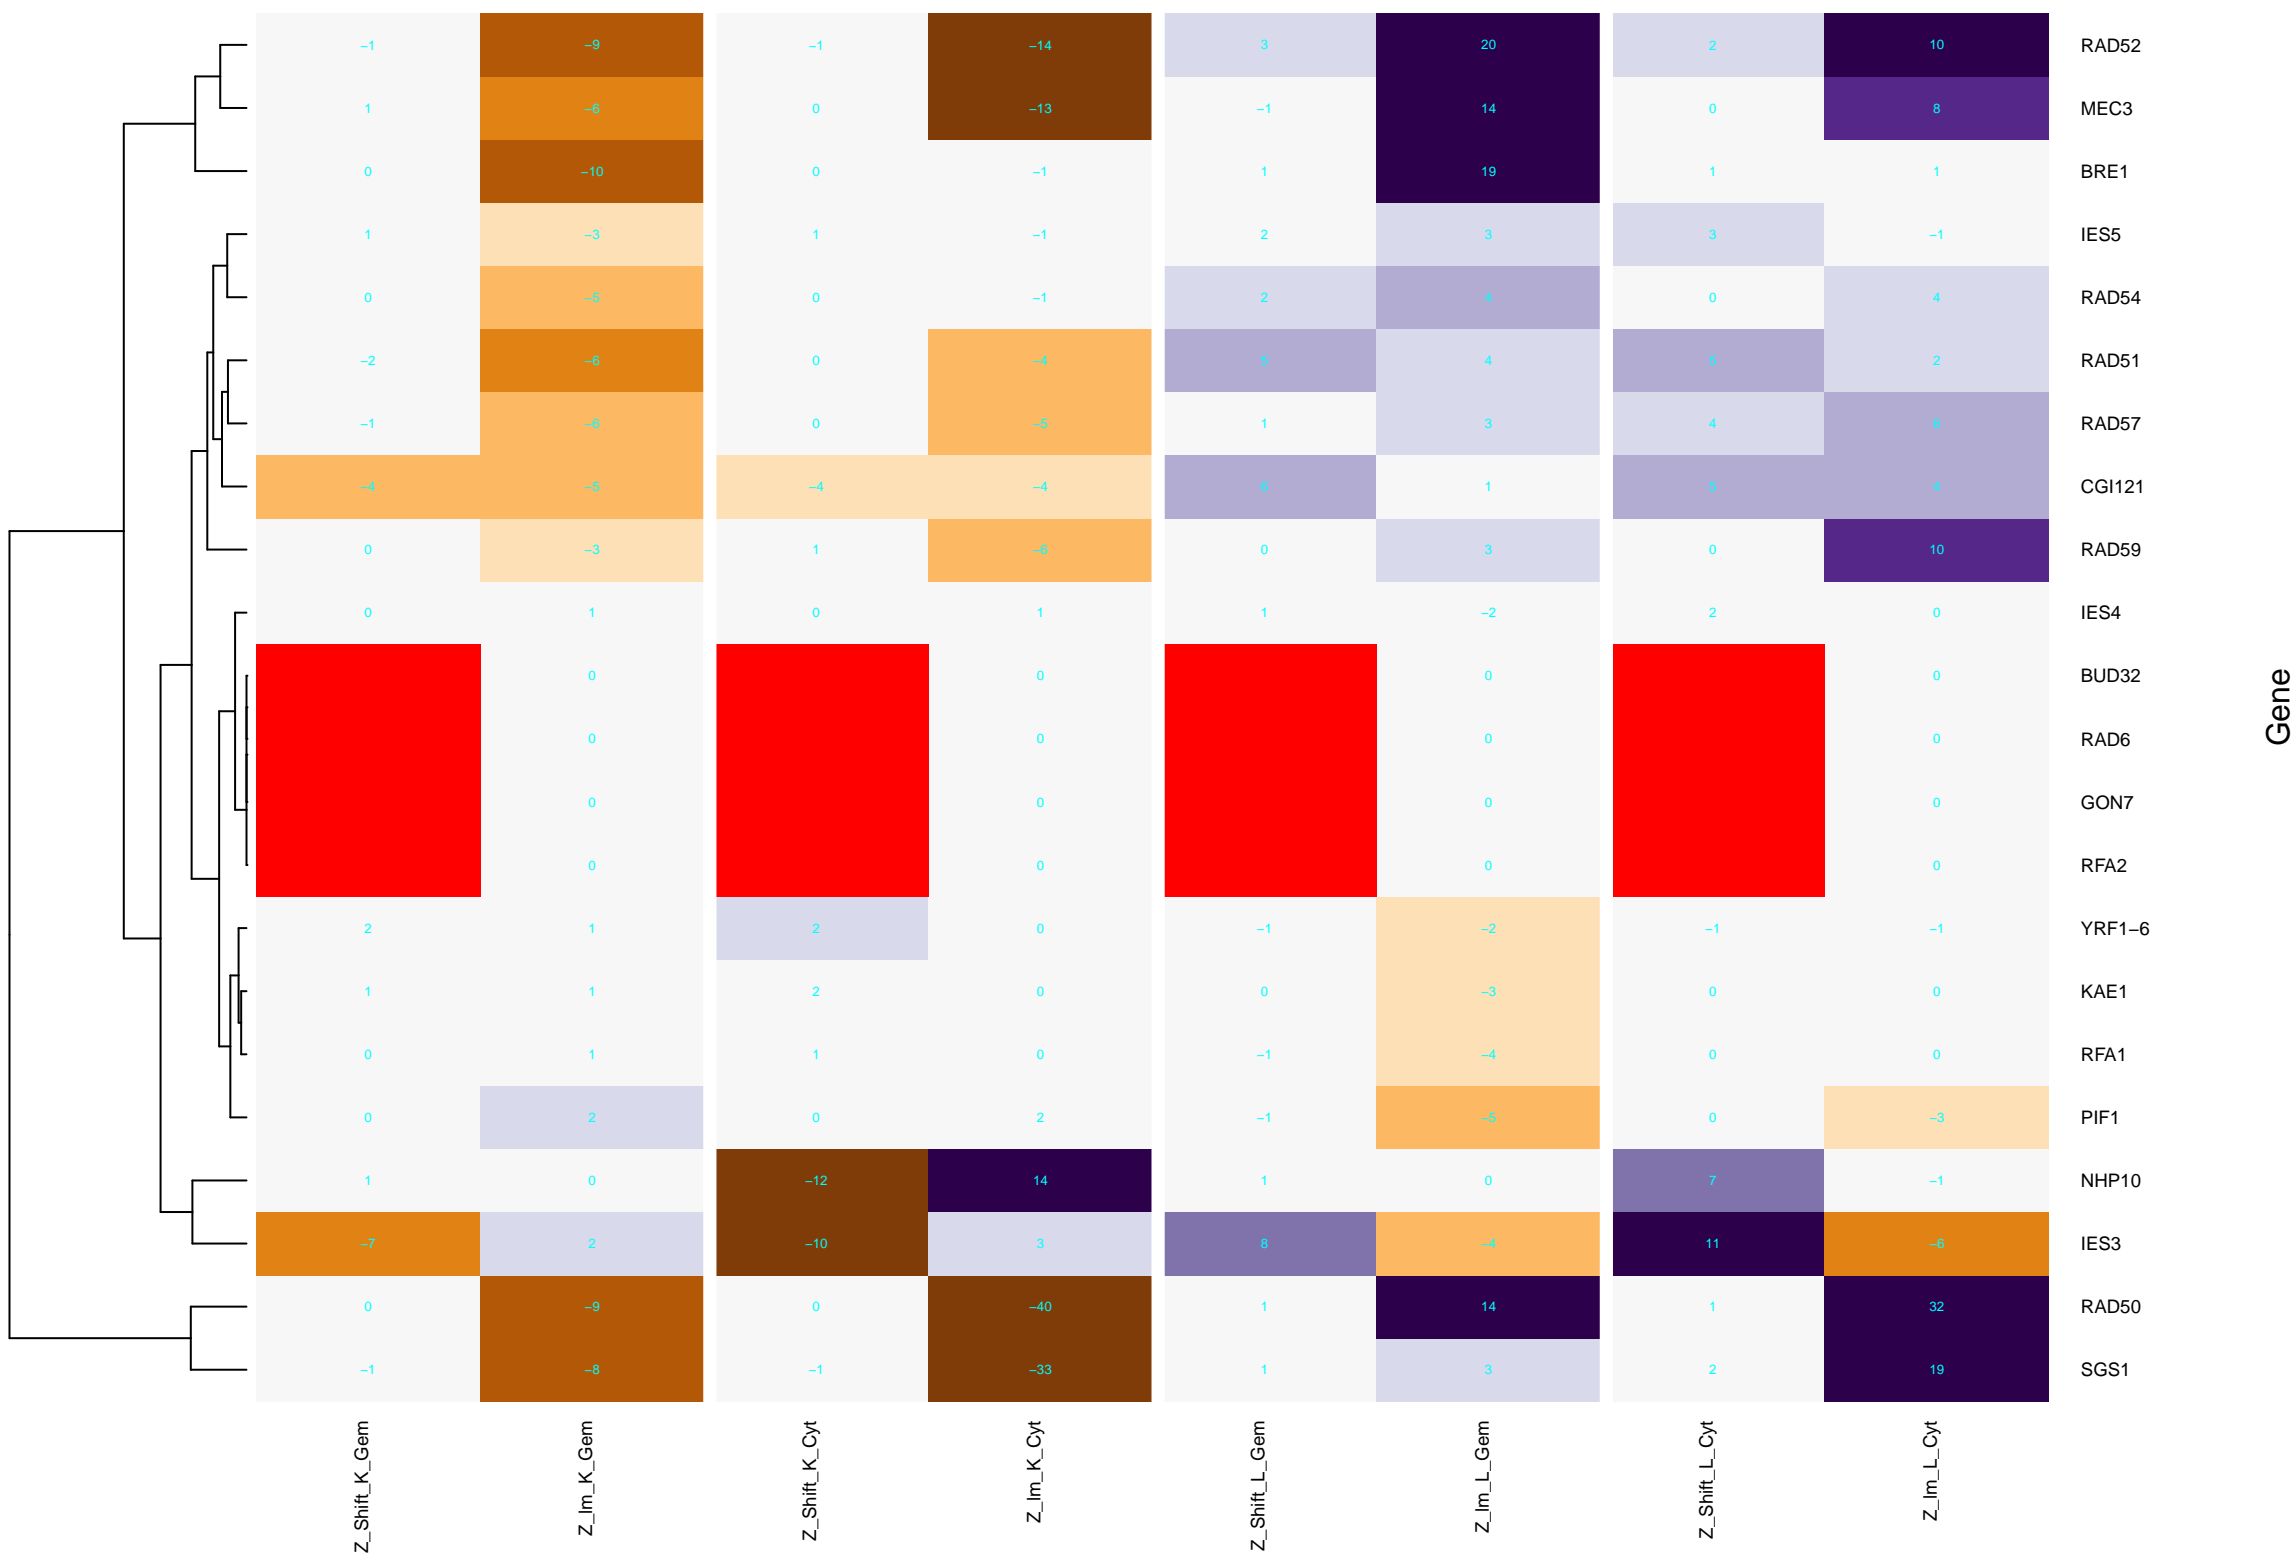

Supplement: s1 [file s1]

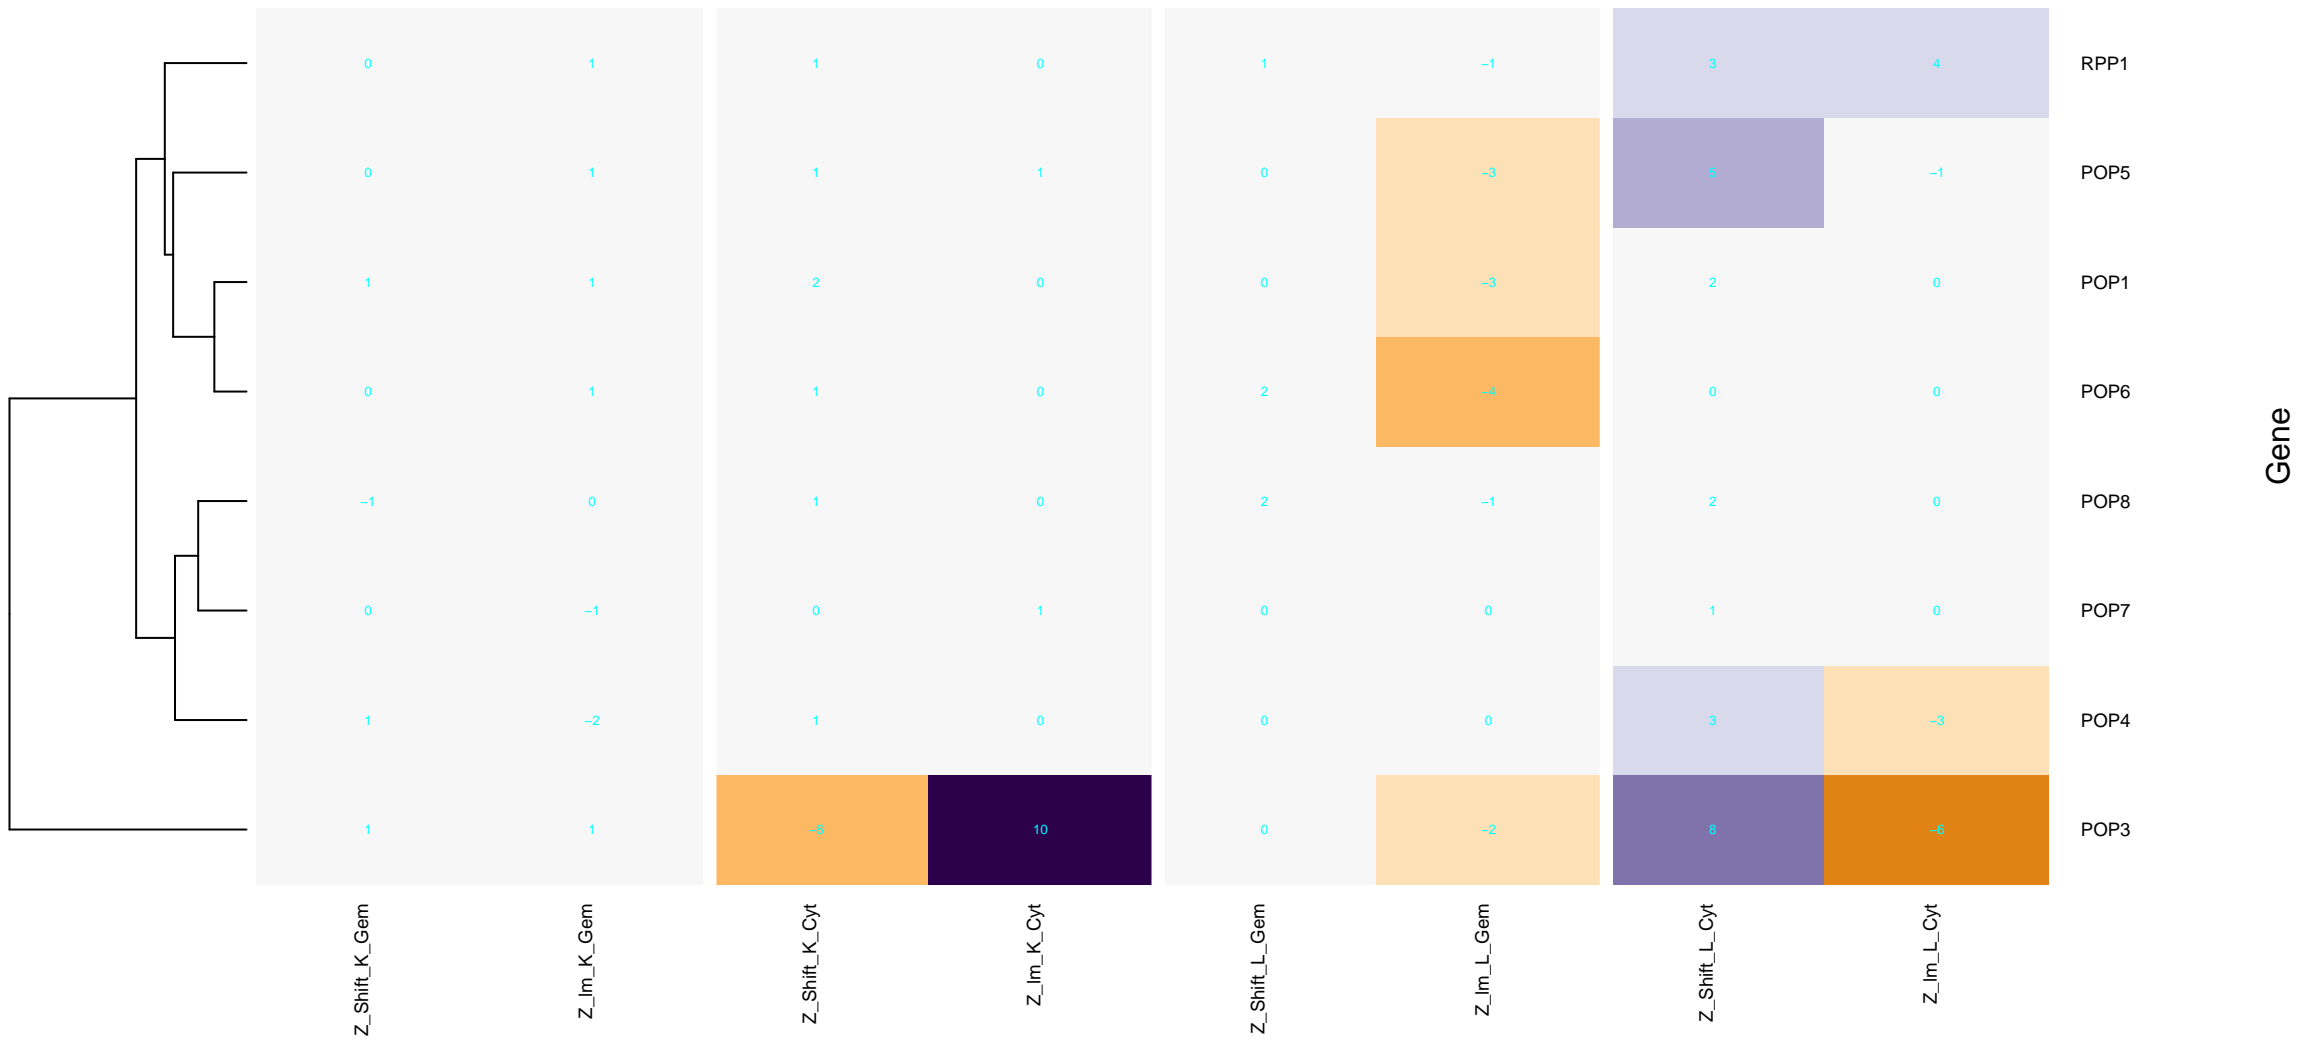

Supplement: s1 [file s1]

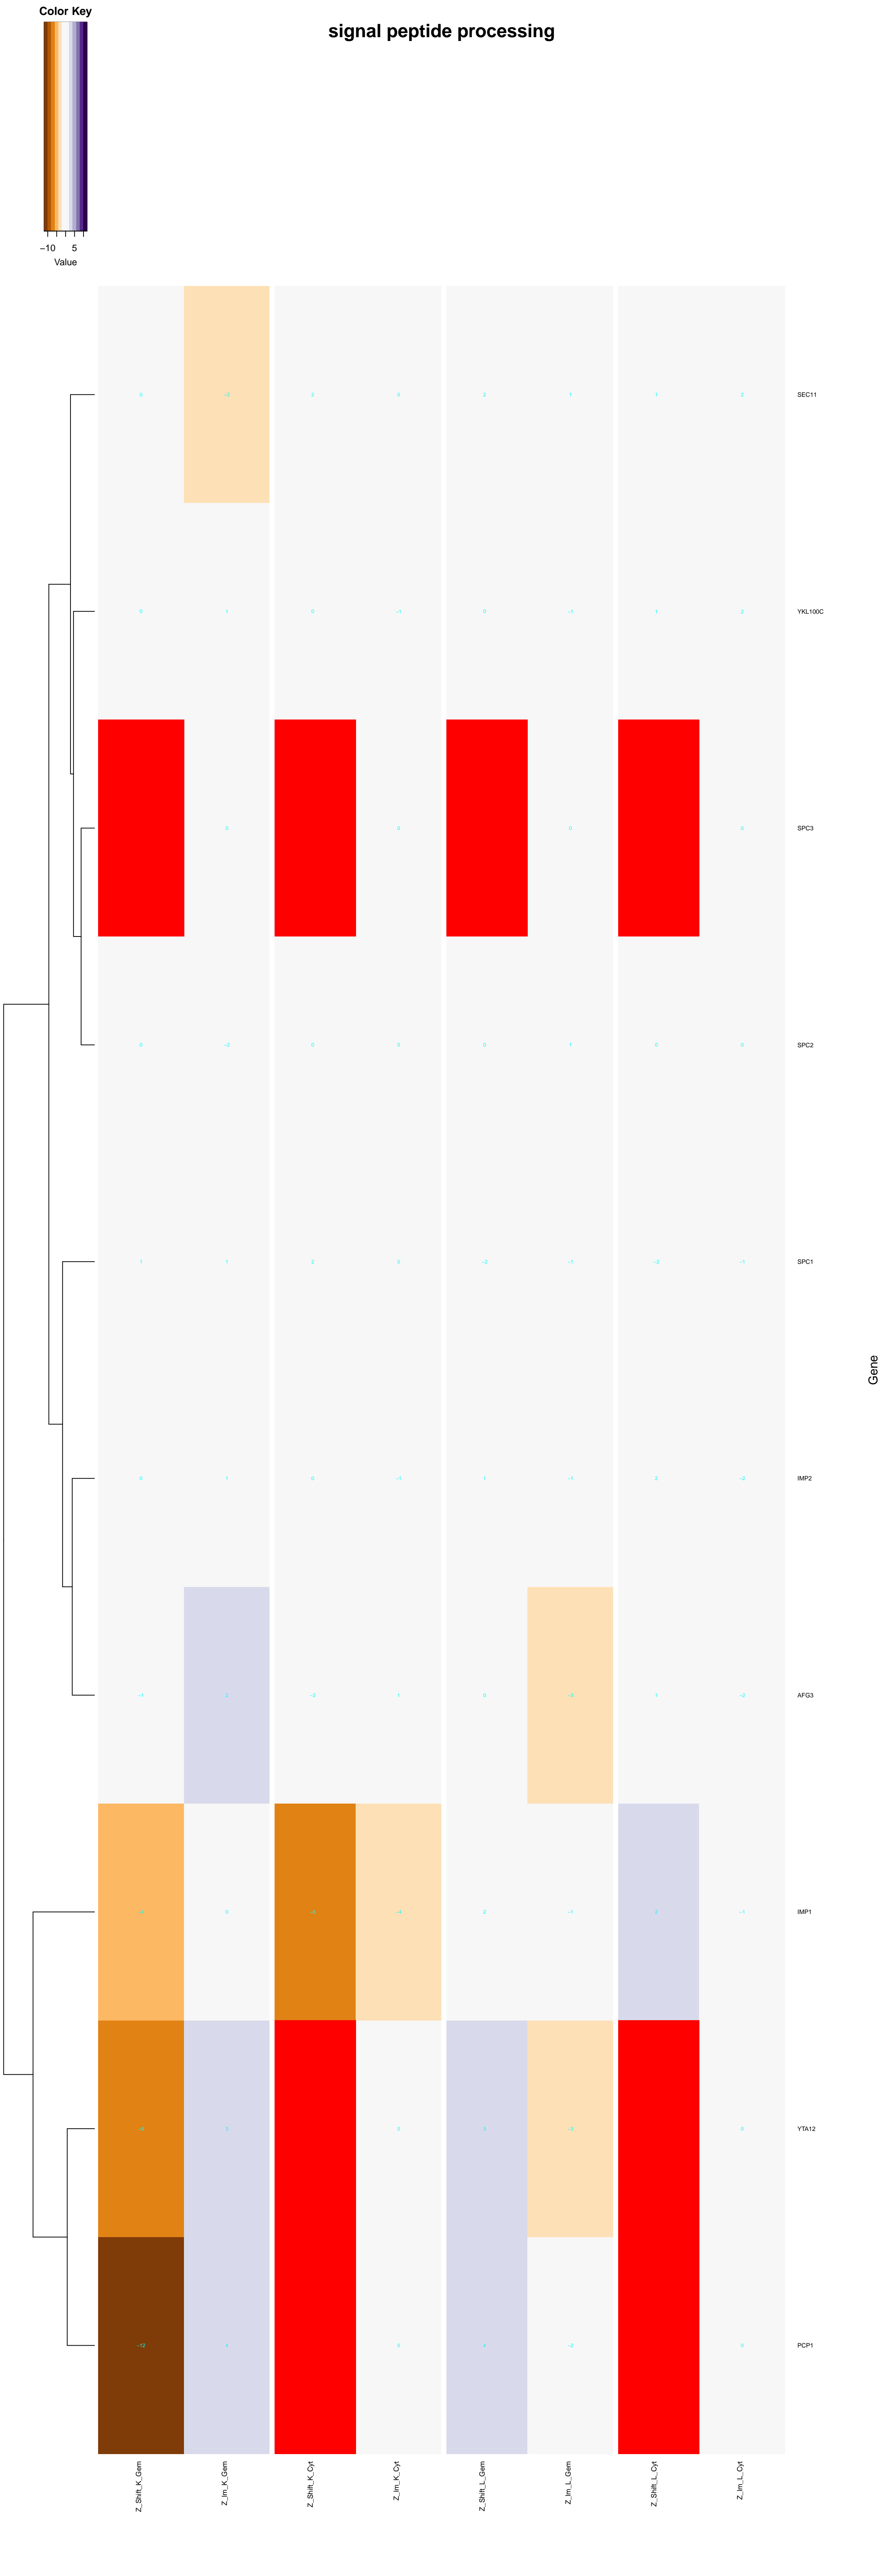

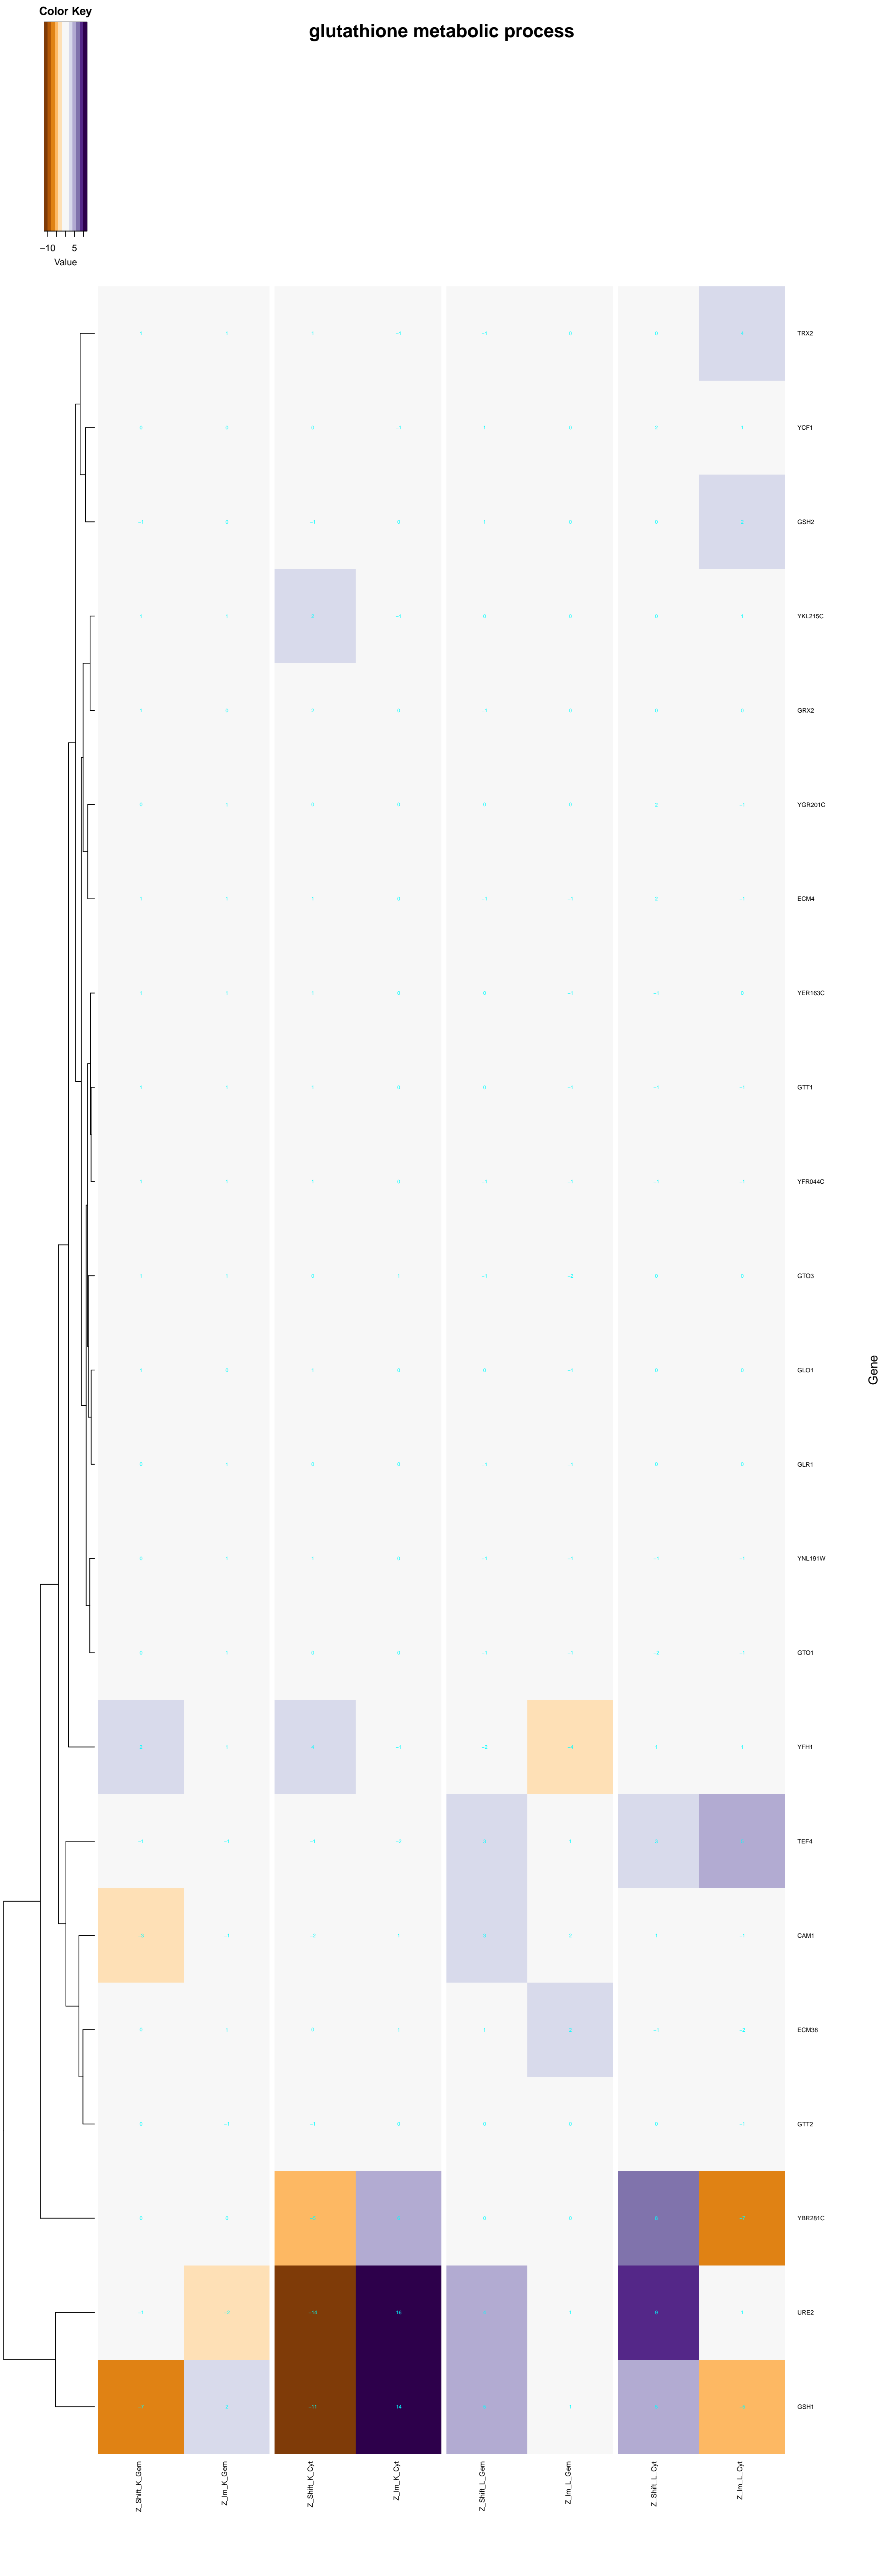

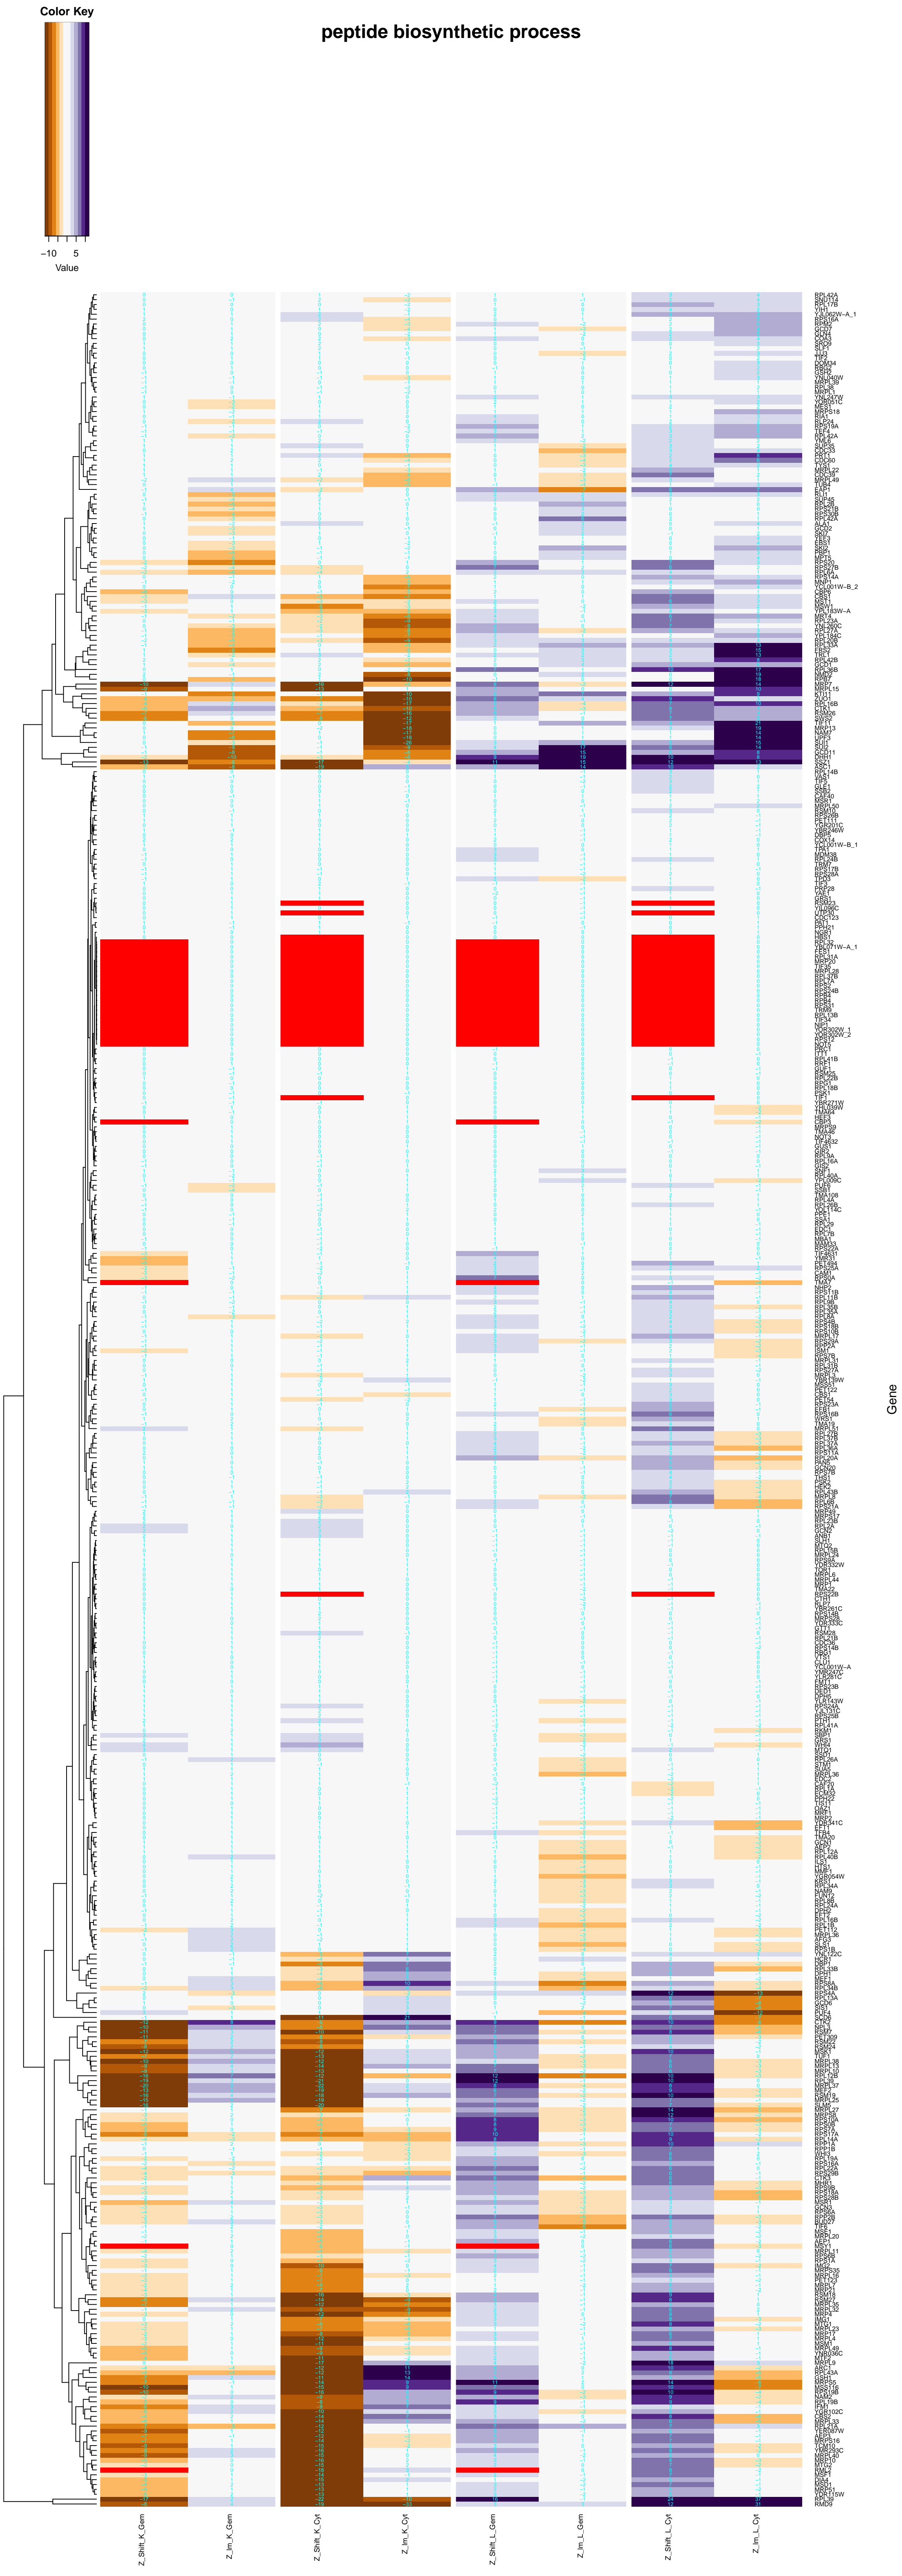

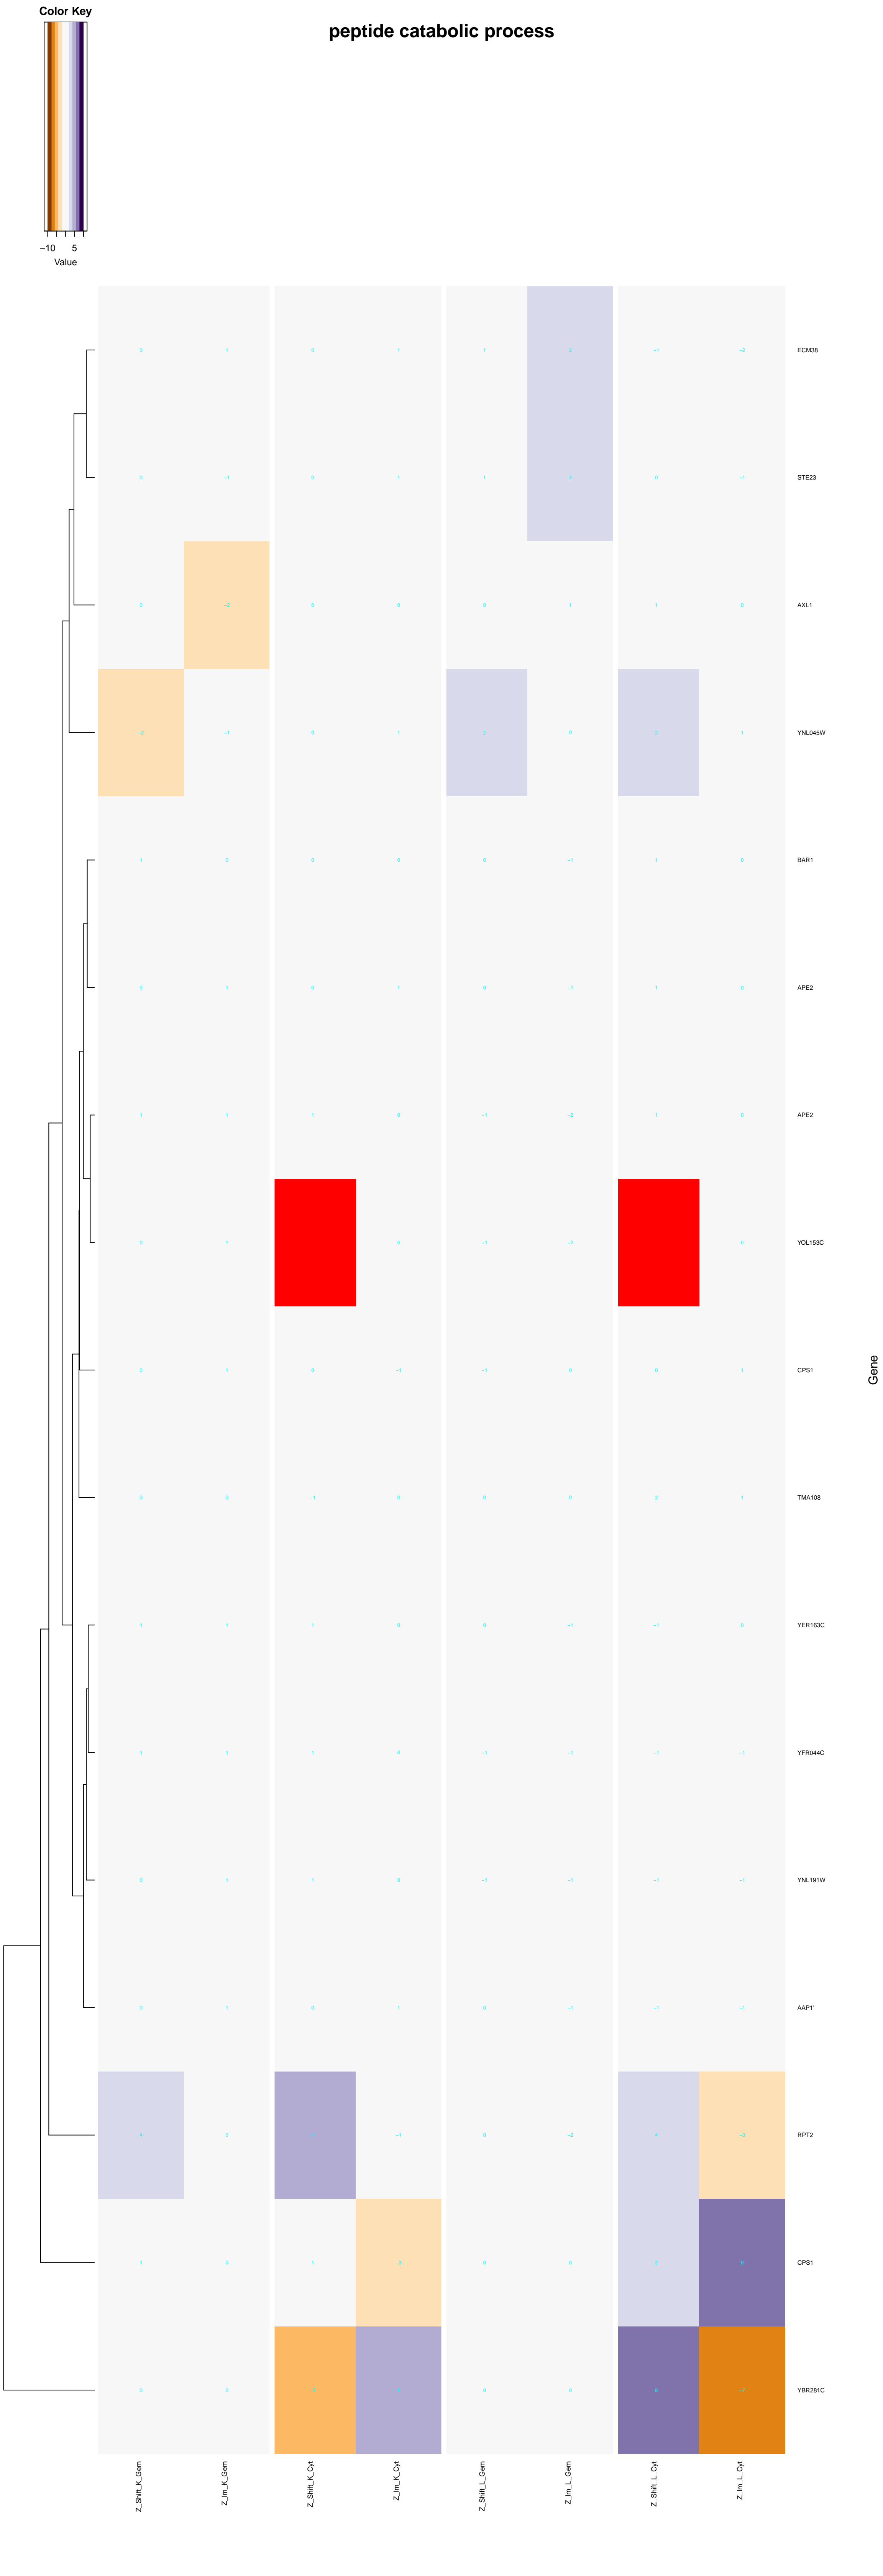

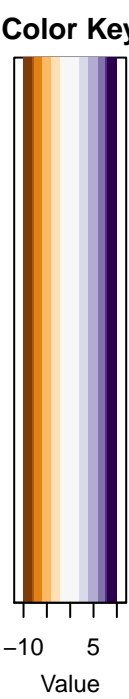

glutathione catabolic process

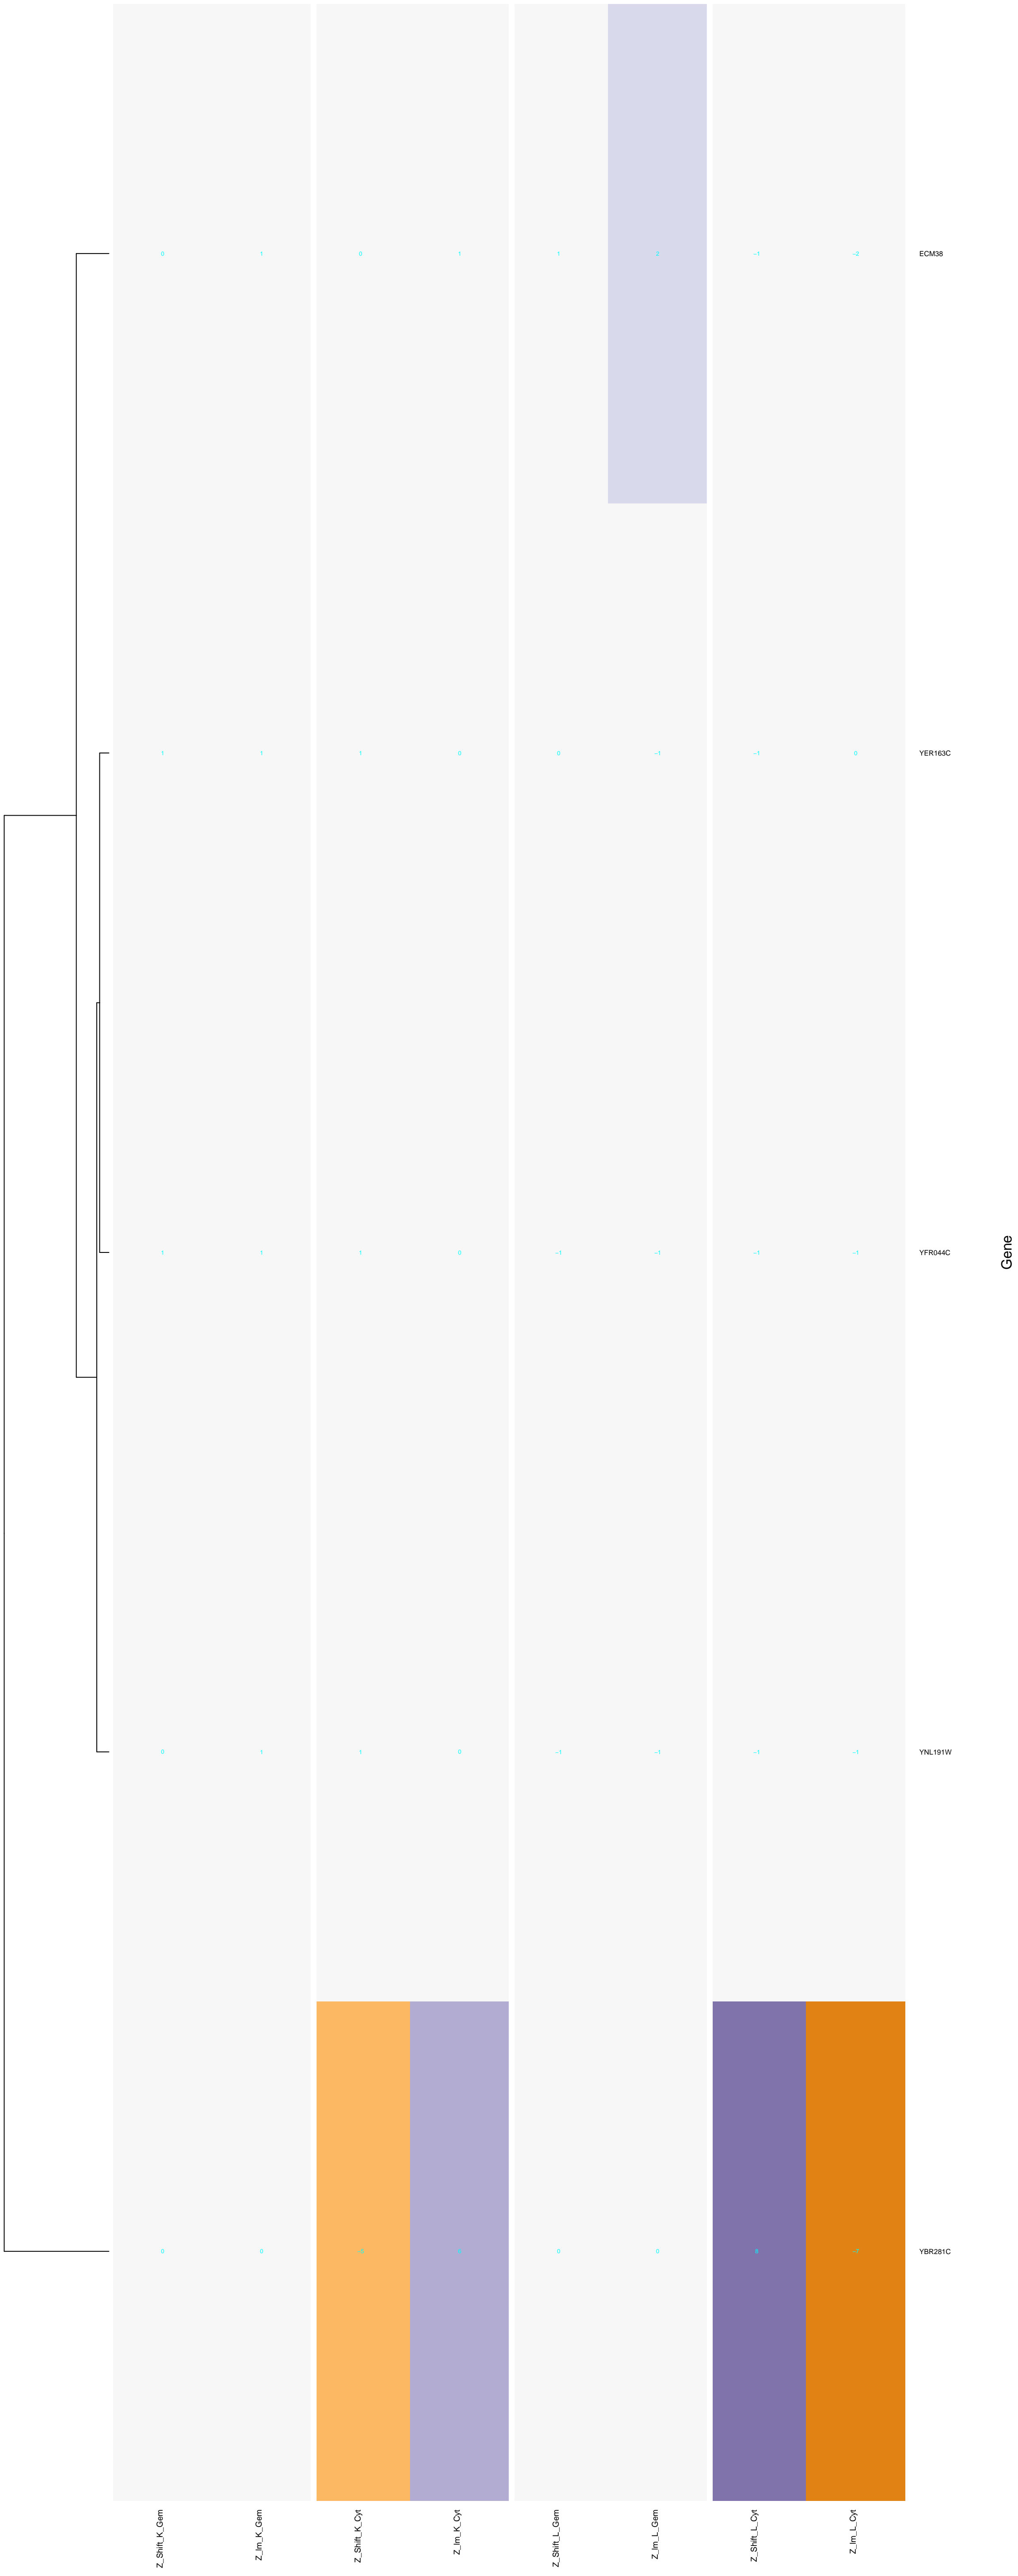





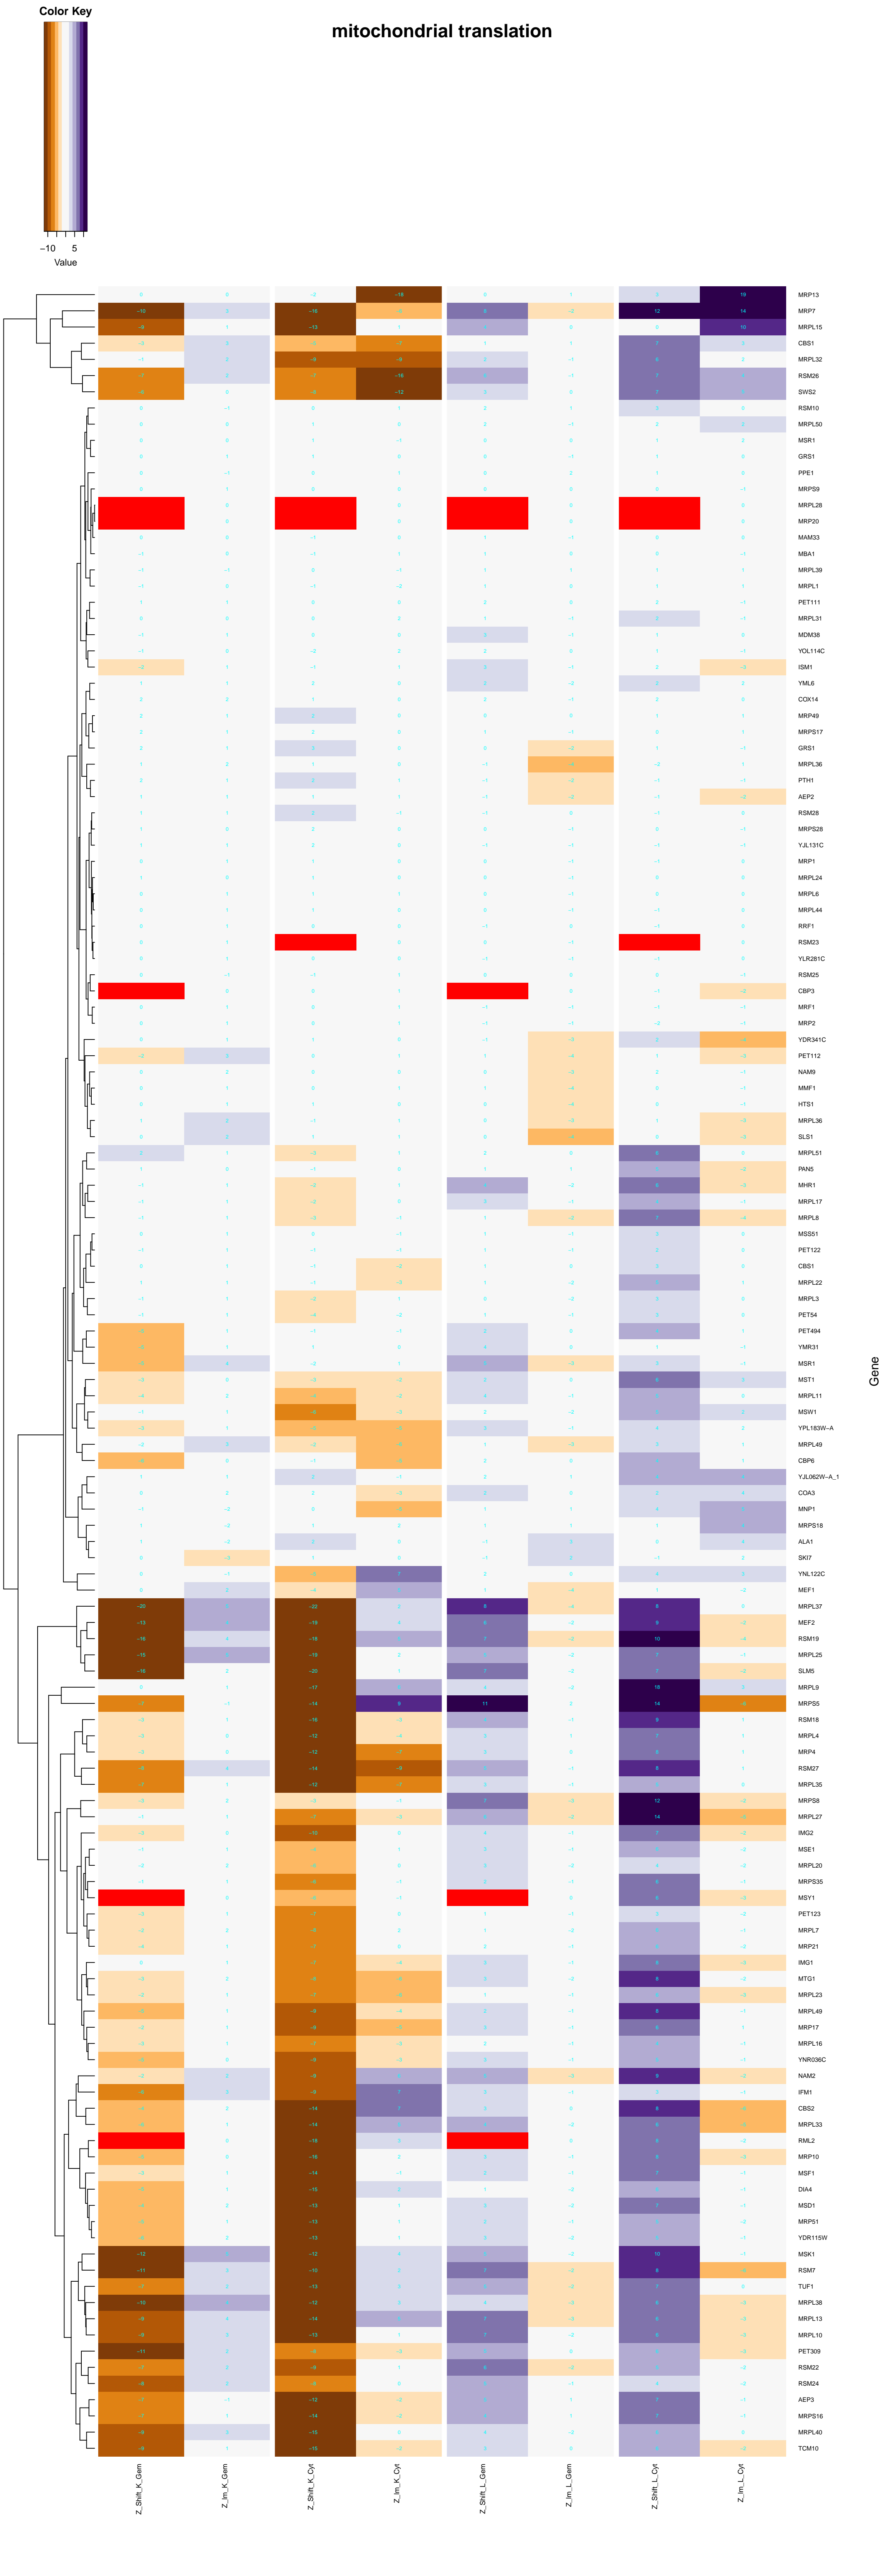

Supplement: s1 [file s1]

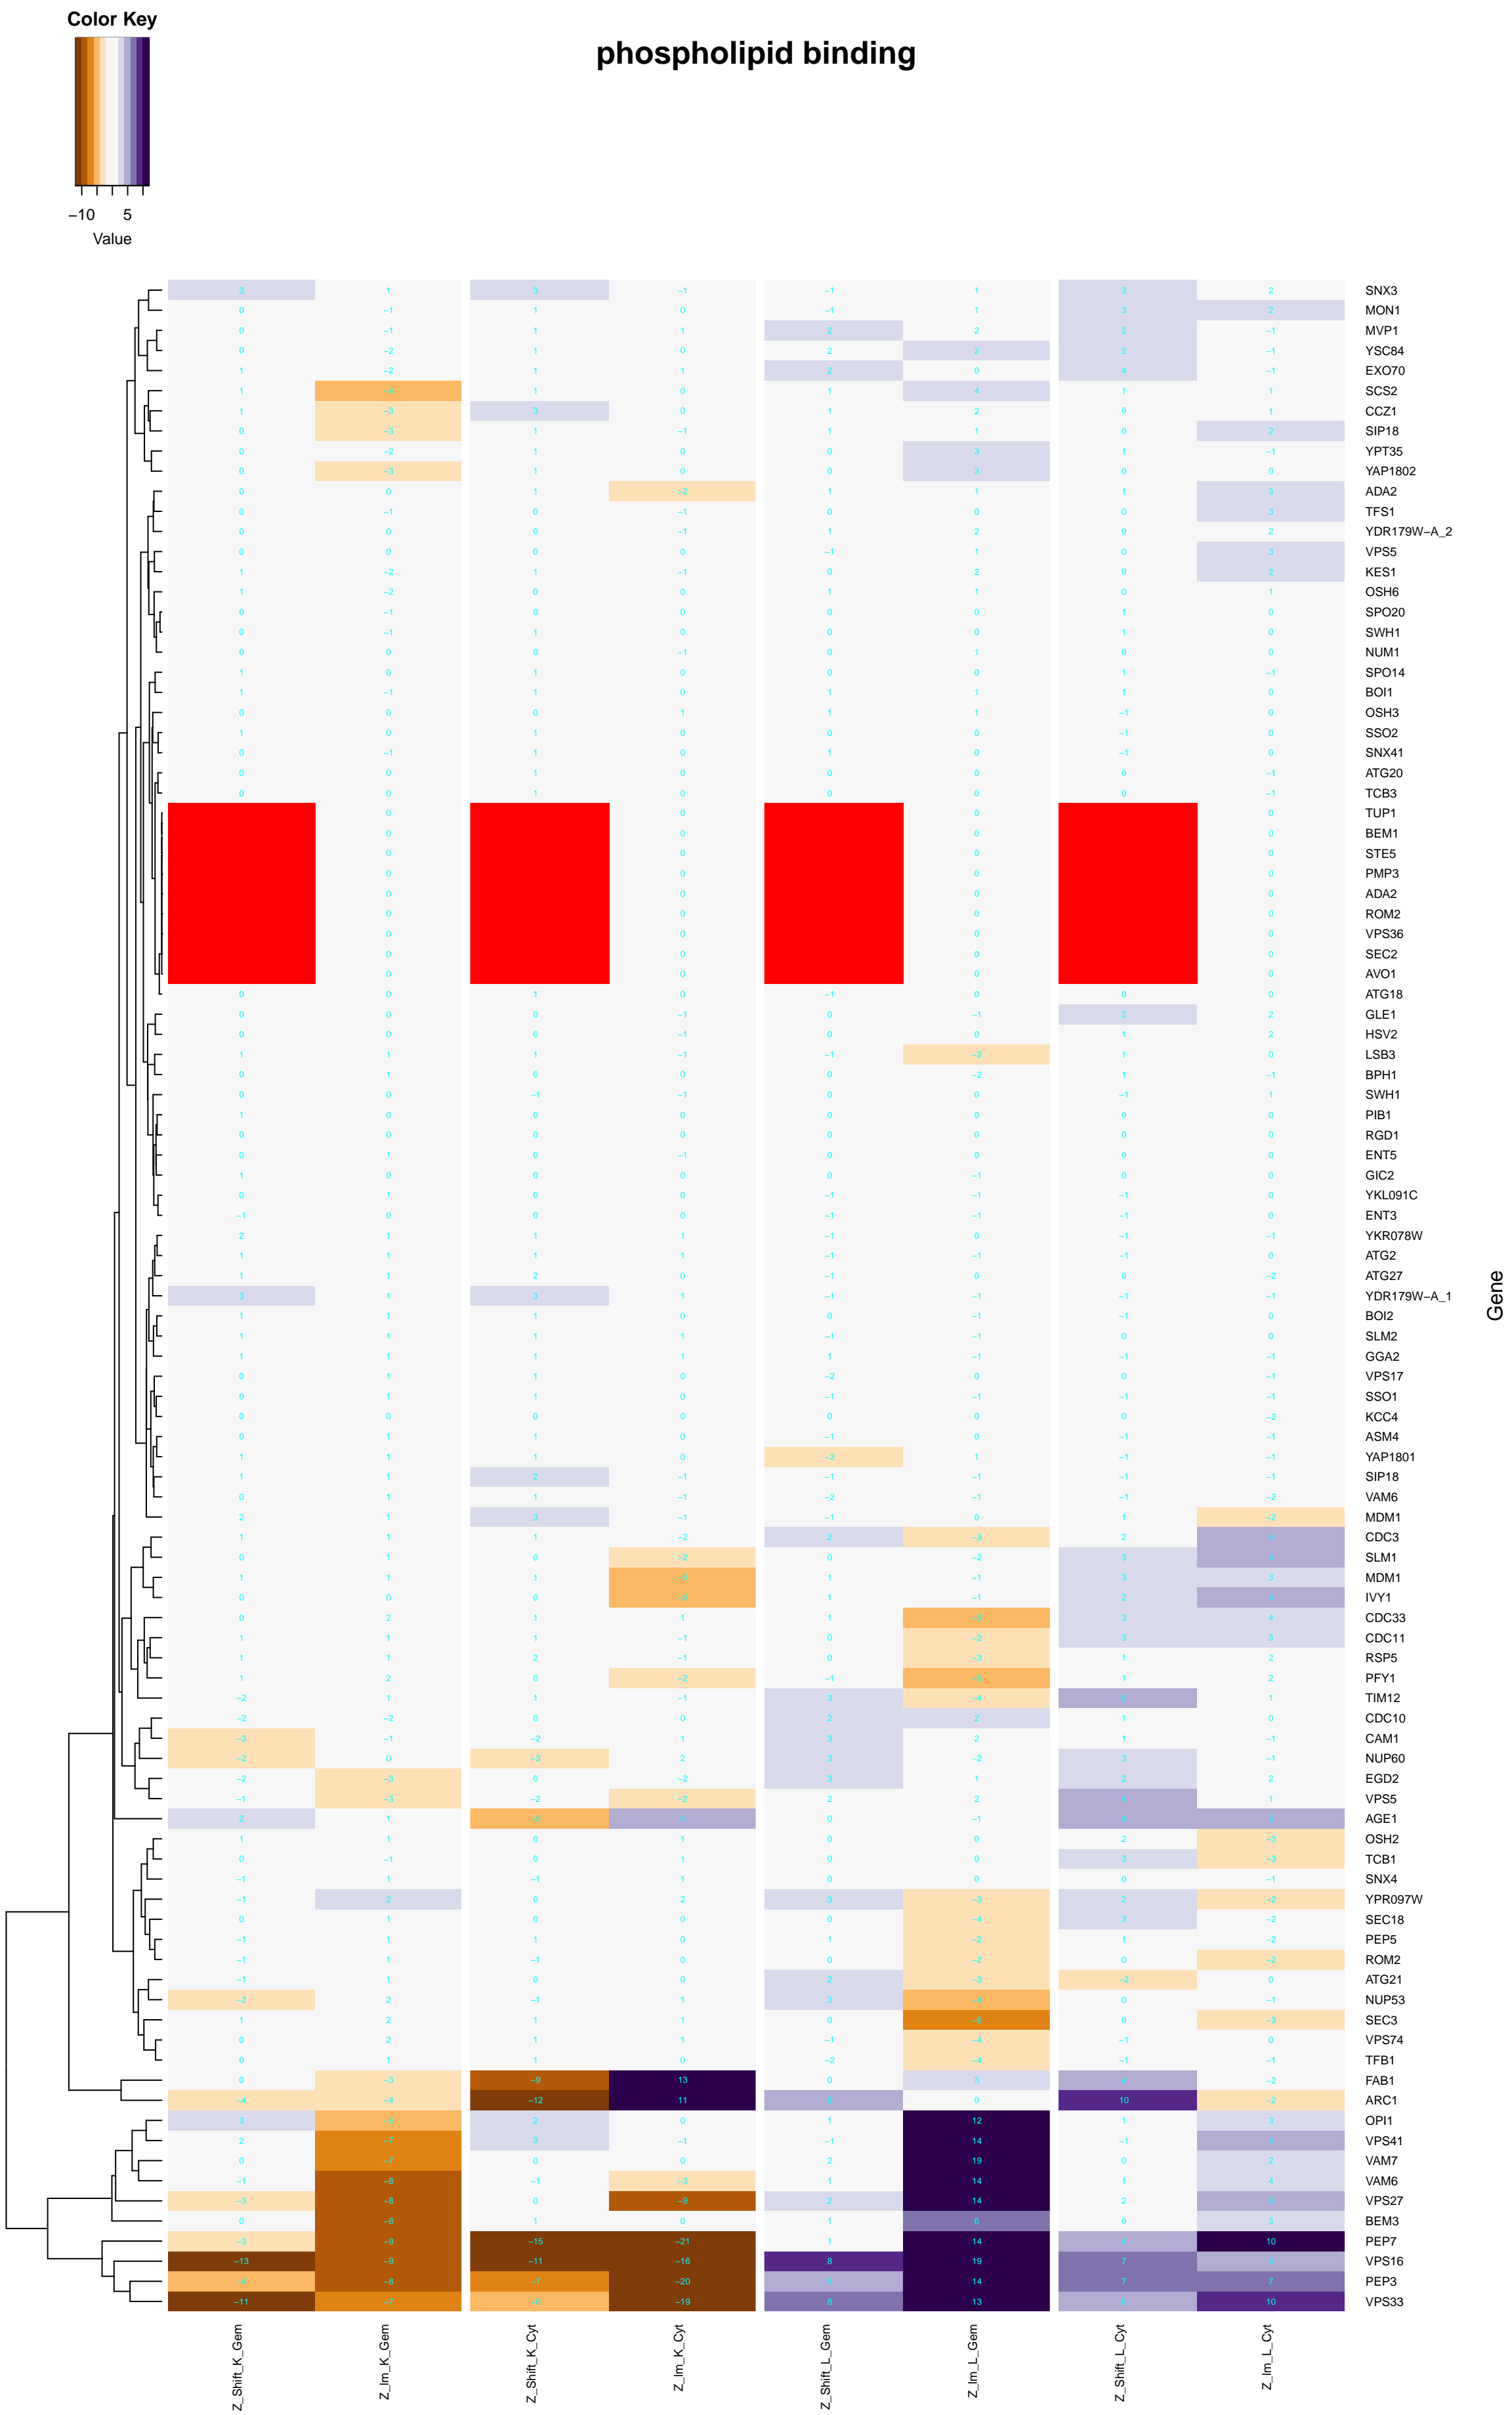

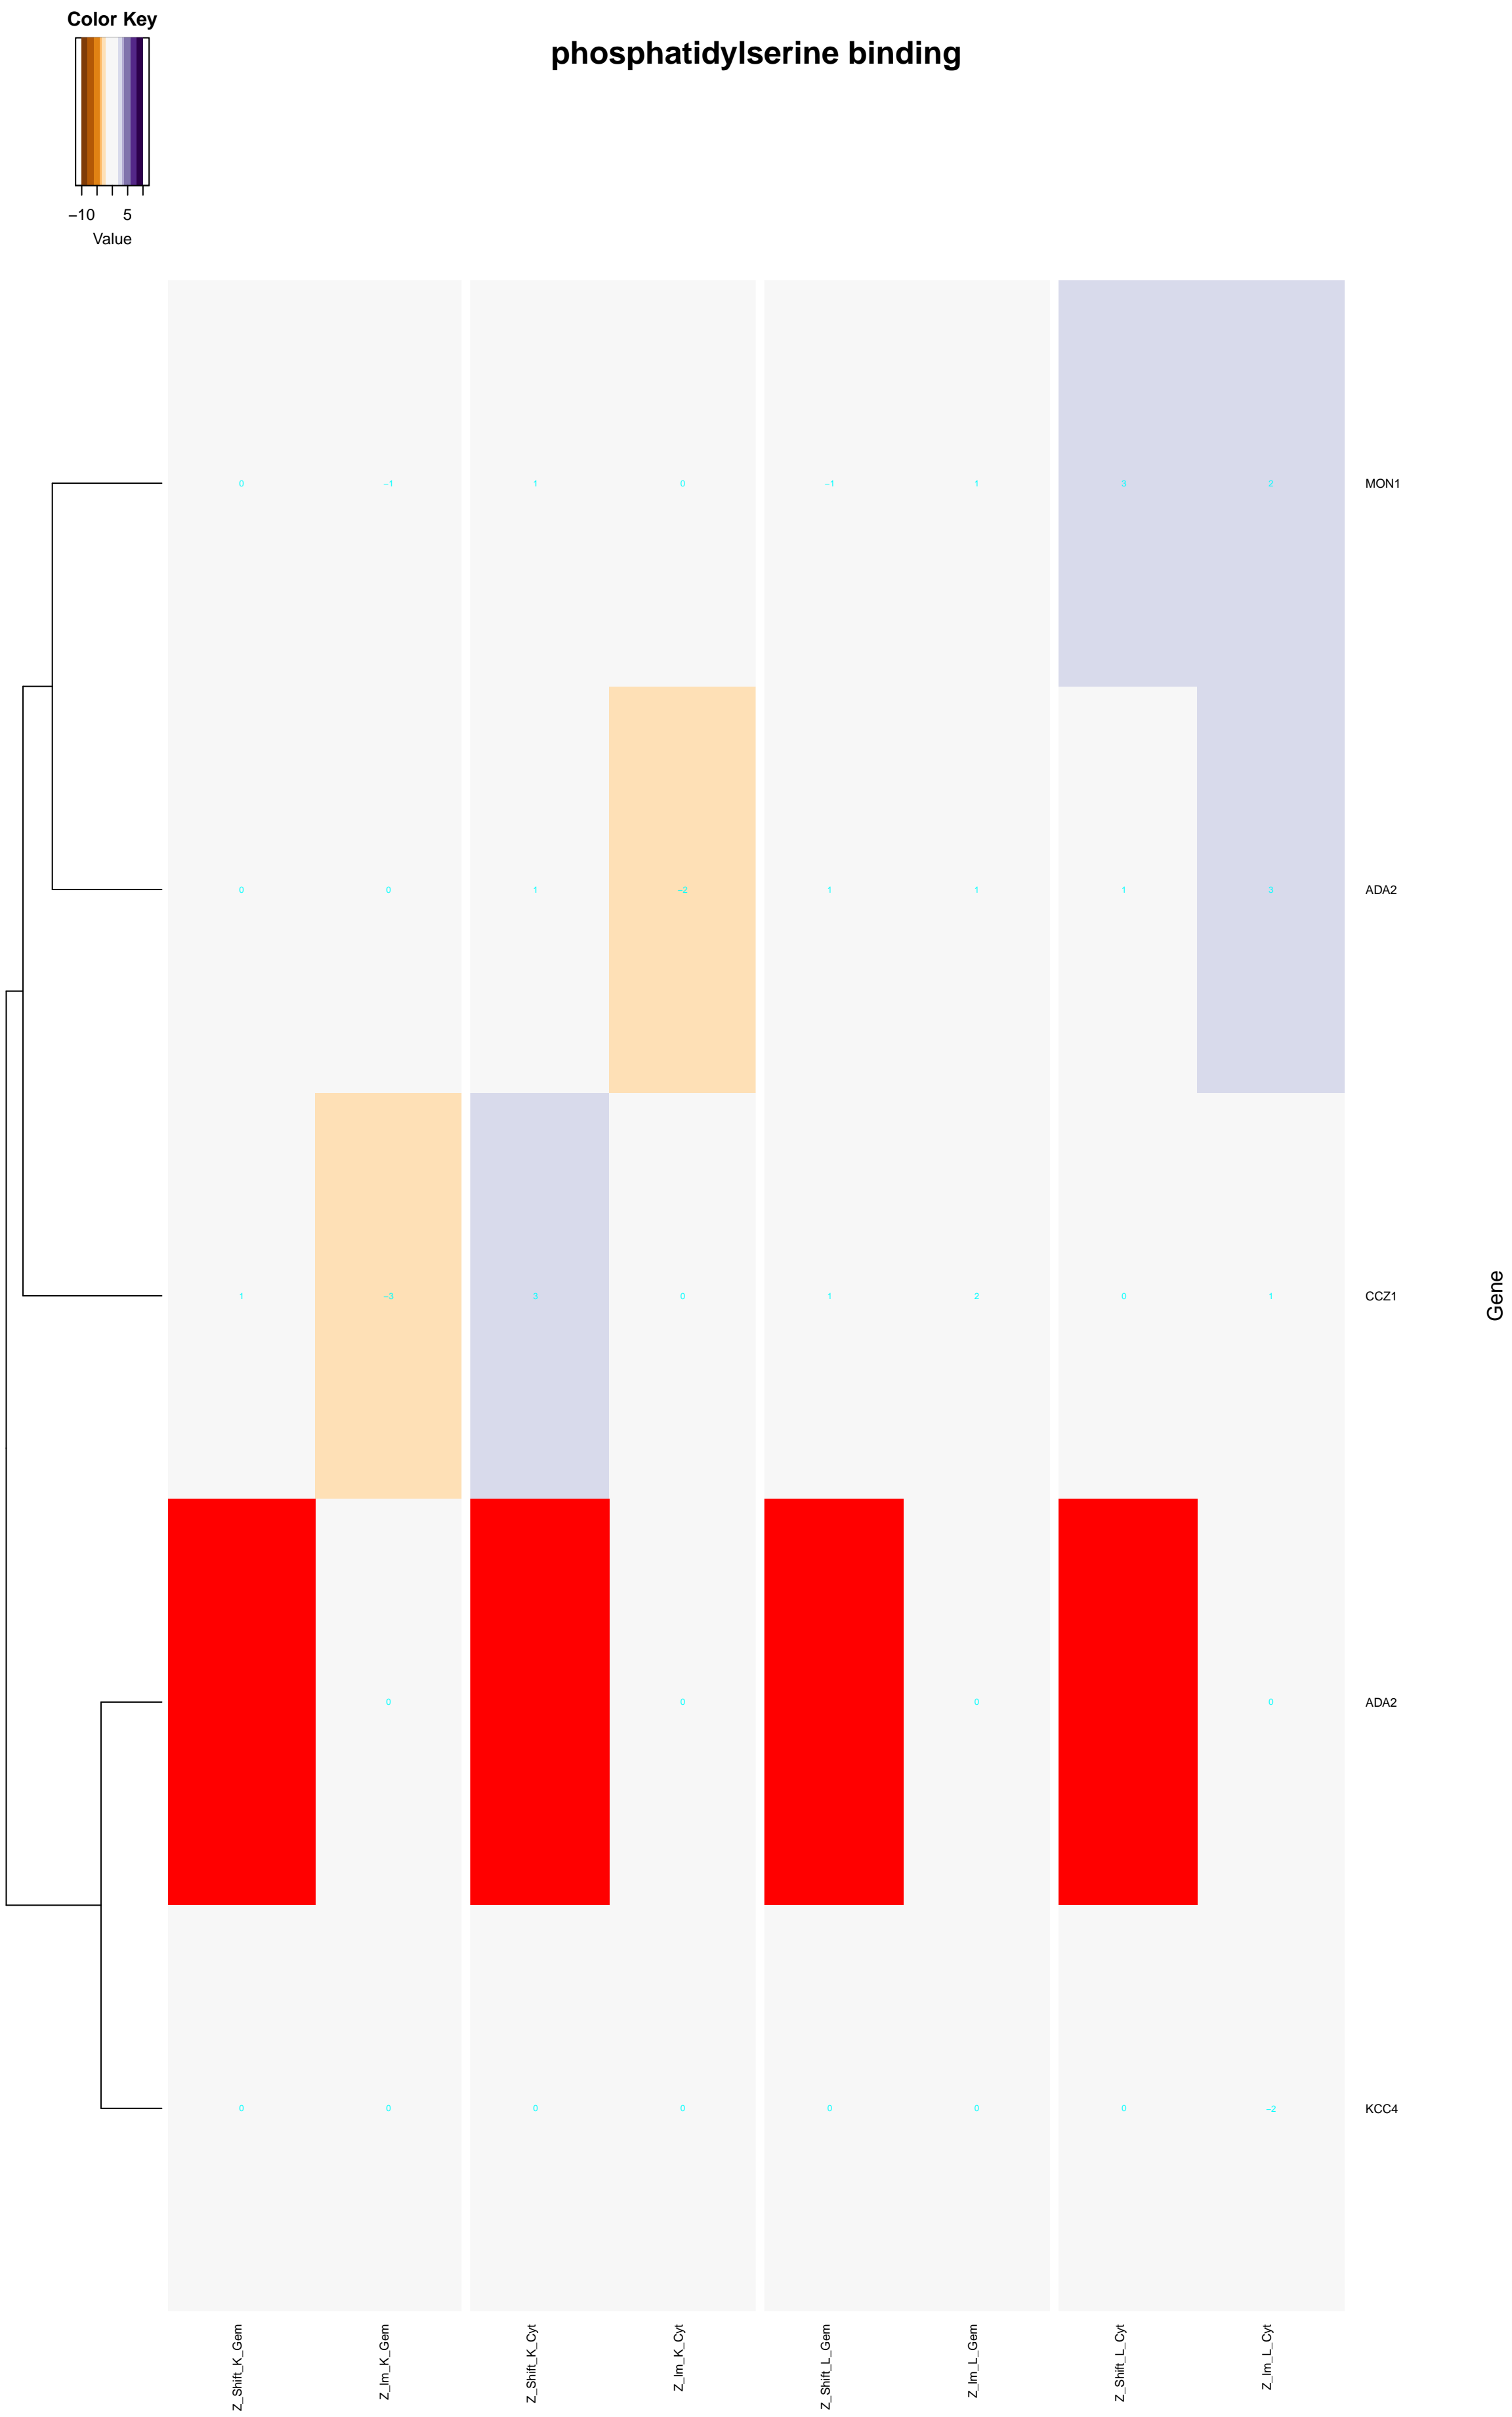

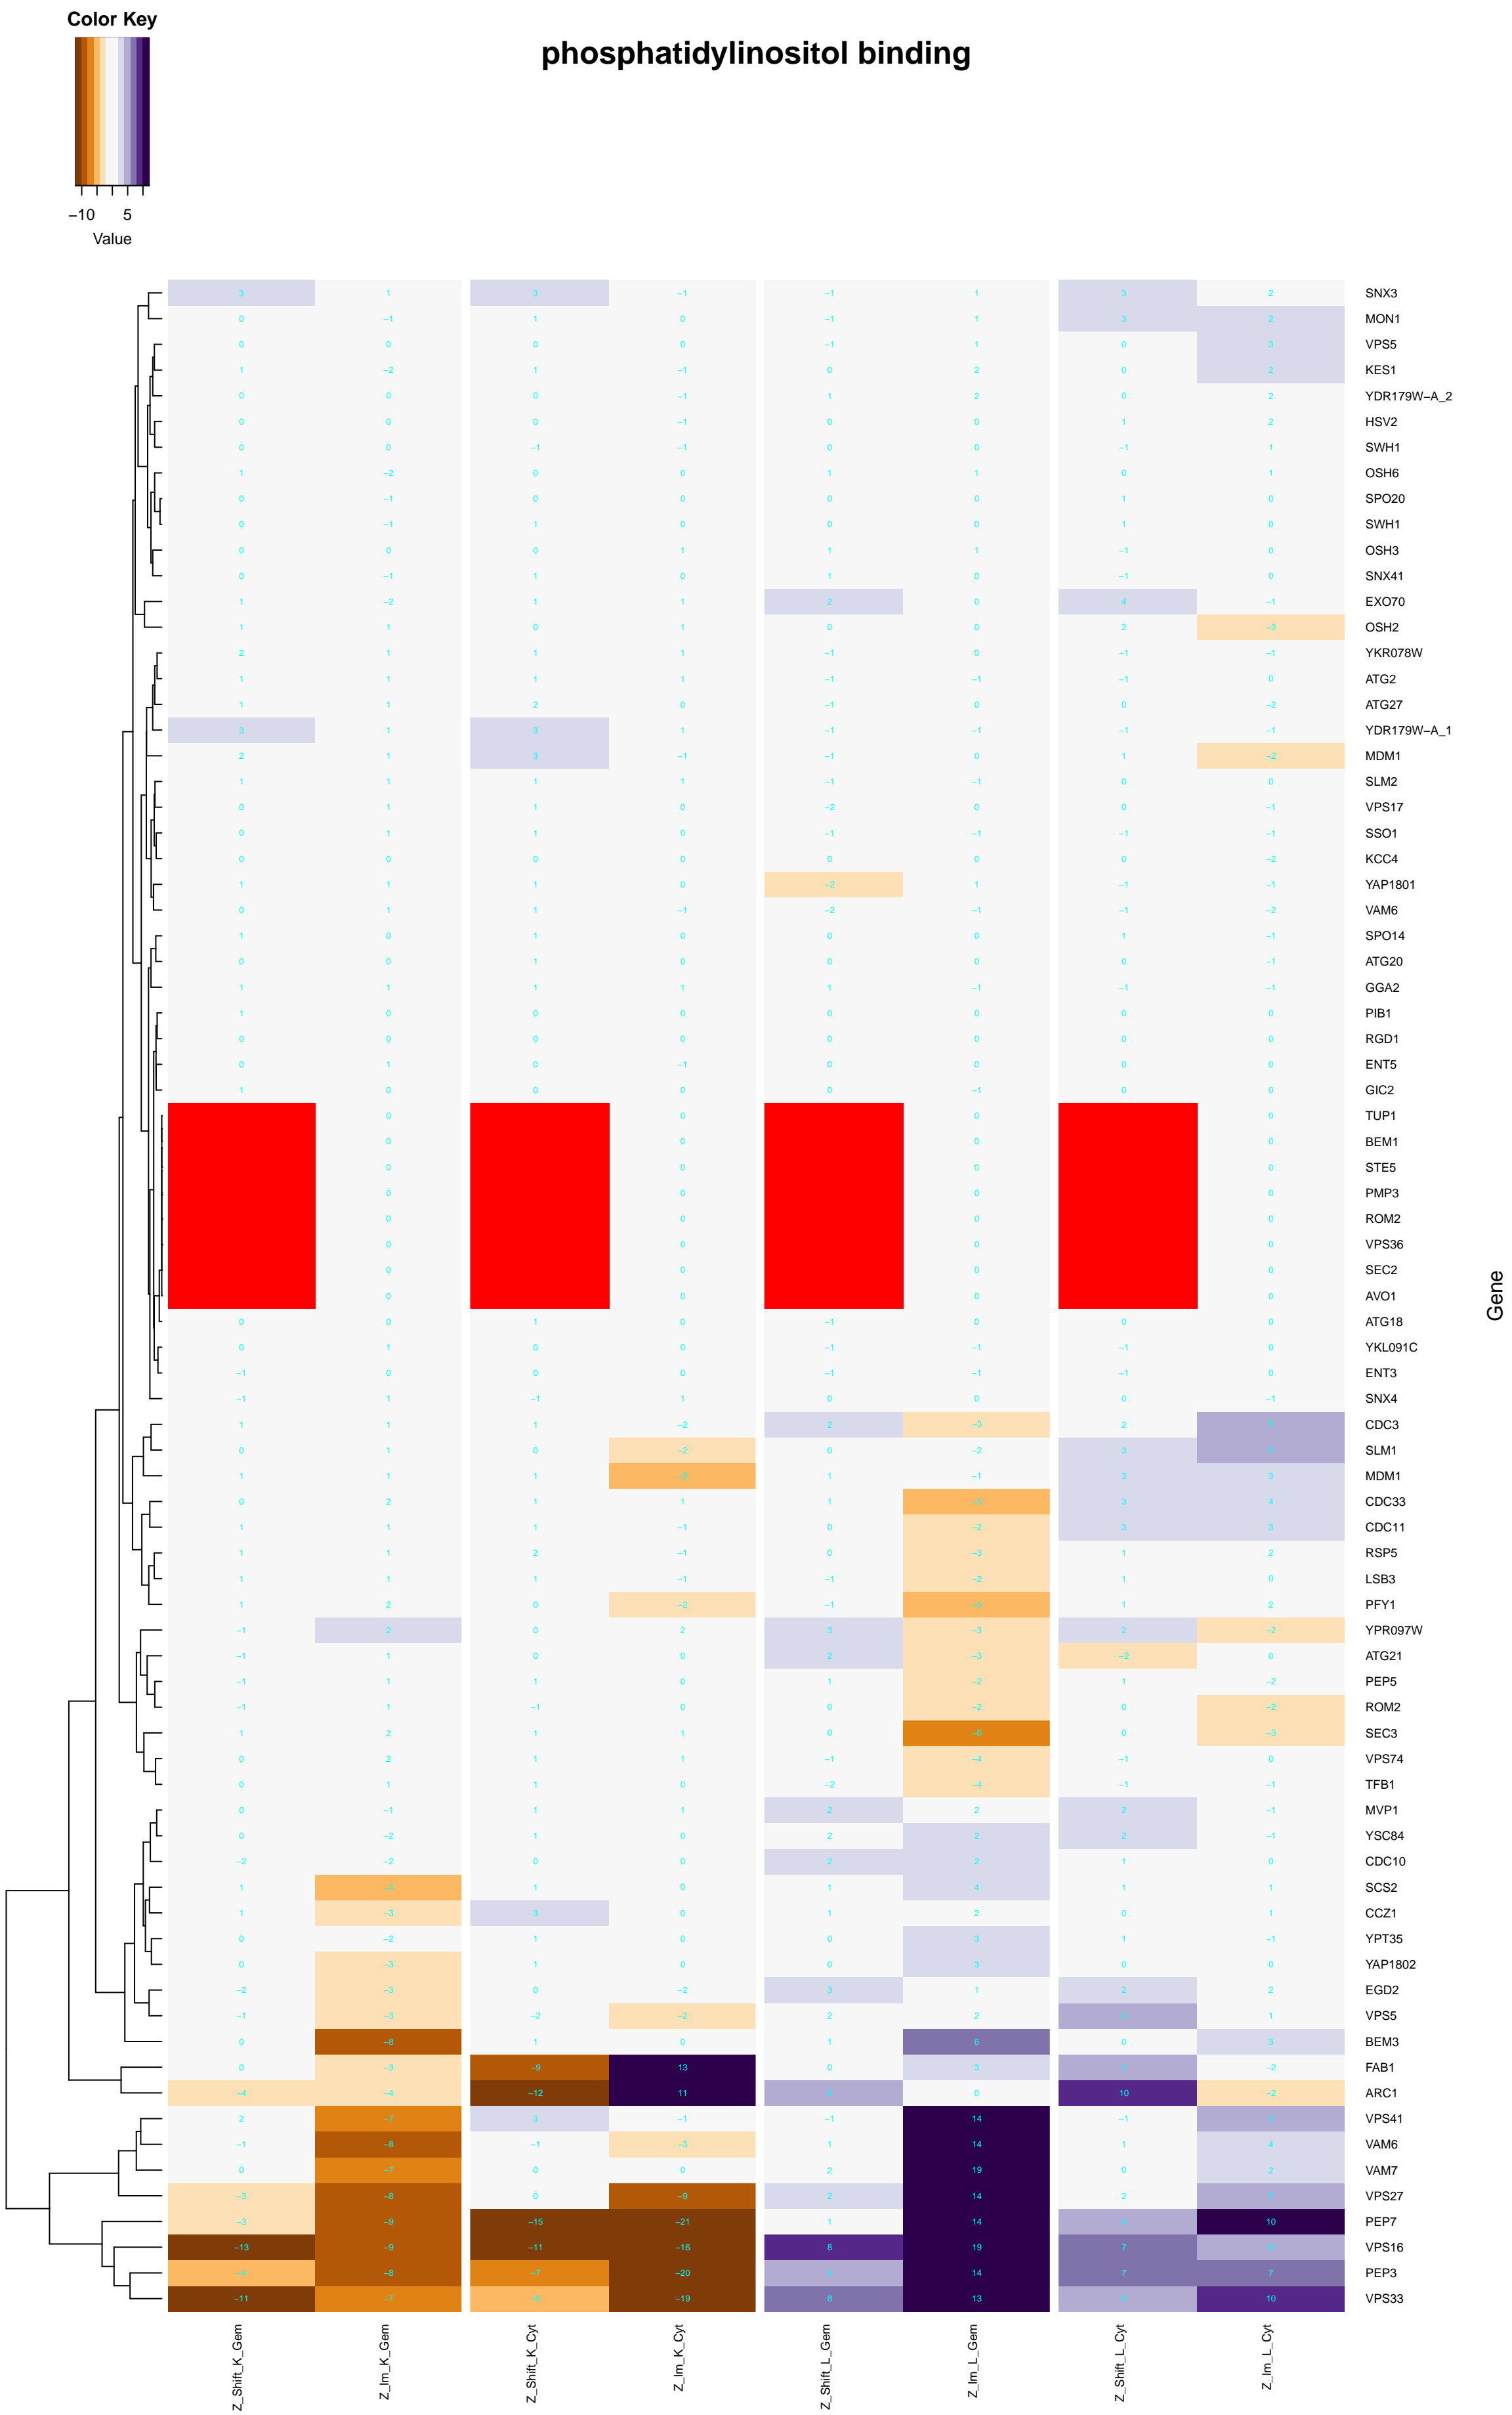

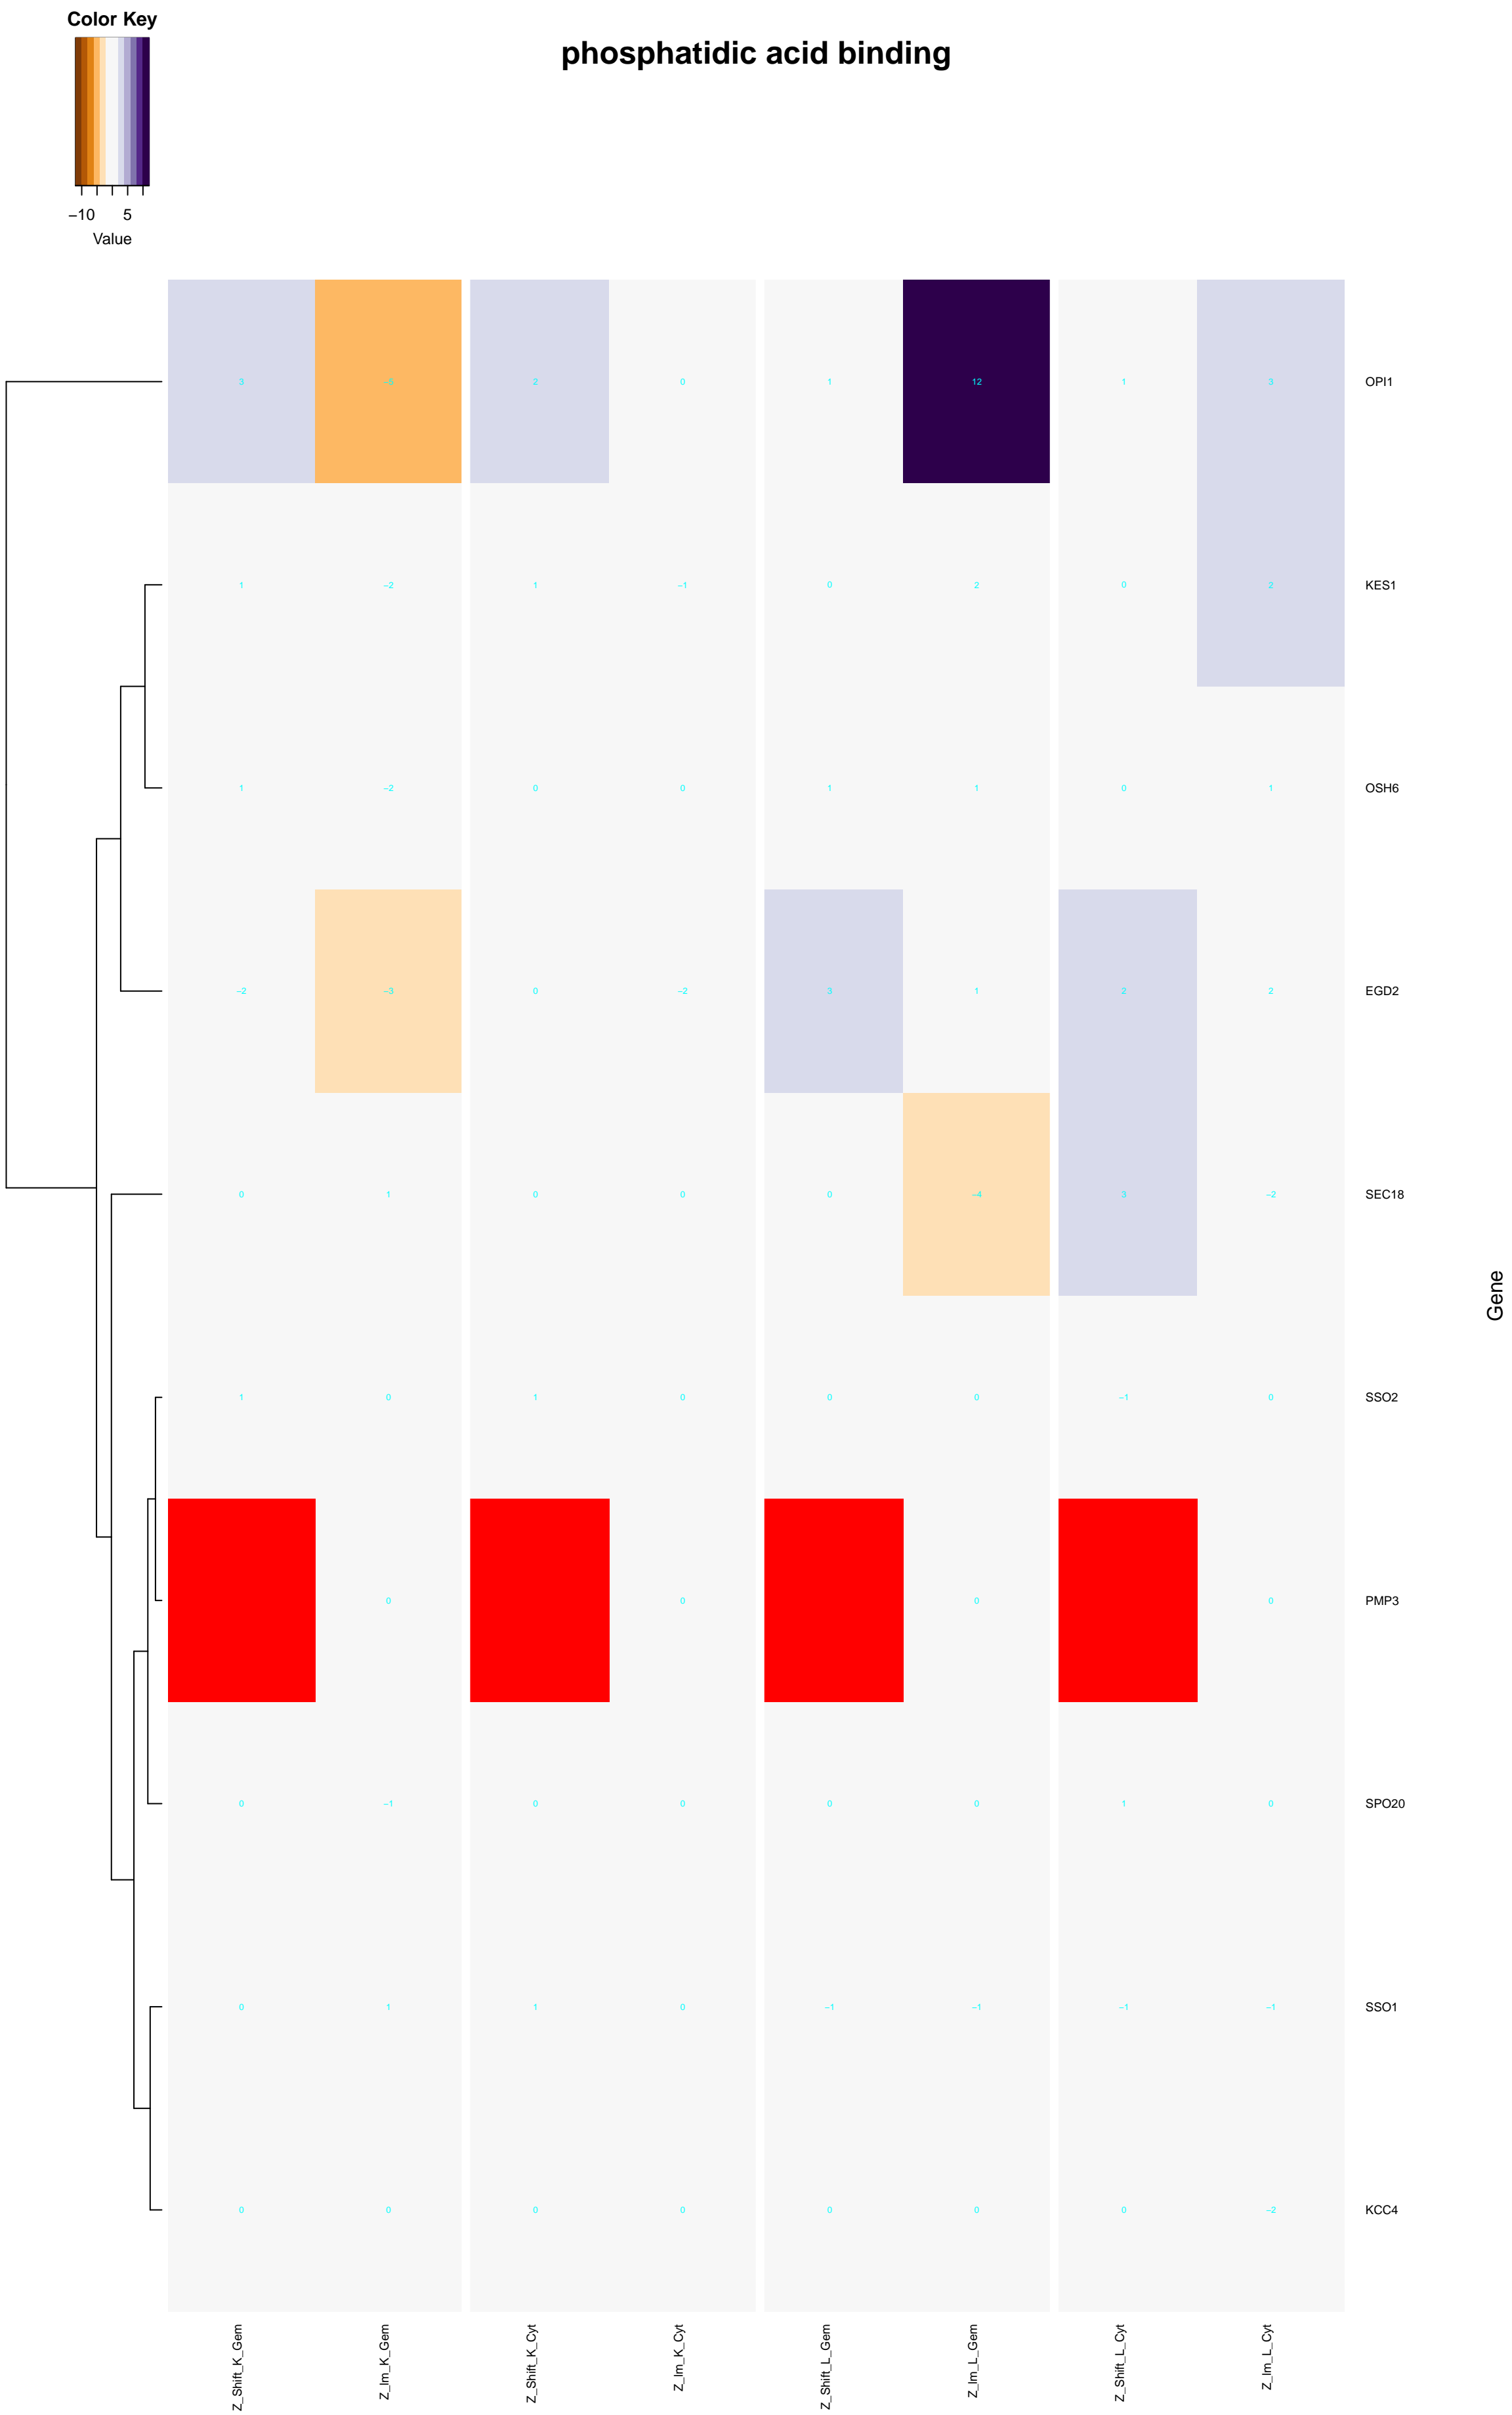

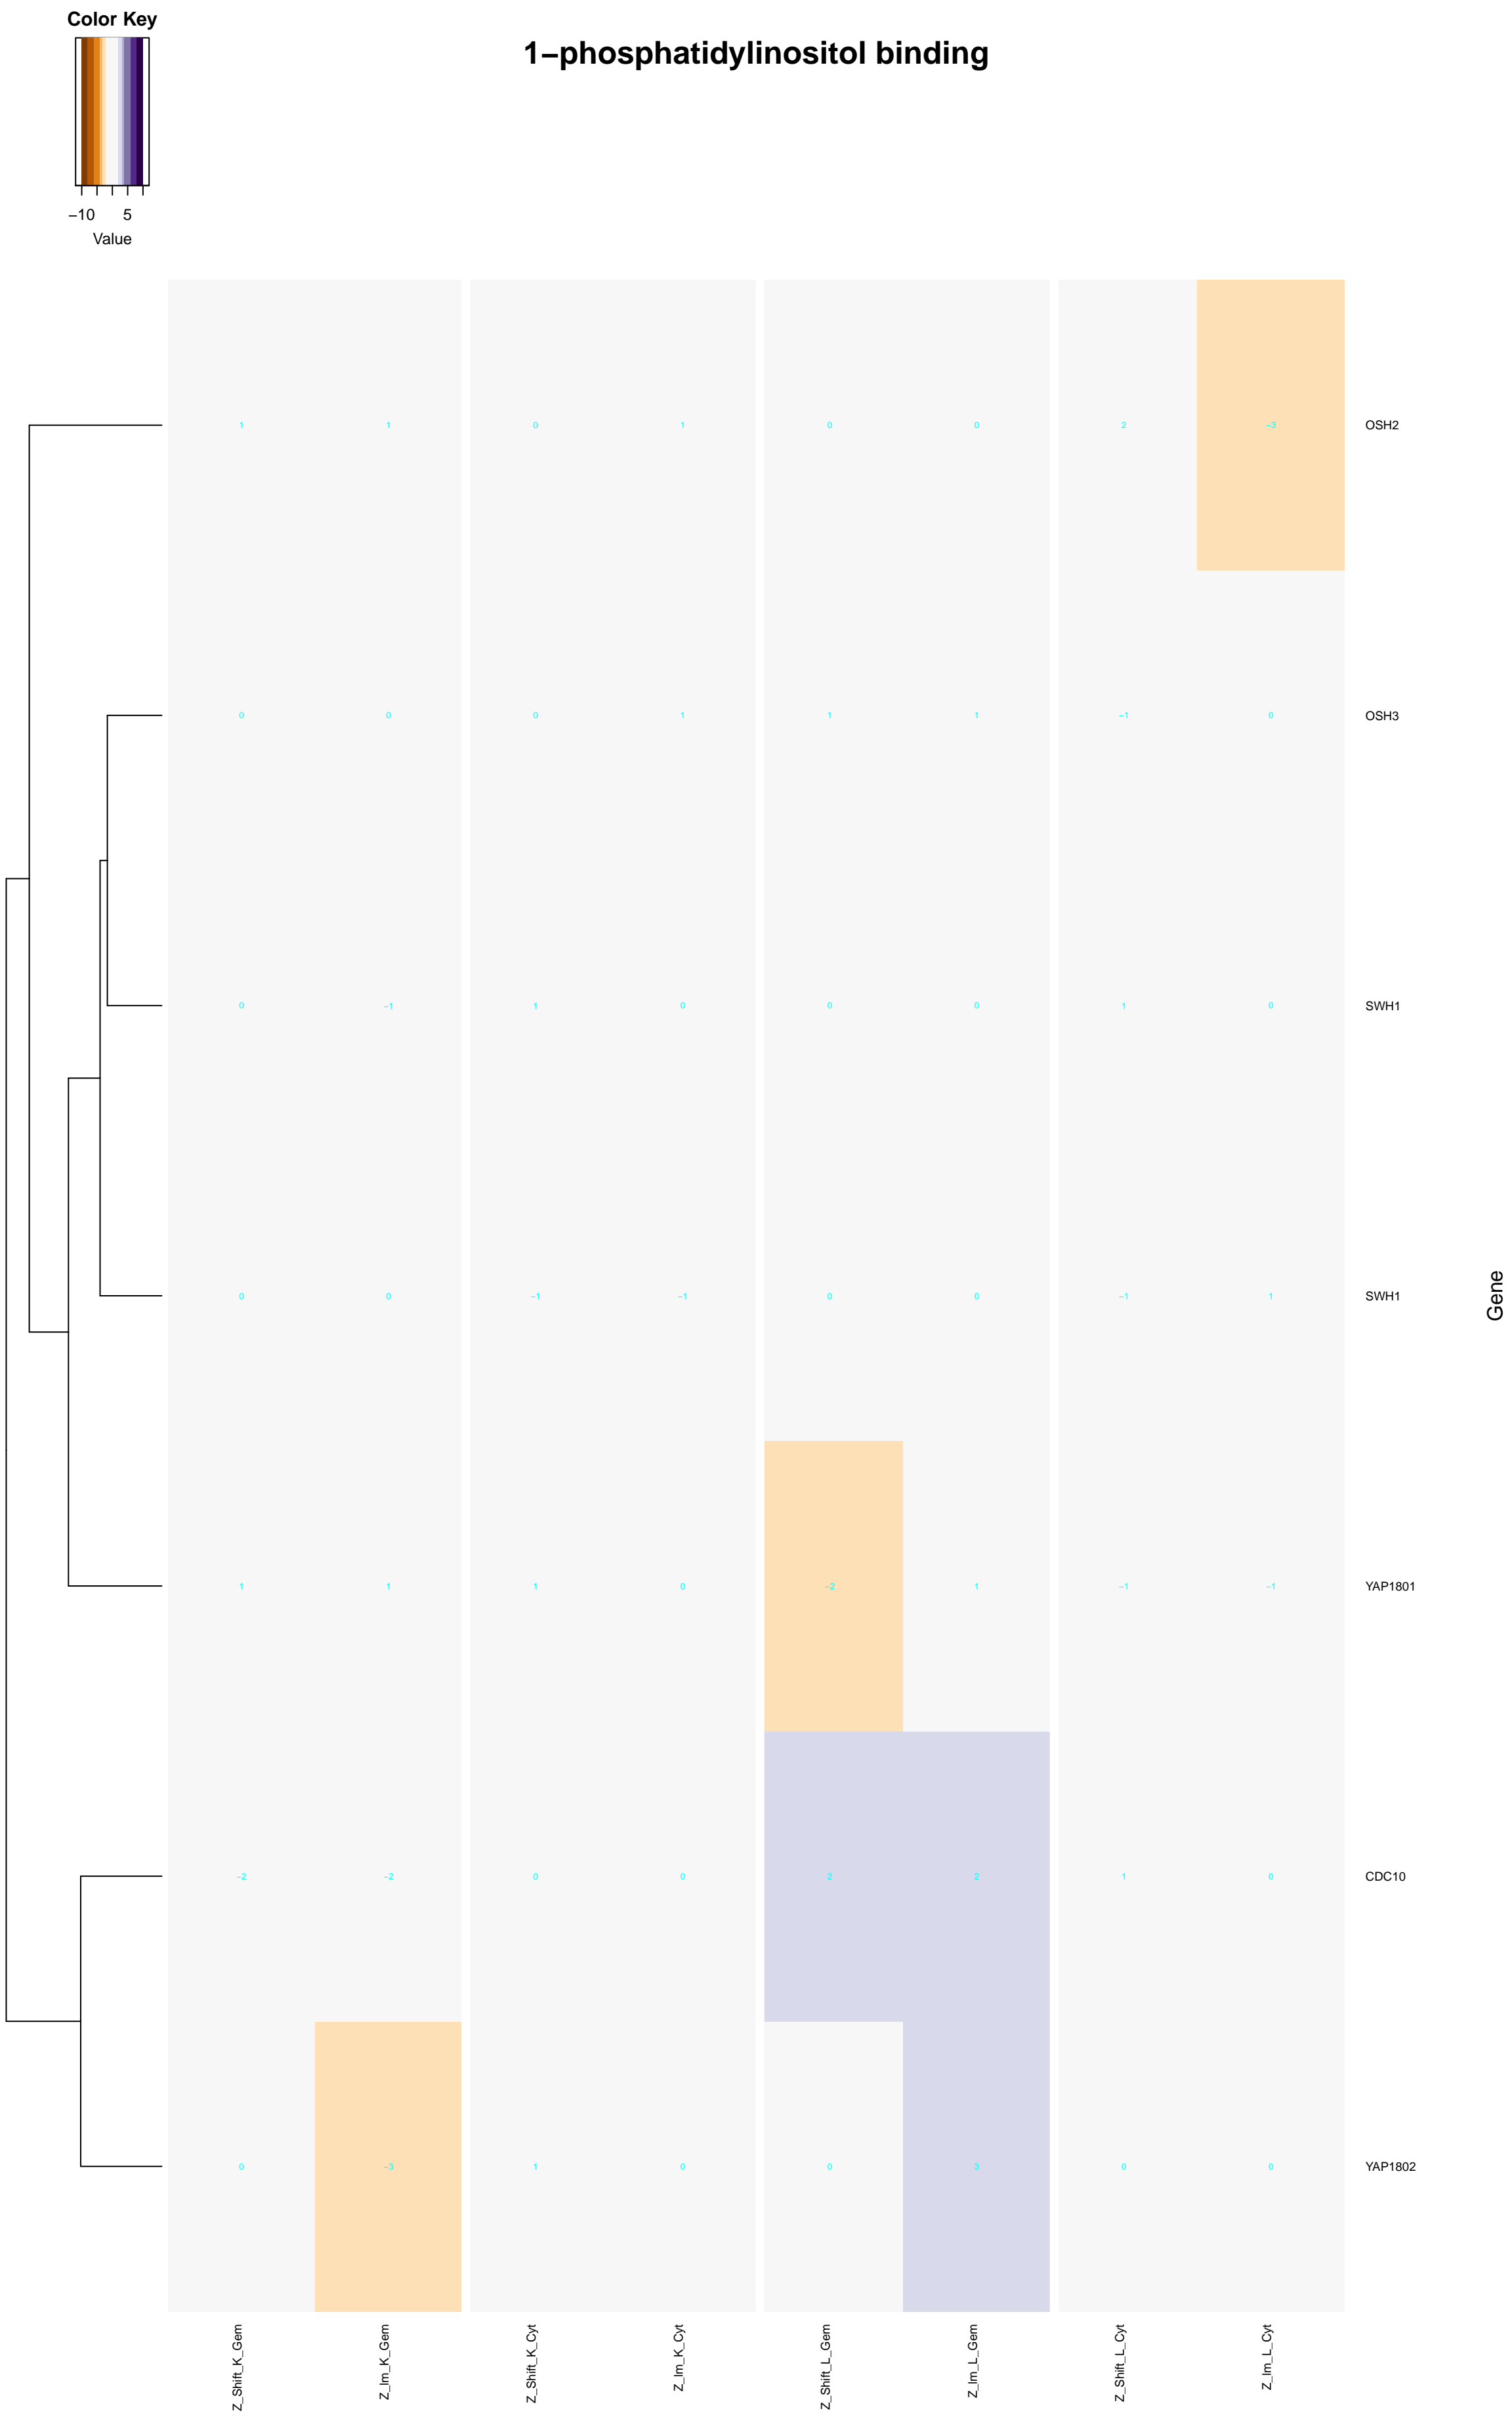

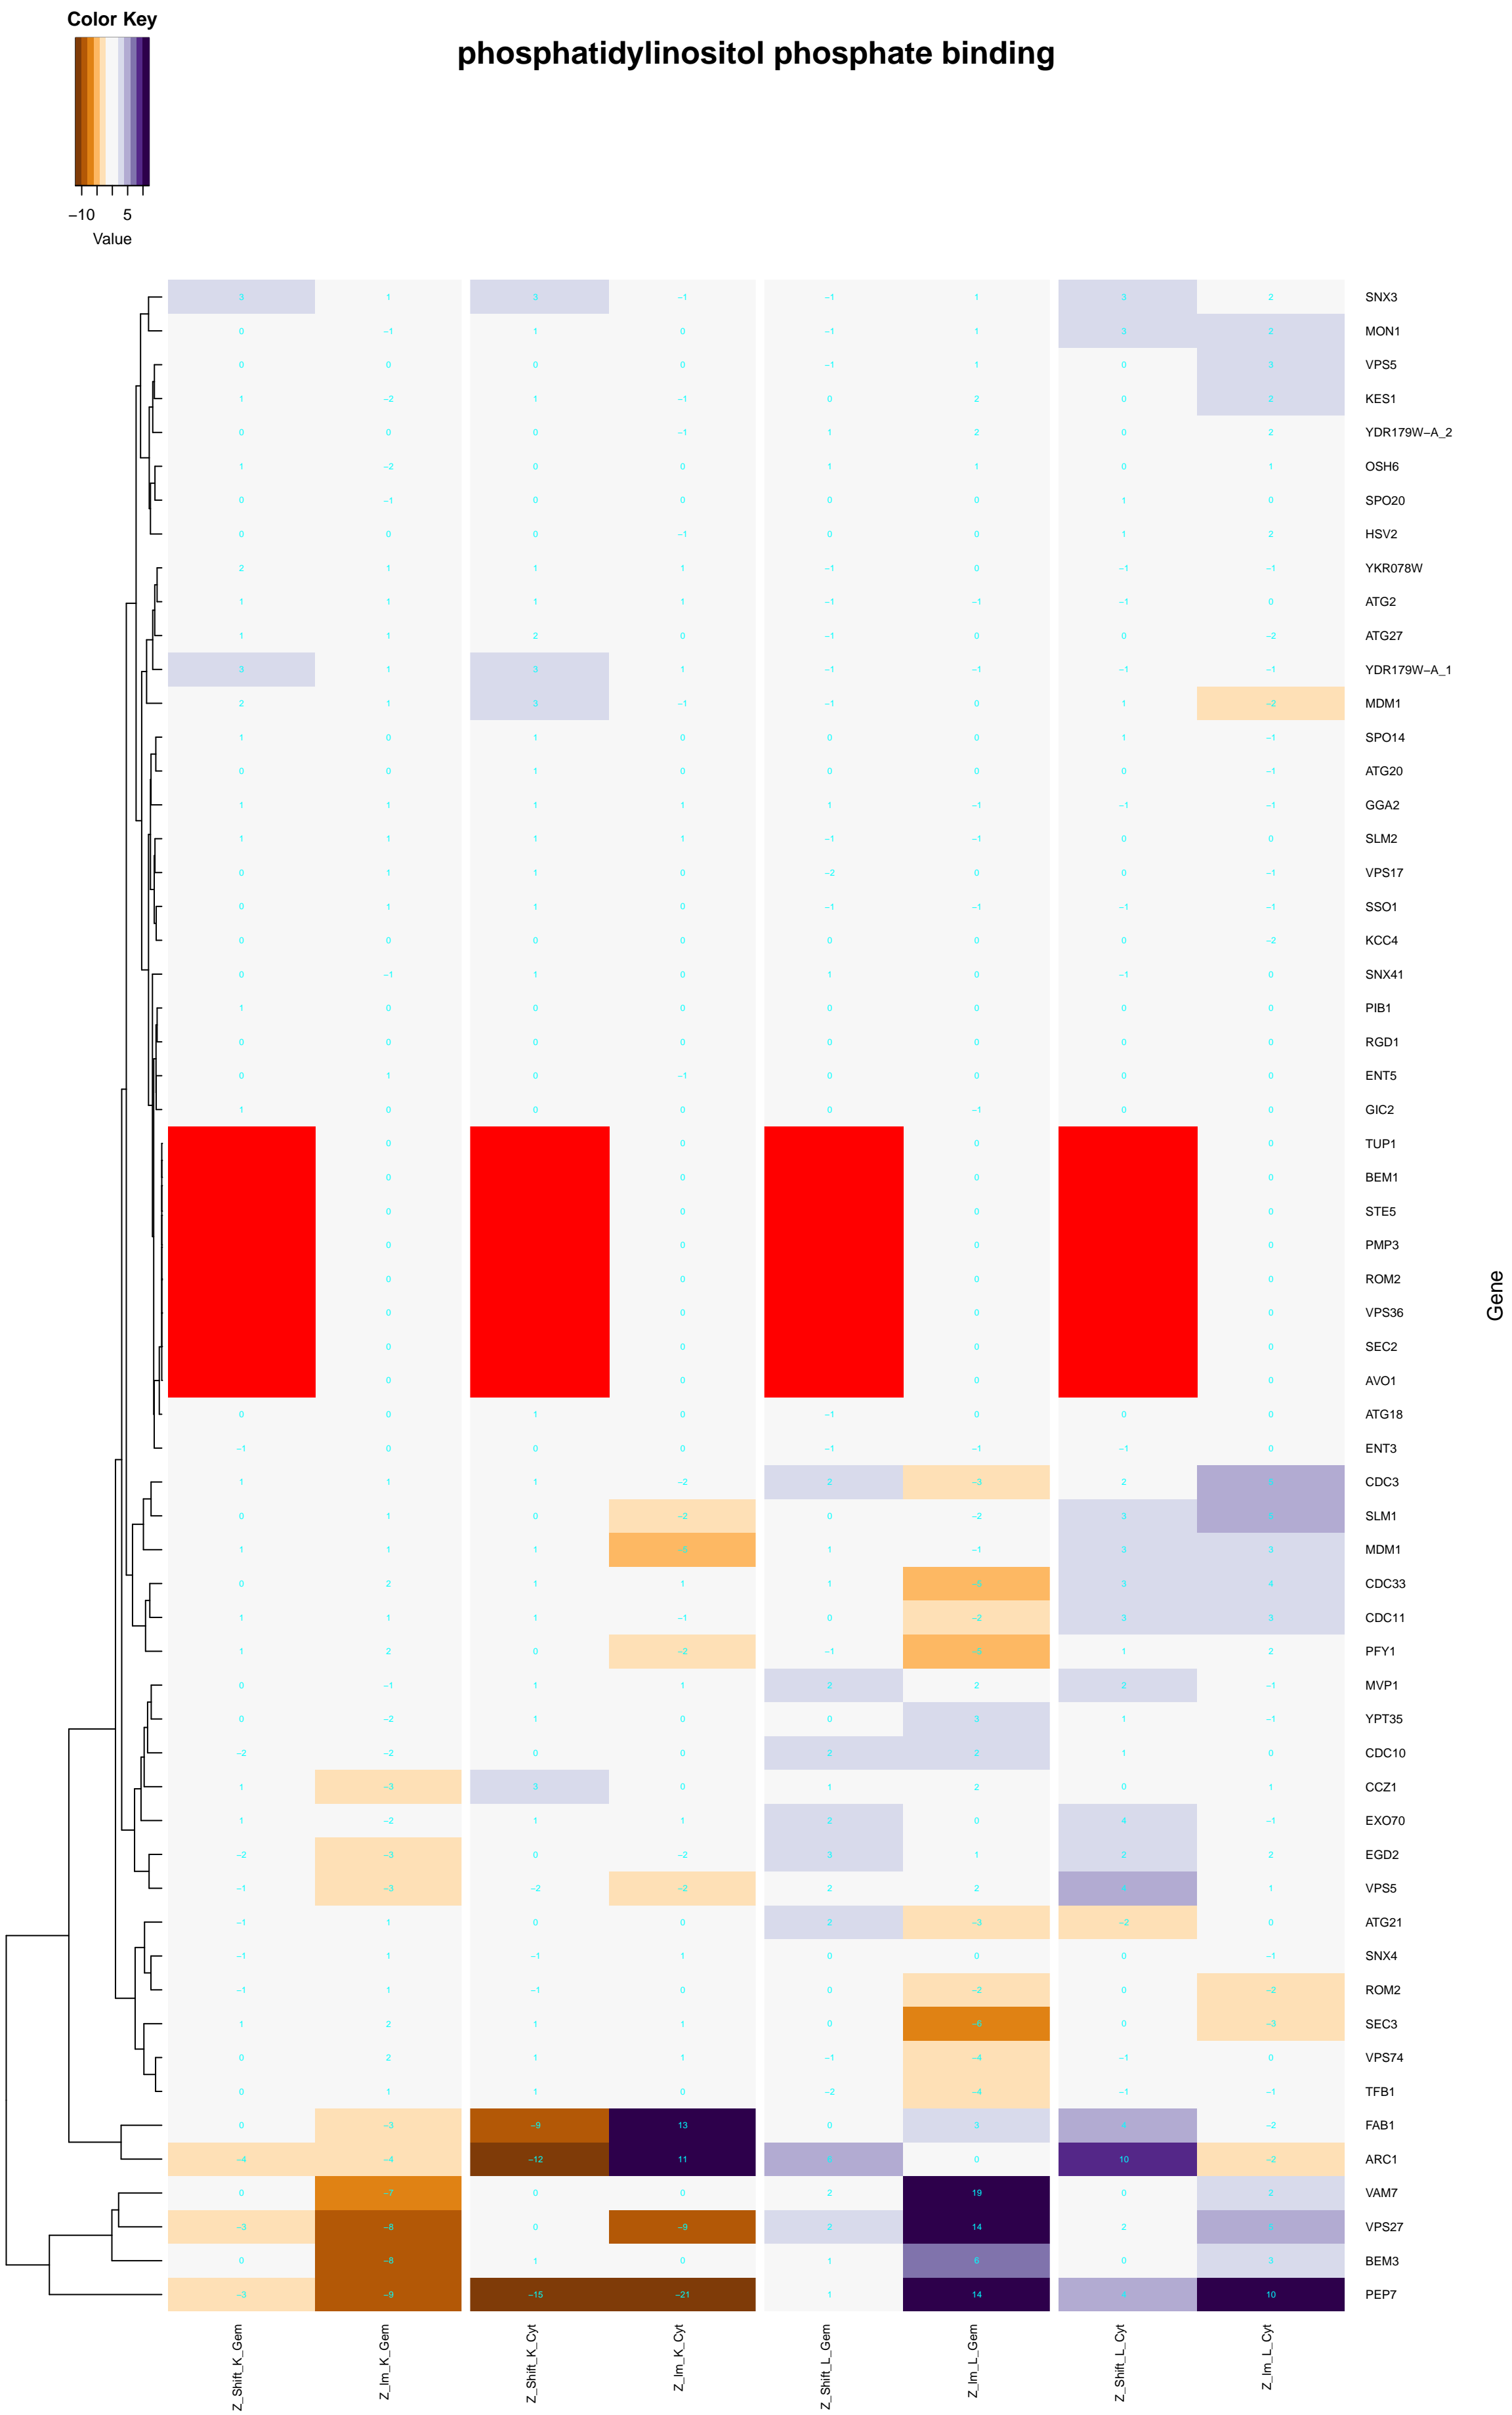

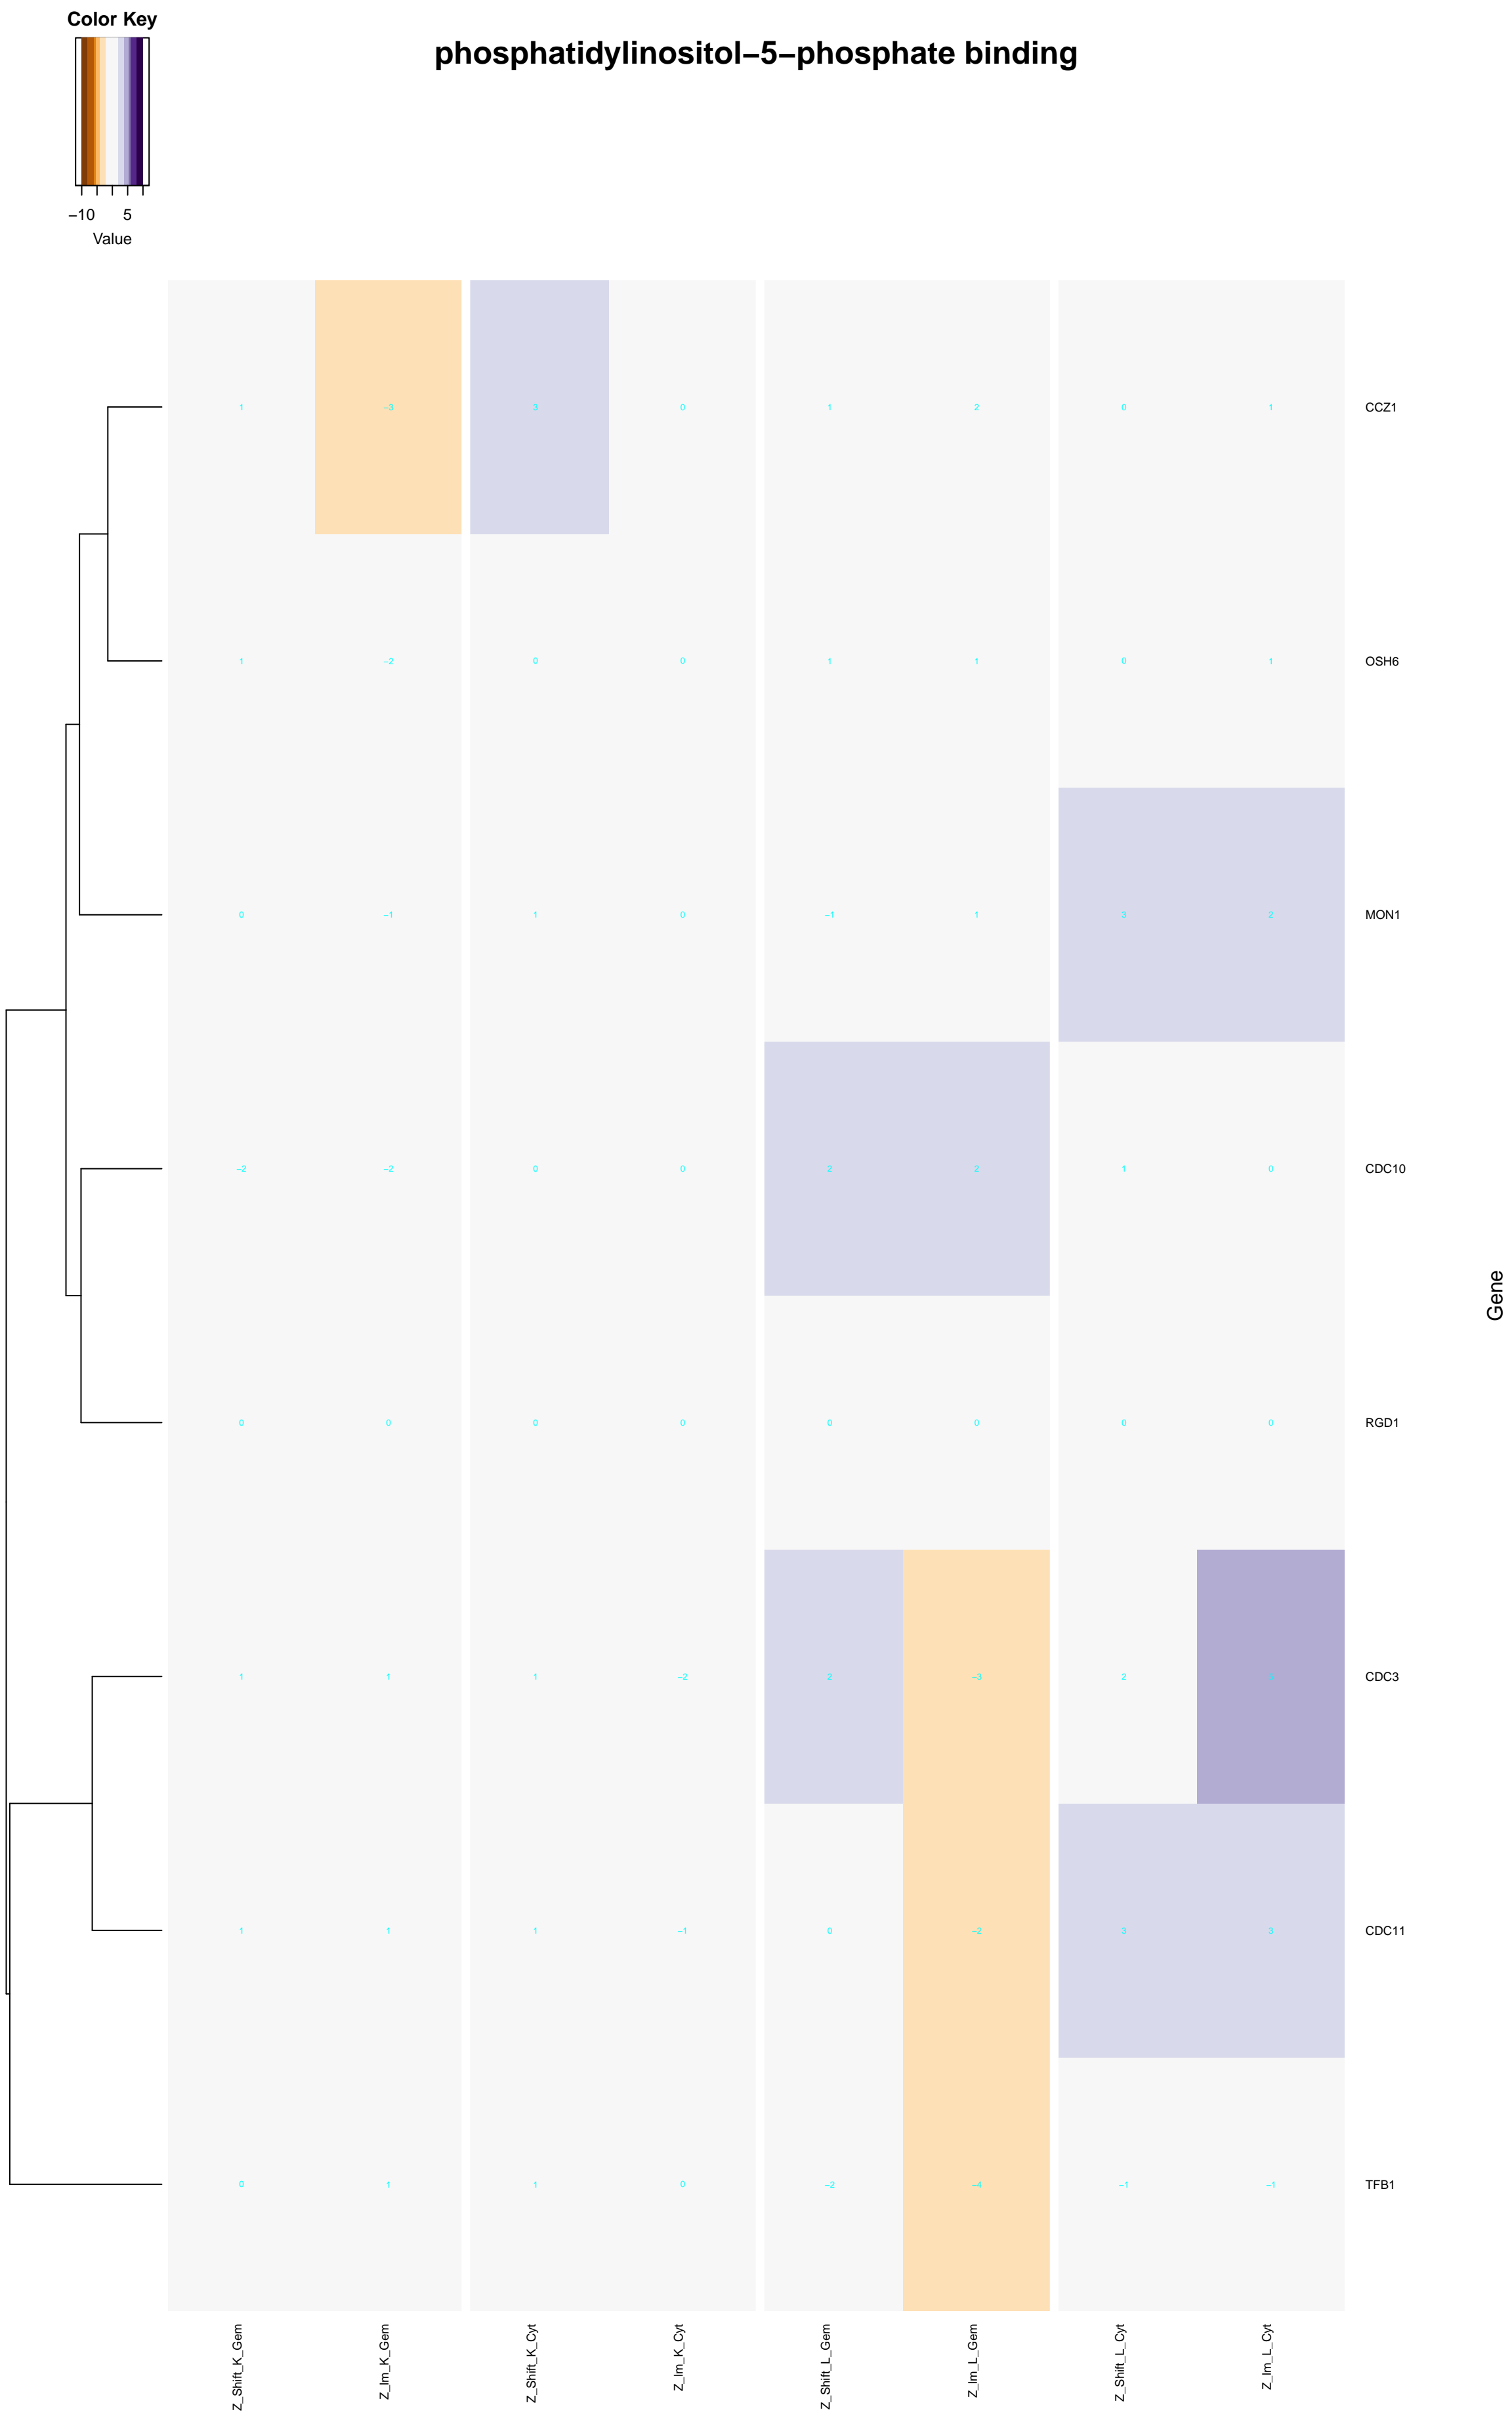

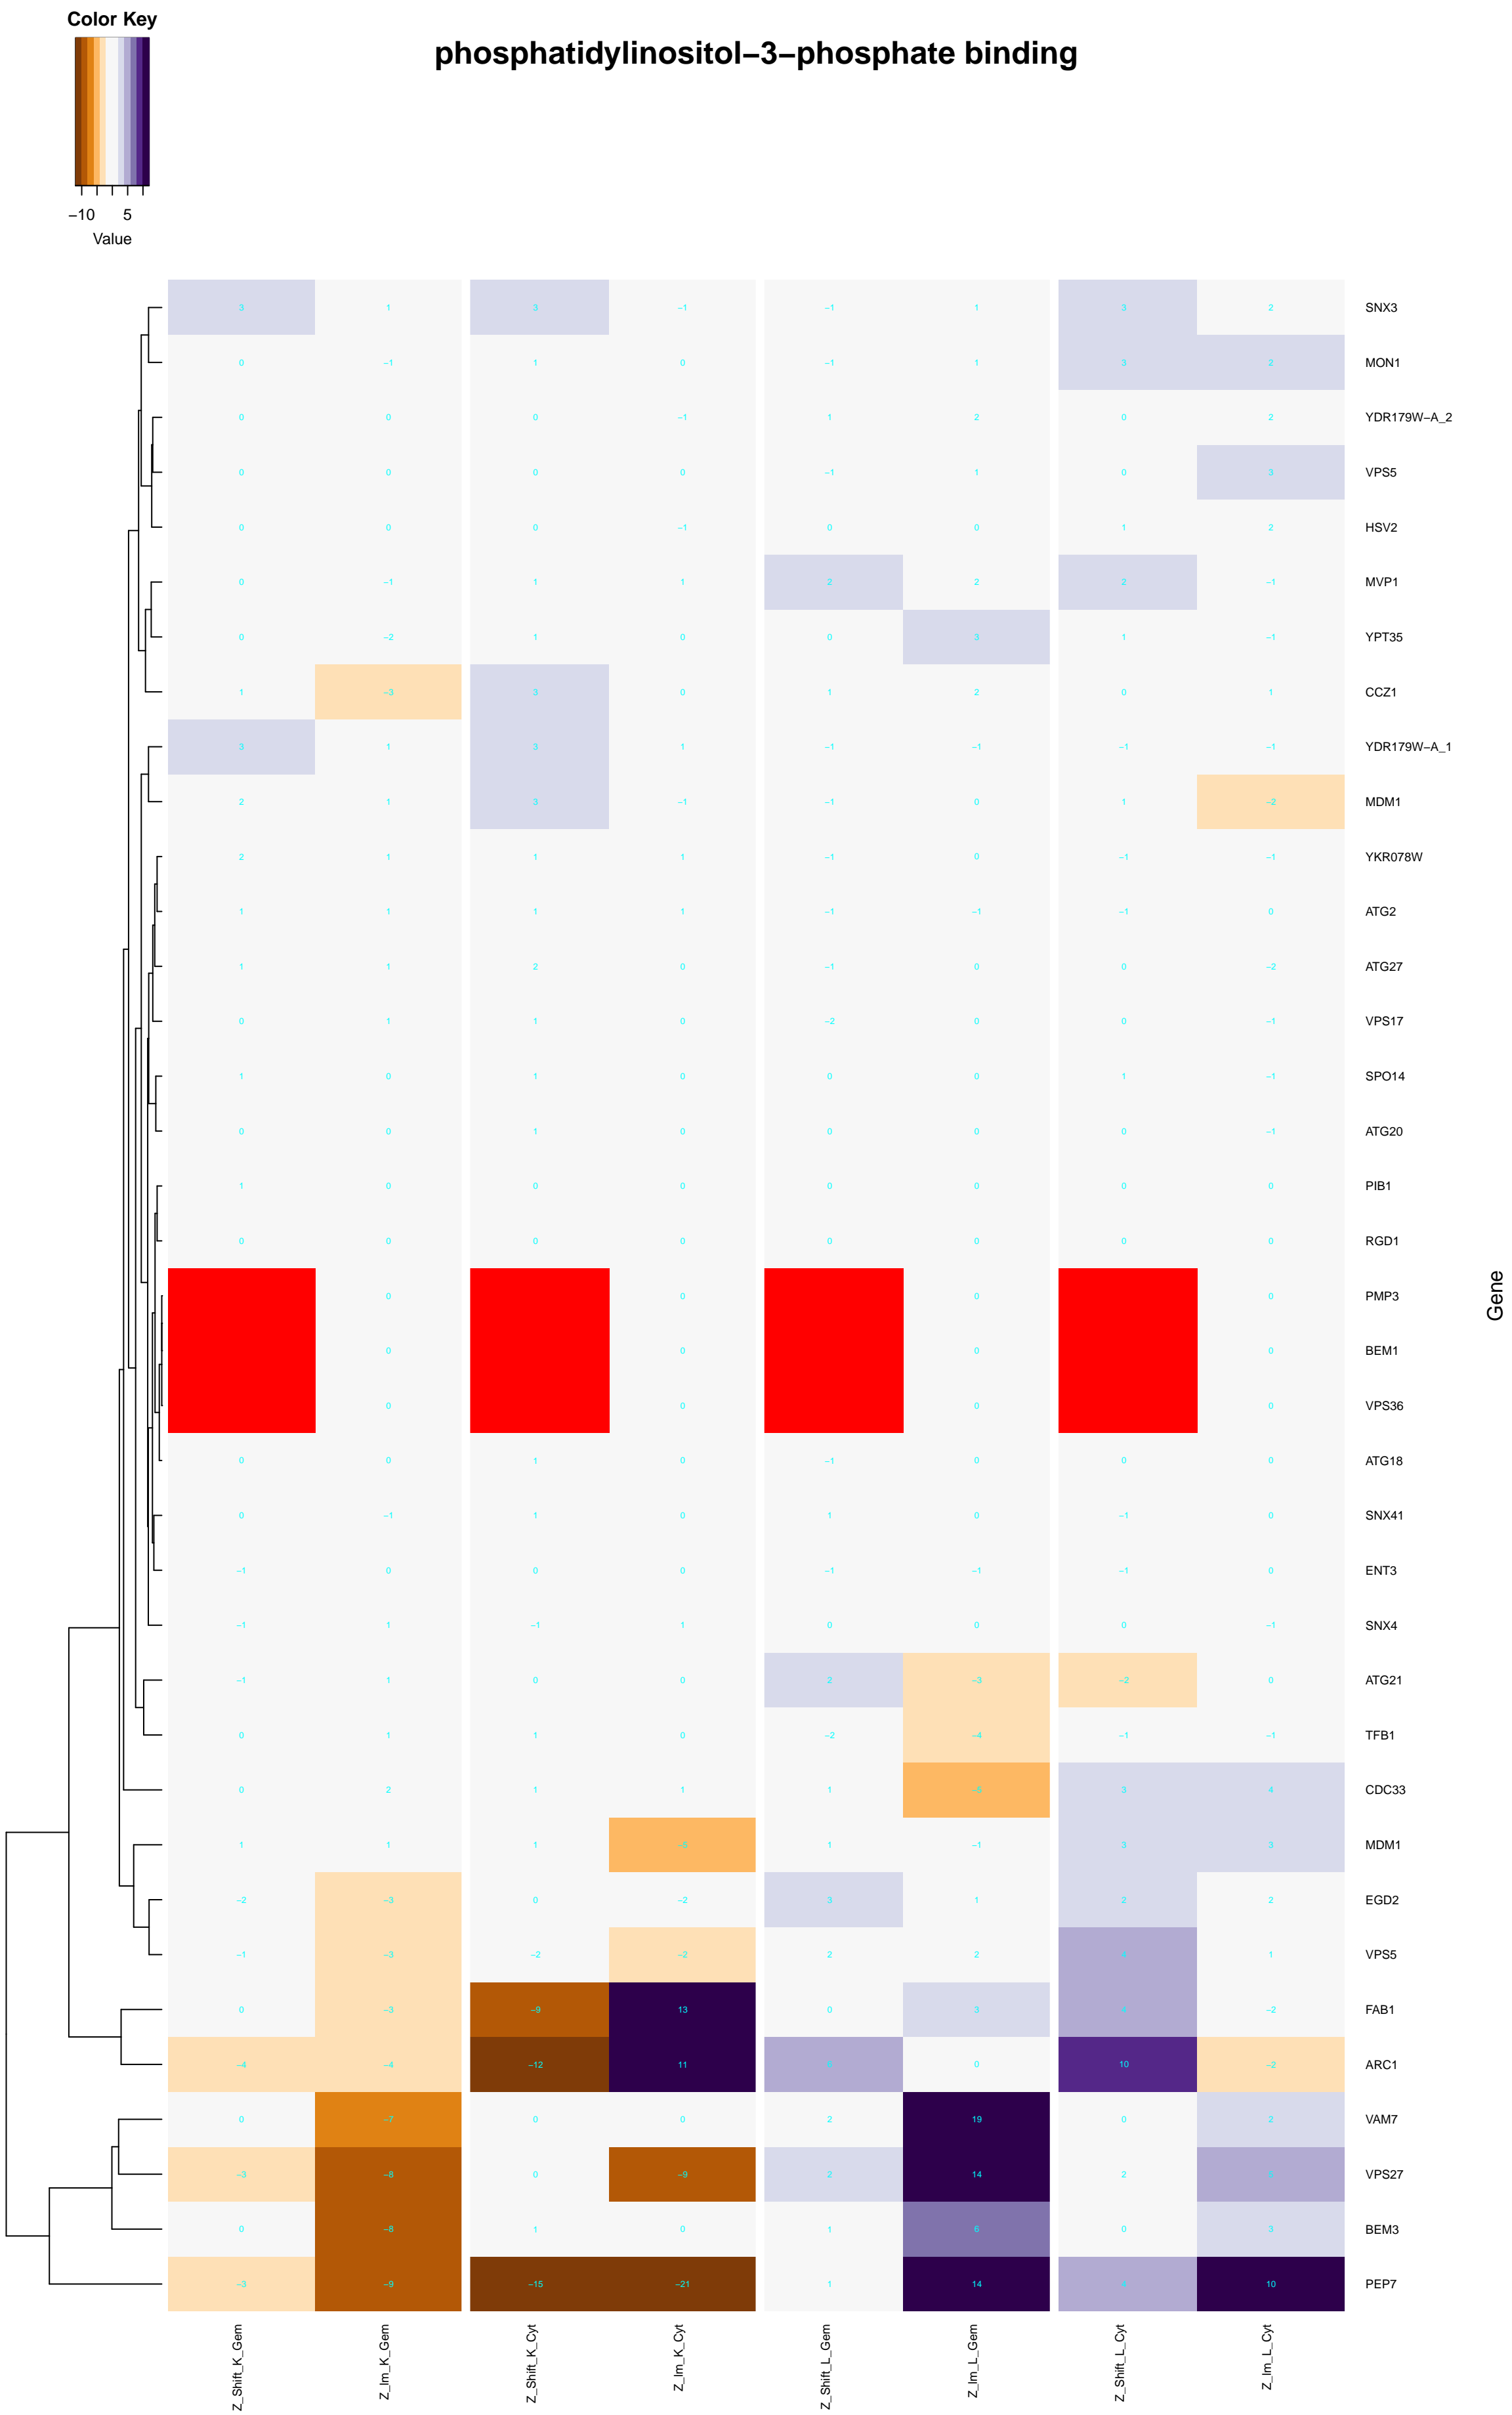

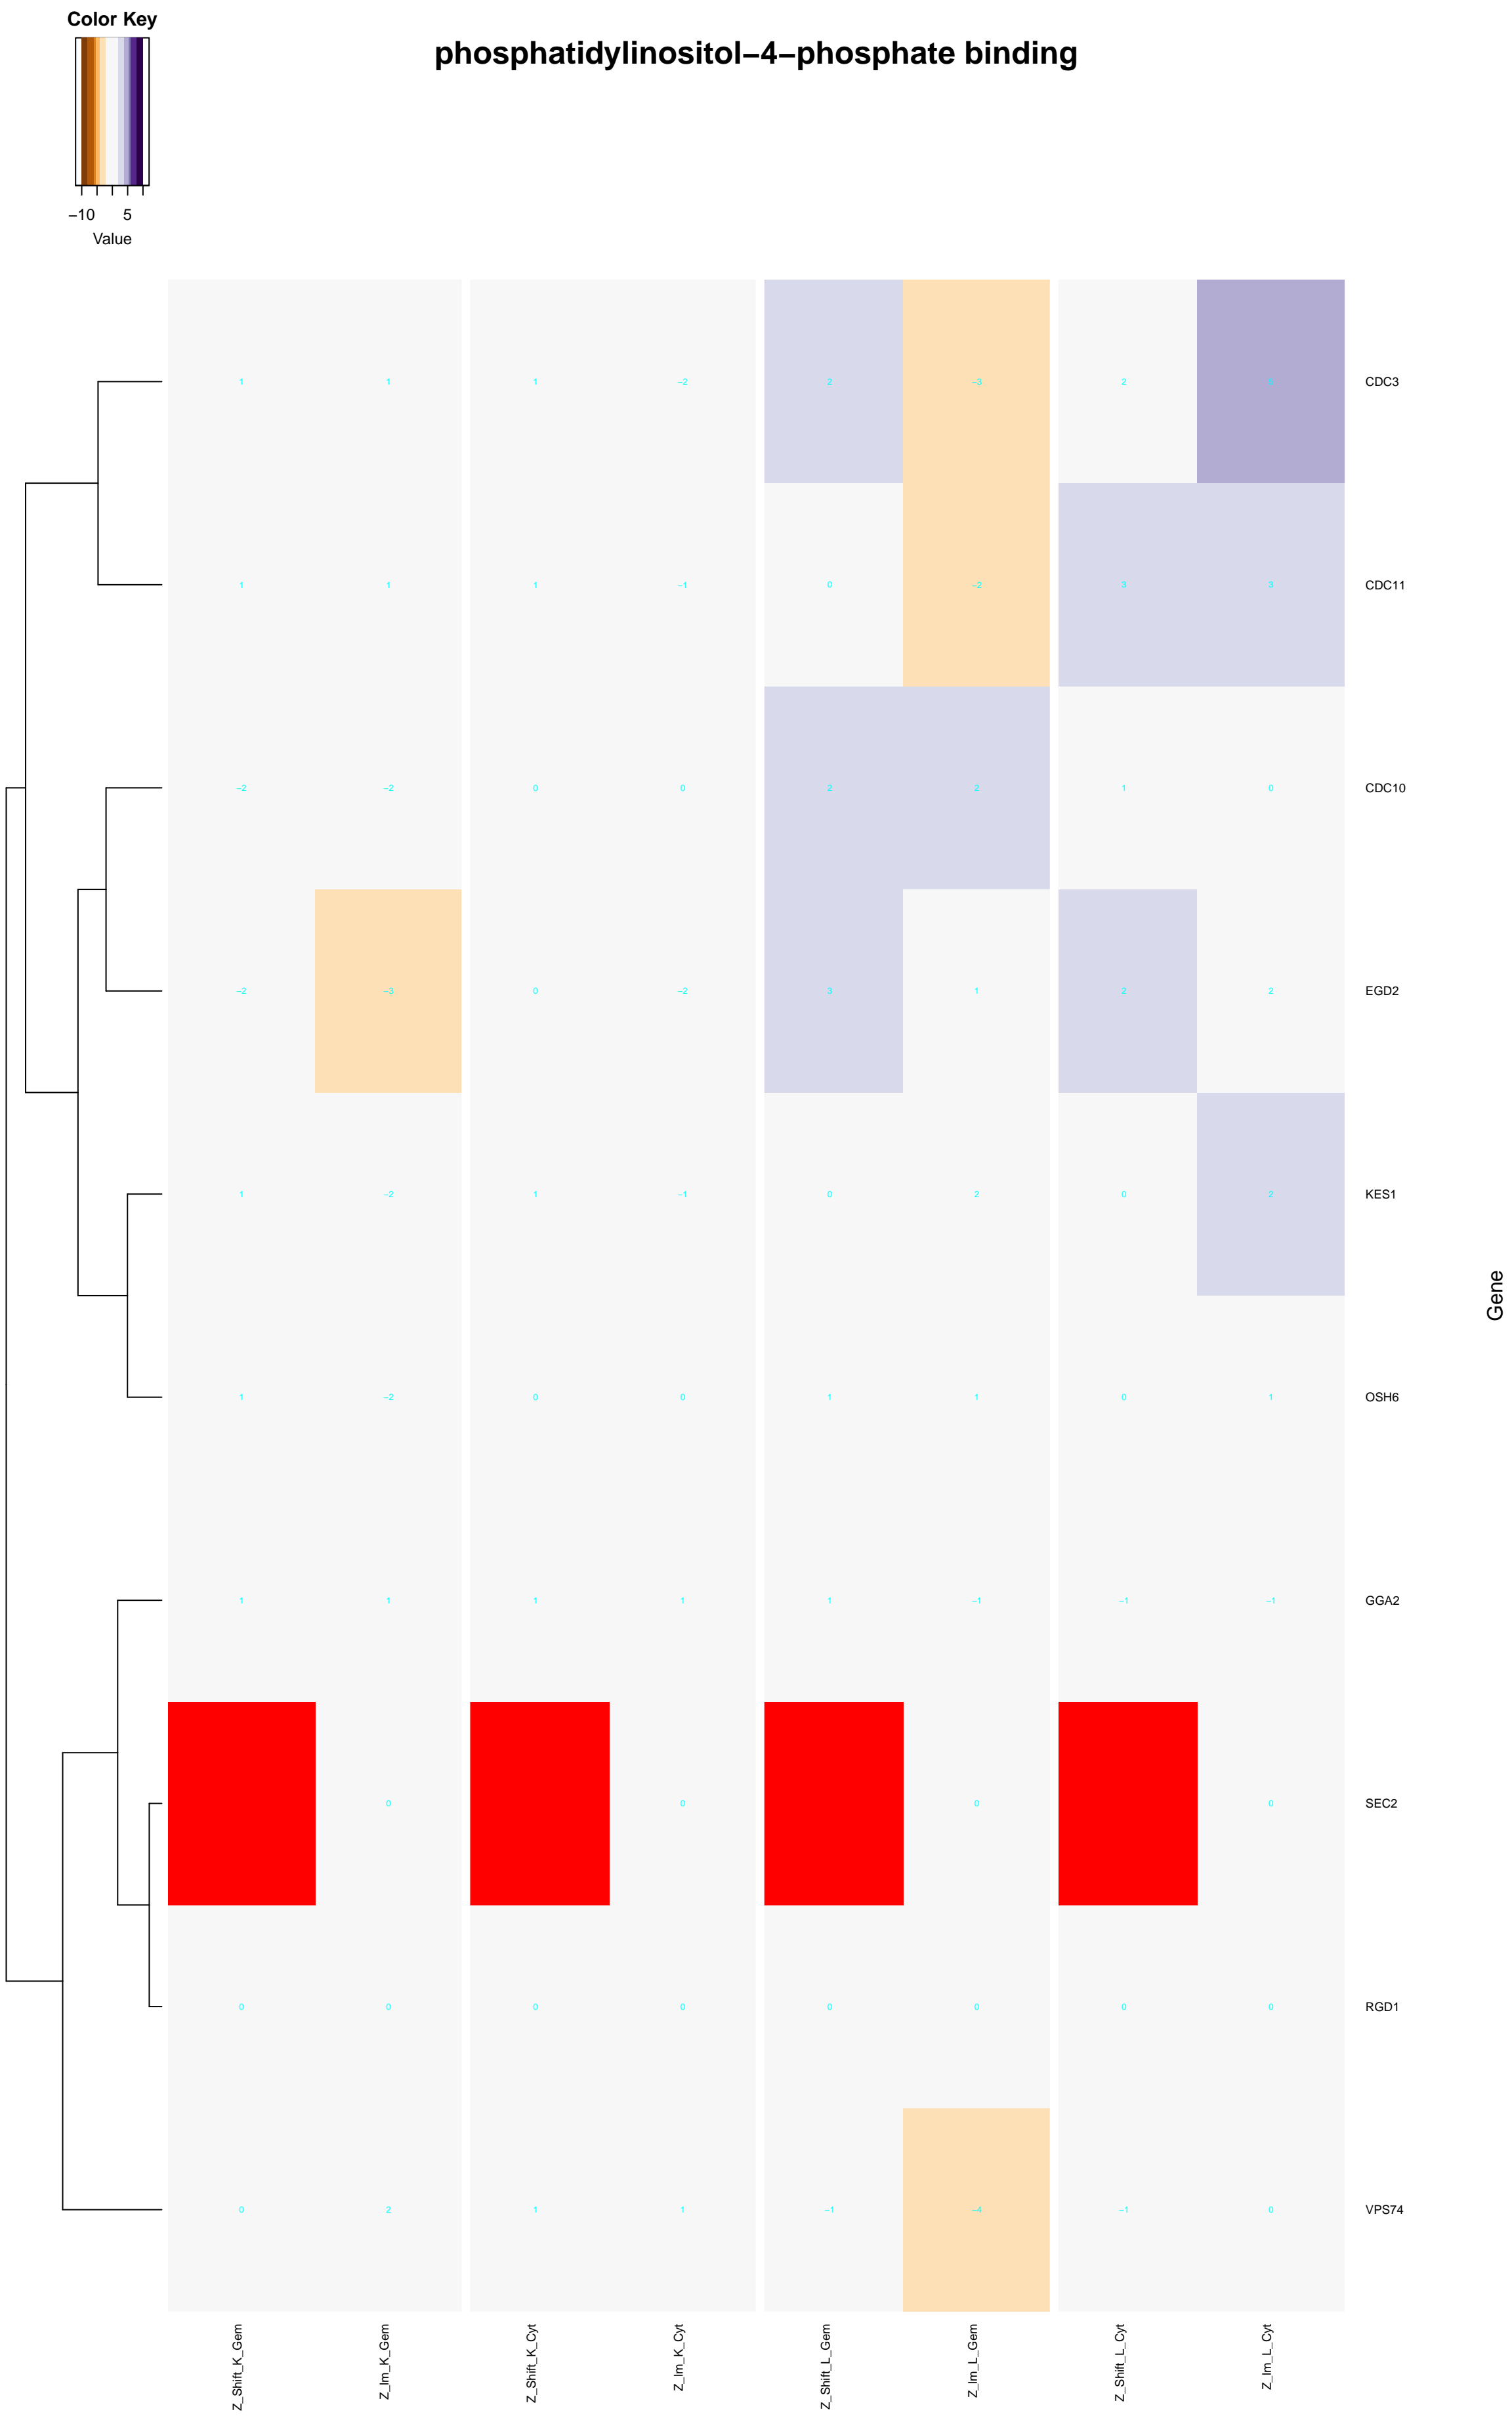

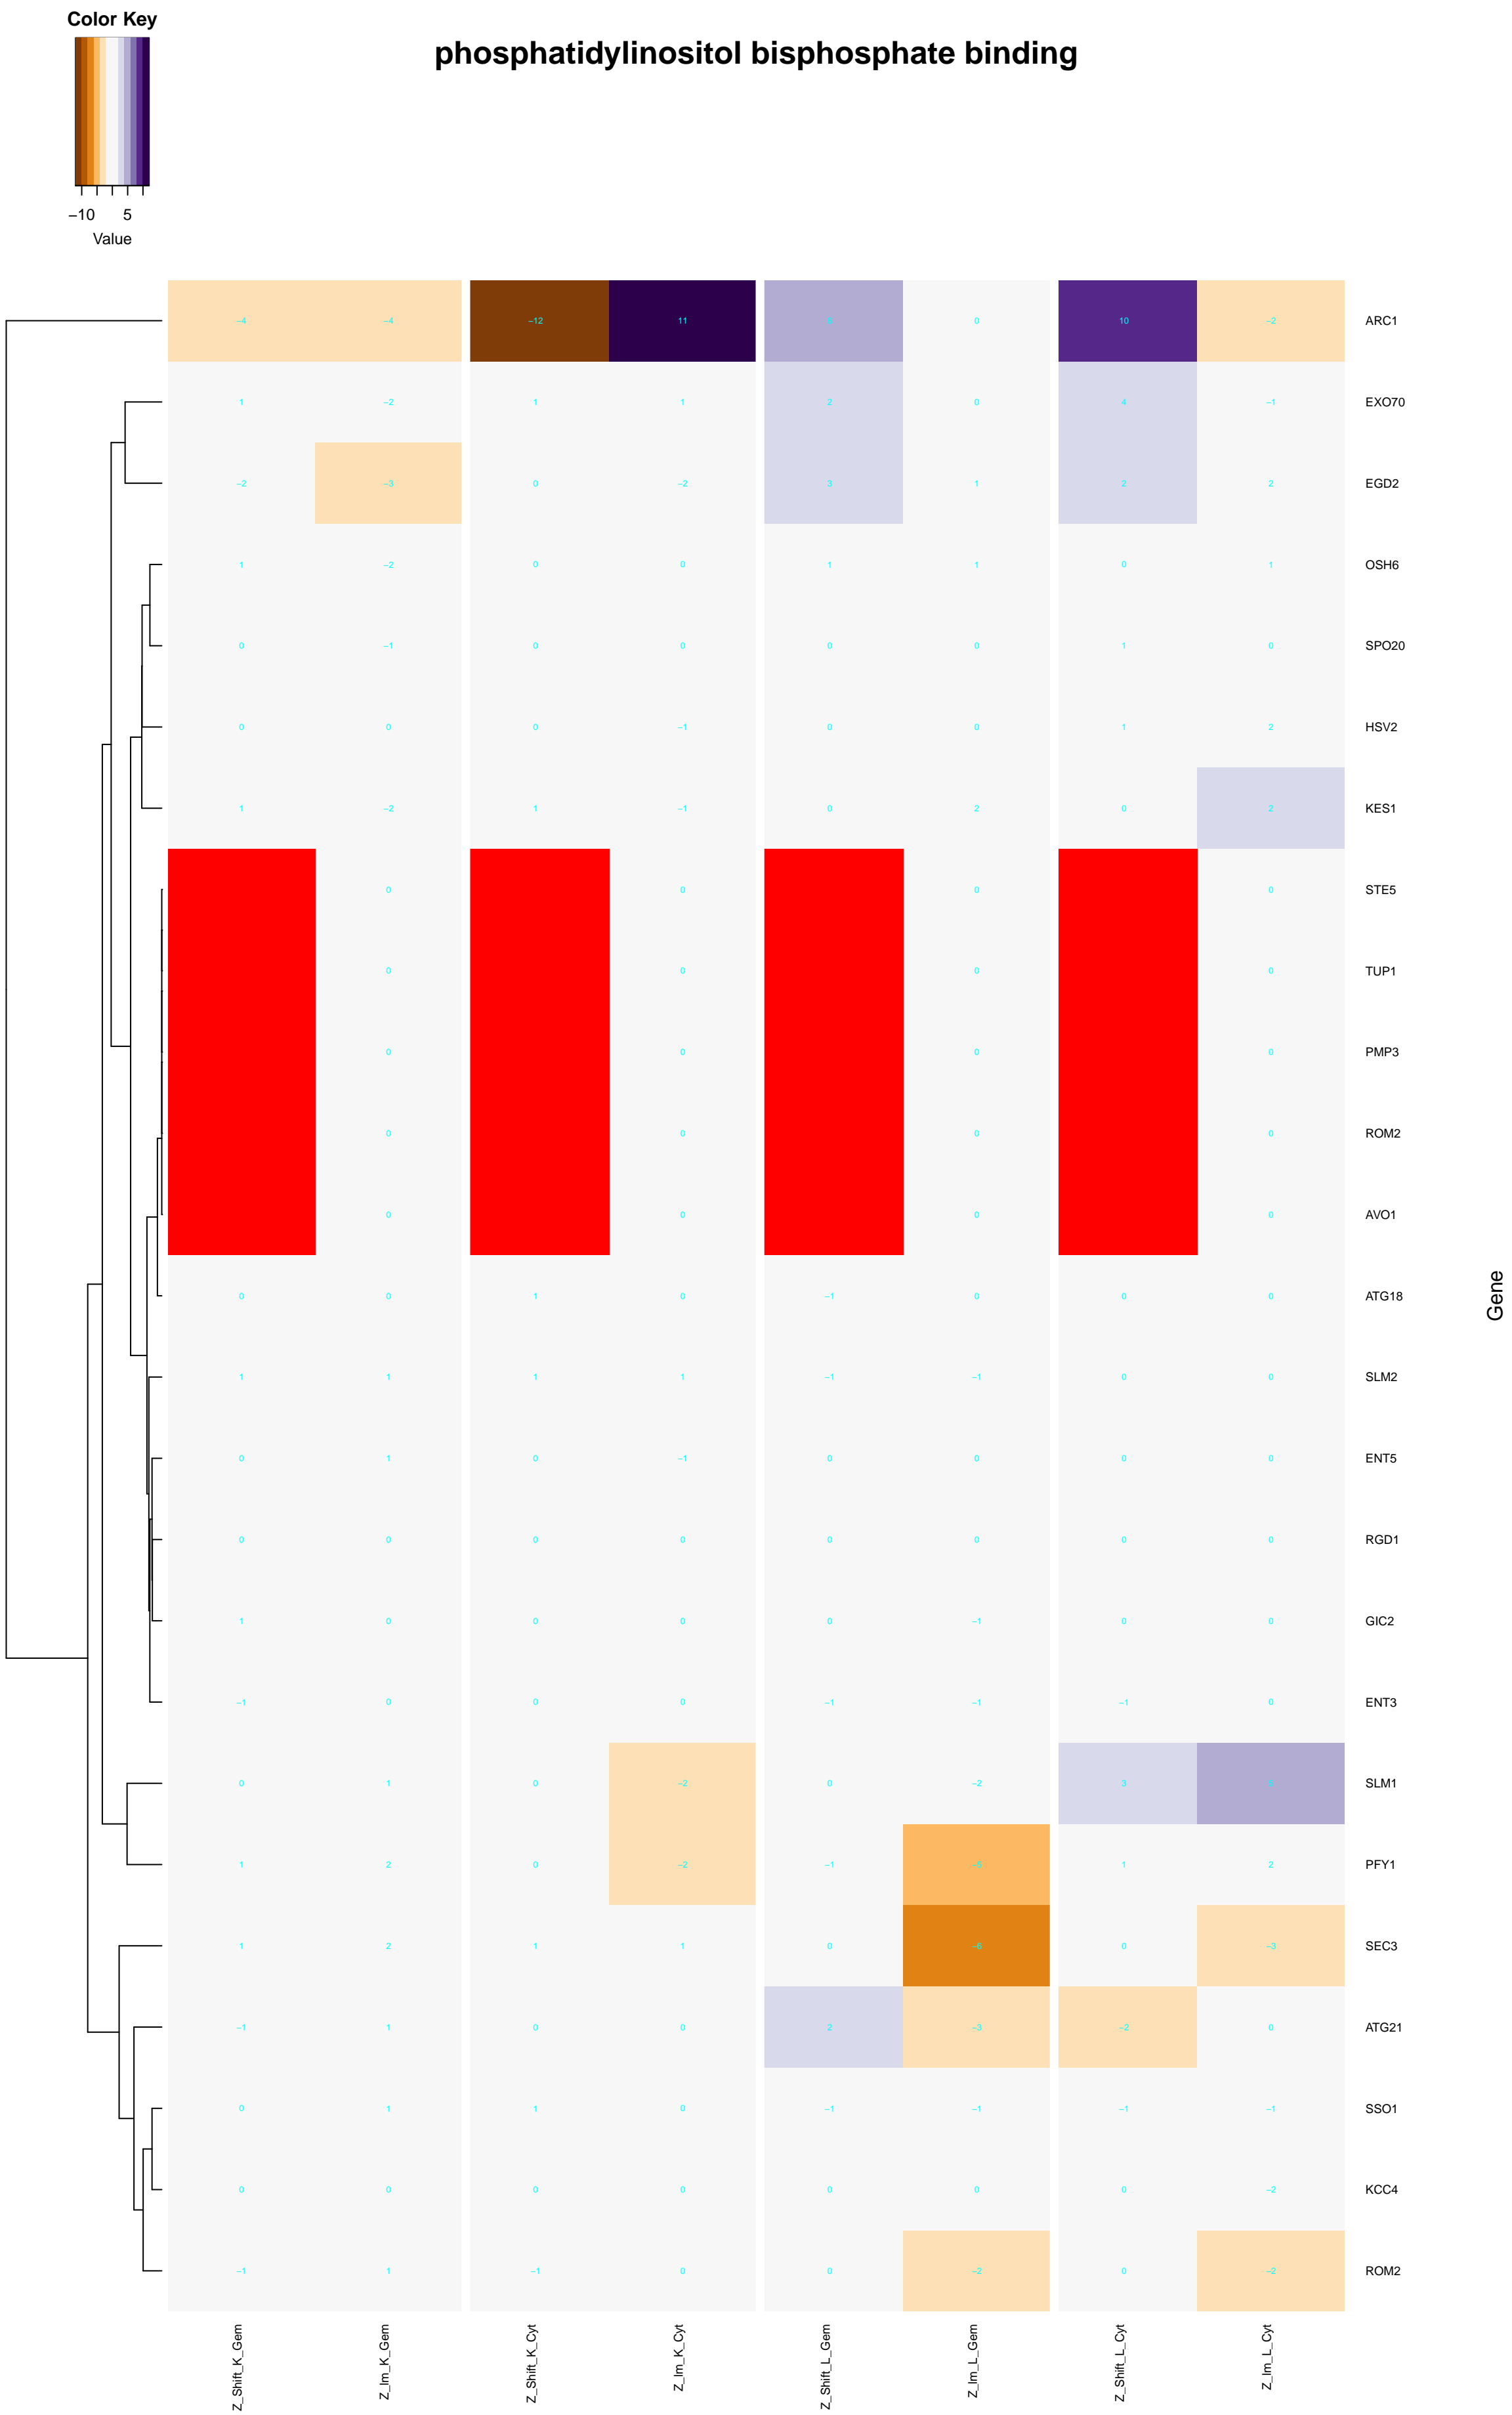

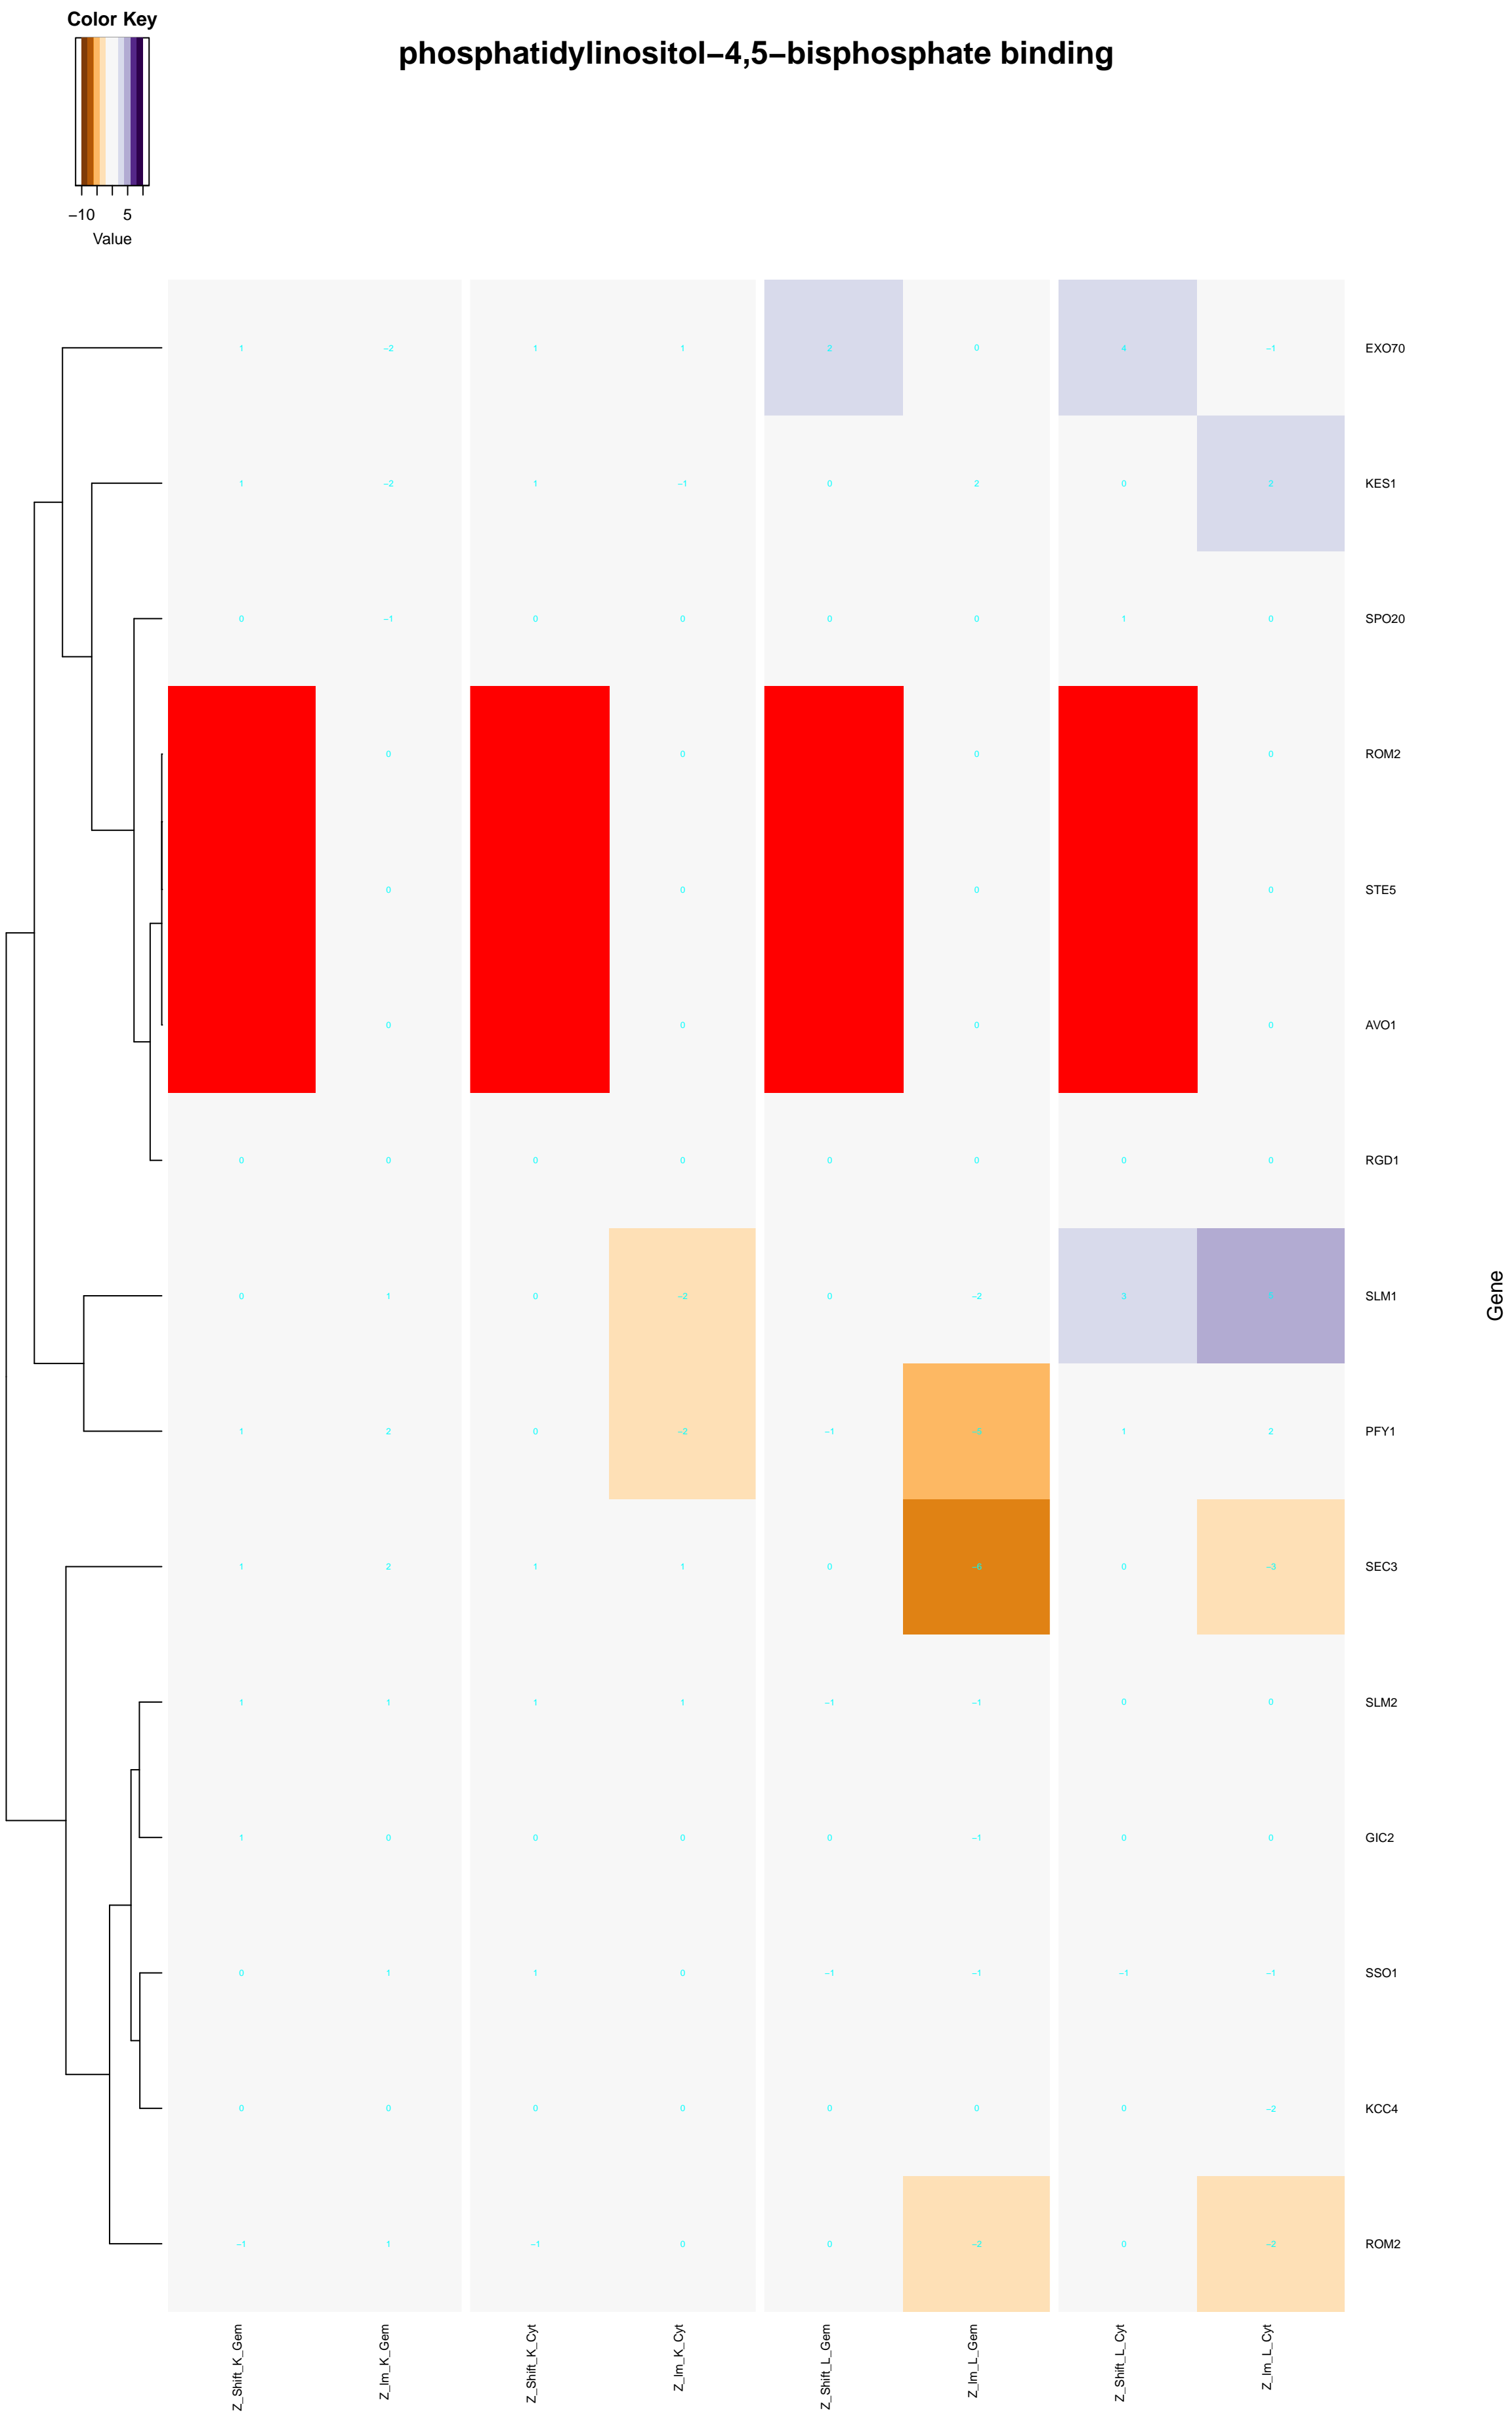

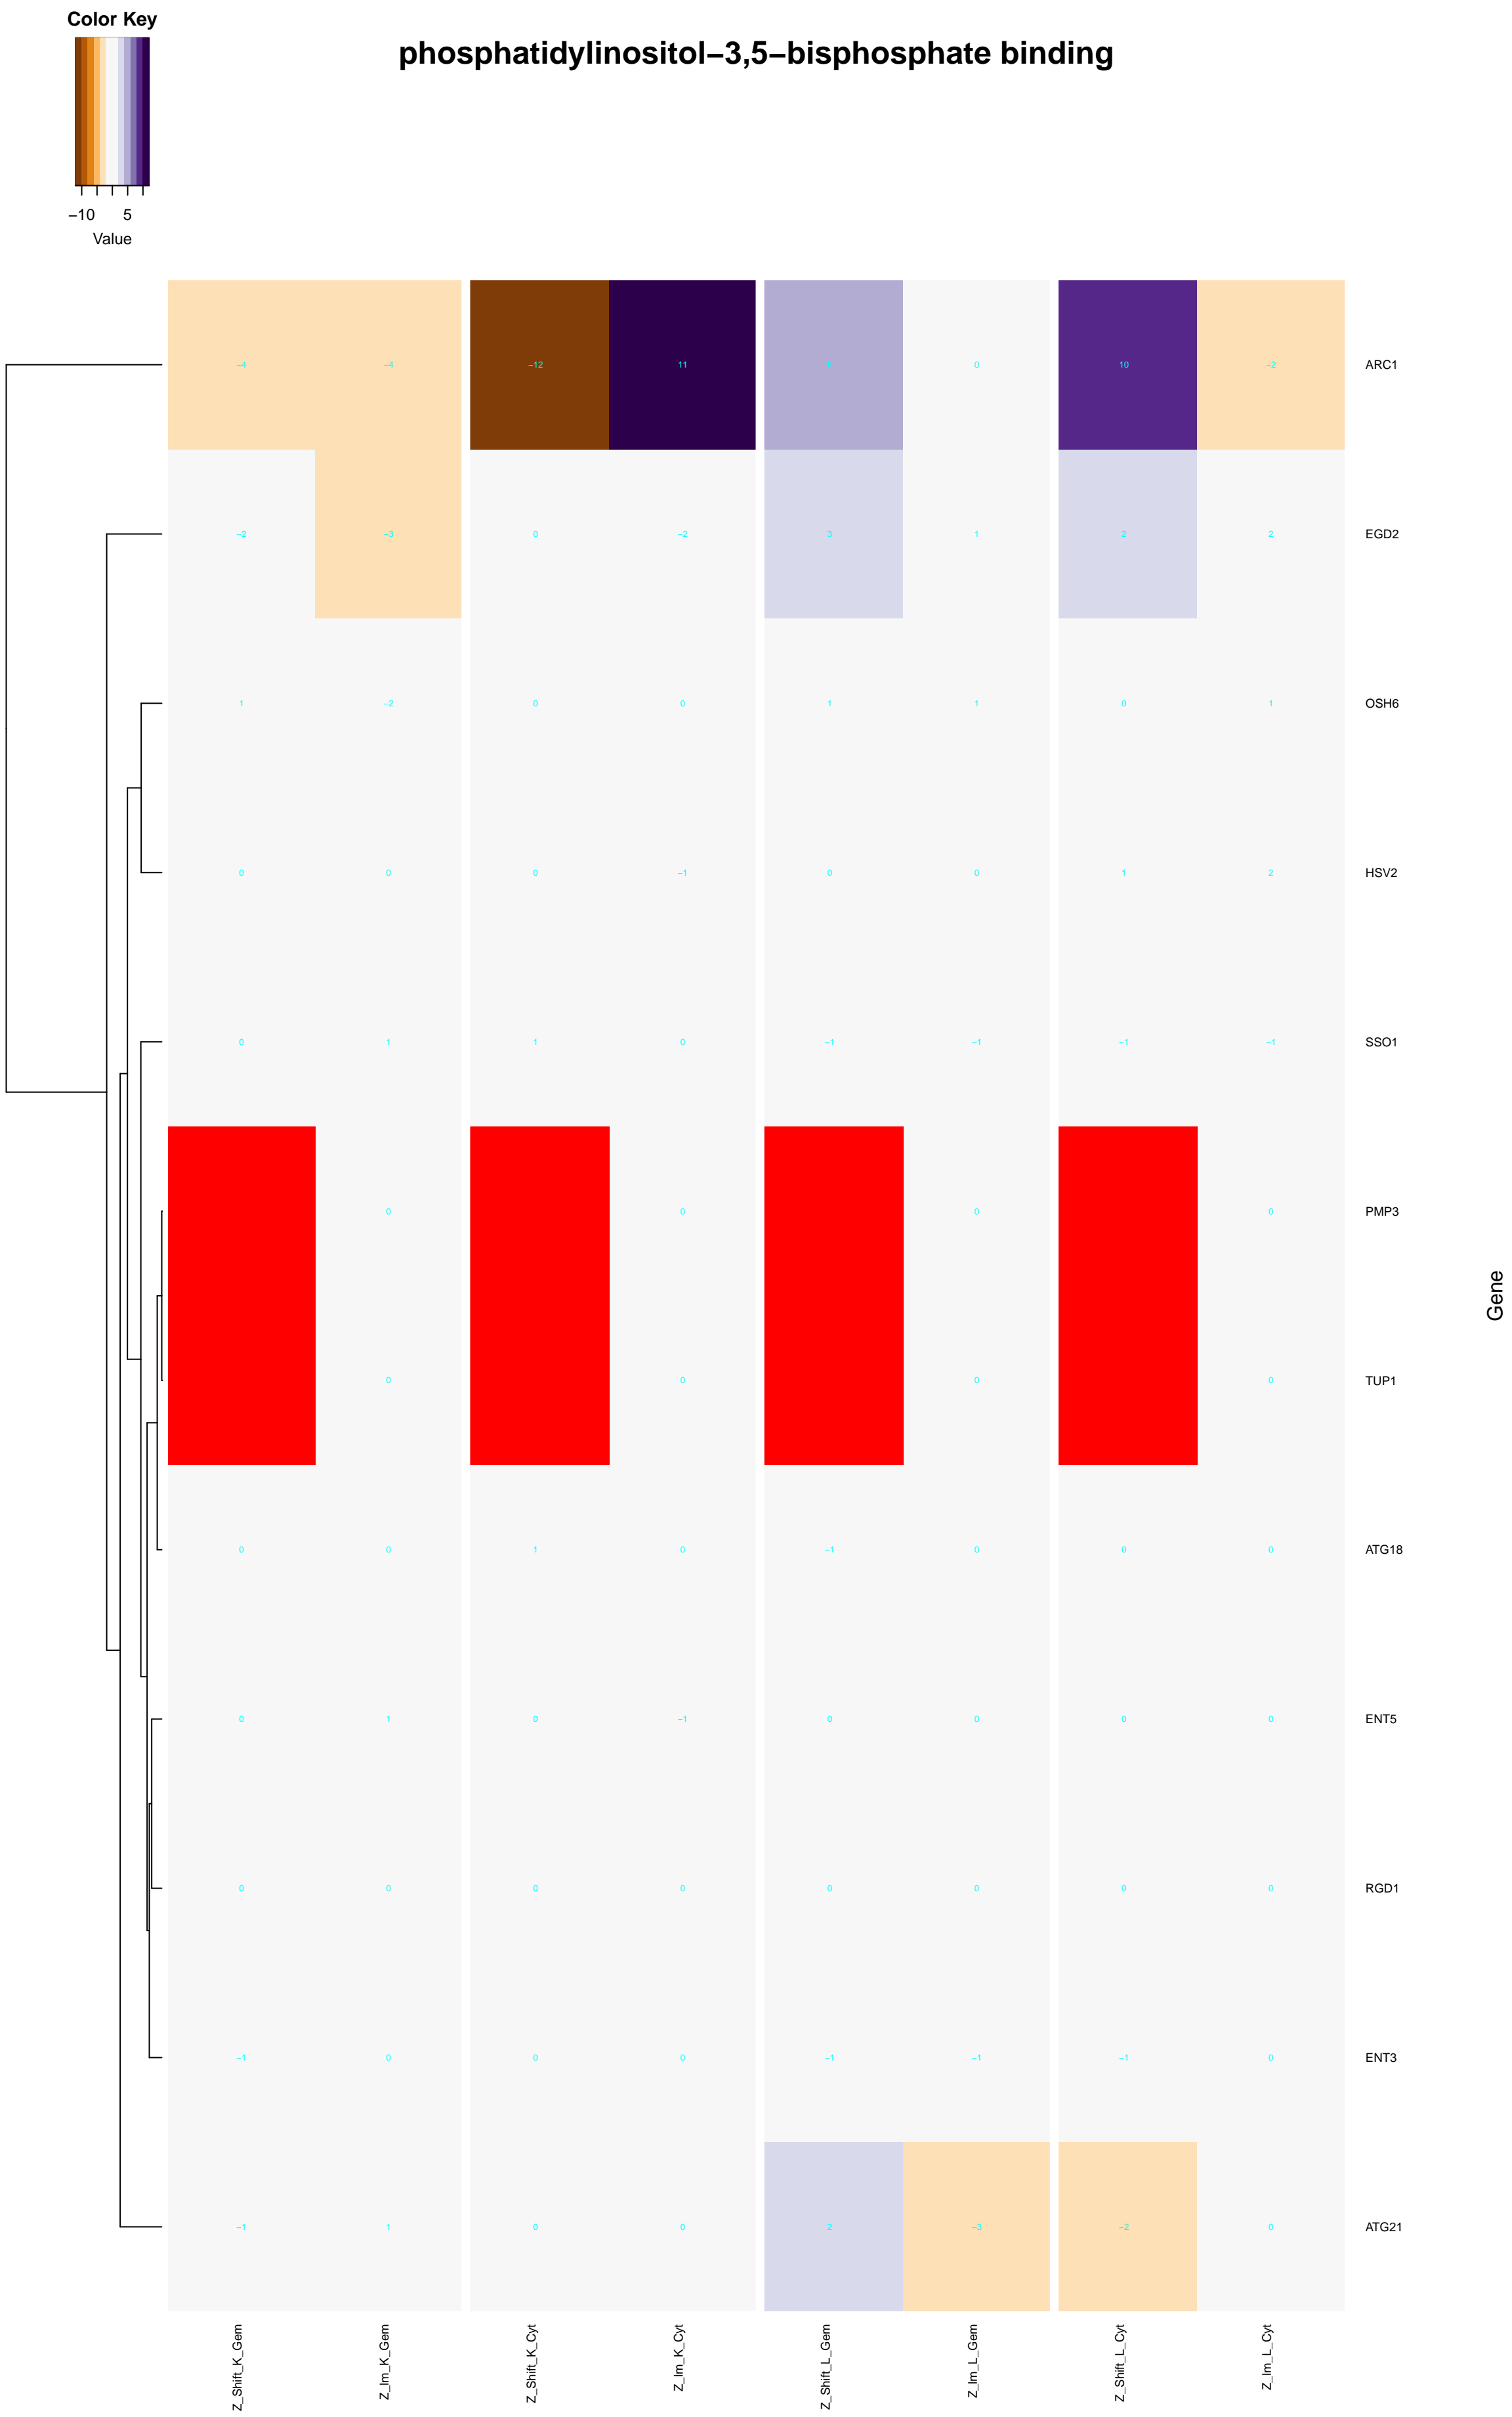

Supplement: s1 [file s1]

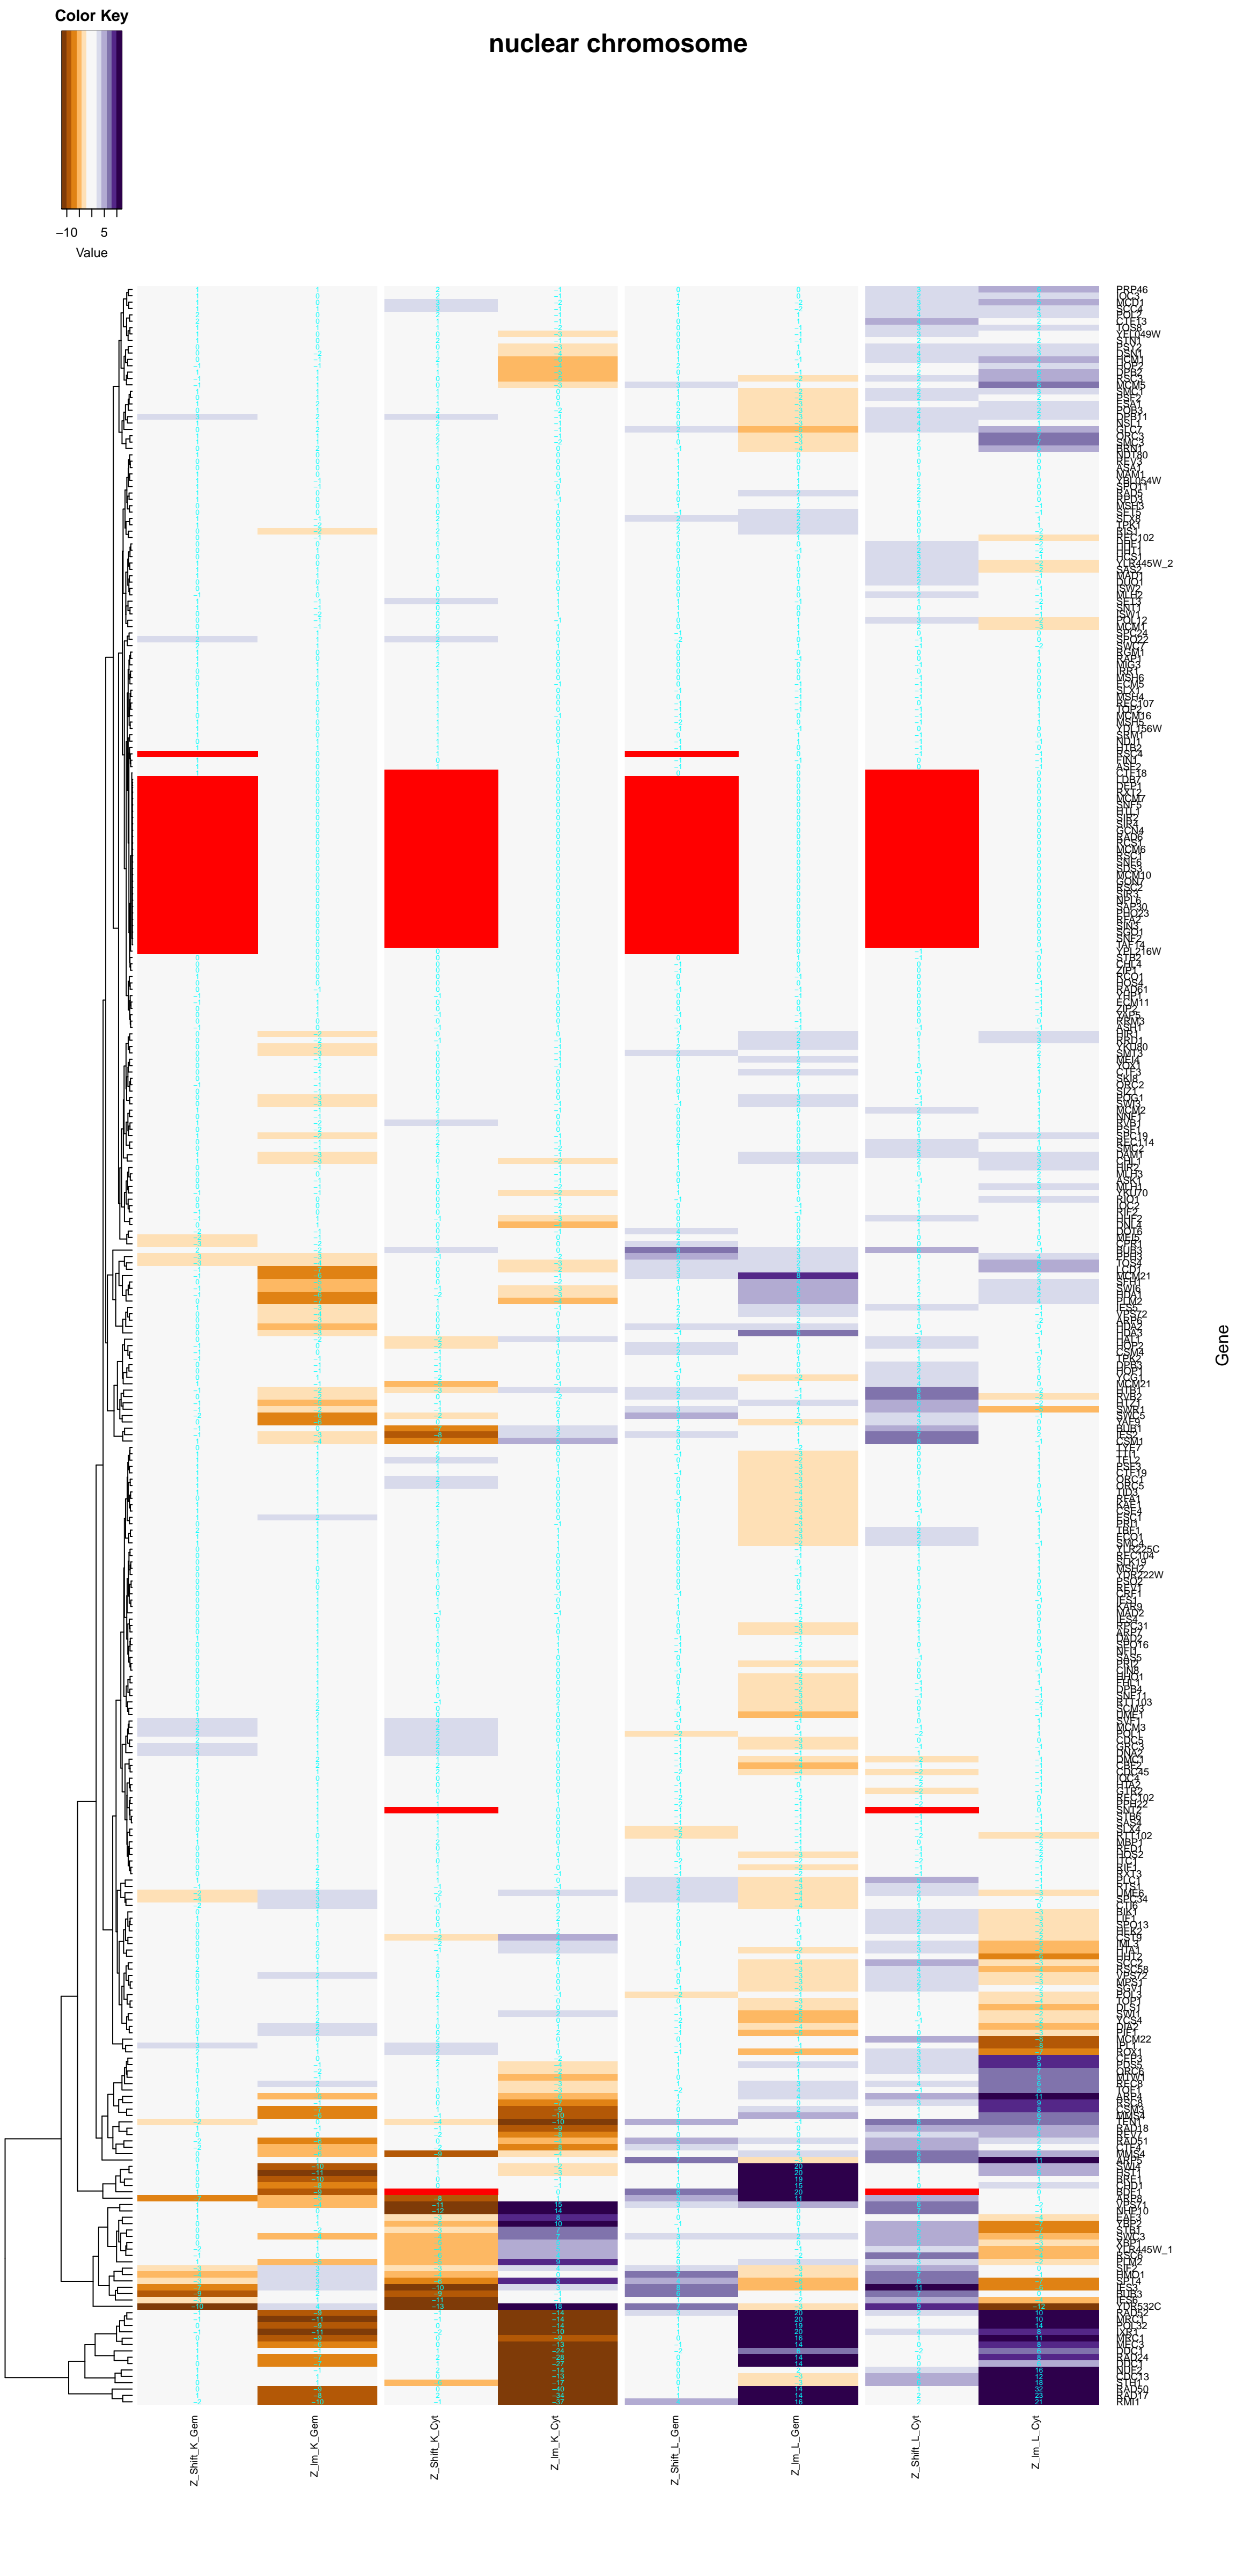

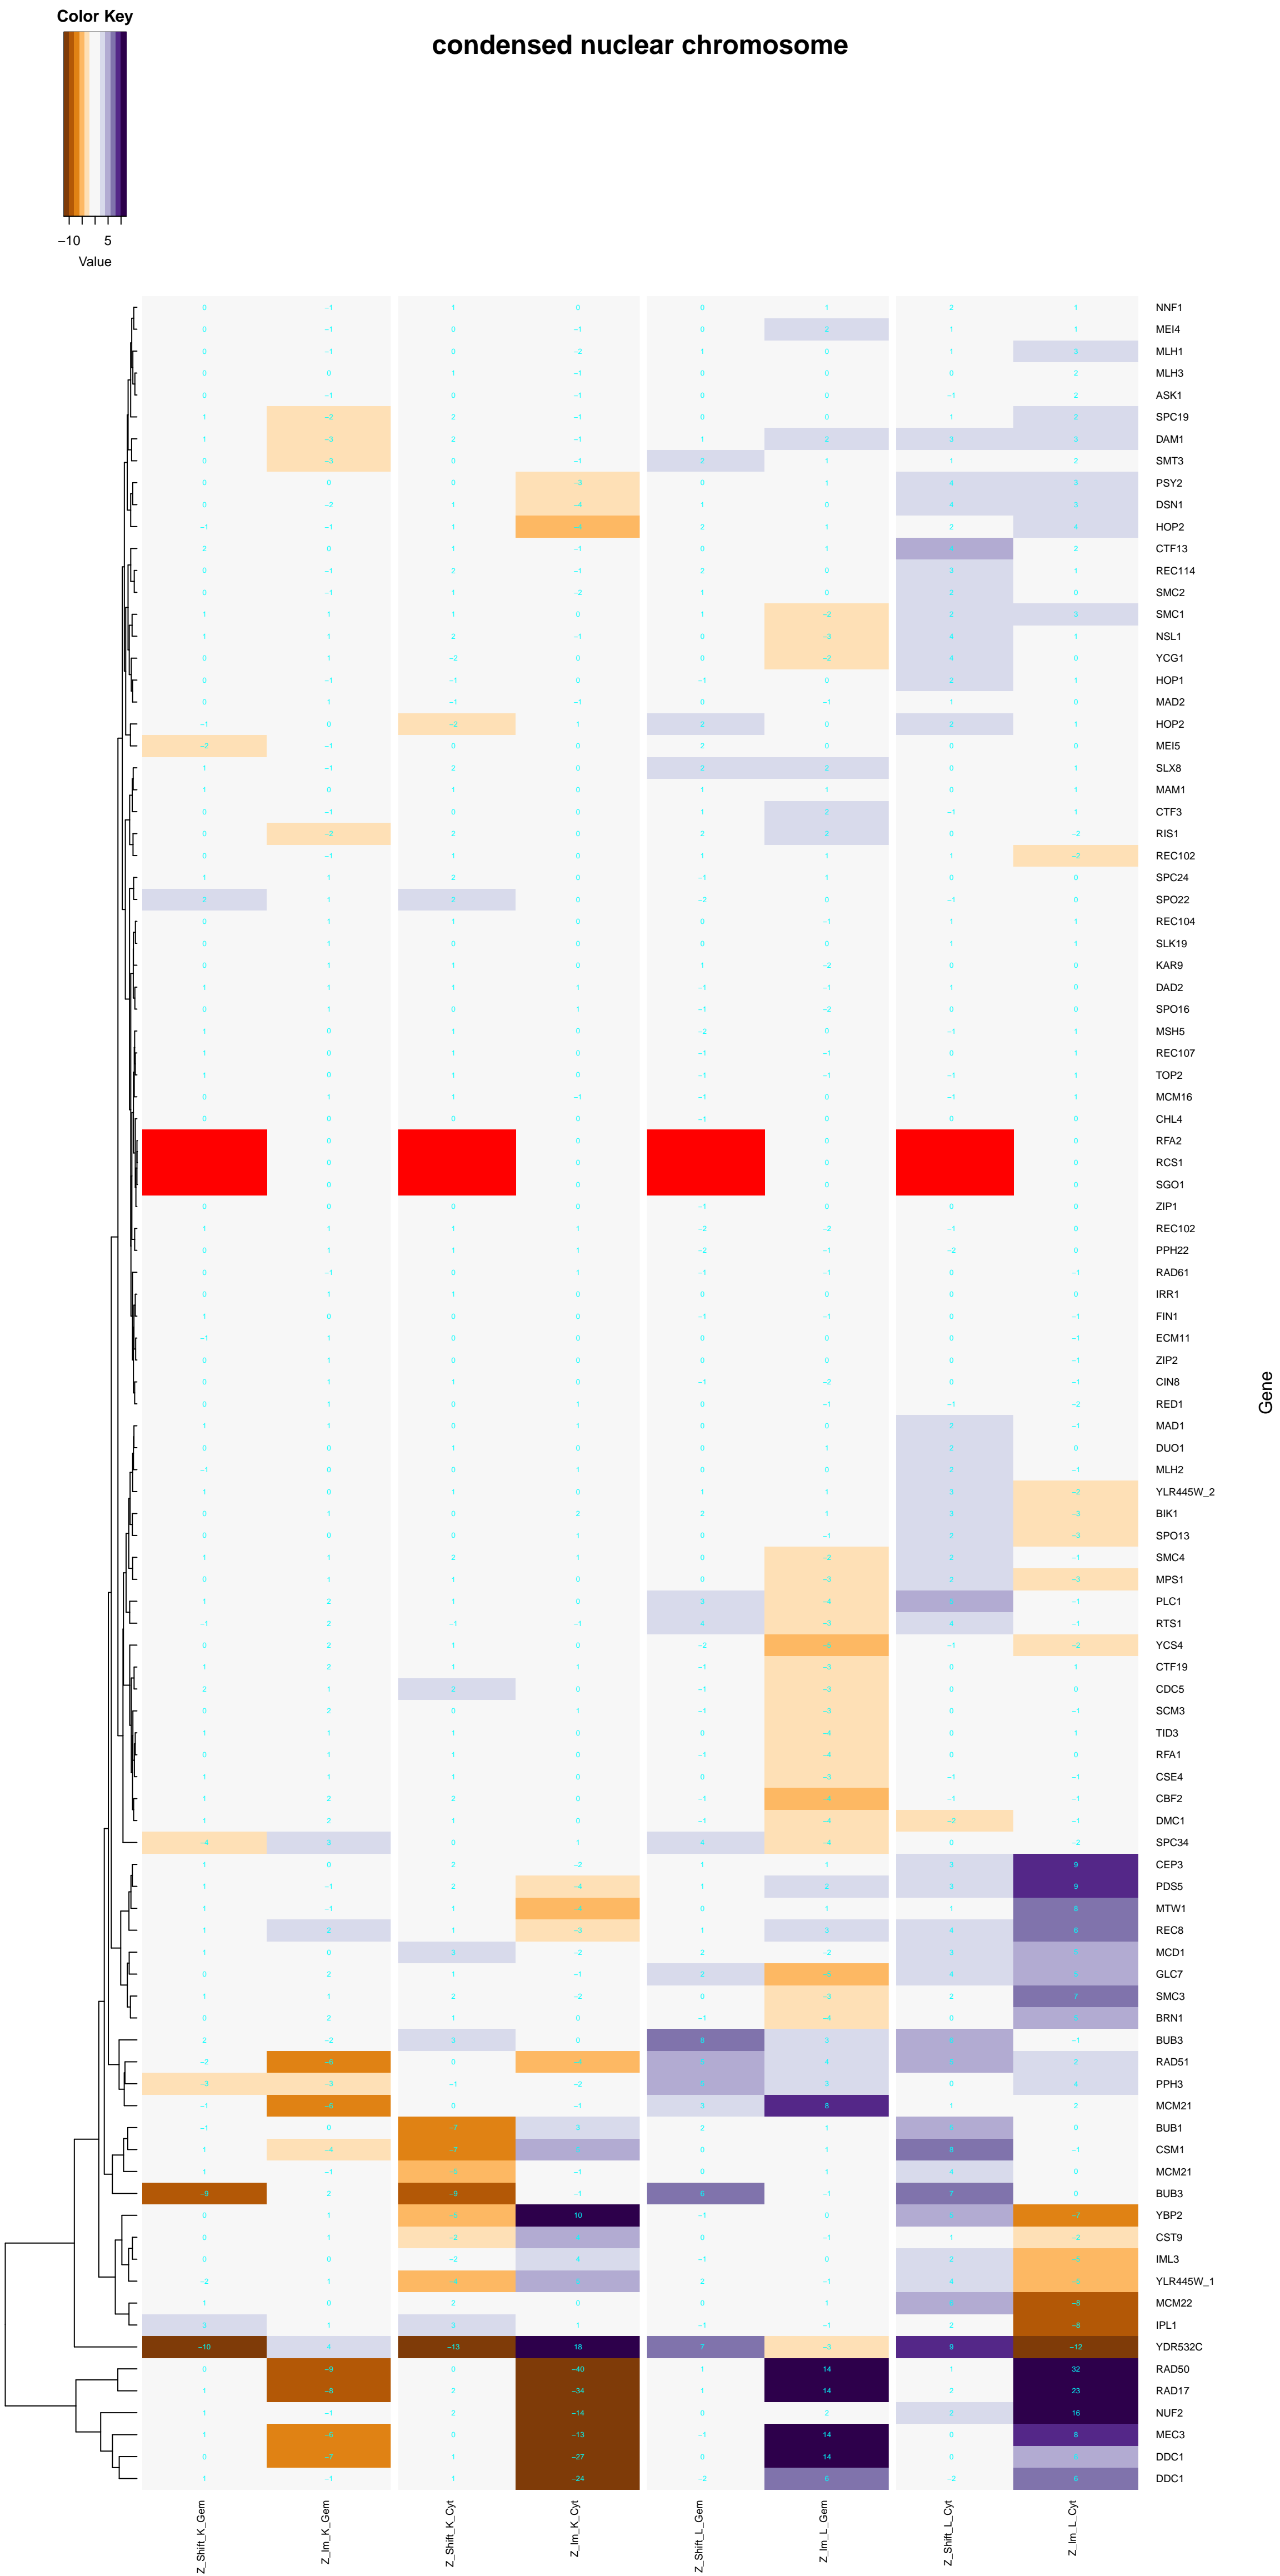

Supplement: s1 [file s1]

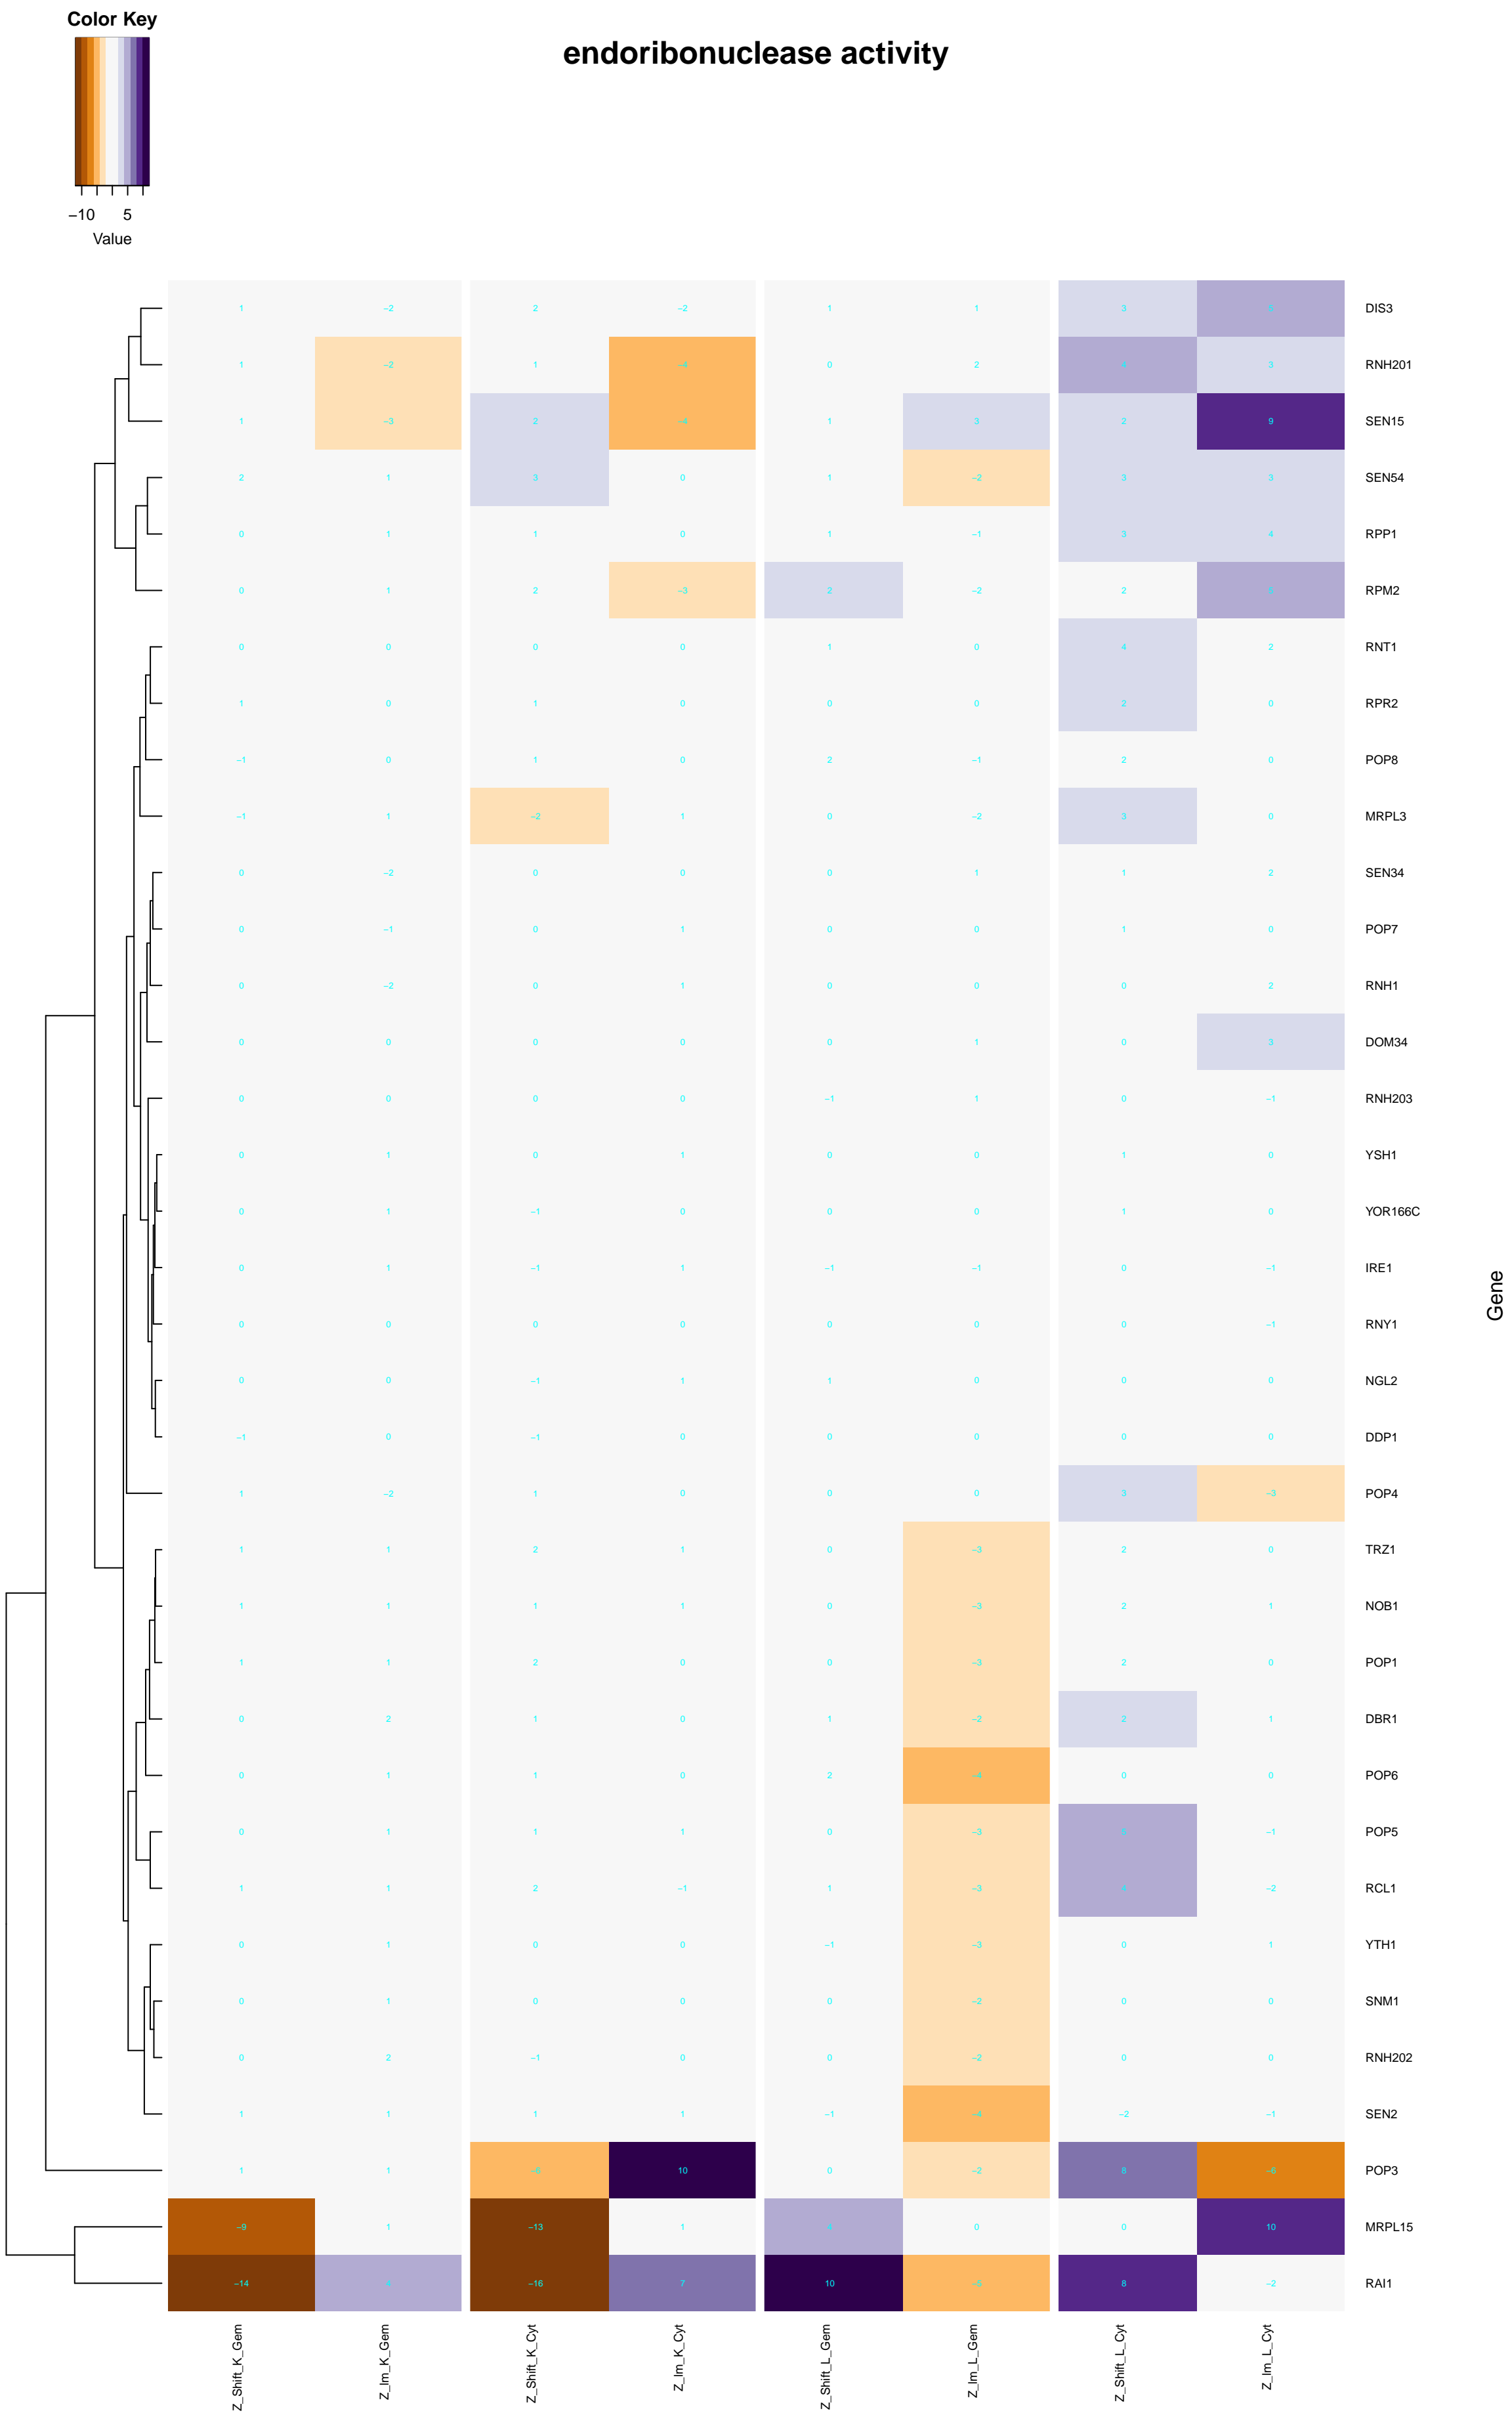

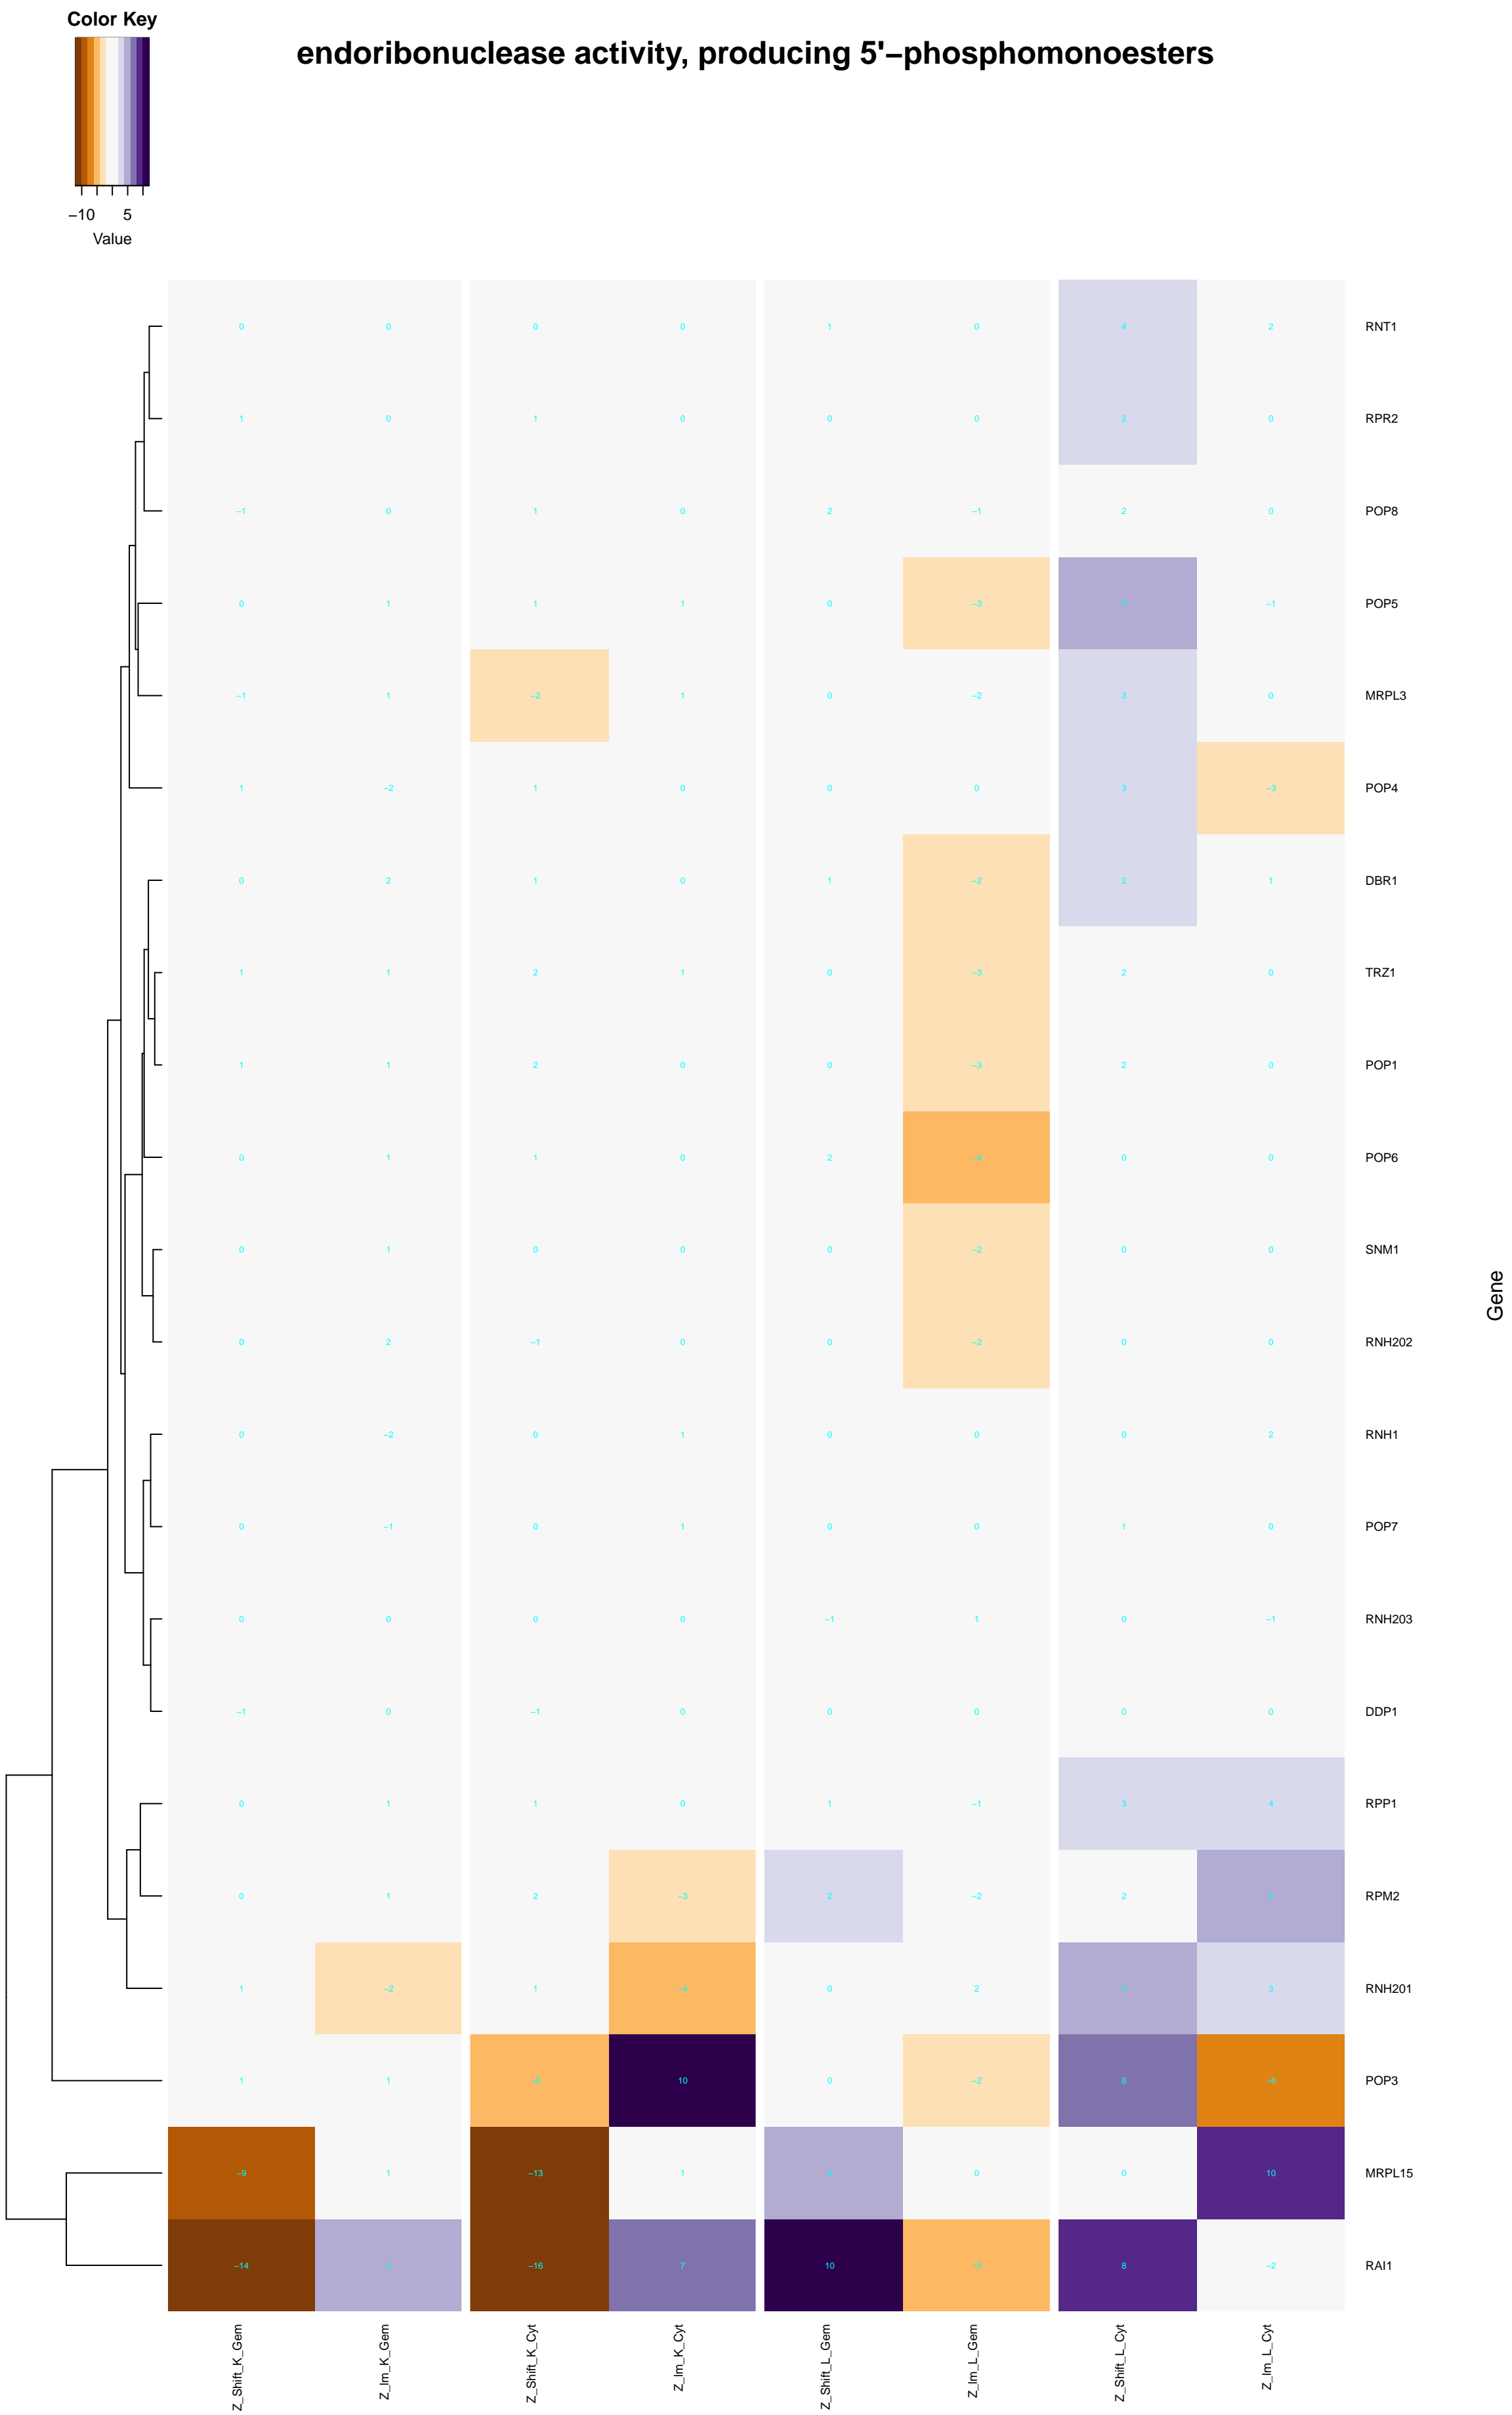

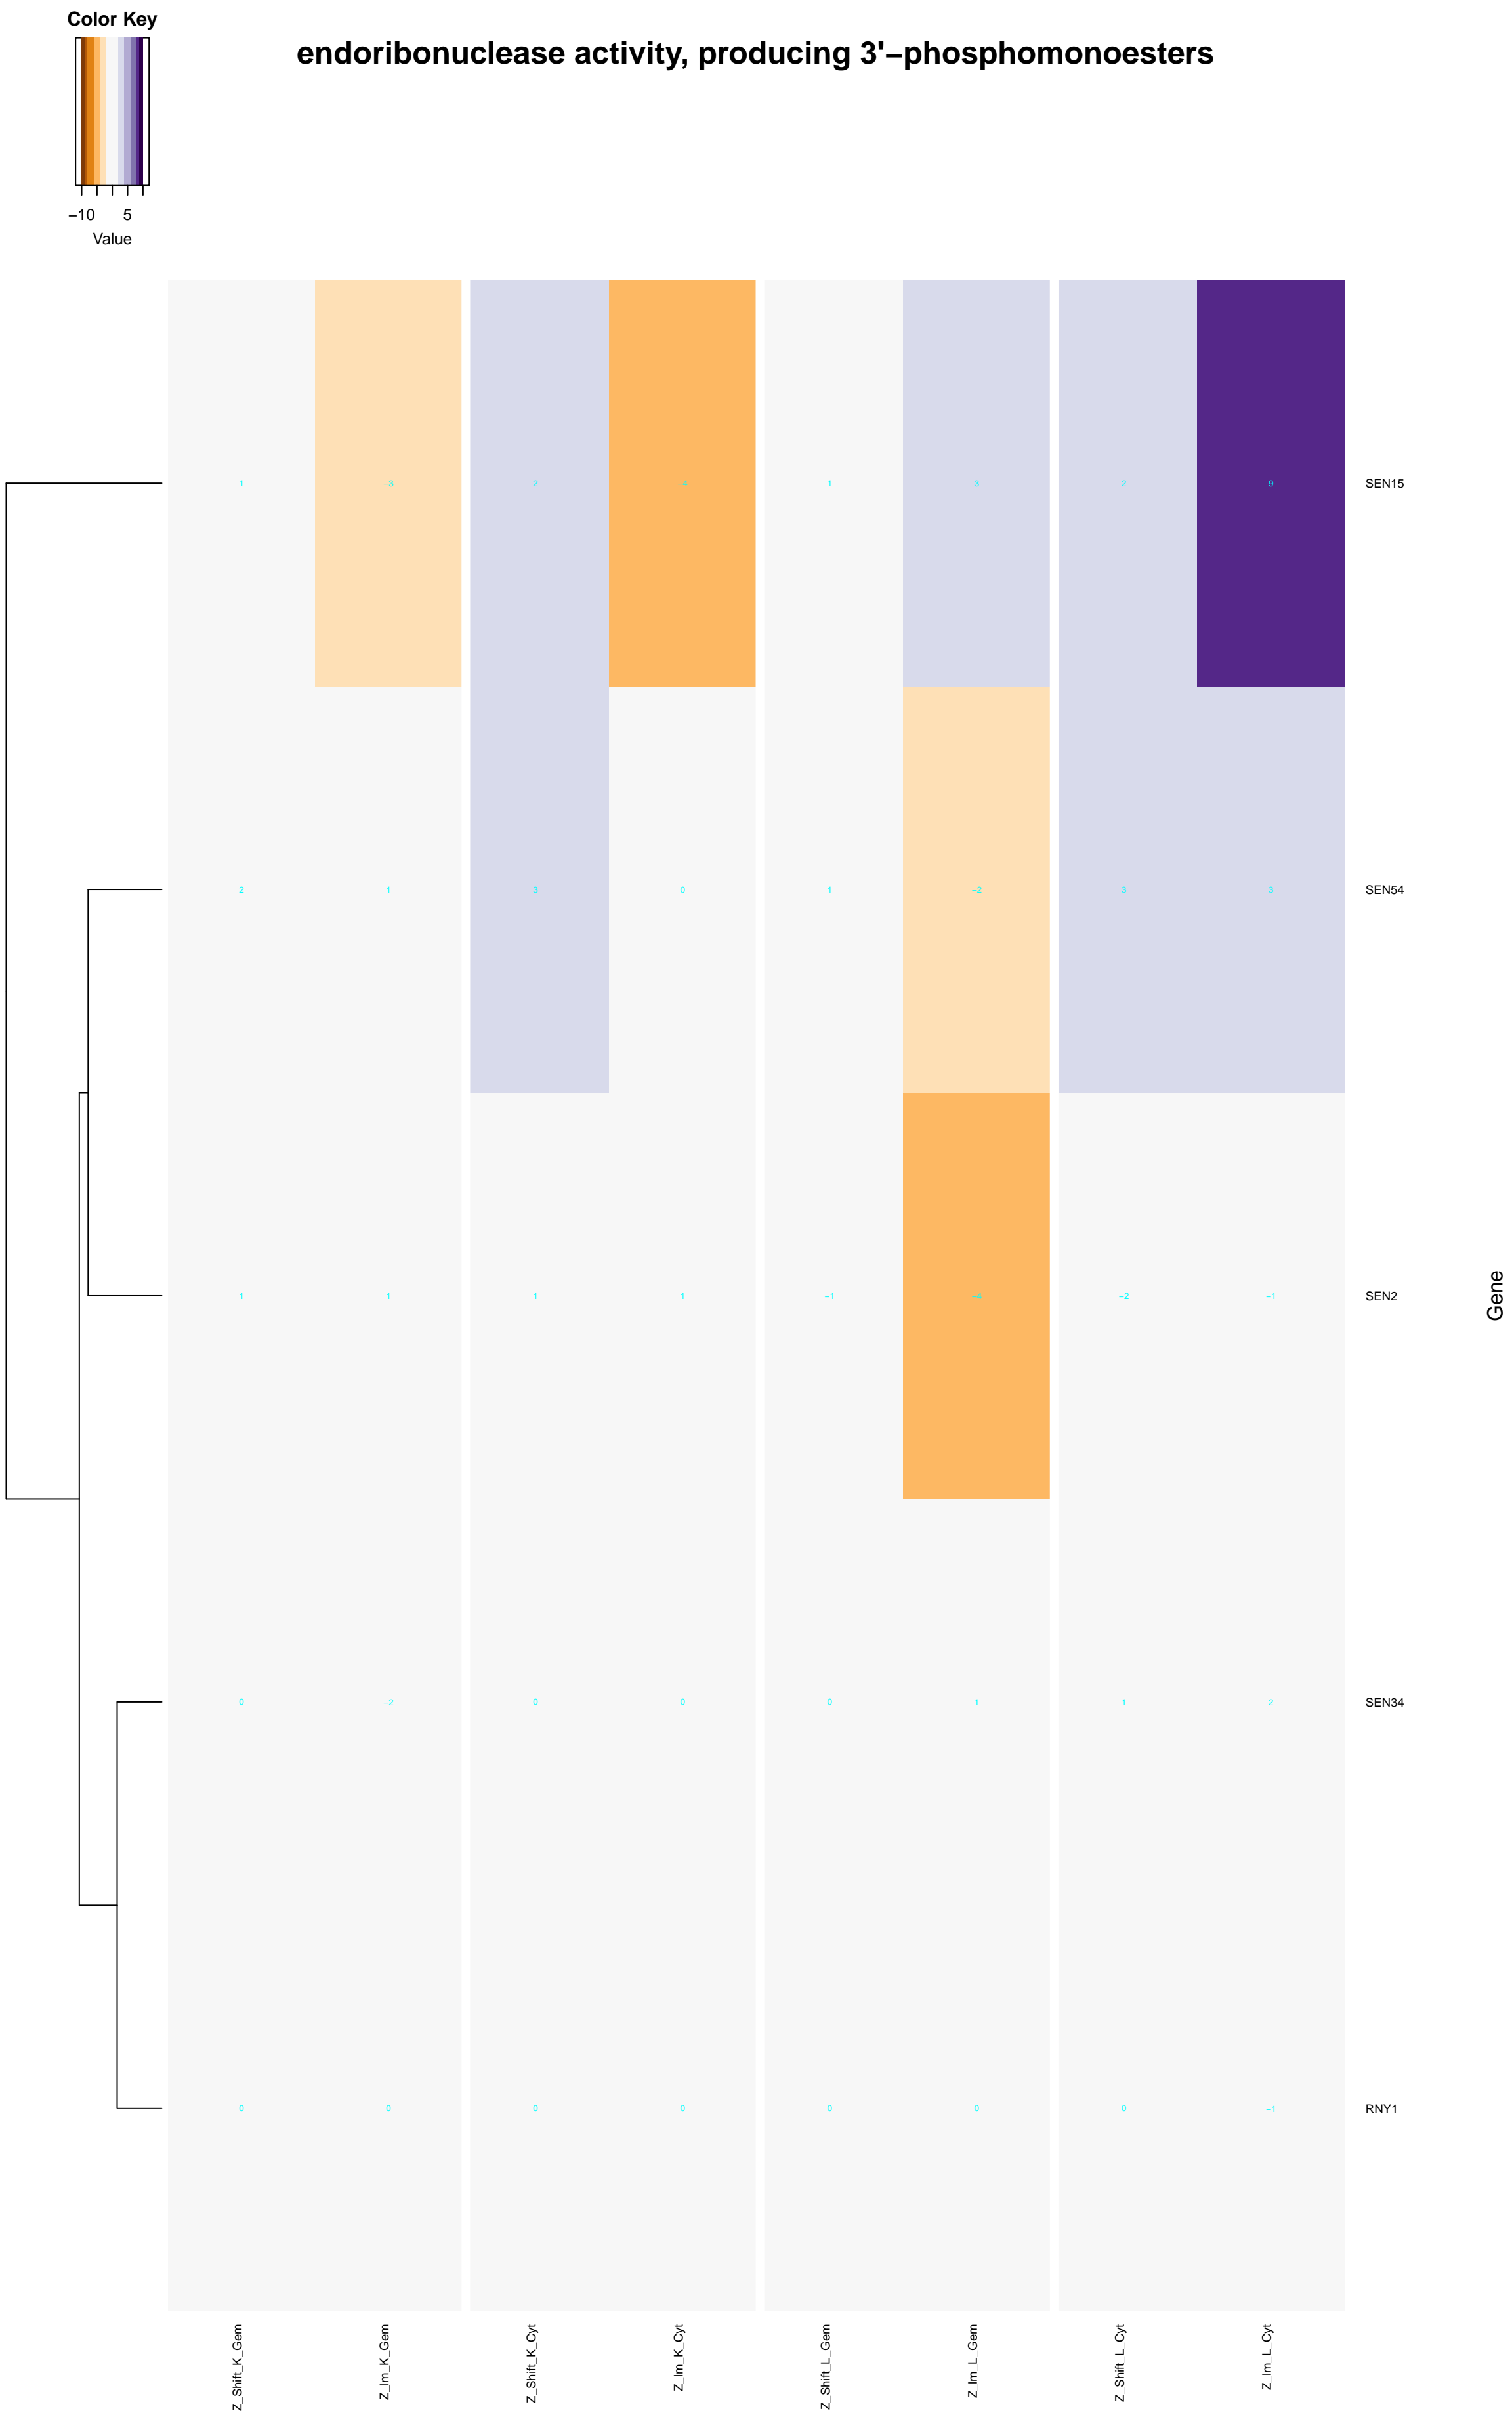

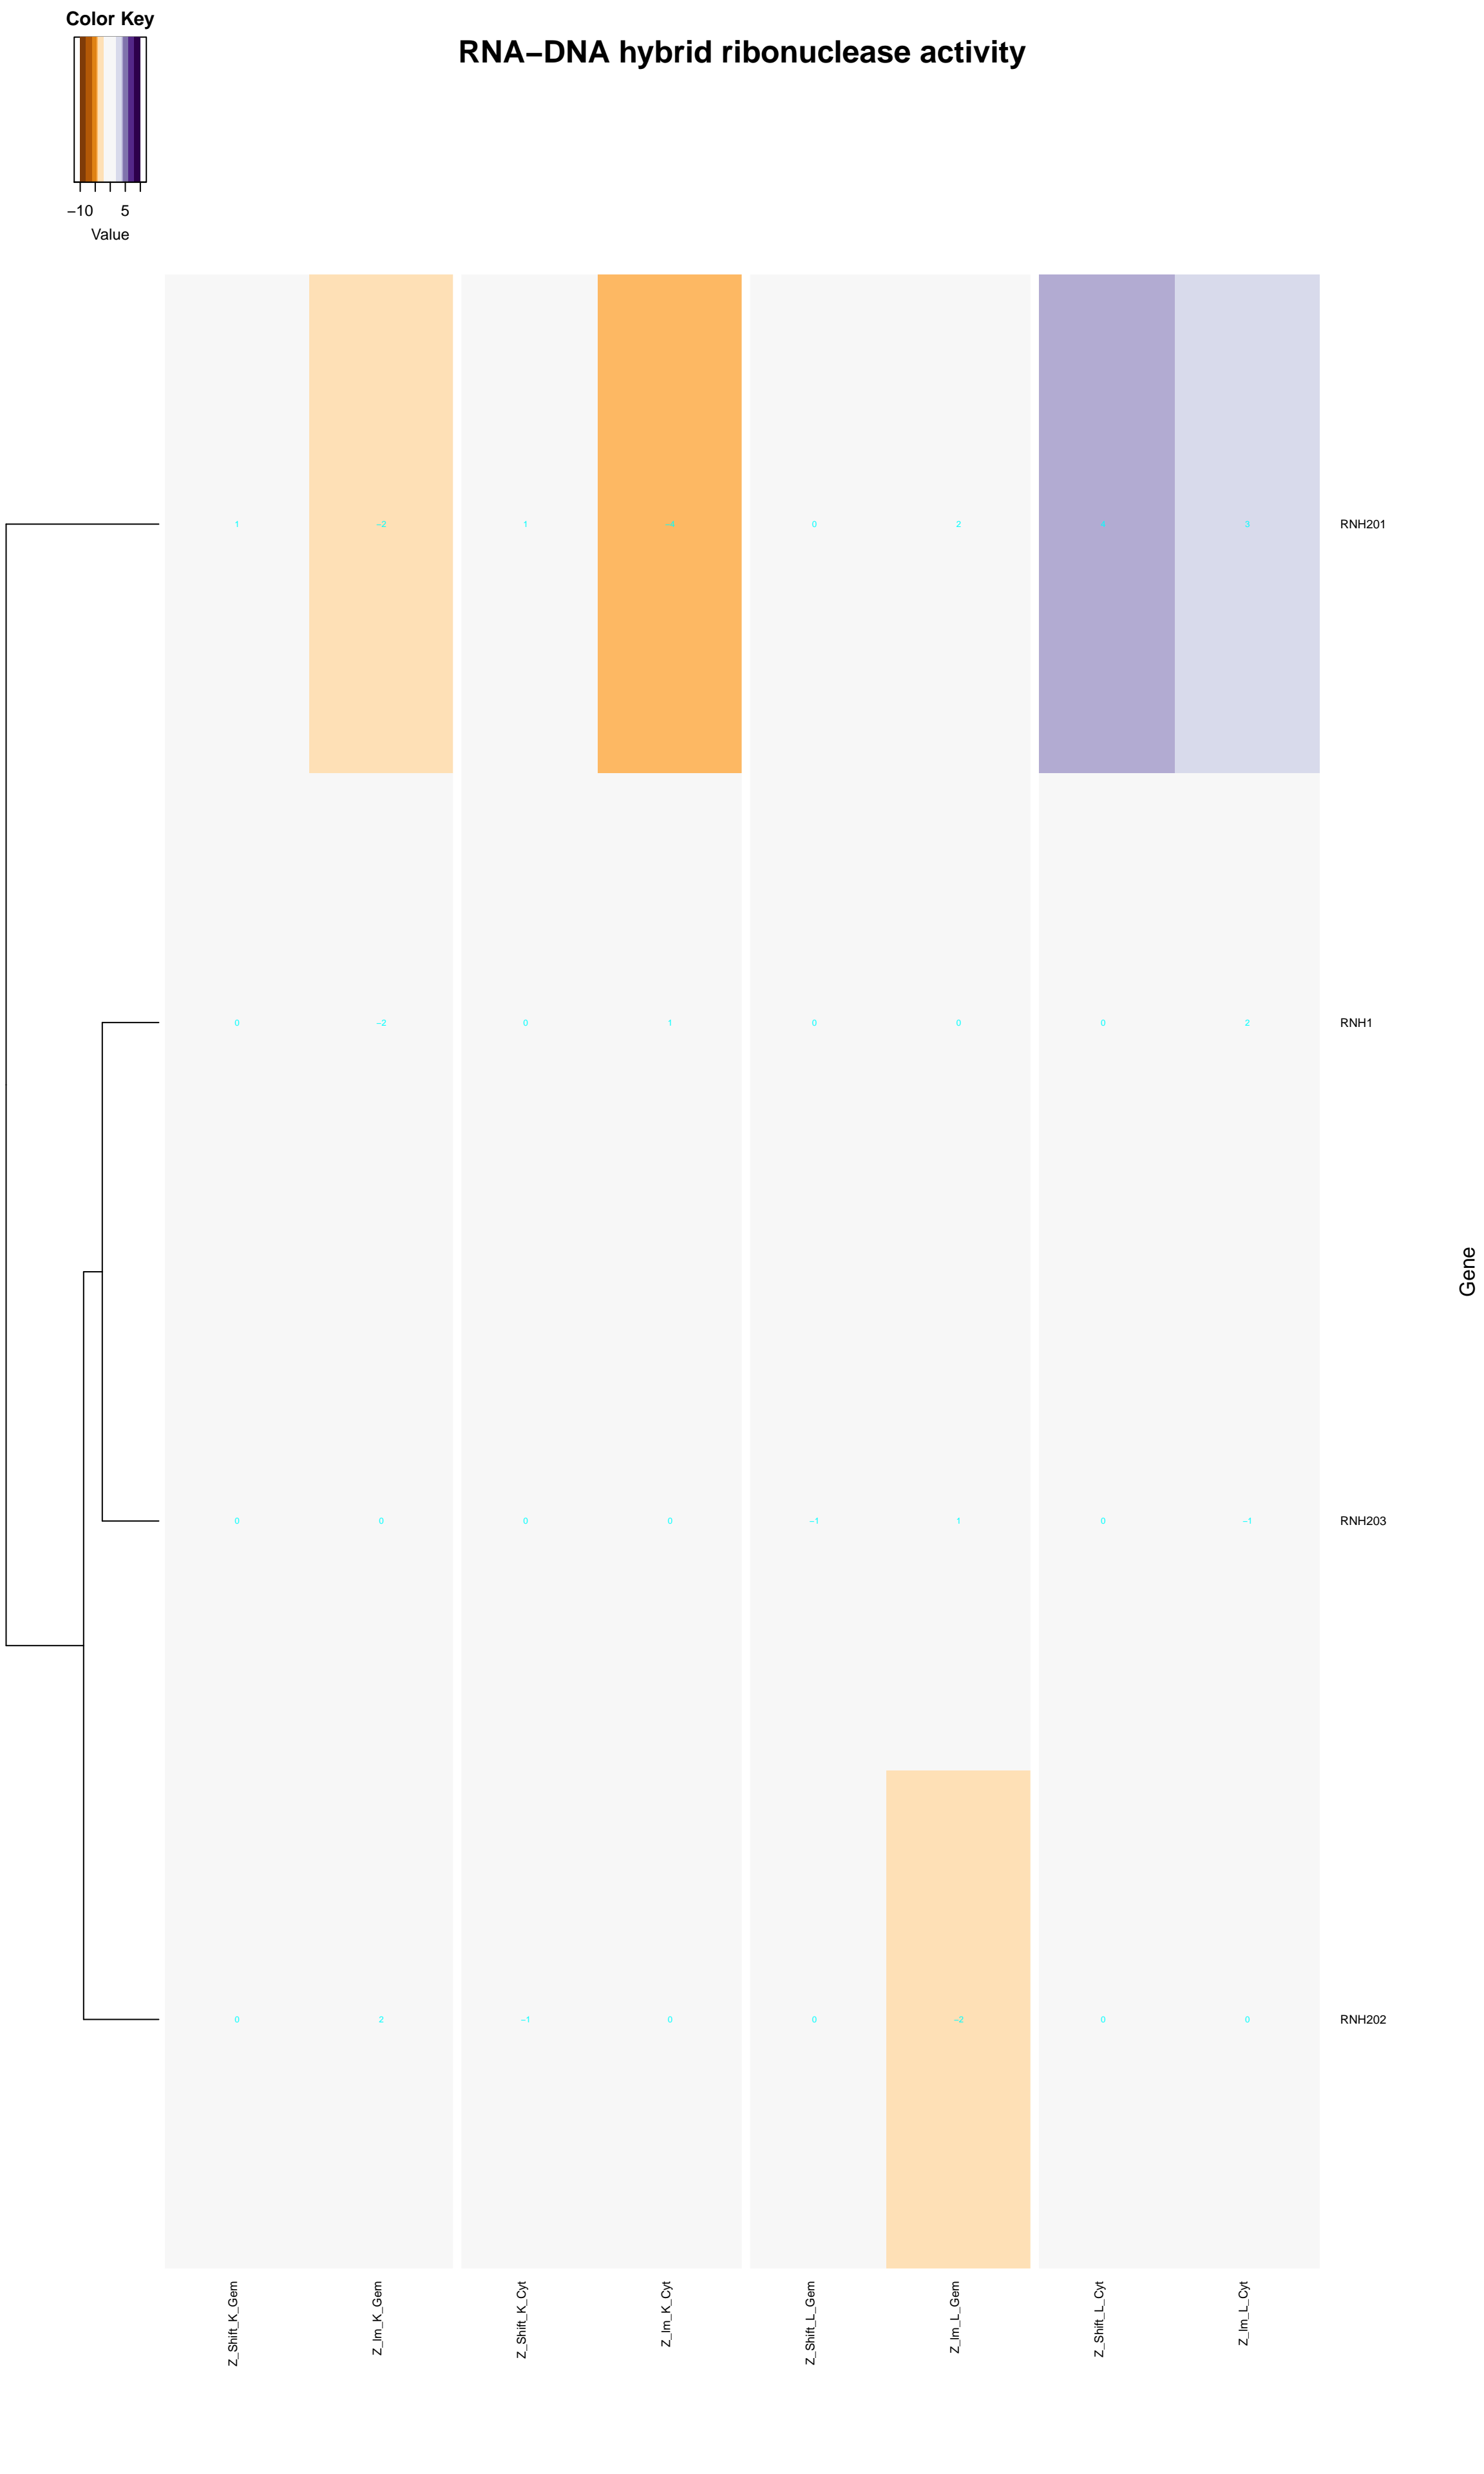

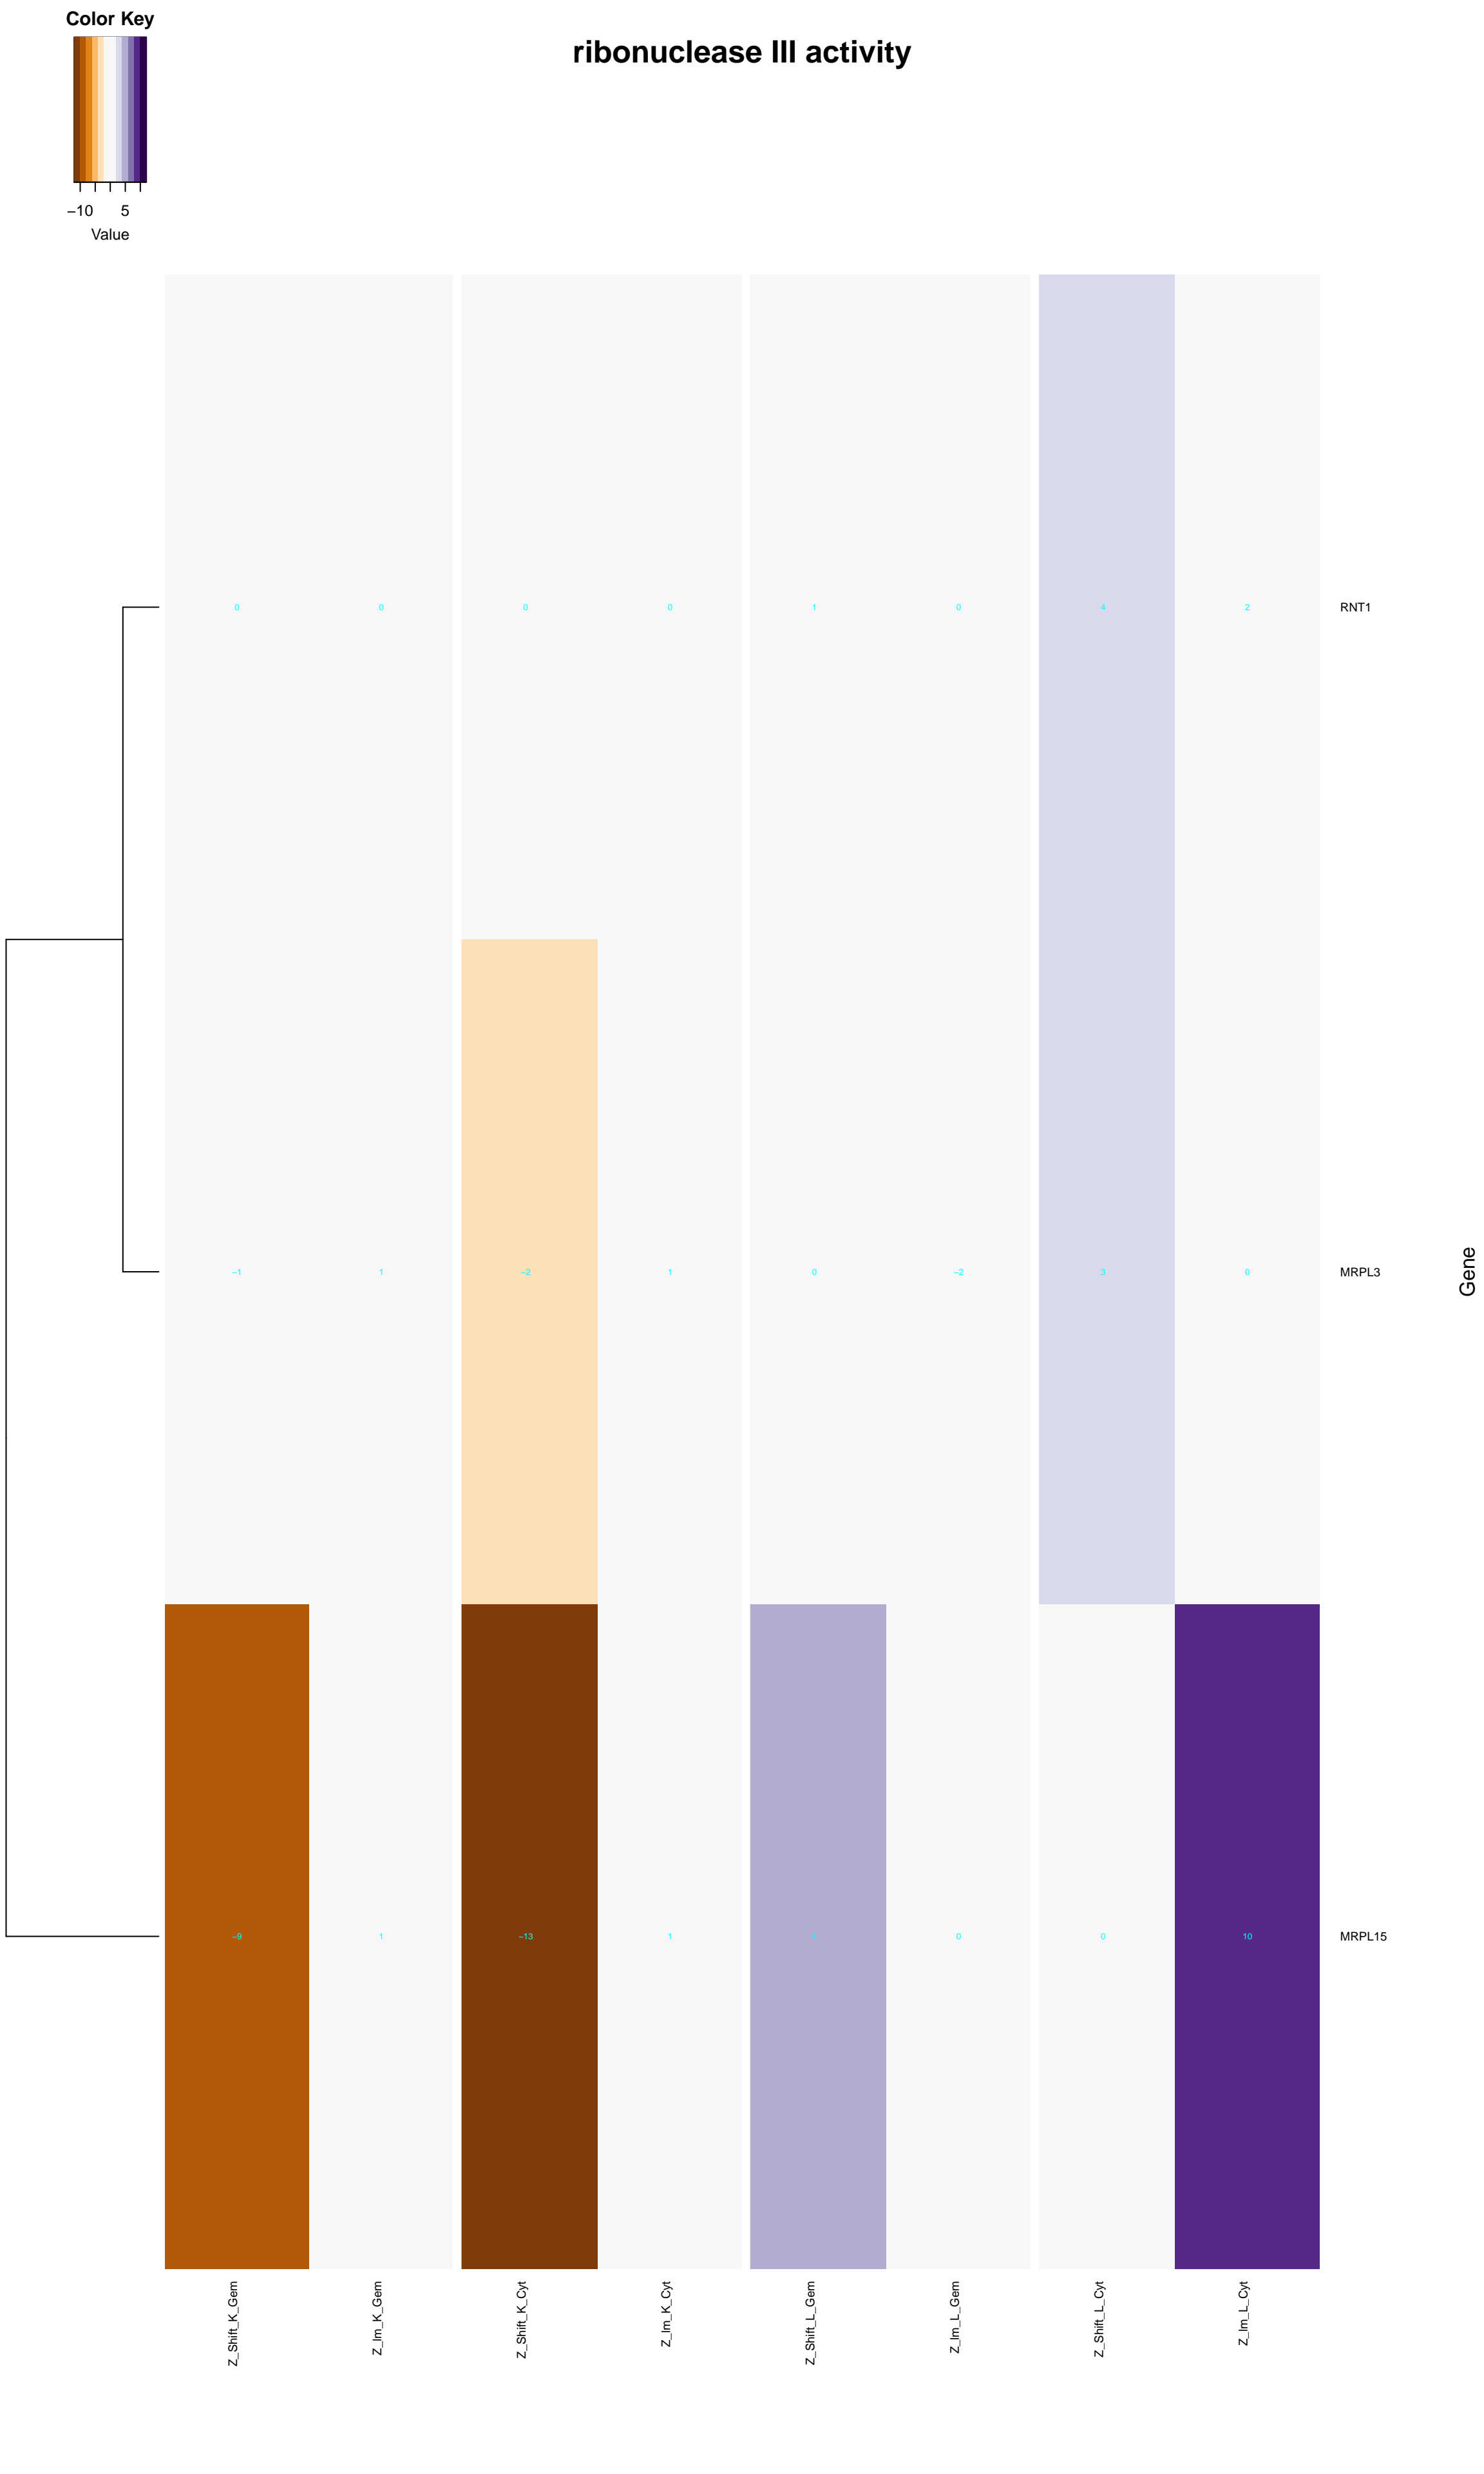

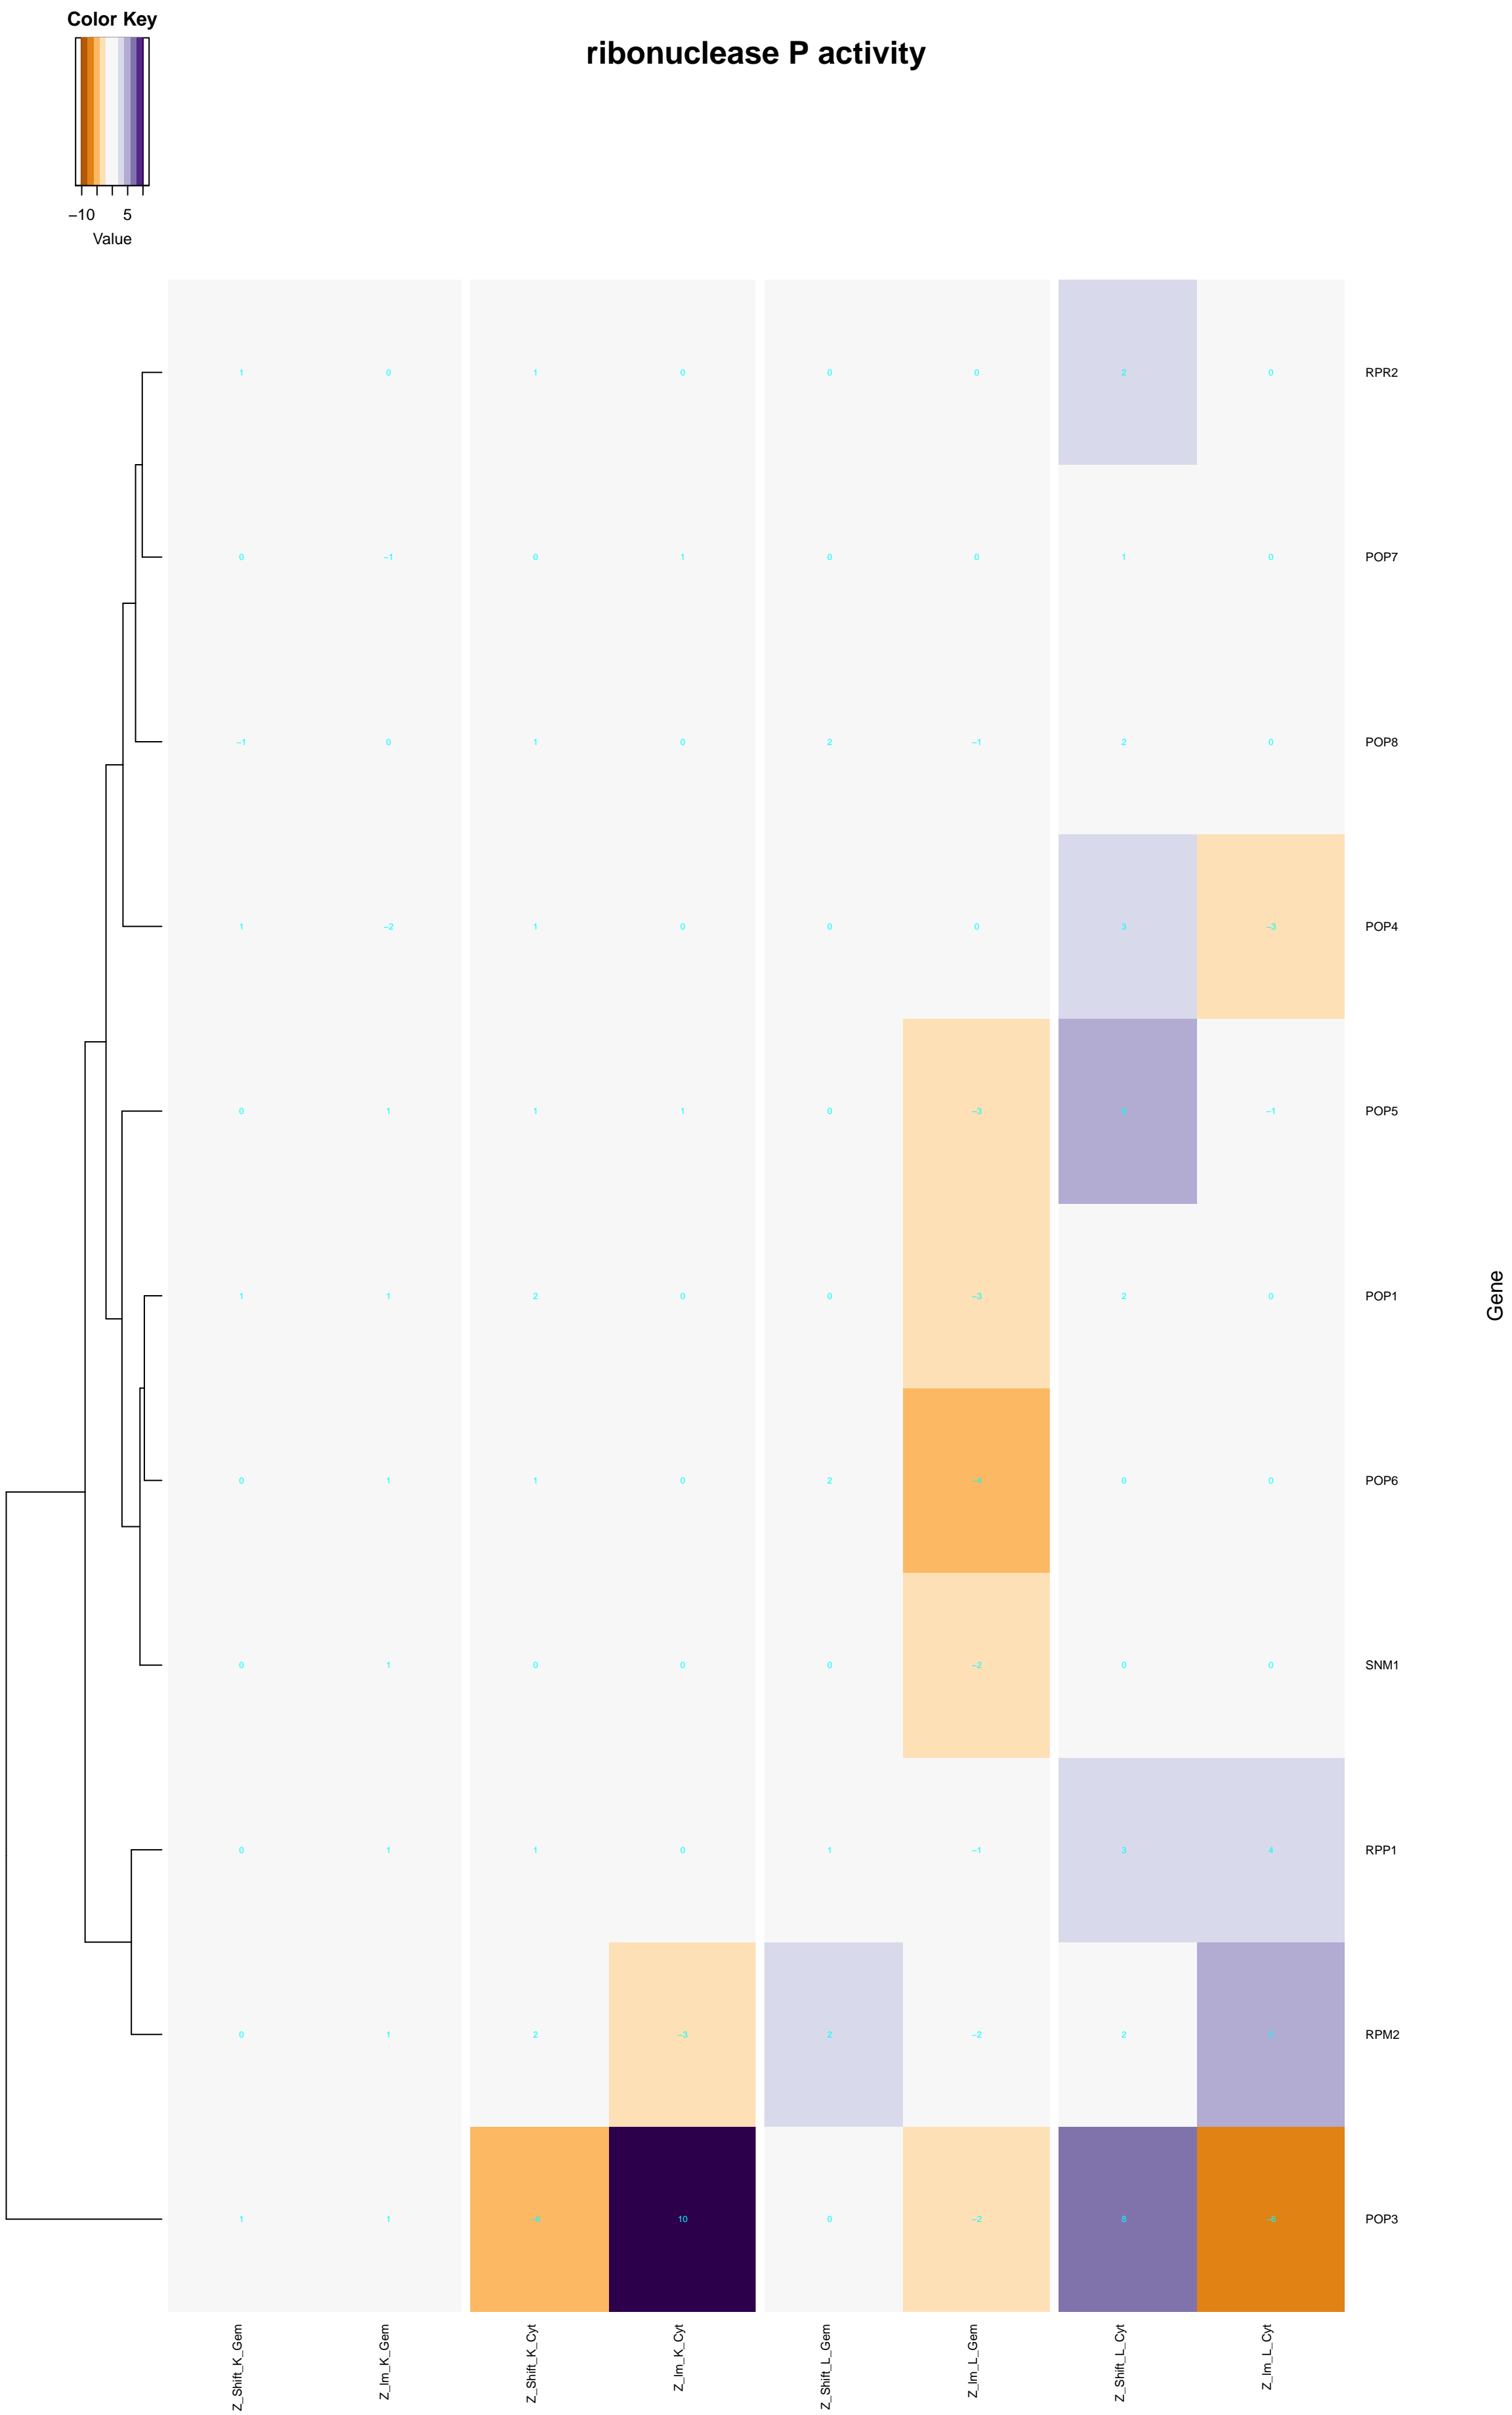

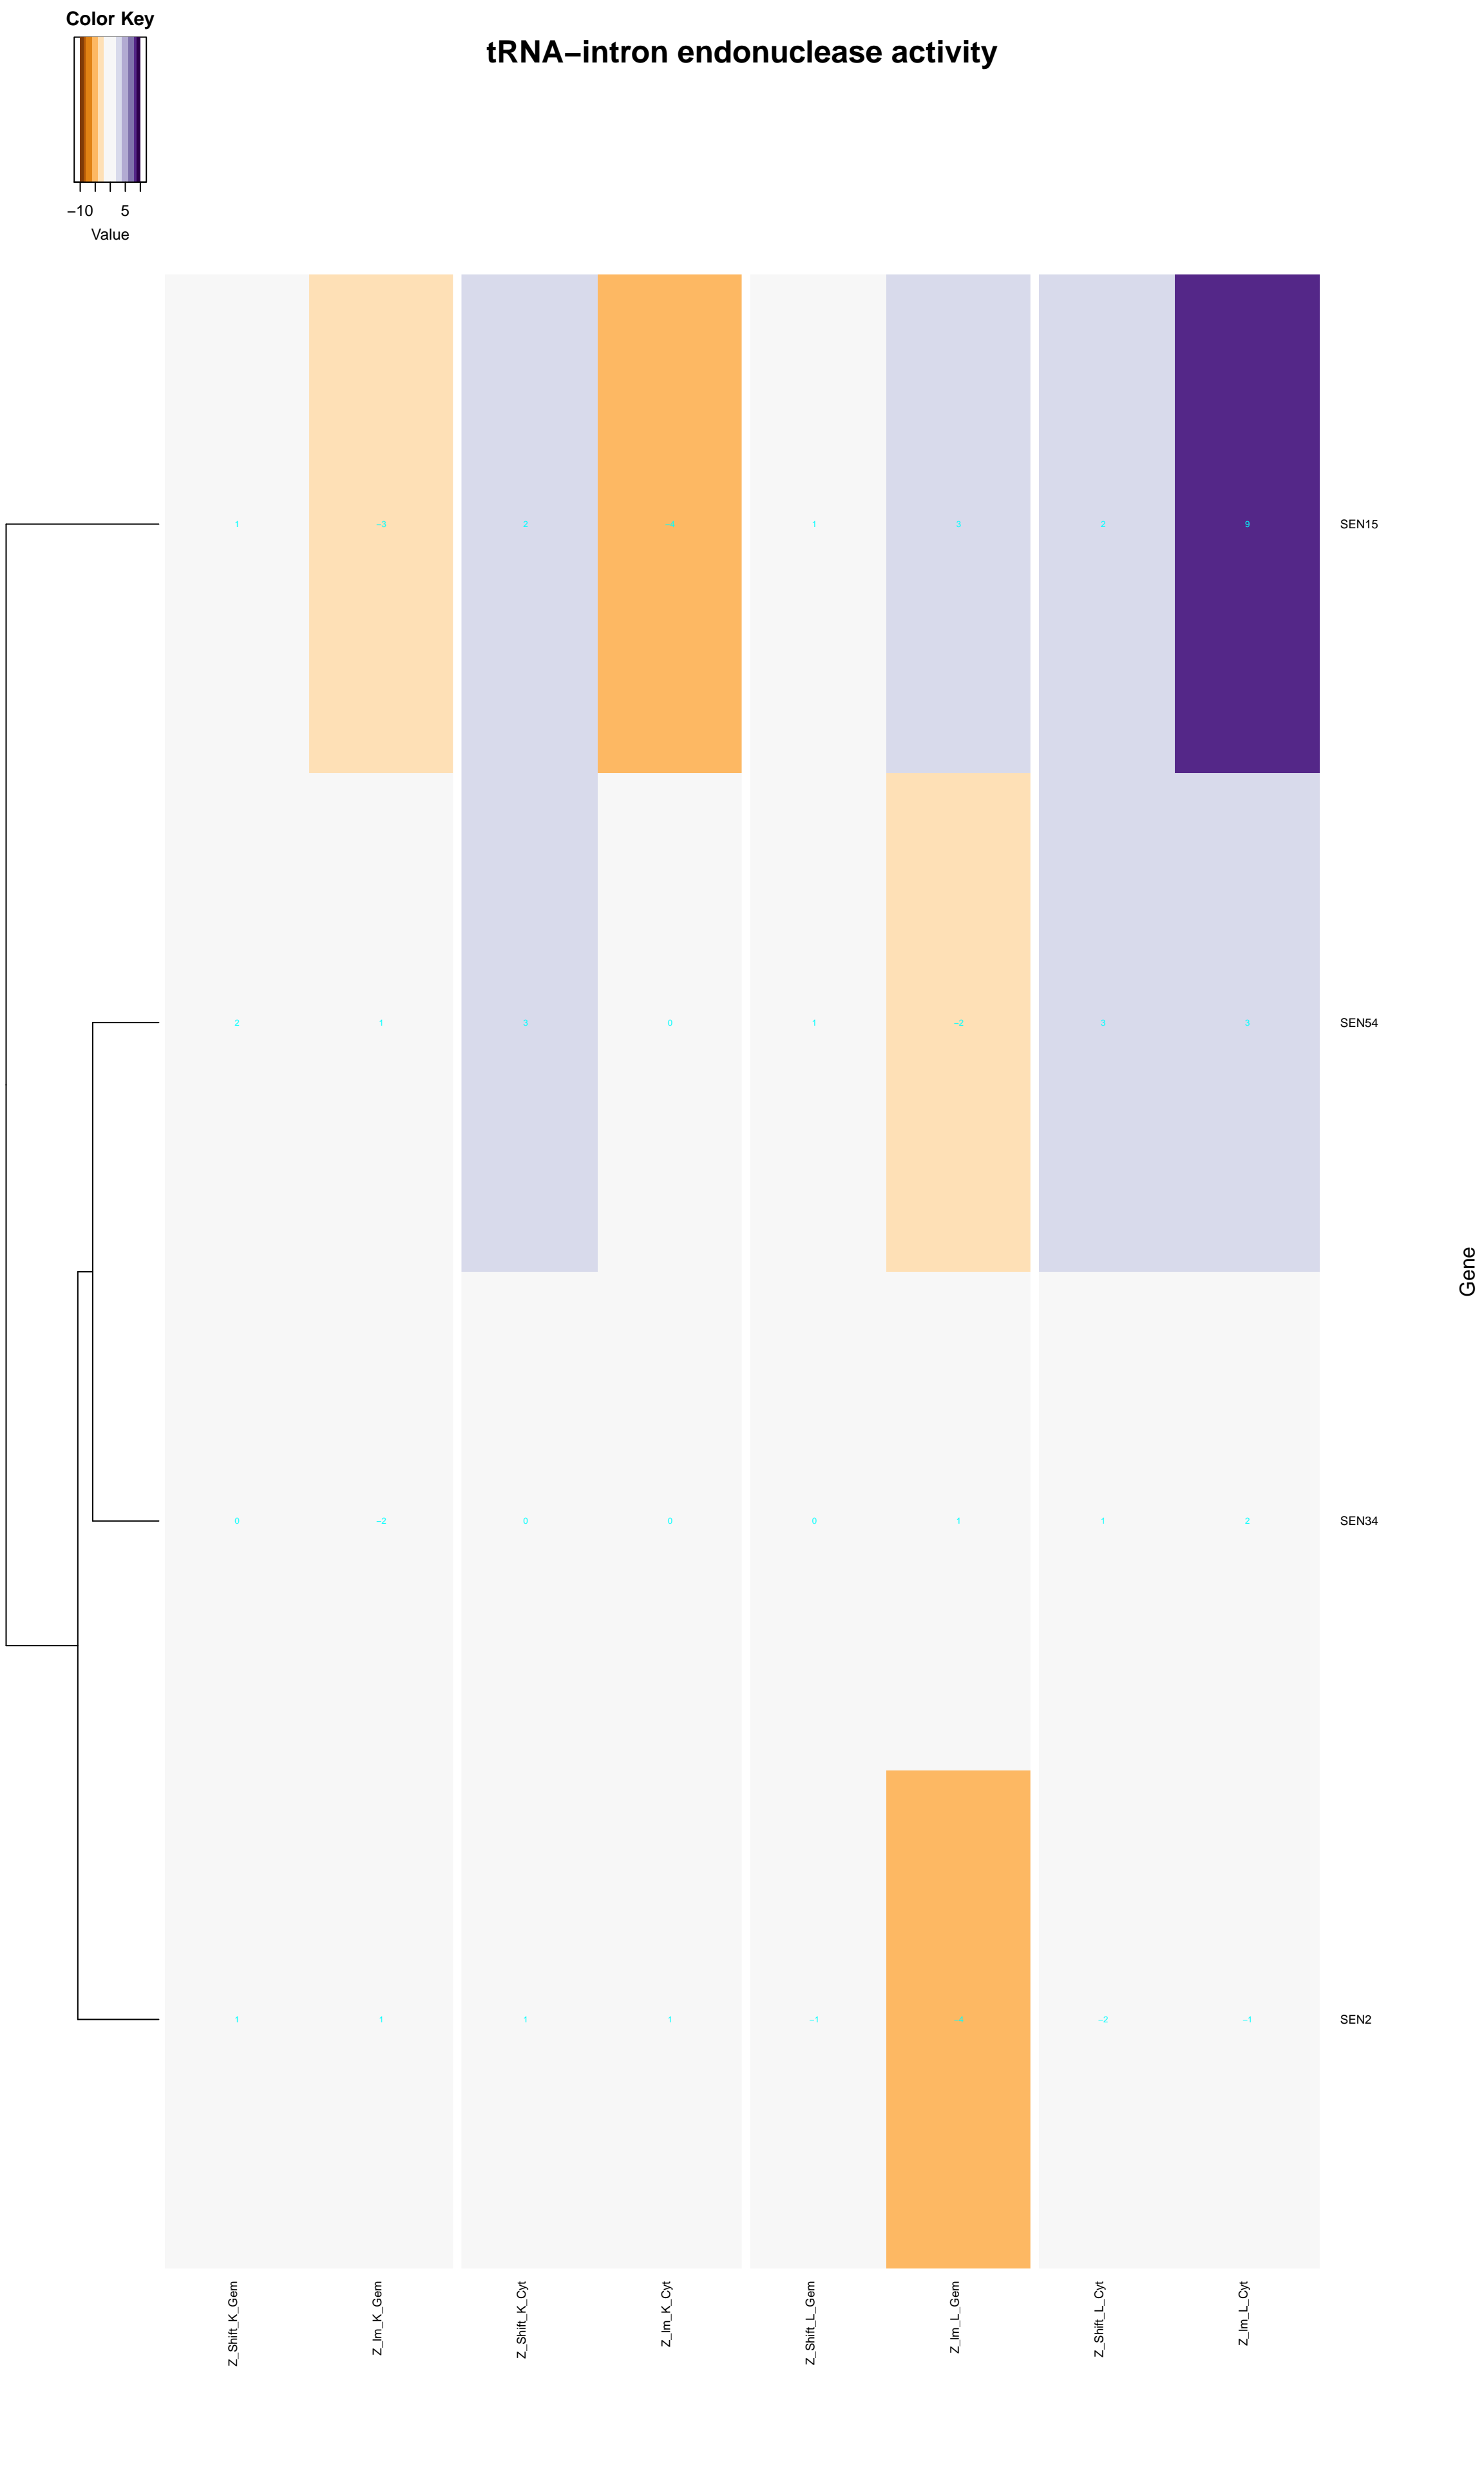

Supplement: s1 [file s1]

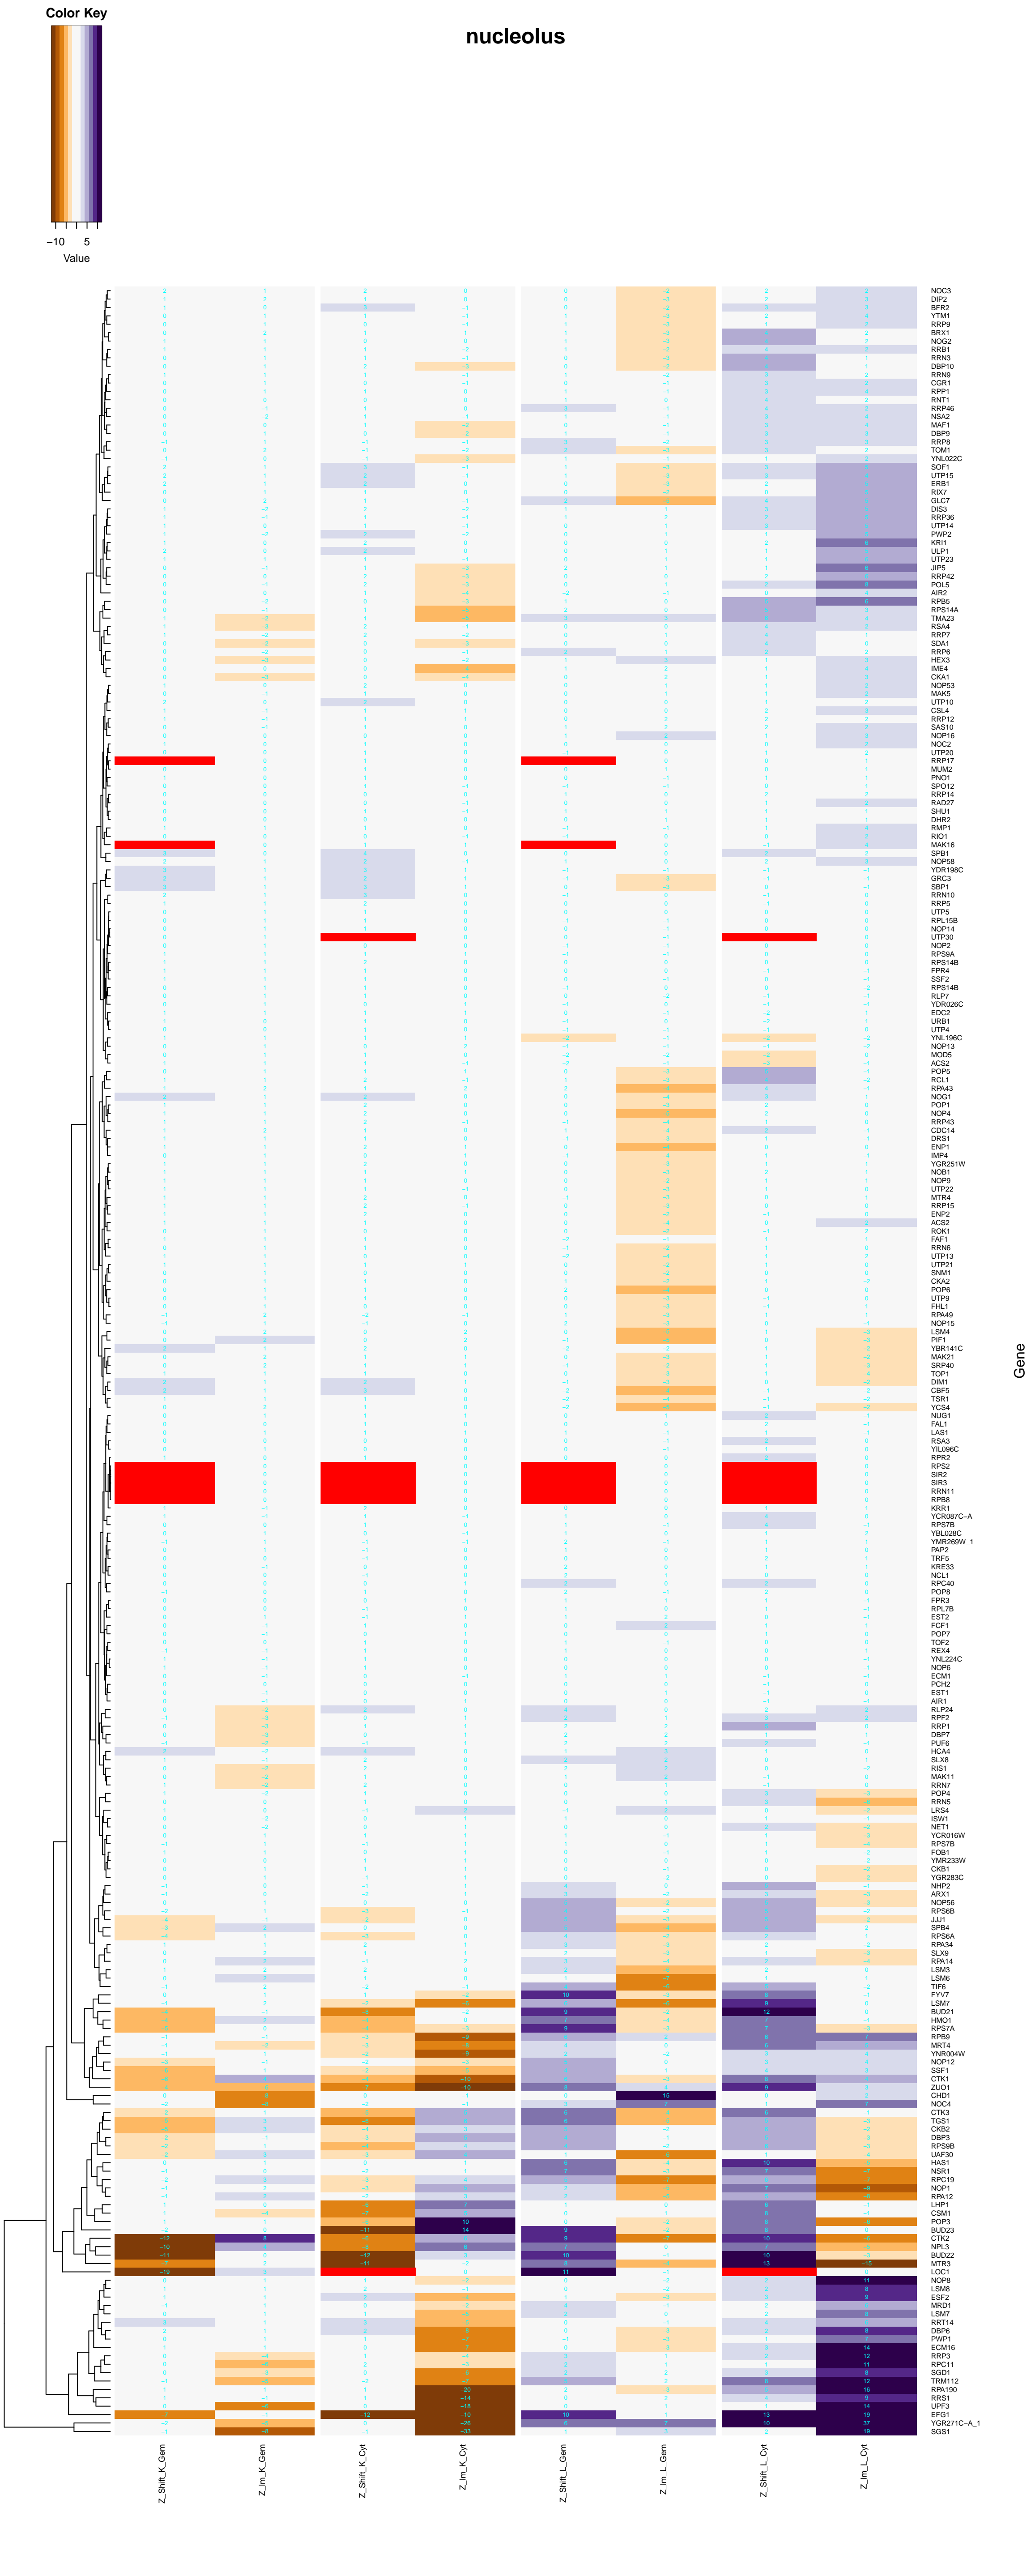

Supplement: s1 [file s1]

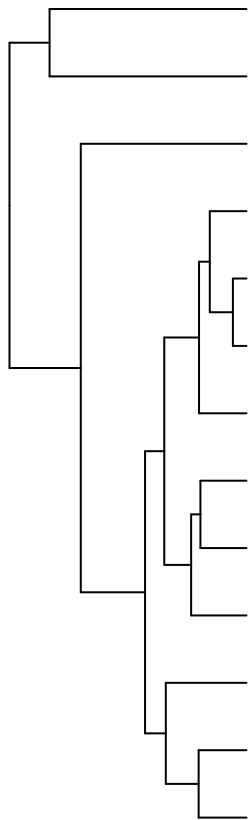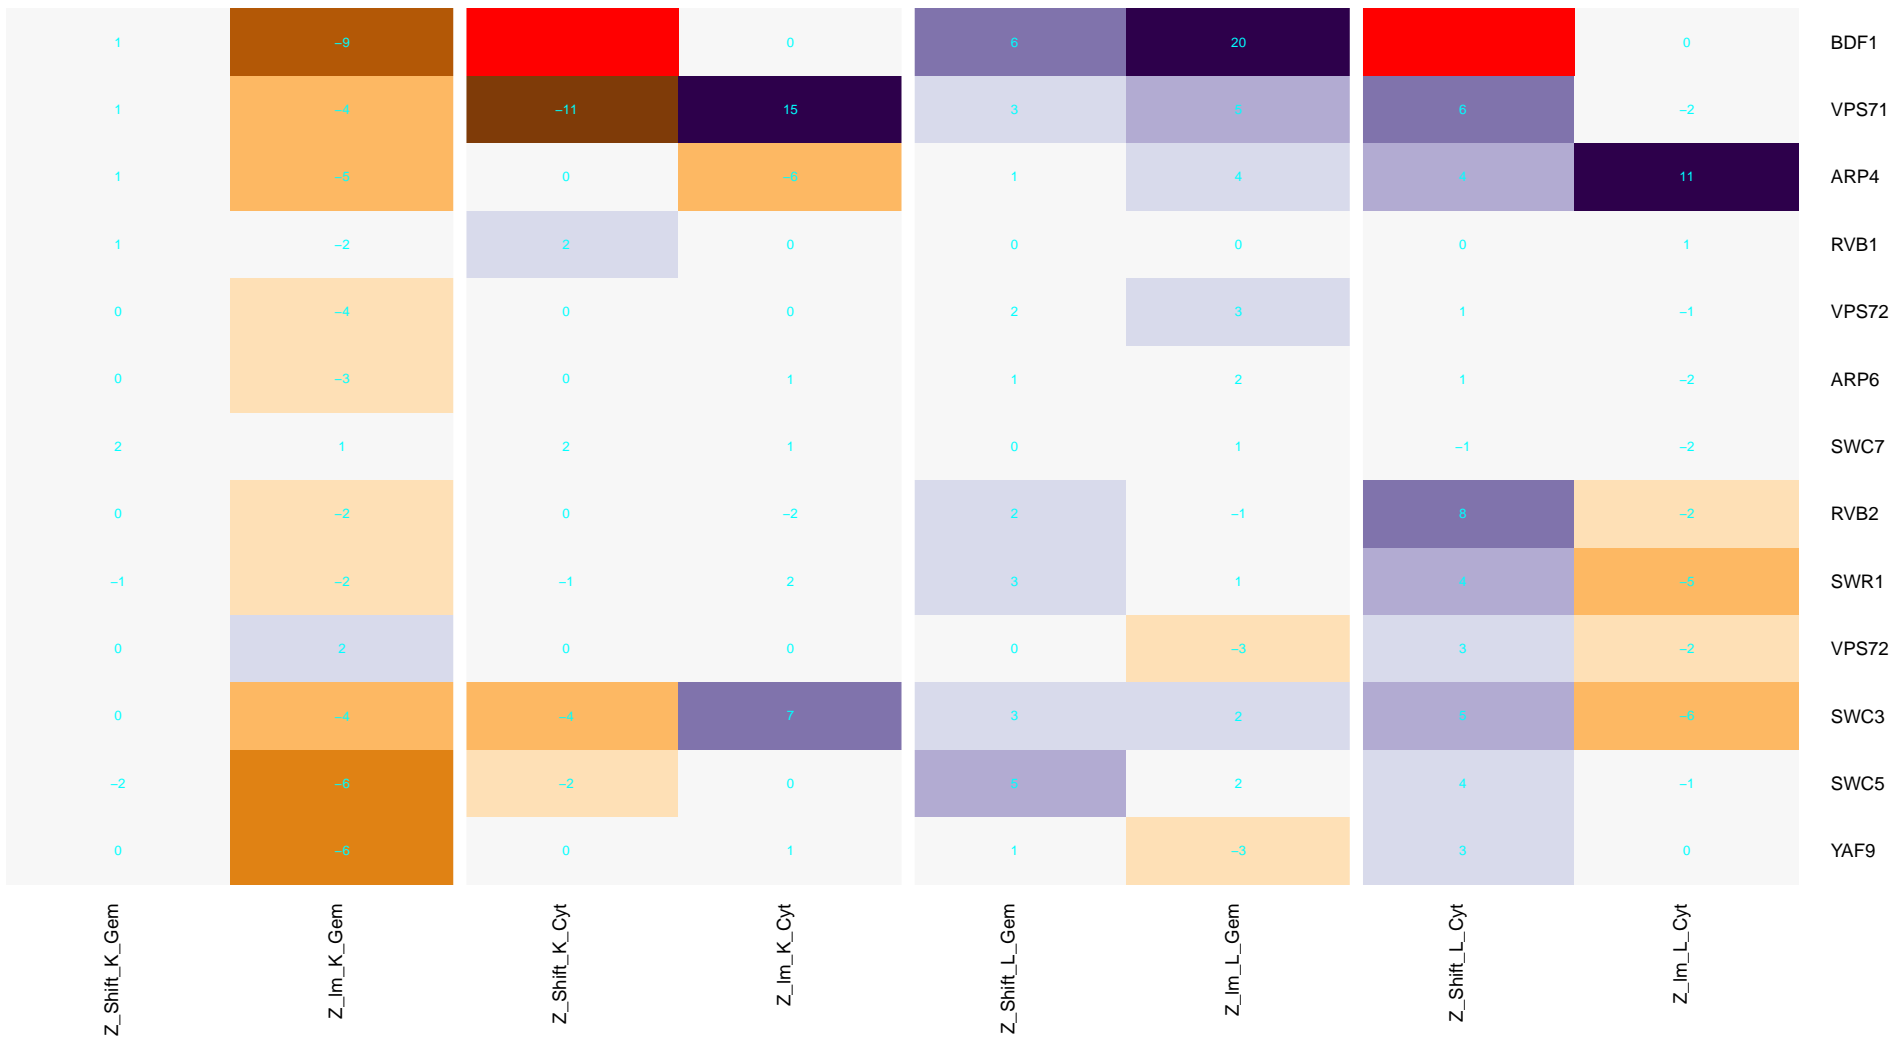

Supplement: s1 [file s1]

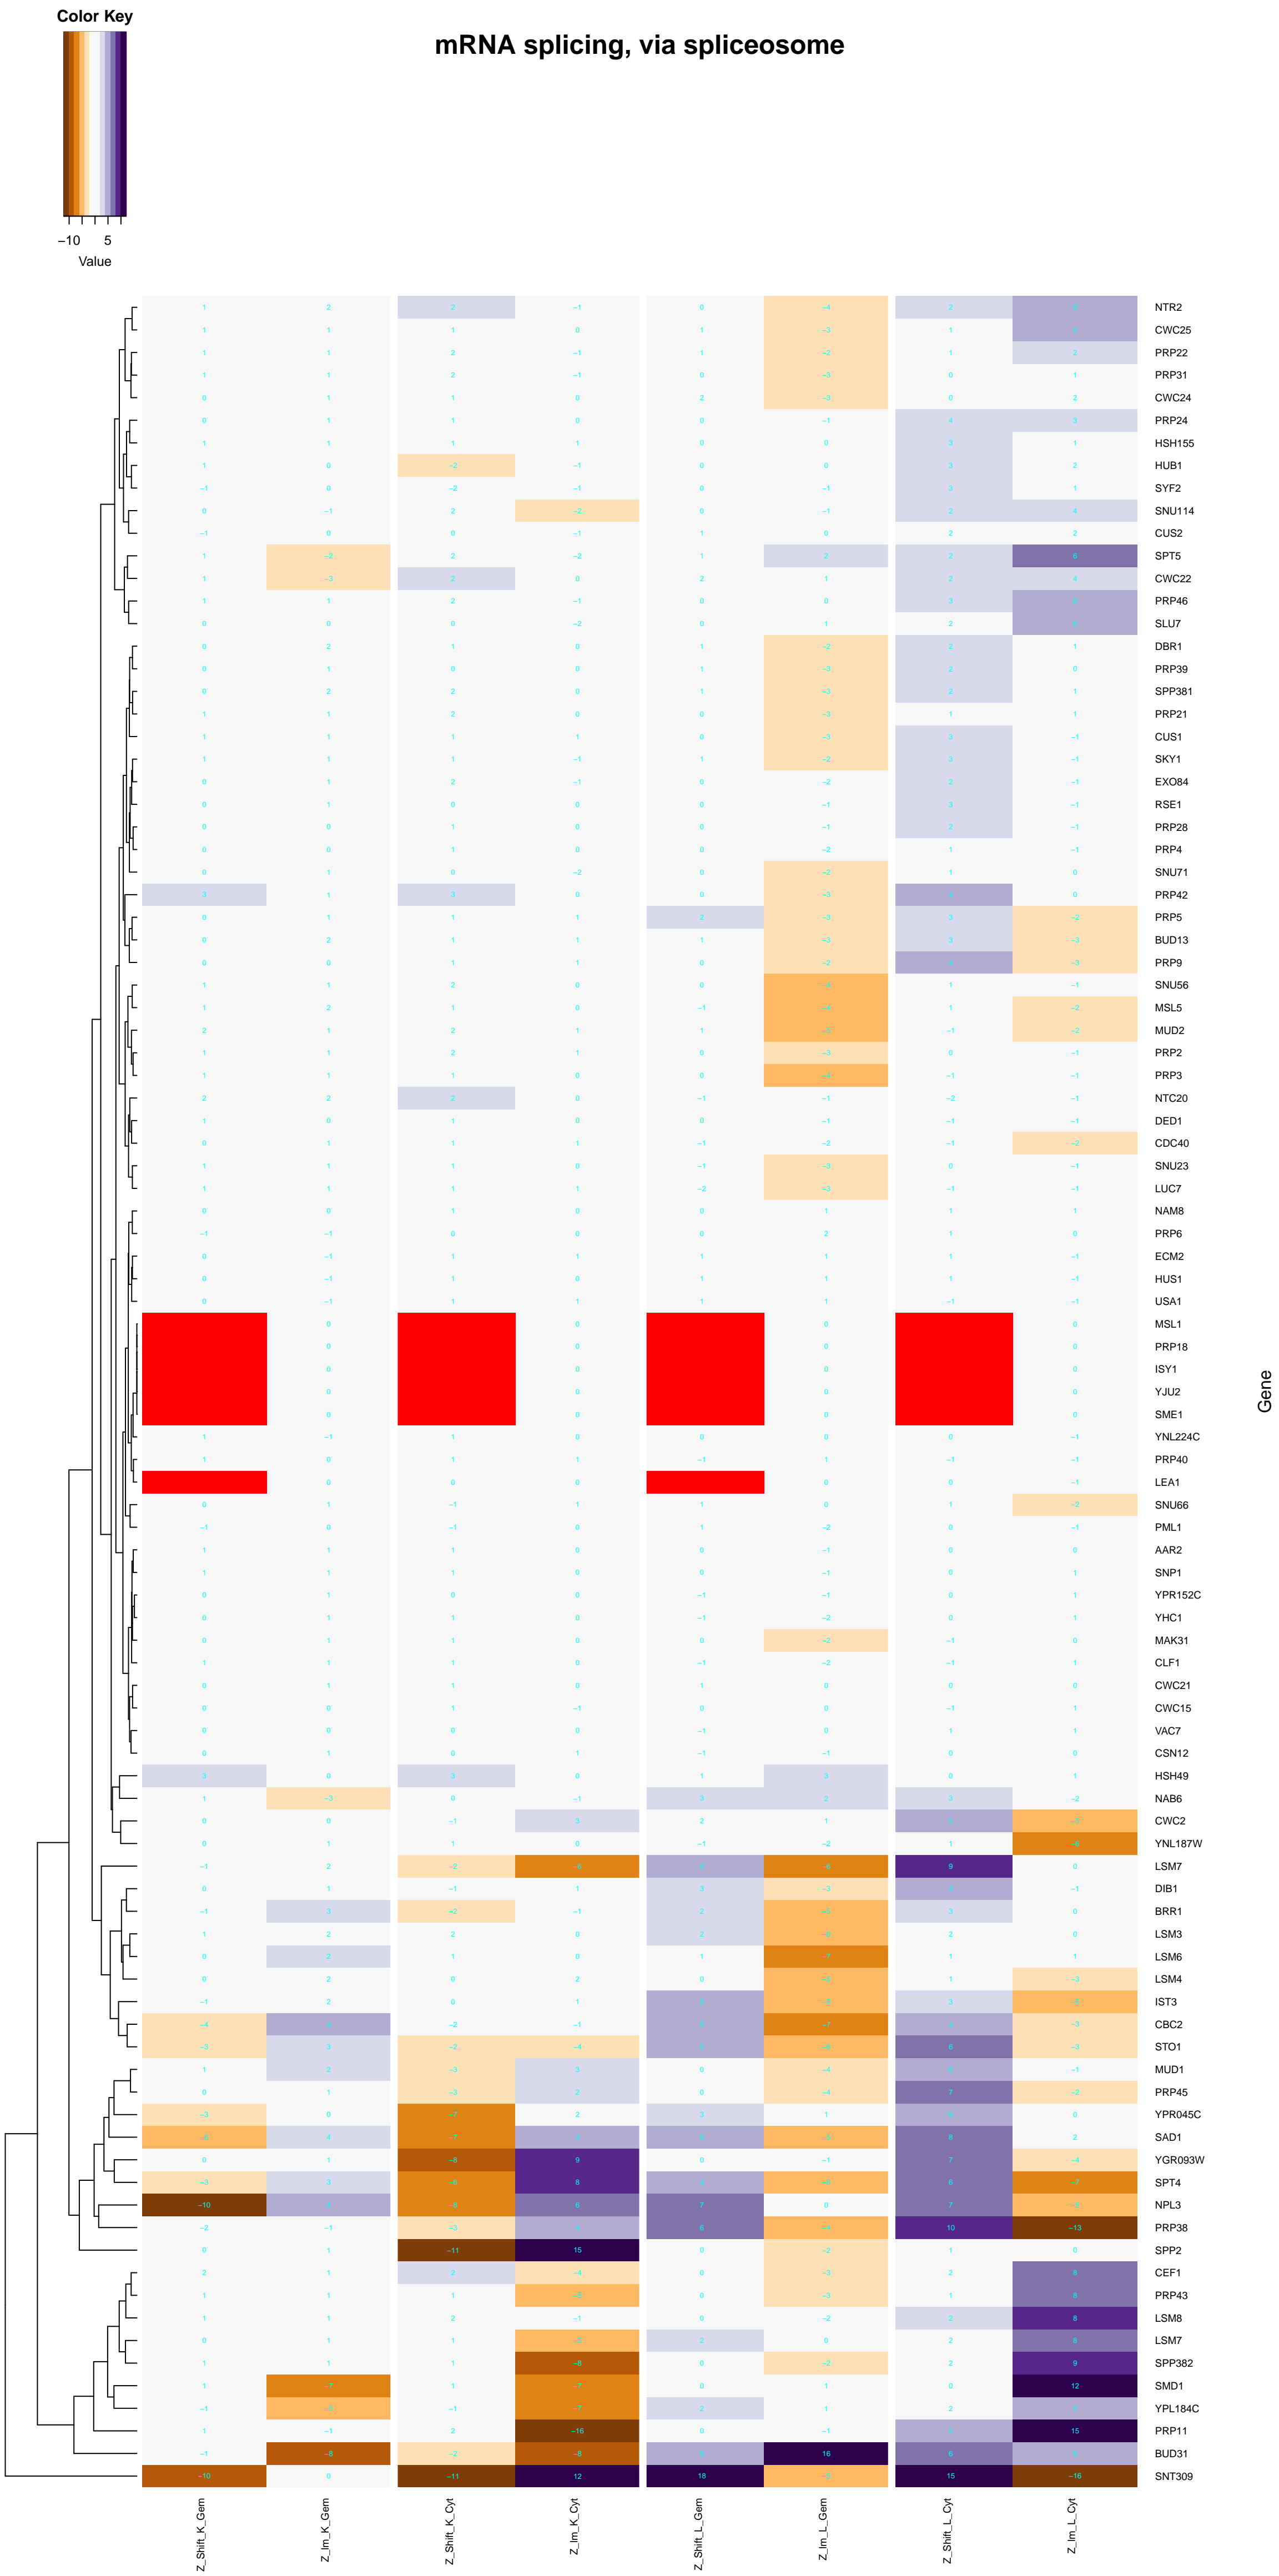

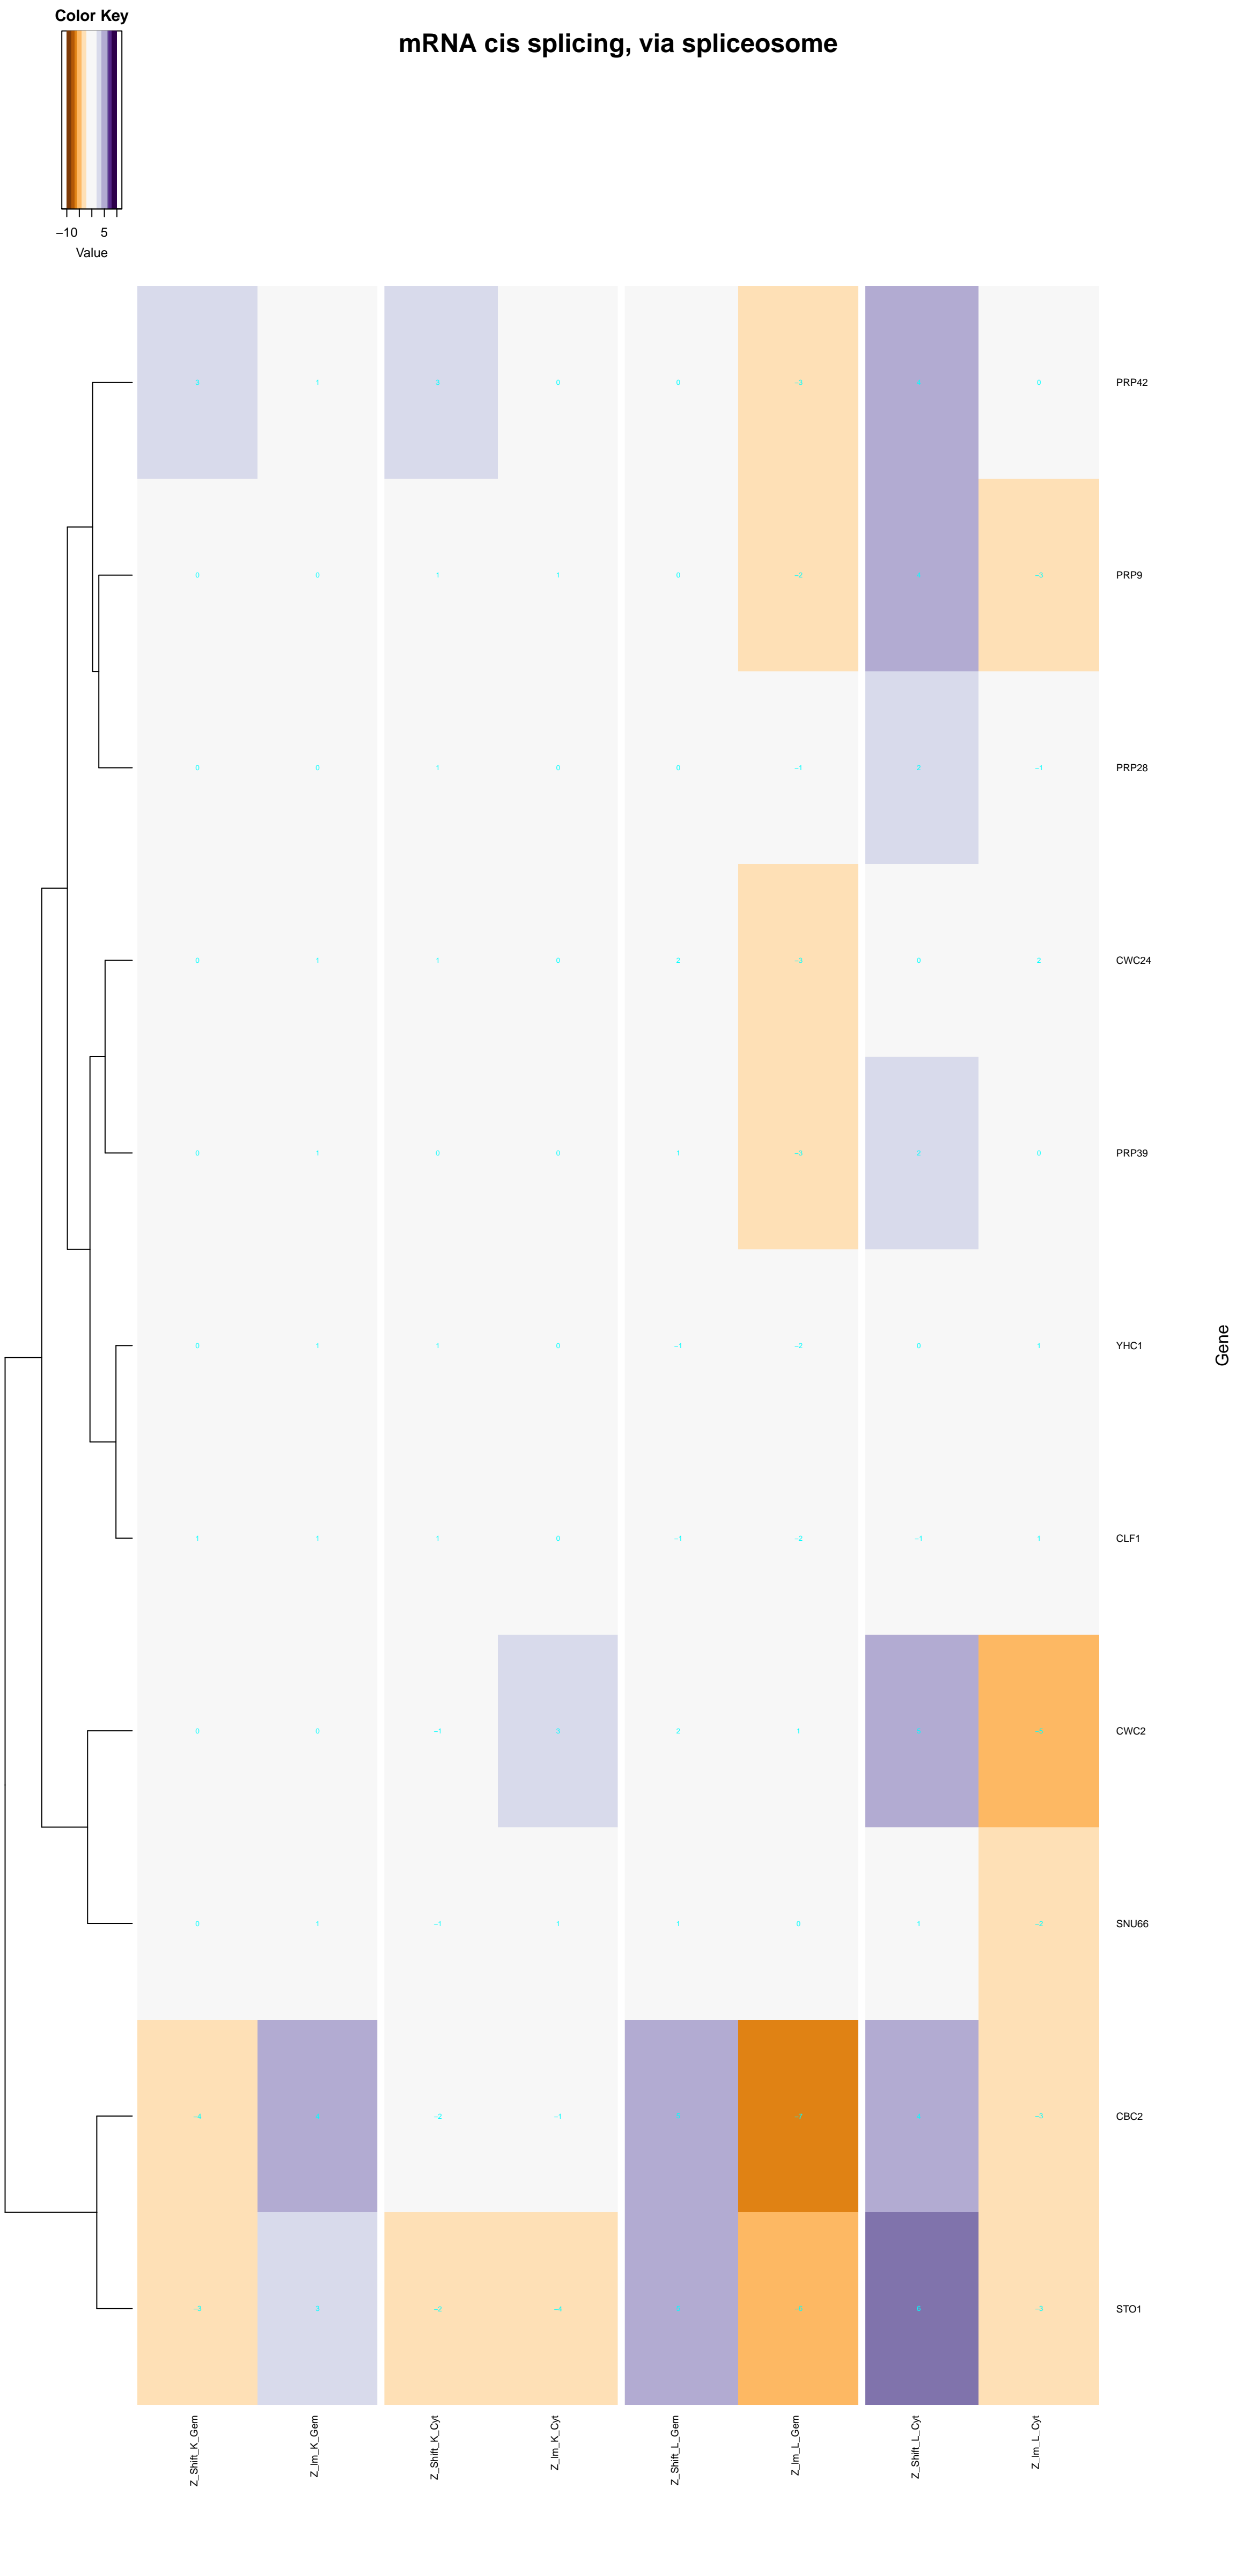

Supplement: s1 [file s1]

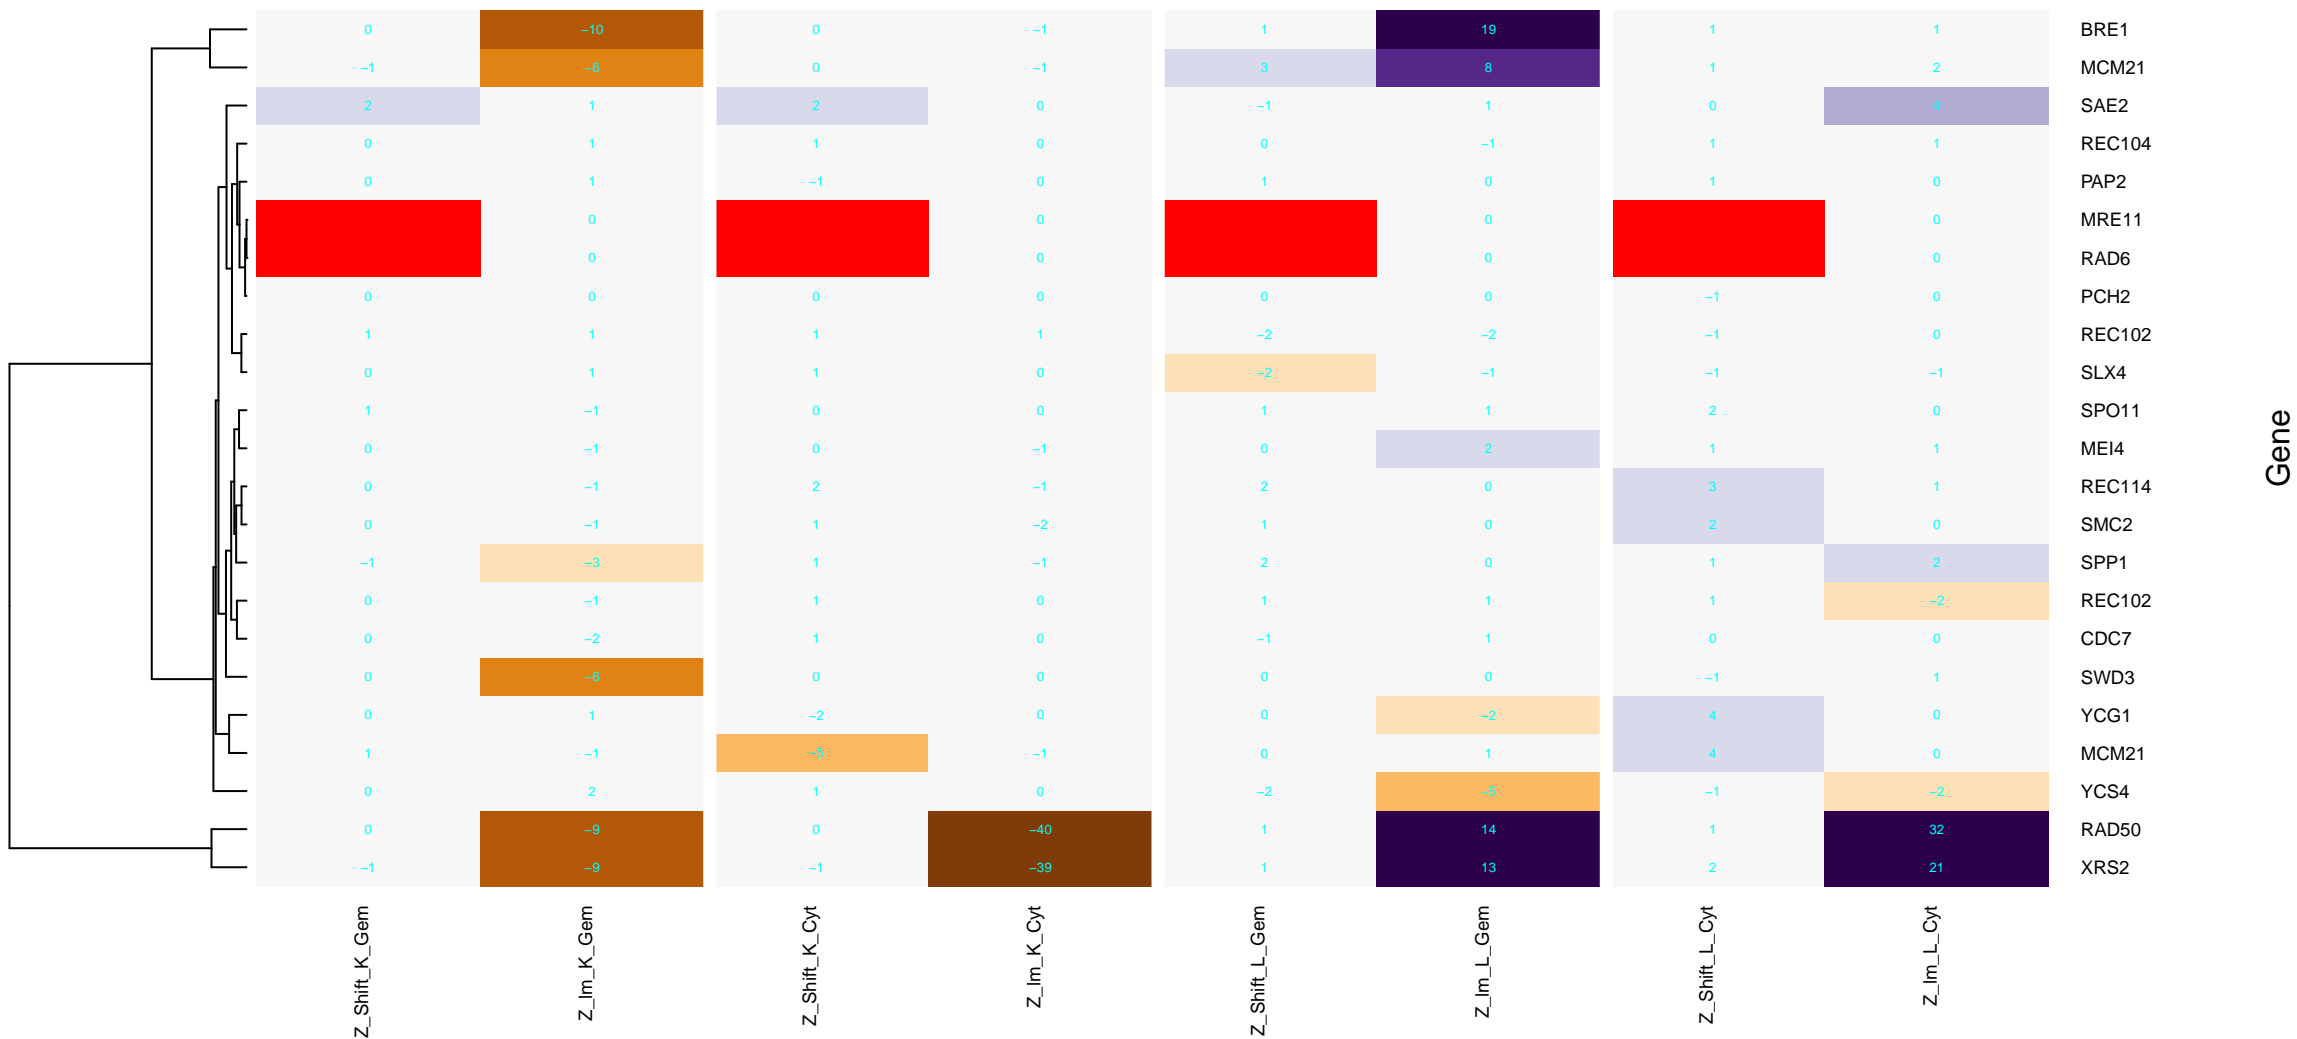

Supplement: s1 [file s1]

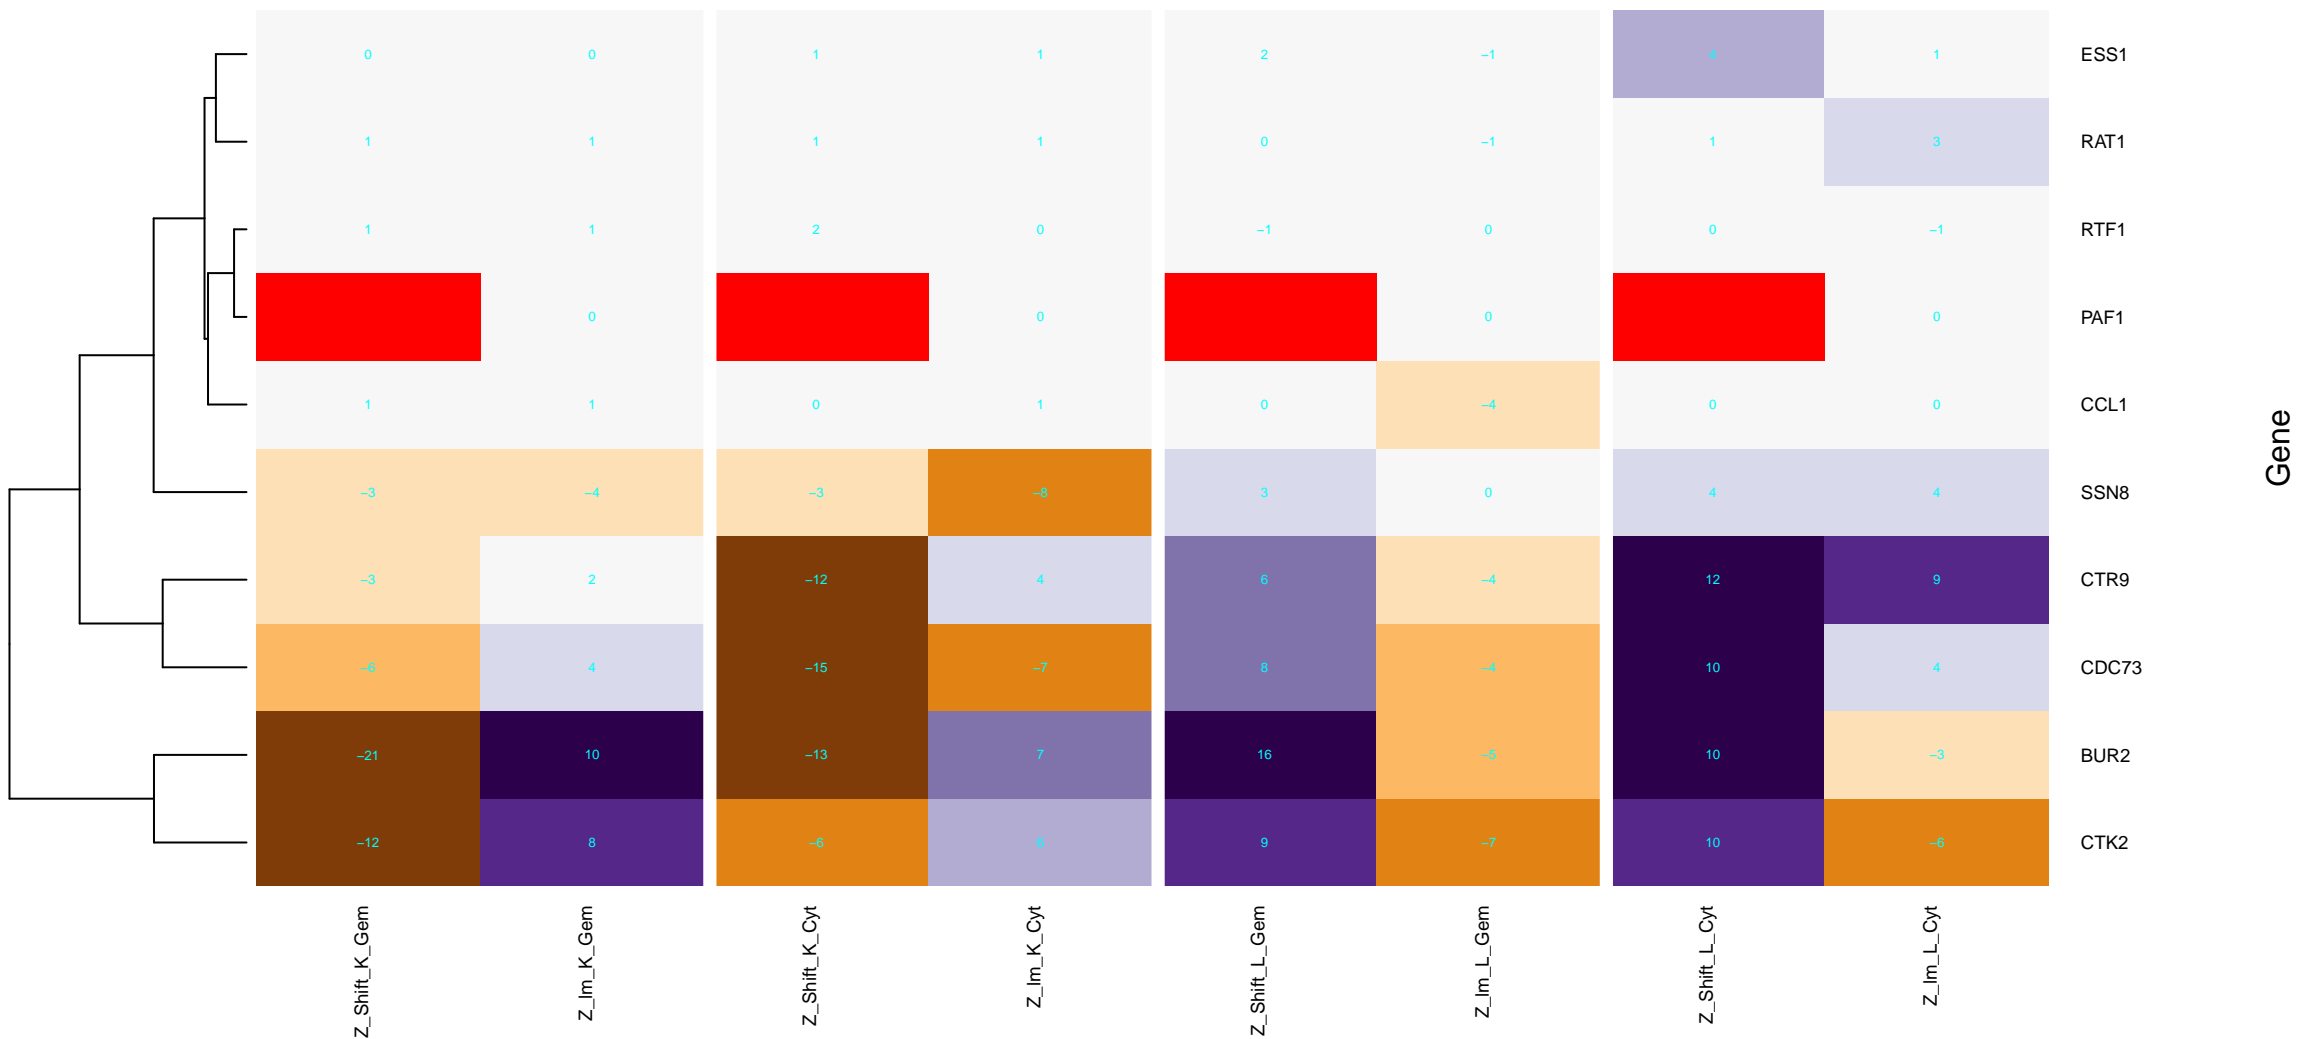

Supplement: s1 [file s1]

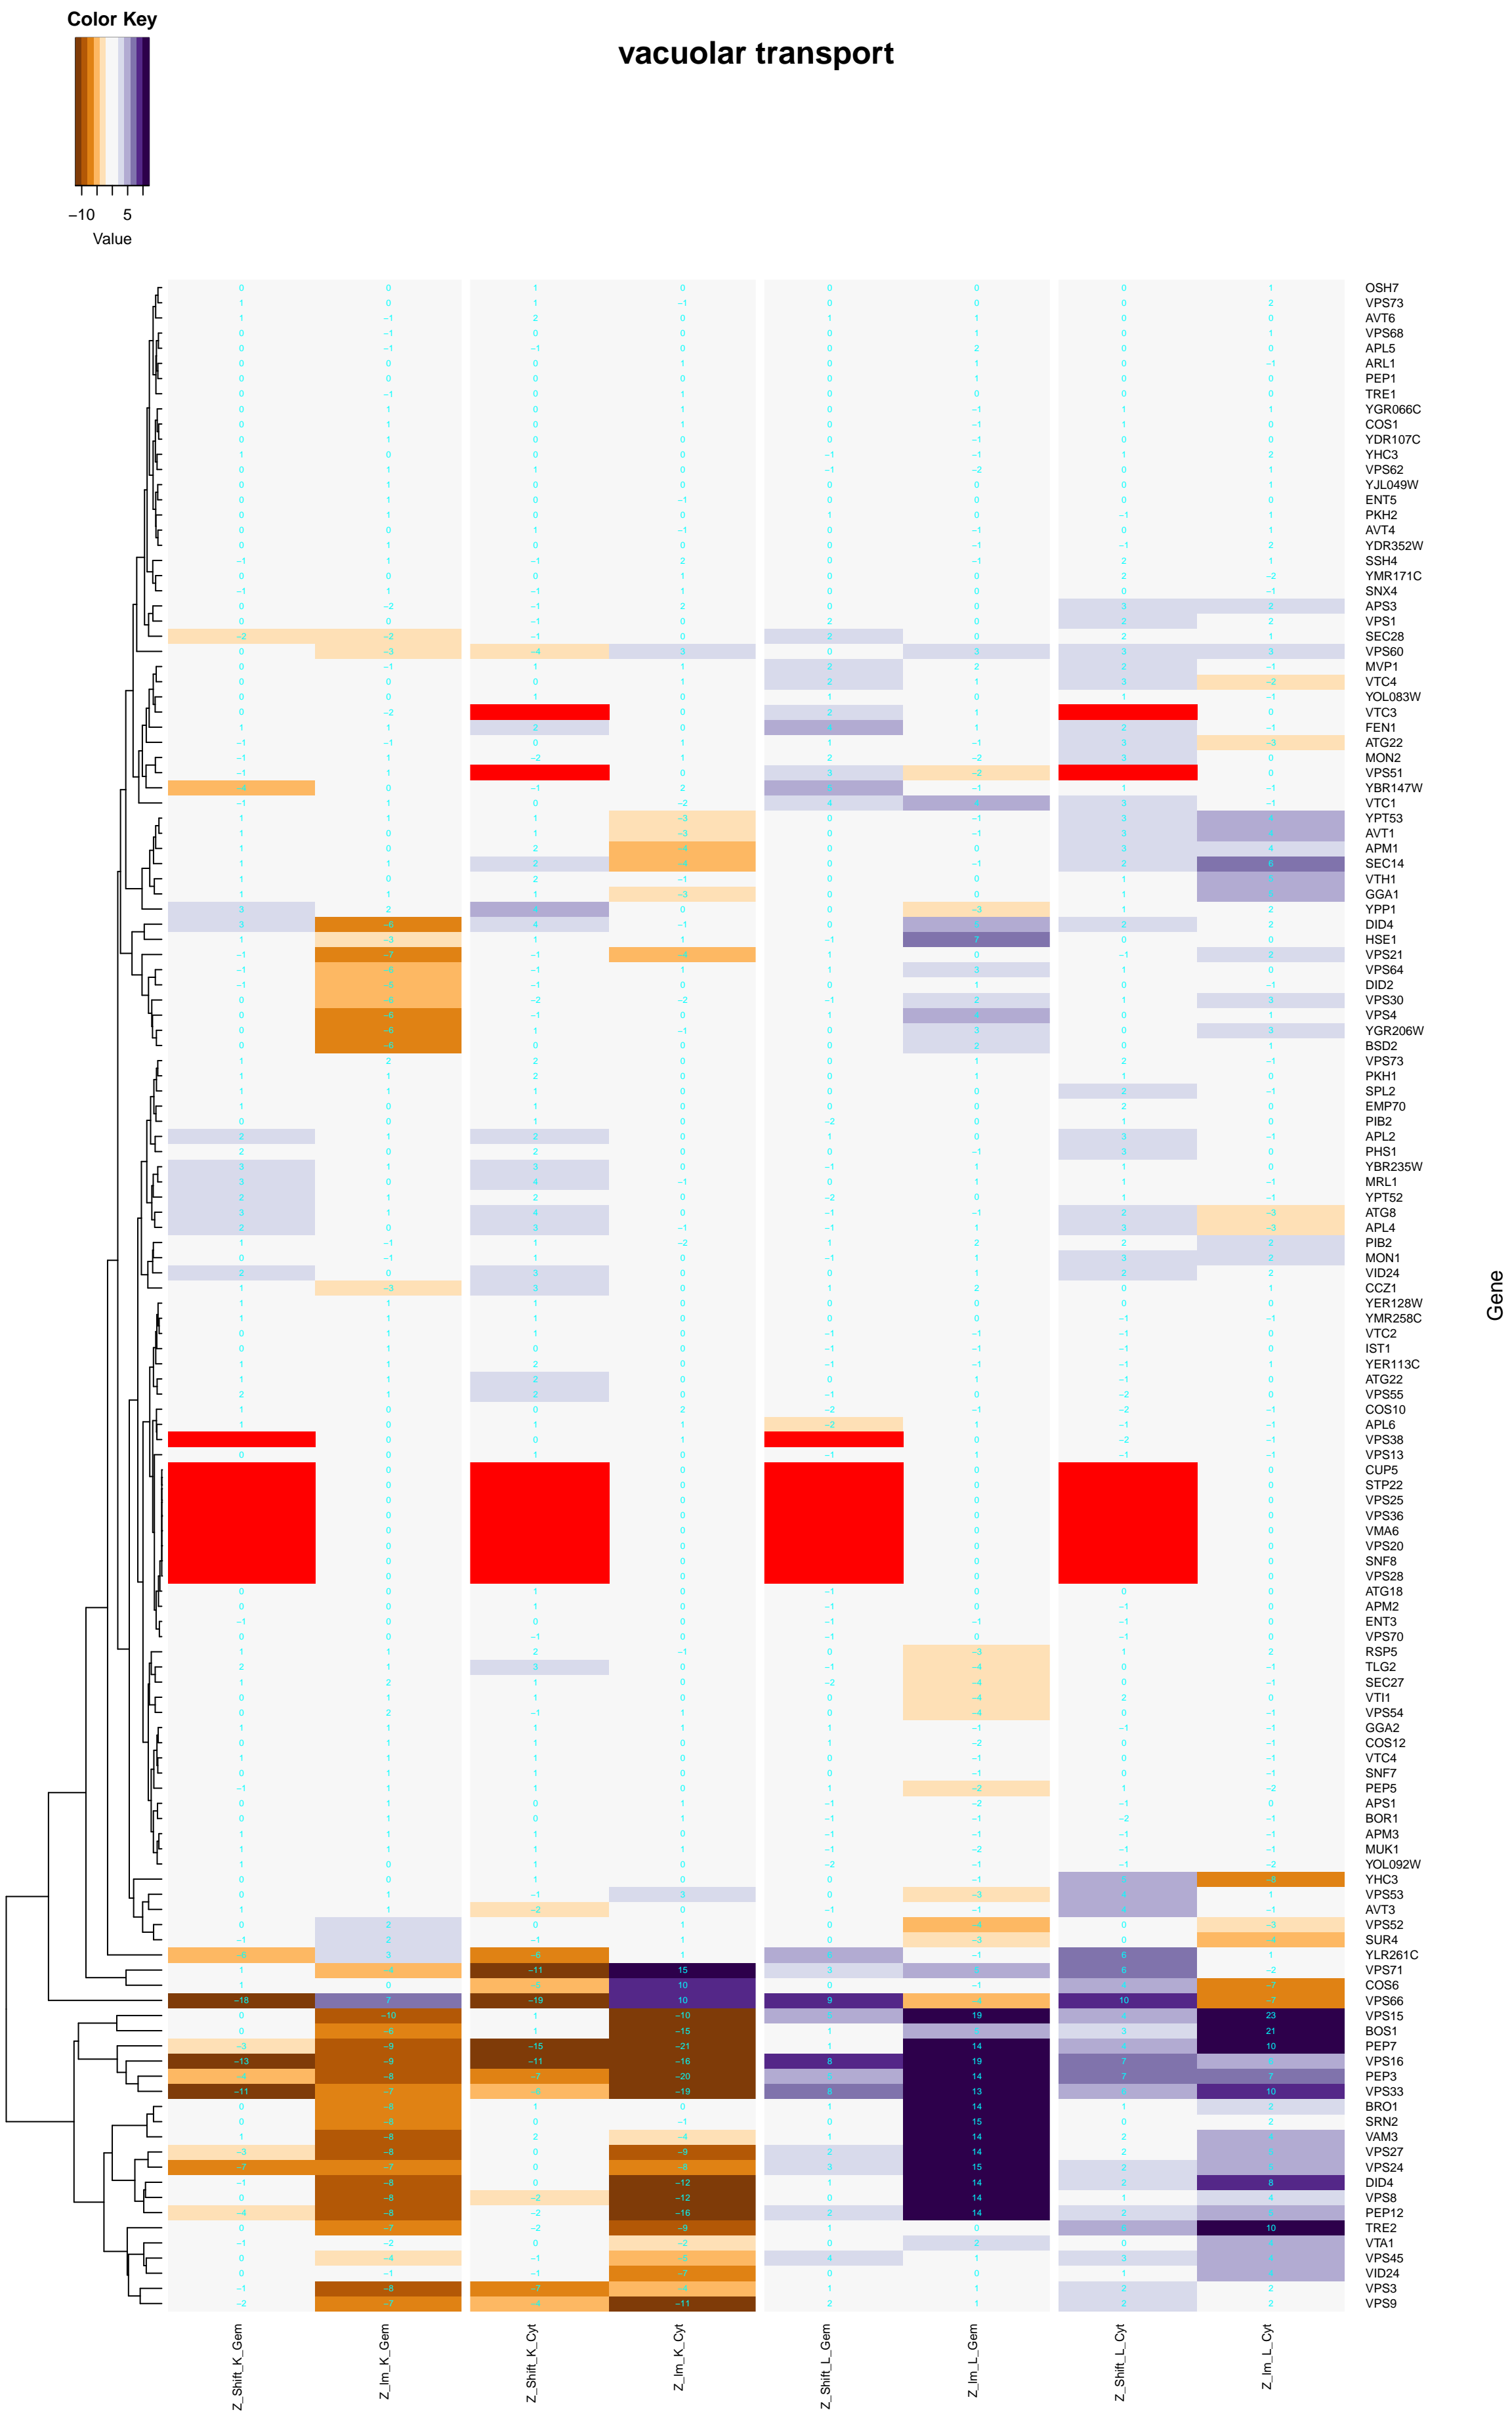

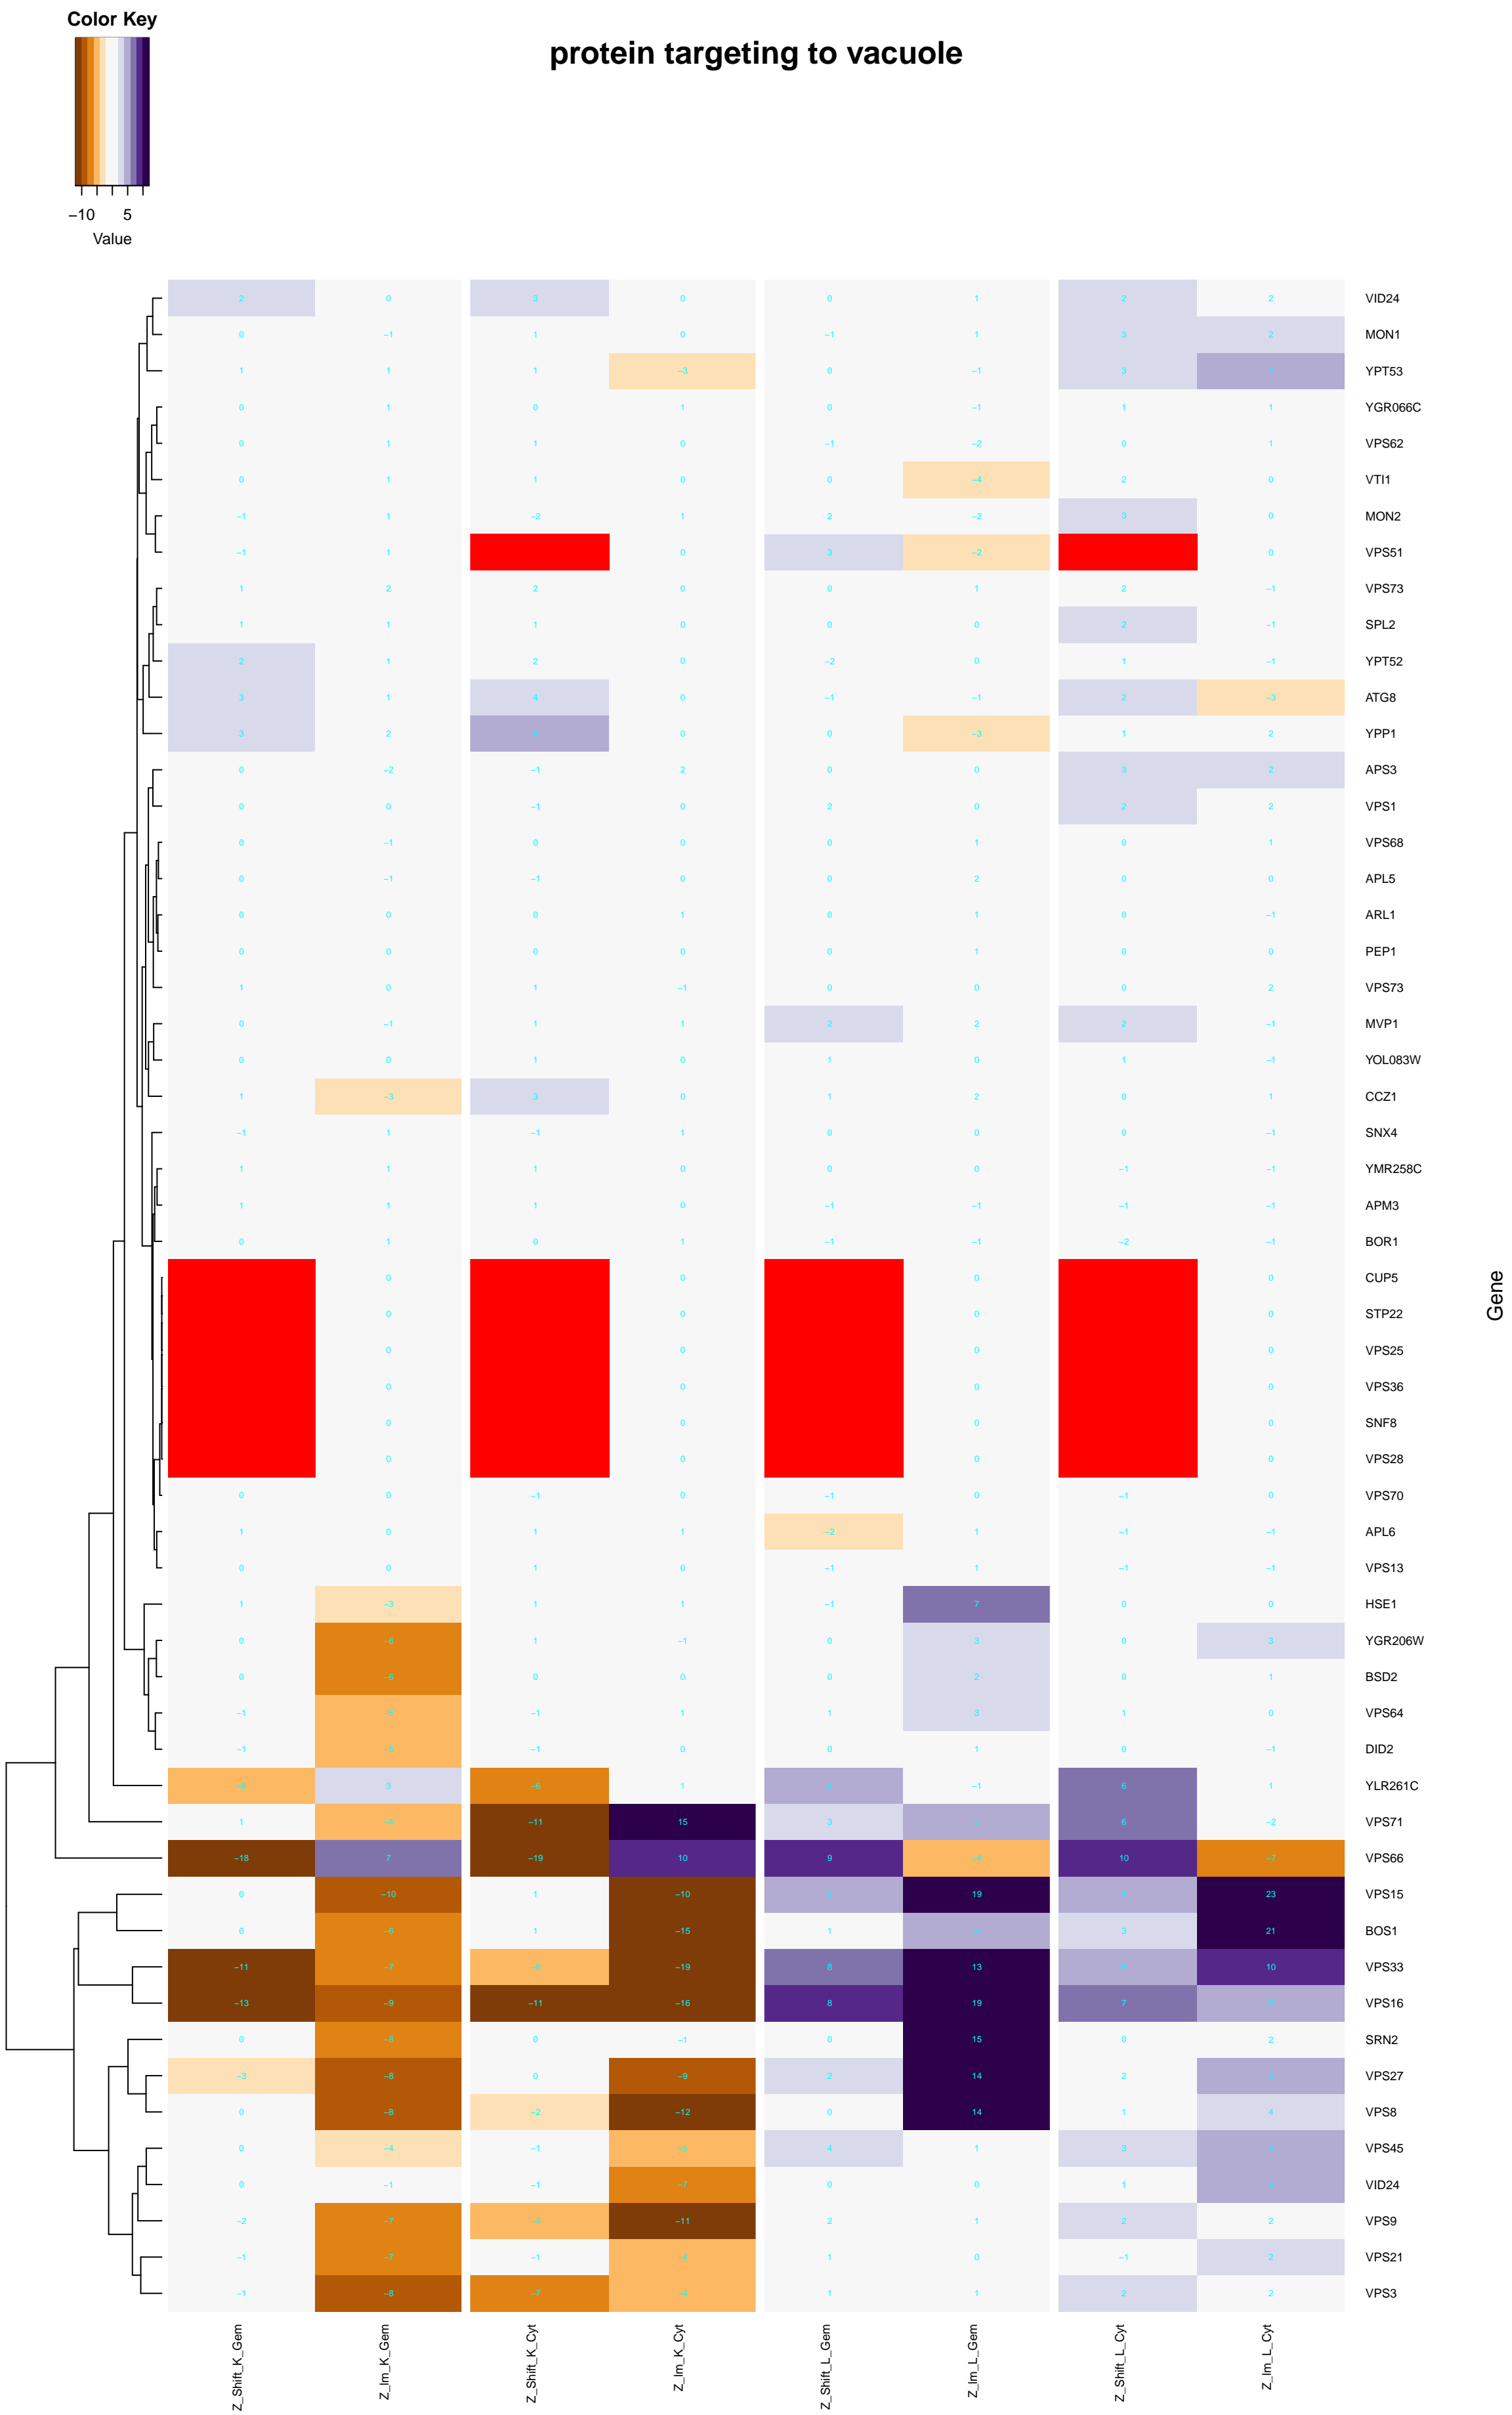

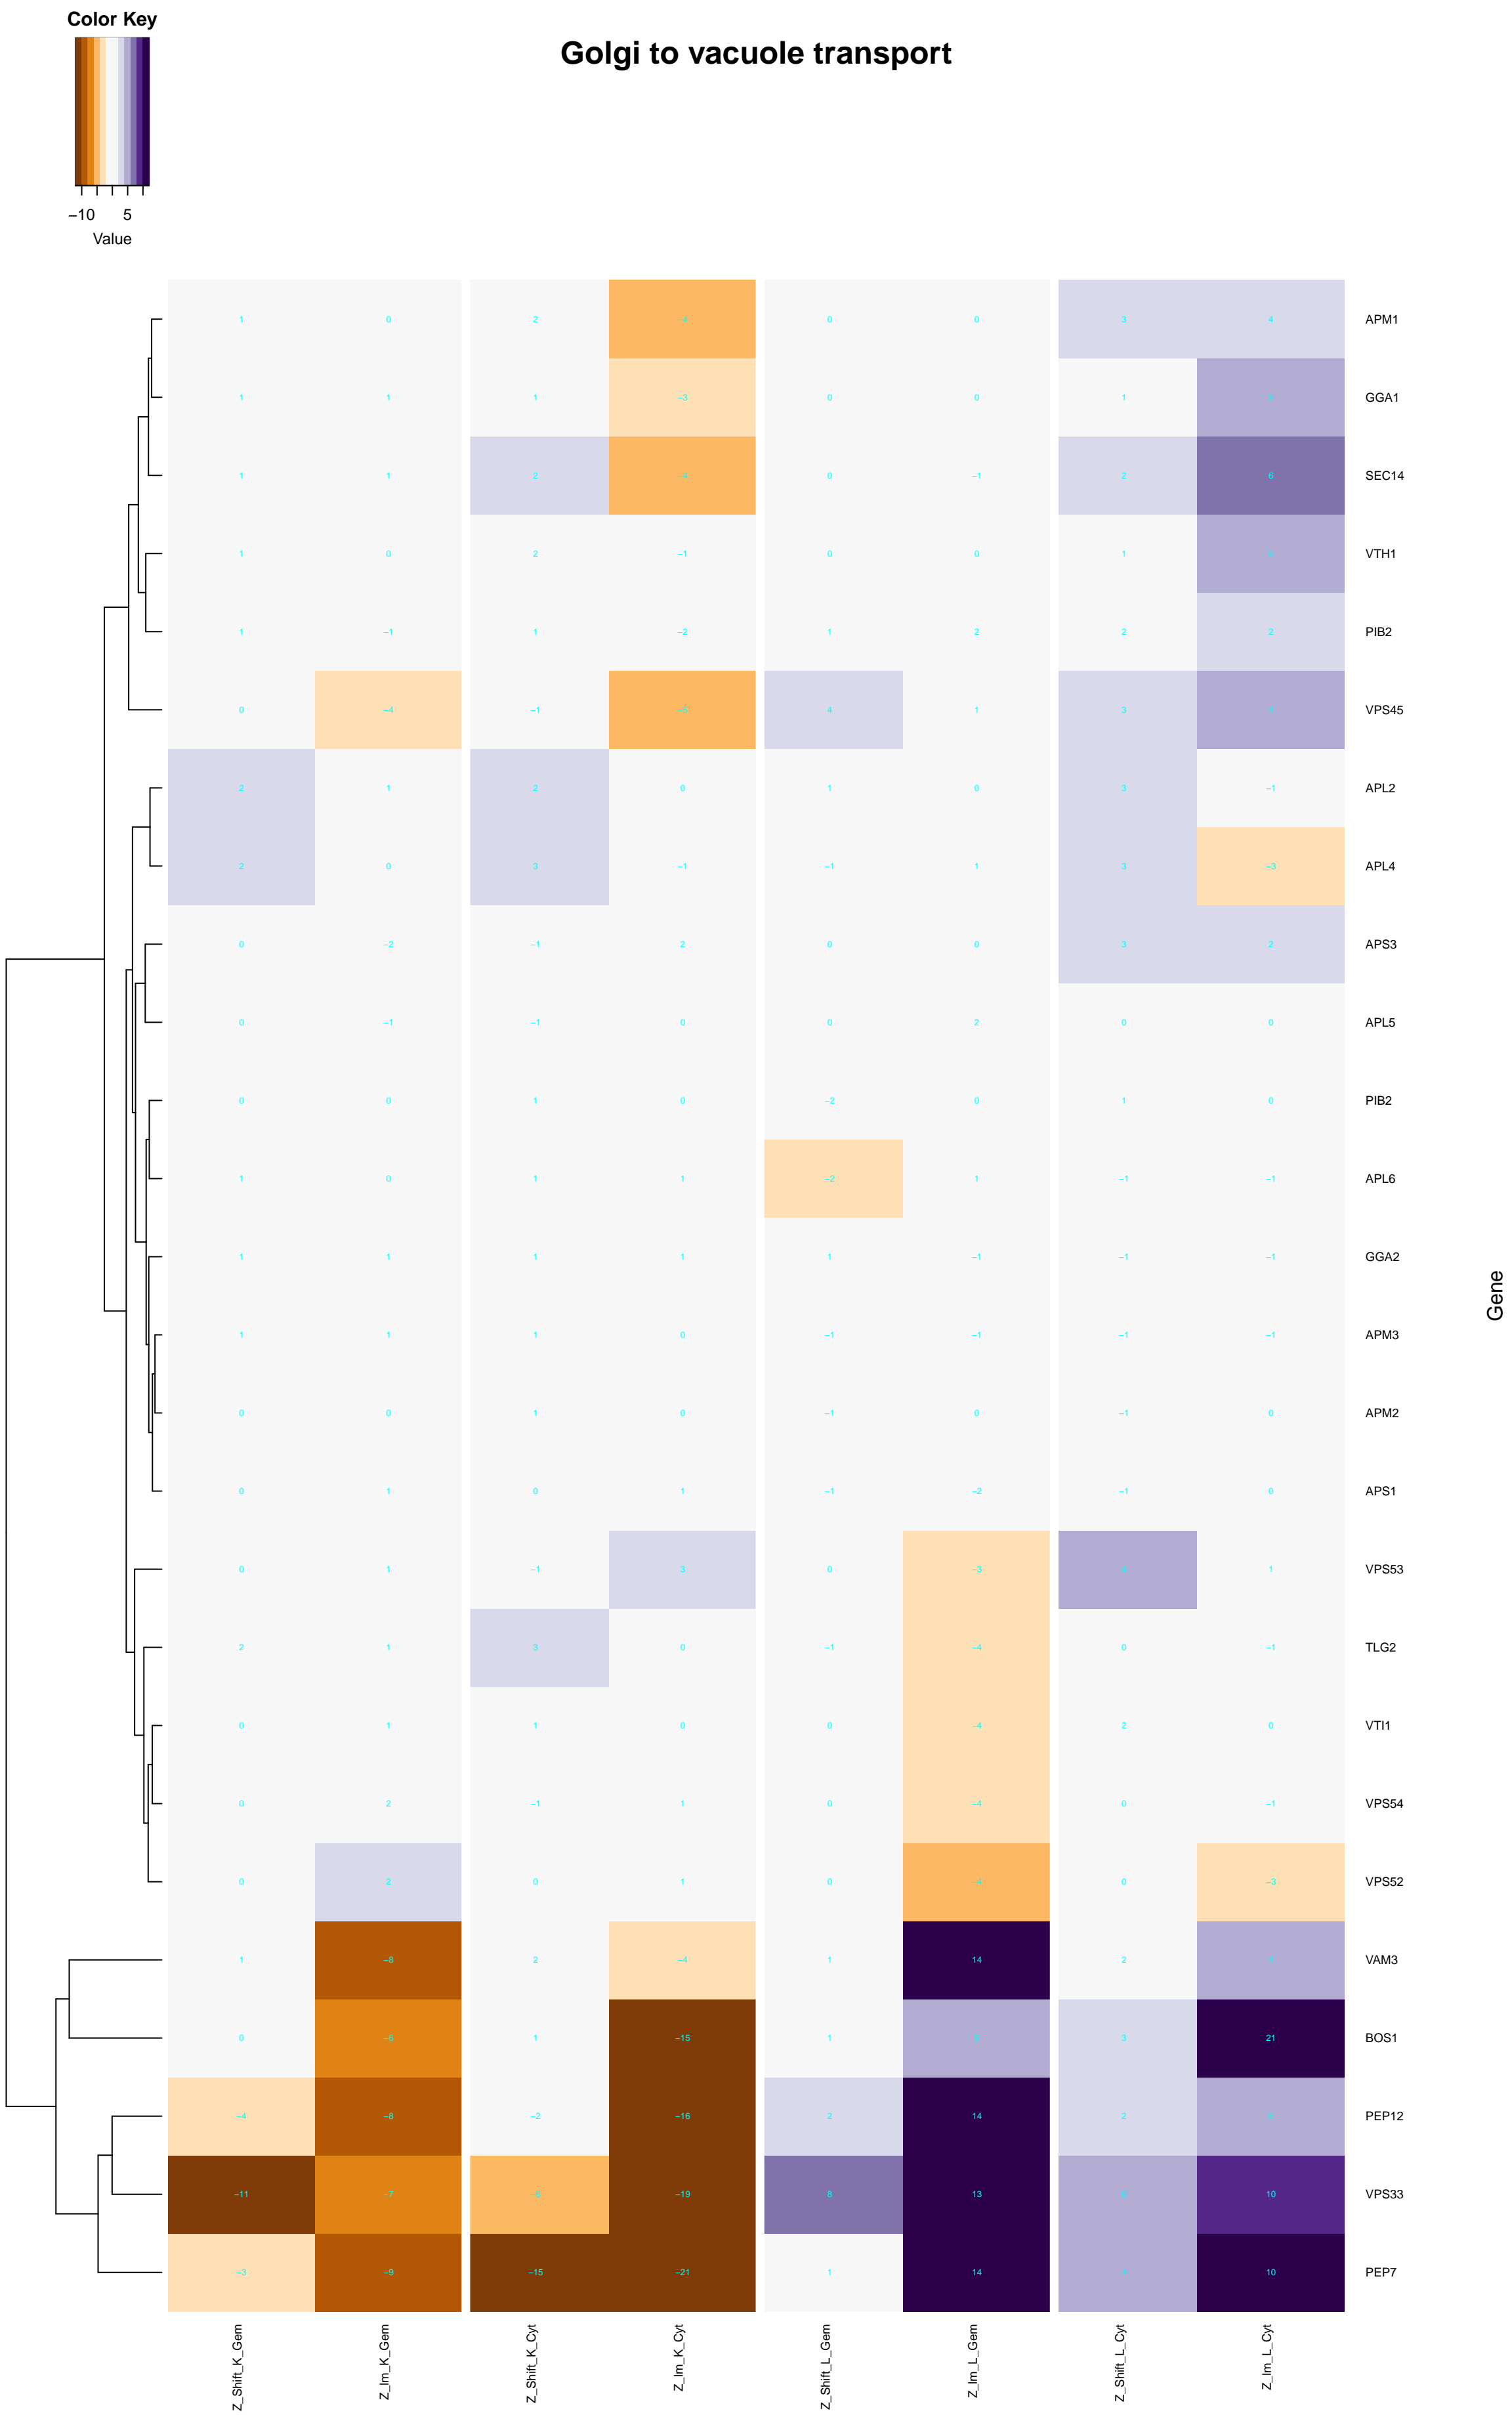

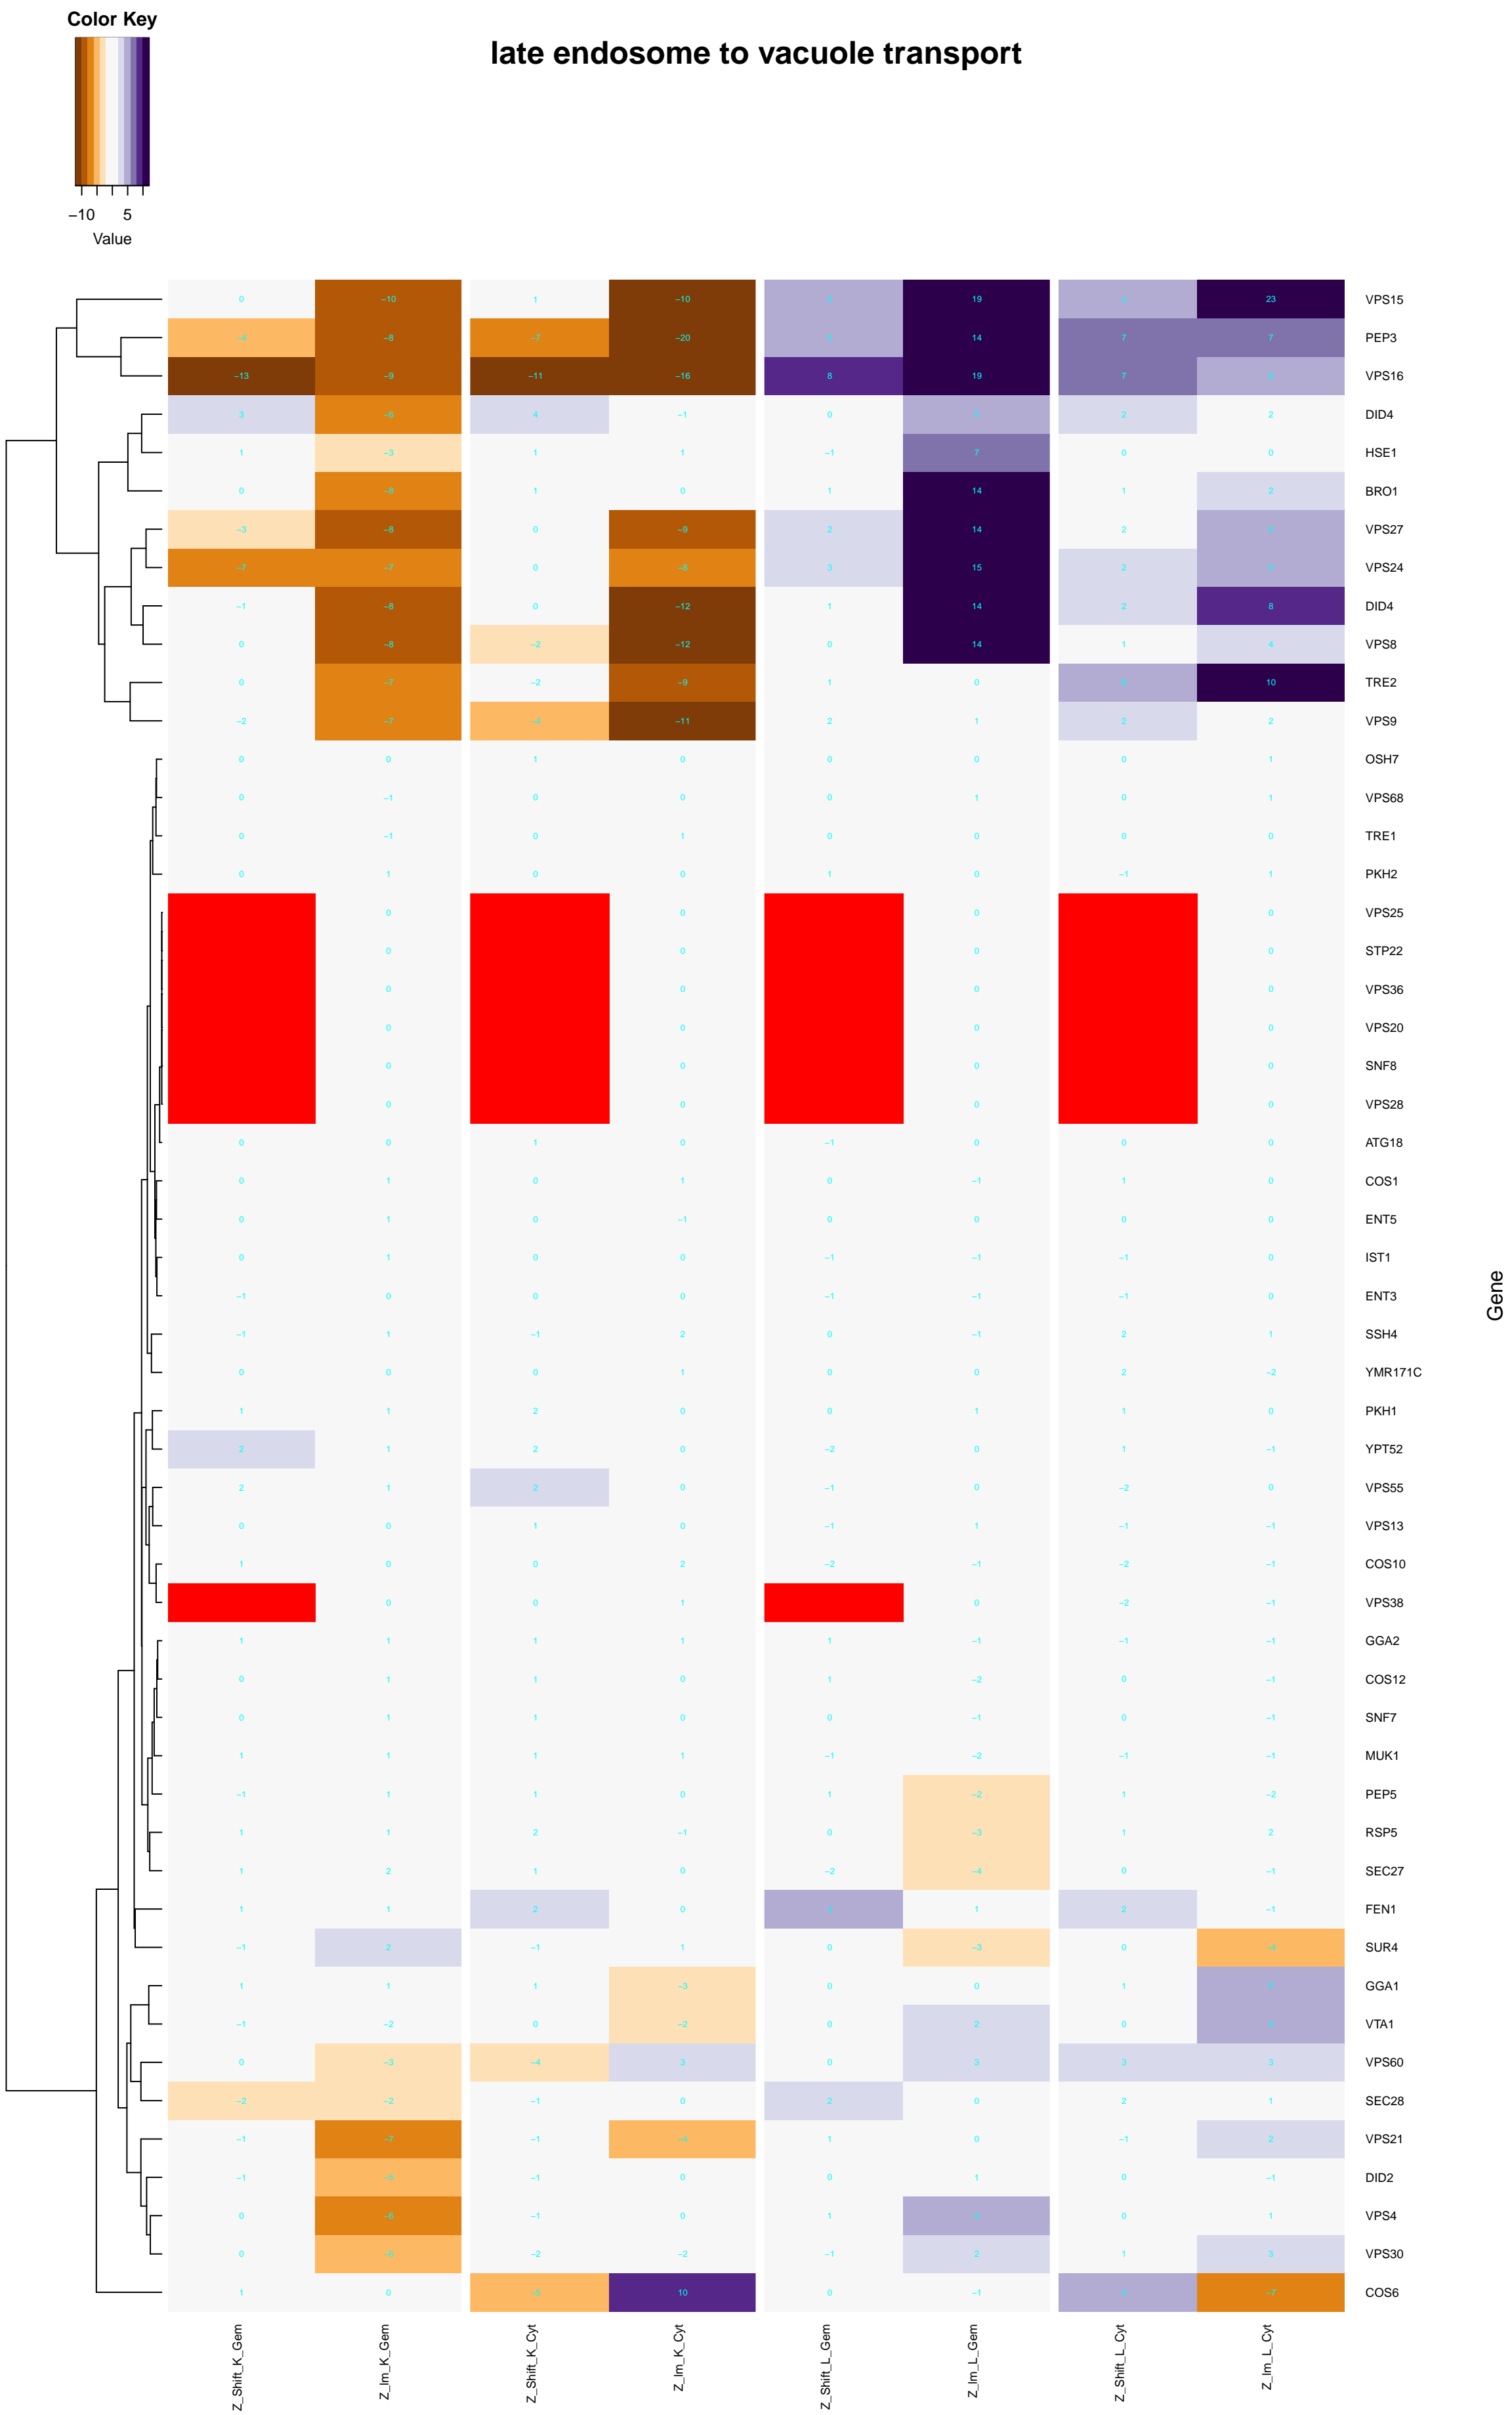





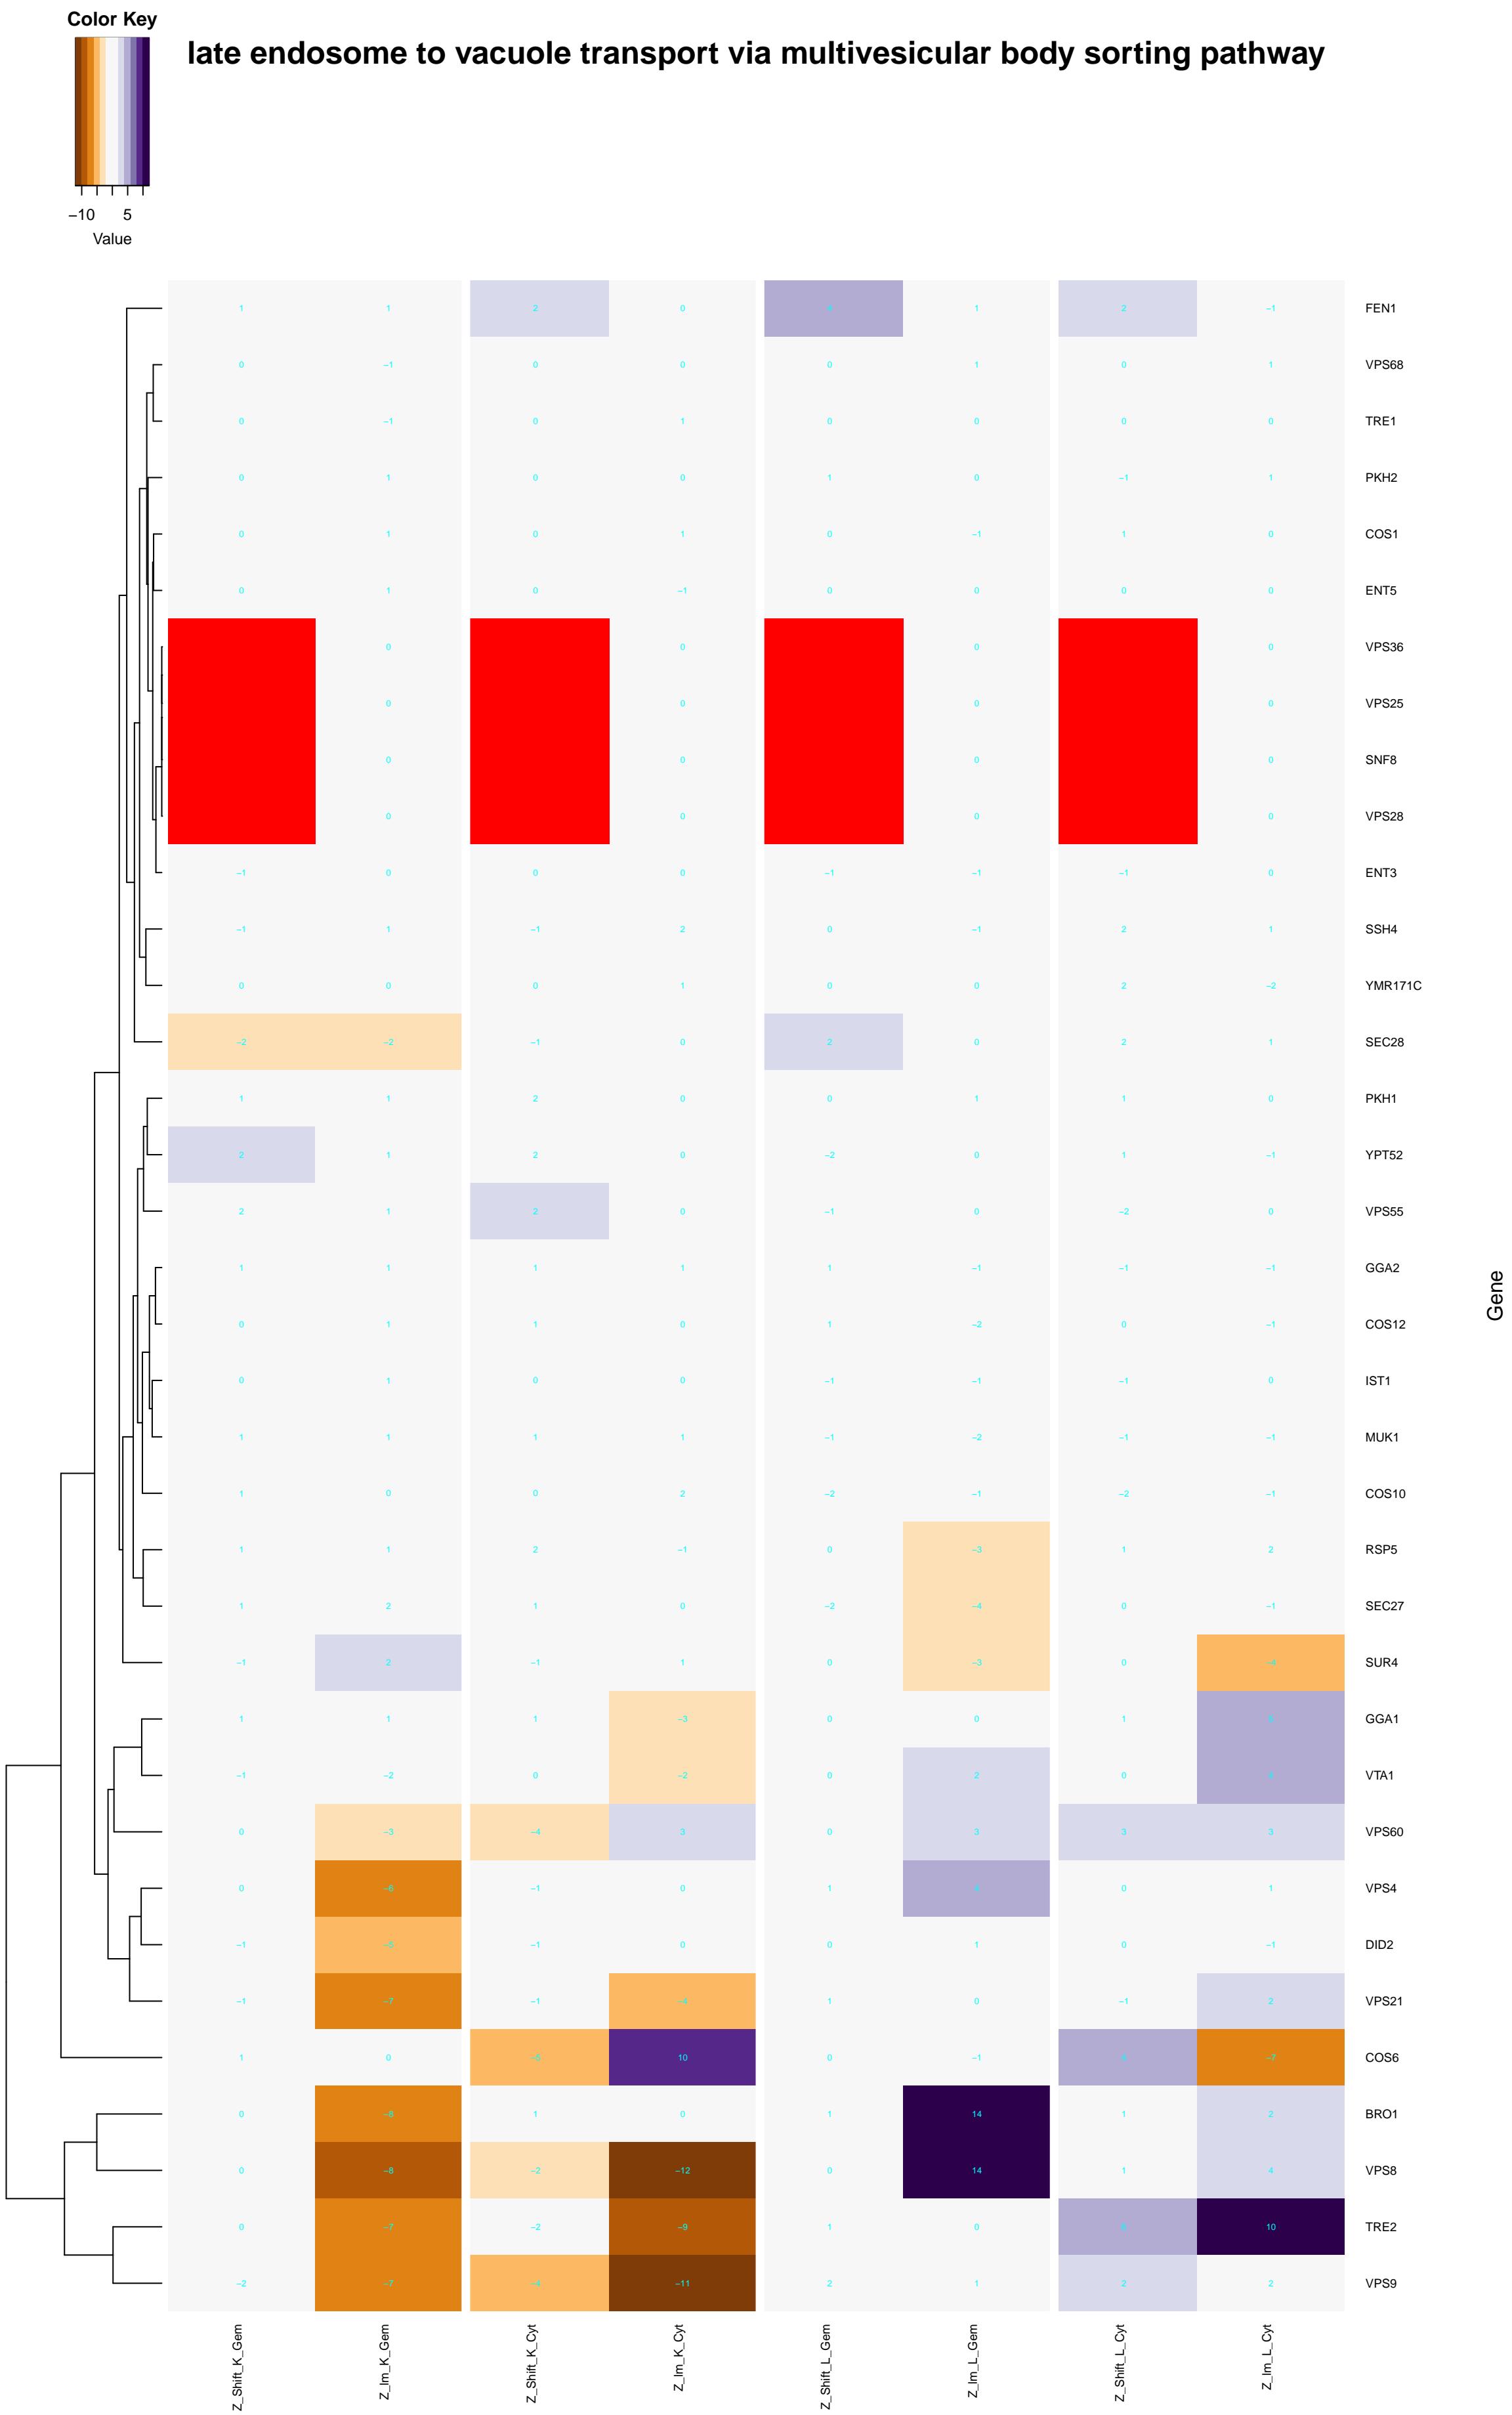

Supplement: s1 [file s1]

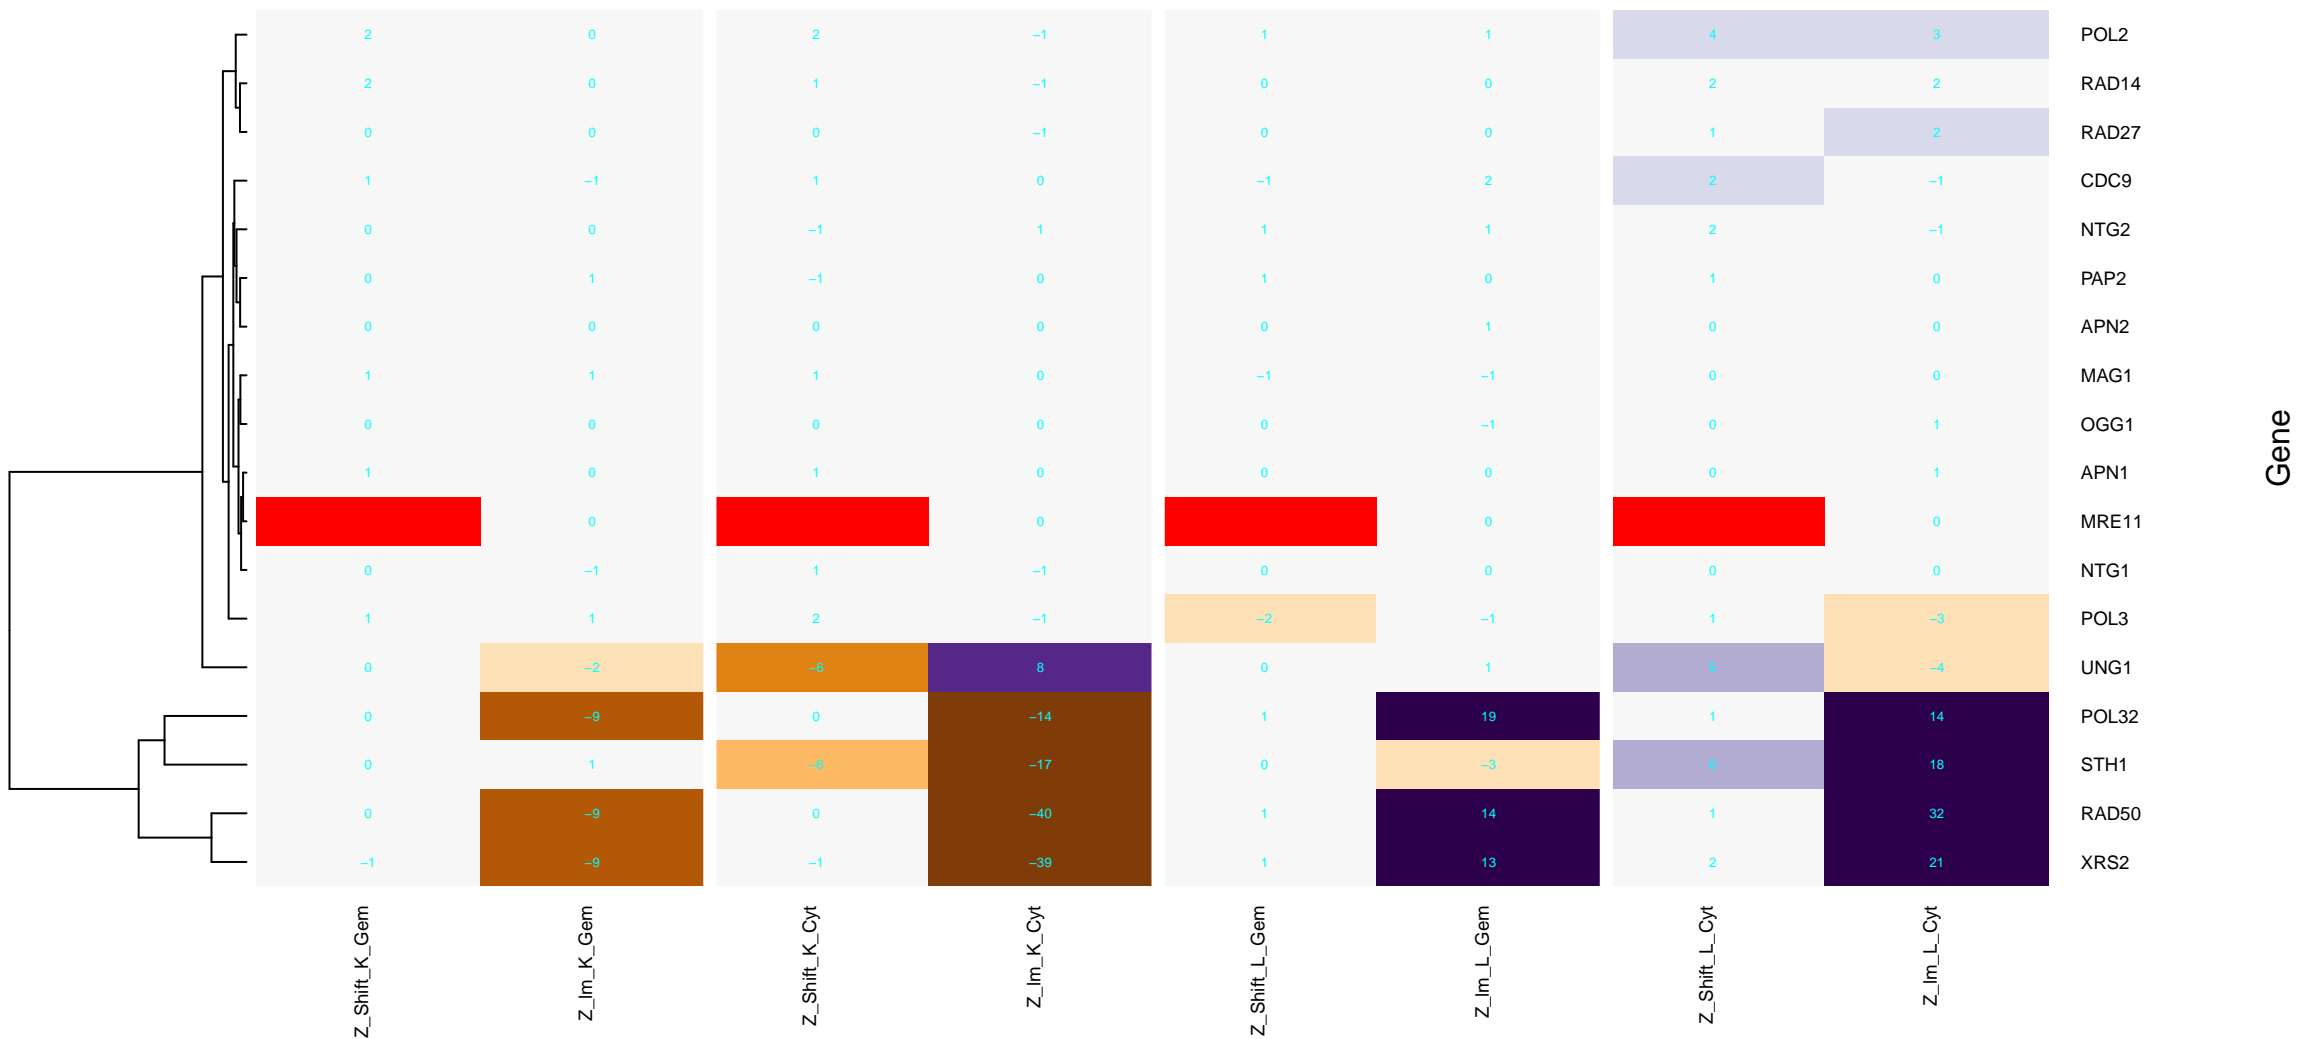

Supplement: s1 [file s1]

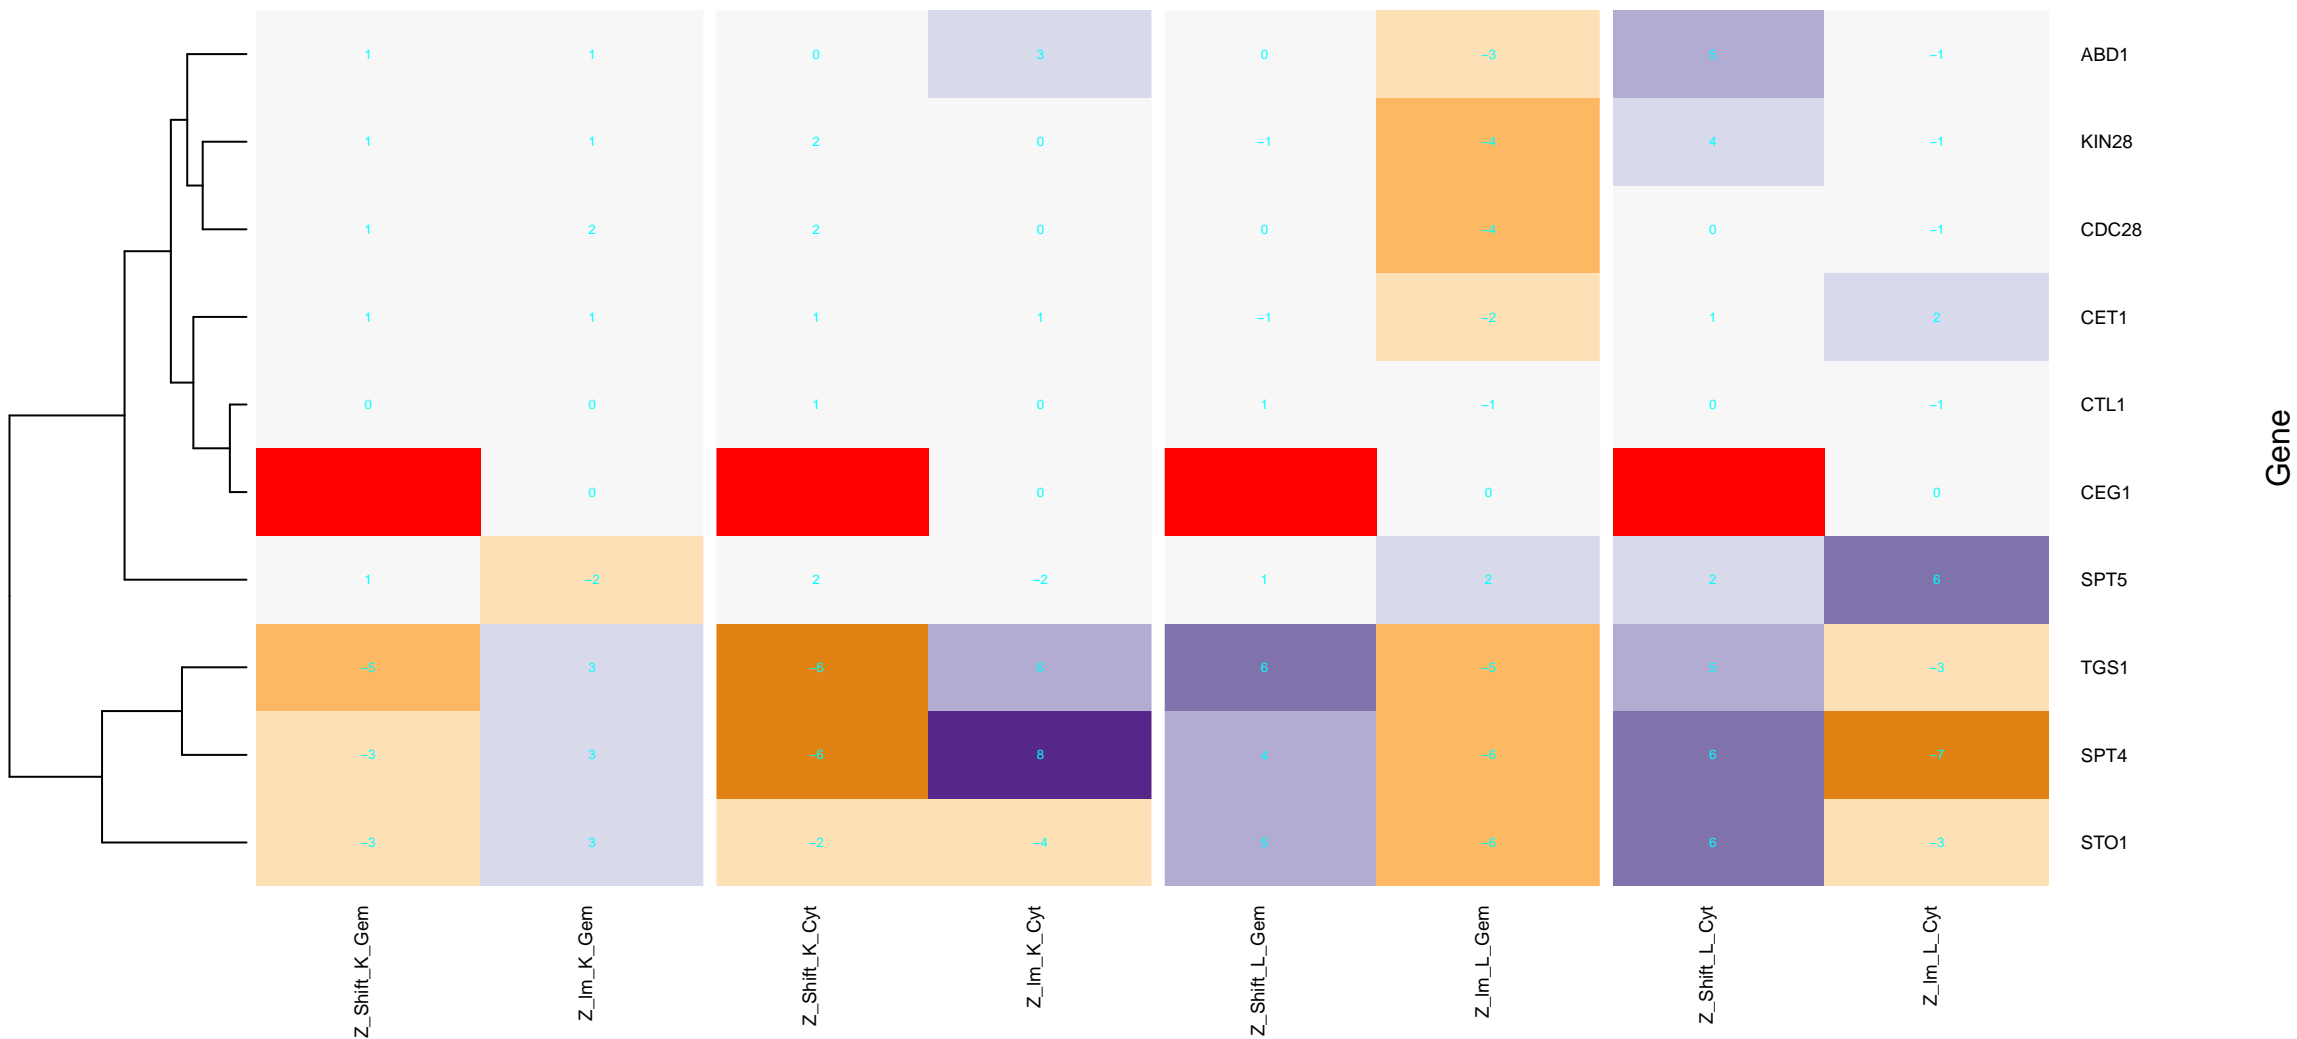

Supplement: s1 [file s1]

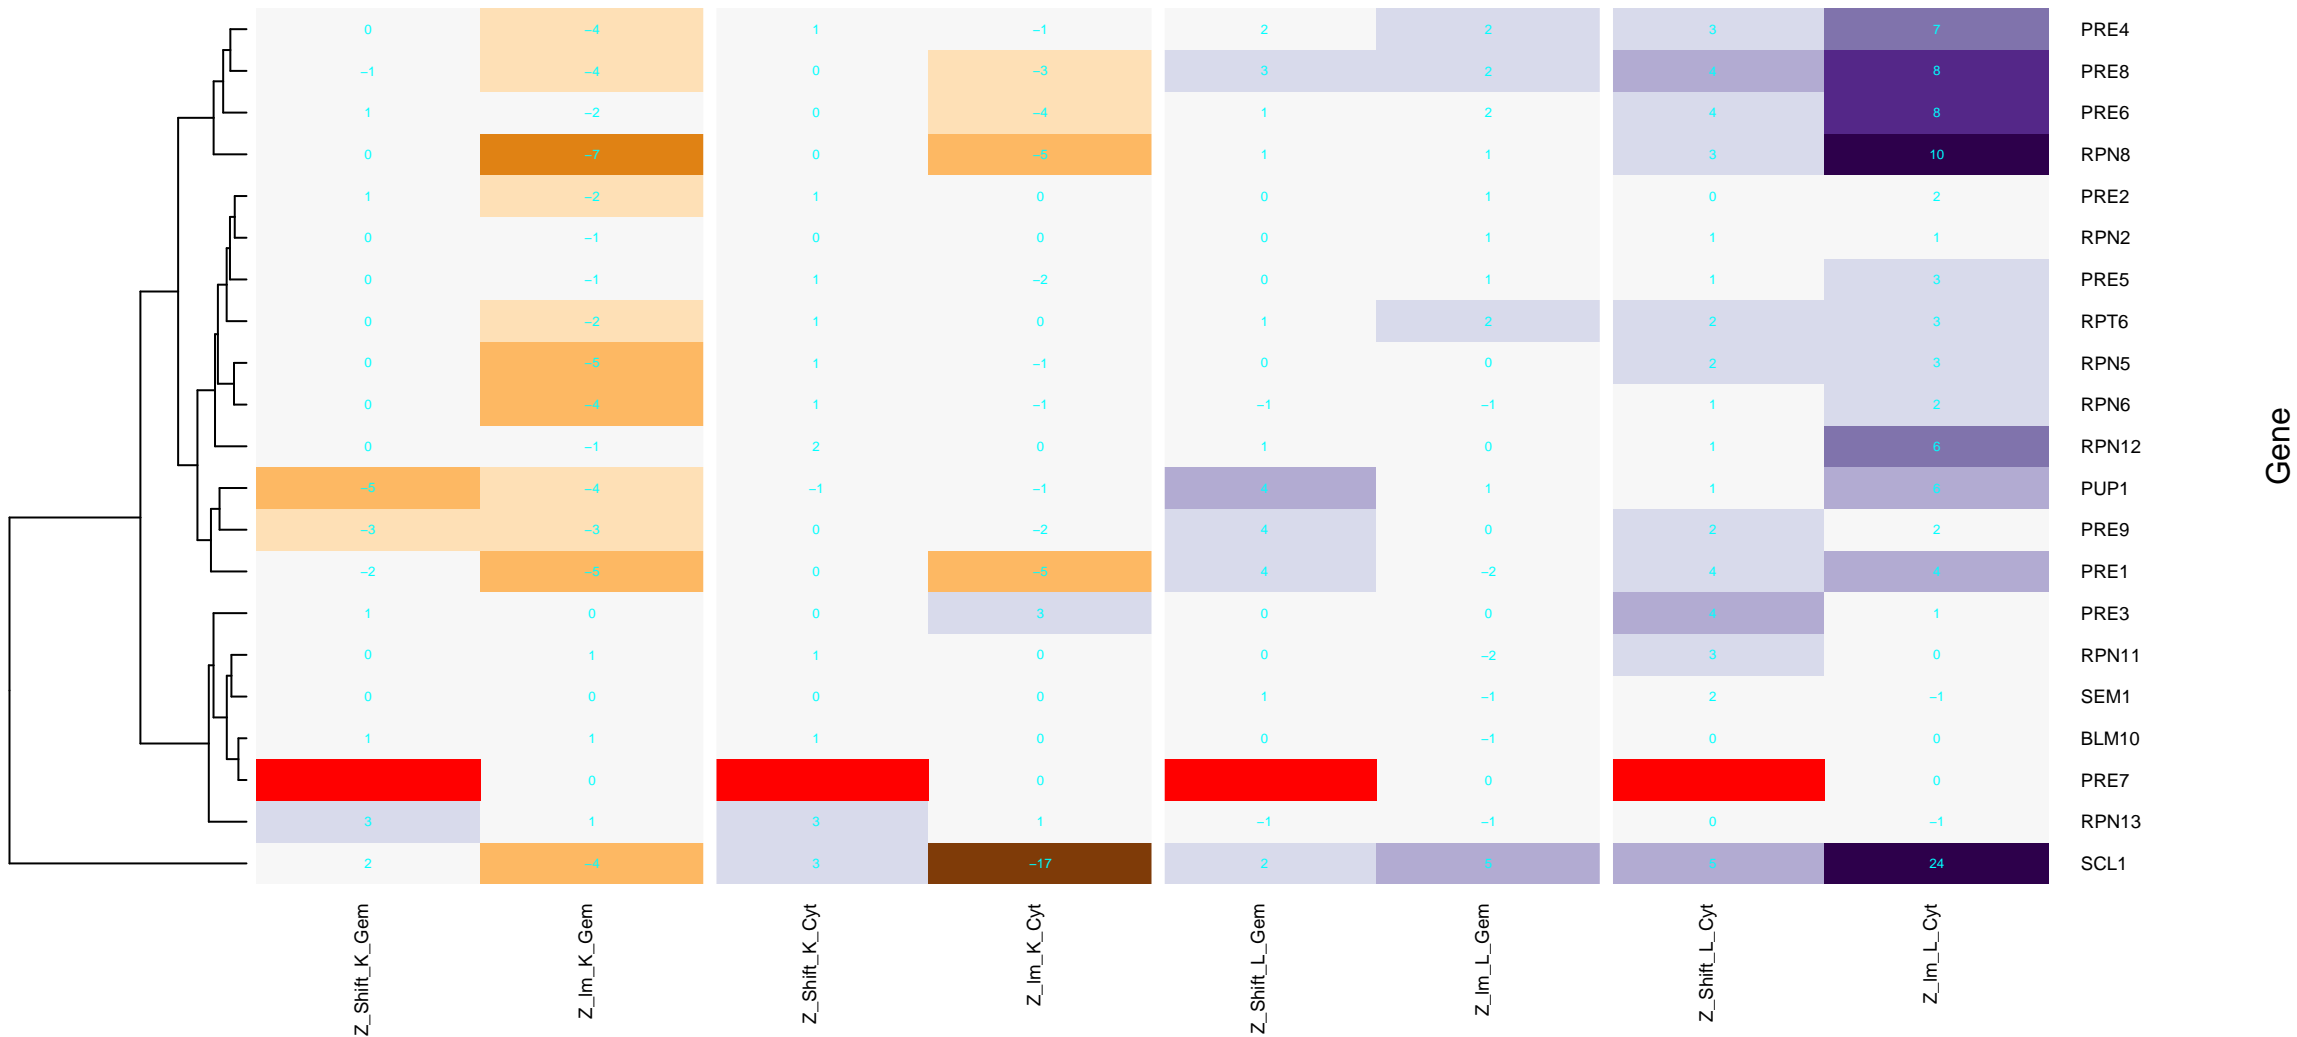

Supplement: s1 [file s1]

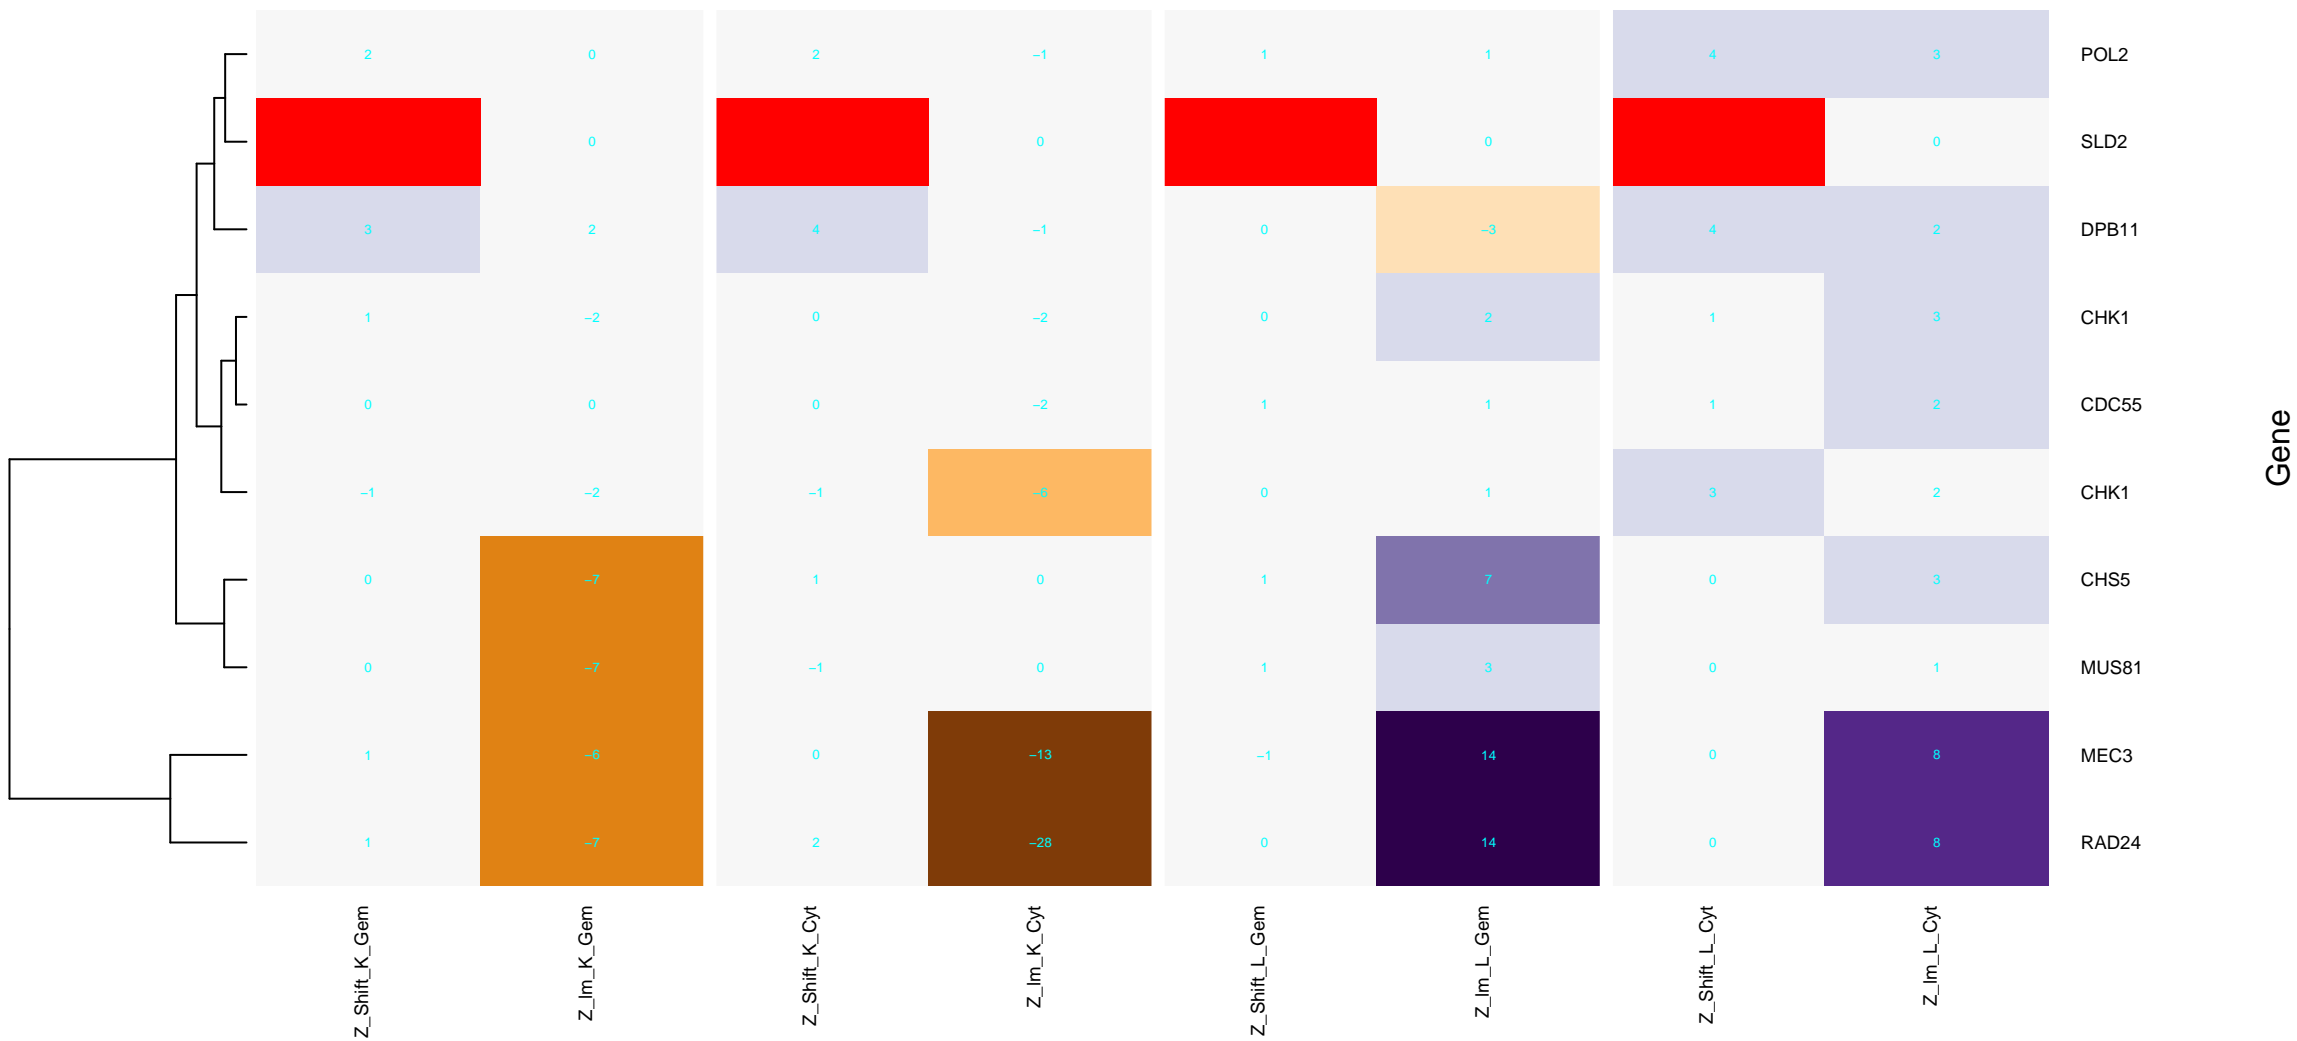

Supplement: s1 [file s1]

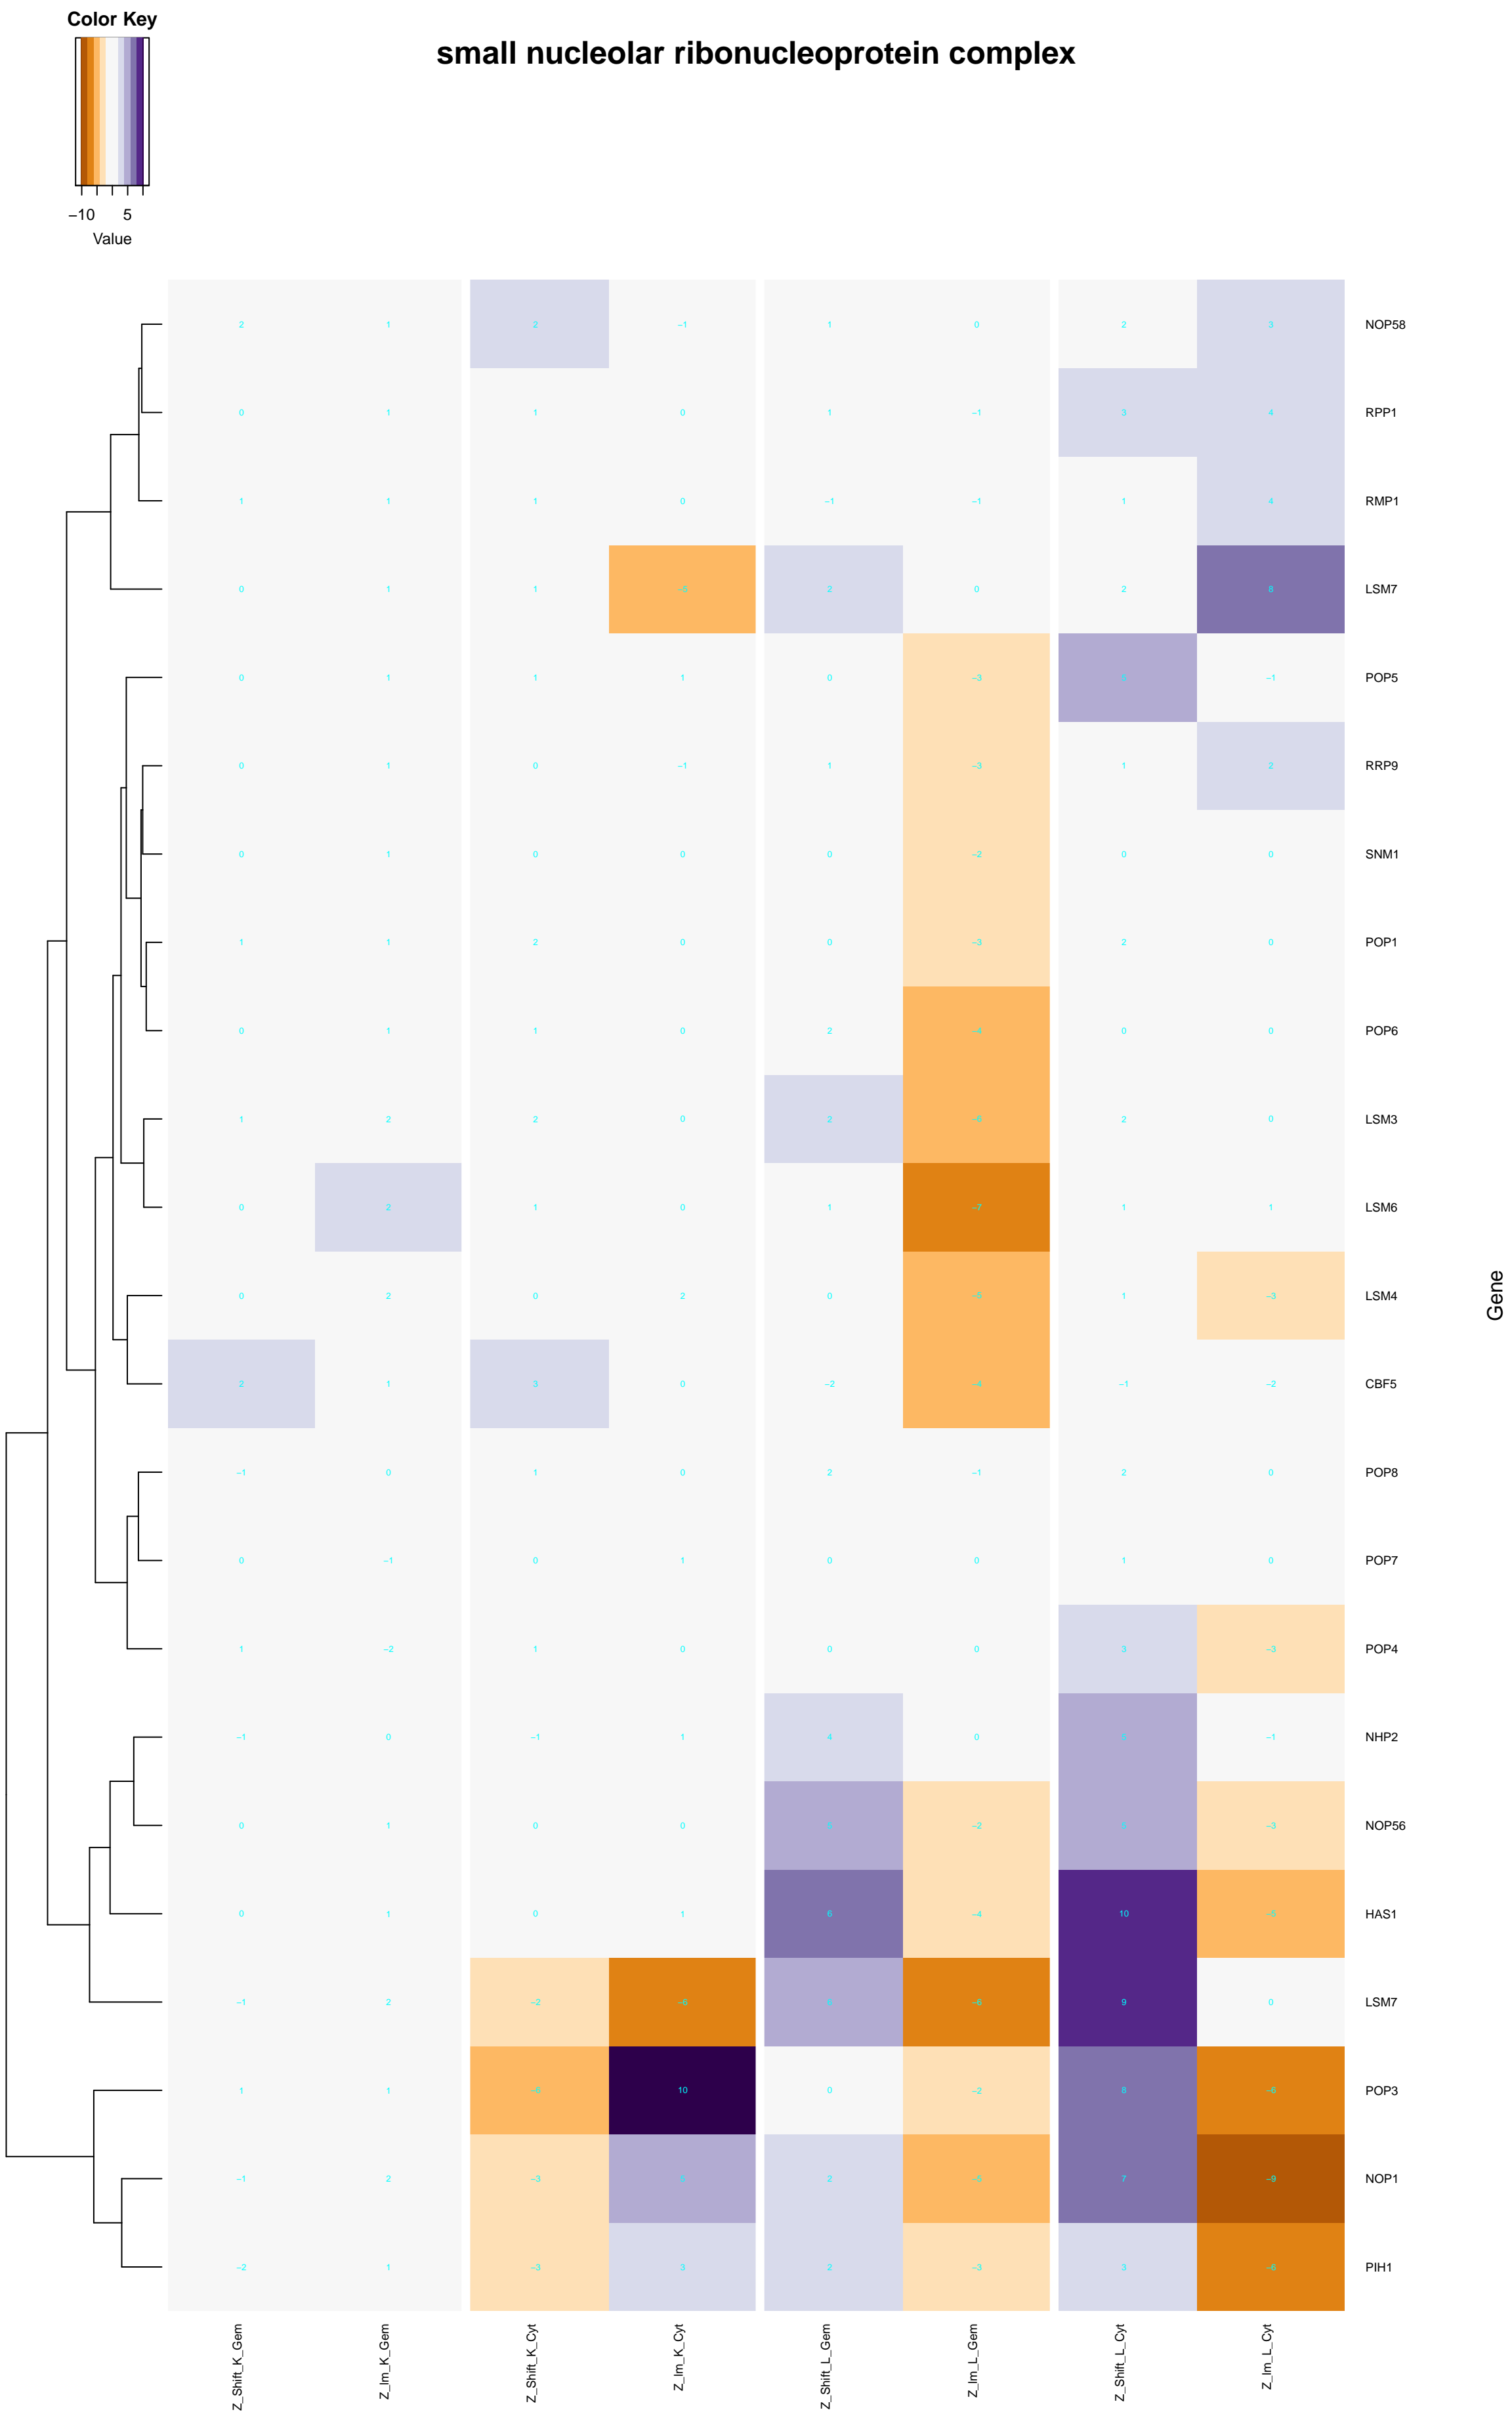

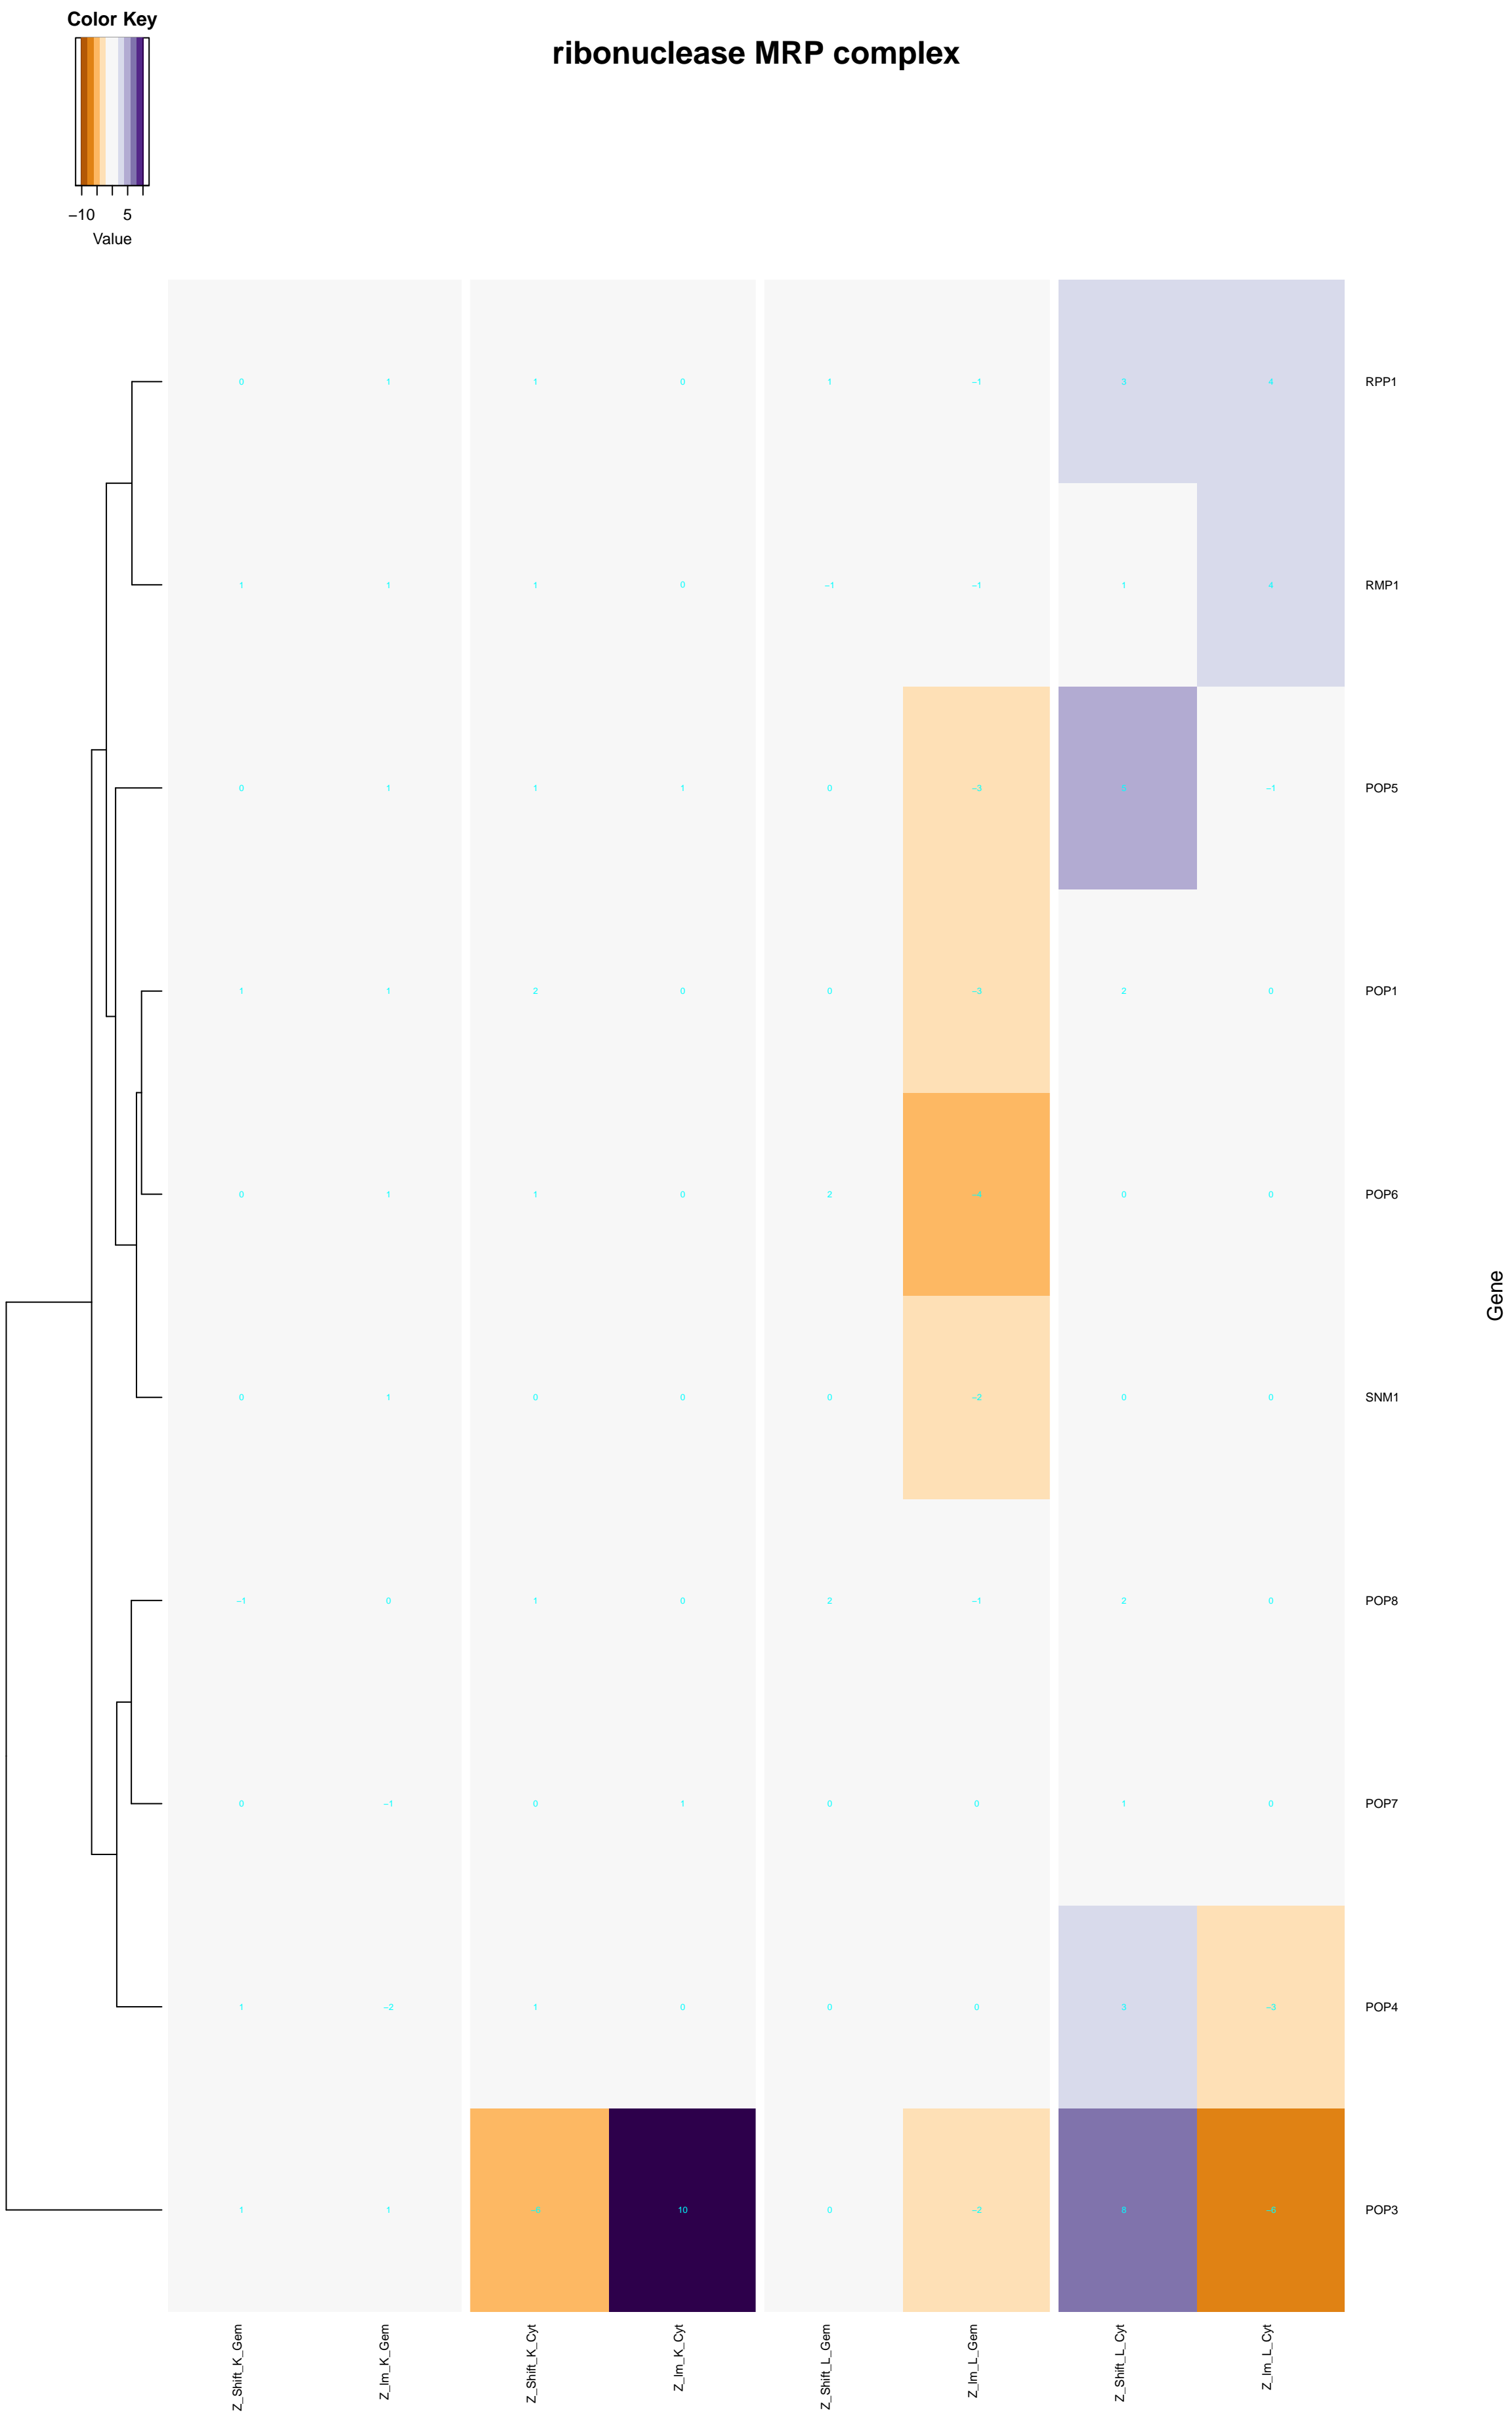

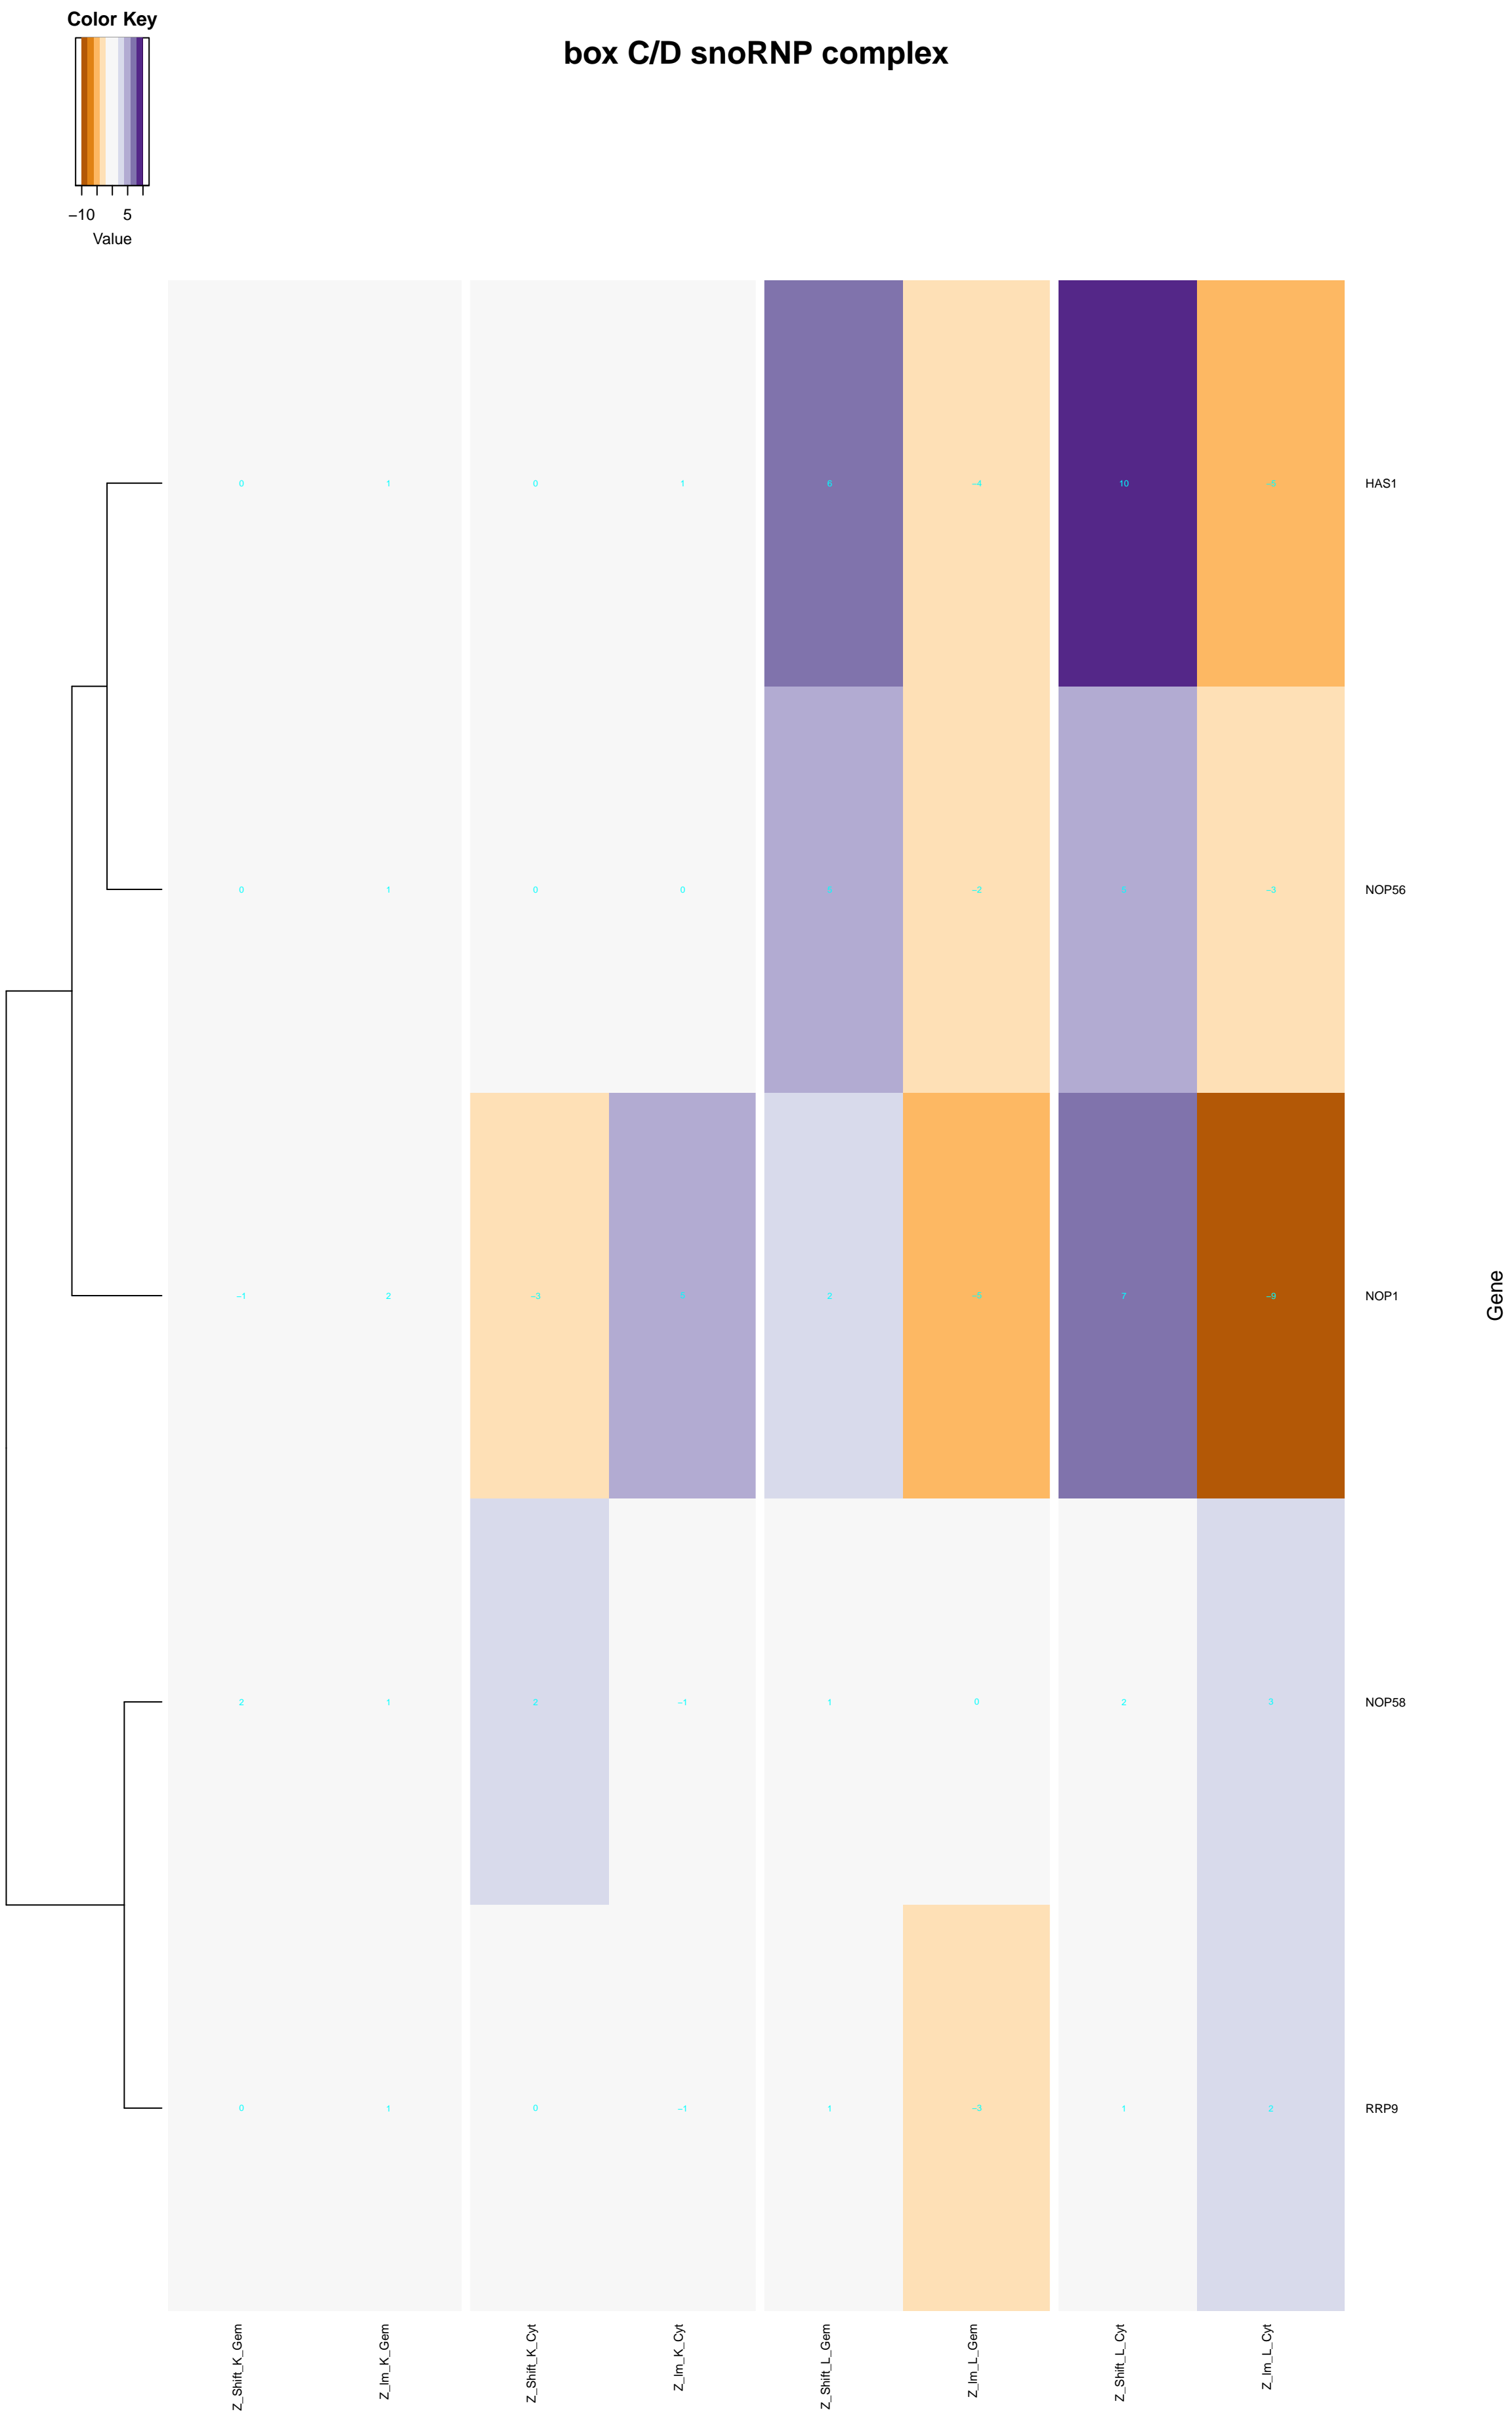

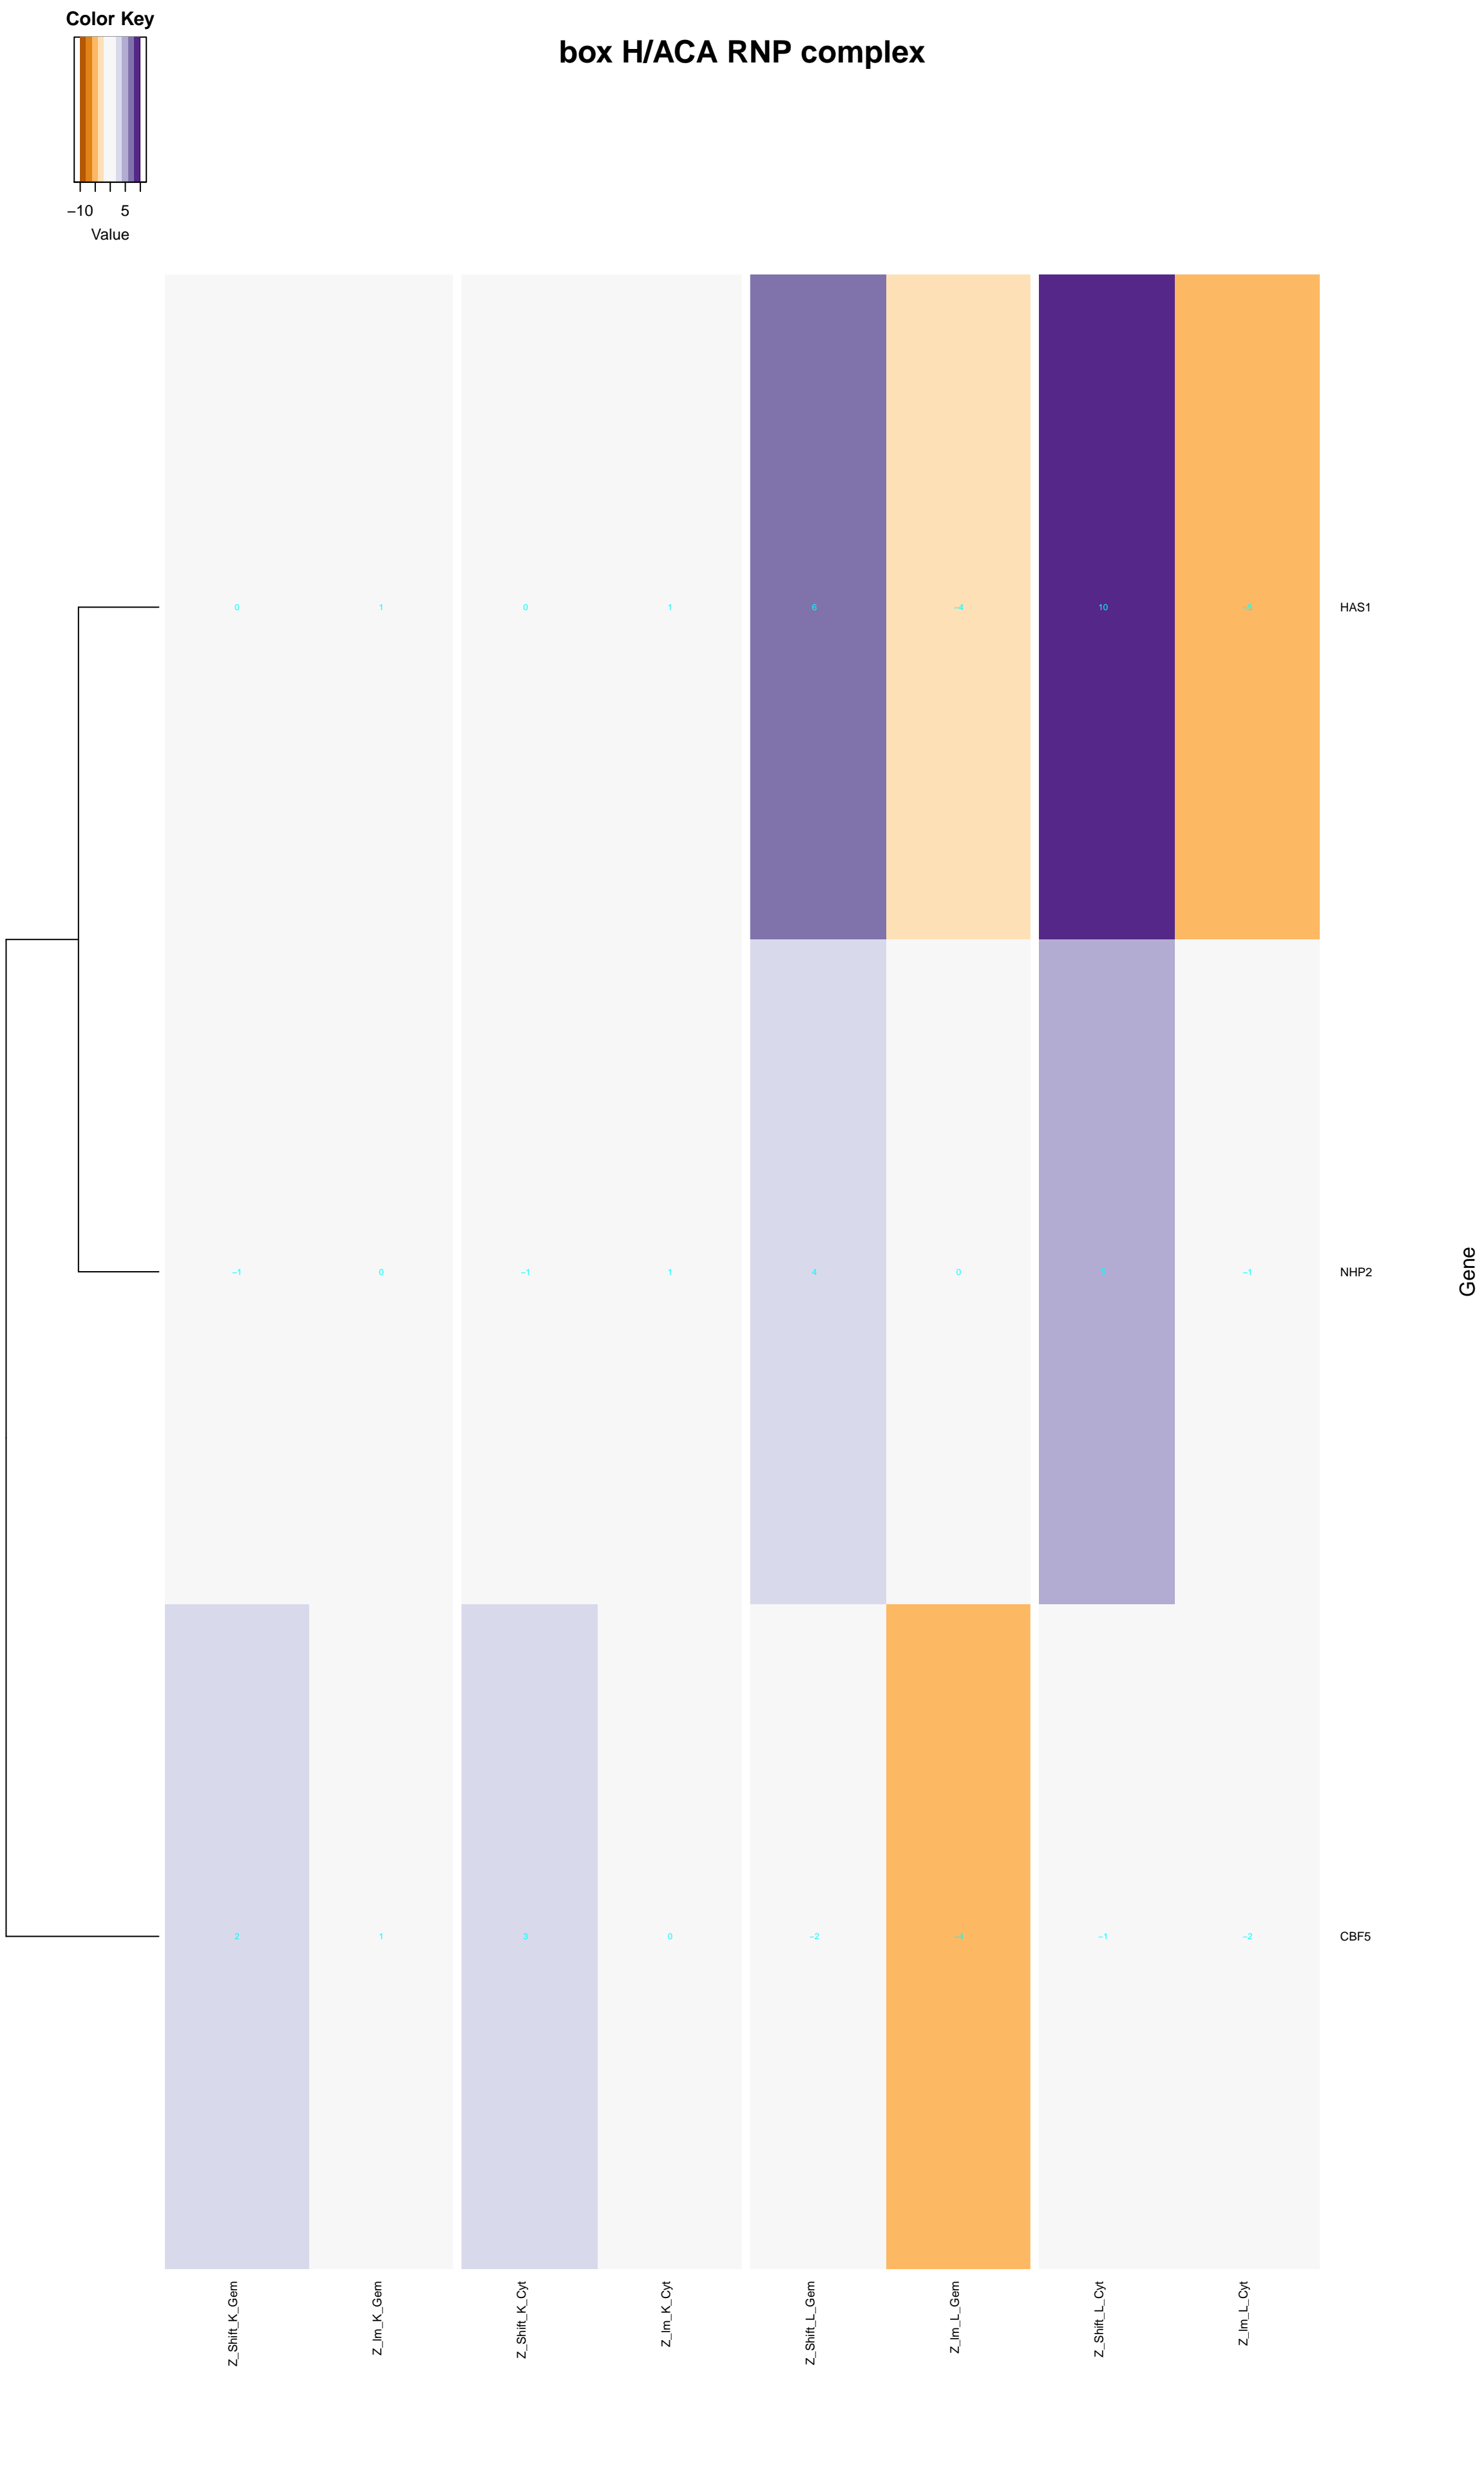

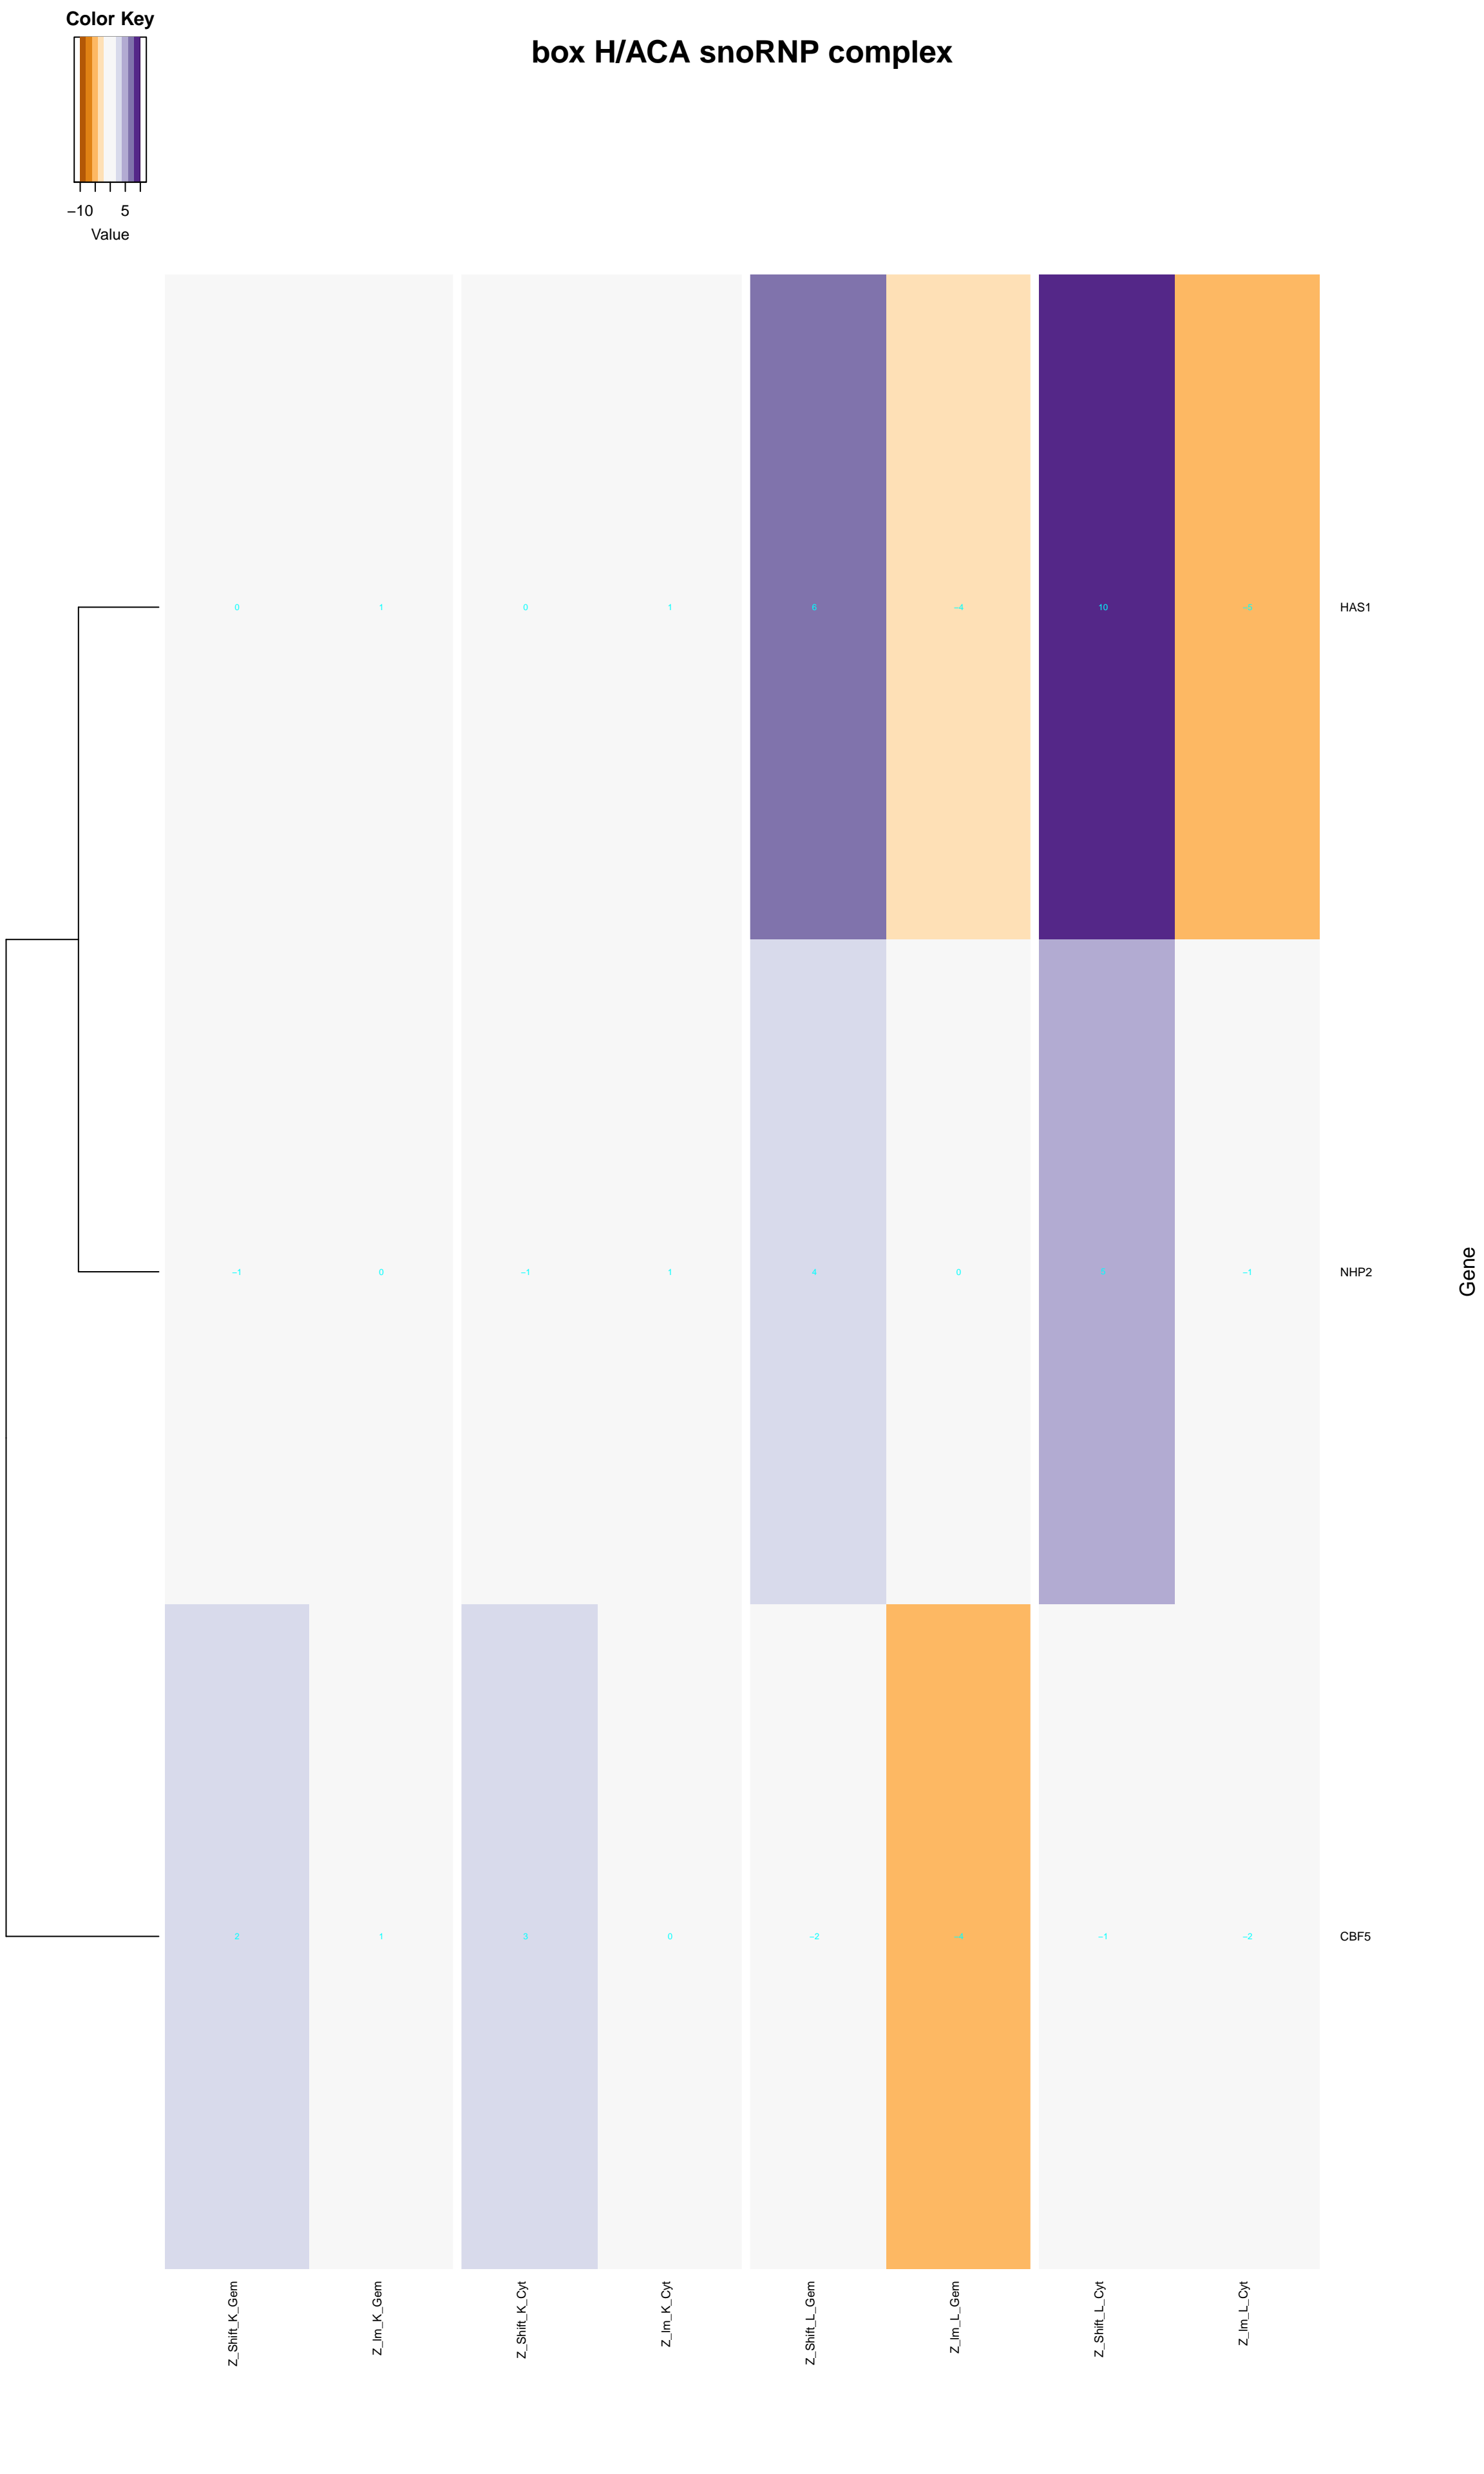

Supplement: s1 [file s1]

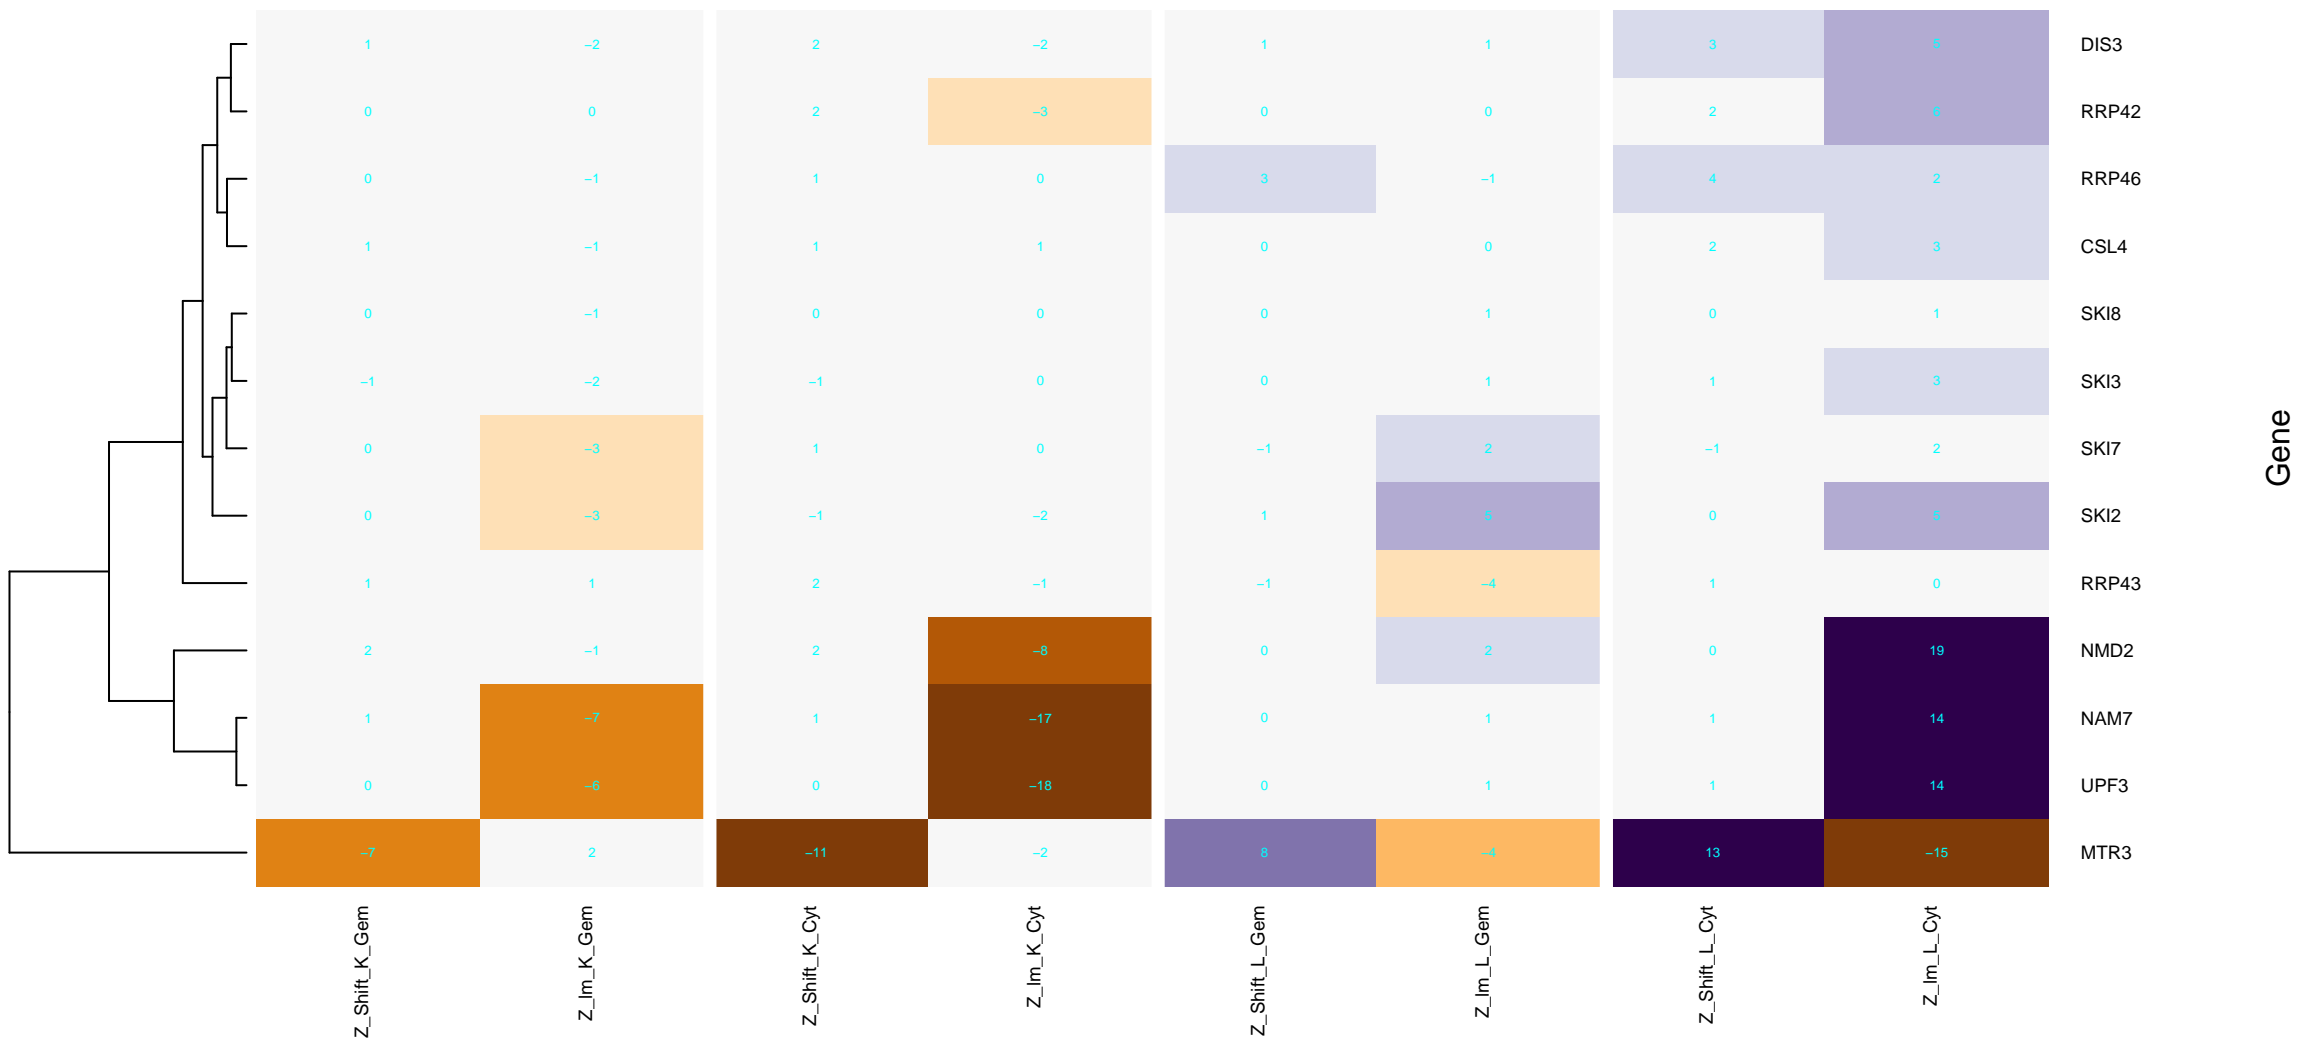

Supplement: s1 [file s1]

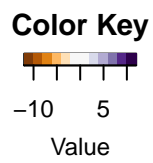

# mediator complex

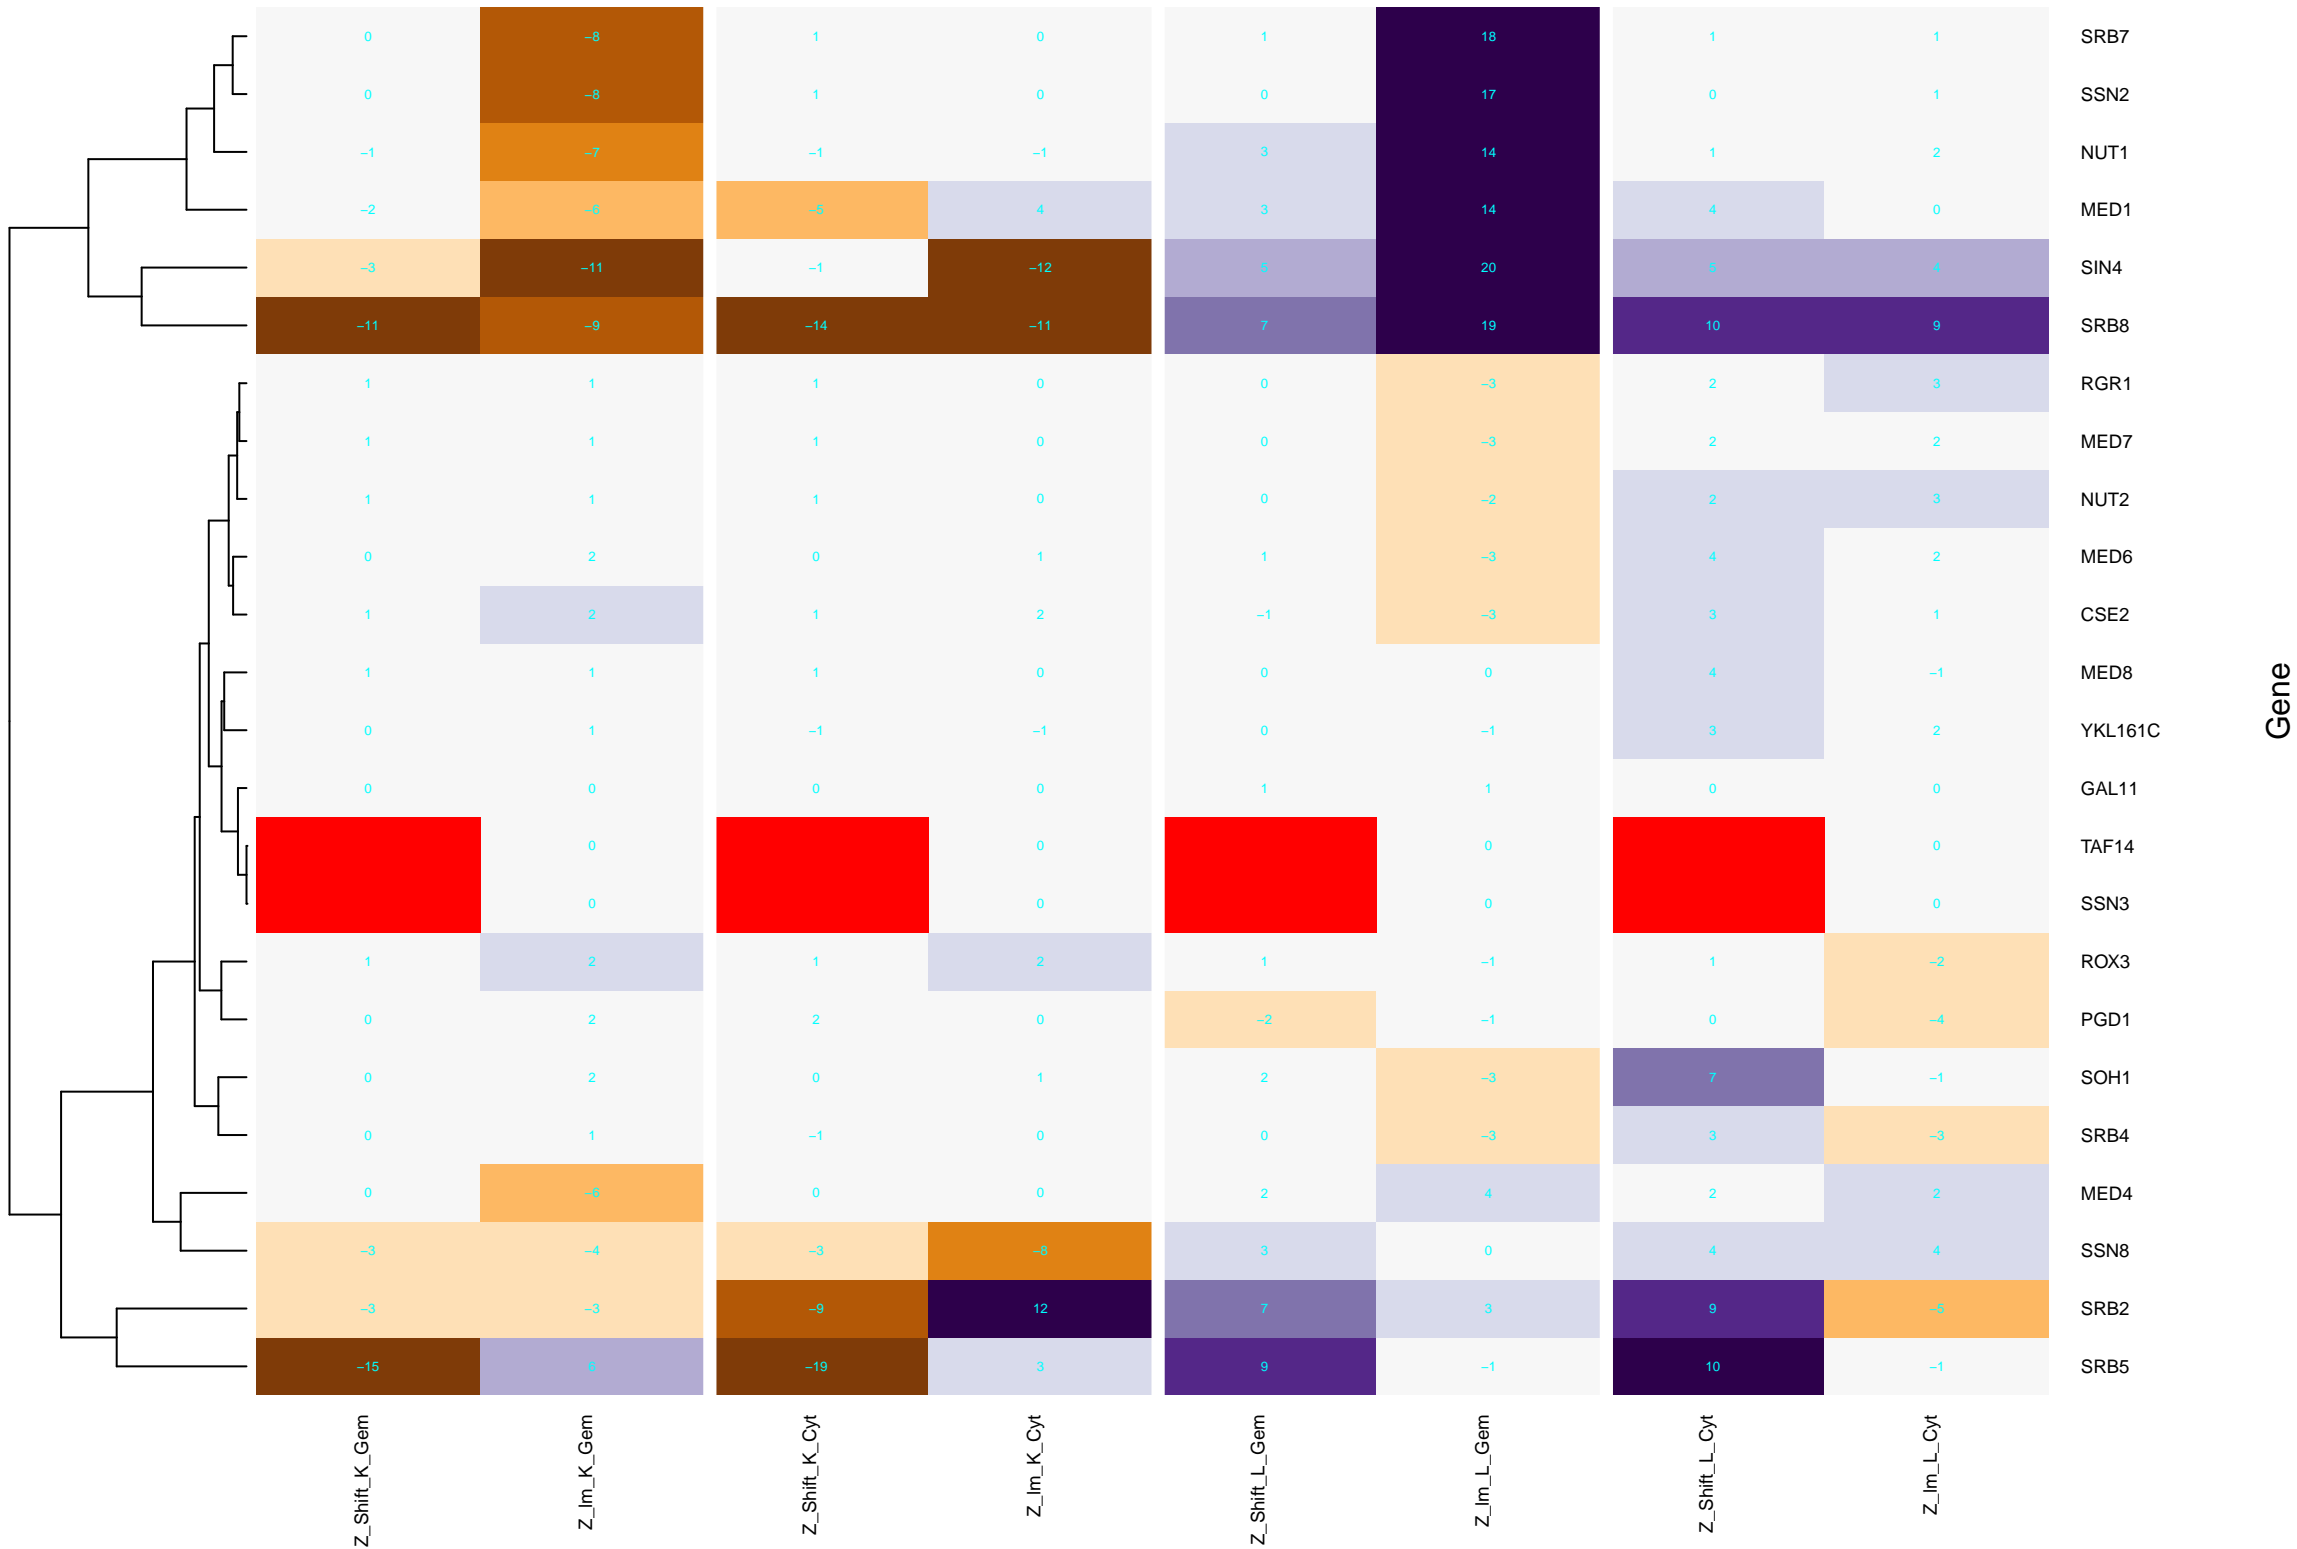

Supplement: s1 [file s1]

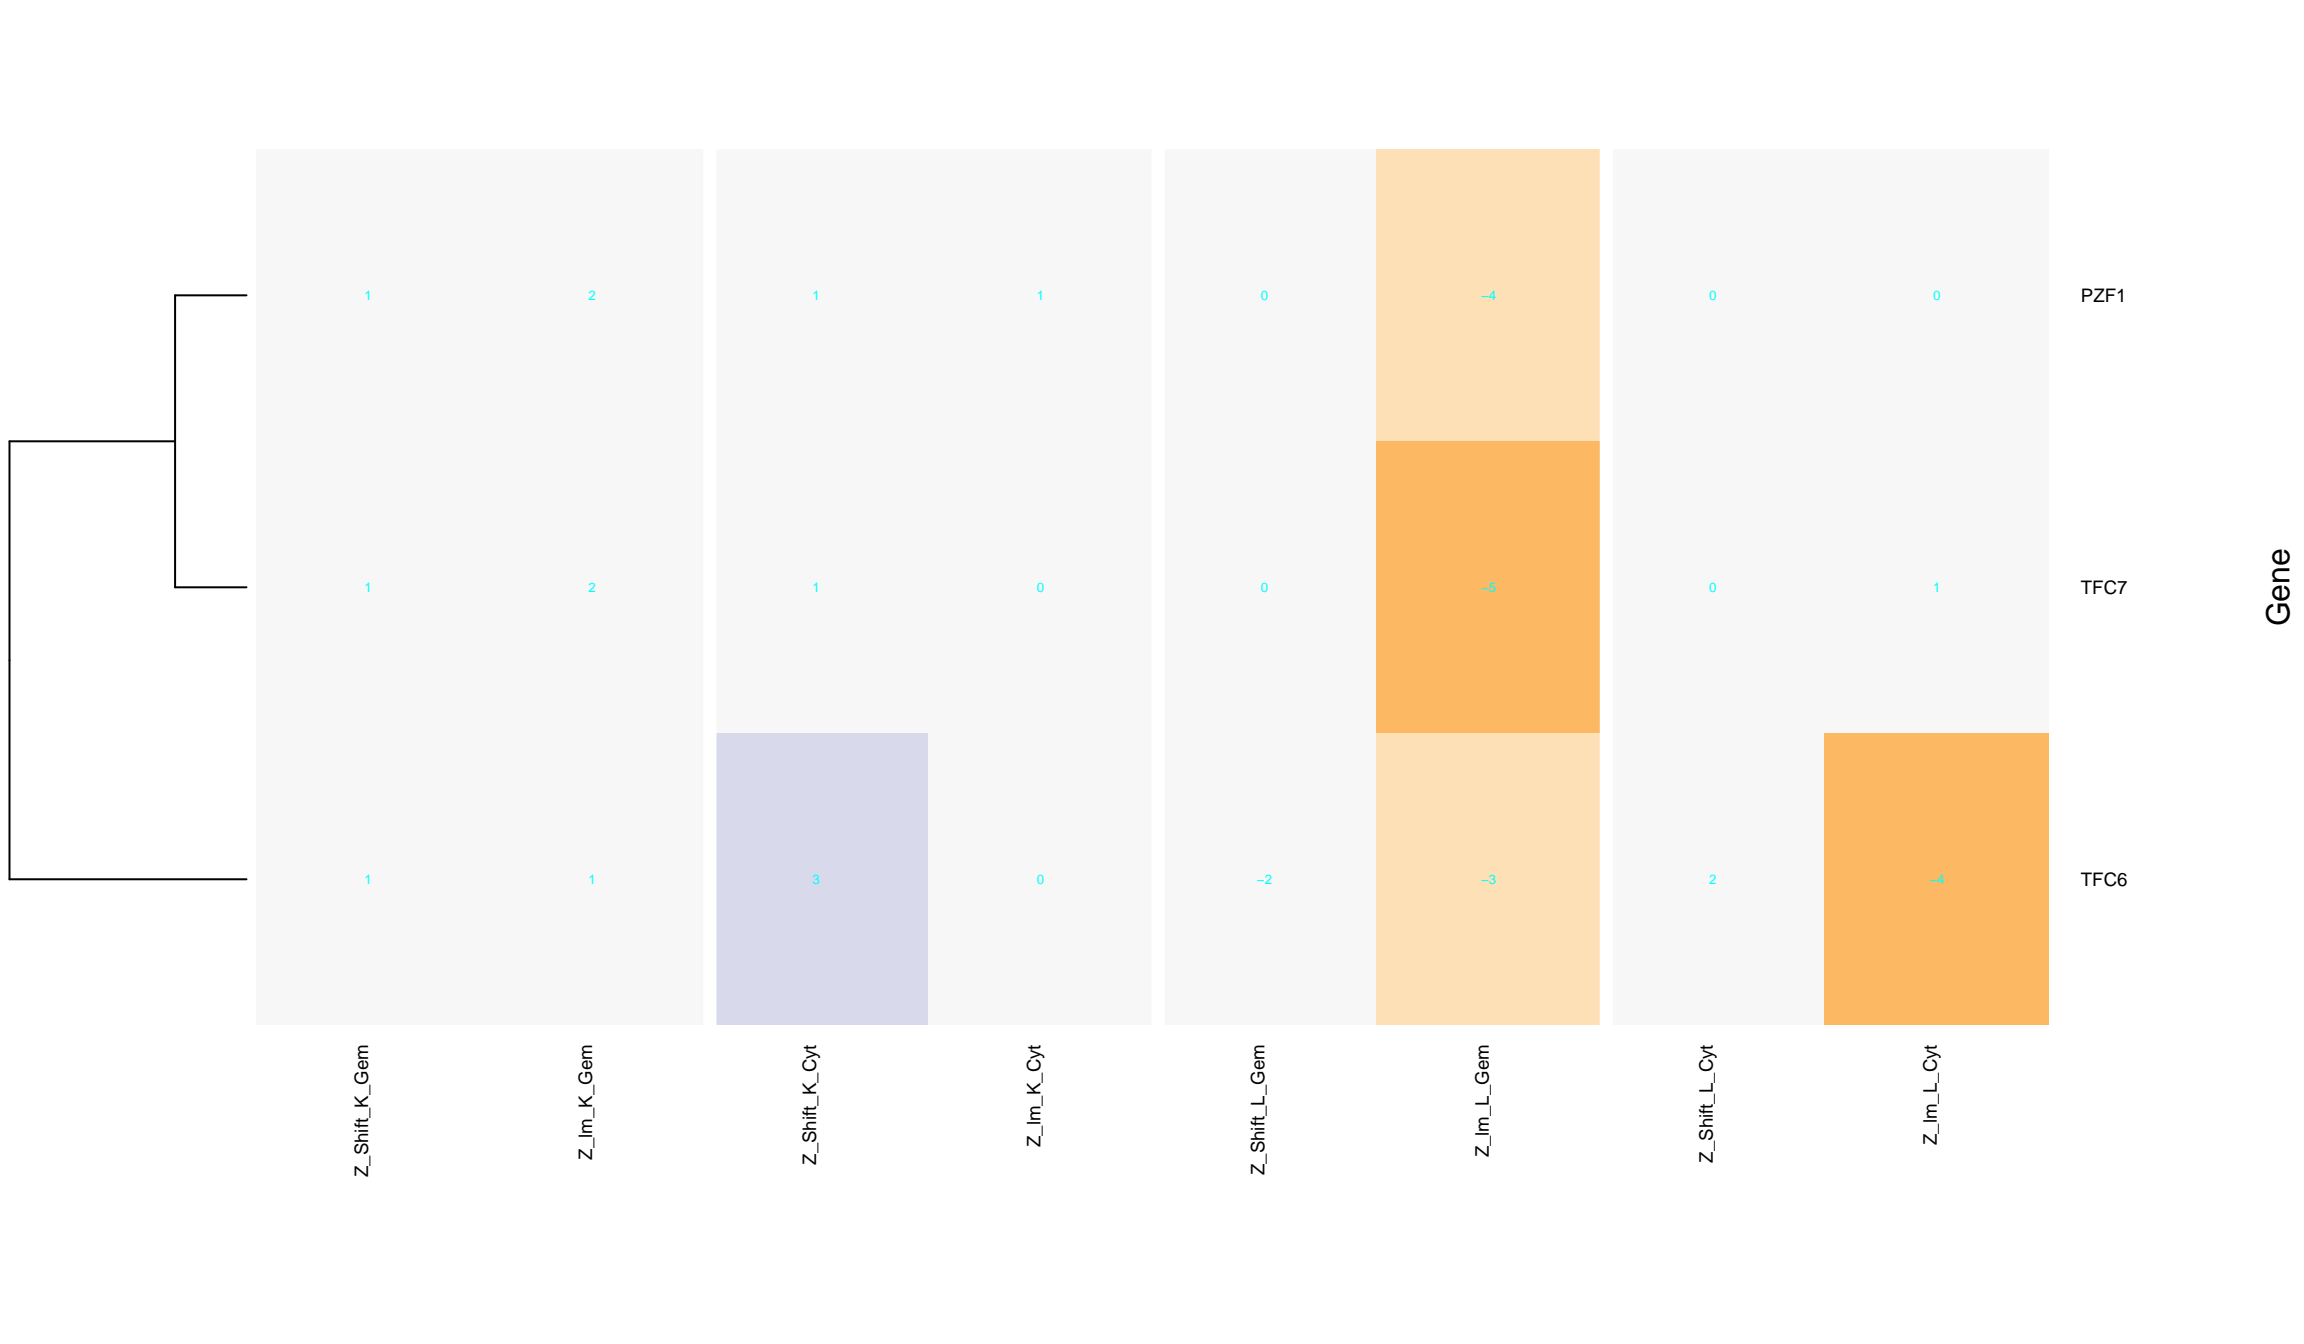

Supplement: s1 [file s1]

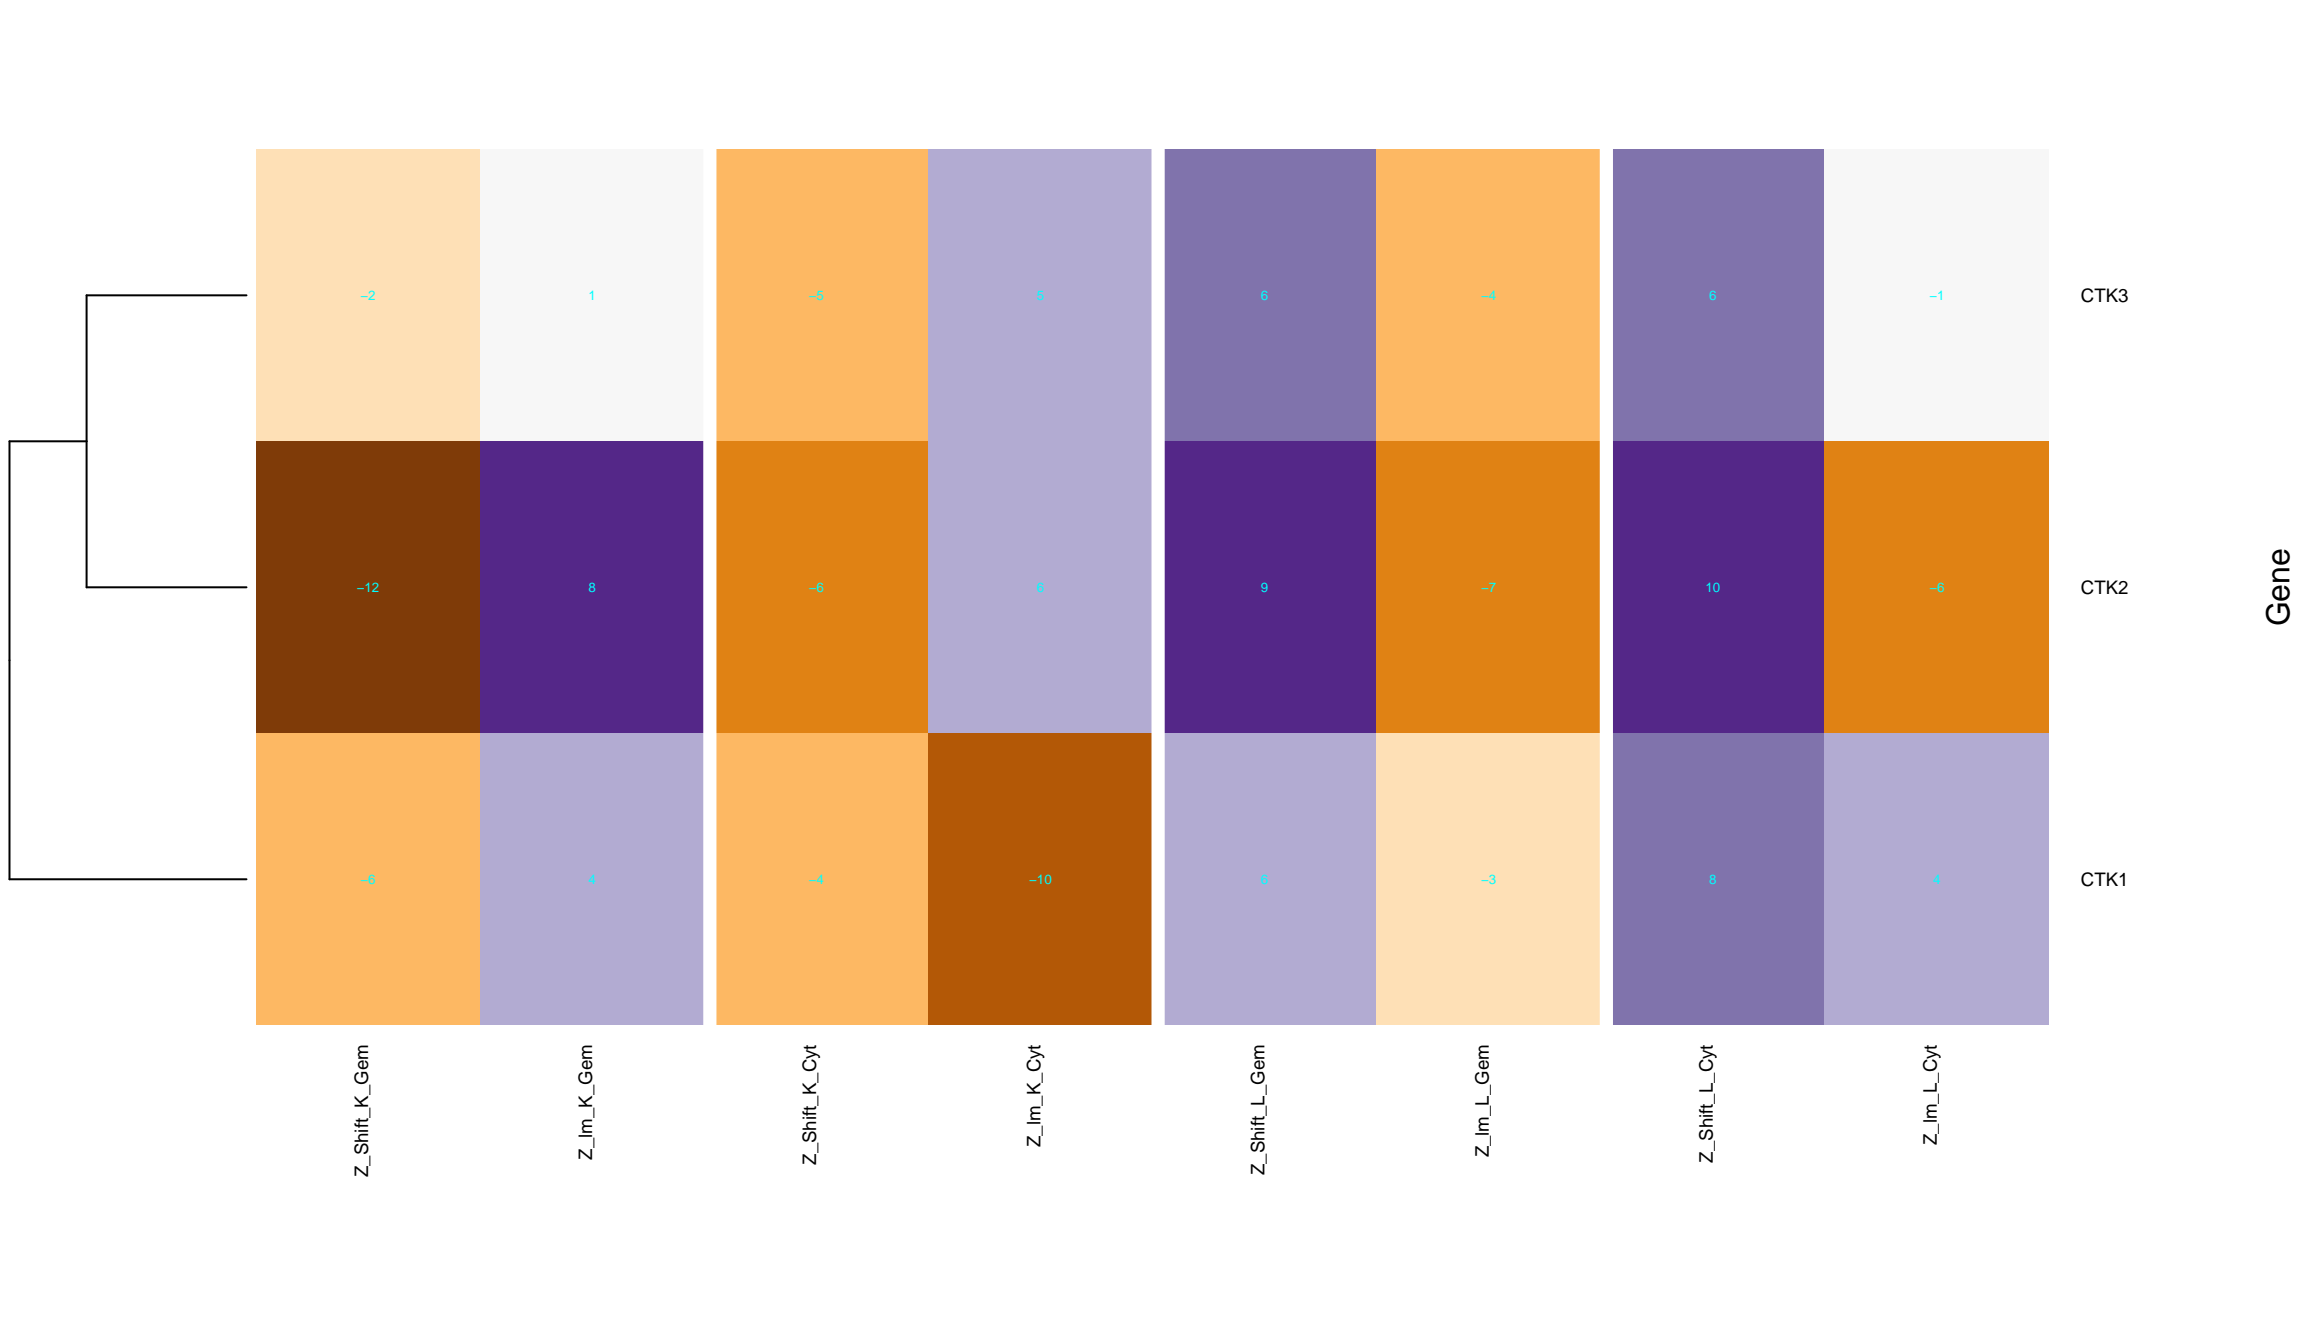

Supplement: s1 [file s1]

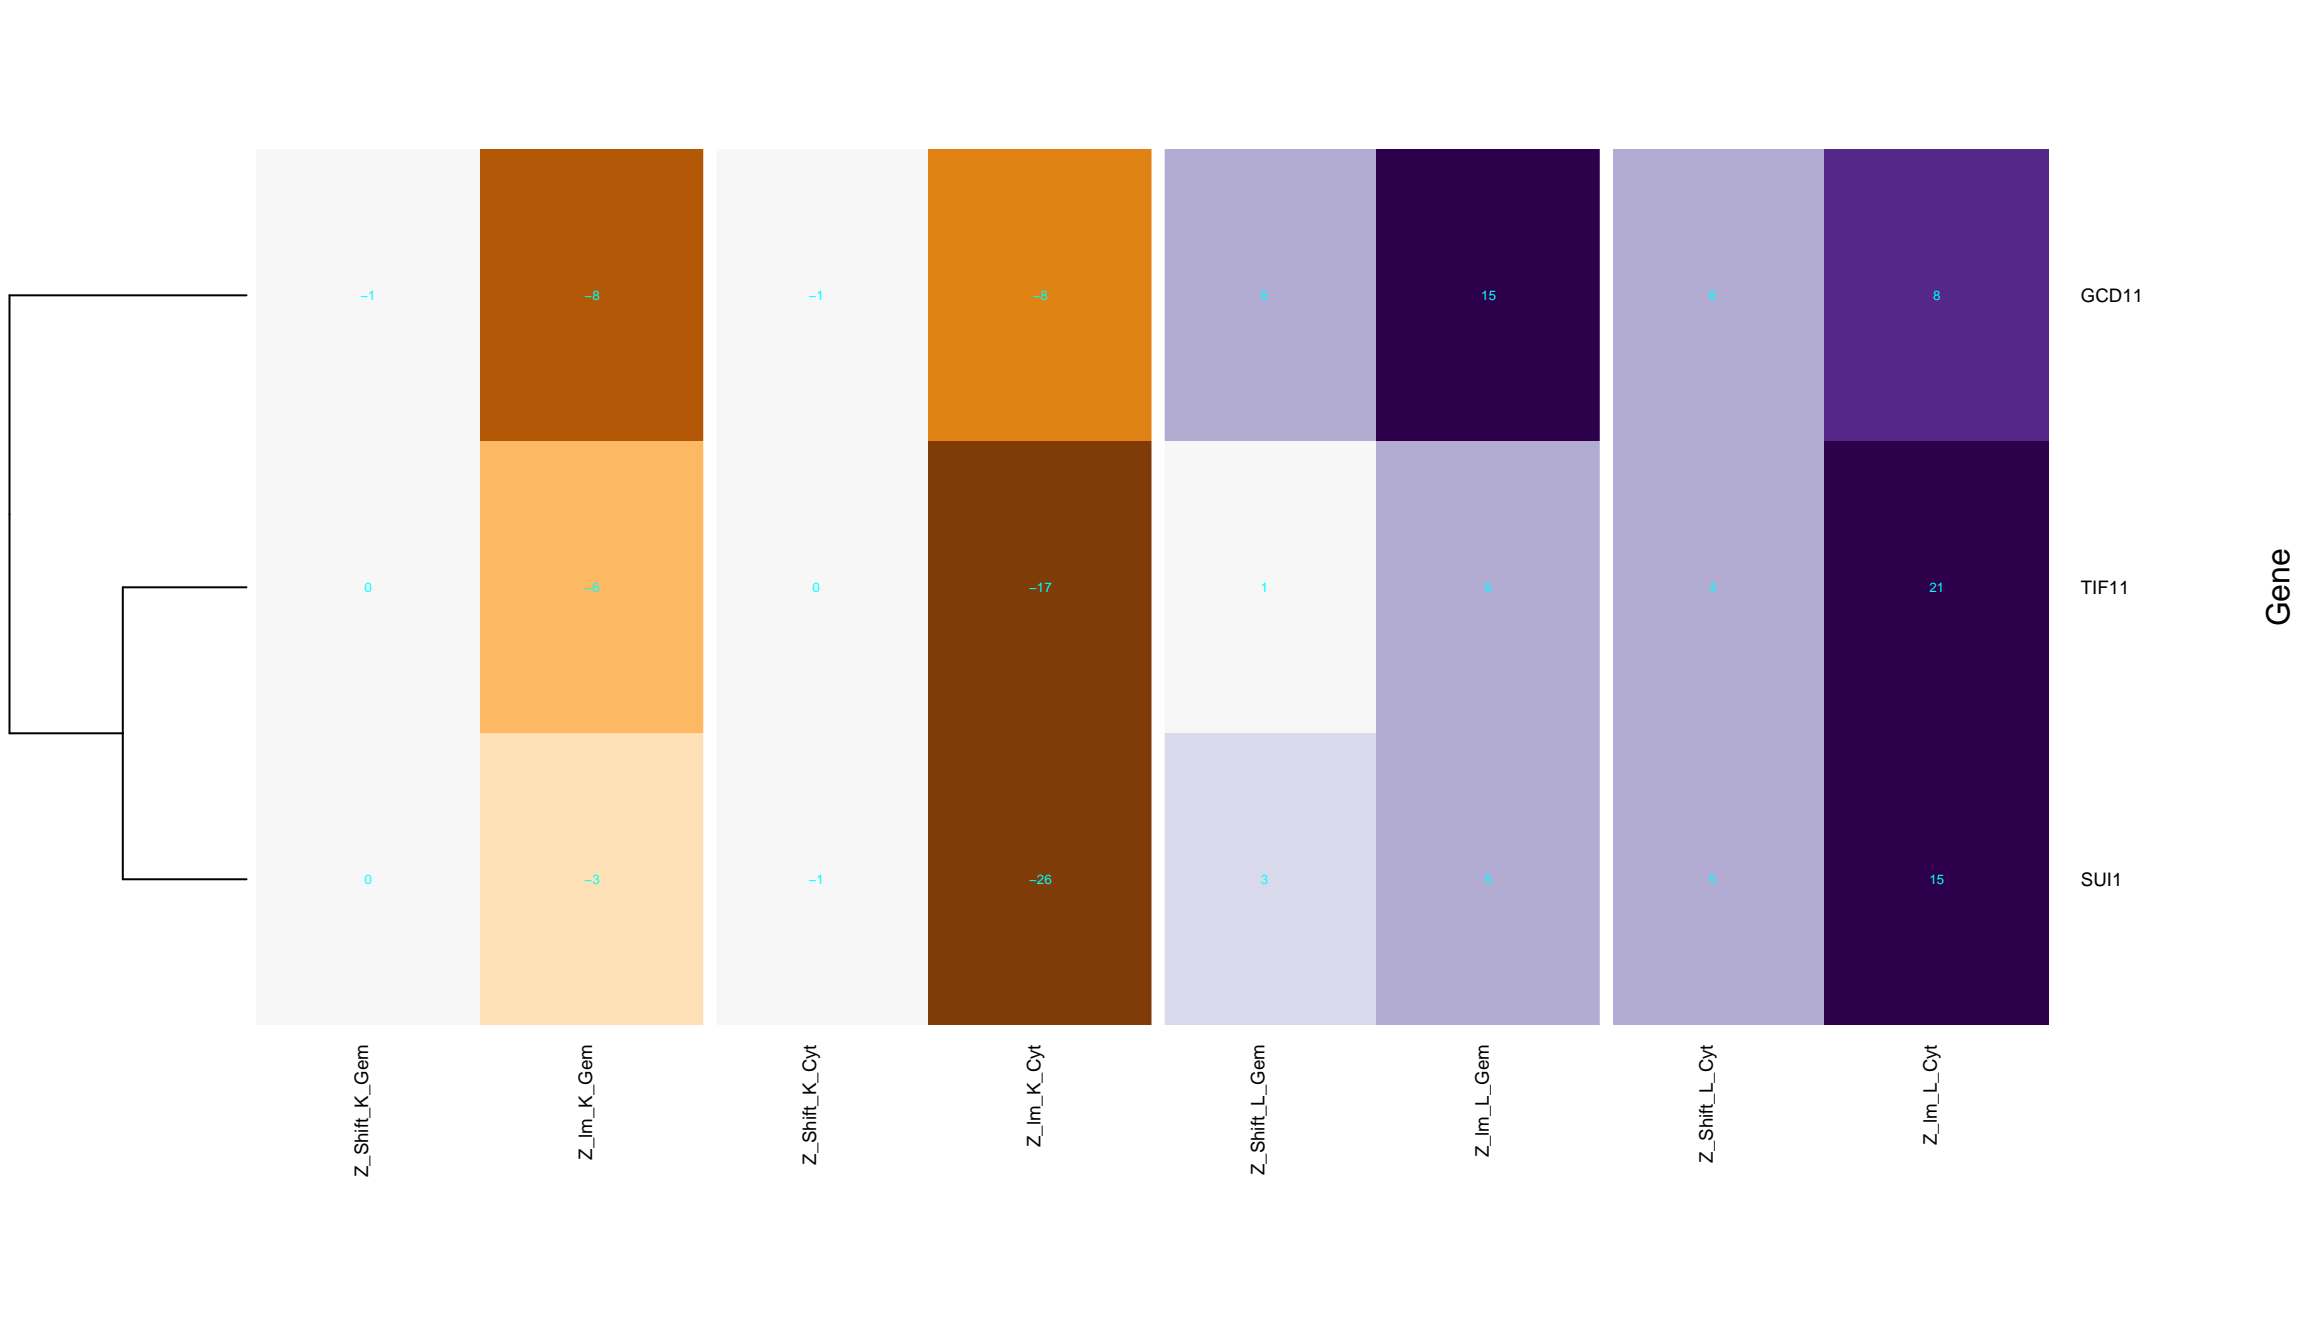

Supplement: s1 [file s1]

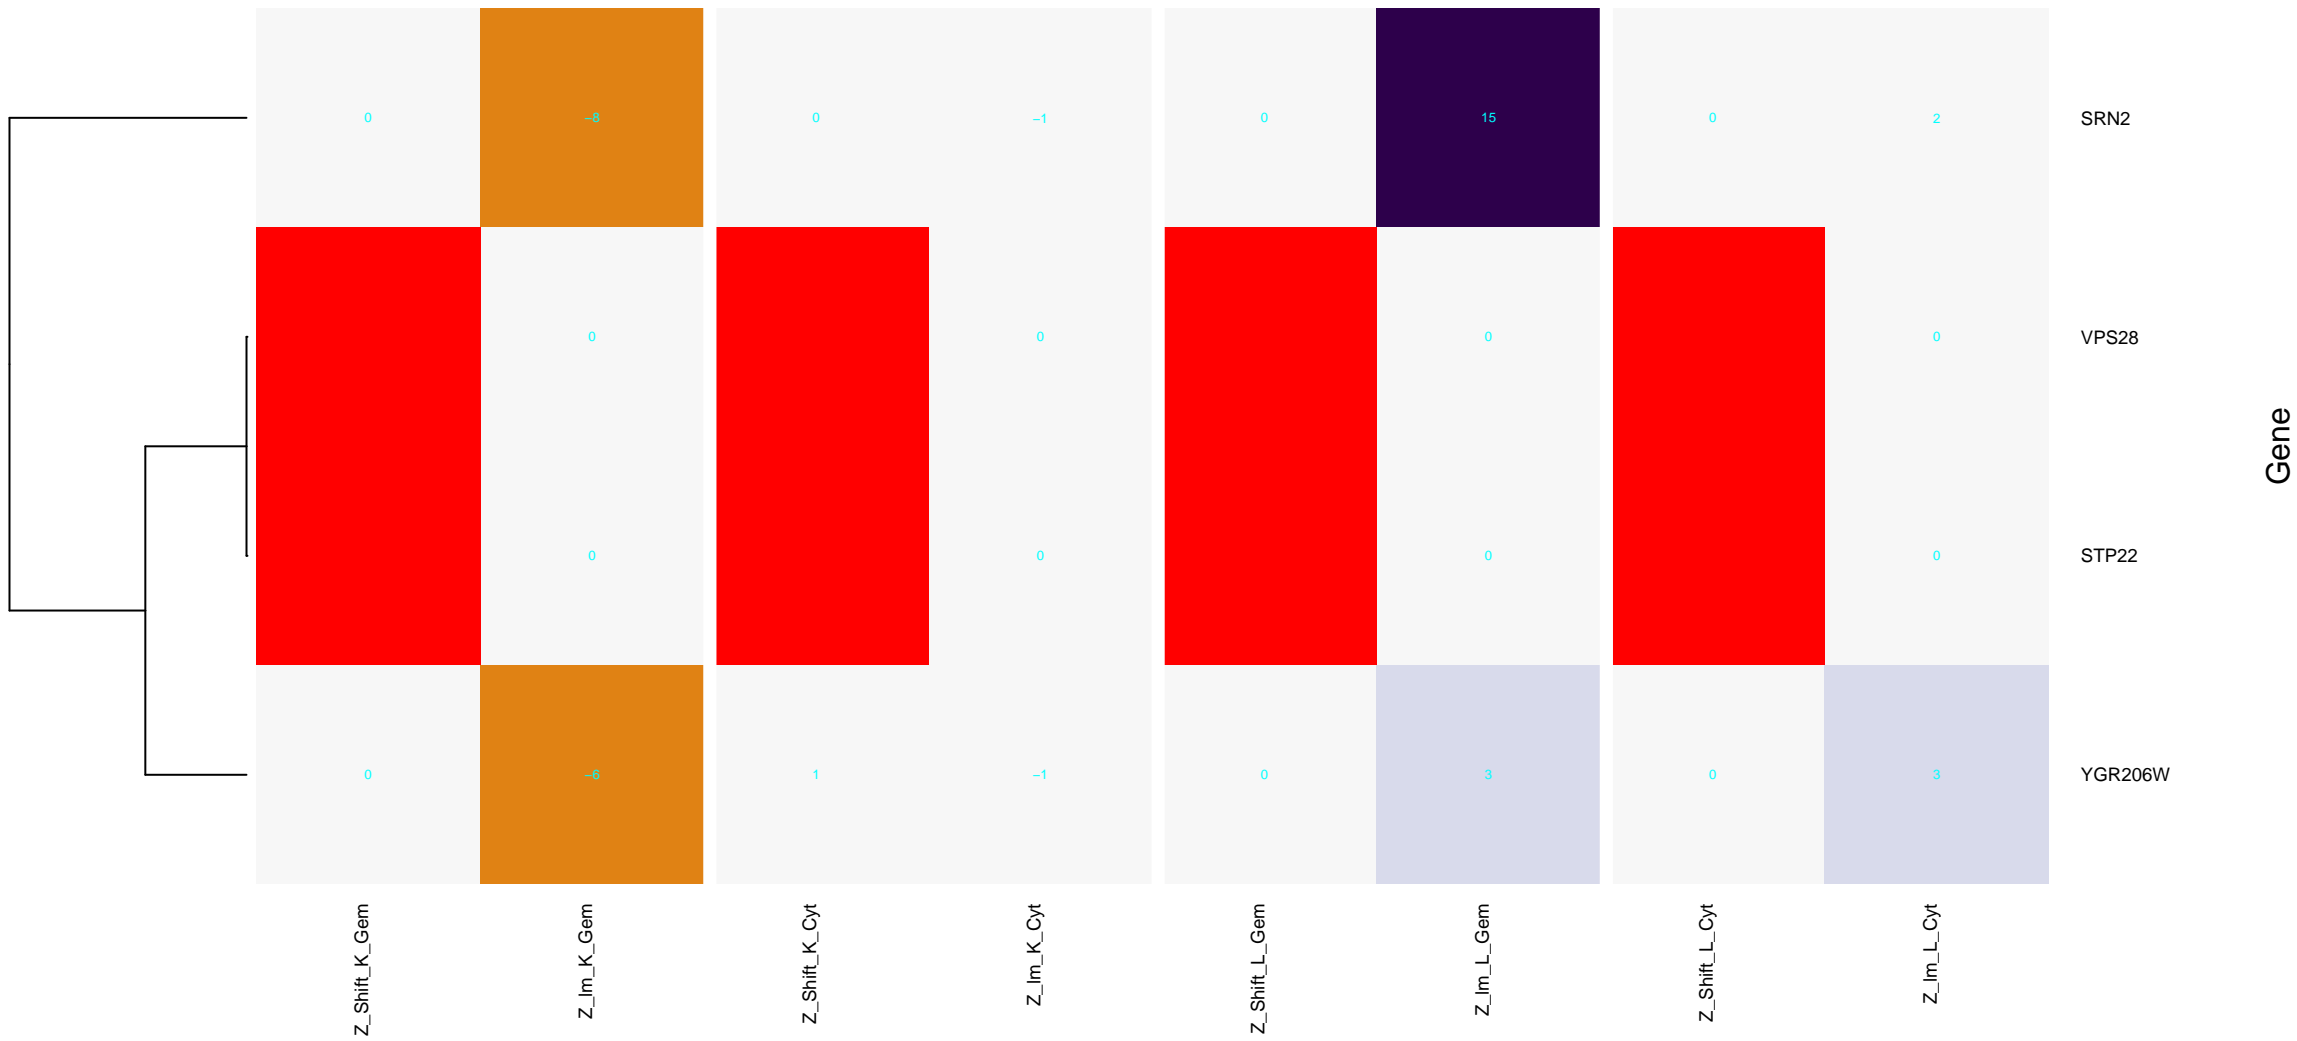

Supplement: s1 [file s1]

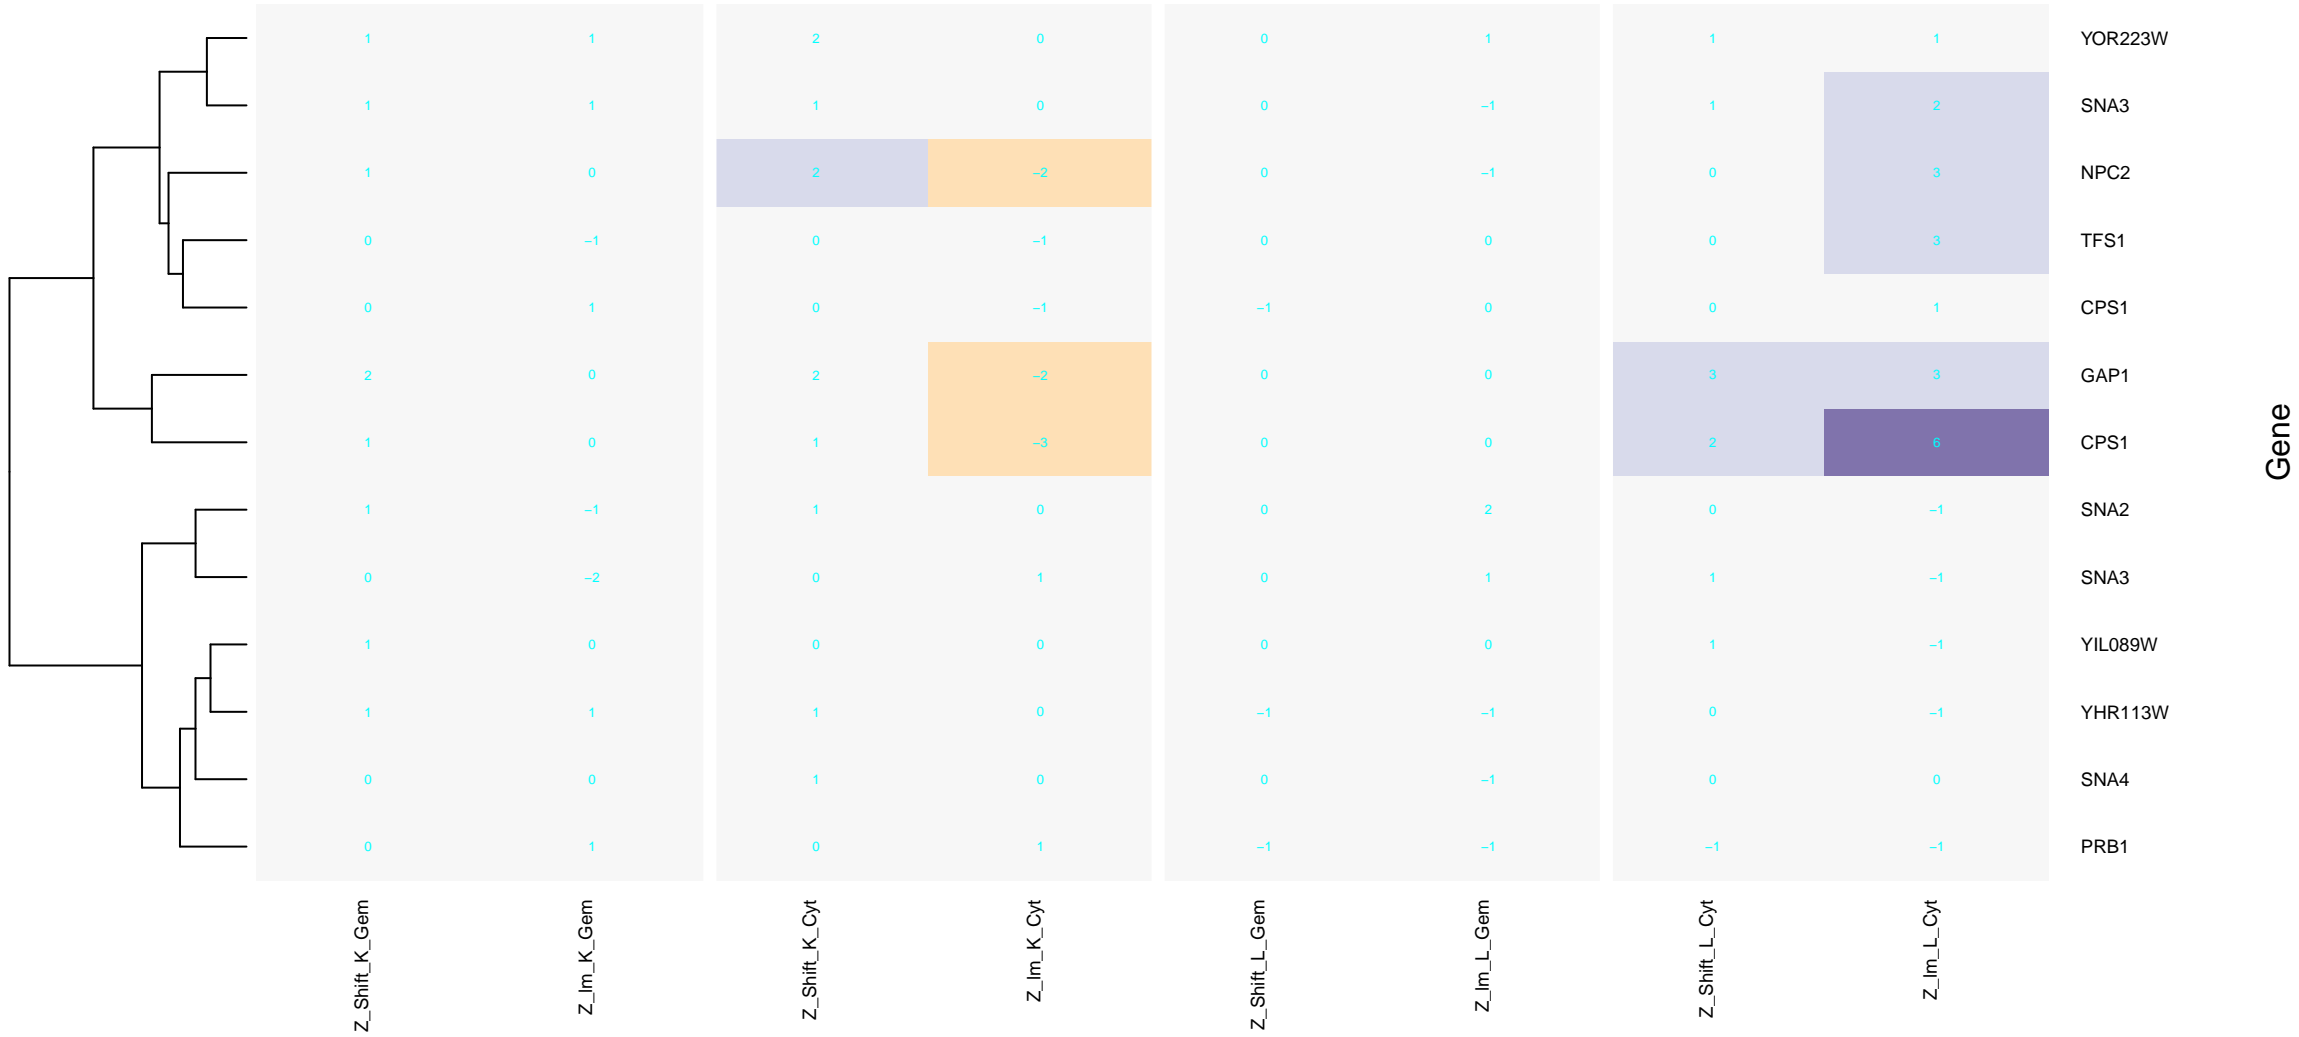

Supplement: s1 [file s1]

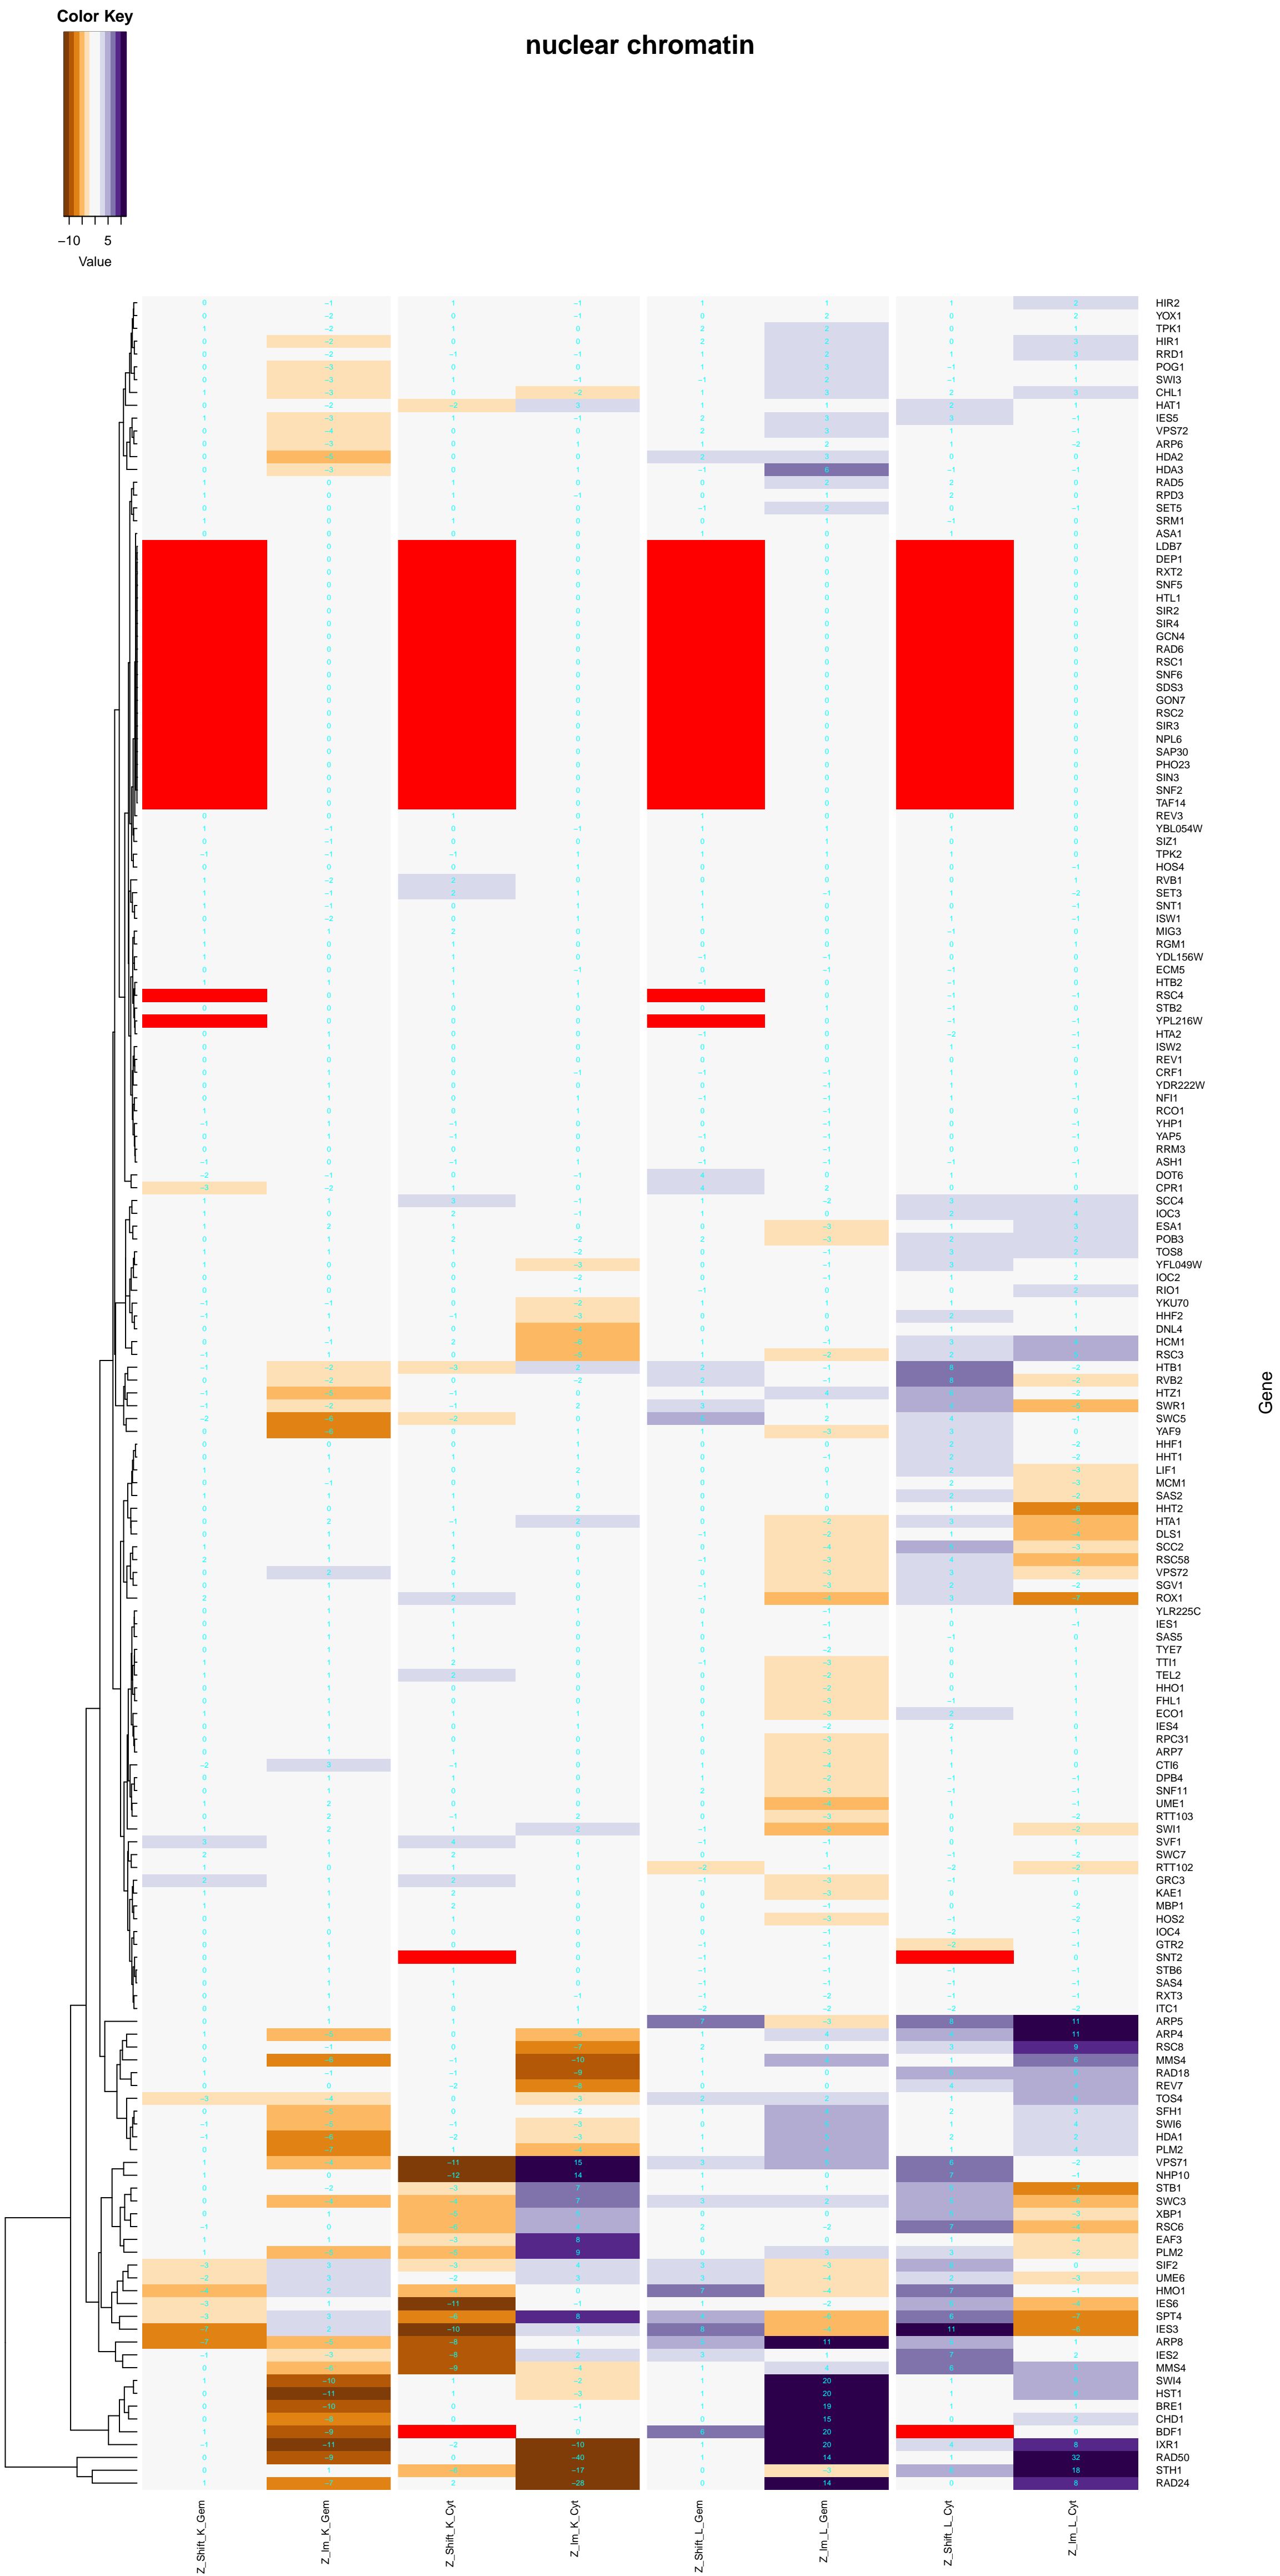

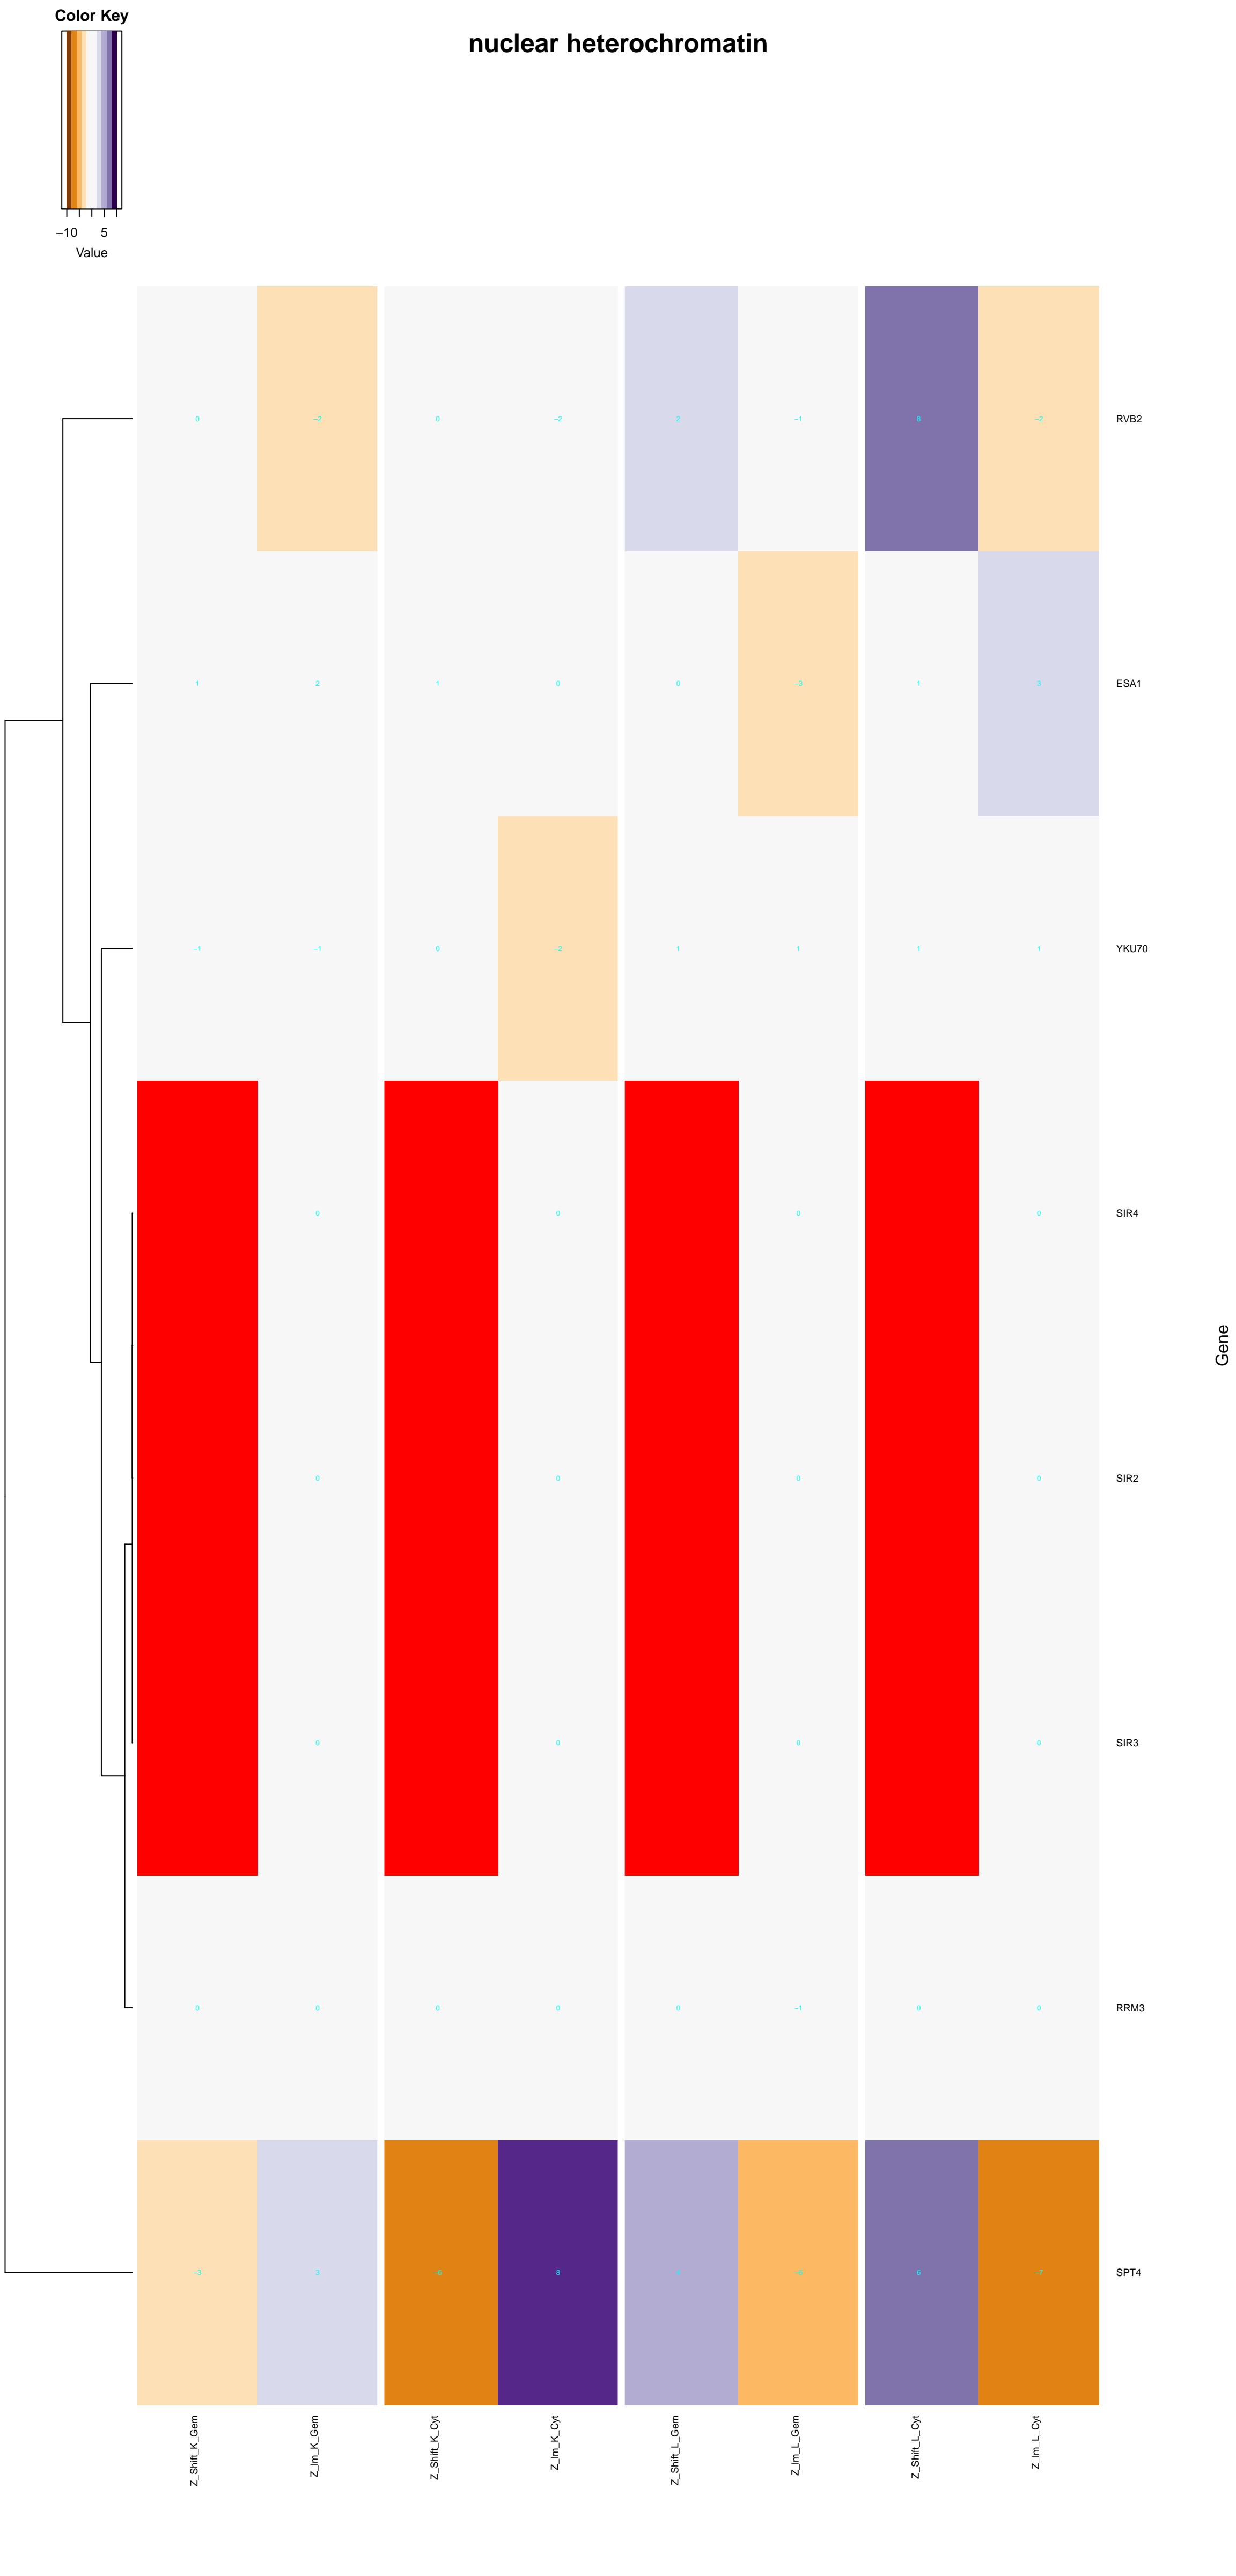

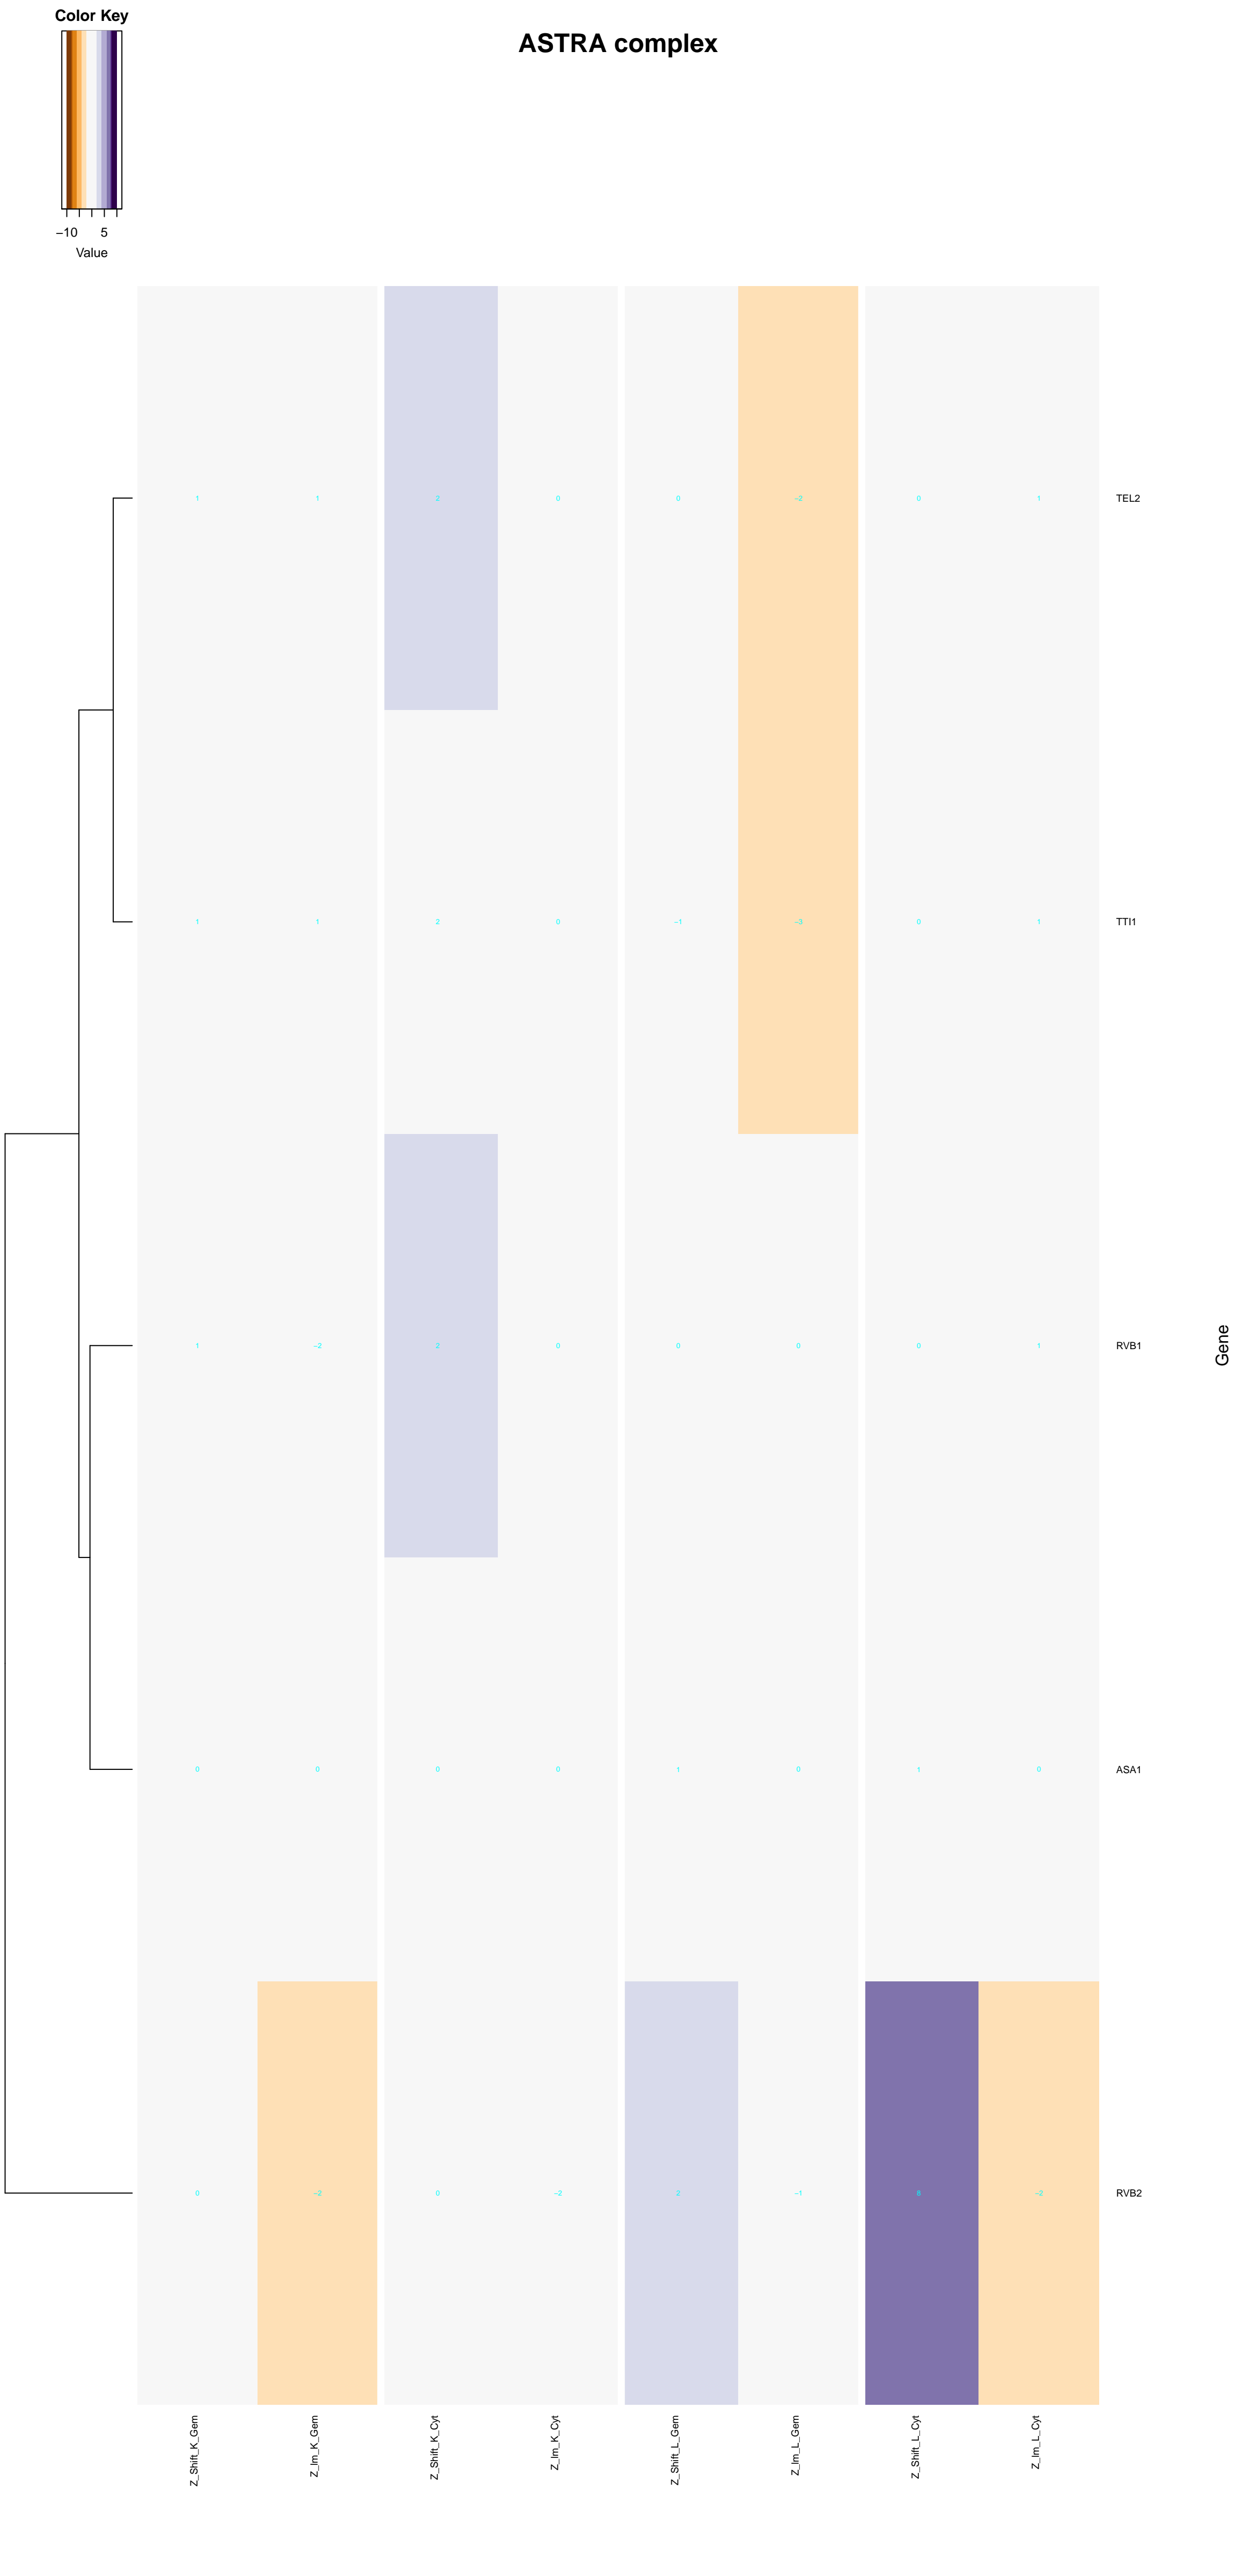

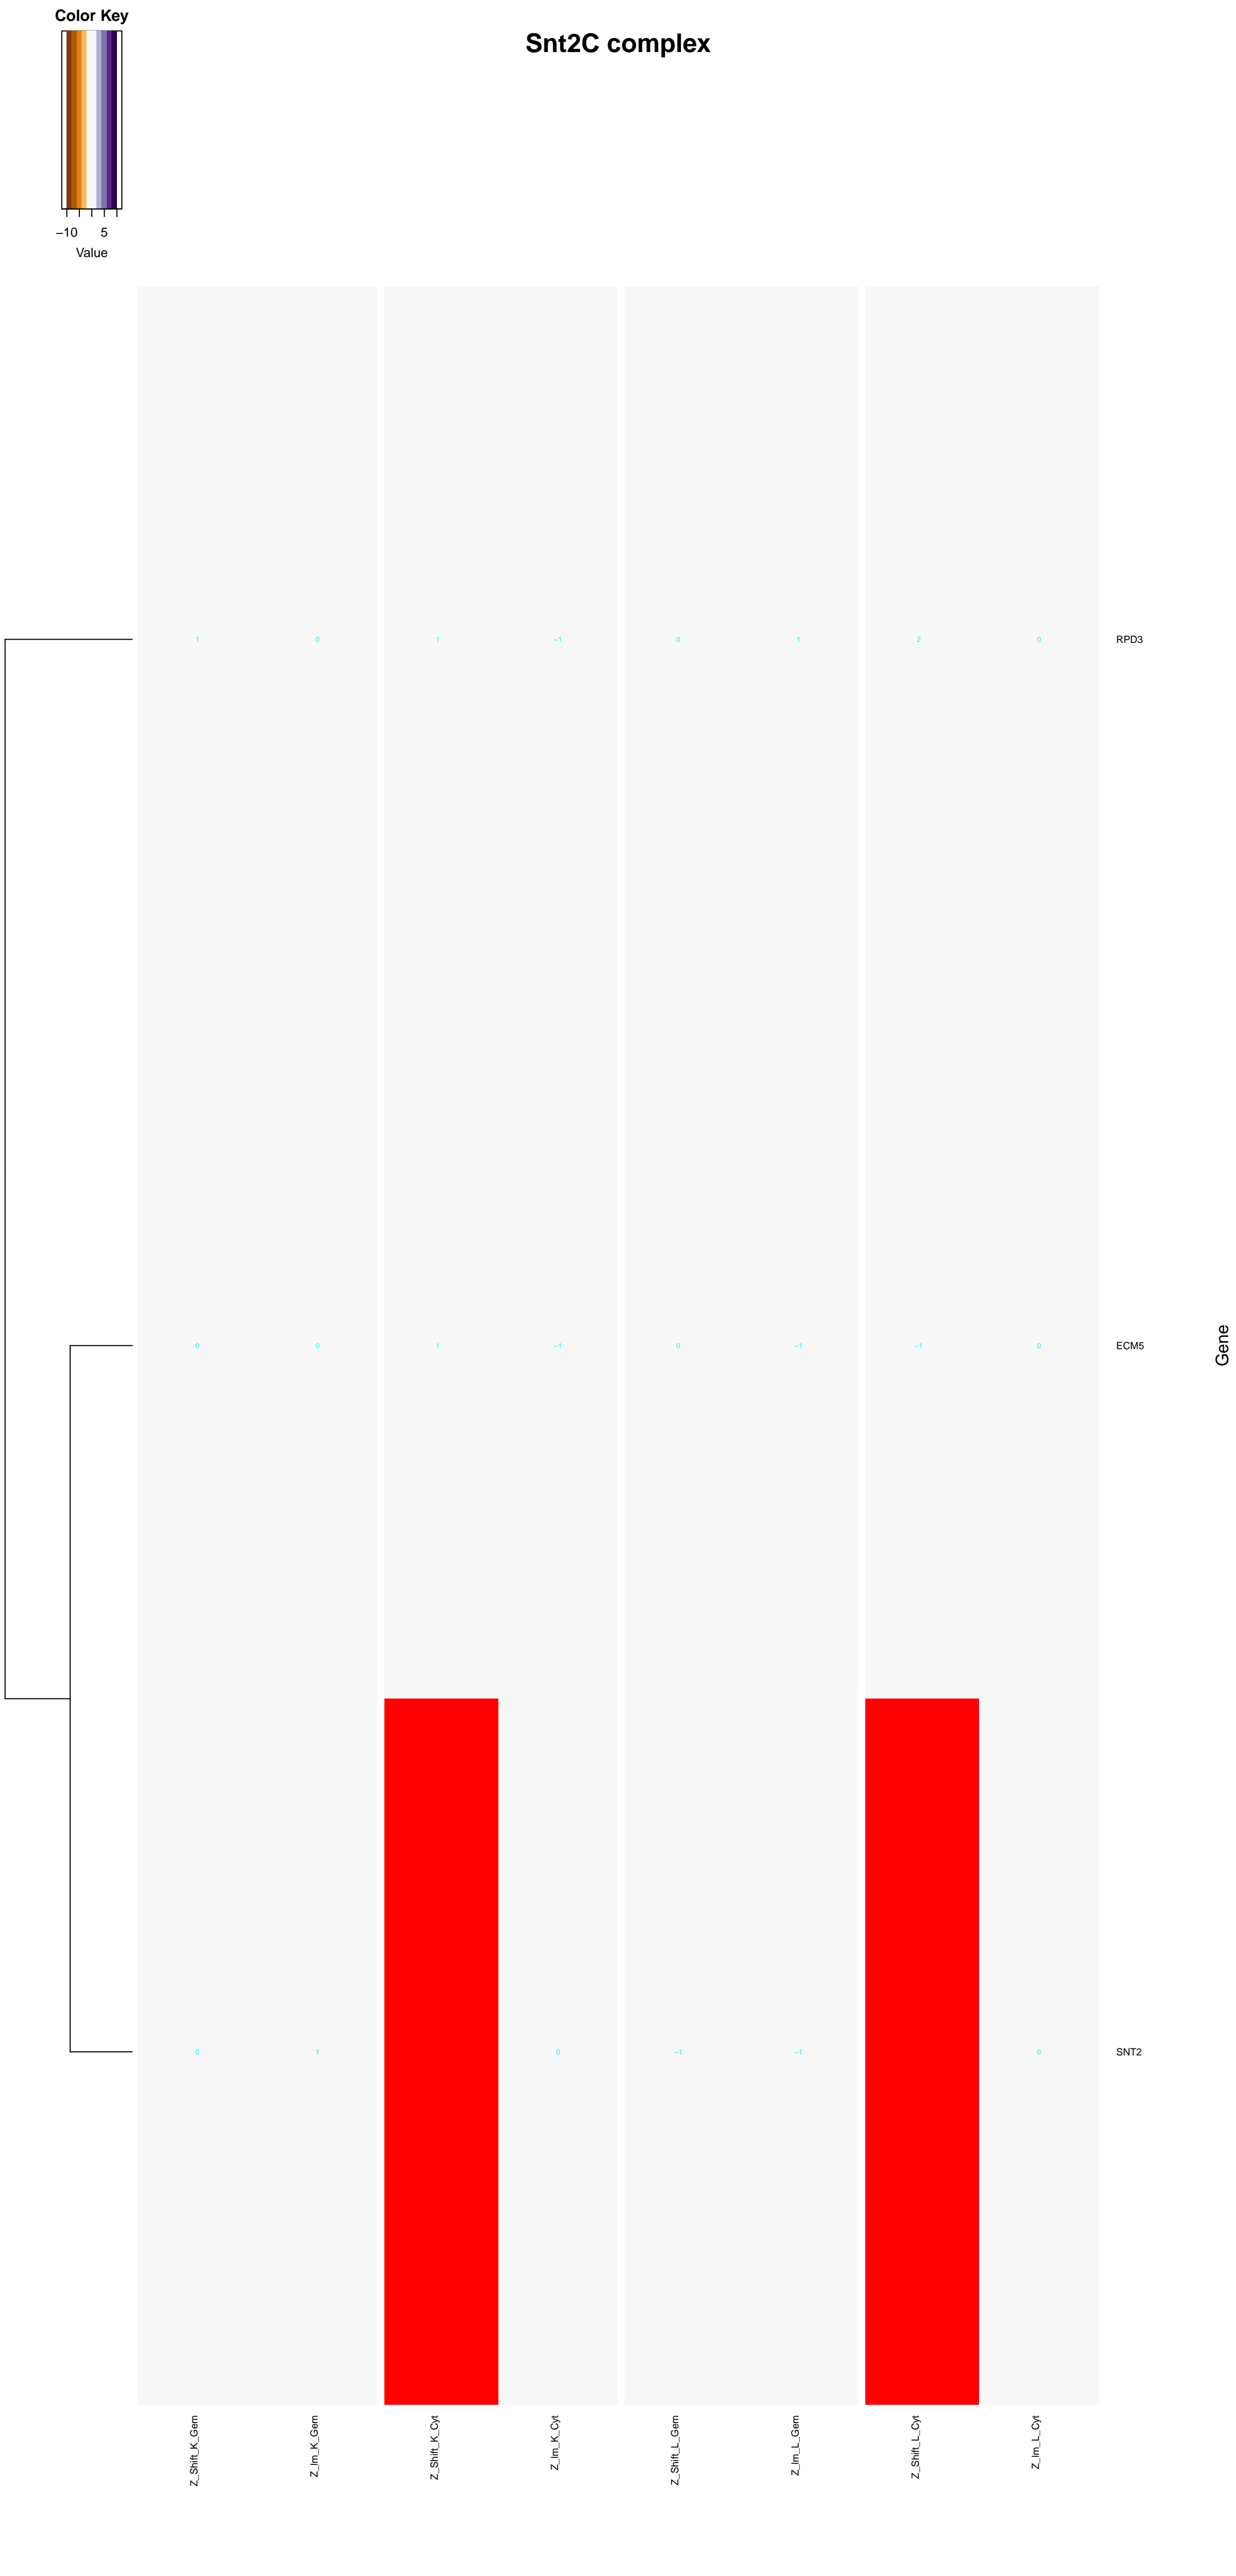

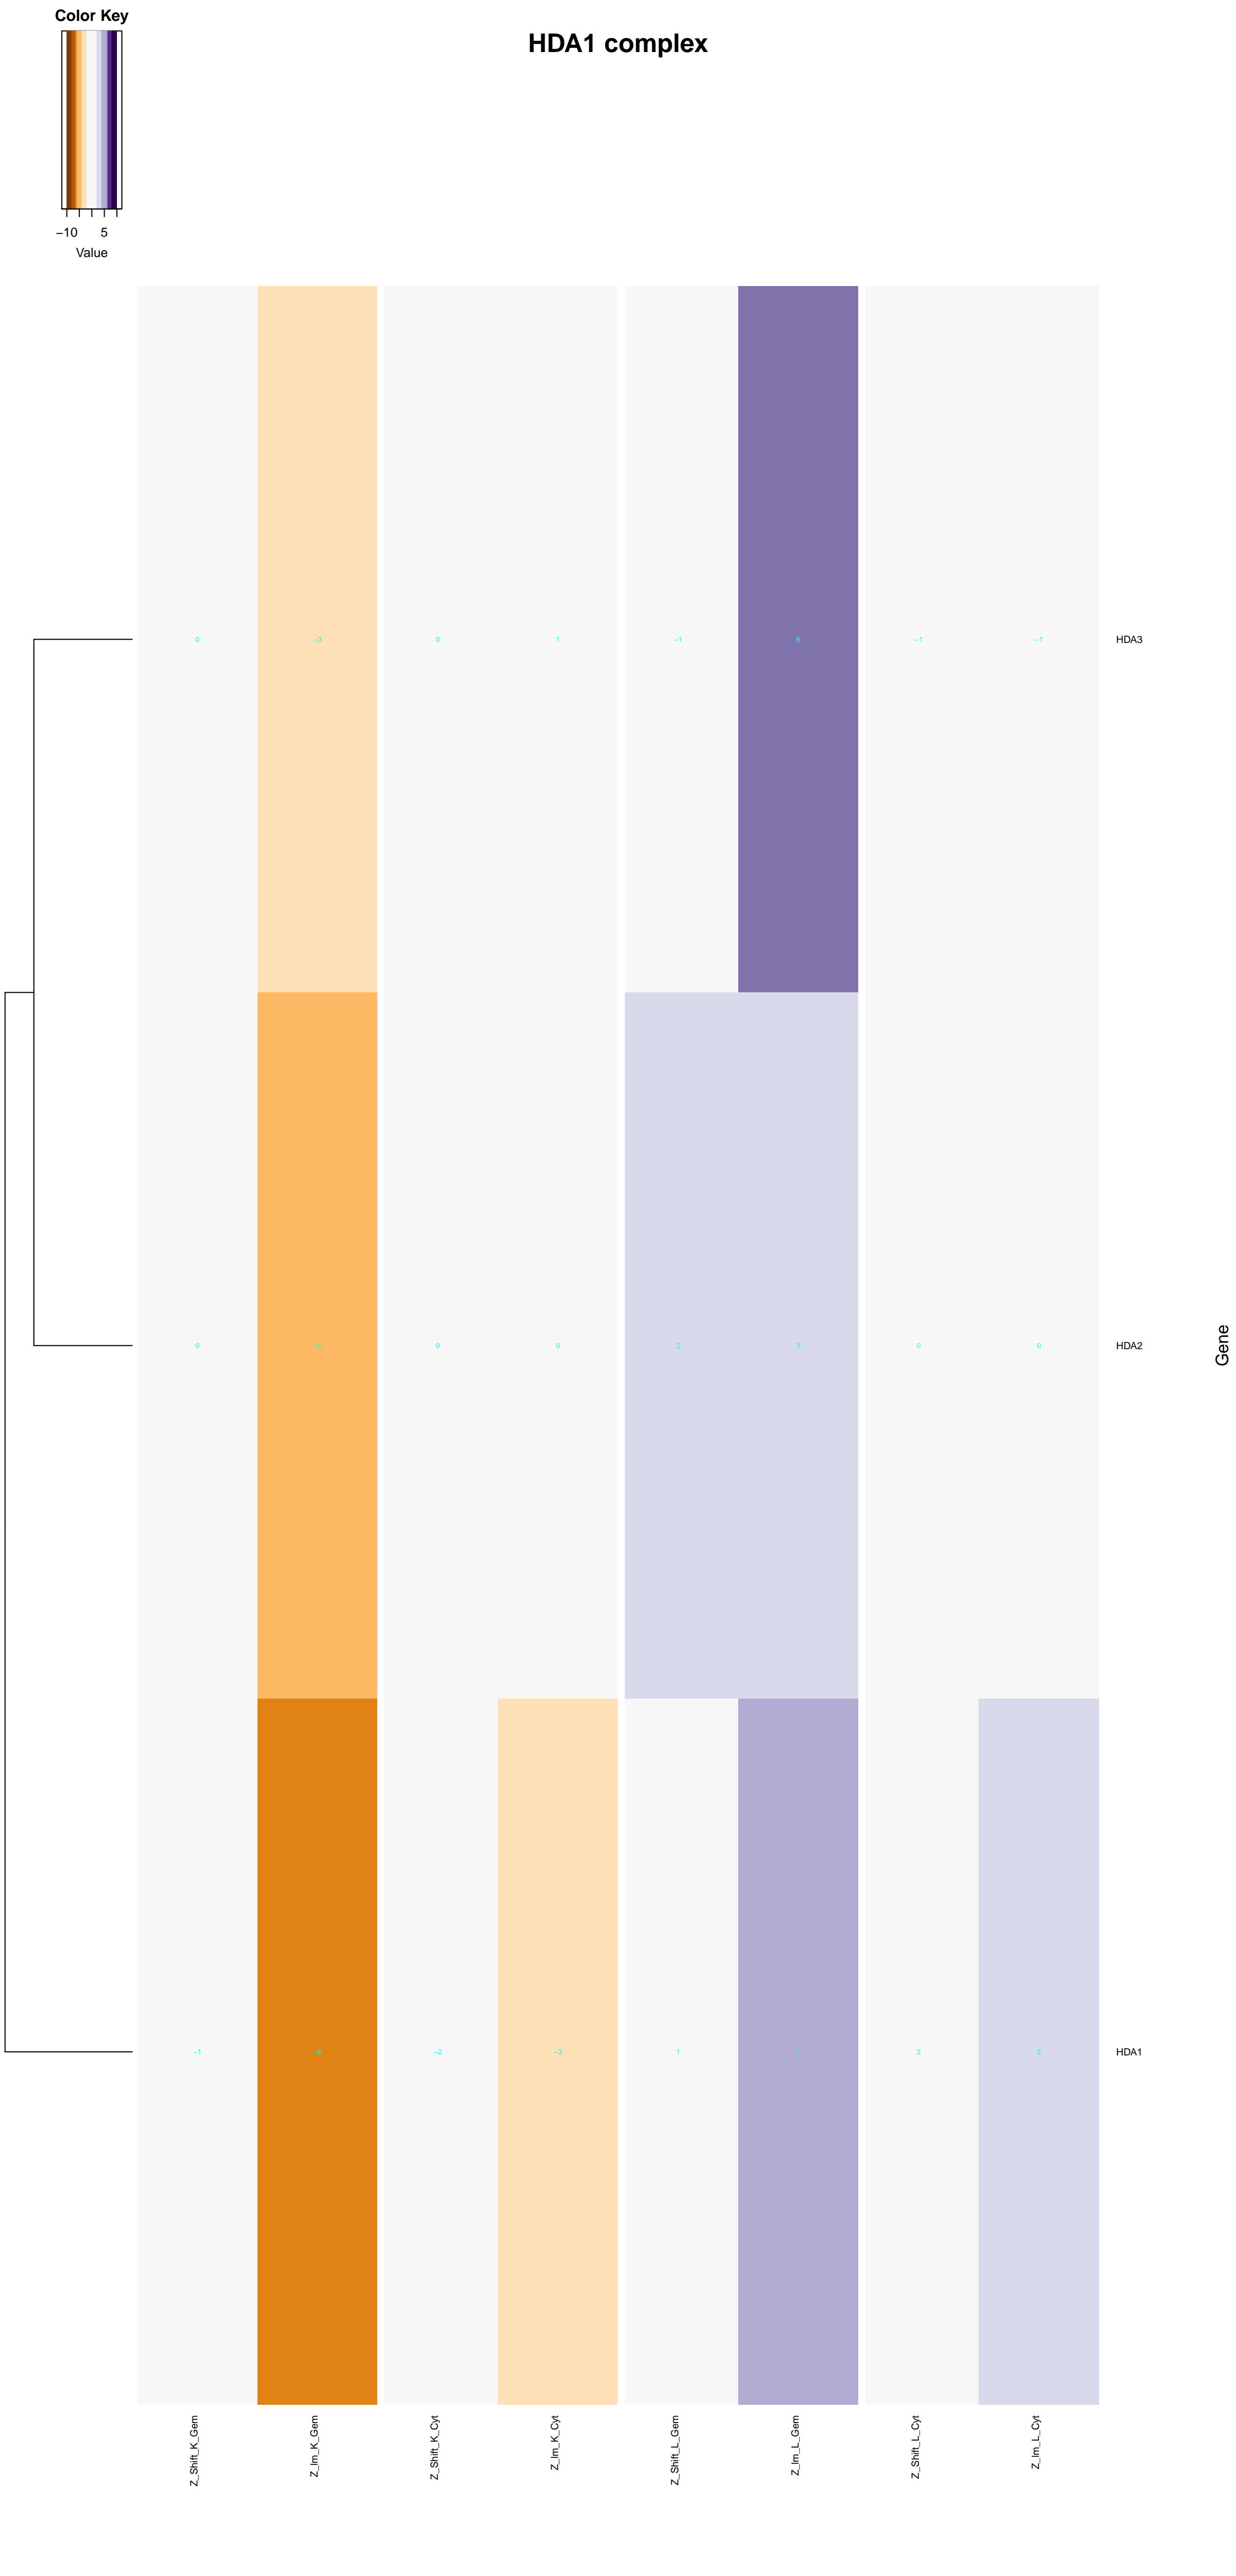

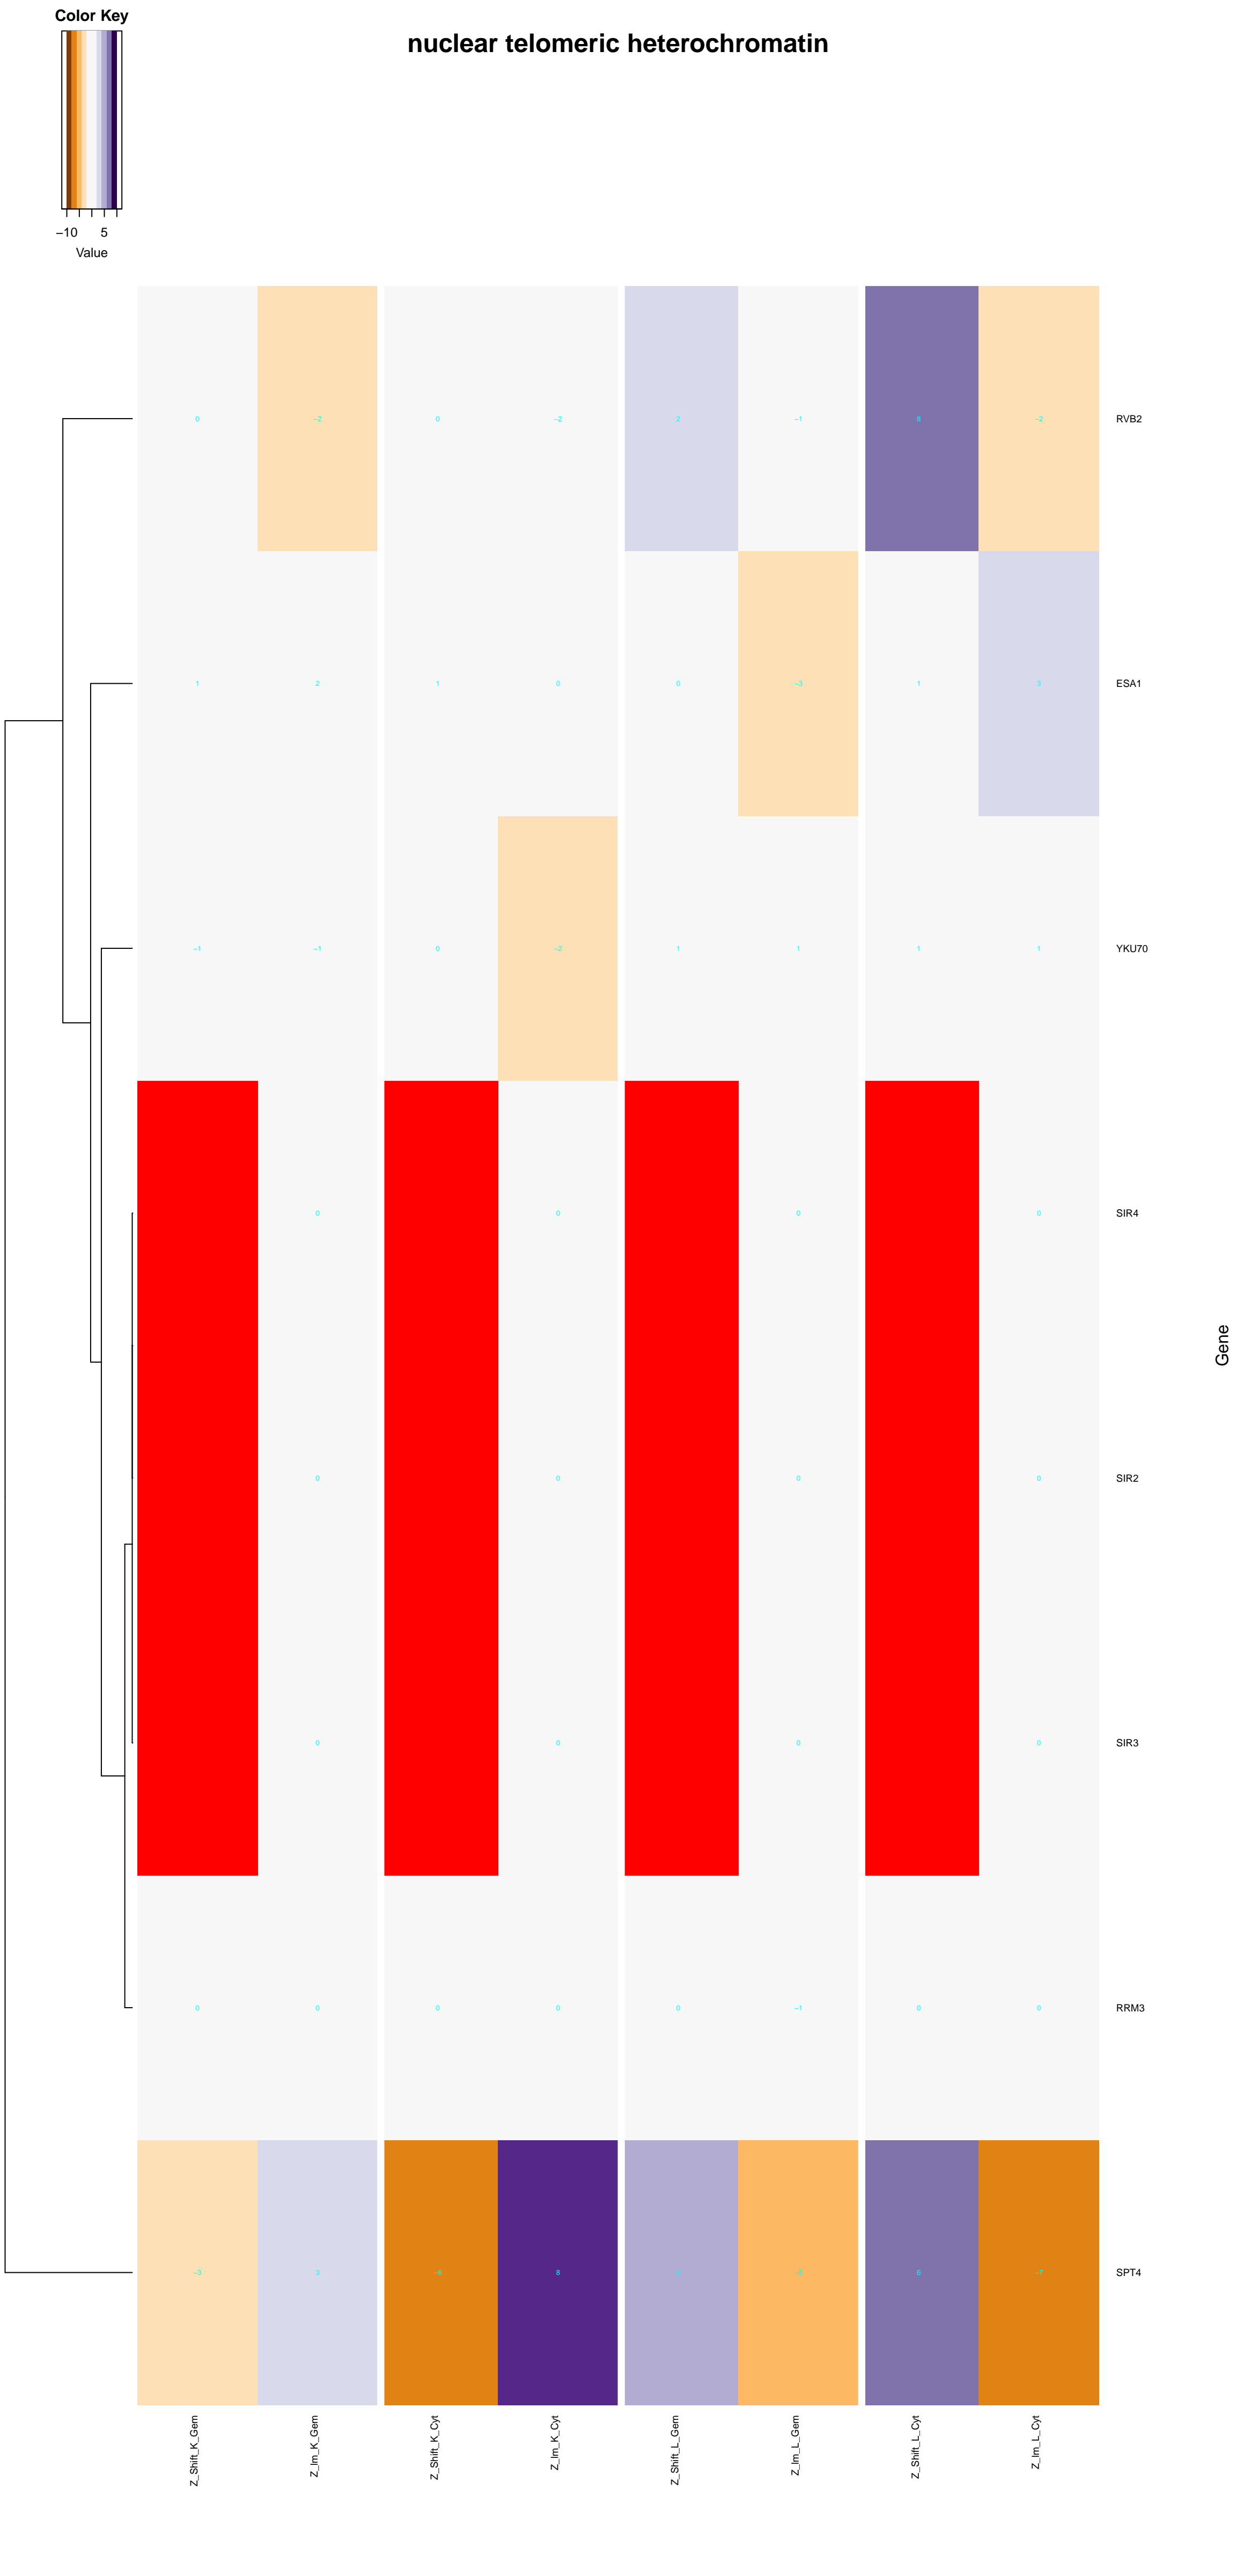

Supplement: s1 [file s1]

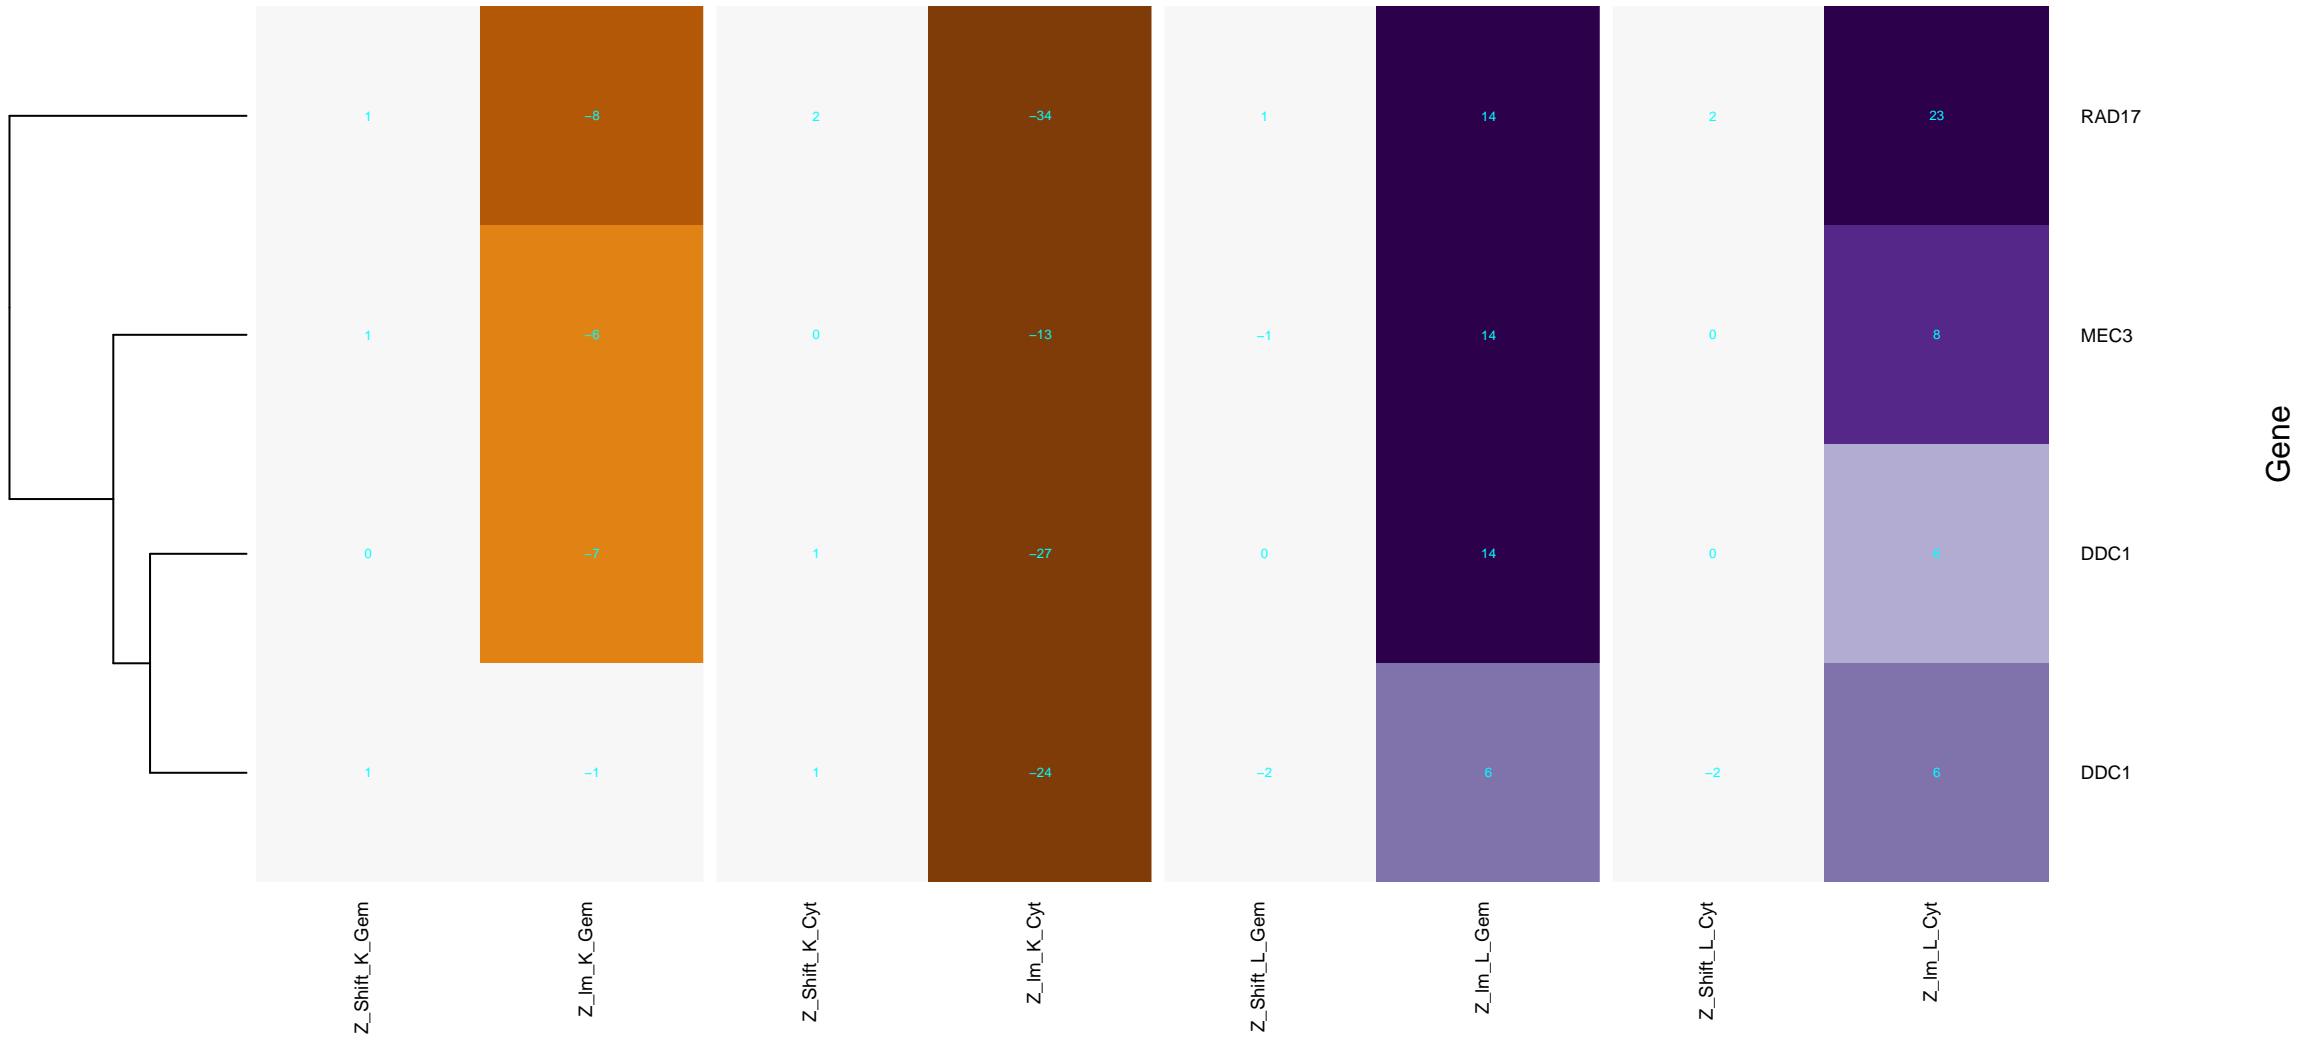

Supplement: s1 [file s1]

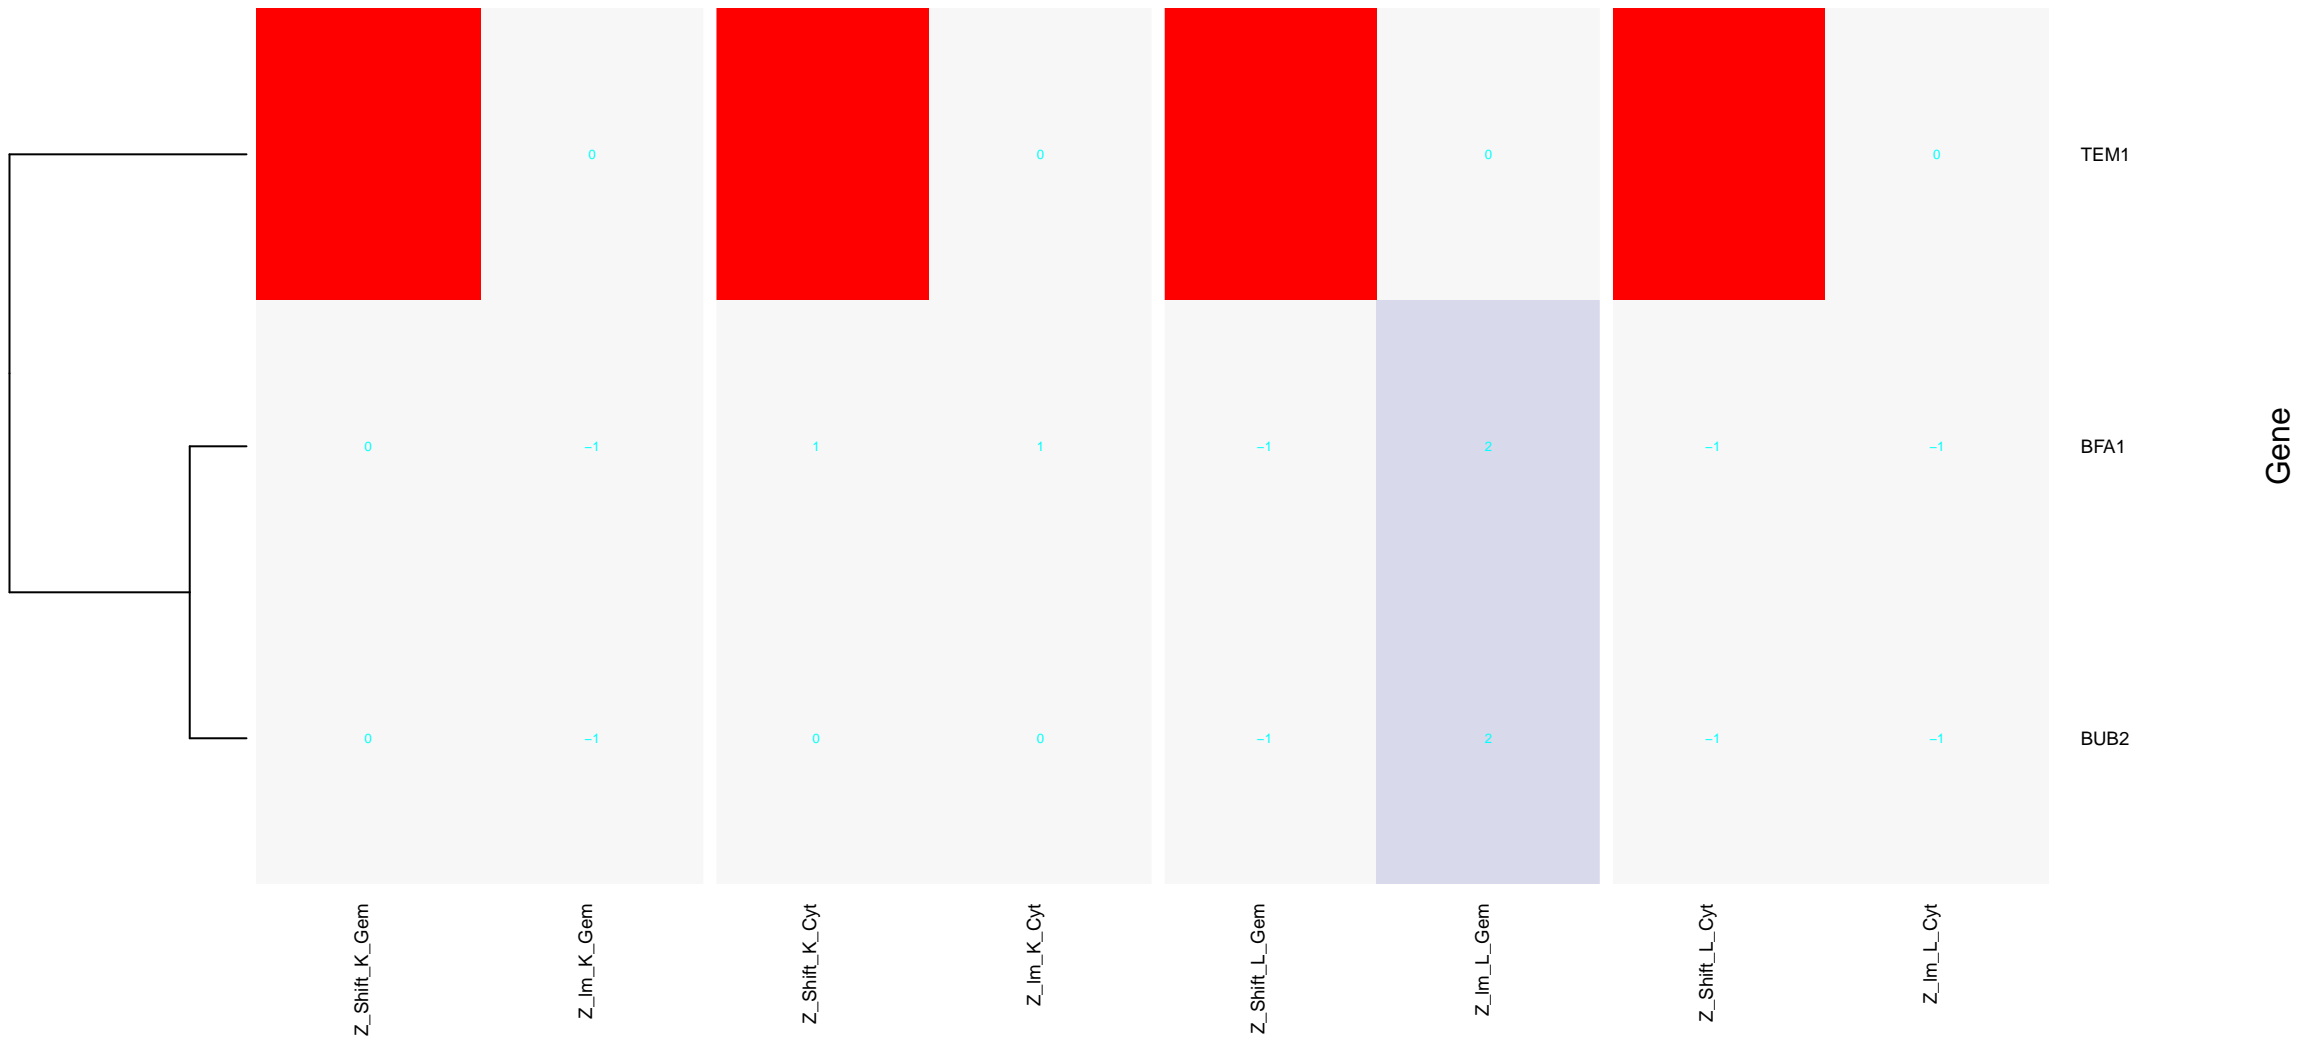

Supplement: s1 [file s1]

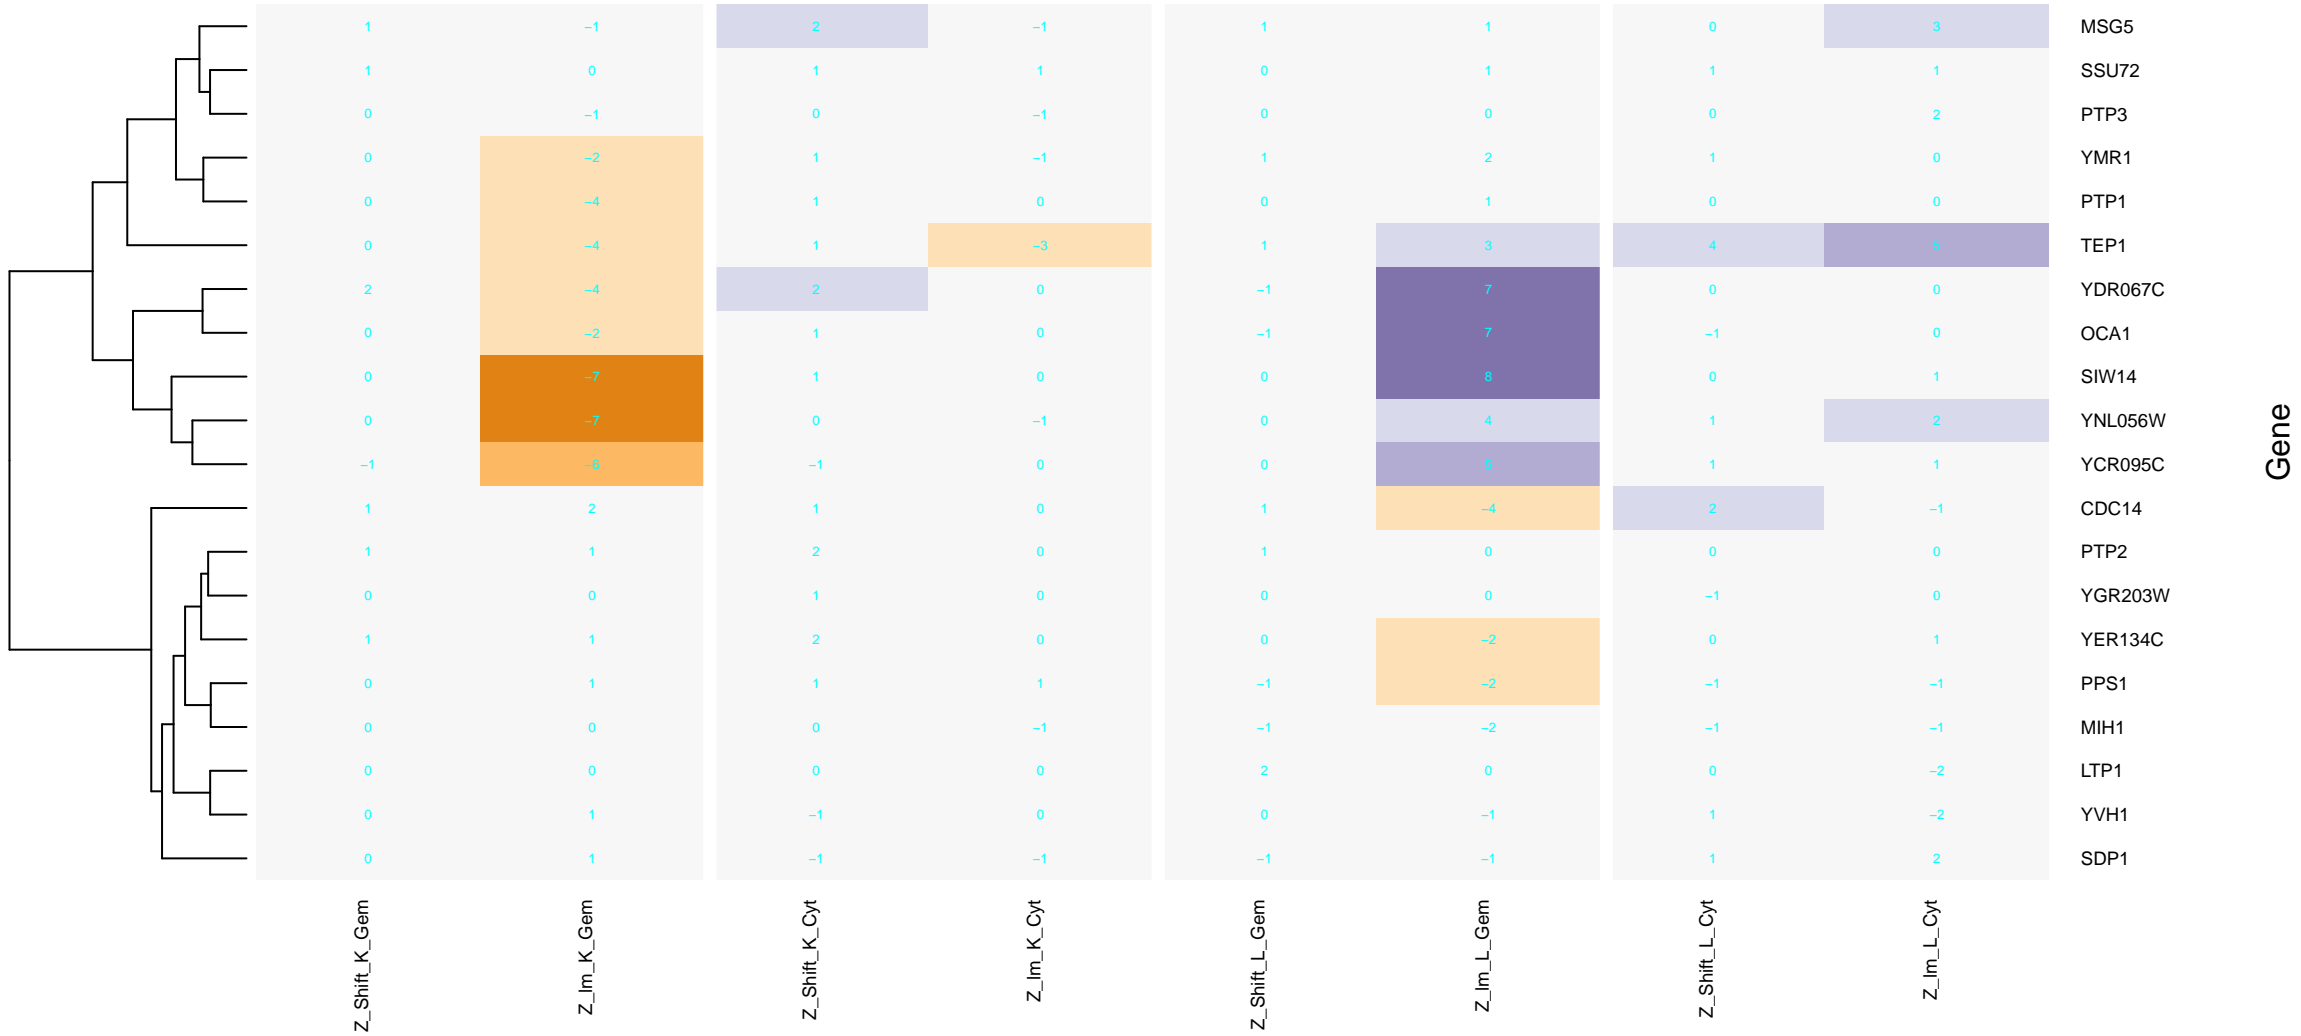

Supplement: s1 [file s1]













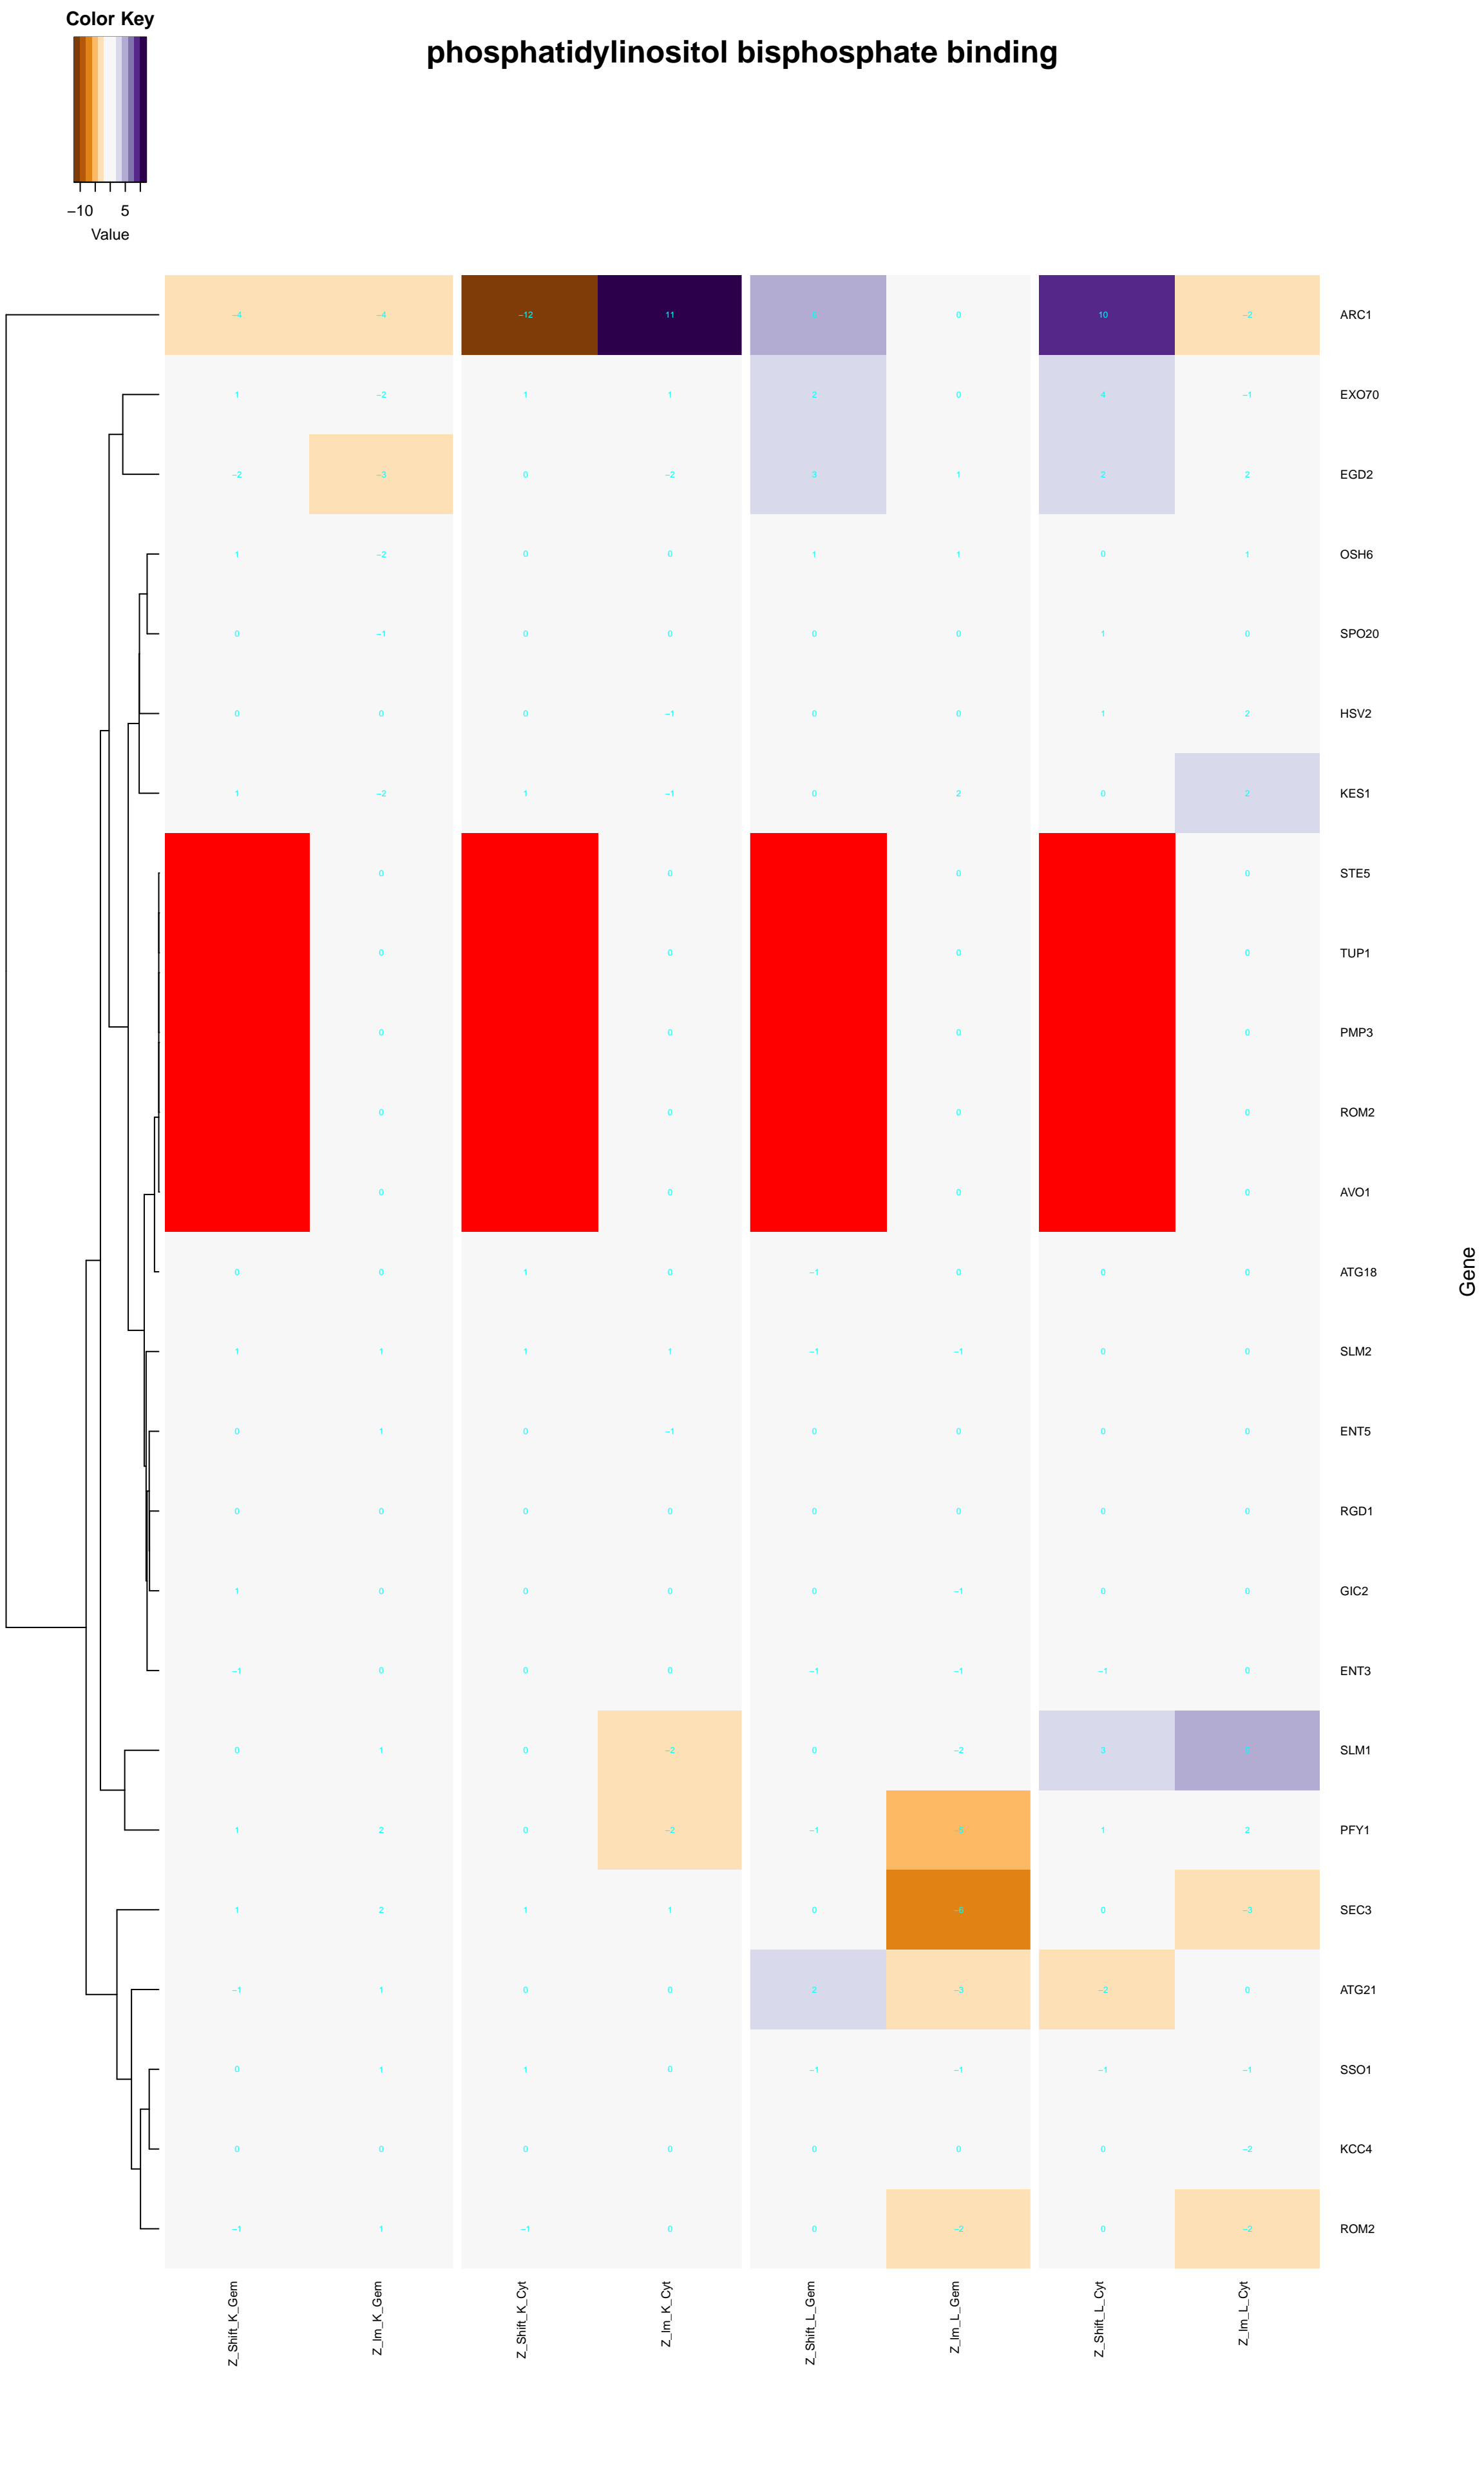





Supplement: s1 [file s1]

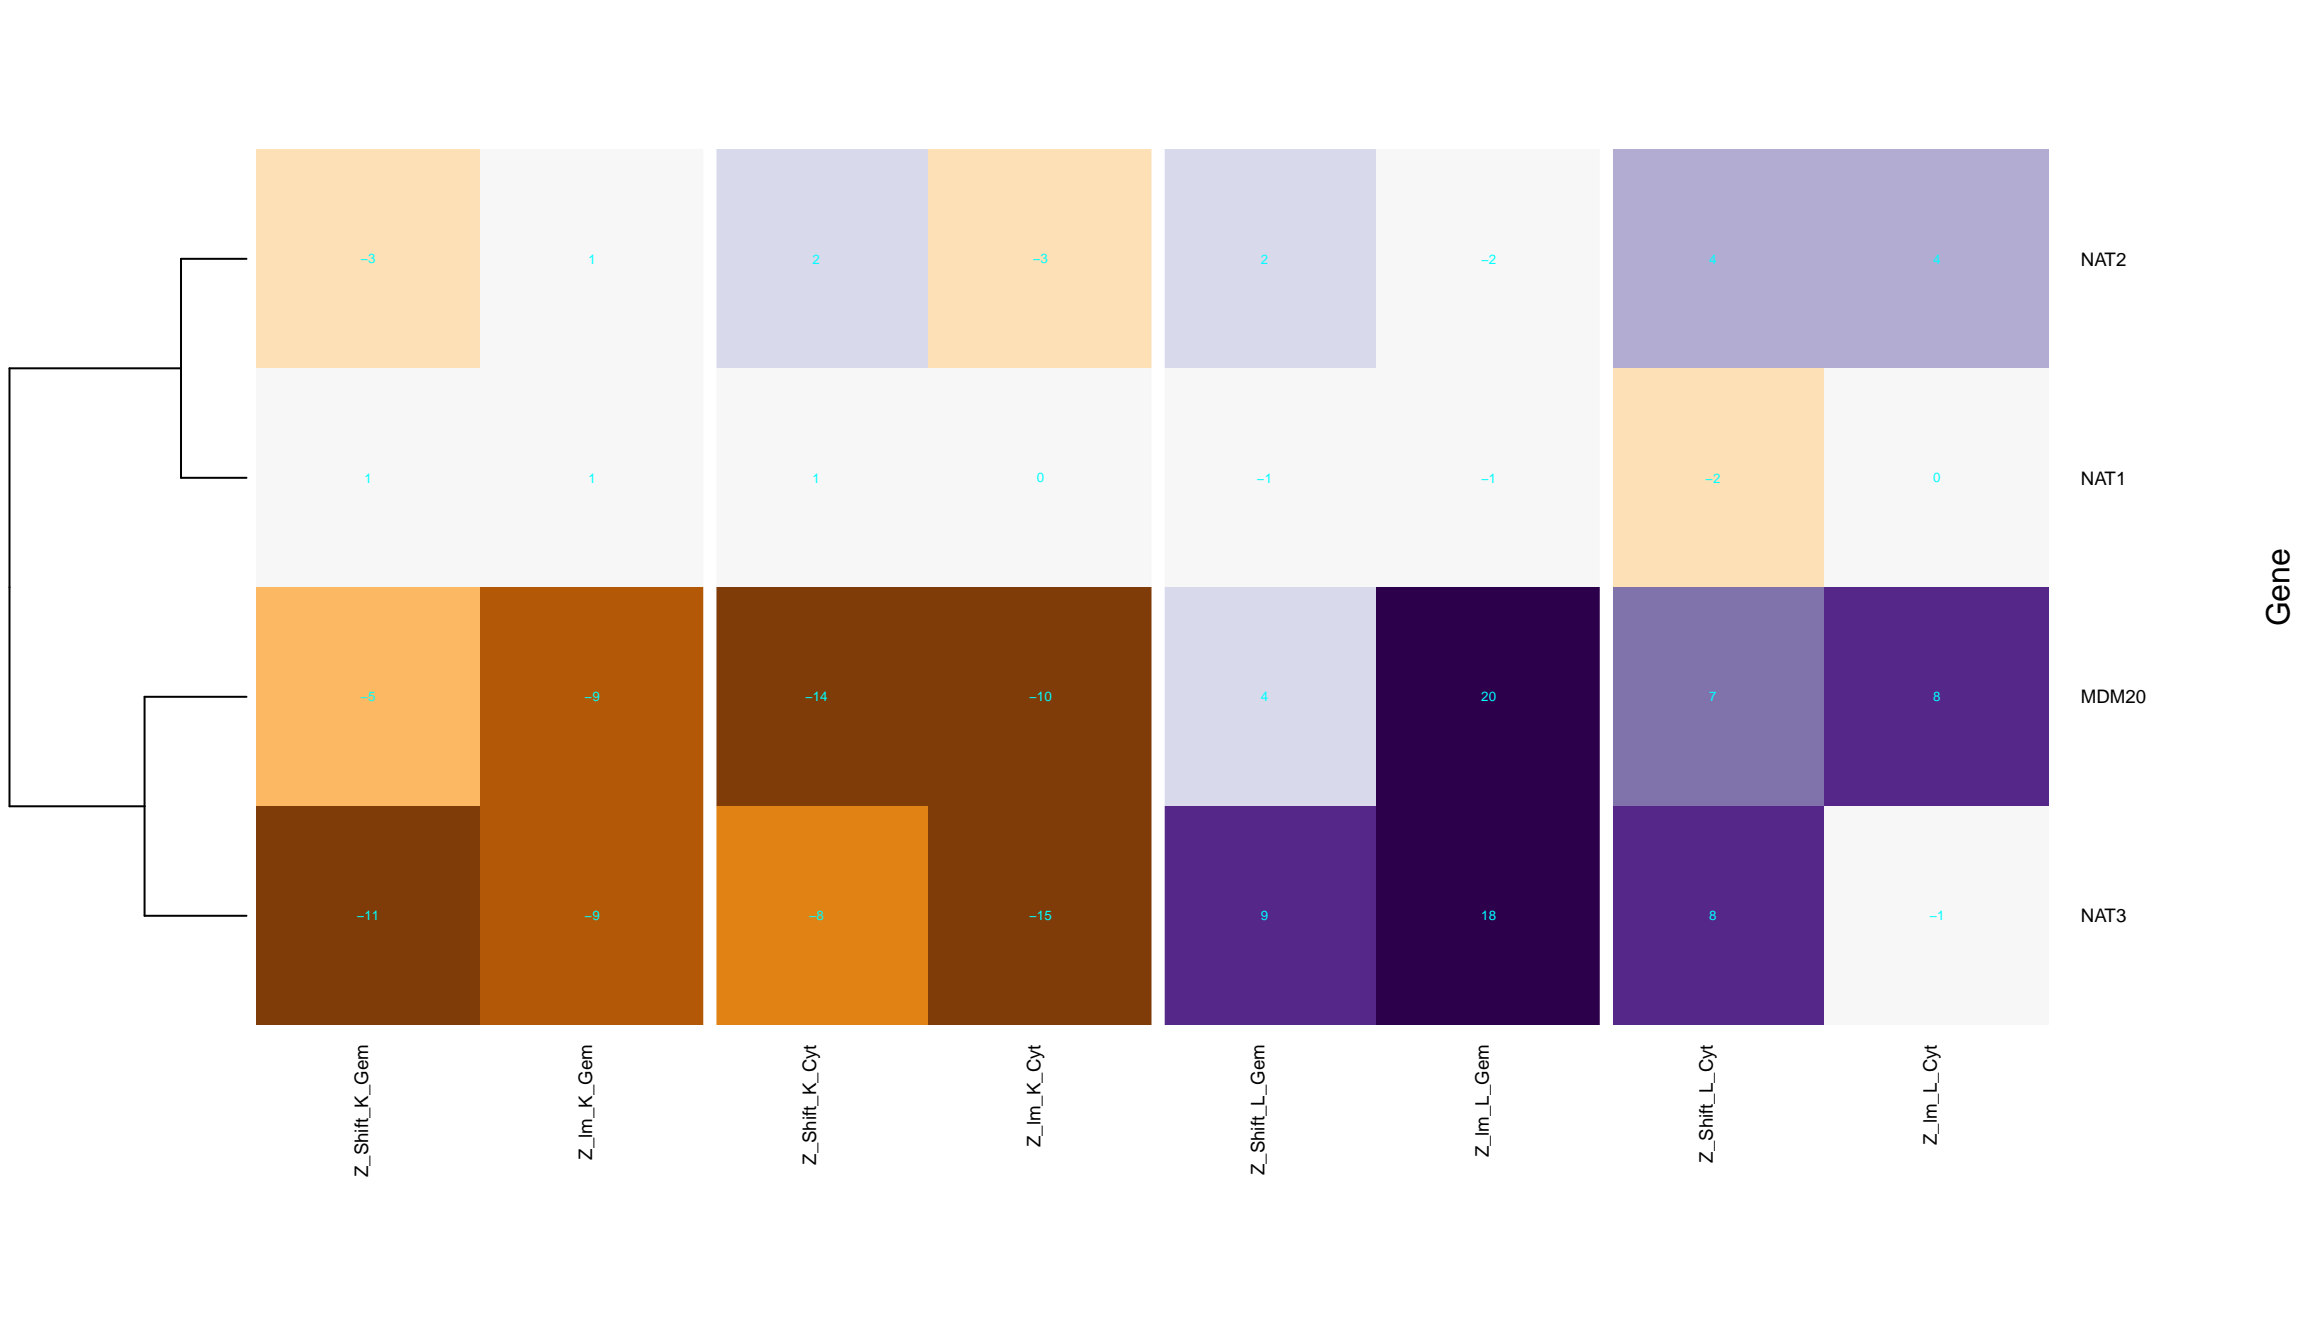

Supplement: s1 [file s1]

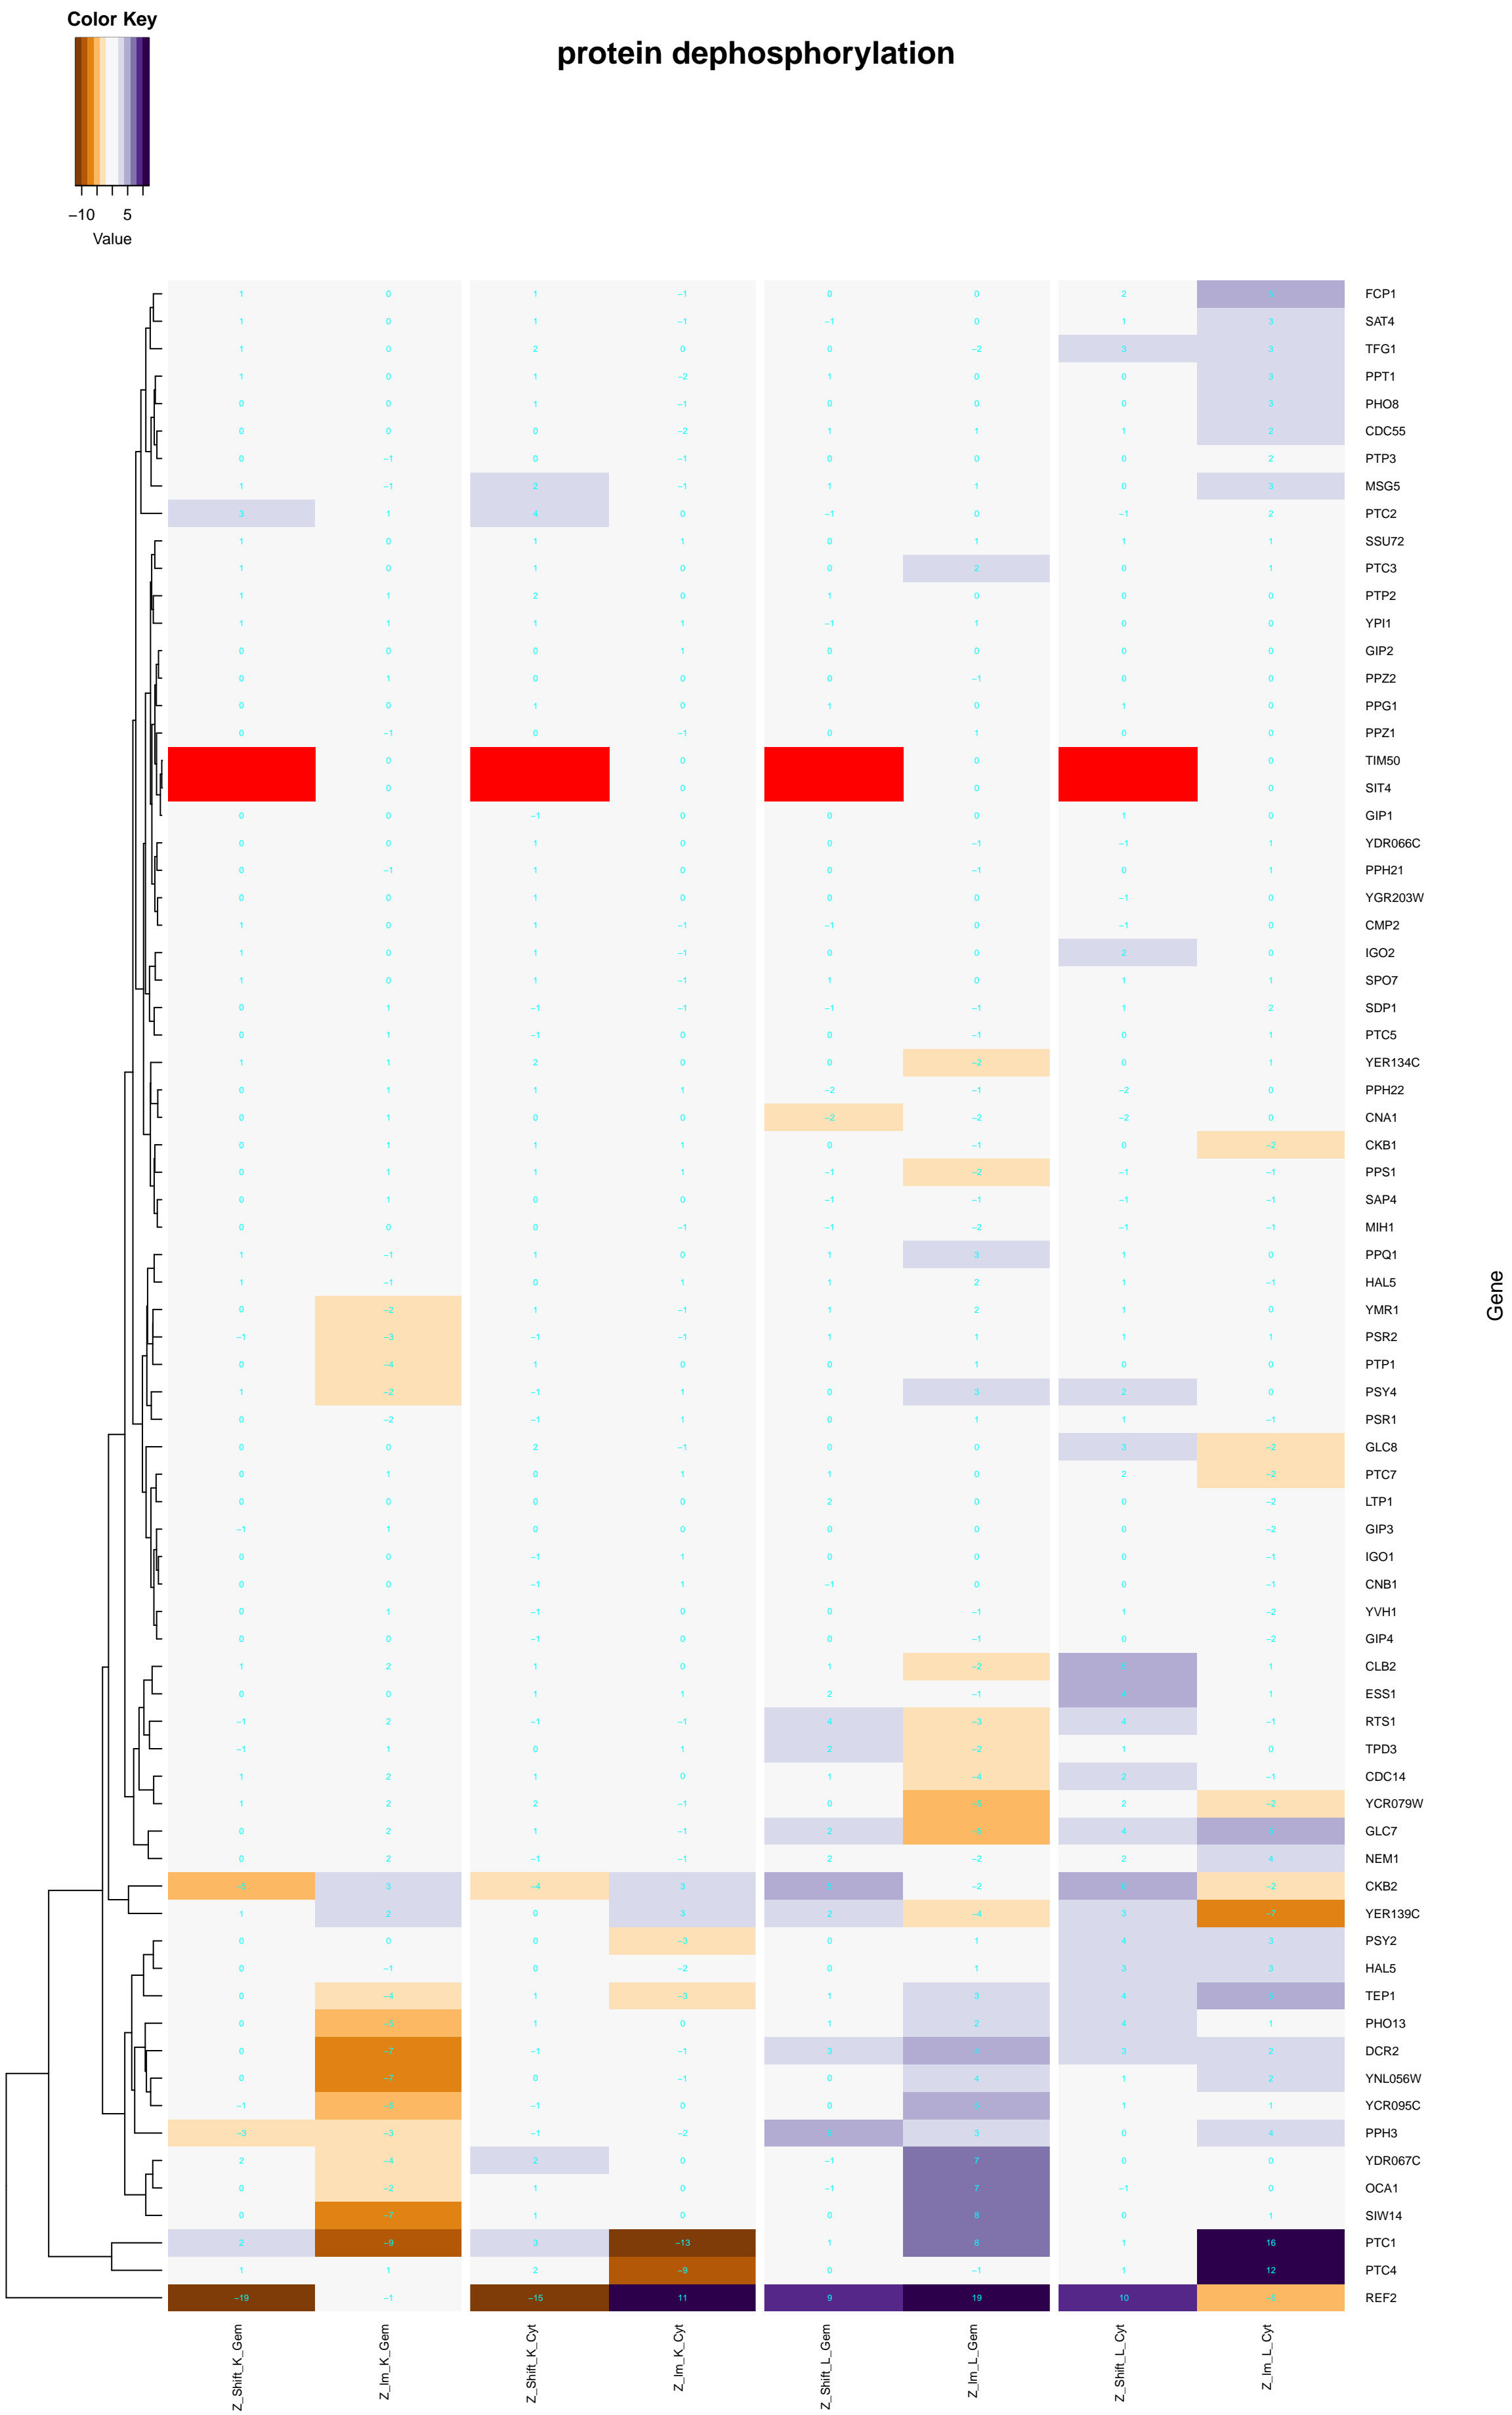

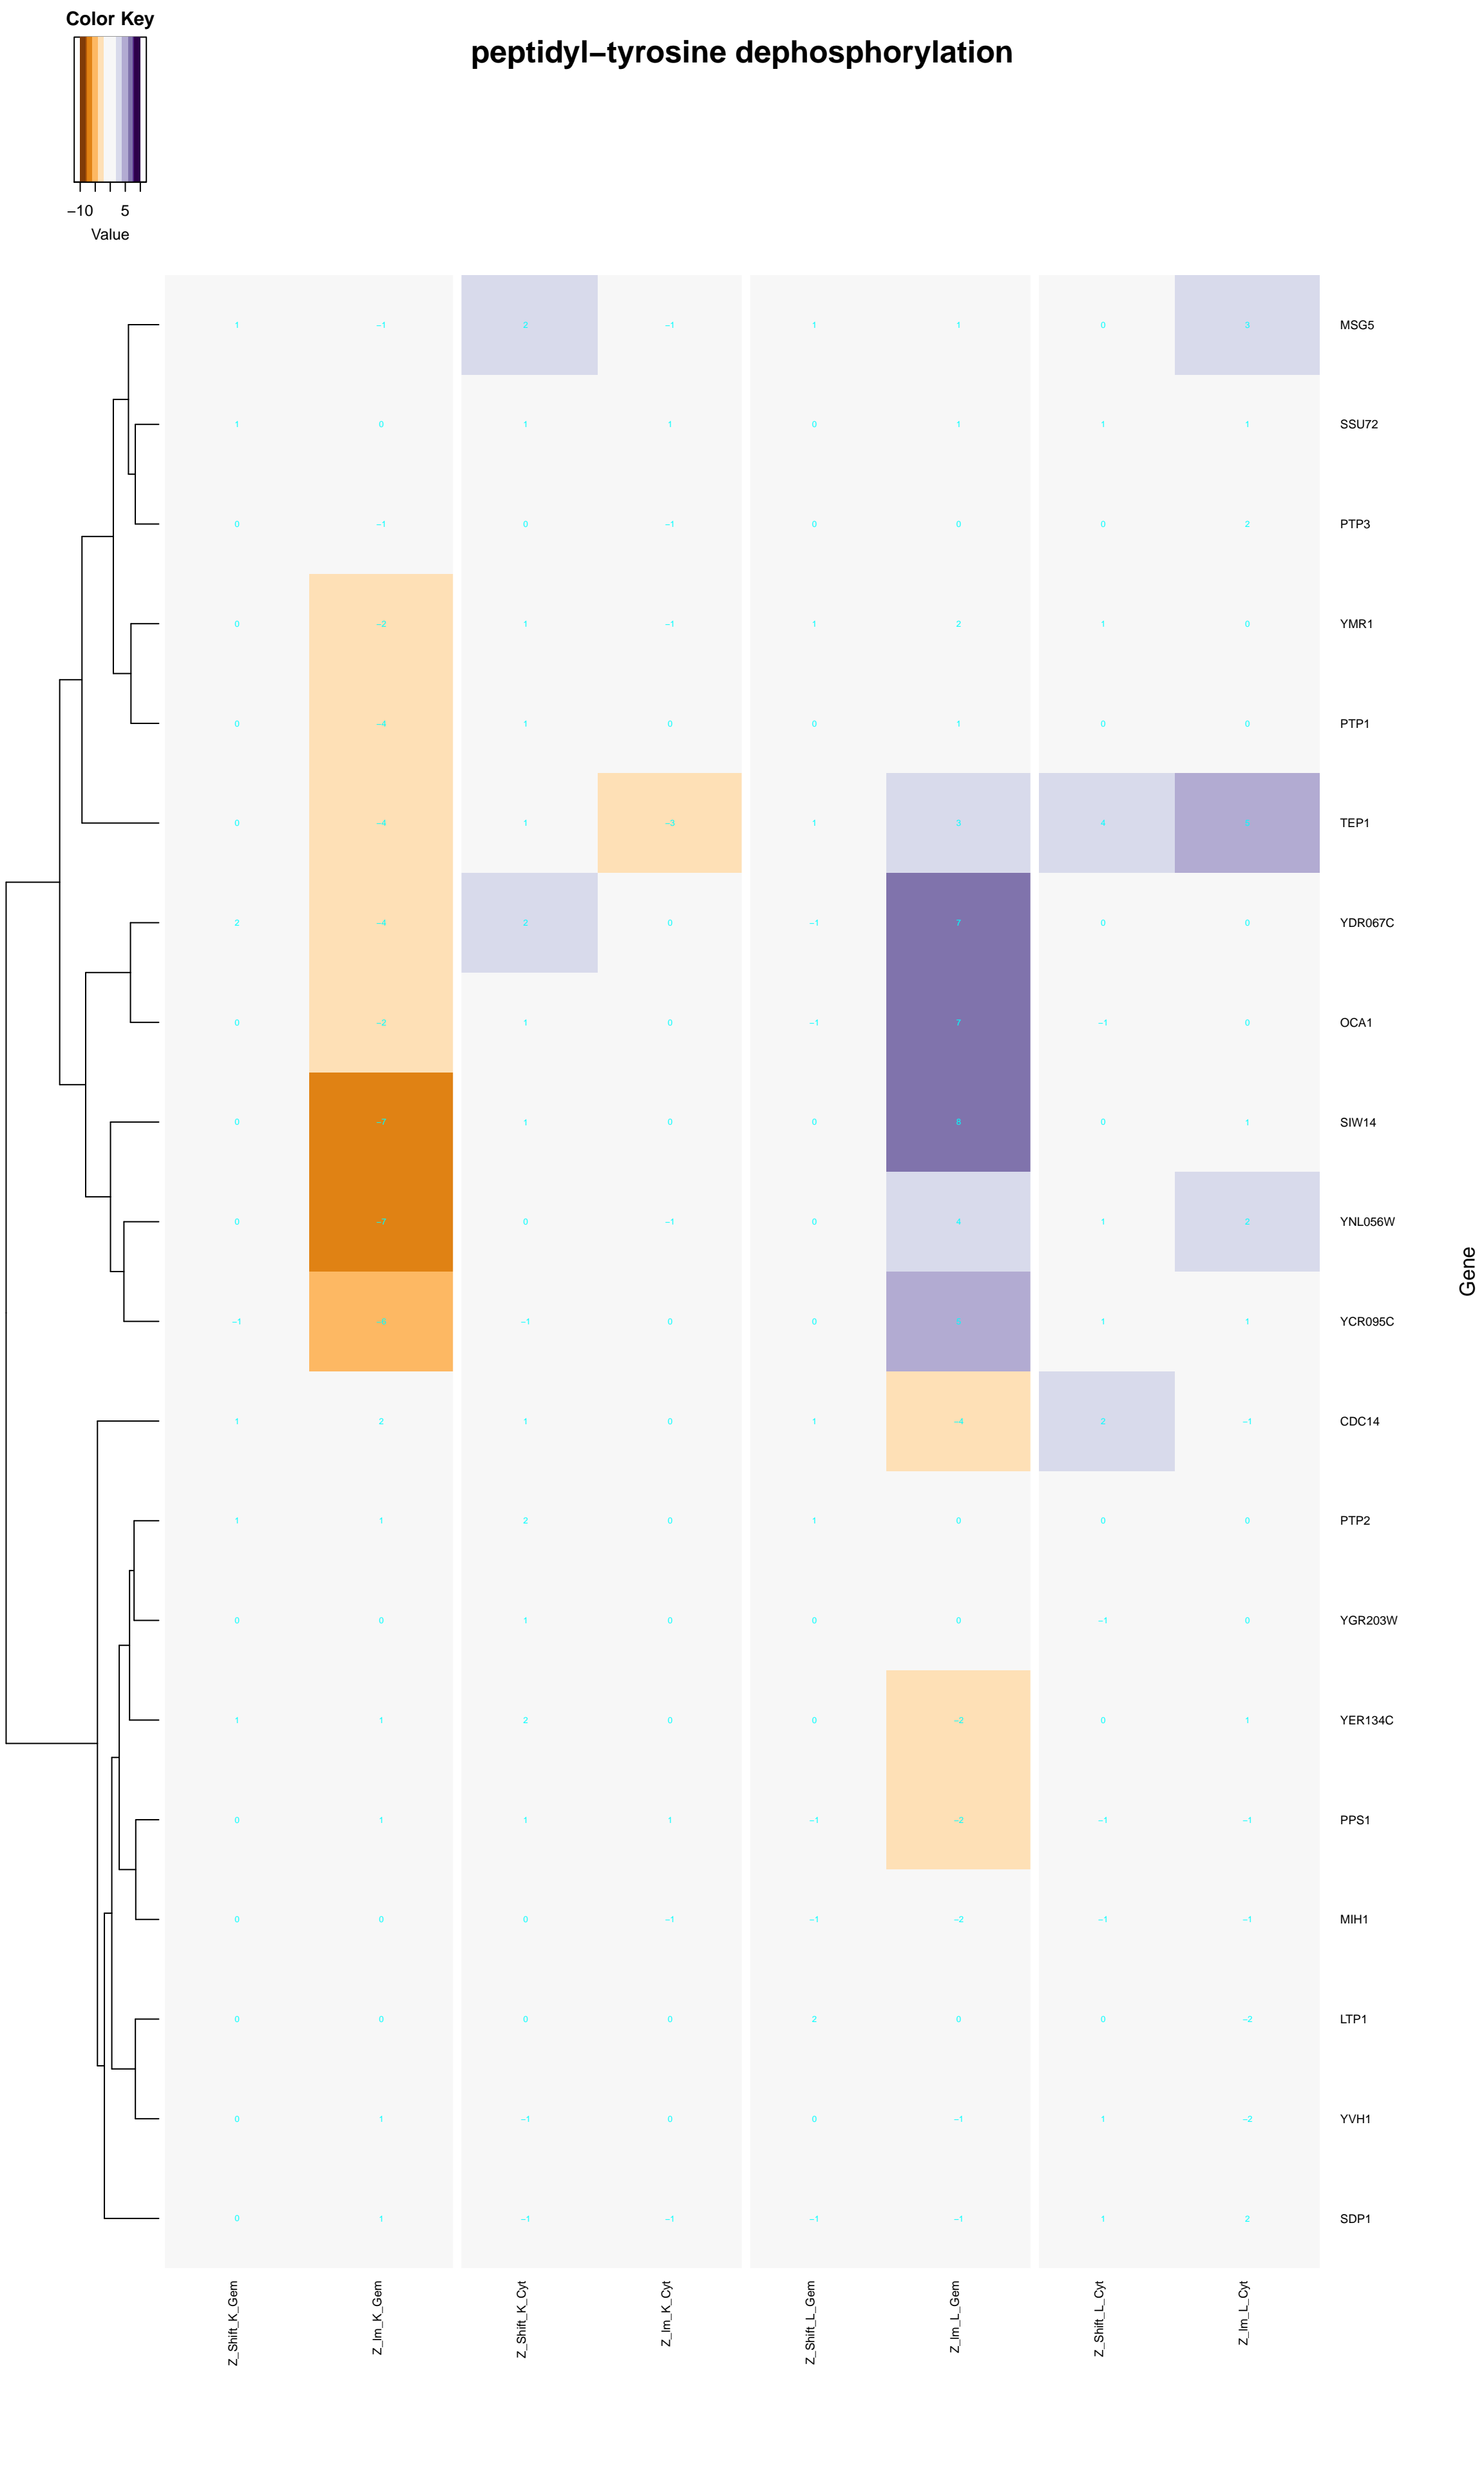

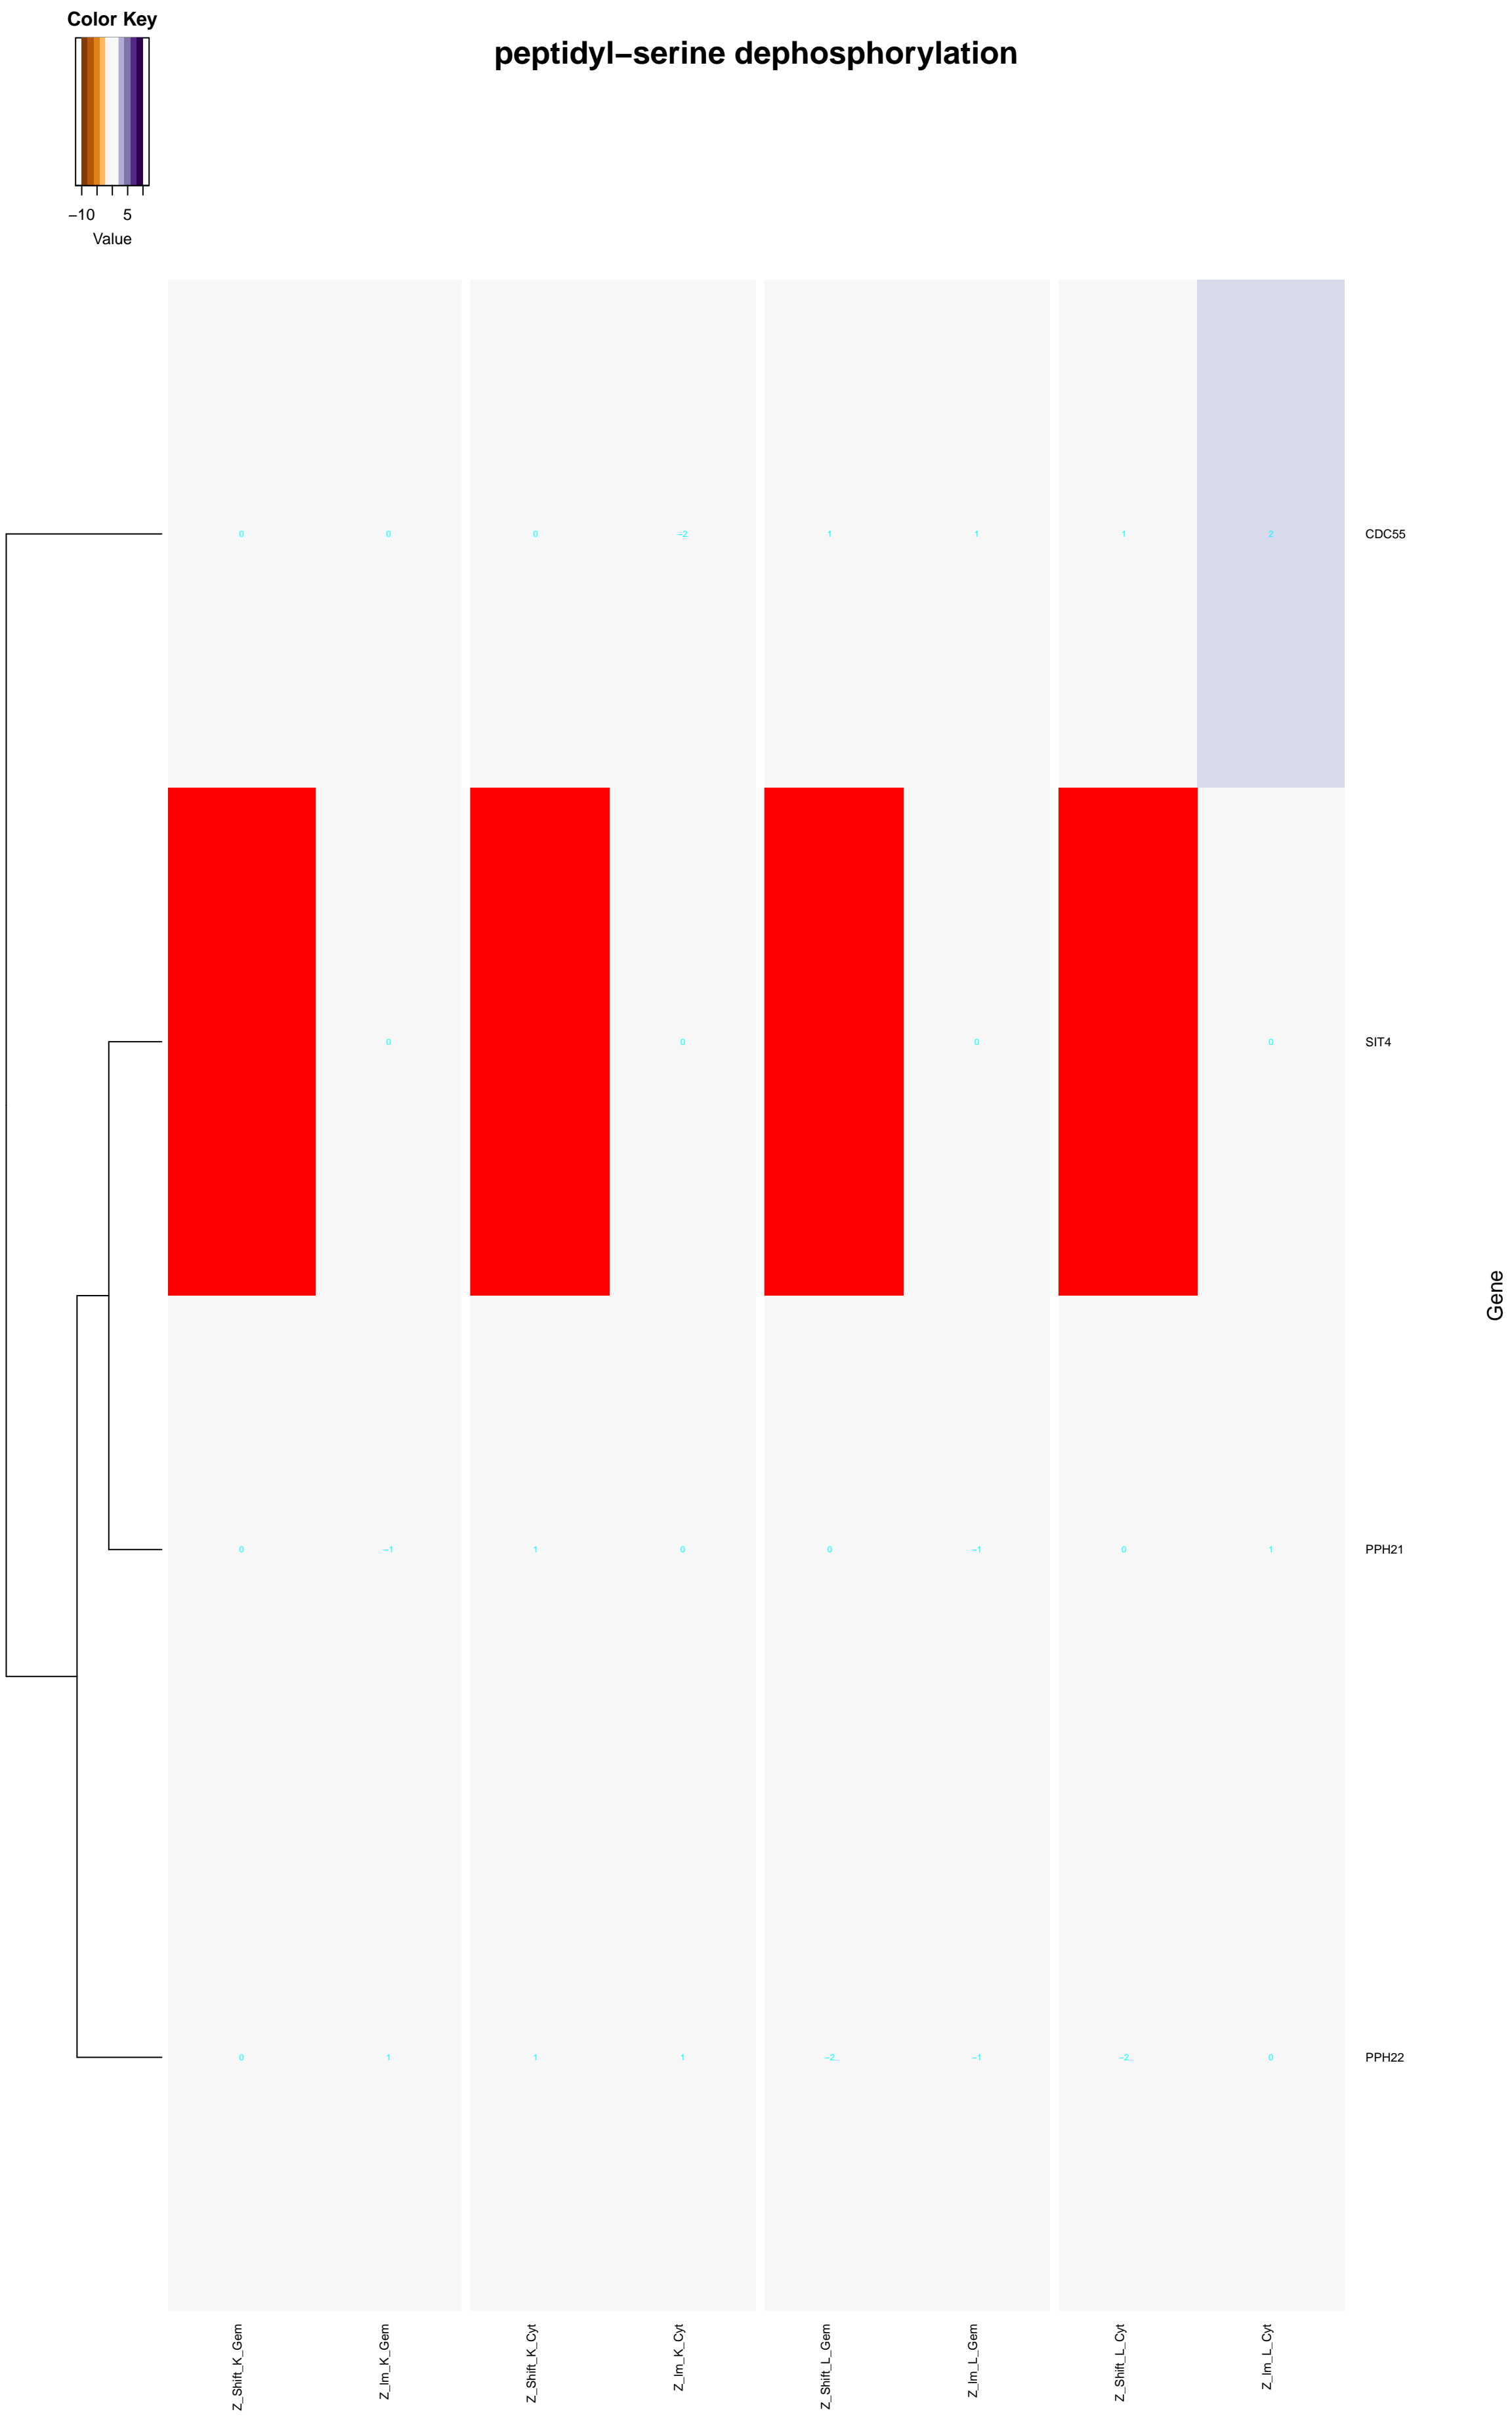

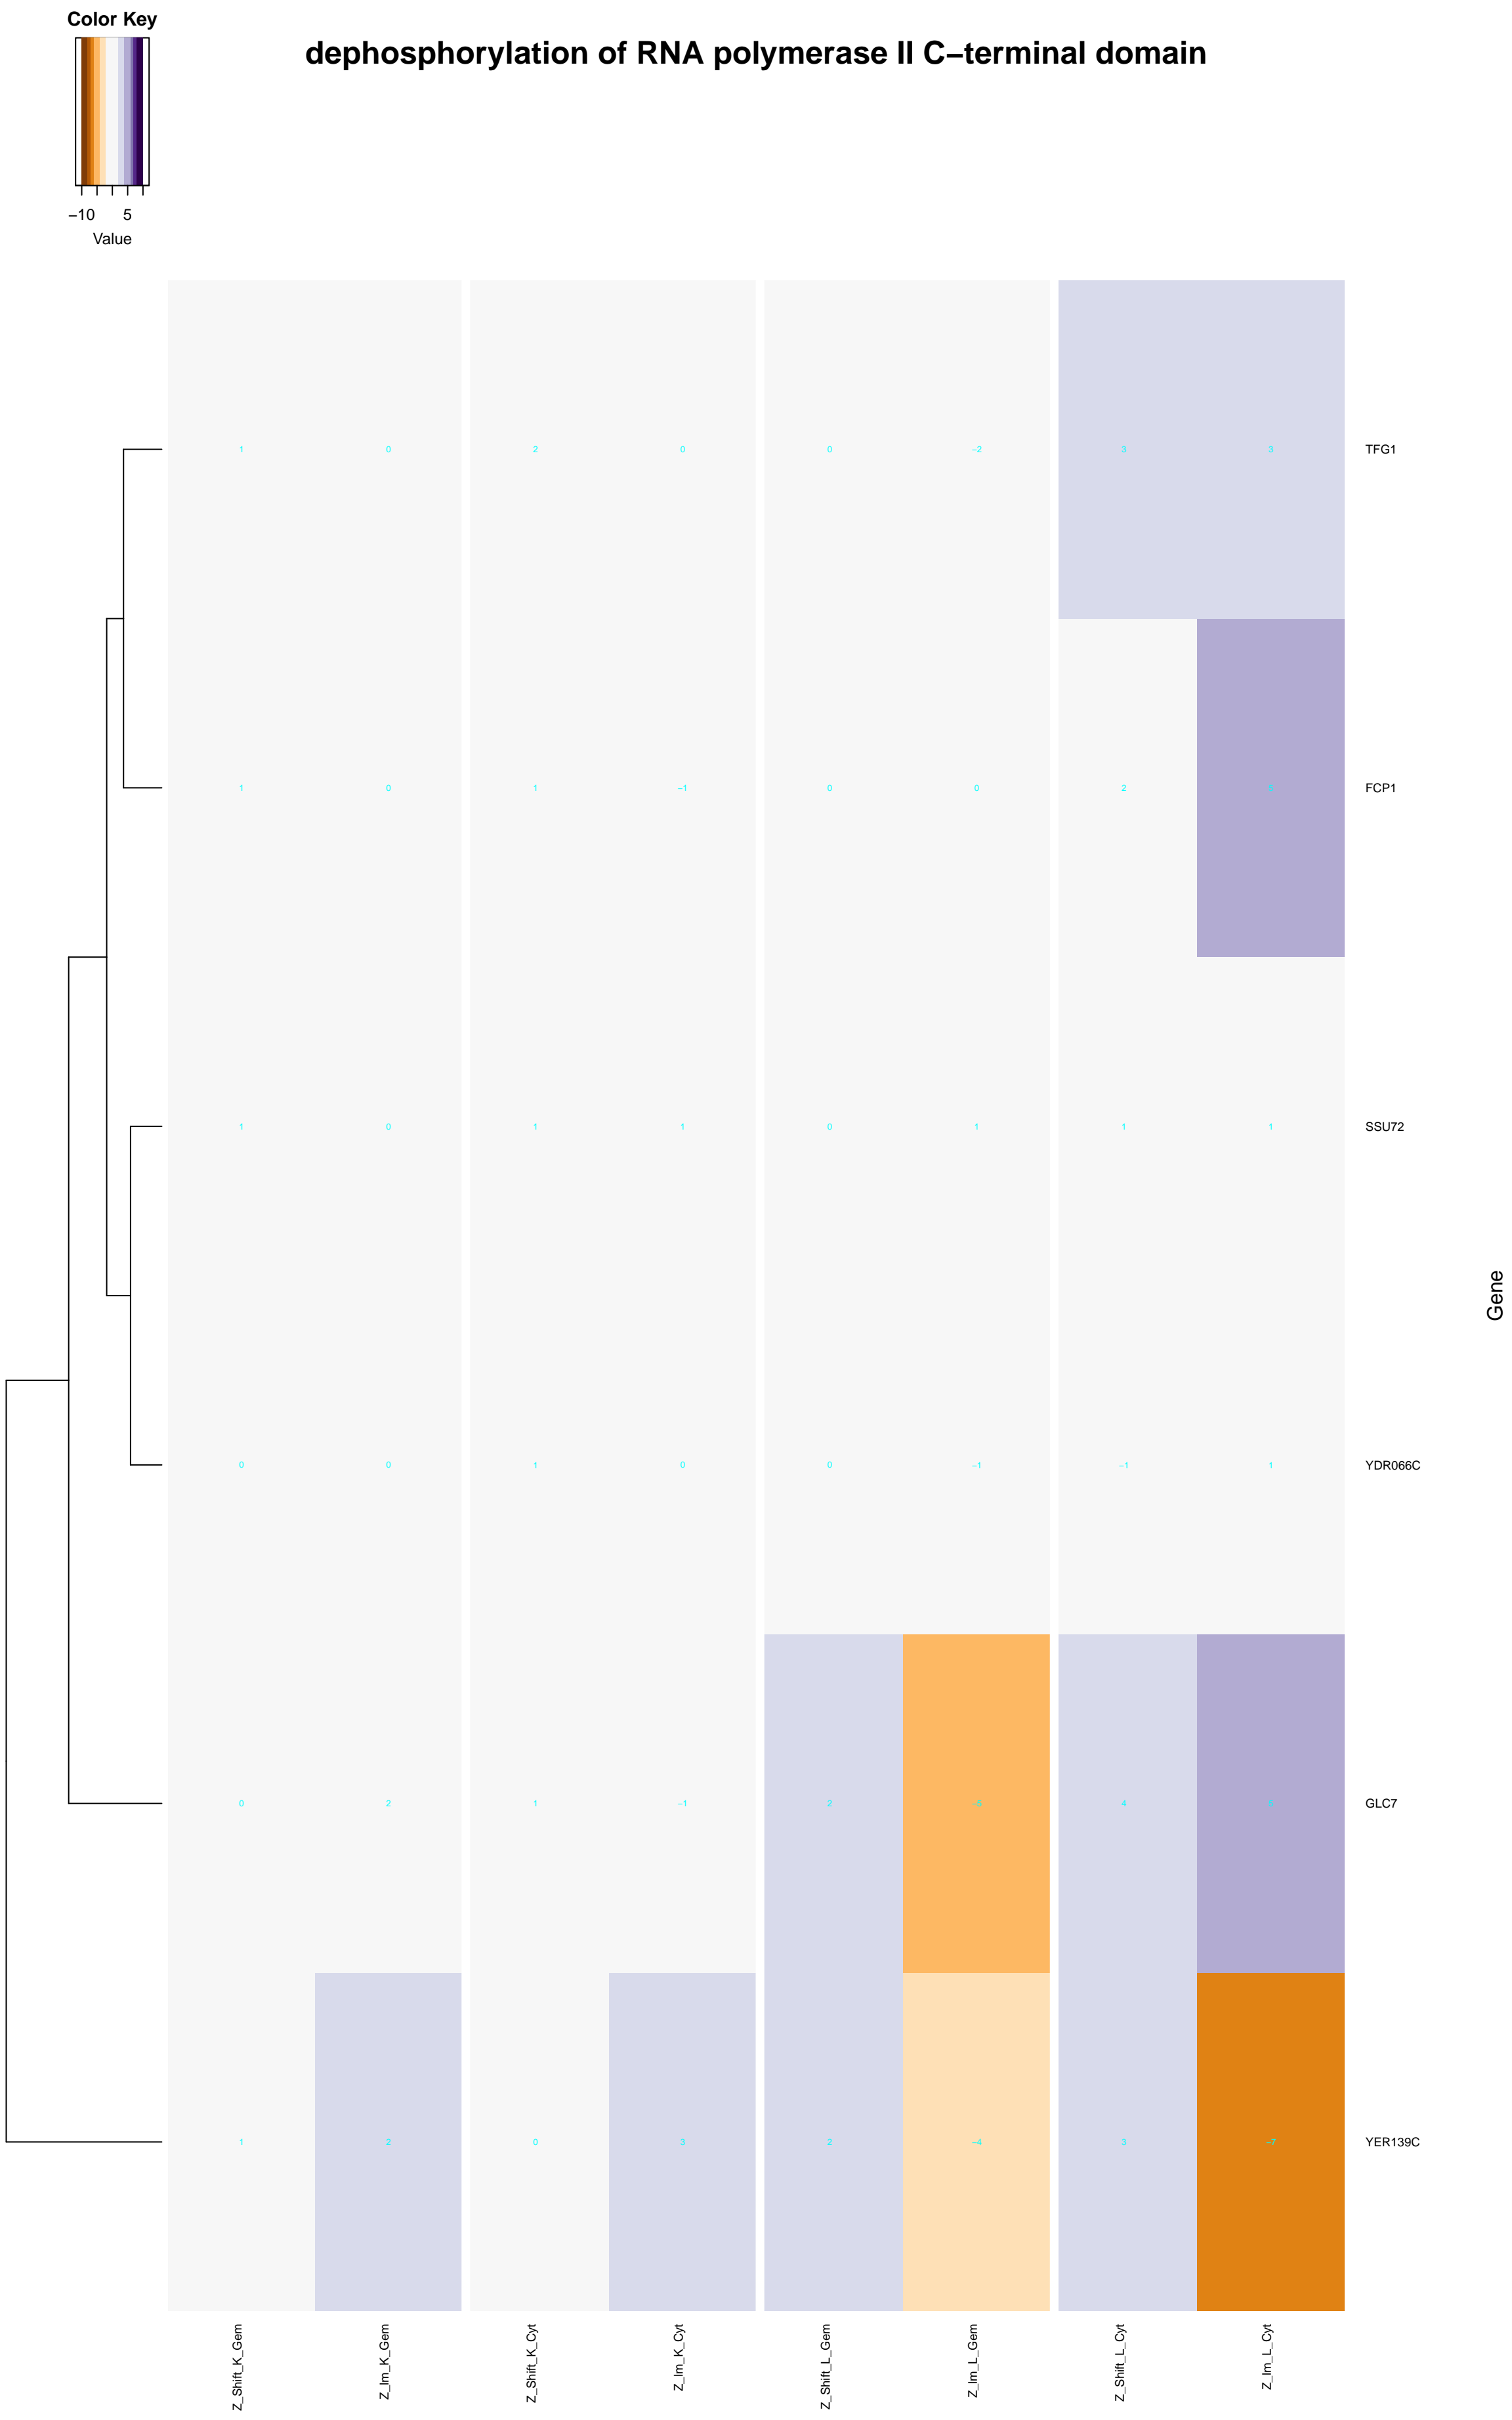

Supplement: s1 [file s1]

## vesicle fusion

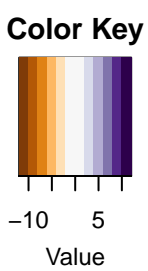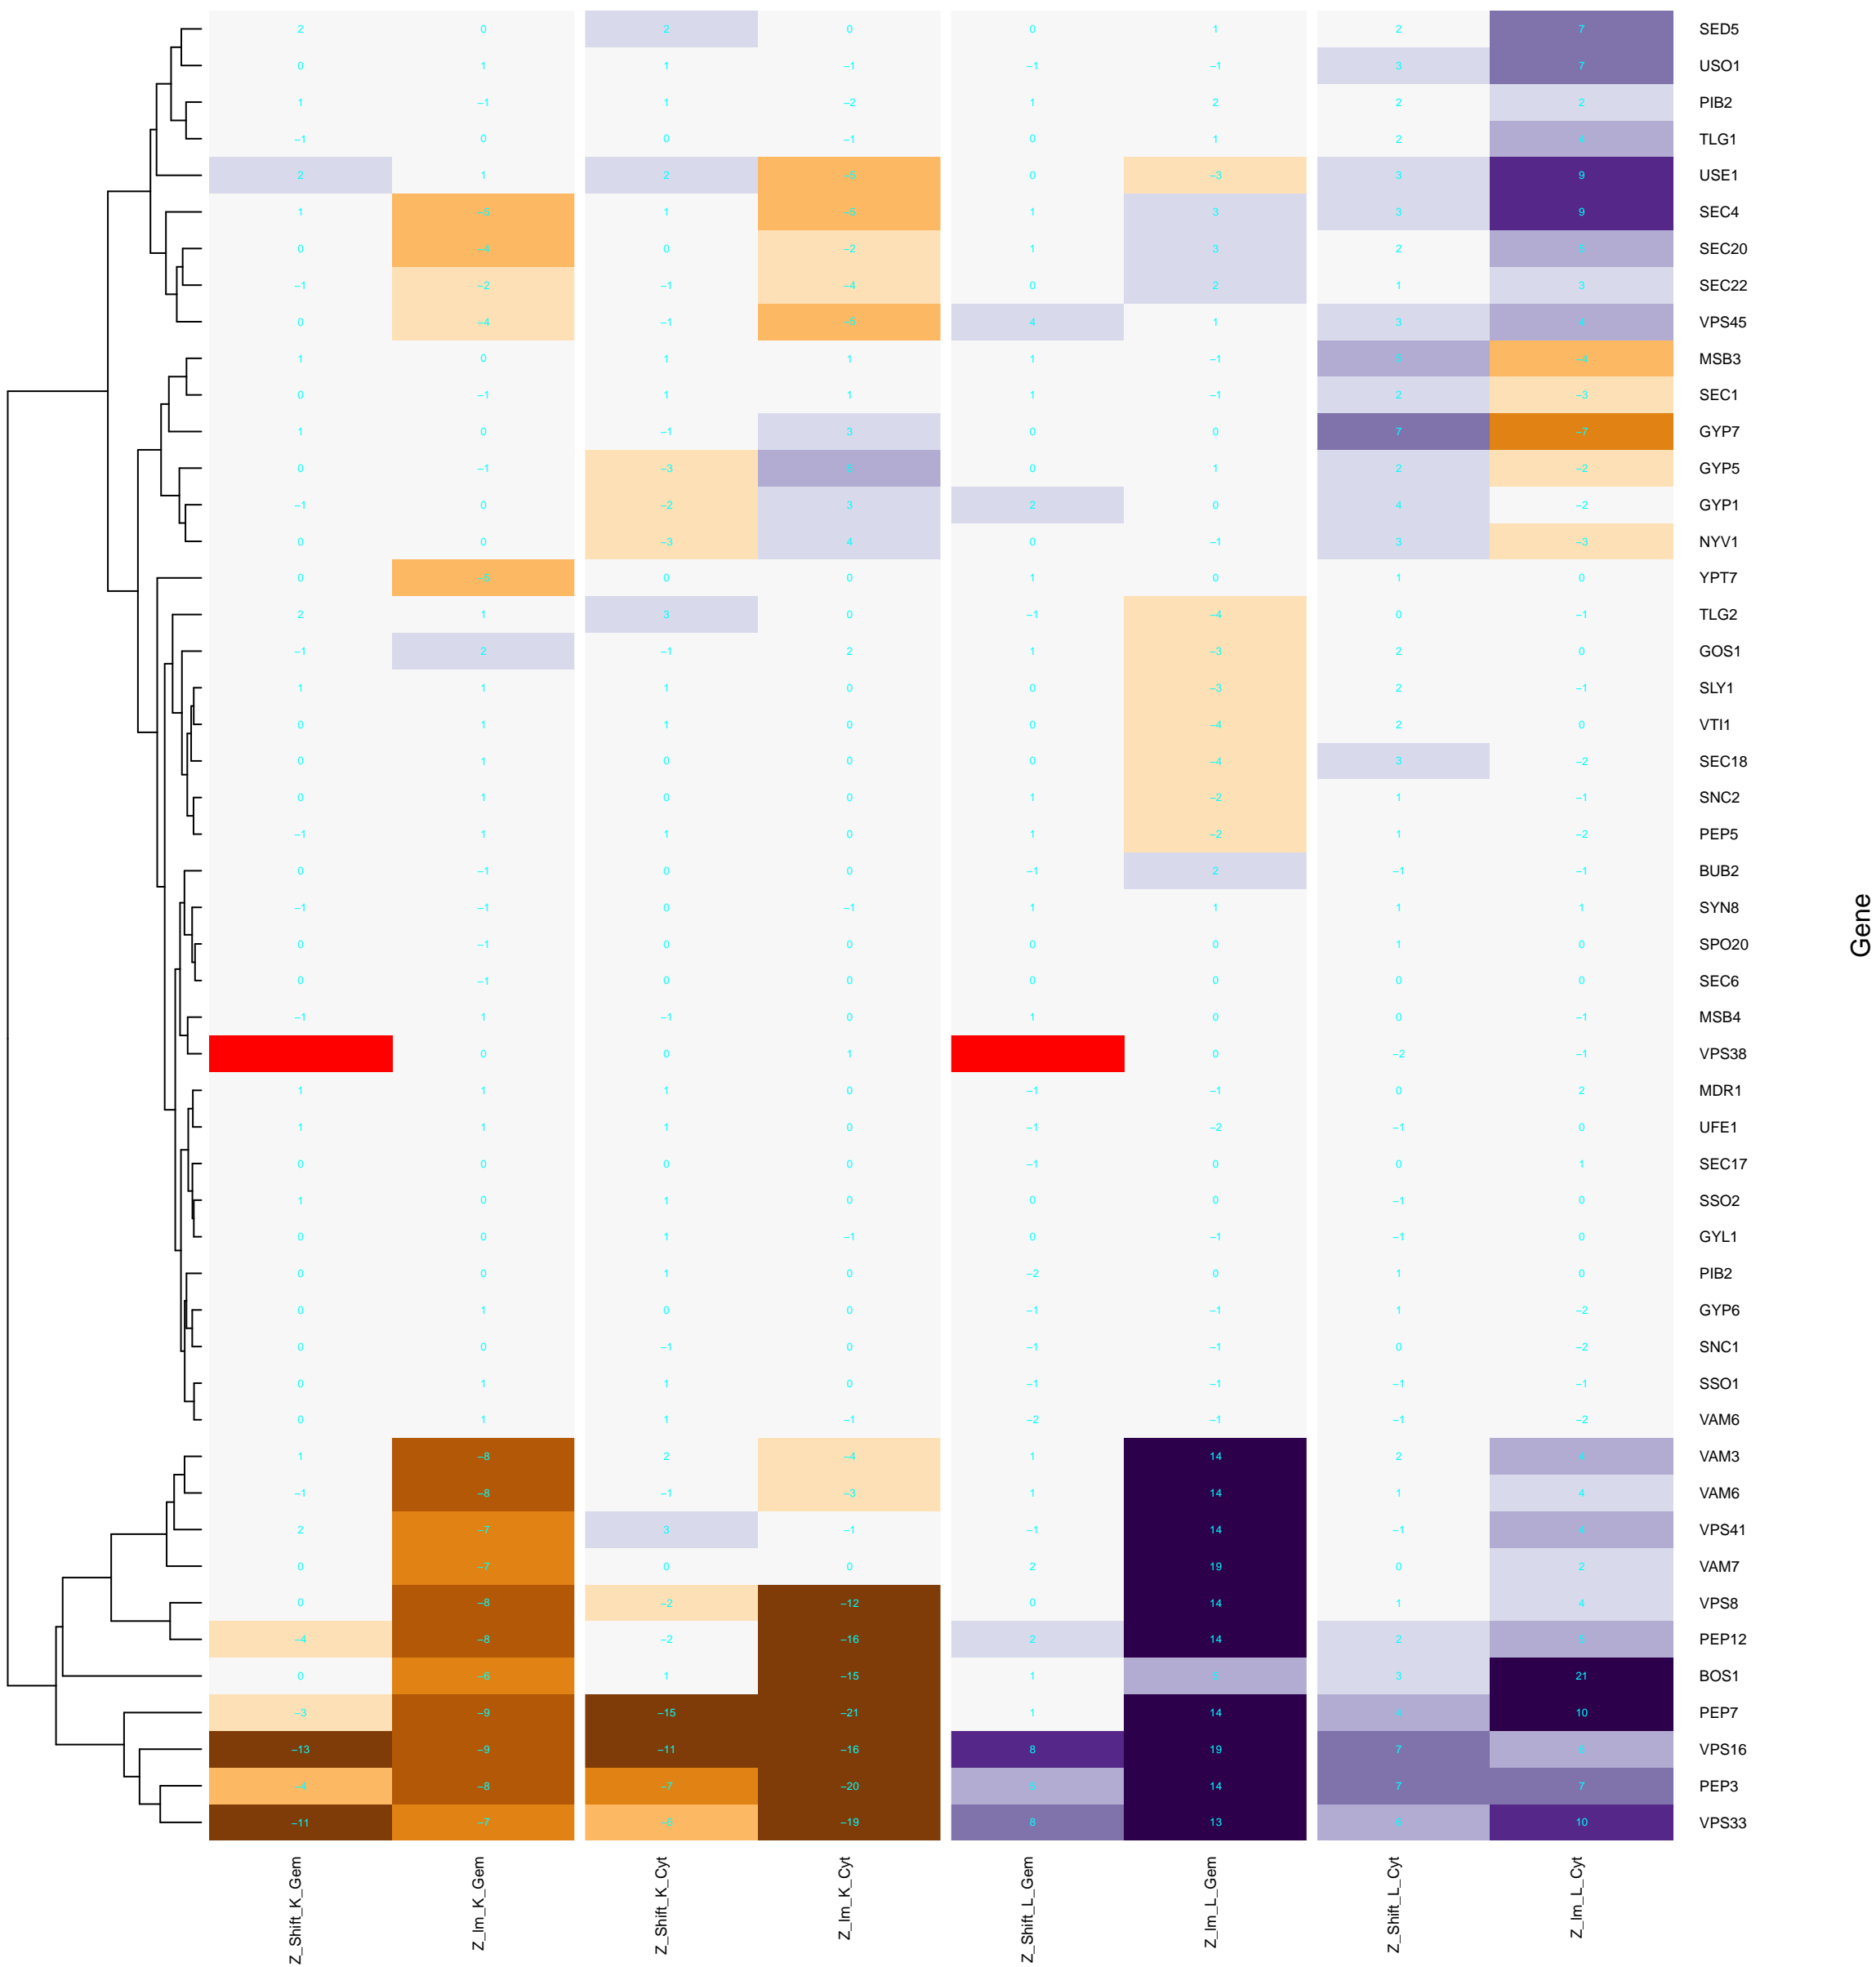



endosomal vesicle fusion

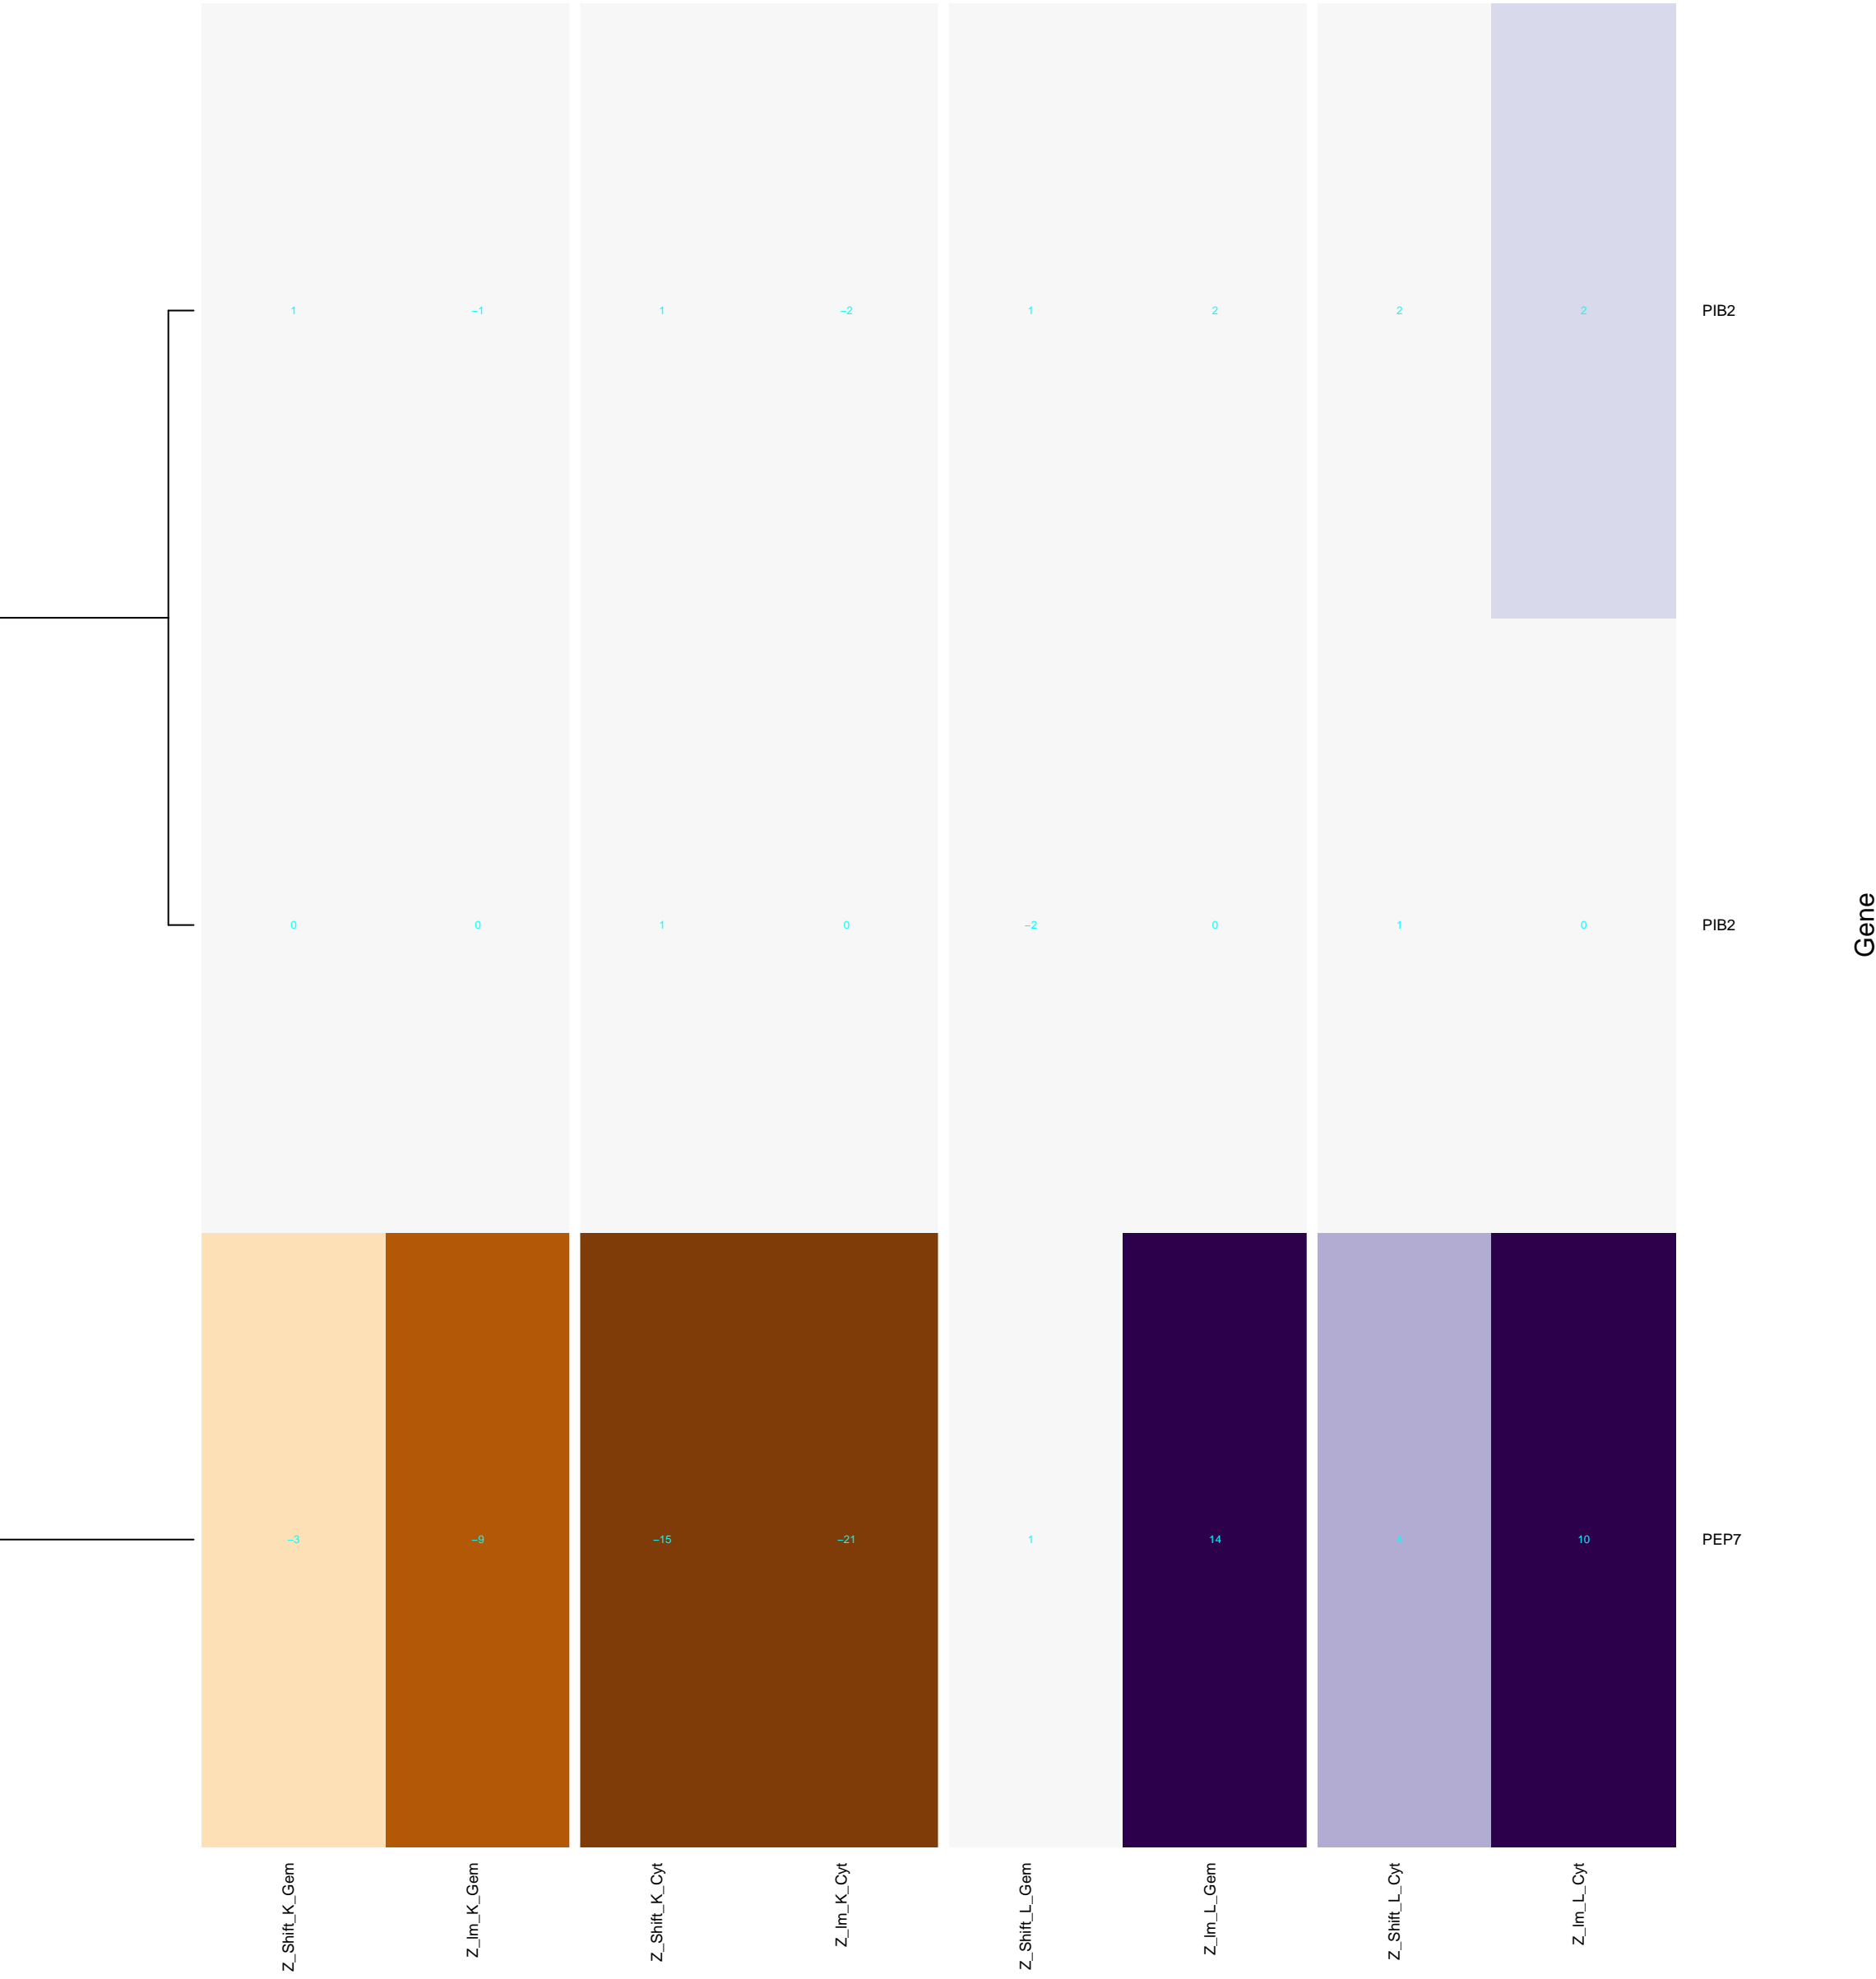

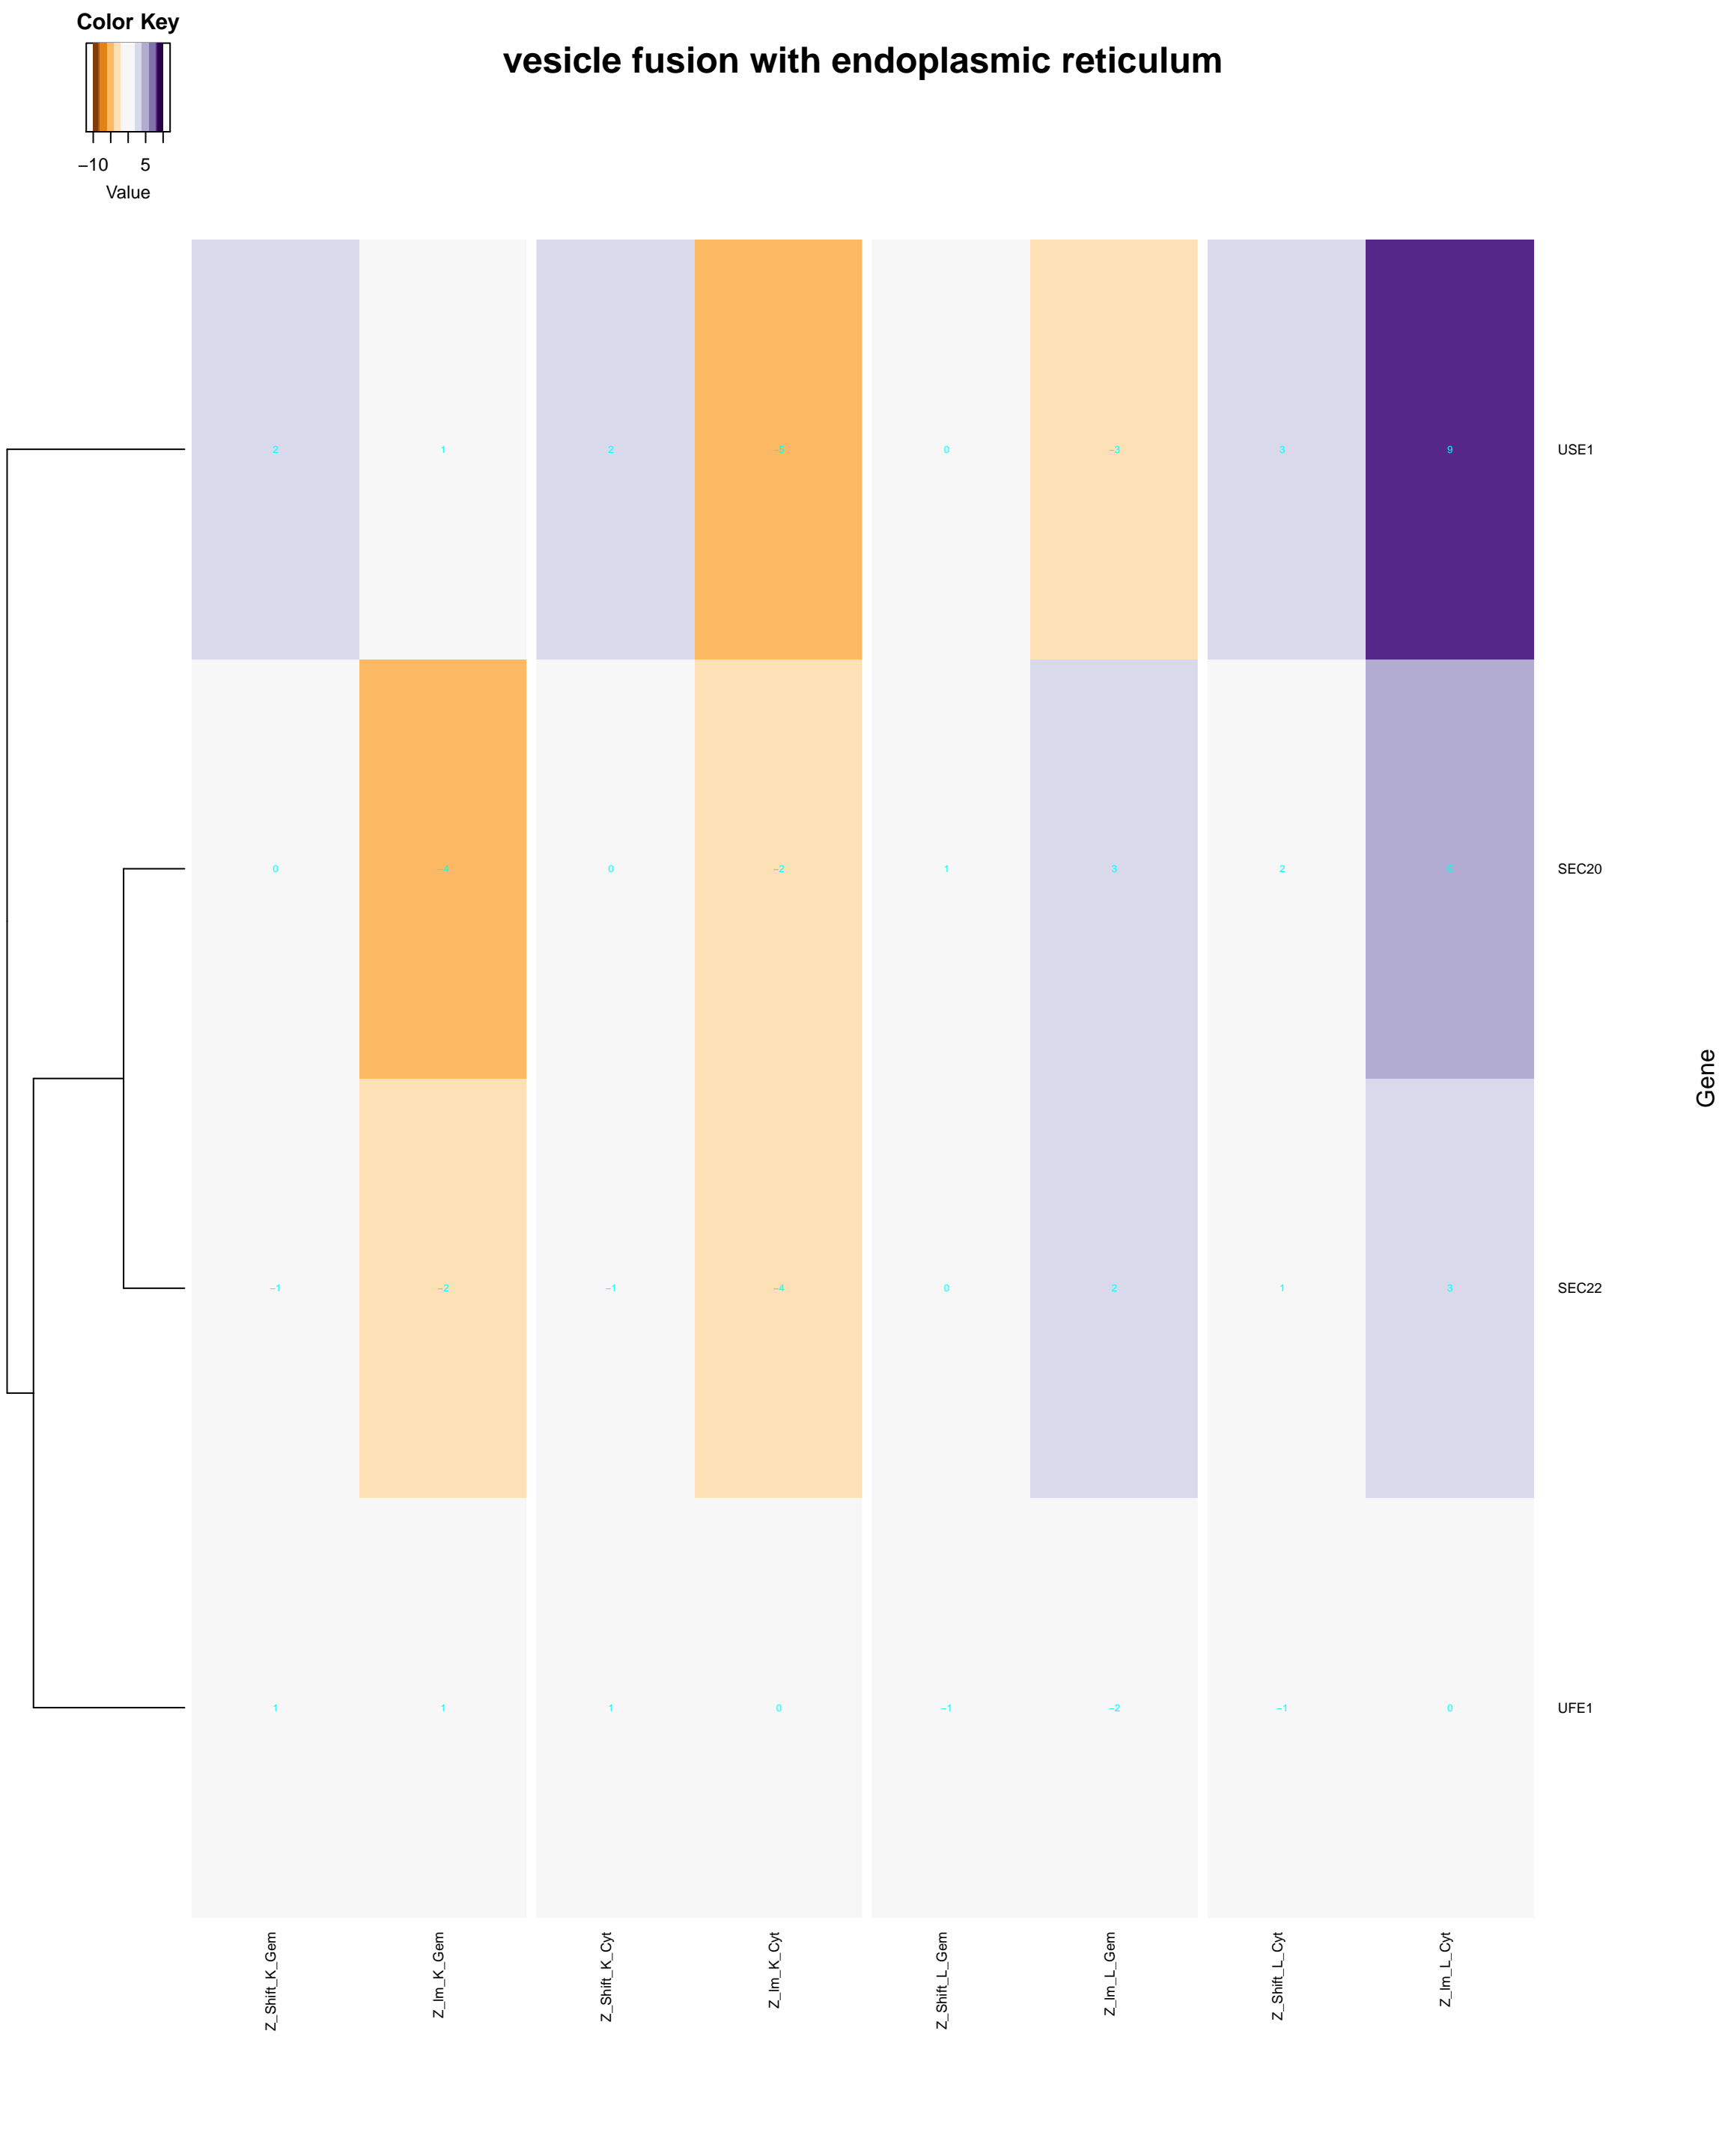

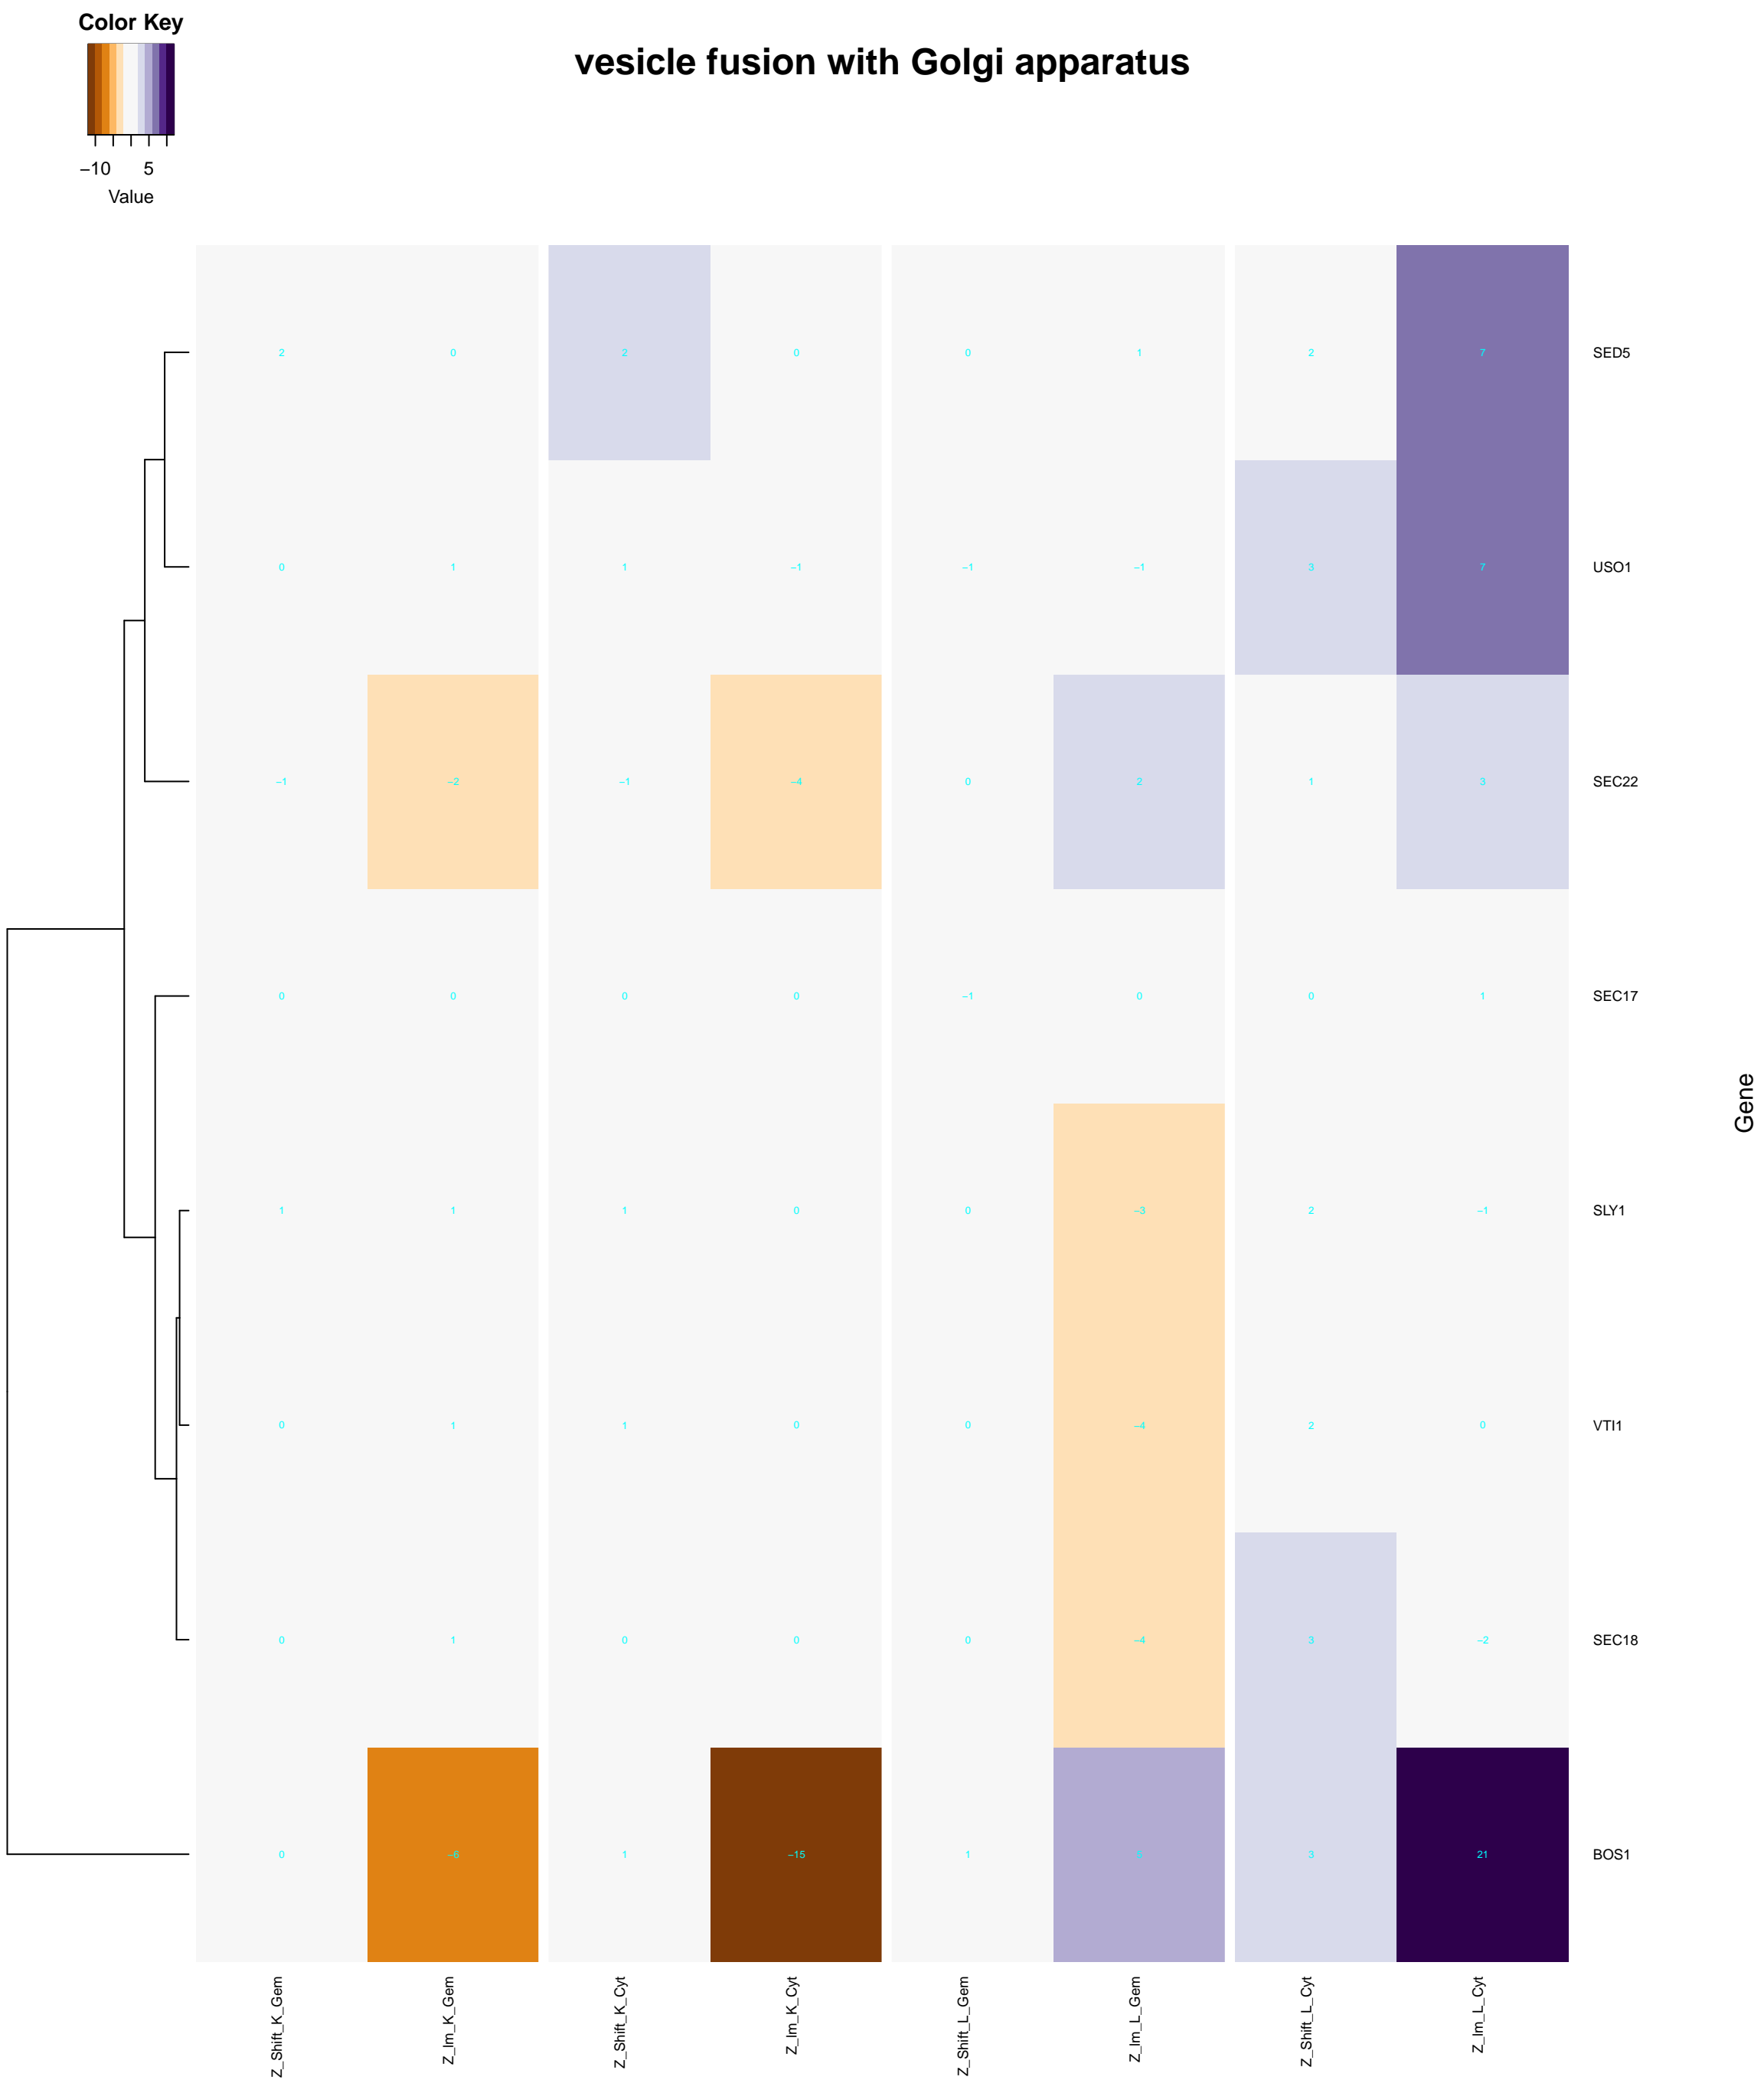

Supplement: s1 [file s1]

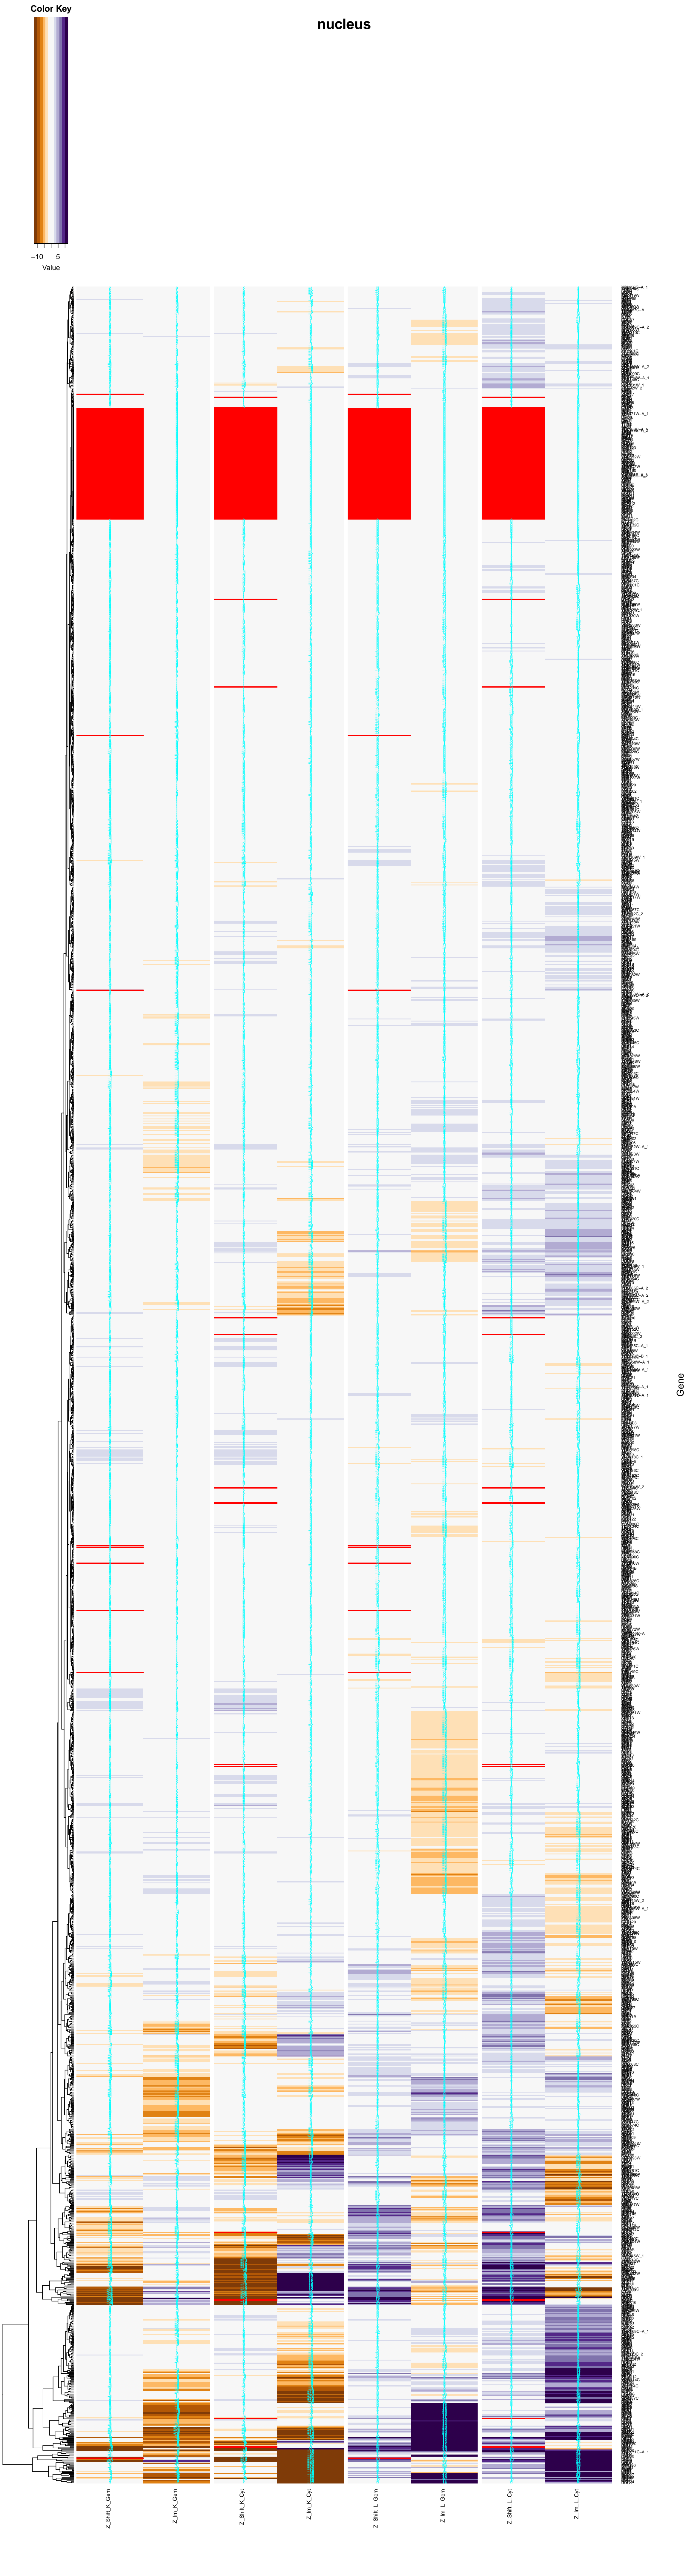

Supplement: s1 [file s1]

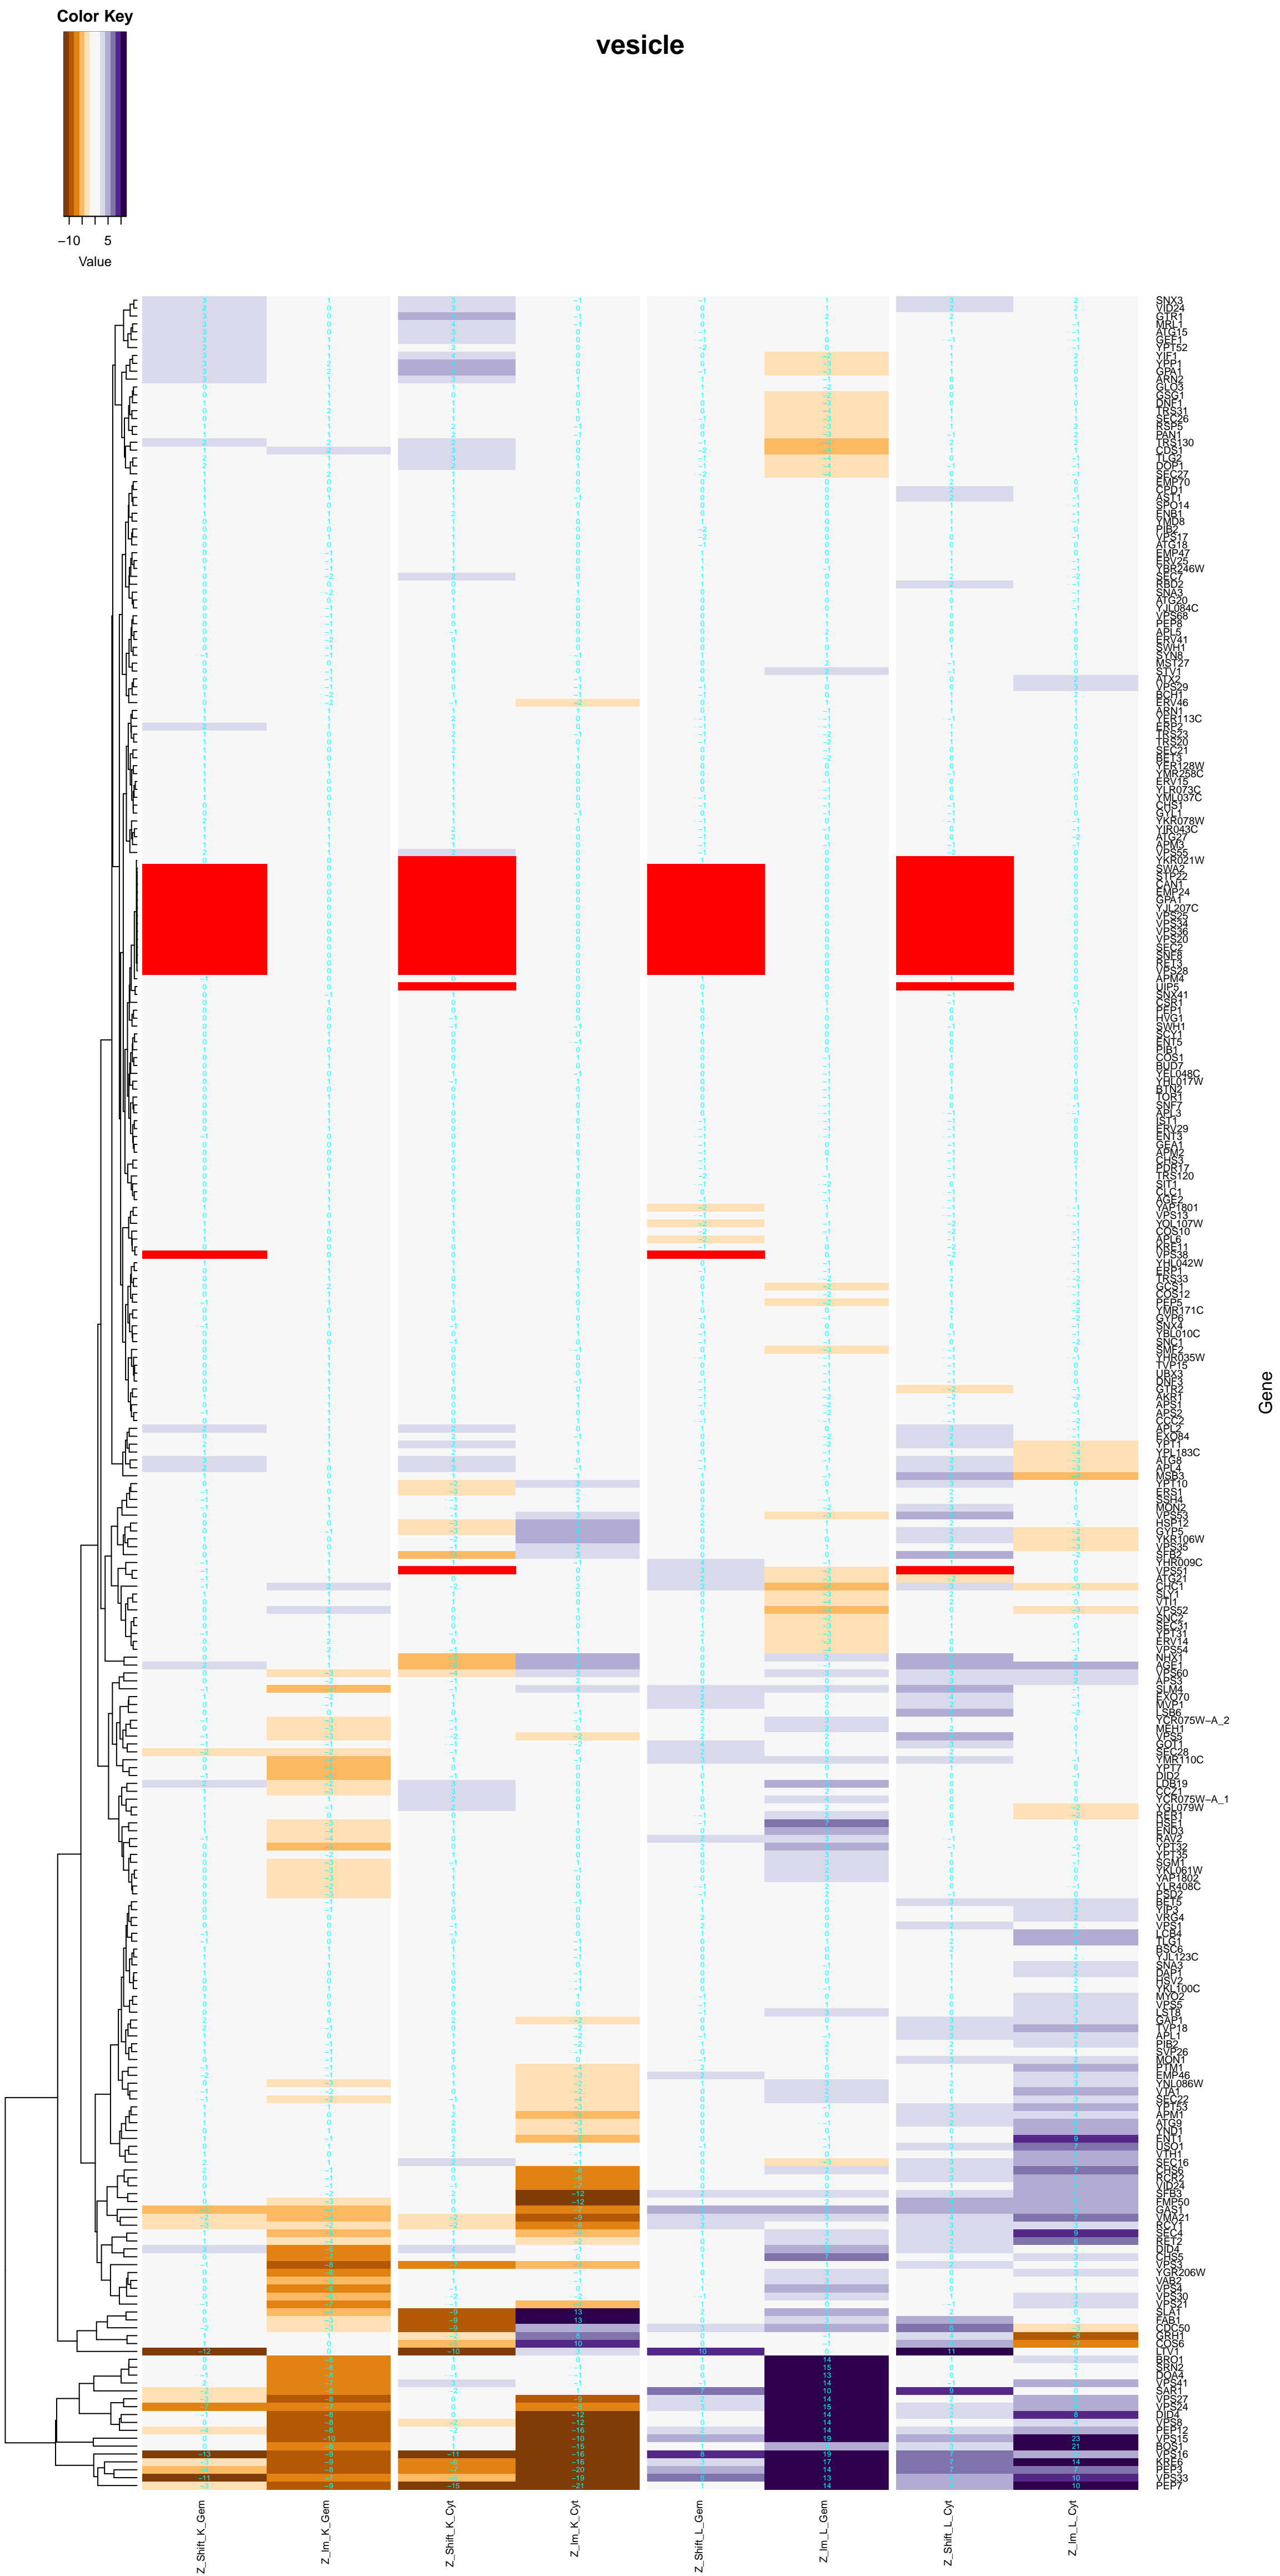

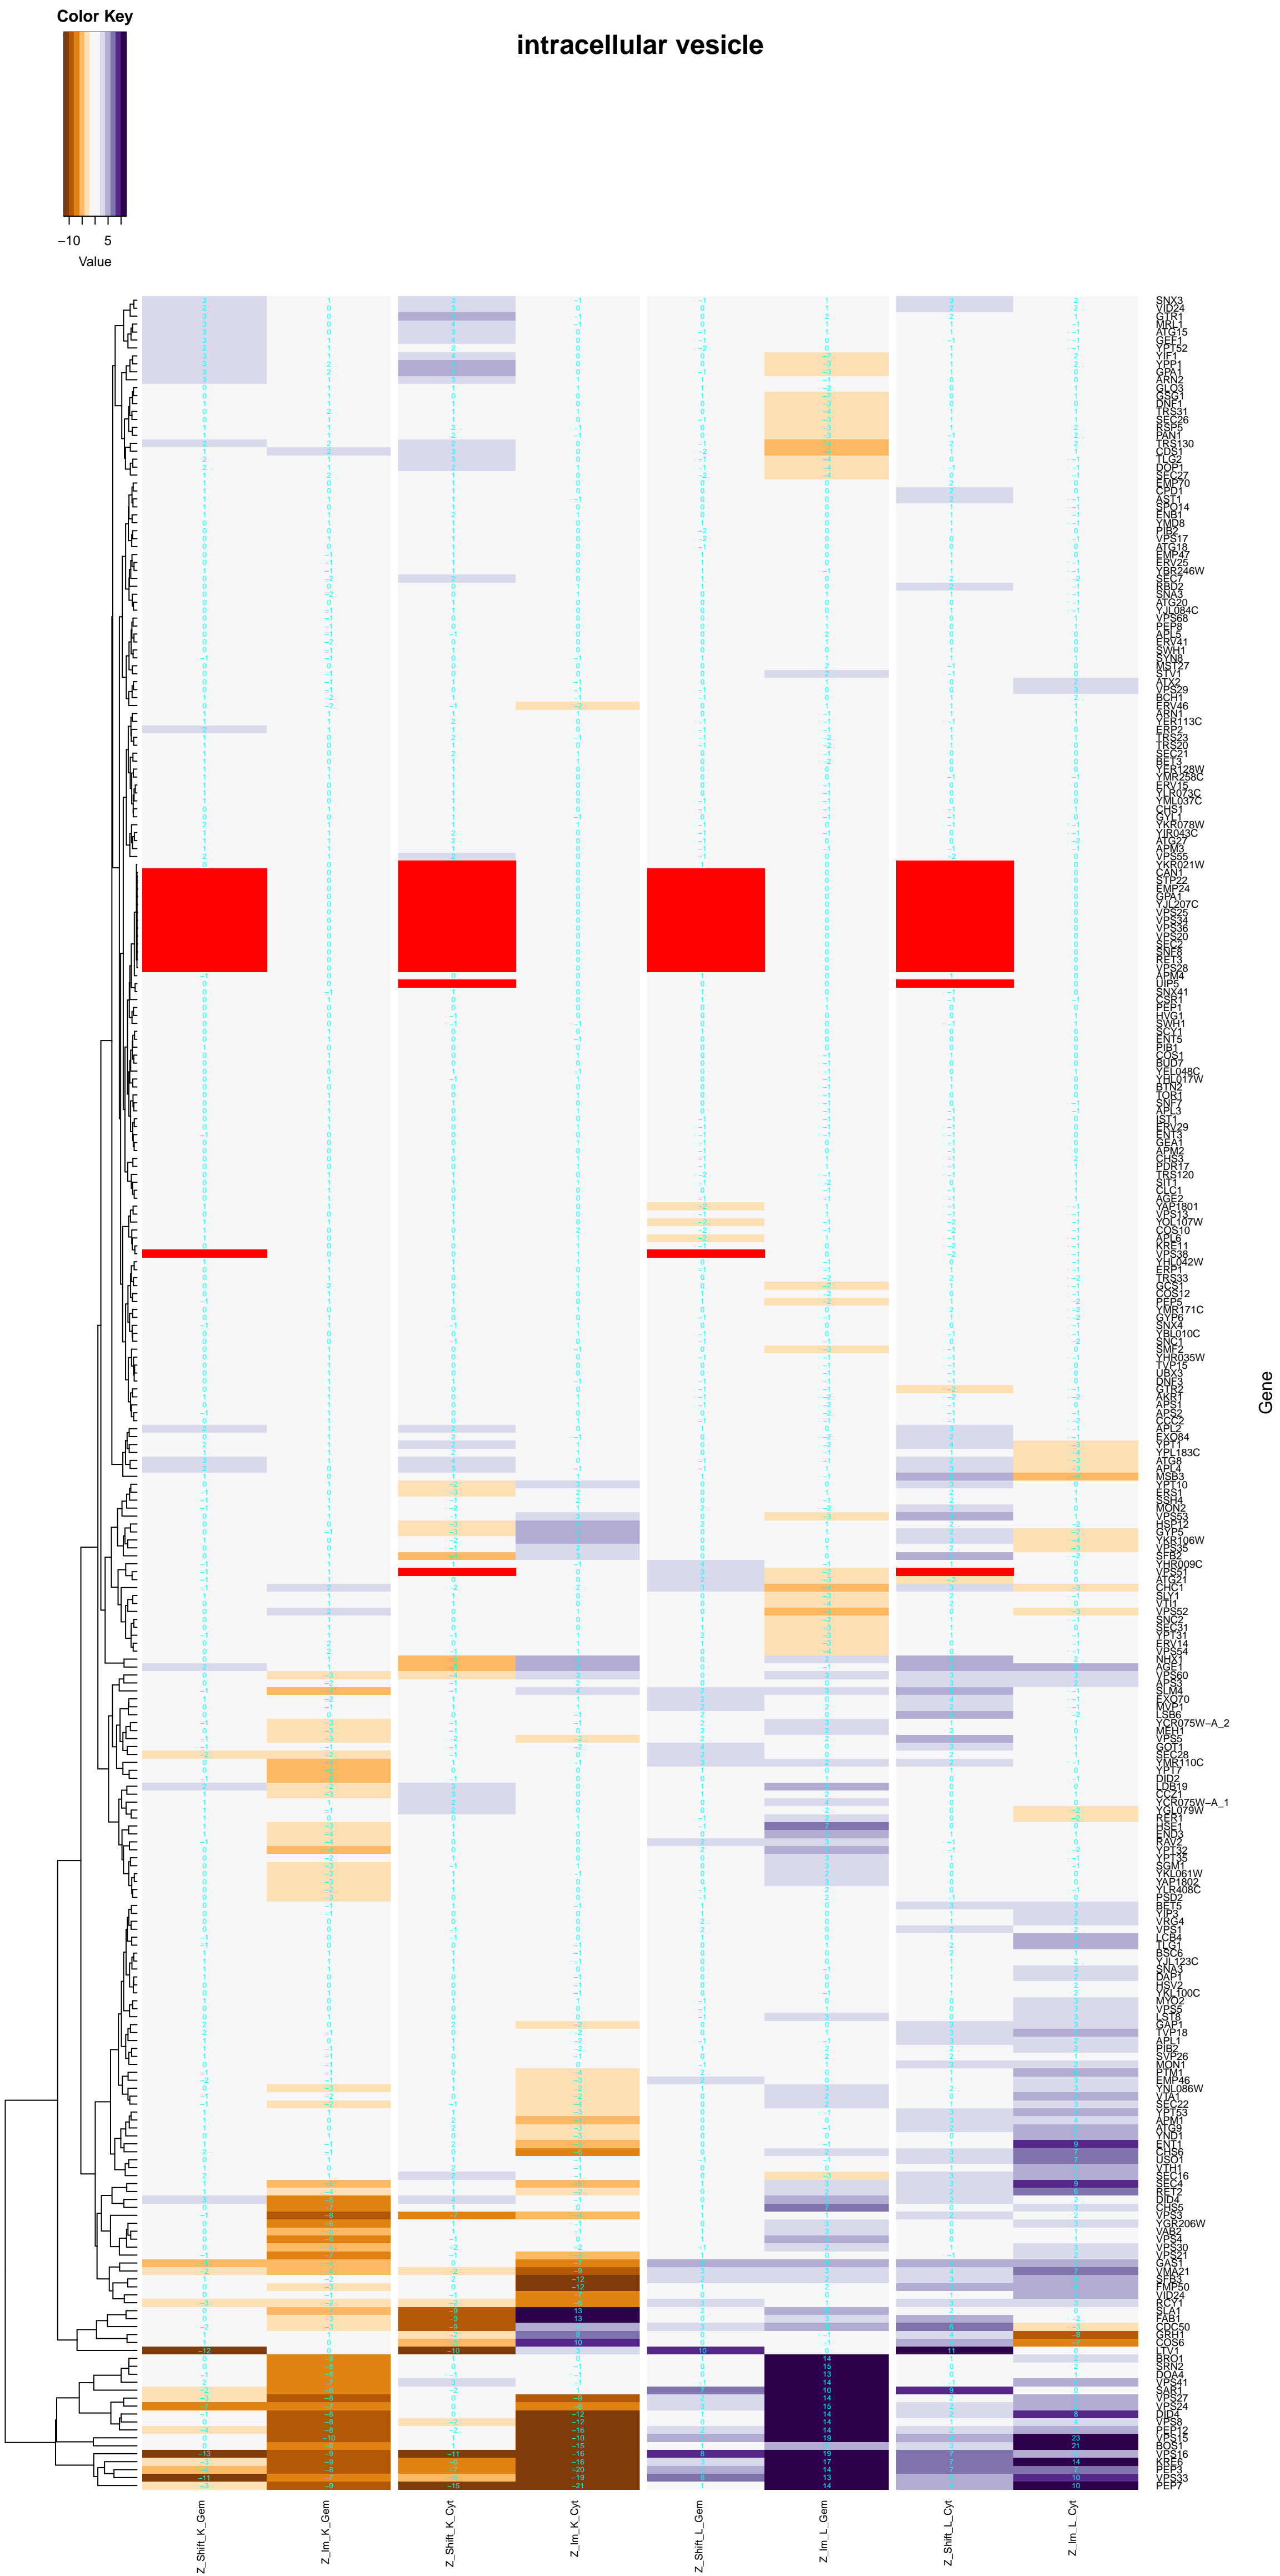

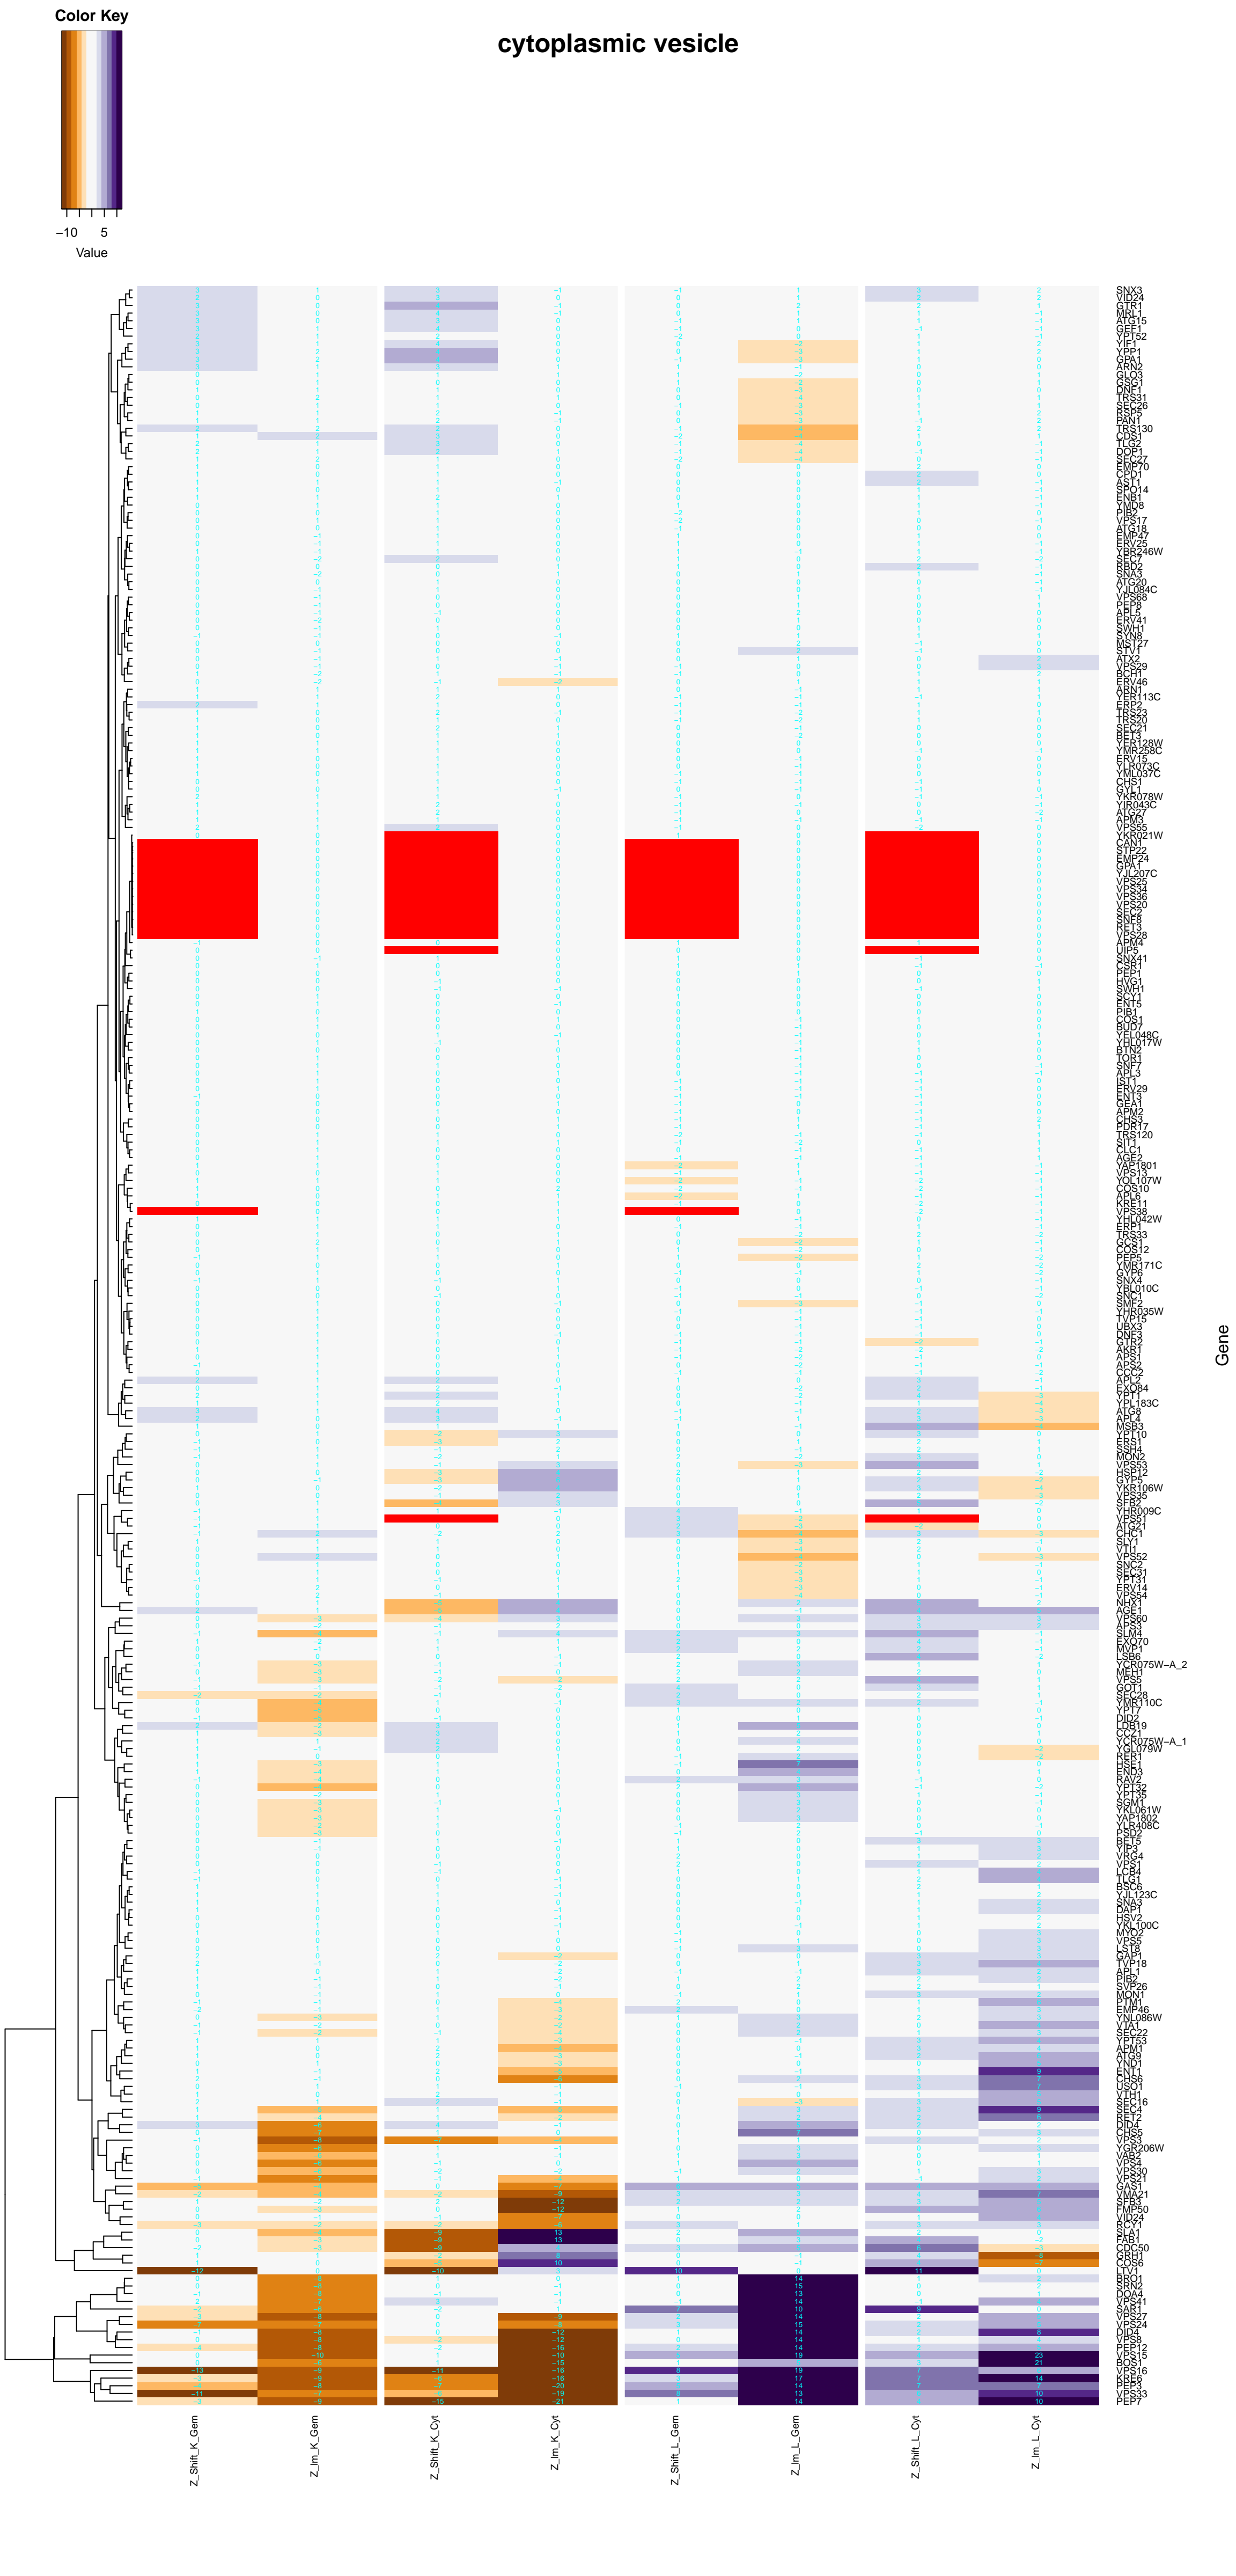



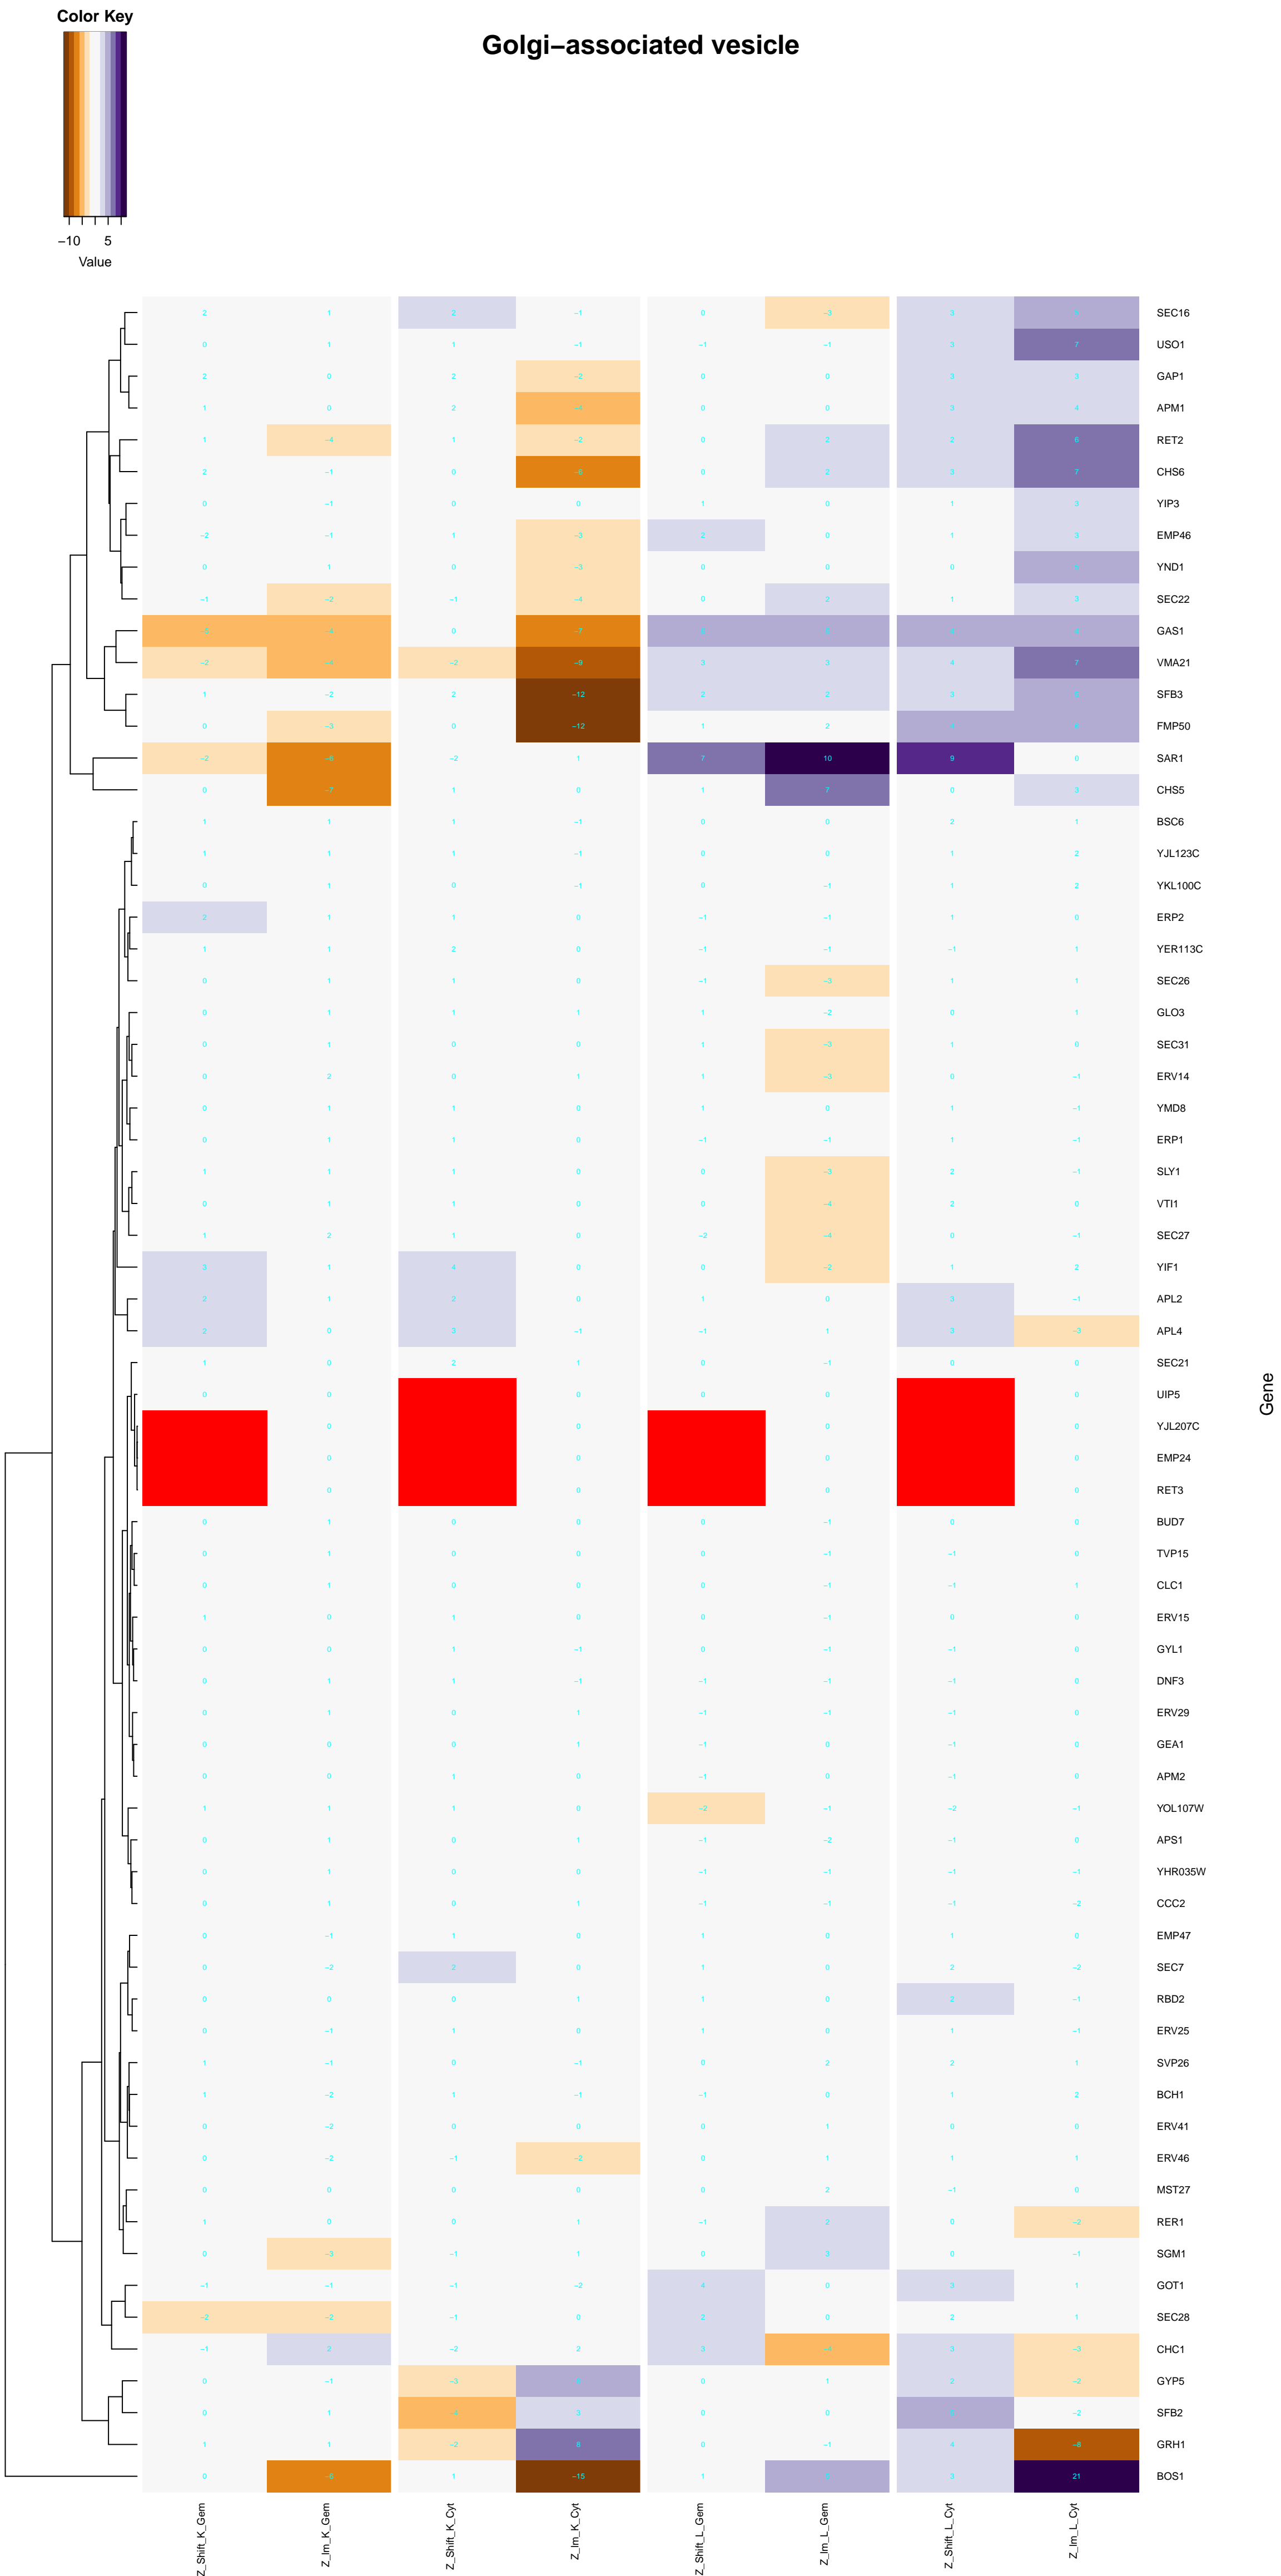

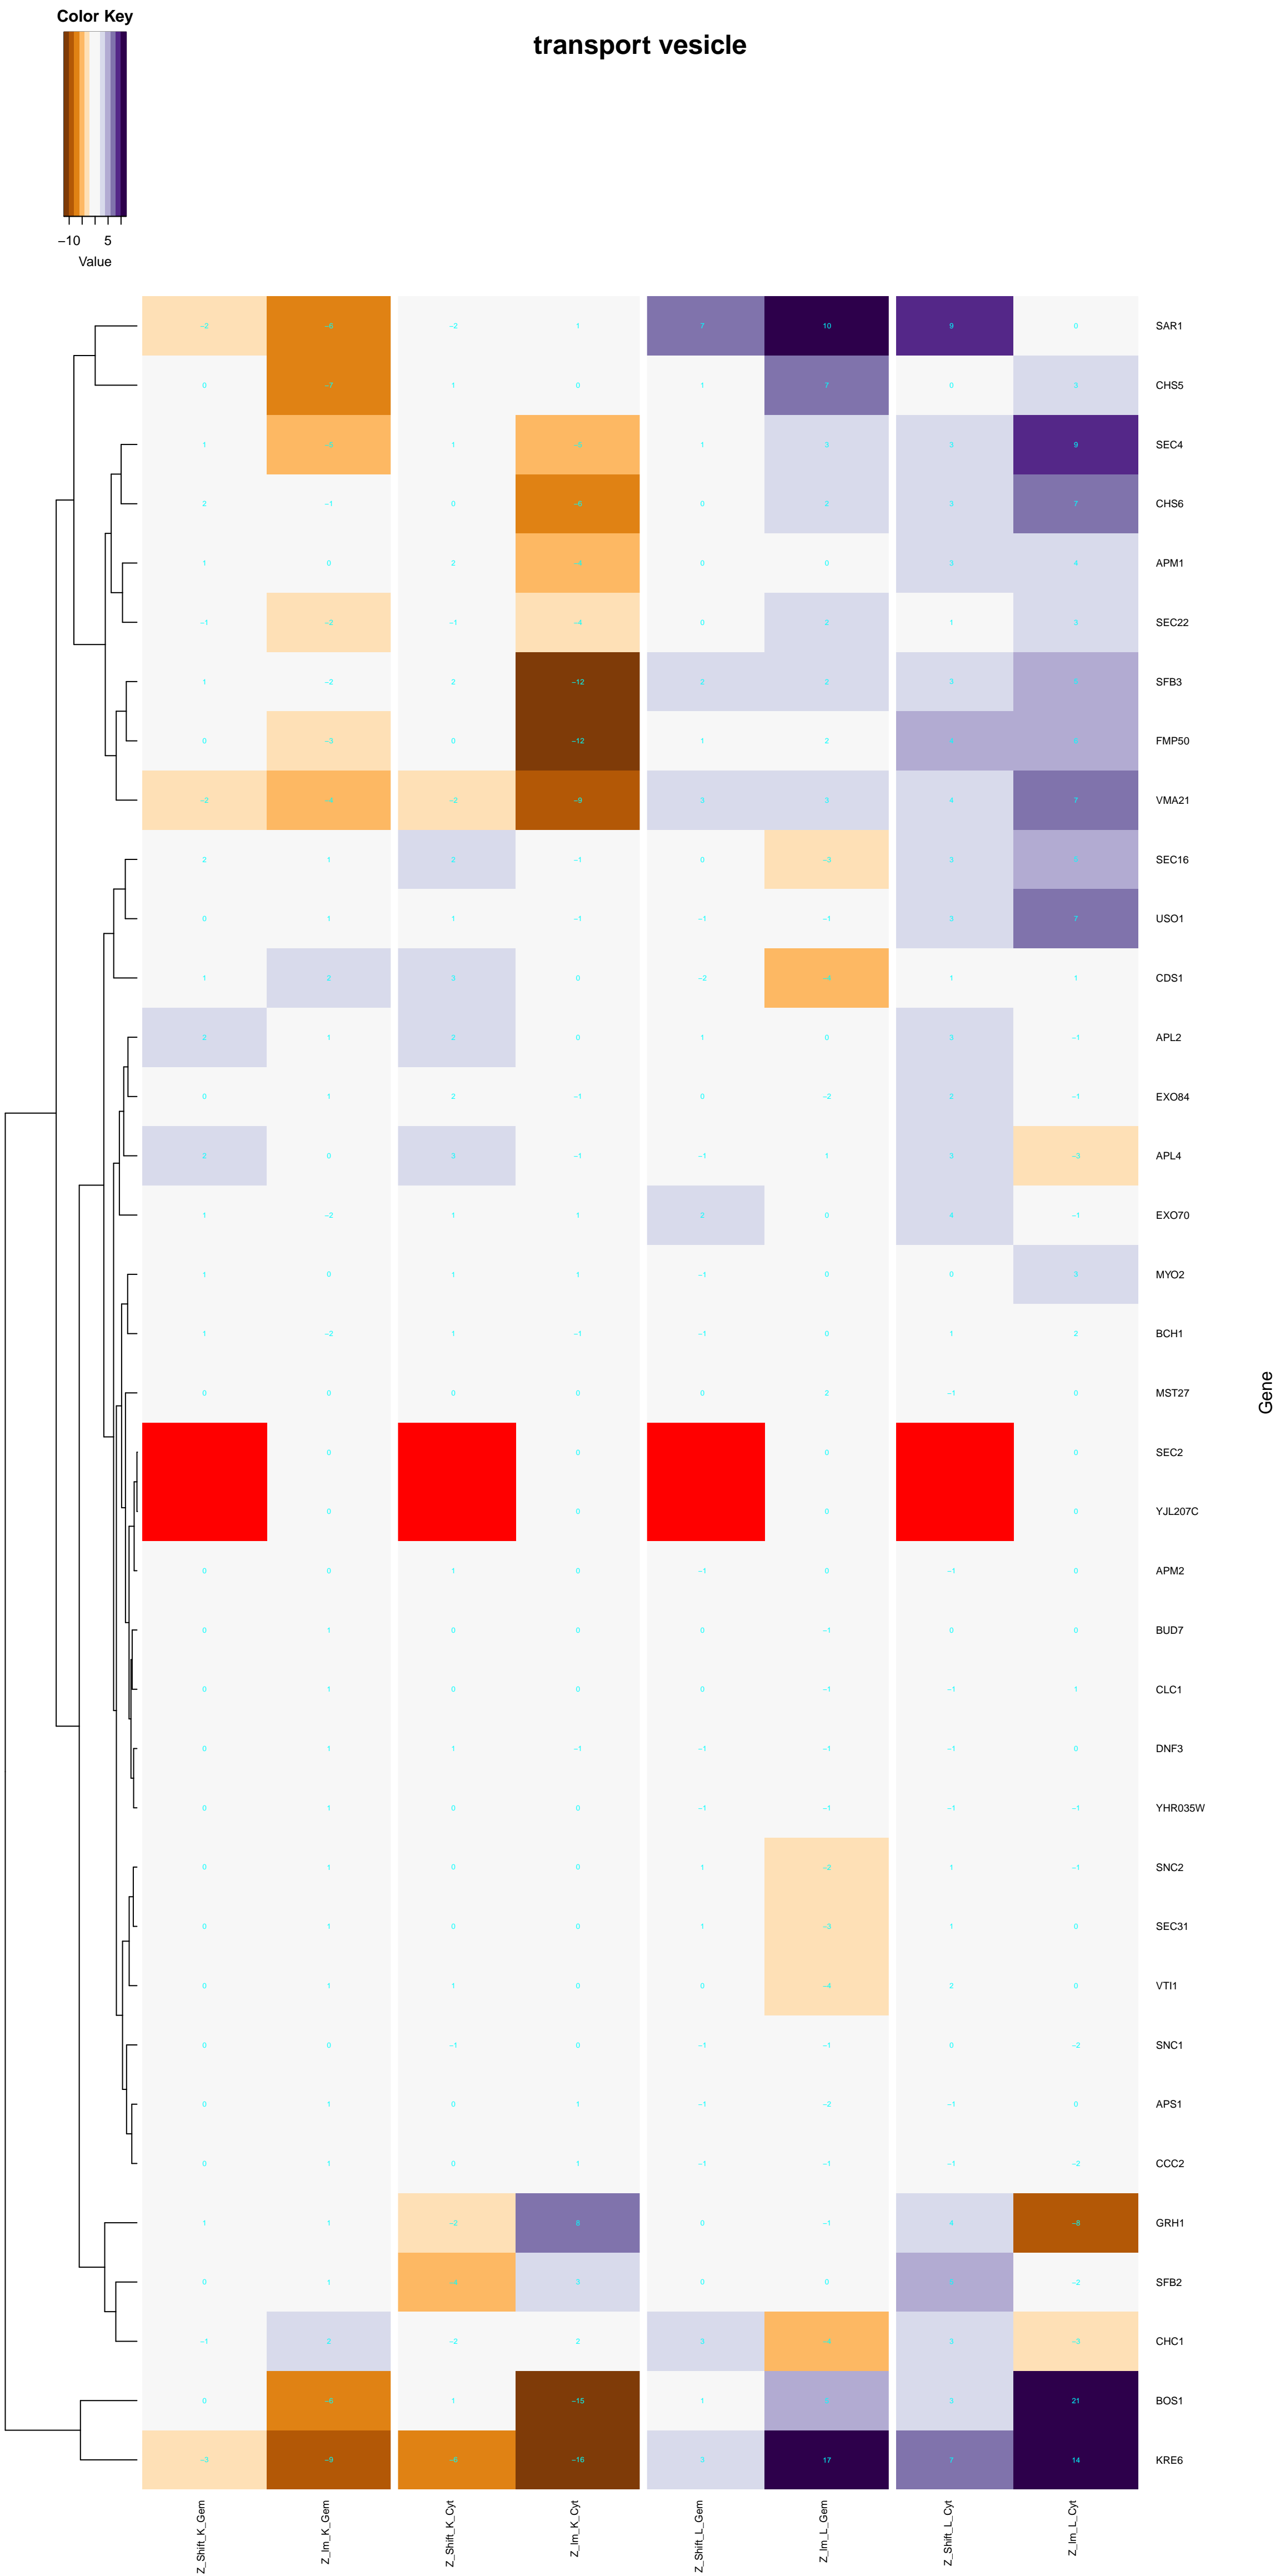

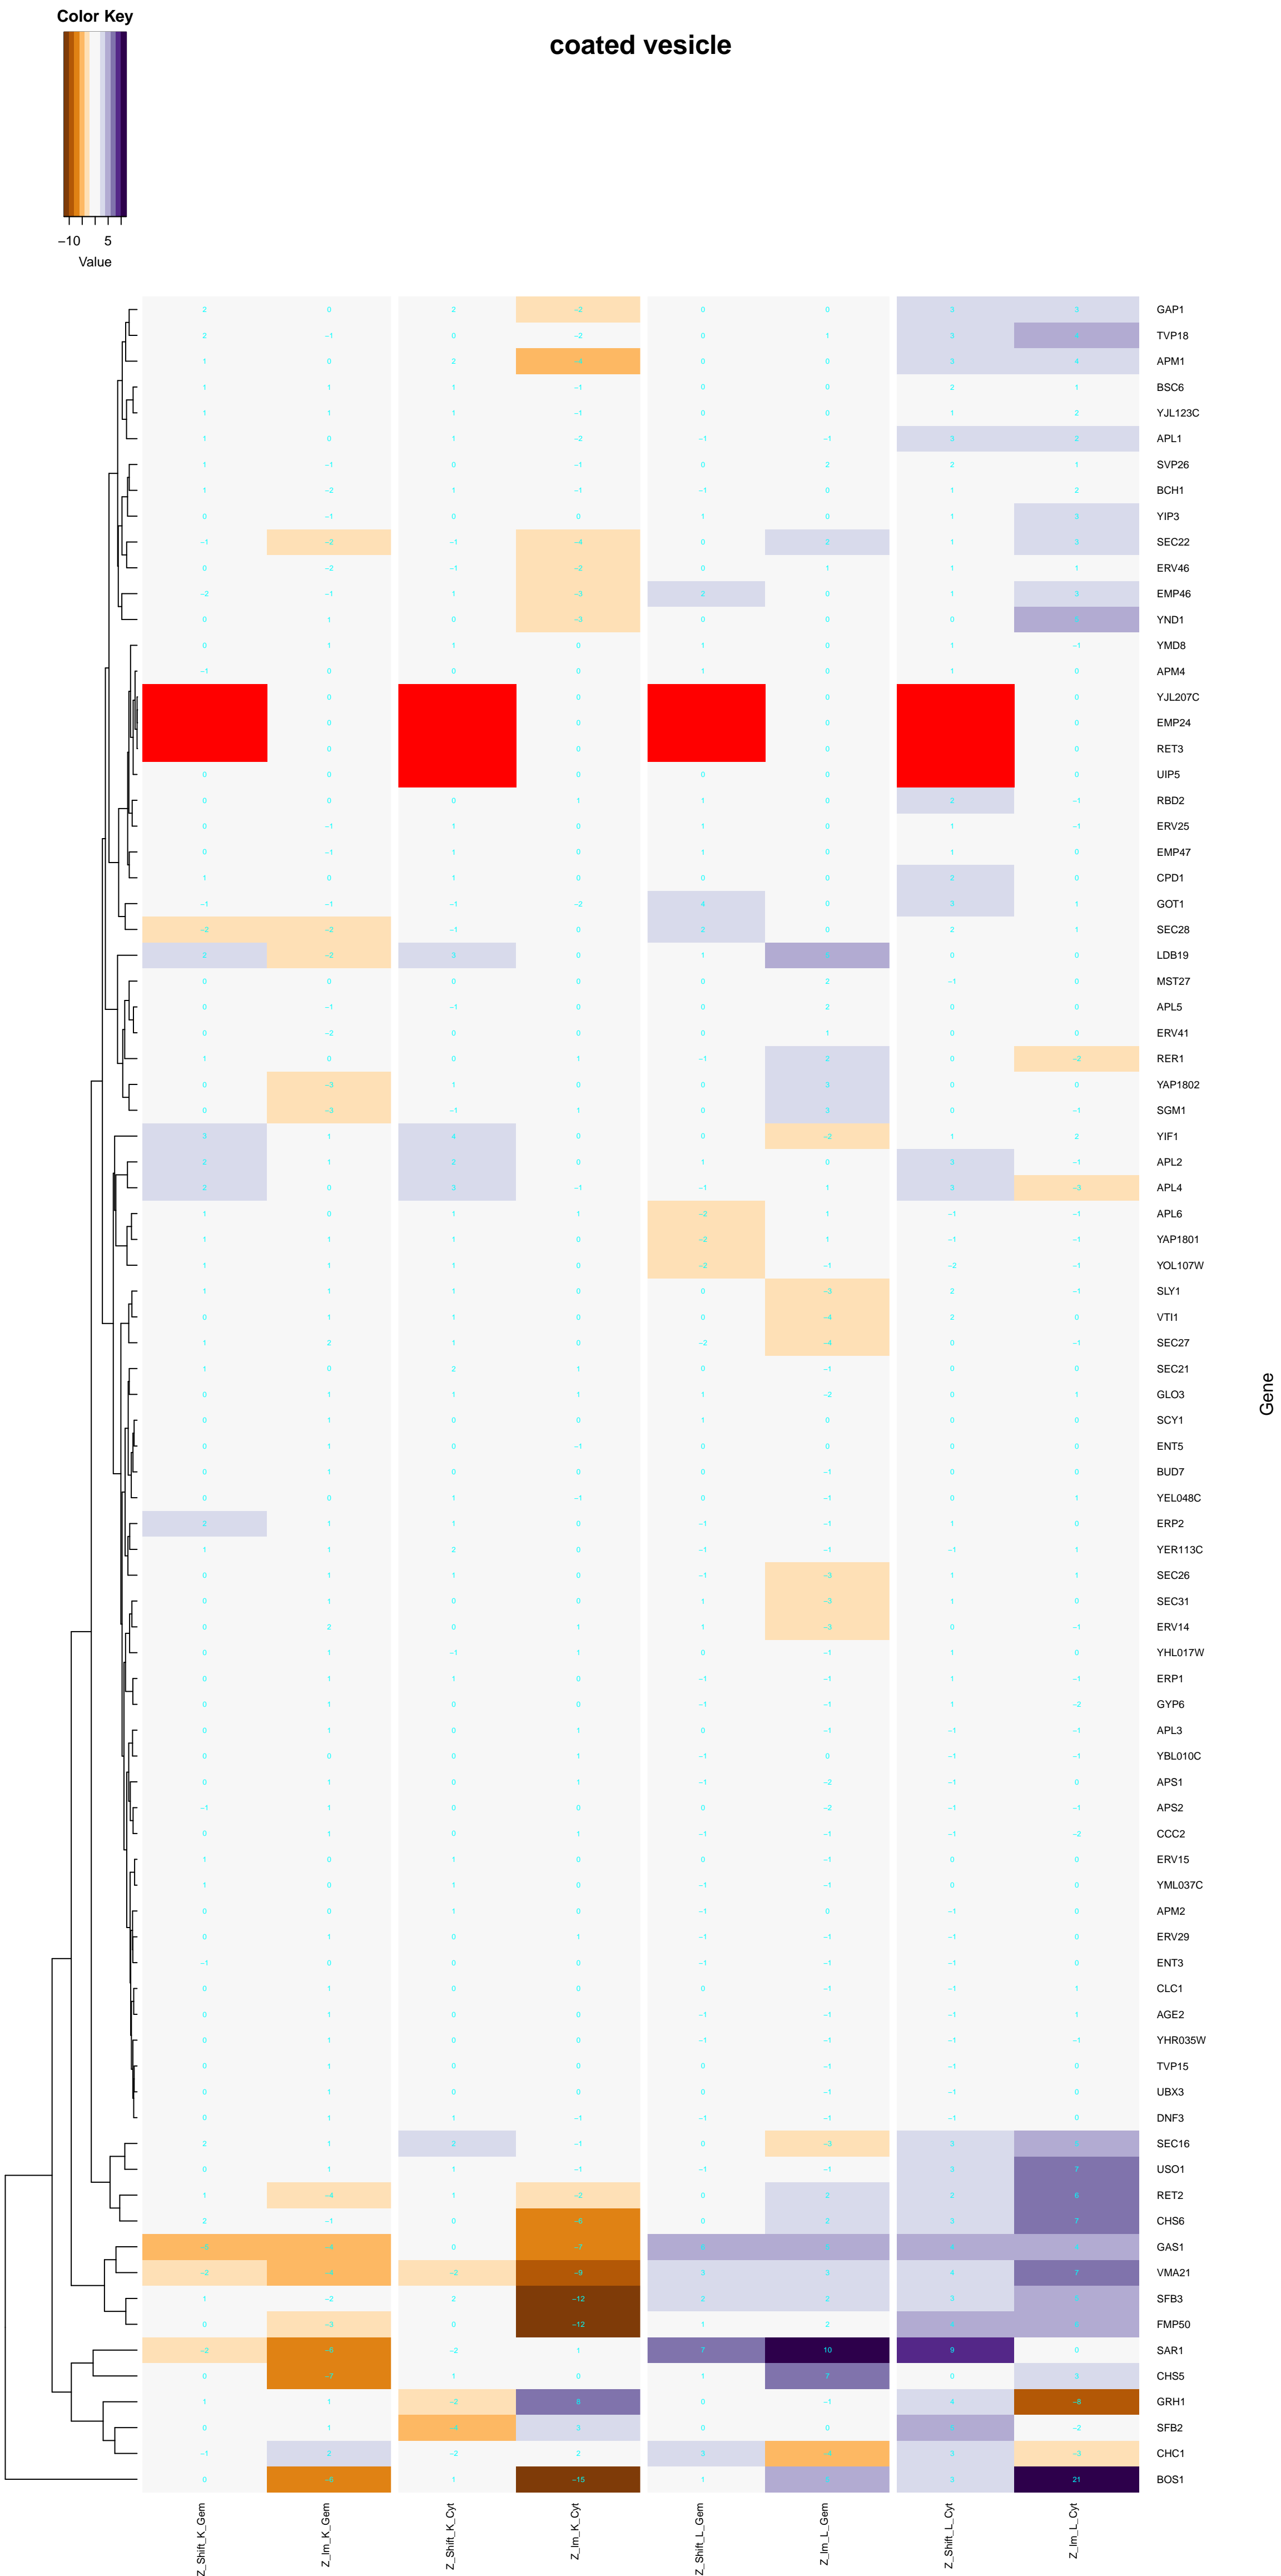

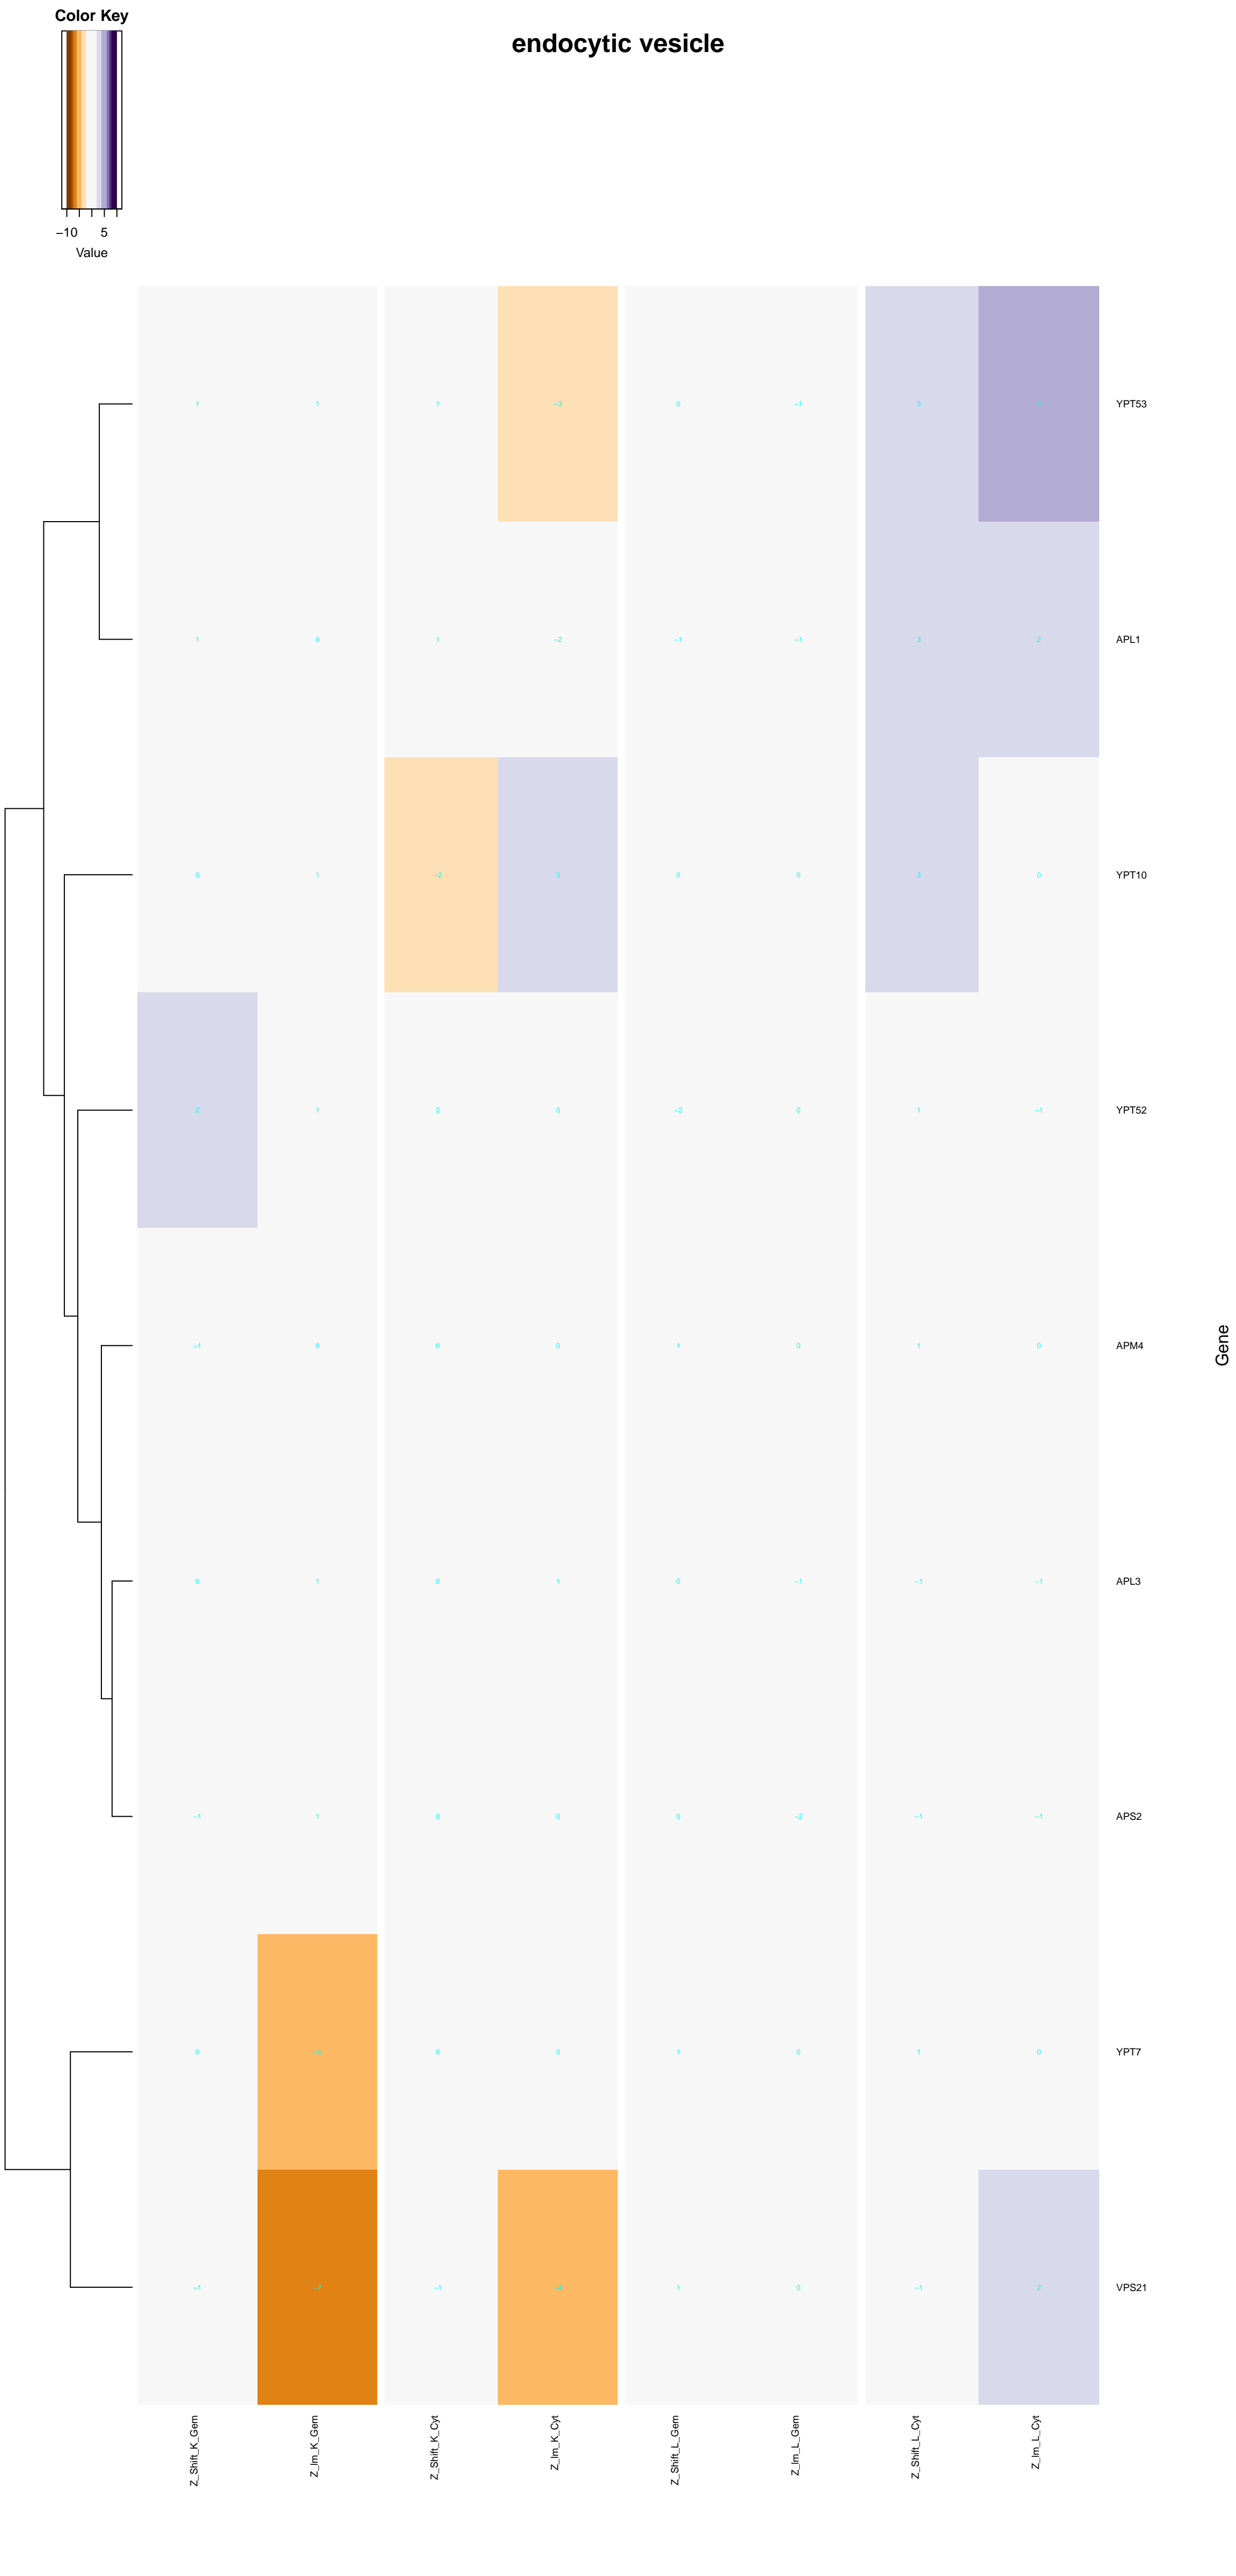



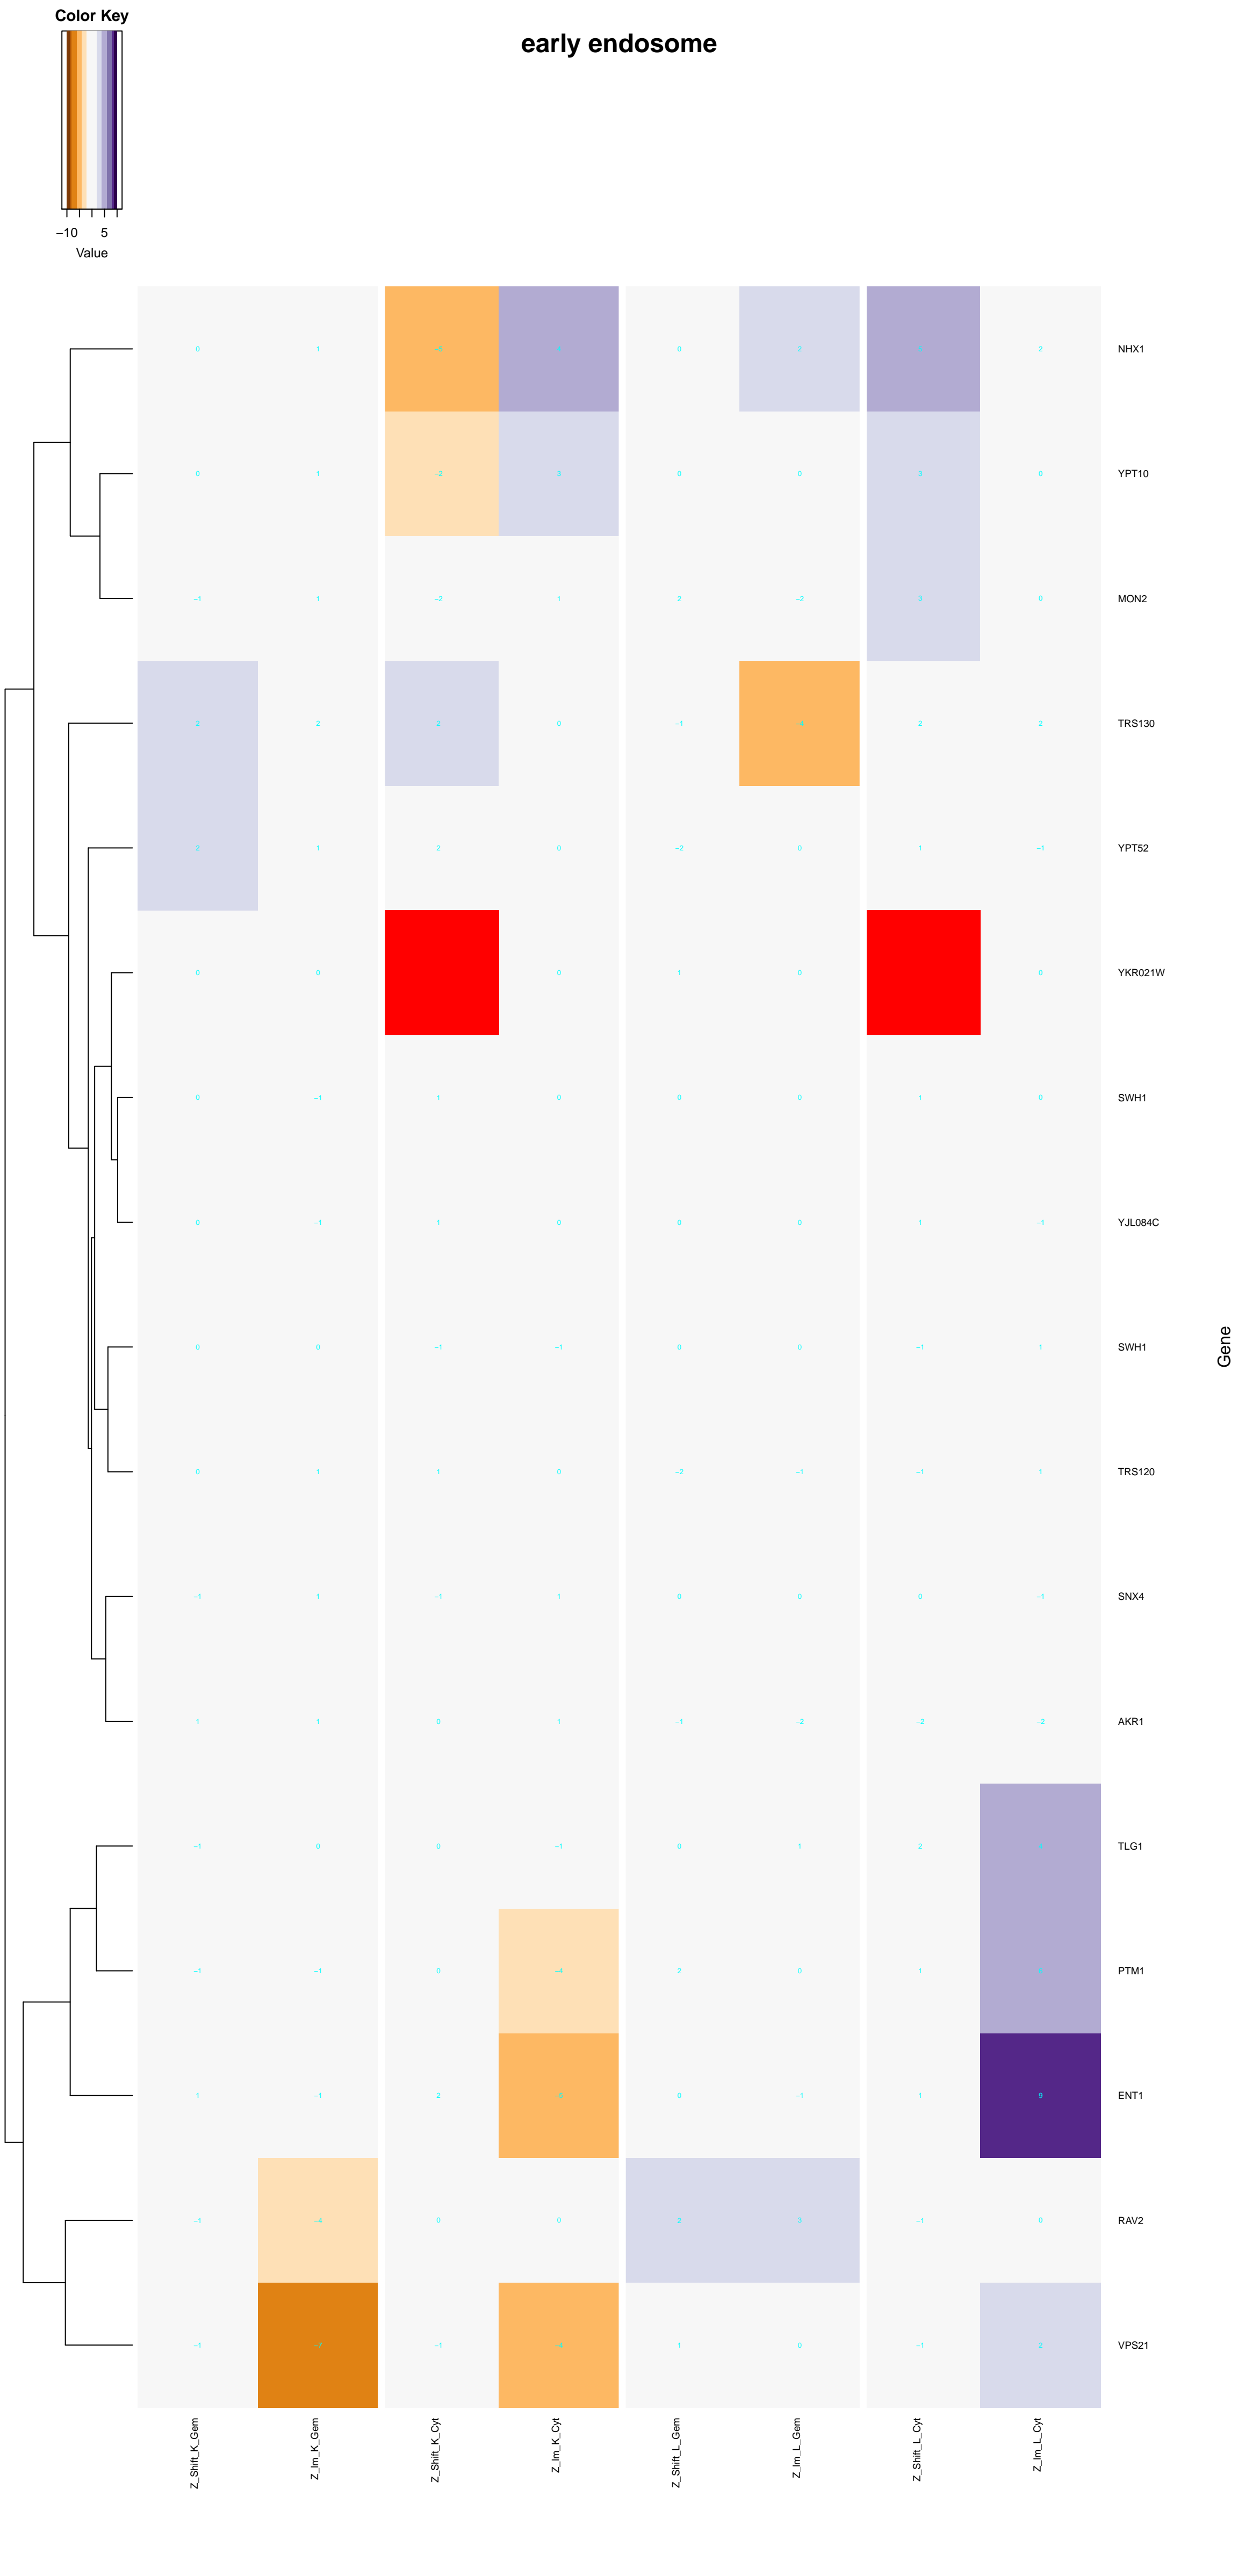

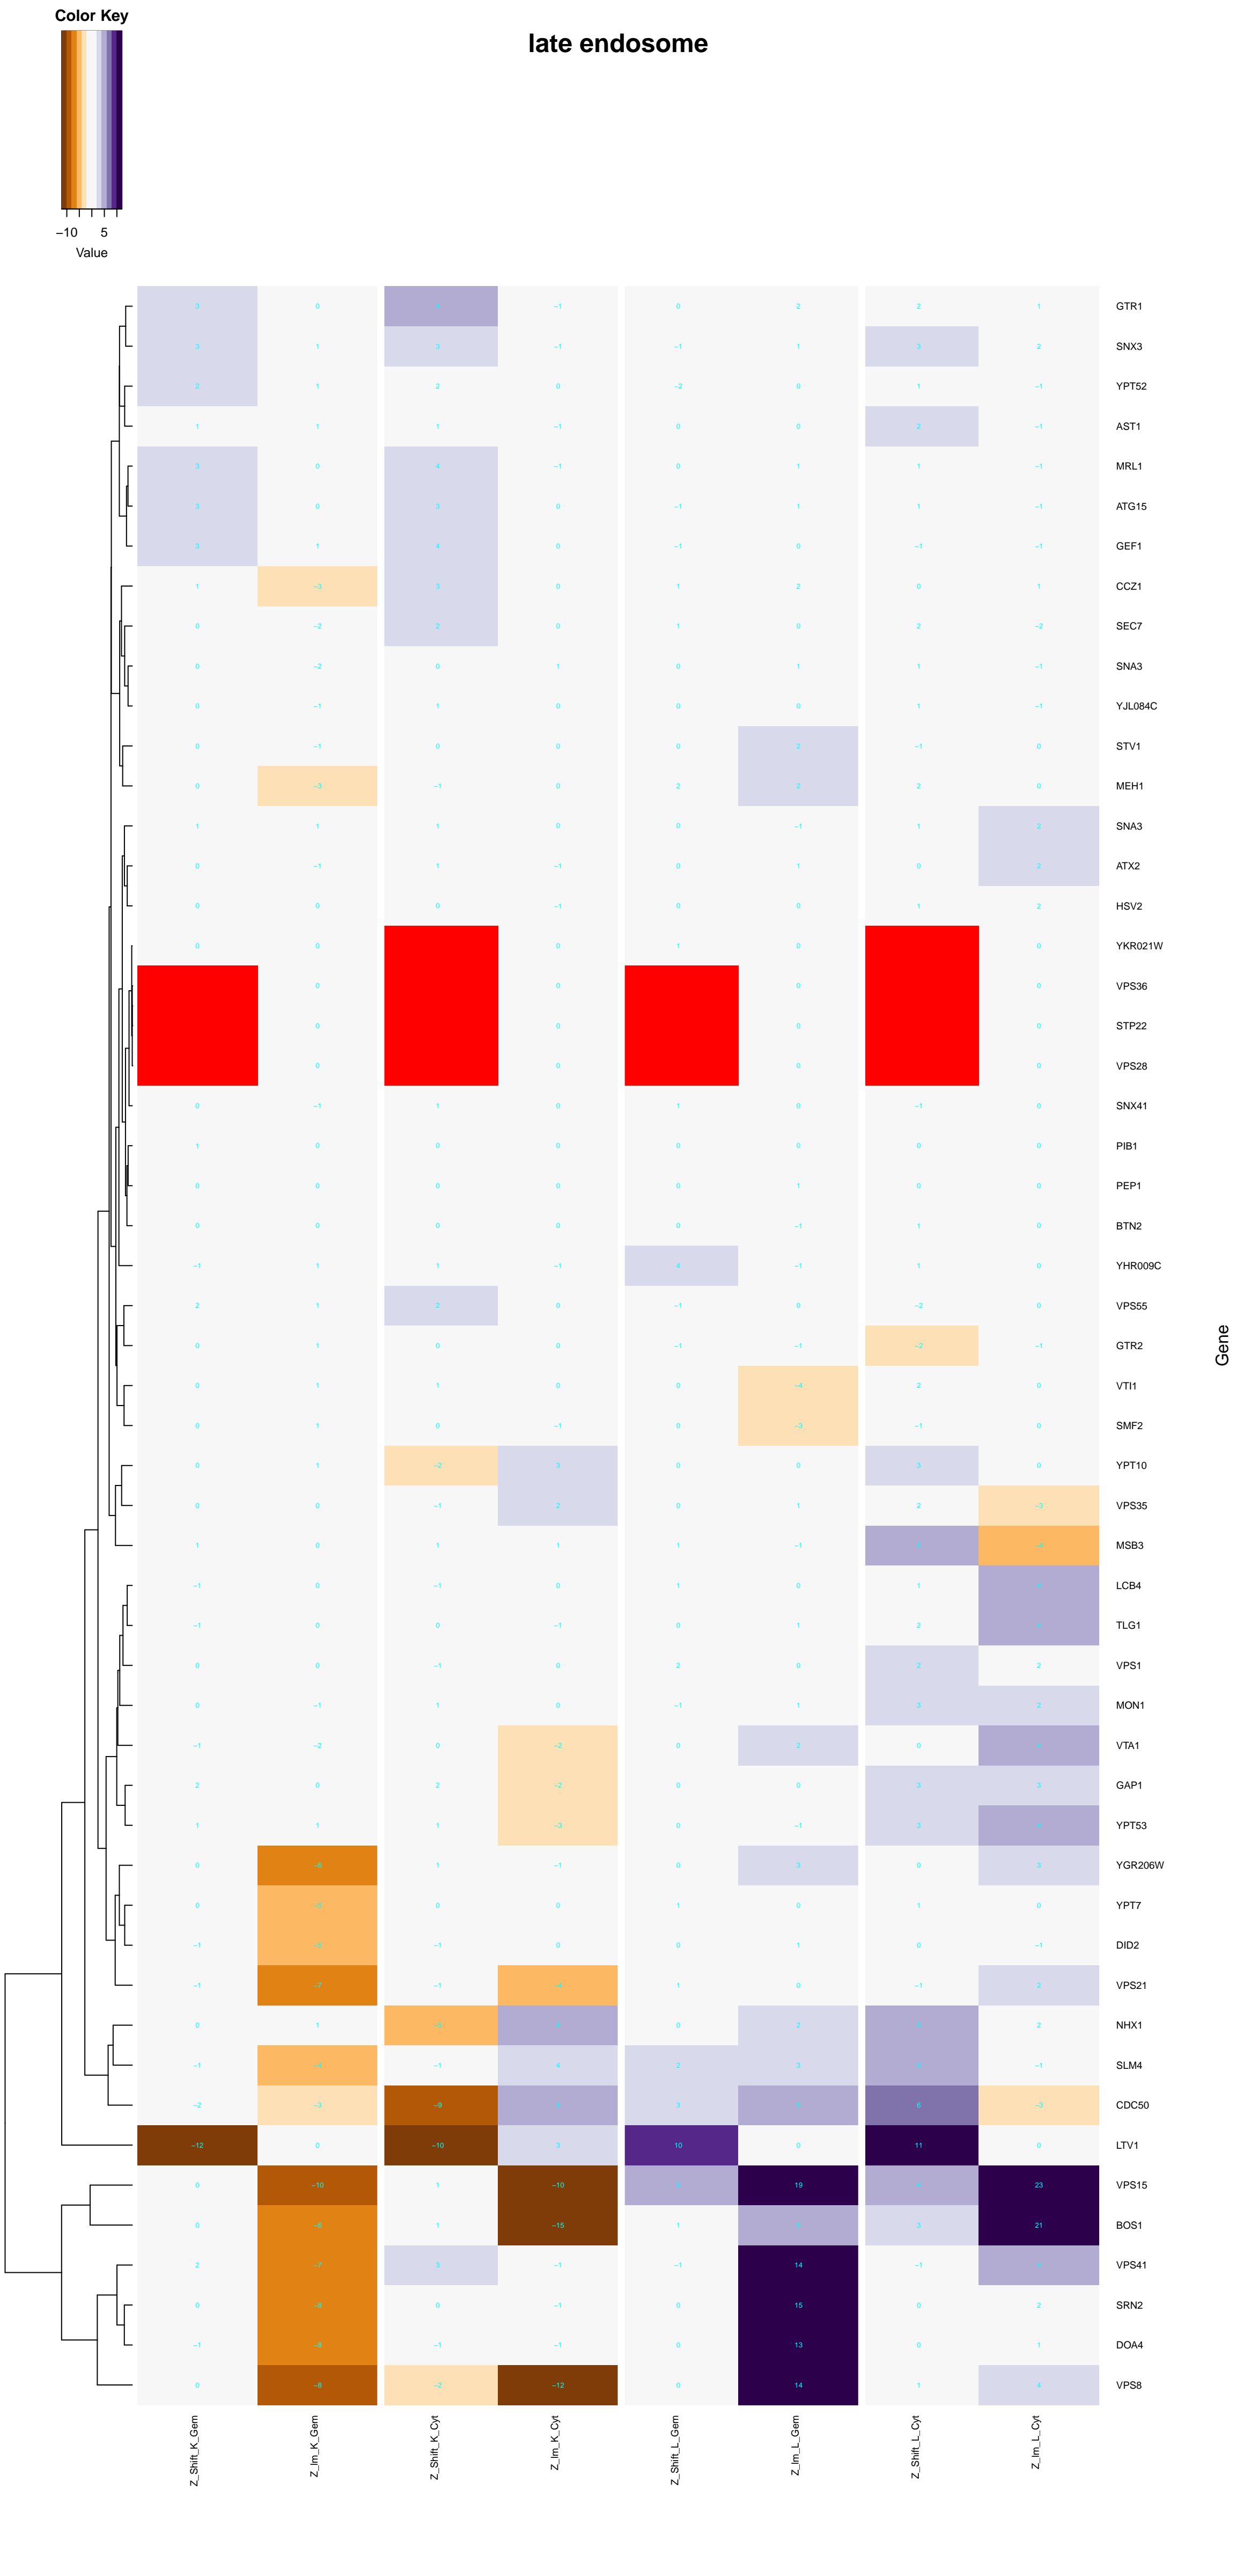

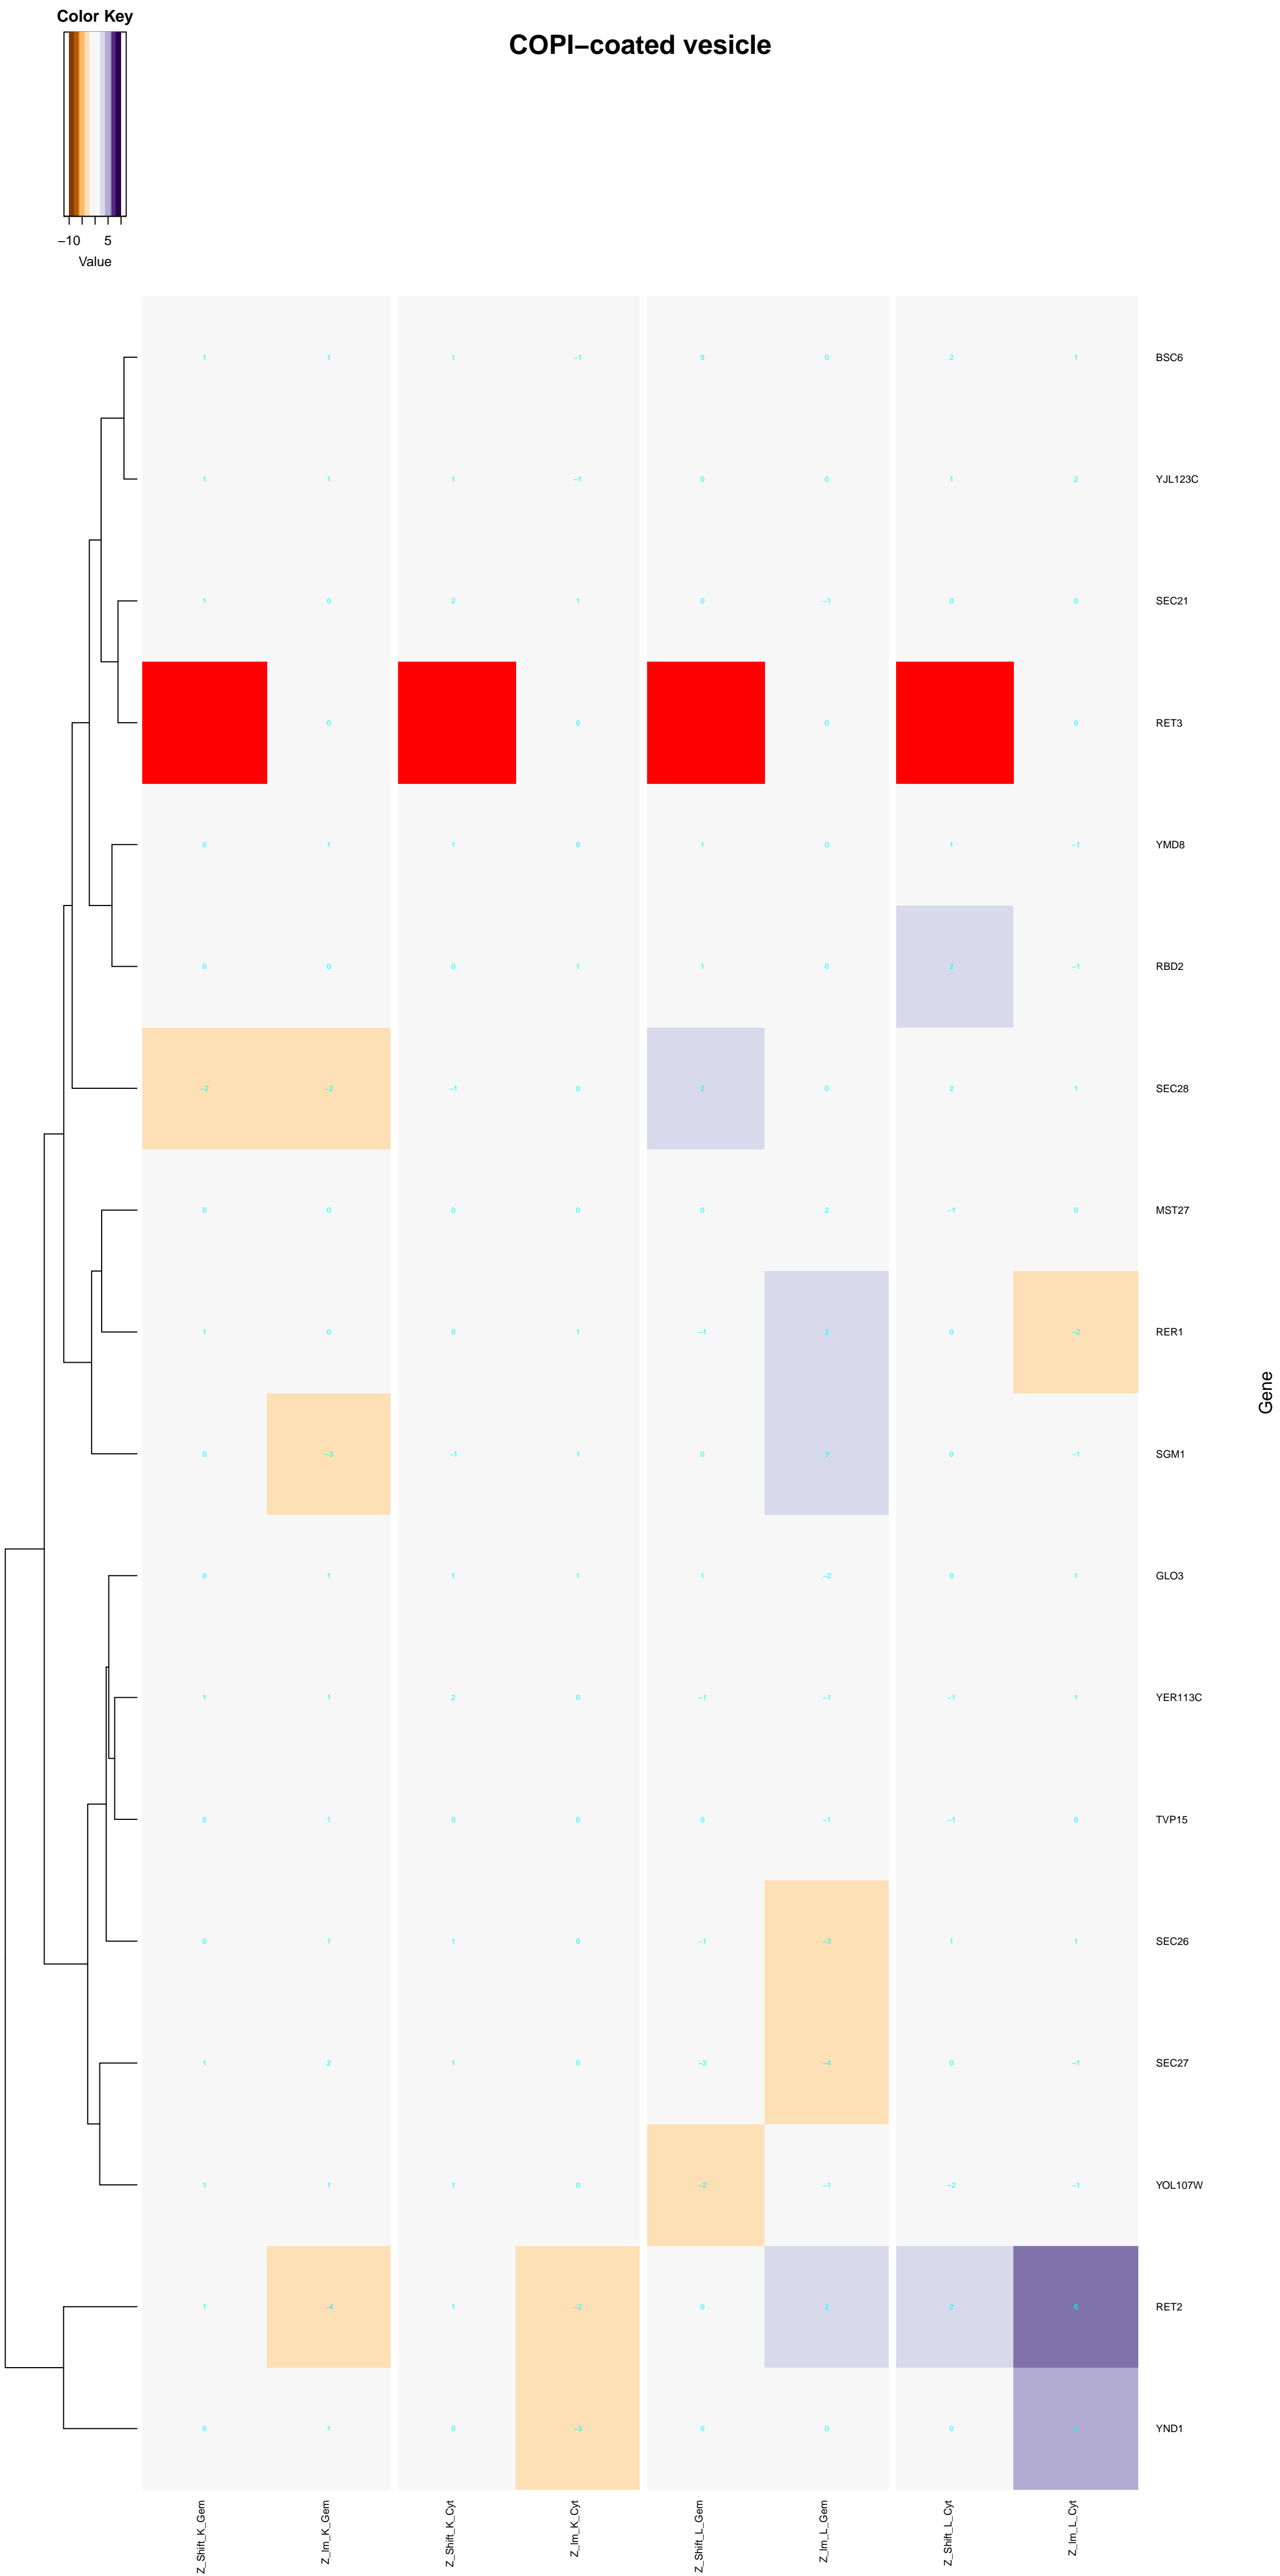

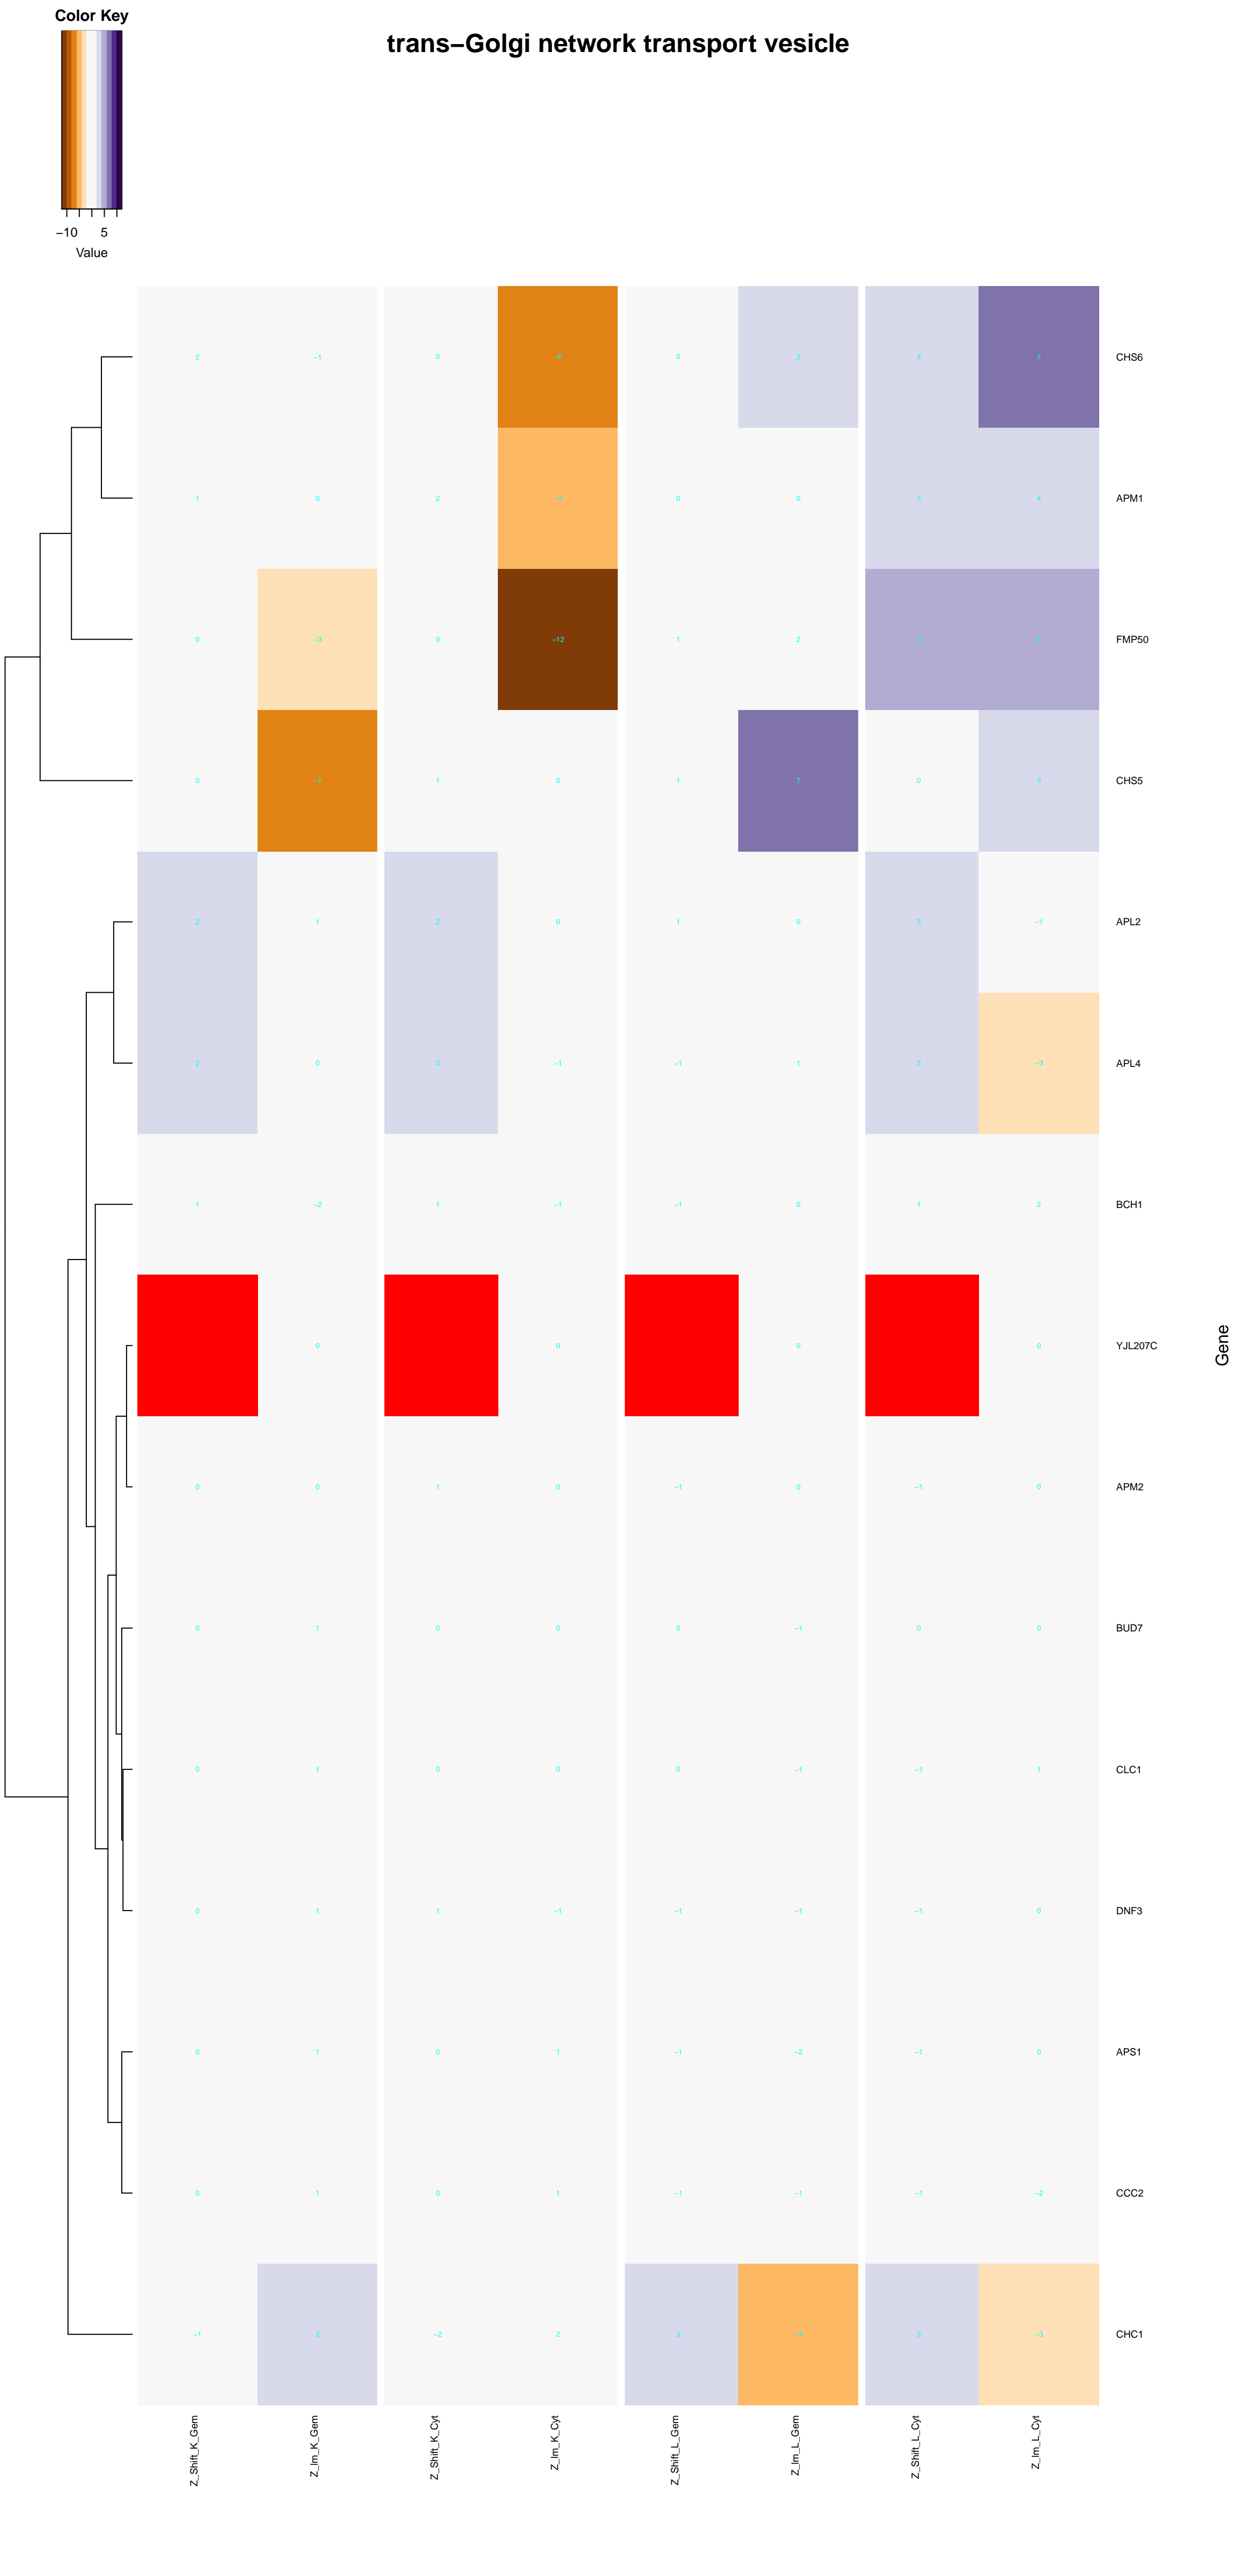

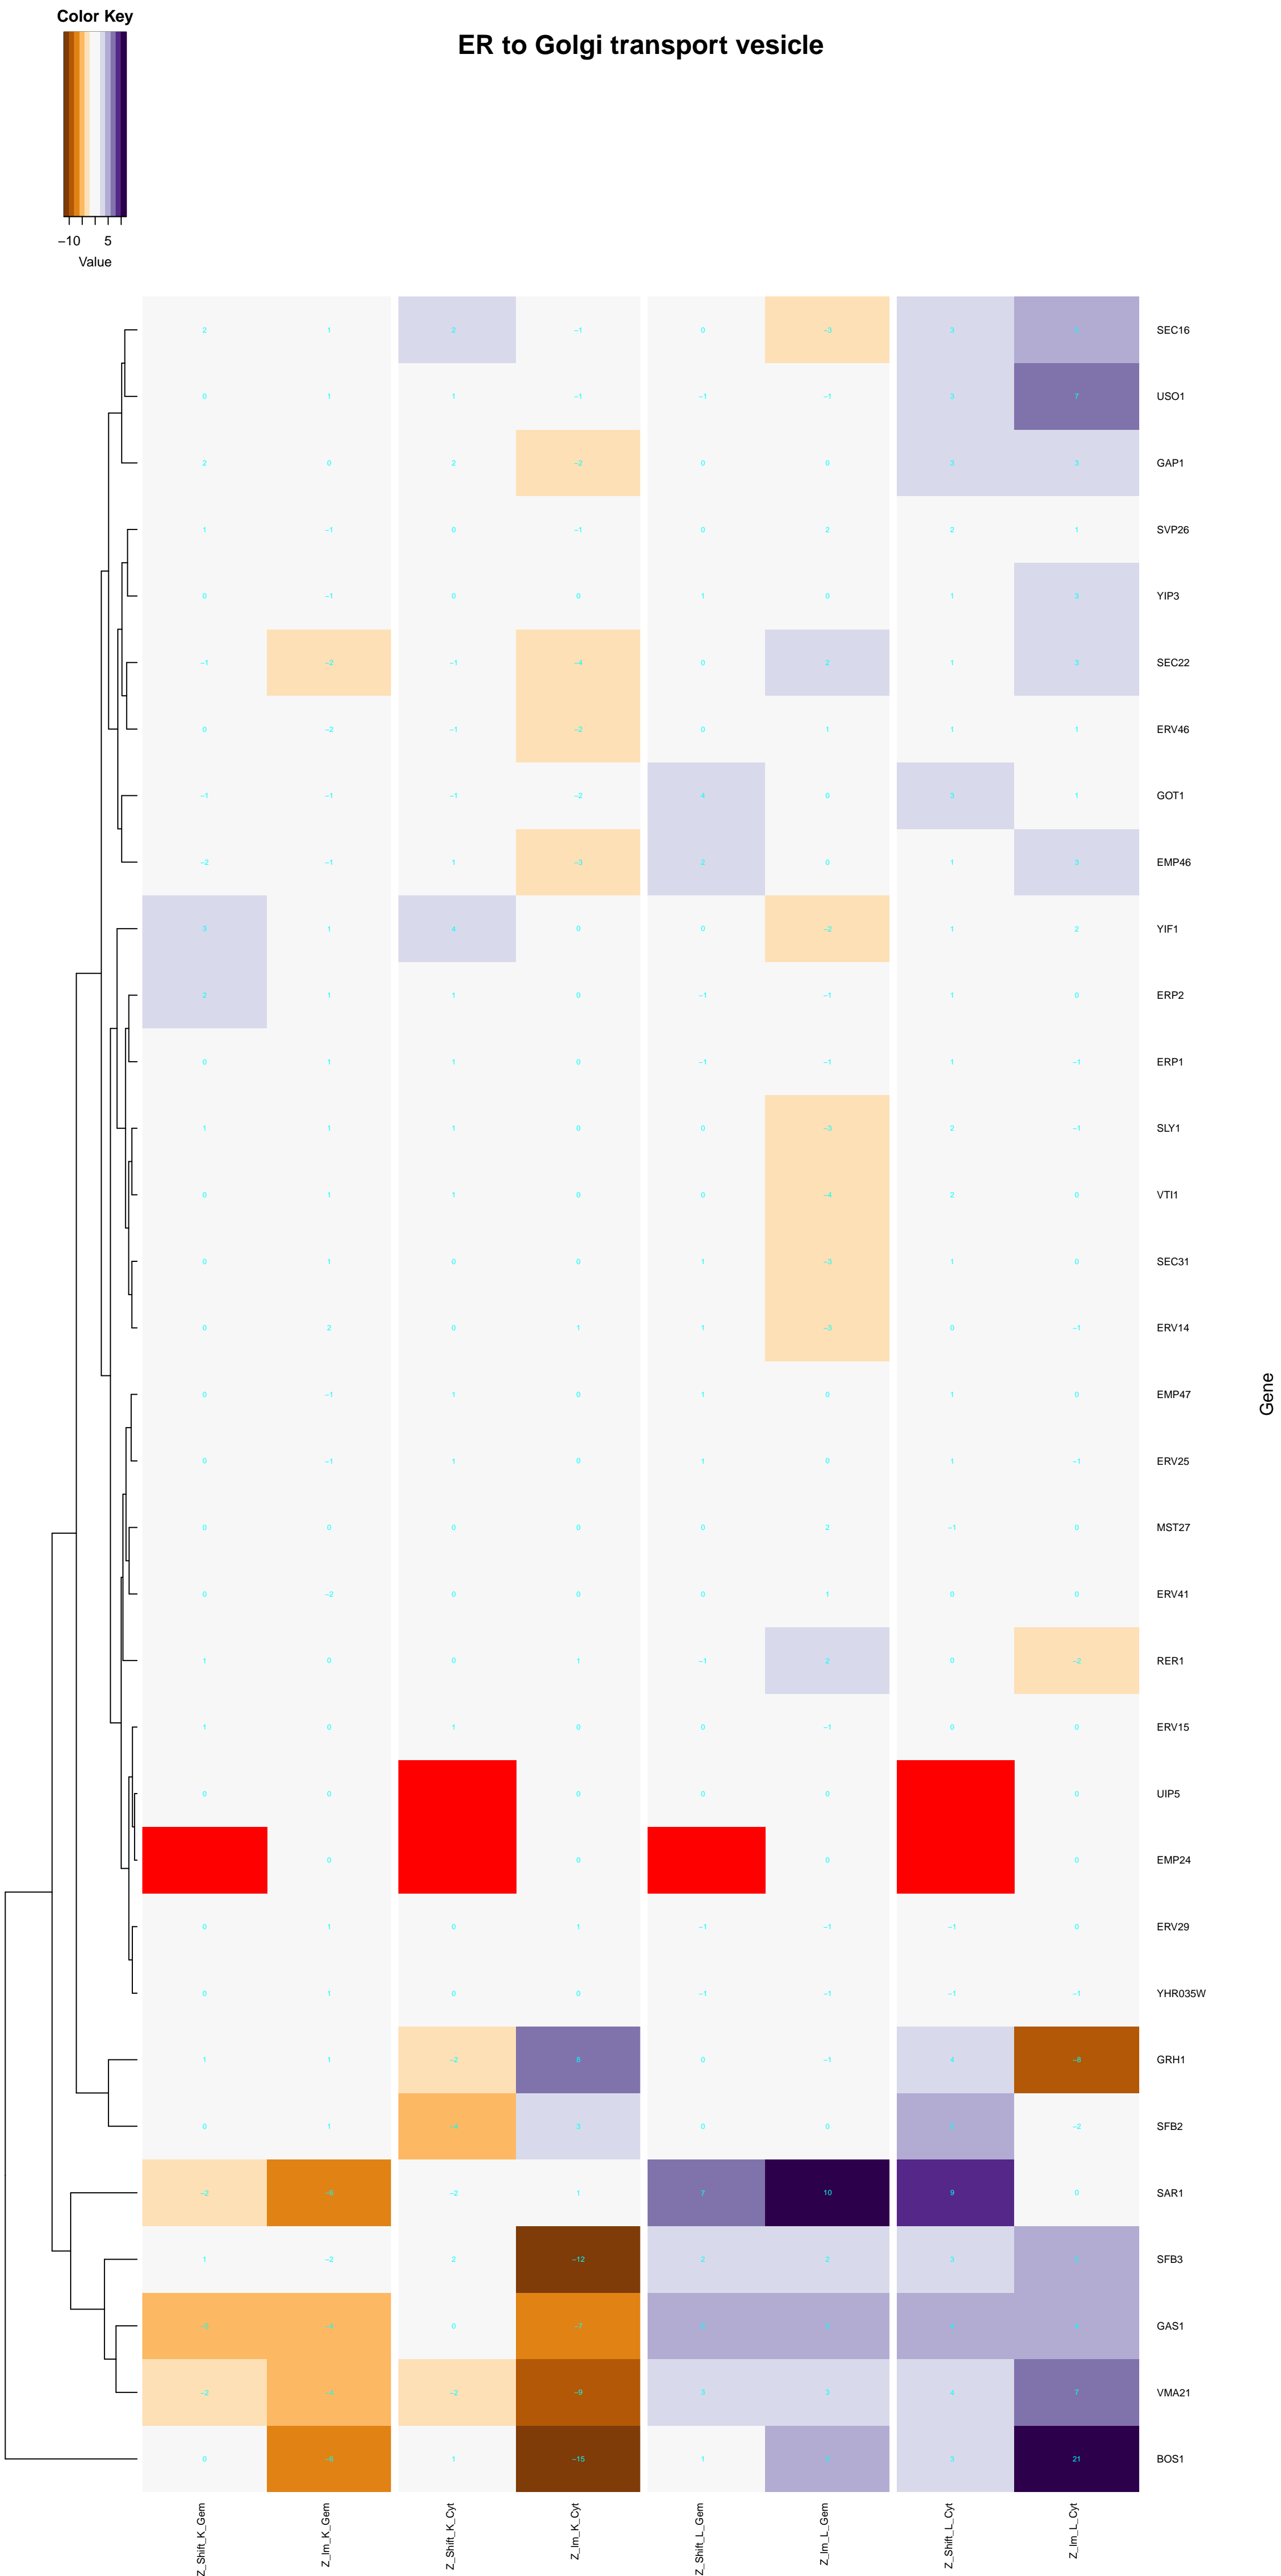

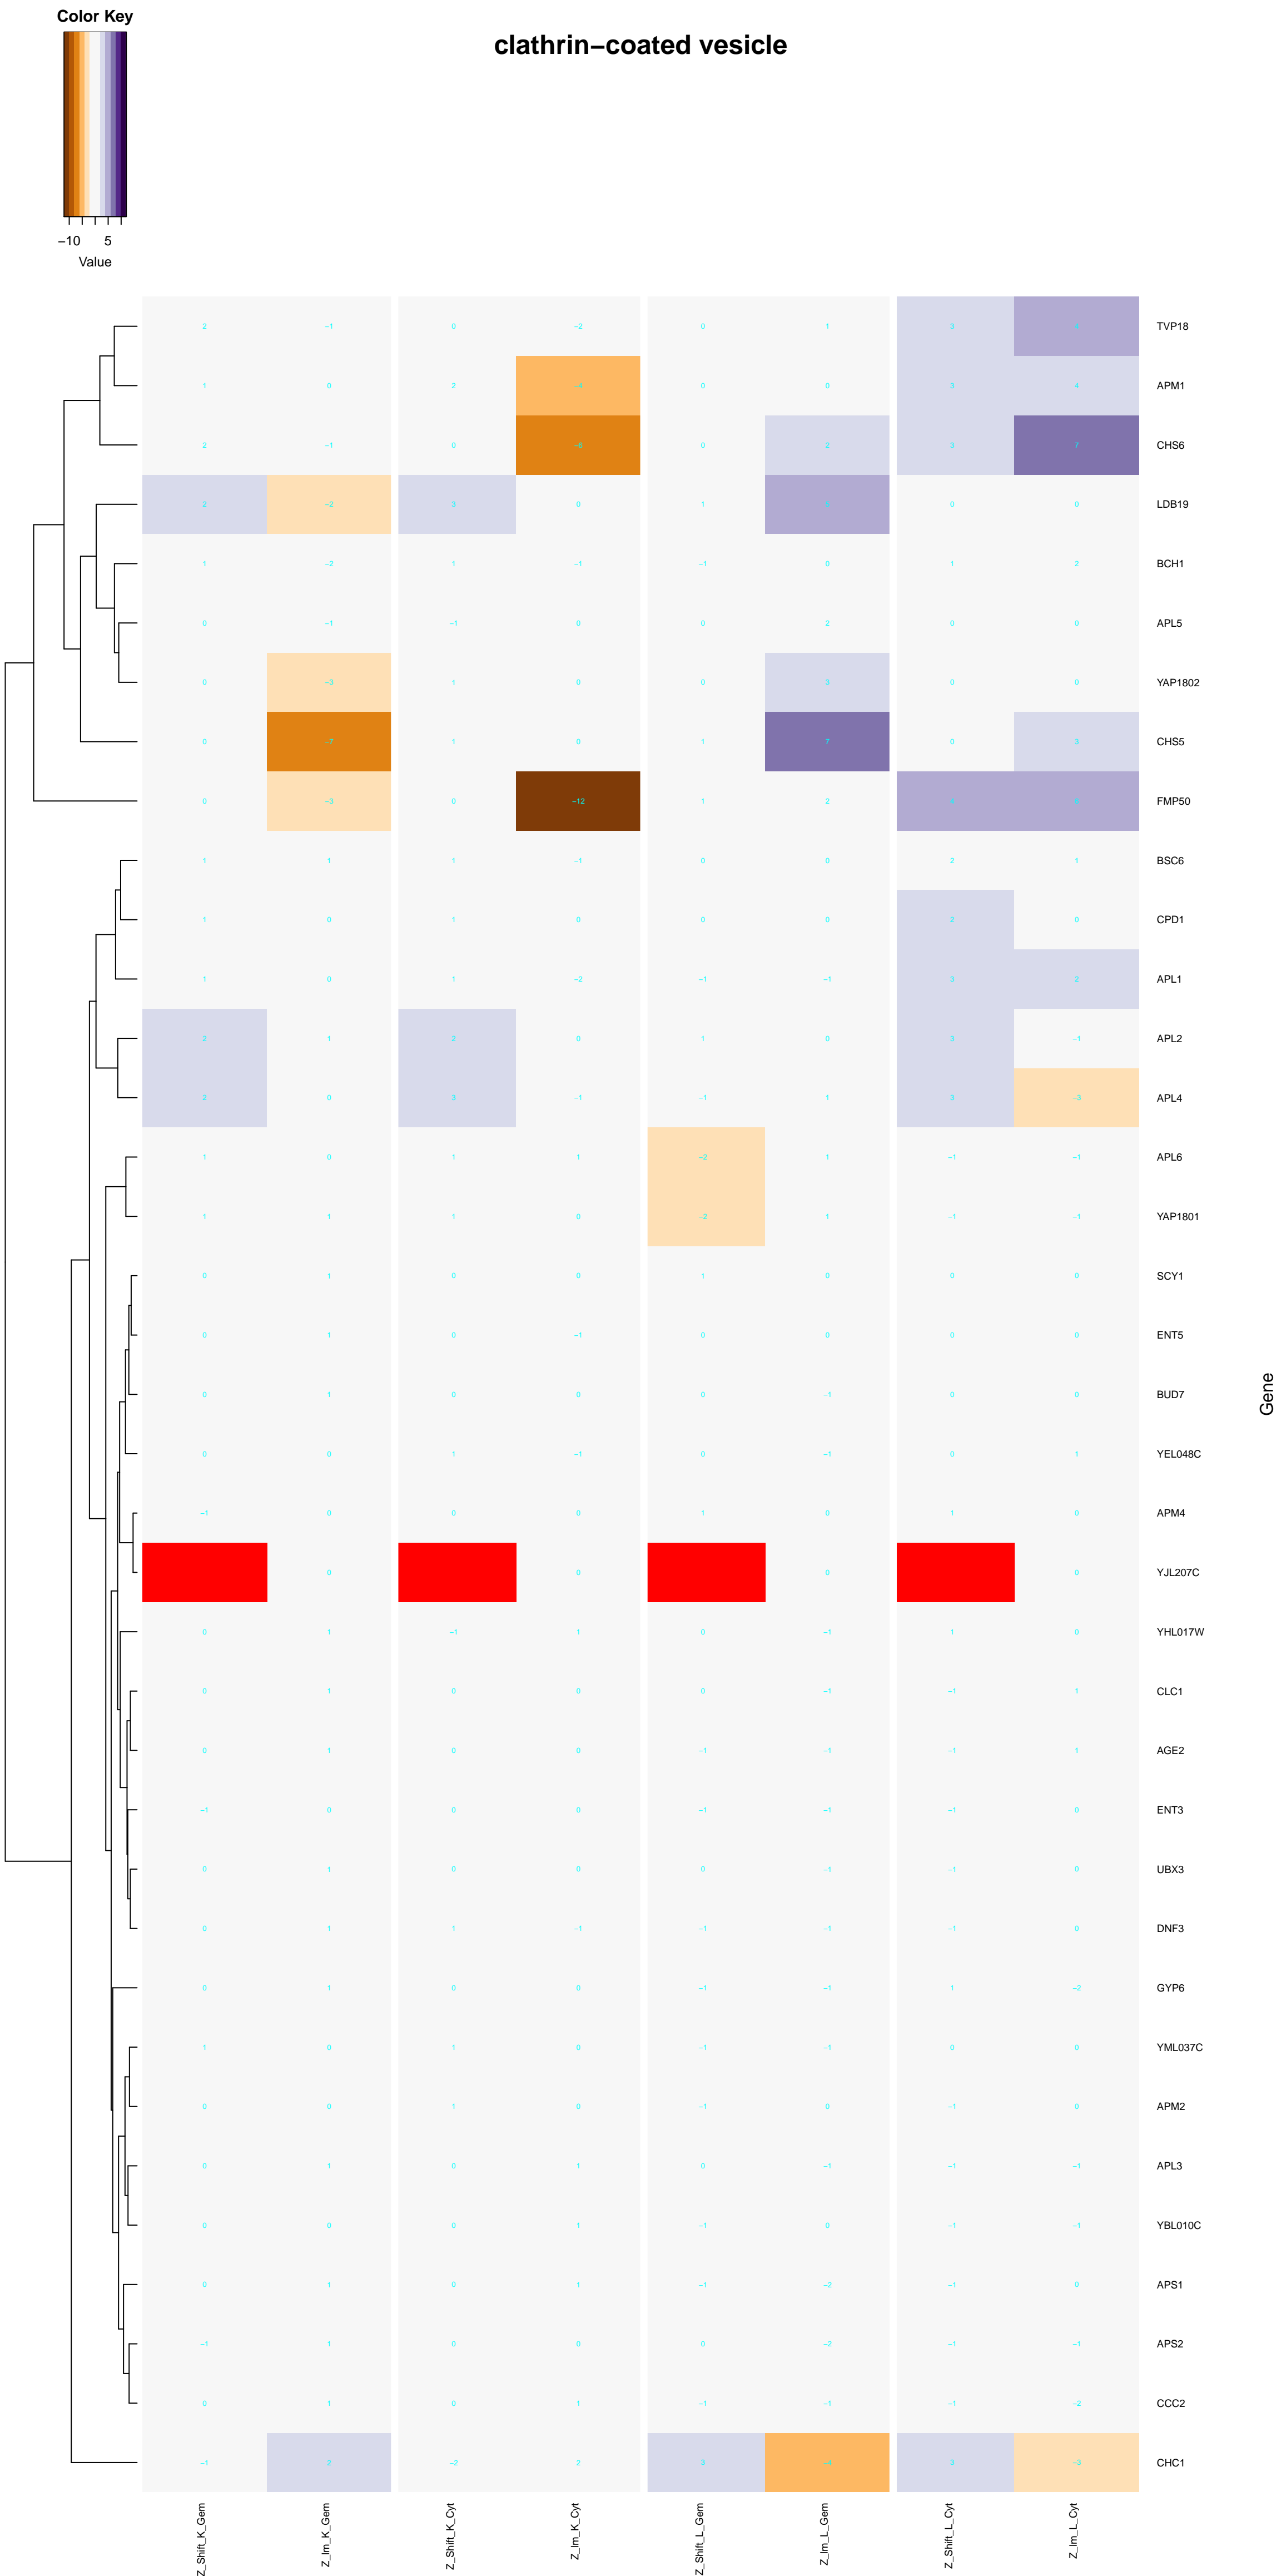

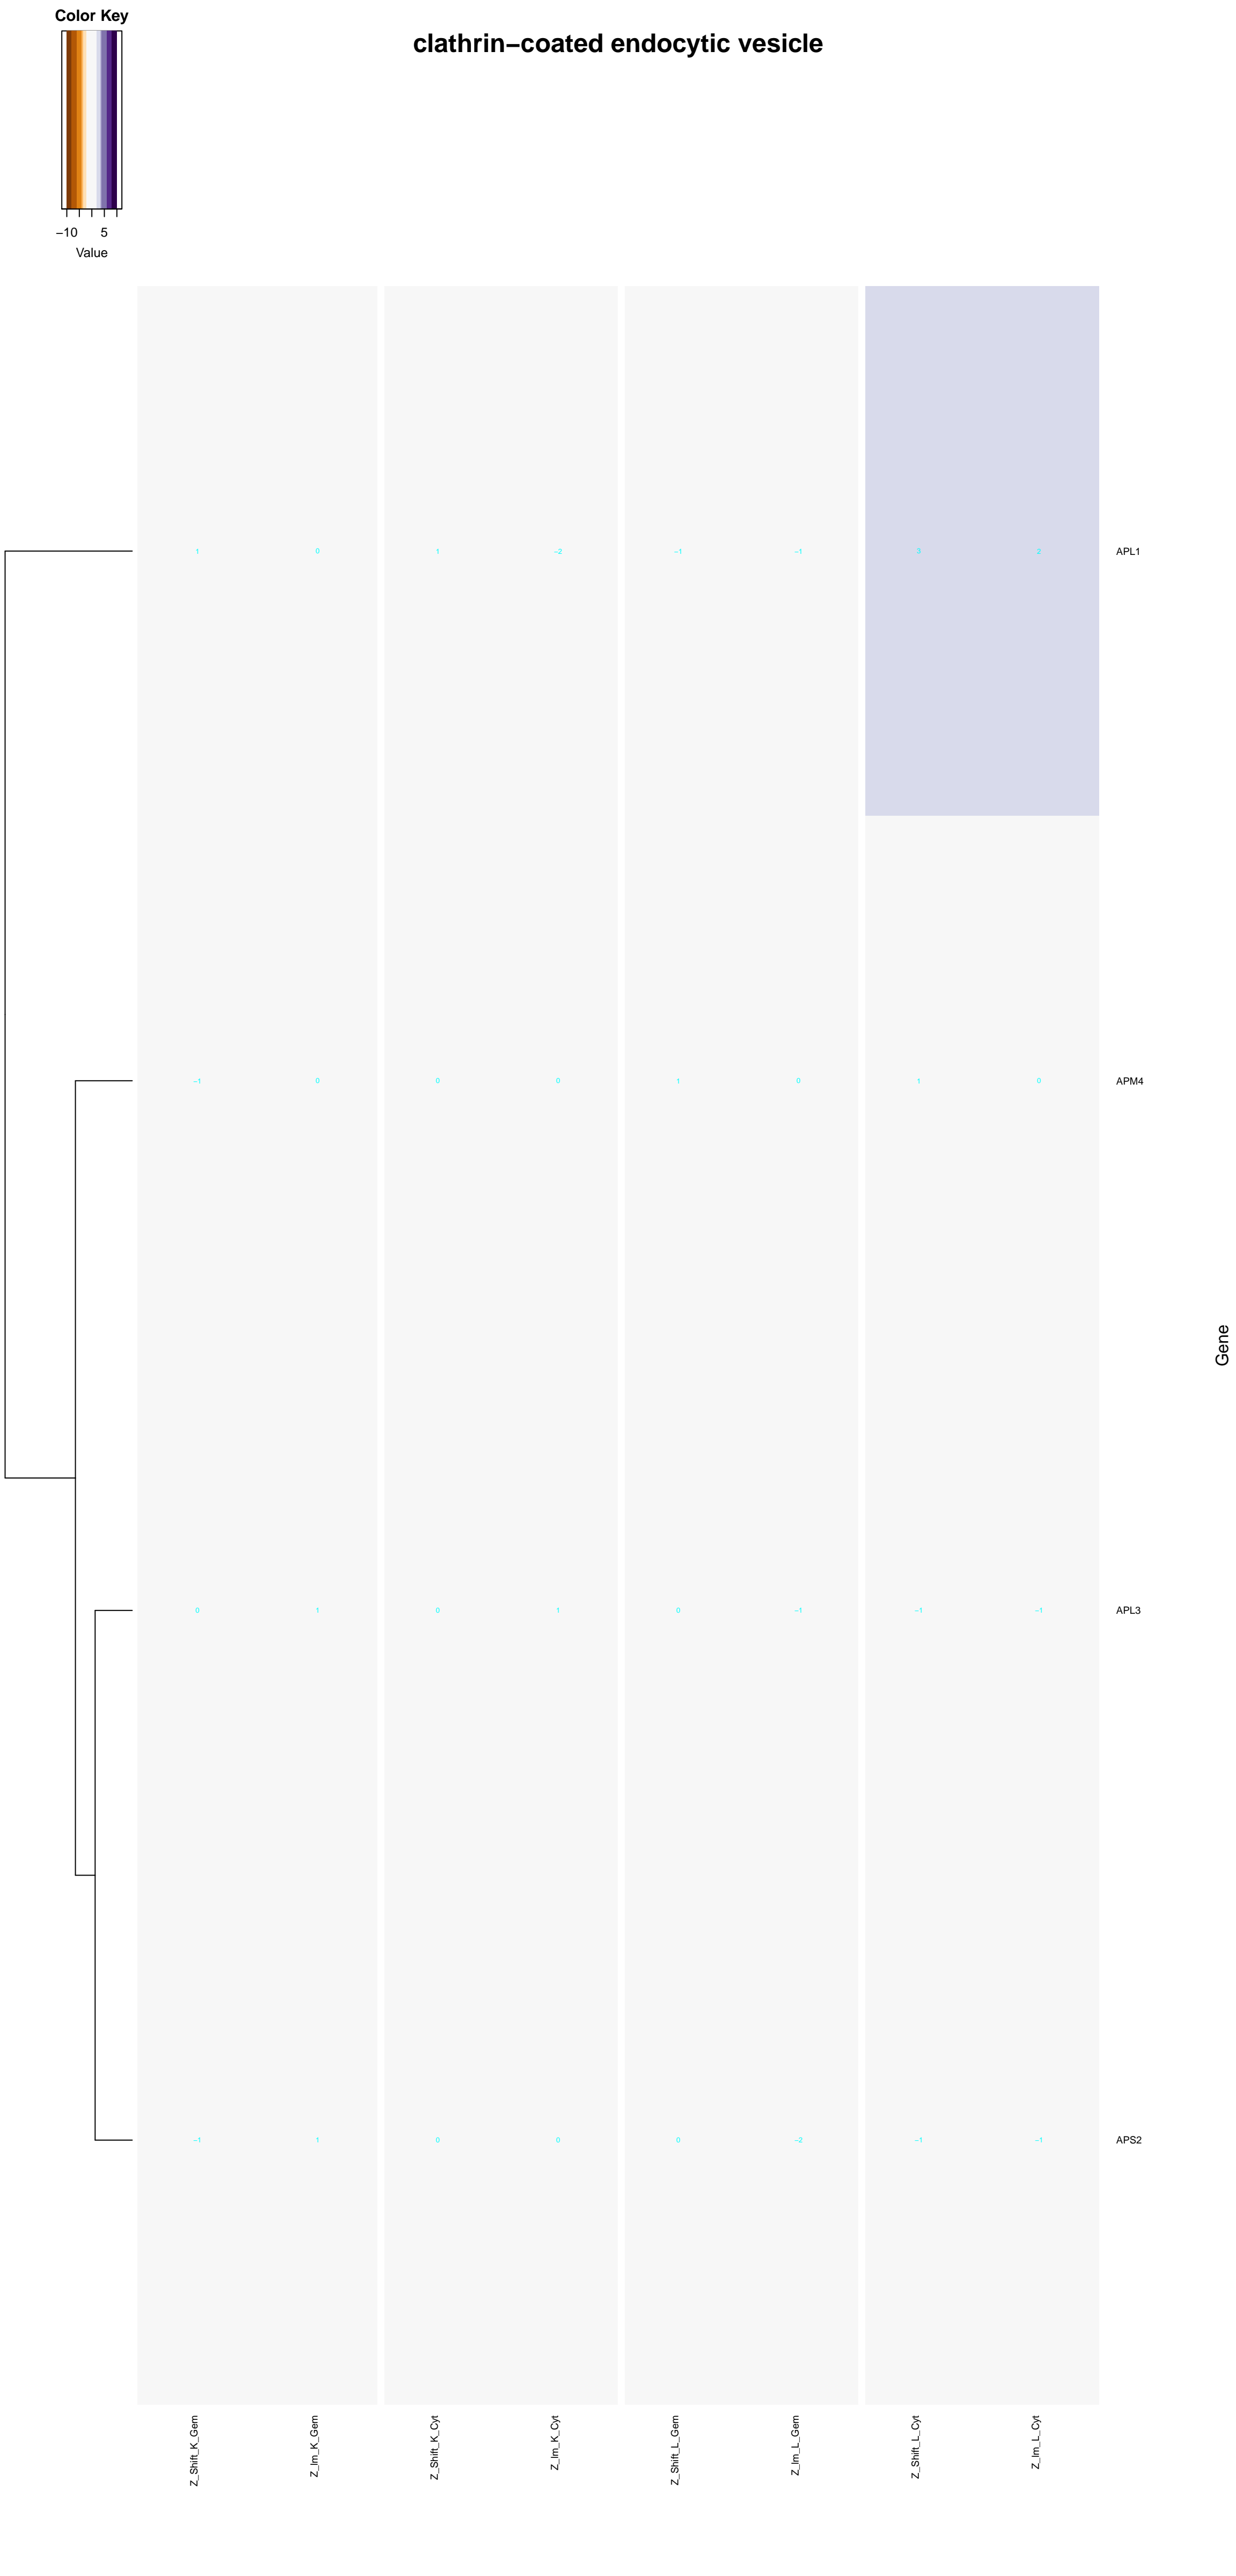

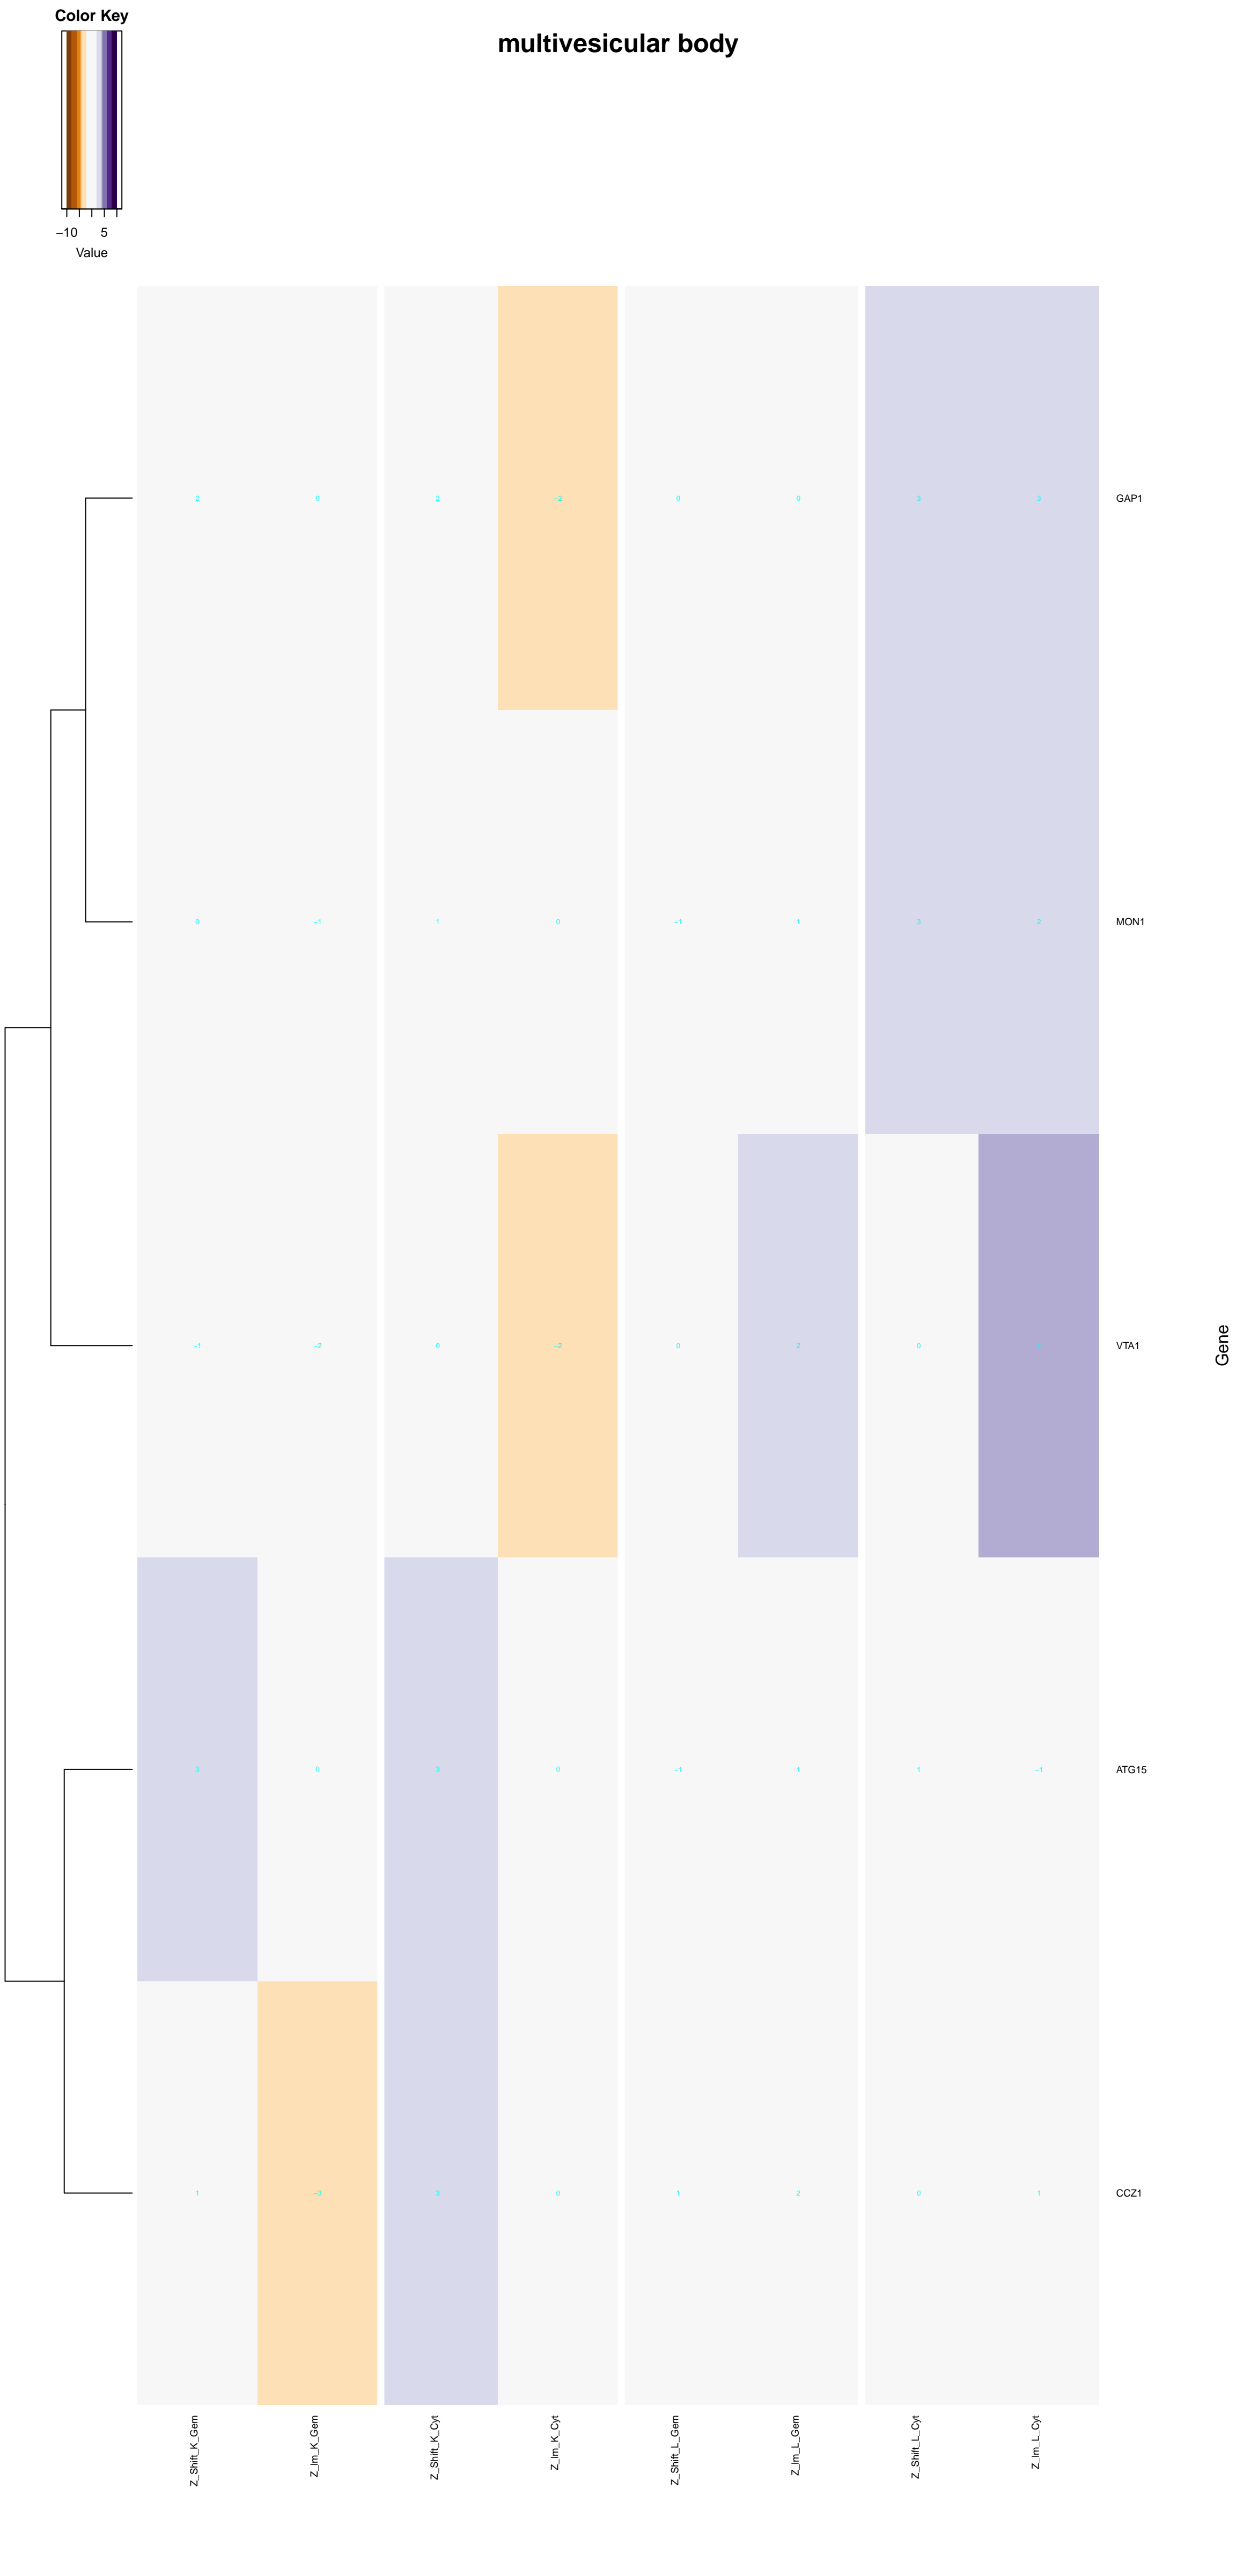

Supplement: s1 [file s1]

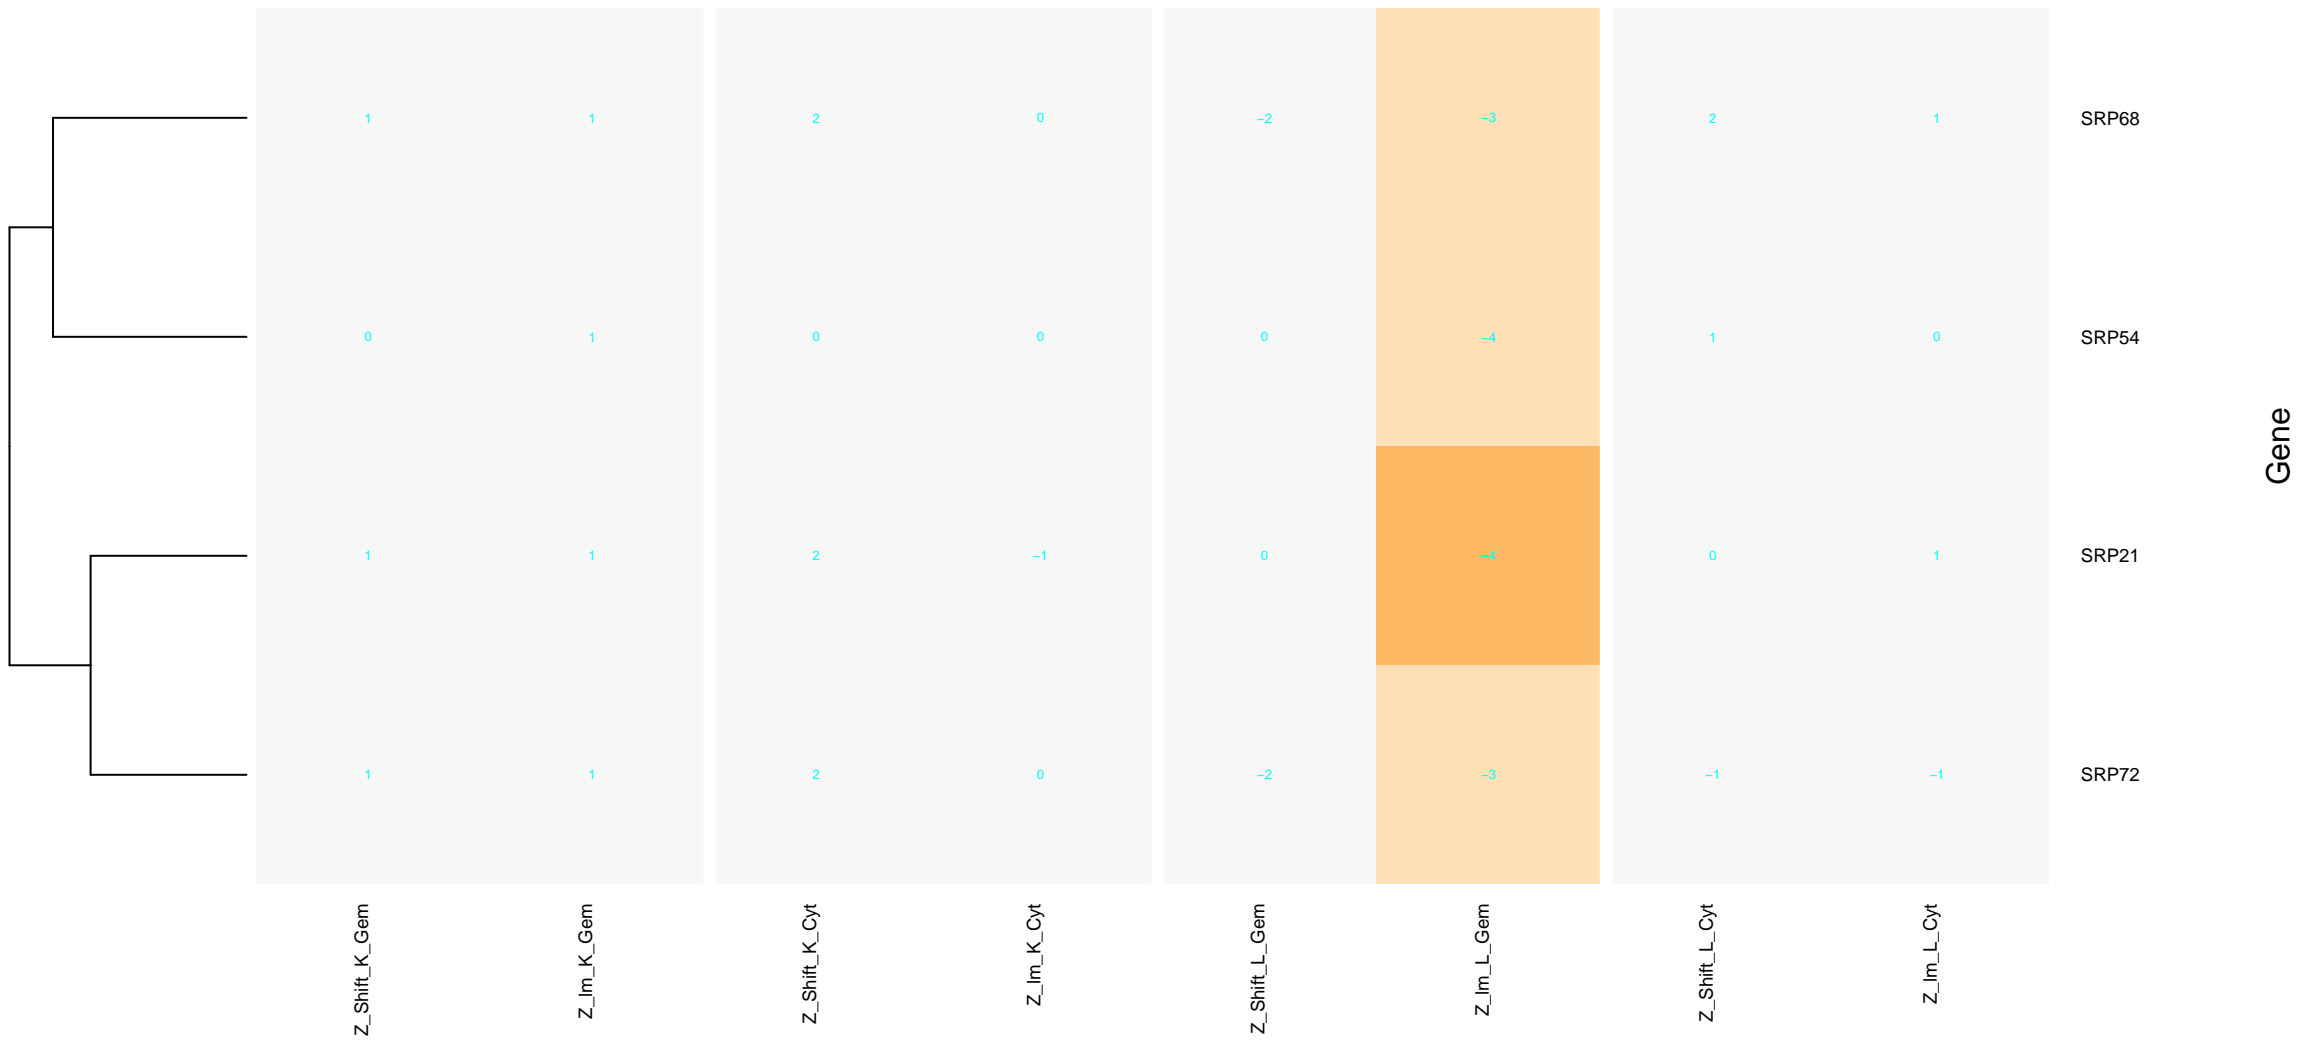

Supplement: s1 [file s1]

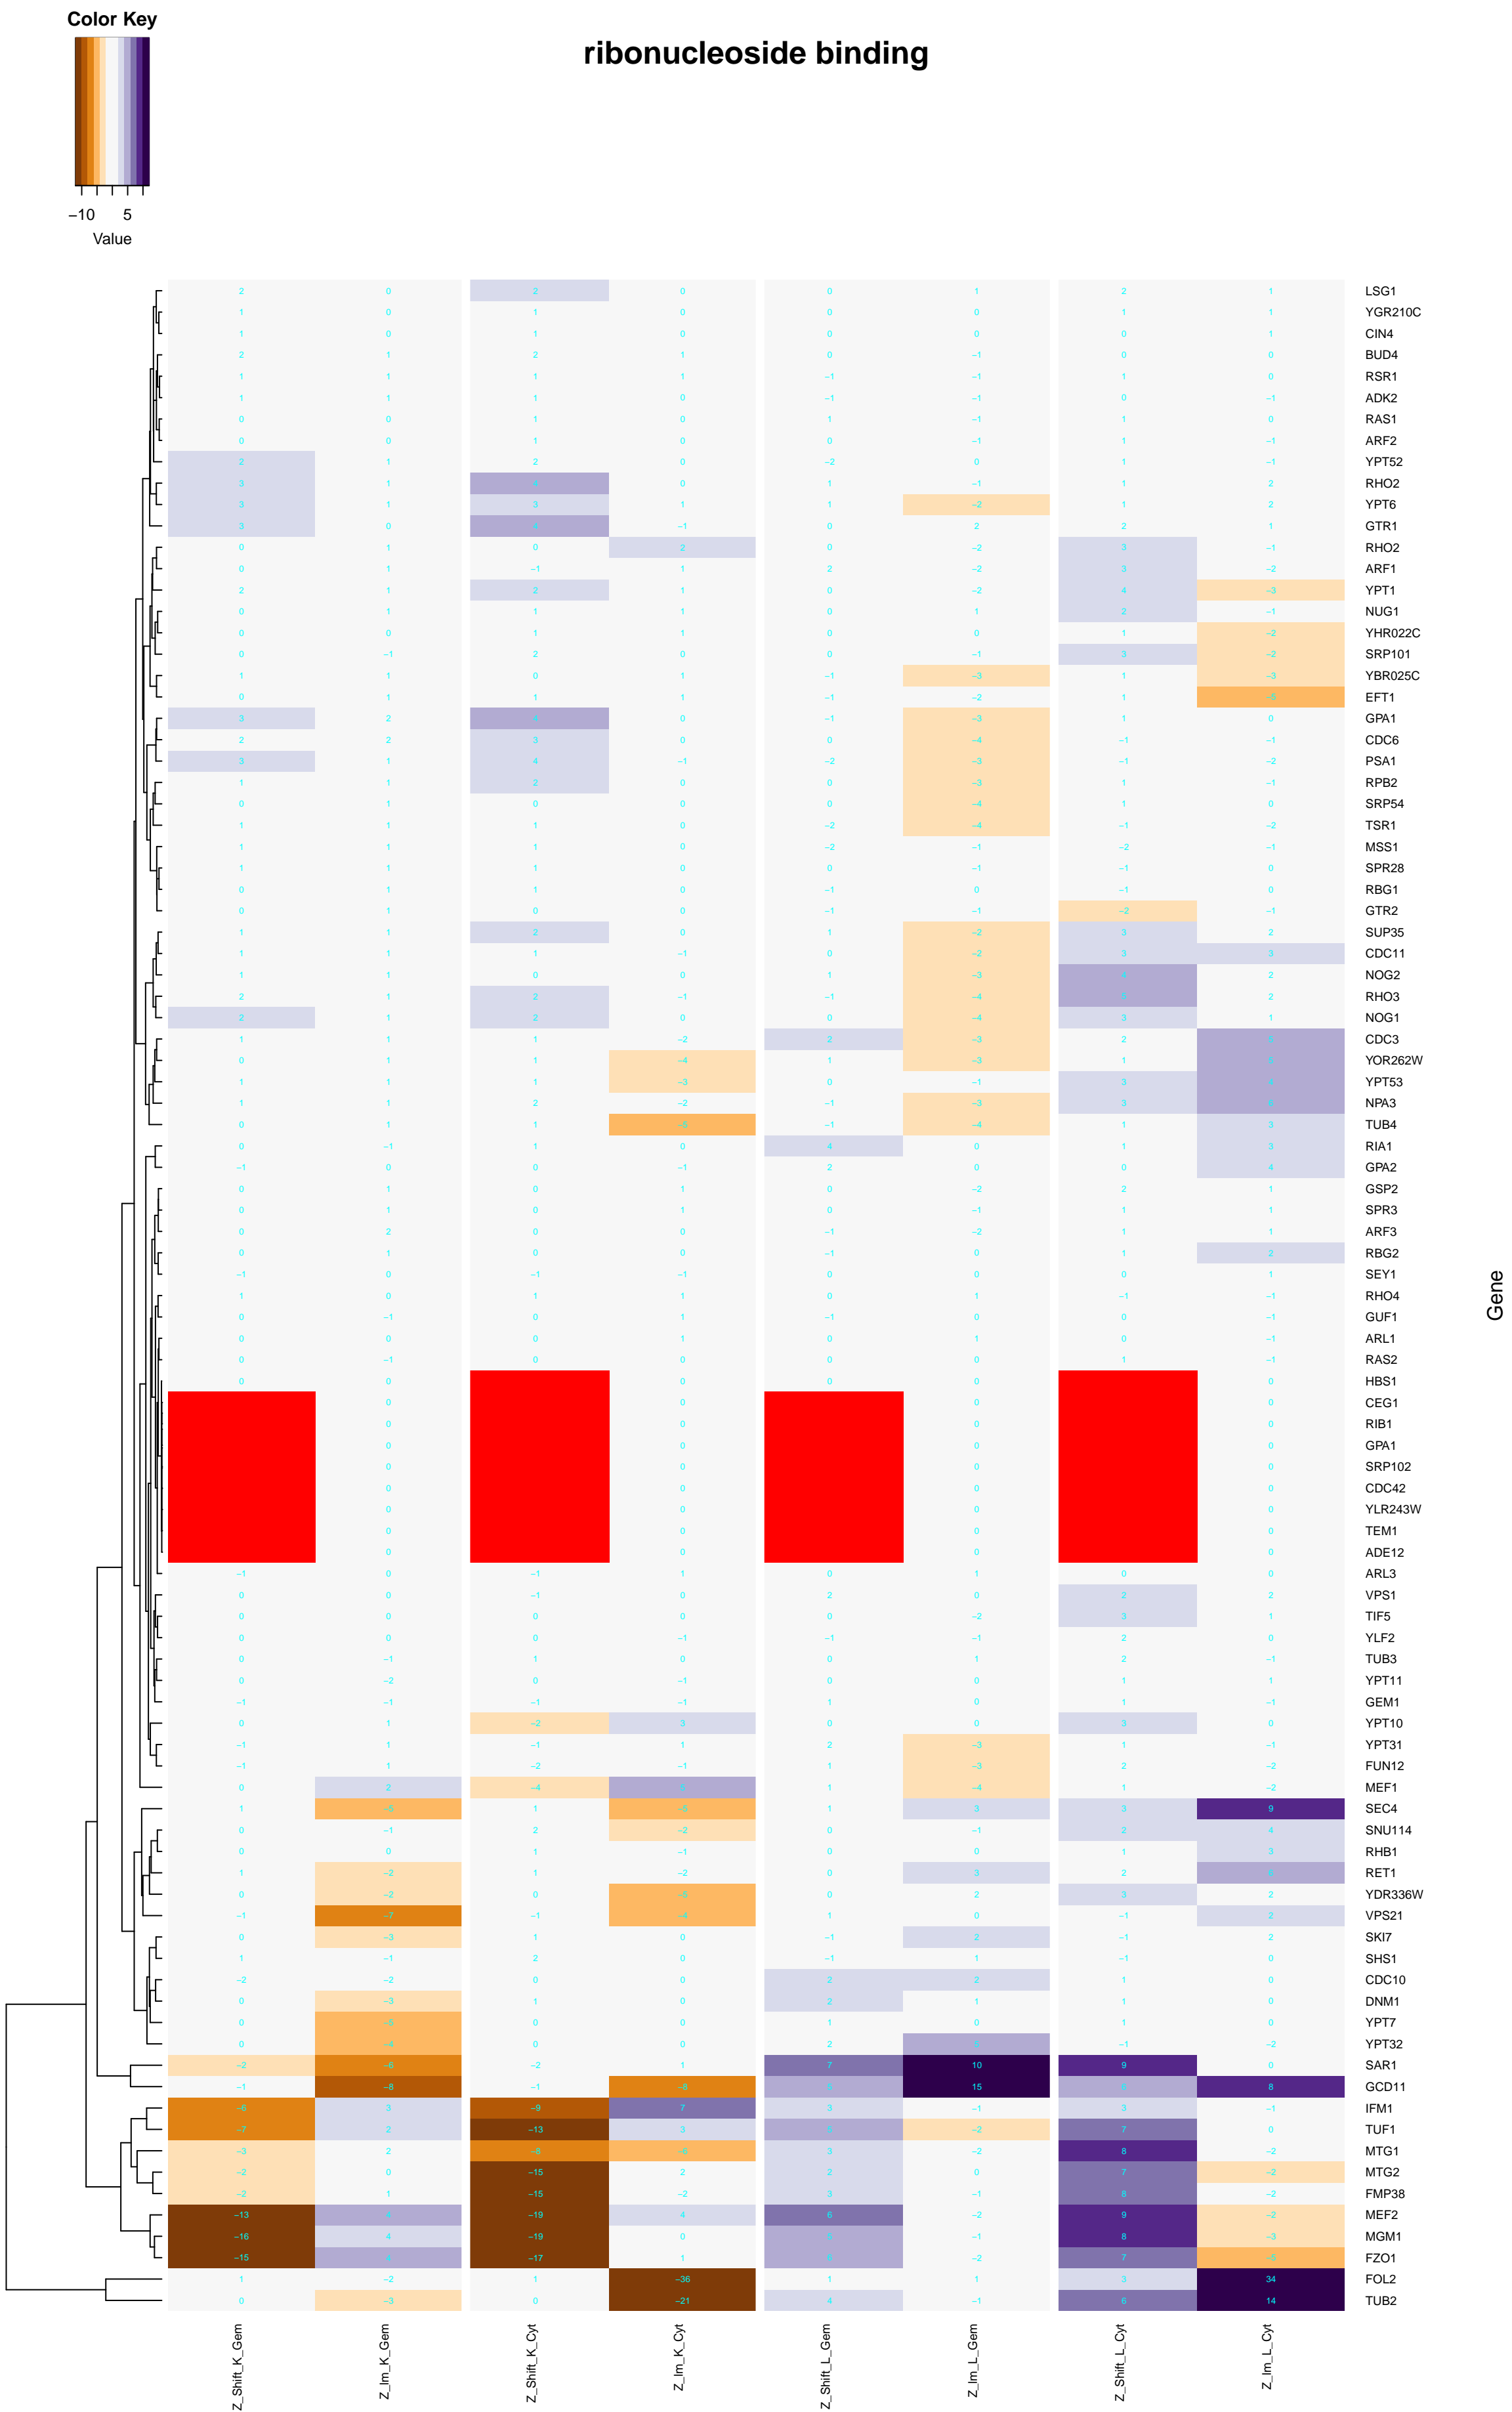

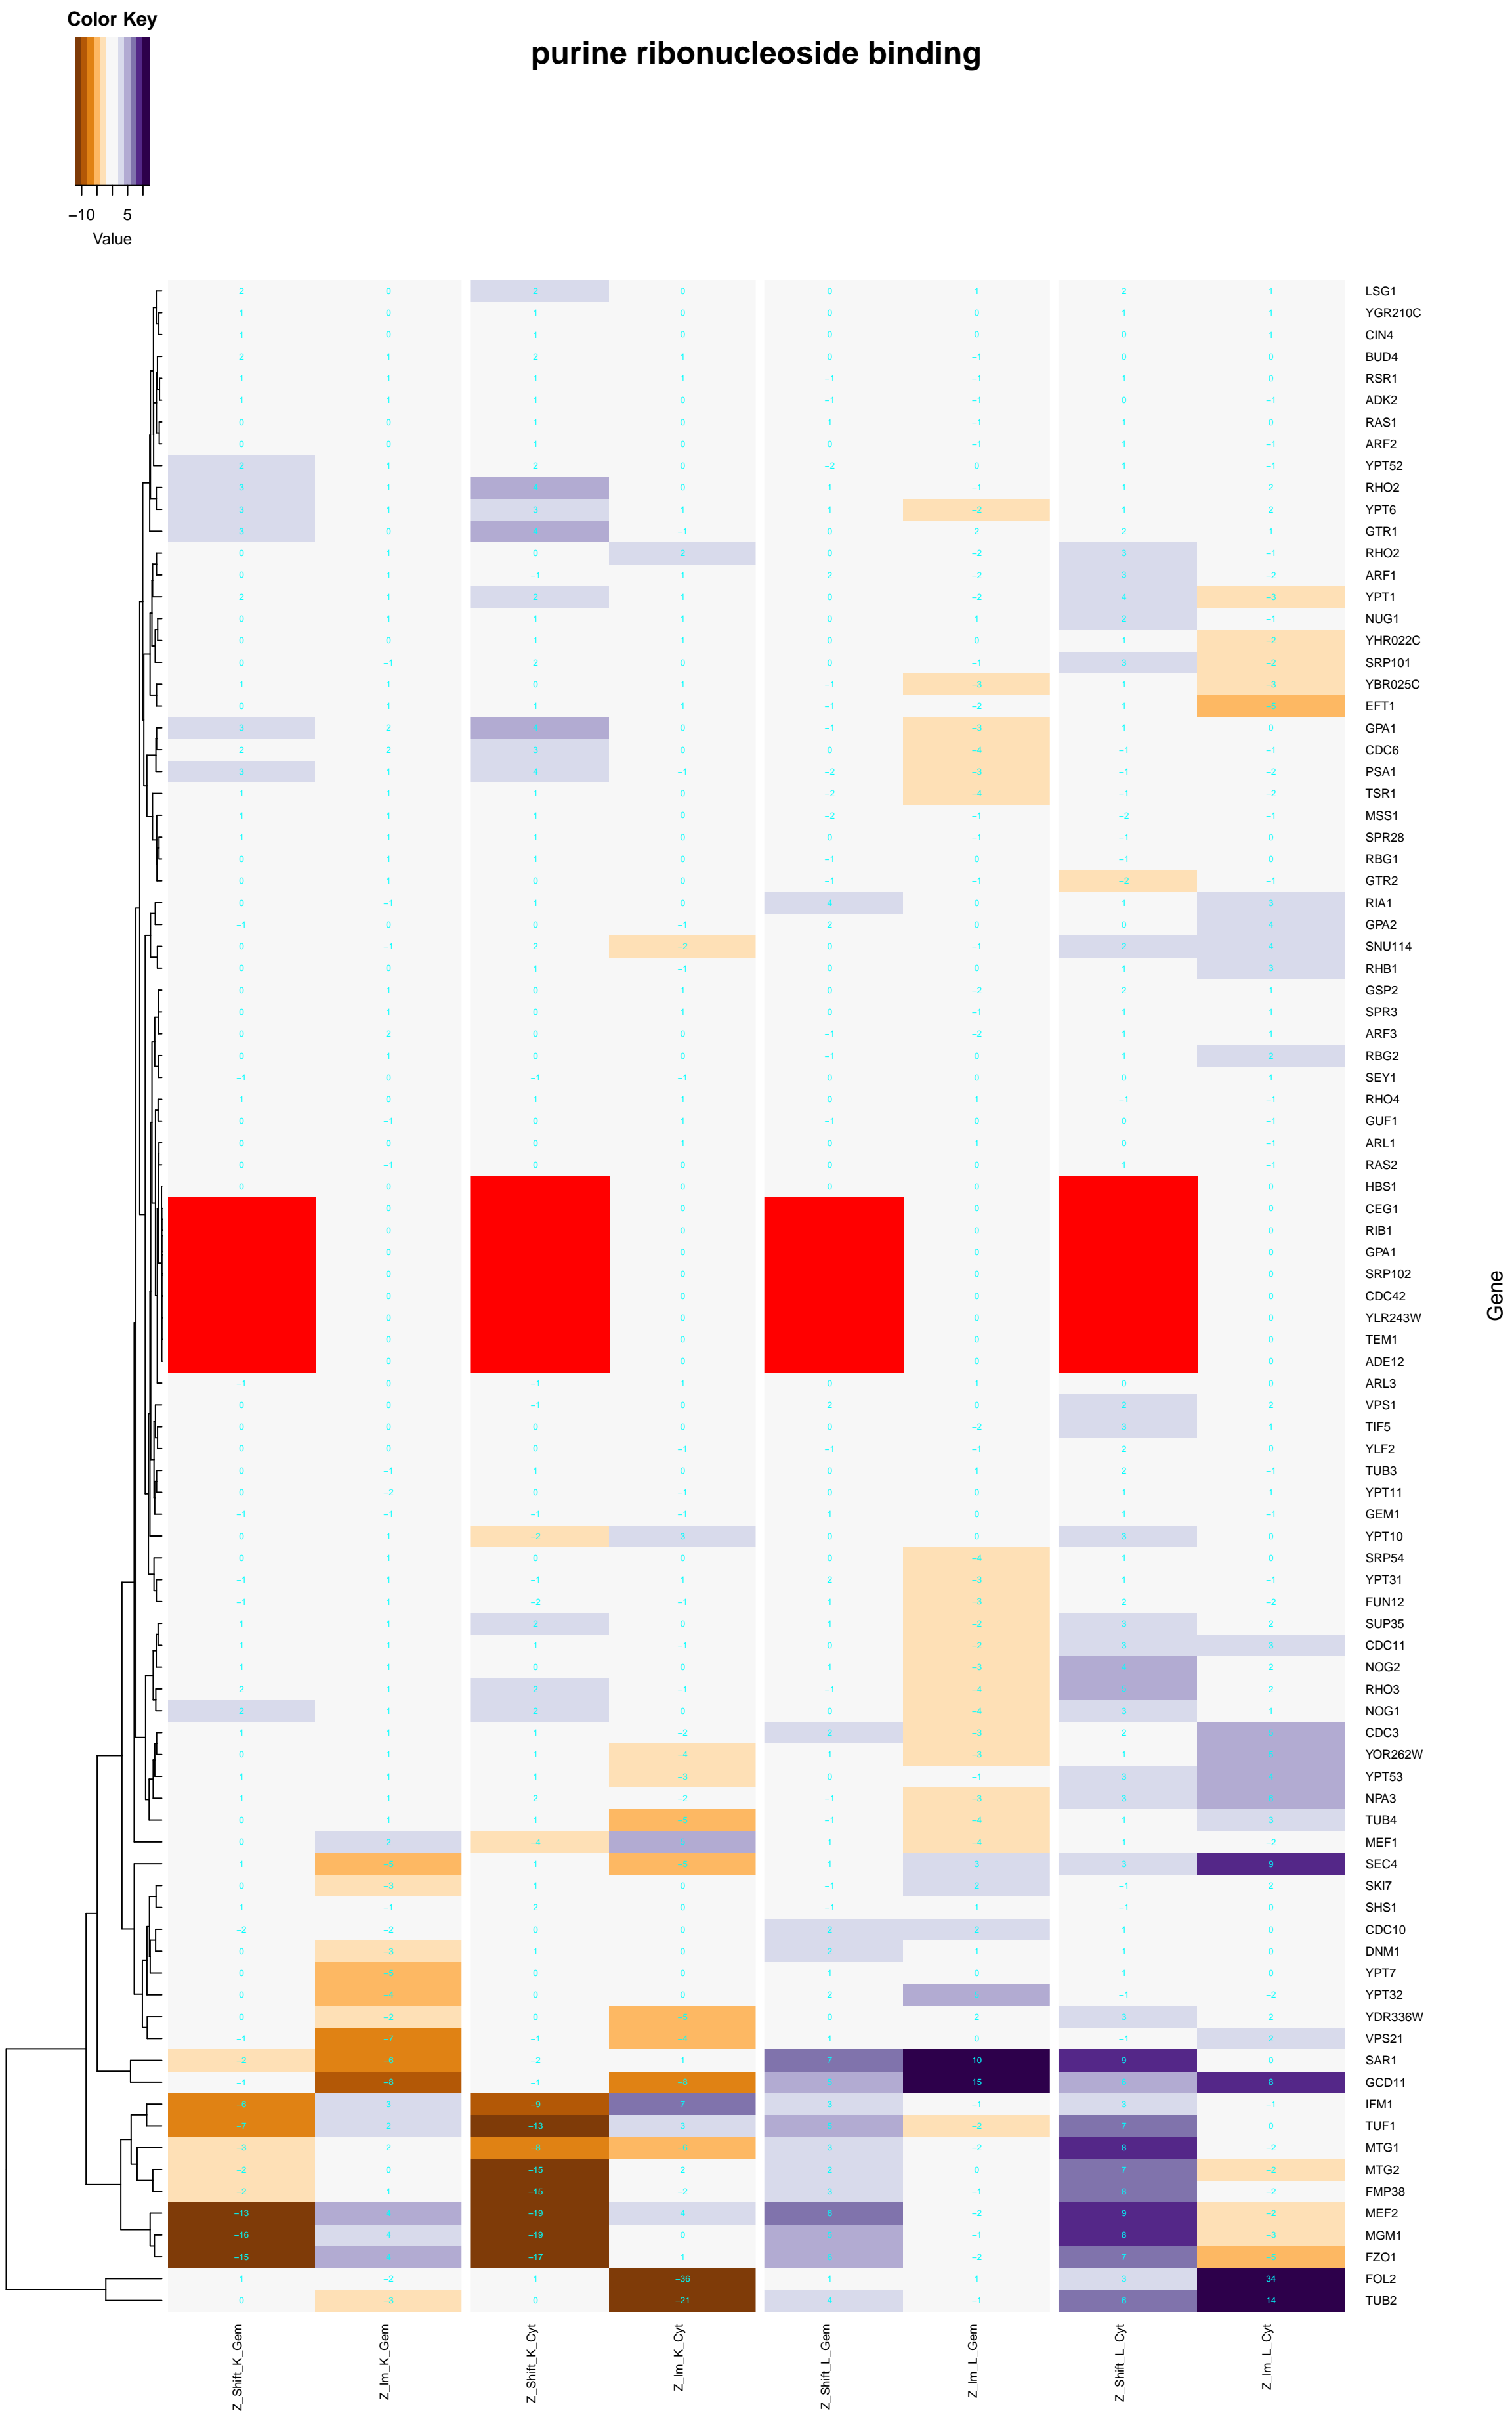



Supplement: s1 [file s1]

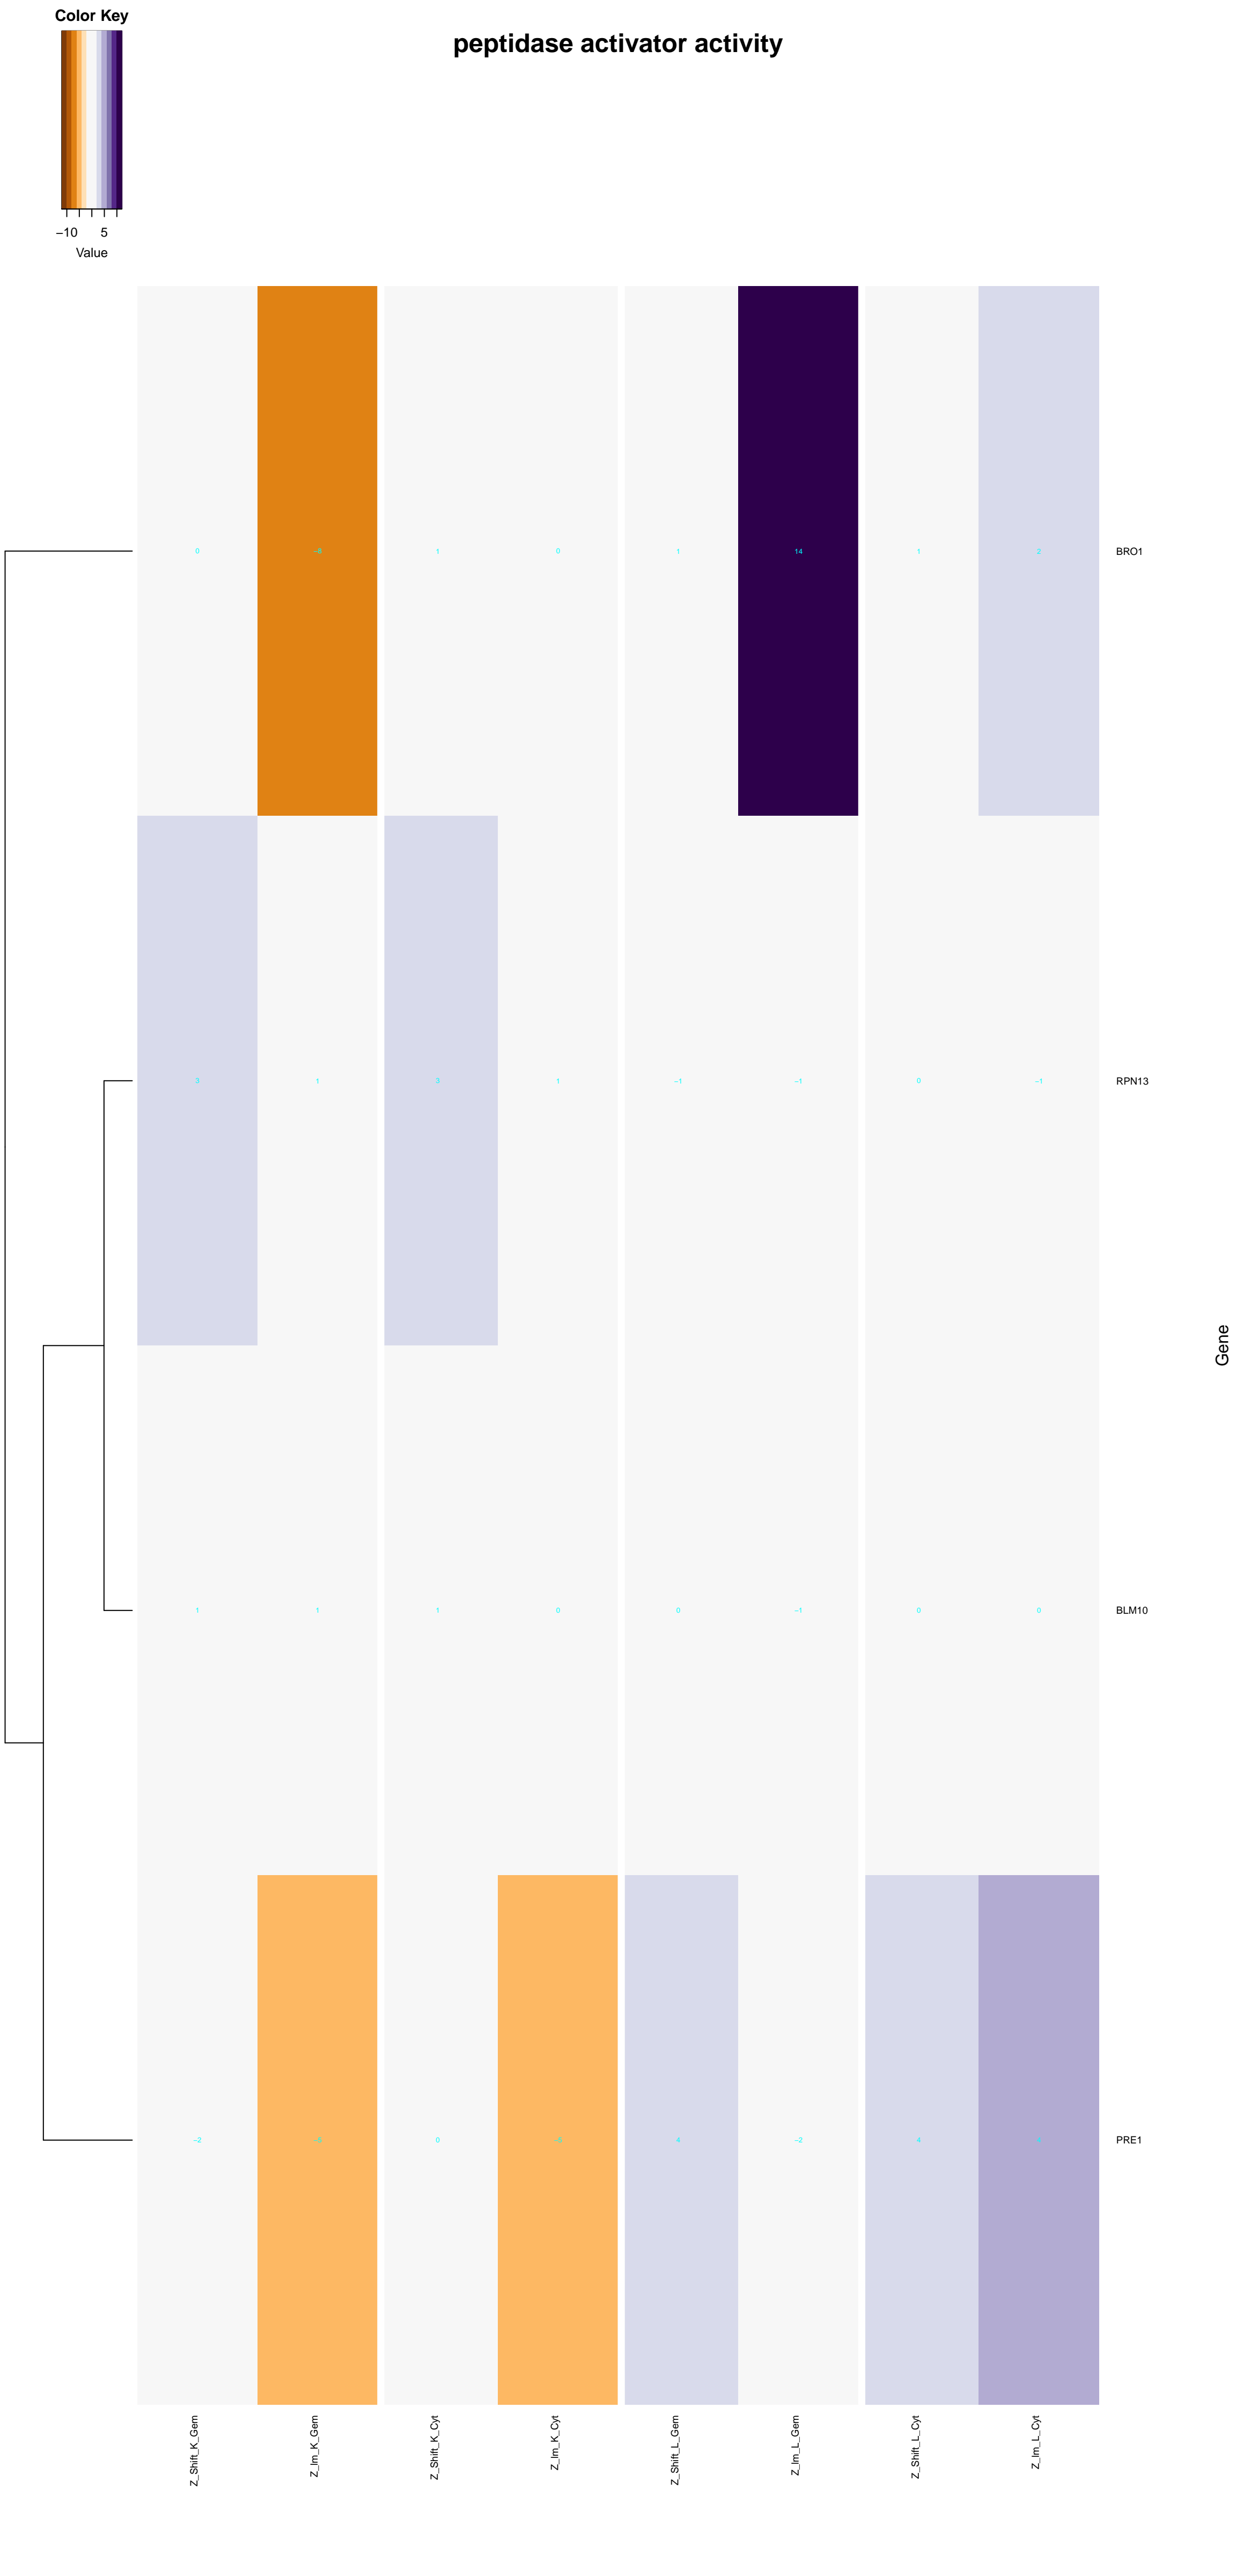

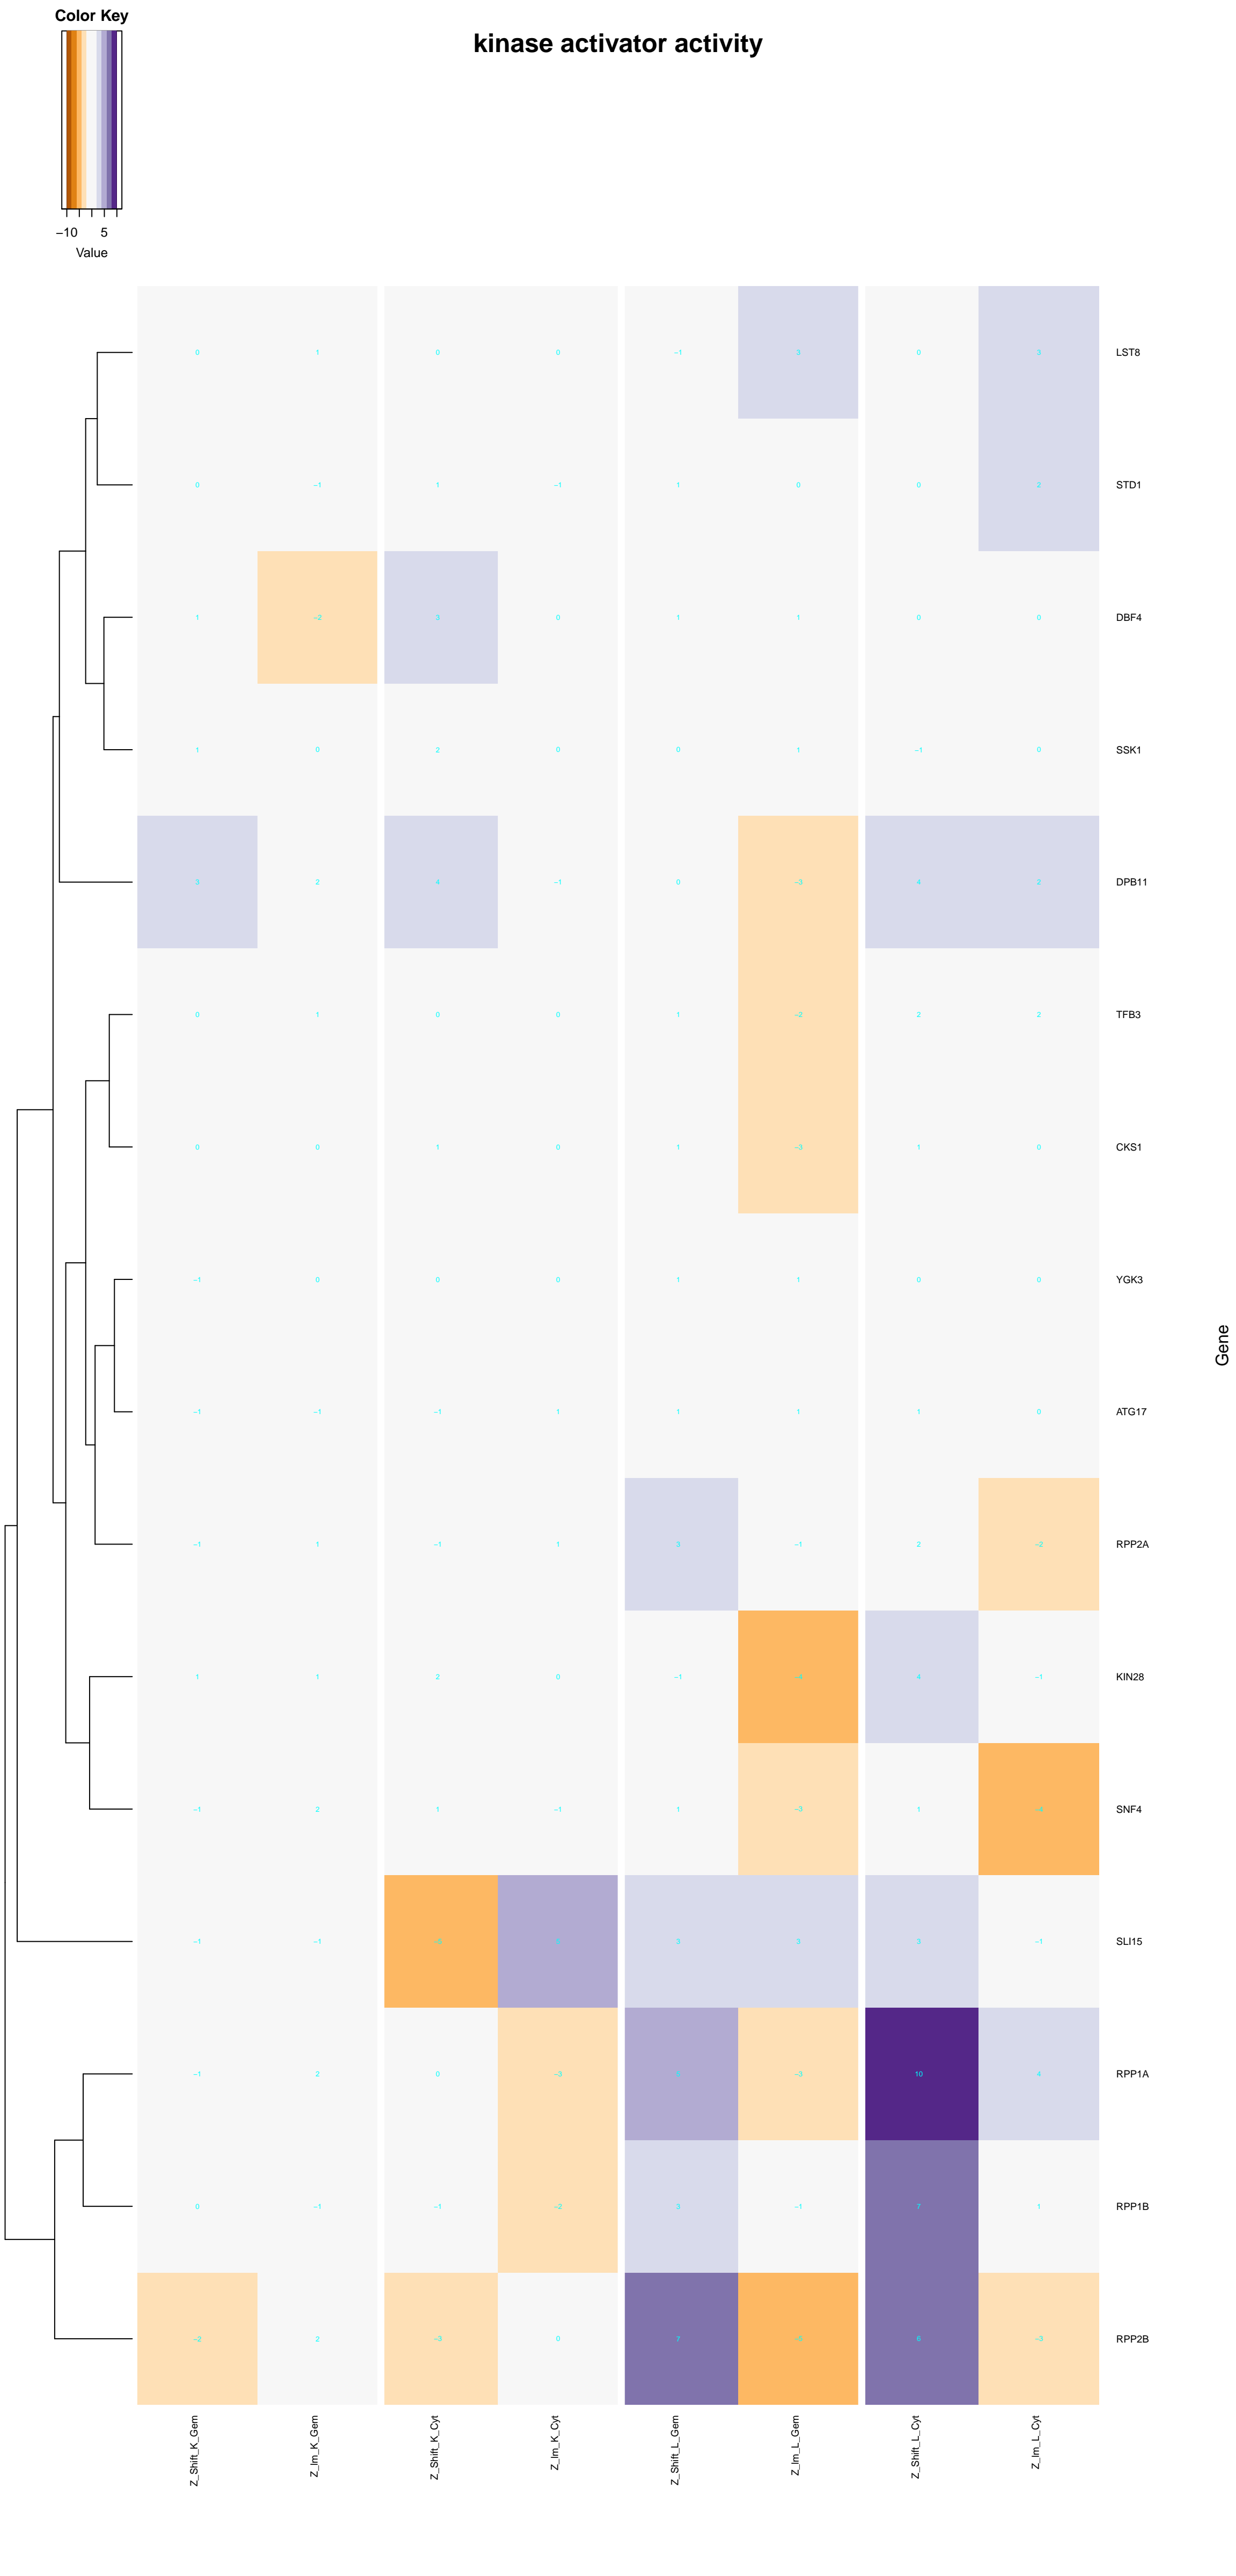

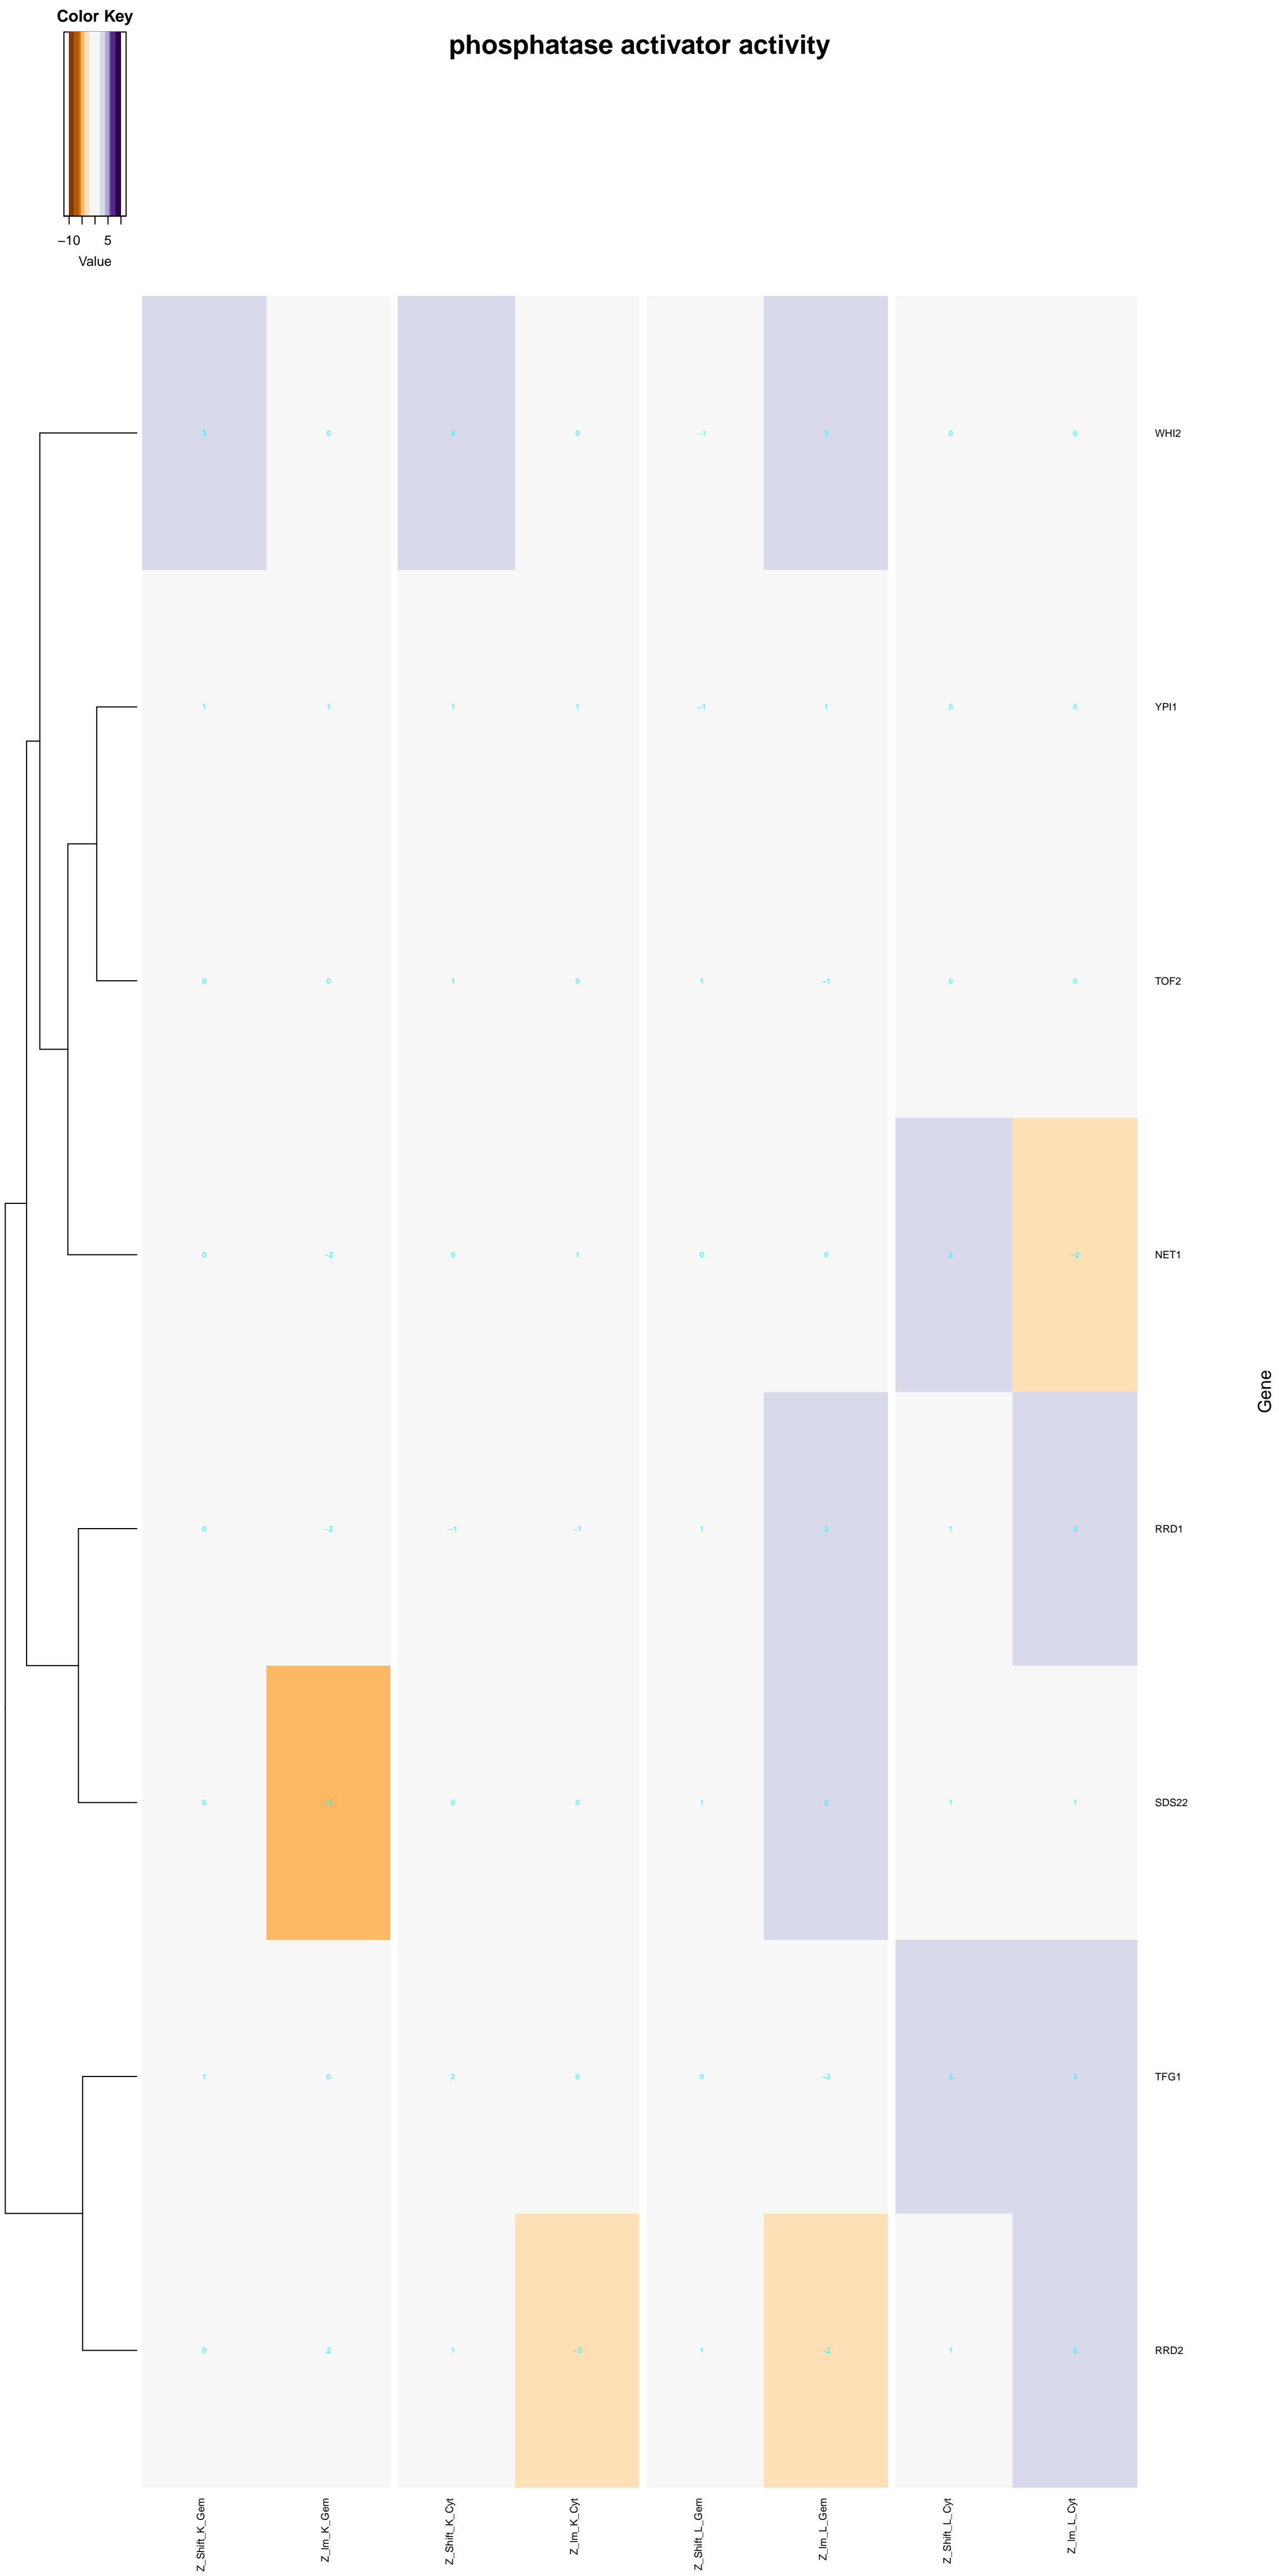

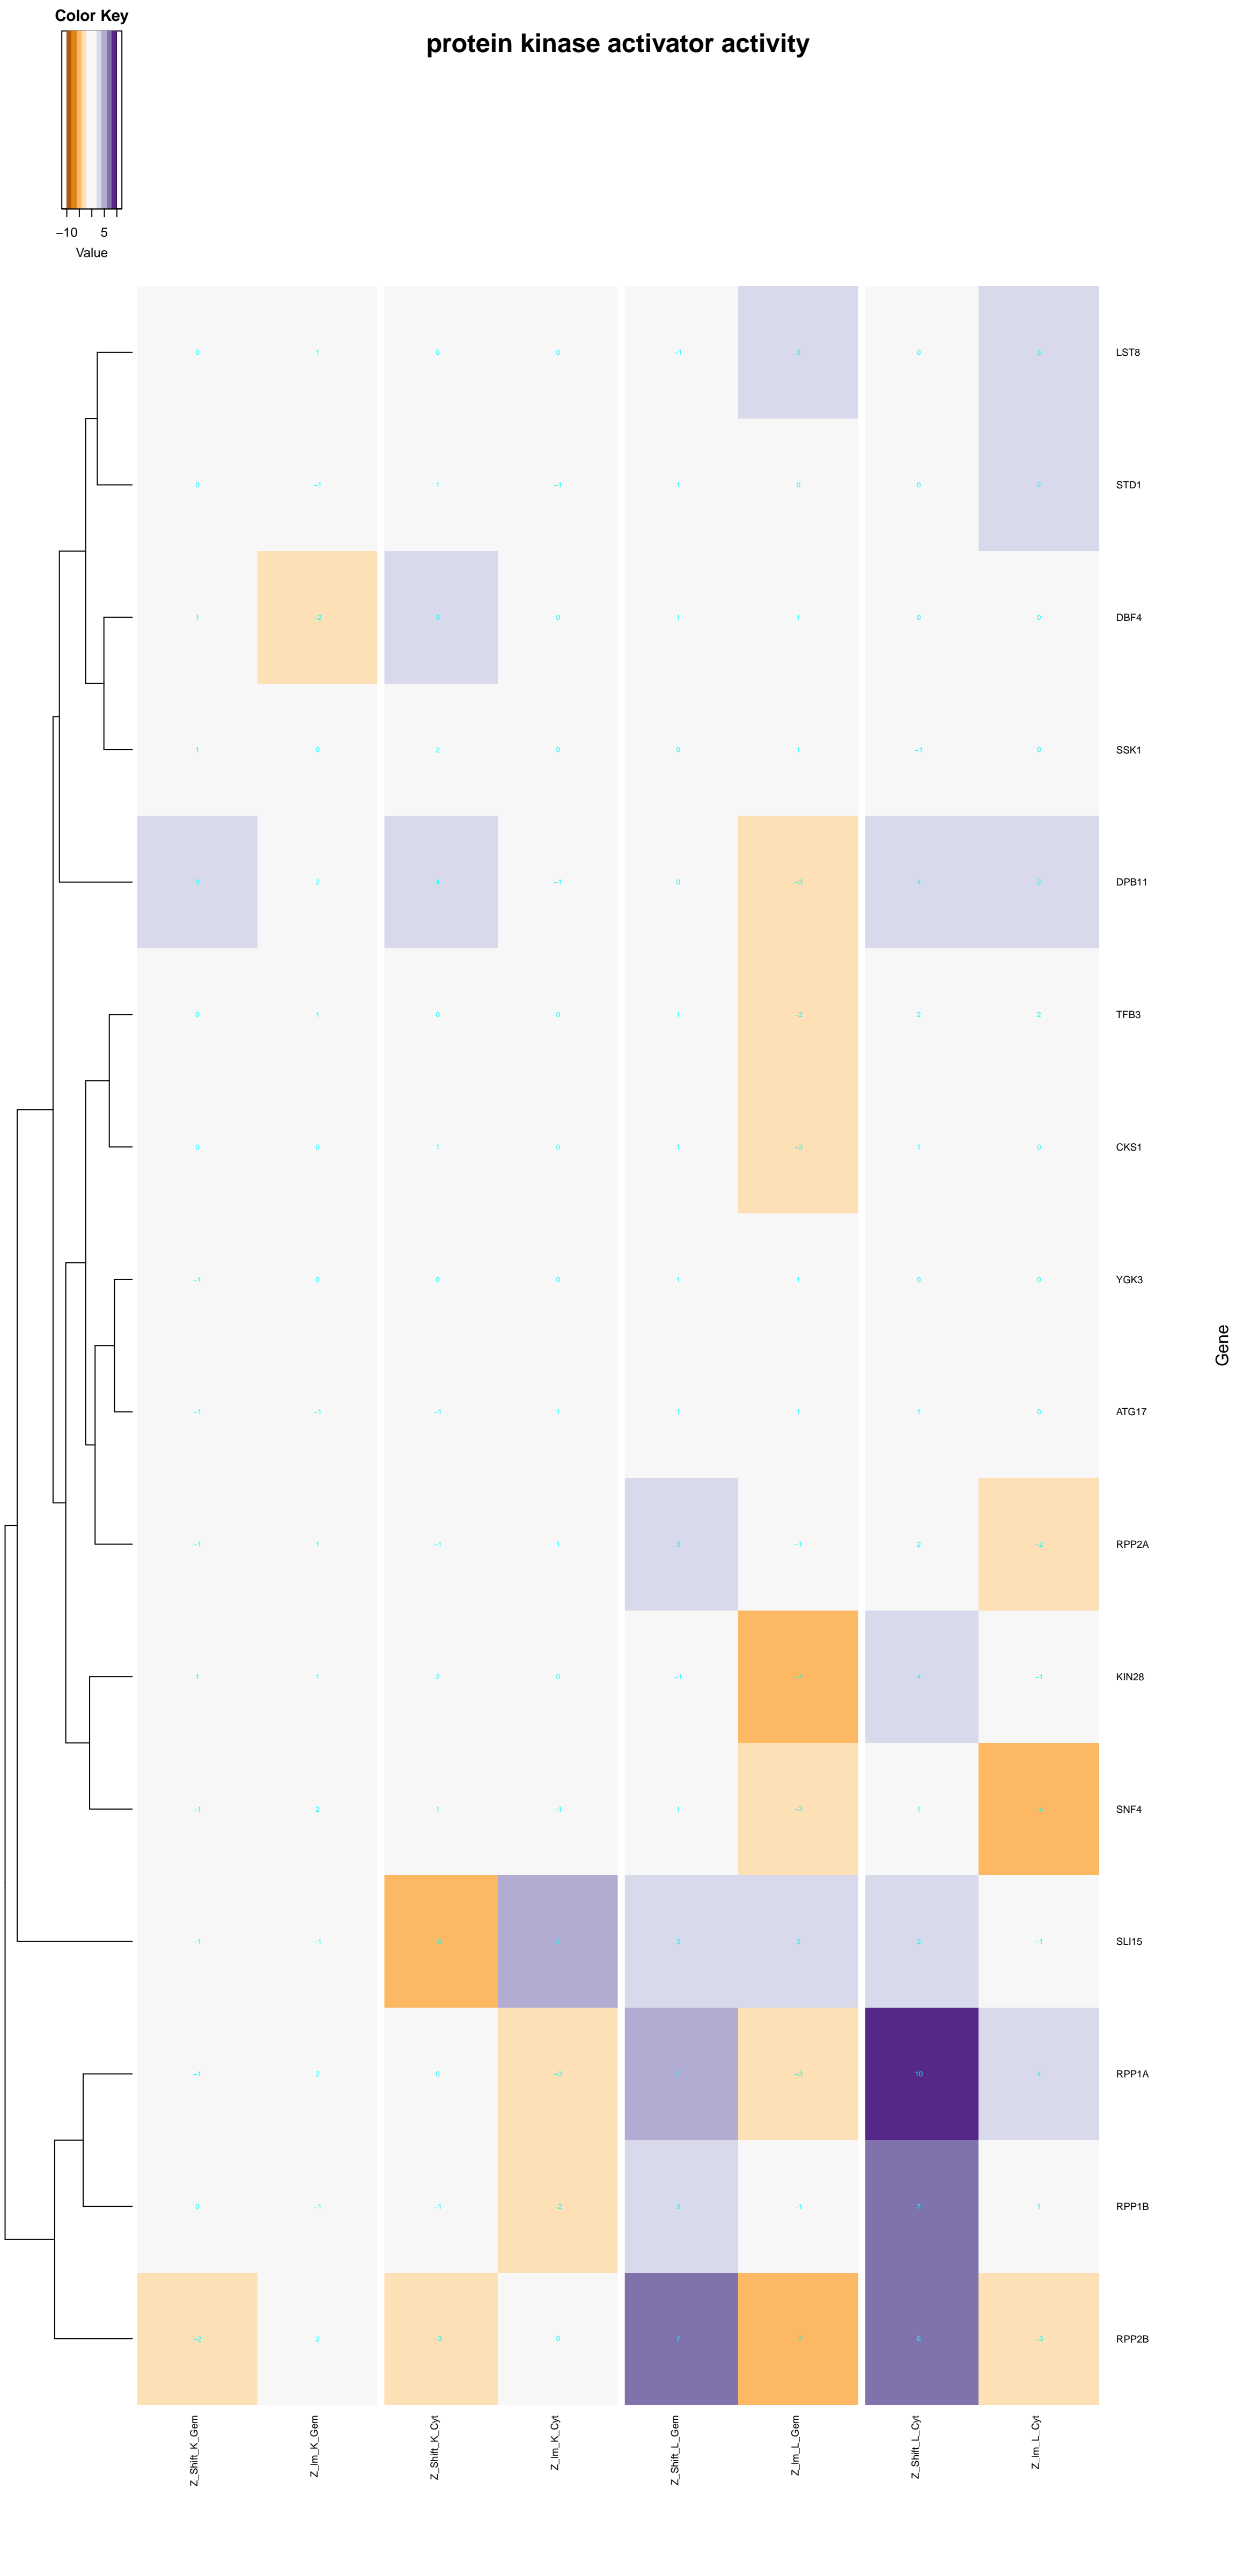

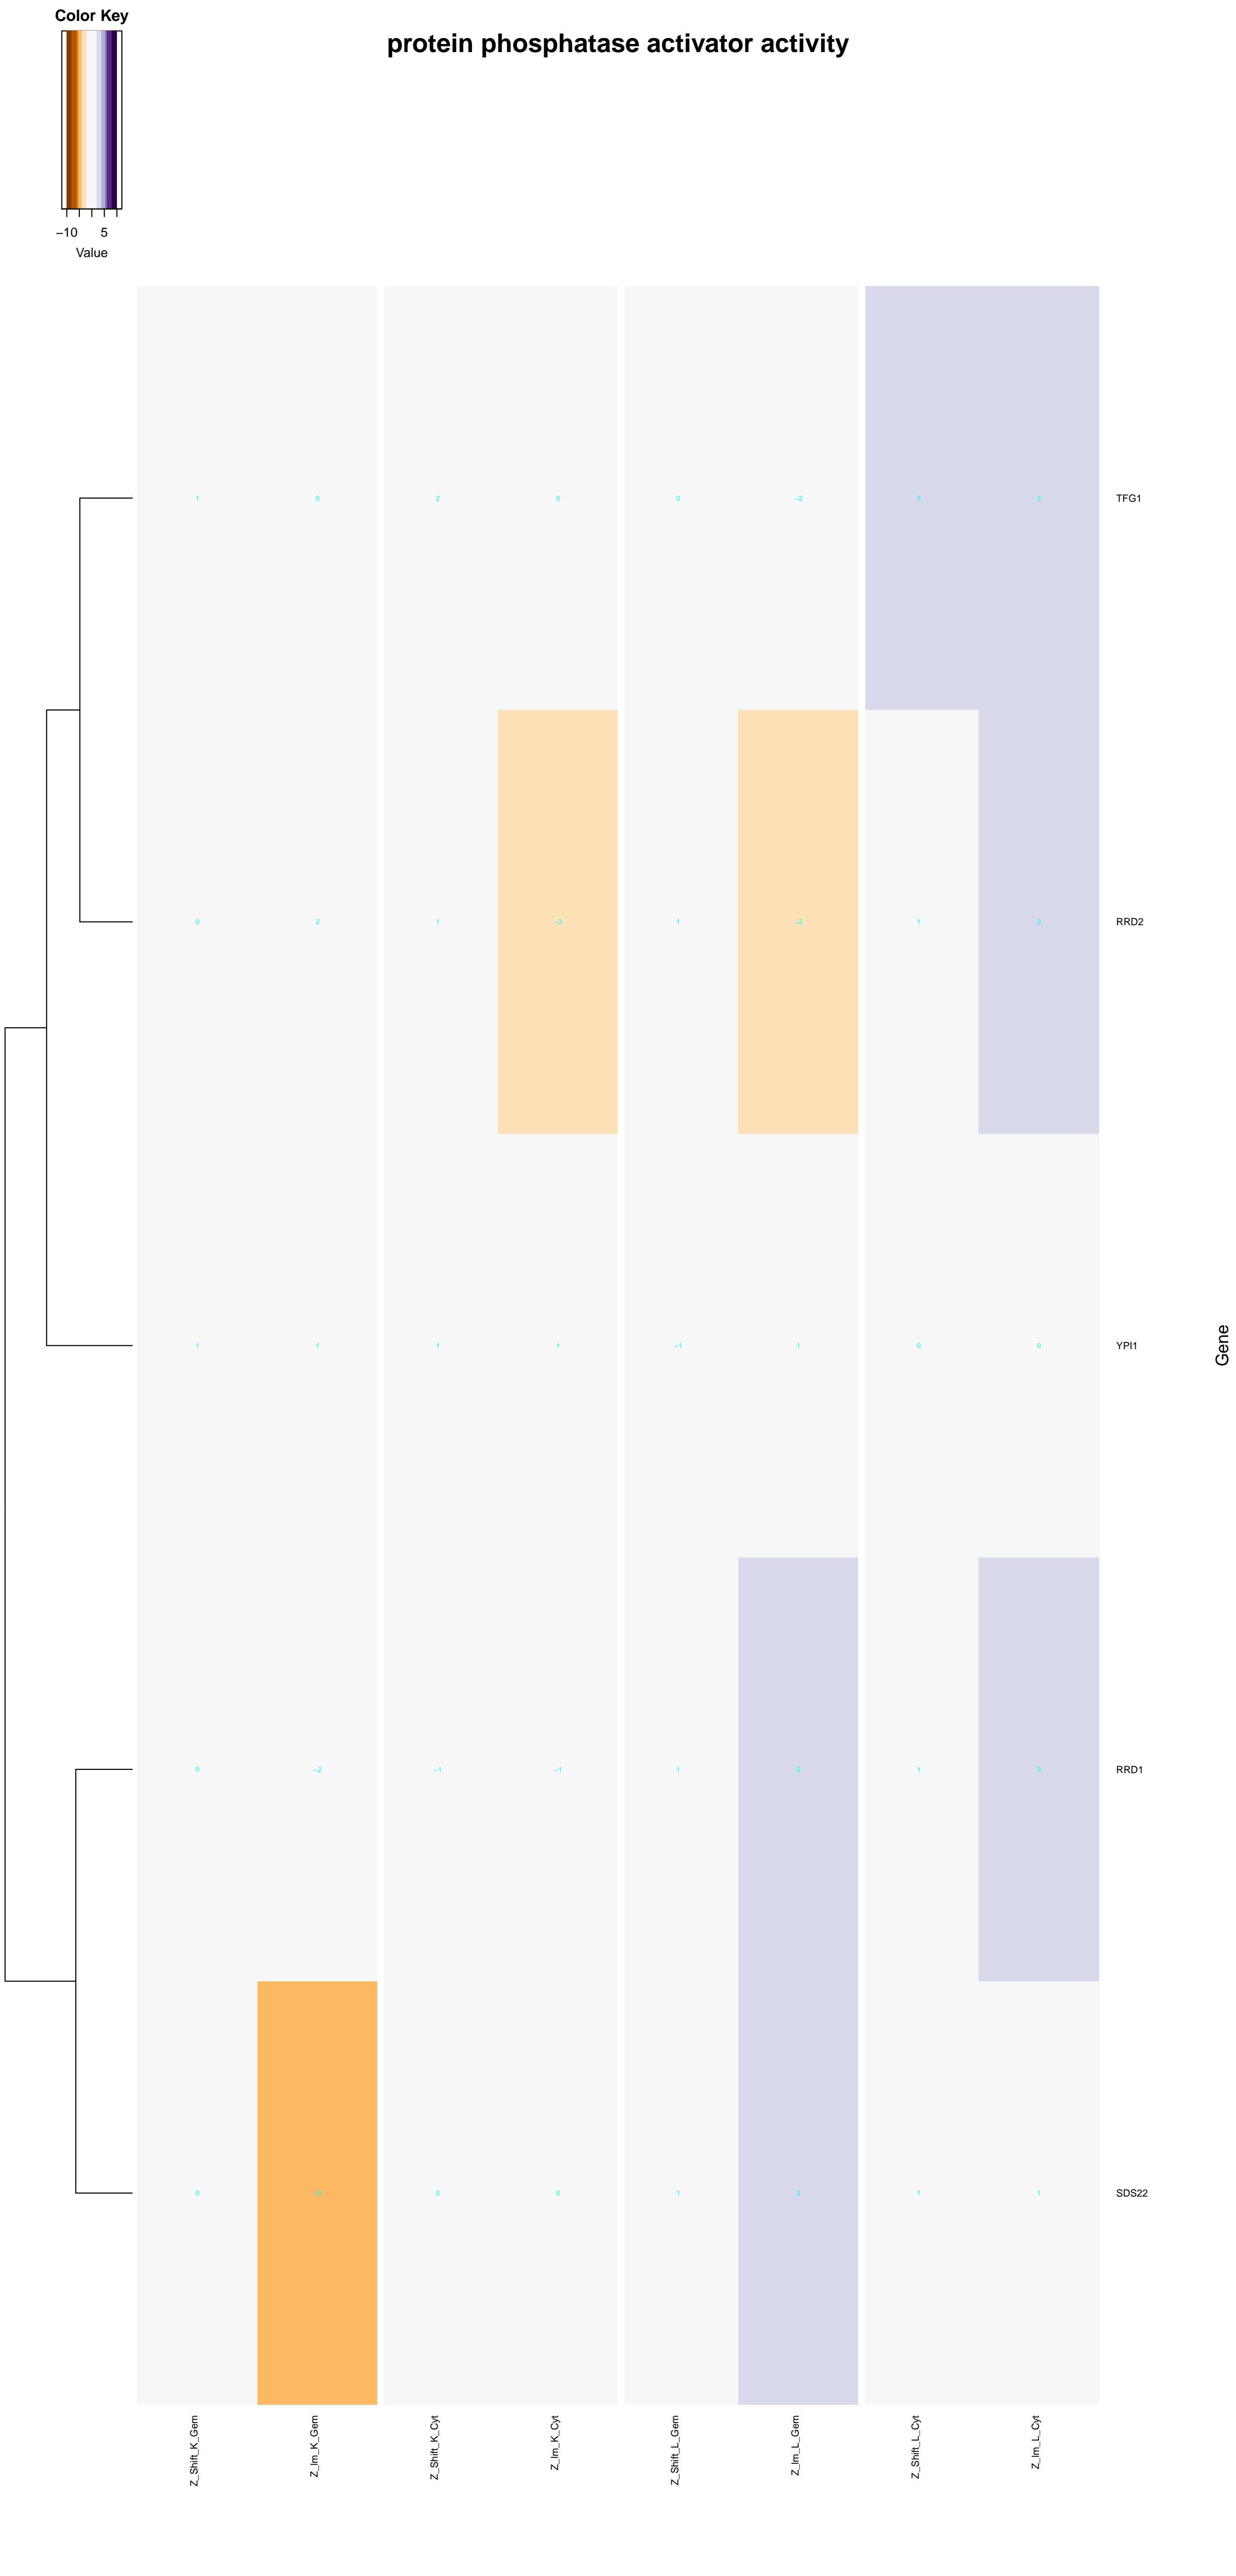

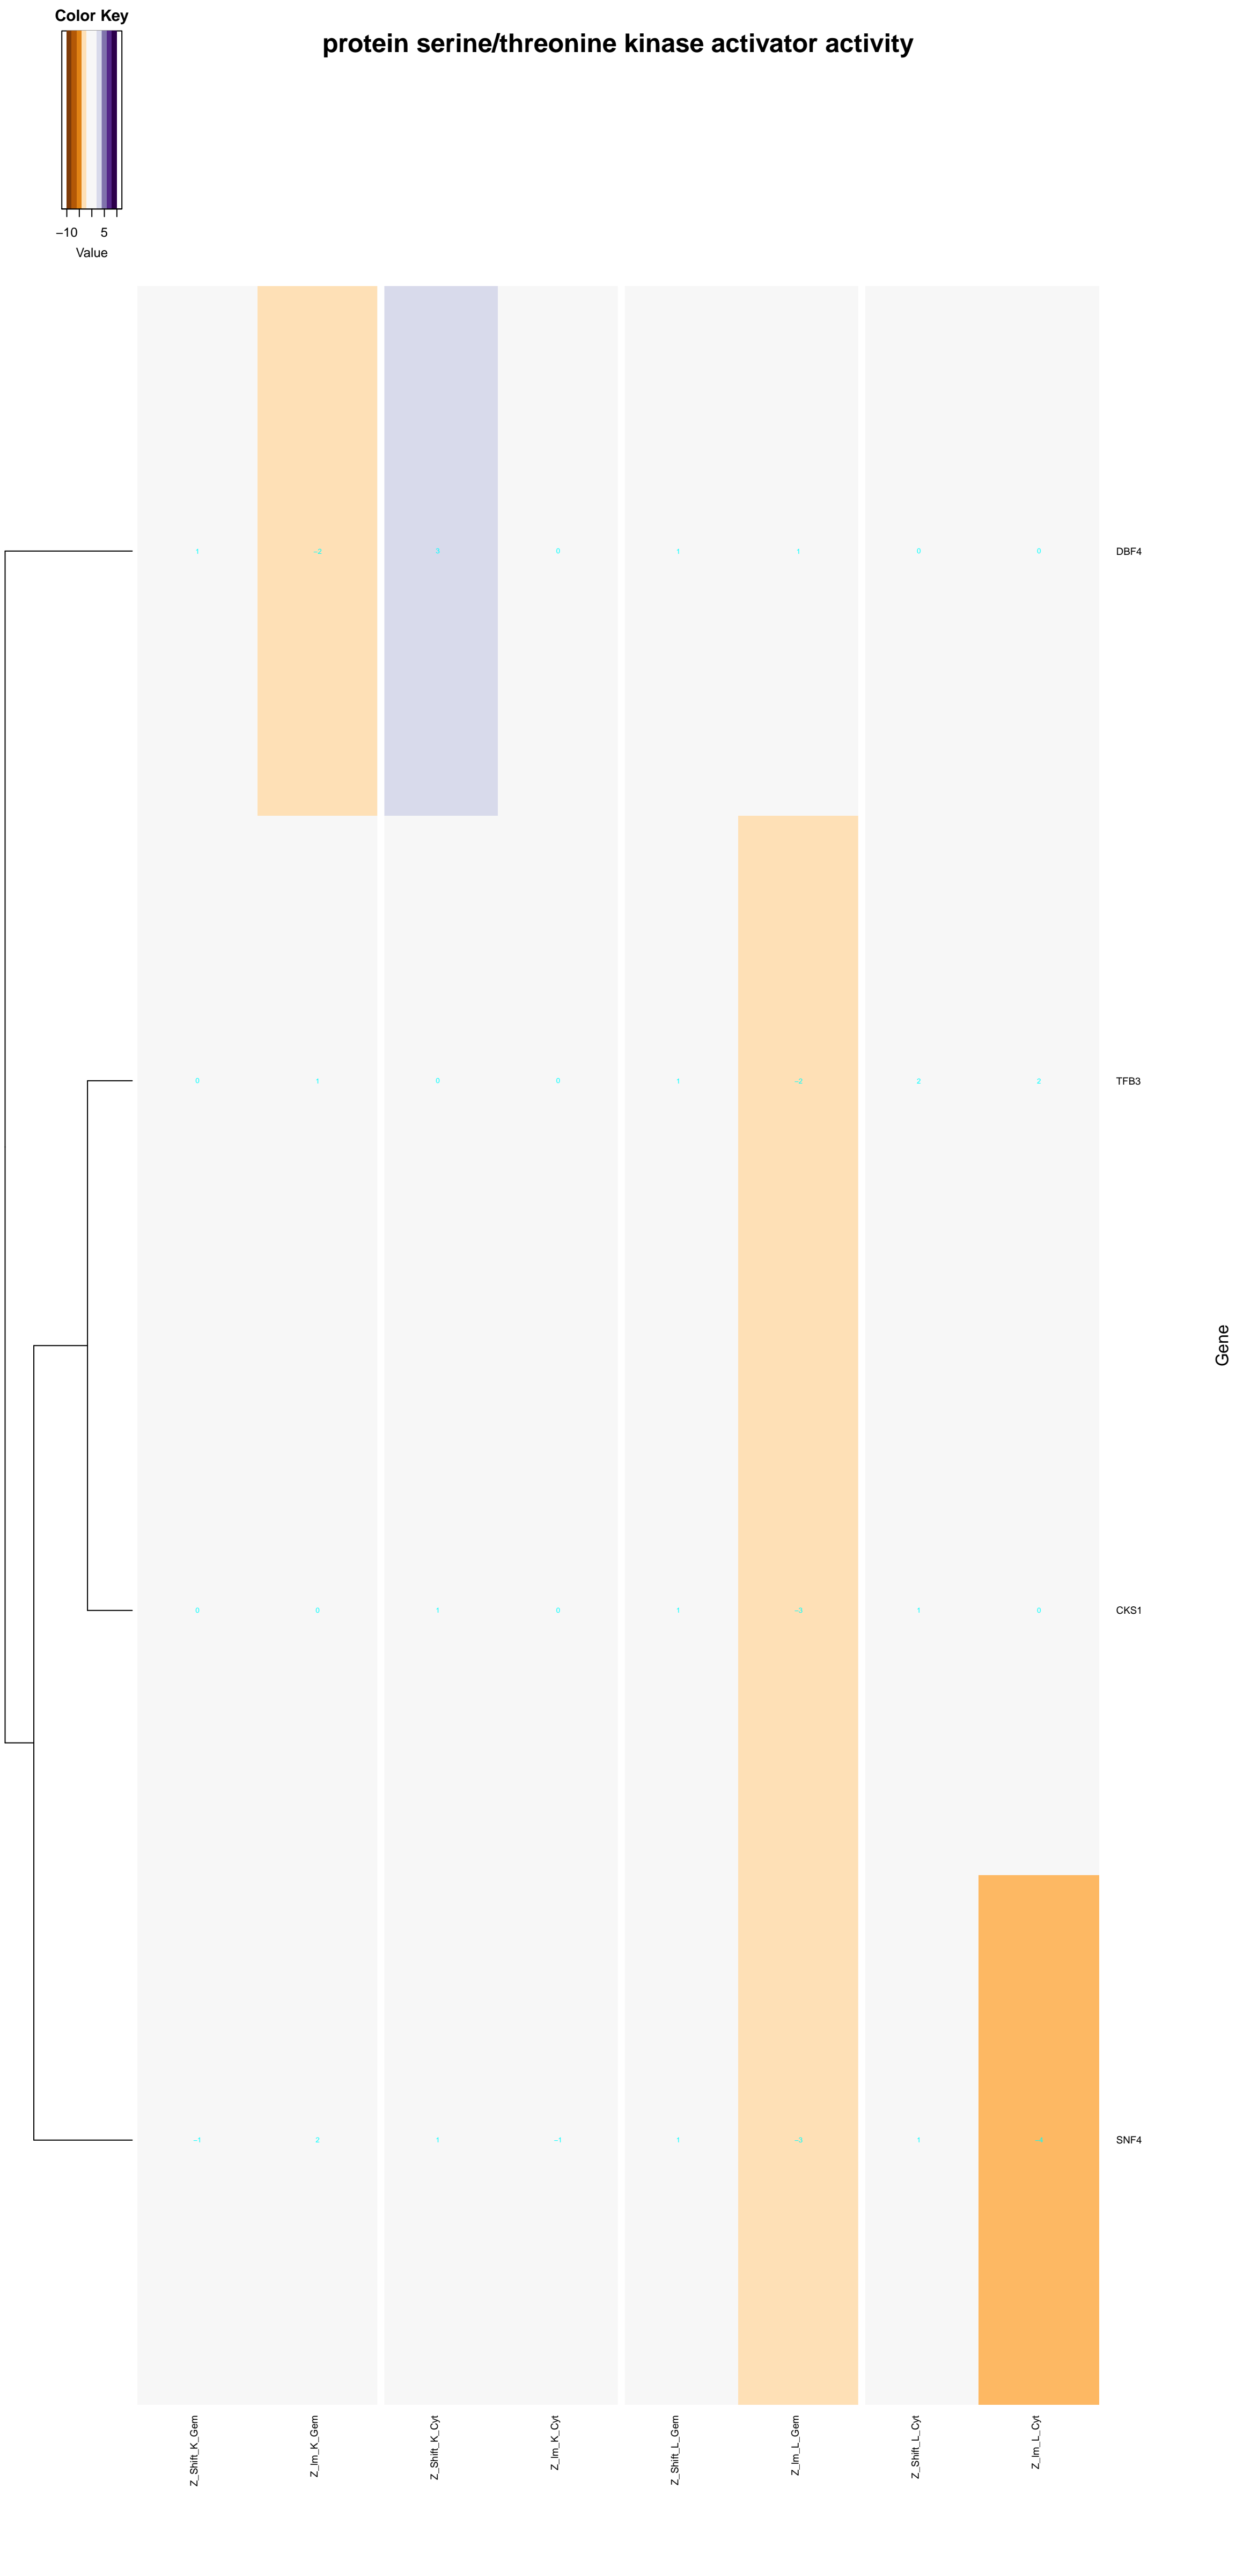

Supplement: s1 [file s1]

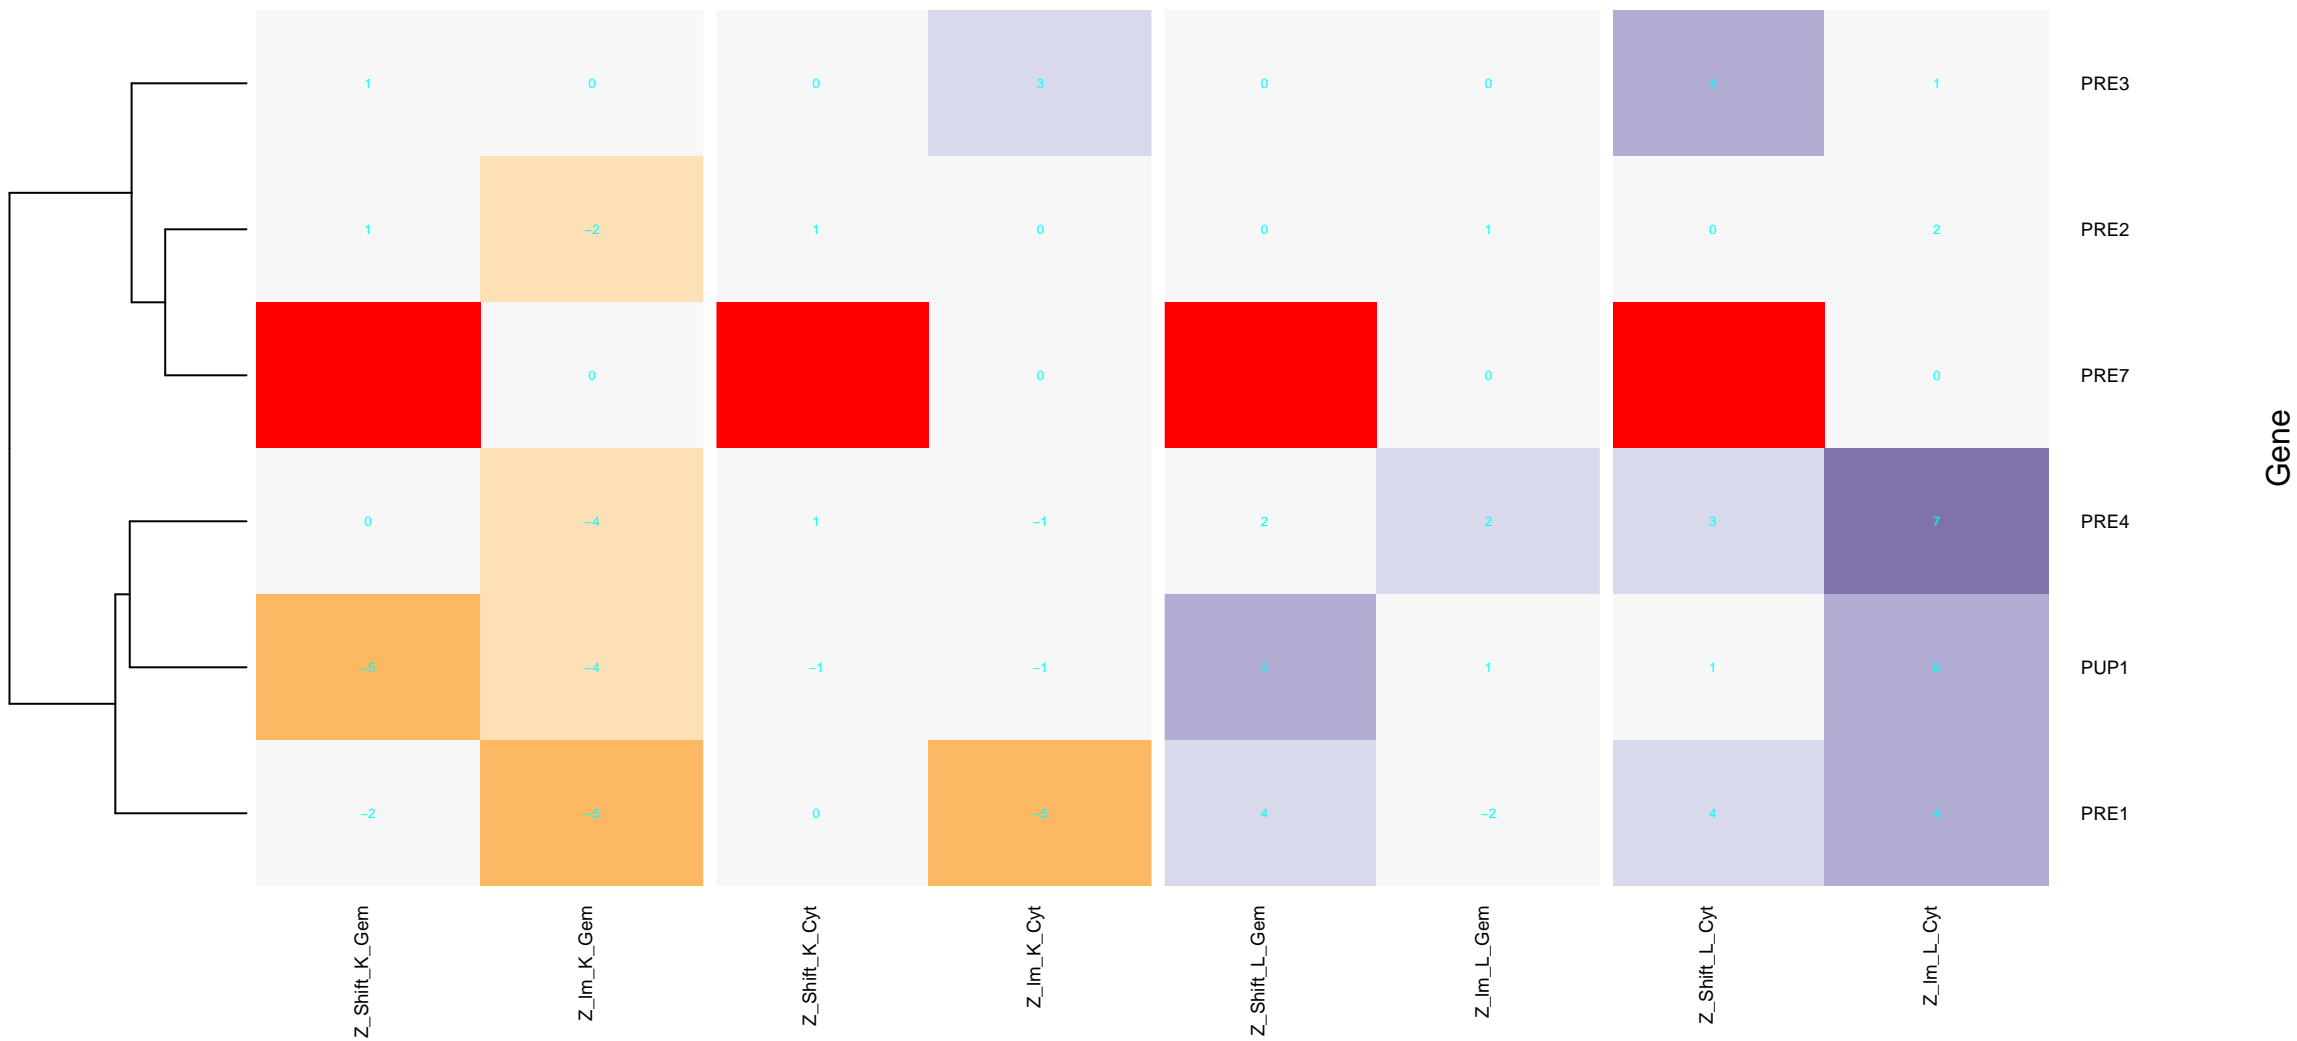

Supplement: s1 [file s1]

















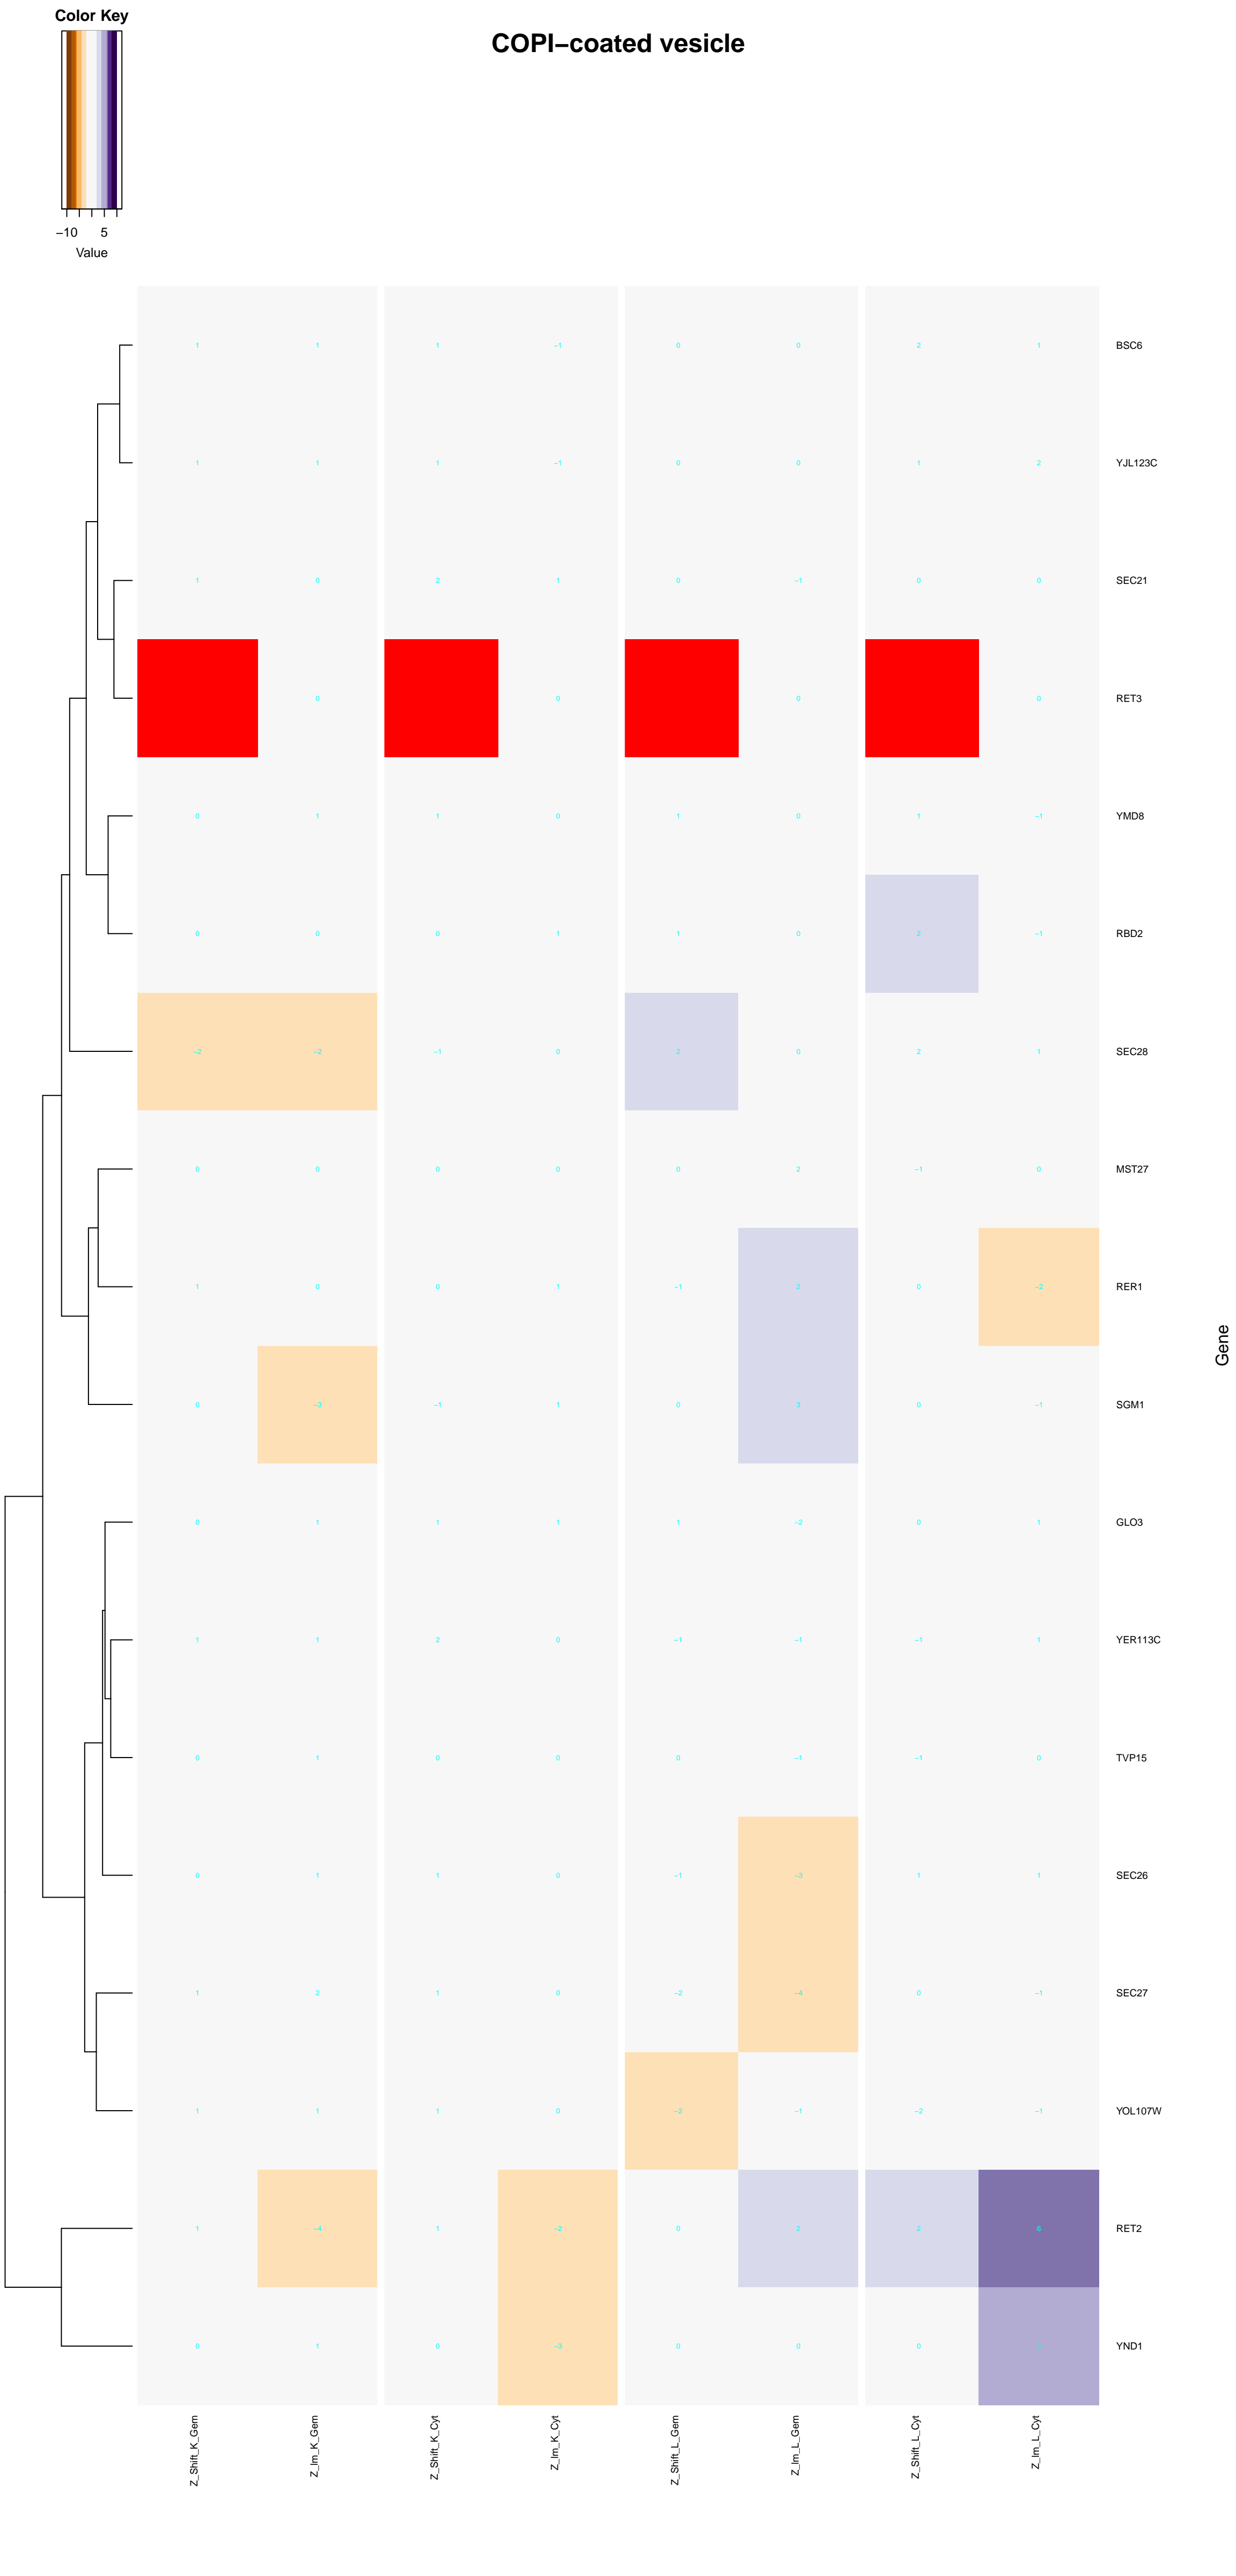



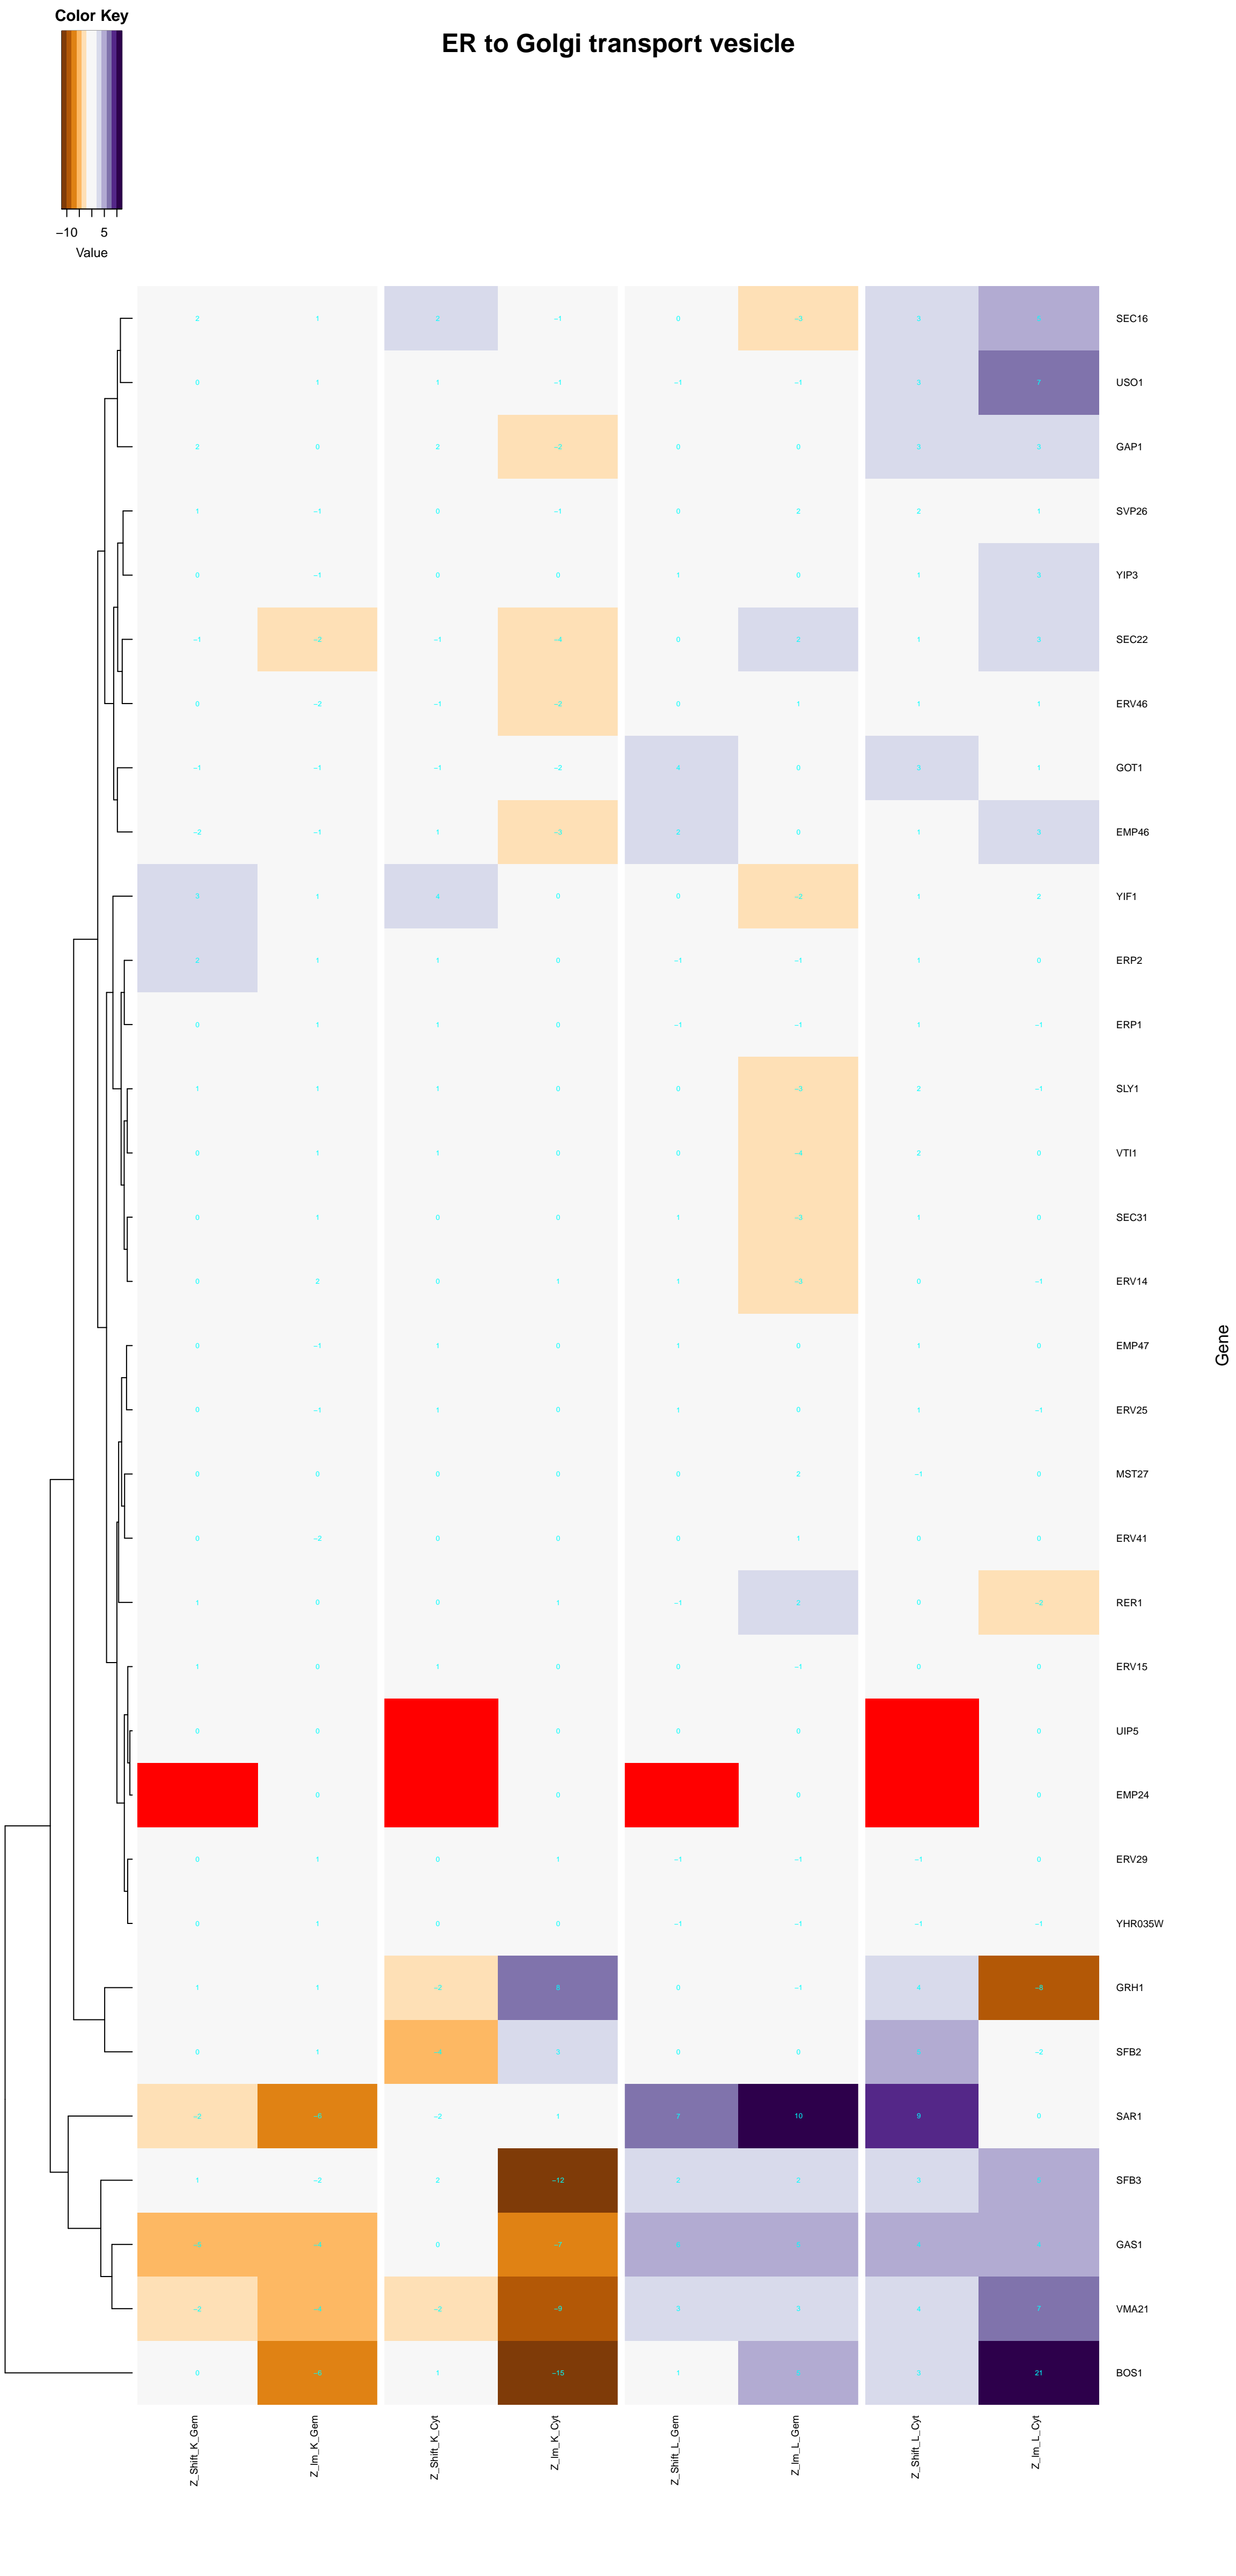







Supplement: s1 [file s1]

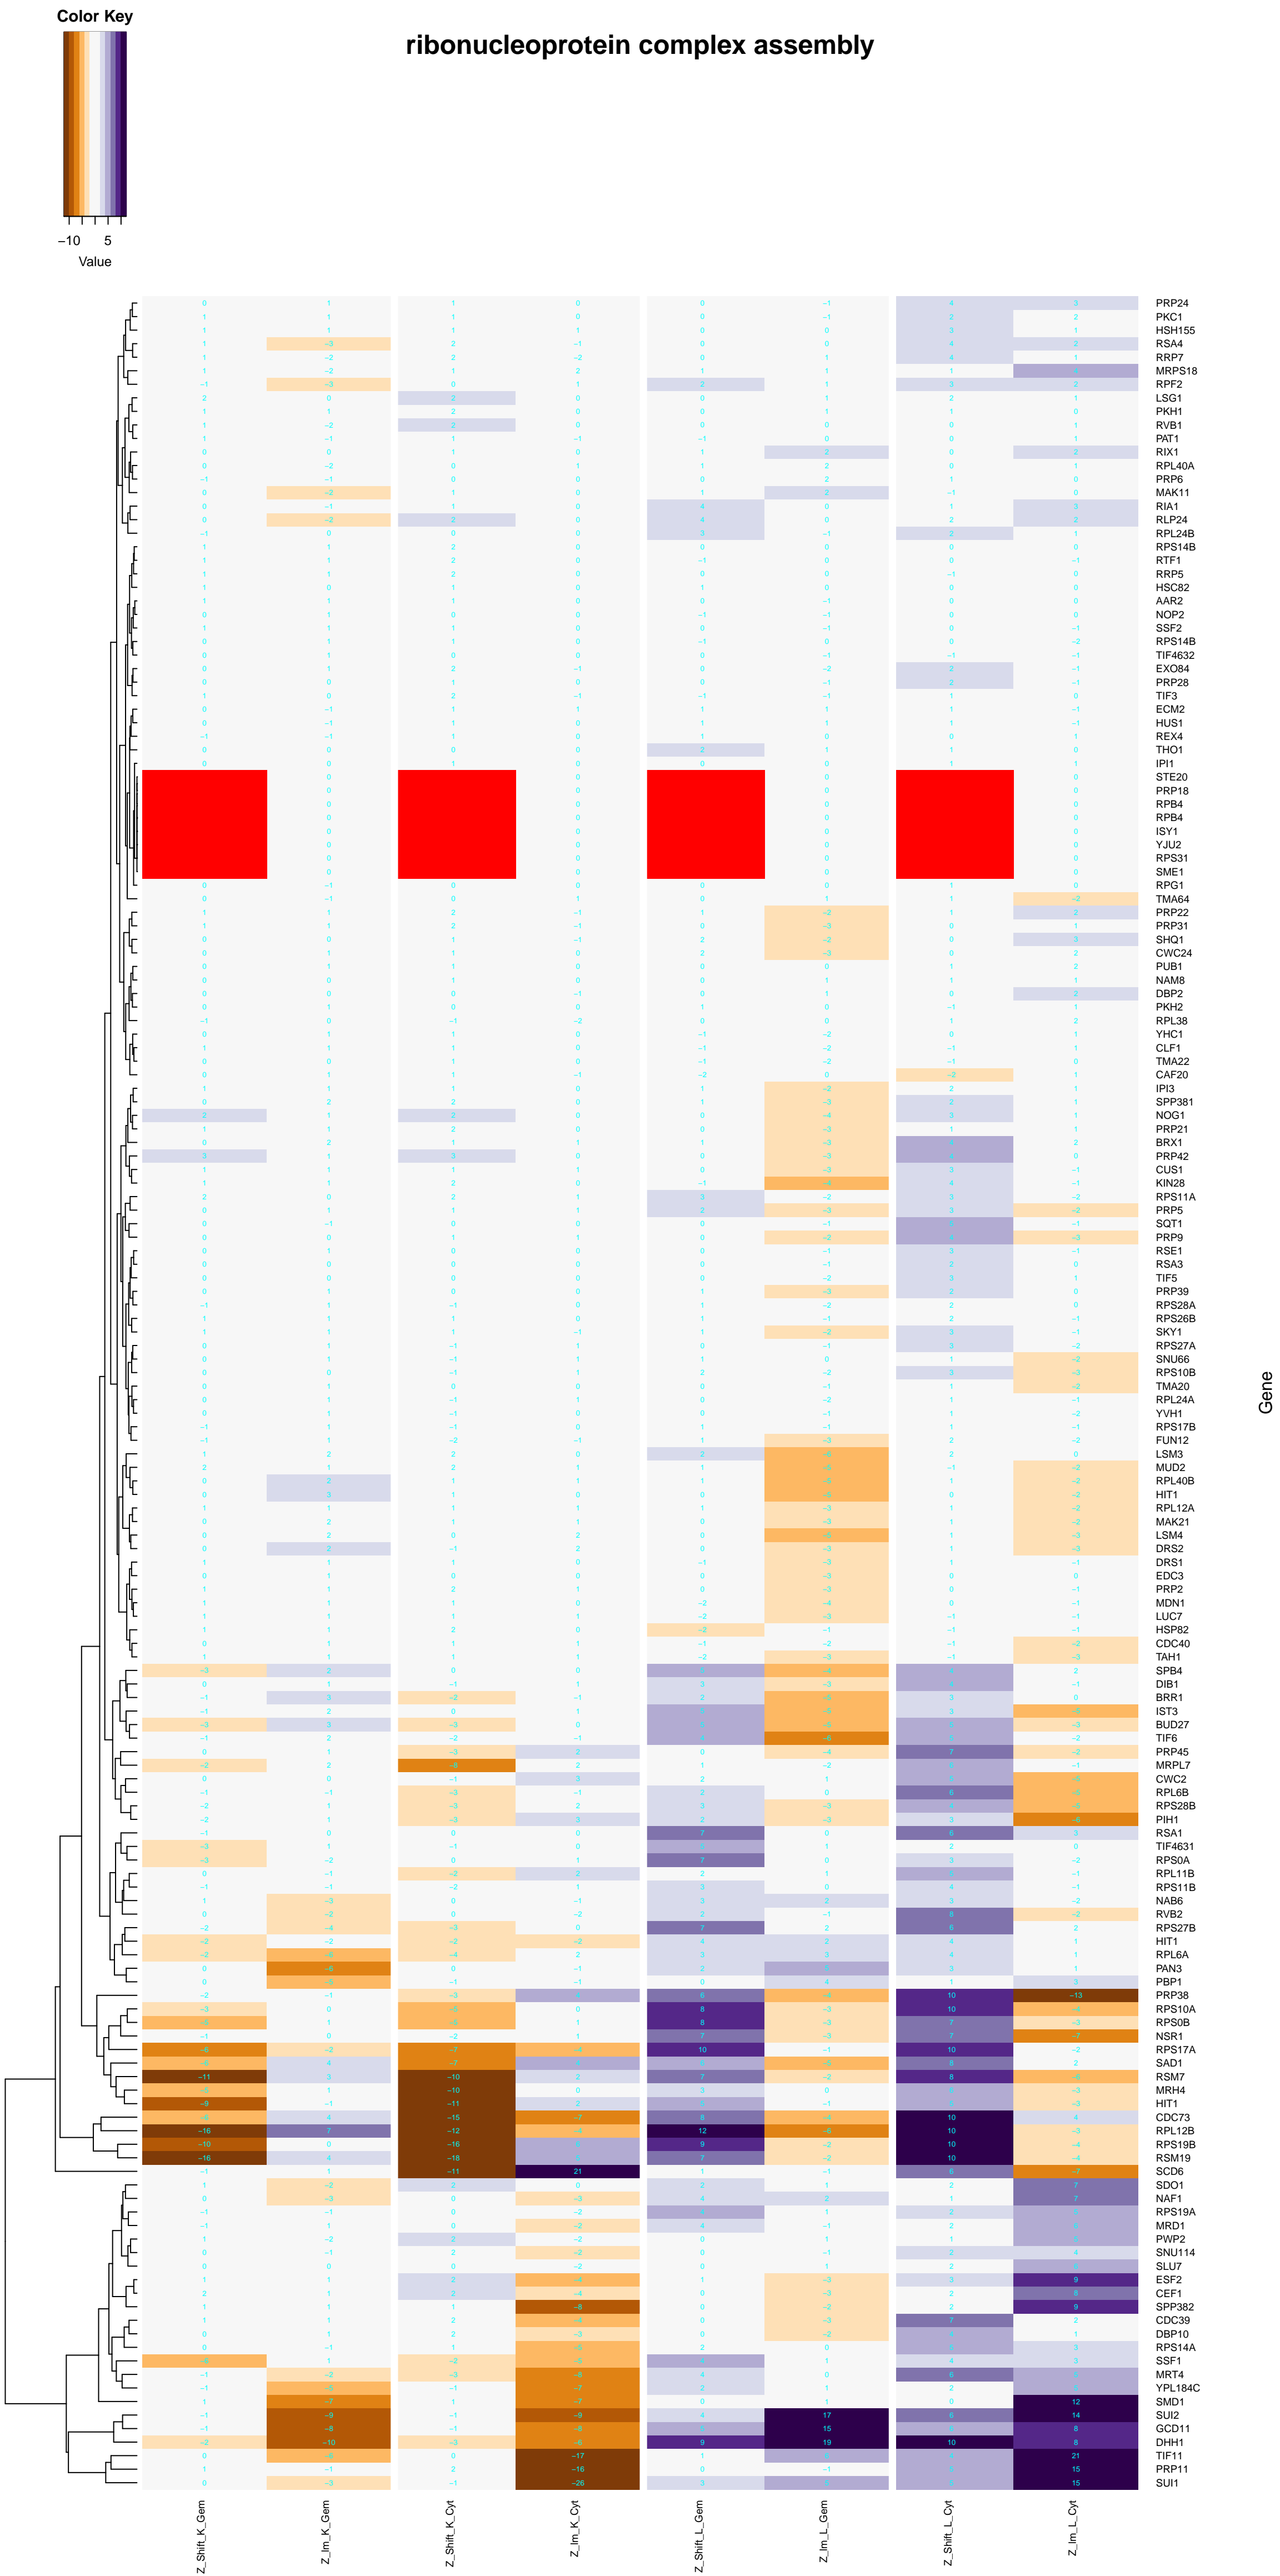

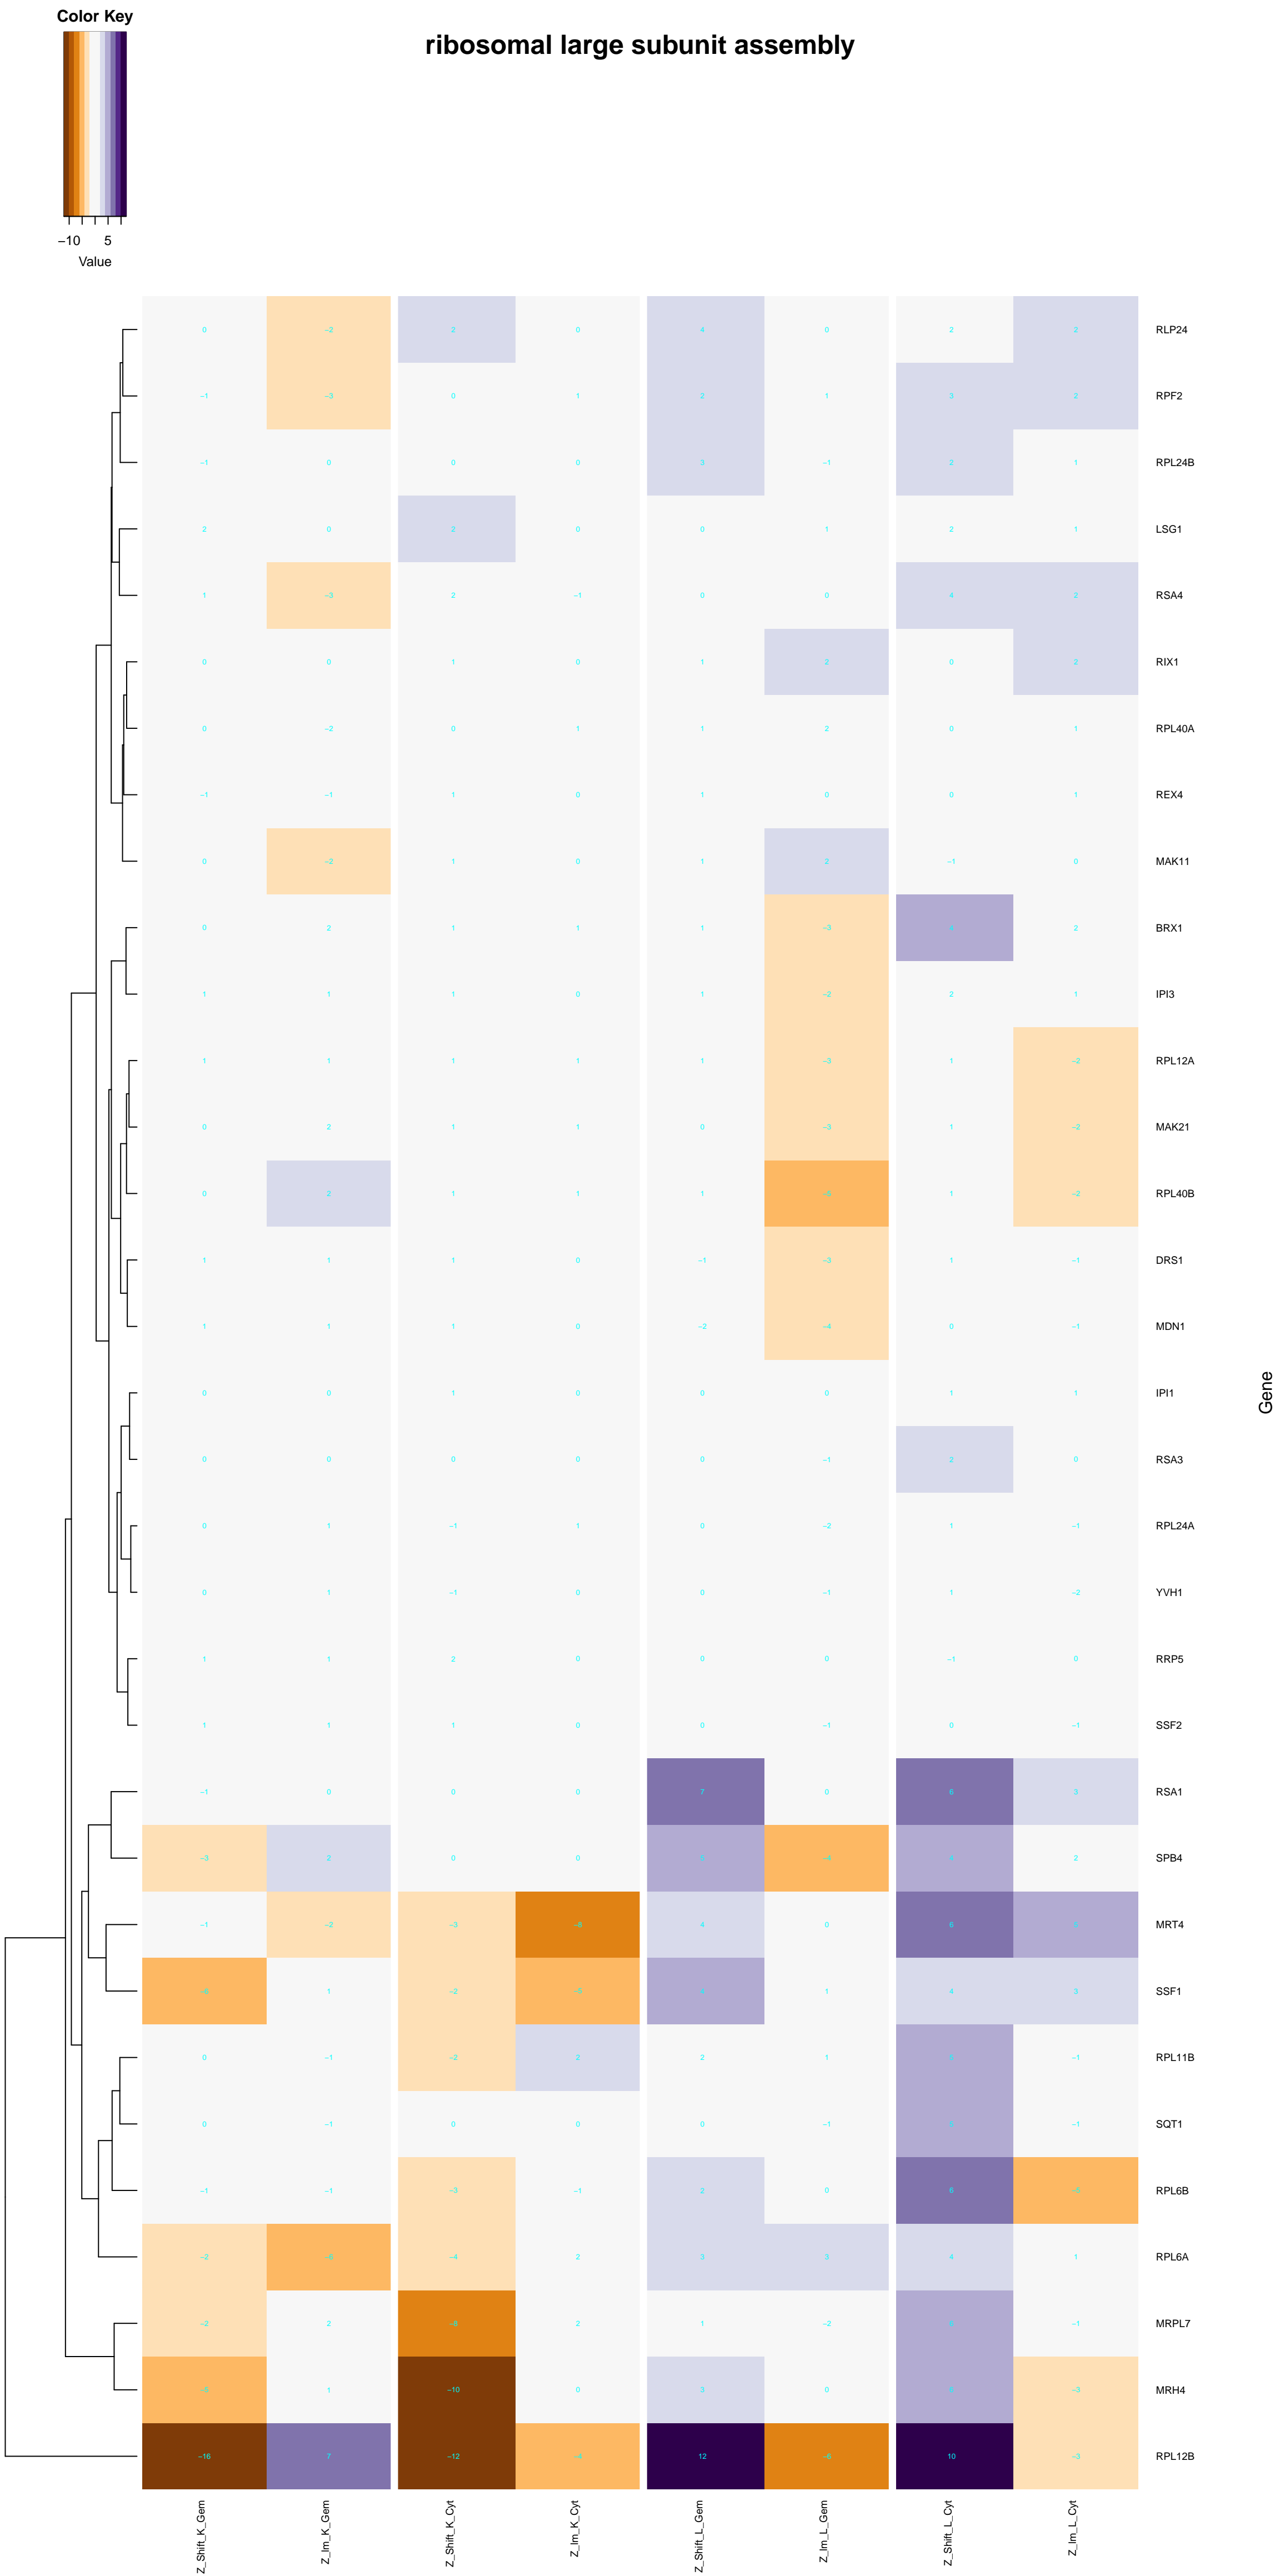

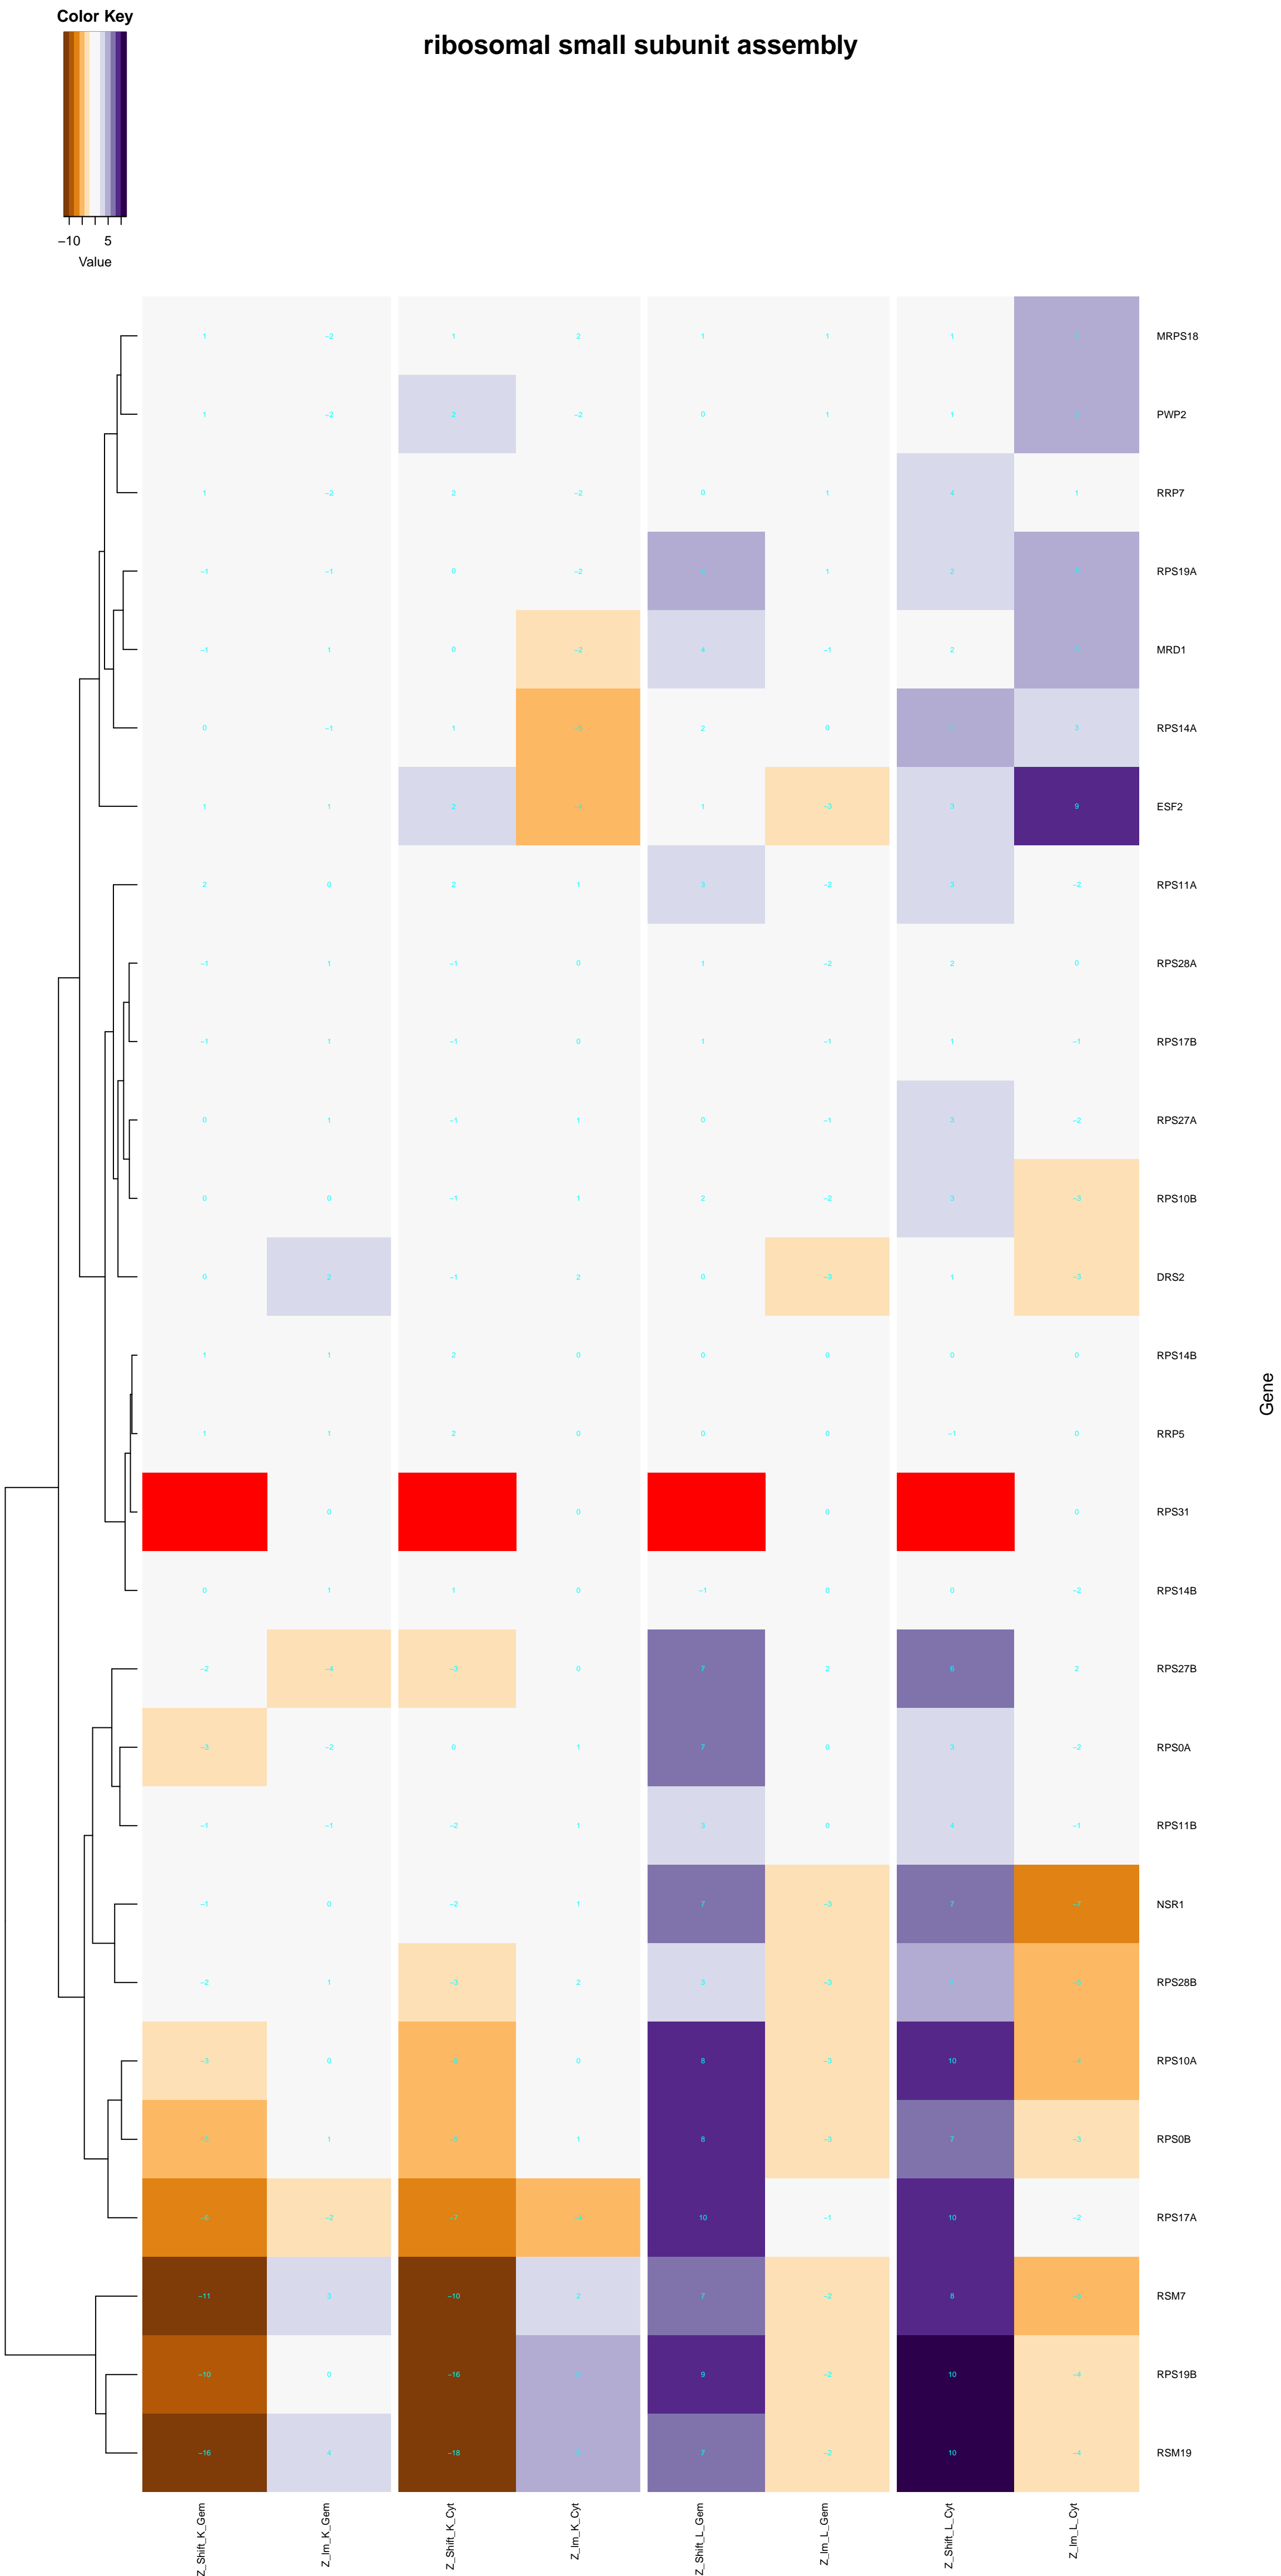

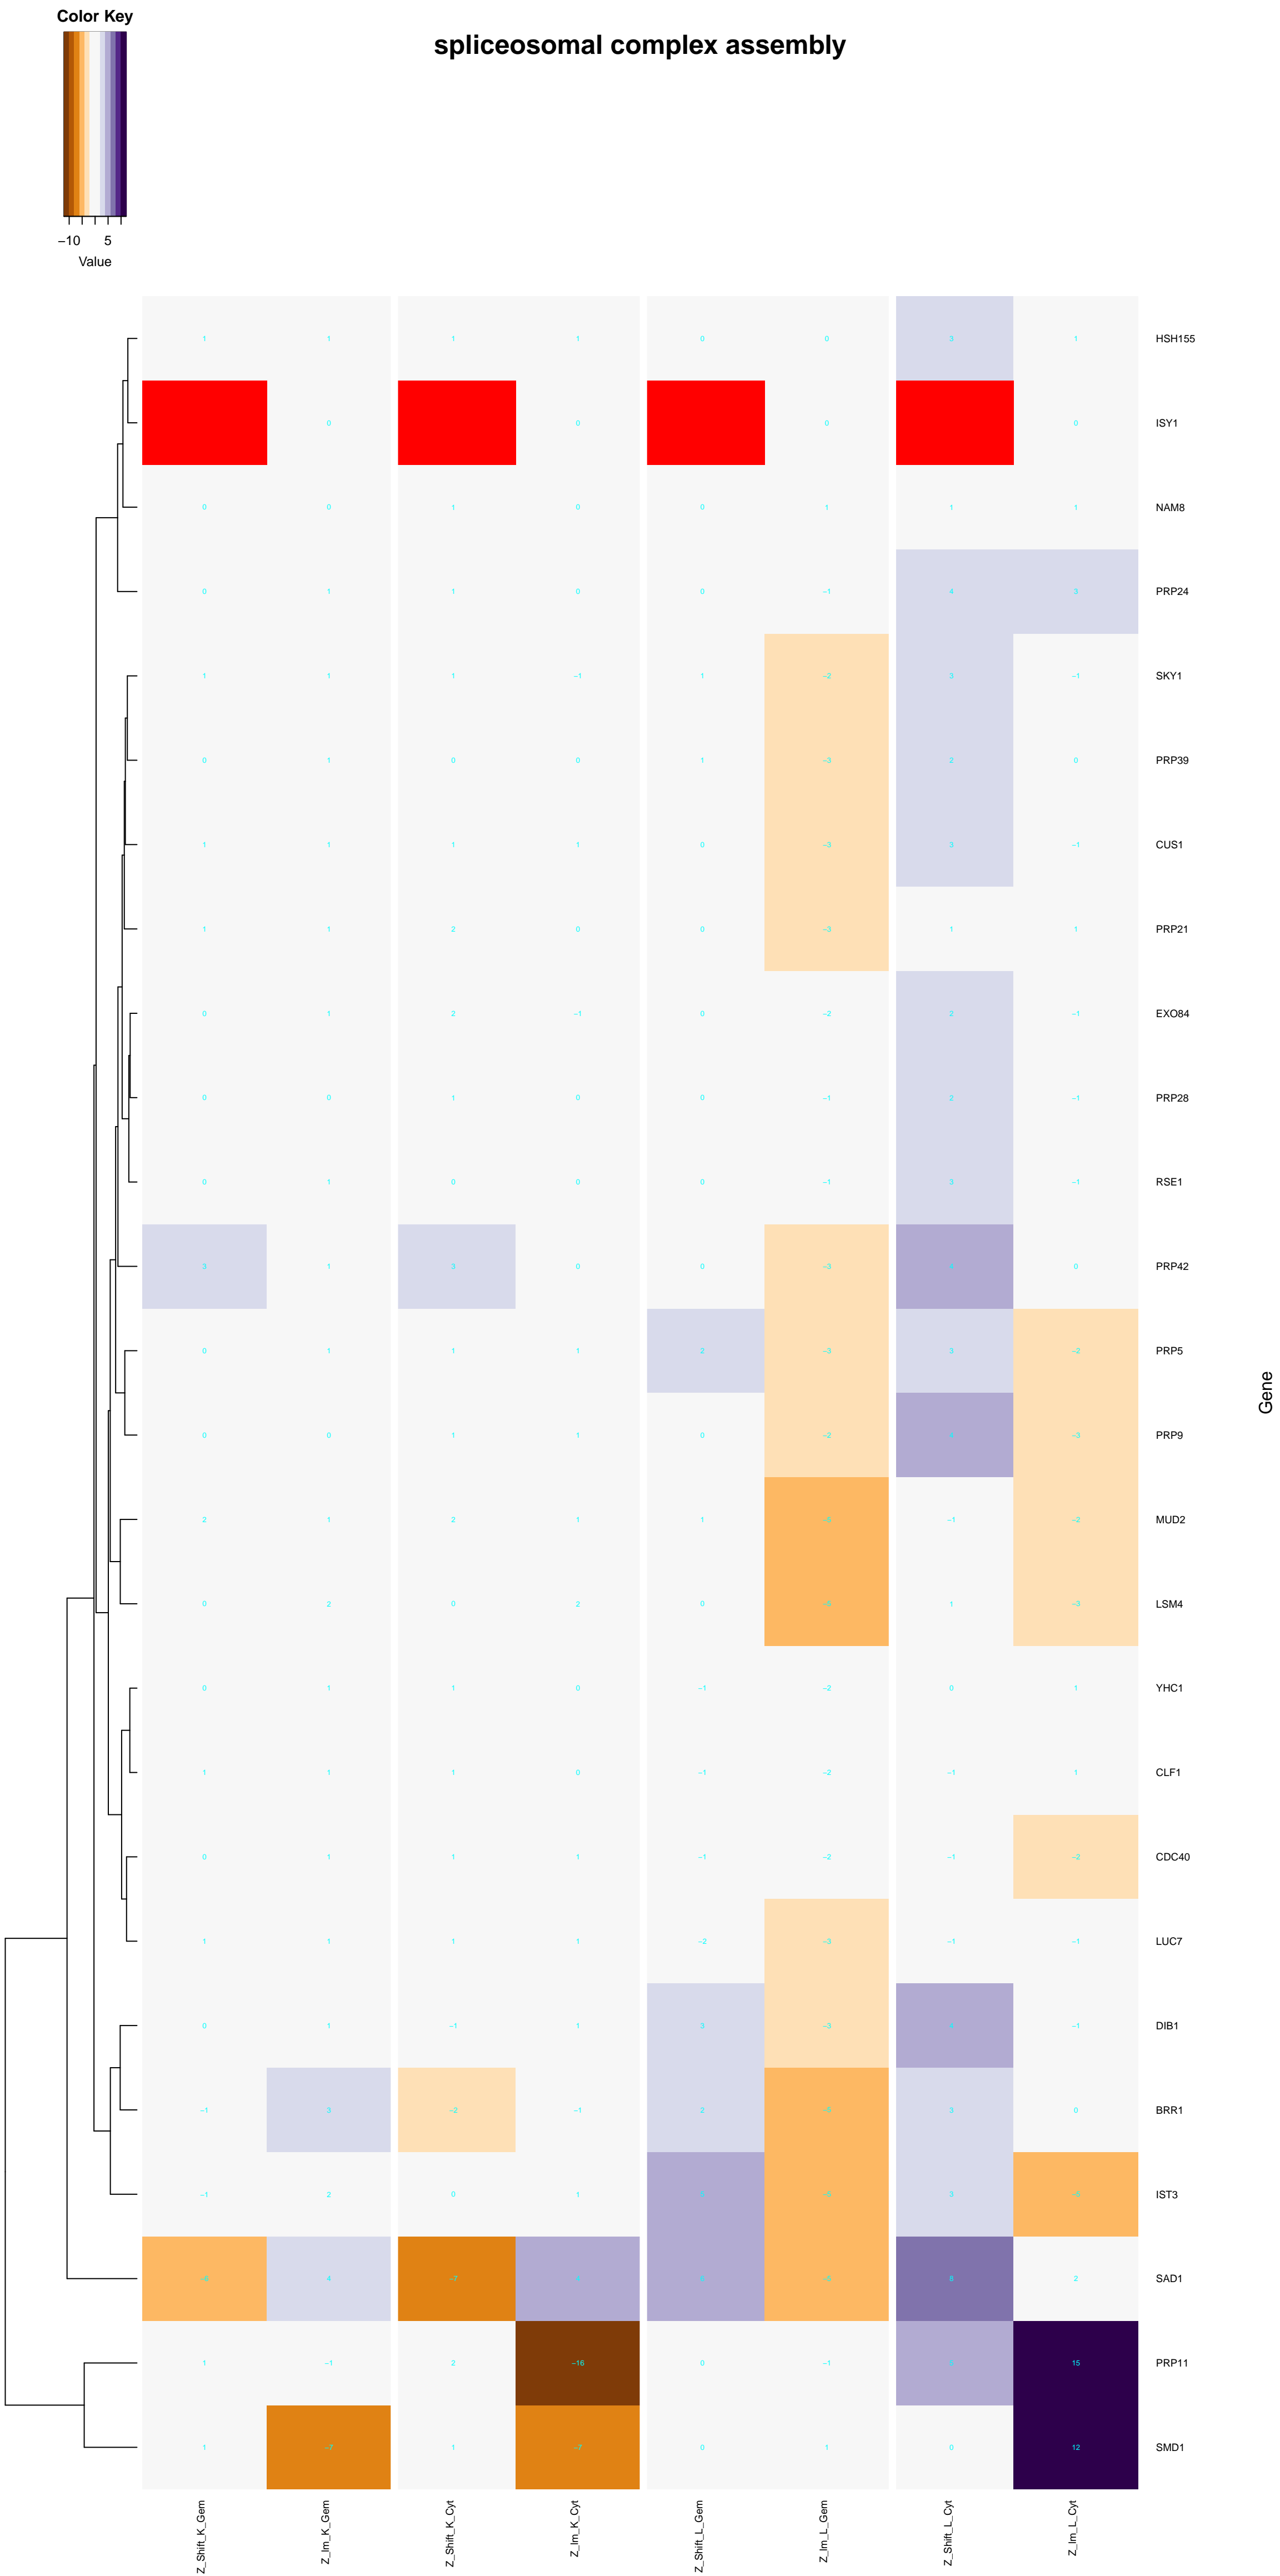

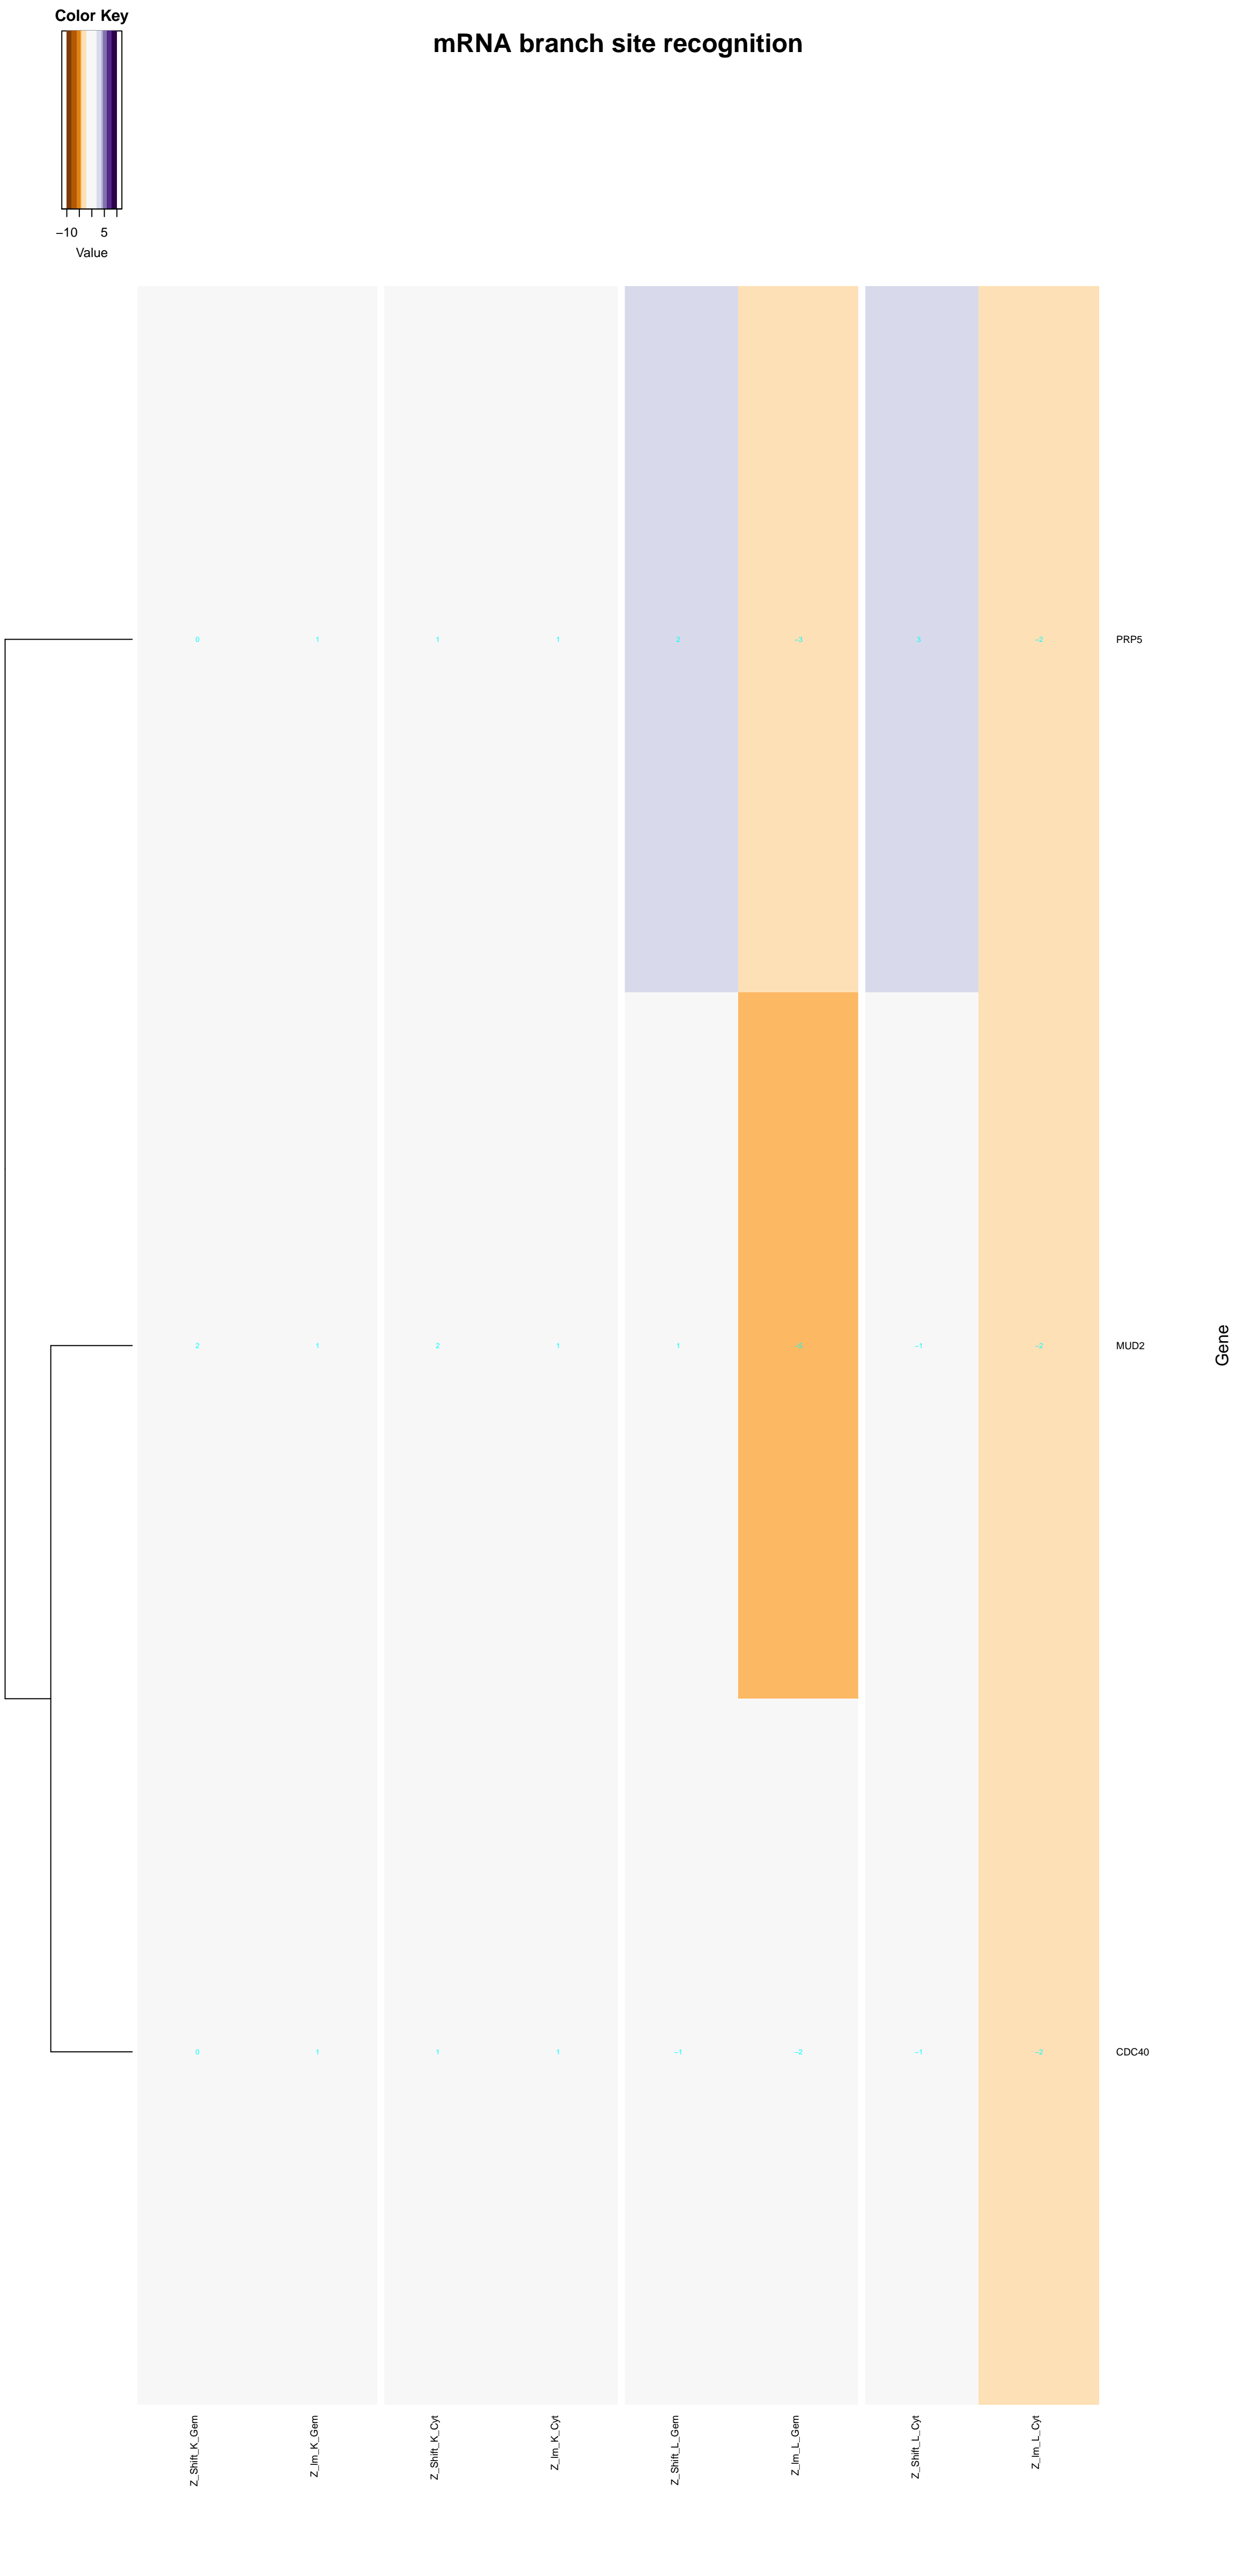

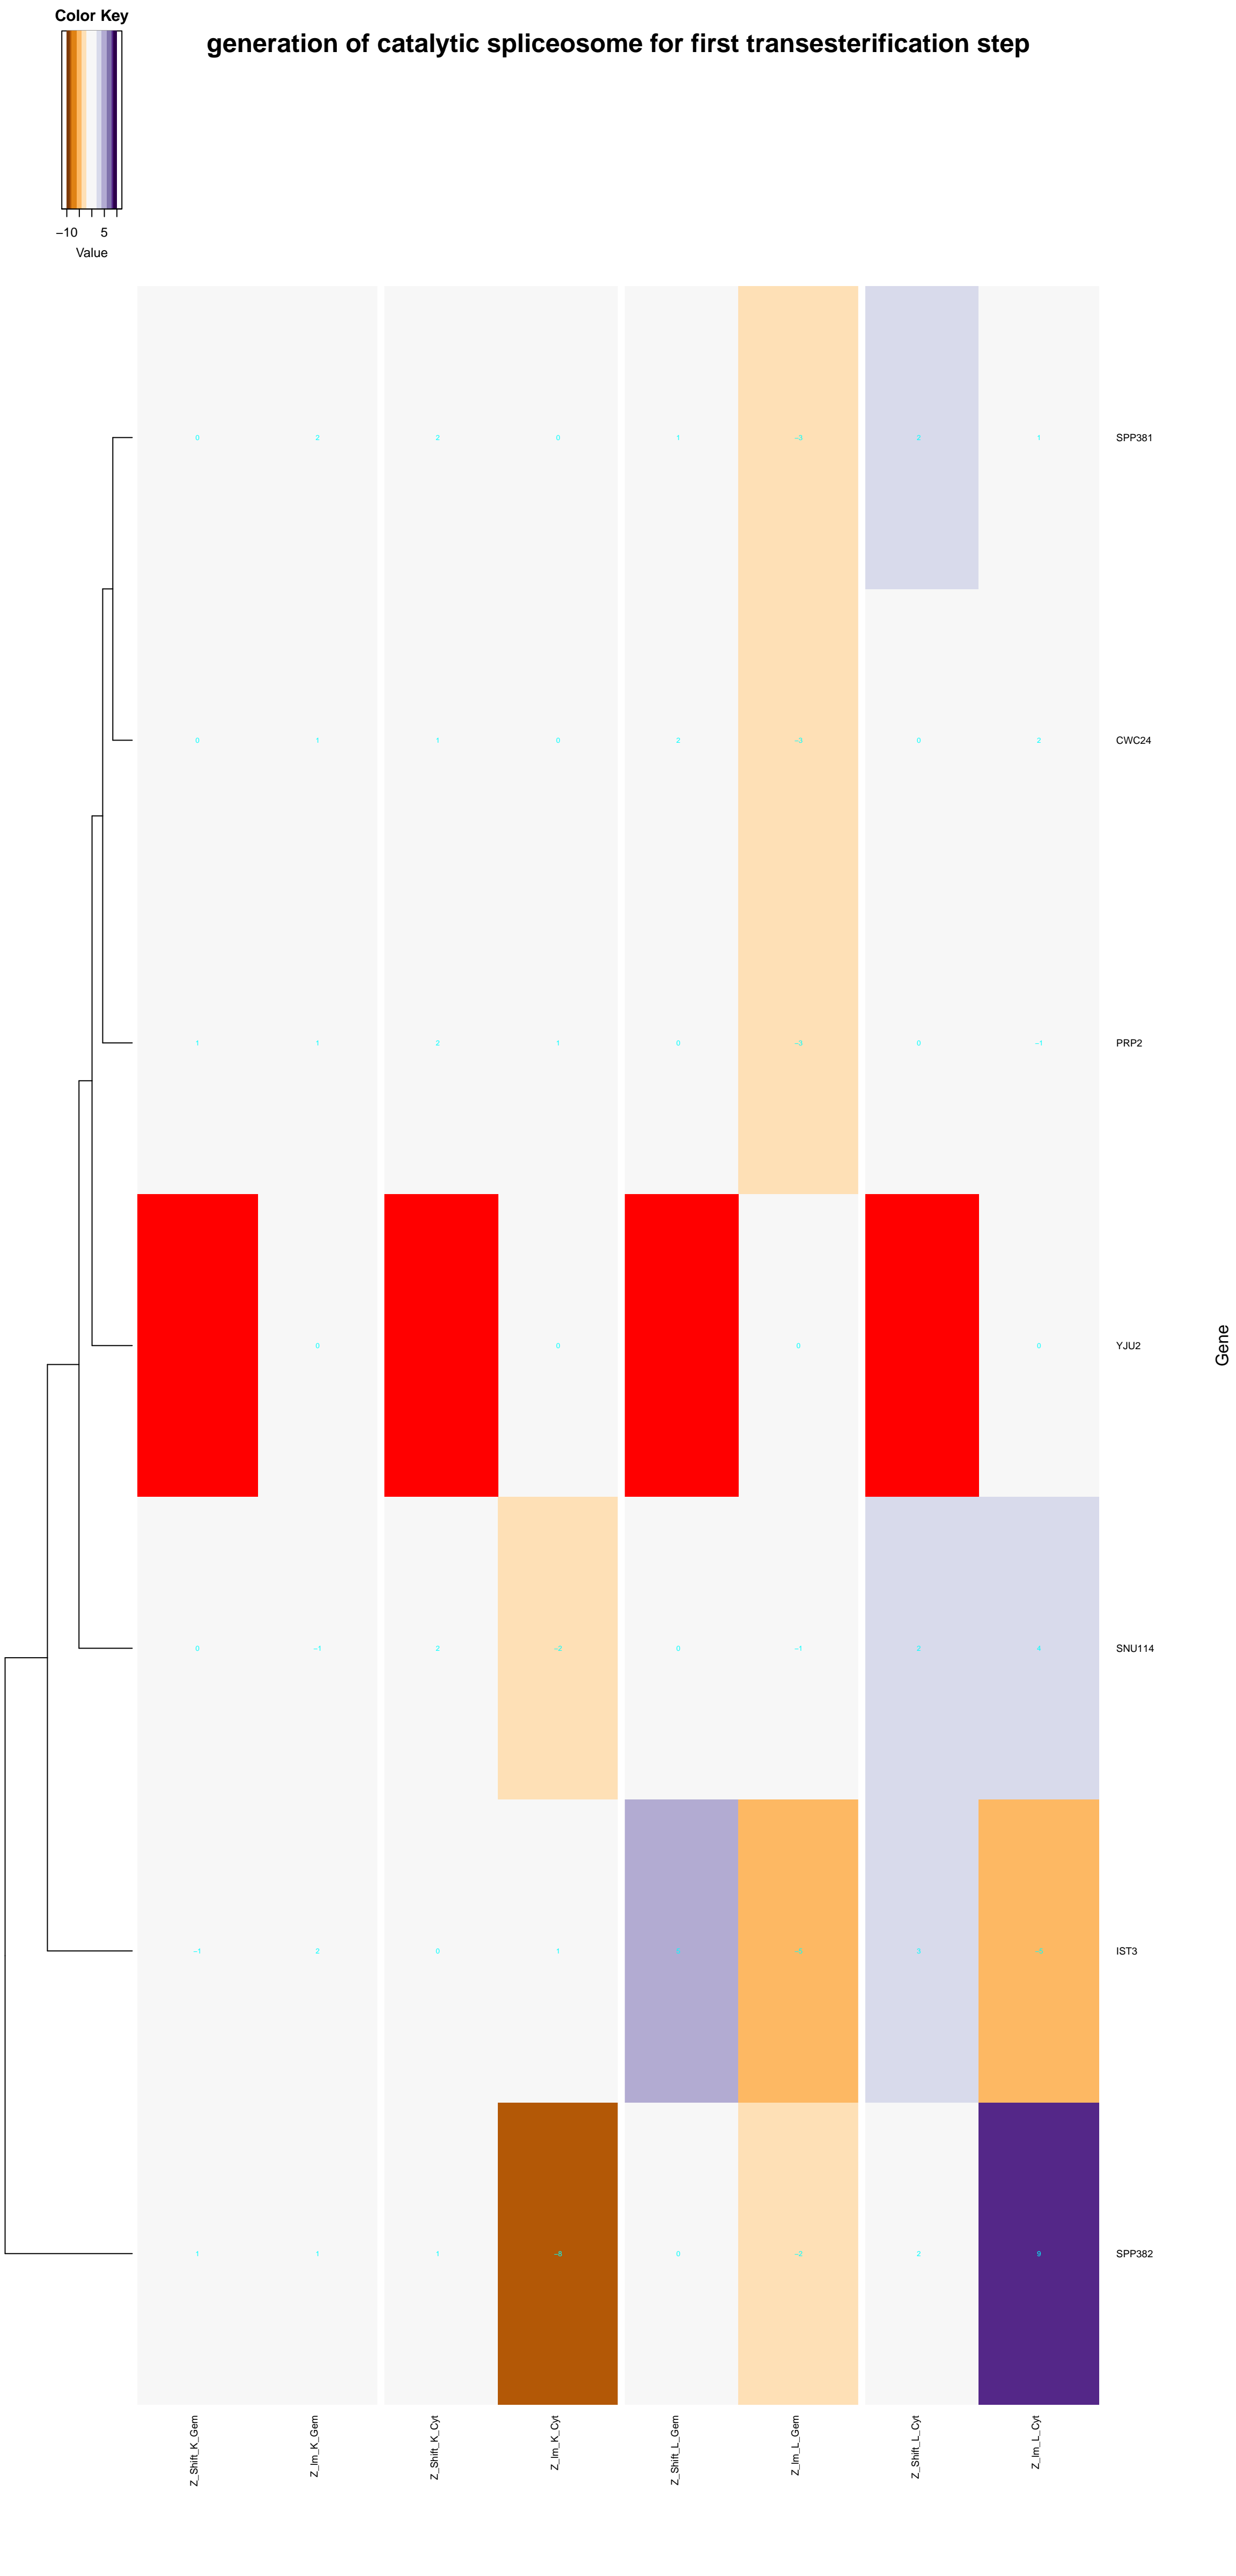

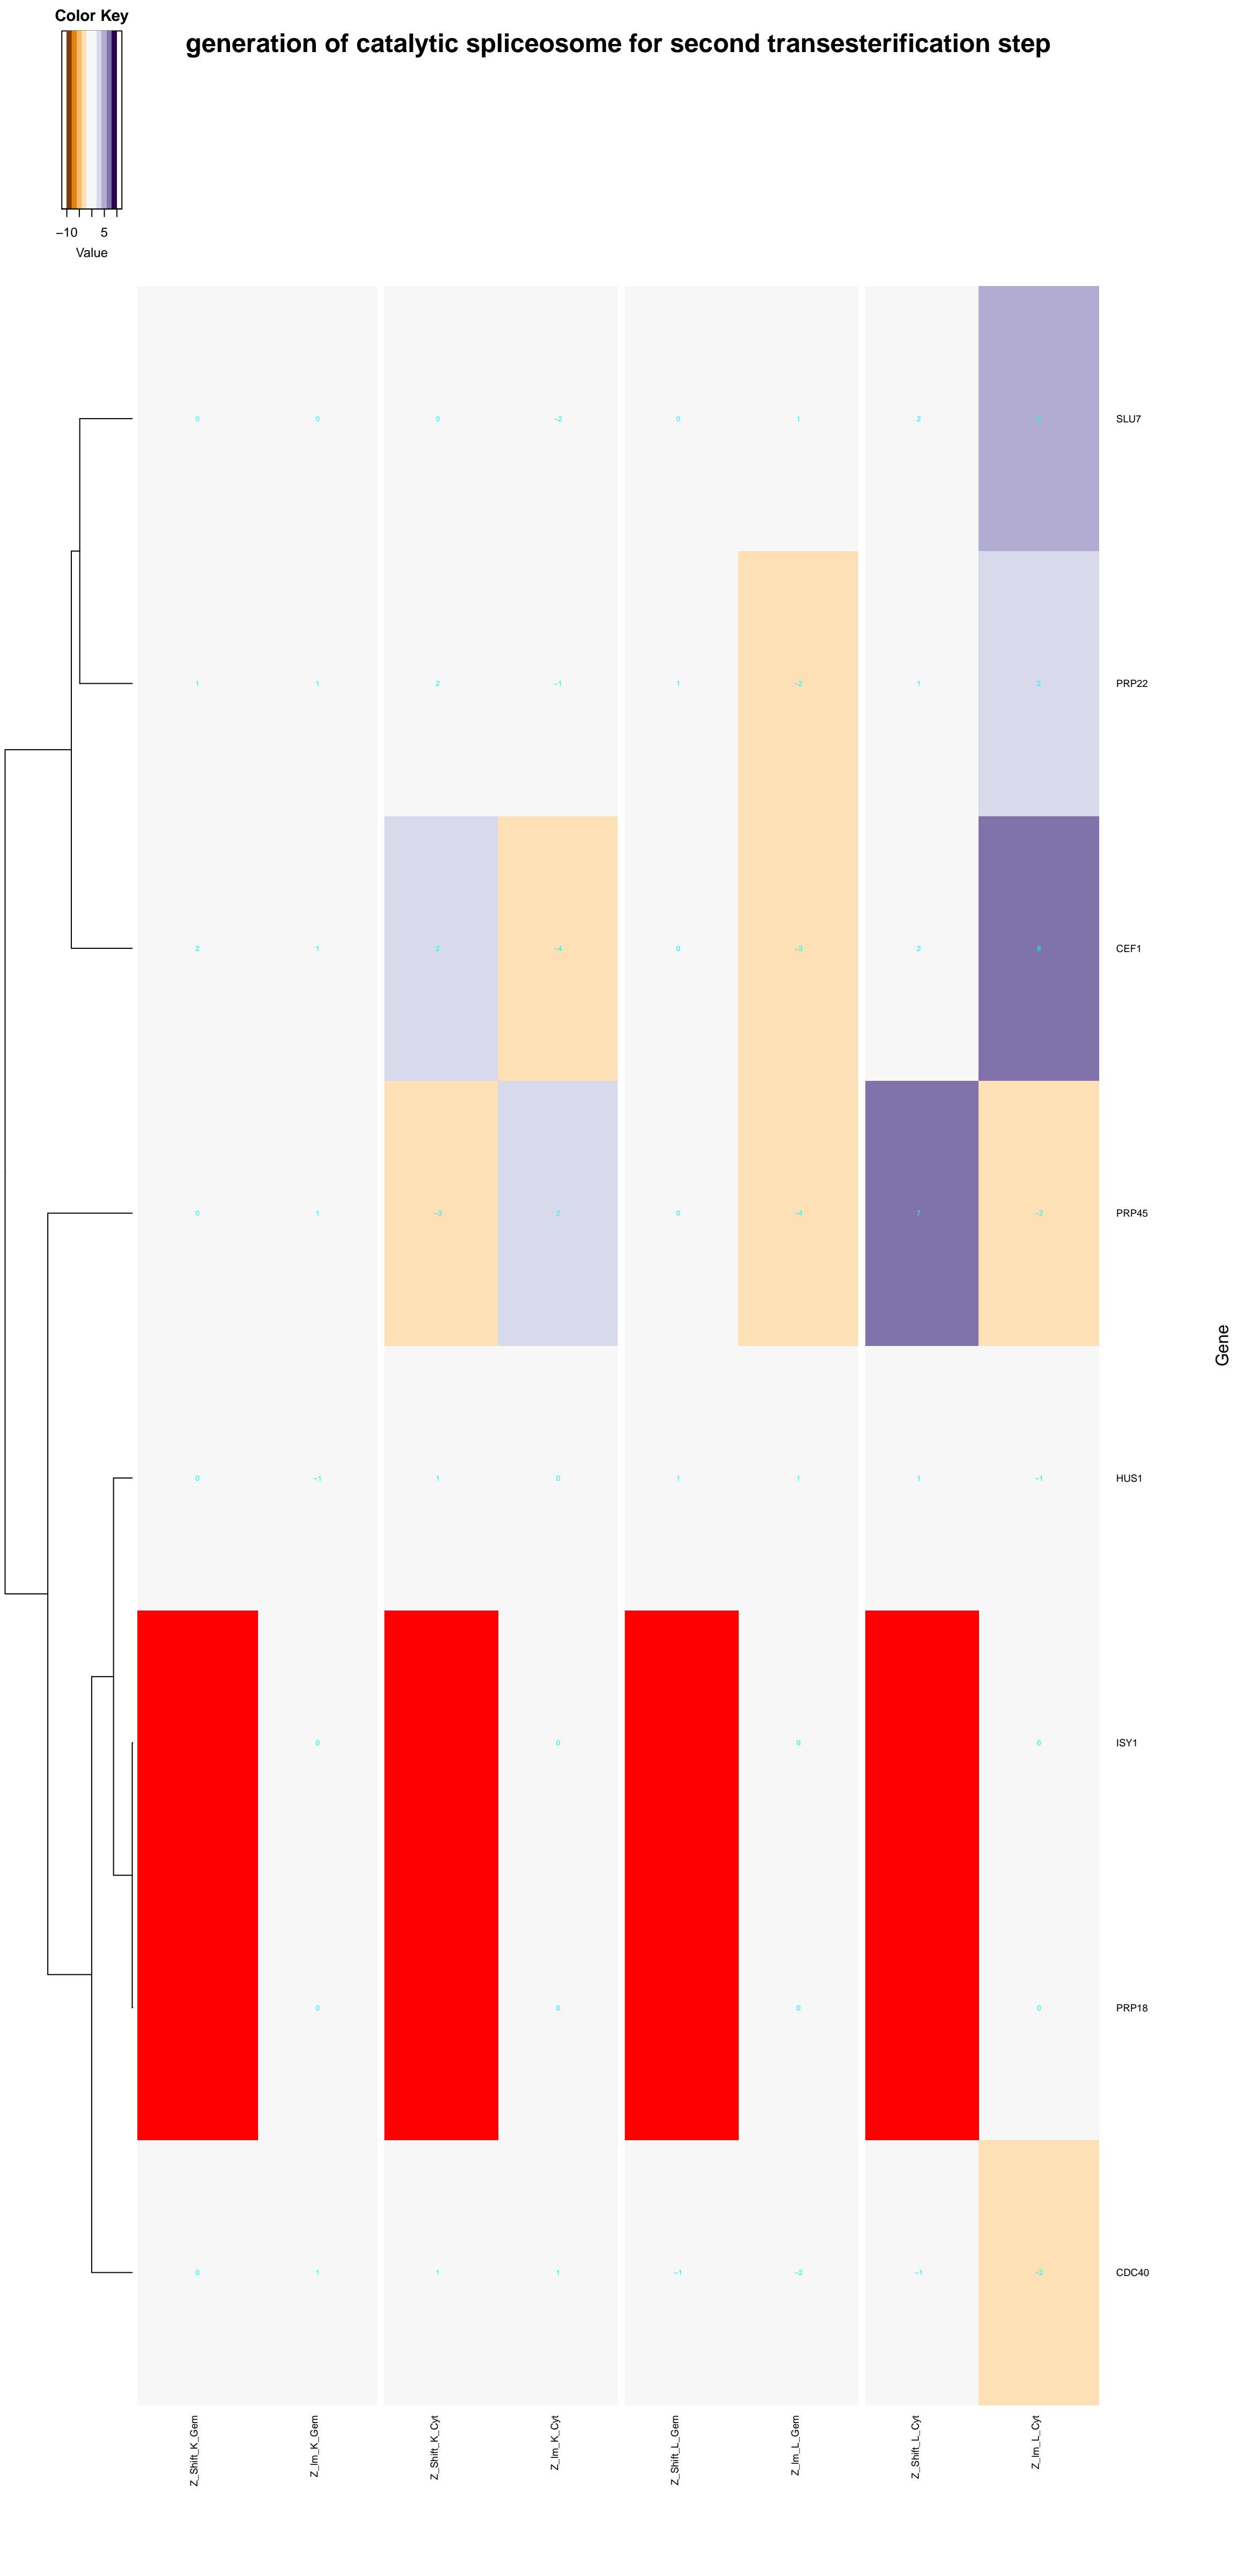

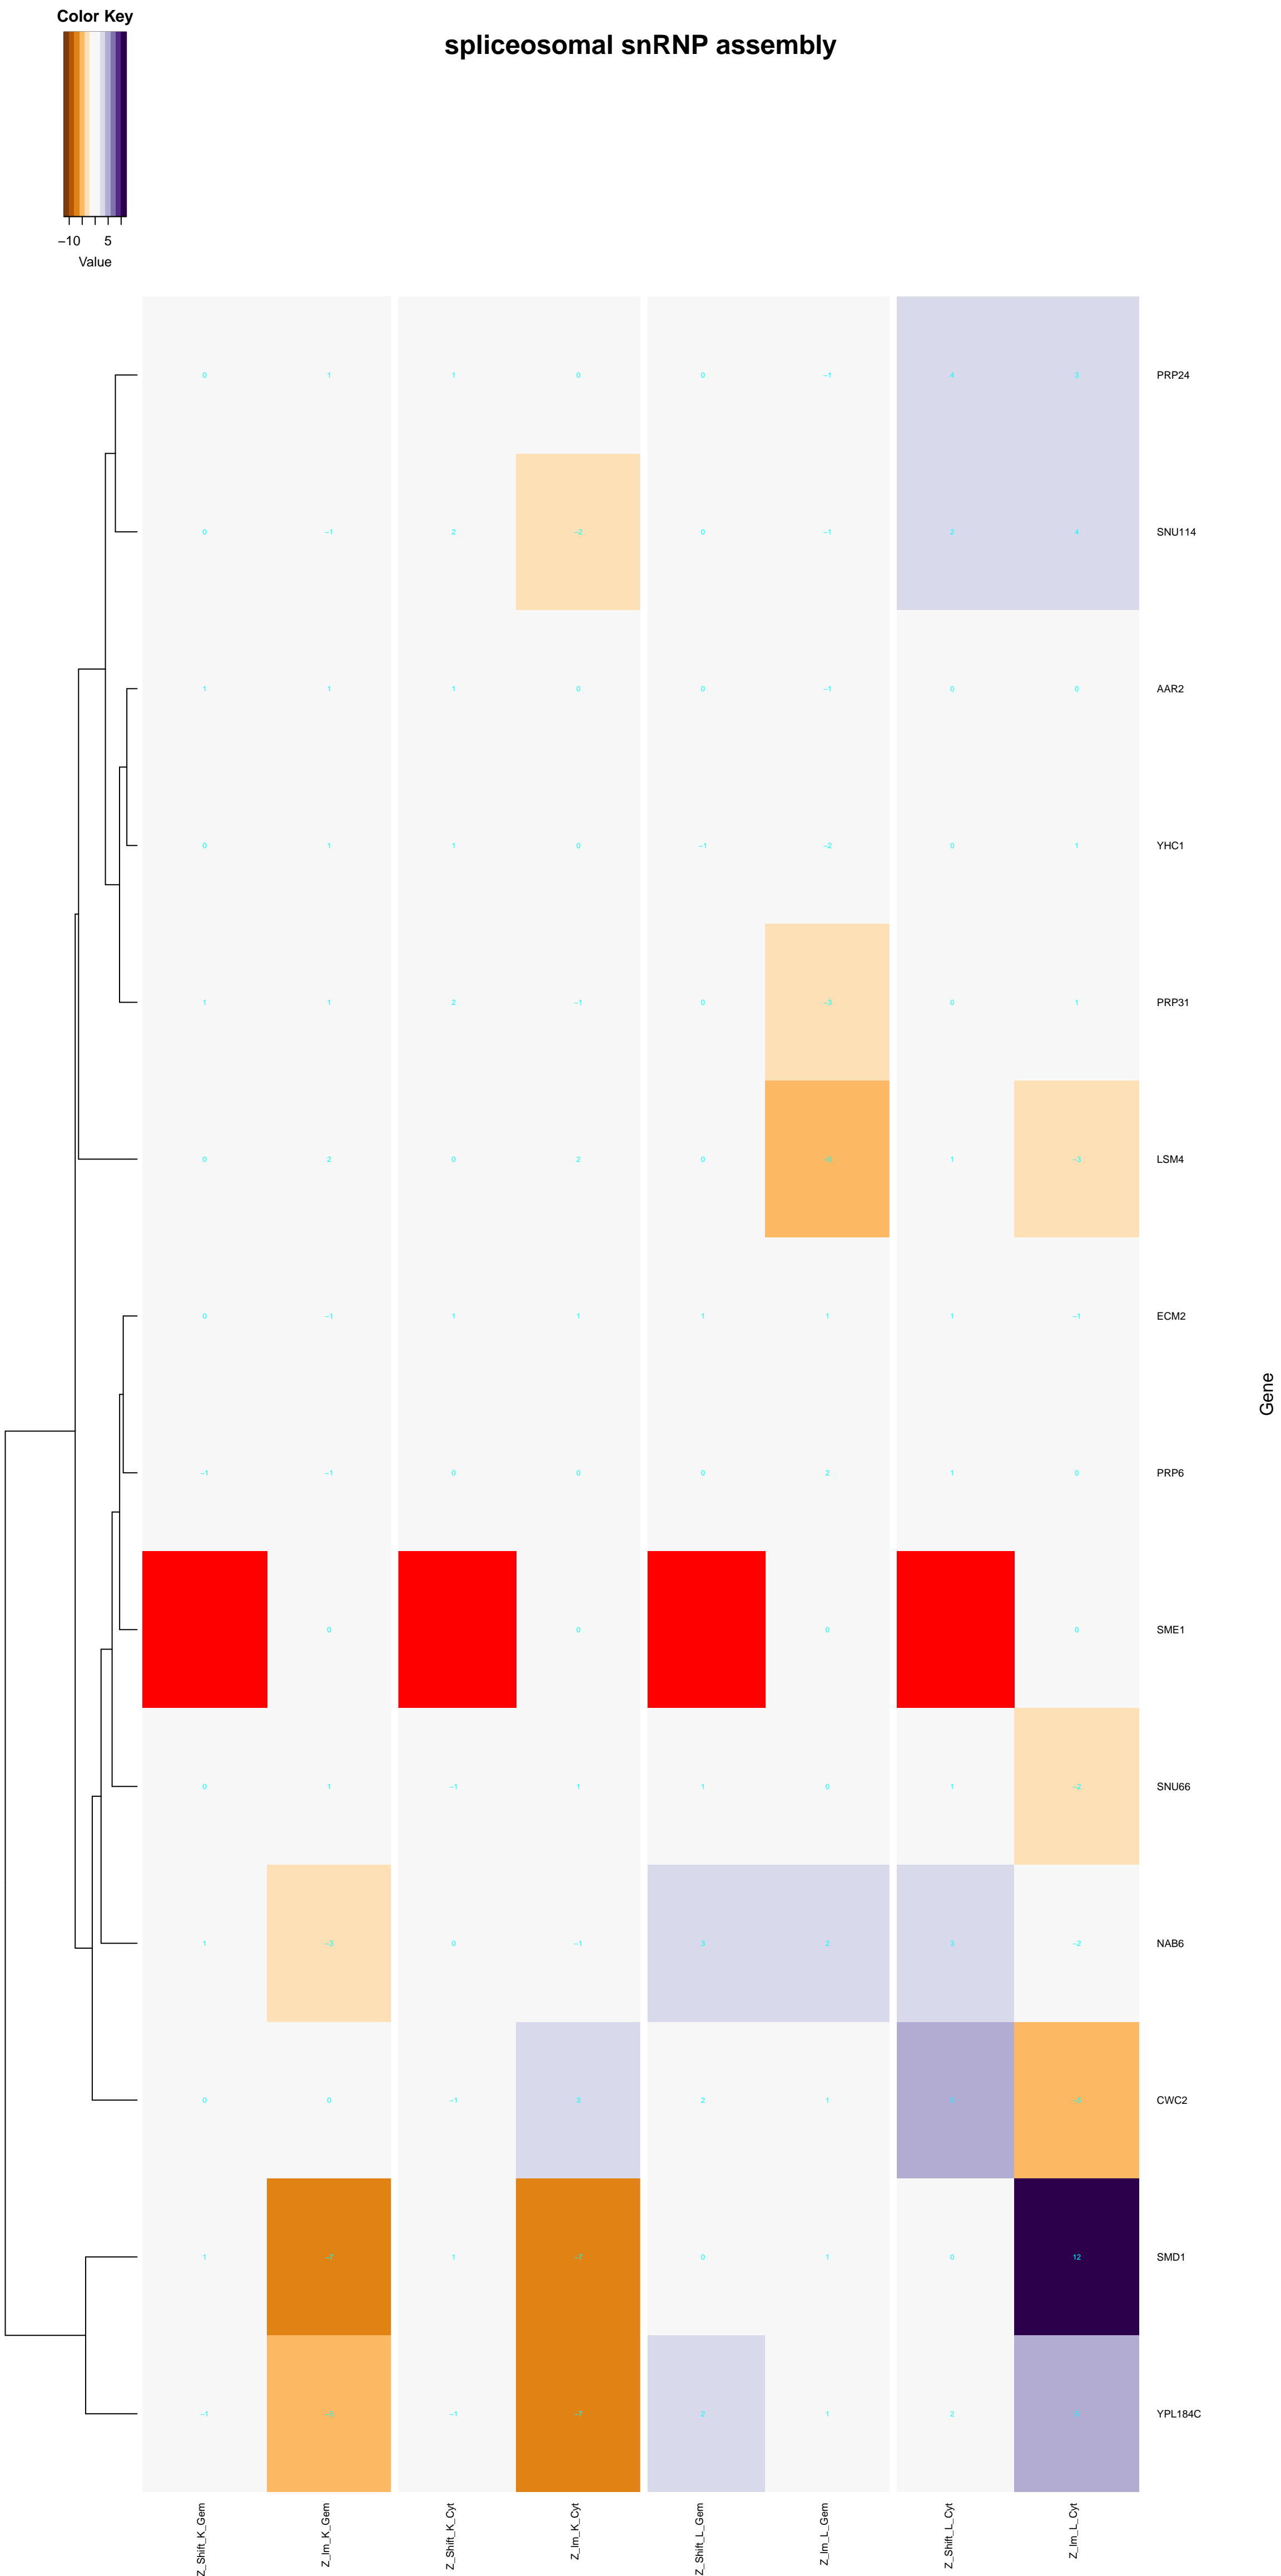

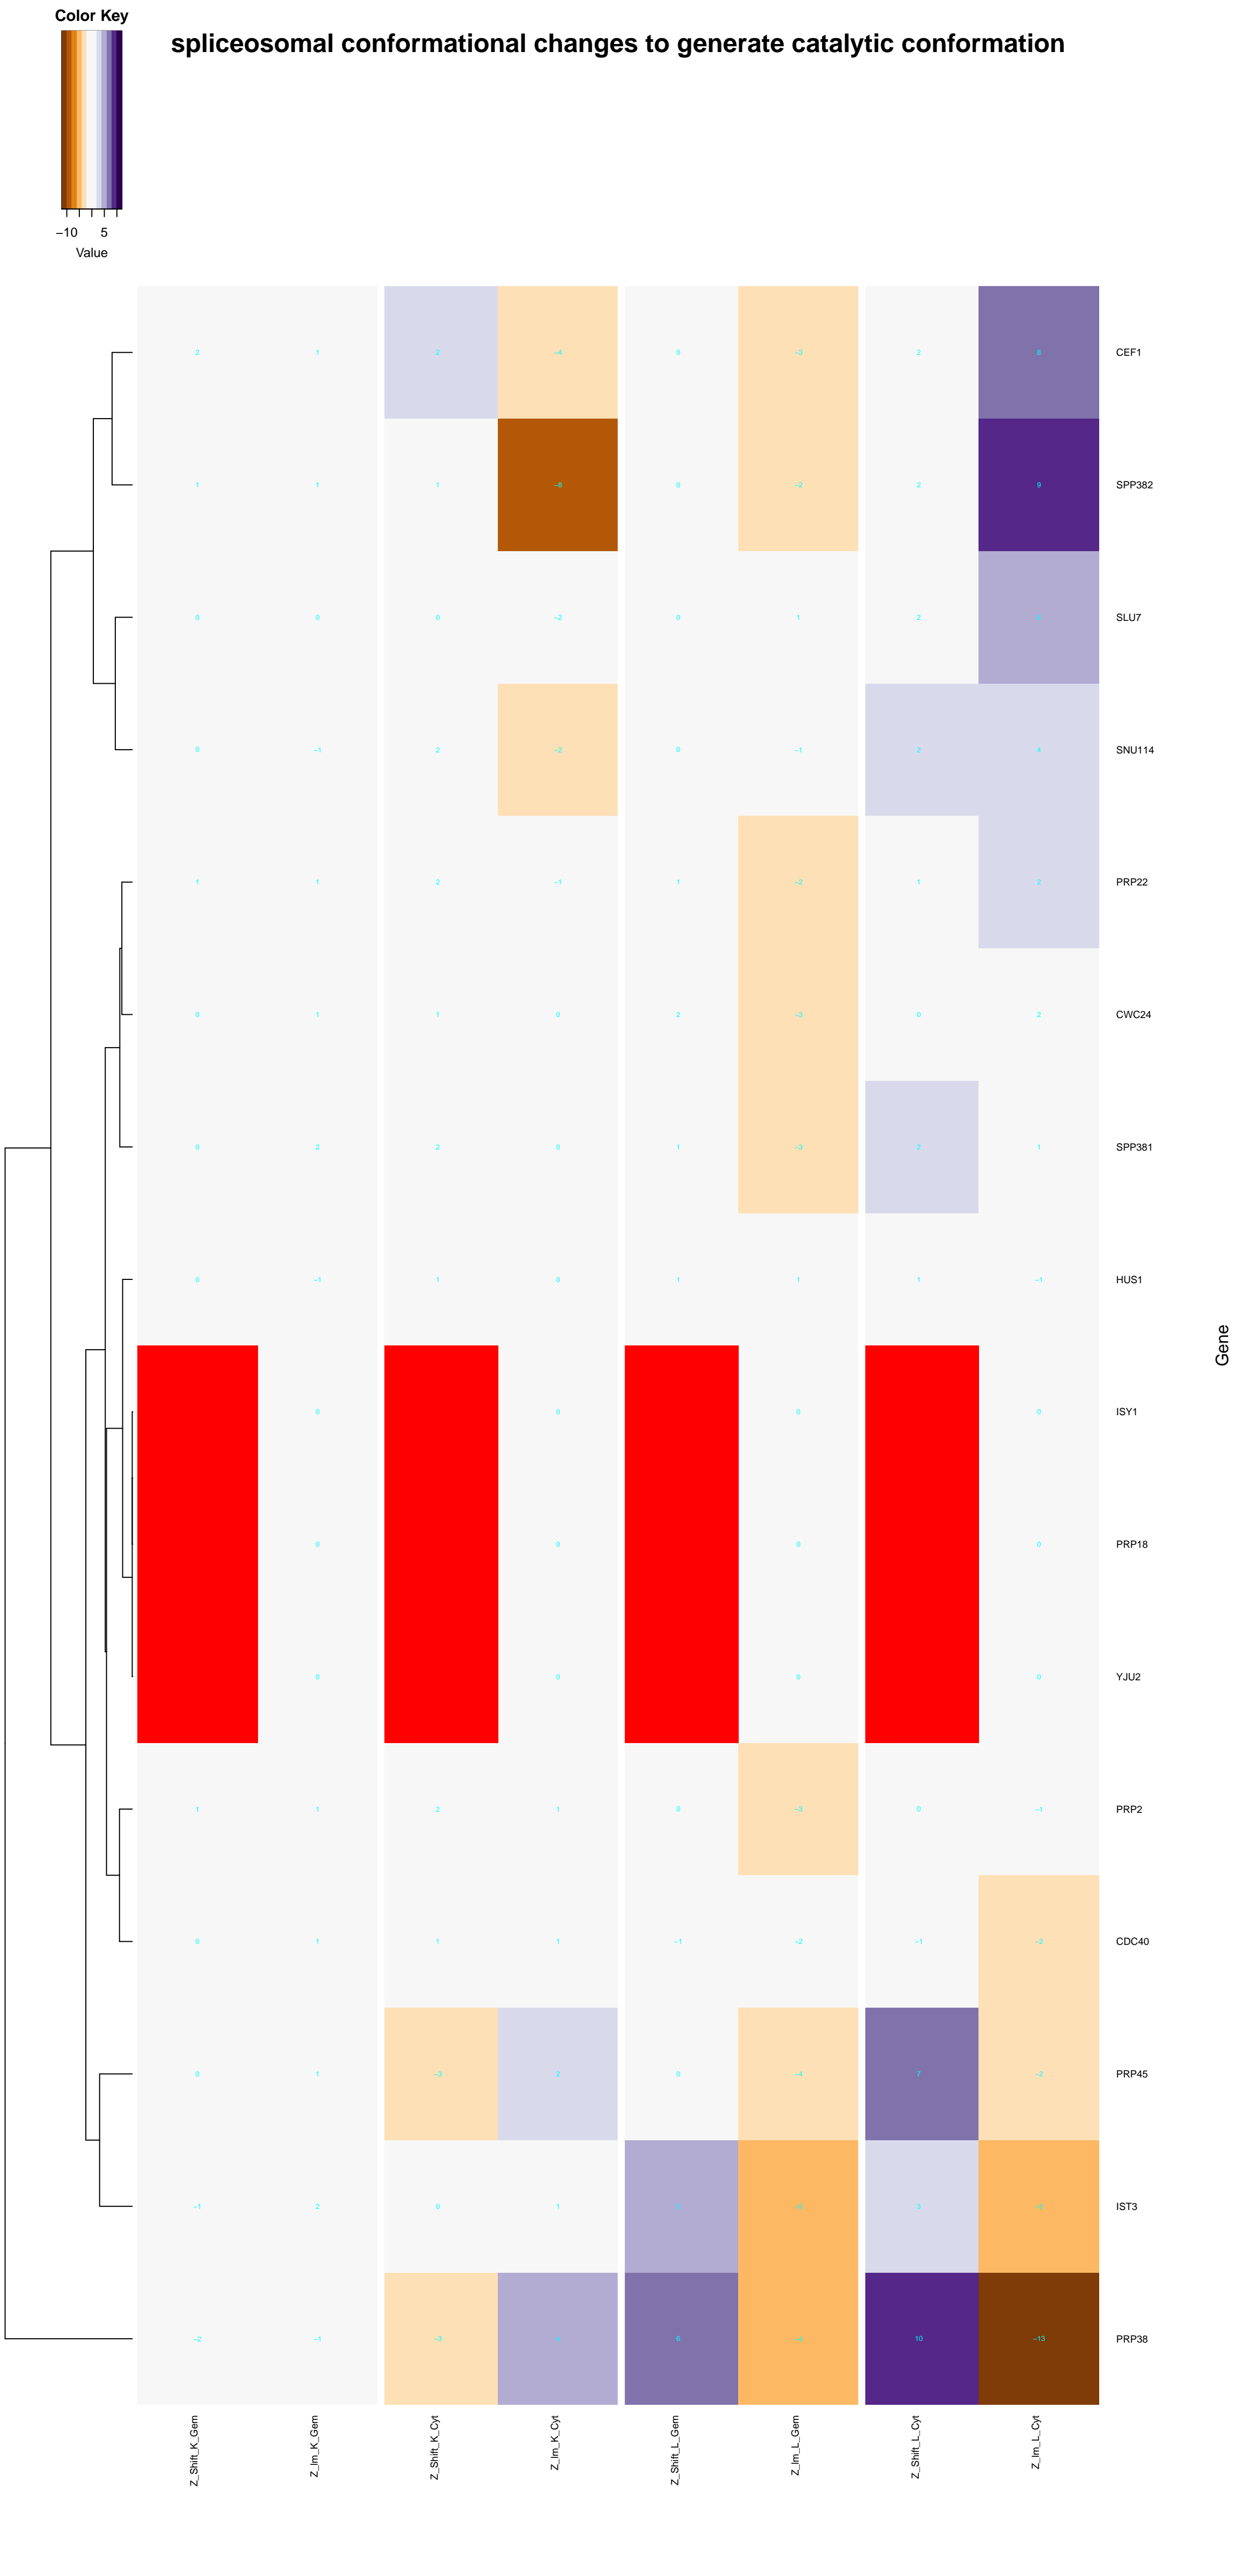

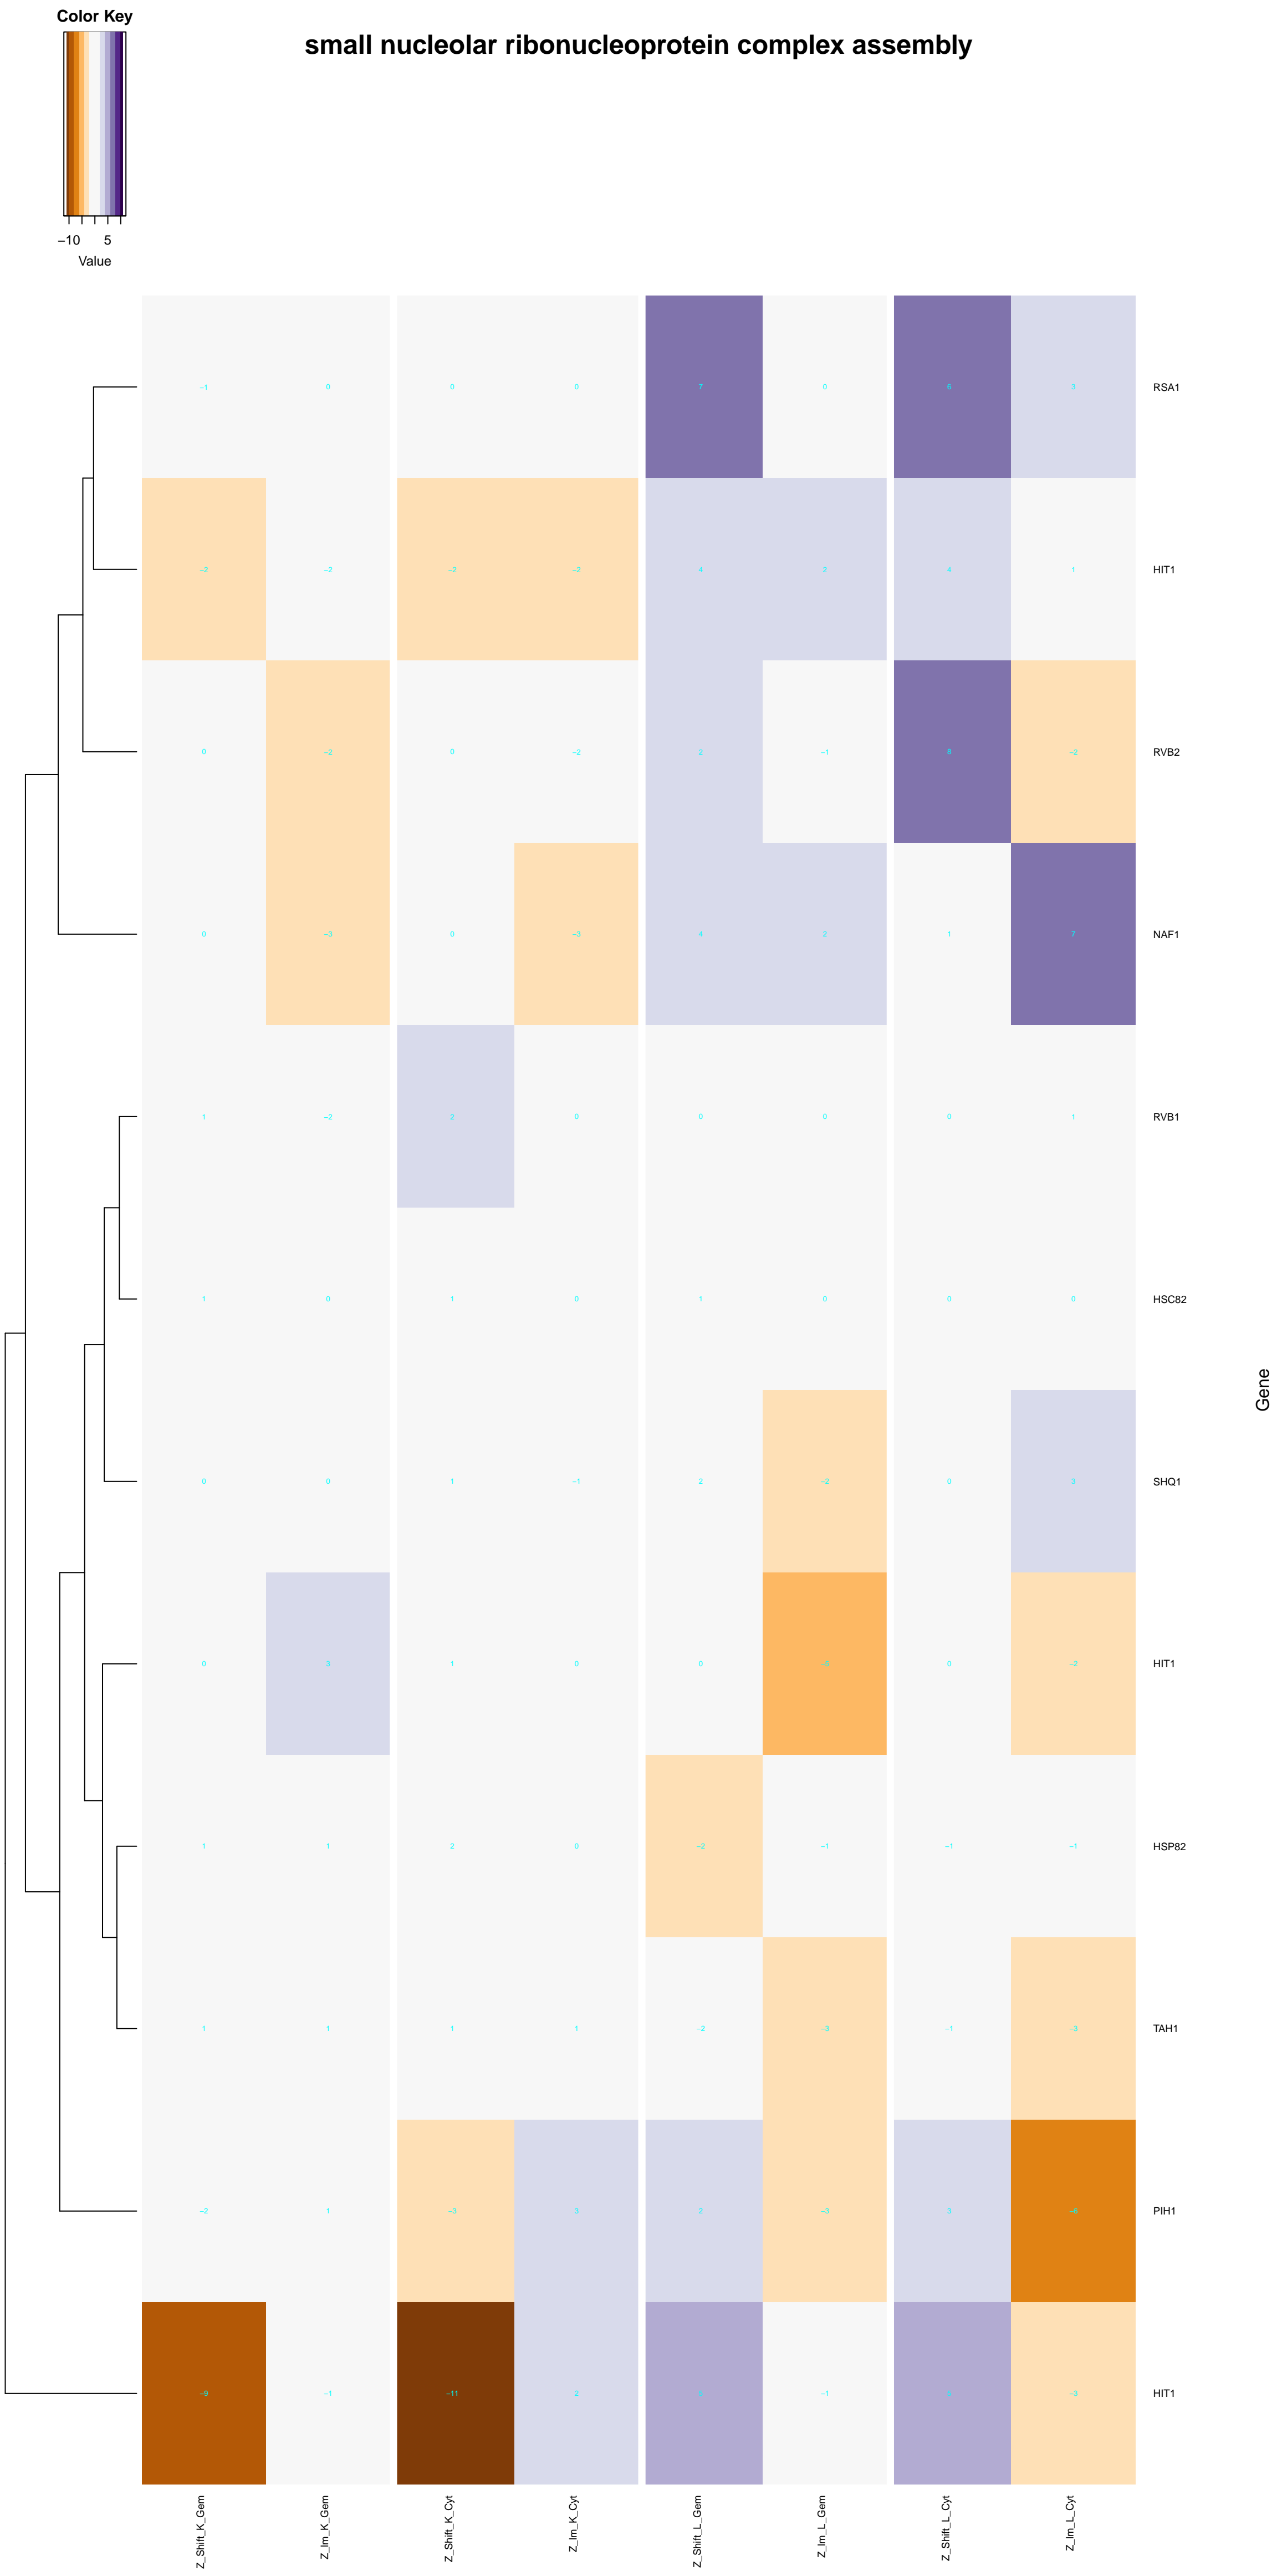

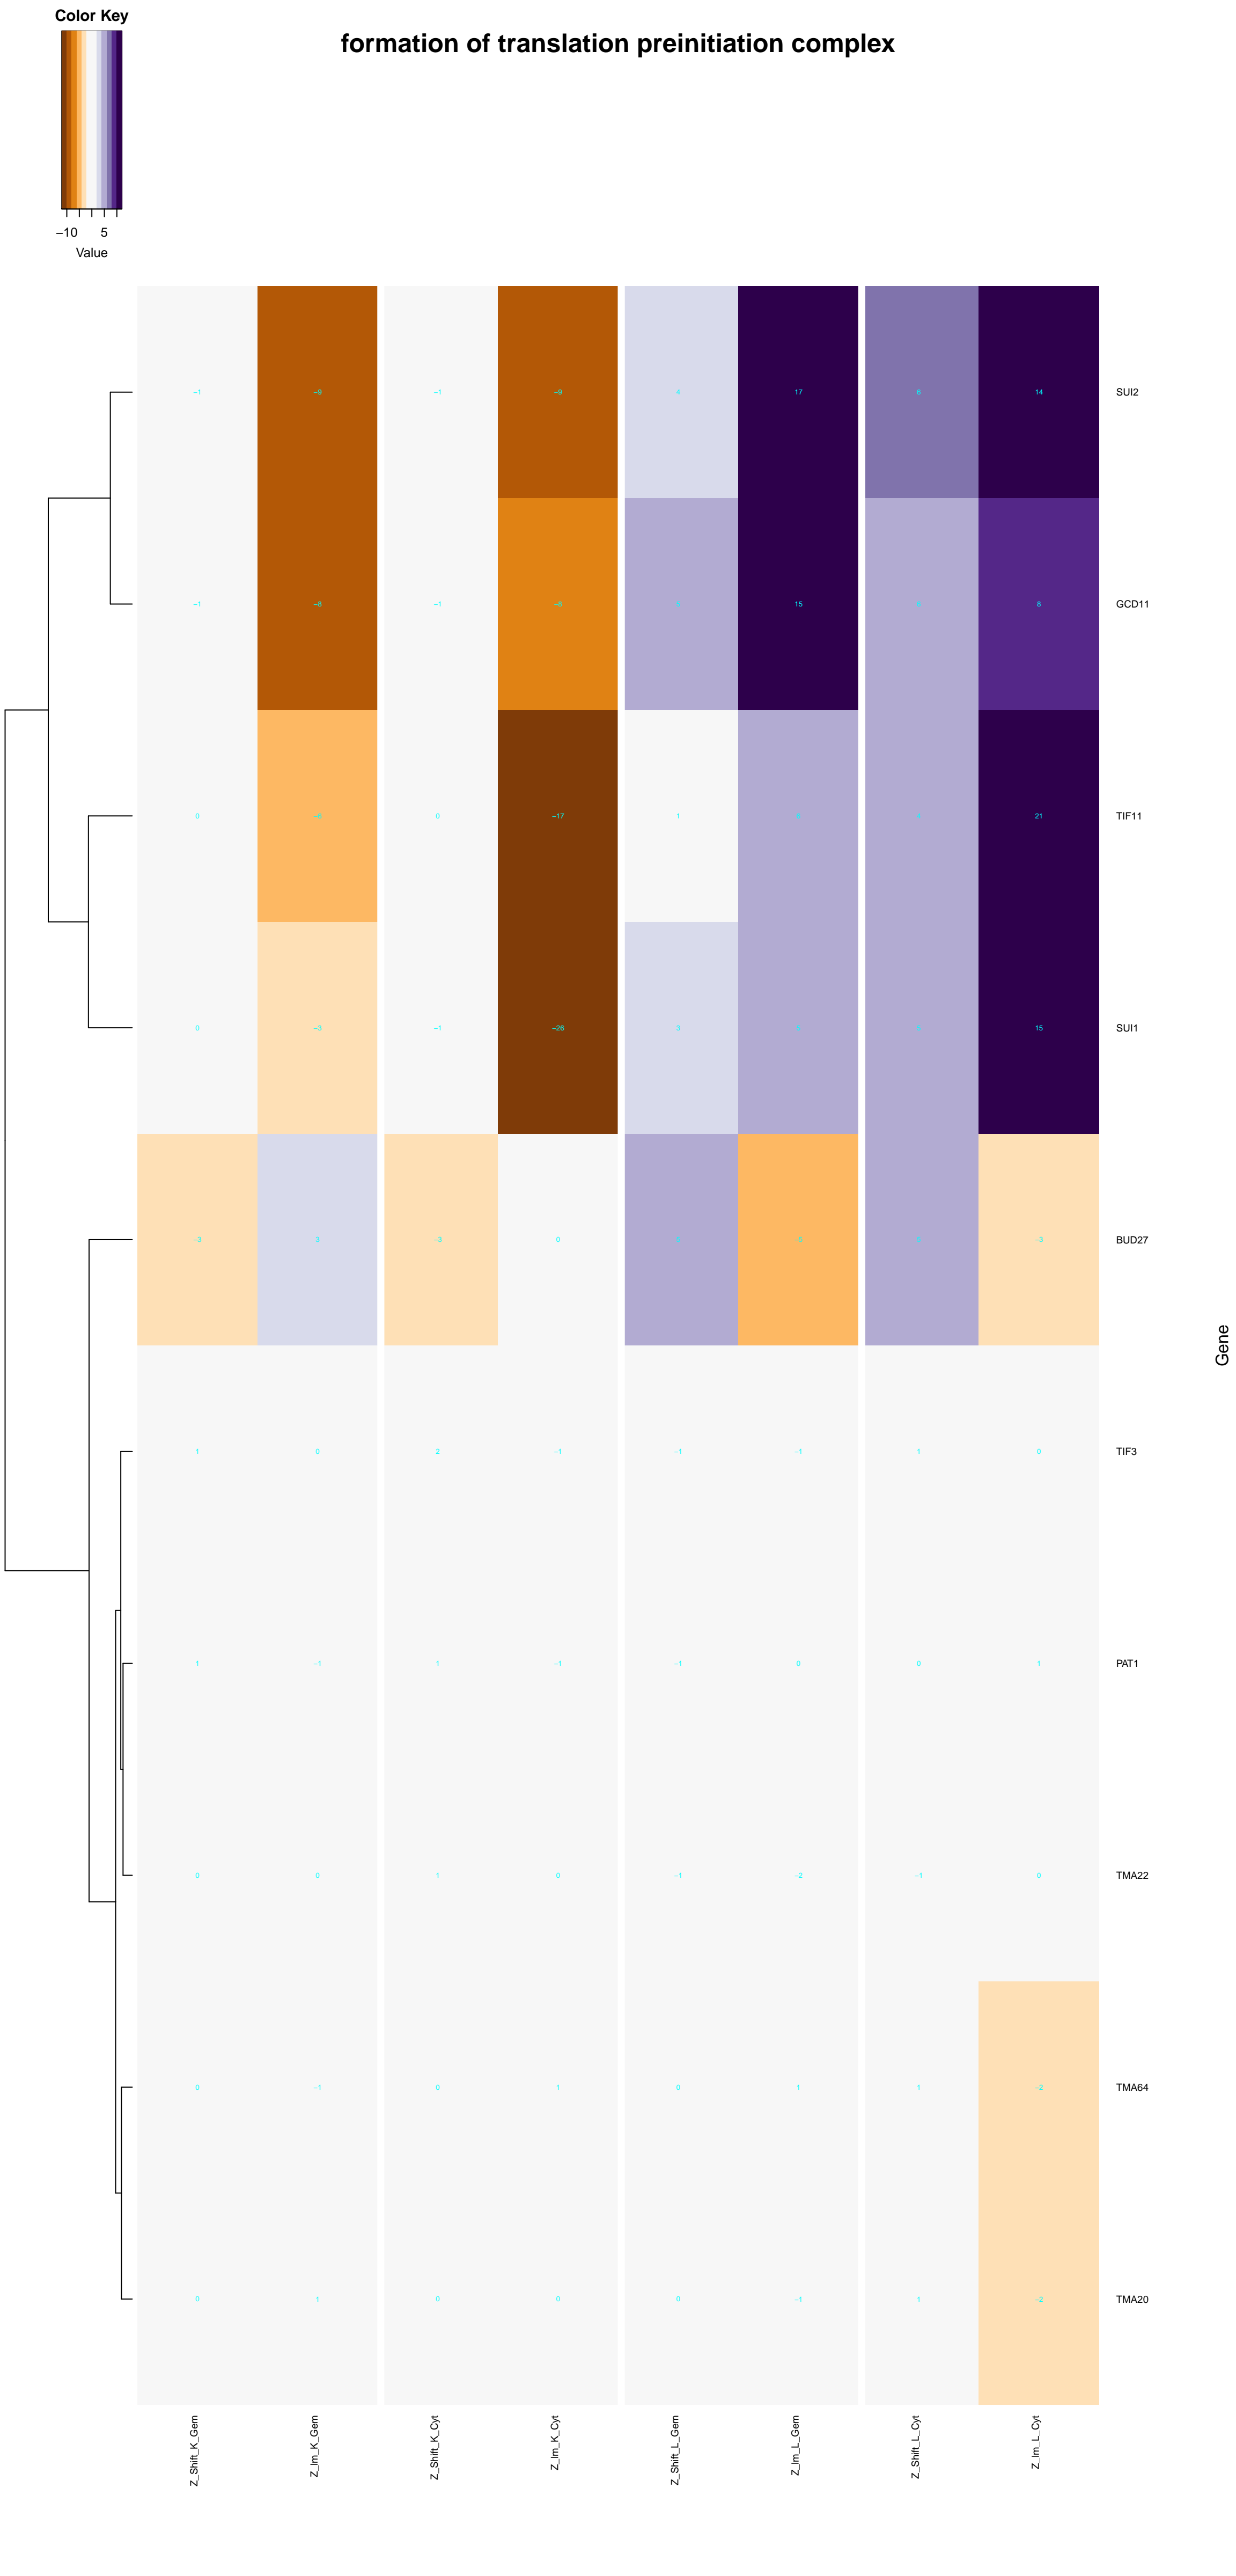

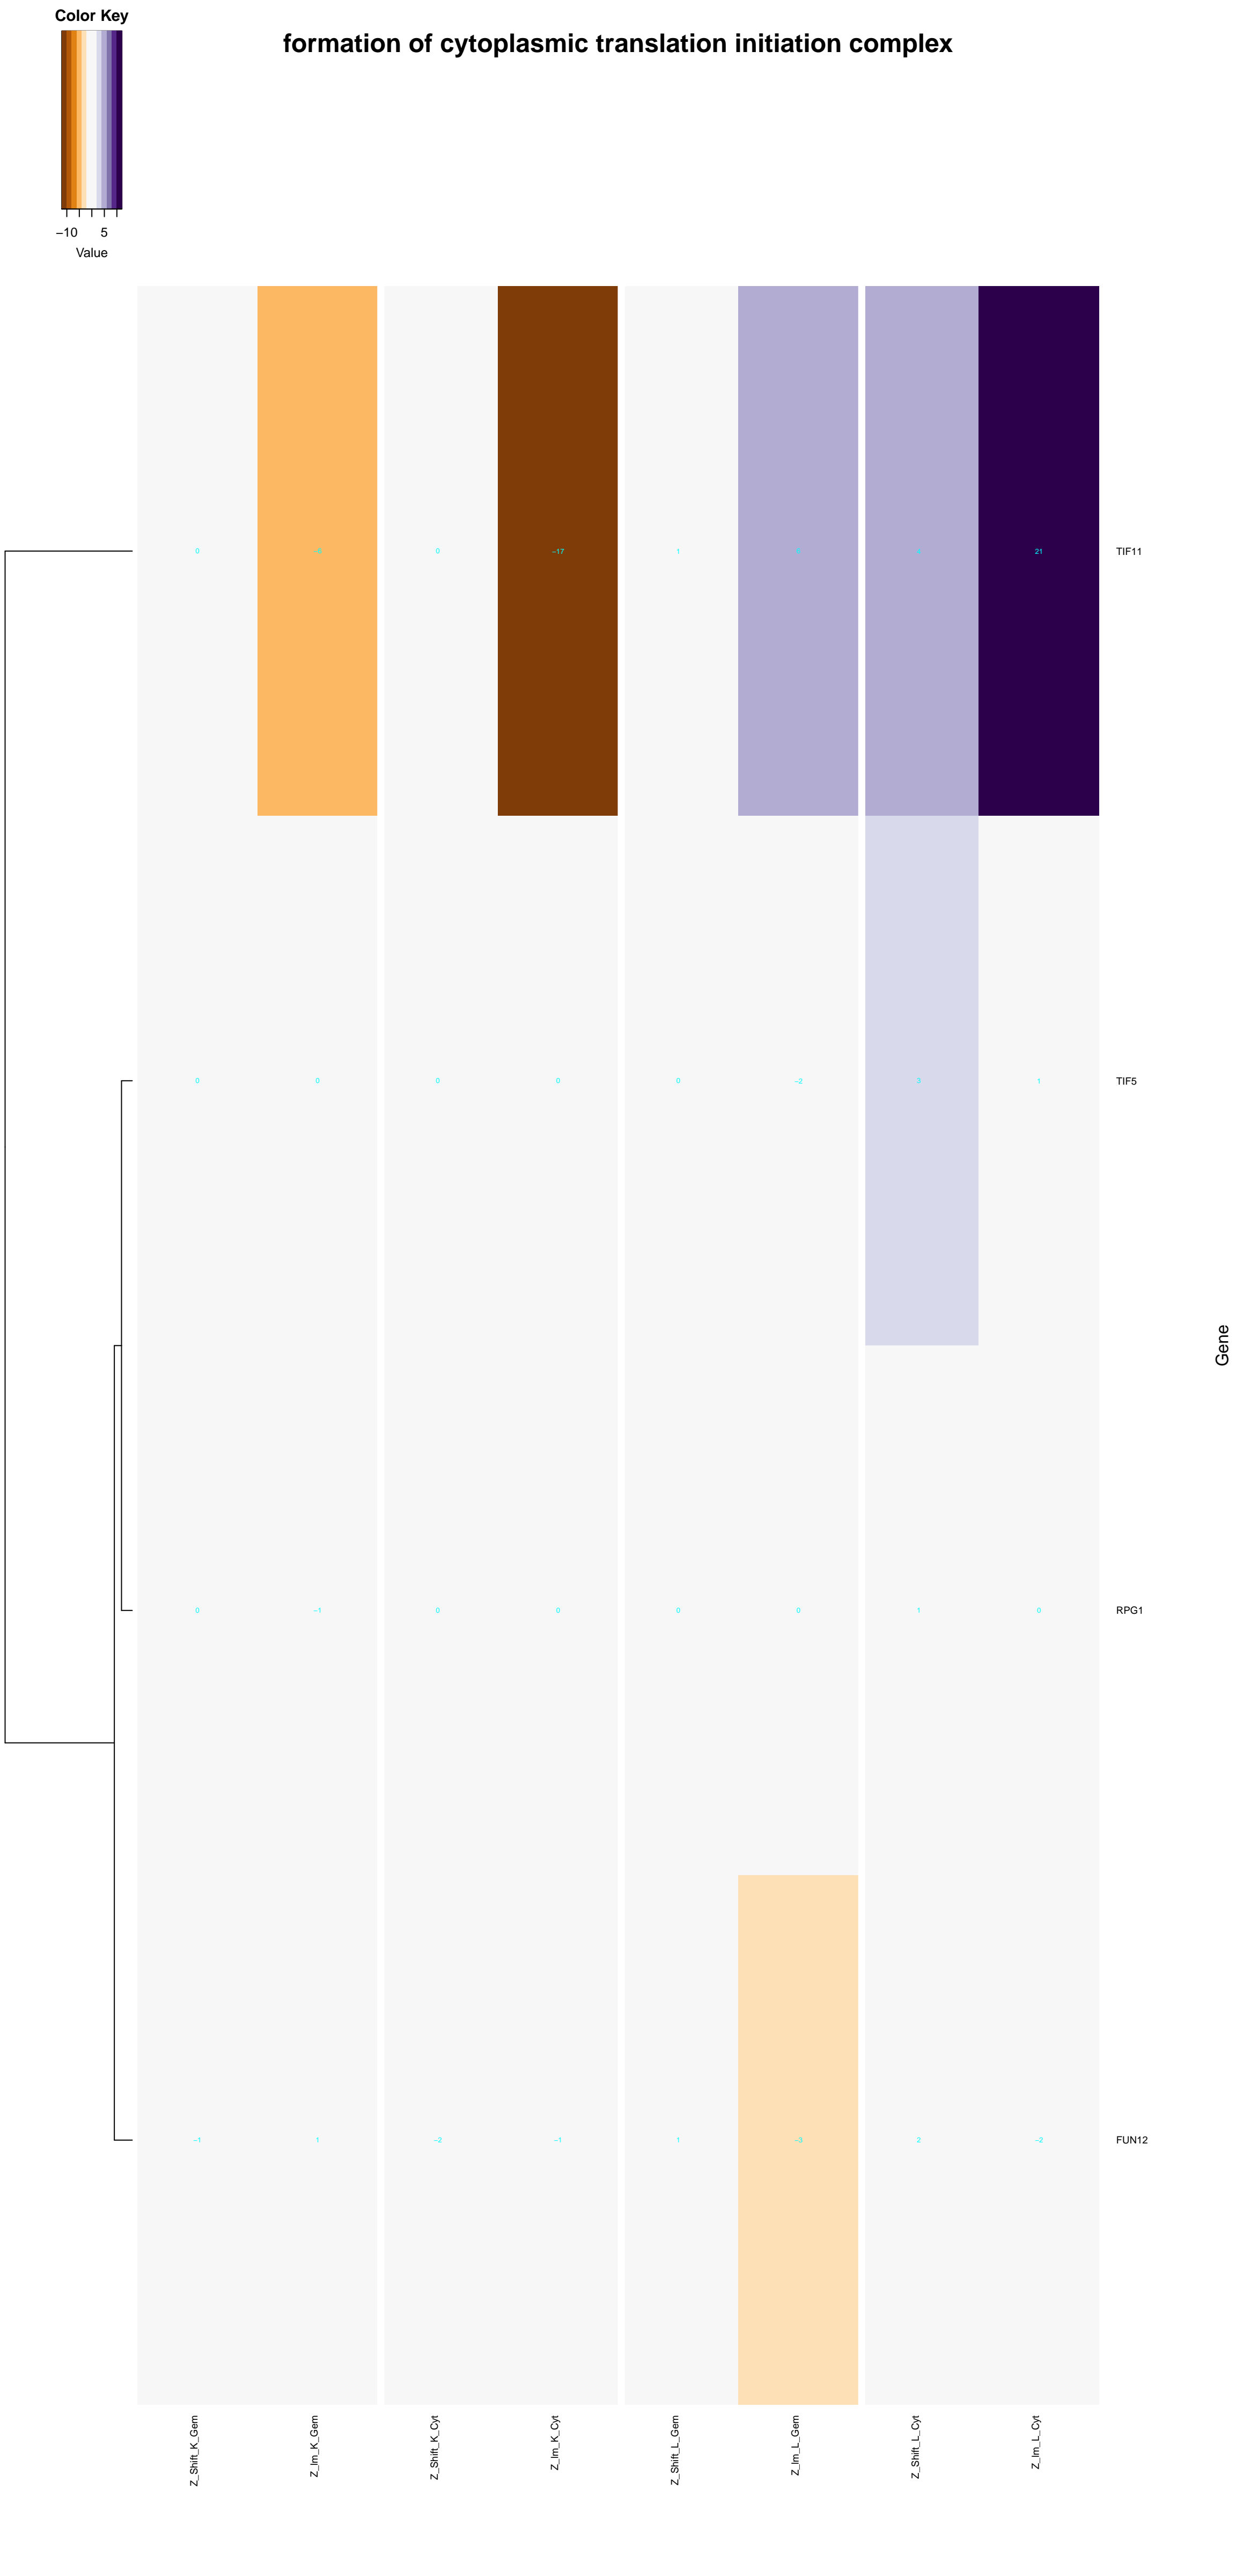

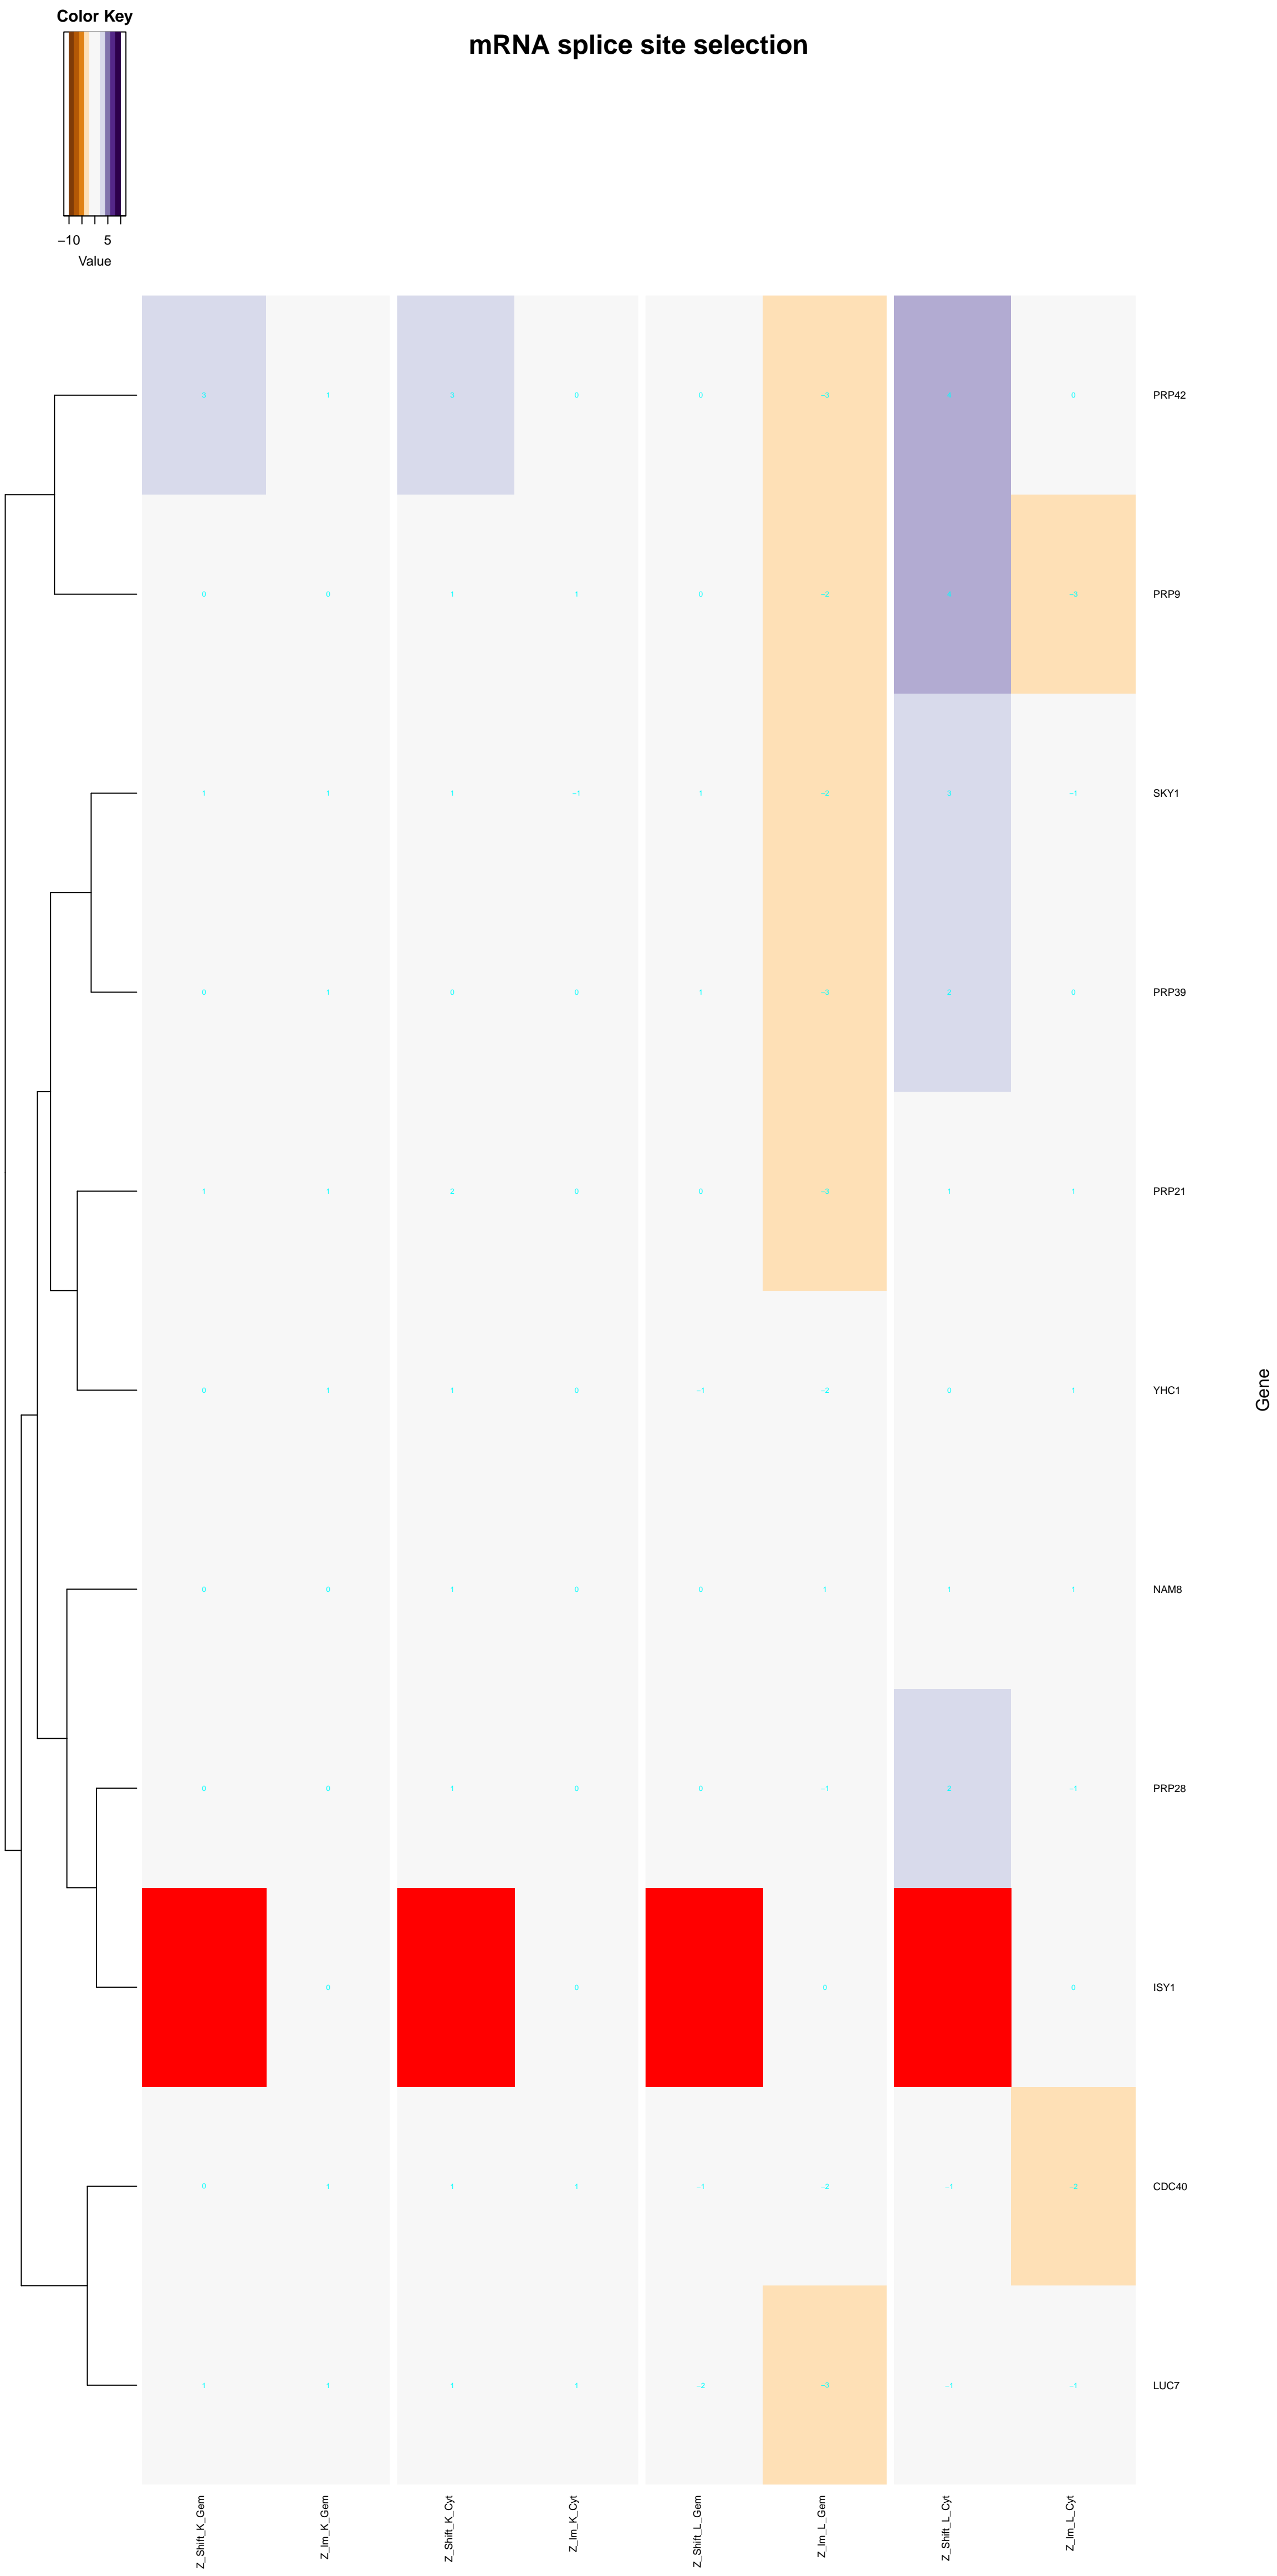

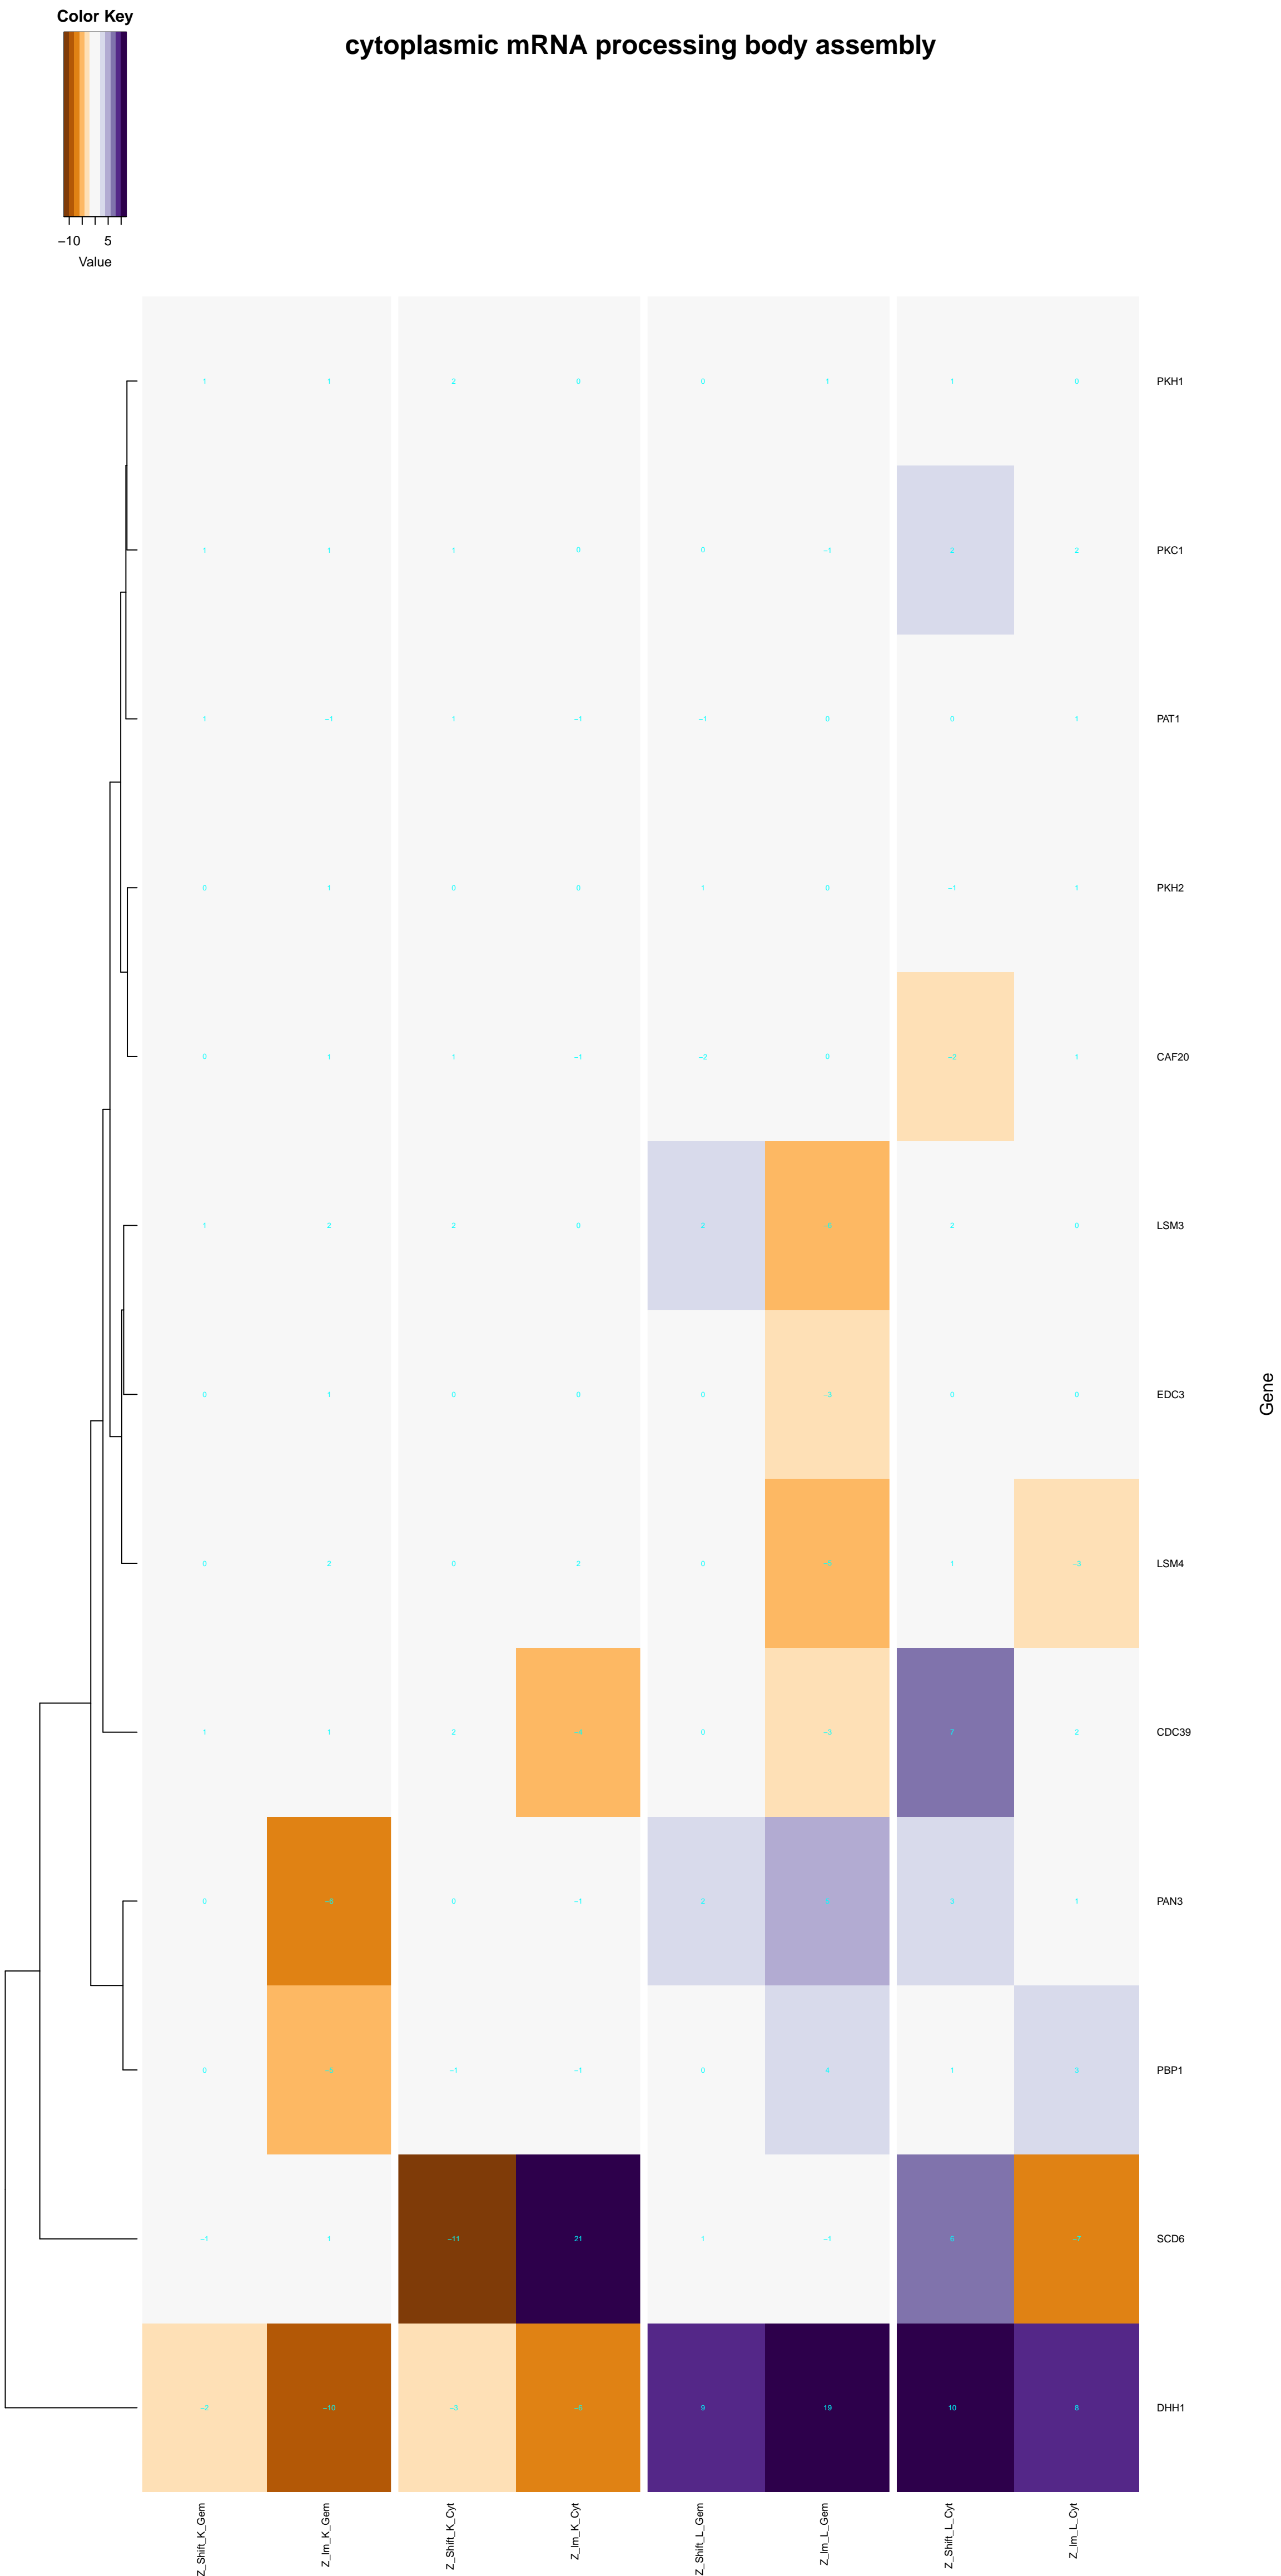

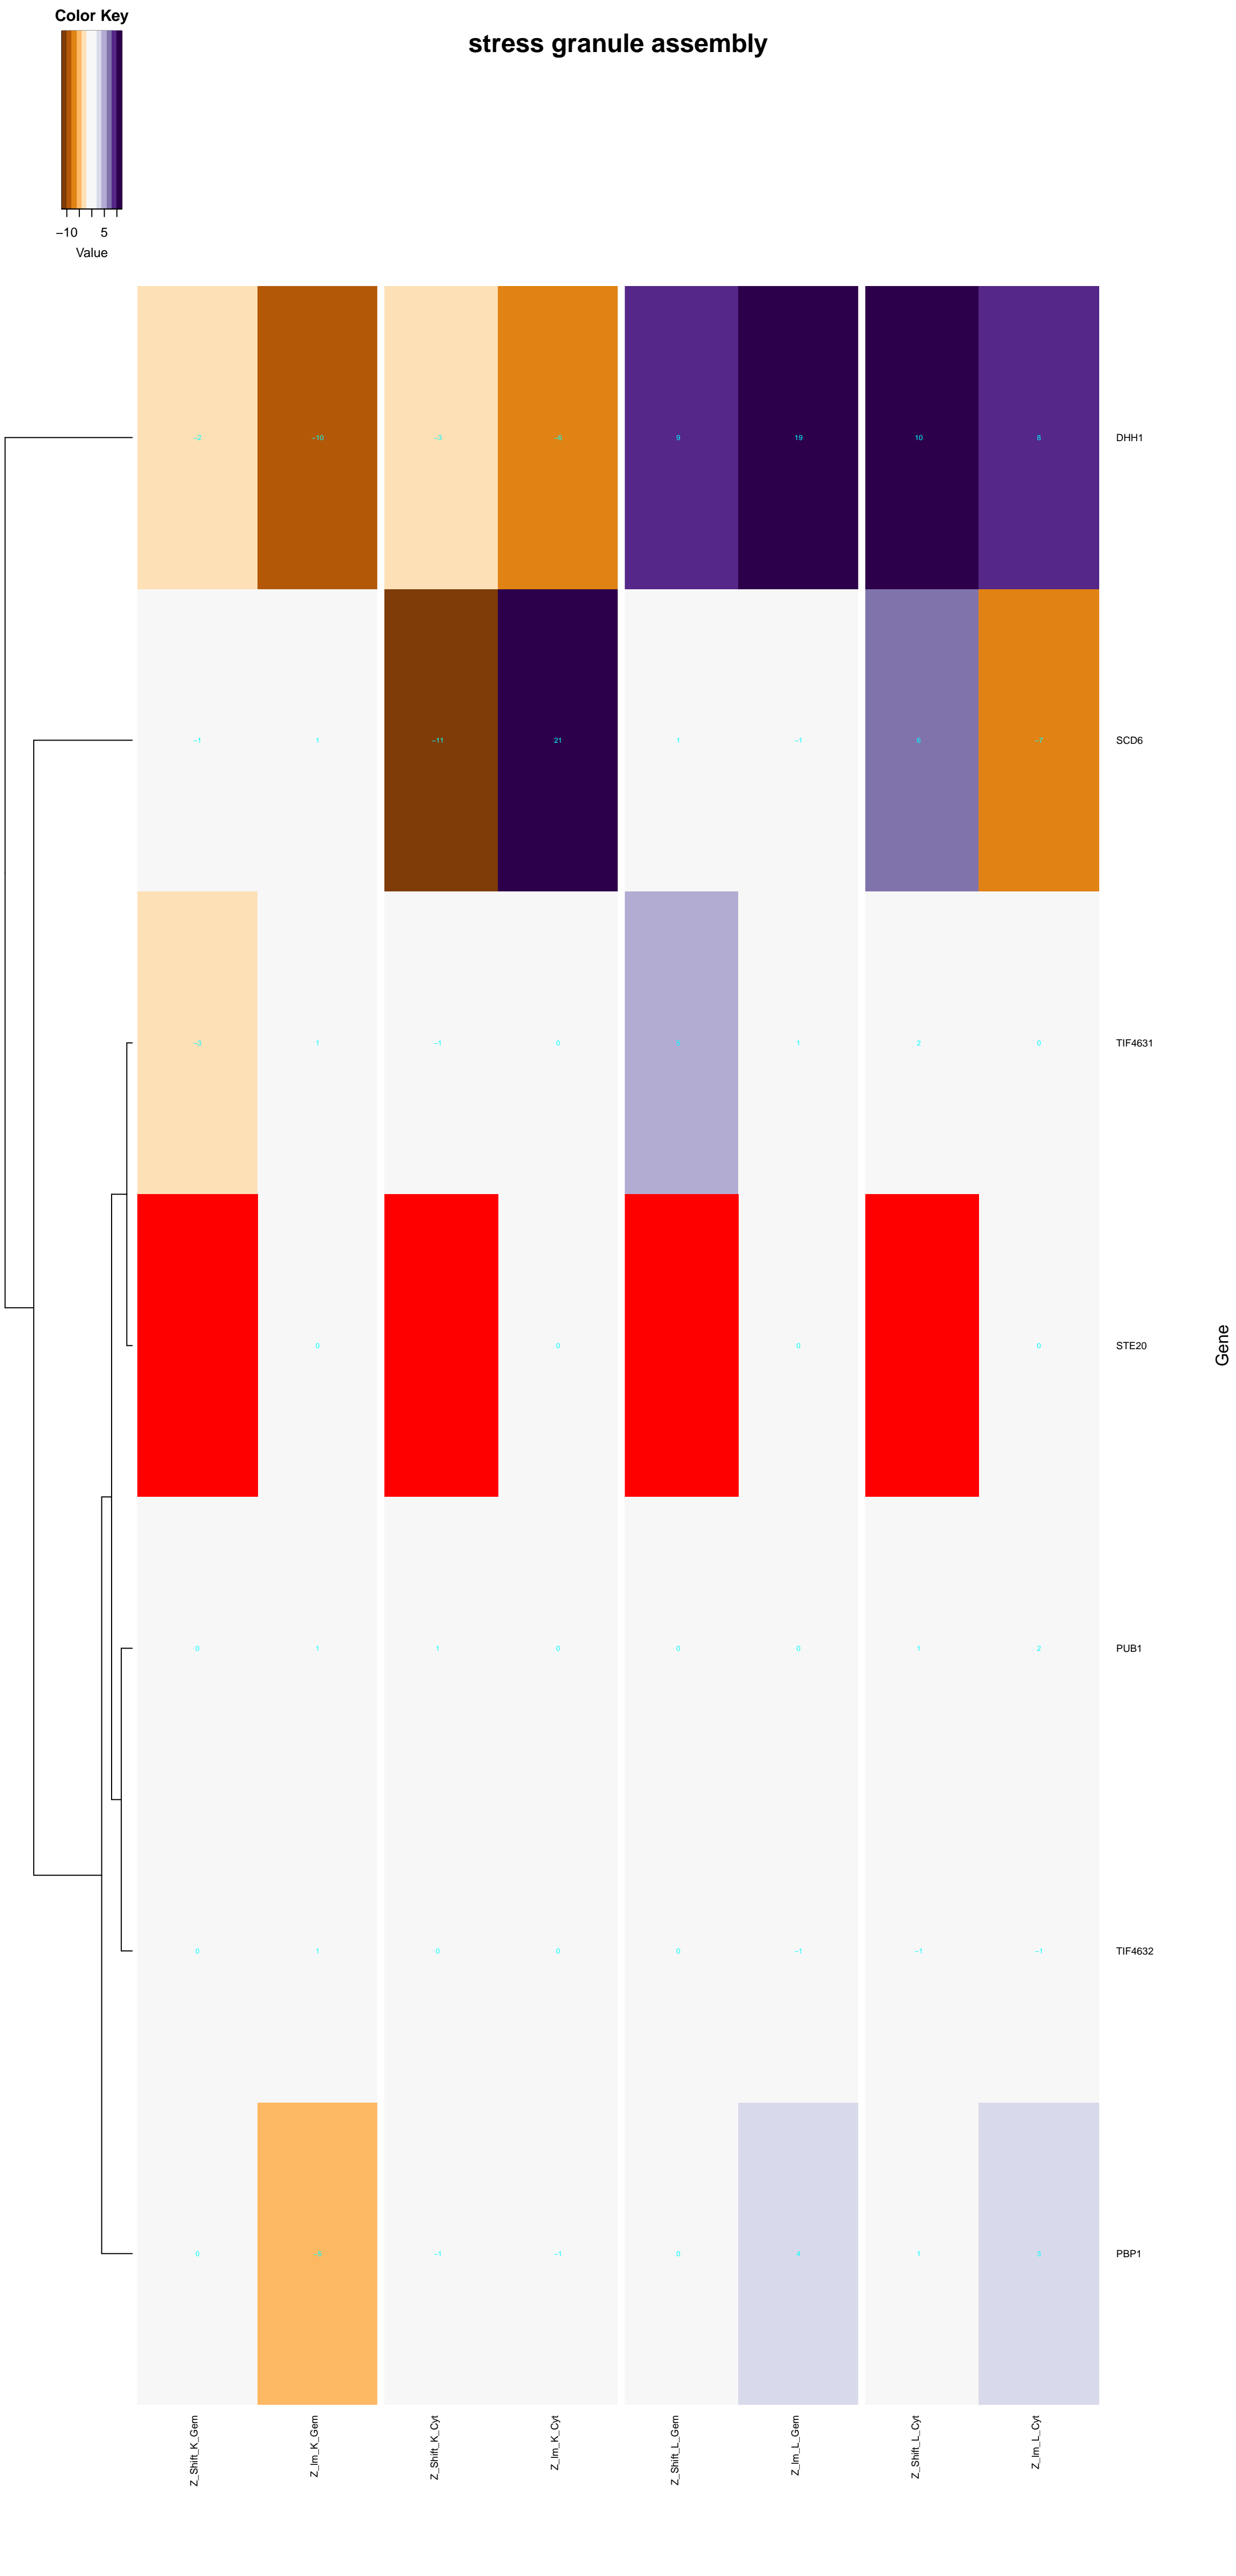

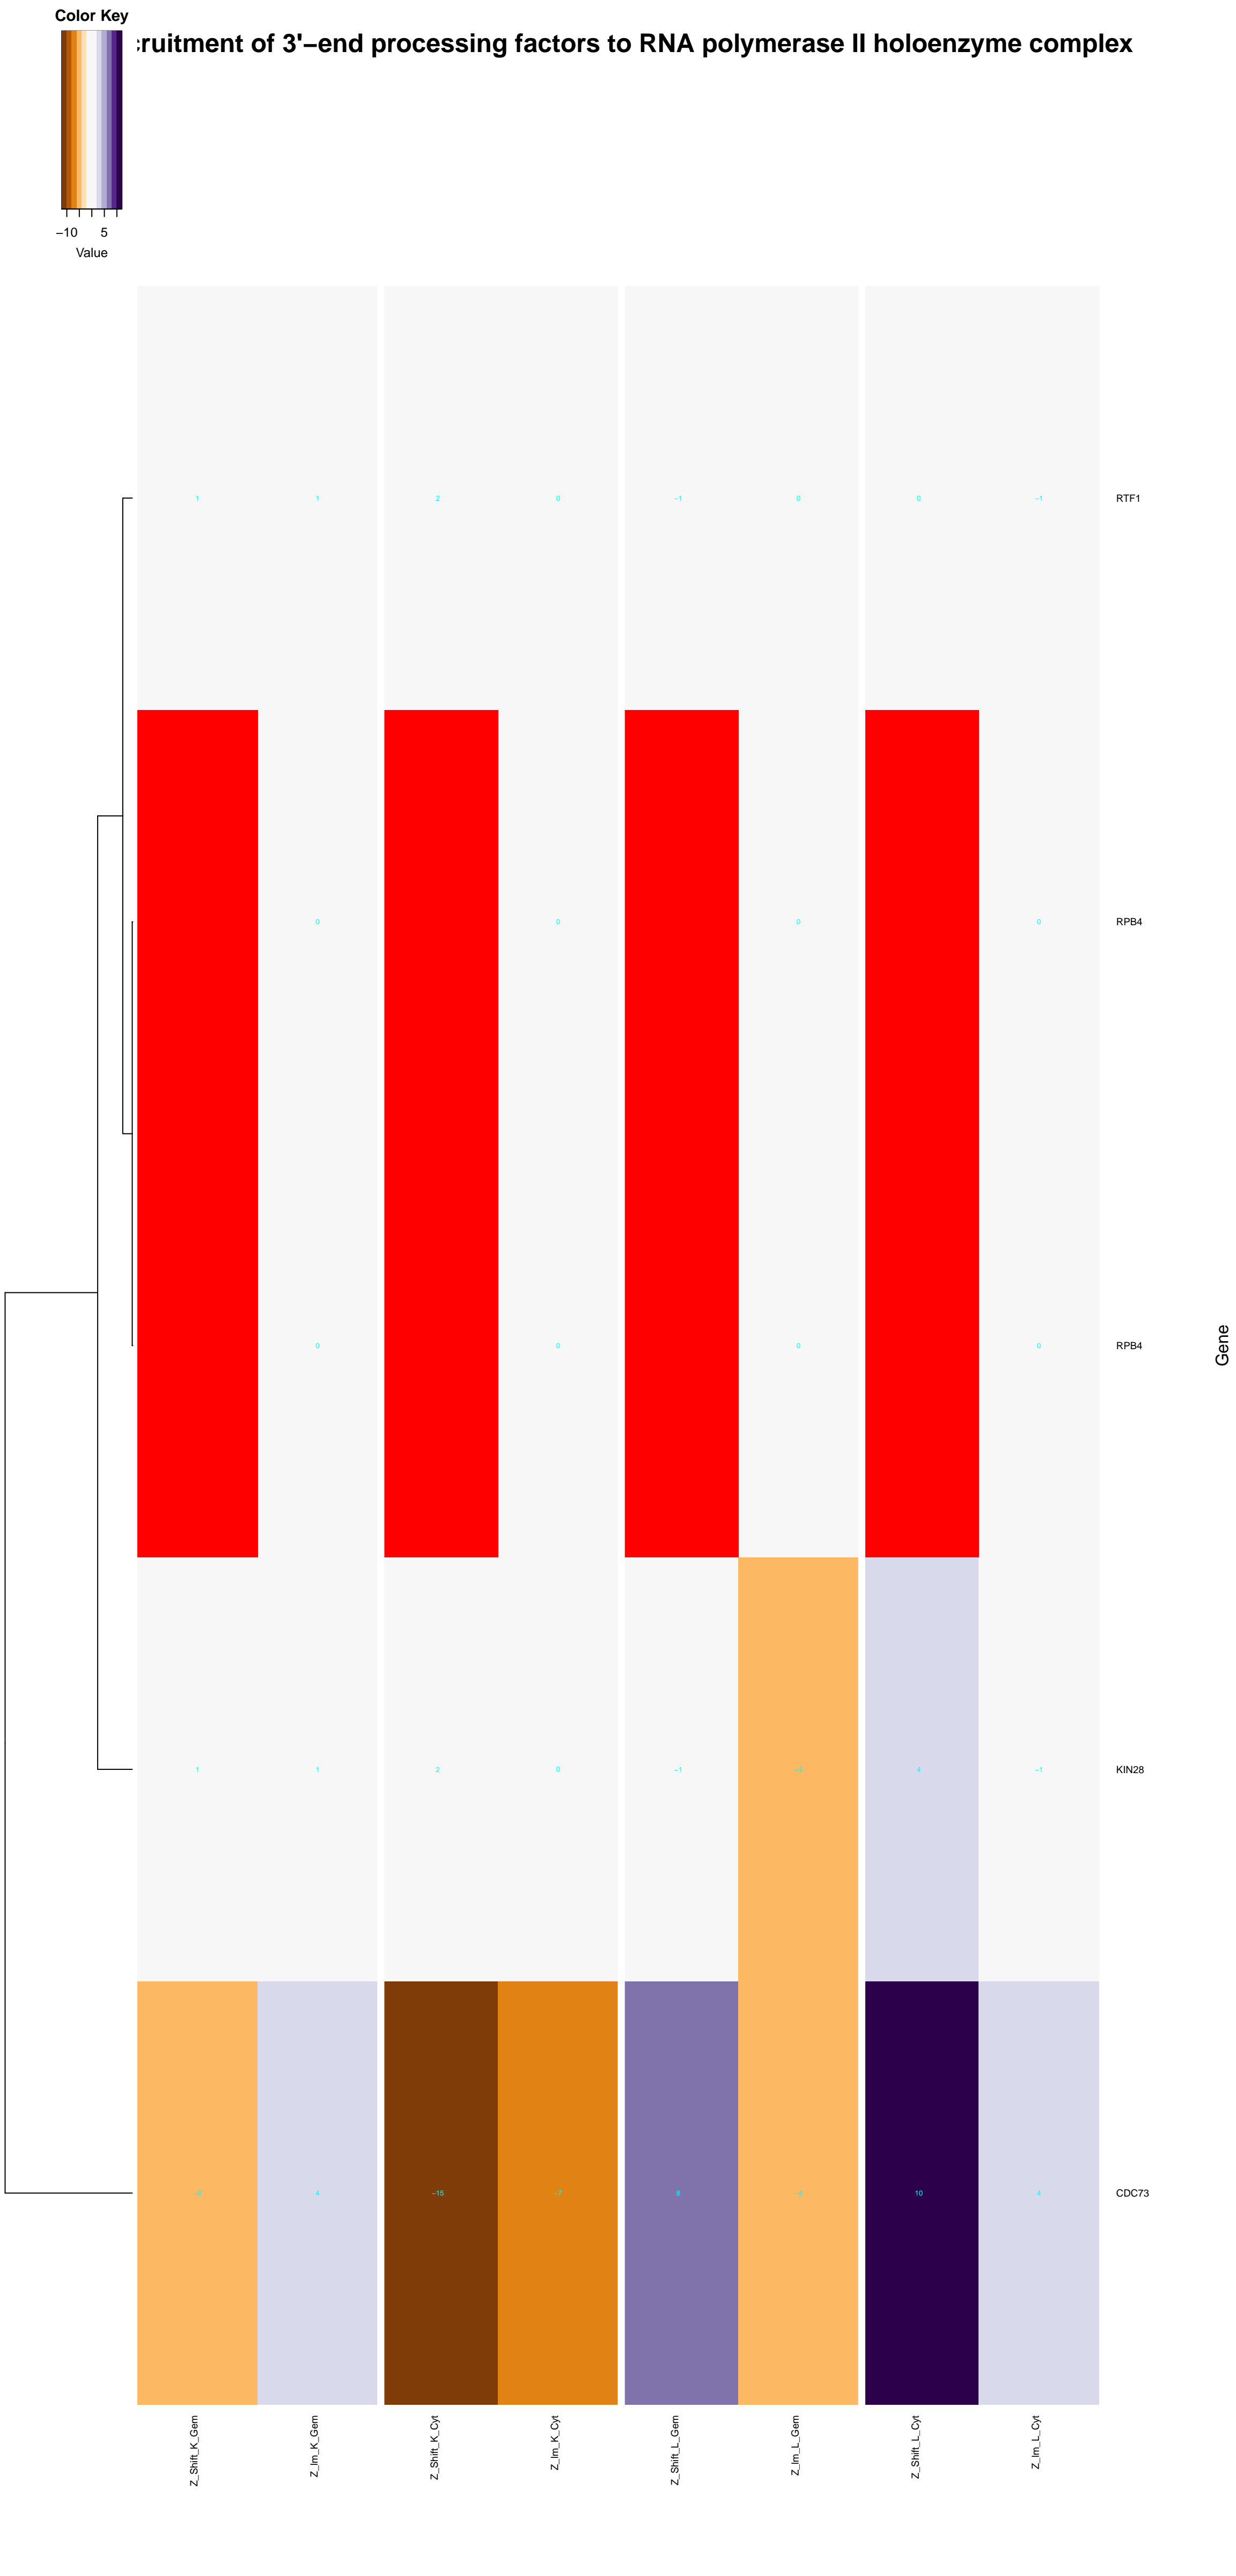



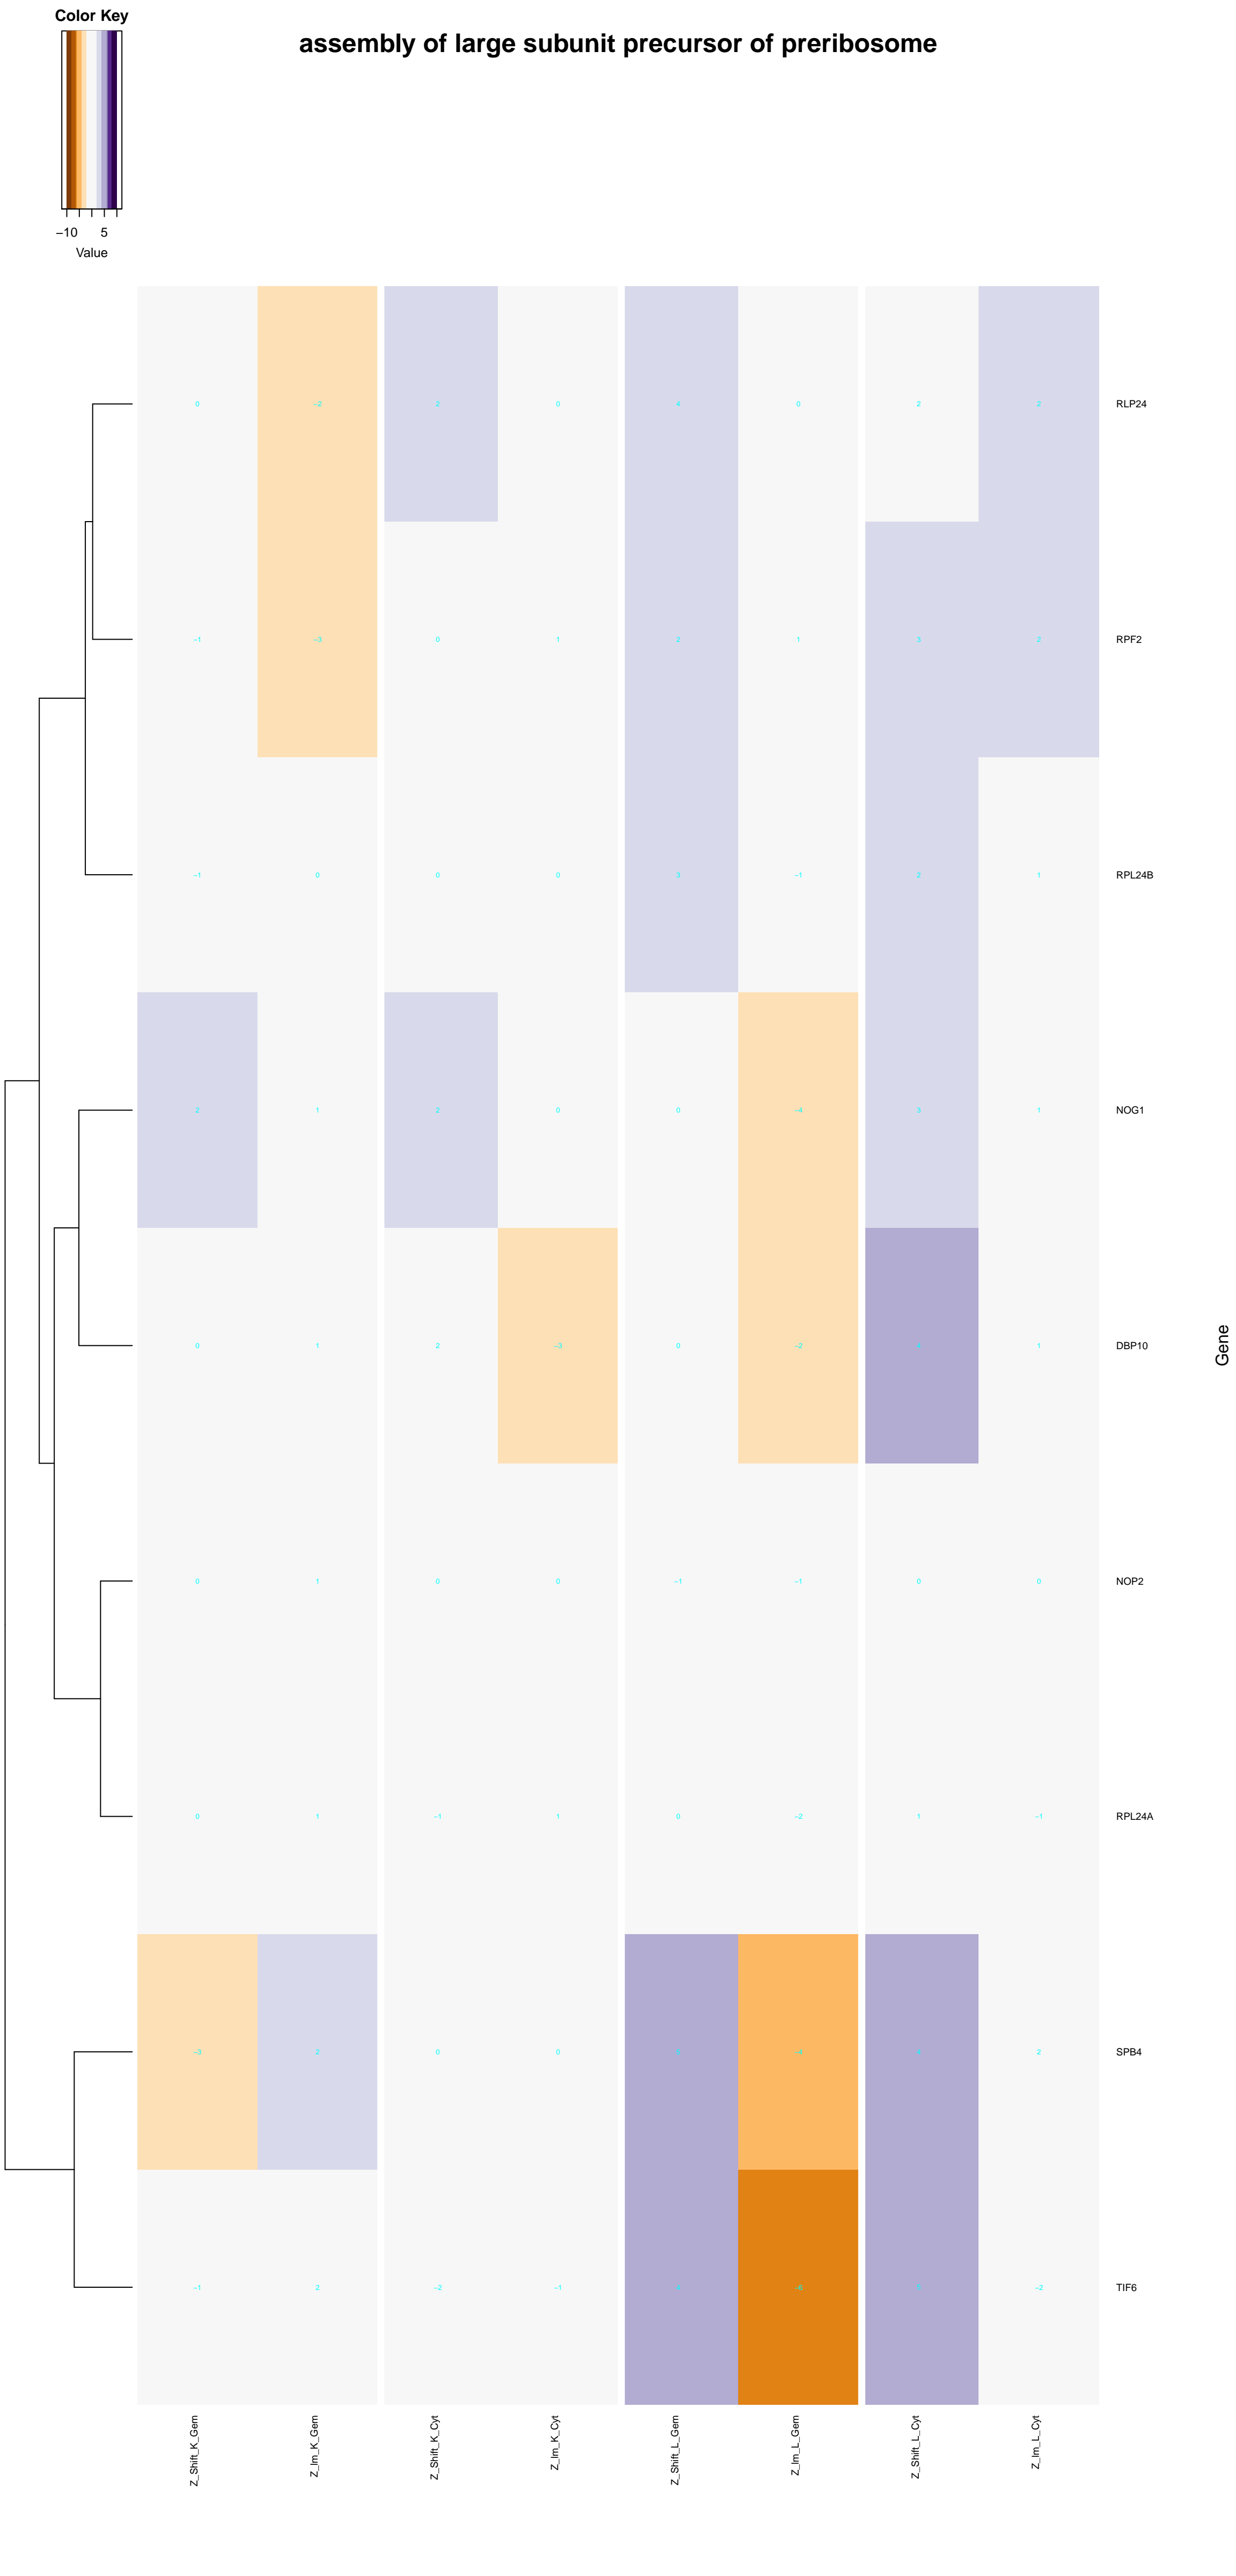

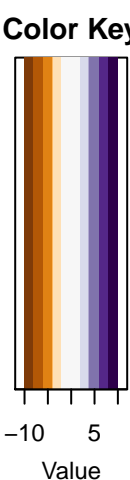

spliceosomal tri-snRNP complex assembly

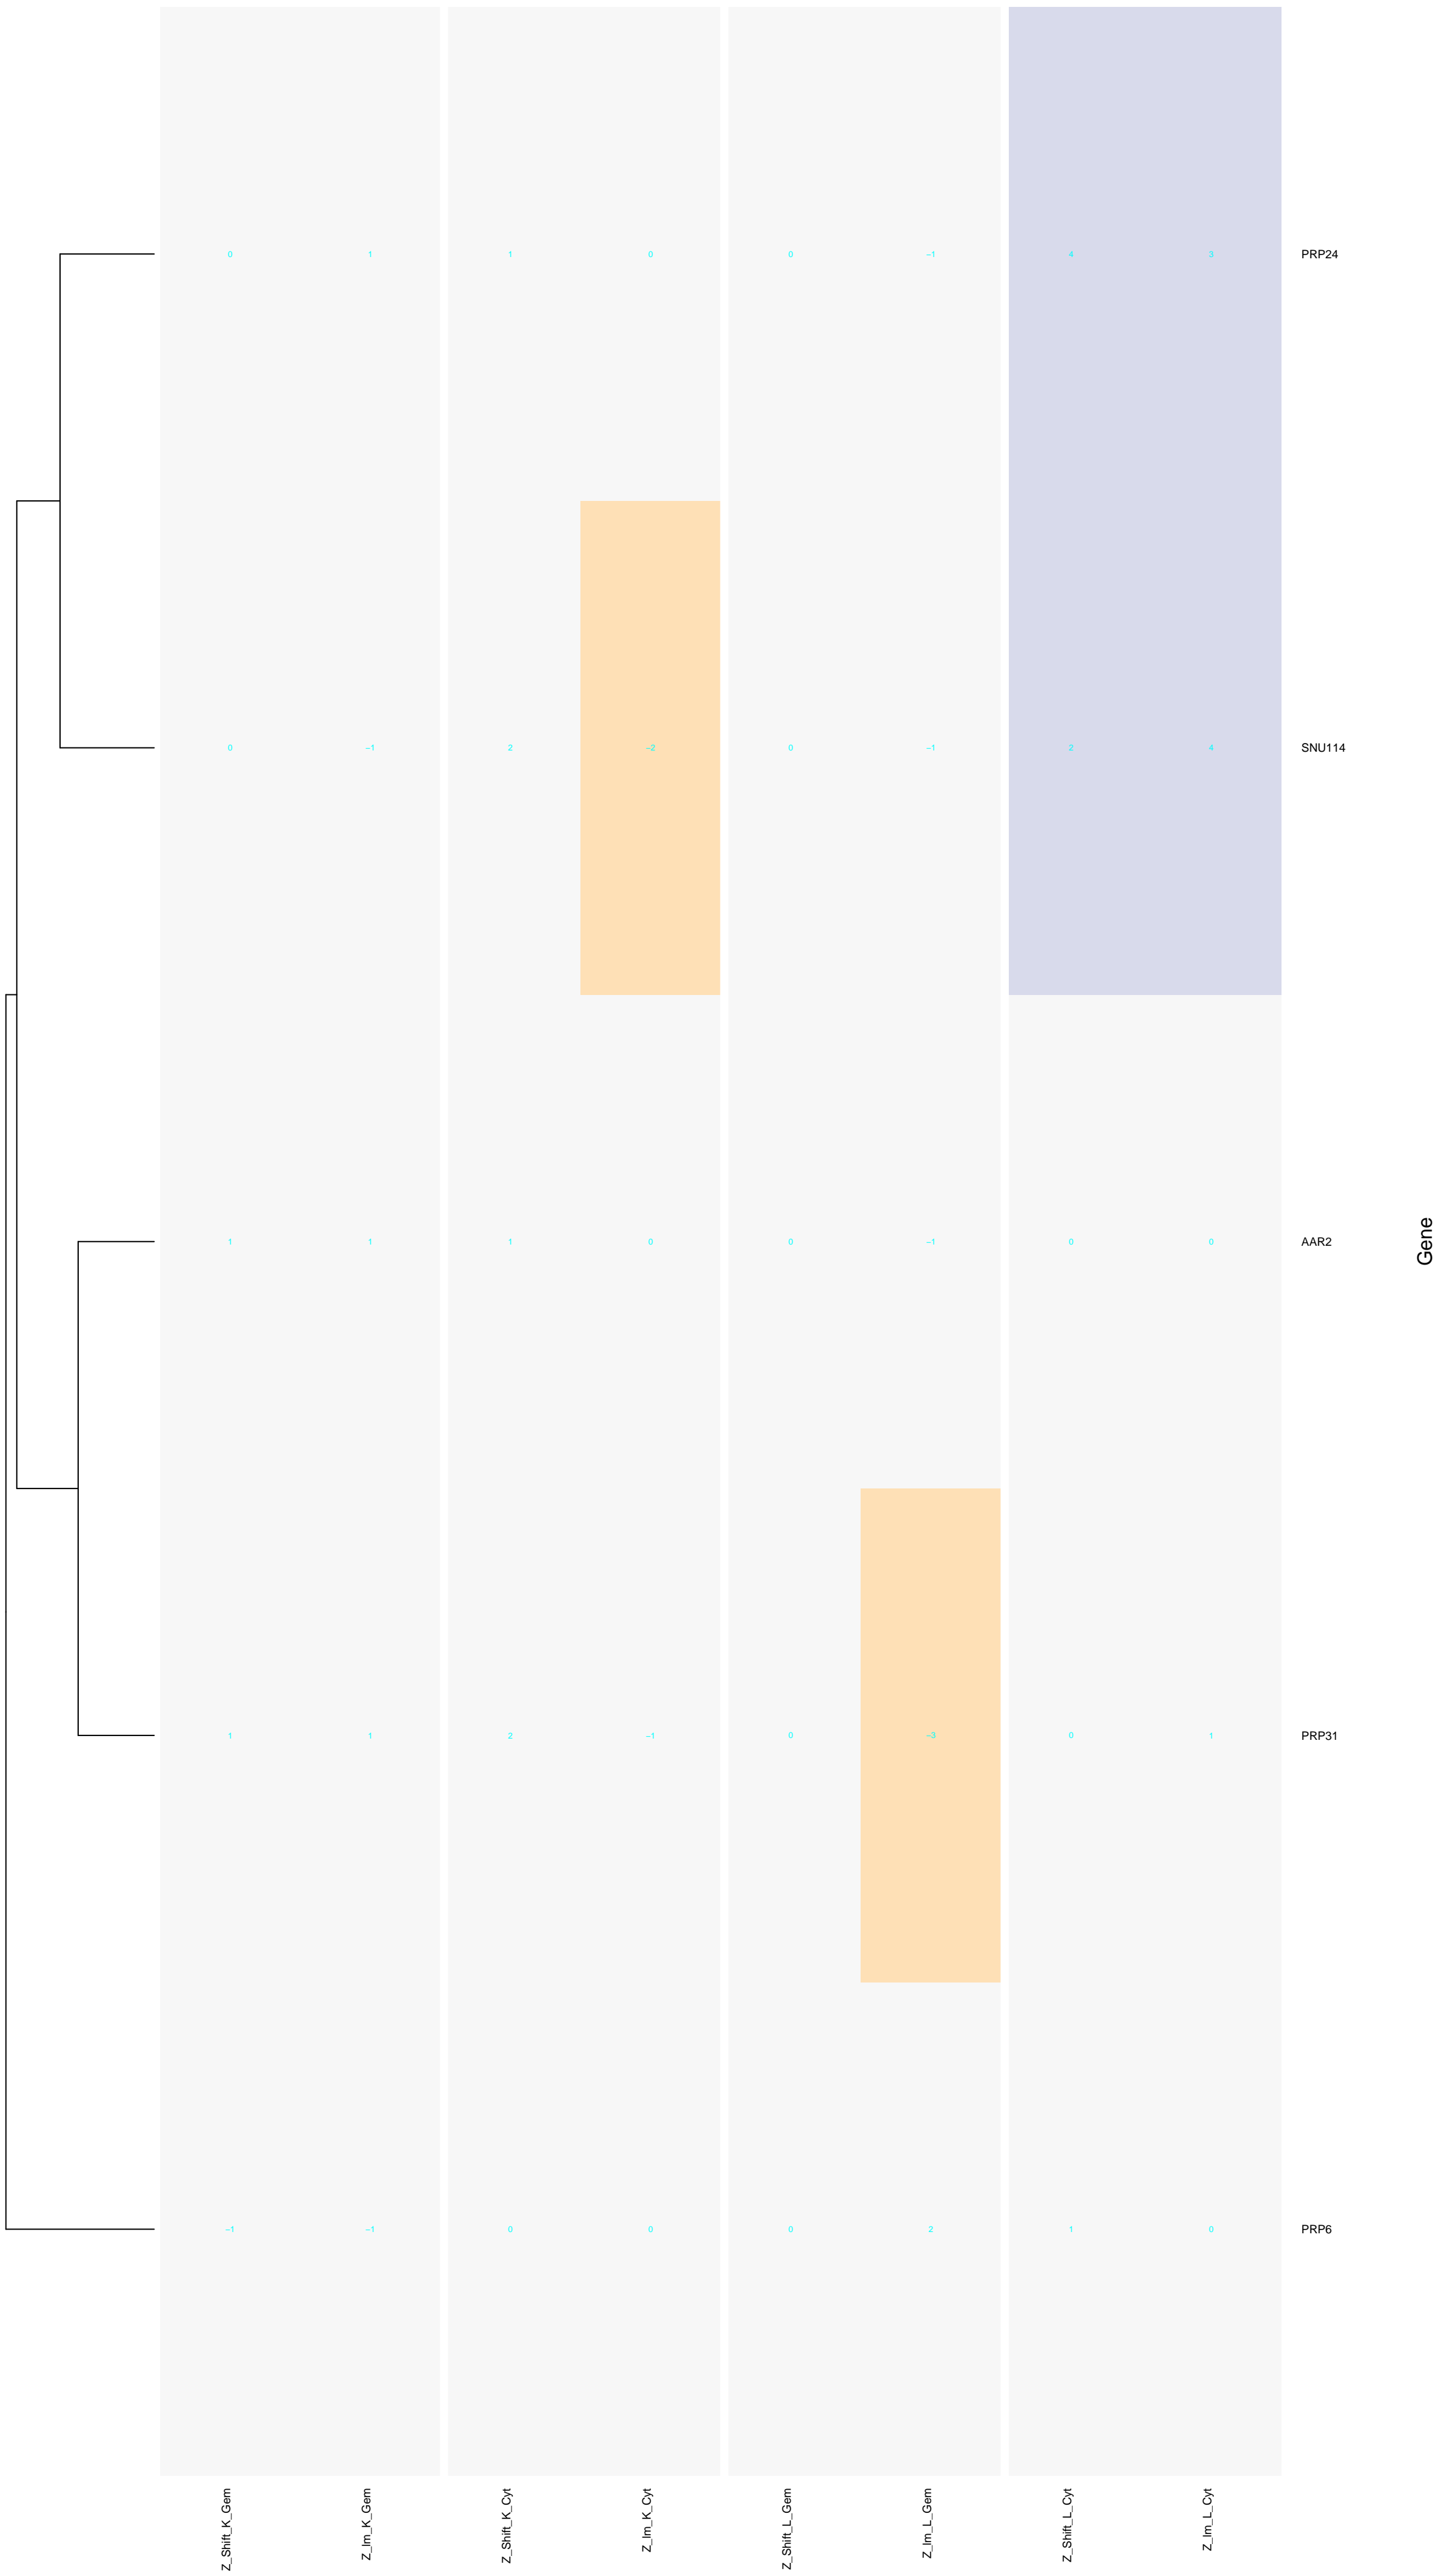

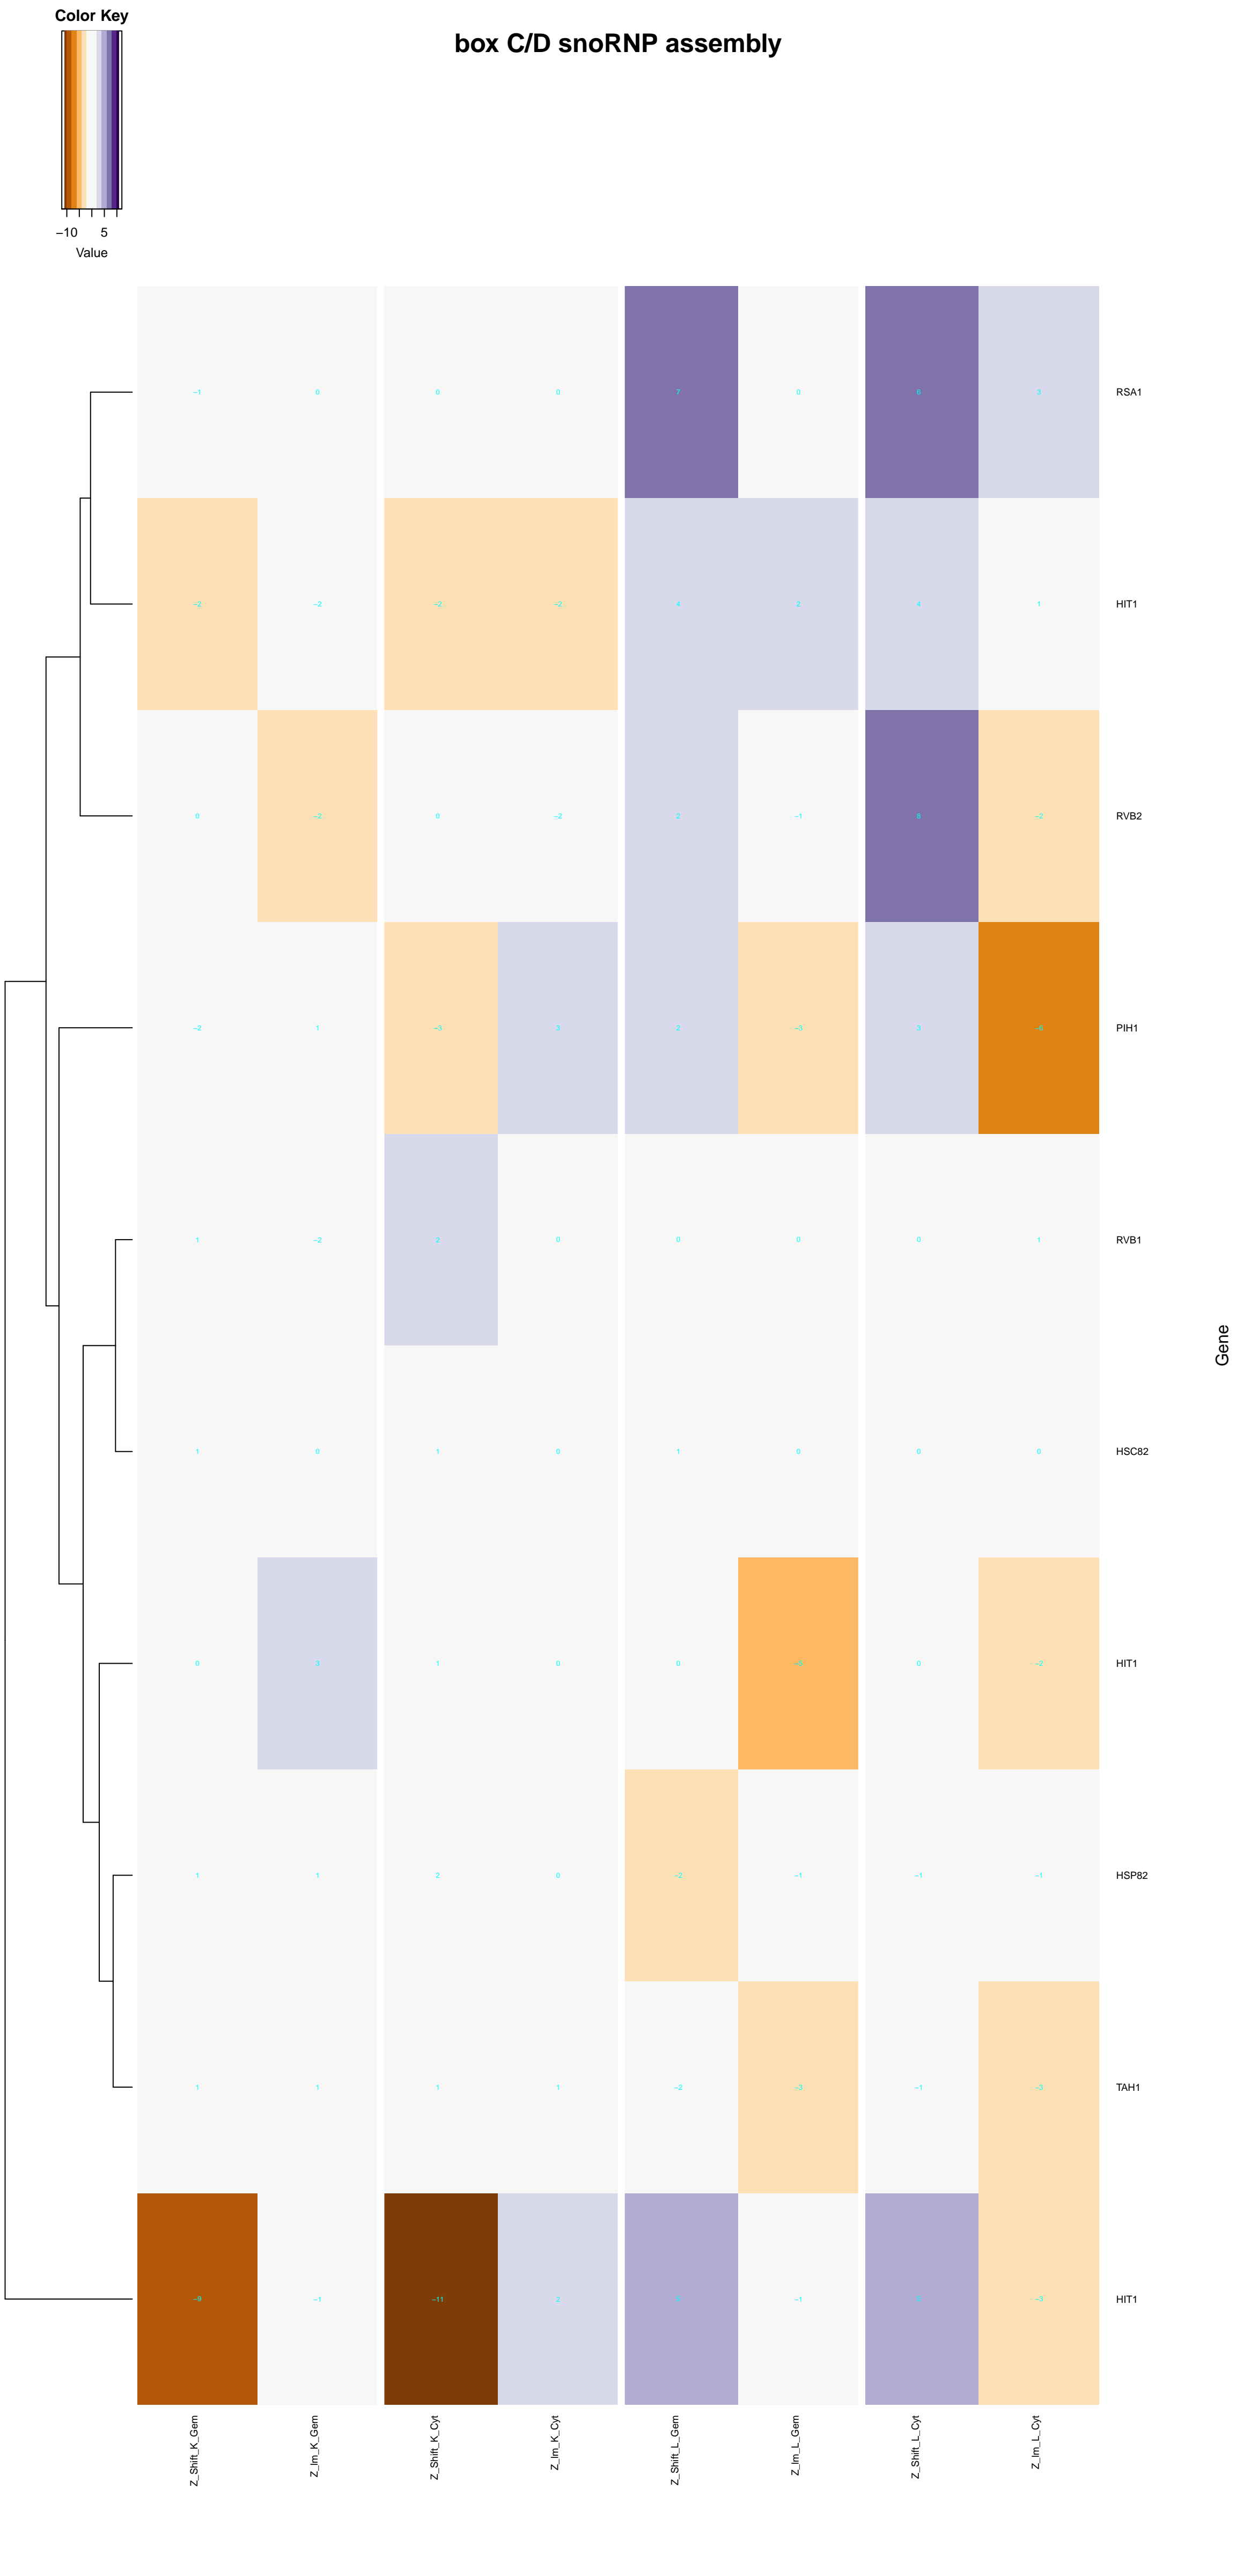

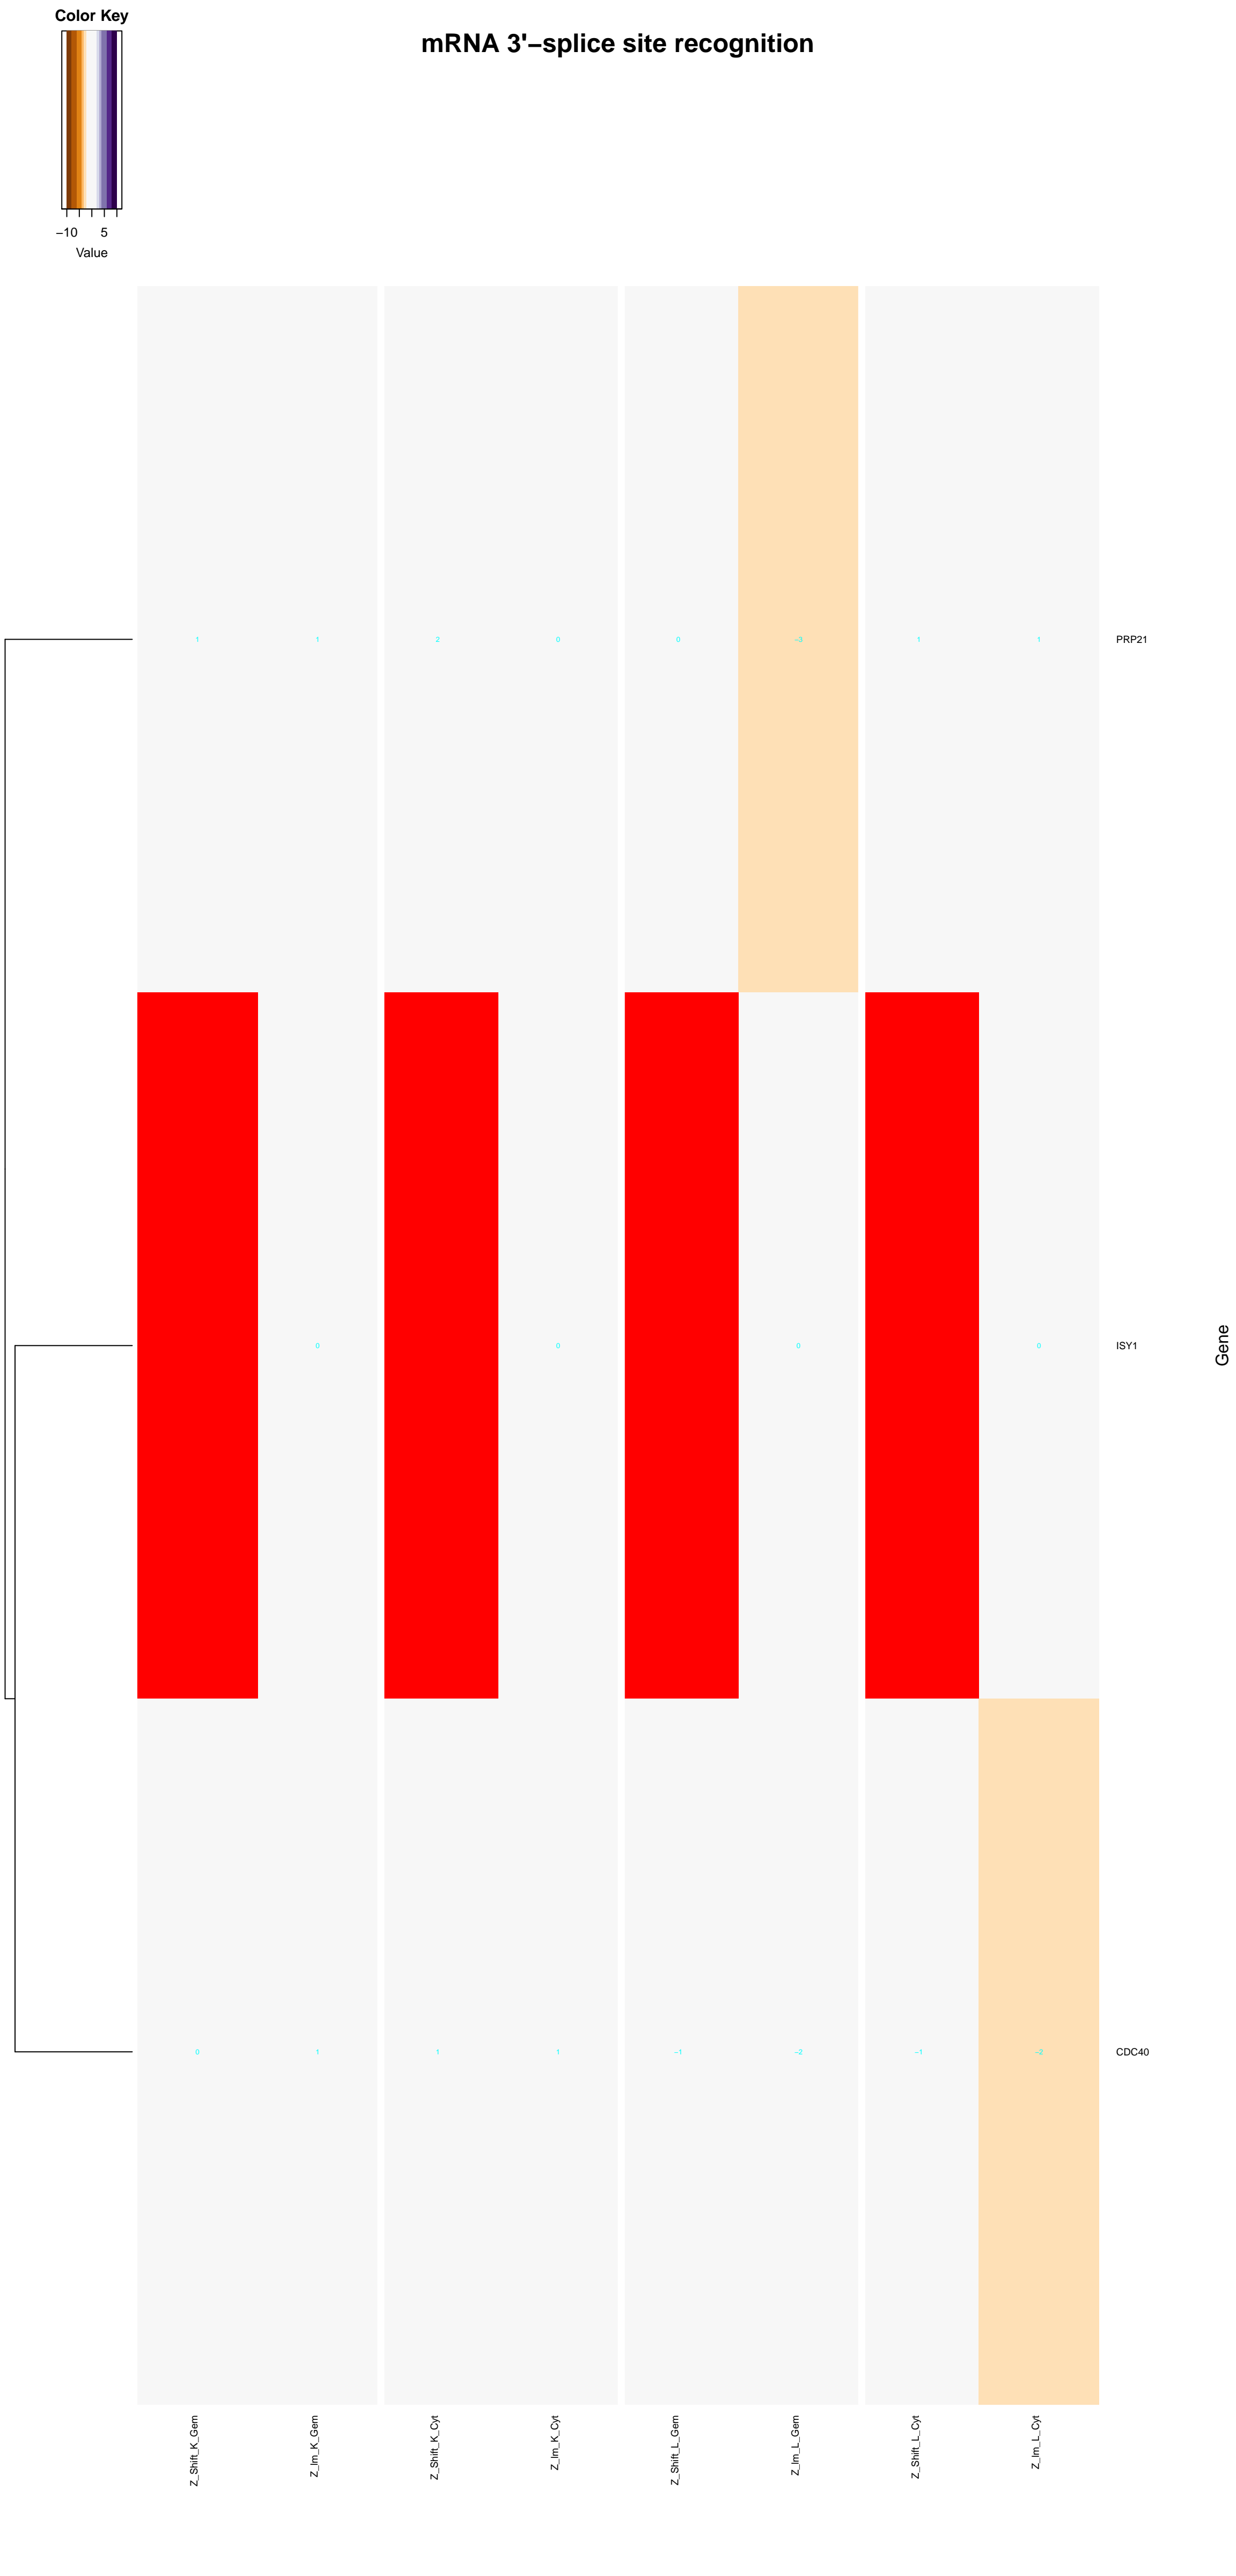

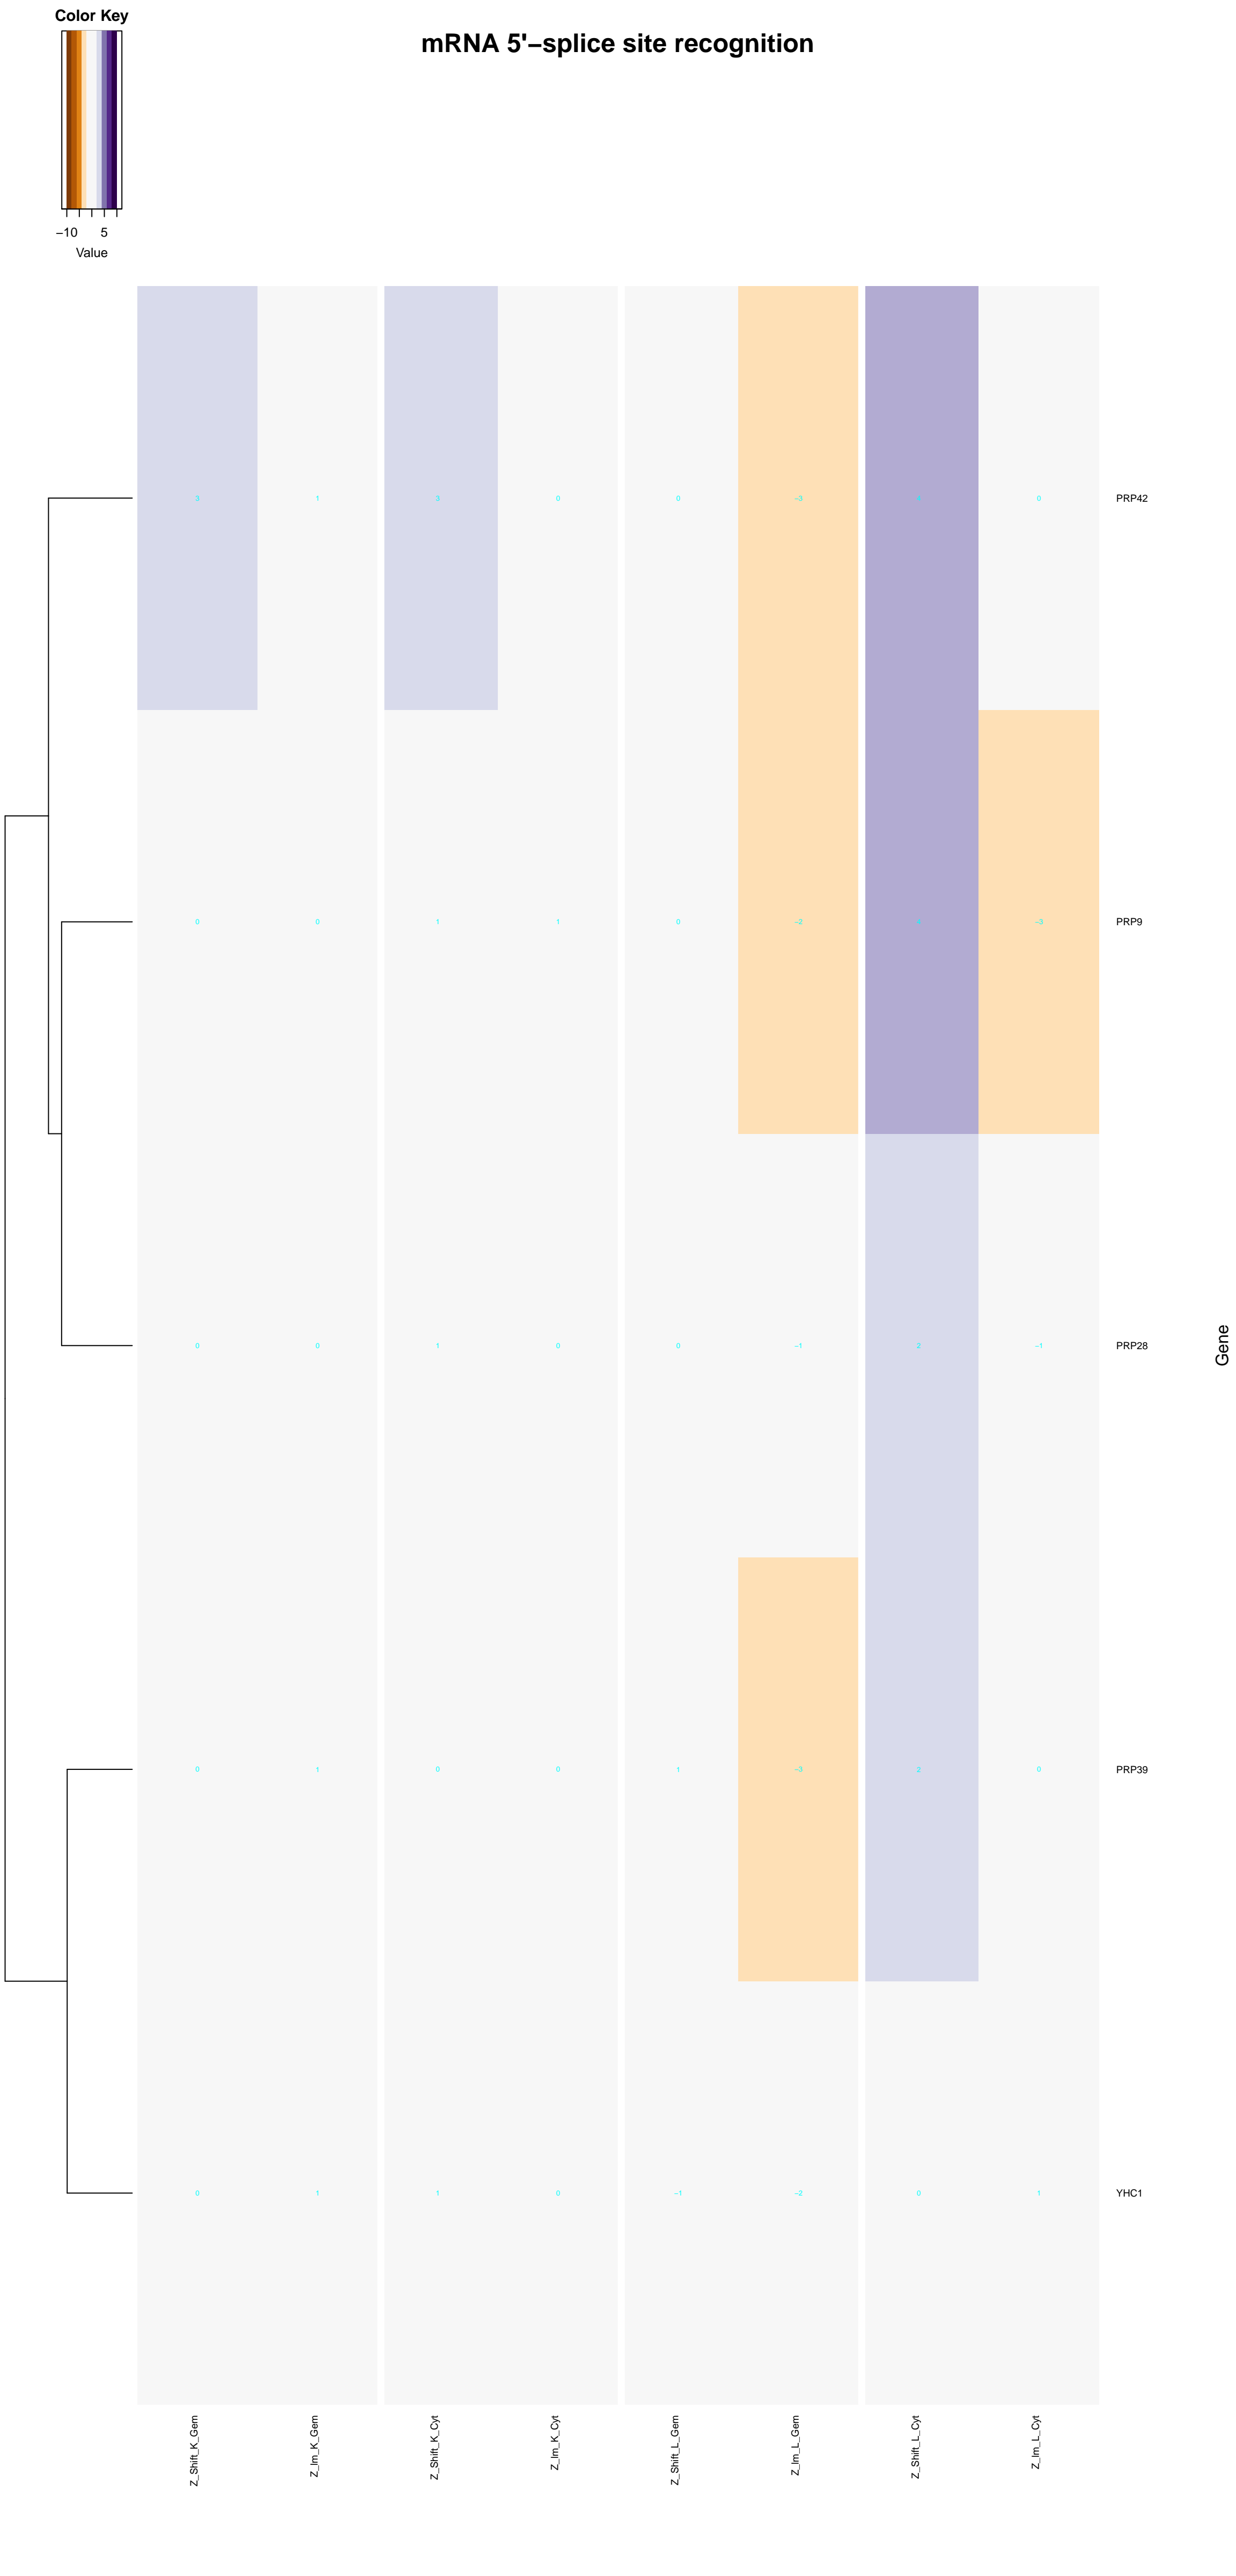

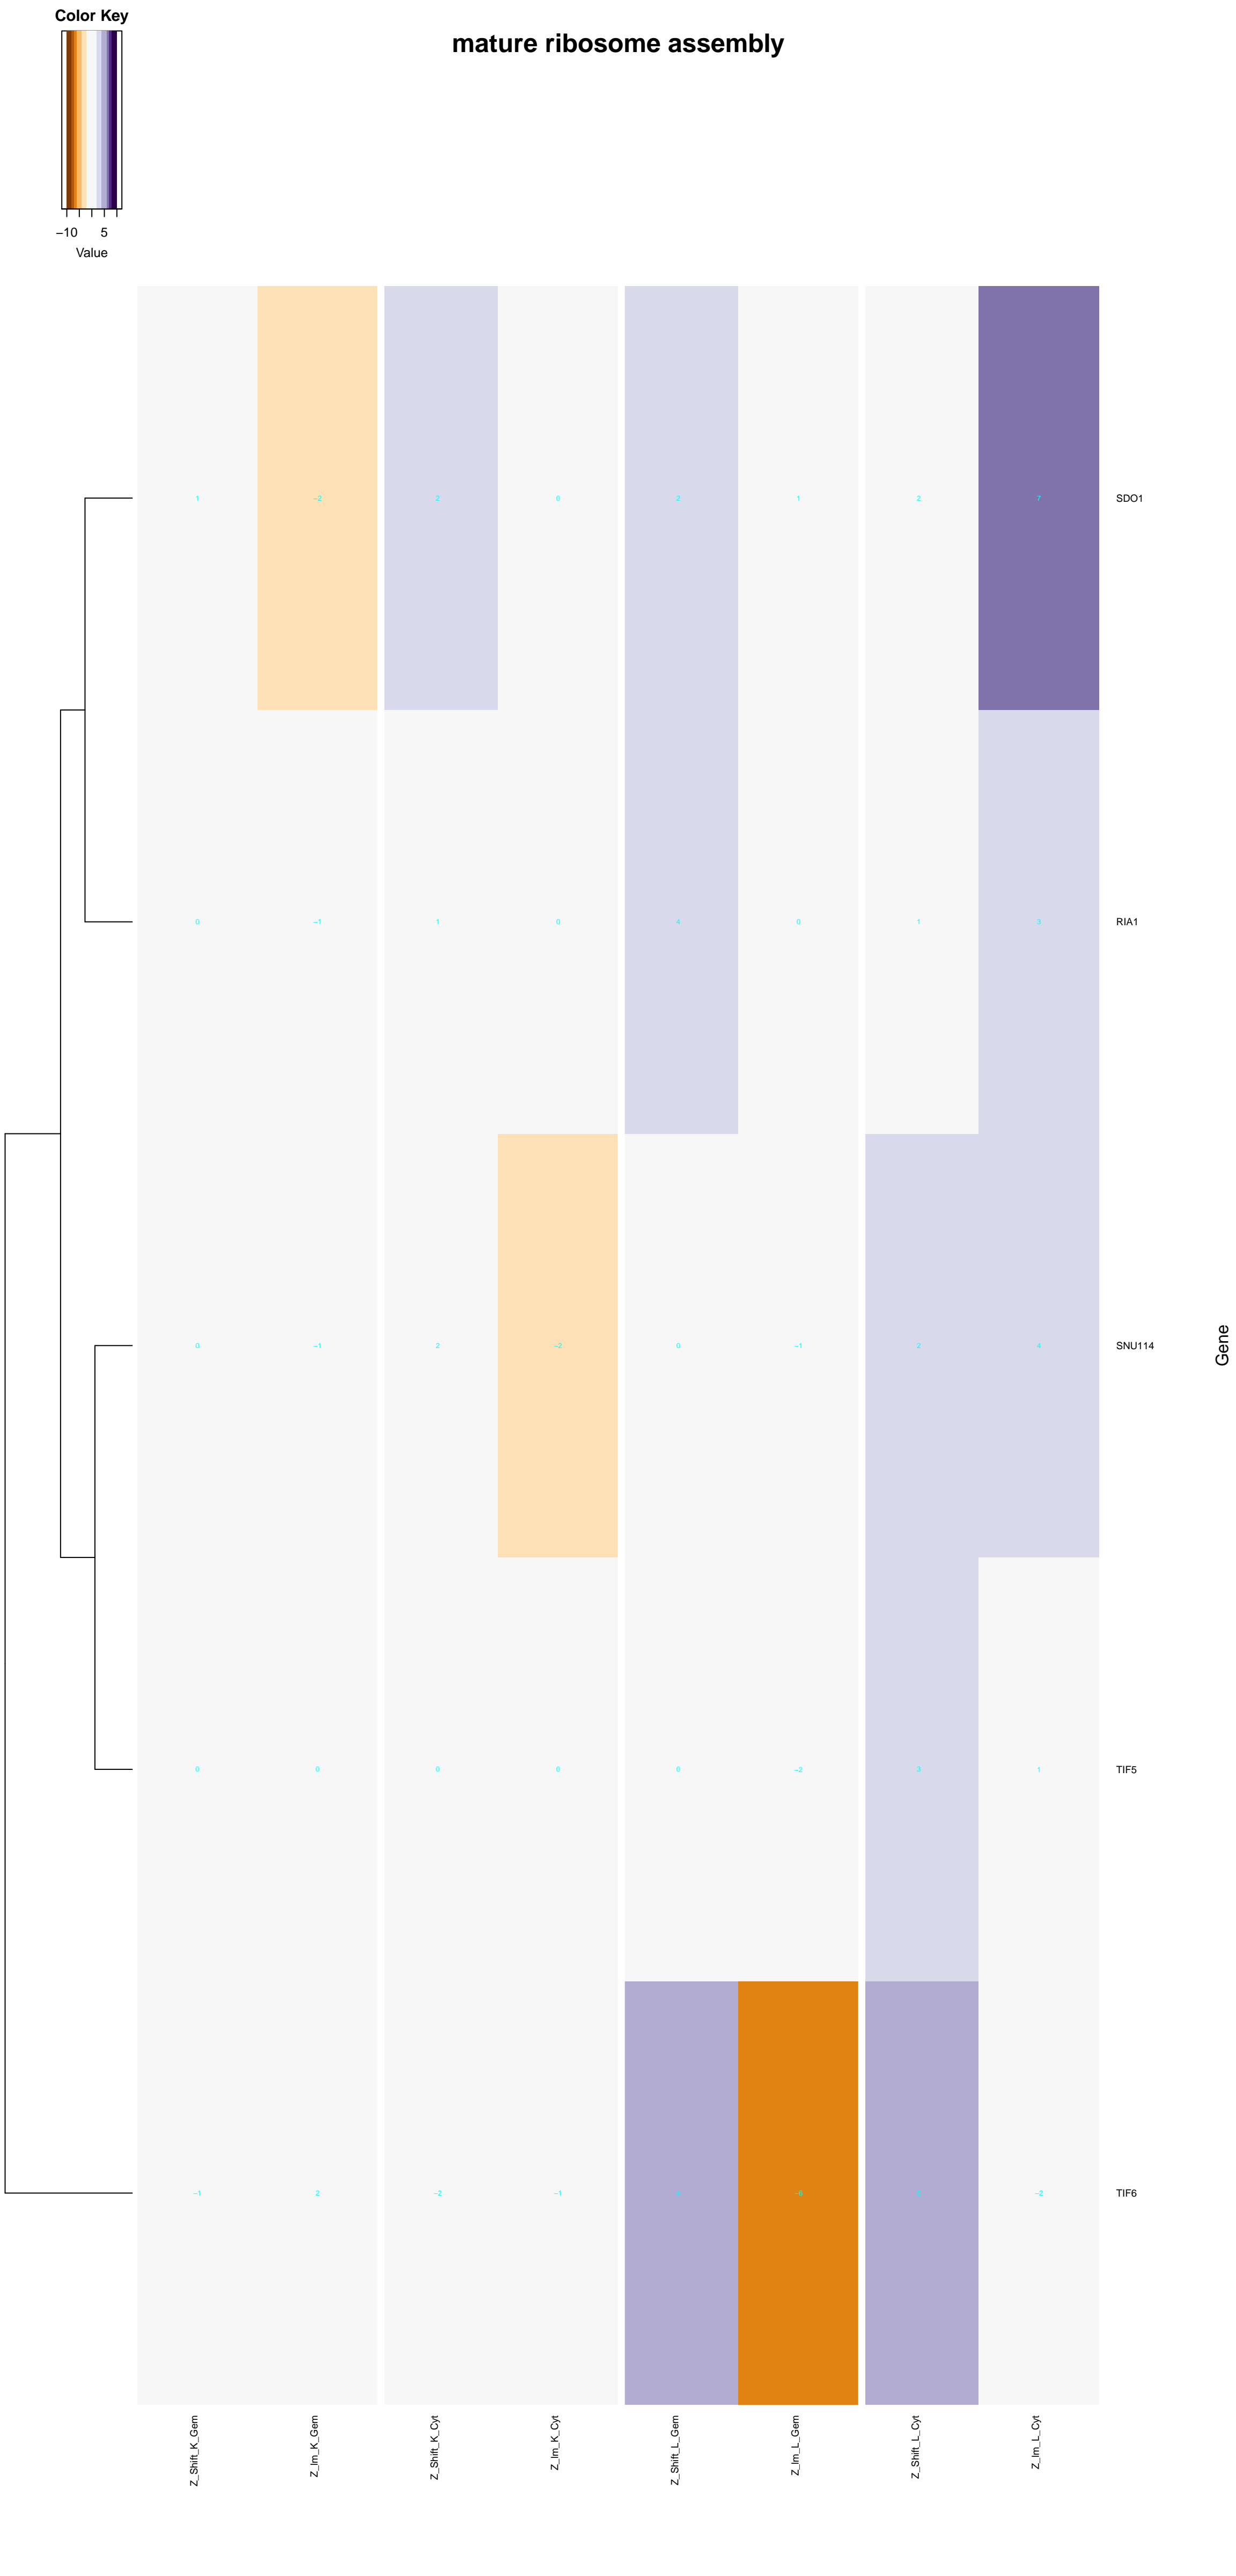

Supplement: s1 [file s1]

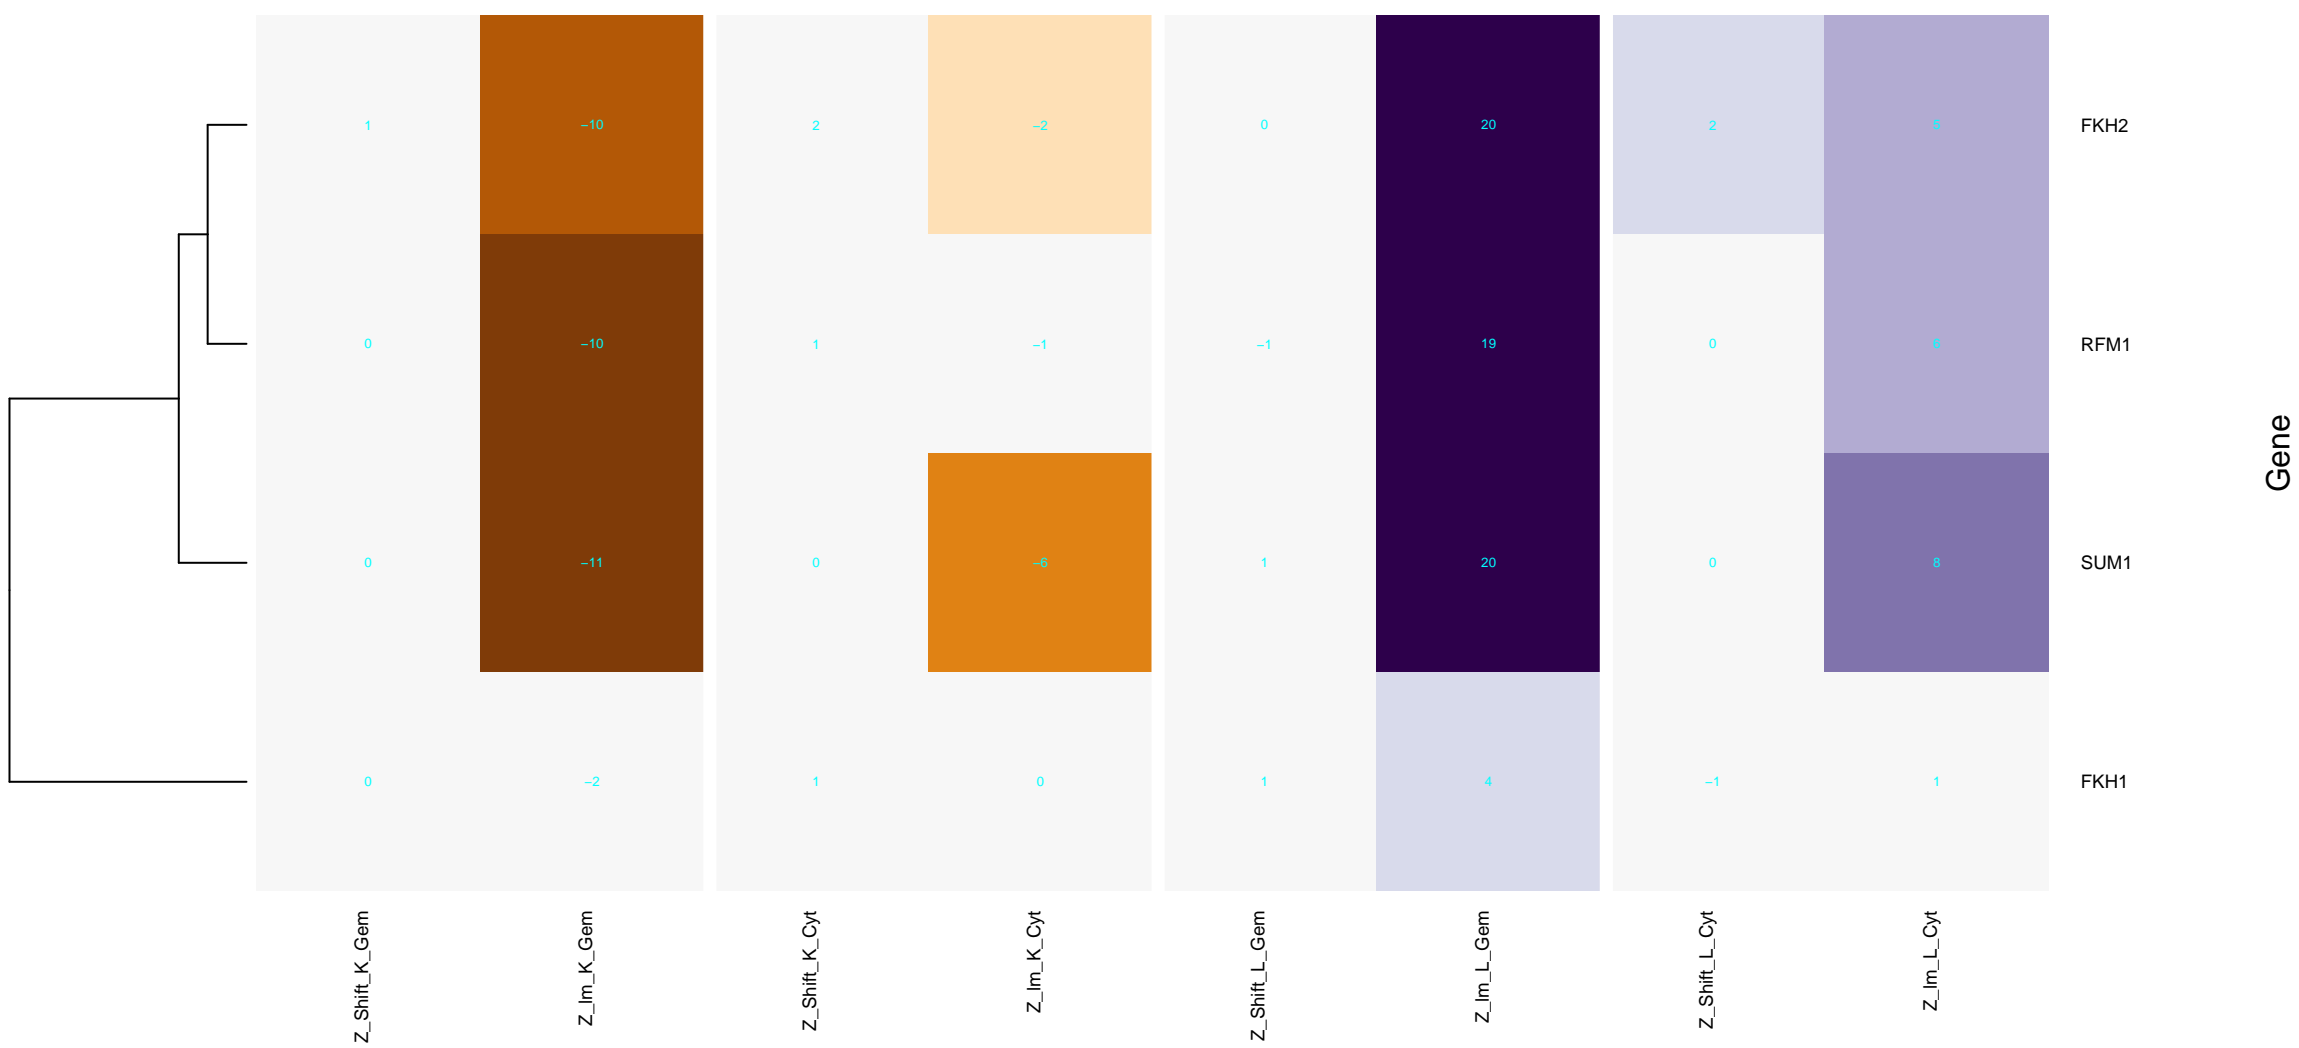

Supplement: s1 [file s1]

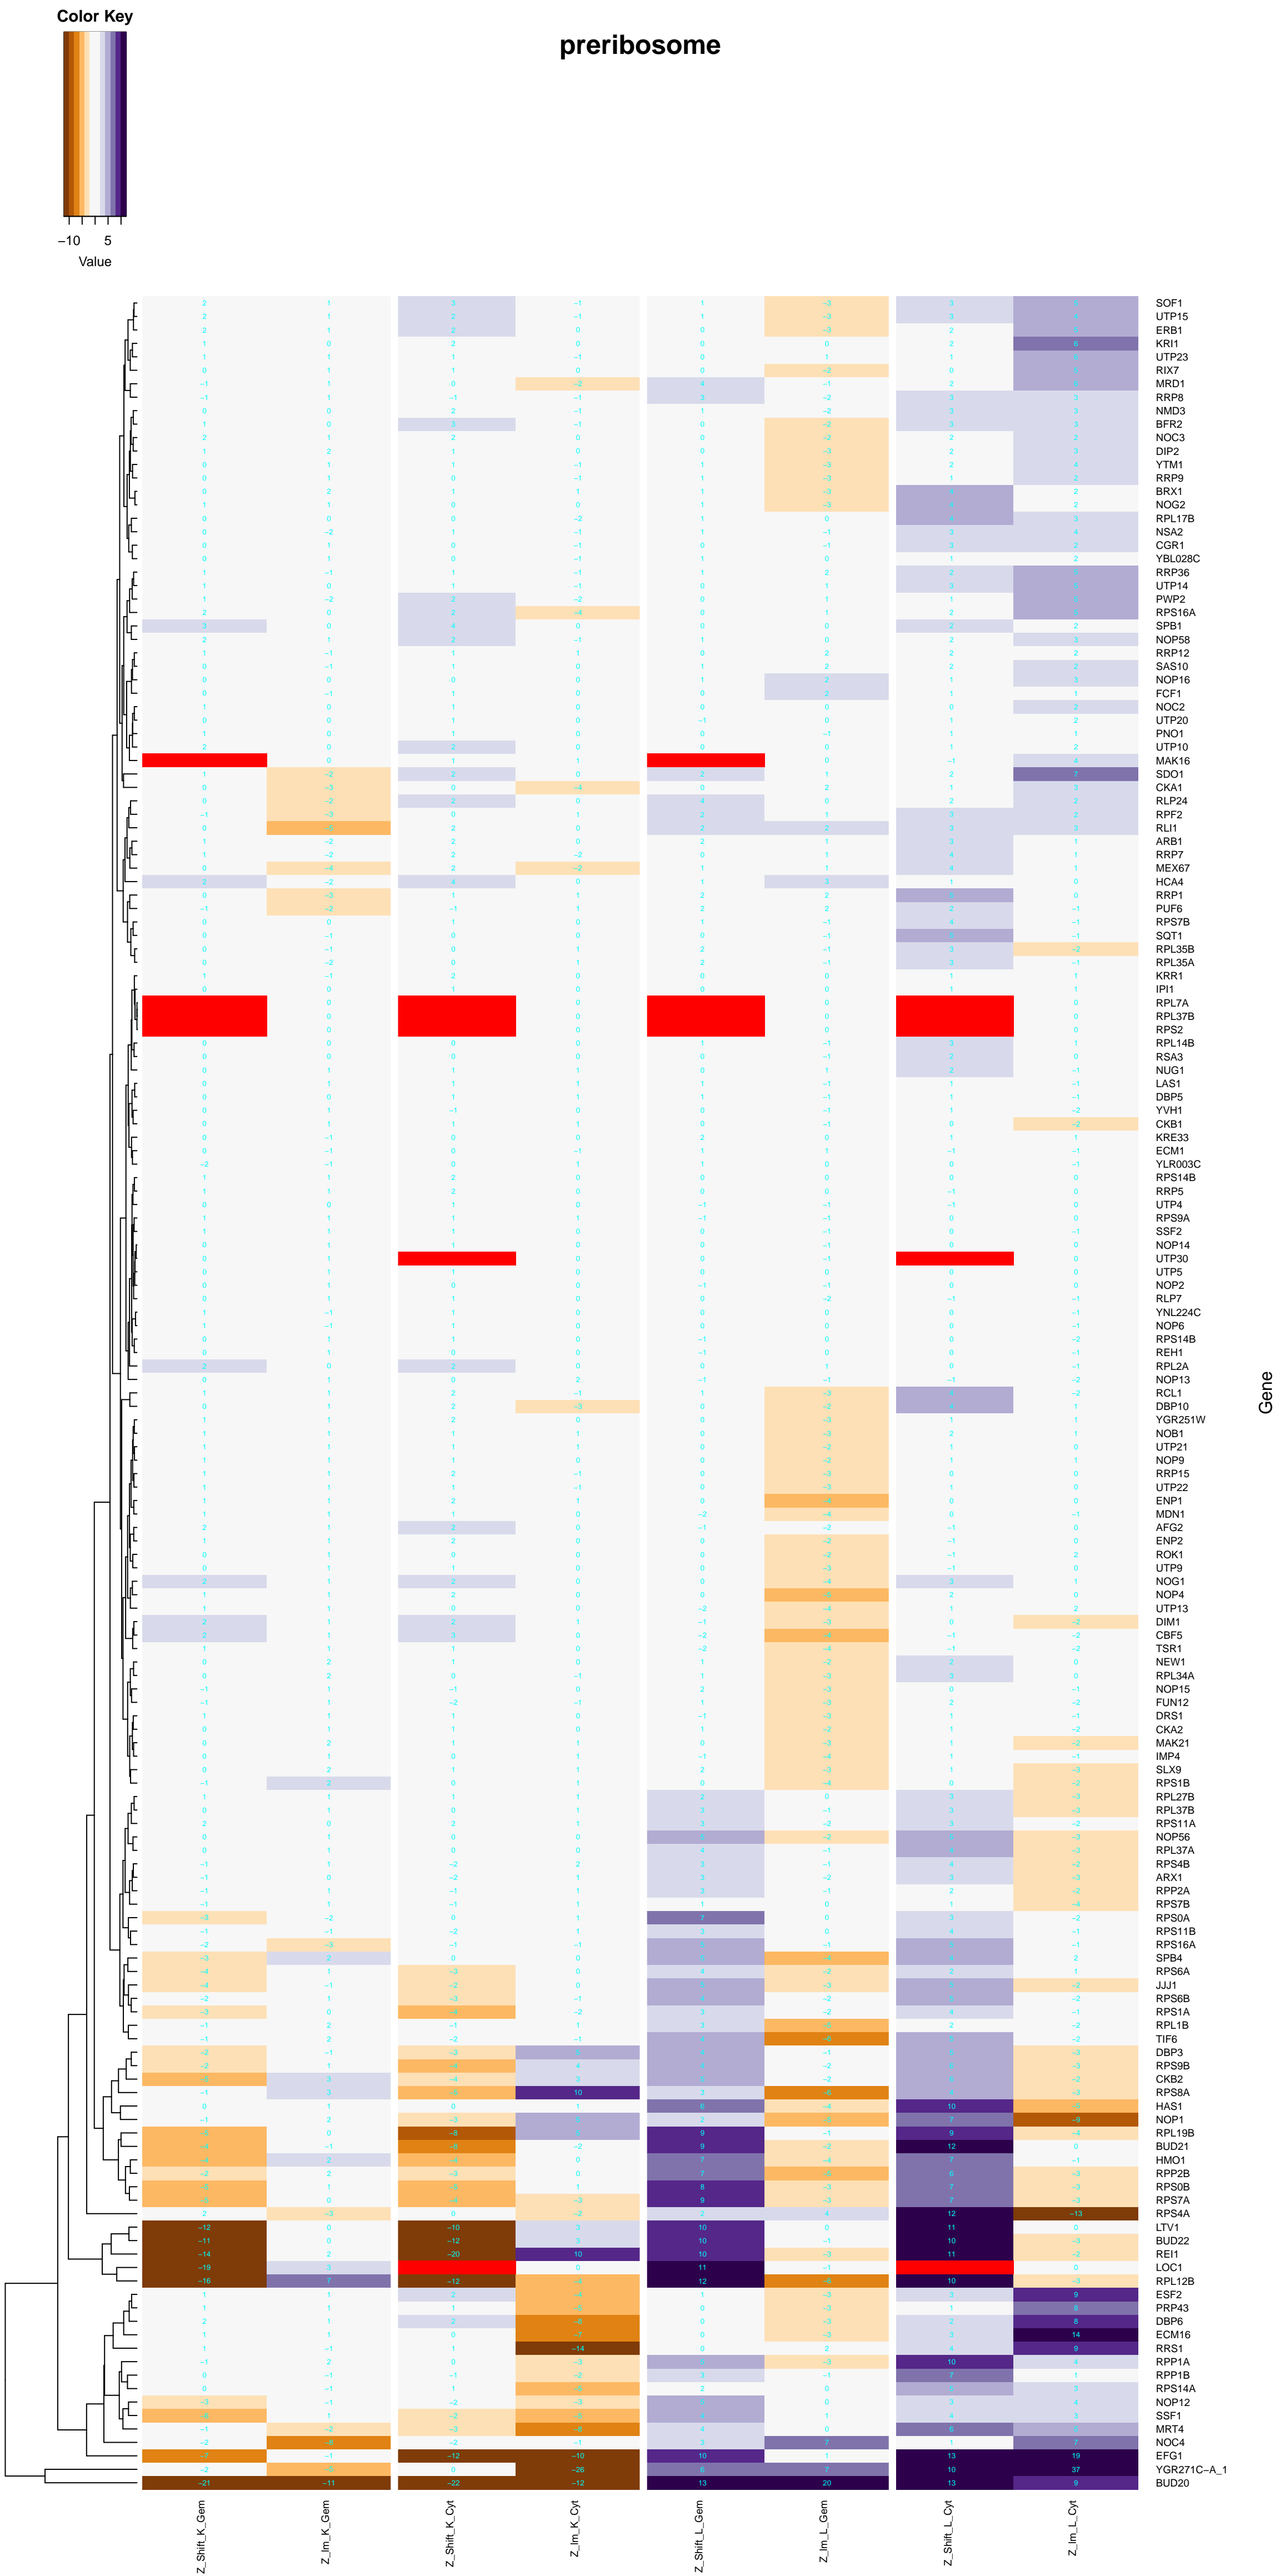

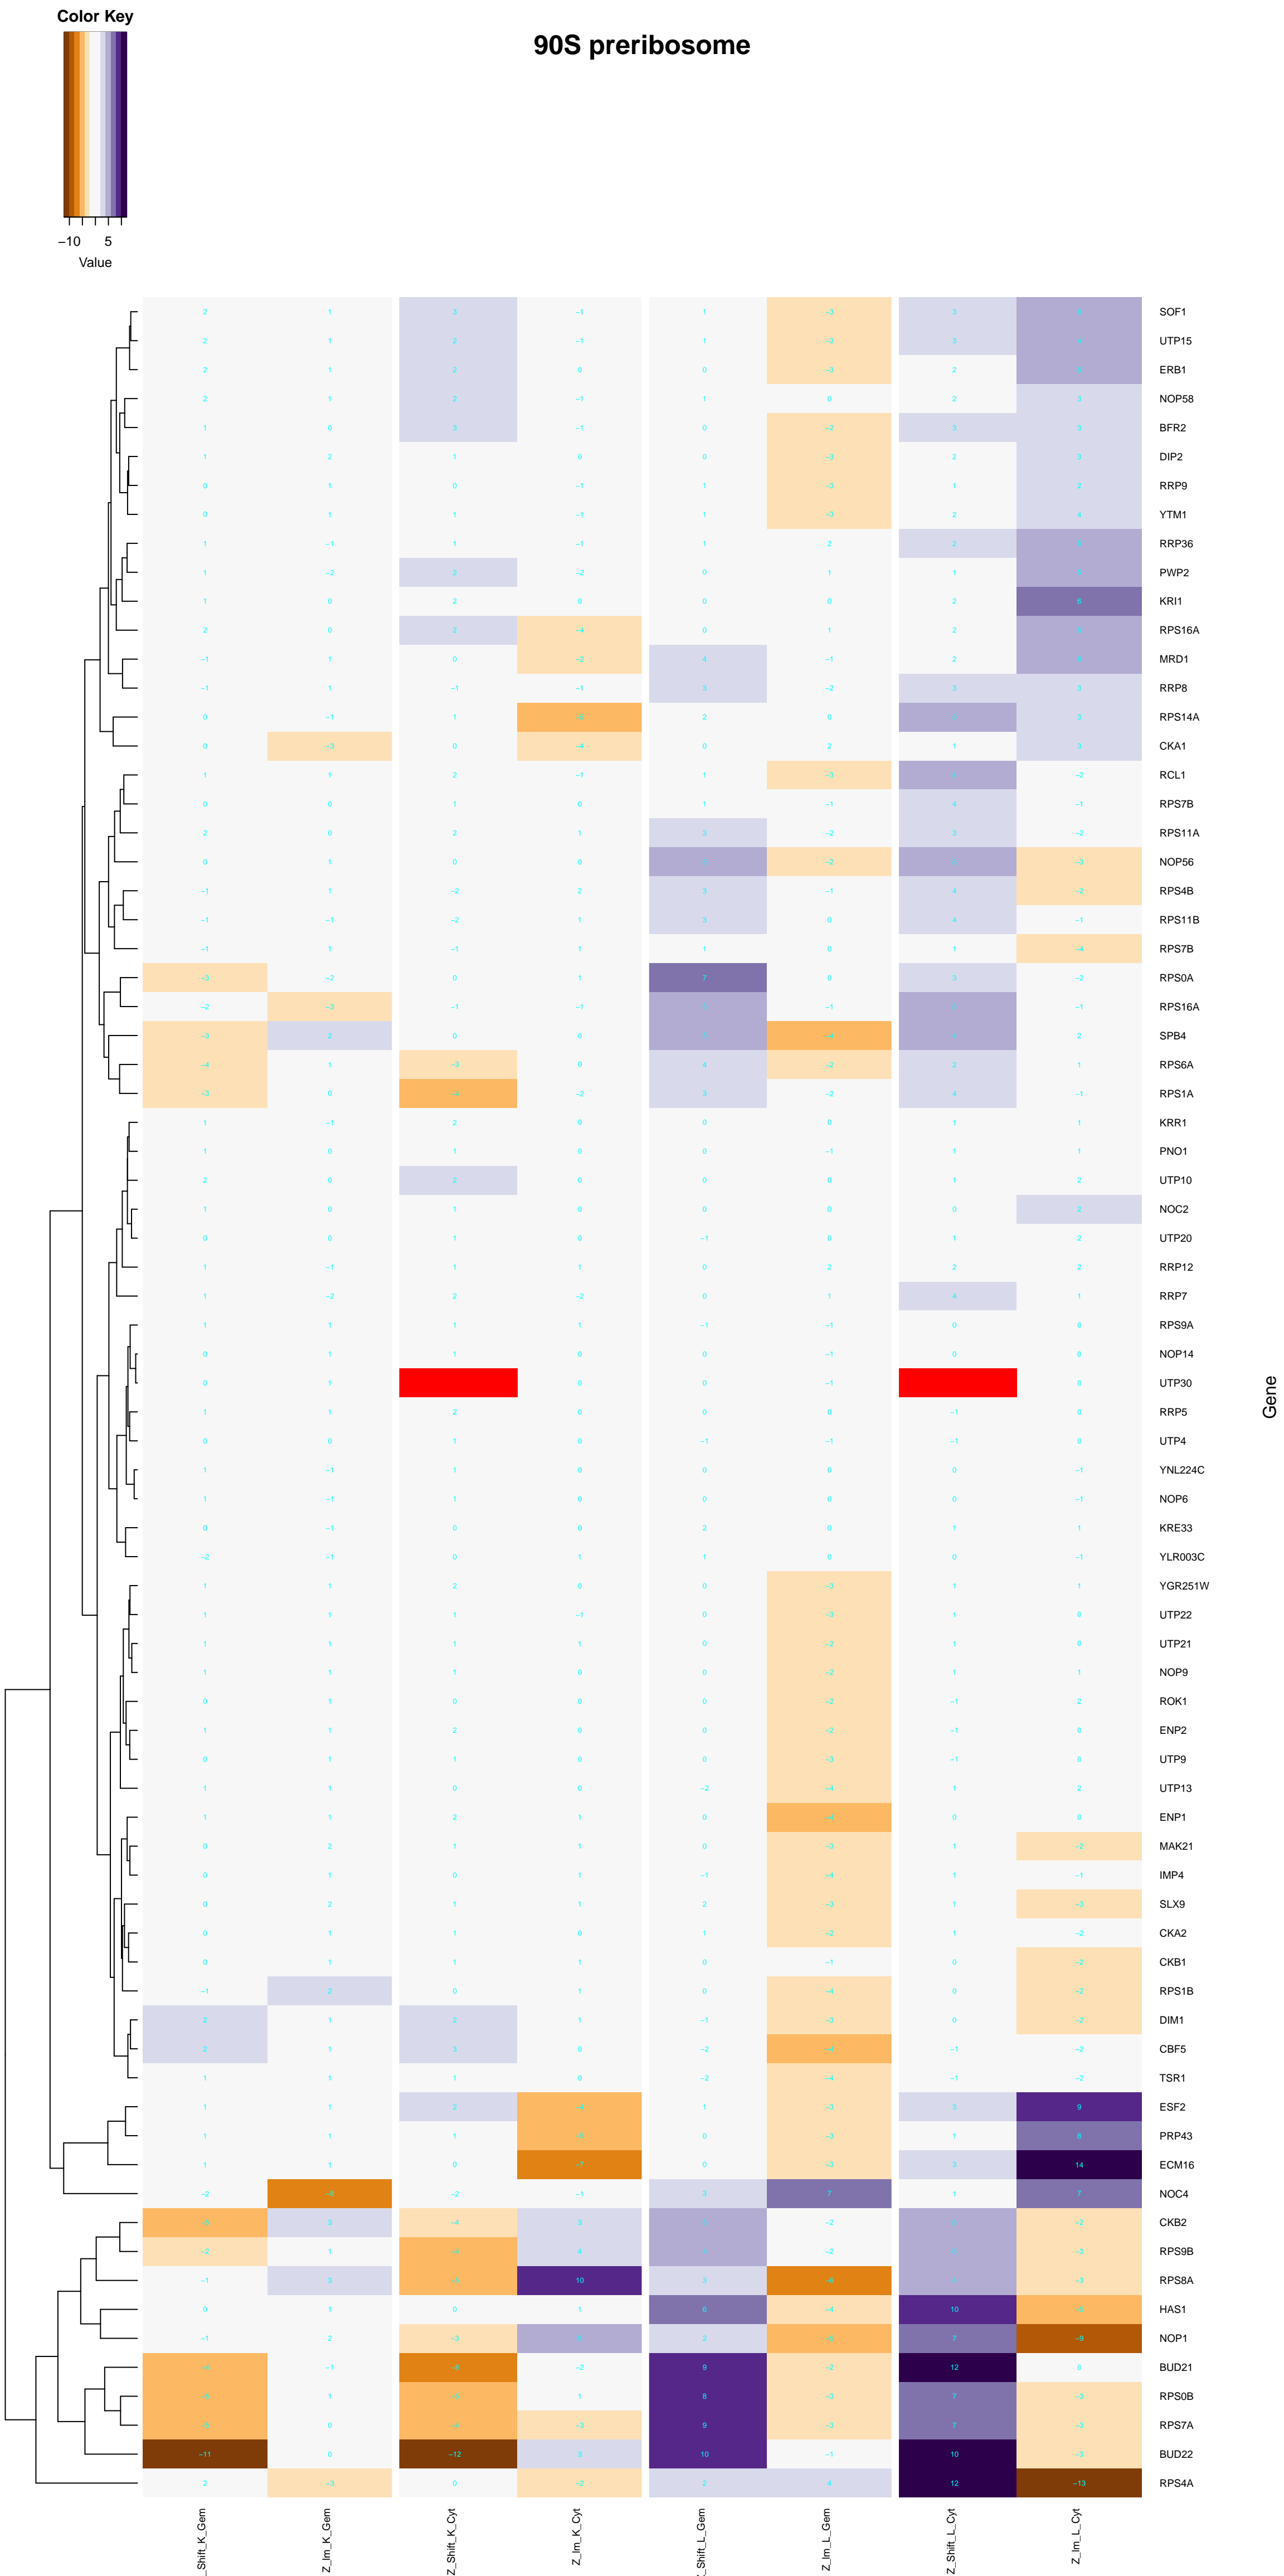

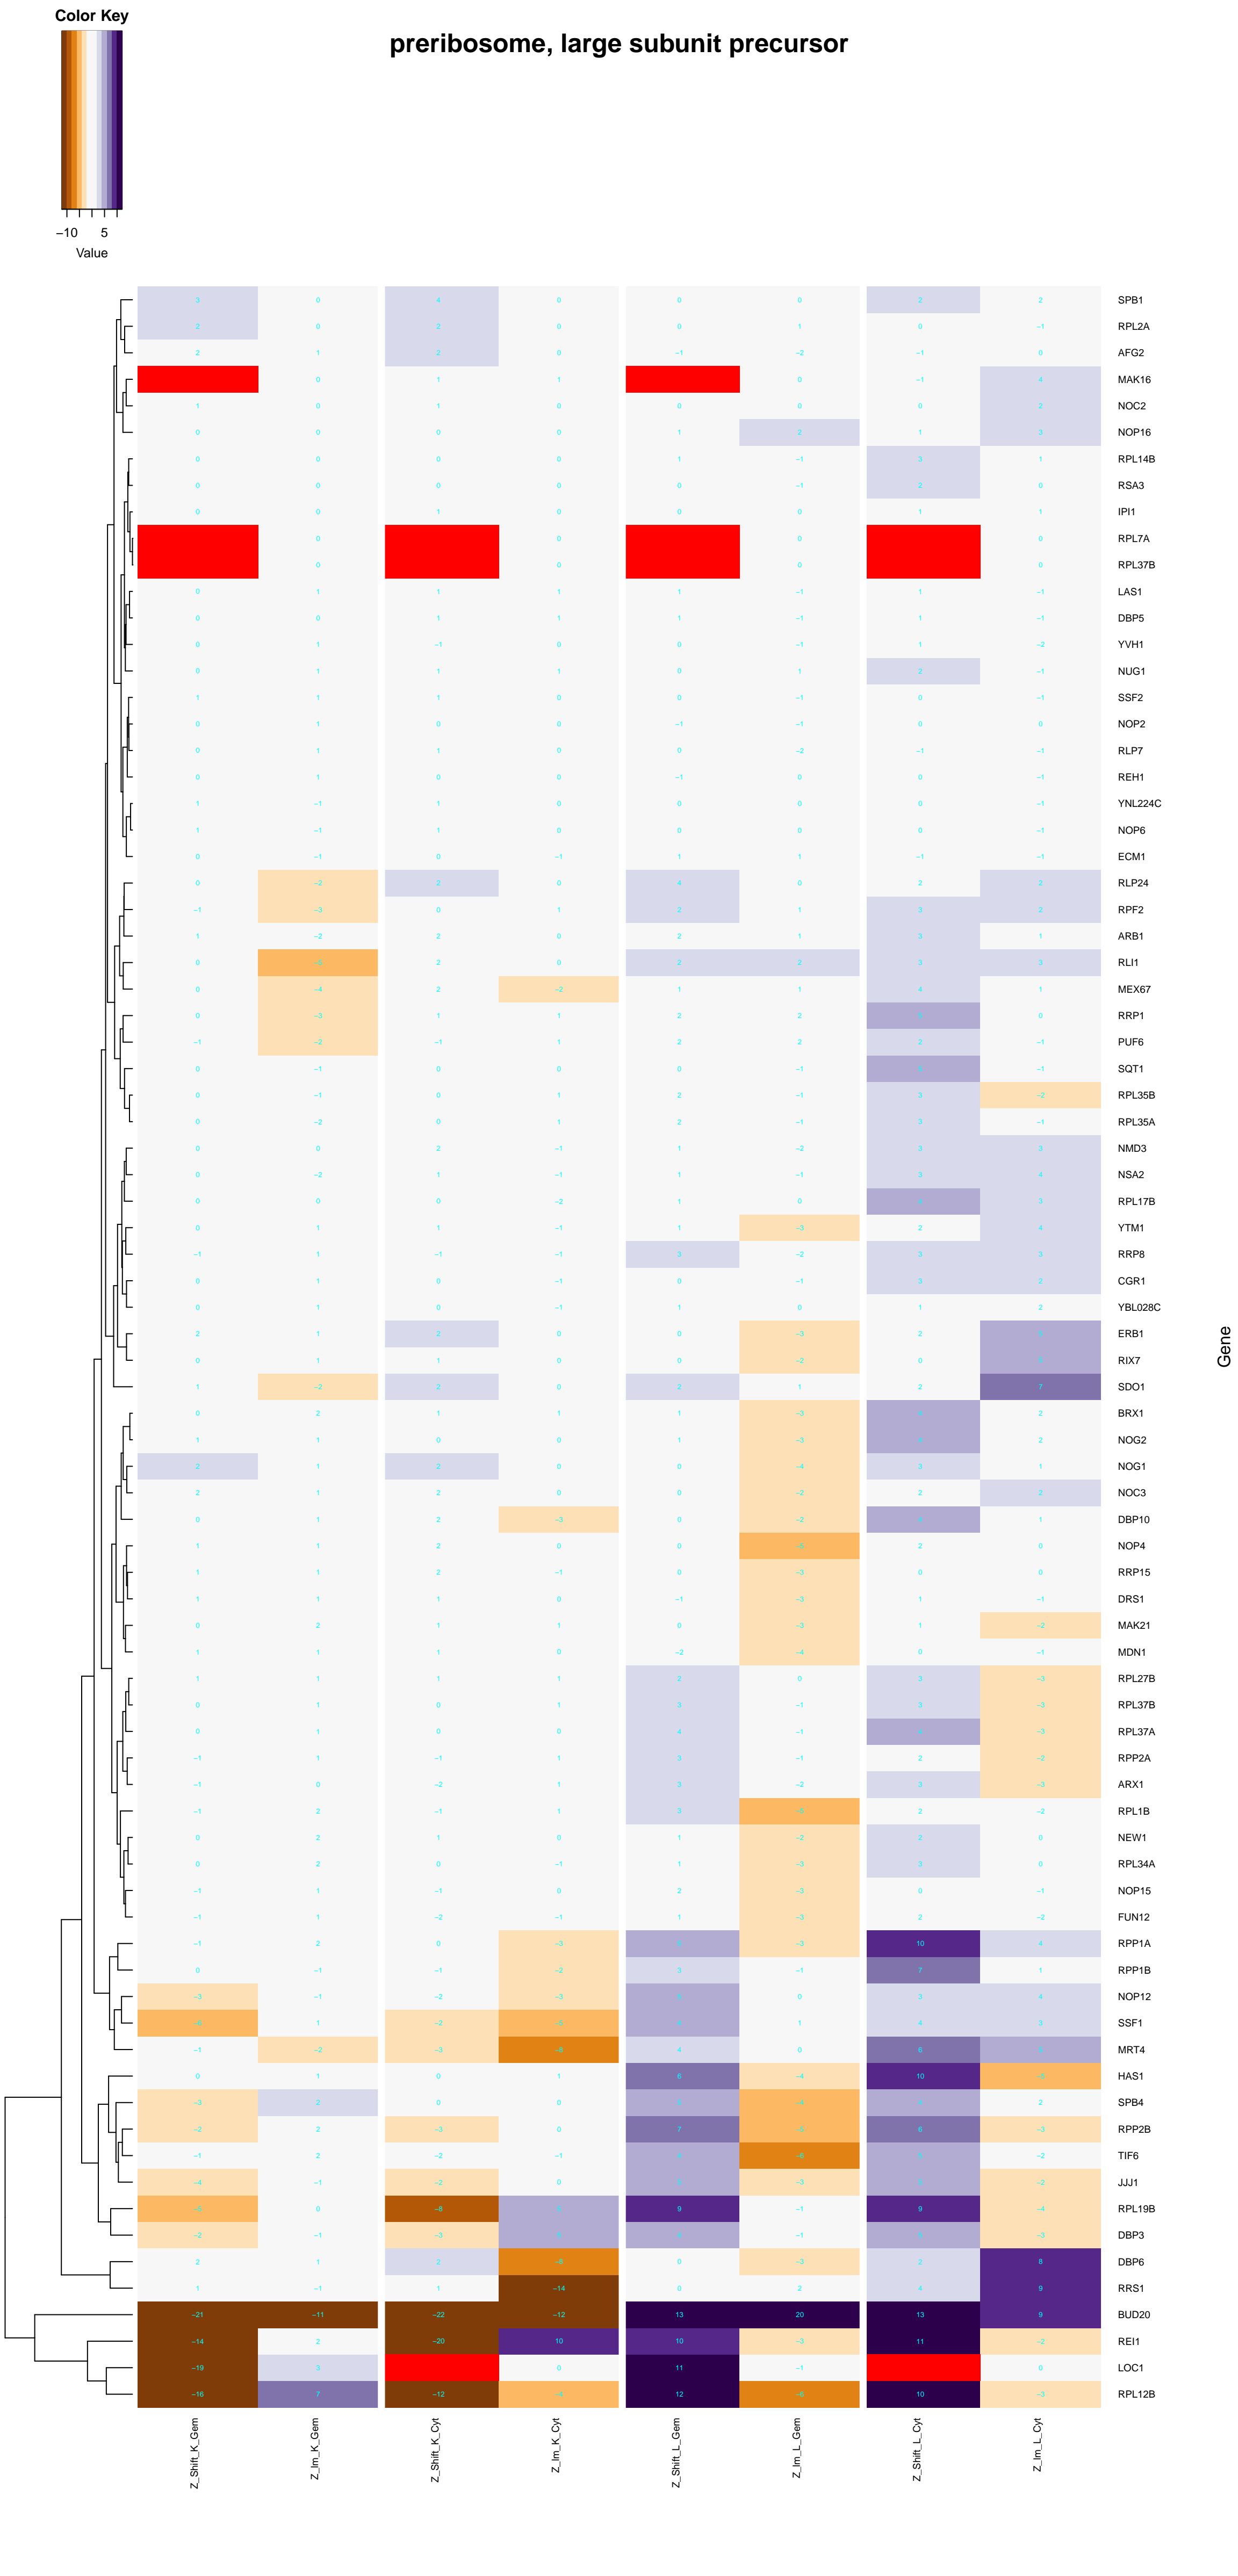

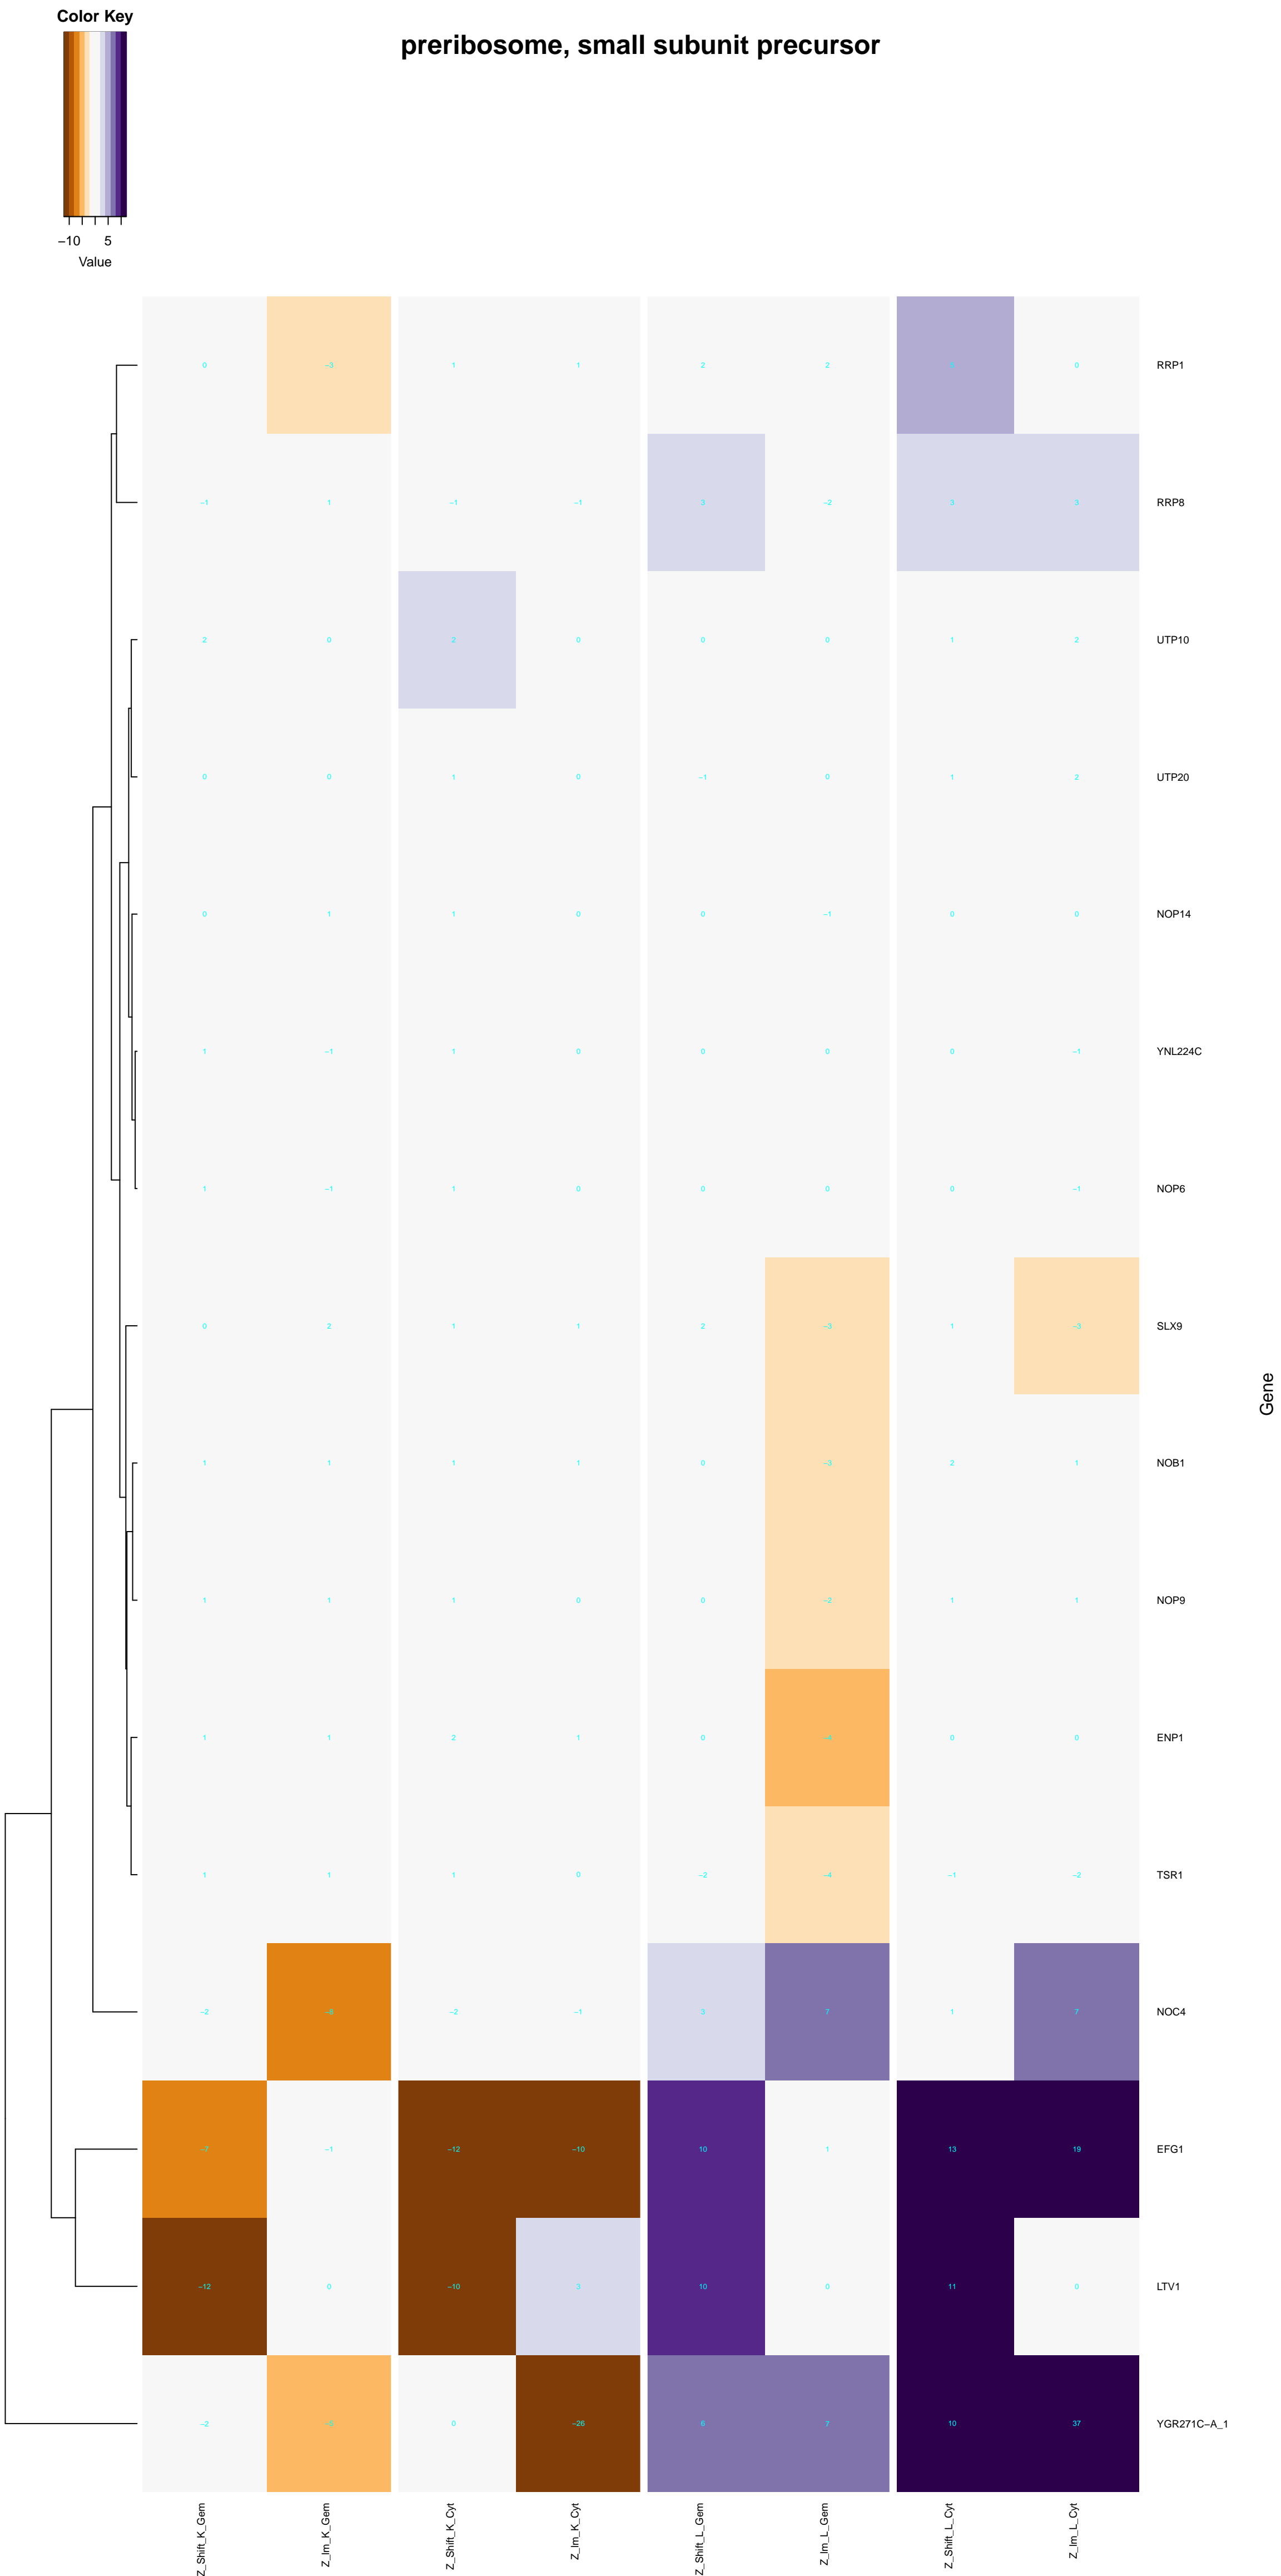

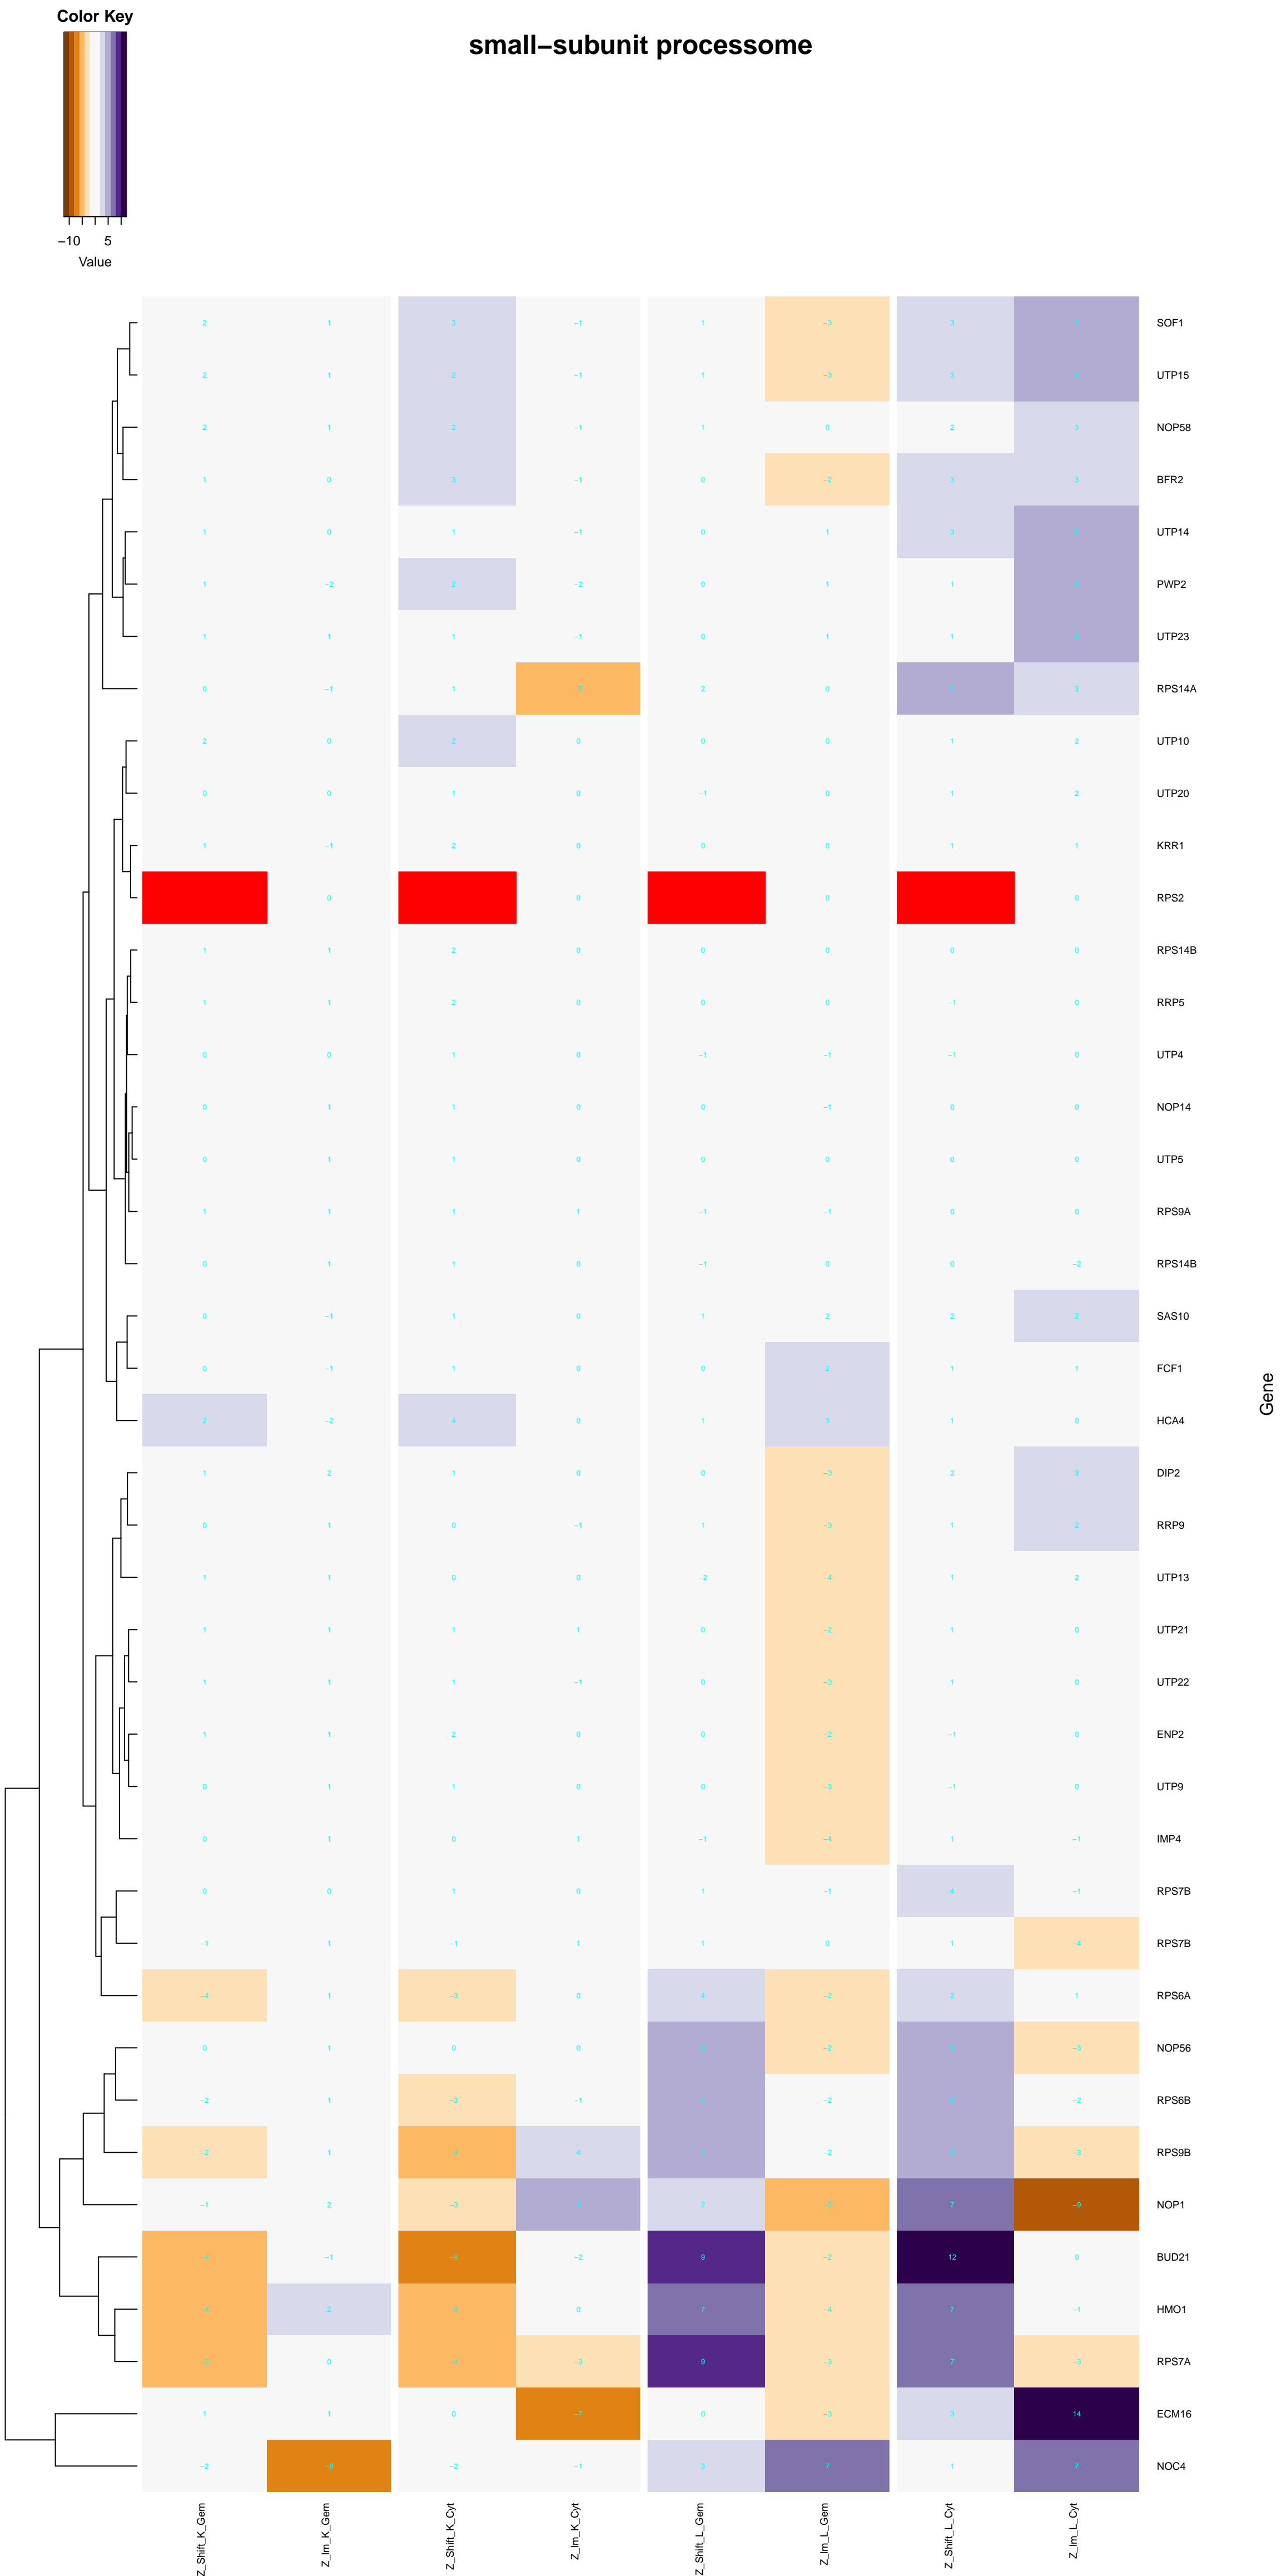

Supplement: s1 [file s1]

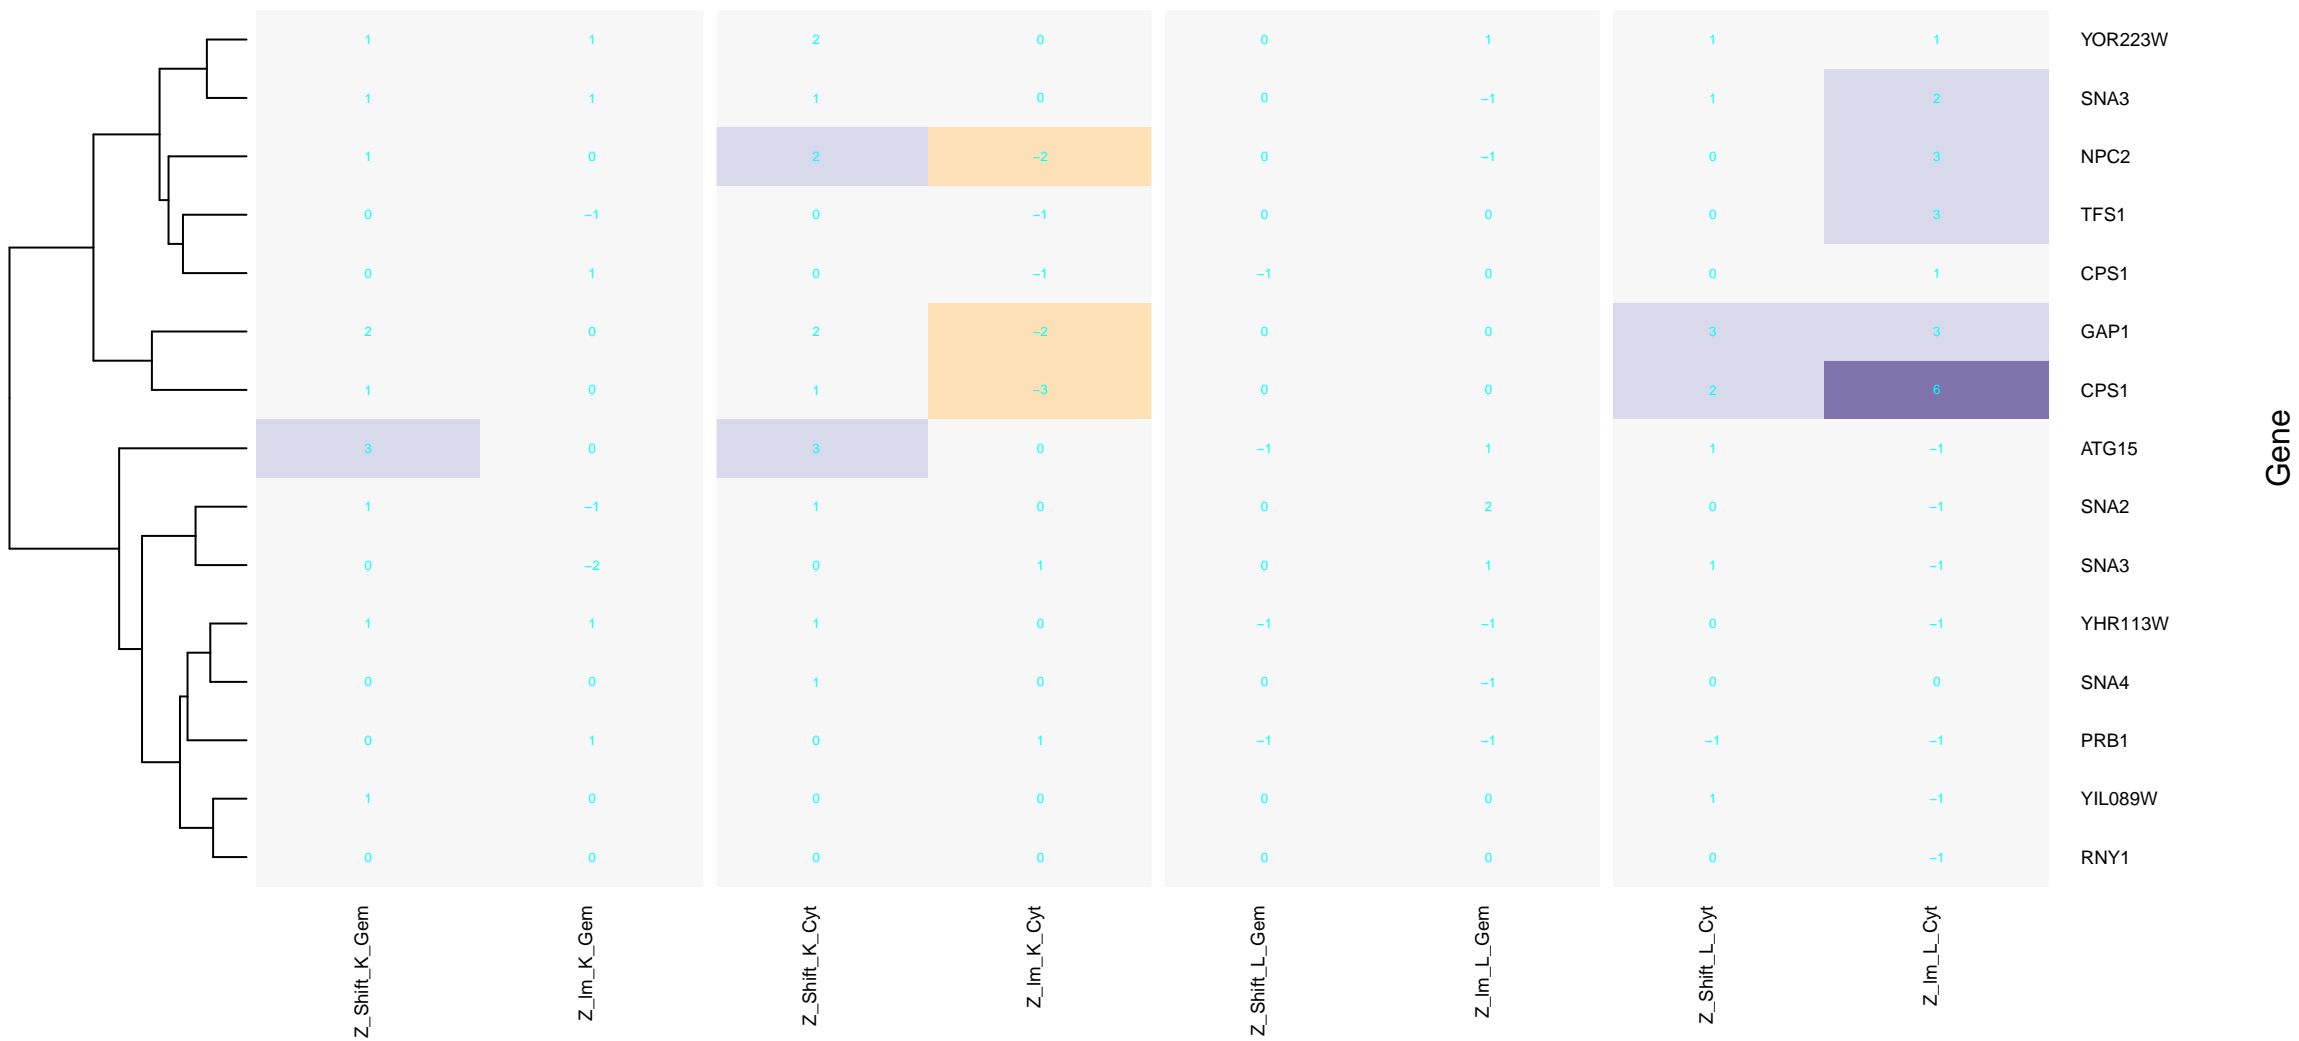

Supplement: s1 [file s1]

## ribosome assembly

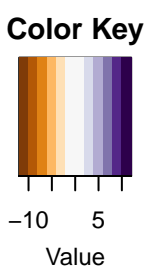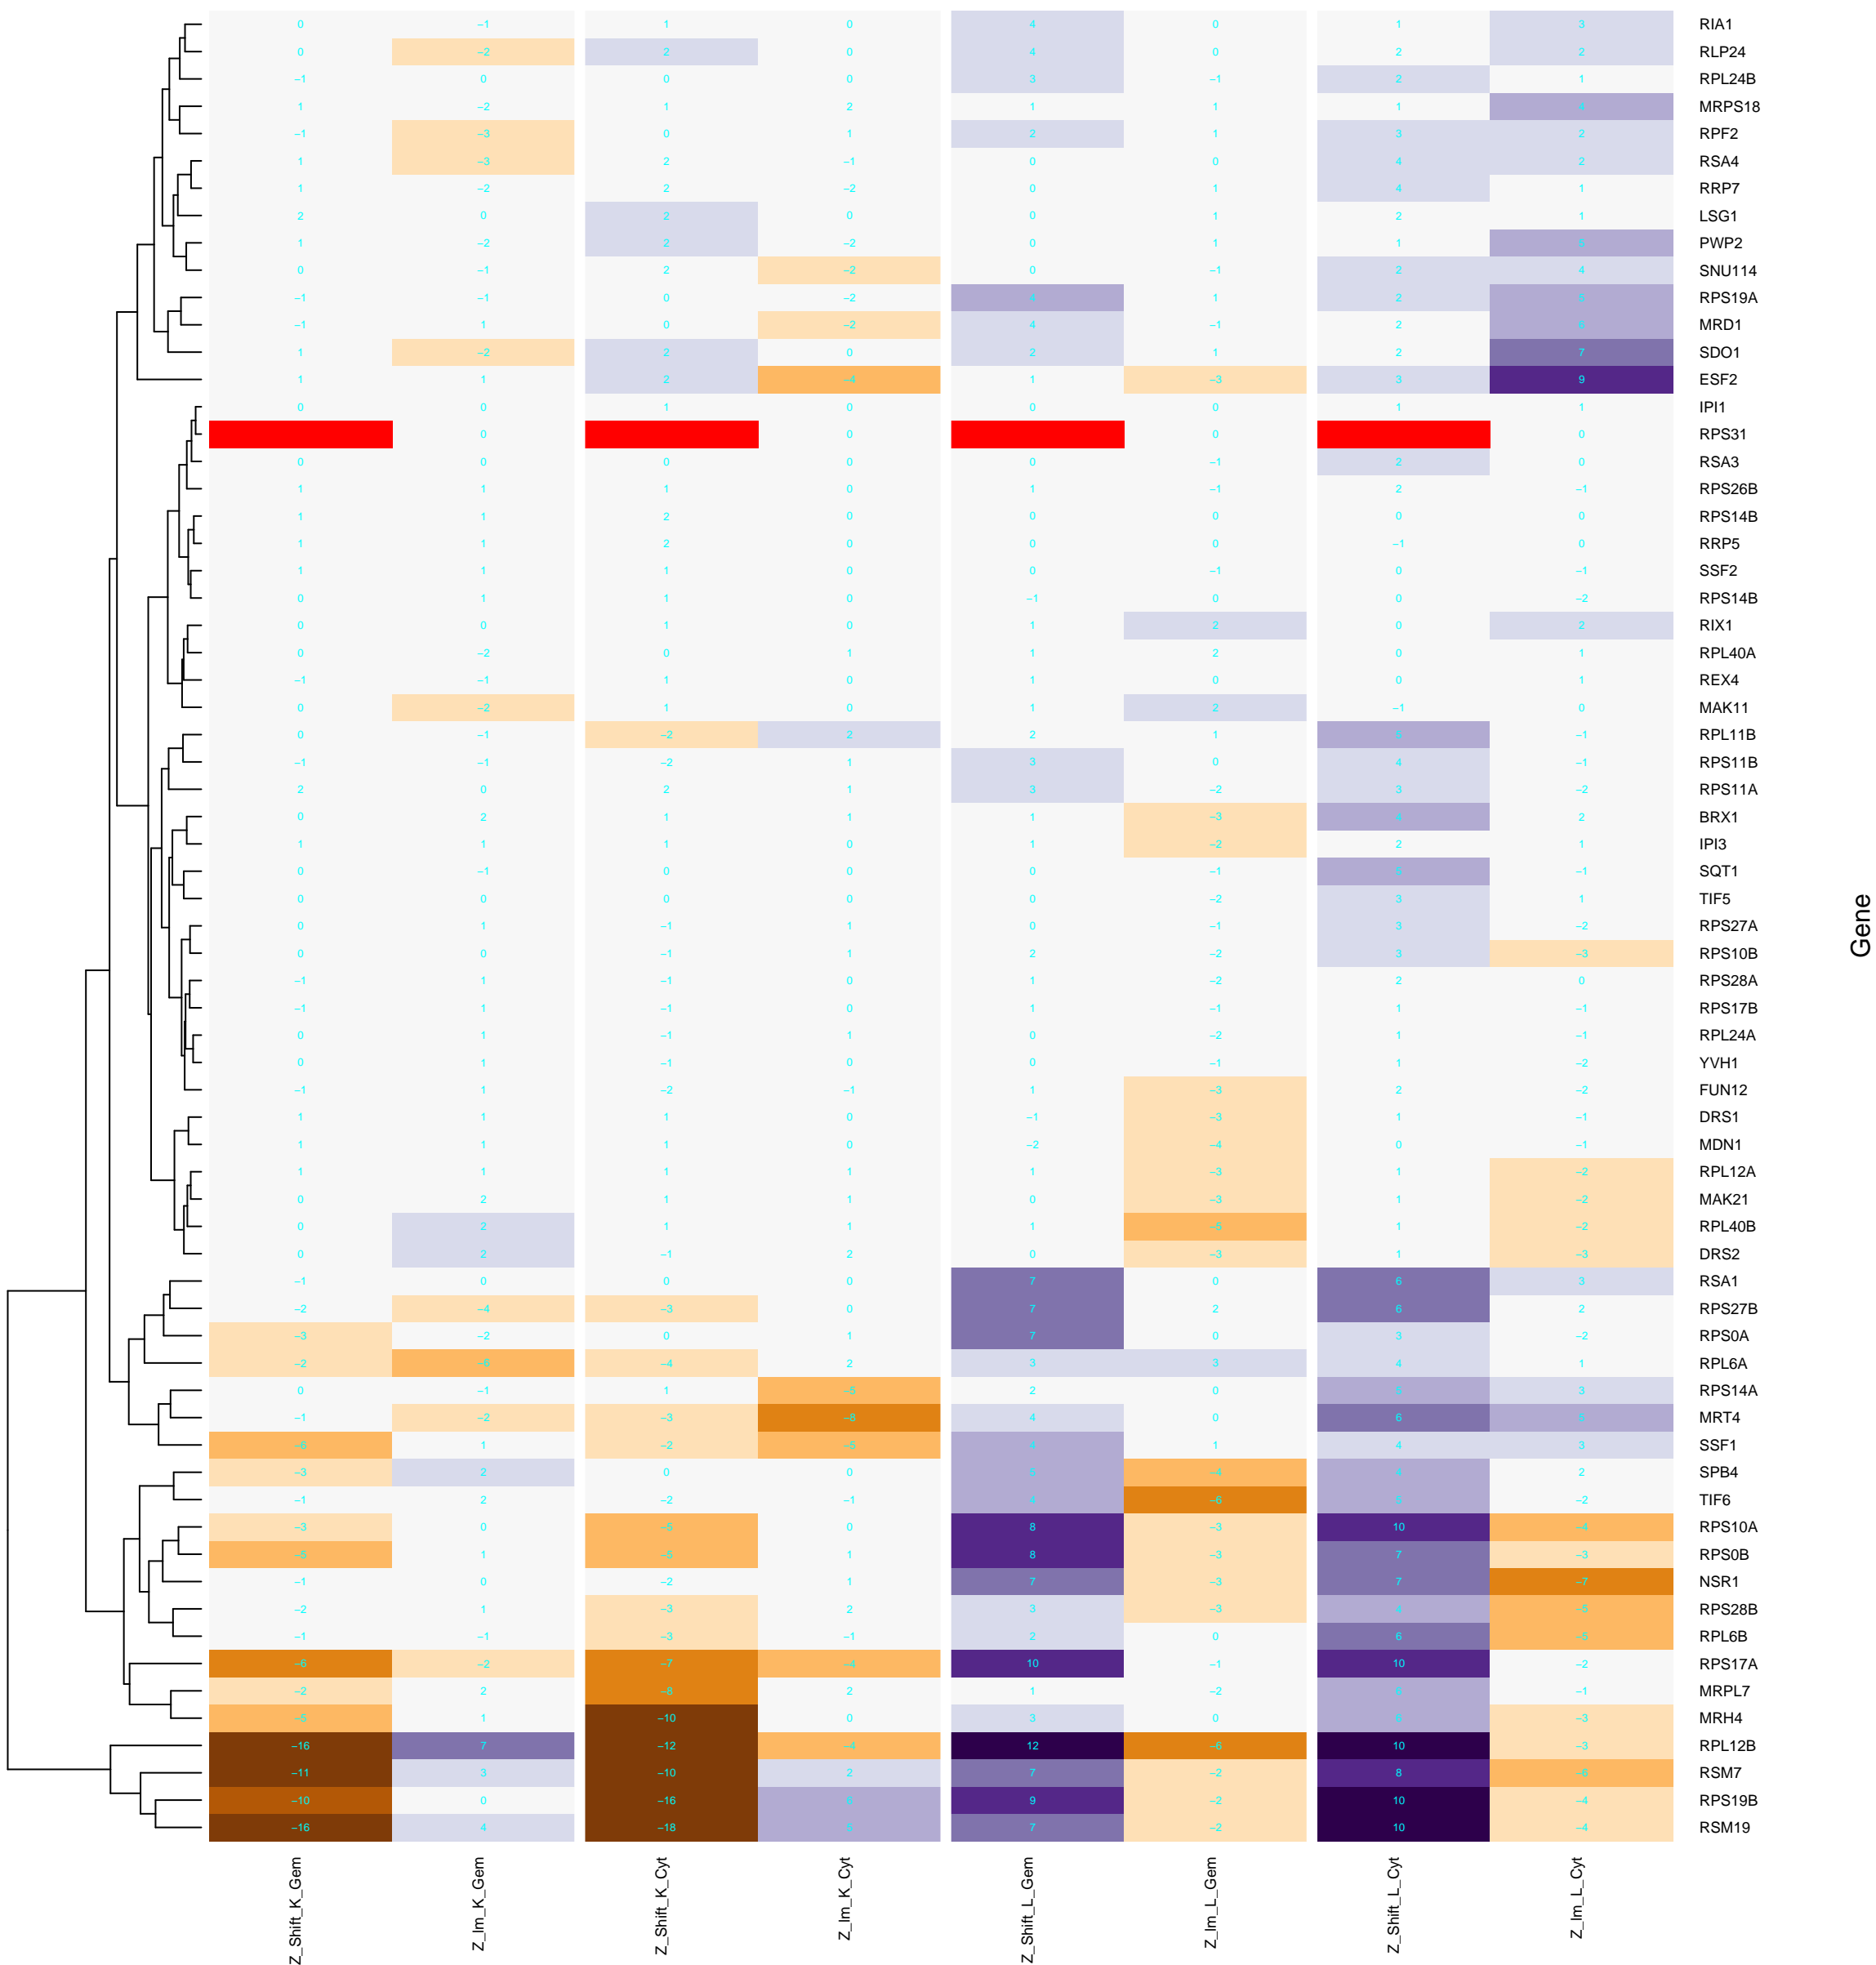

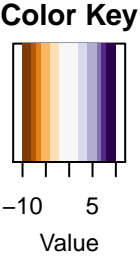

mature ribosome assembly

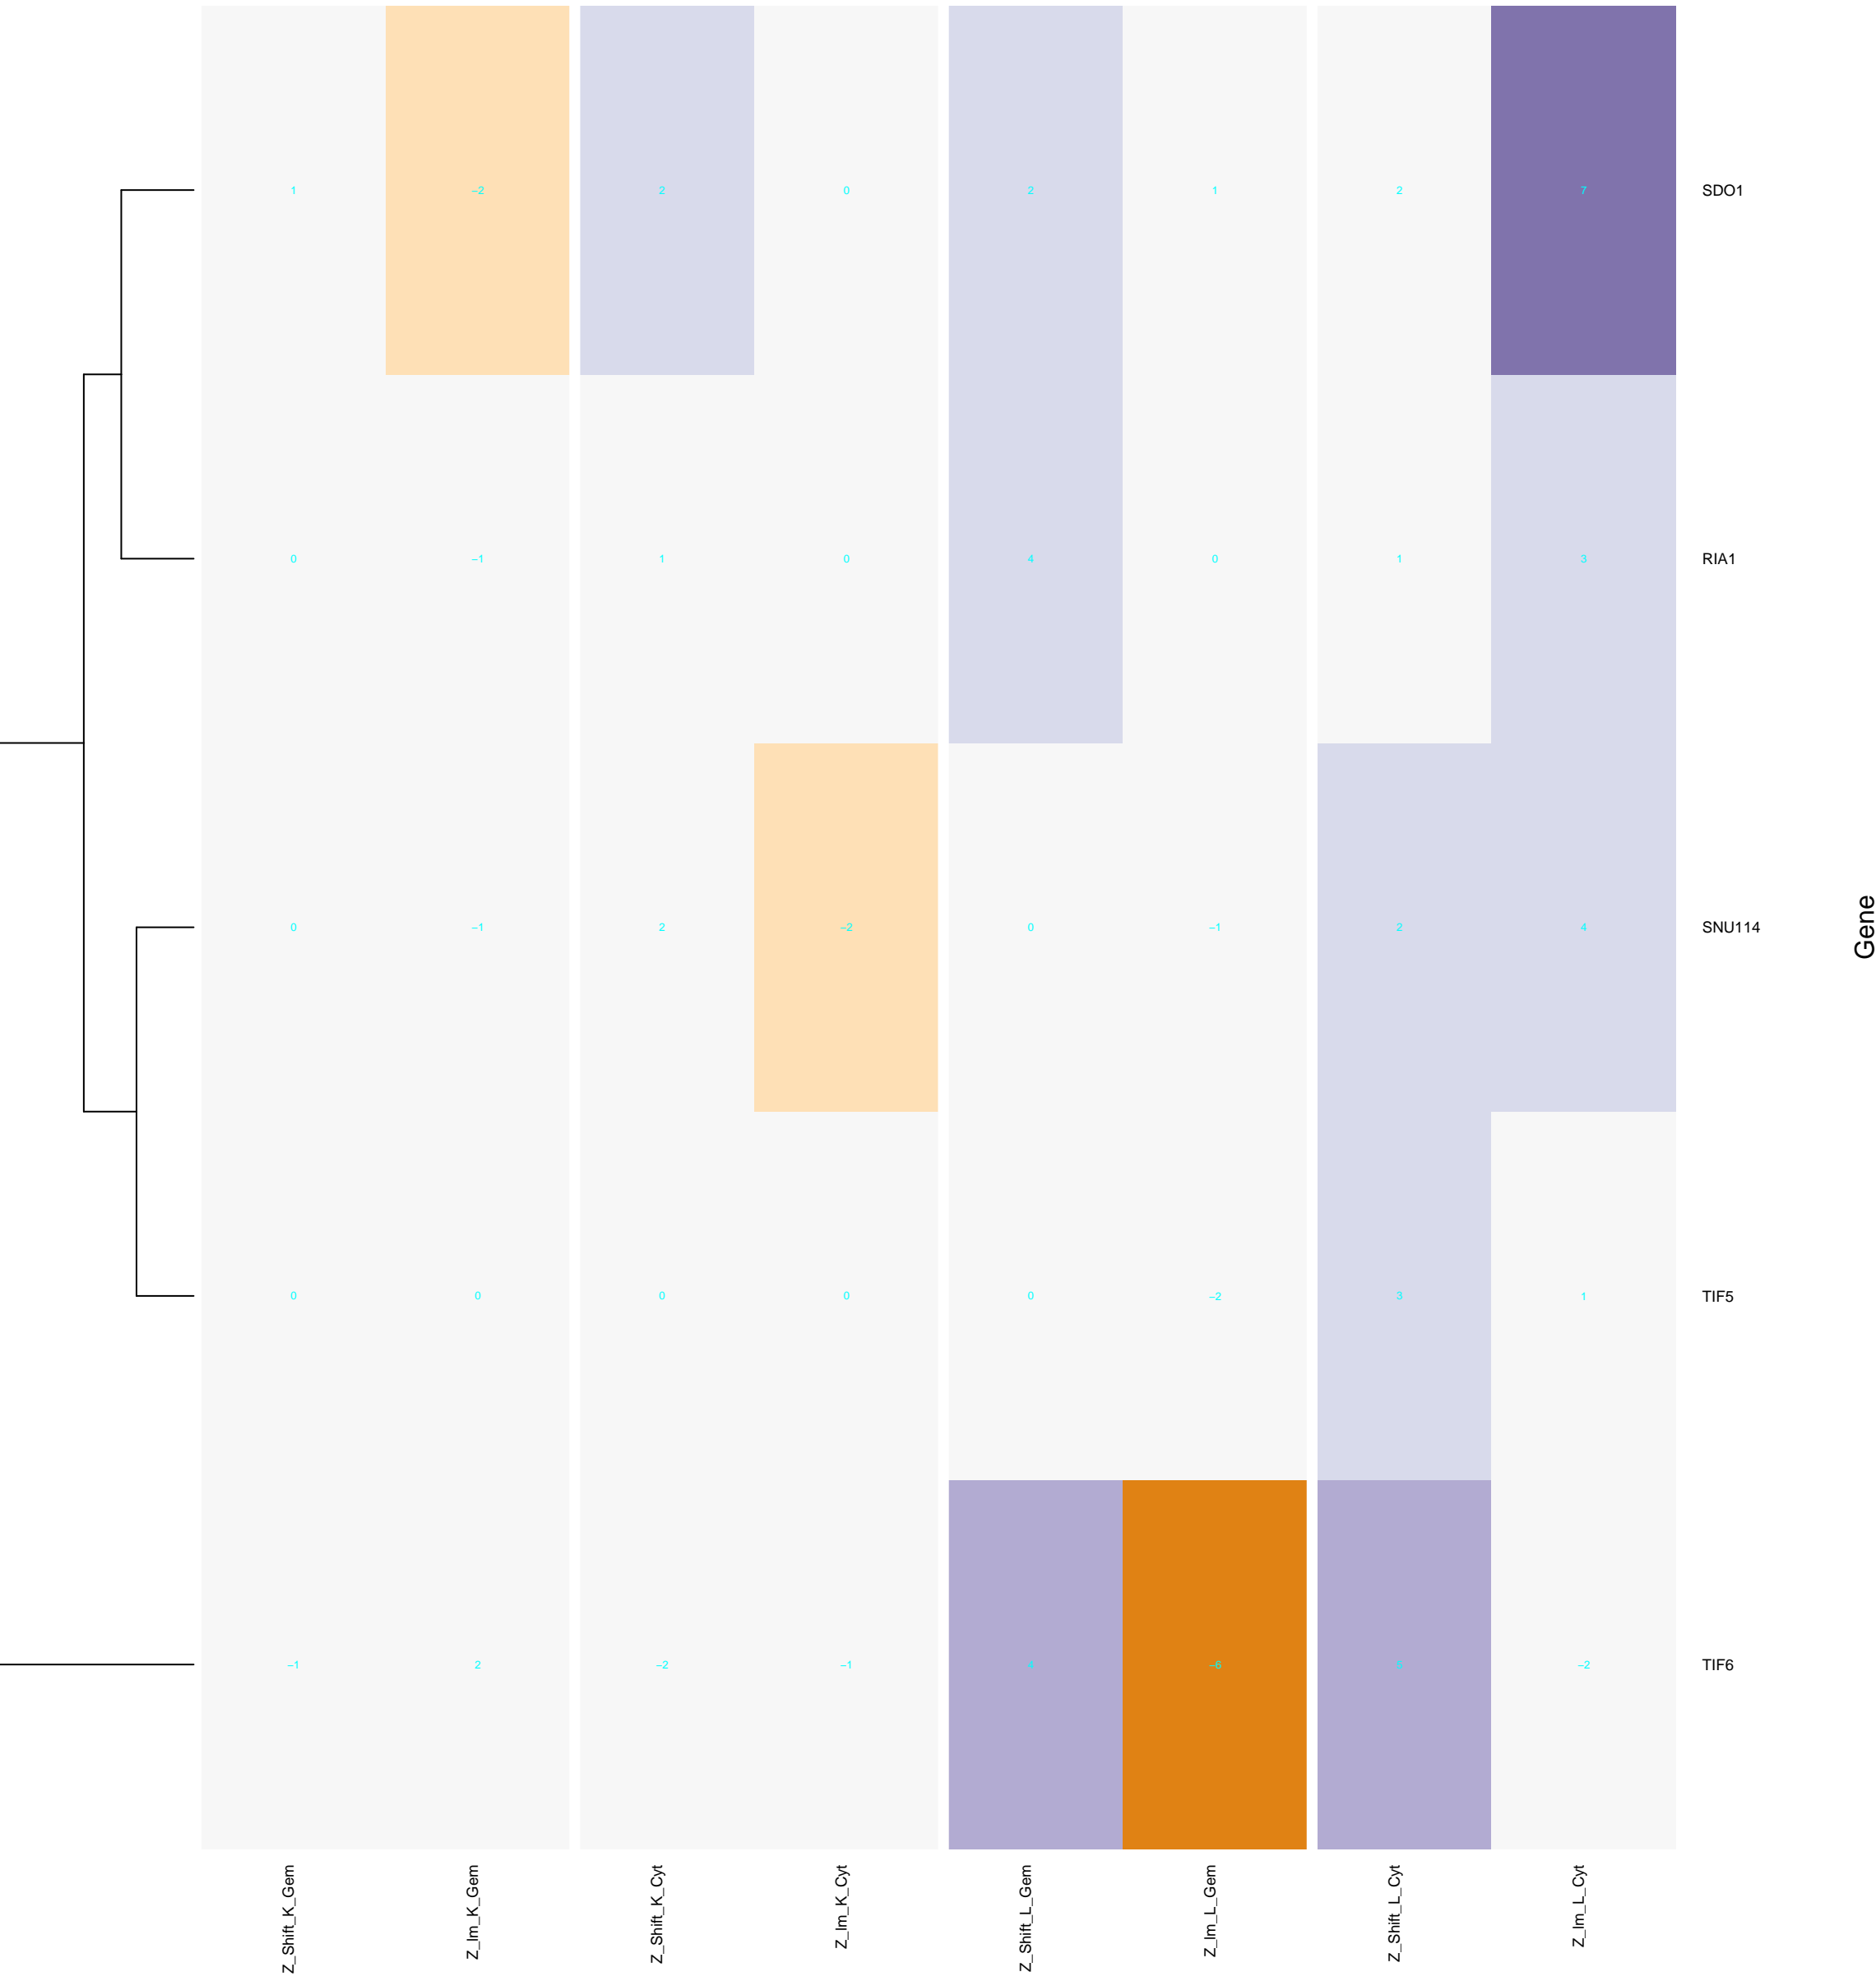

Supplement: s1 [file s1]

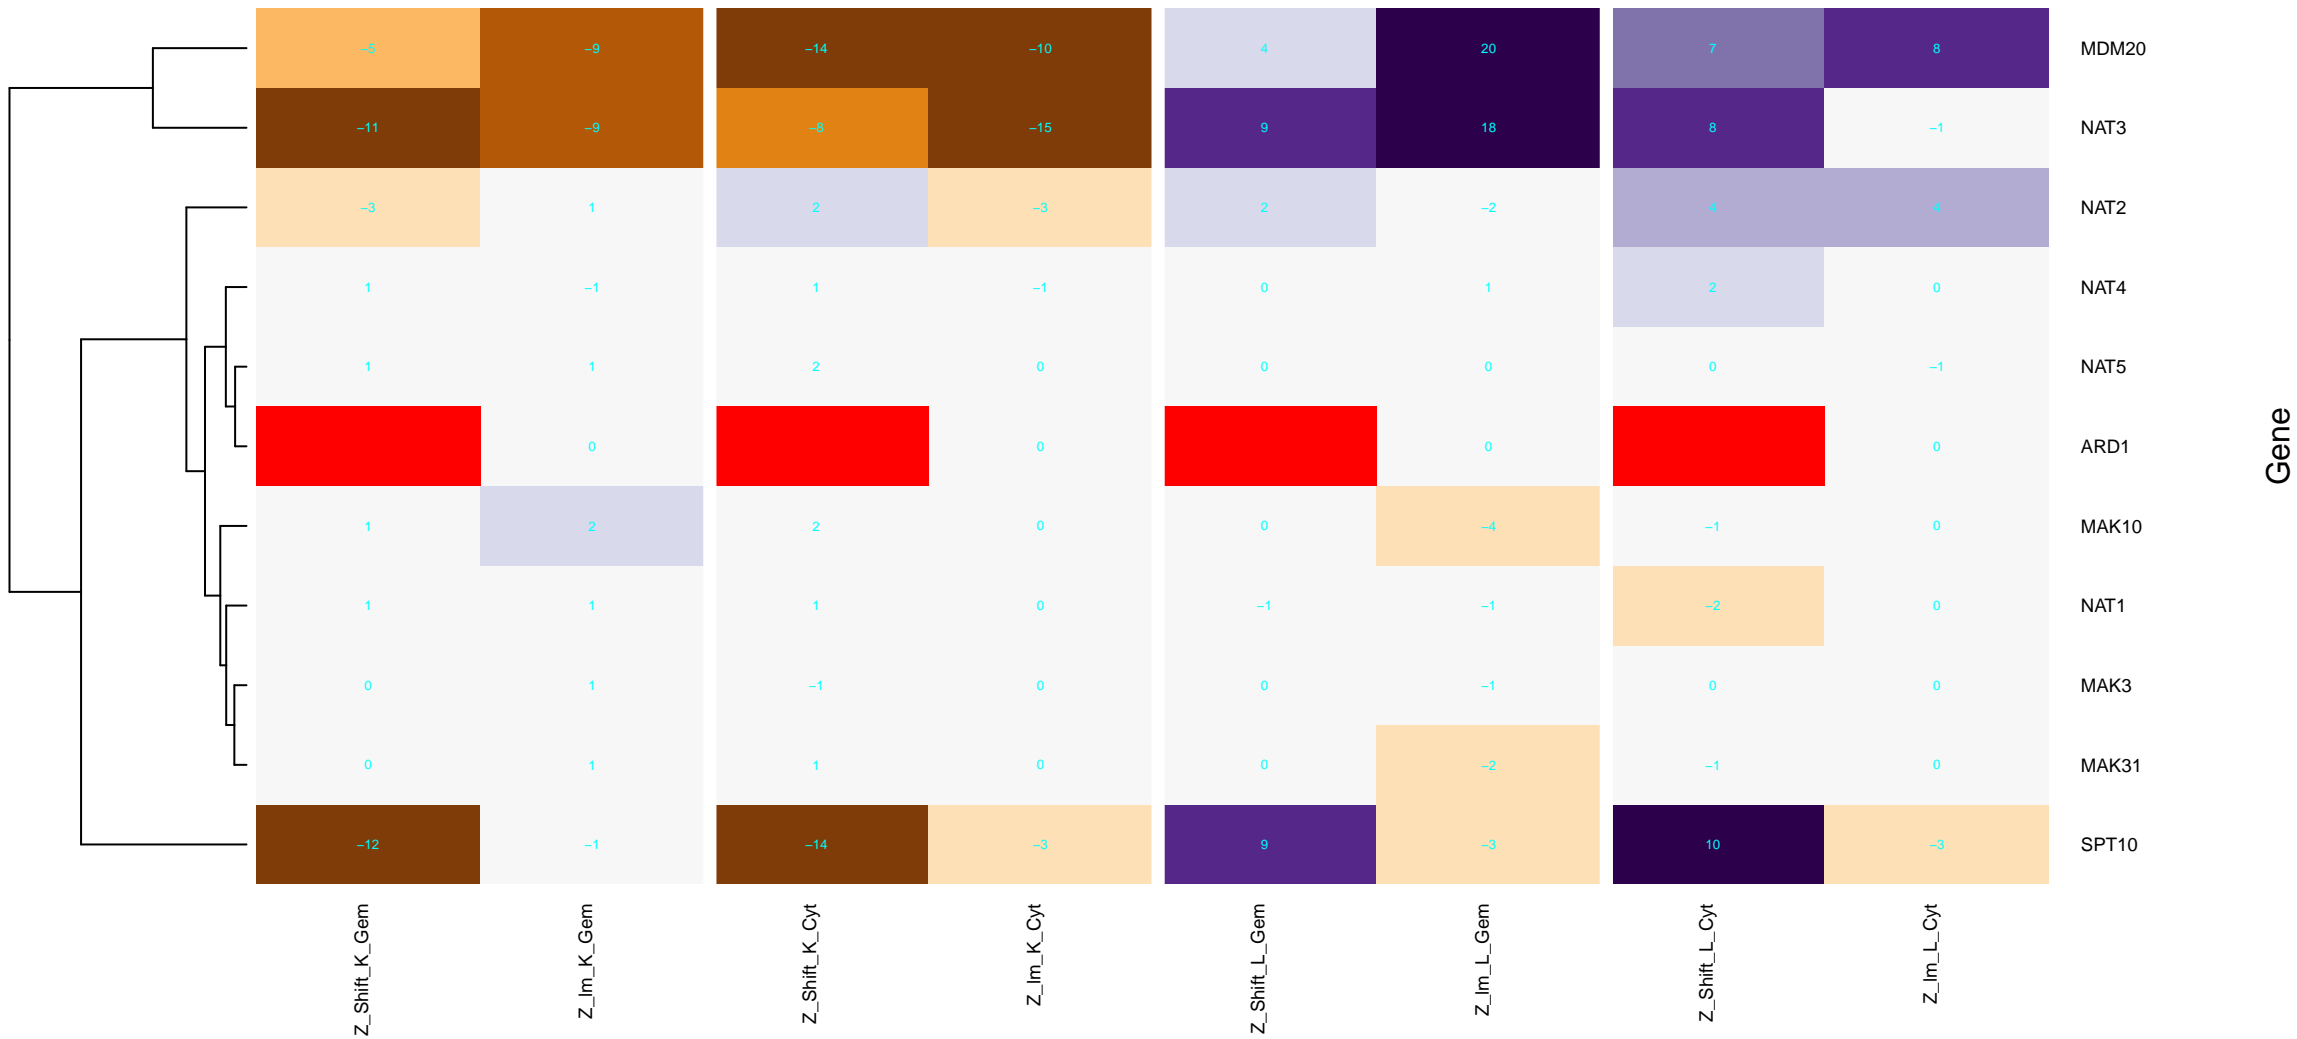

Supplement: s1 [file s1]
