# Supplementary figures and images for: A Humanized Yeast Phenomic Model of Deoxycytidine Kinase to Predict Genetic Buffering of Nucleoside Analog Cytotoxicity (part 2 of 4)
Source: MDPI journal article supplement (doi:10.3390/genes10100770), 2019-09-30

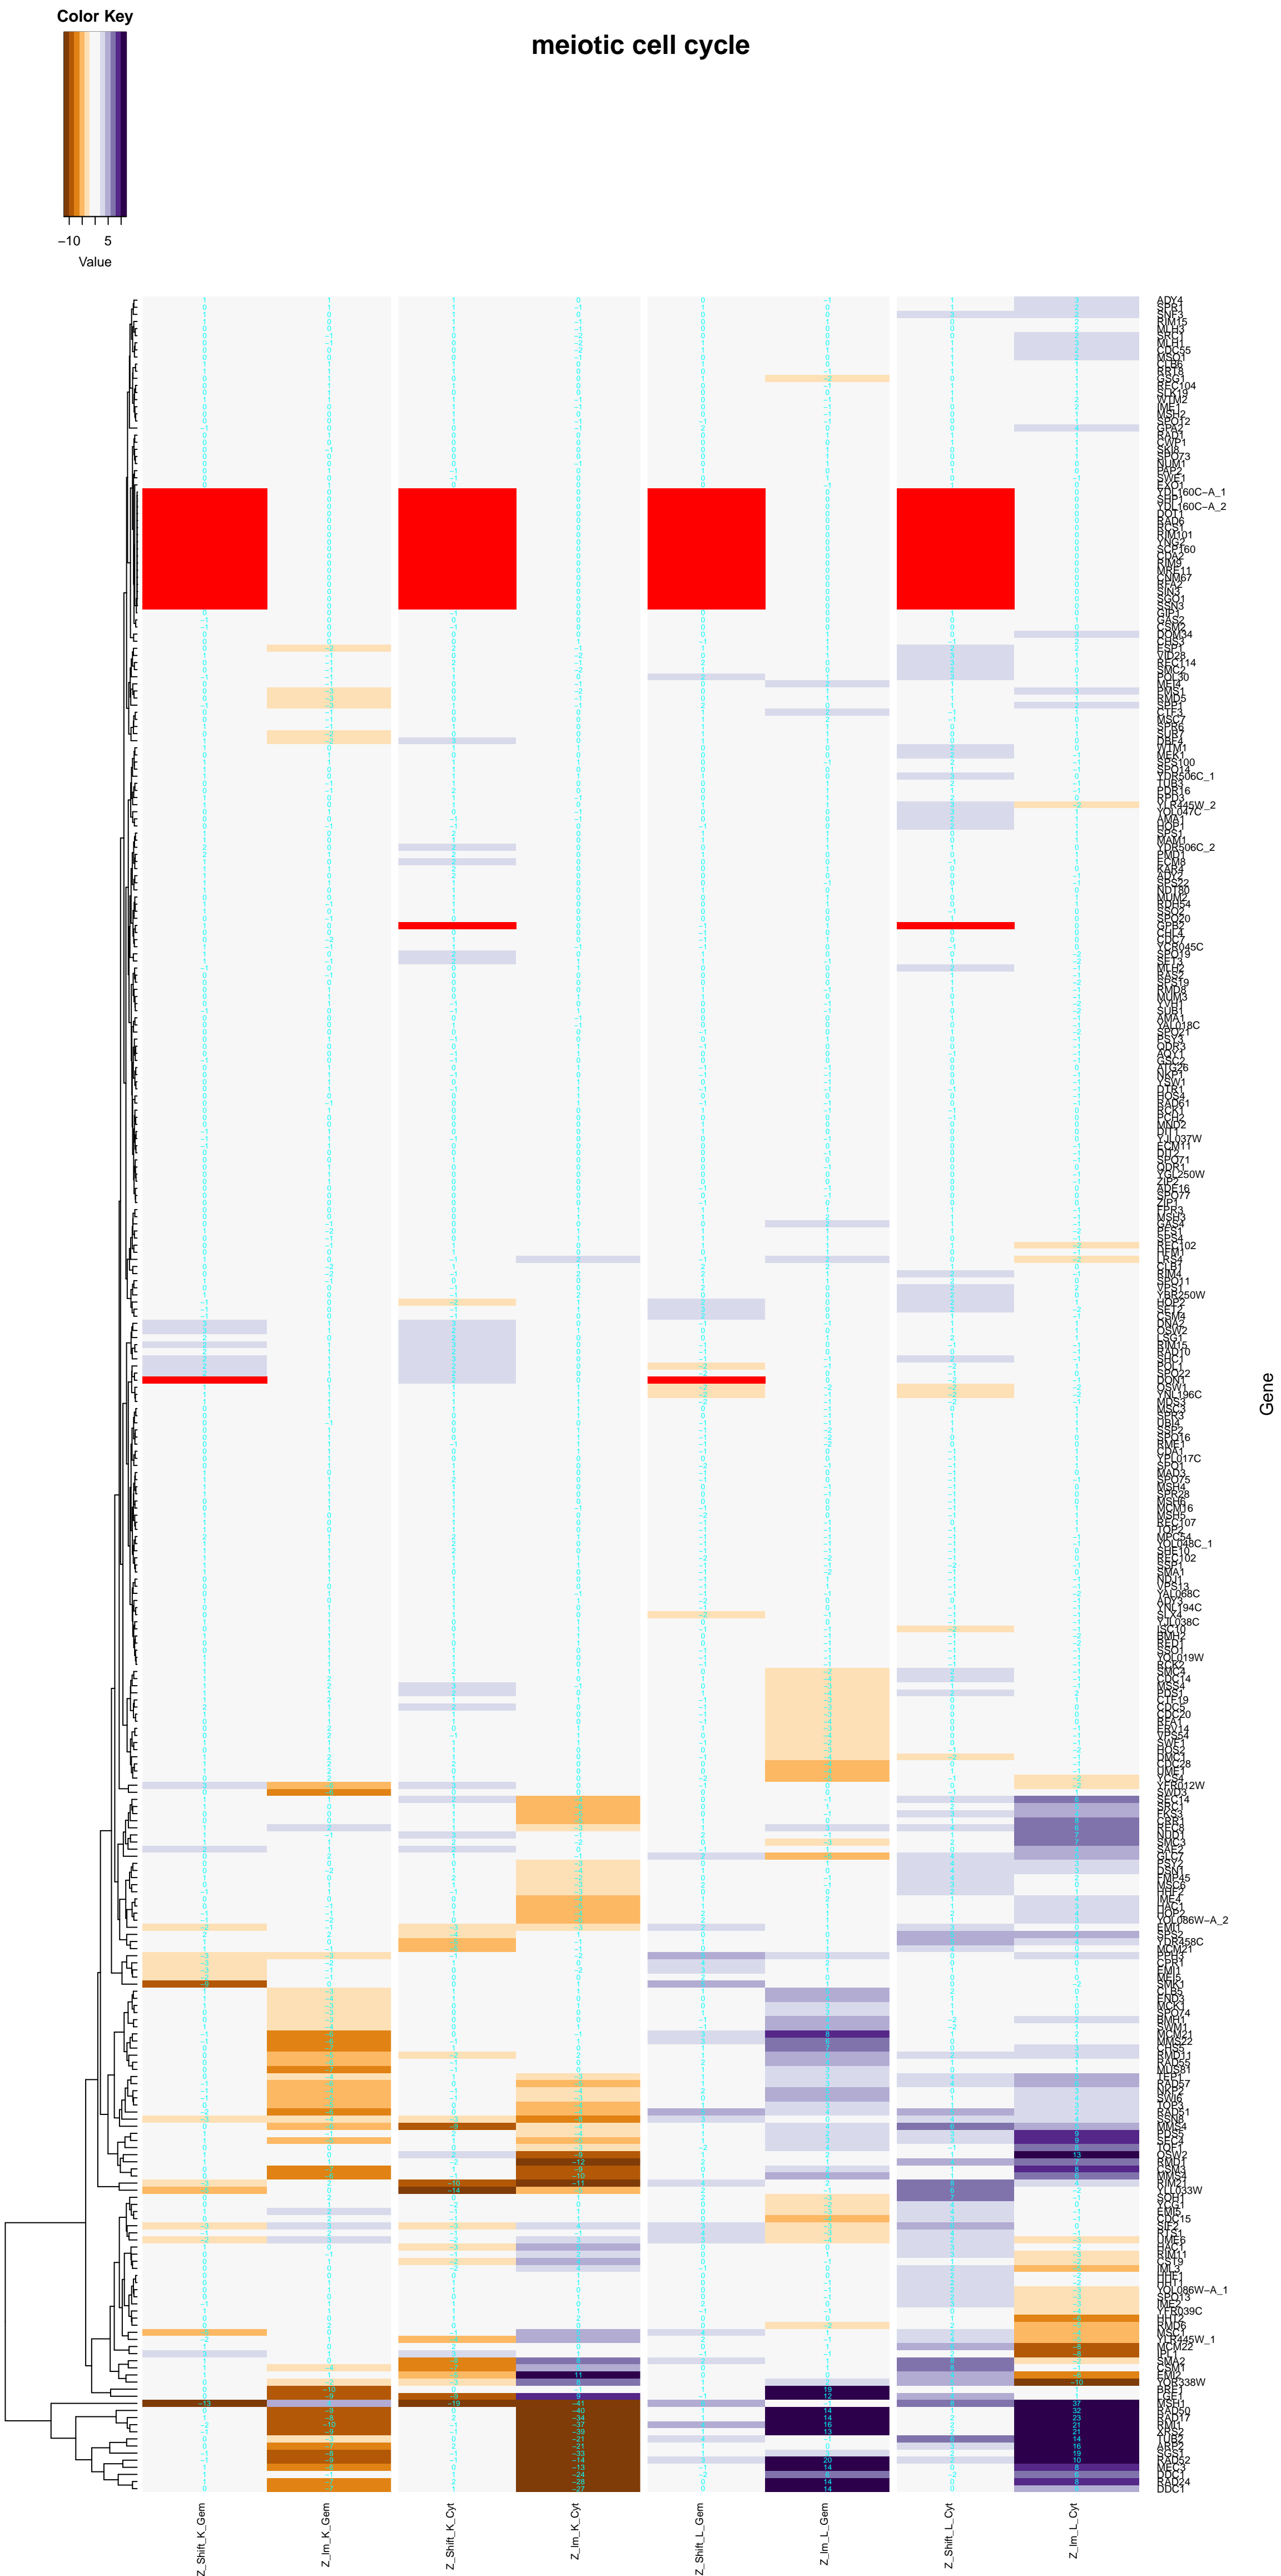

Supplement: s1 [file s1]

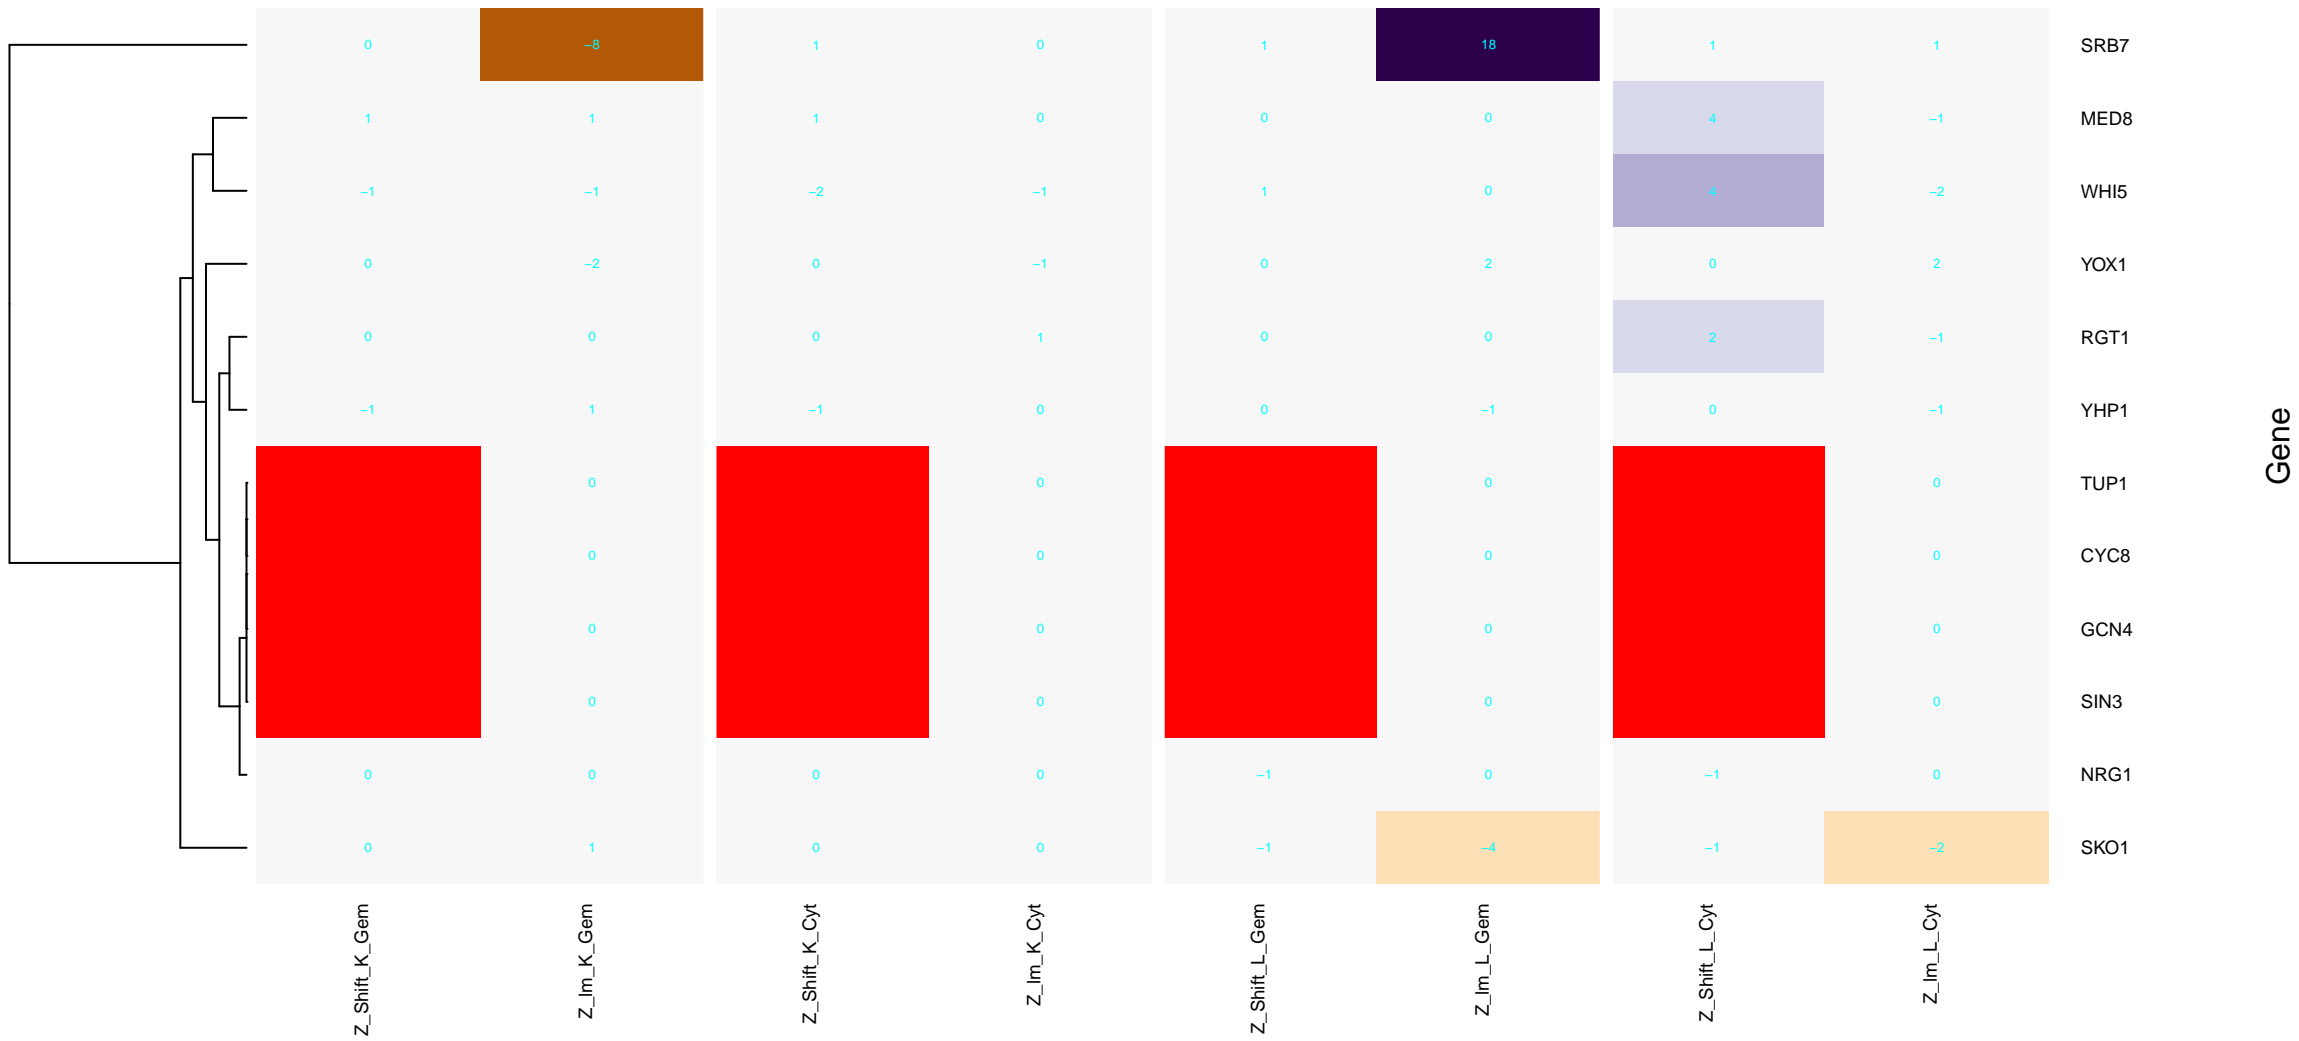

Supplement: s1 [file s1]

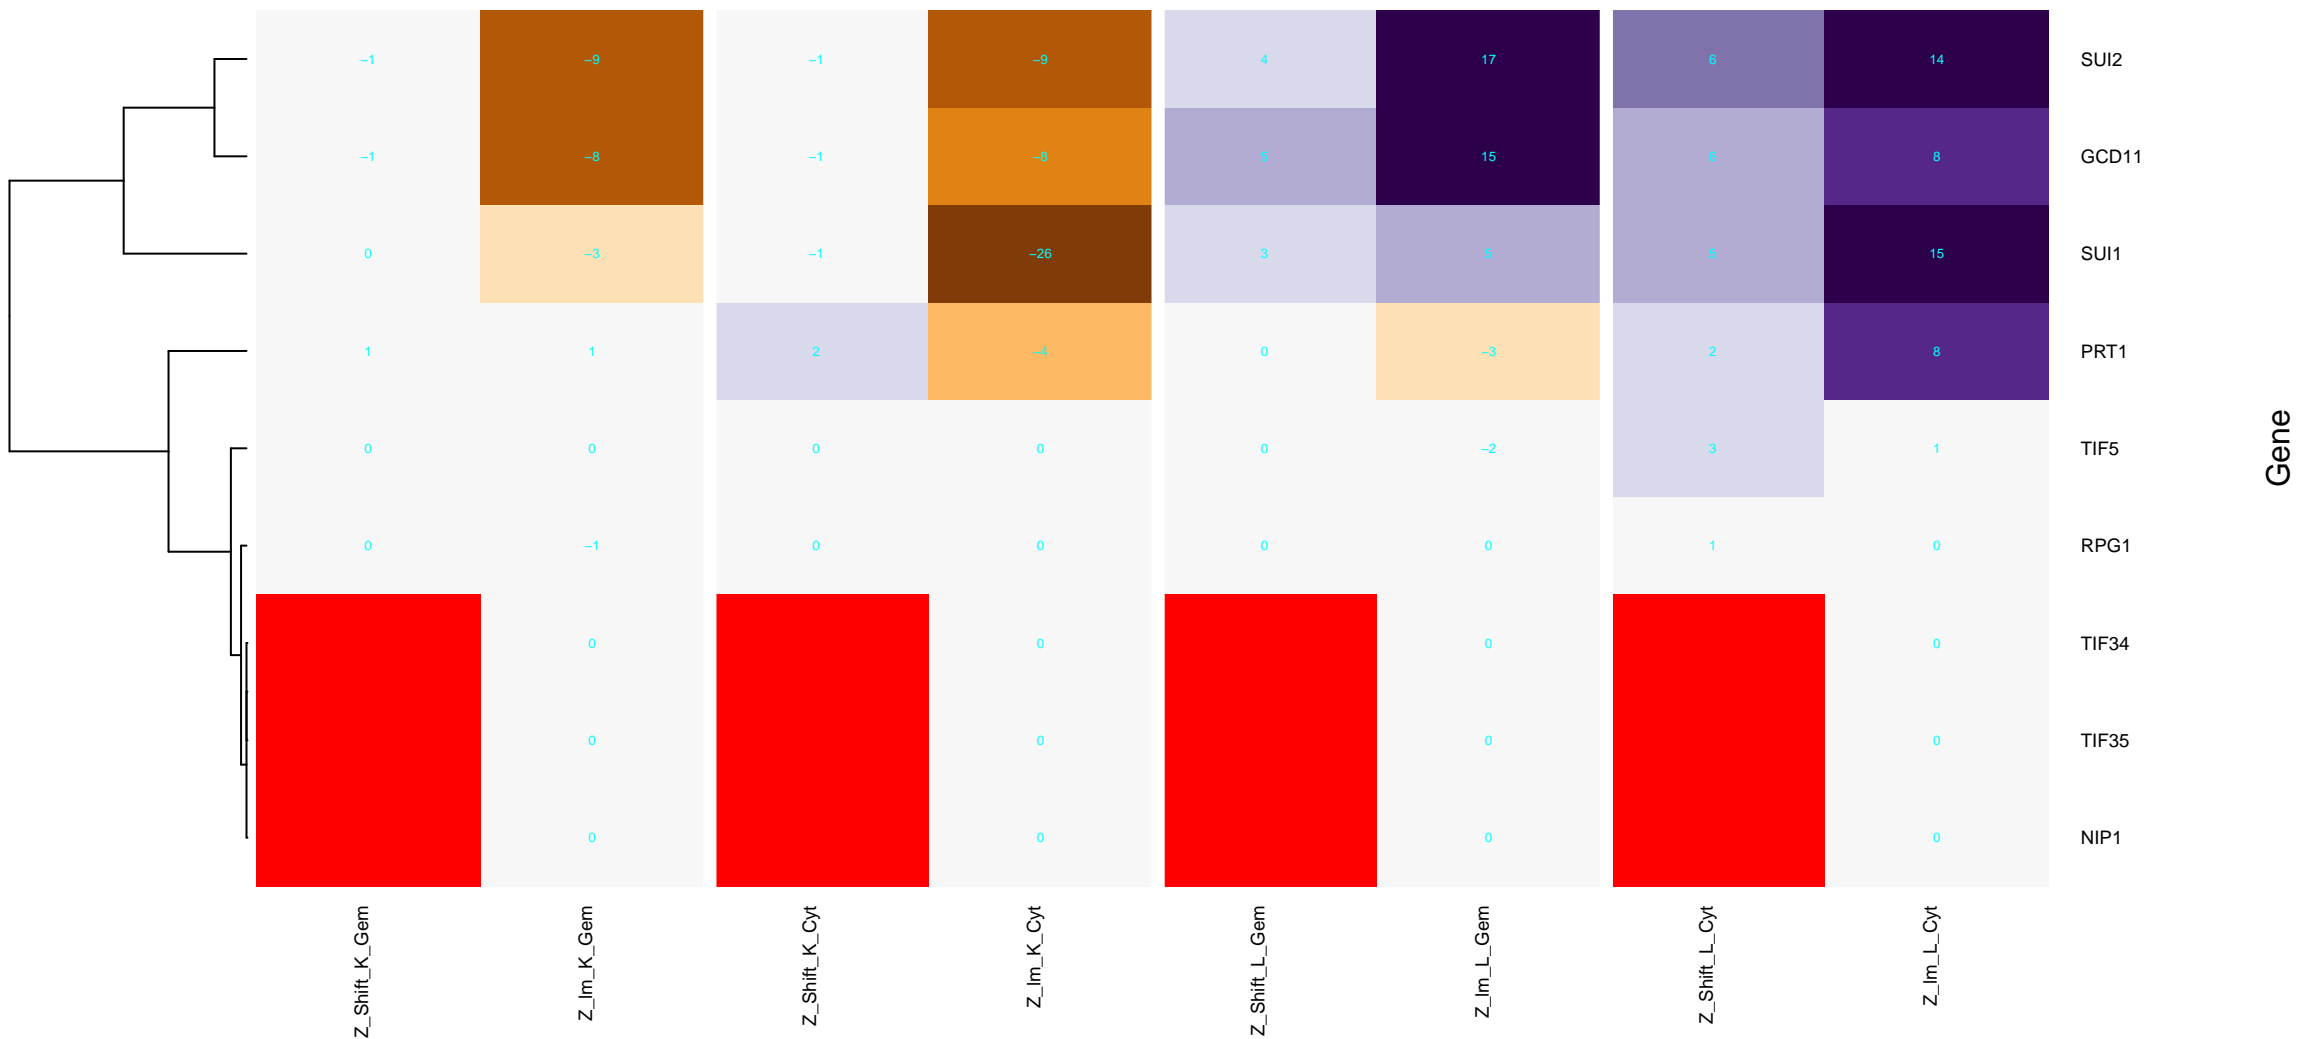

Supplement: s1 [file s1]

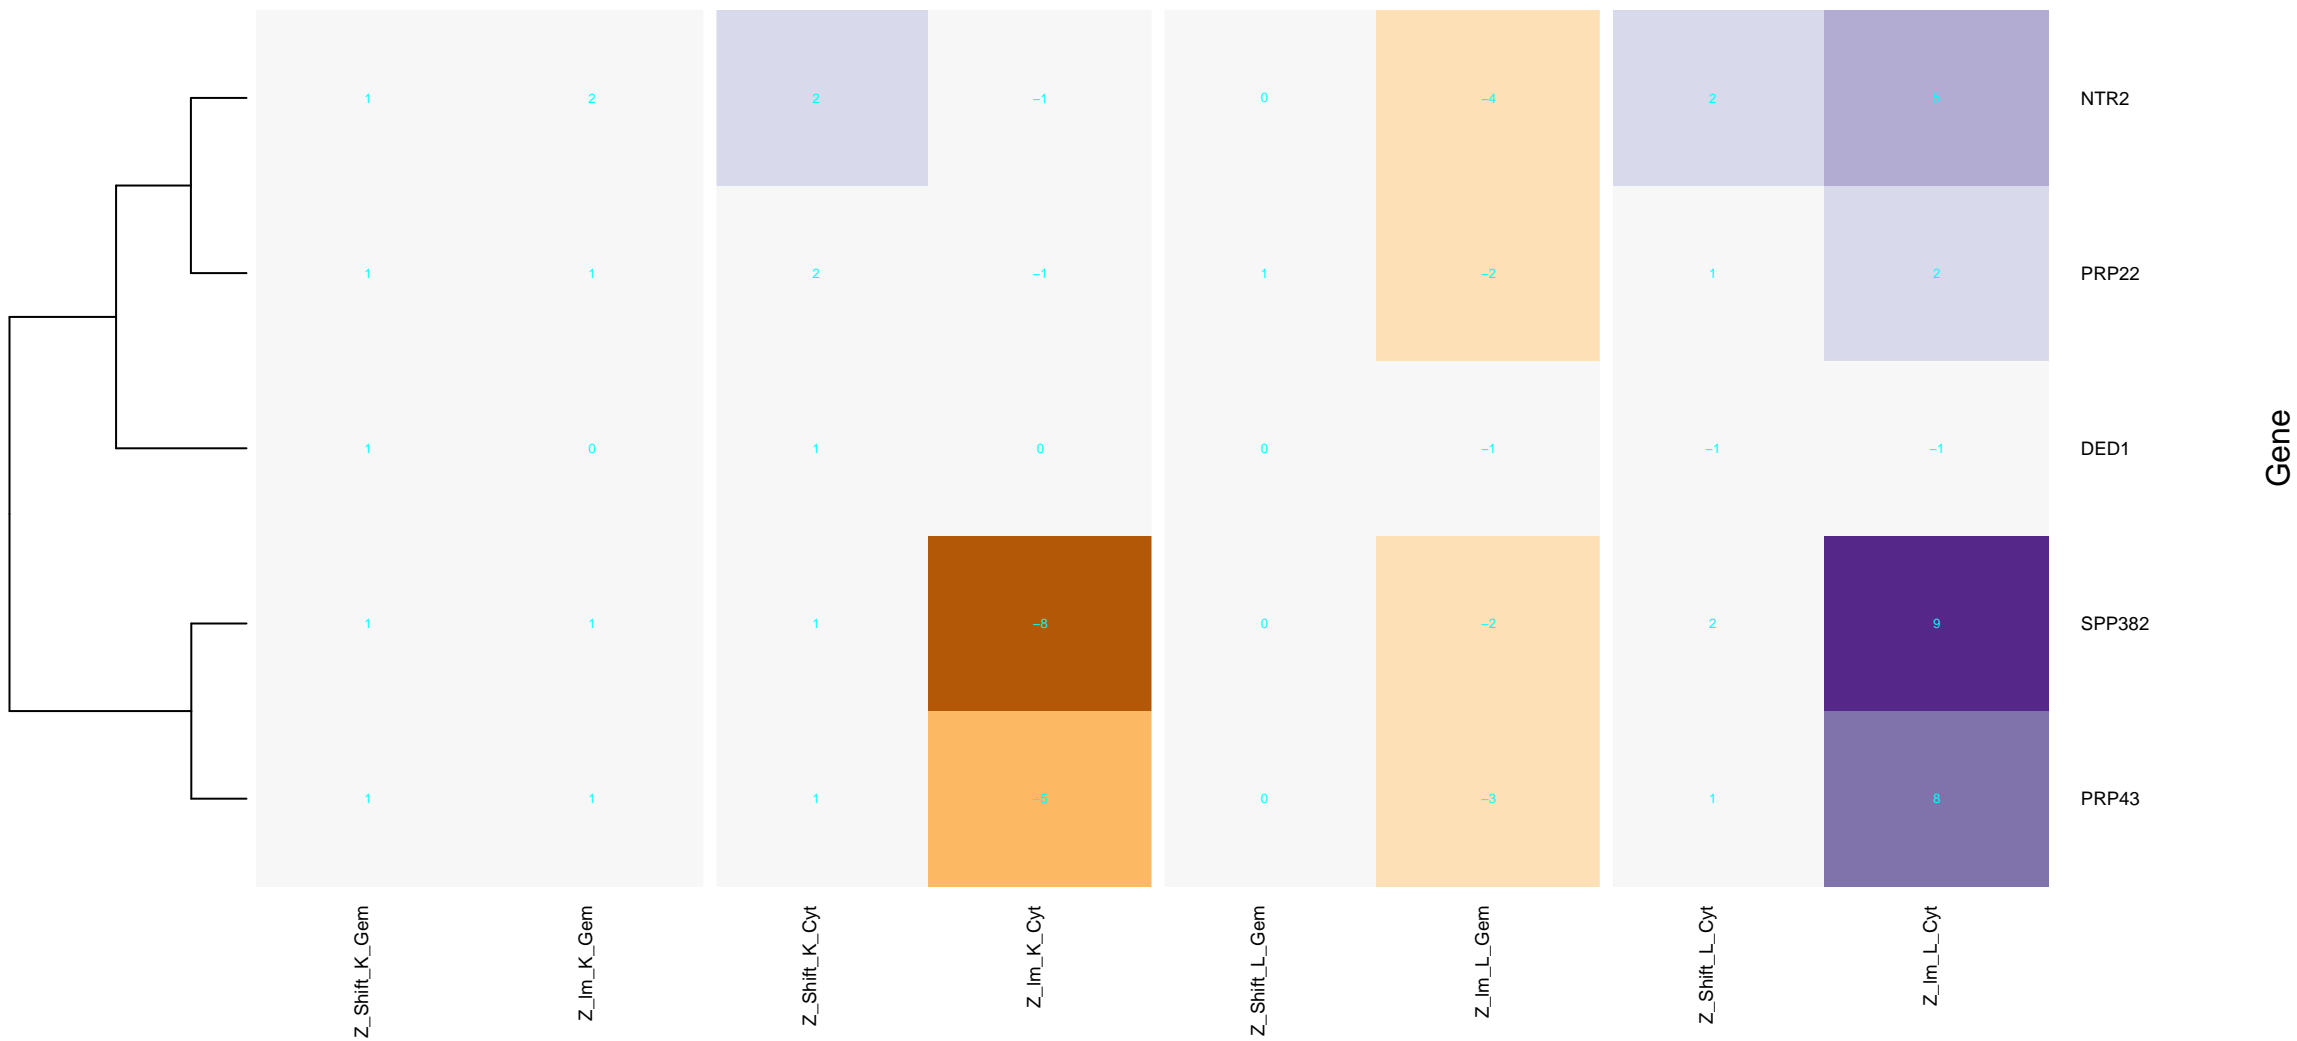

Supplement: s1 [file s1]

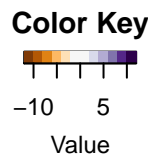

# nuclear replication fork

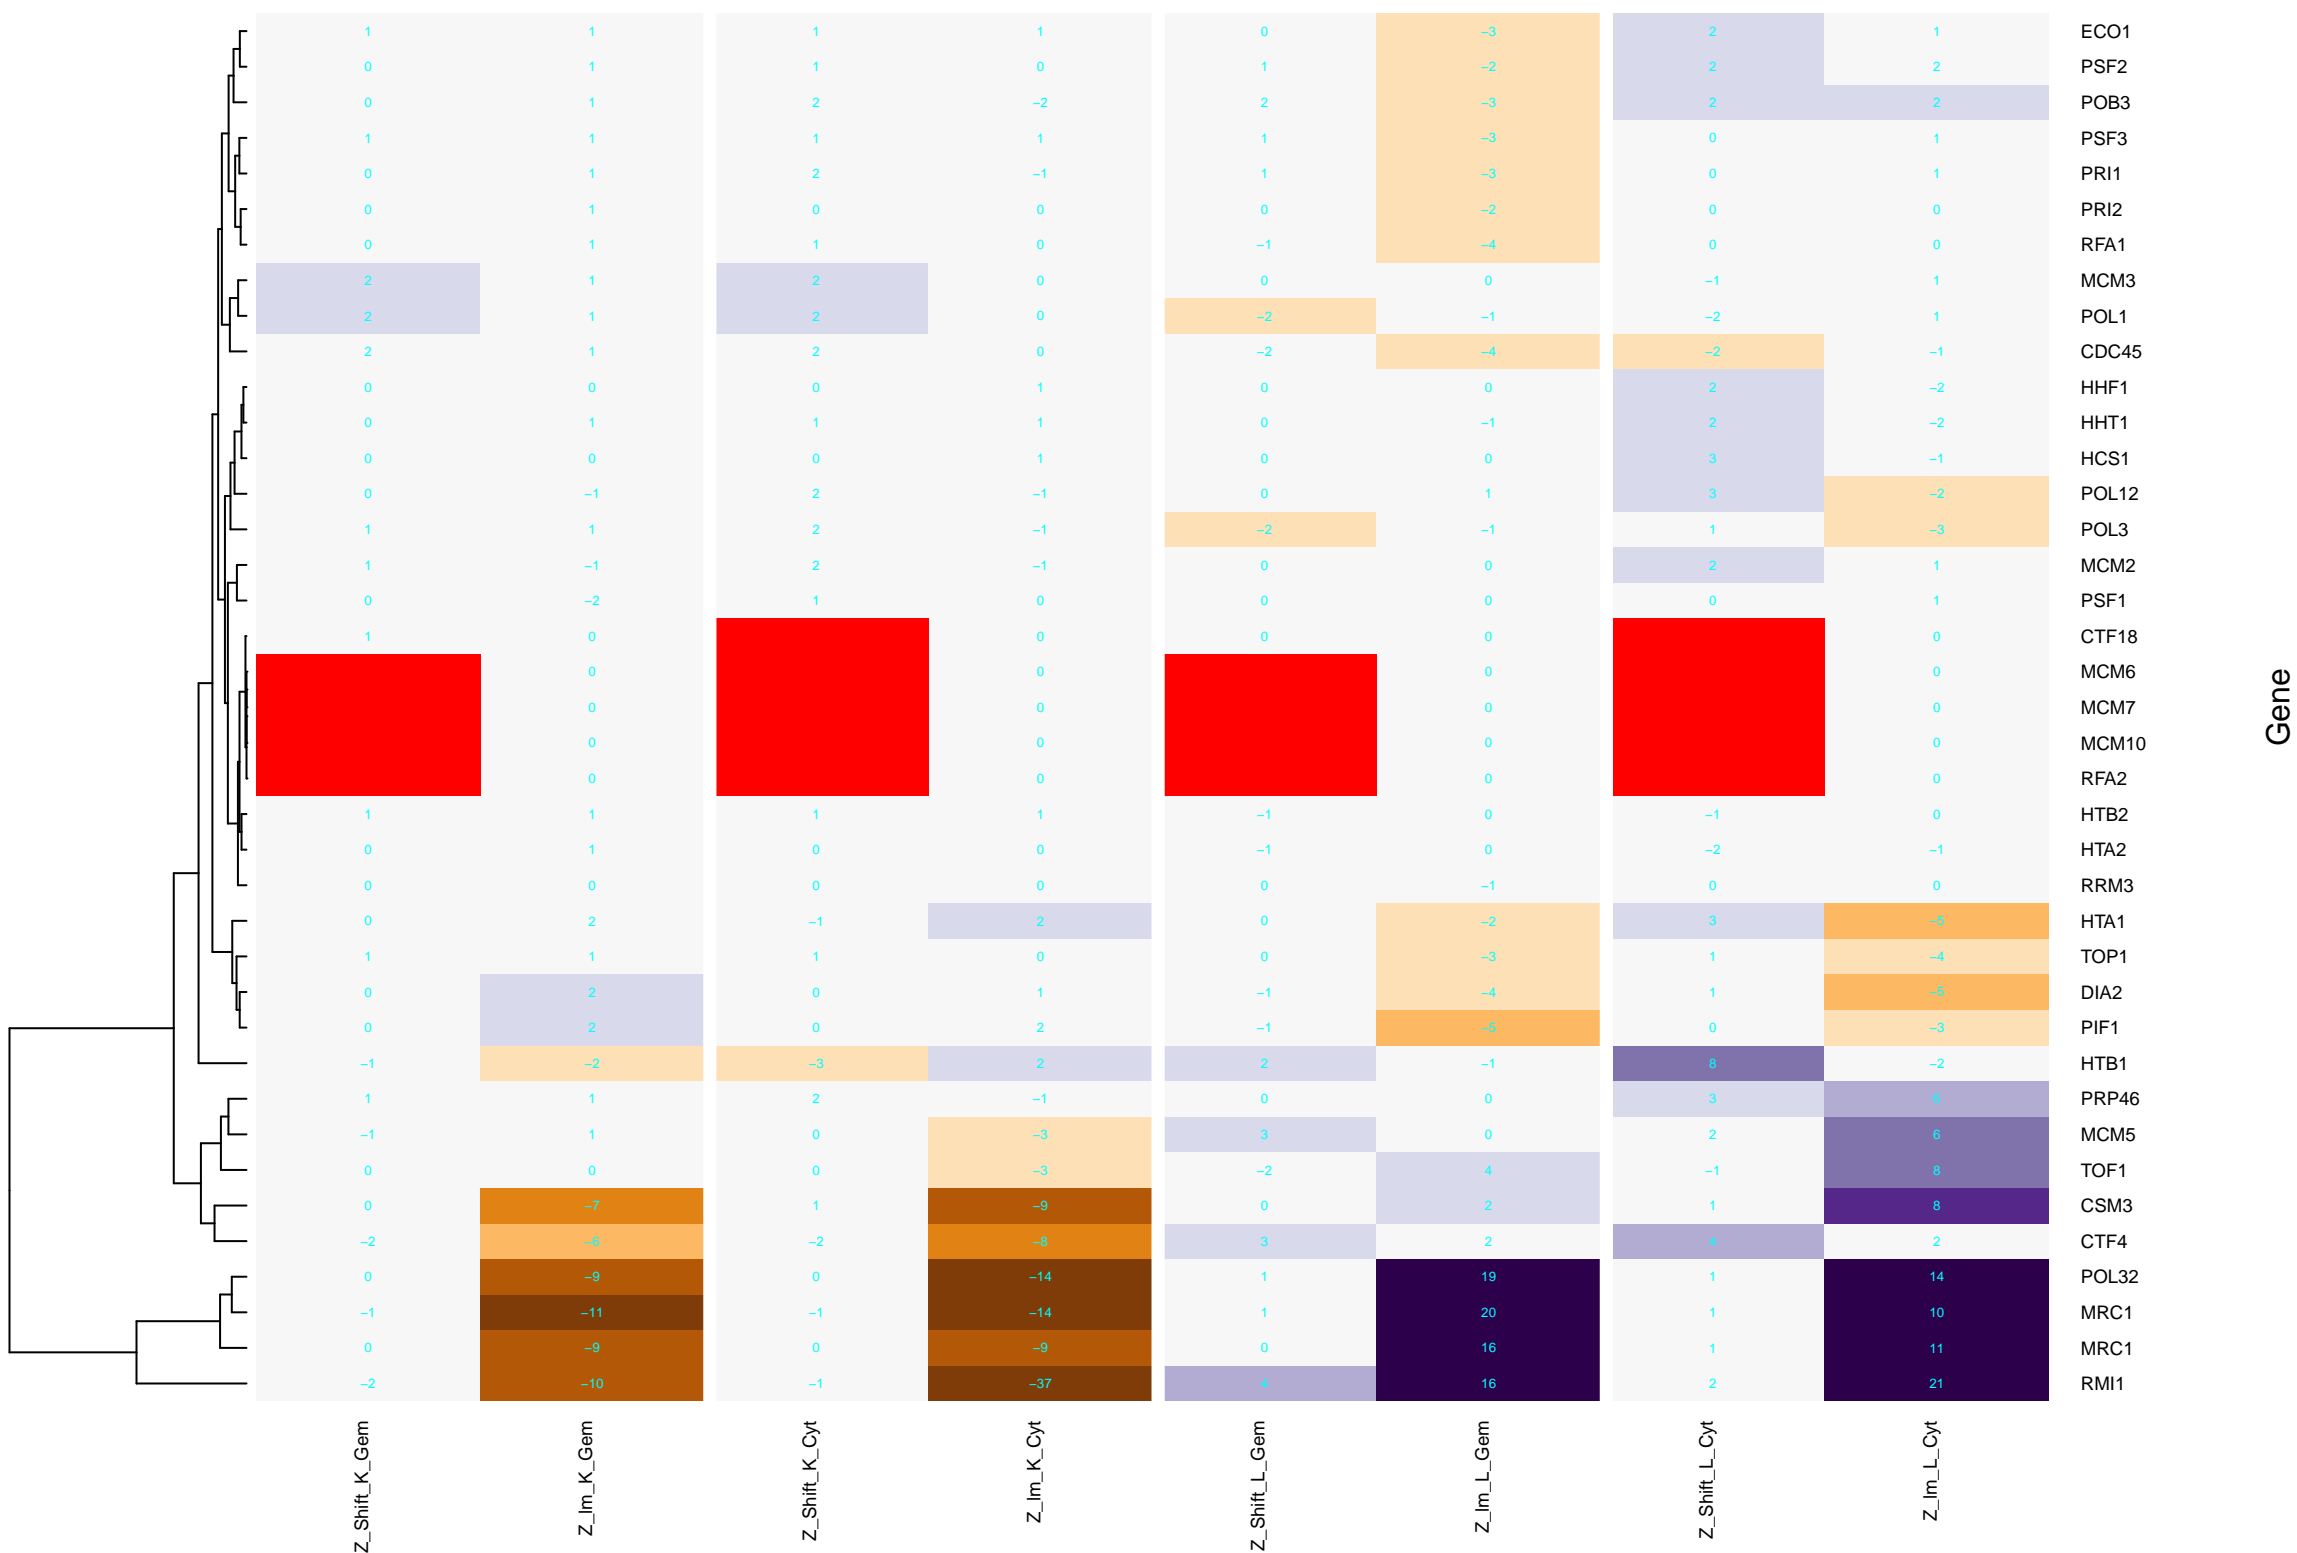

Supplement: s1 [file s1]

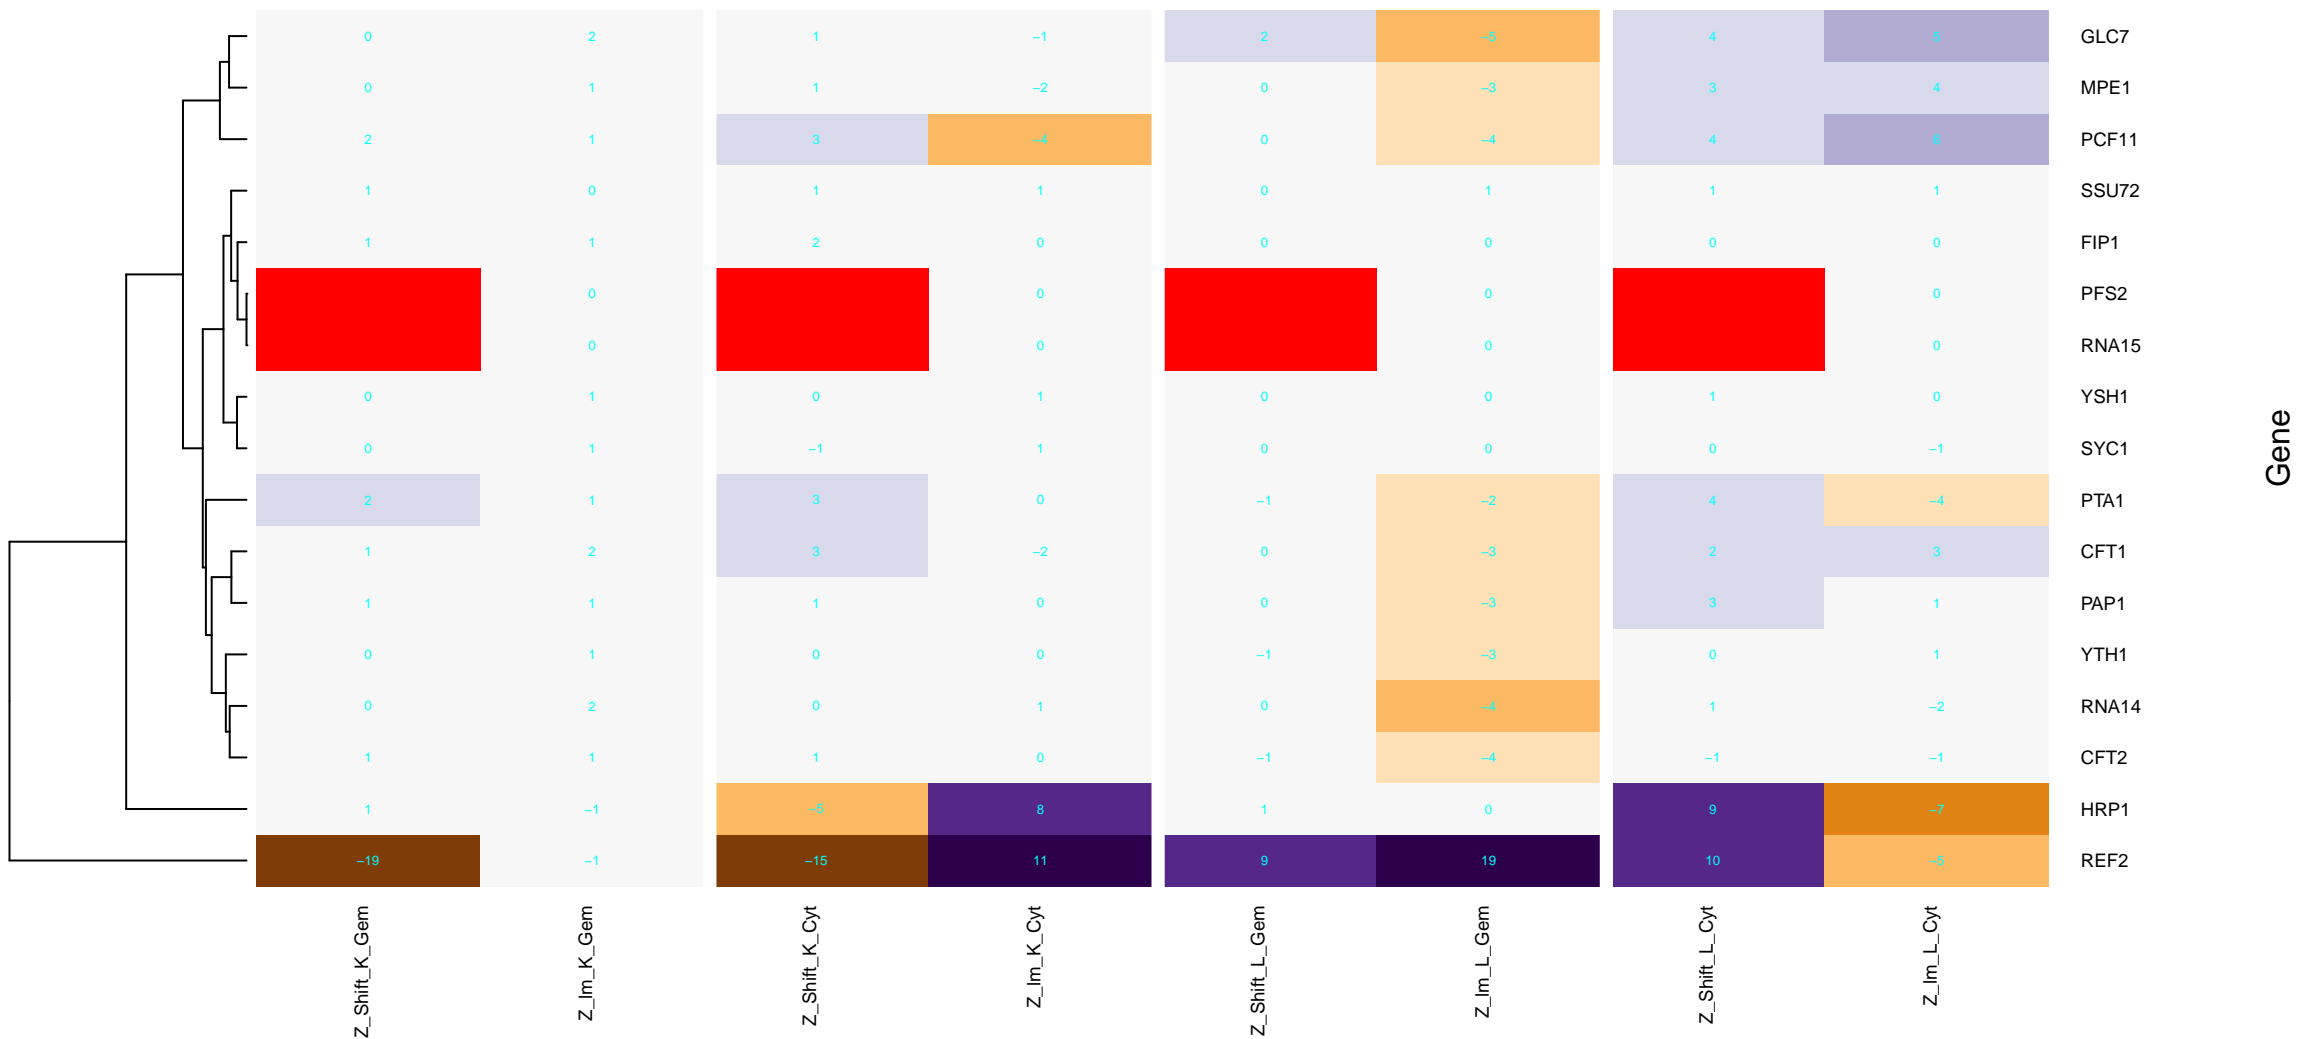

Supplement: s1 [file s1]

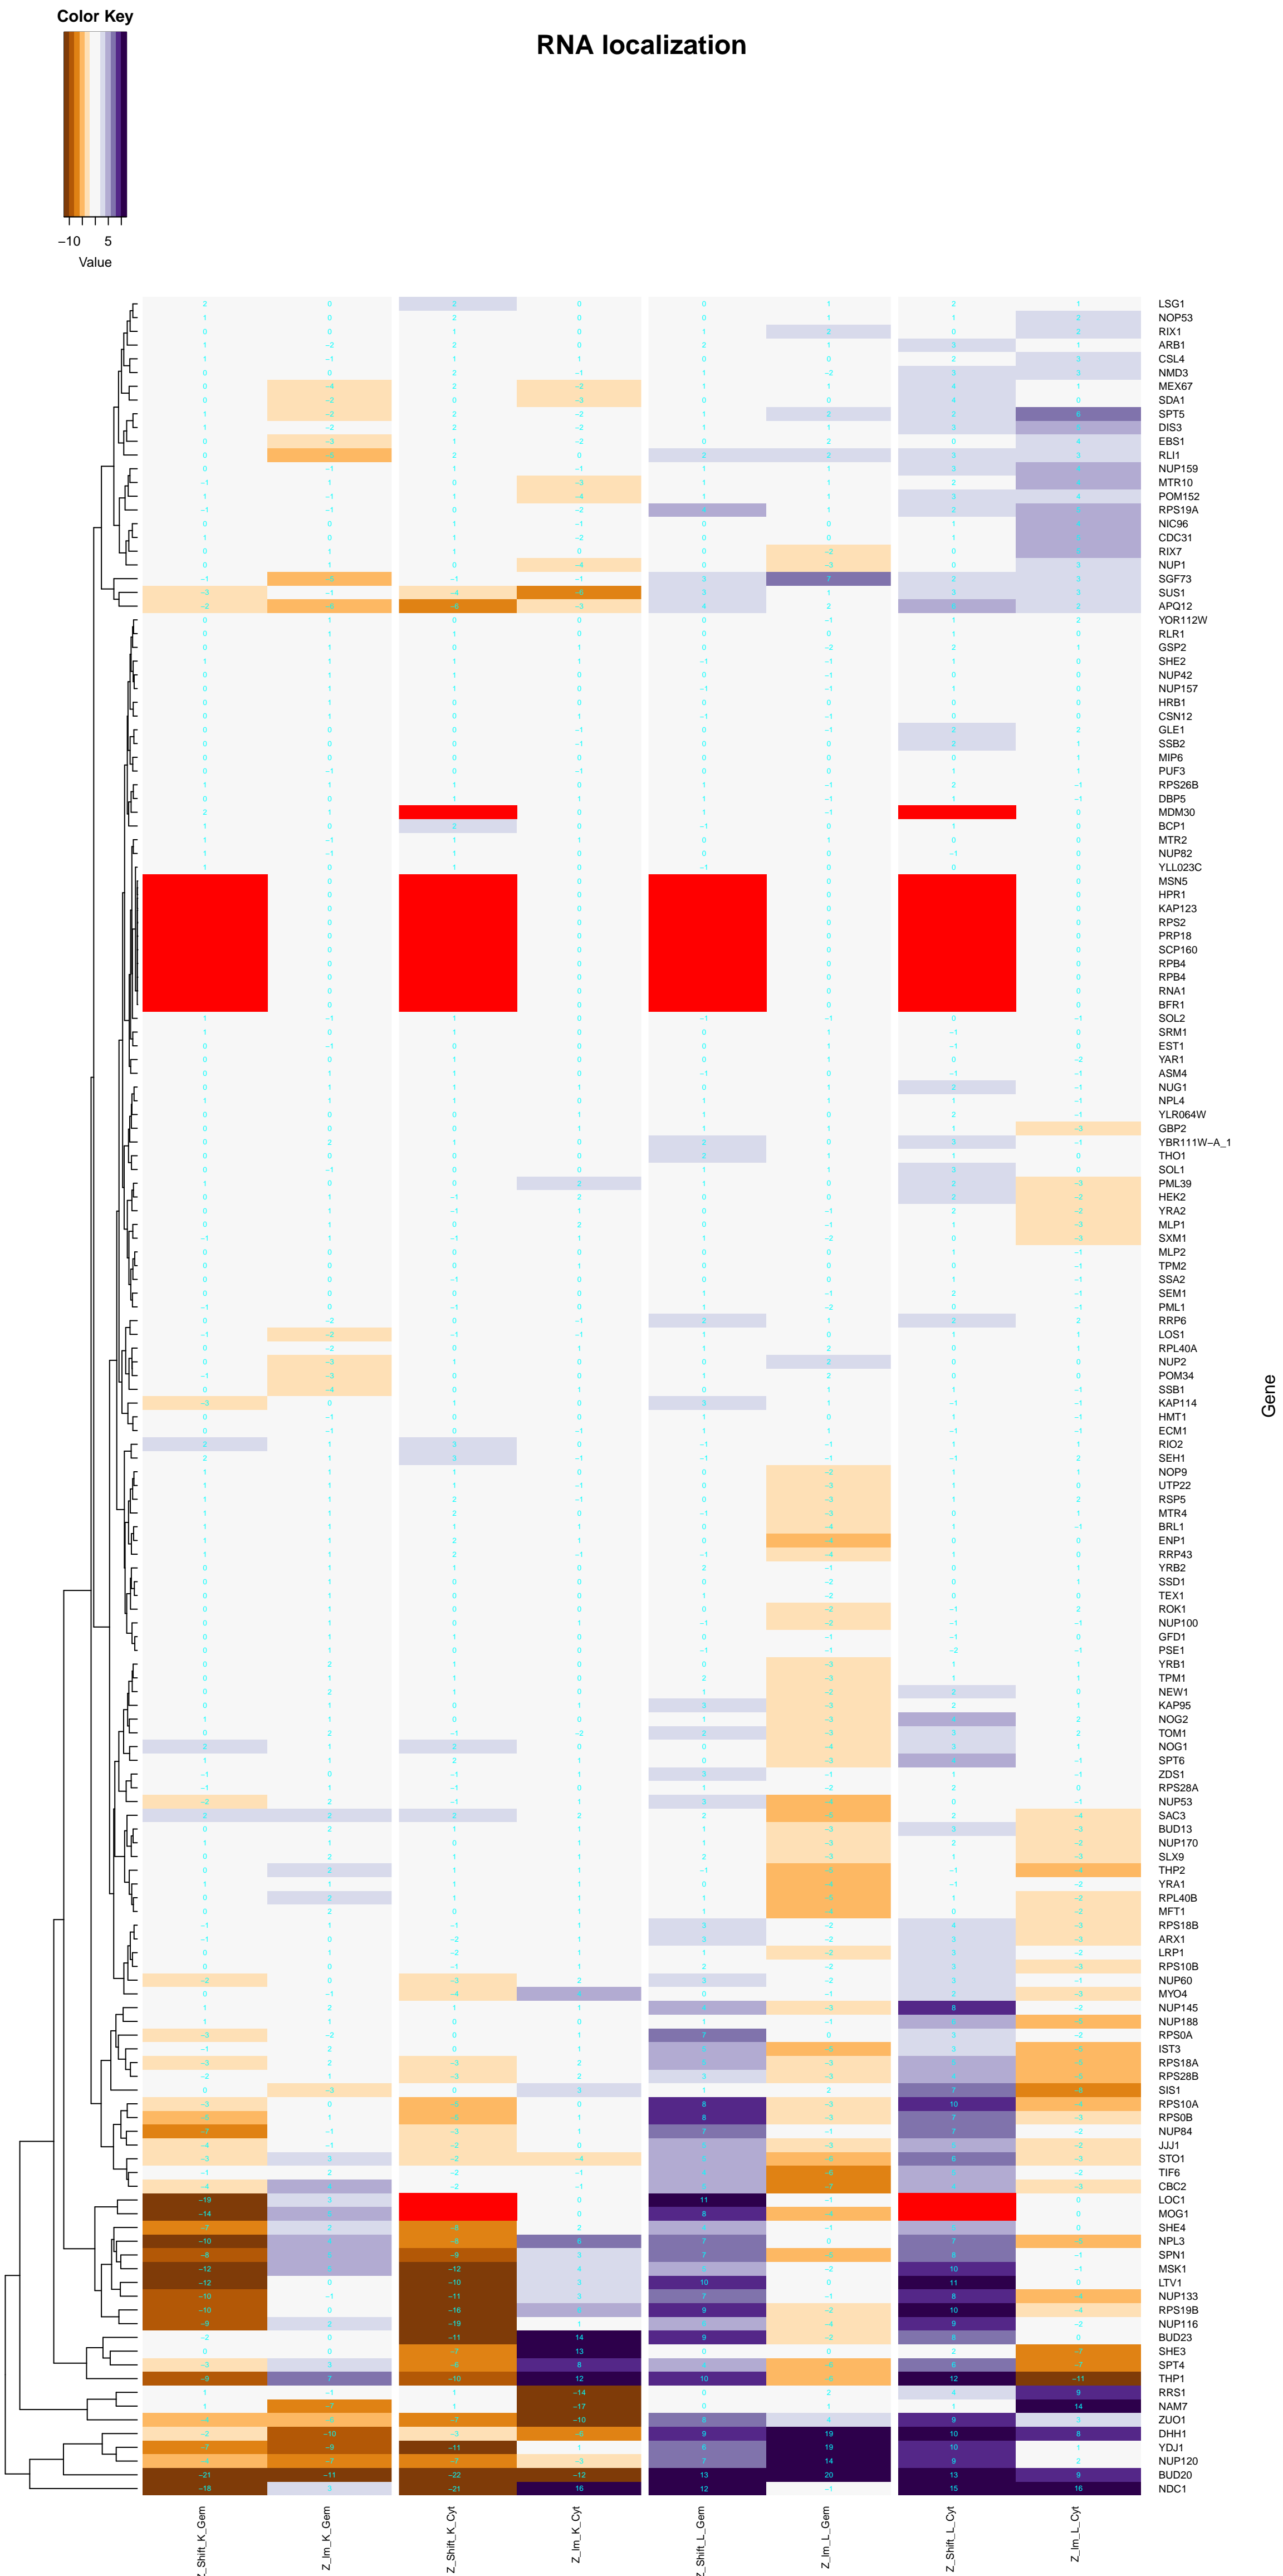

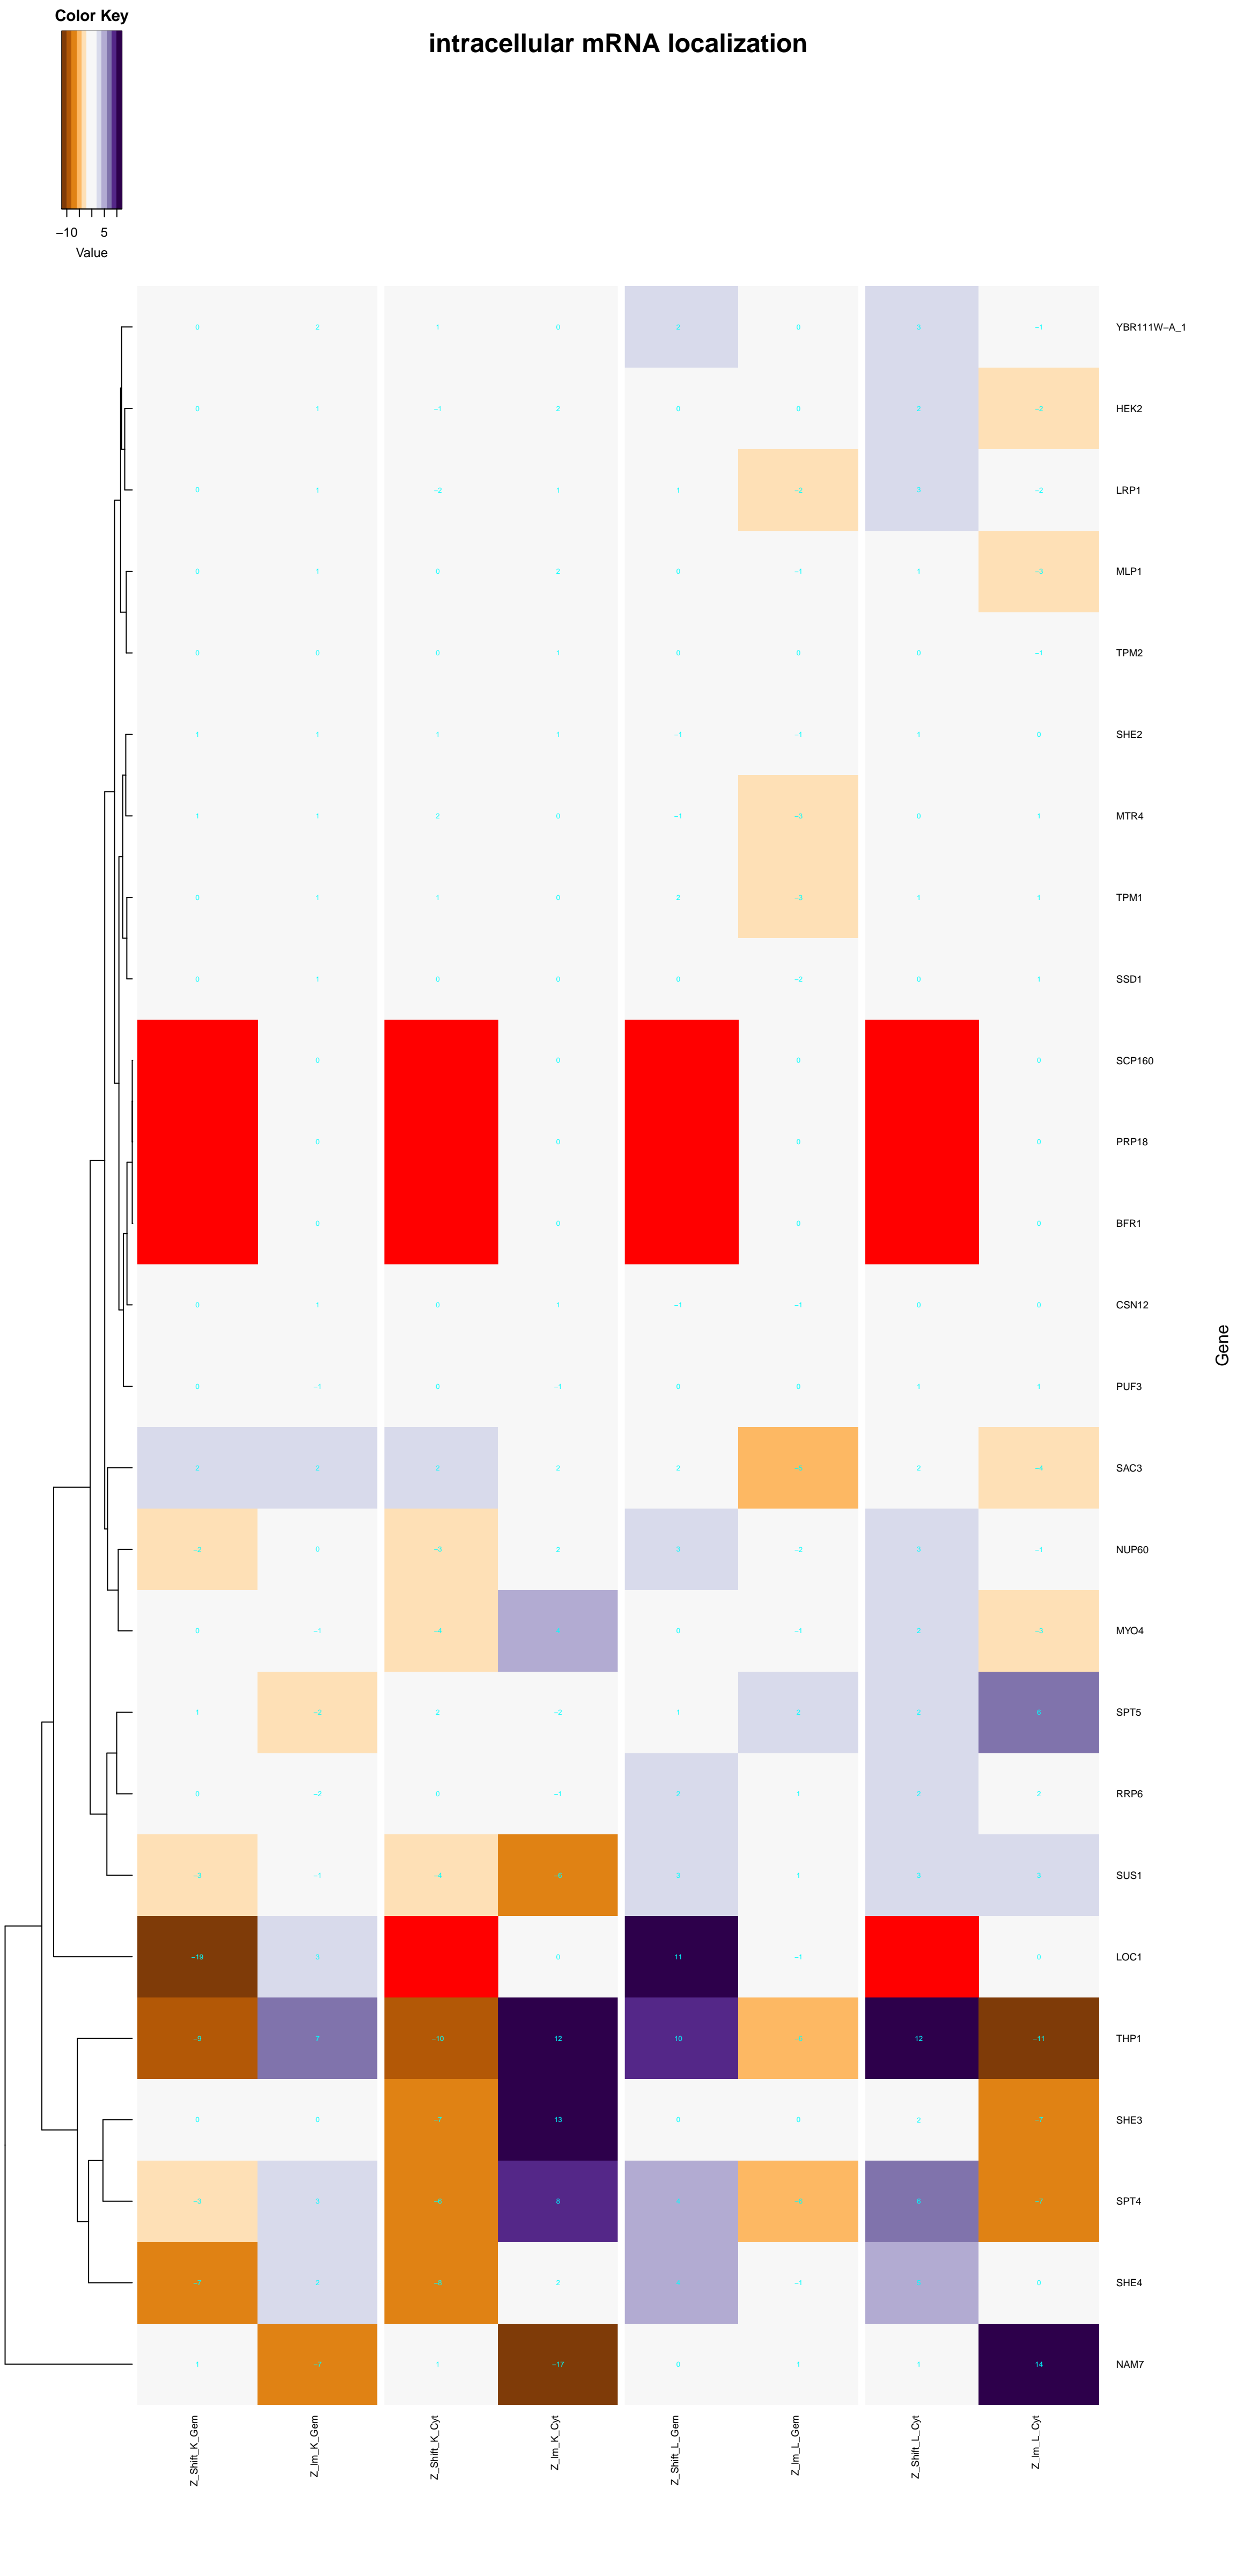

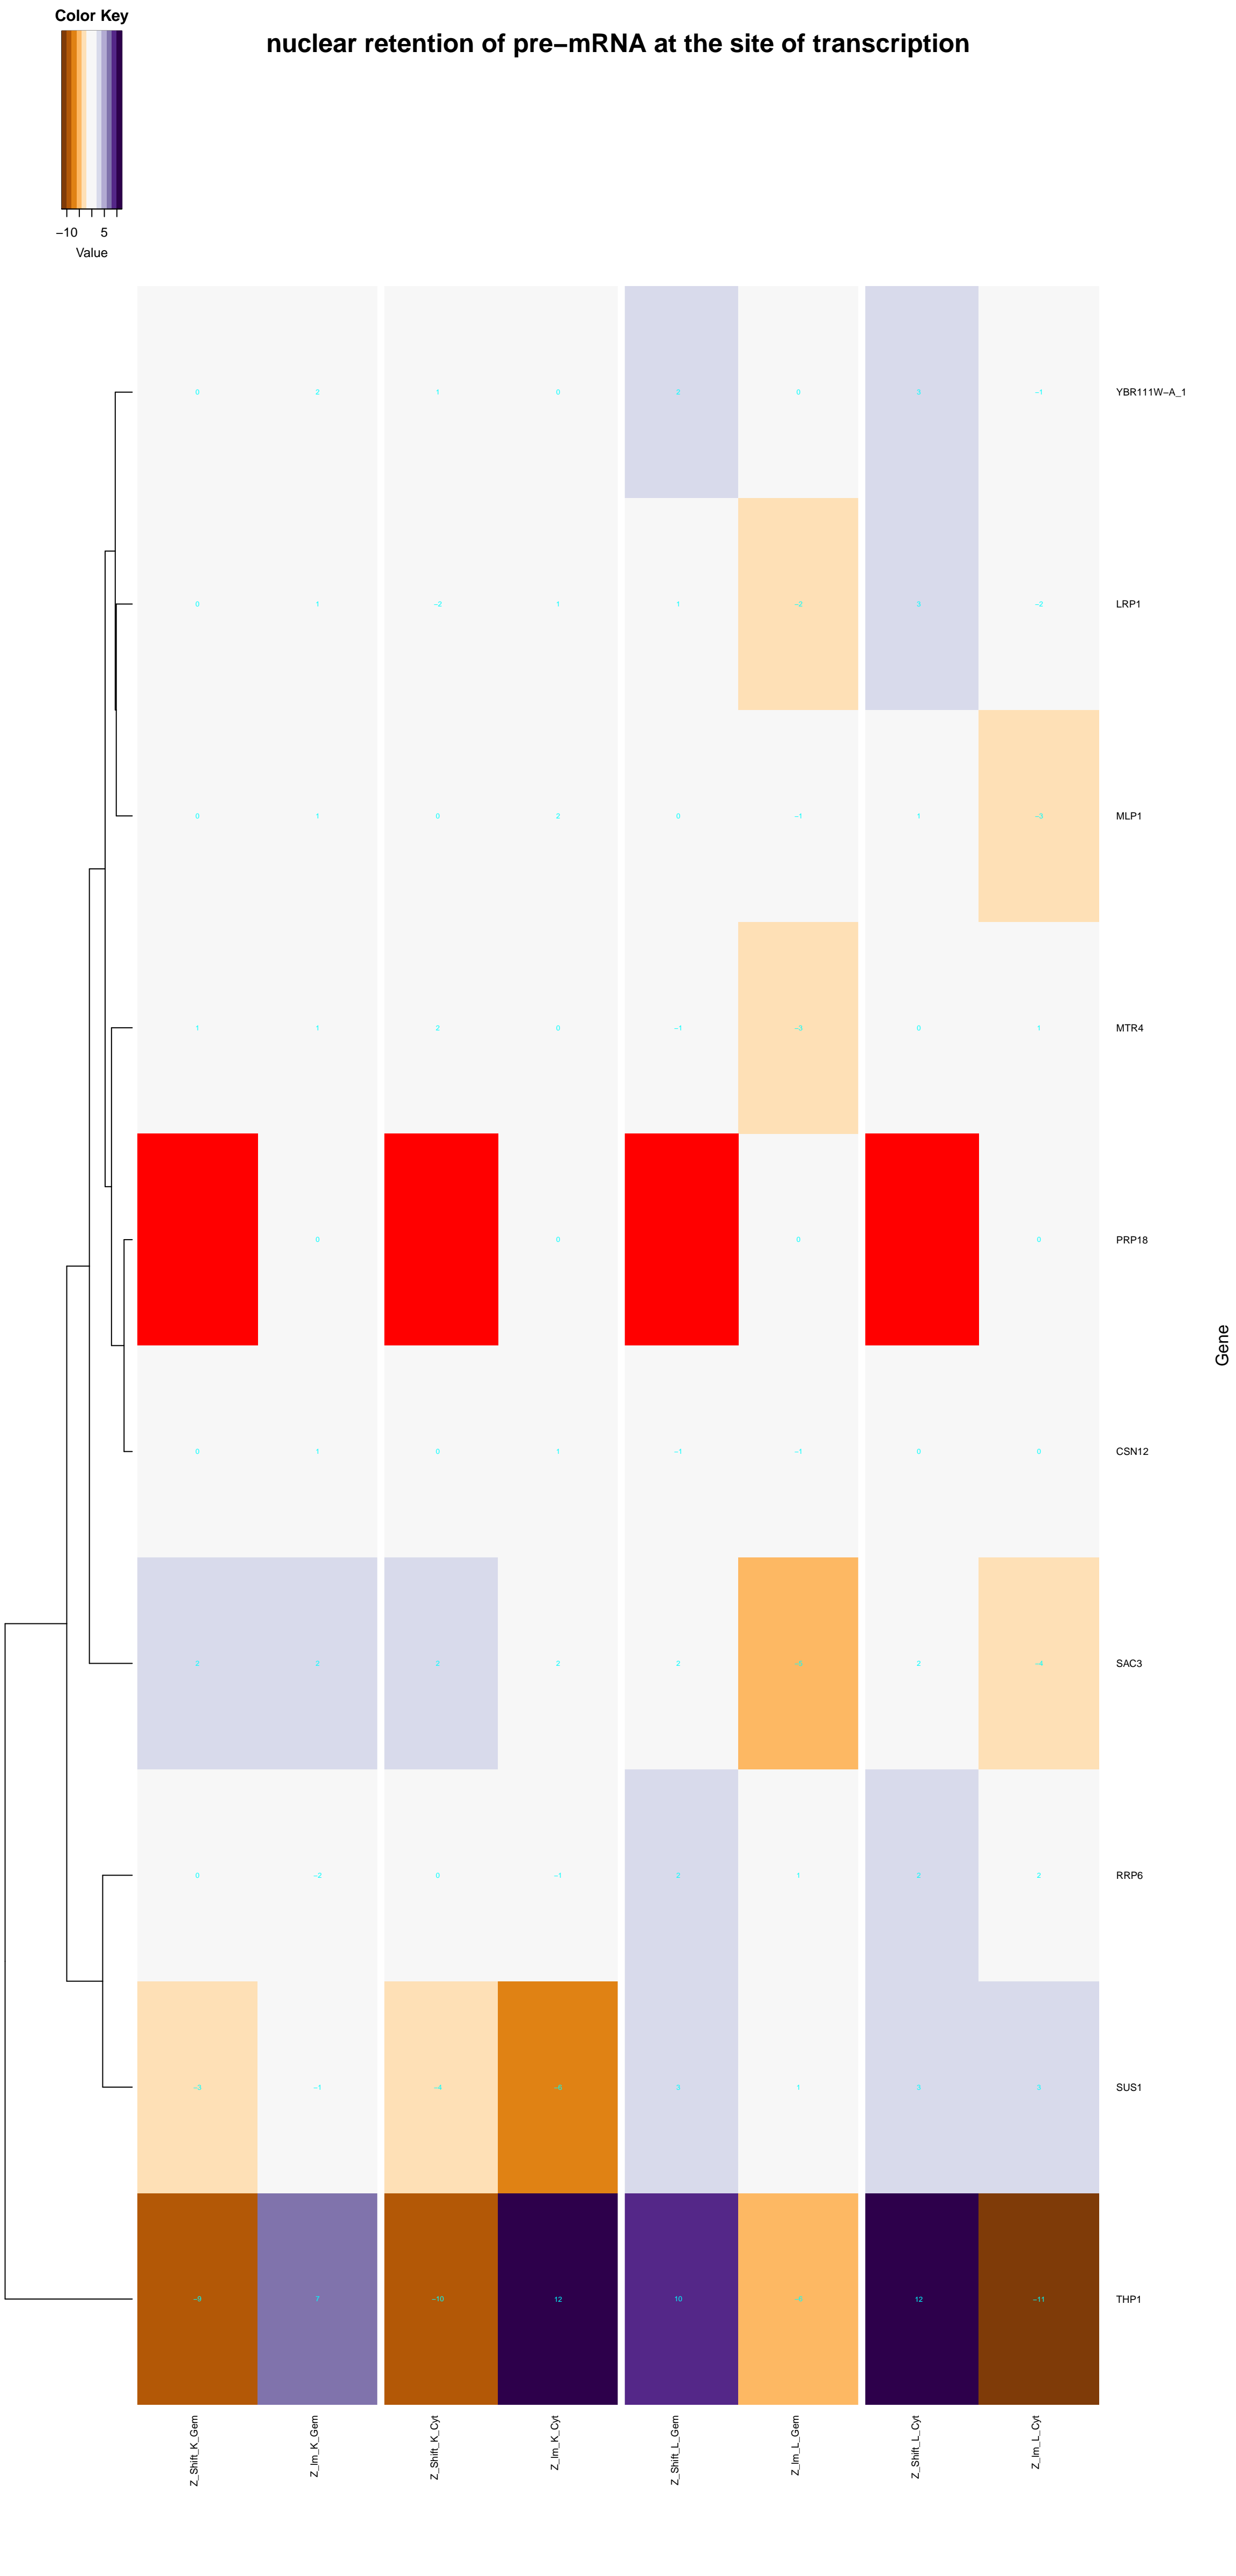

Supplement: s1 [file s1]

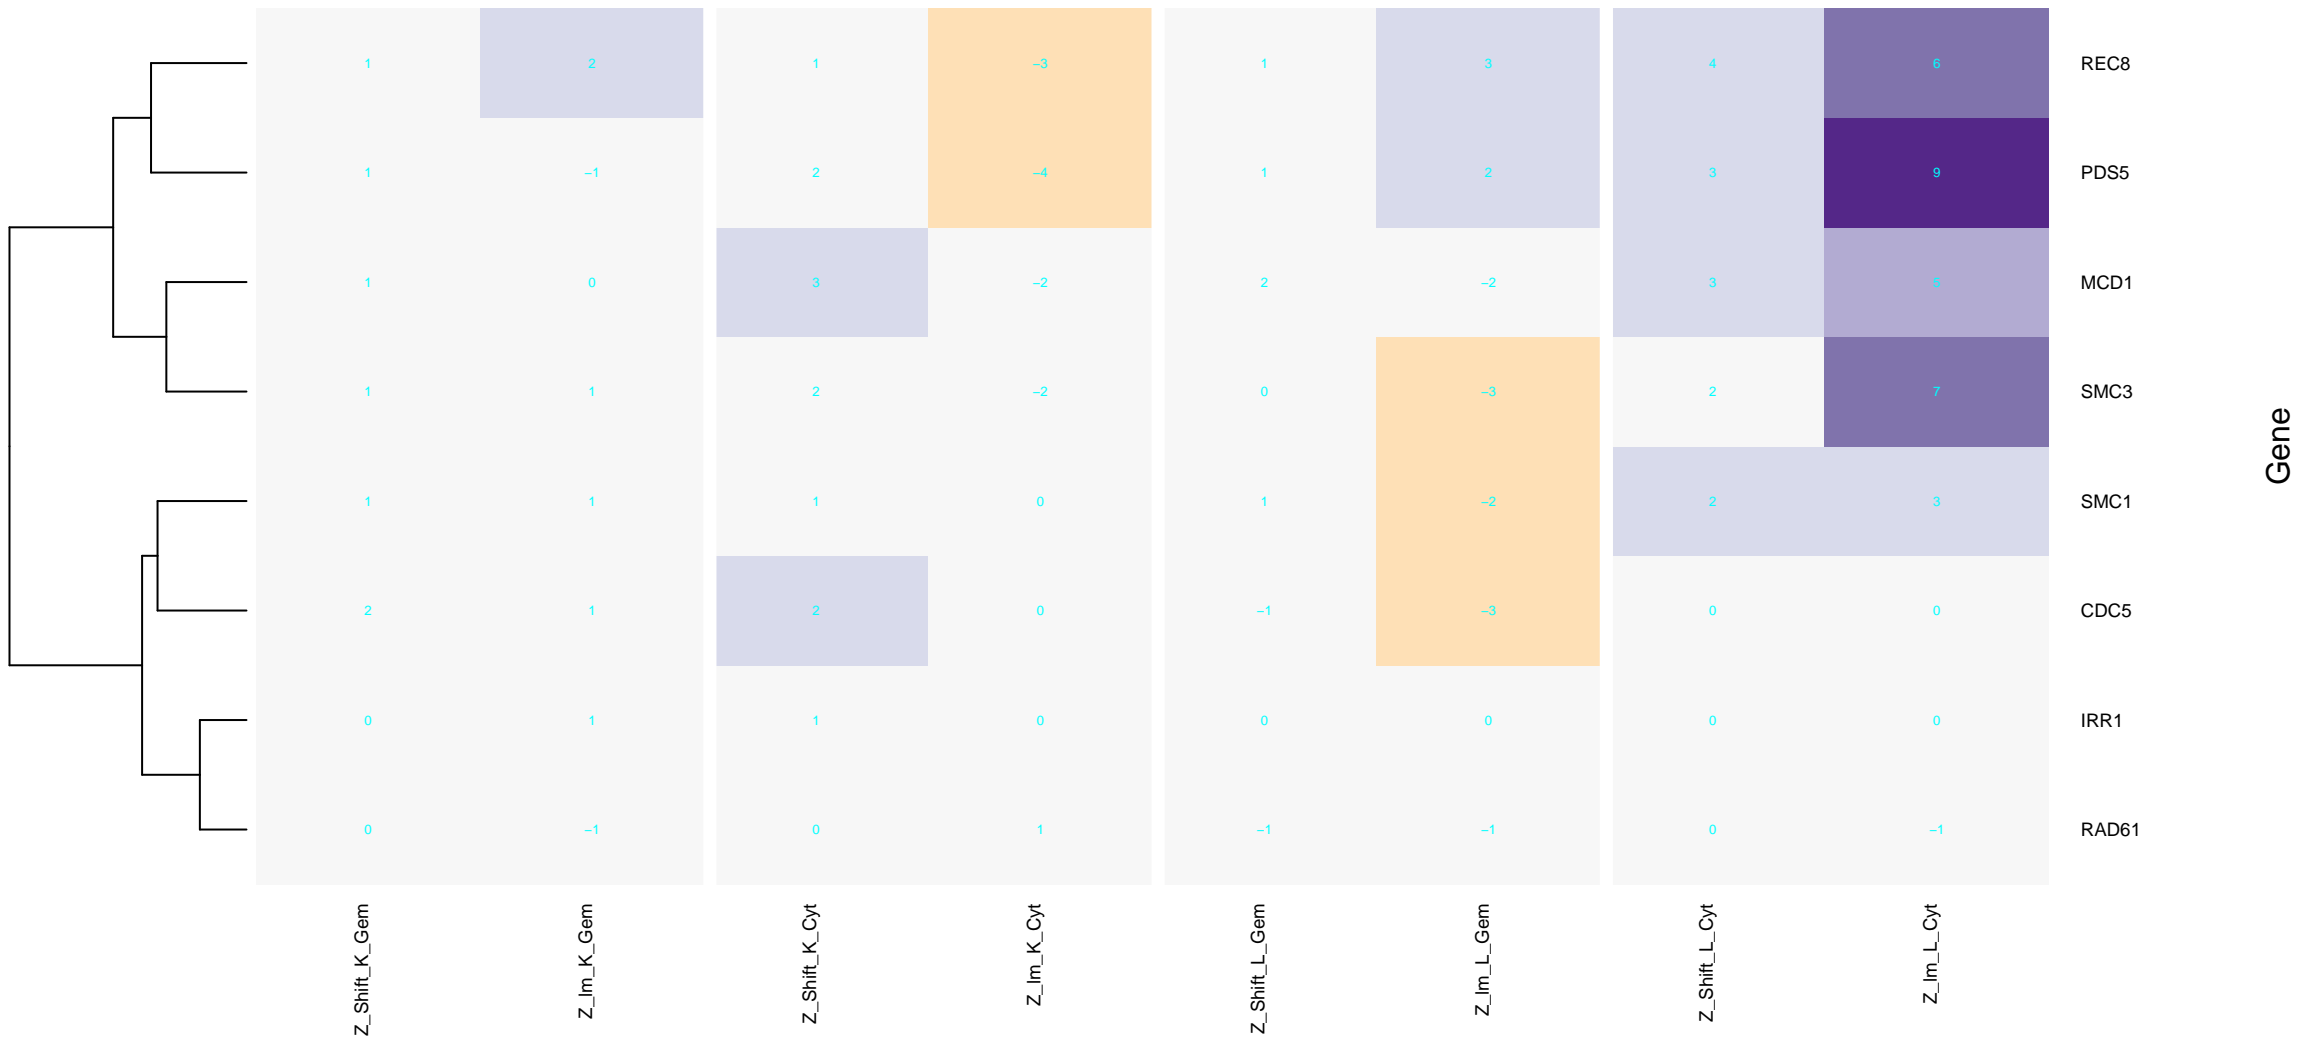

Supplement: s1 [file s1]

## 90S preribosome

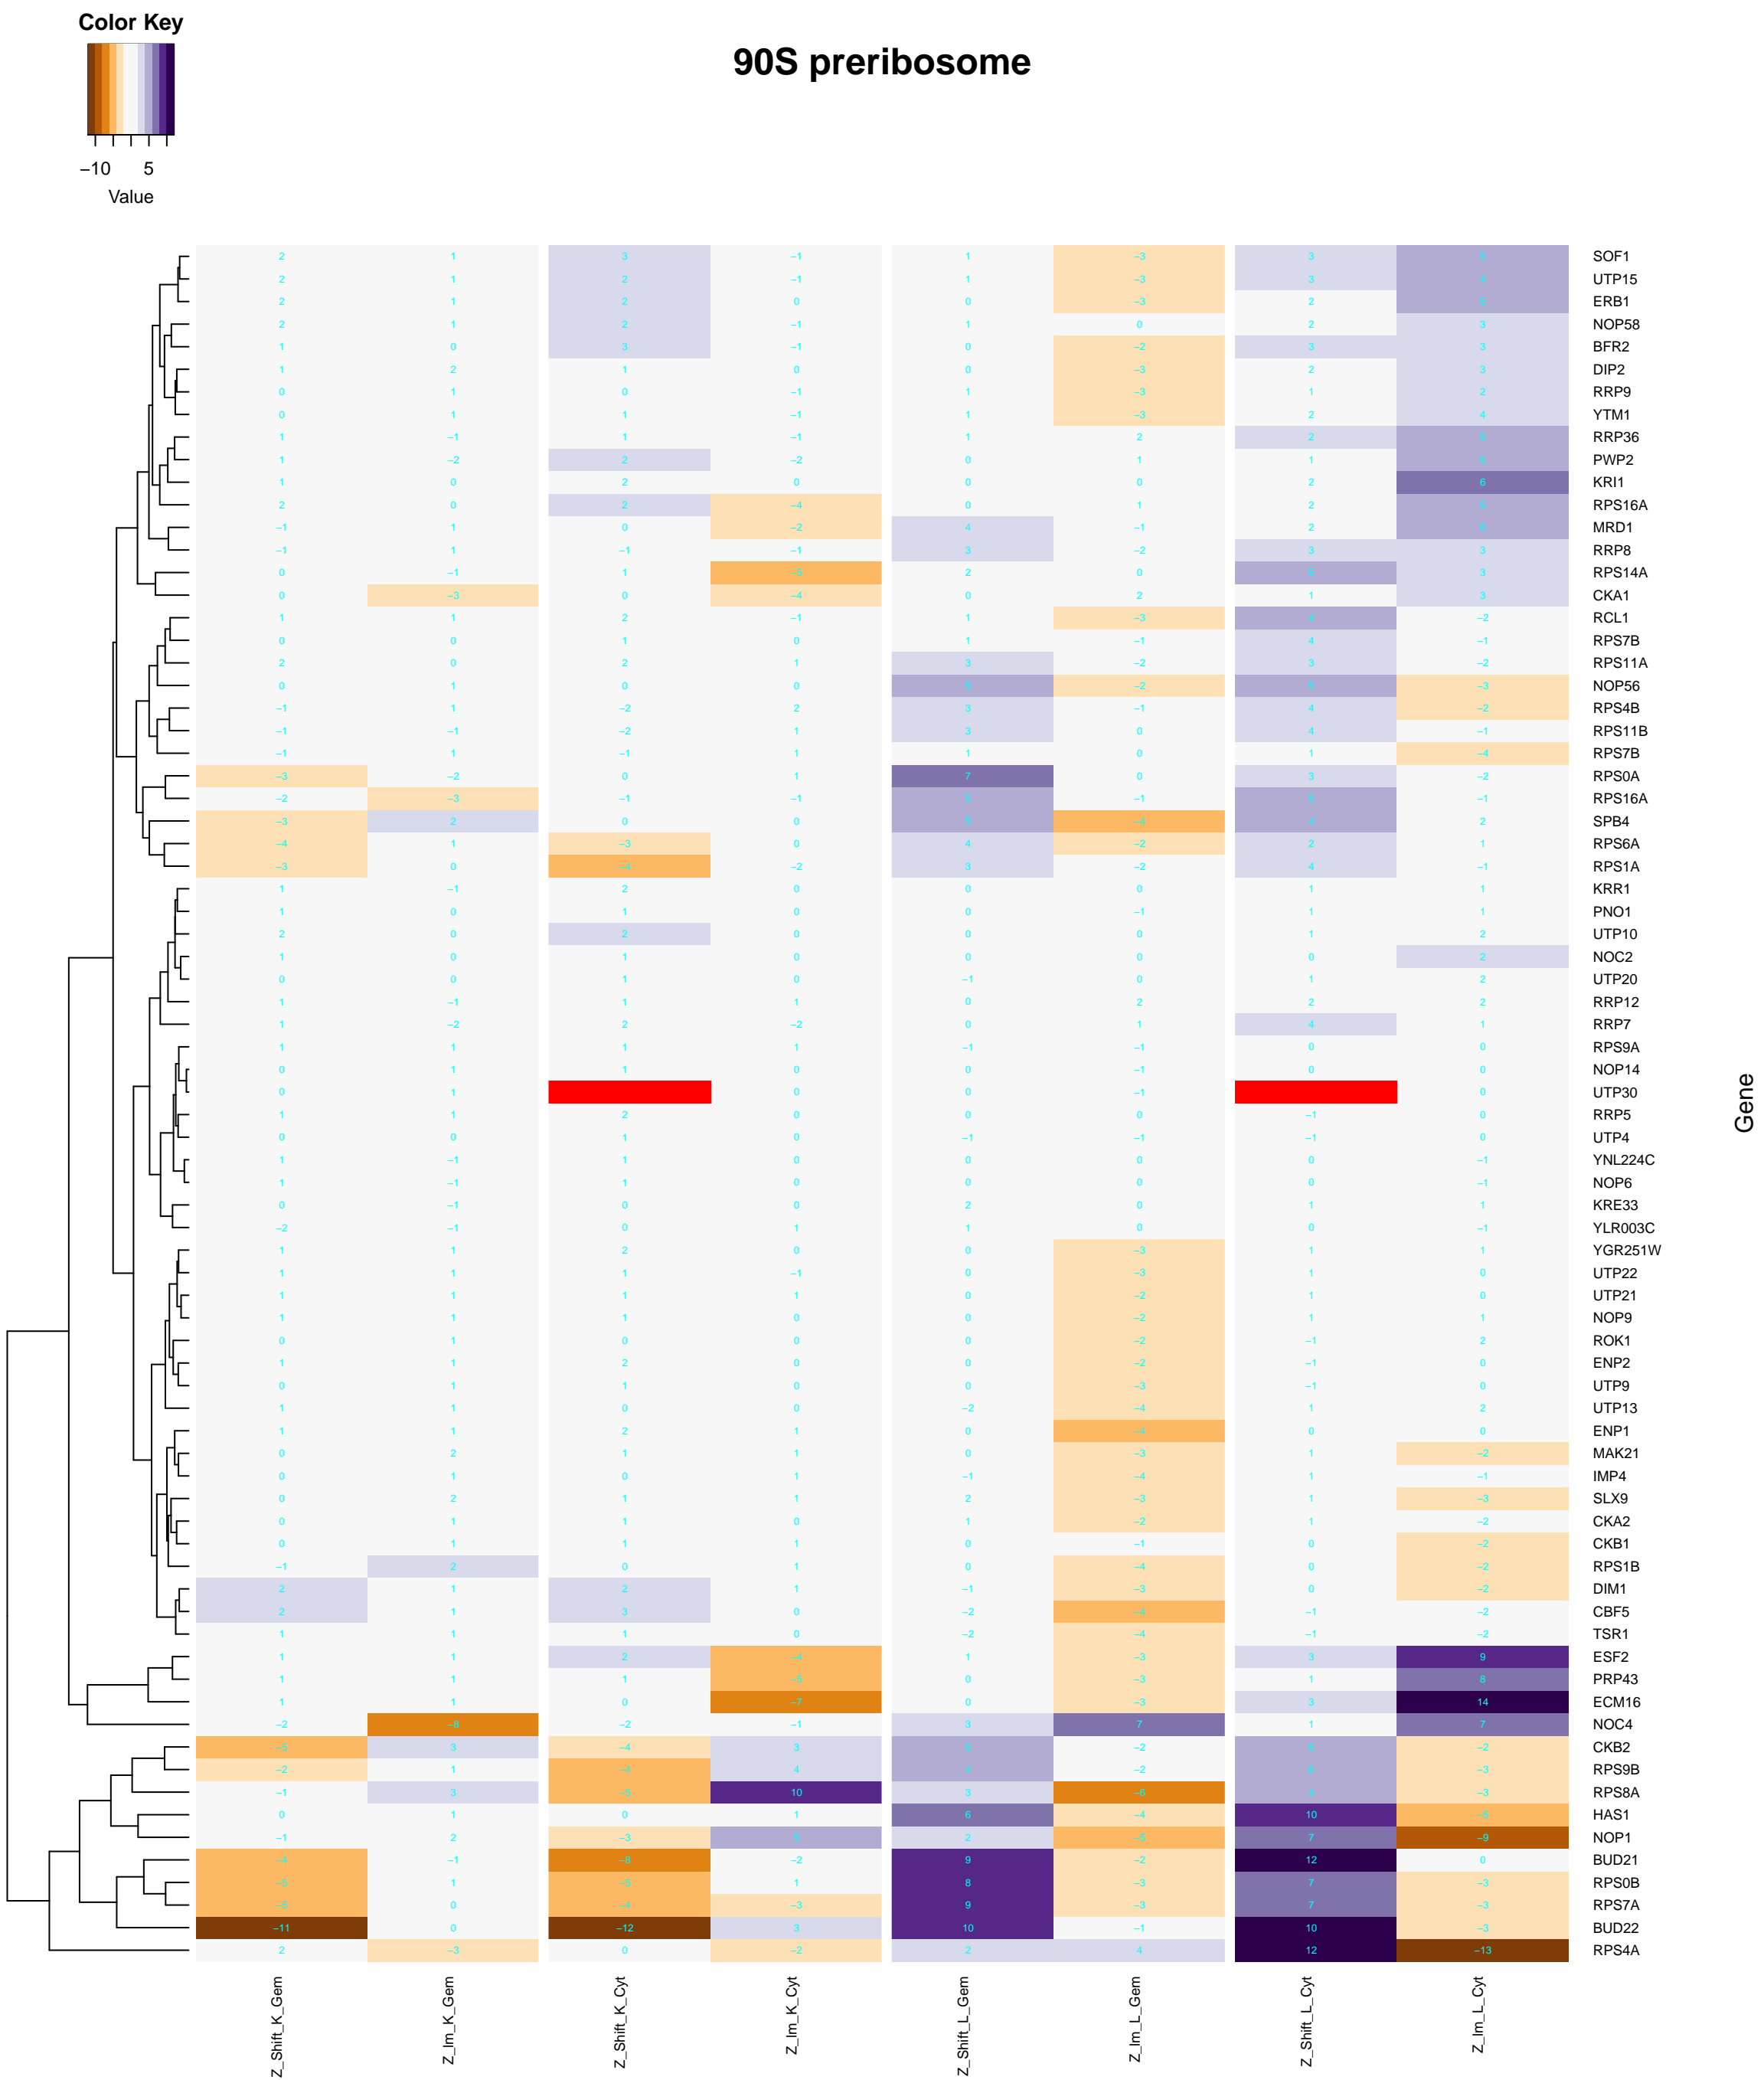

Supplement: s1 [file s1]

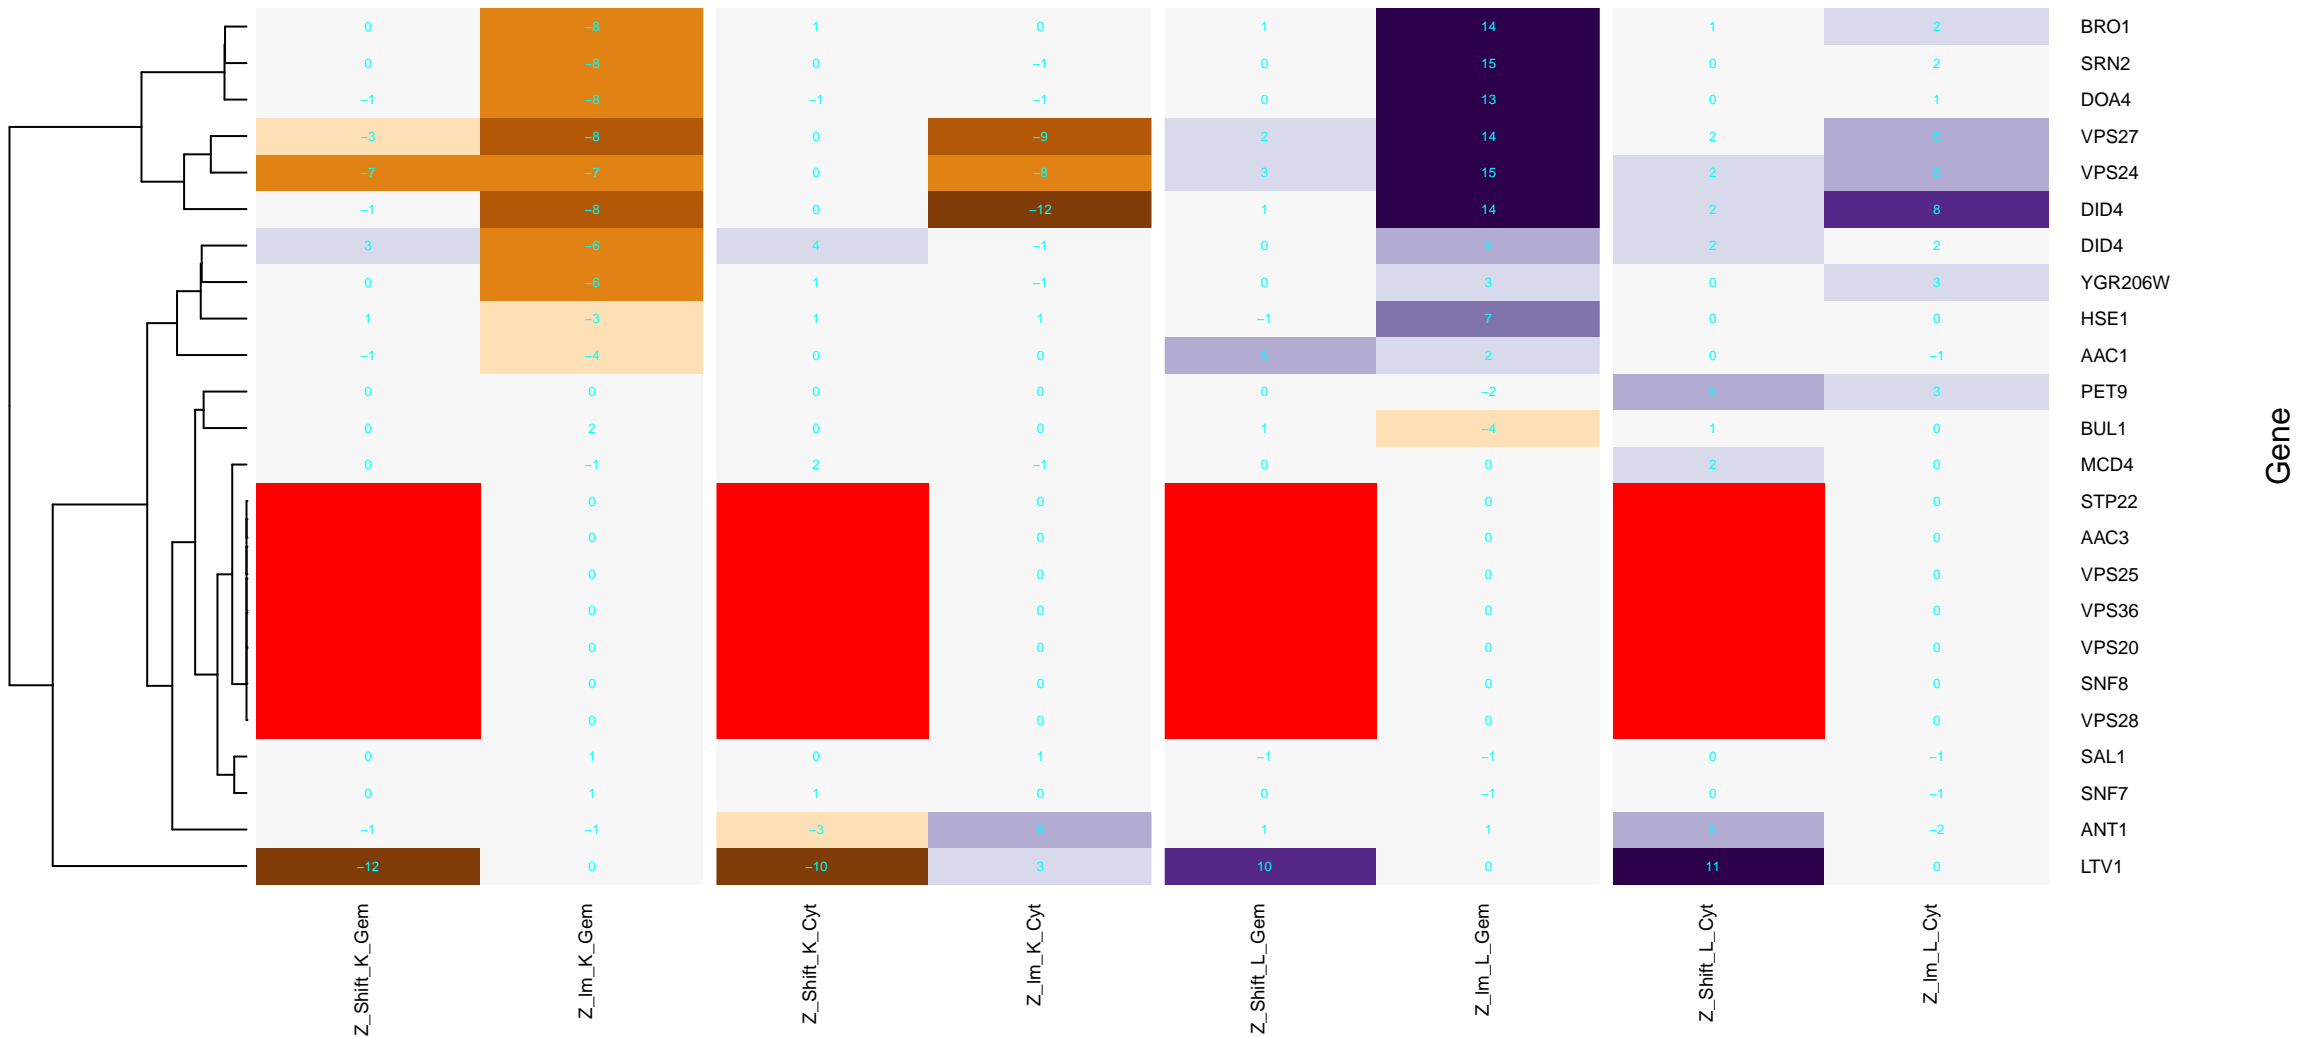

Supplement: s1 [file s1]

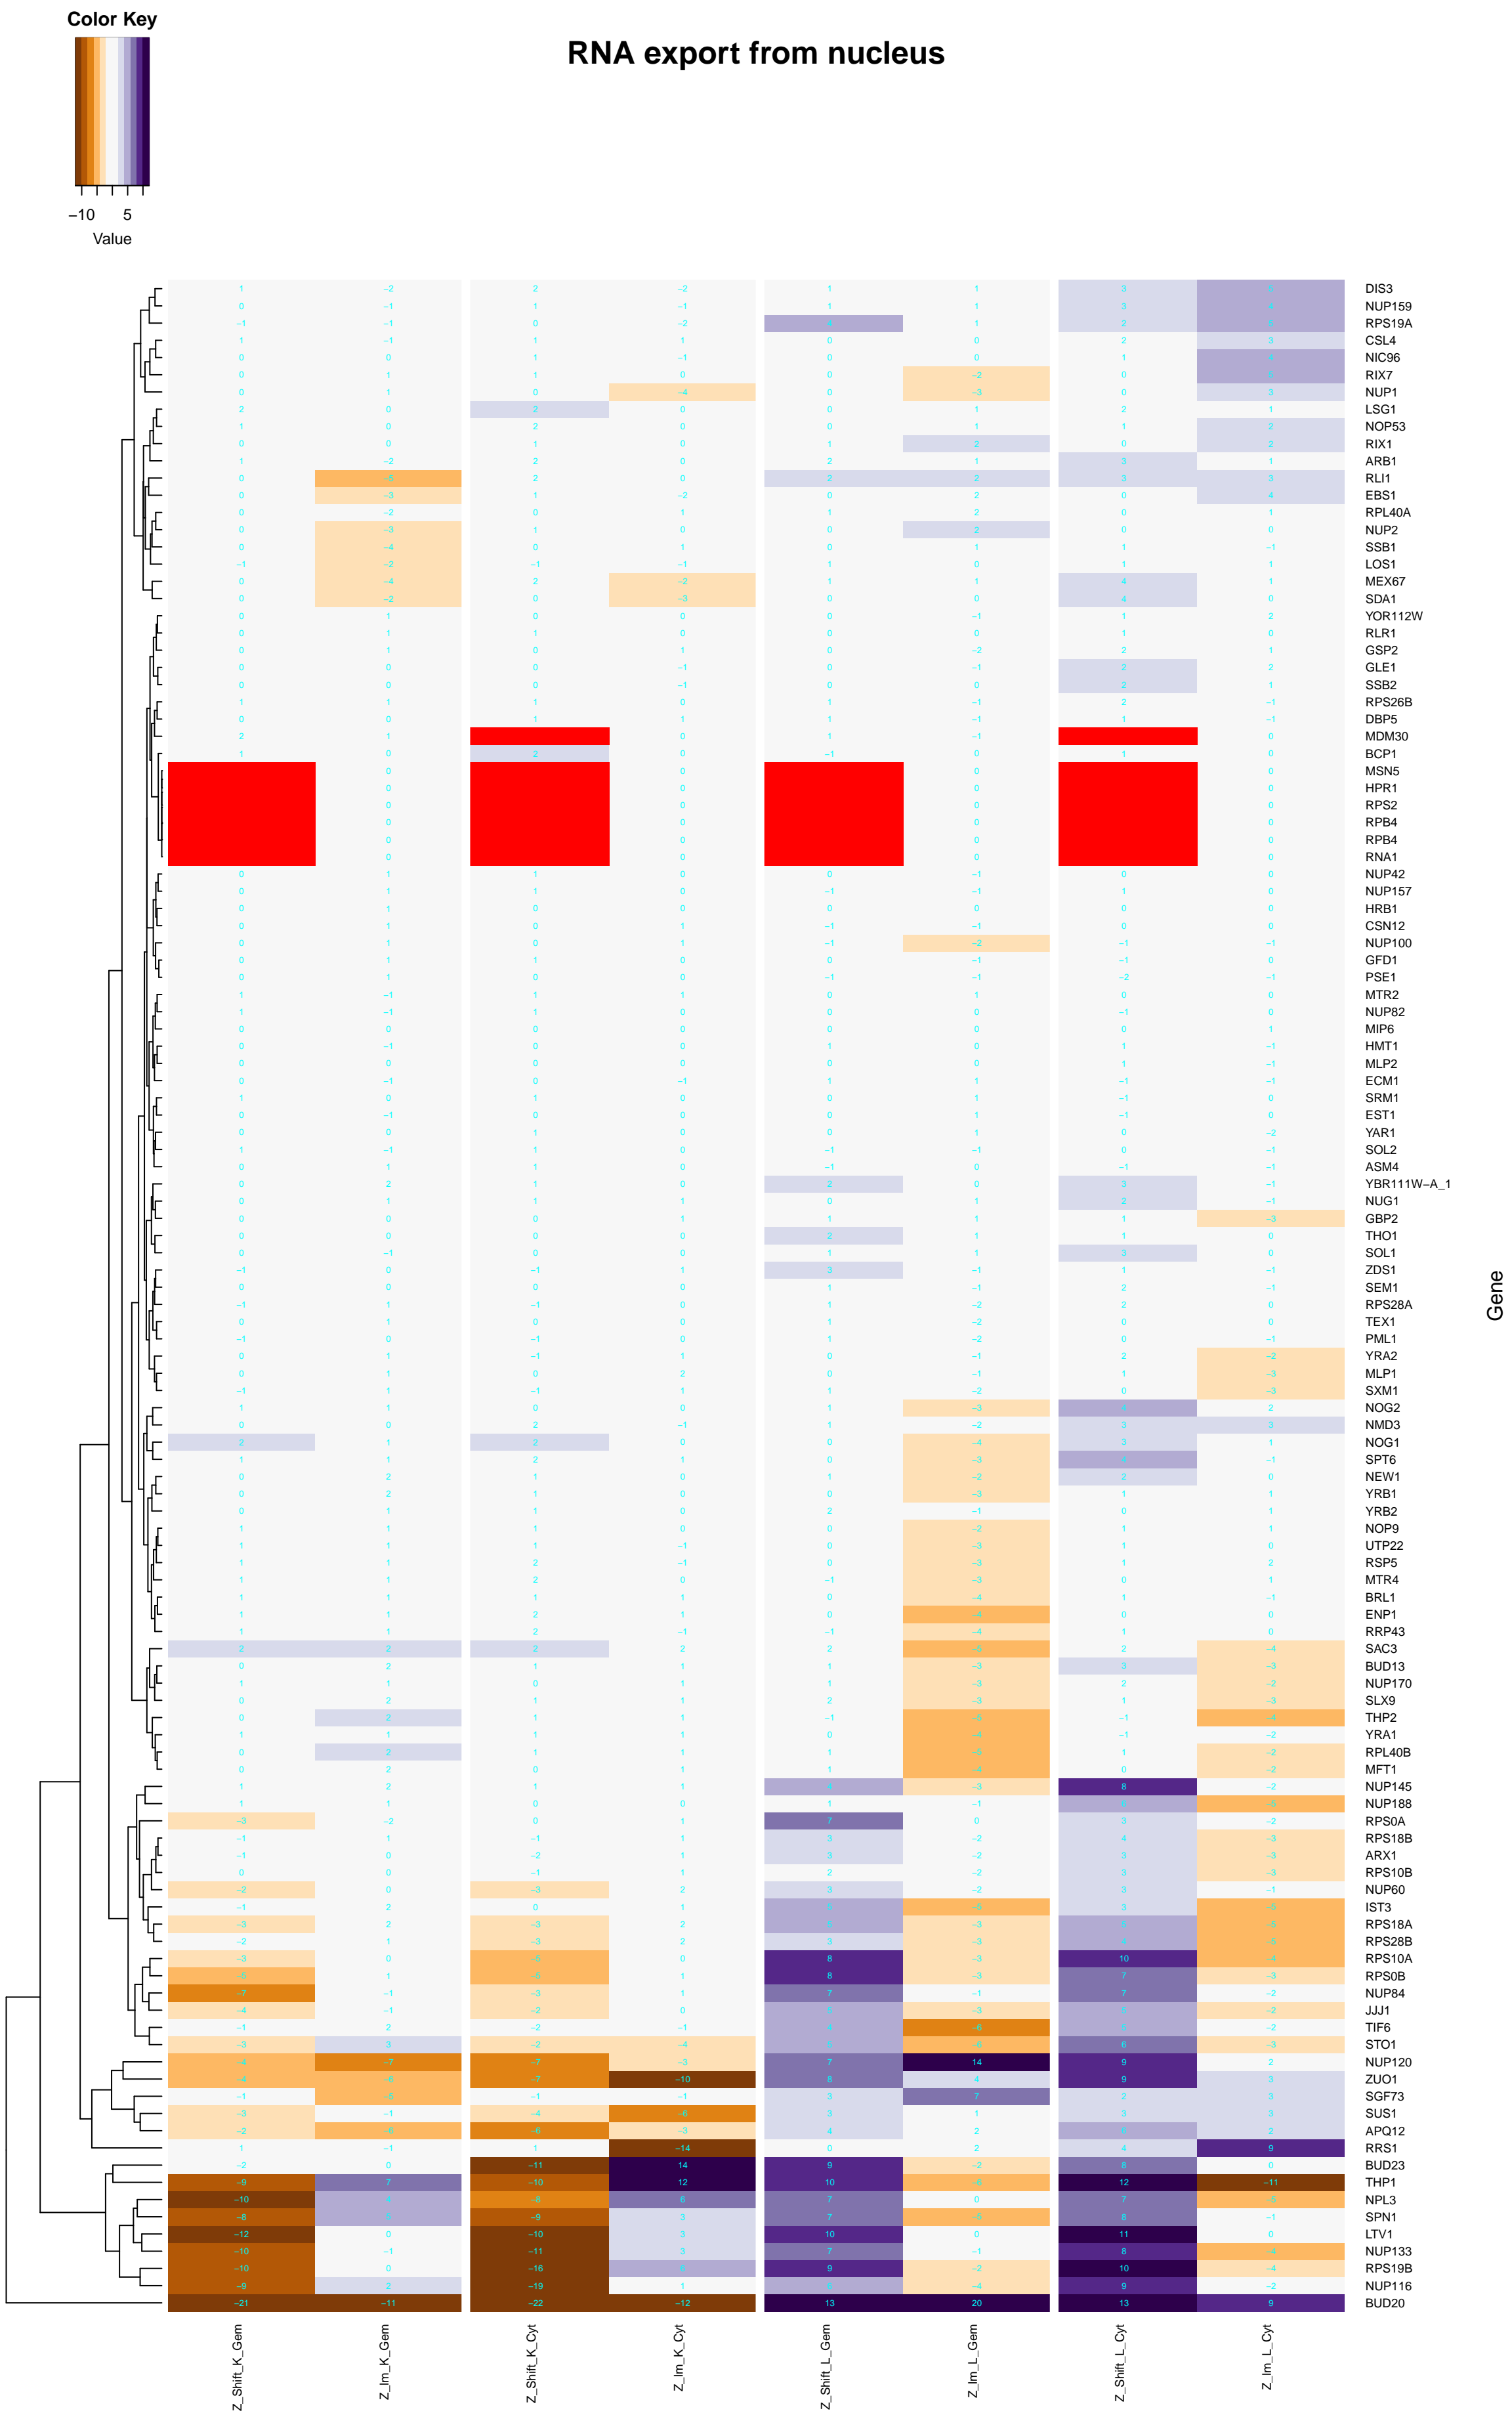

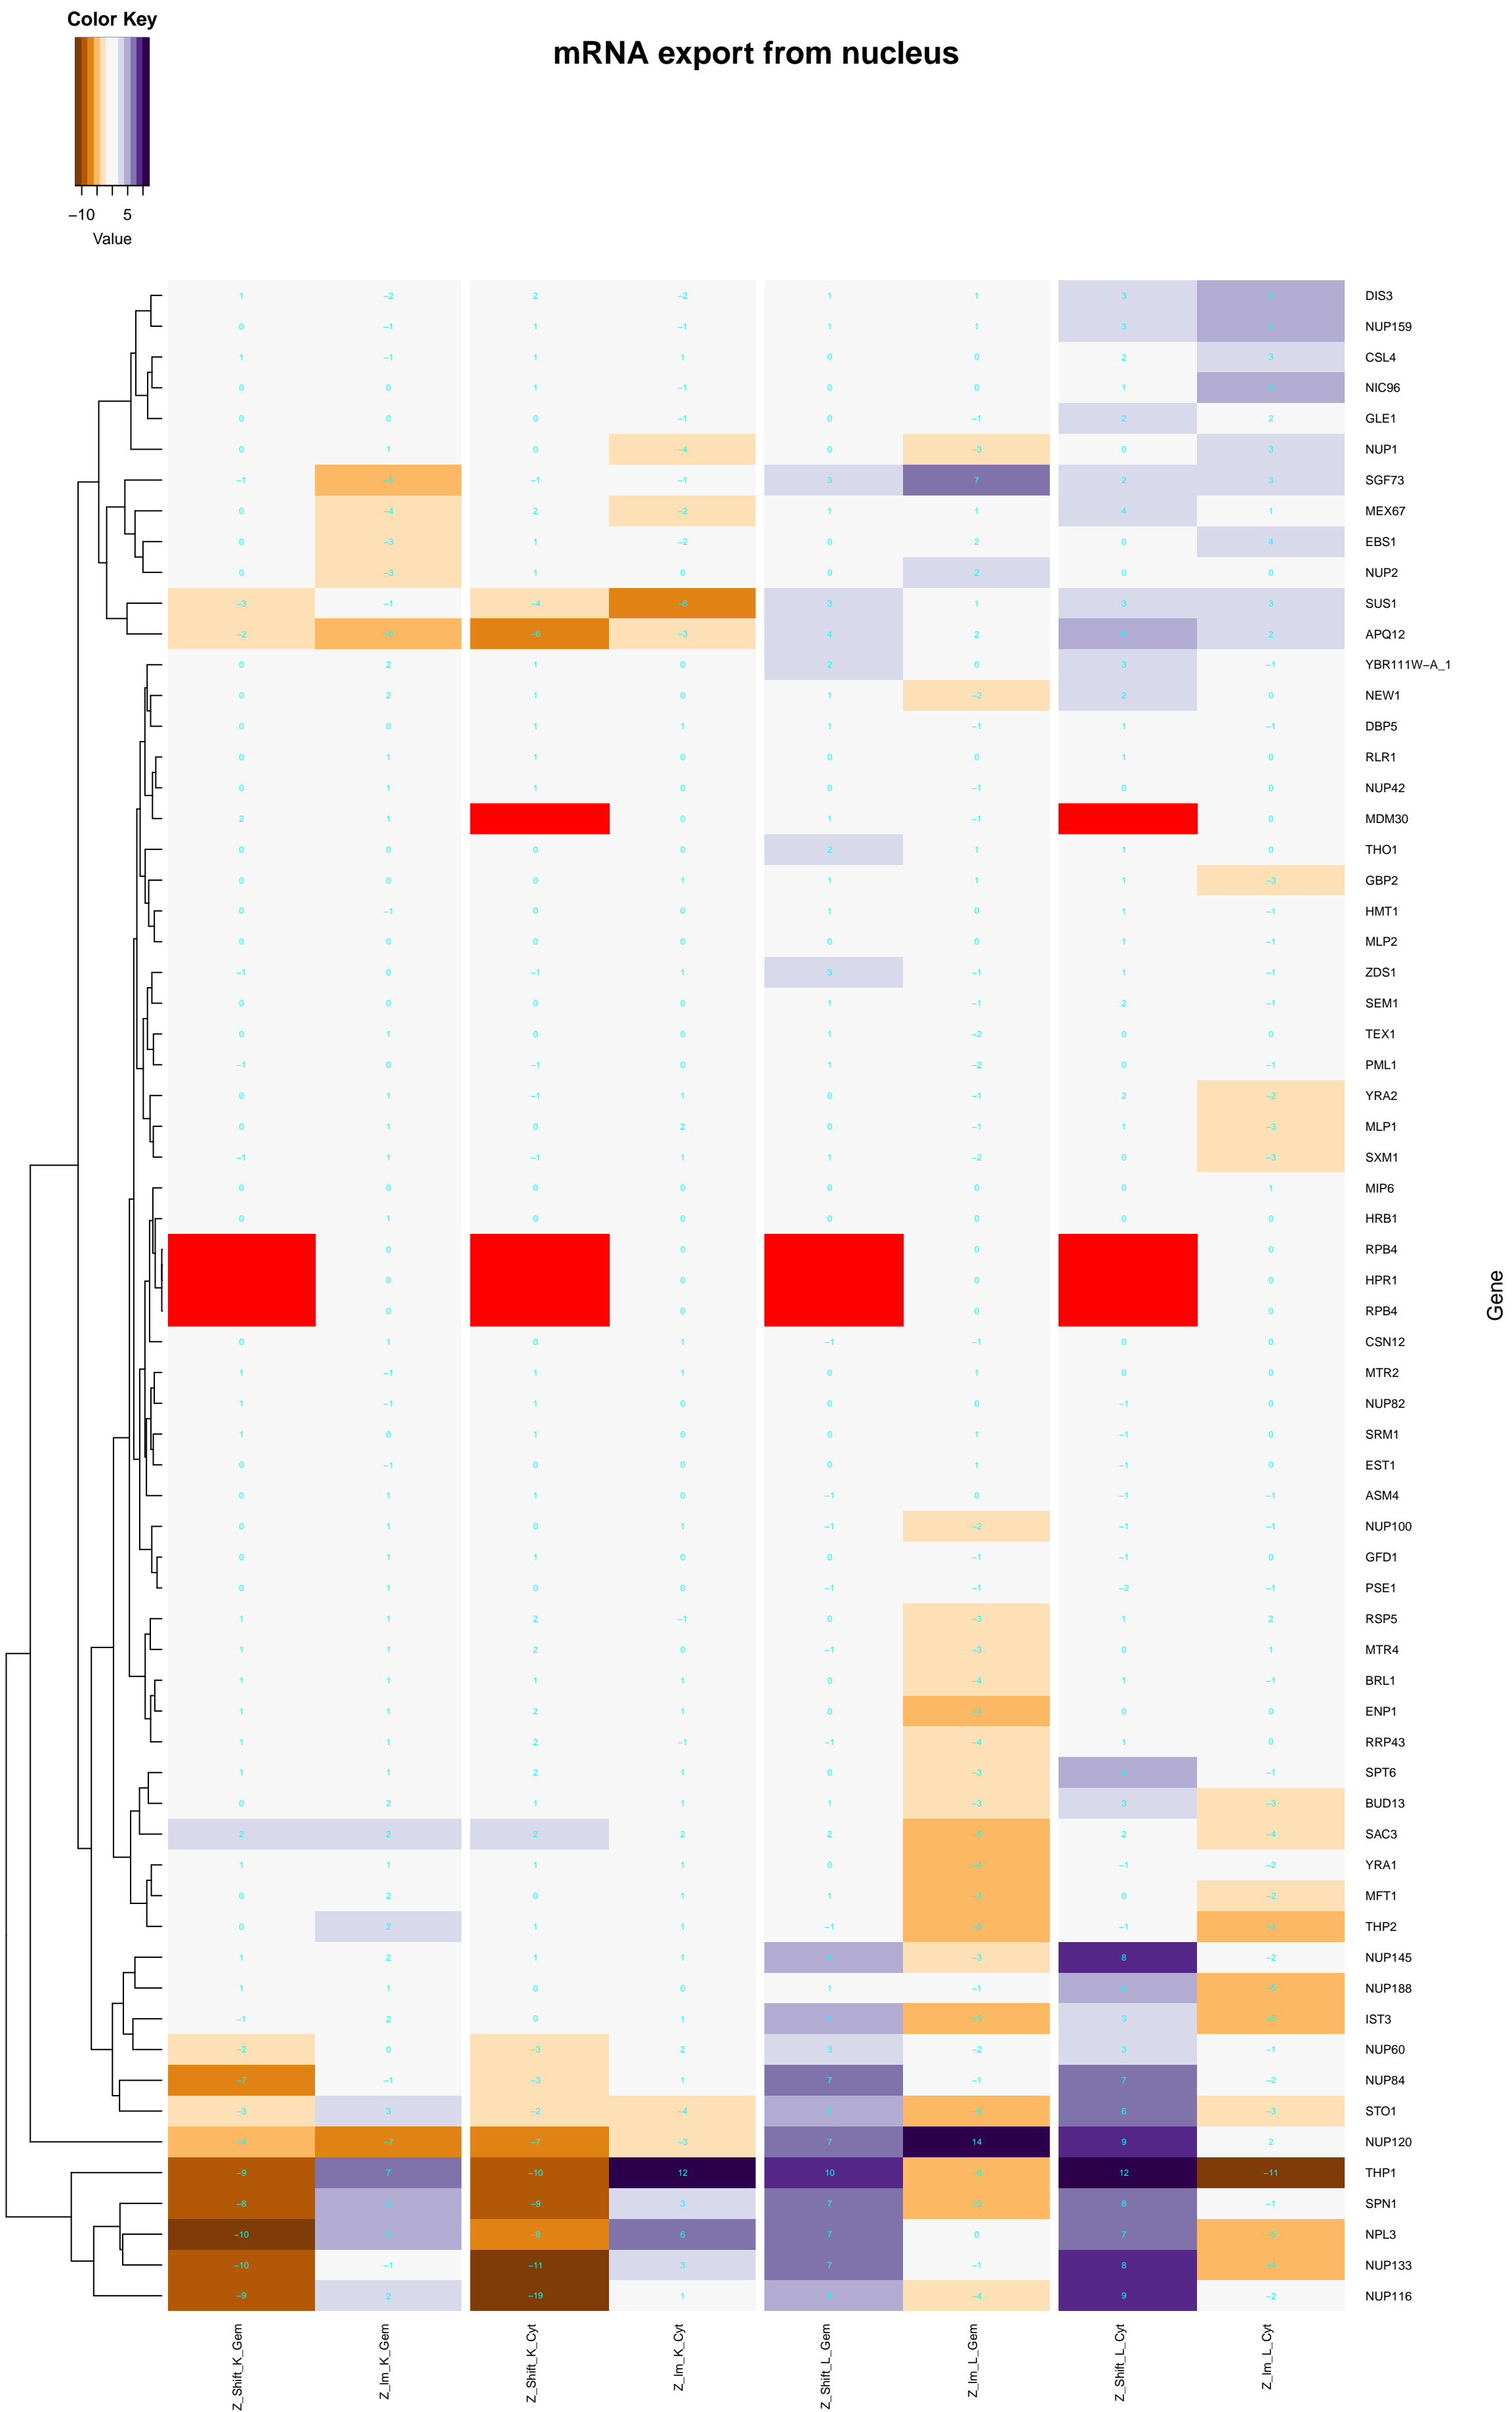

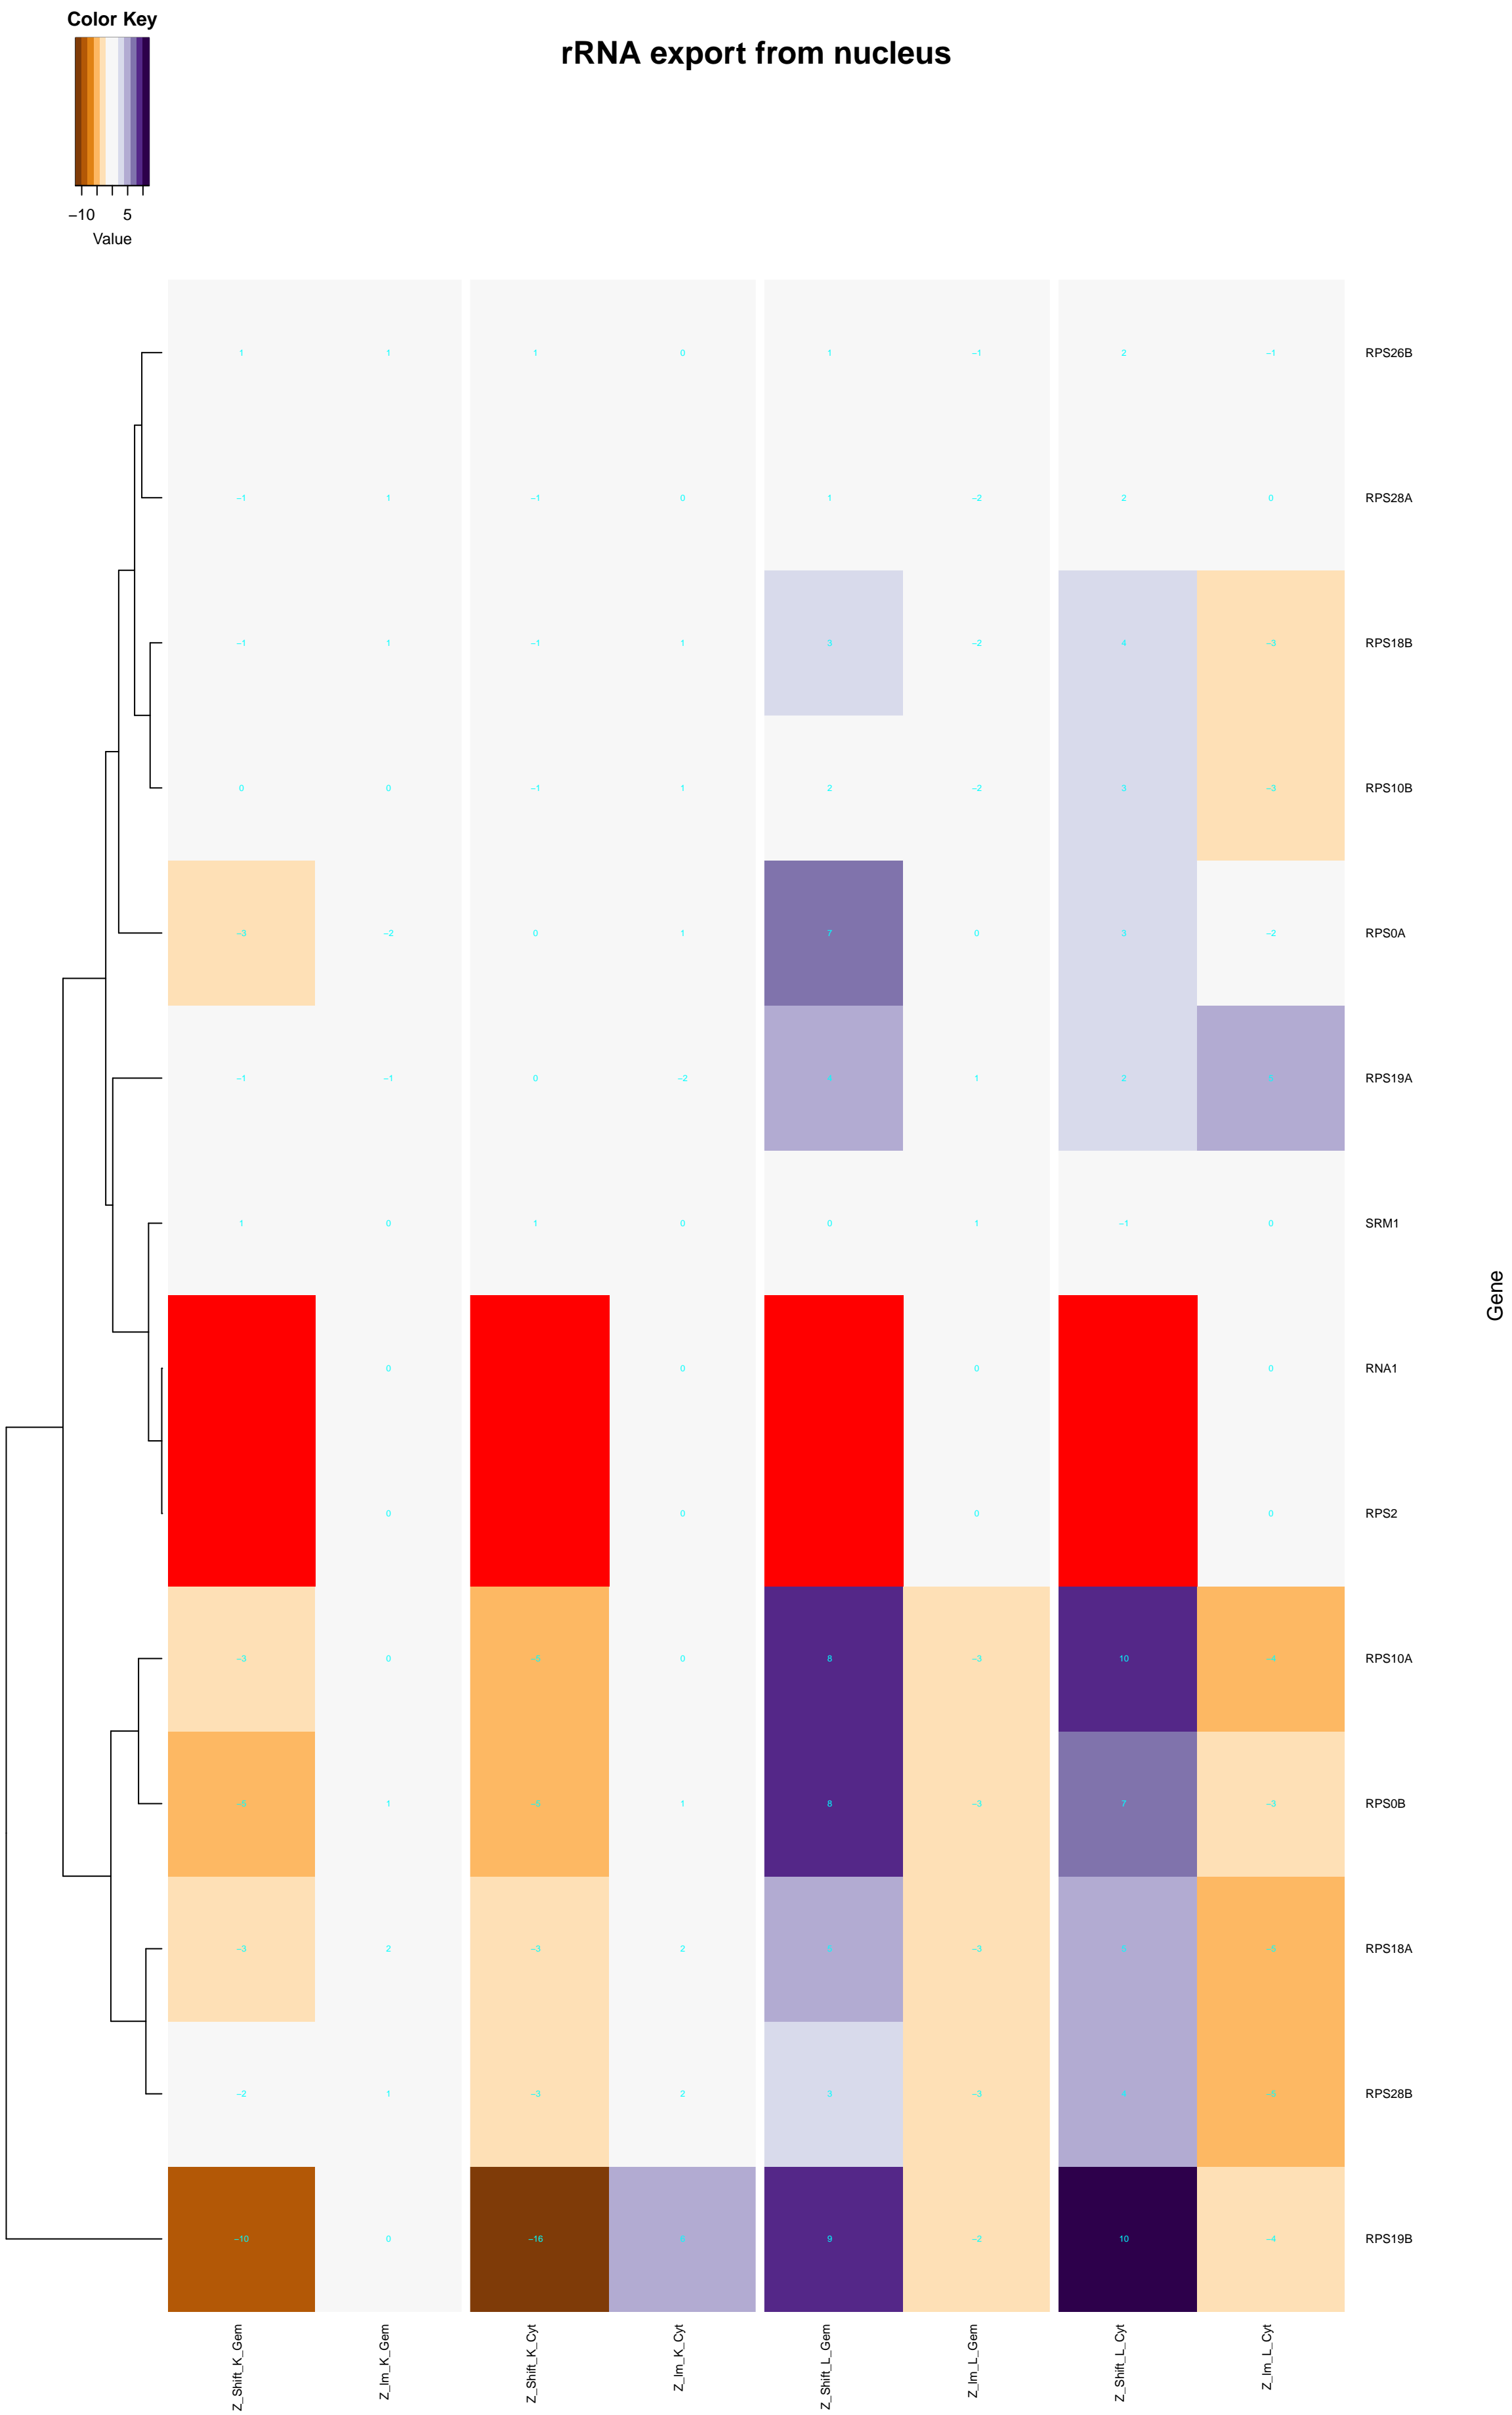

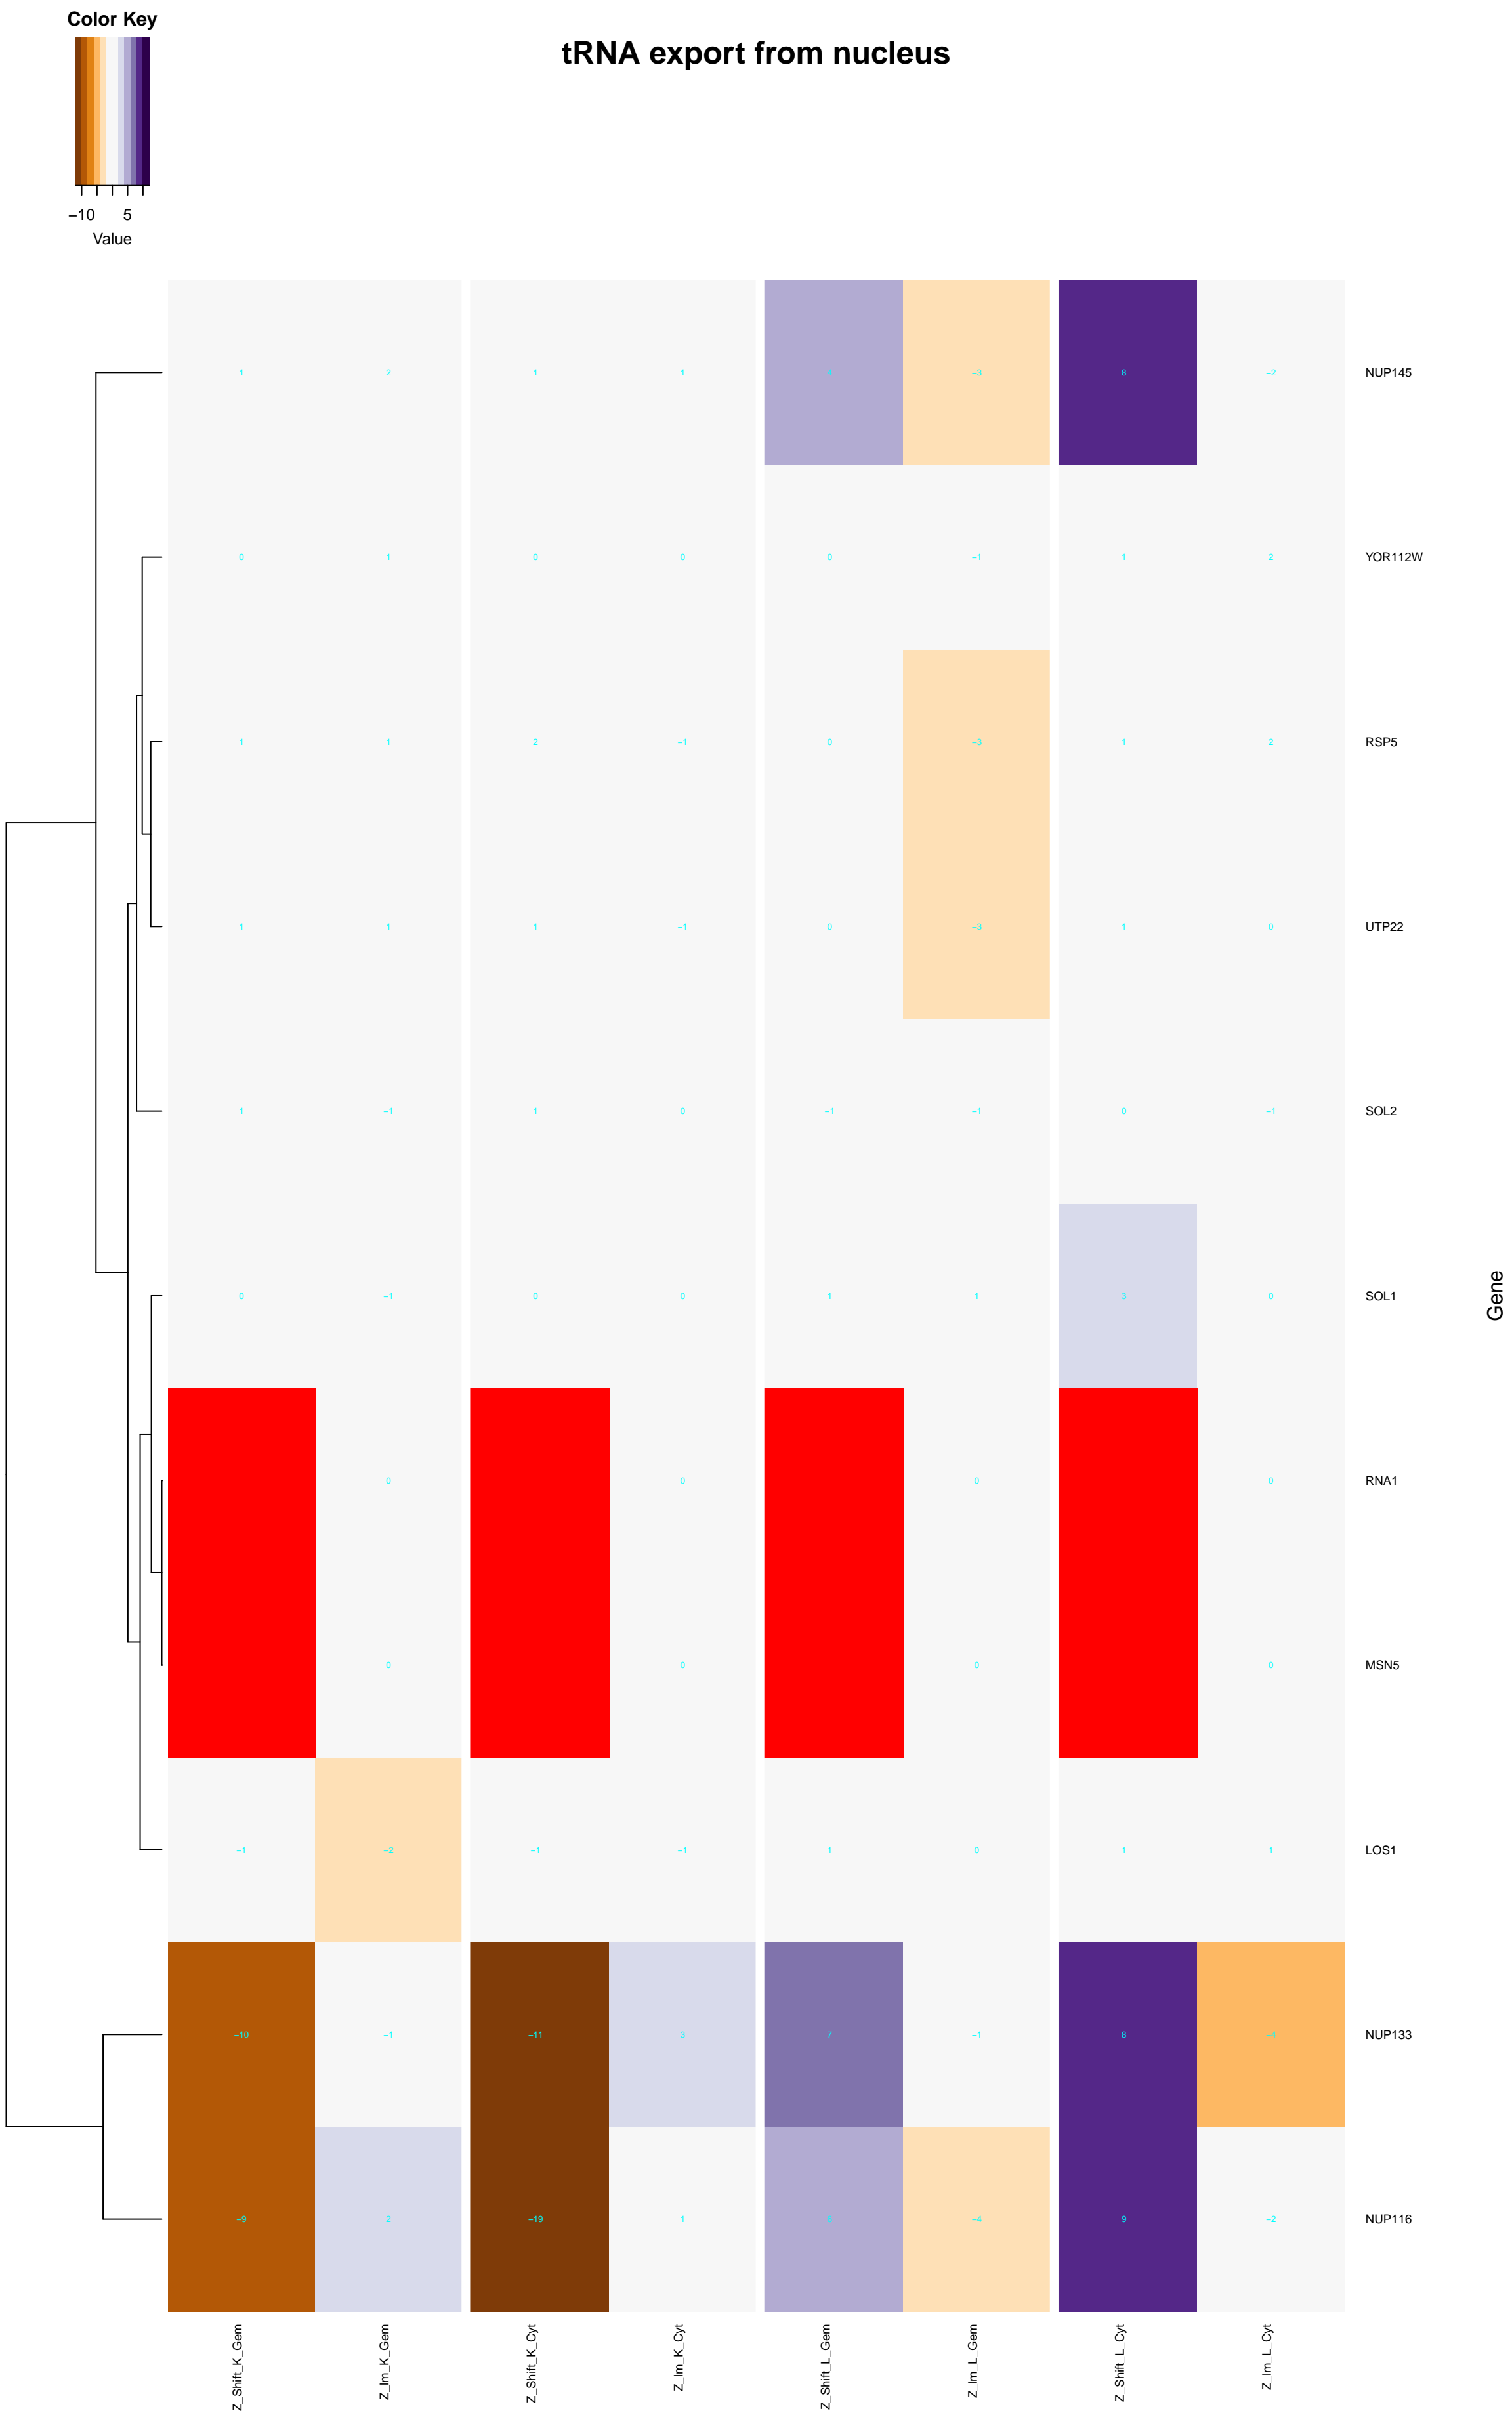

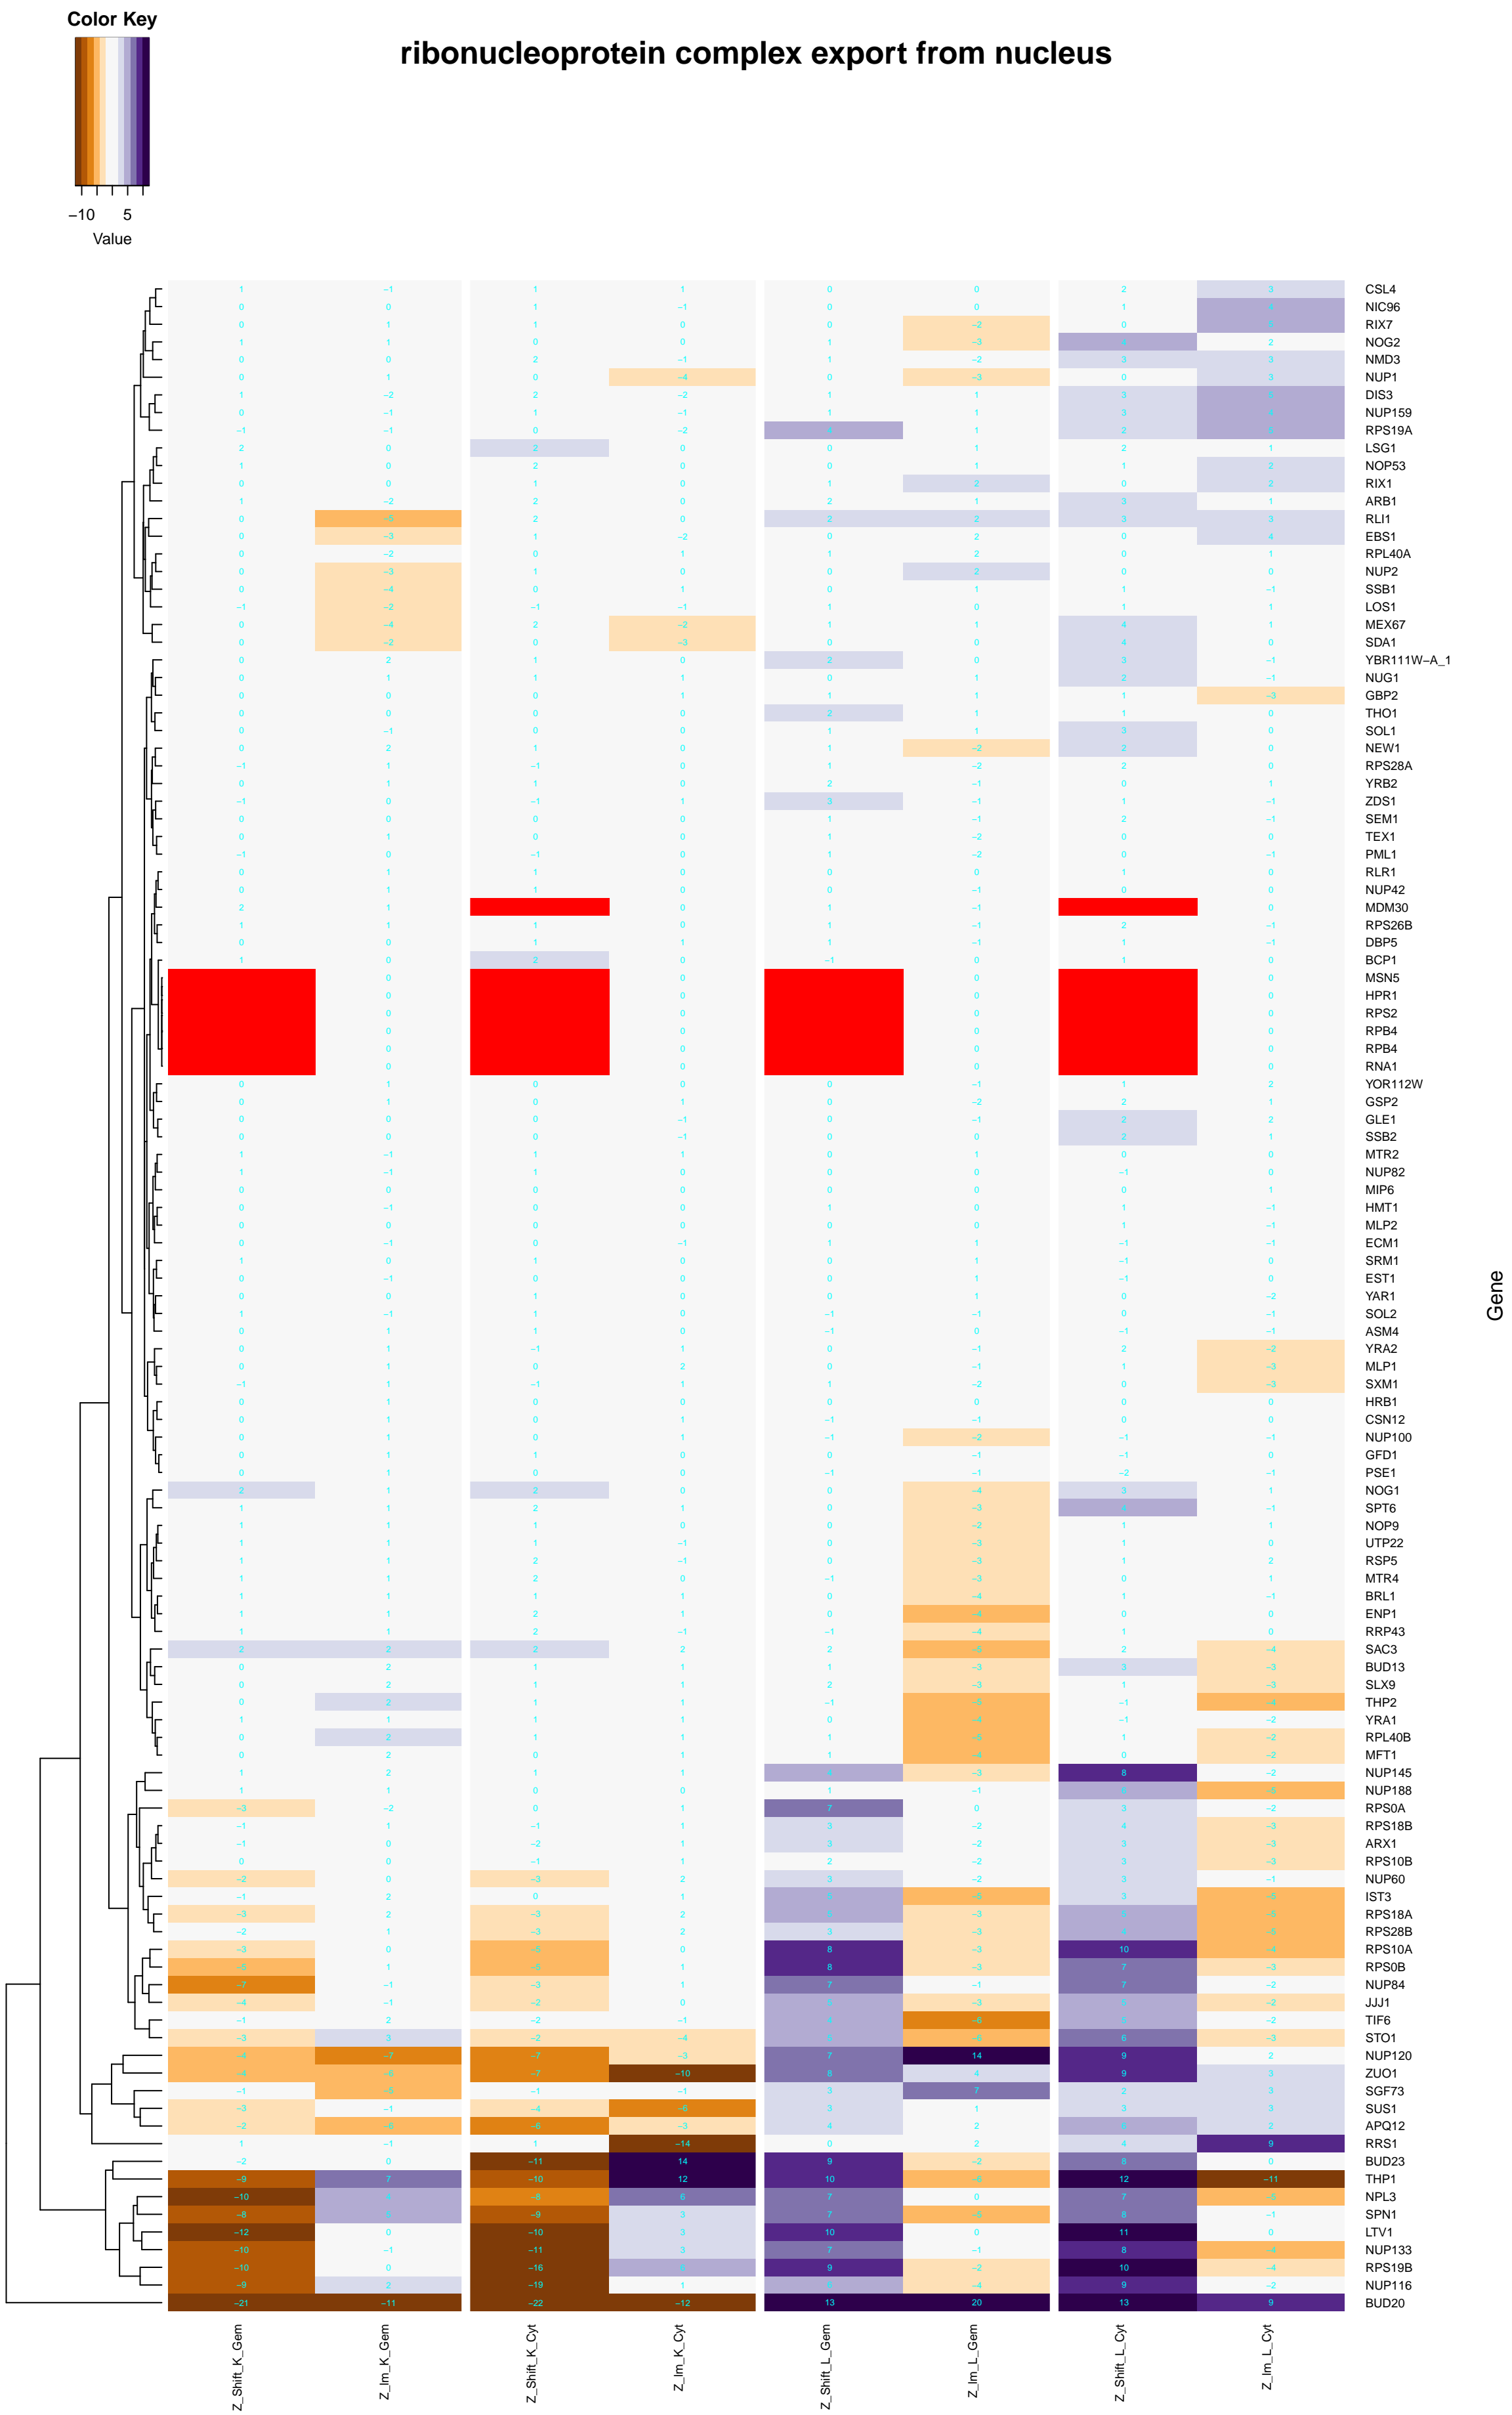

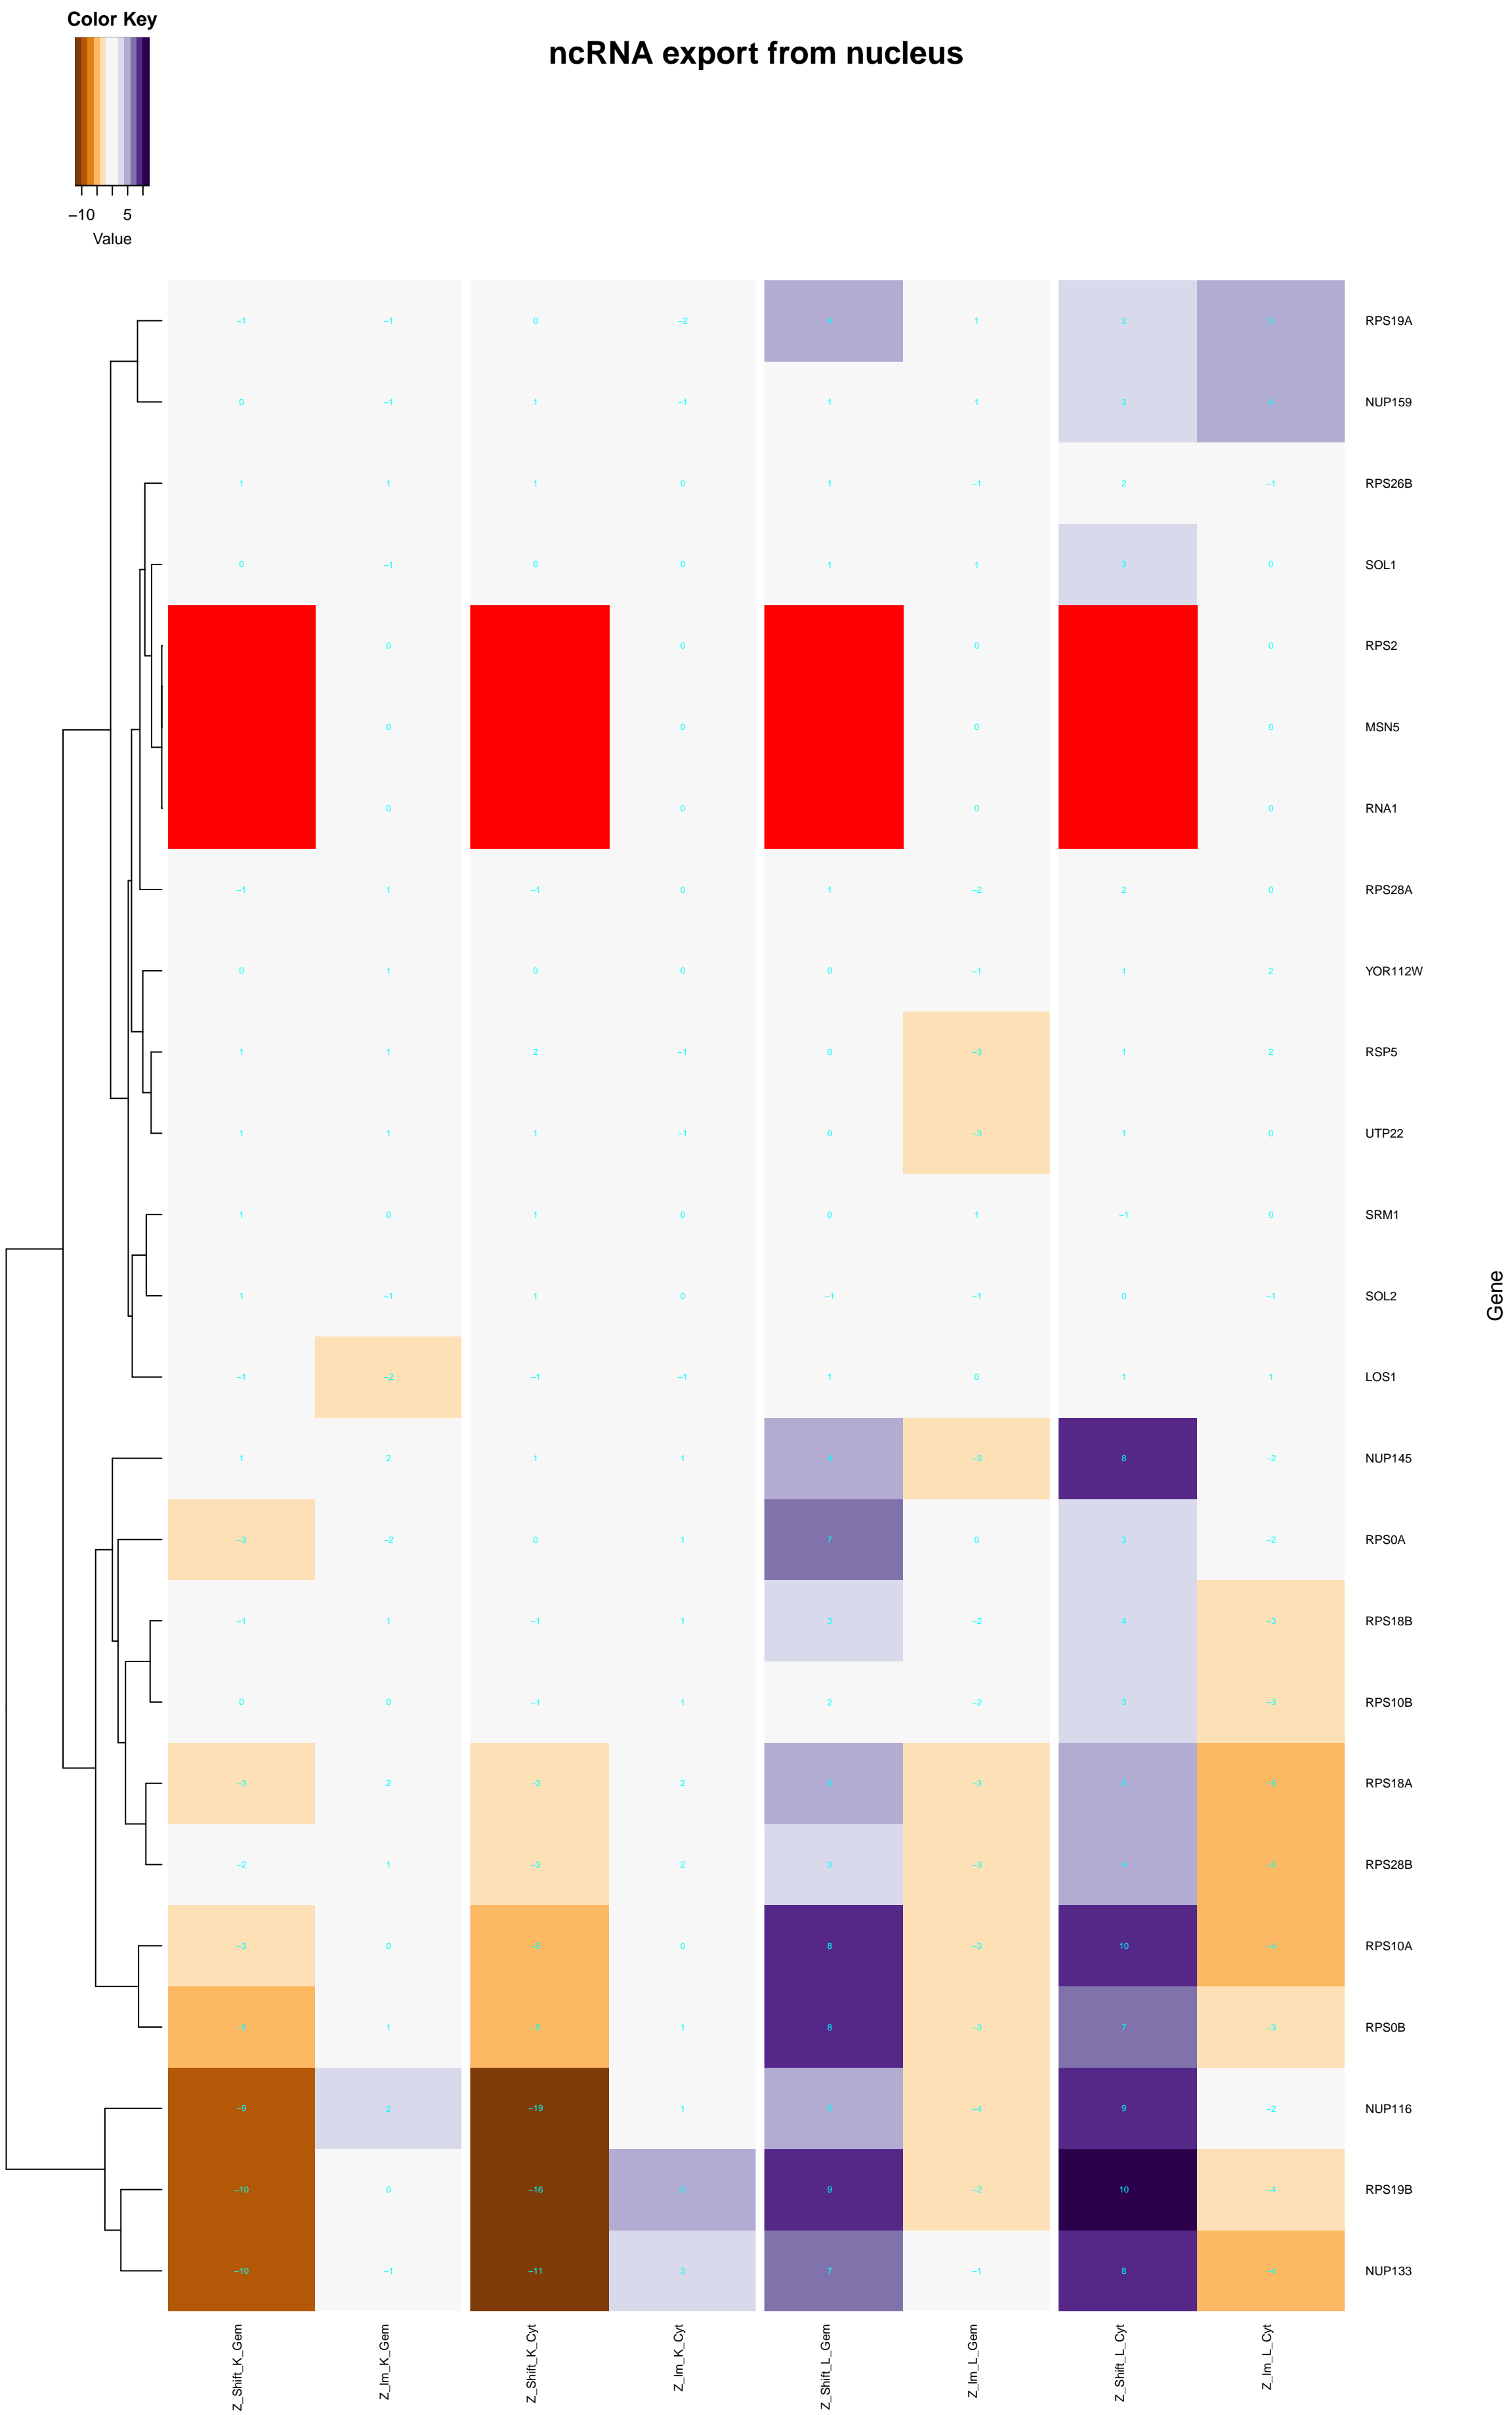

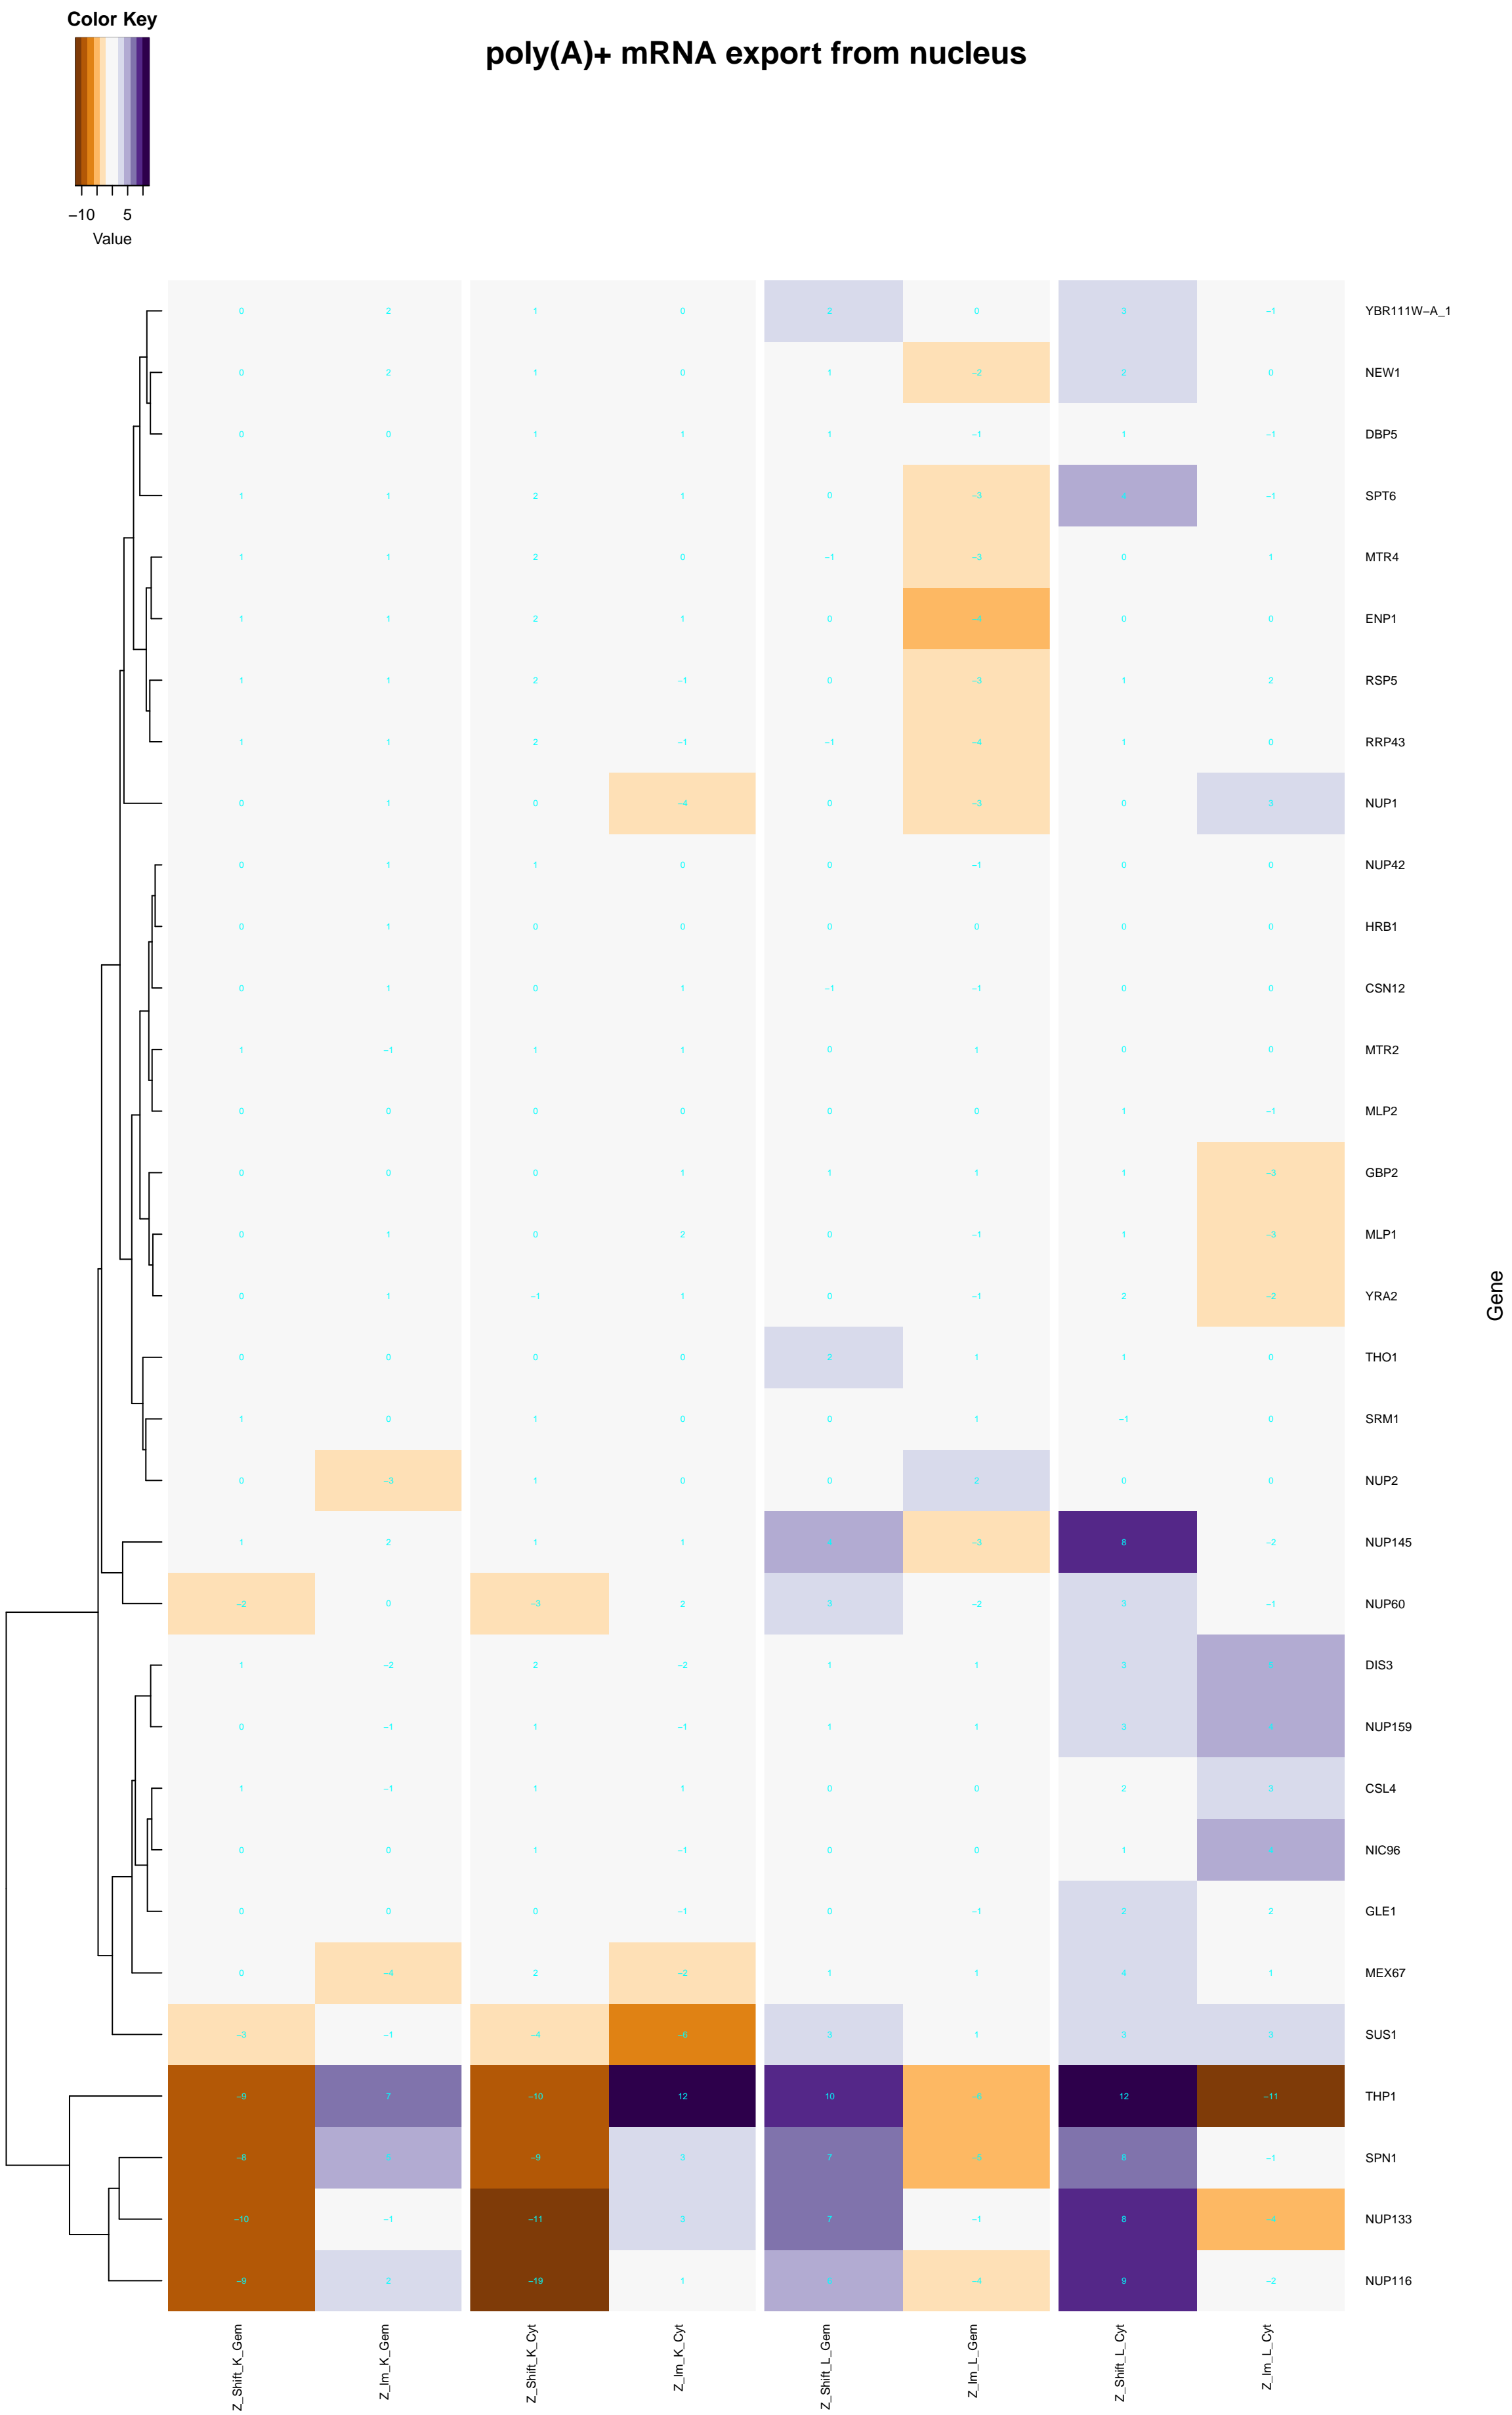

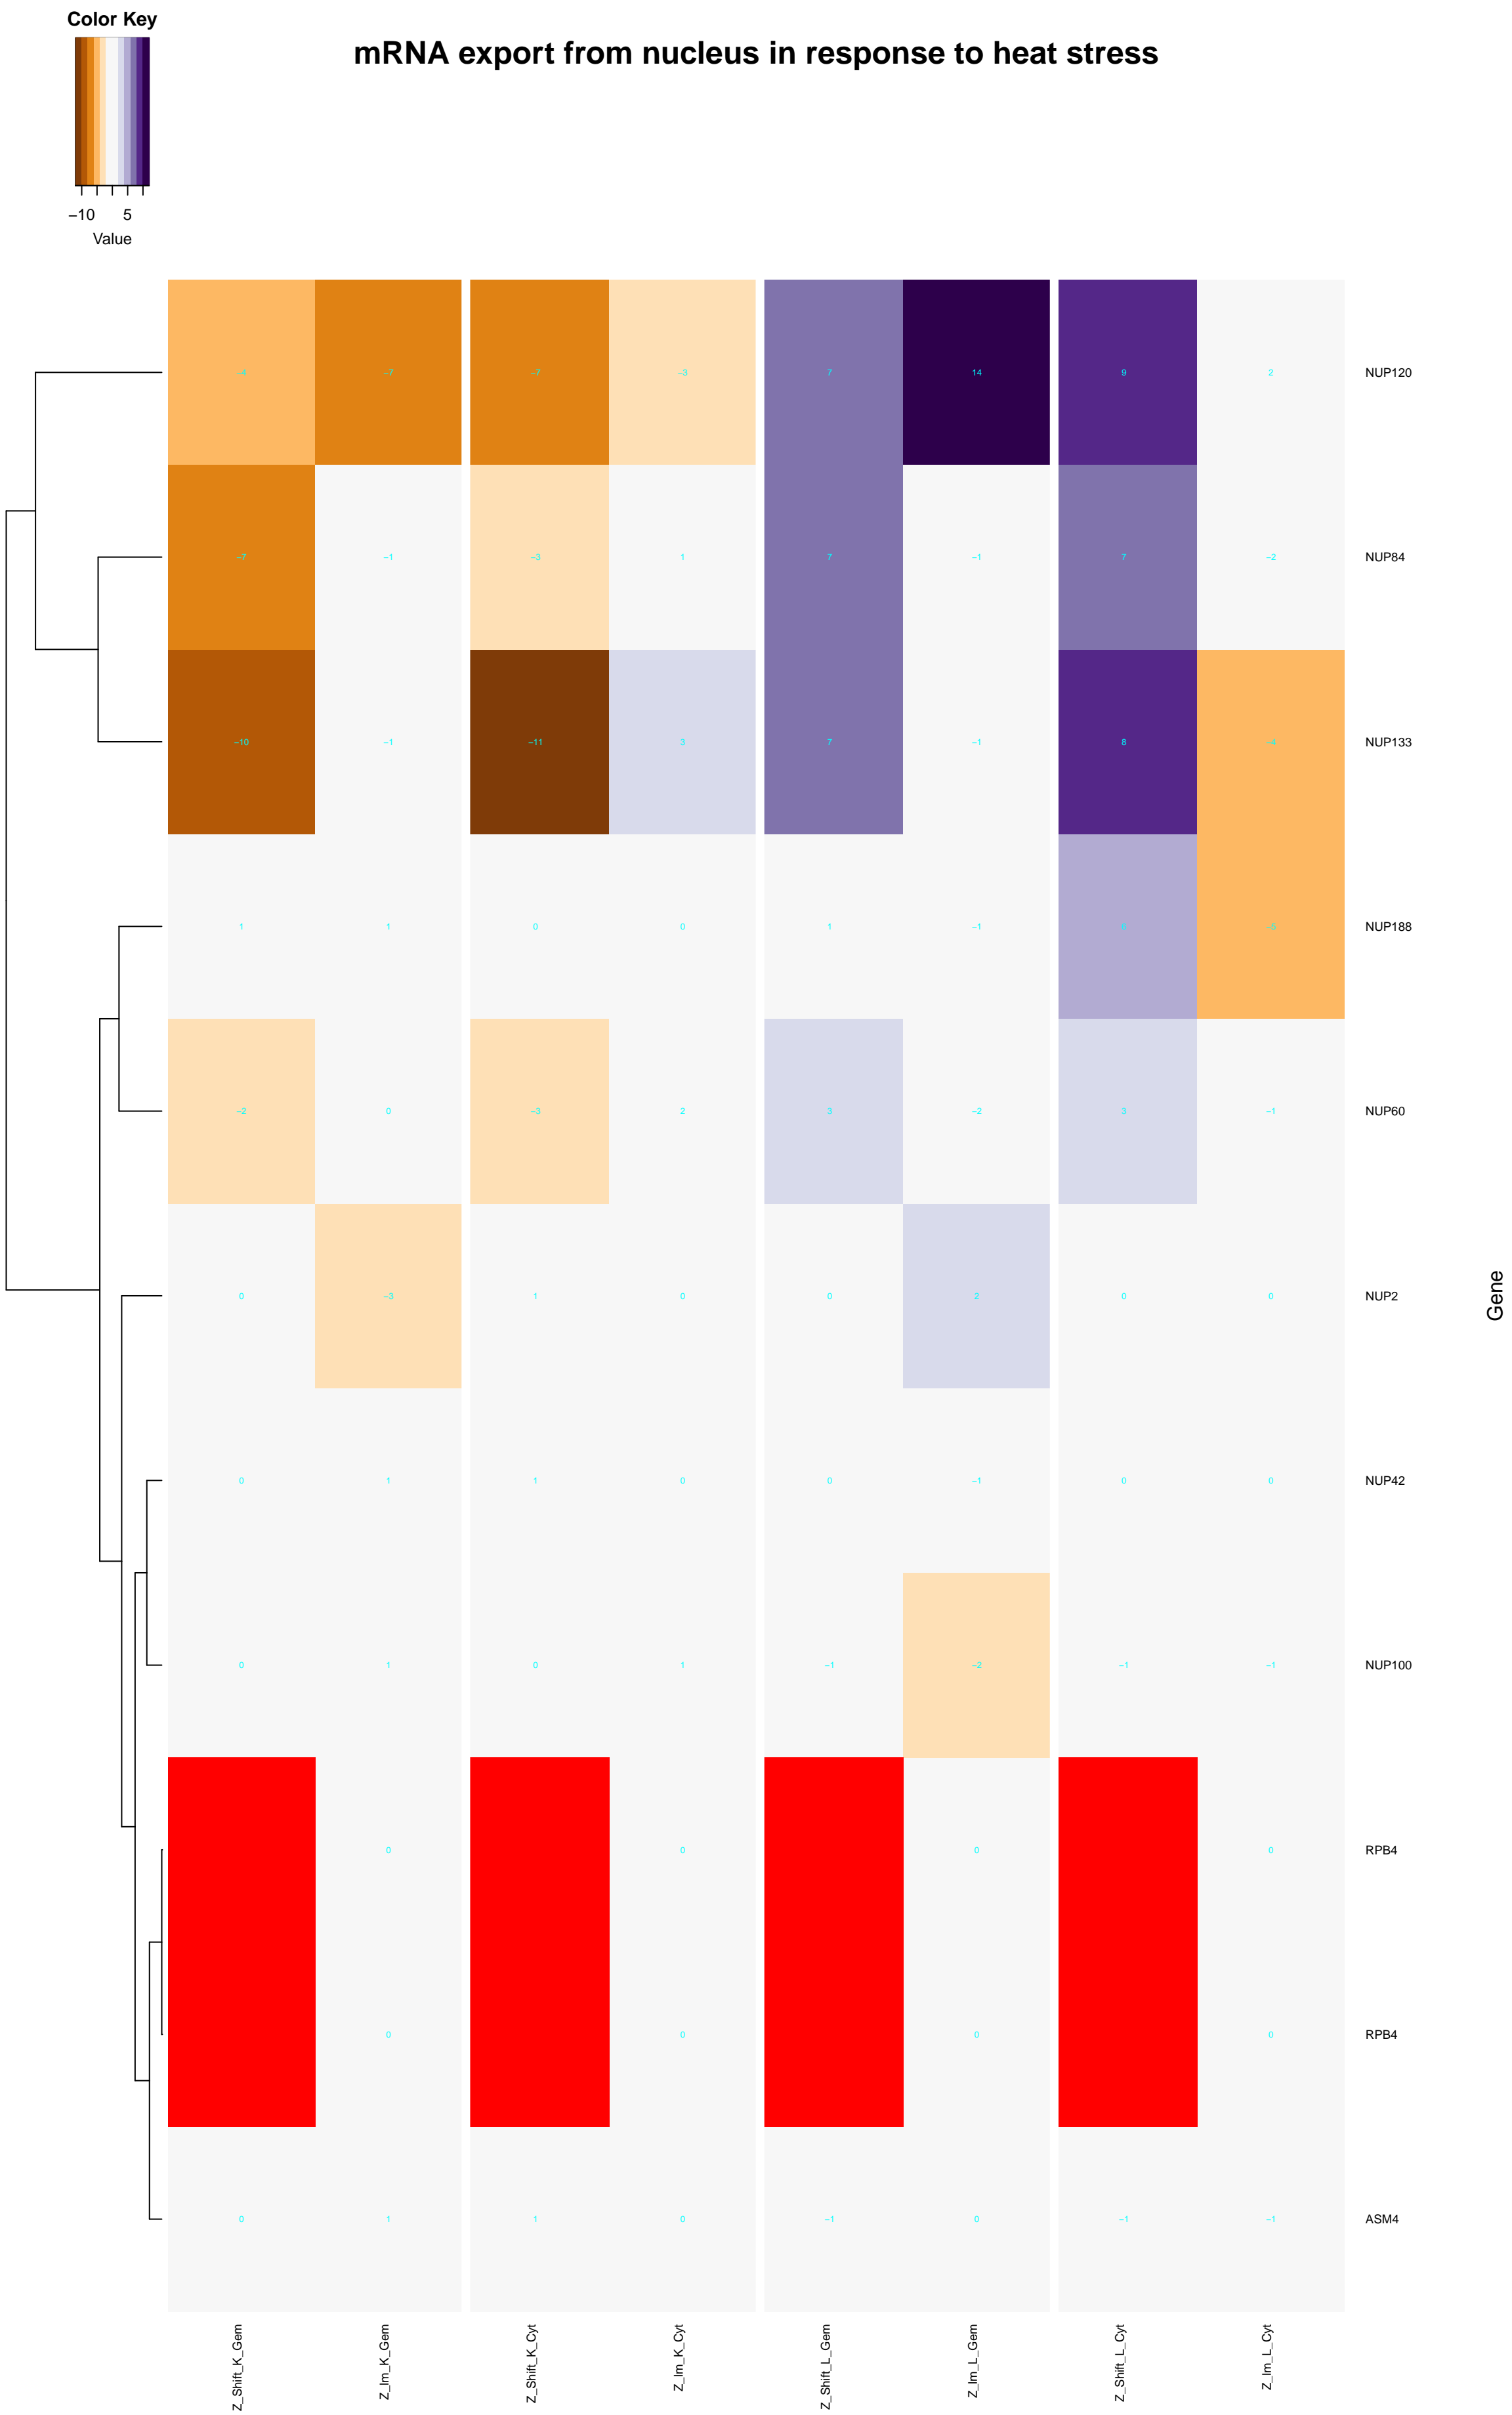

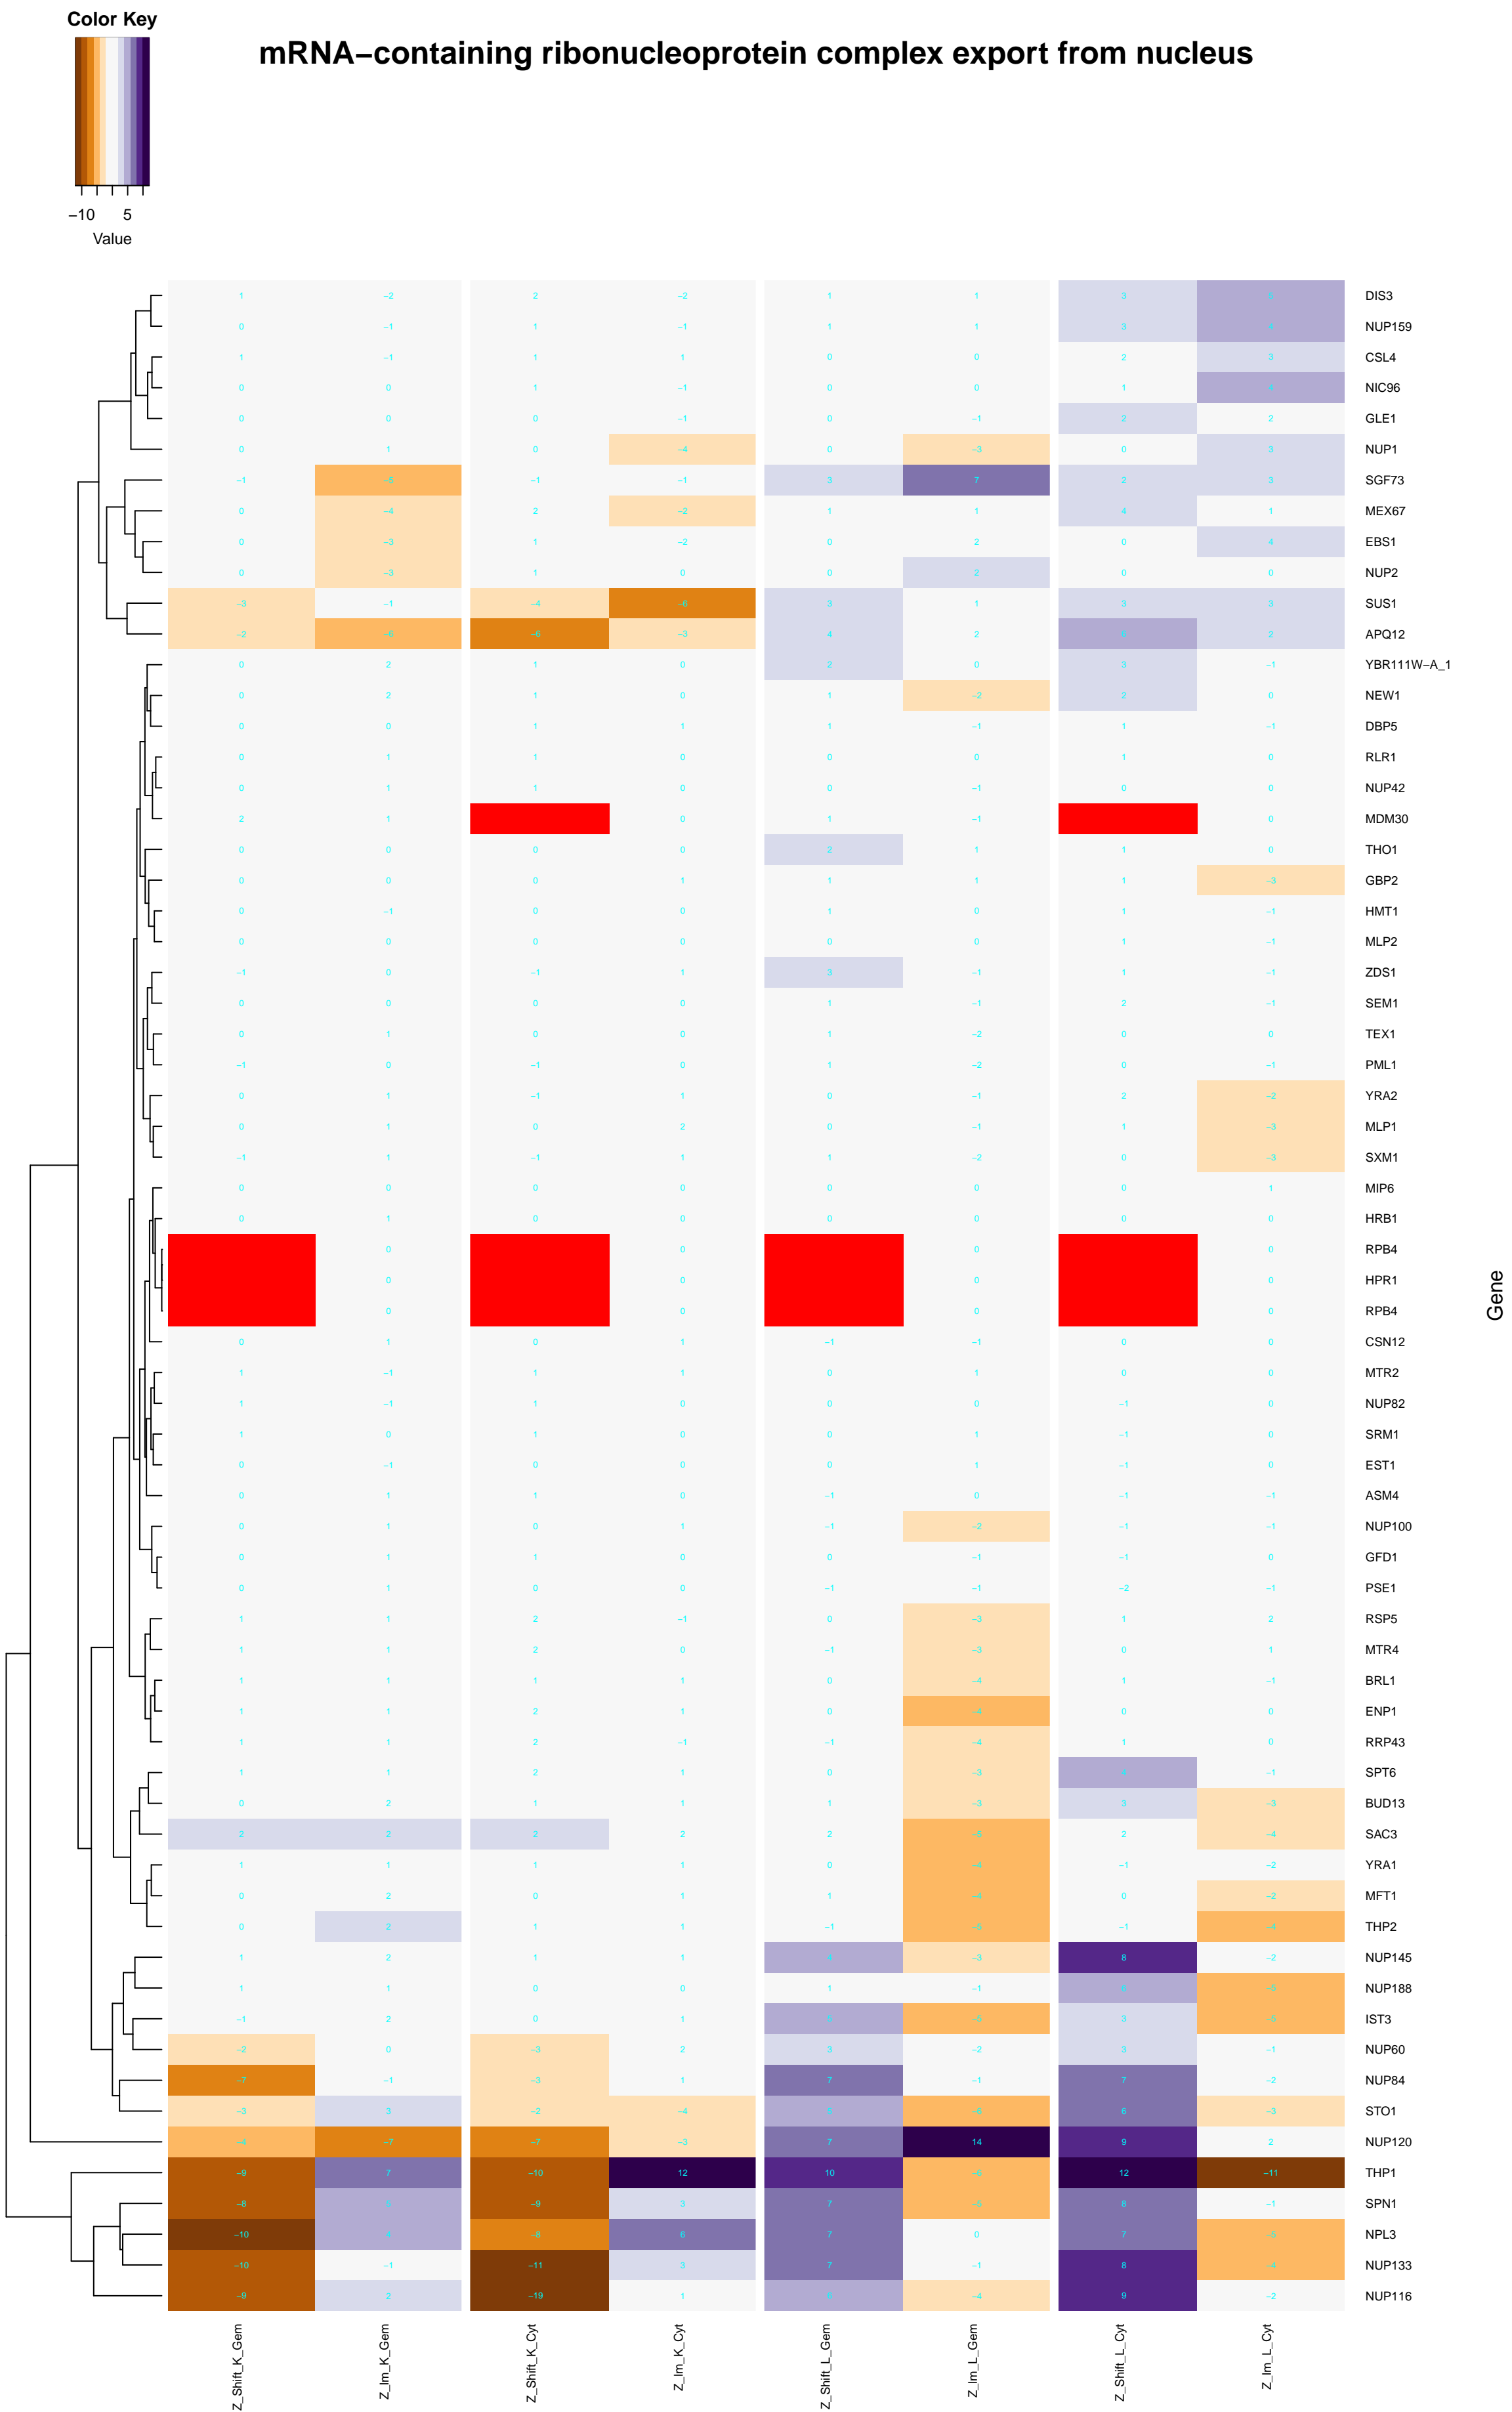

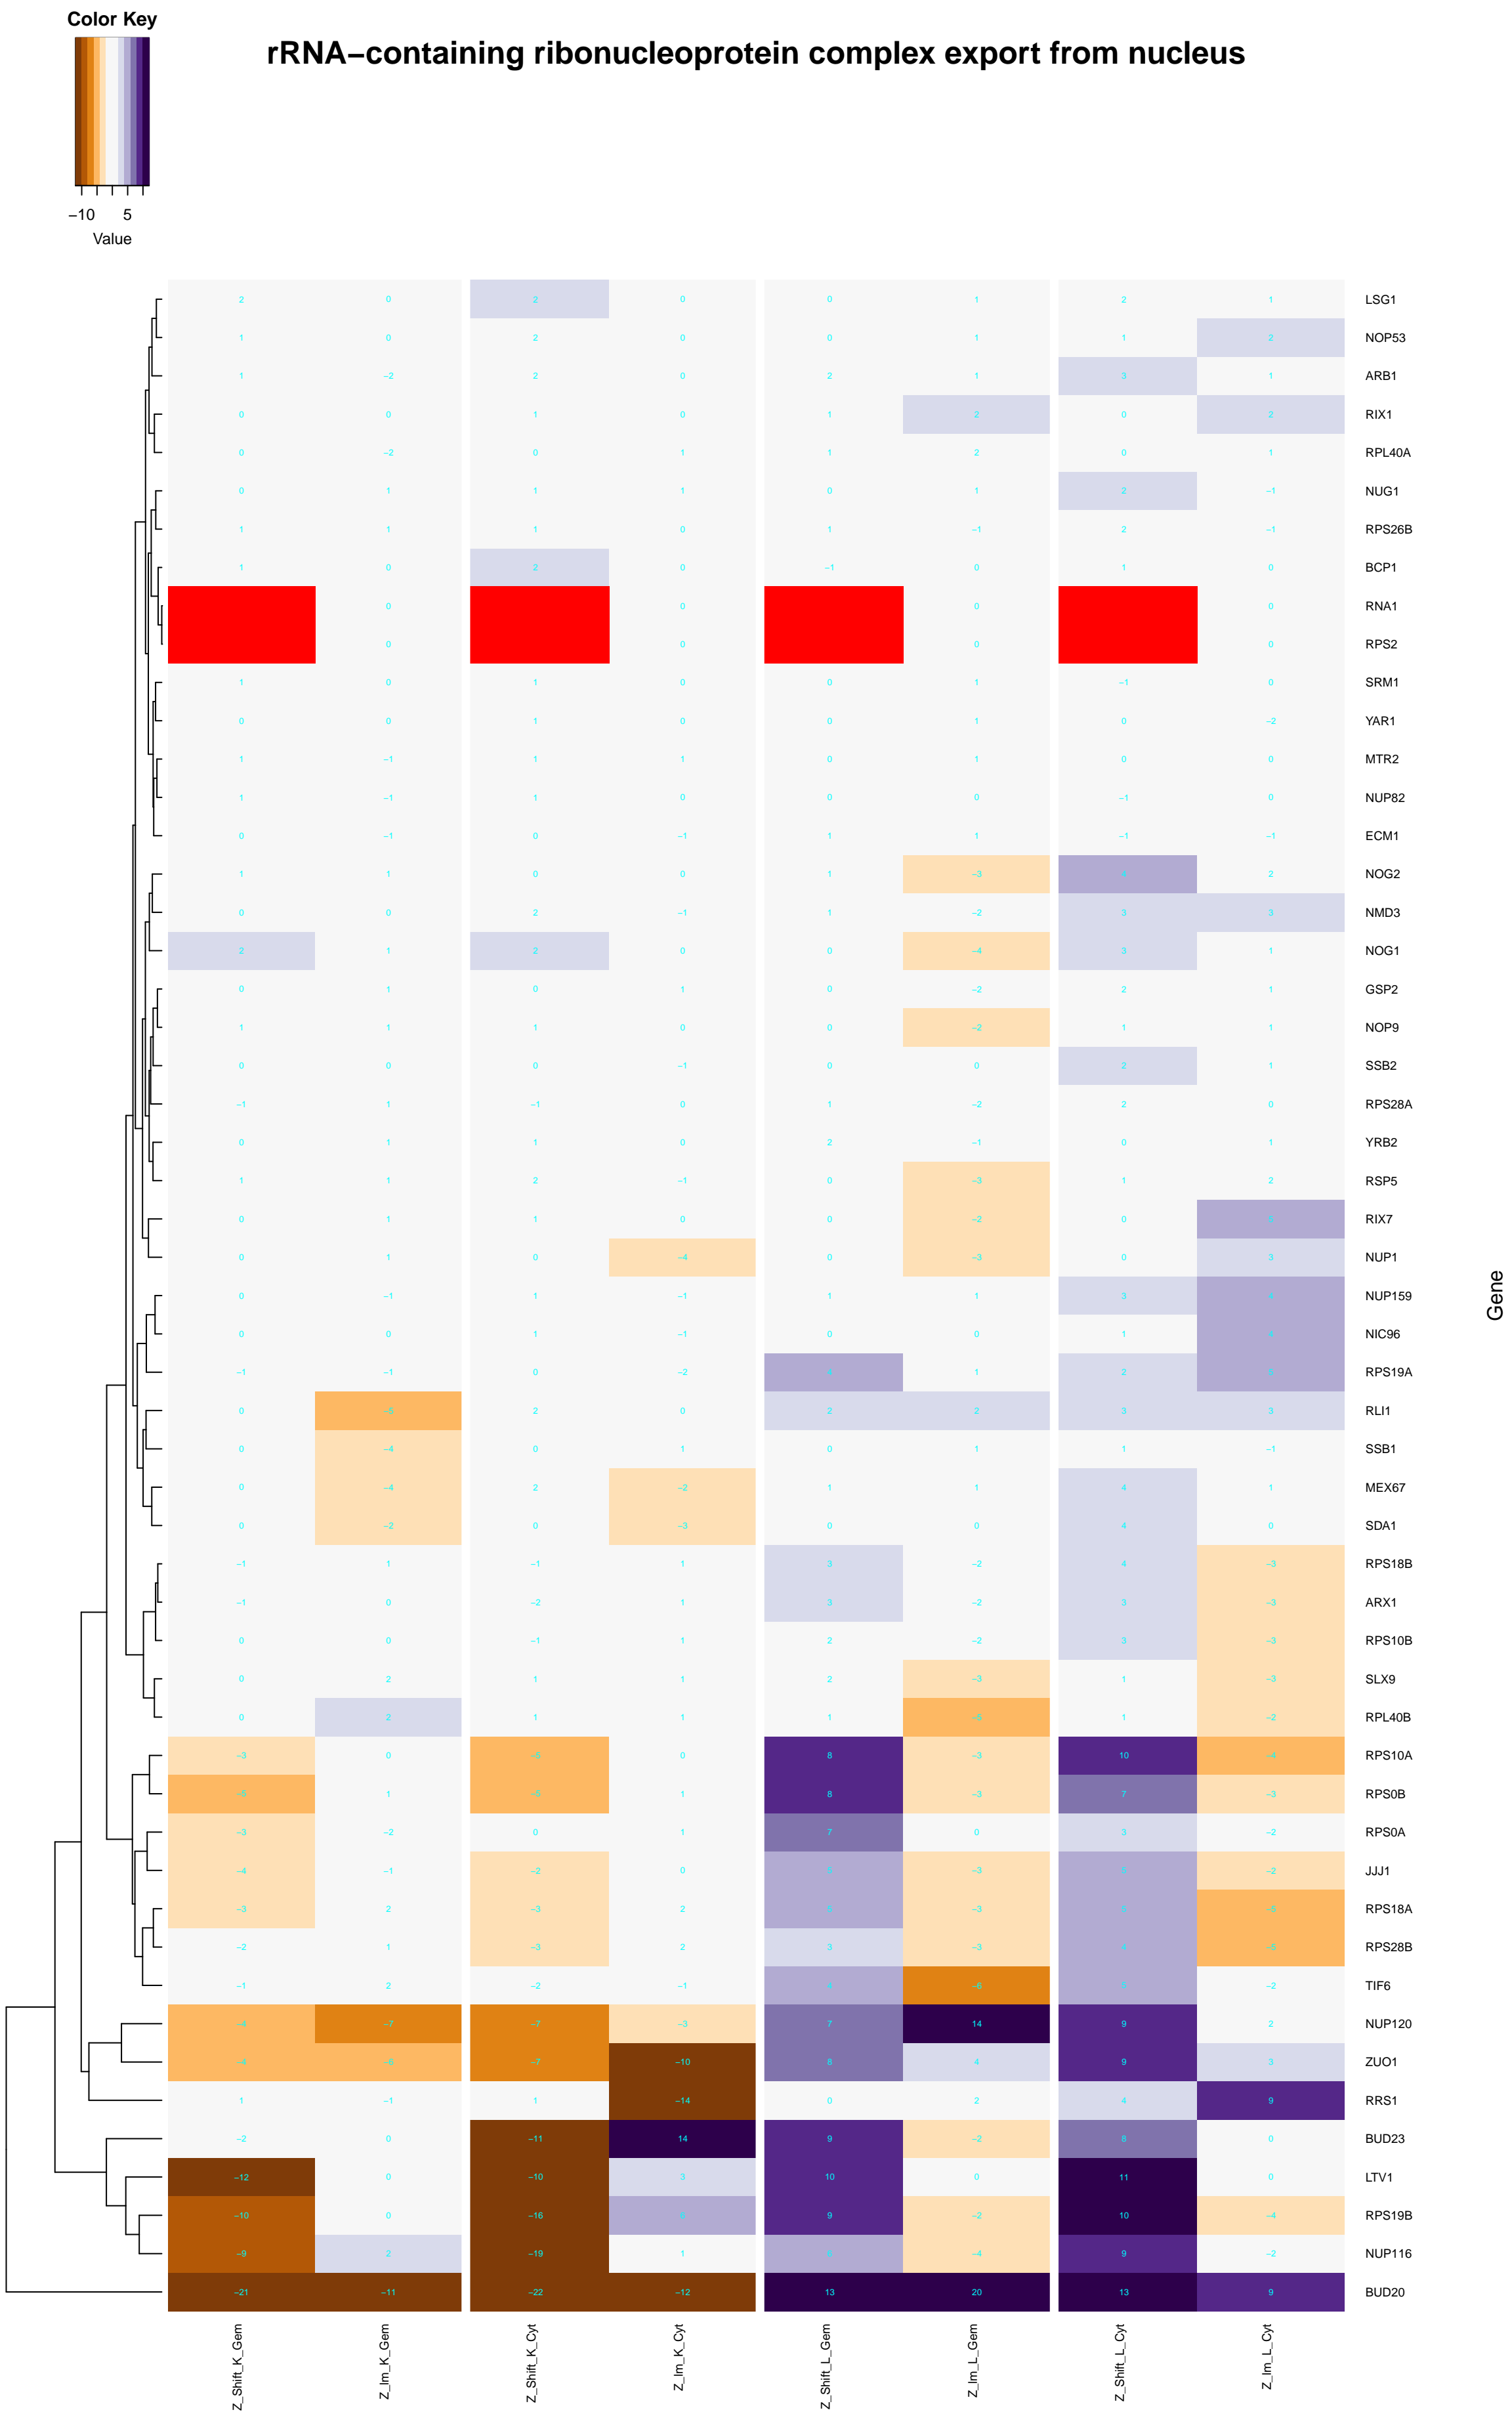

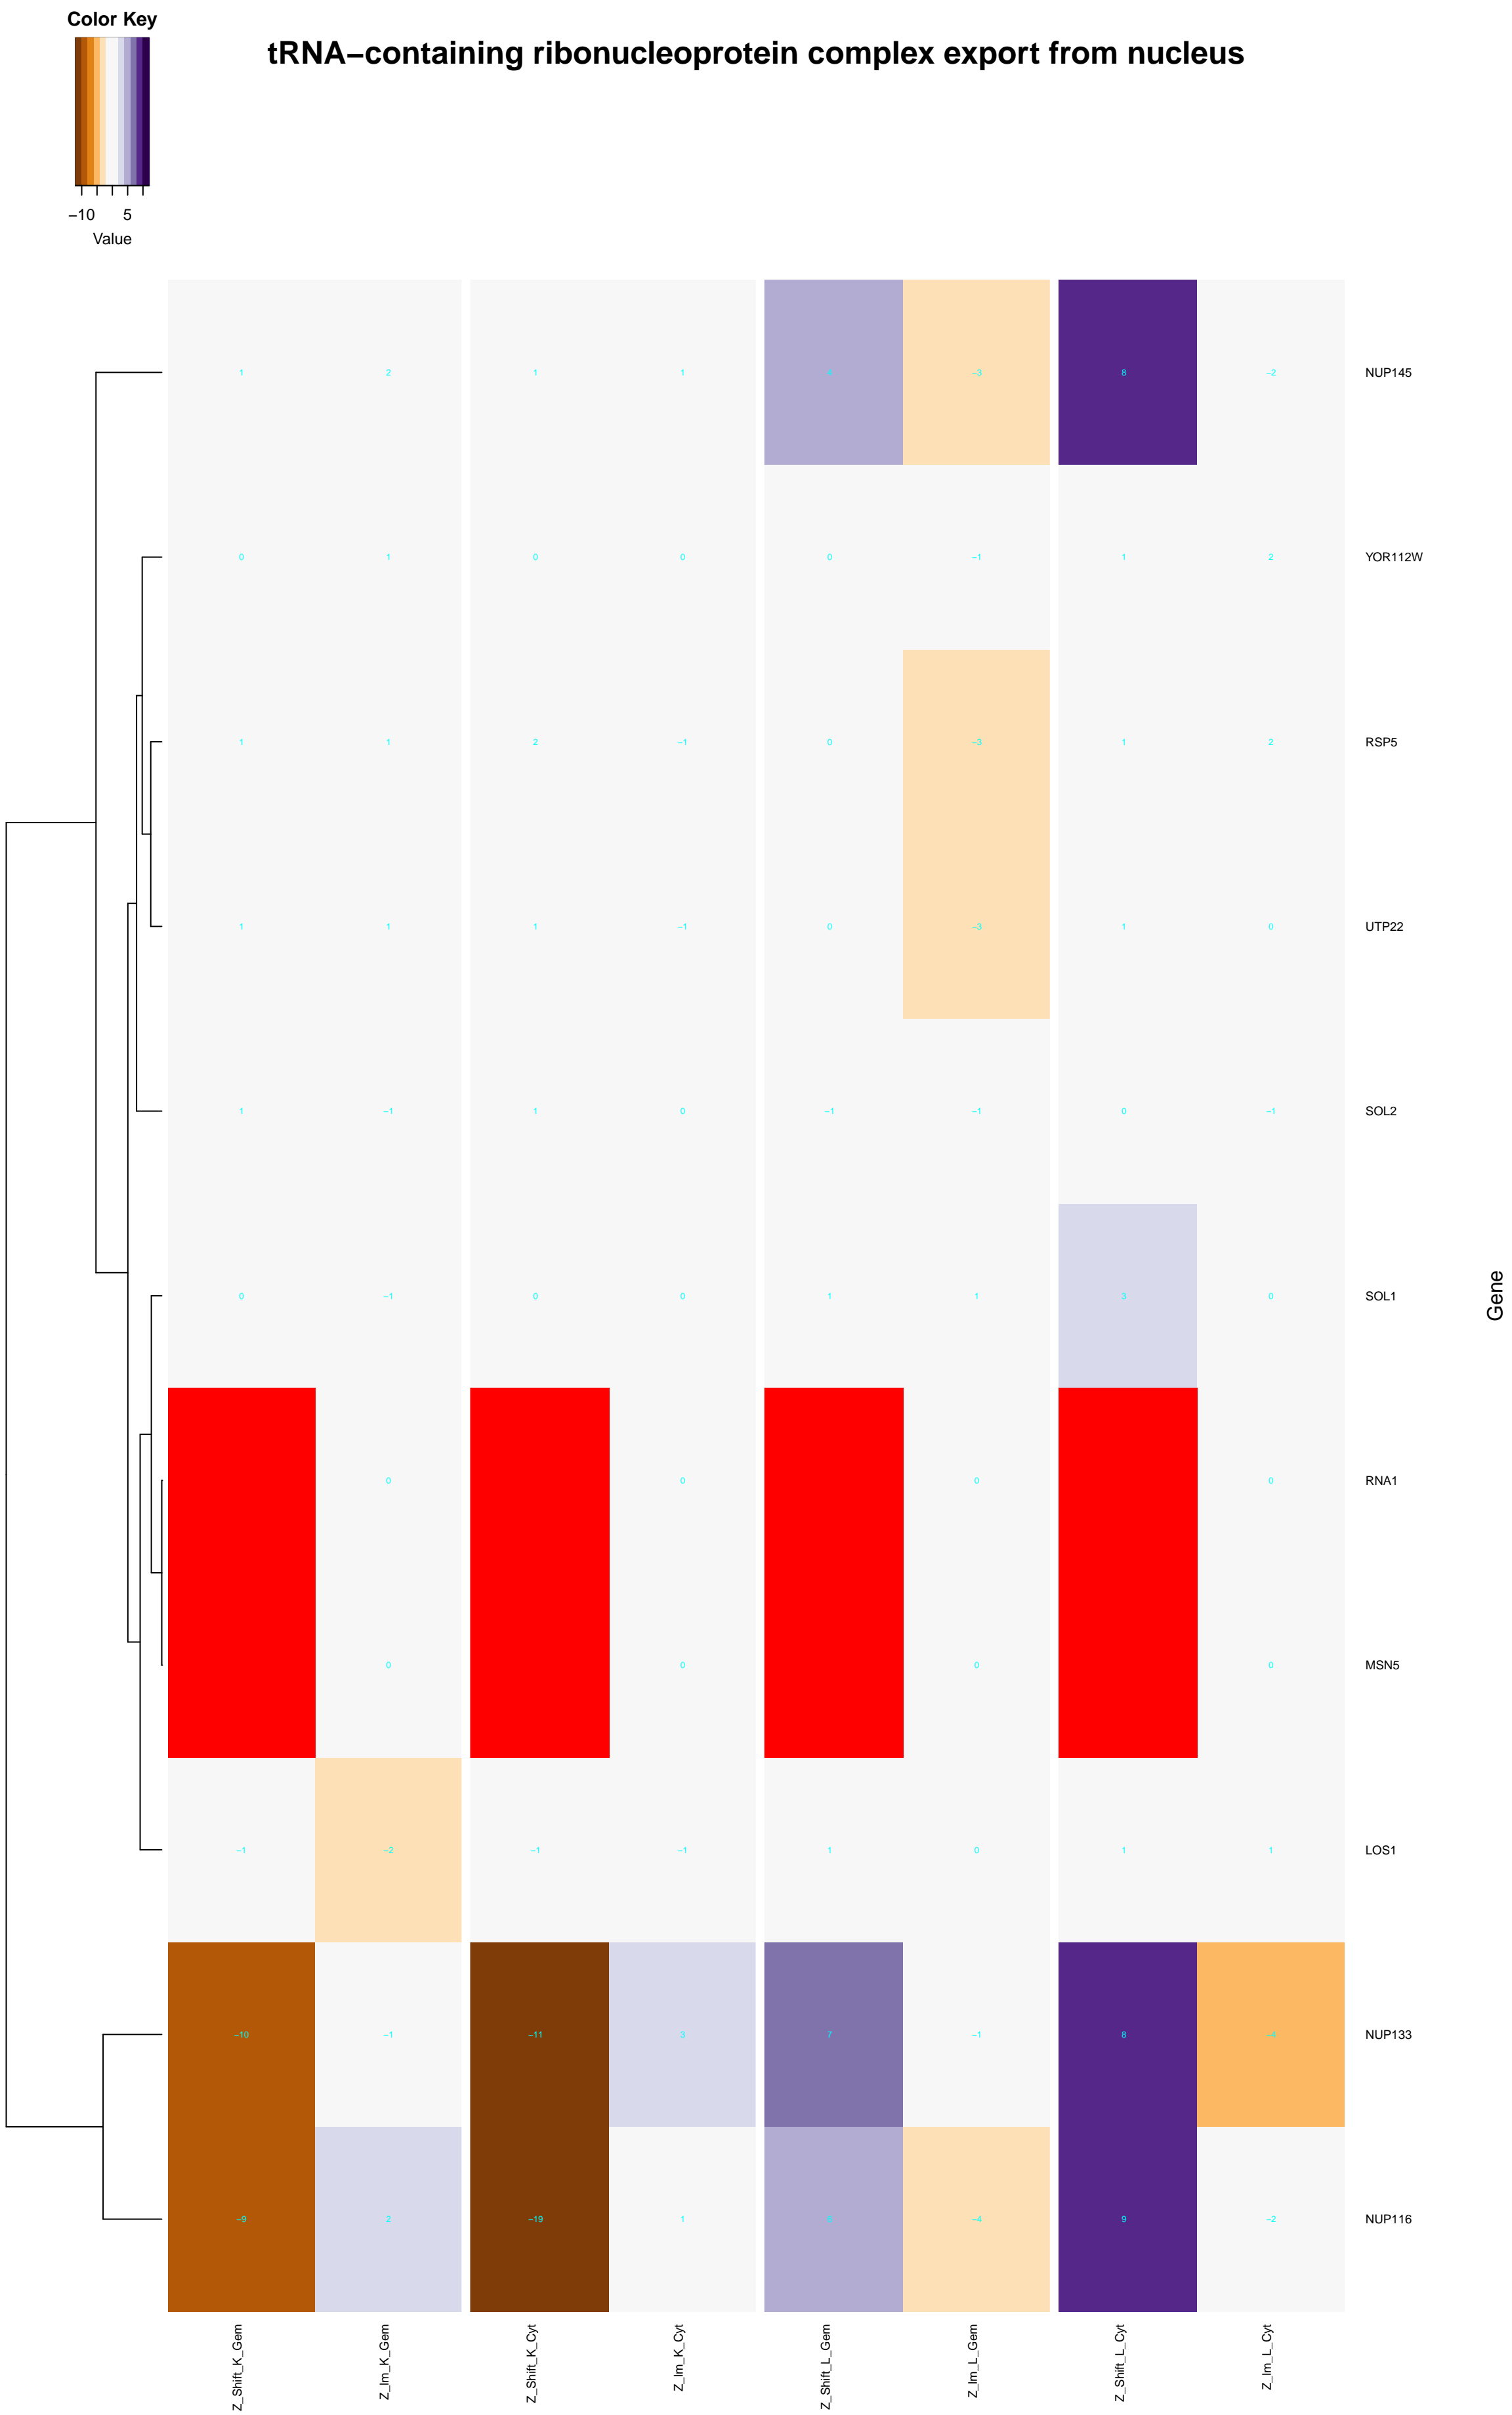

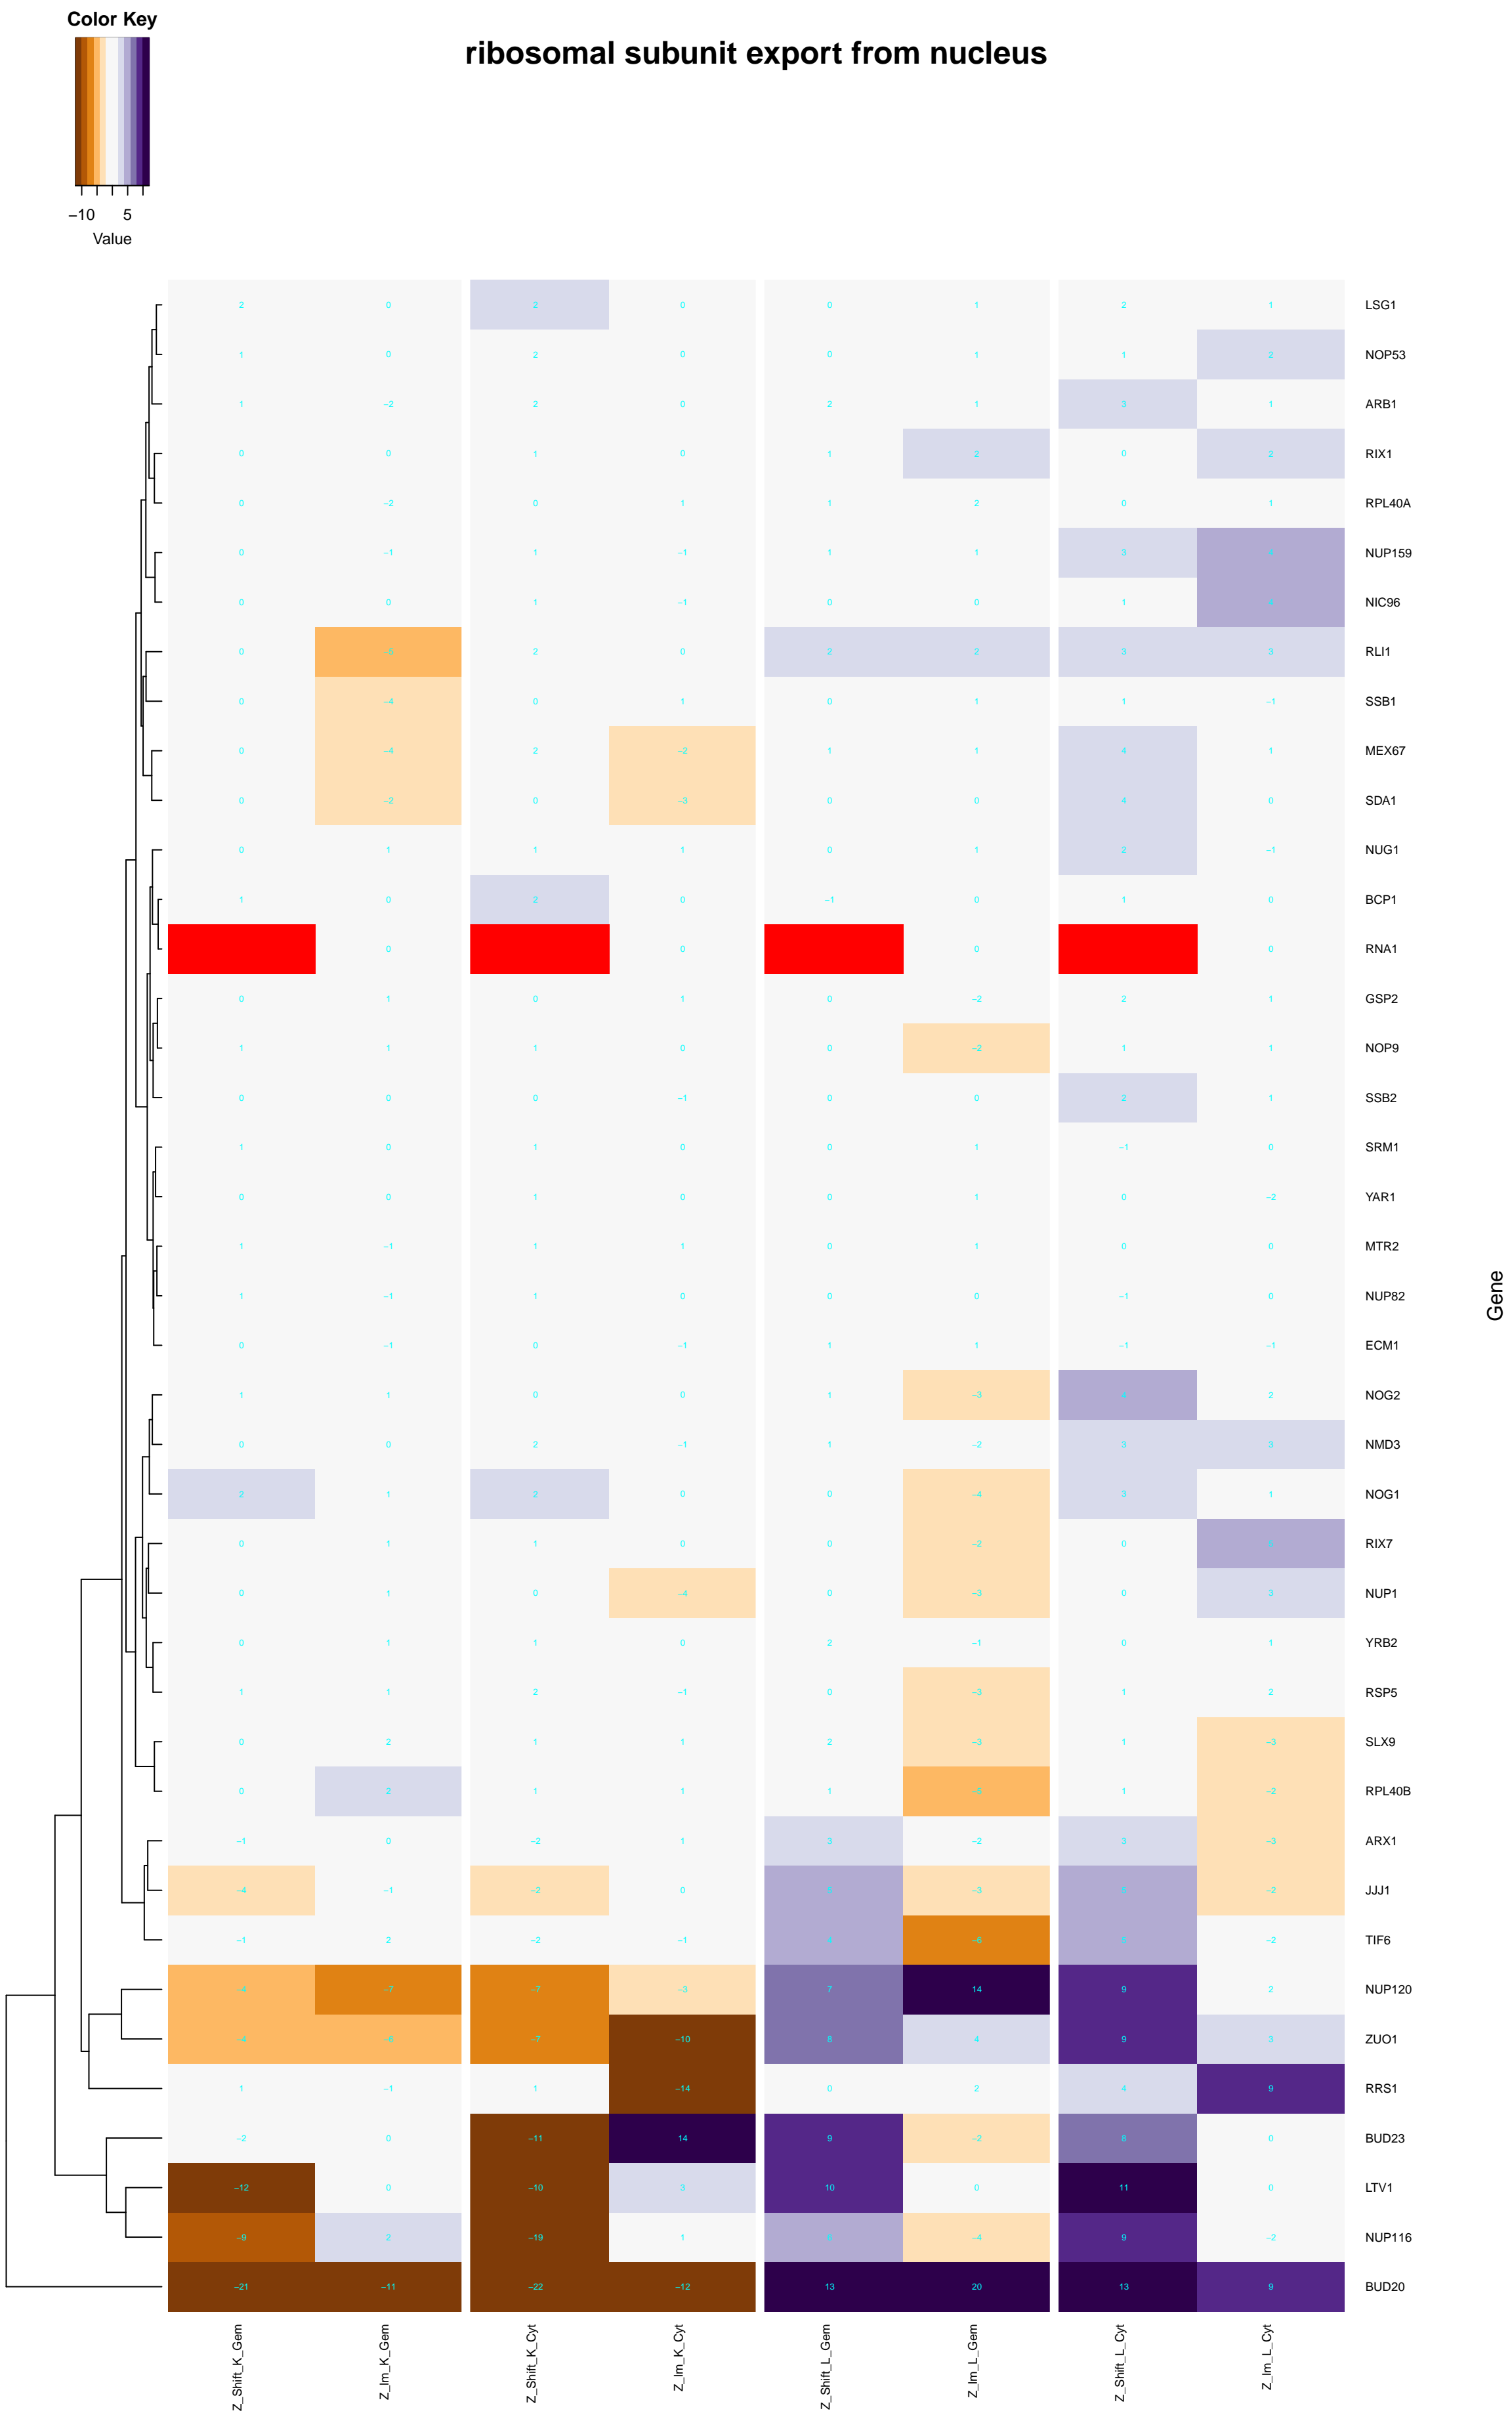

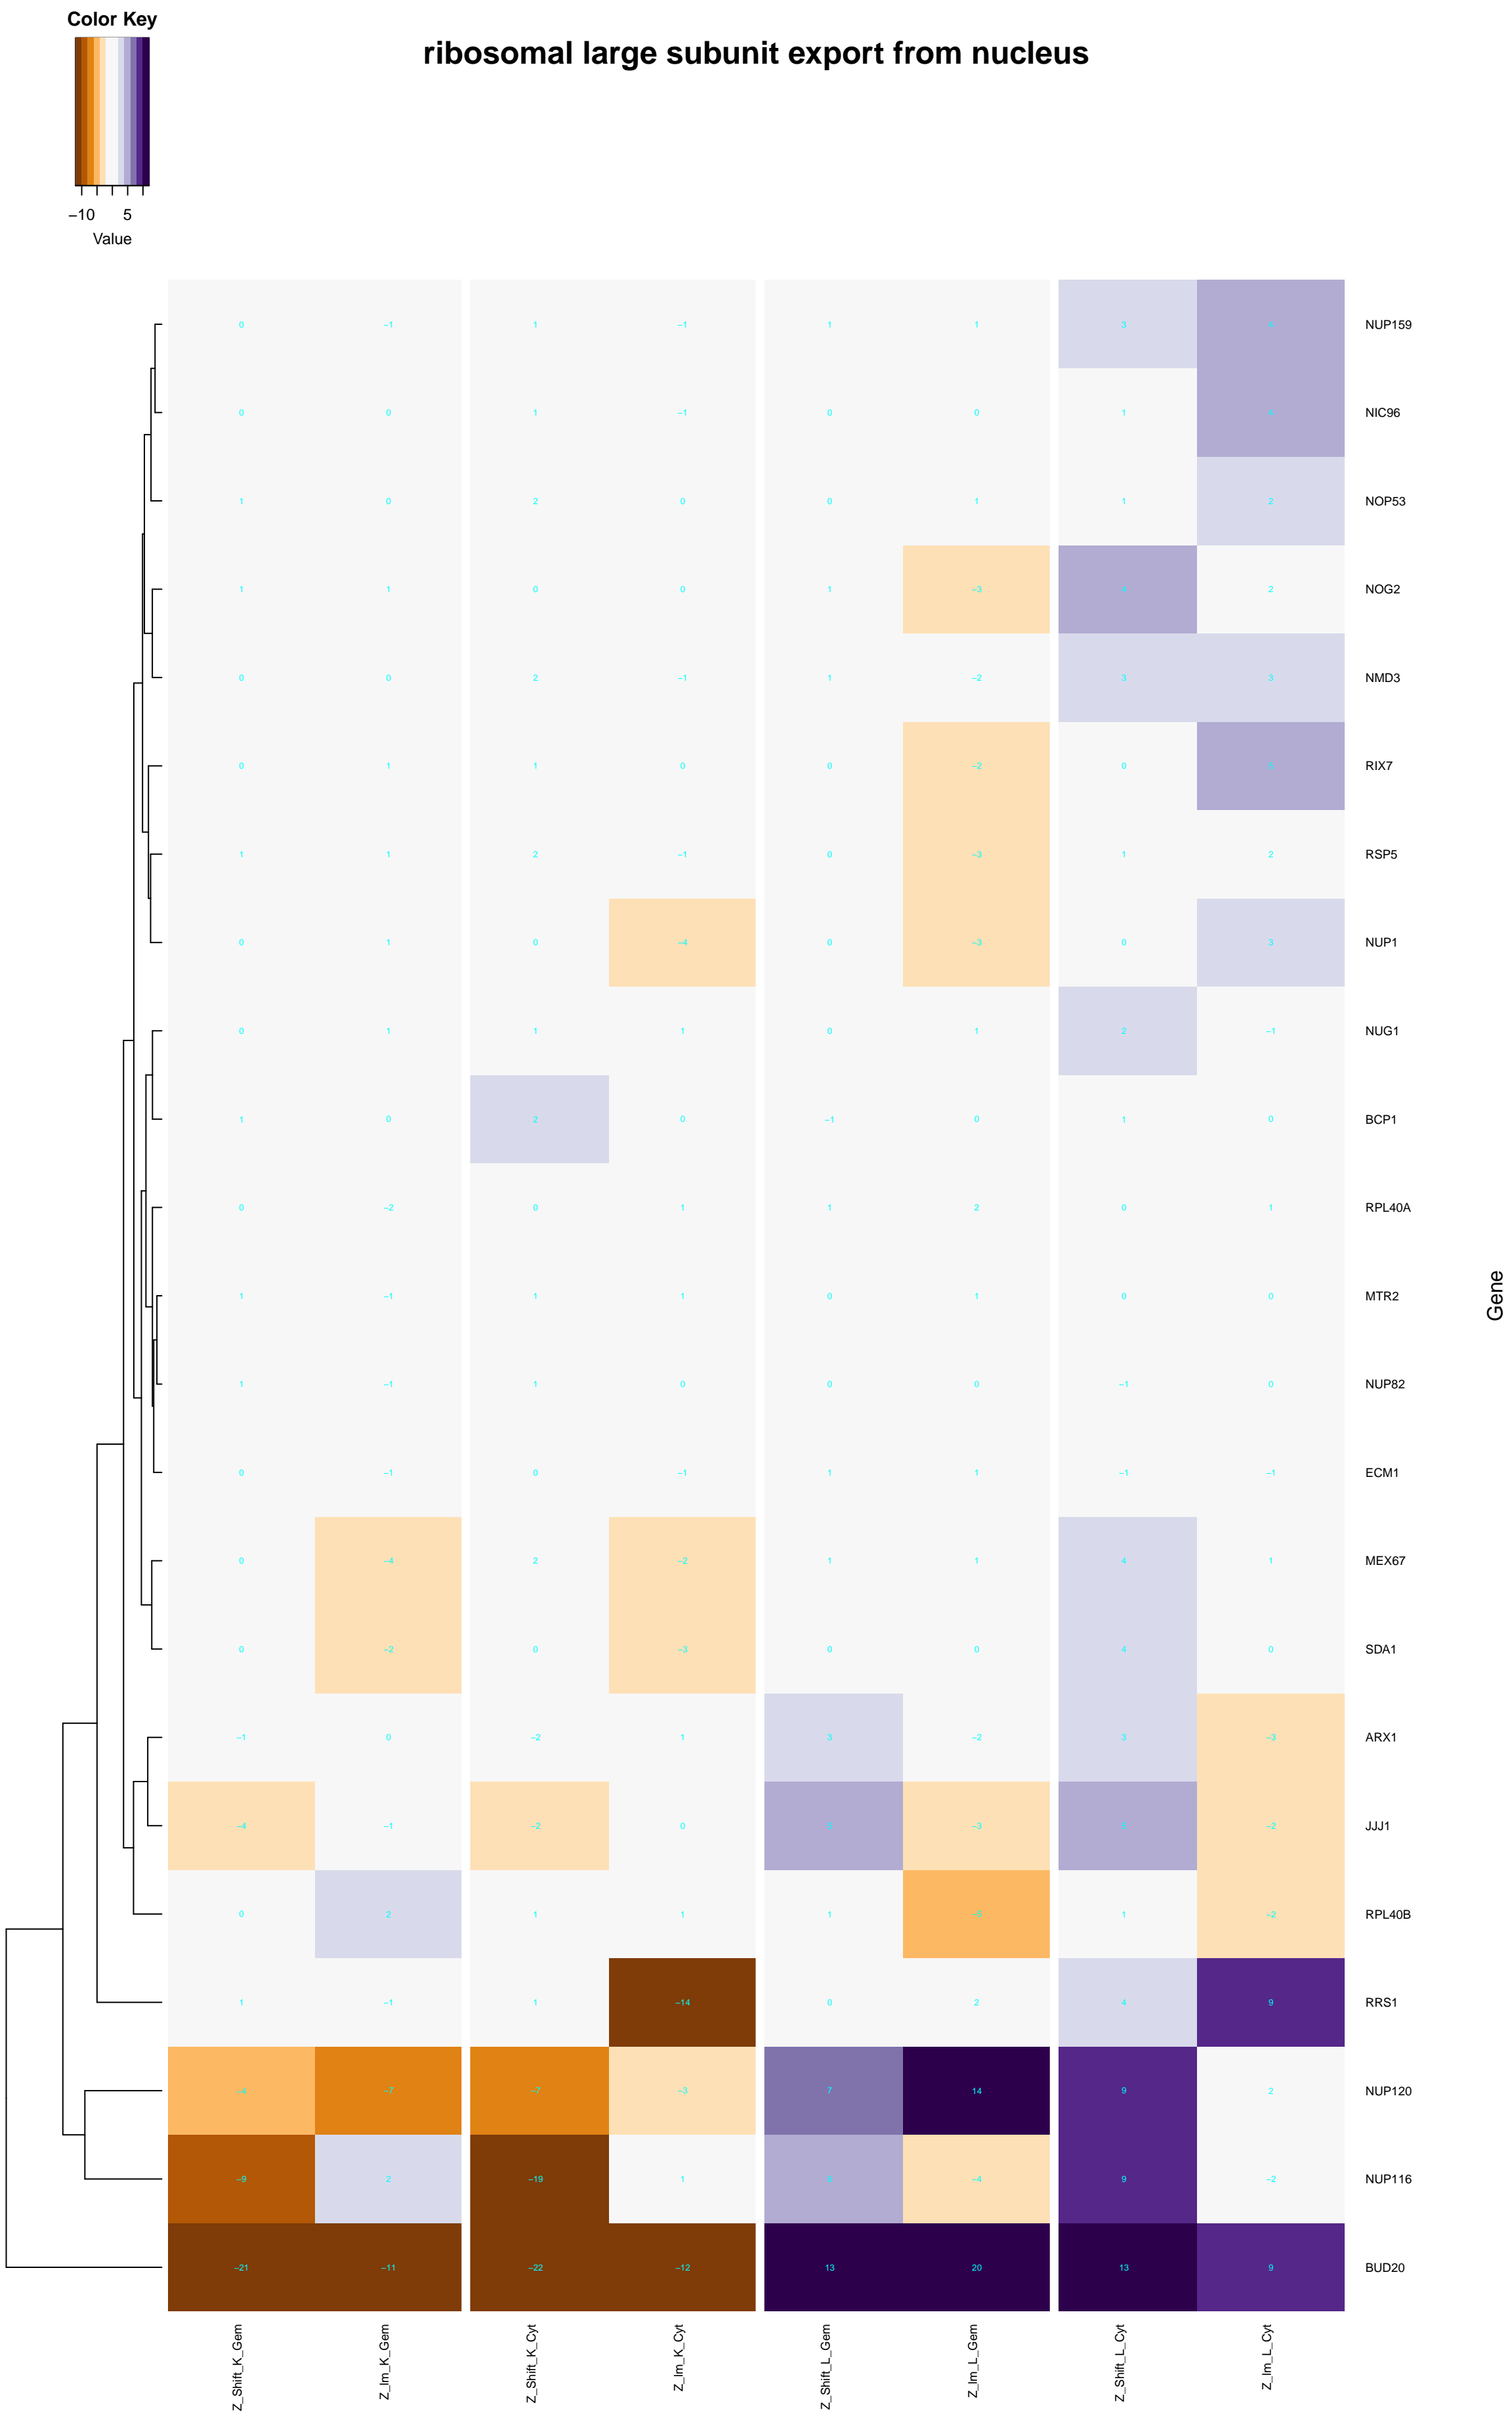

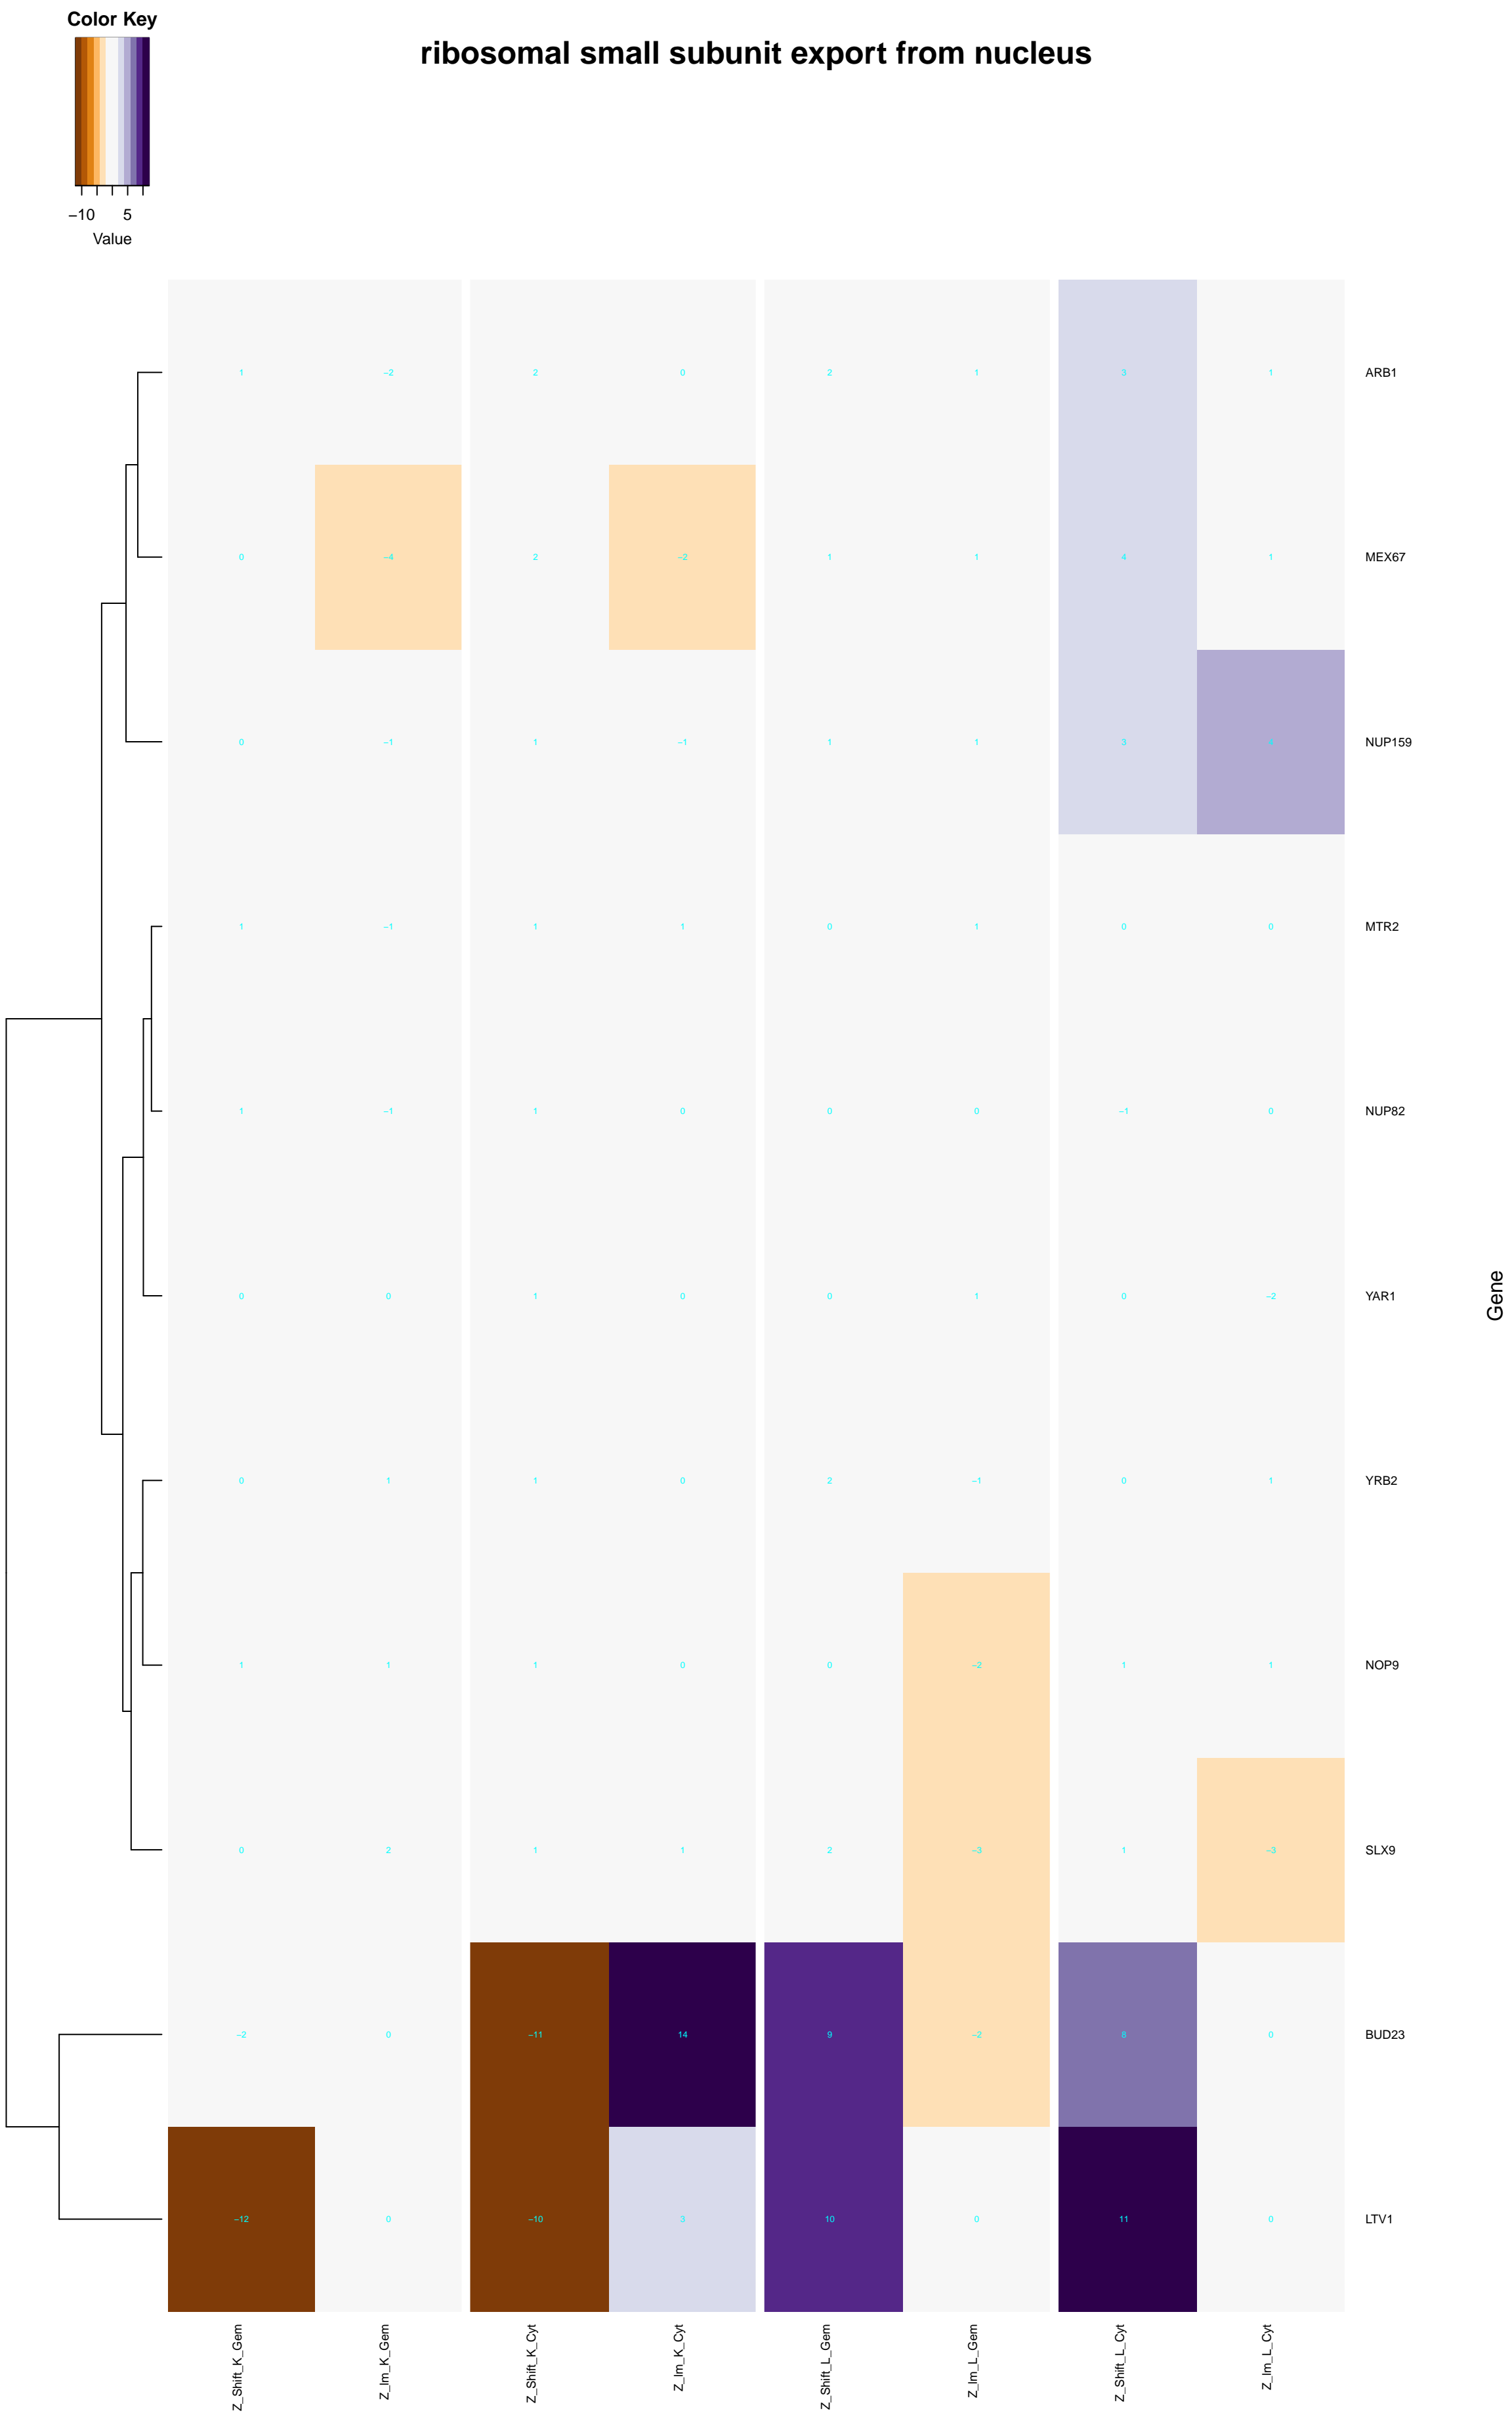

Supplement: s1 [file s1]

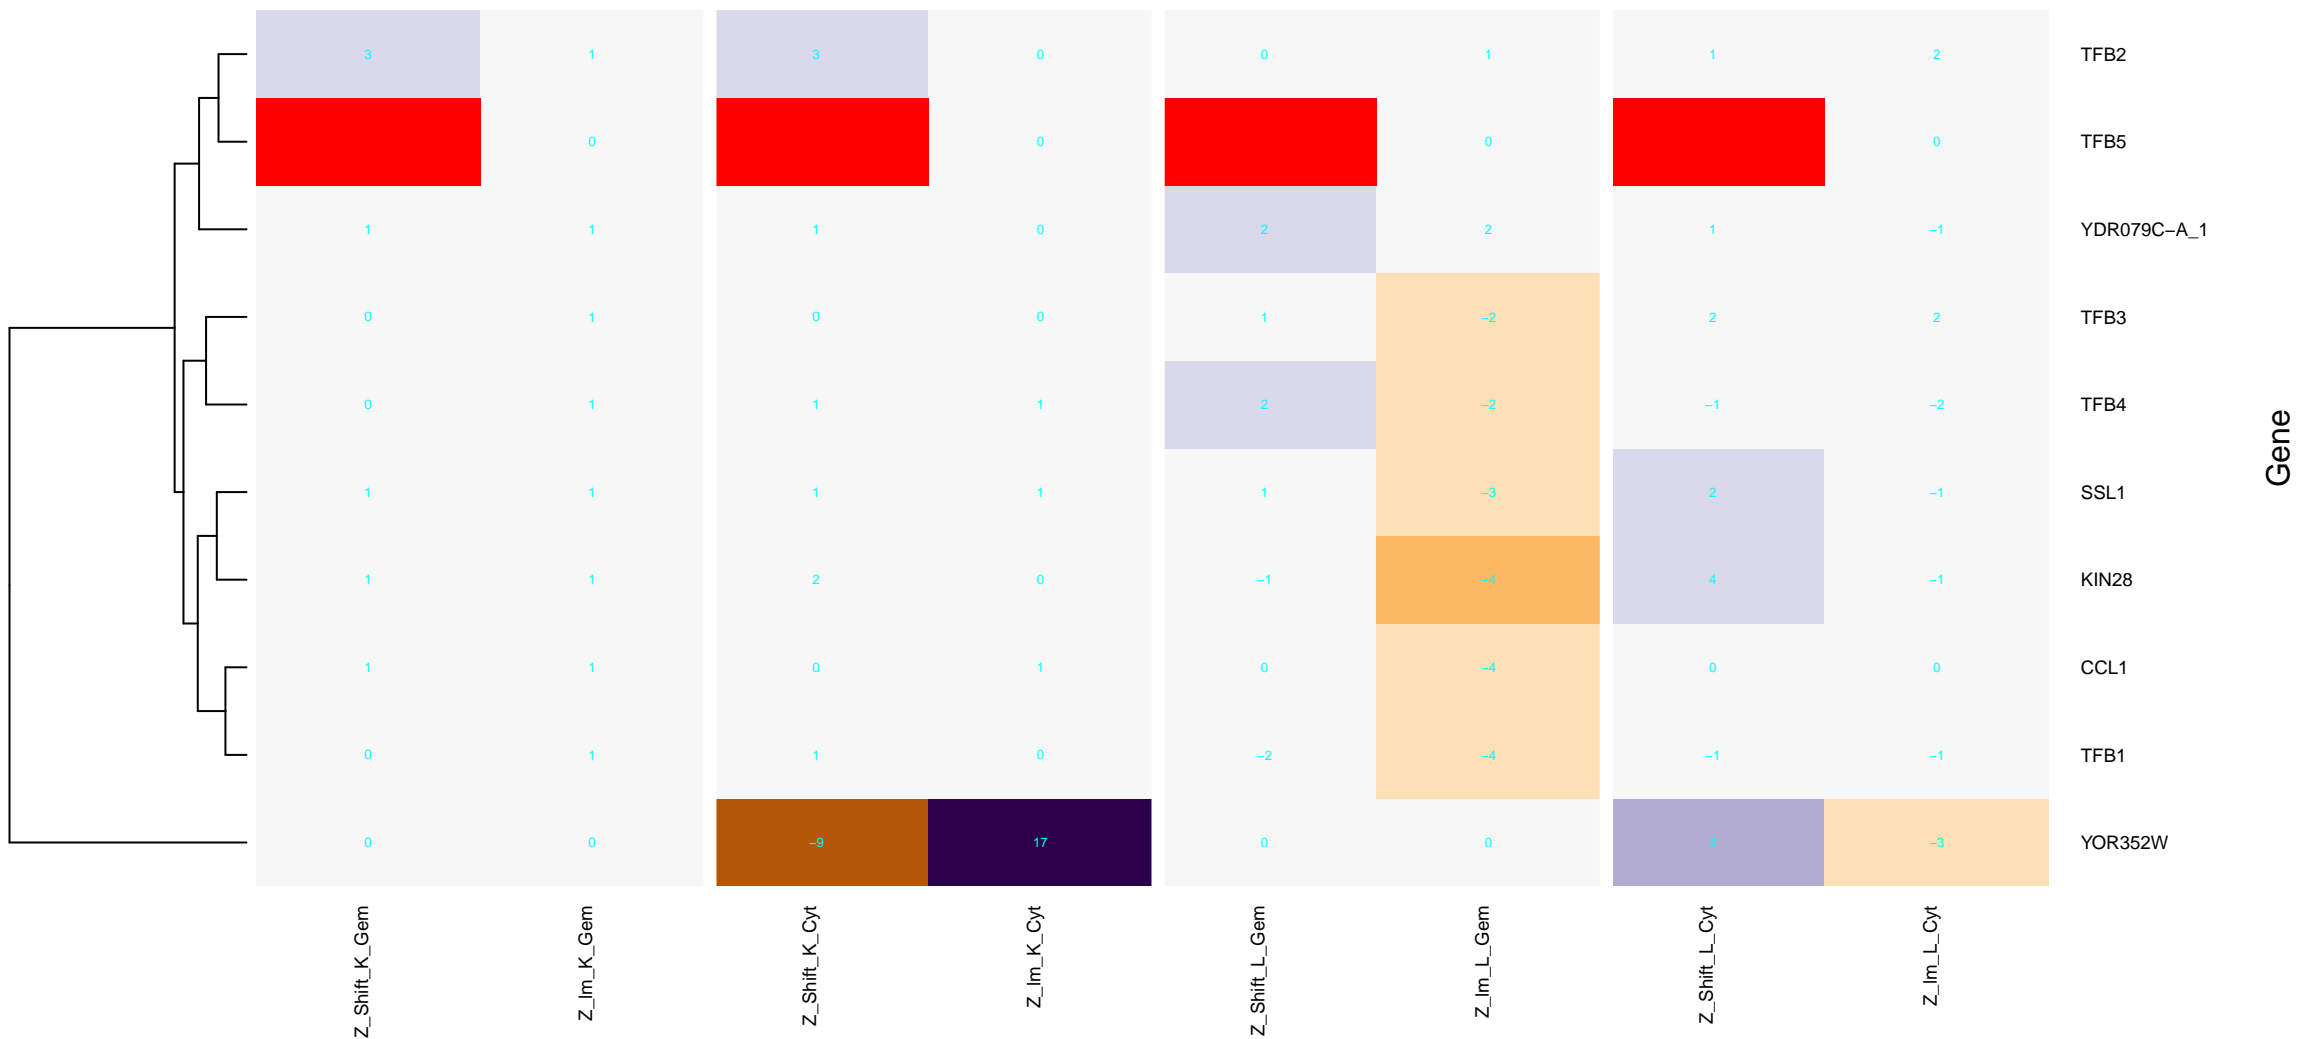

Supplement: s1 [file s1]

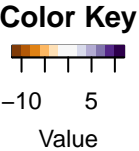

protein deubiquitination

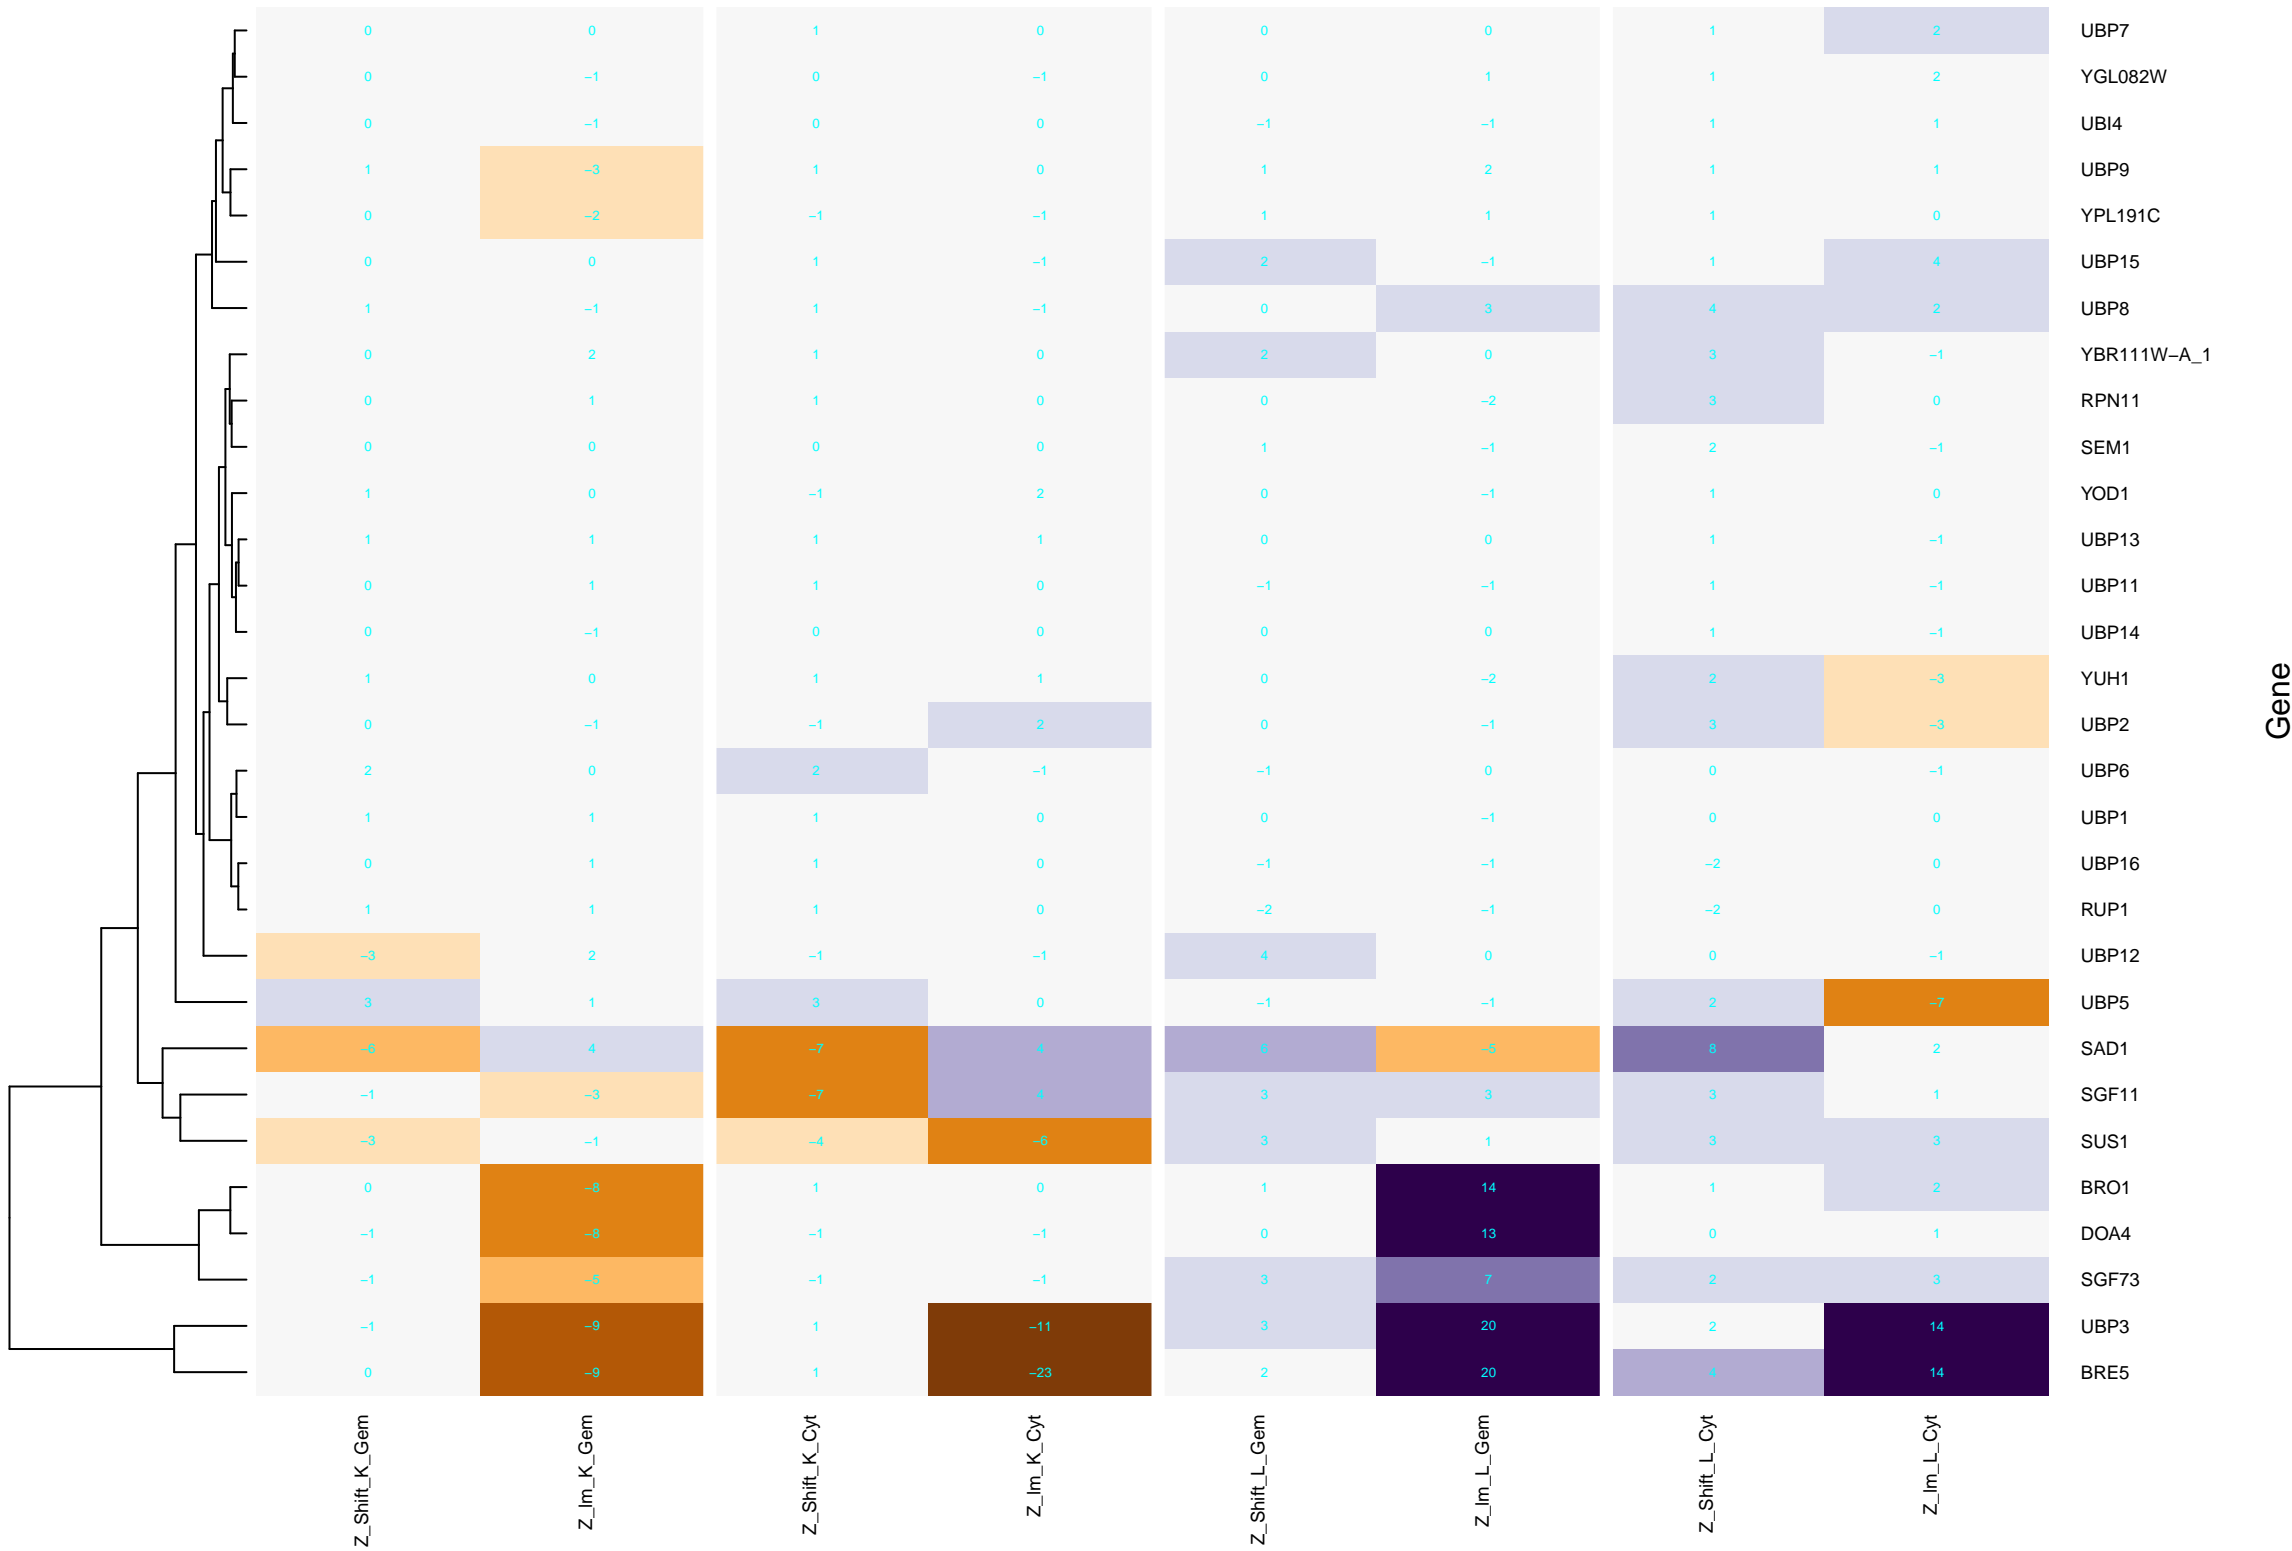

Color Key

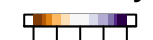

-10 5

Value

# histone deubiquitination

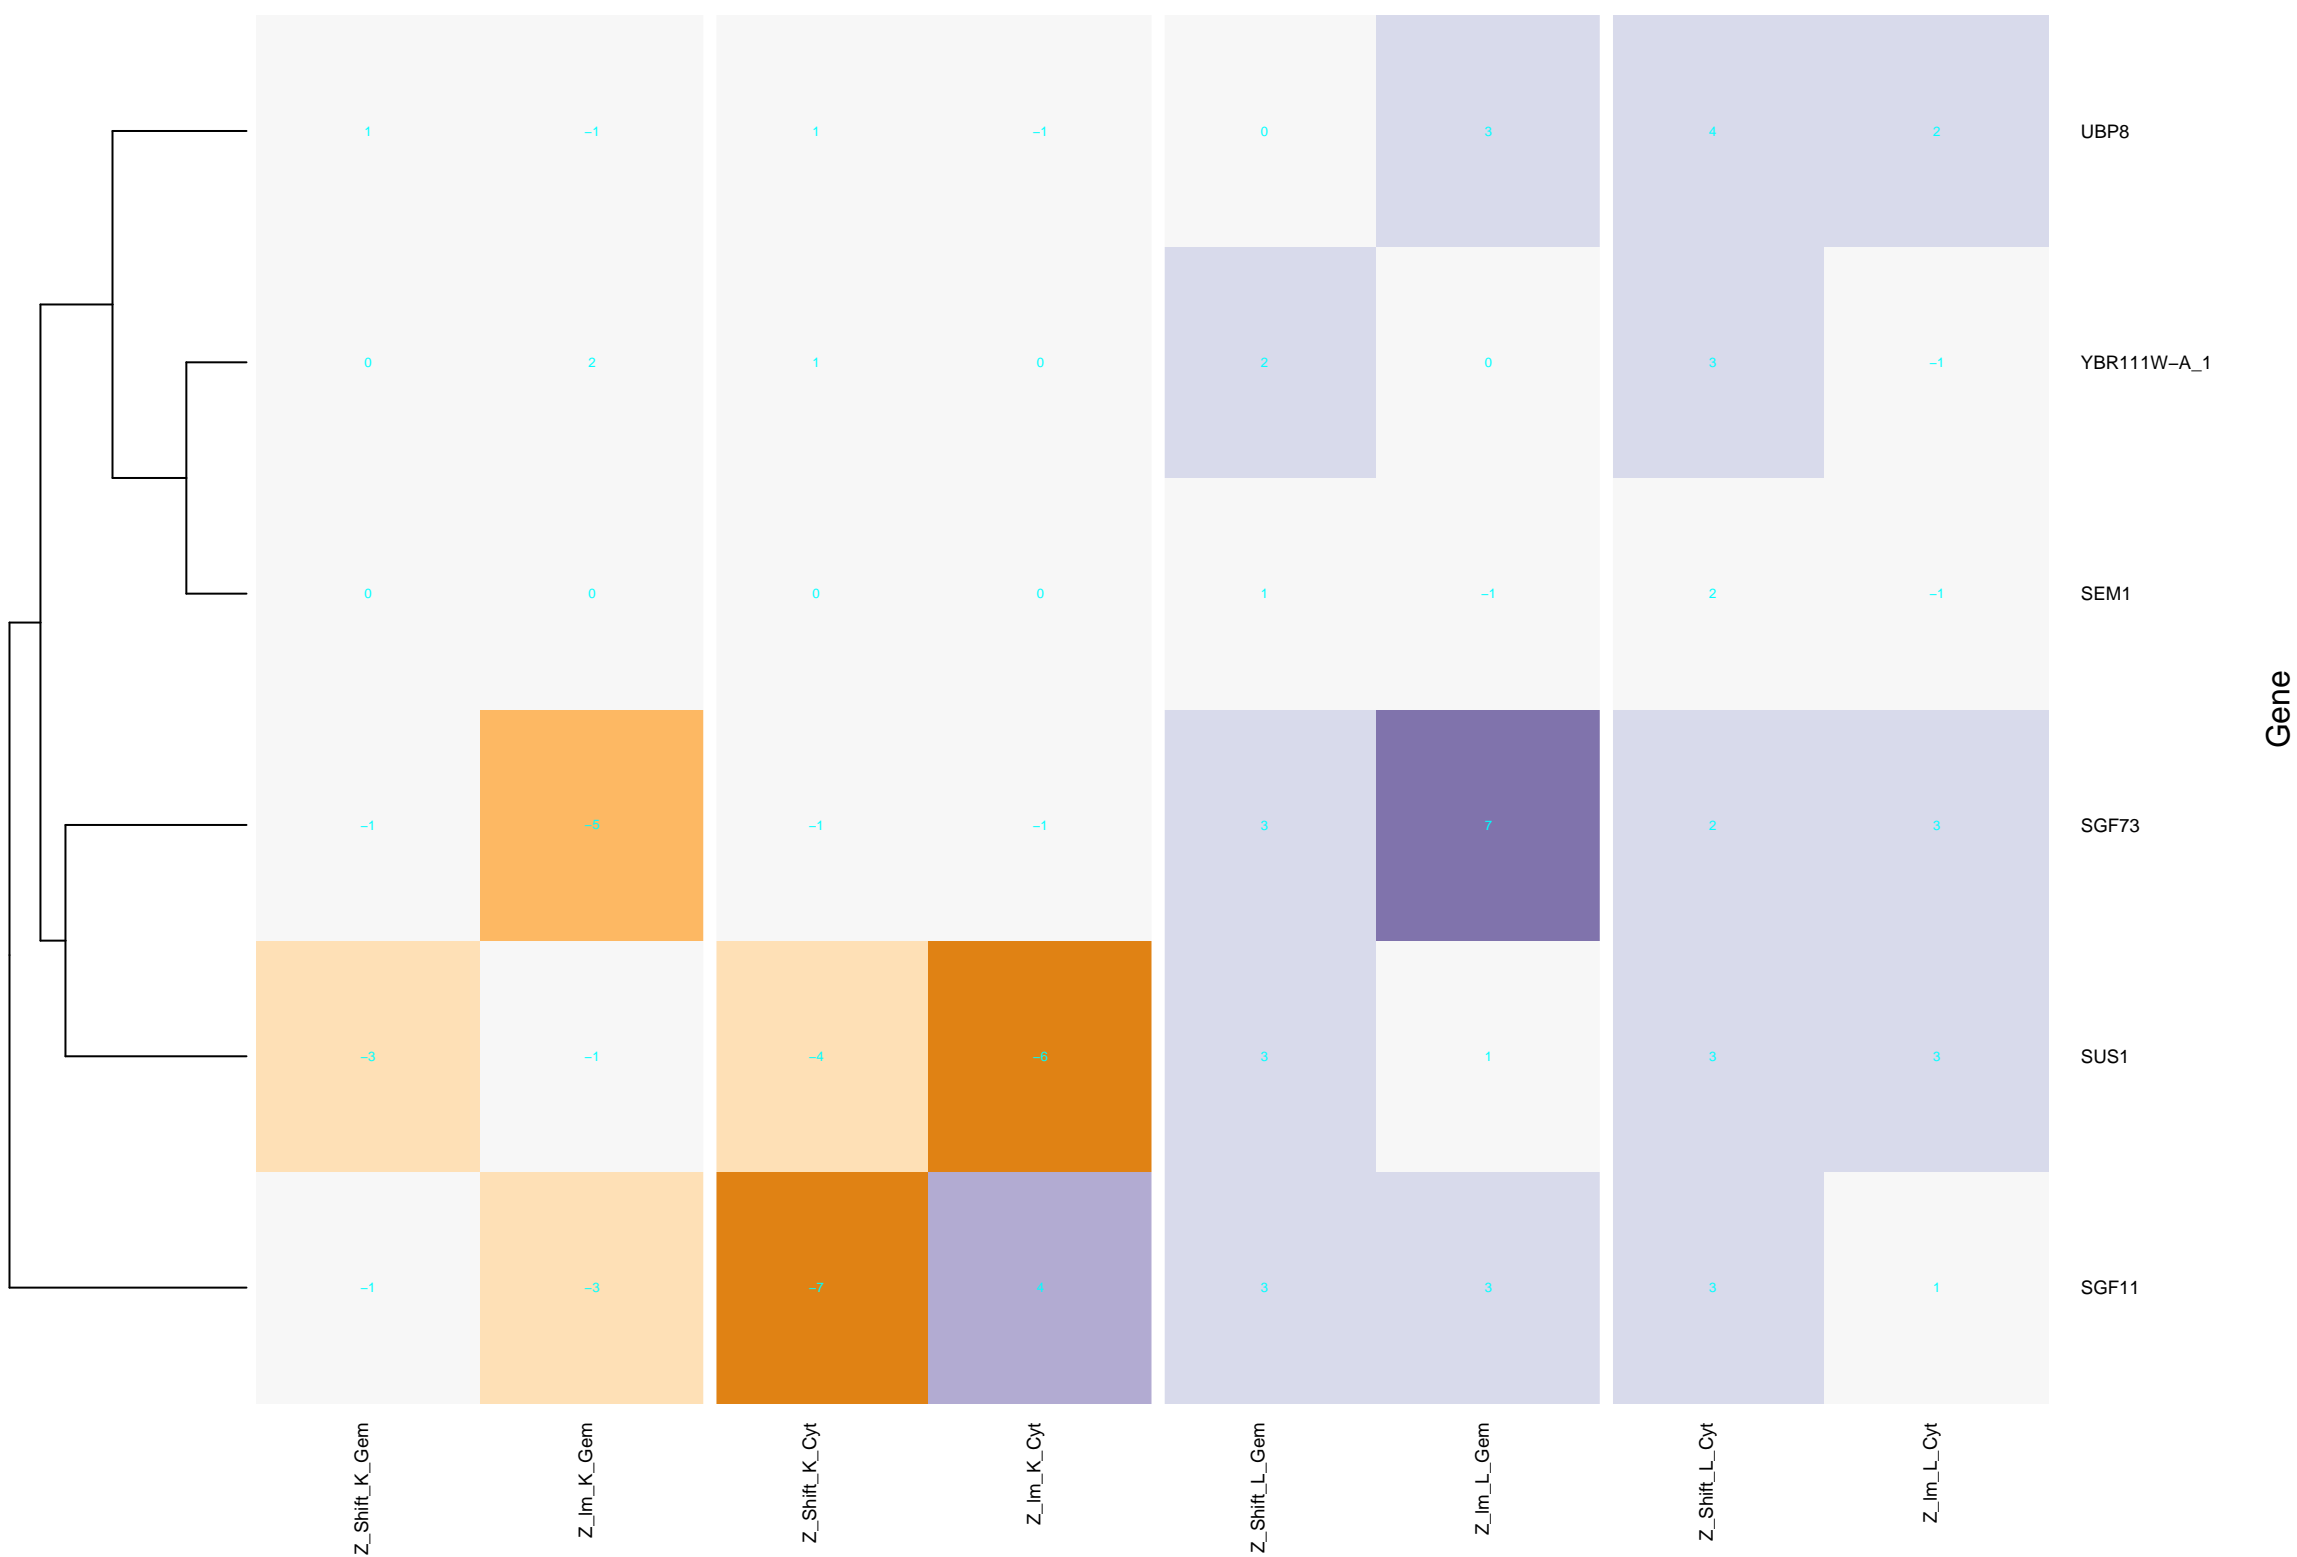

Supplement: s1 [file s1]

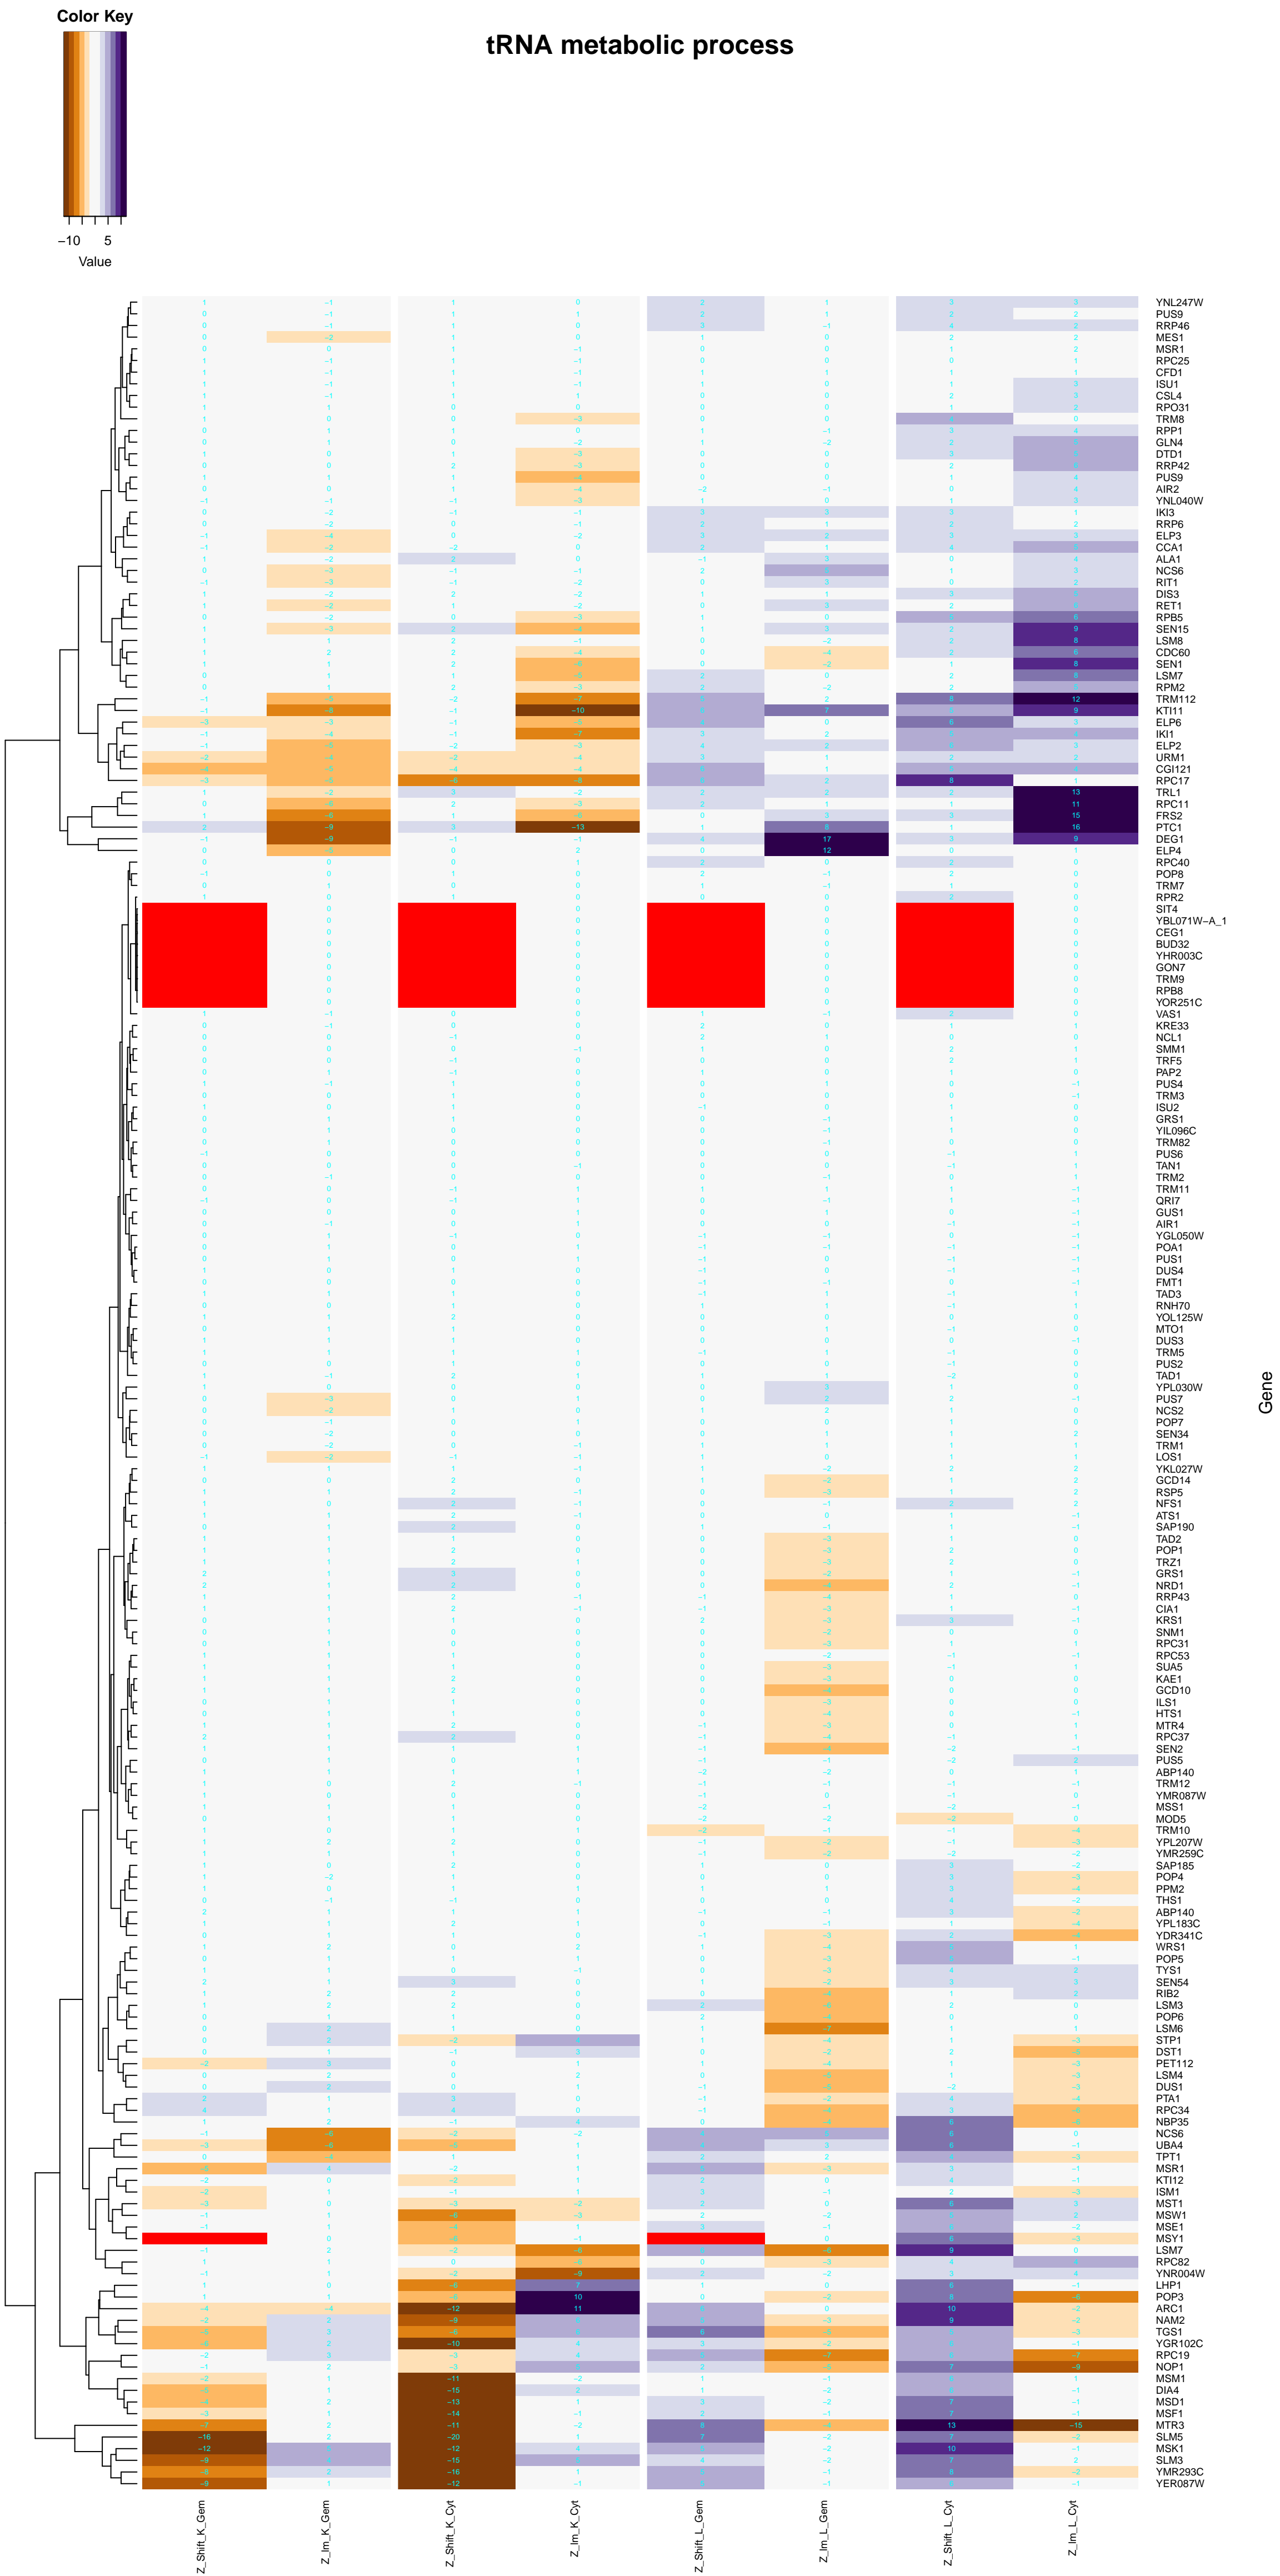

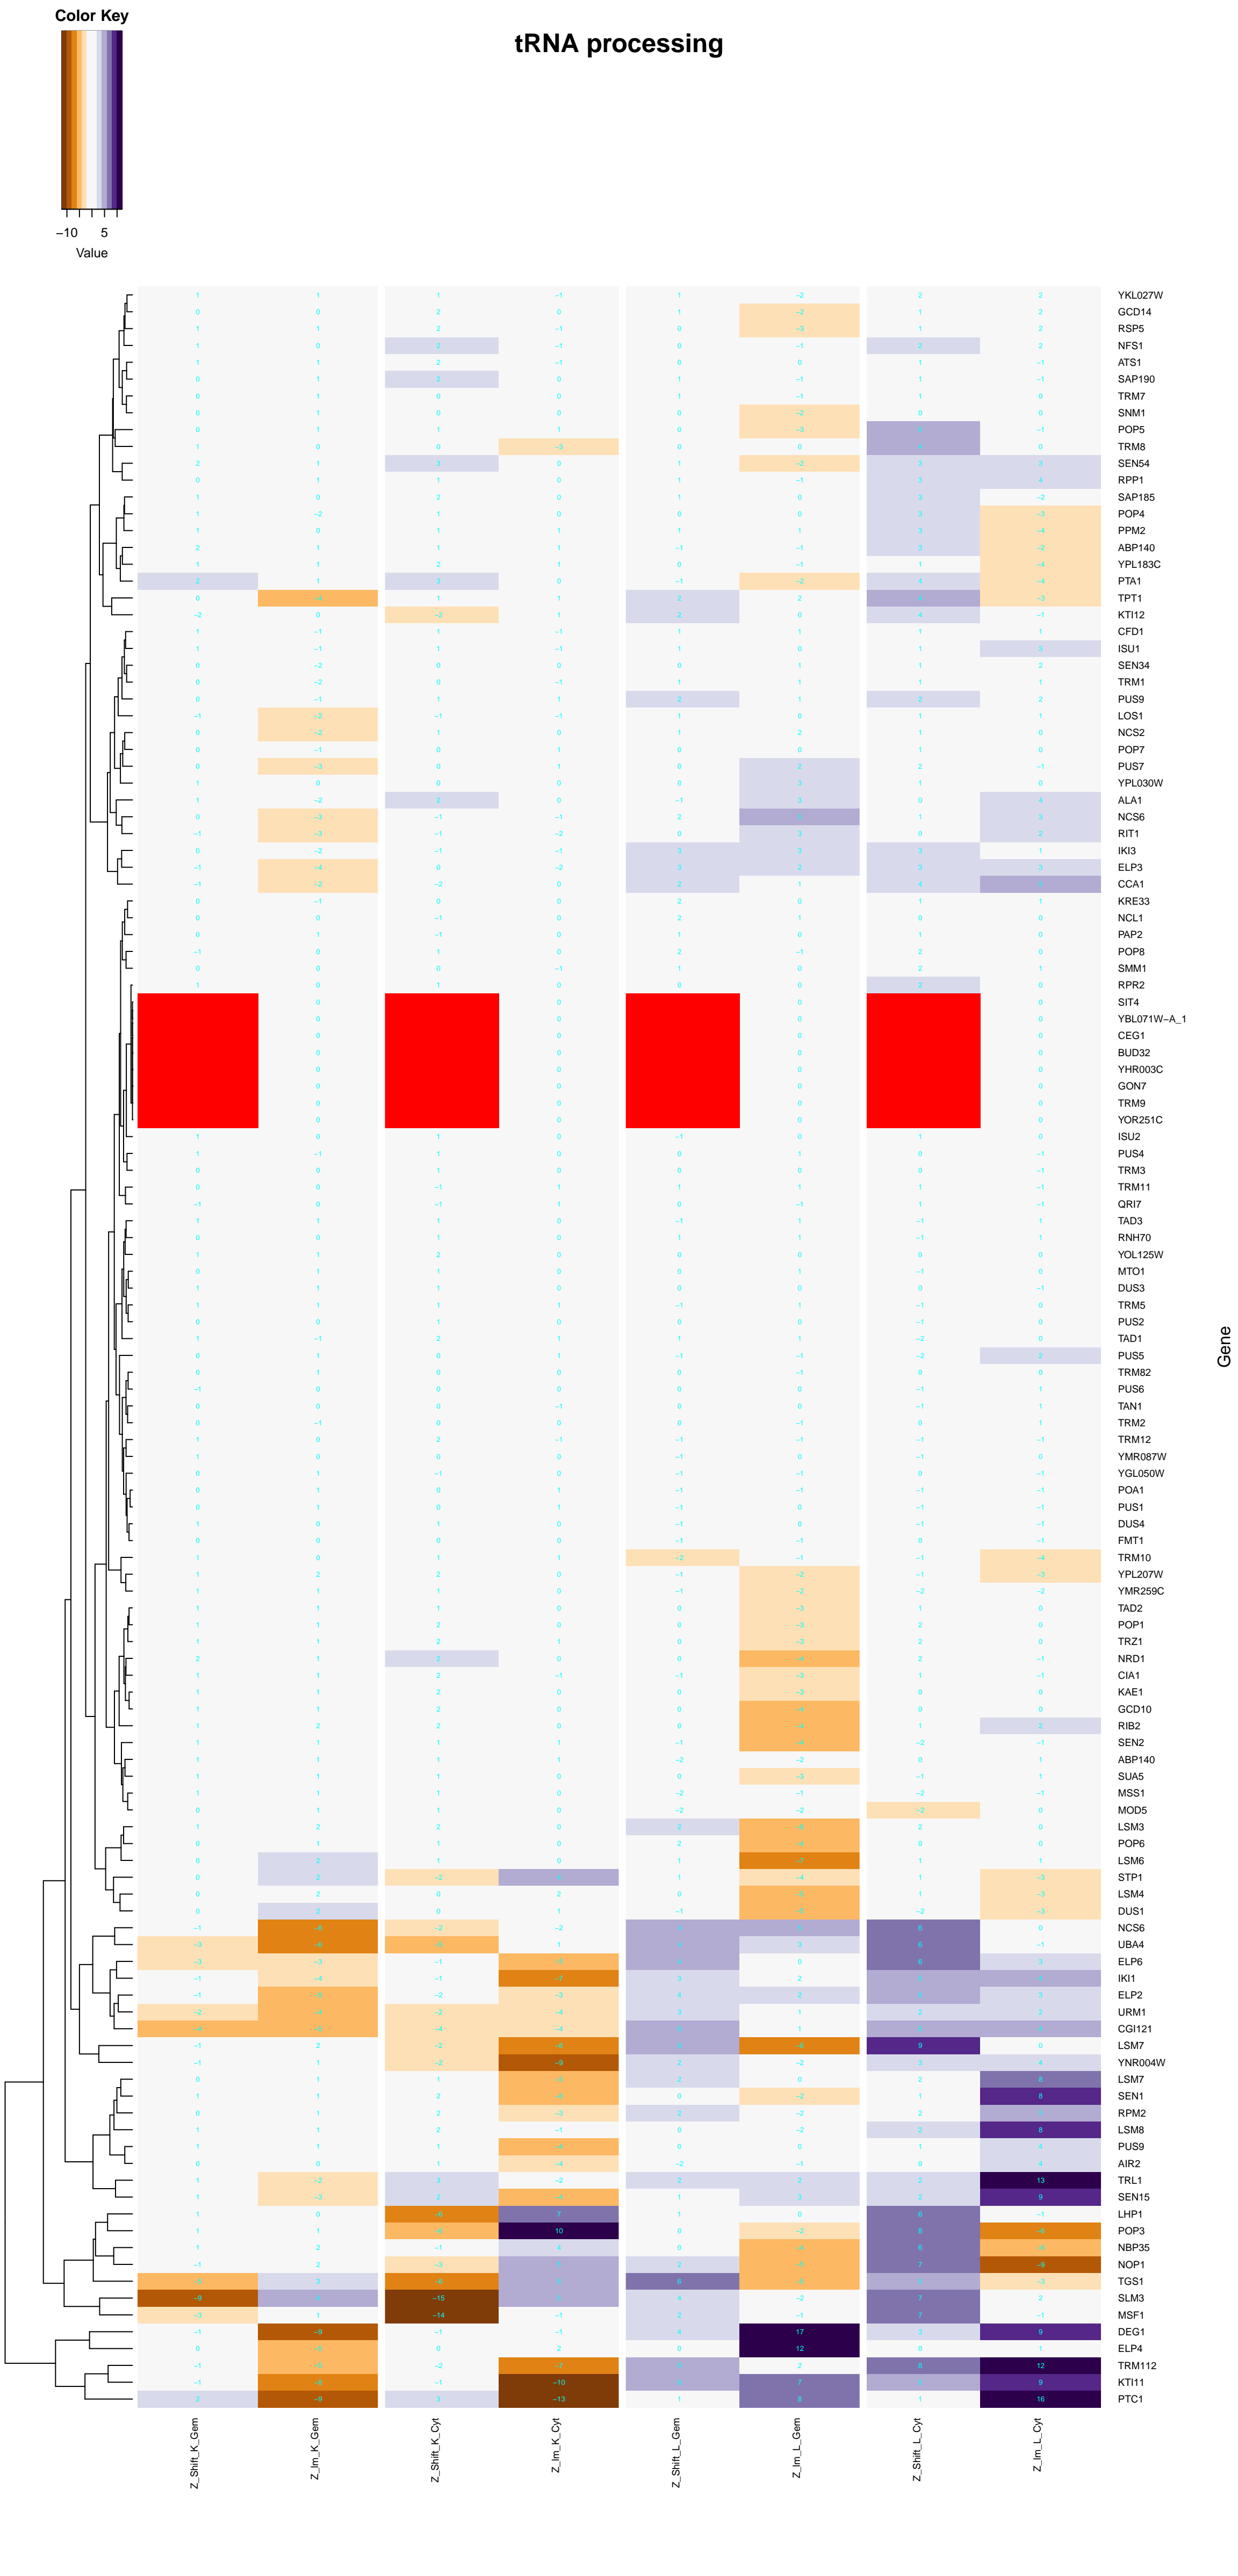

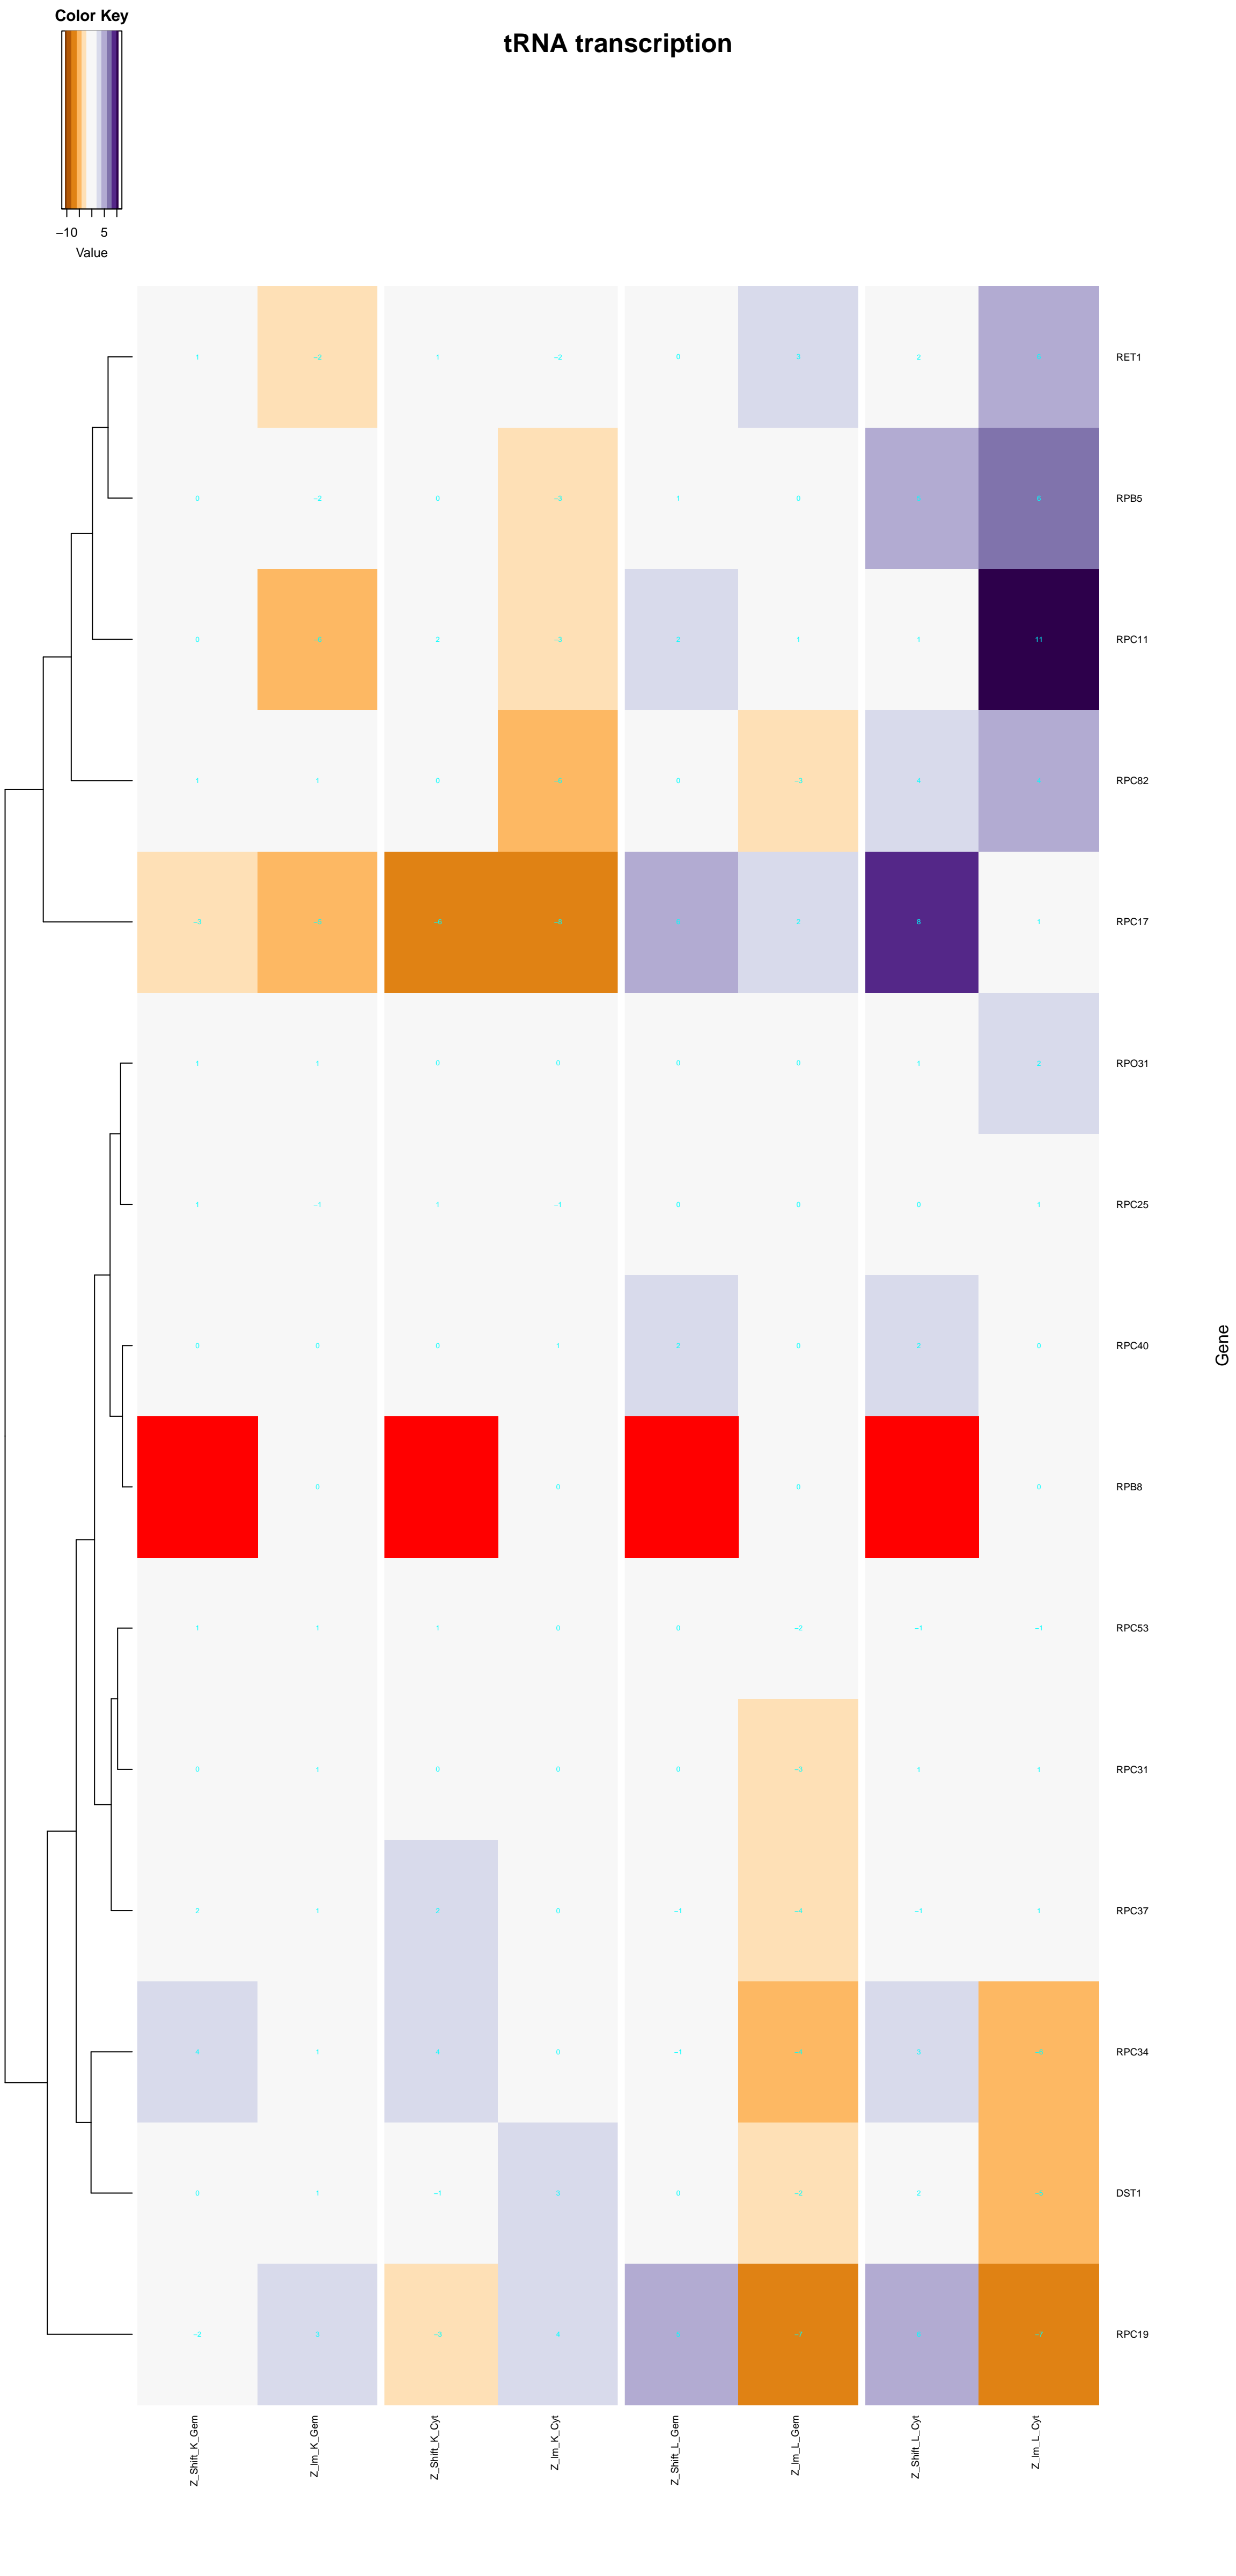

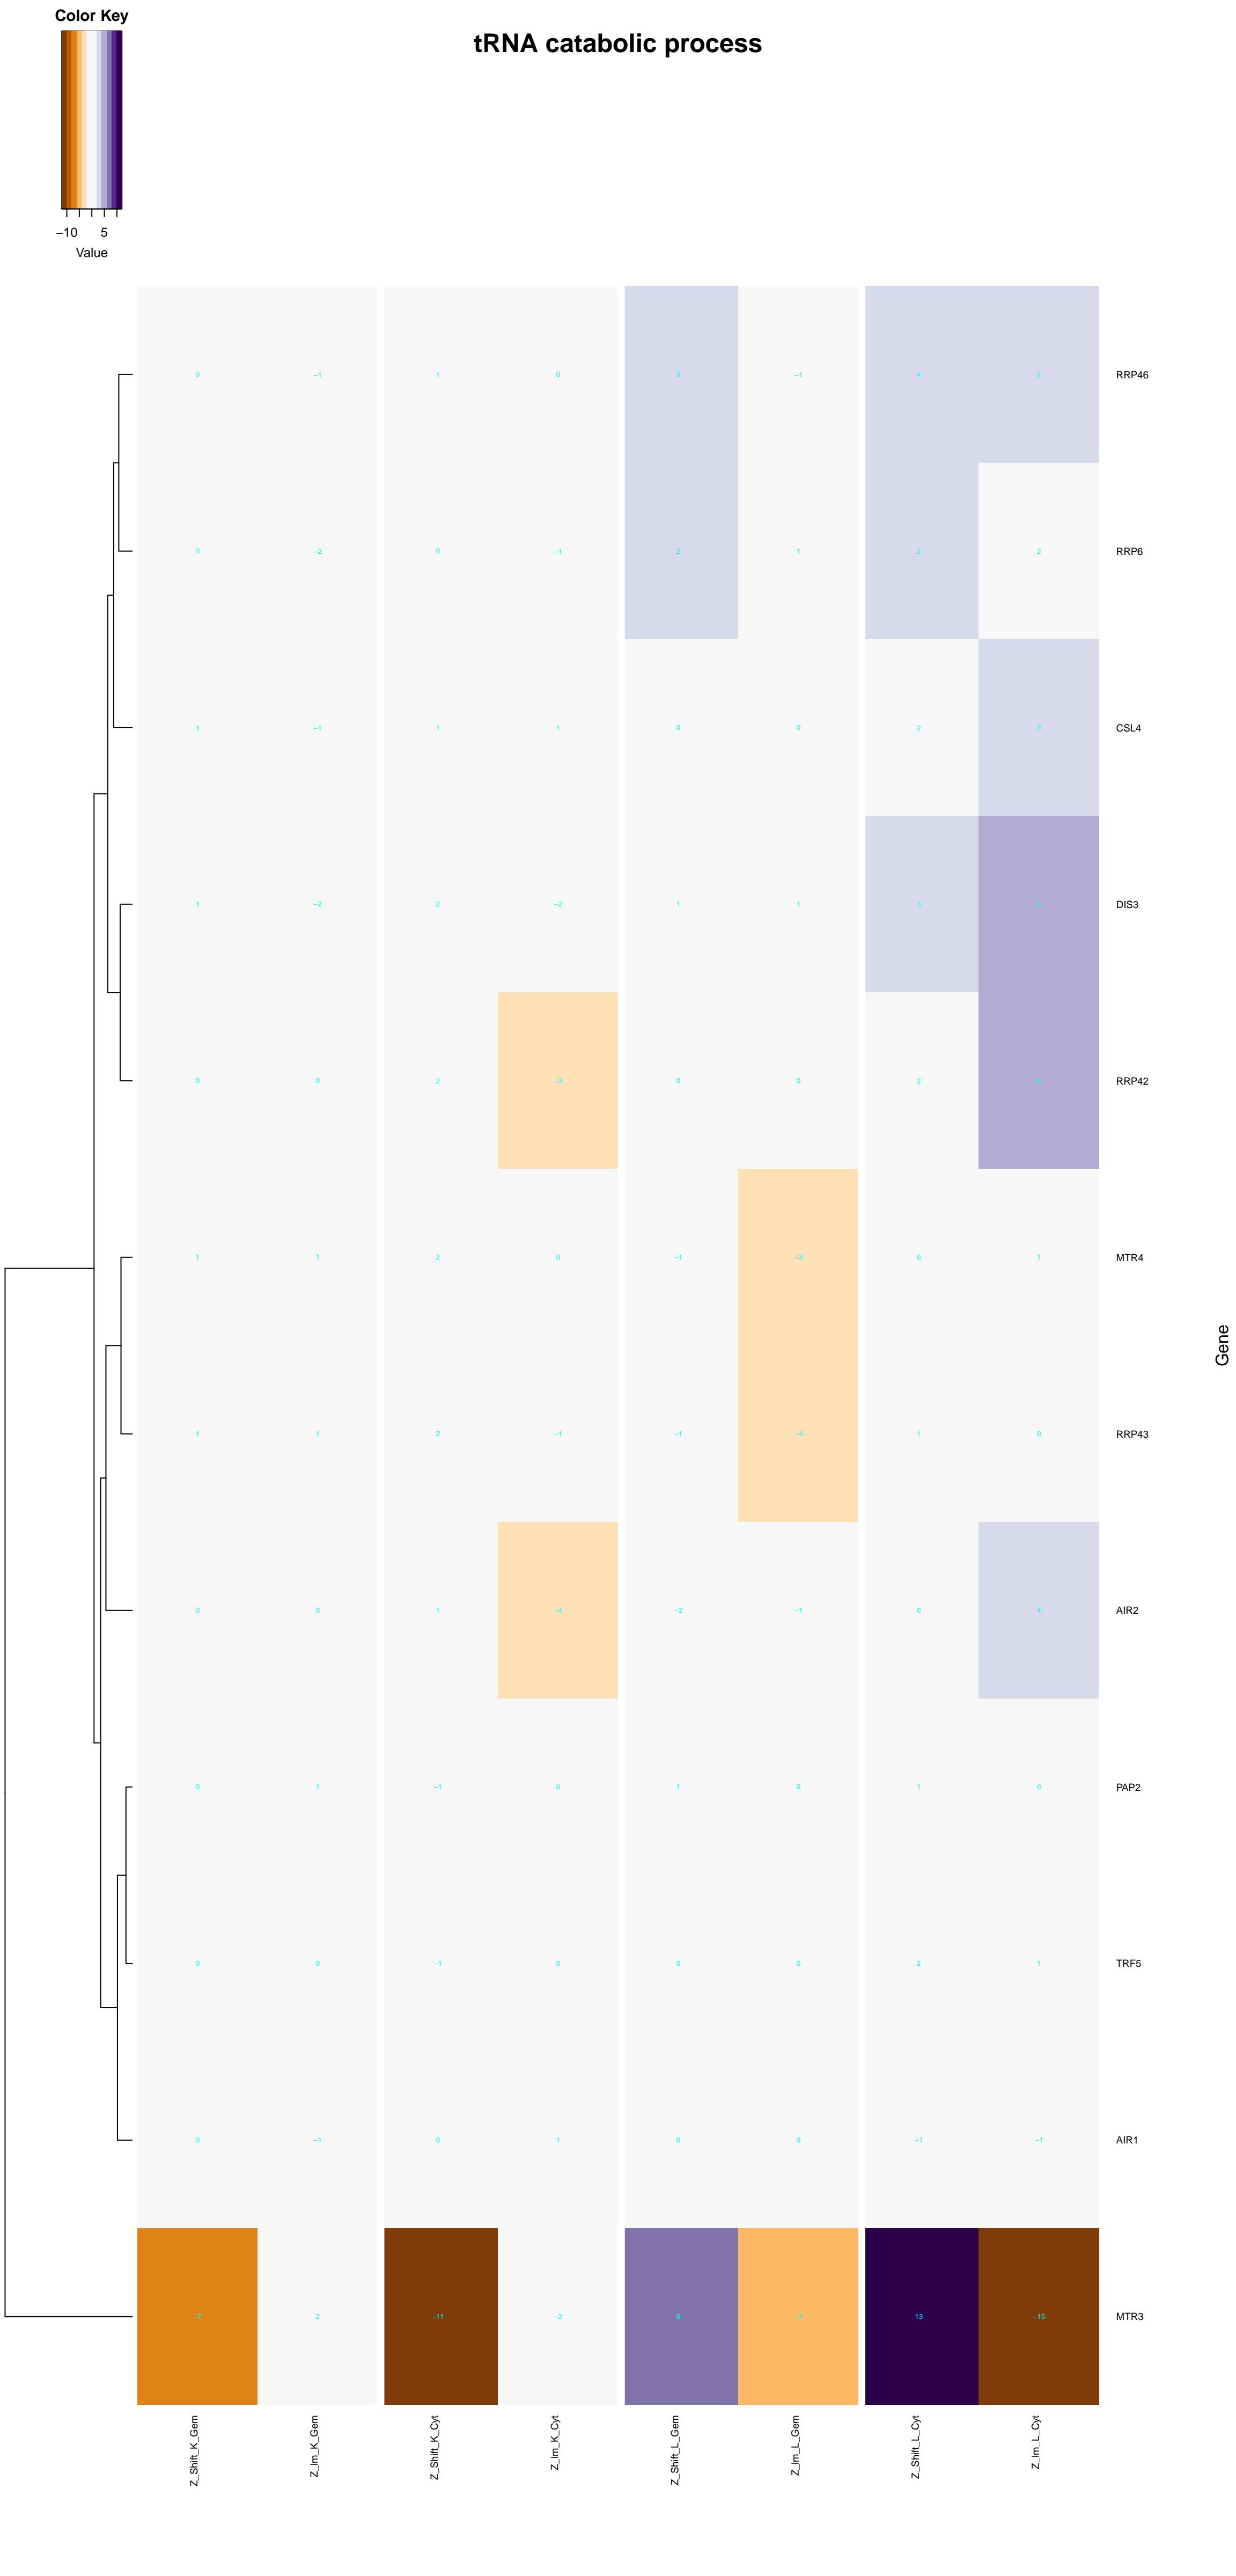

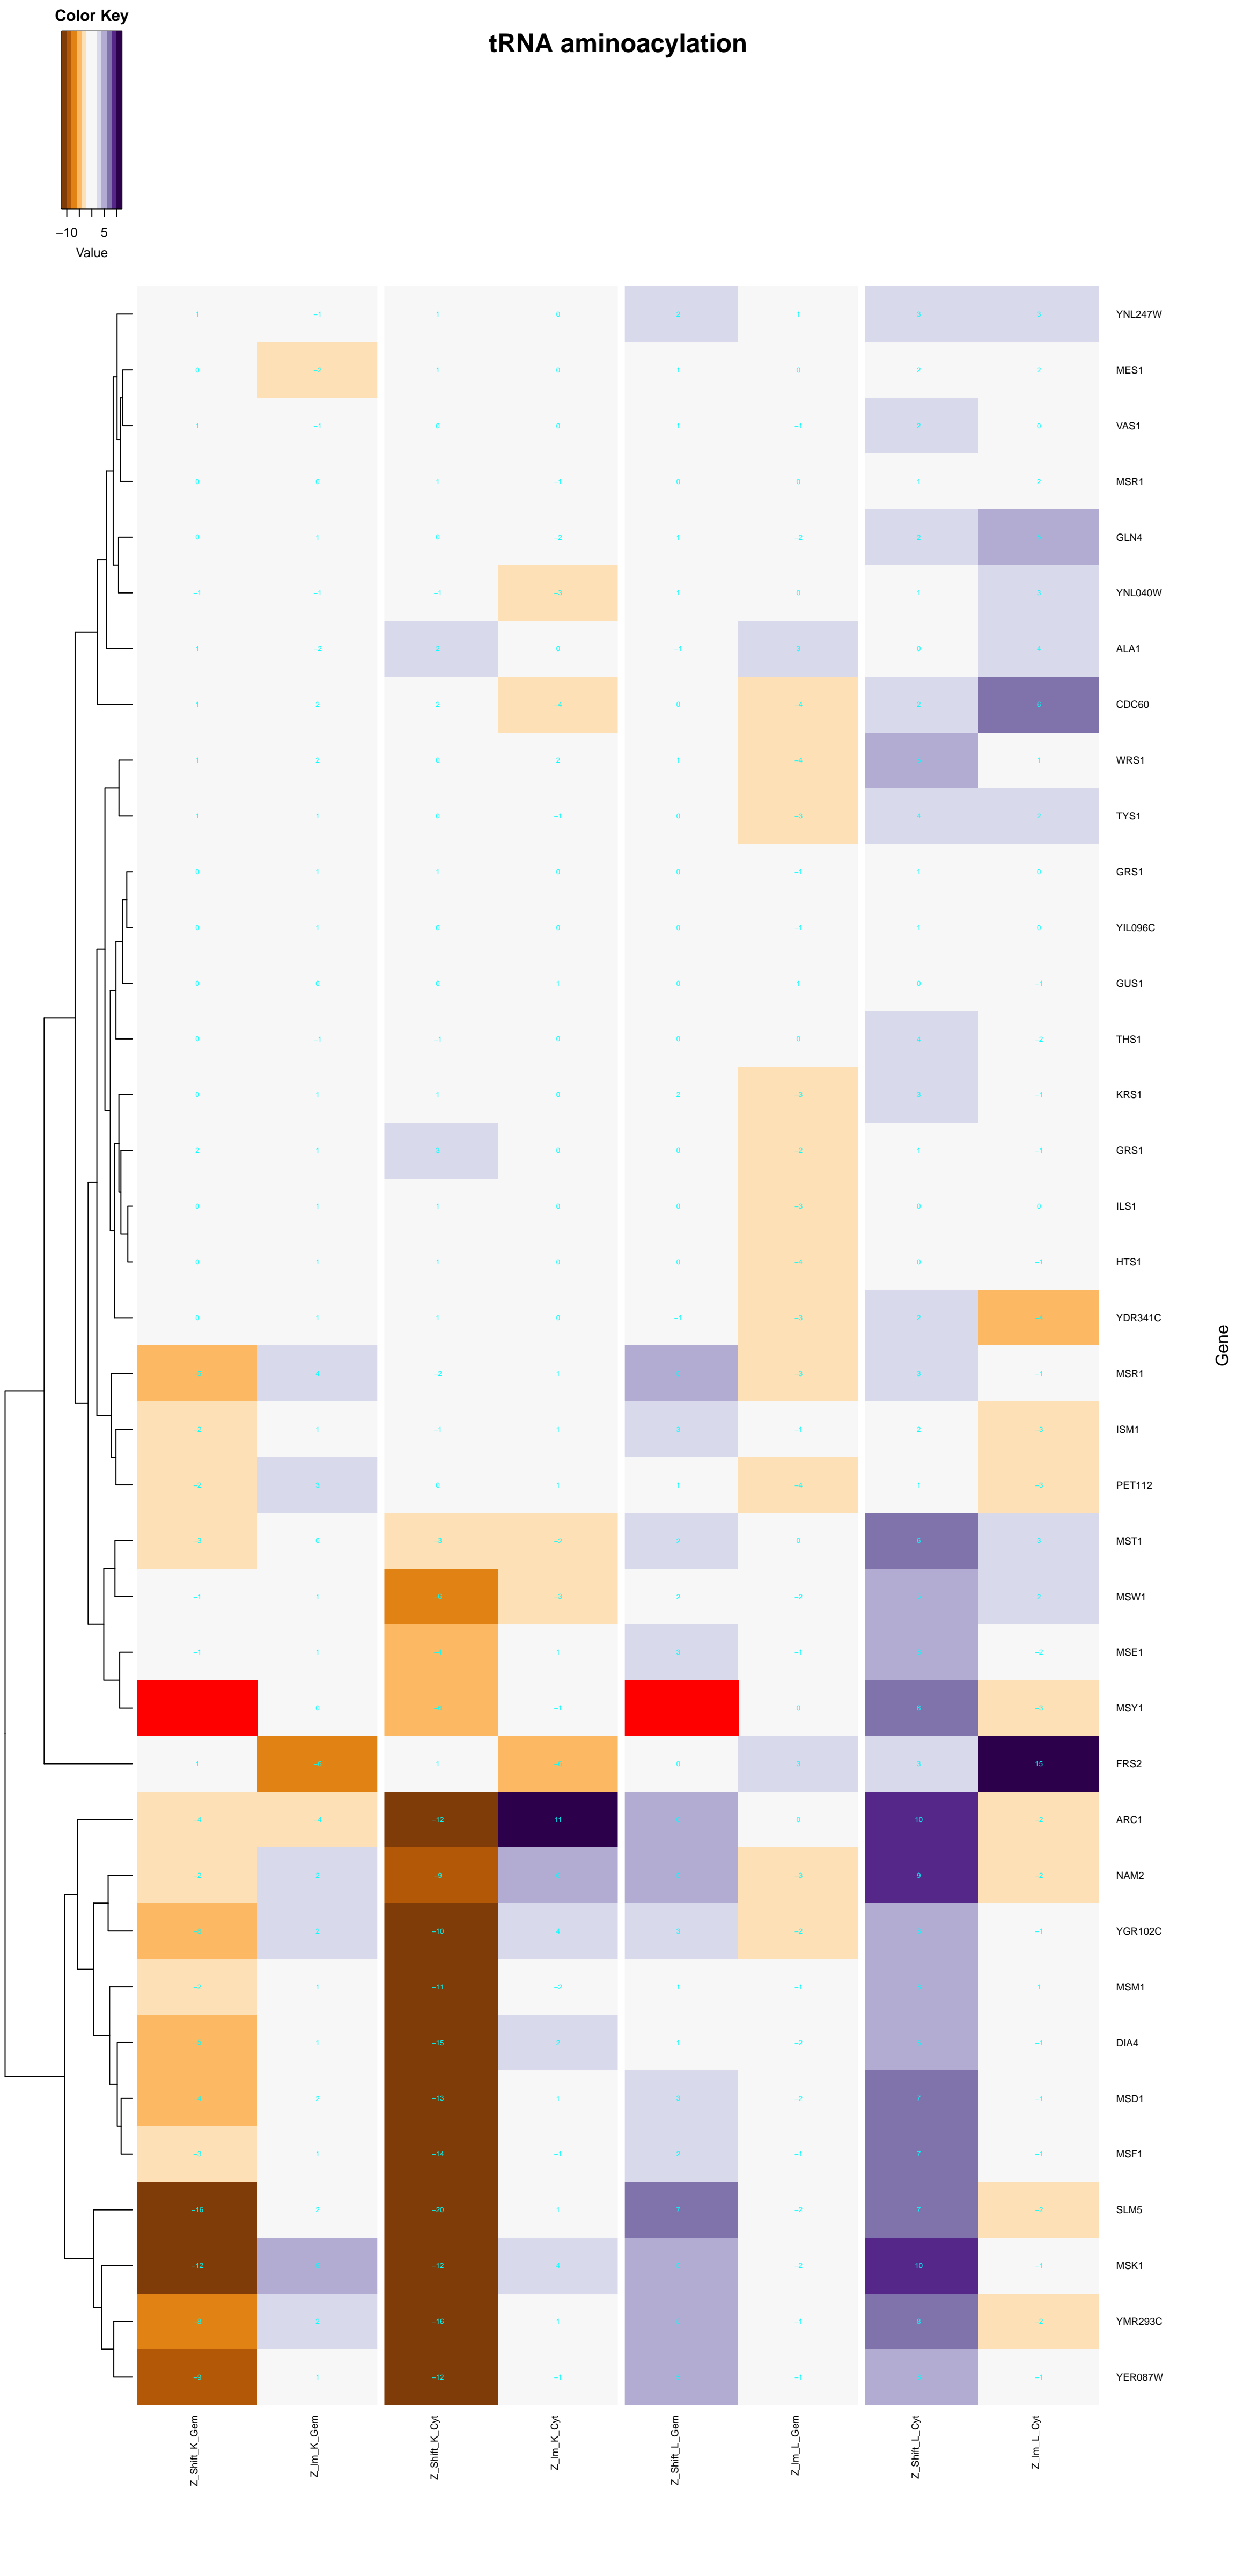

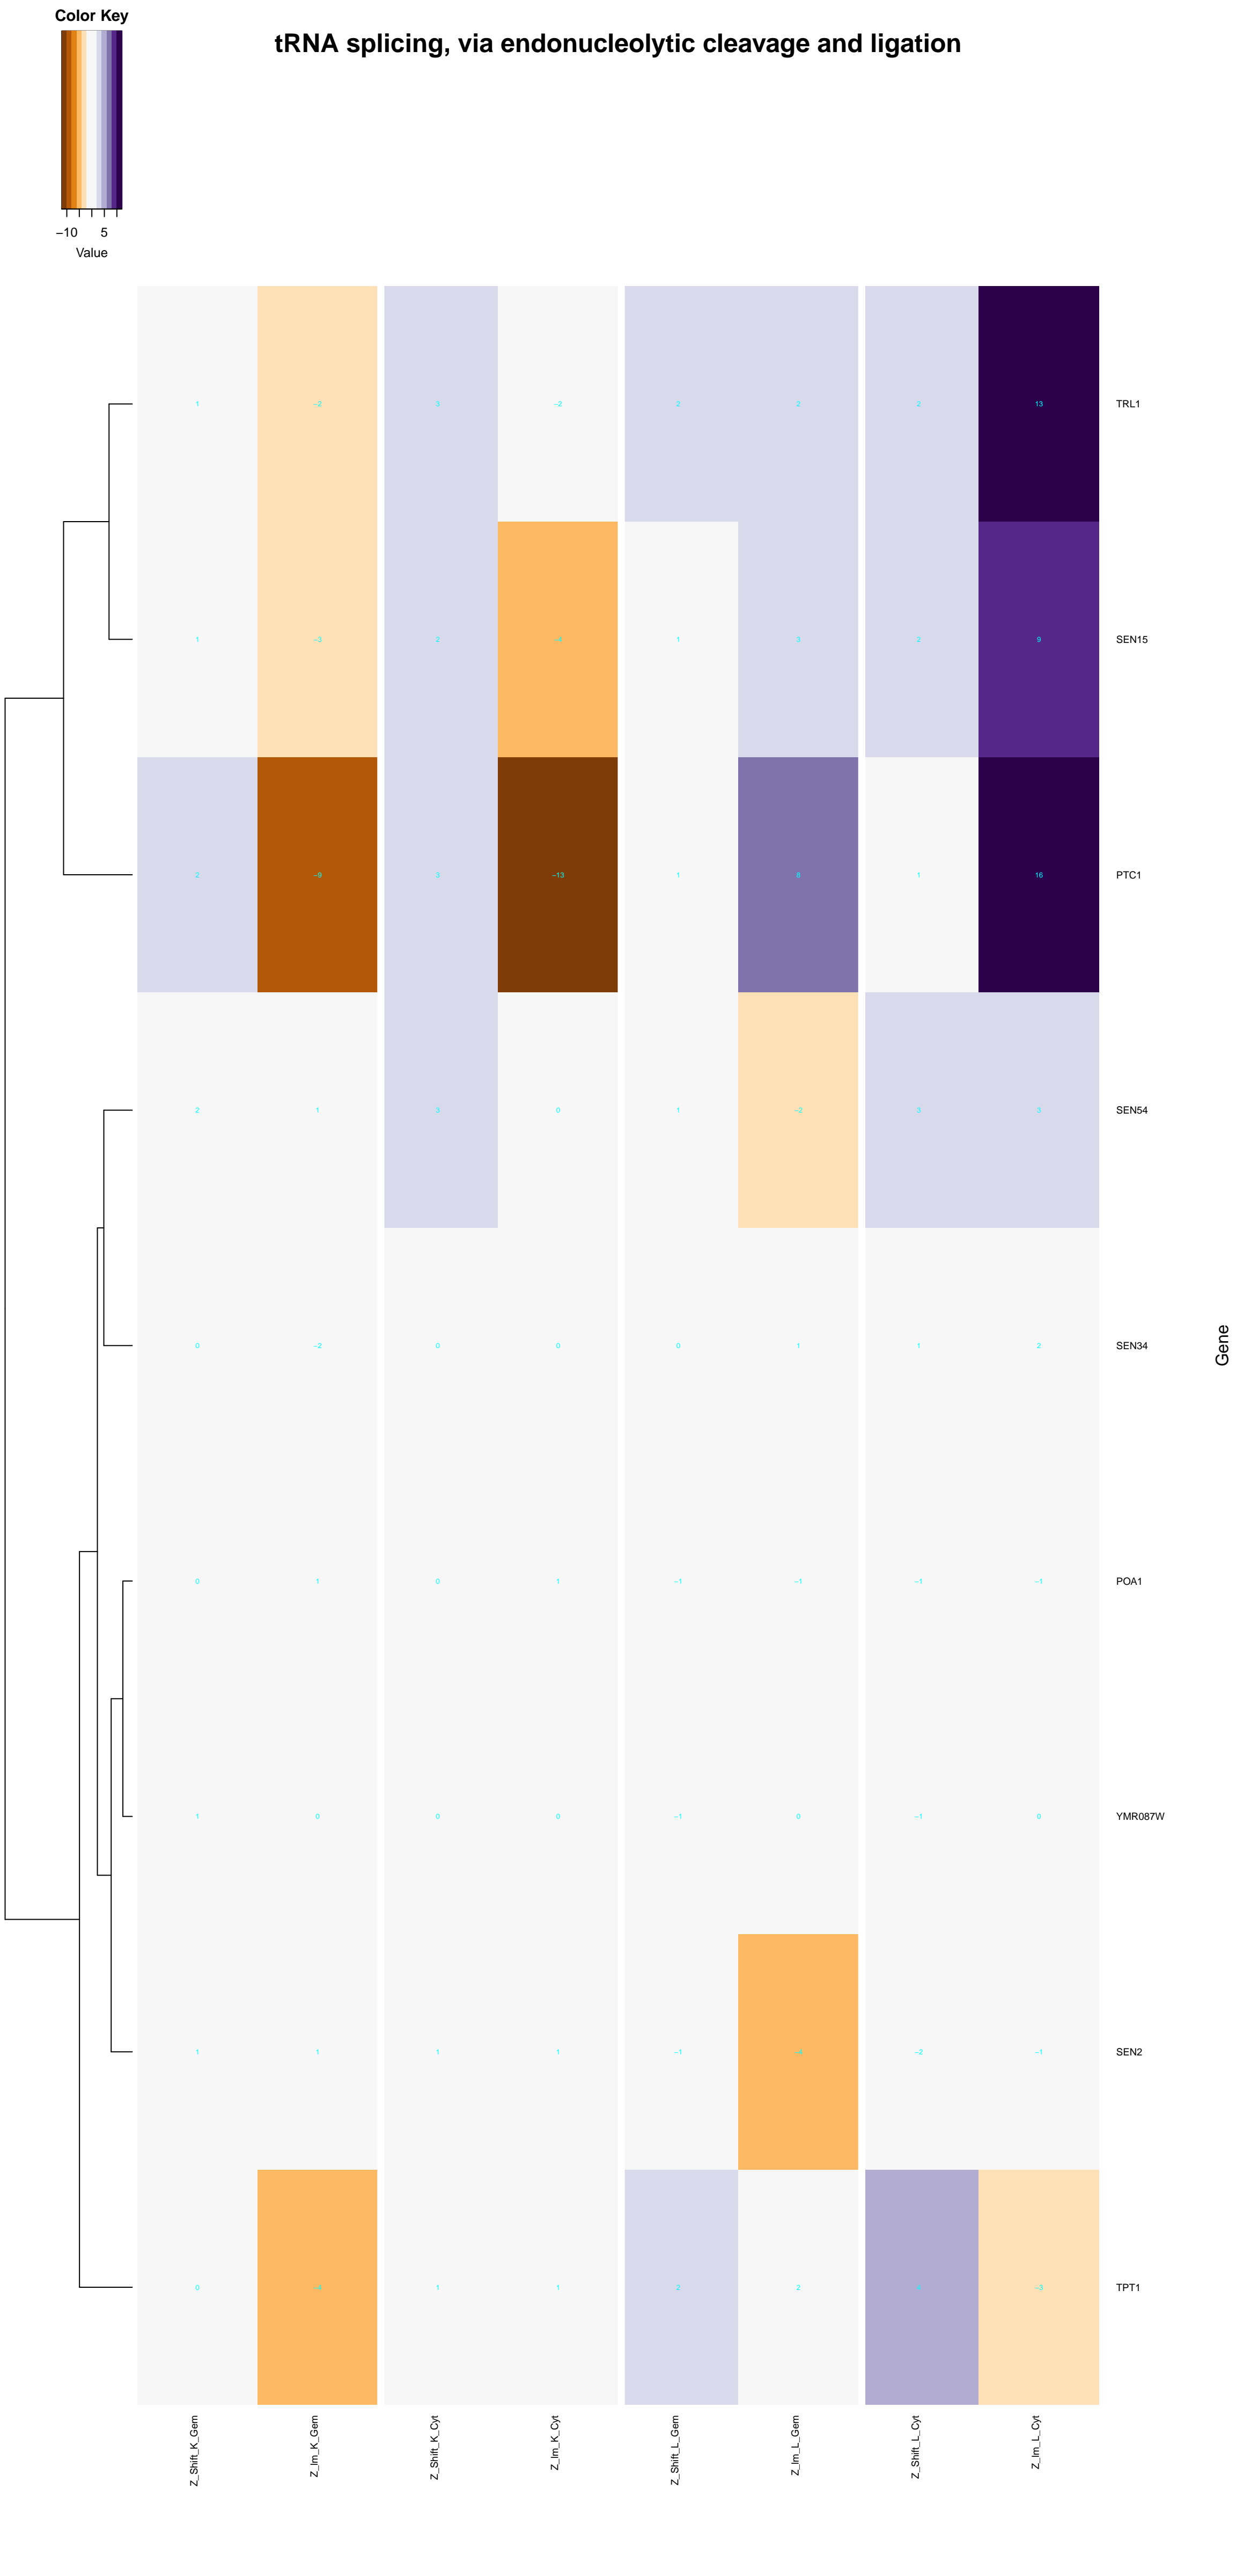

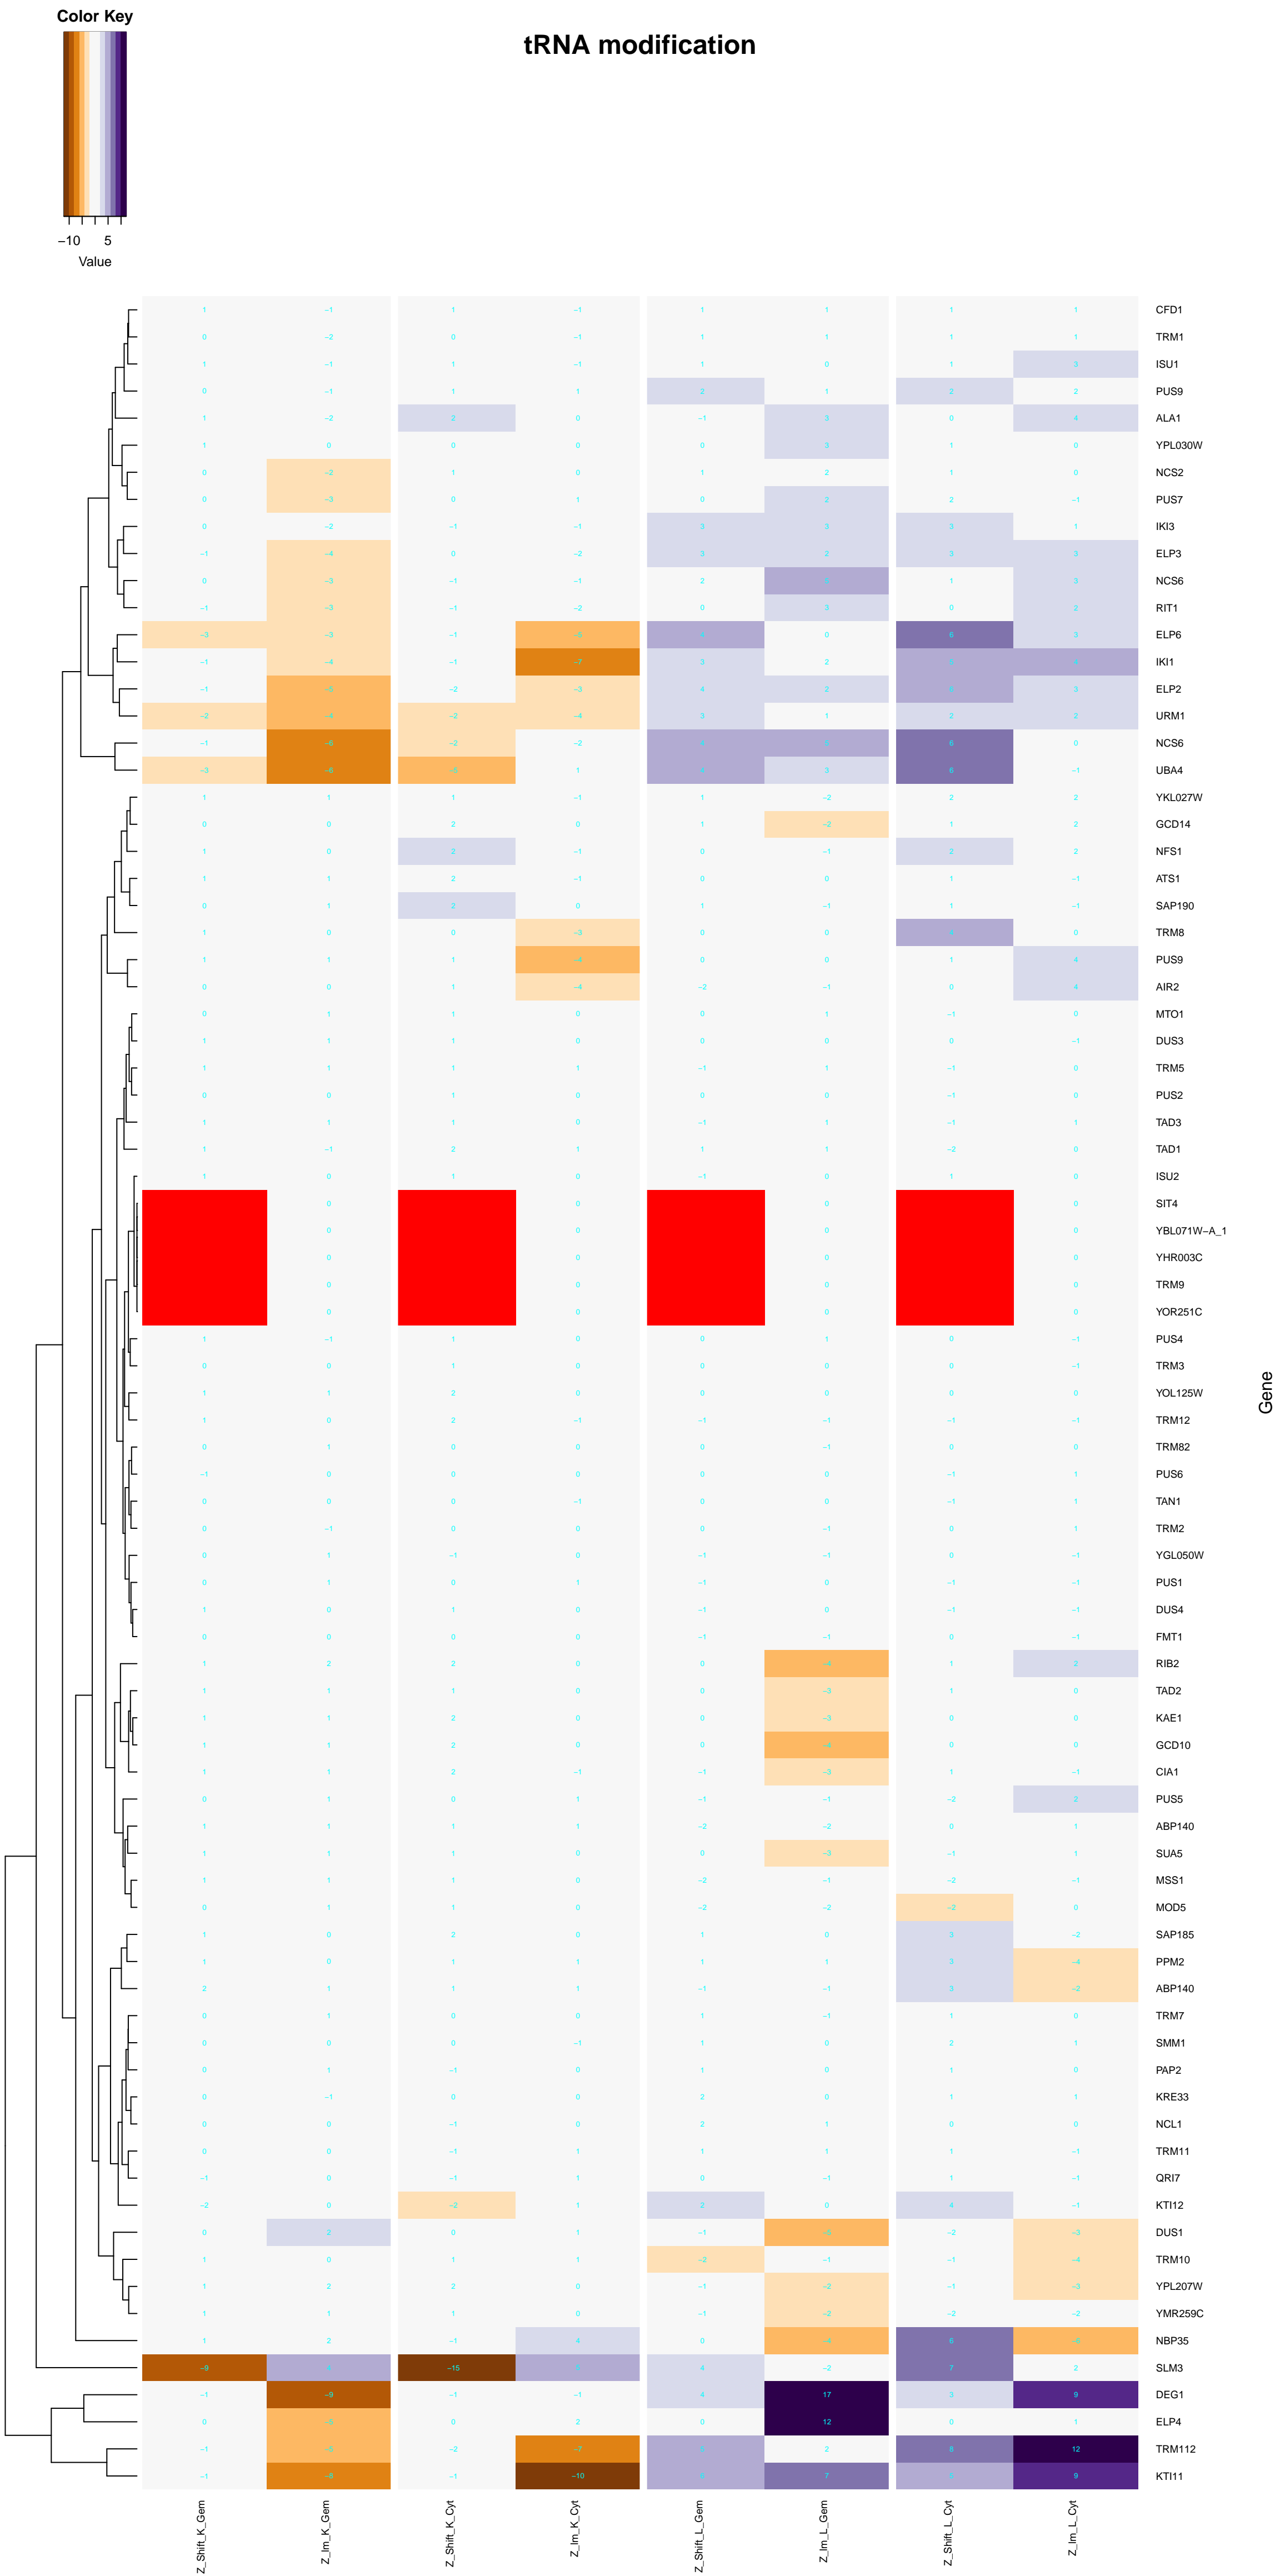

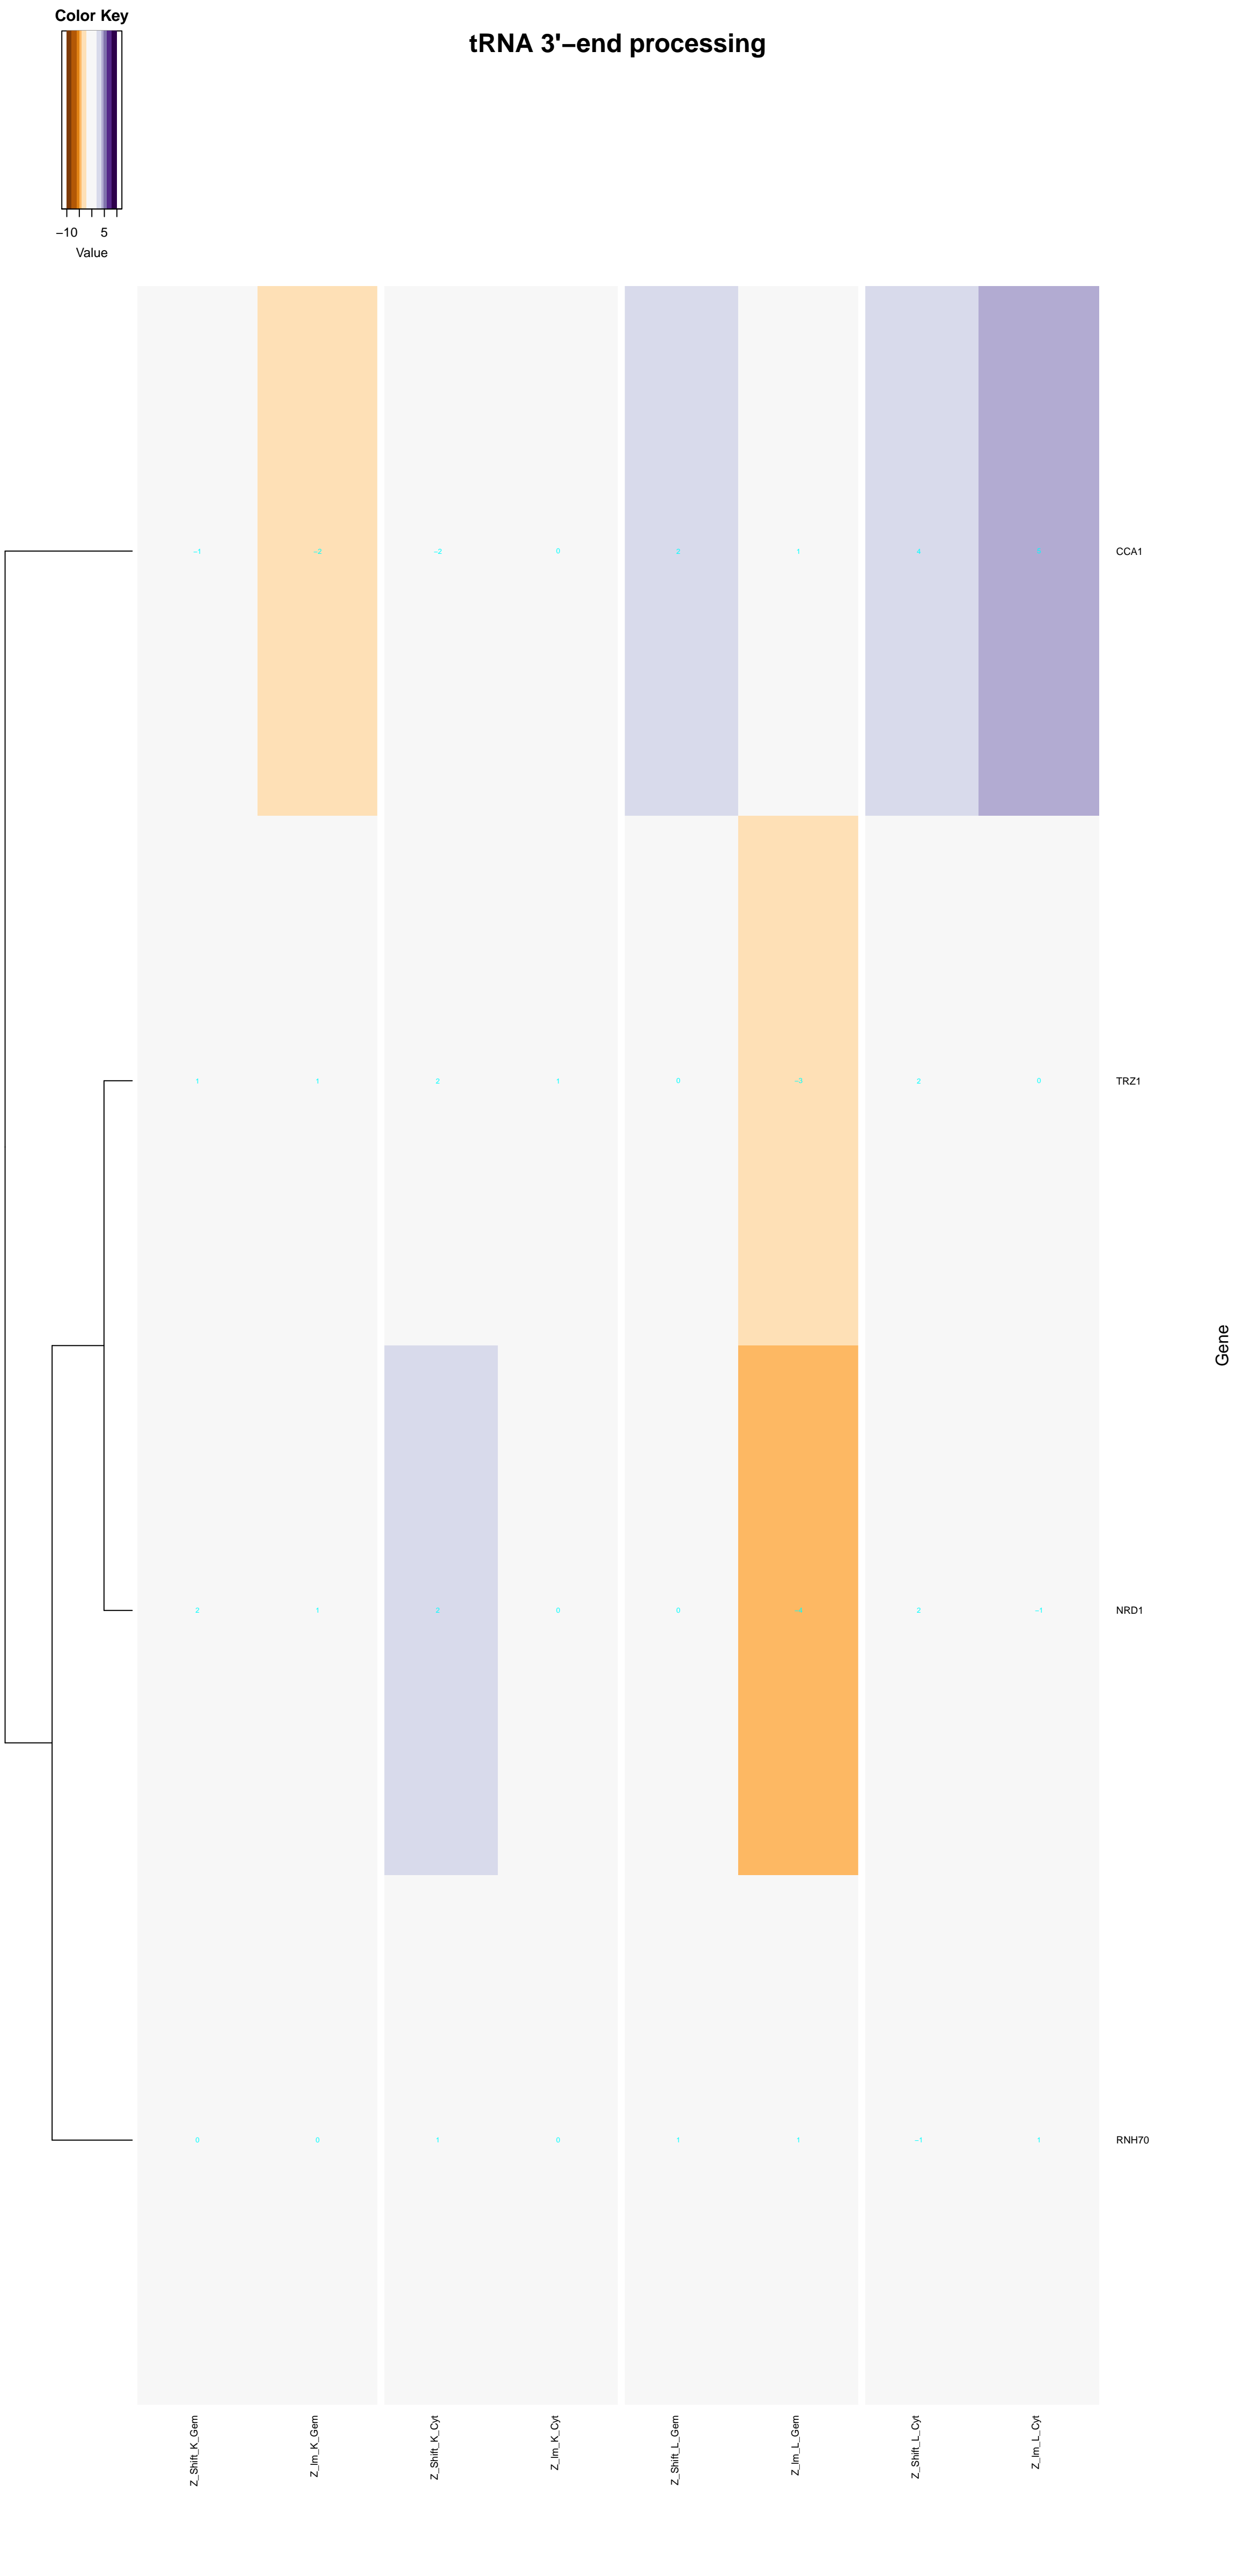



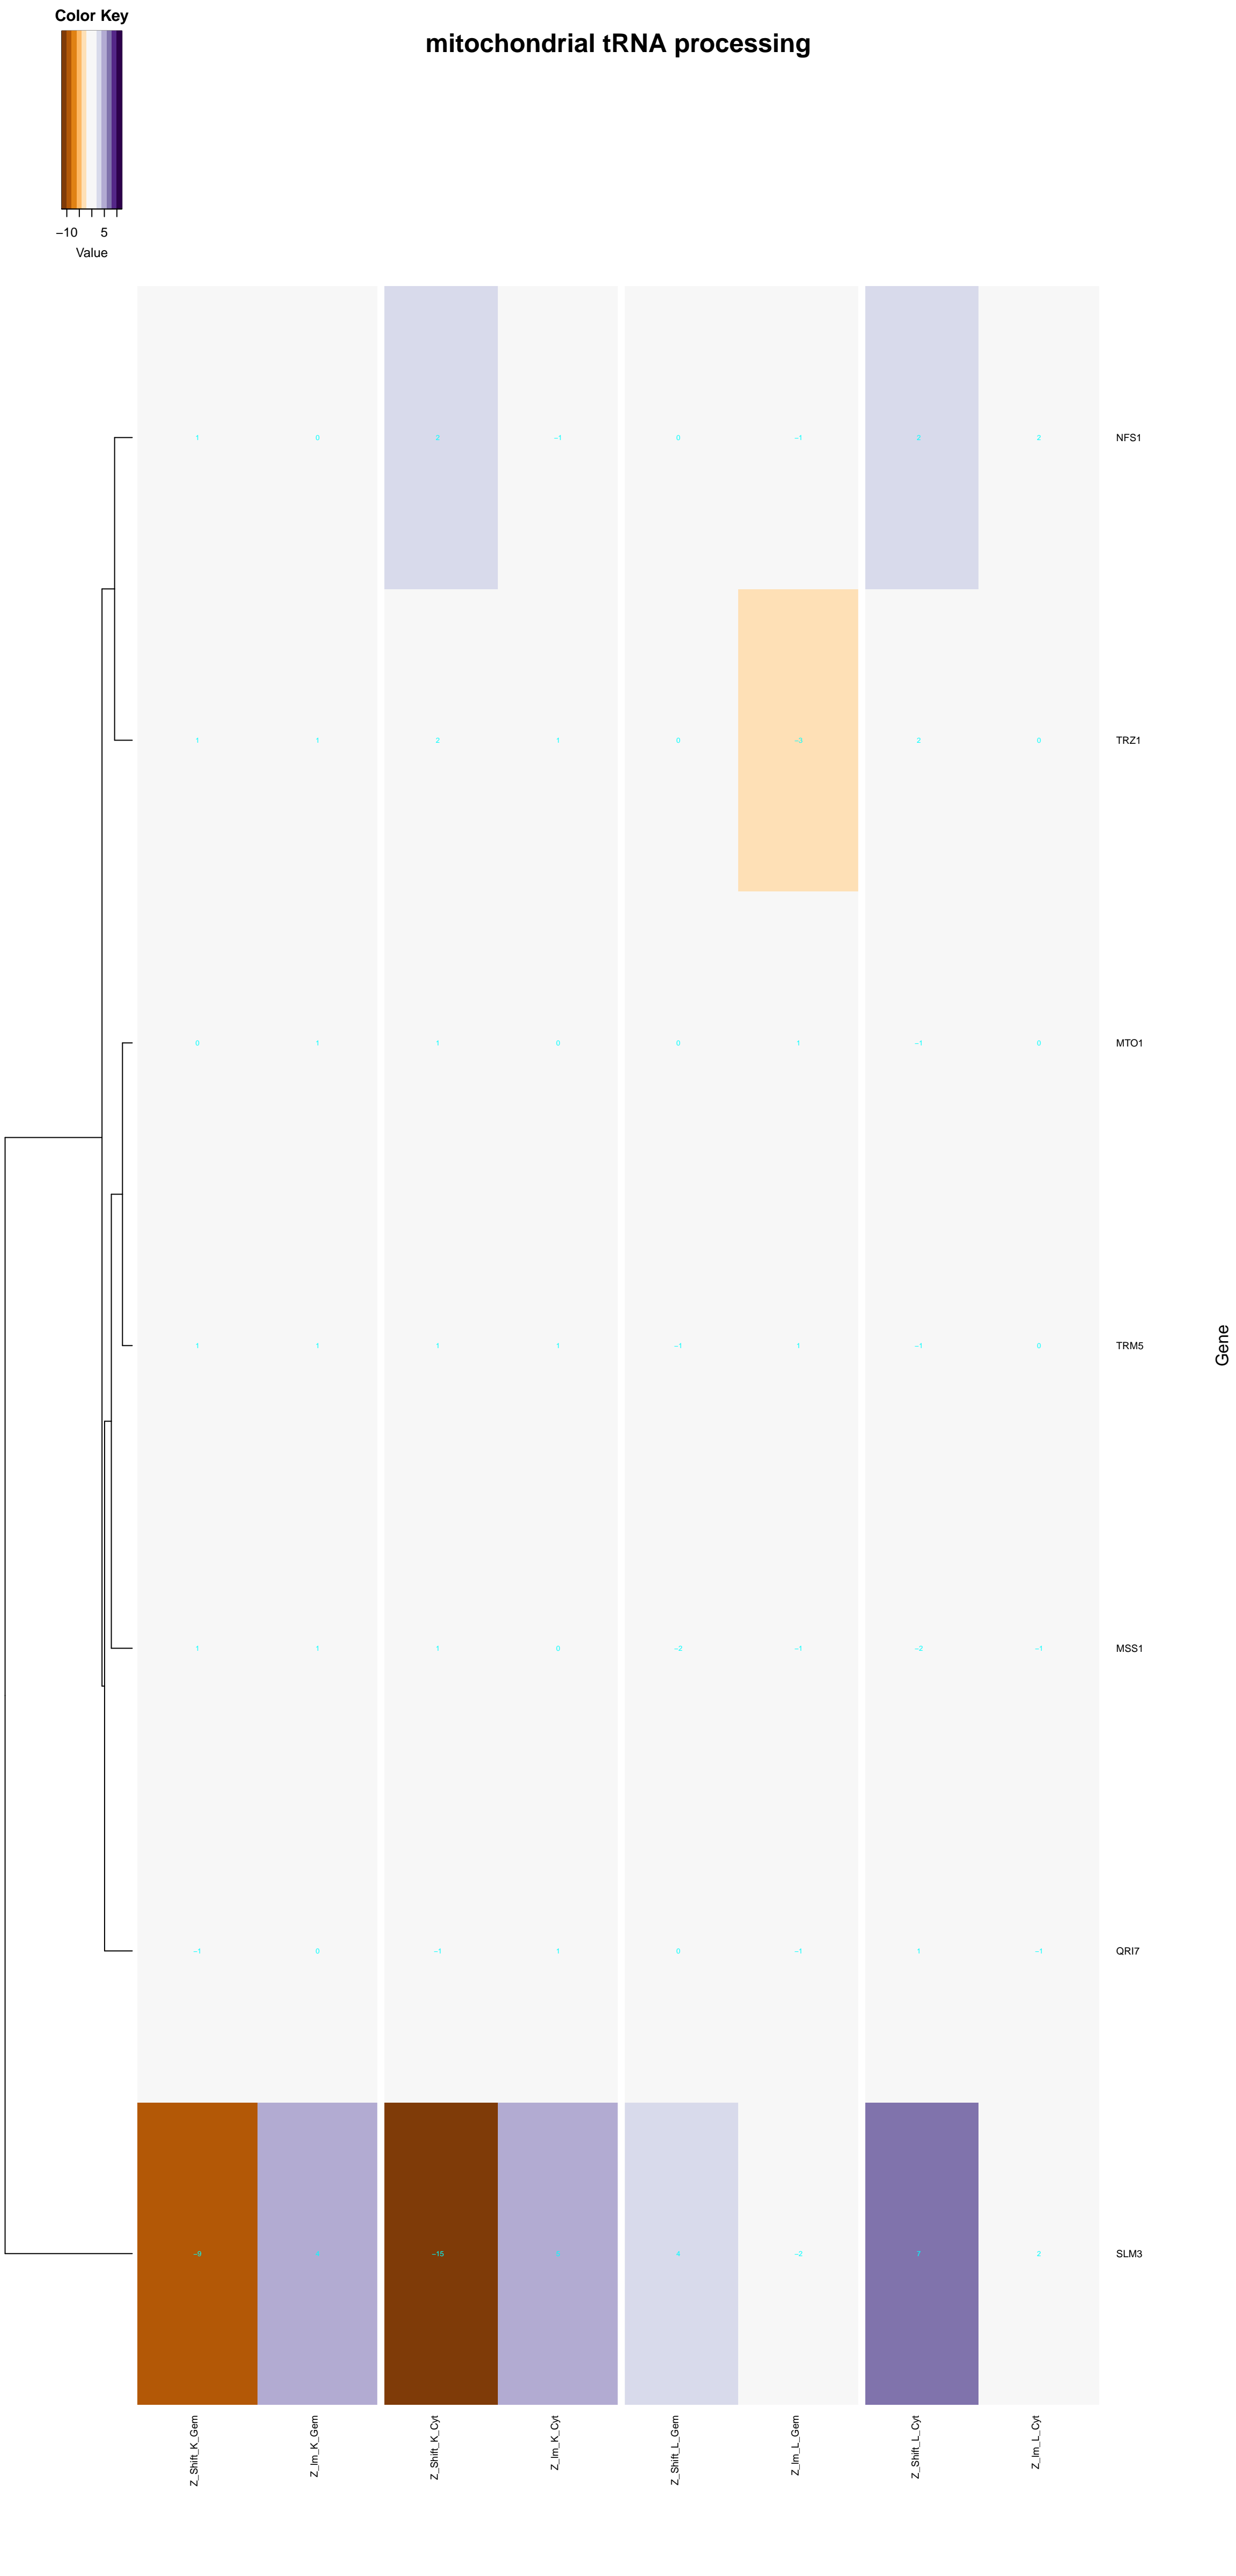

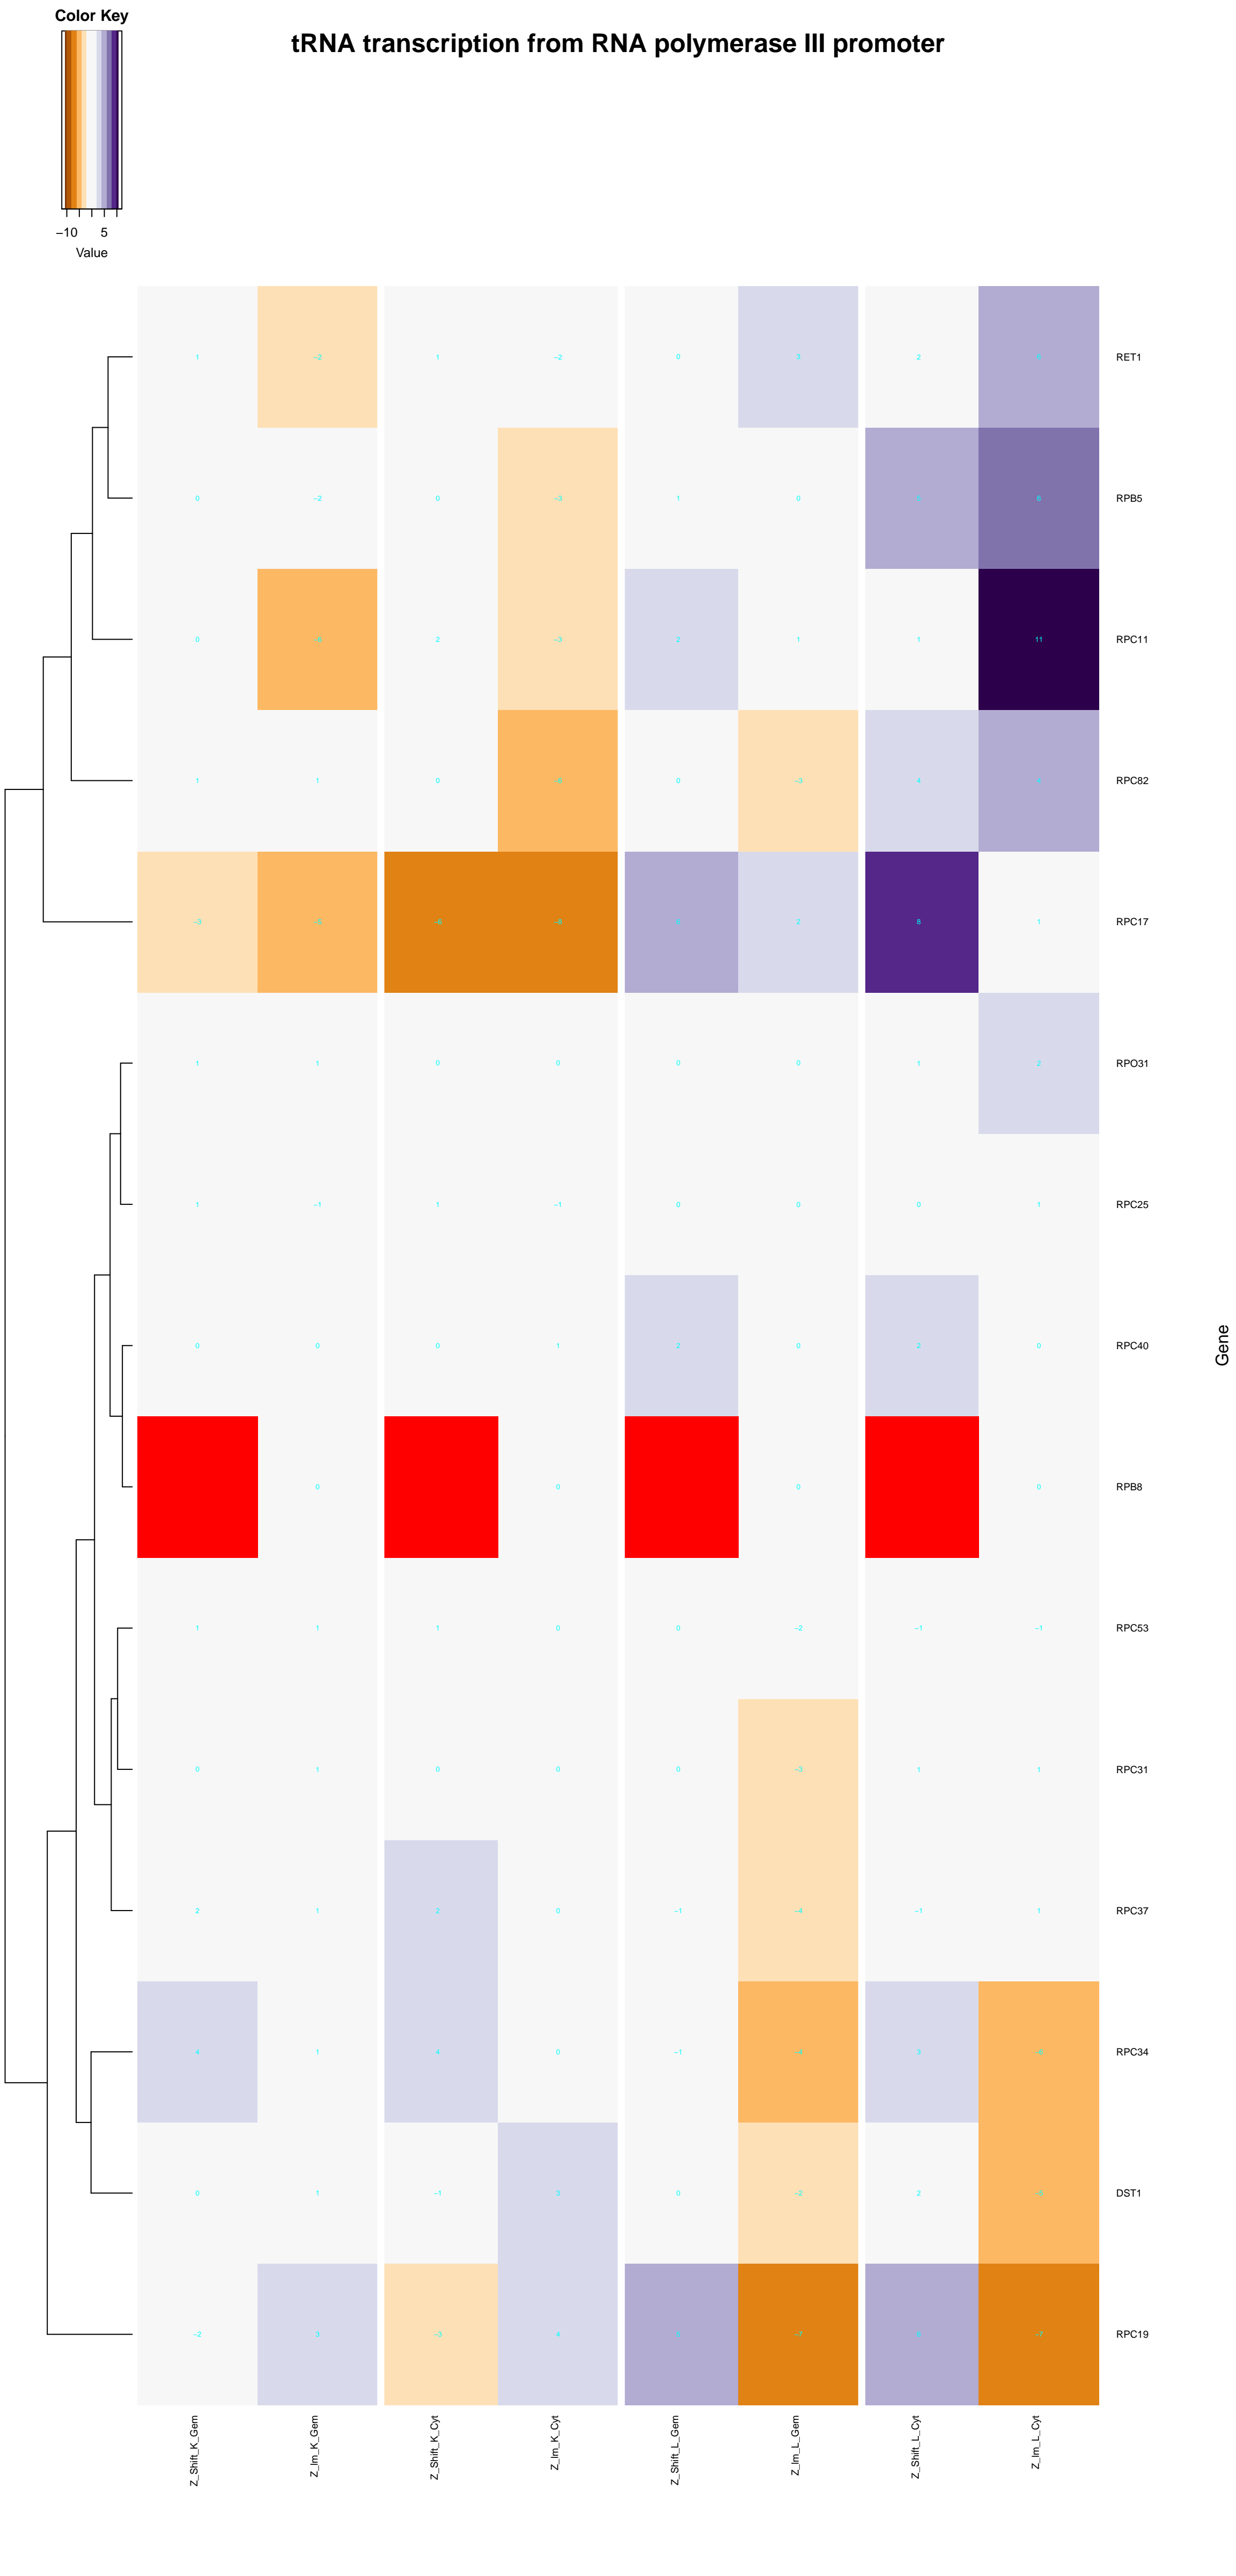

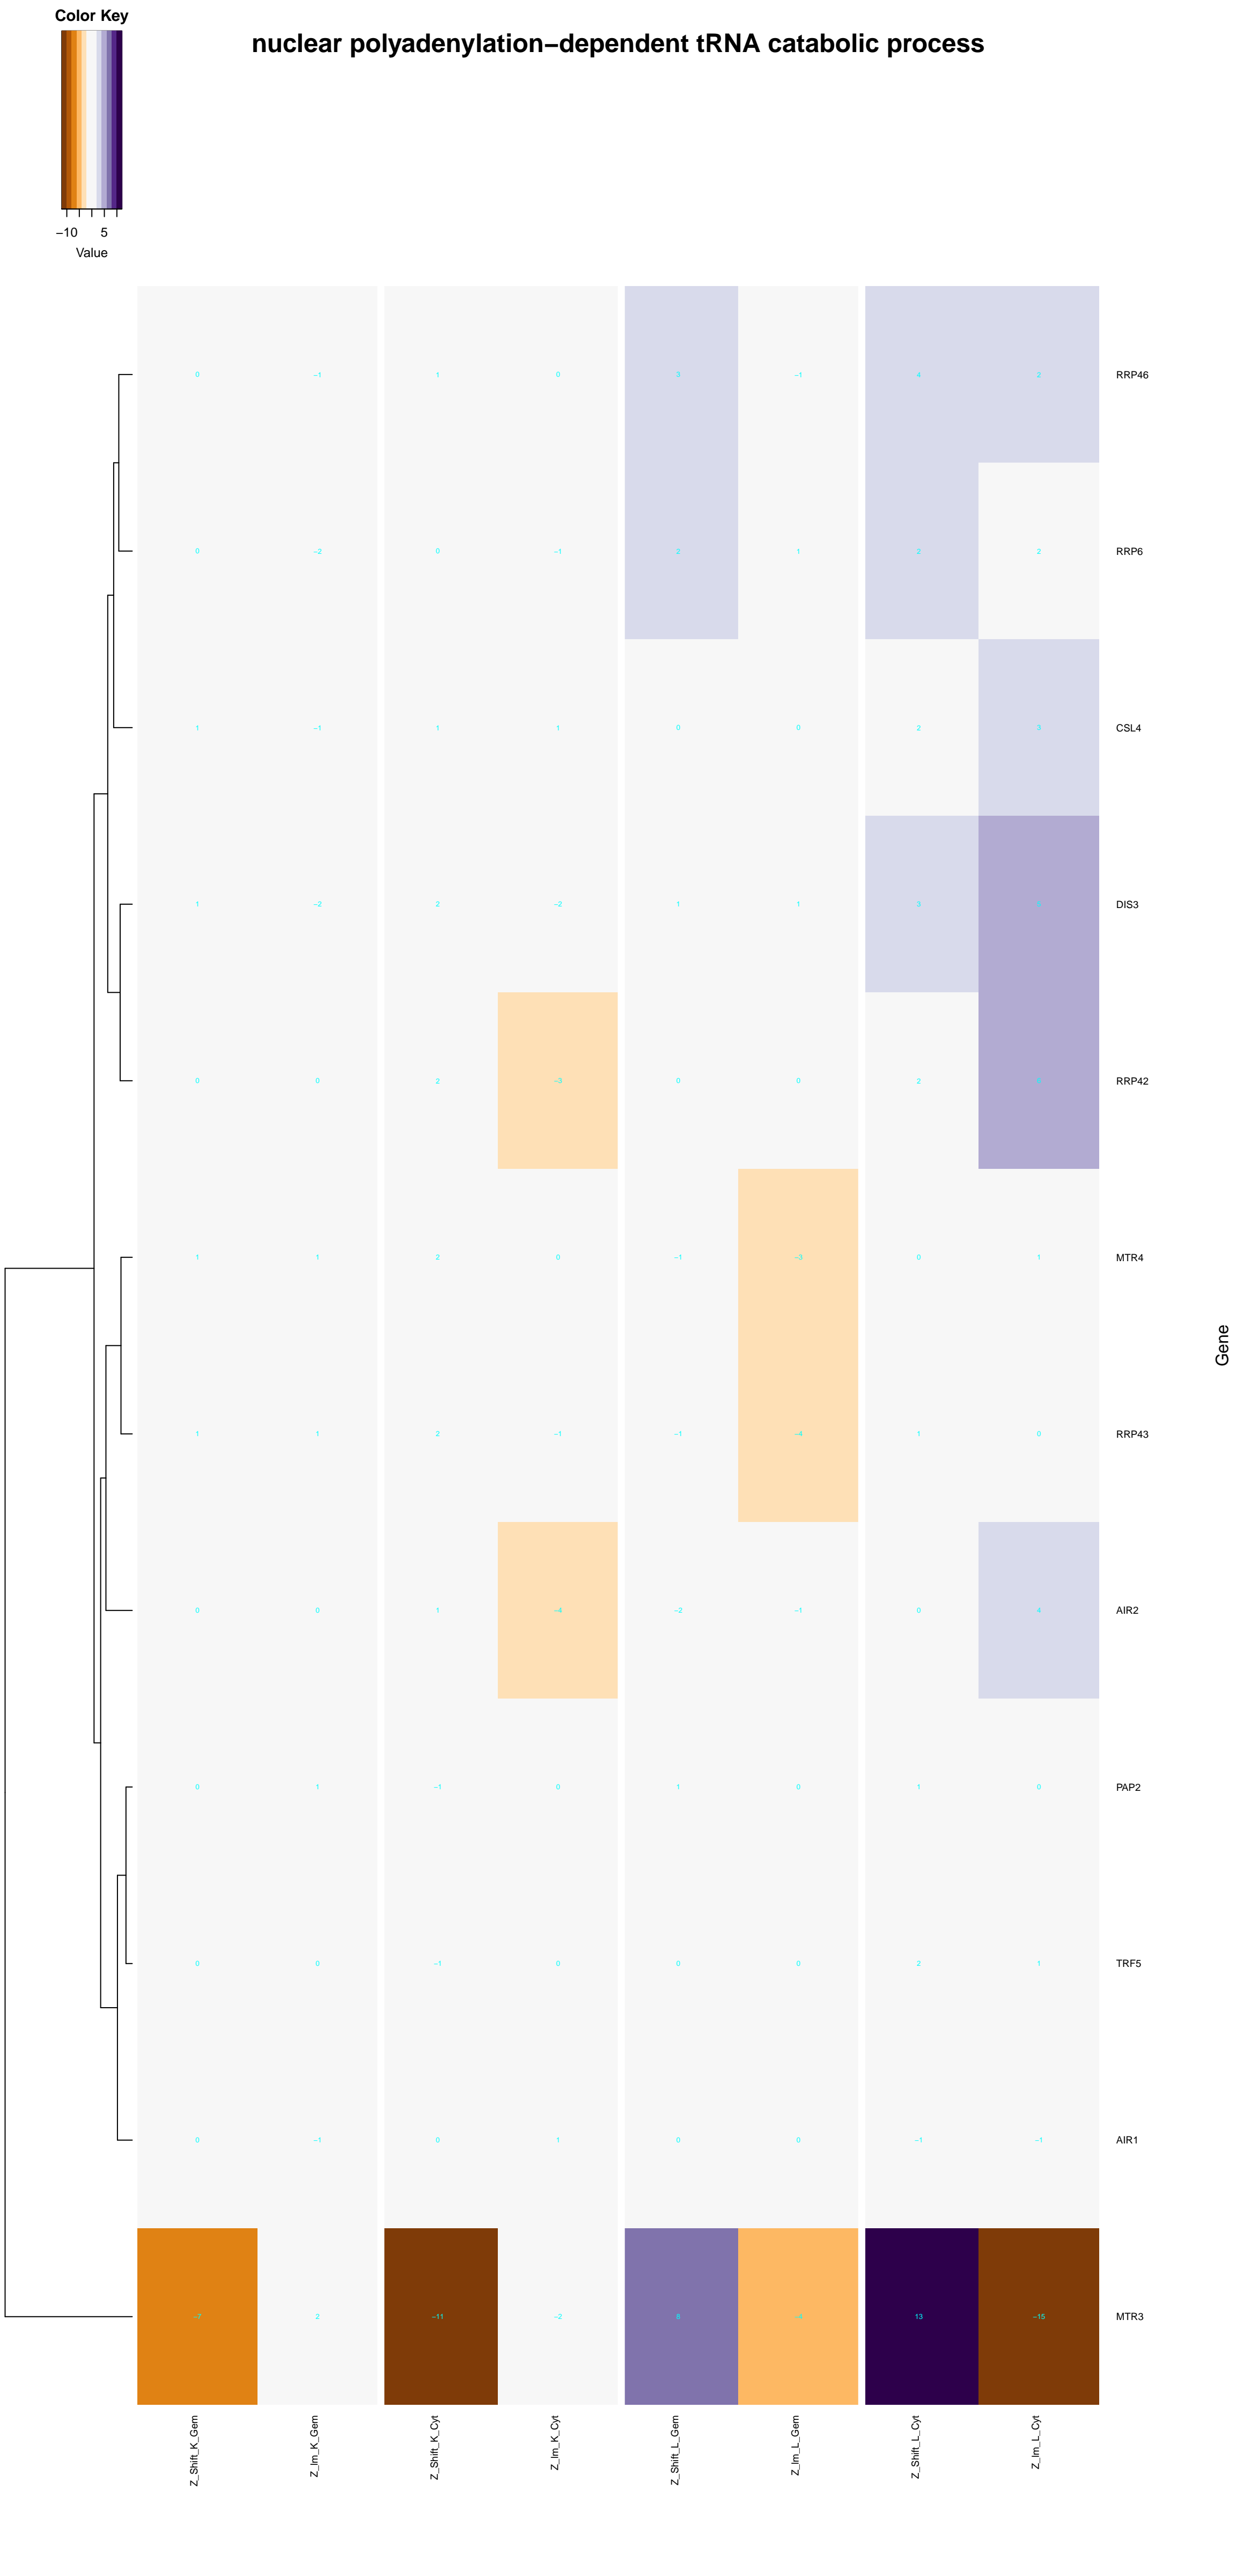

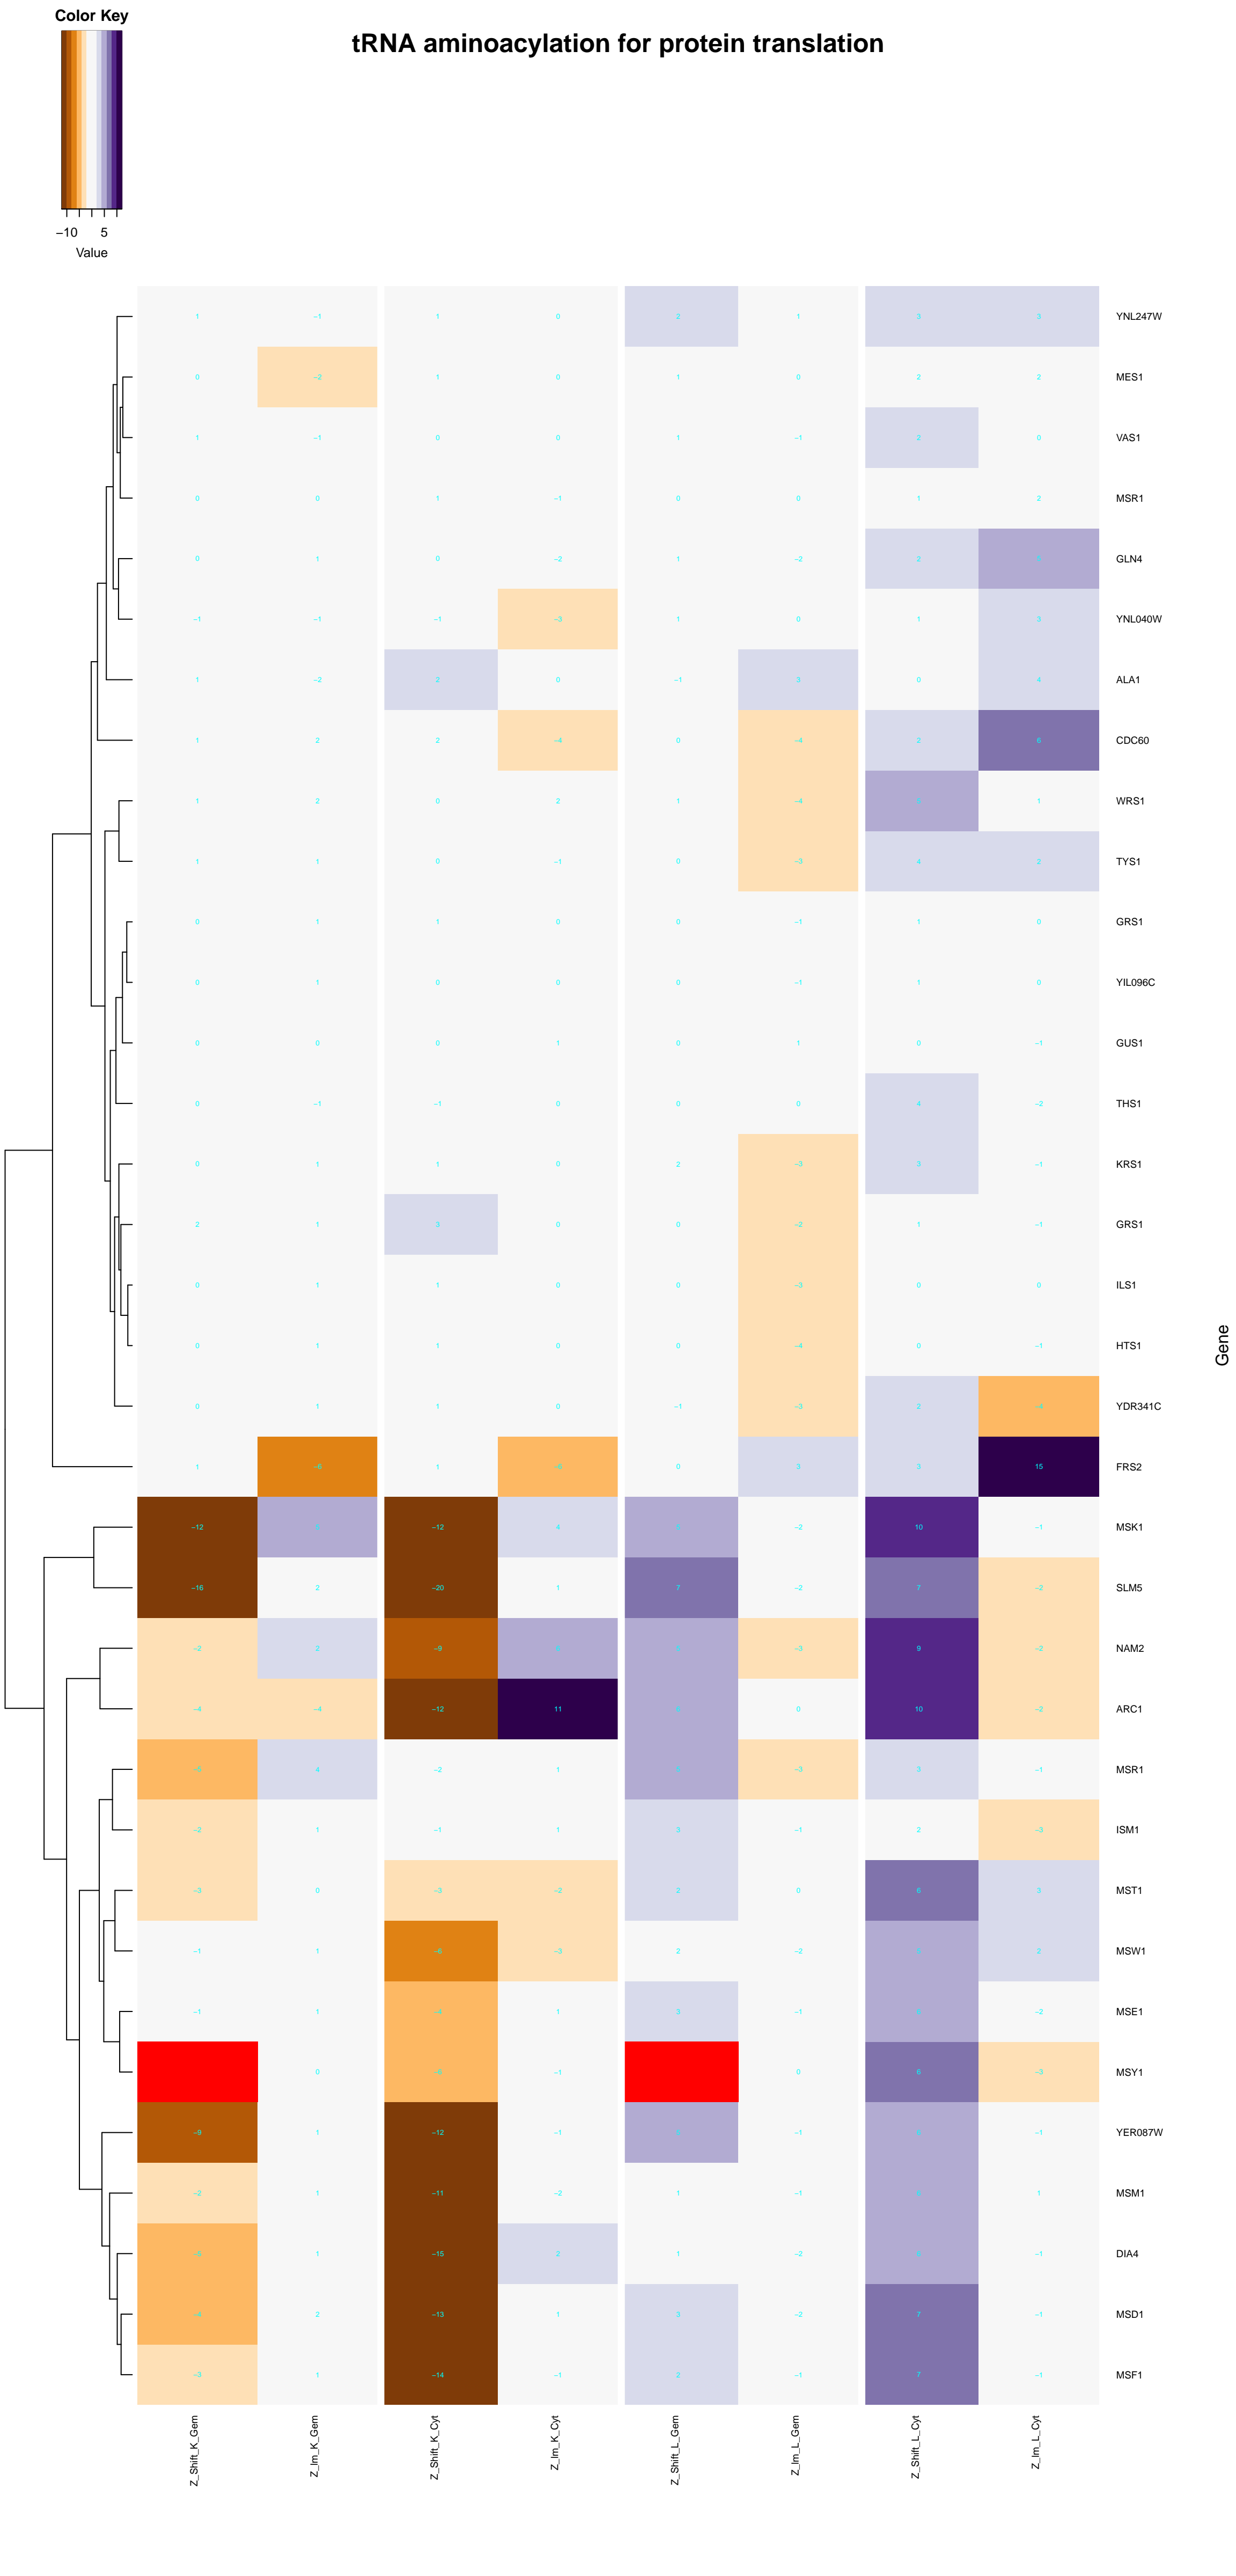

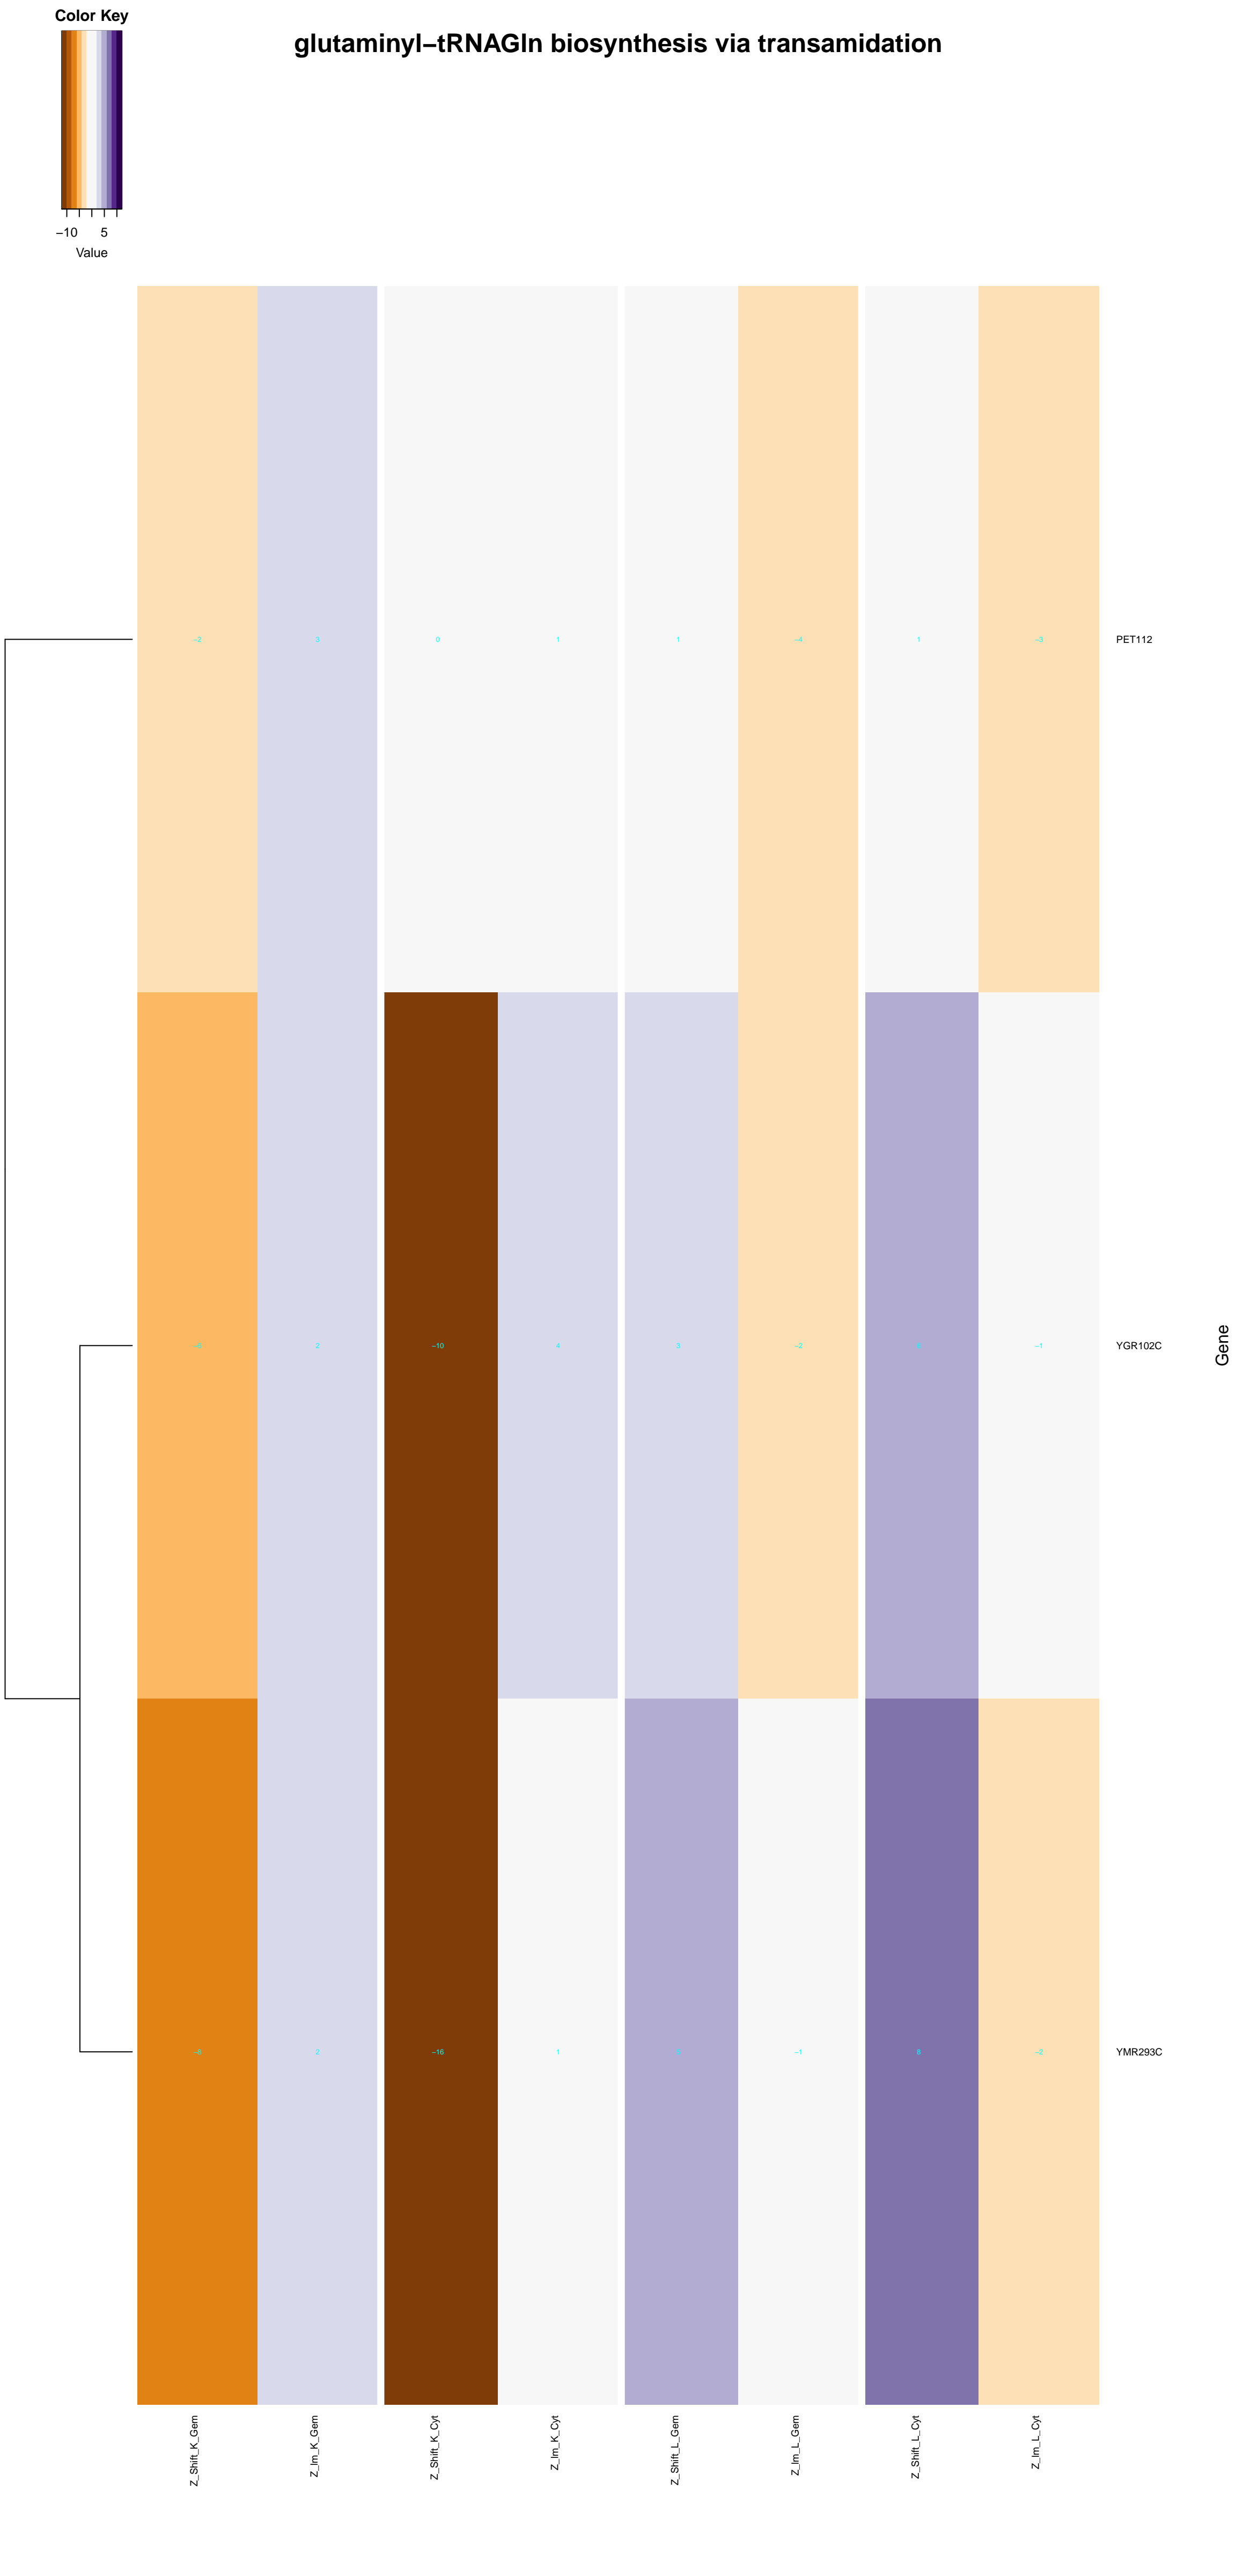

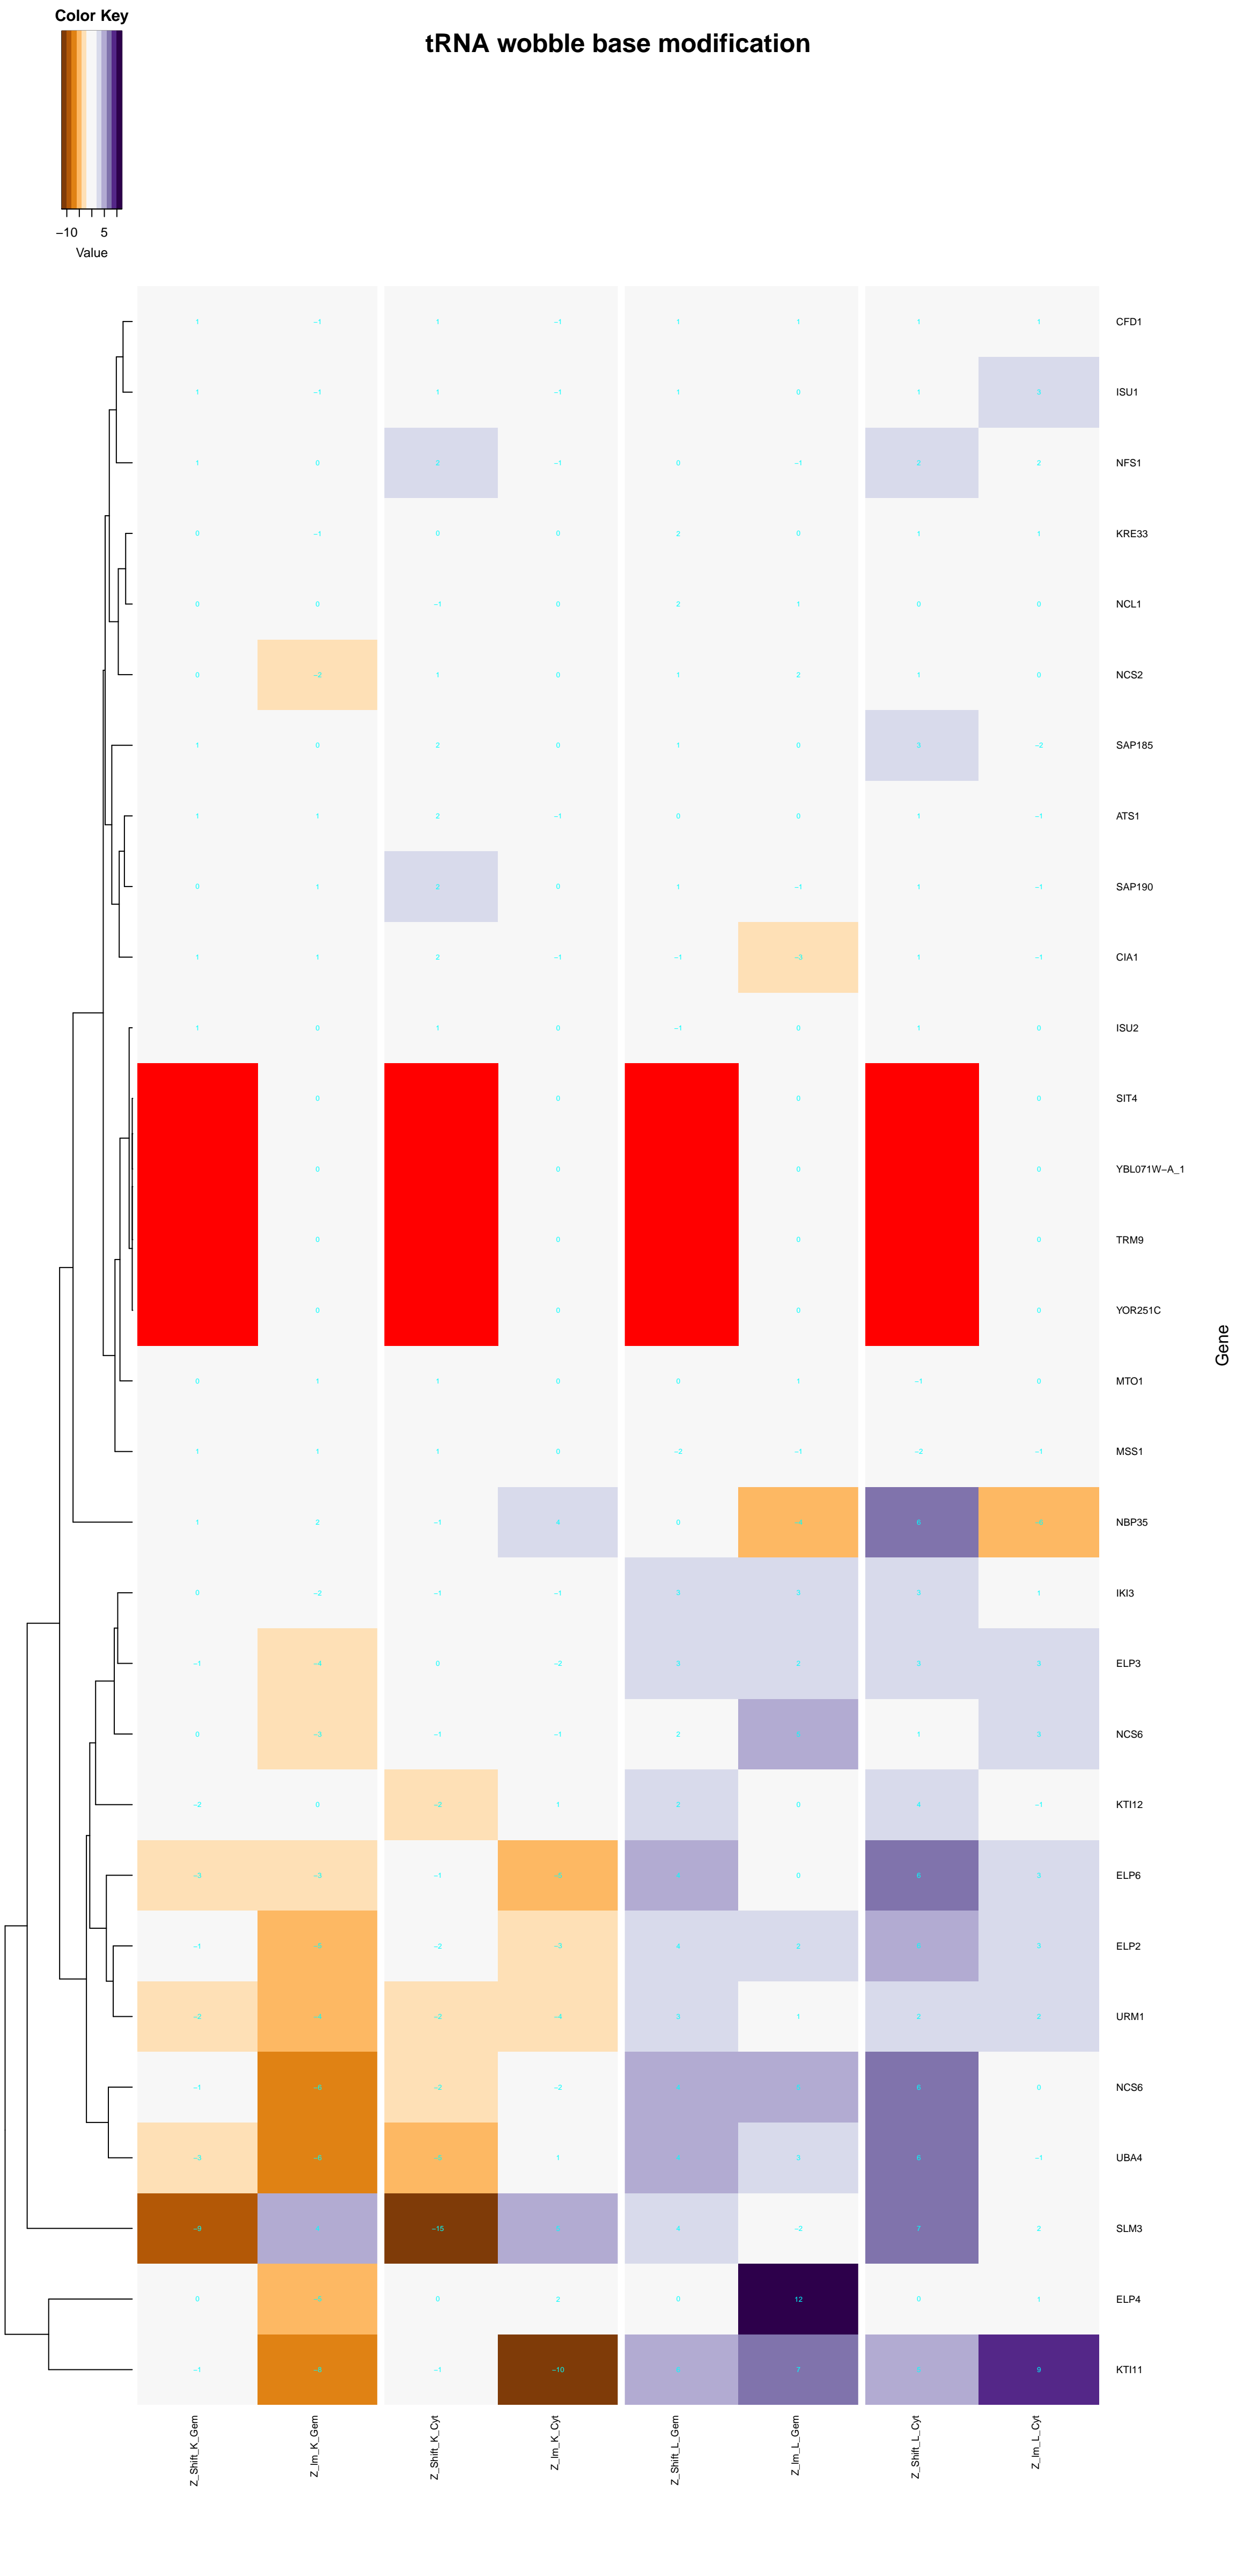

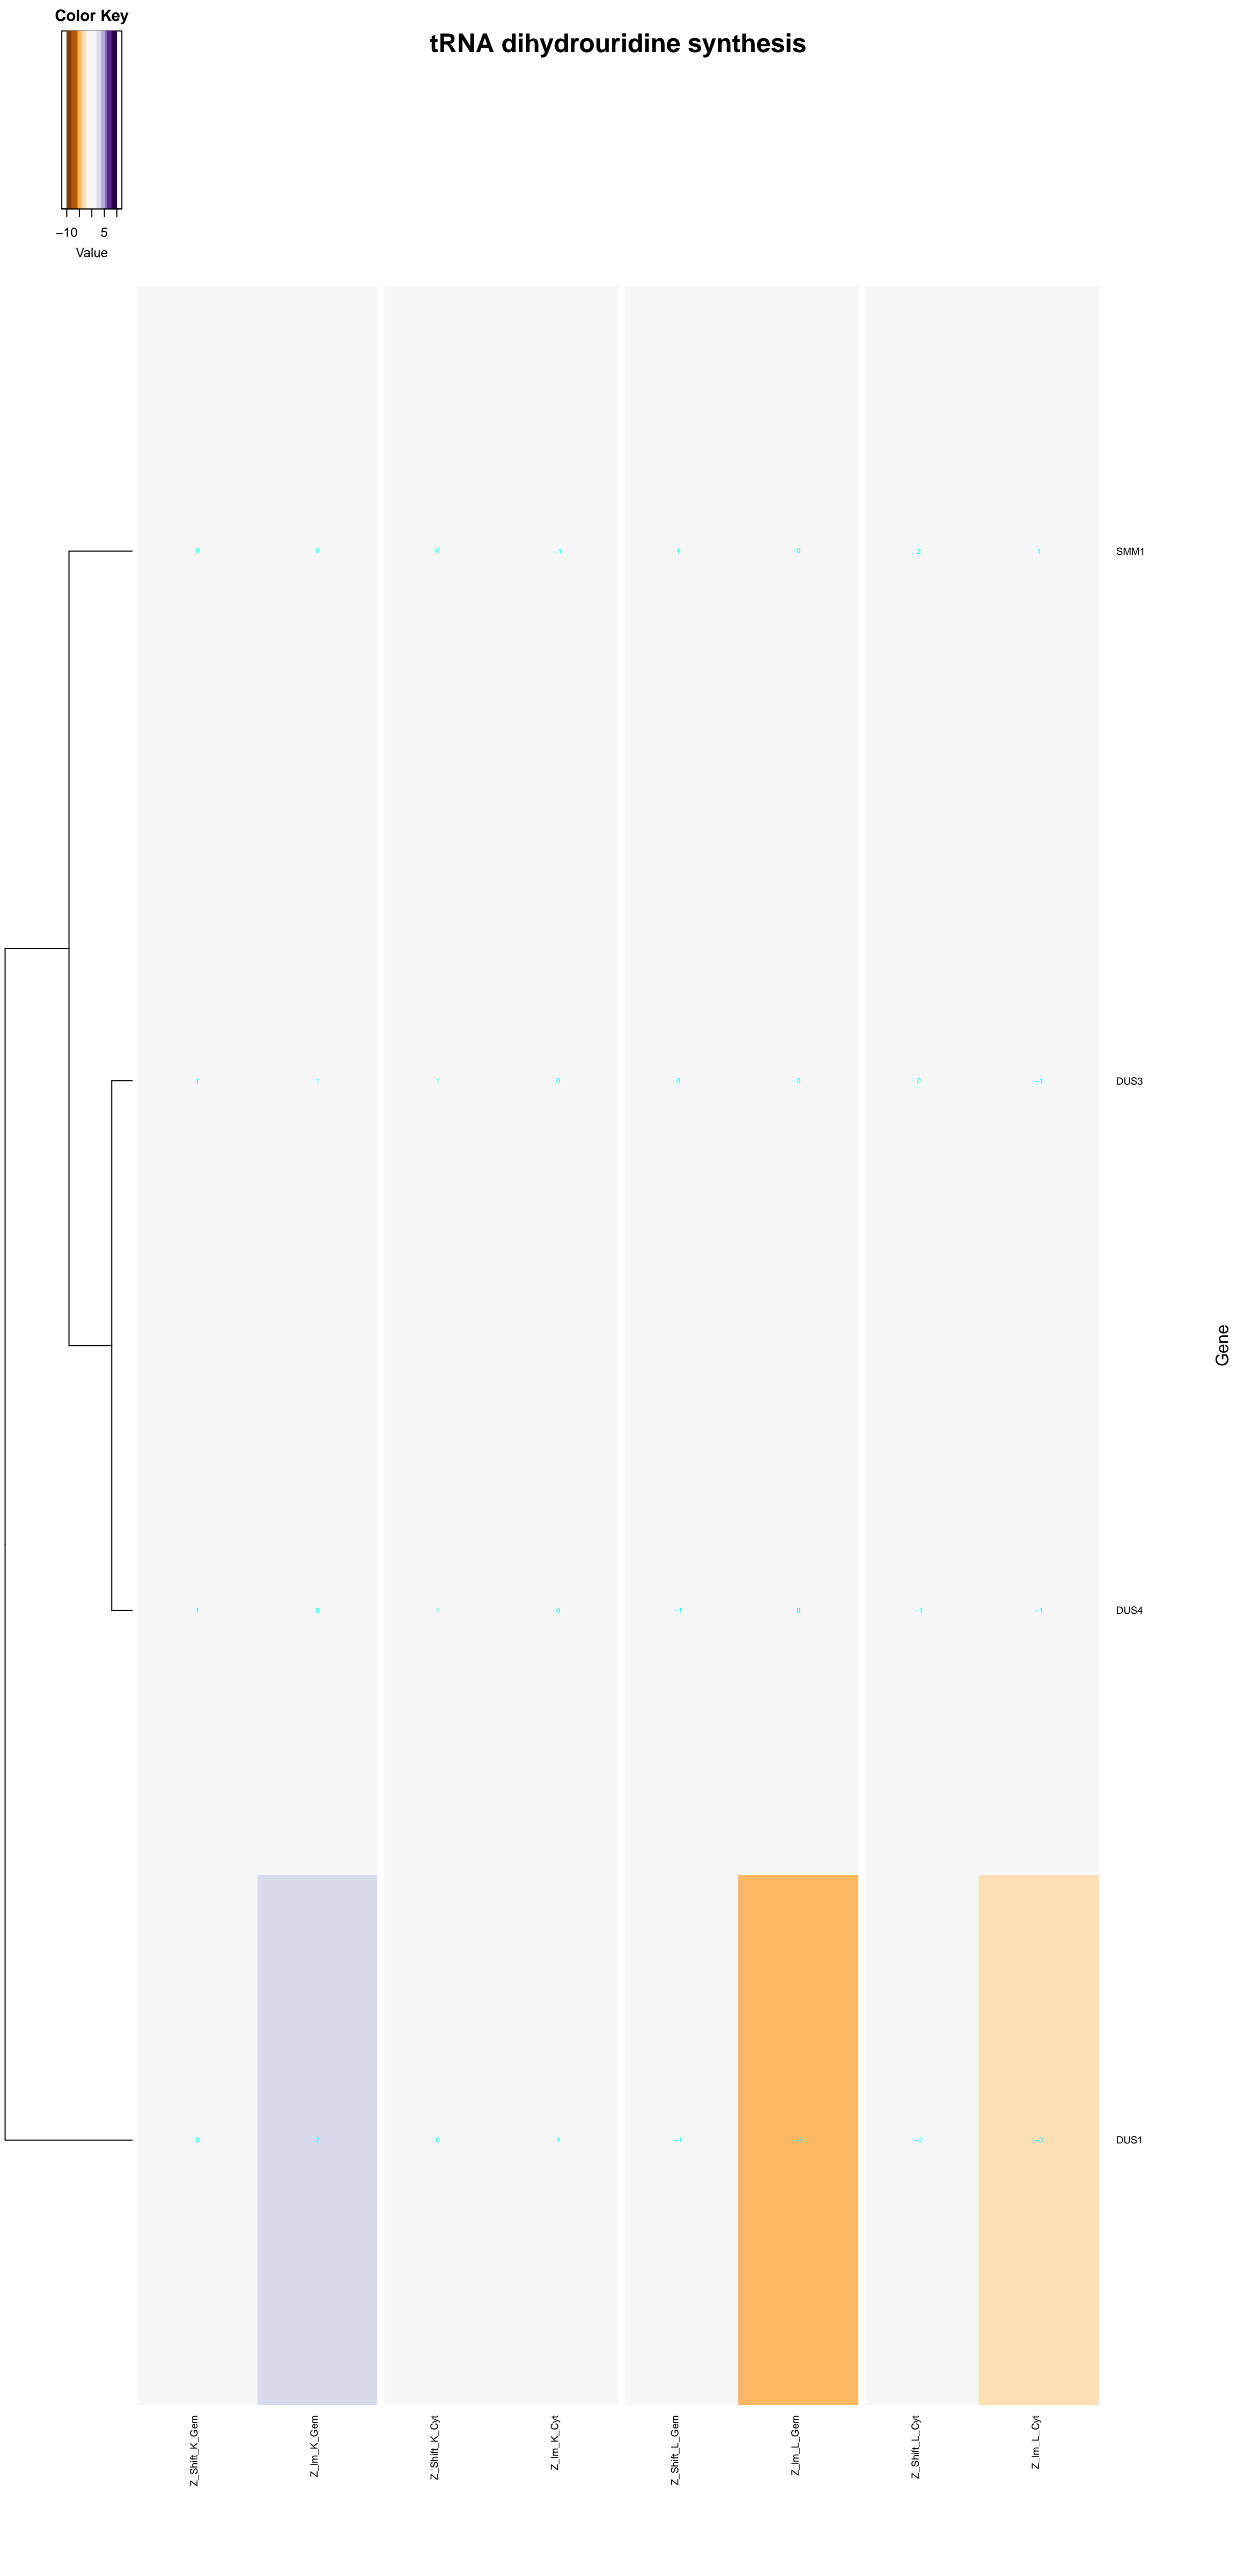

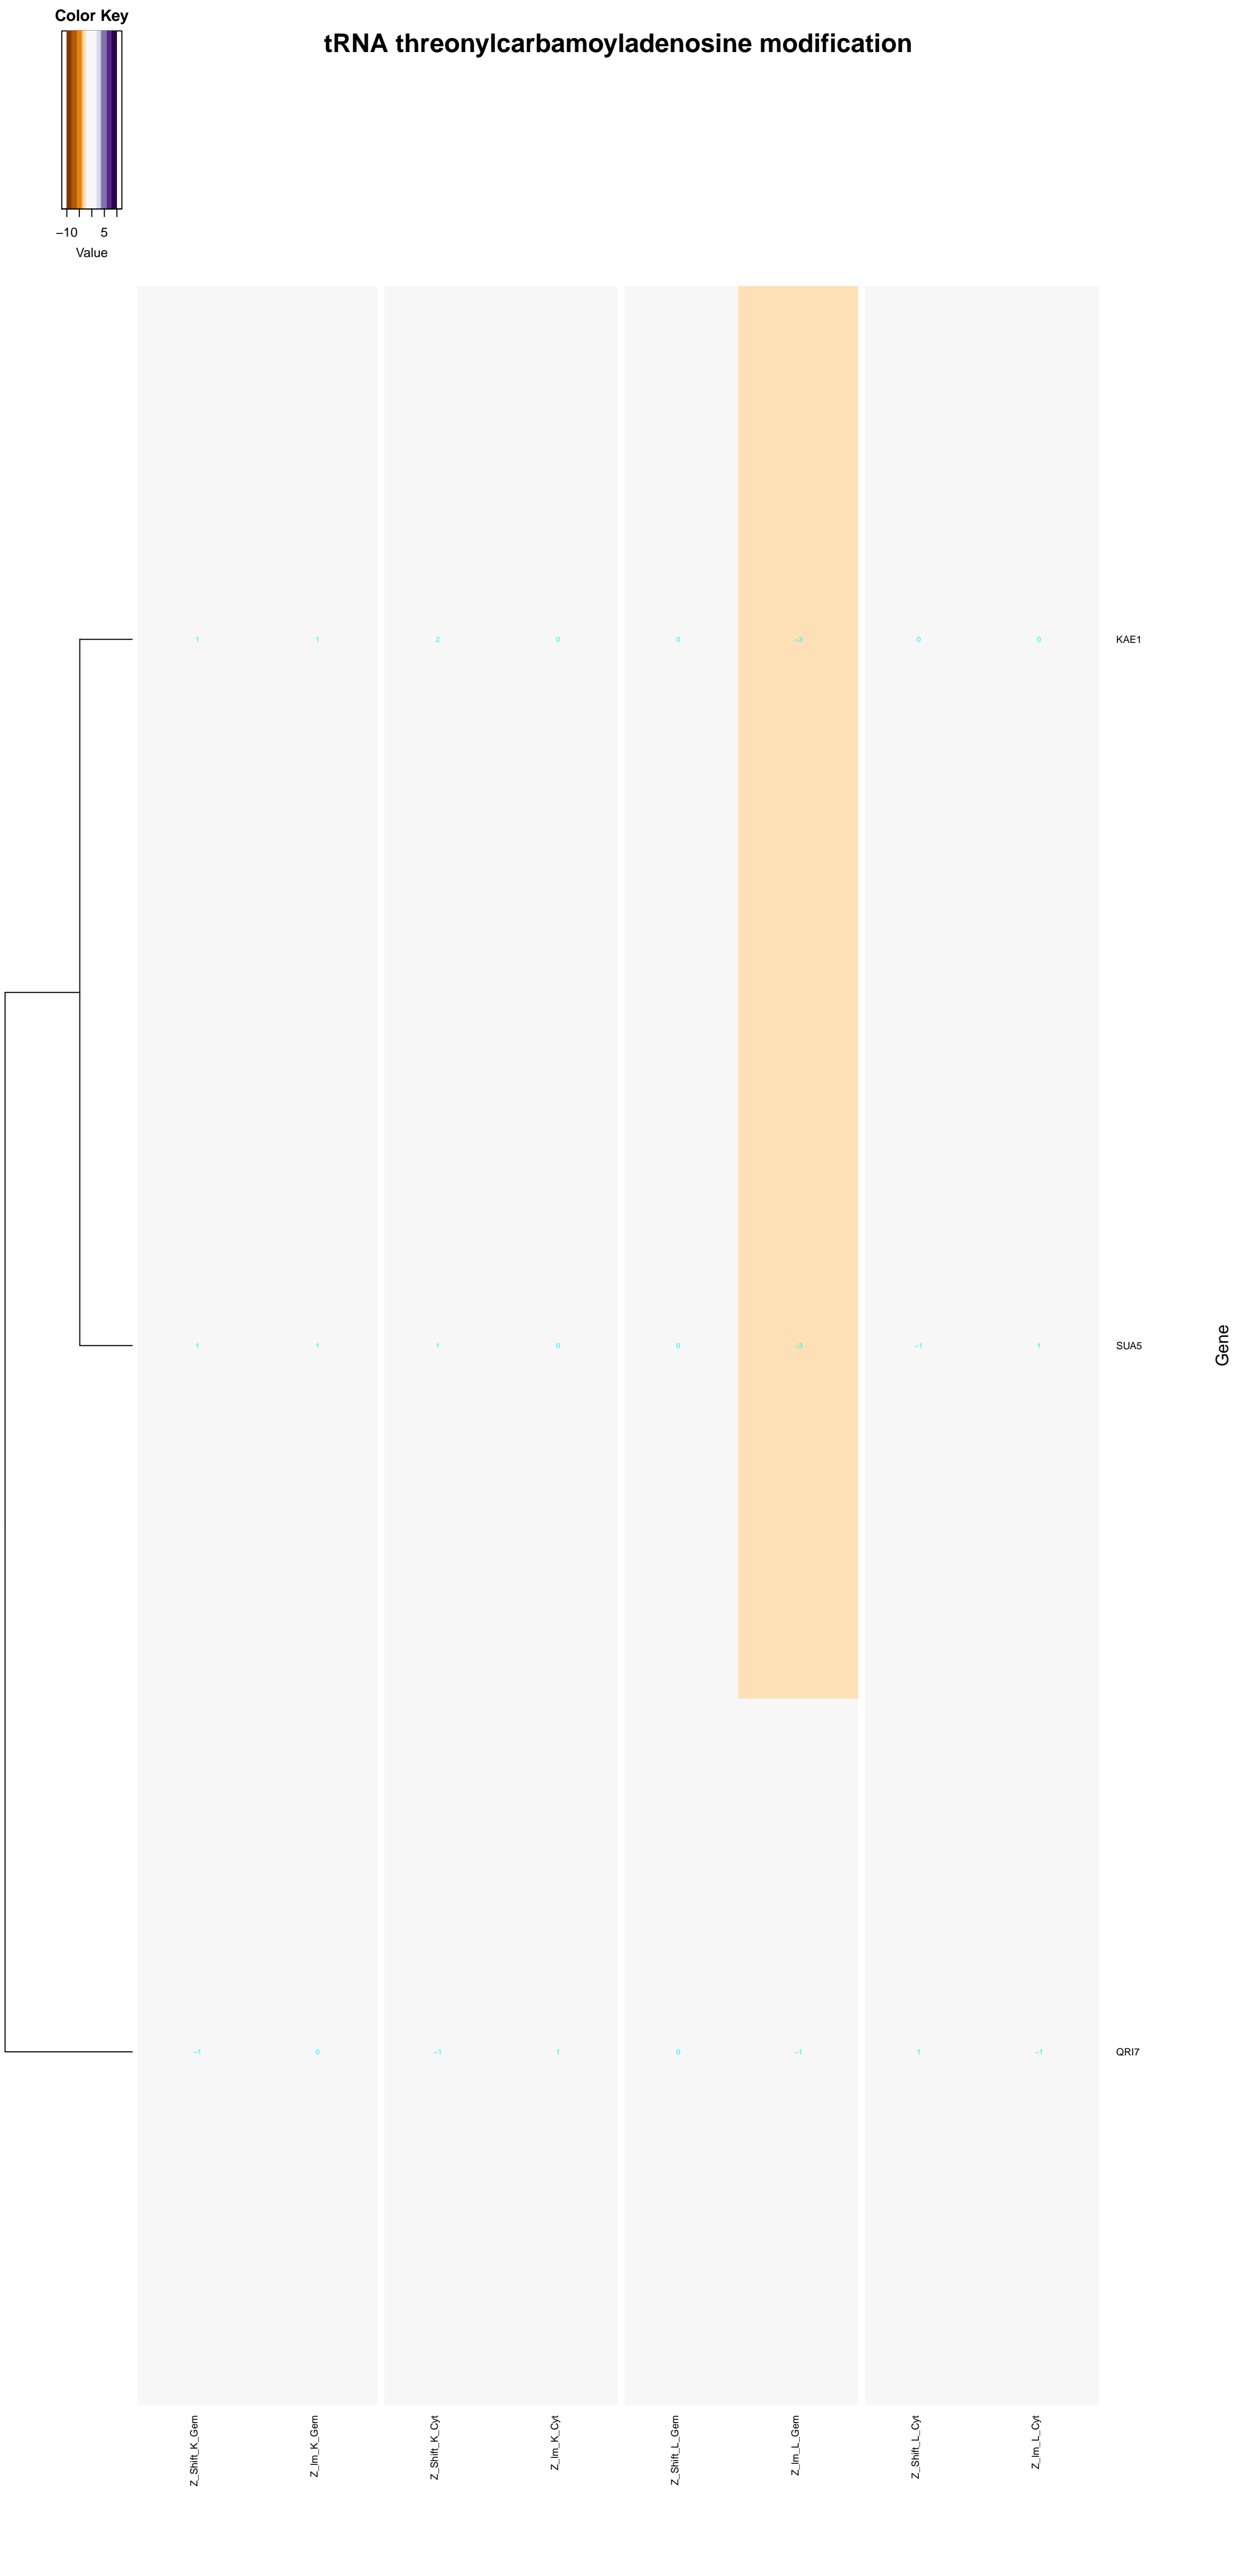



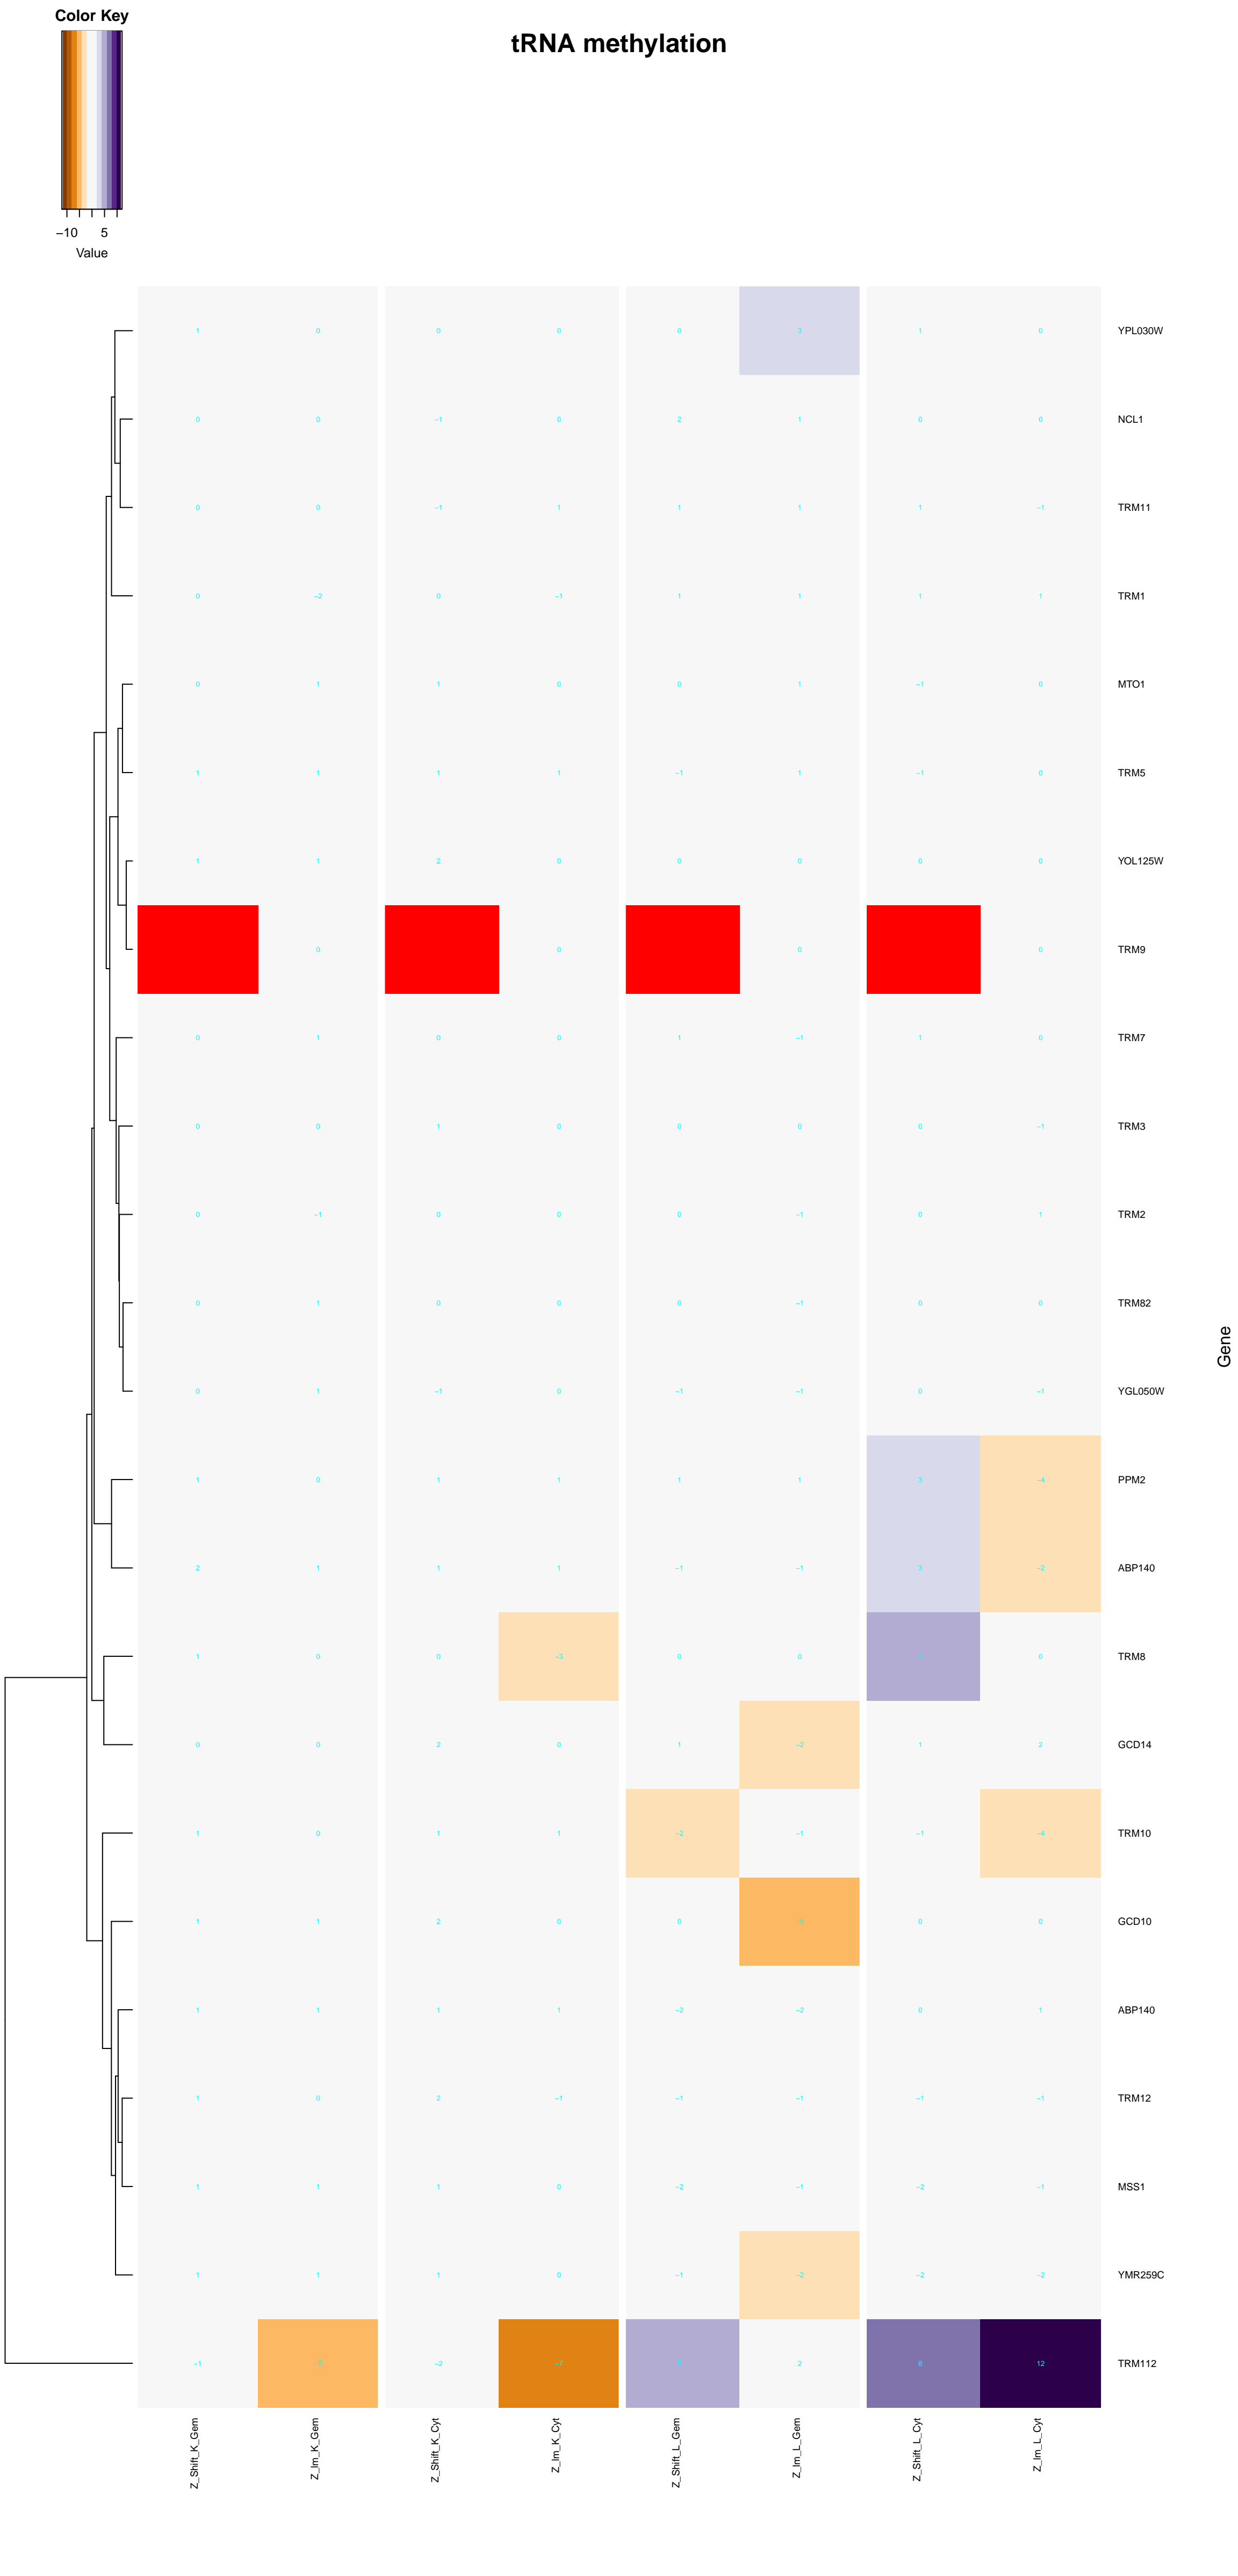

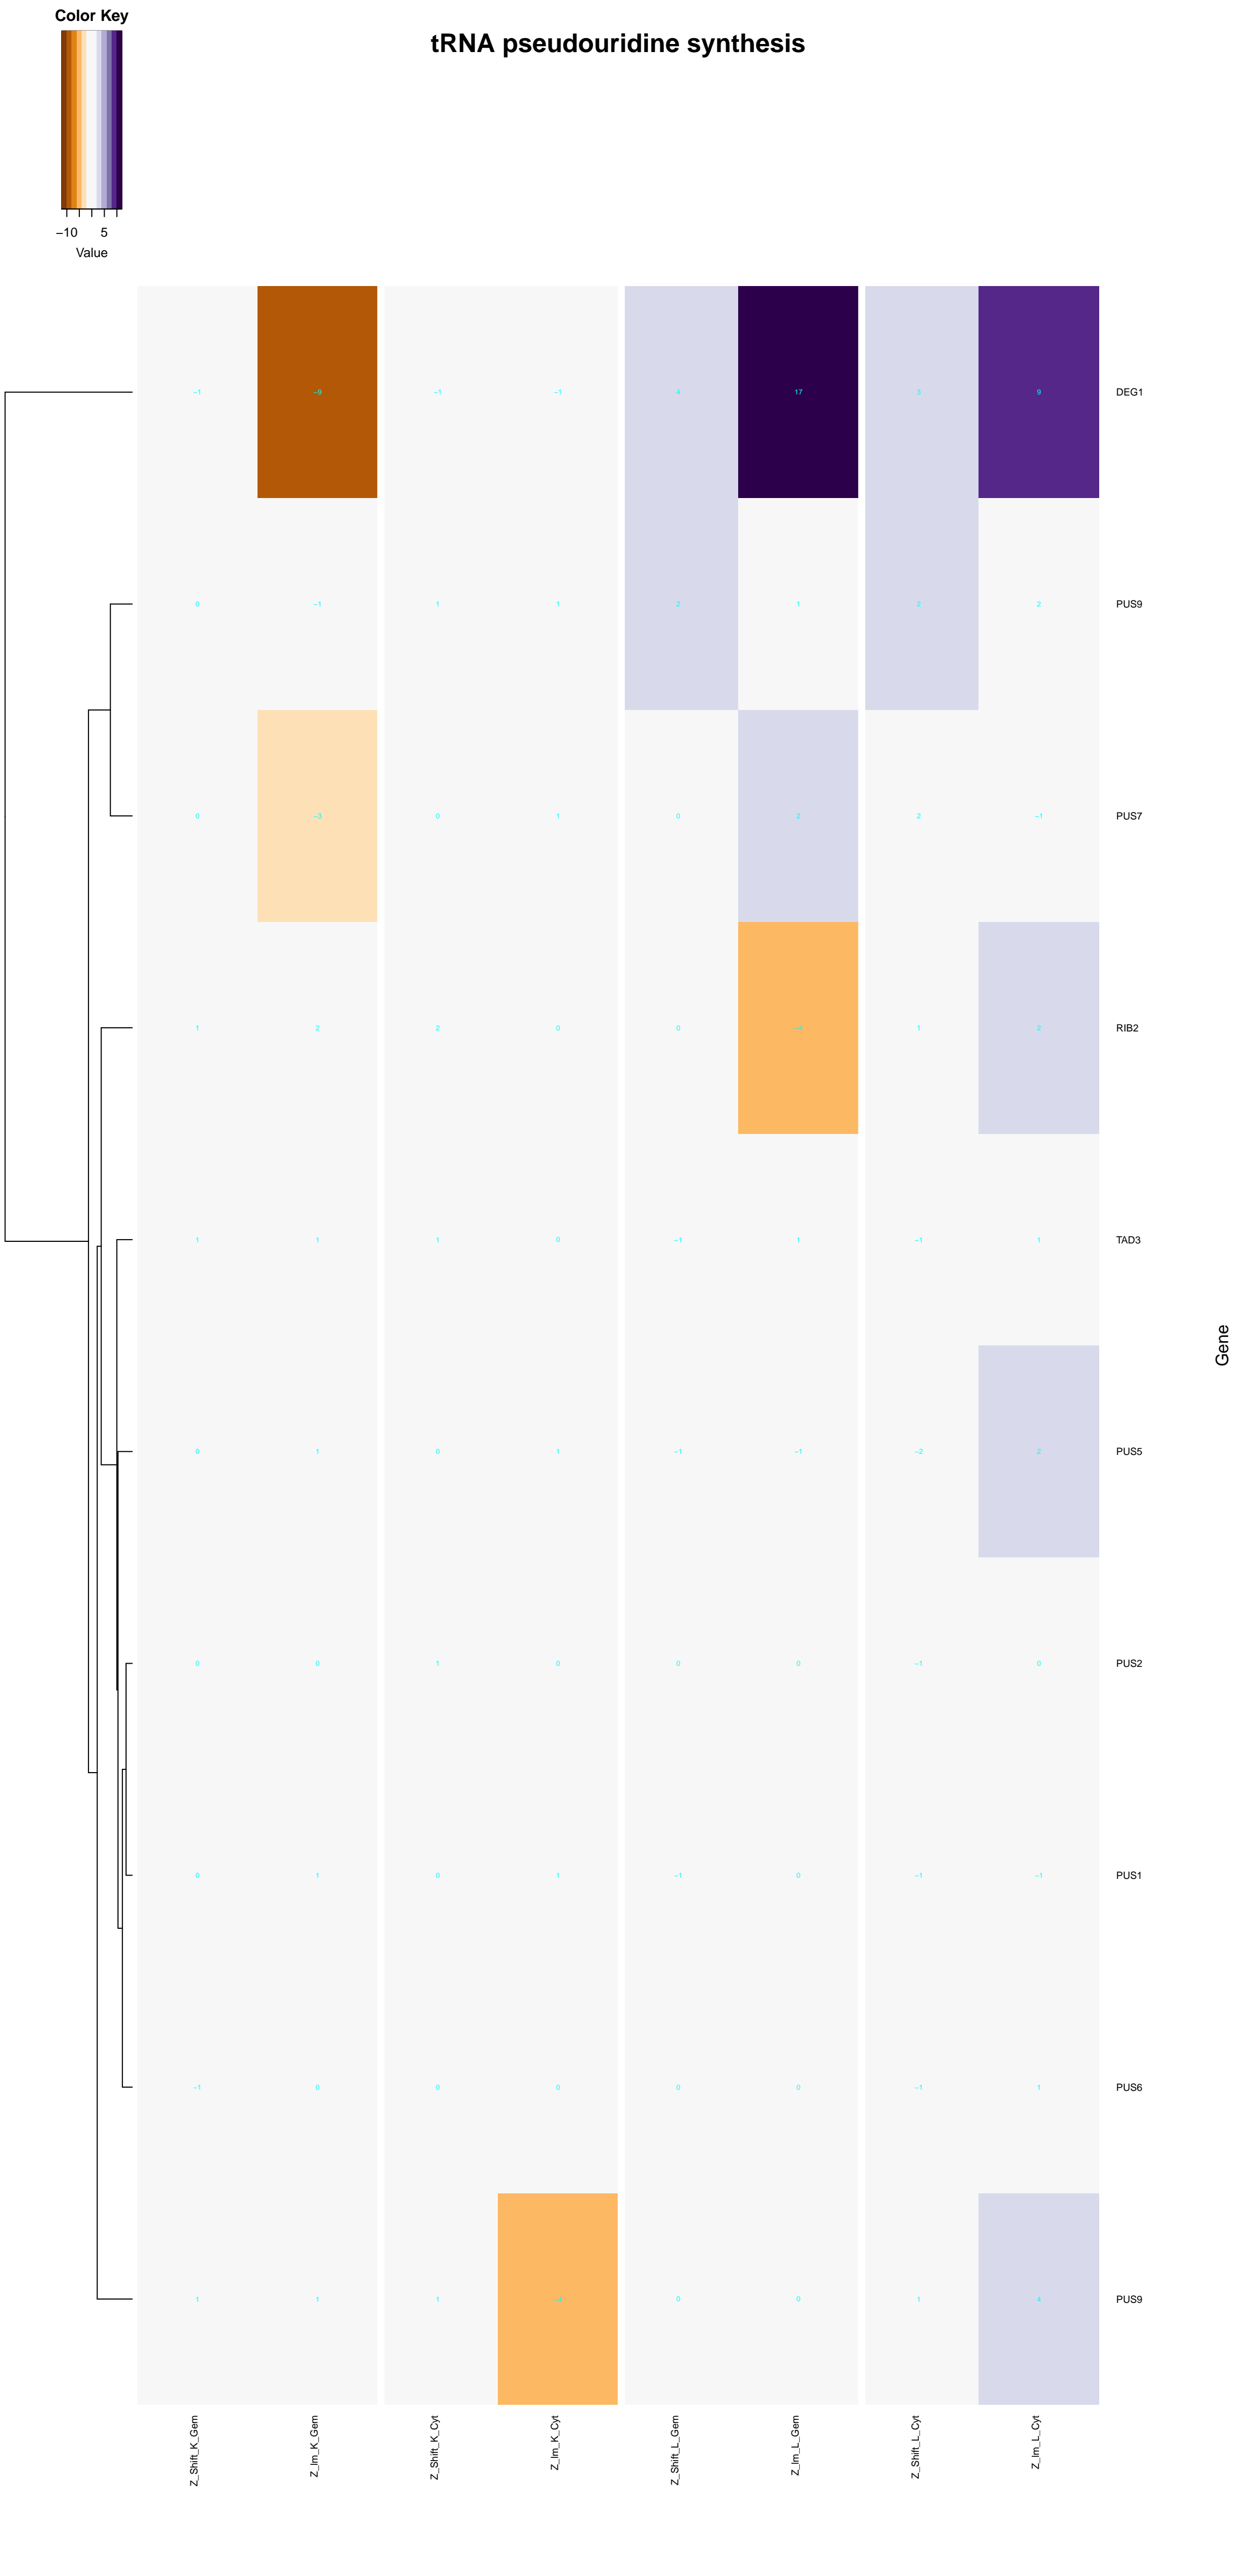

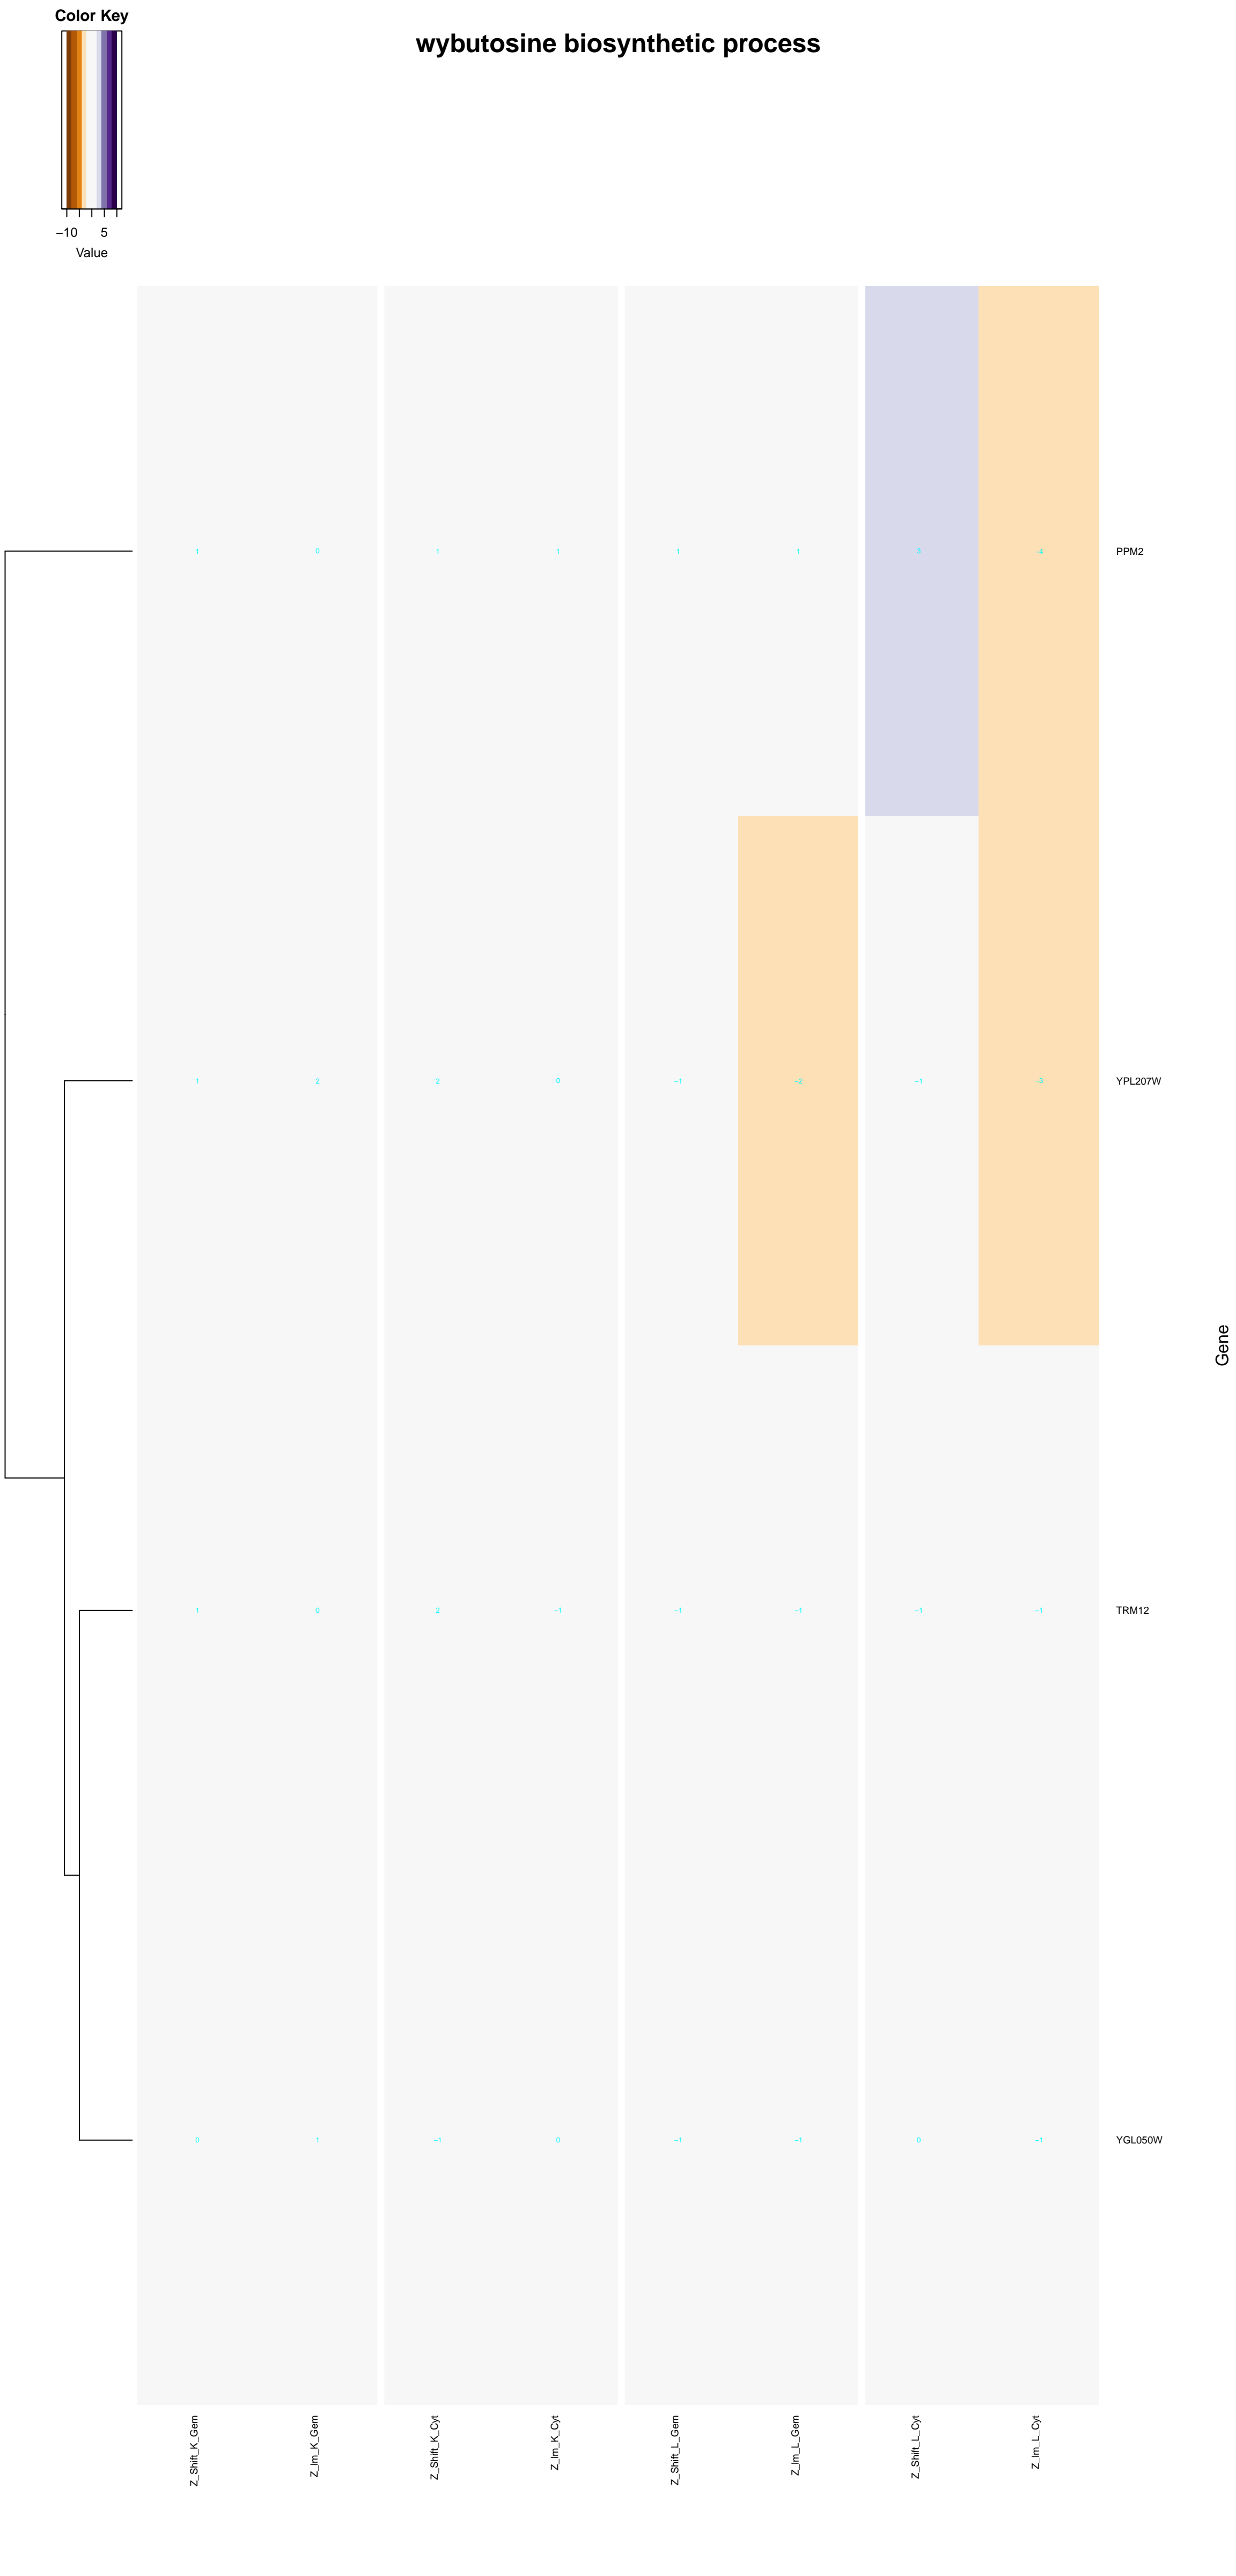

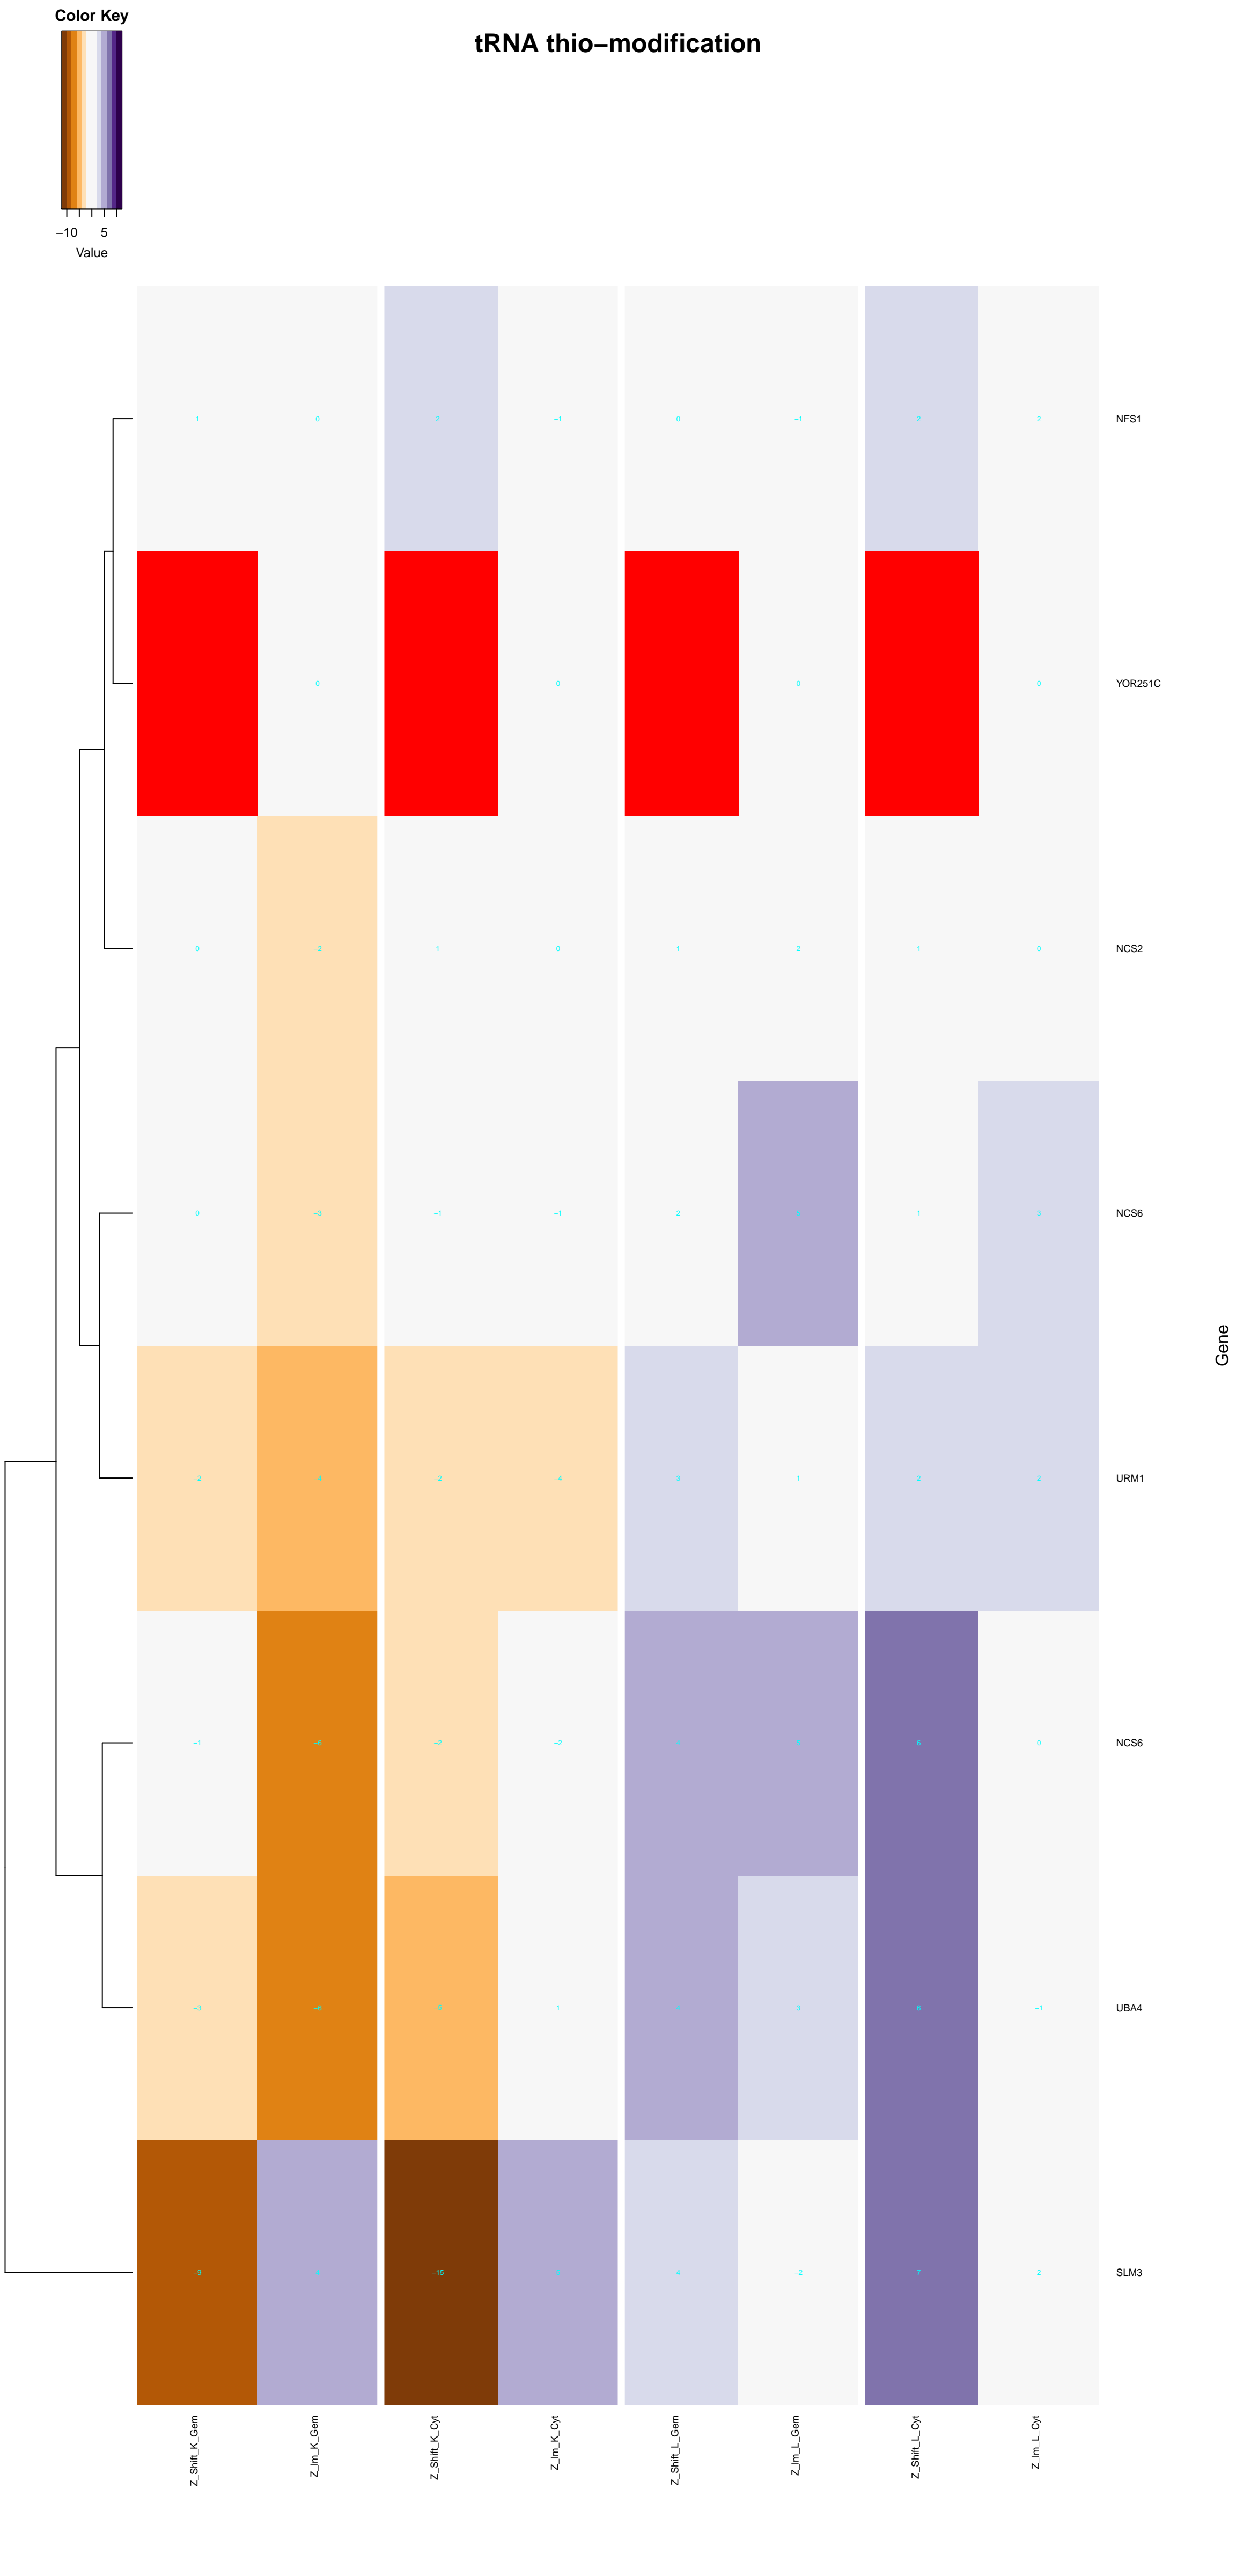

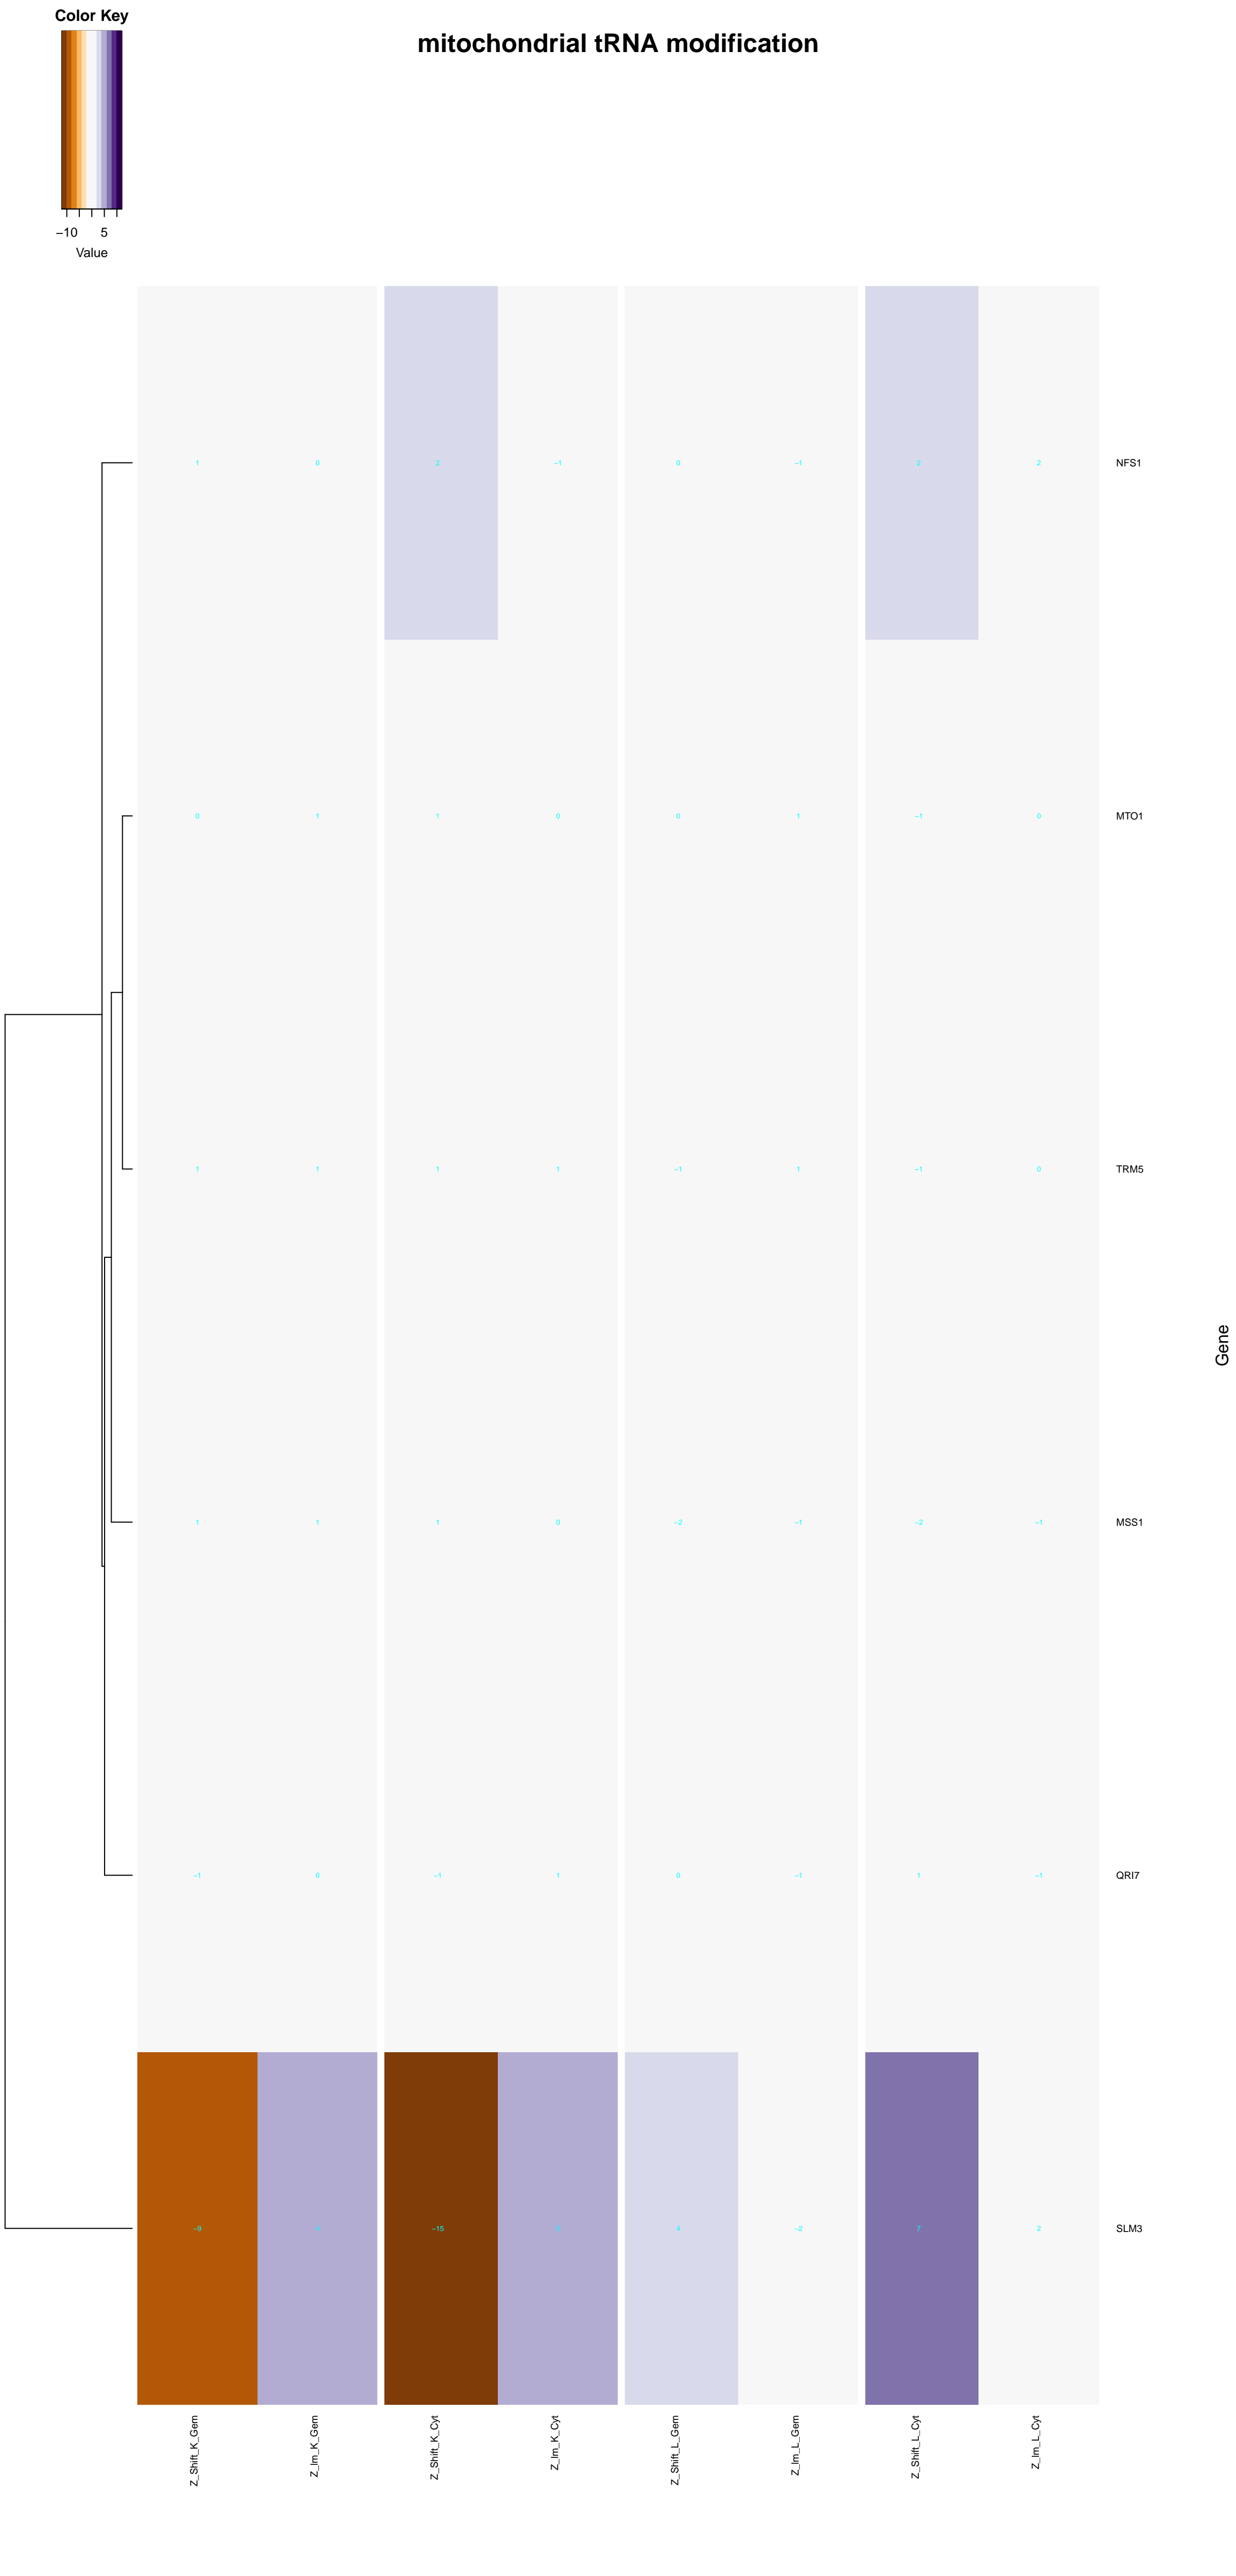

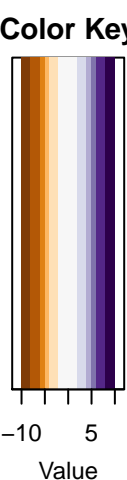

arginyl-tRNA aminoacylation

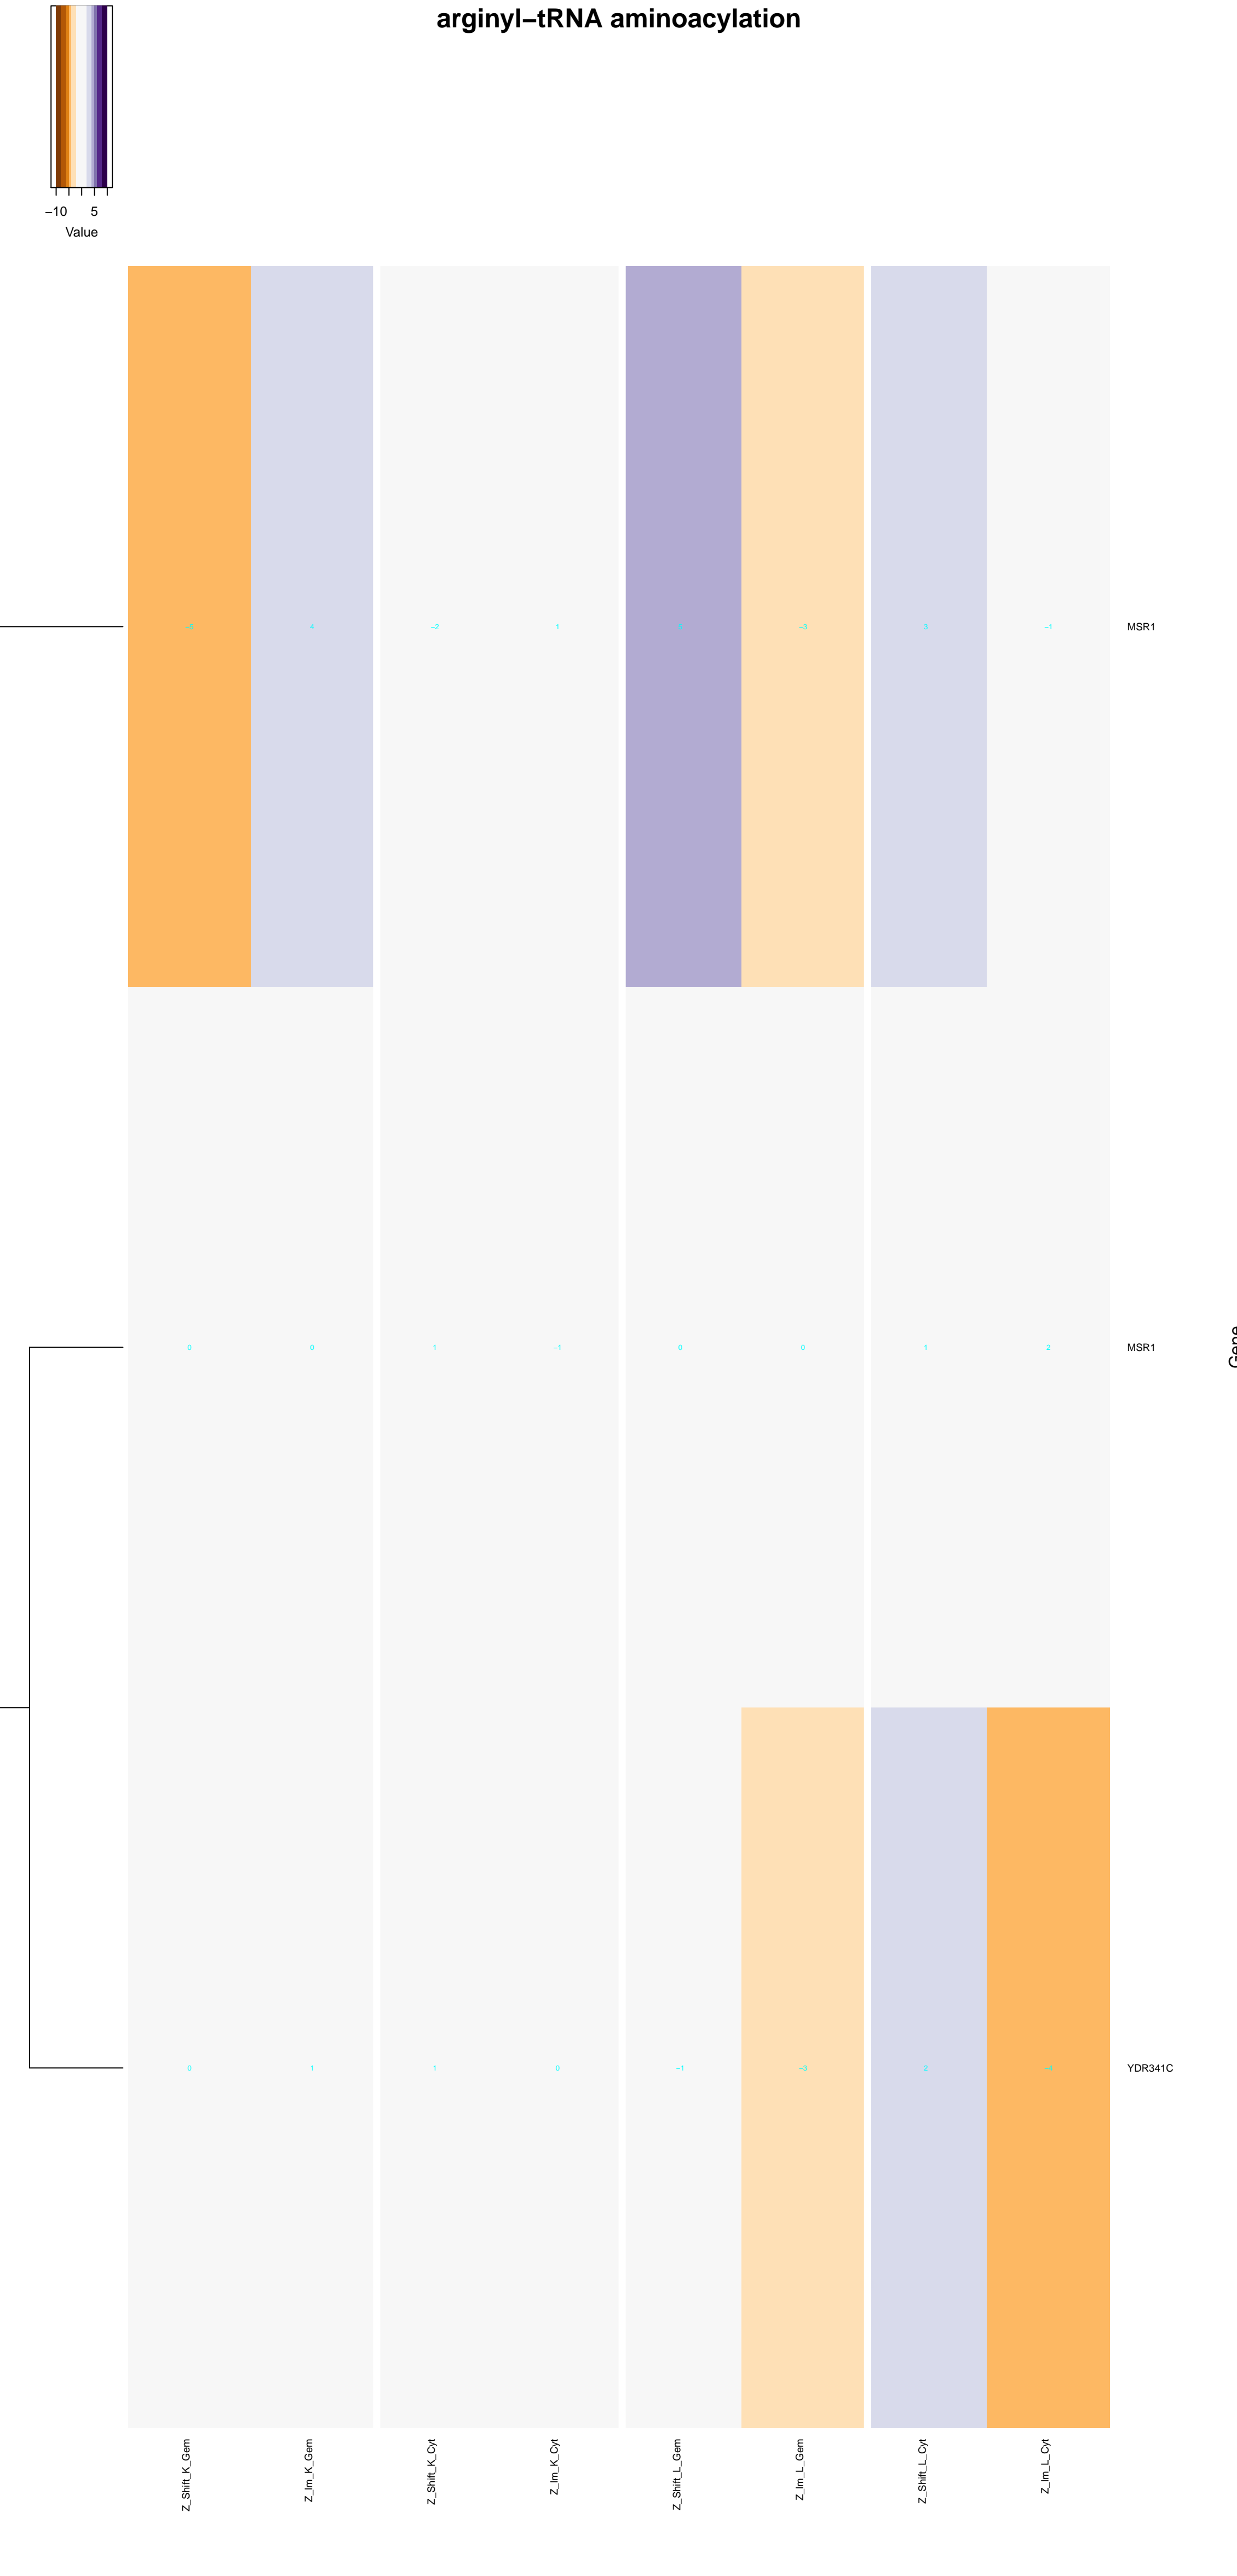

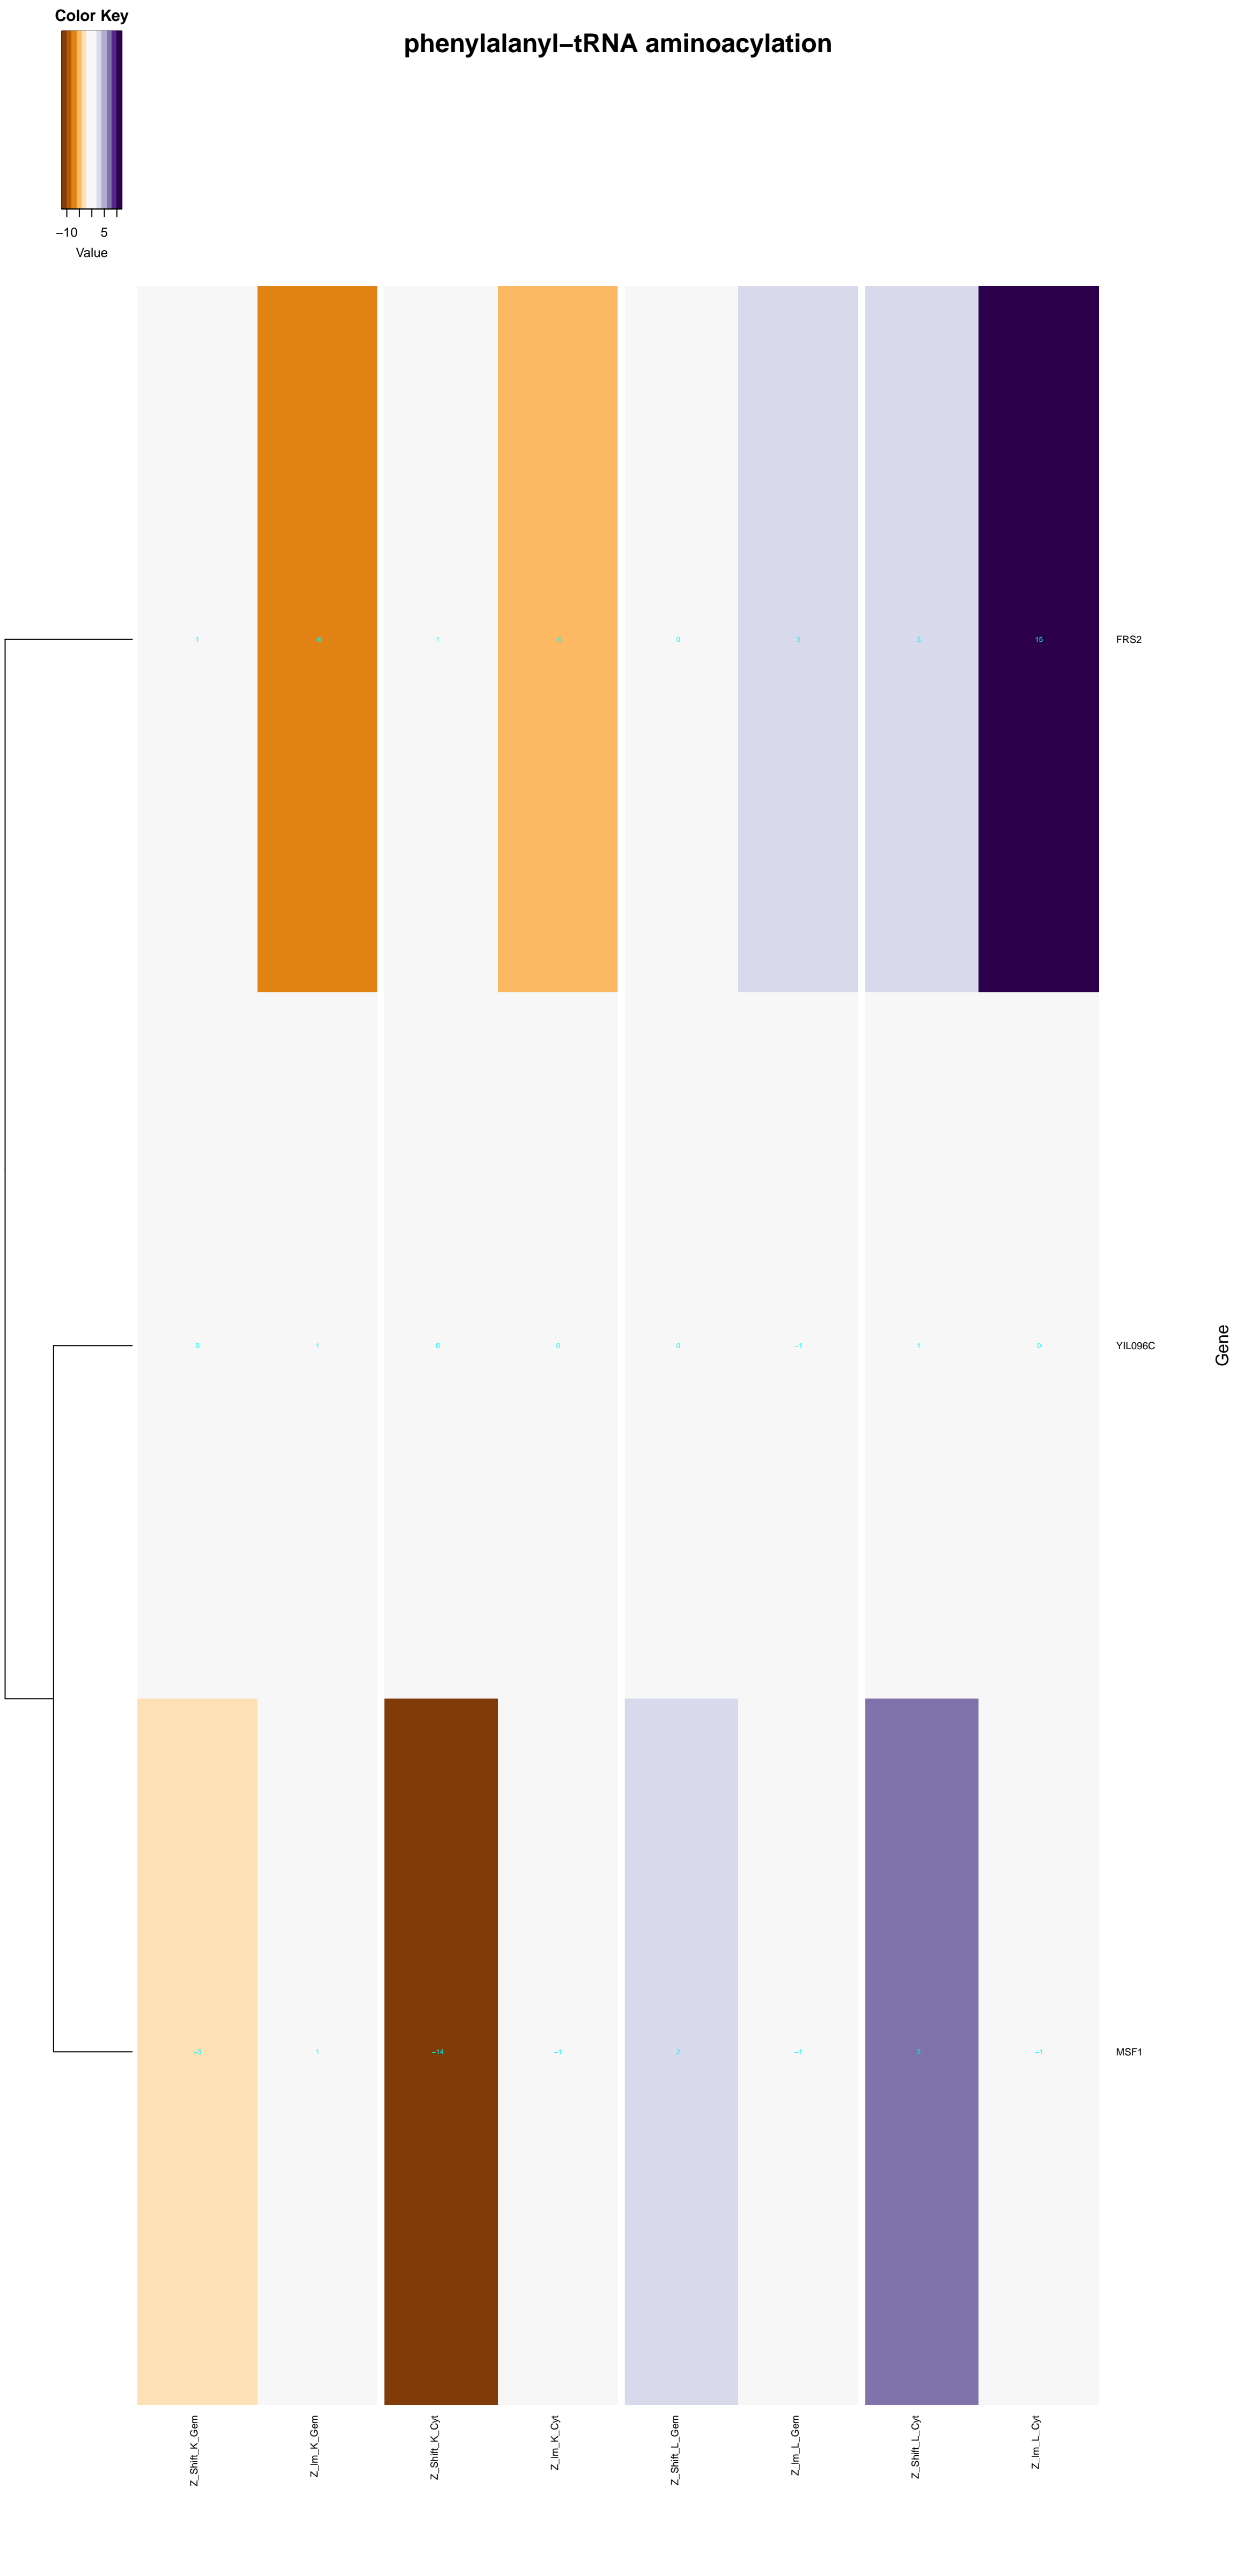

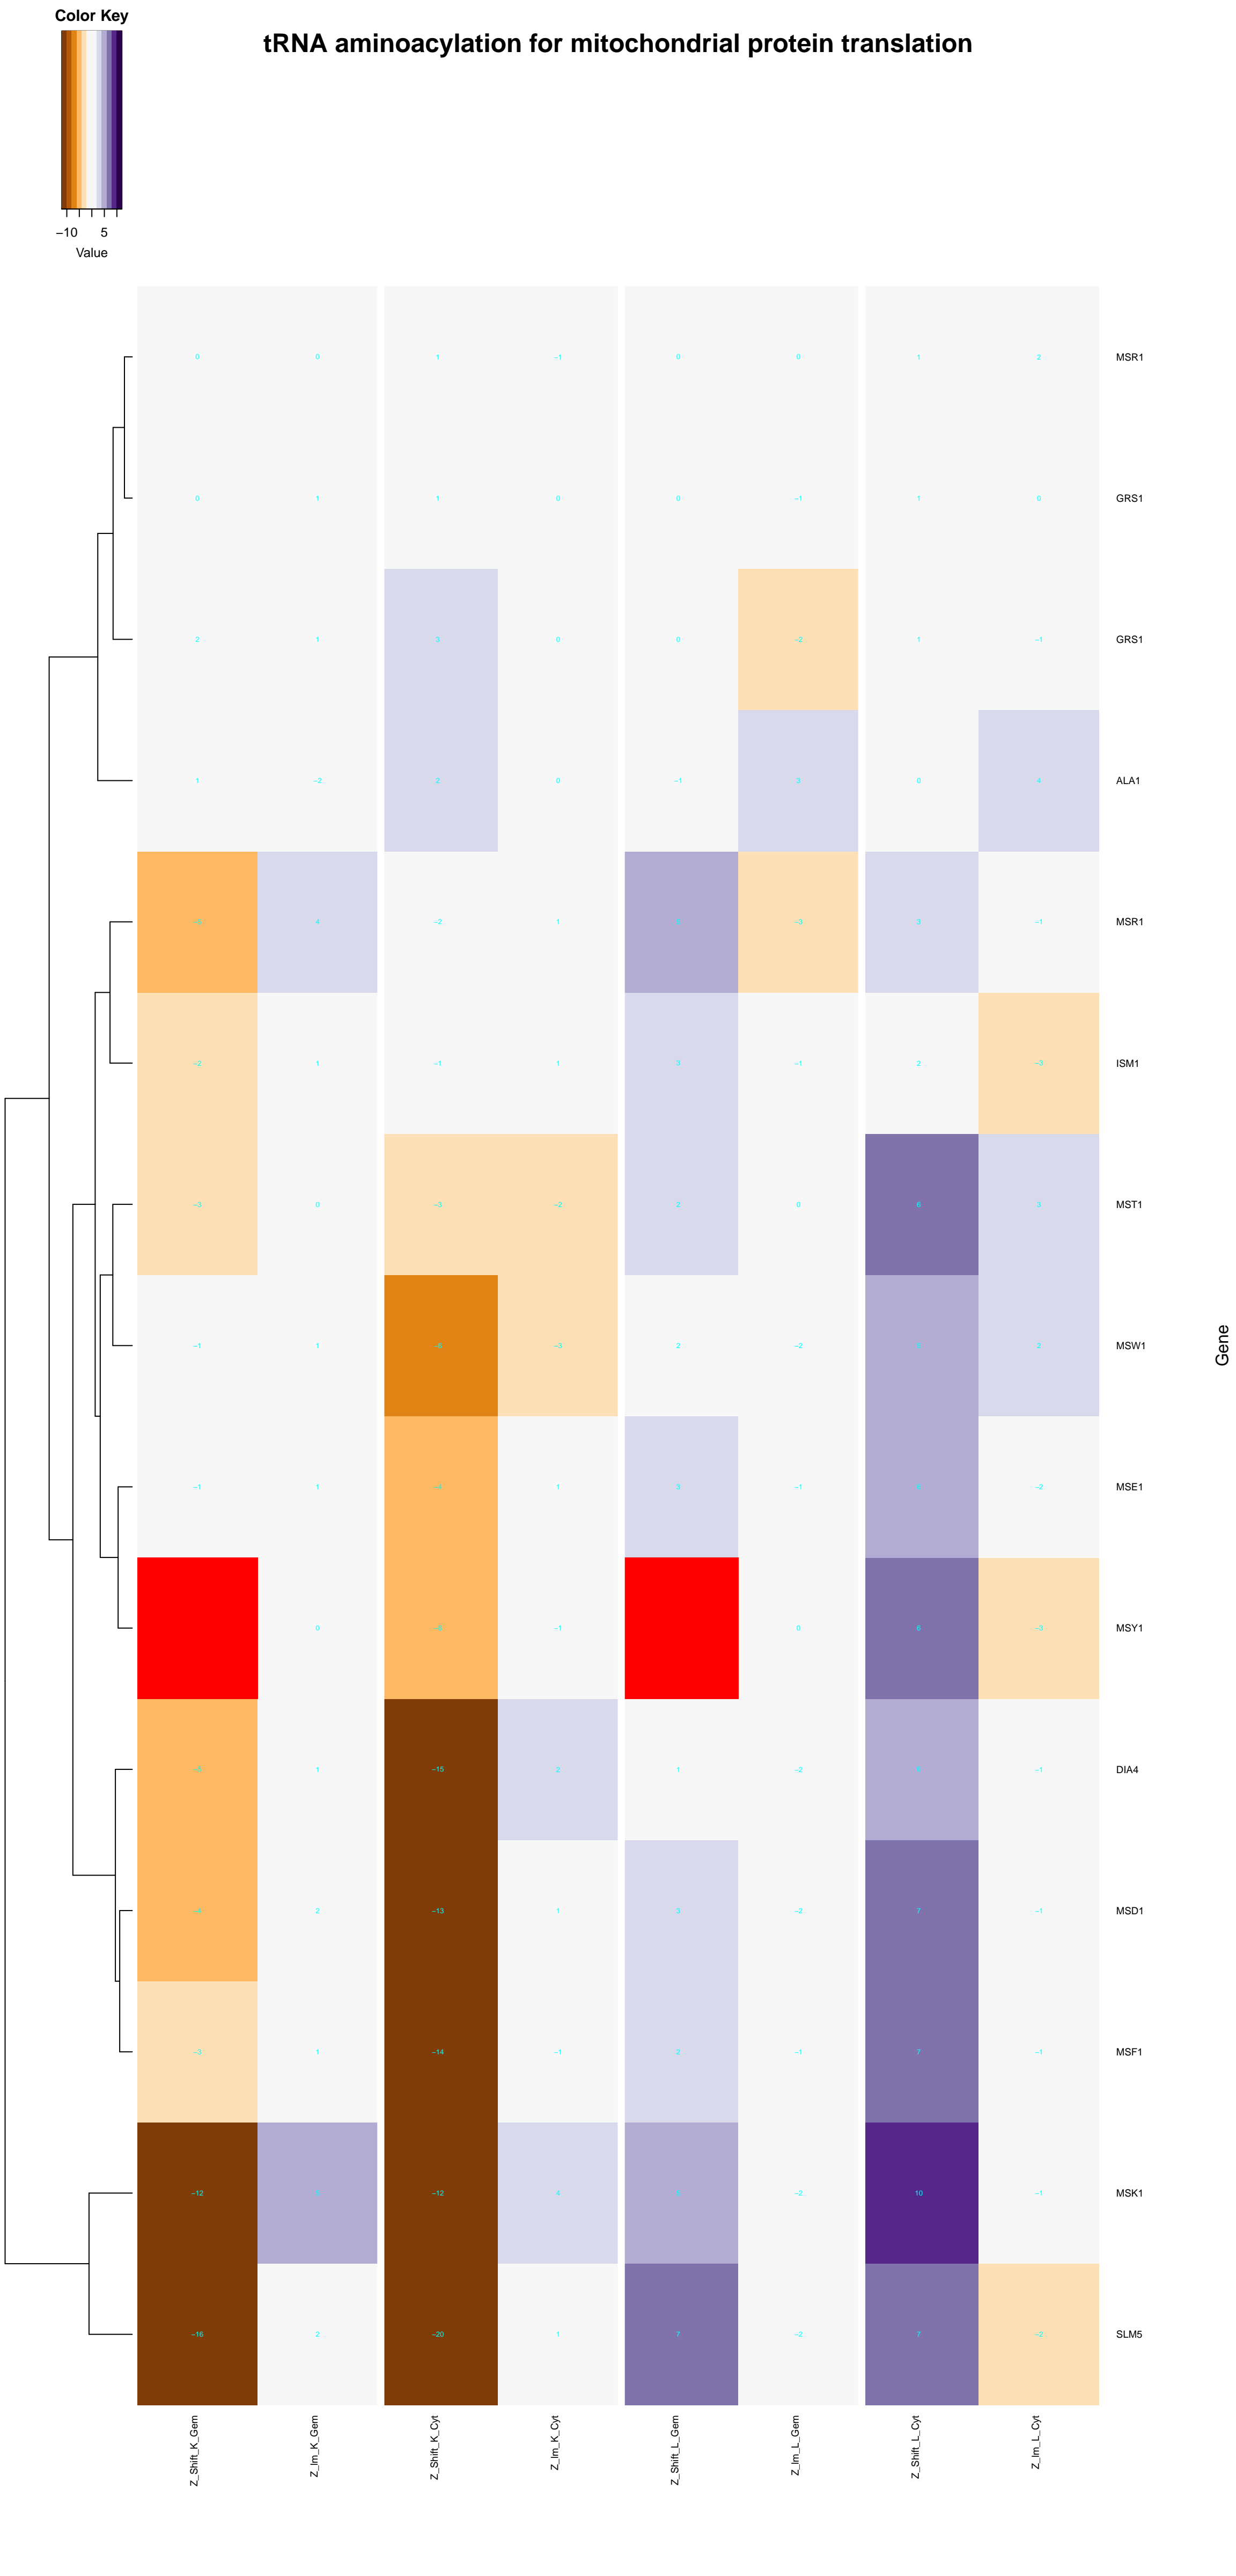



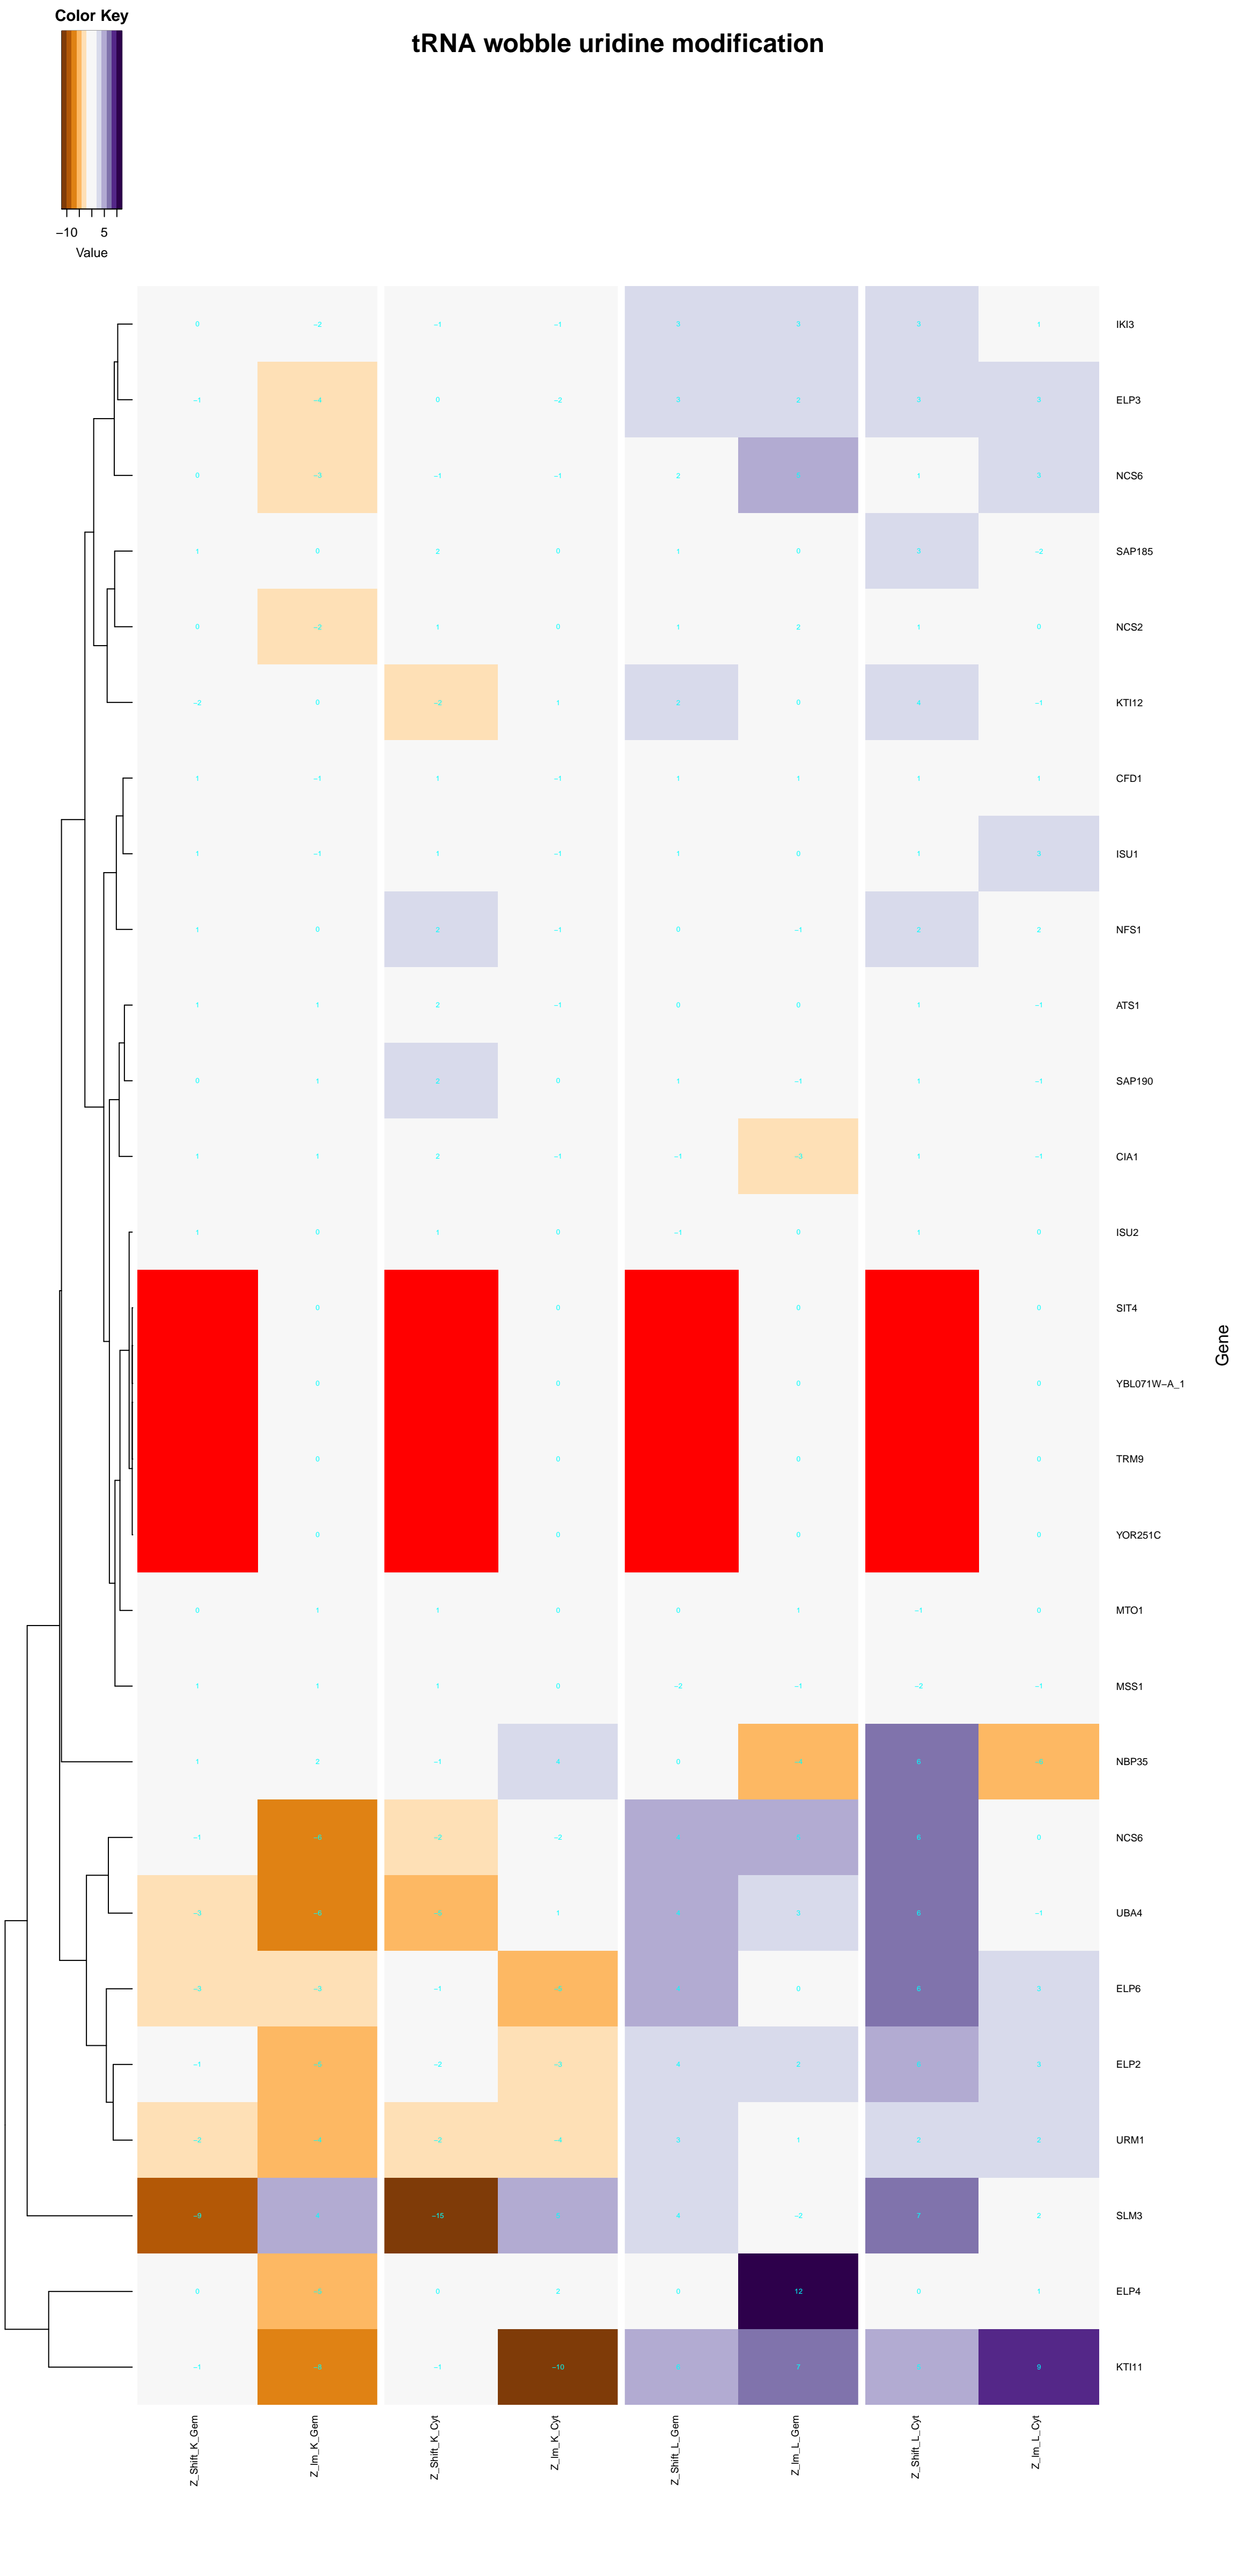

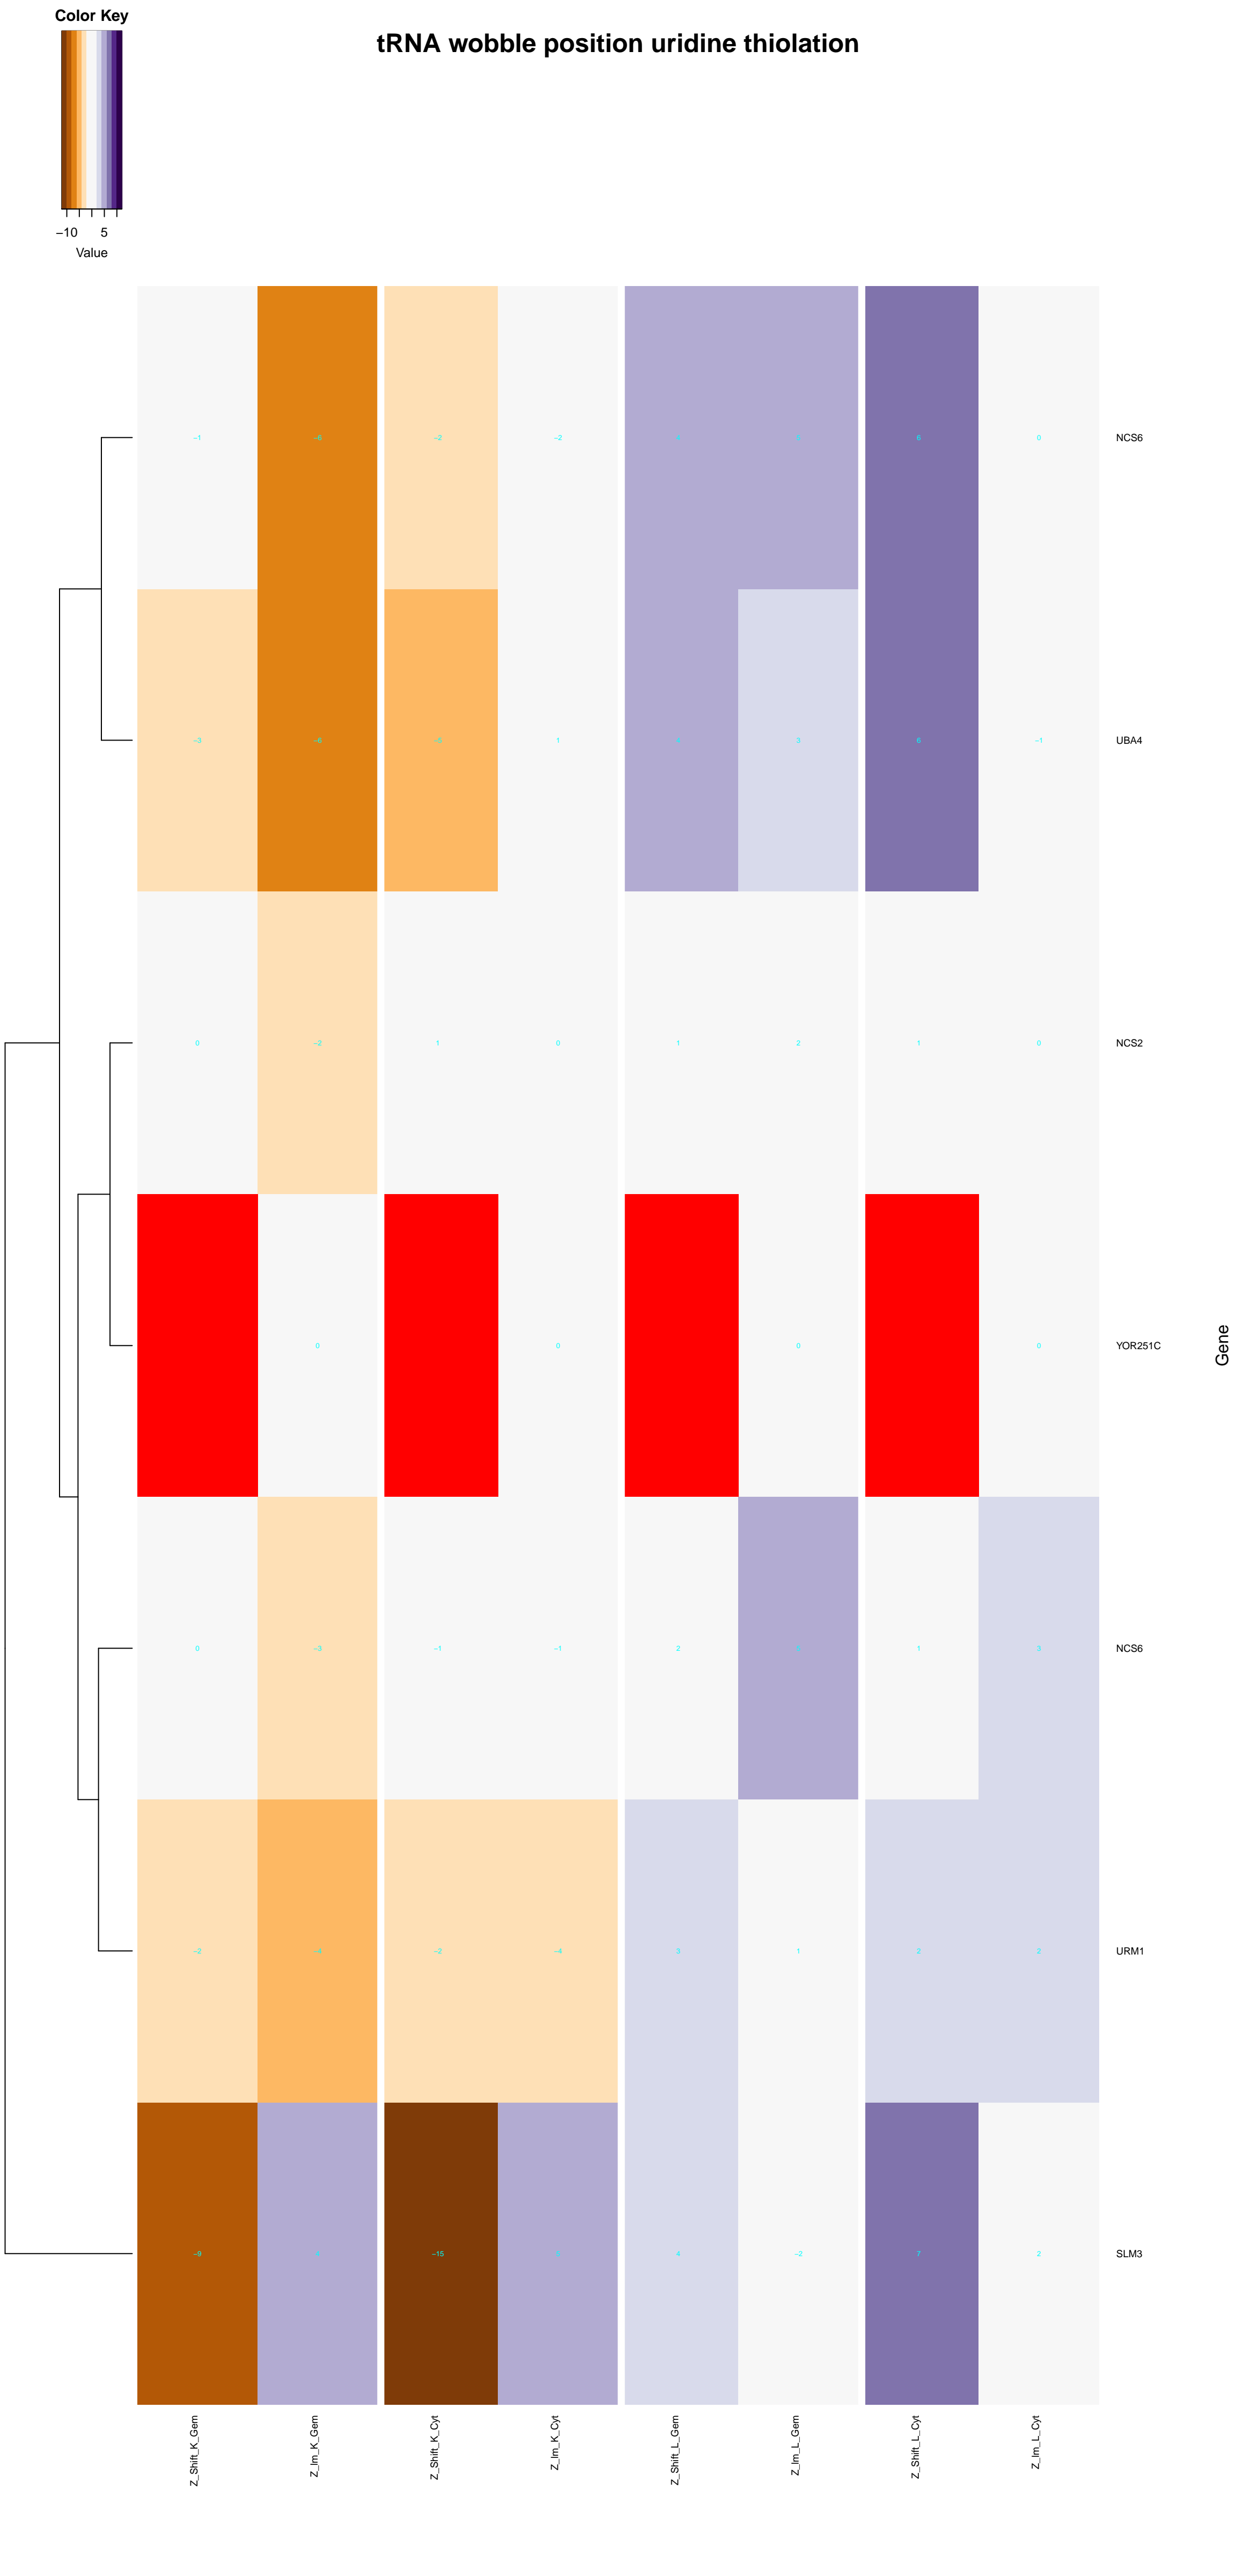

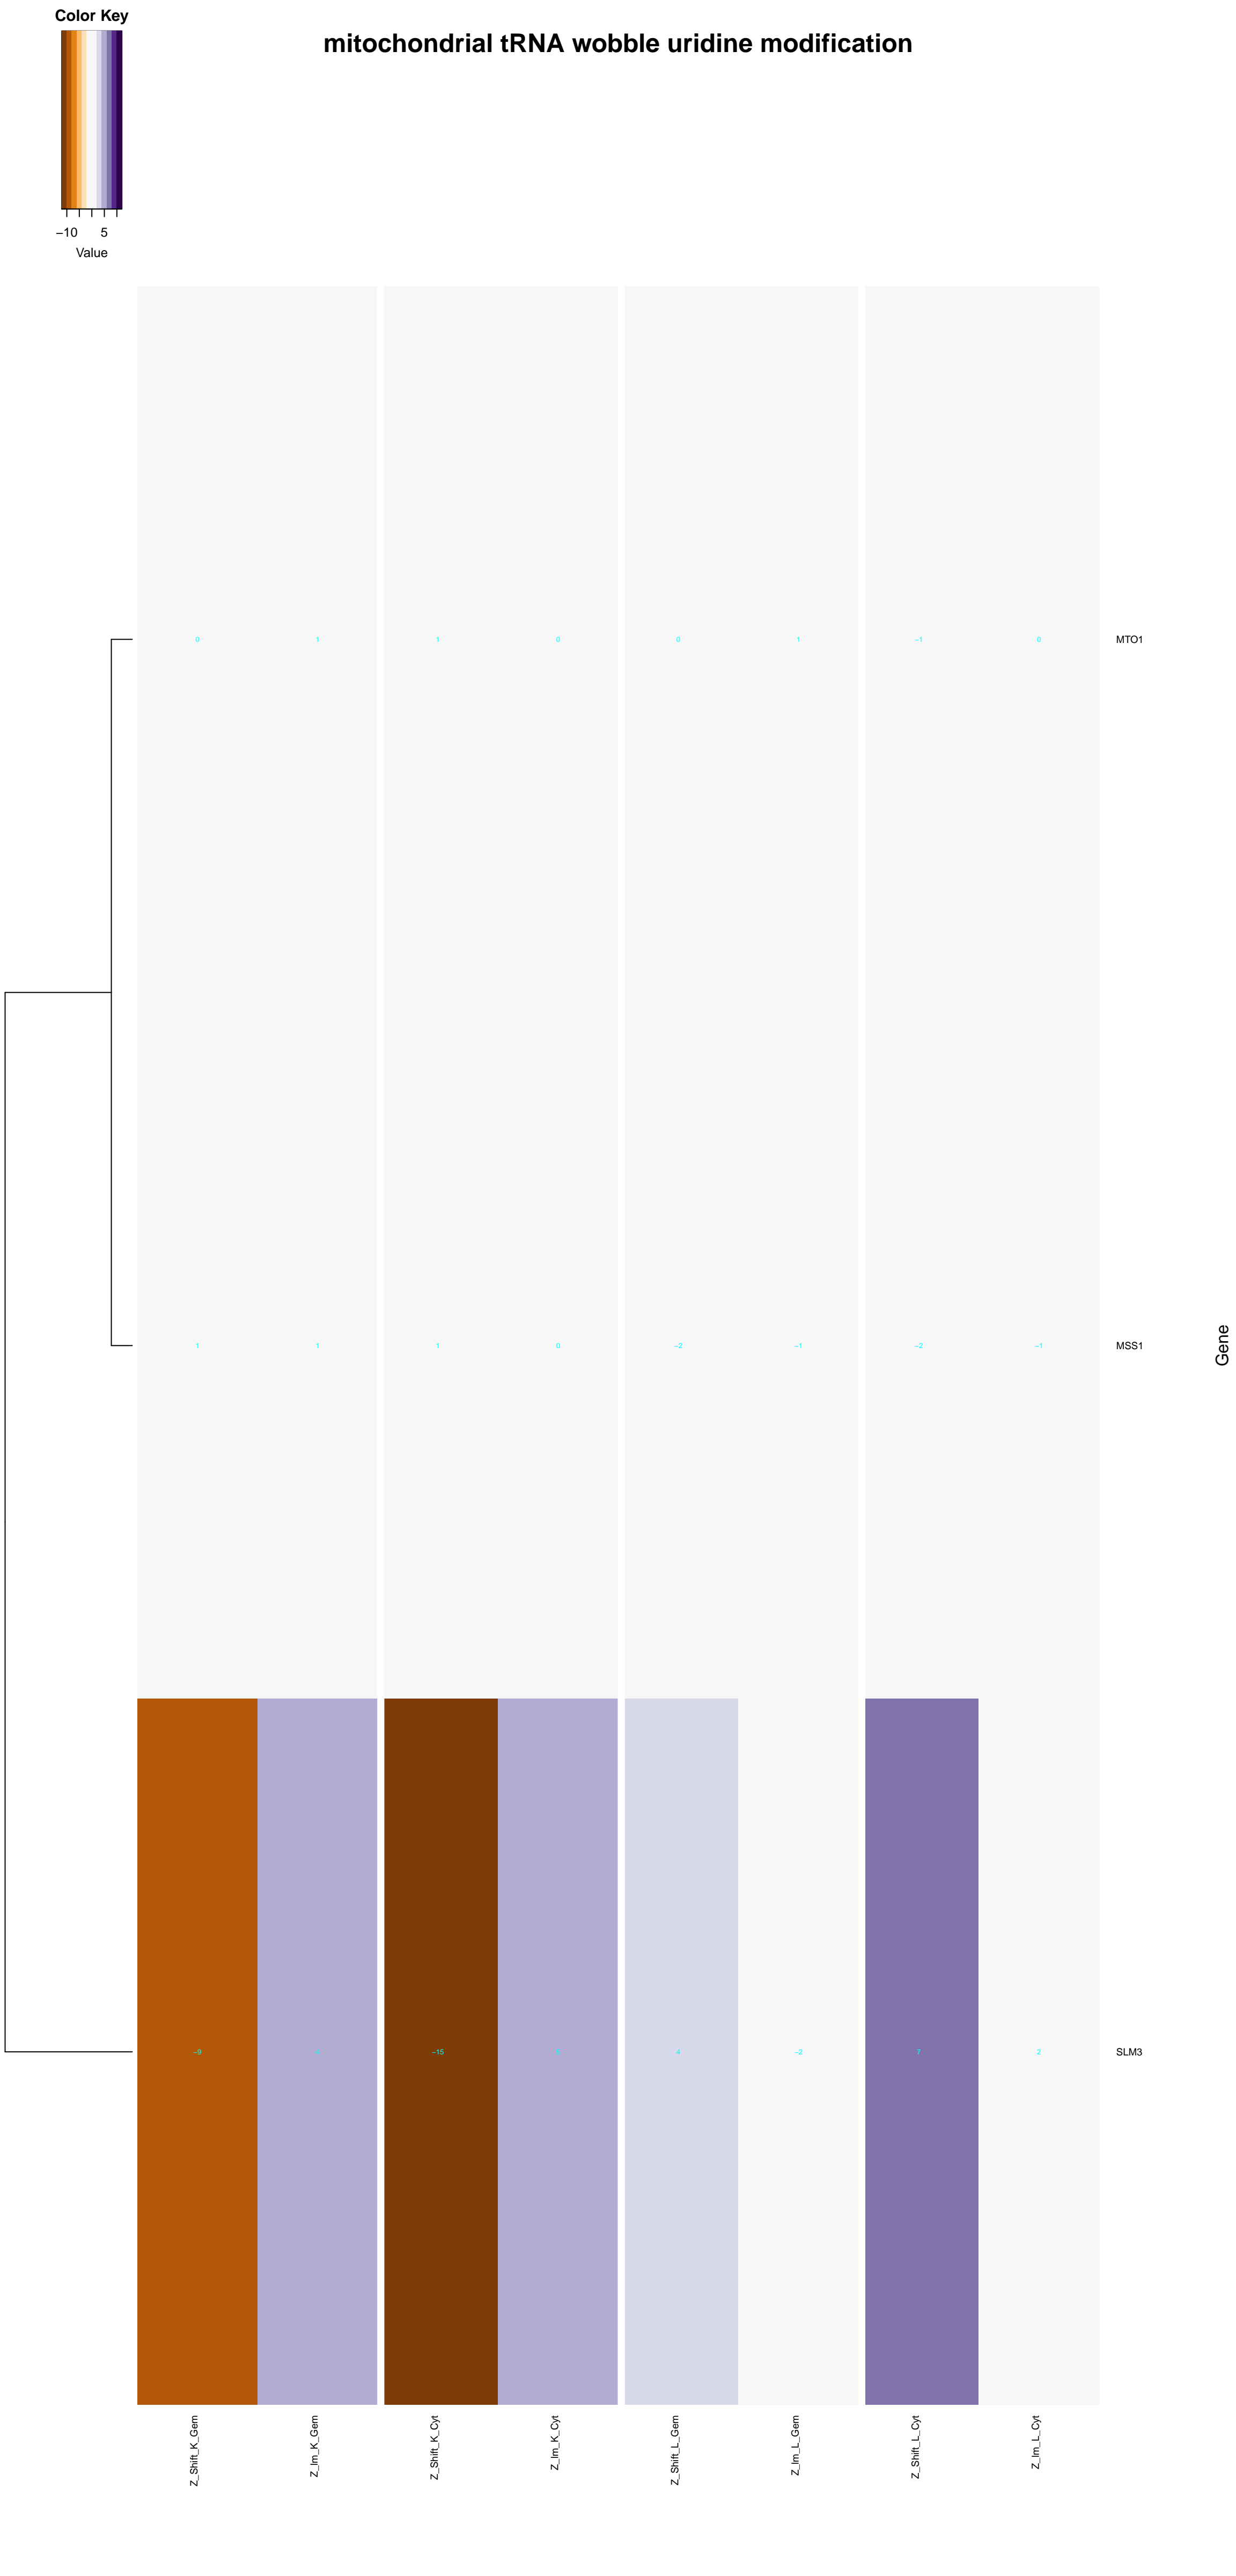

Supplement: s1 [file s1]

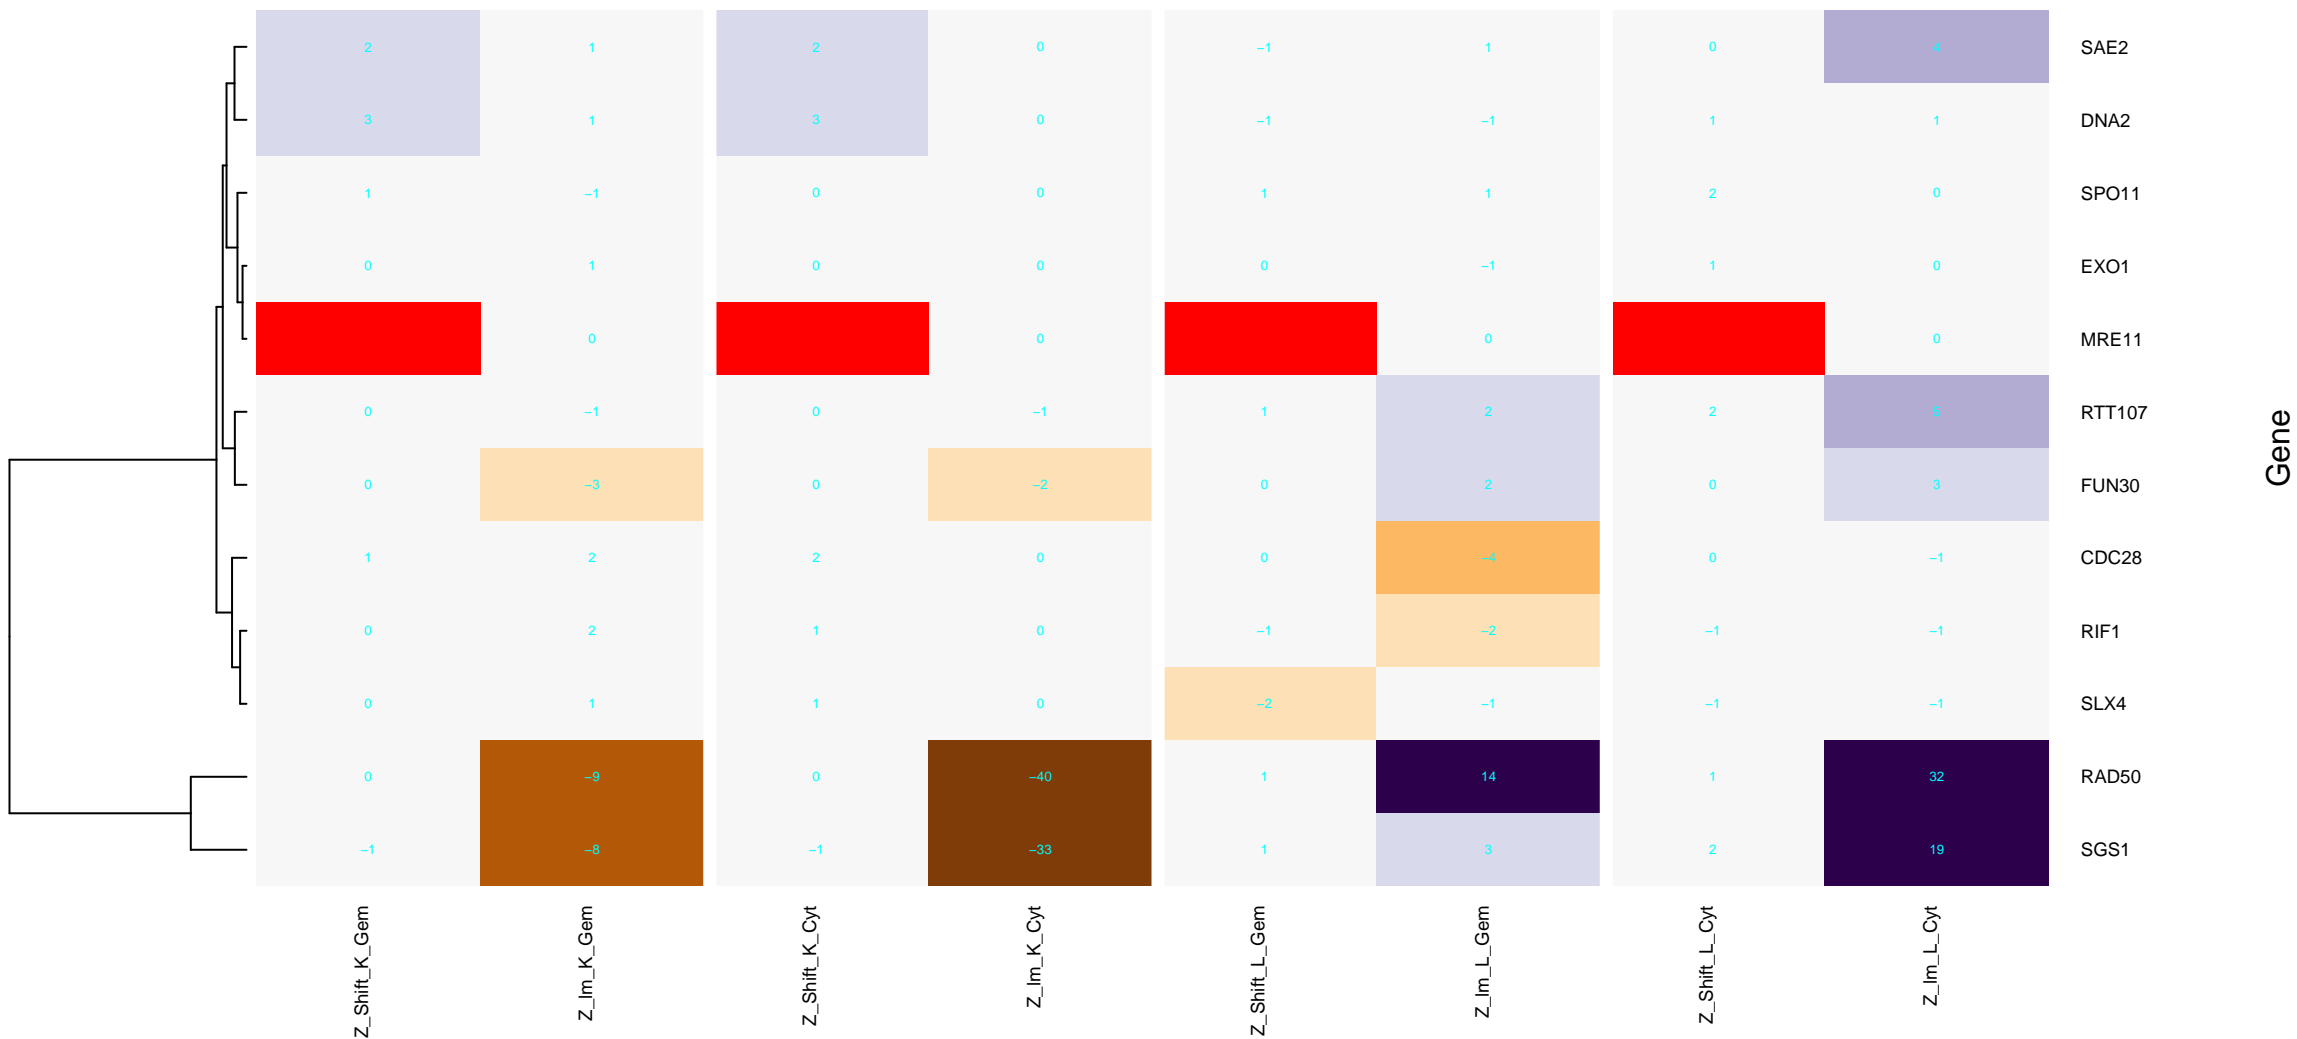

Supplement: s1 [file s1]

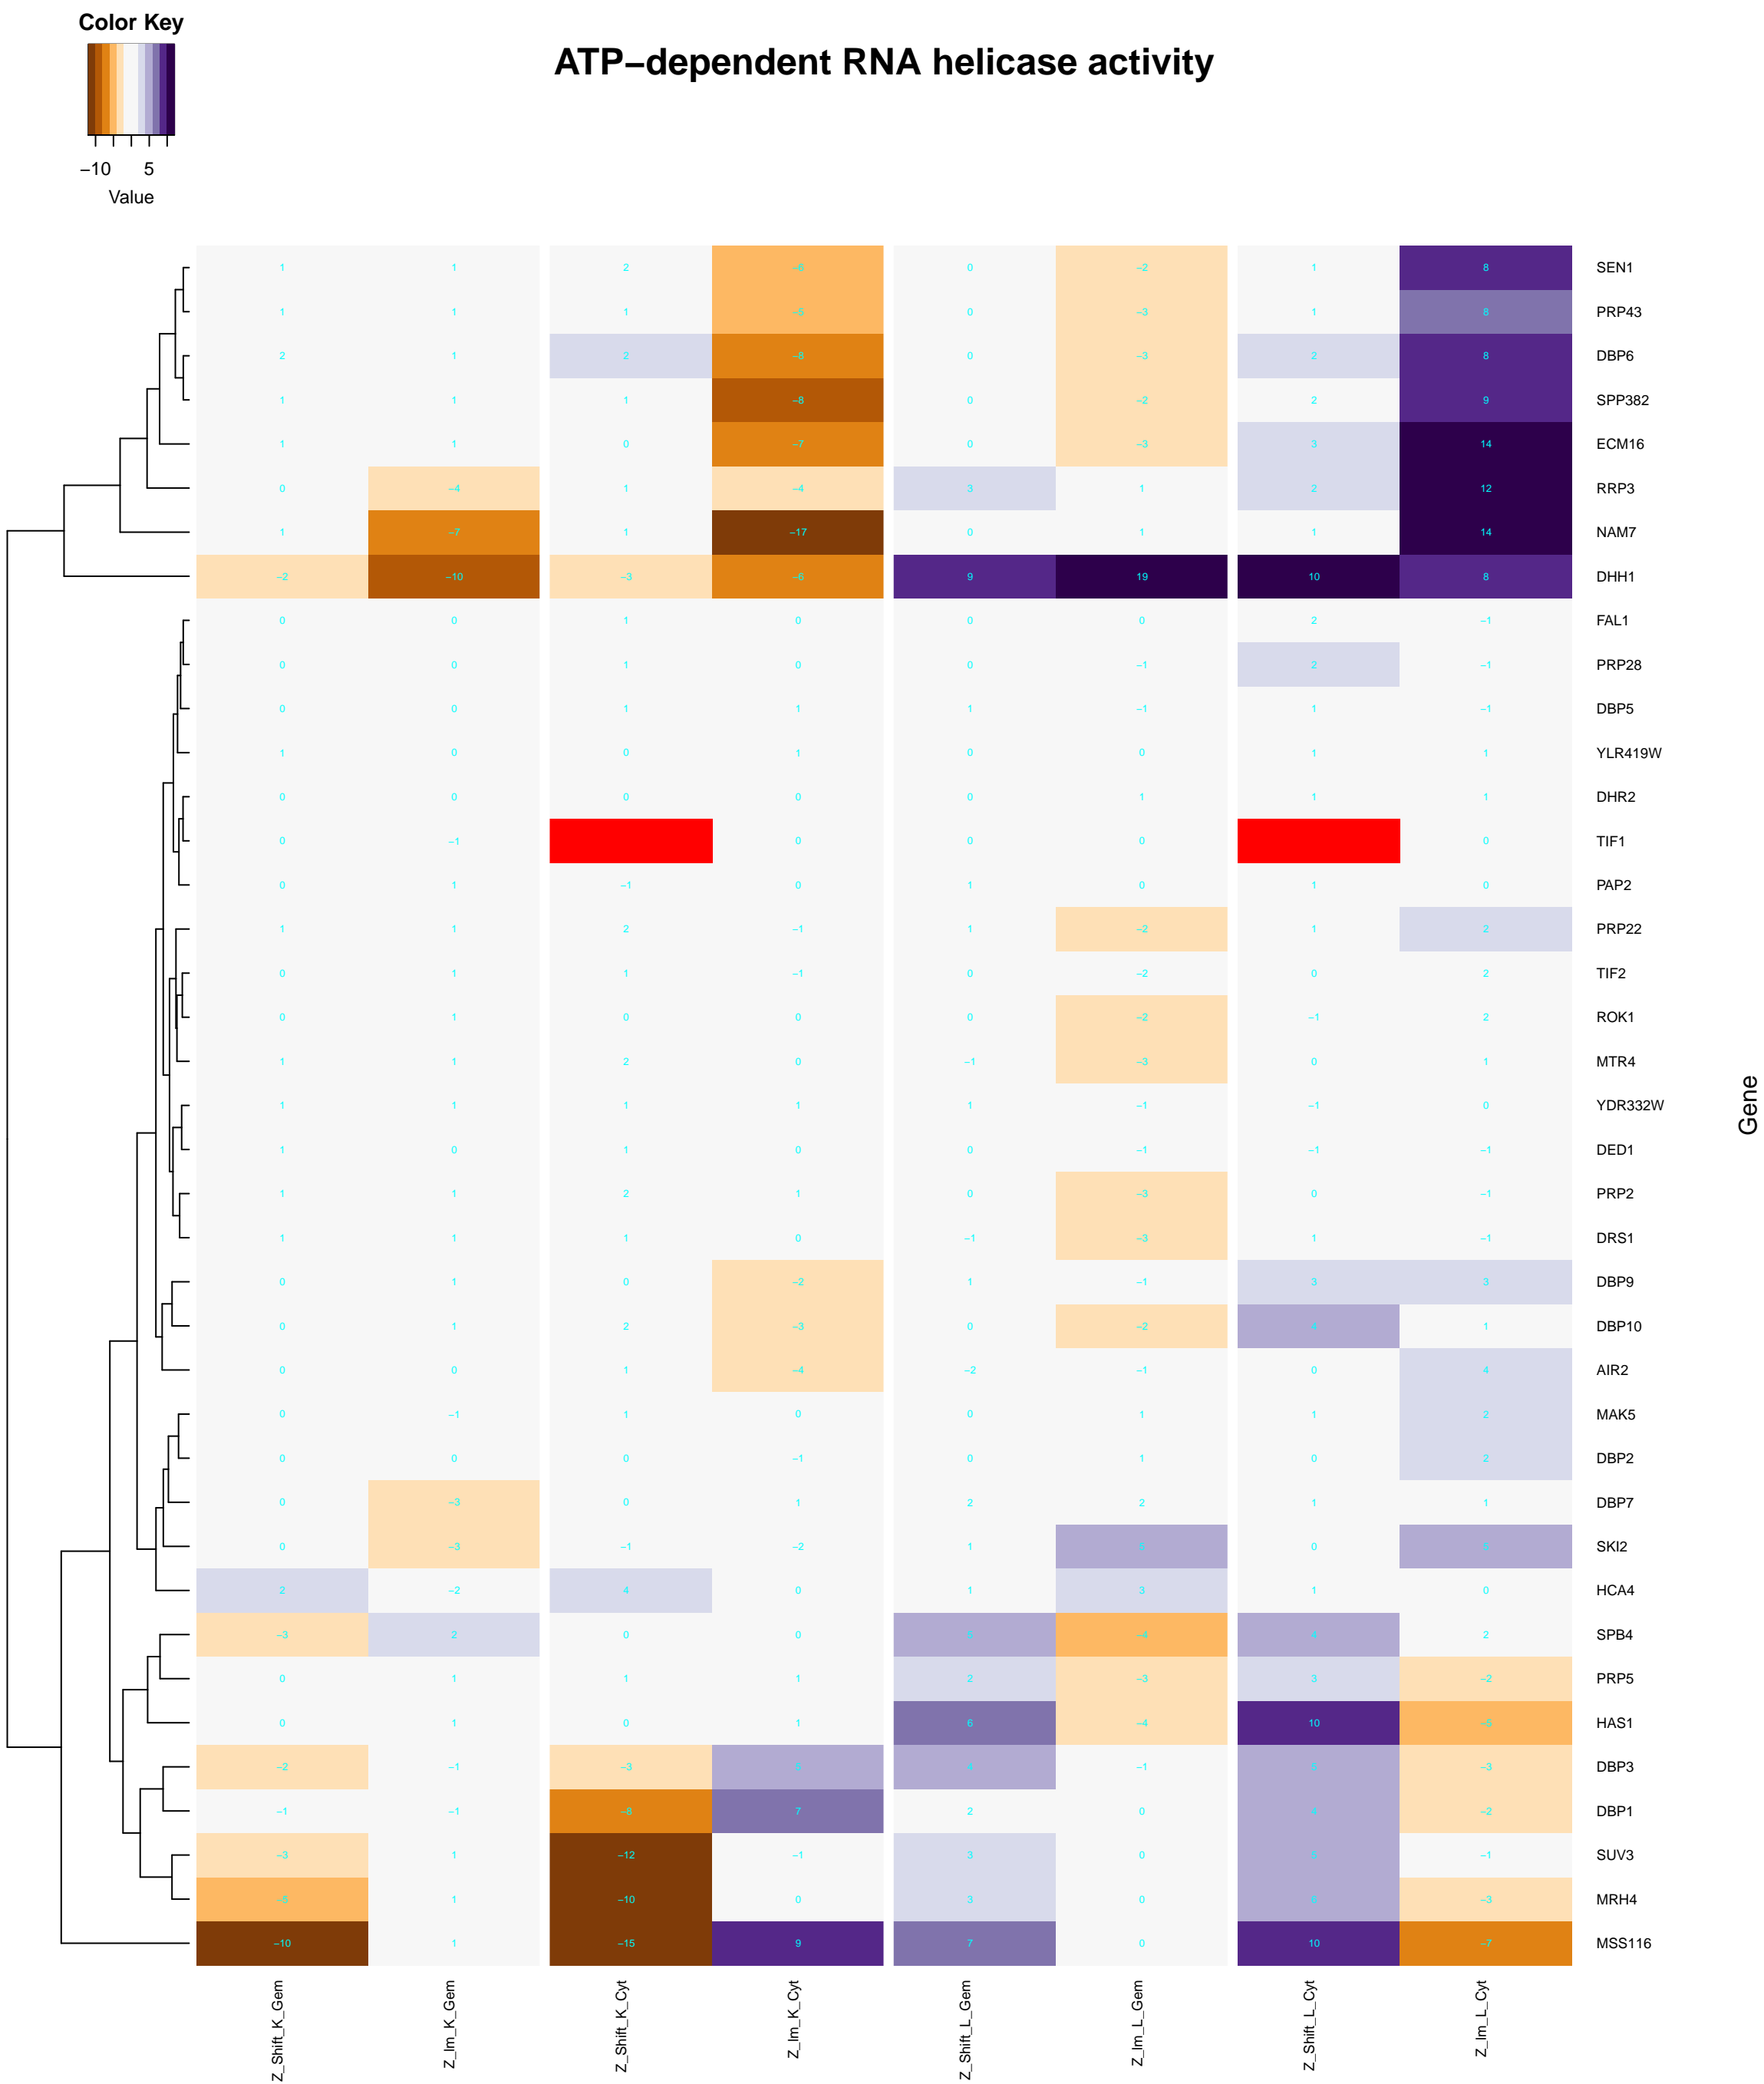

Color Key

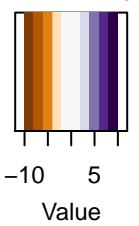

ATP-dependent 3'-5' RNA helicase activity

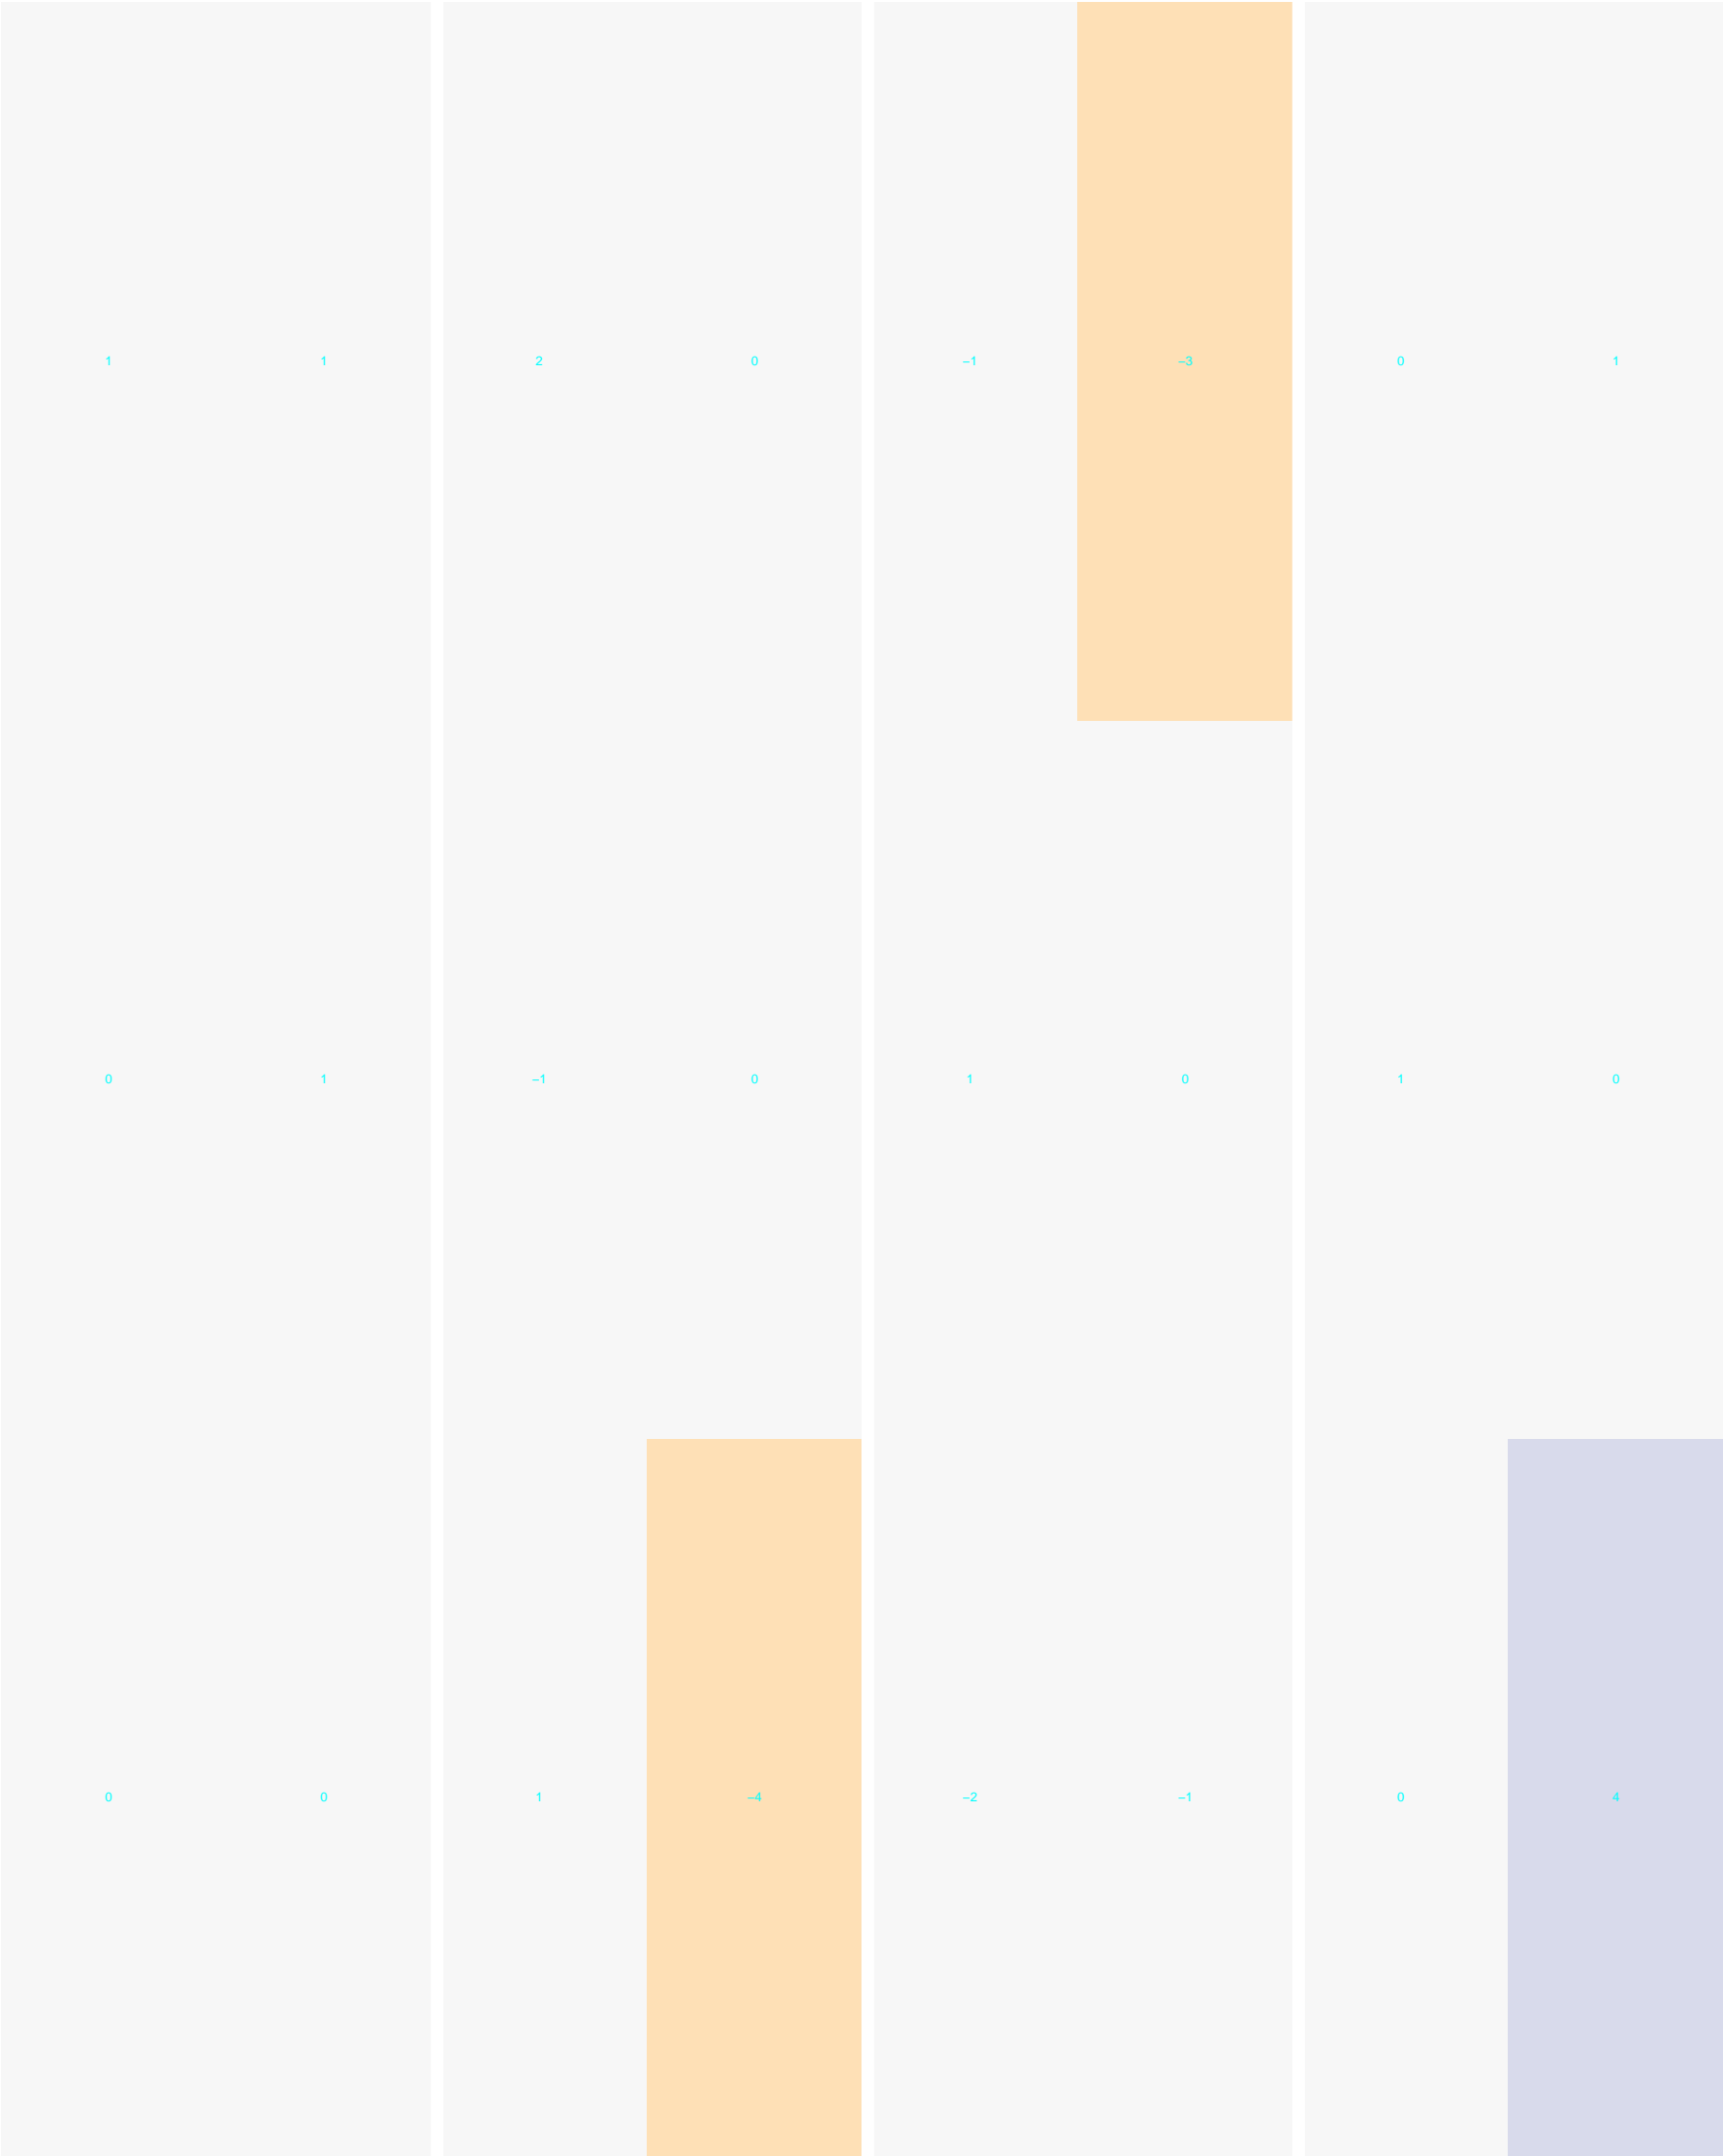

Gene

Supplement: s1 [file s1]

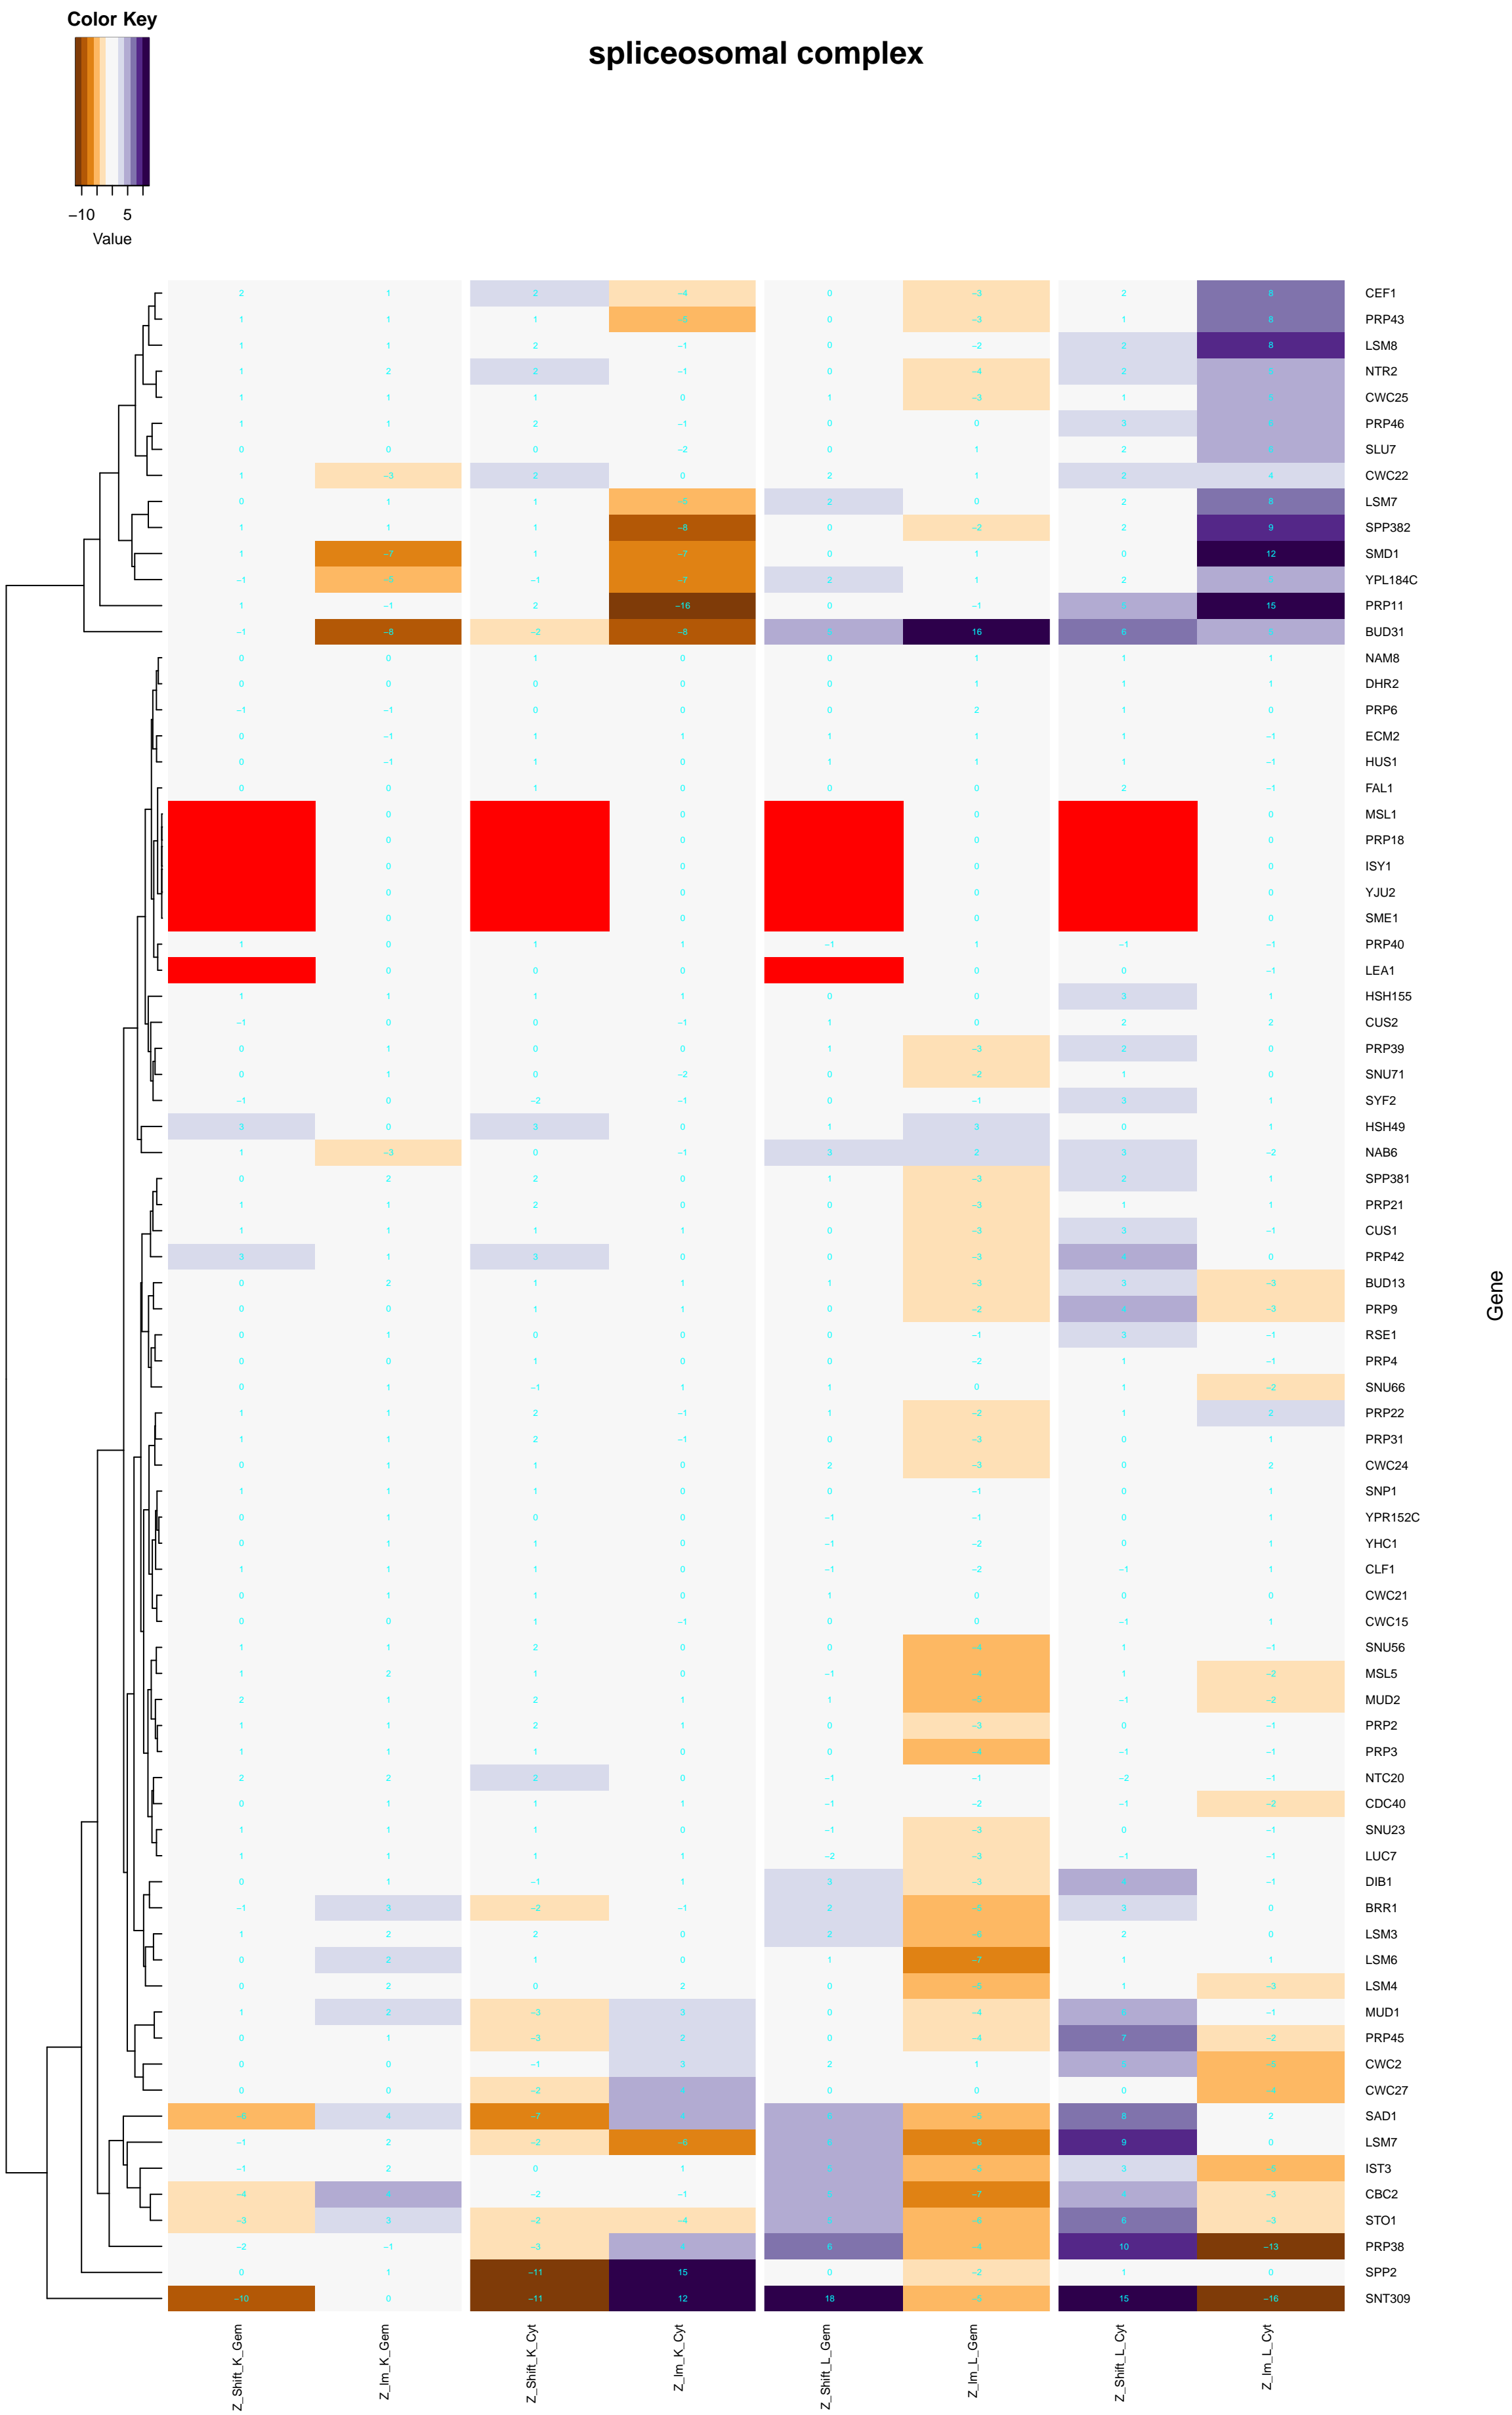

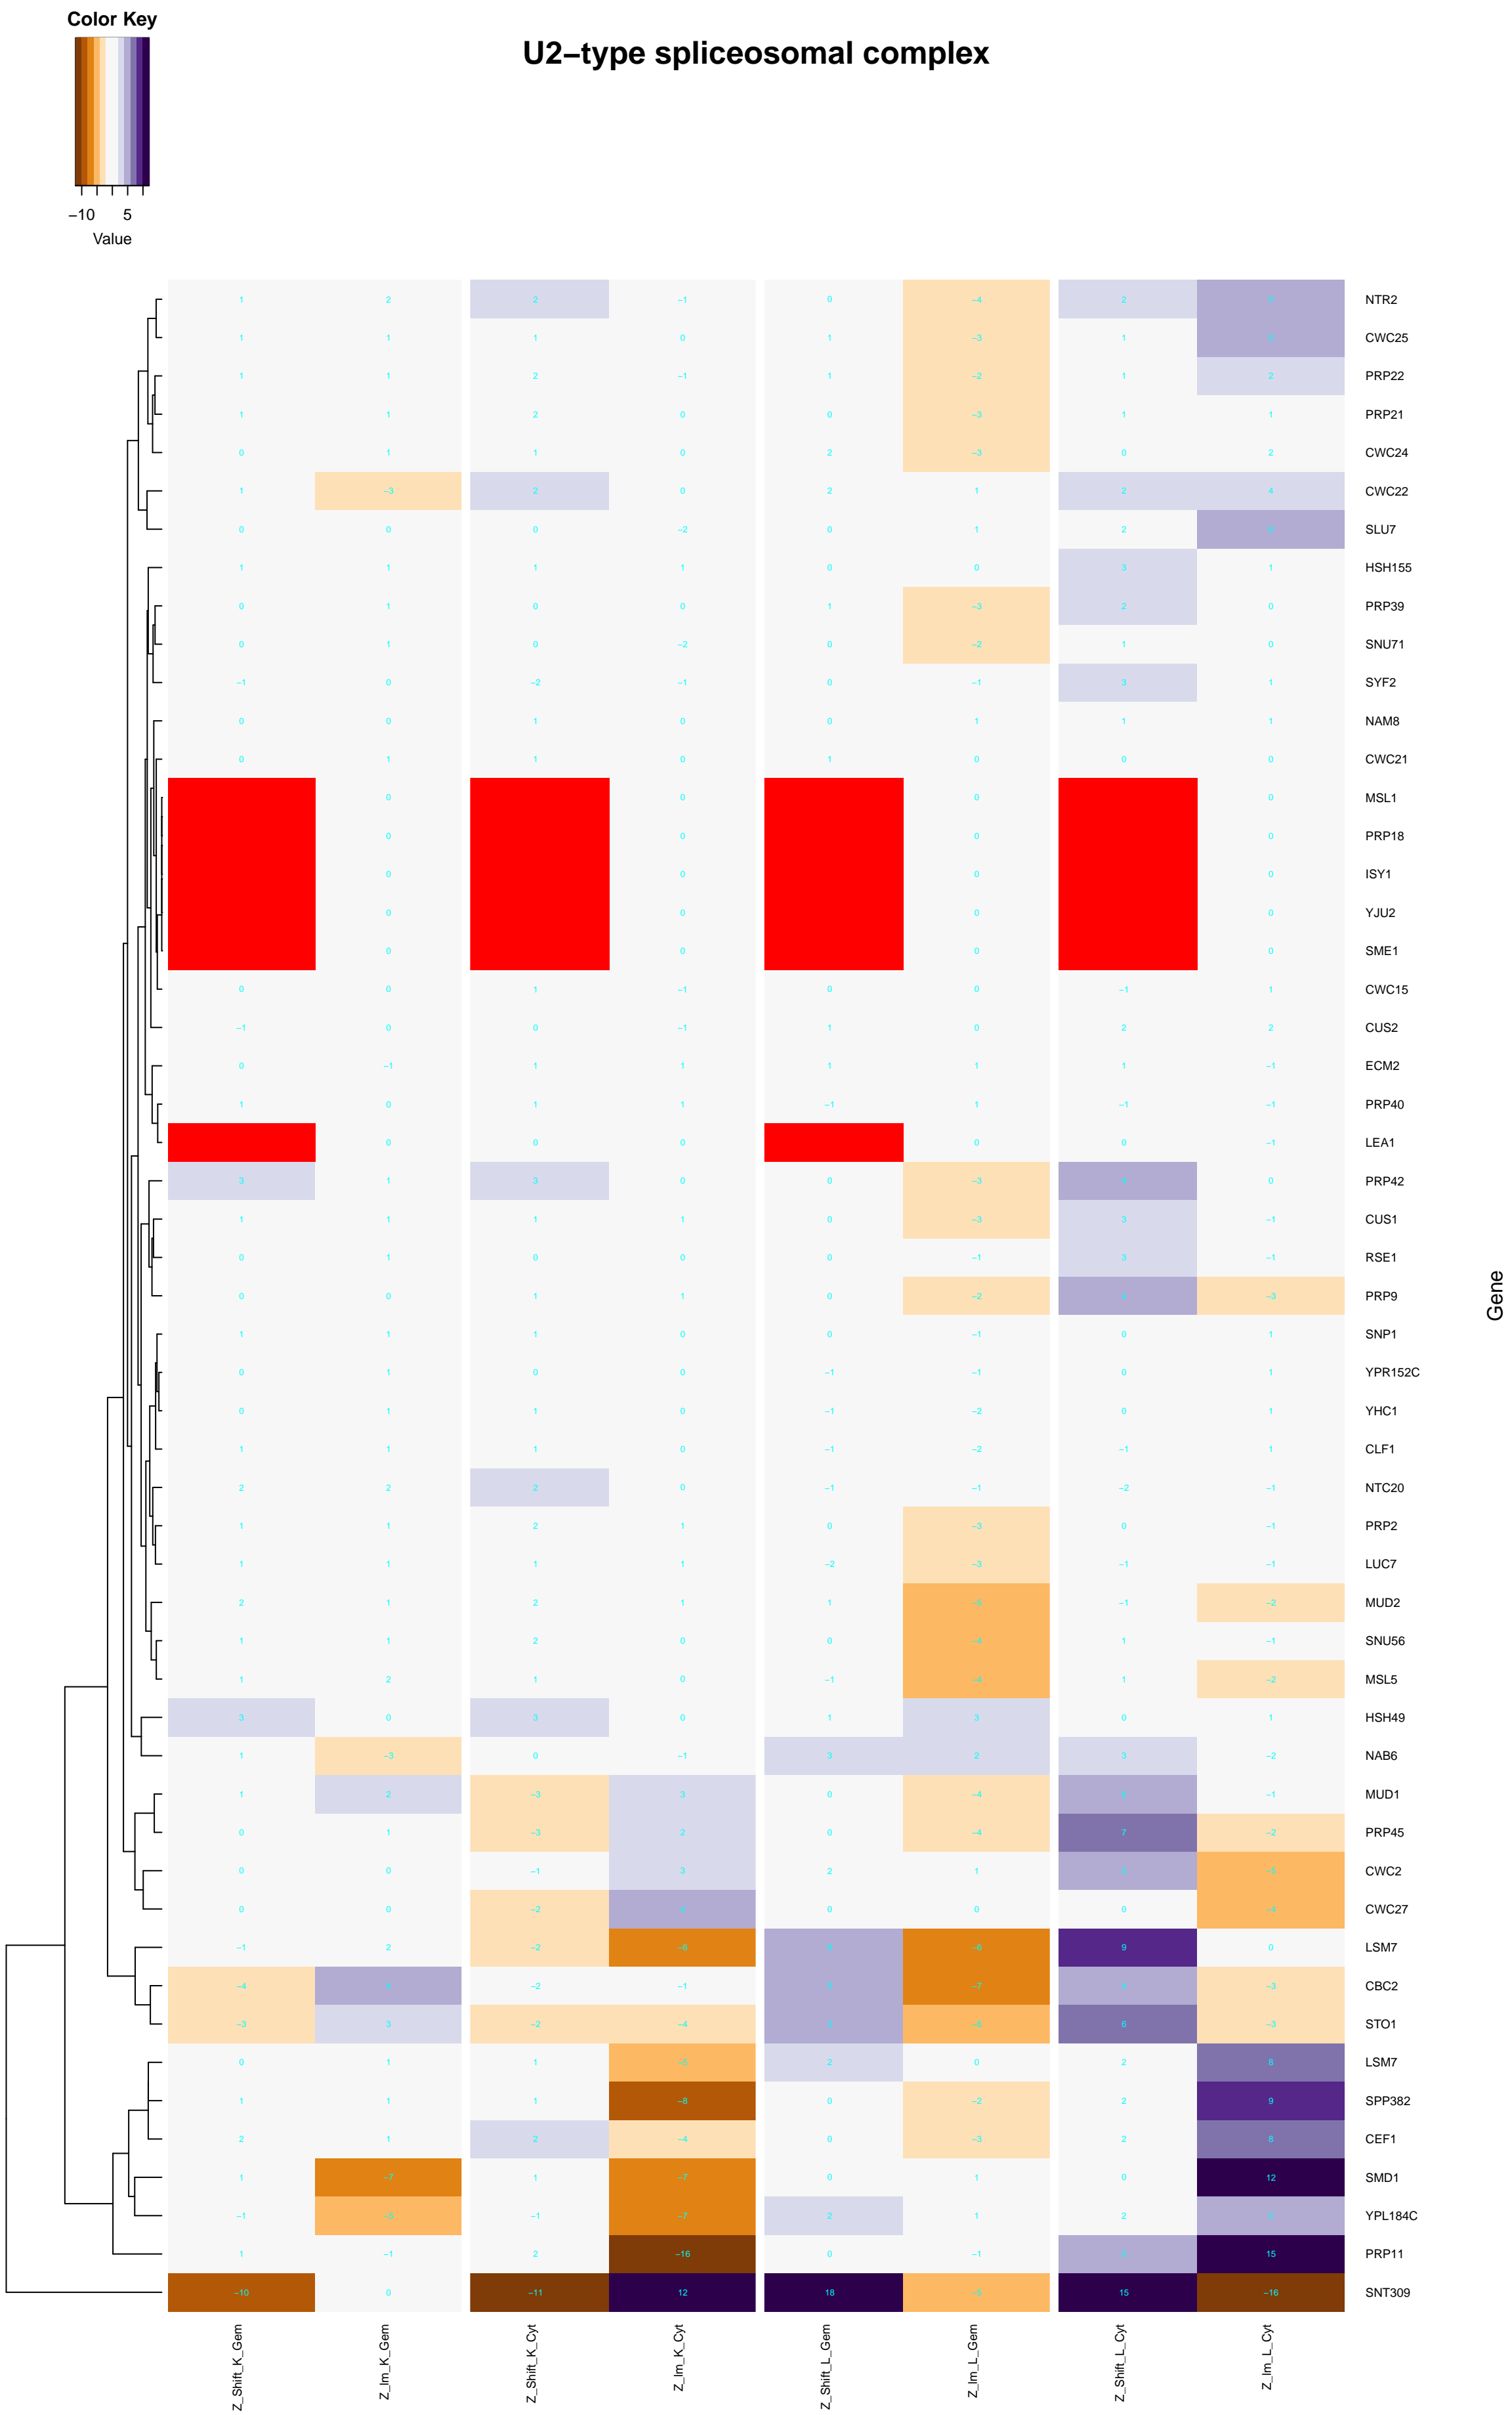

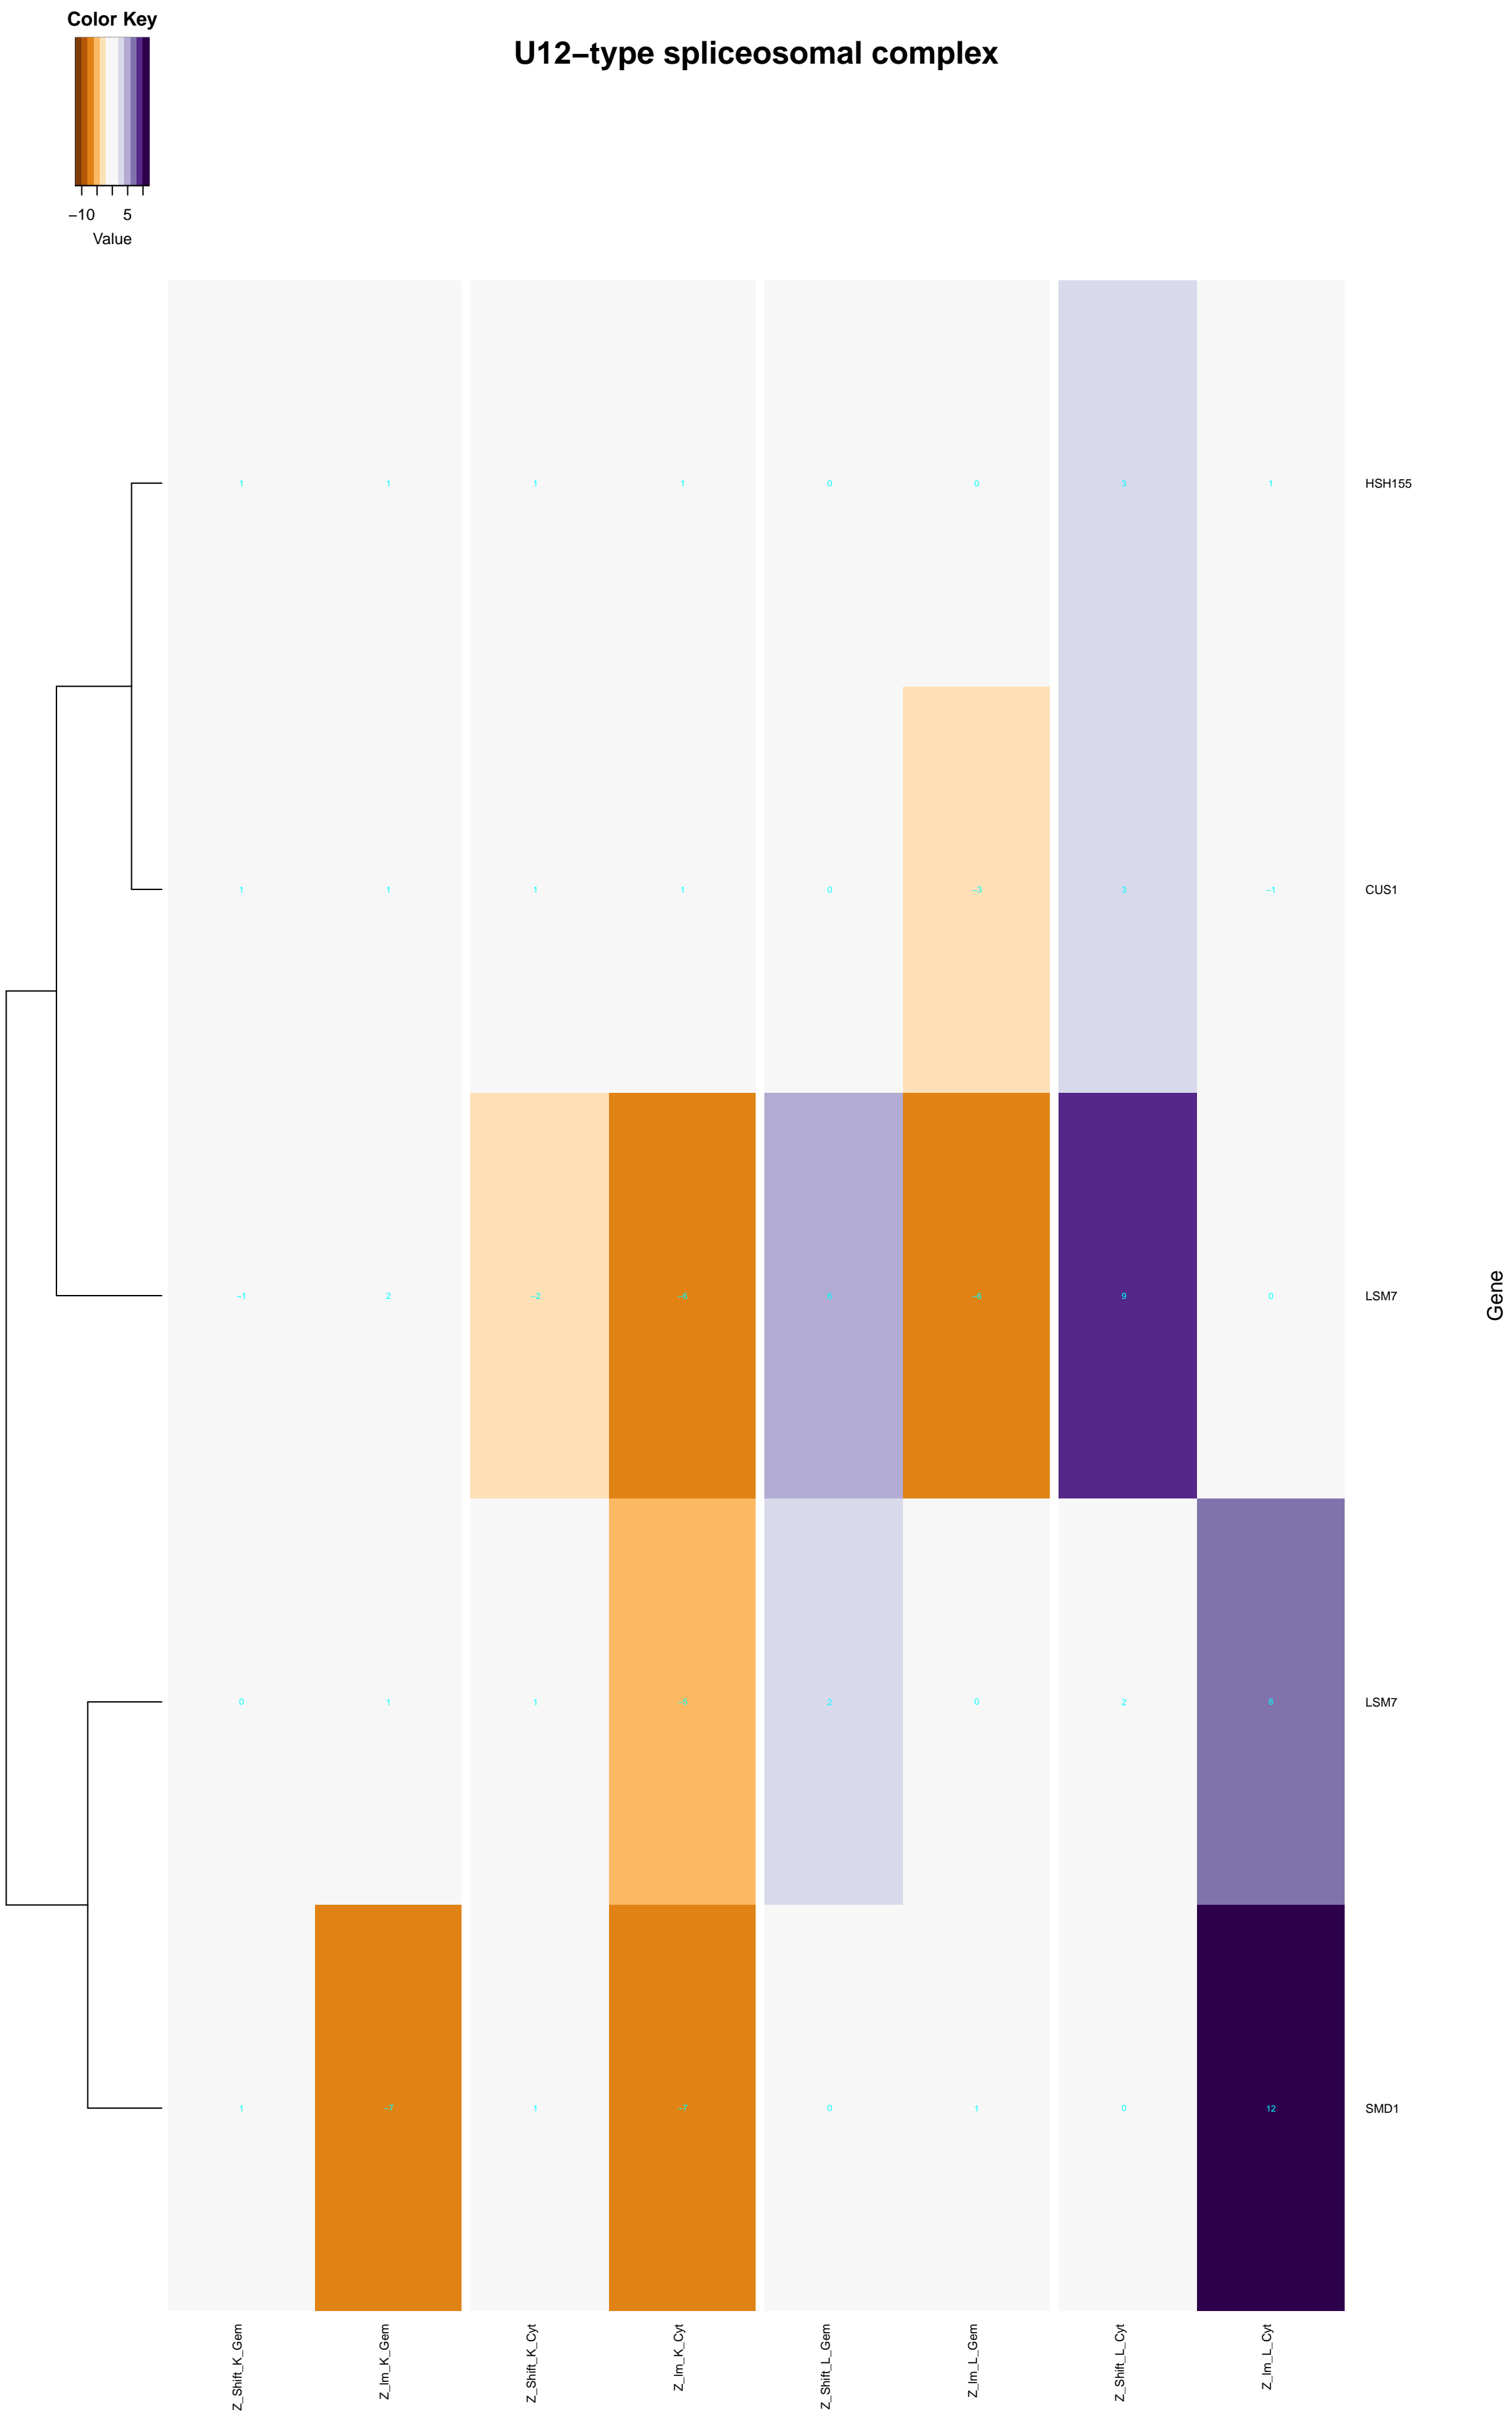

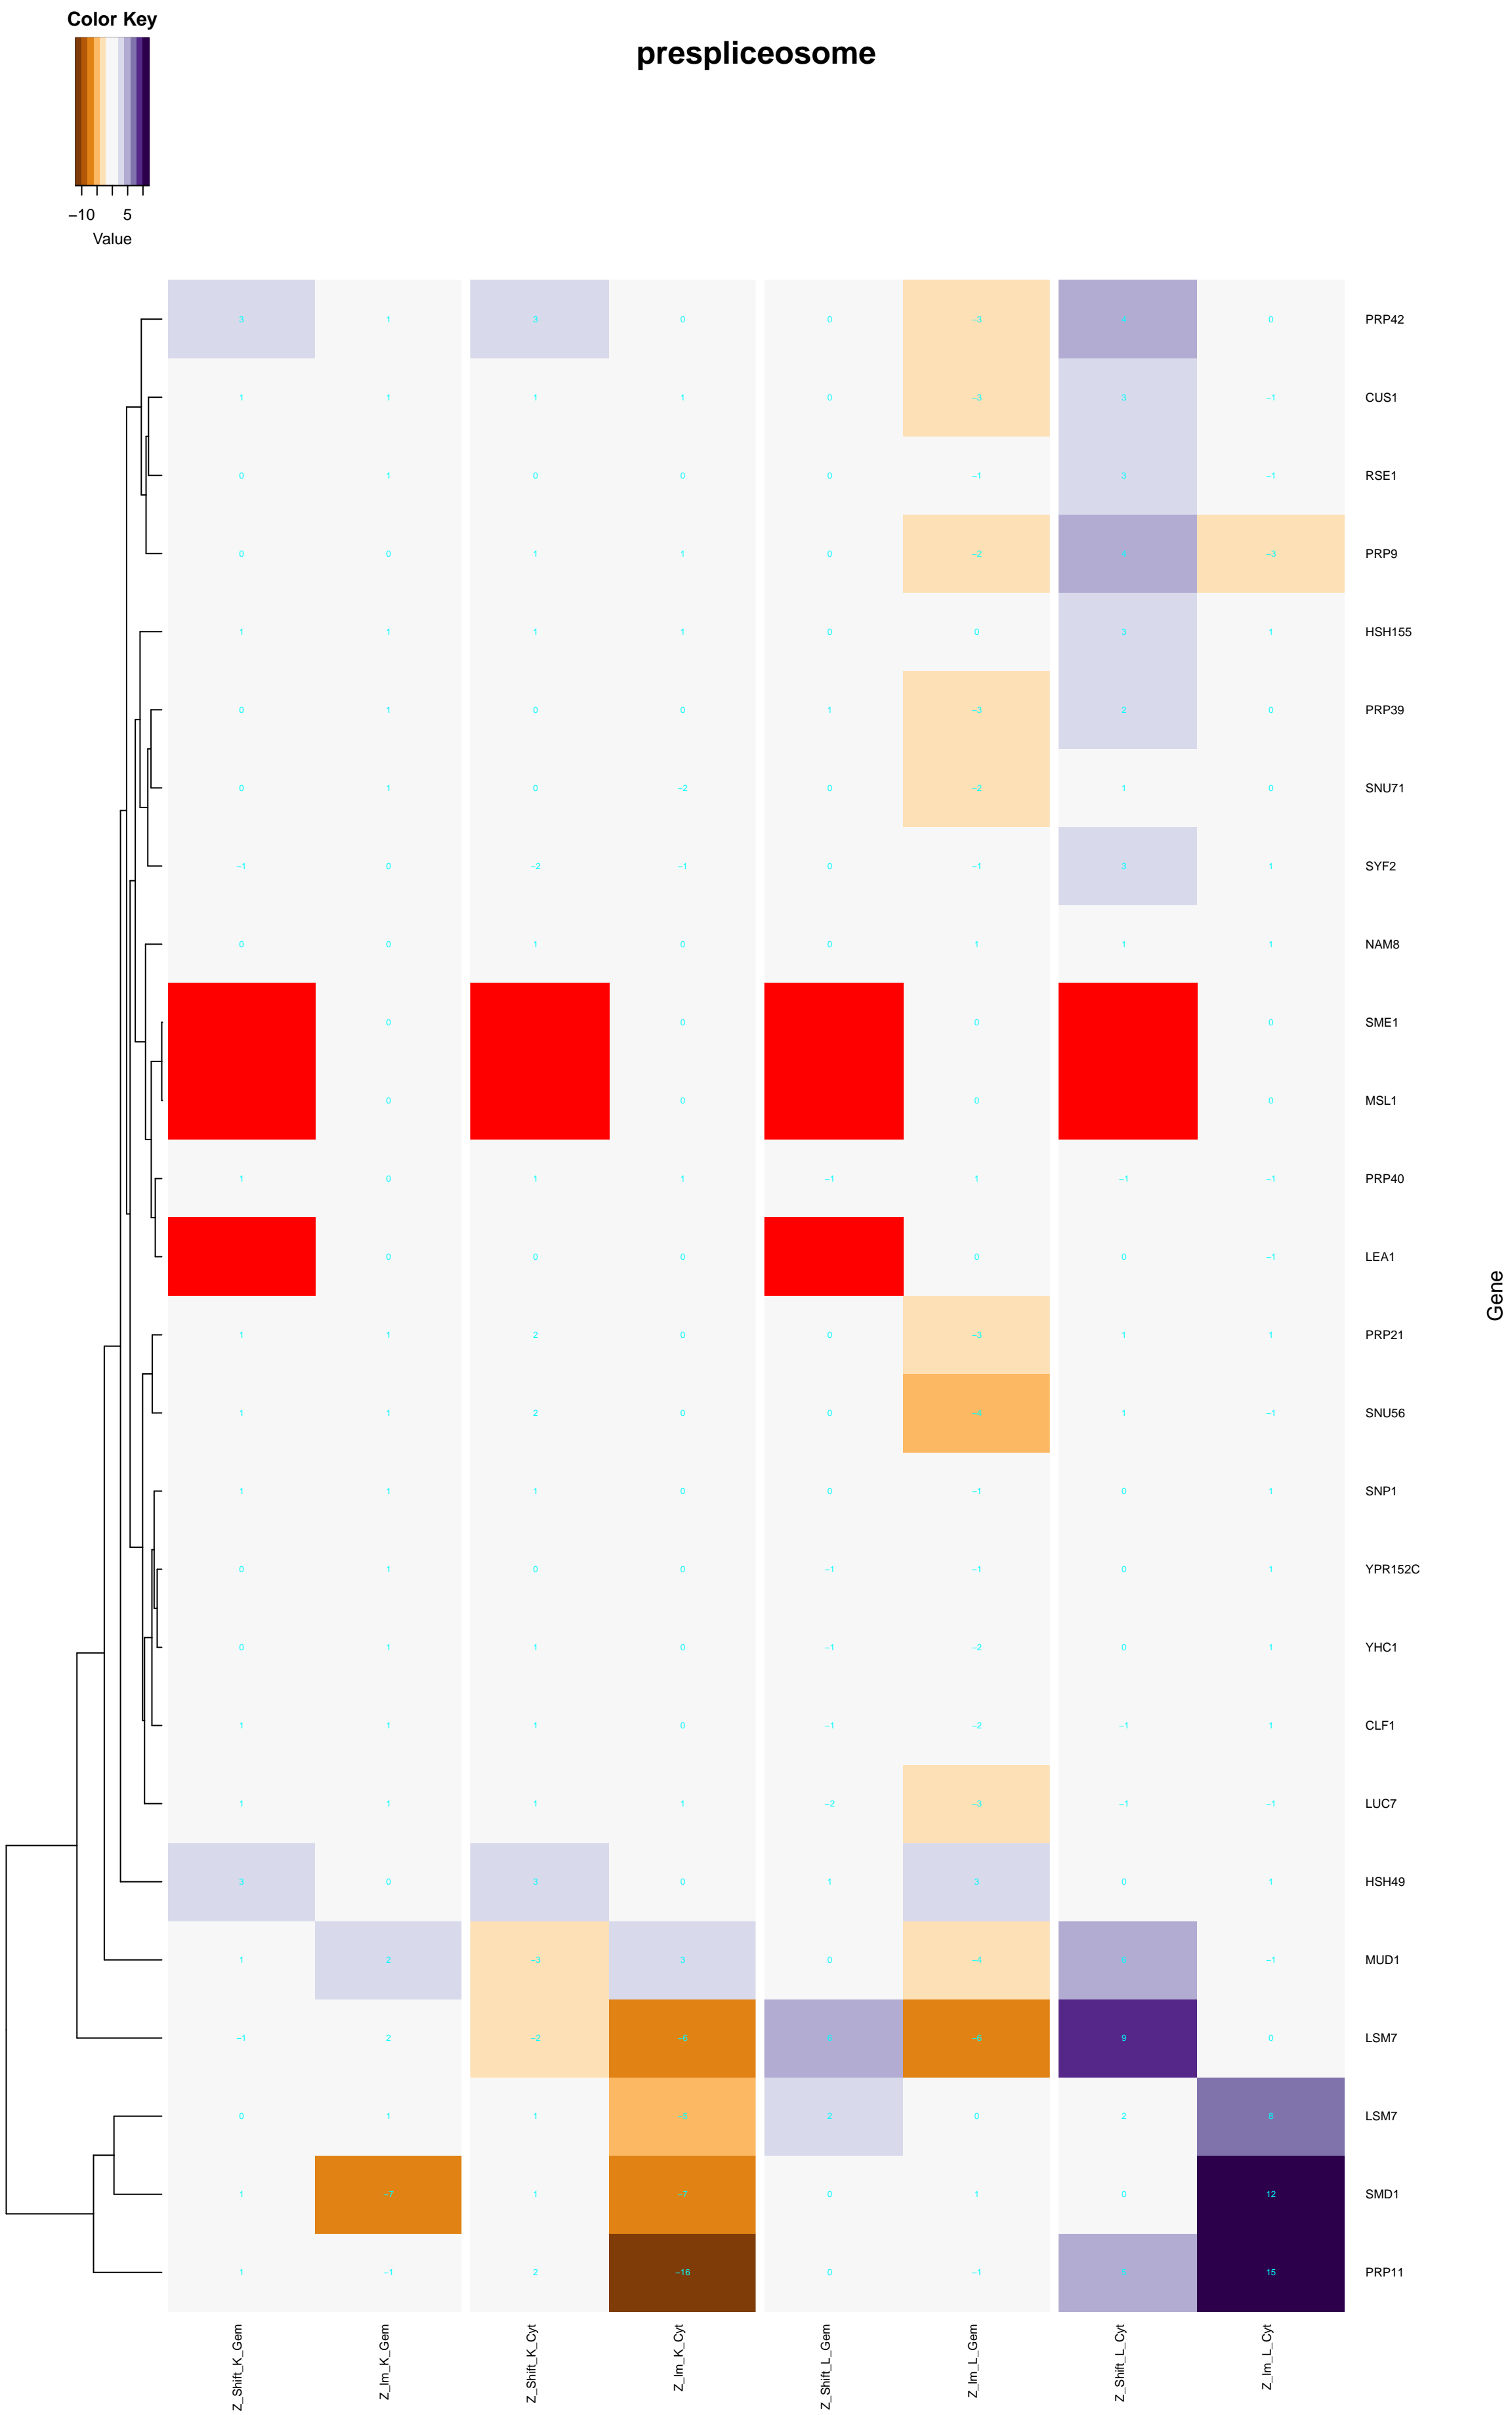

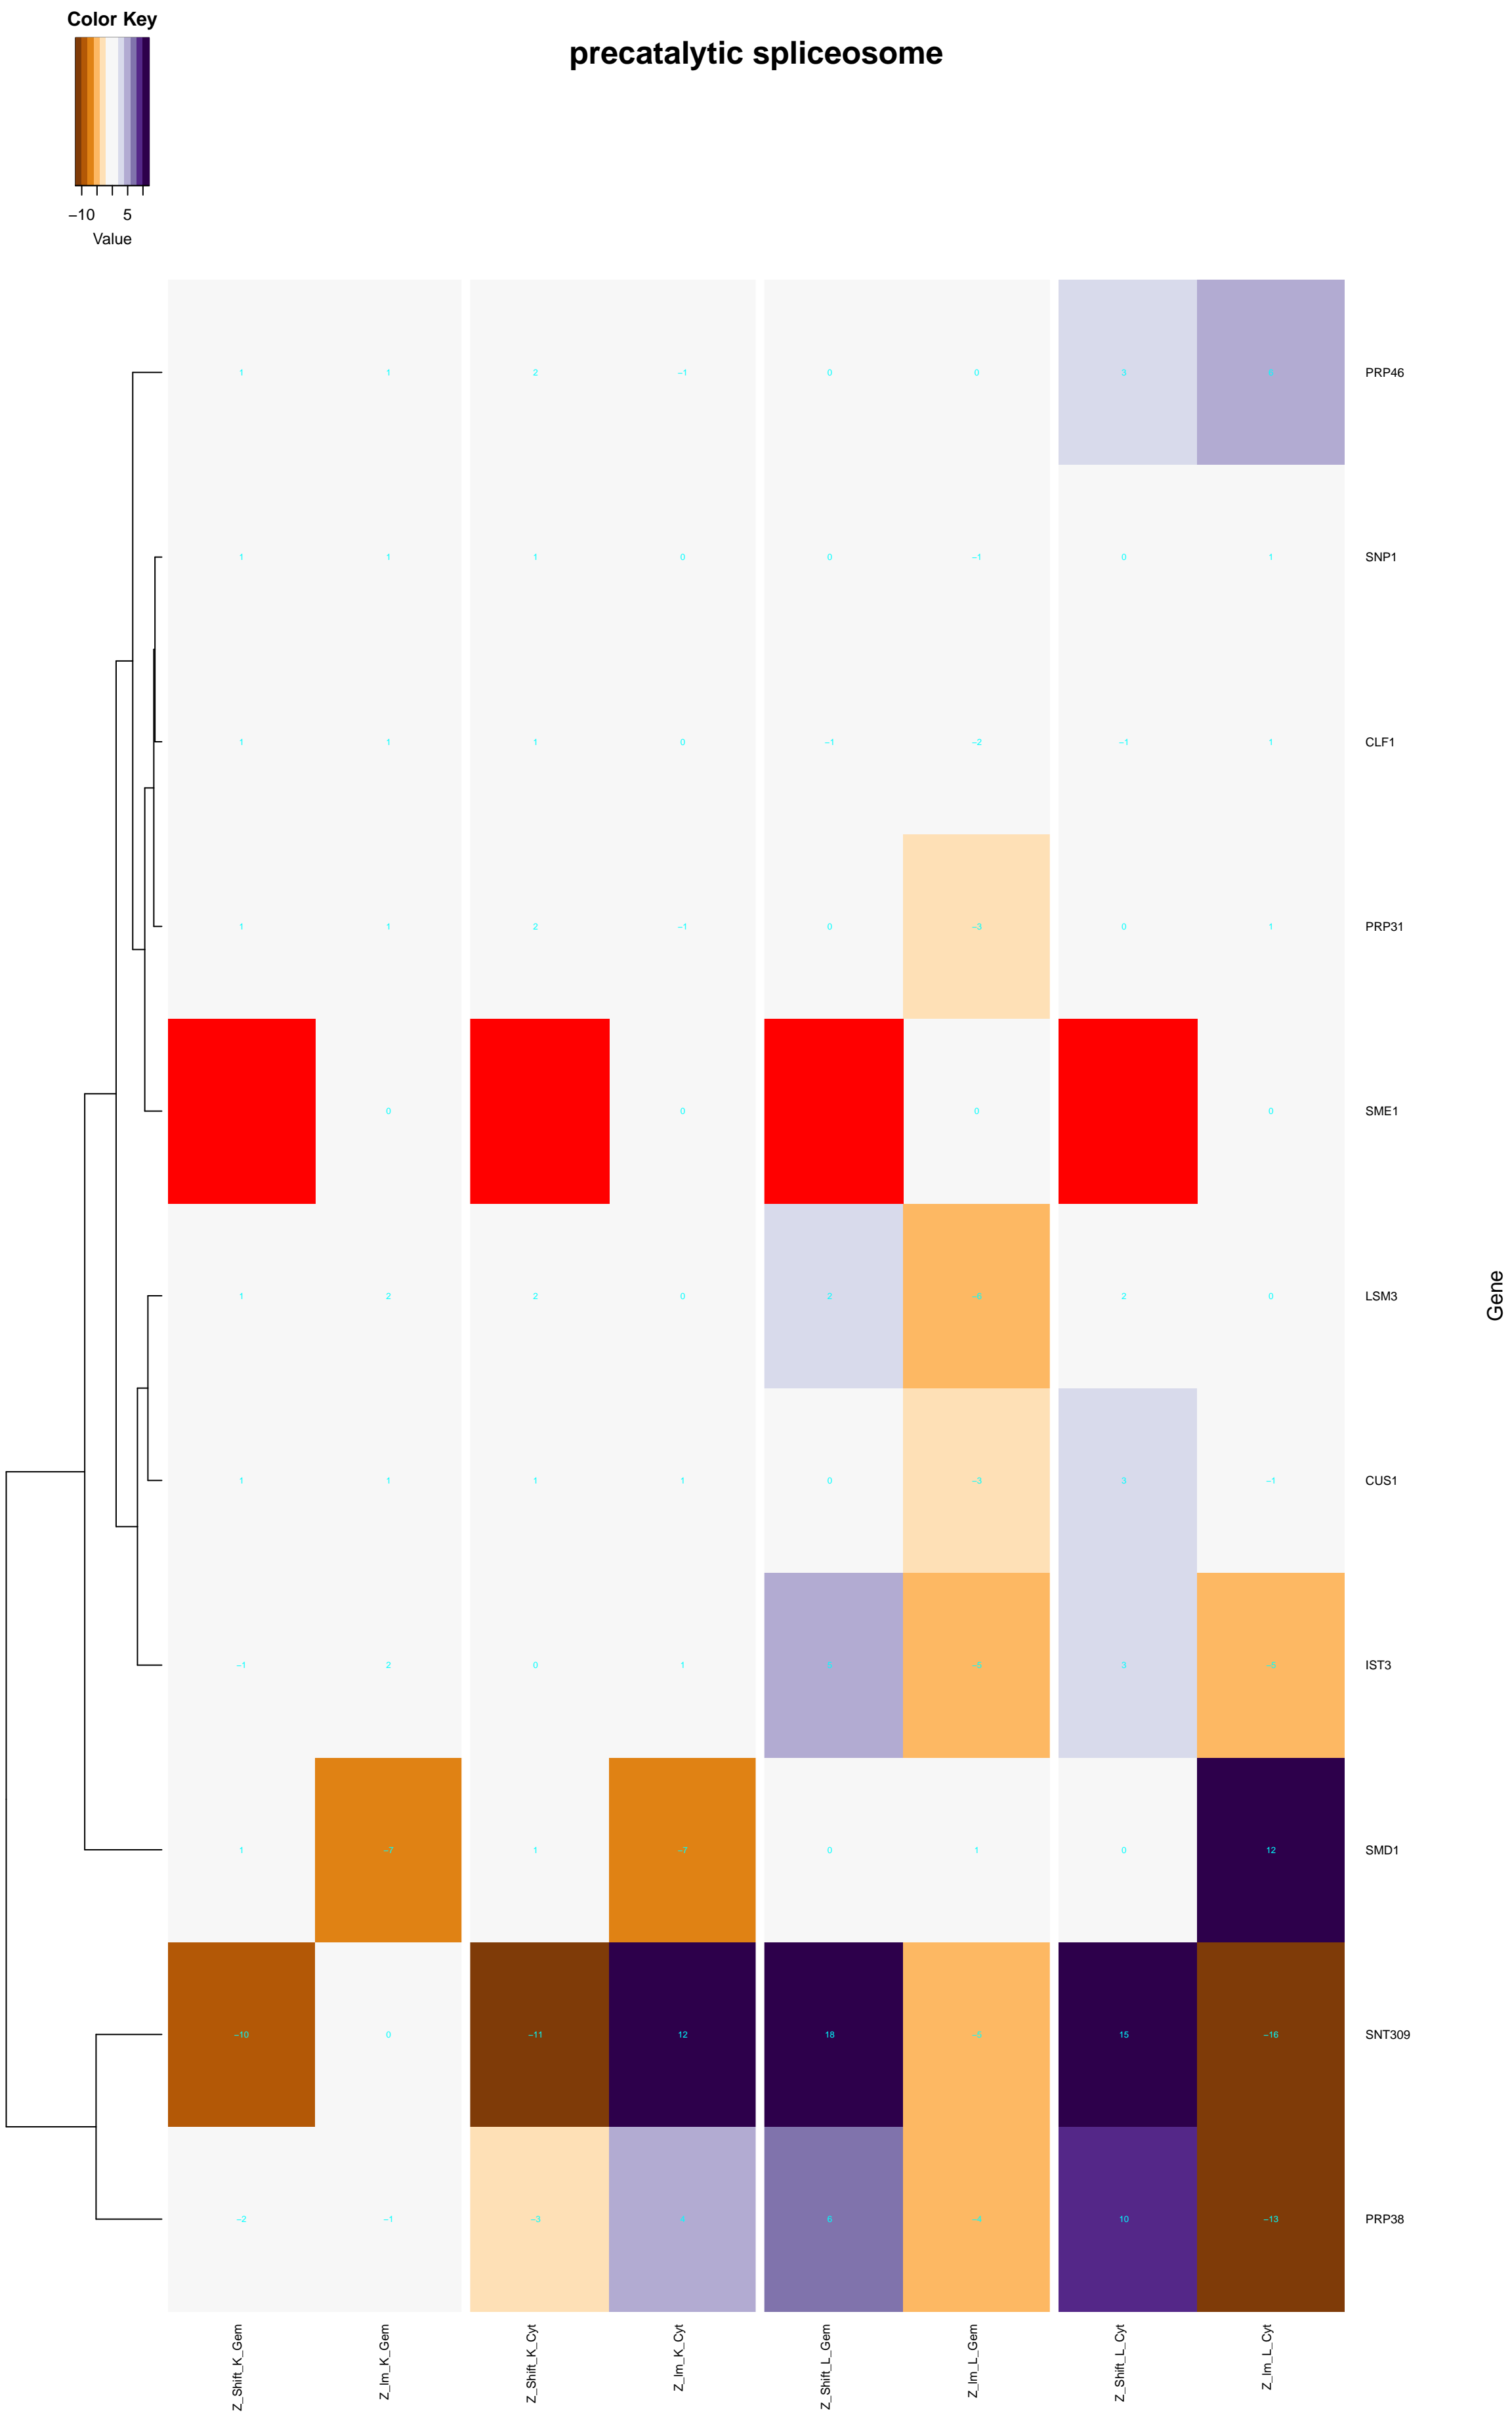

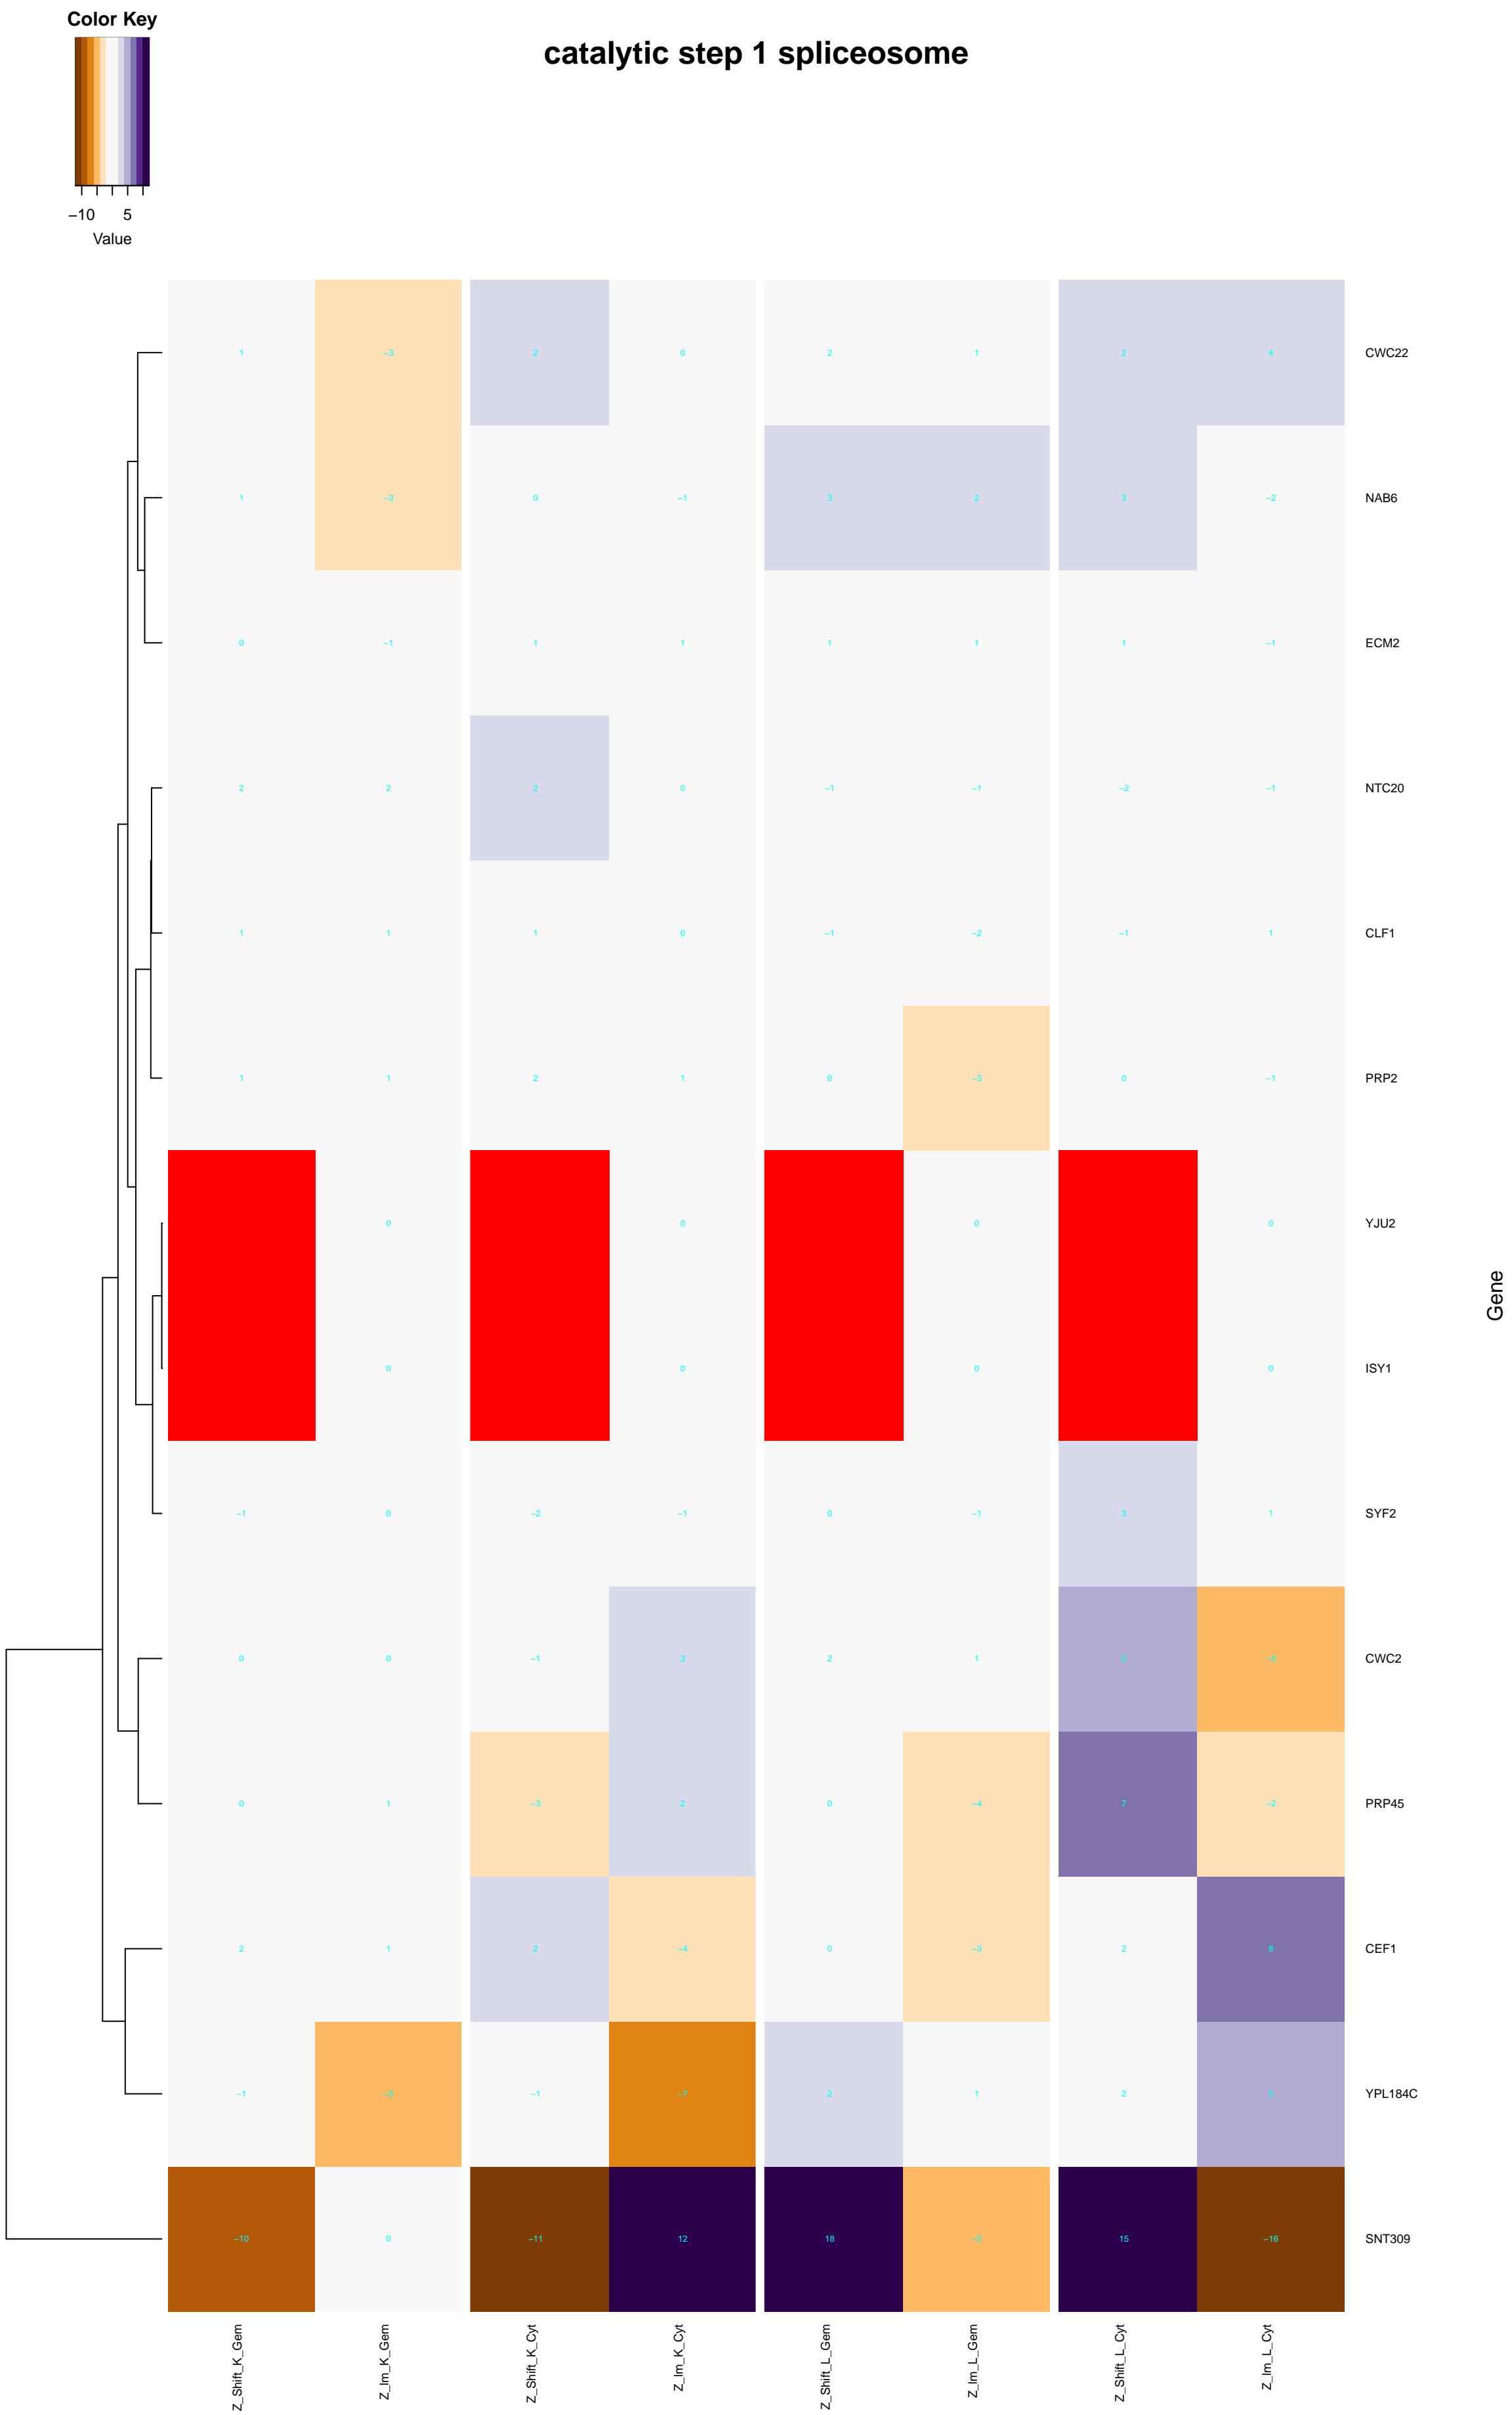

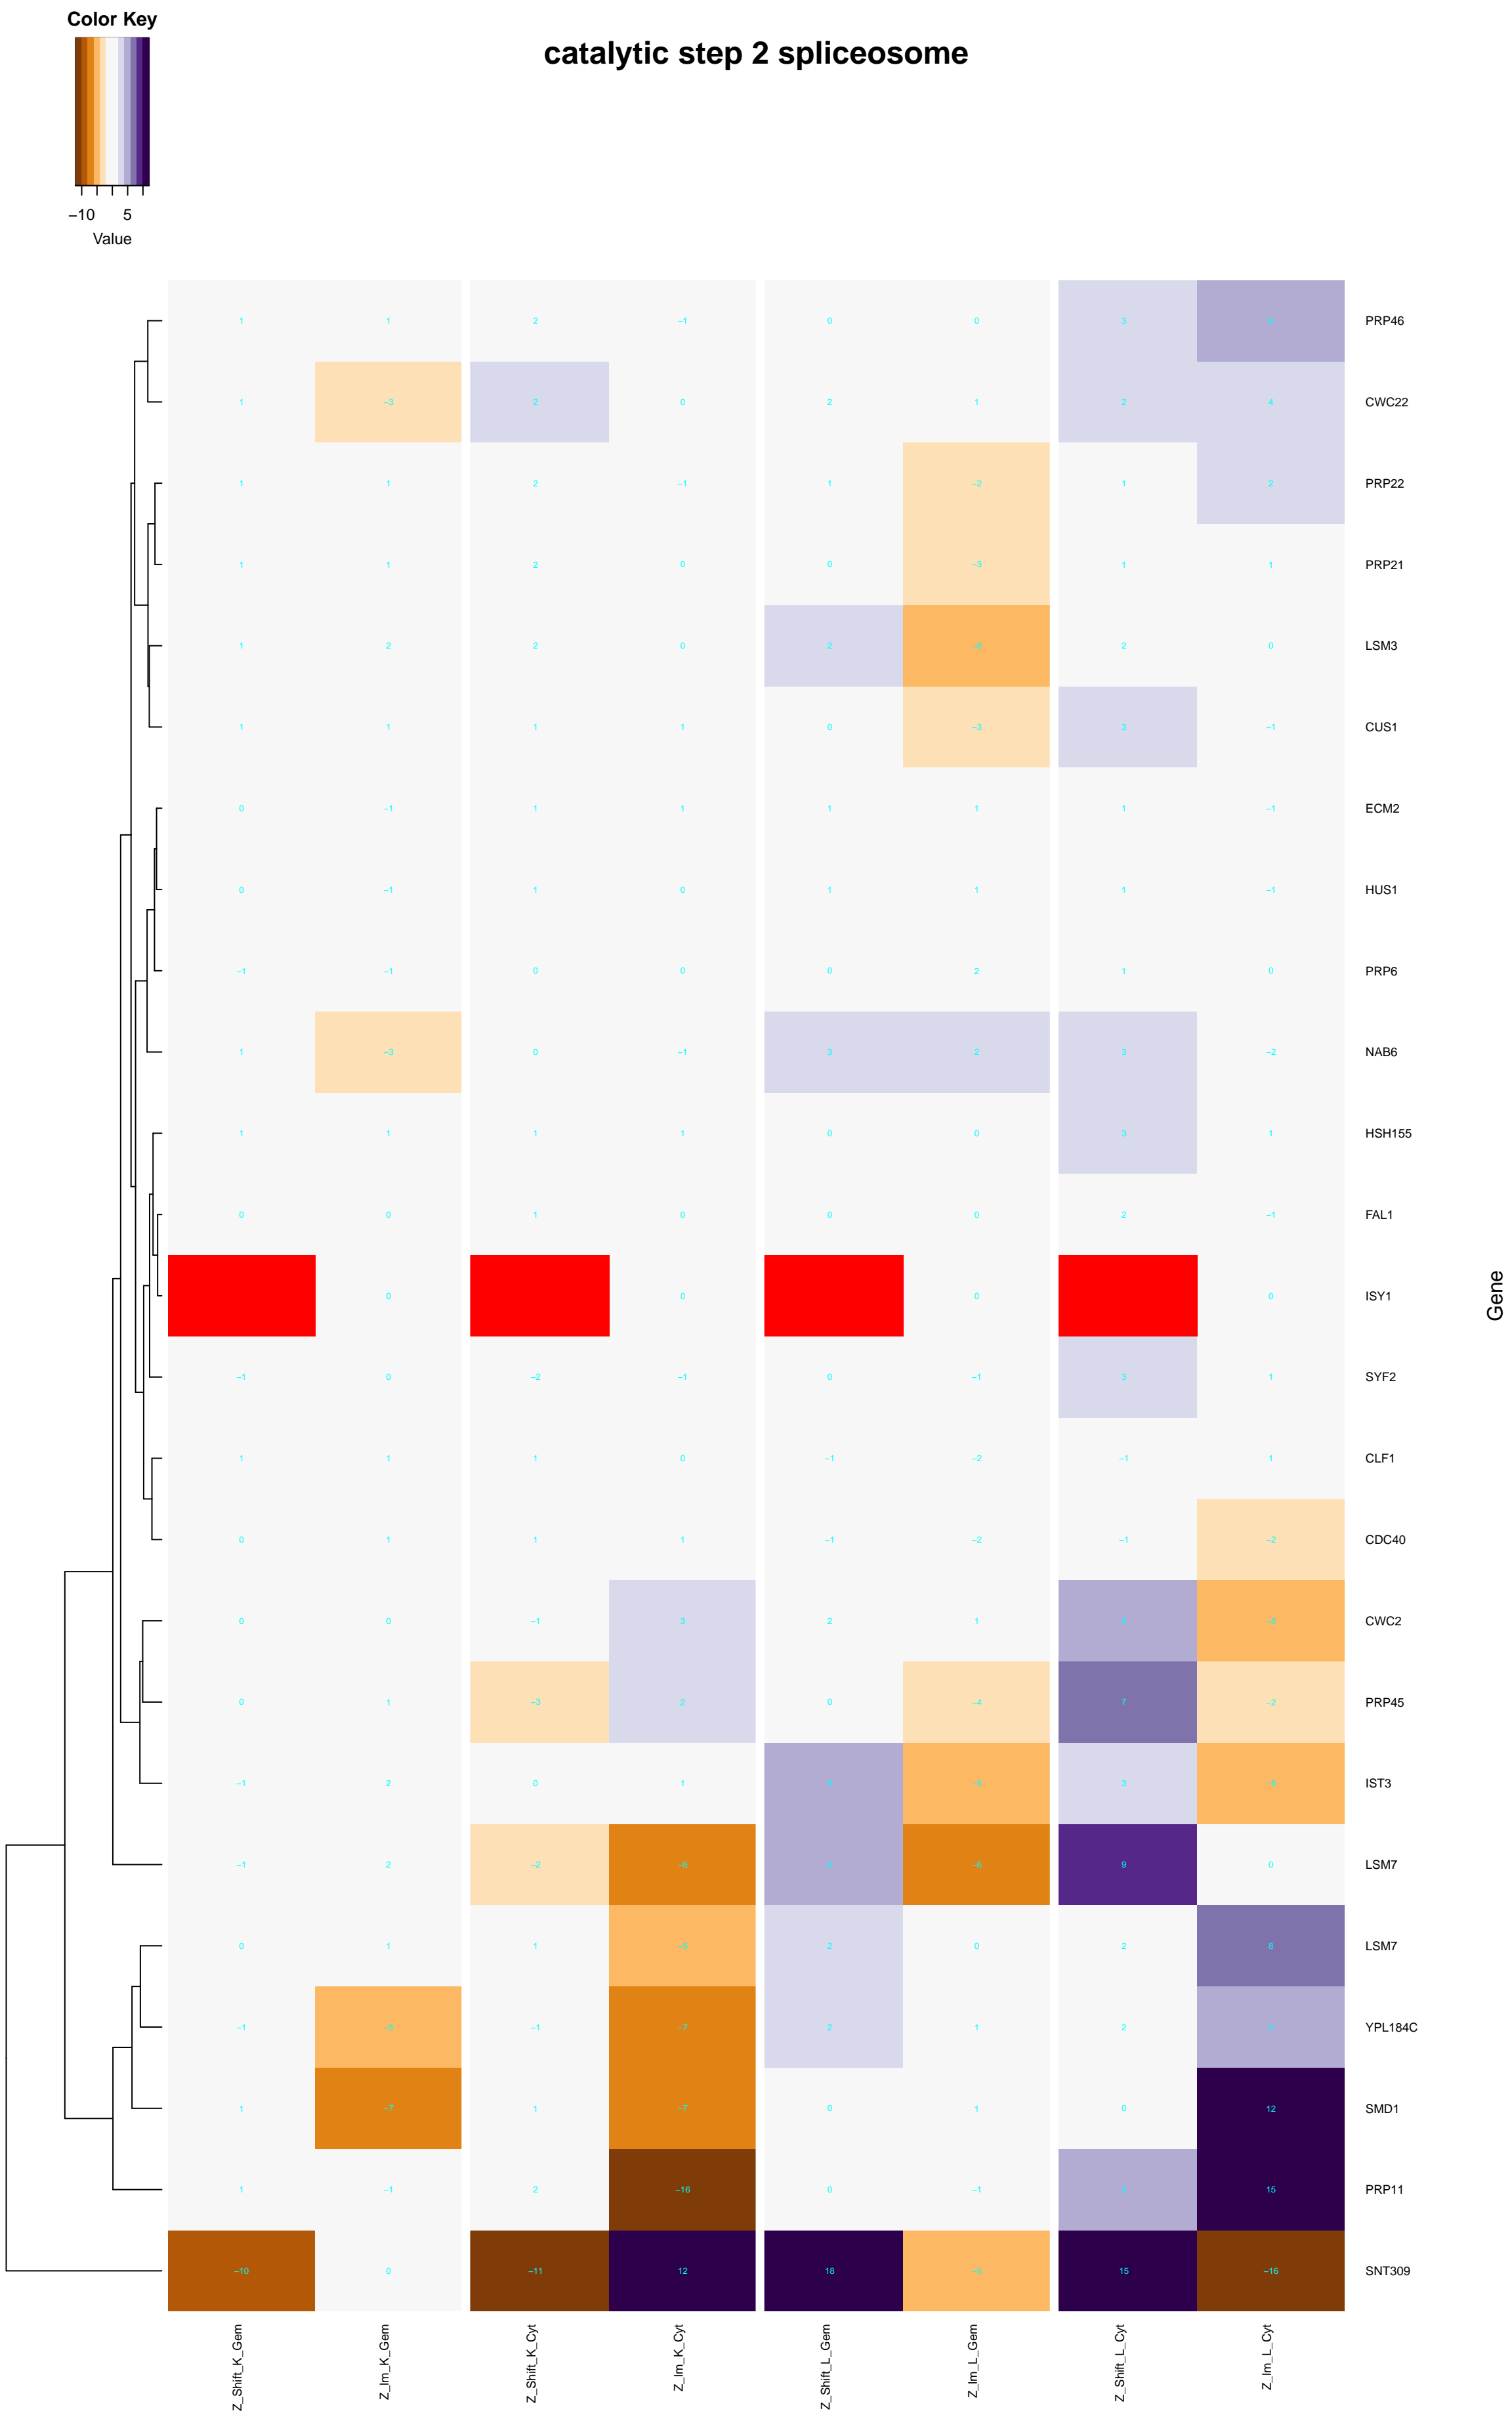

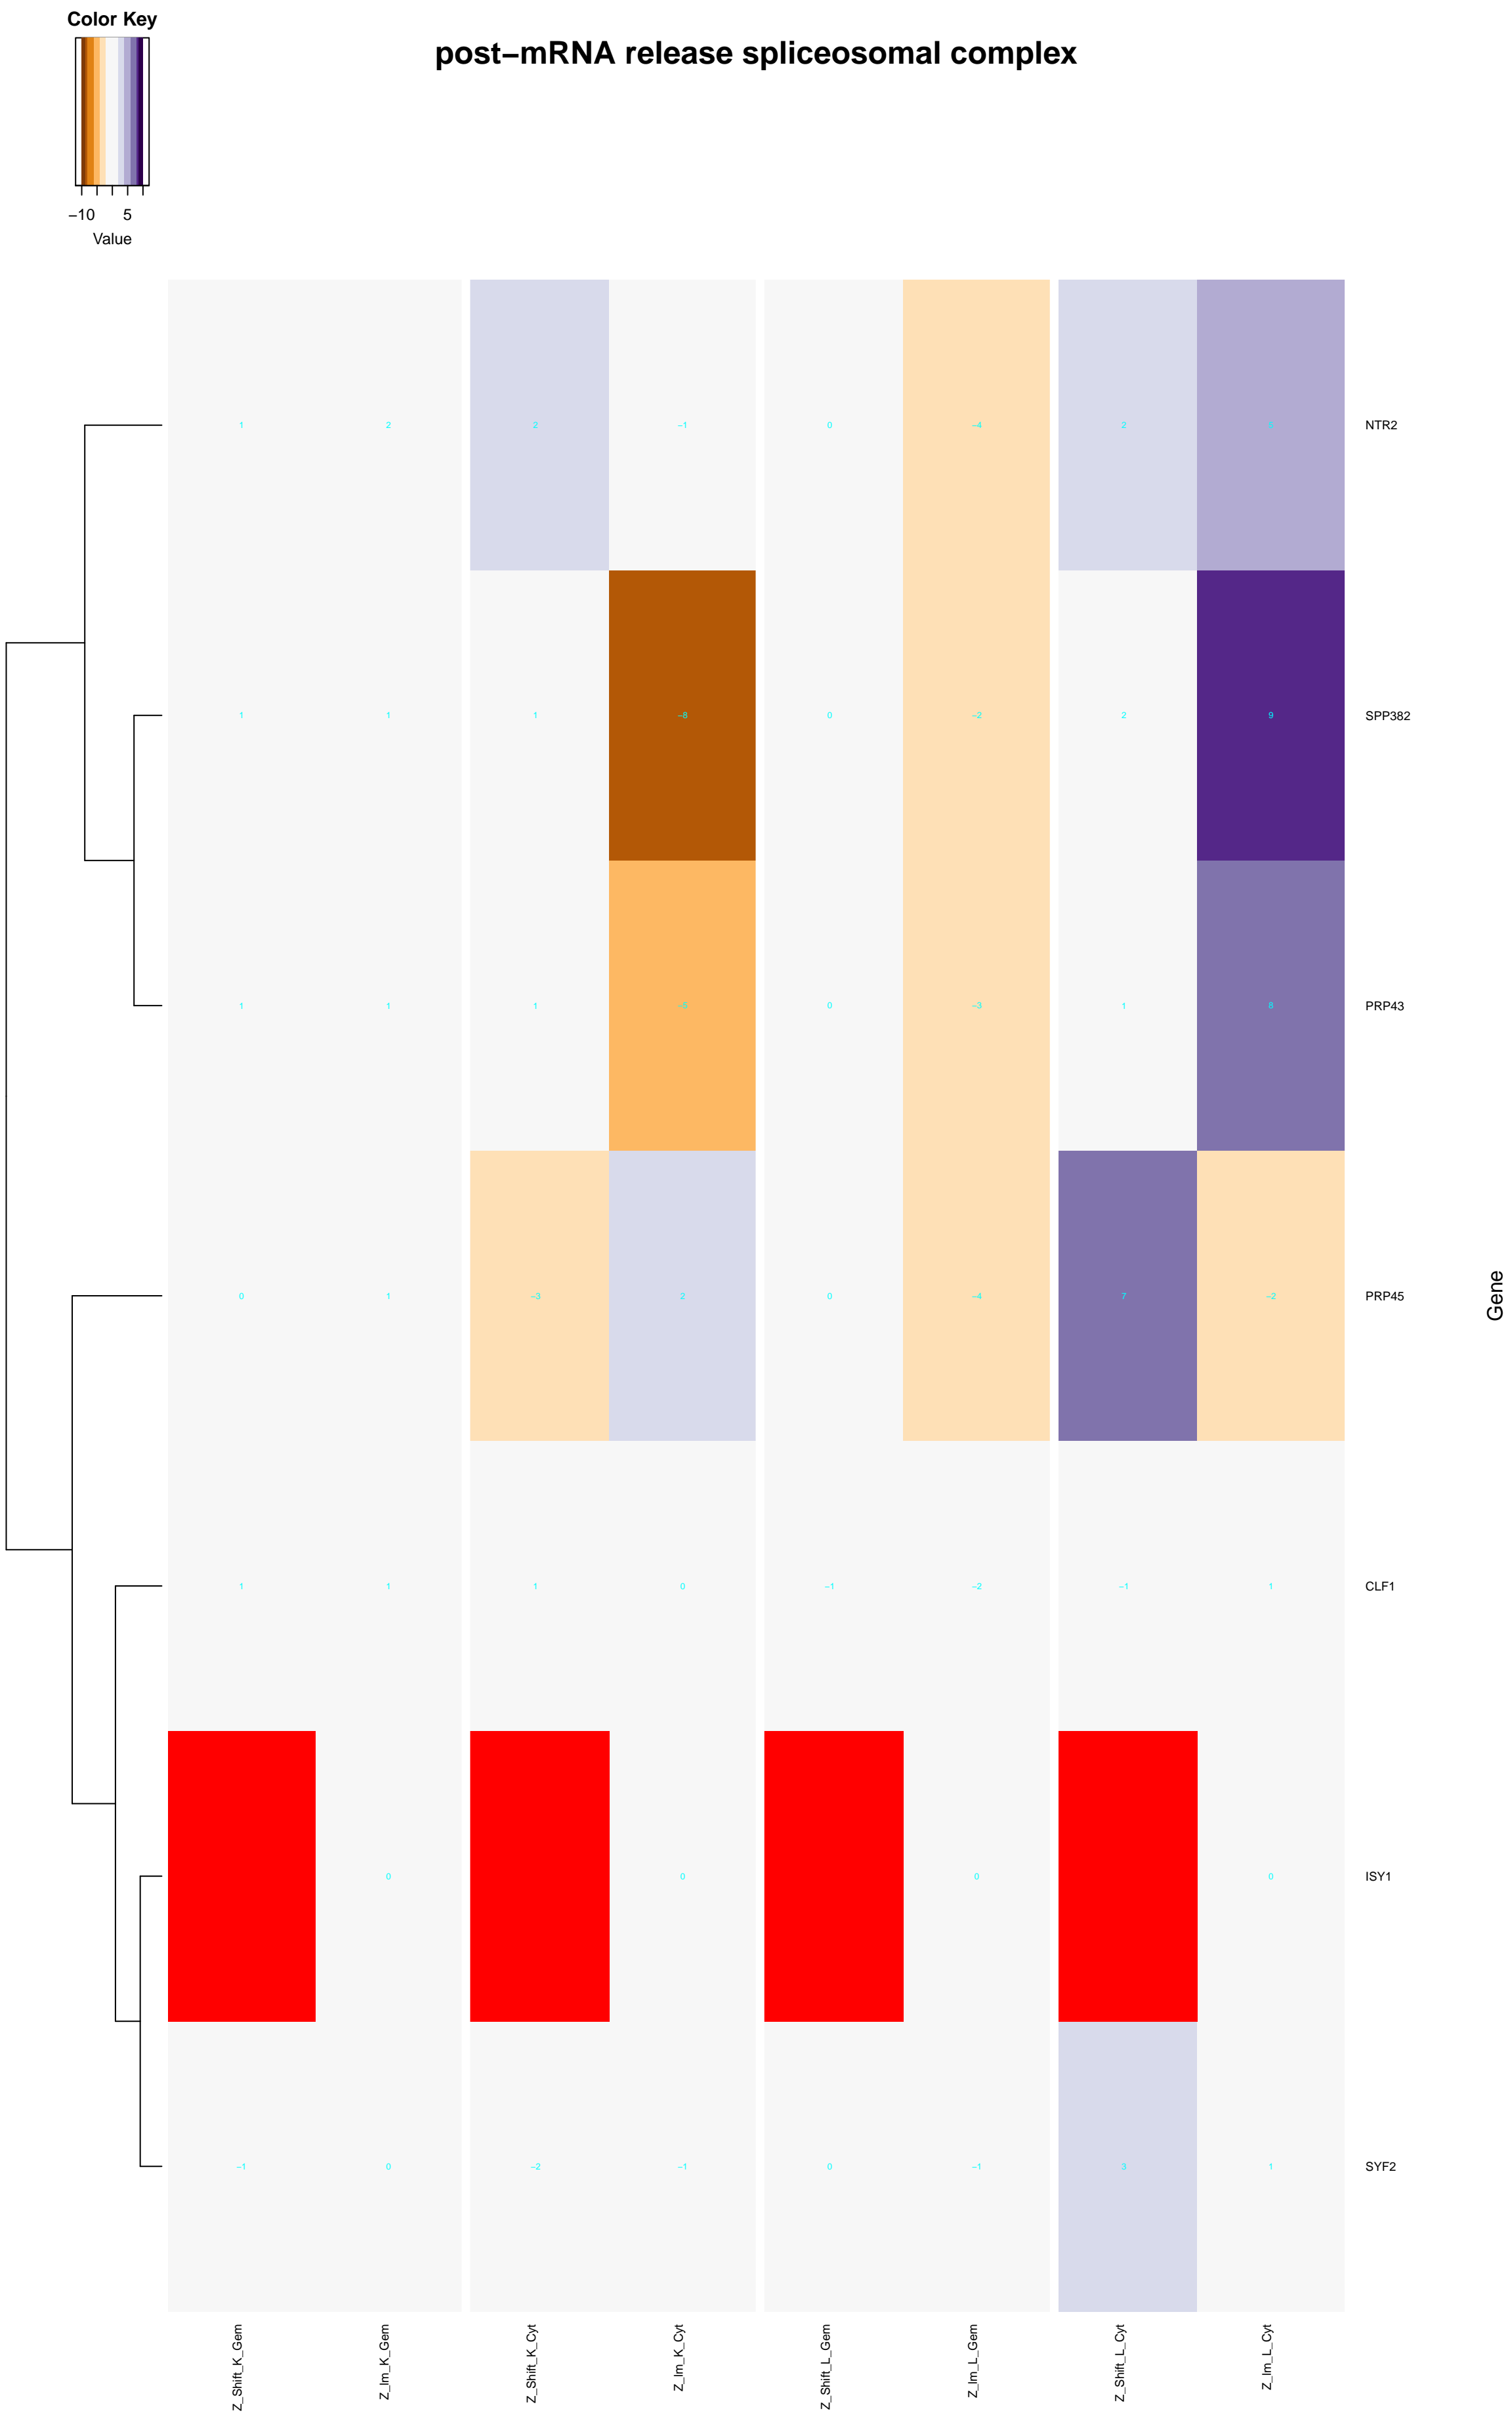

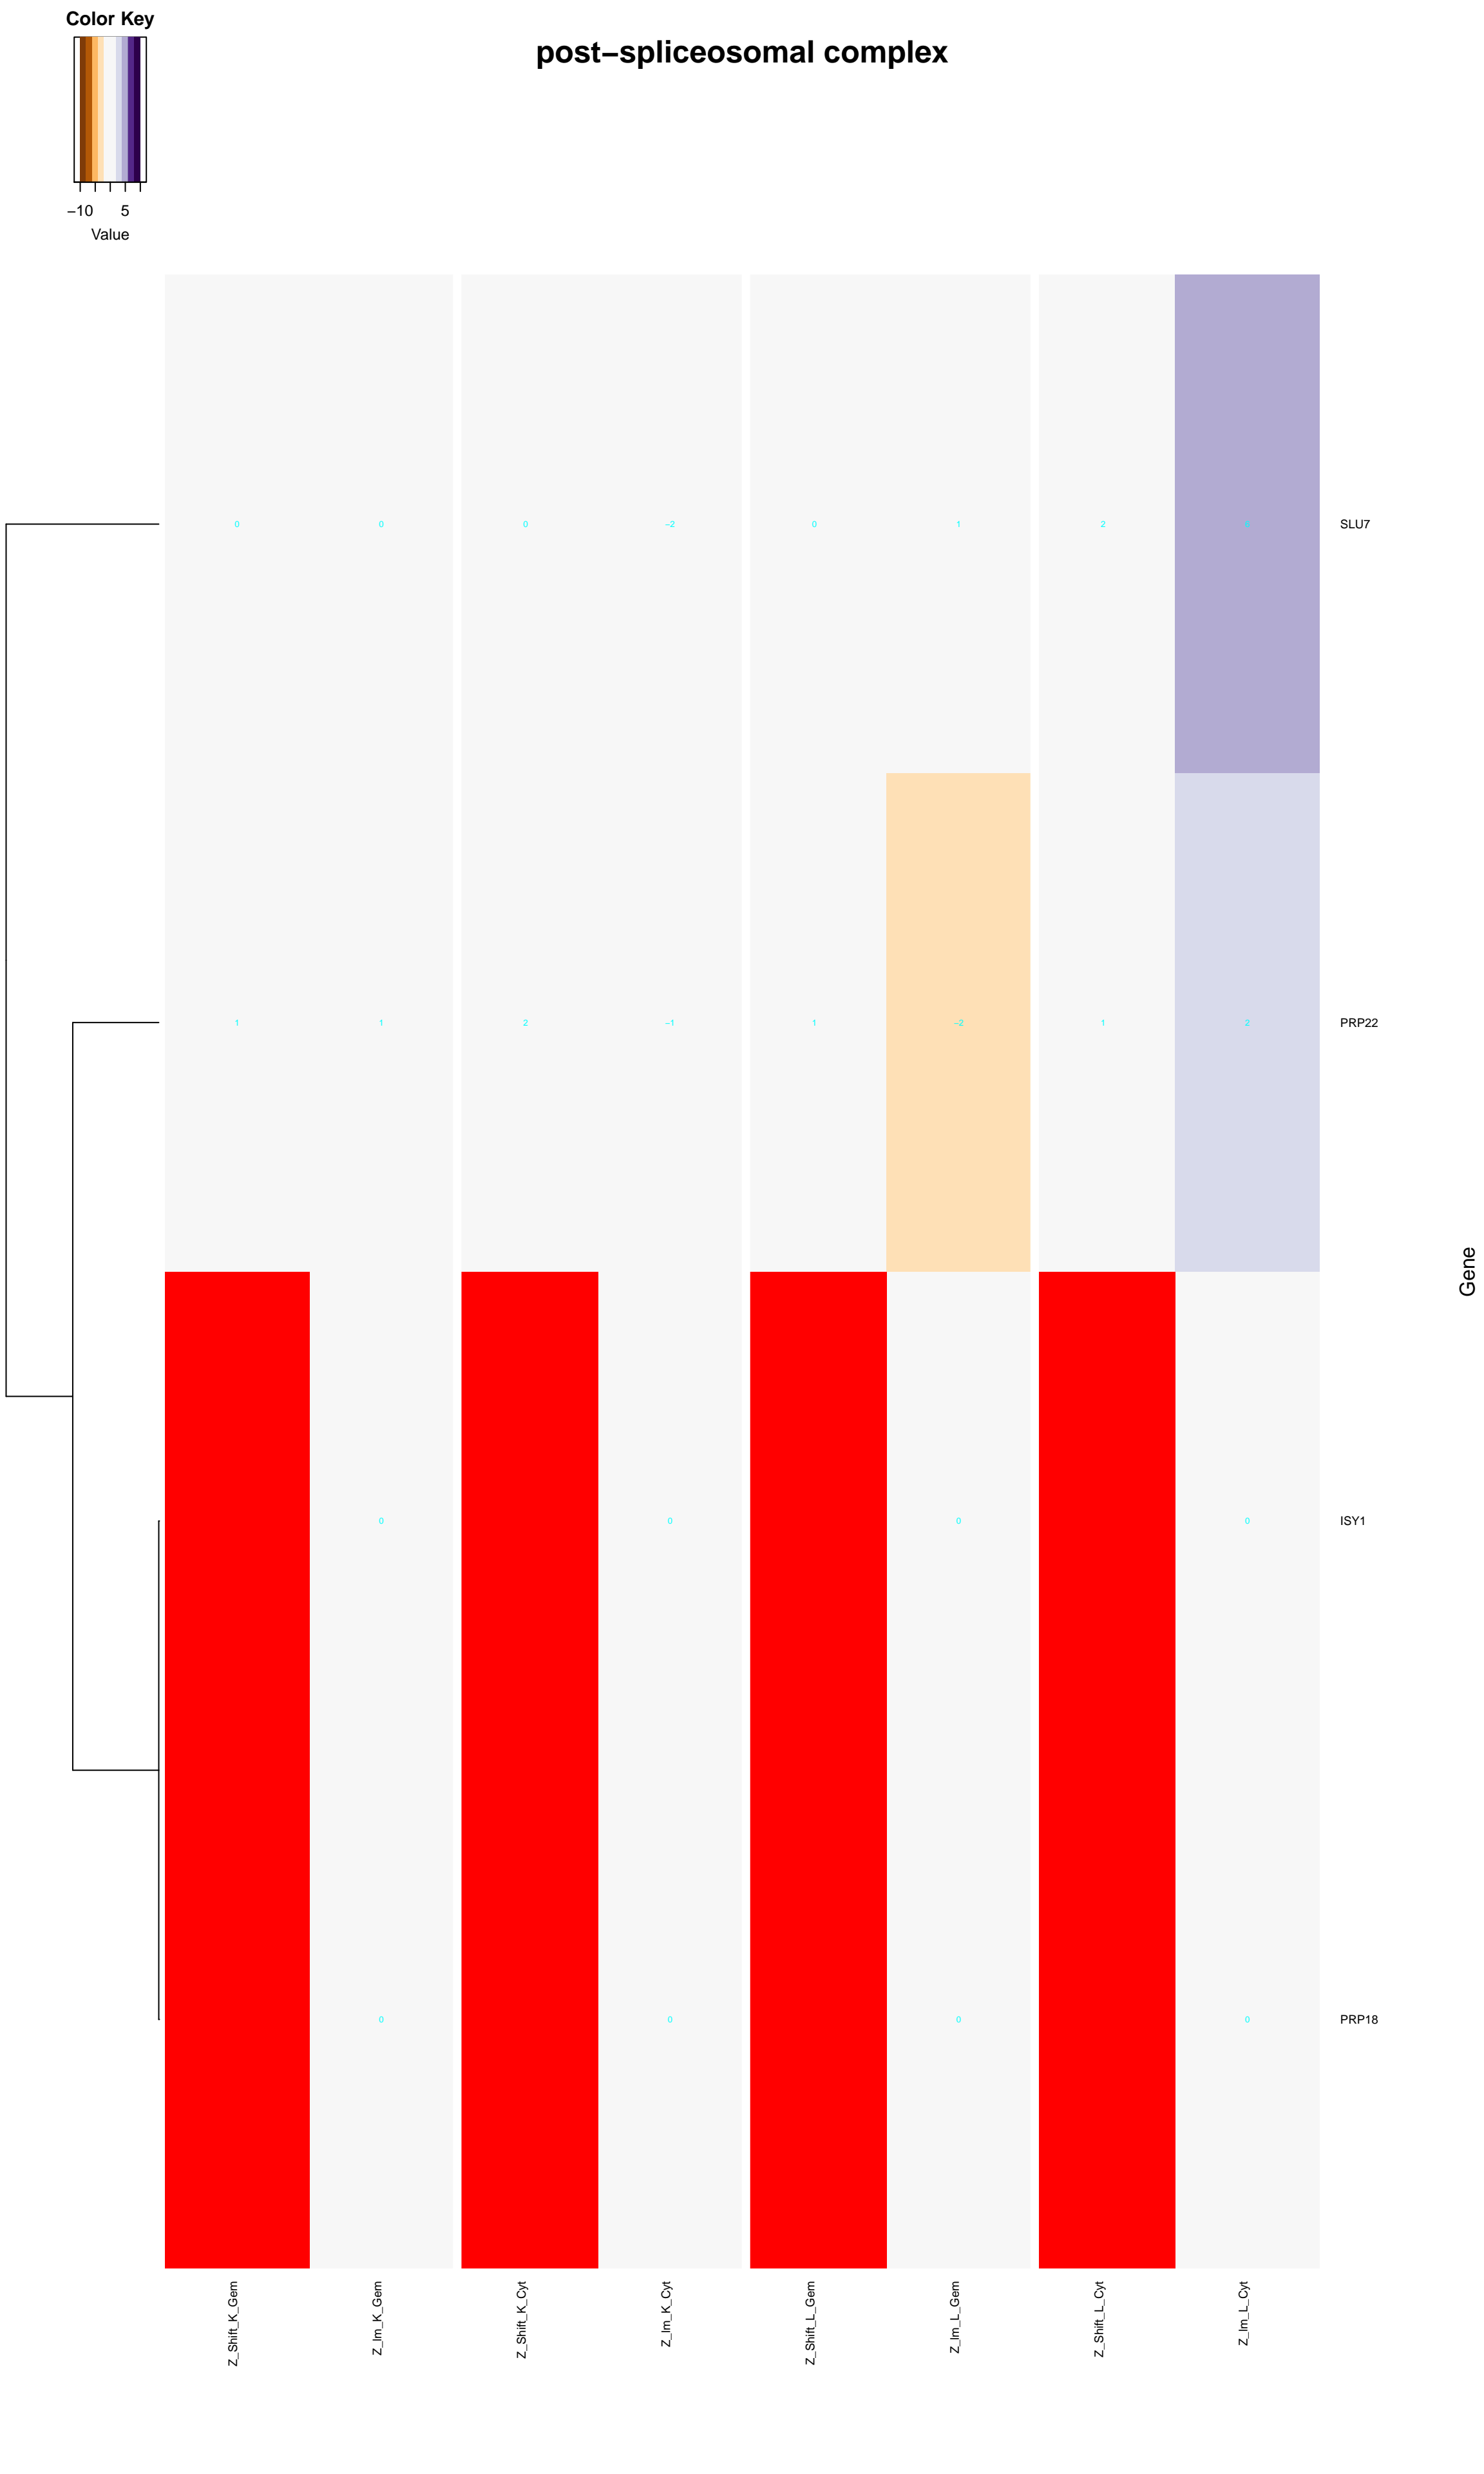

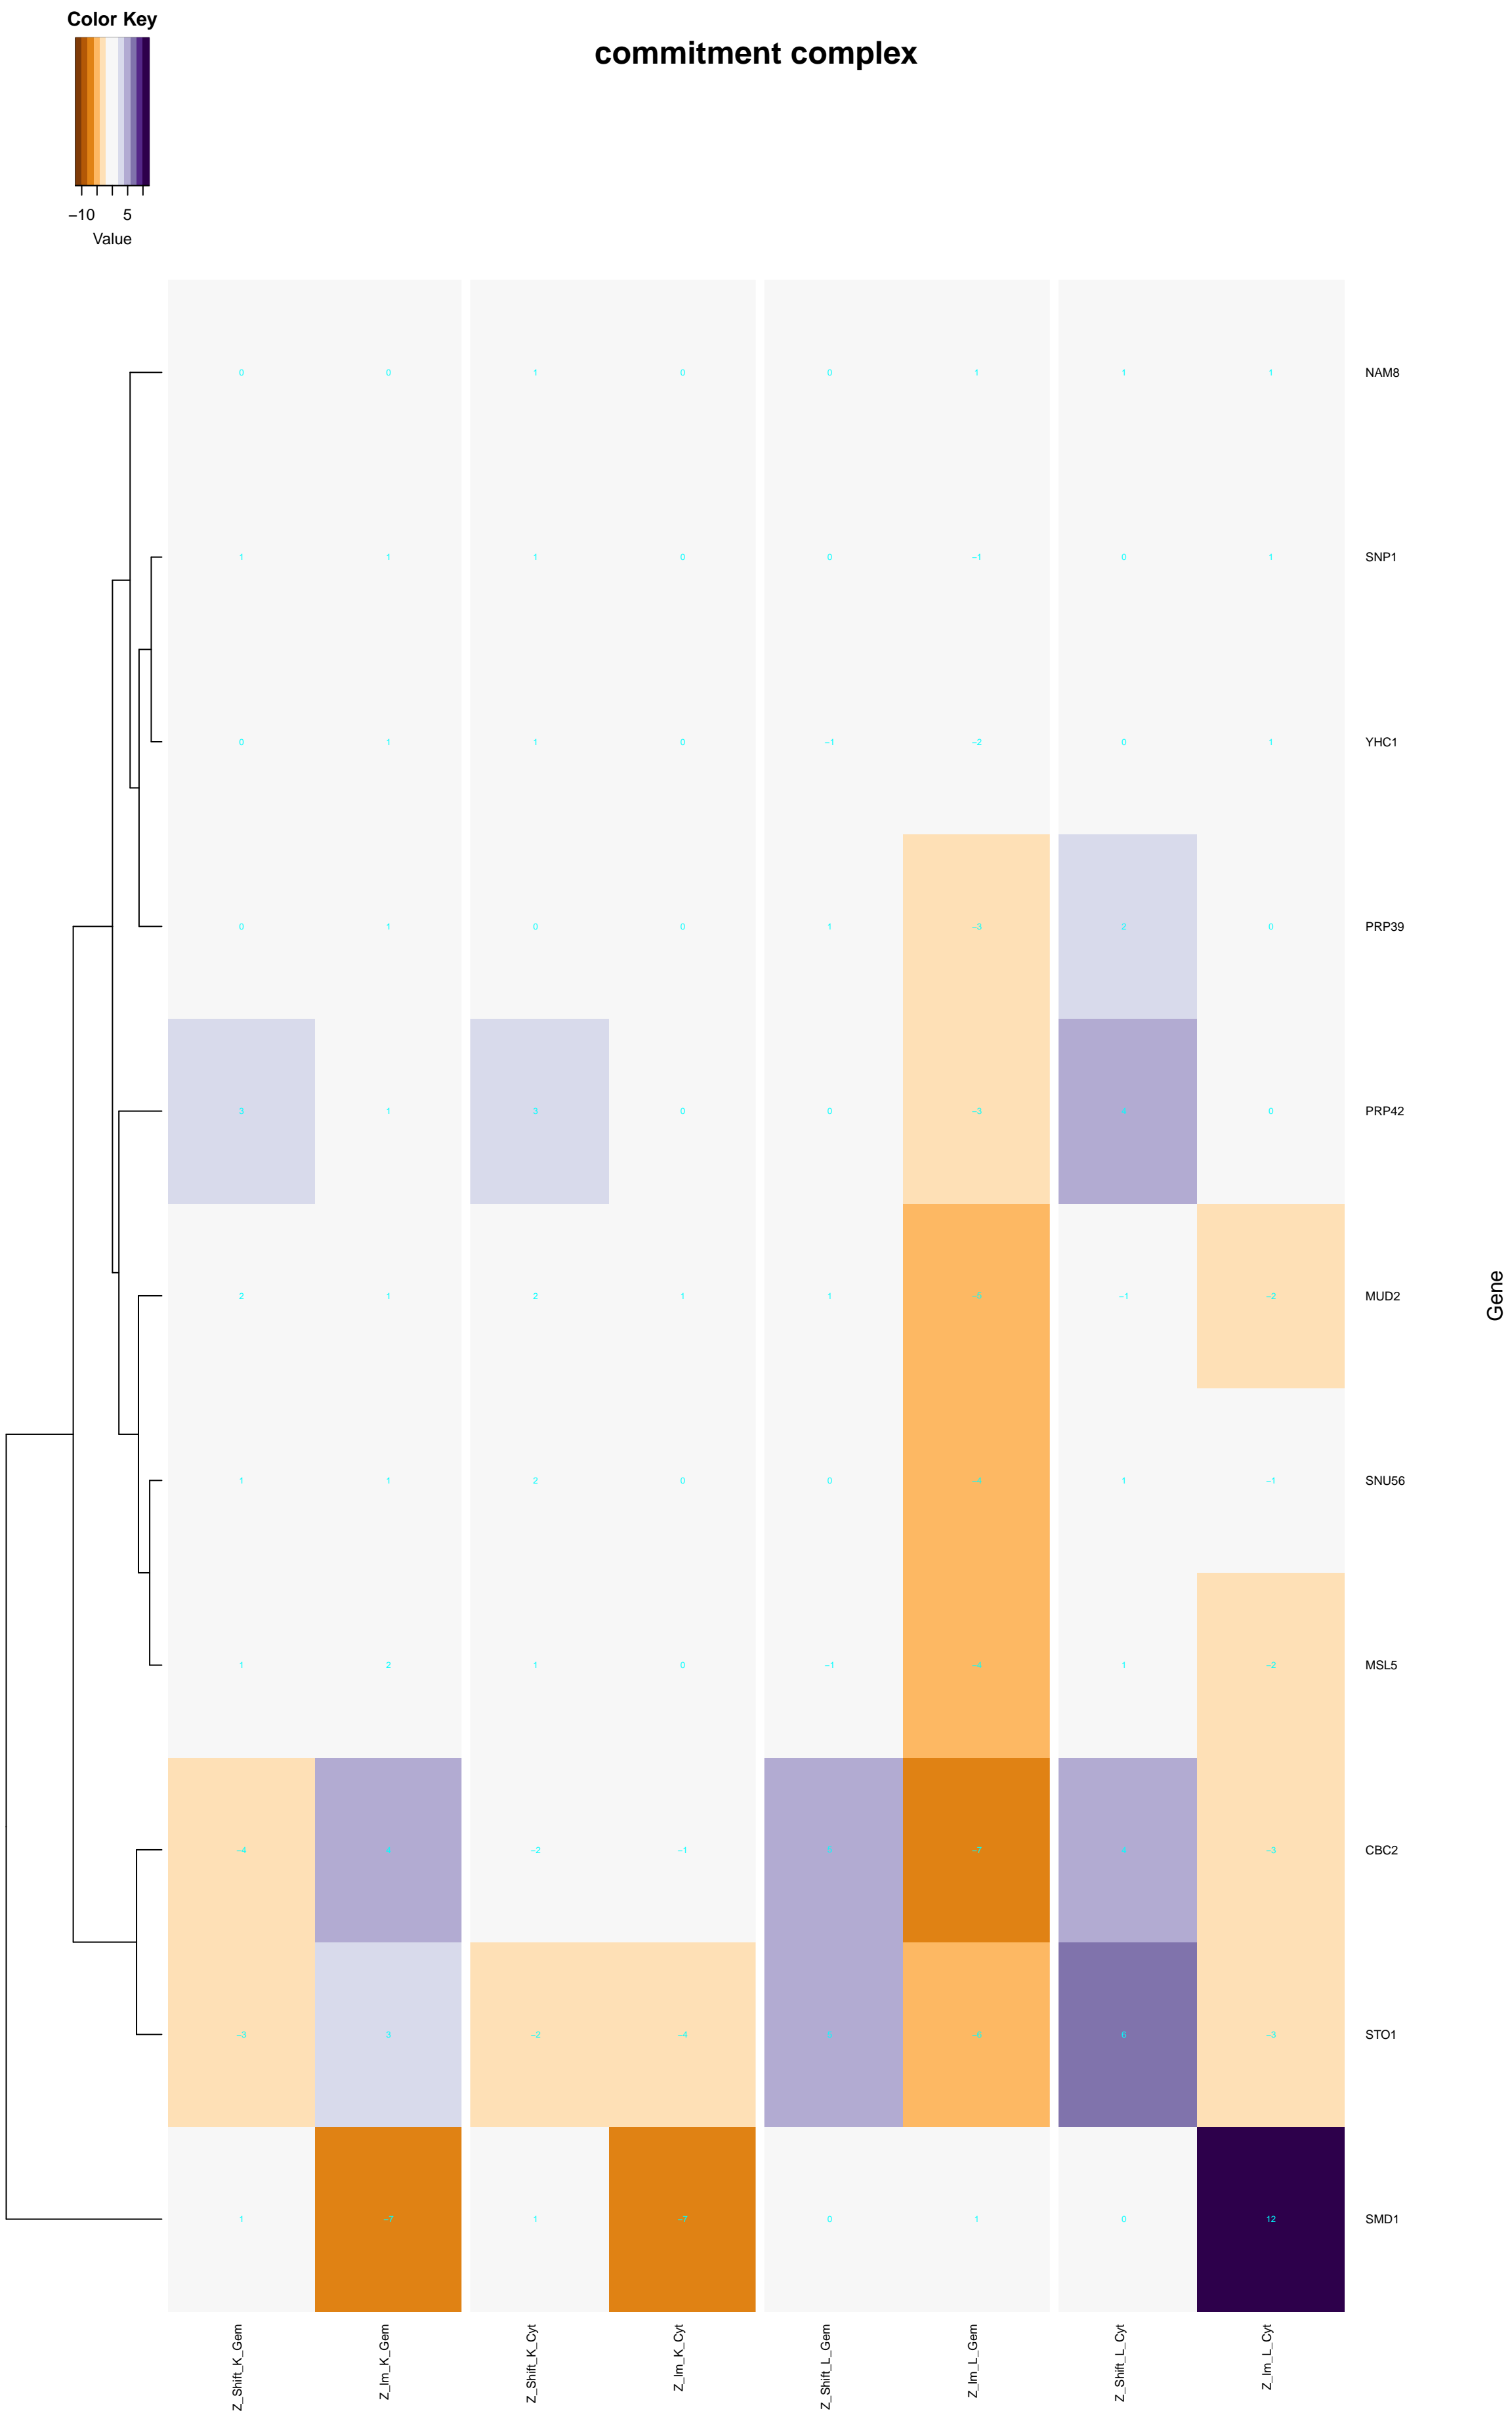

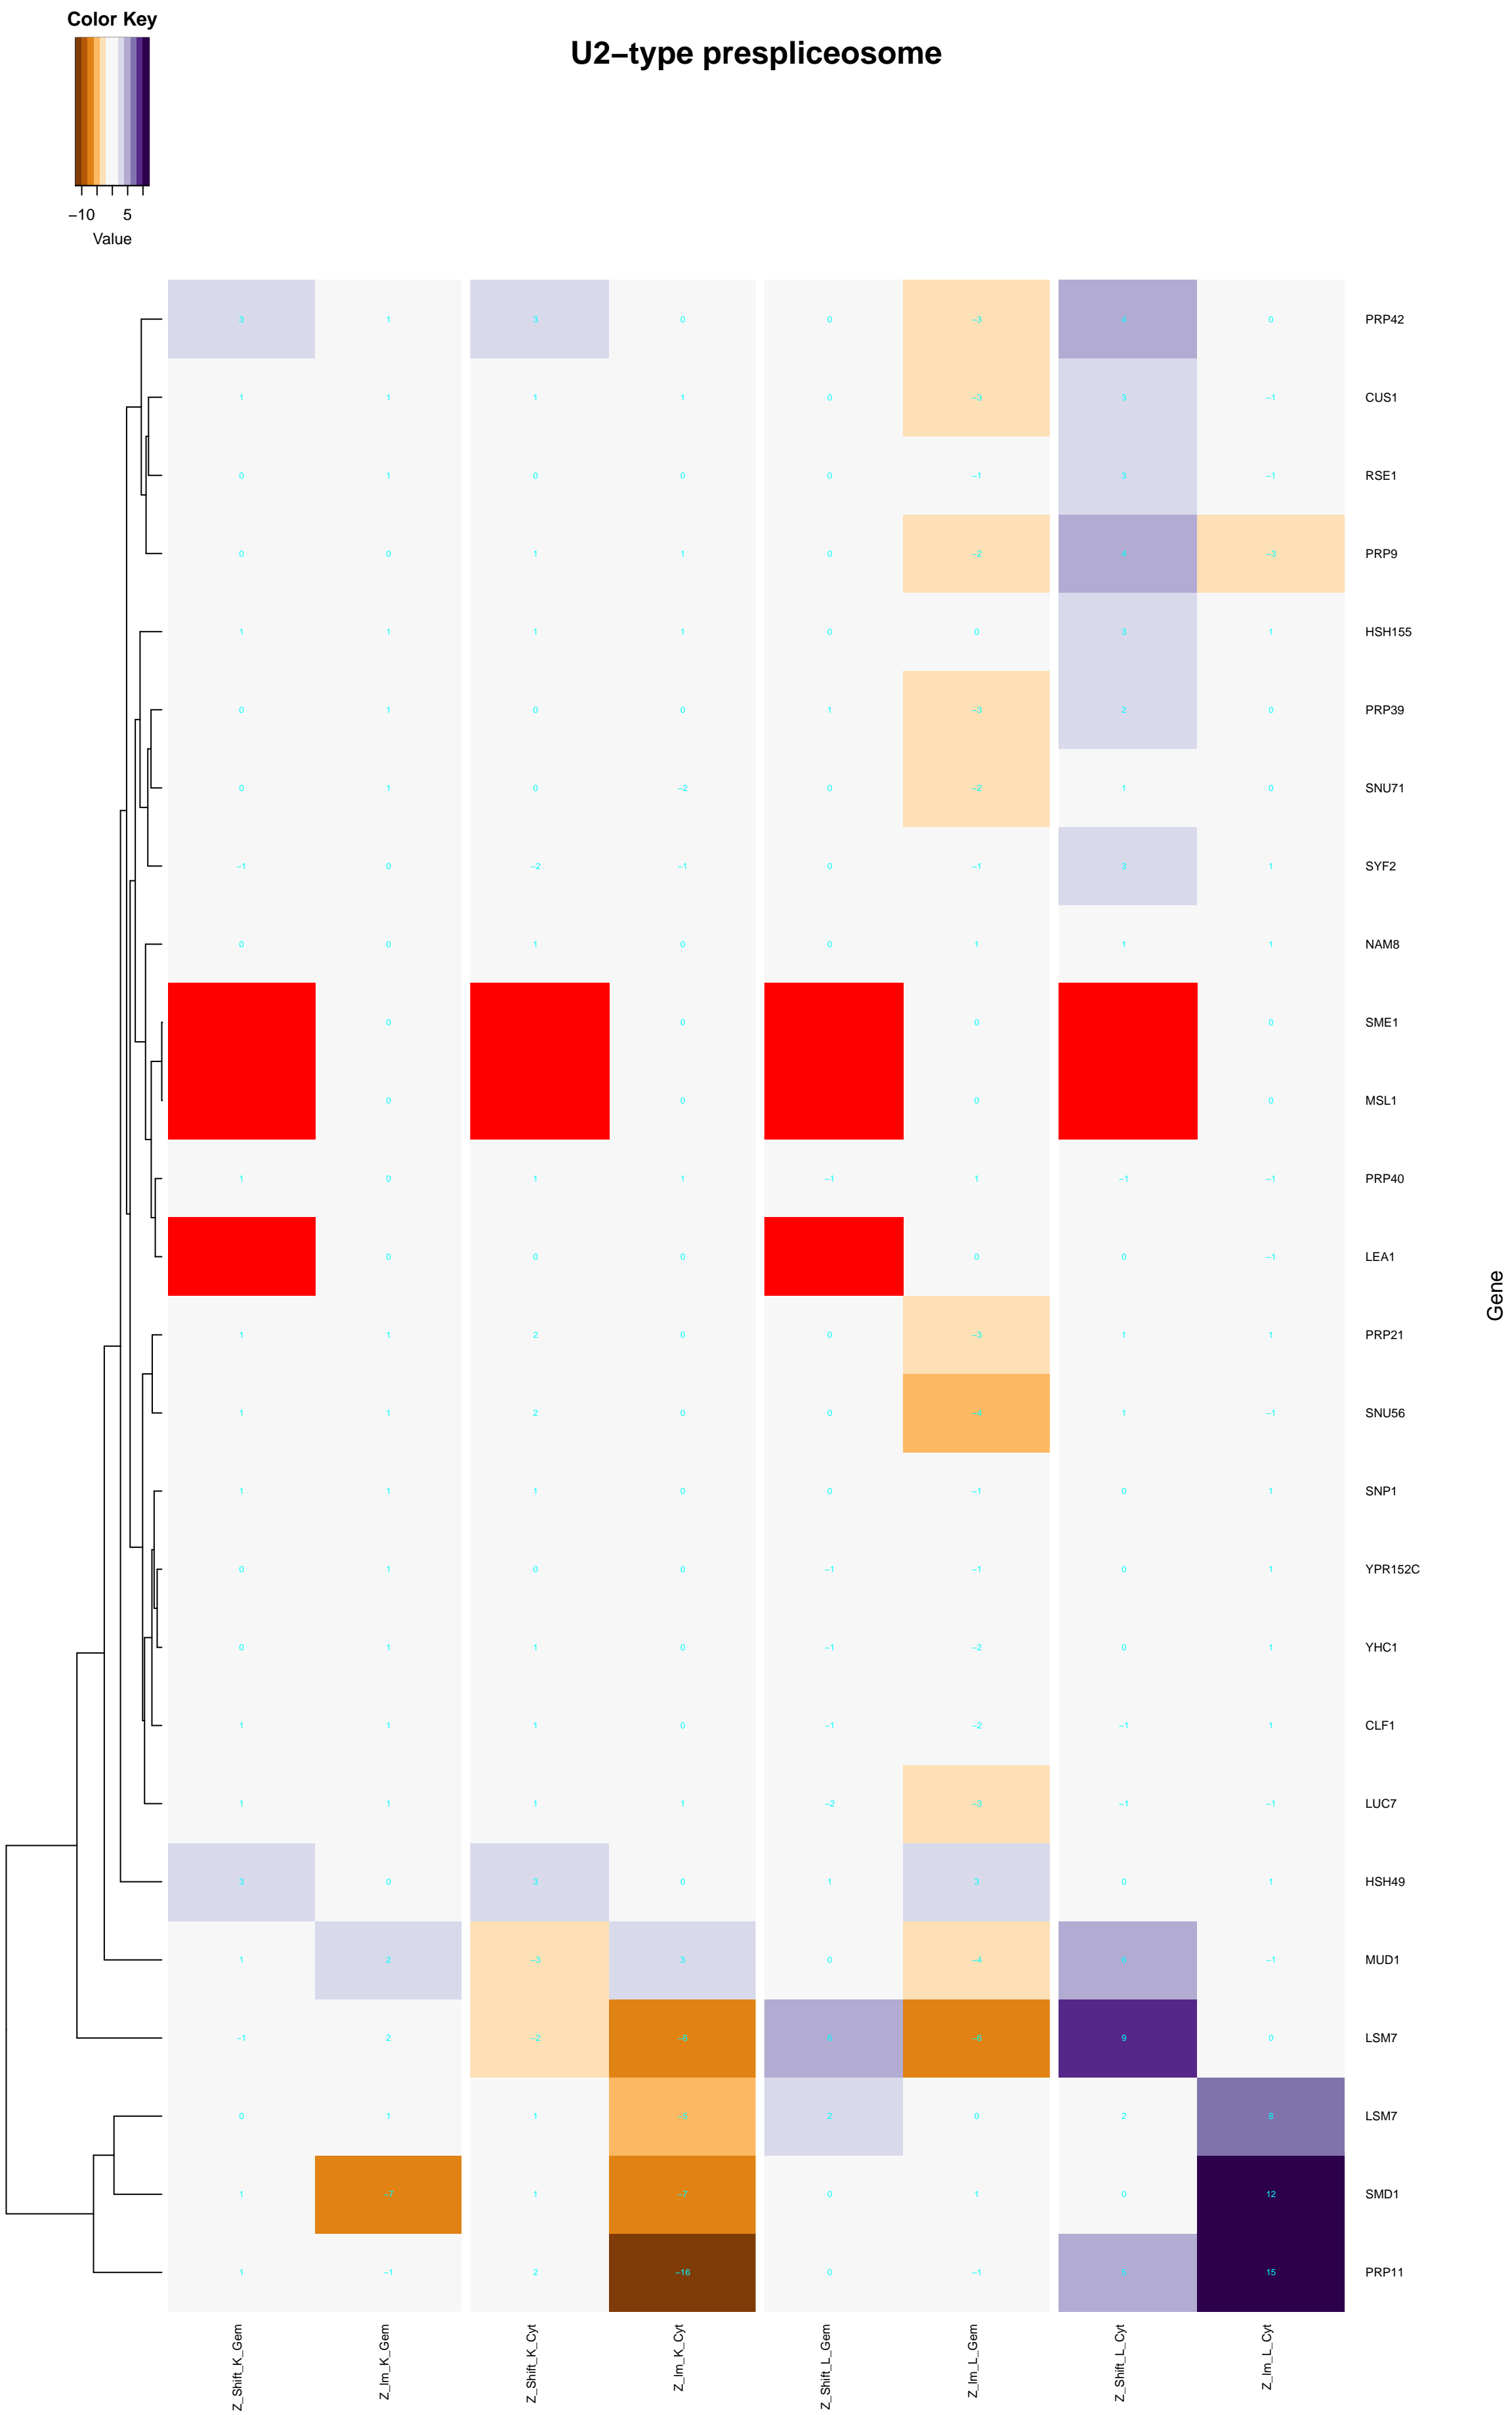

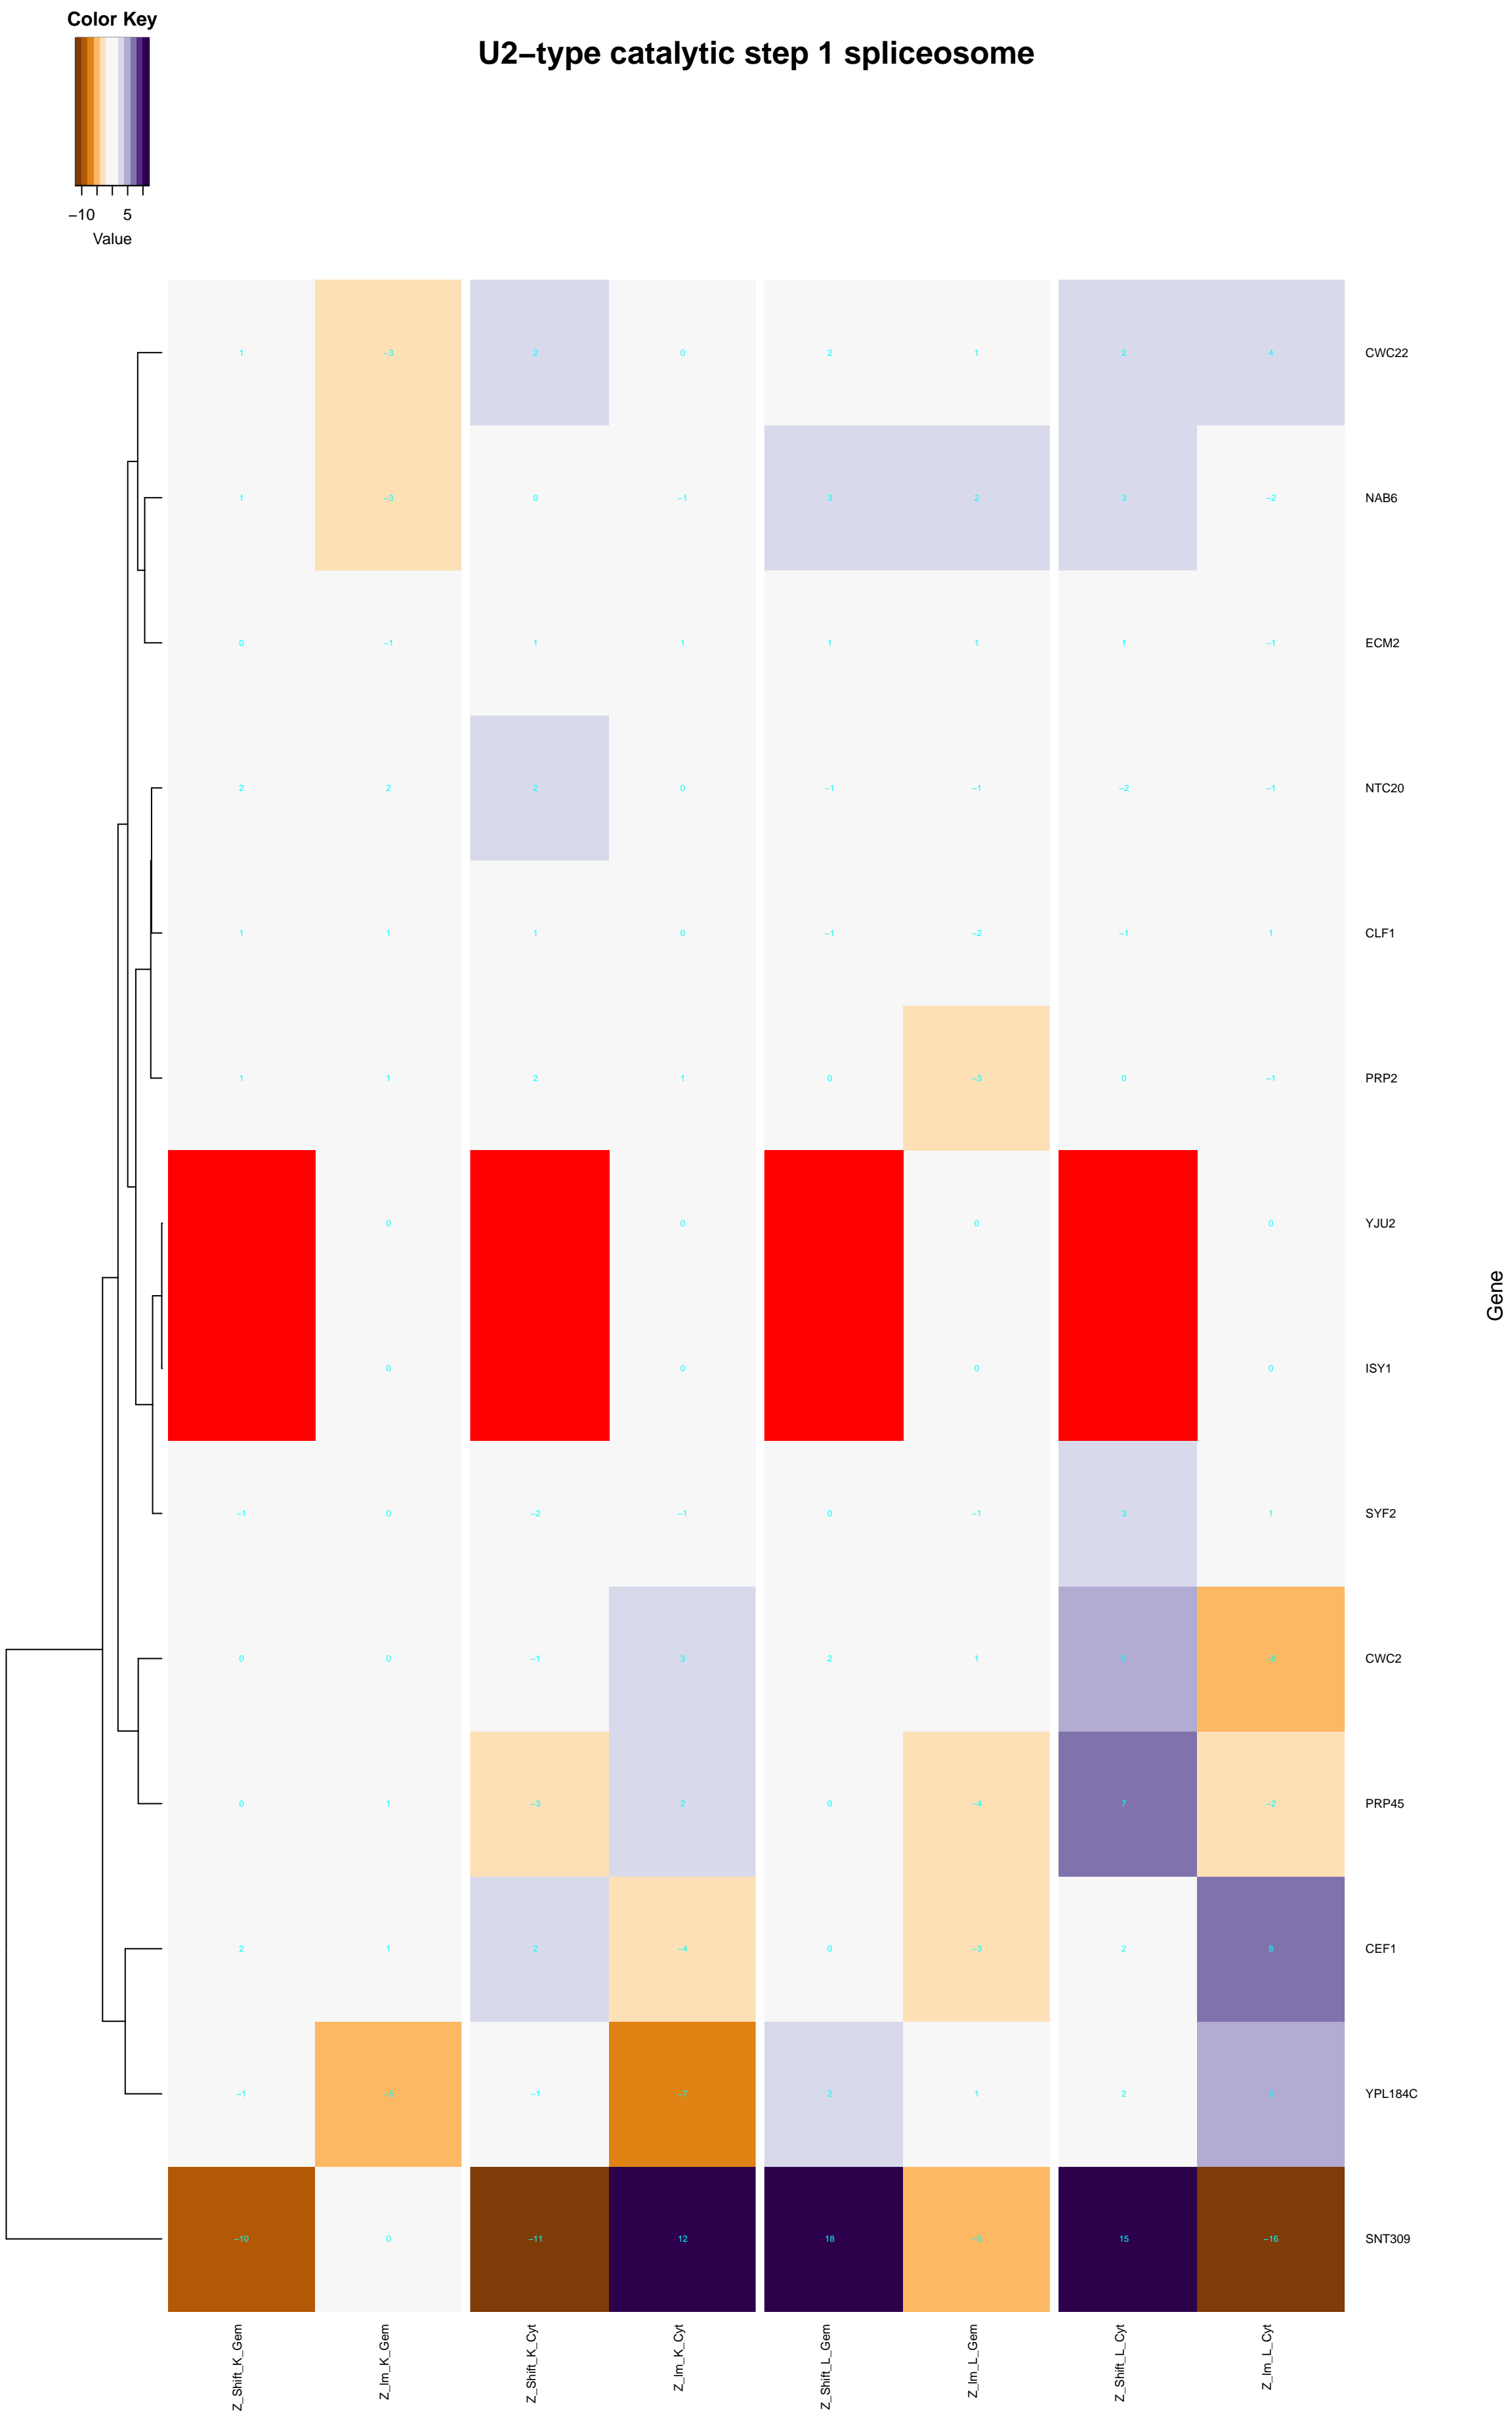

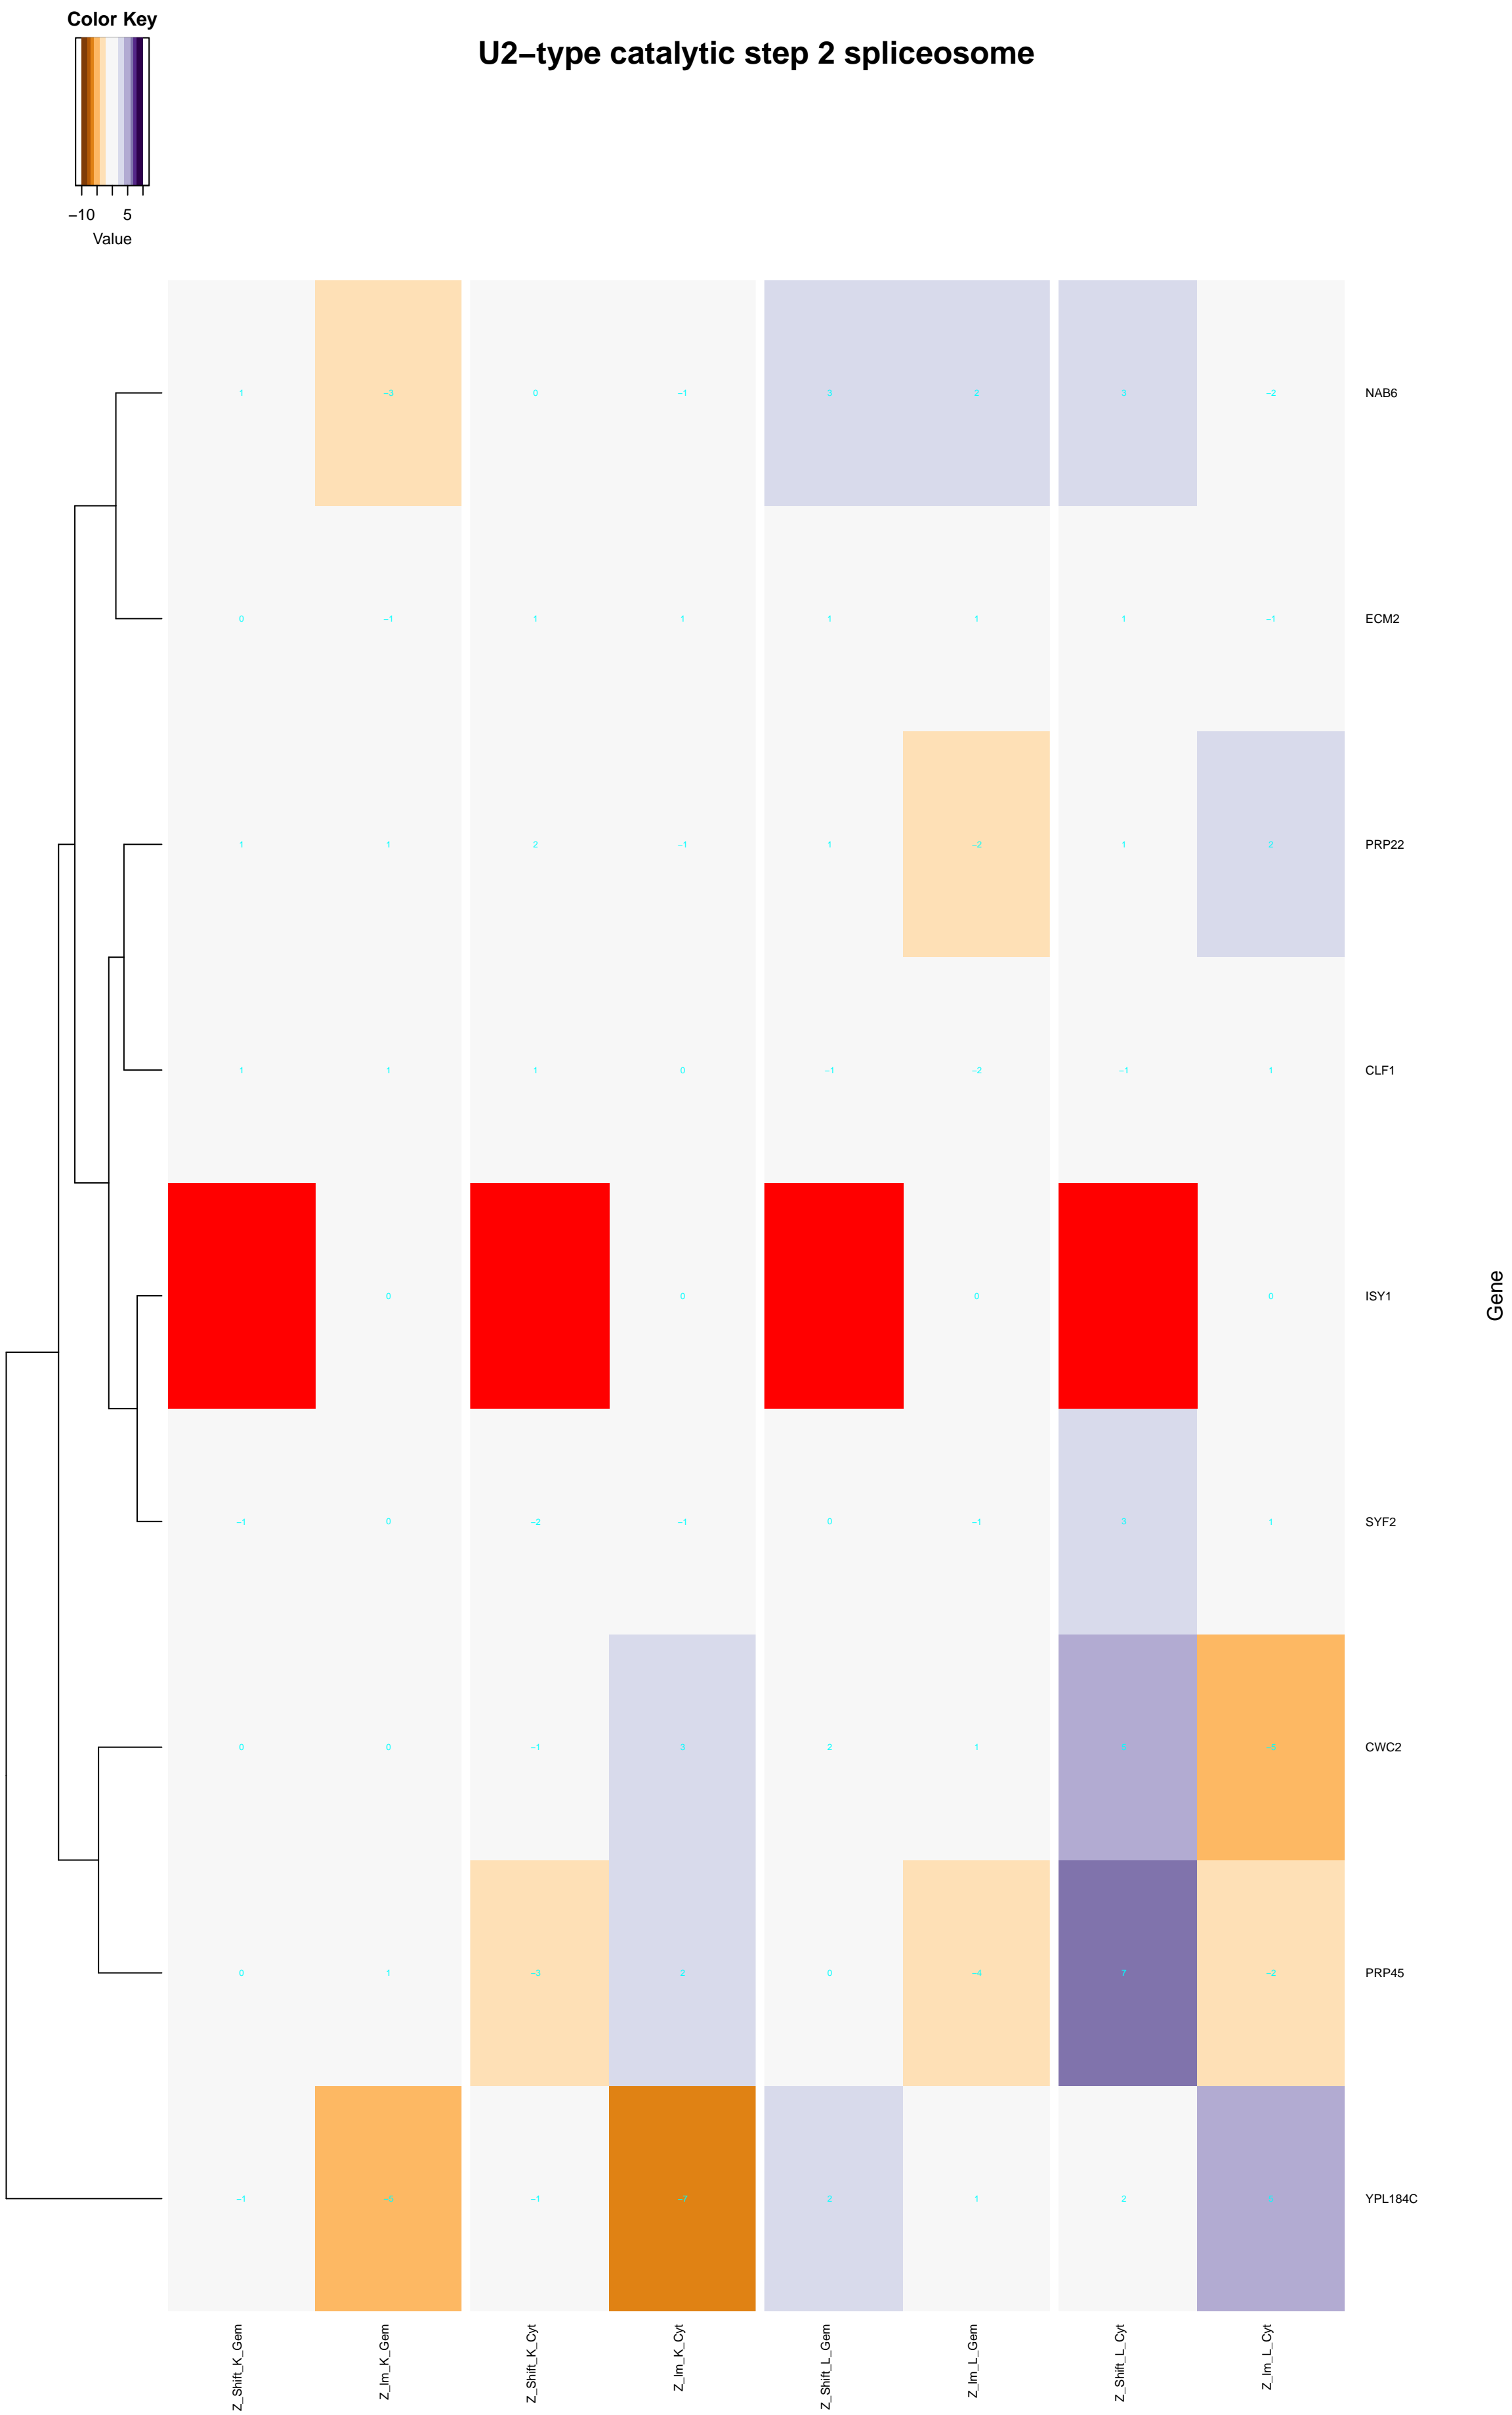

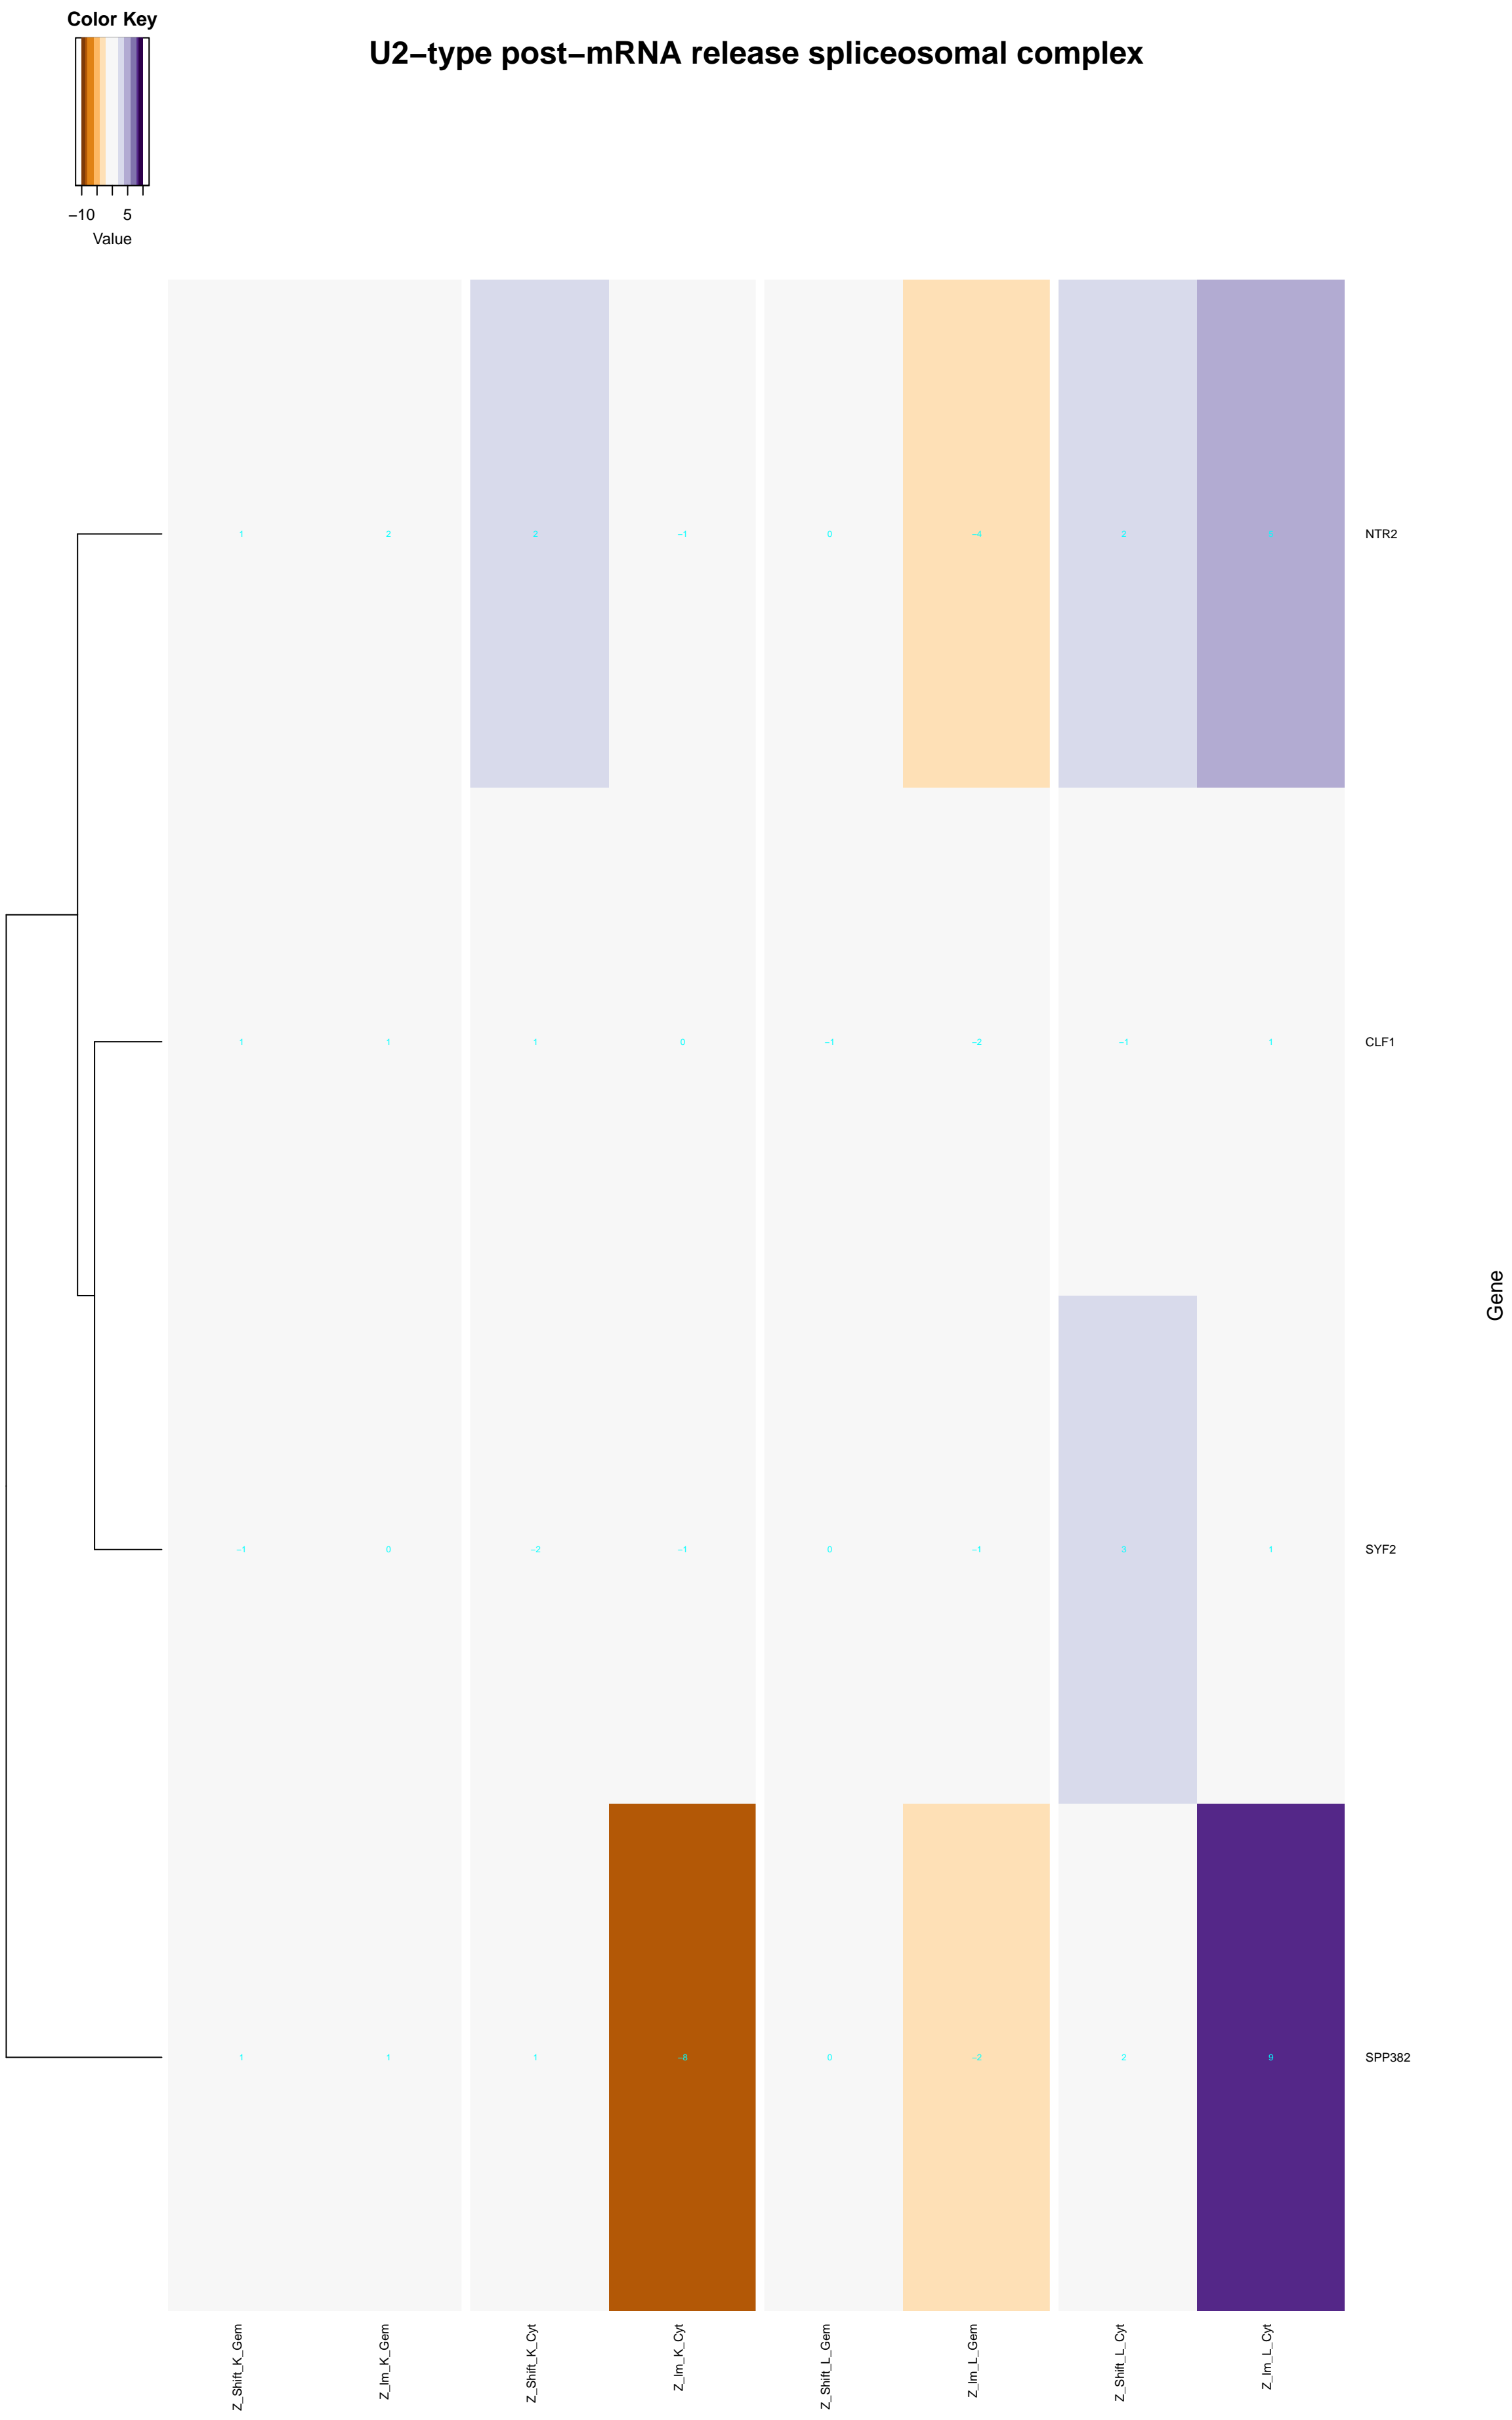

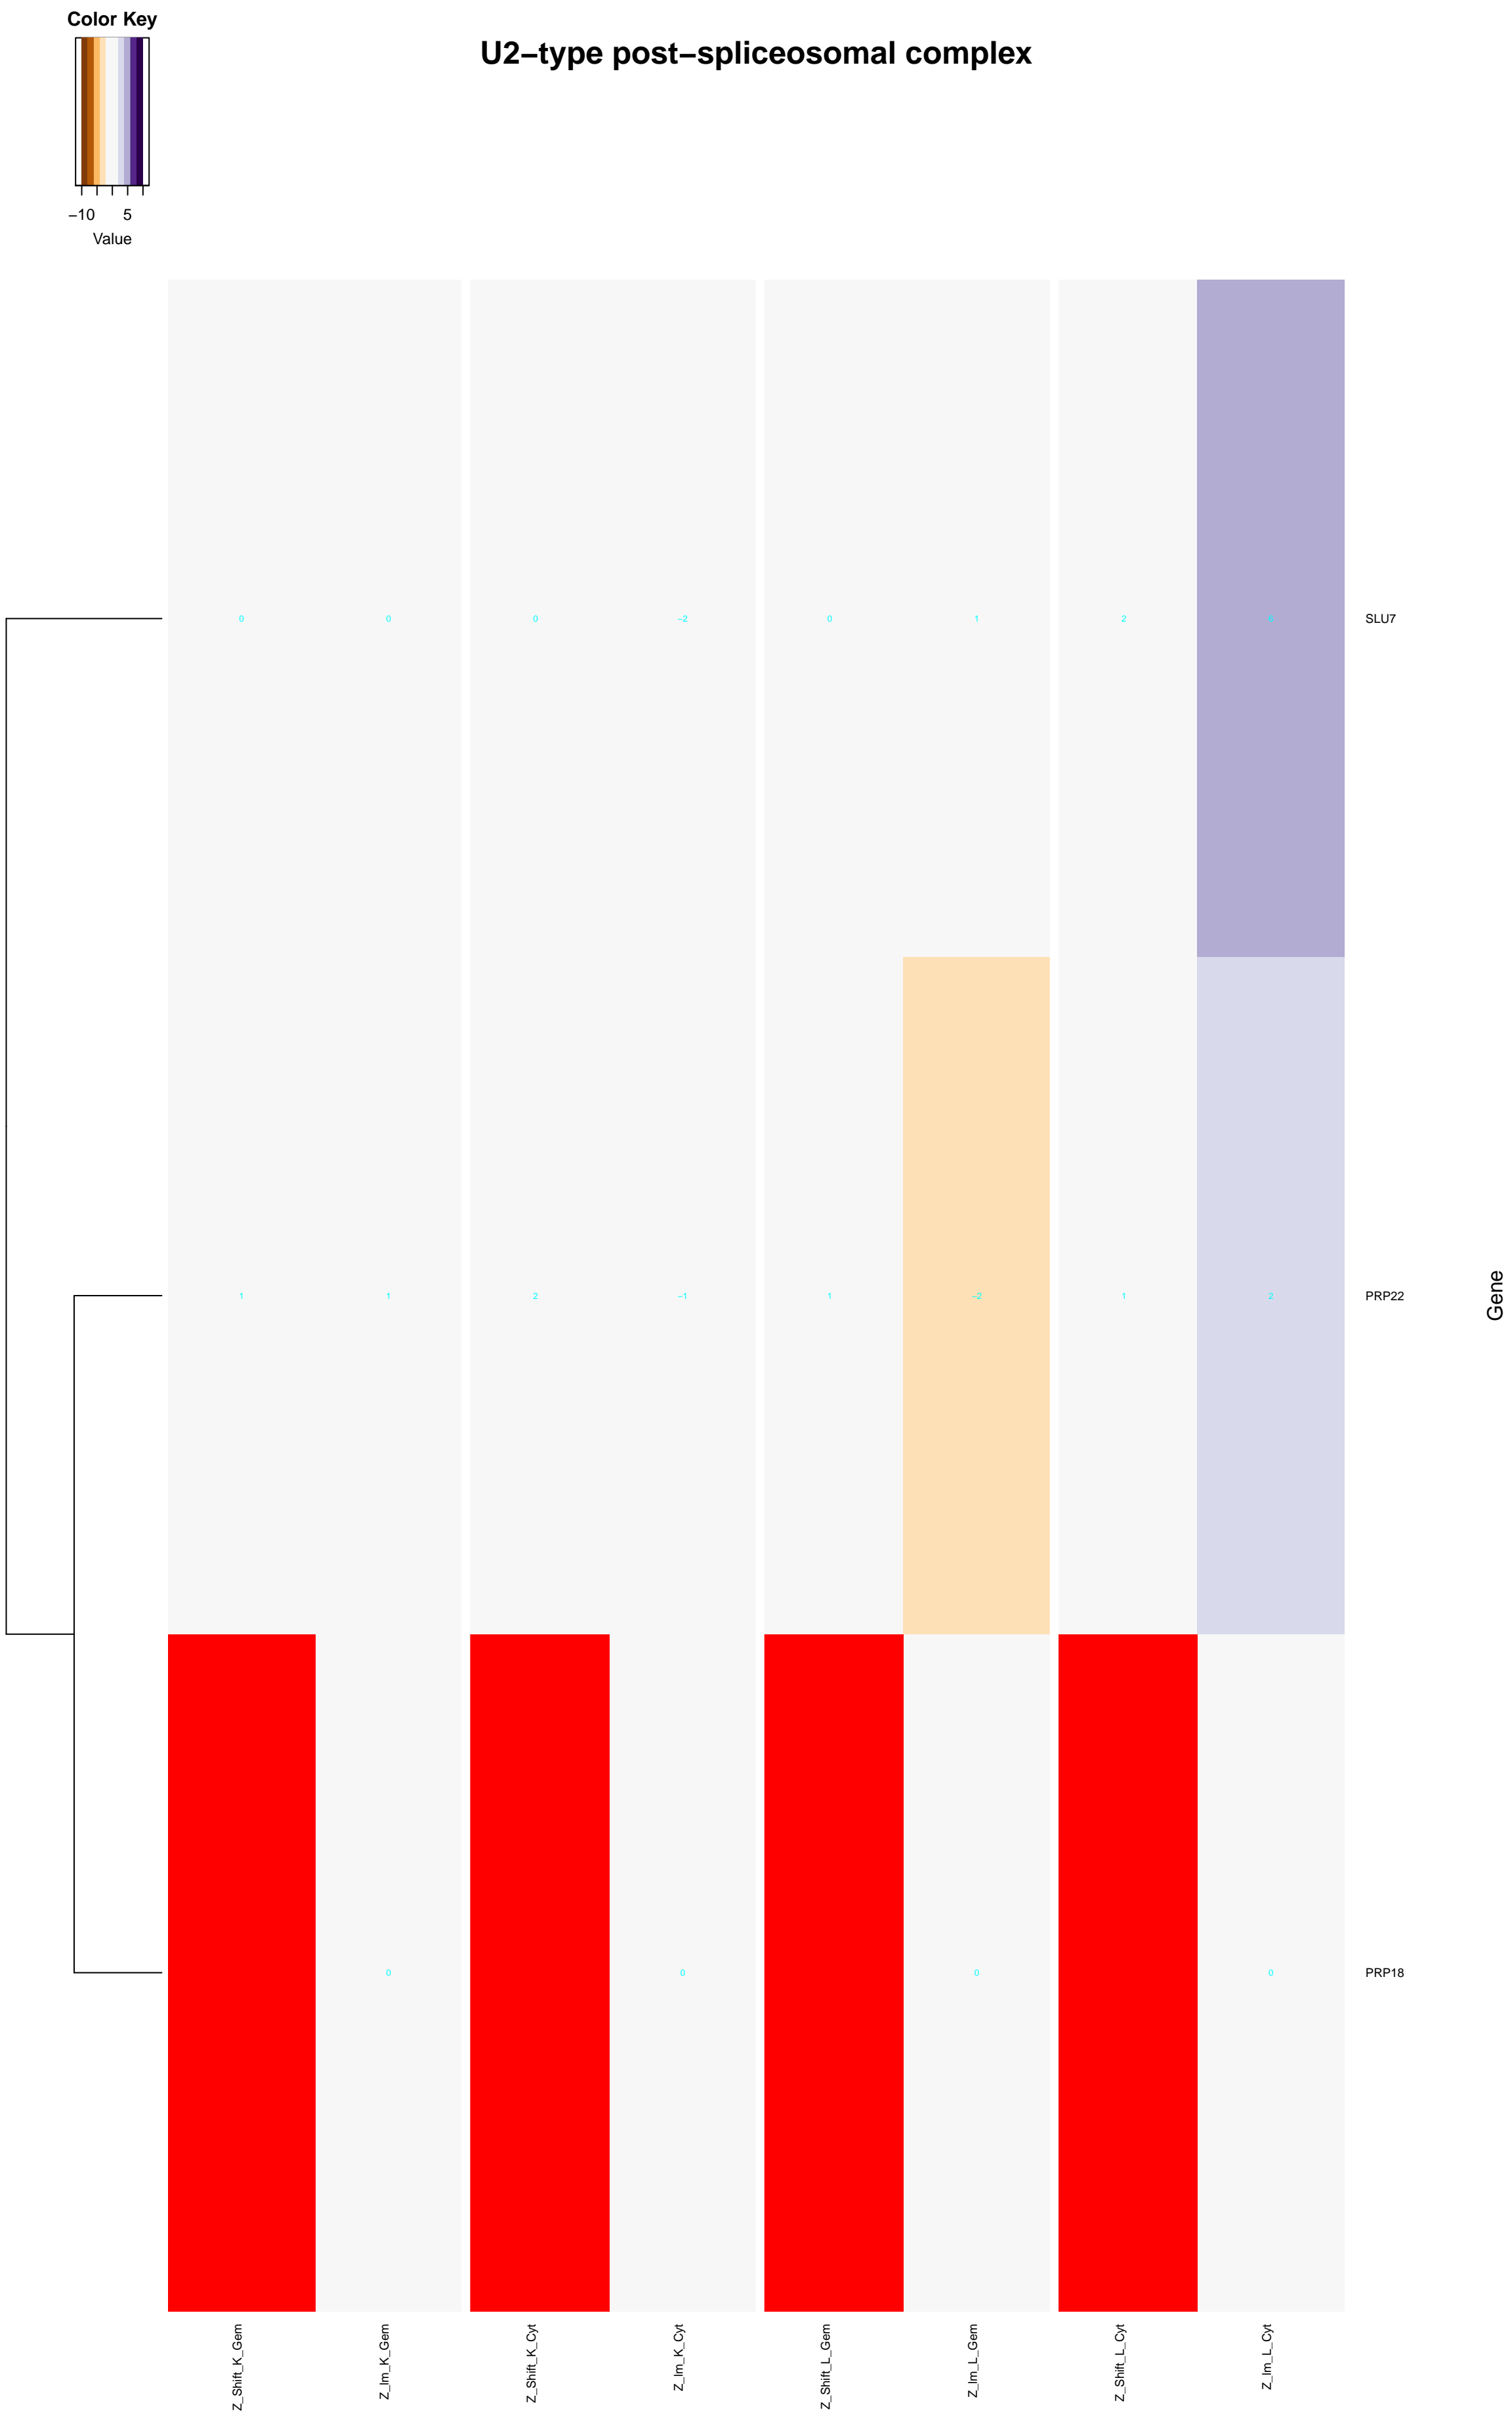

Supplement: s1 [file s1]

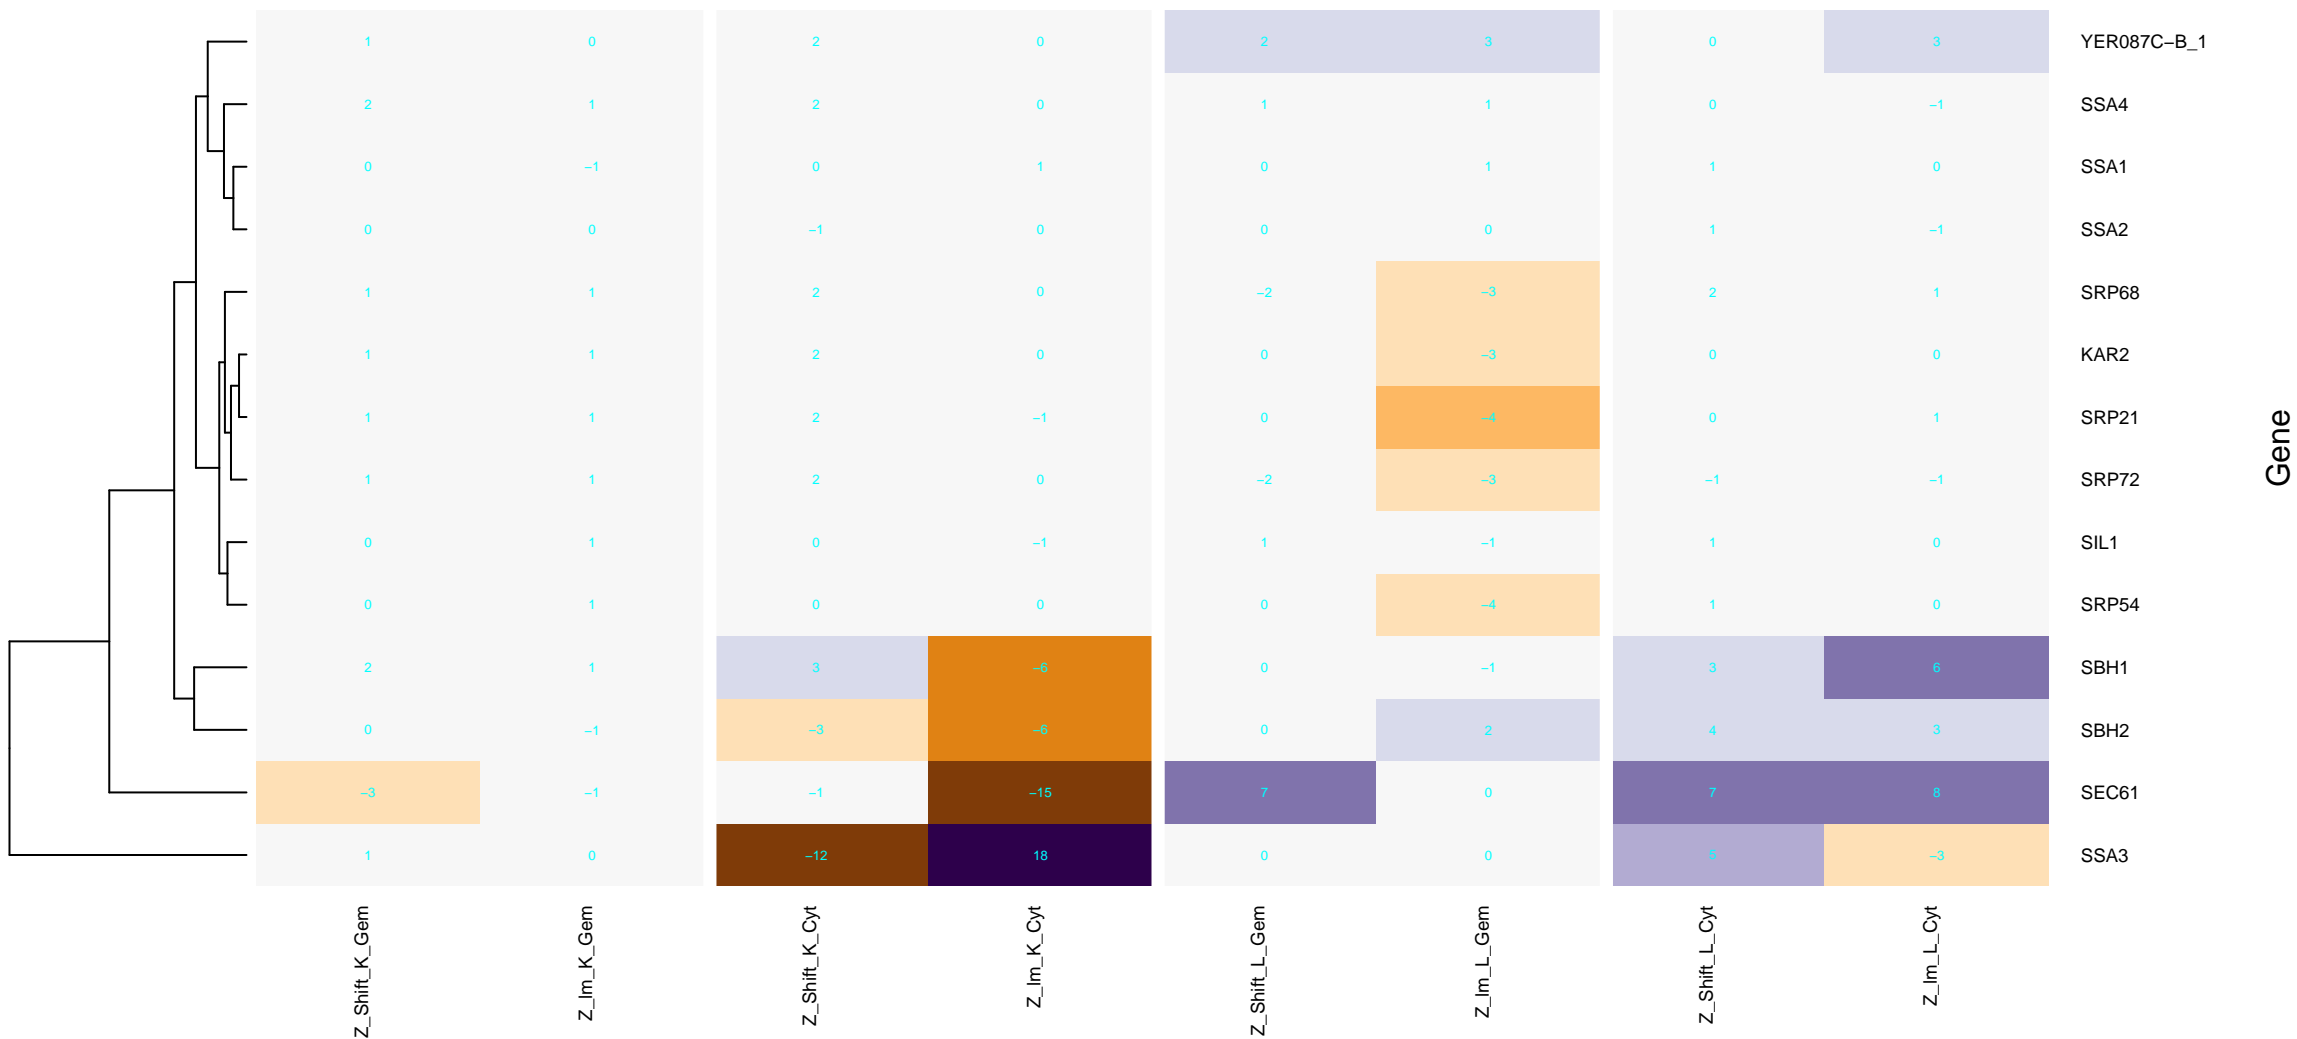

Supplement: s1 [file s1]

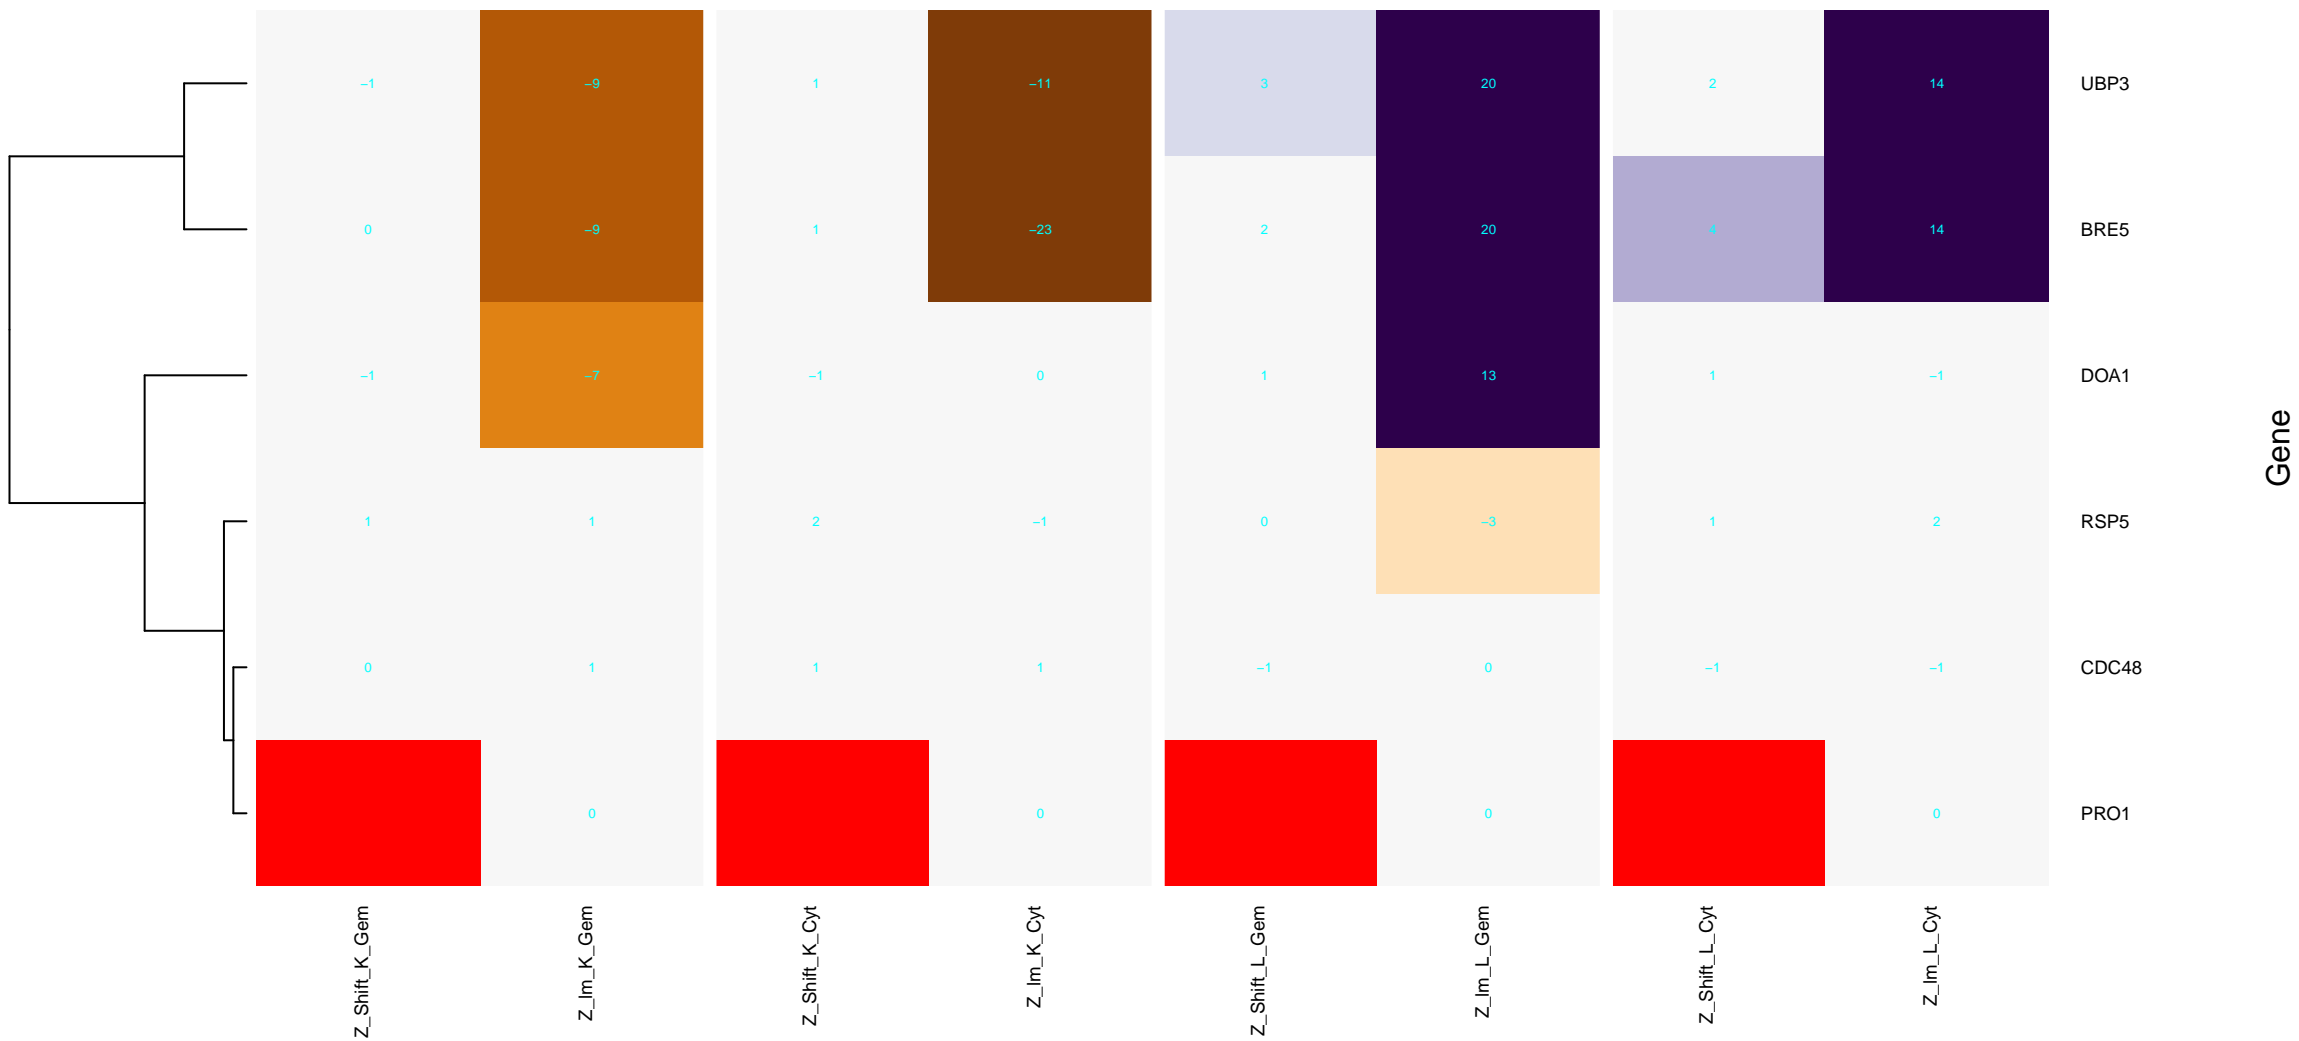

Supplement: s1 [file s1]

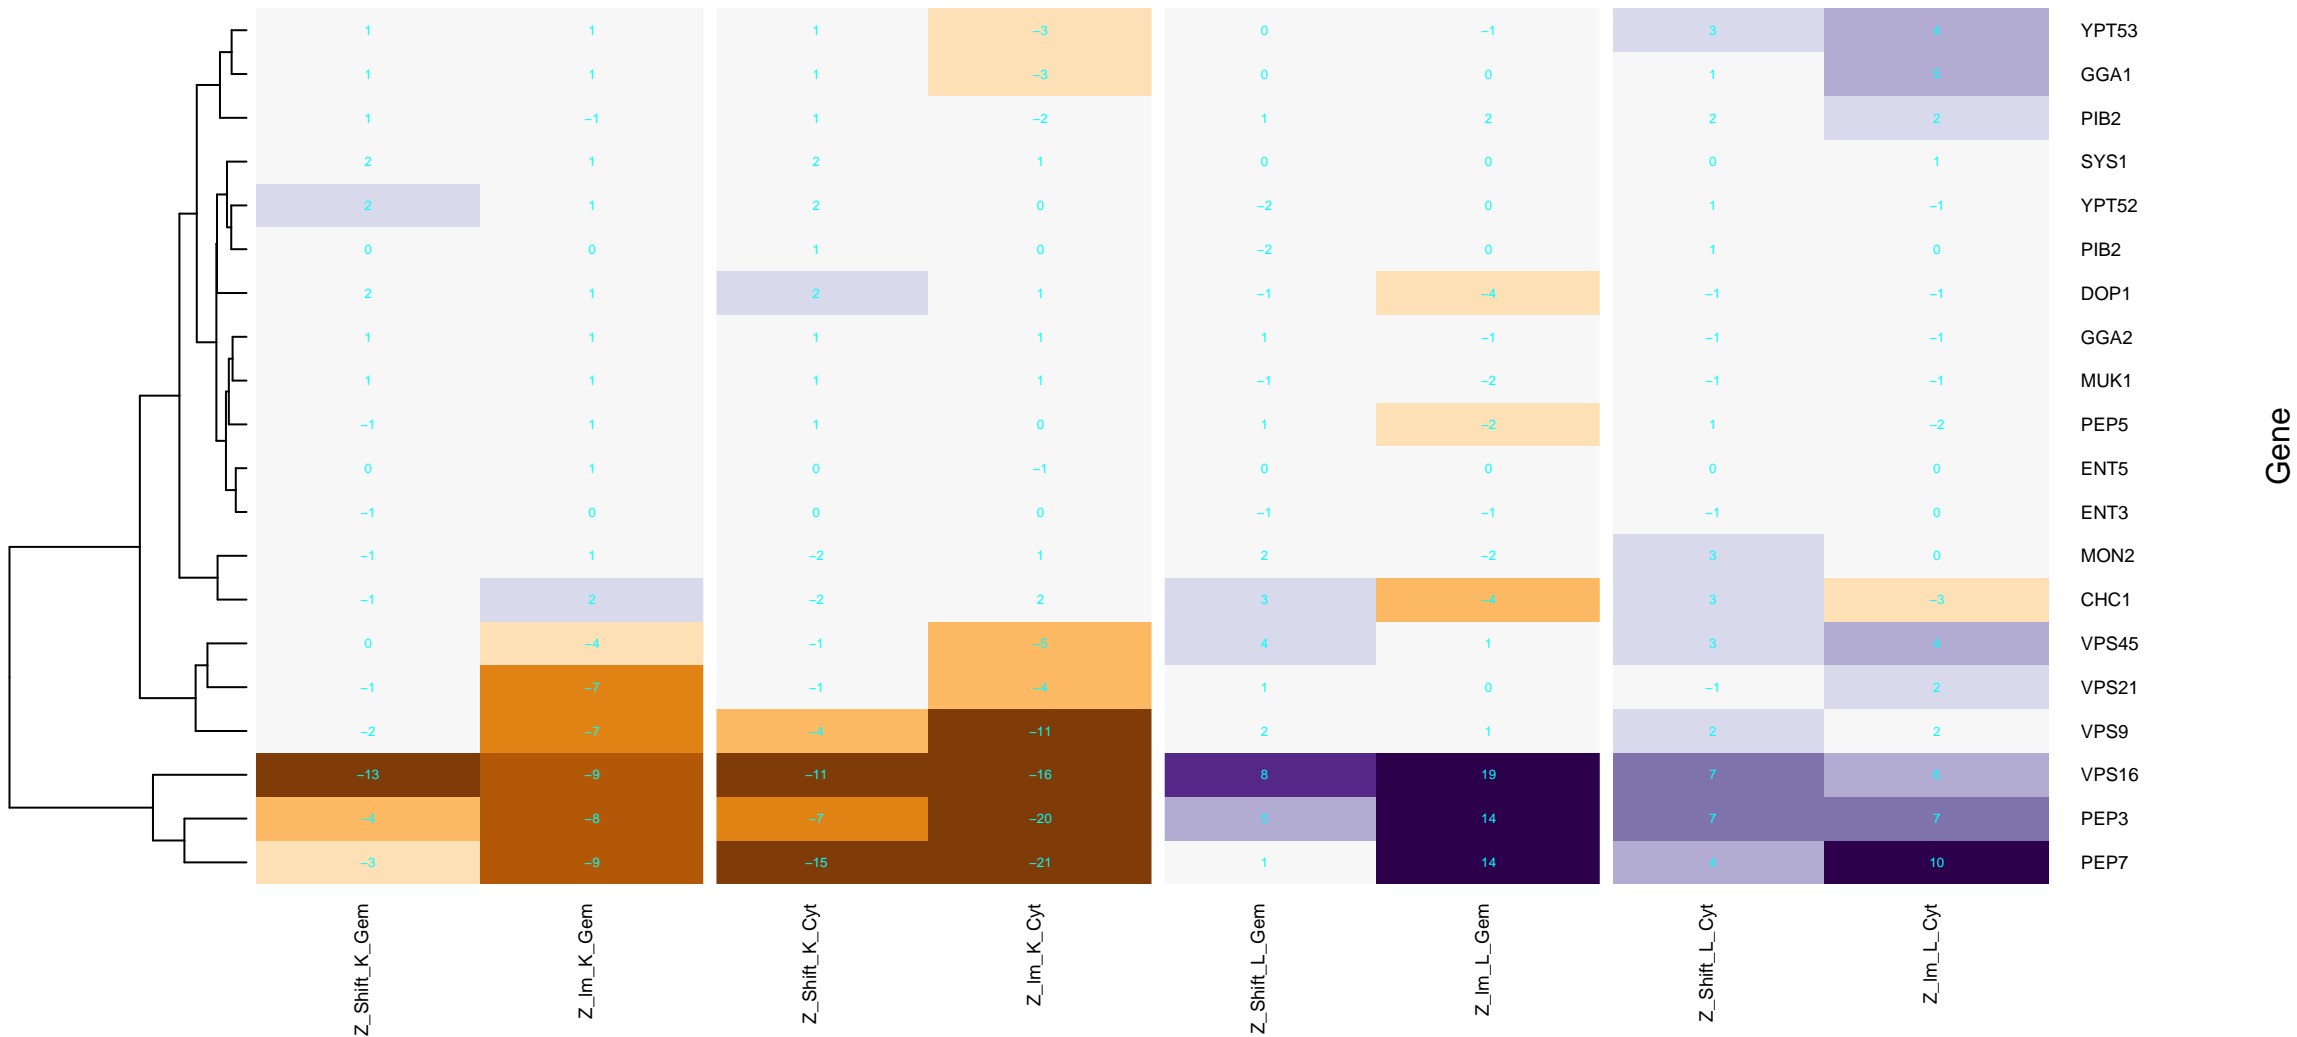

Supplement: s1 [file s1]

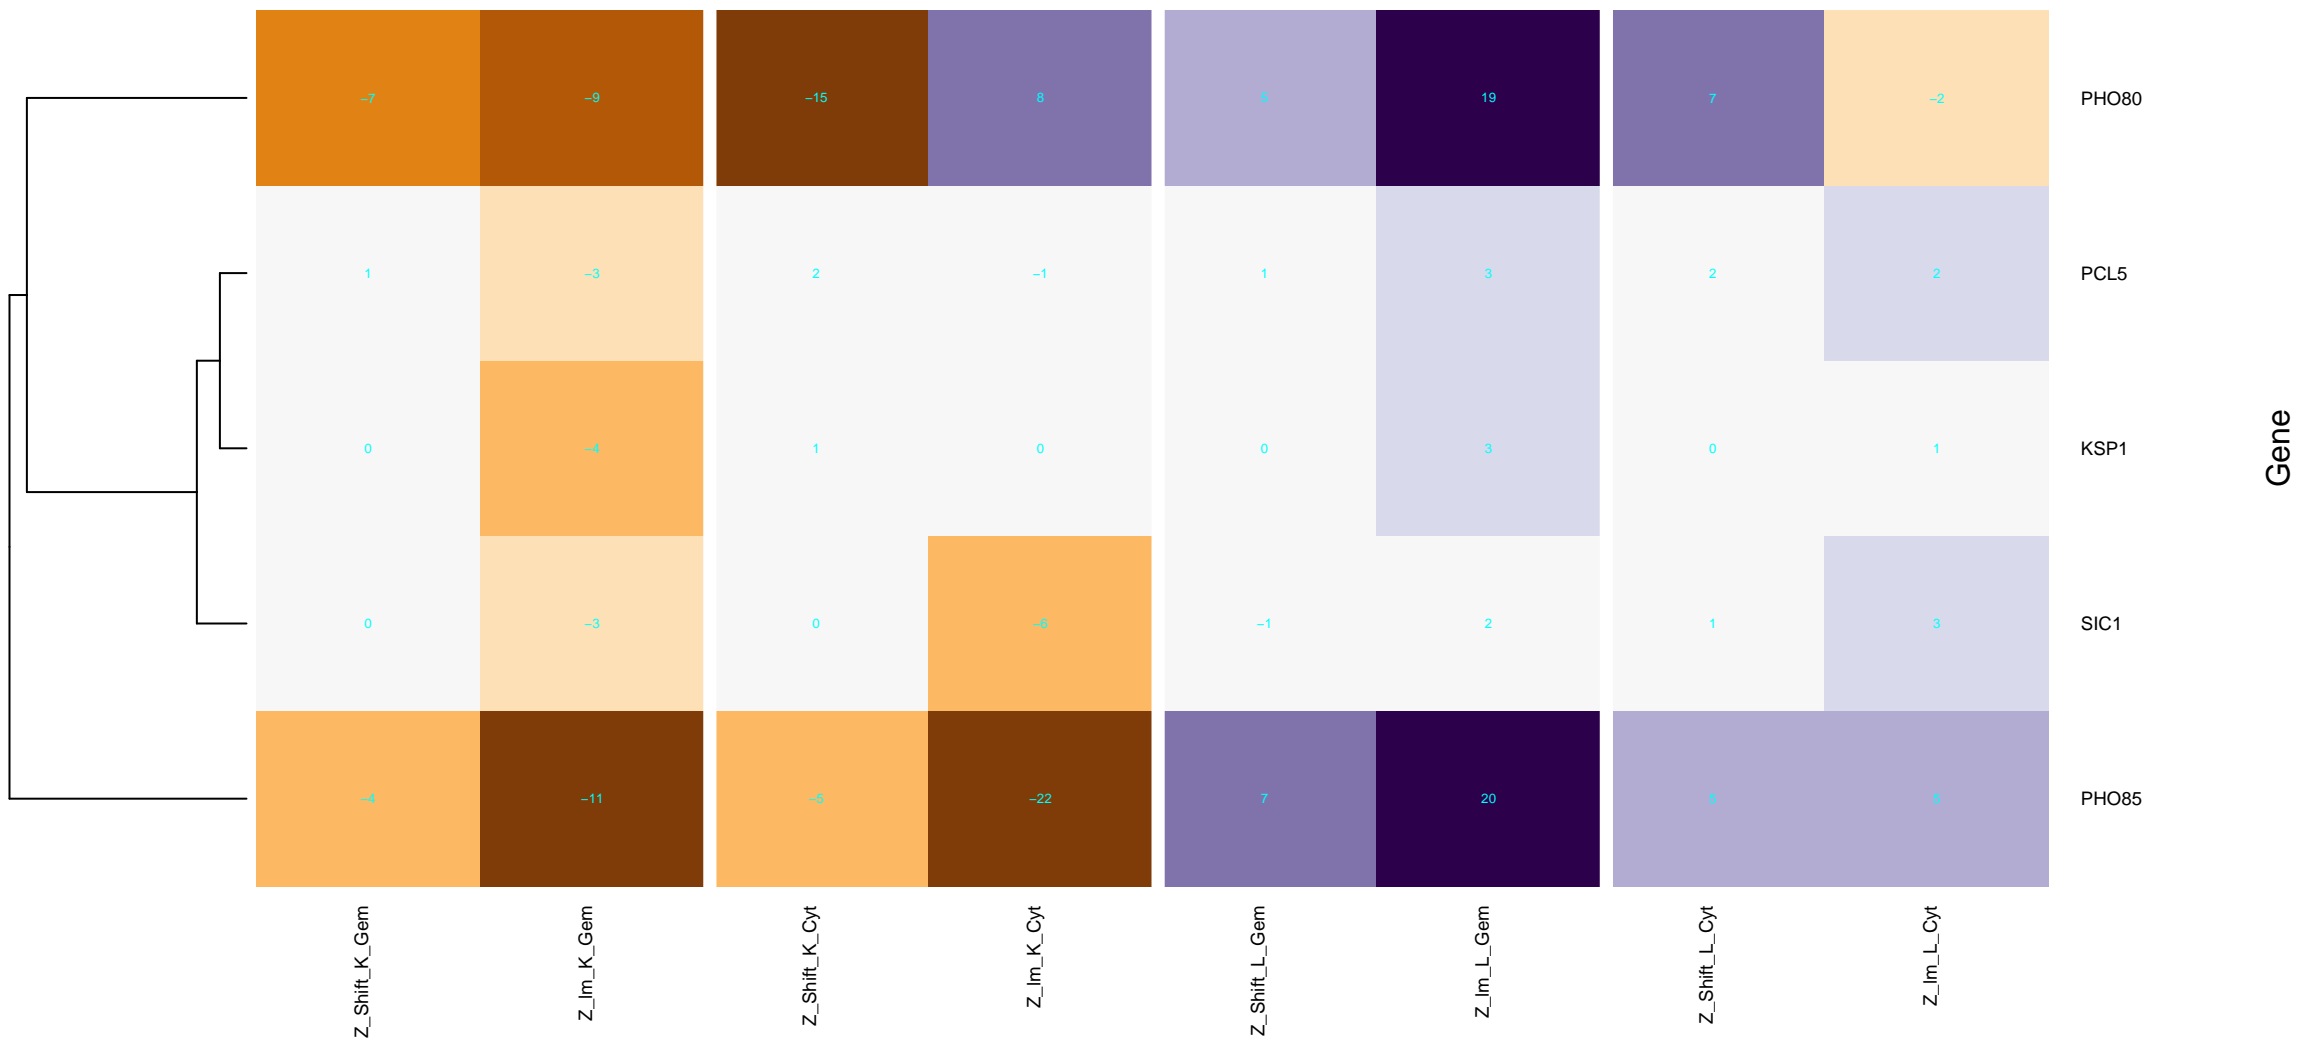

Supplement: s1 [file s1]

Color Key

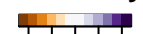

-10 5

Value

polysome

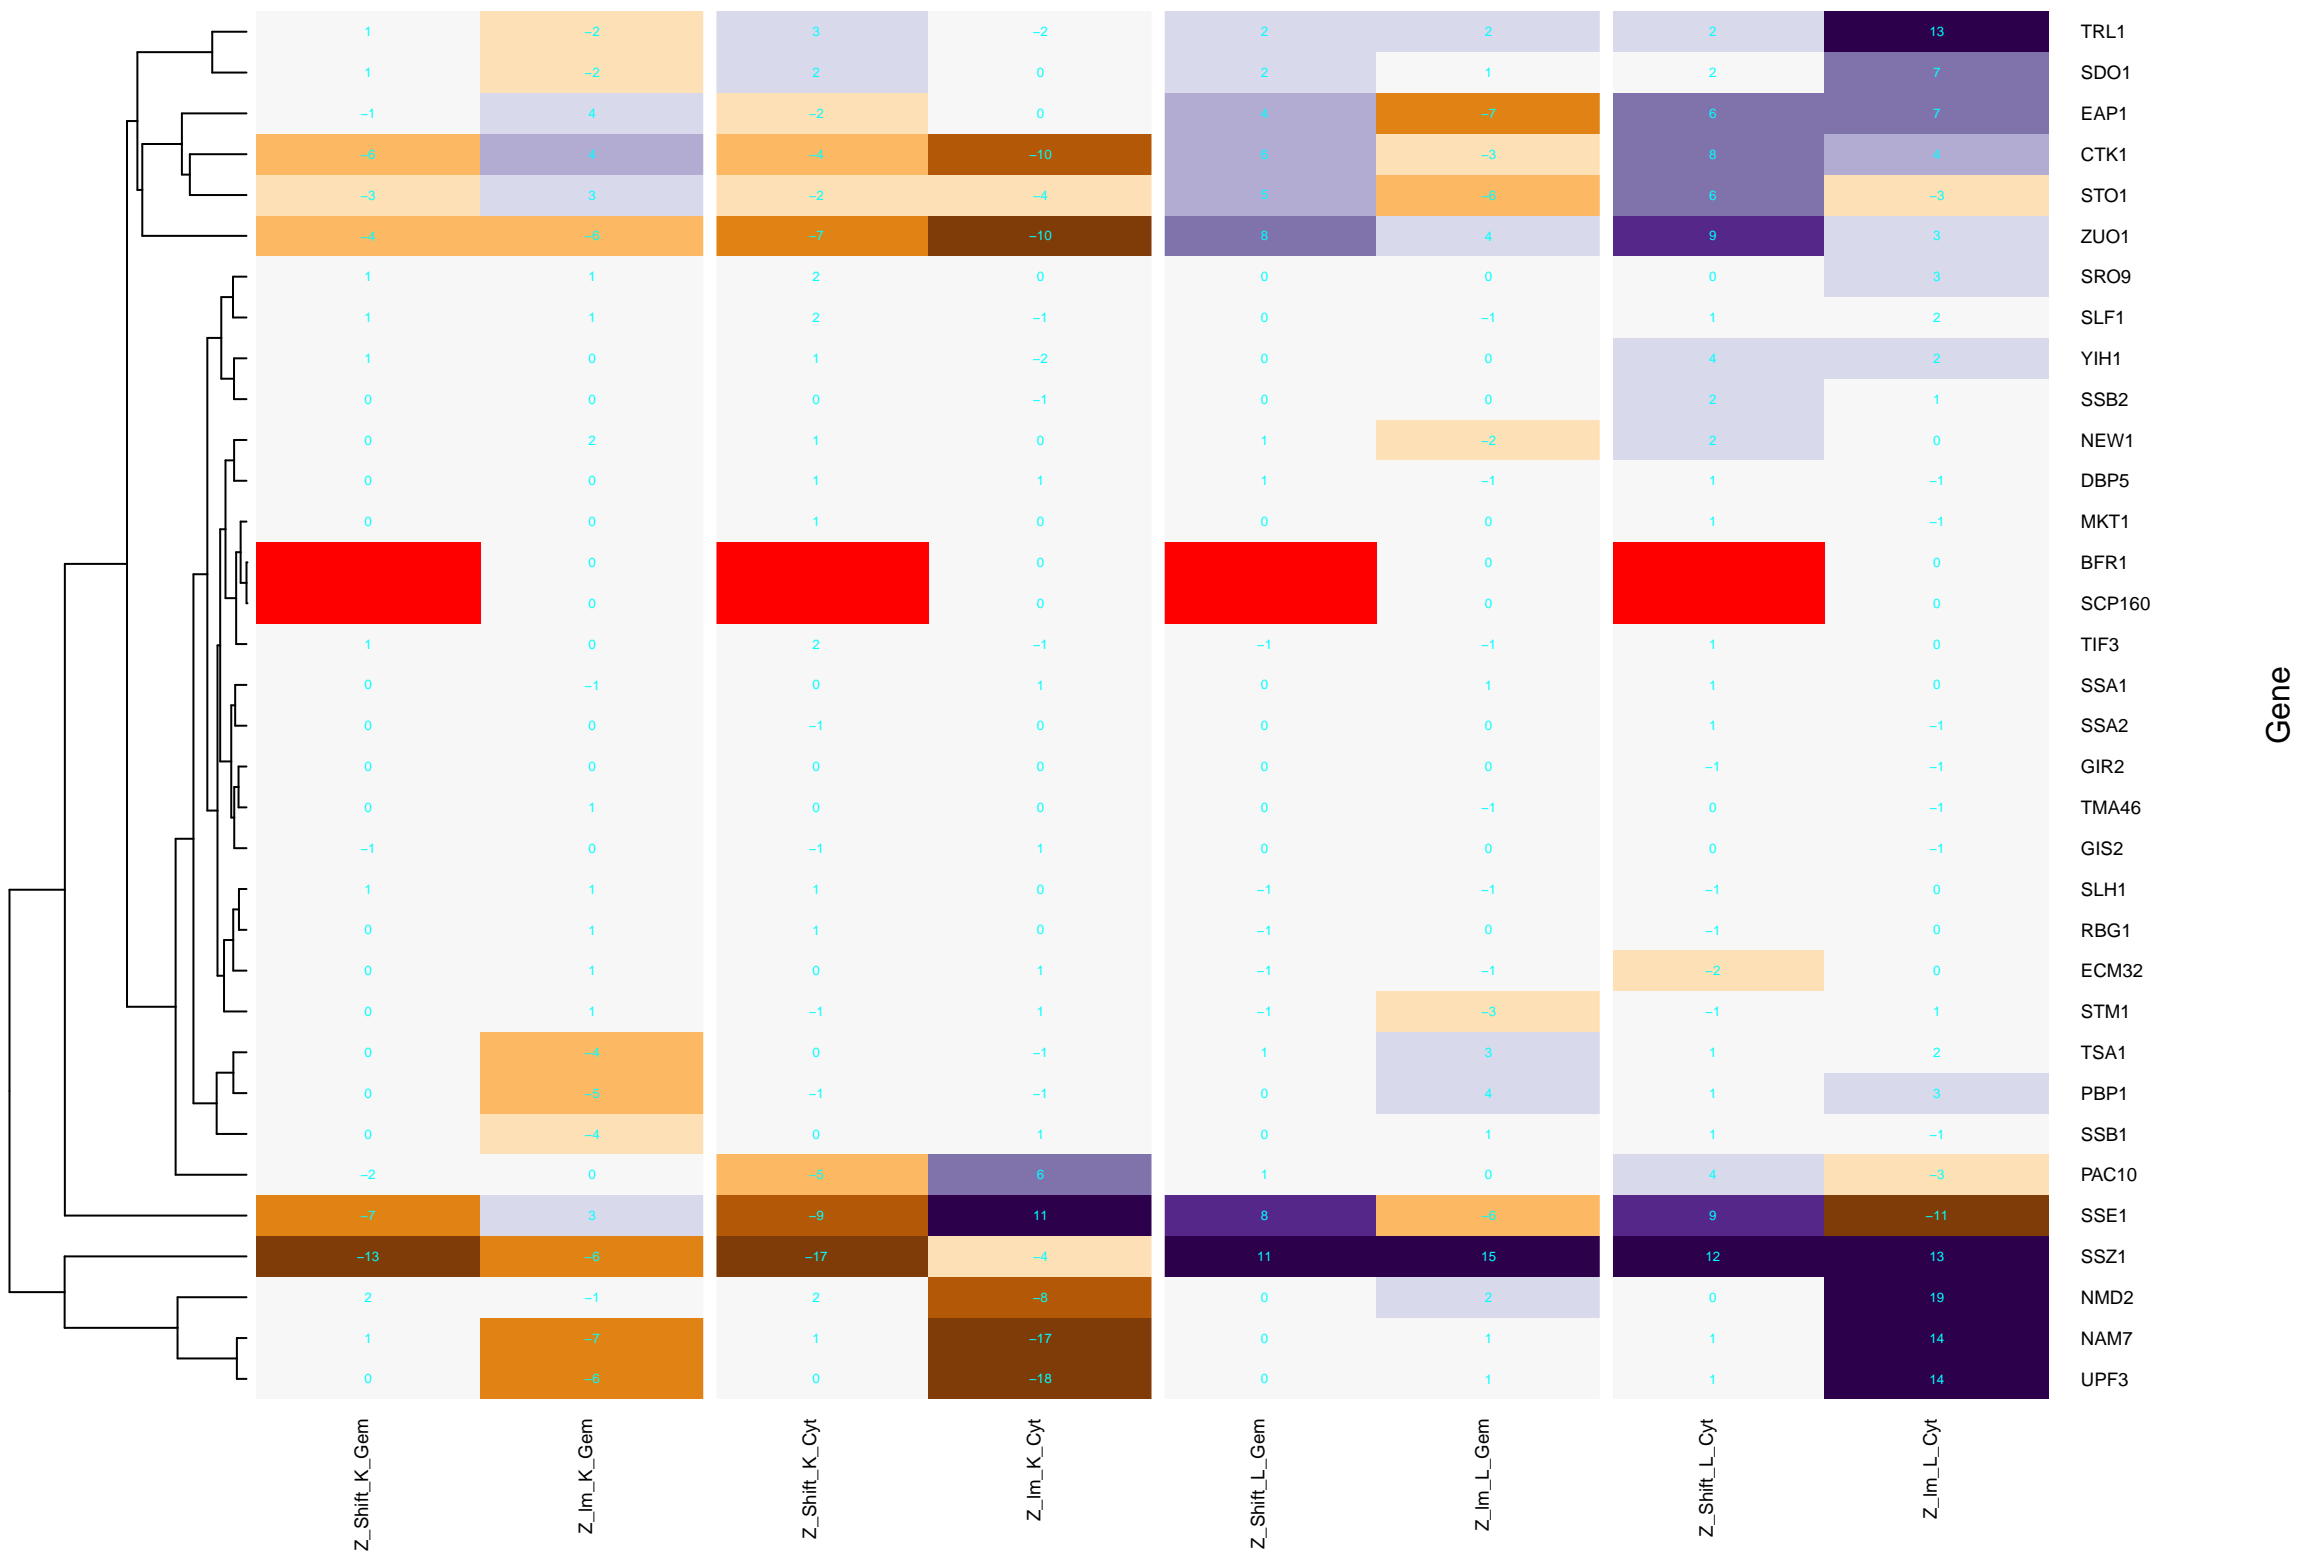

Supplement: s1 [file s1]

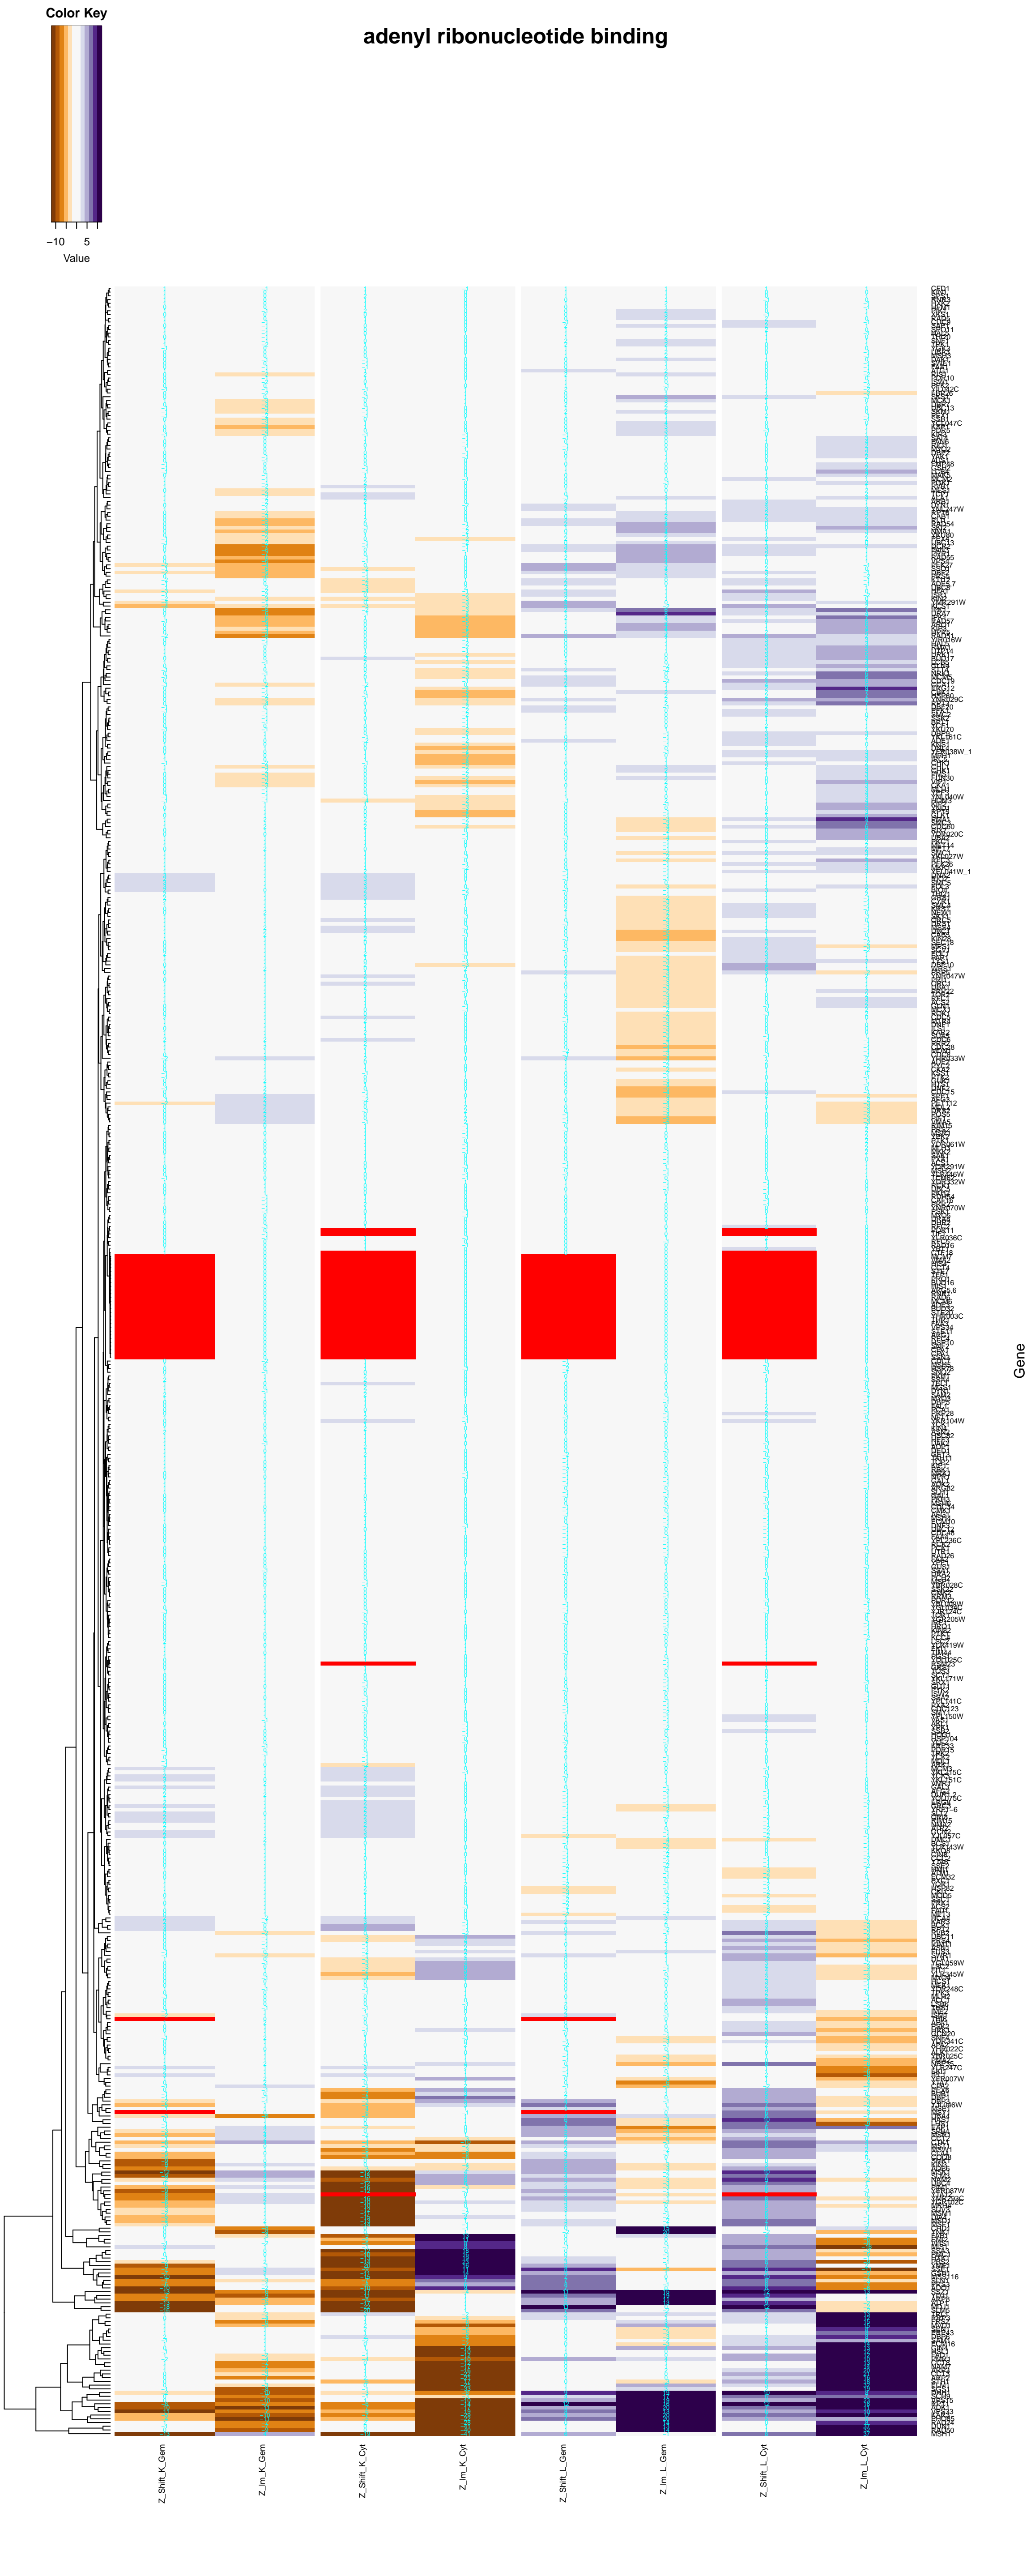

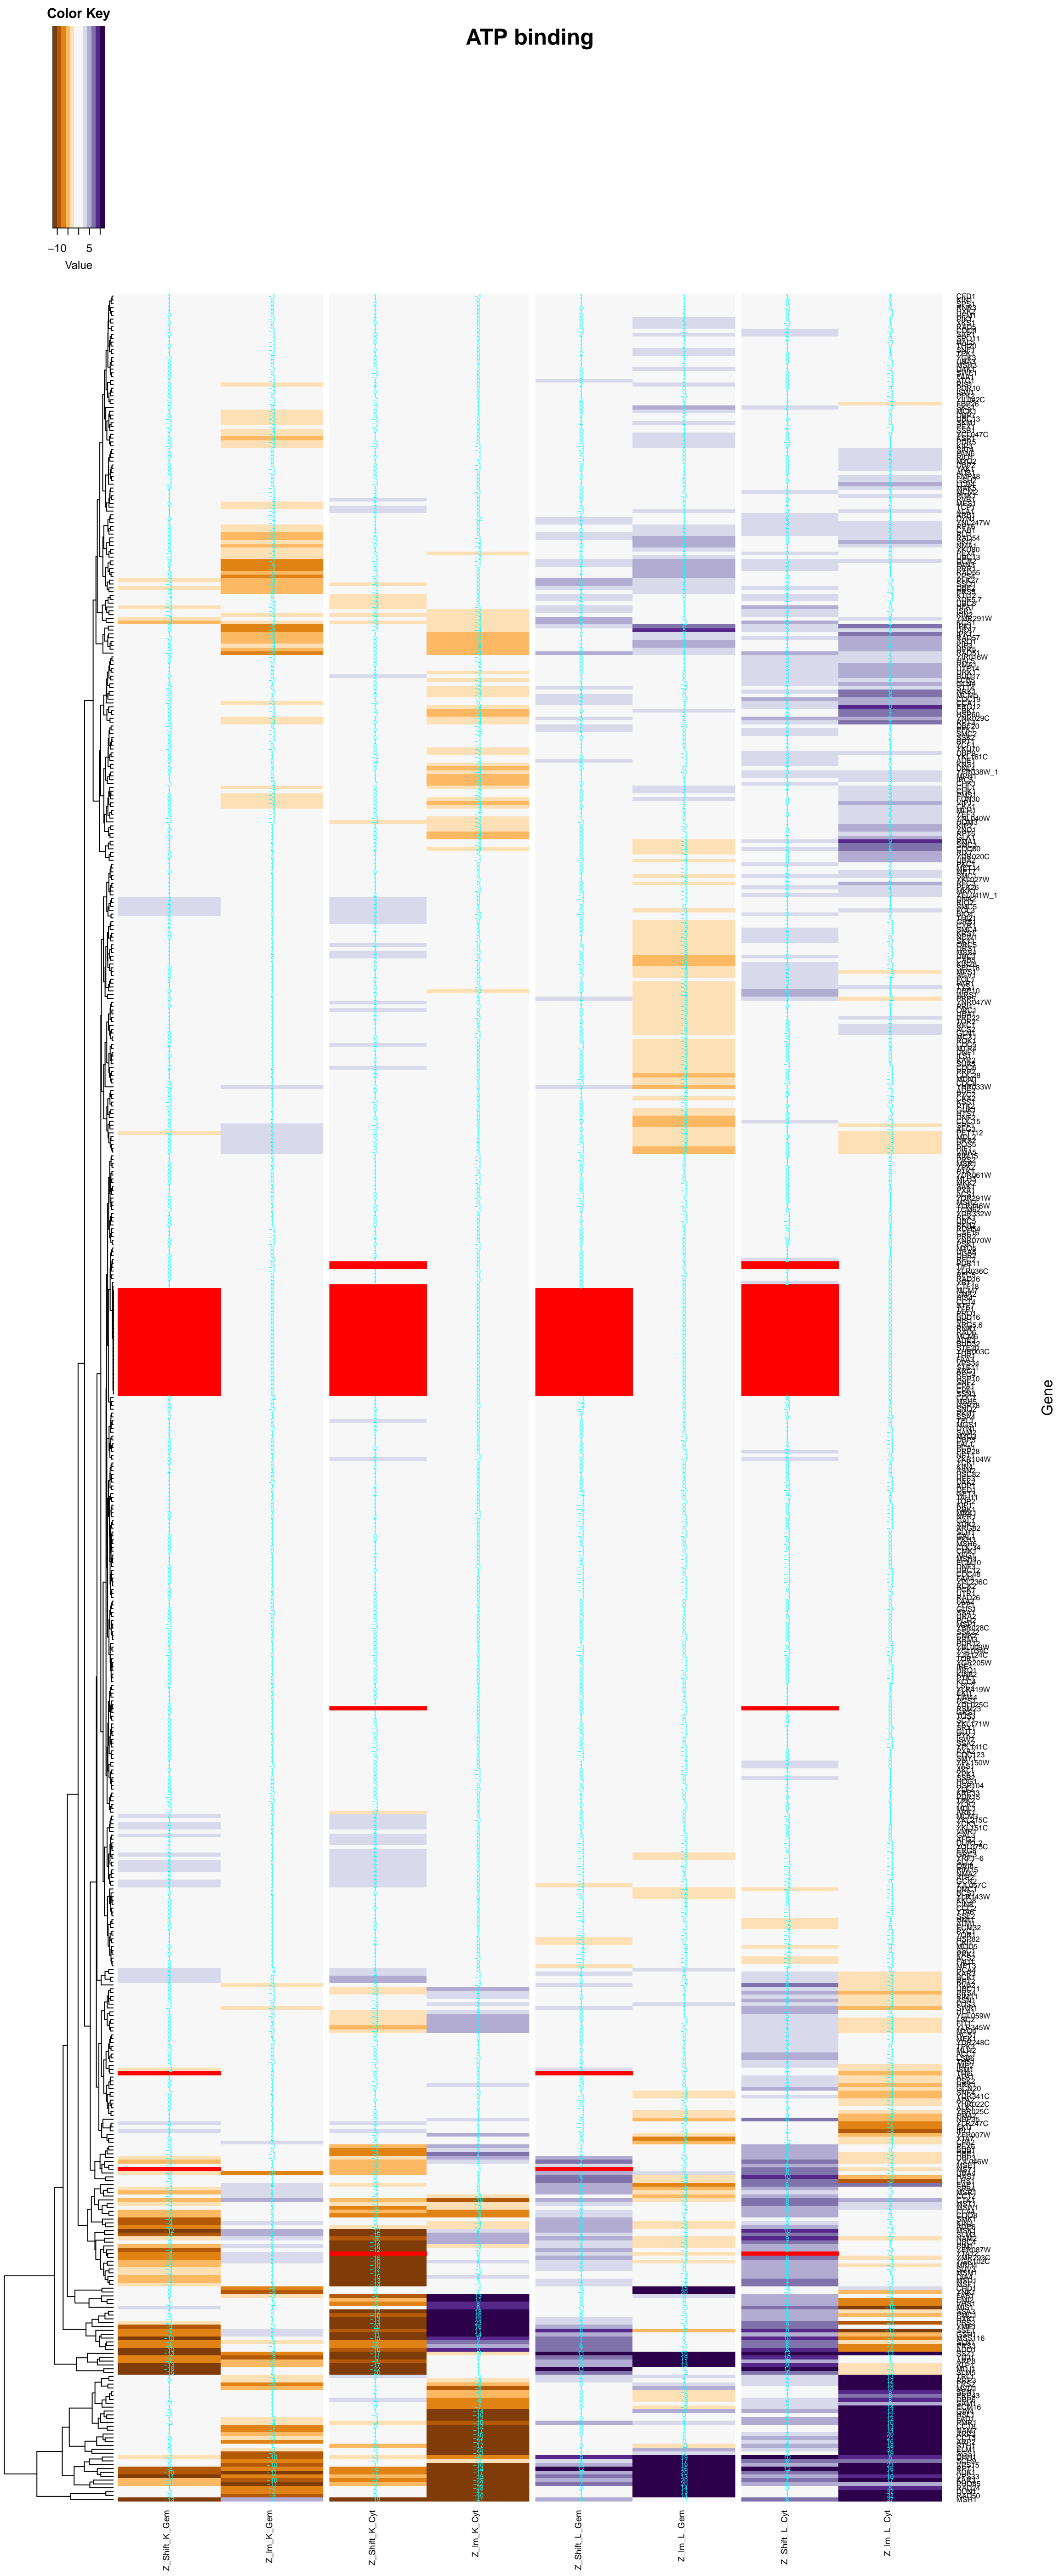

AMP binding

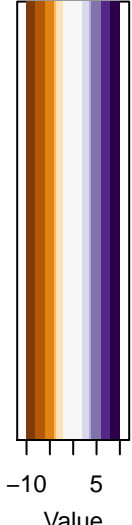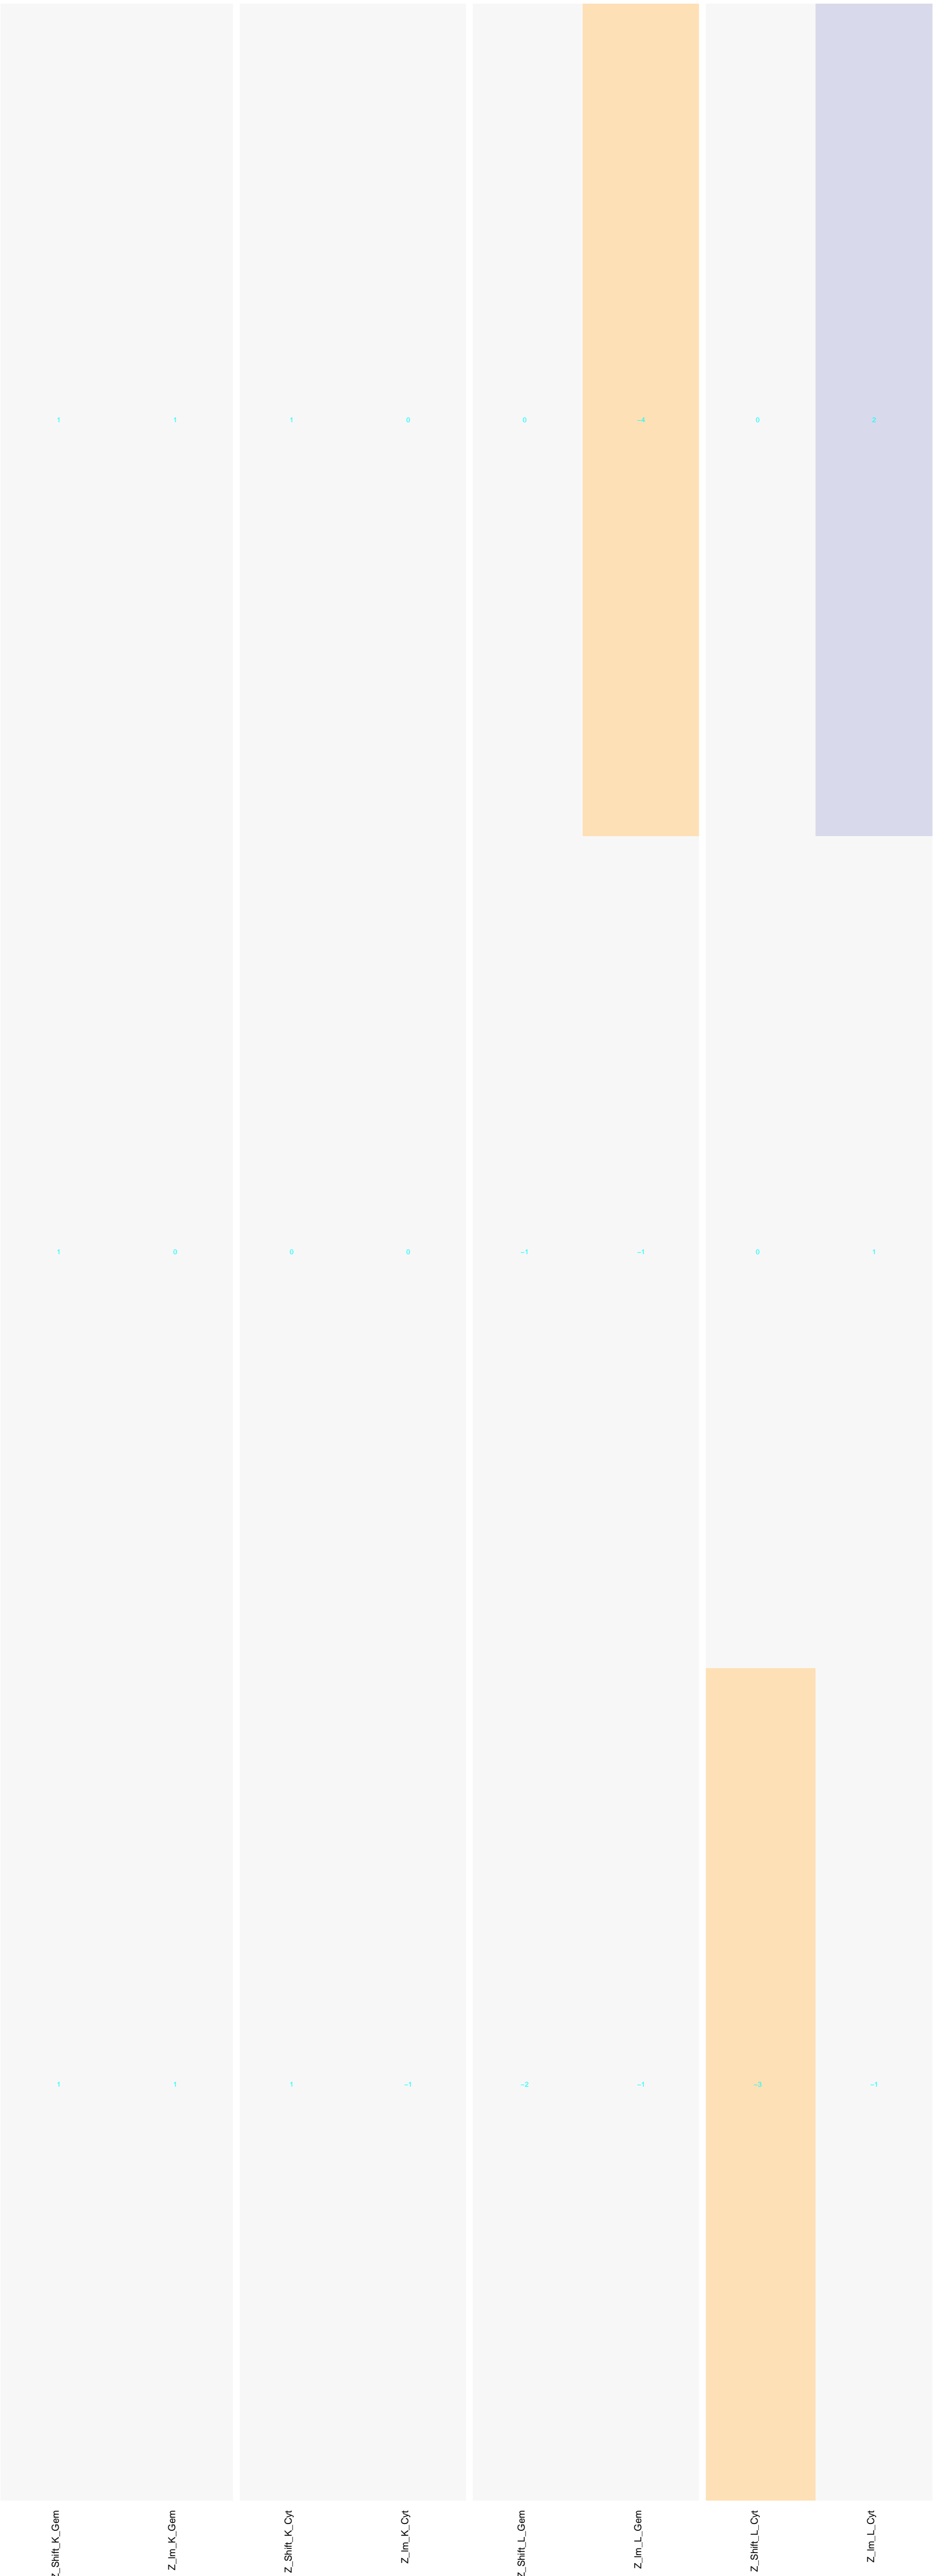

Gene

Supplement: s1 [file s1]



# mitochondrial large ribosomal subunit

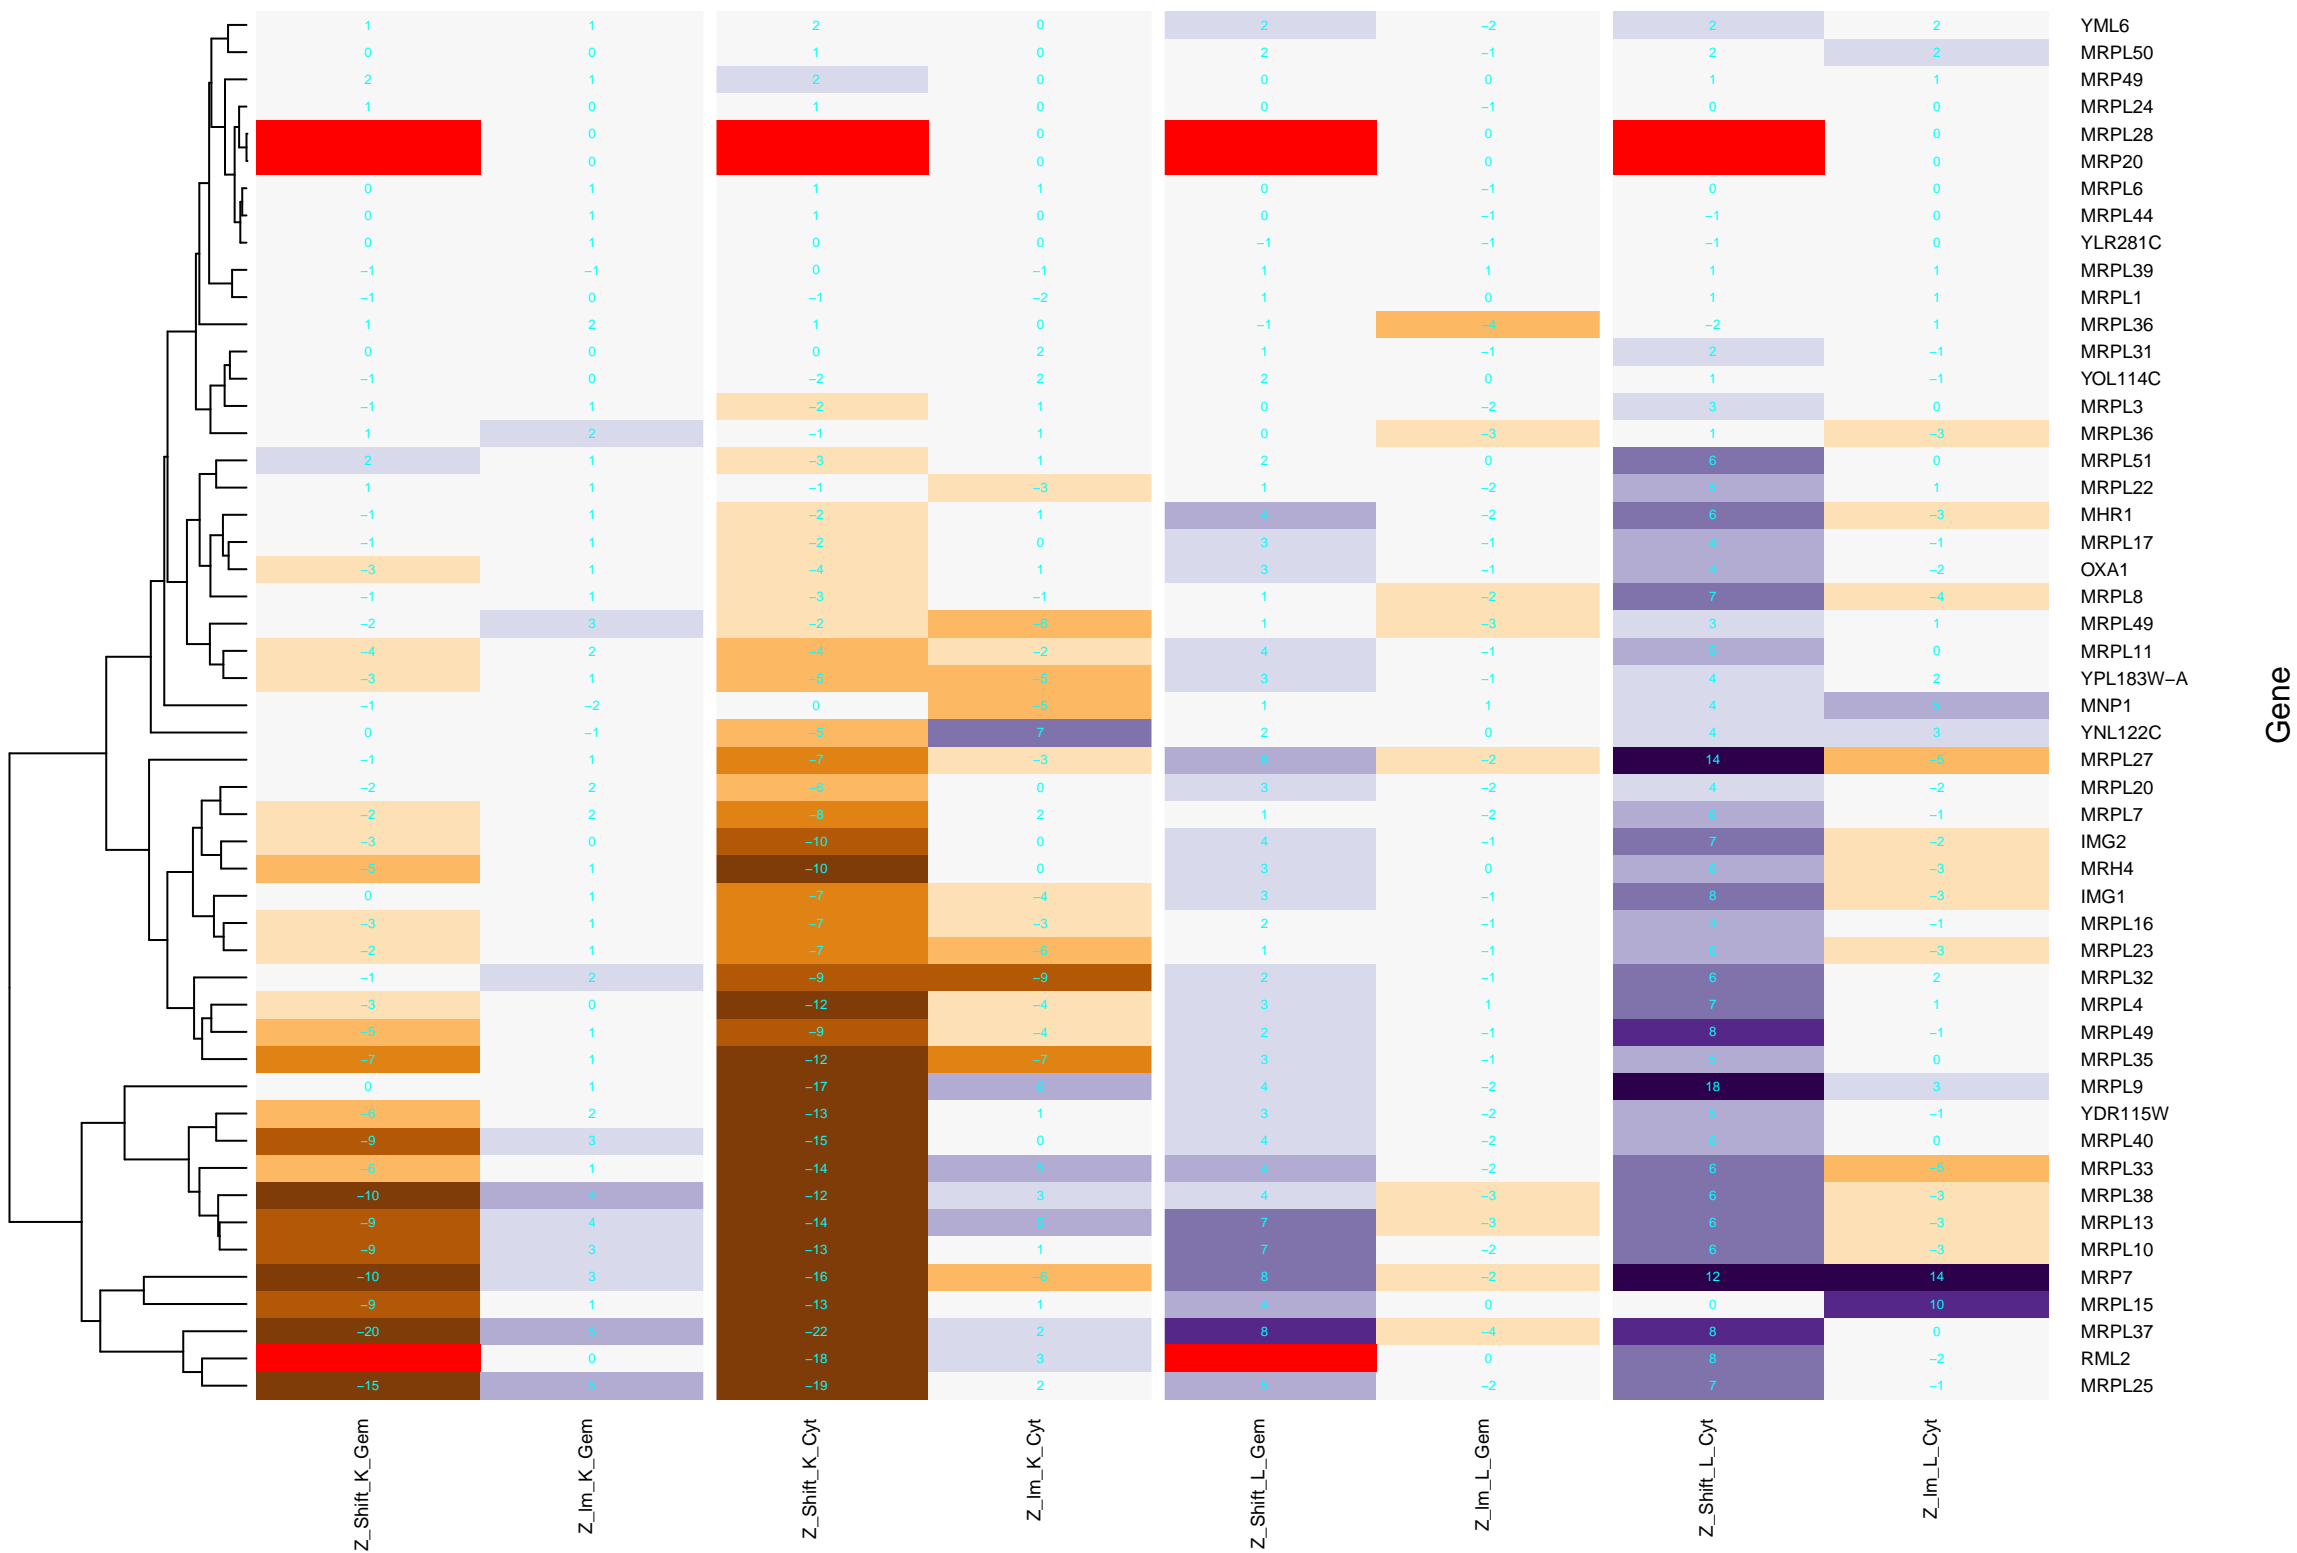

Supplement: s1 [file s1]

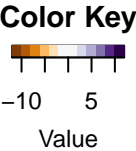

ion of LSU-rRNA from tricistronic rRNA transcript (SSU-rRNA, 5.8S rRNA, LSU-rRNA)

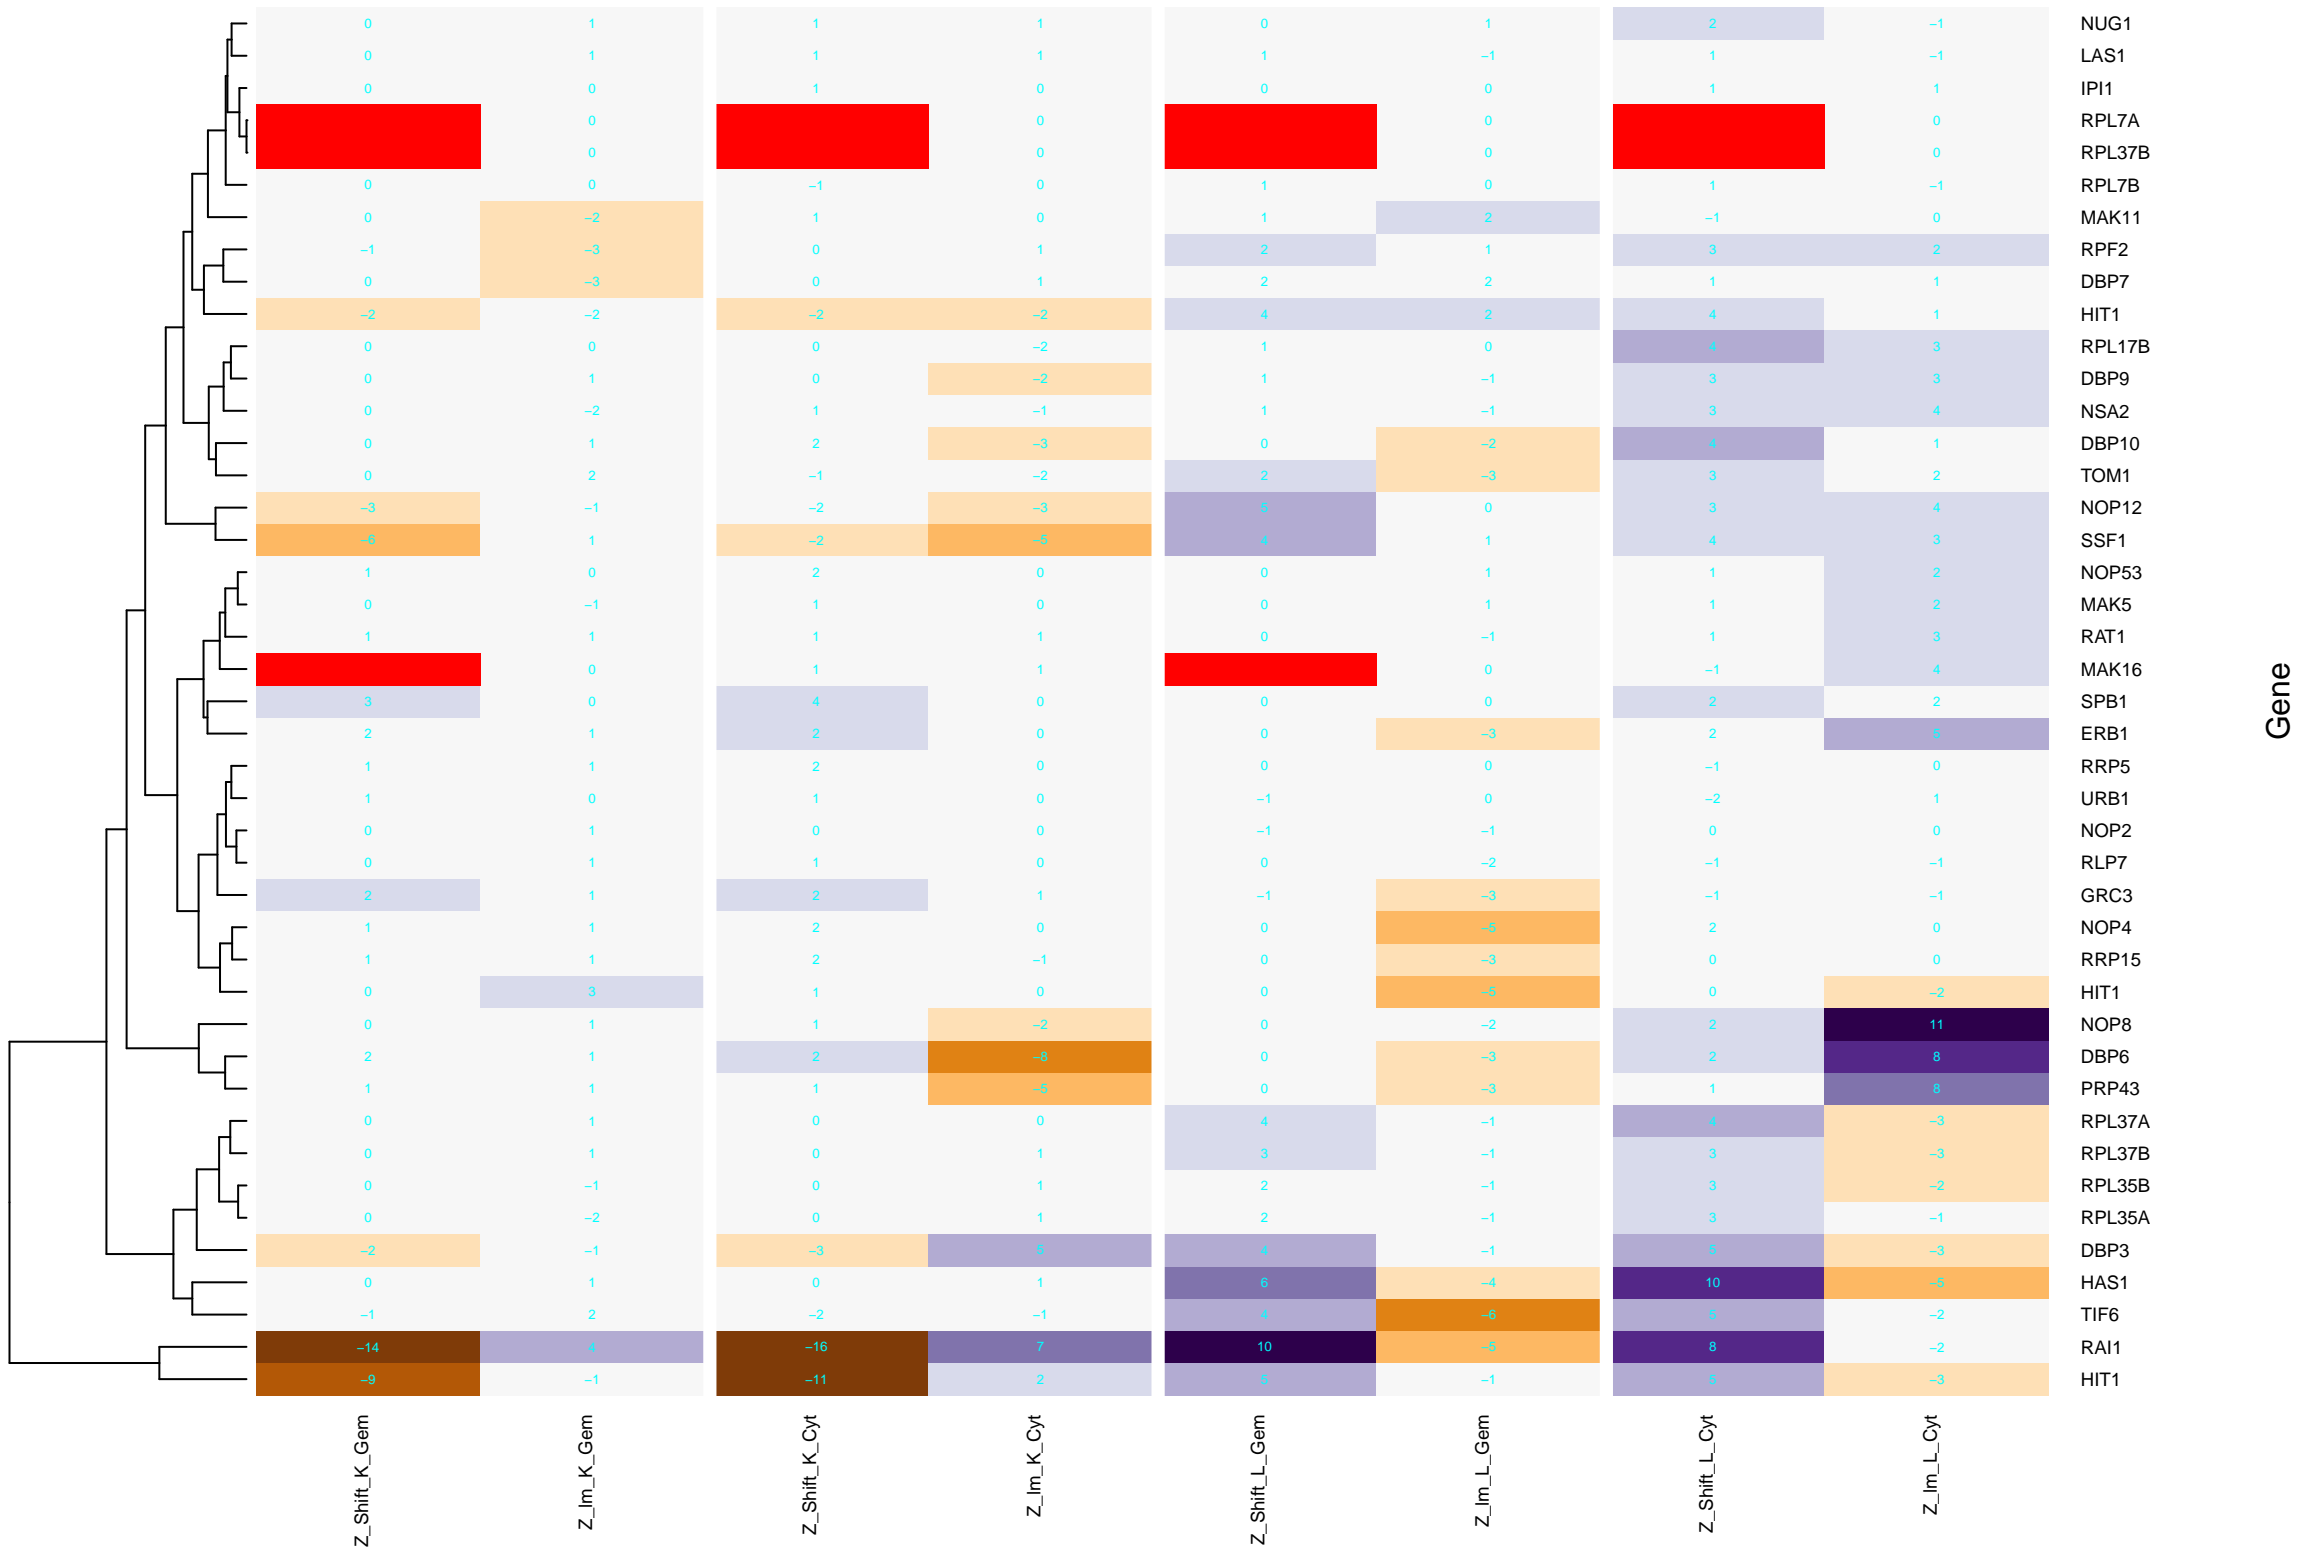

Supplement: s1 [file s1]

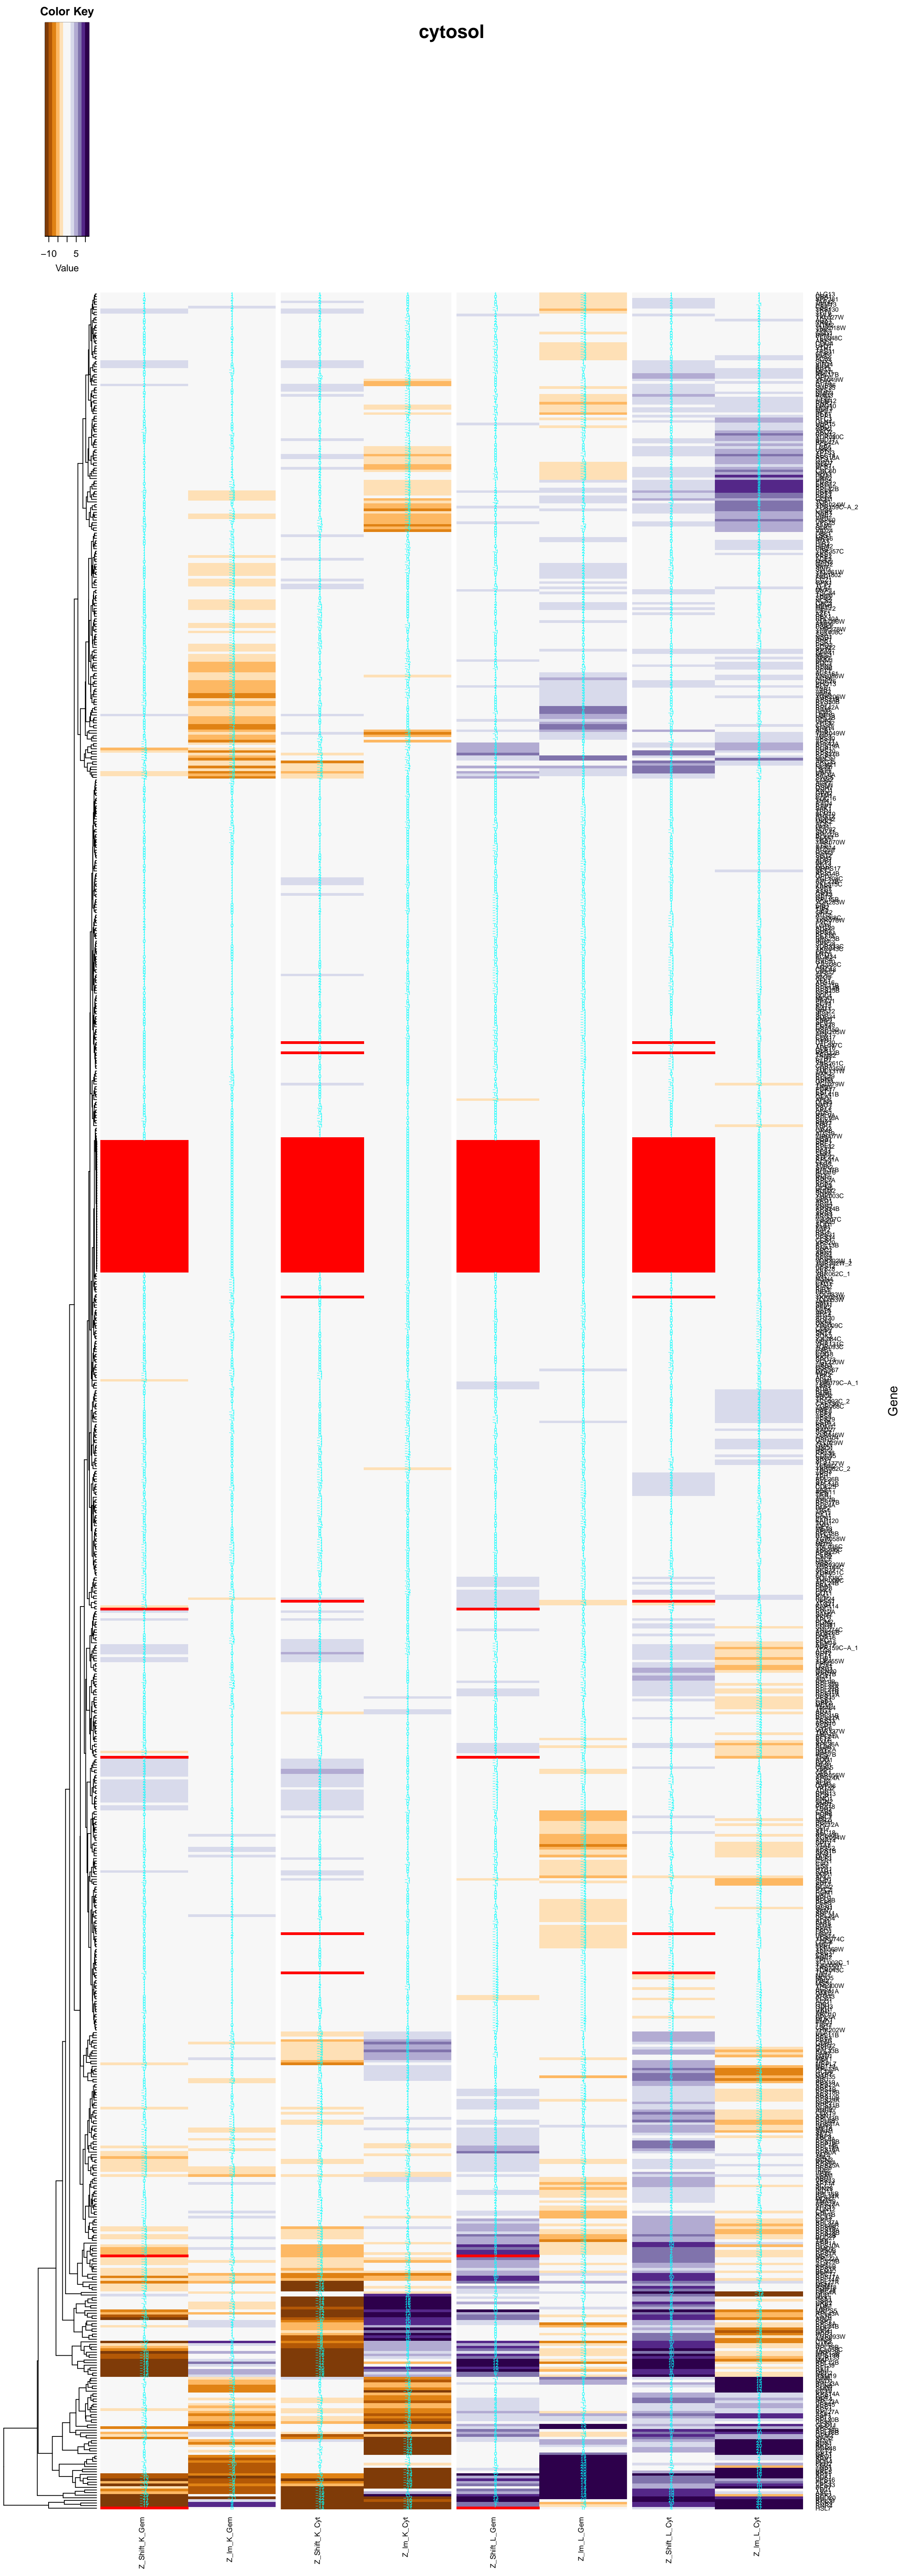

Supplement: s1 [file s1]

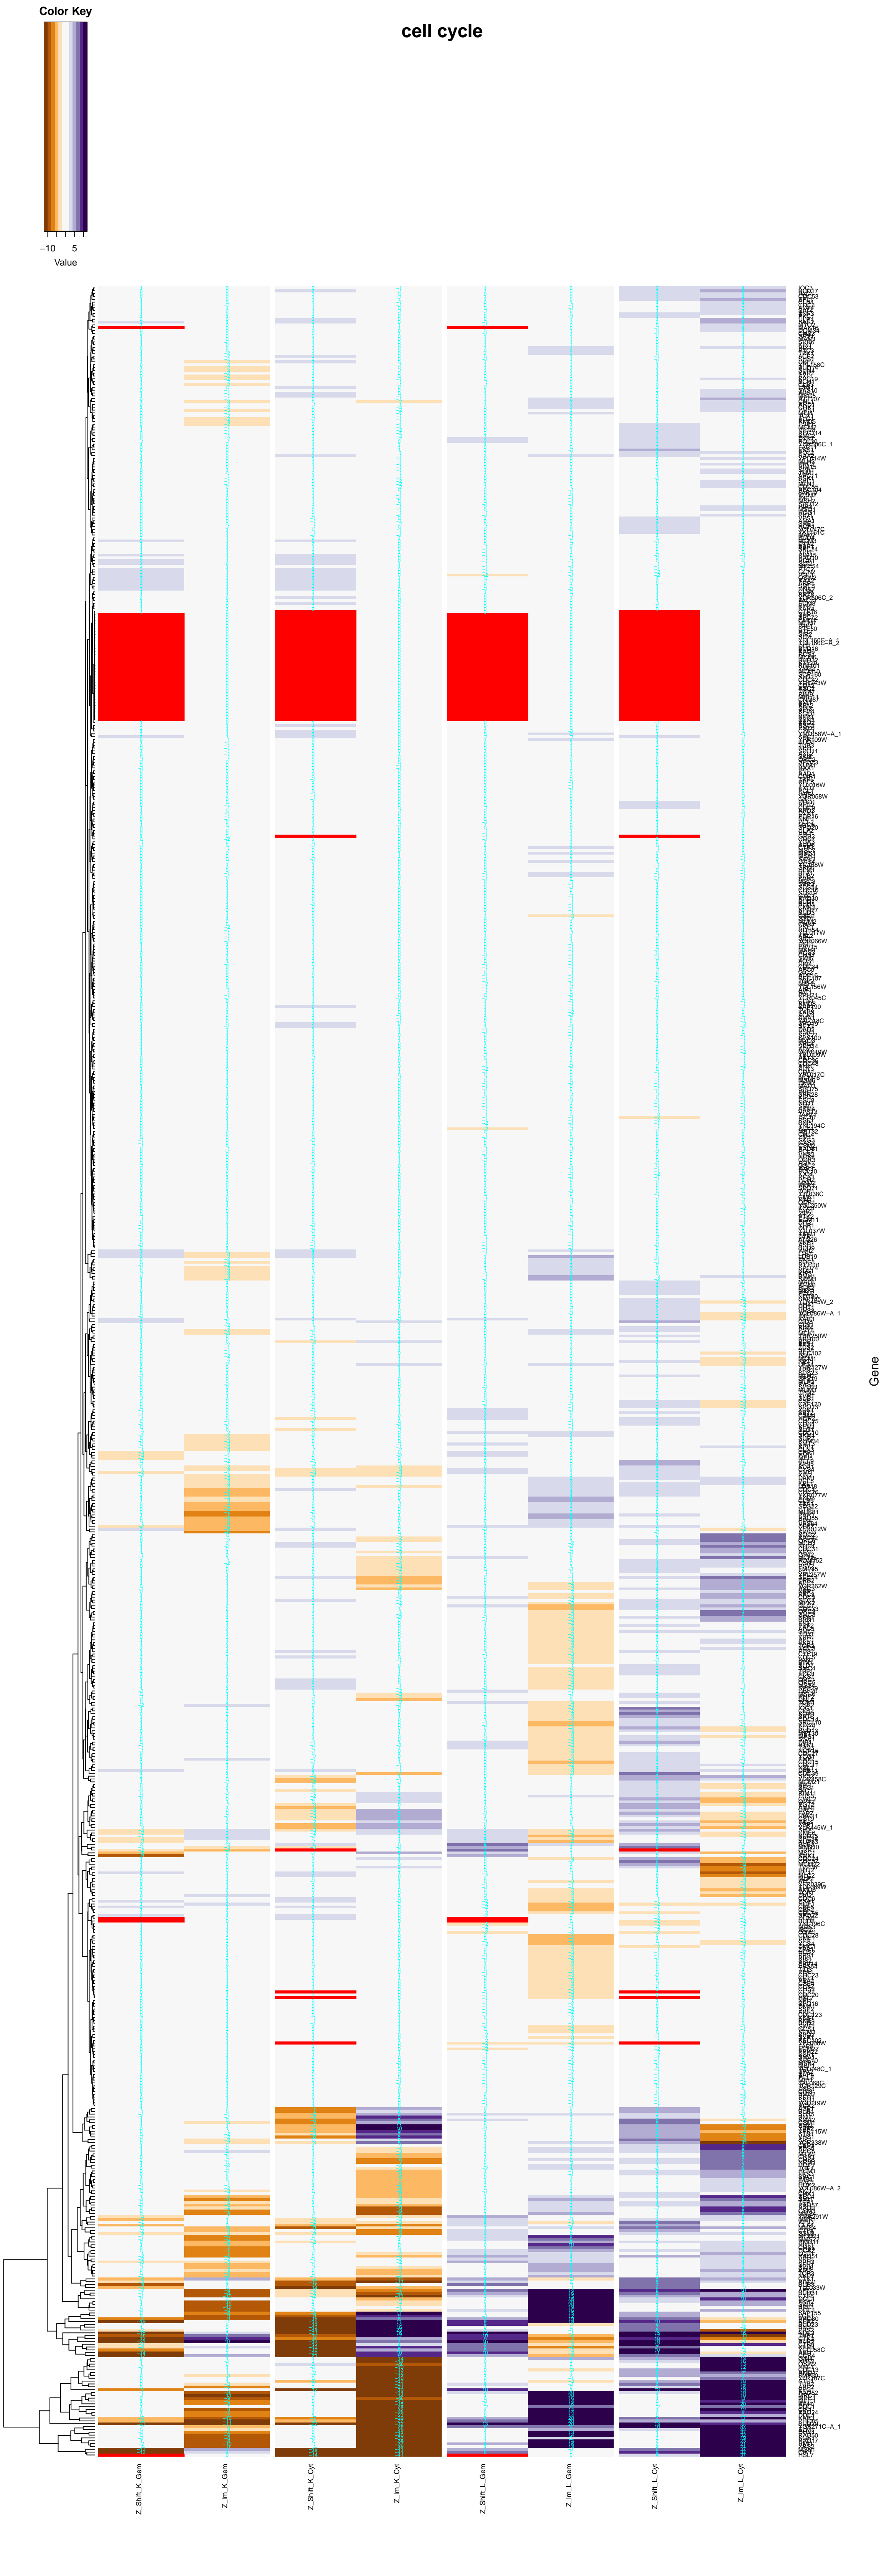

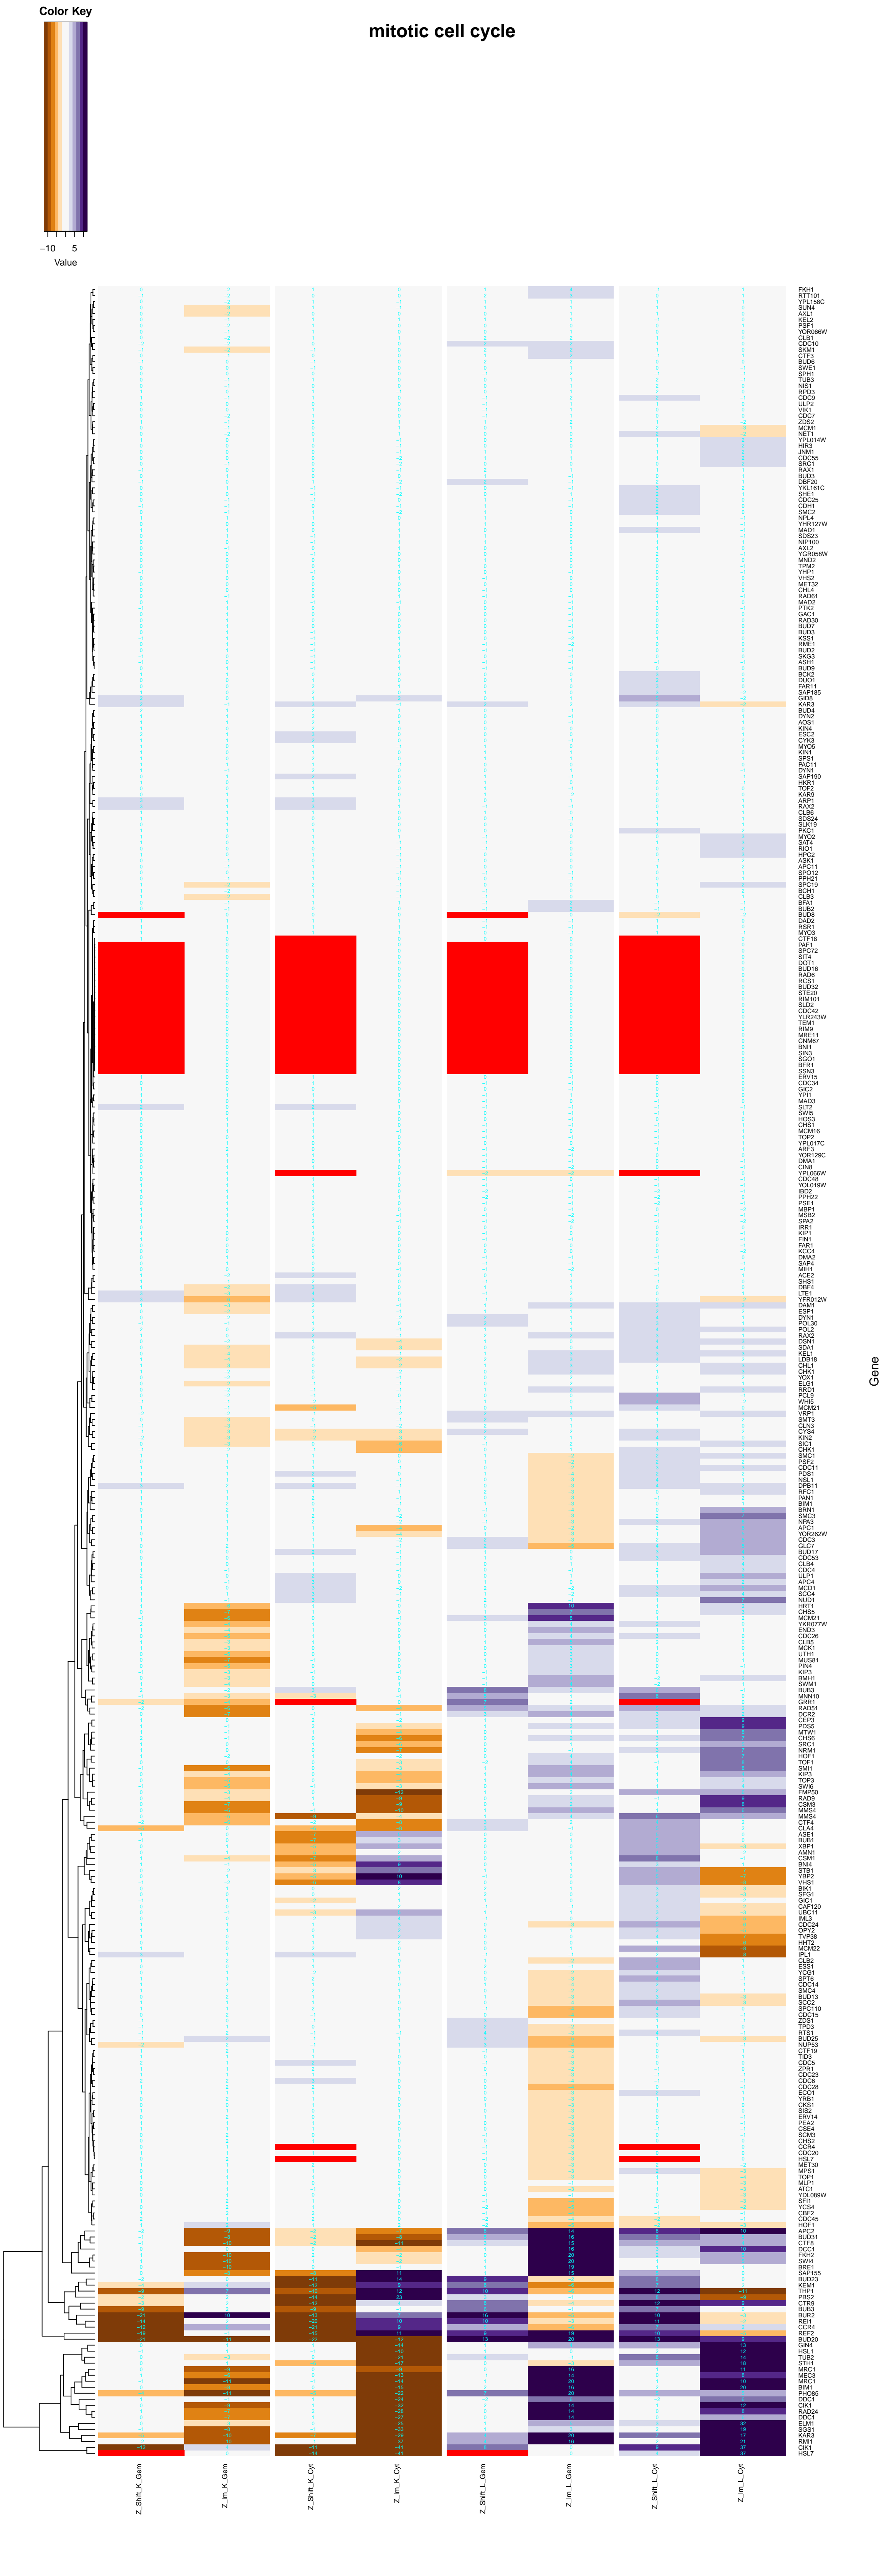

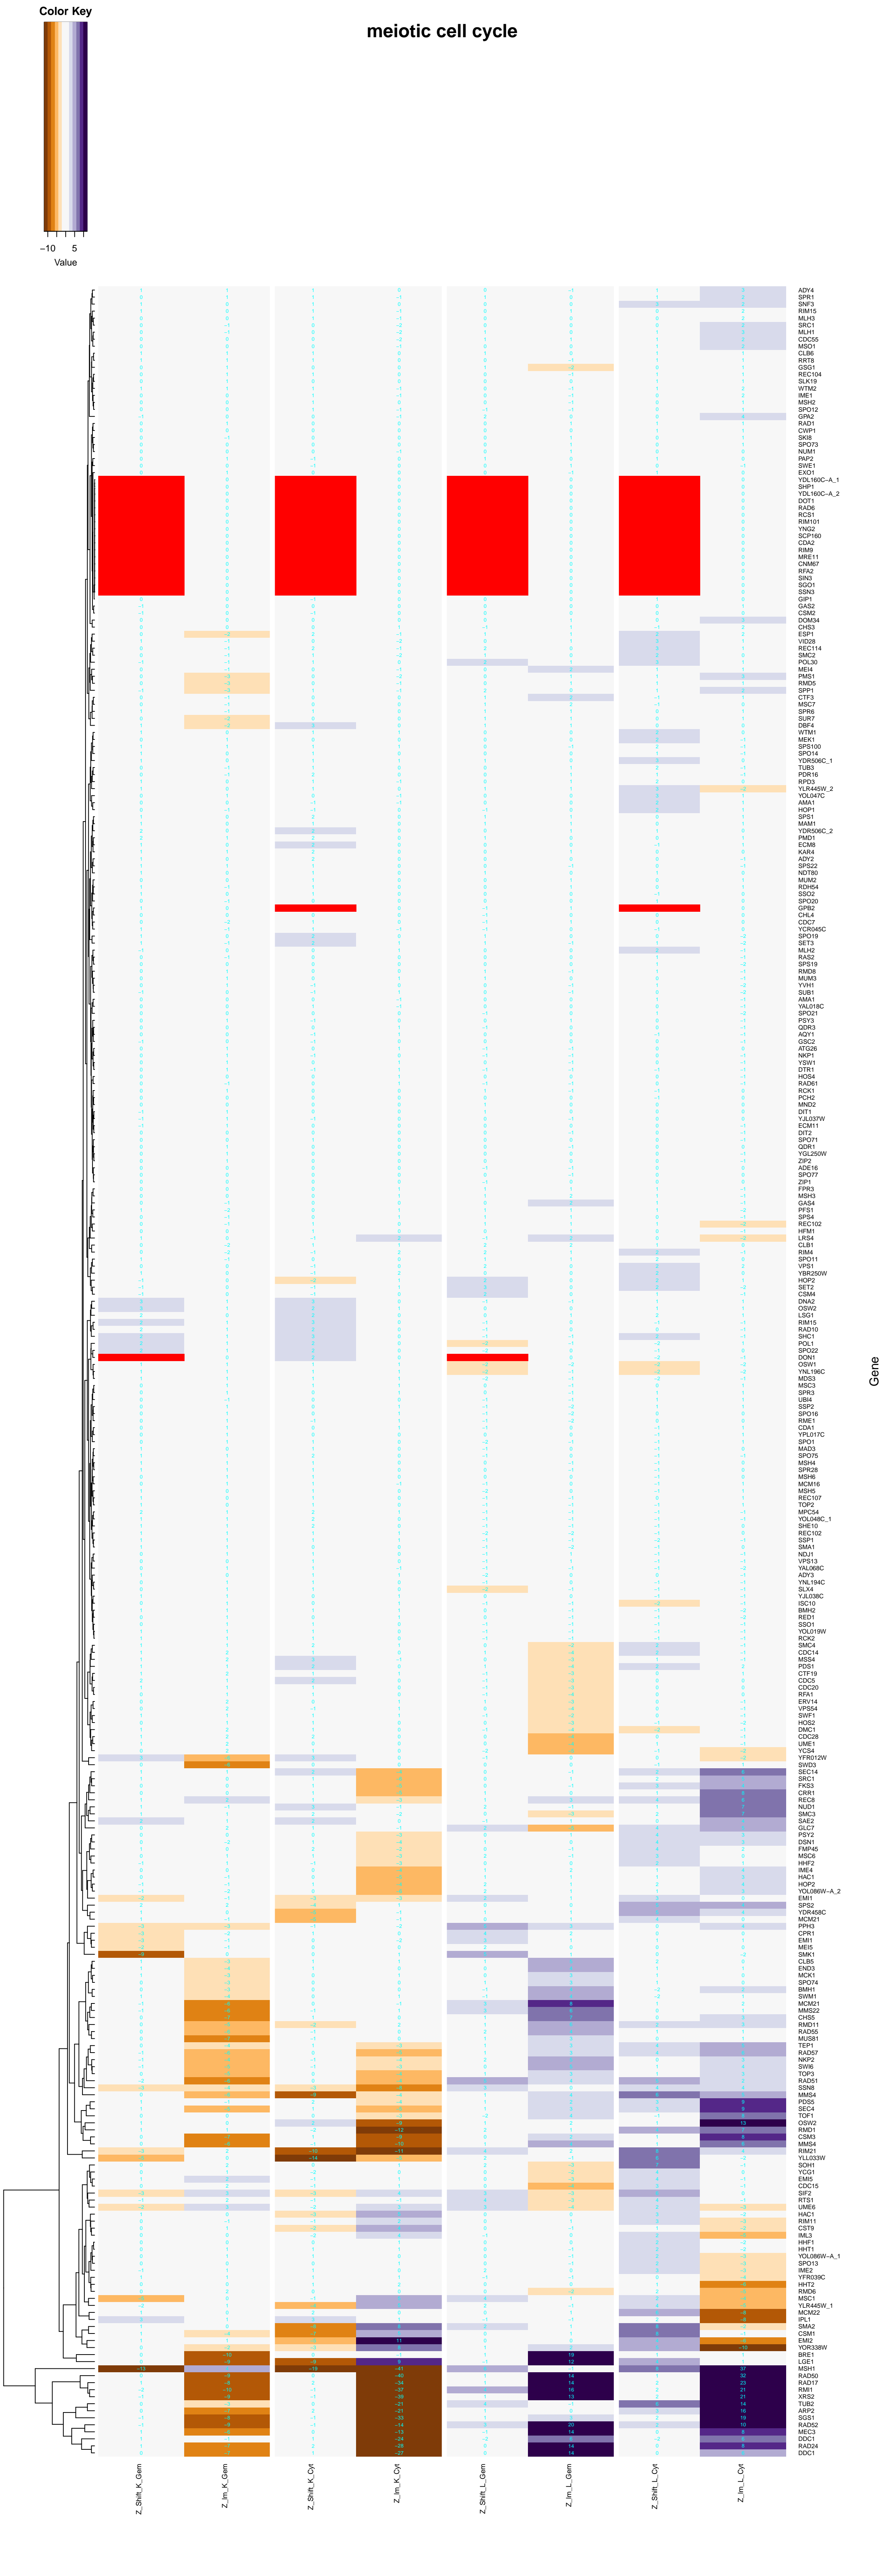

Supplement: s1 [file s1]

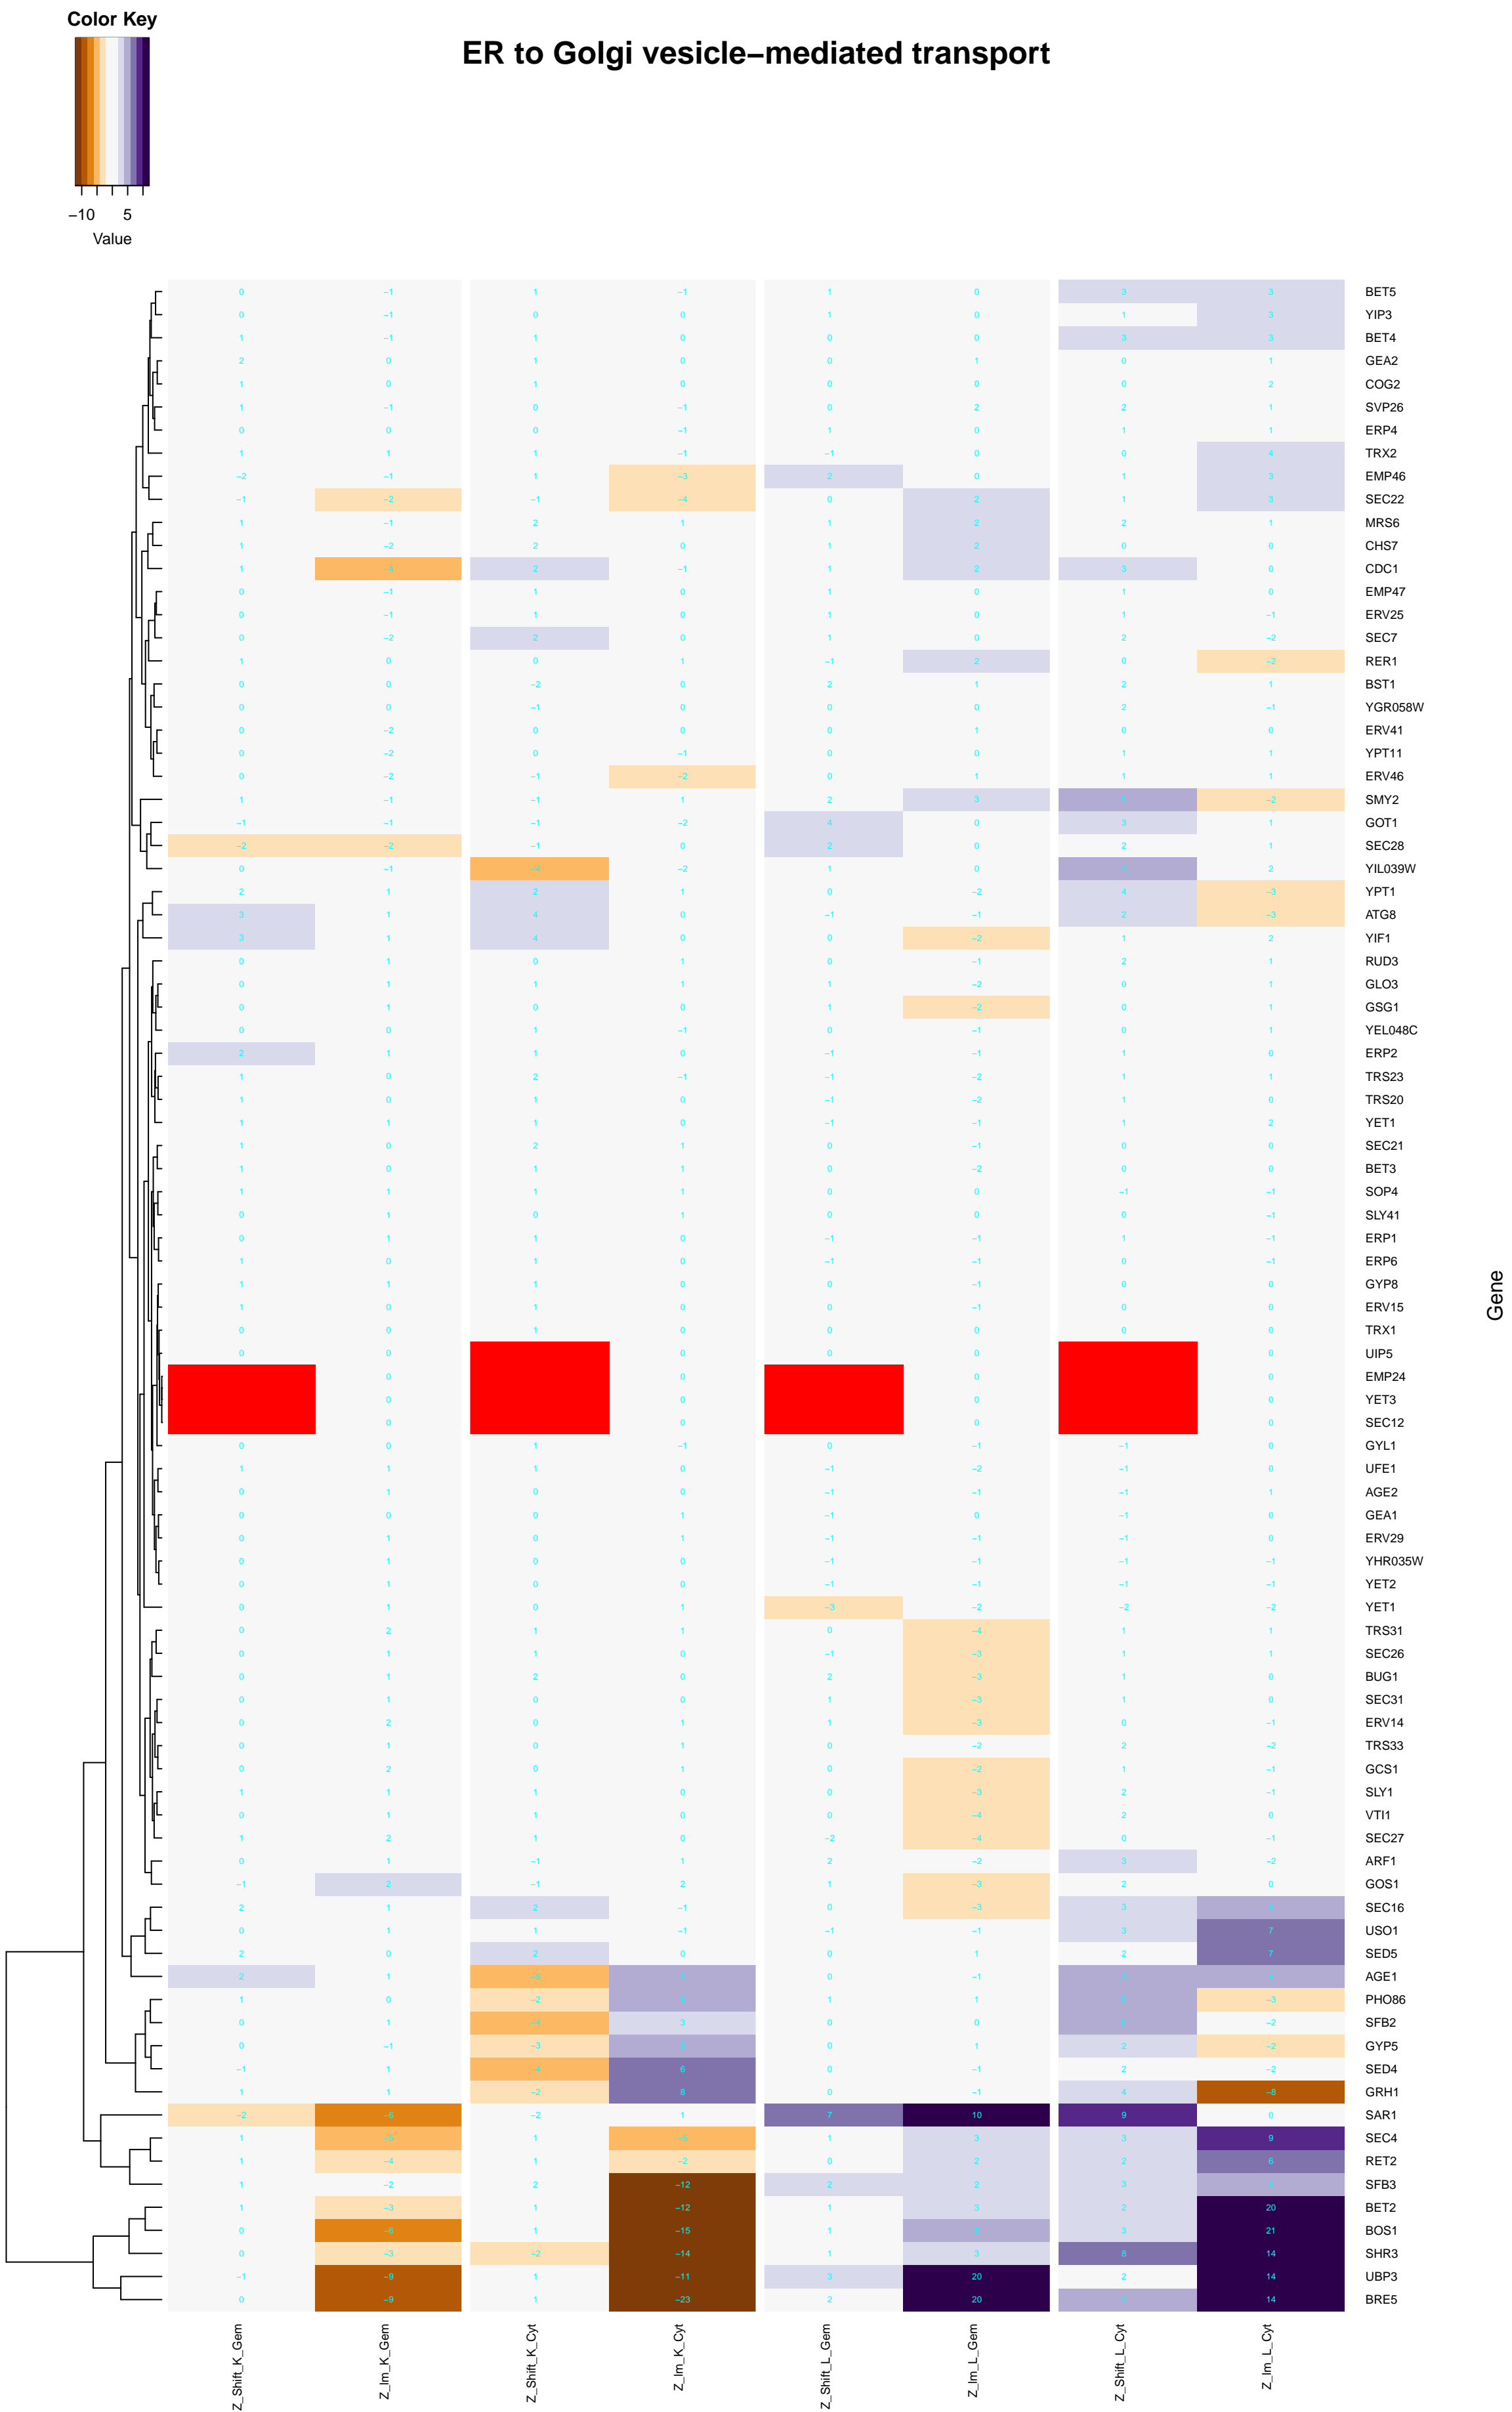

Supplement: s1 [file s1]

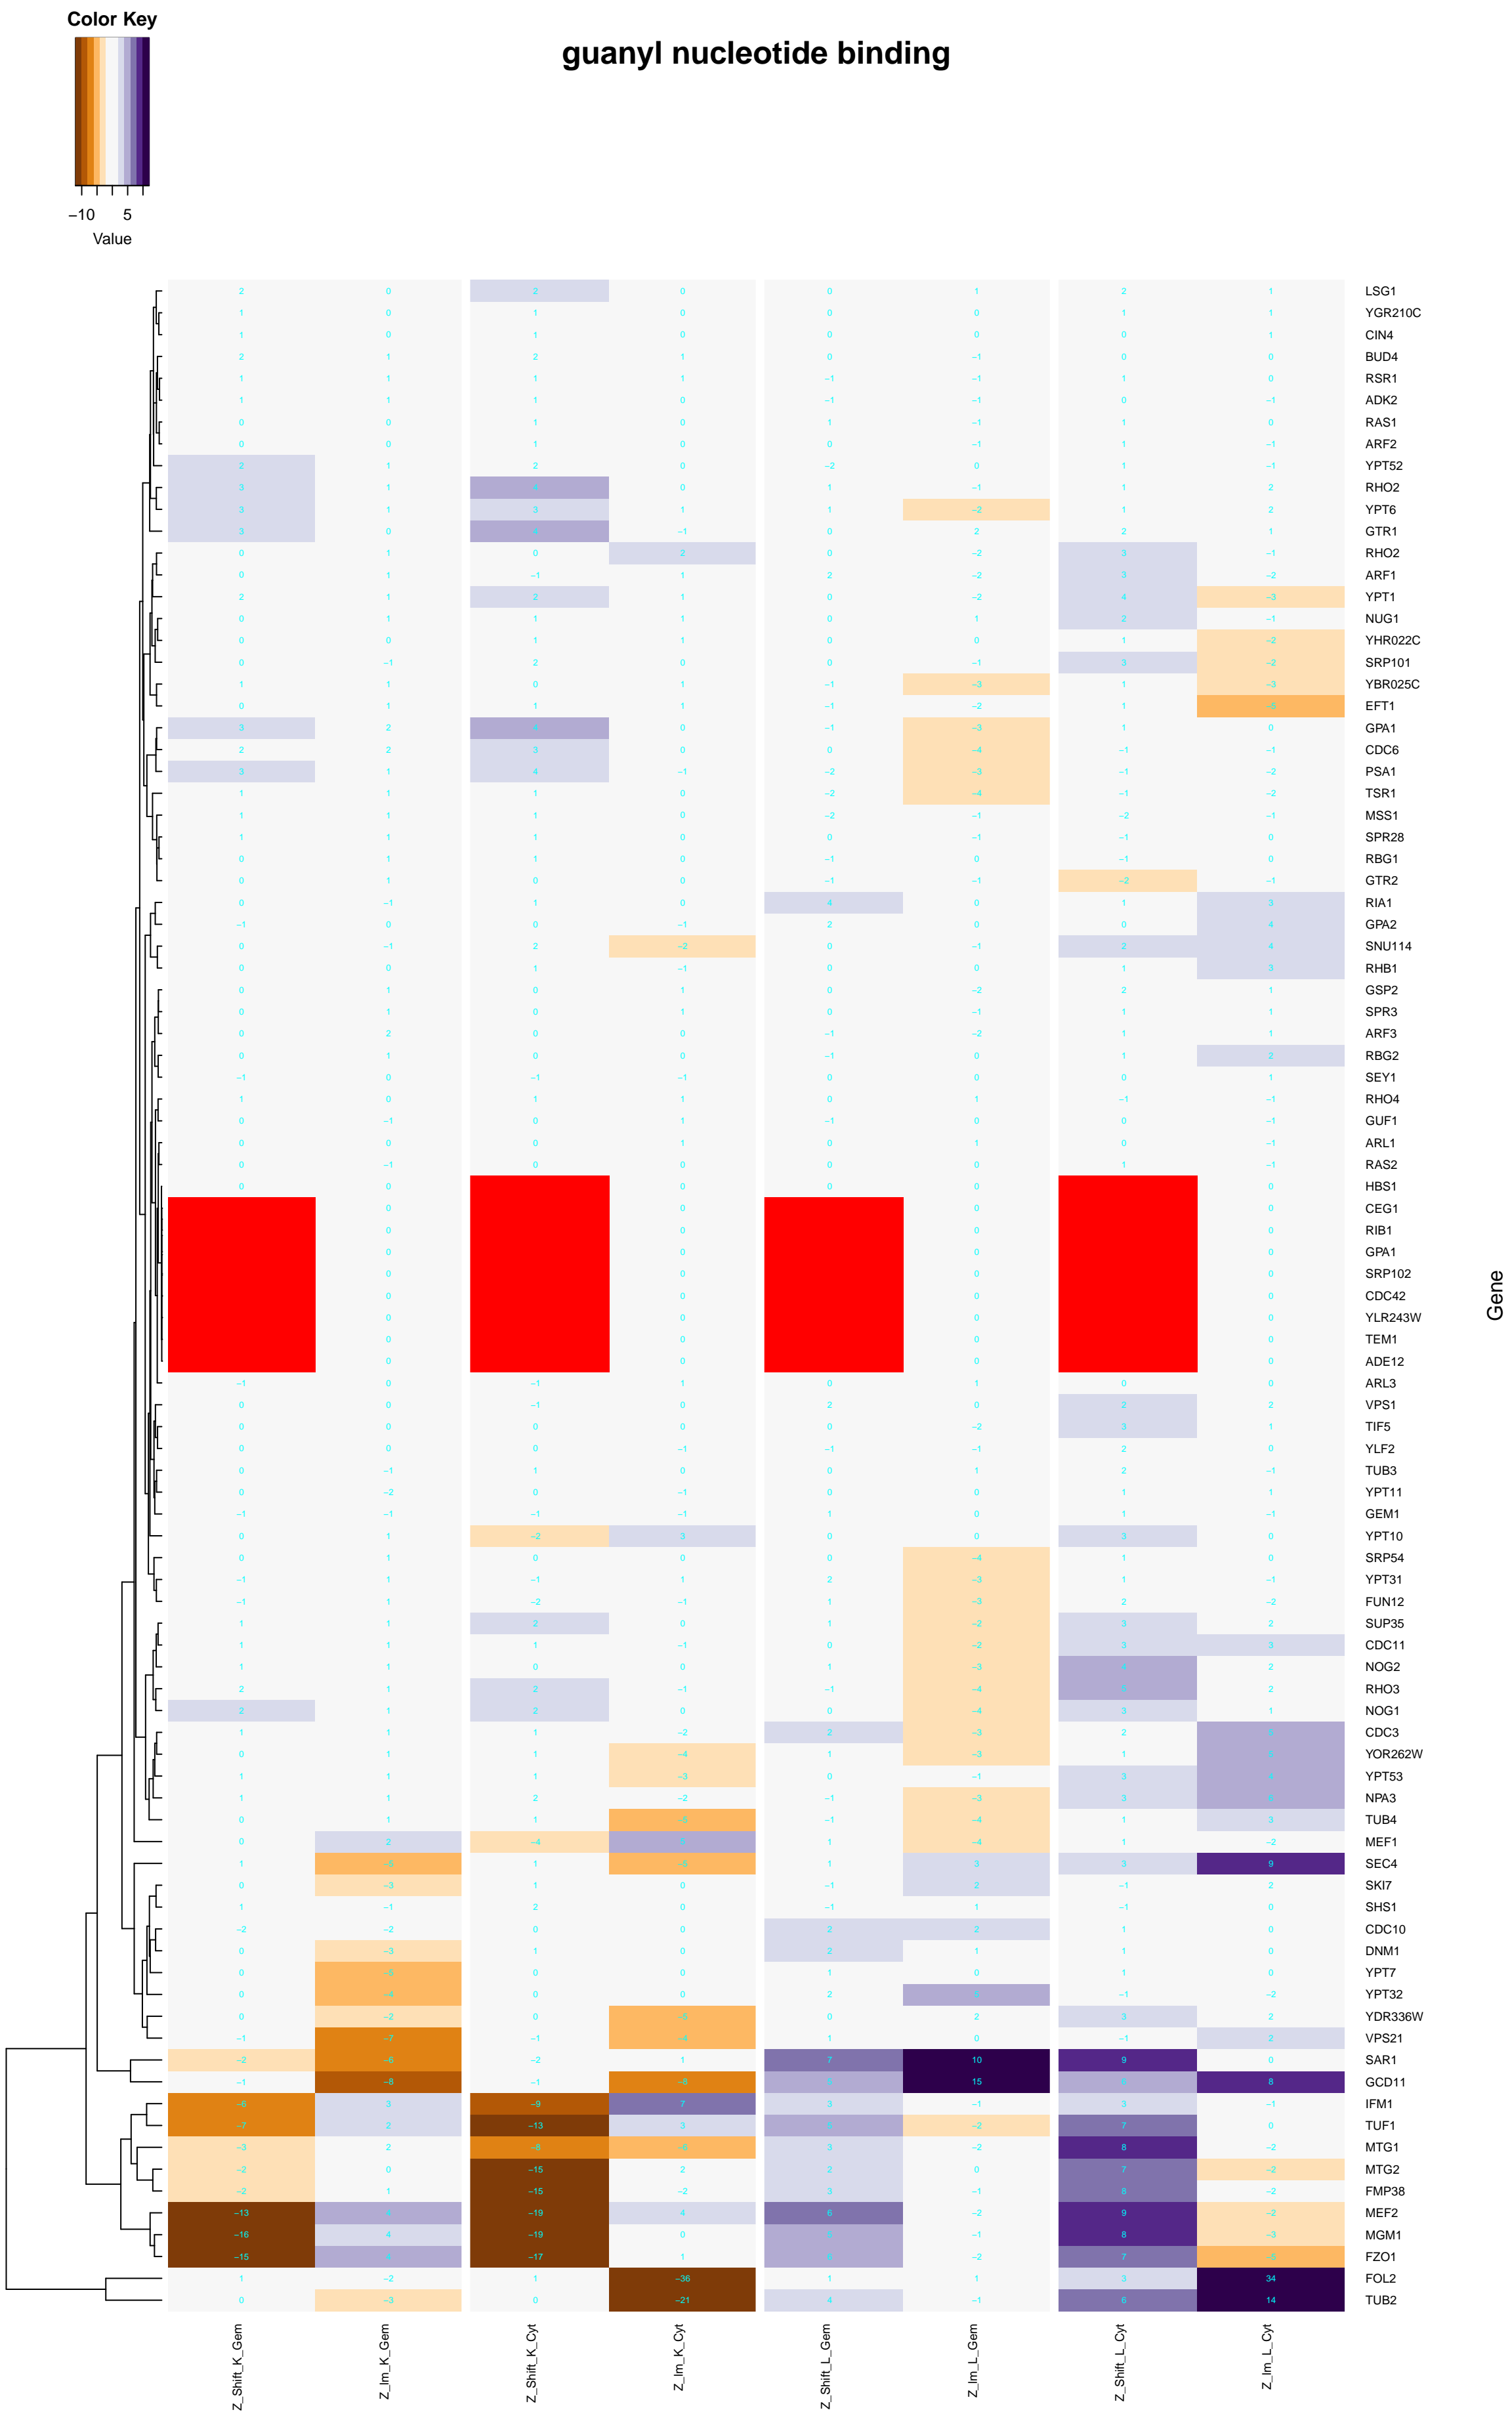

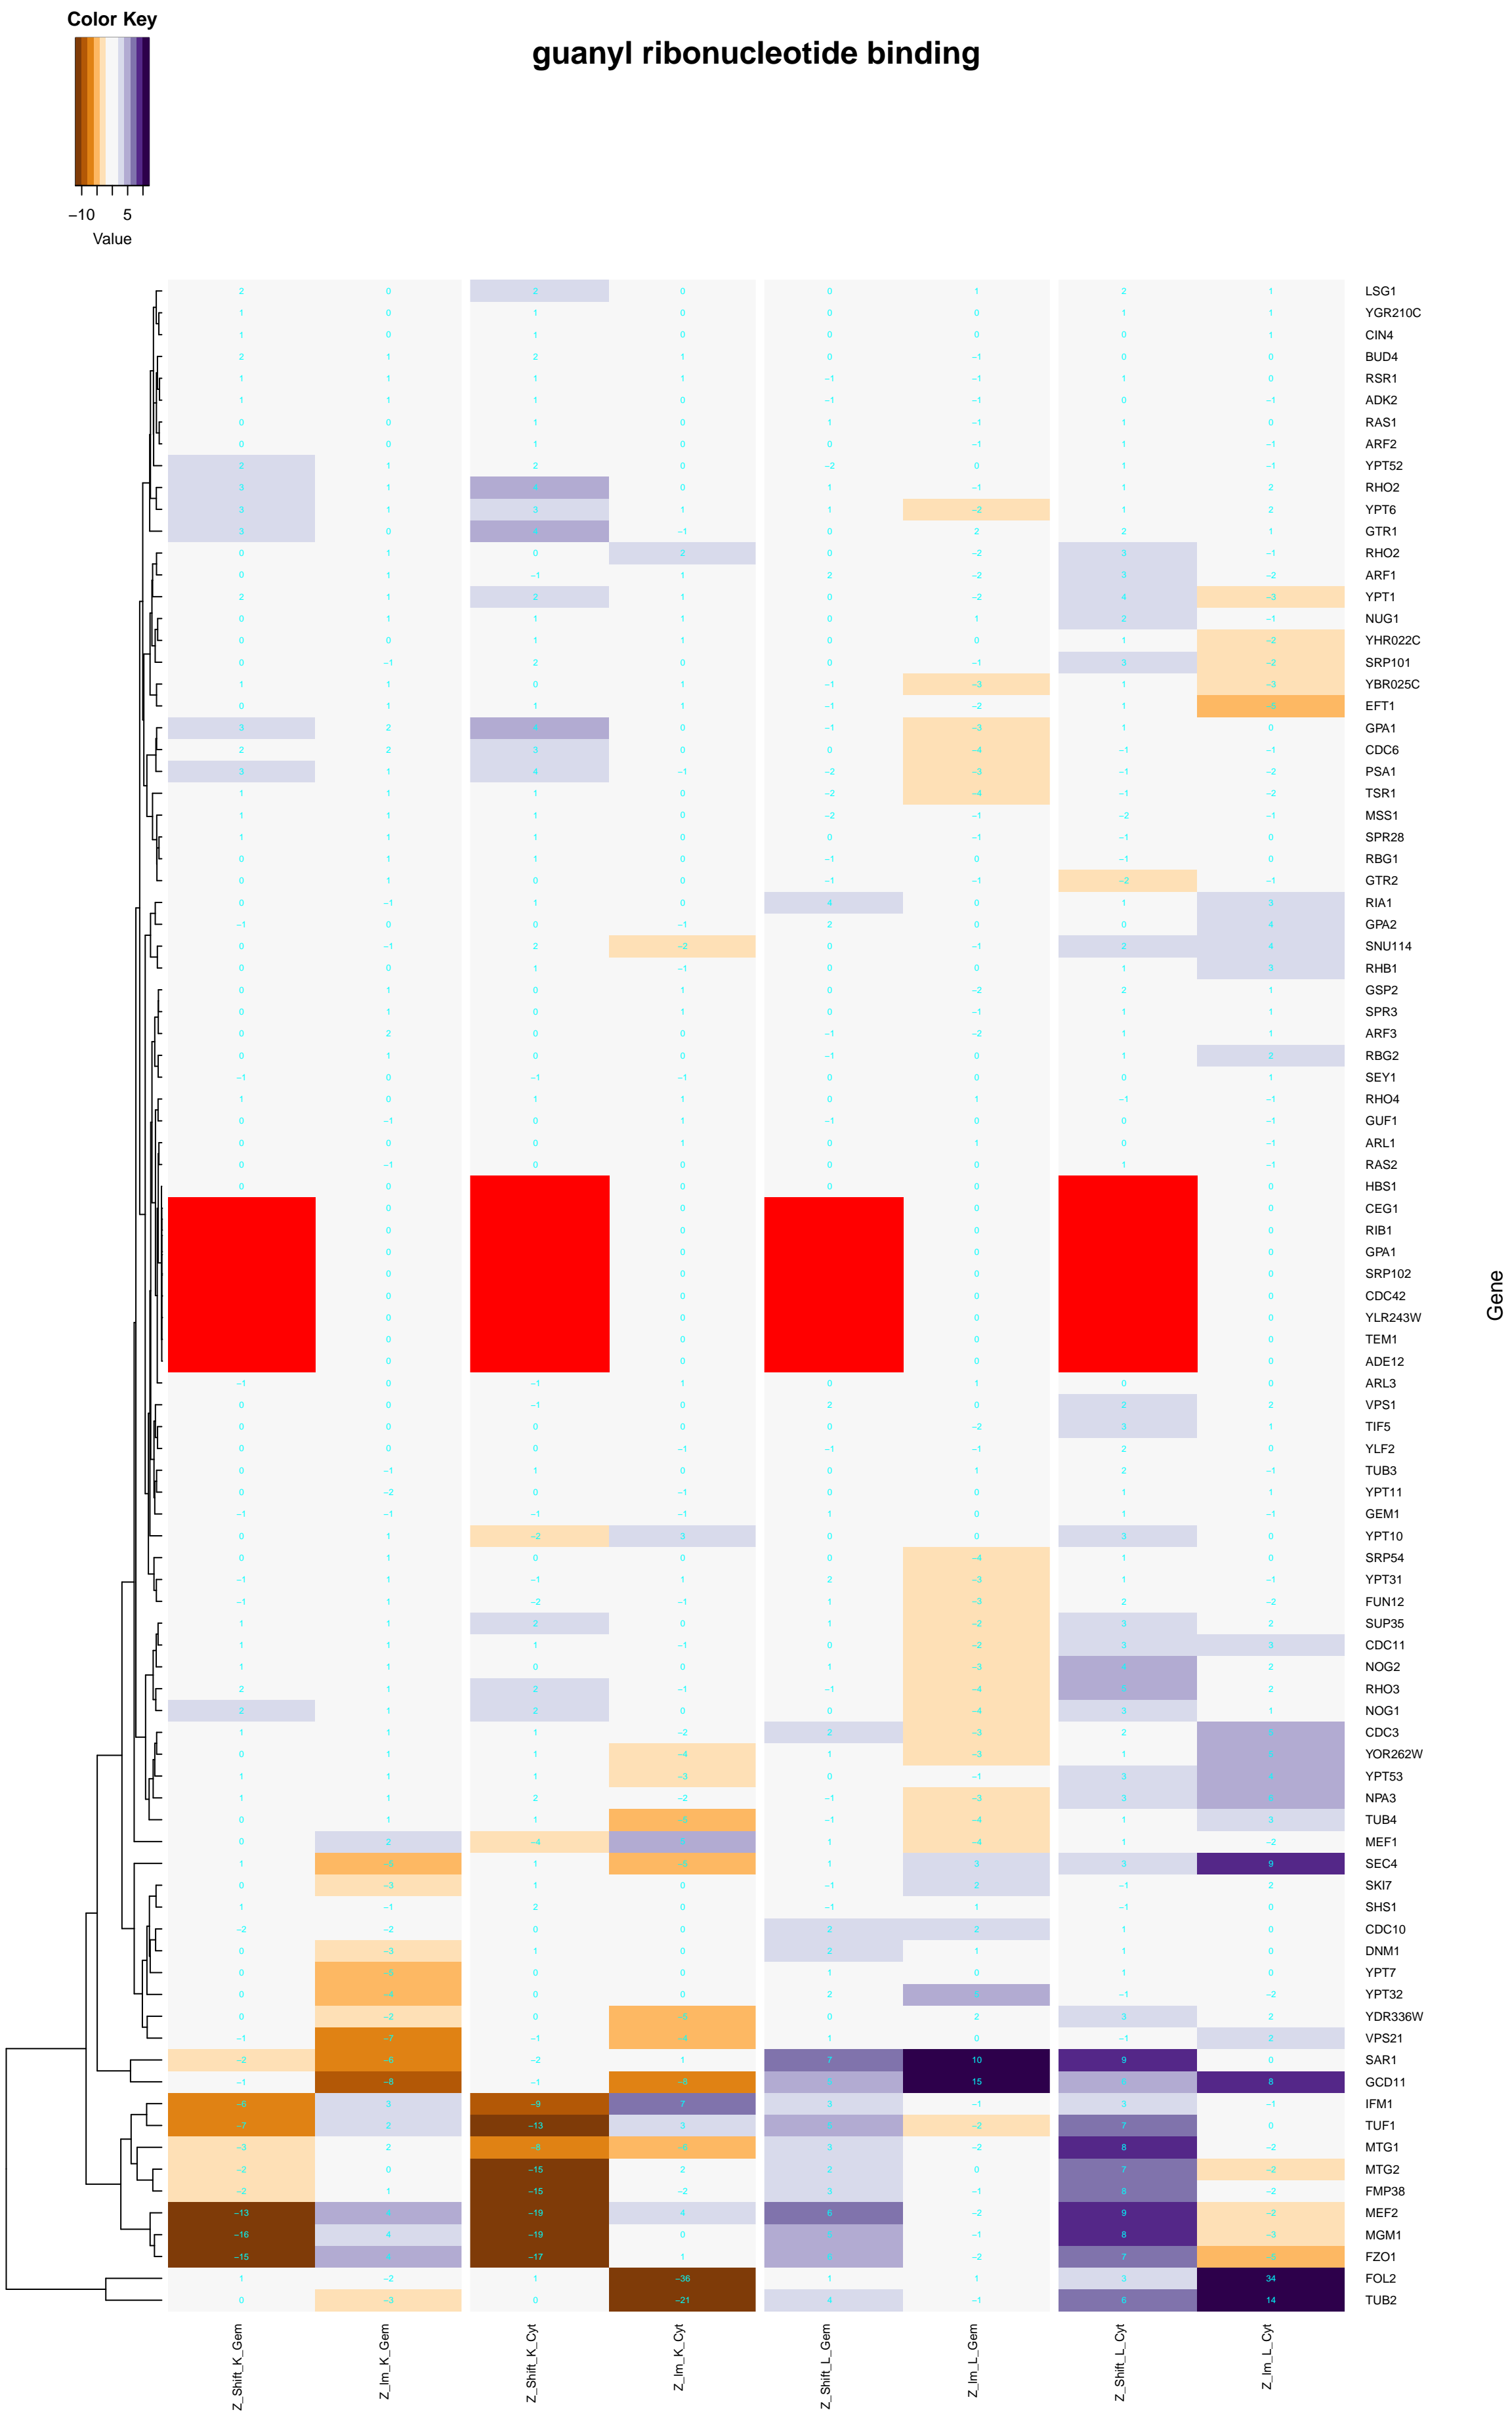

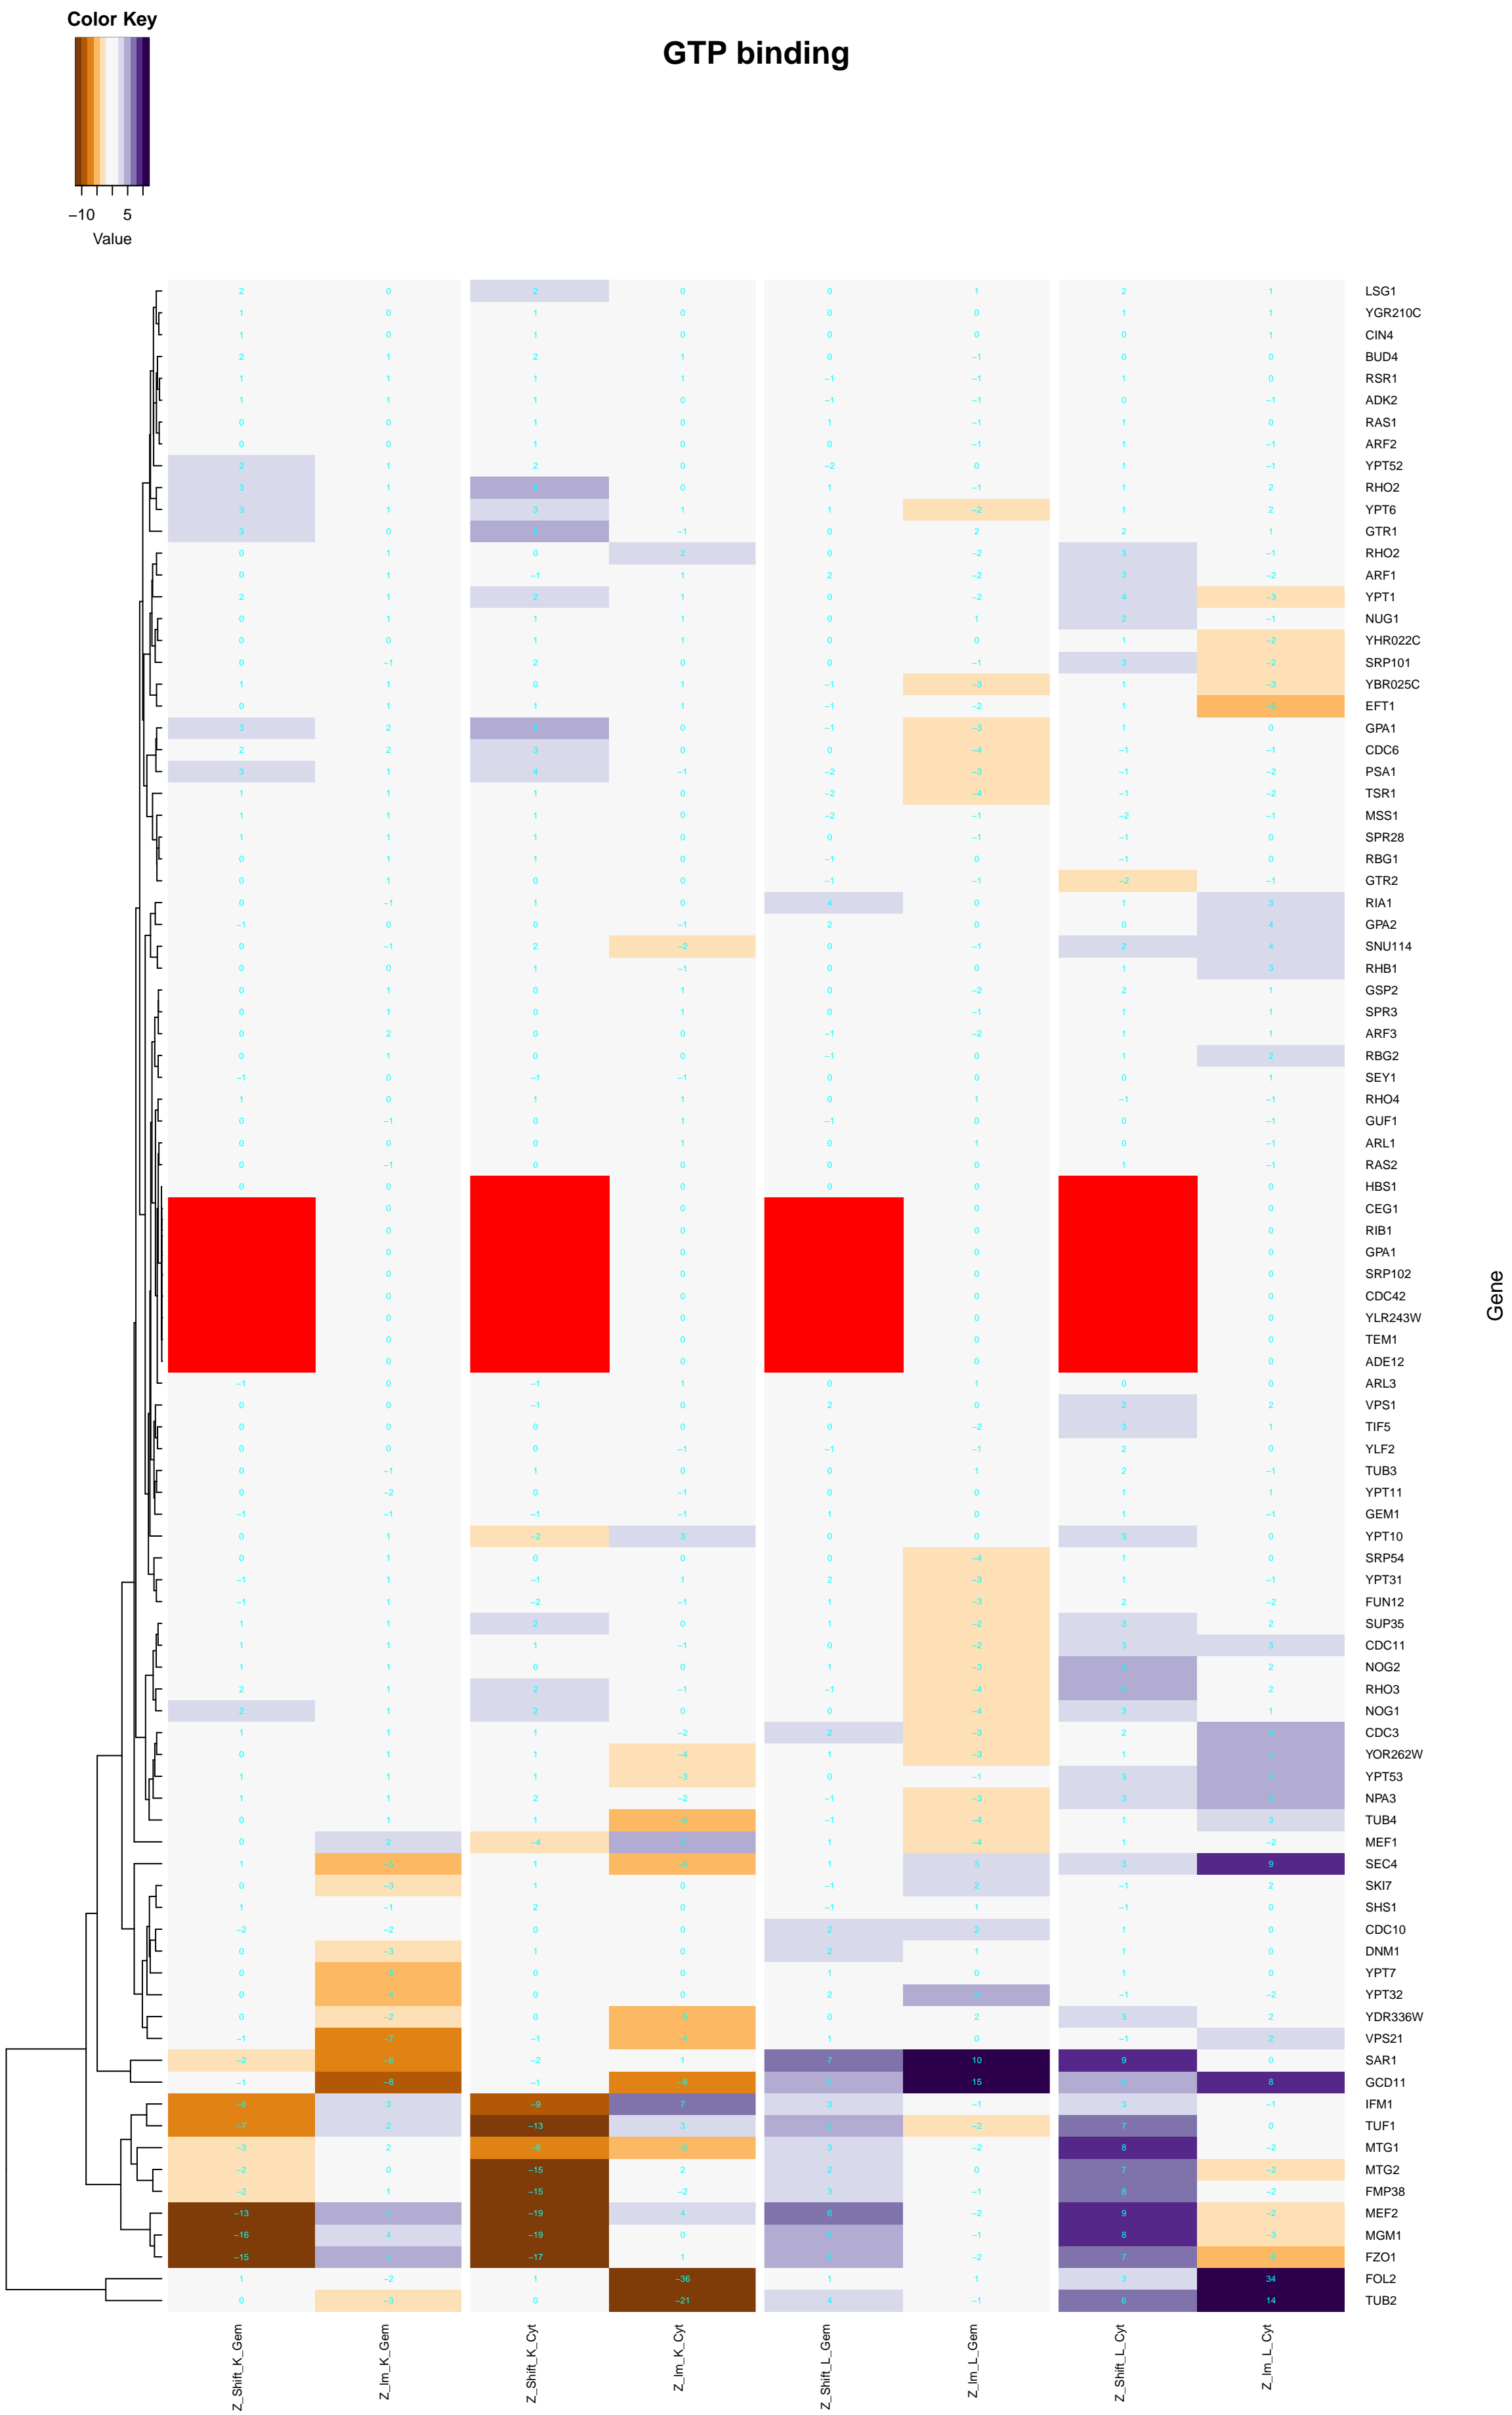

Supplement: s1 [file s1]

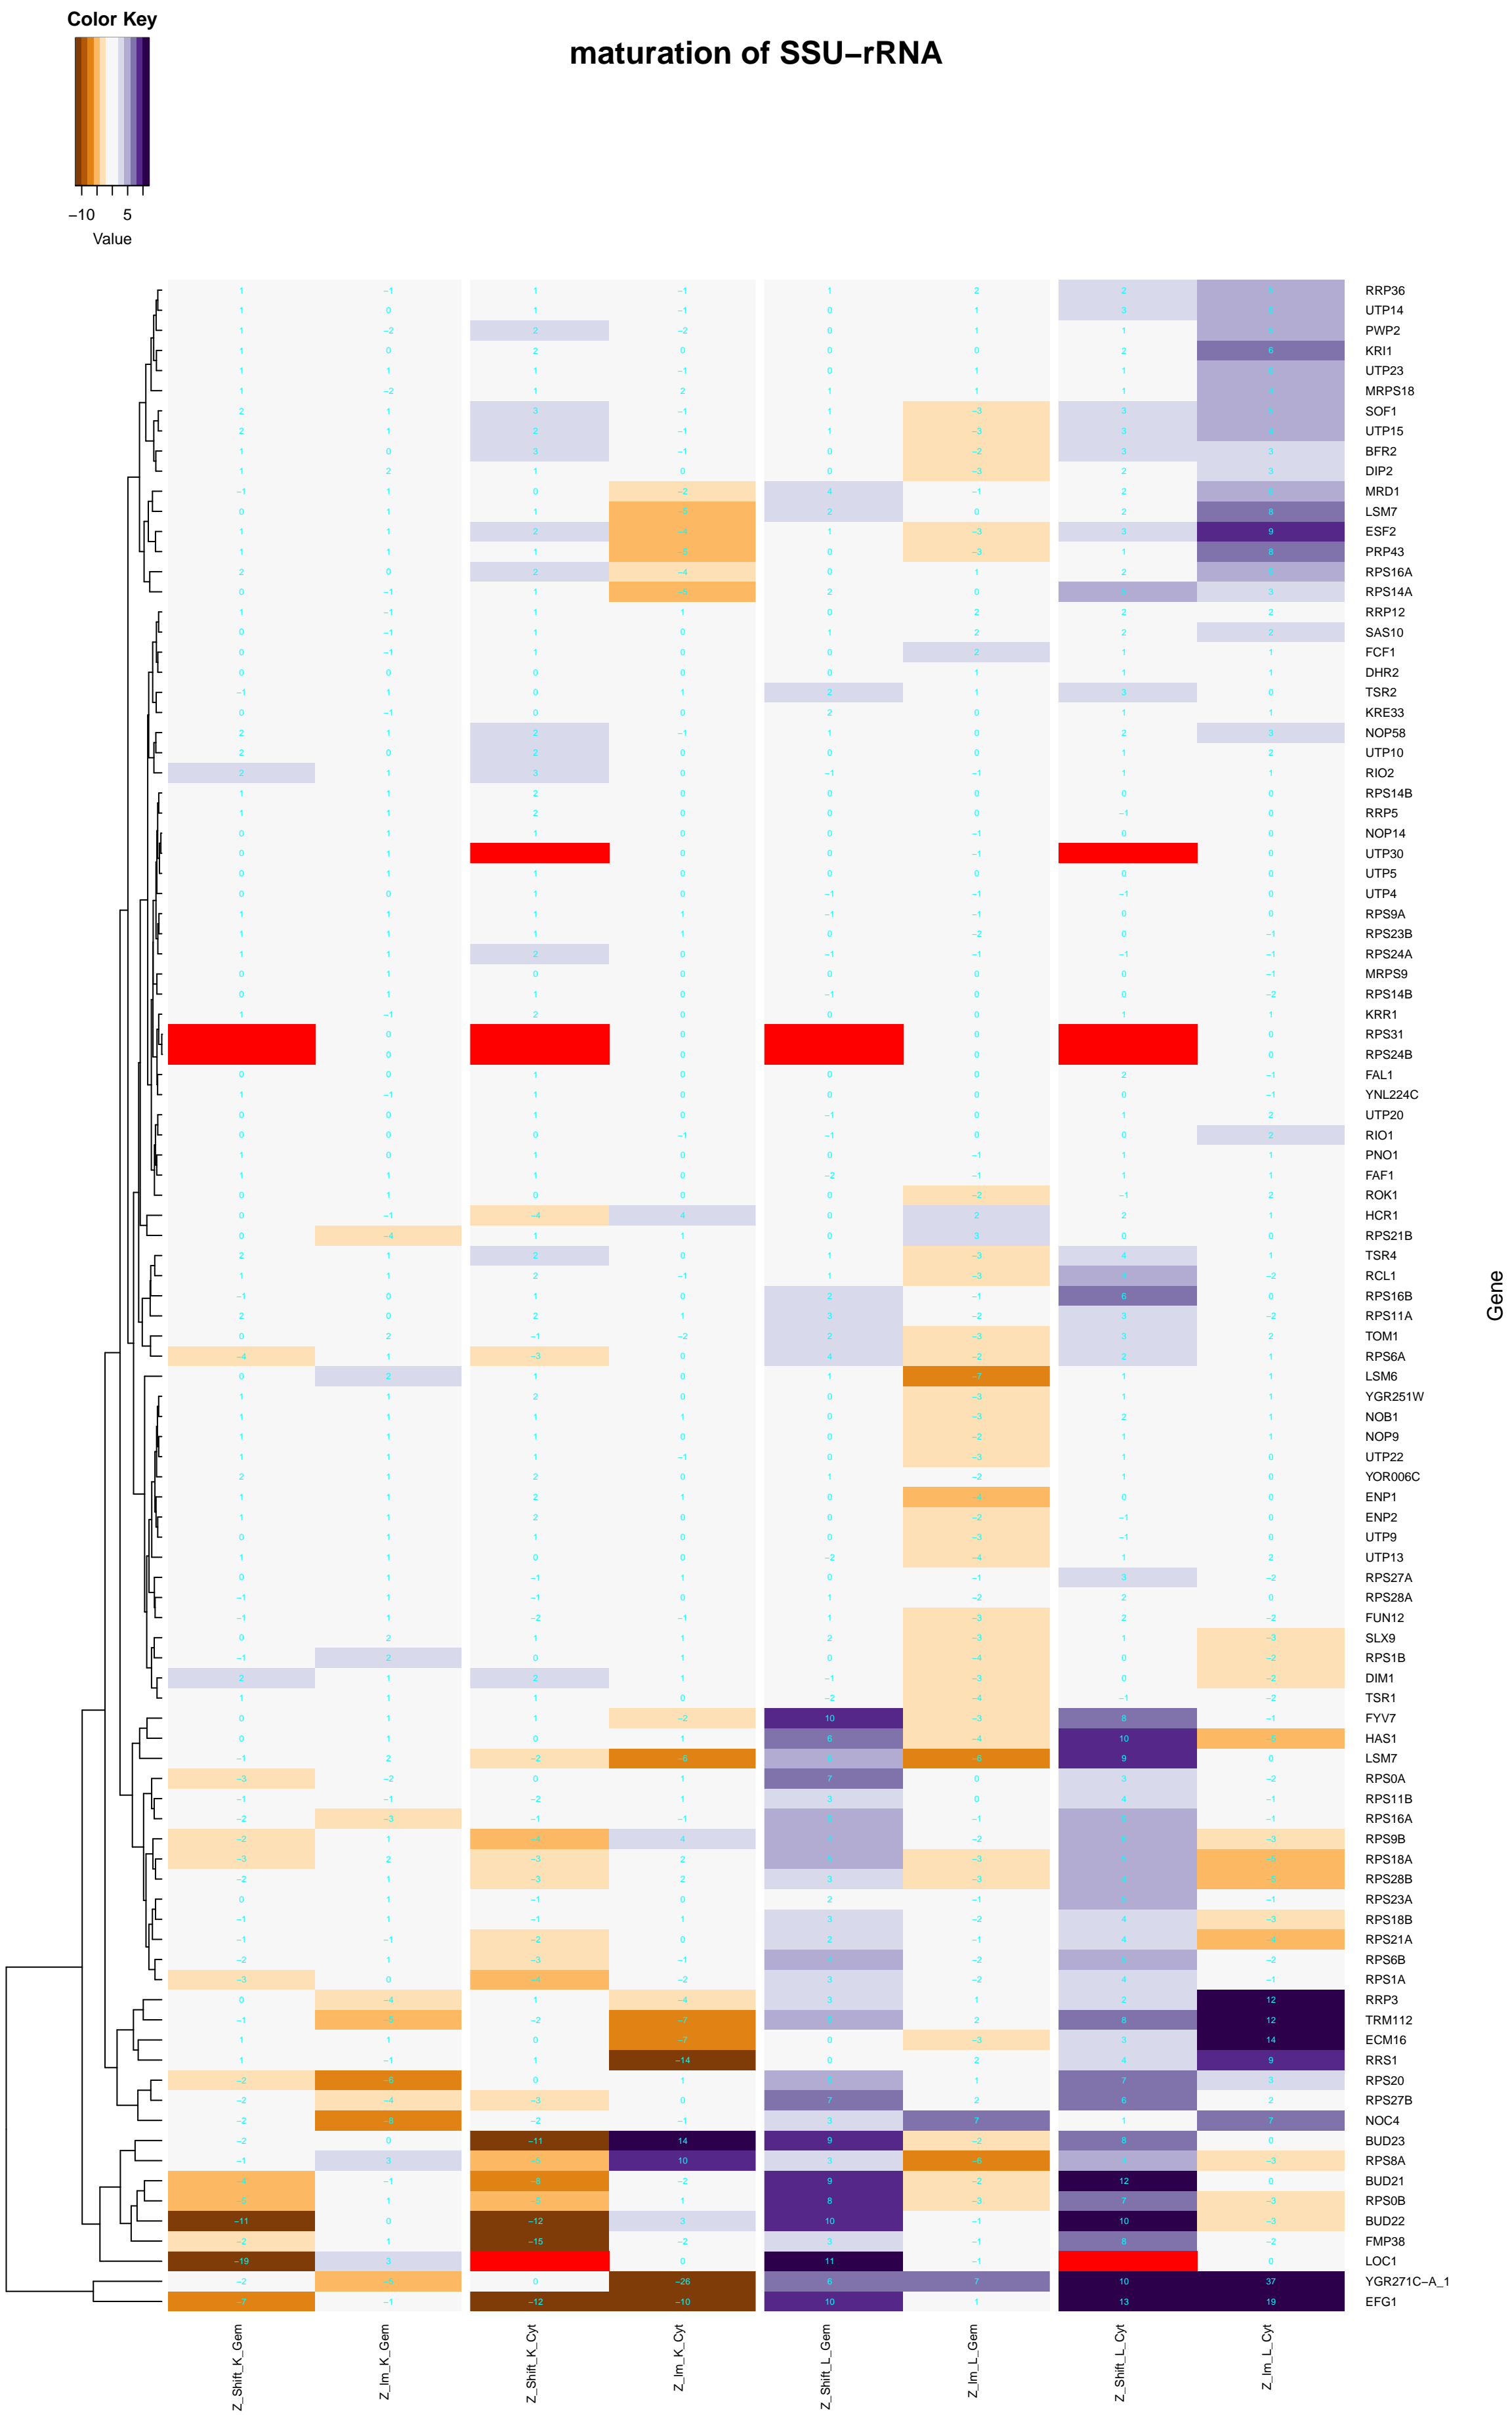

Color Key

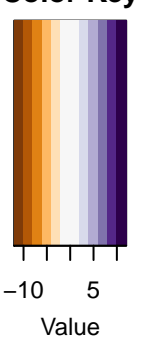

ion of SSU-rRNA from tricistronic rRNA transcript (SSU-rRNA, 5.8S rRNA, LSU-rRNA)

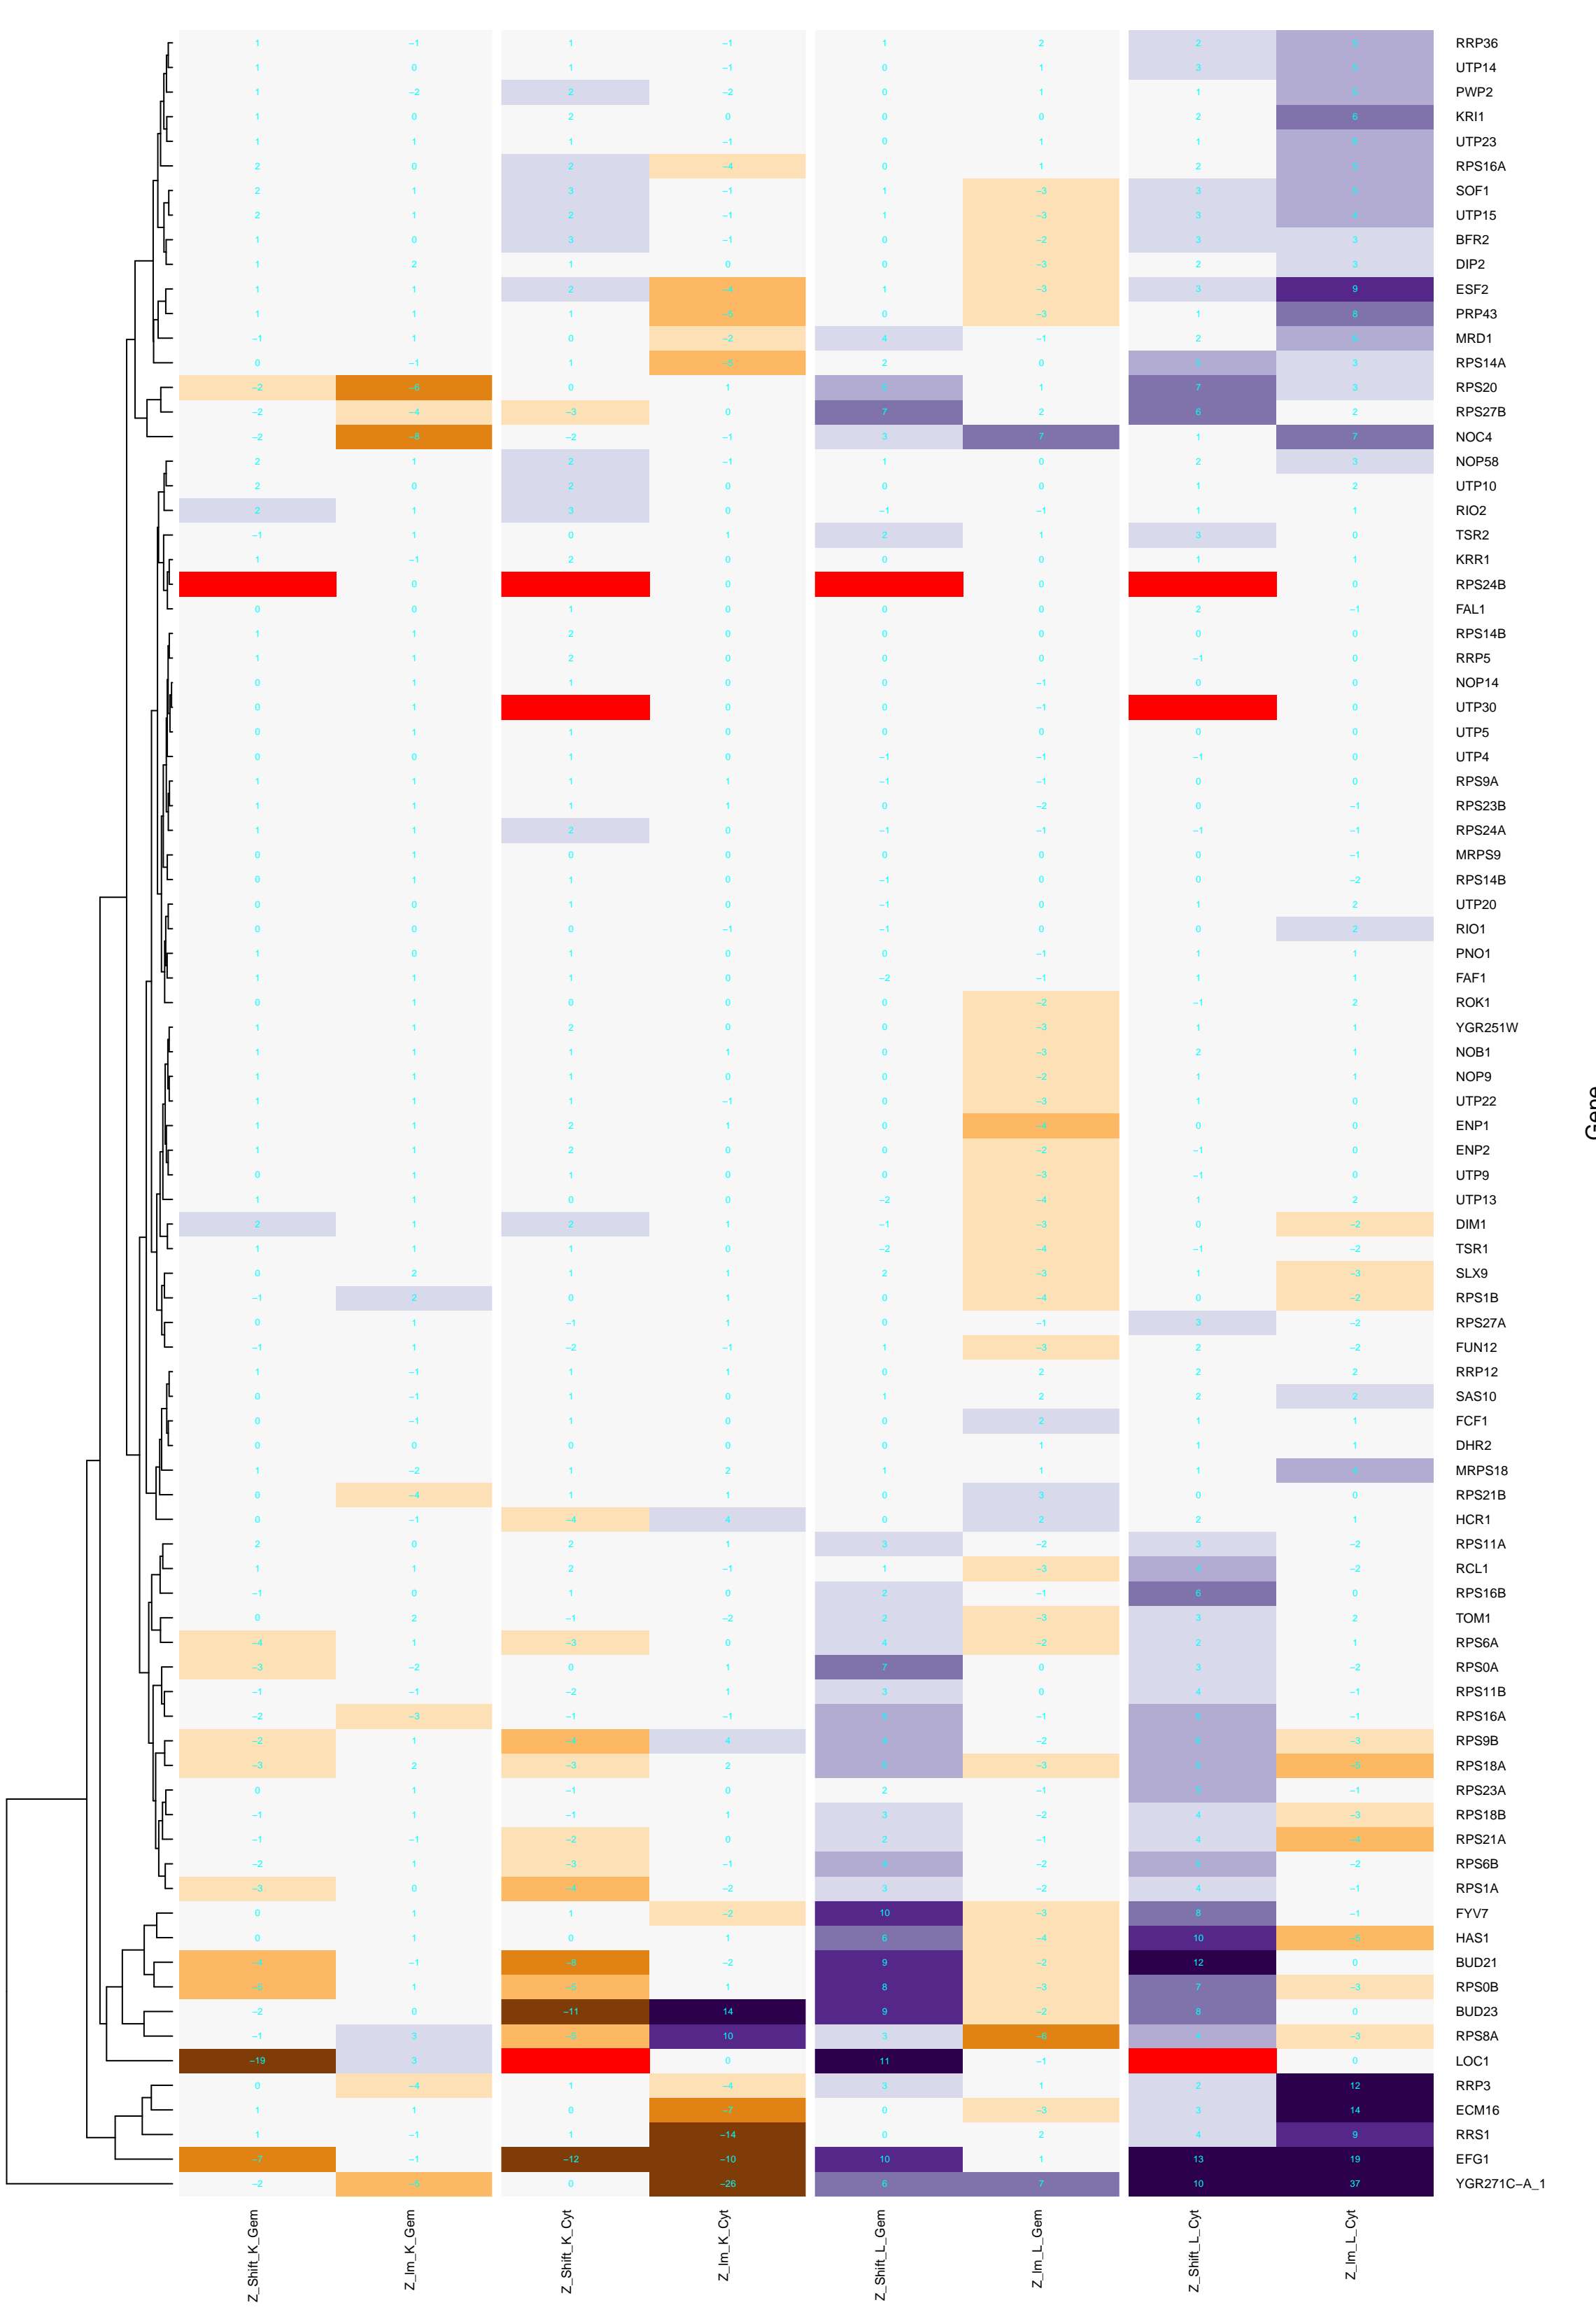

Supplement: s1 [file s1]

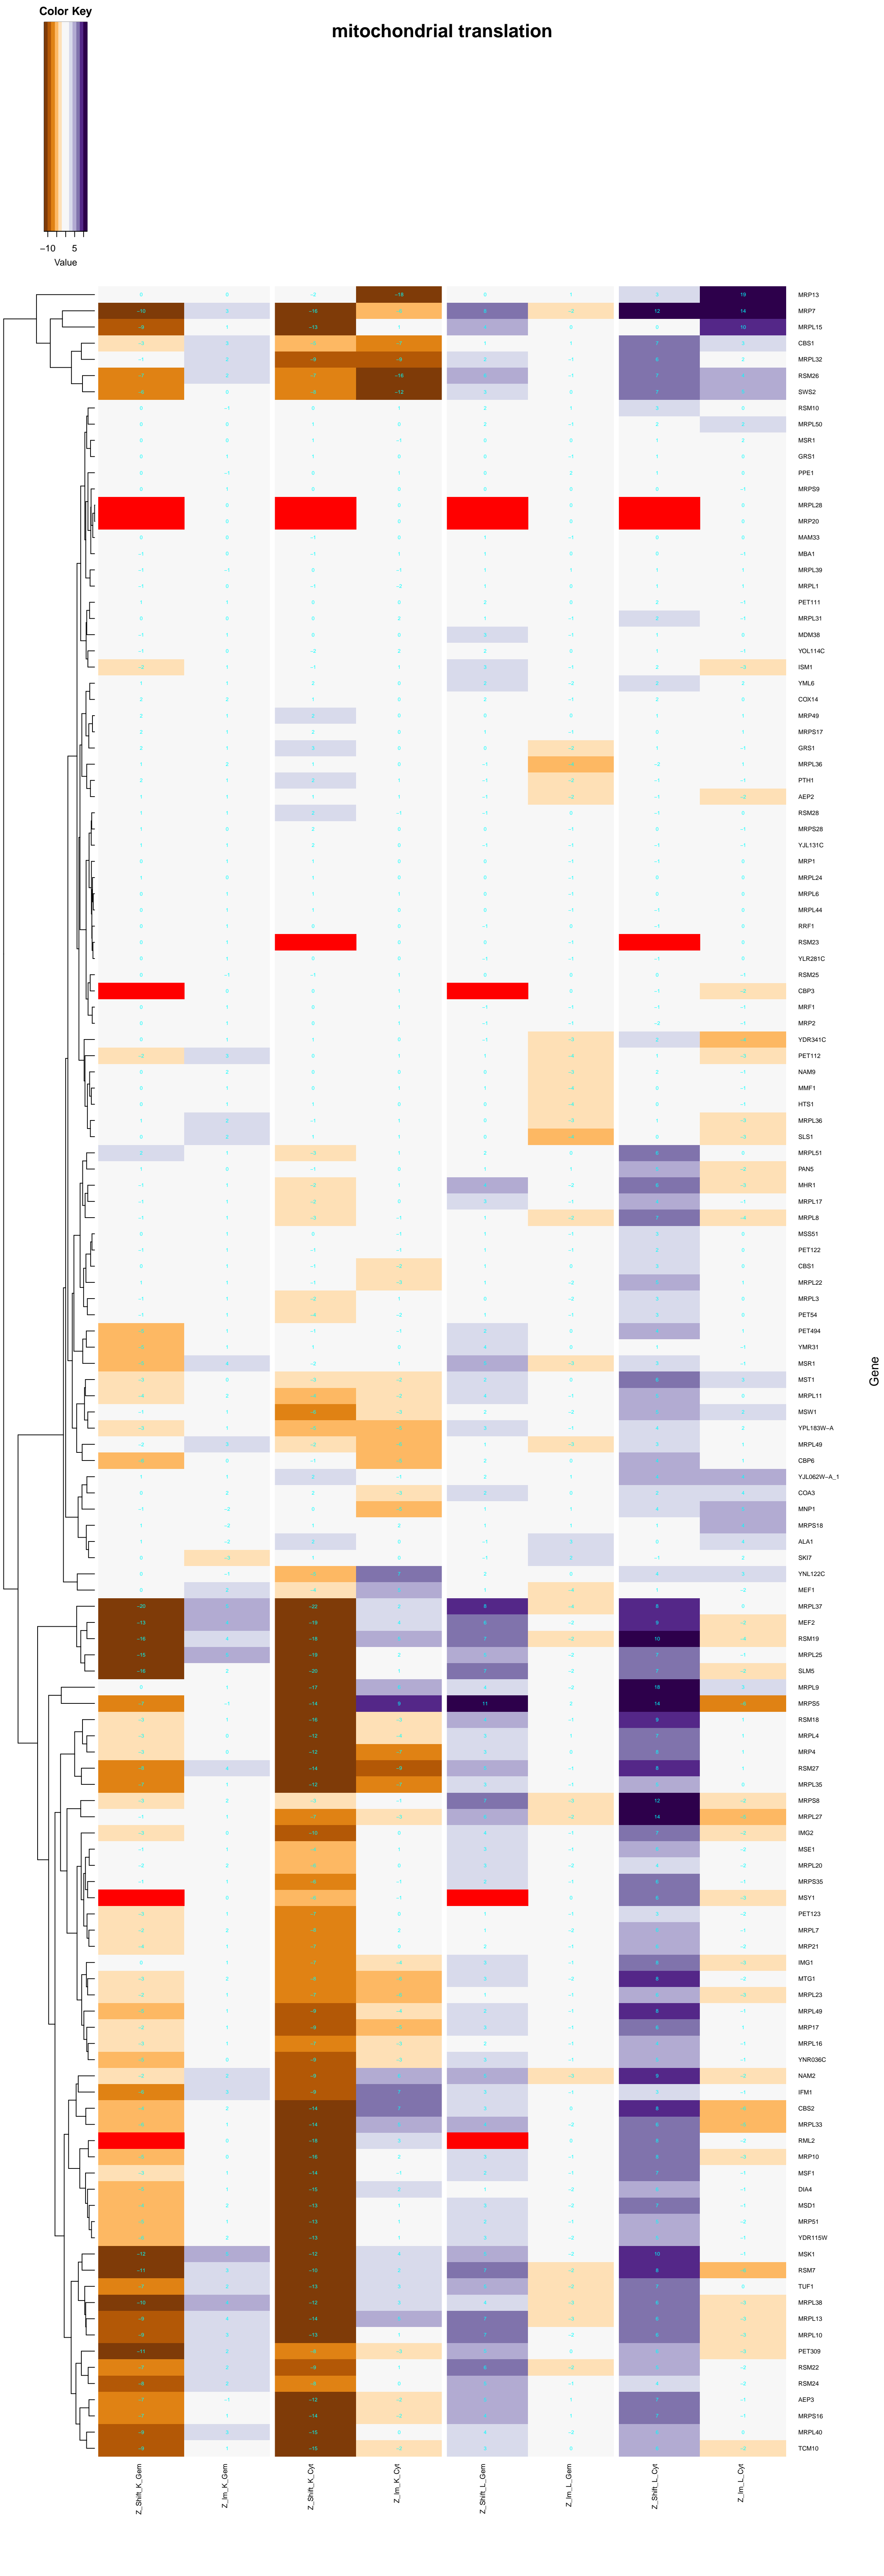

Supplement: s1 [file s1]

### Color Key

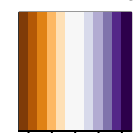

Value

## ncRNA 3'-end processing

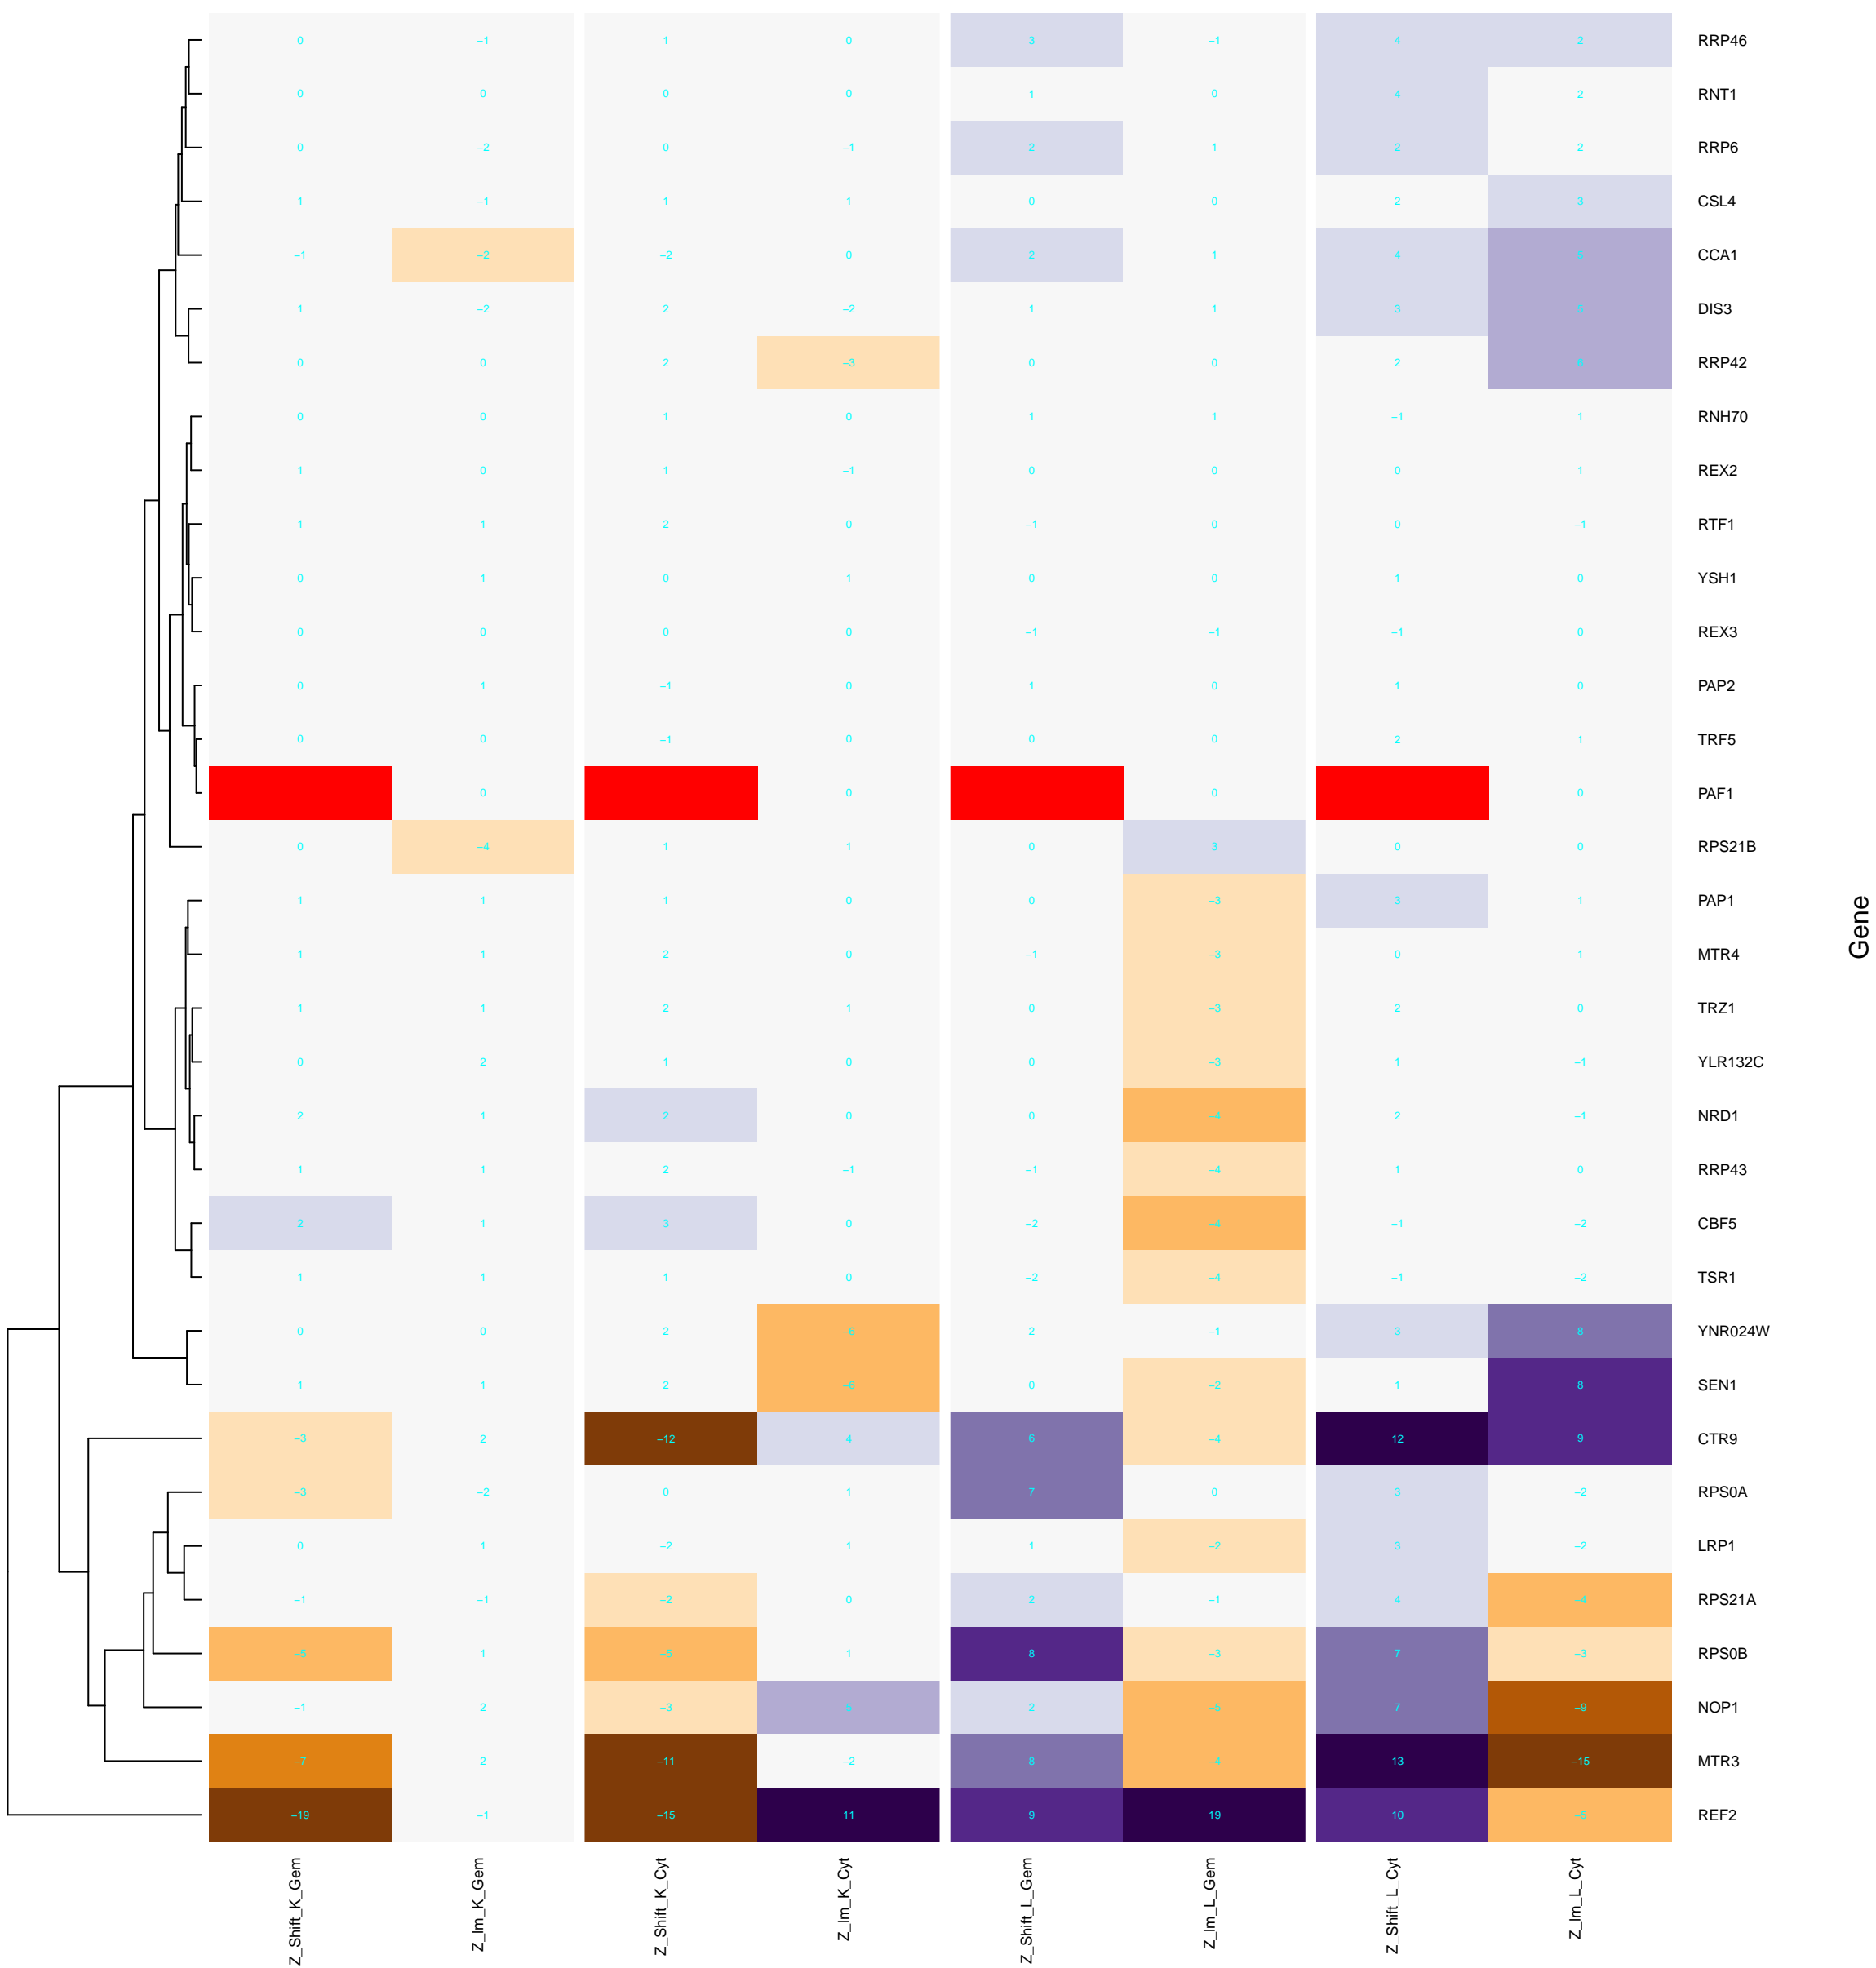

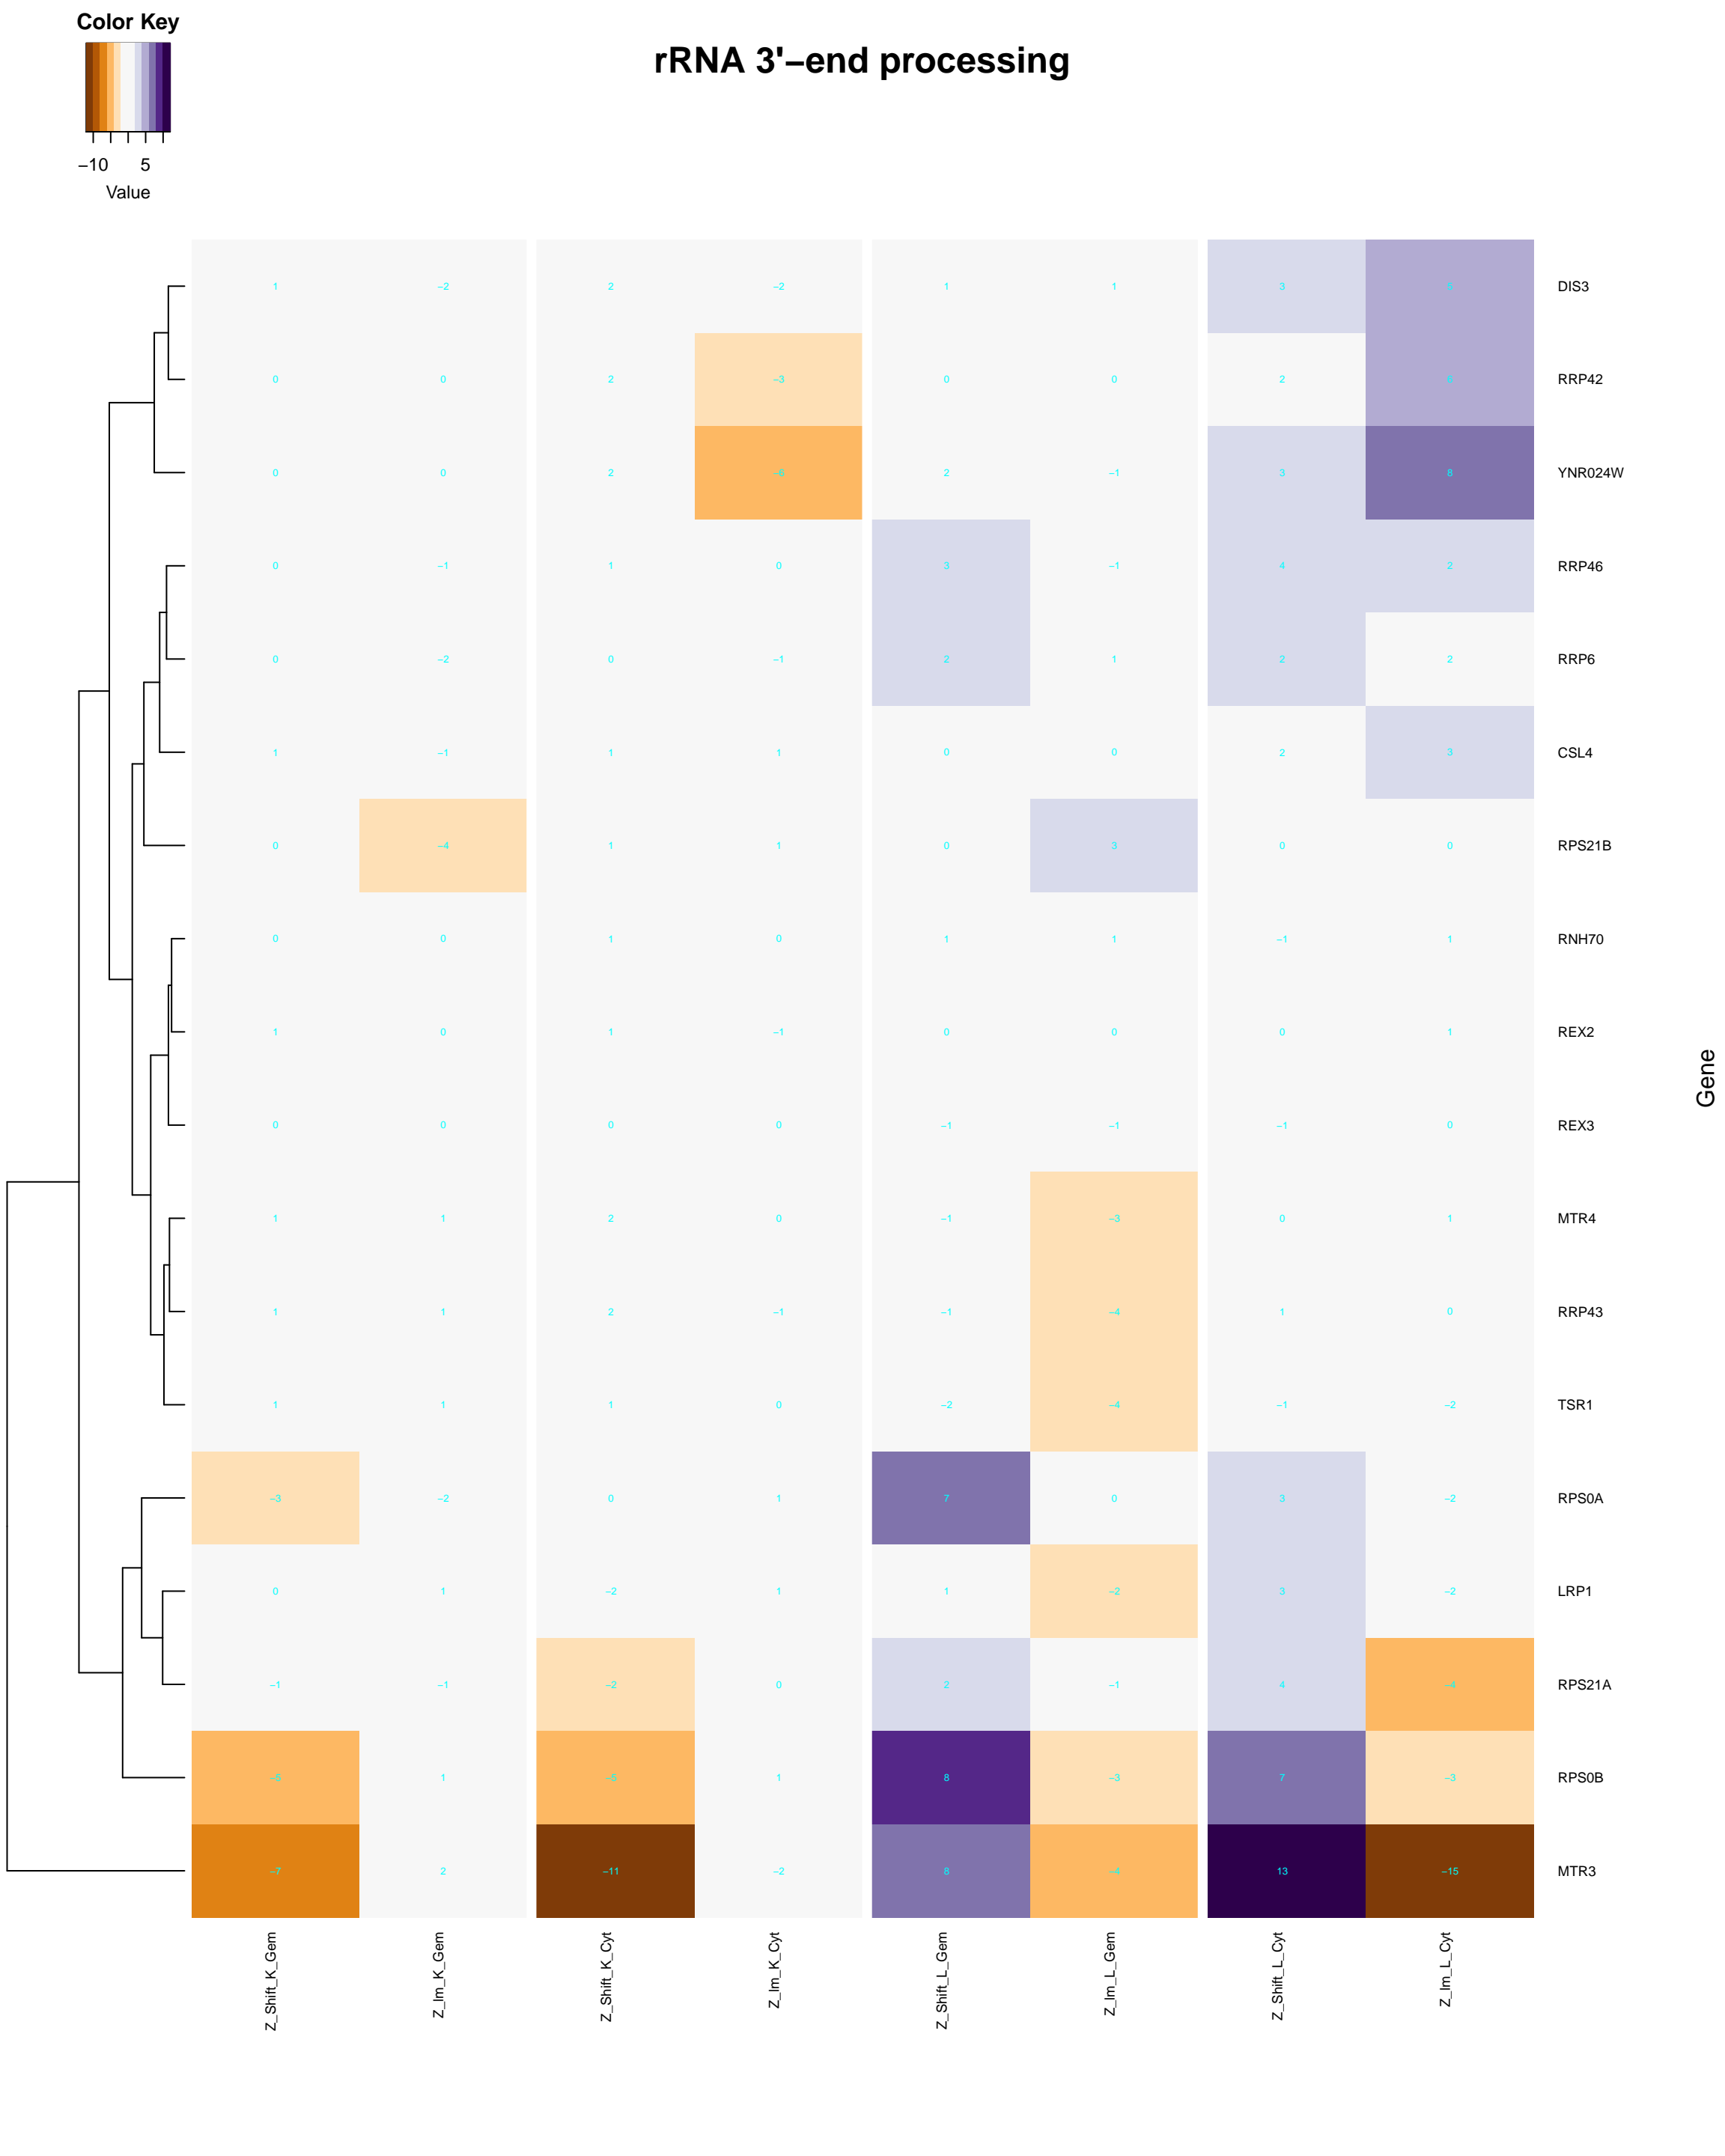

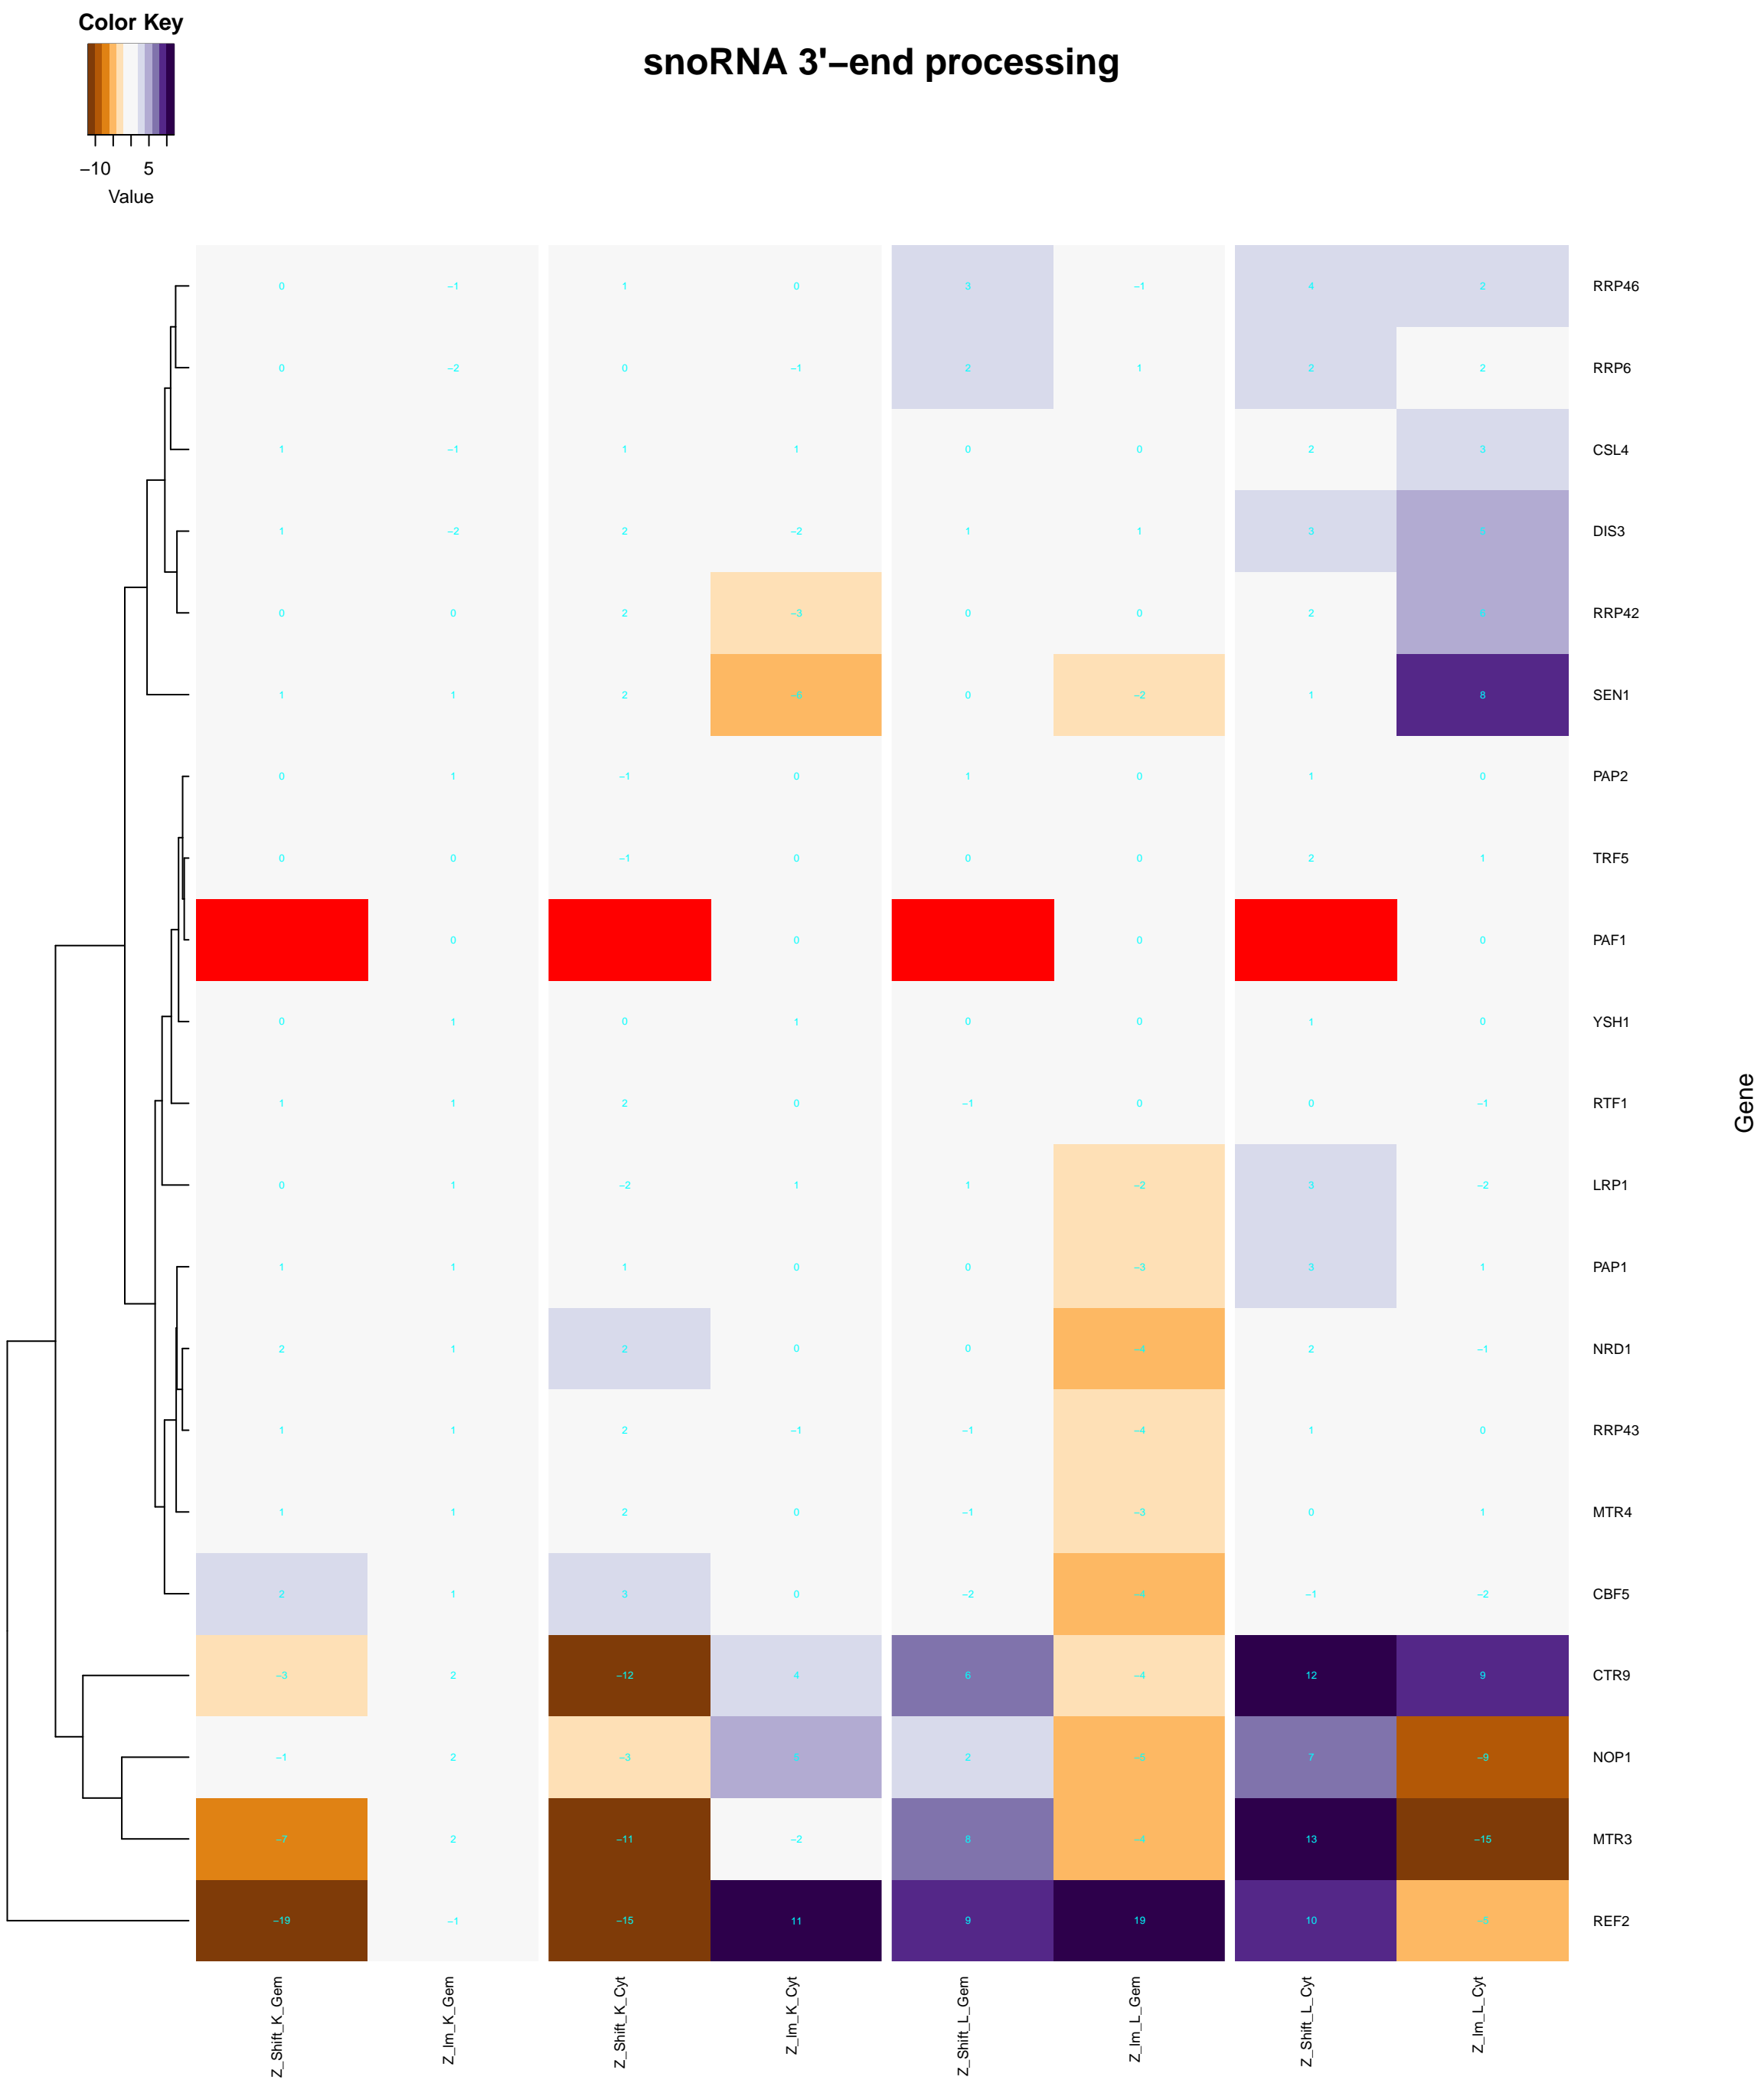

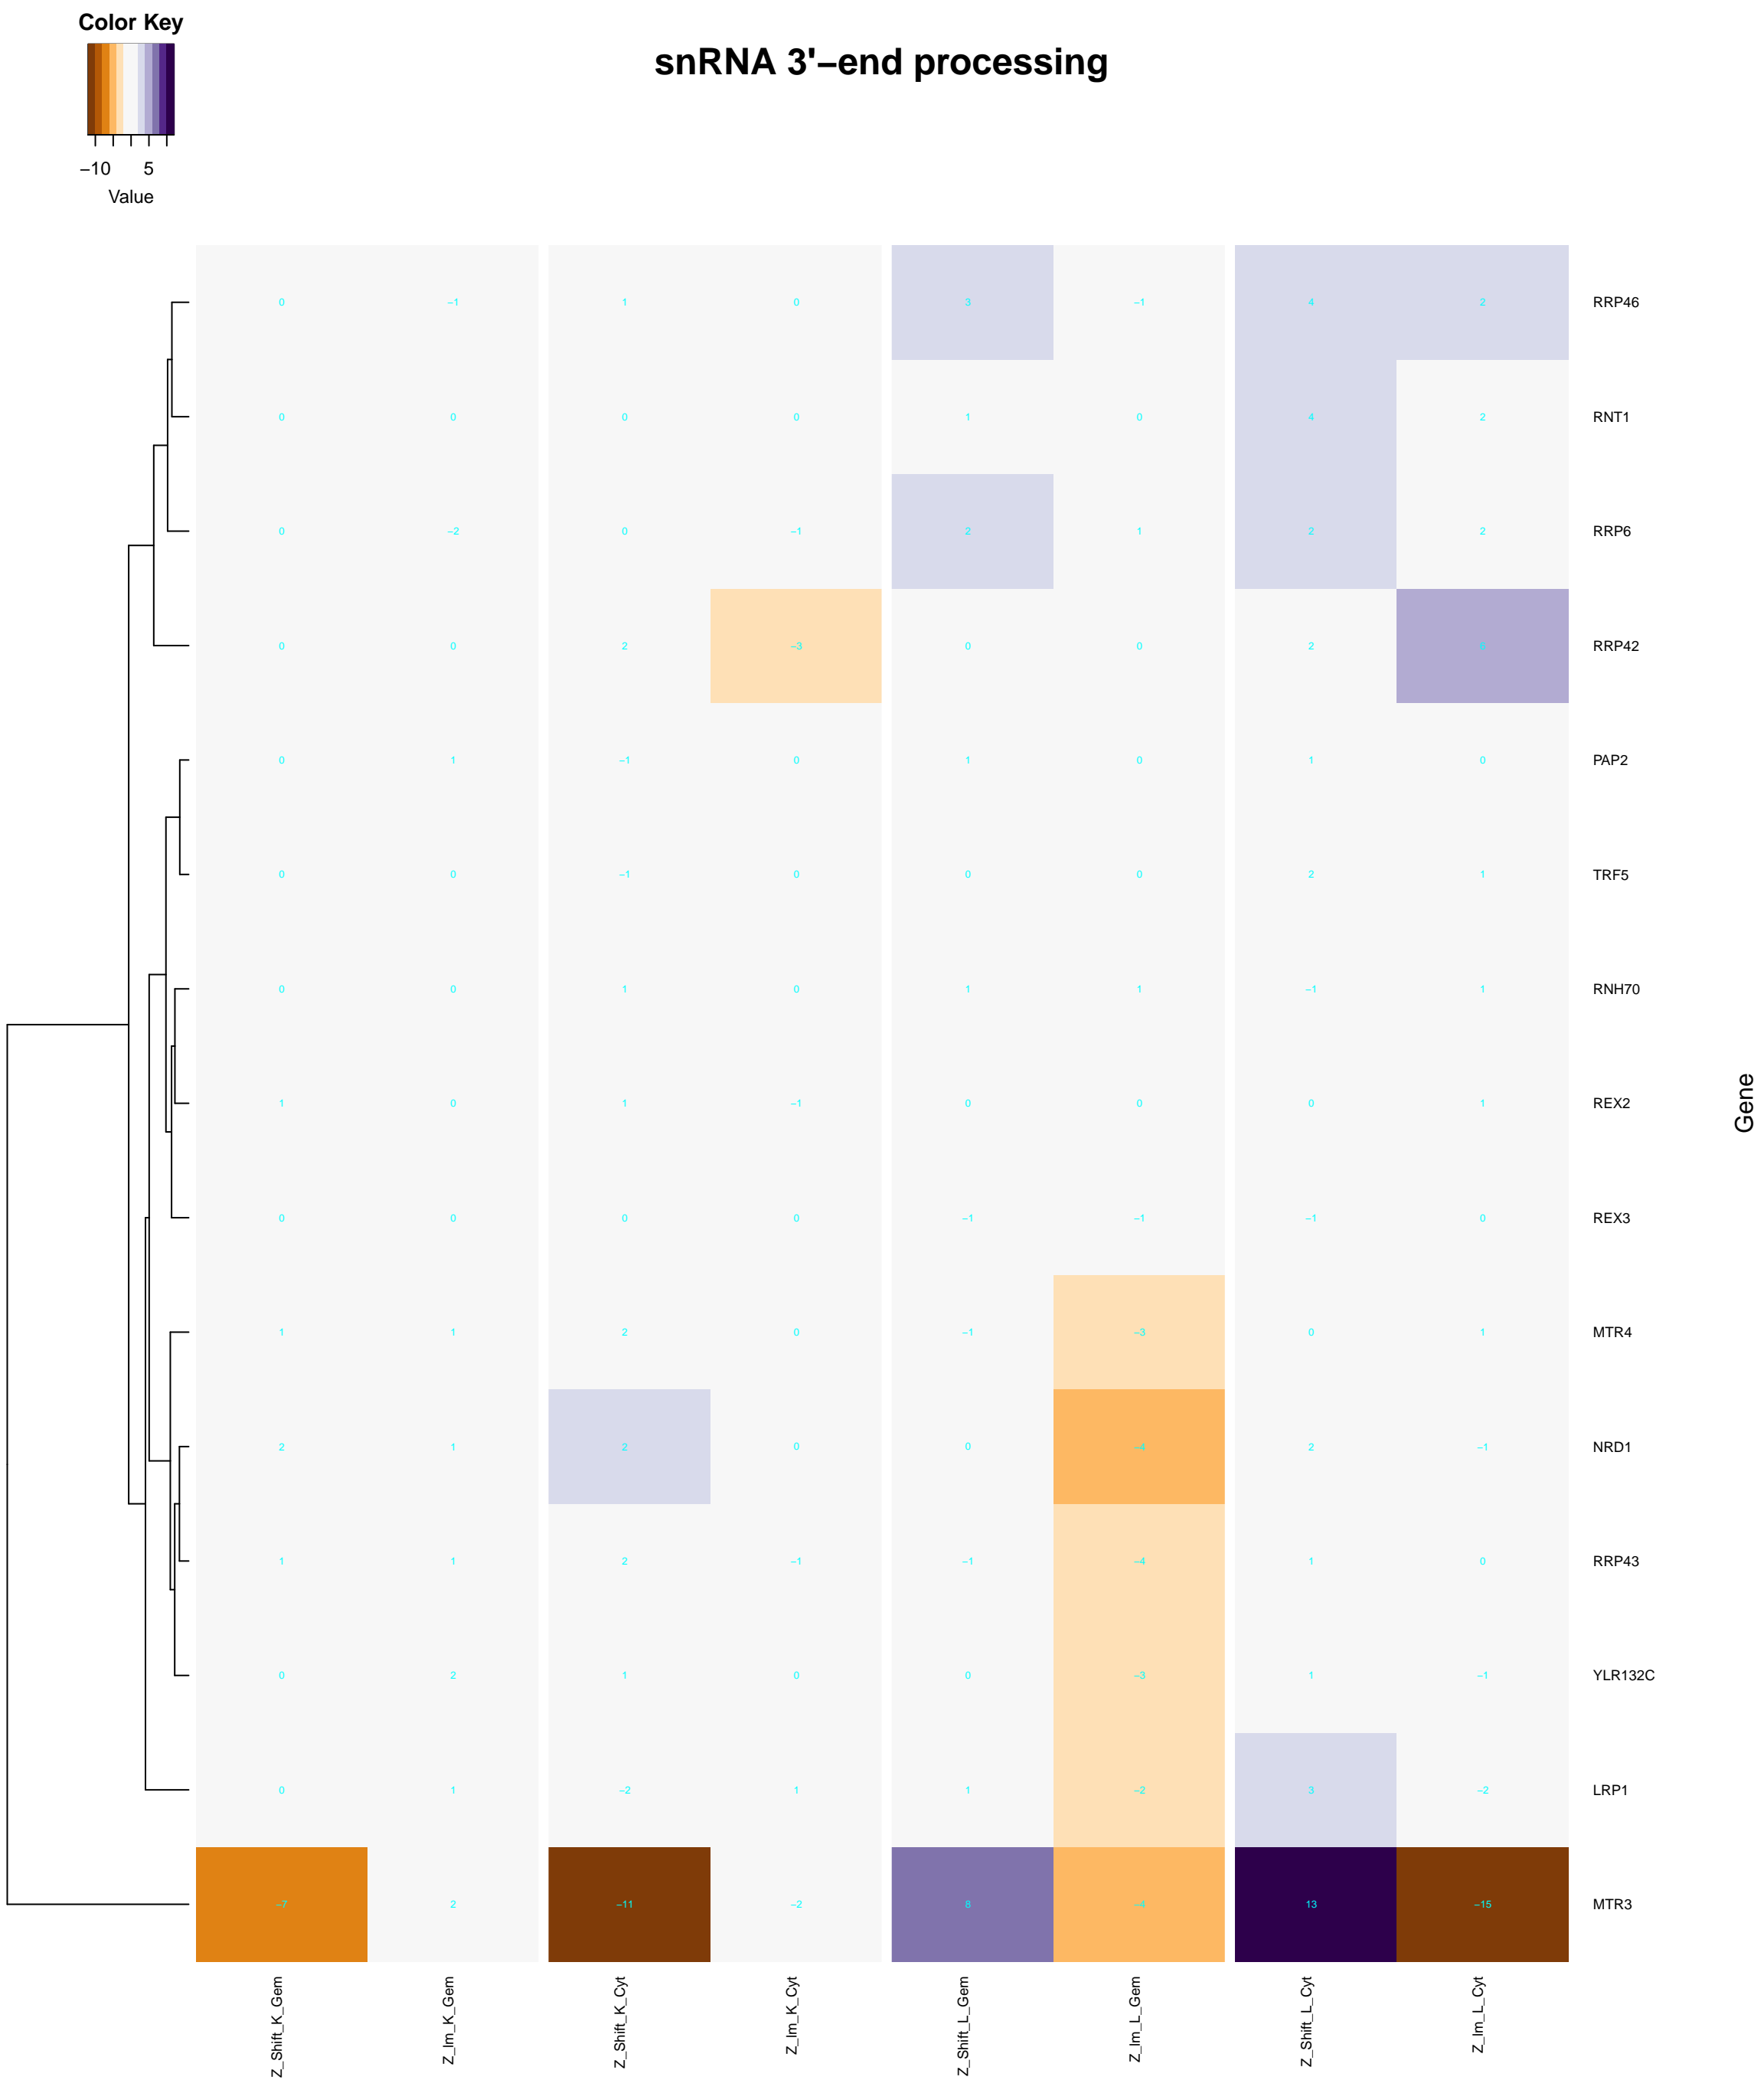

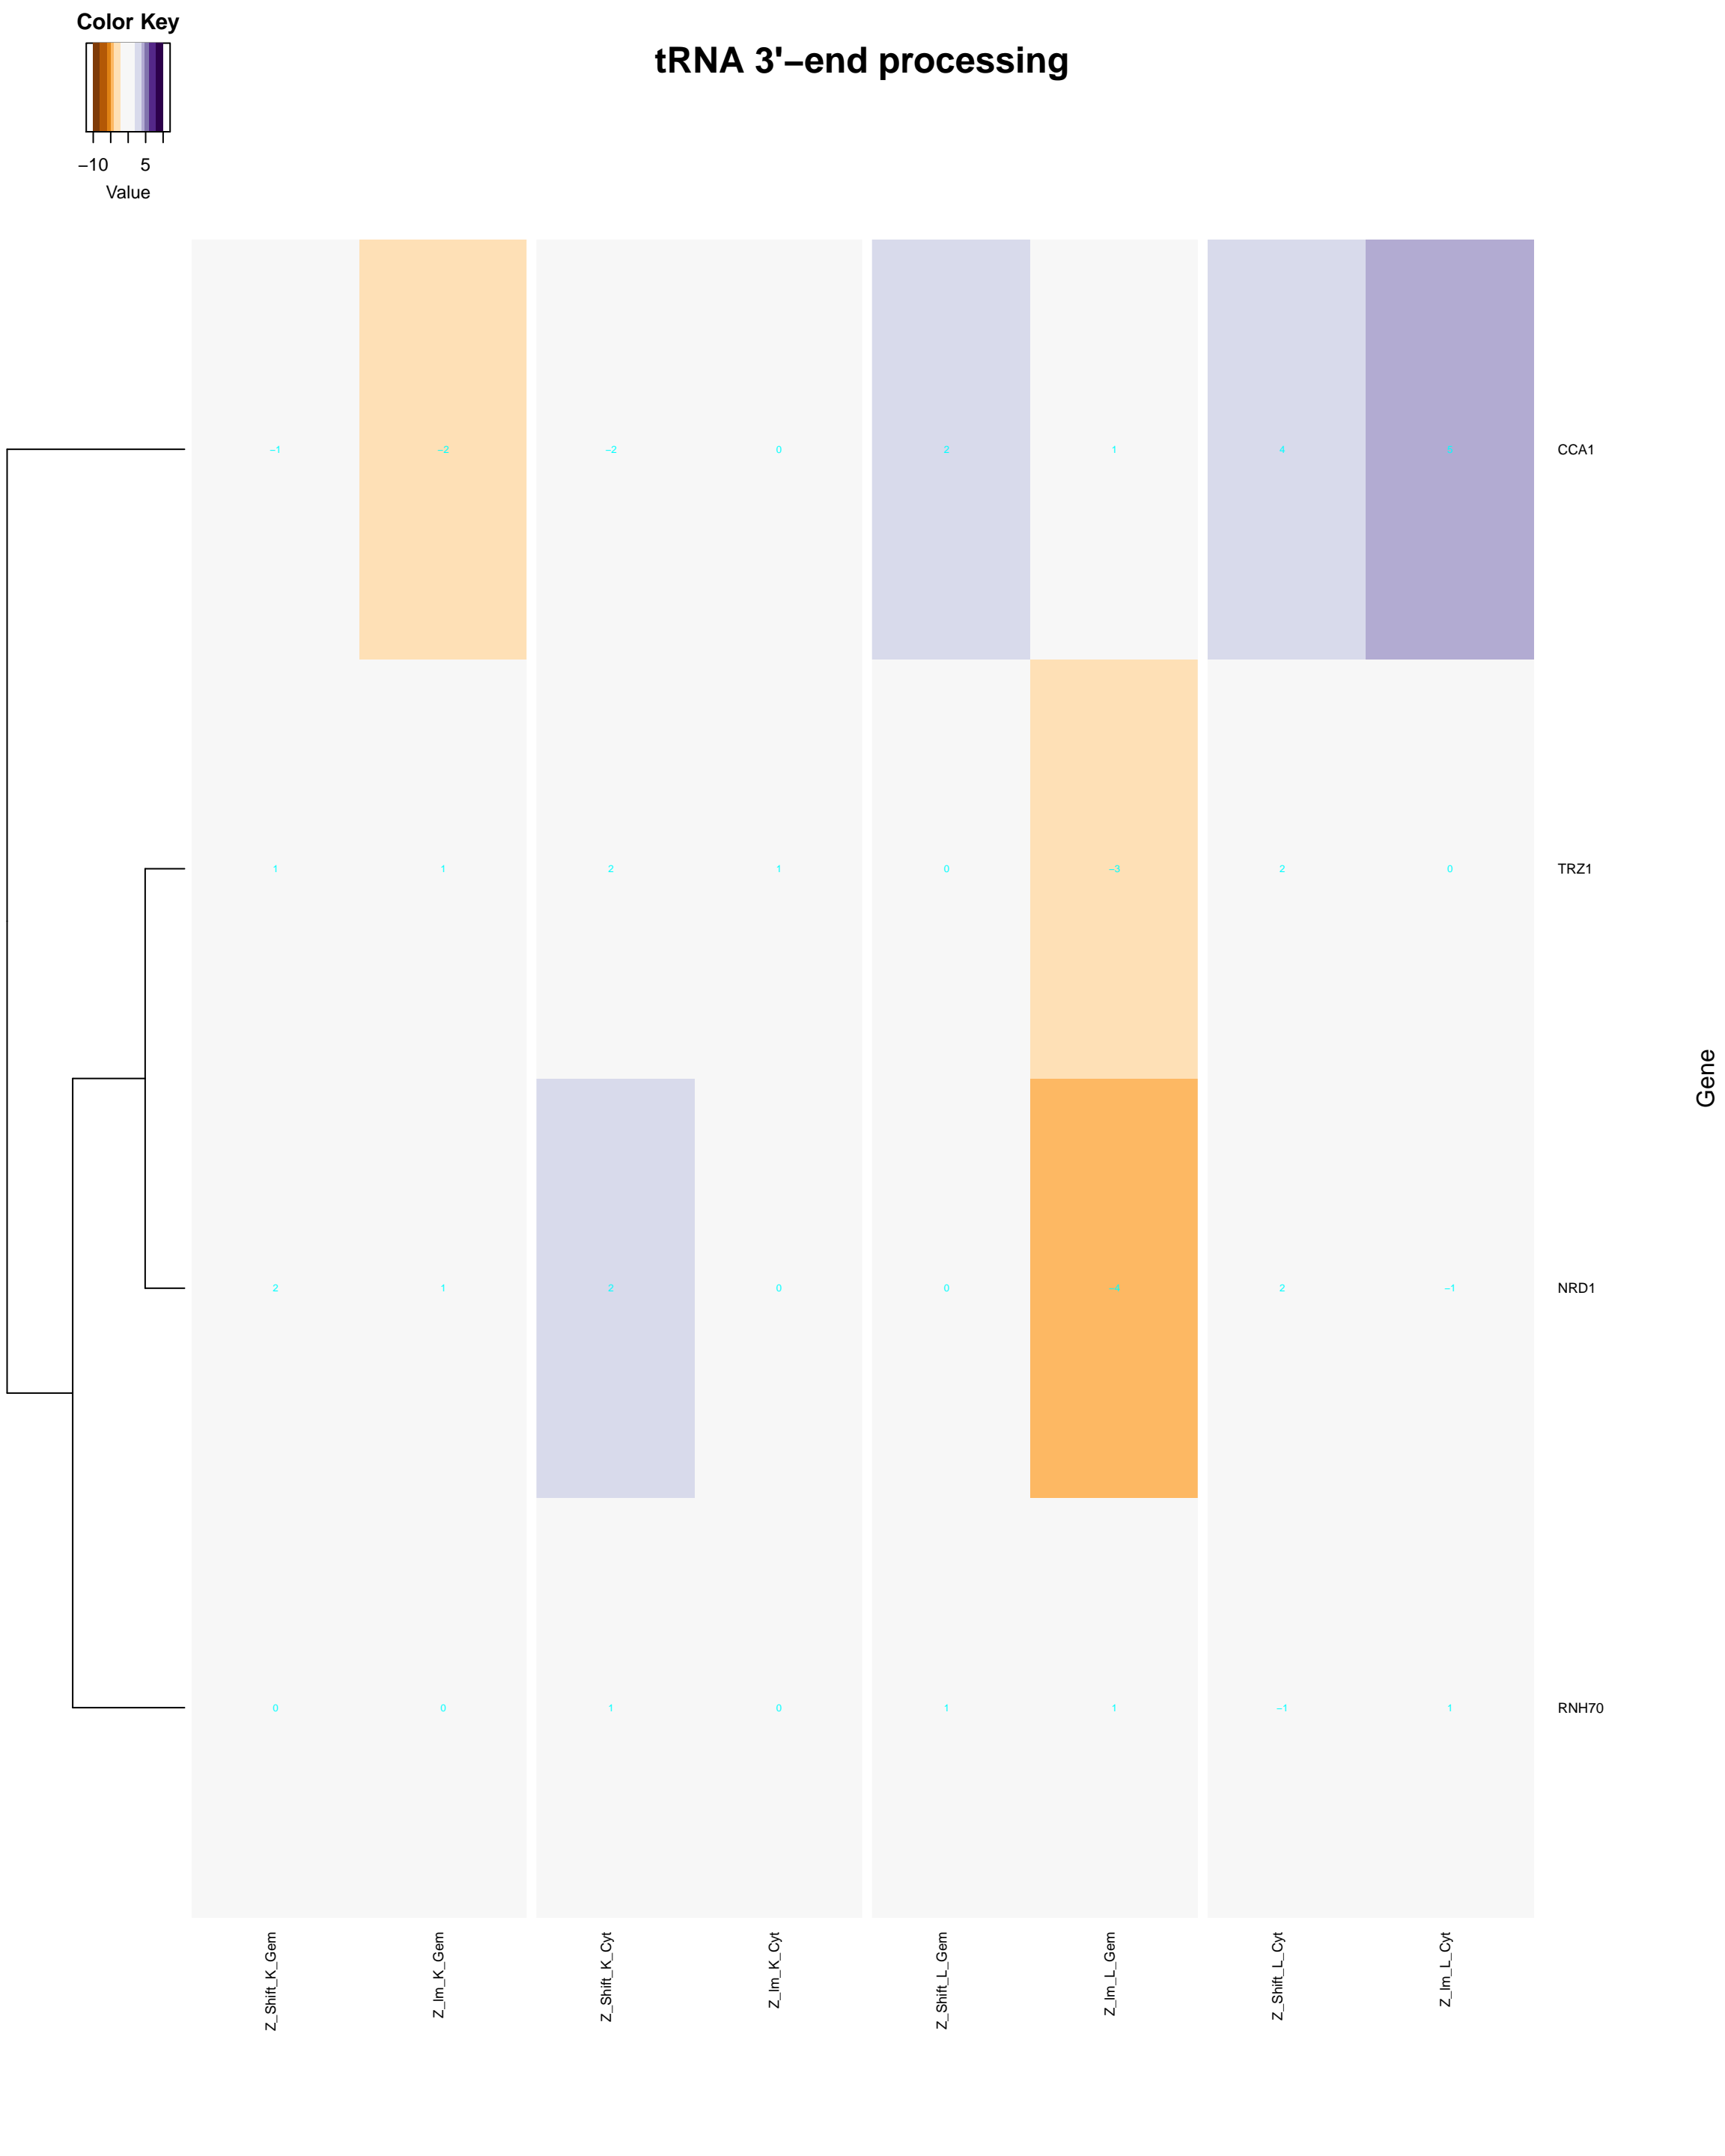

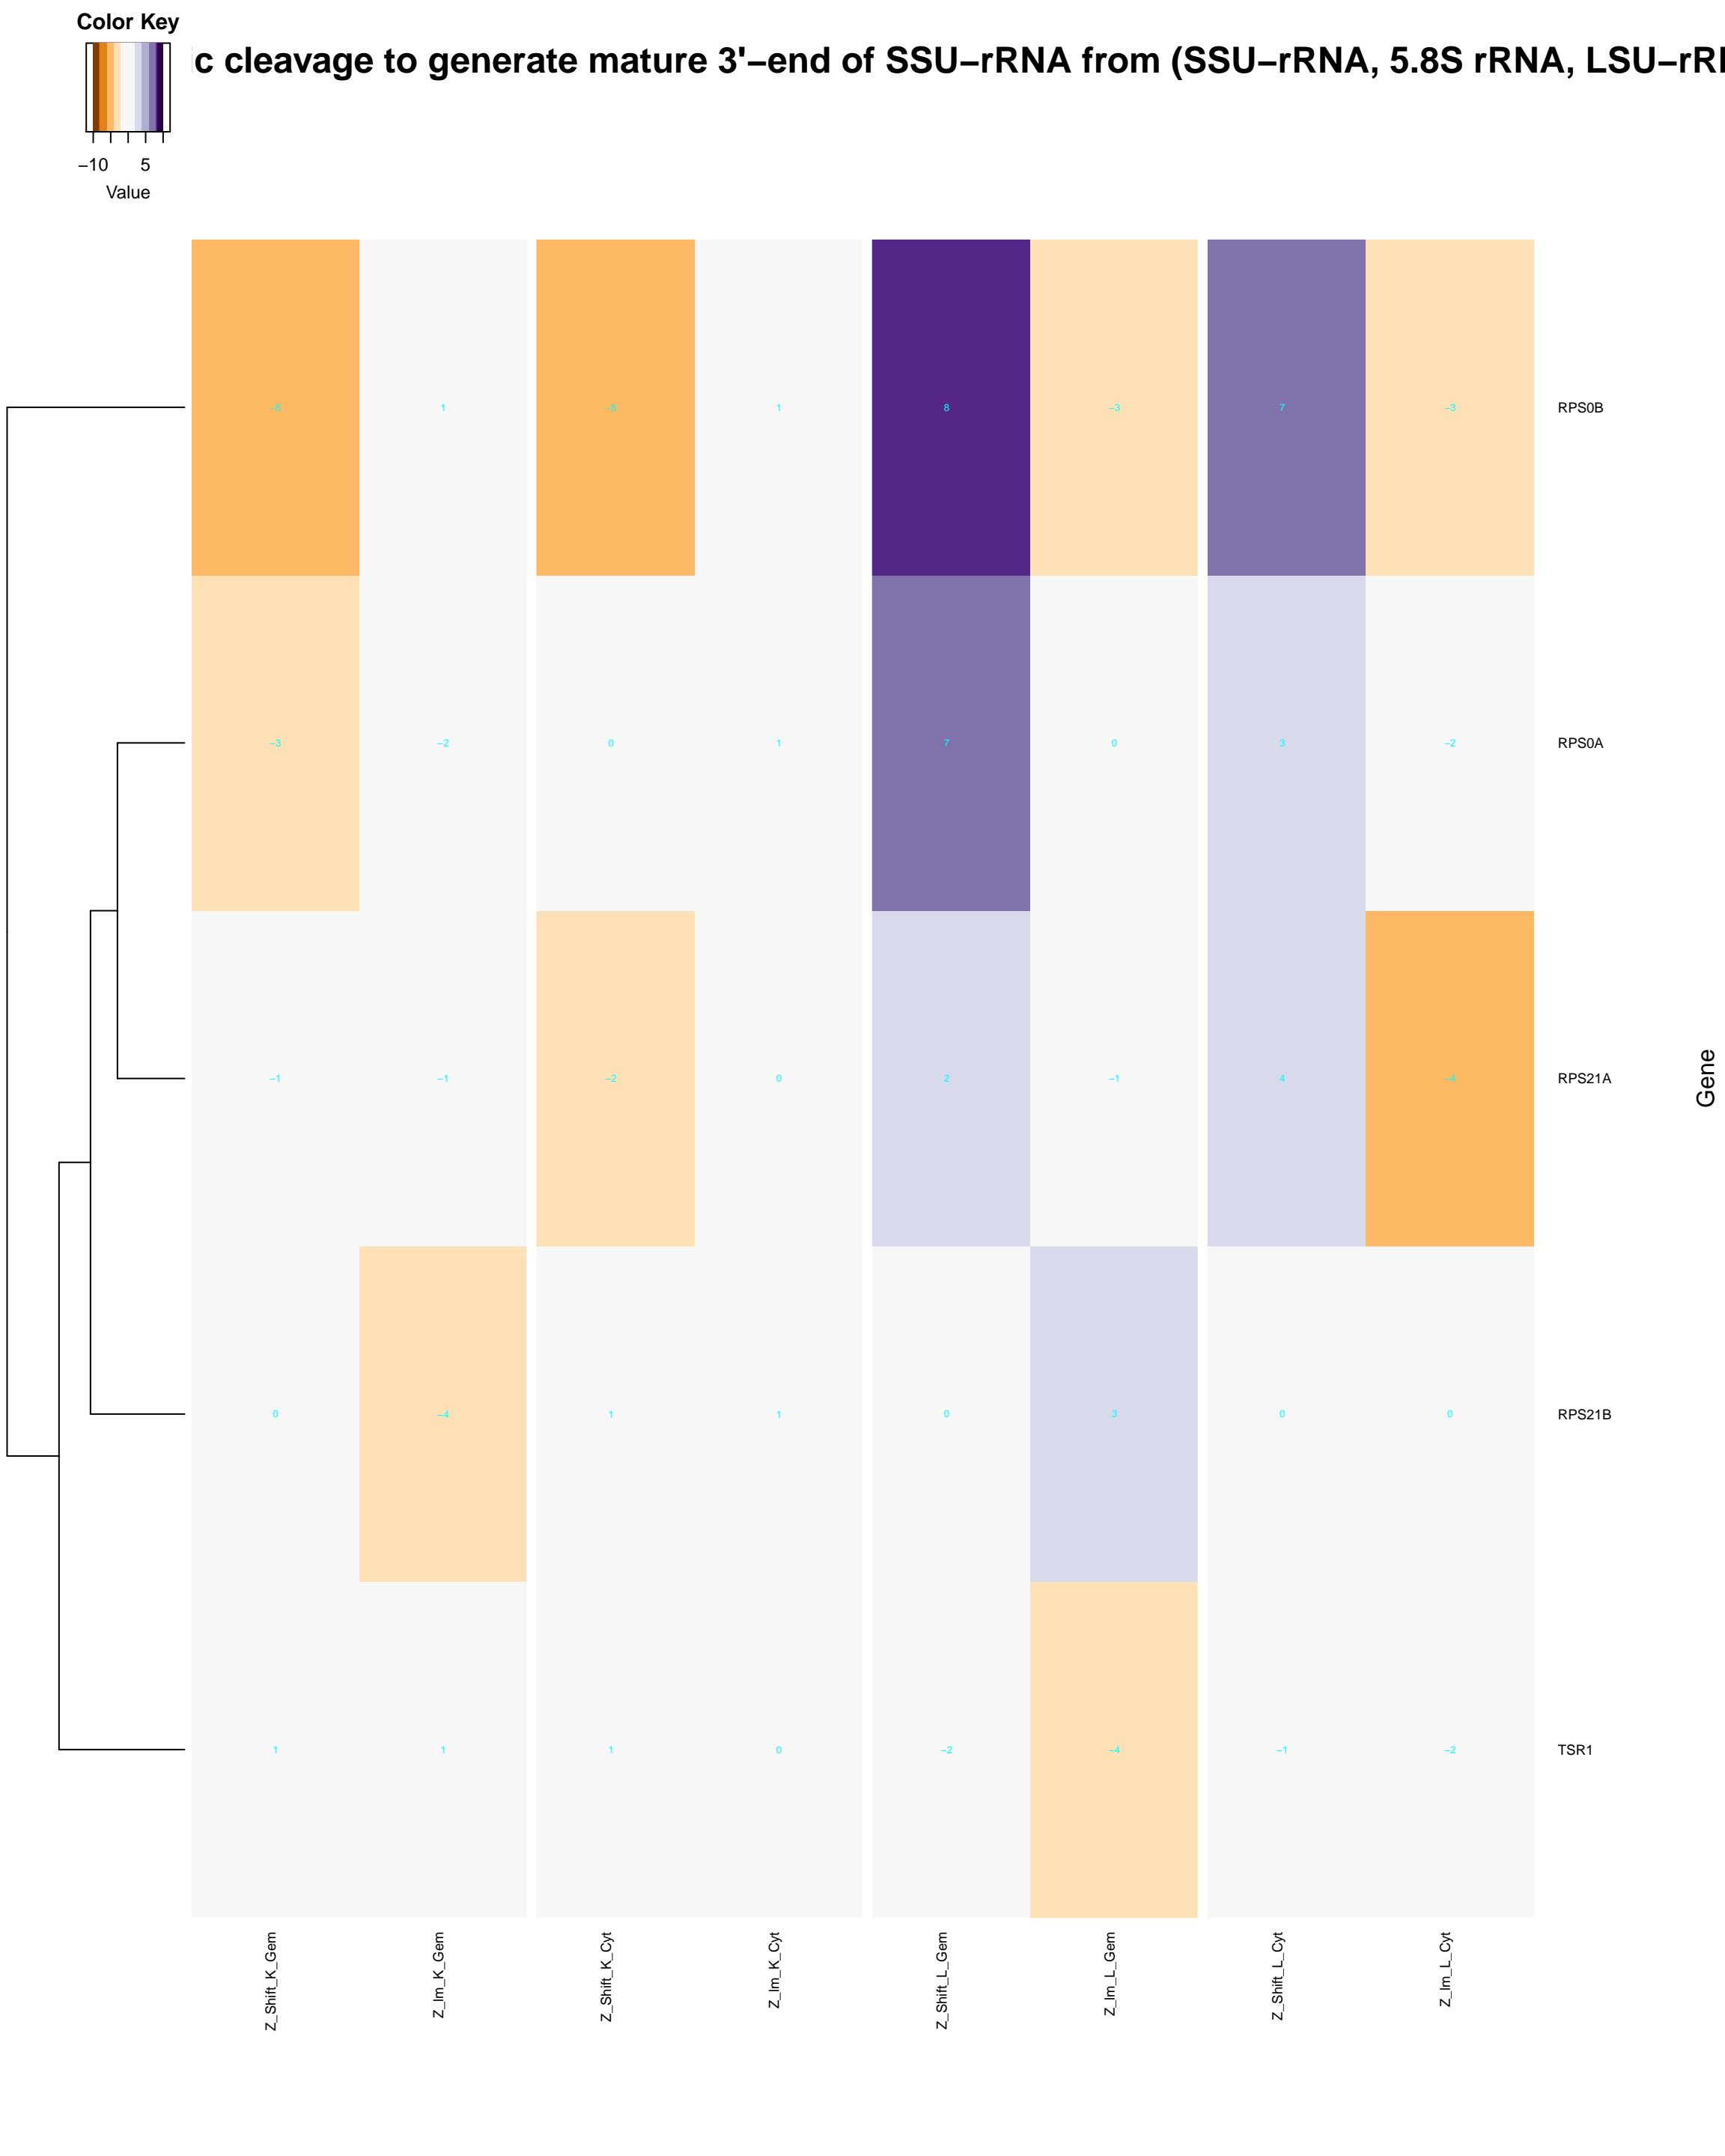

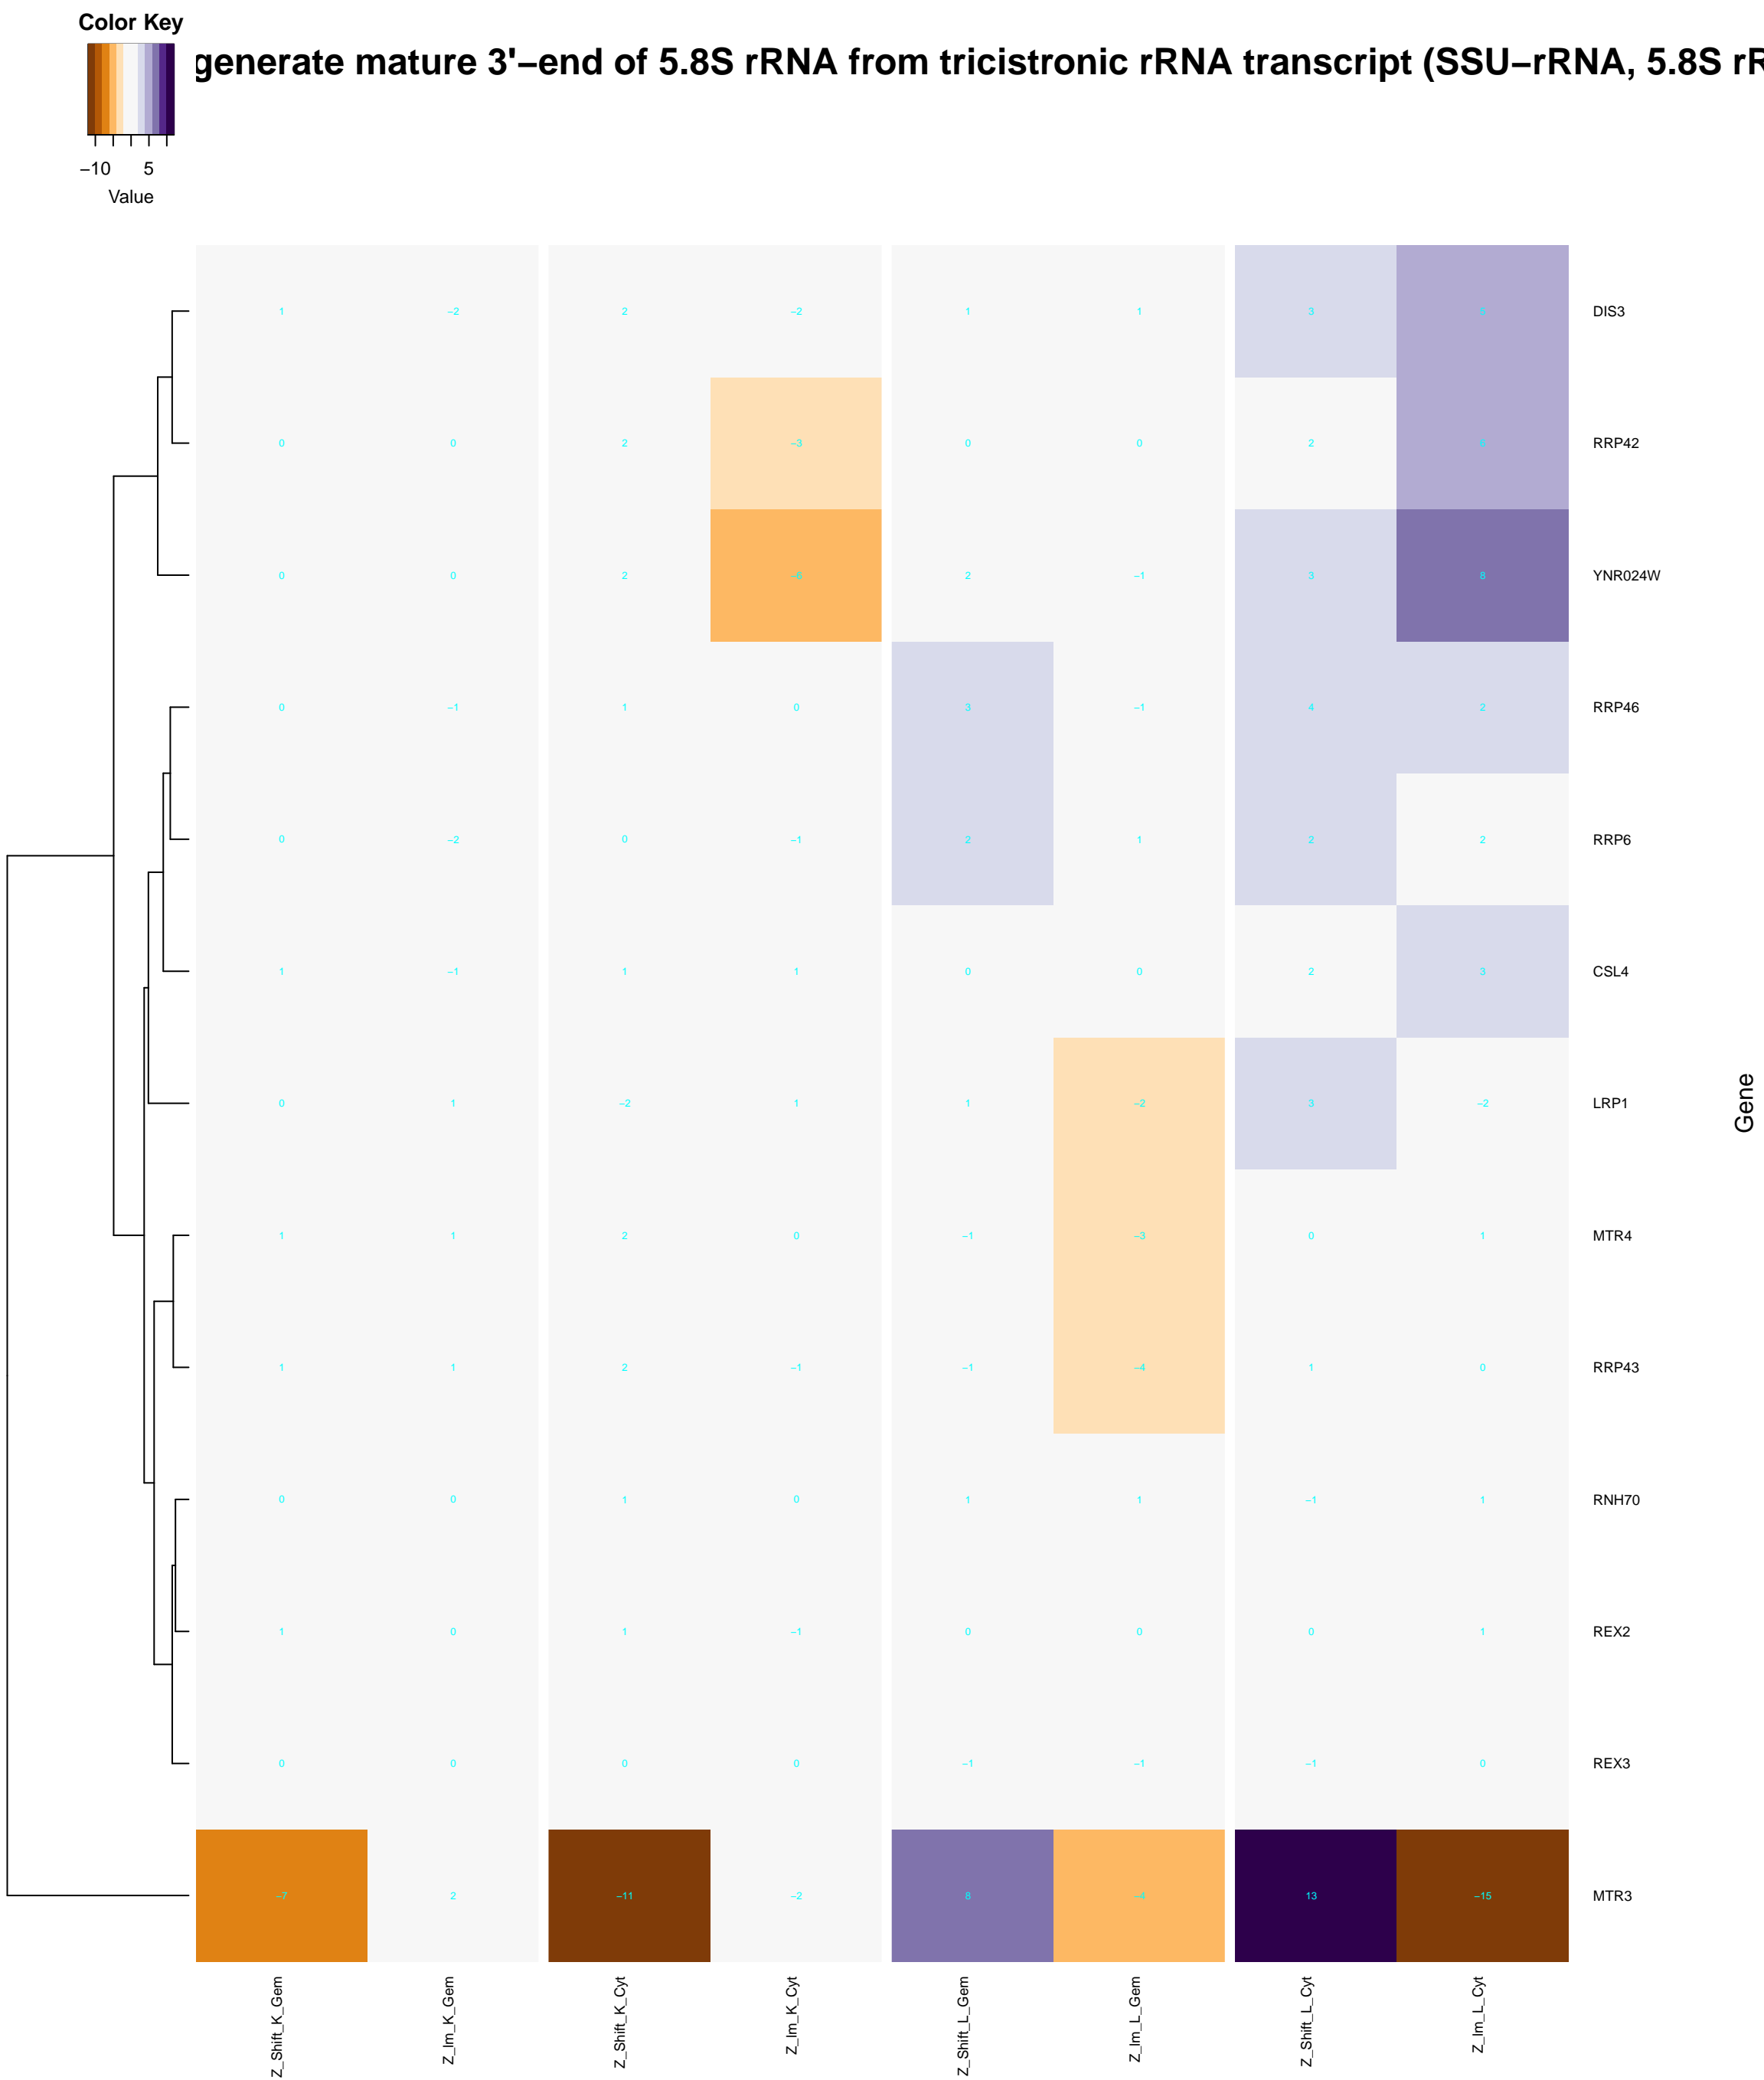

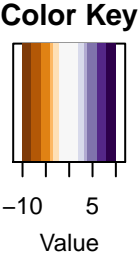

snoRNA polyadenylation

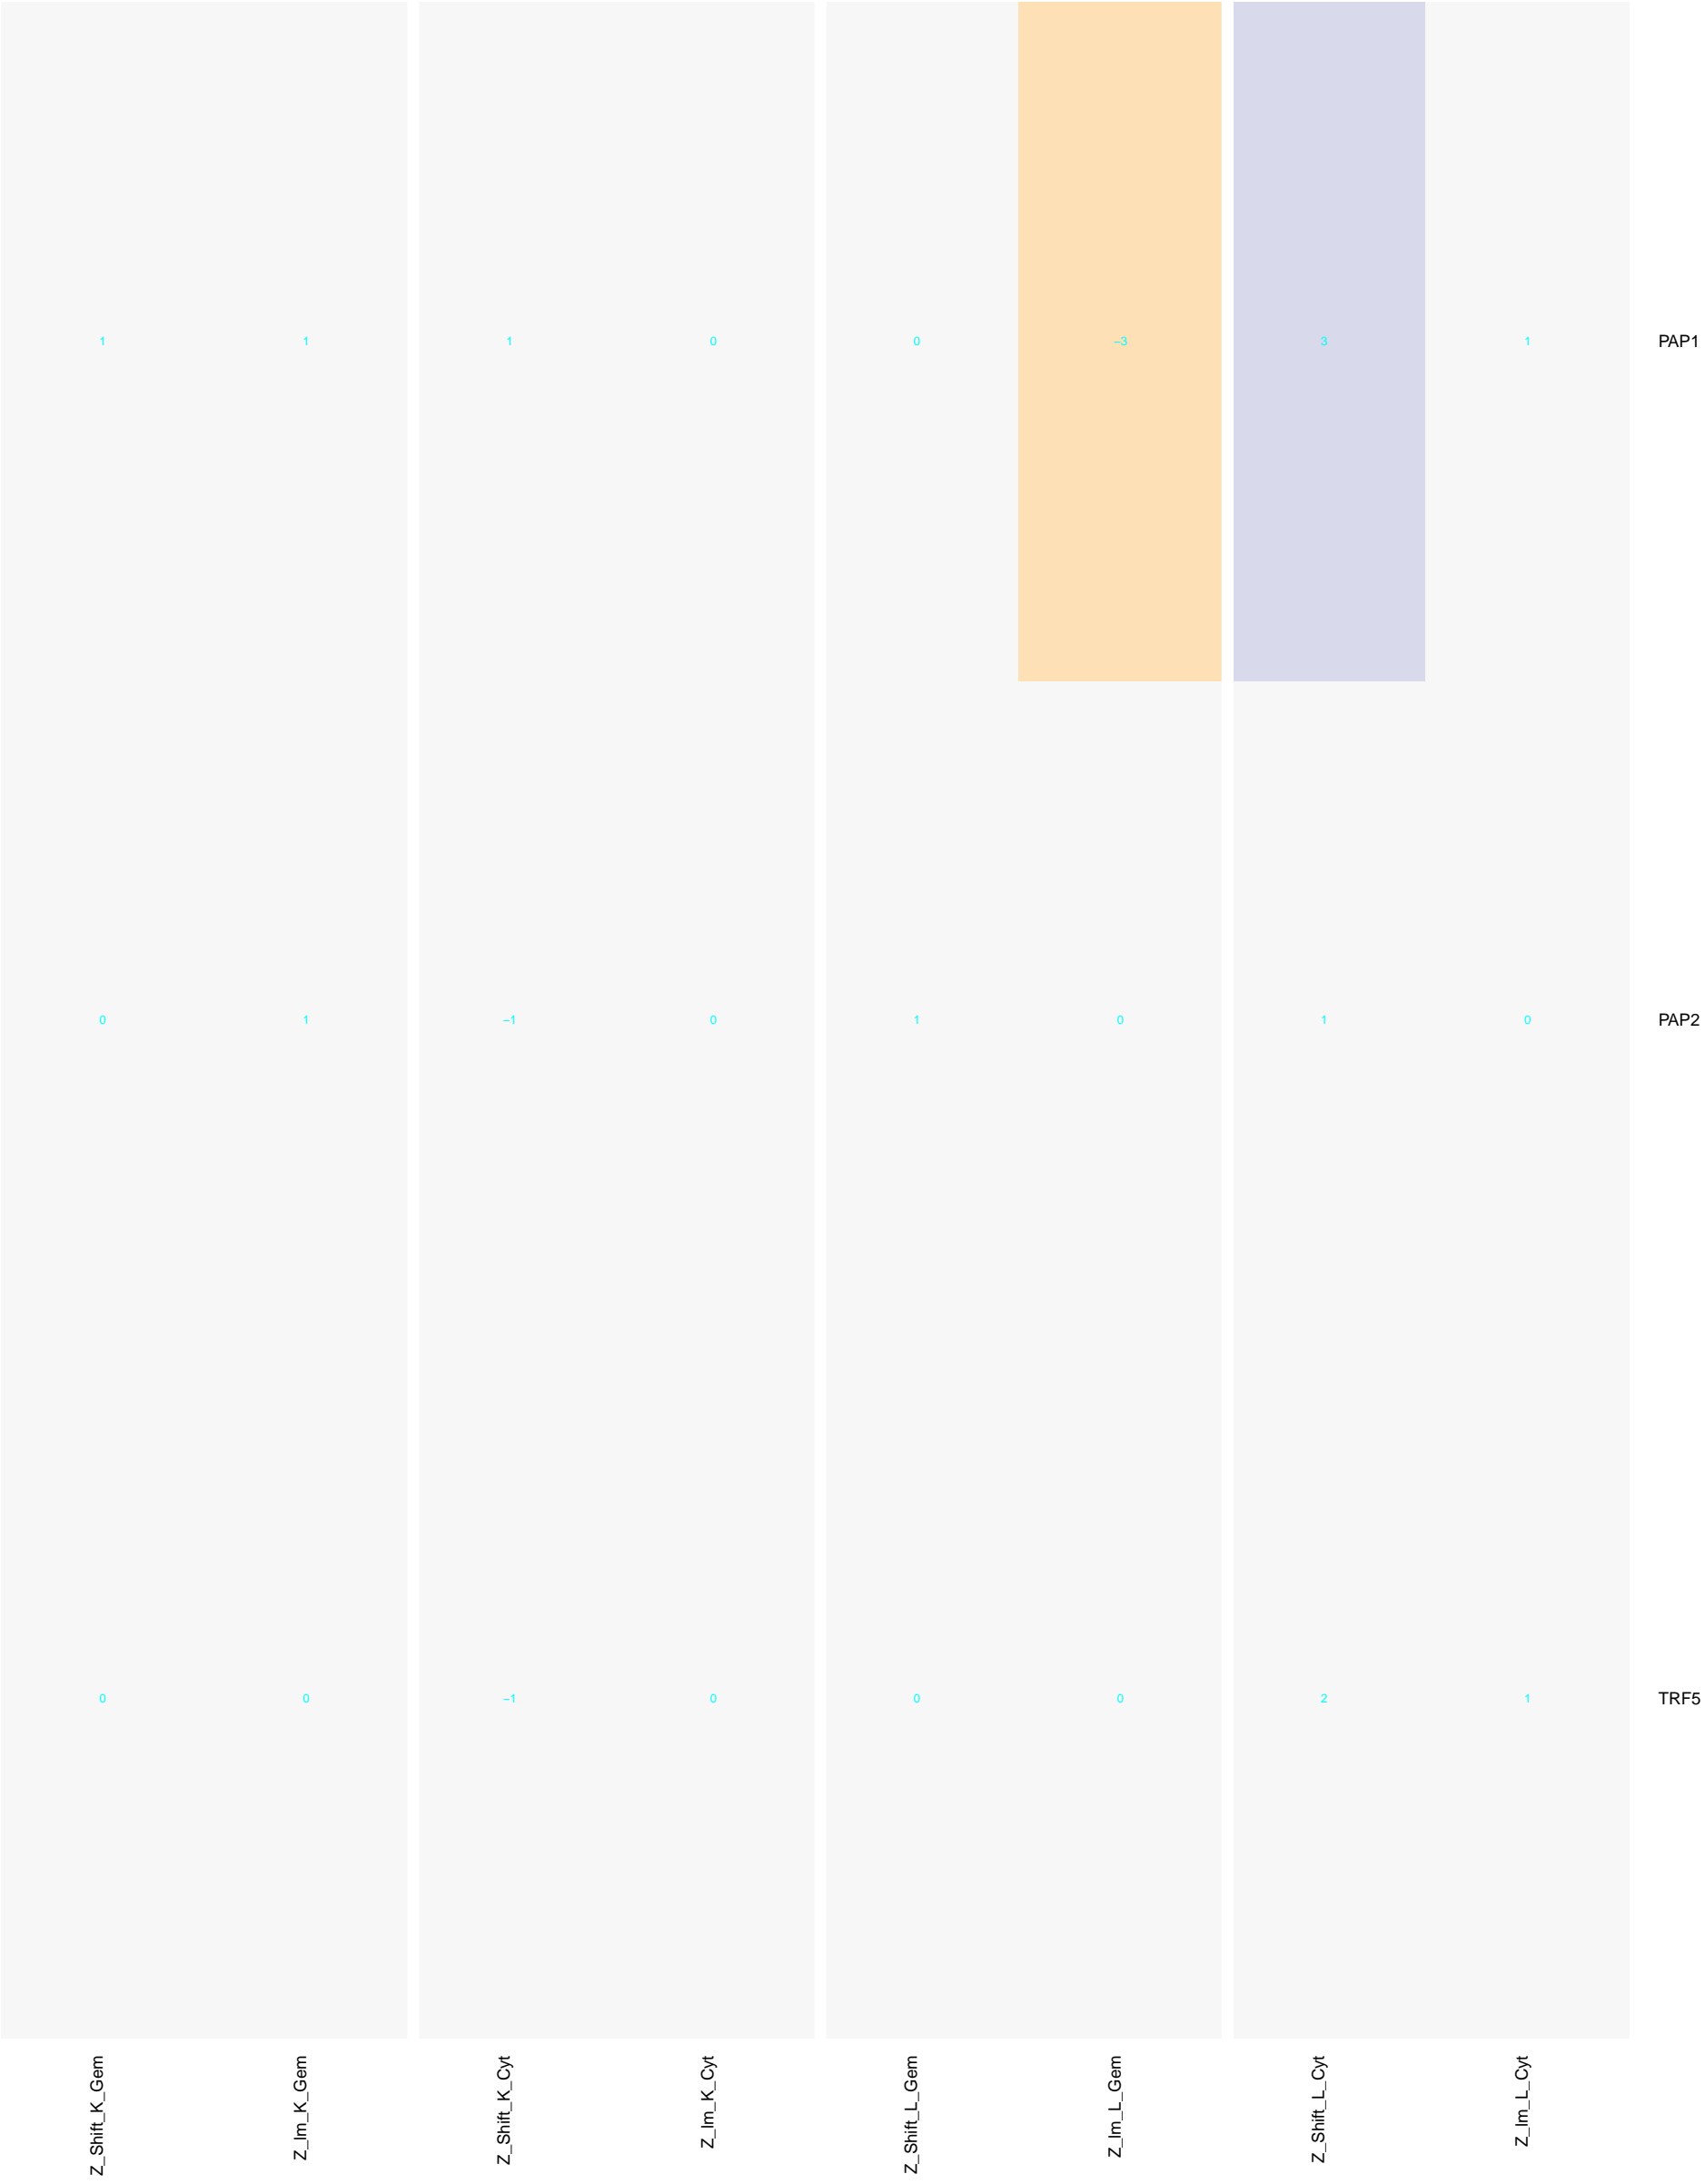

Gene



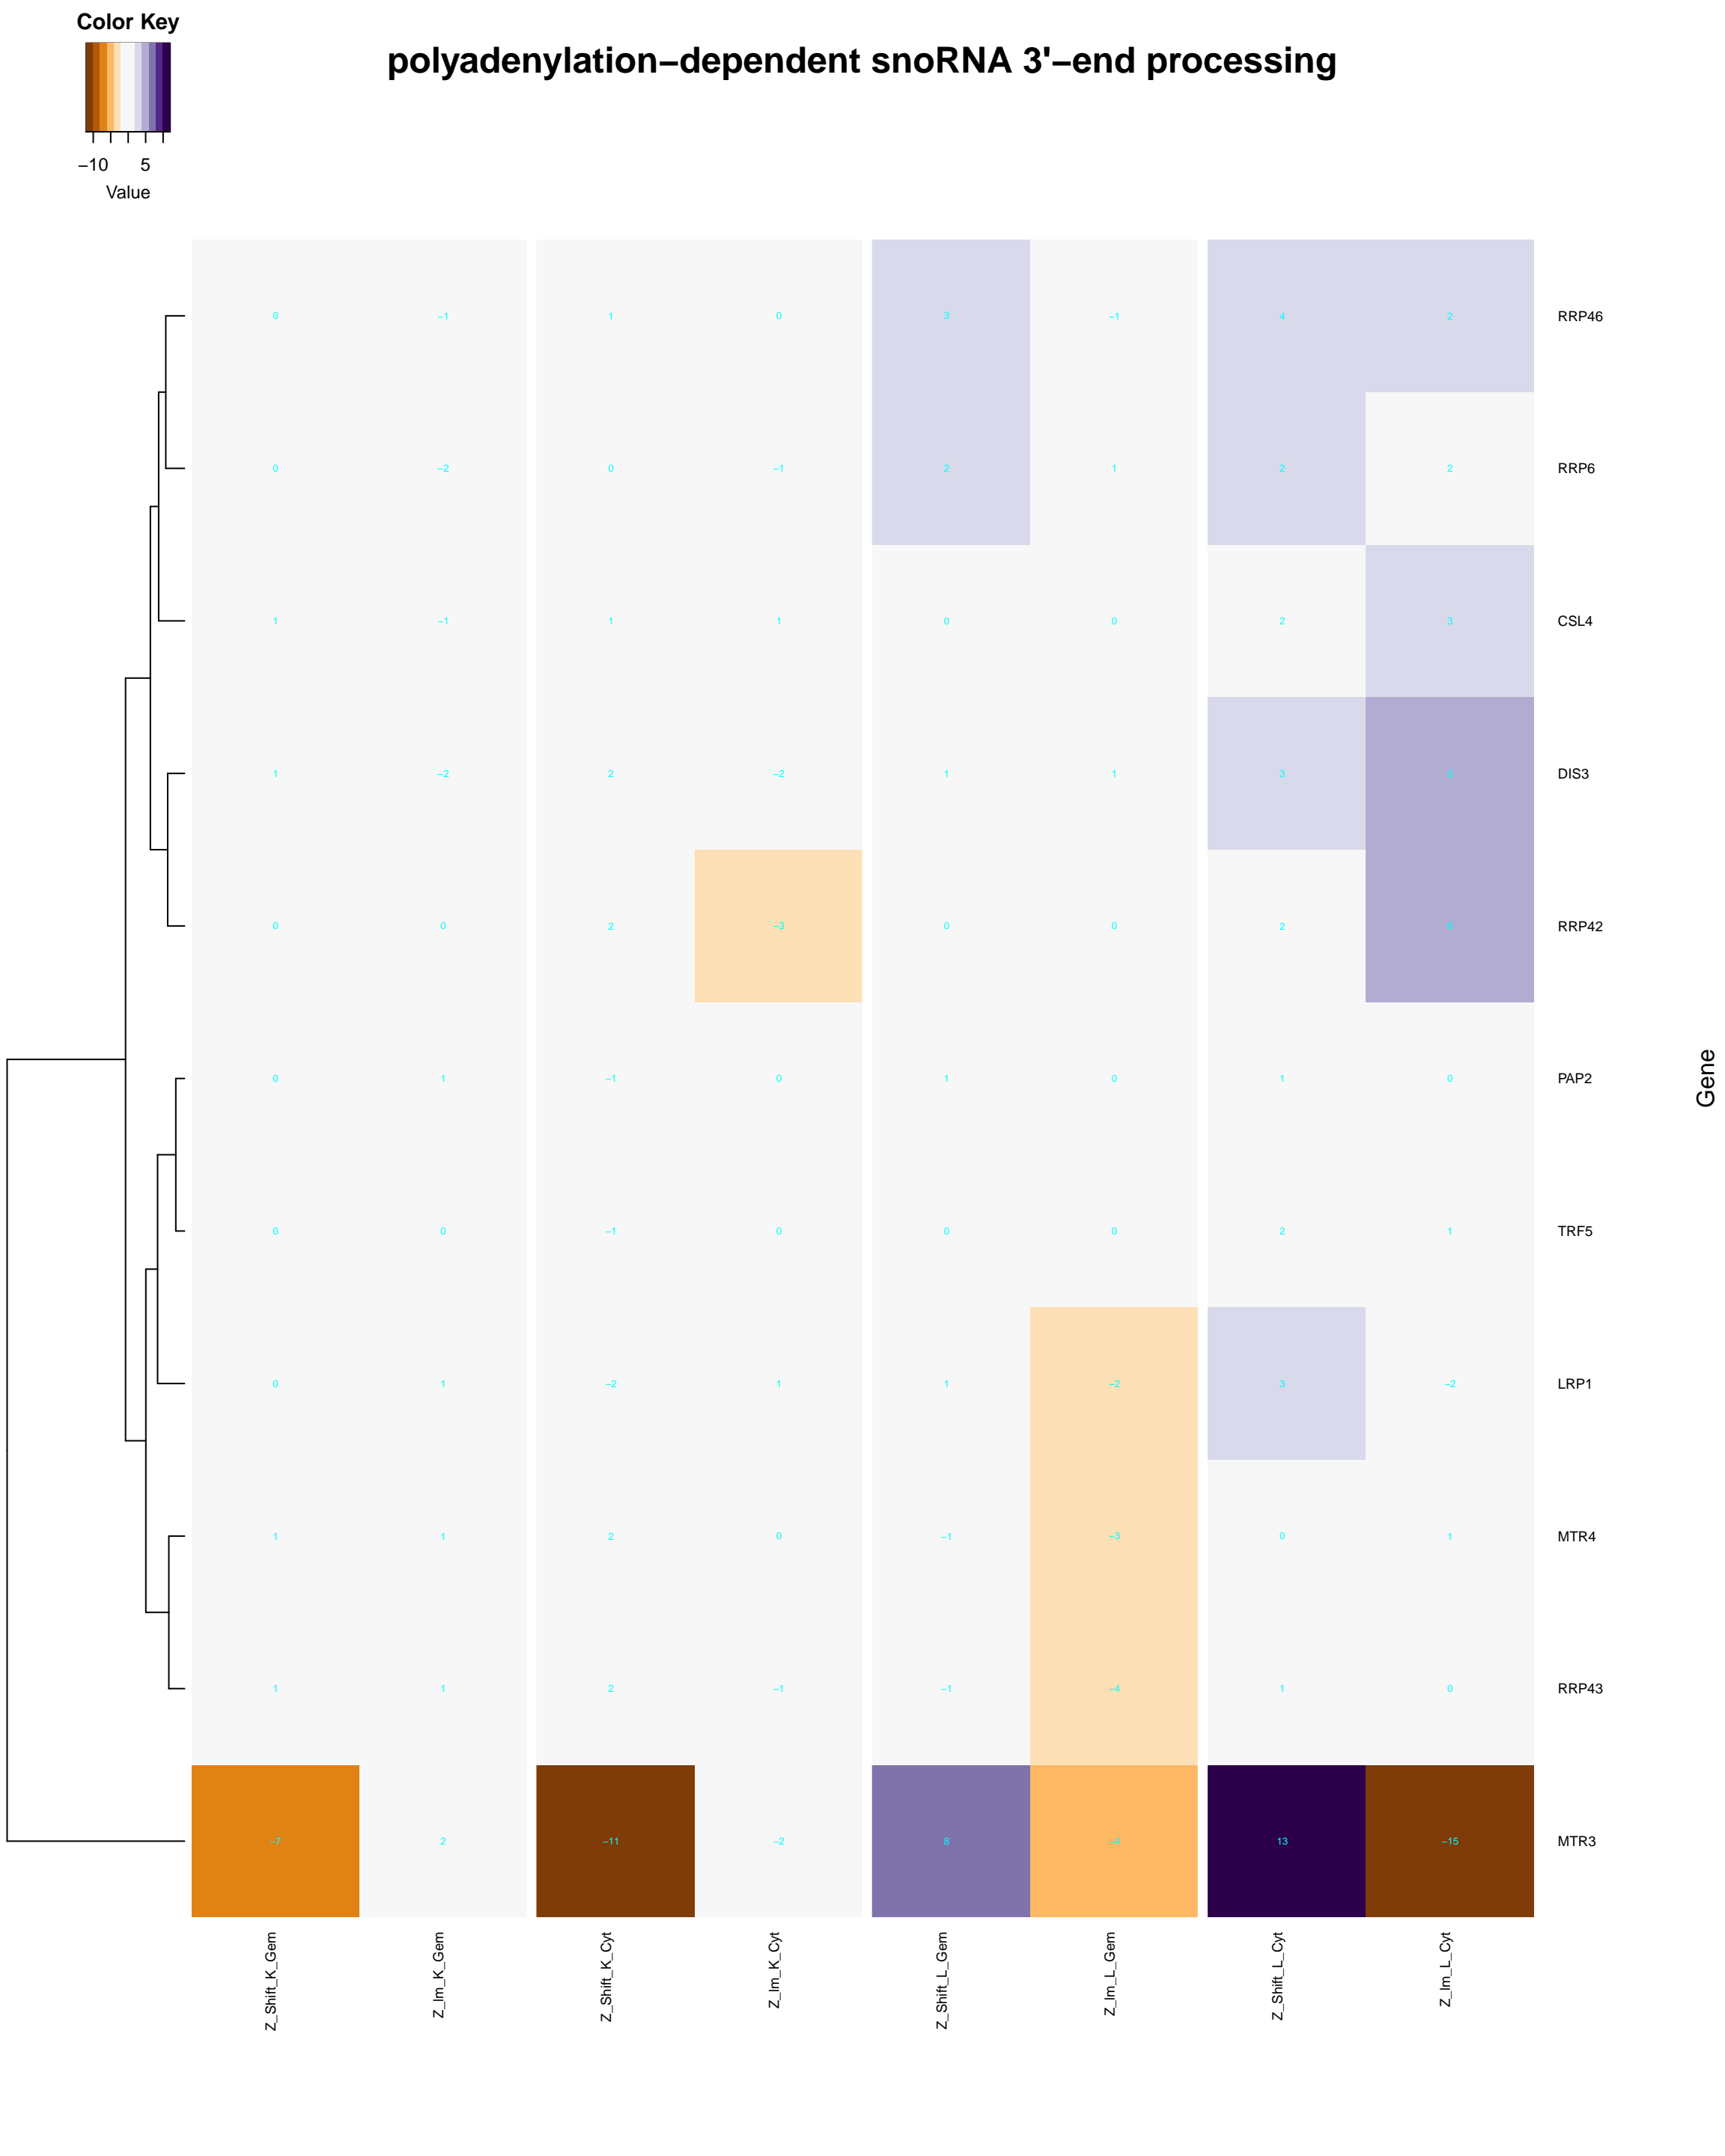

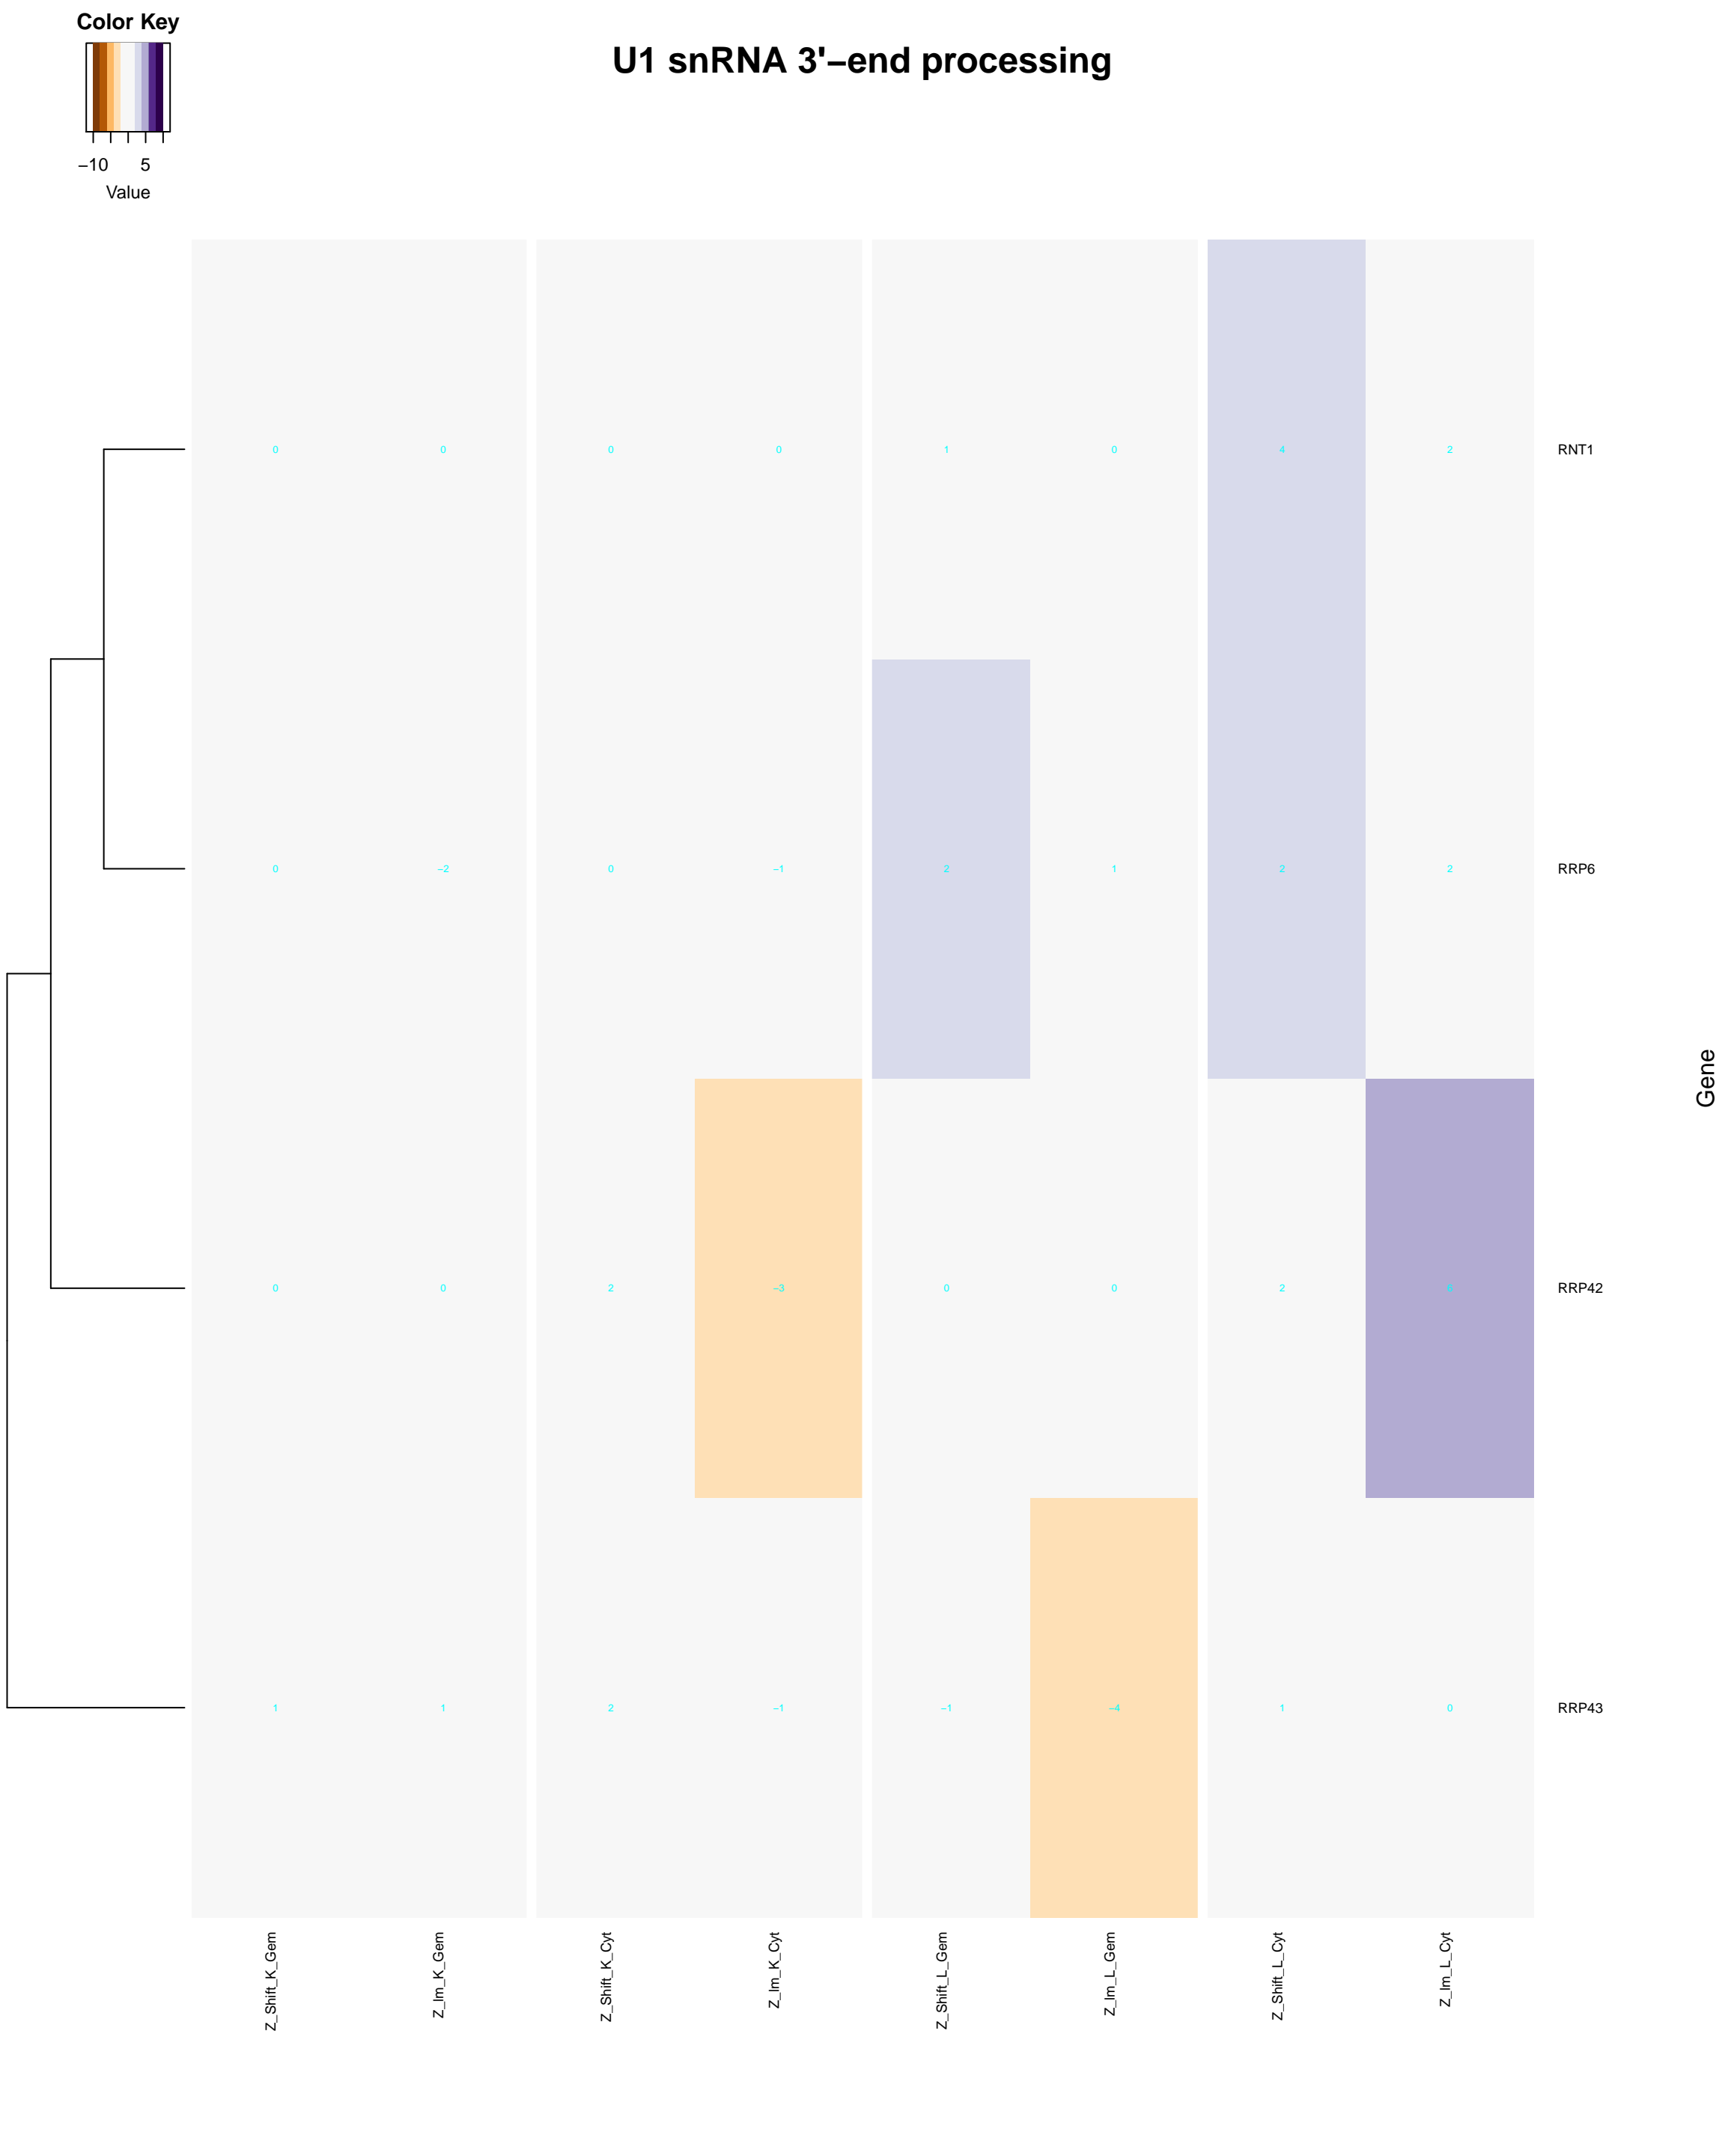

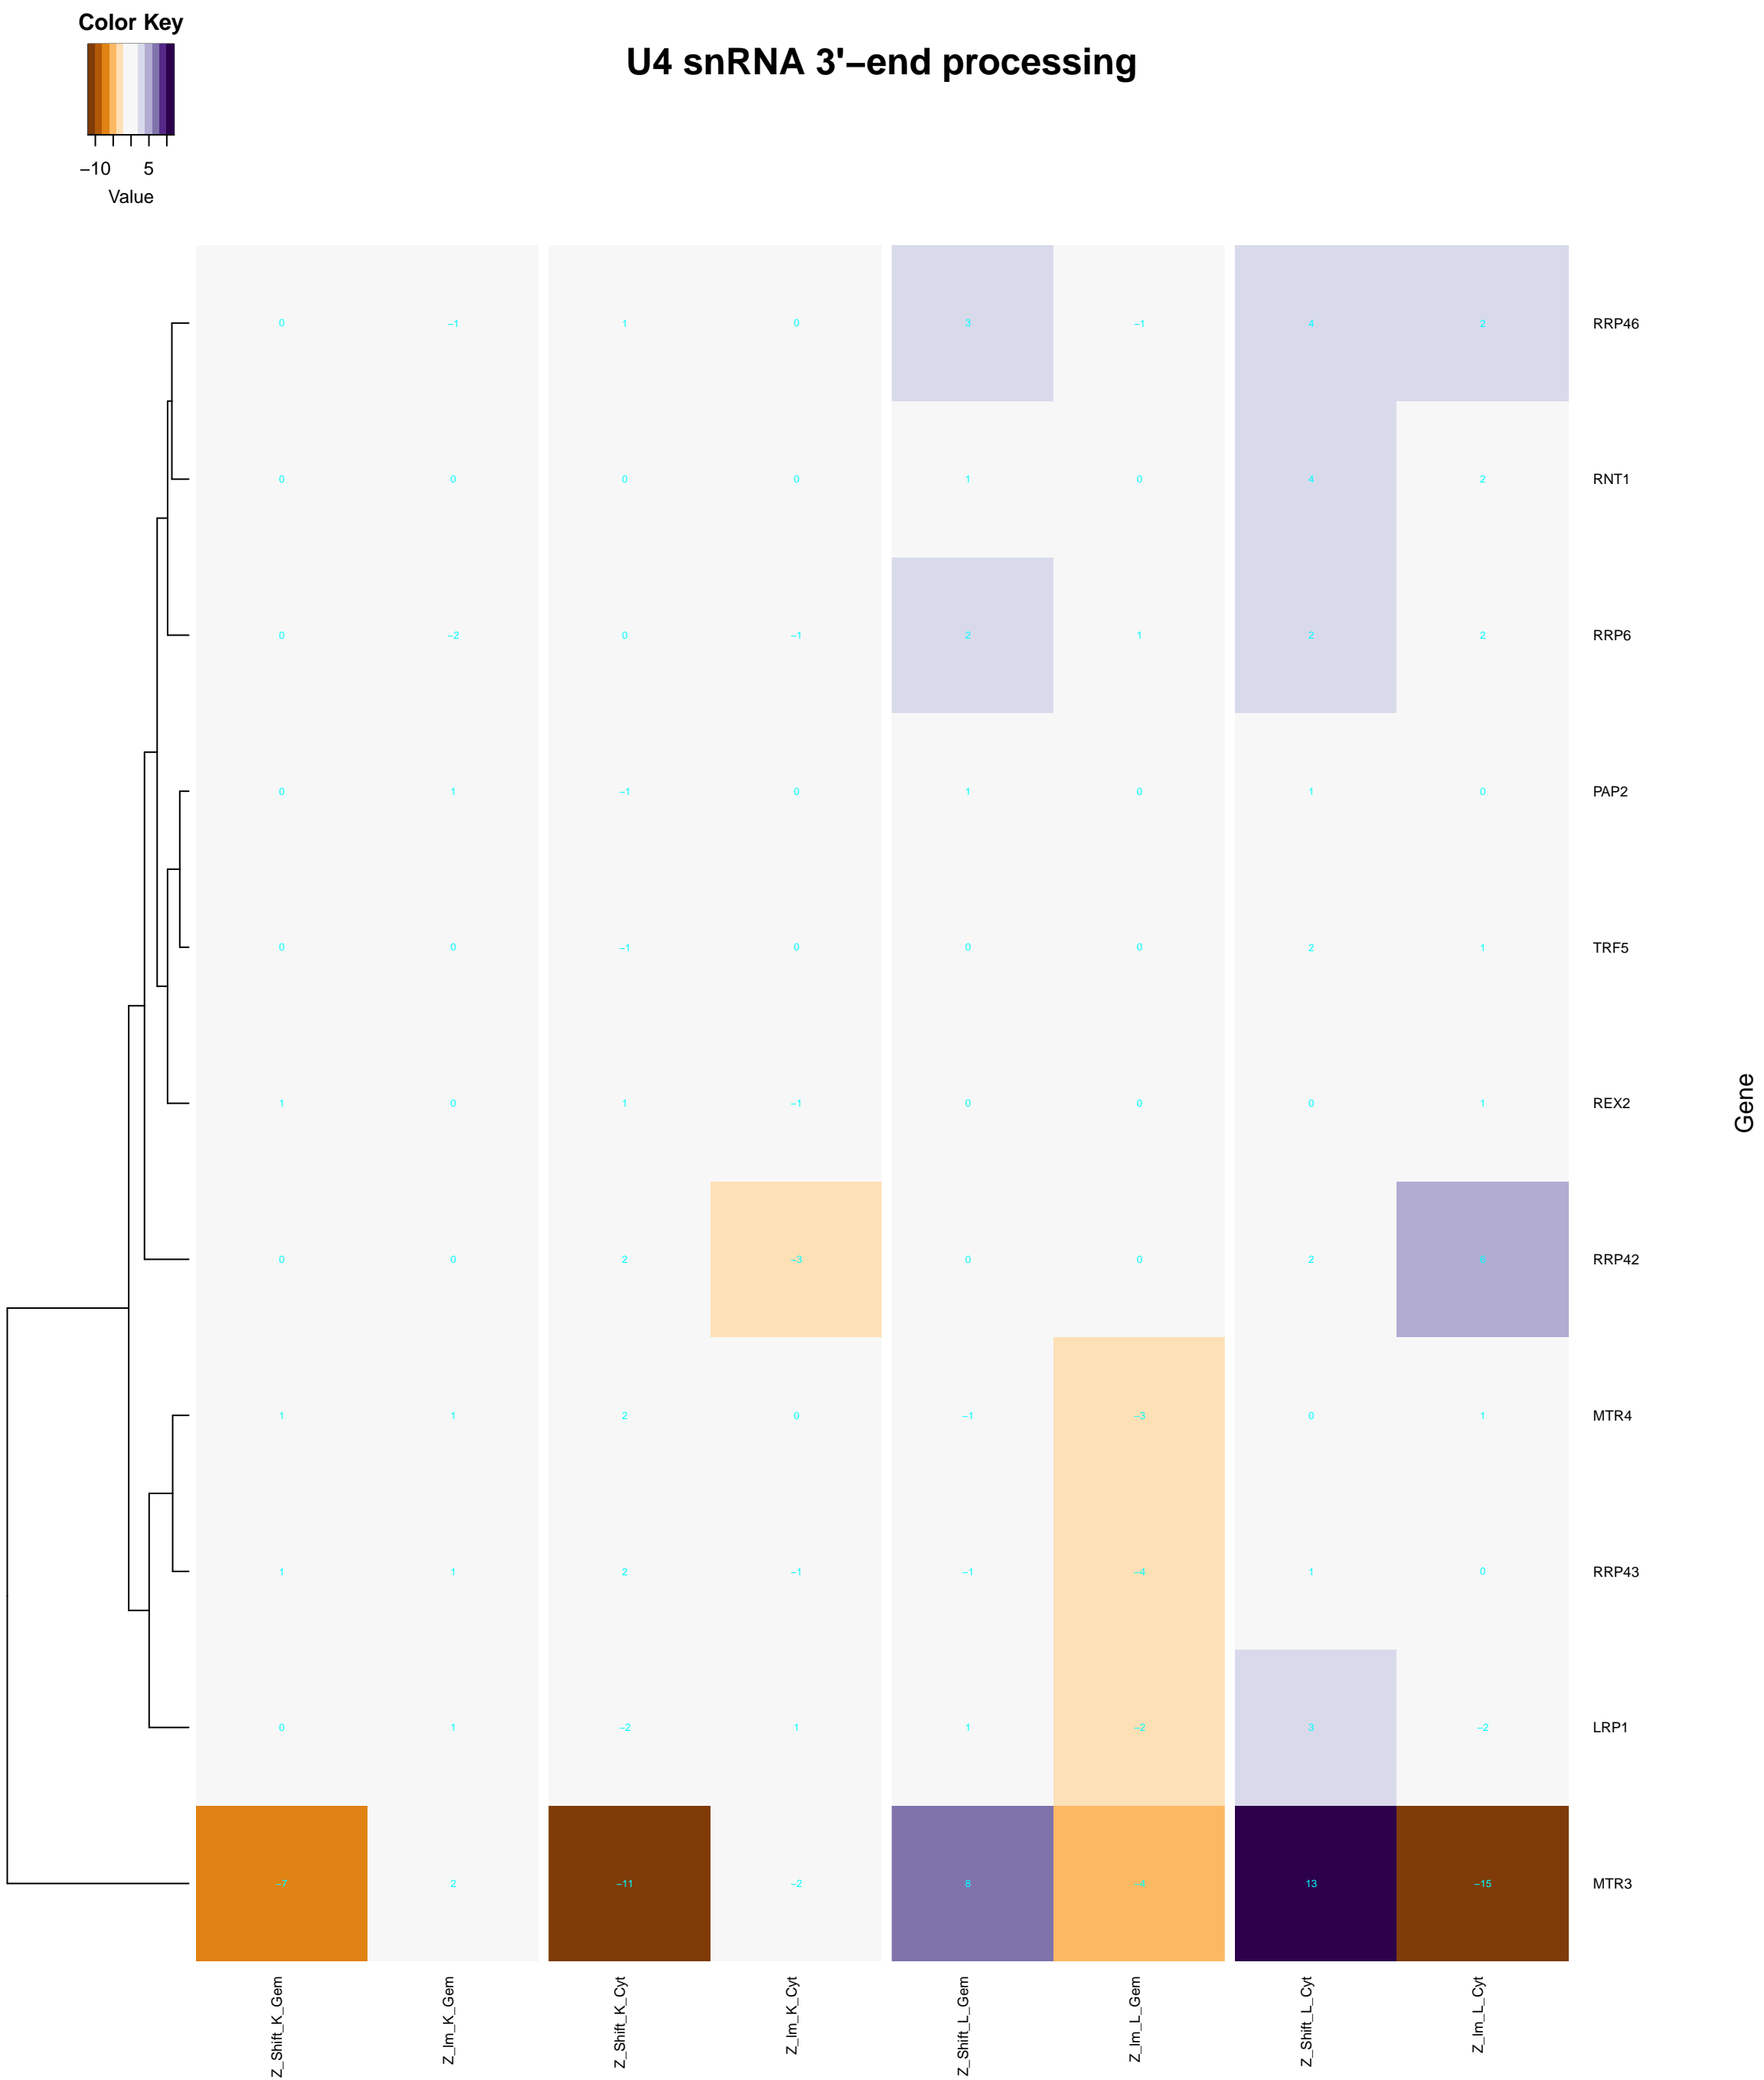

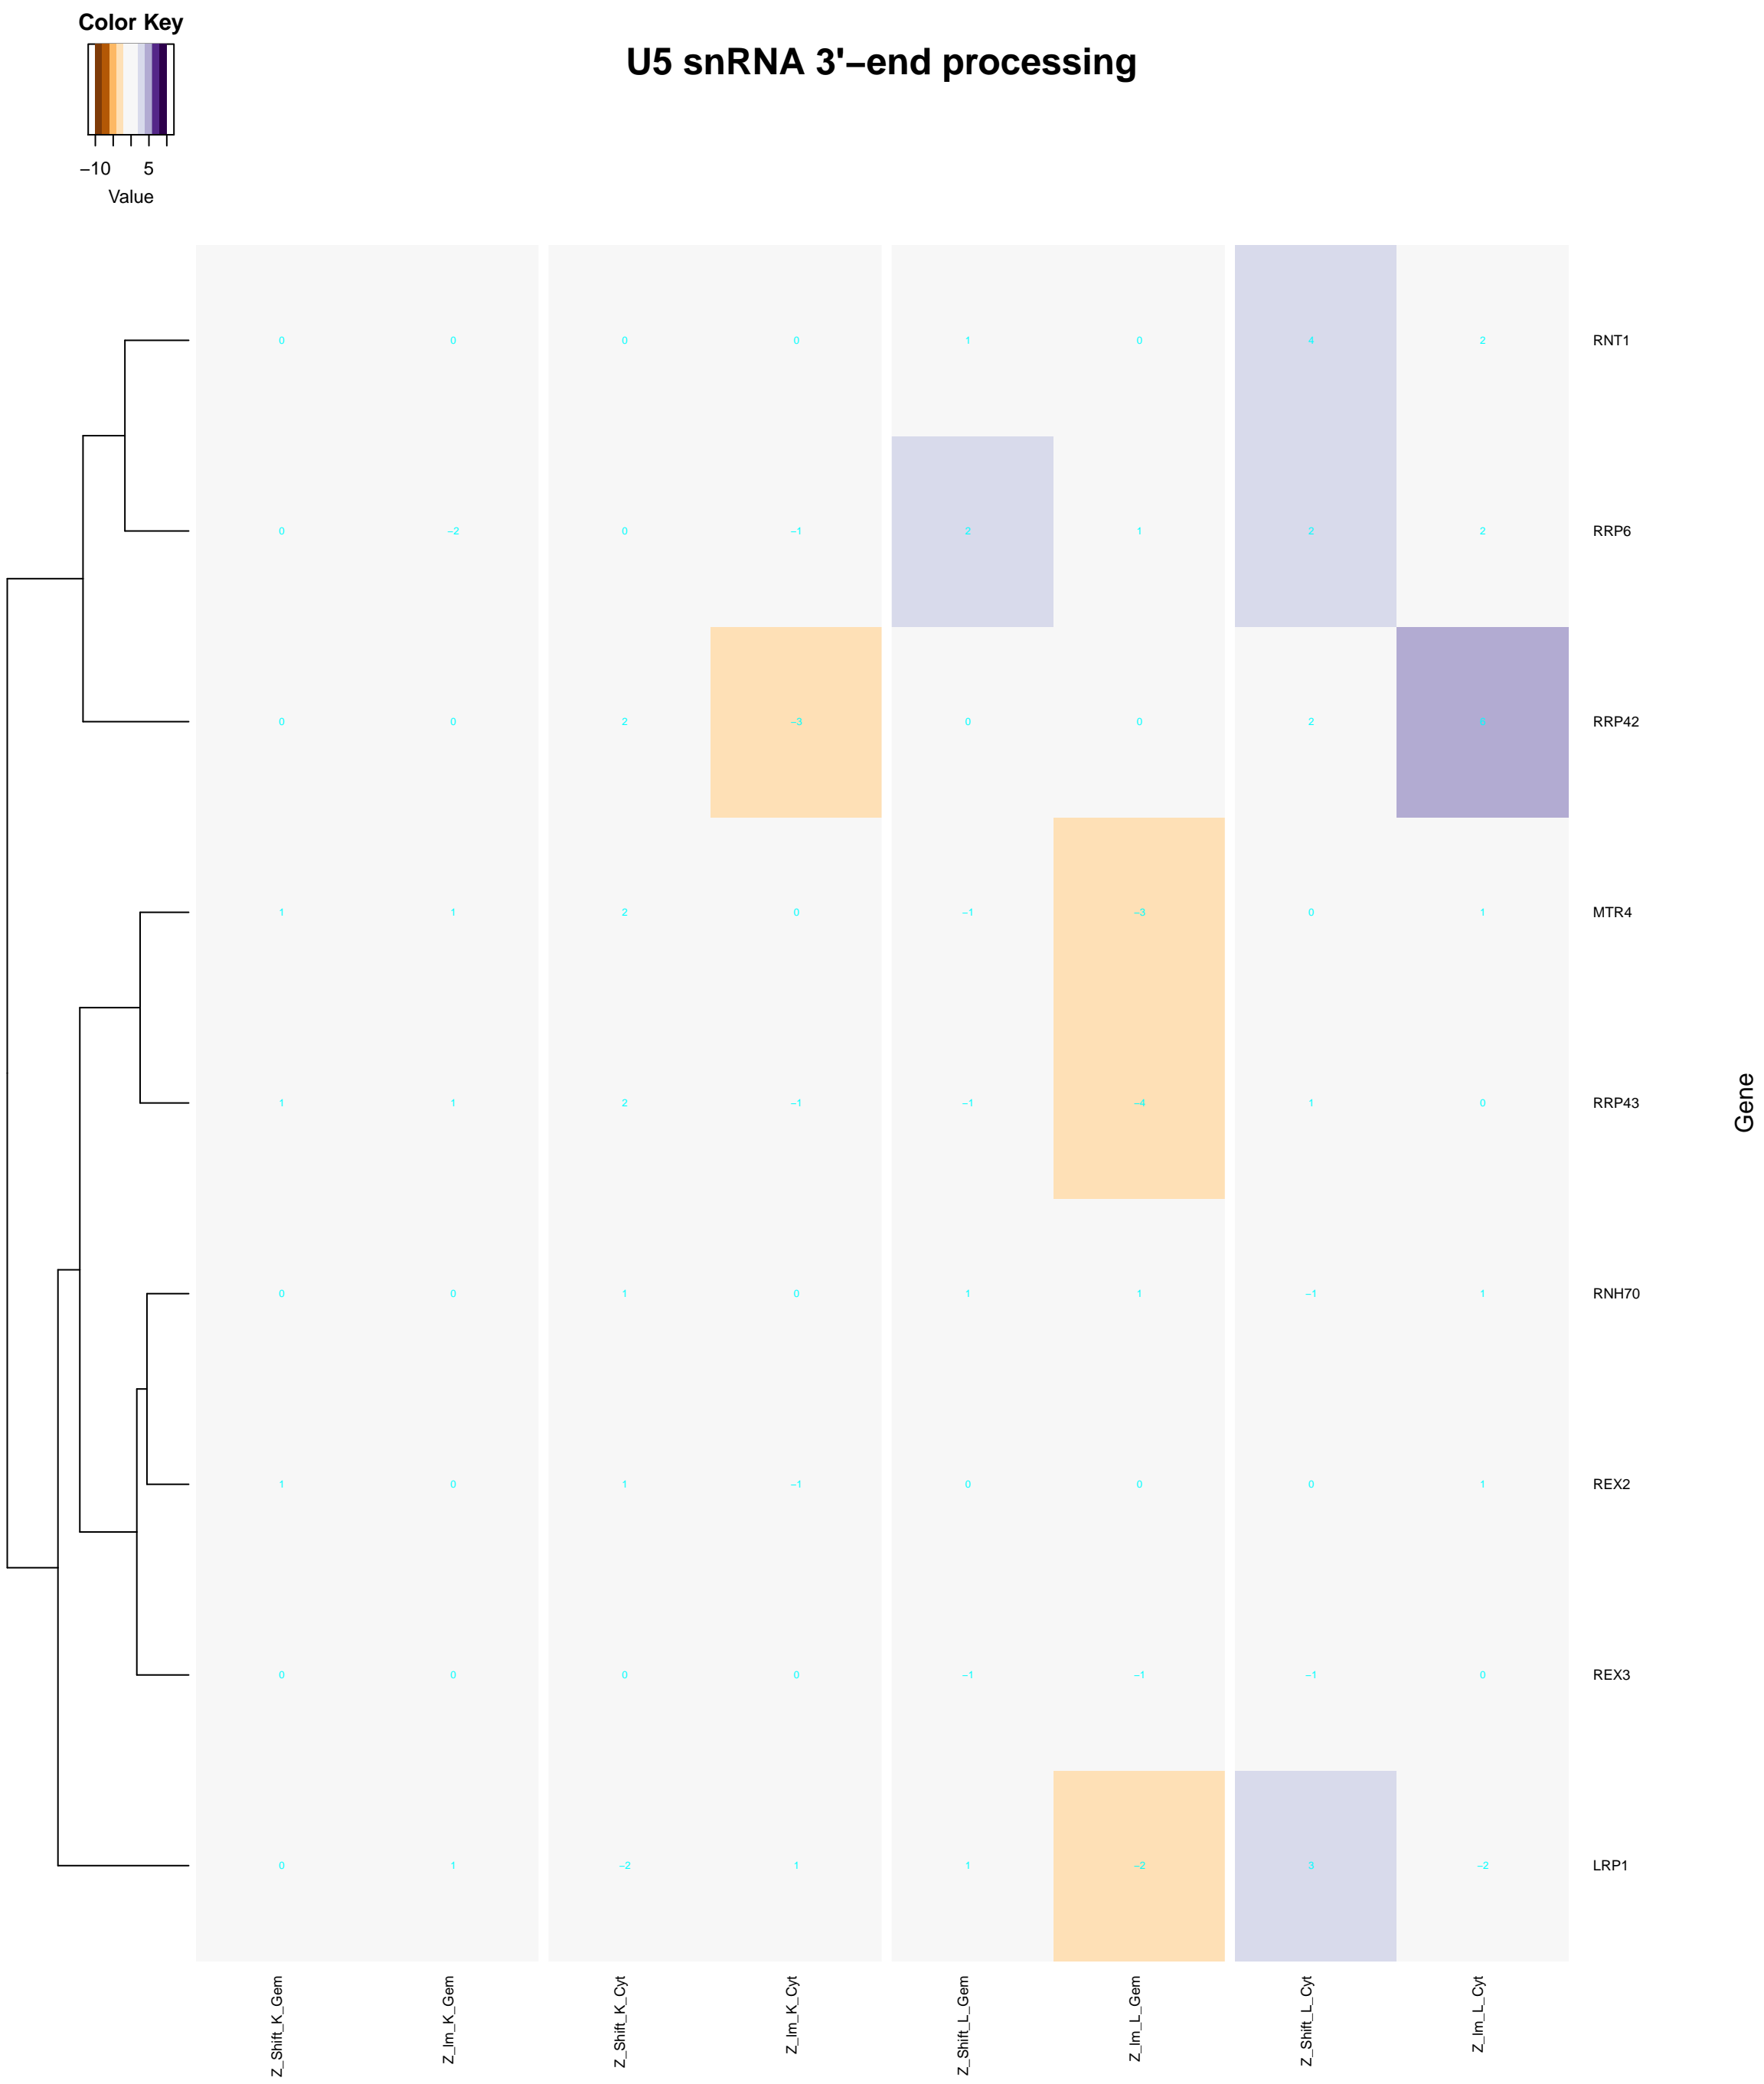

Supplement: s1 [file s1]



Separate SSU-rRNA from 5.8S rRNA and LSU-rRNA from tricistronic rRNA transcript (SSU-rRNA)

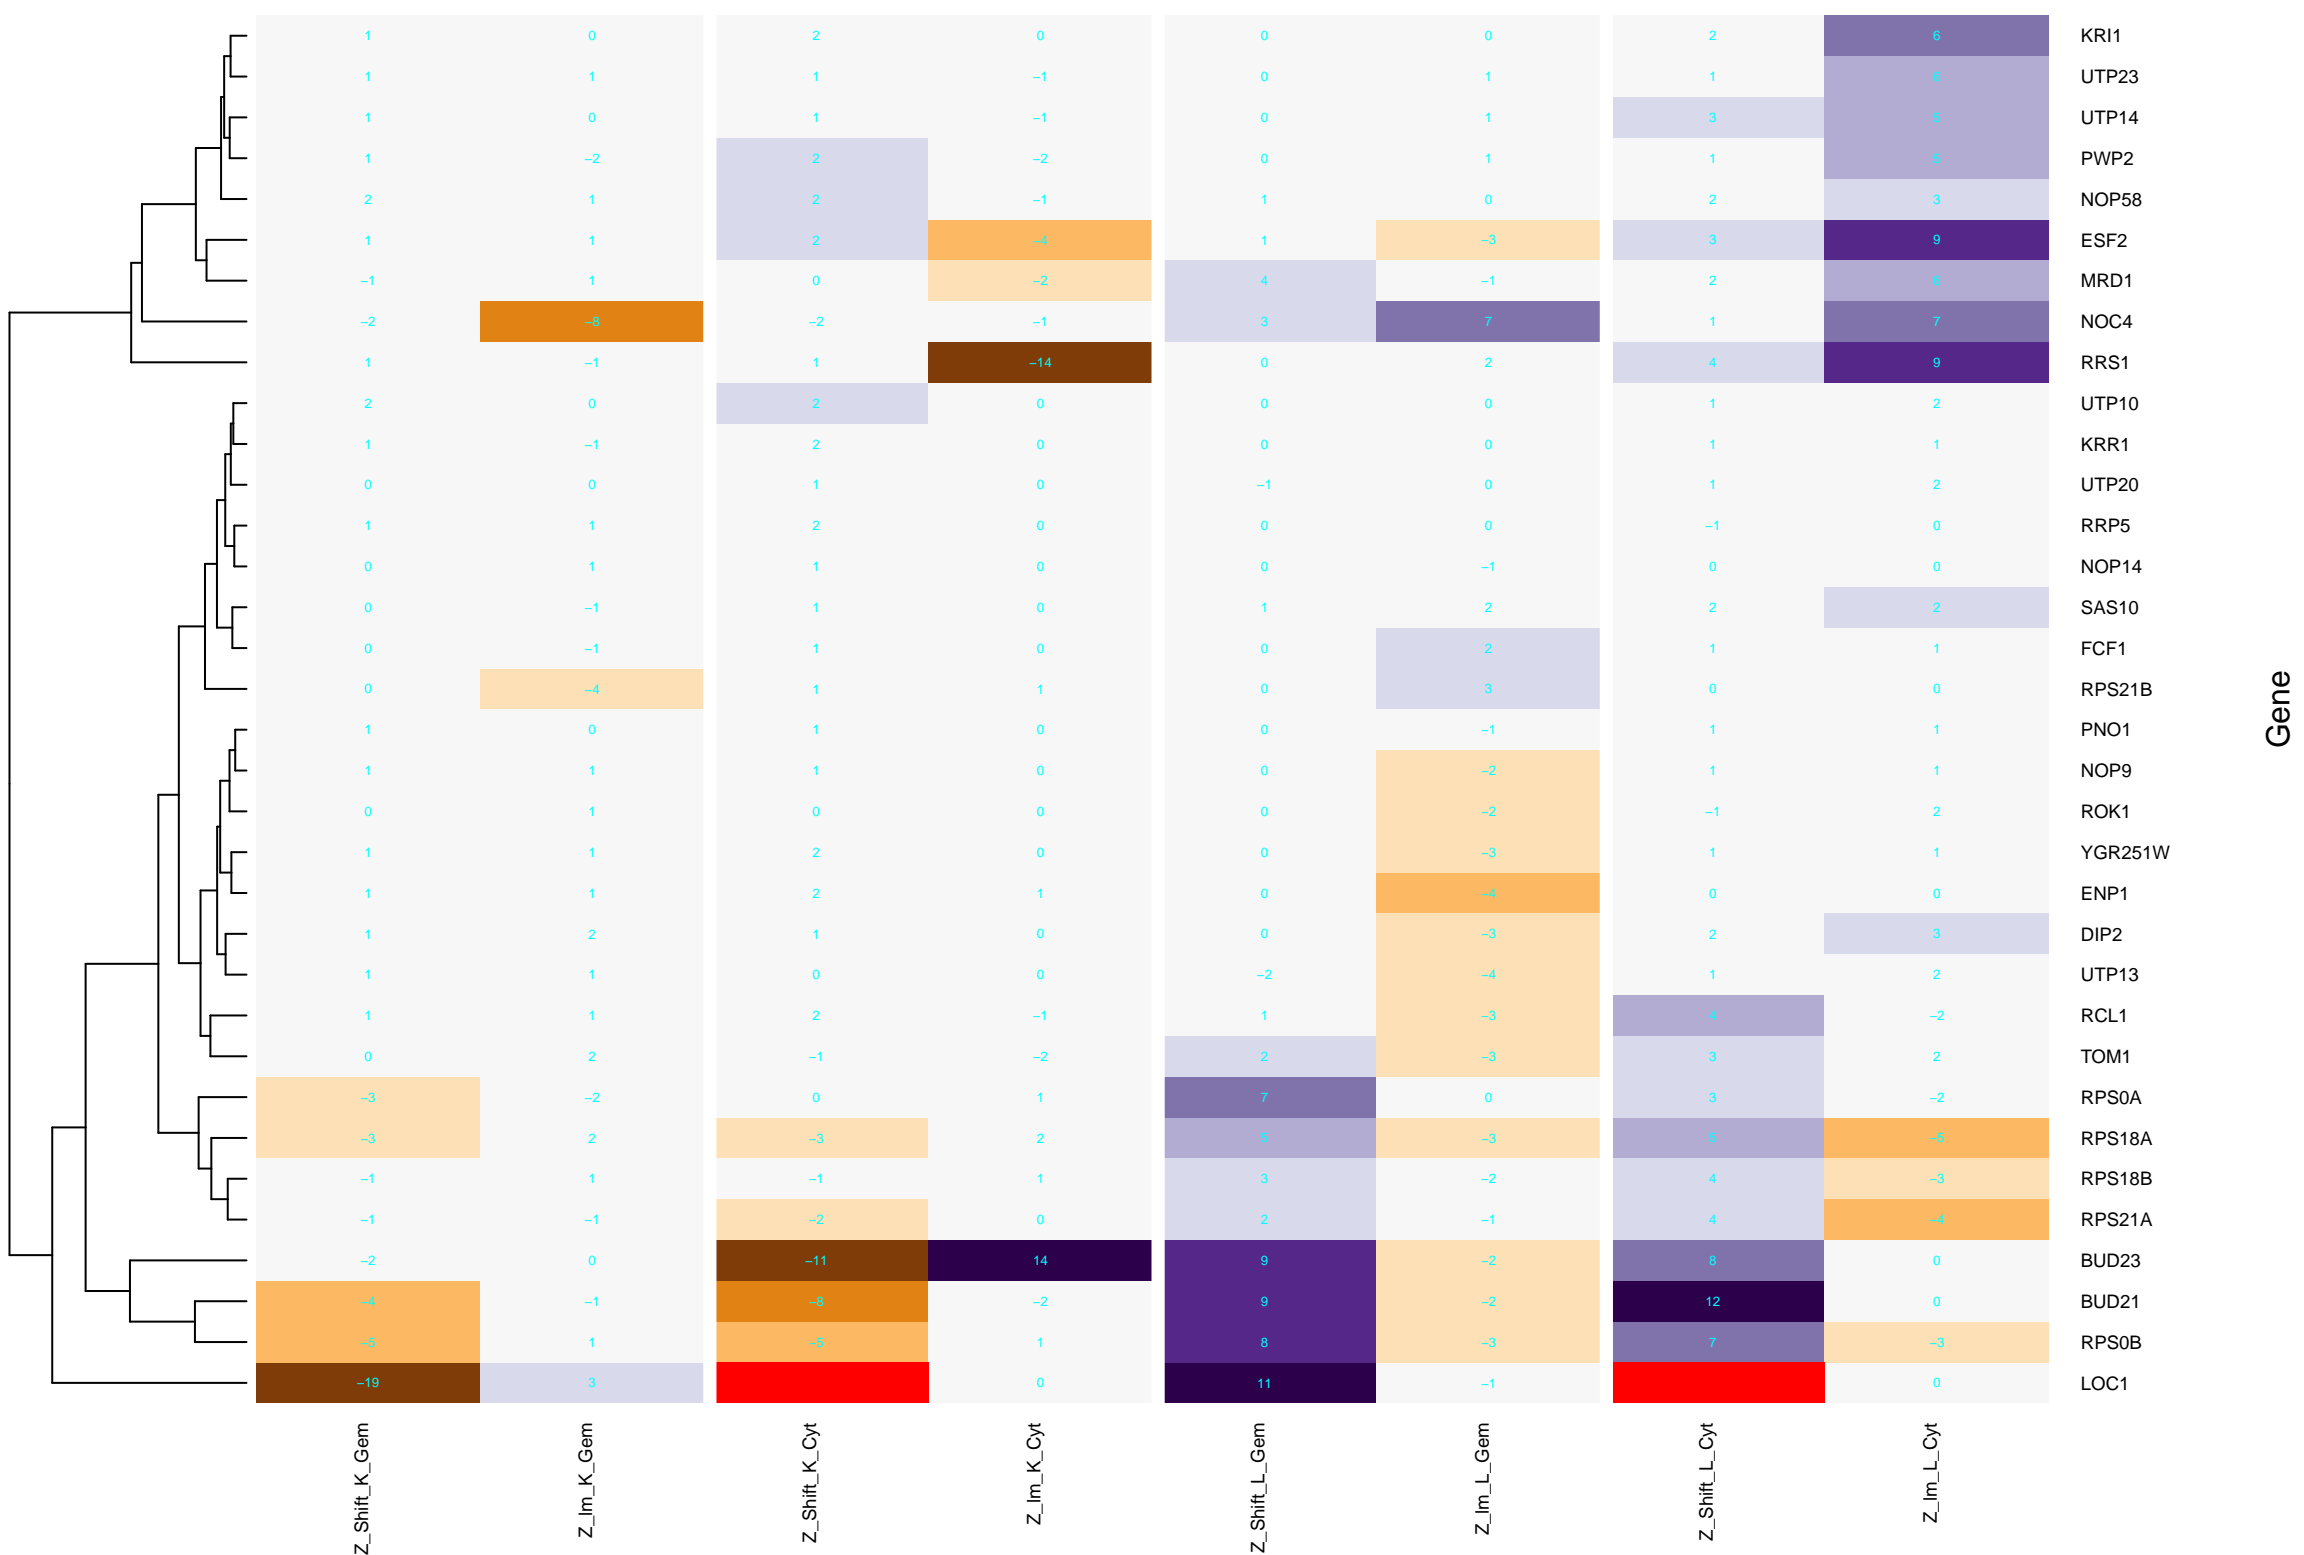

Supplement: s1 [file s1]

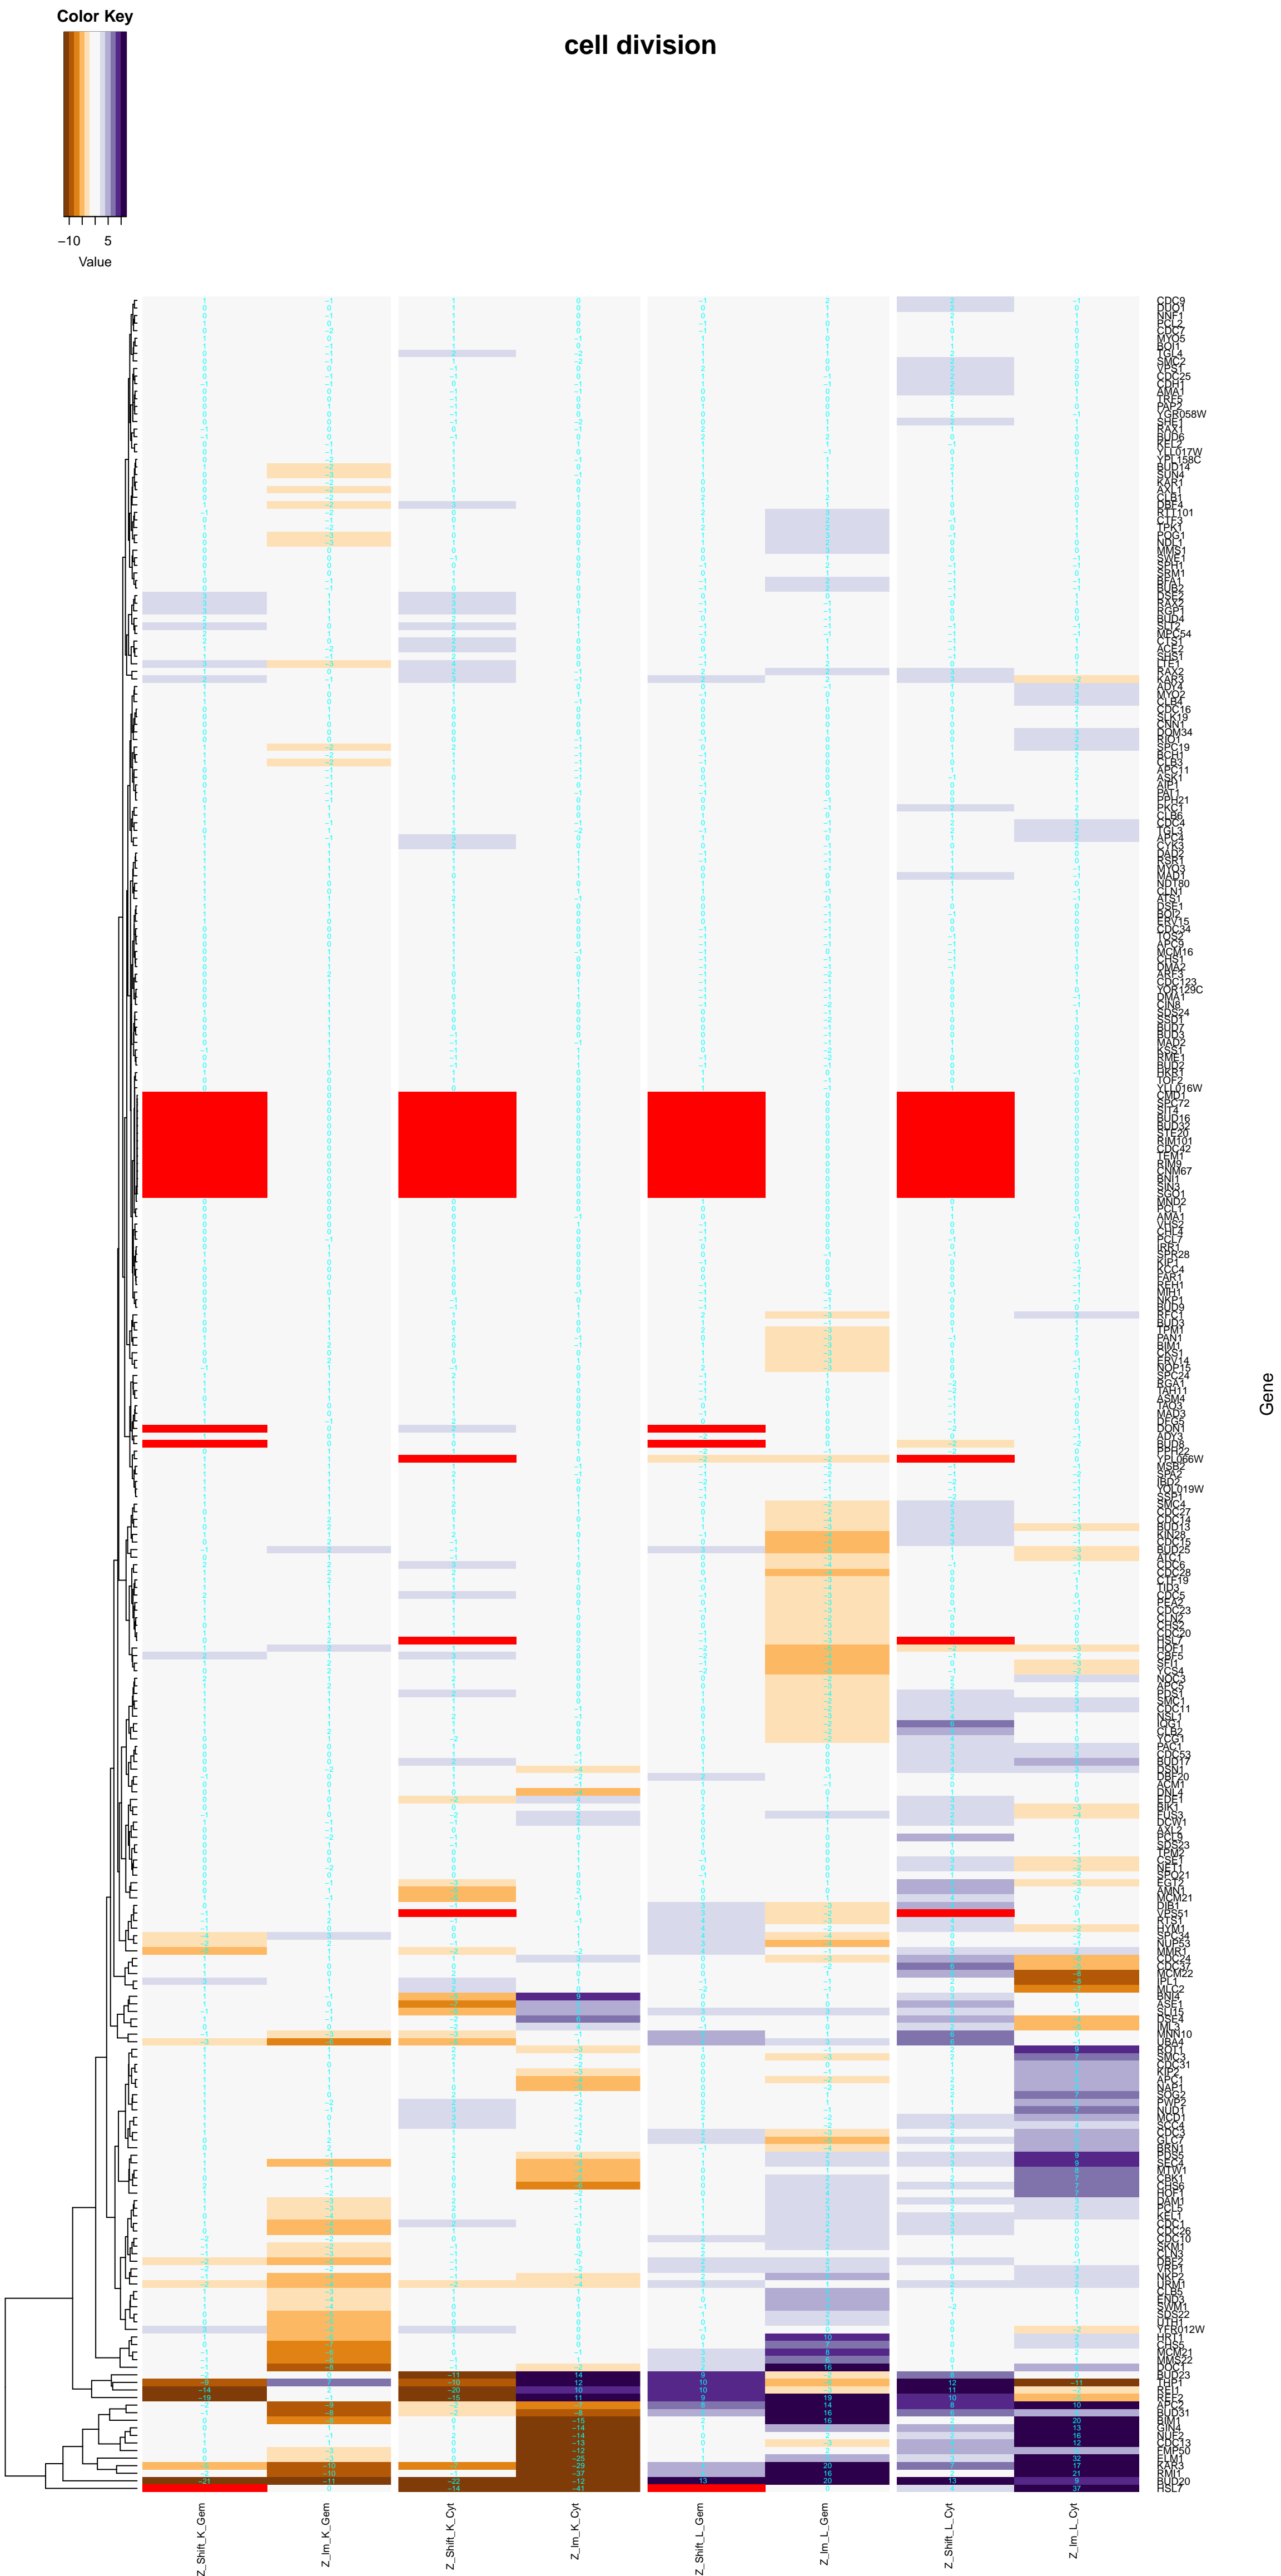

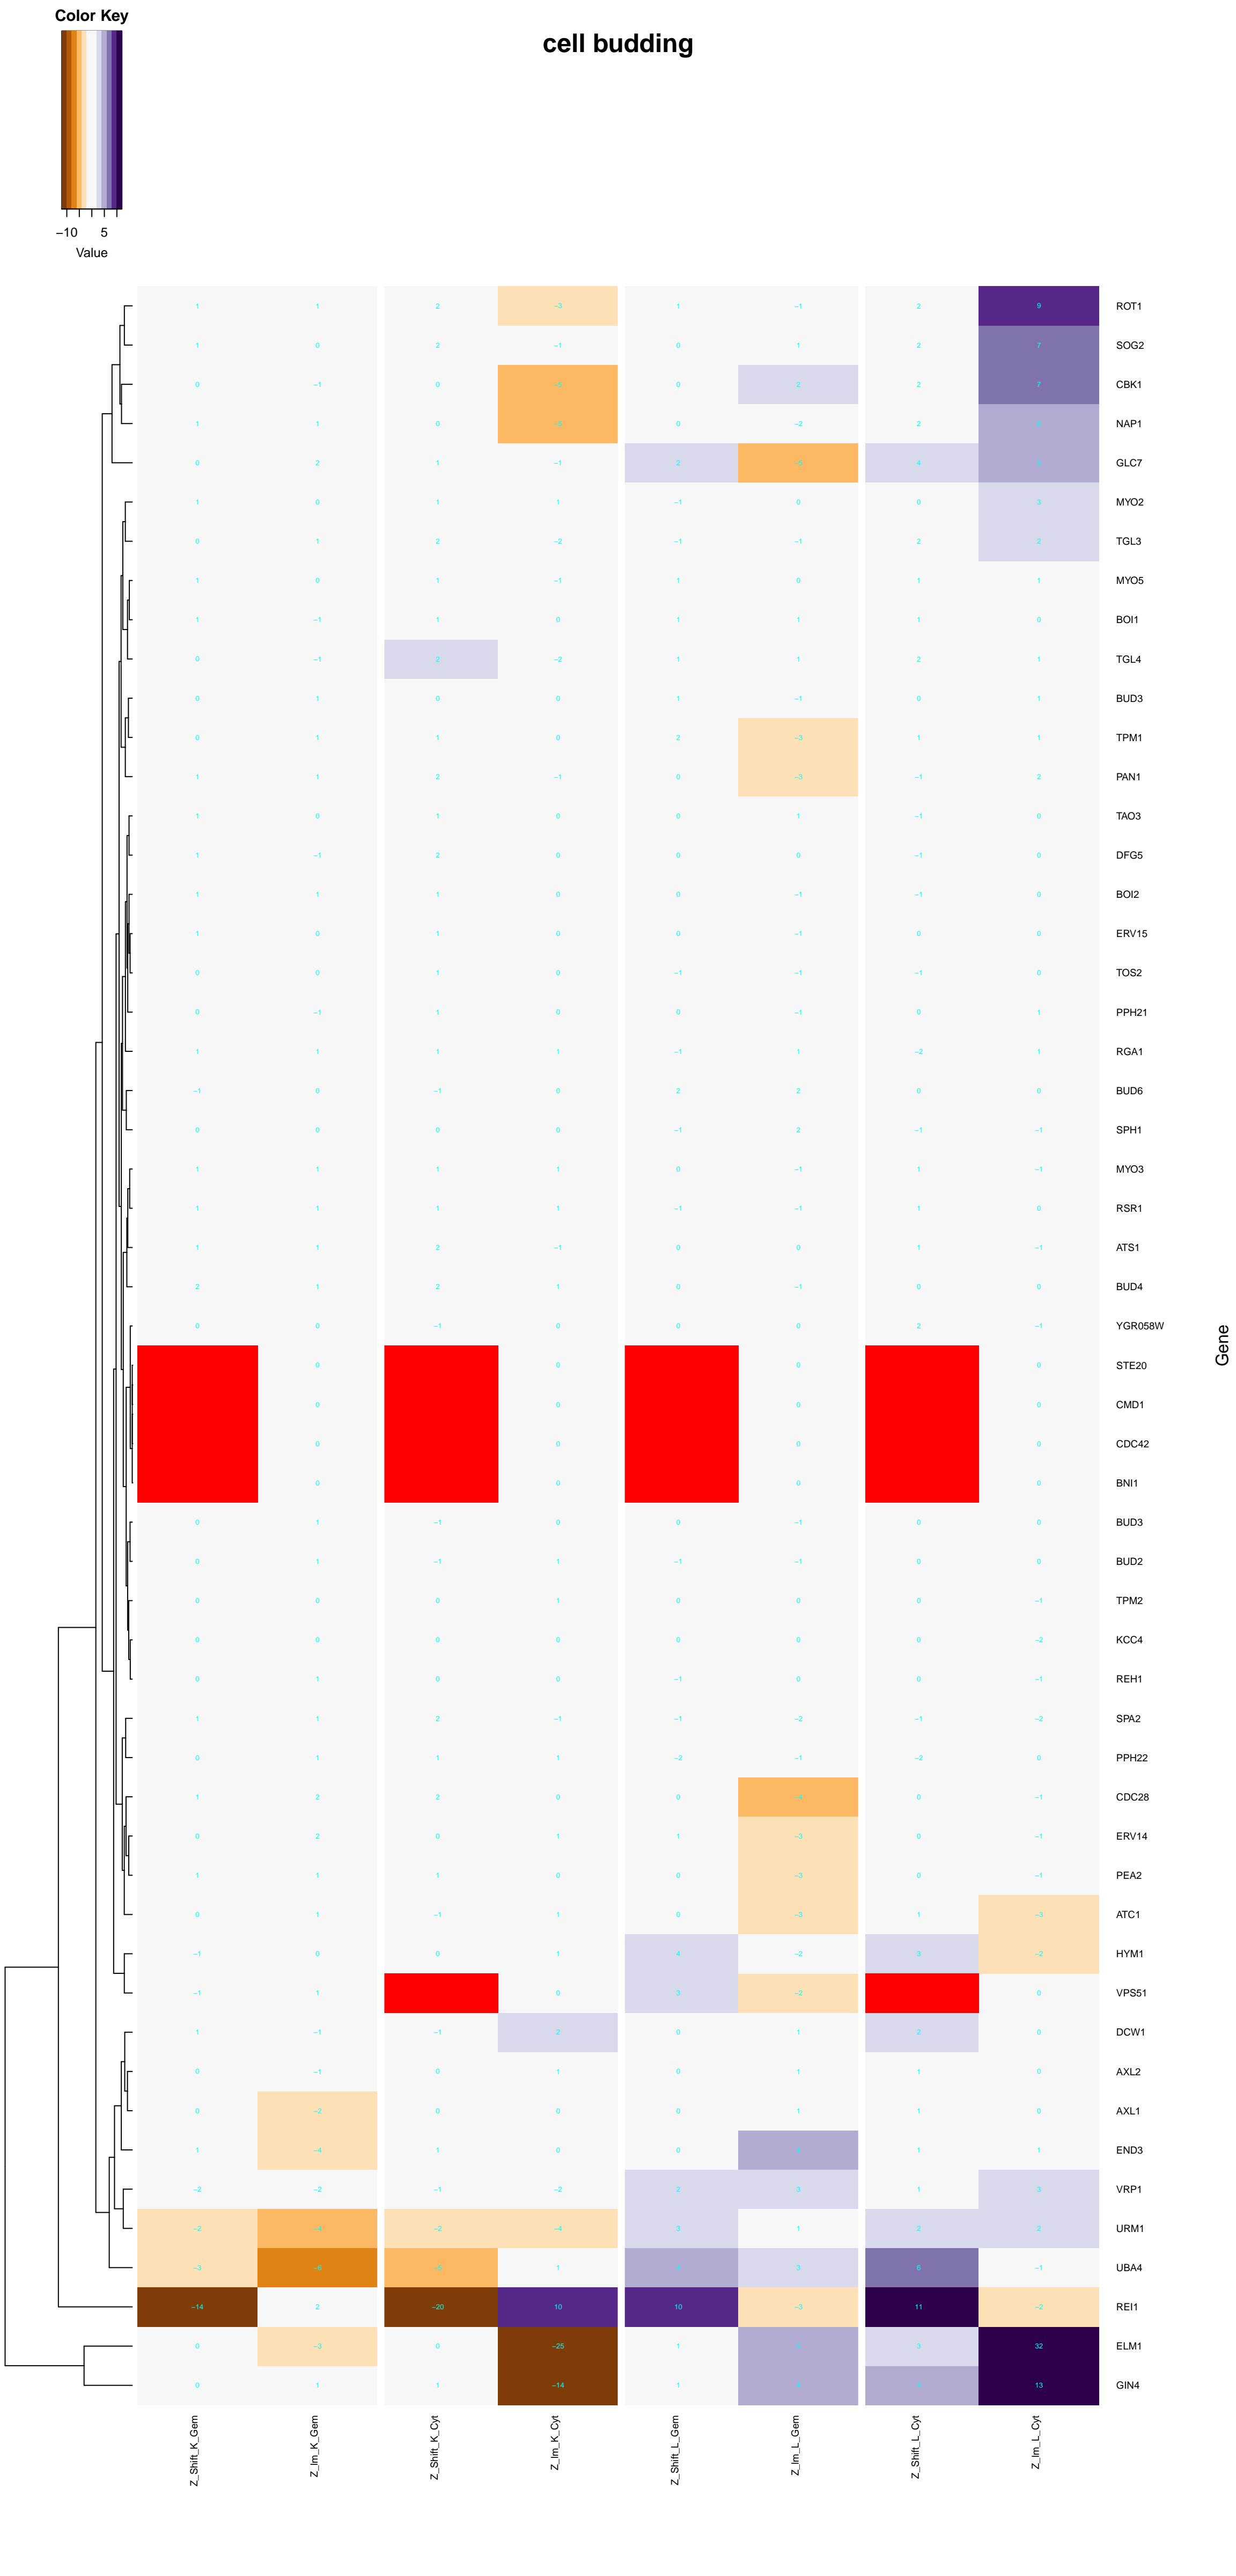

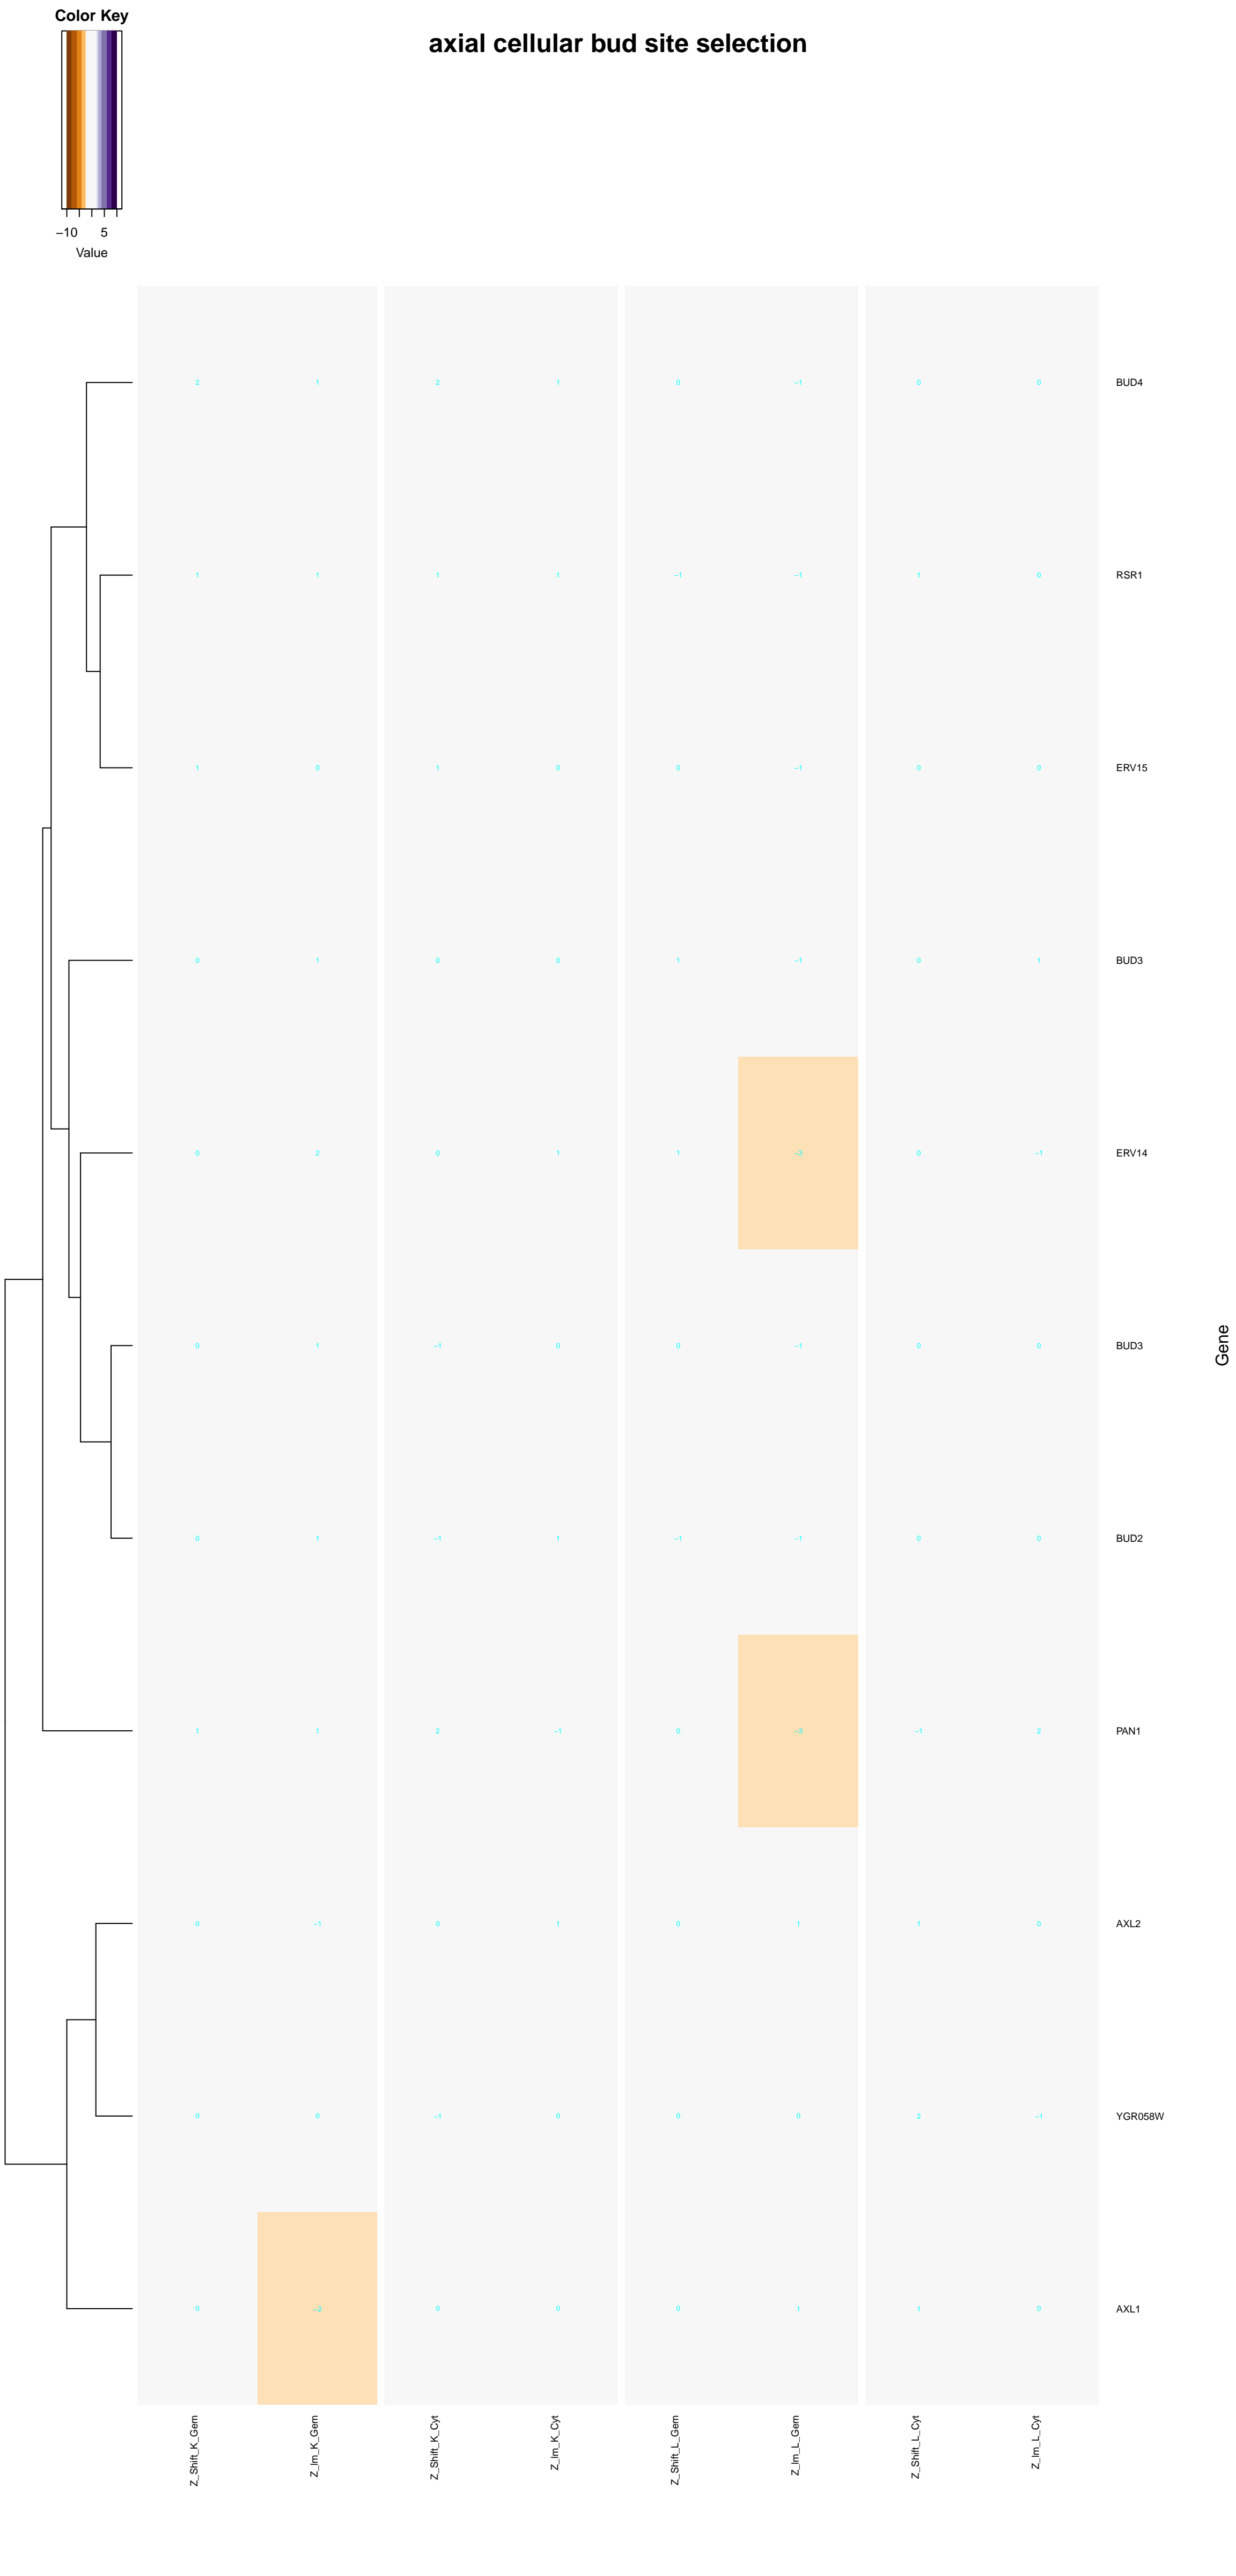

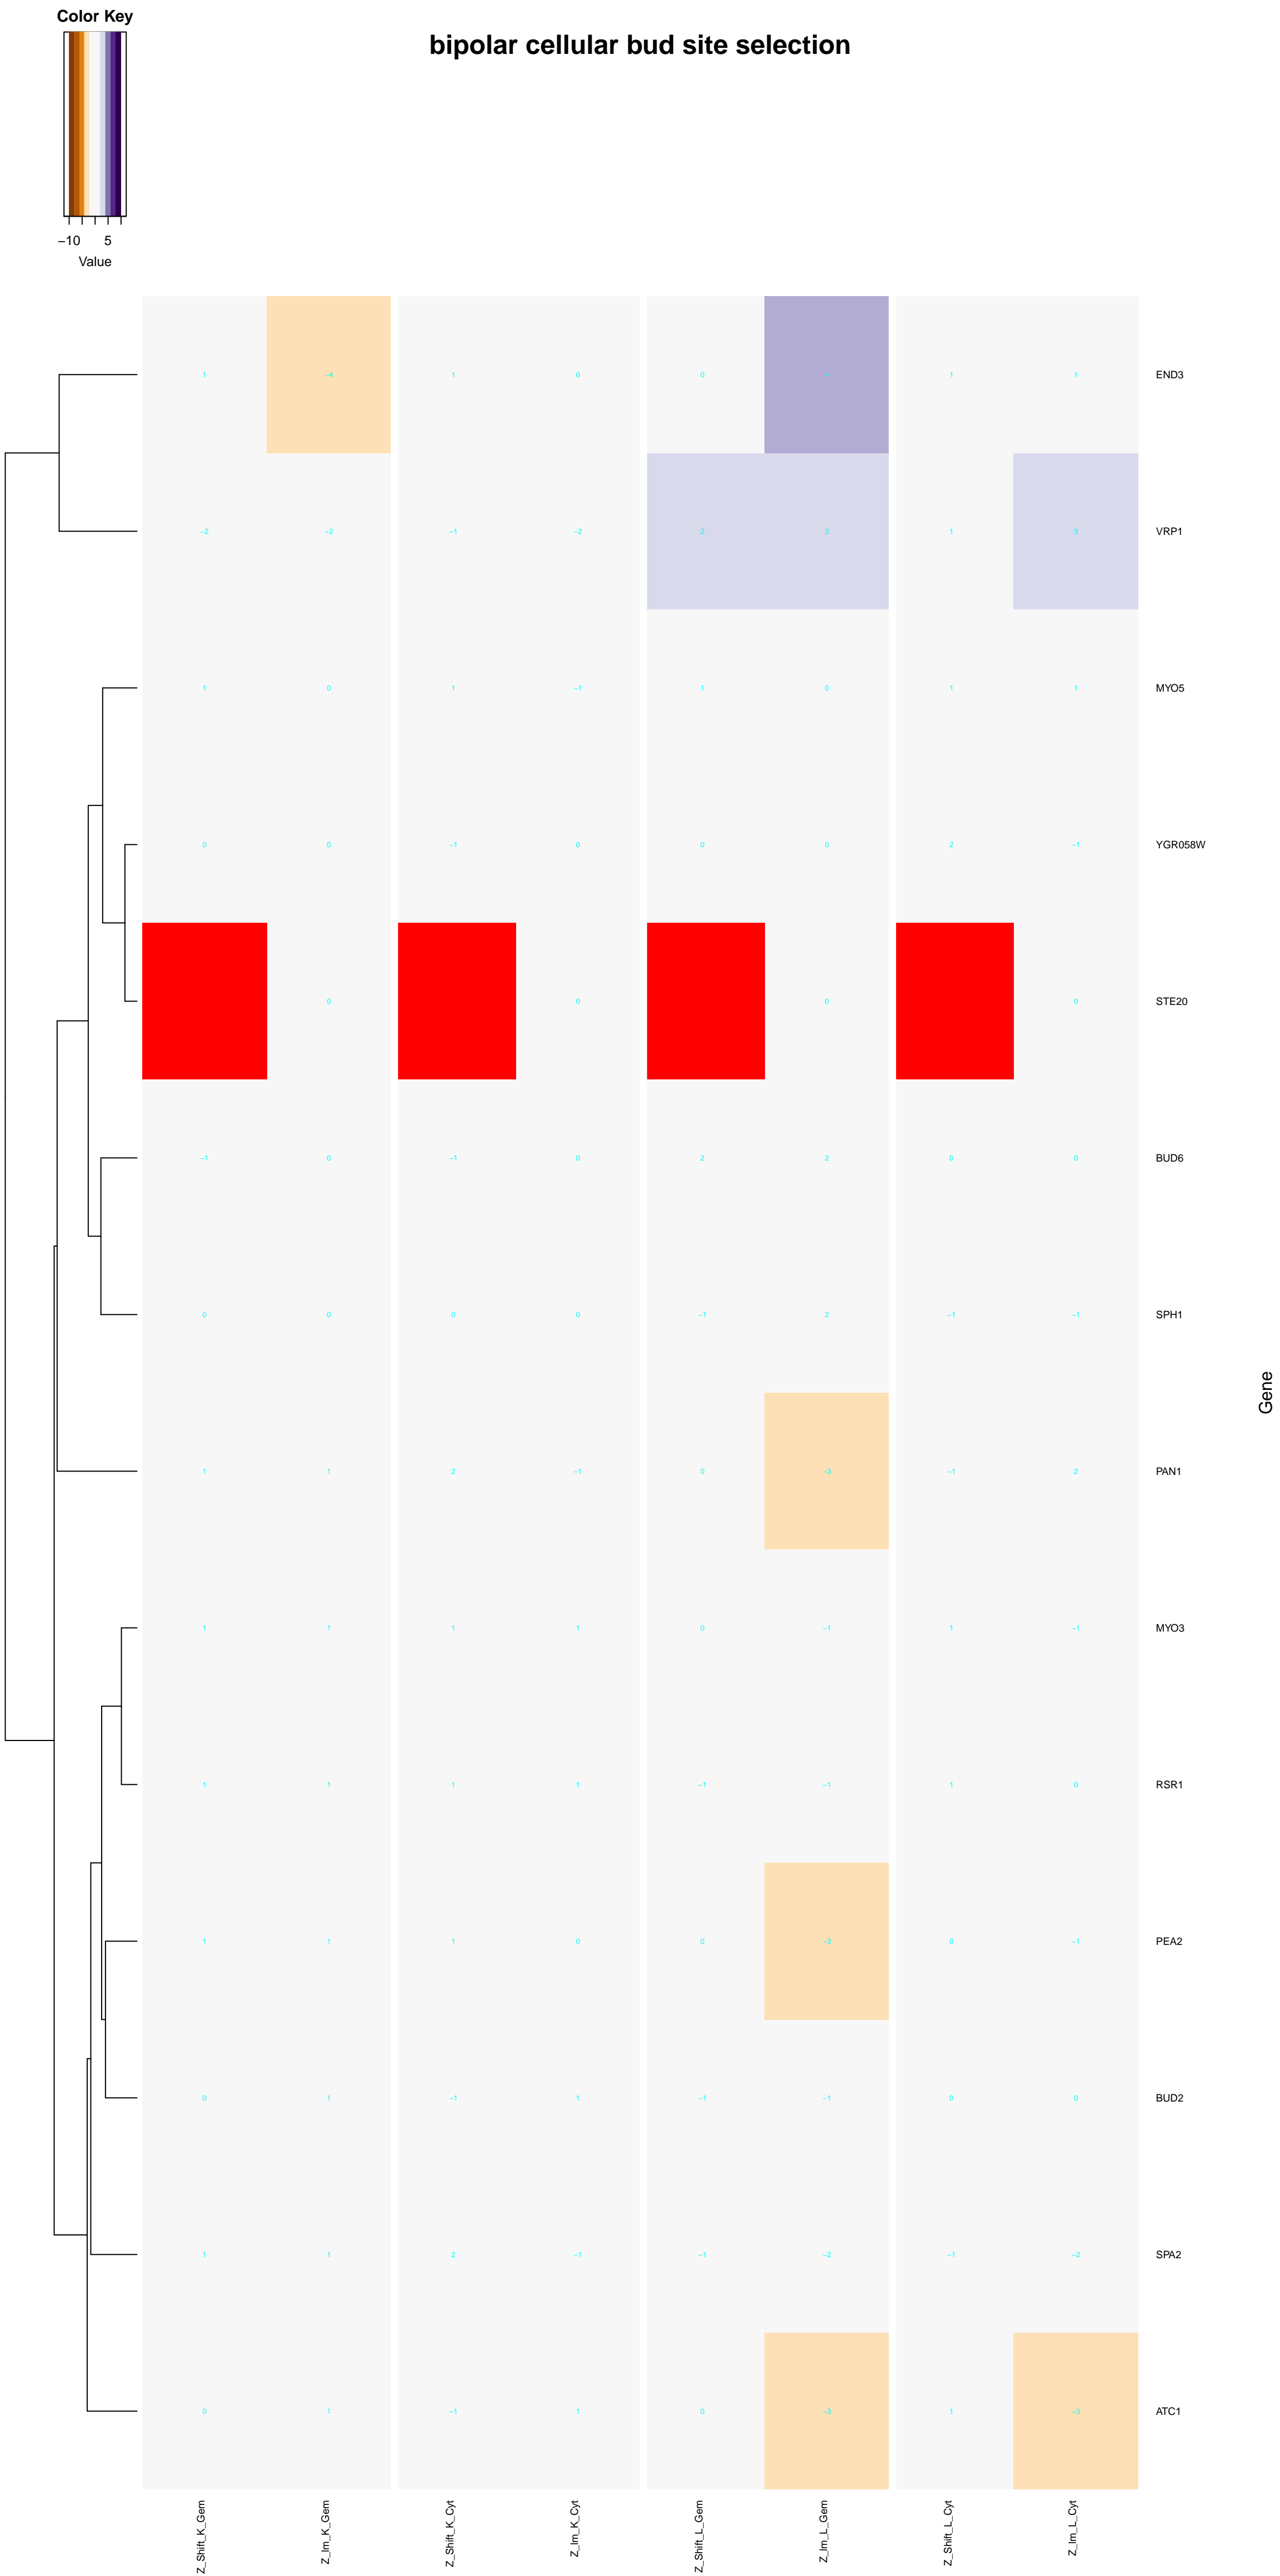

Supplement: s1 [file s1]

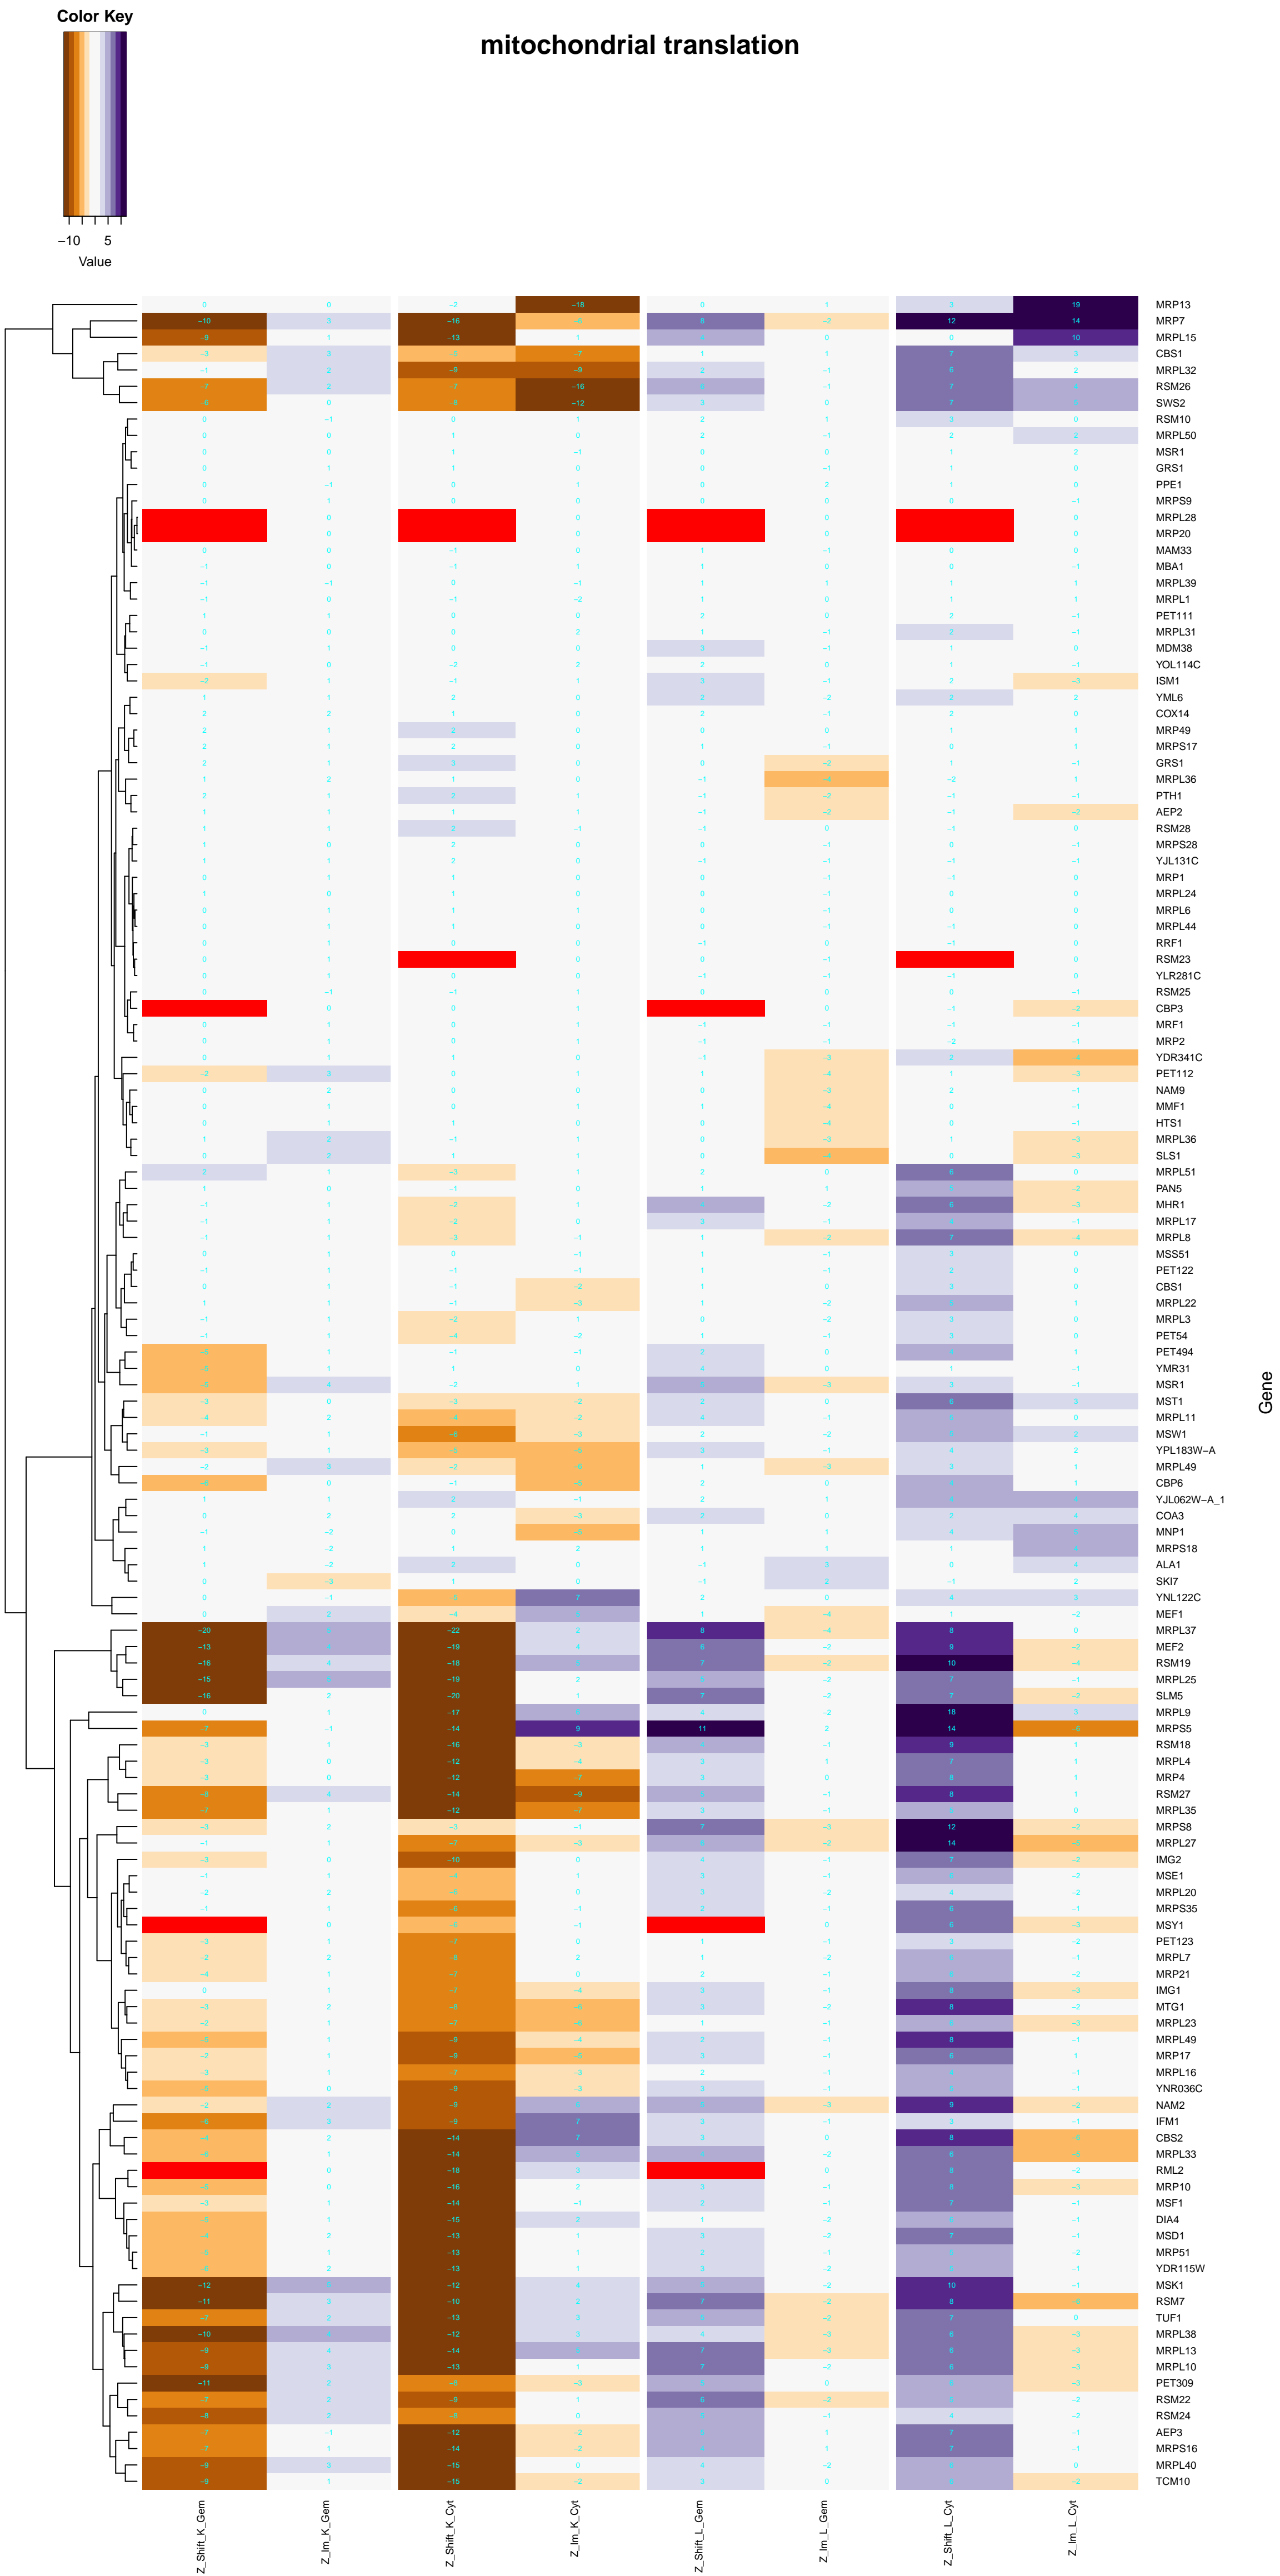

Supplement: s1 [file s1]

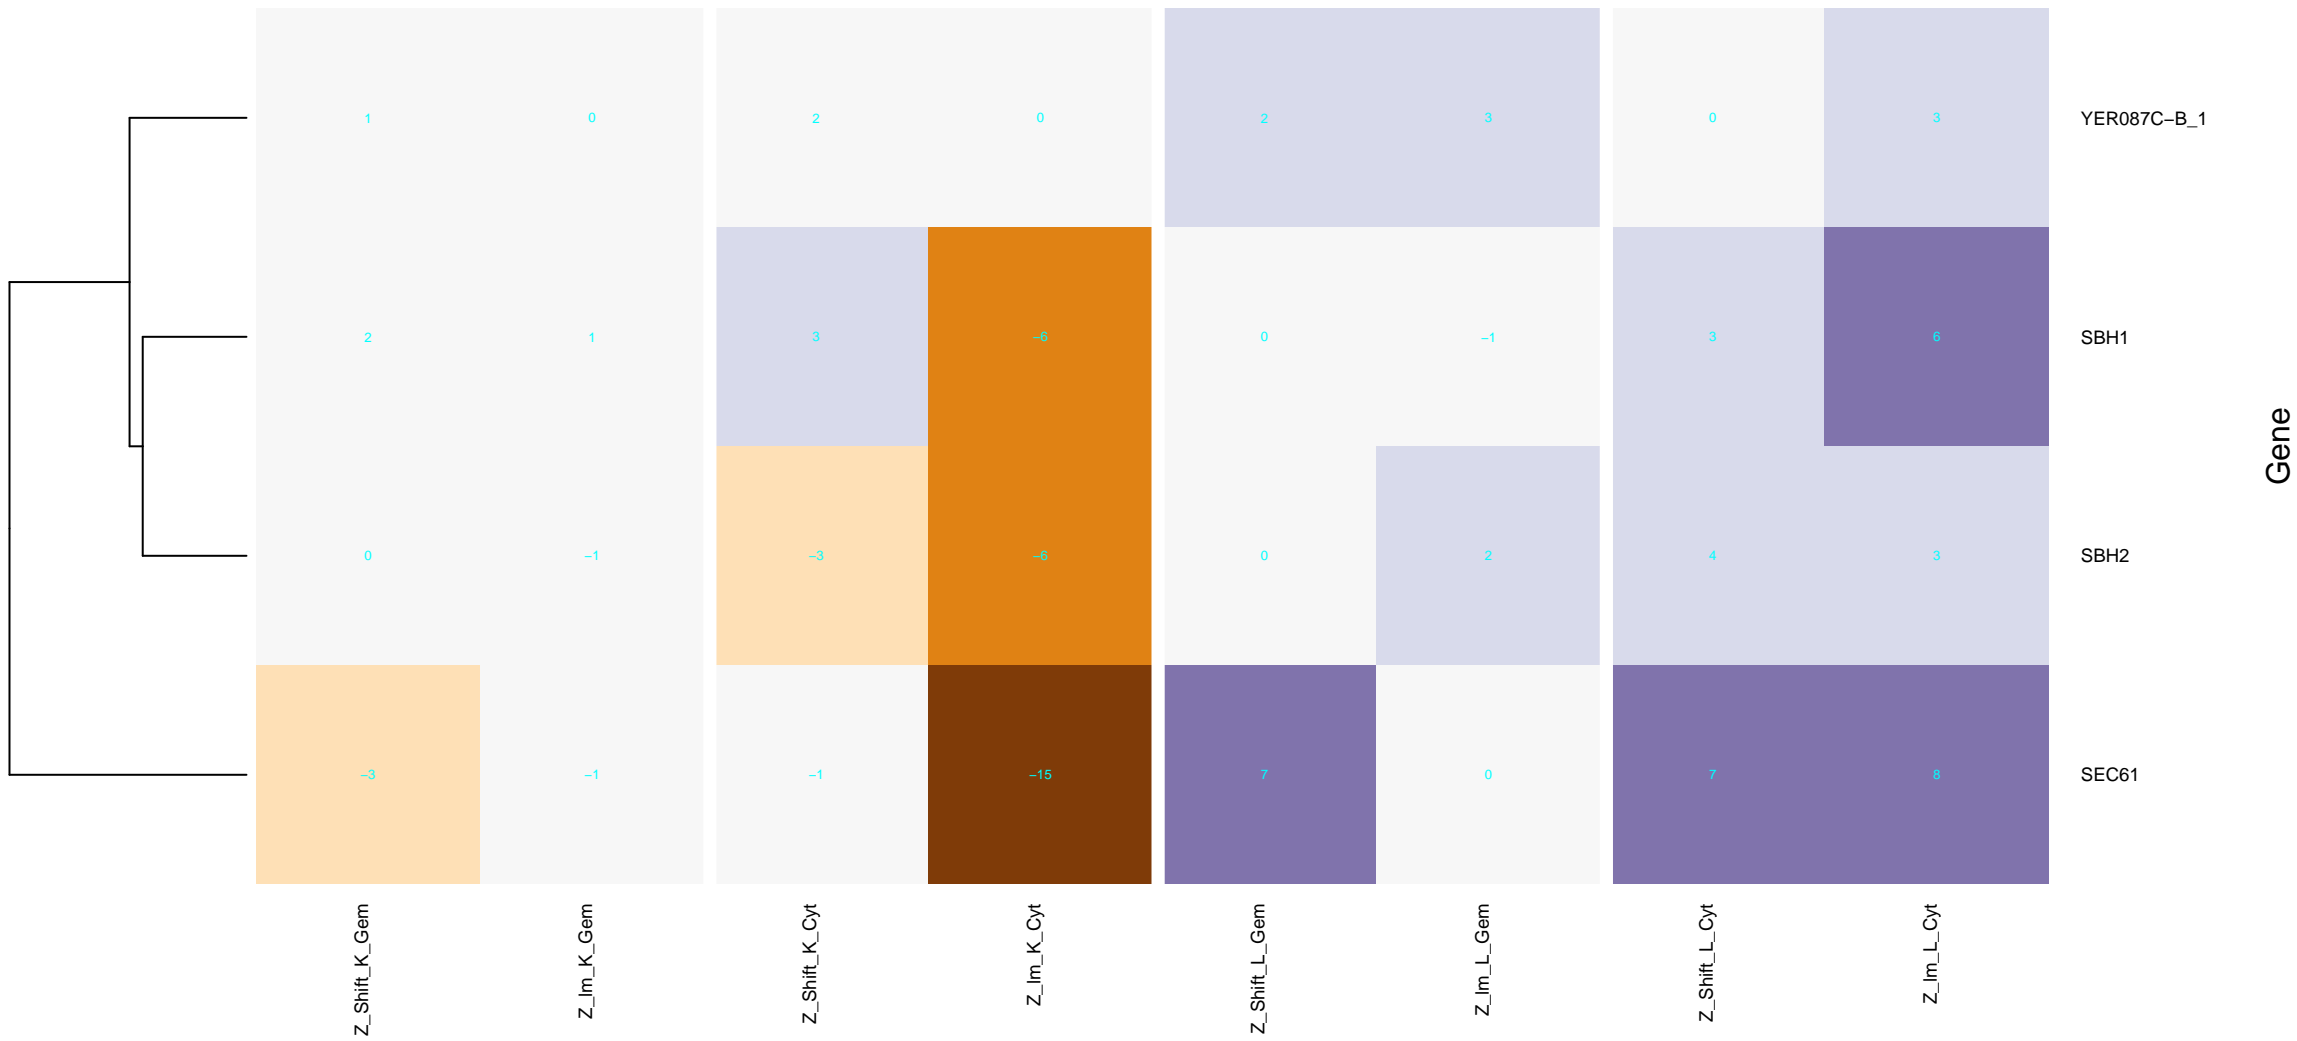

Supplement: s1 [file s1]

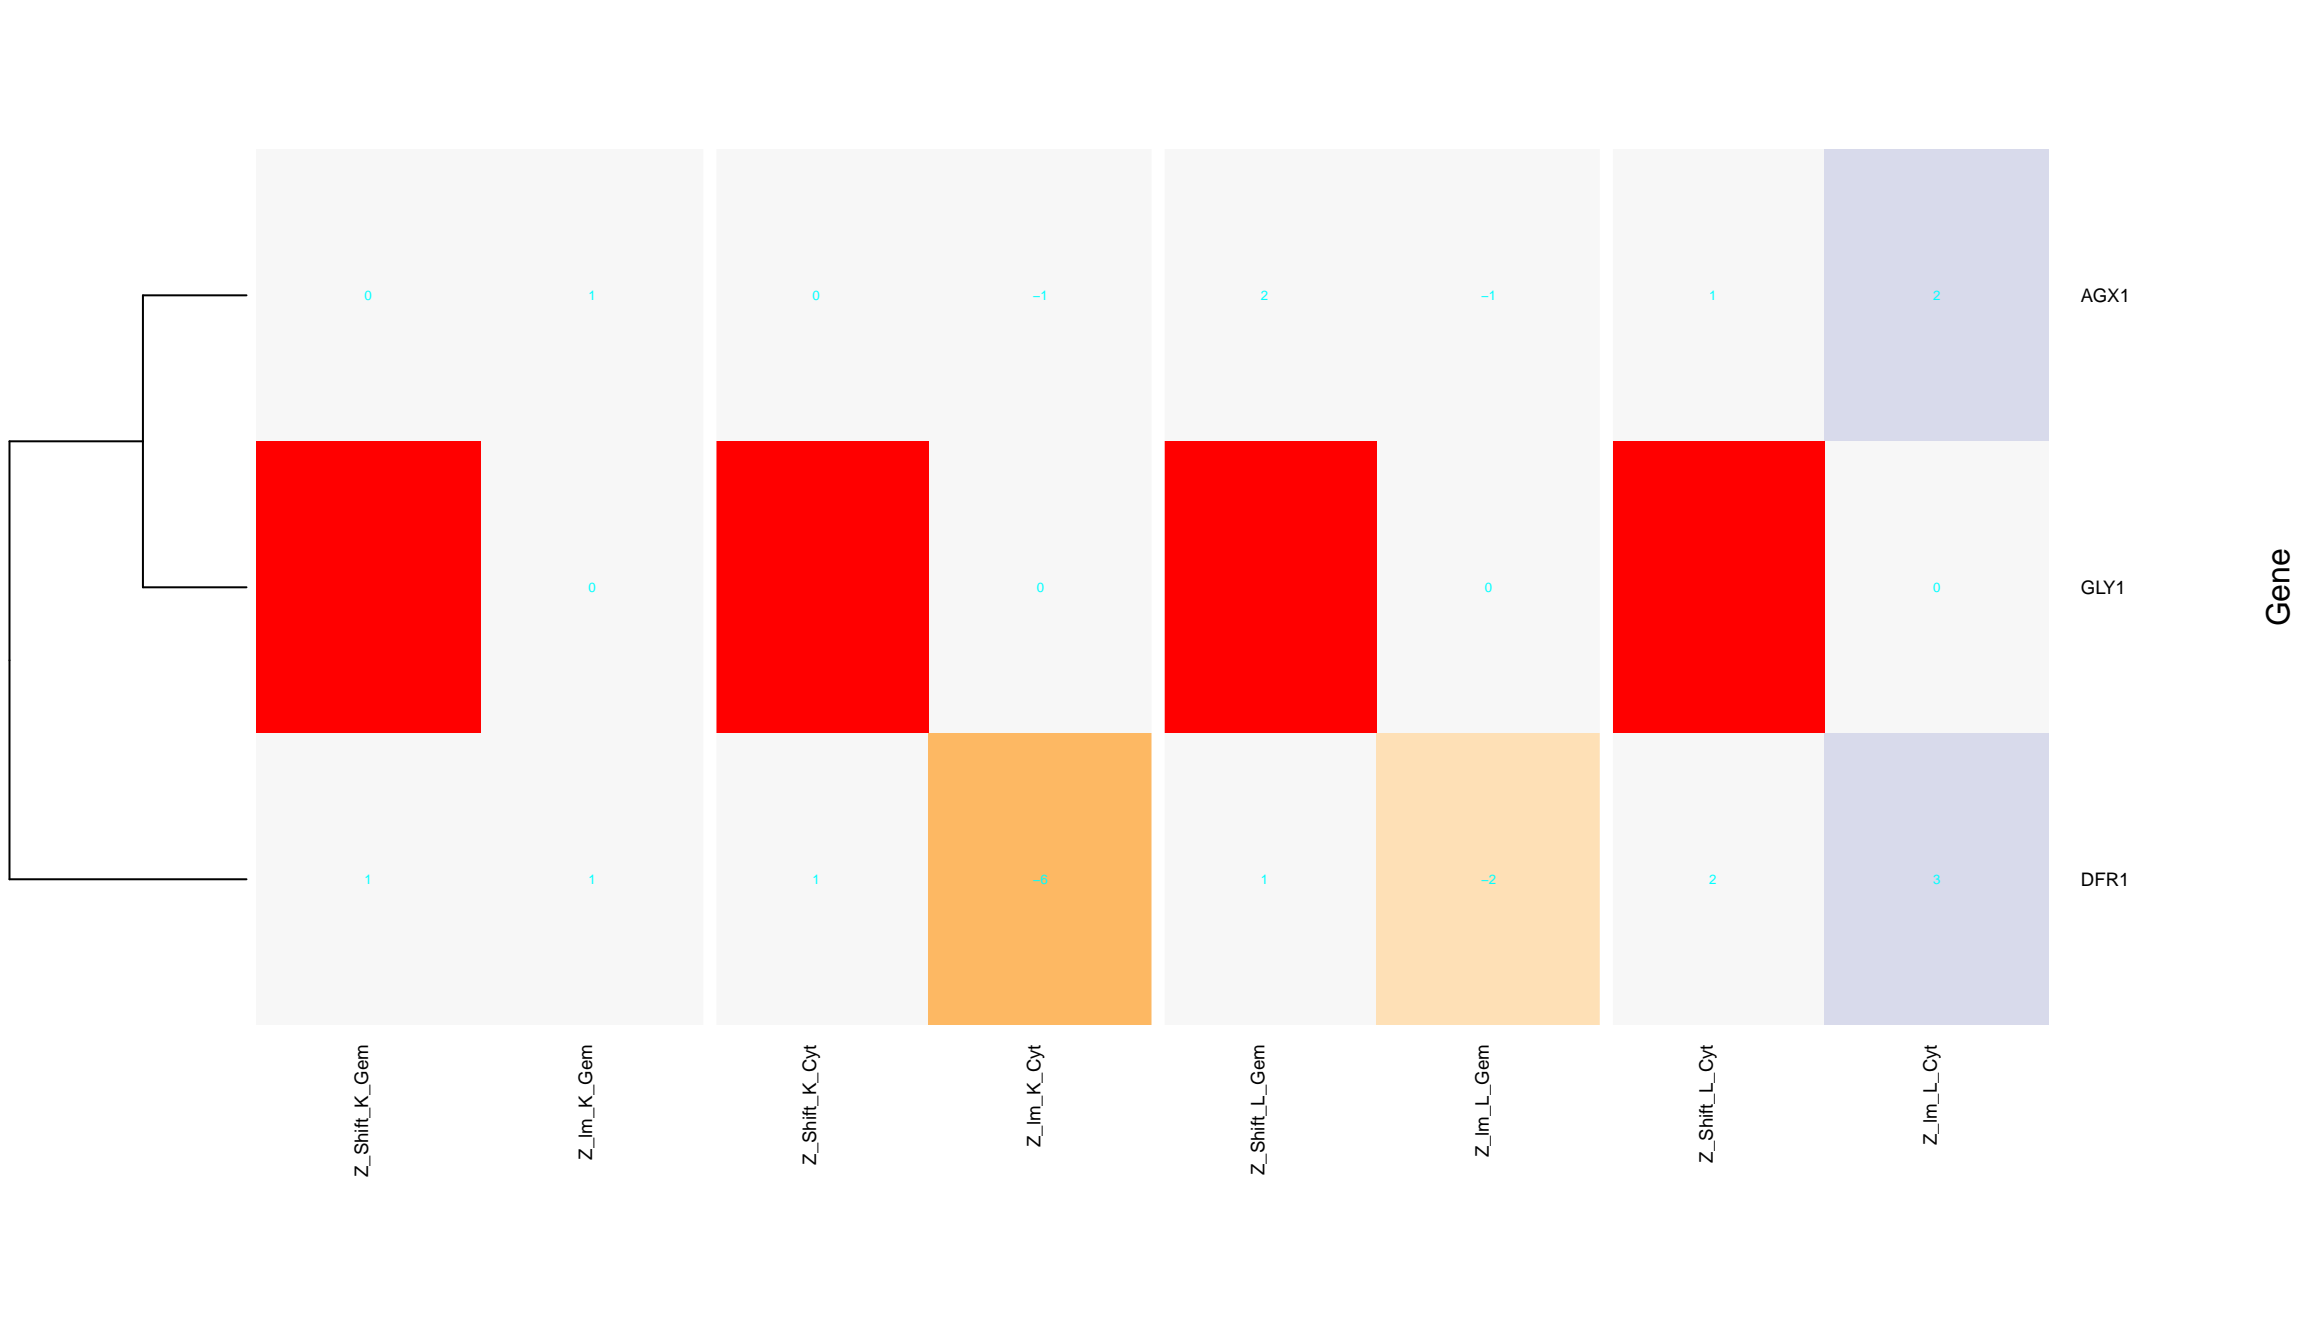

Supplement: s1 [file s1]

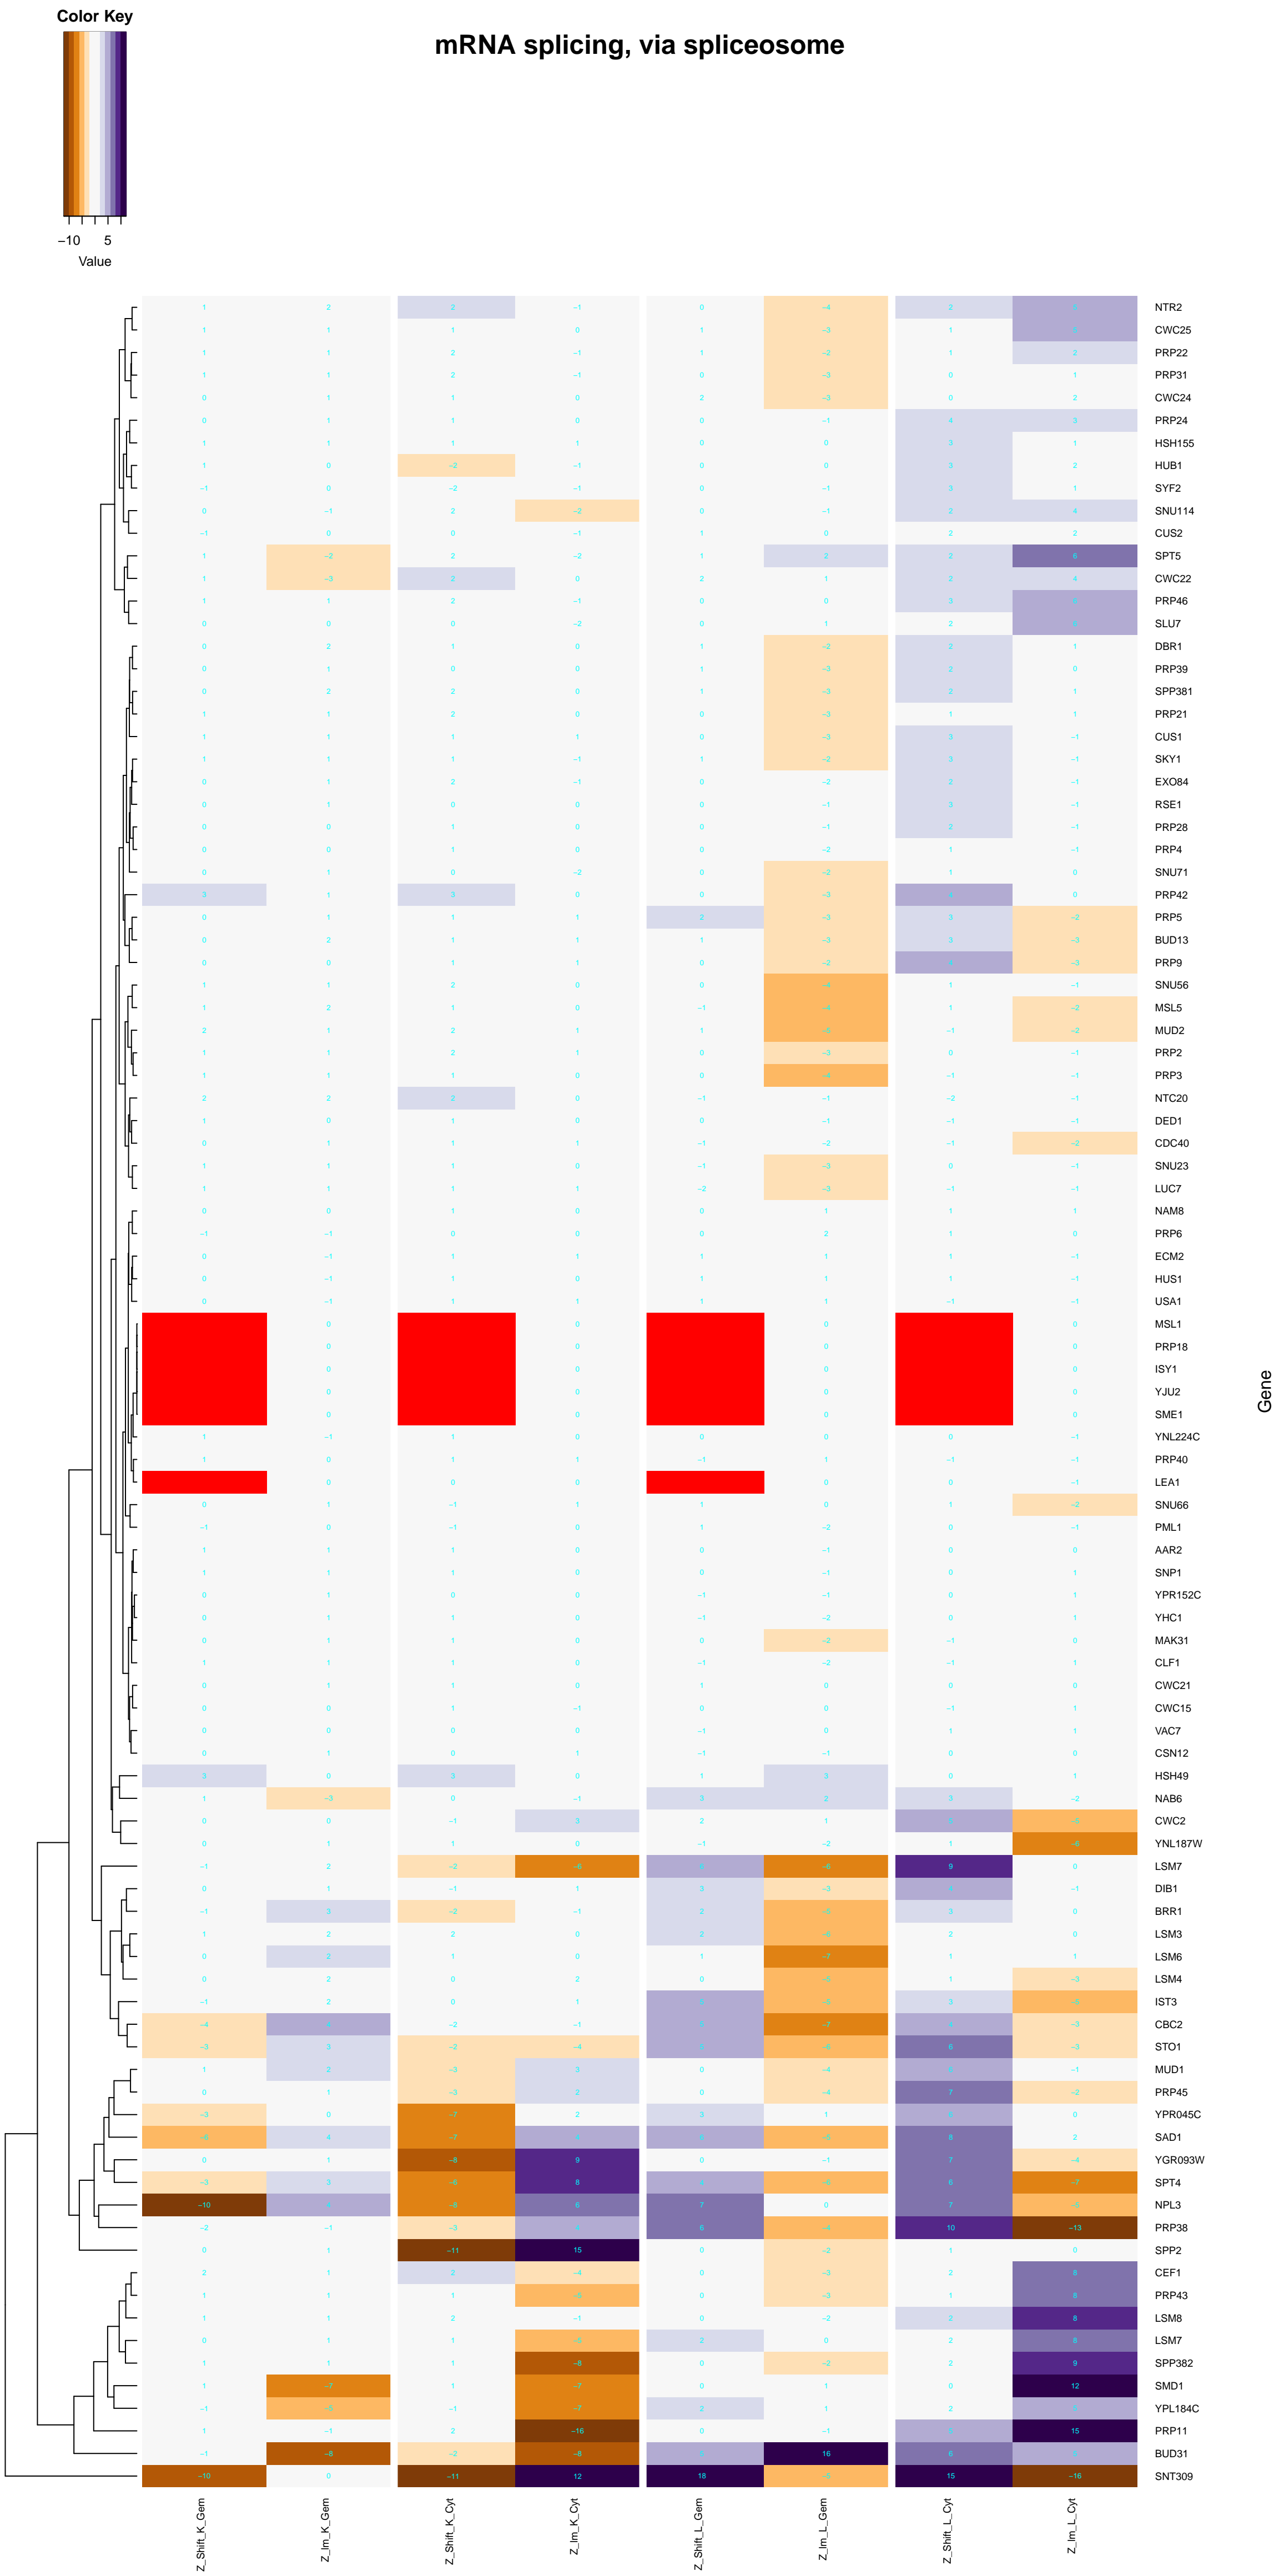

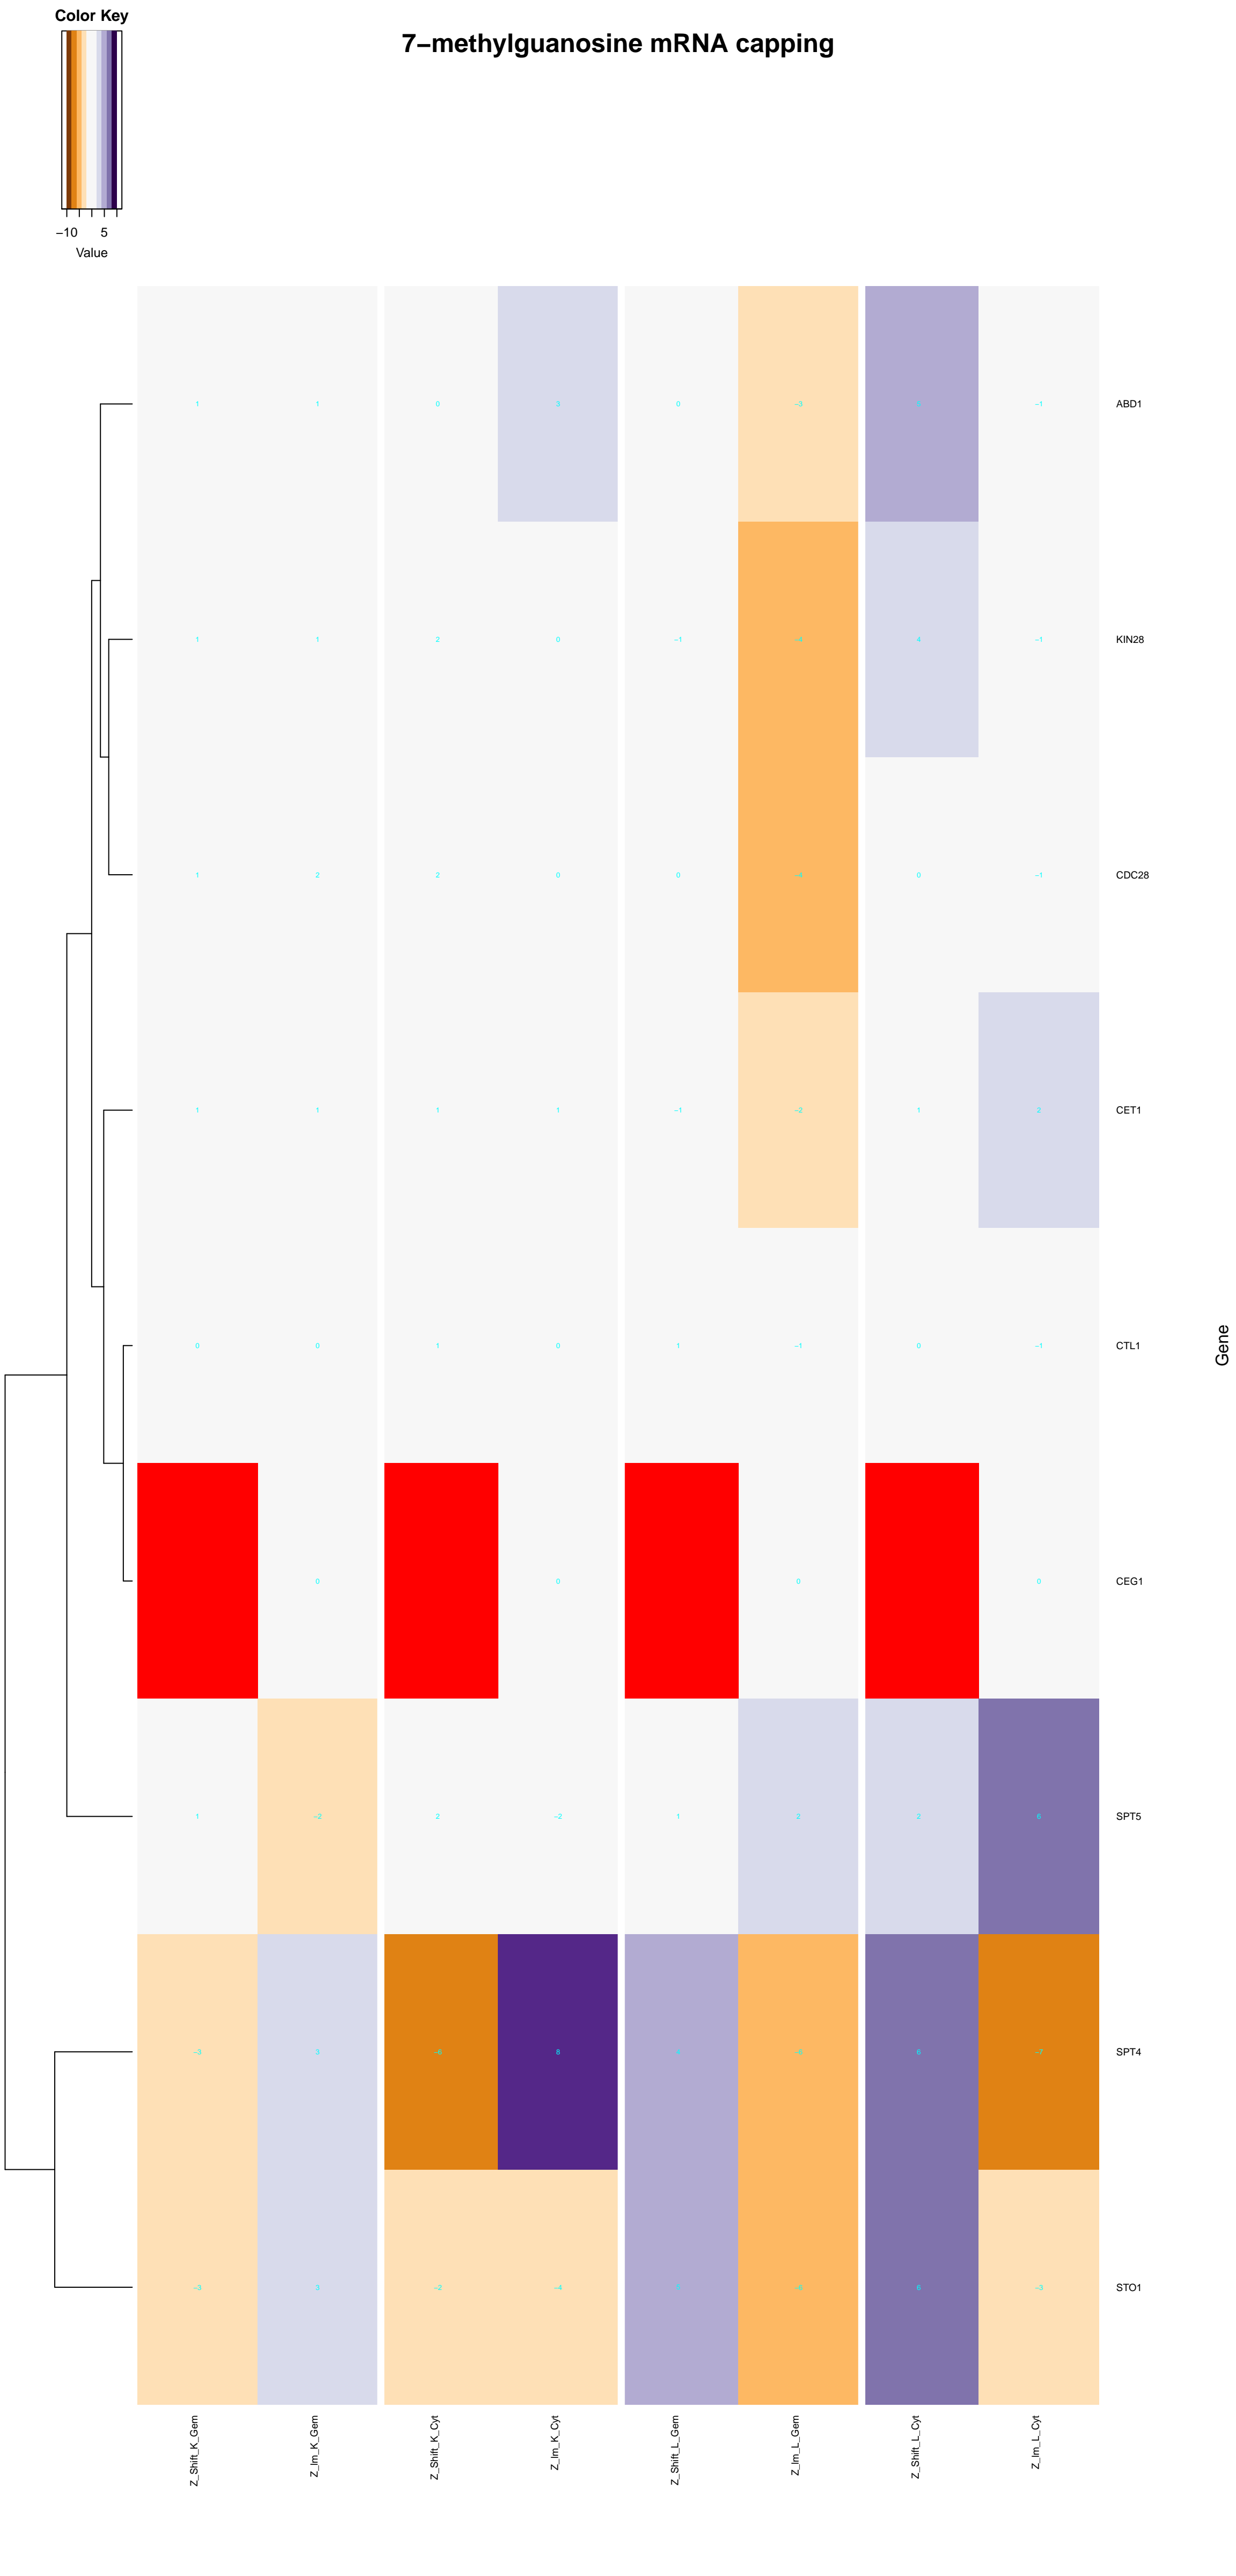

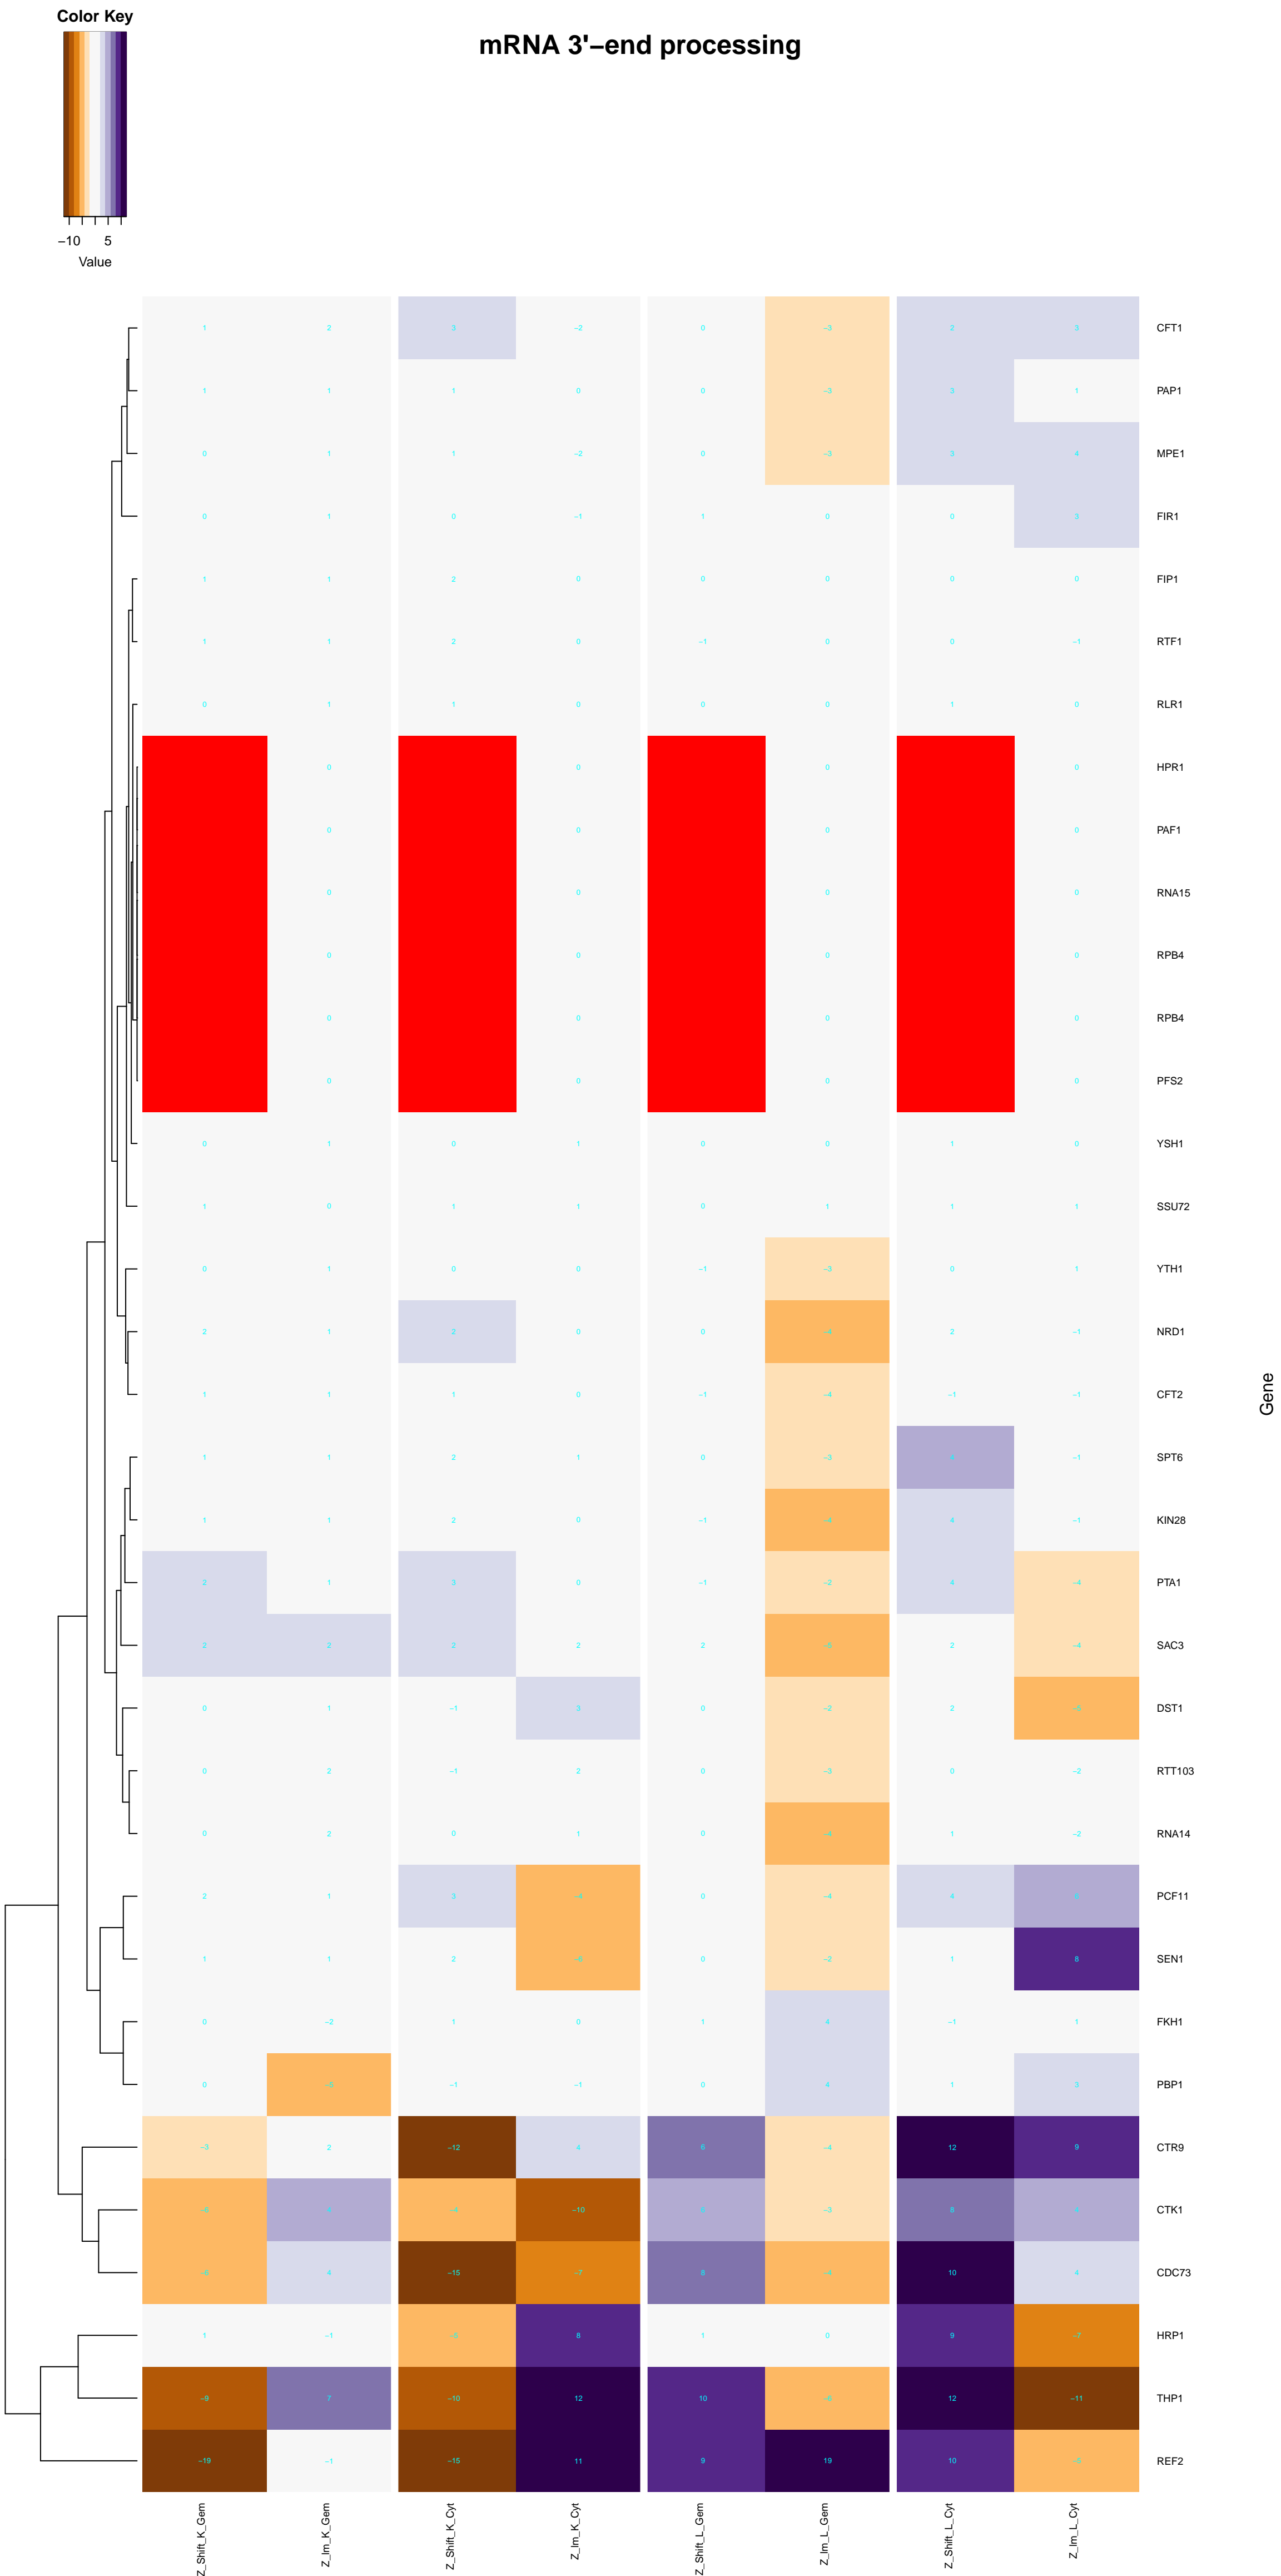

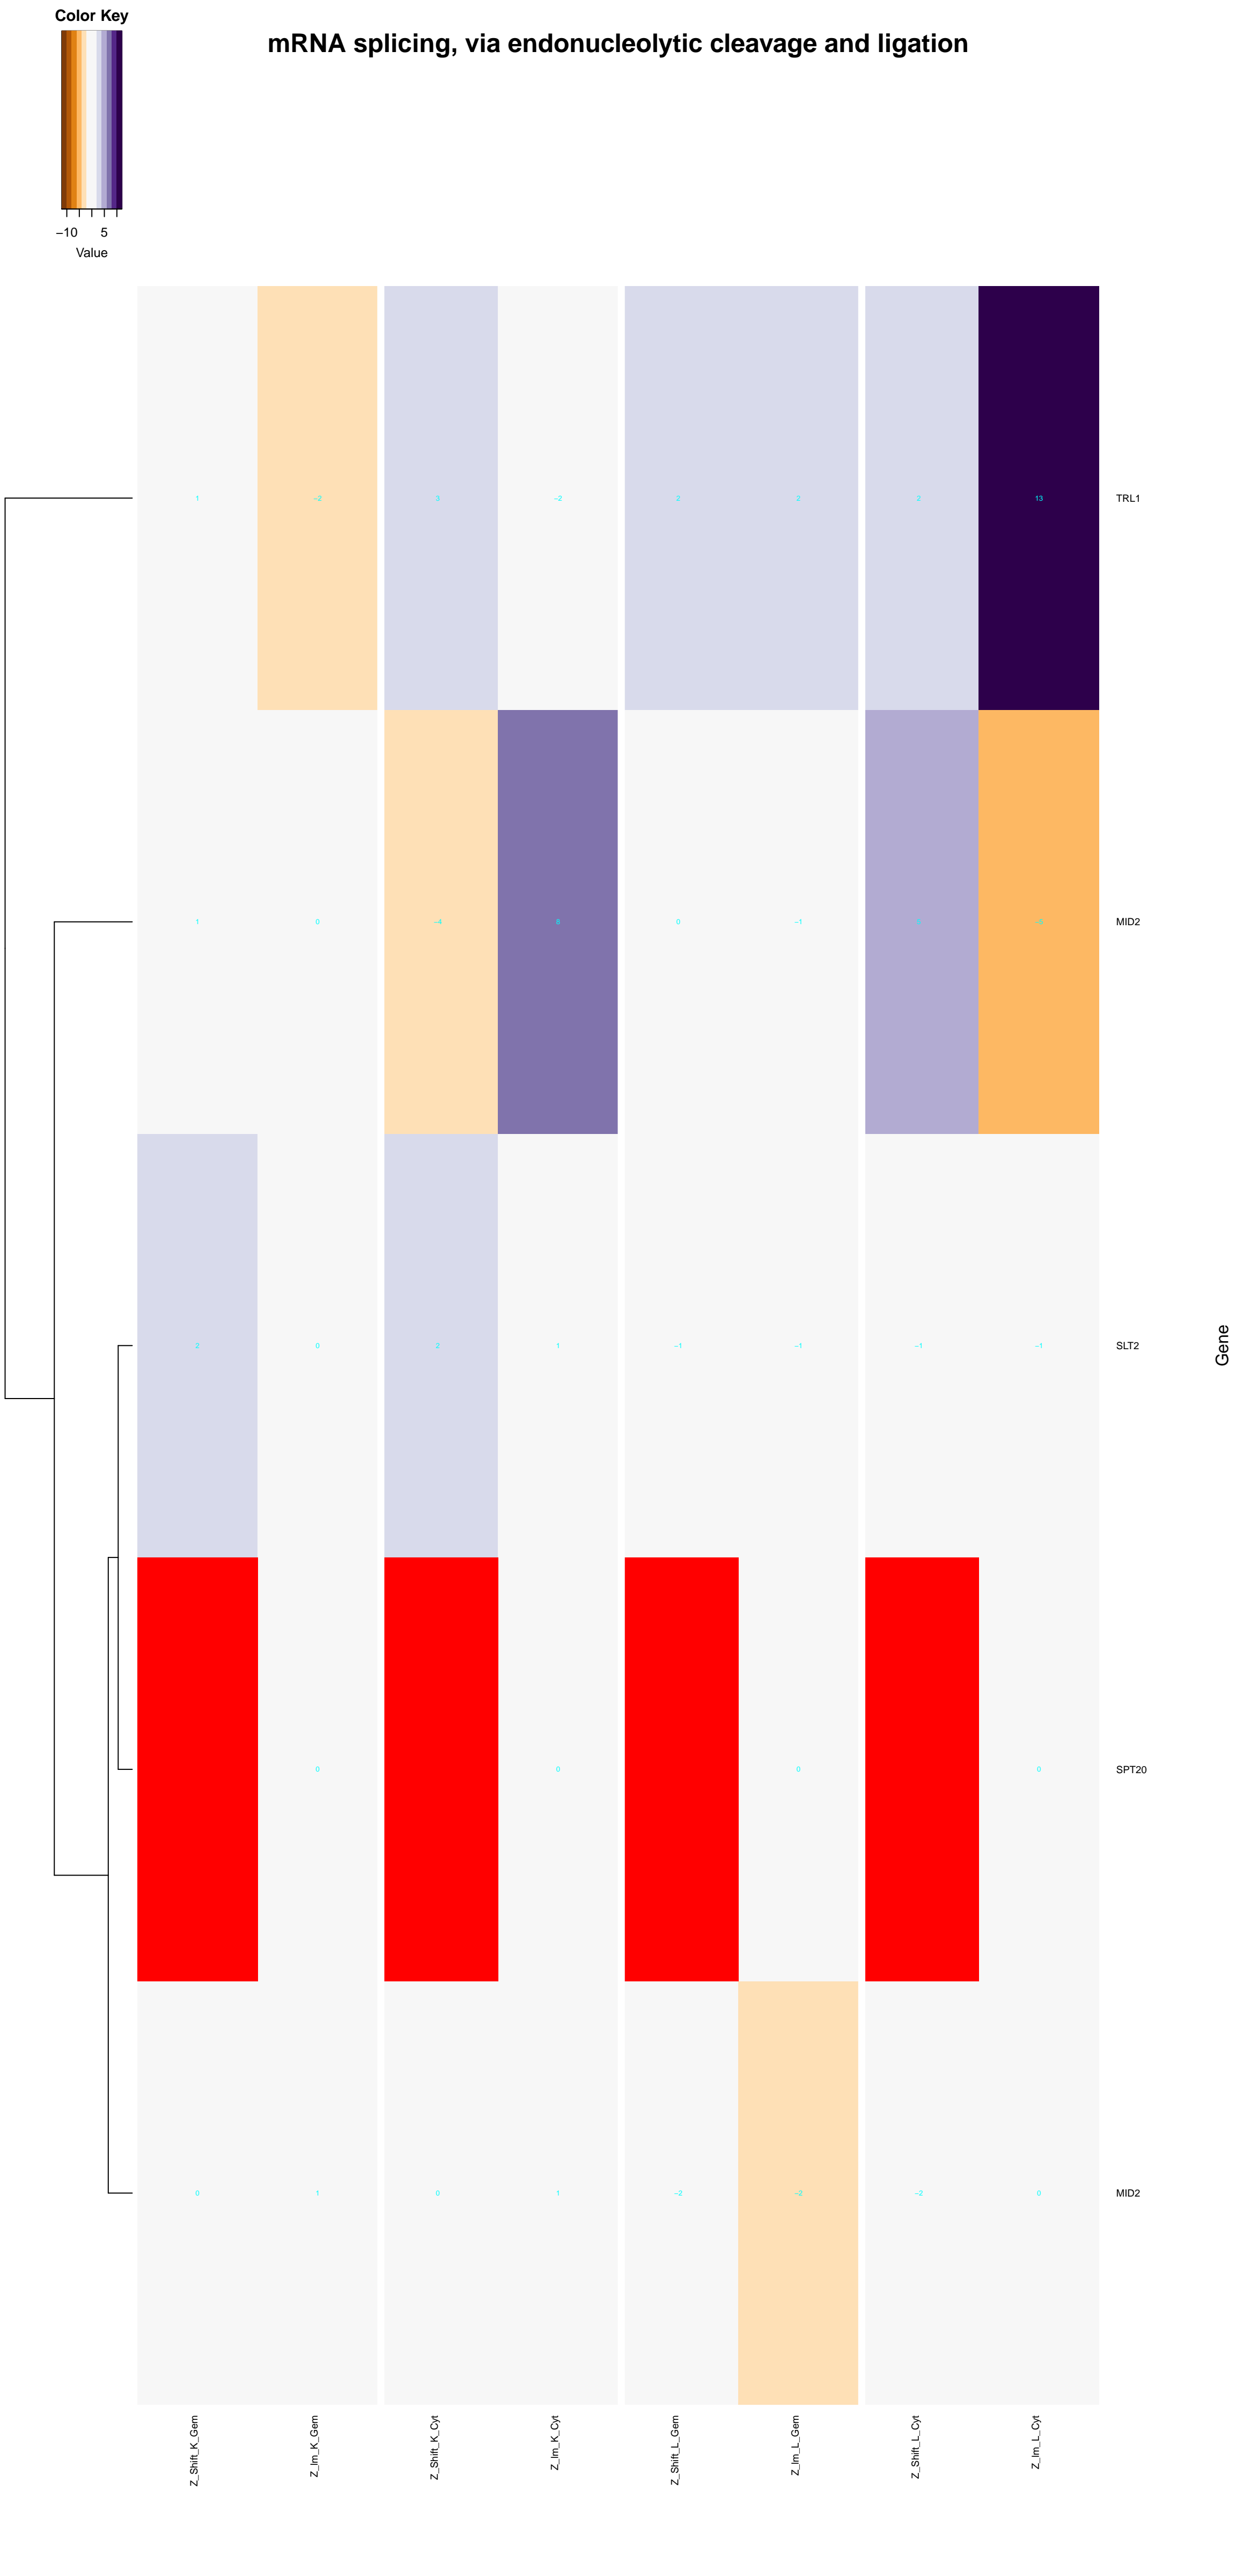

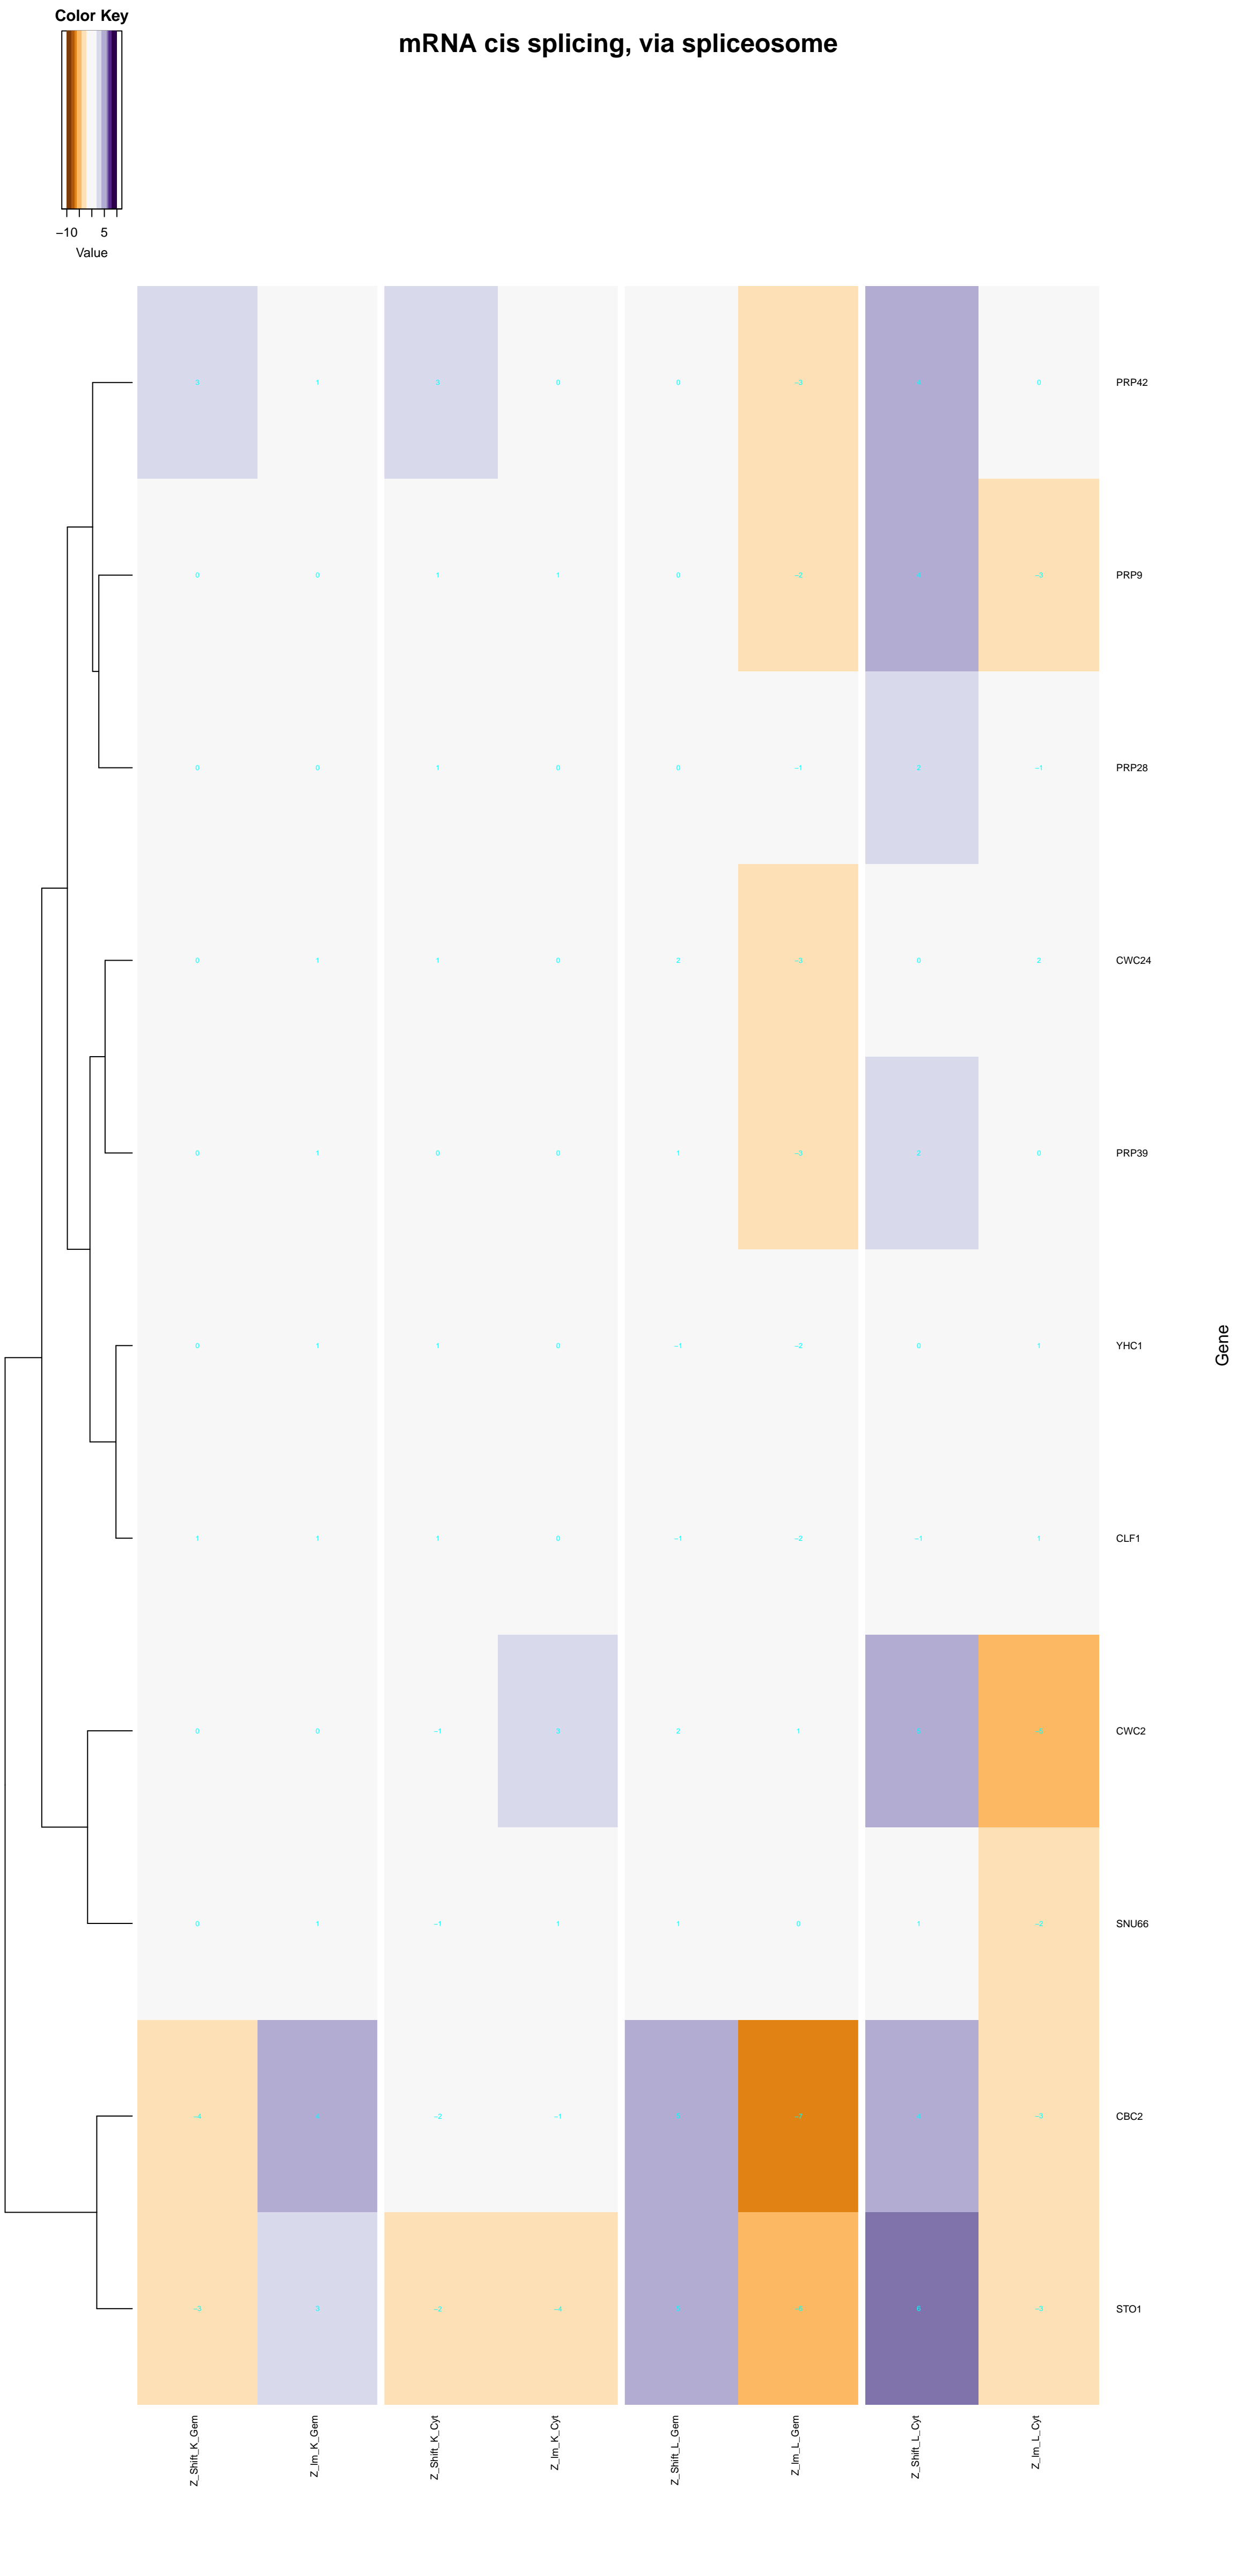

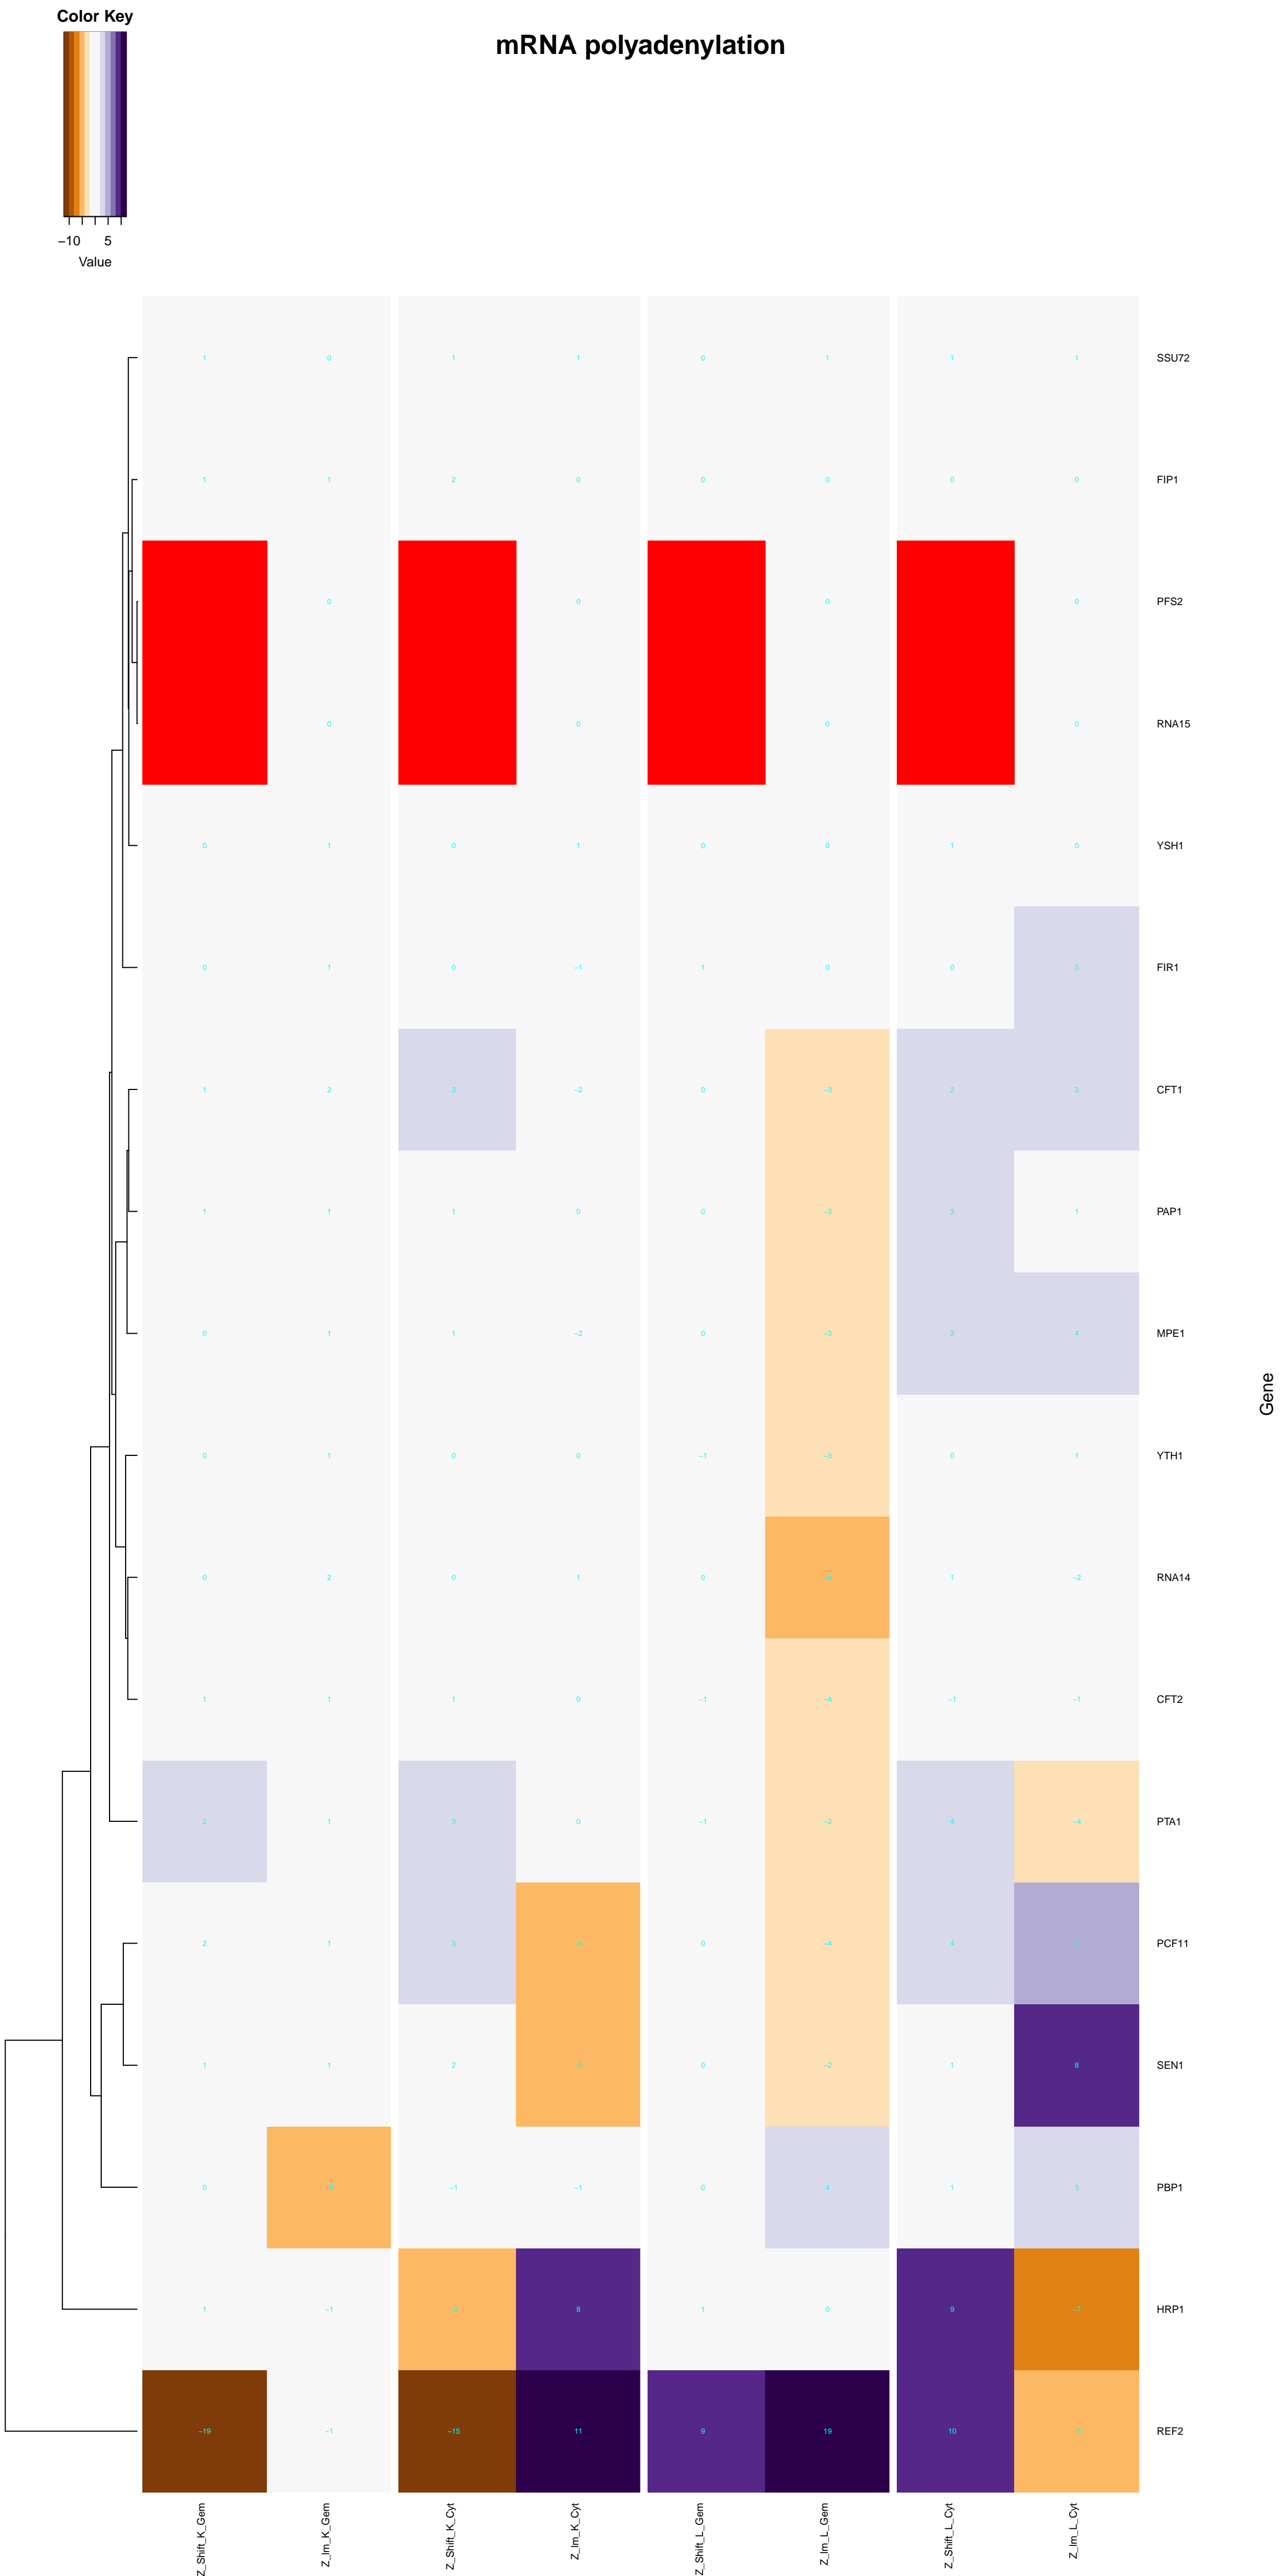

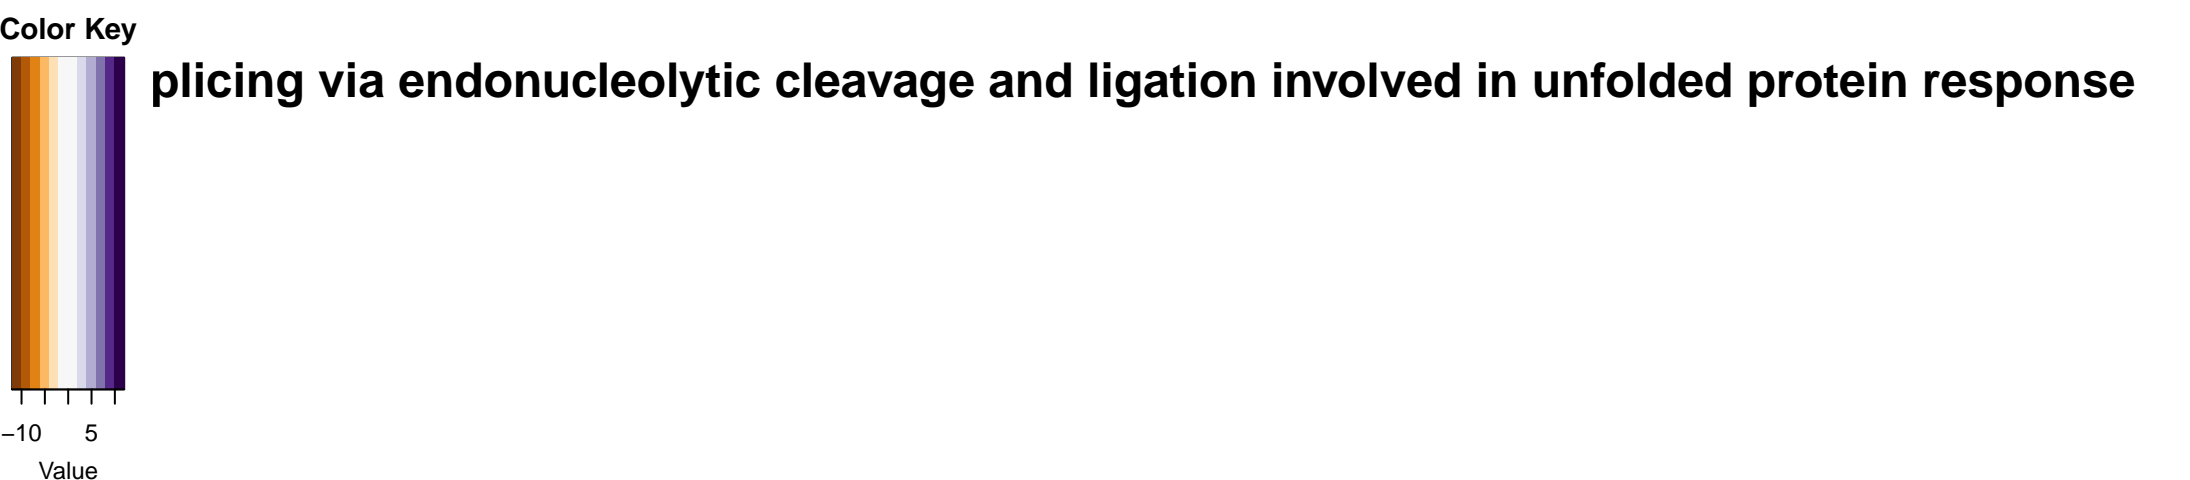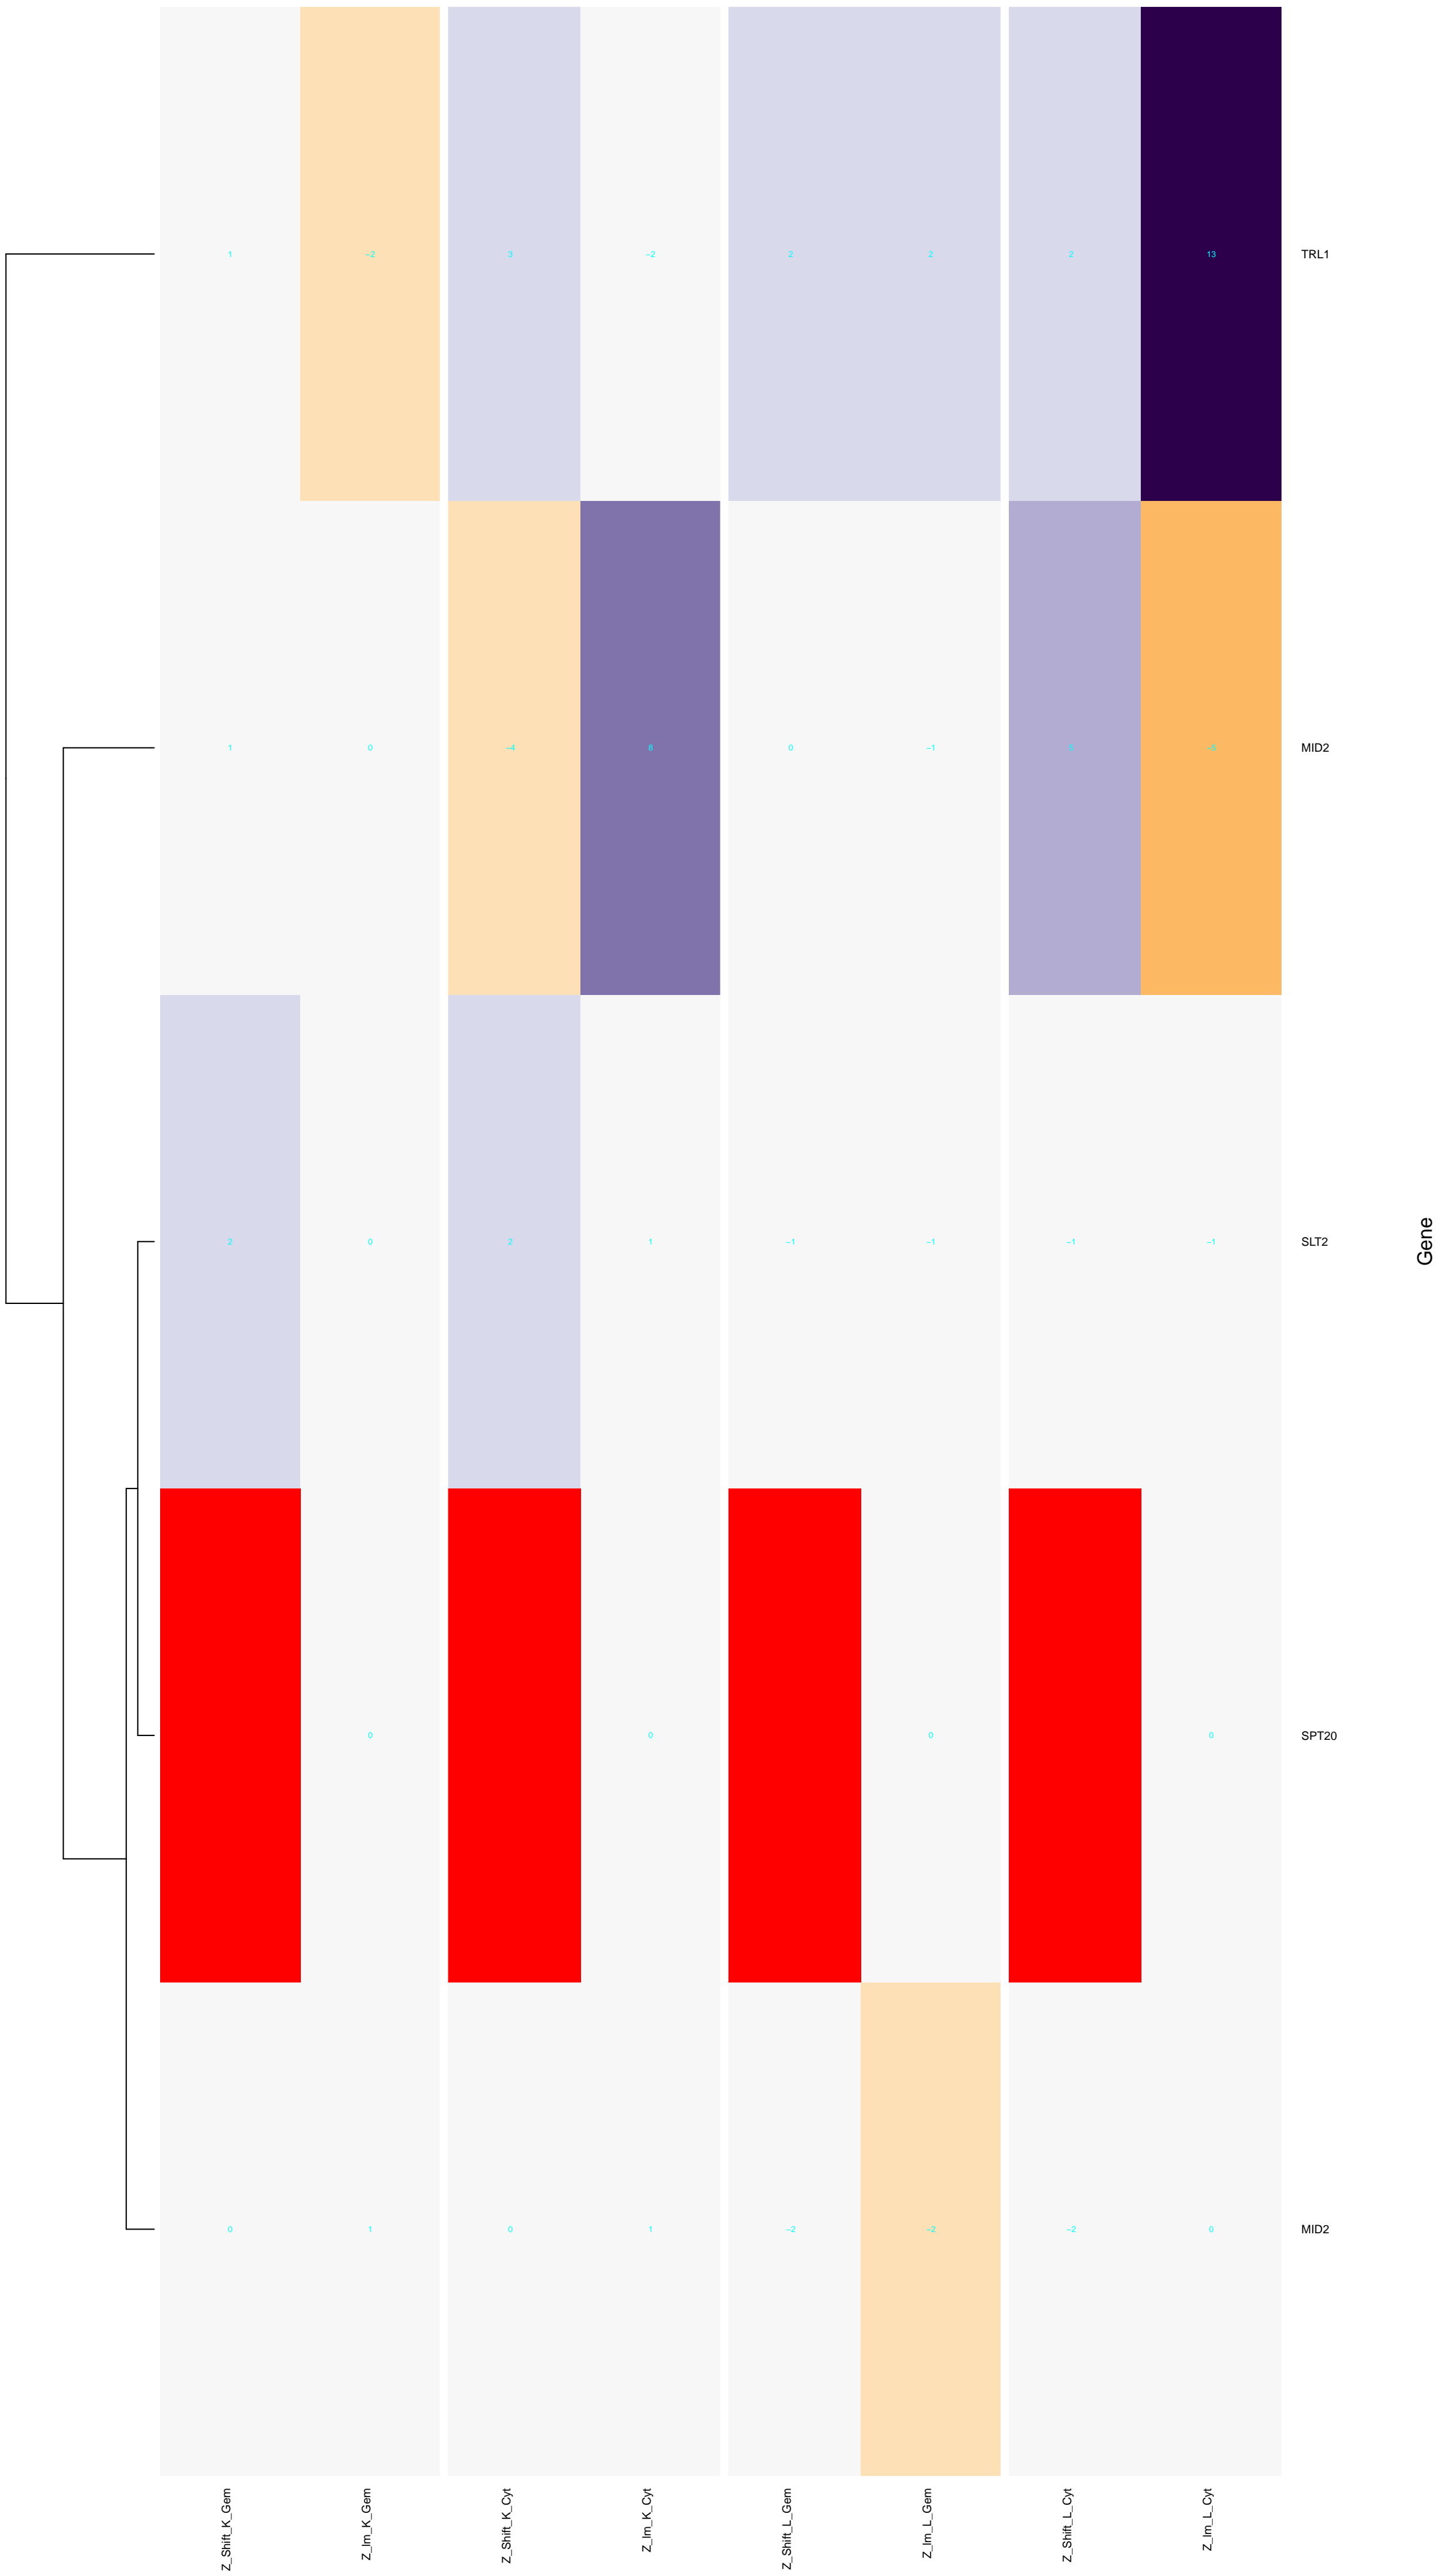

Supplement: s1 [file s1]

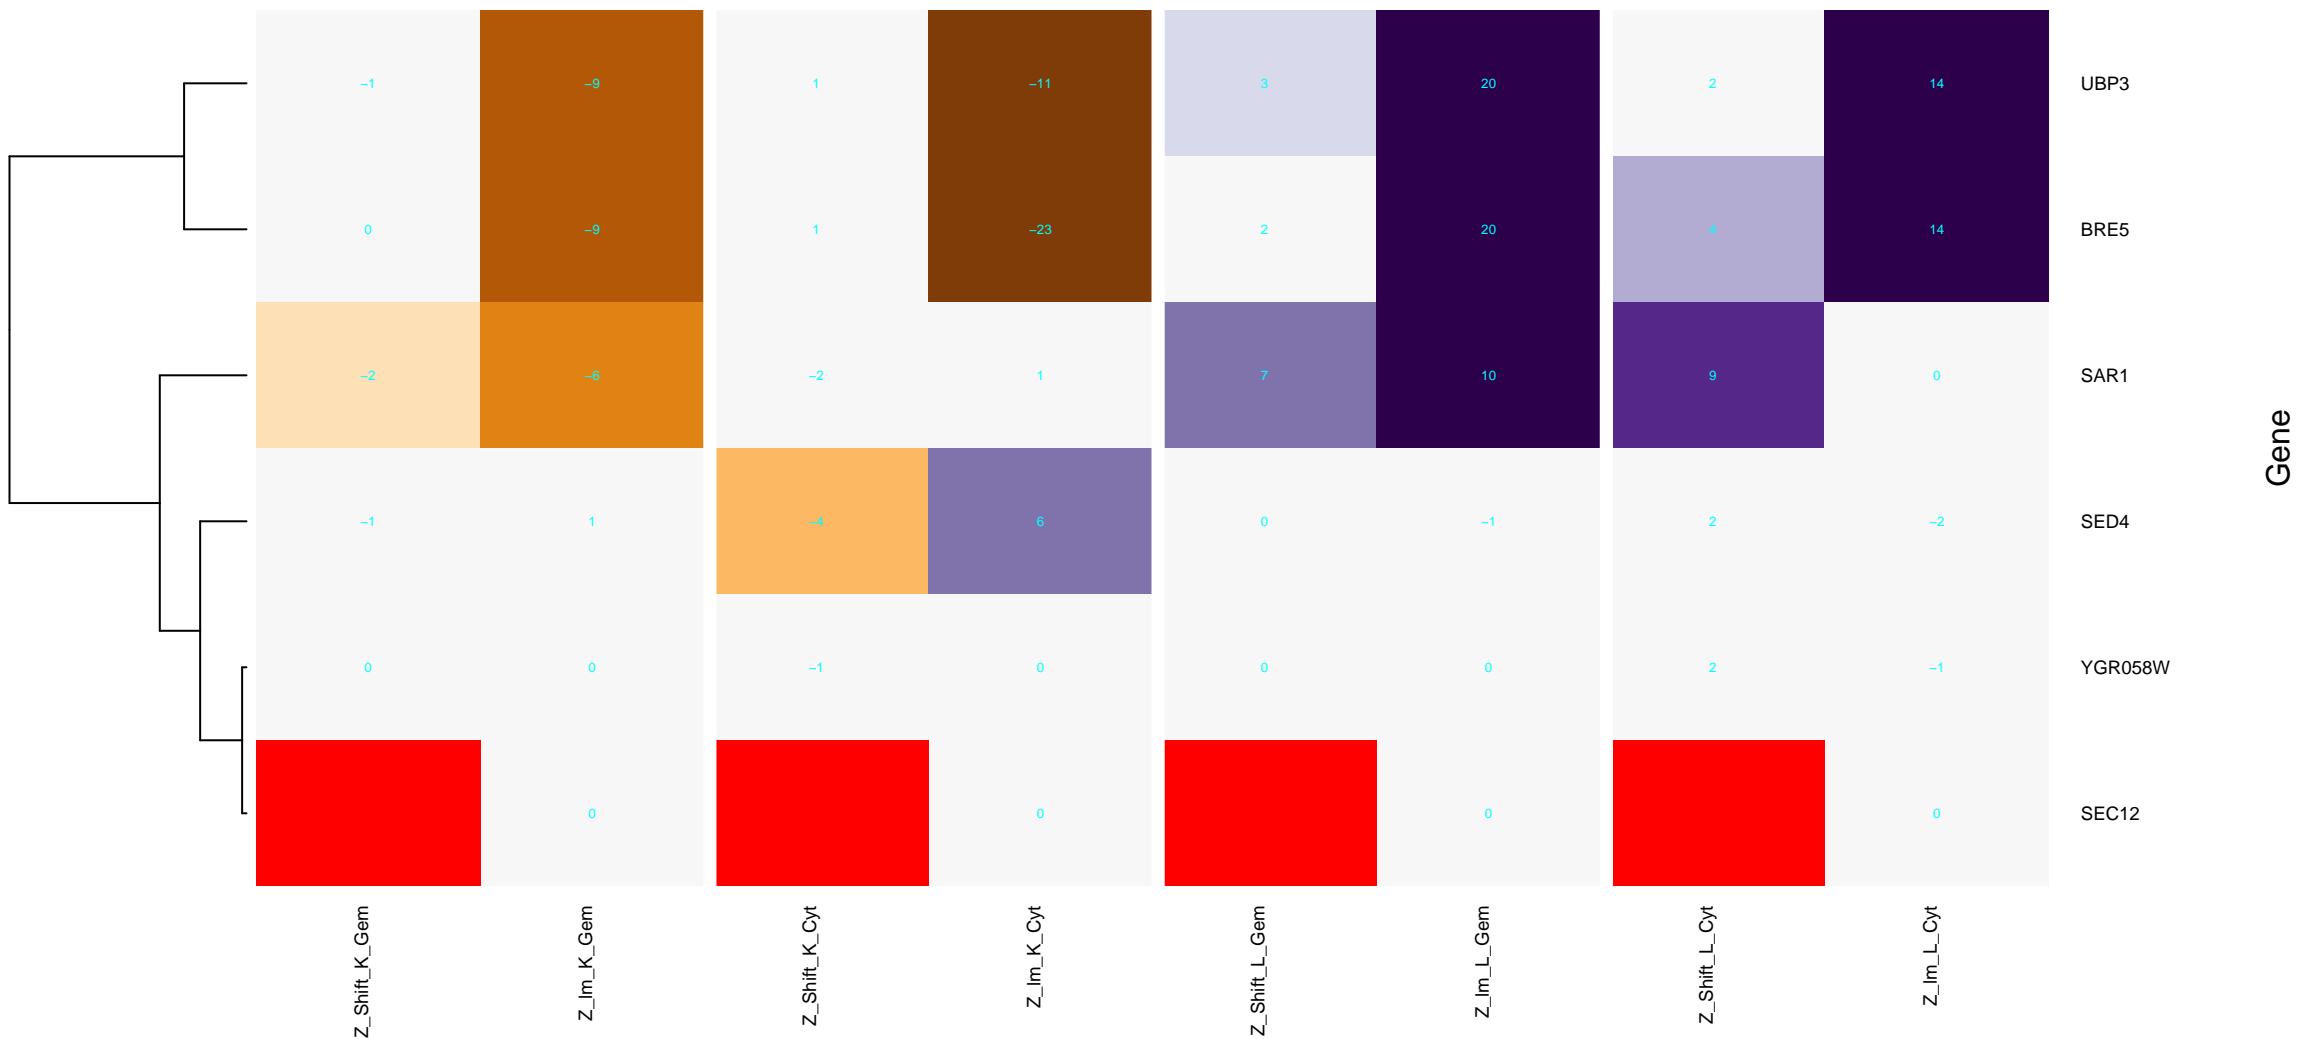

Supplement: s1 [file s1]

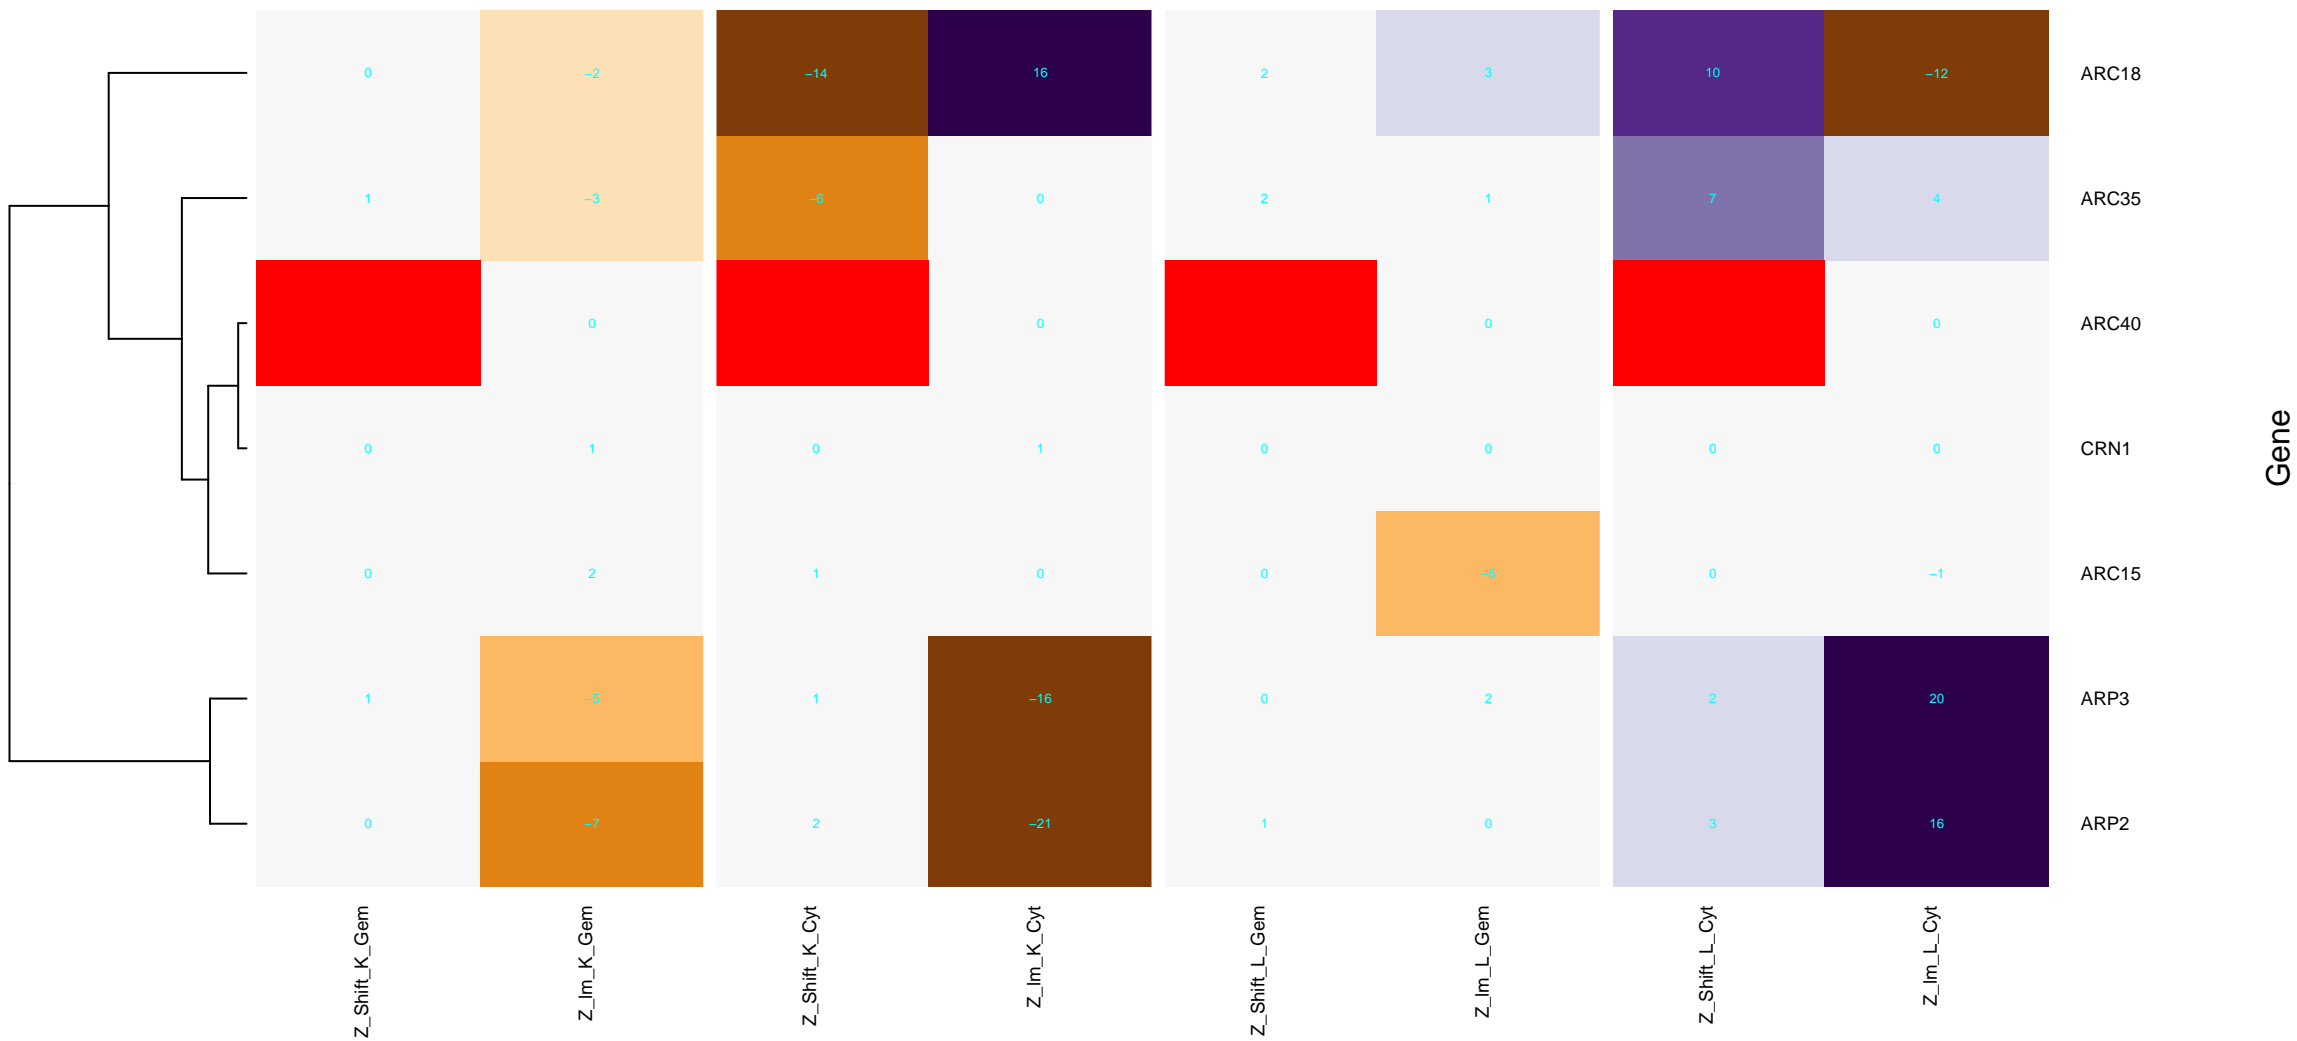

Supplement: s1 [file s1]

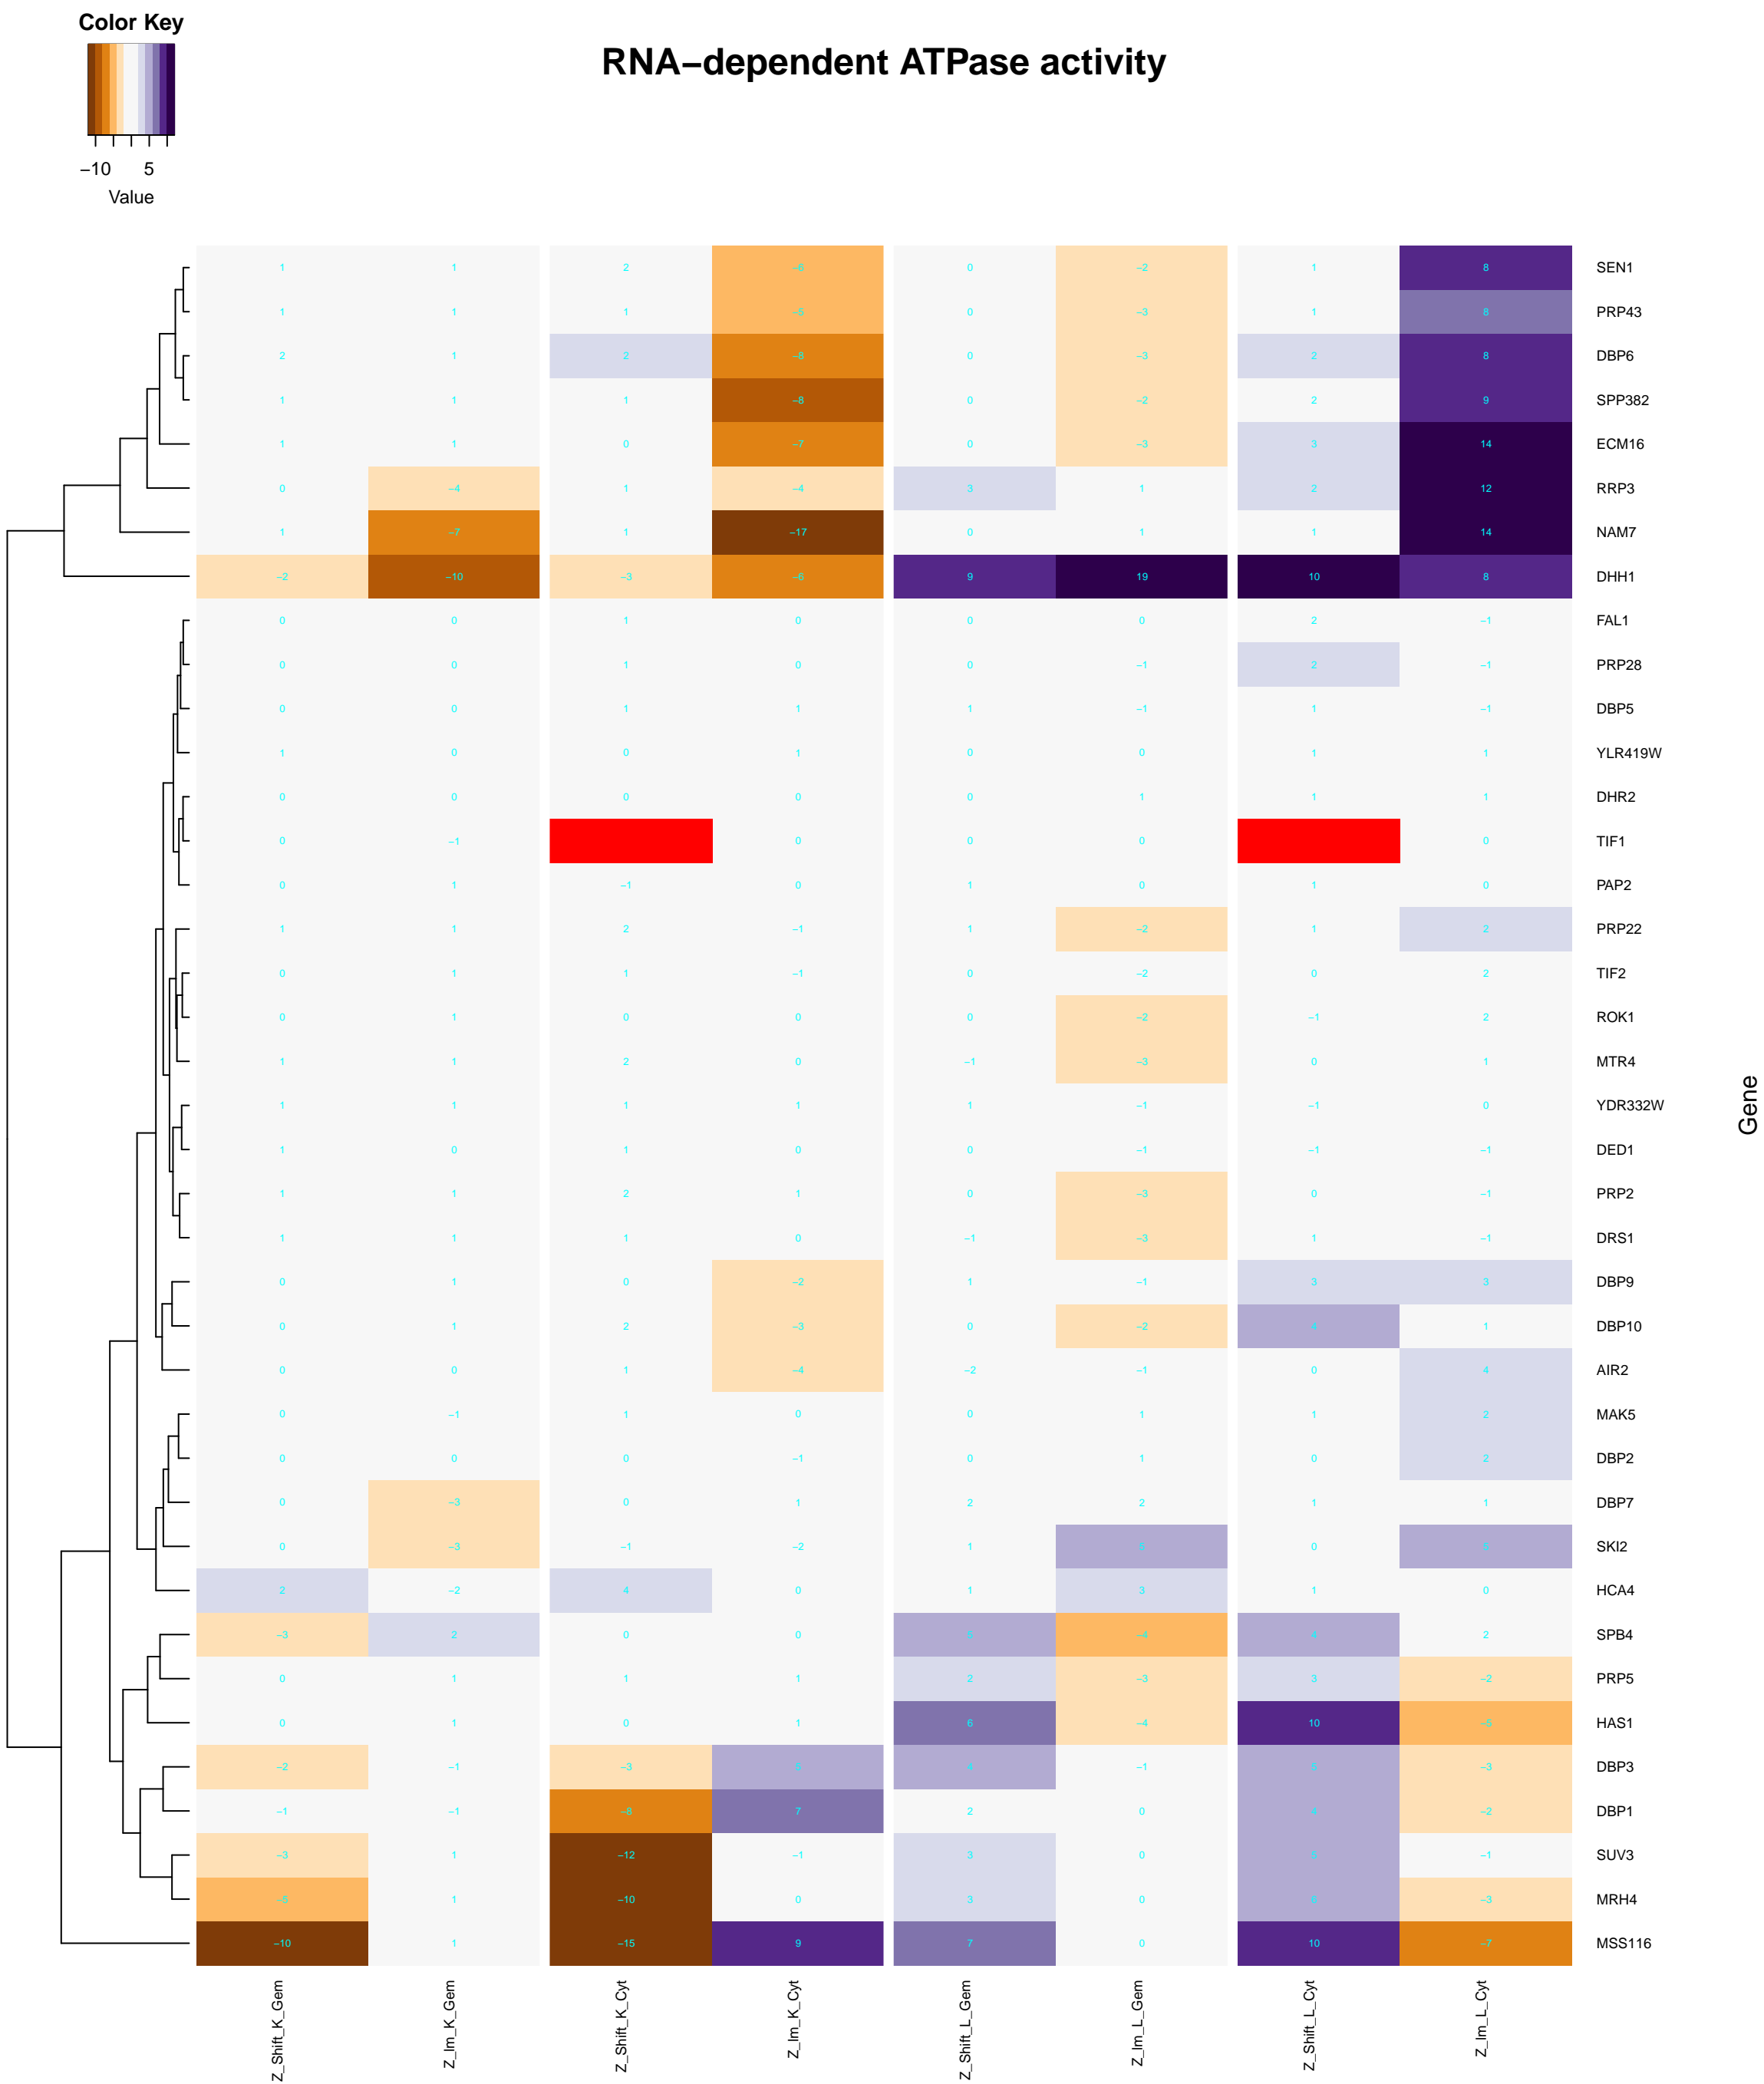



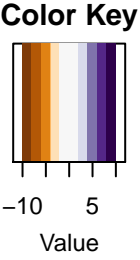

ATP-dependent 3'-5' RNA helicase activity

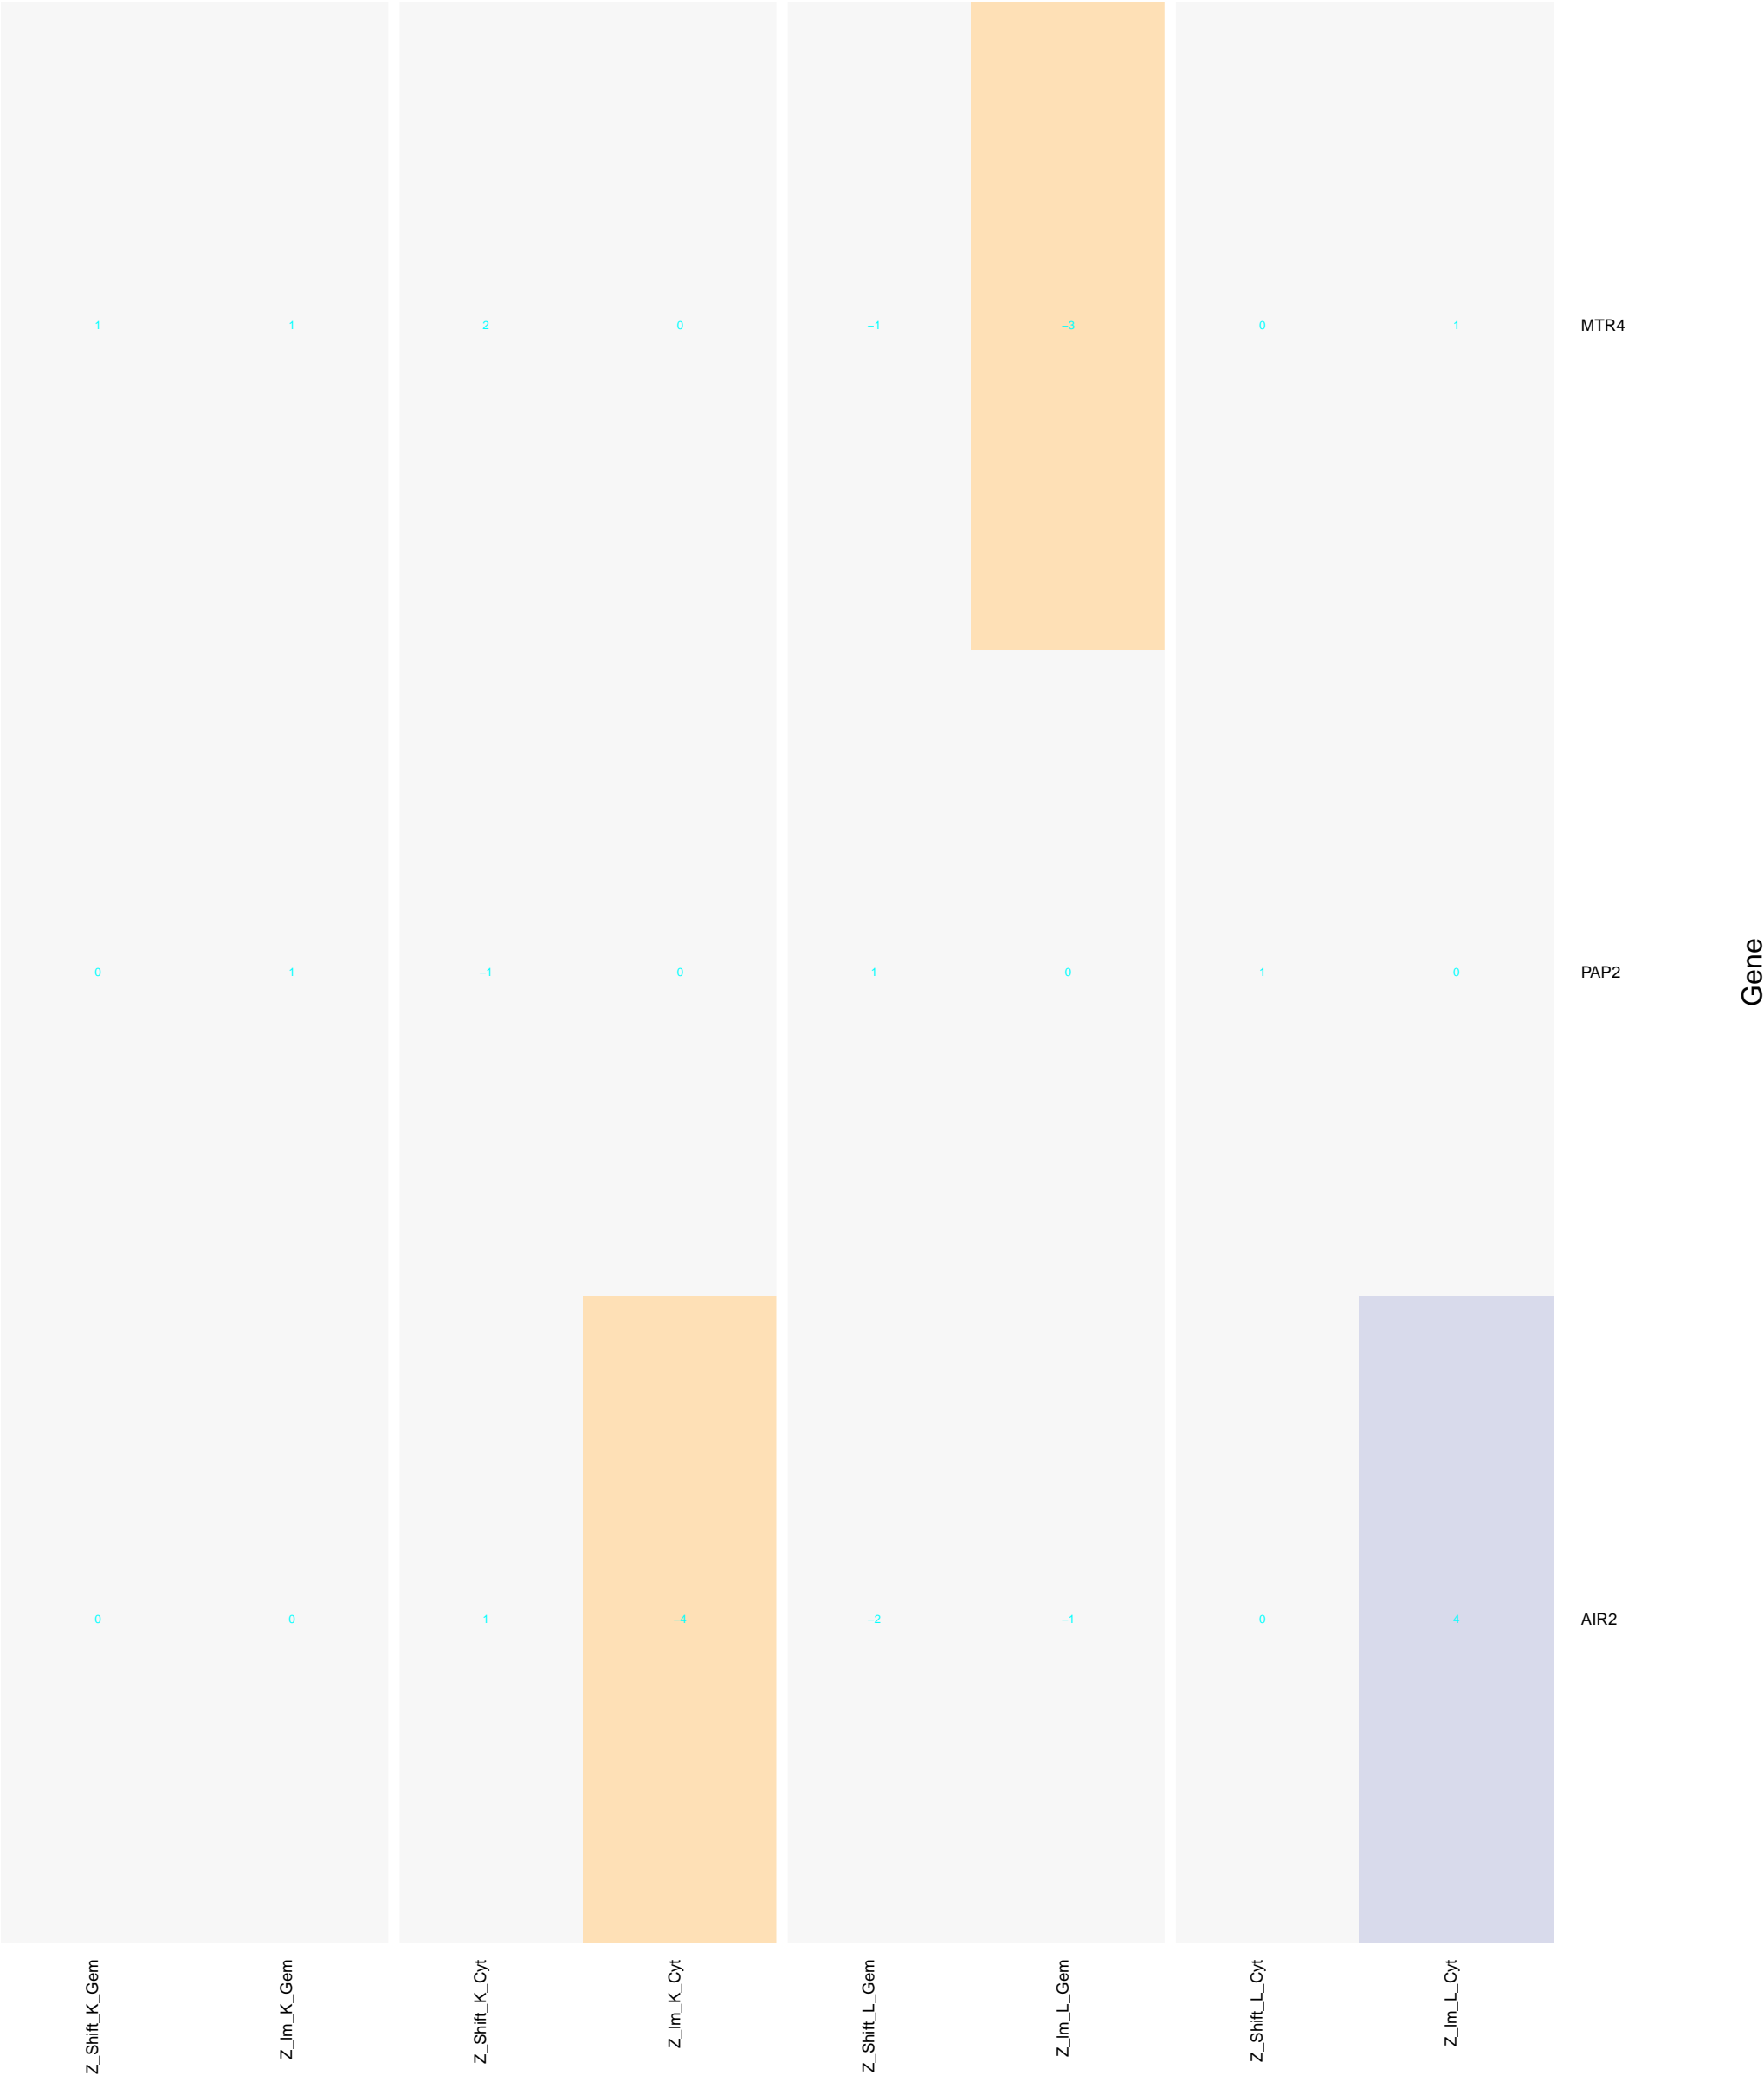

Supplement: s1 [file s1]

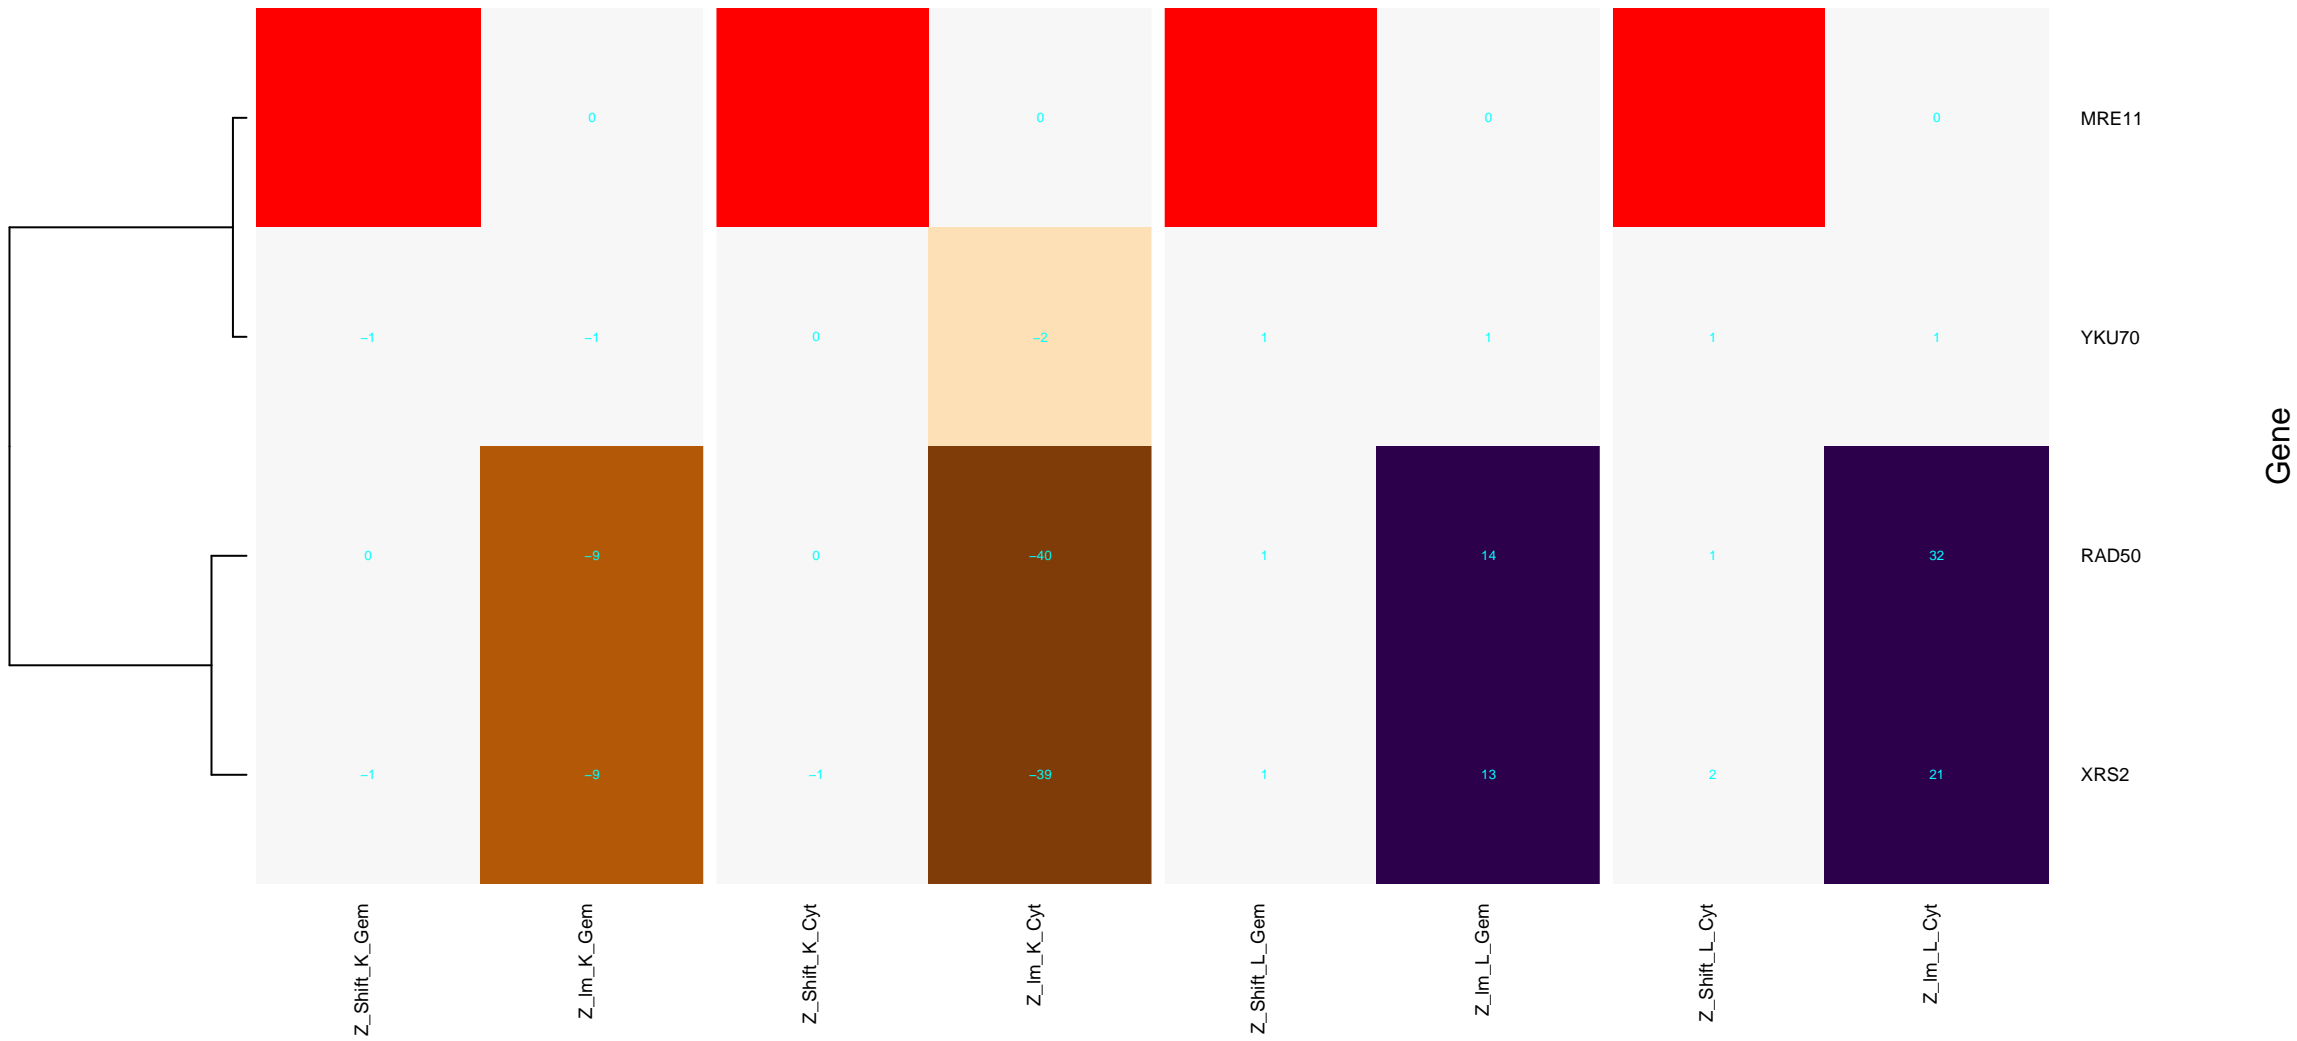

Supplement: s1 [file s1]

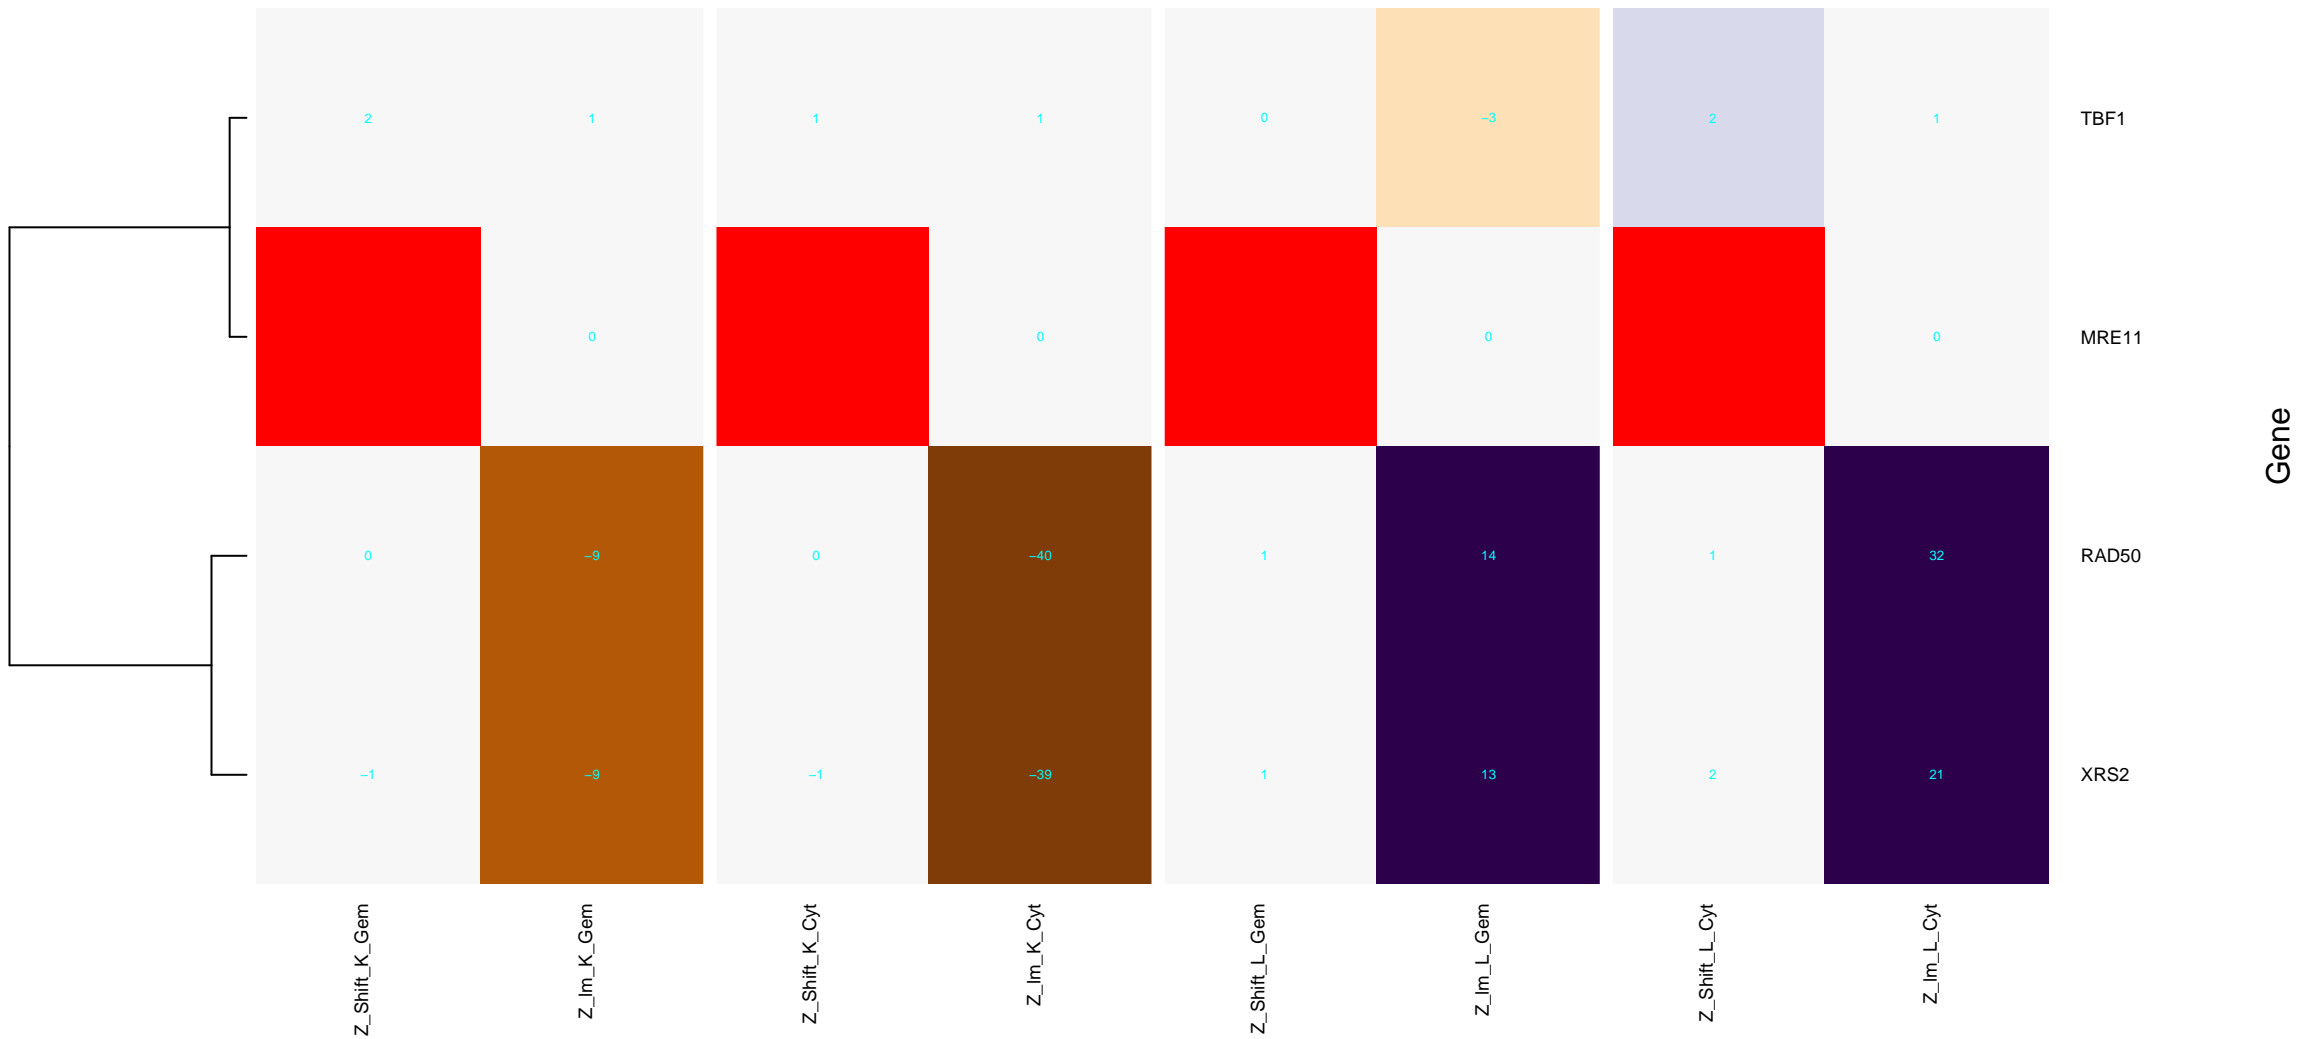

Supplement: s1 [file s1]

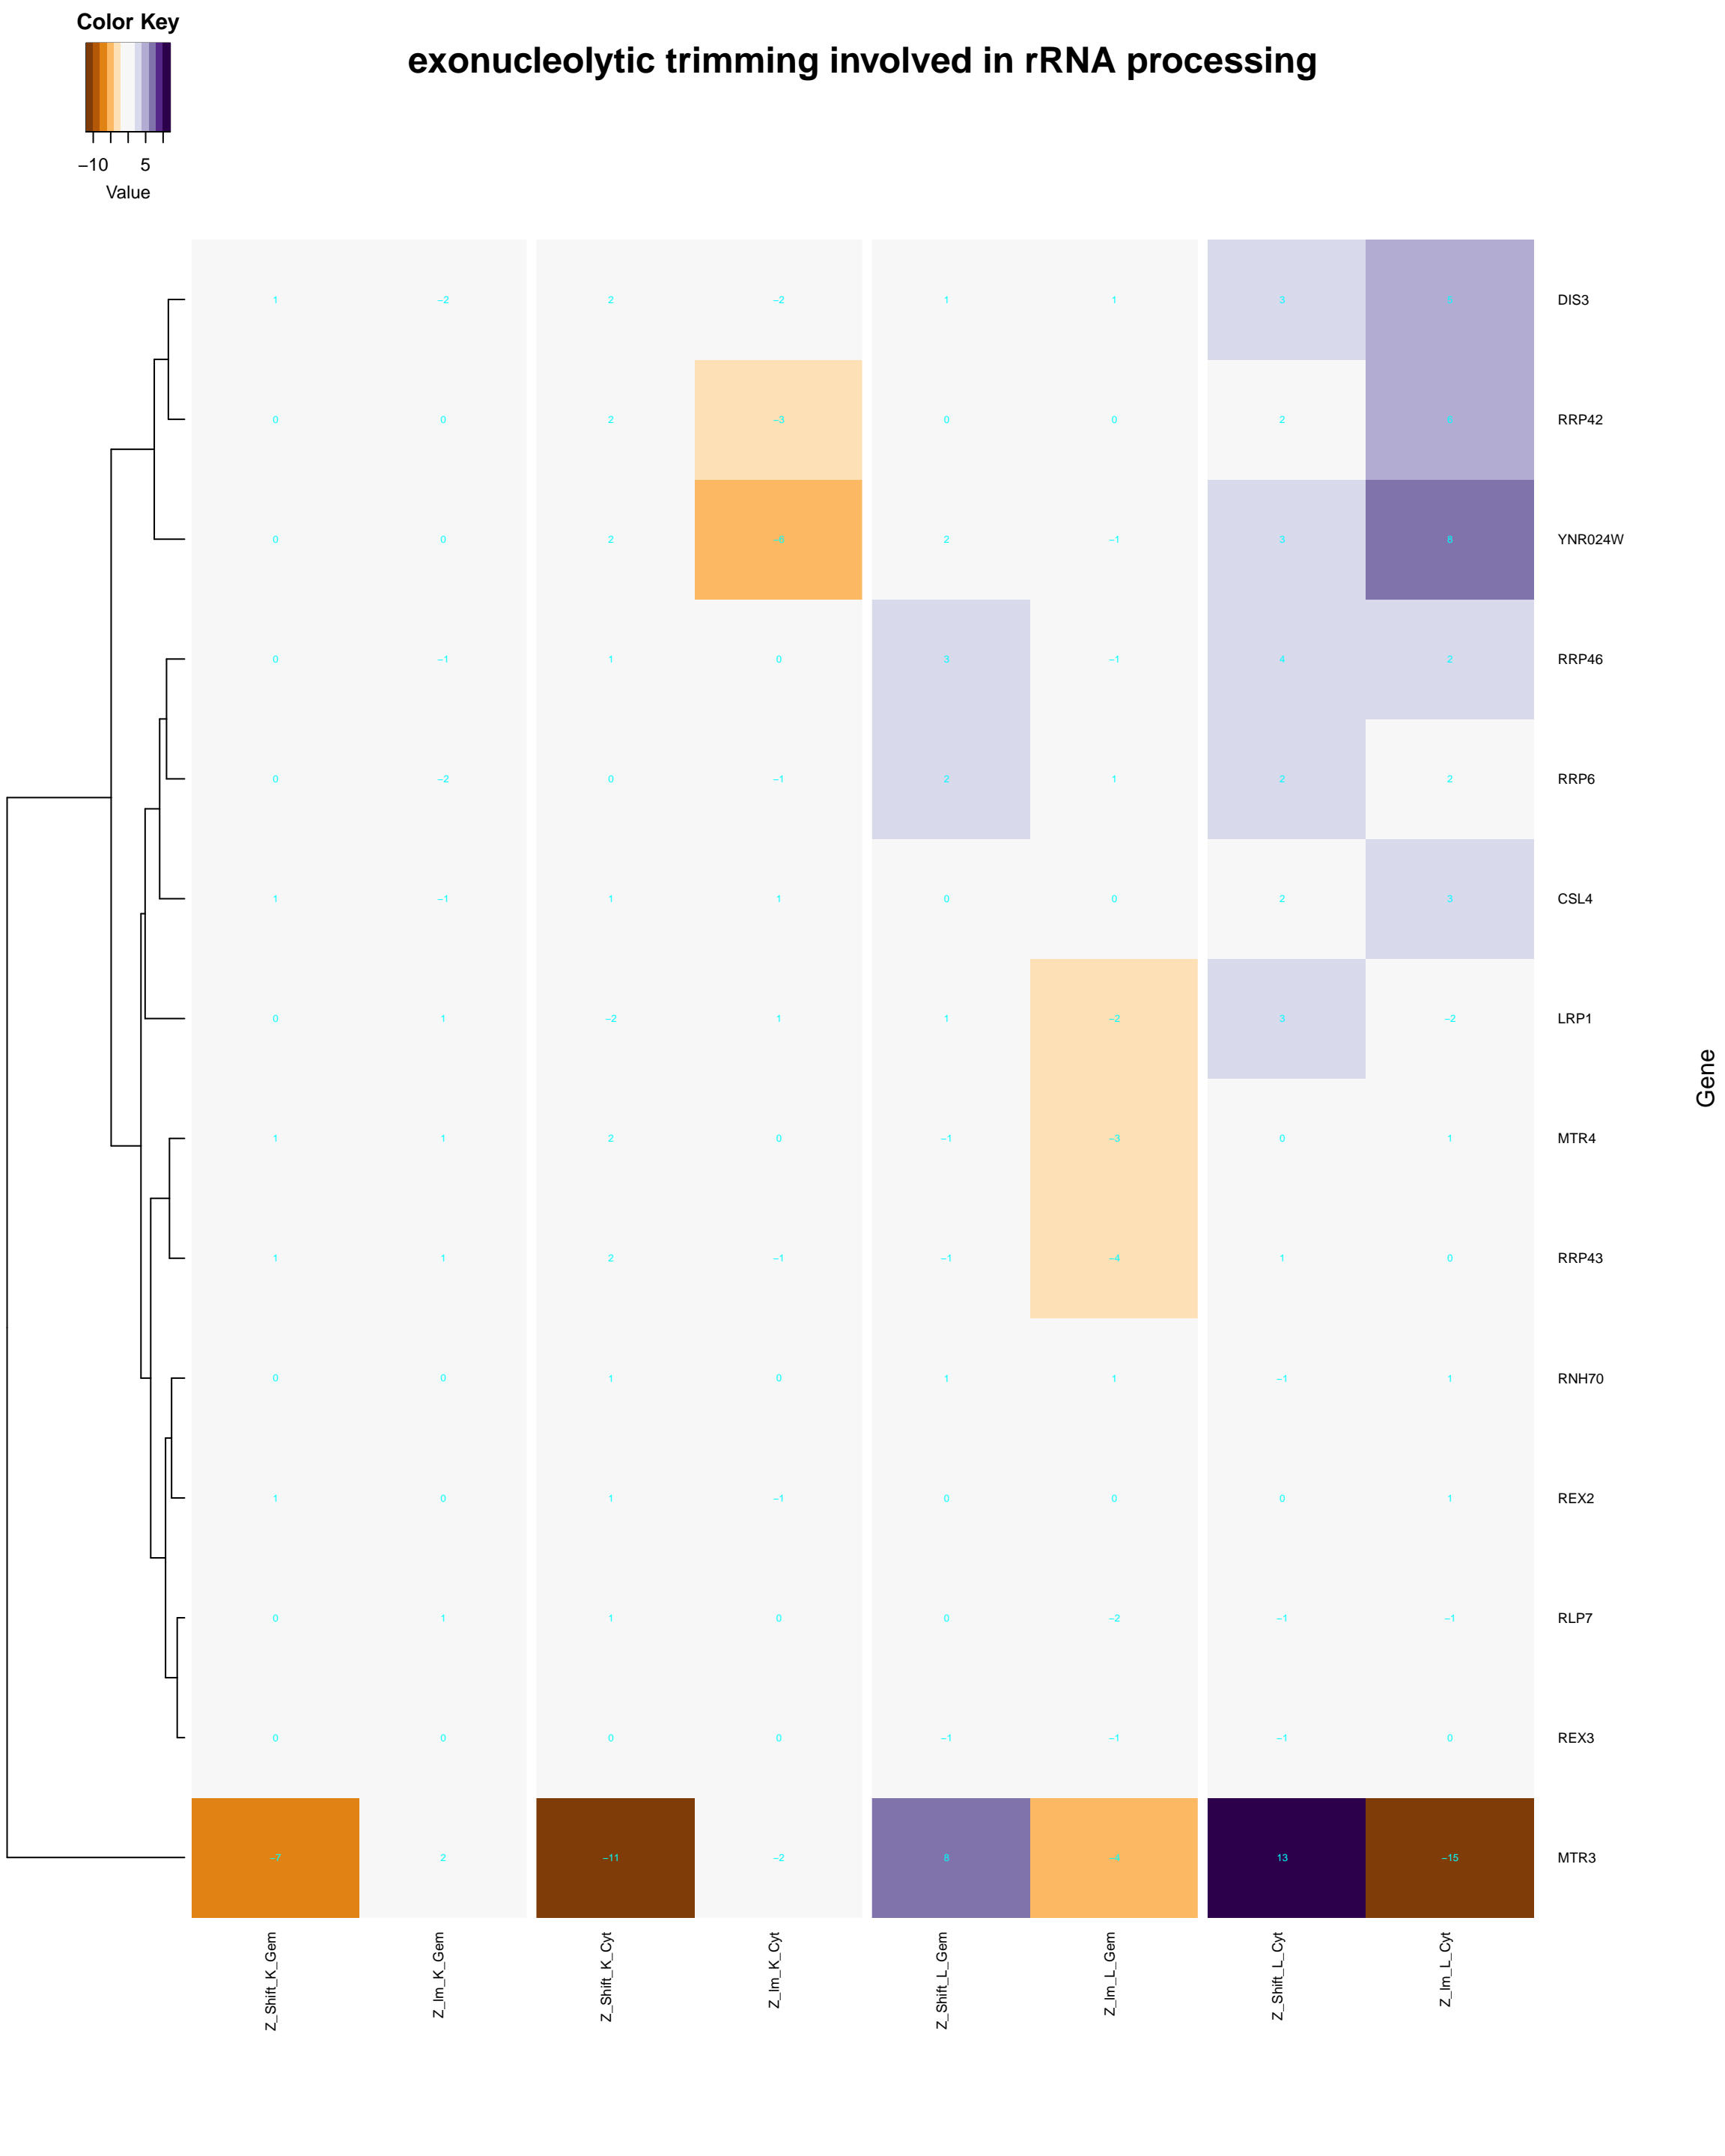





Color Key

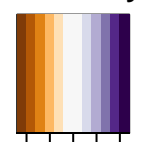

-10 5  
Value

nucleolytic cleavage of tricistronic rRNA transcript (SSU-rRNA, 5.8S rRNA, LSU-rRNA)

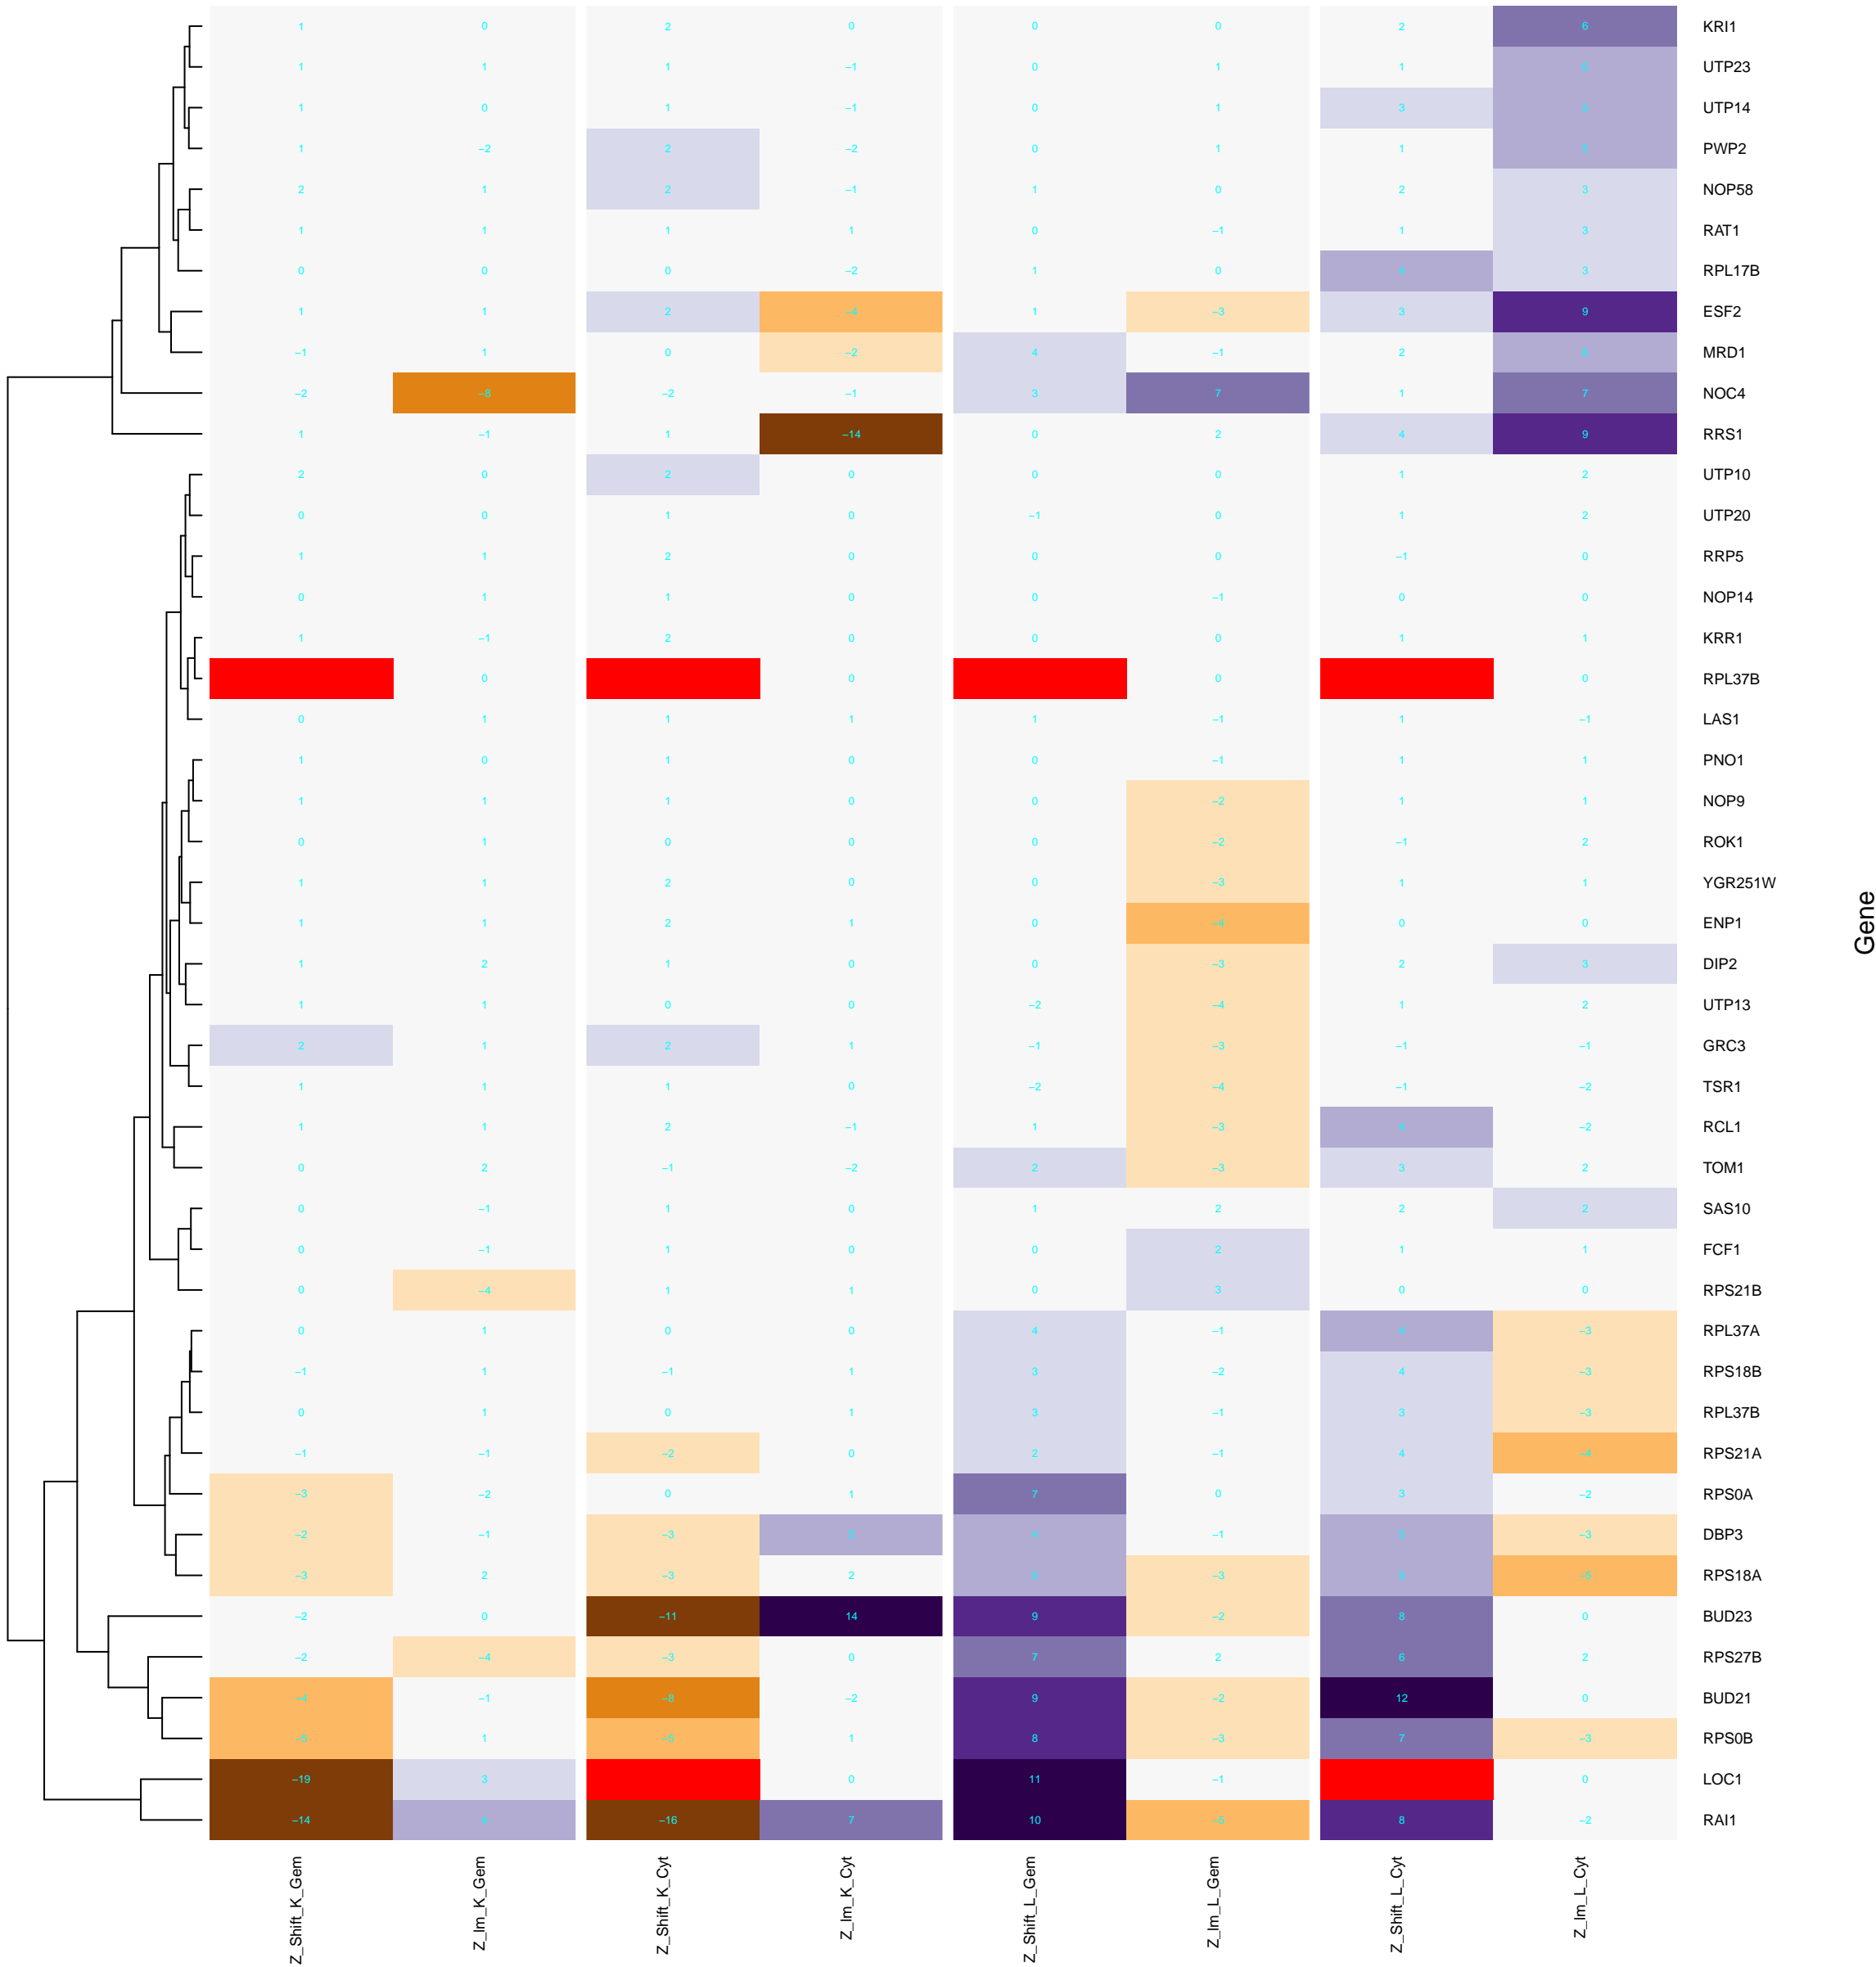

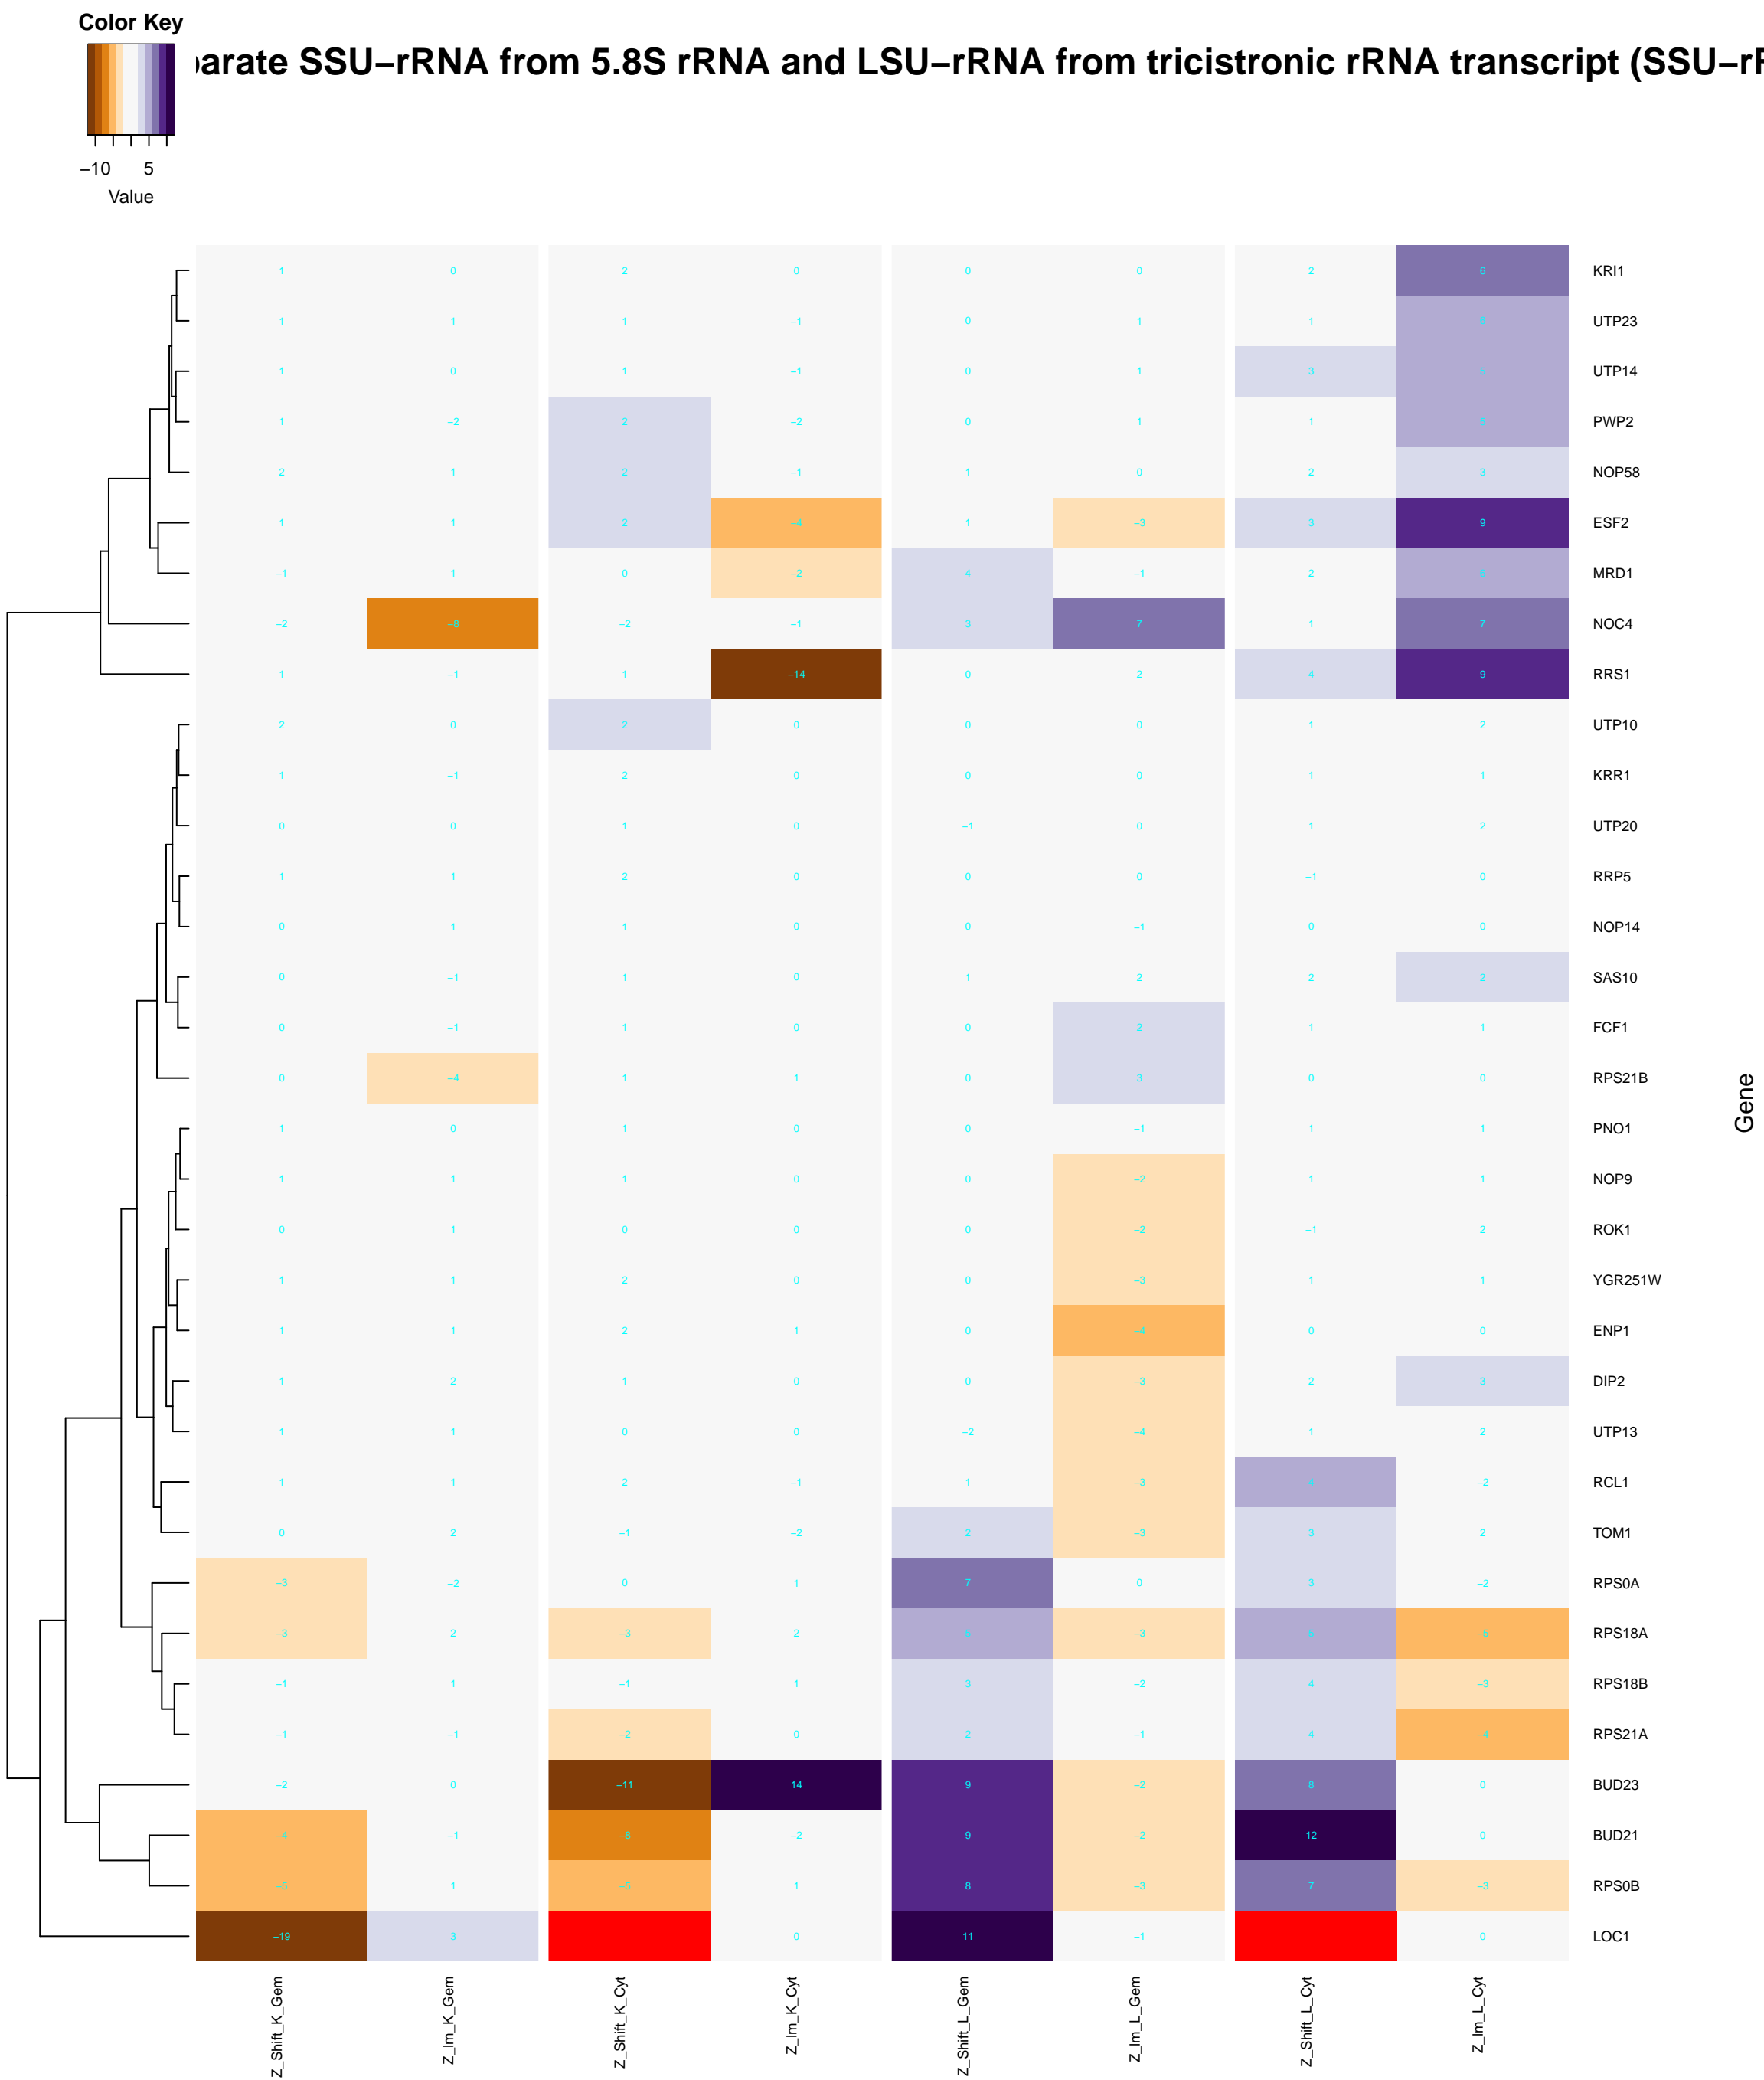

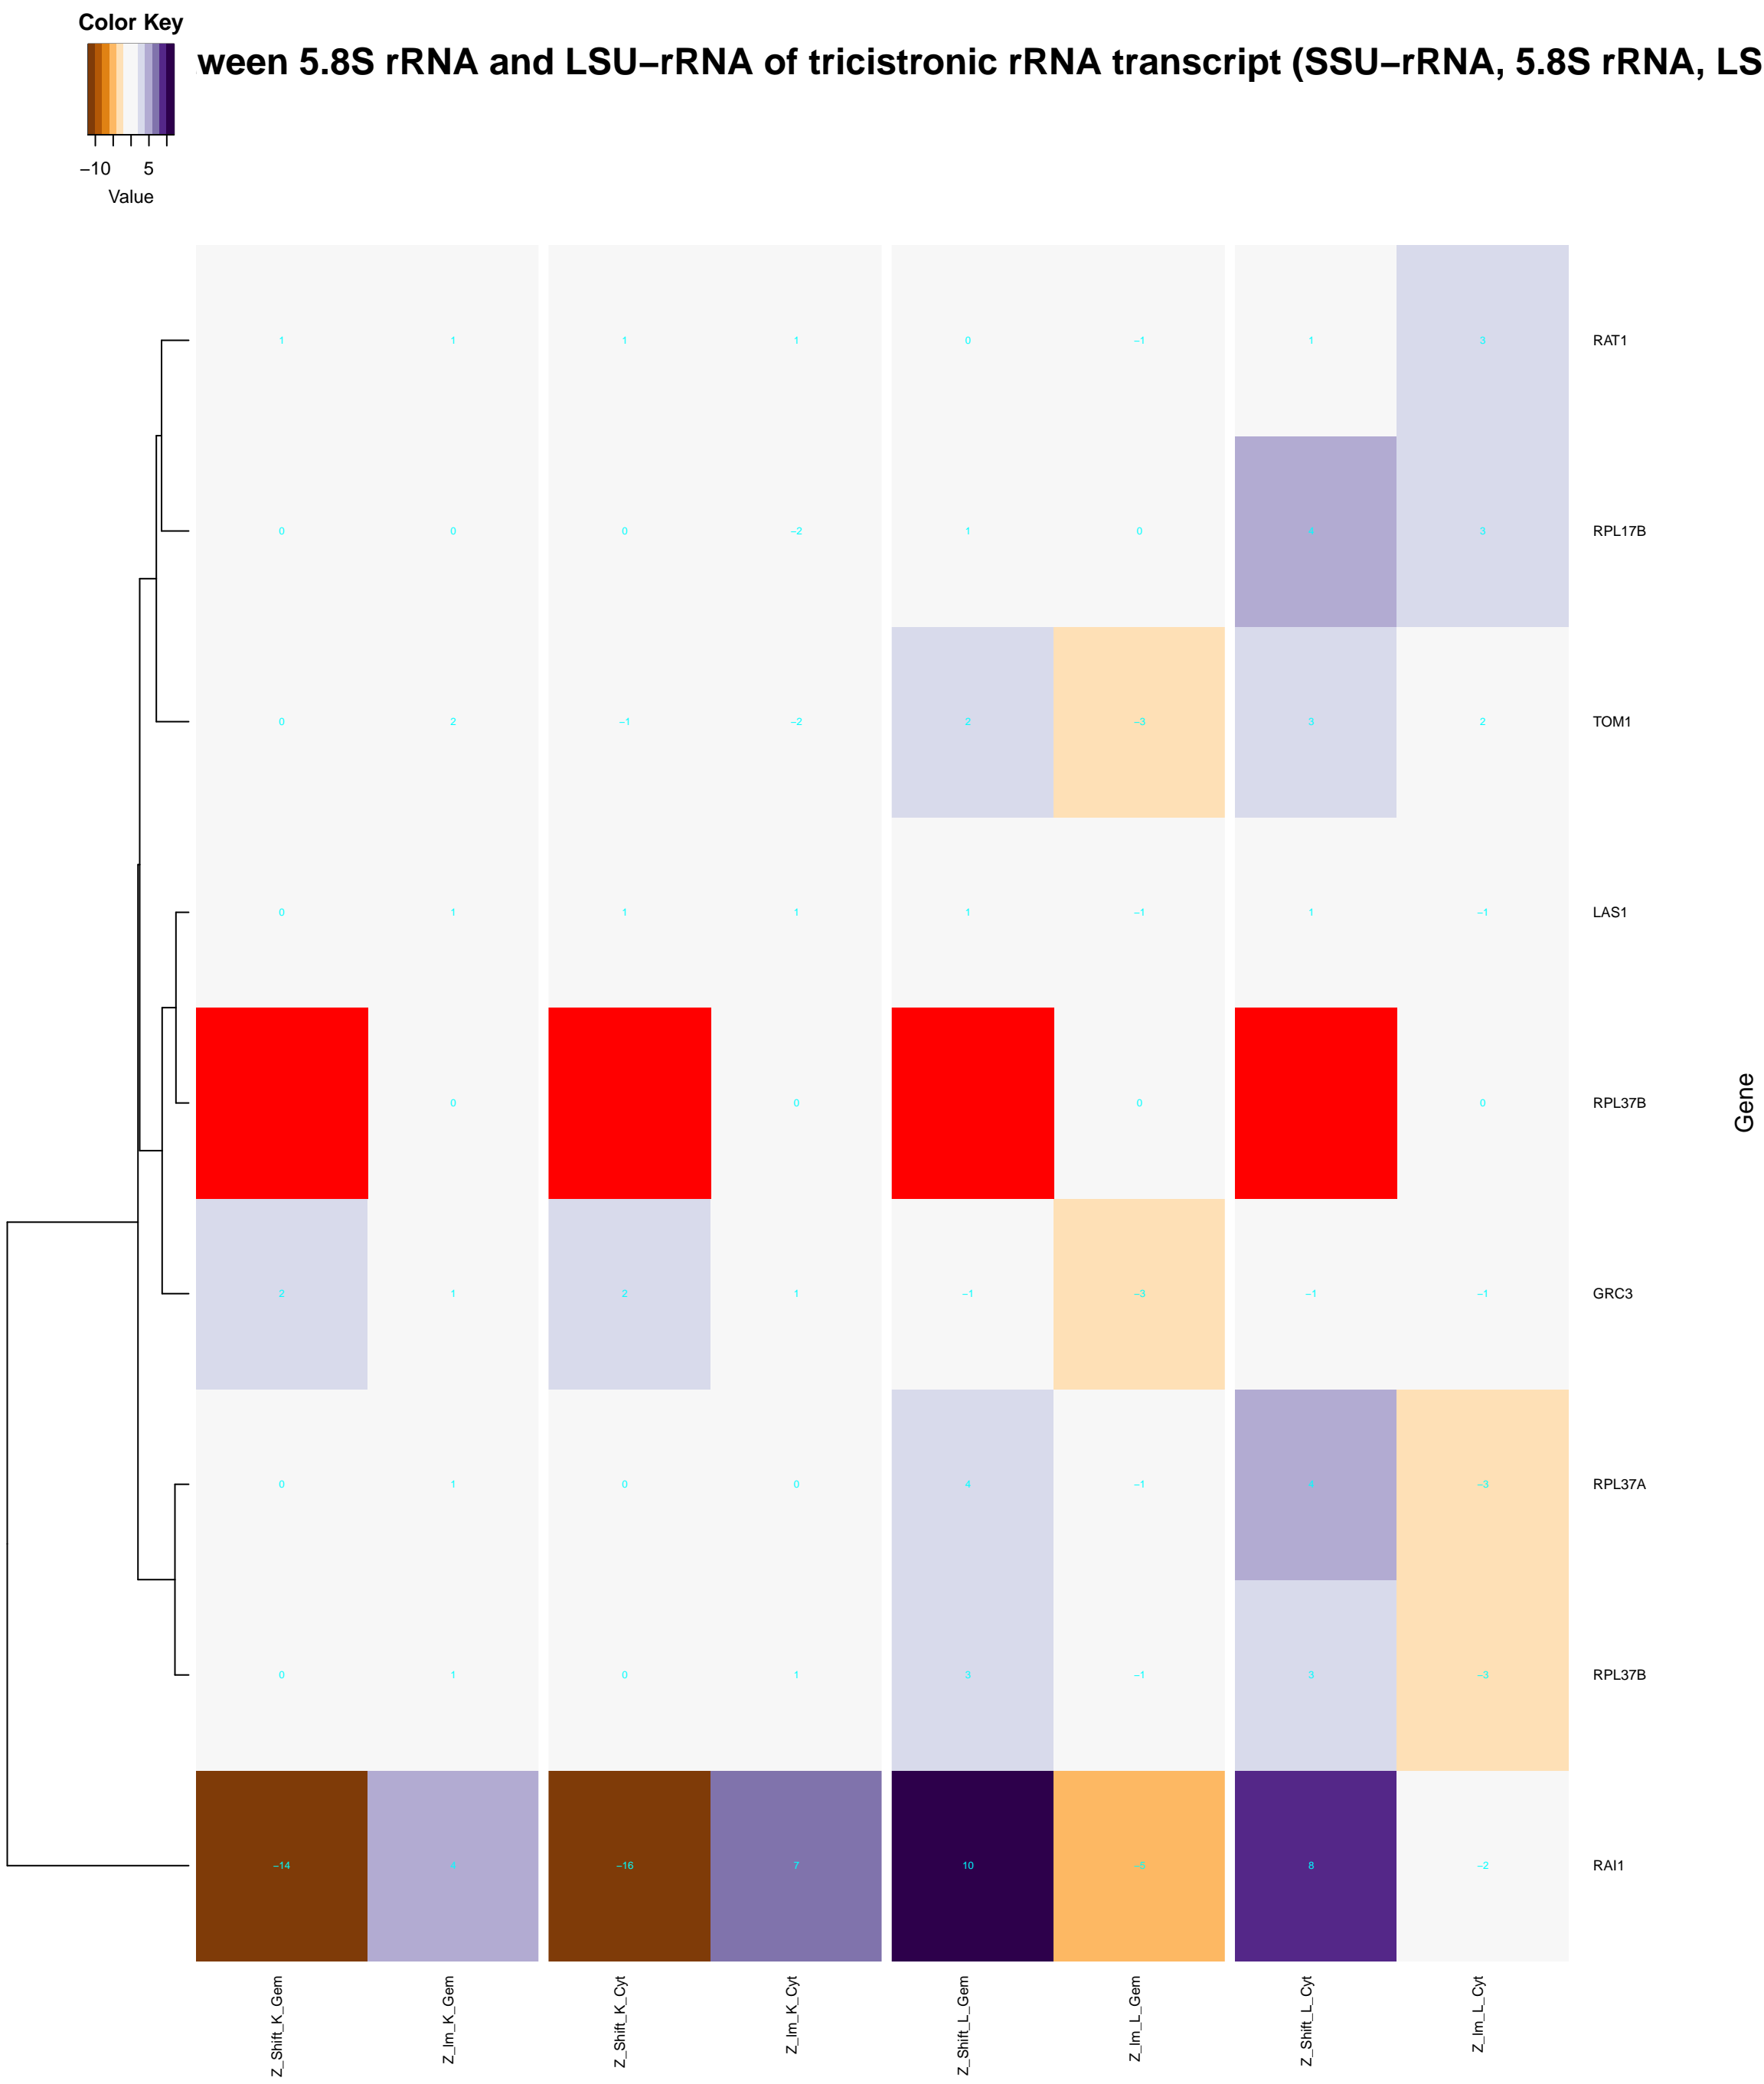

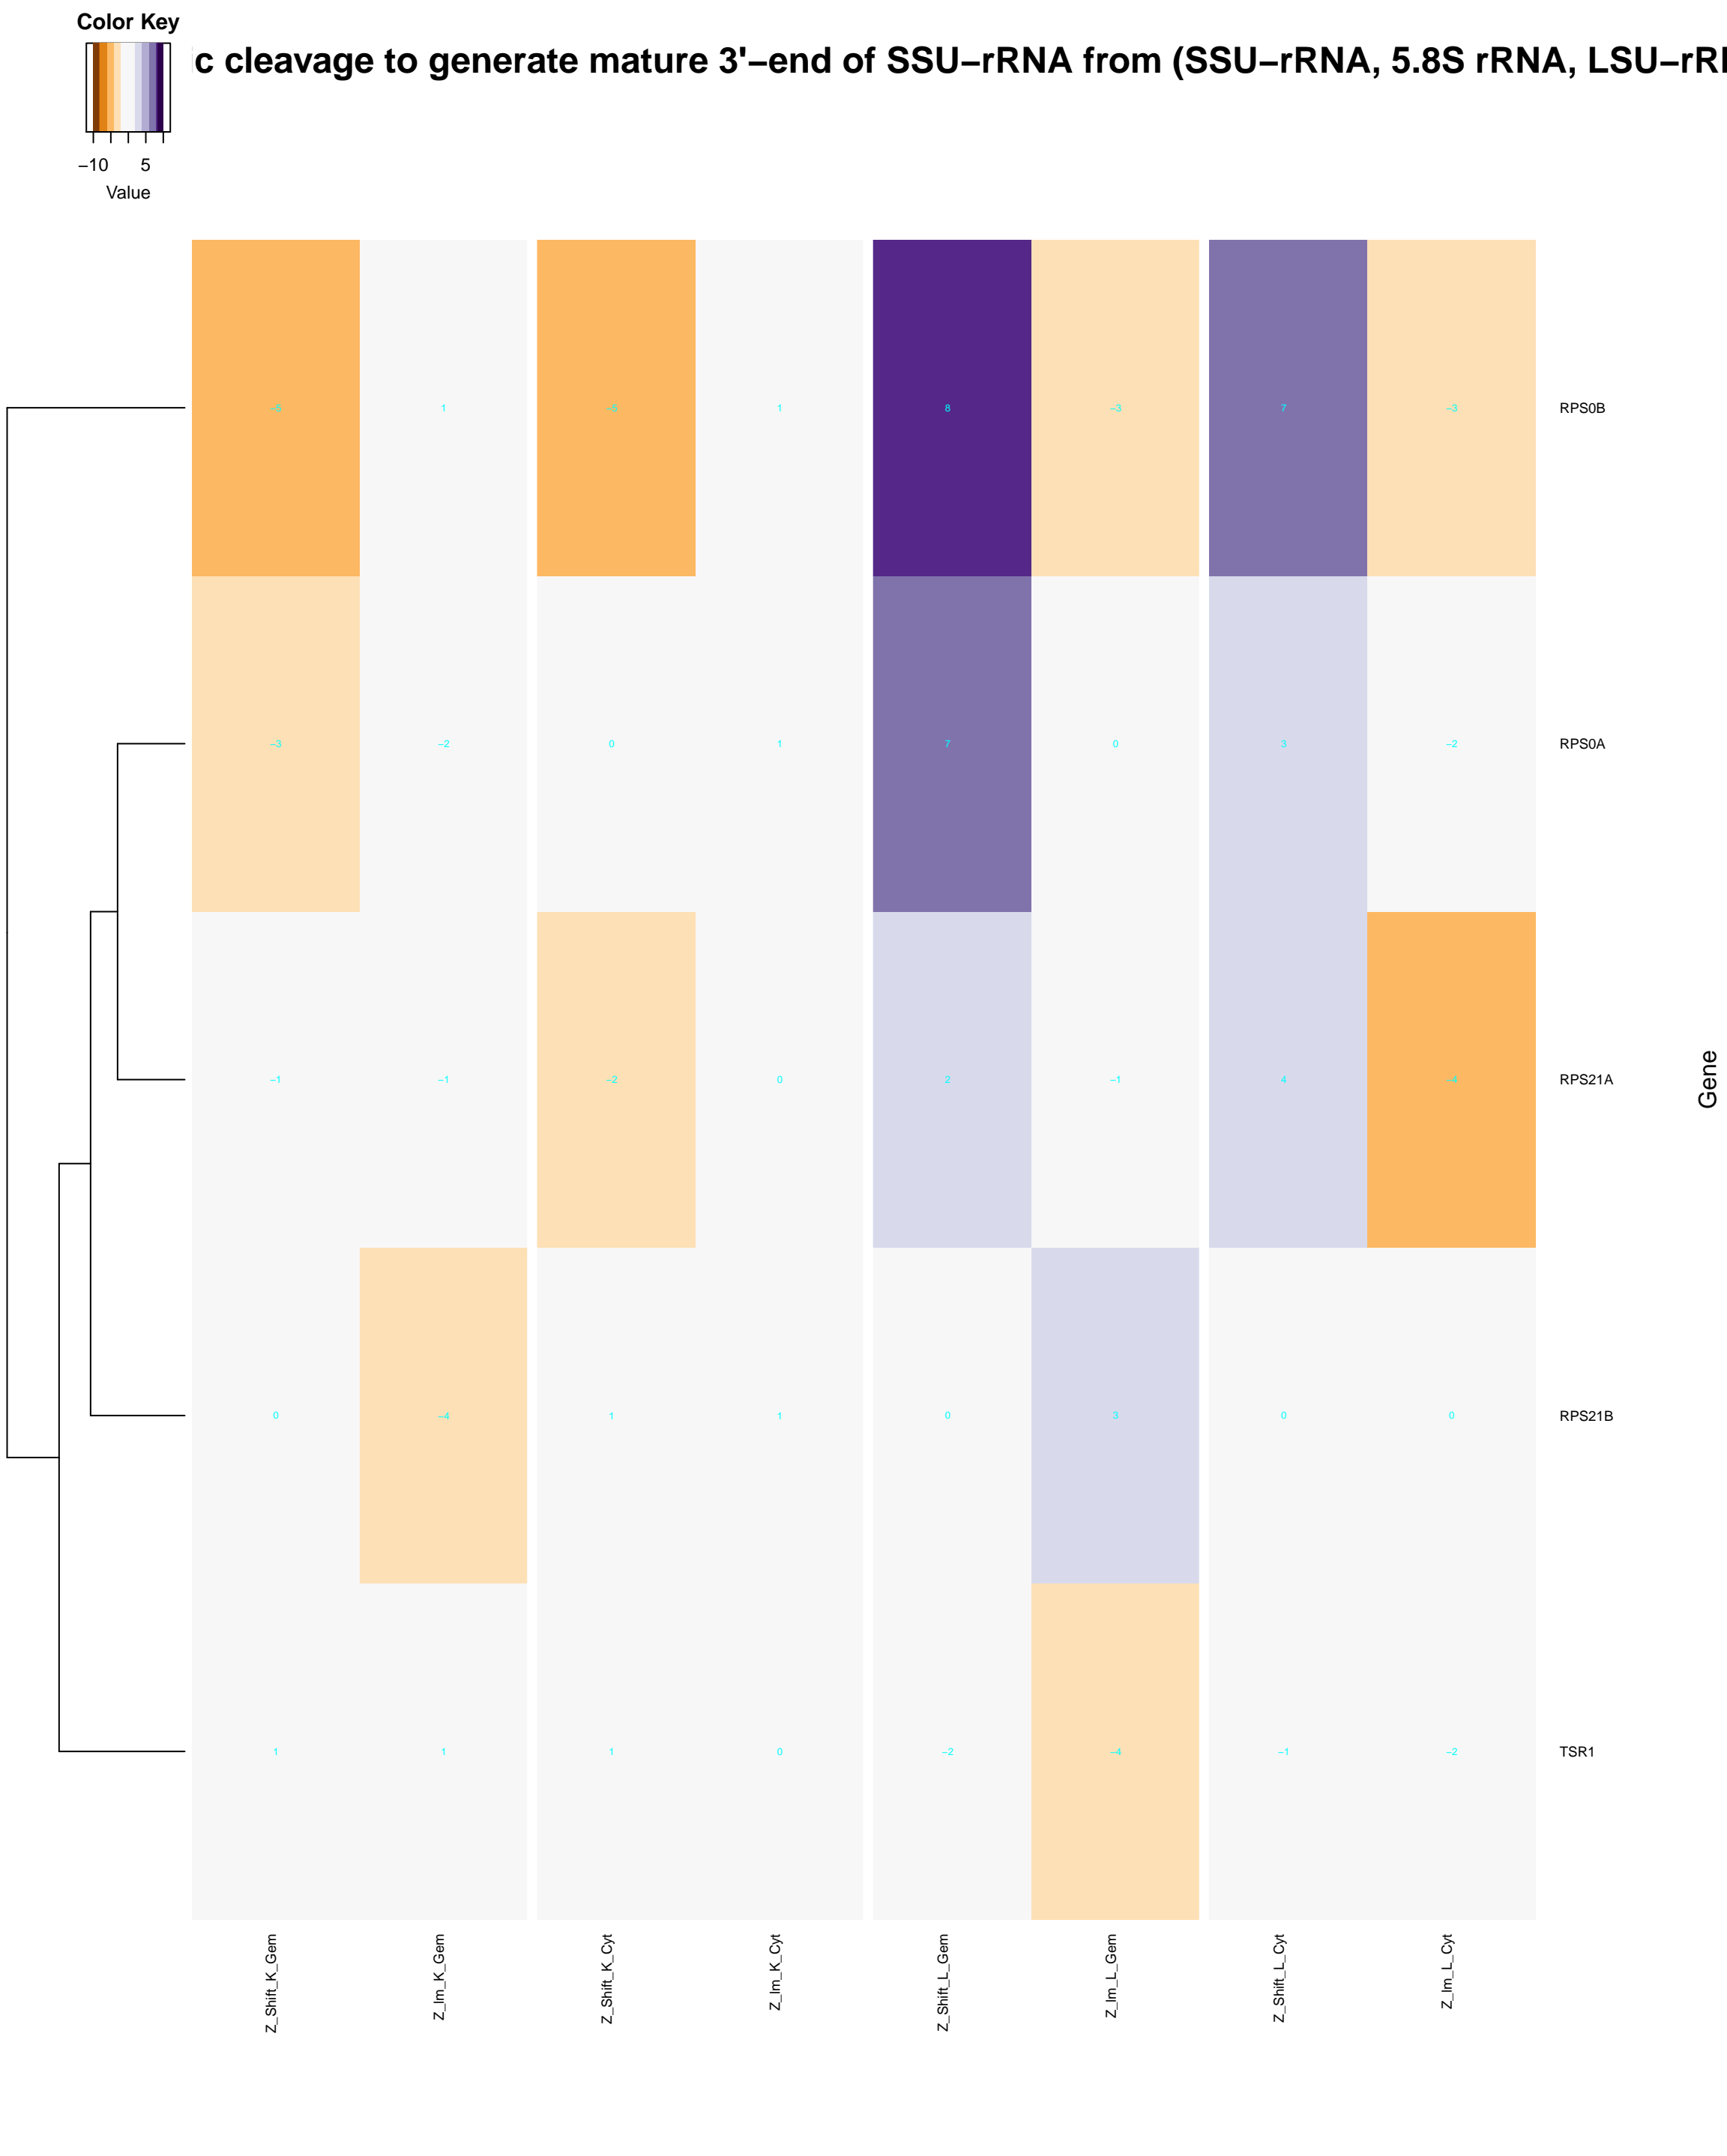

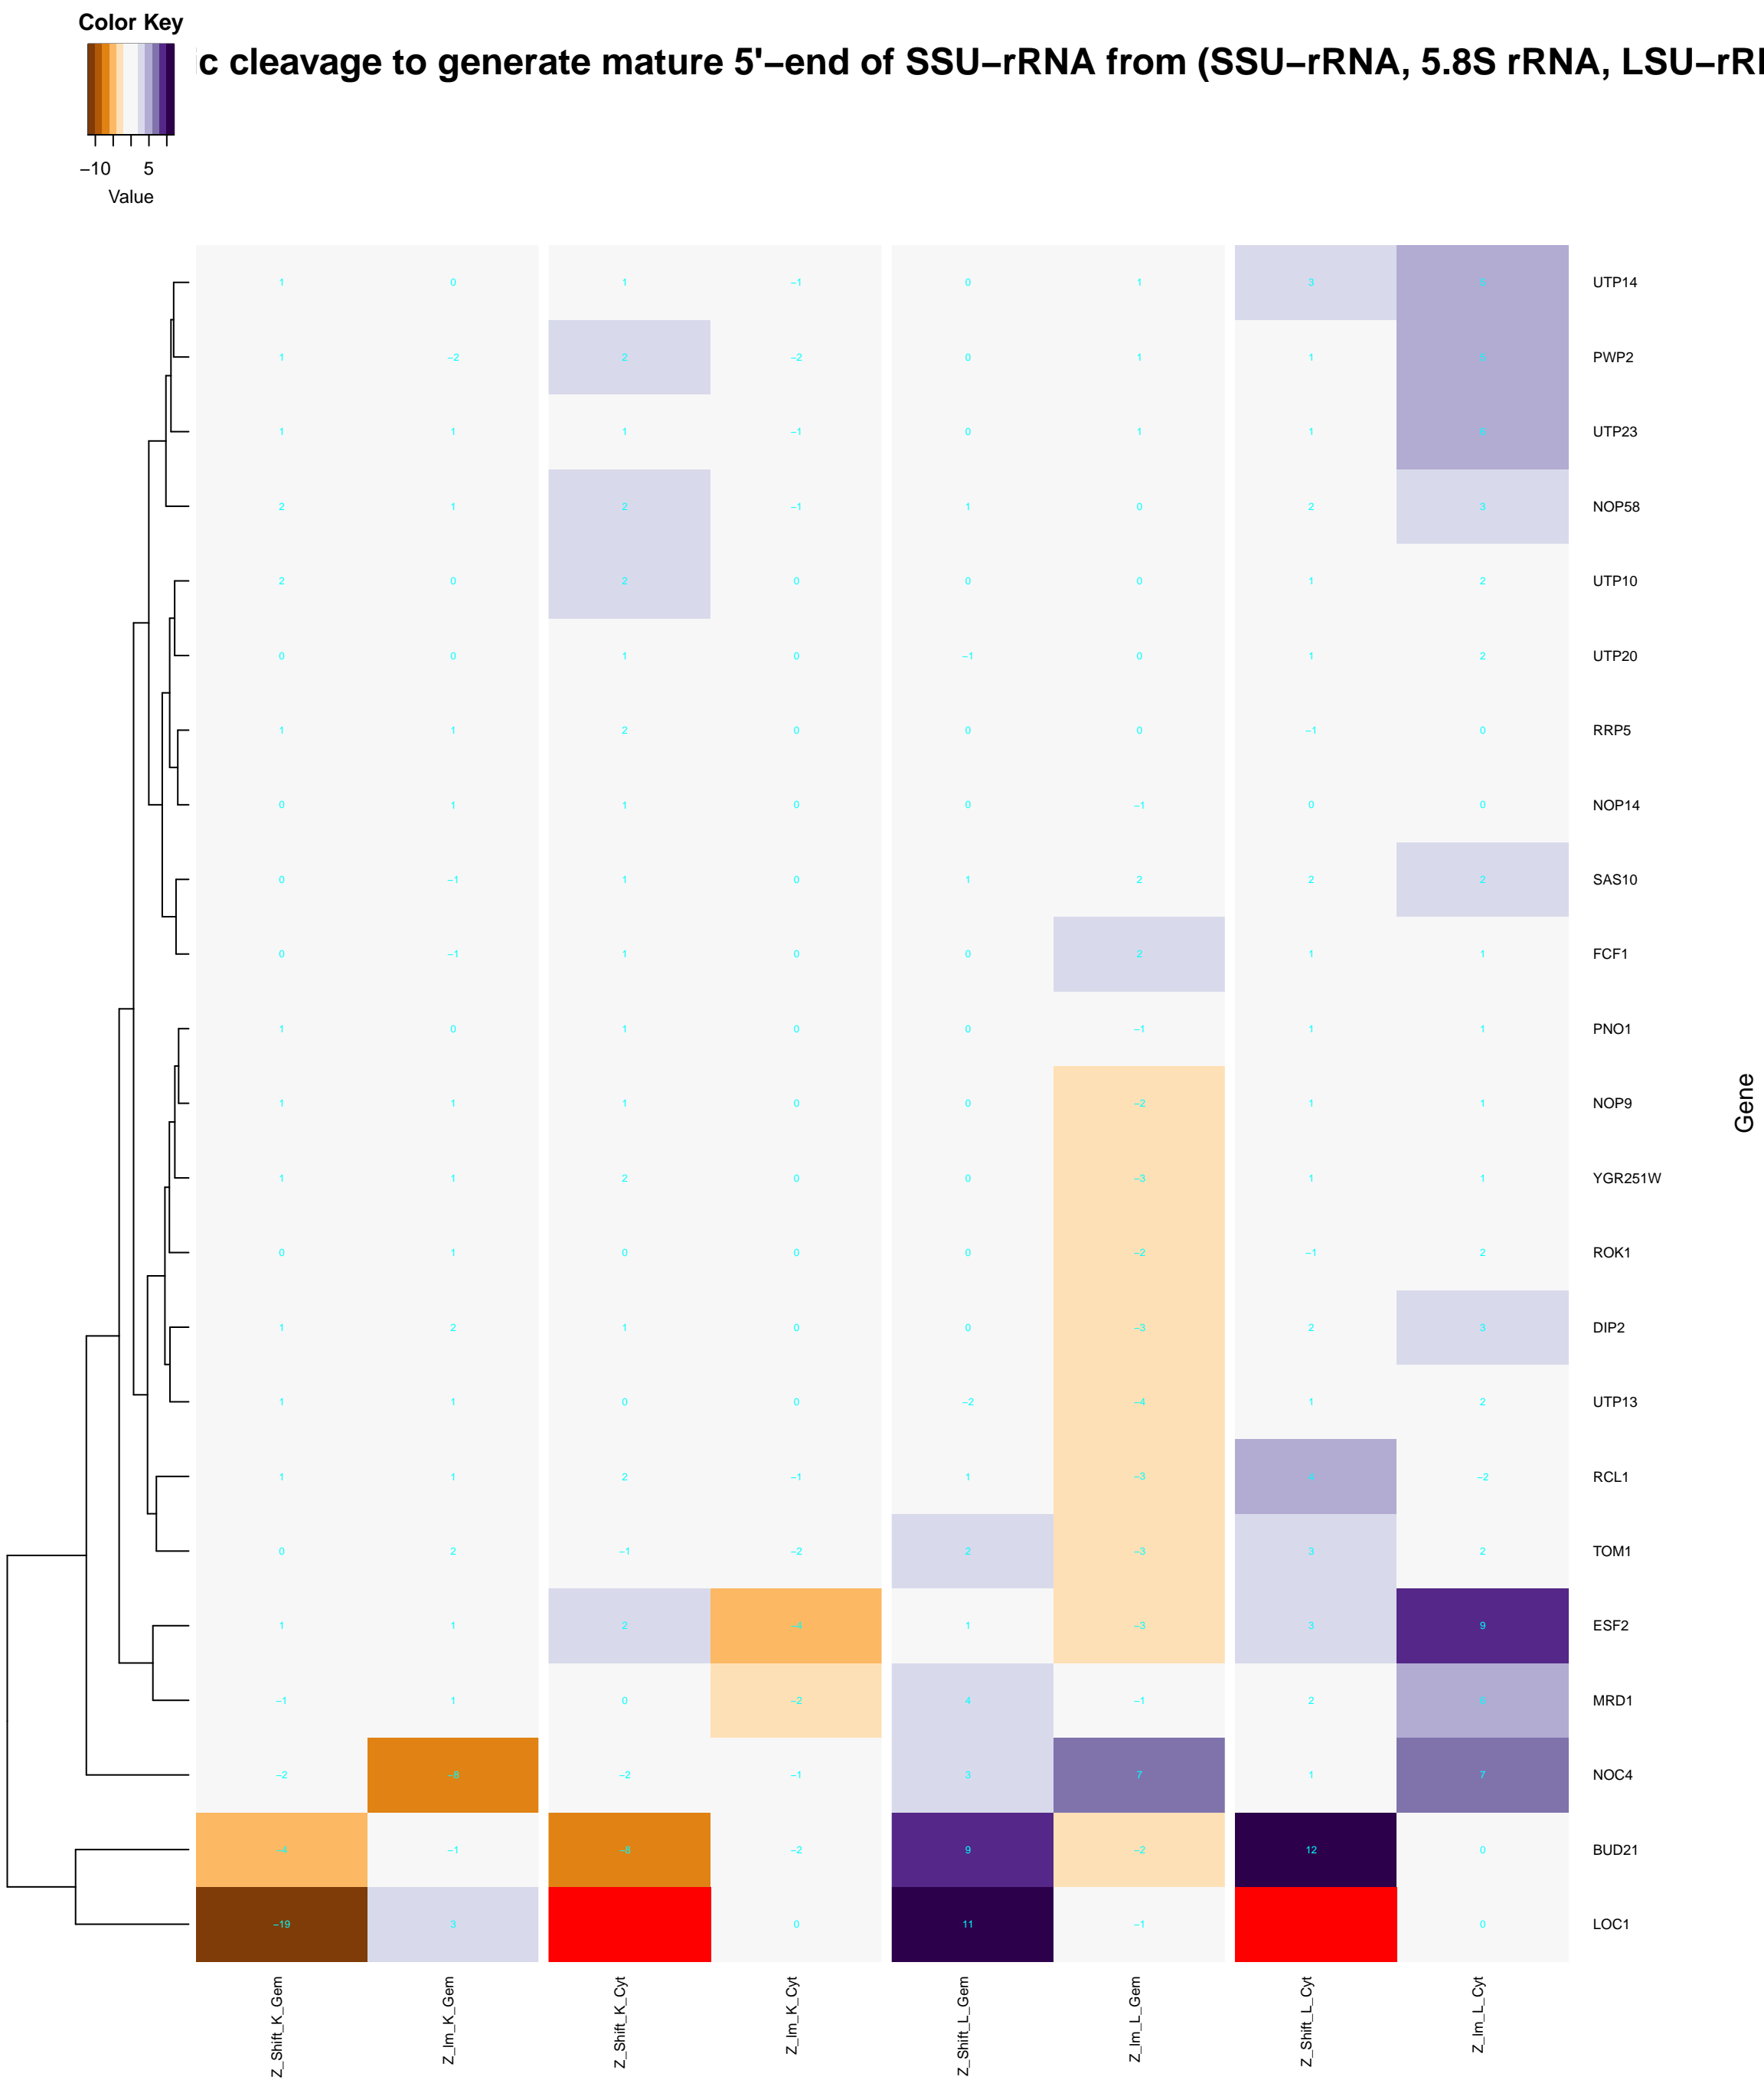

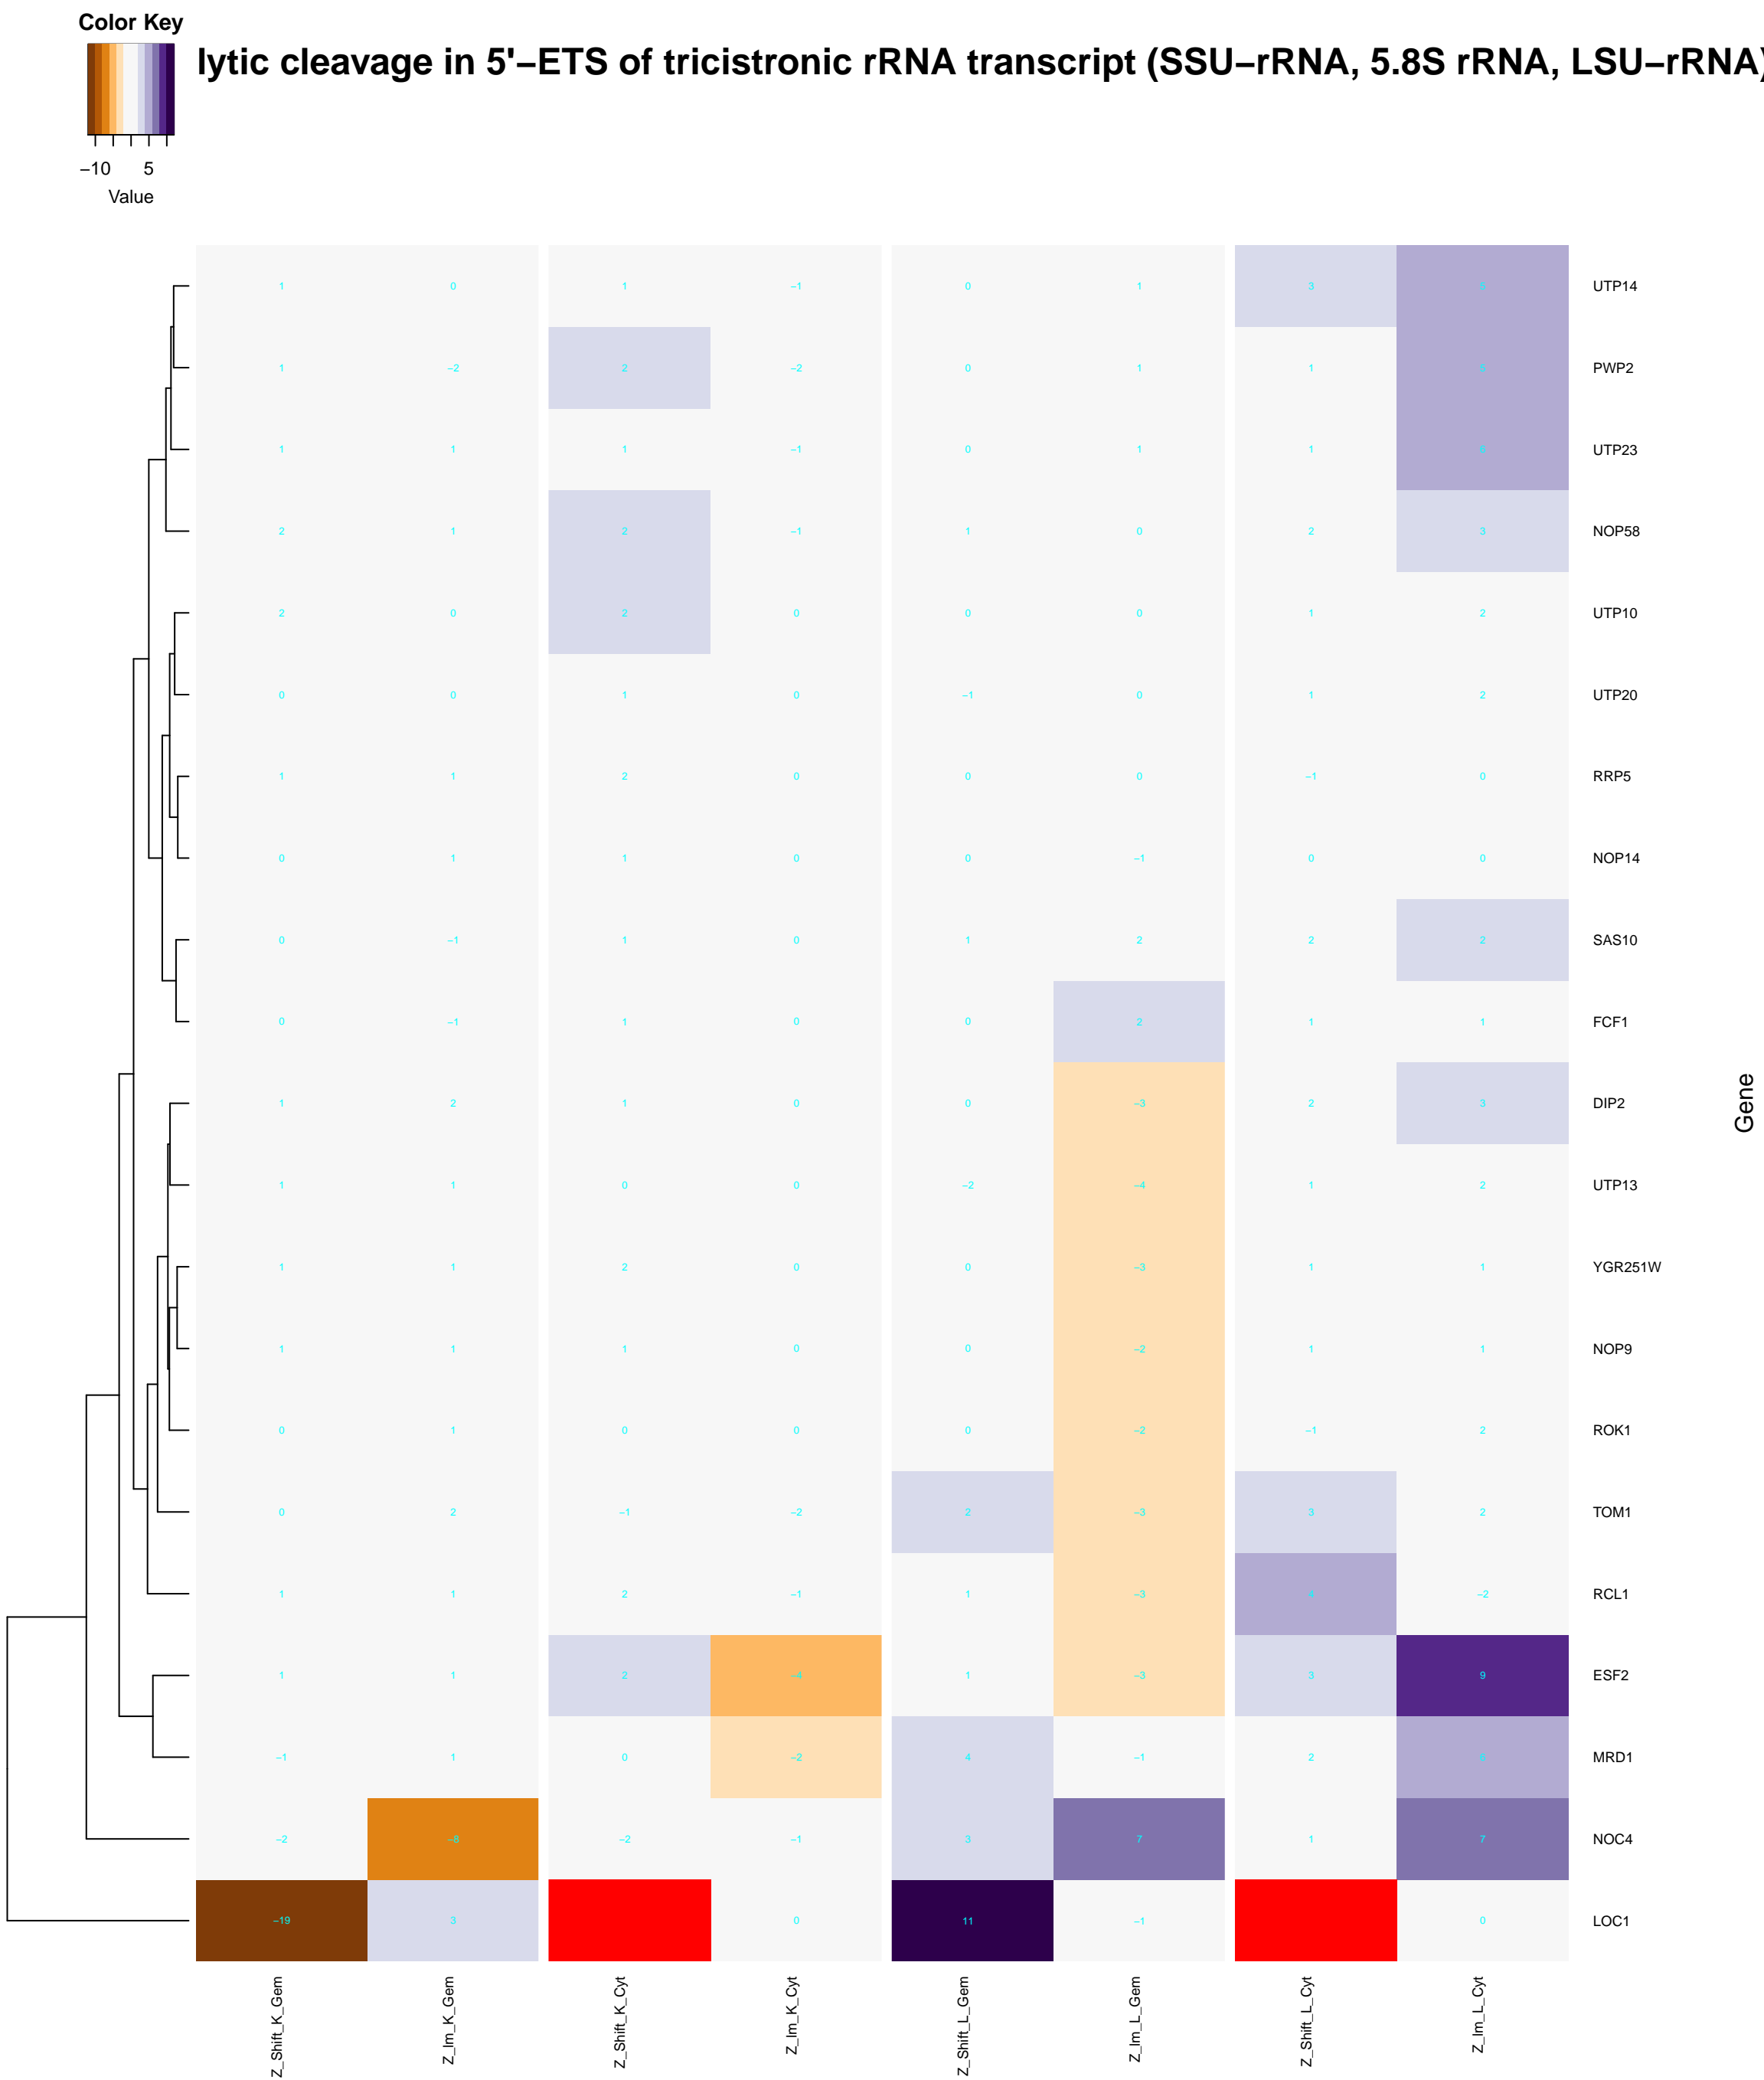

Supplement: s1 [file s1]

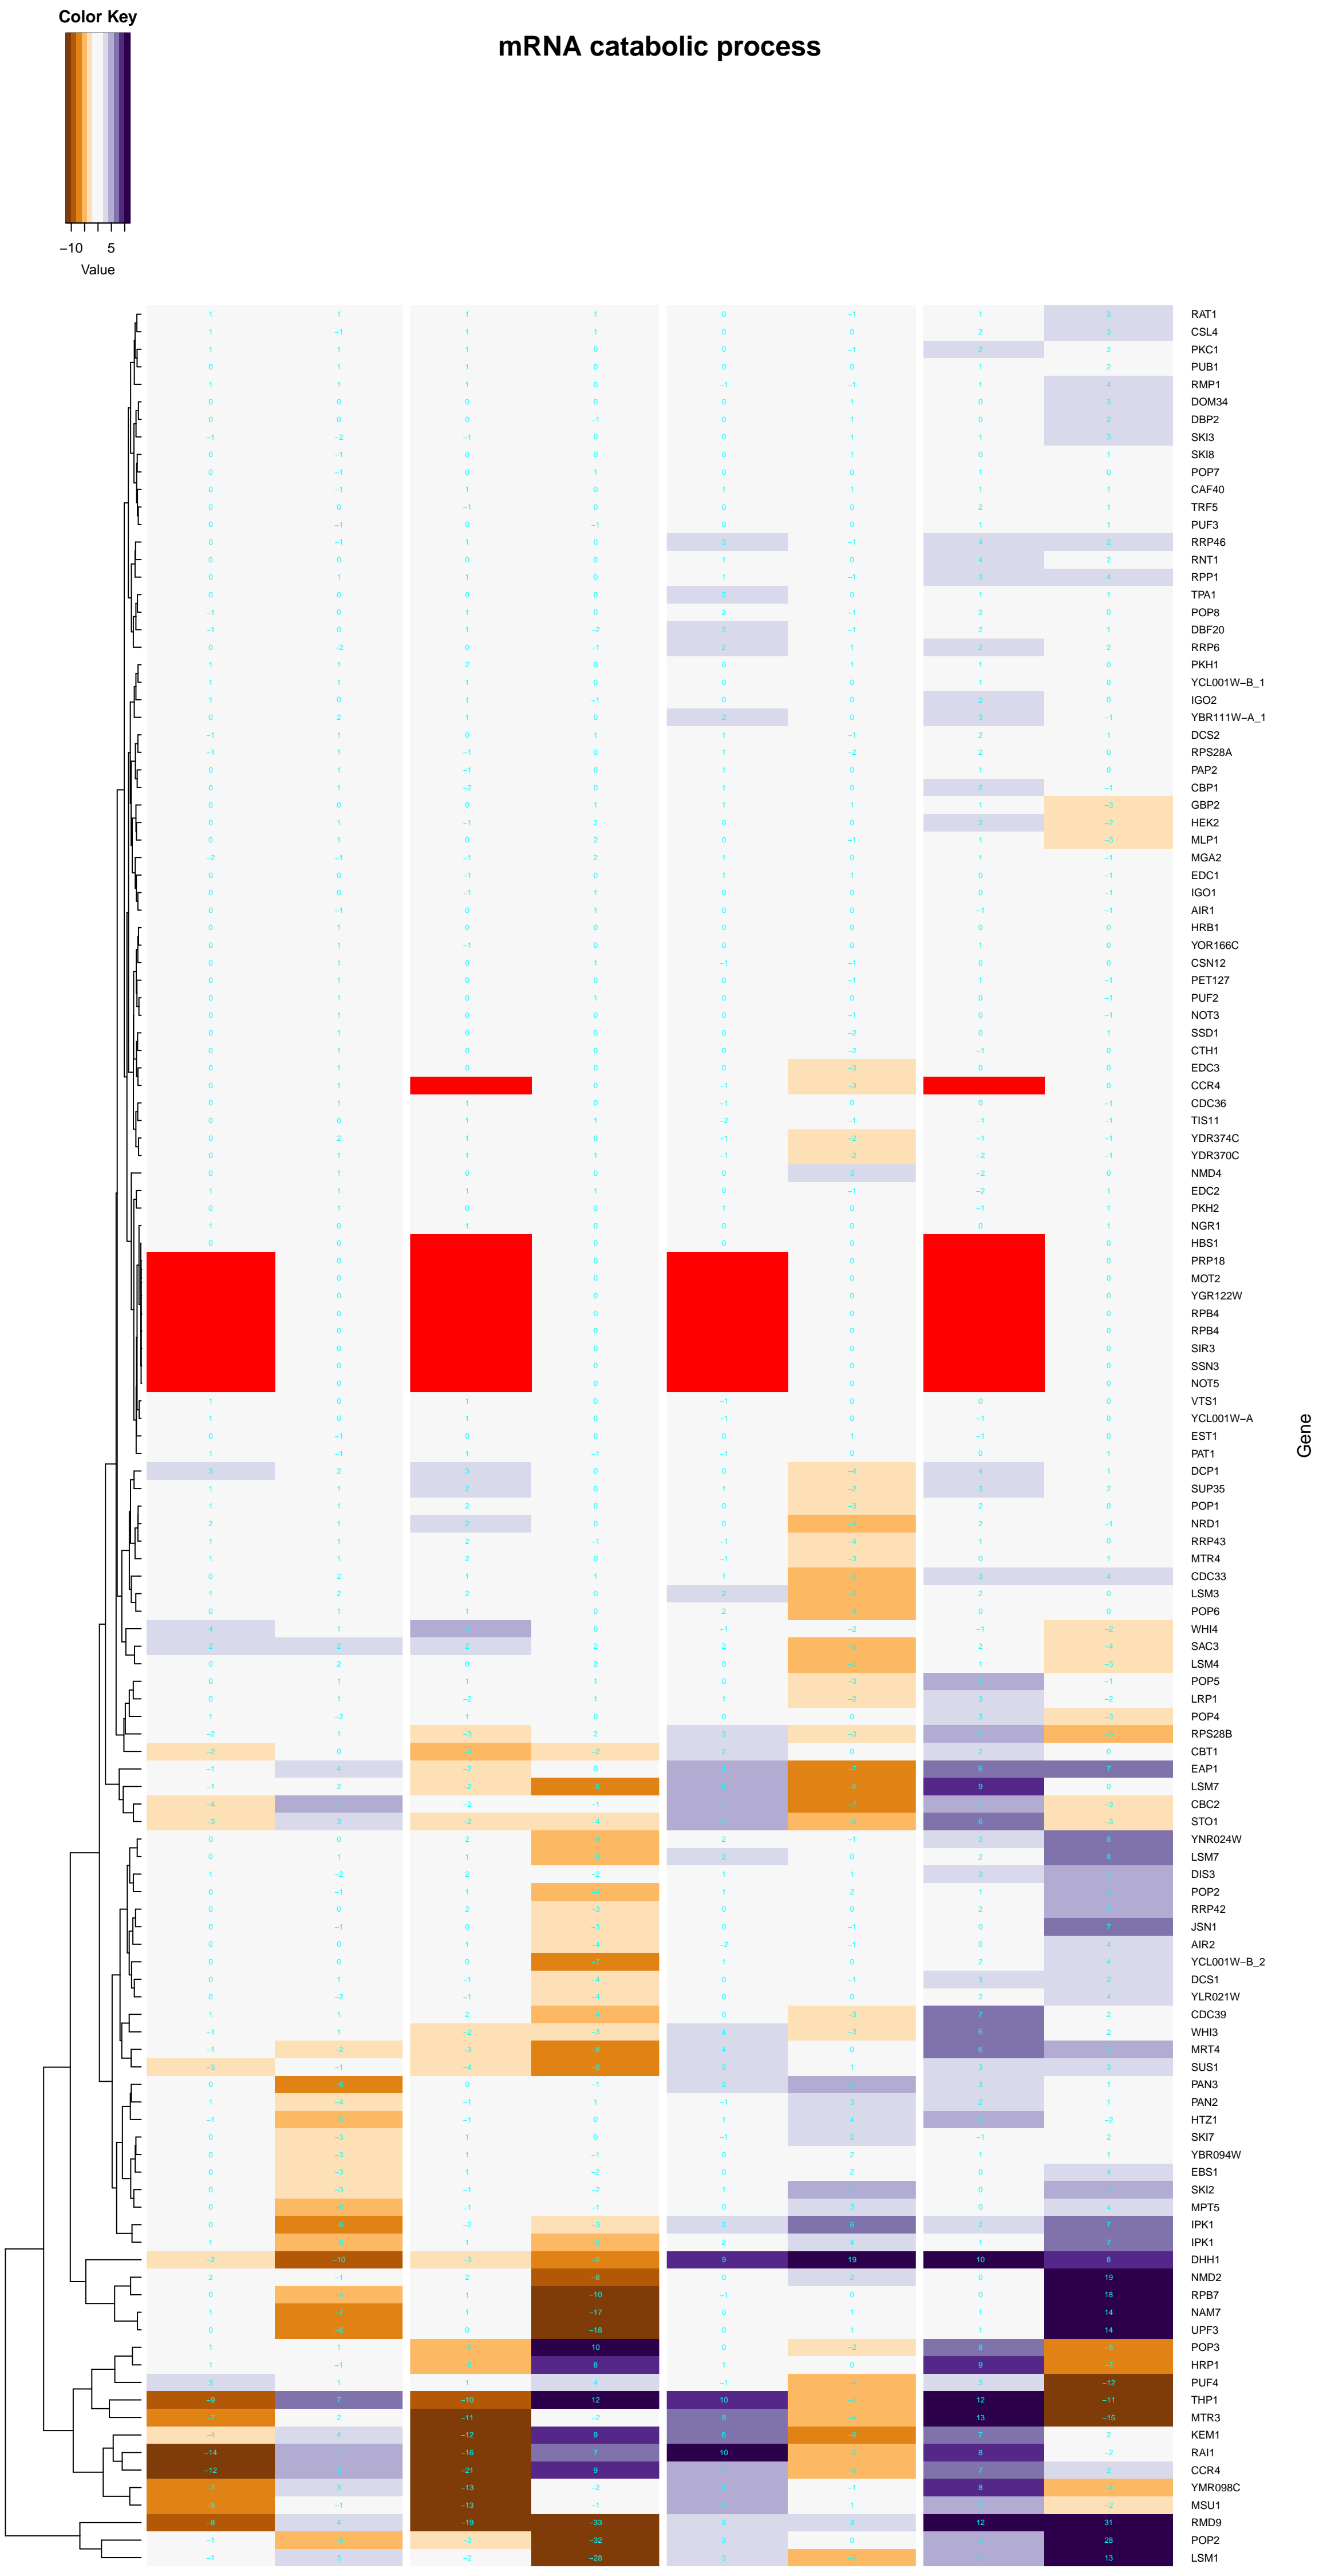

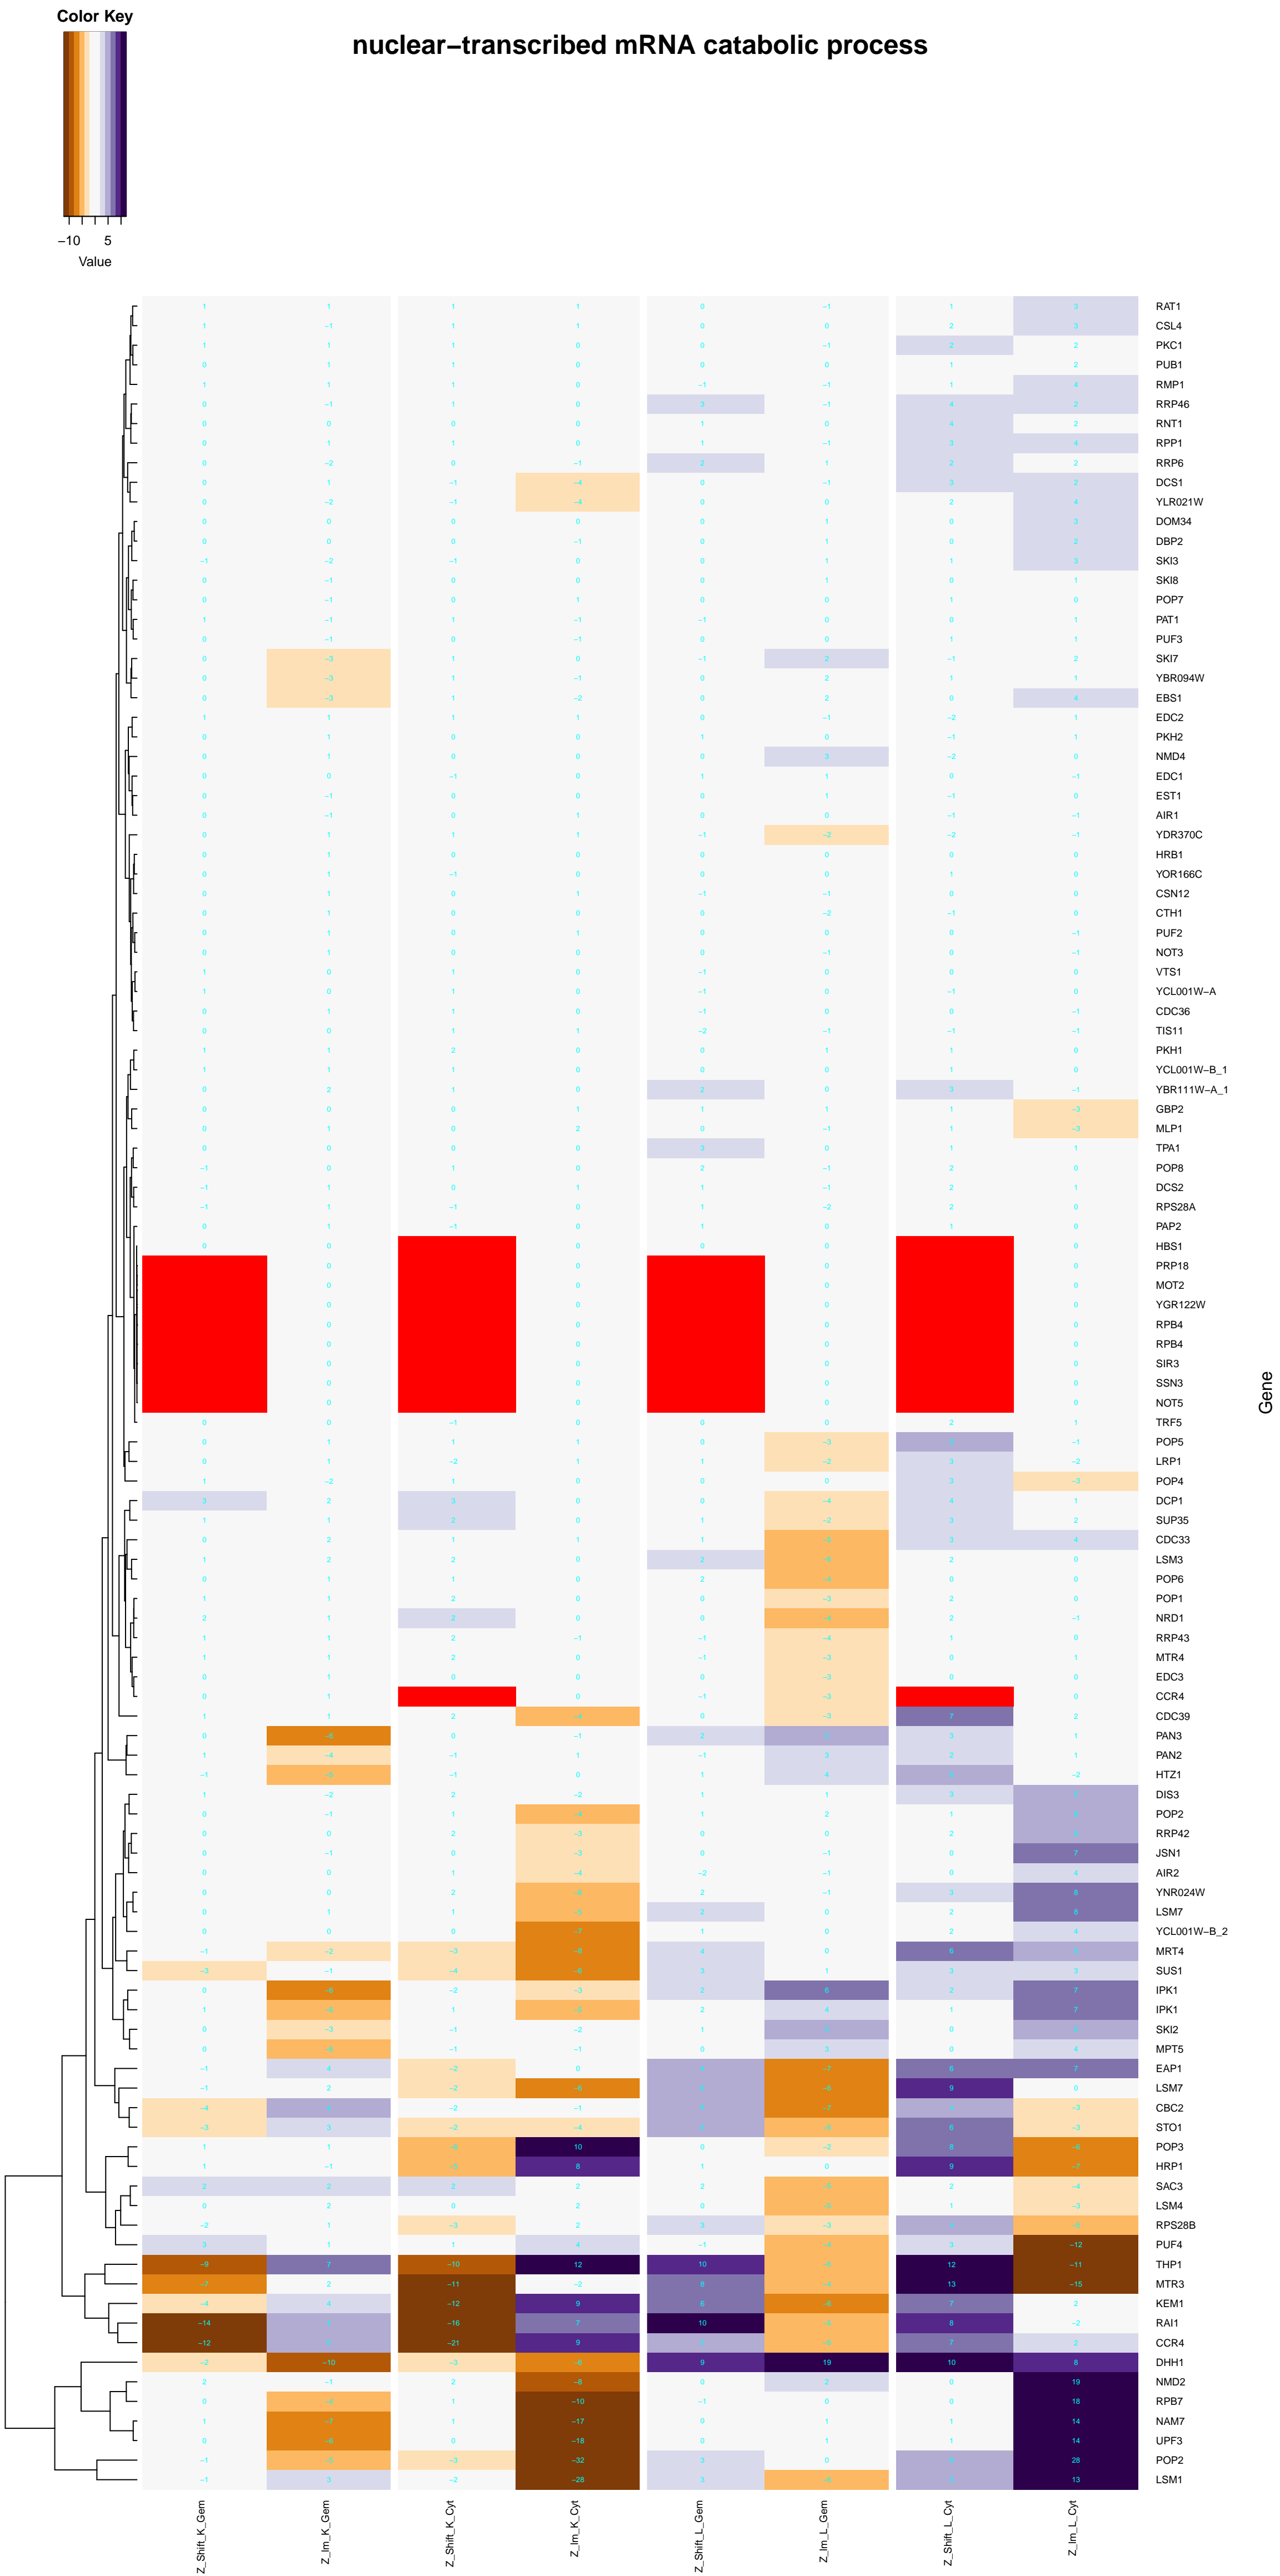

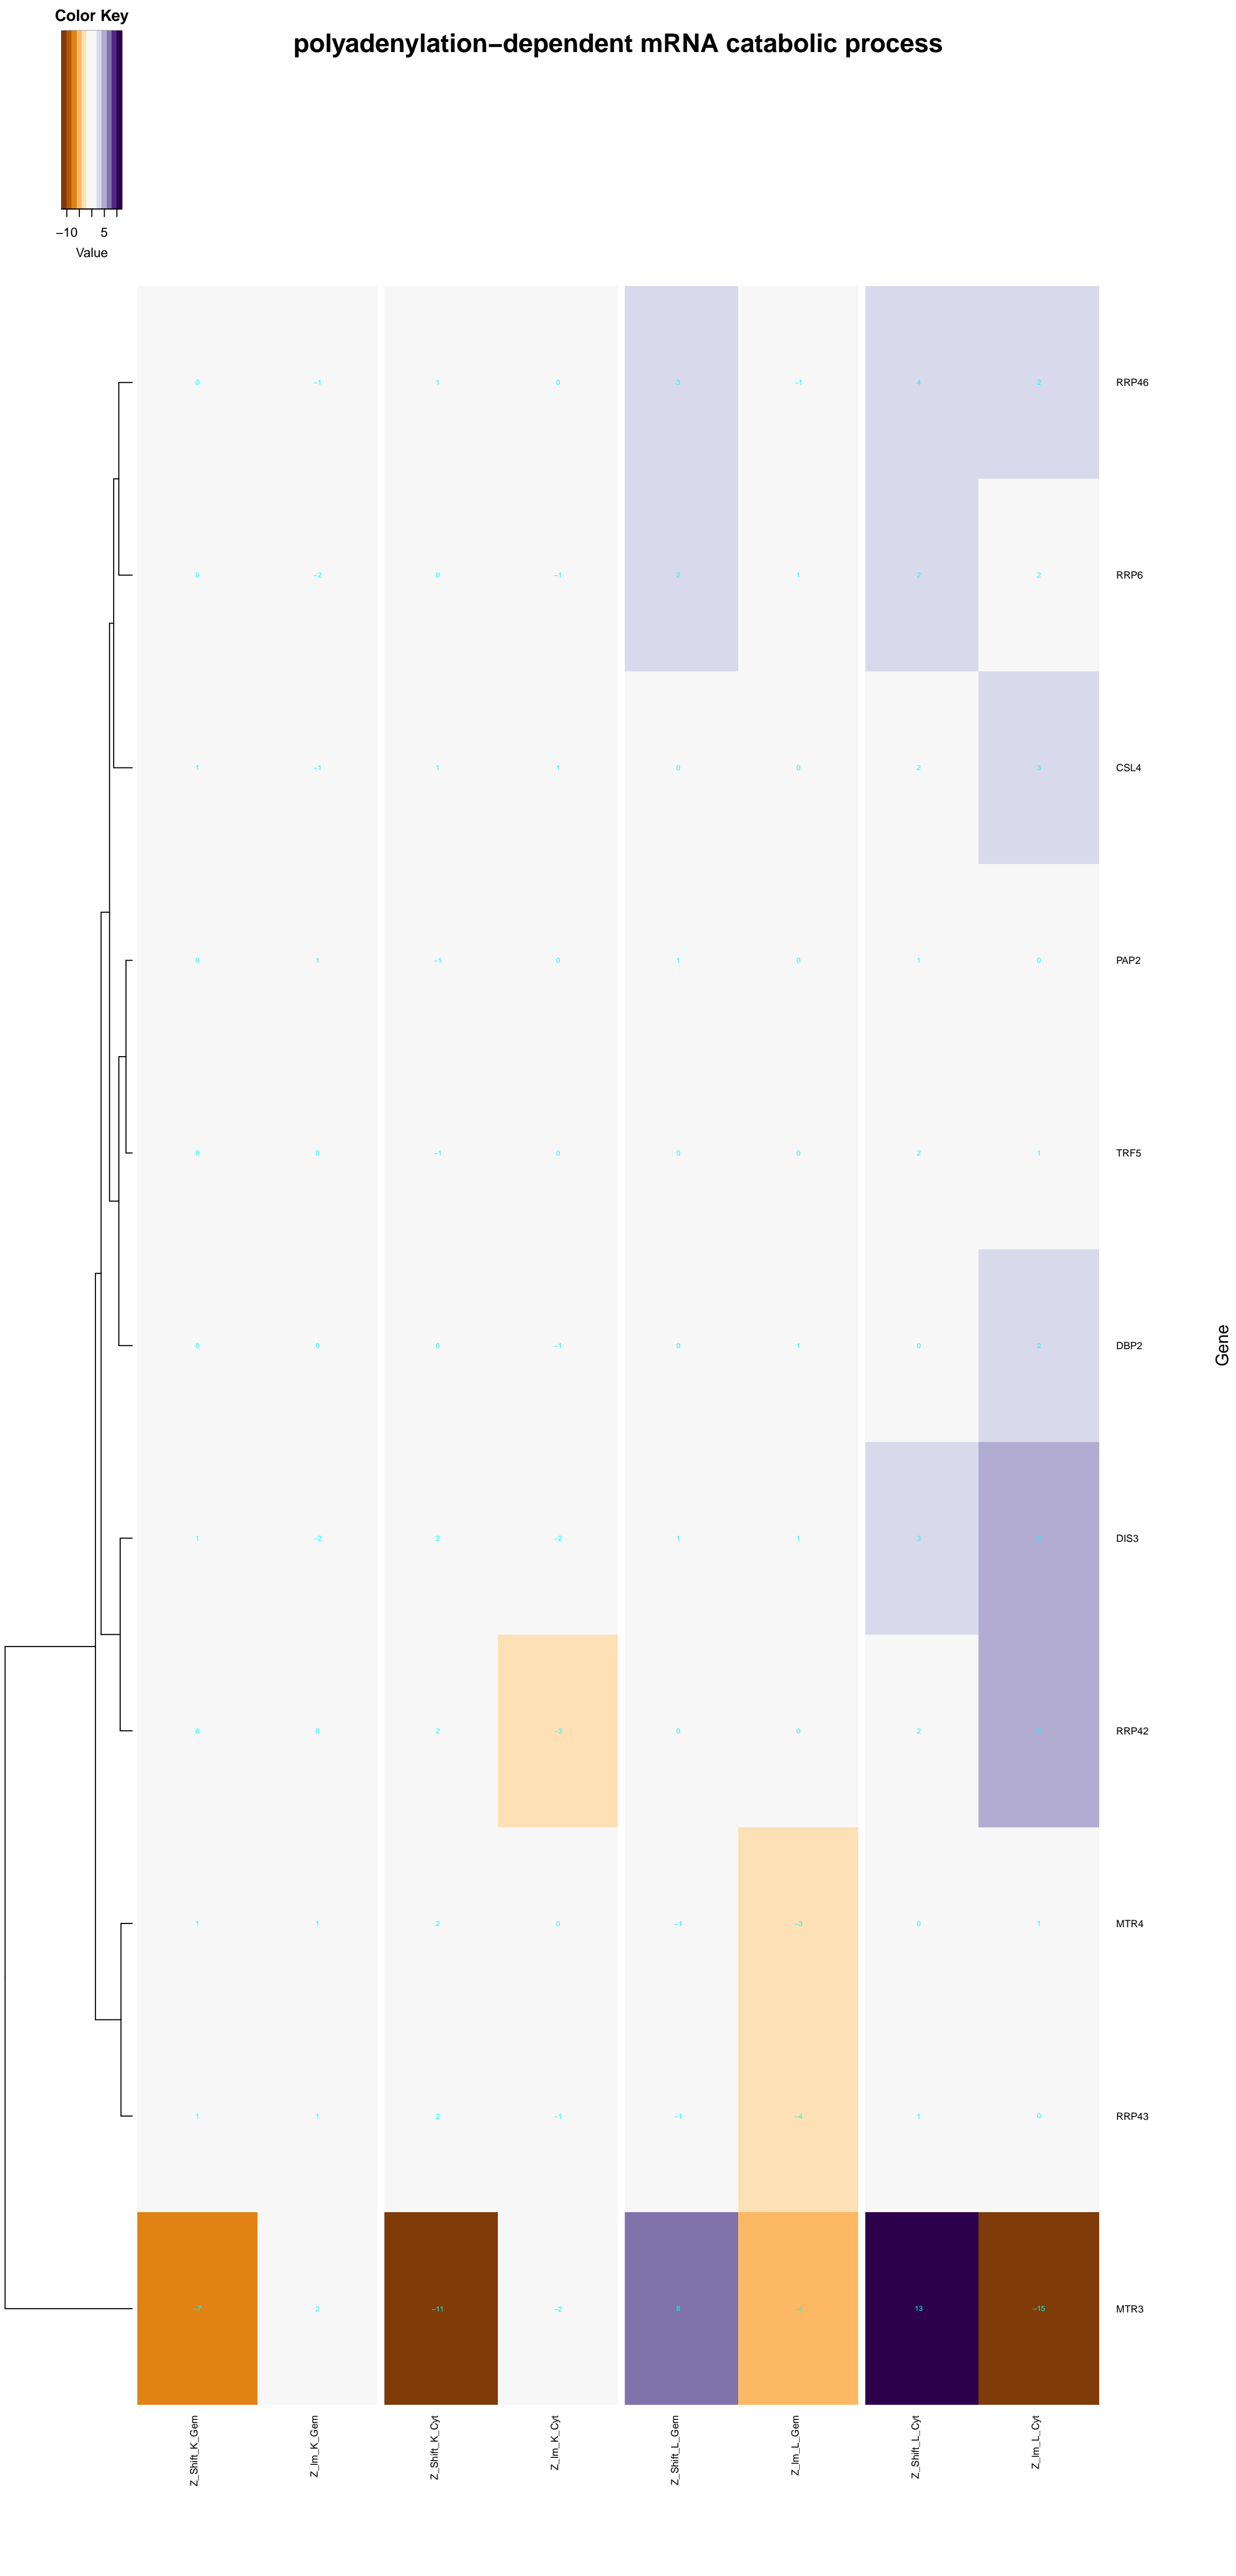

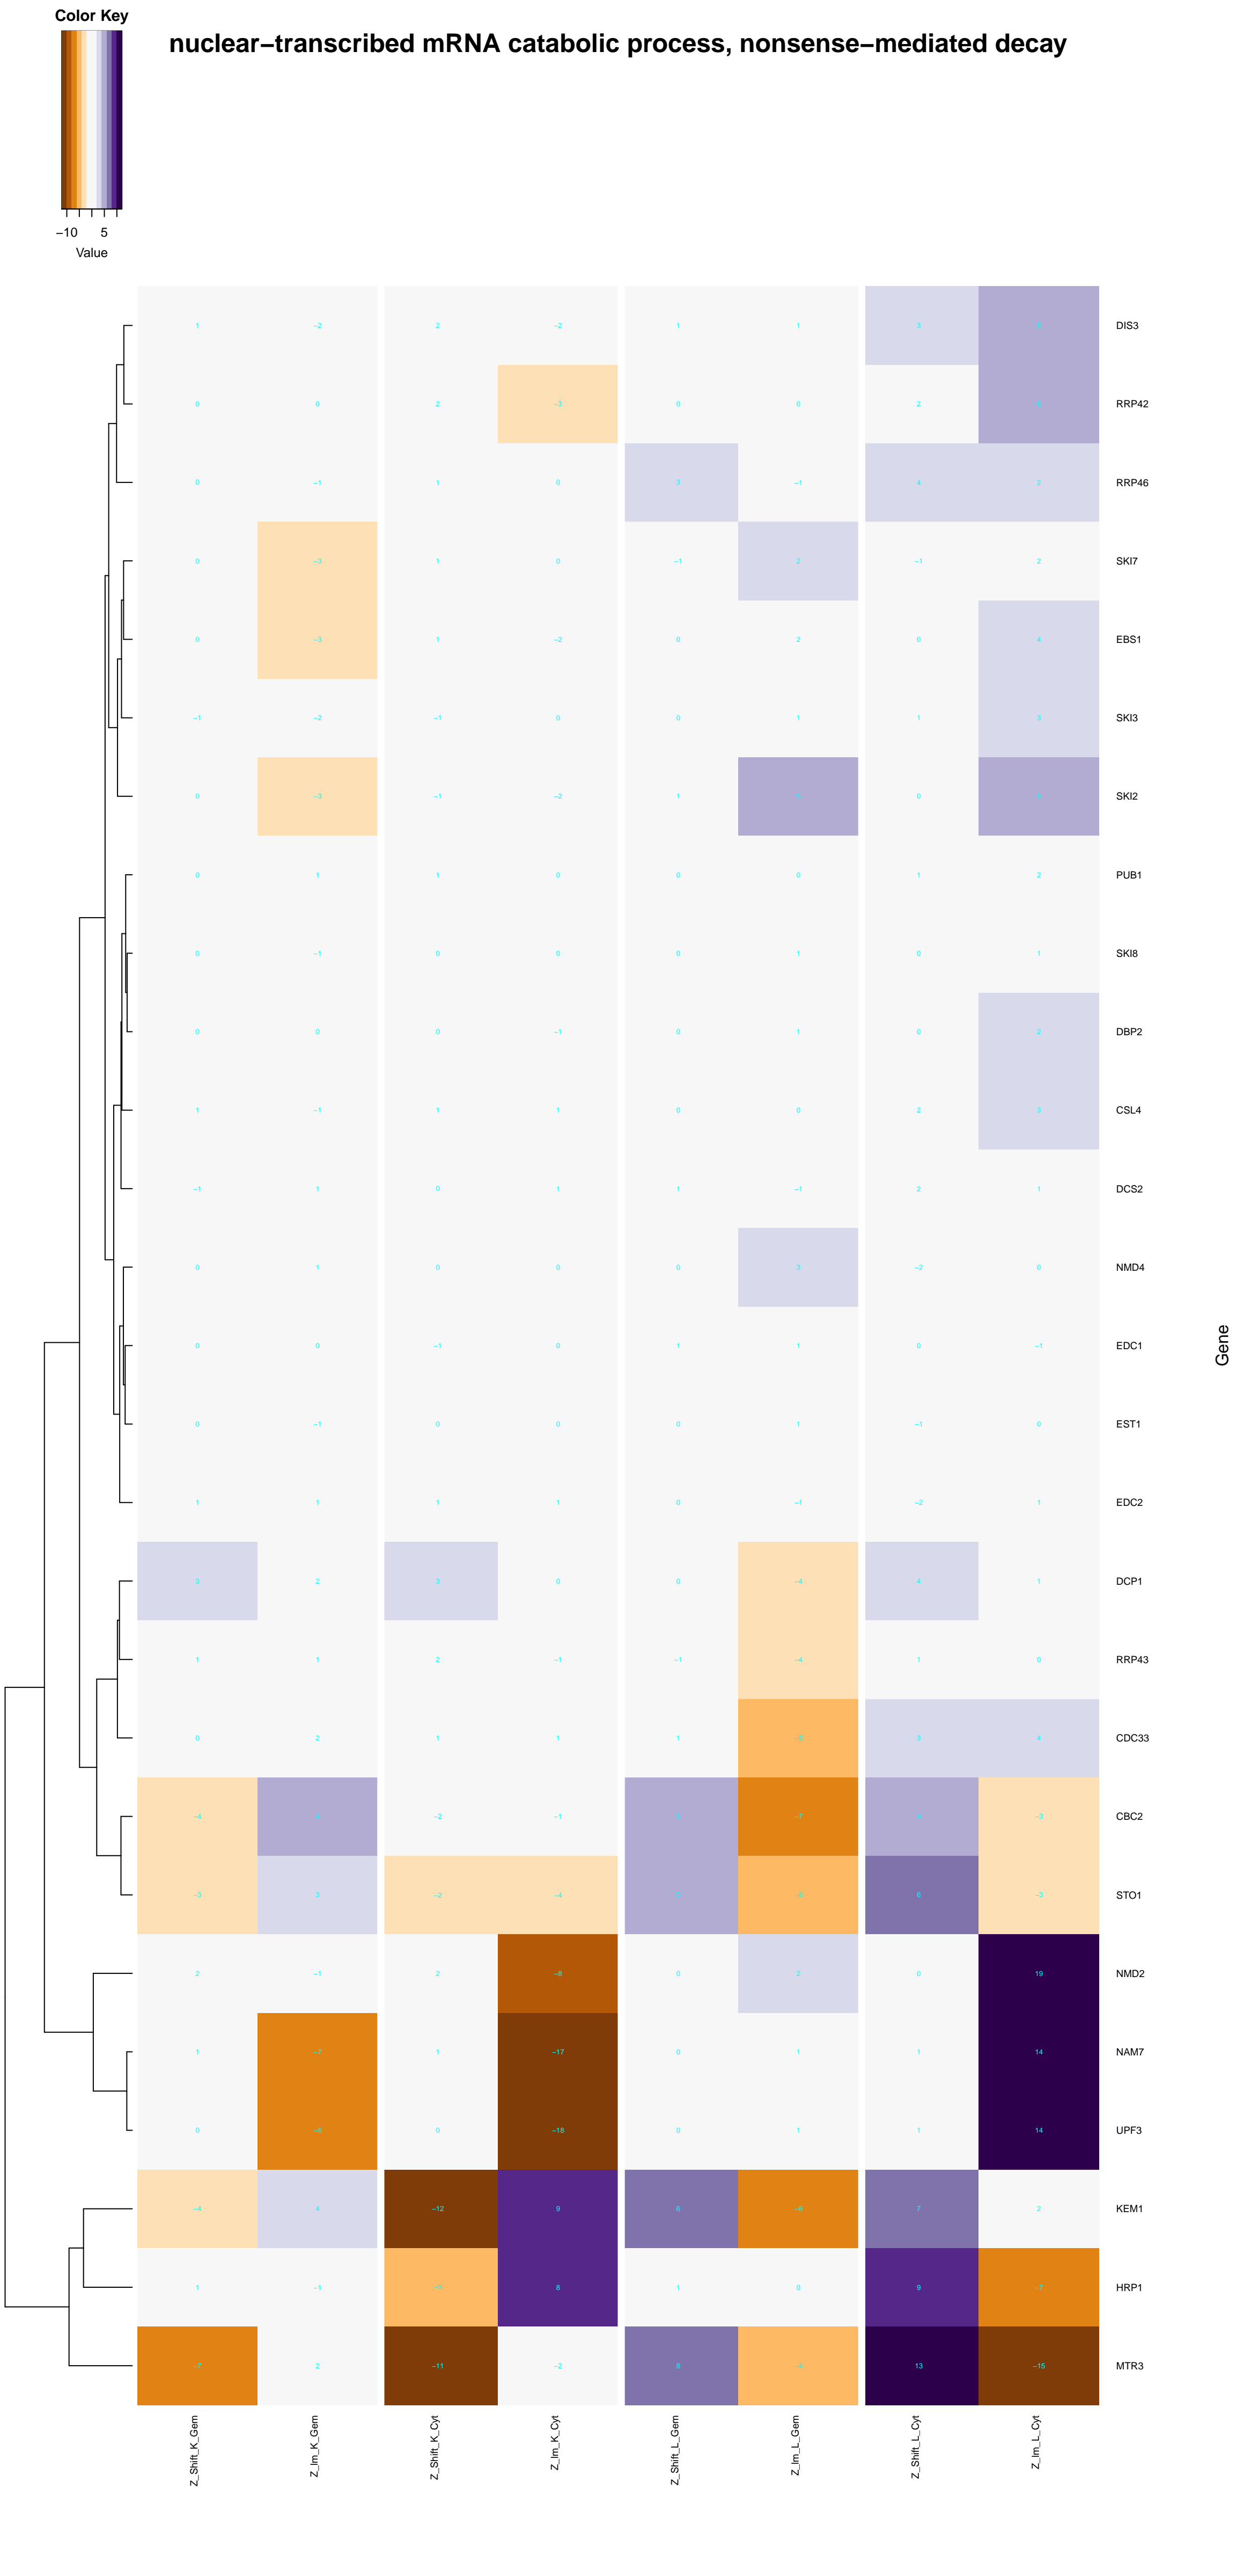

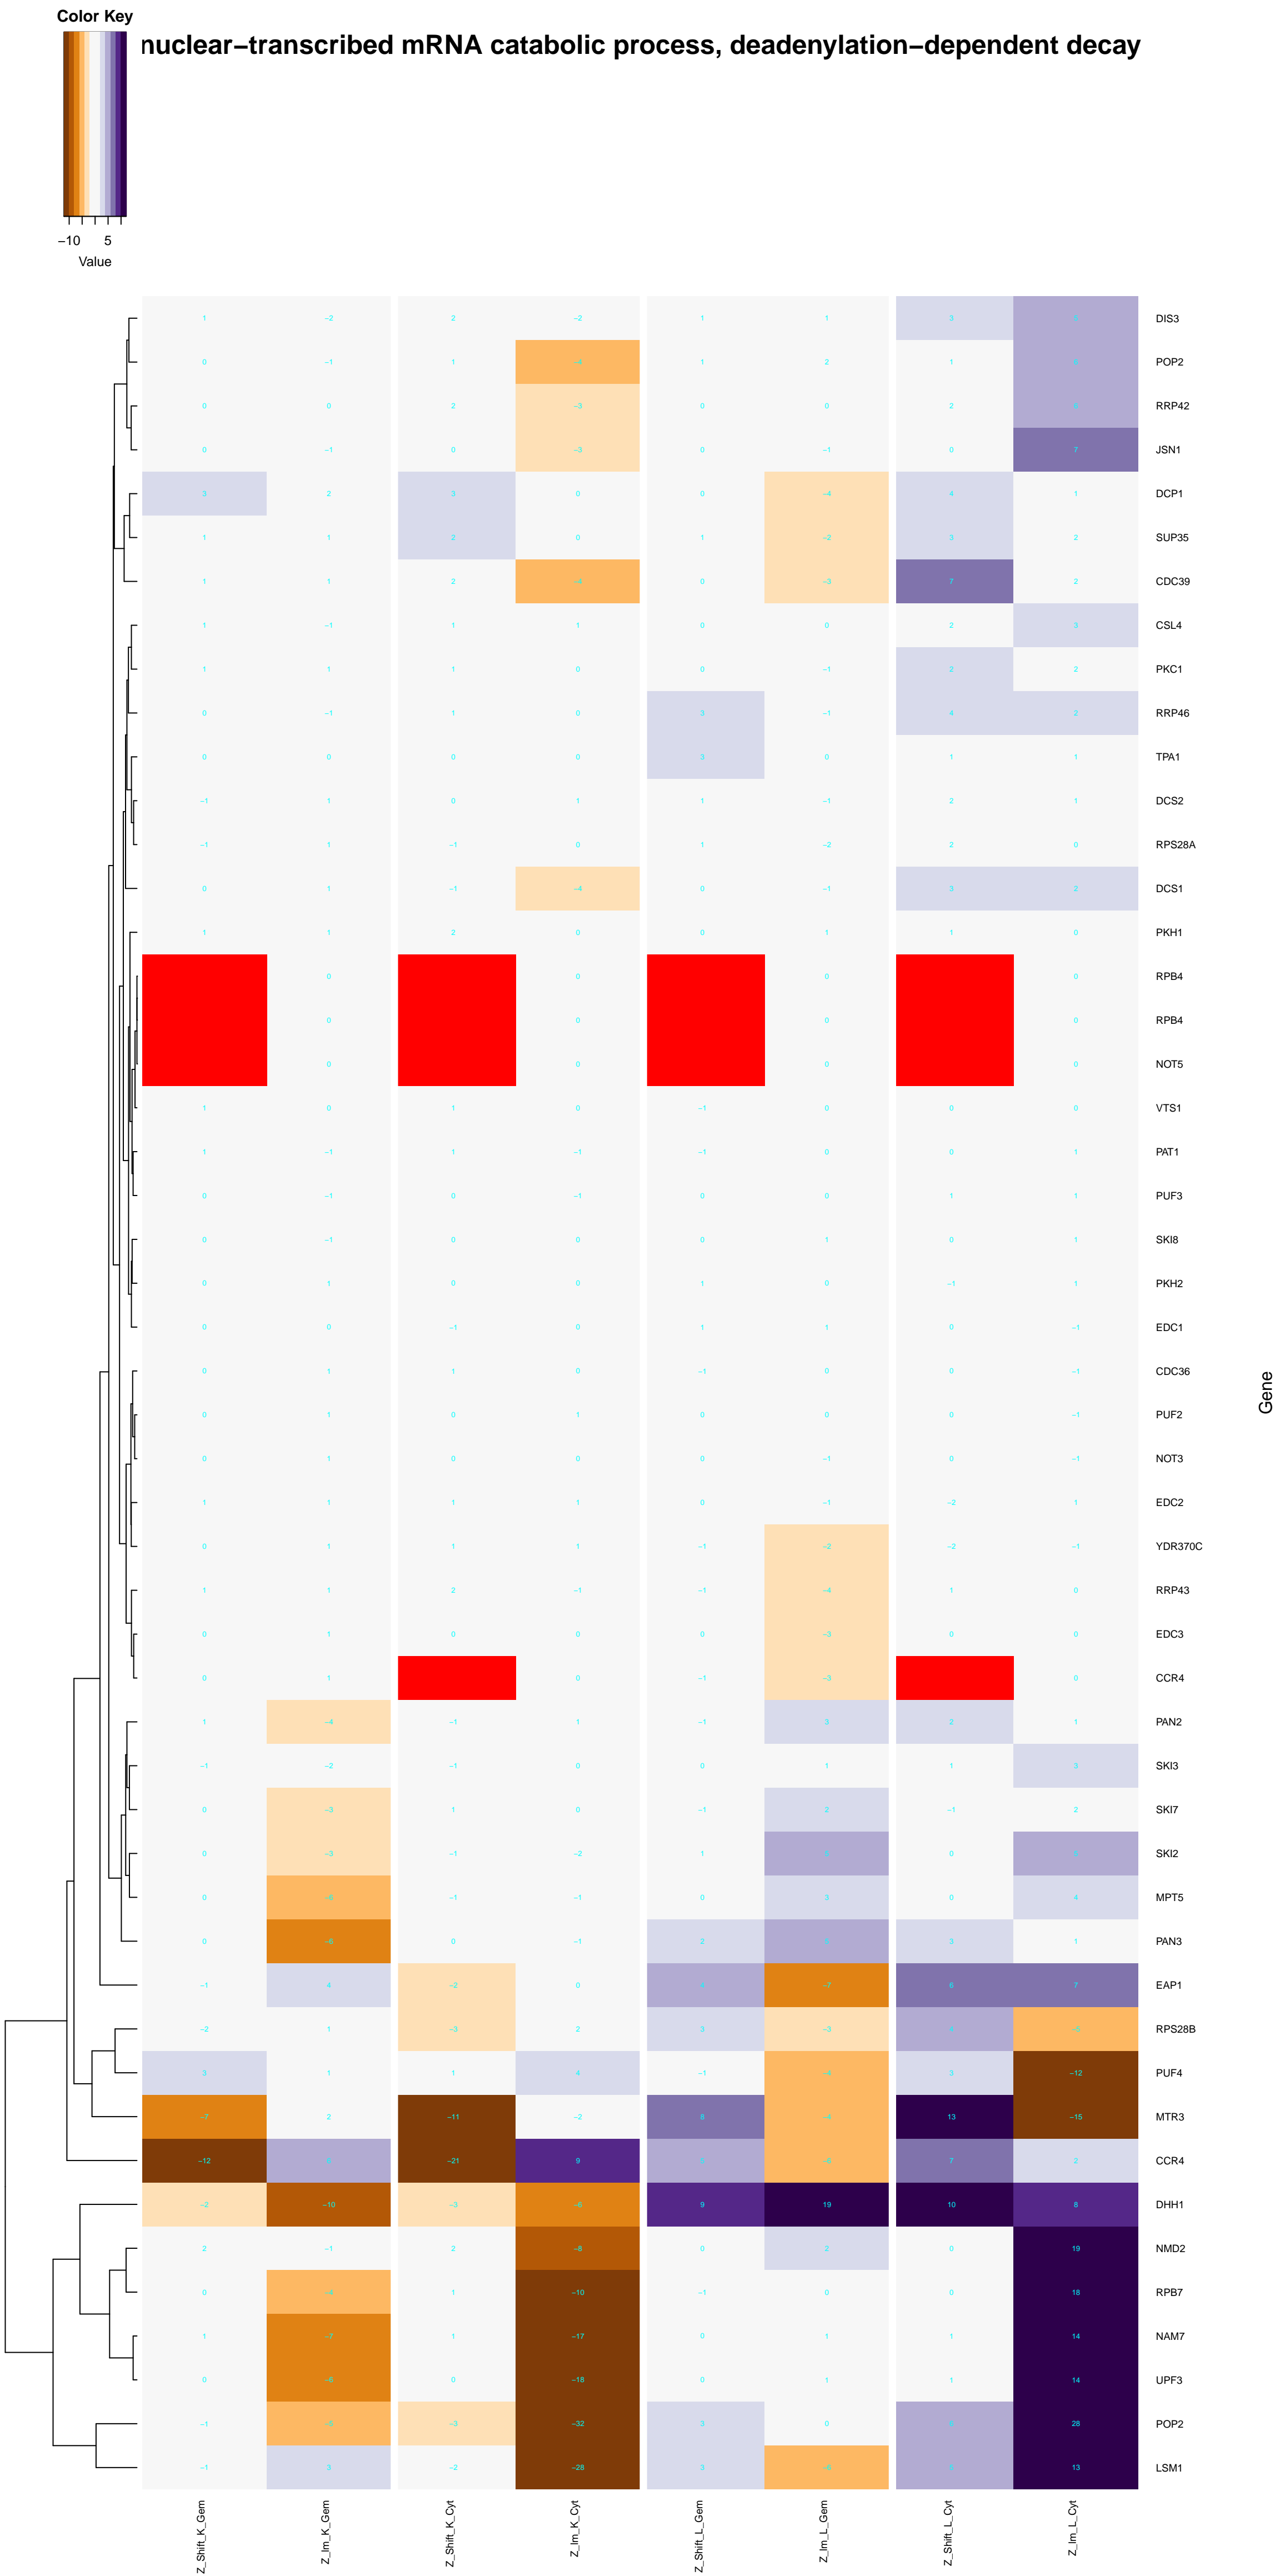

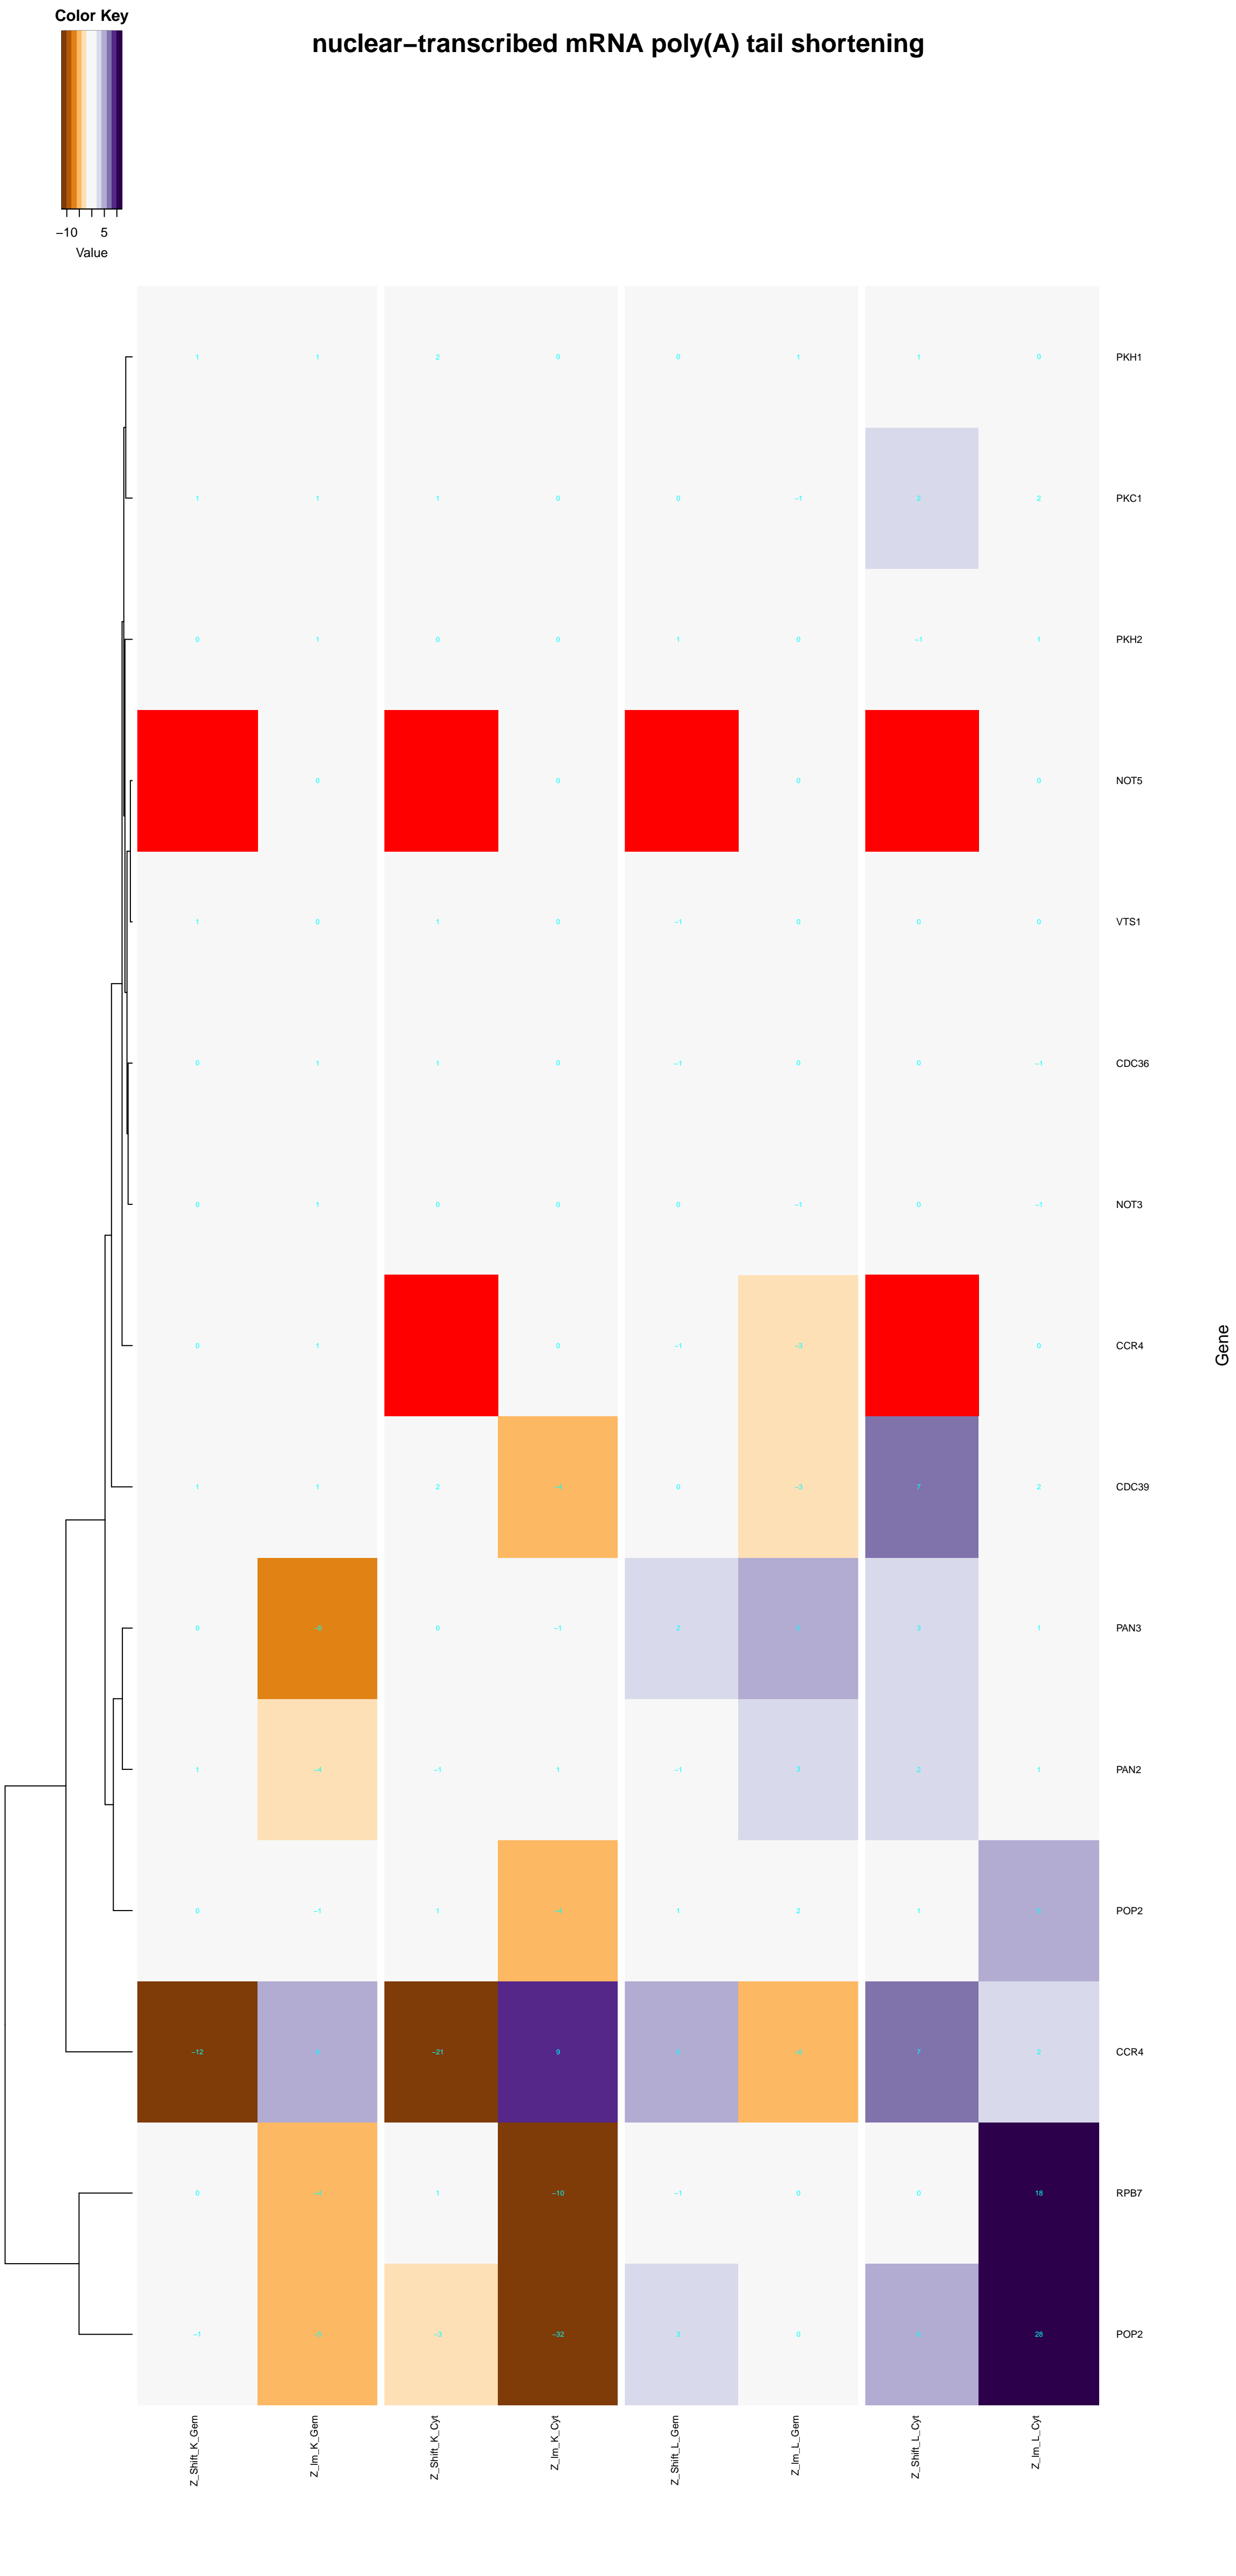

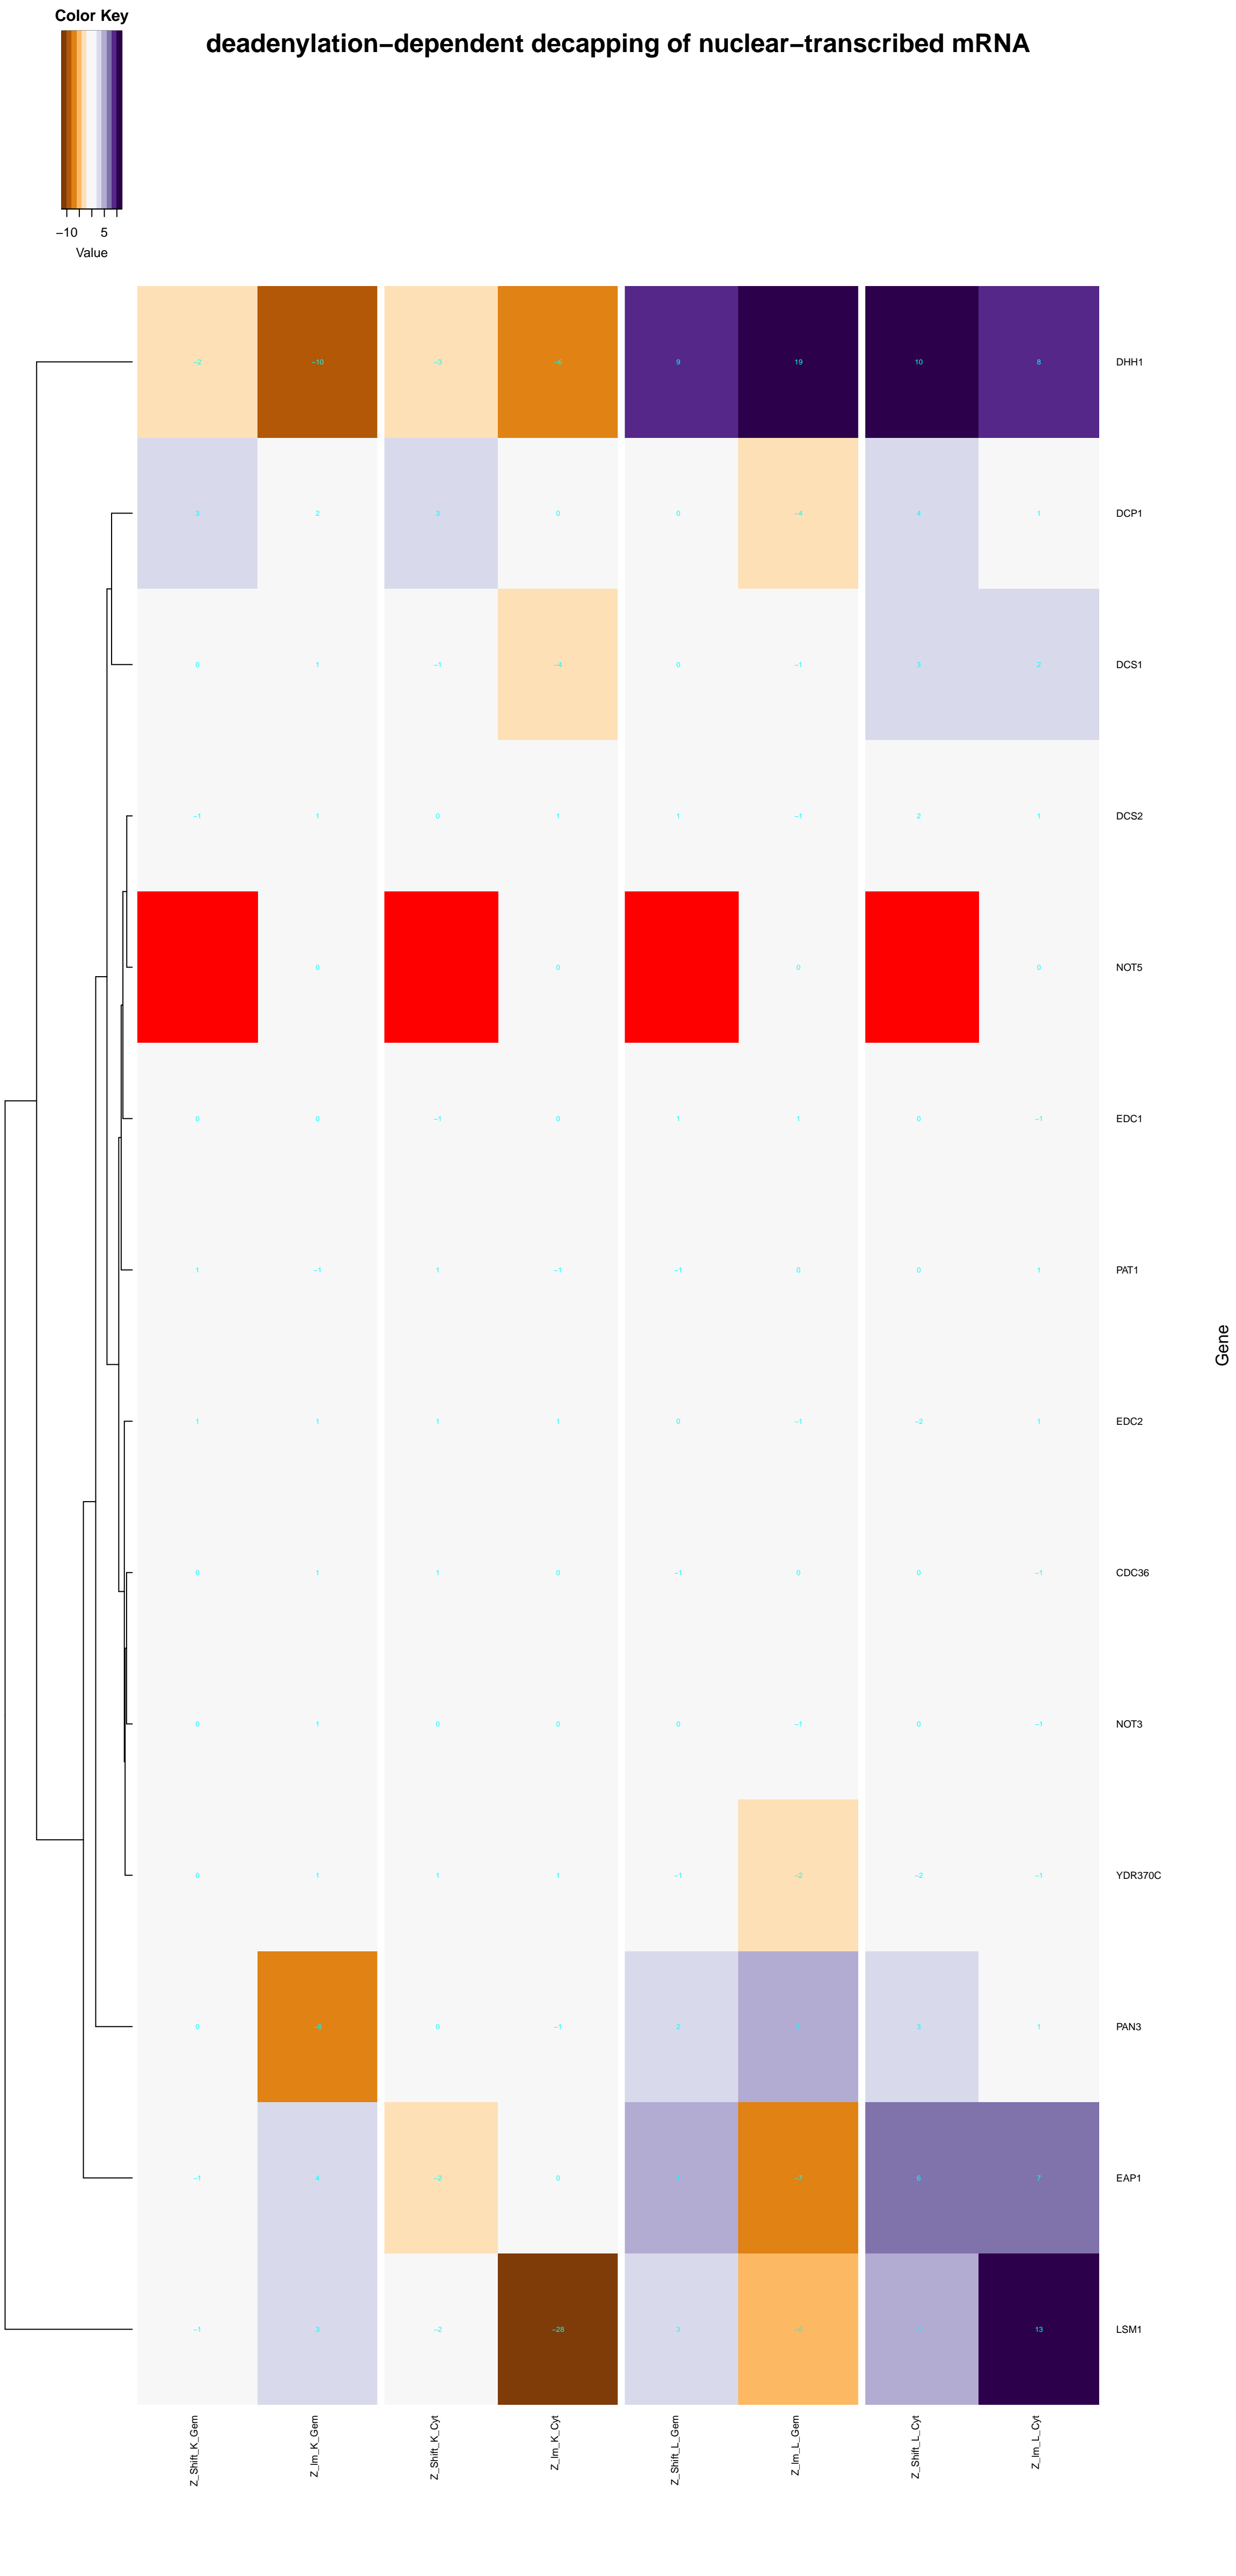

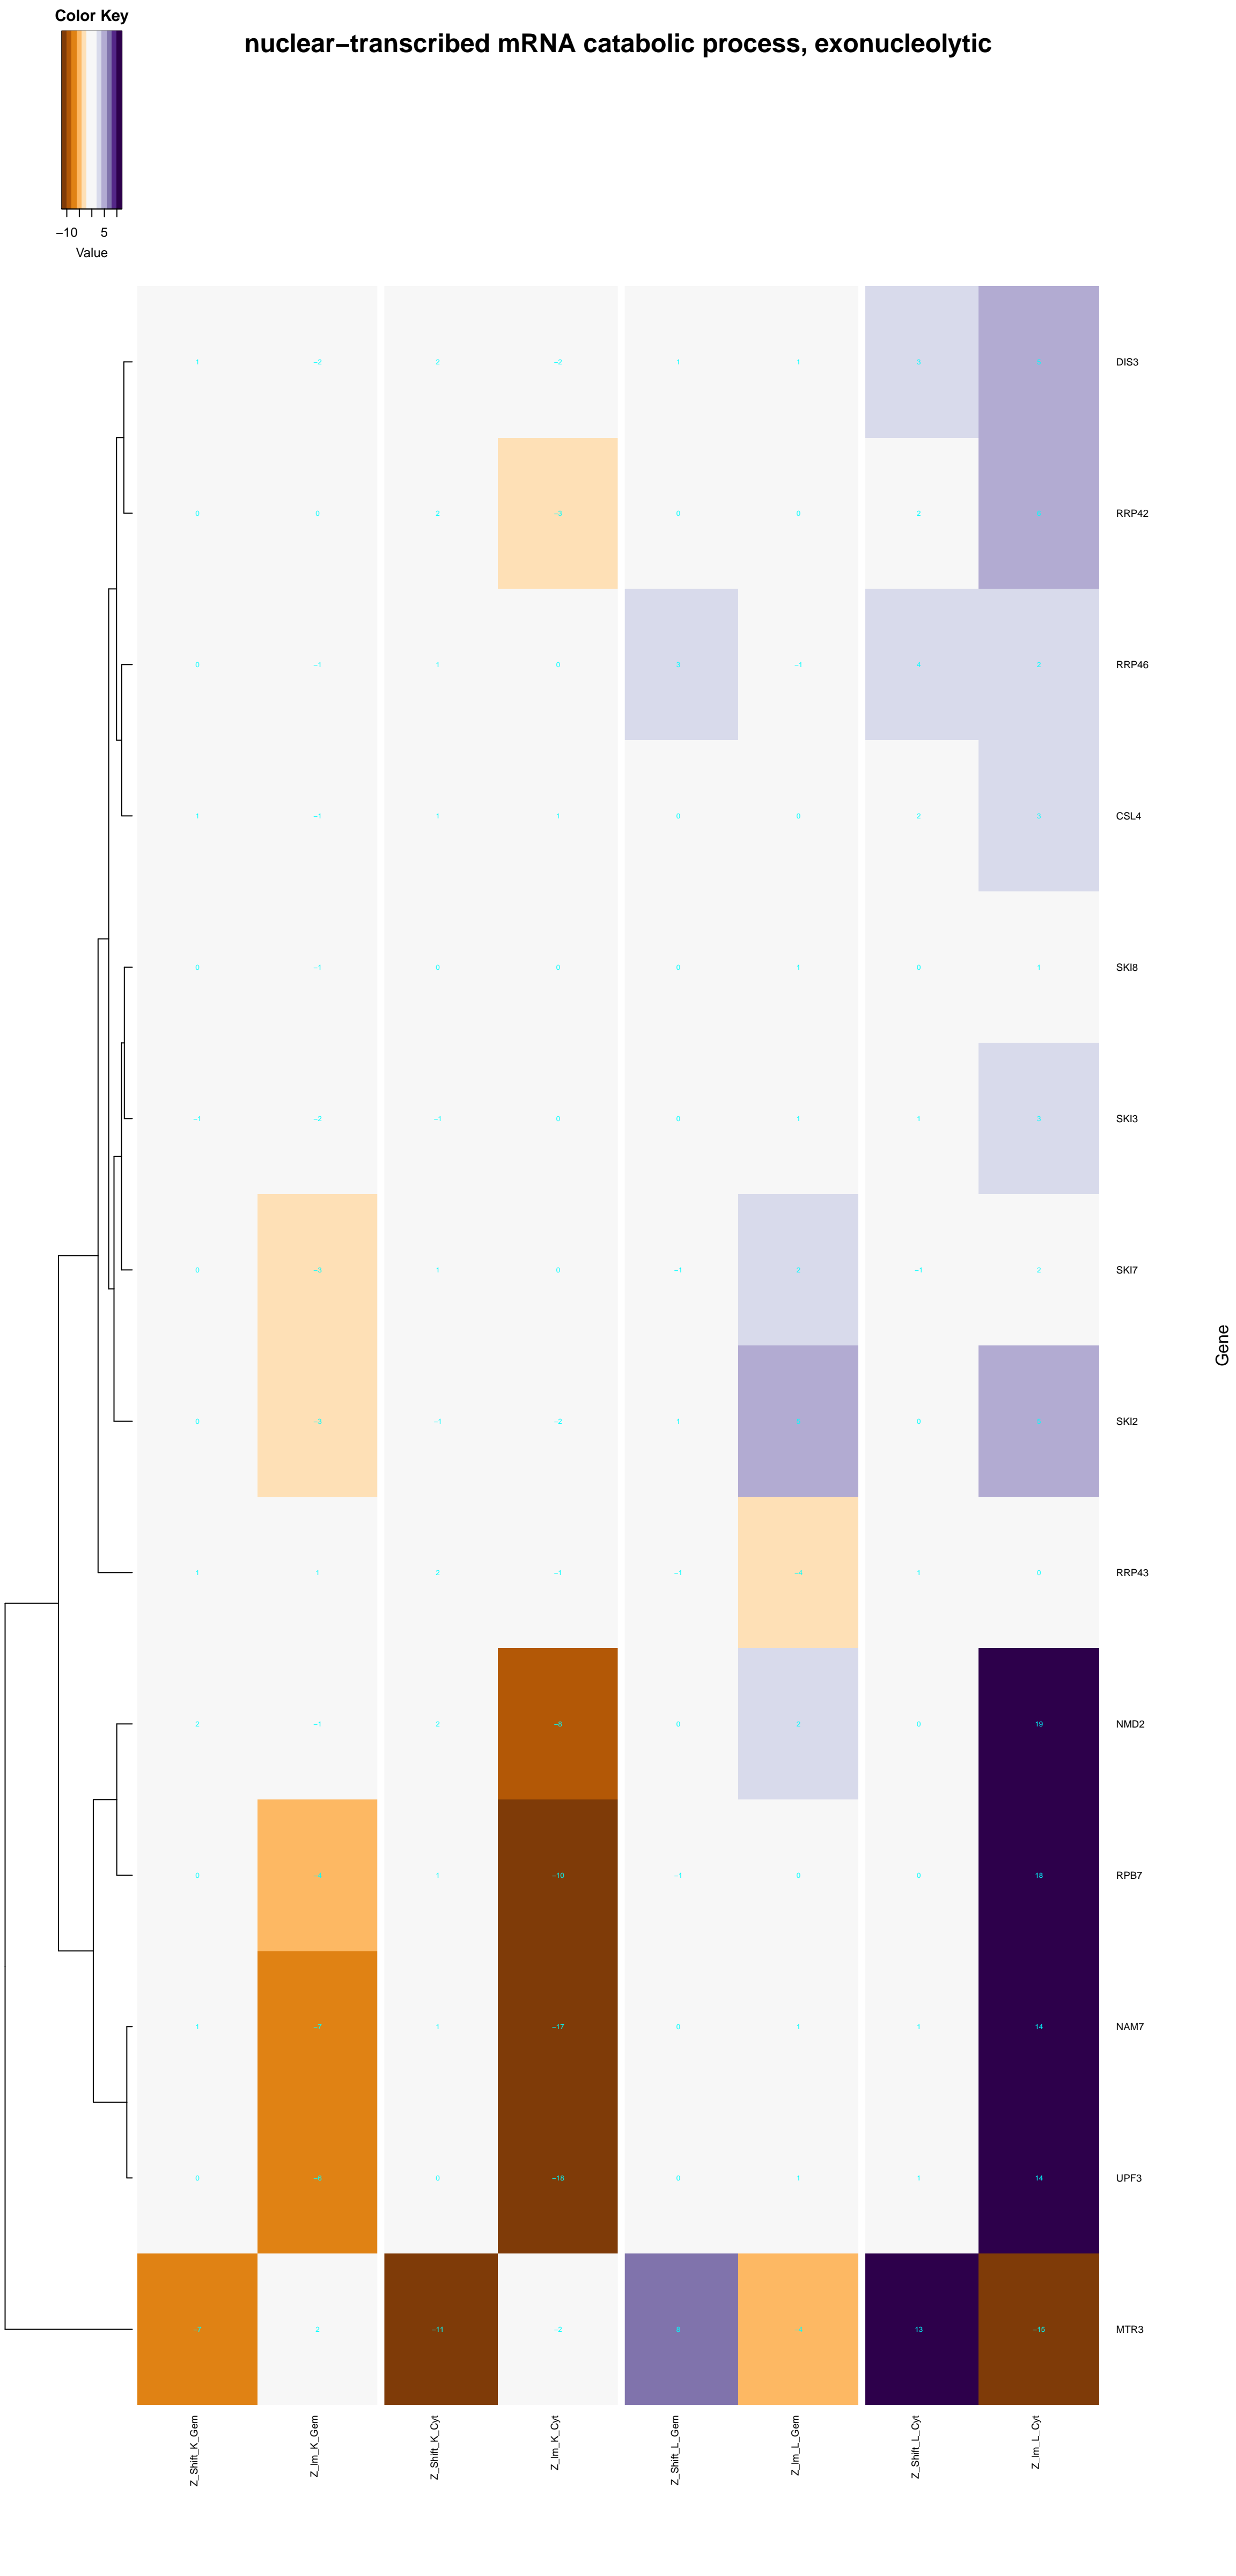

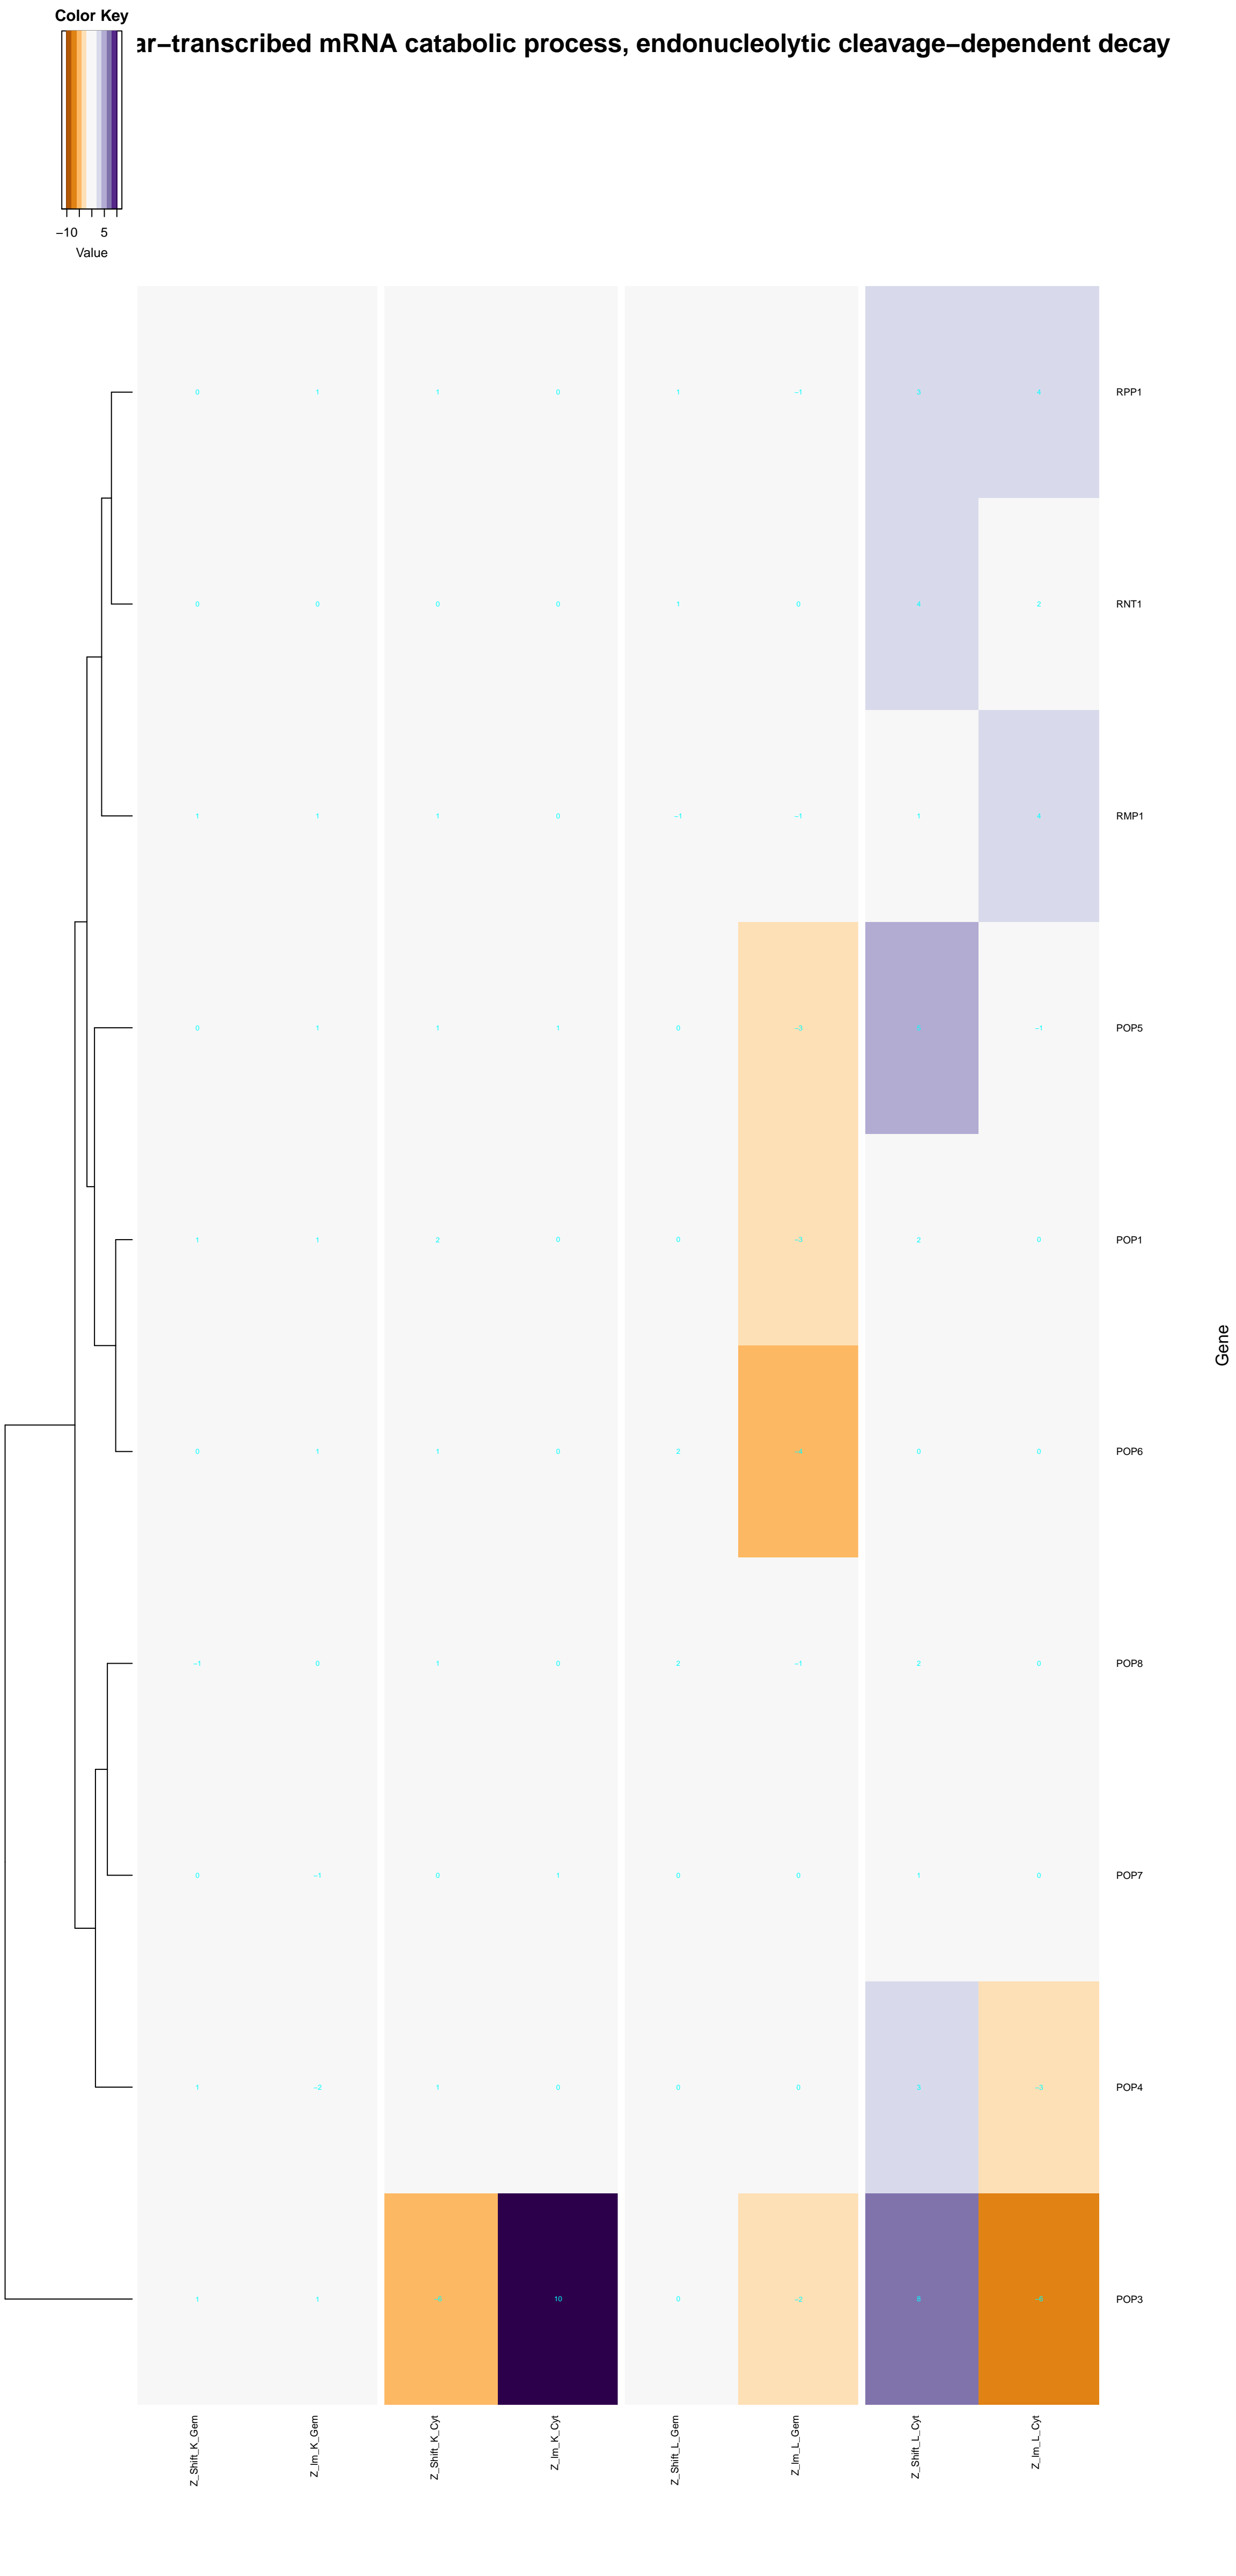

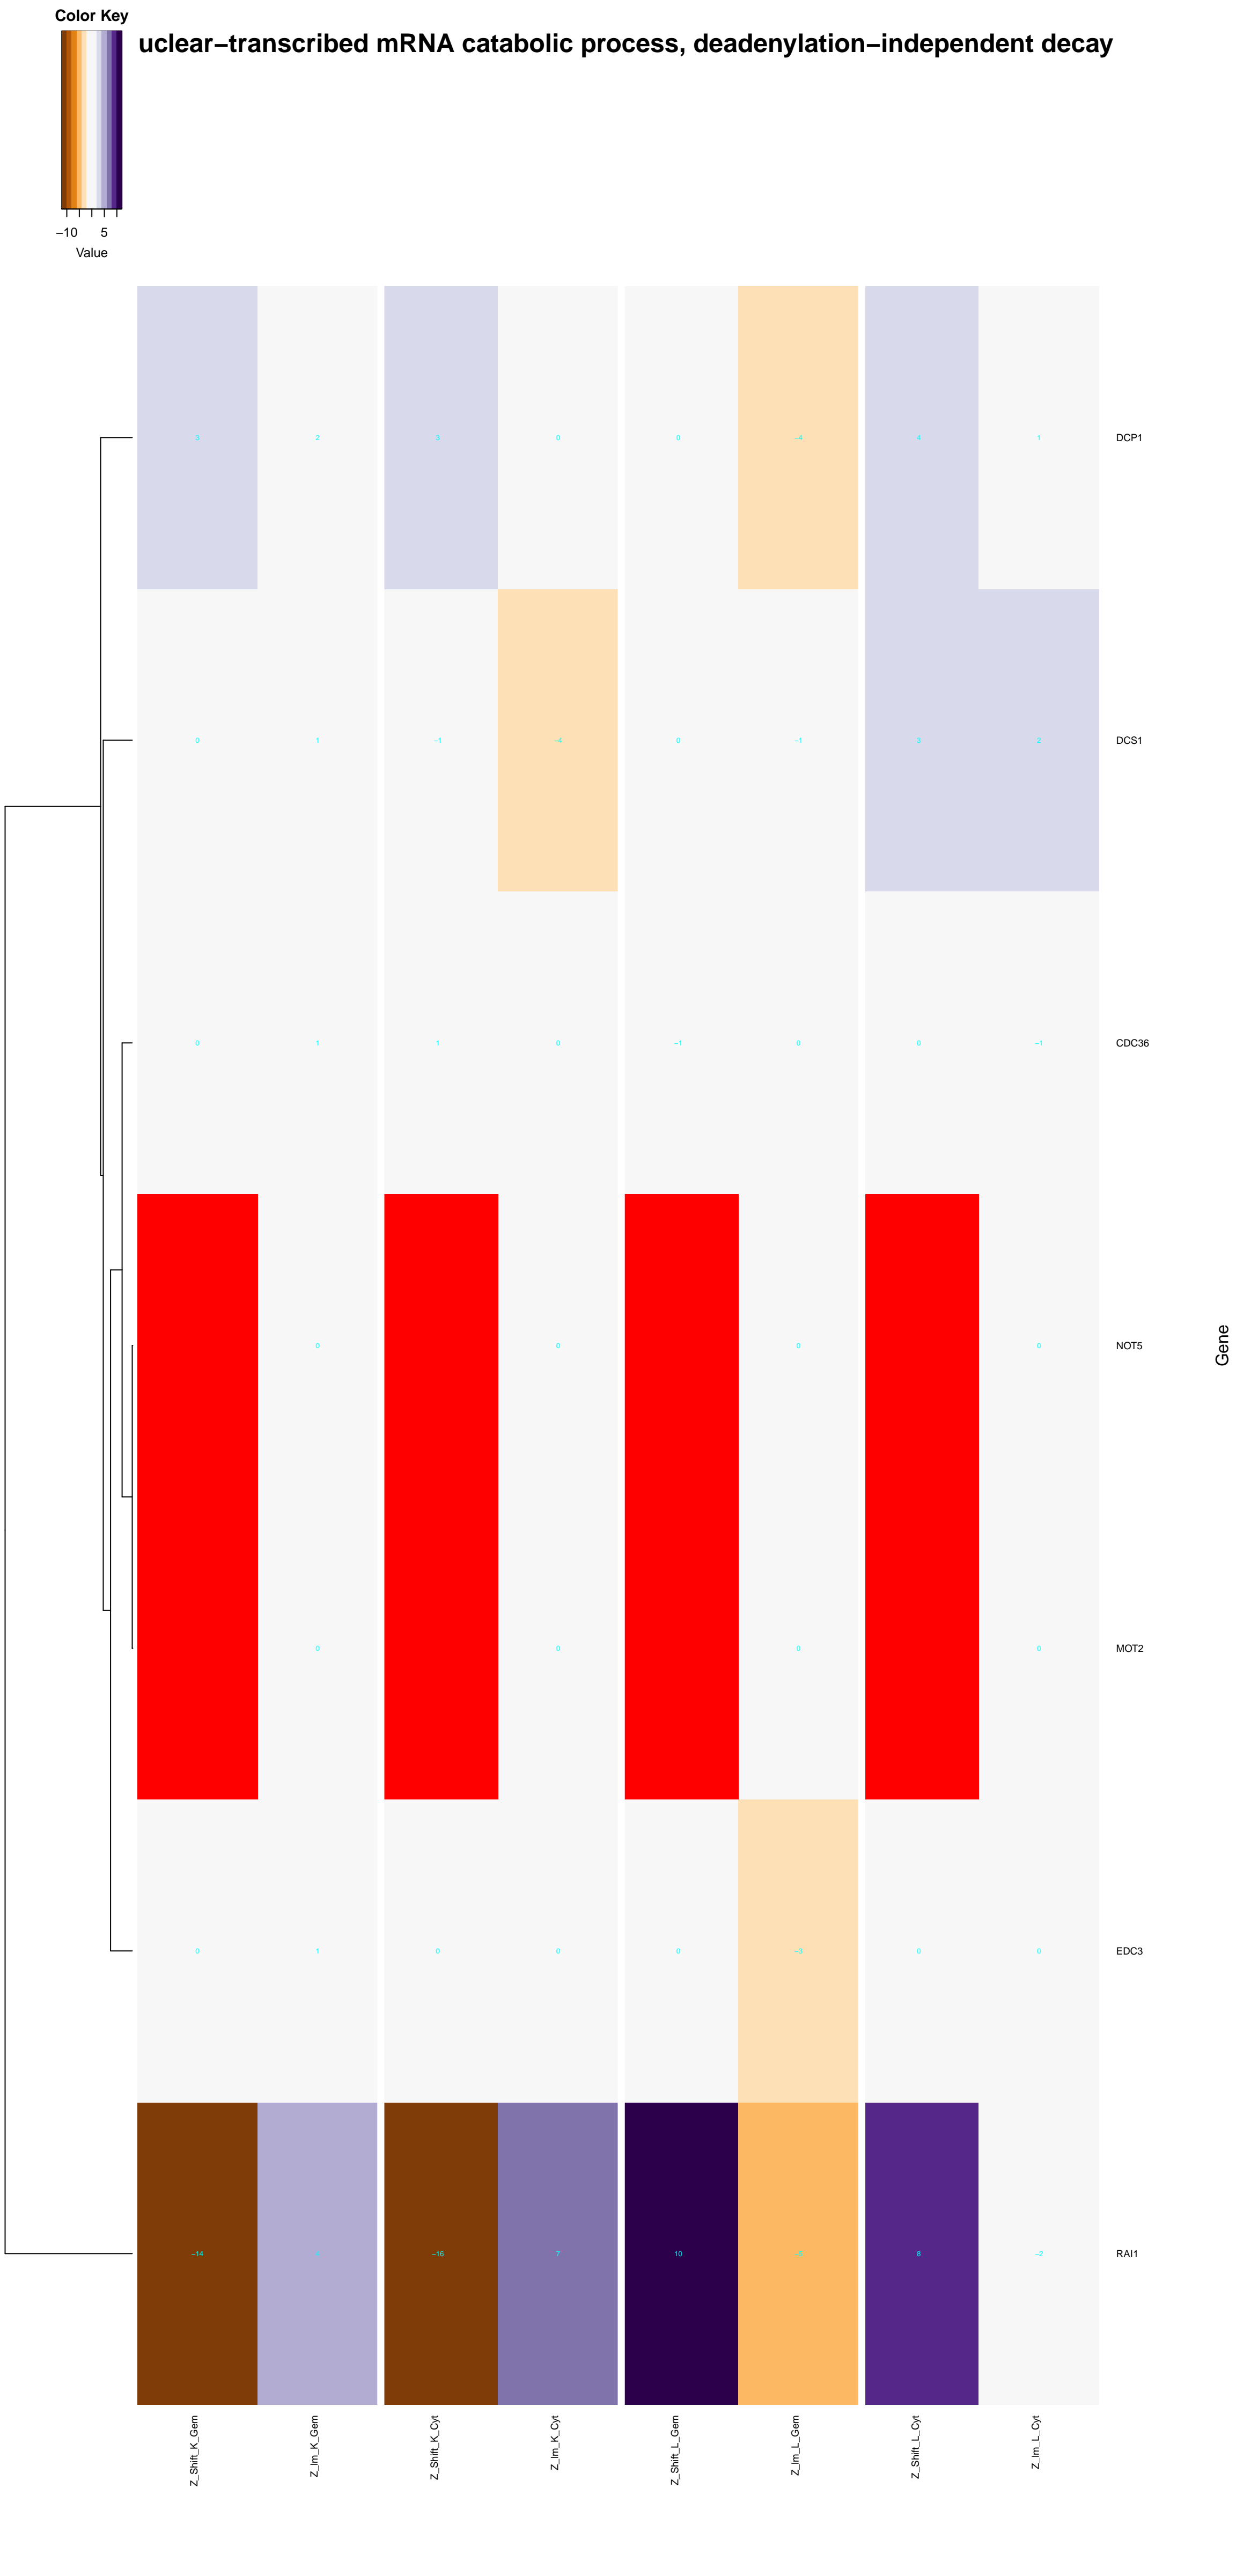

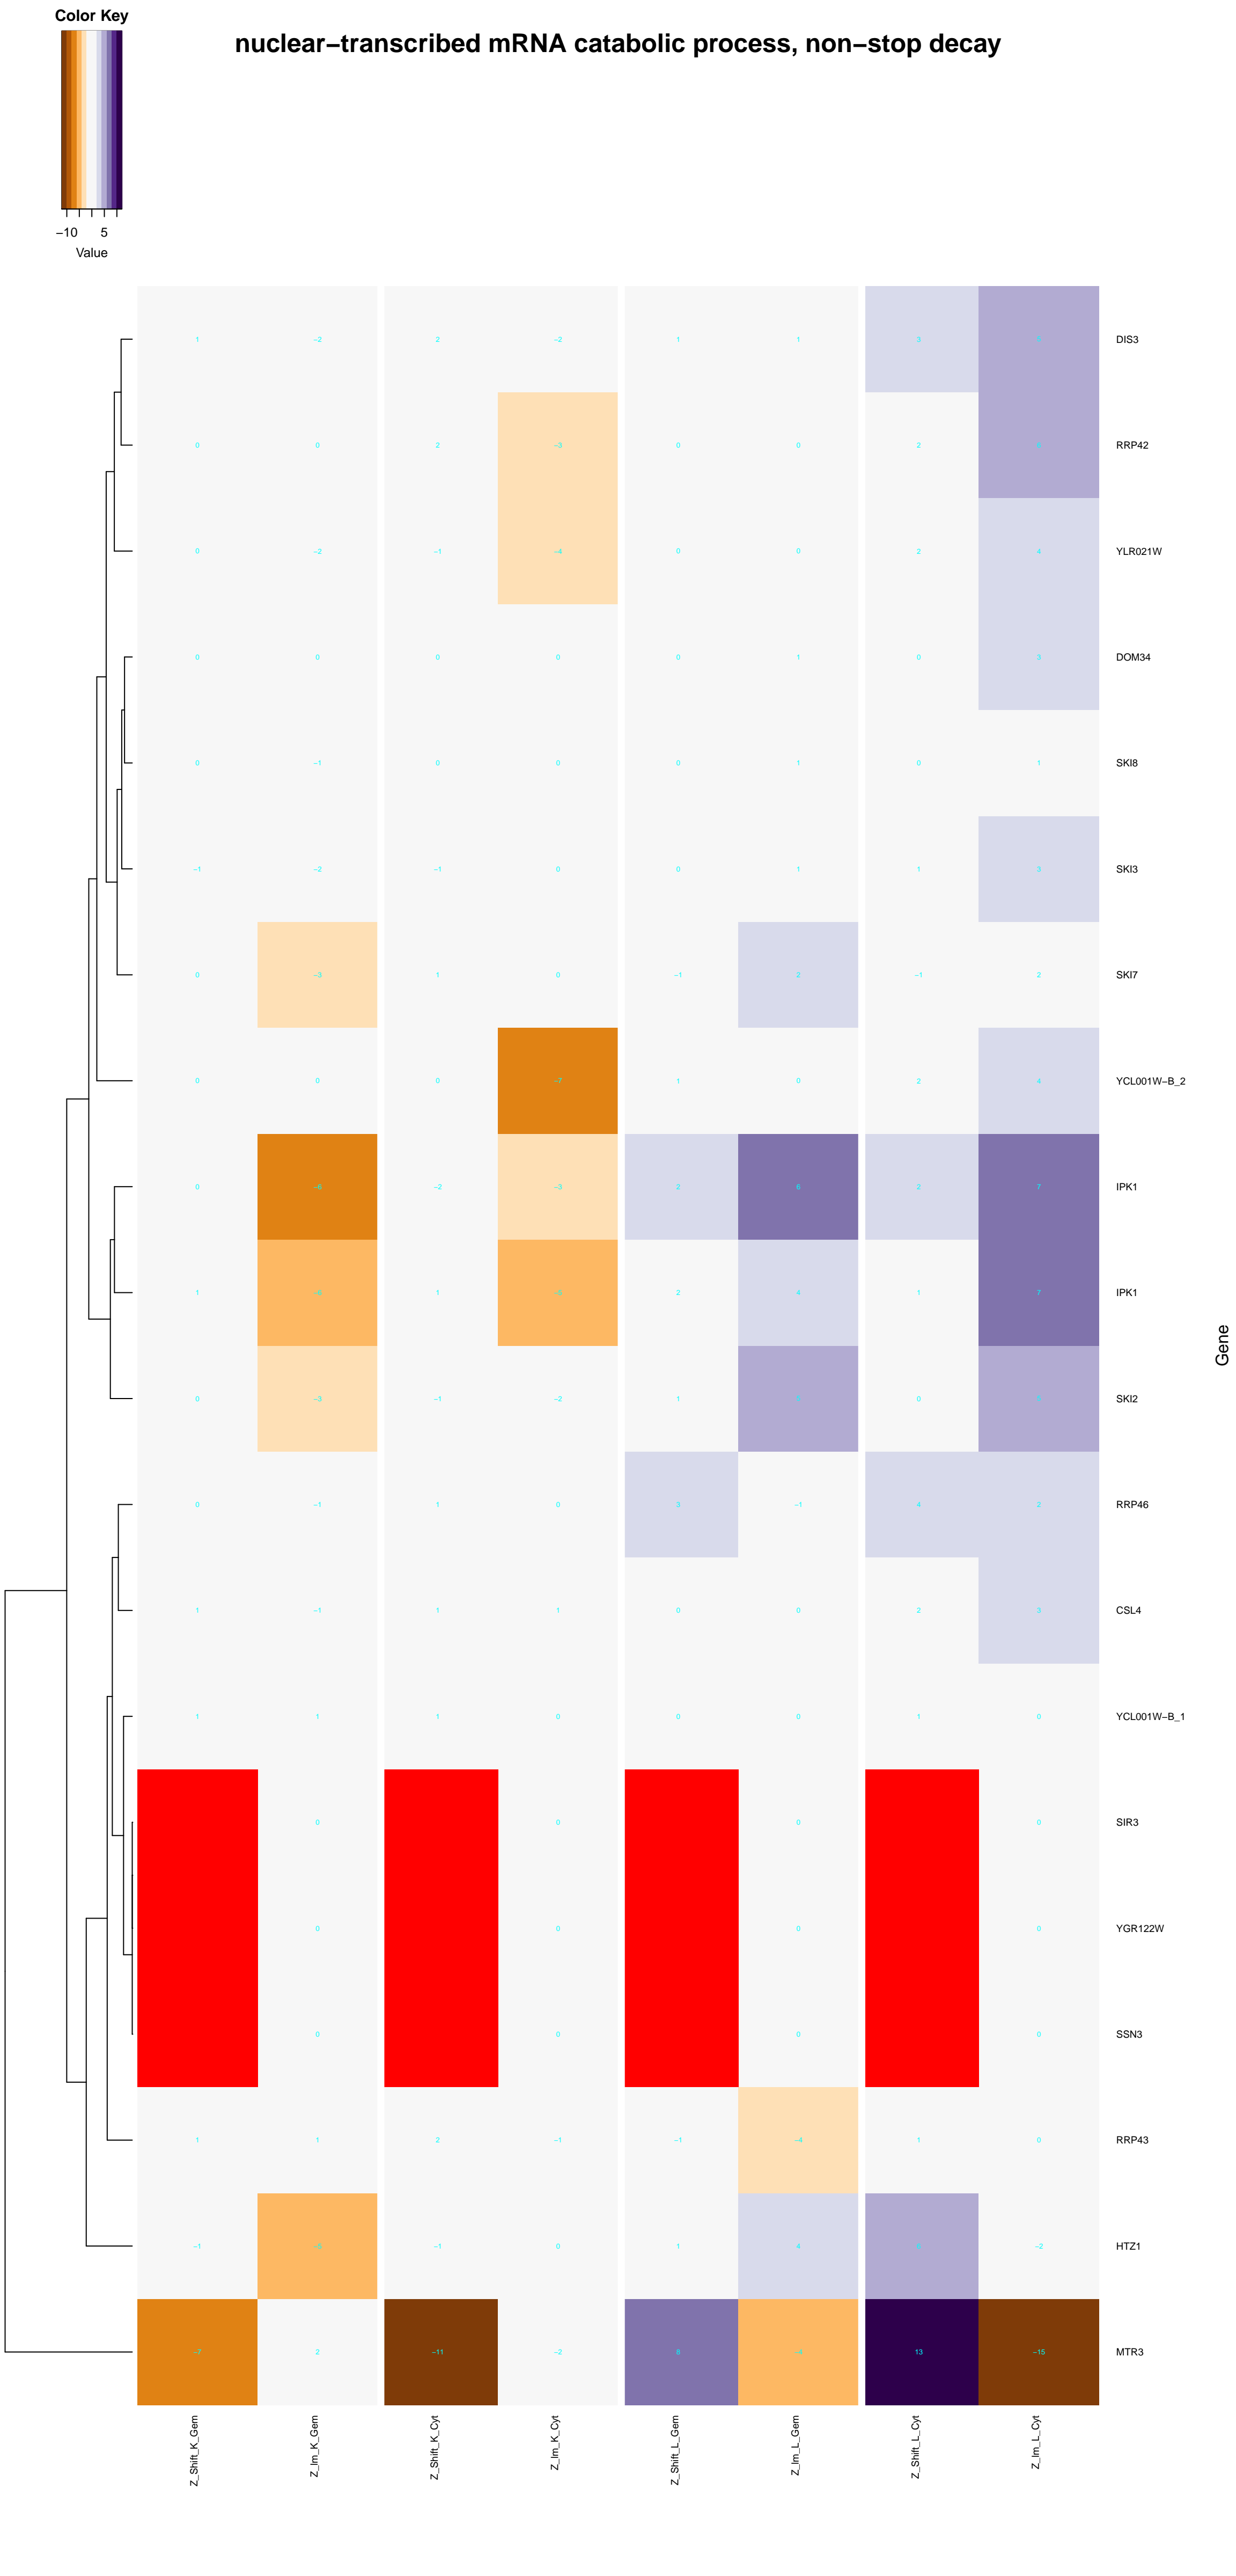

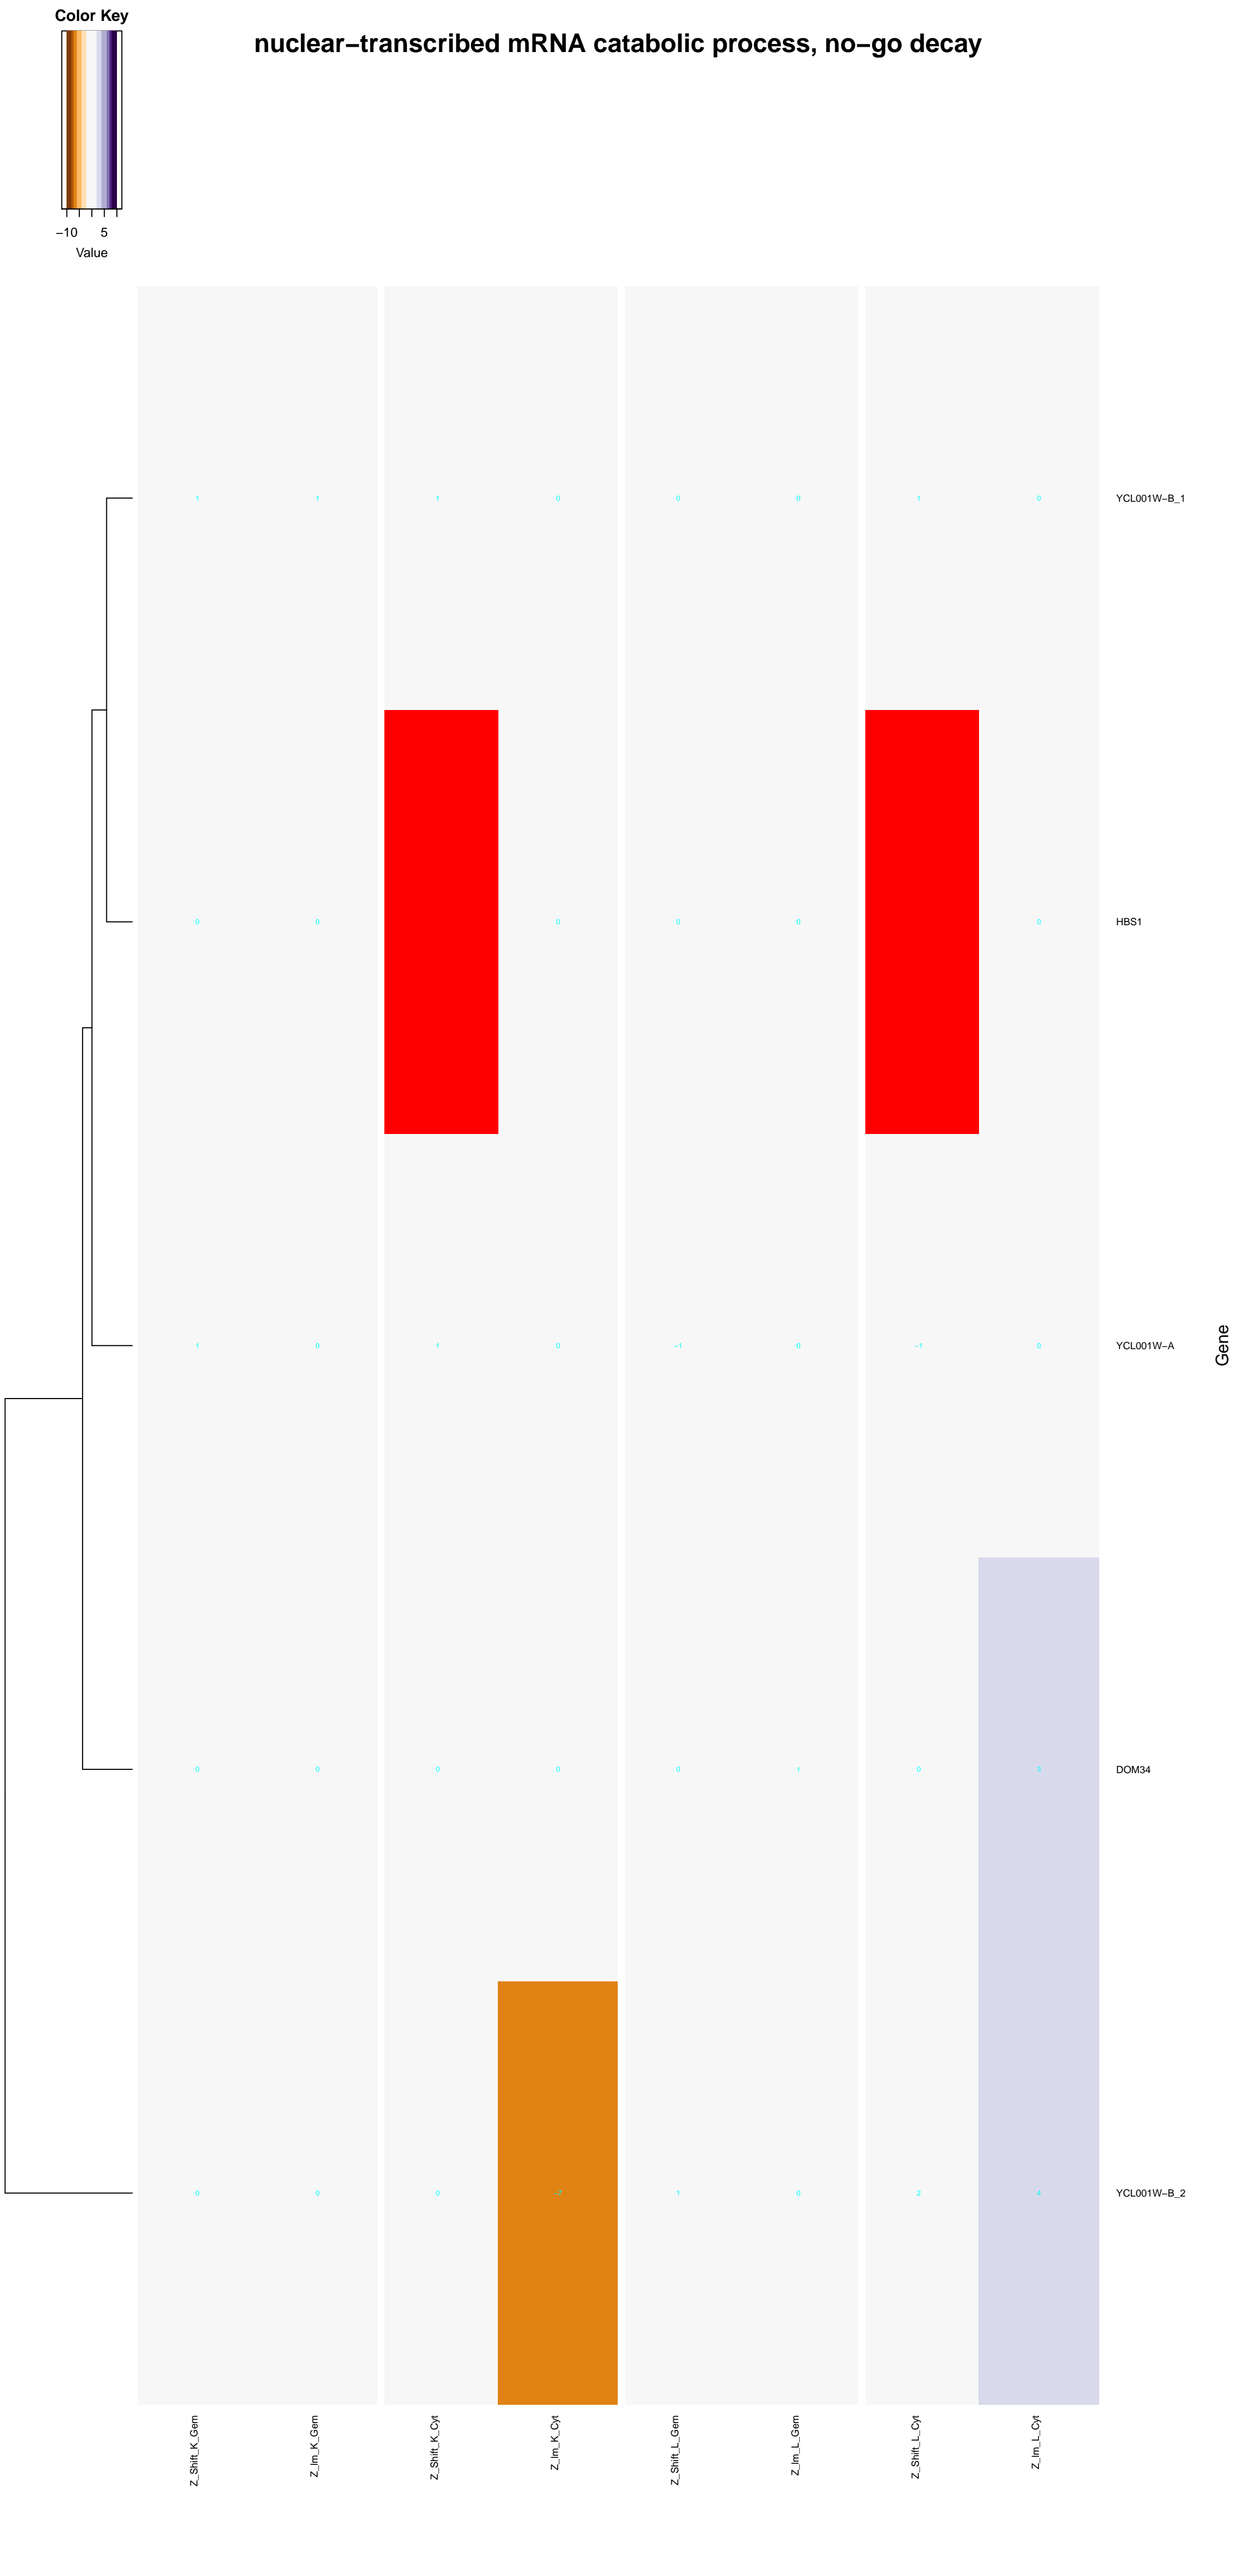

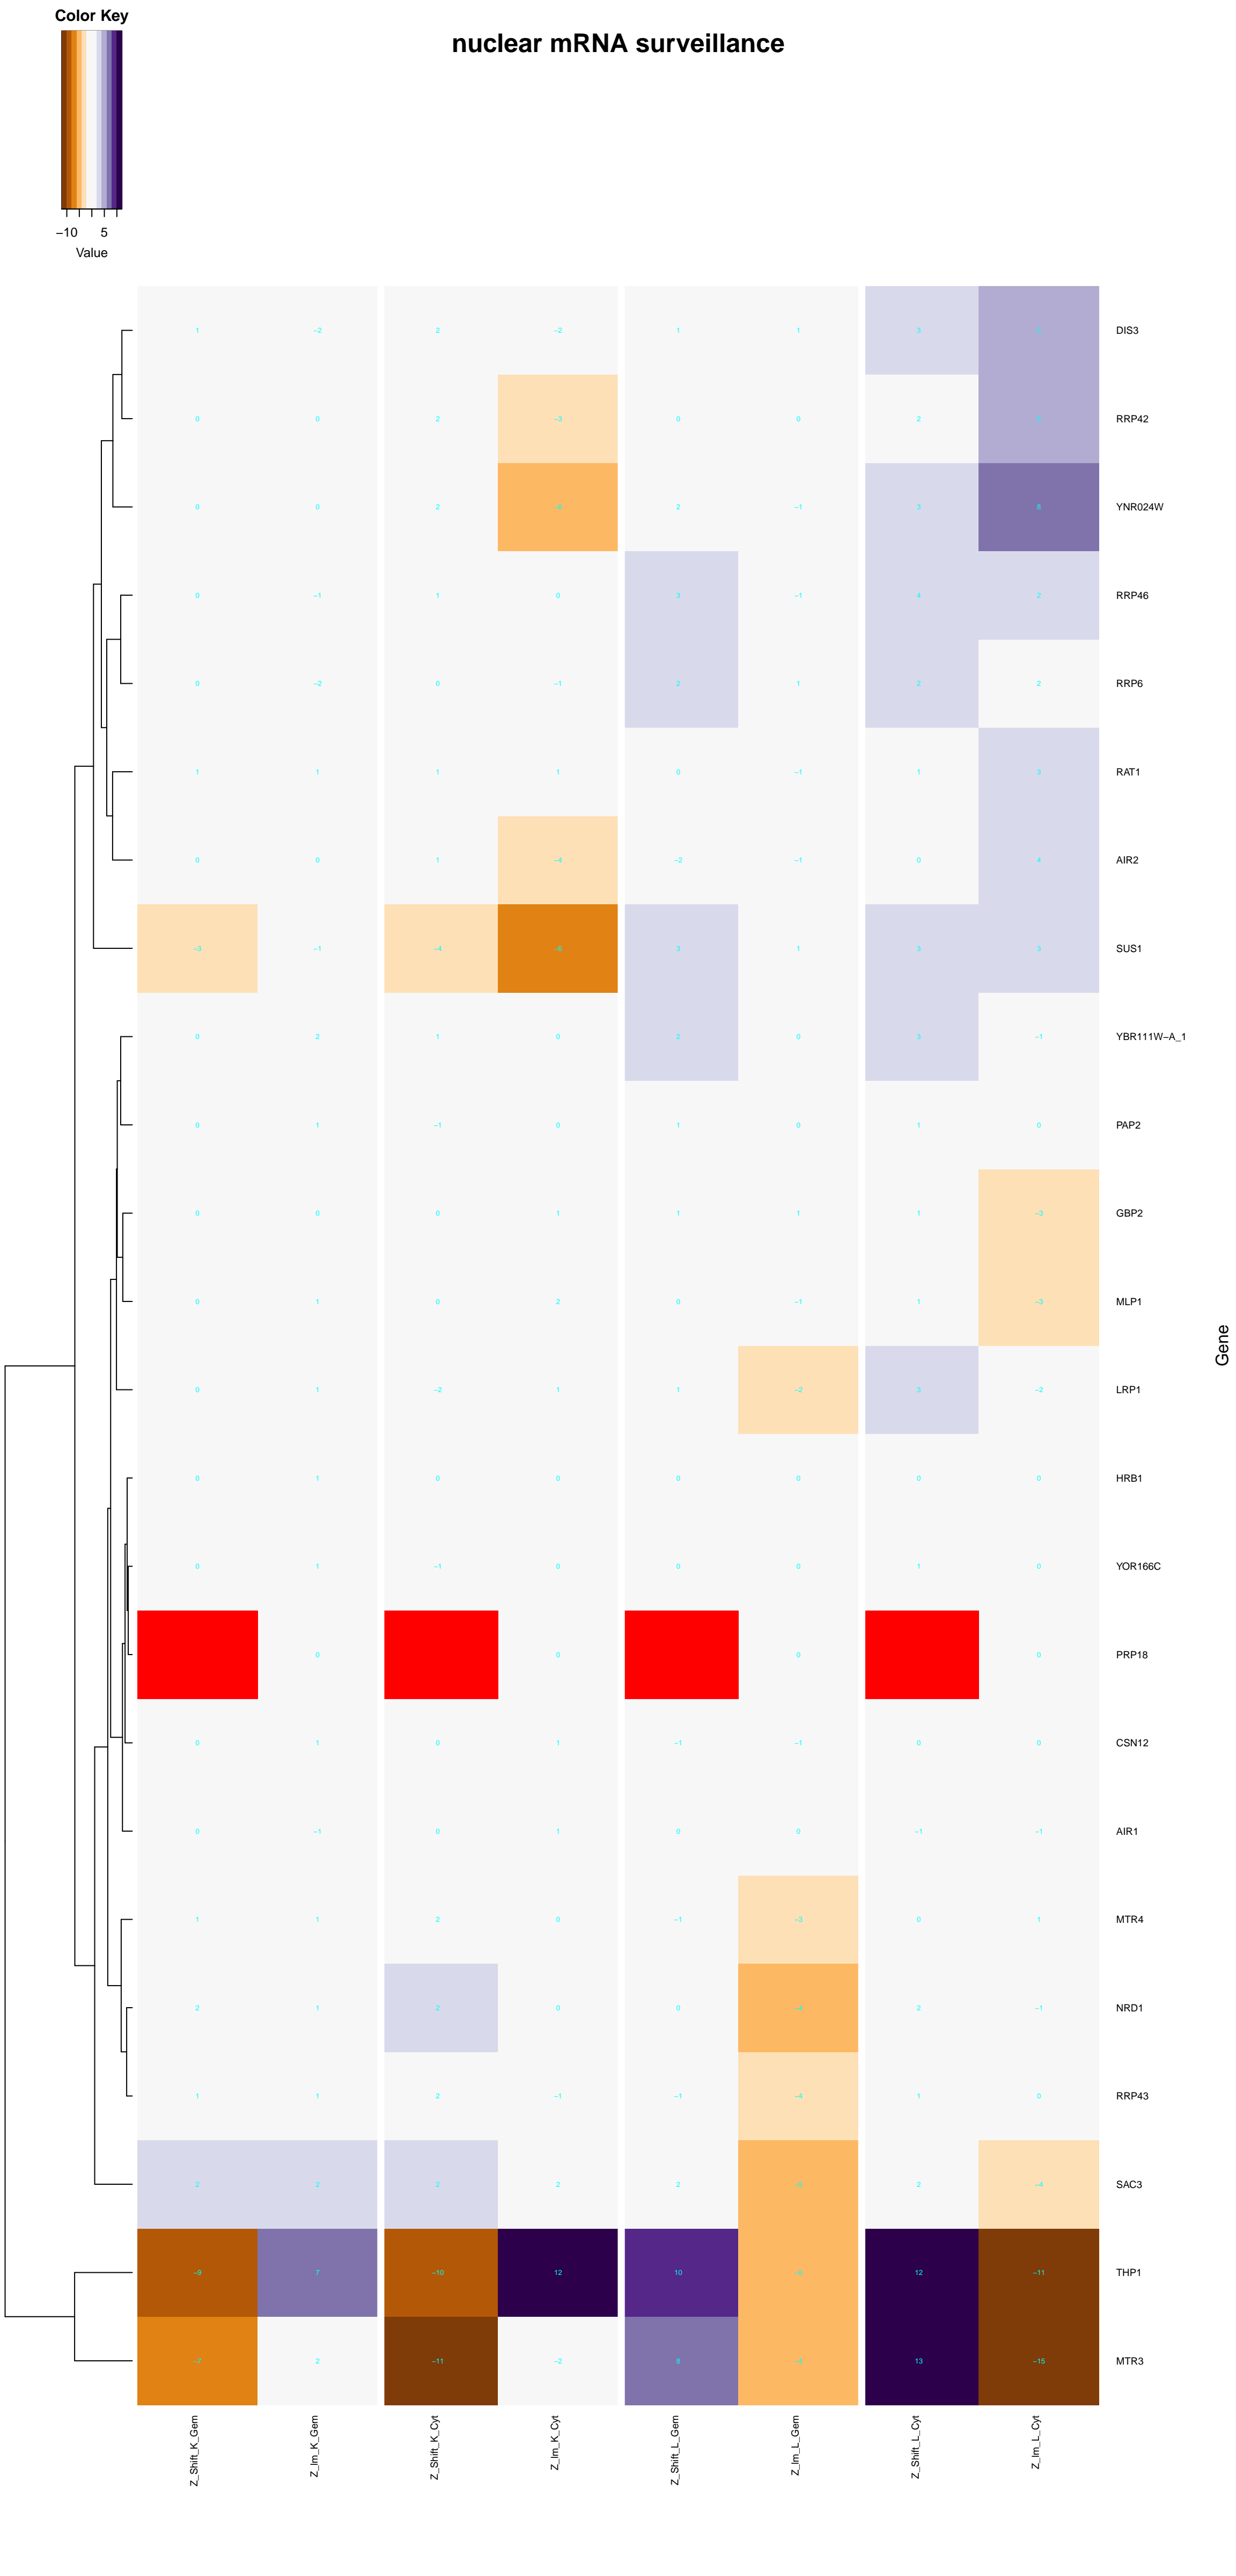

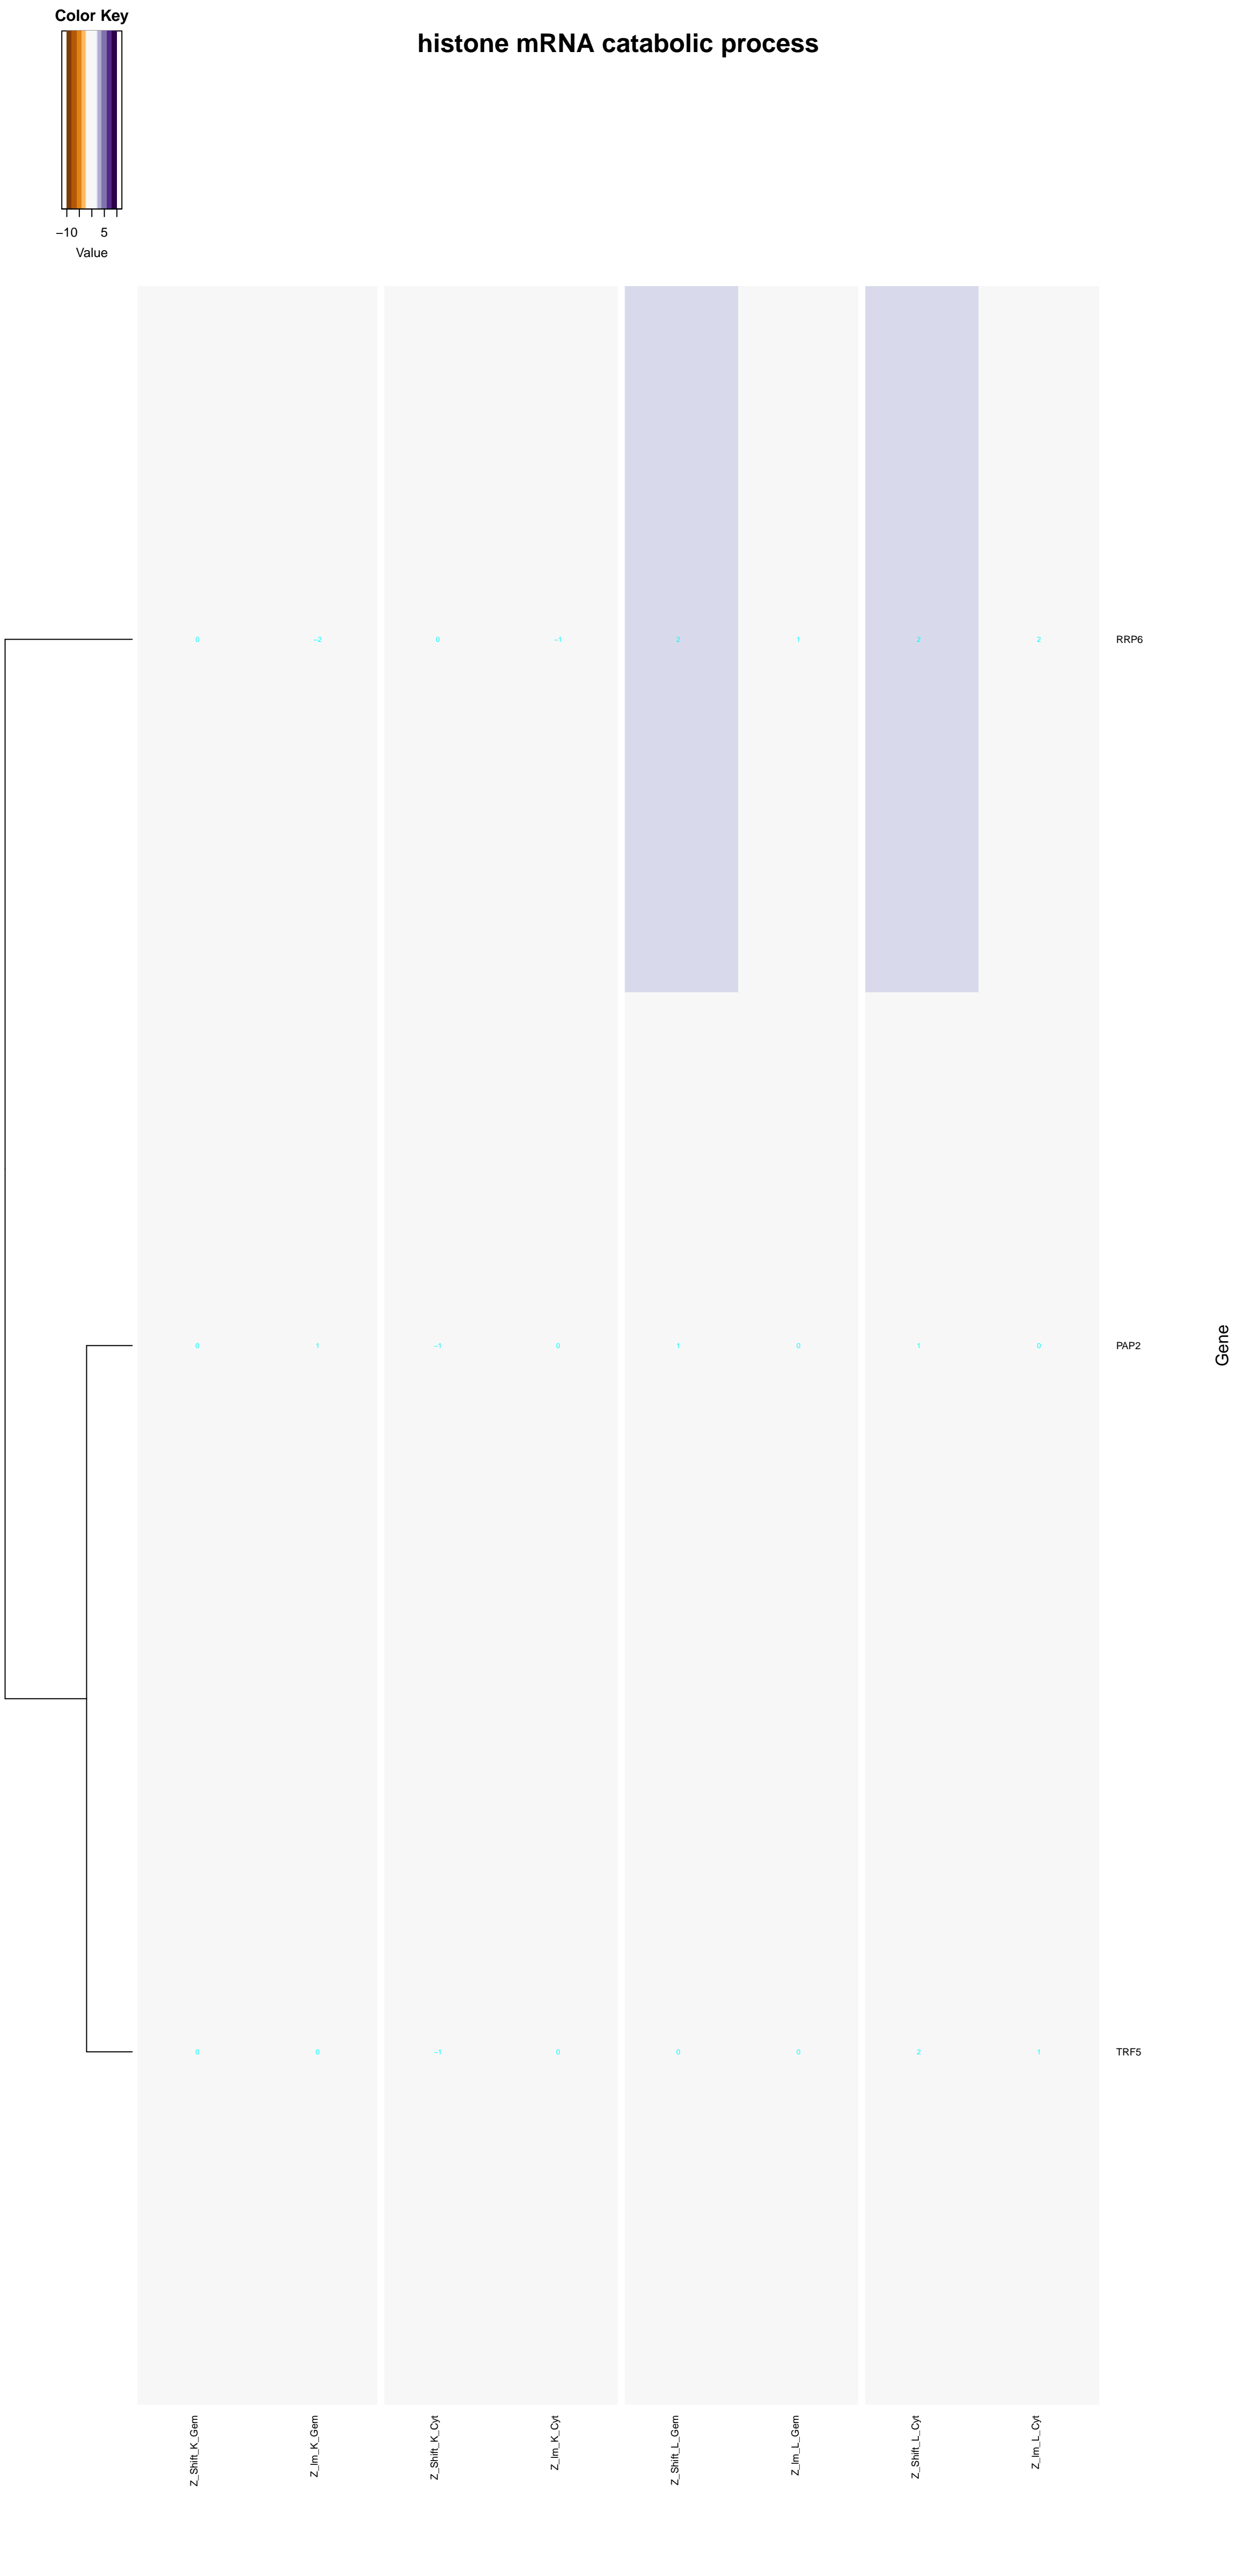

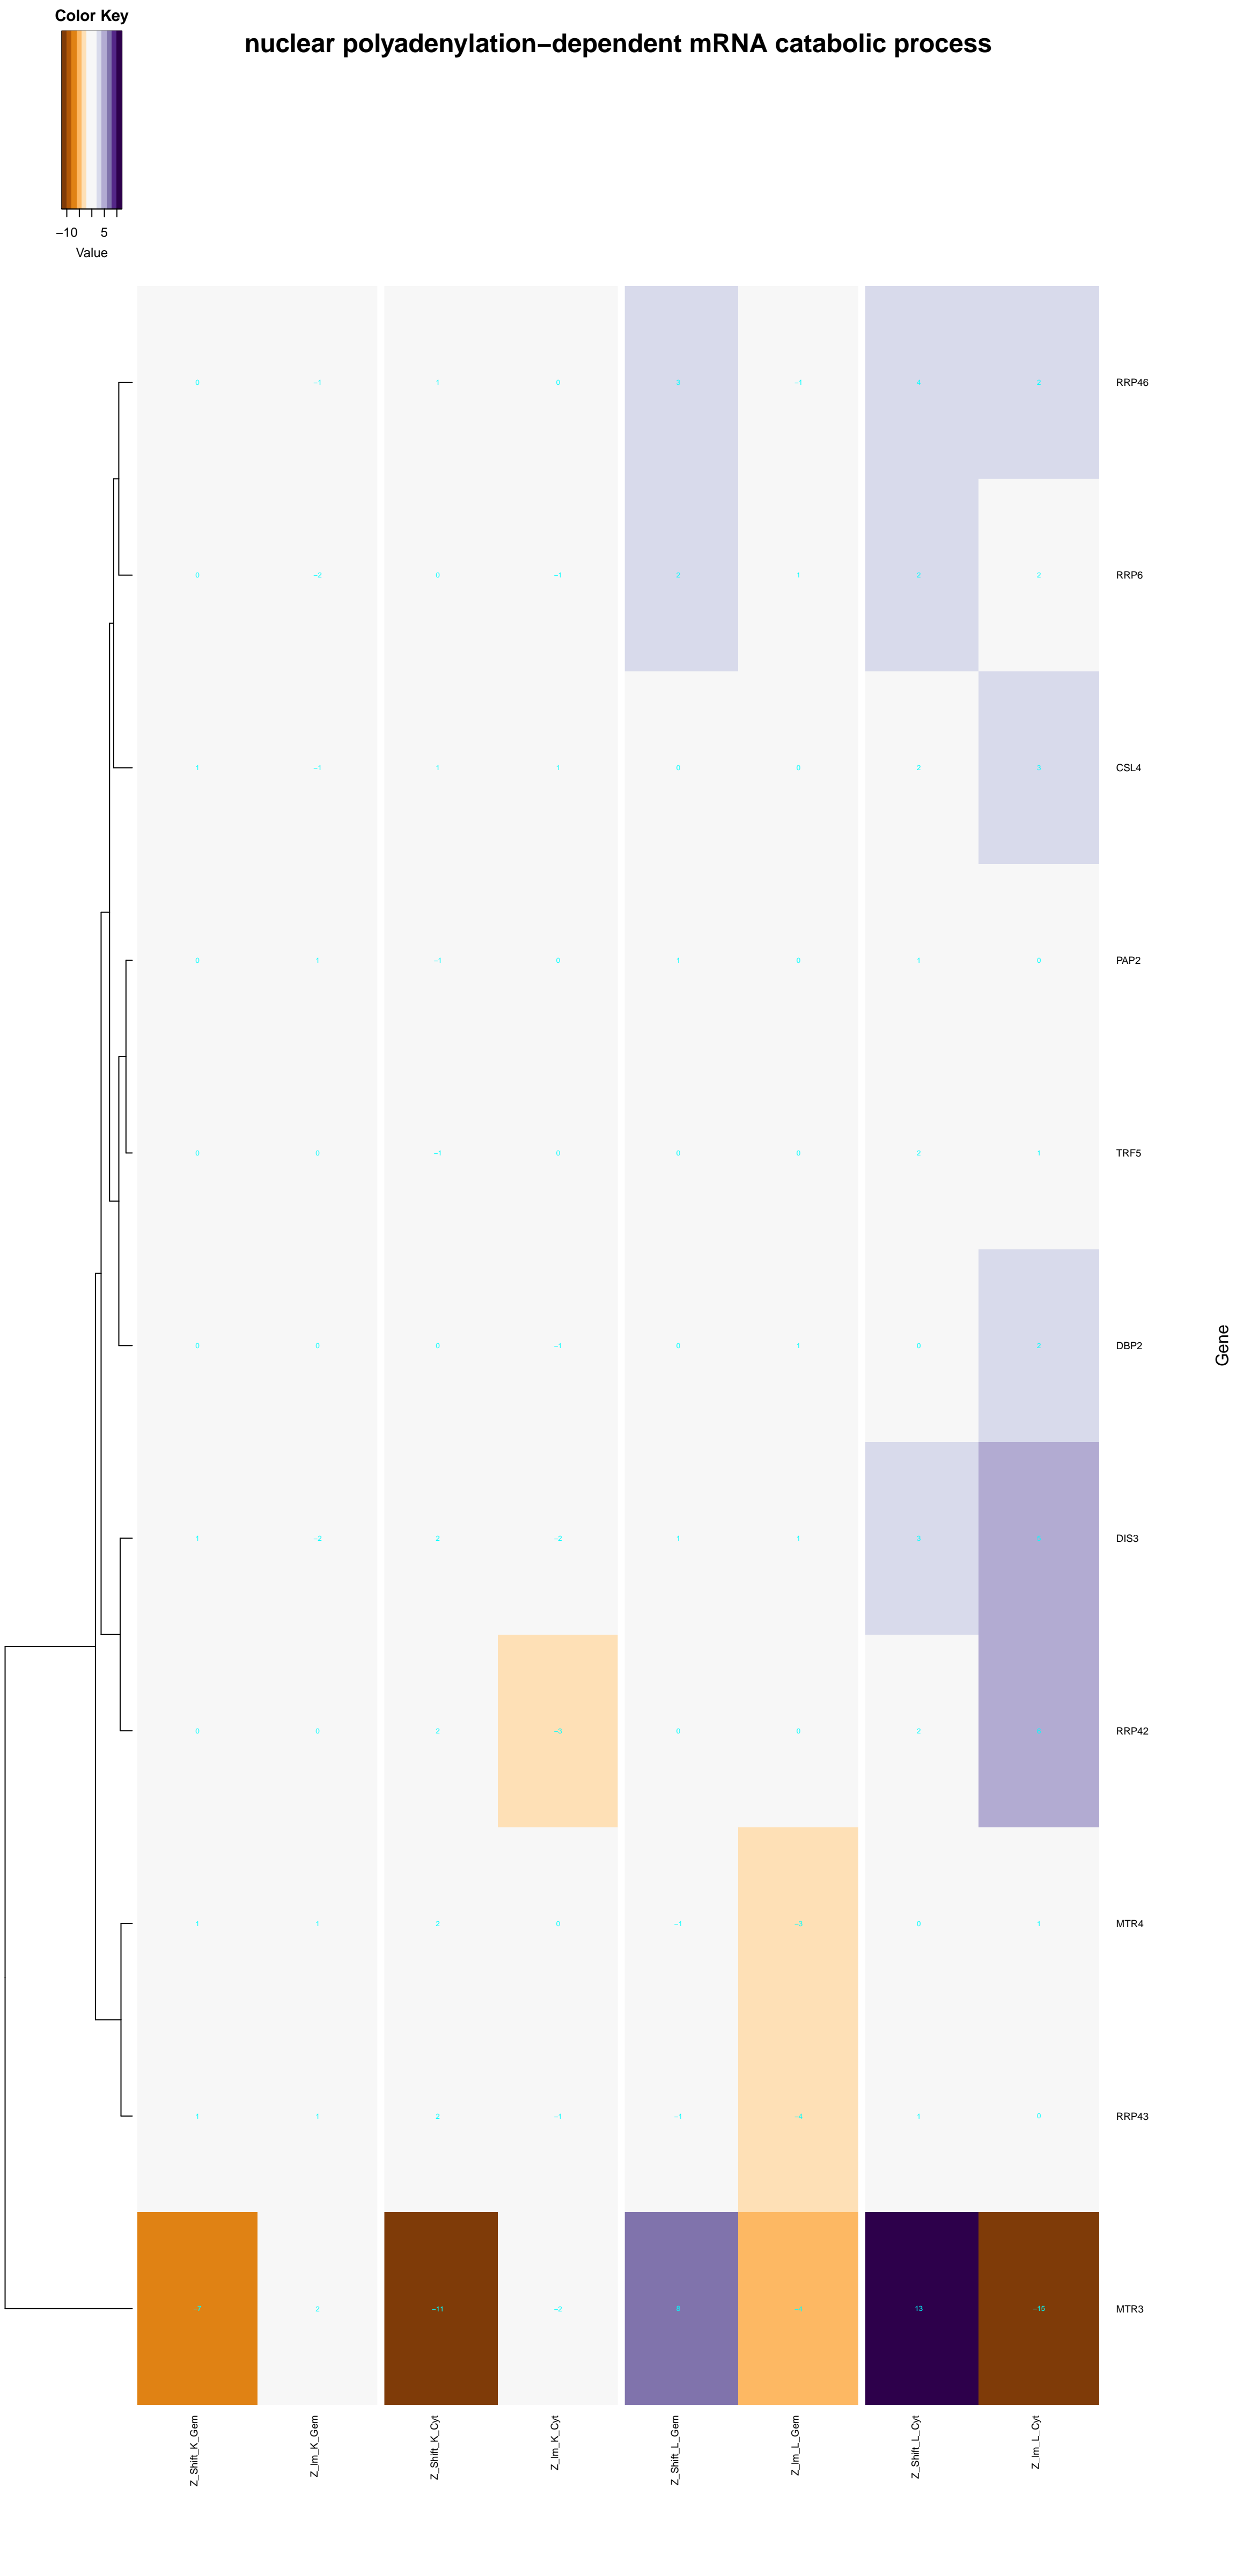

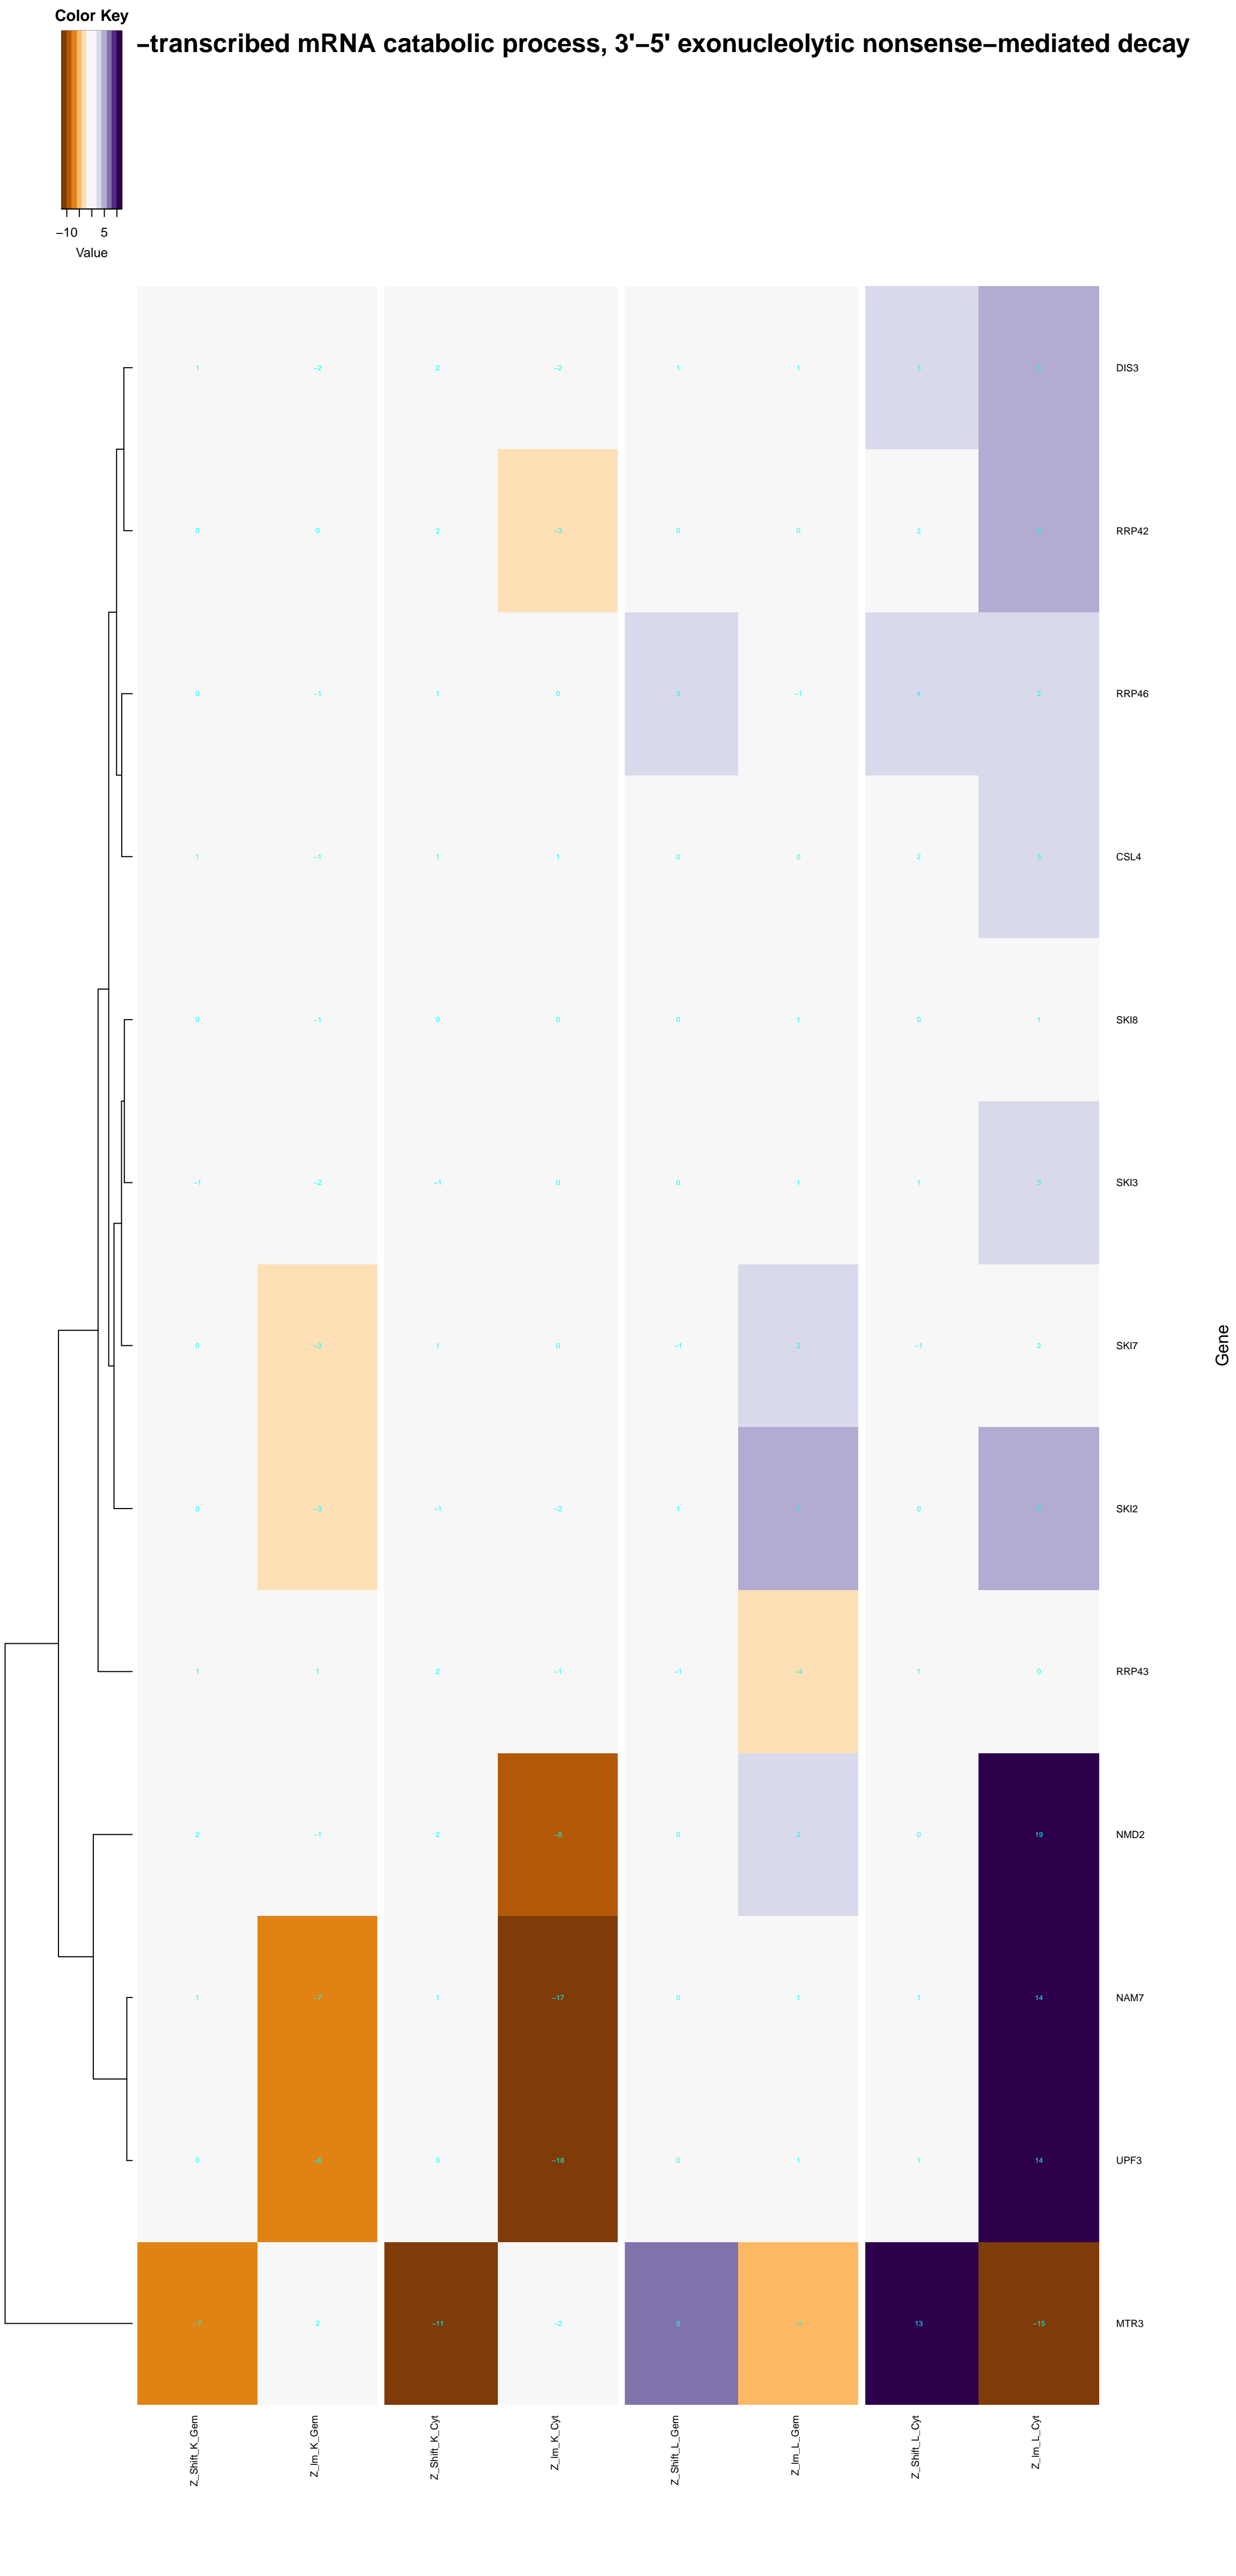

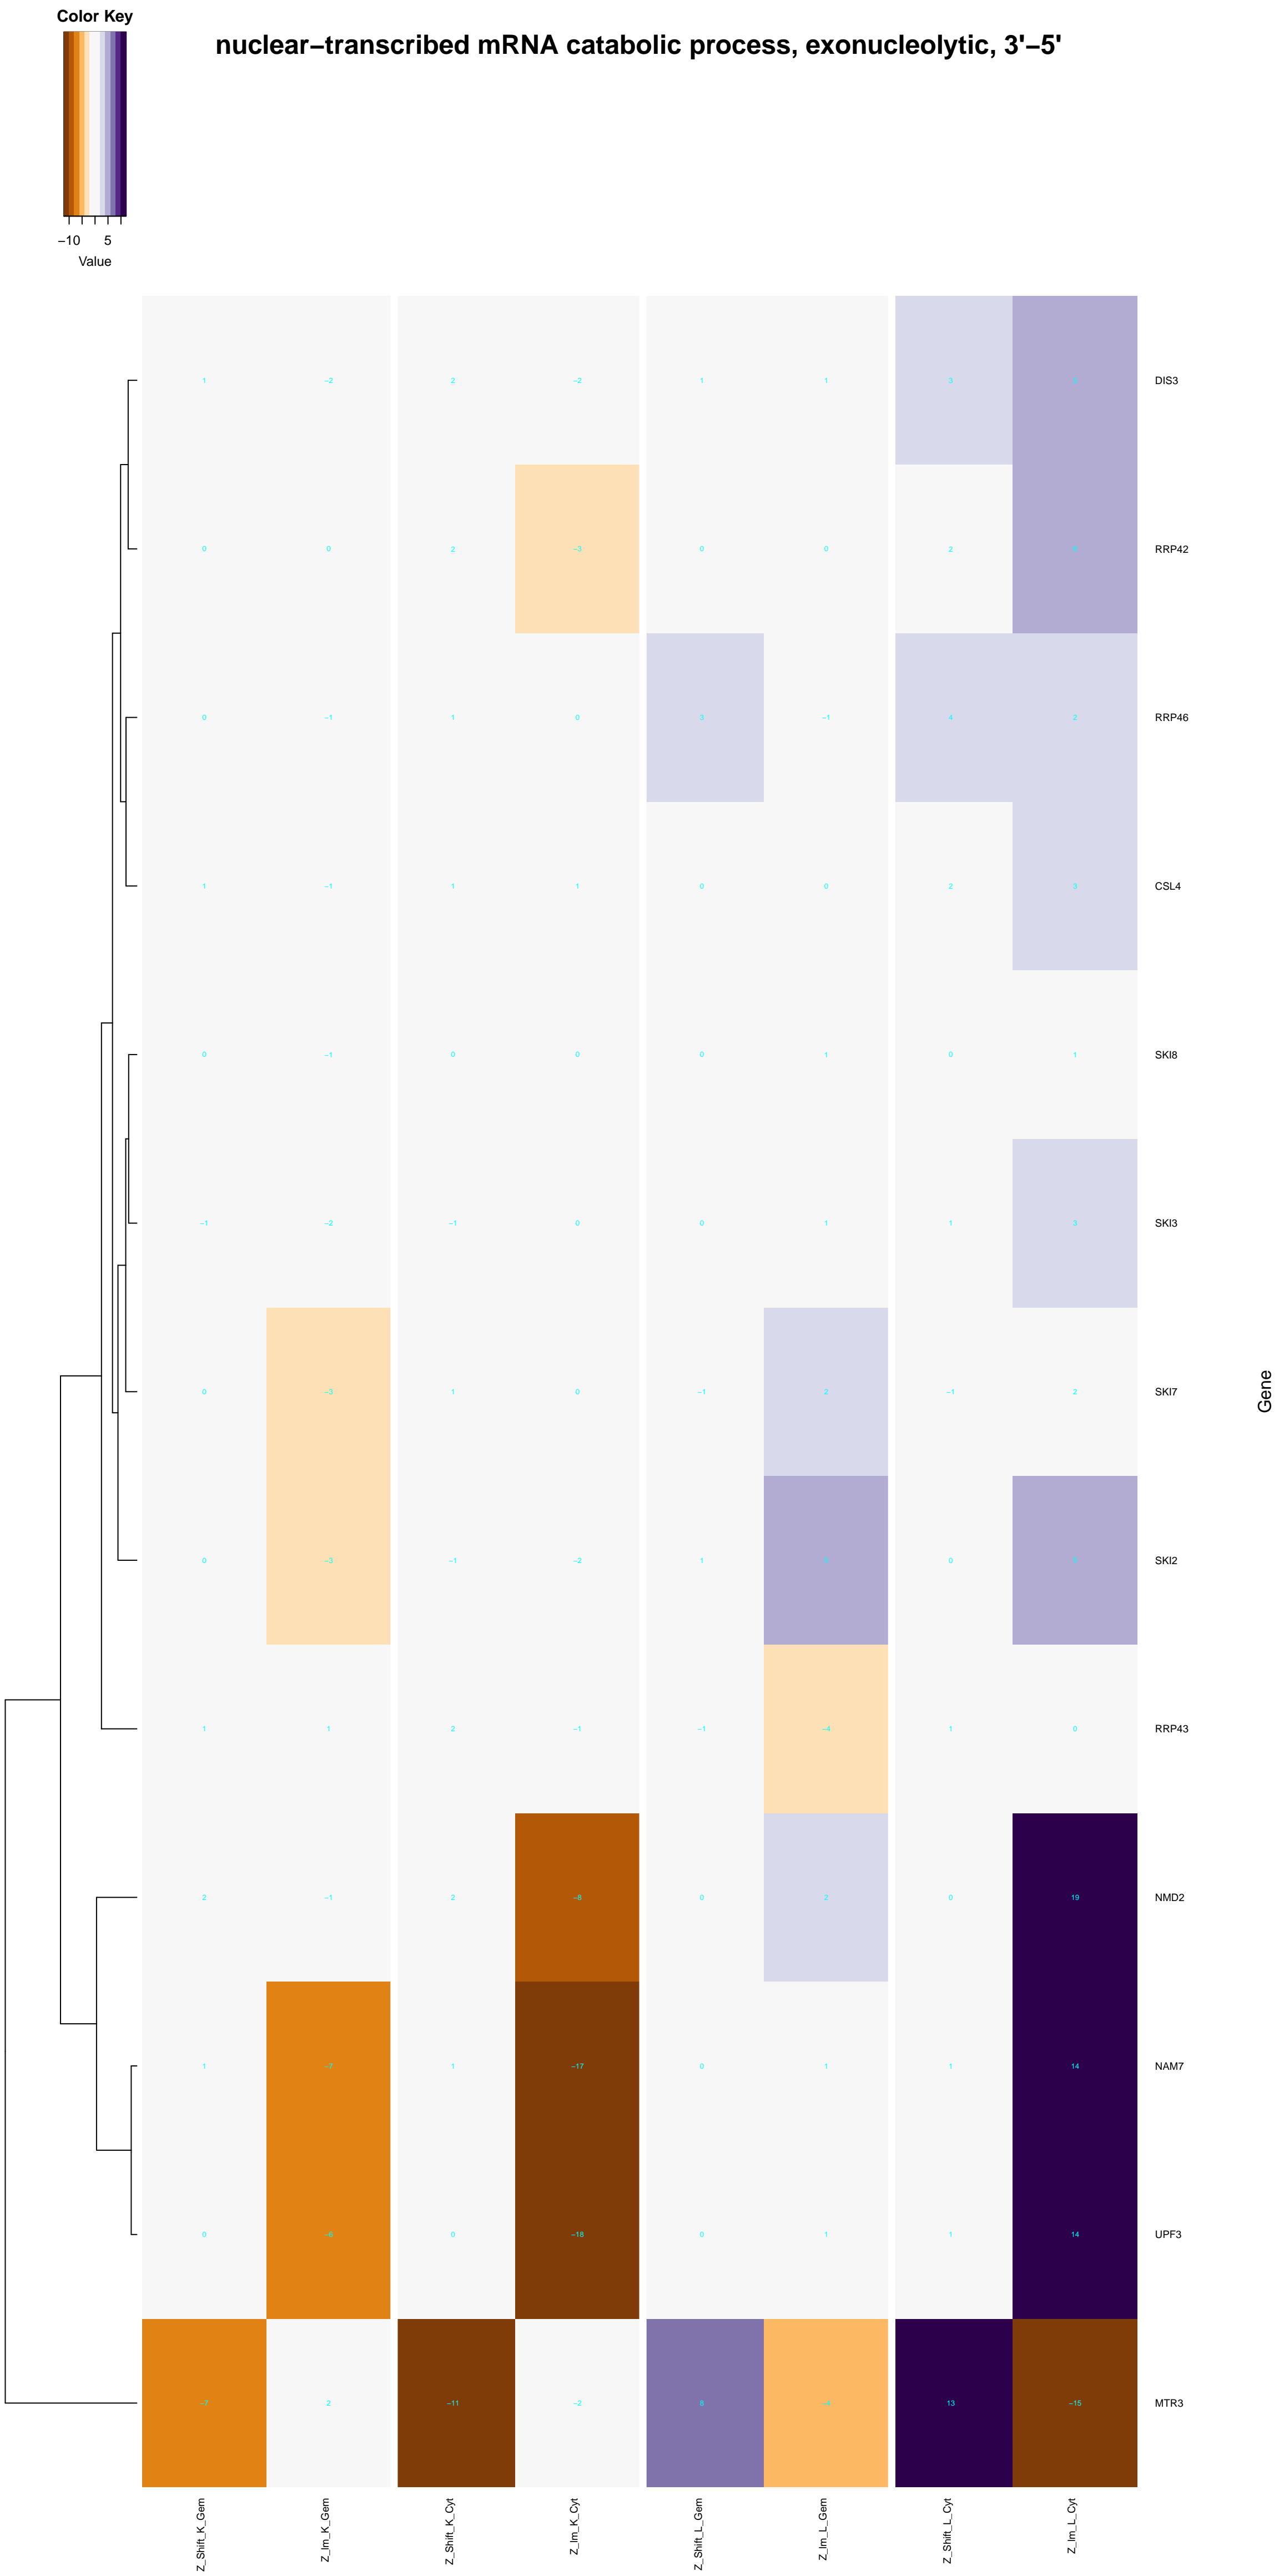

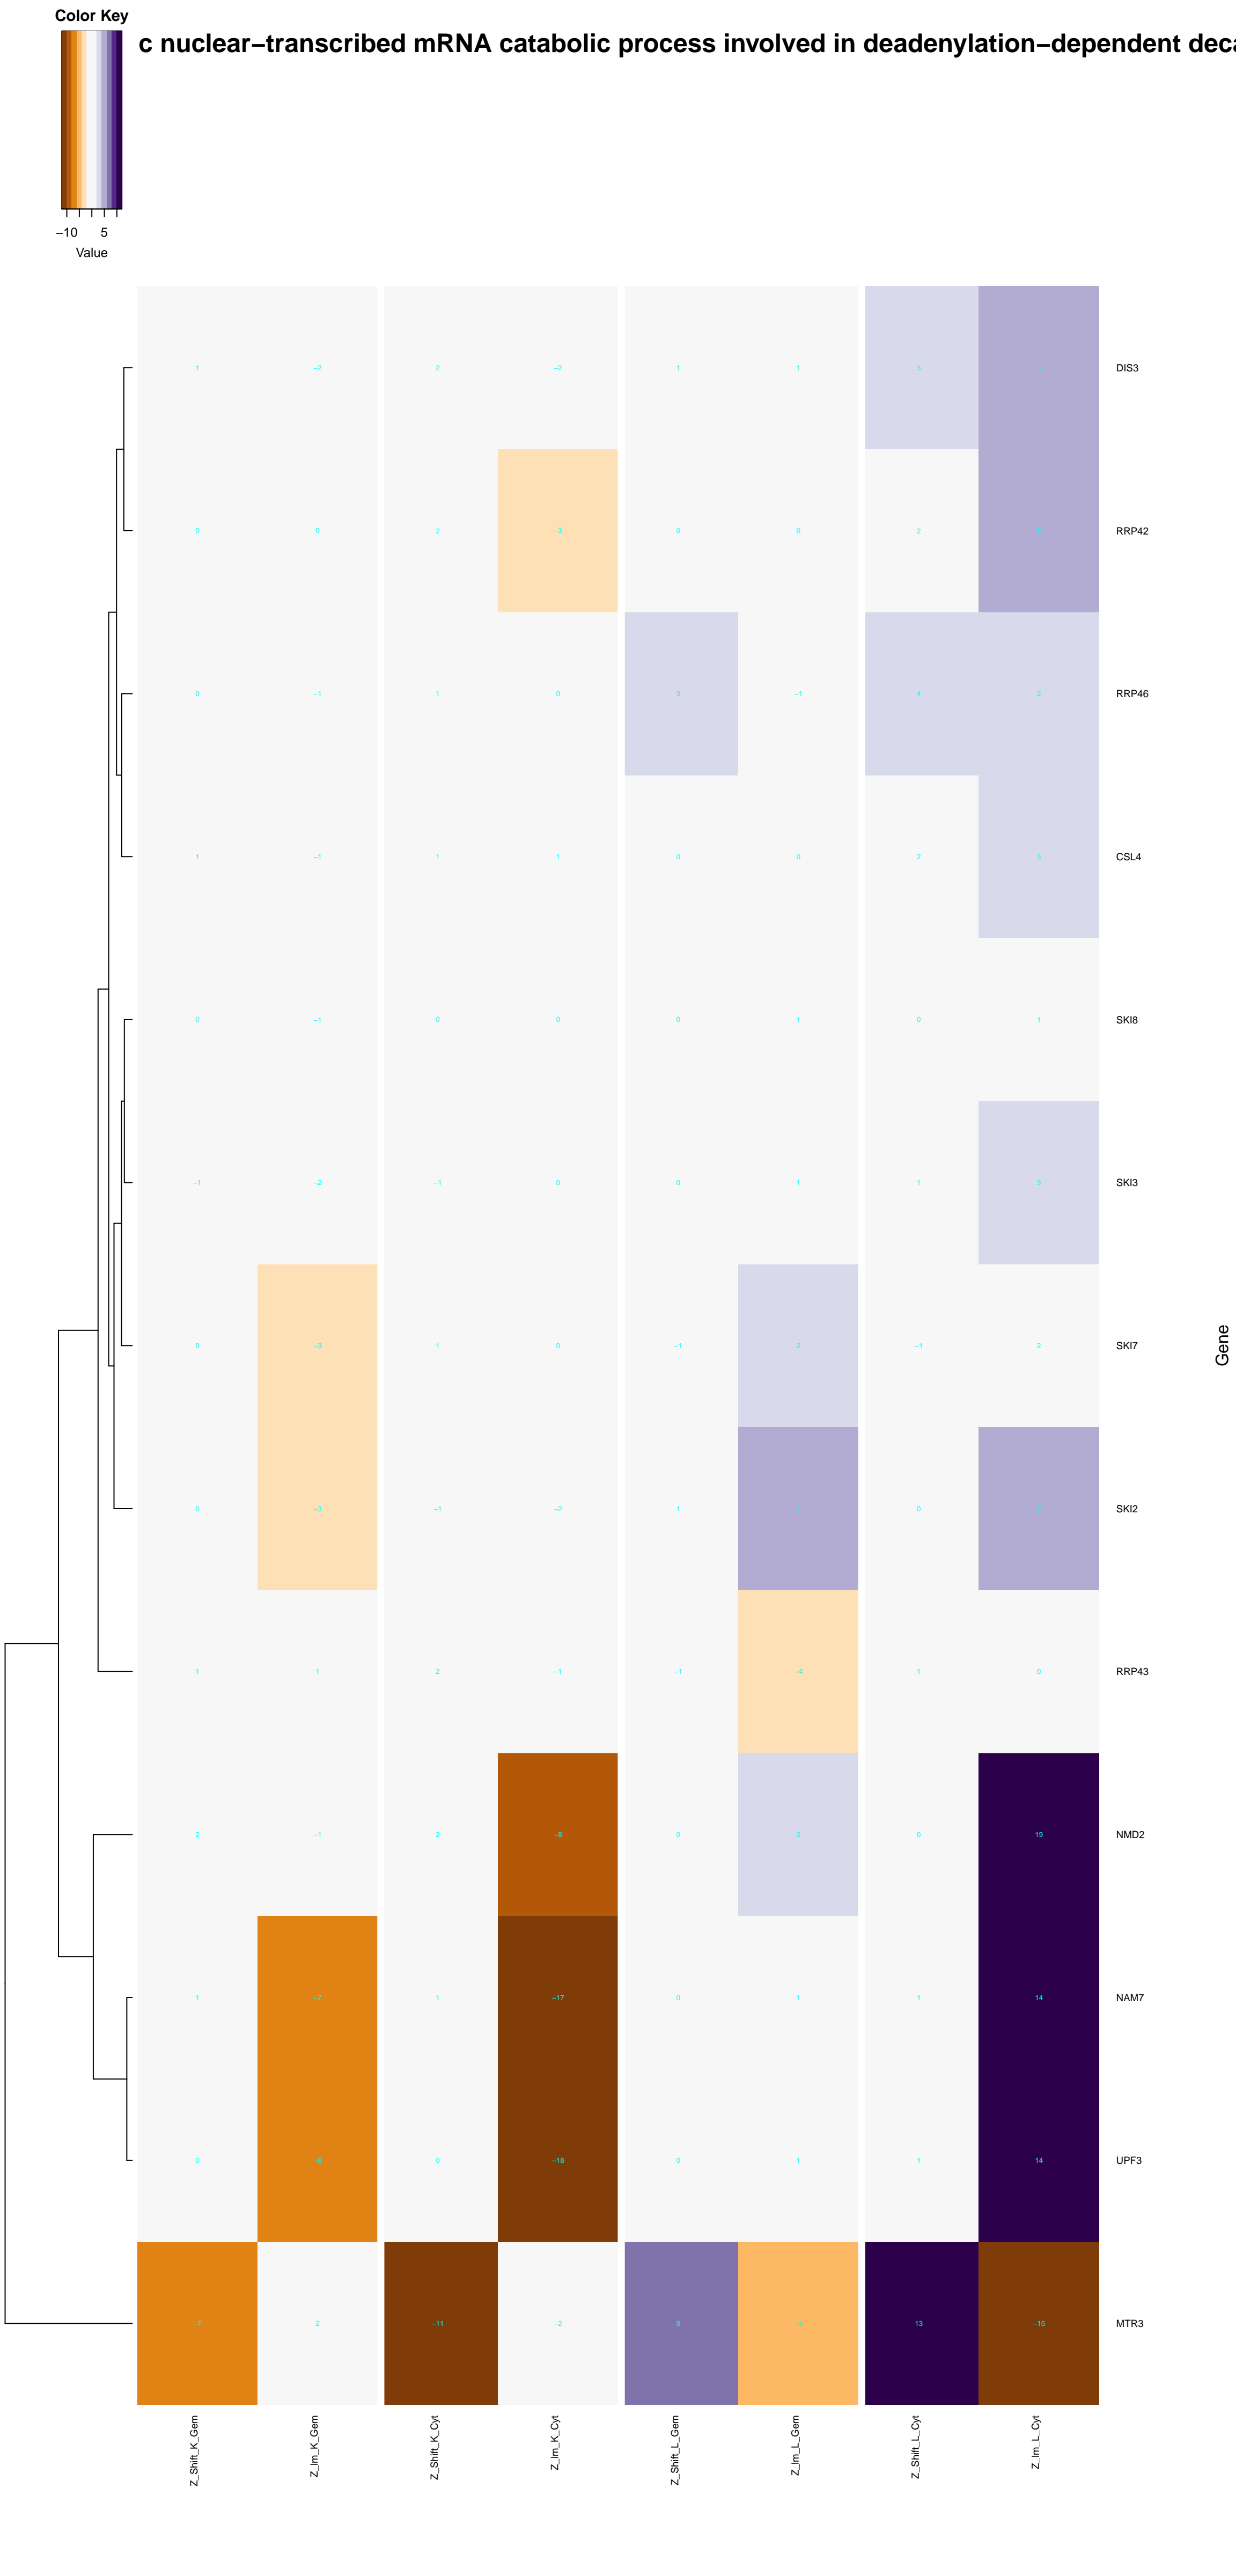

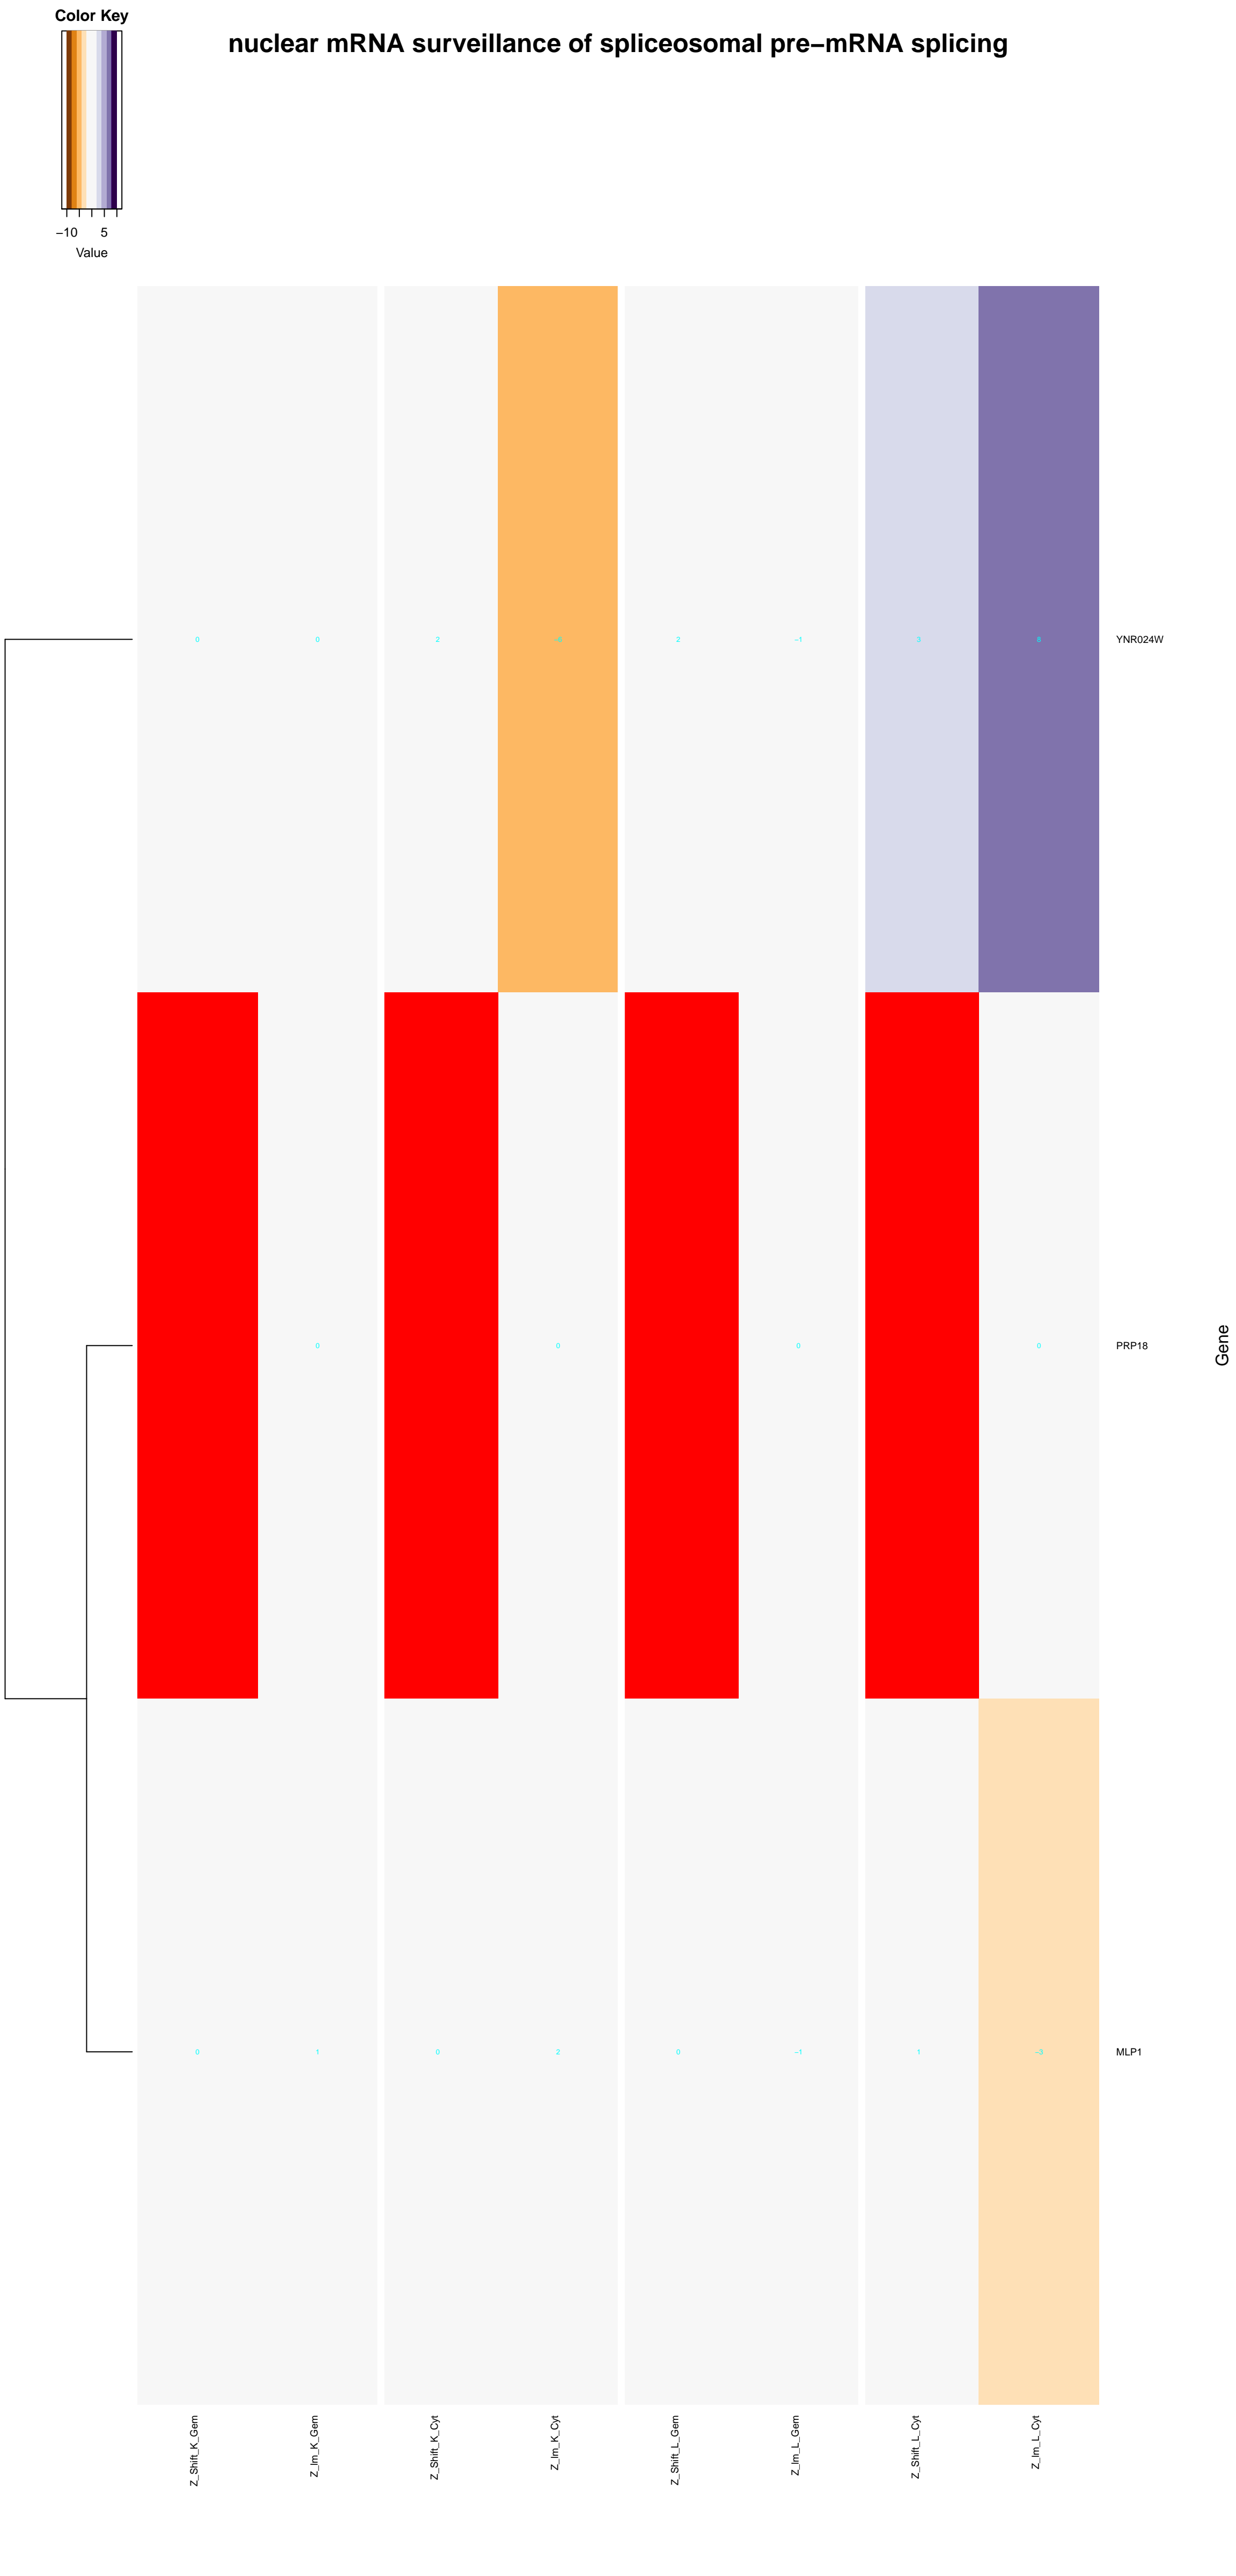

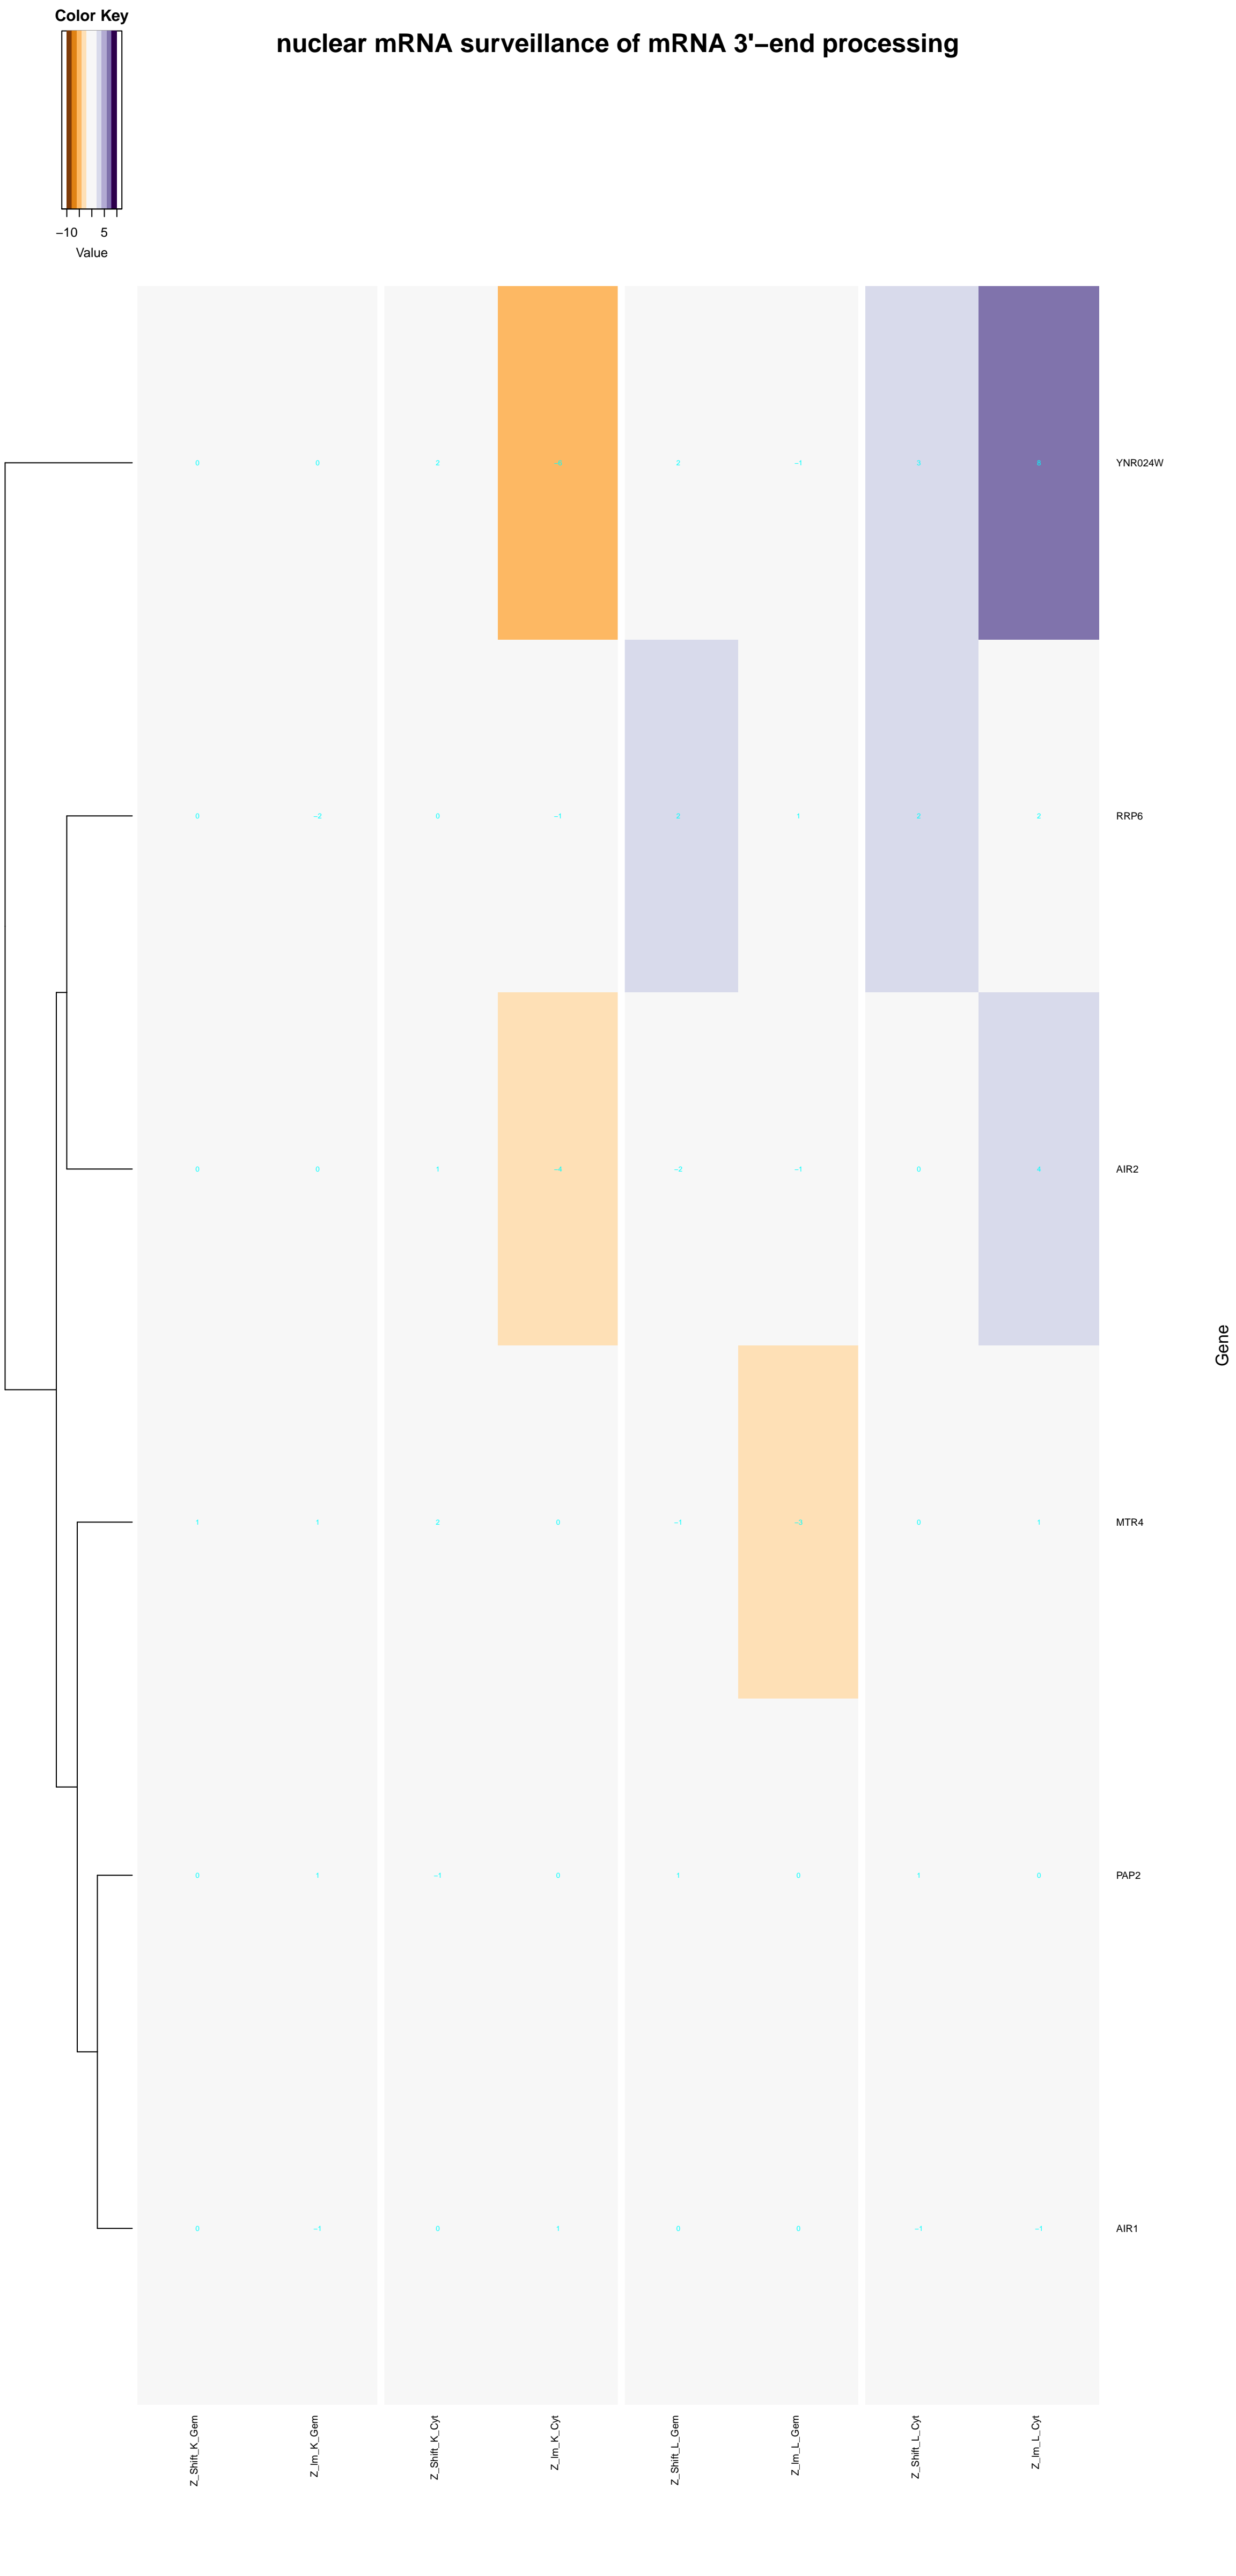

Supplement: s1 [file s1]

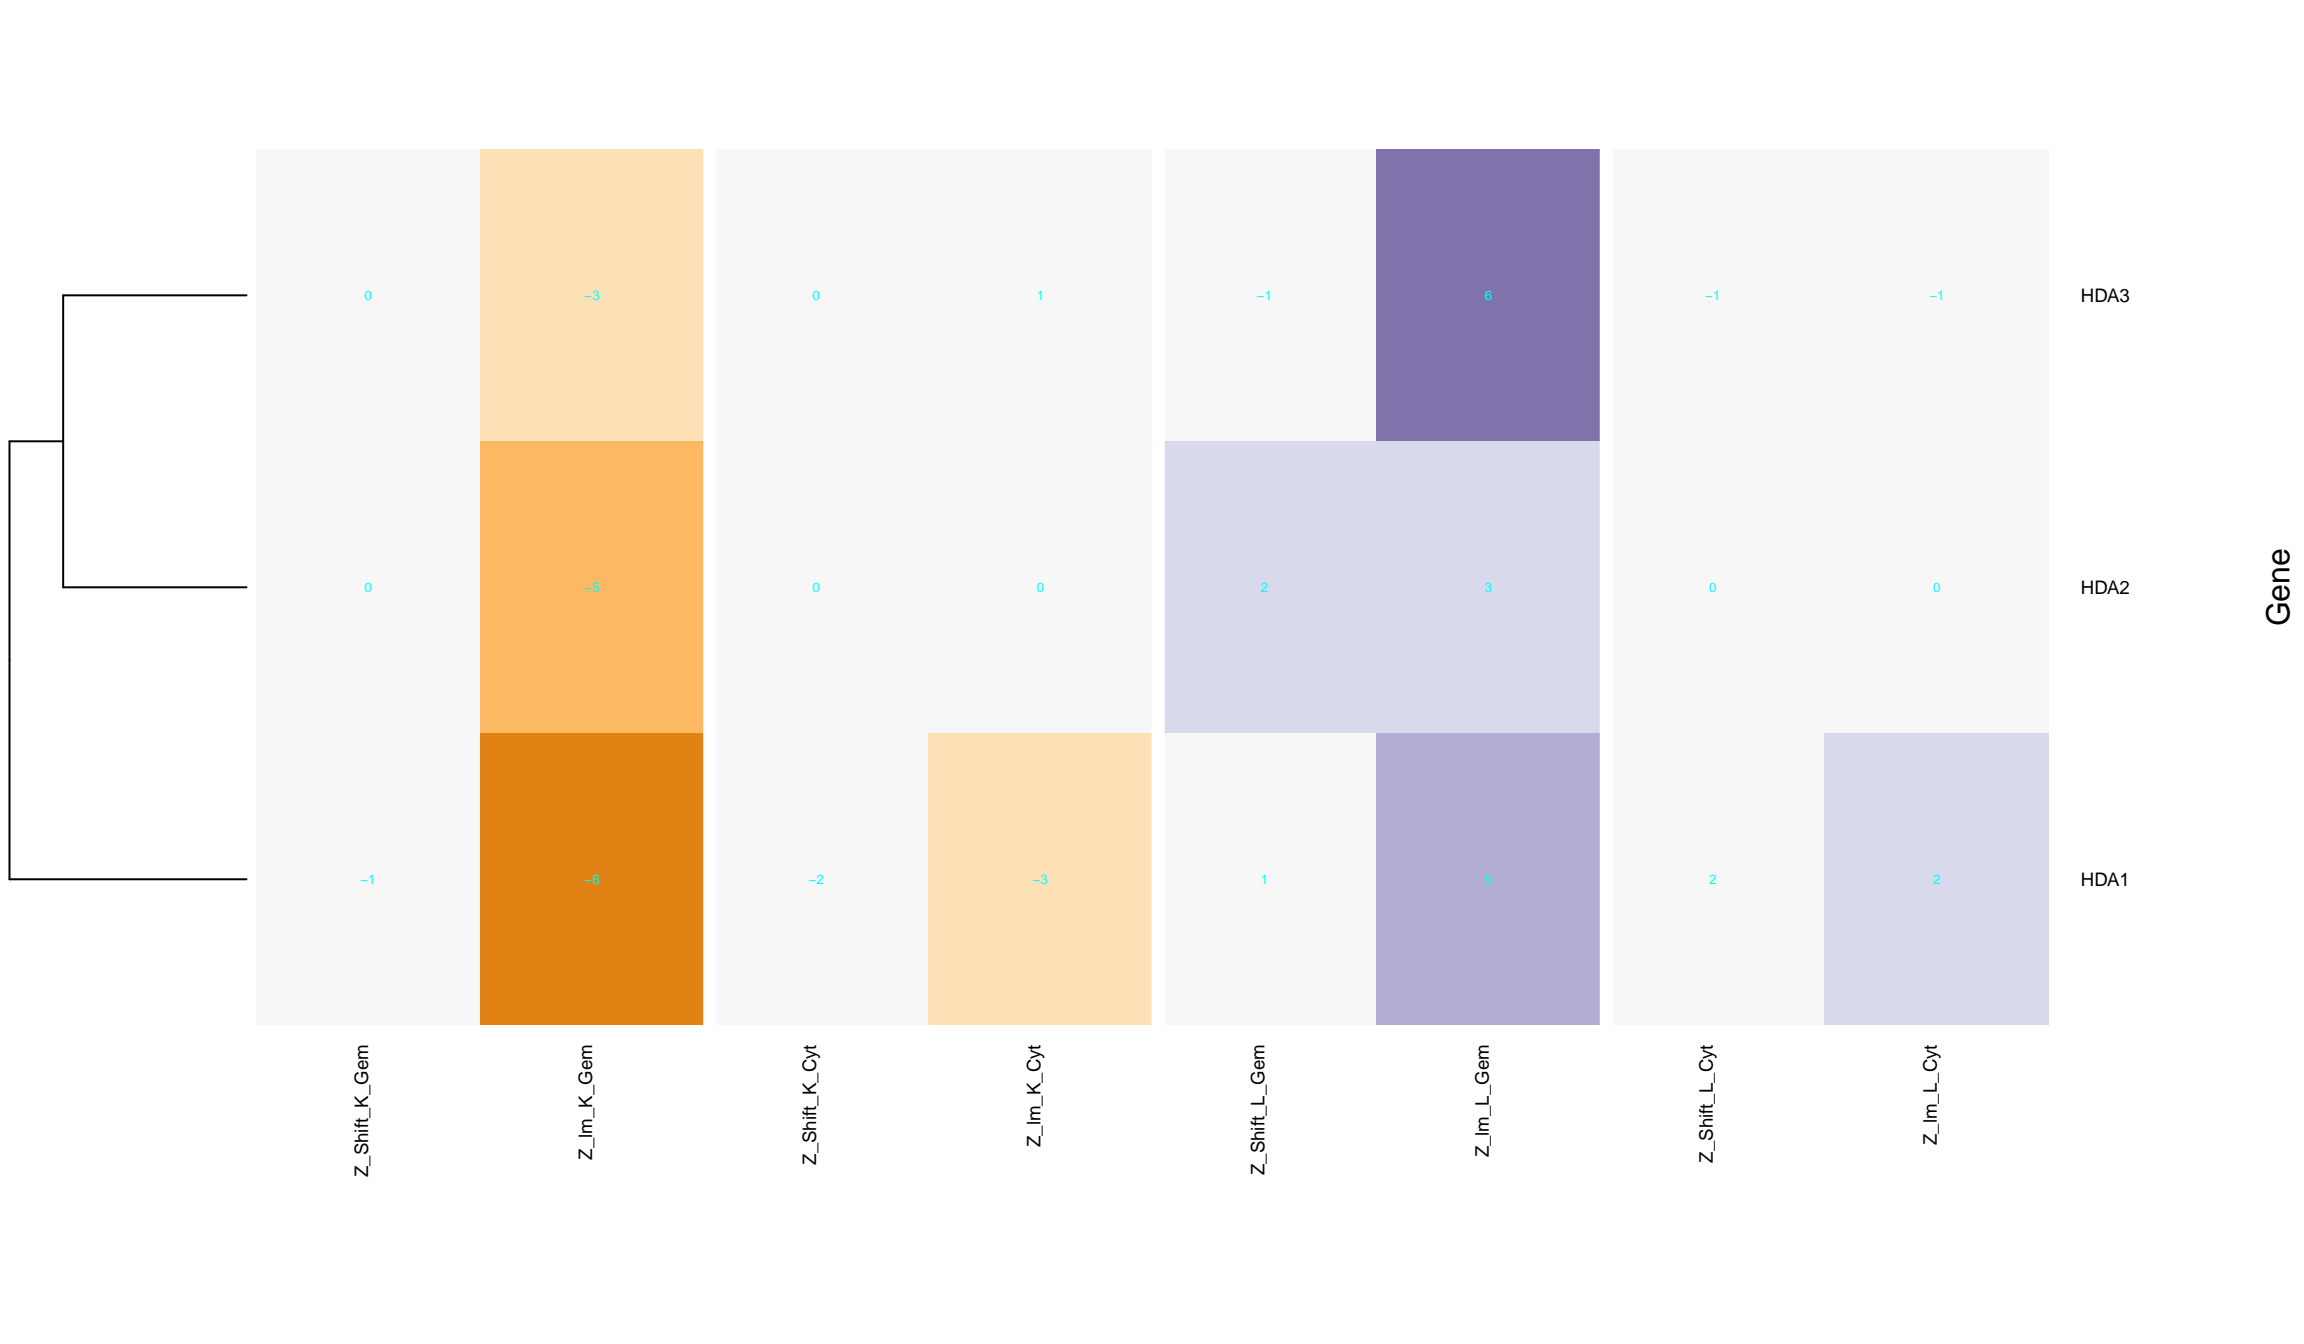

Supplement: s1 [file s1]

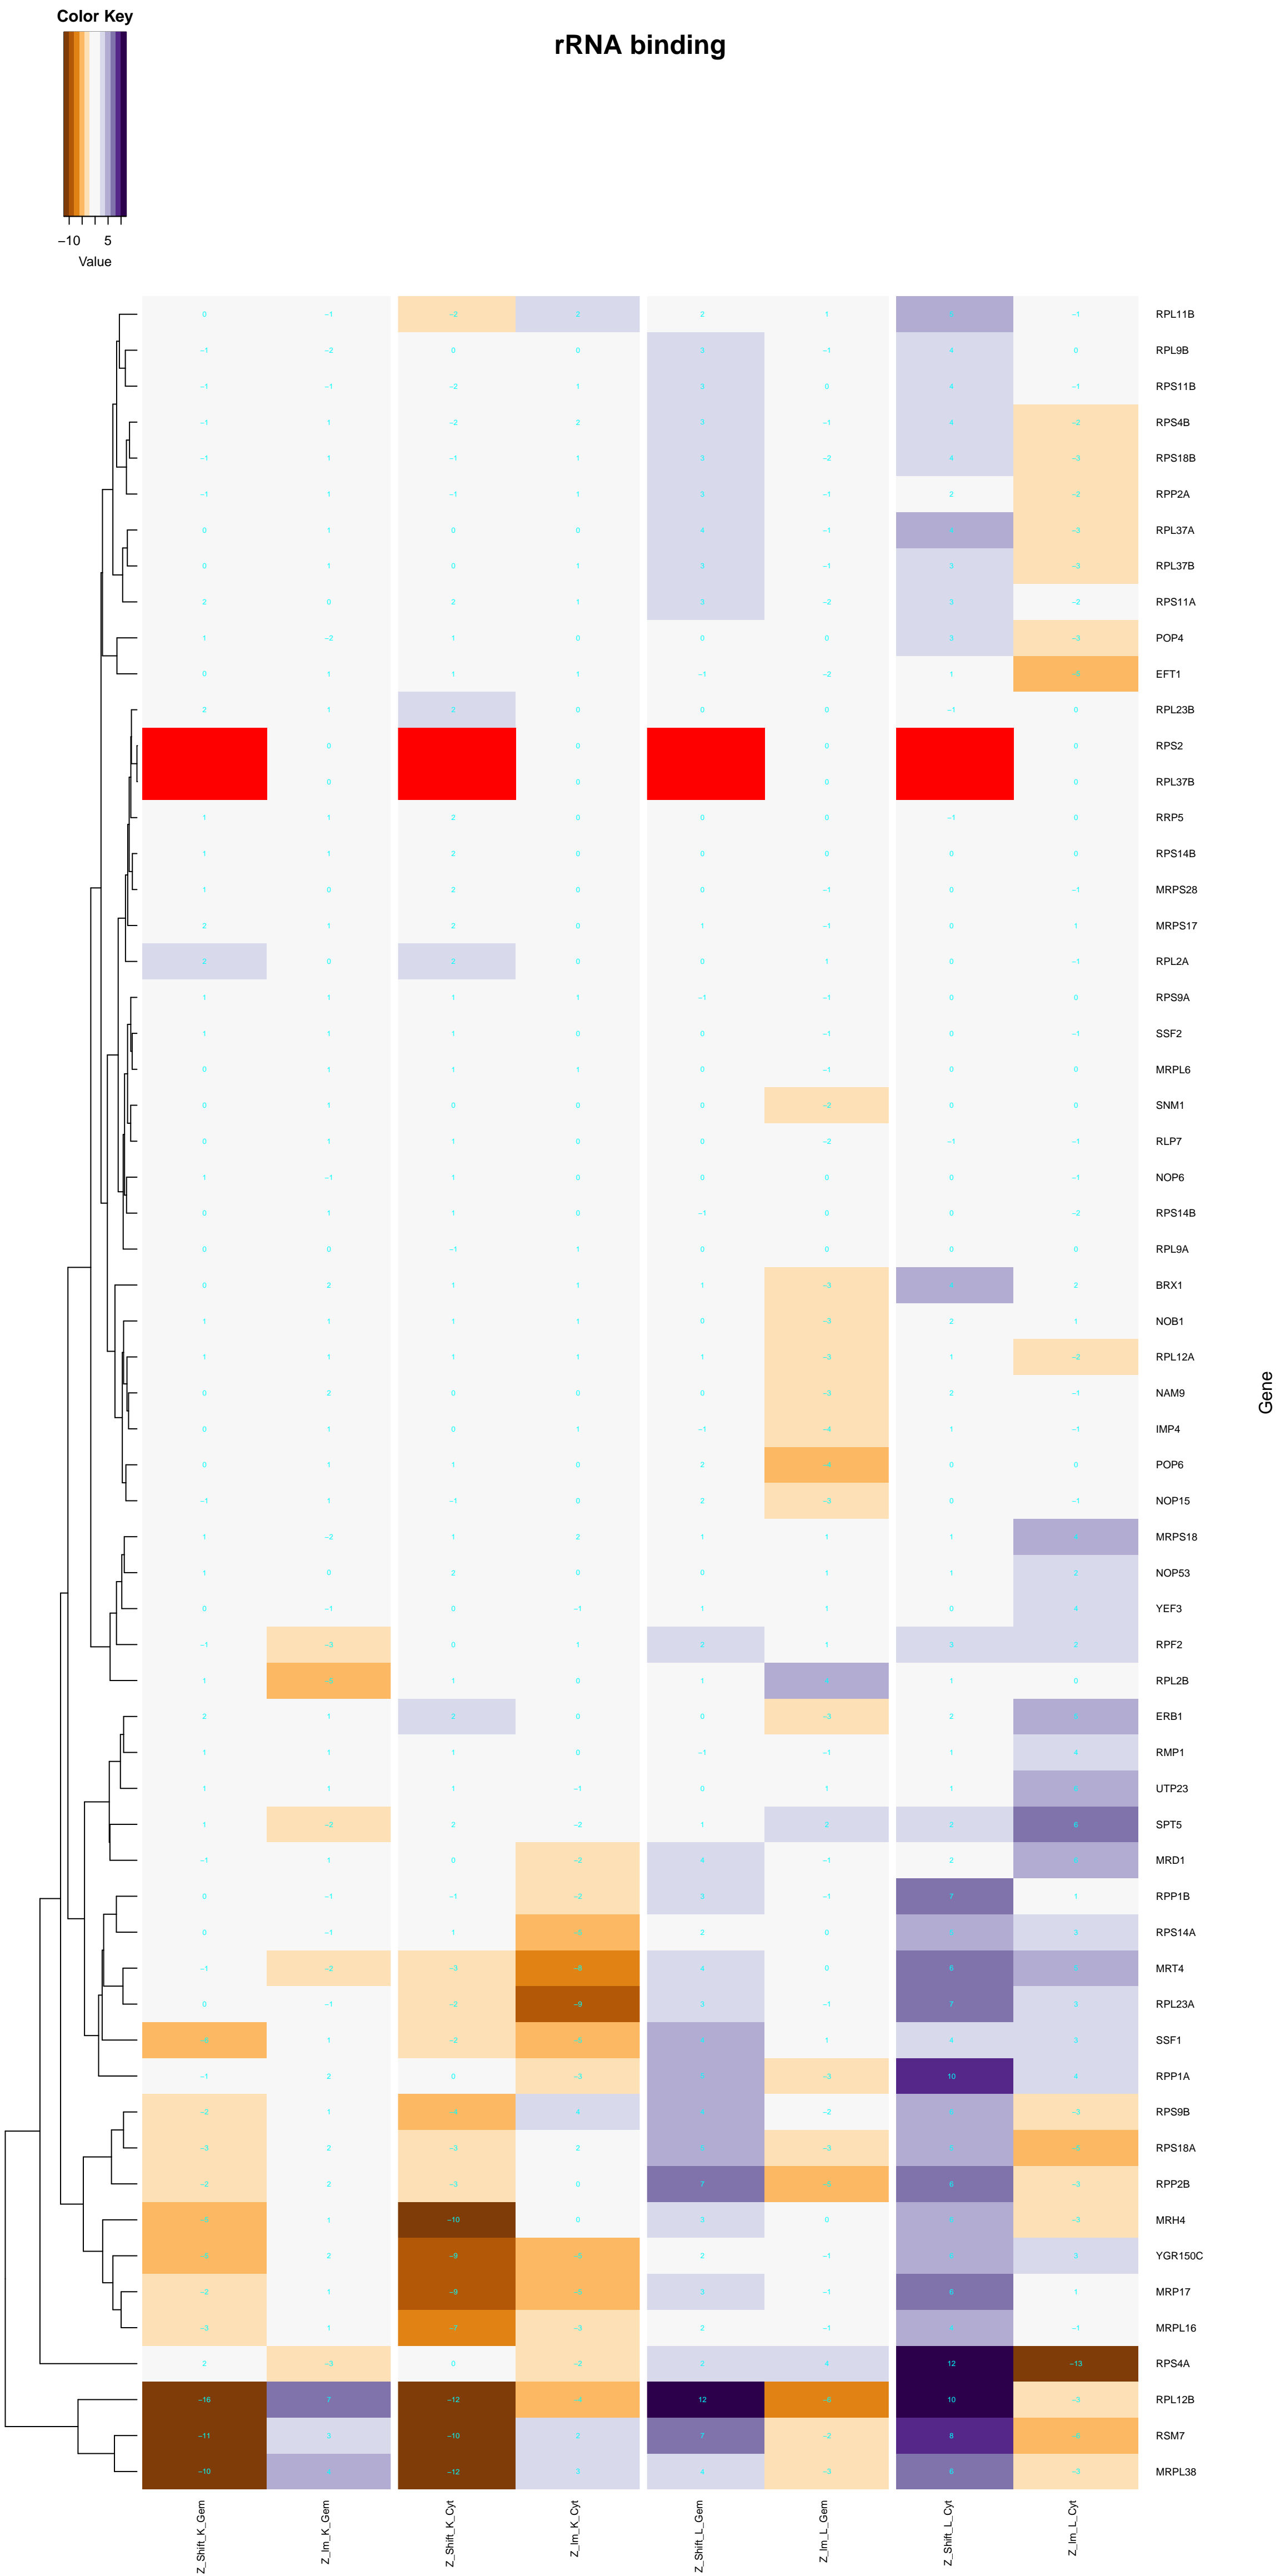

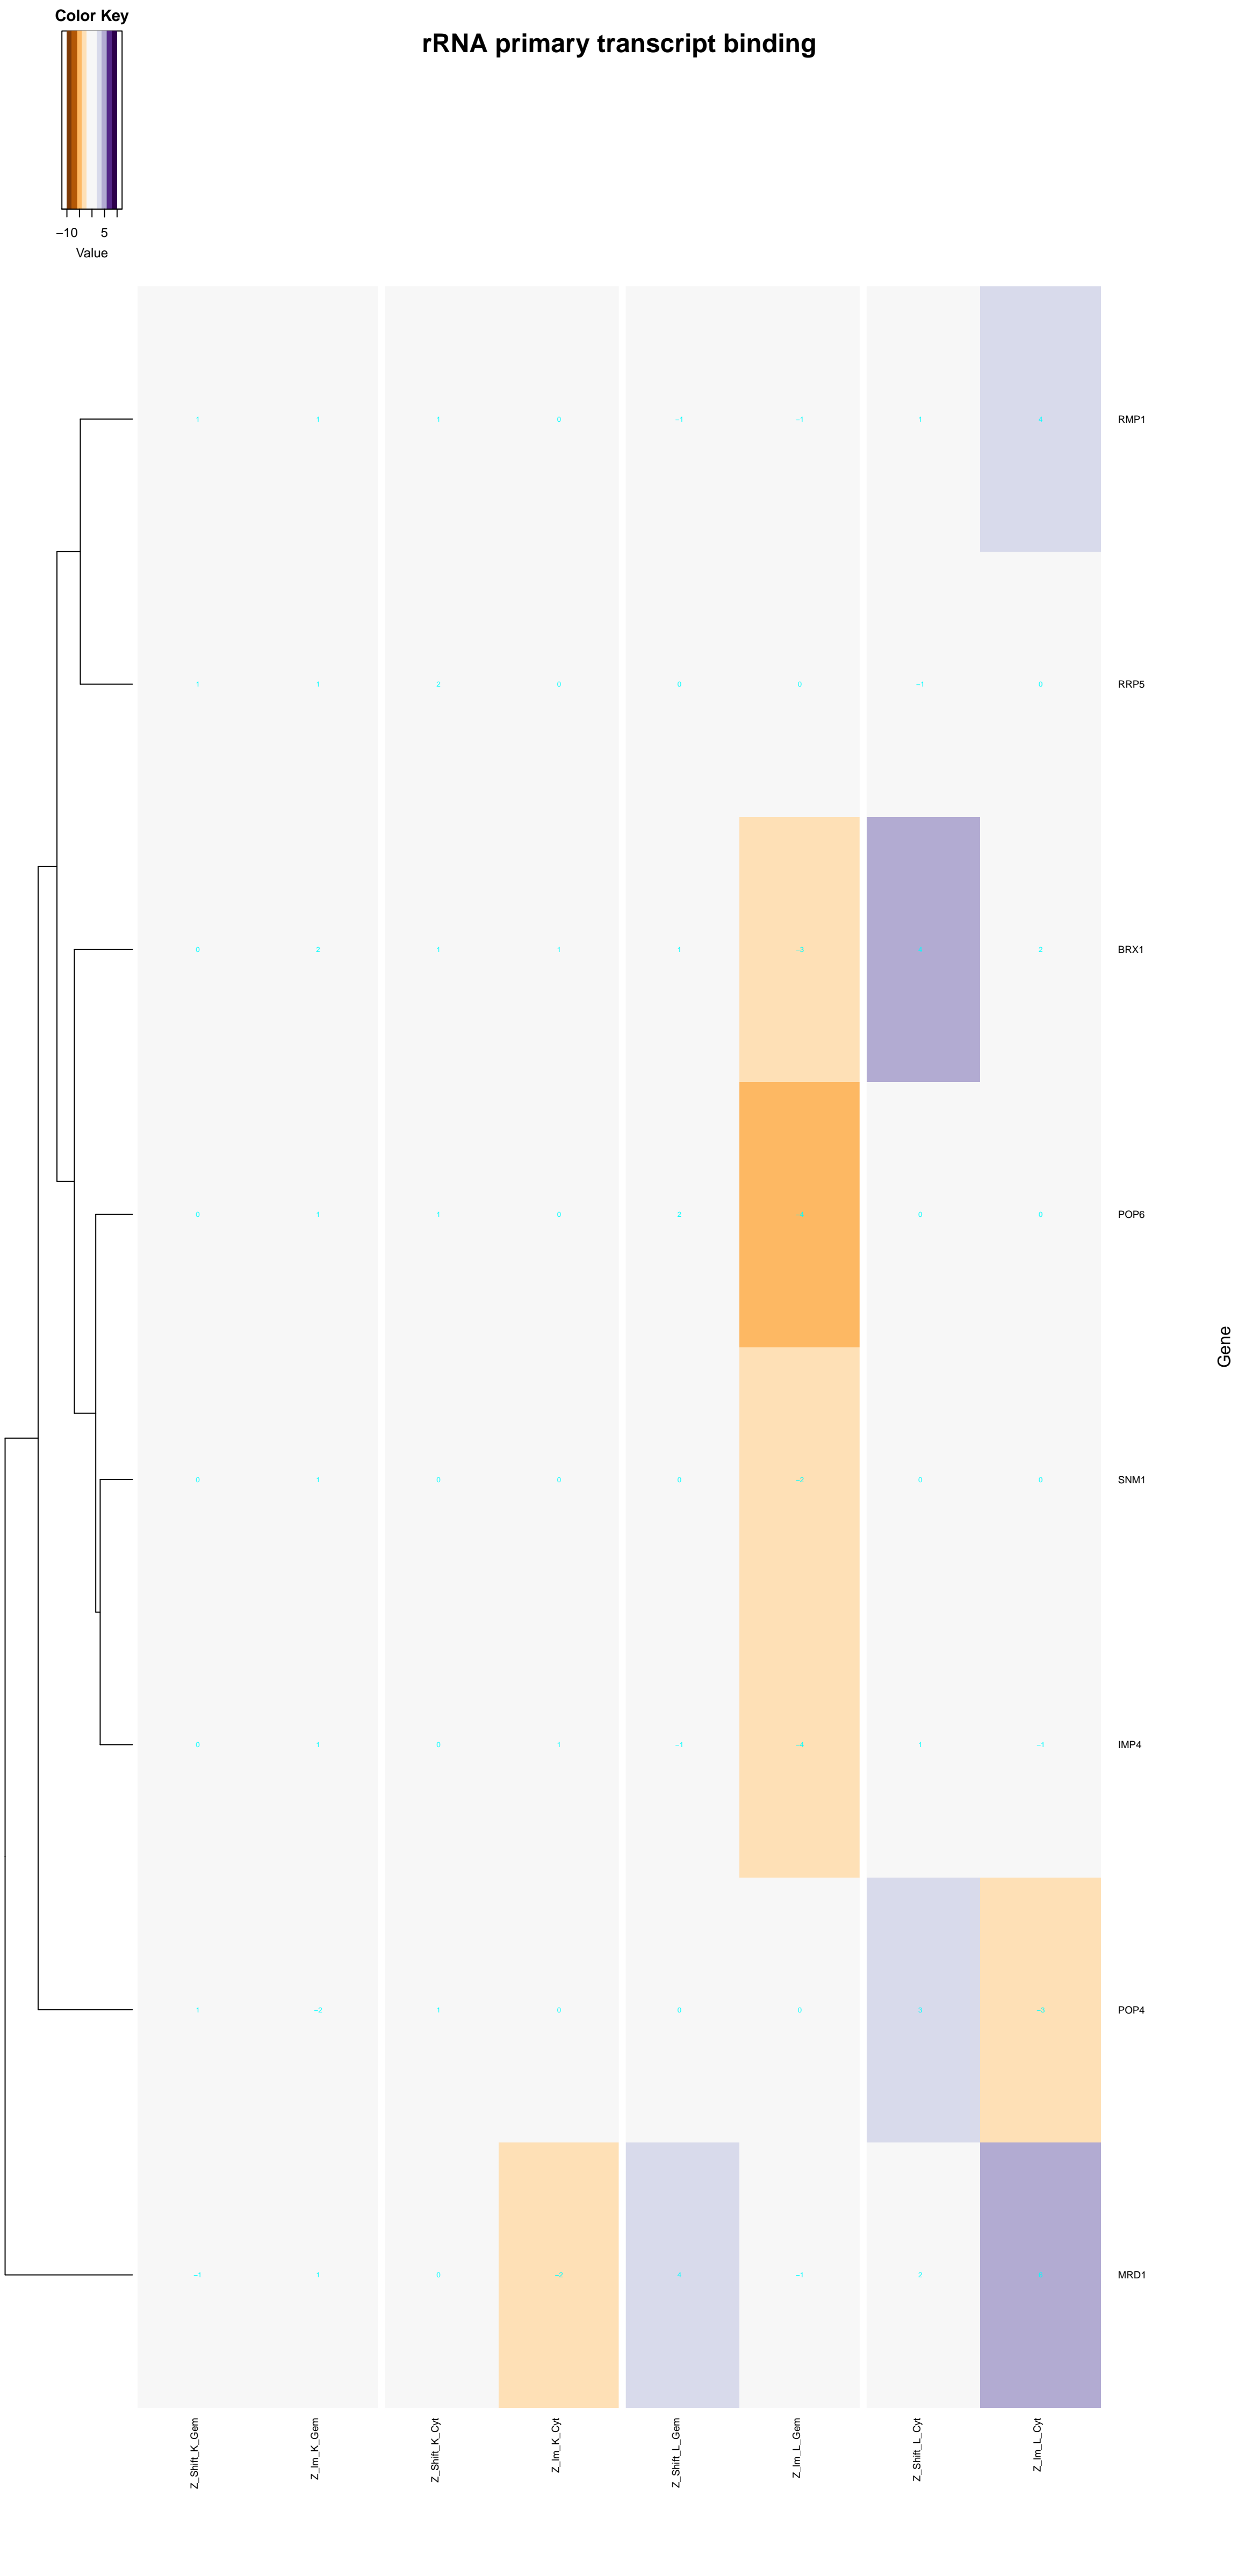

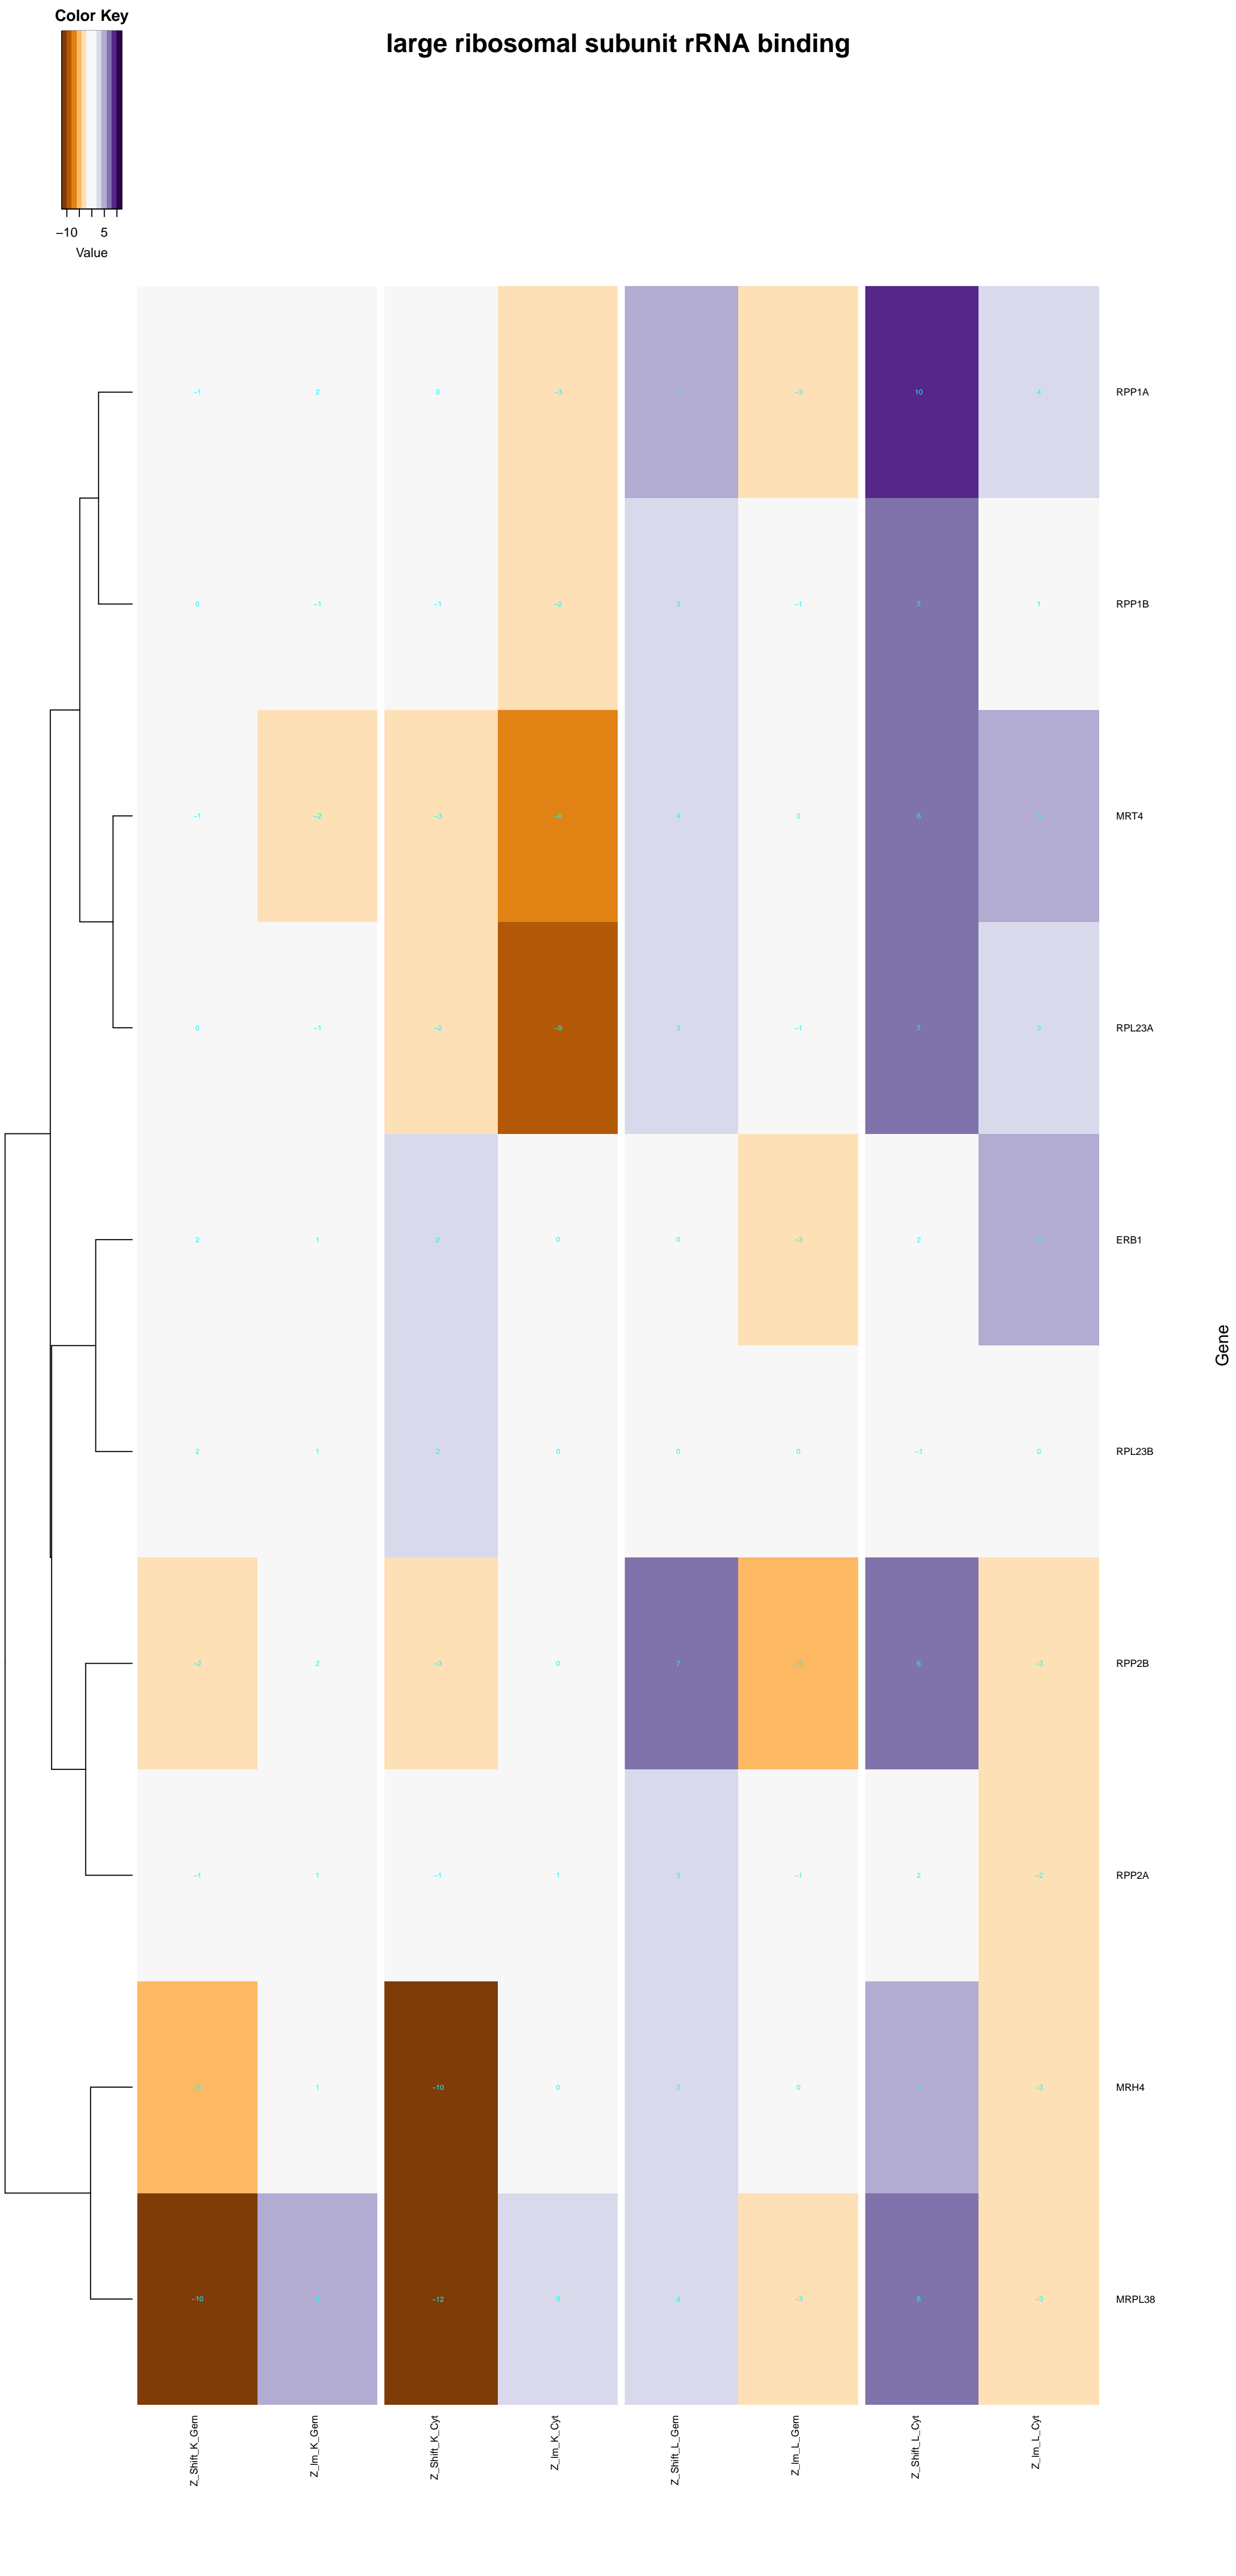

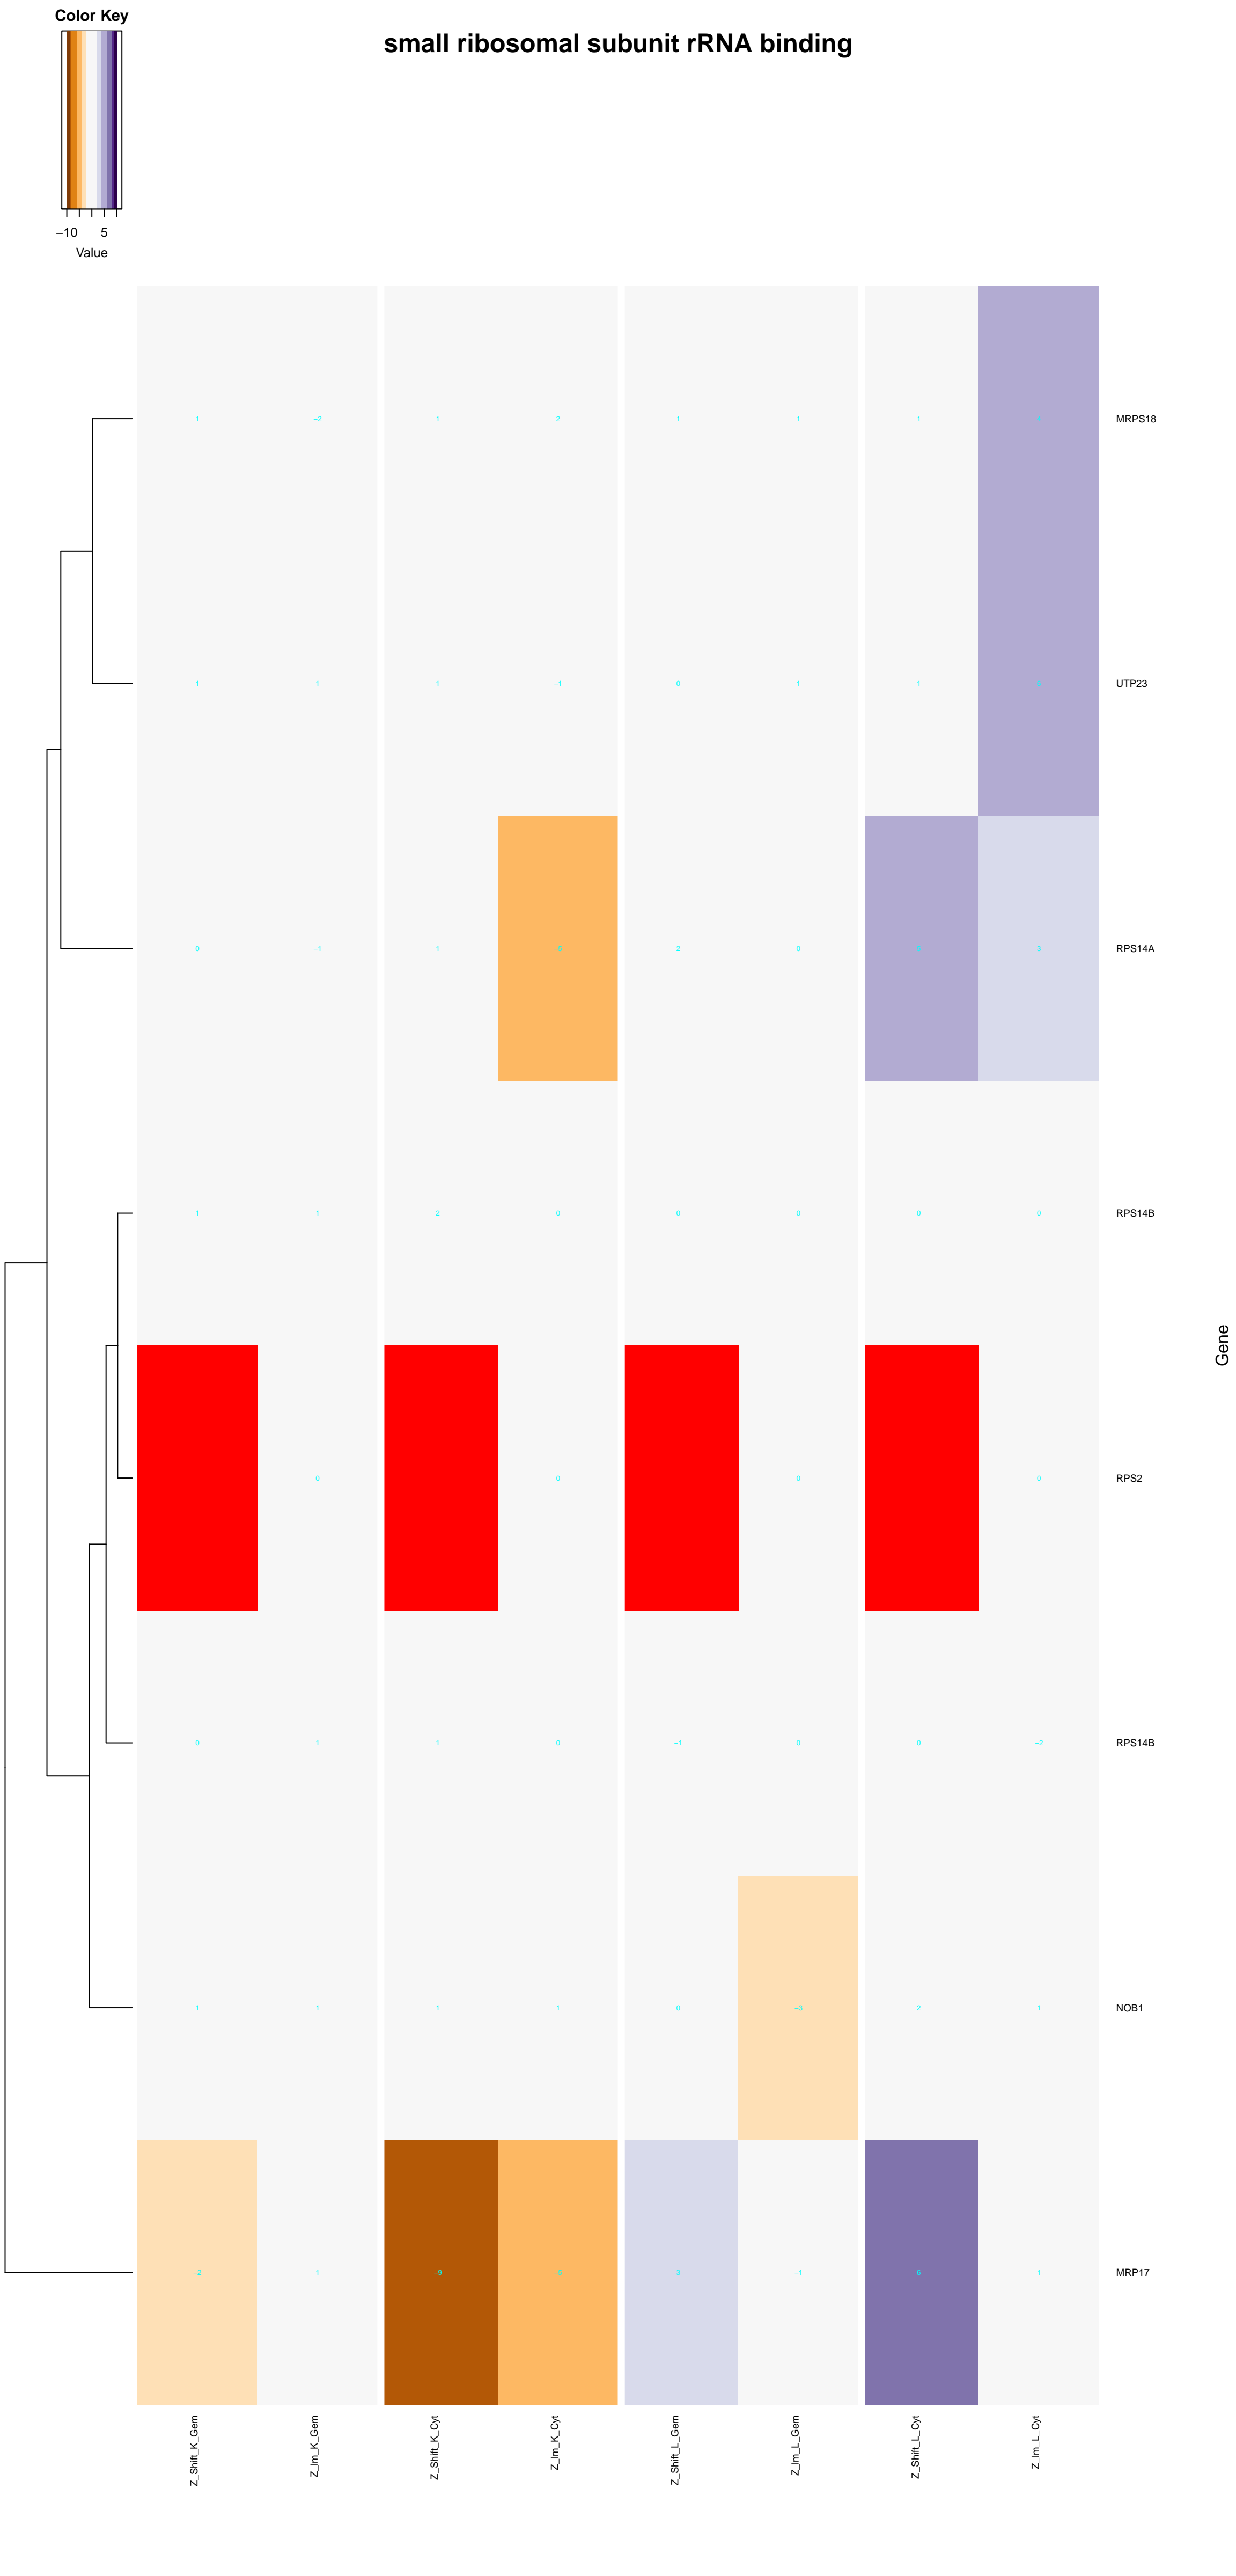

Supplement: s1 [file s1]

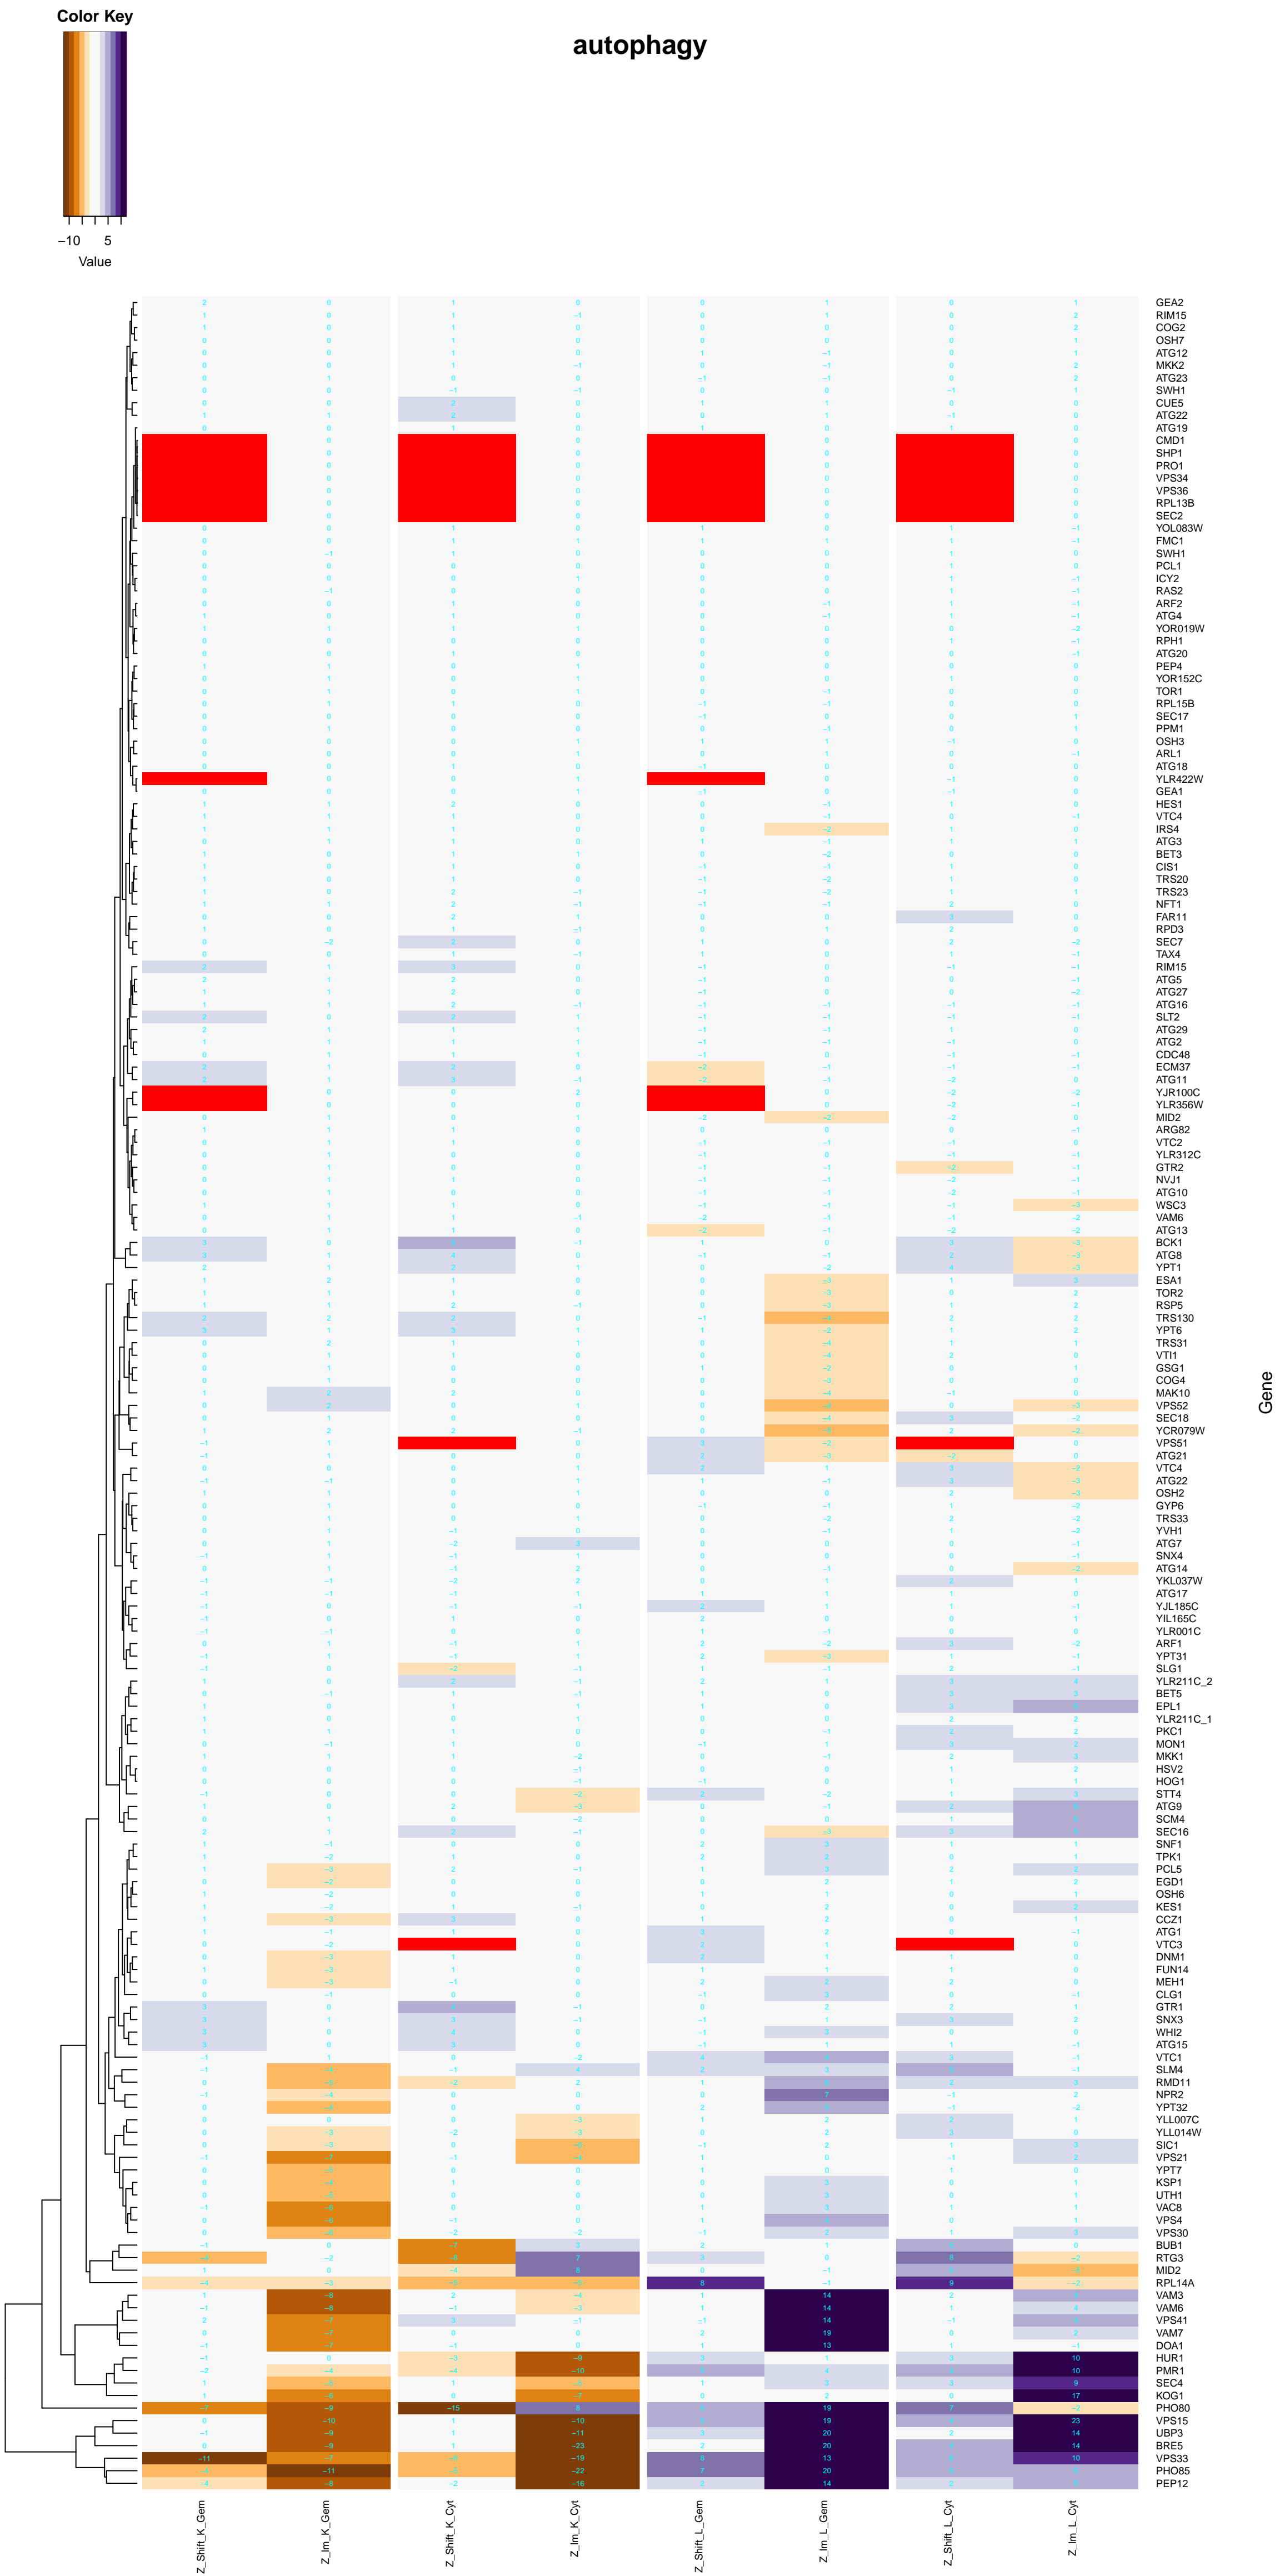

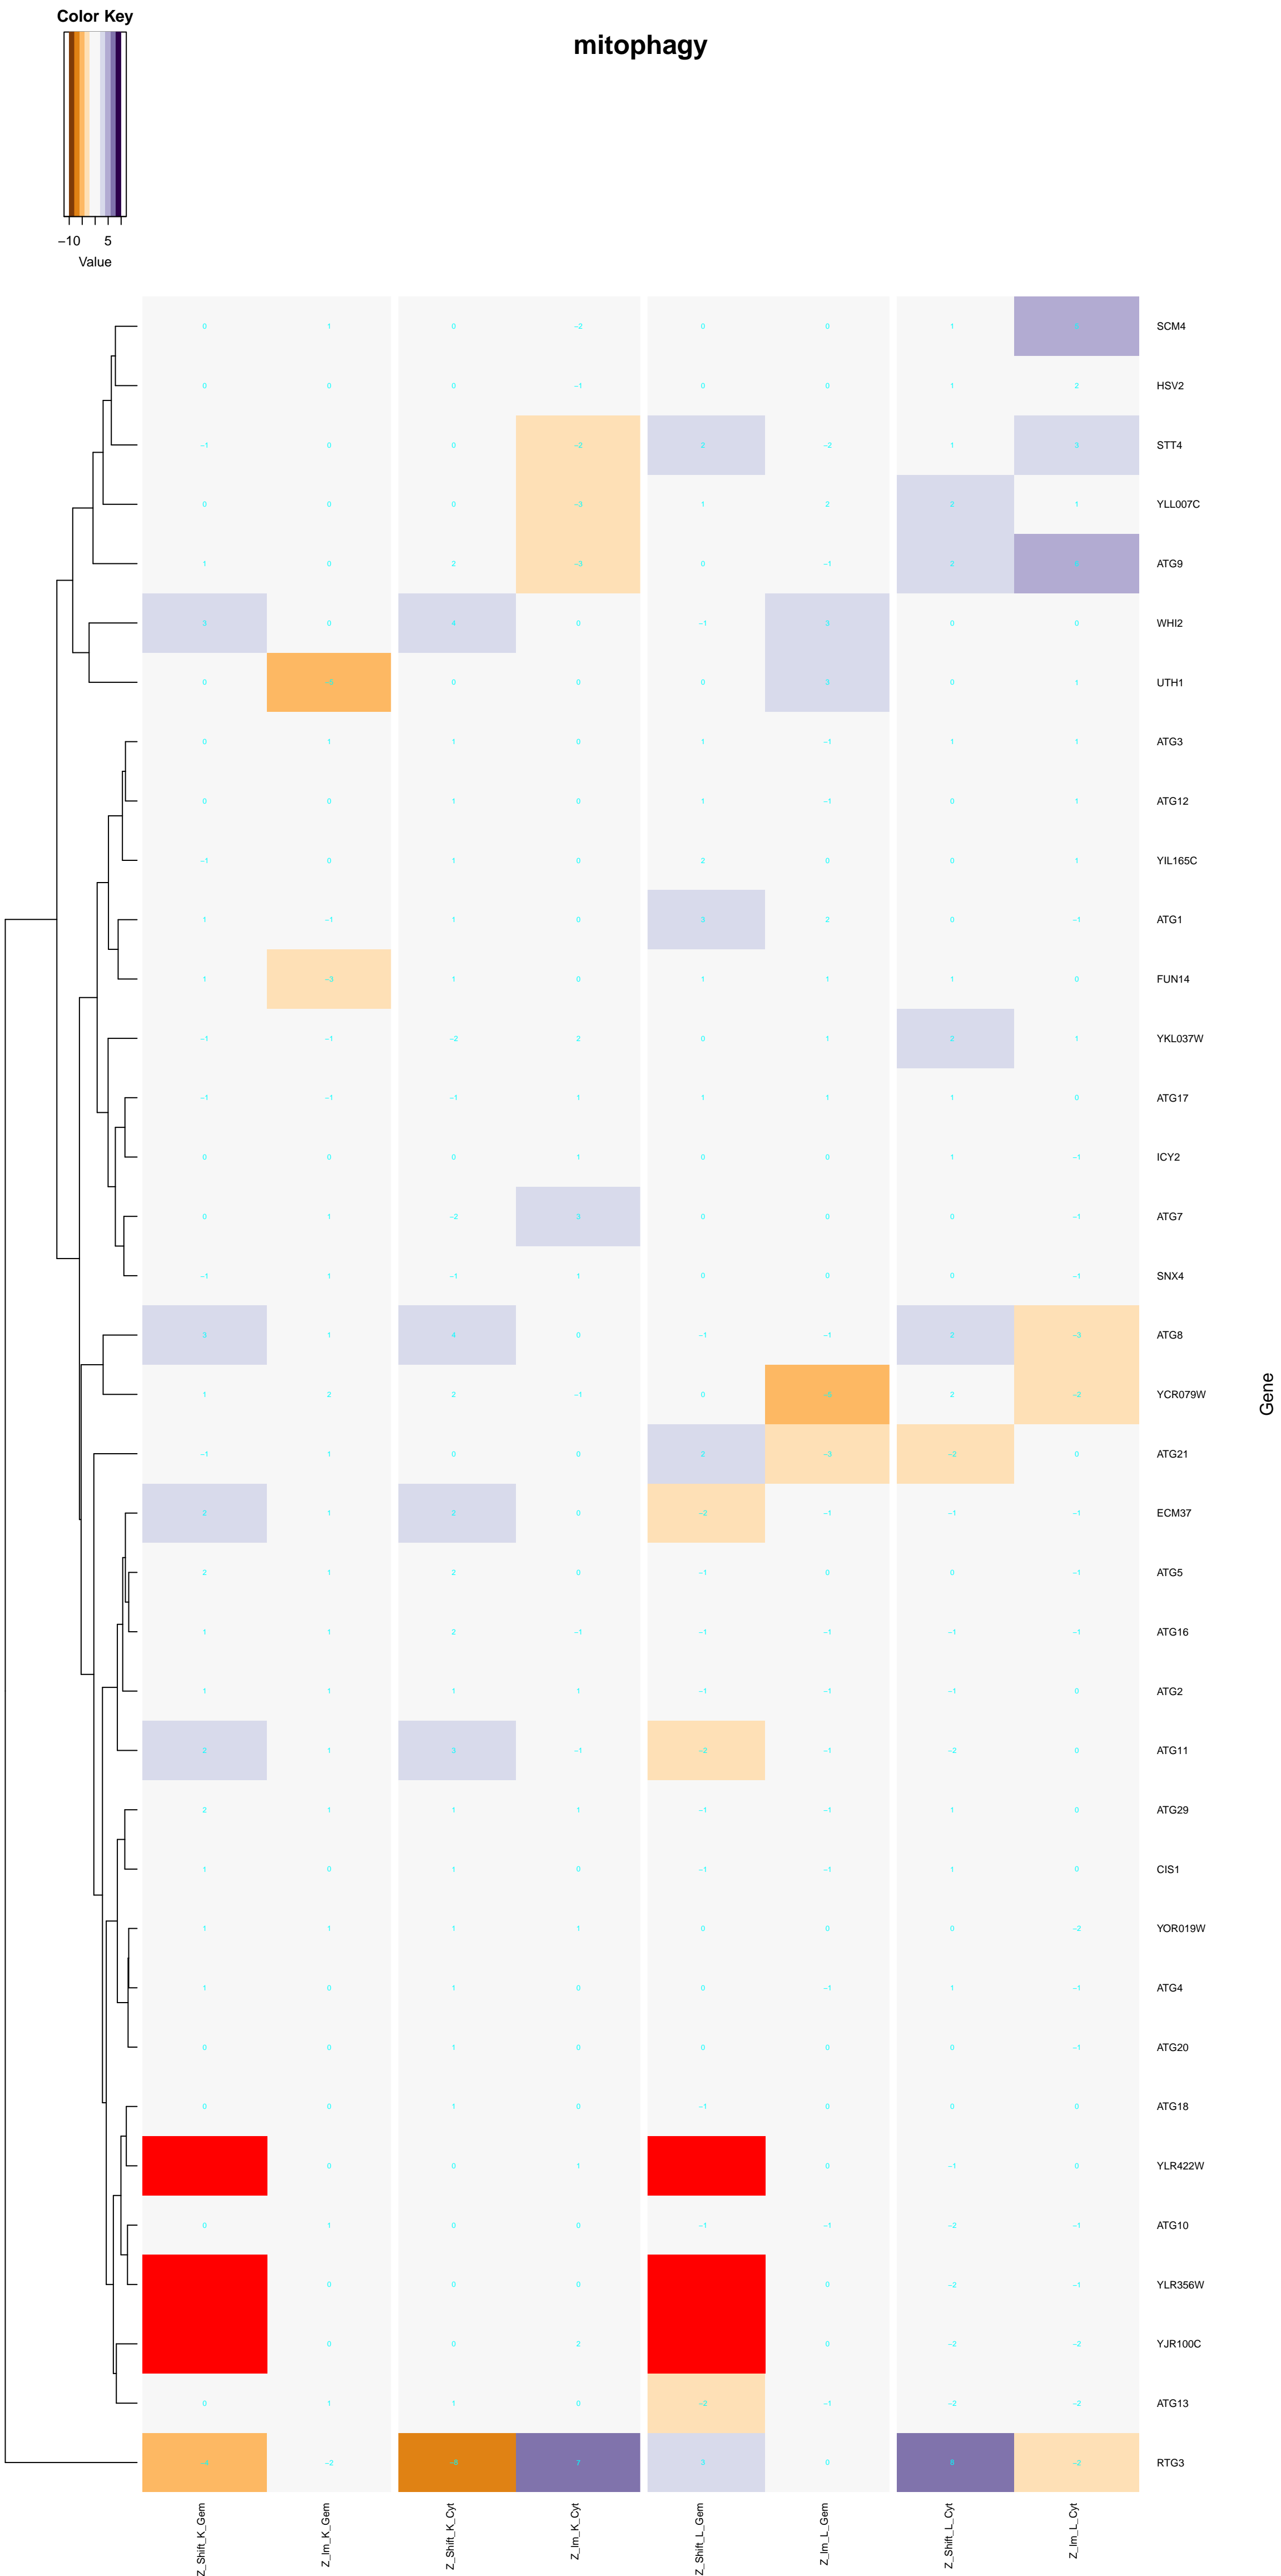

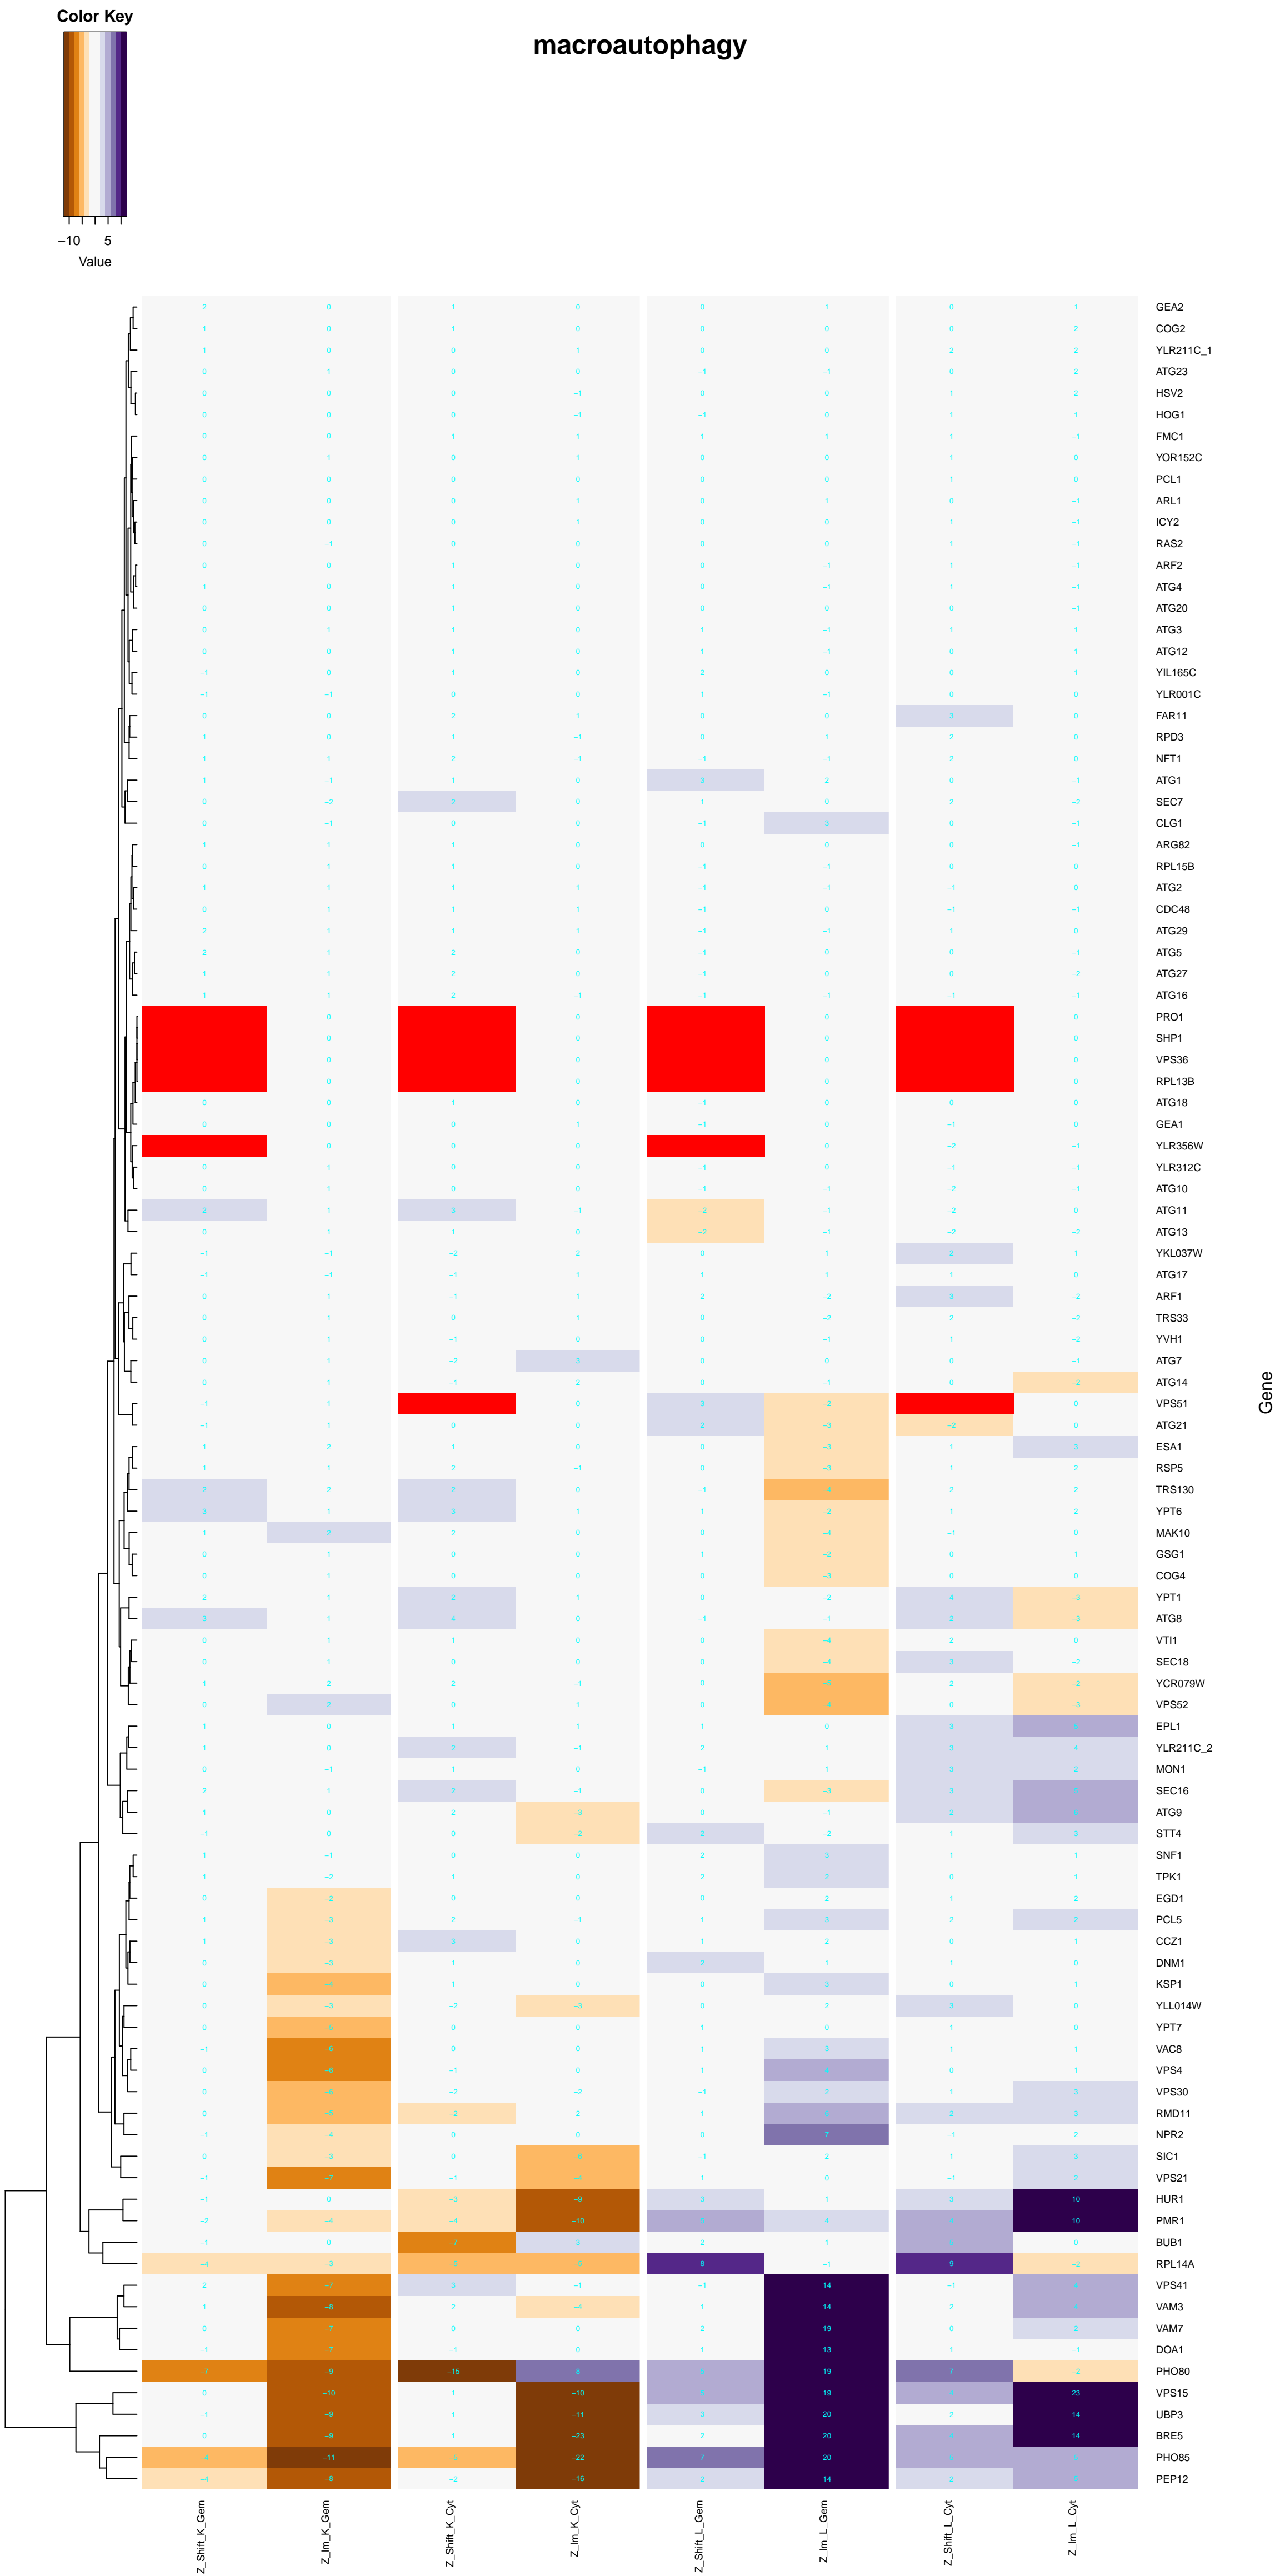

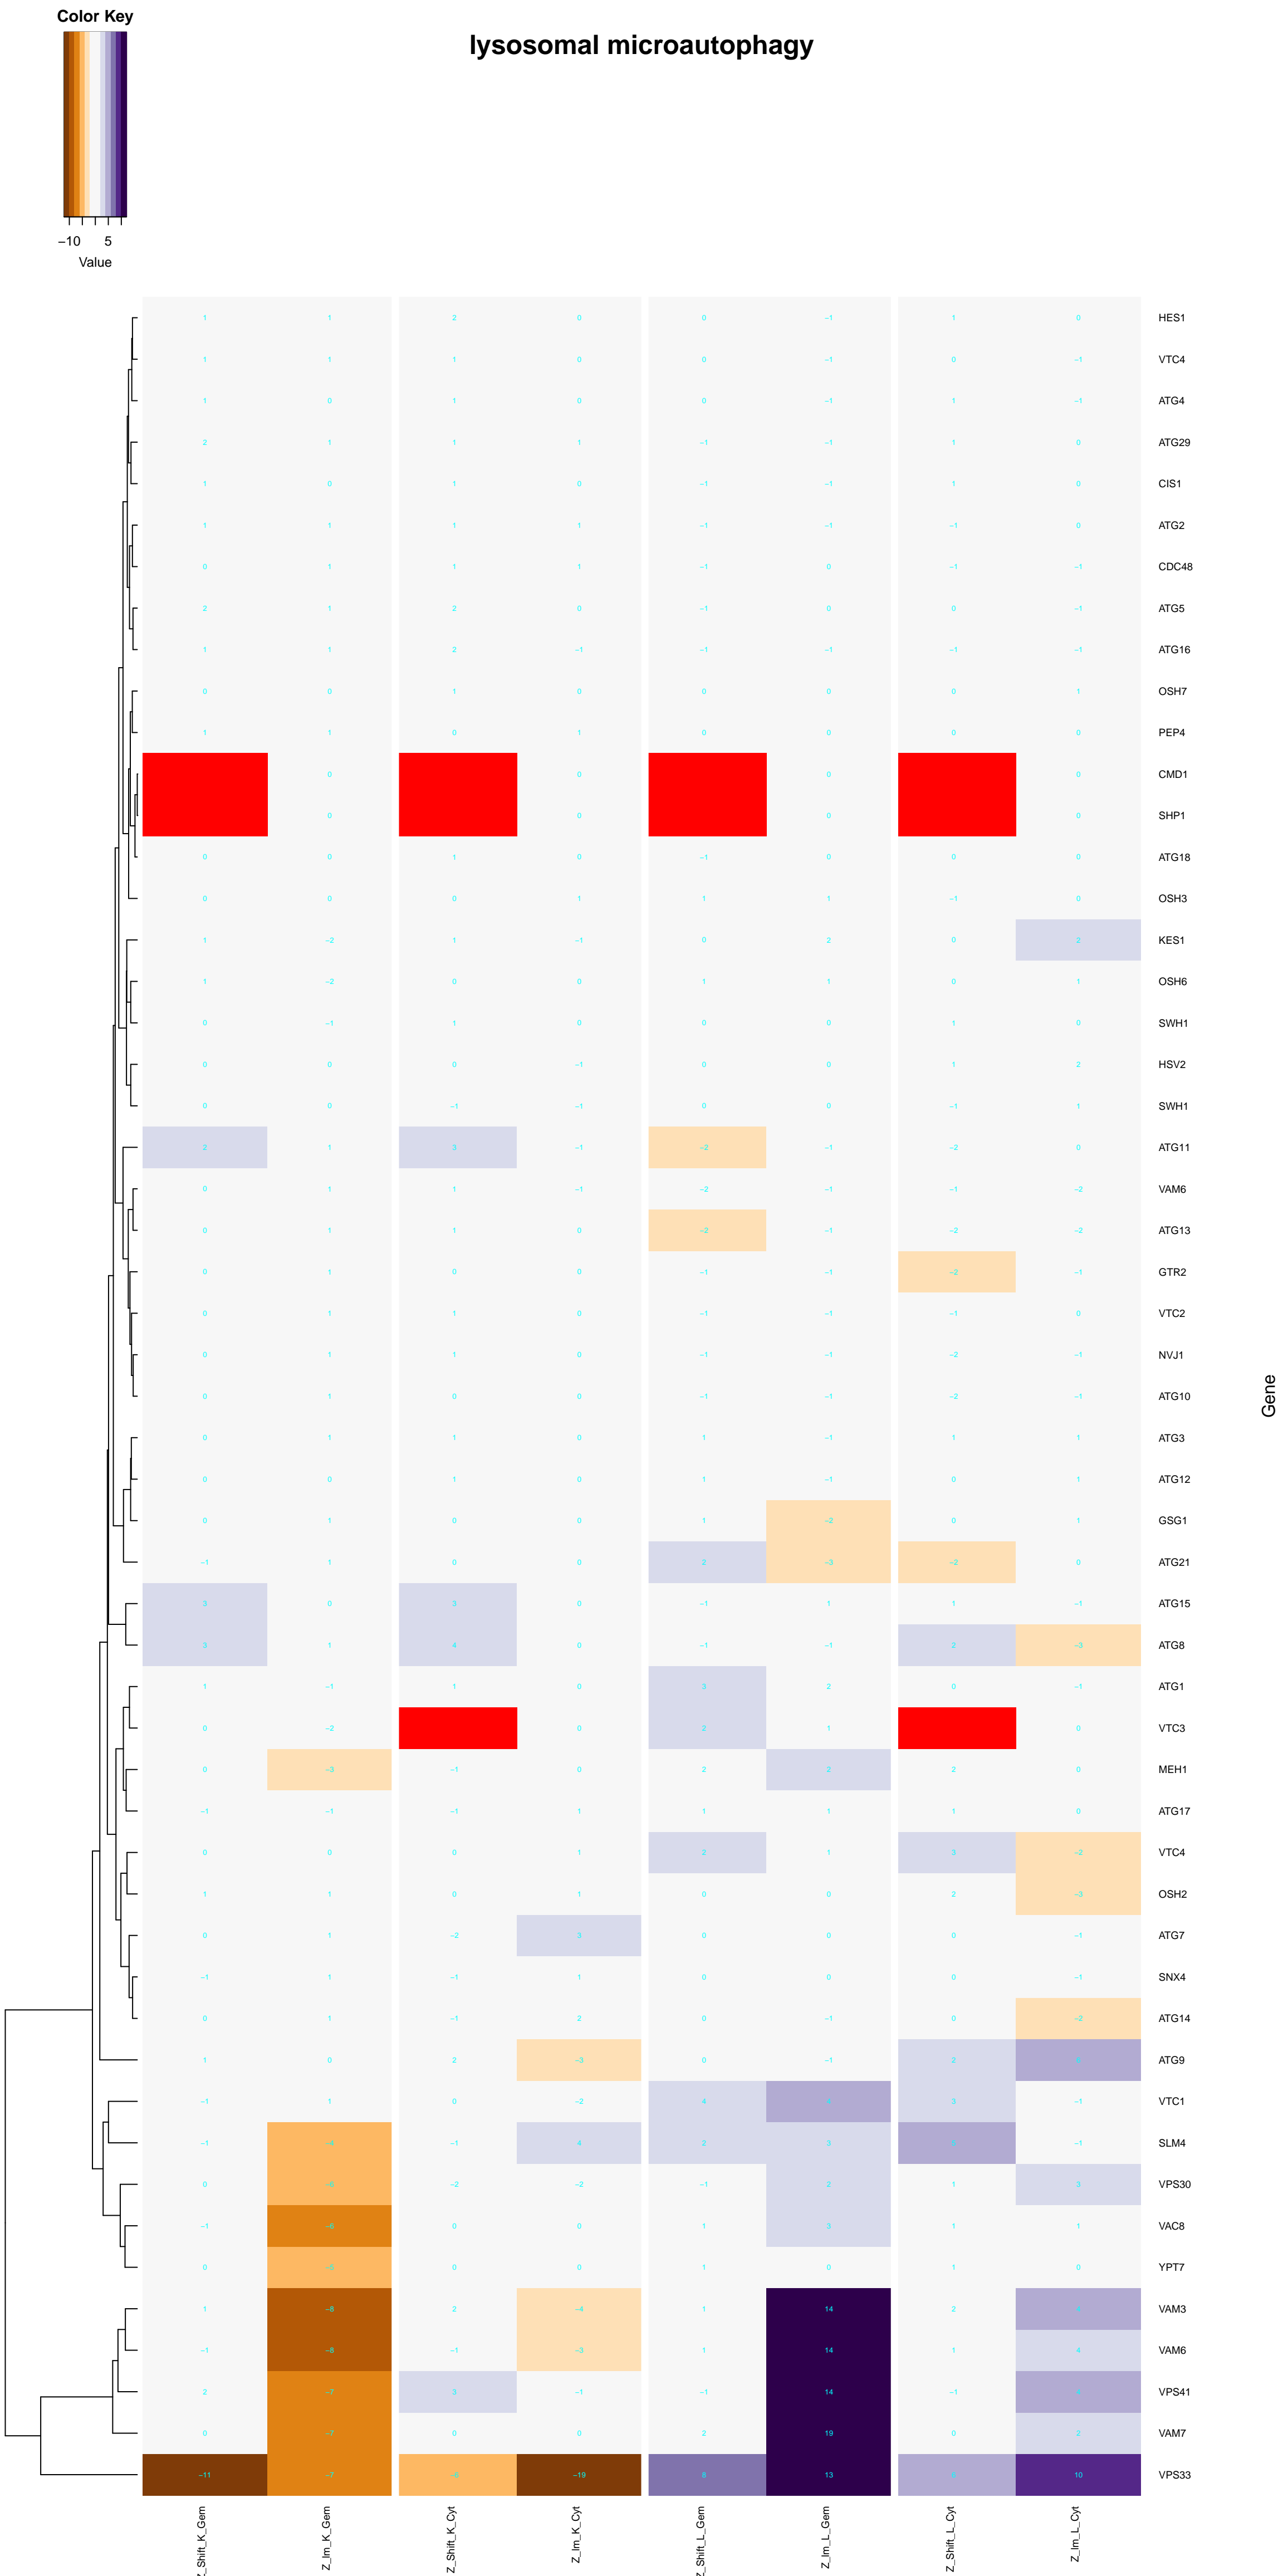

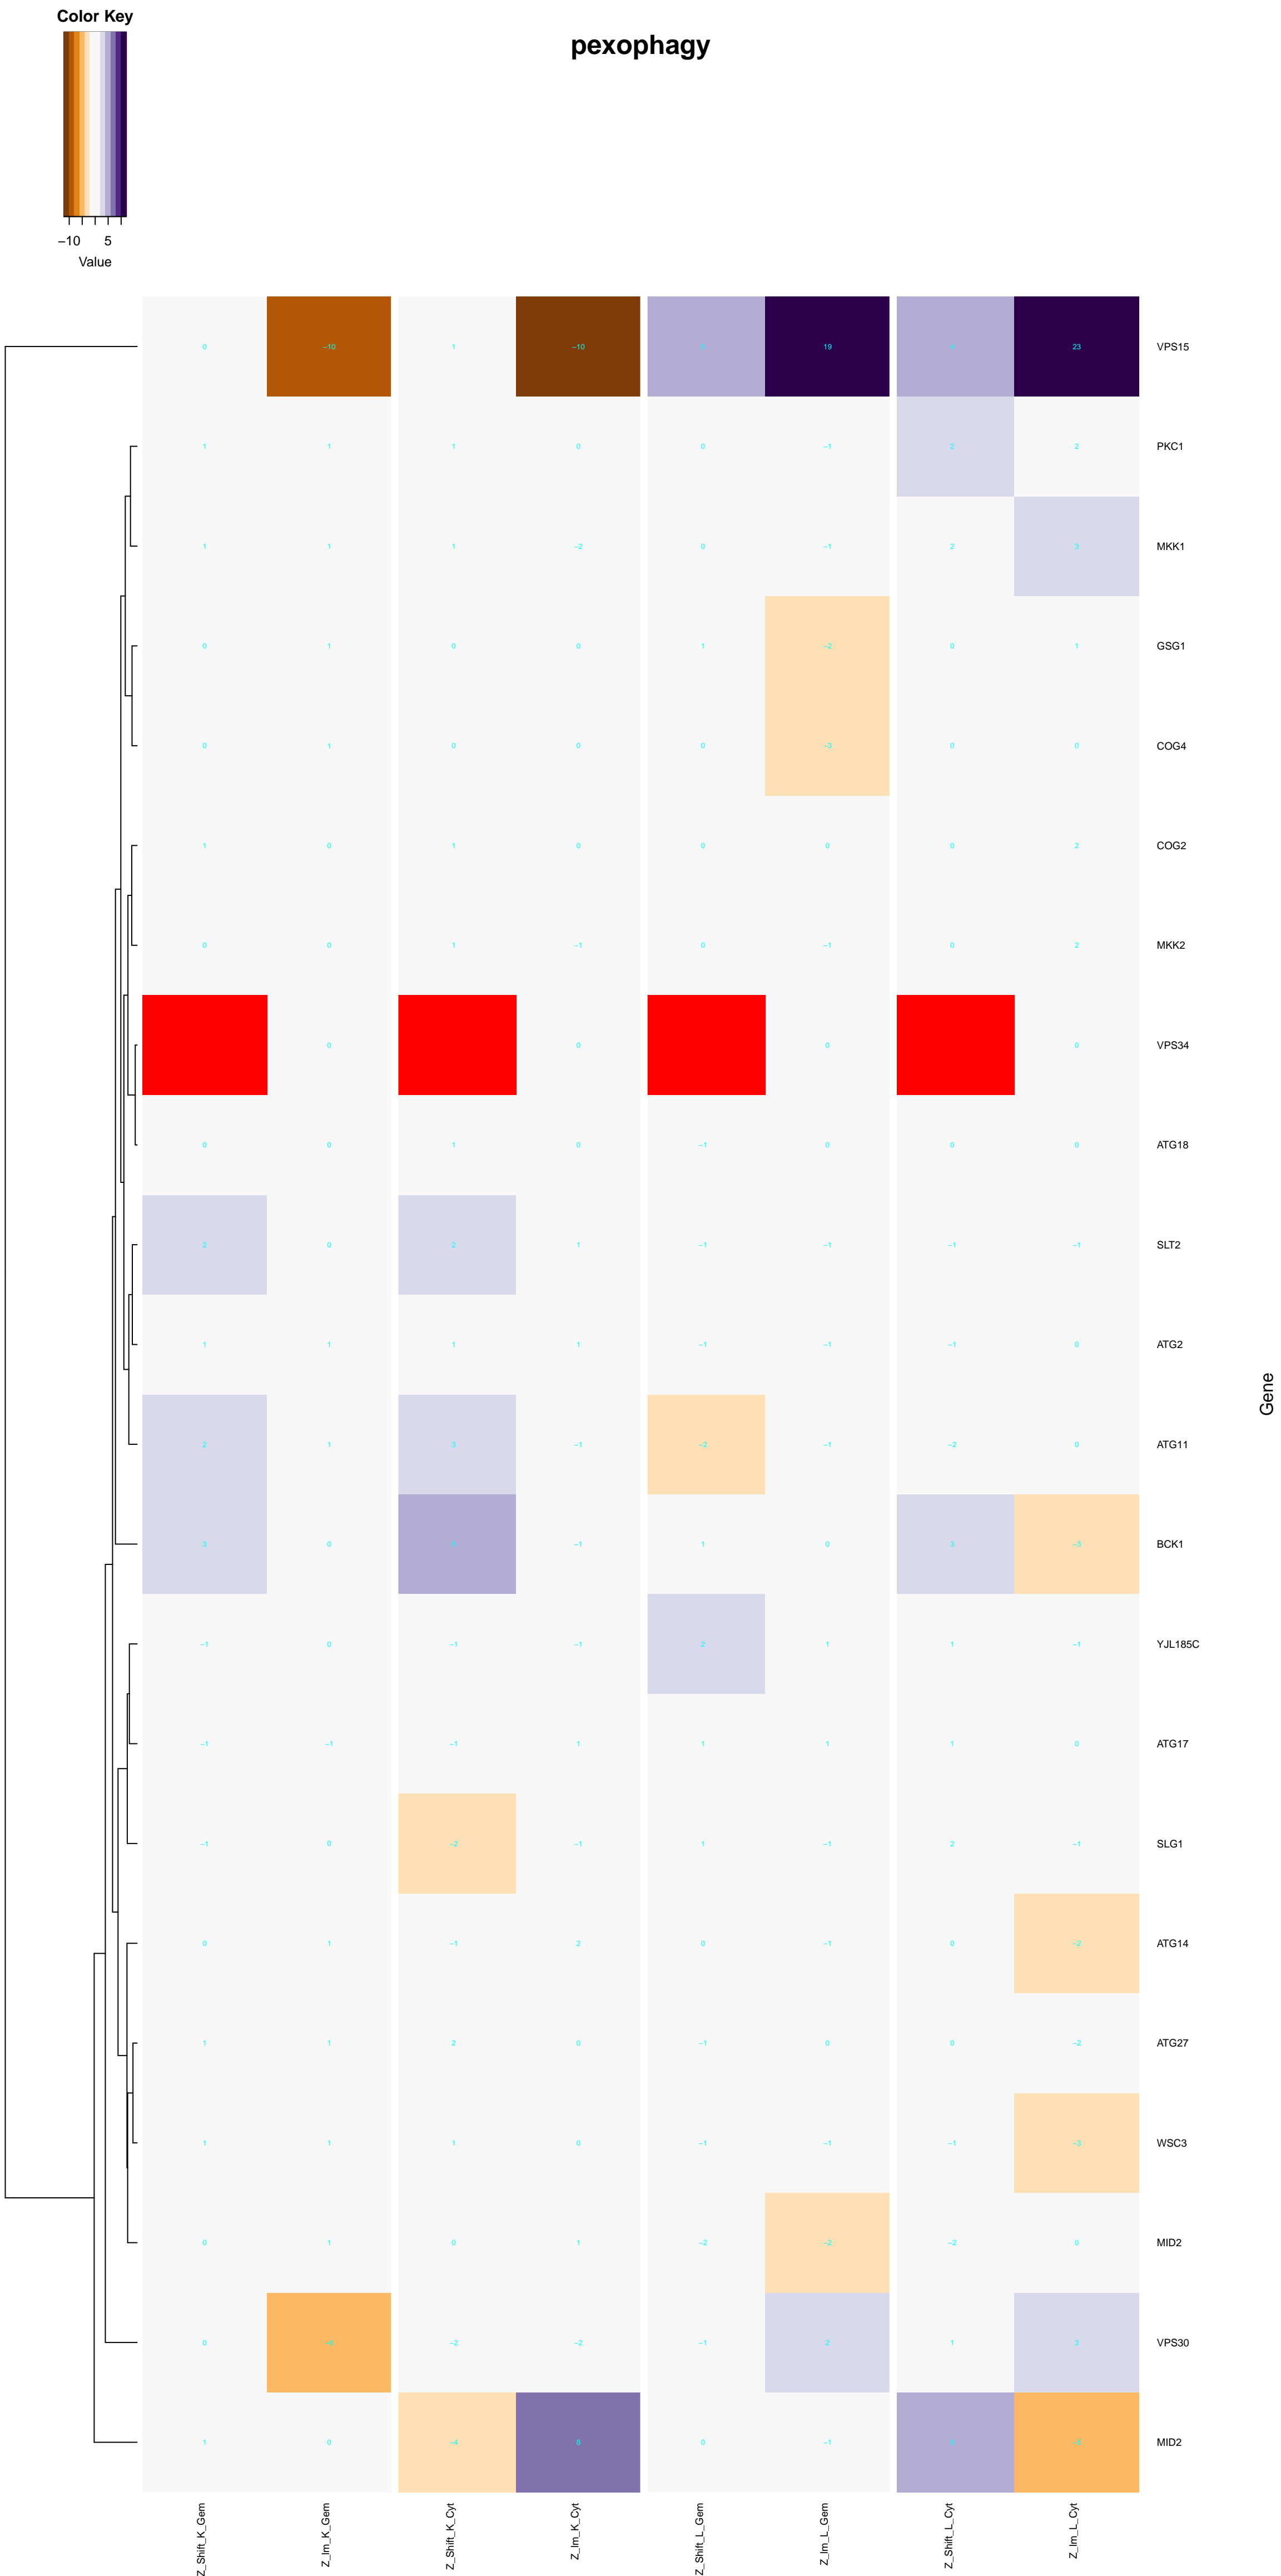

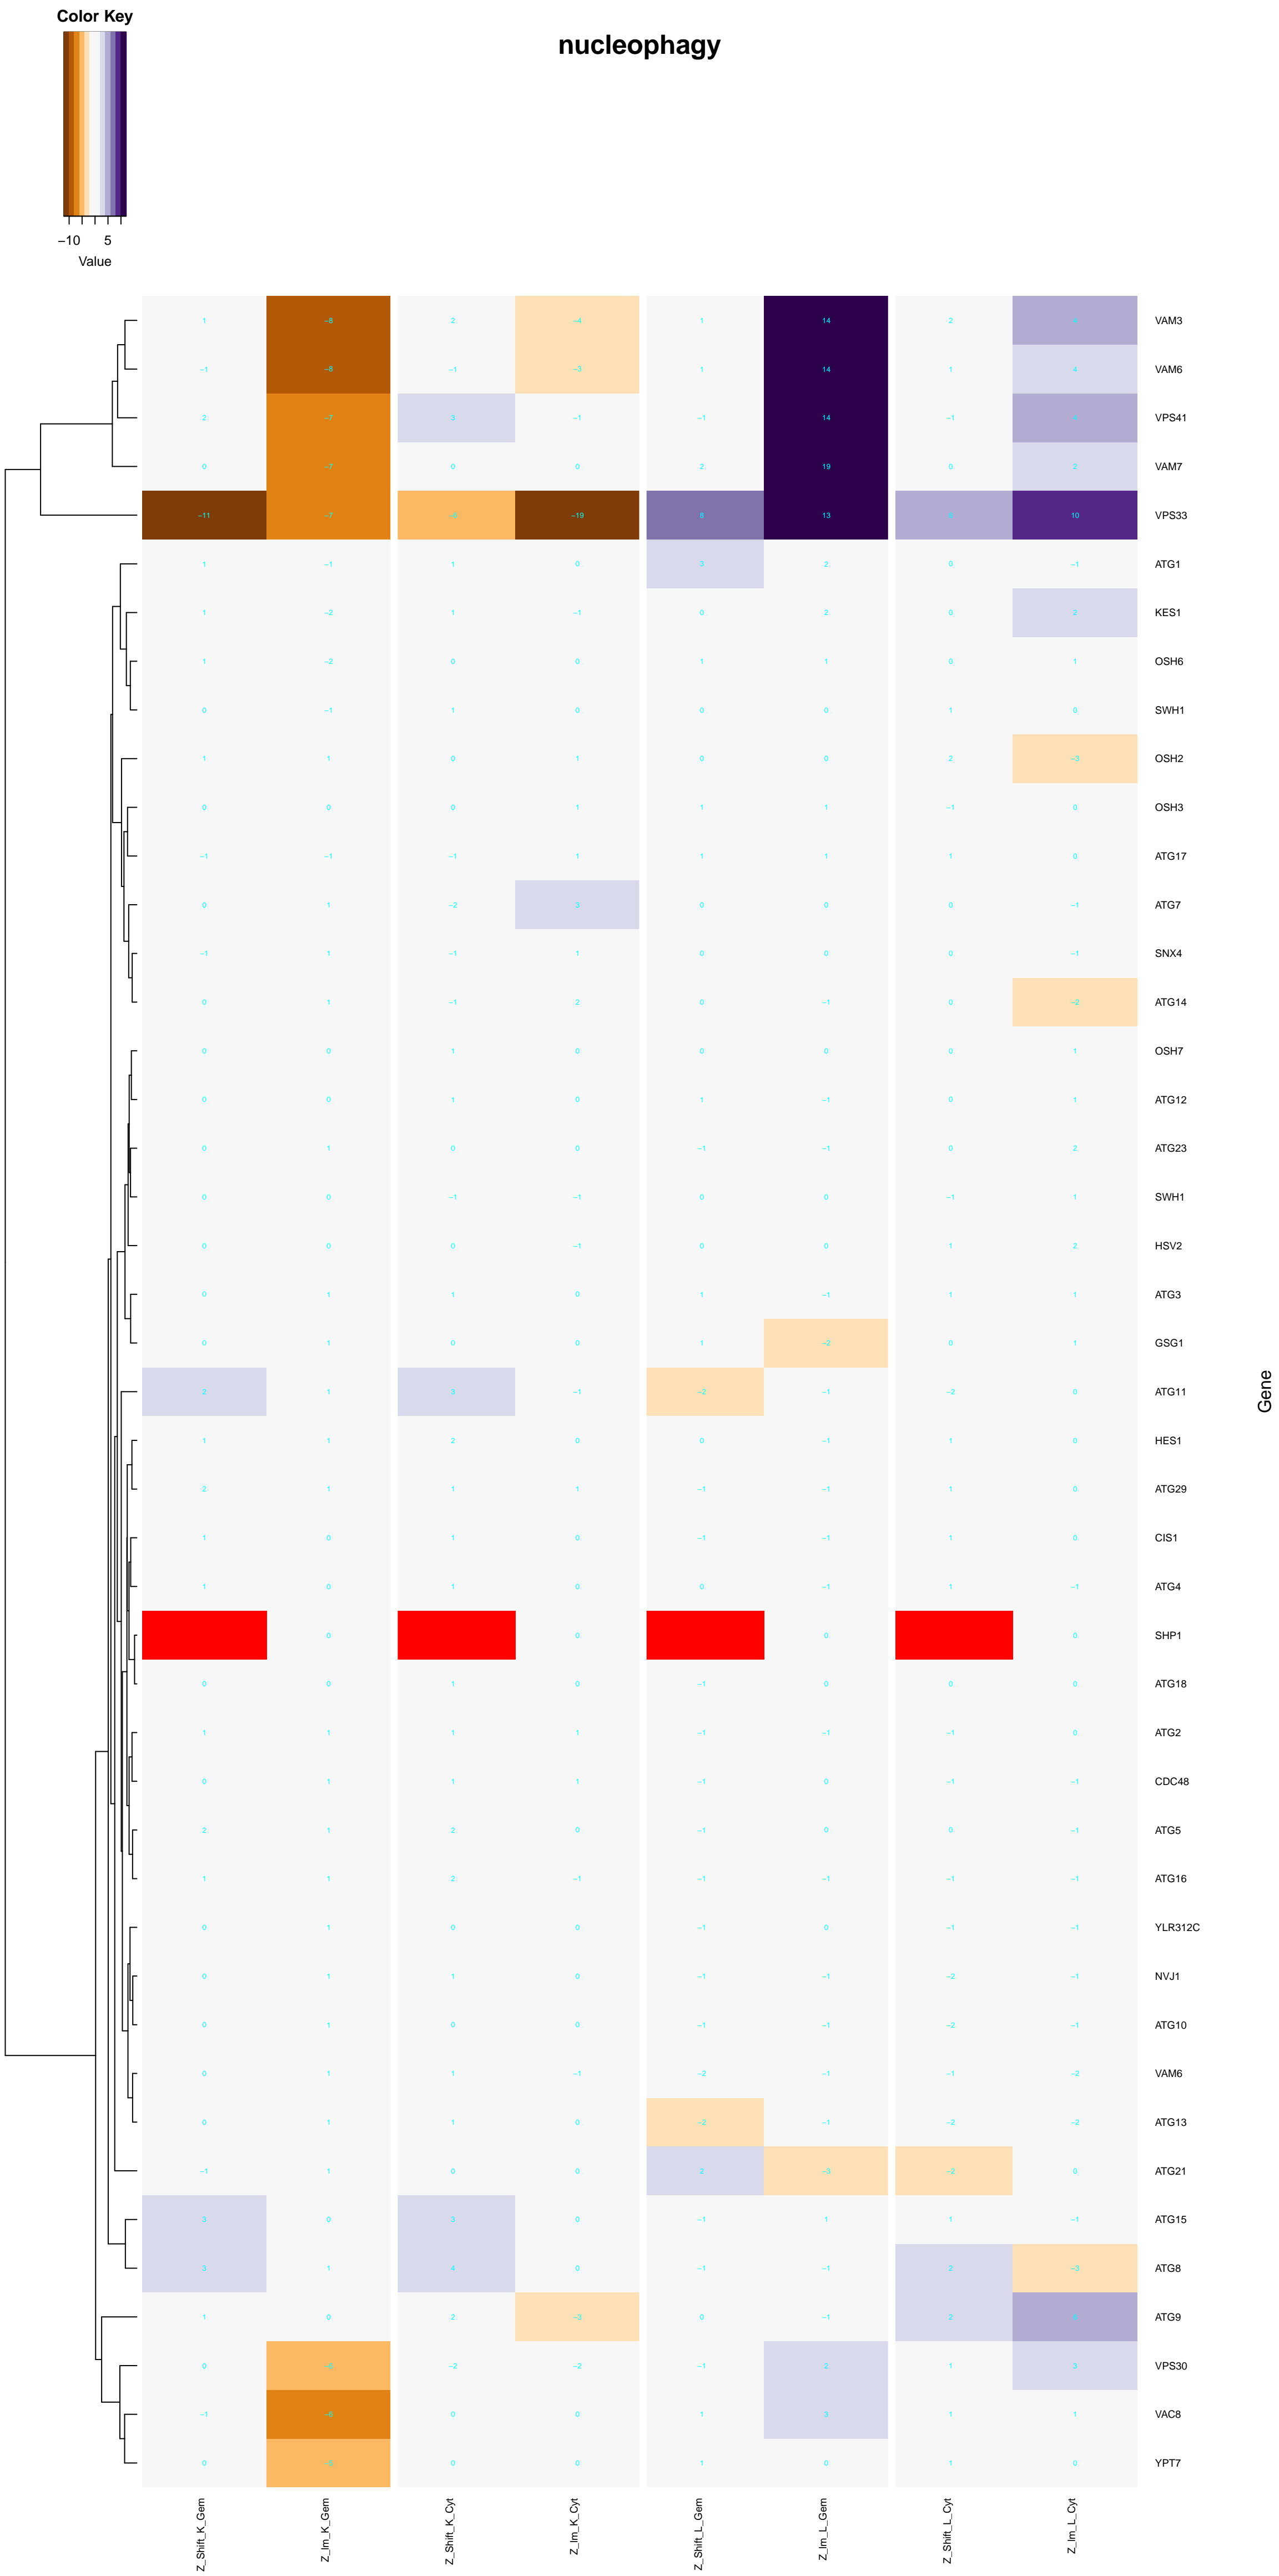

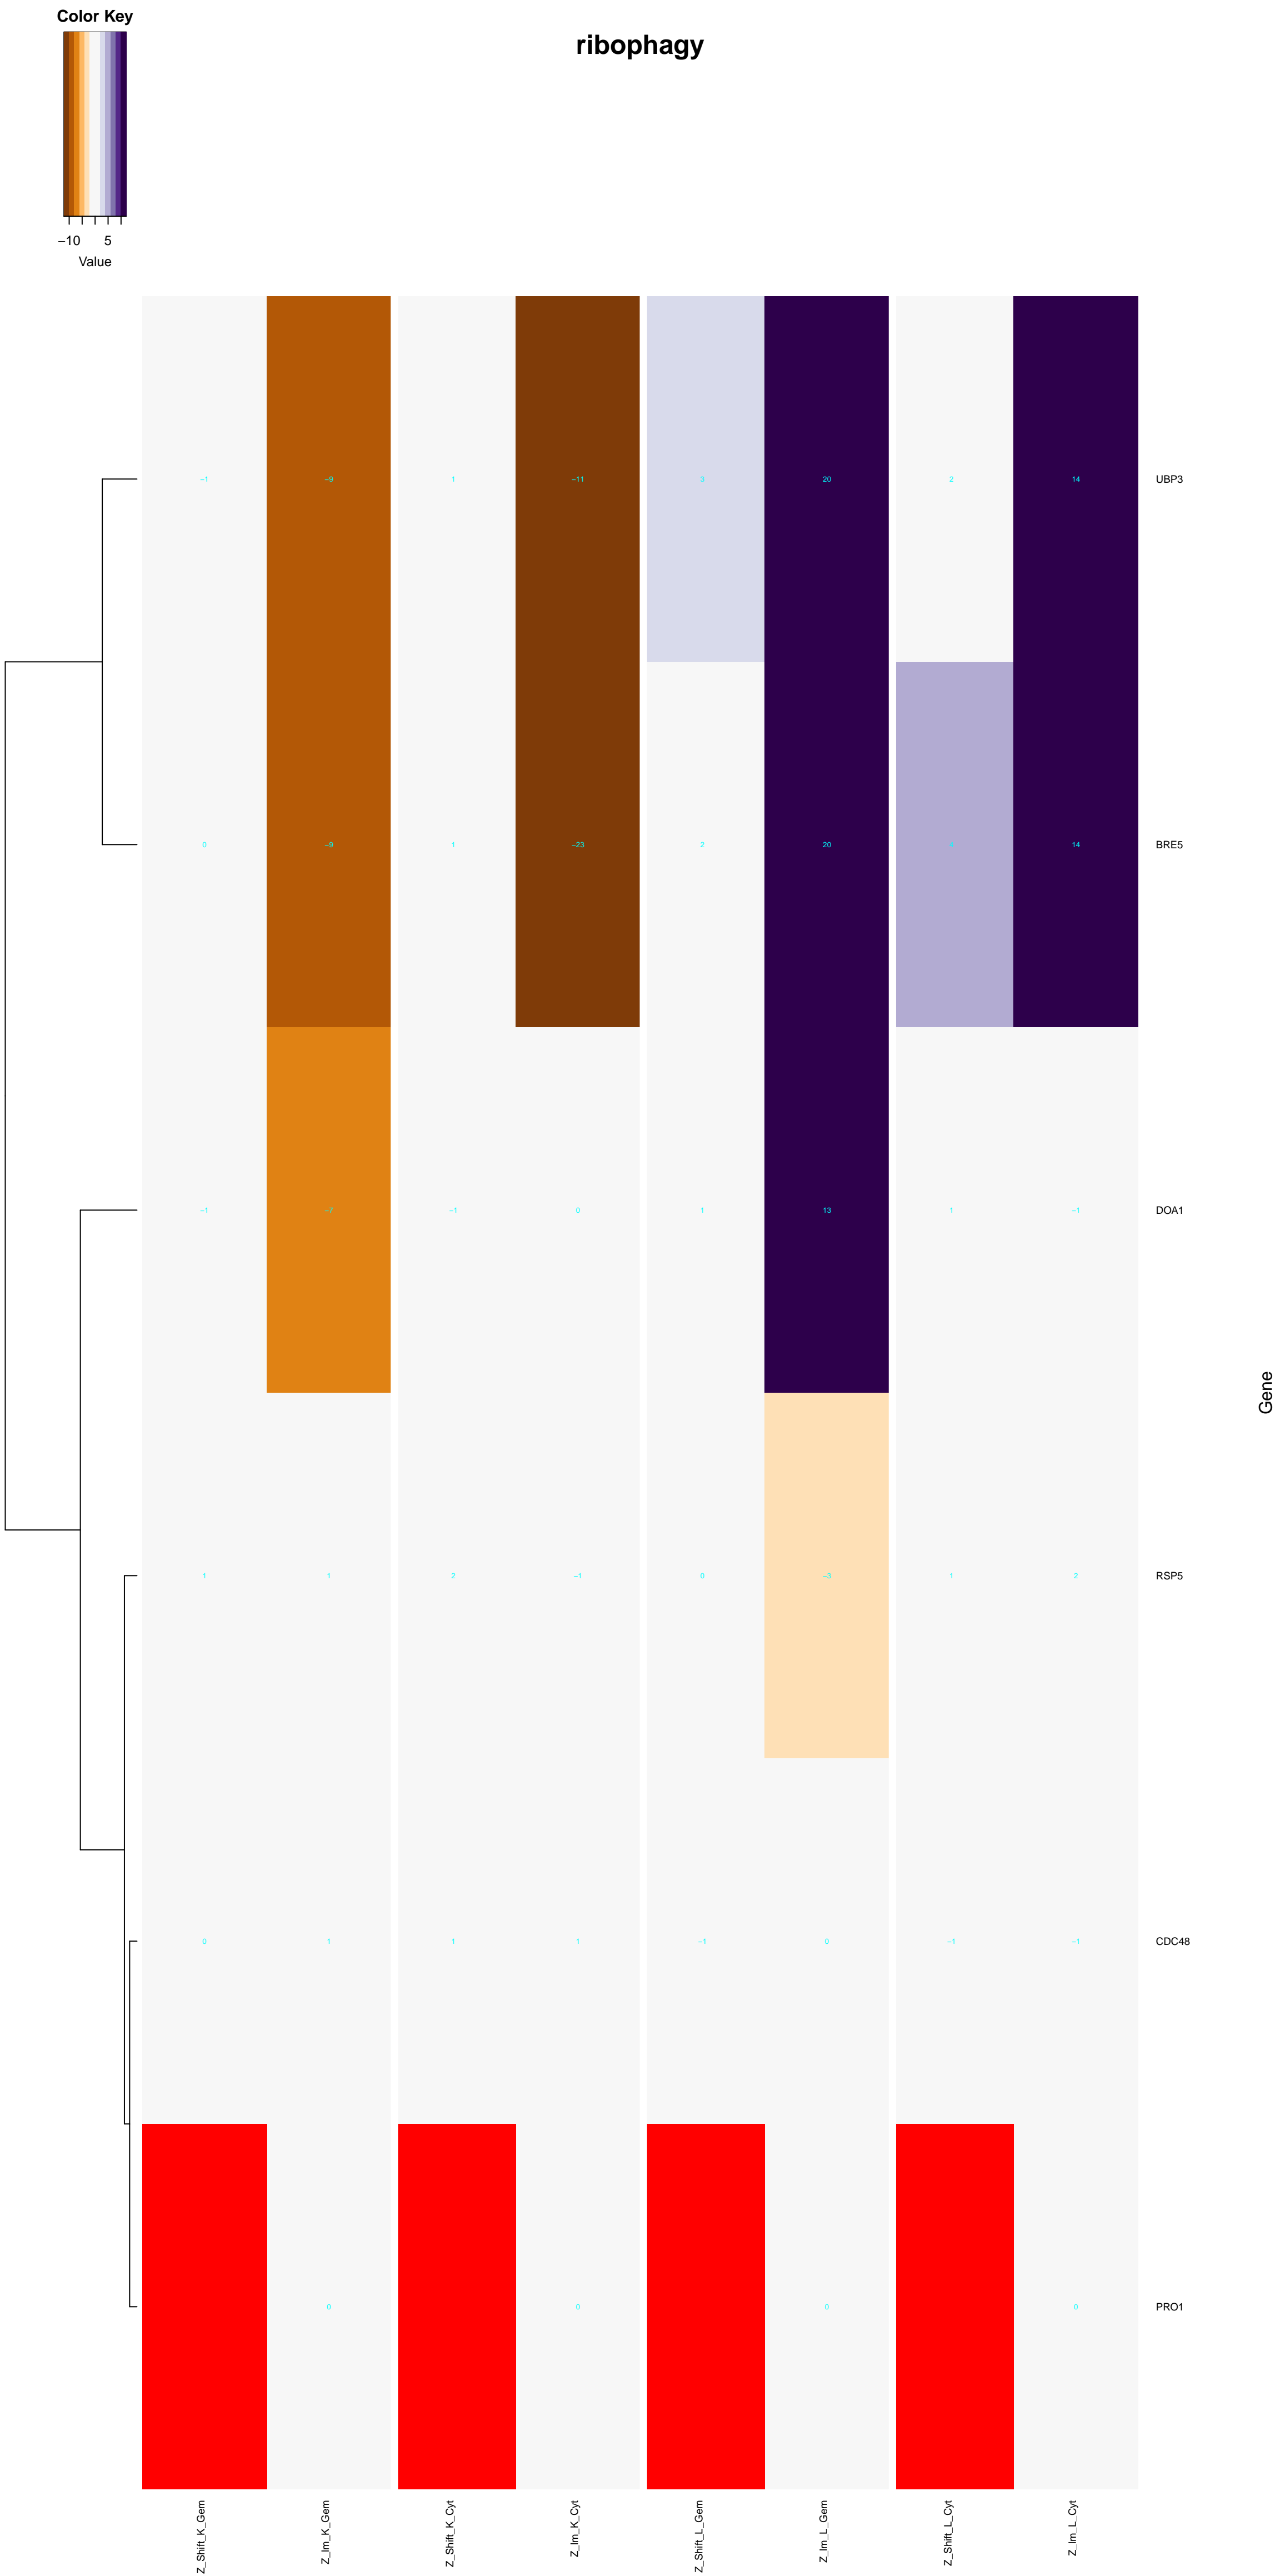

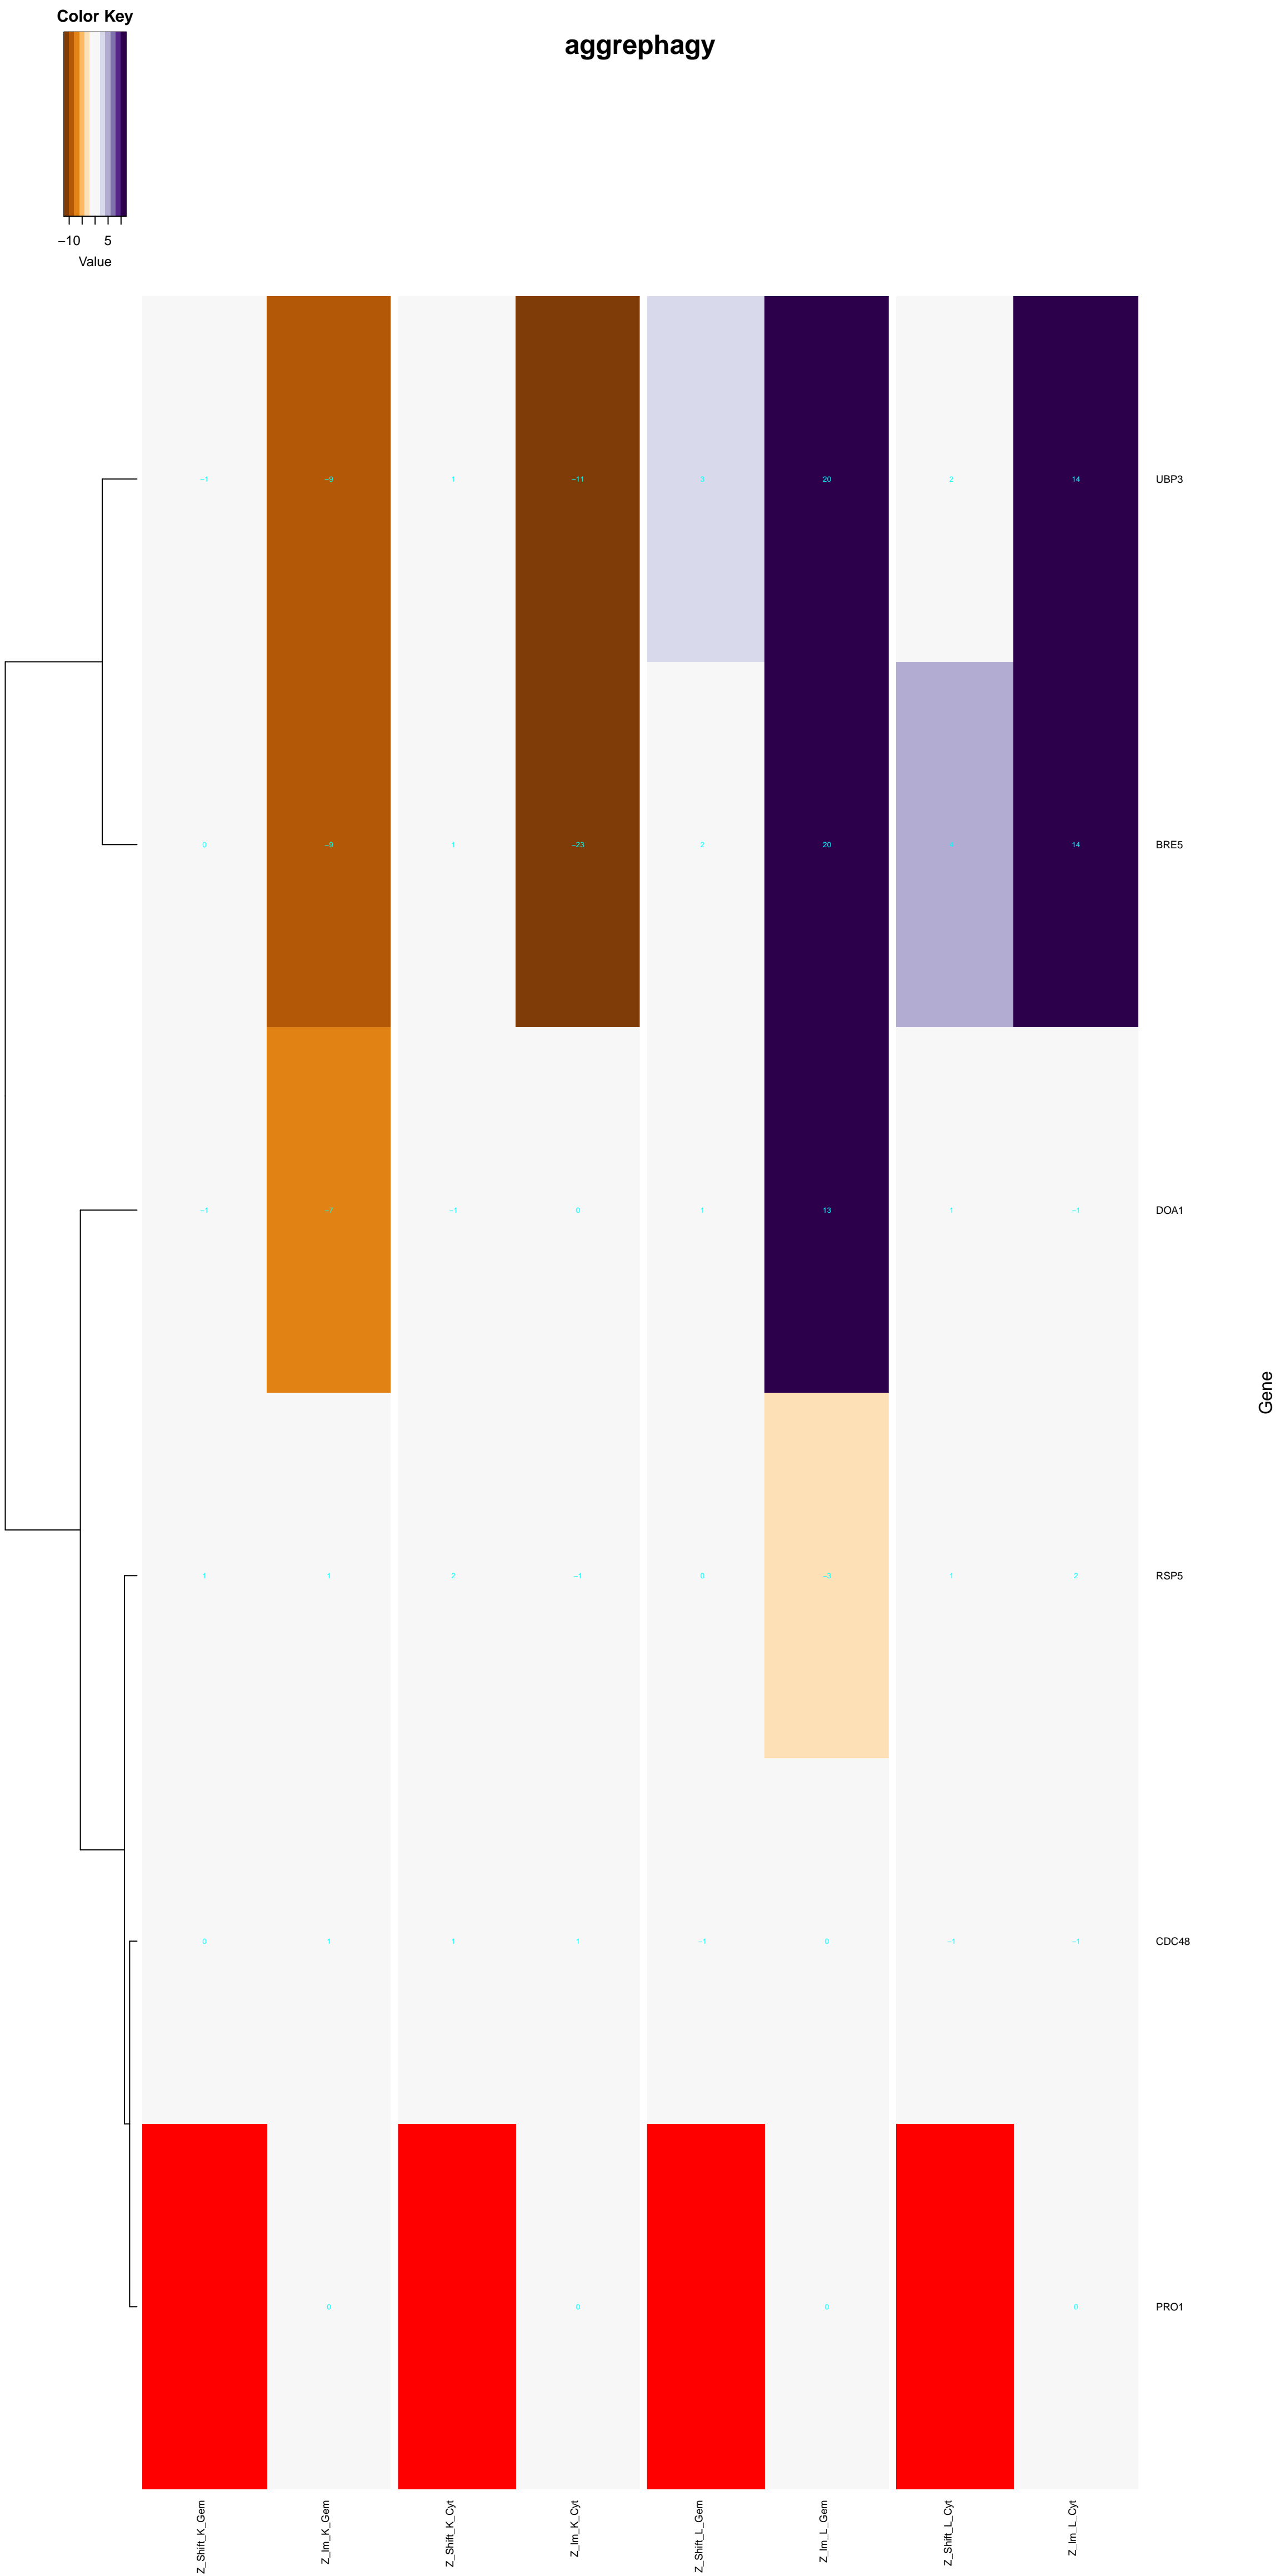

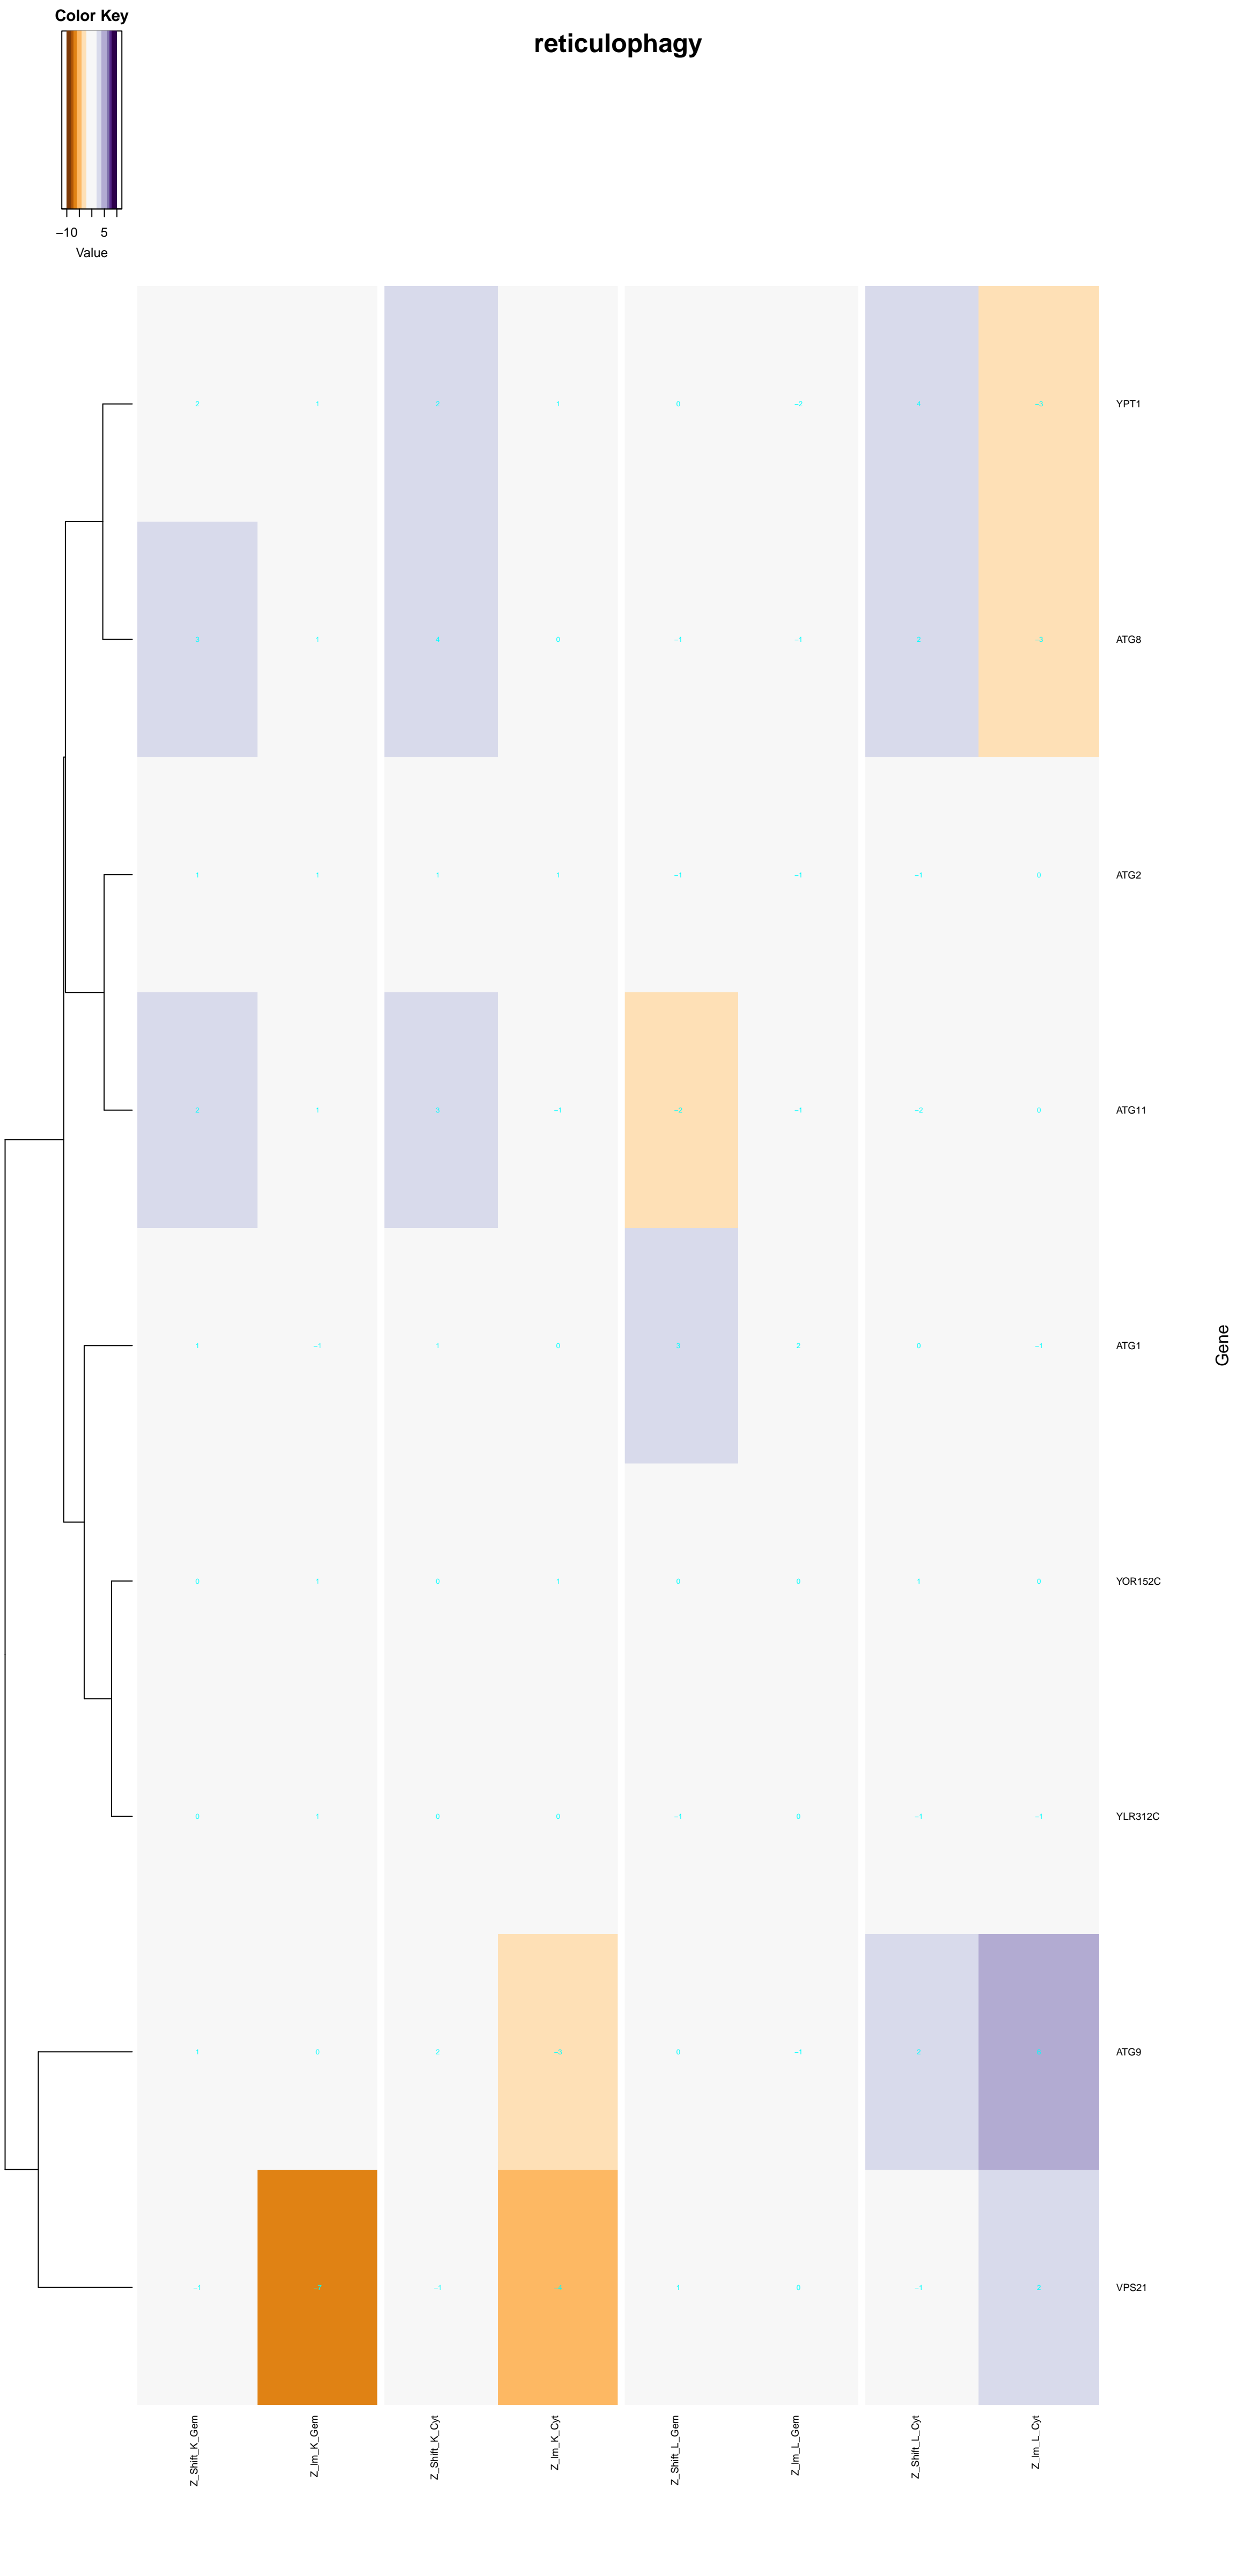

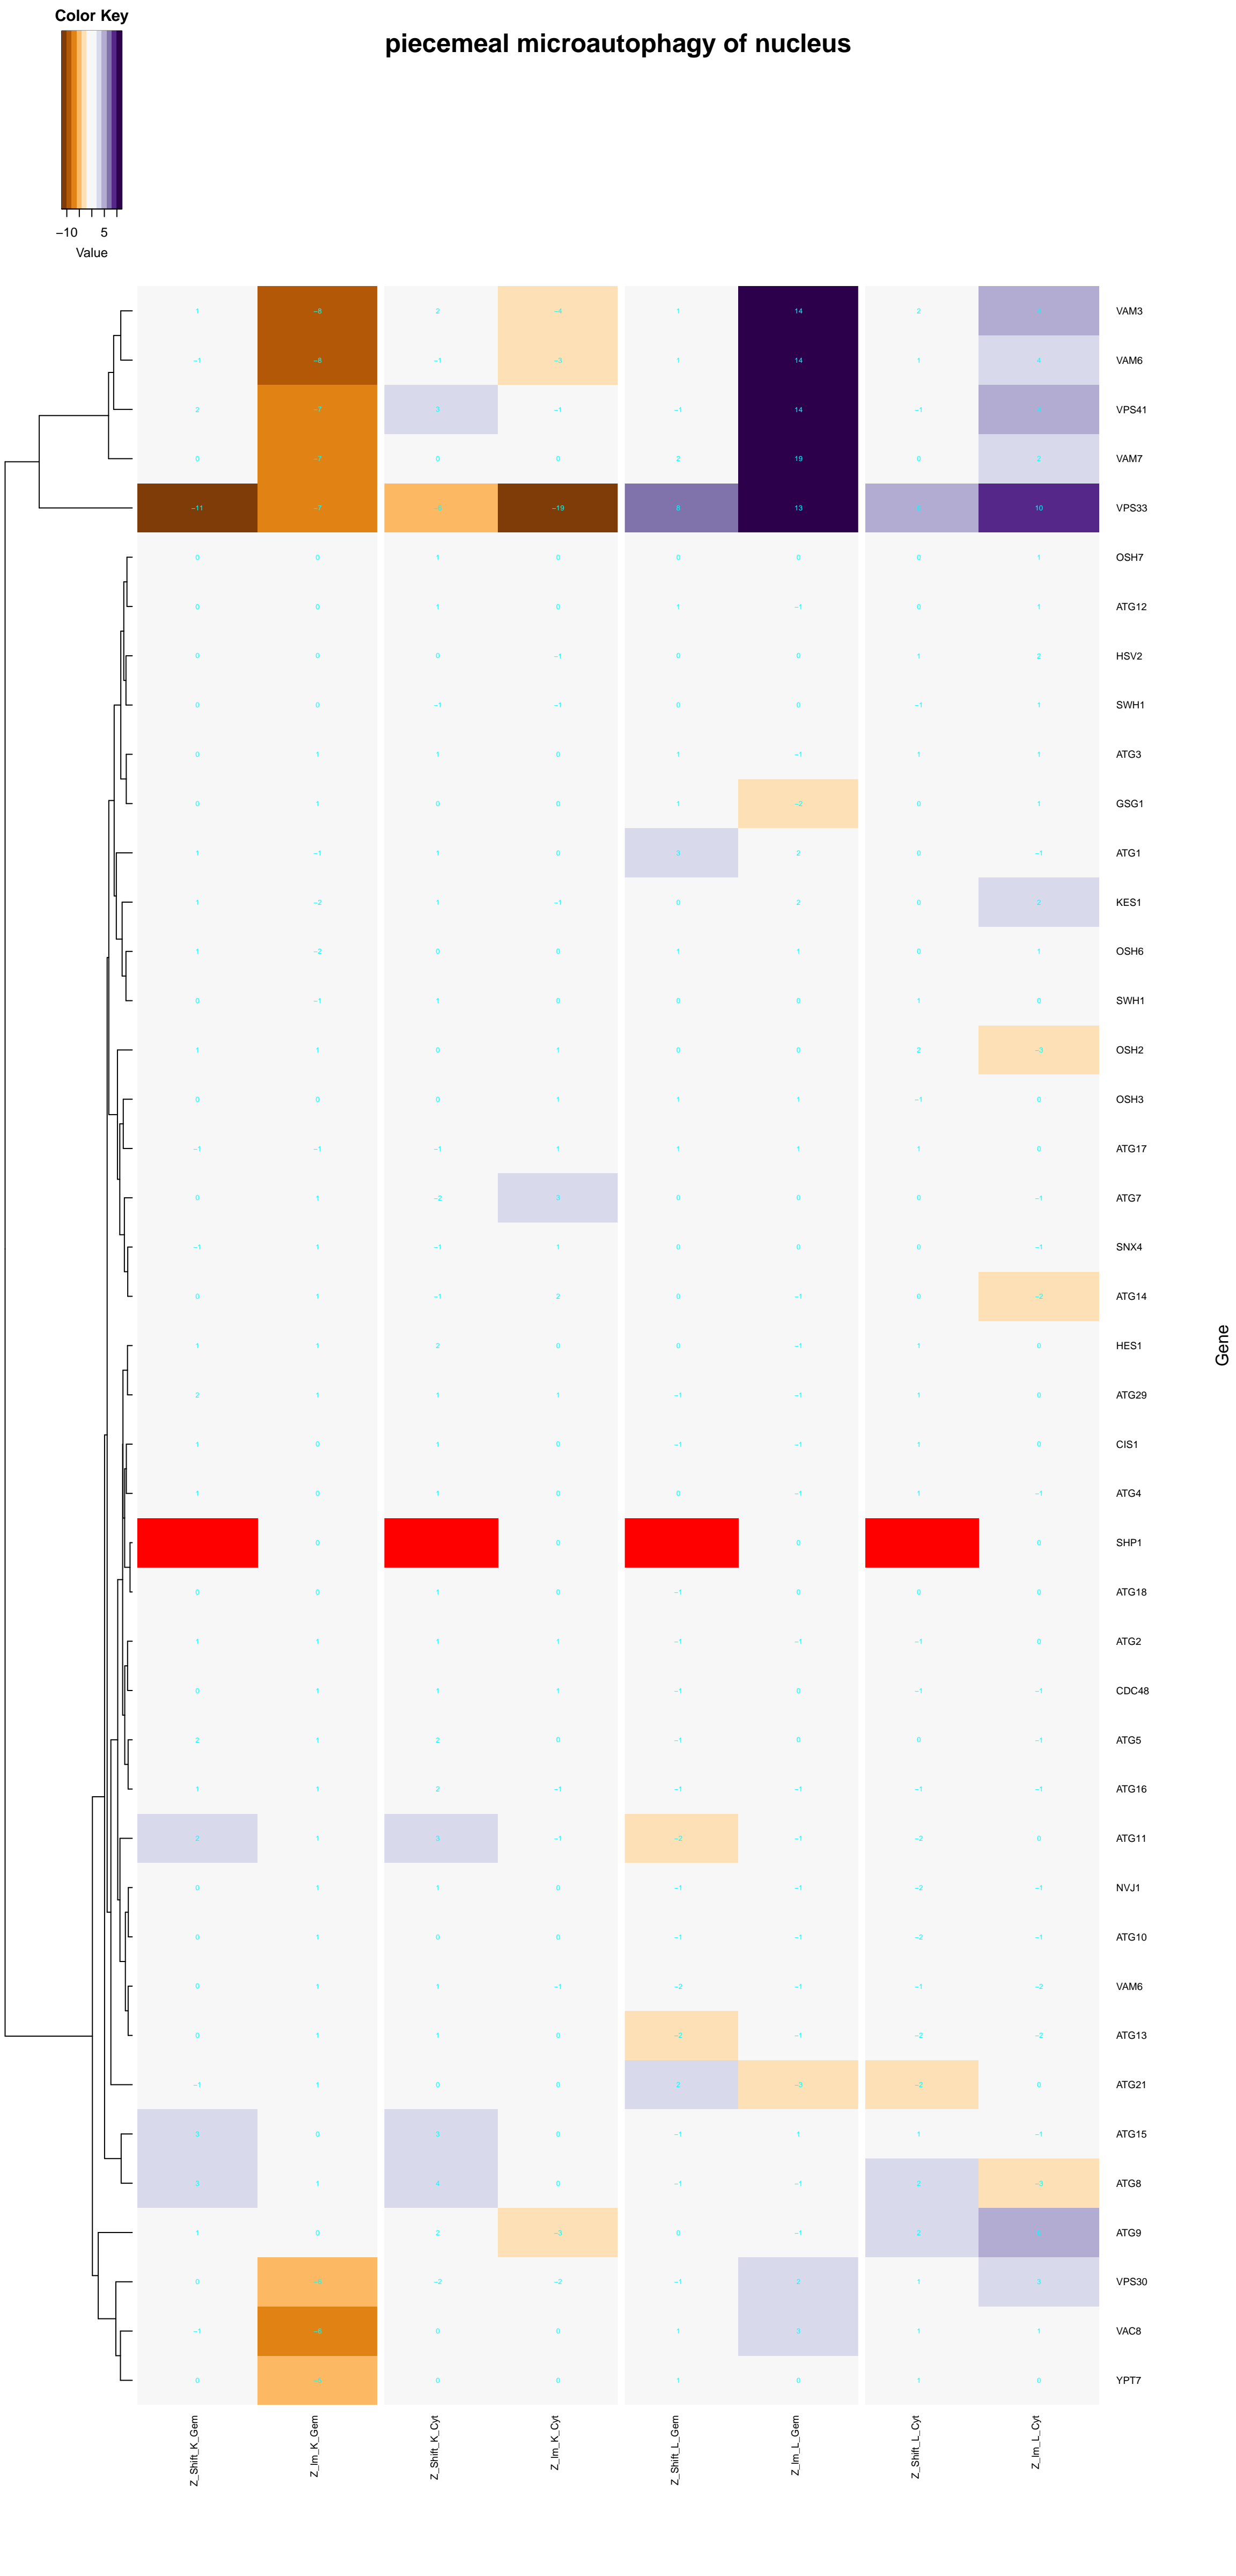

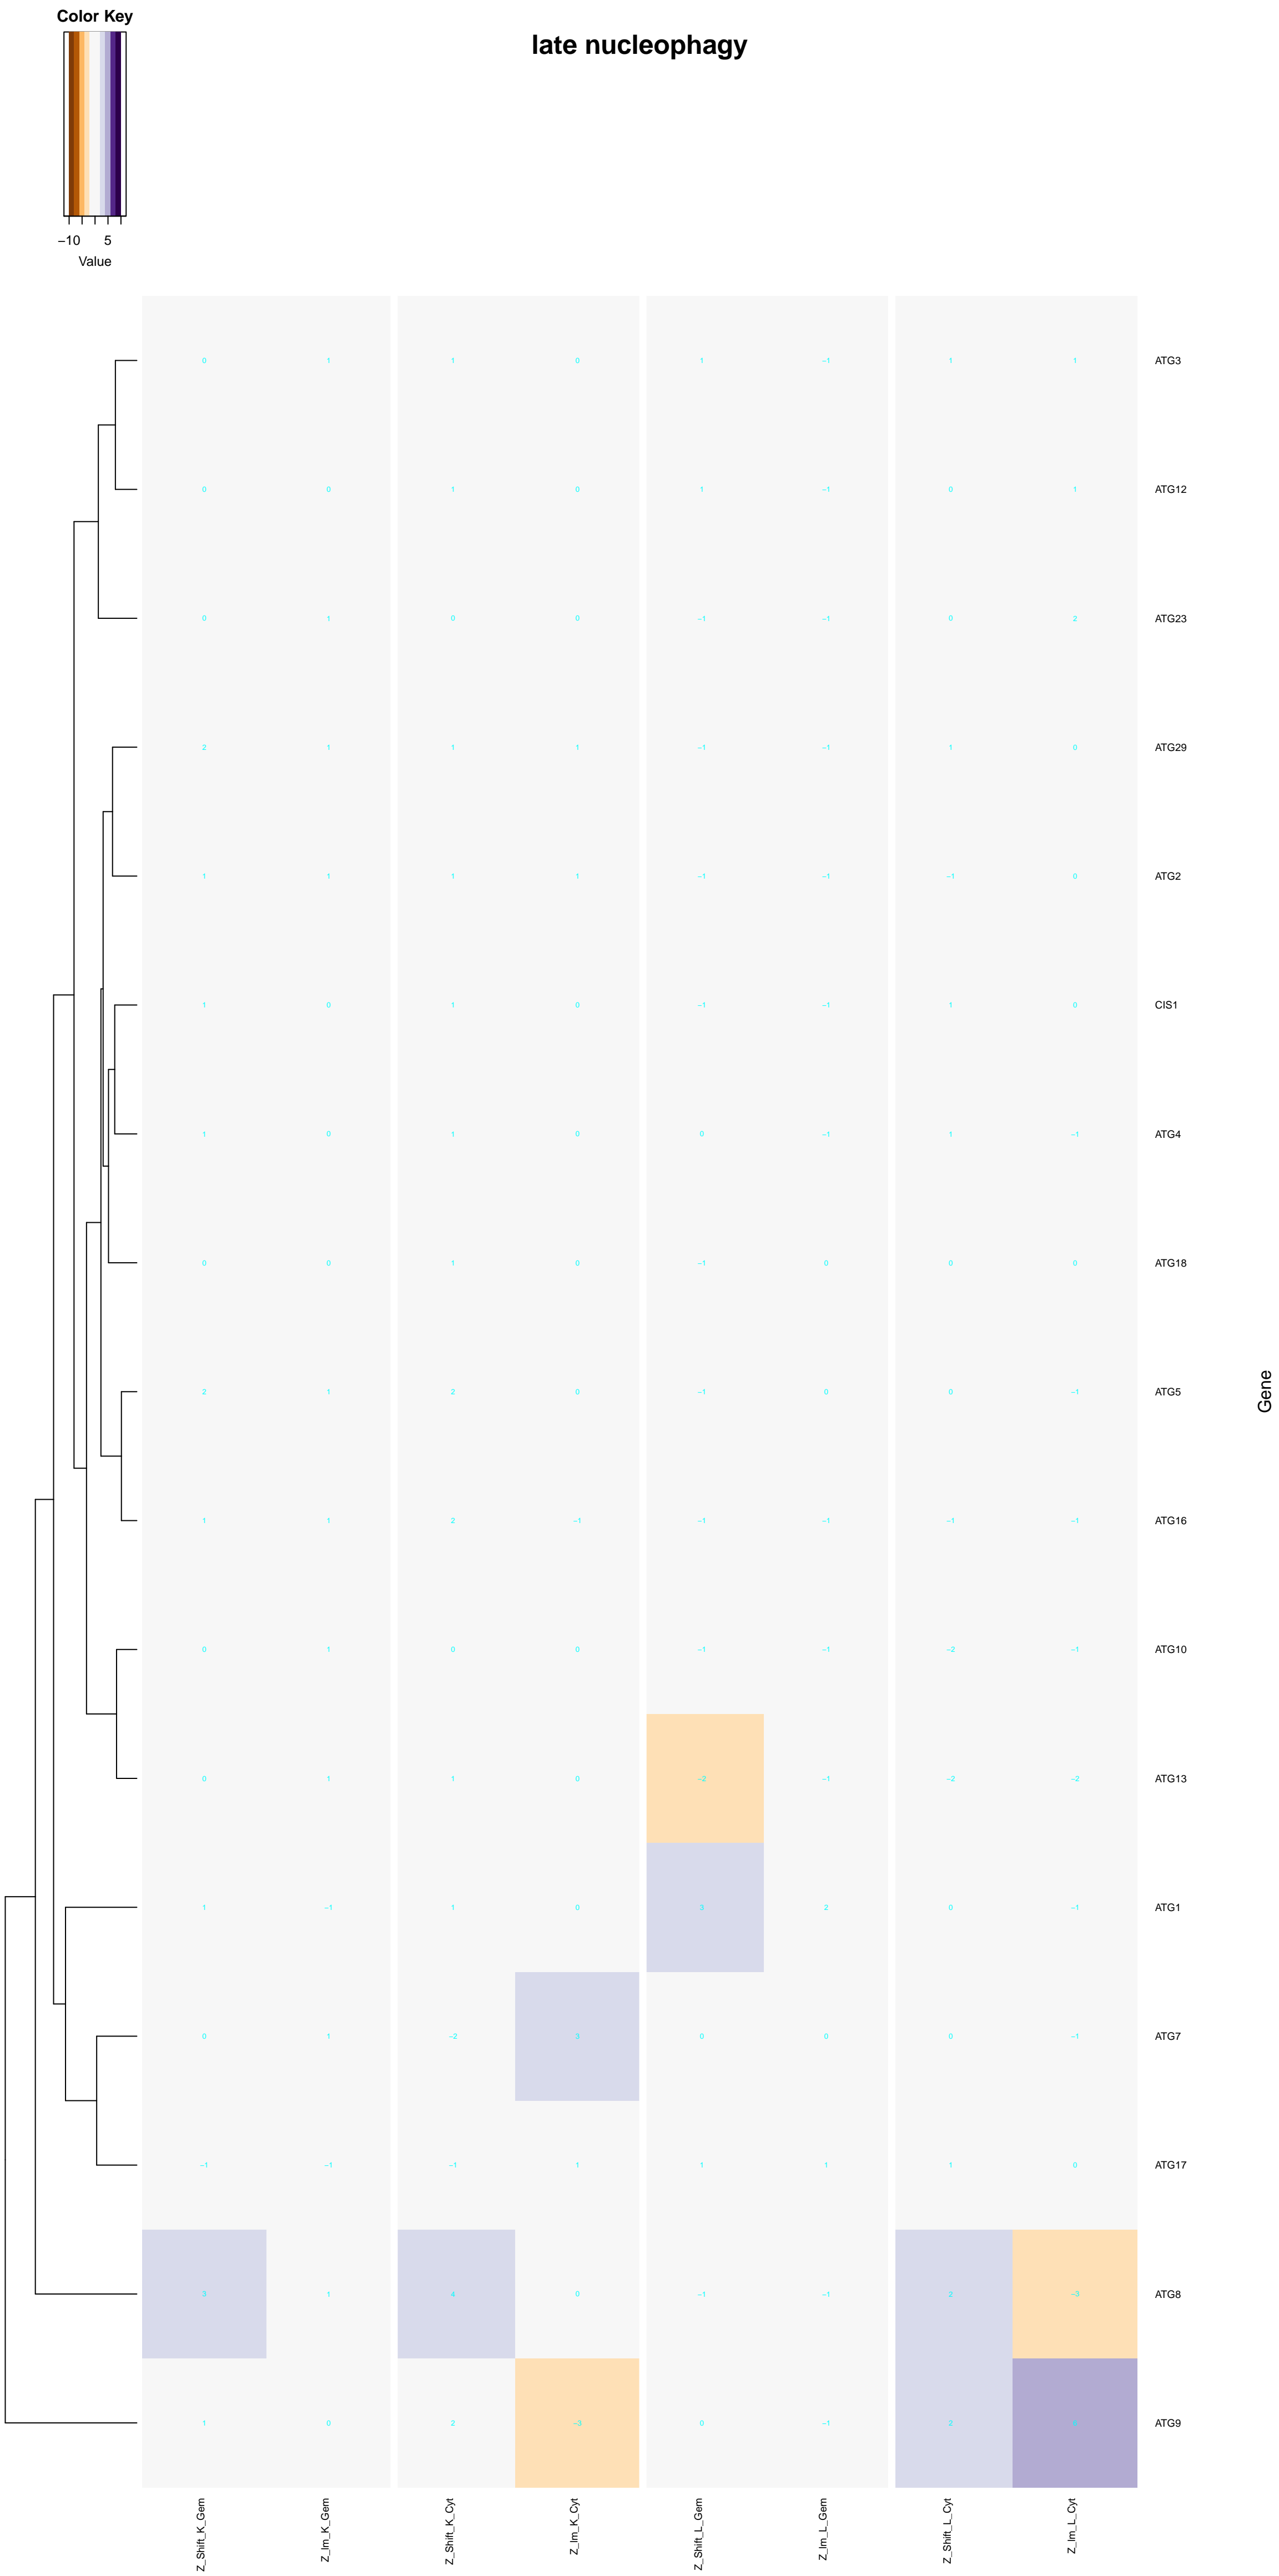

Supplement: s1 [file s1]

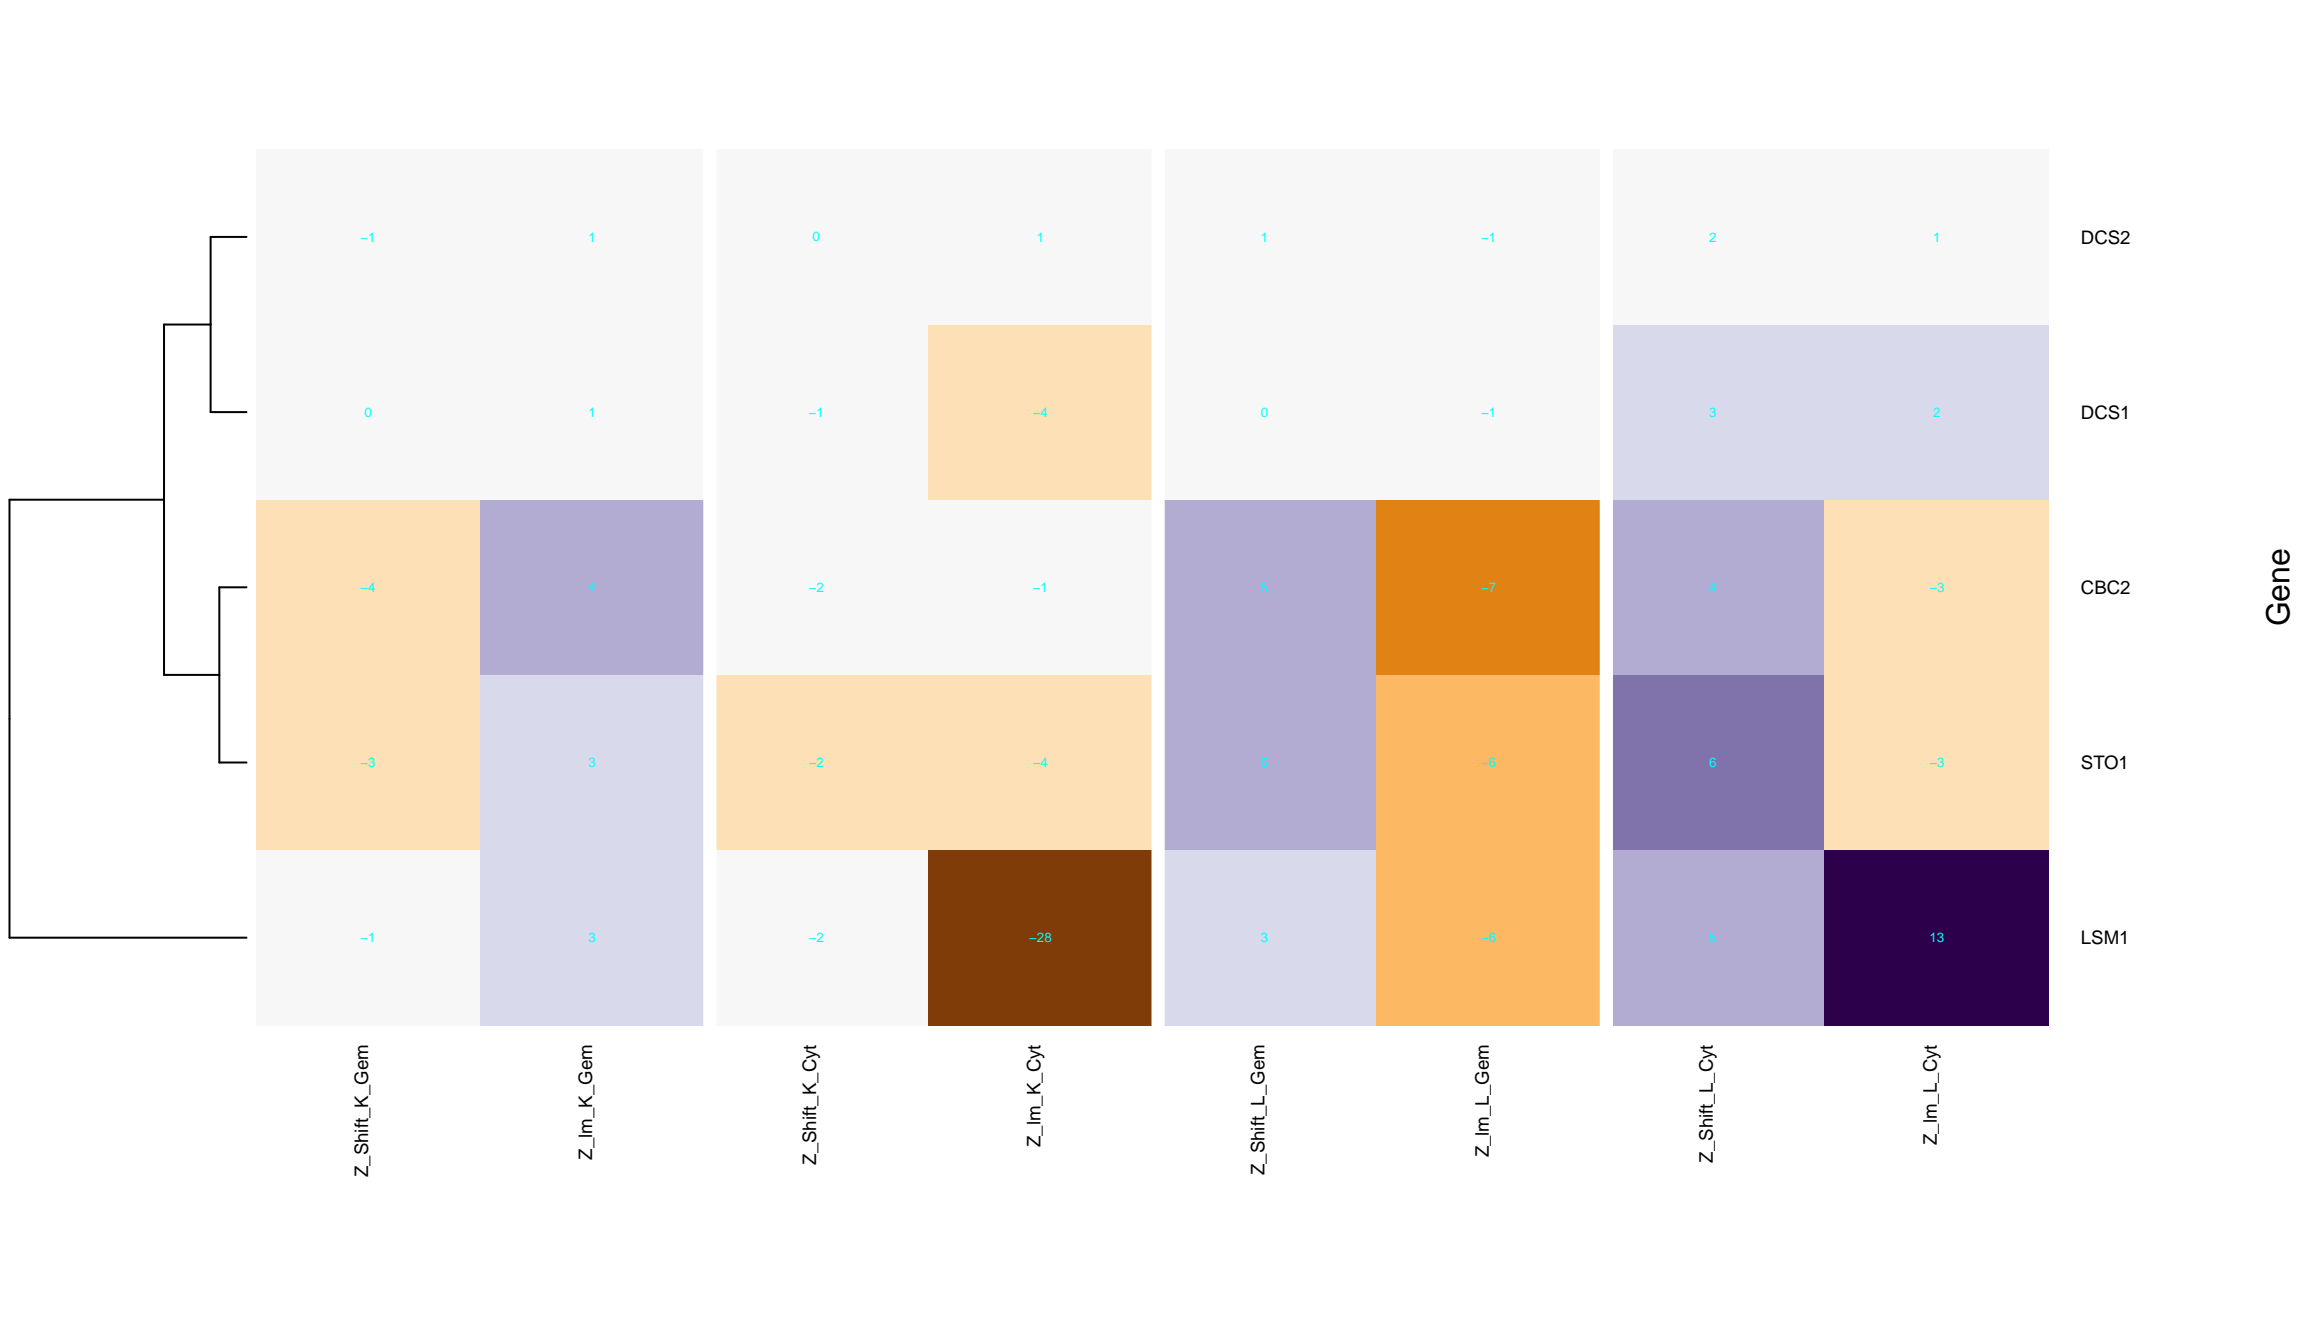

Supplement: s1 [file s1]

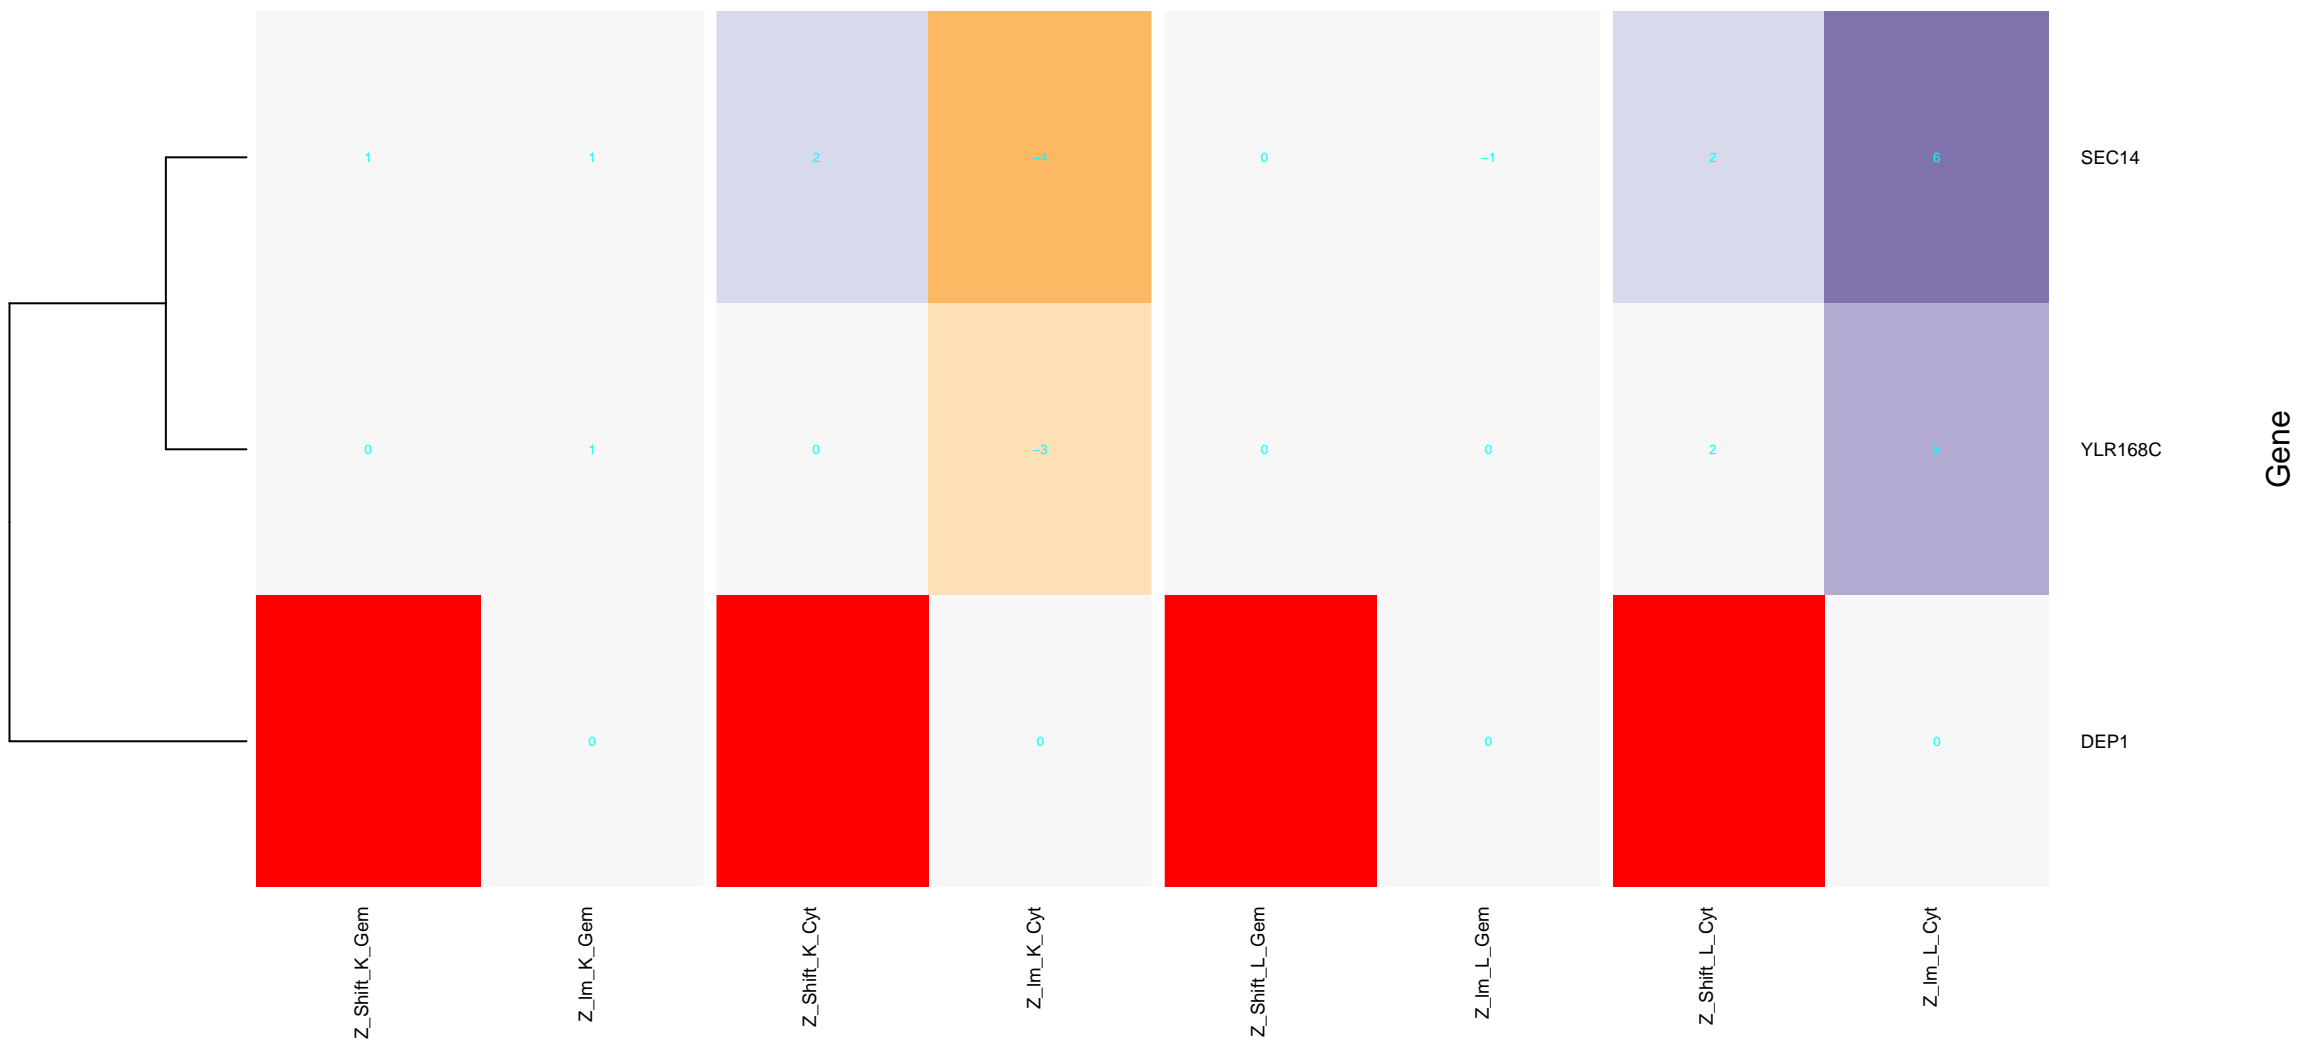

Supplement: s1 [file s1]

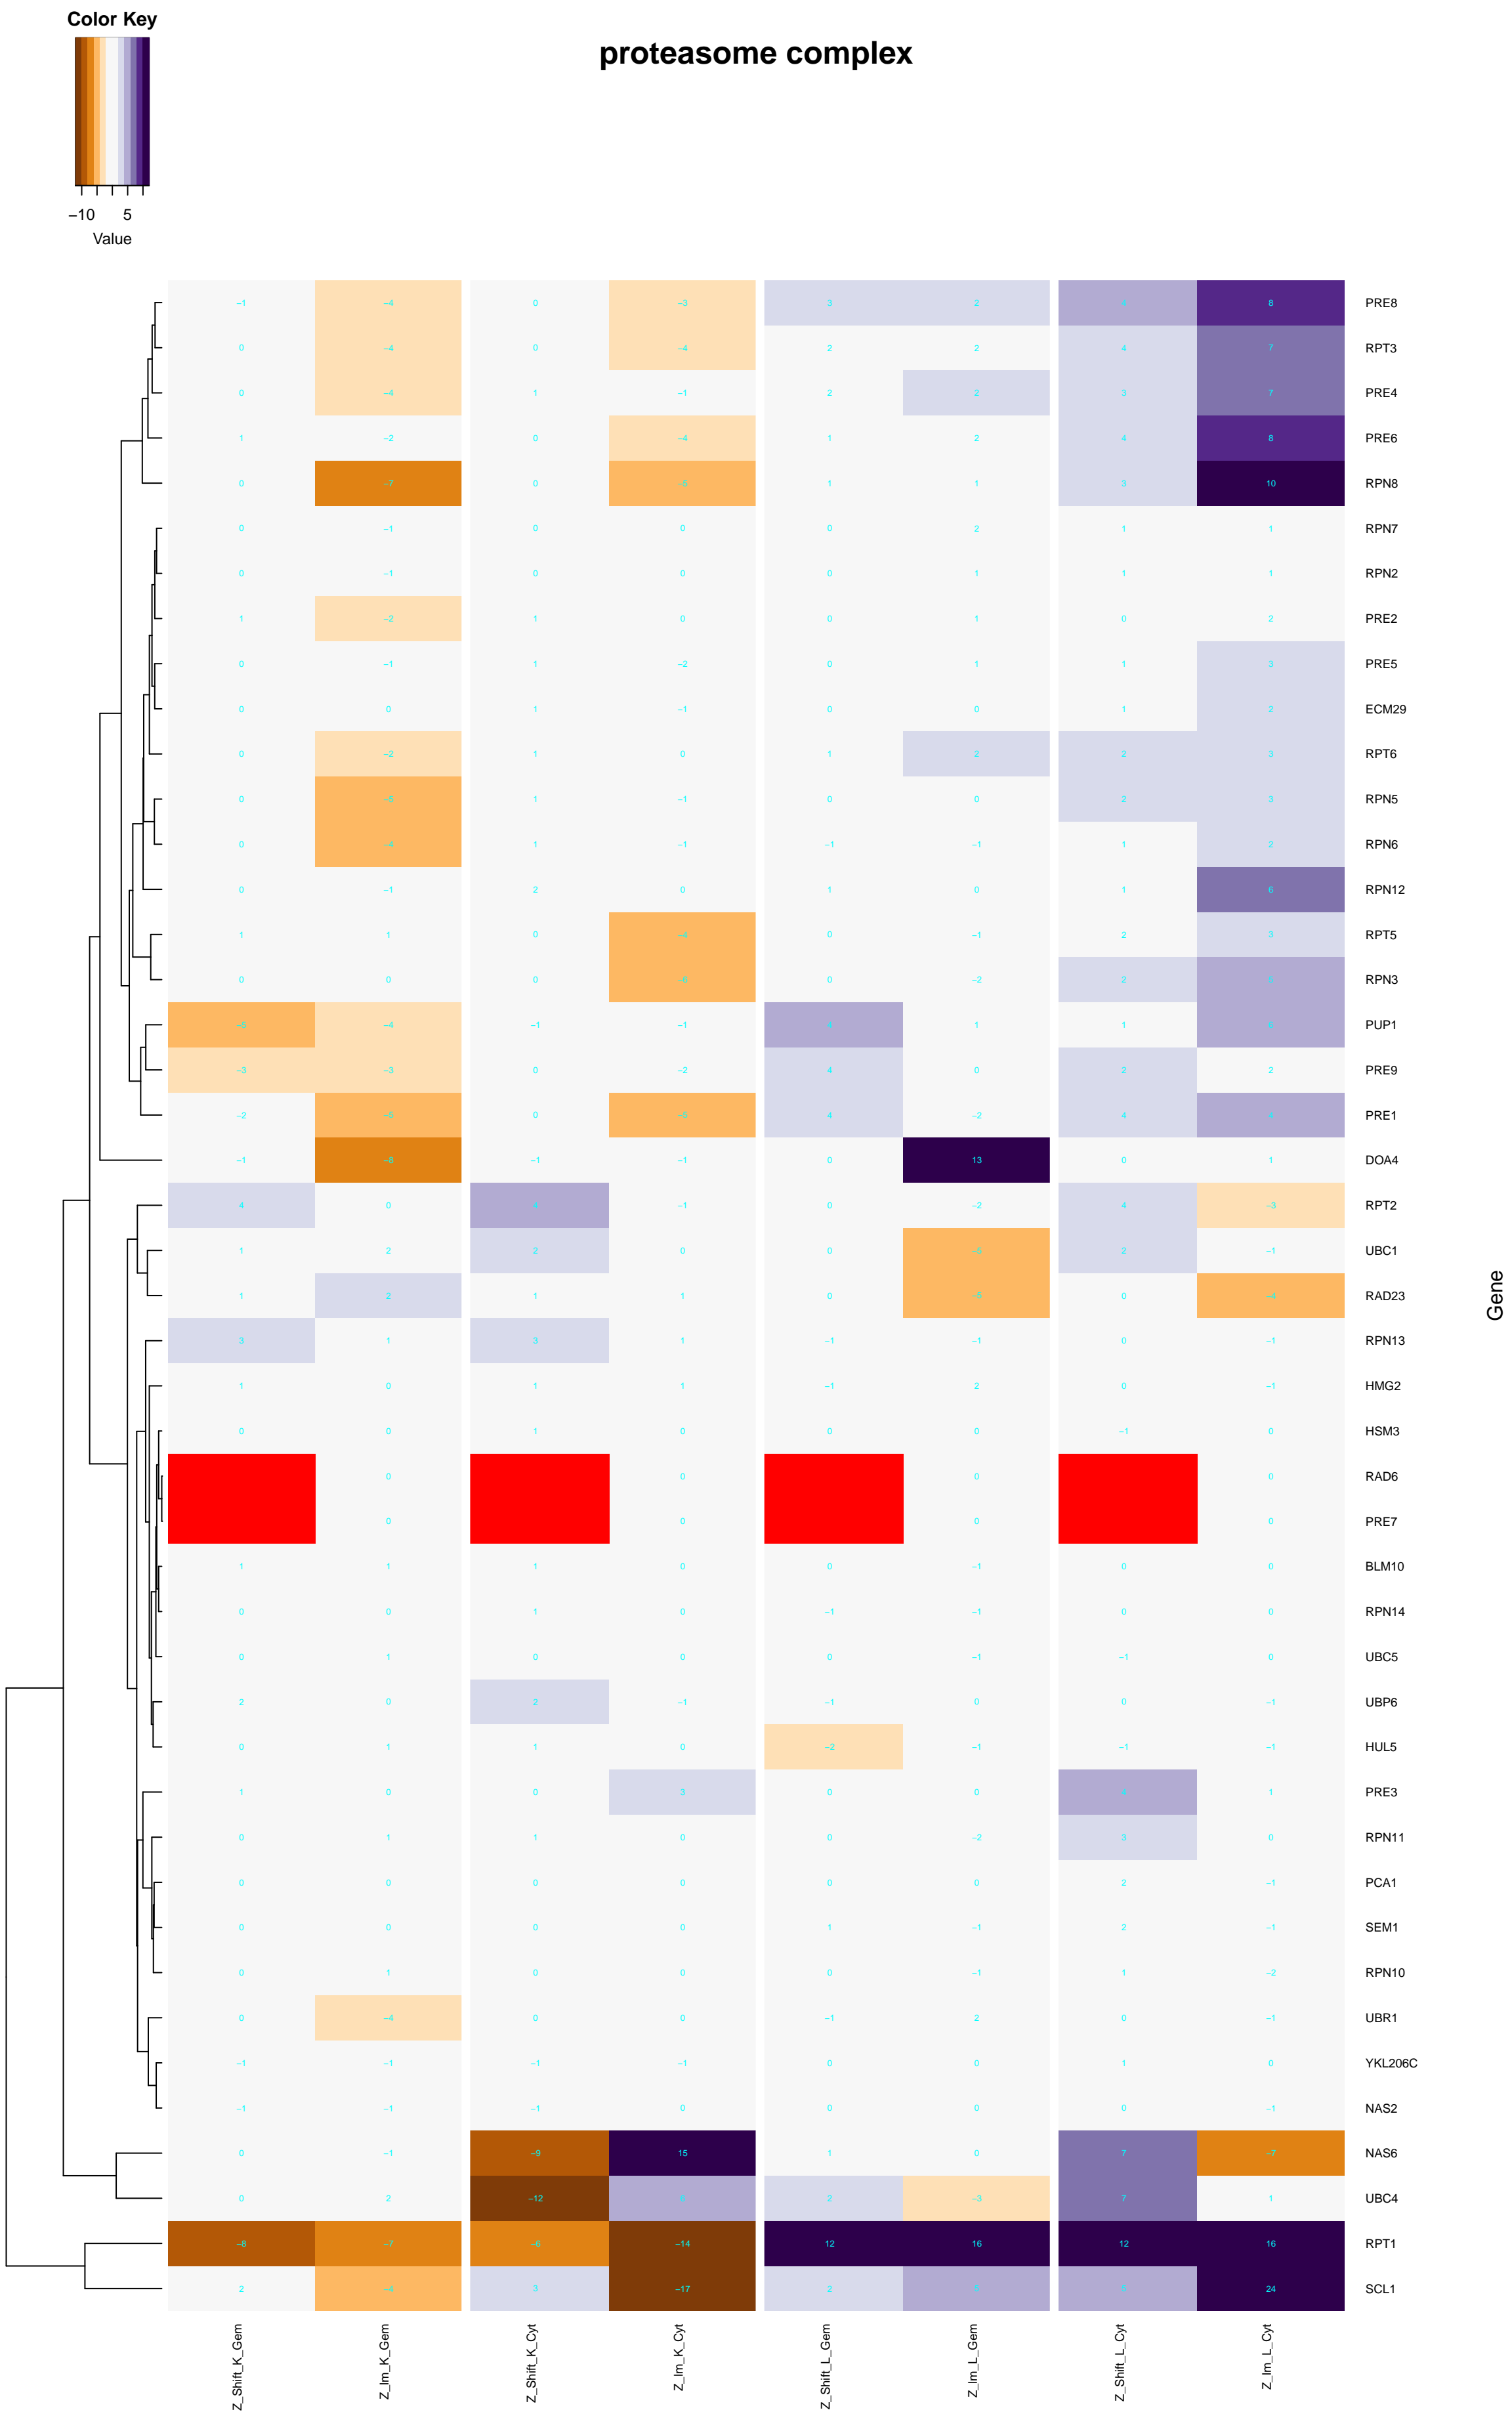

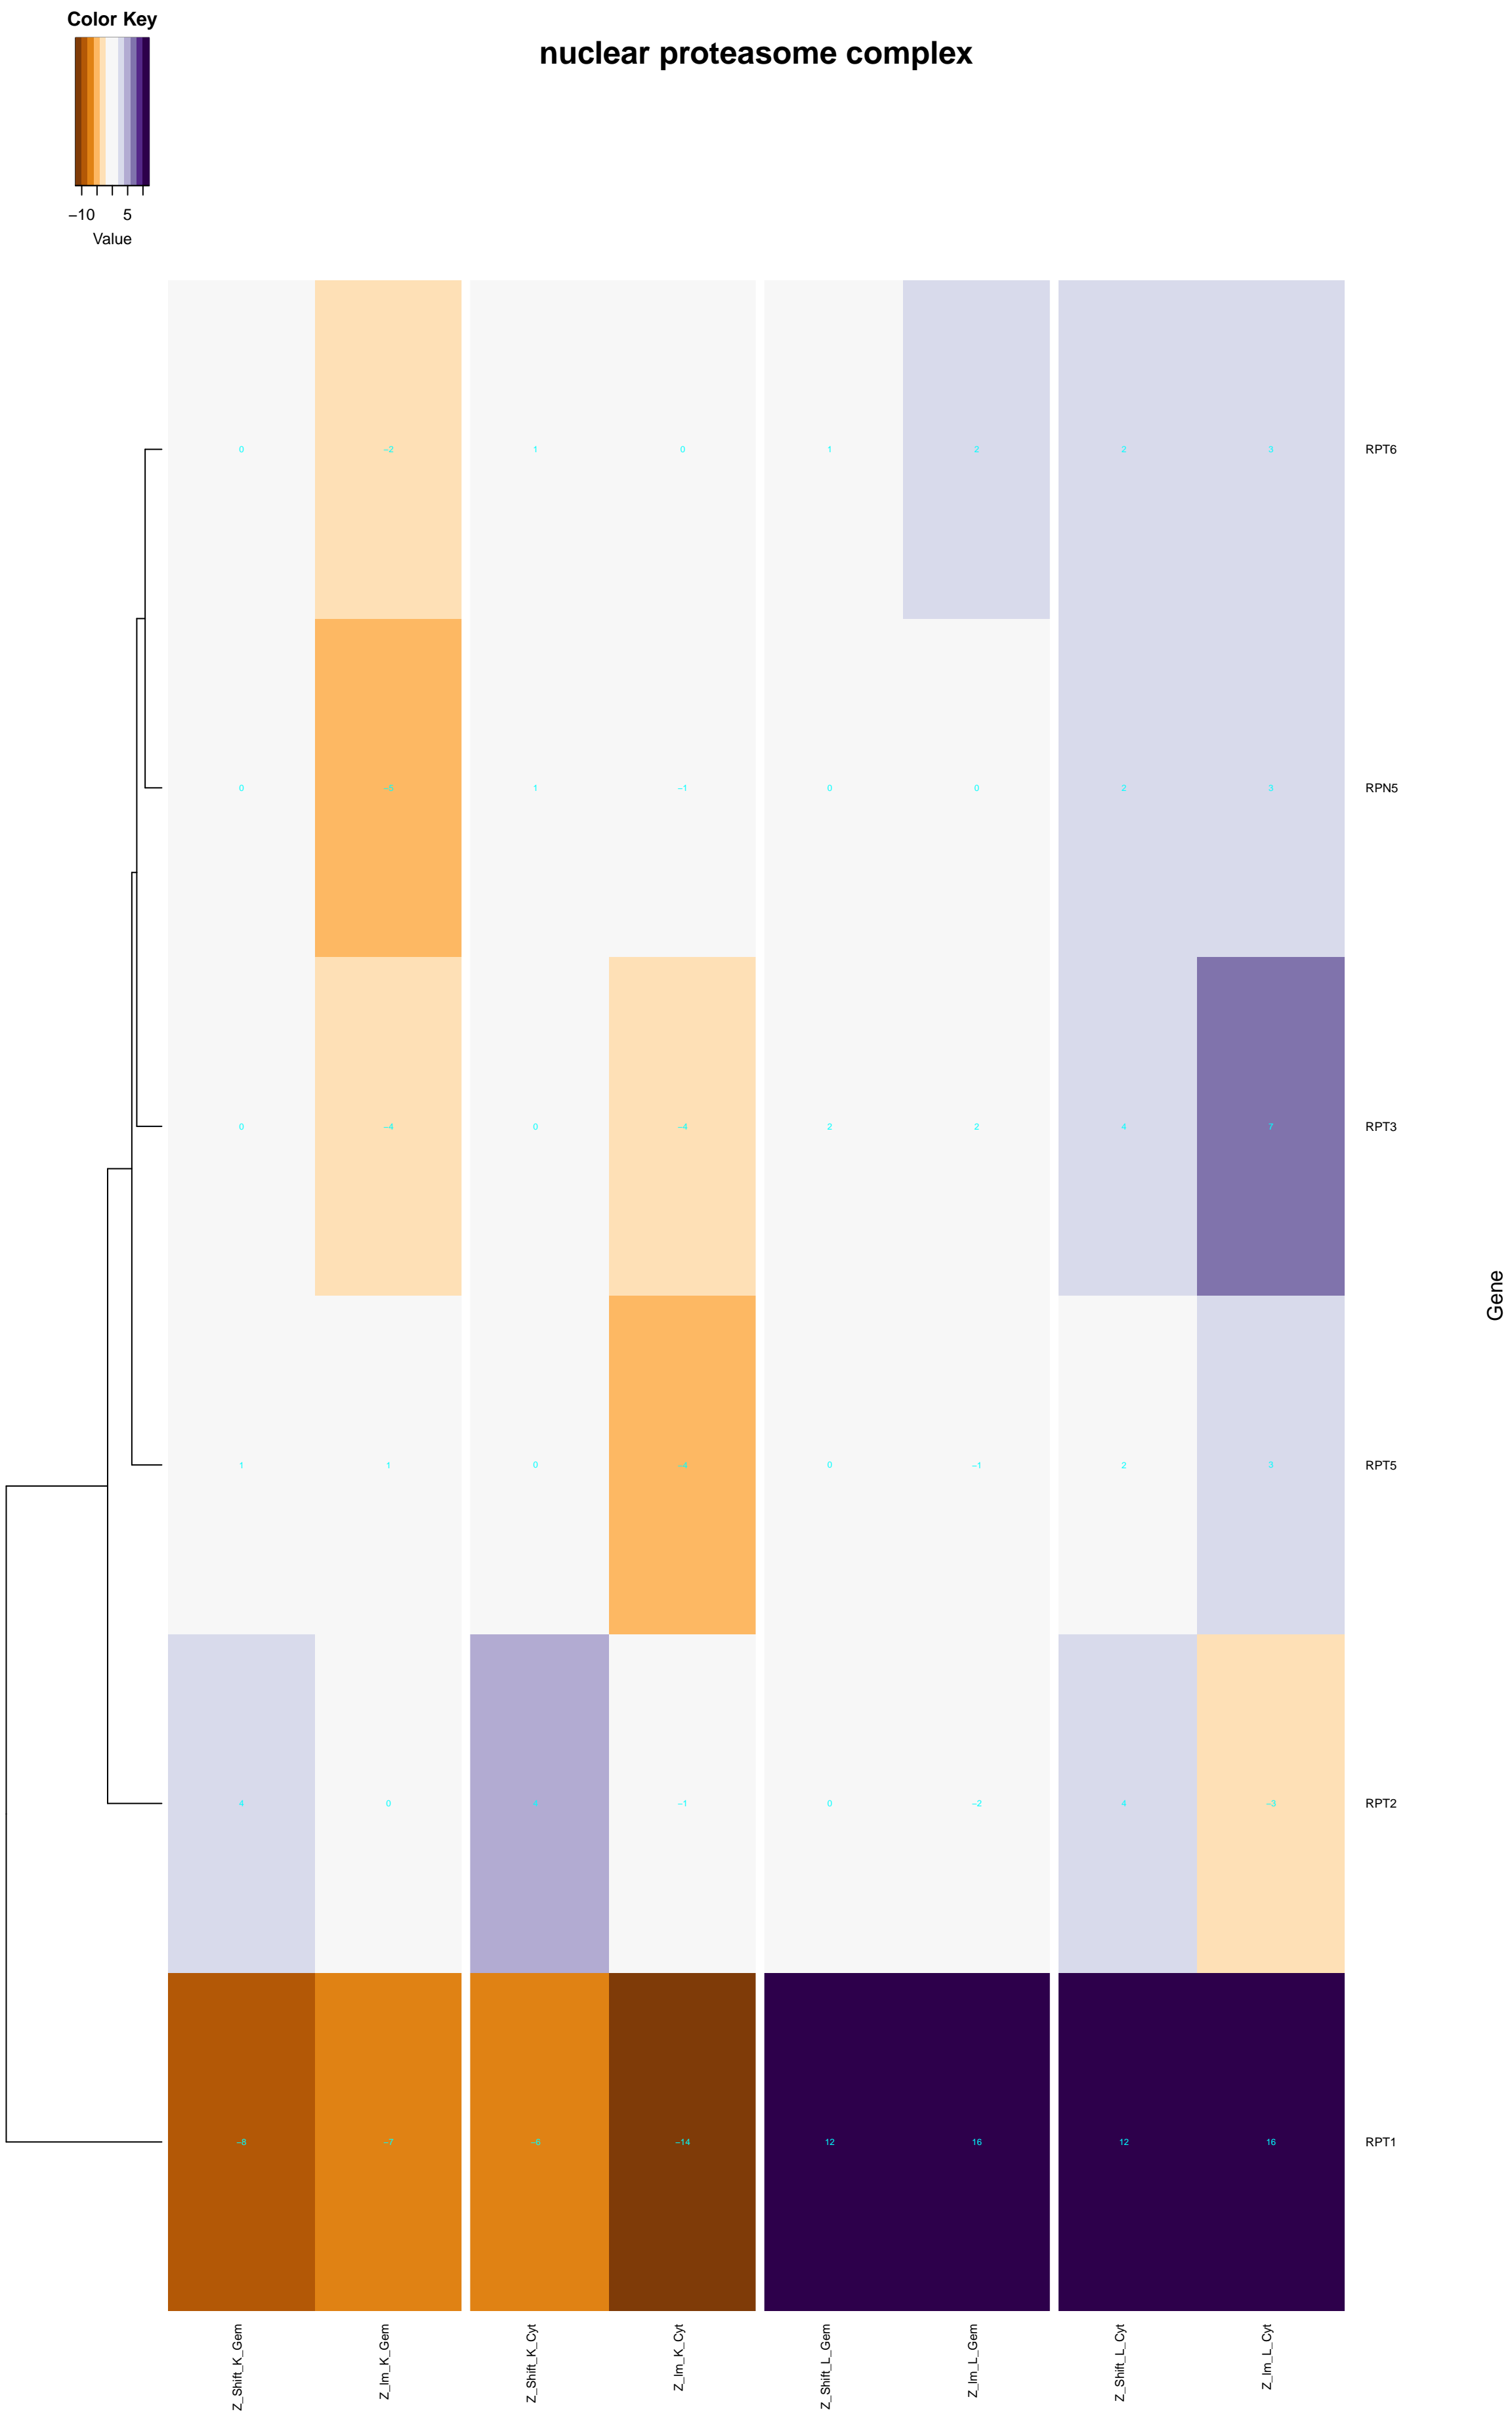

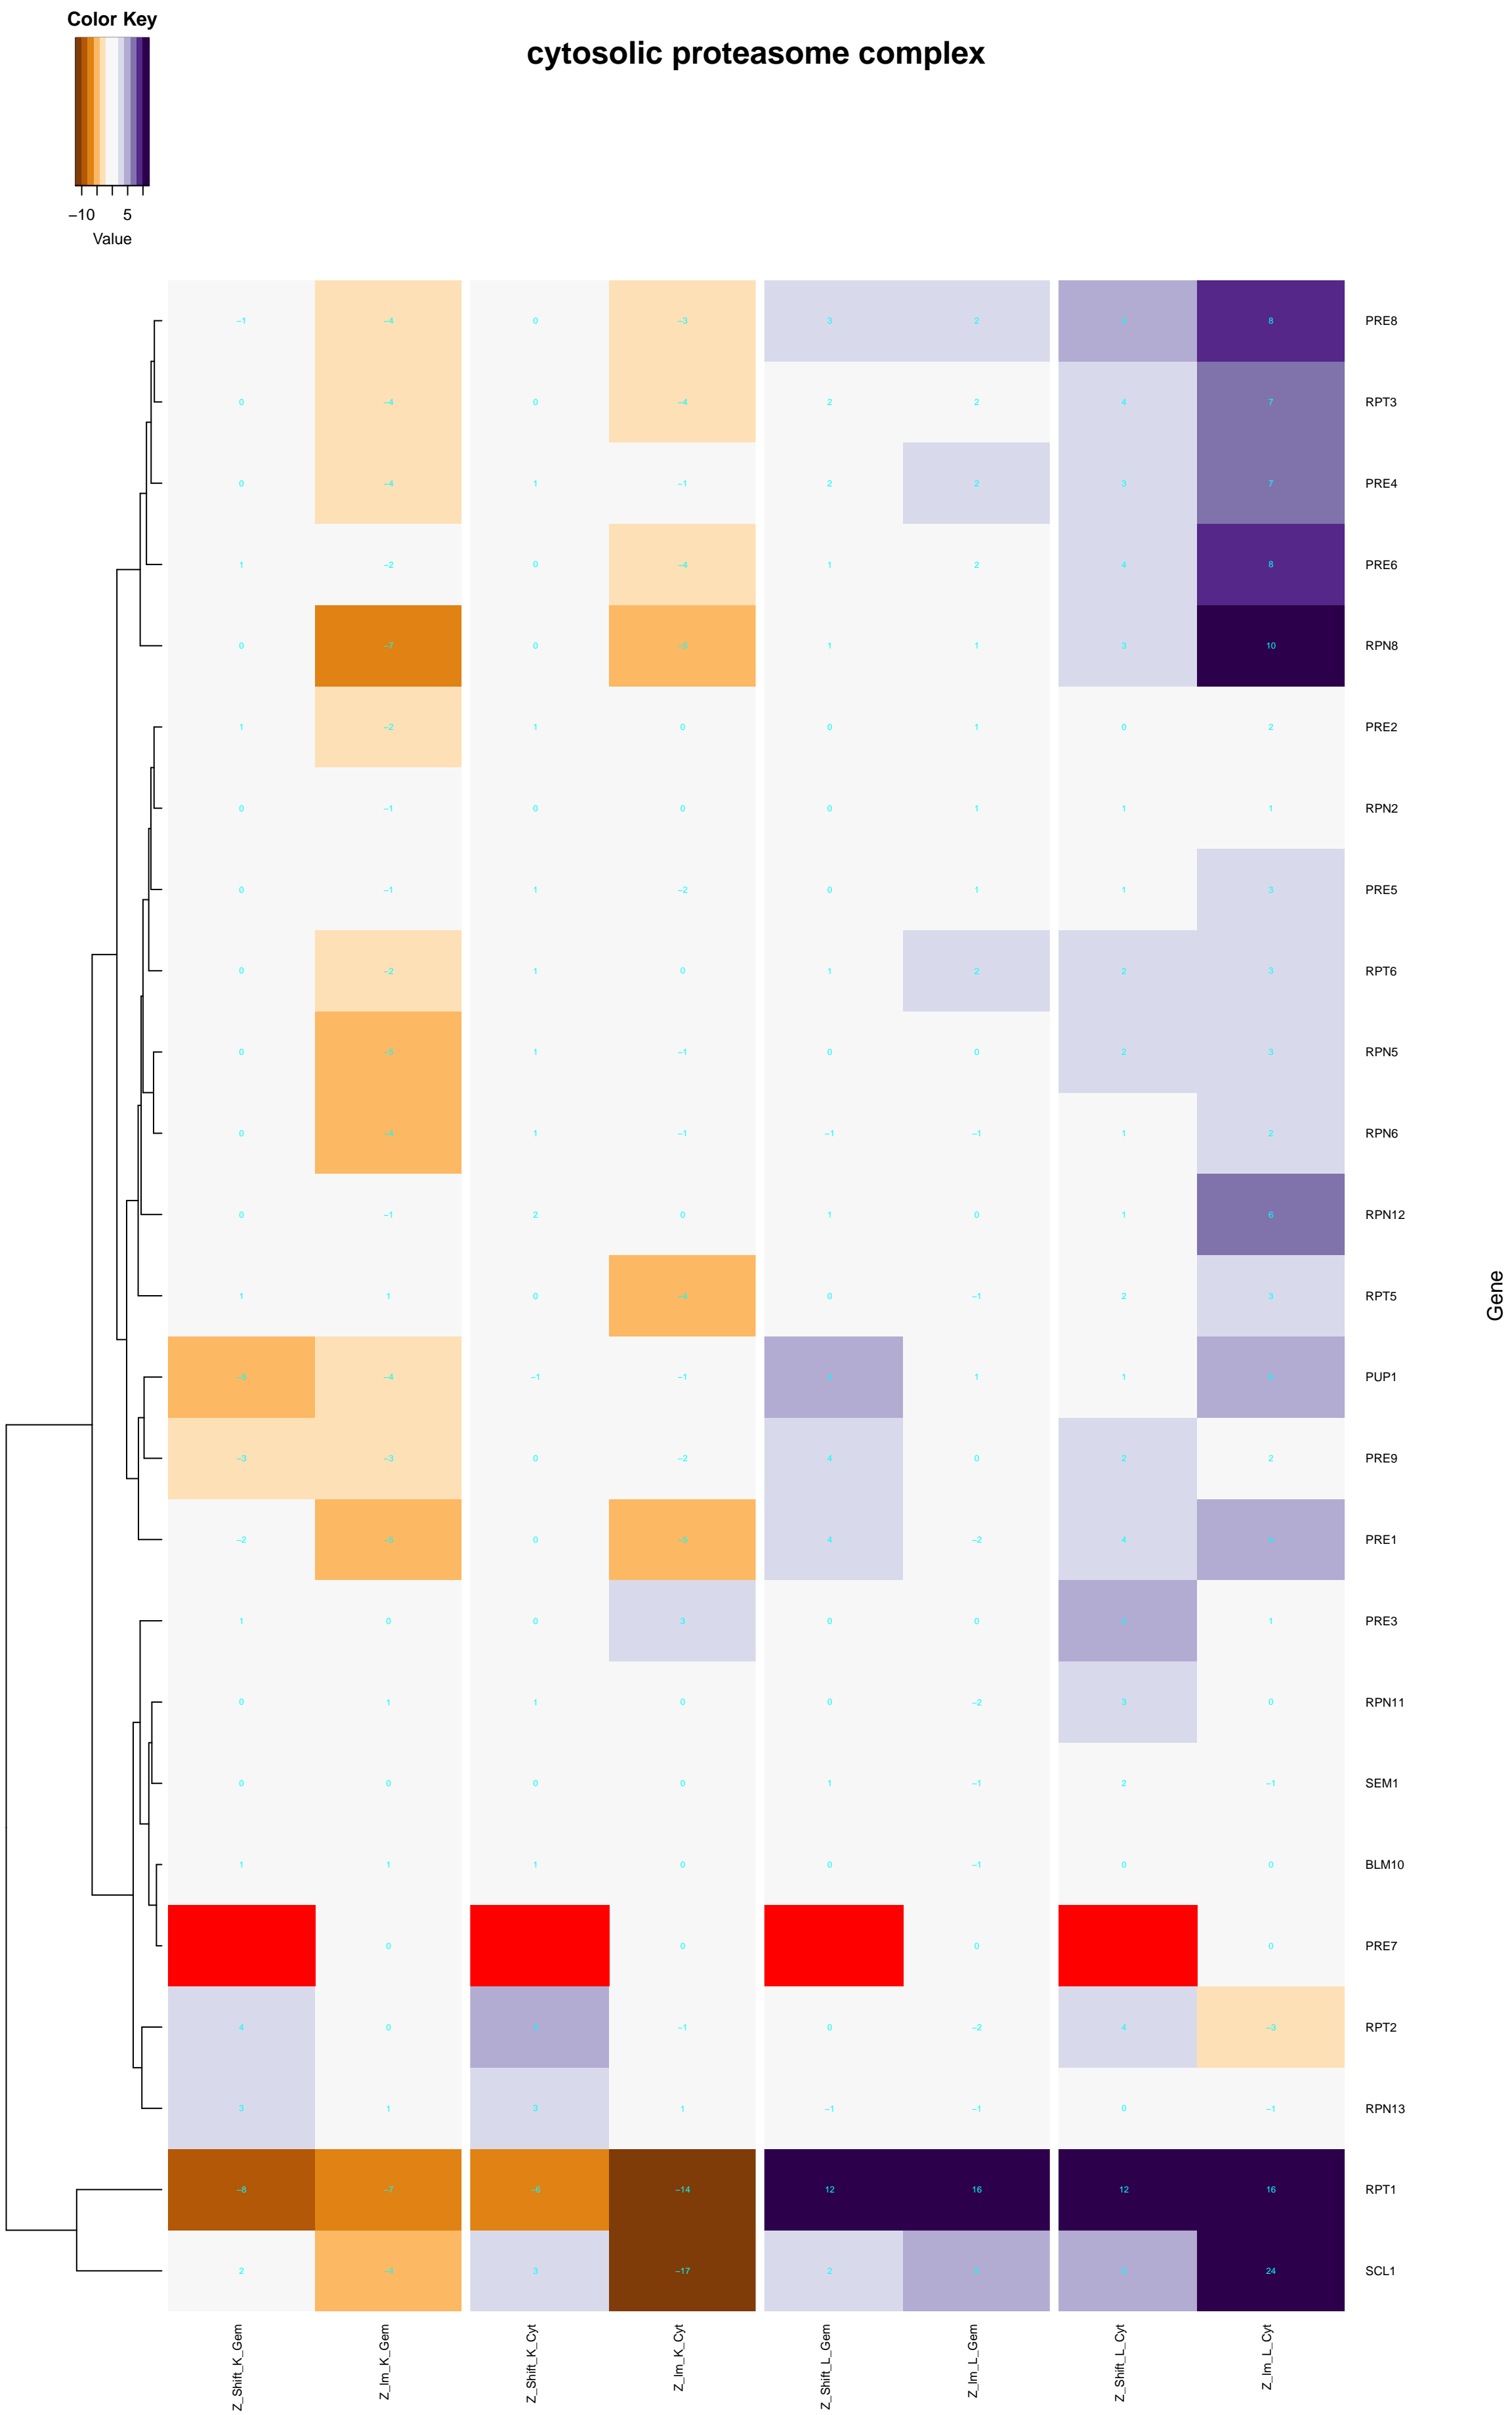

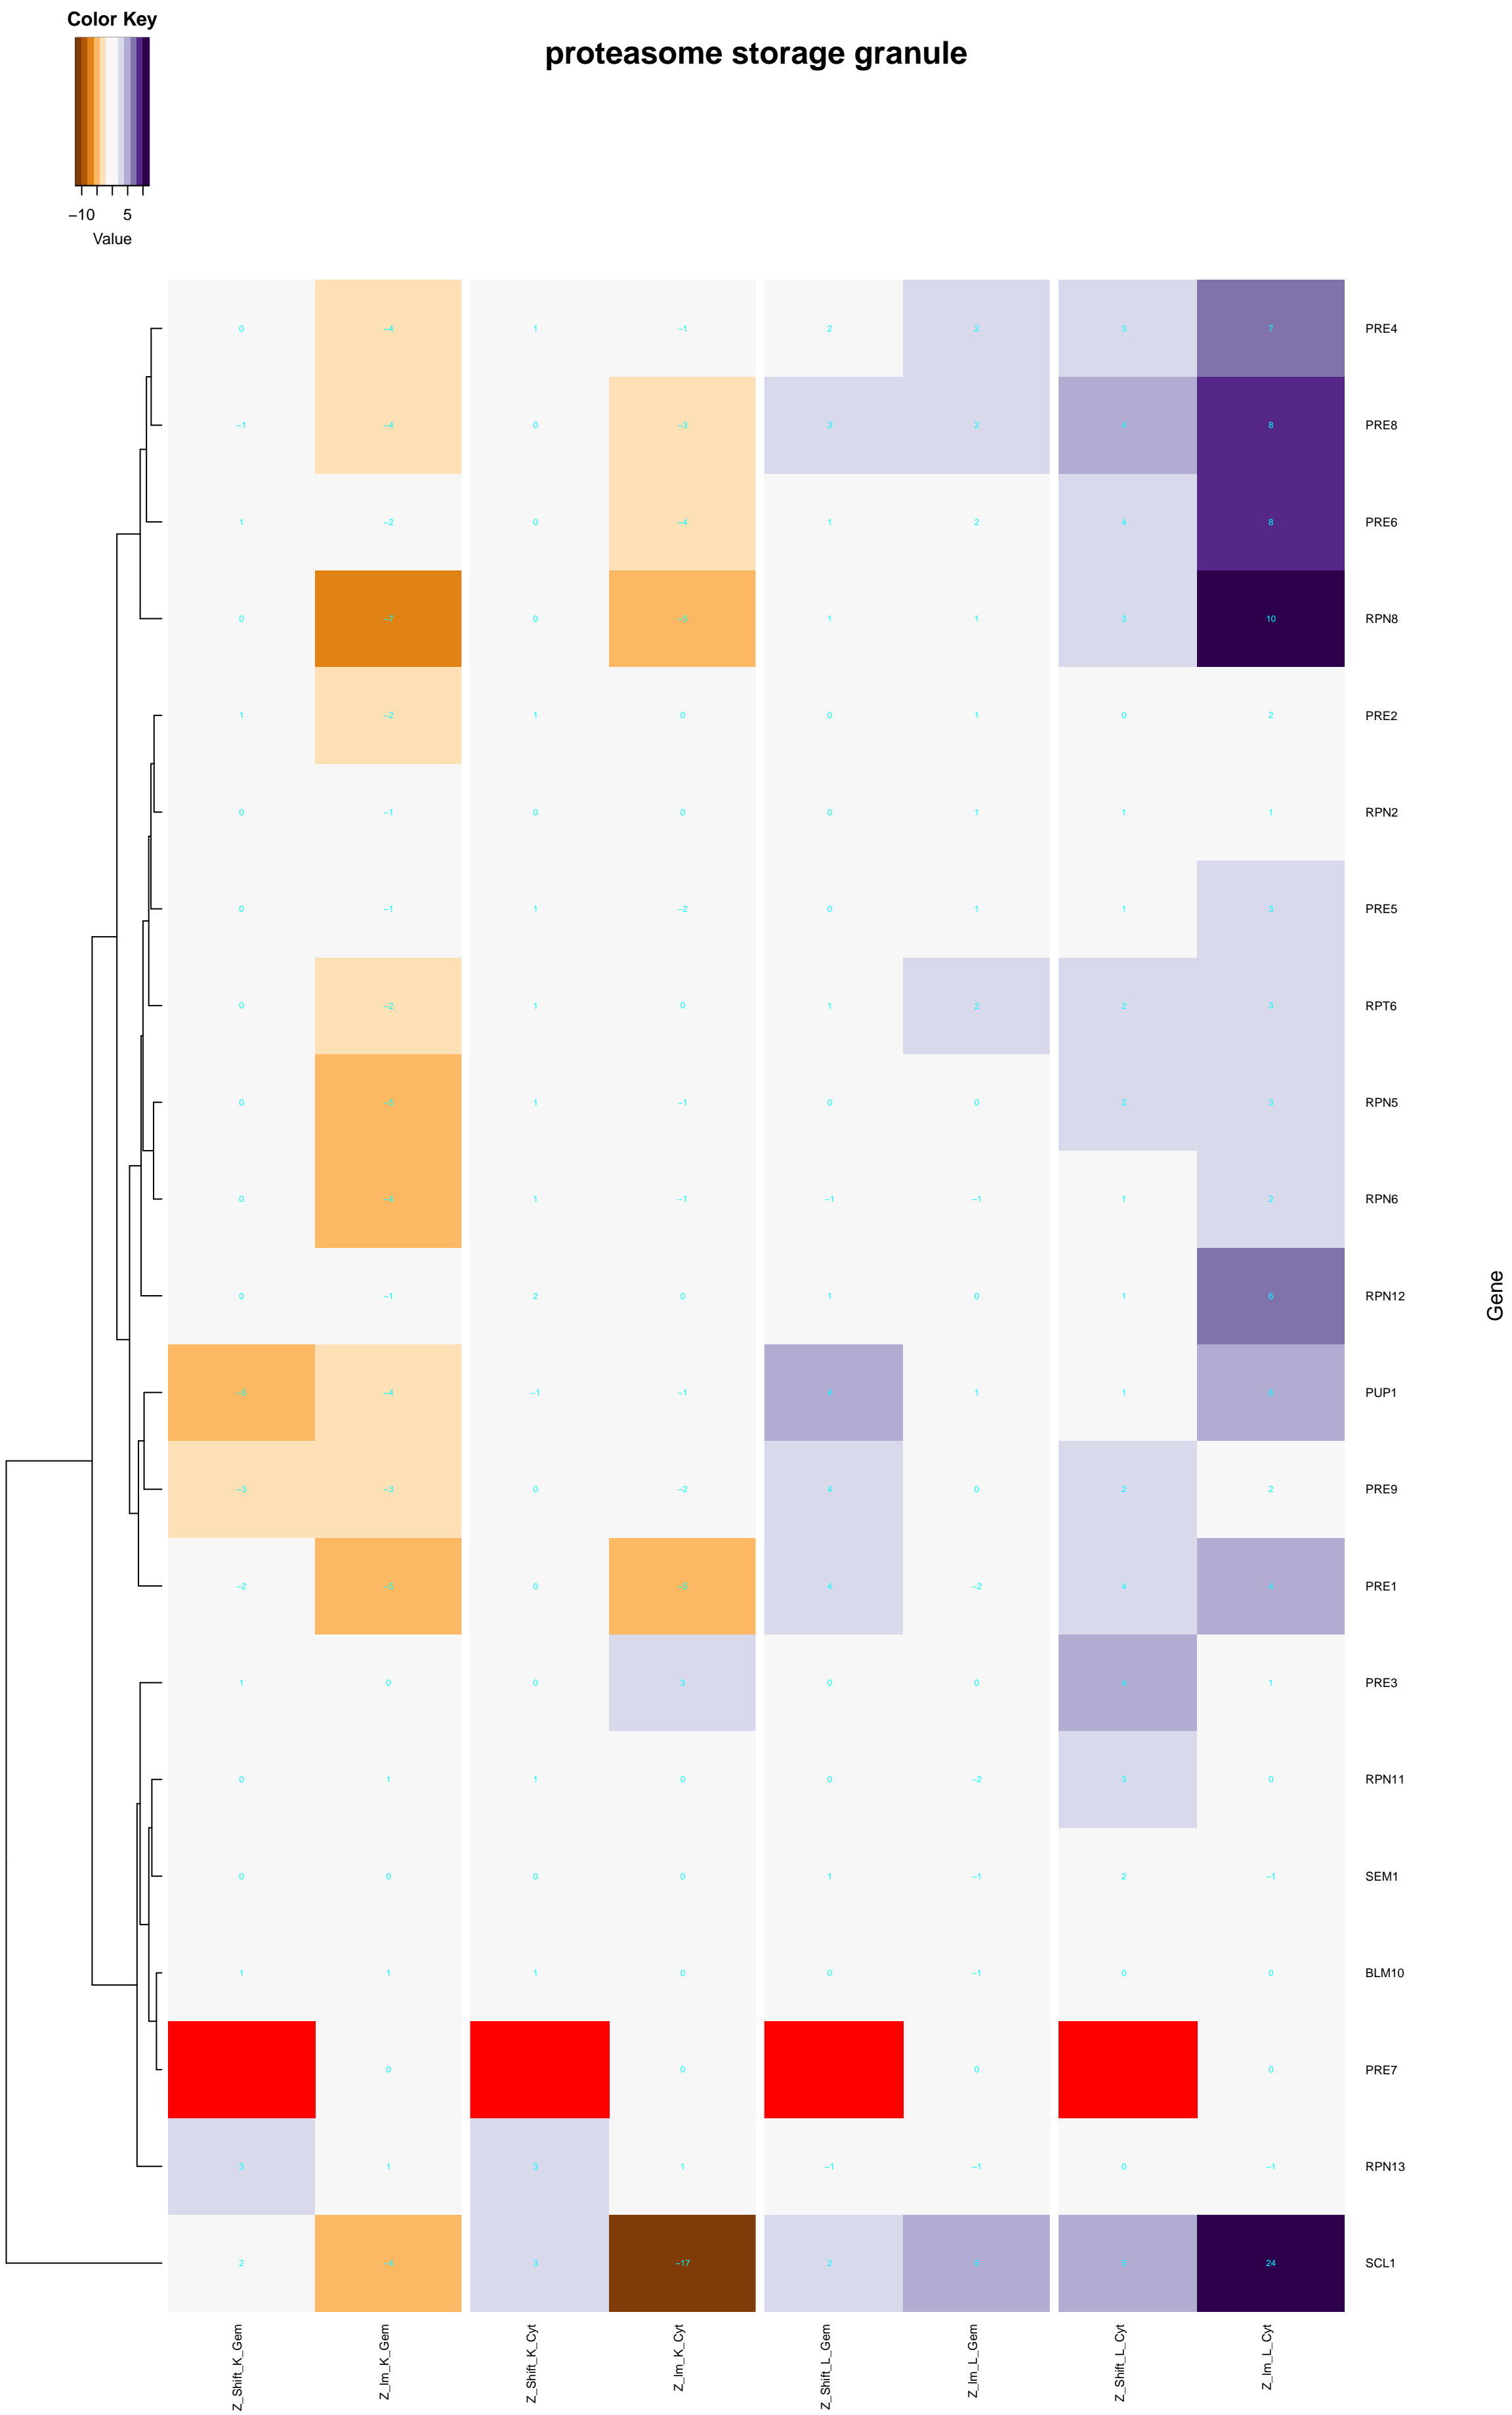

Supplement: s1 [file s1]

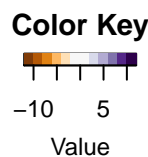

# proton-transporting ATP synthase activity, rotational mechanism

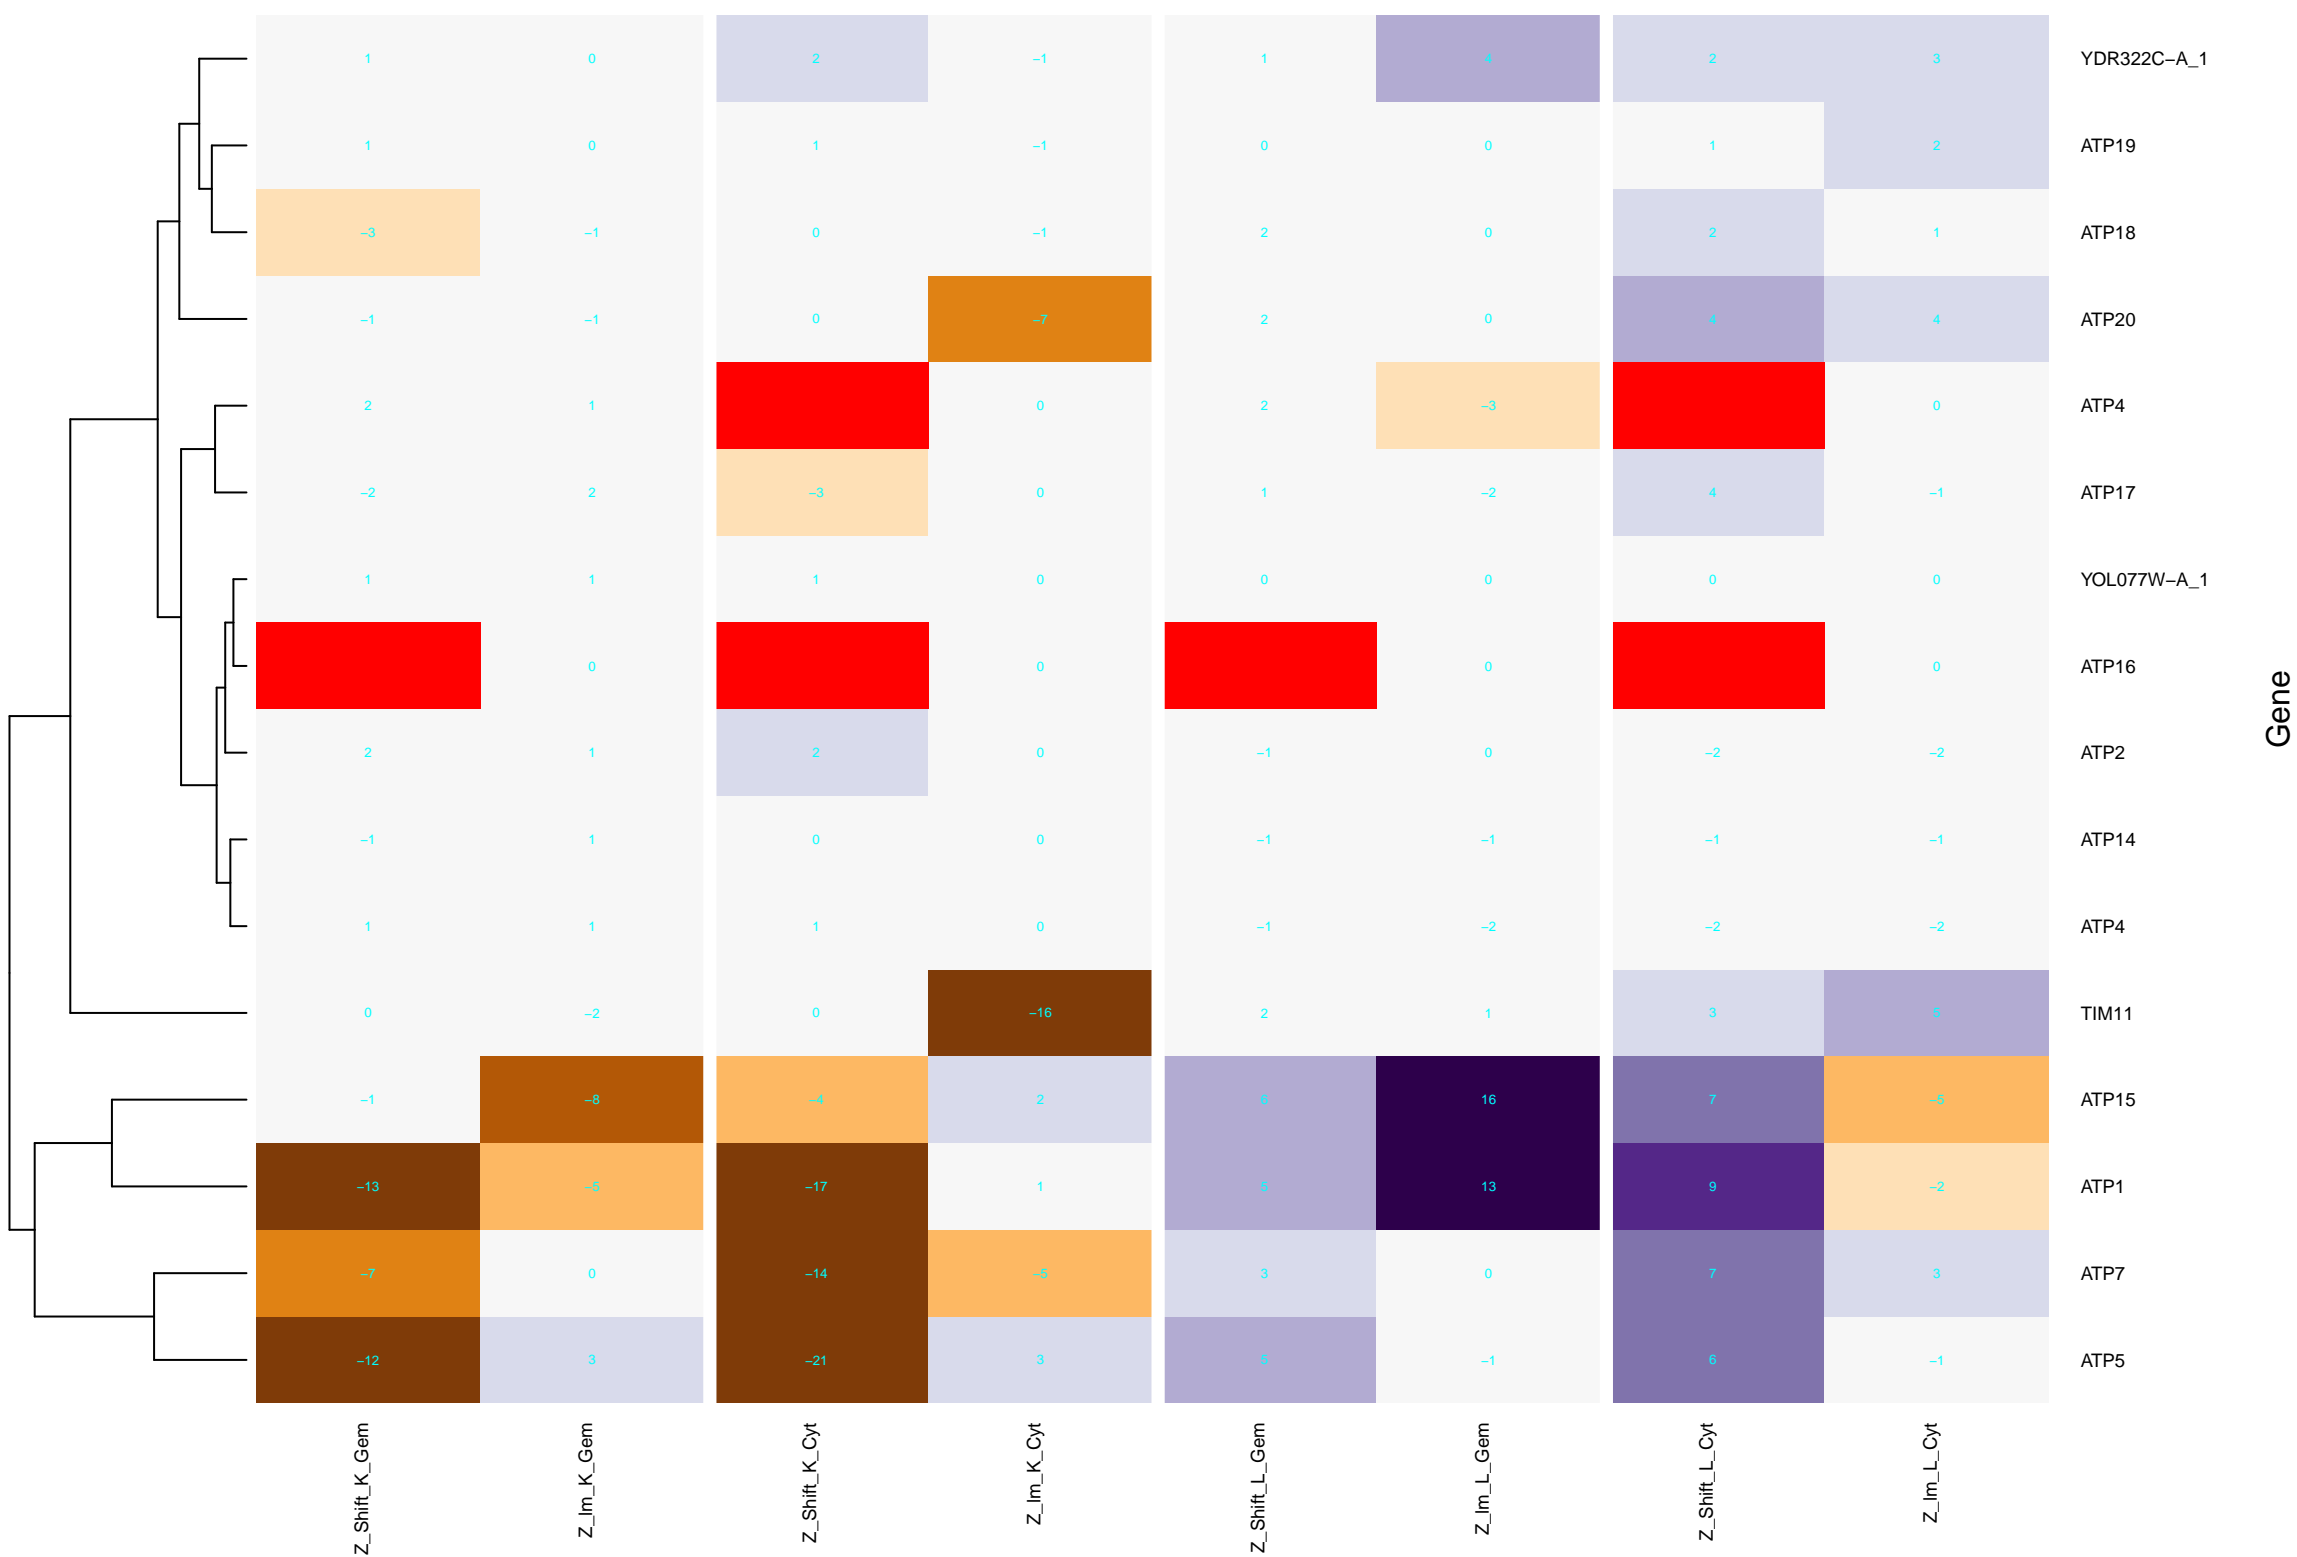

Supplement: s1 [file s1]

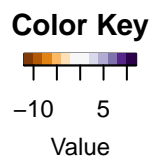

# mitochondrial proton-transporting ATP synthase complex

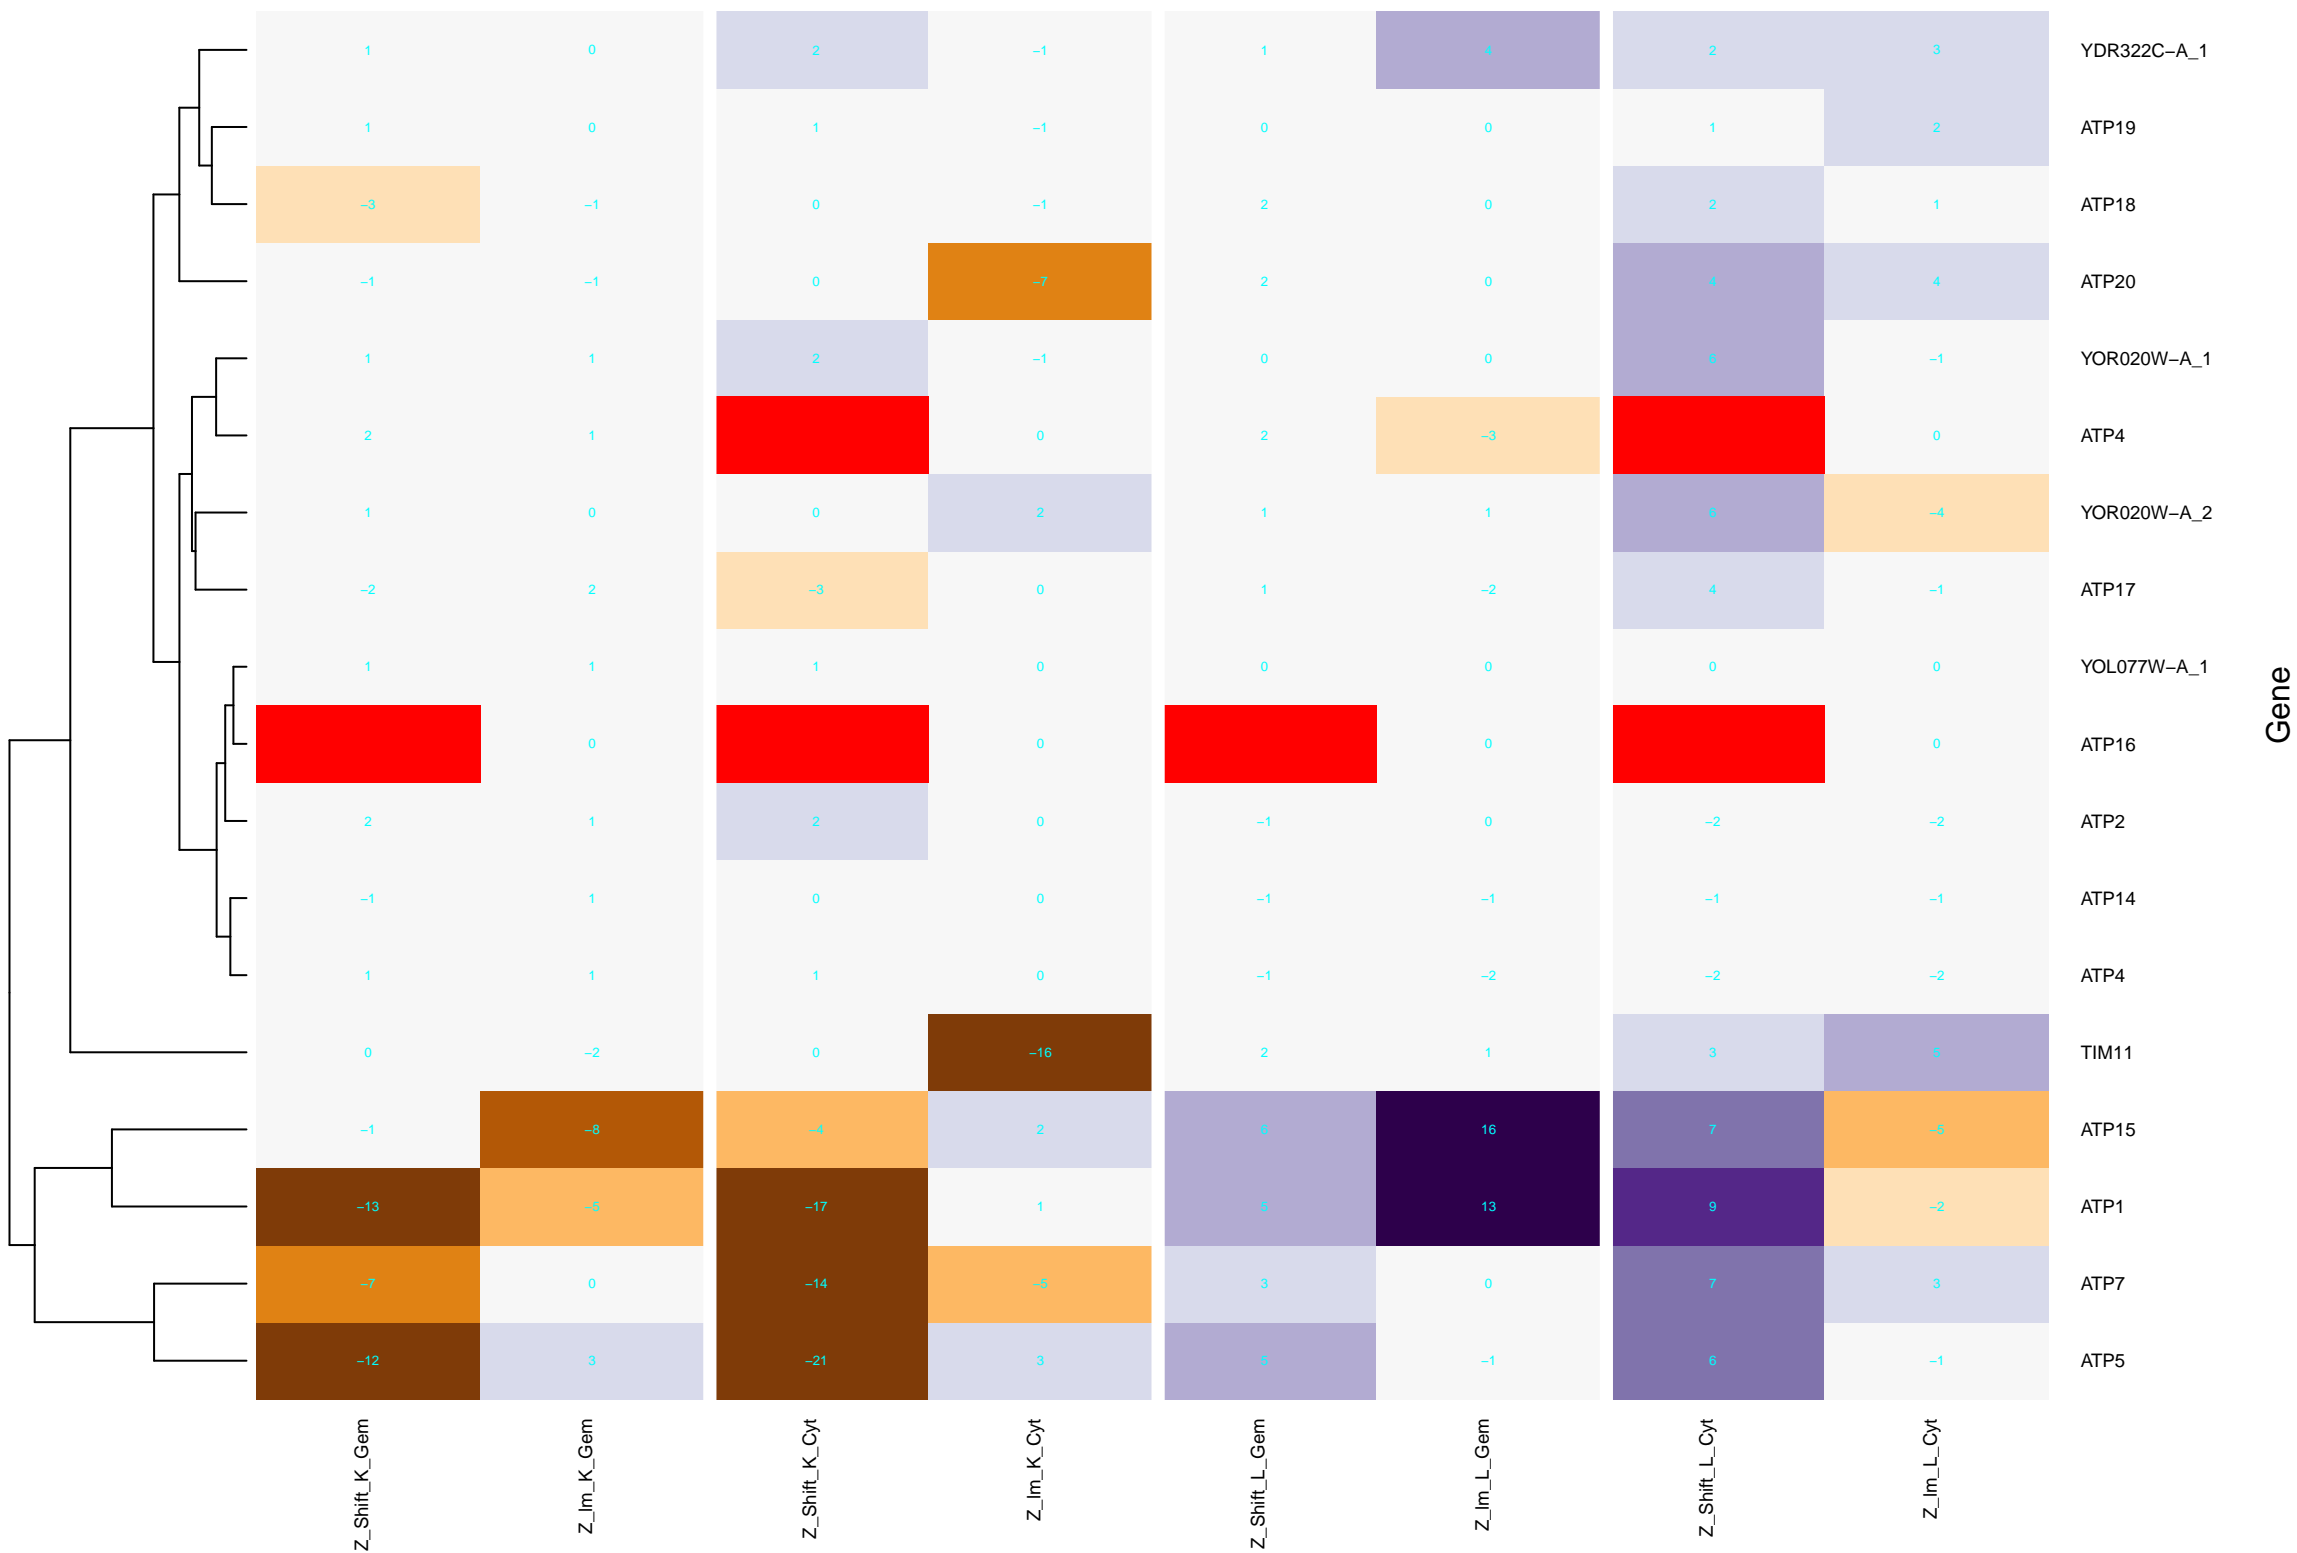

Supplement: s1 [file s1]

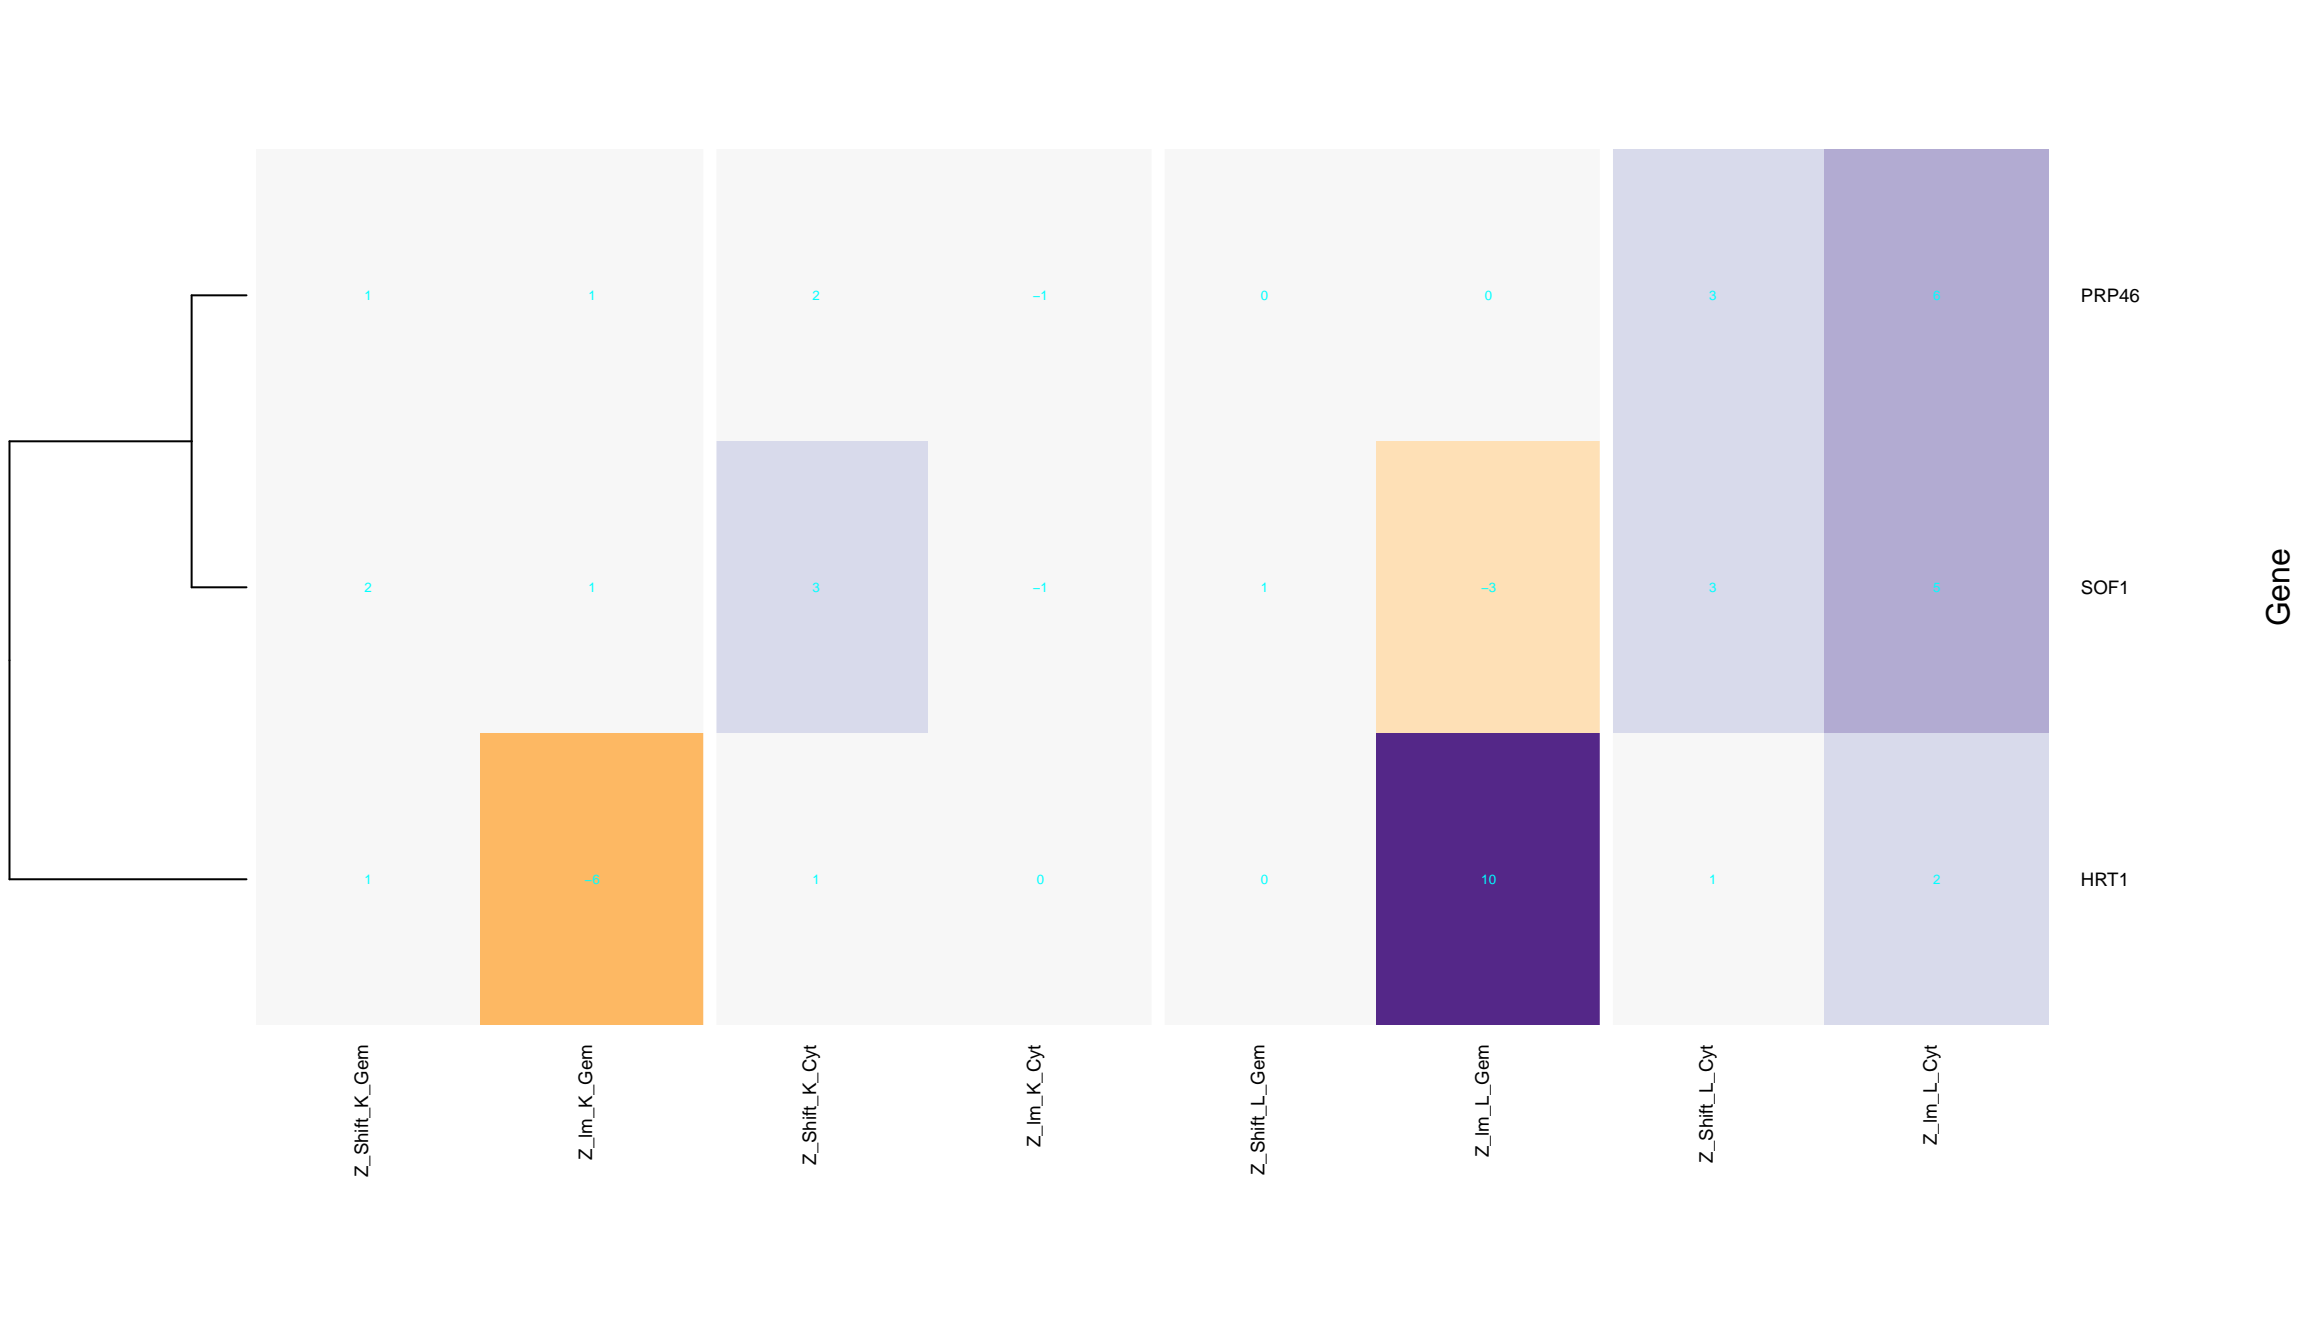

Supplement: s1 [file s1]

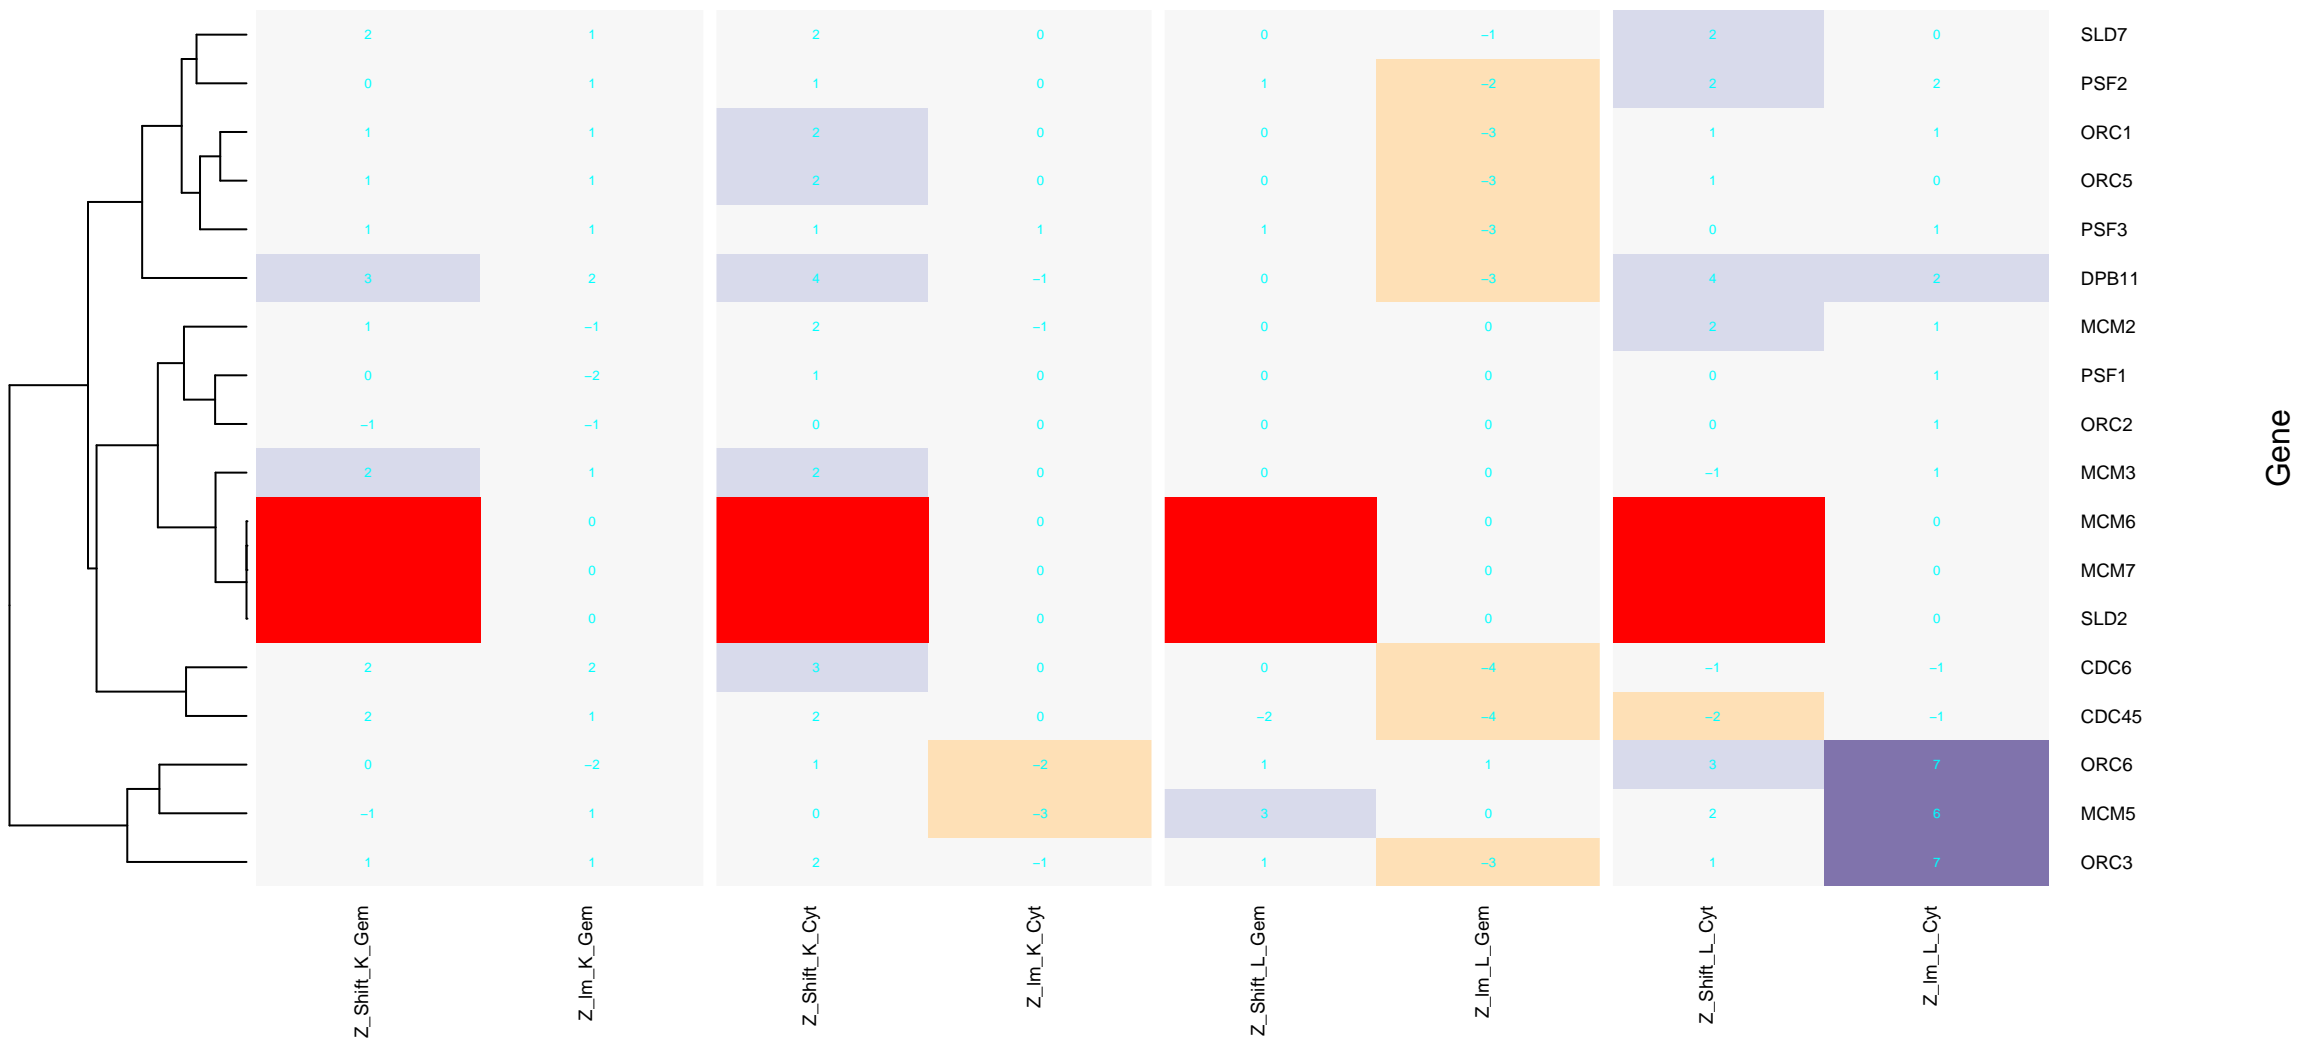

Supplement: s1 [file s1]



Supplement: s1 [file s1]

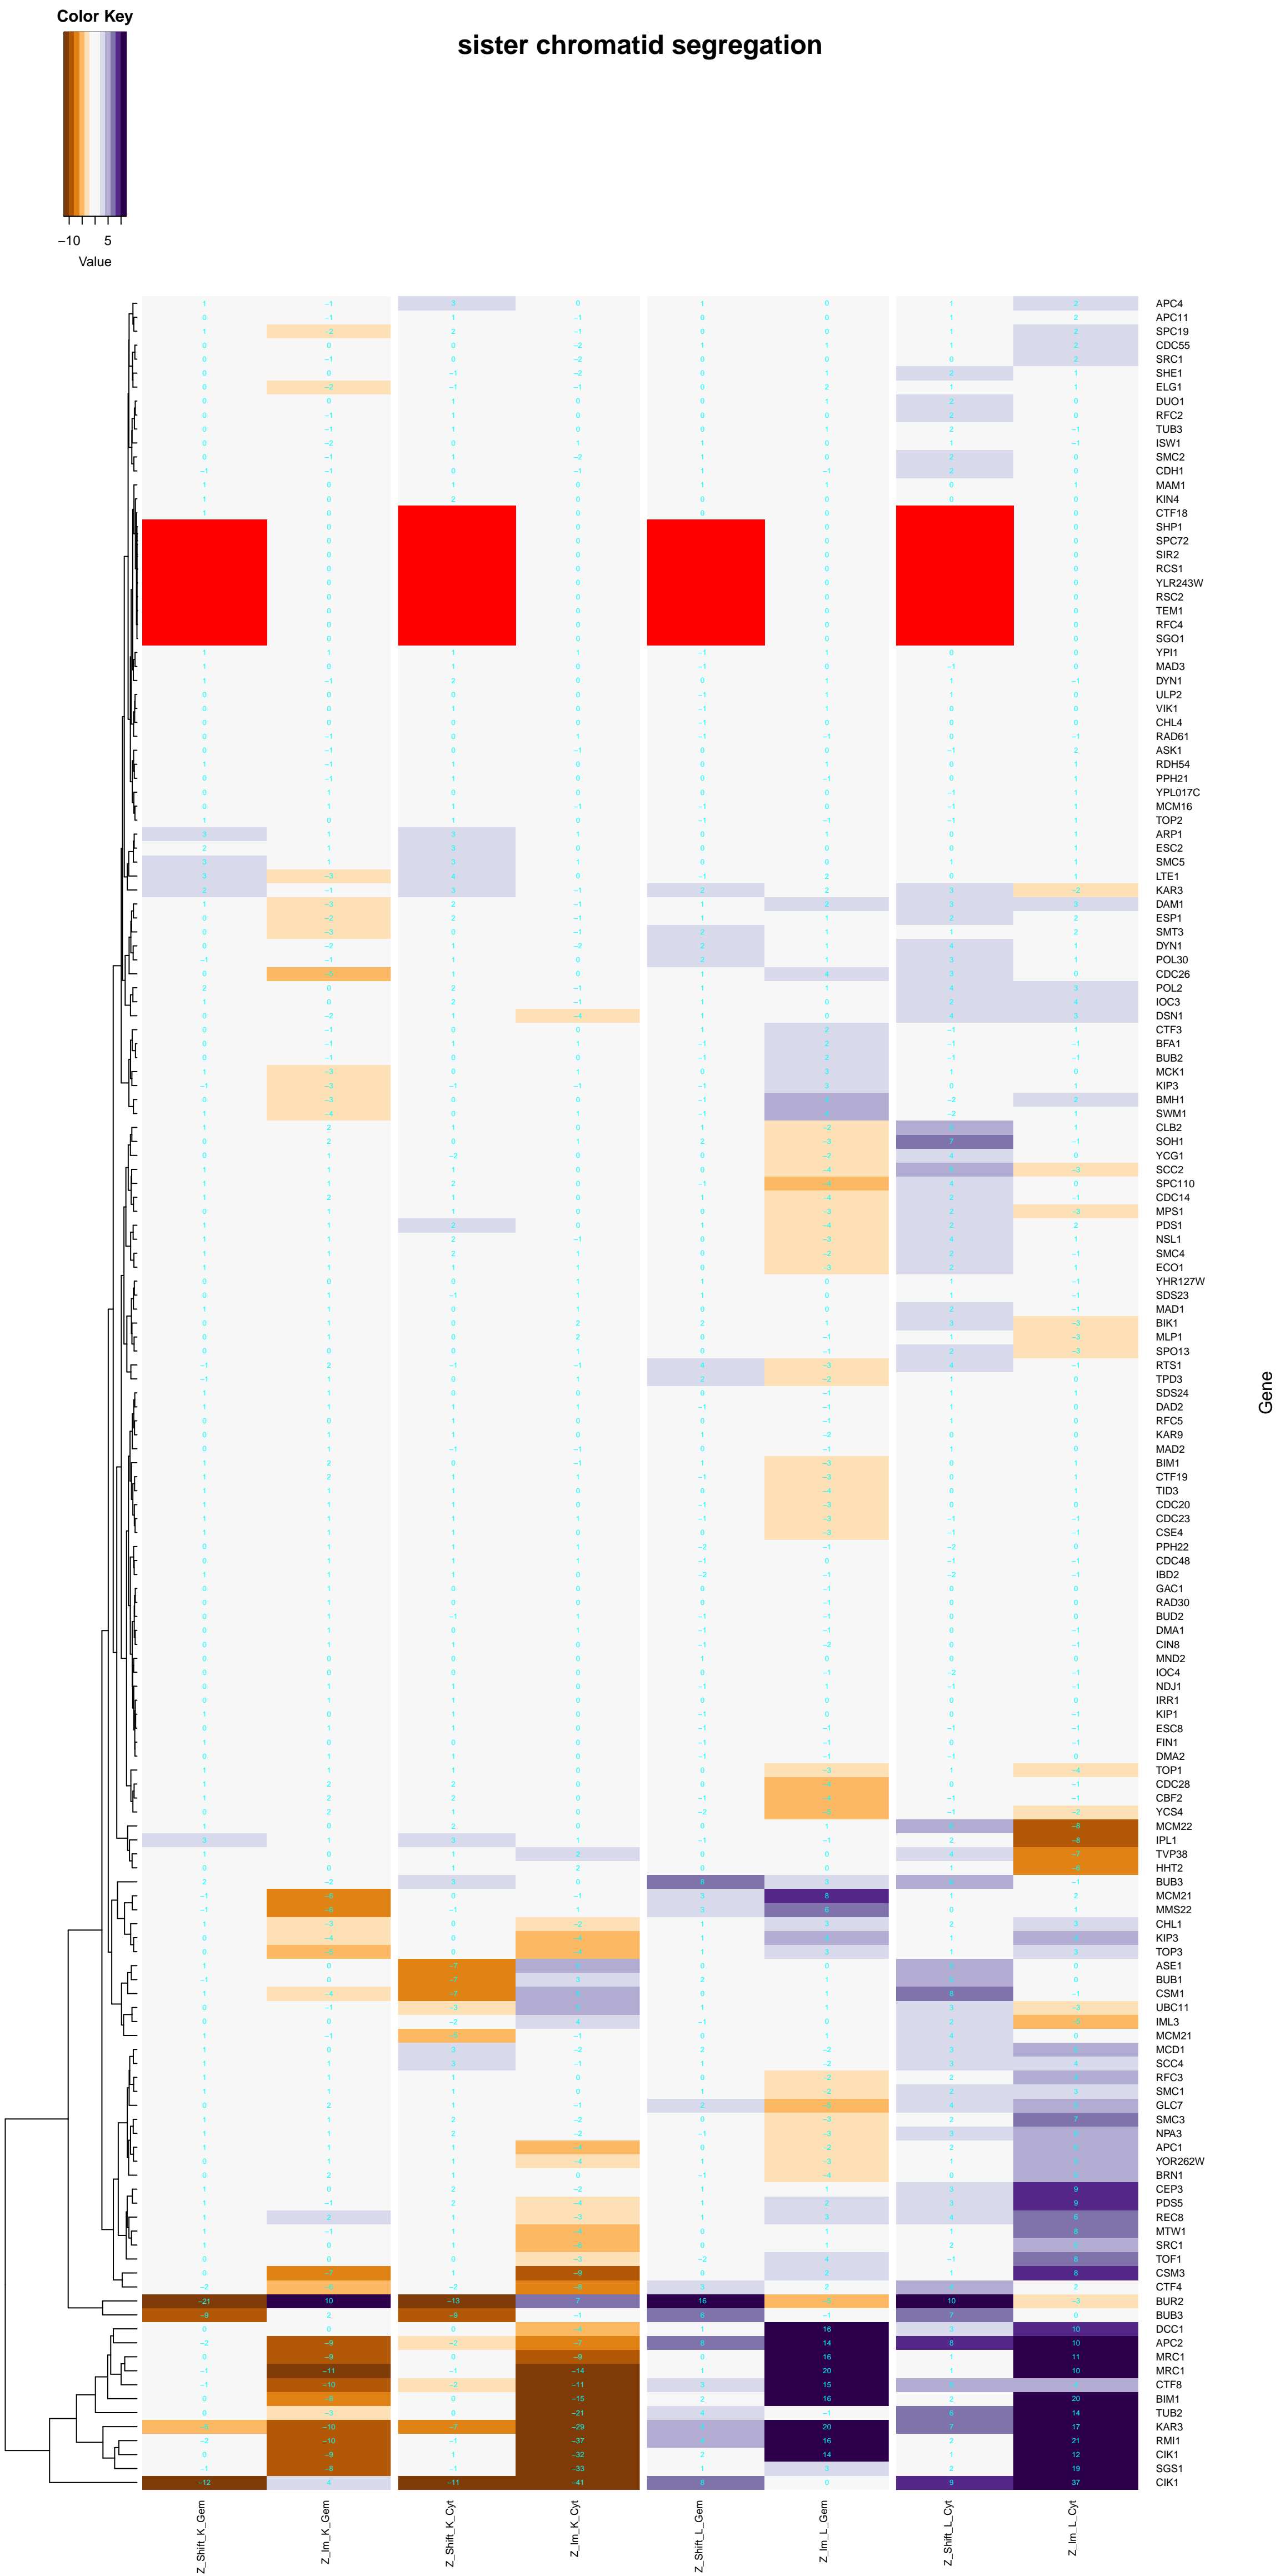

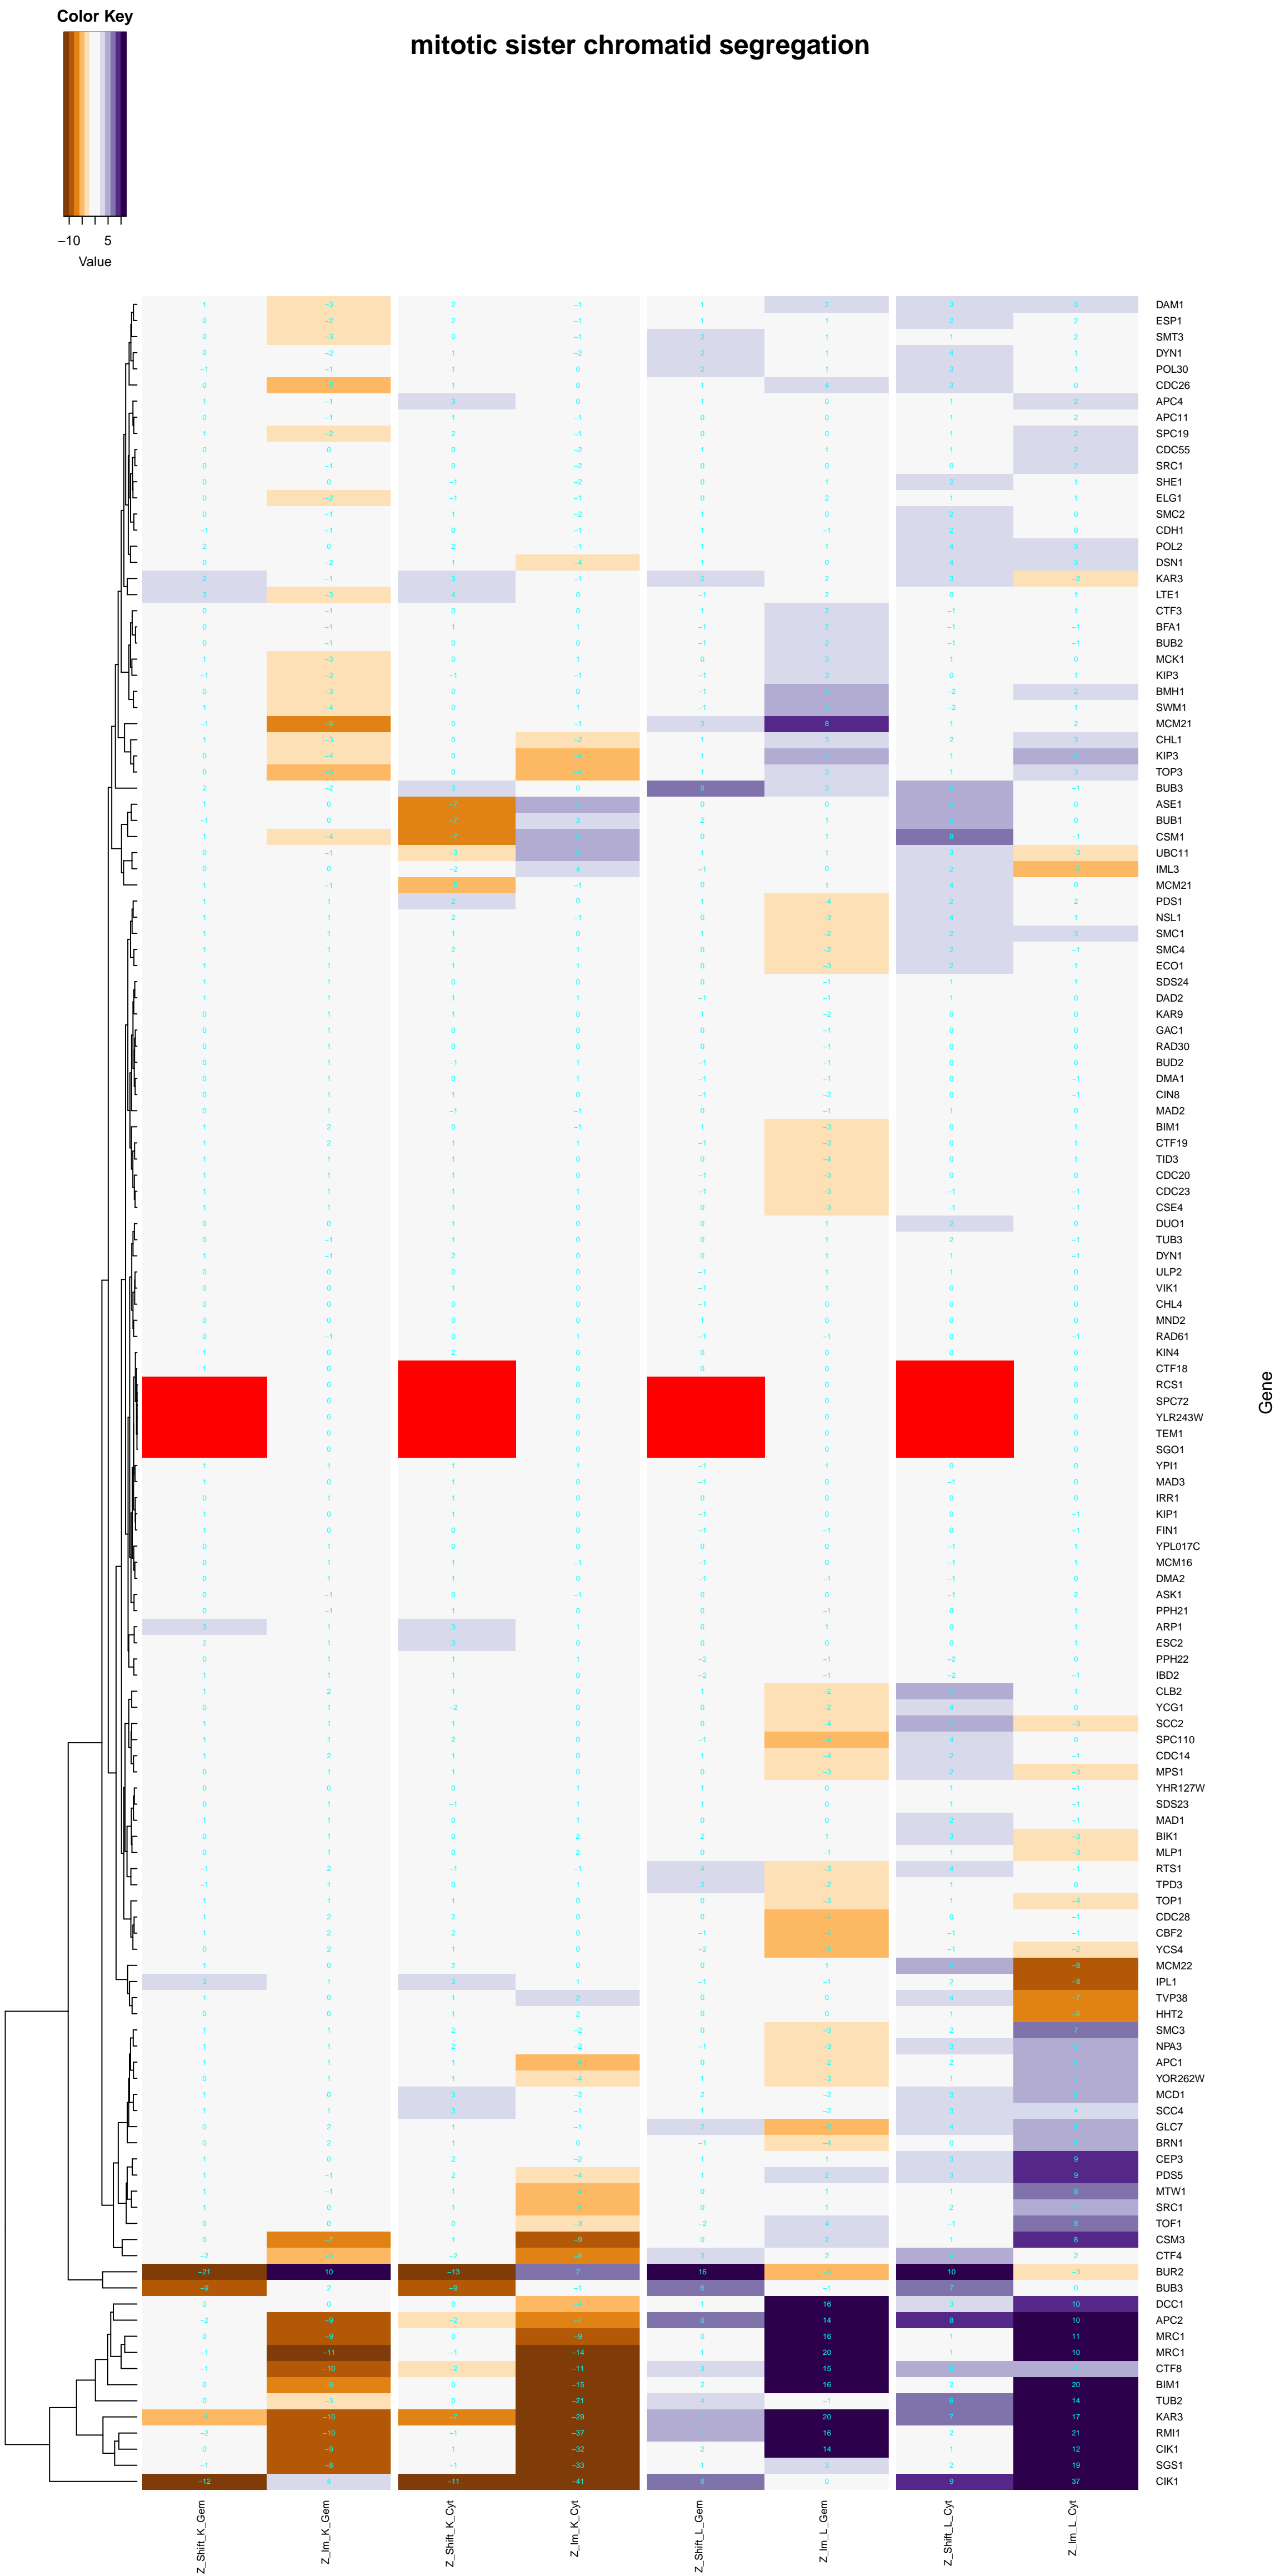

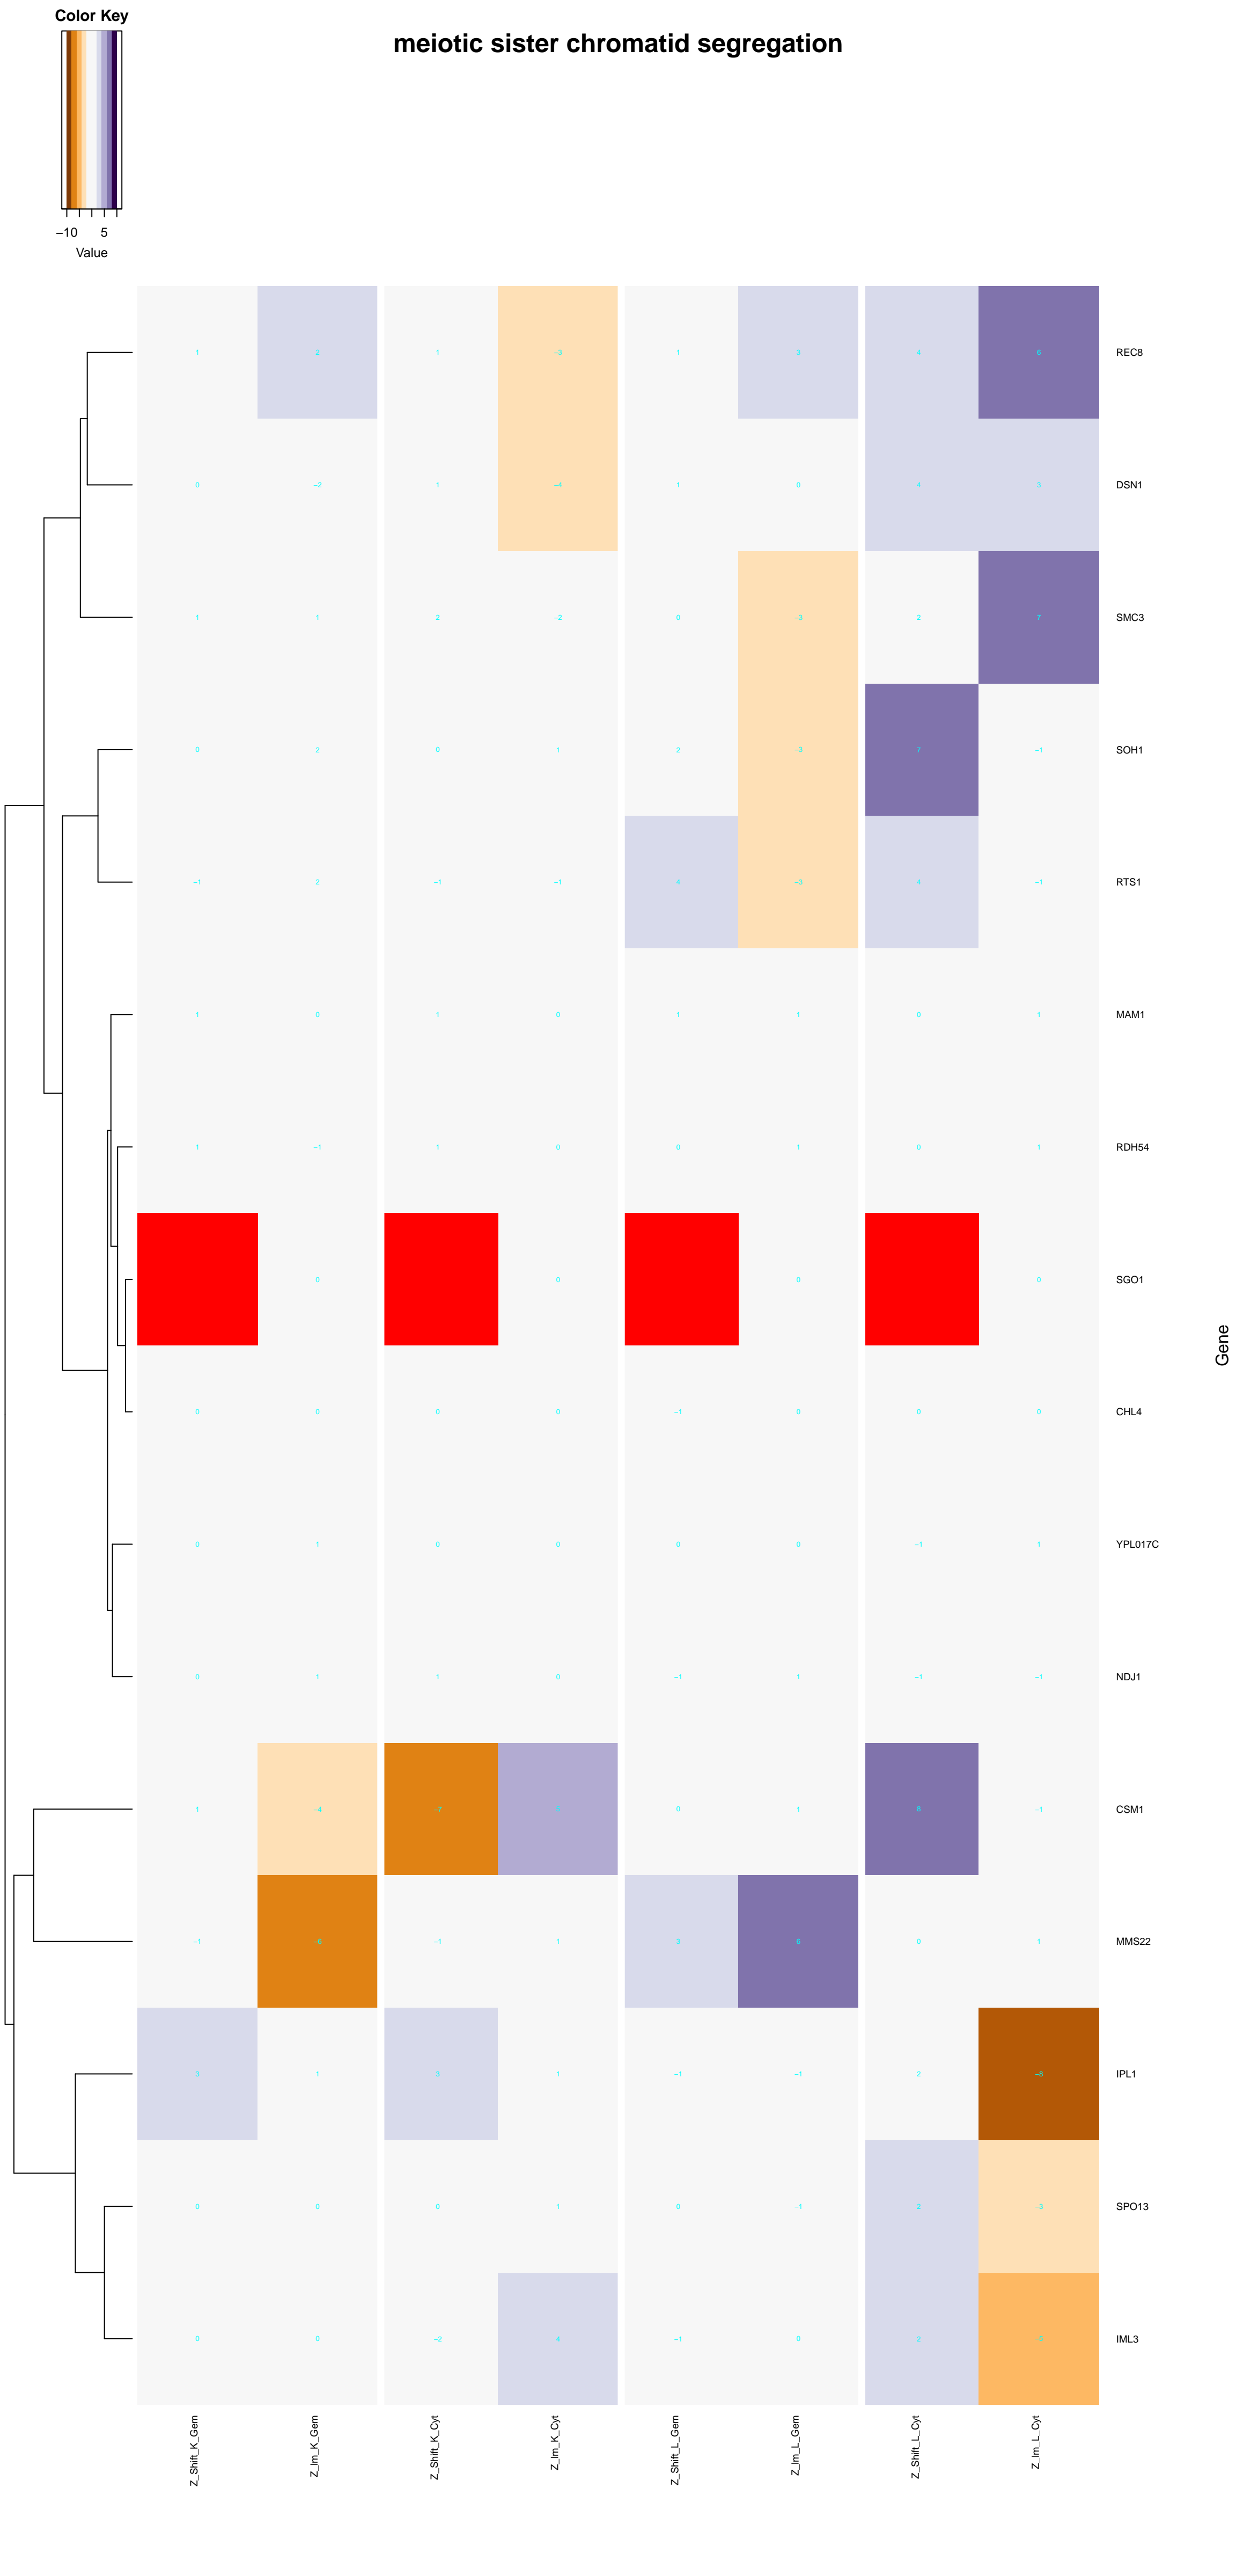

Supplement: s1 [file s1]

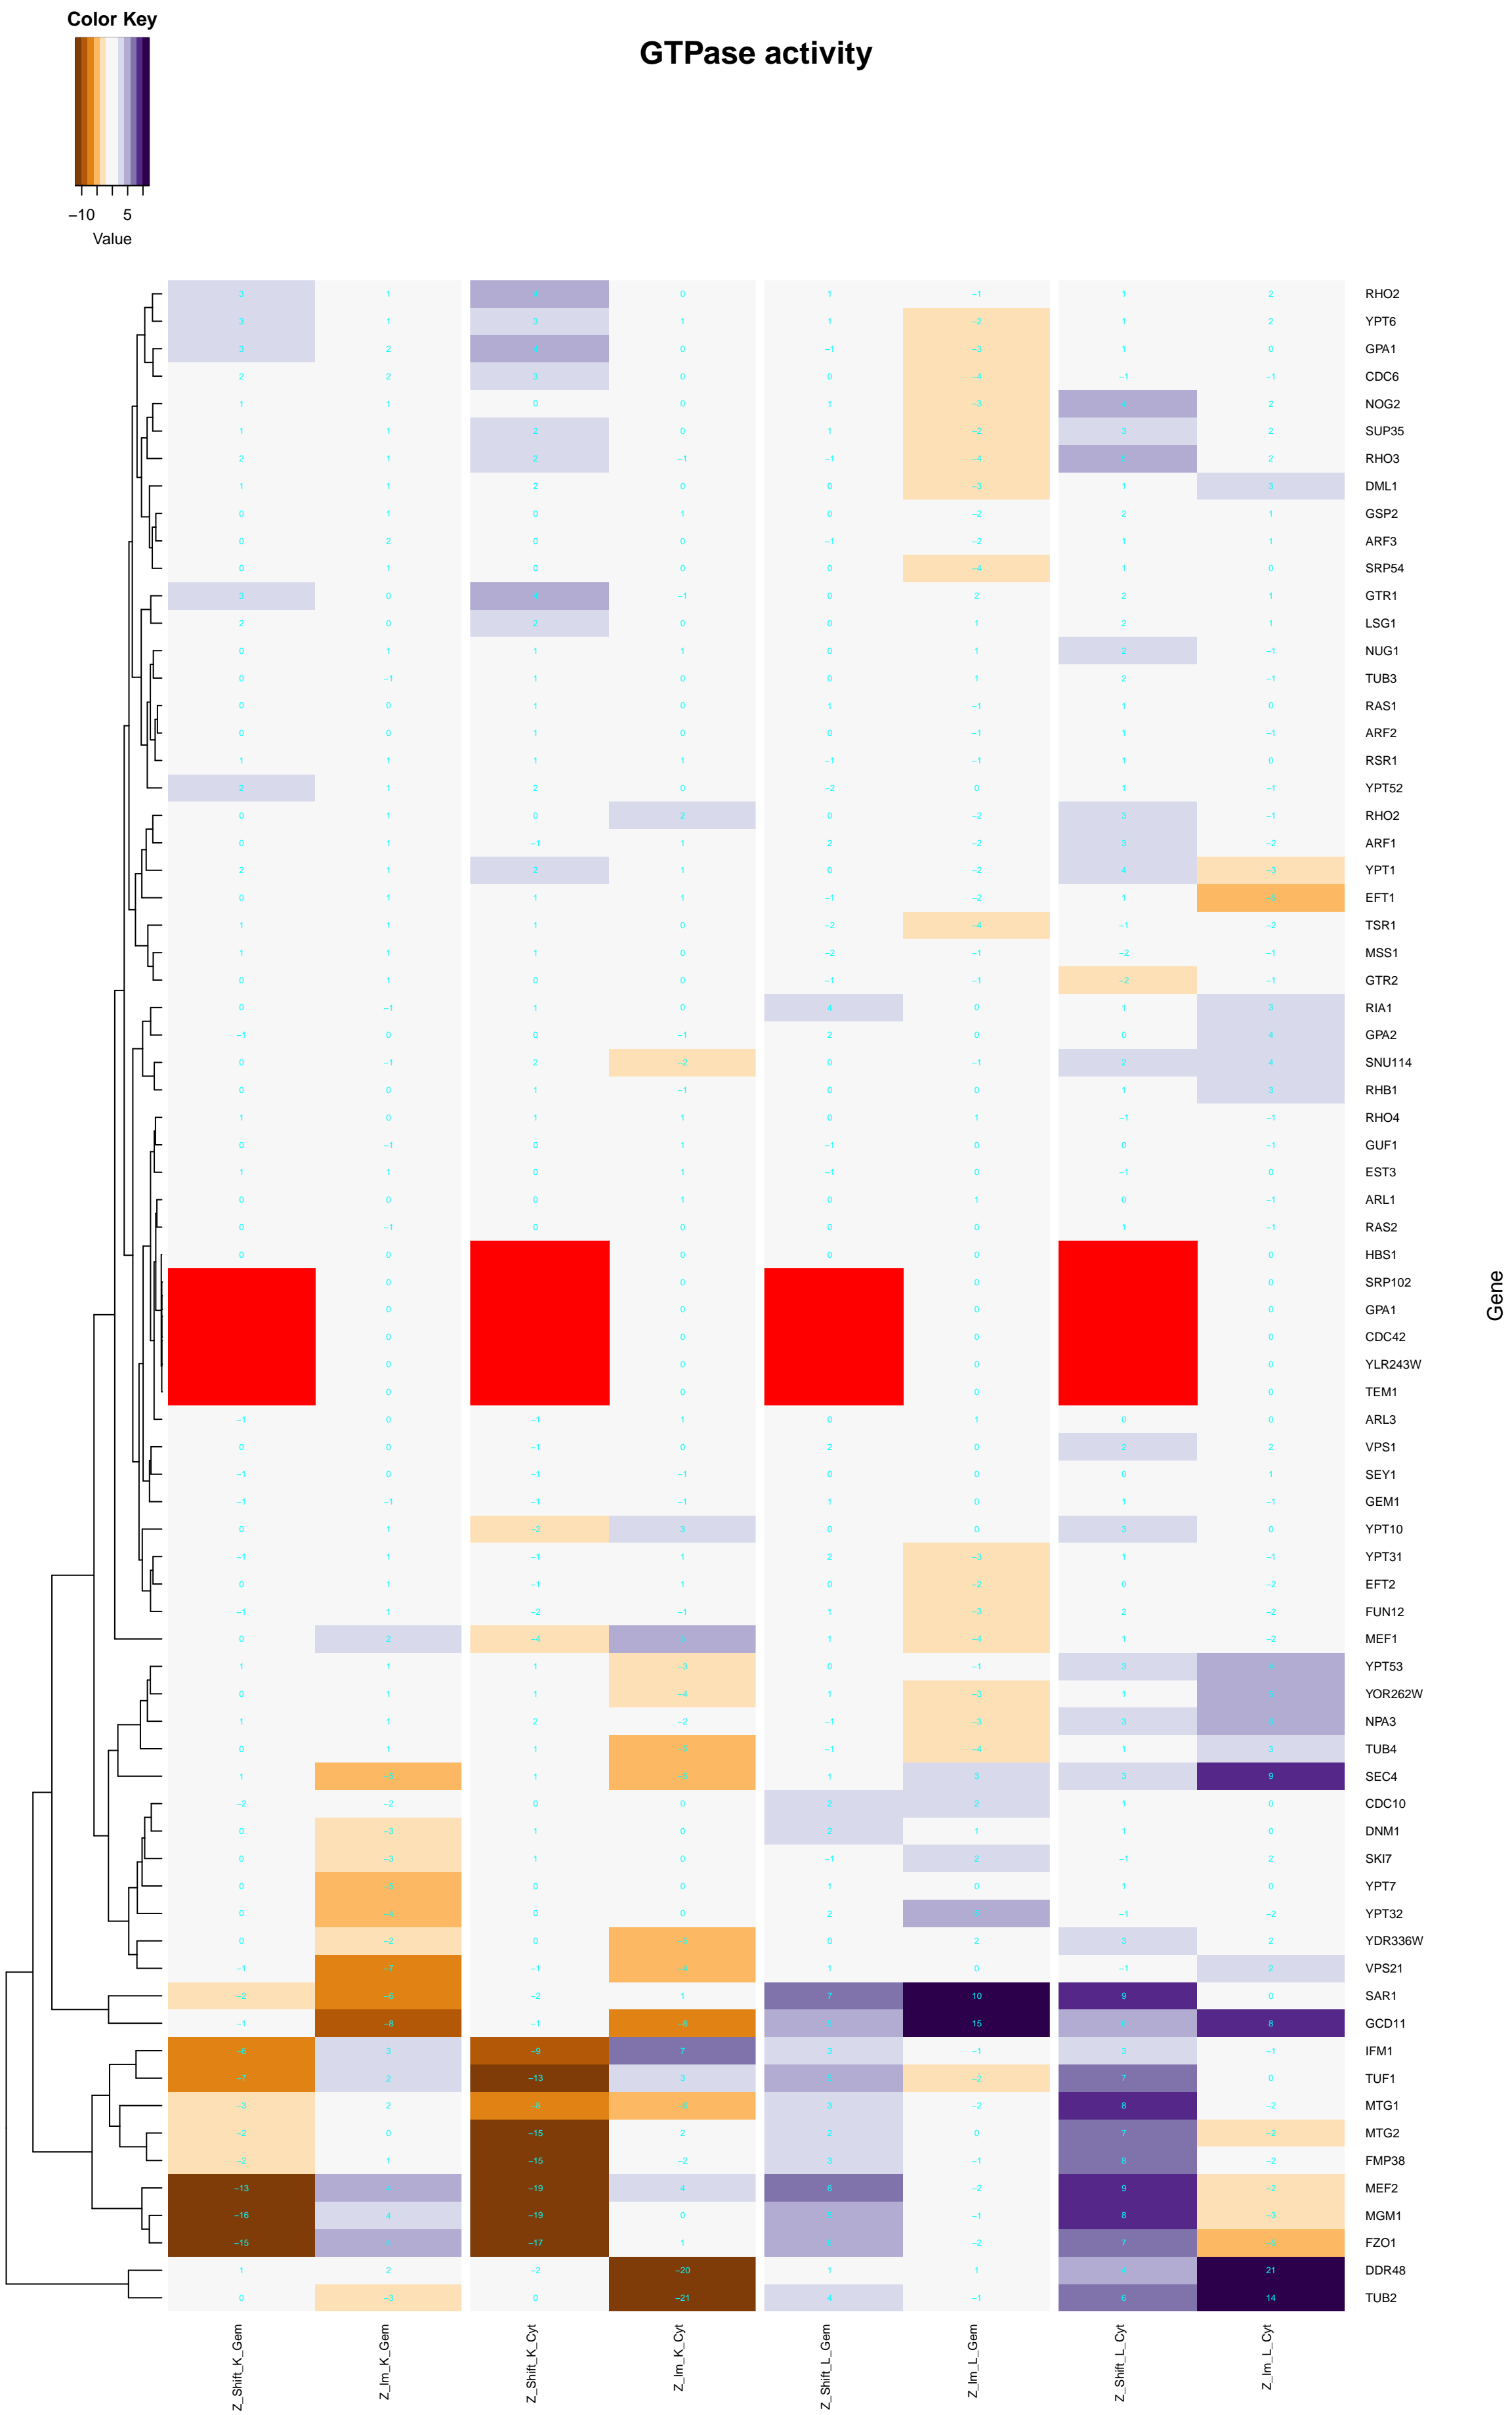

Supplement: s1 [file s1]

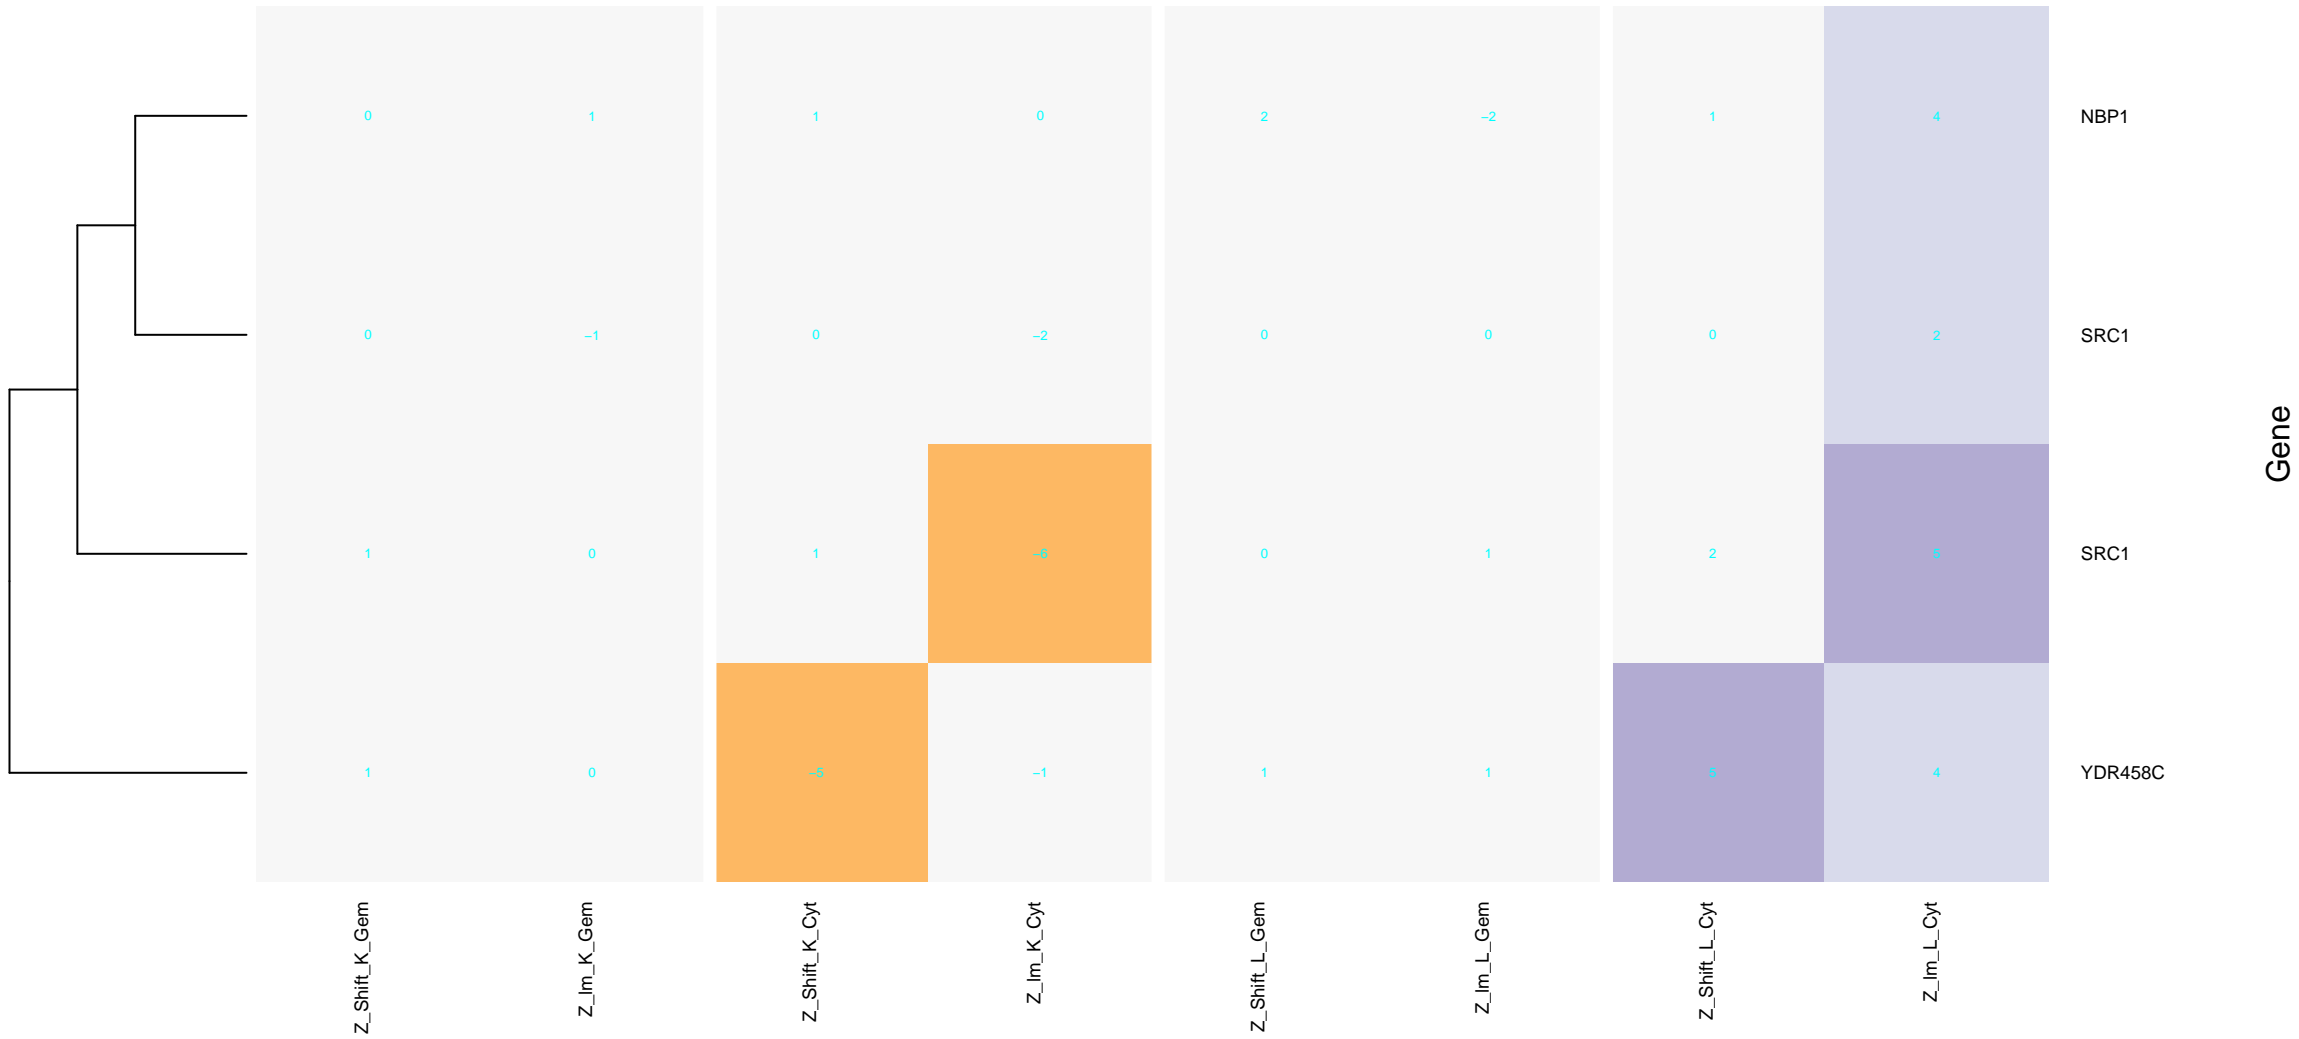

Supplement: s1 [file s1]

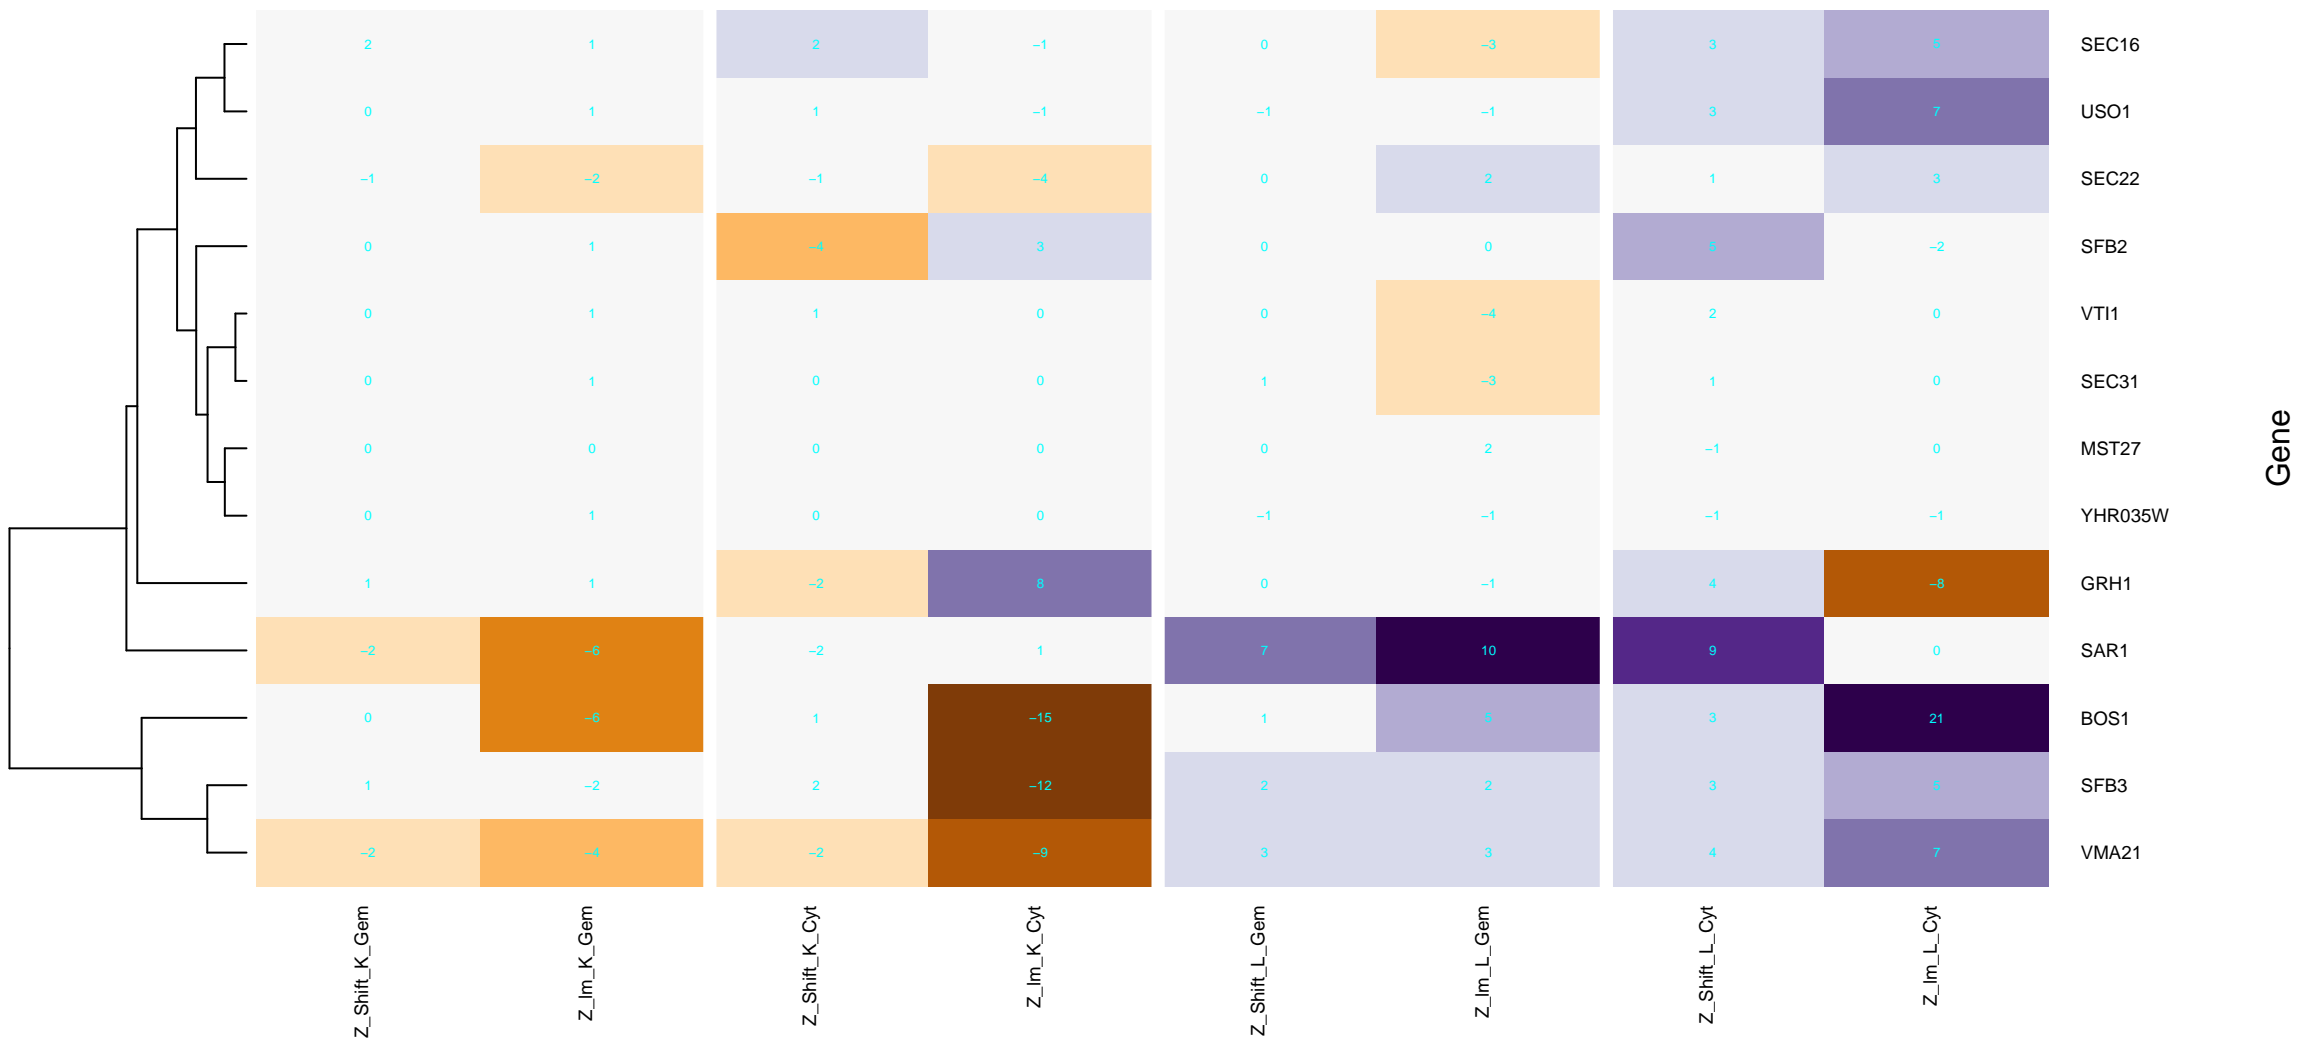

Supplement: s1 [file s1]

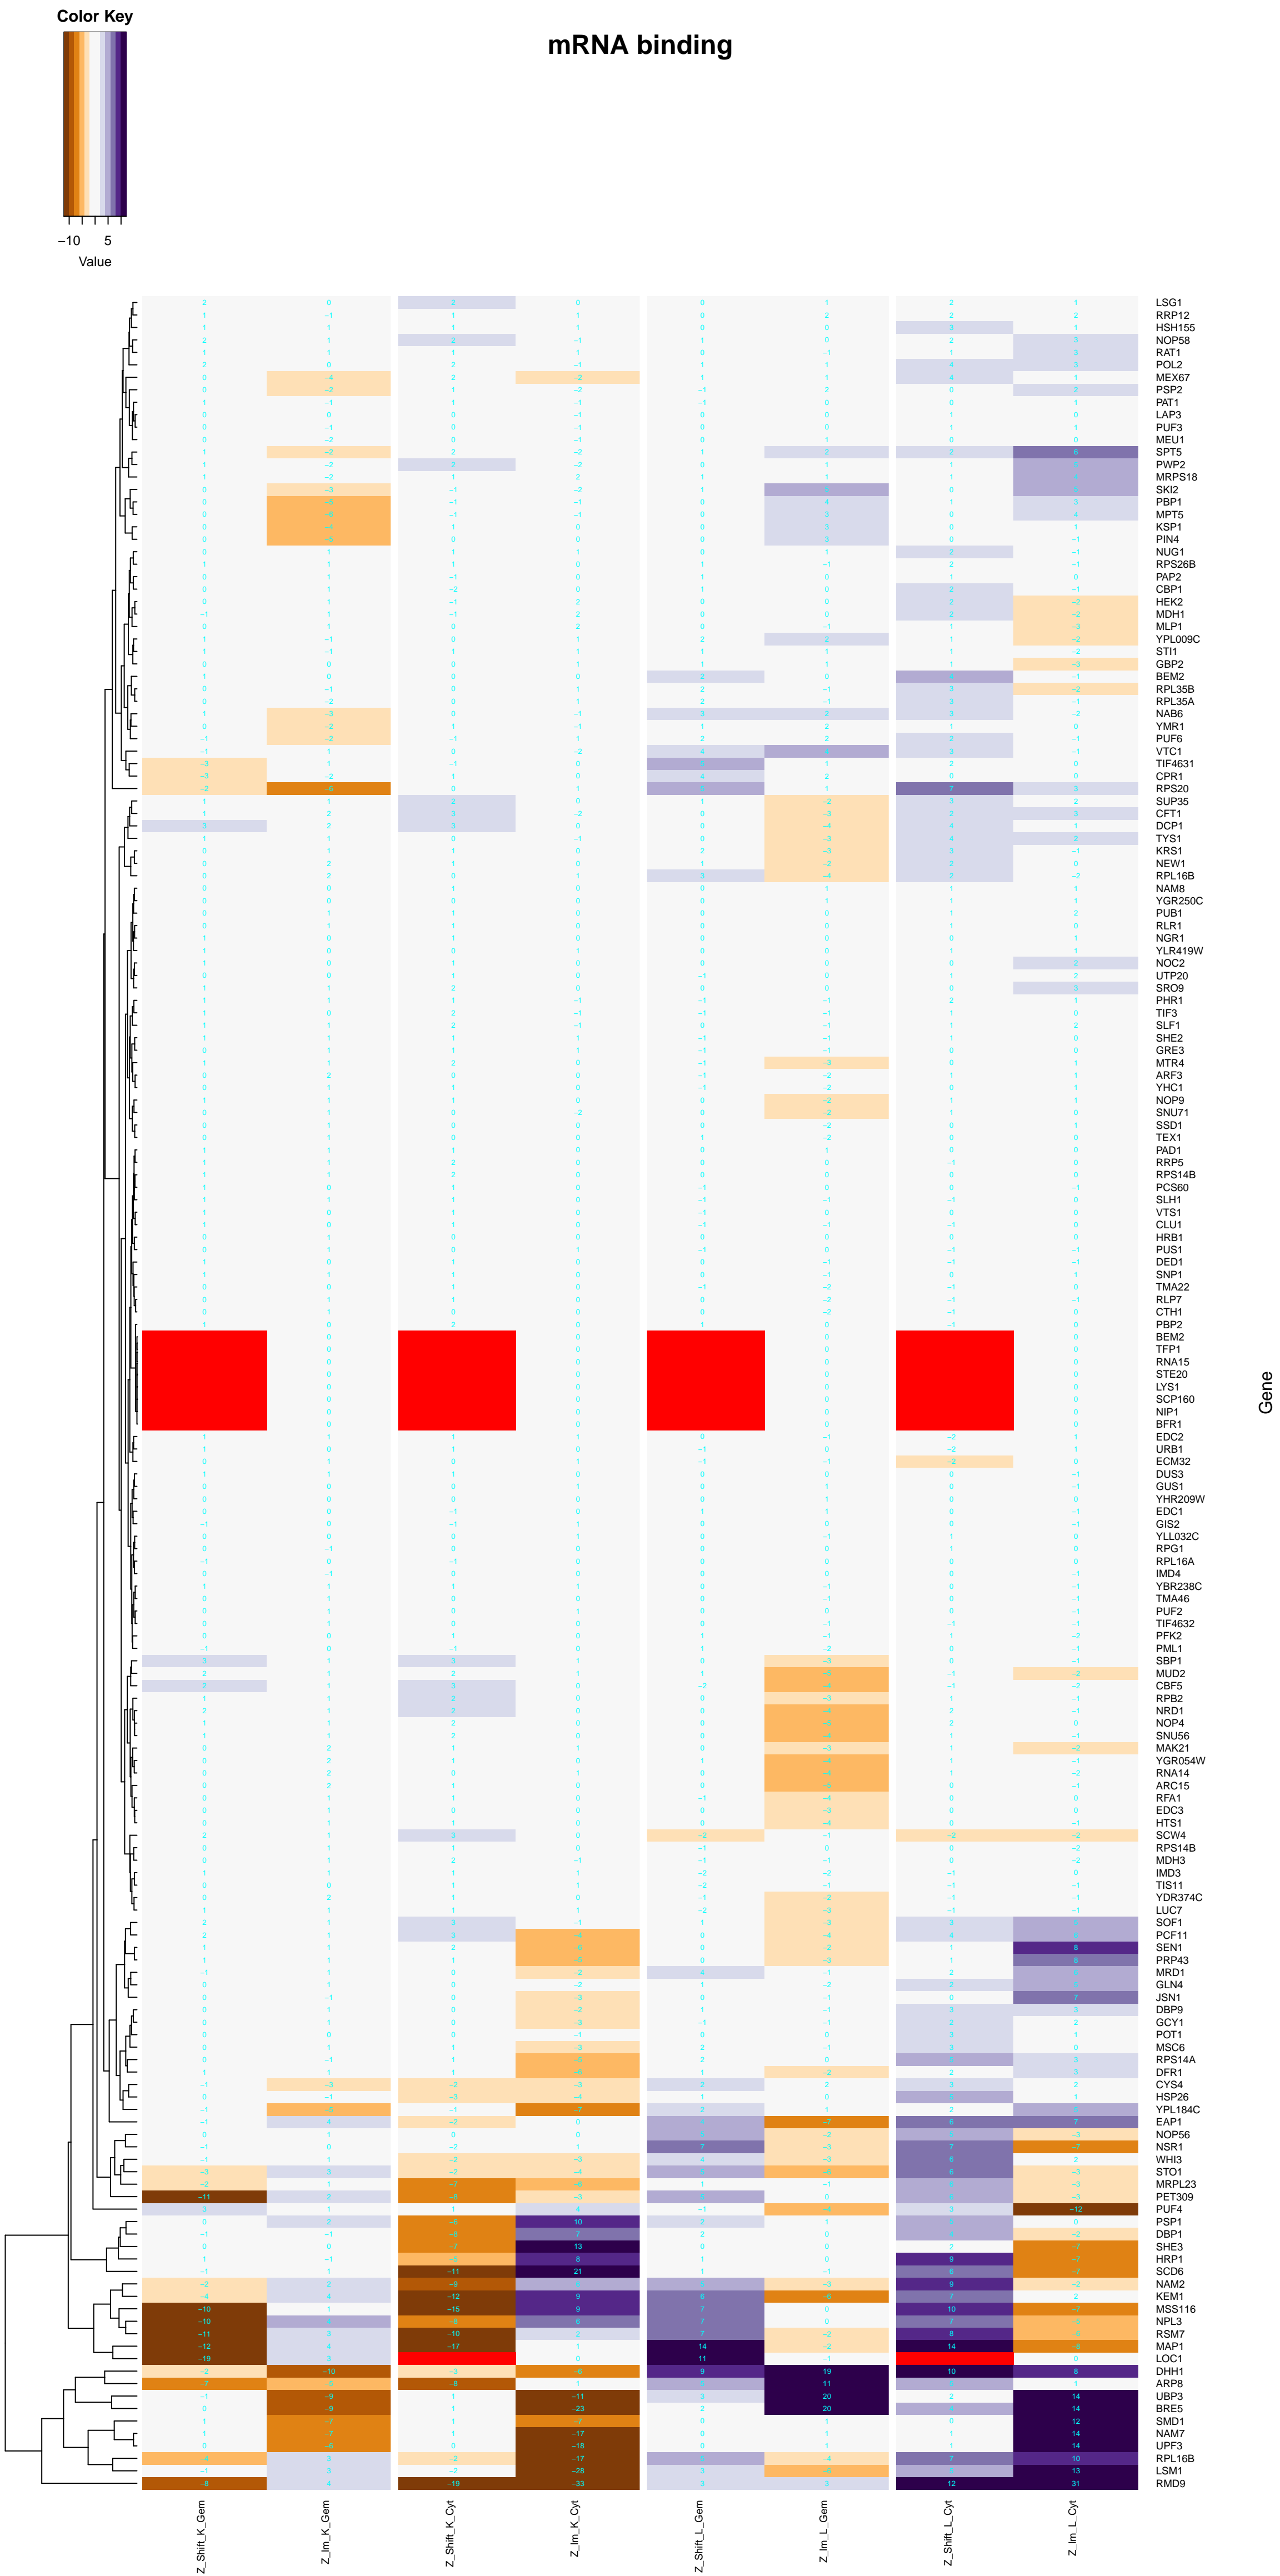

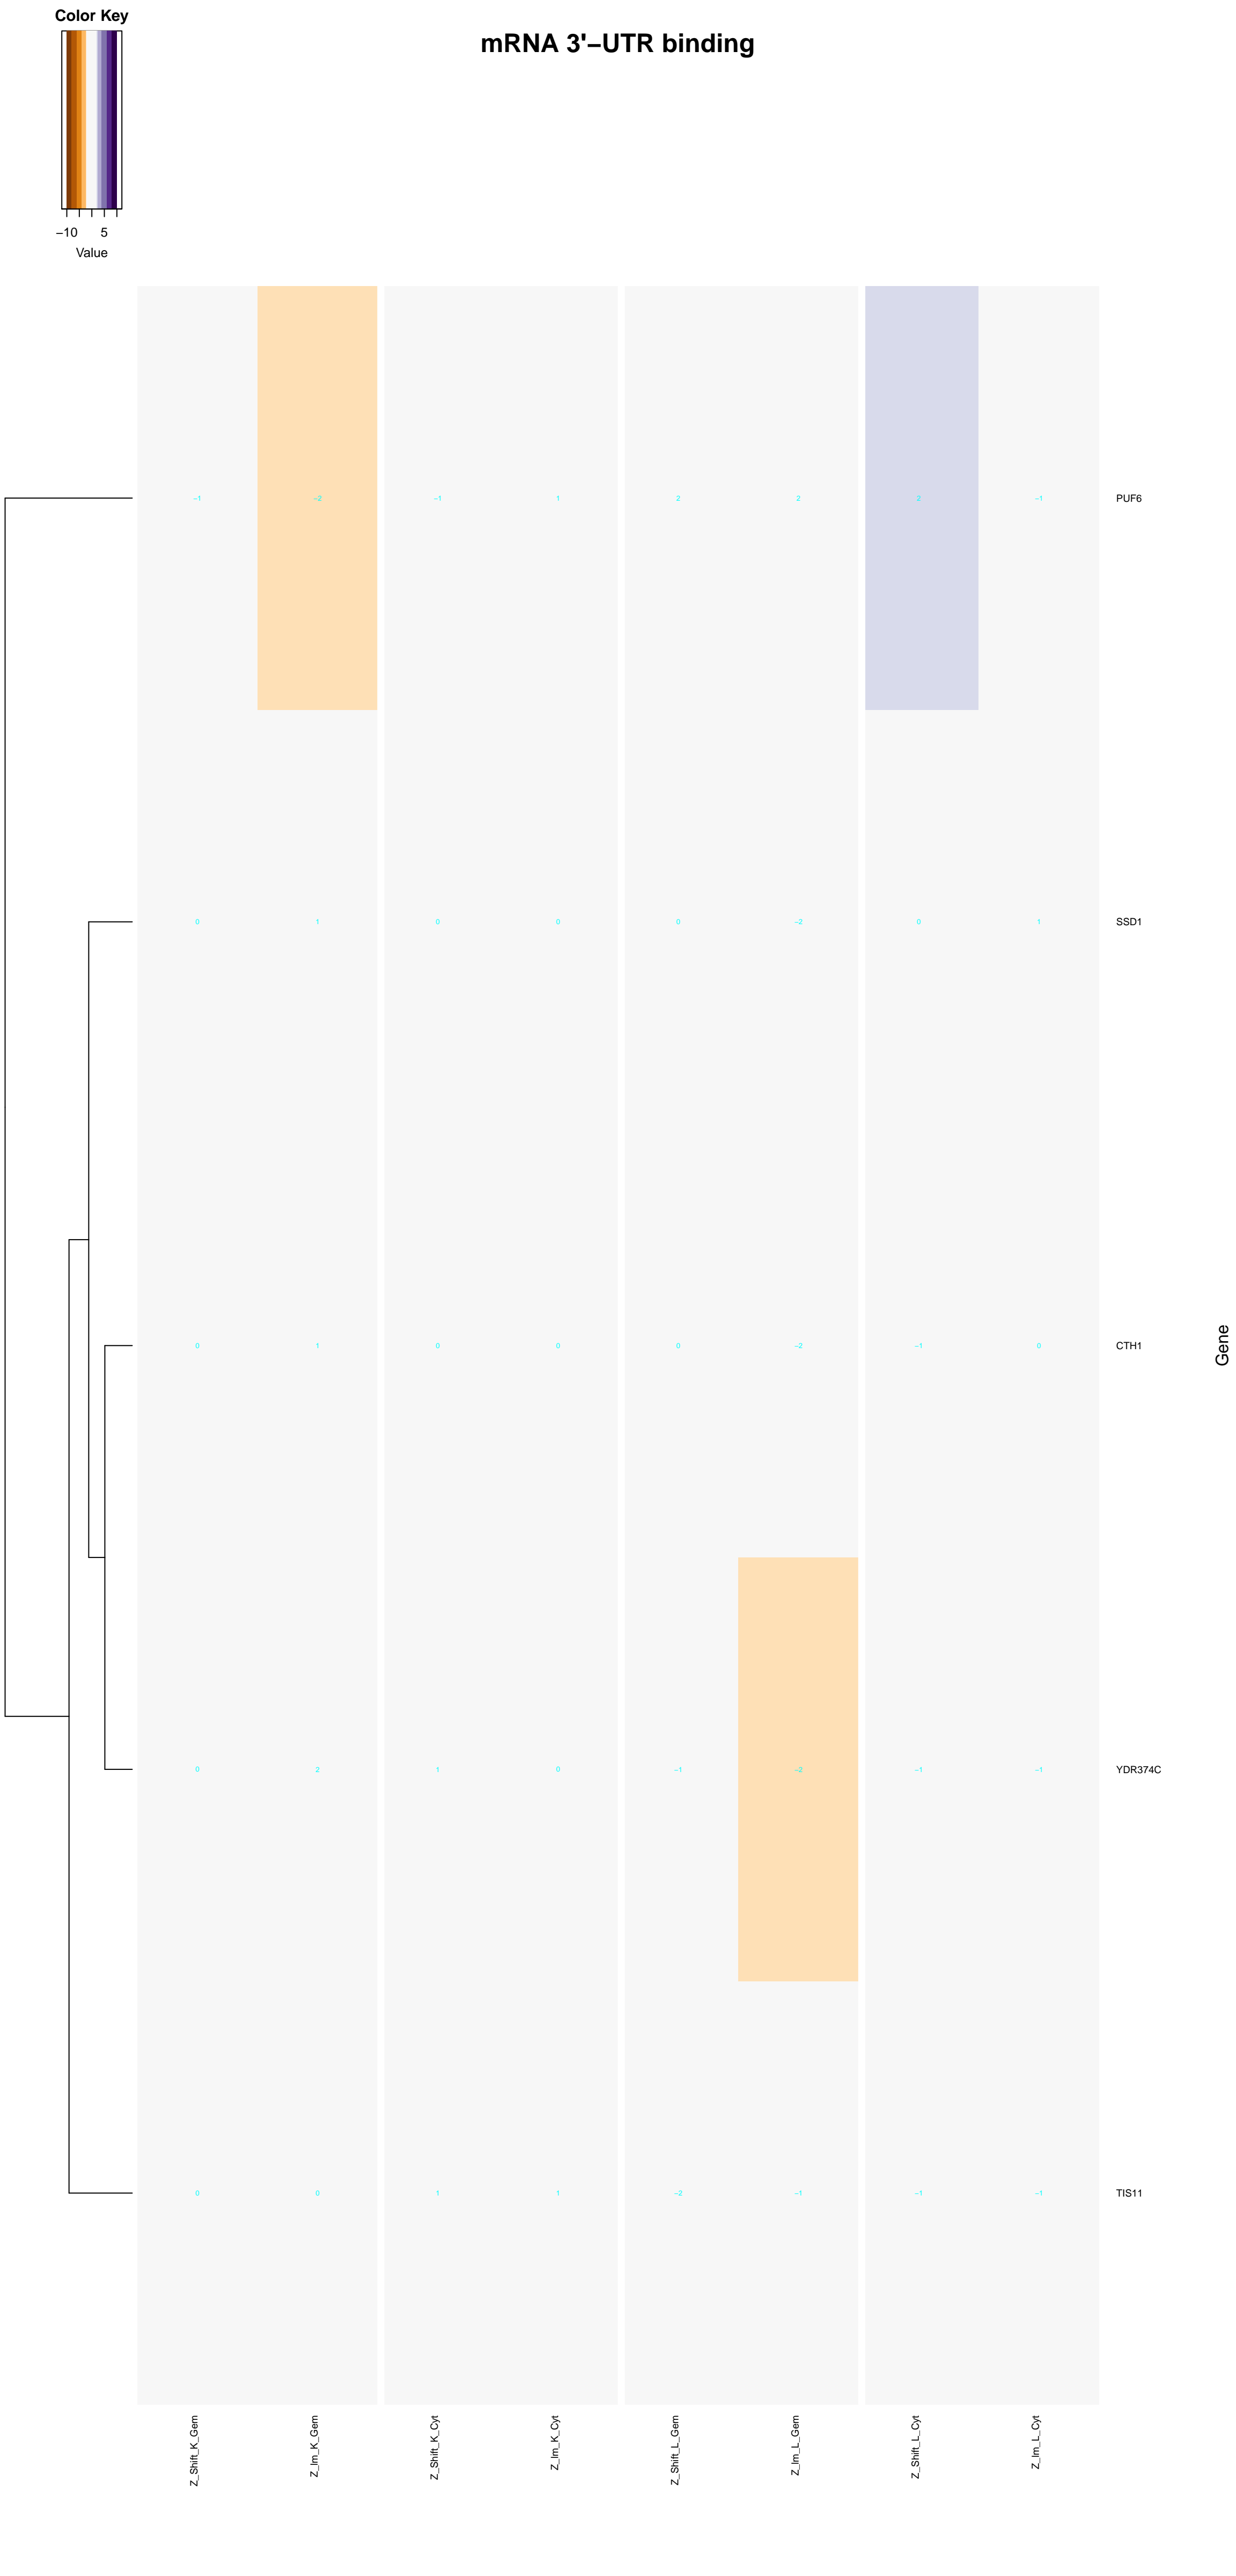

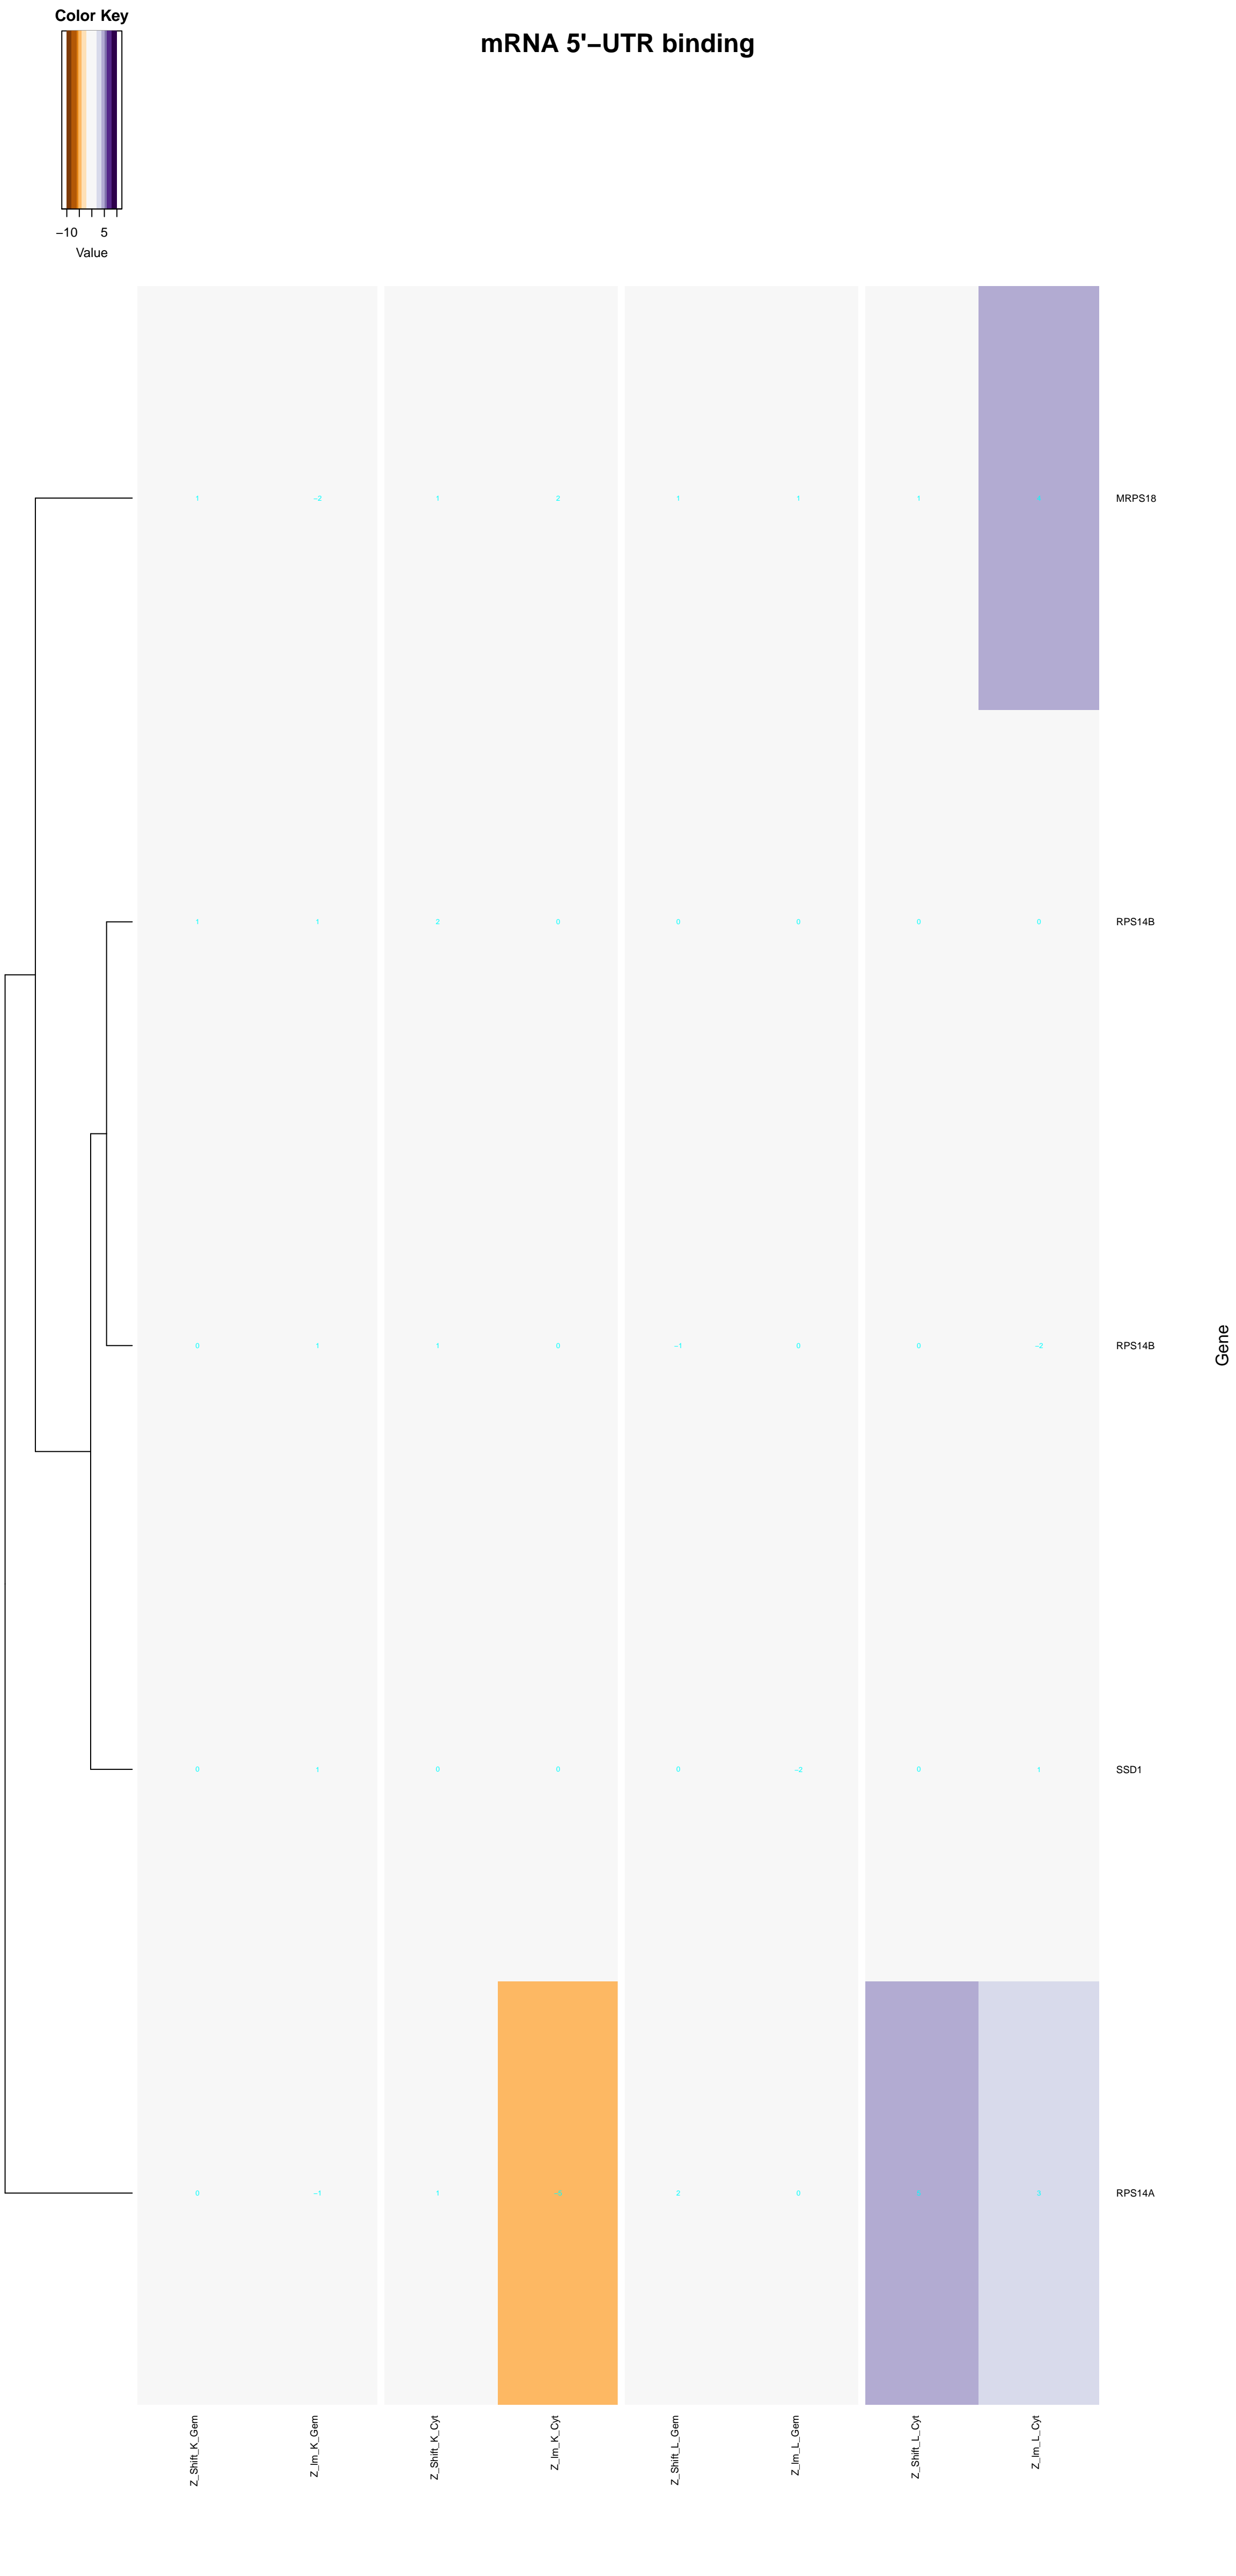

Supplement: s1 [file s1]

-10      5  
Value

## pyruvate metabolic process

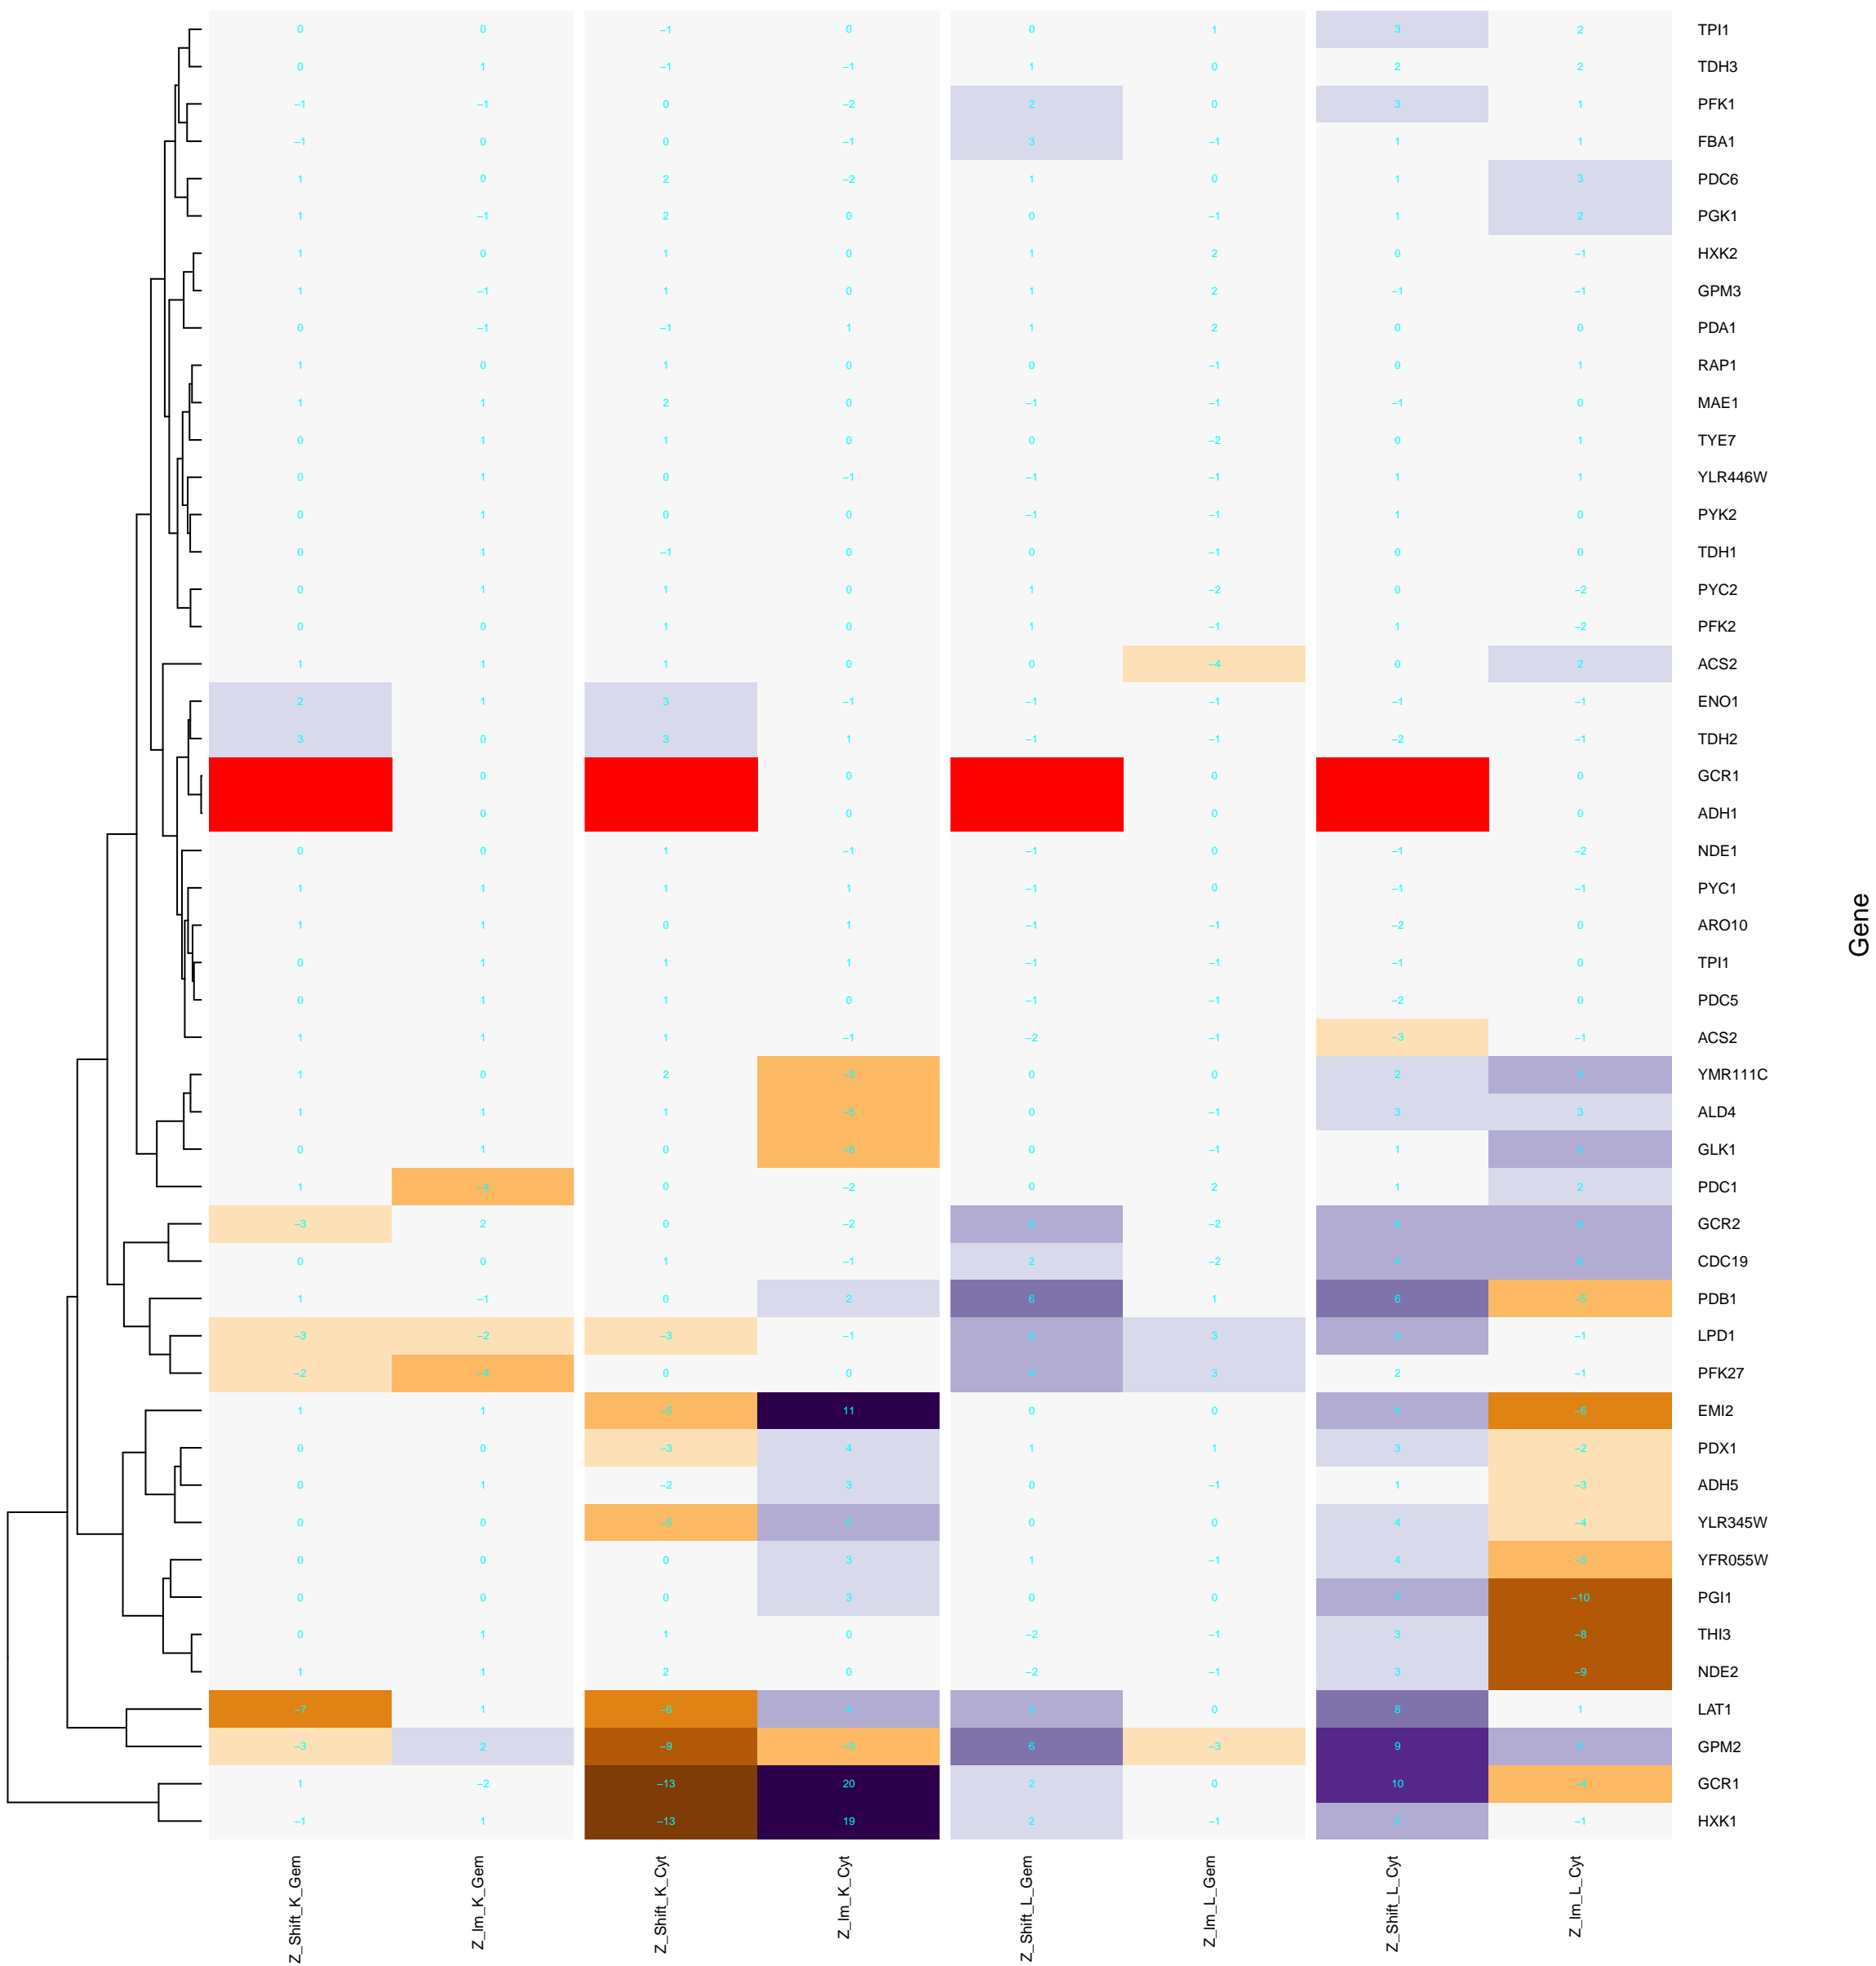

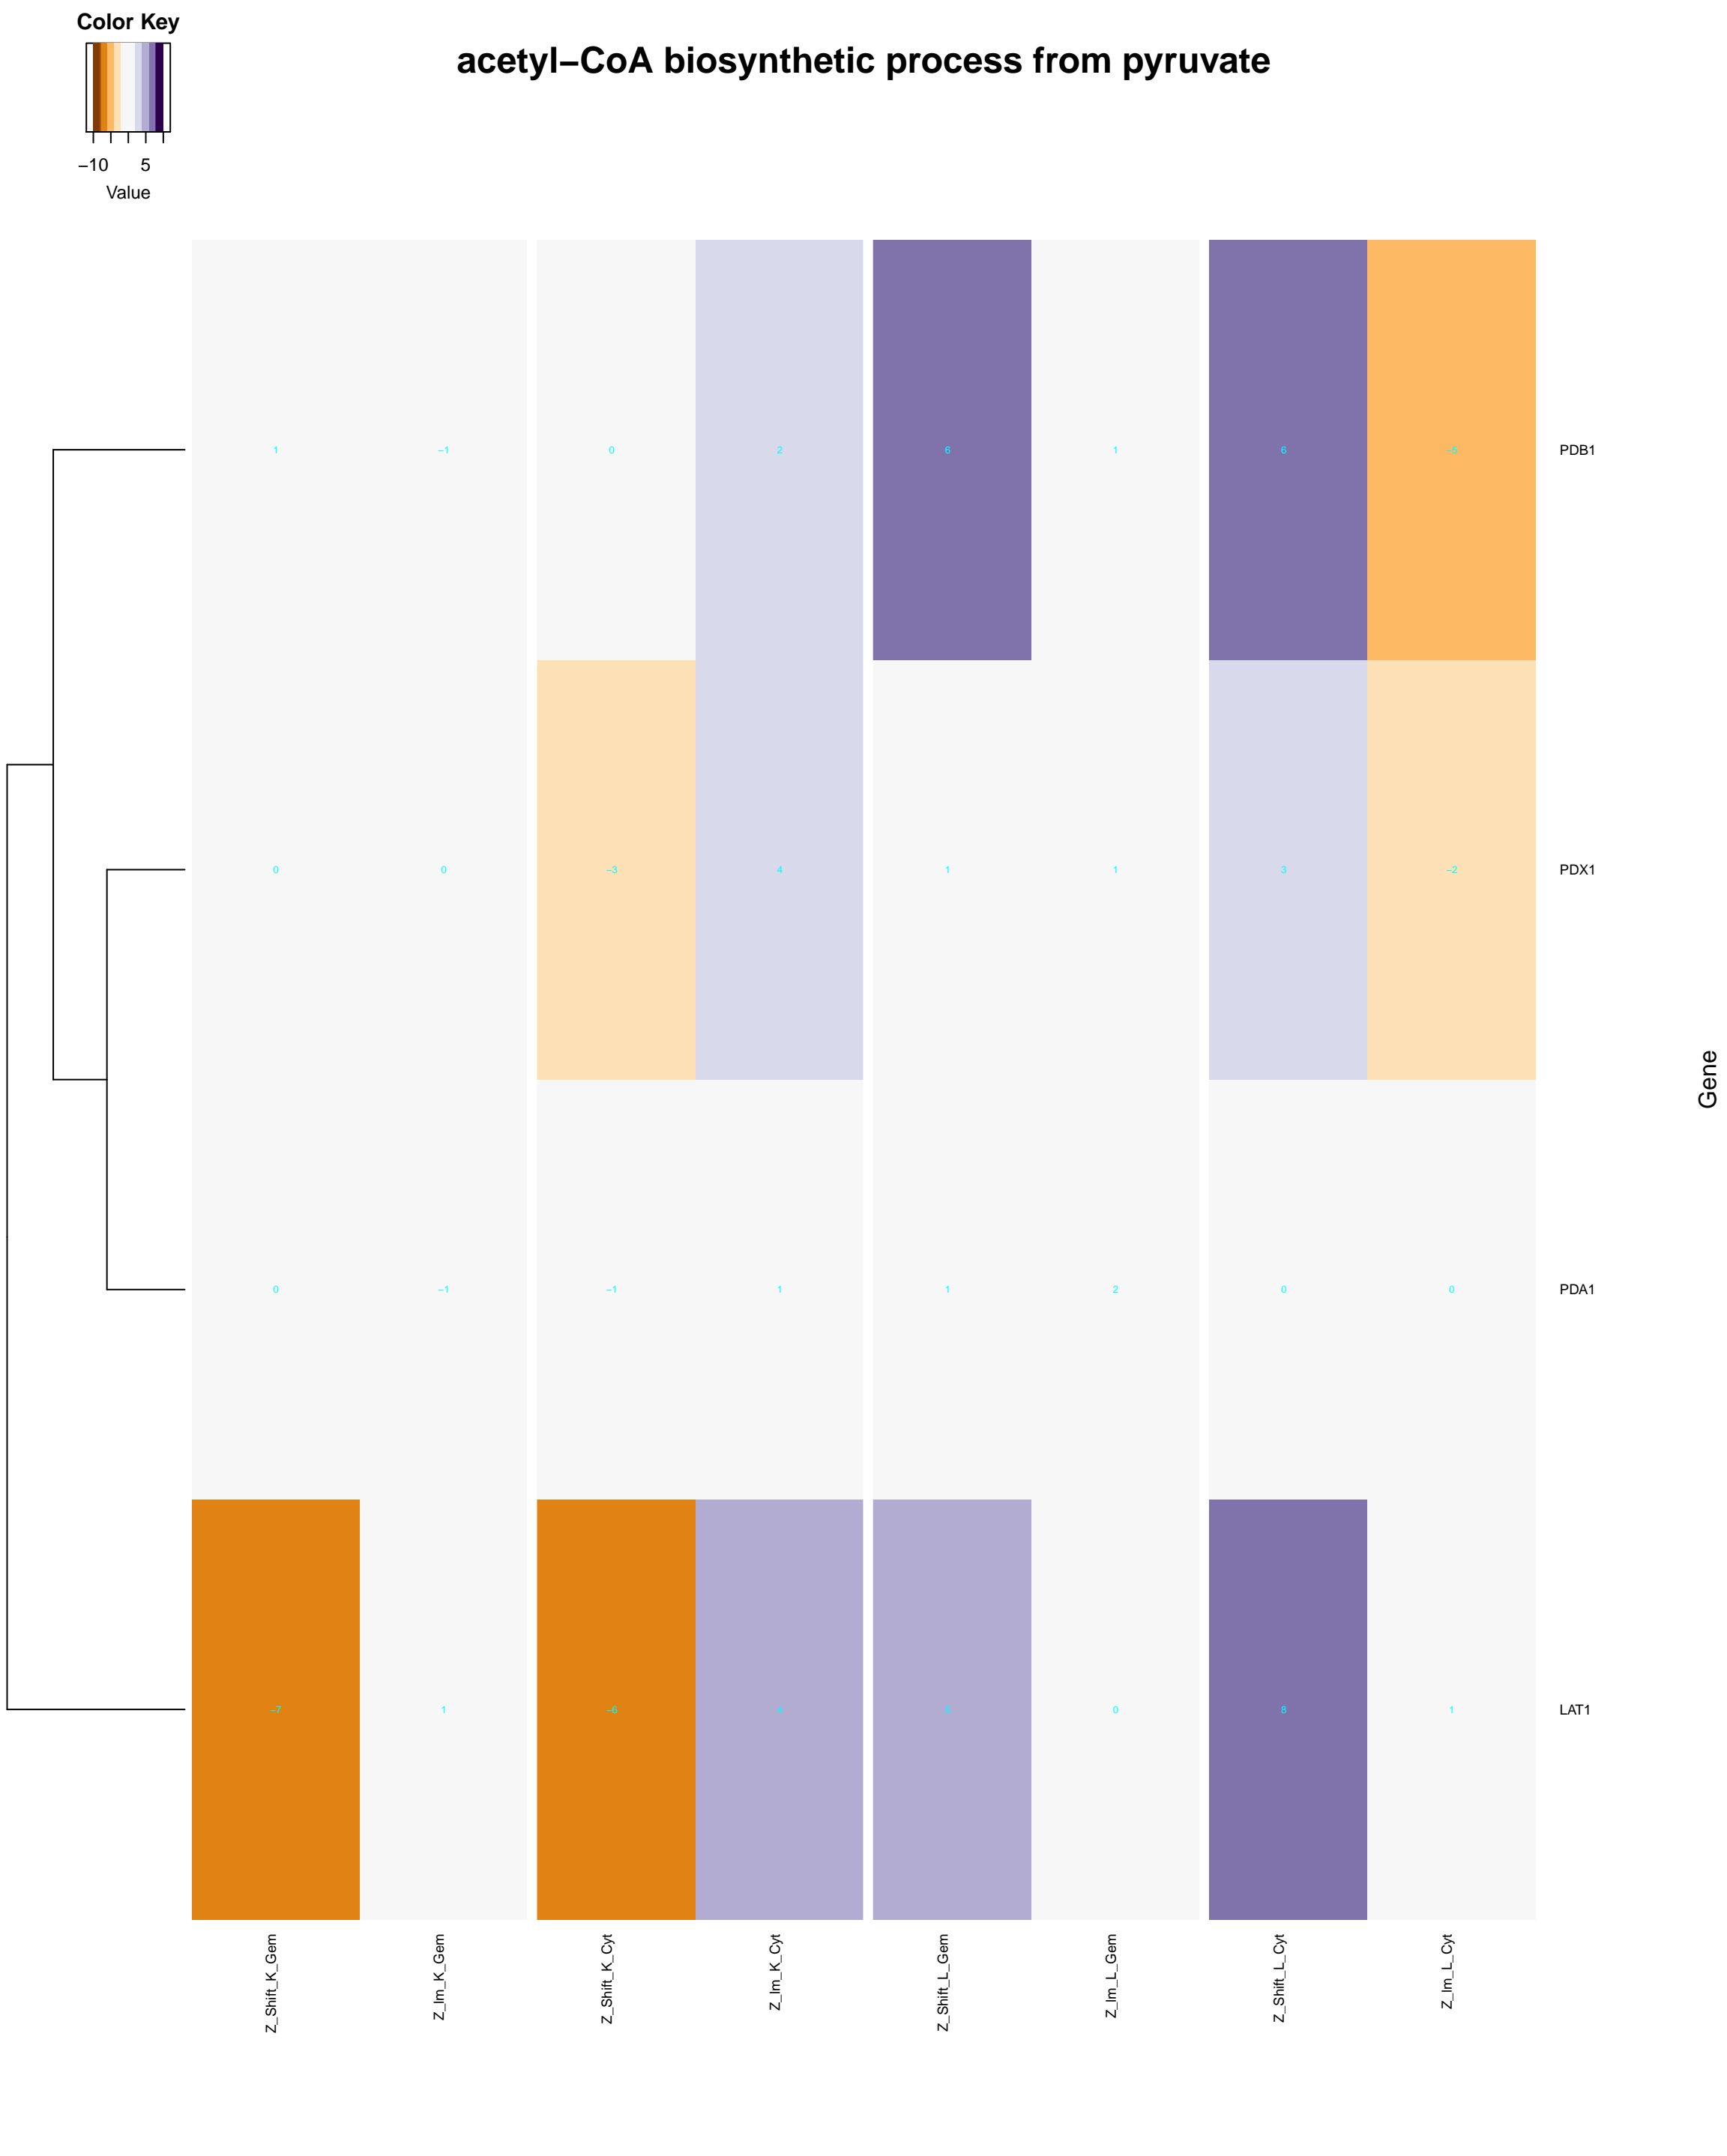

## glycolytic process

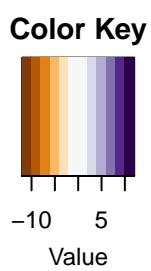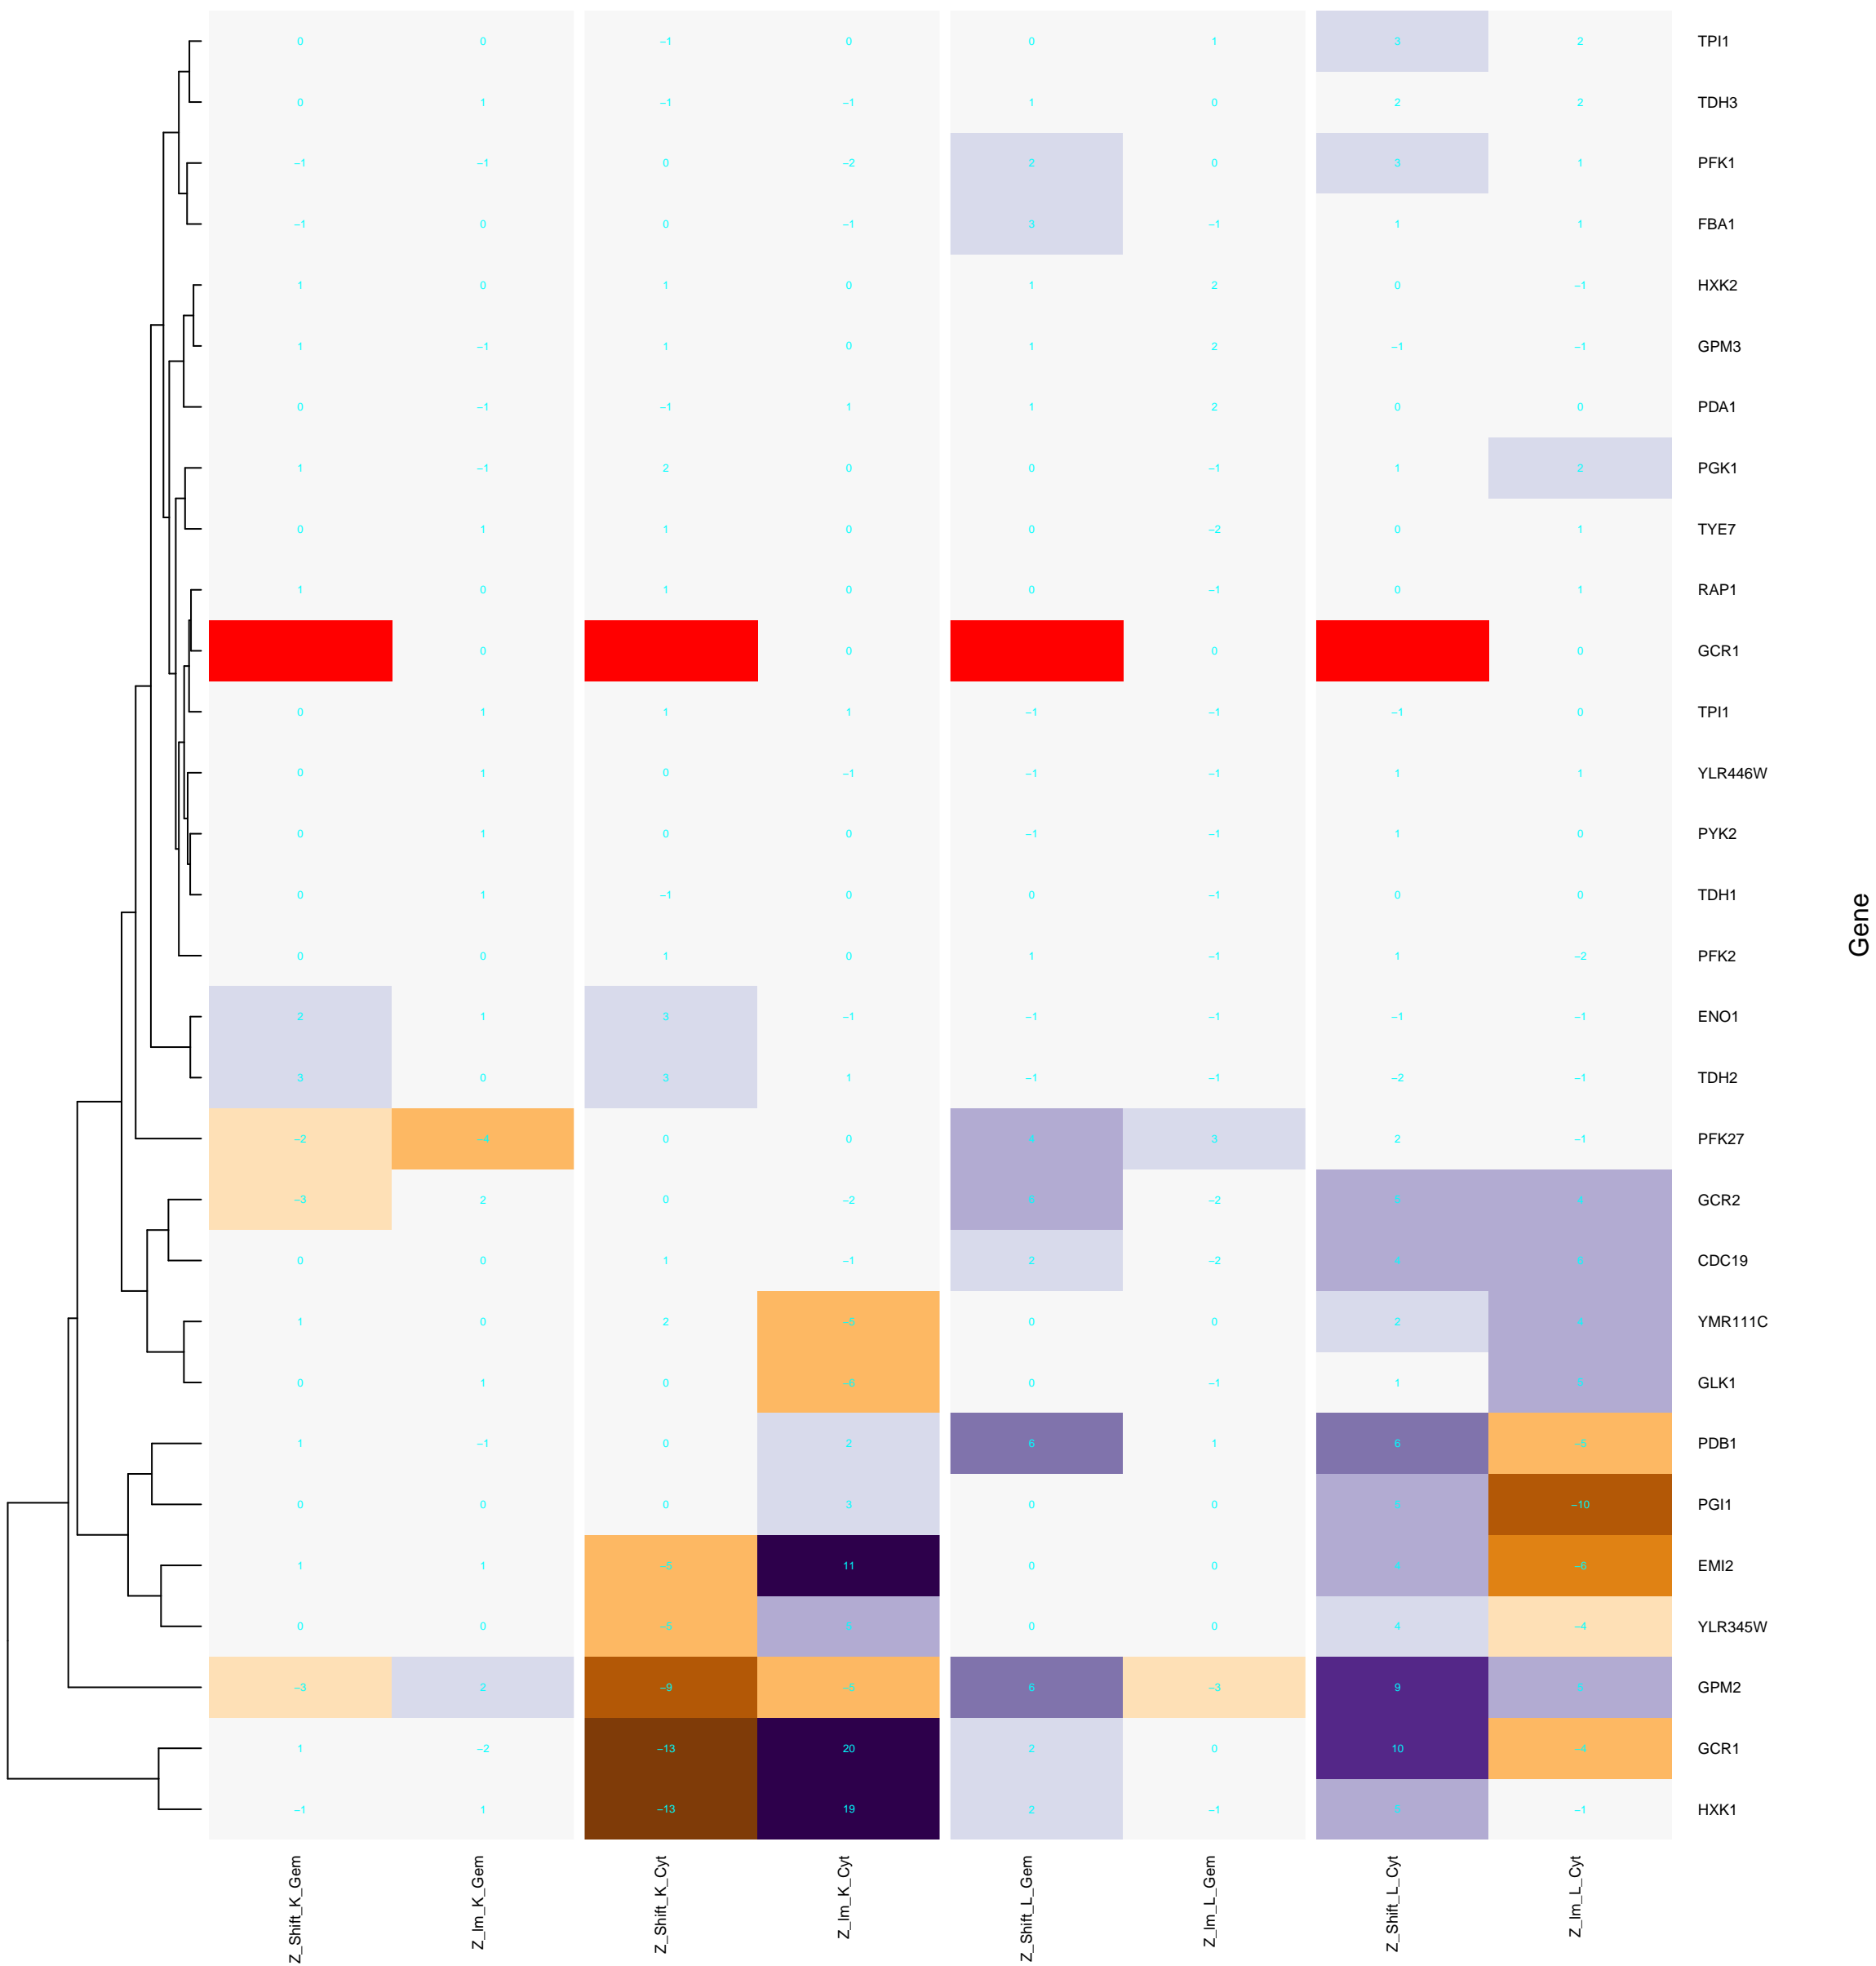

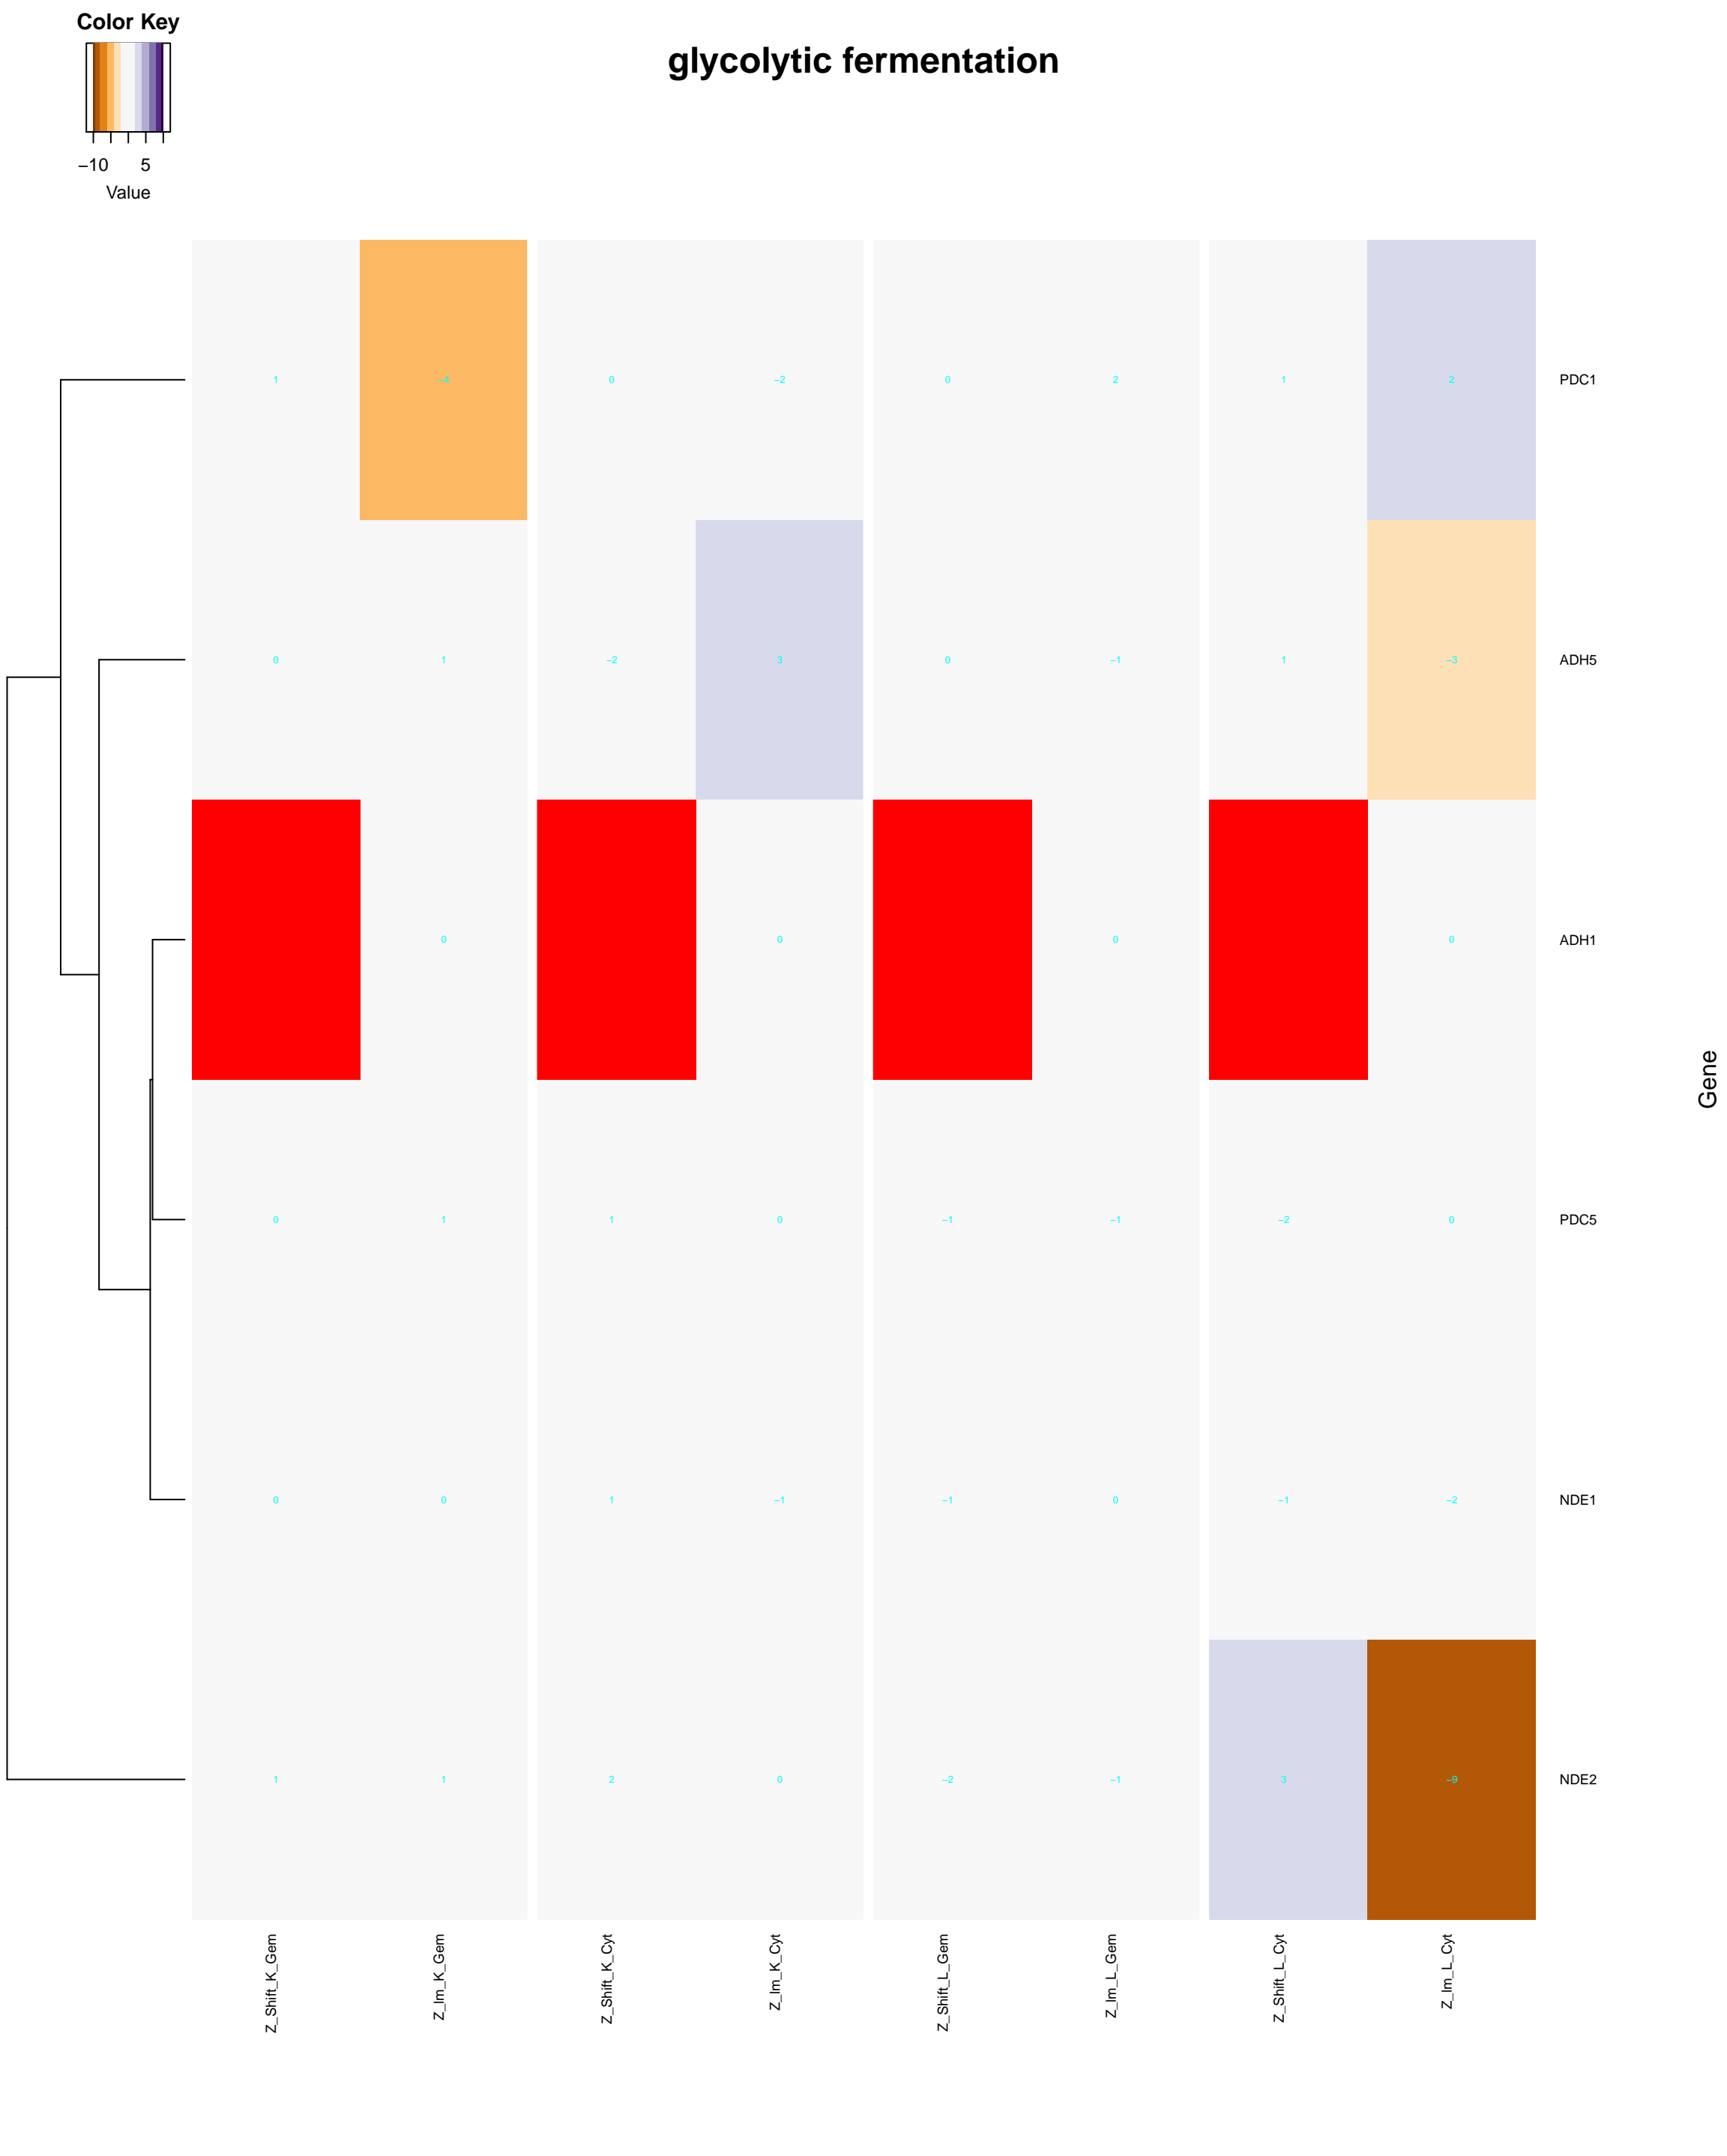

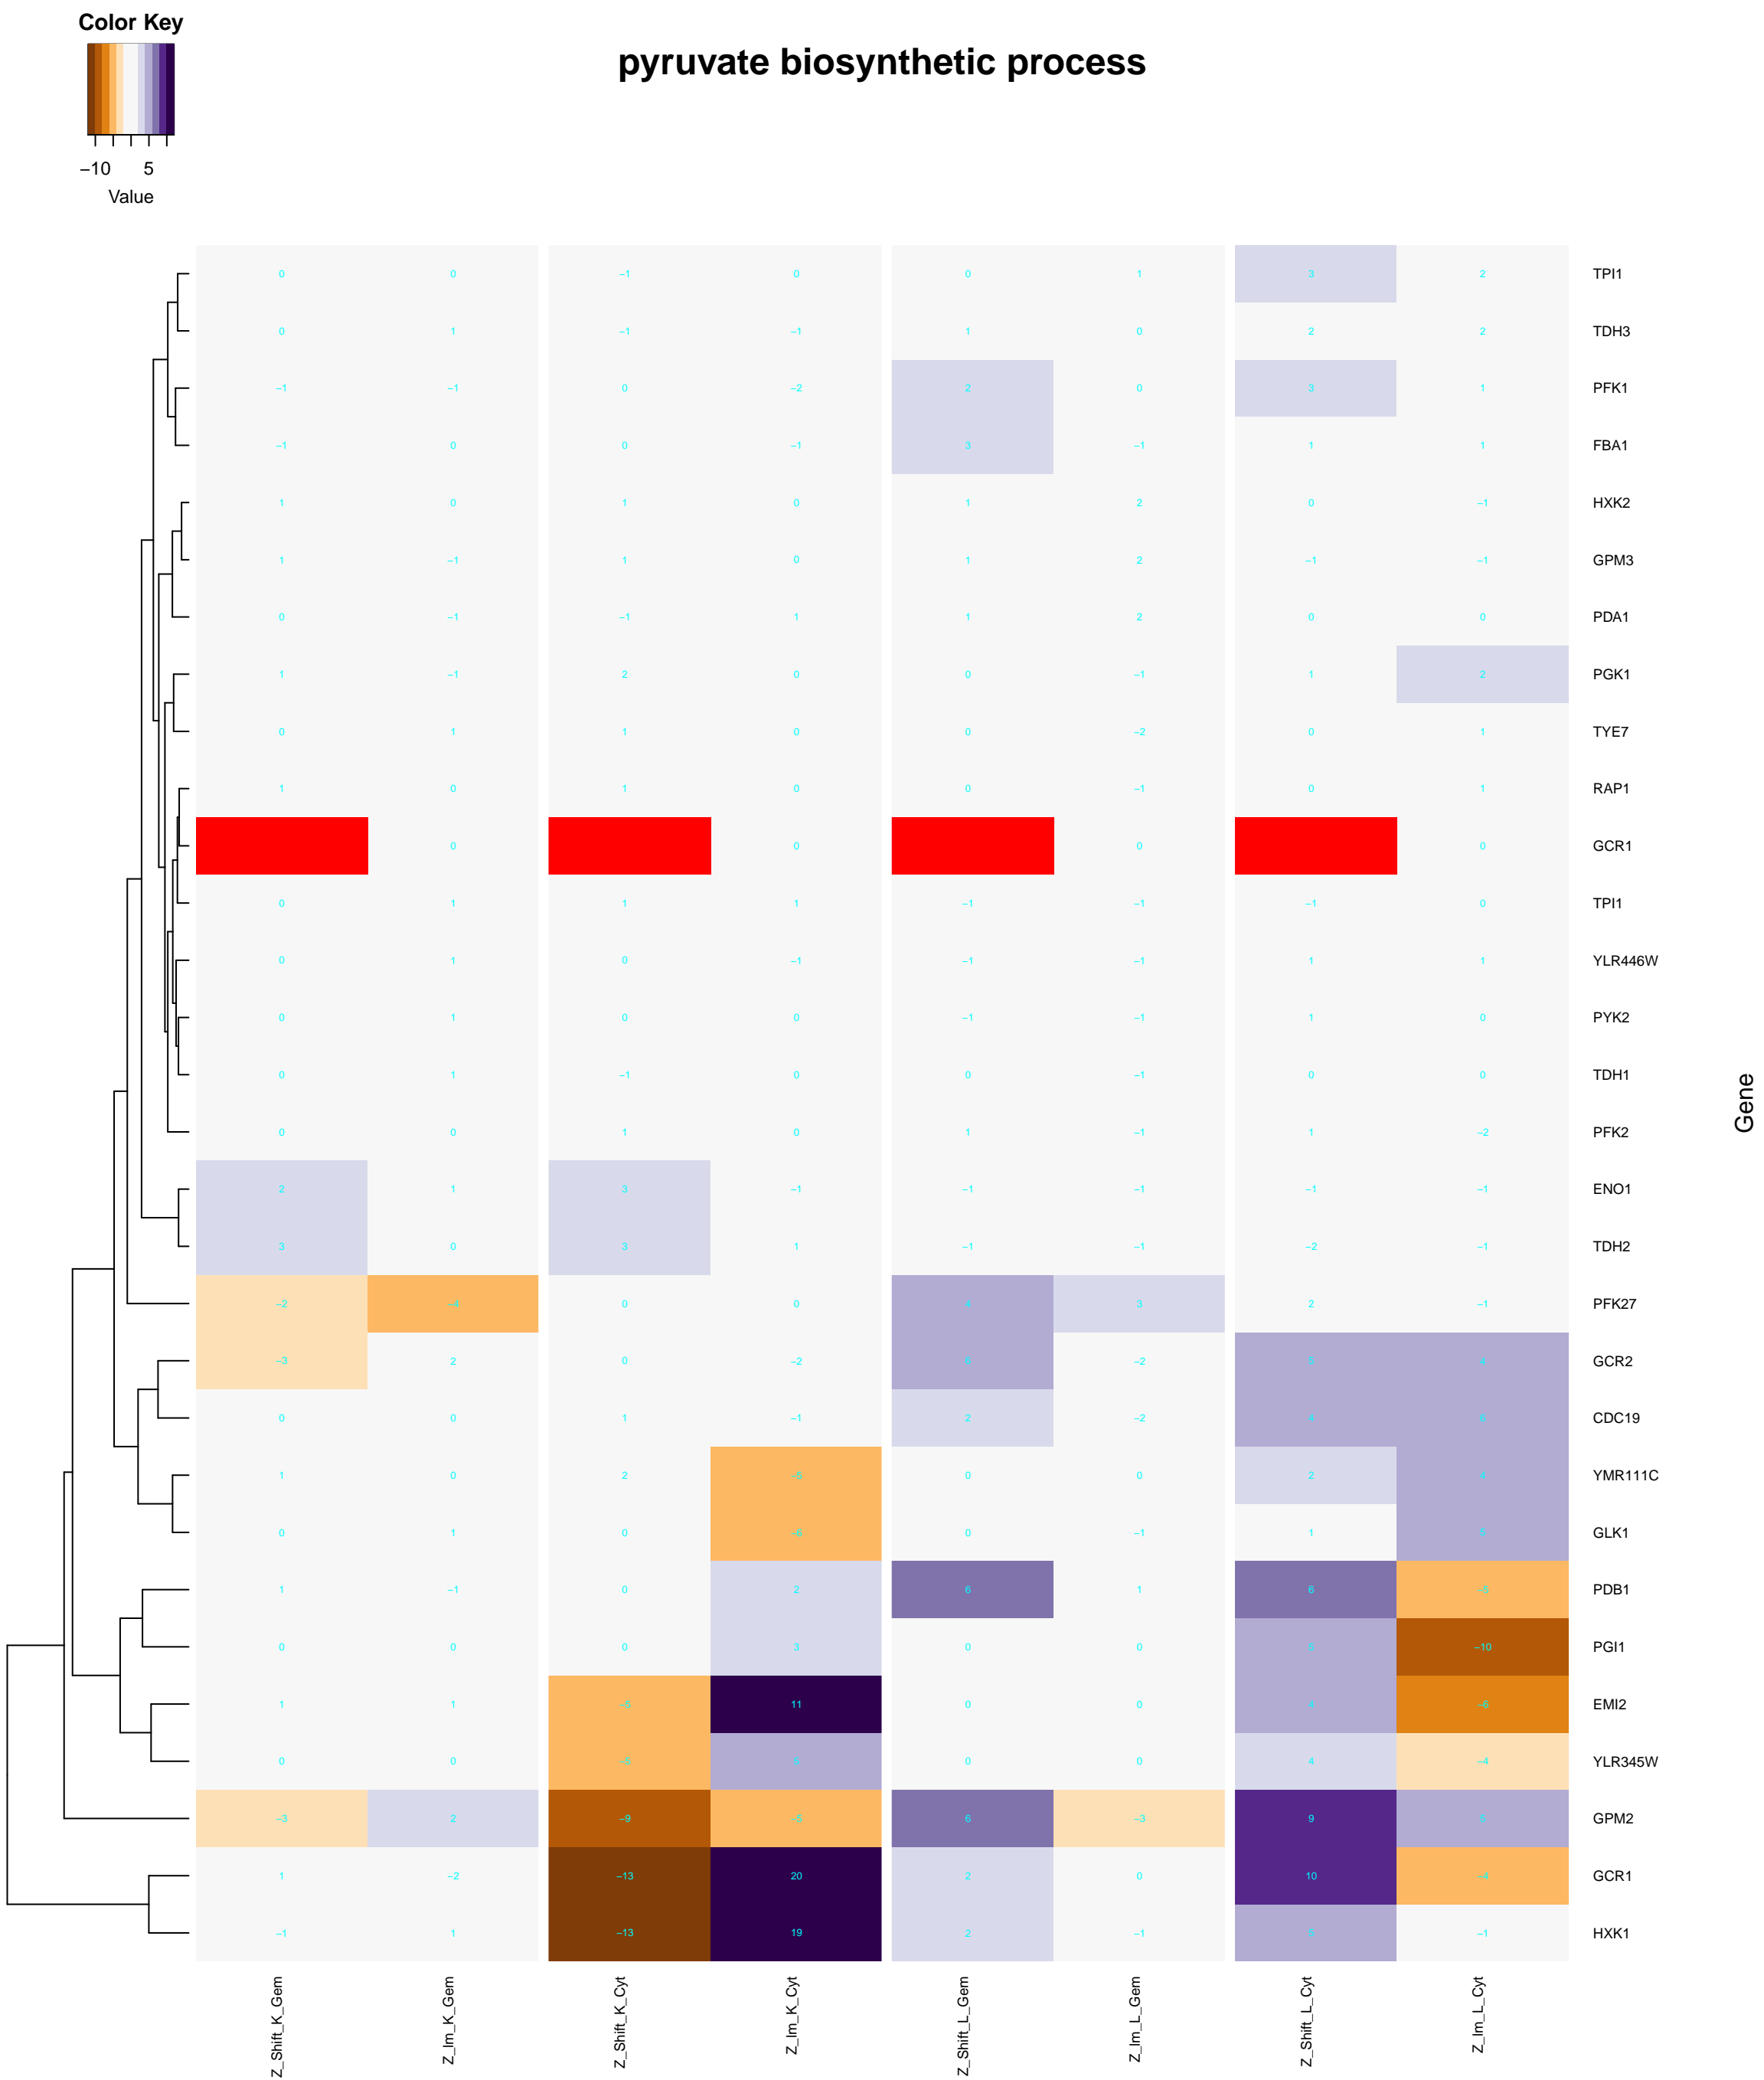

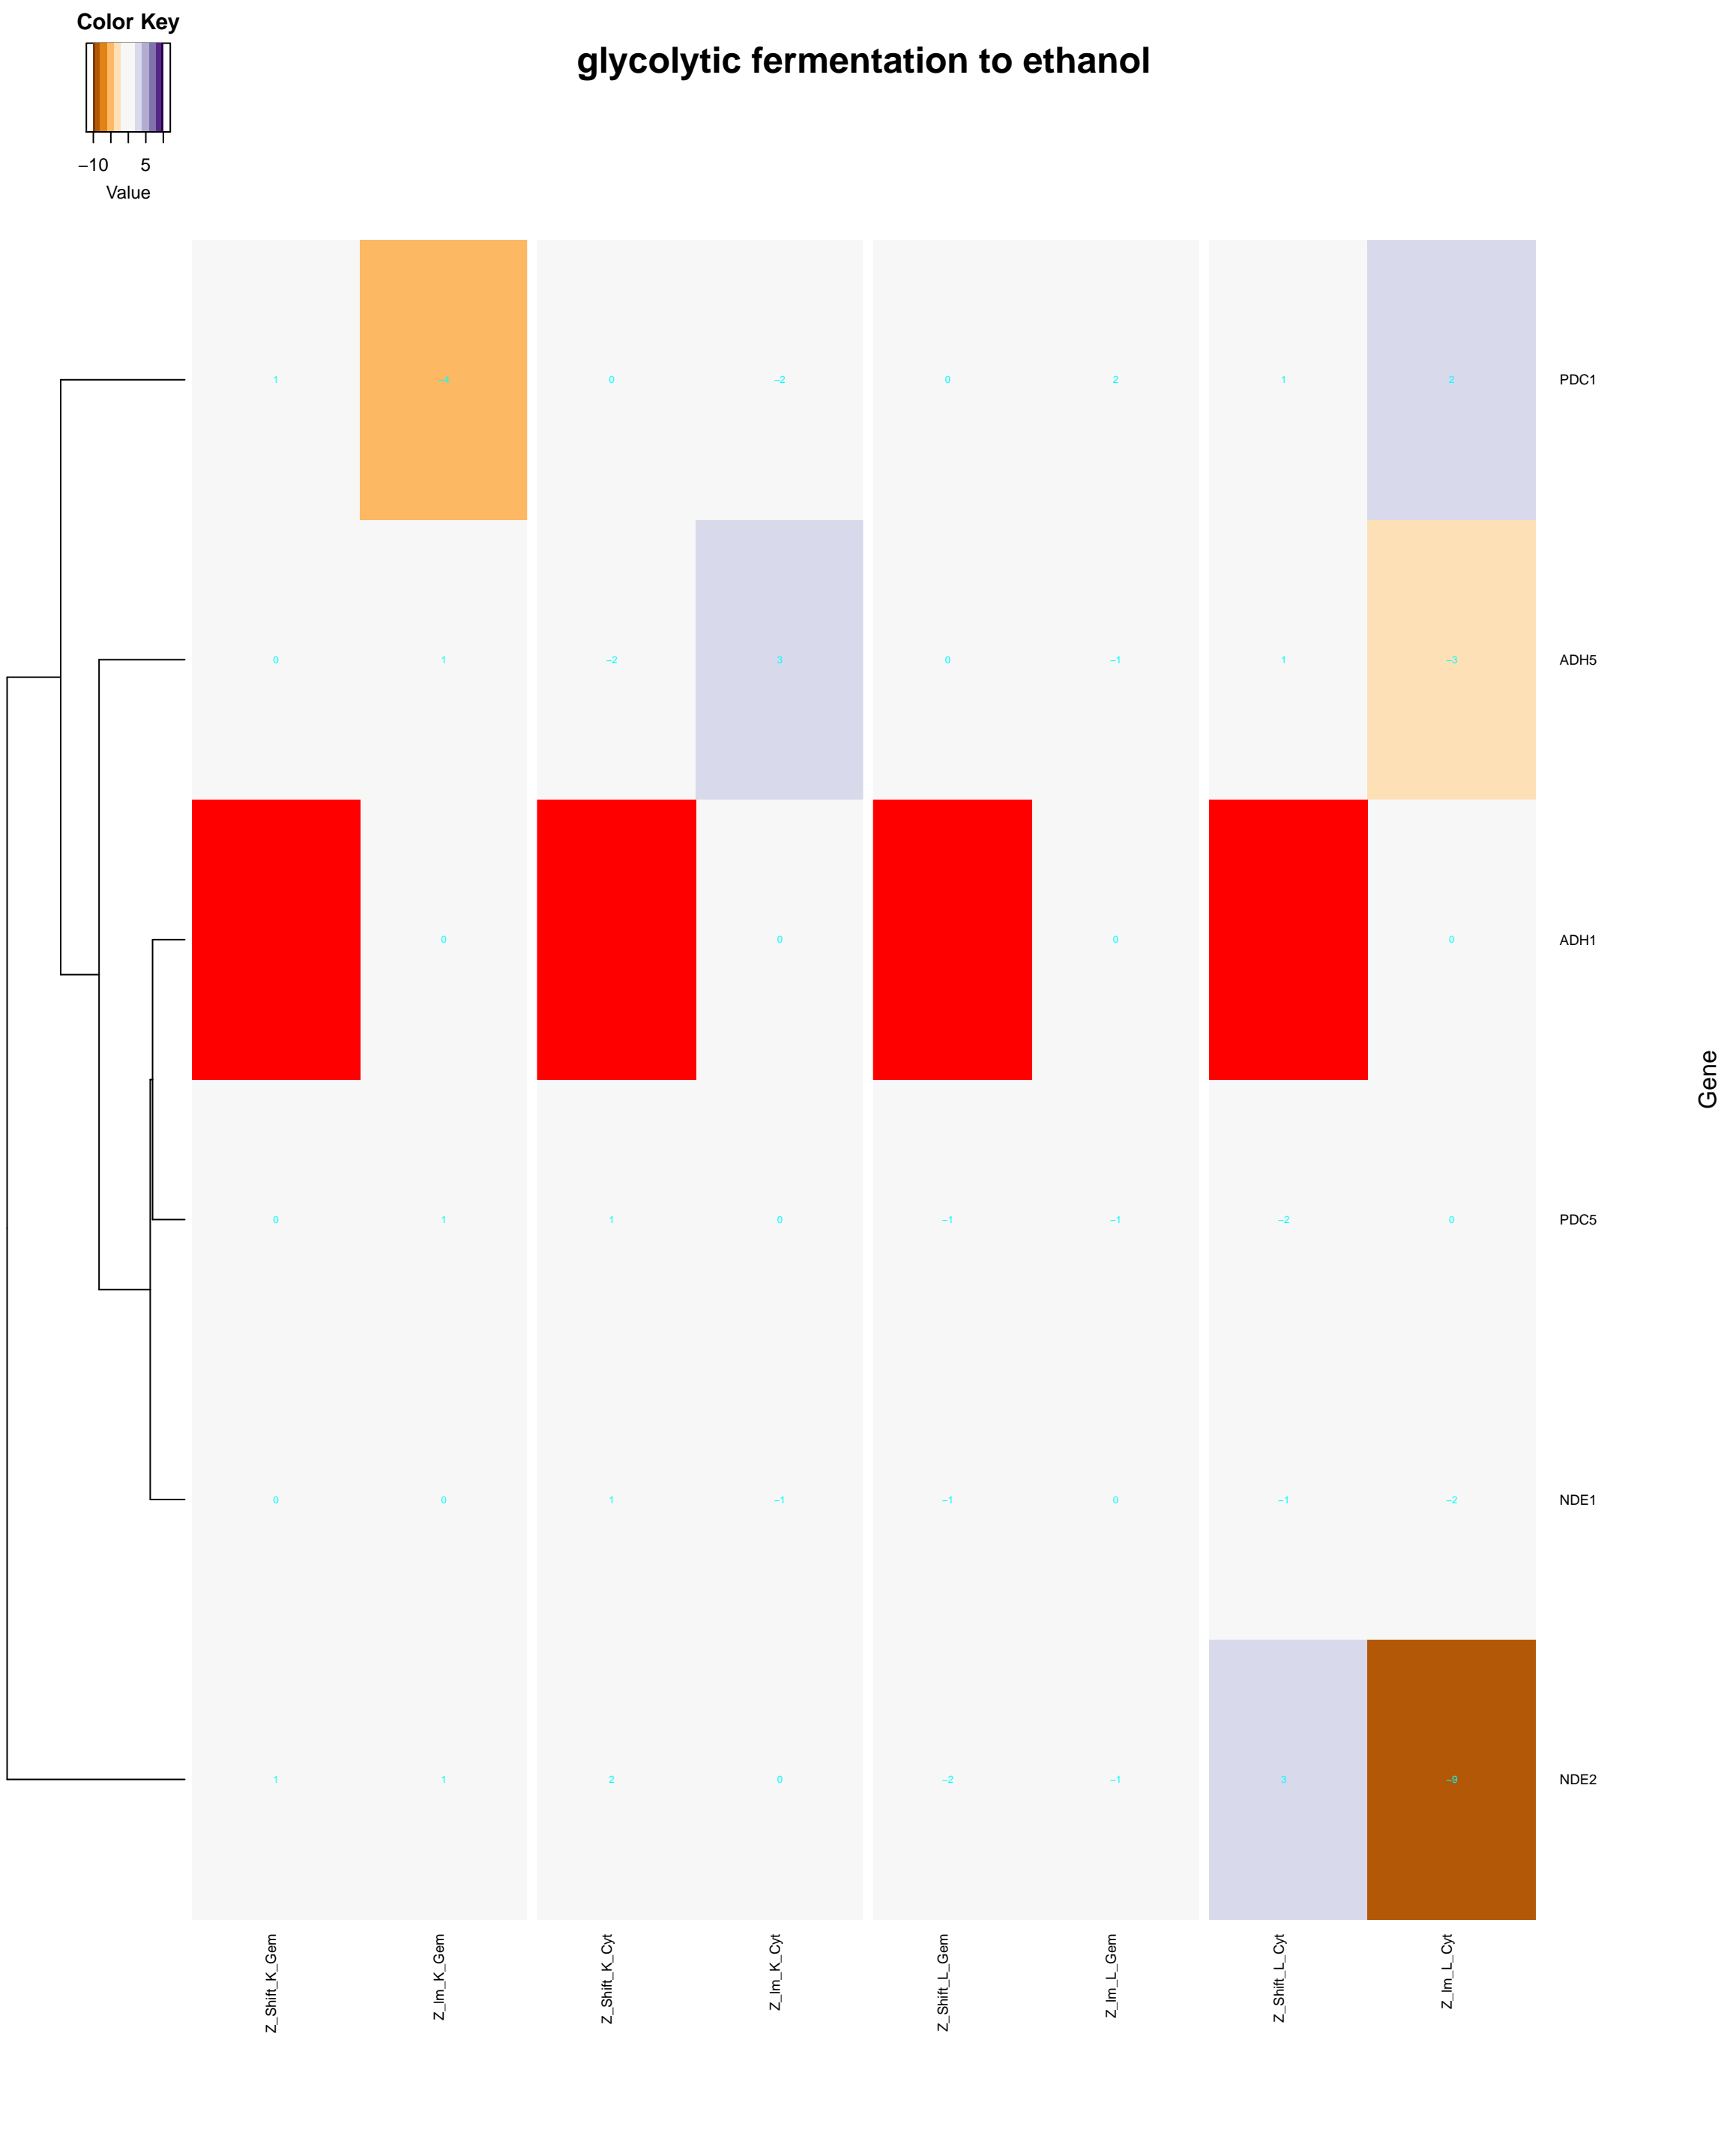

Supplement: s1 [file s1]

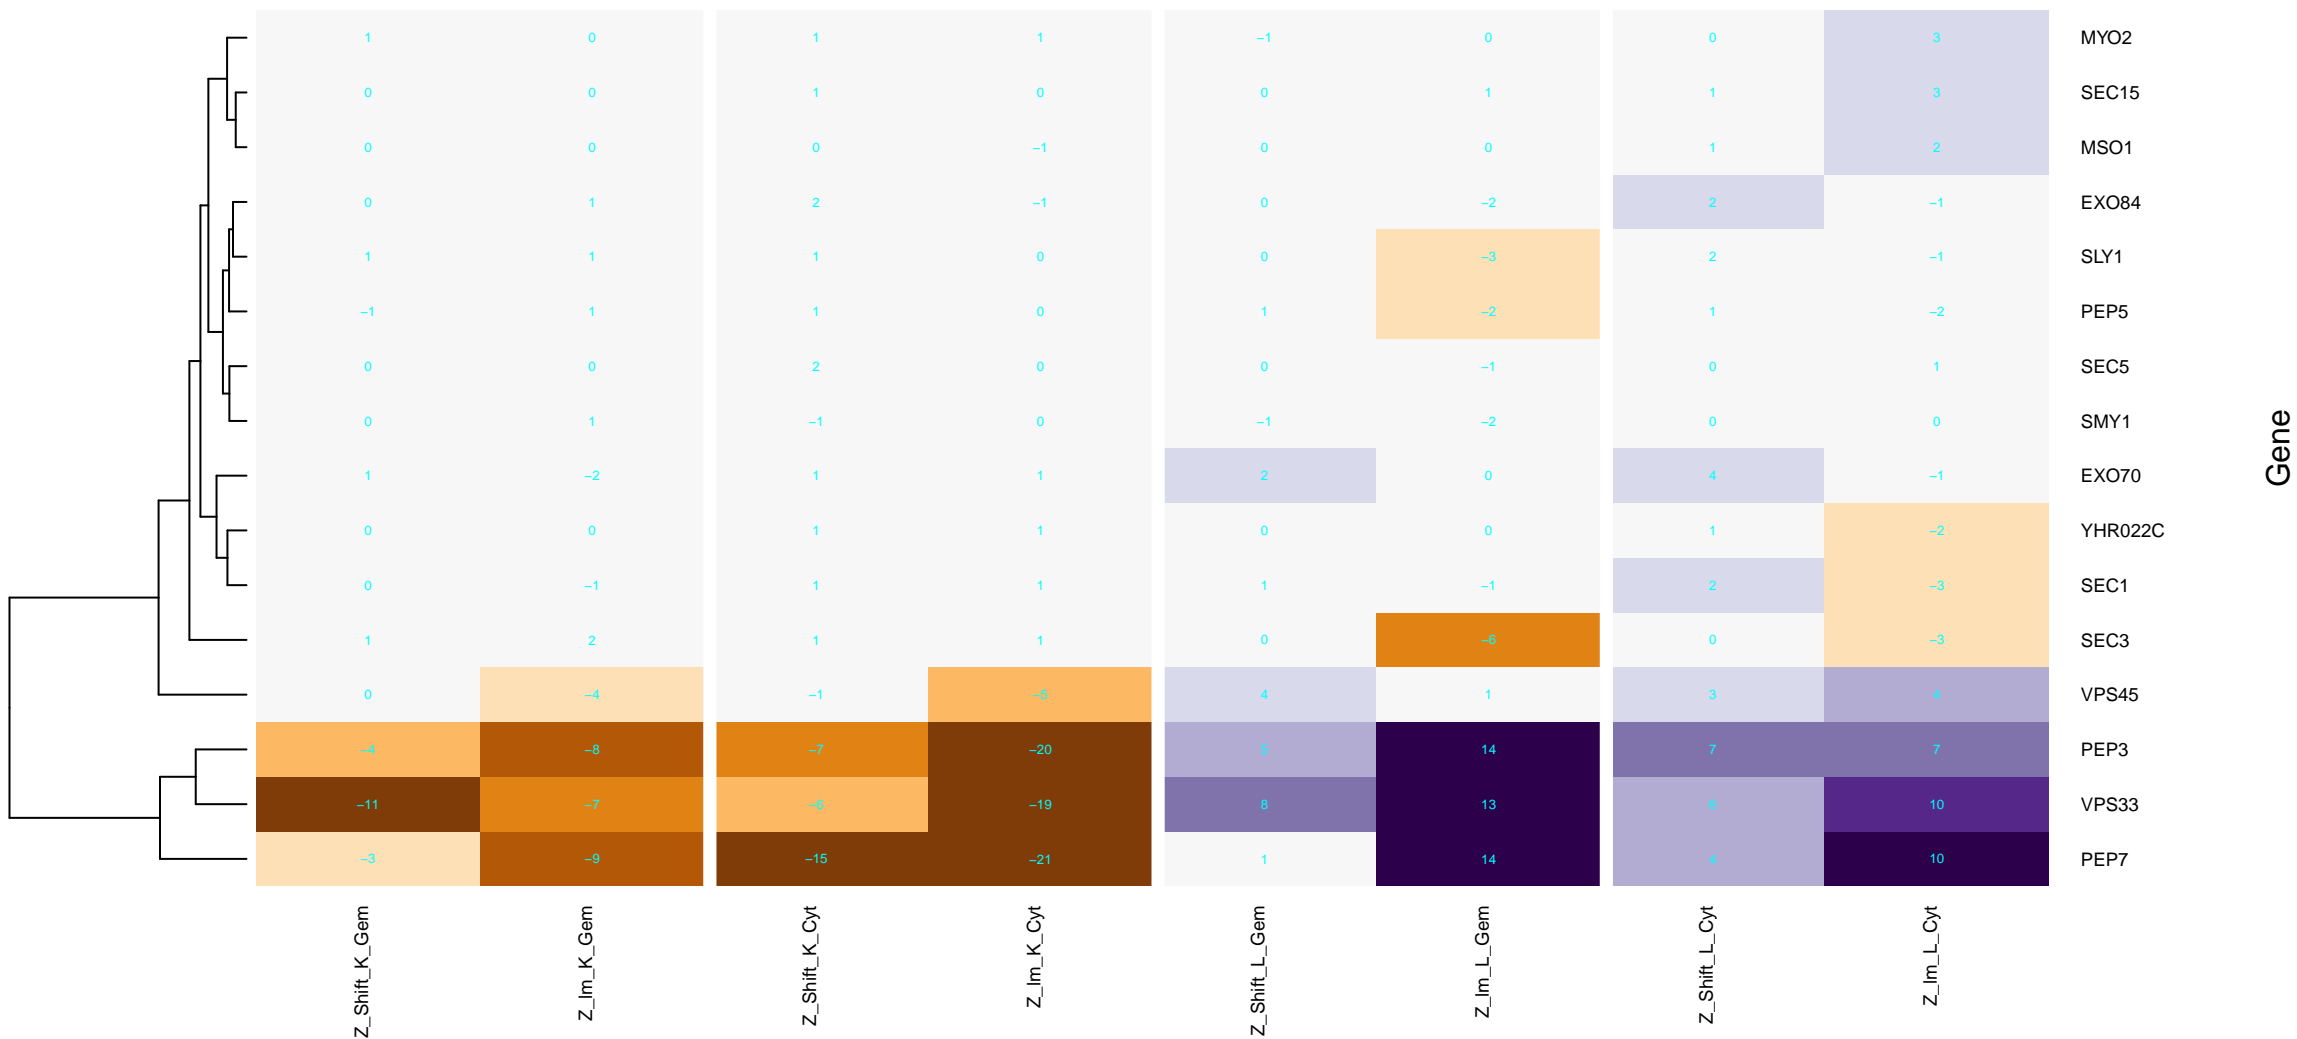

Supplement: s1 [file s1]

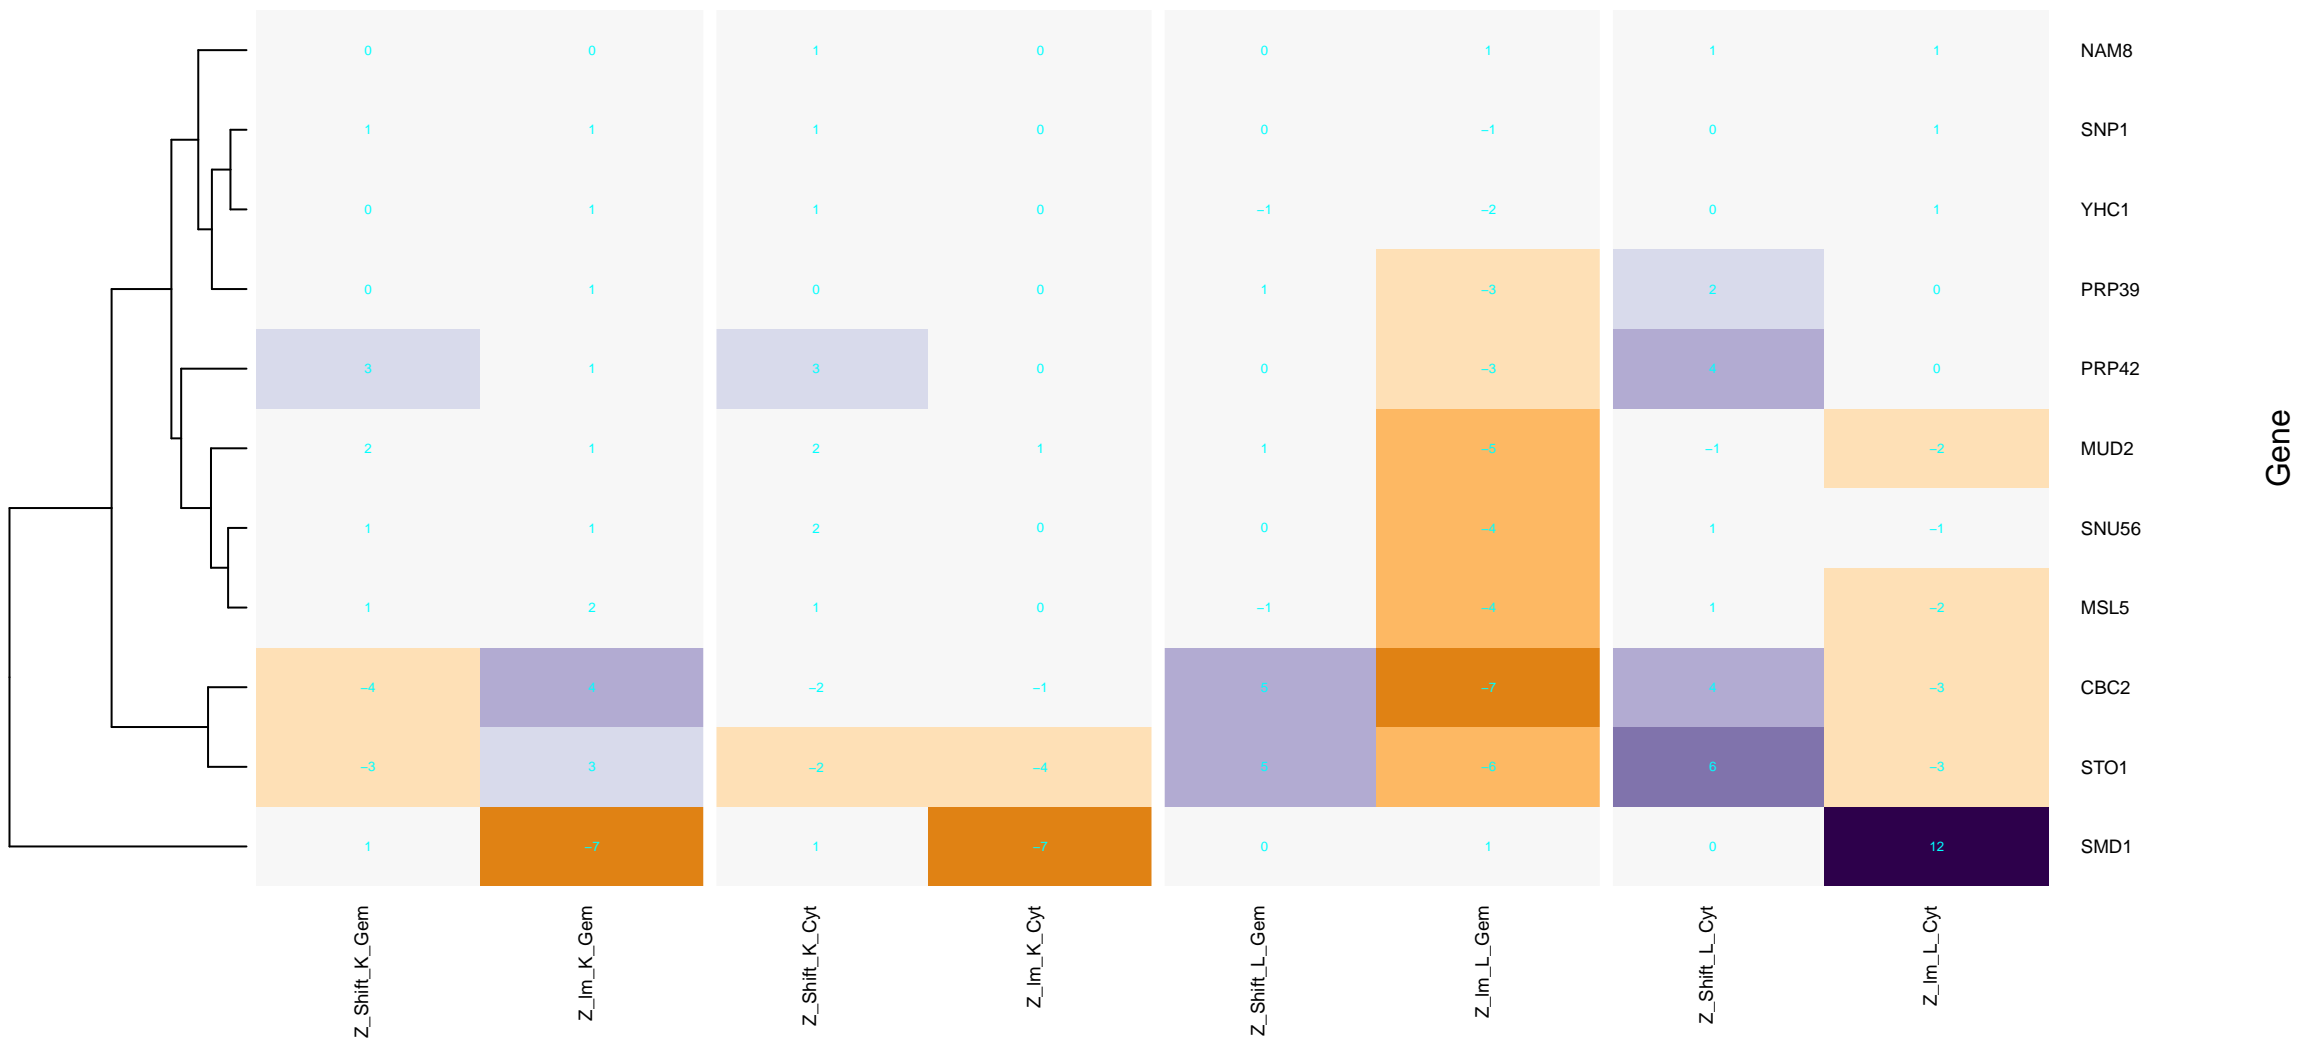

Supplement: s1 [file s1]

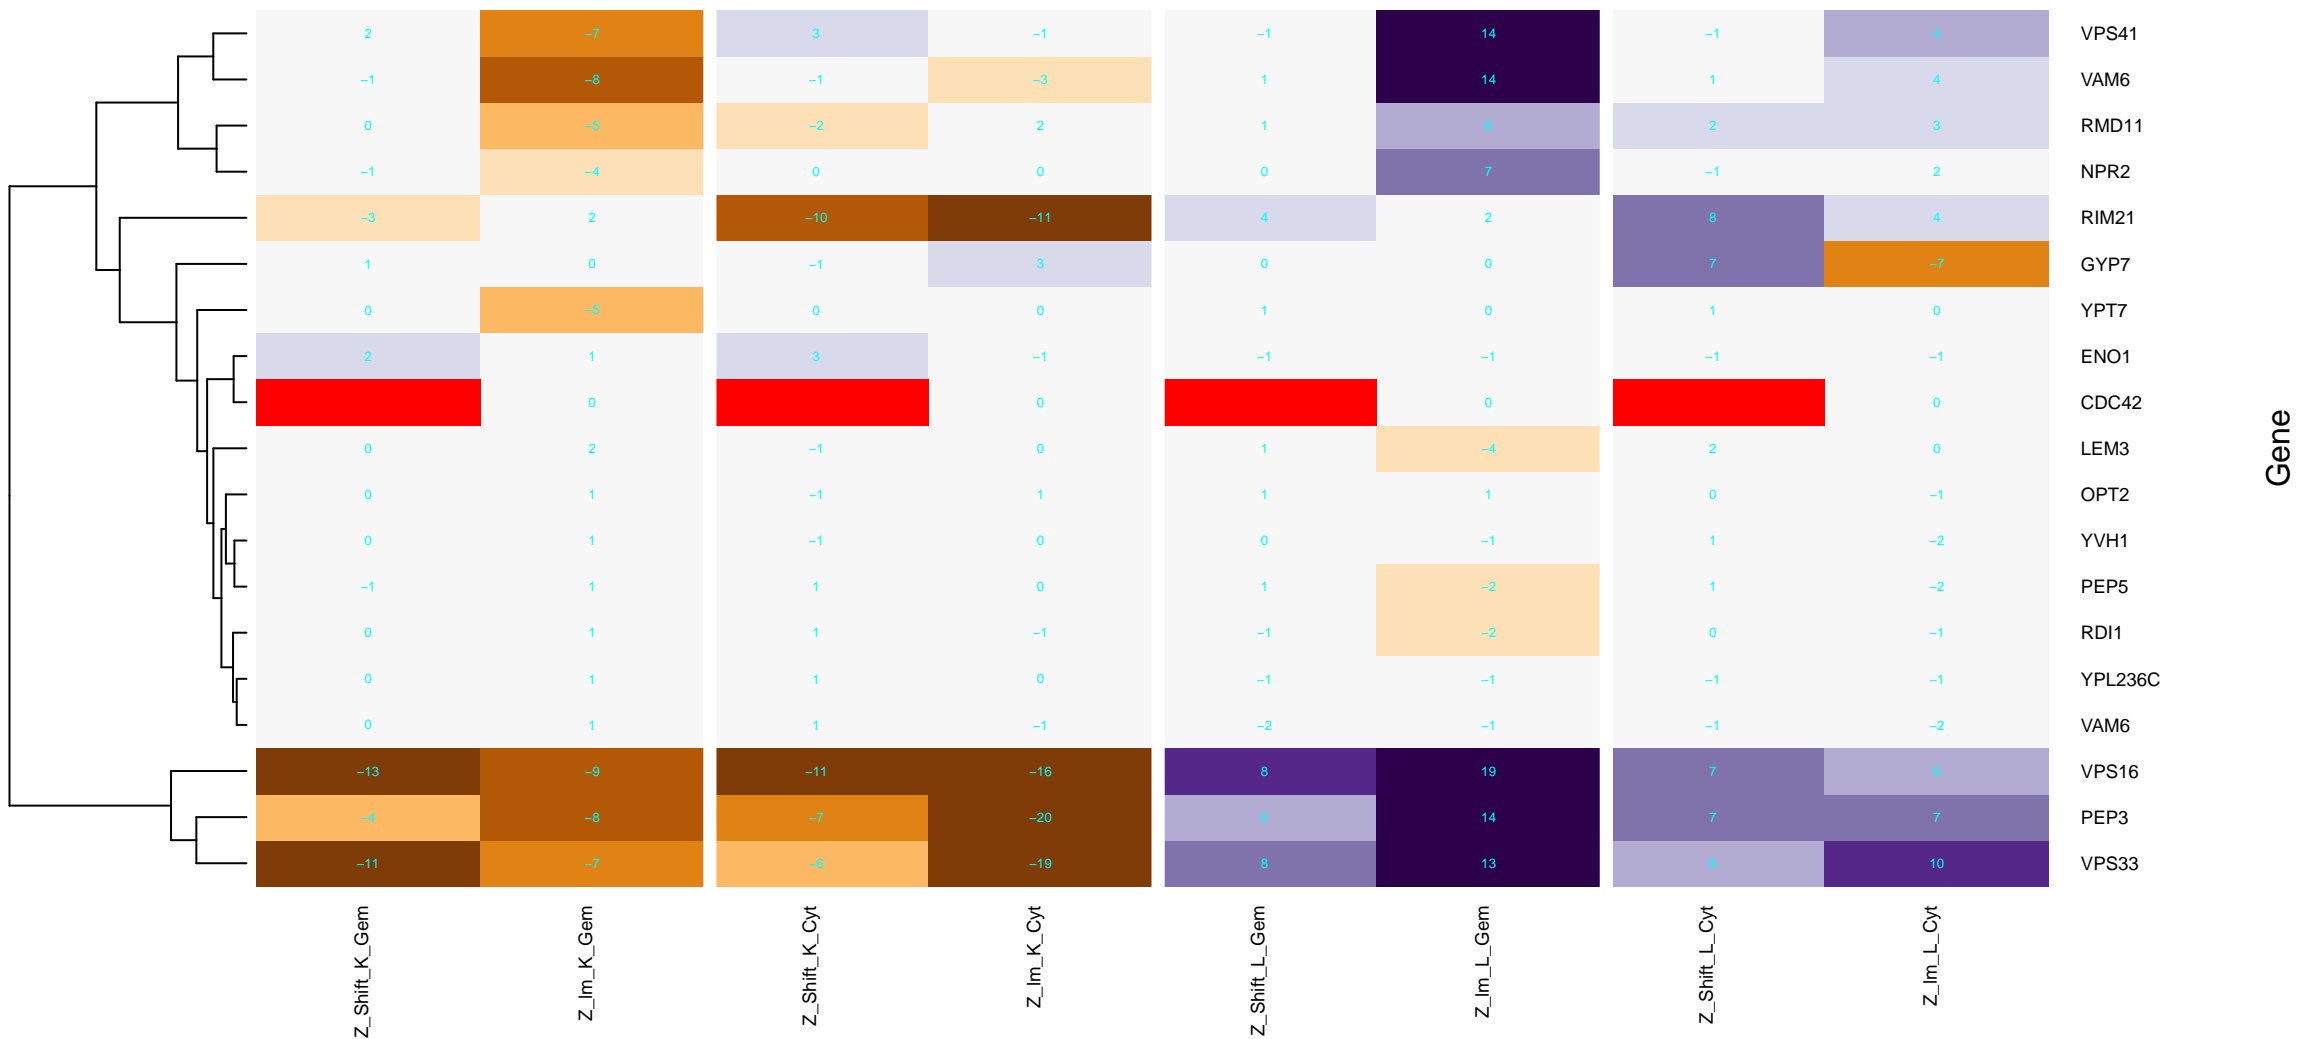

Supplement: s1 [file s1]

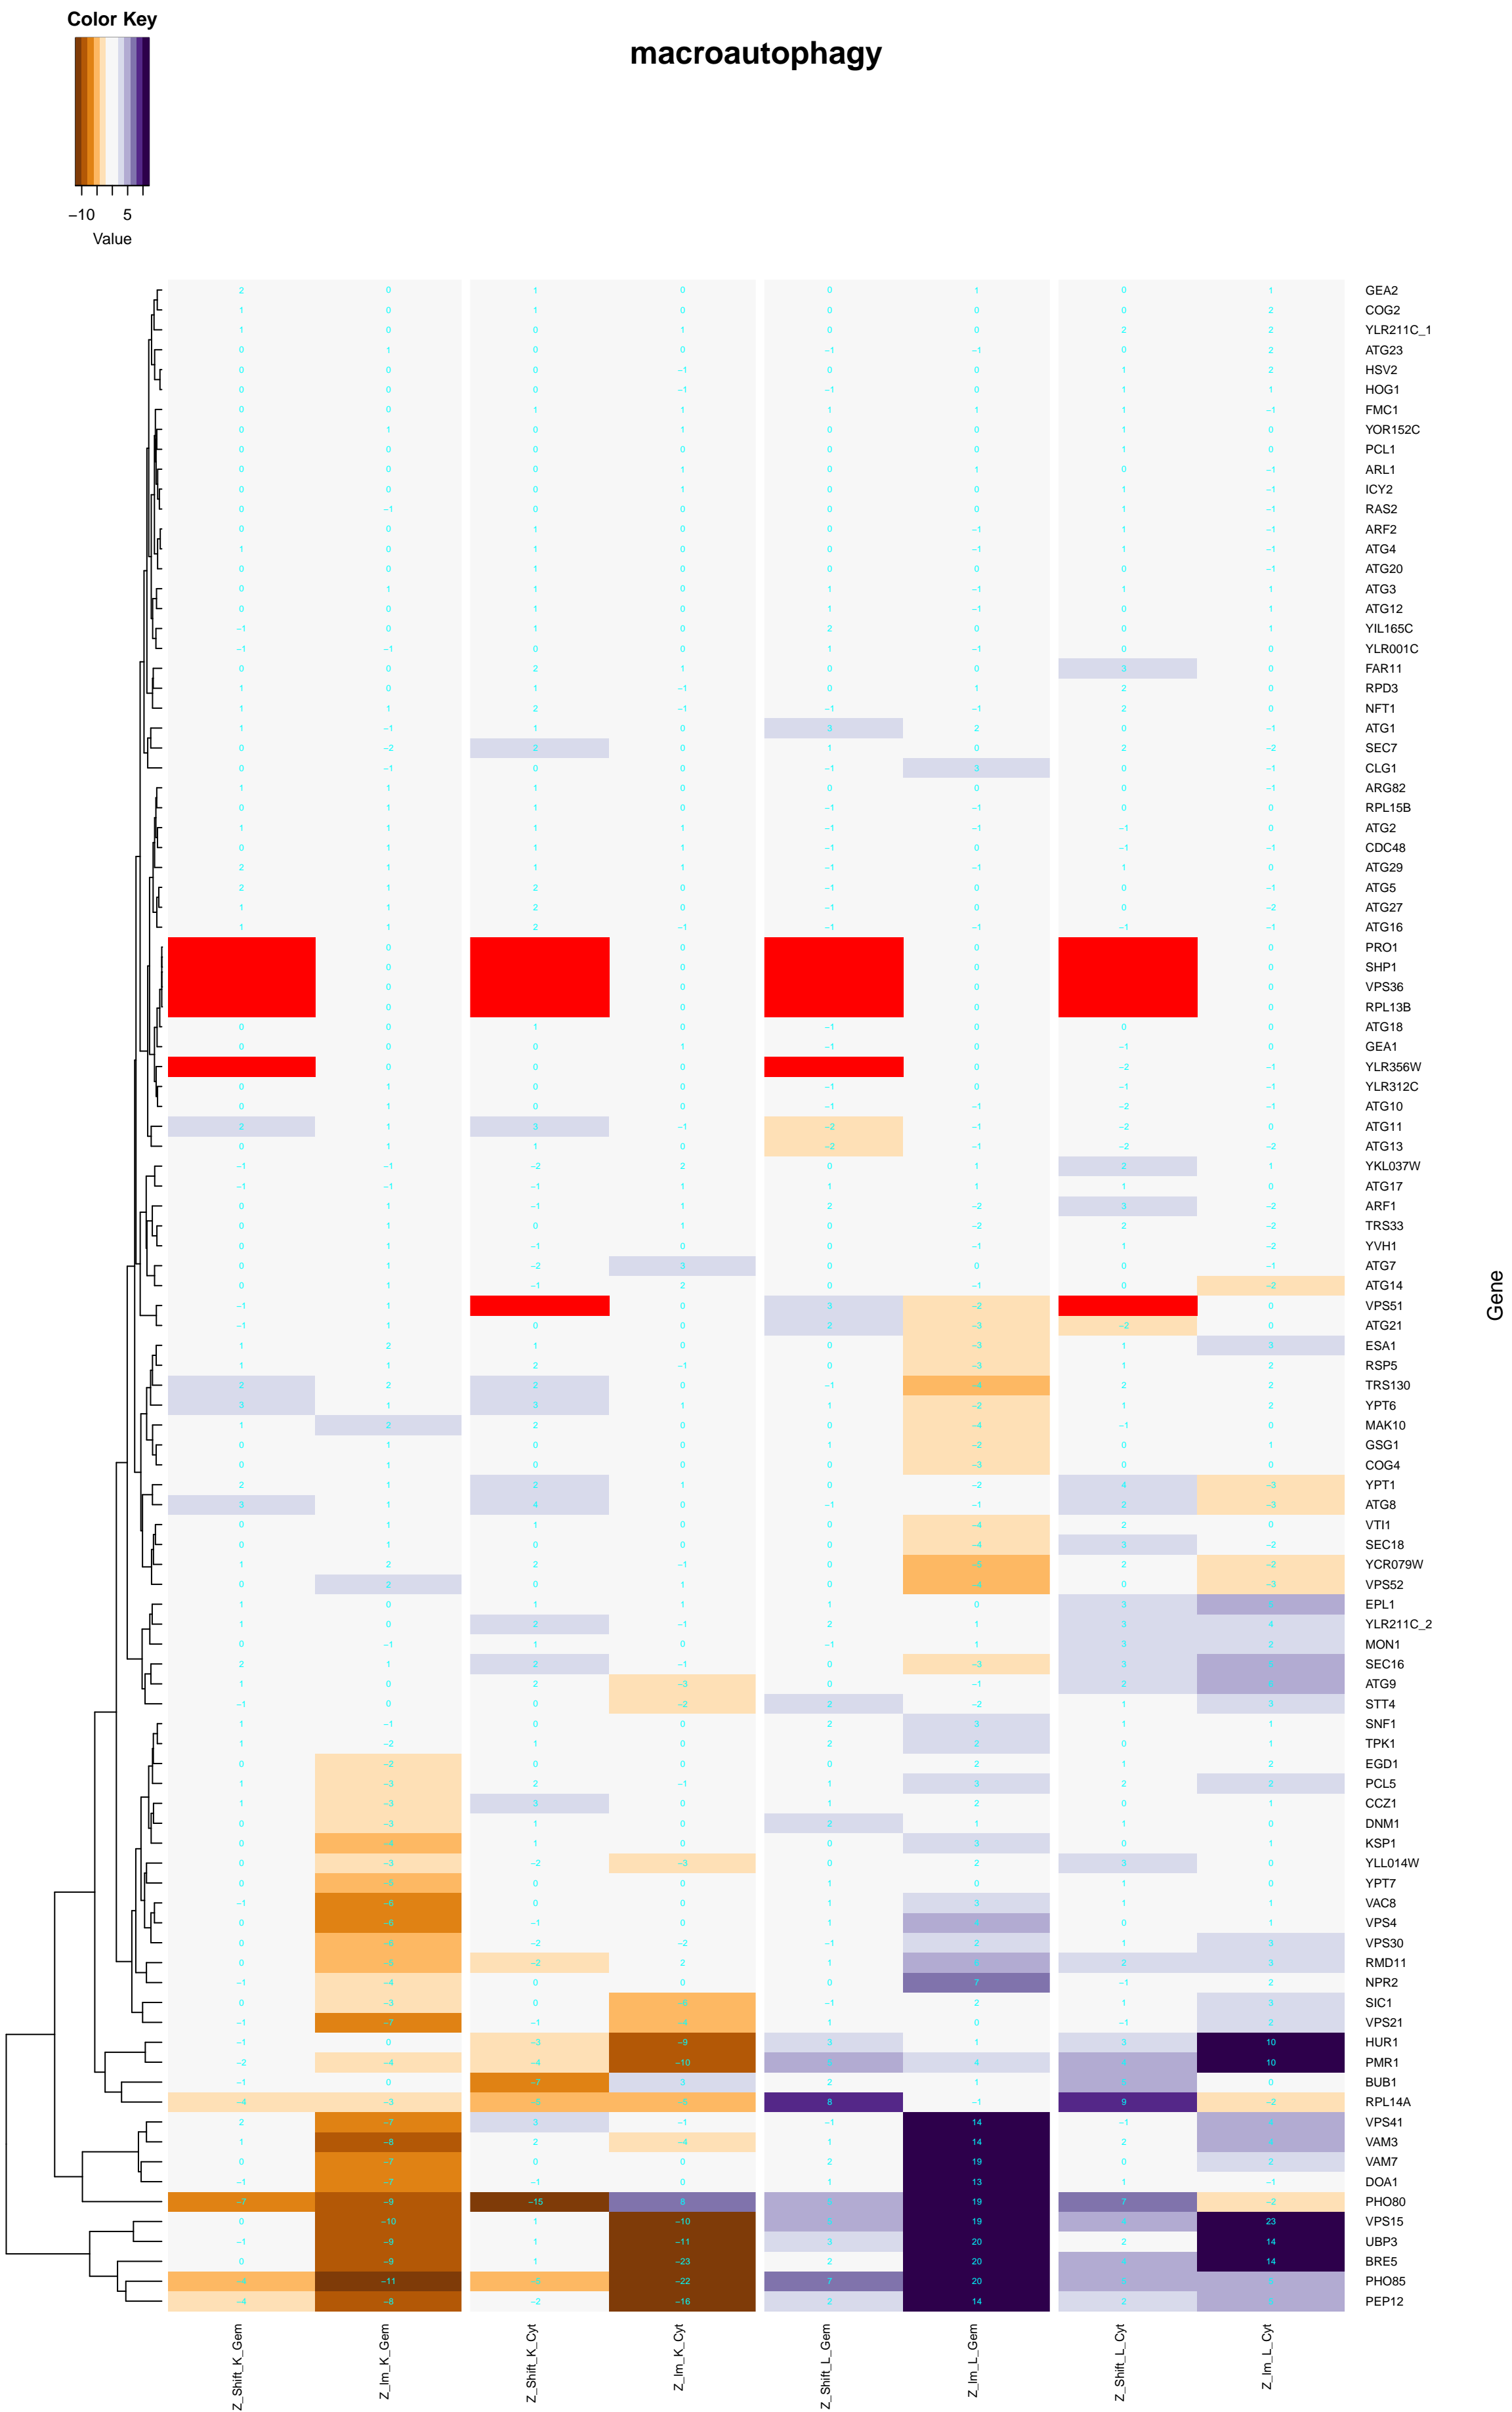

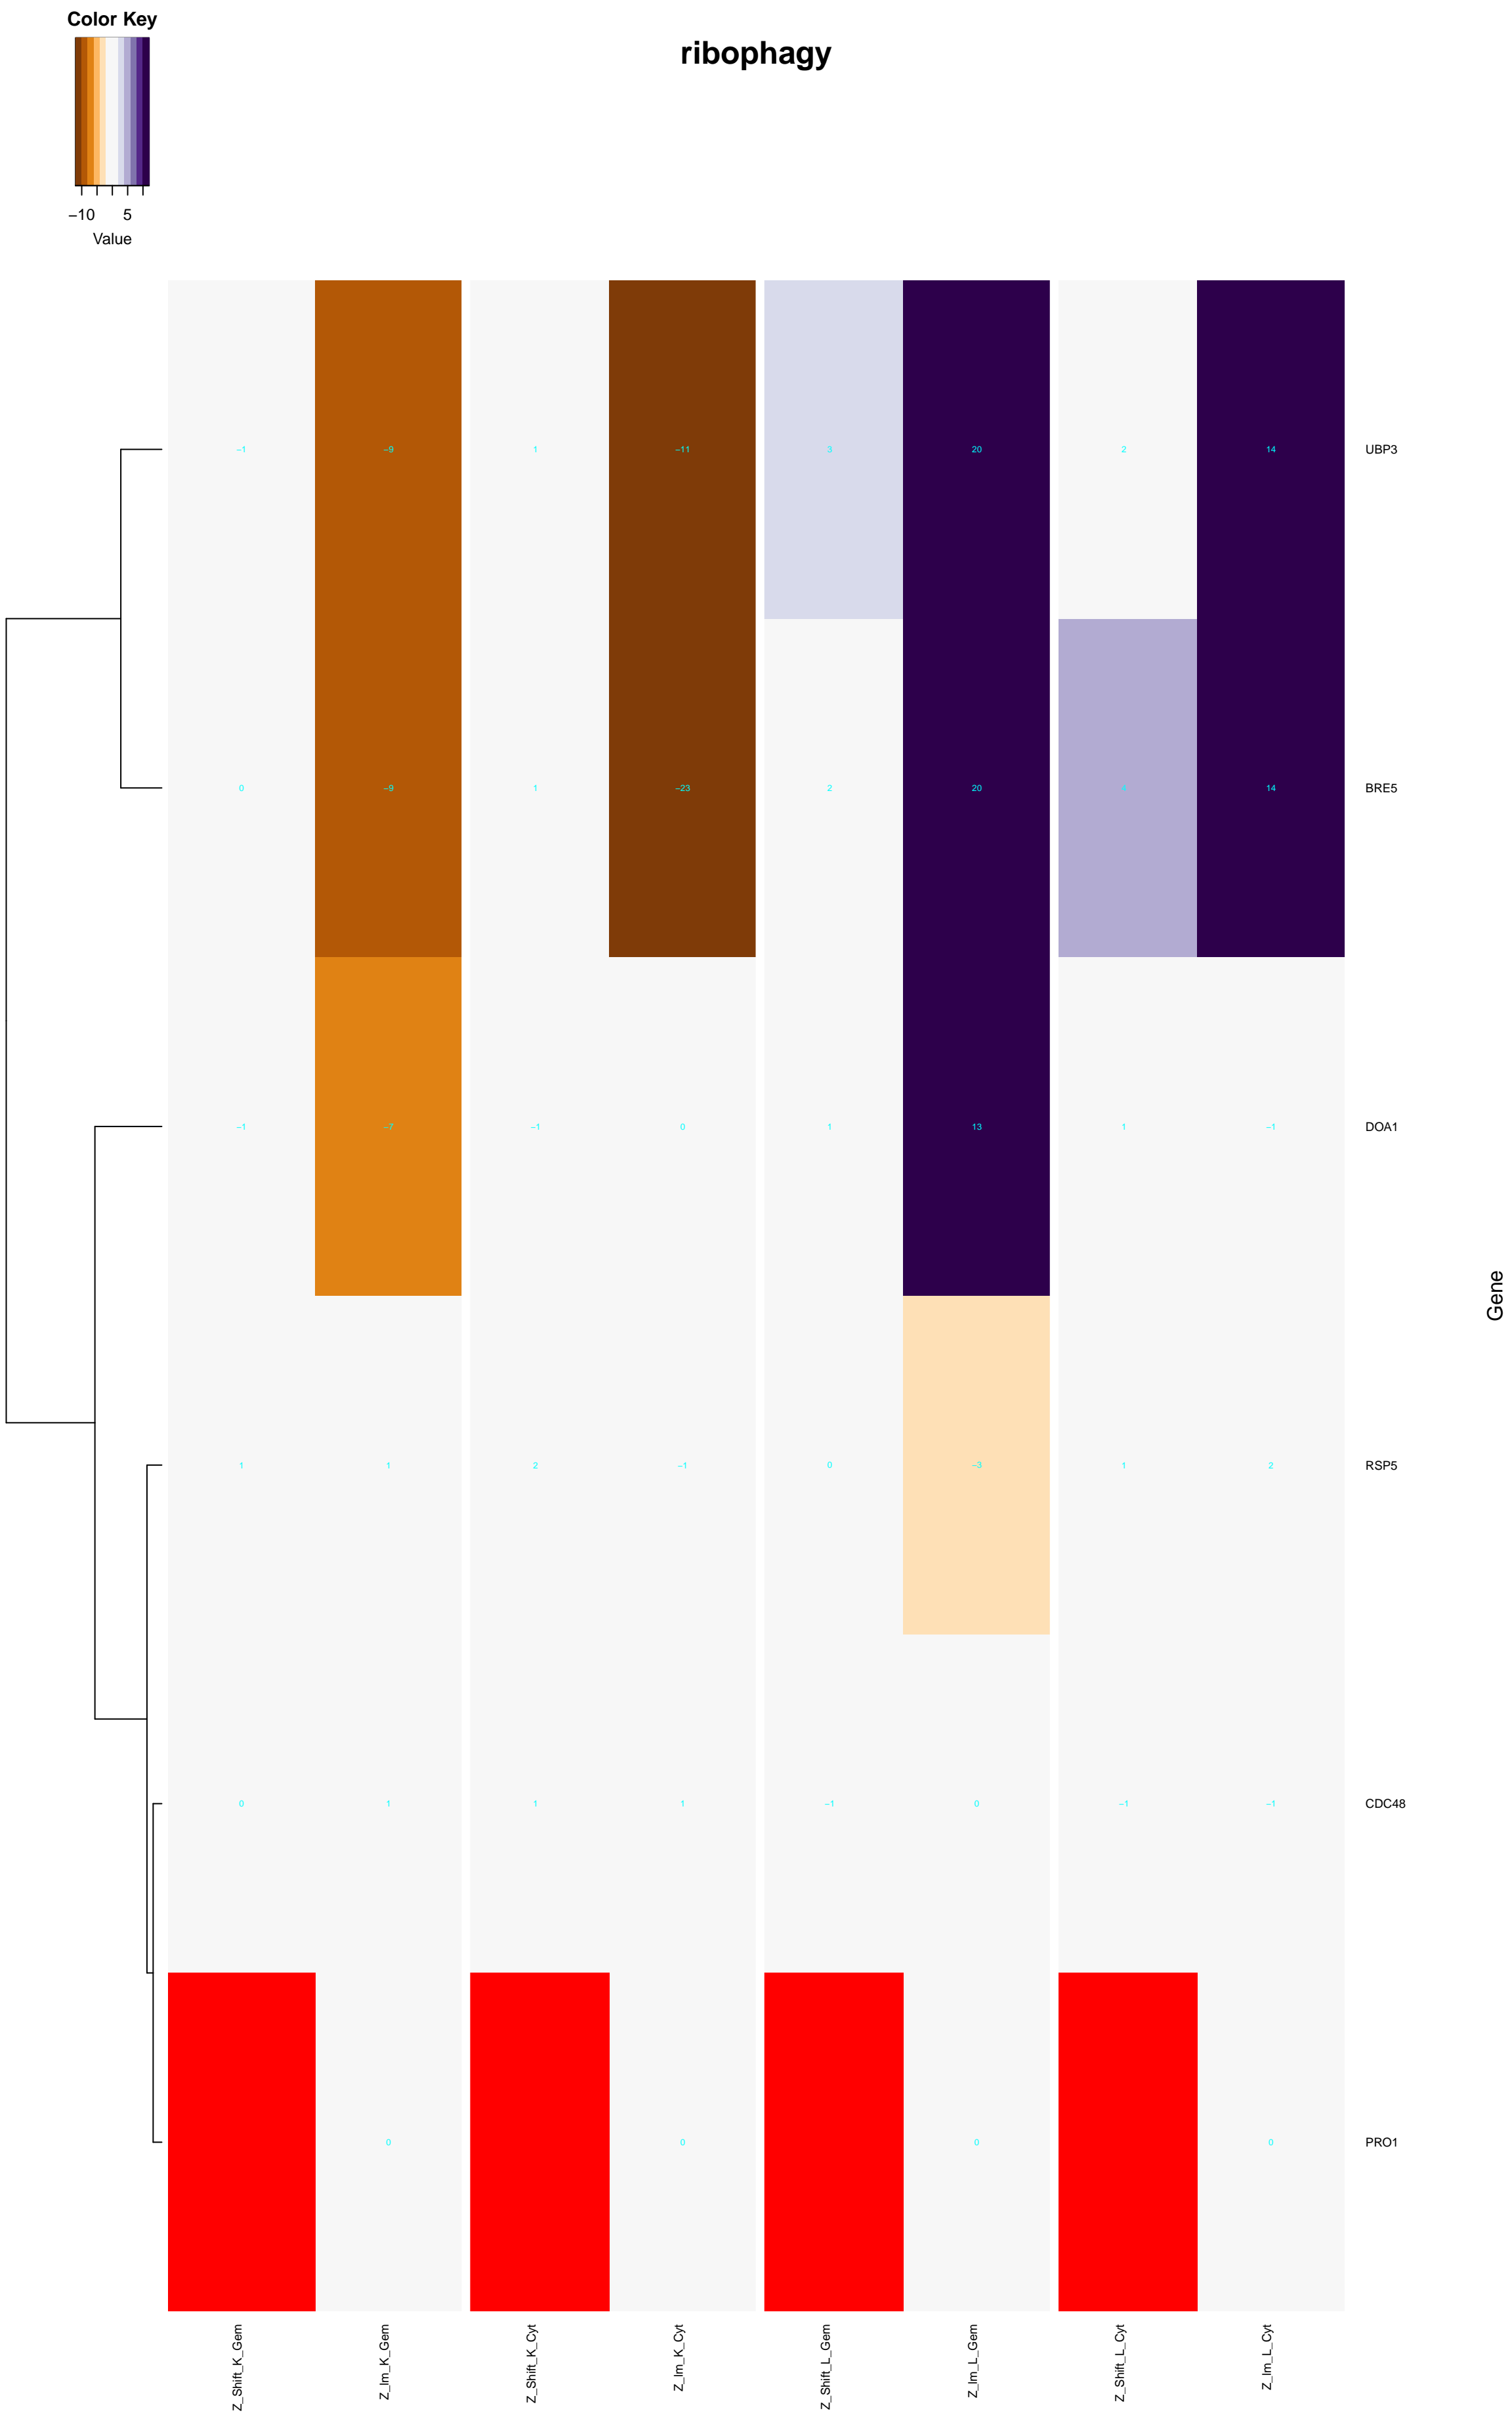

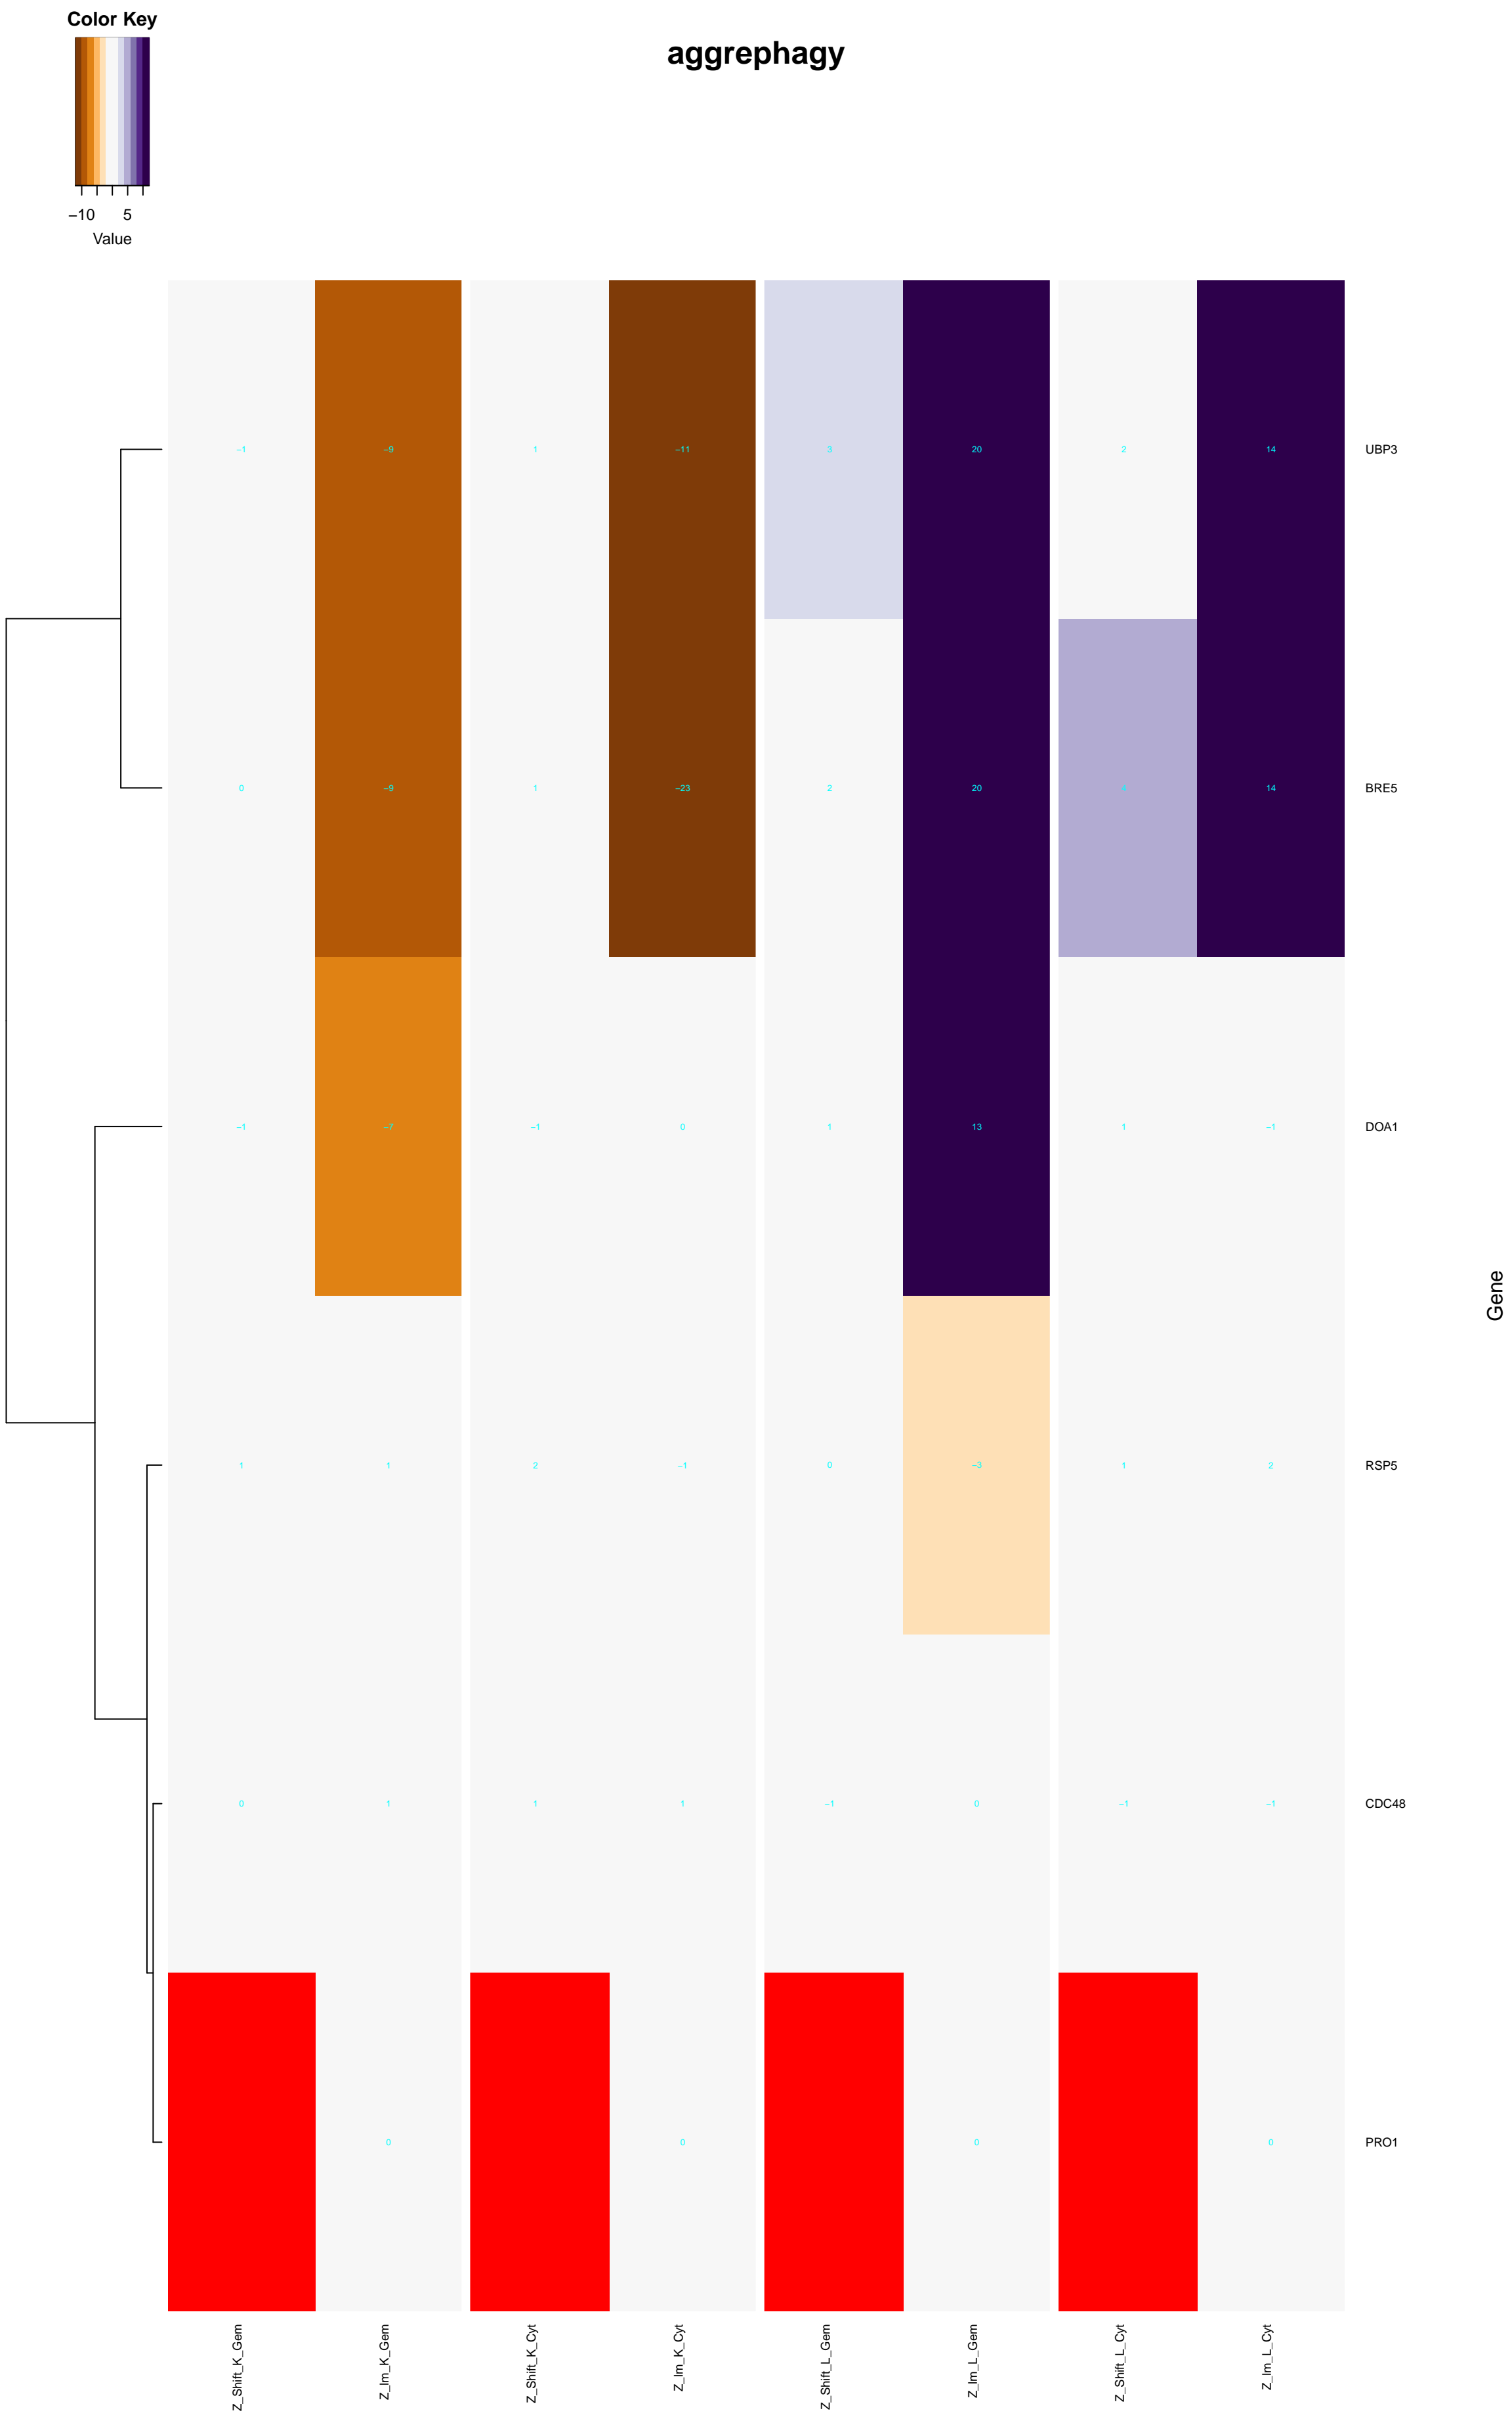

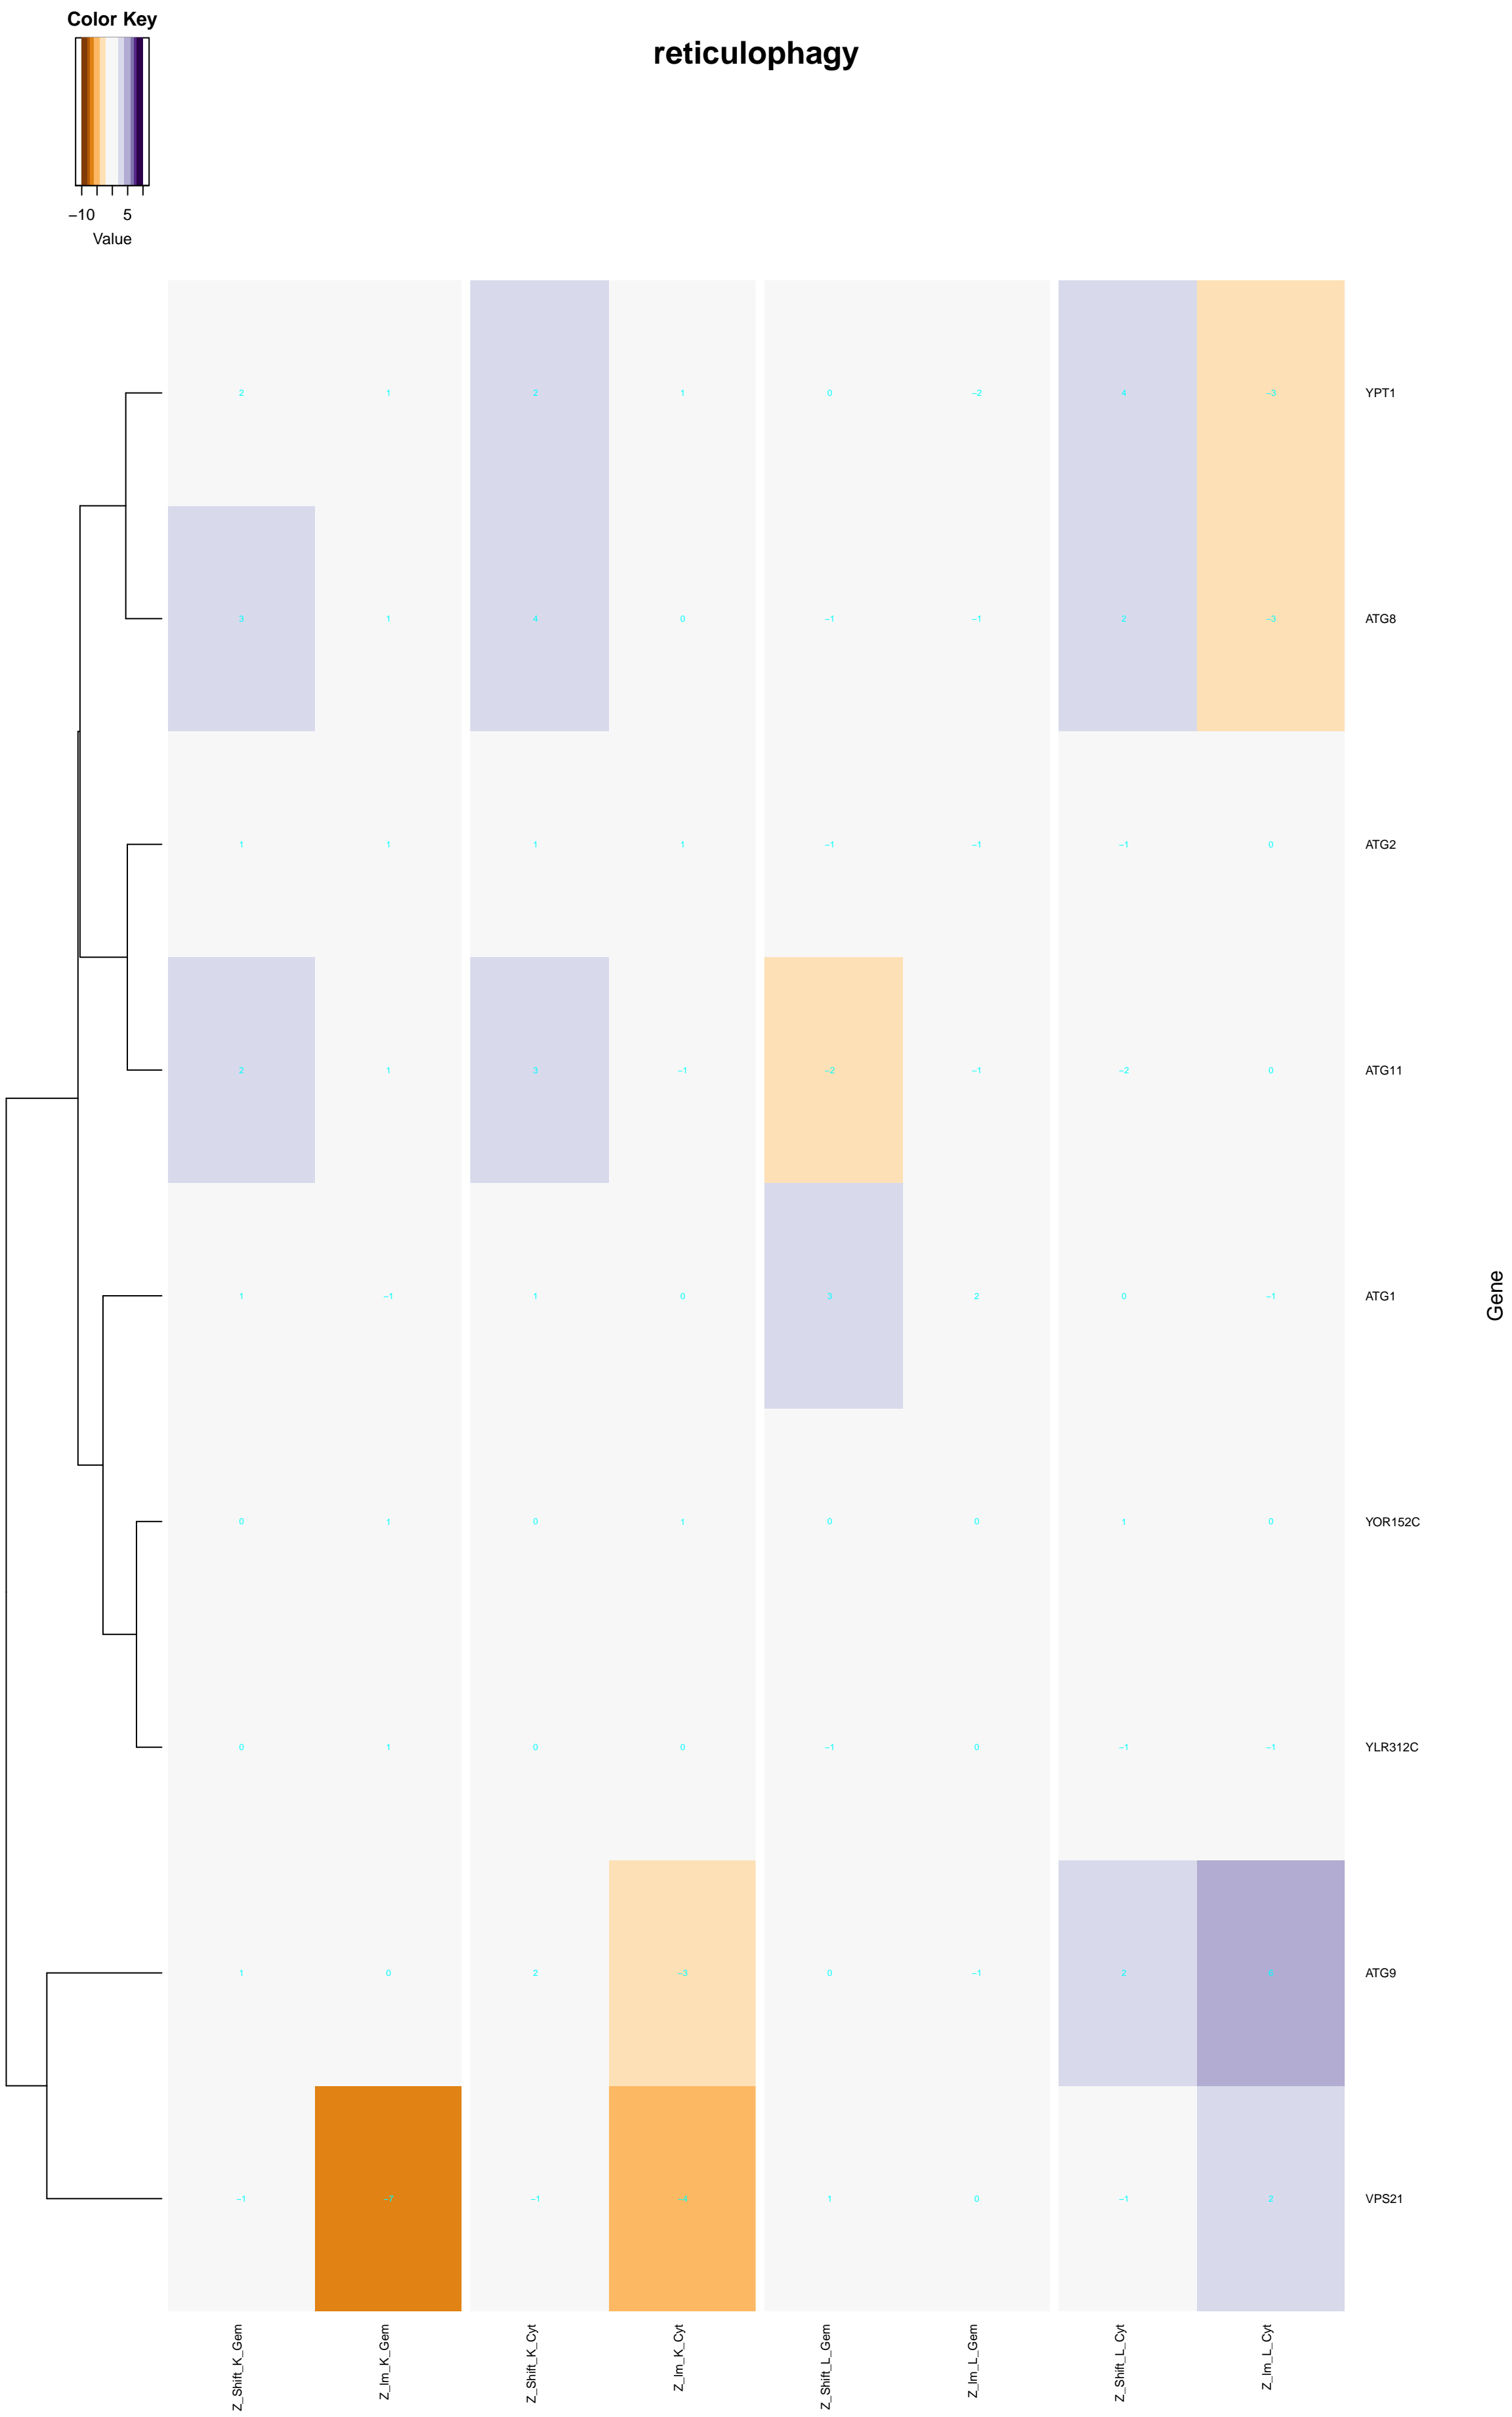

Supplement: s1 [file s1]

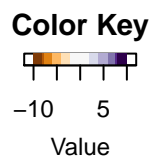

# protein tyrosine phosphatase activity

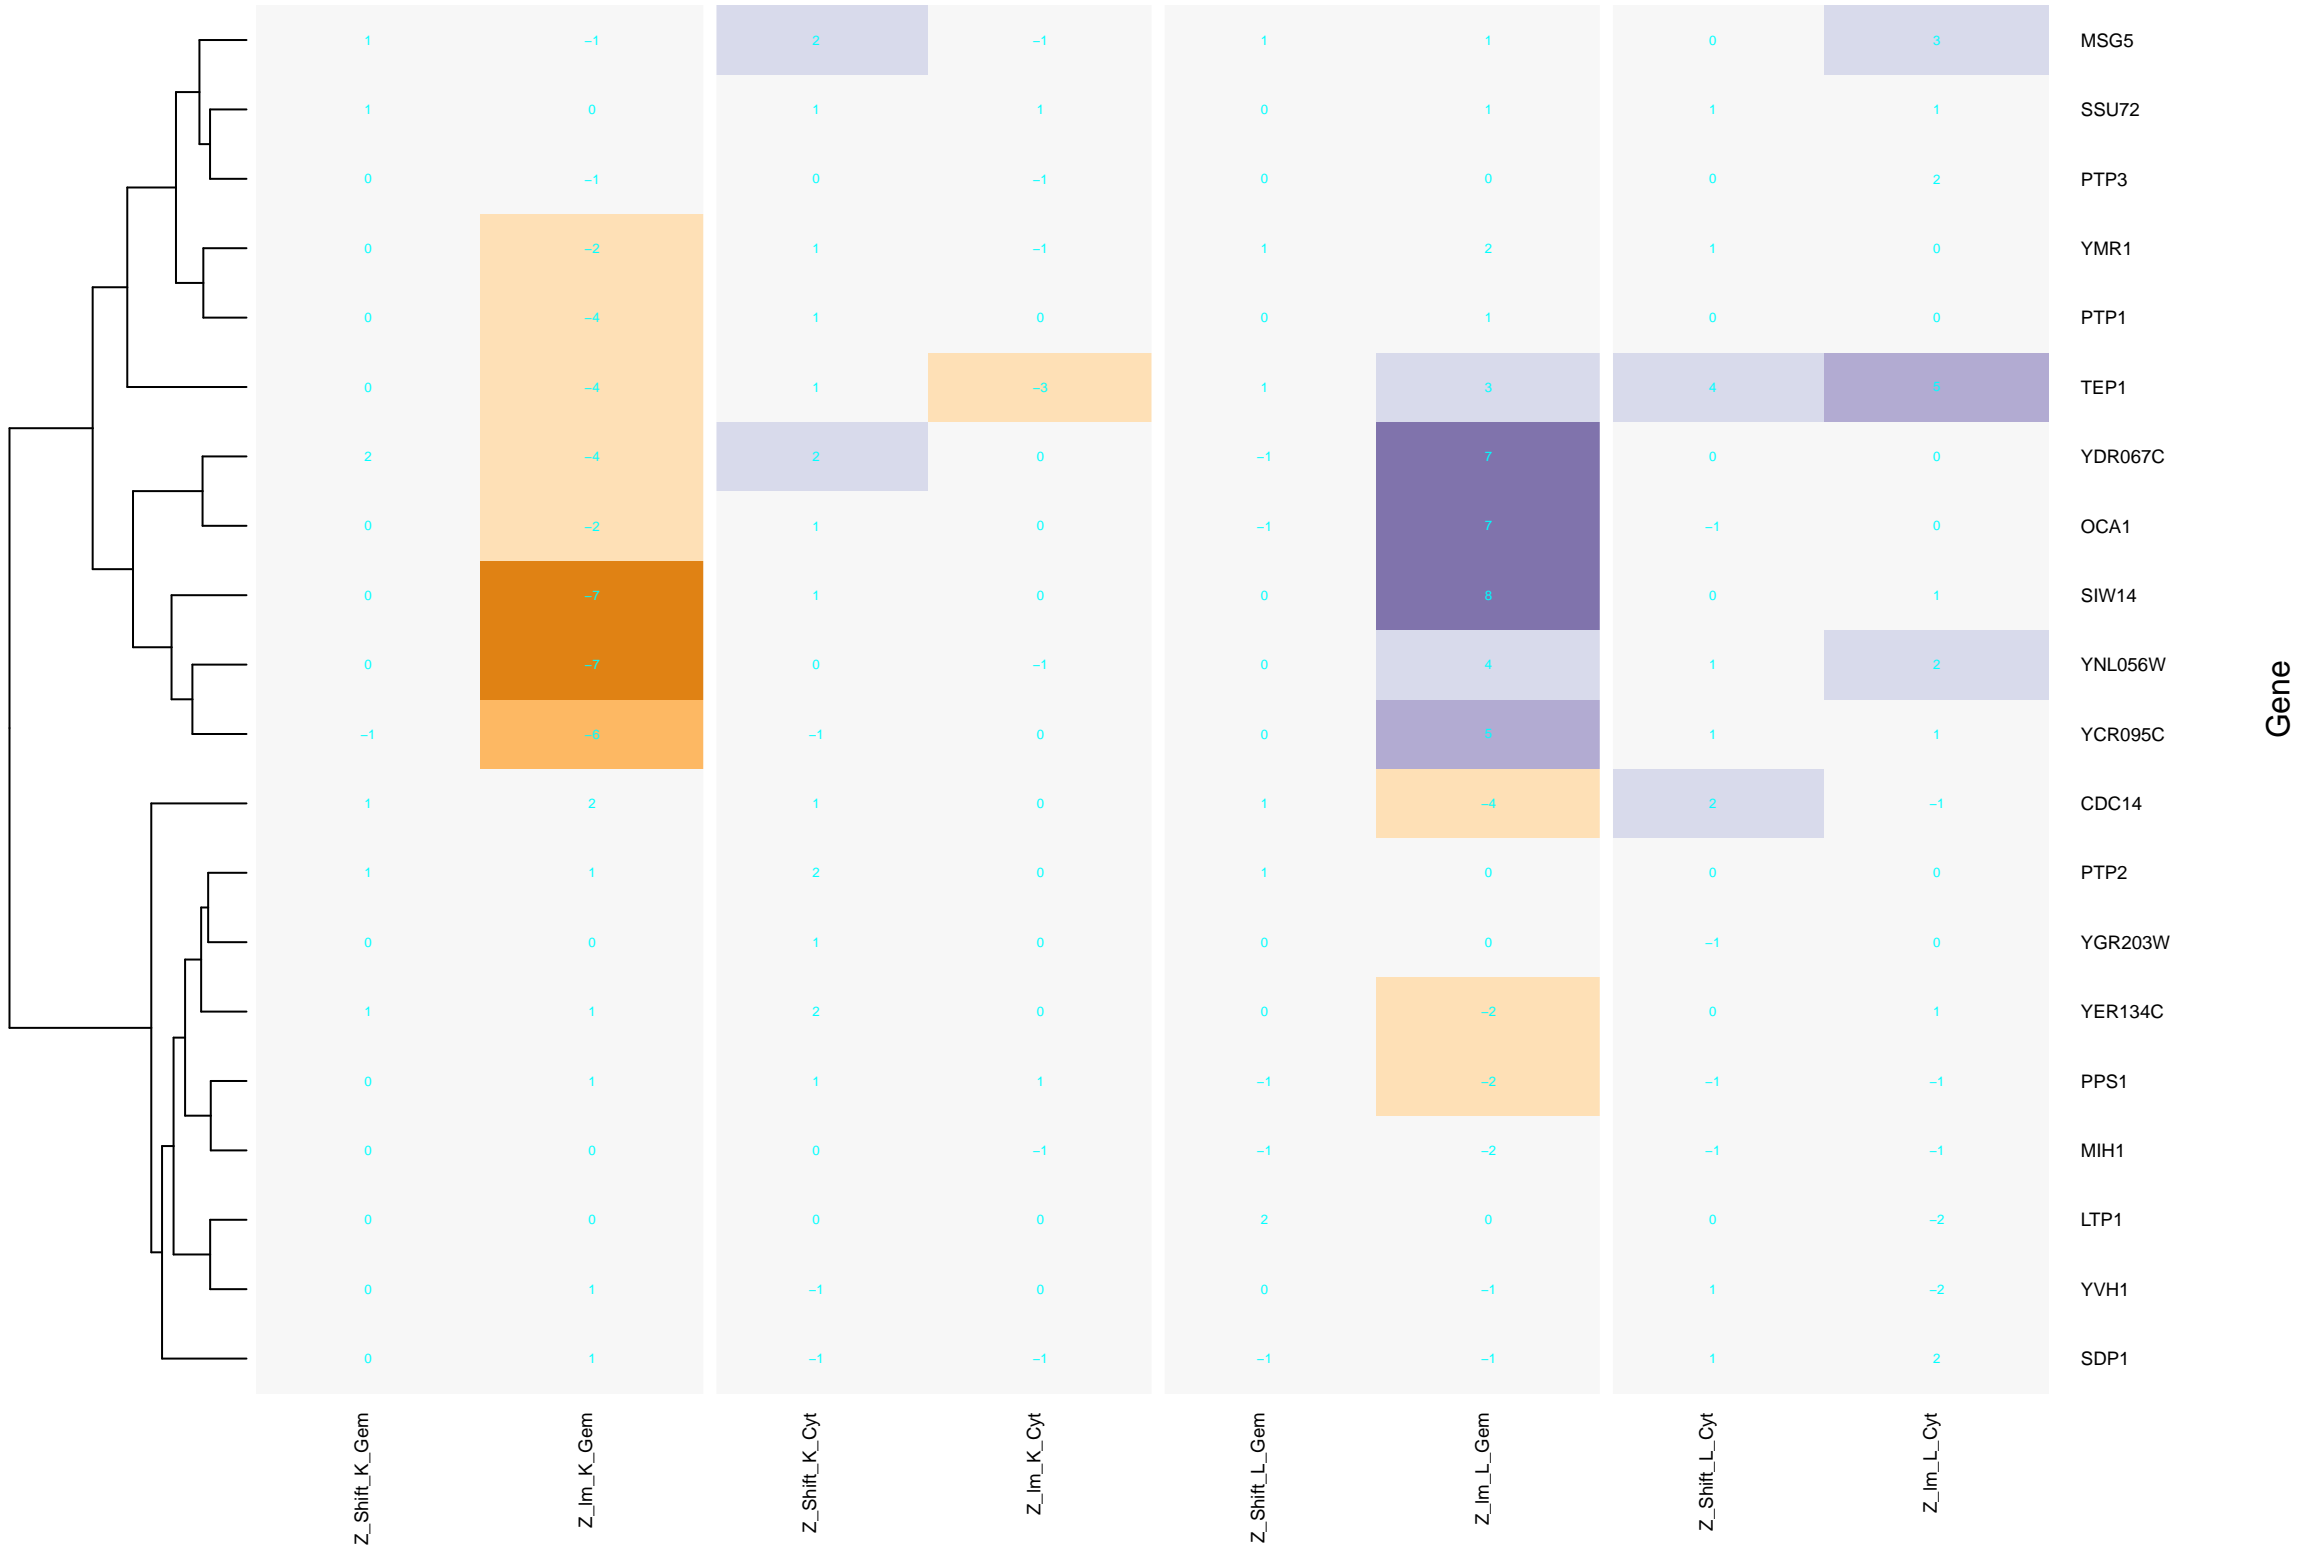

Supplement: s1 [file s1]

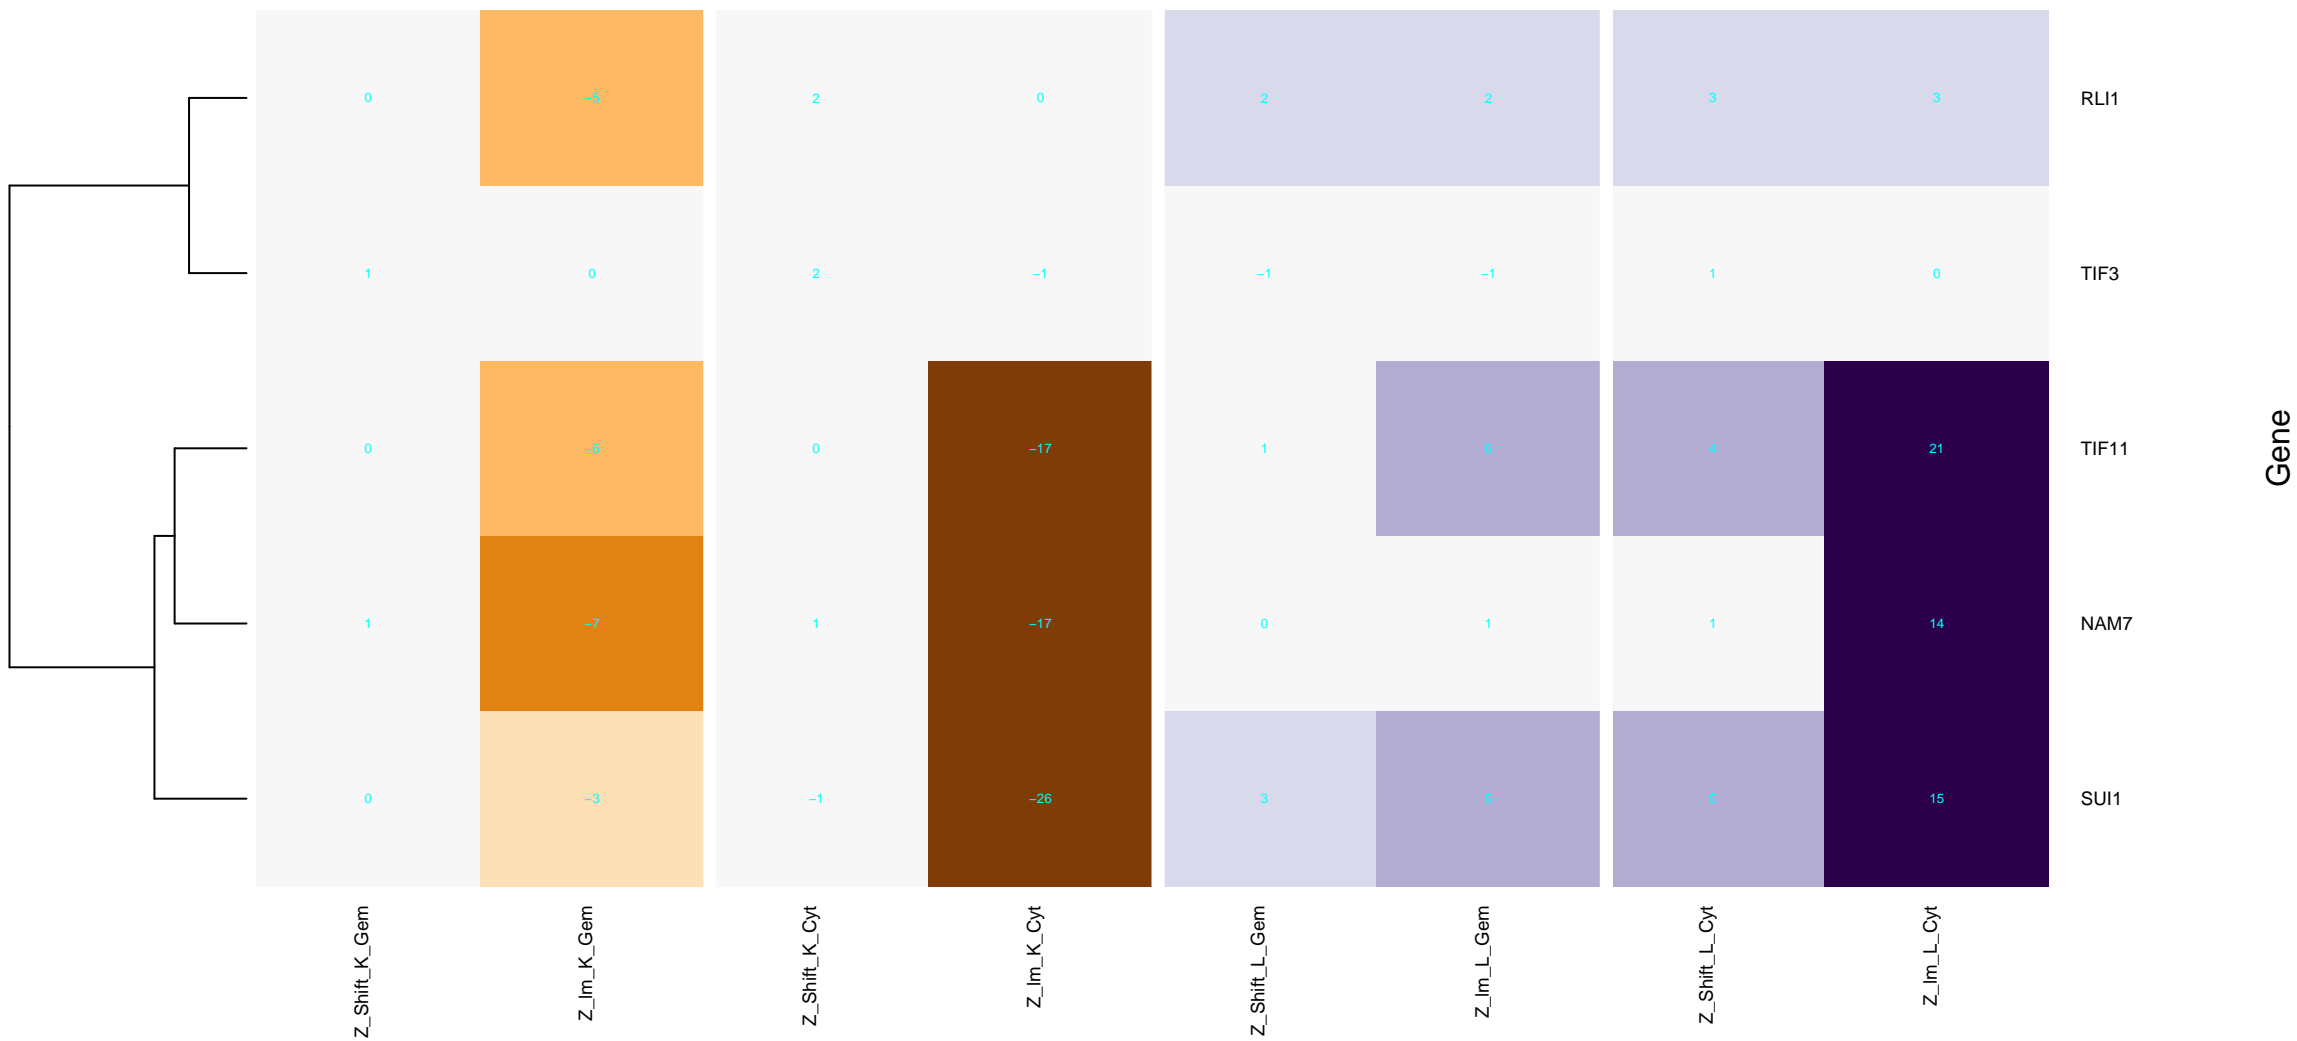

Supplement: s1 [file s1]

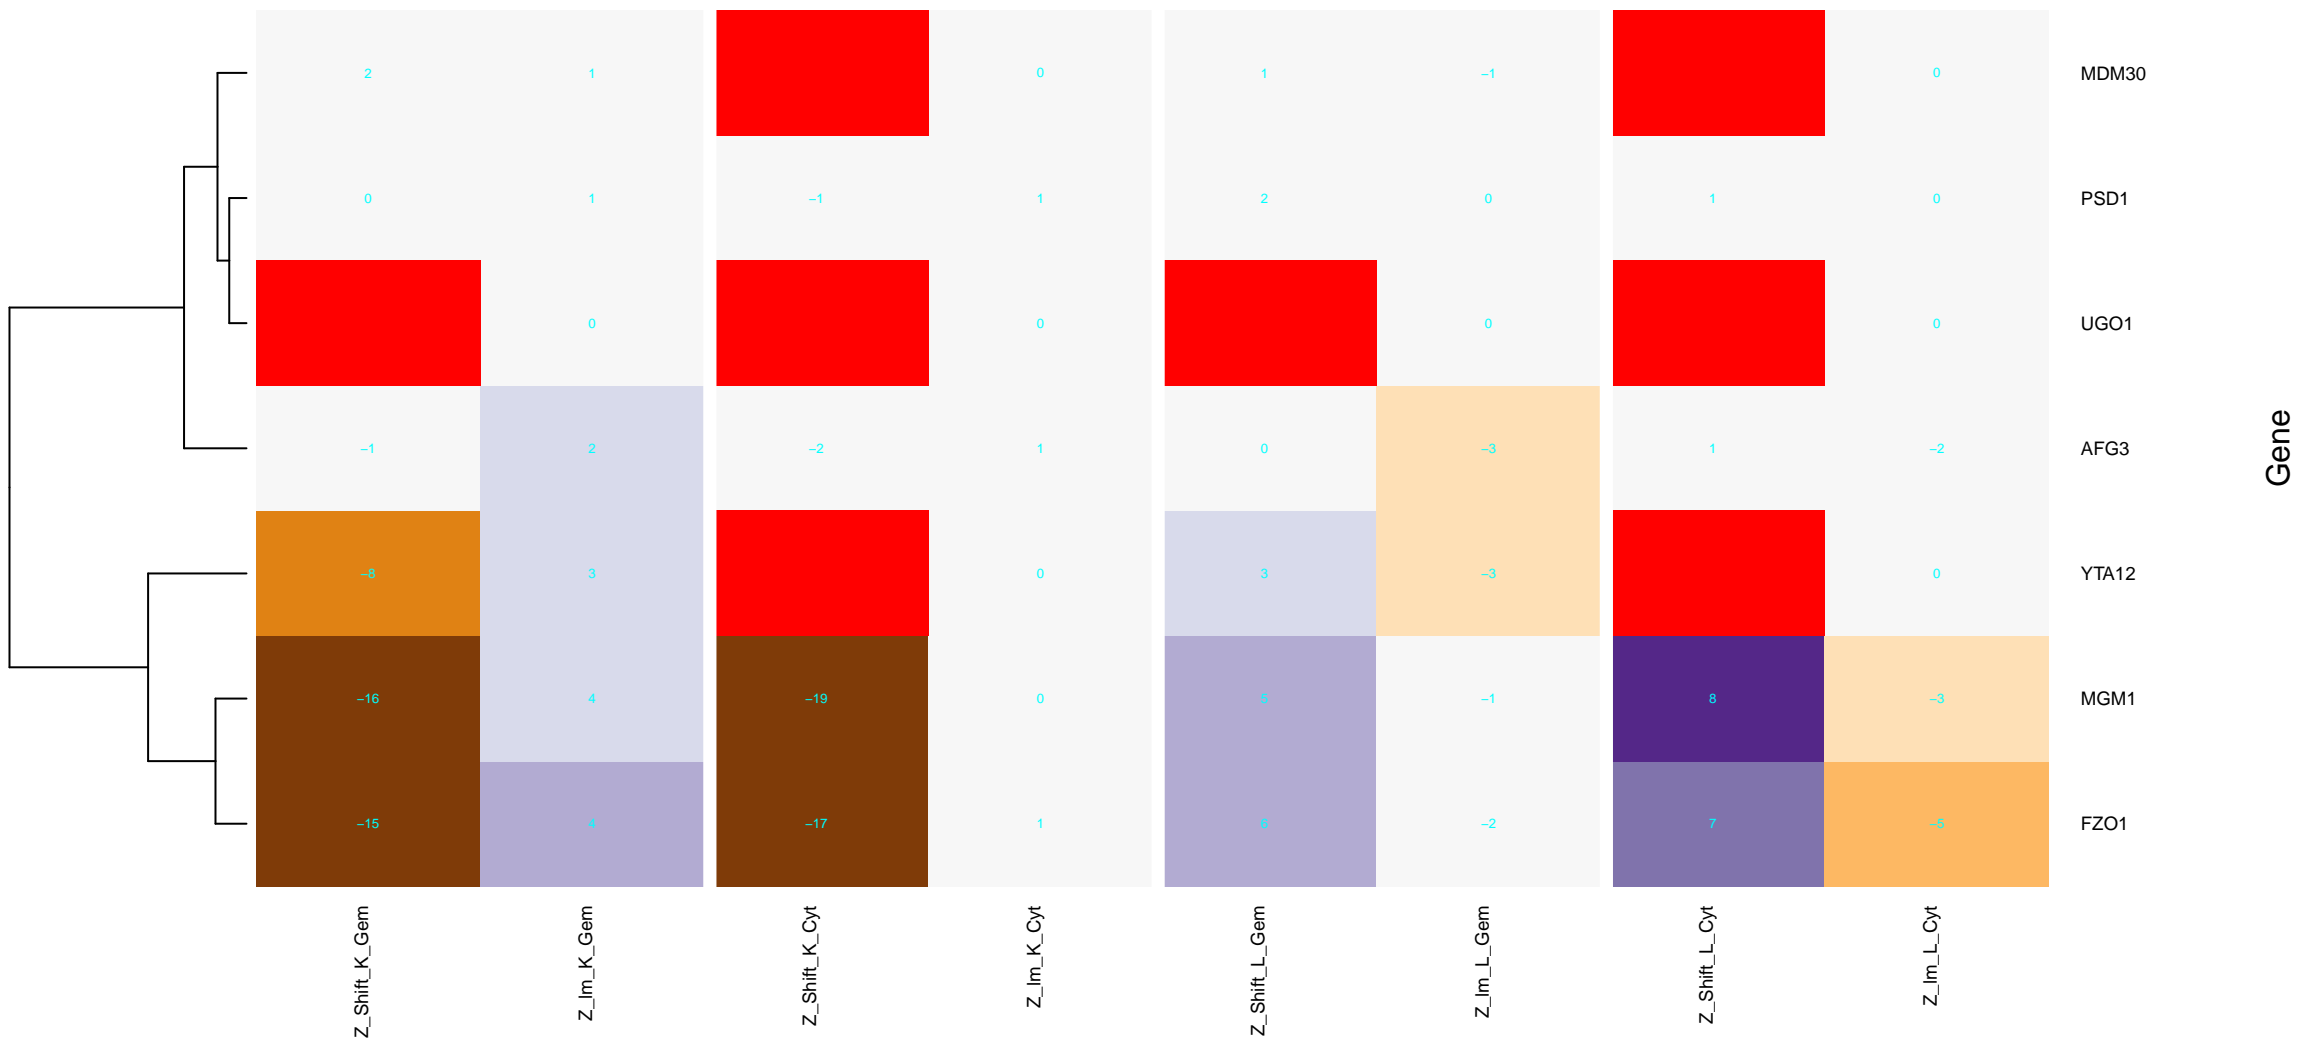

Supplement: s1 [file s1]

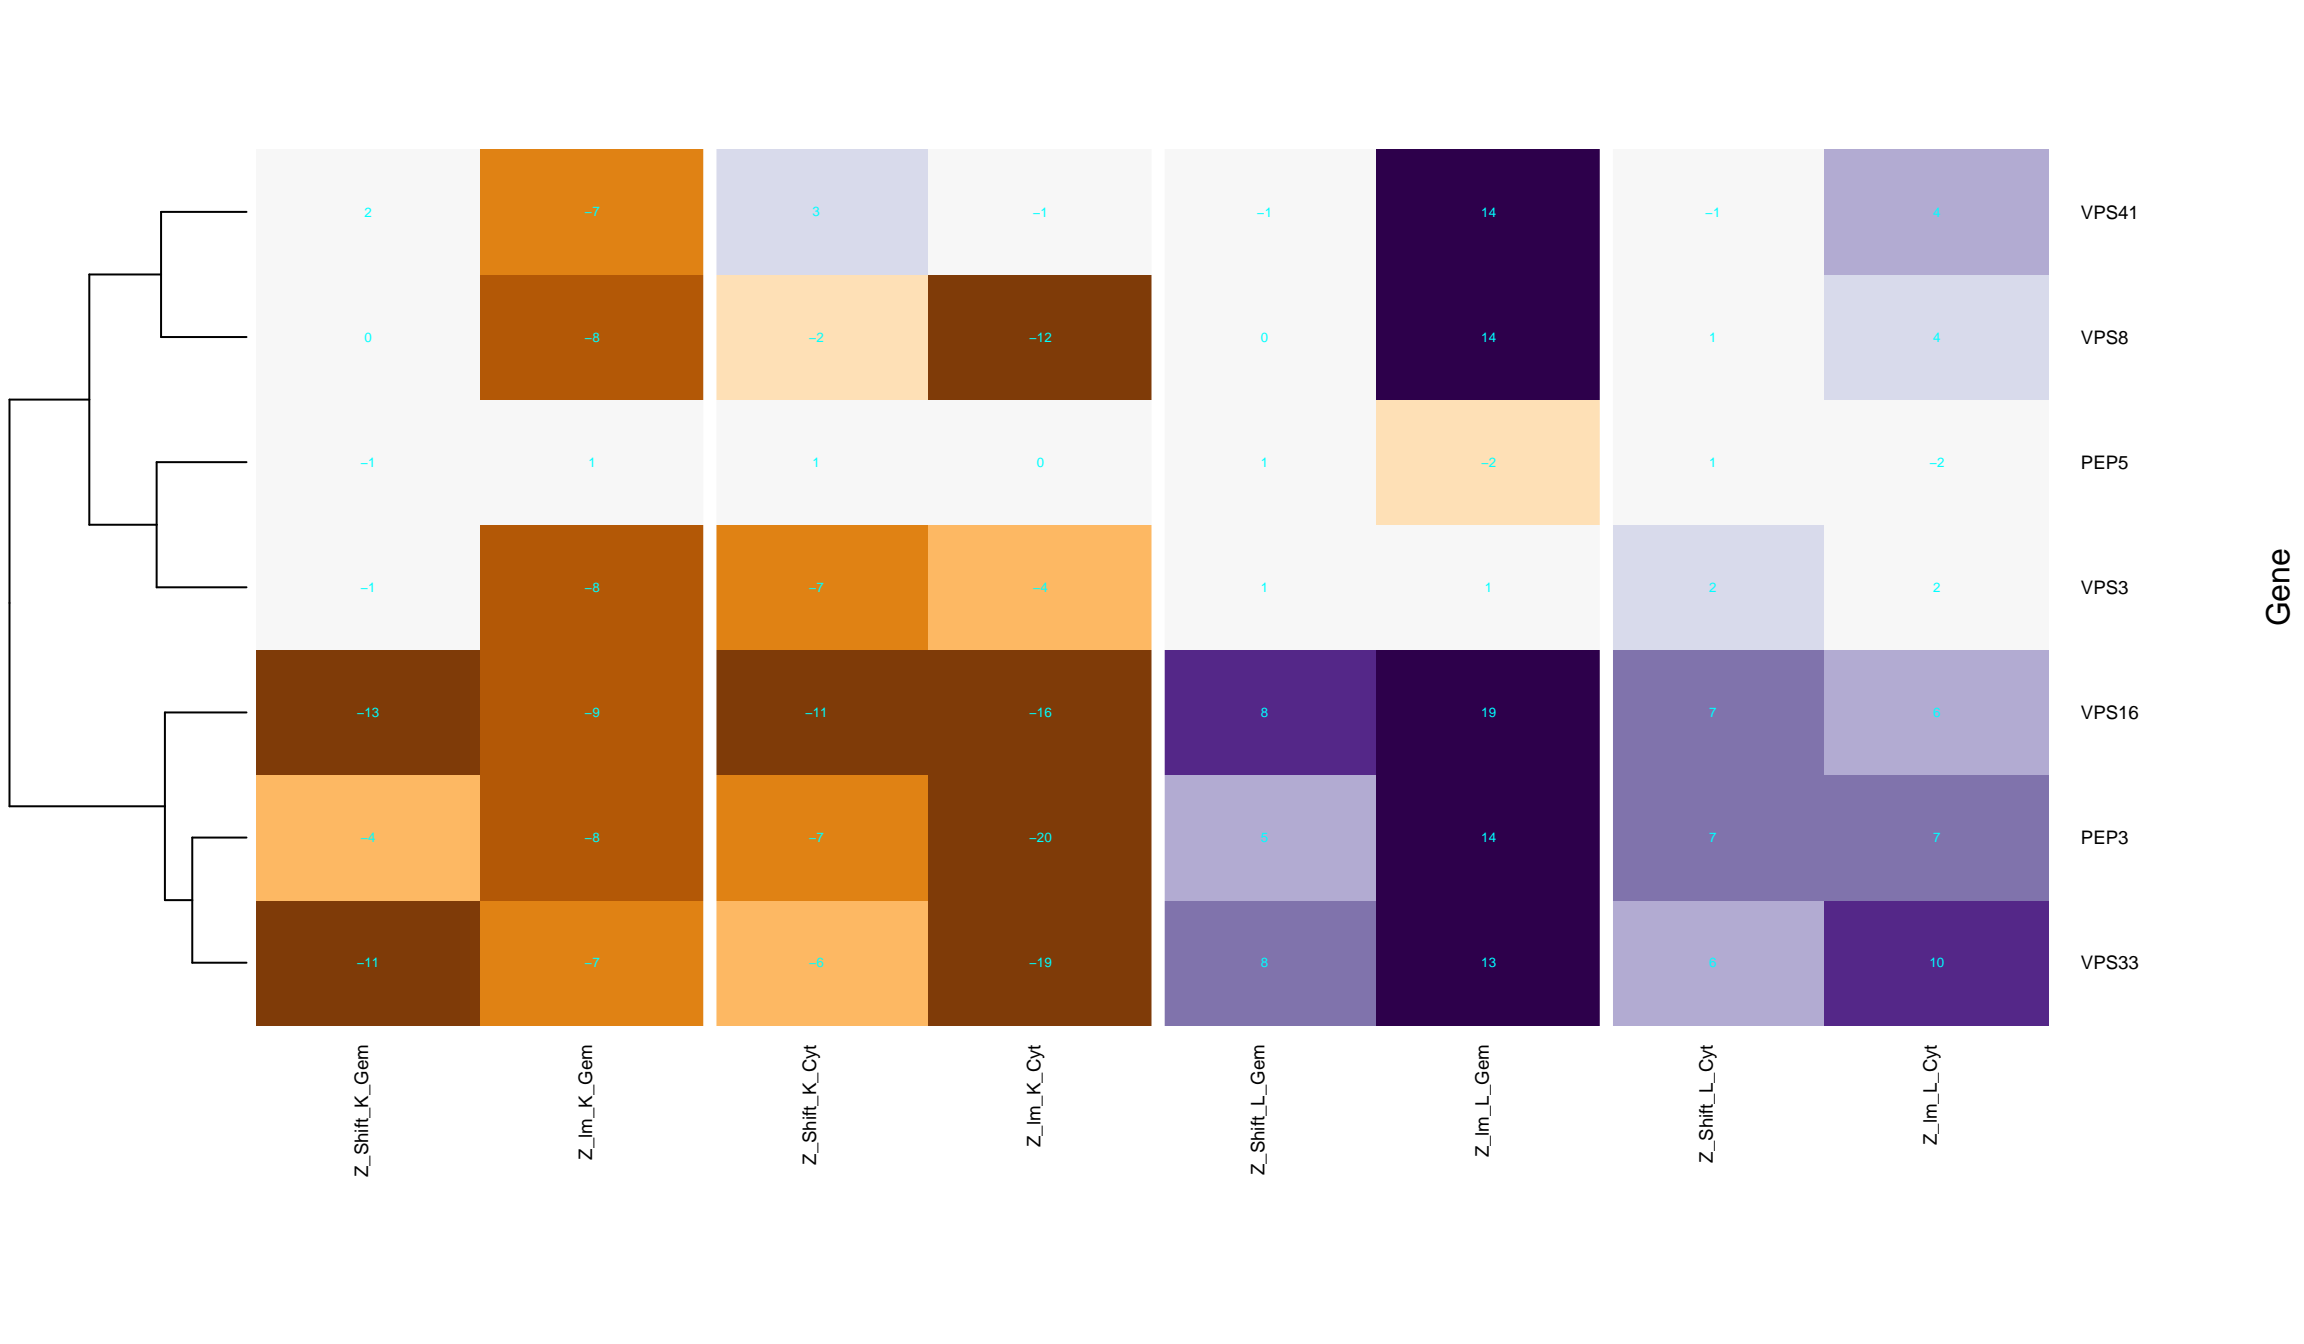

Supplement: s1 [file s1]

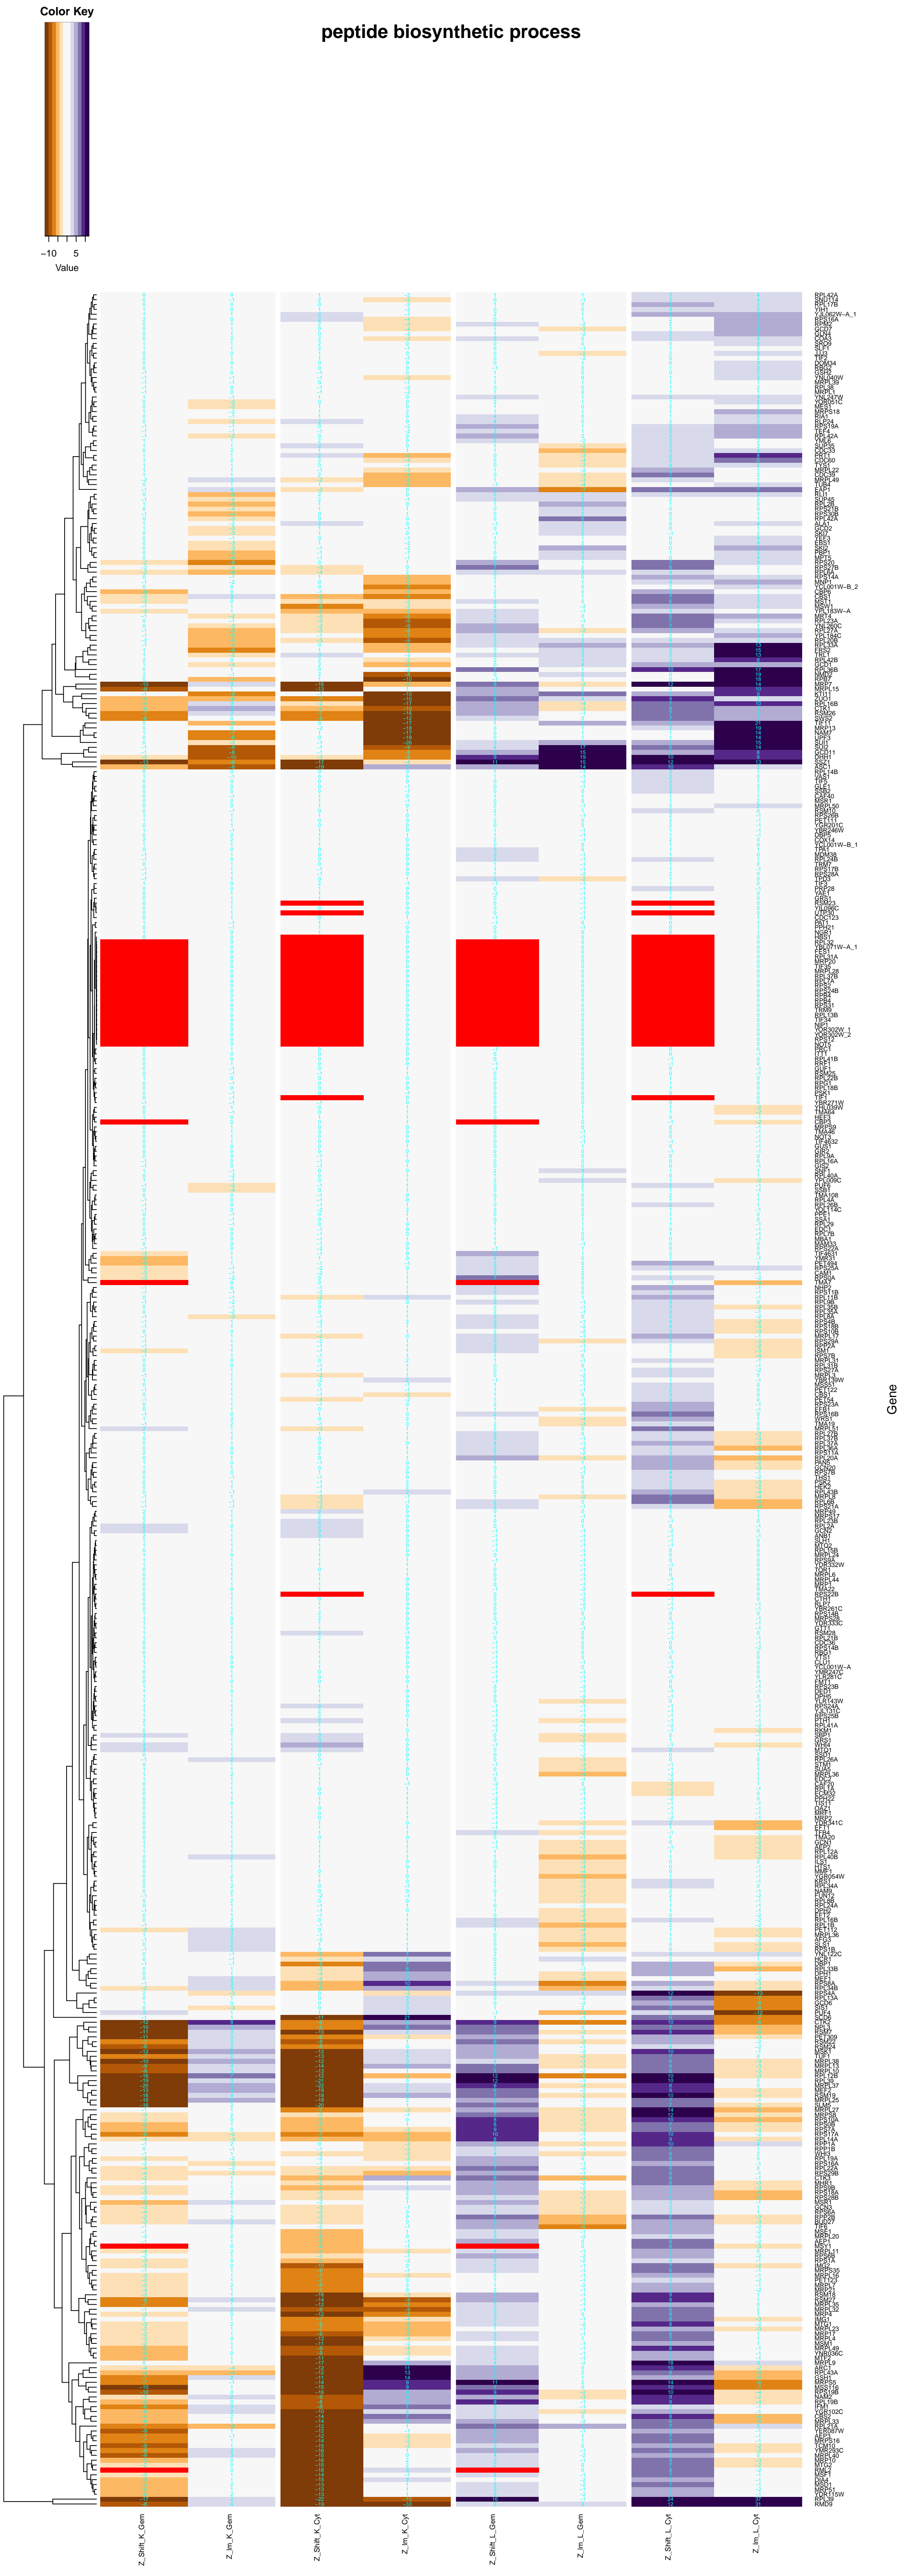







Supplement: s1 [file s1]

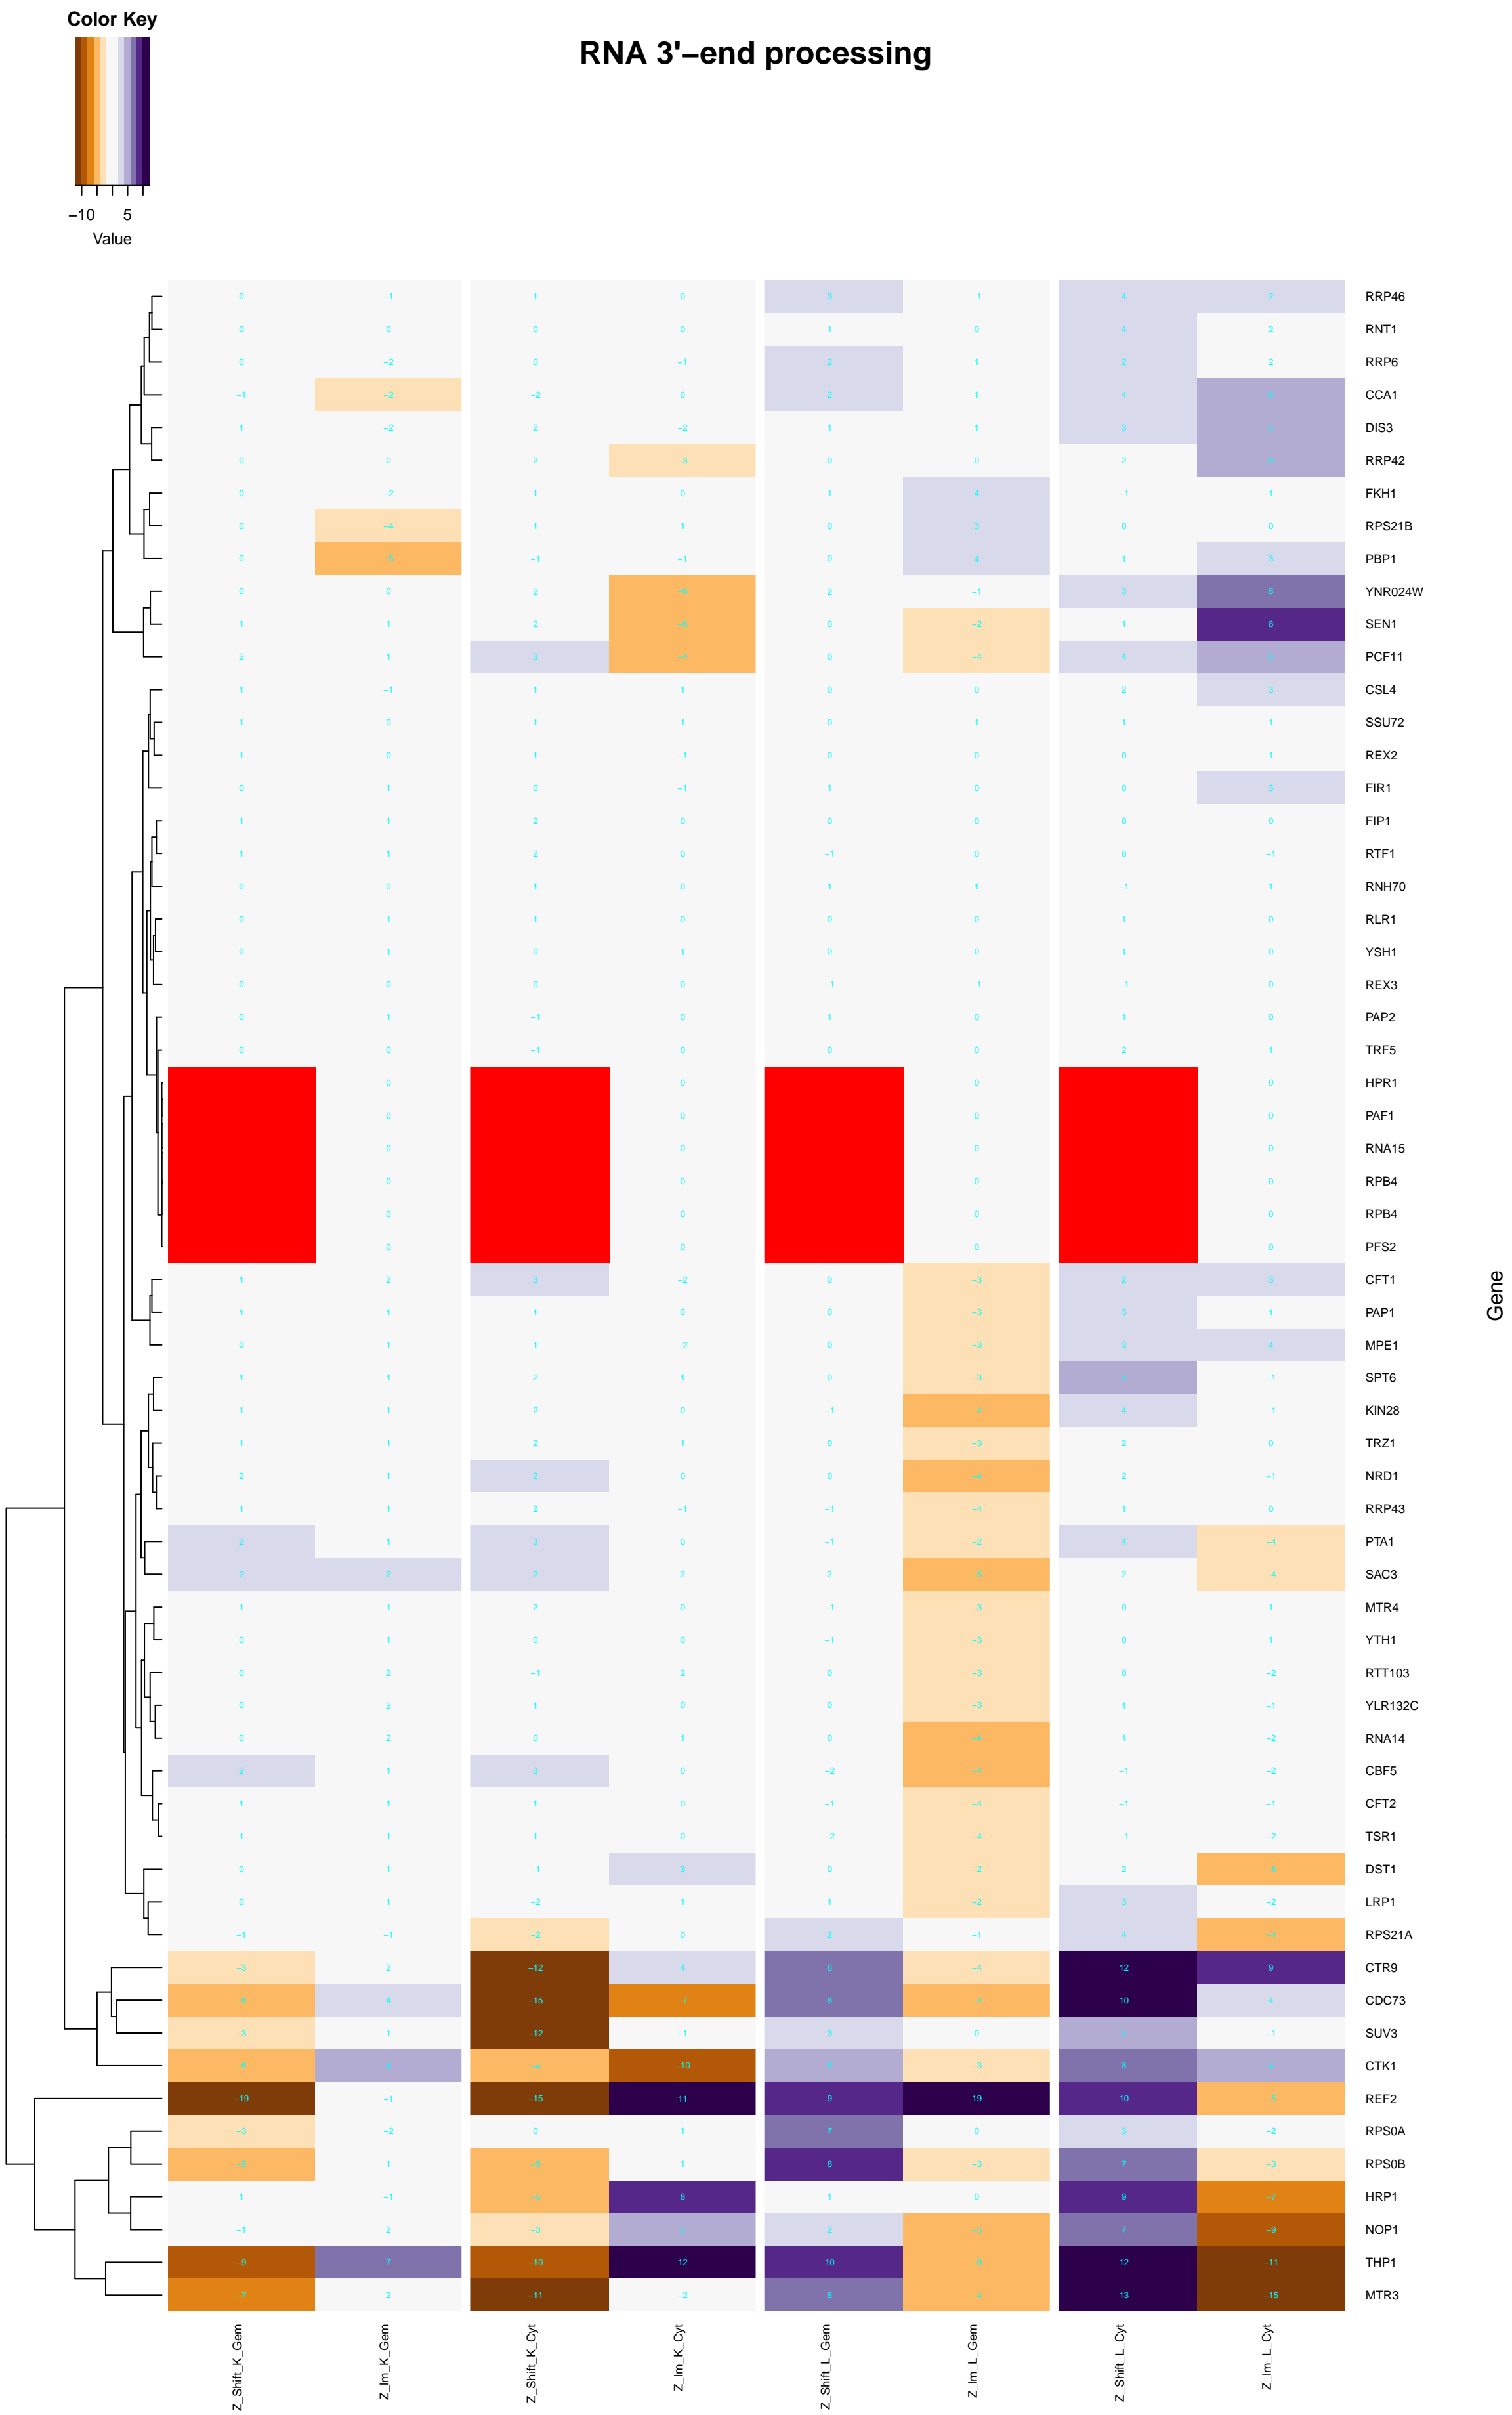

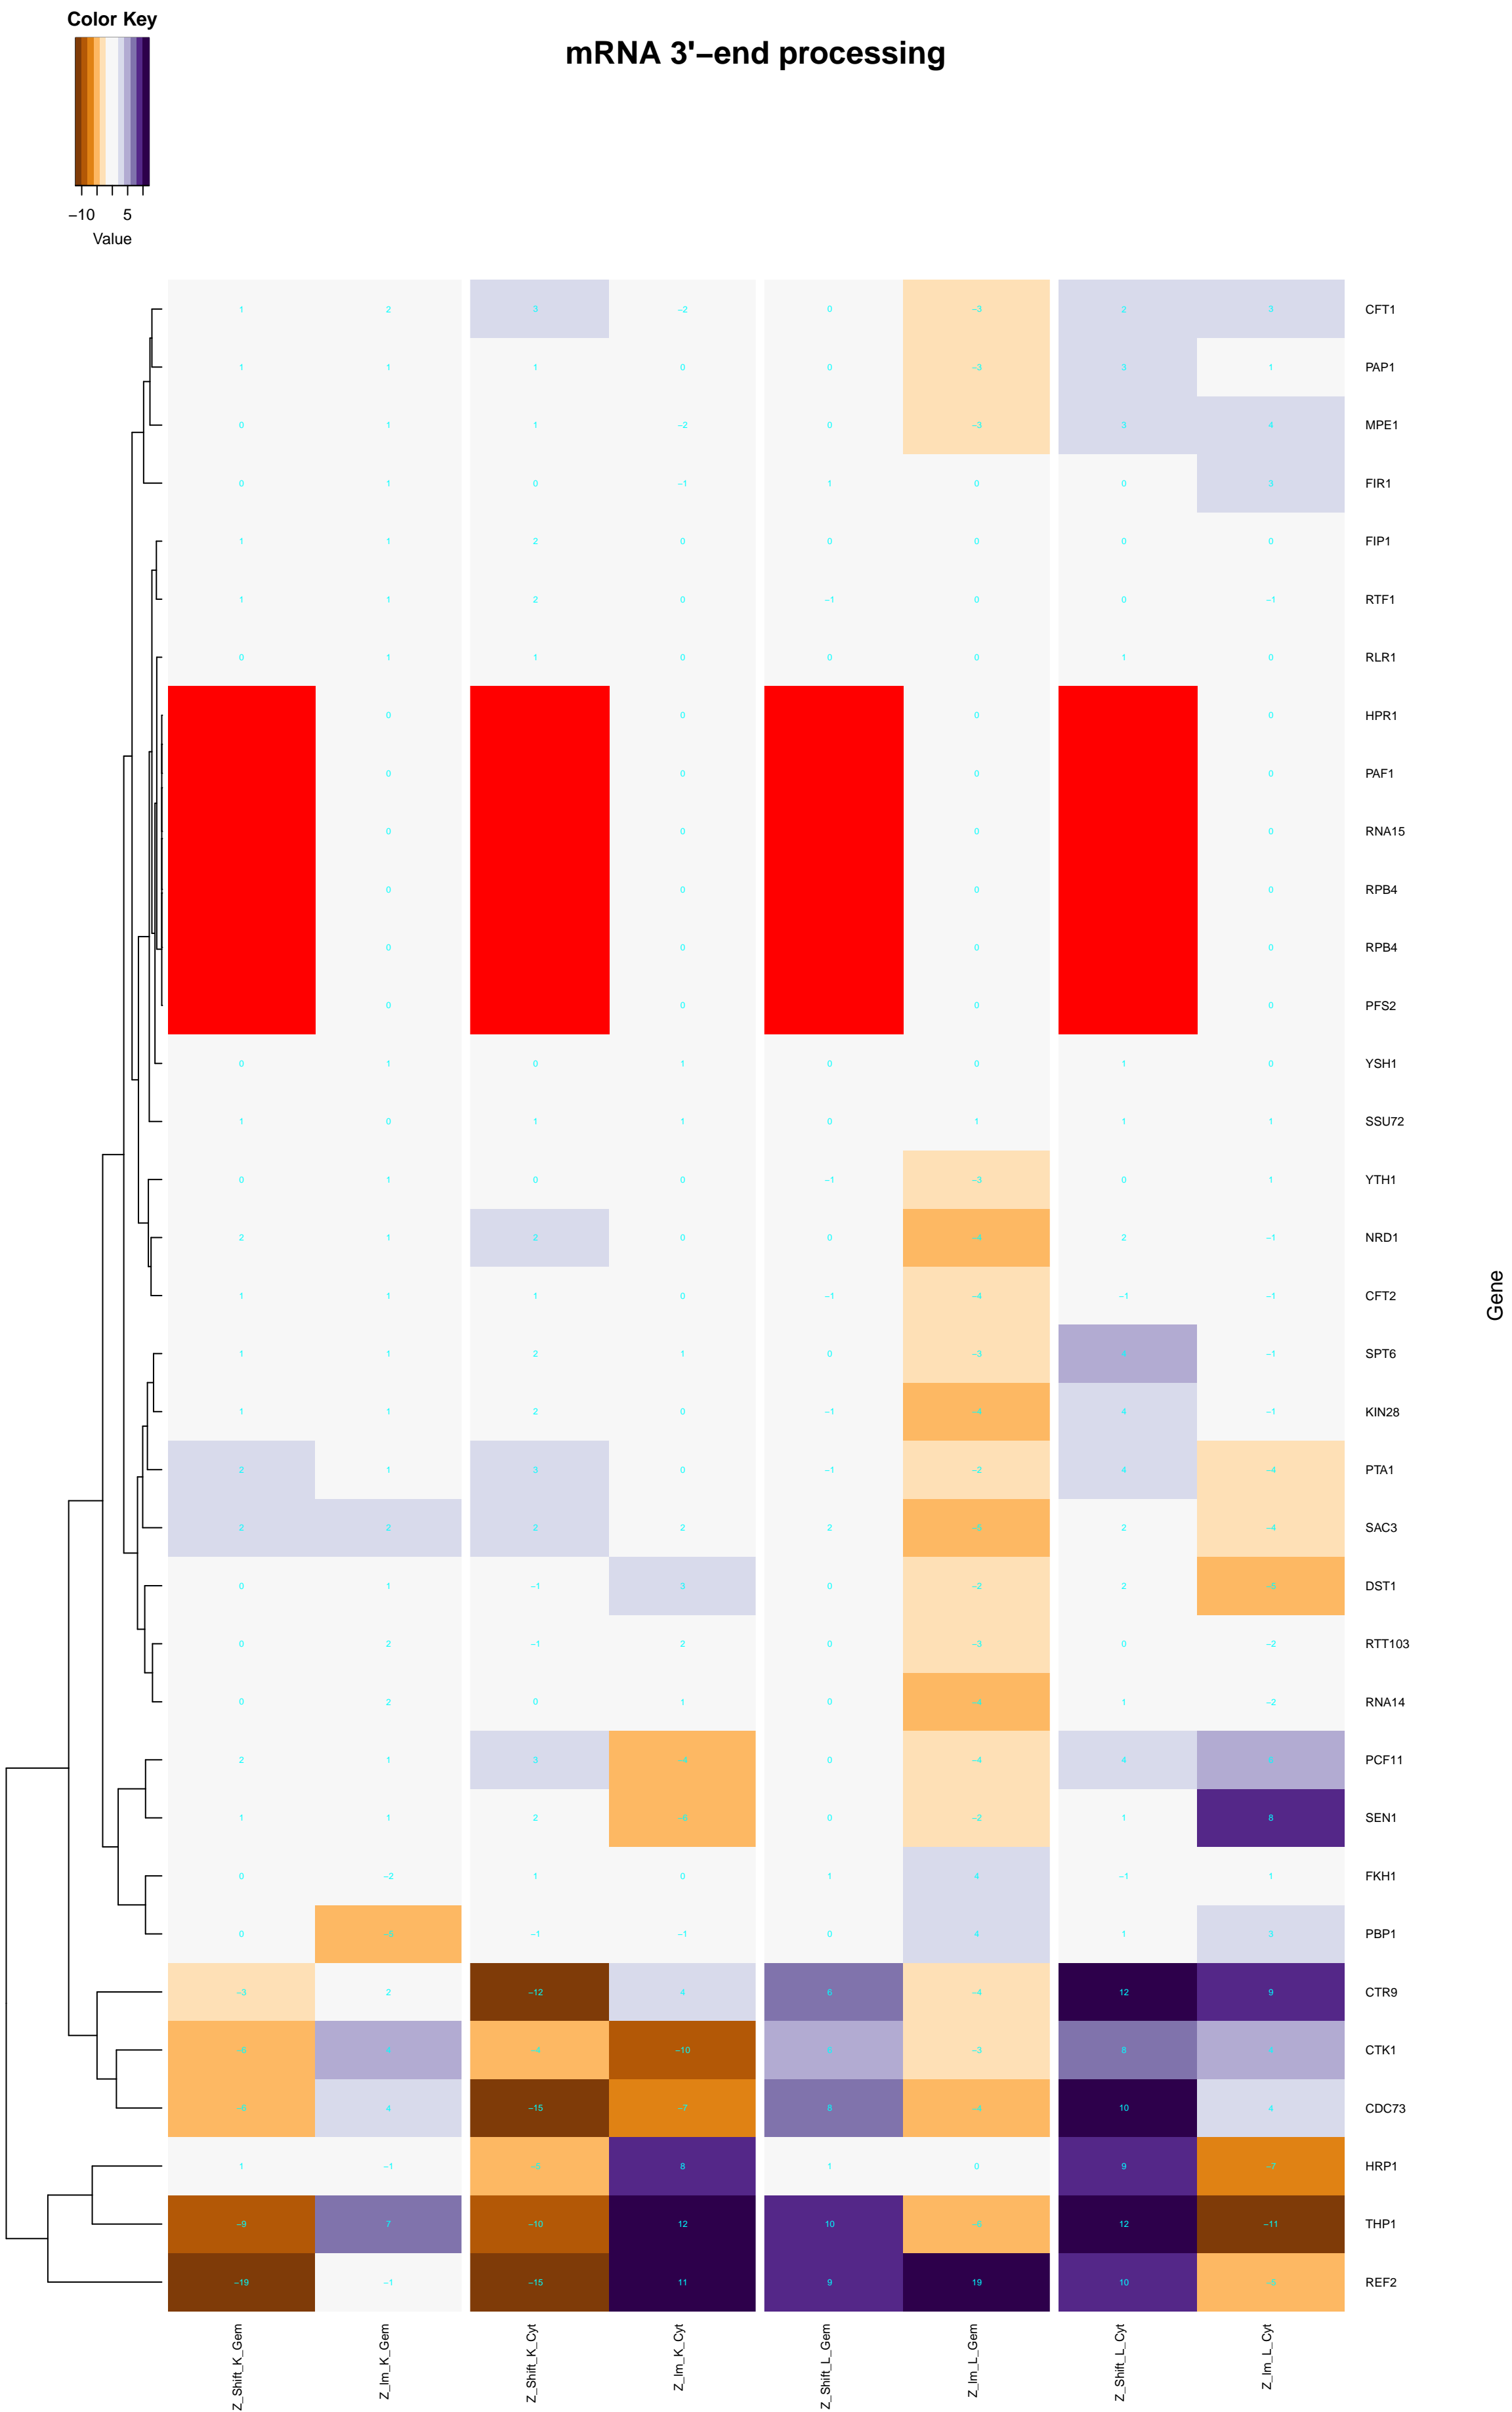

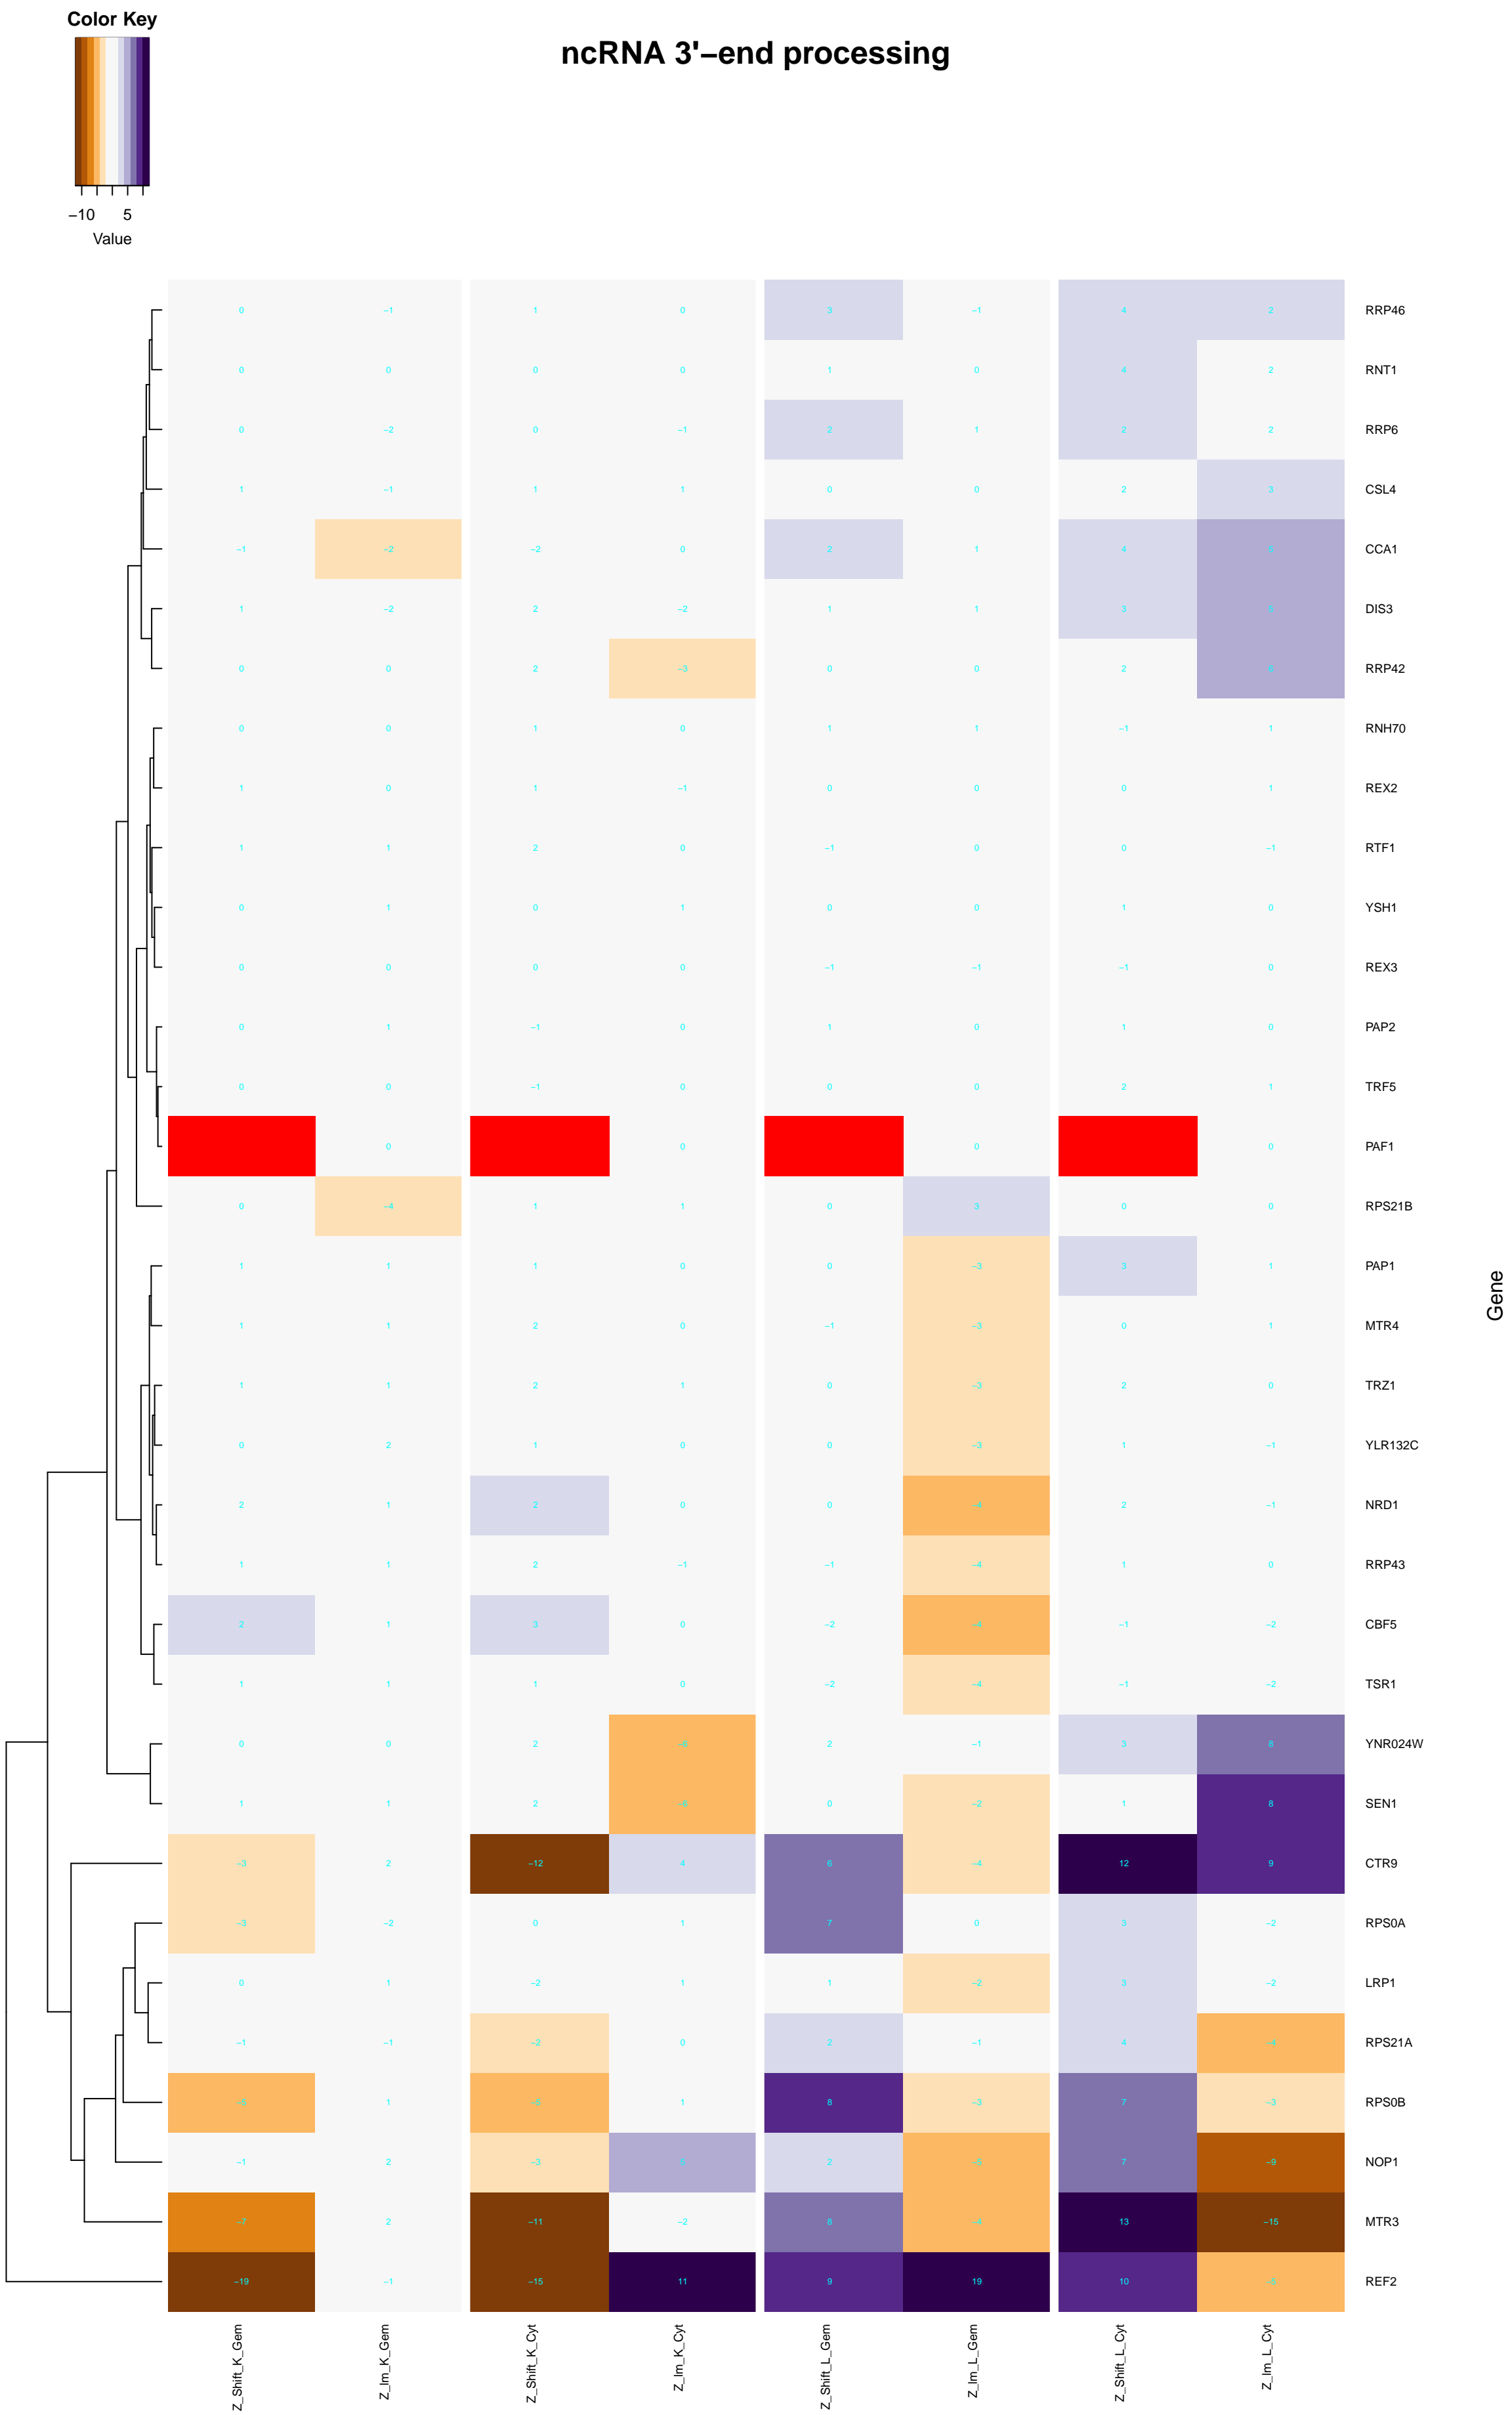

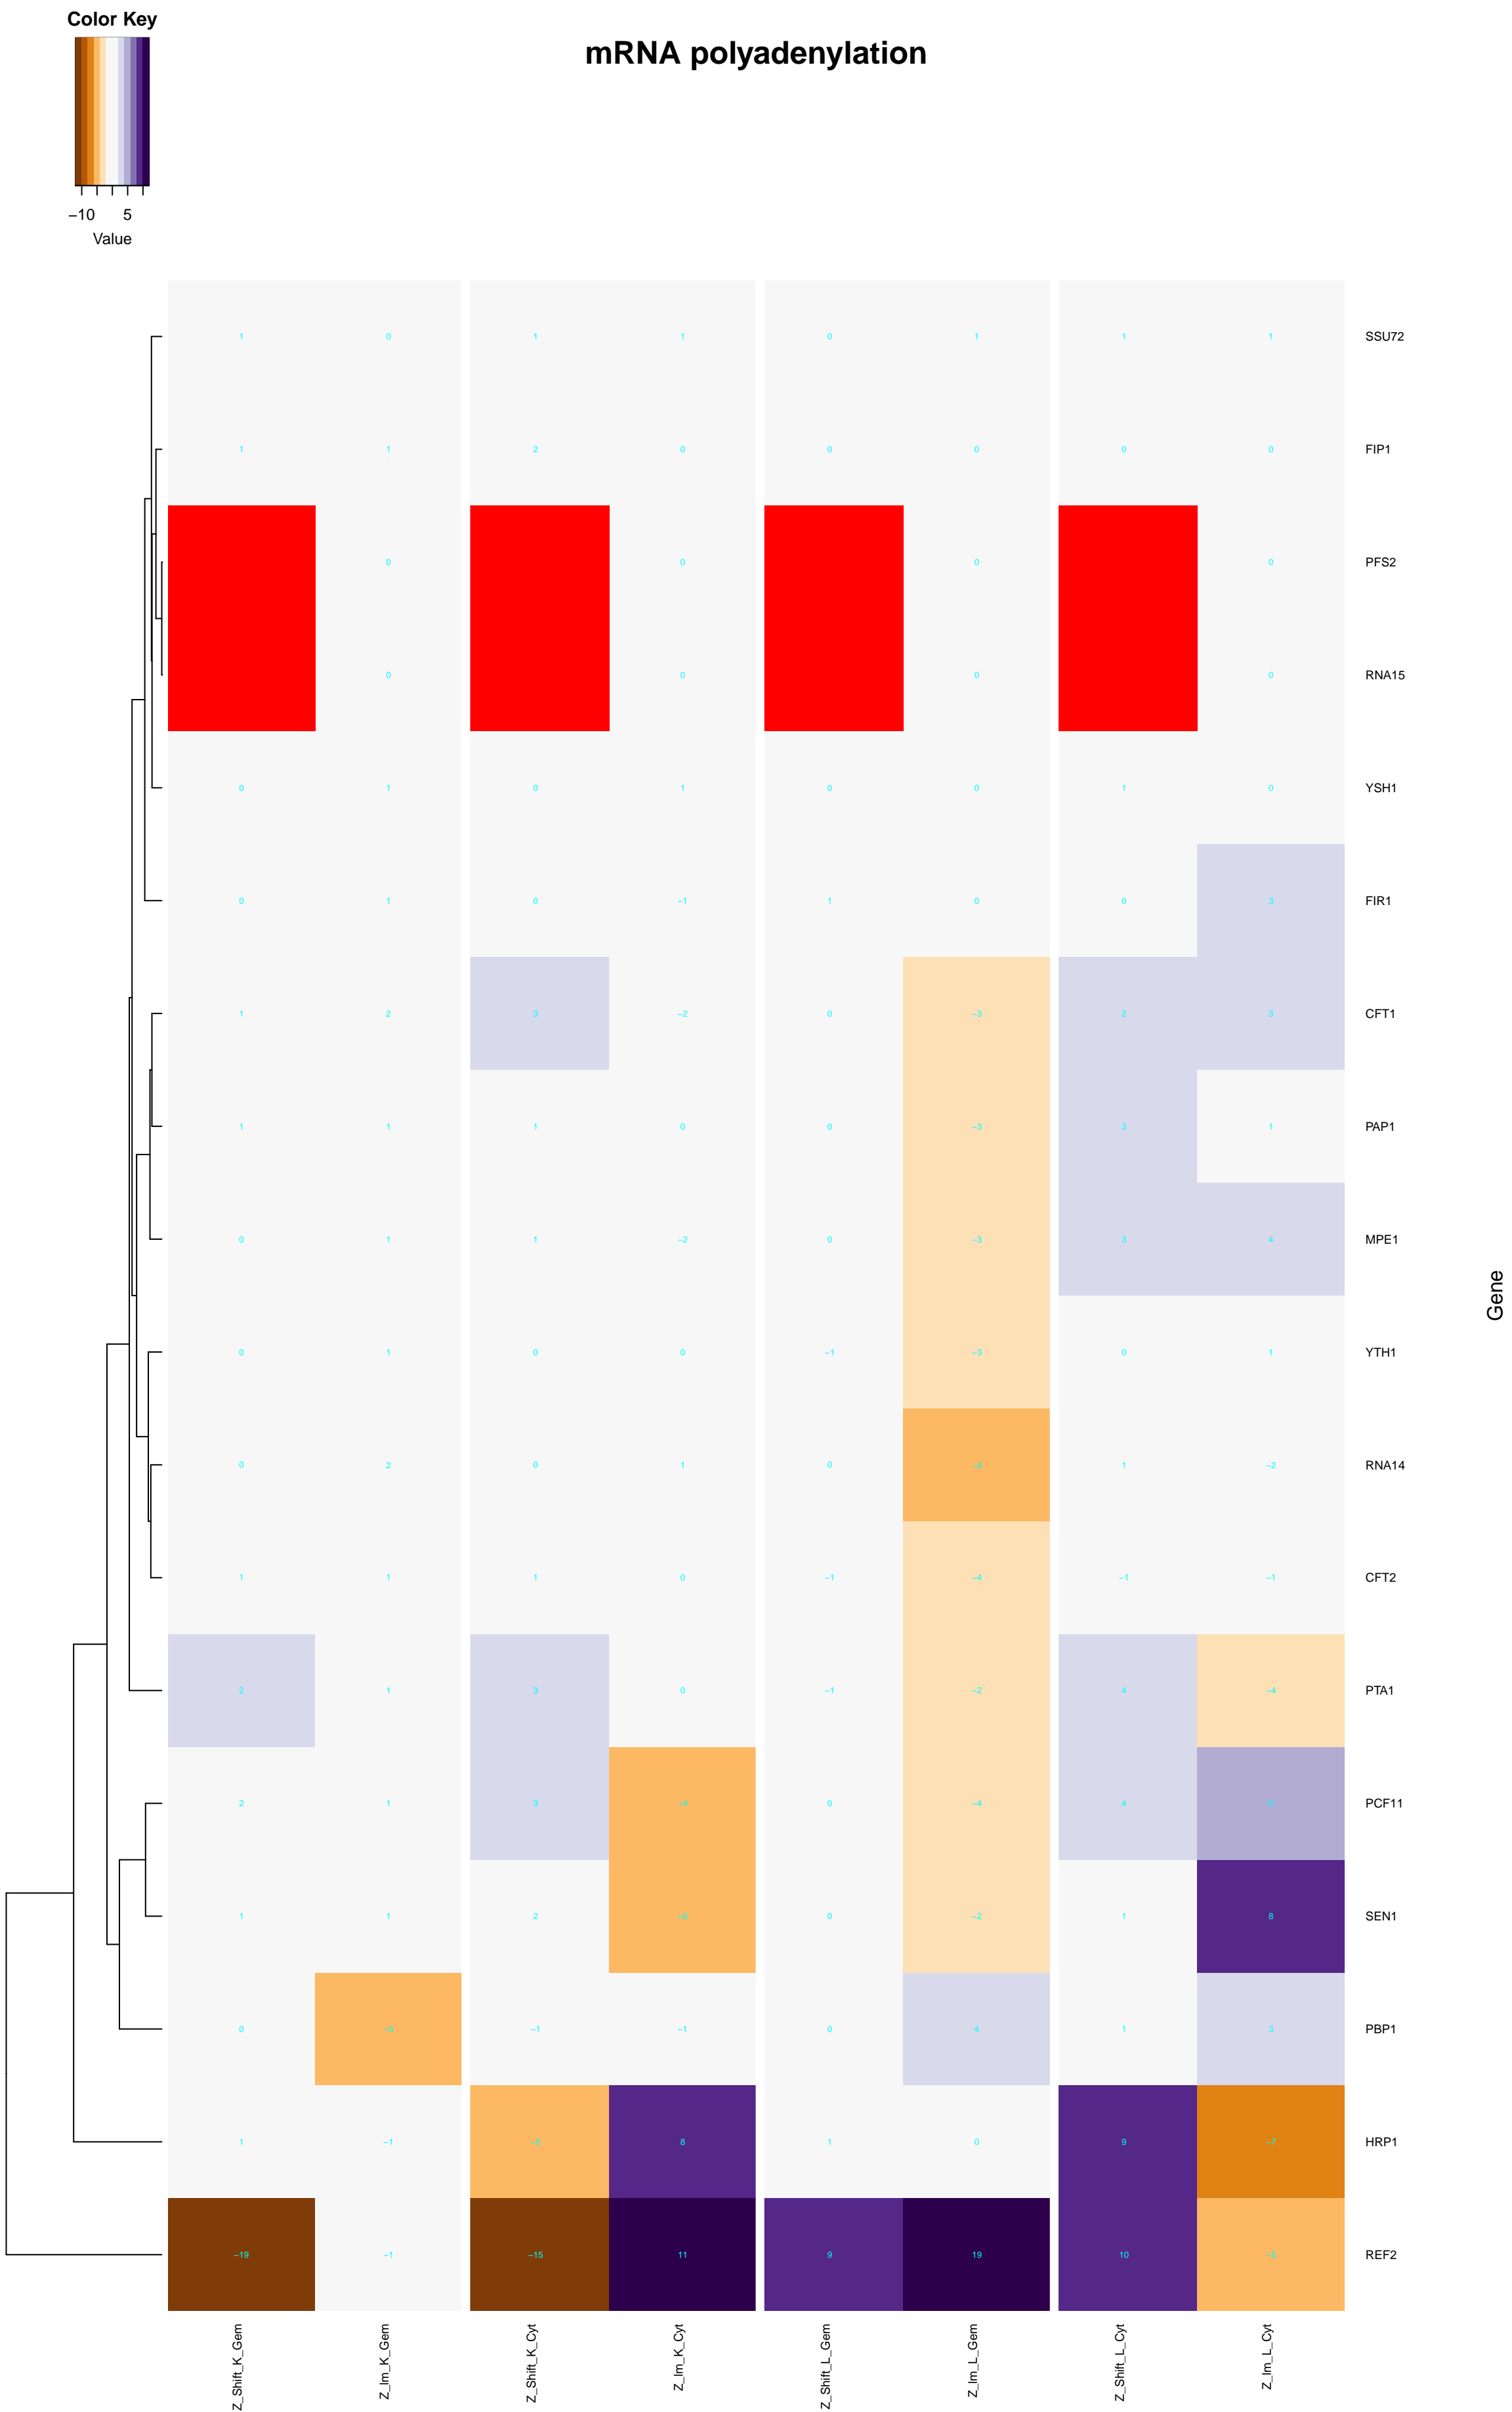

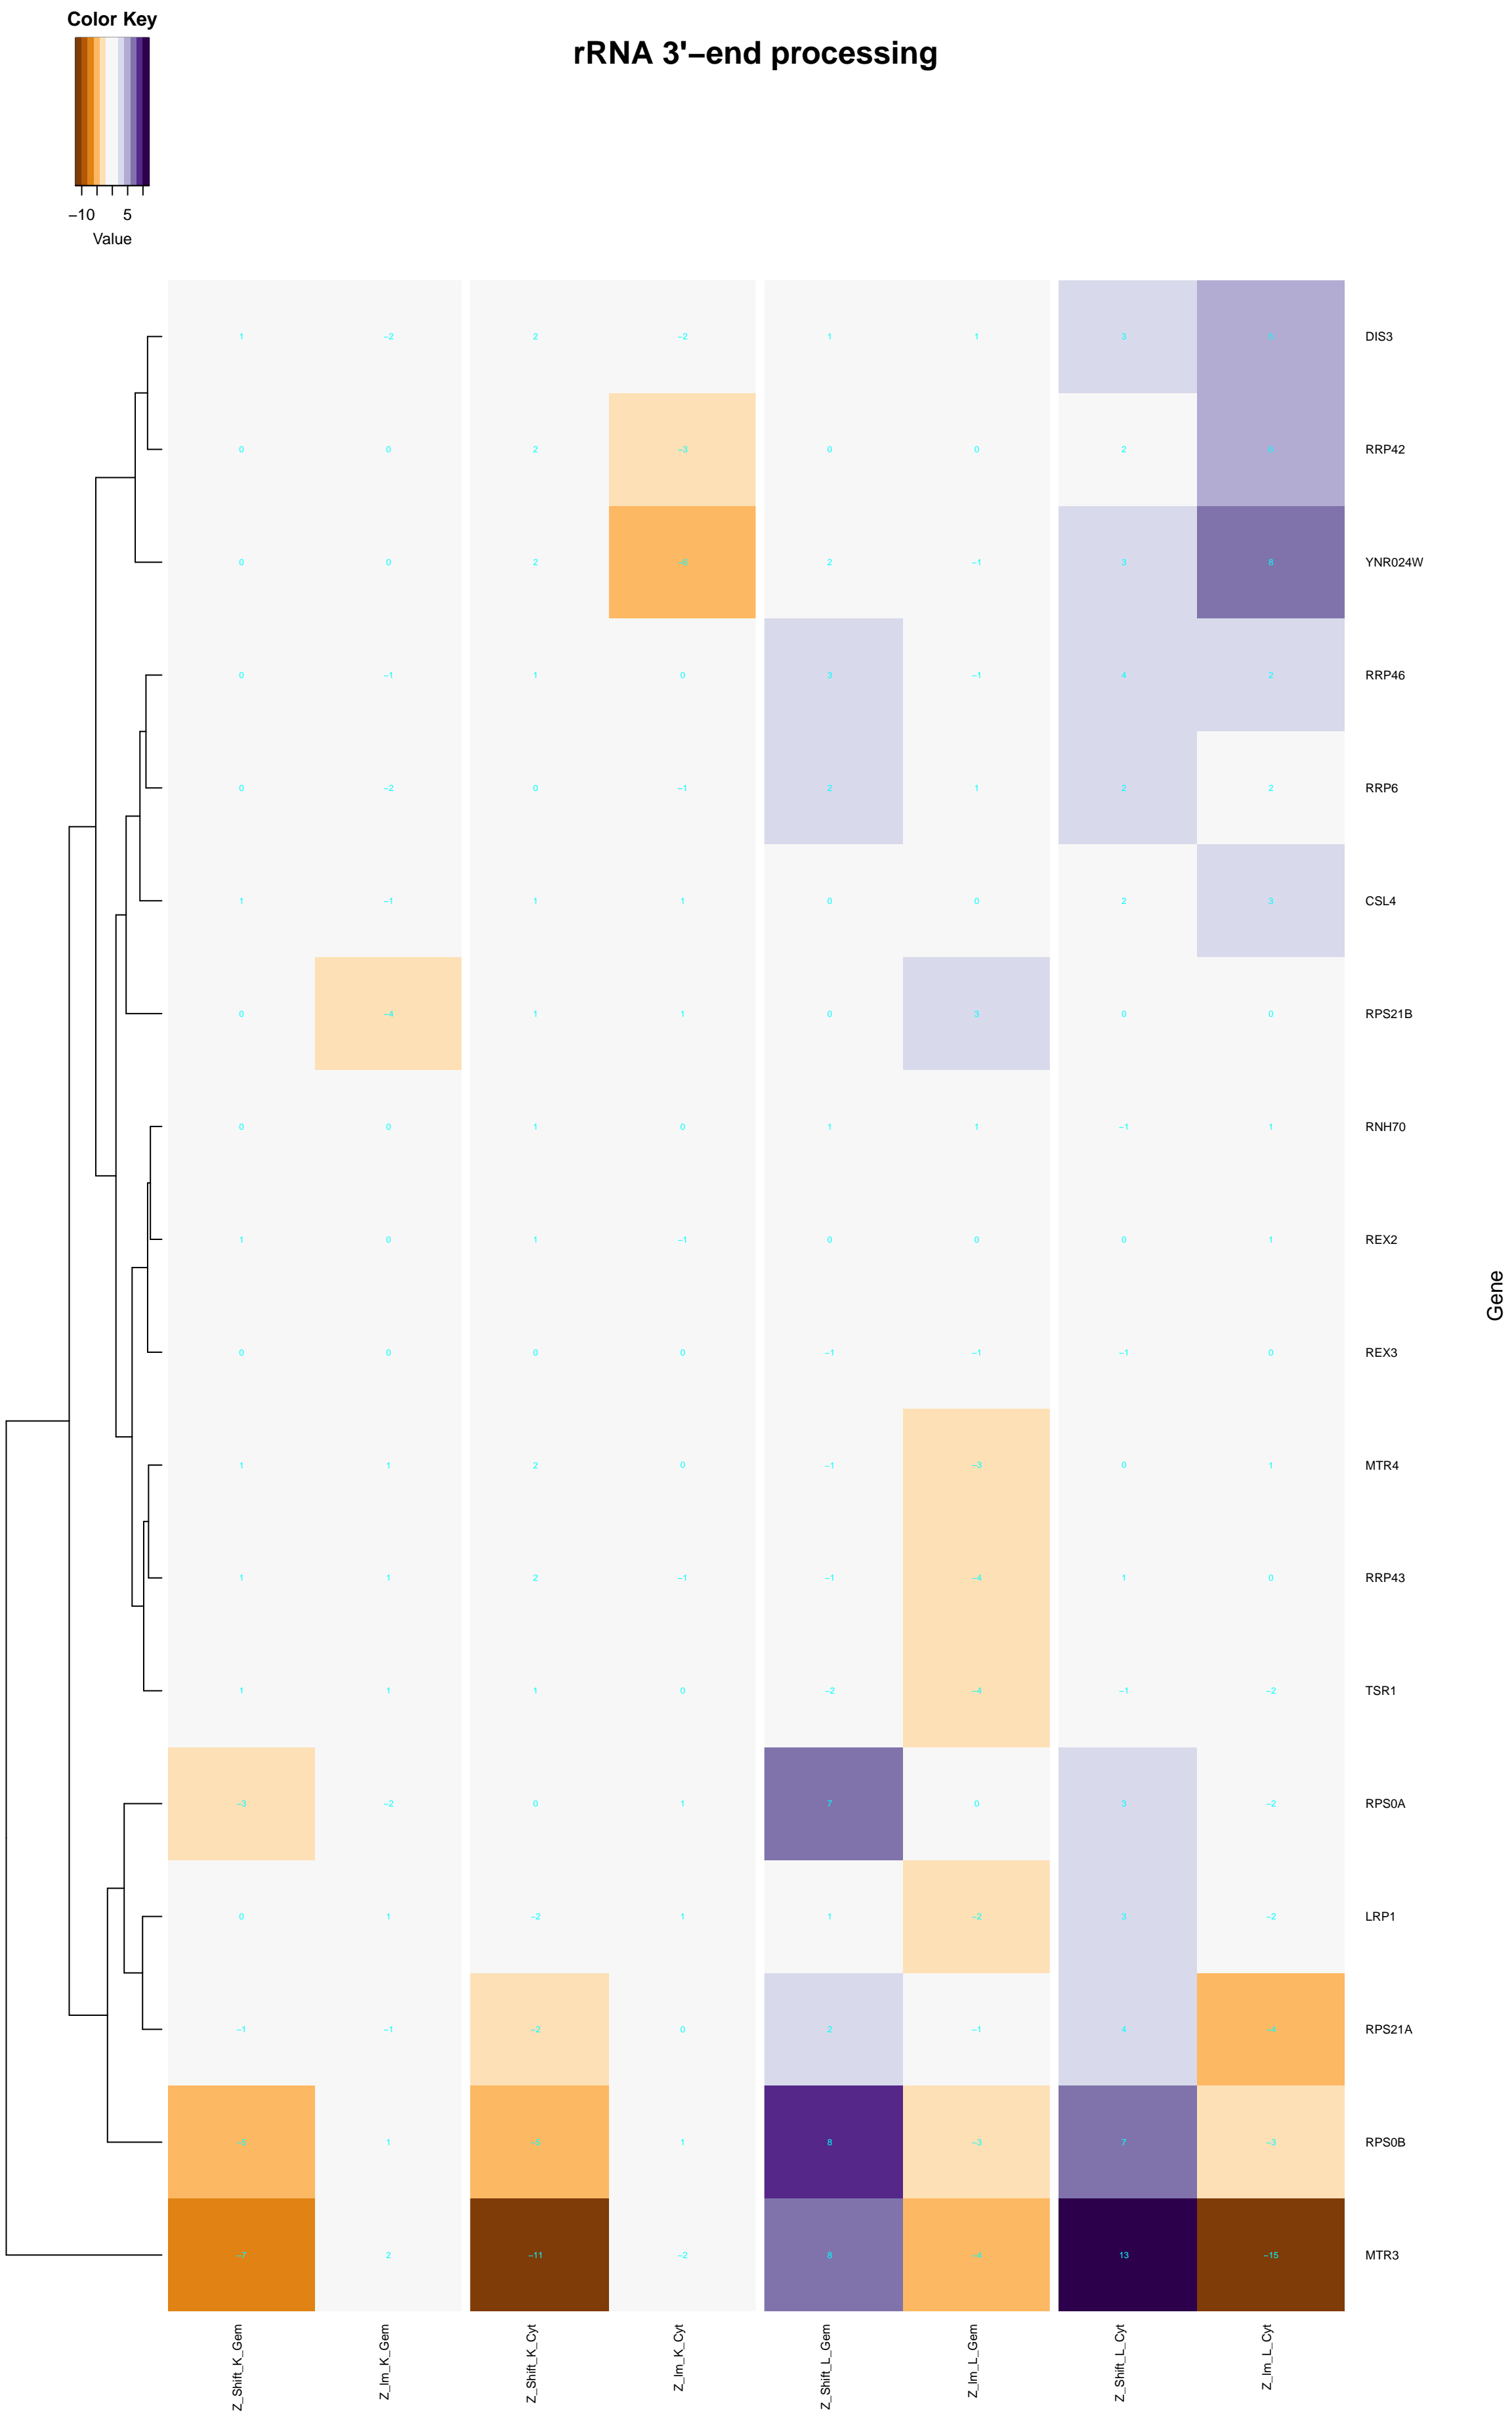

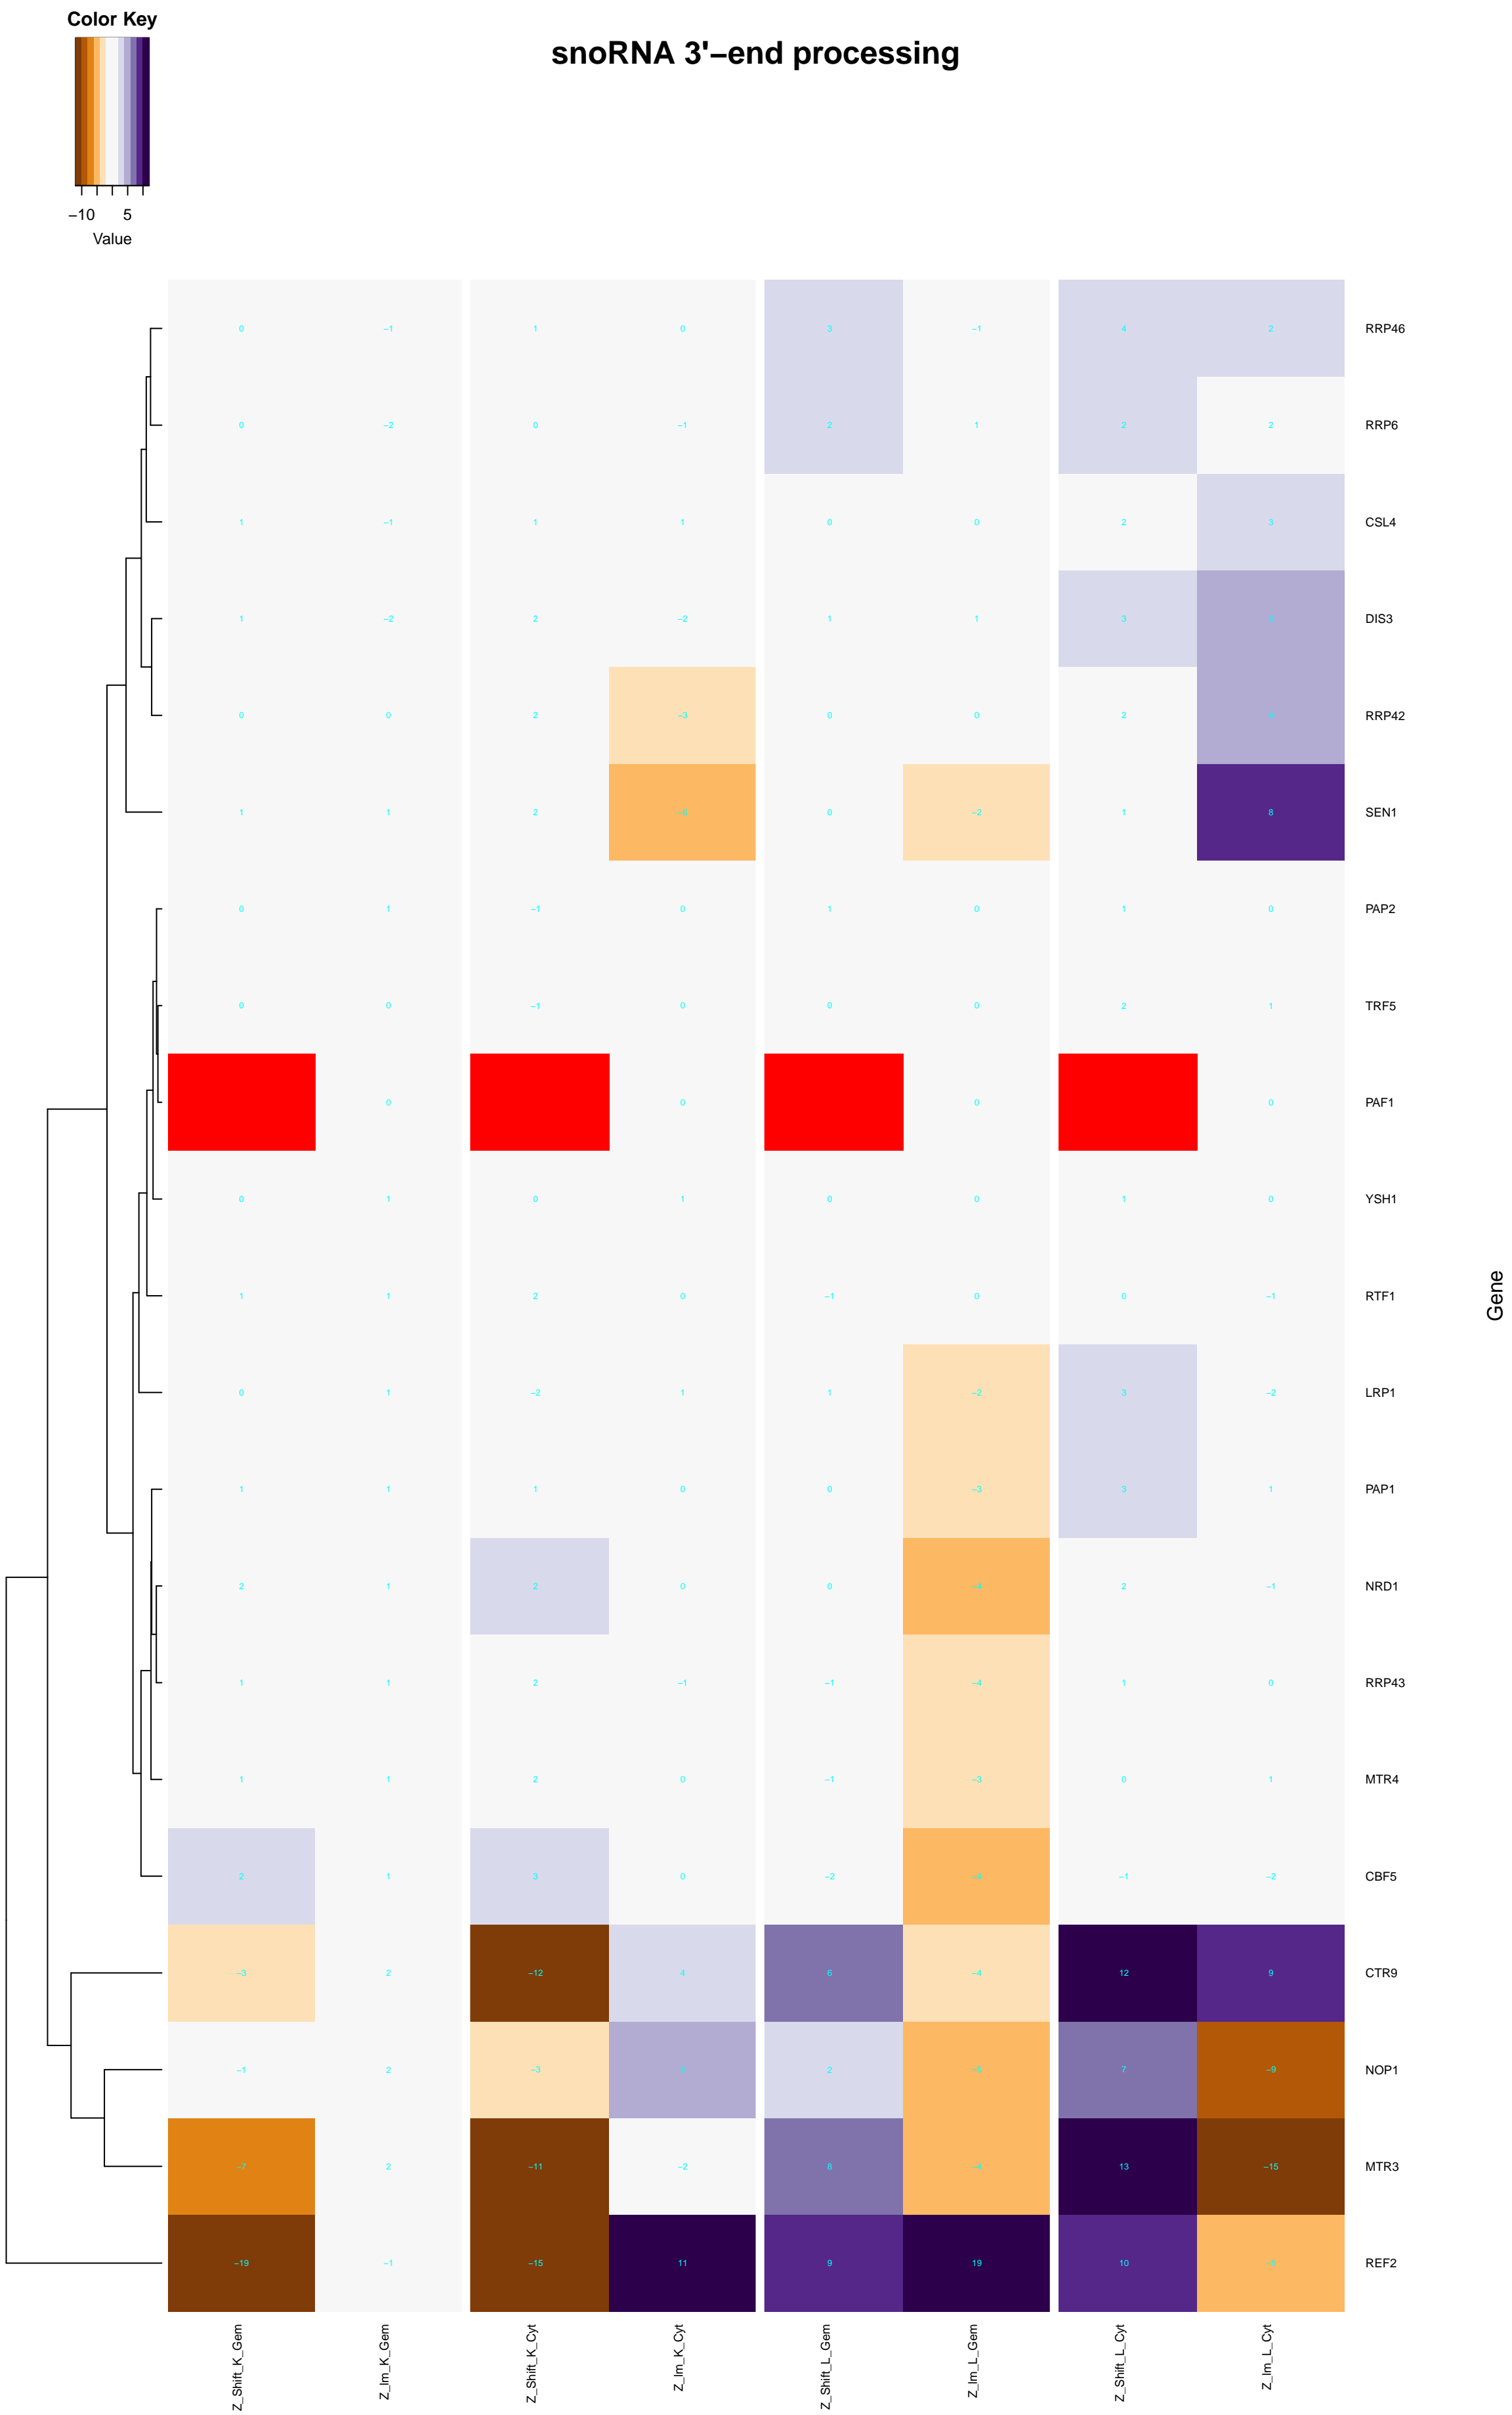

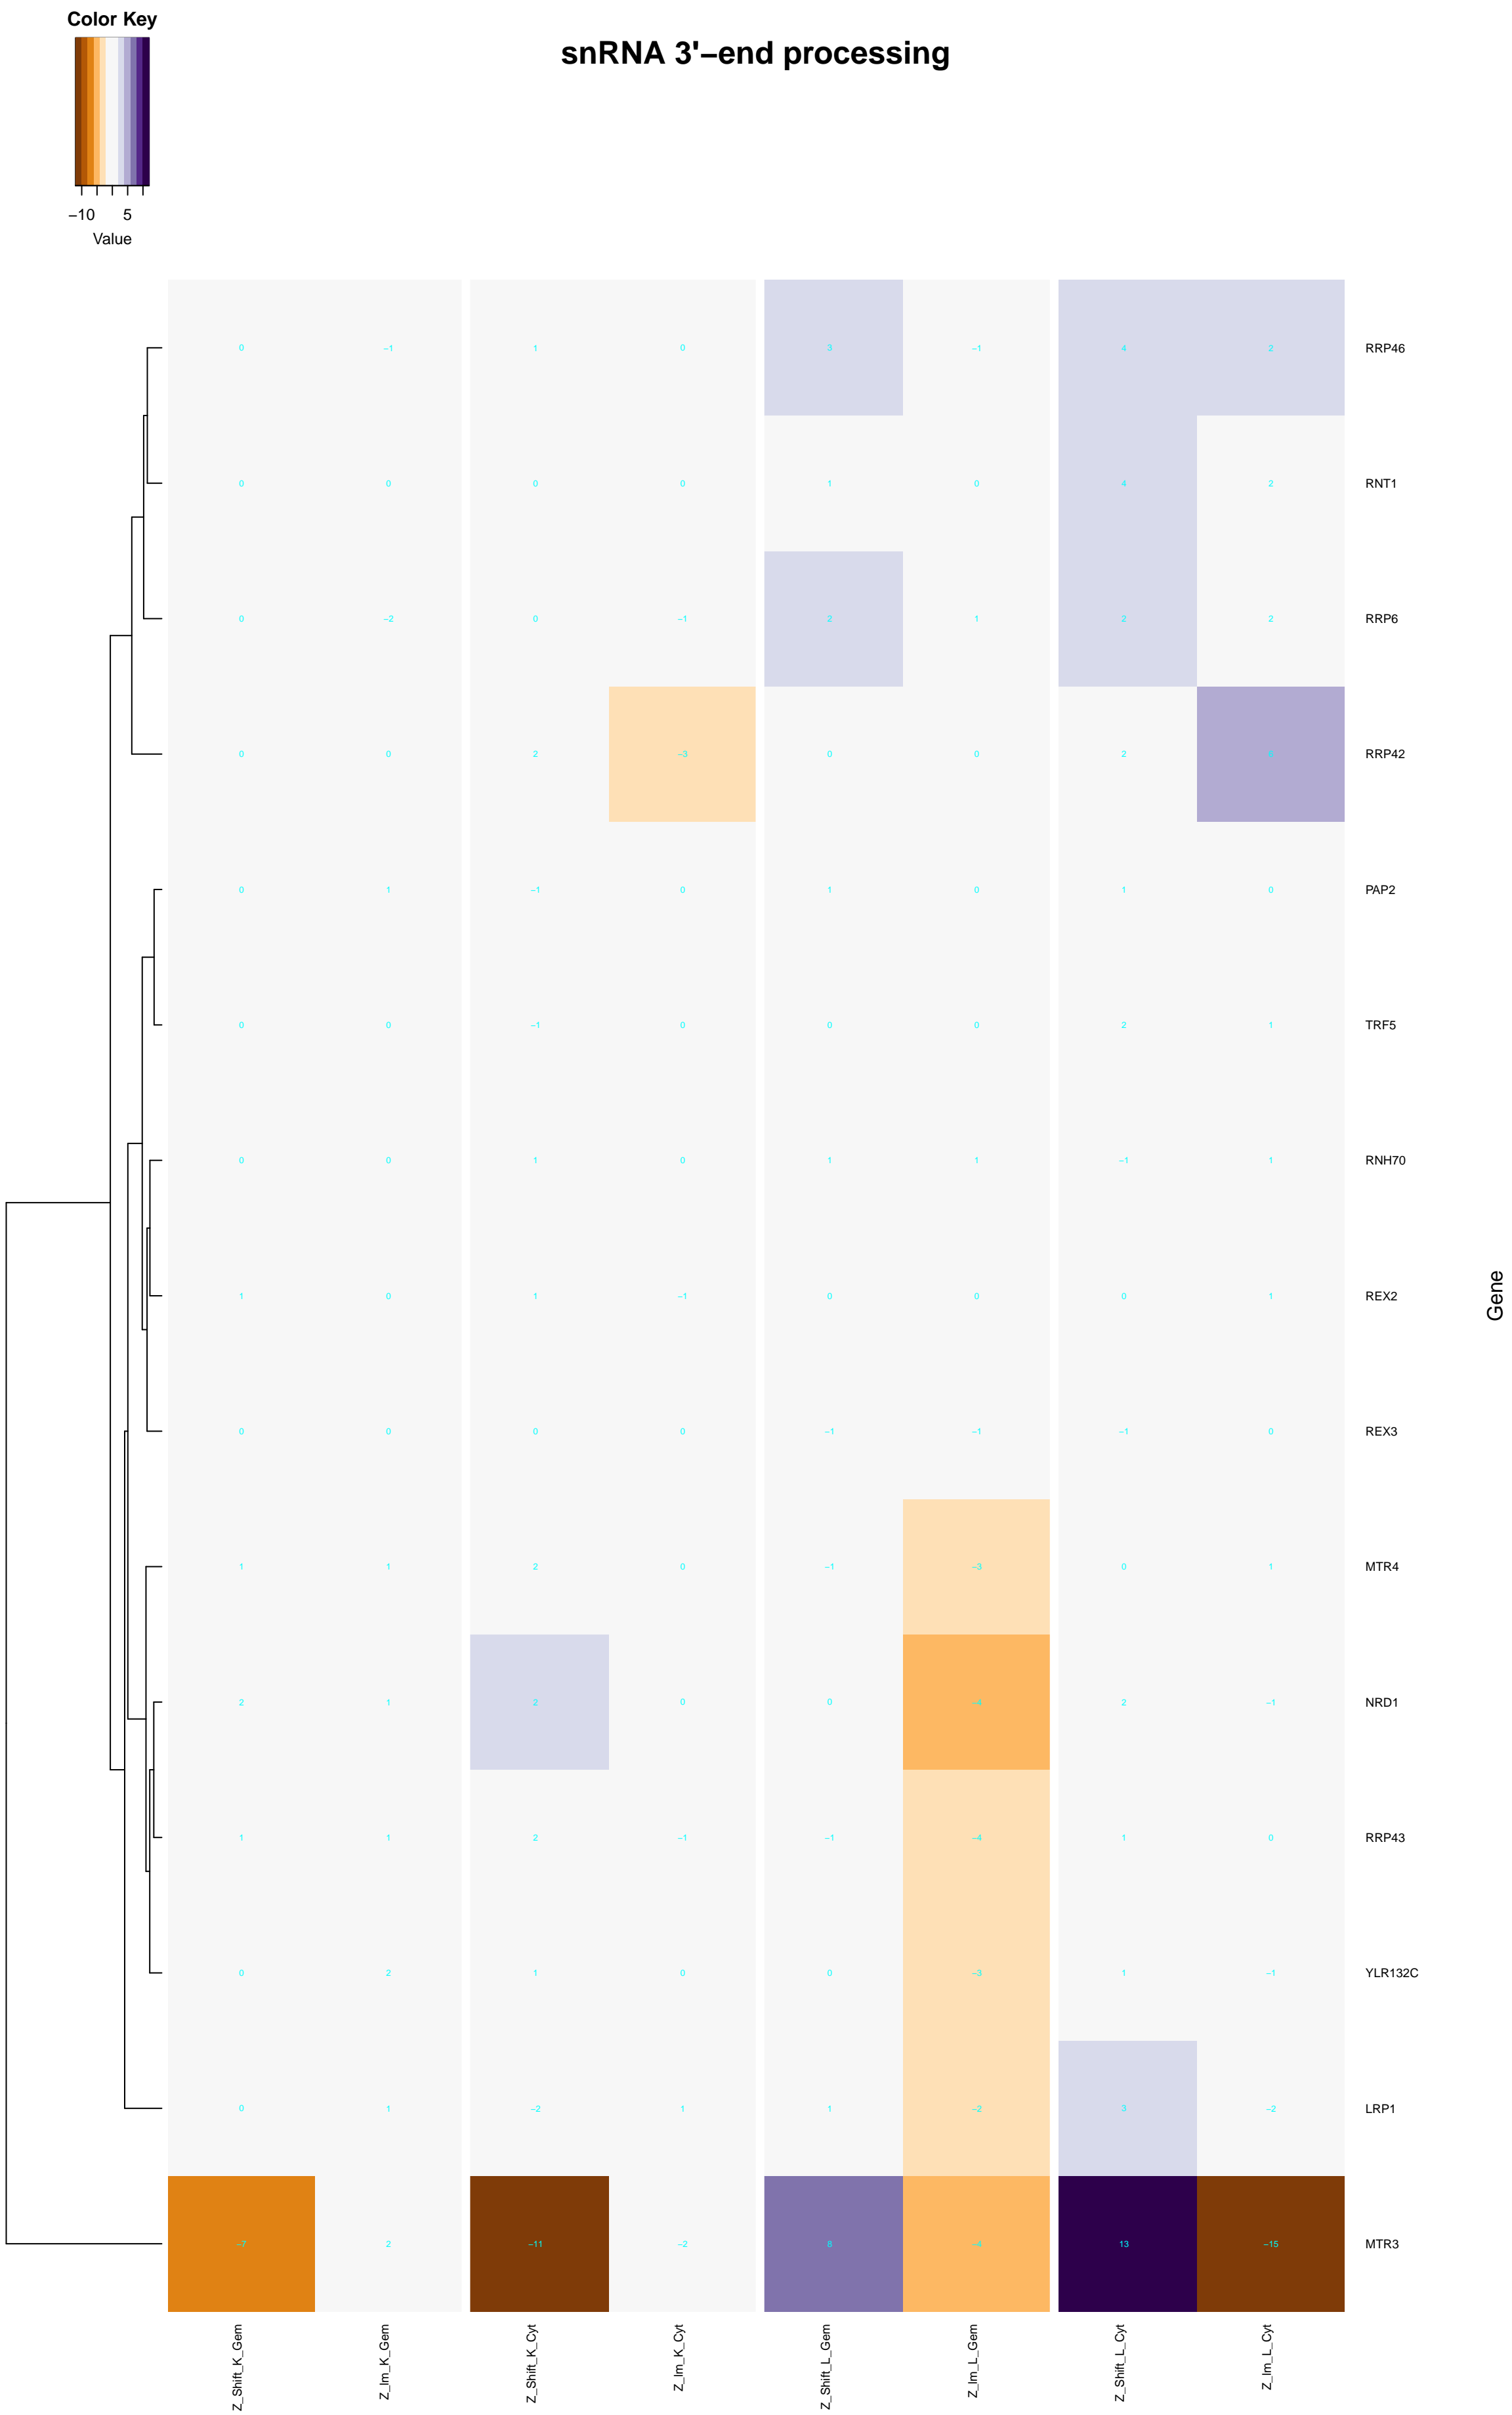

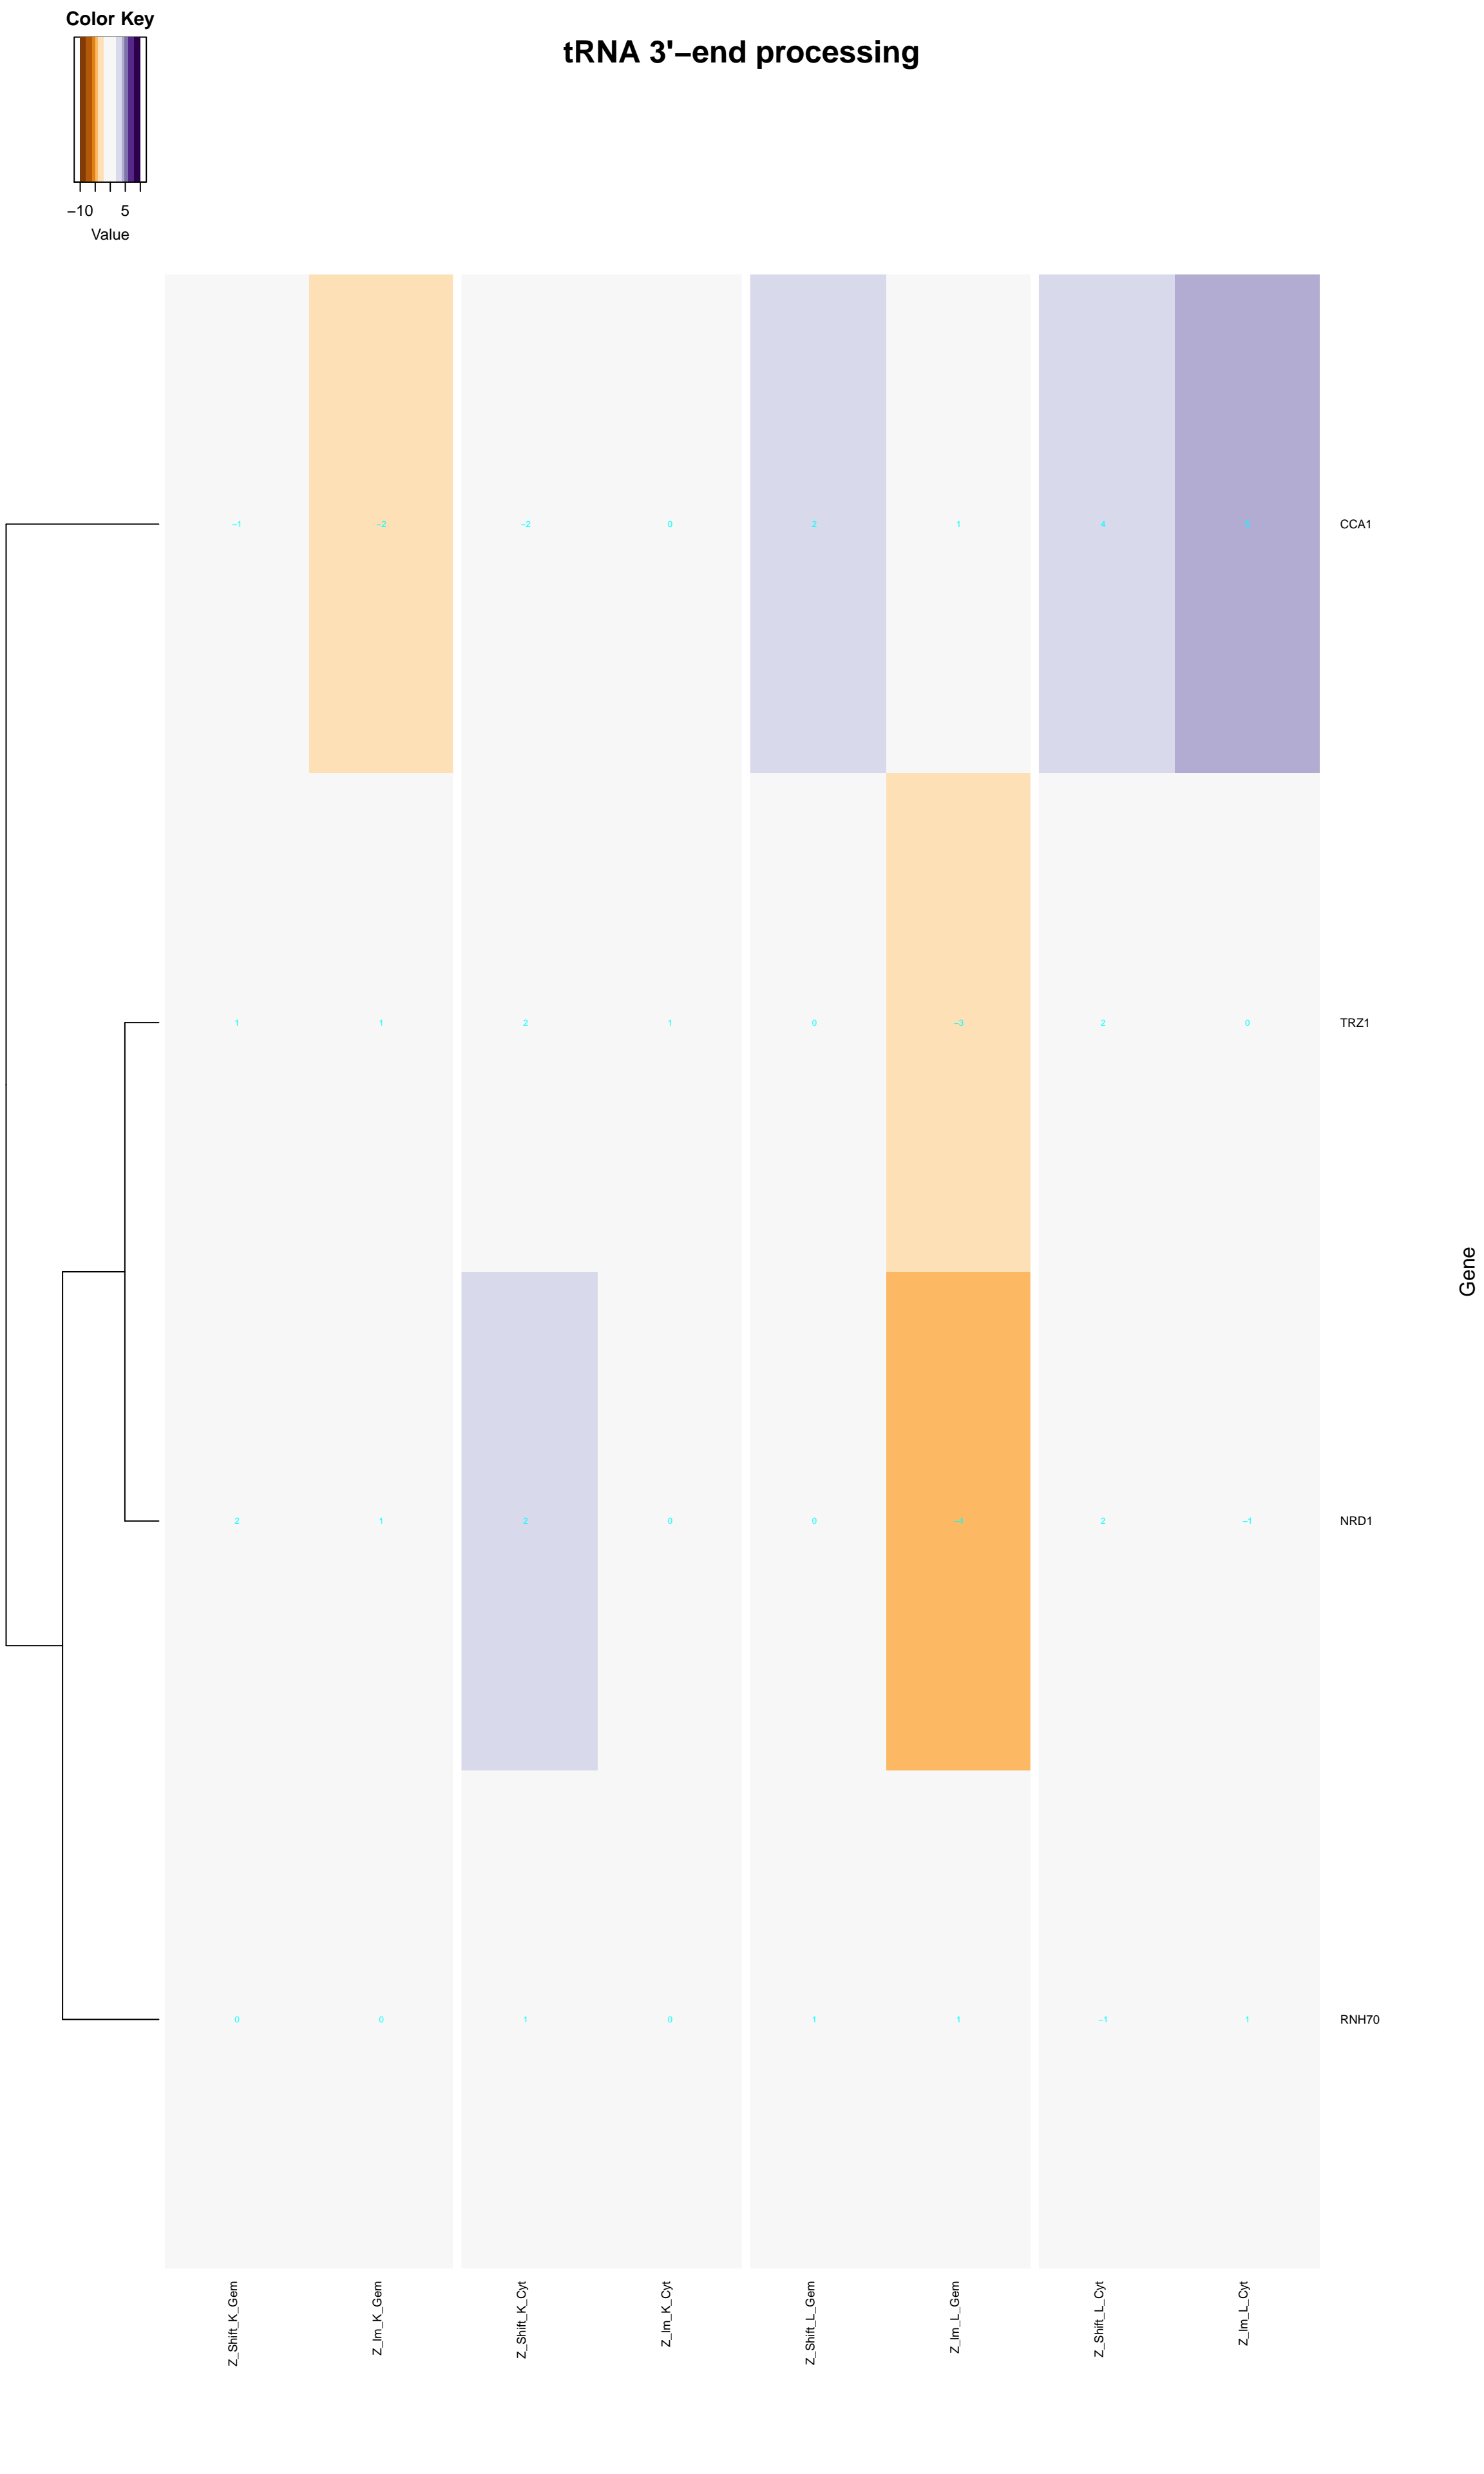



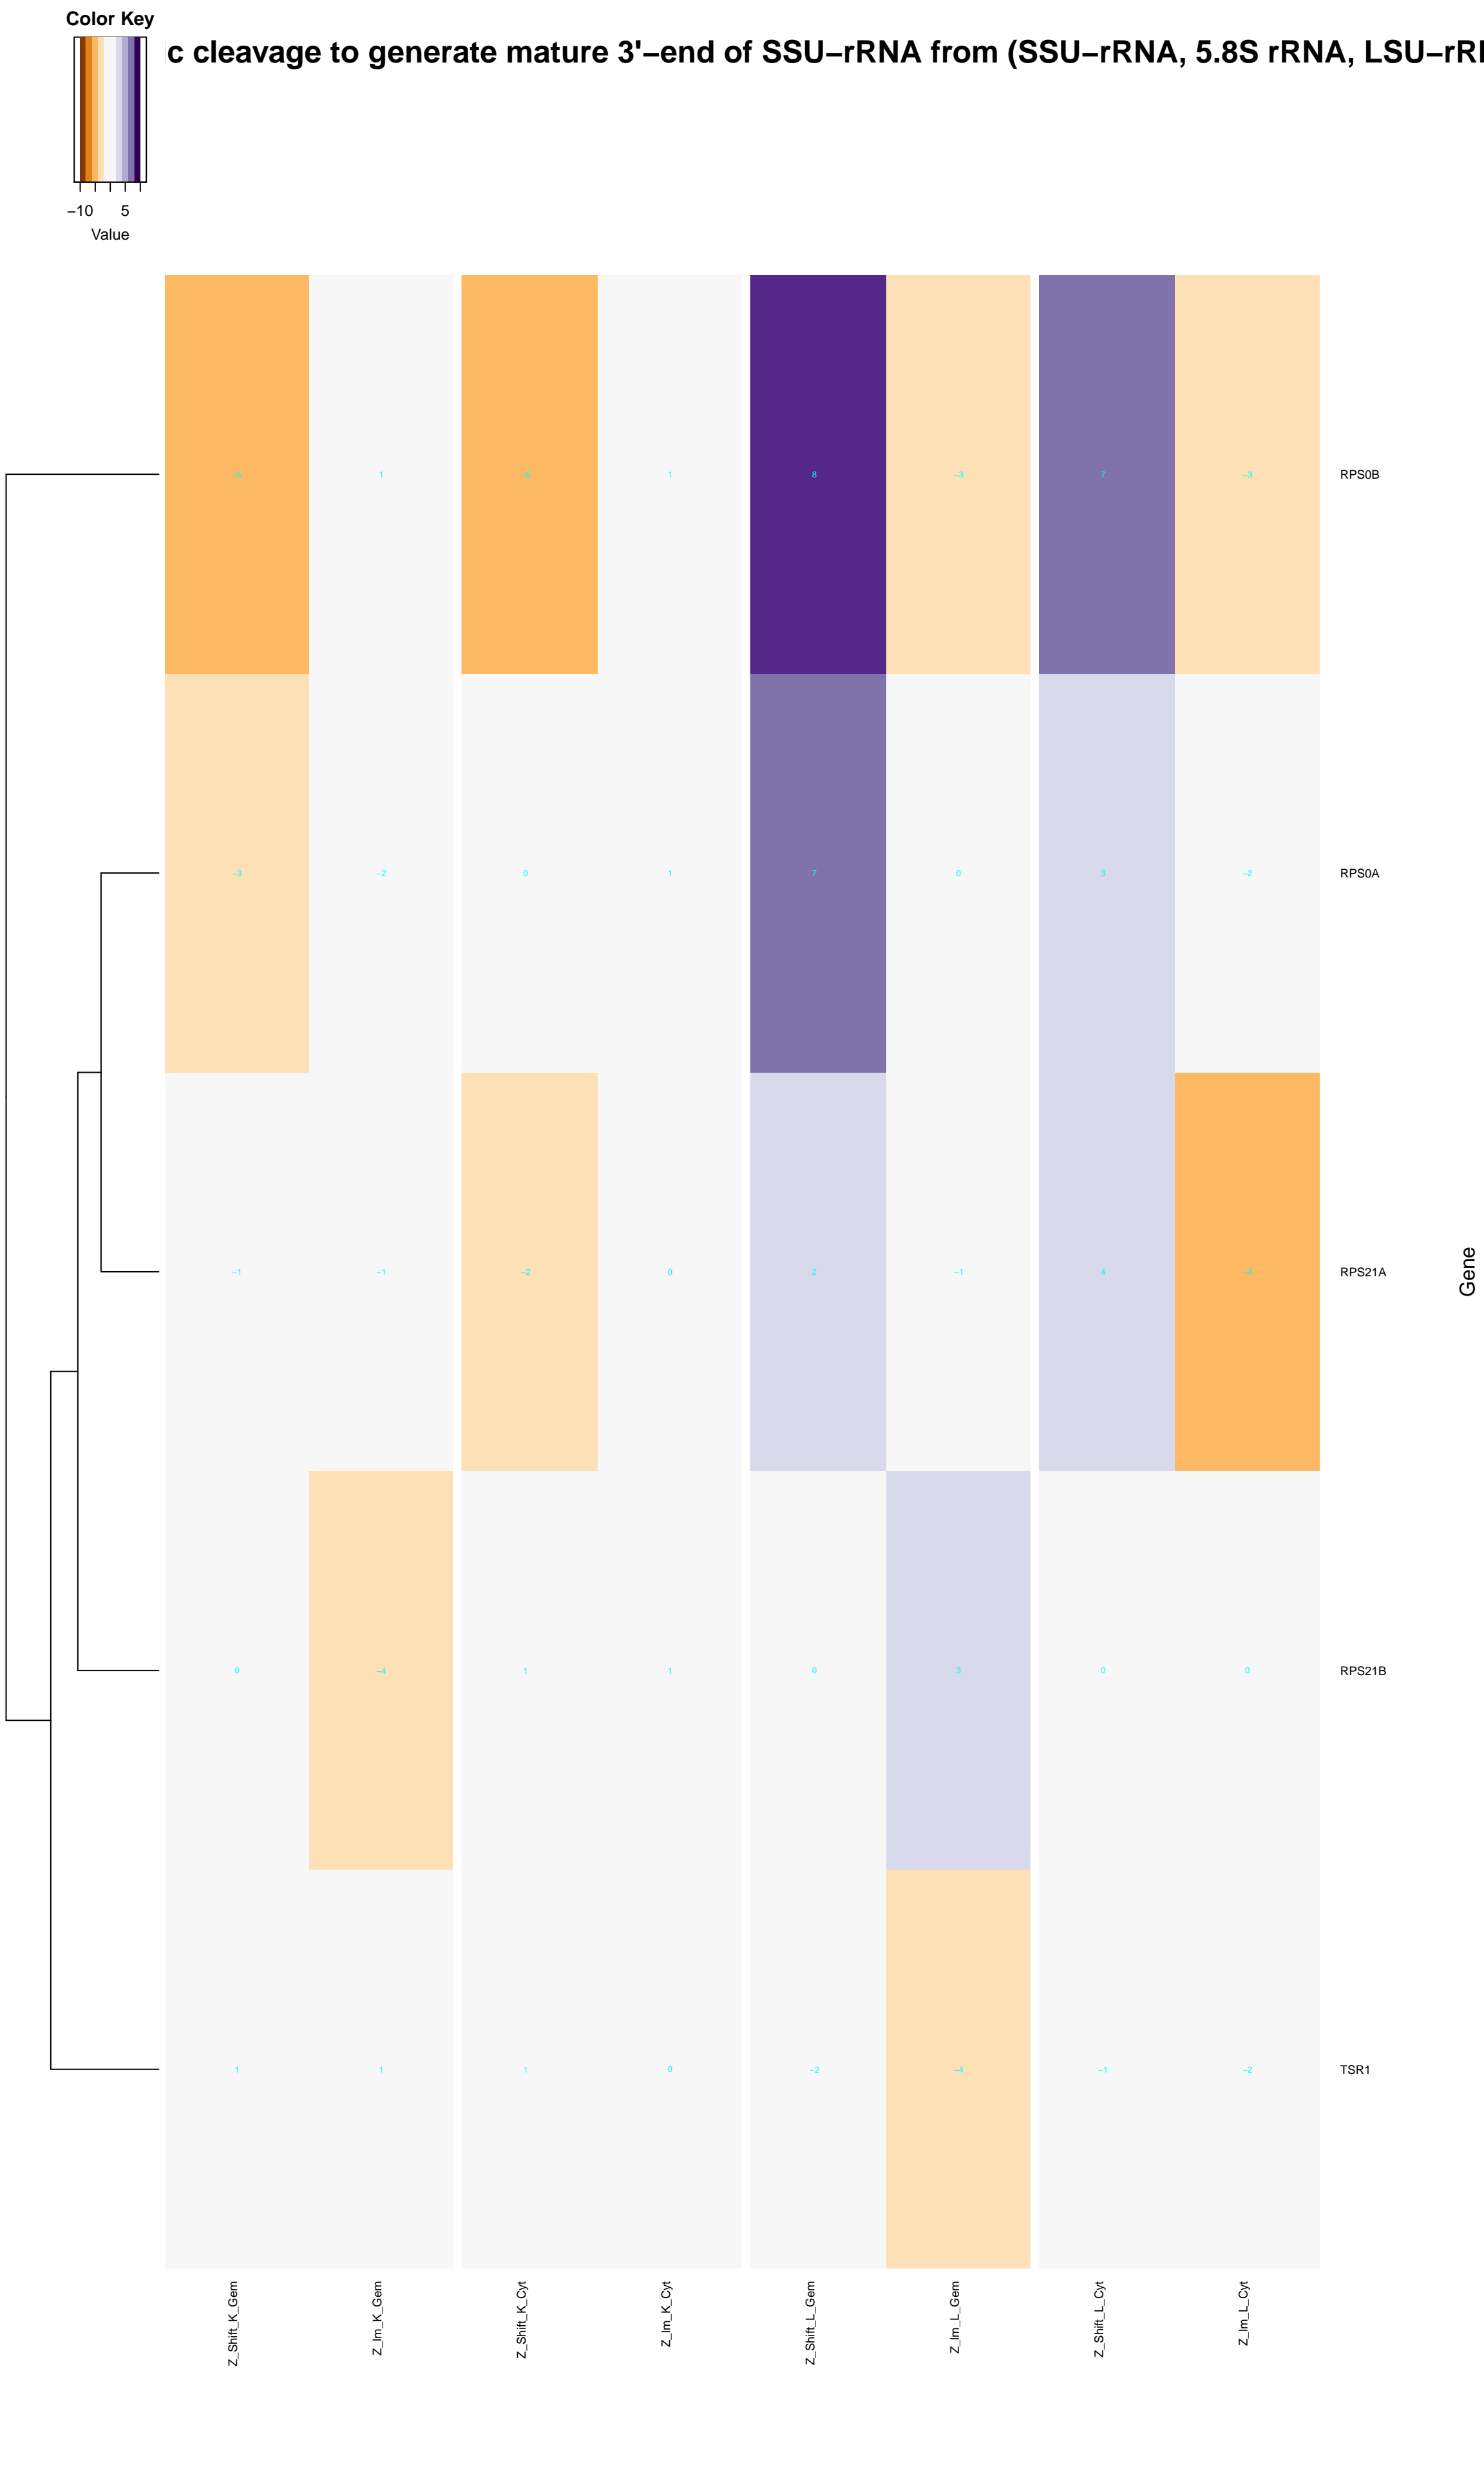

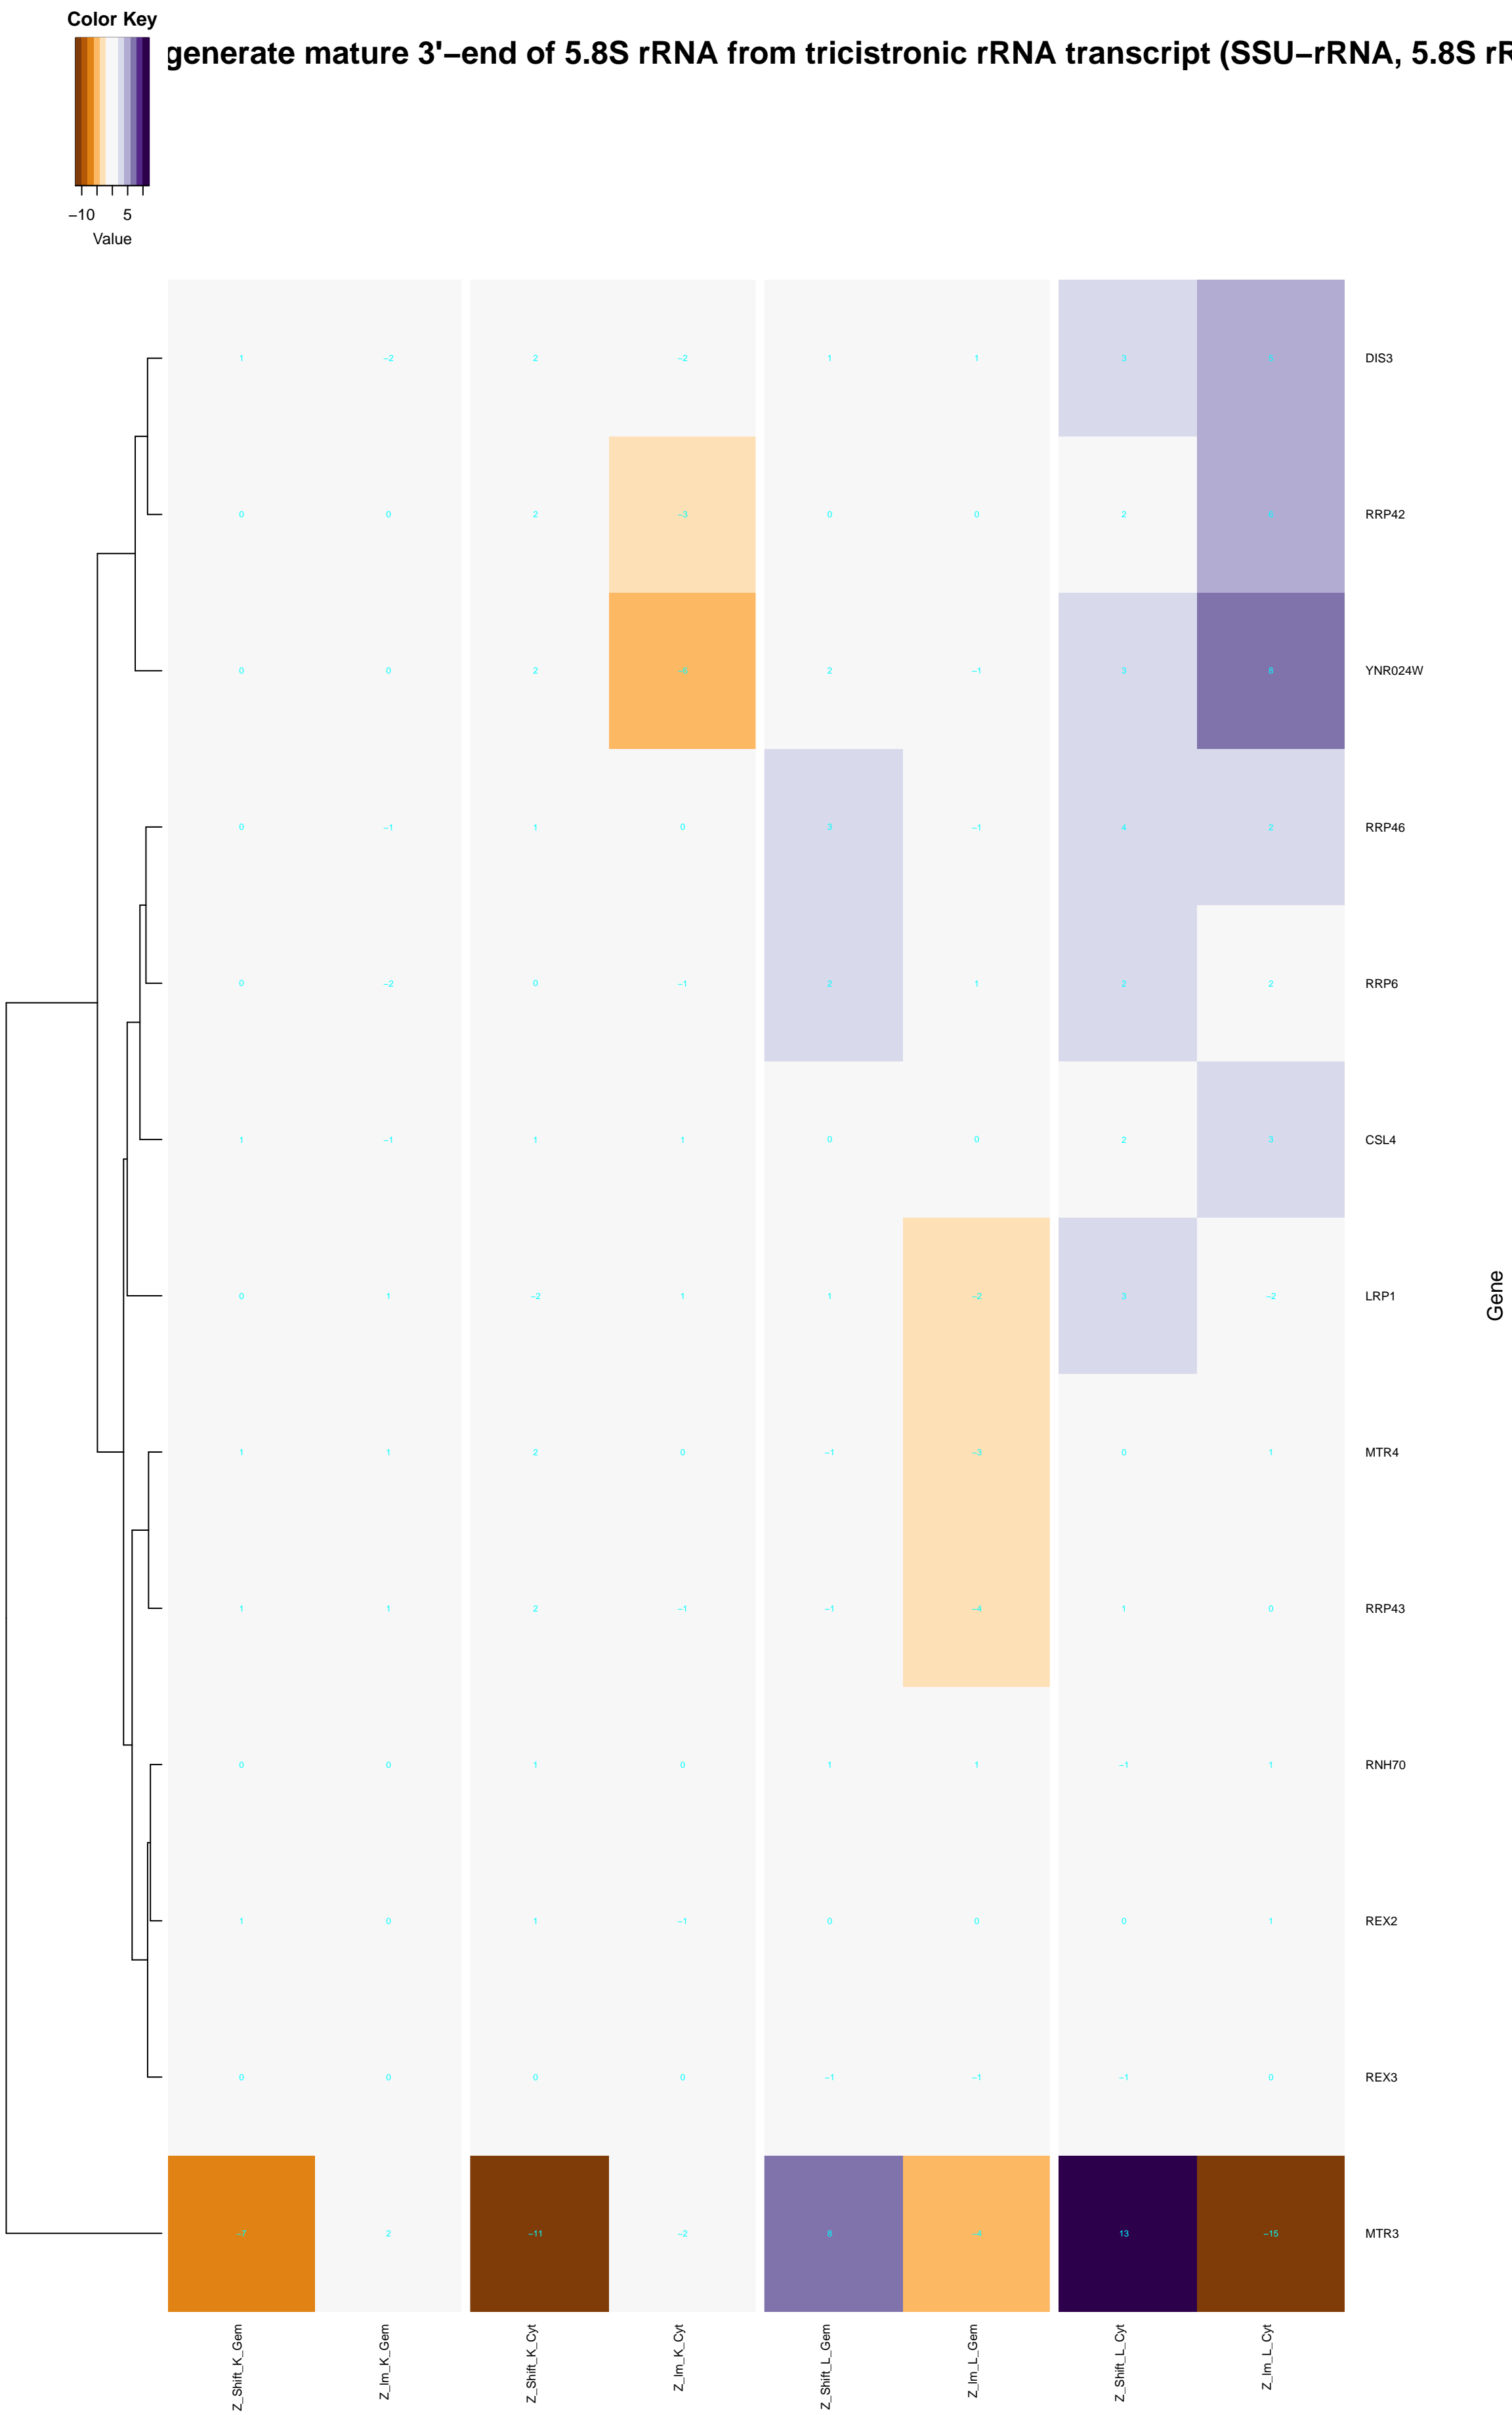

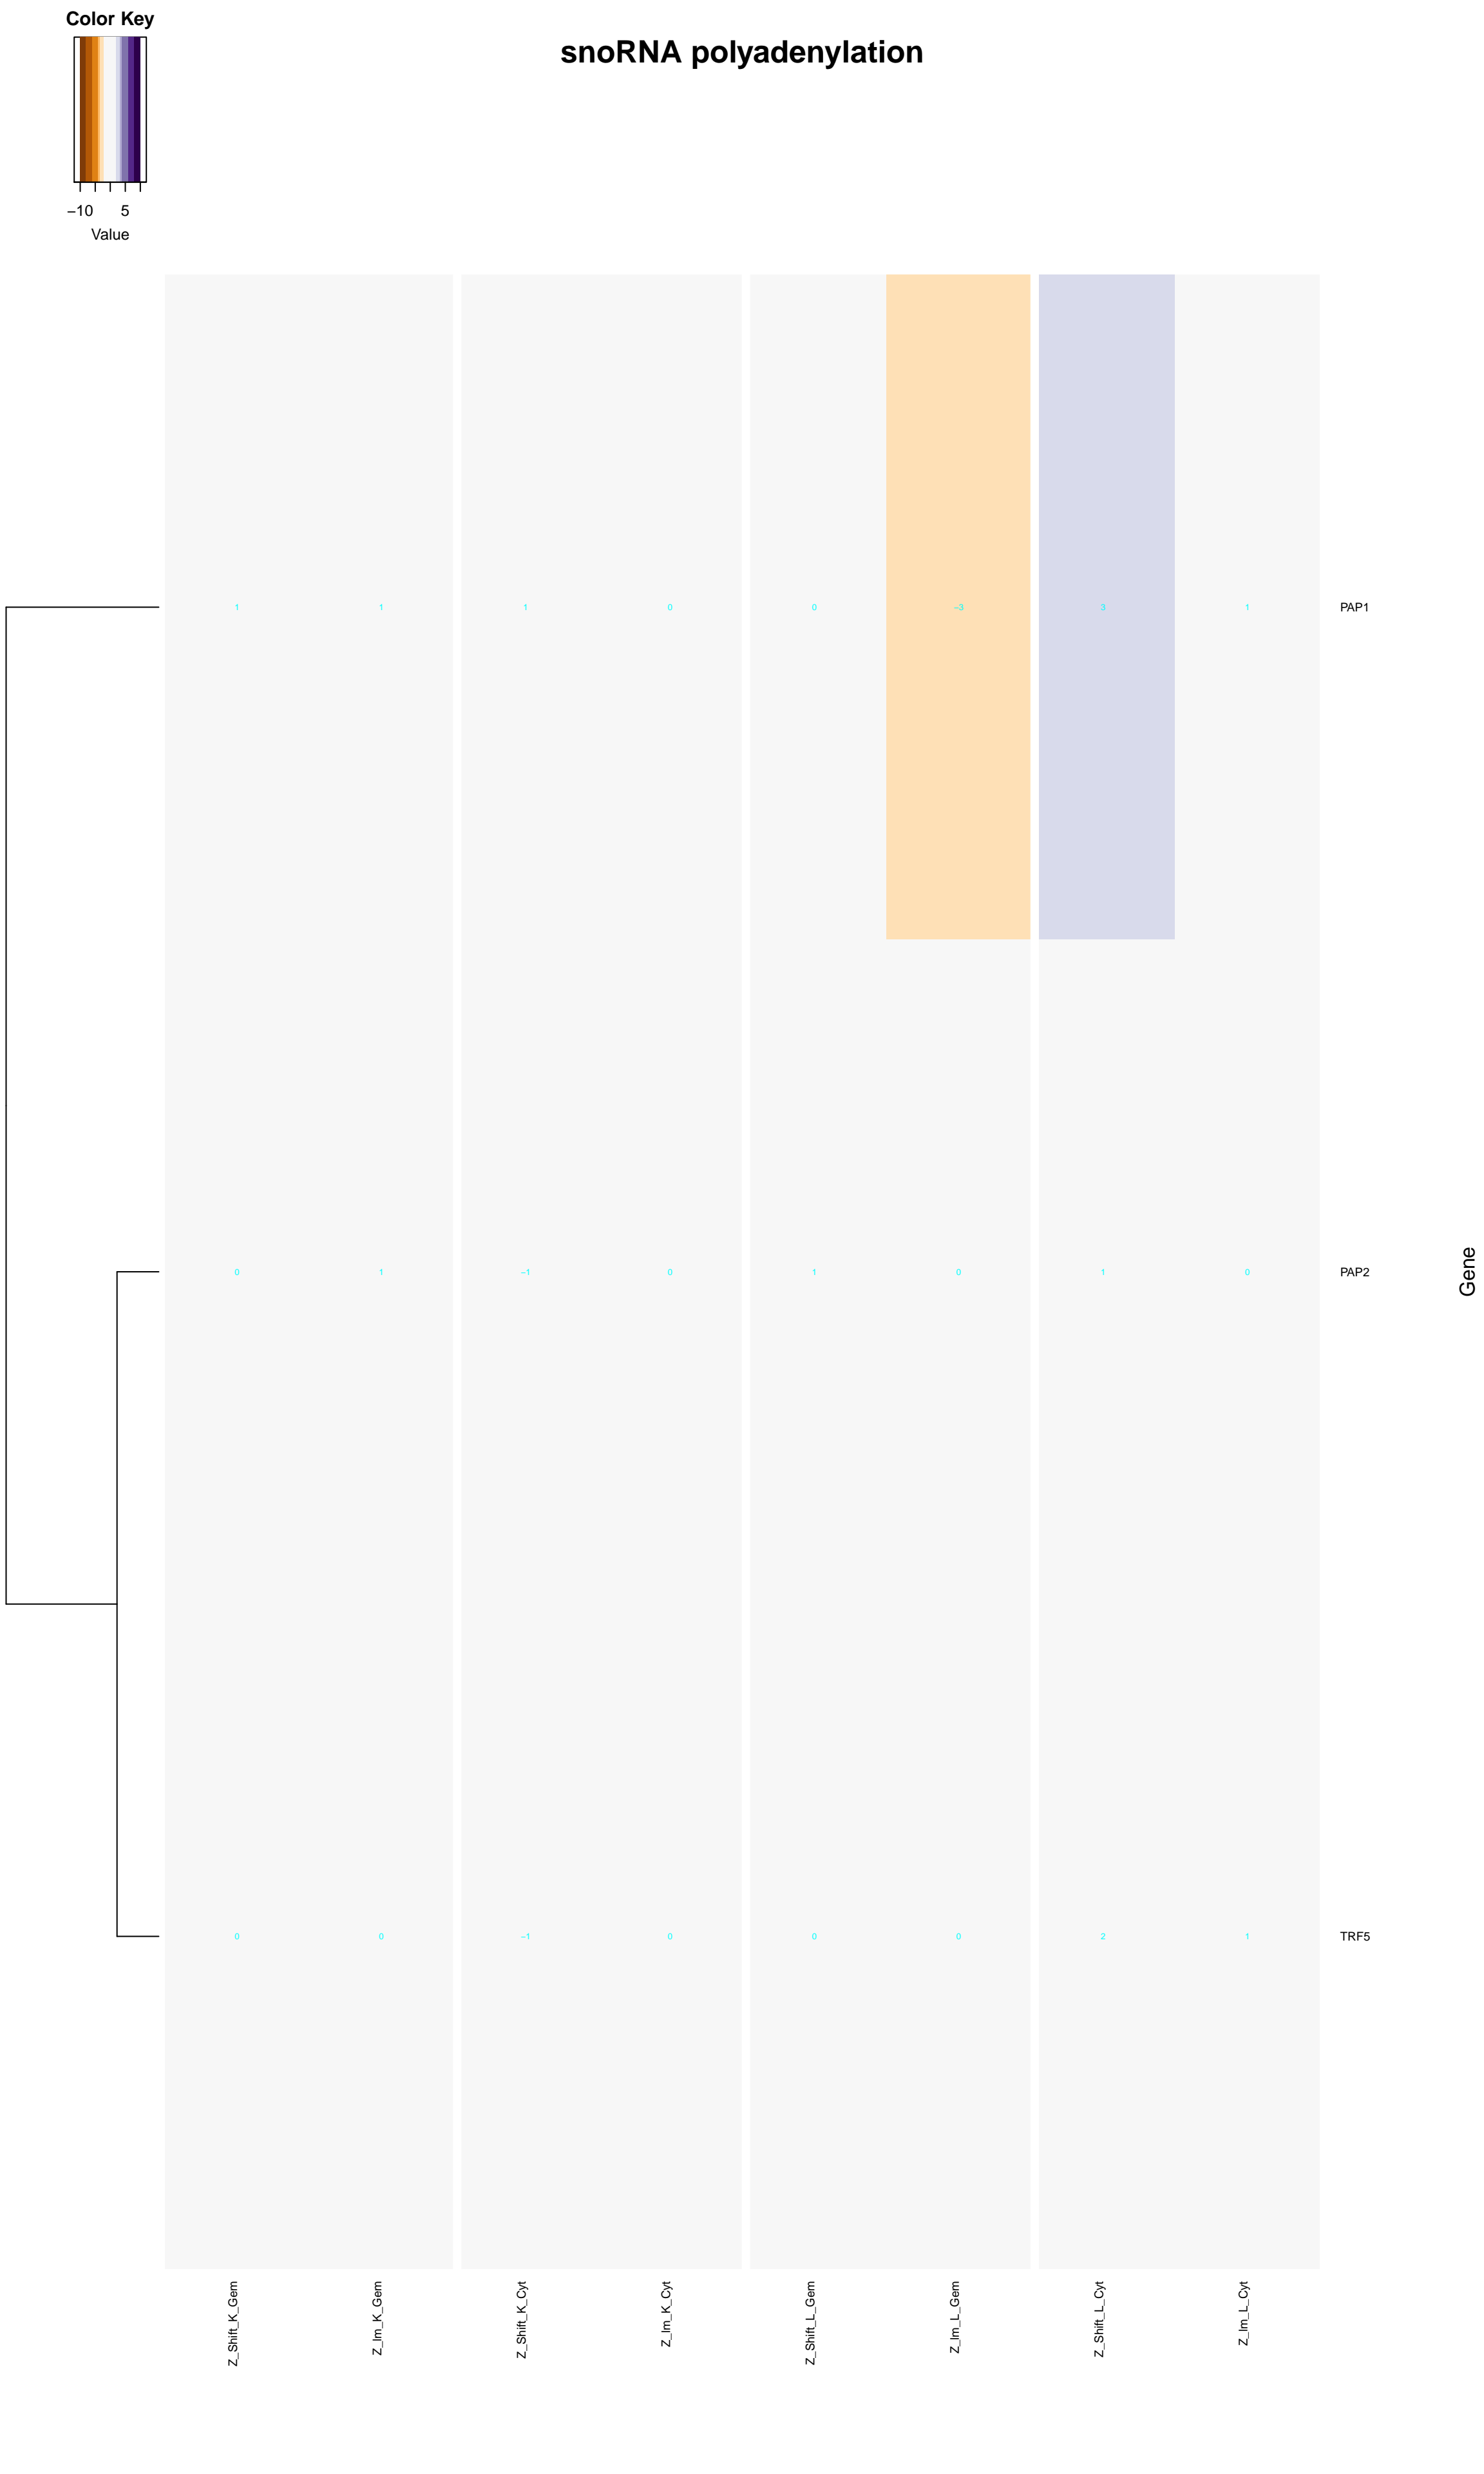

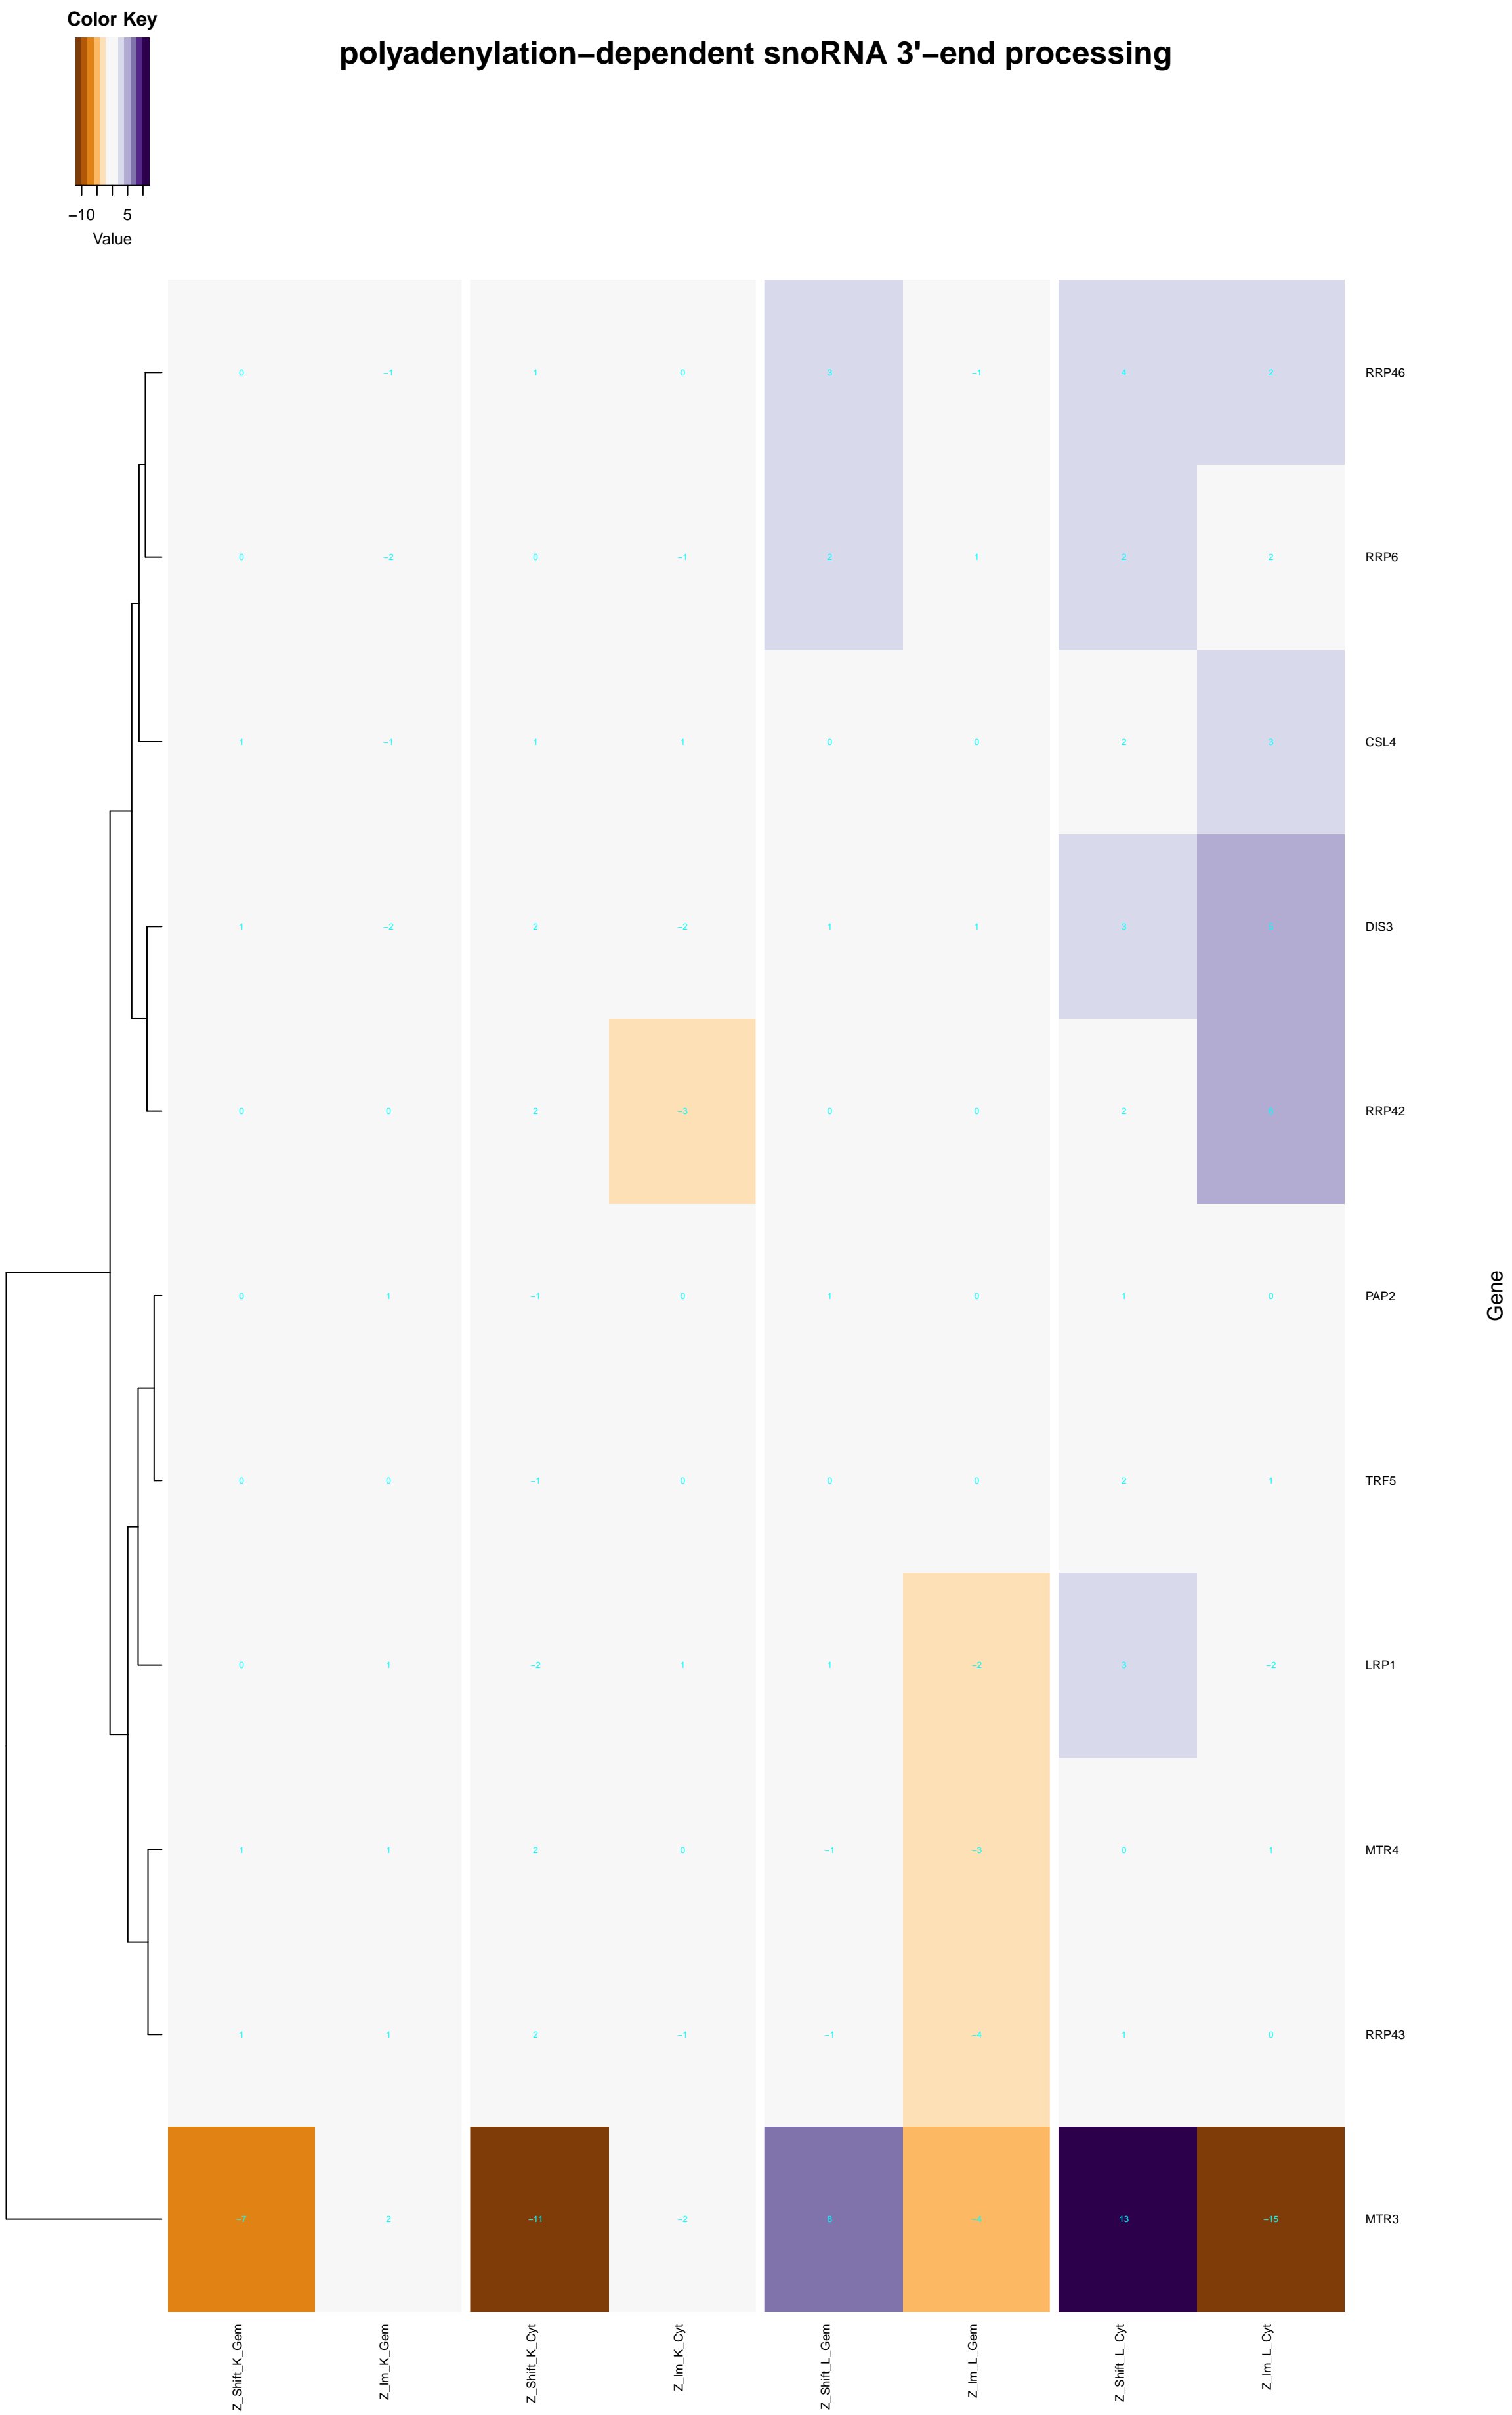

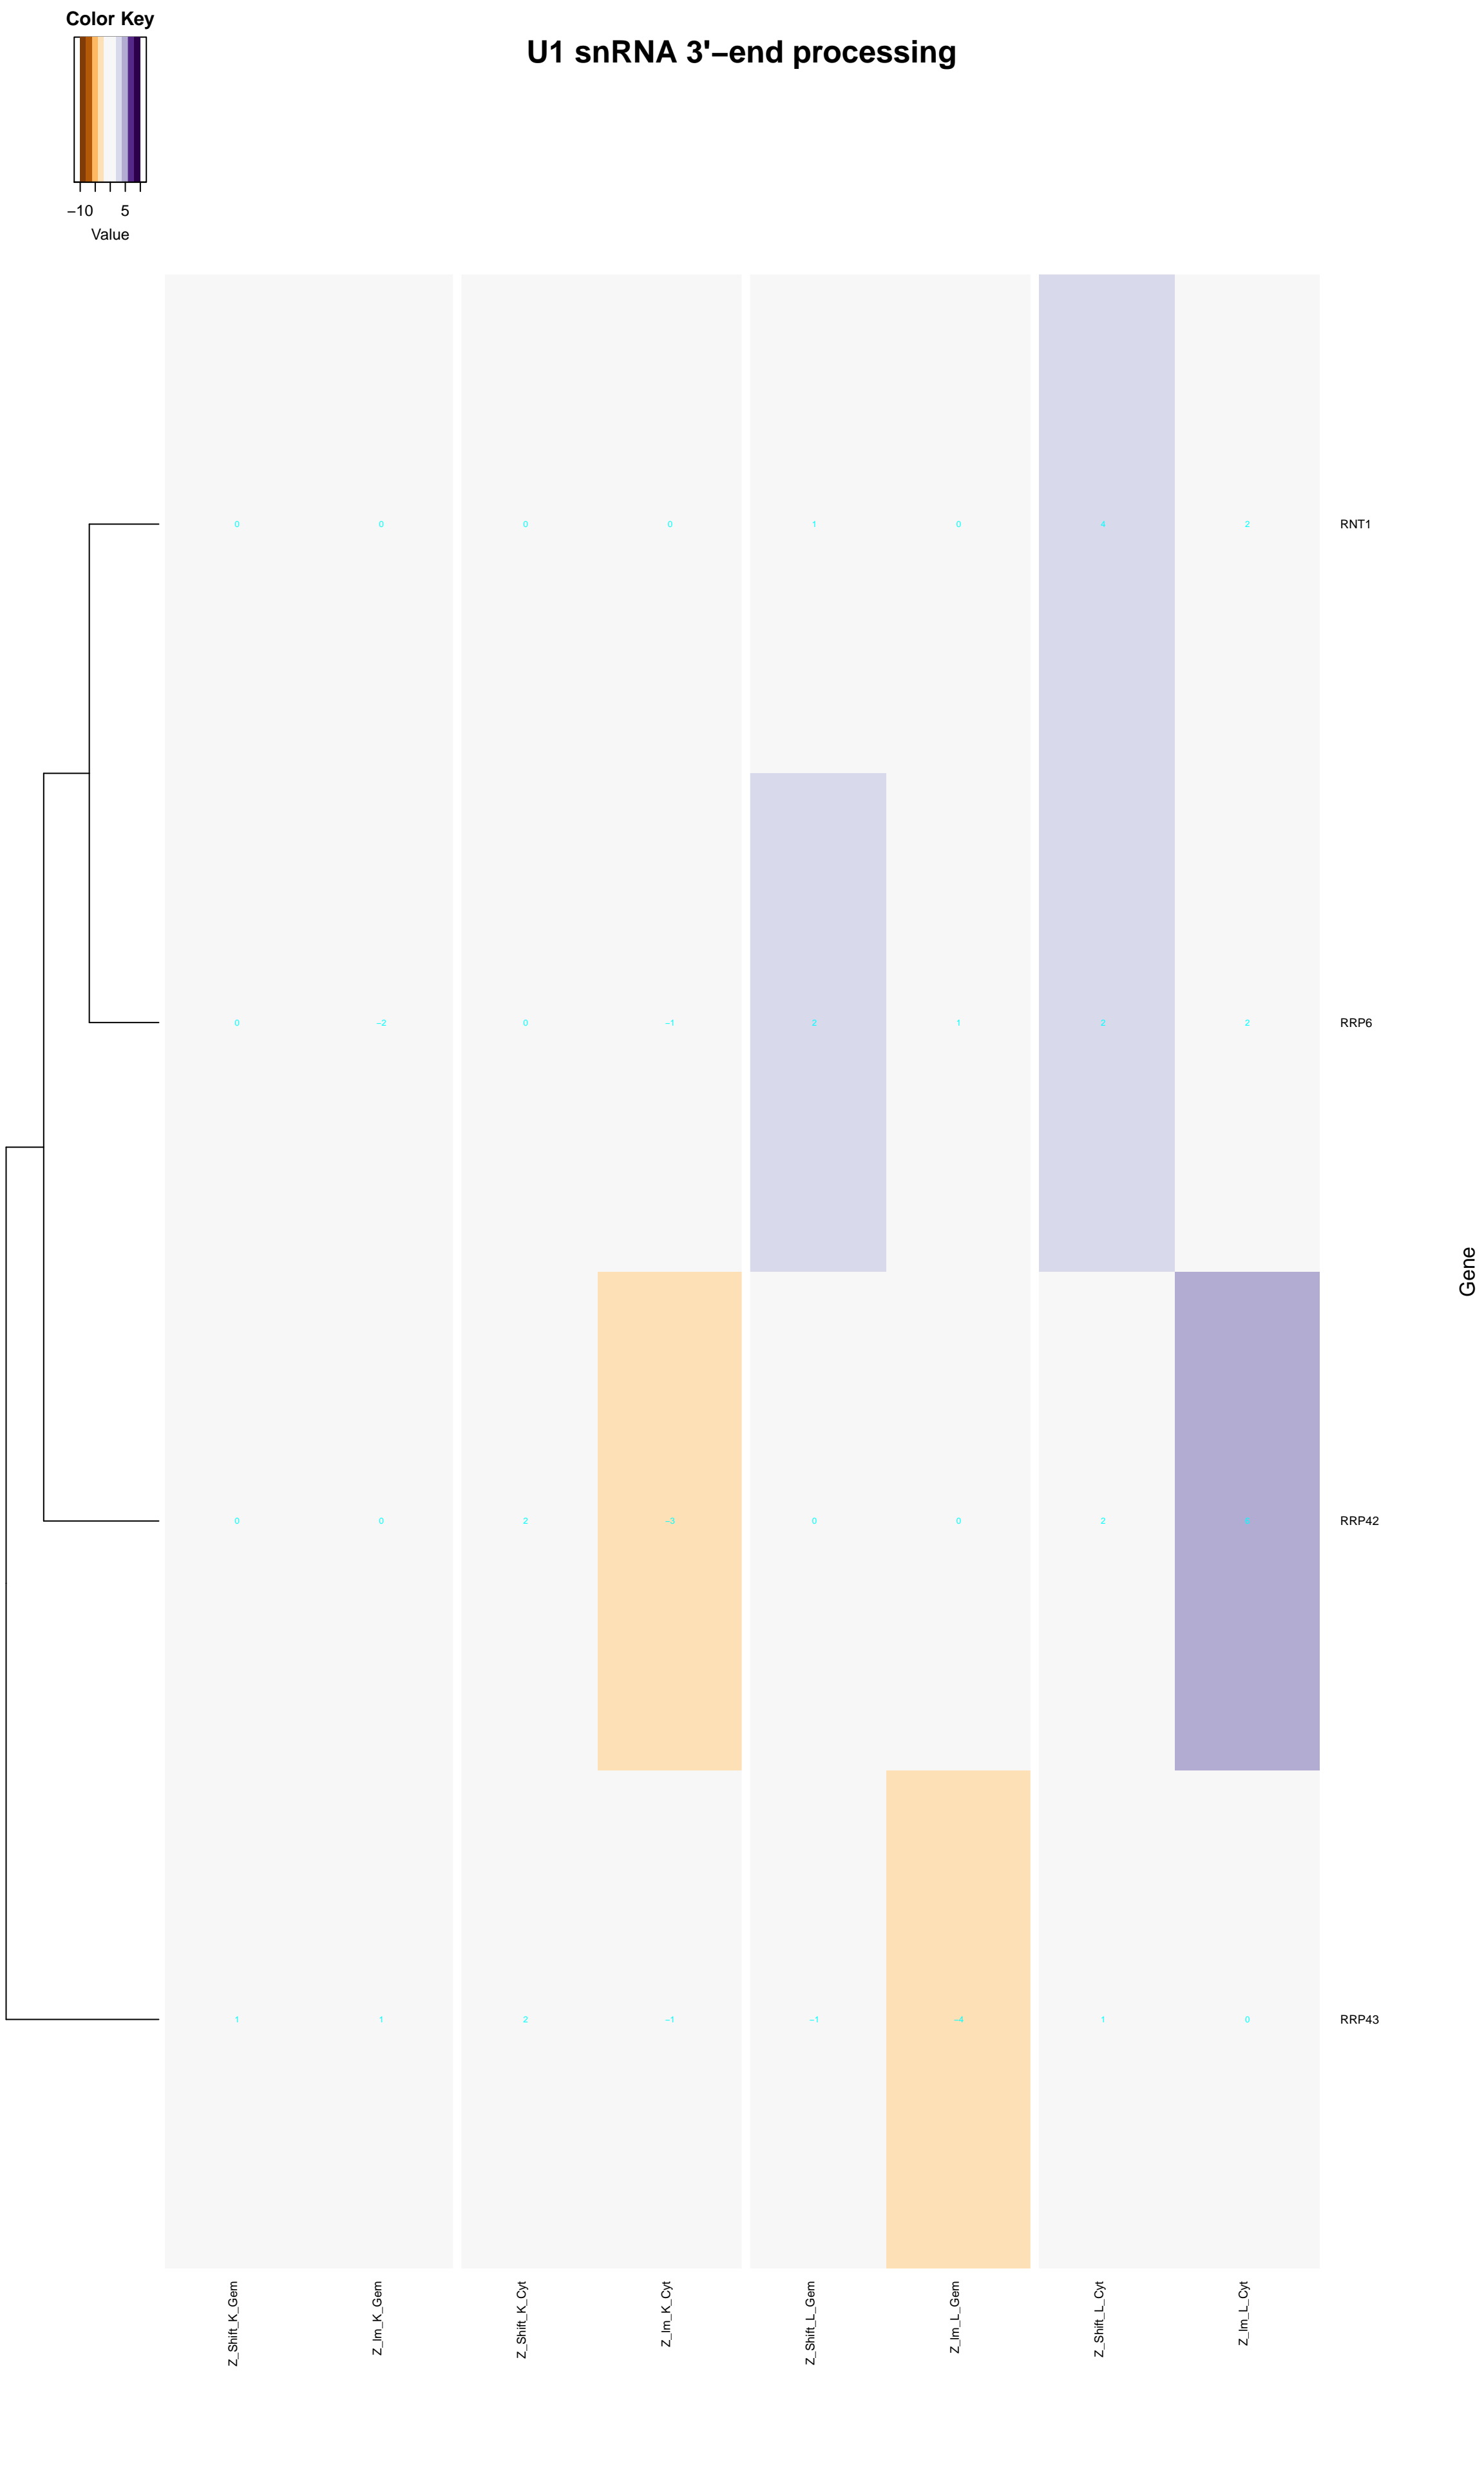

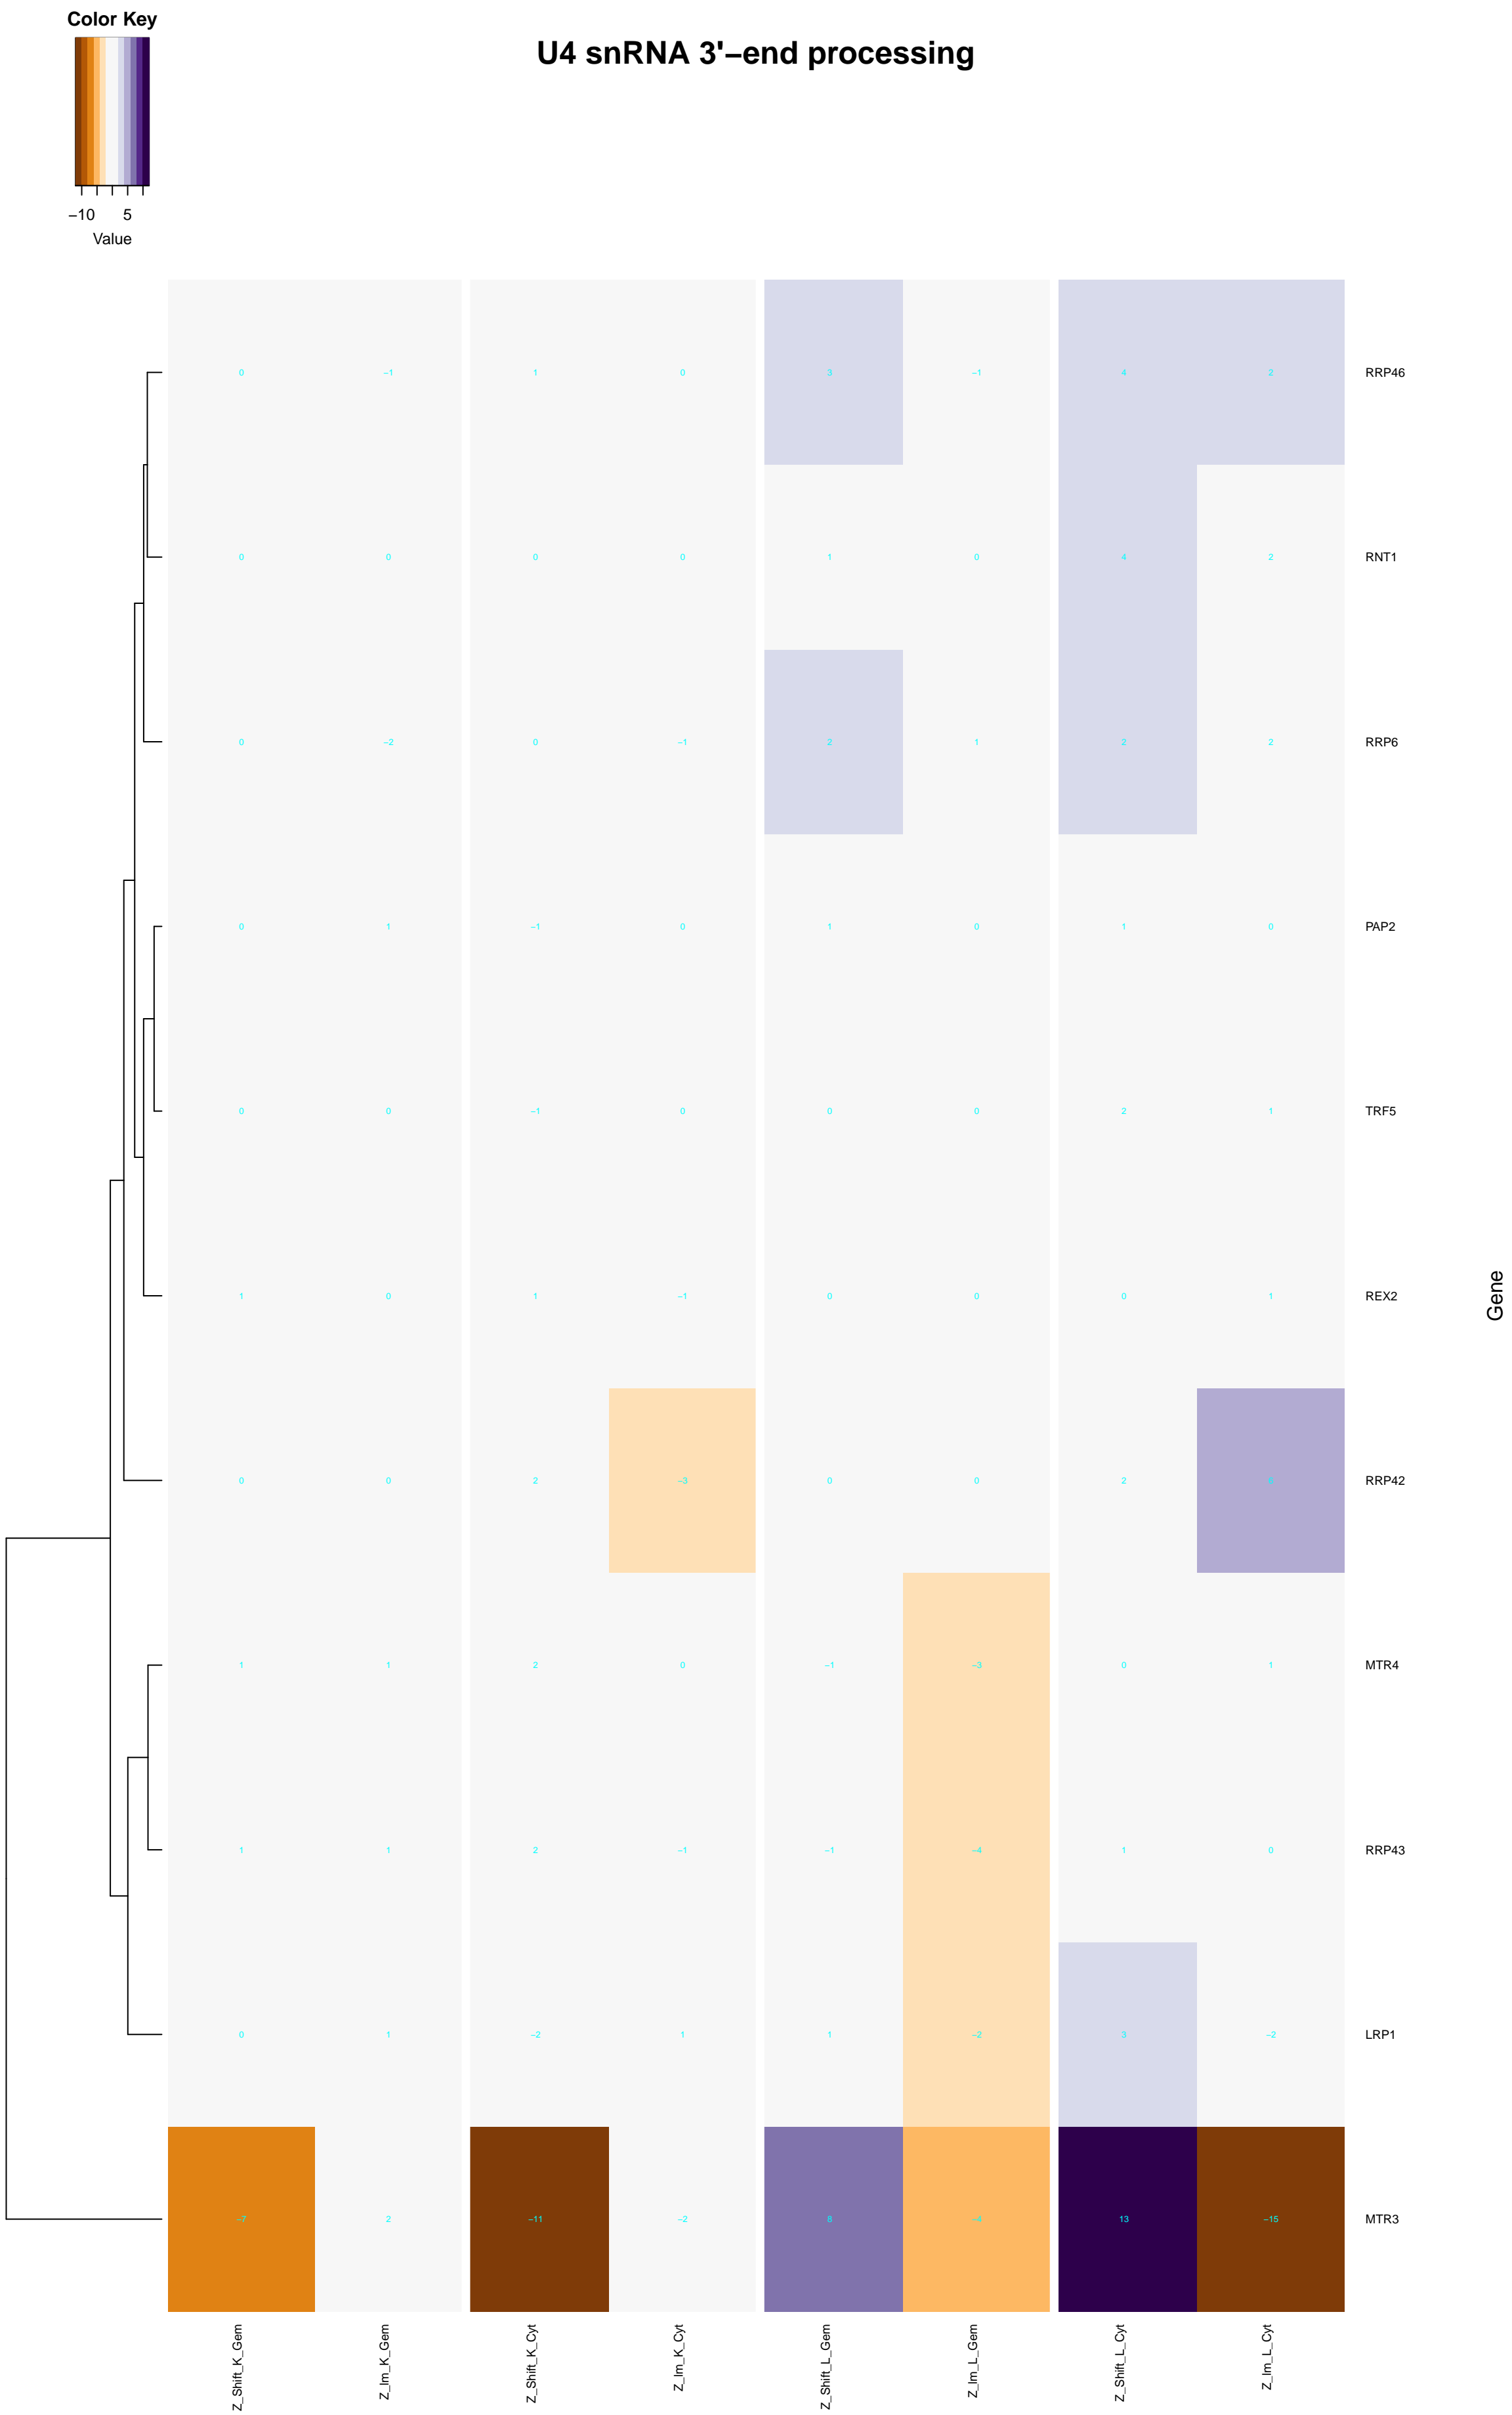

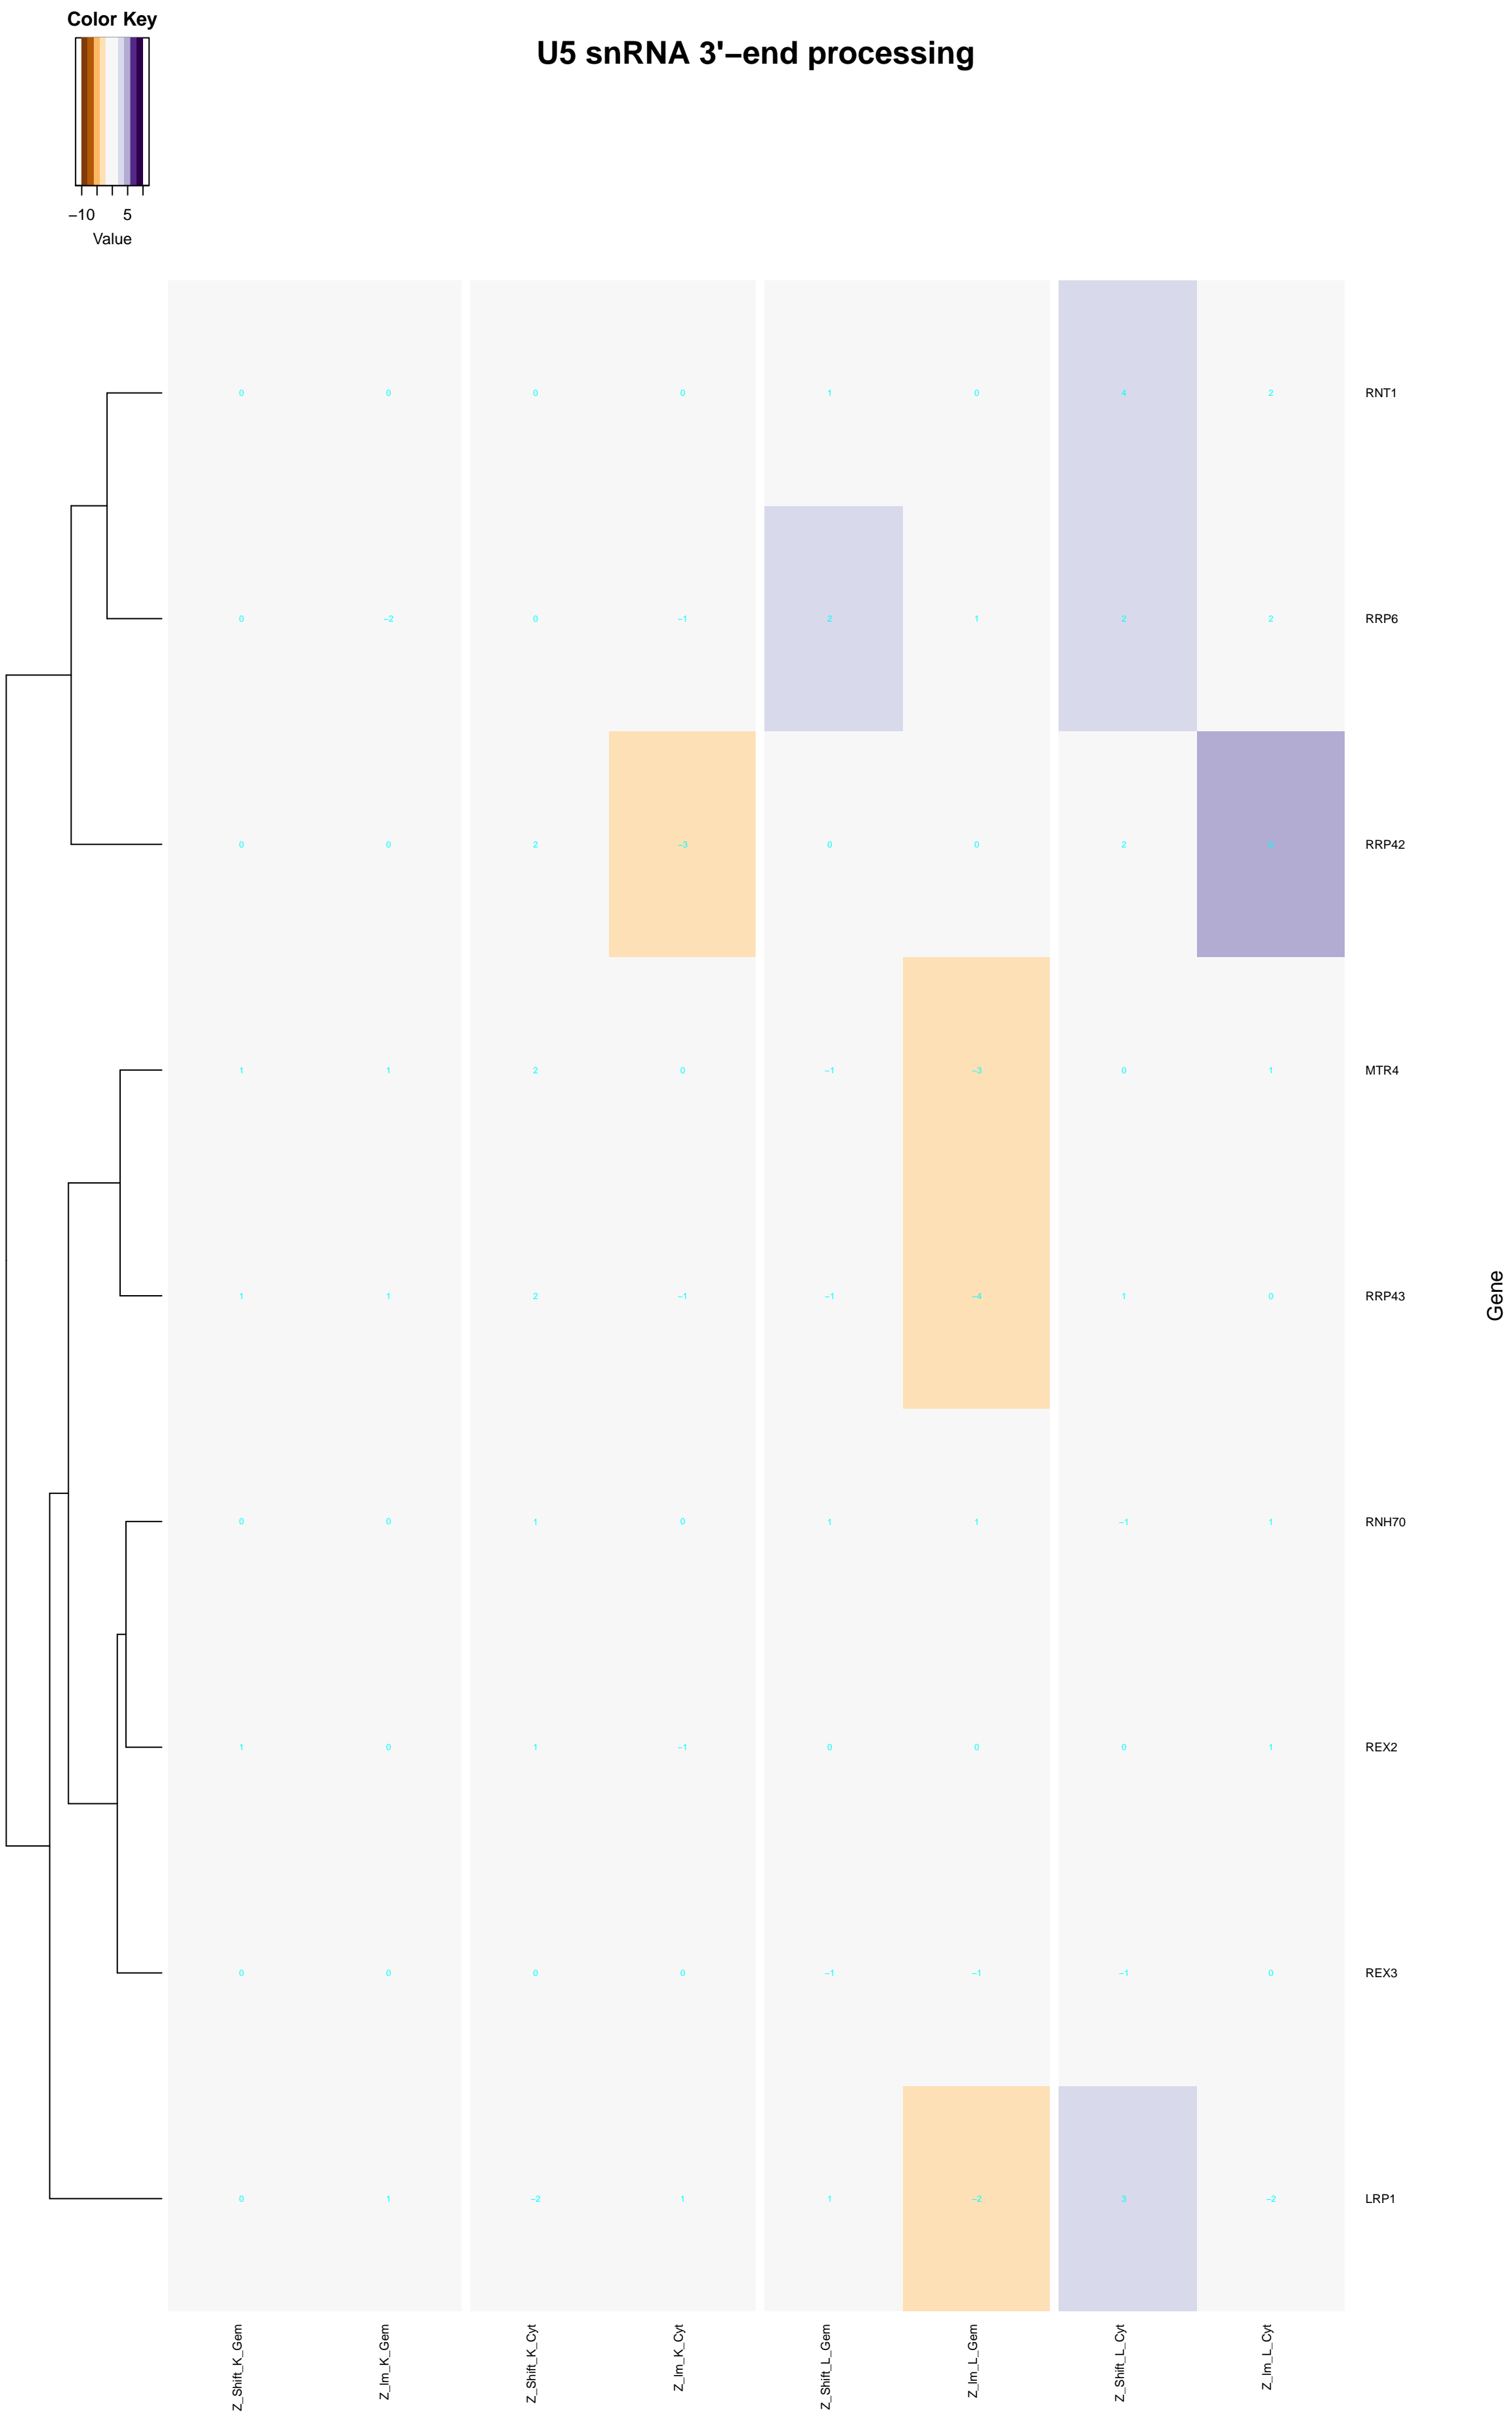

Supplement: s1 [file s1]

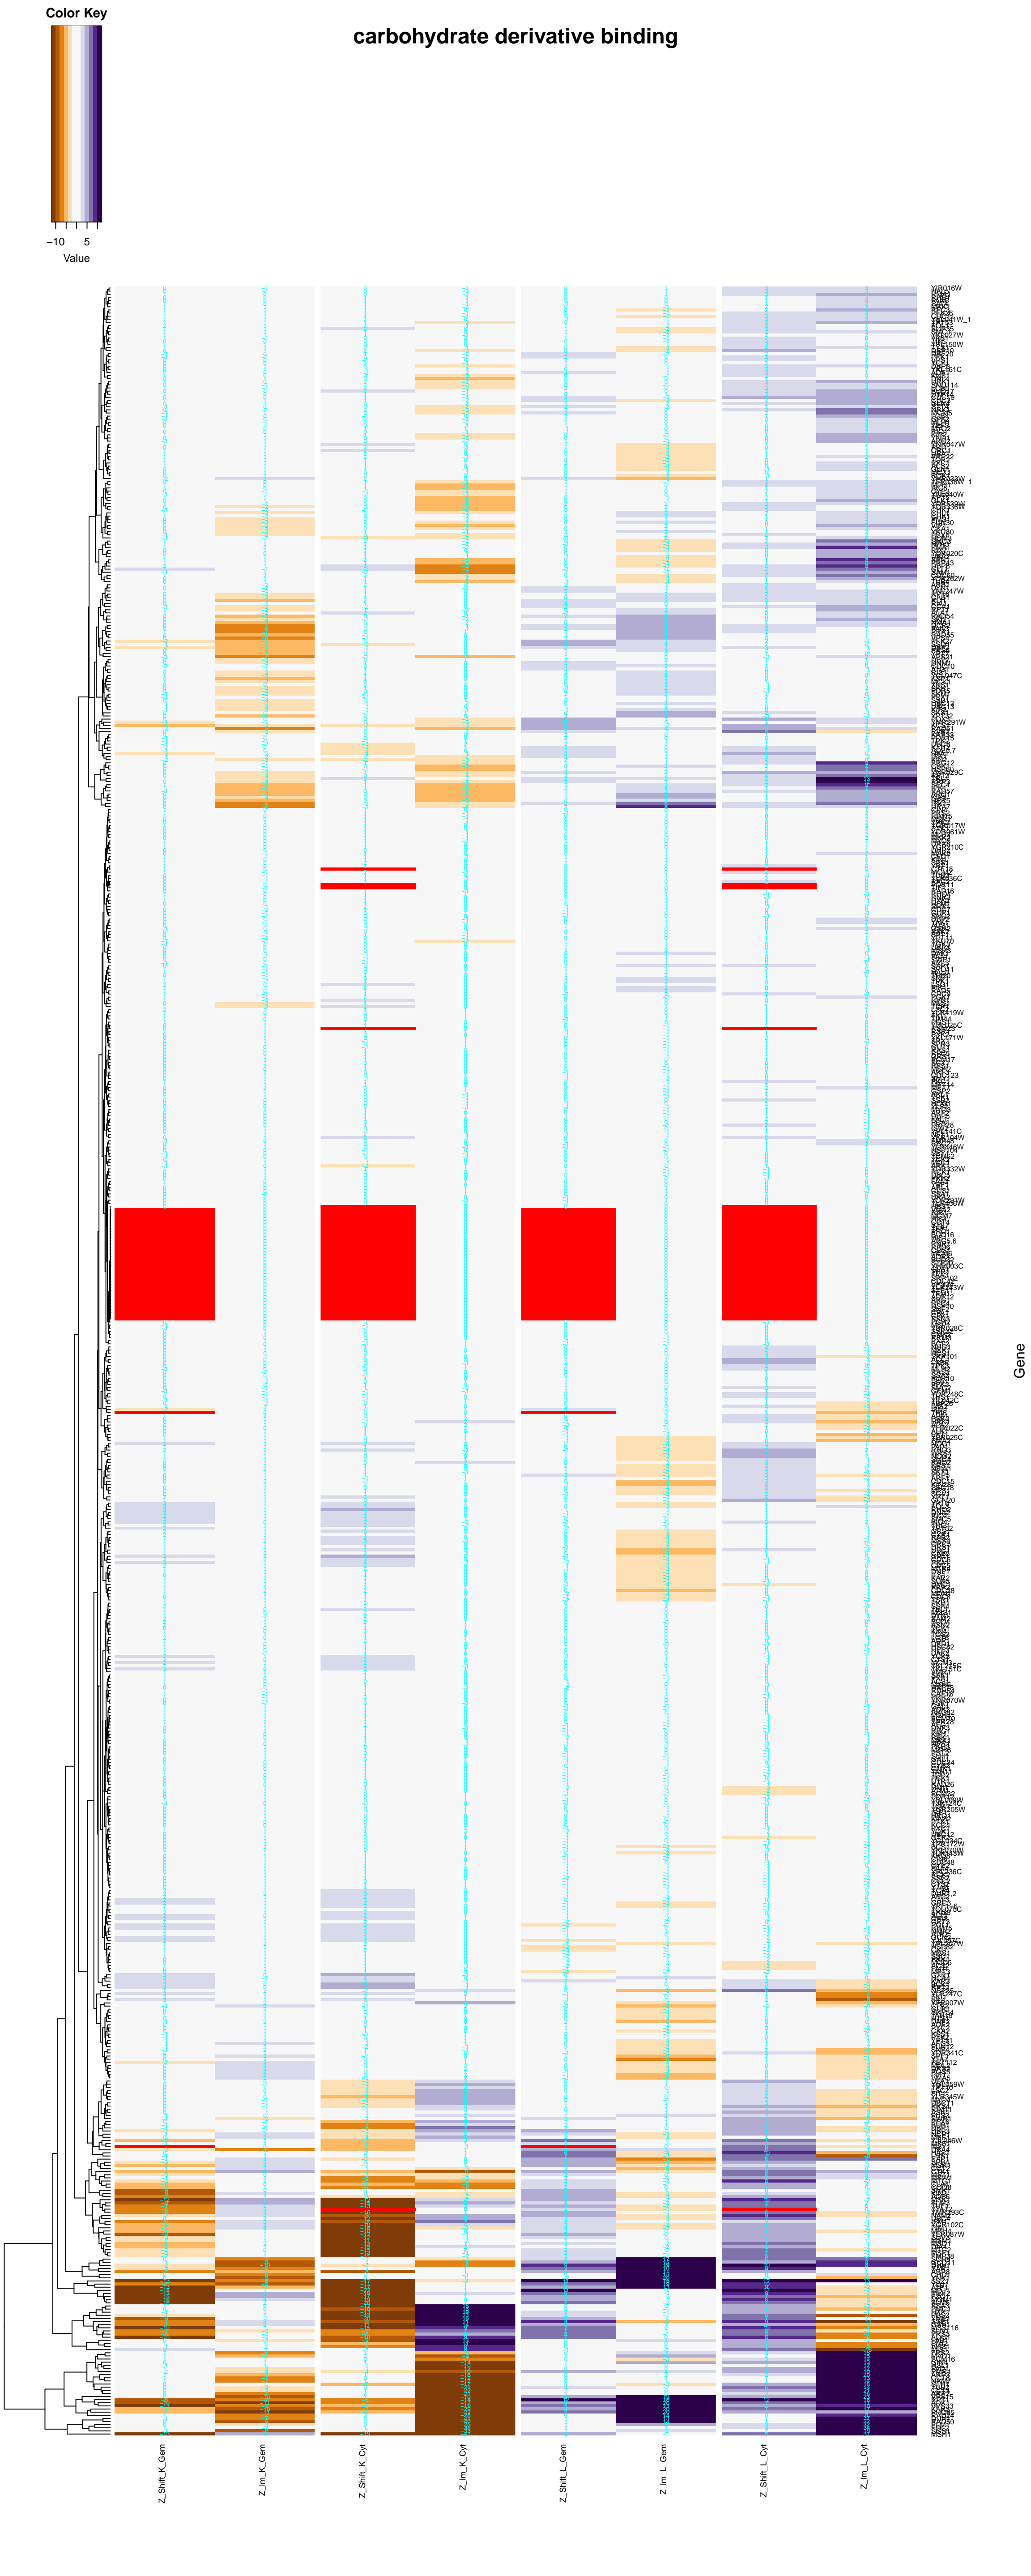

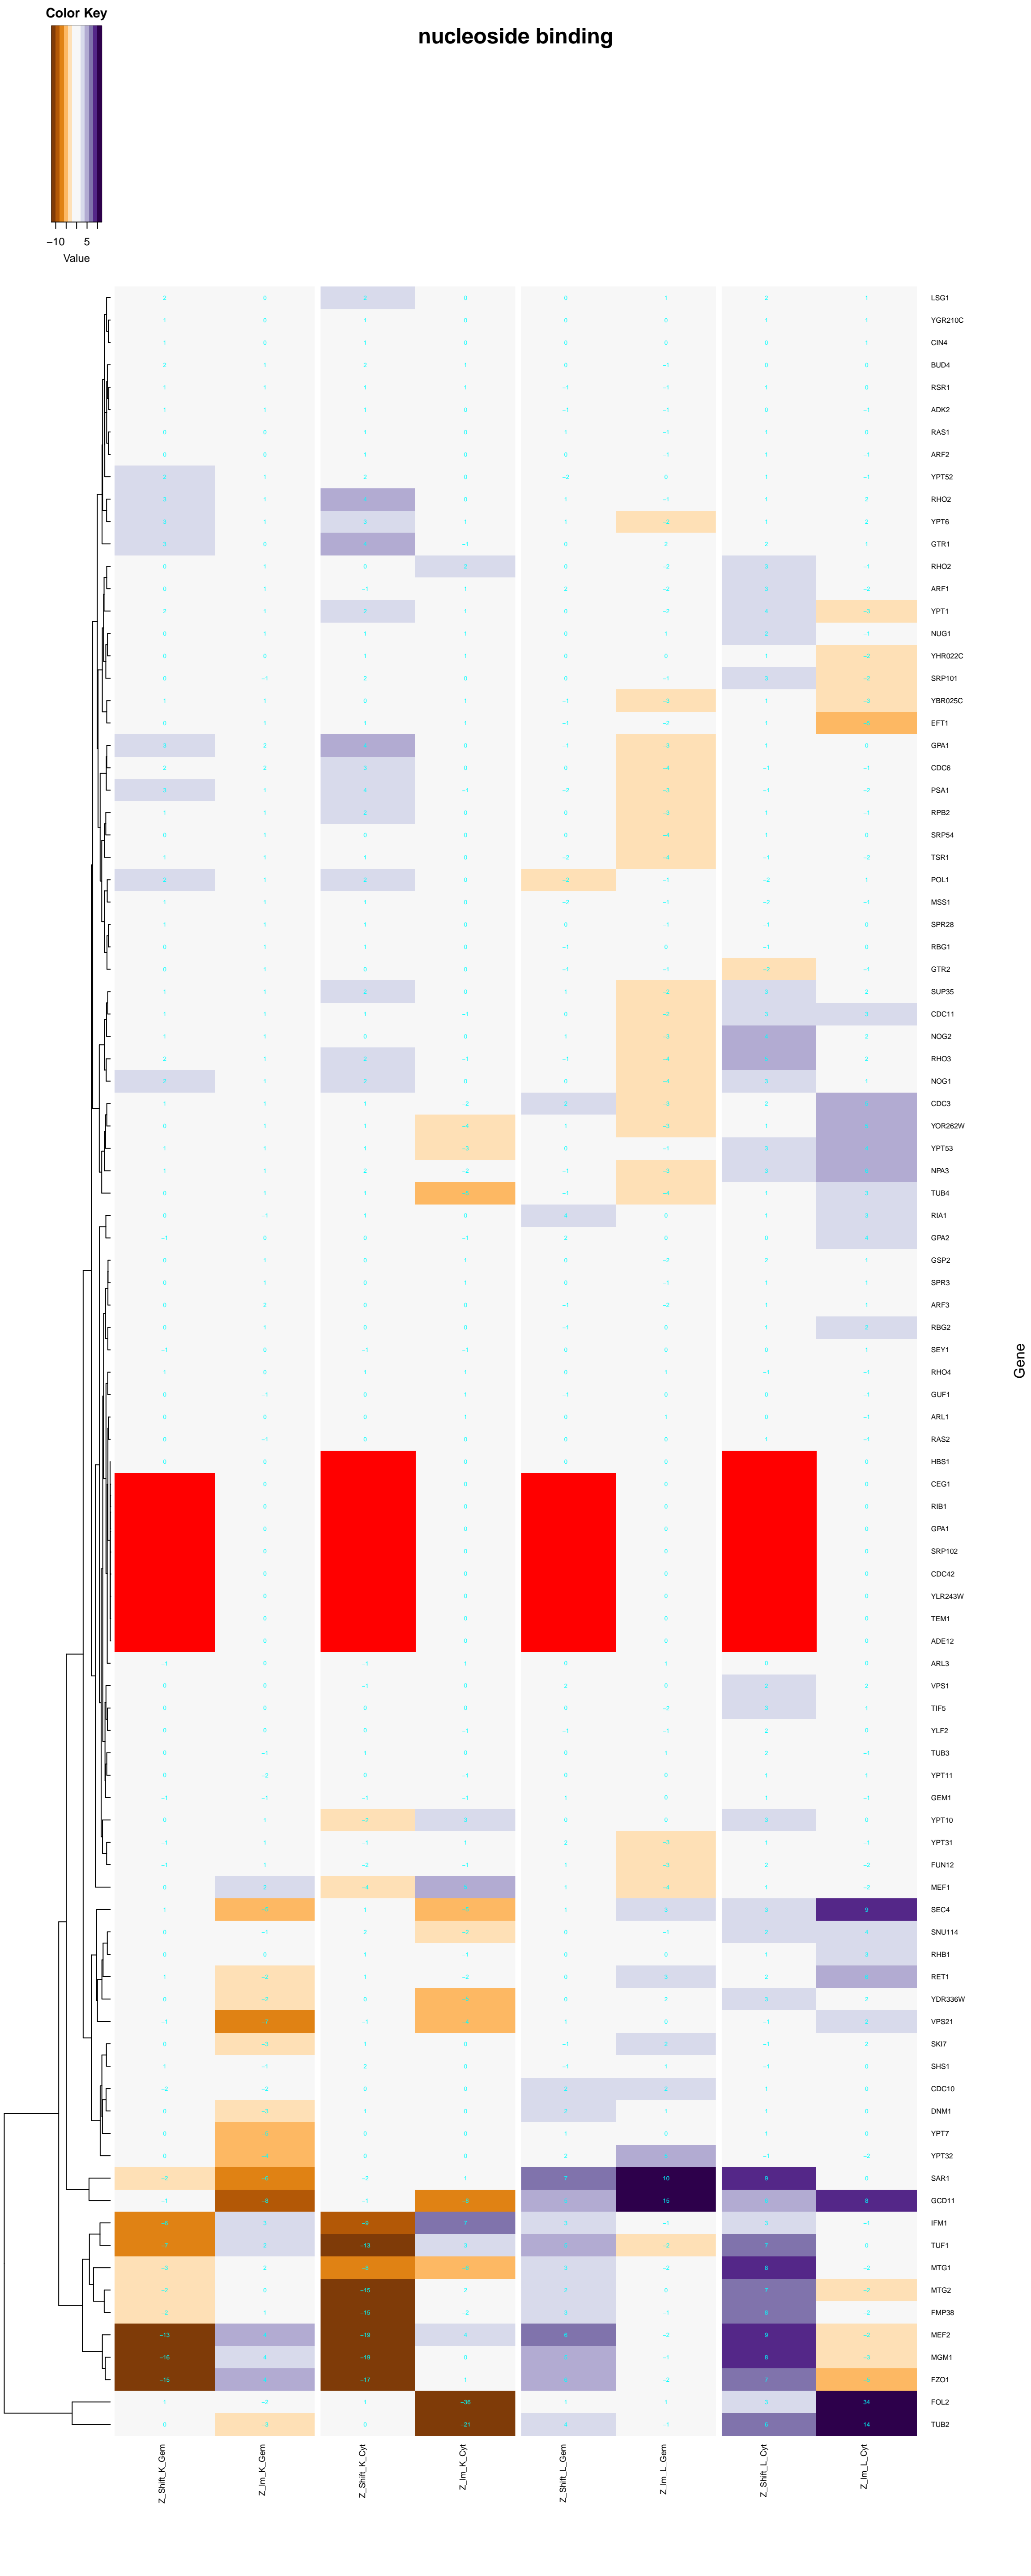

chitin binding

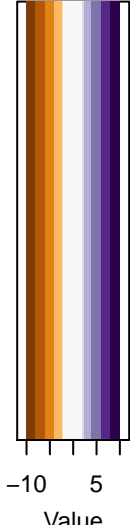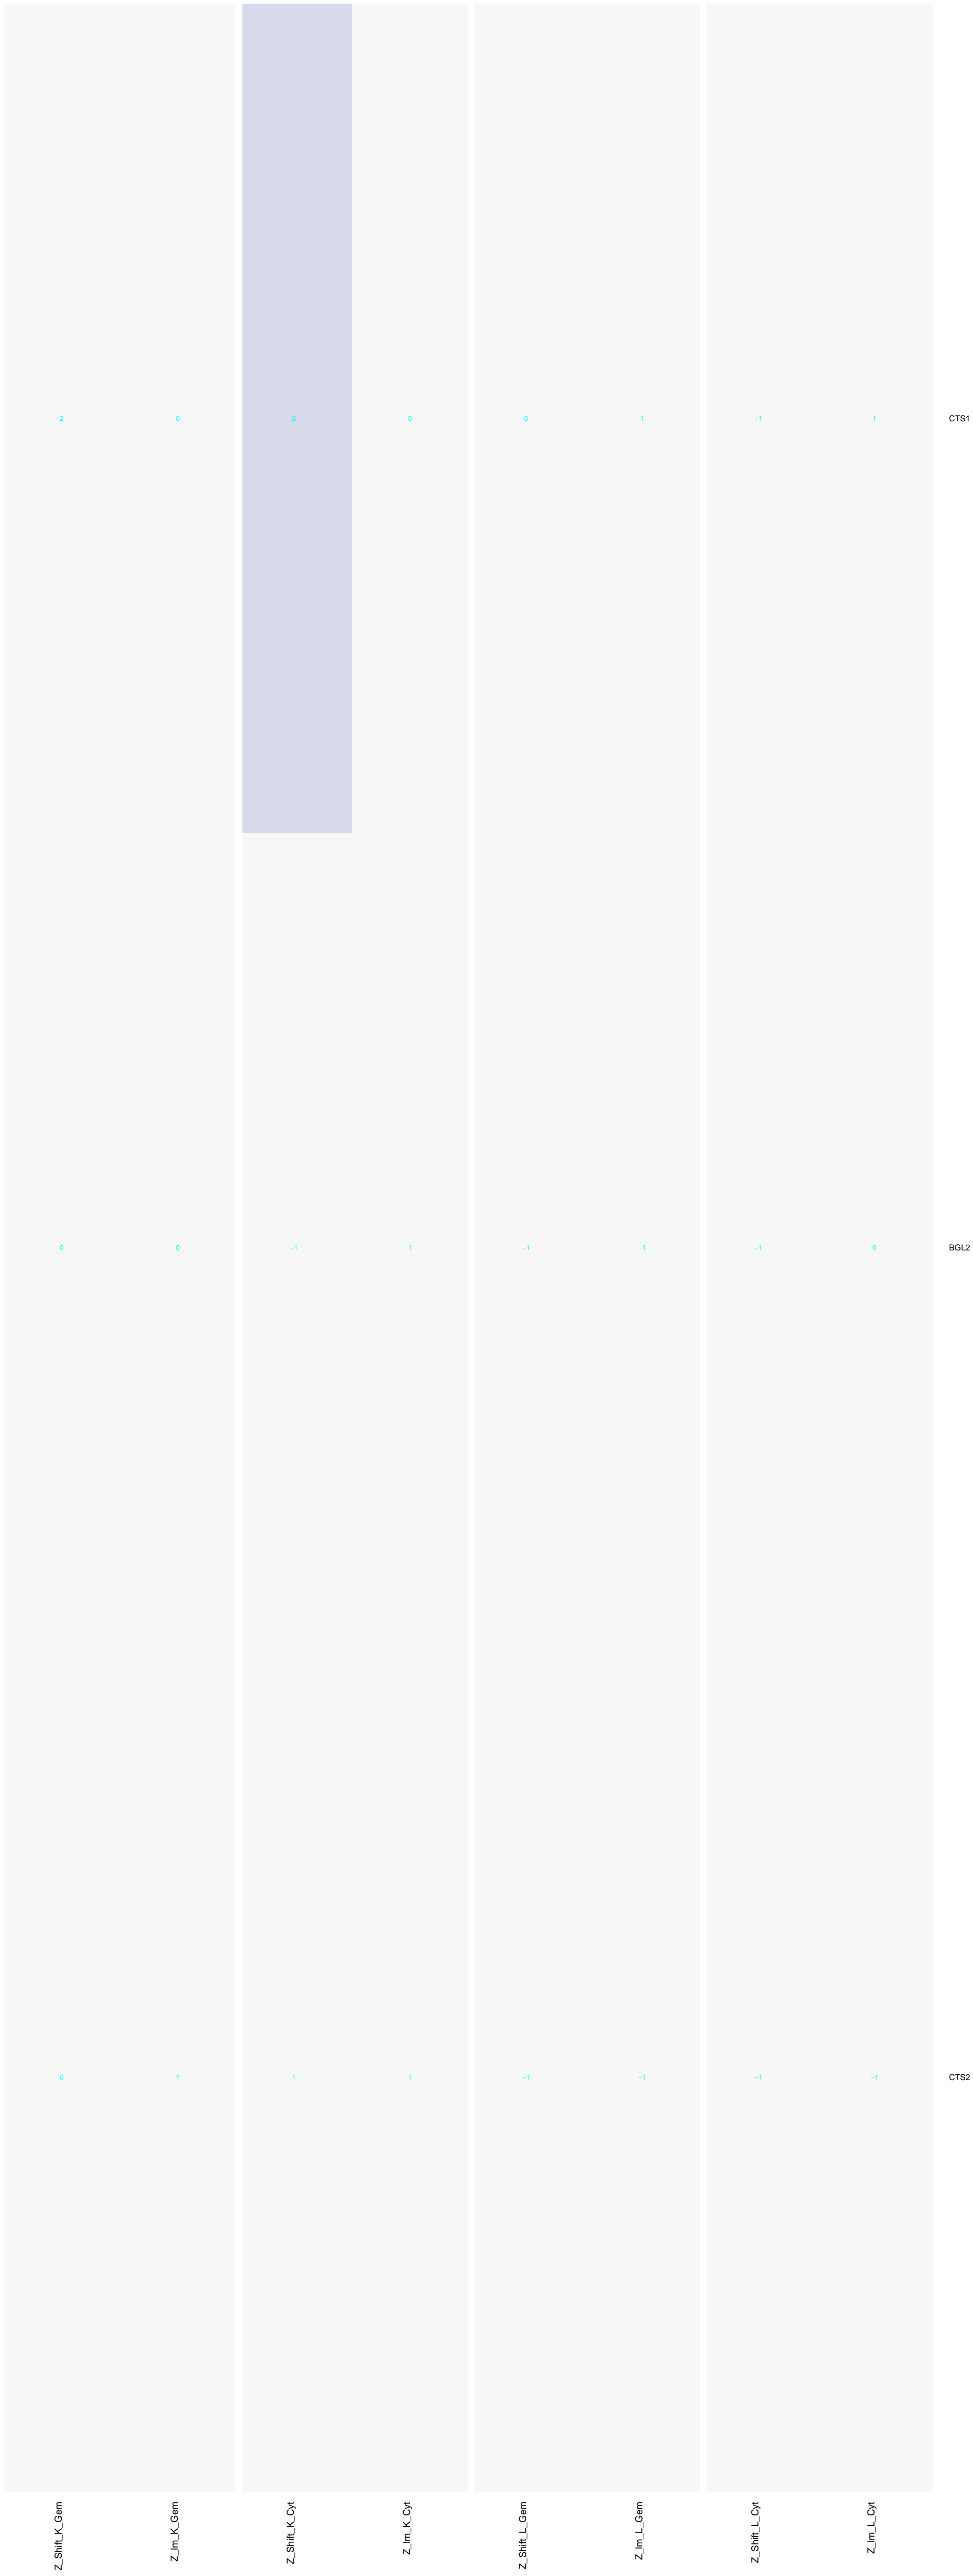

Gene

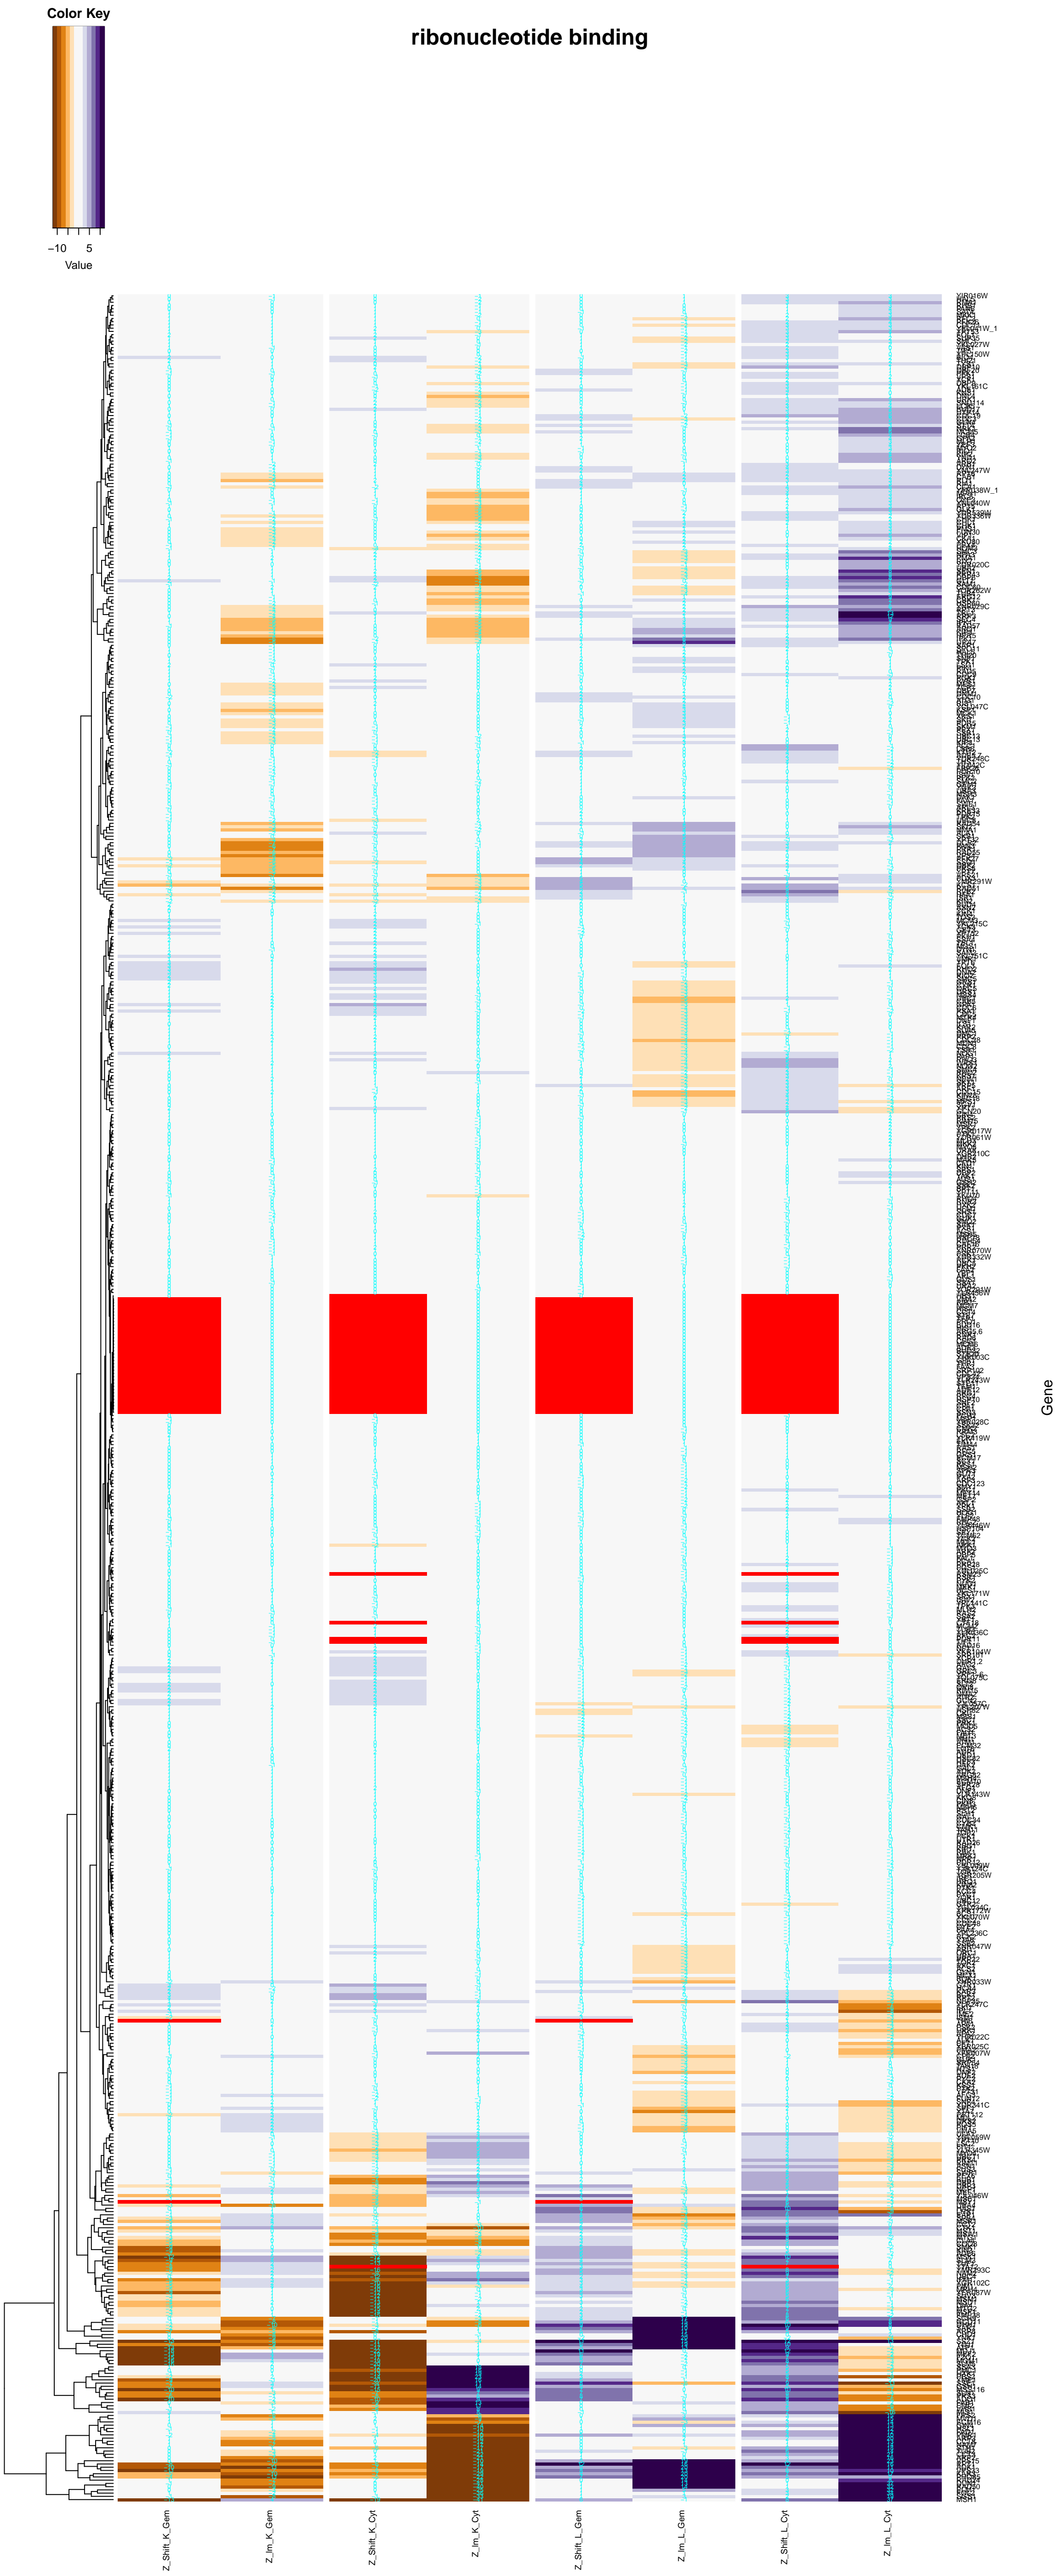

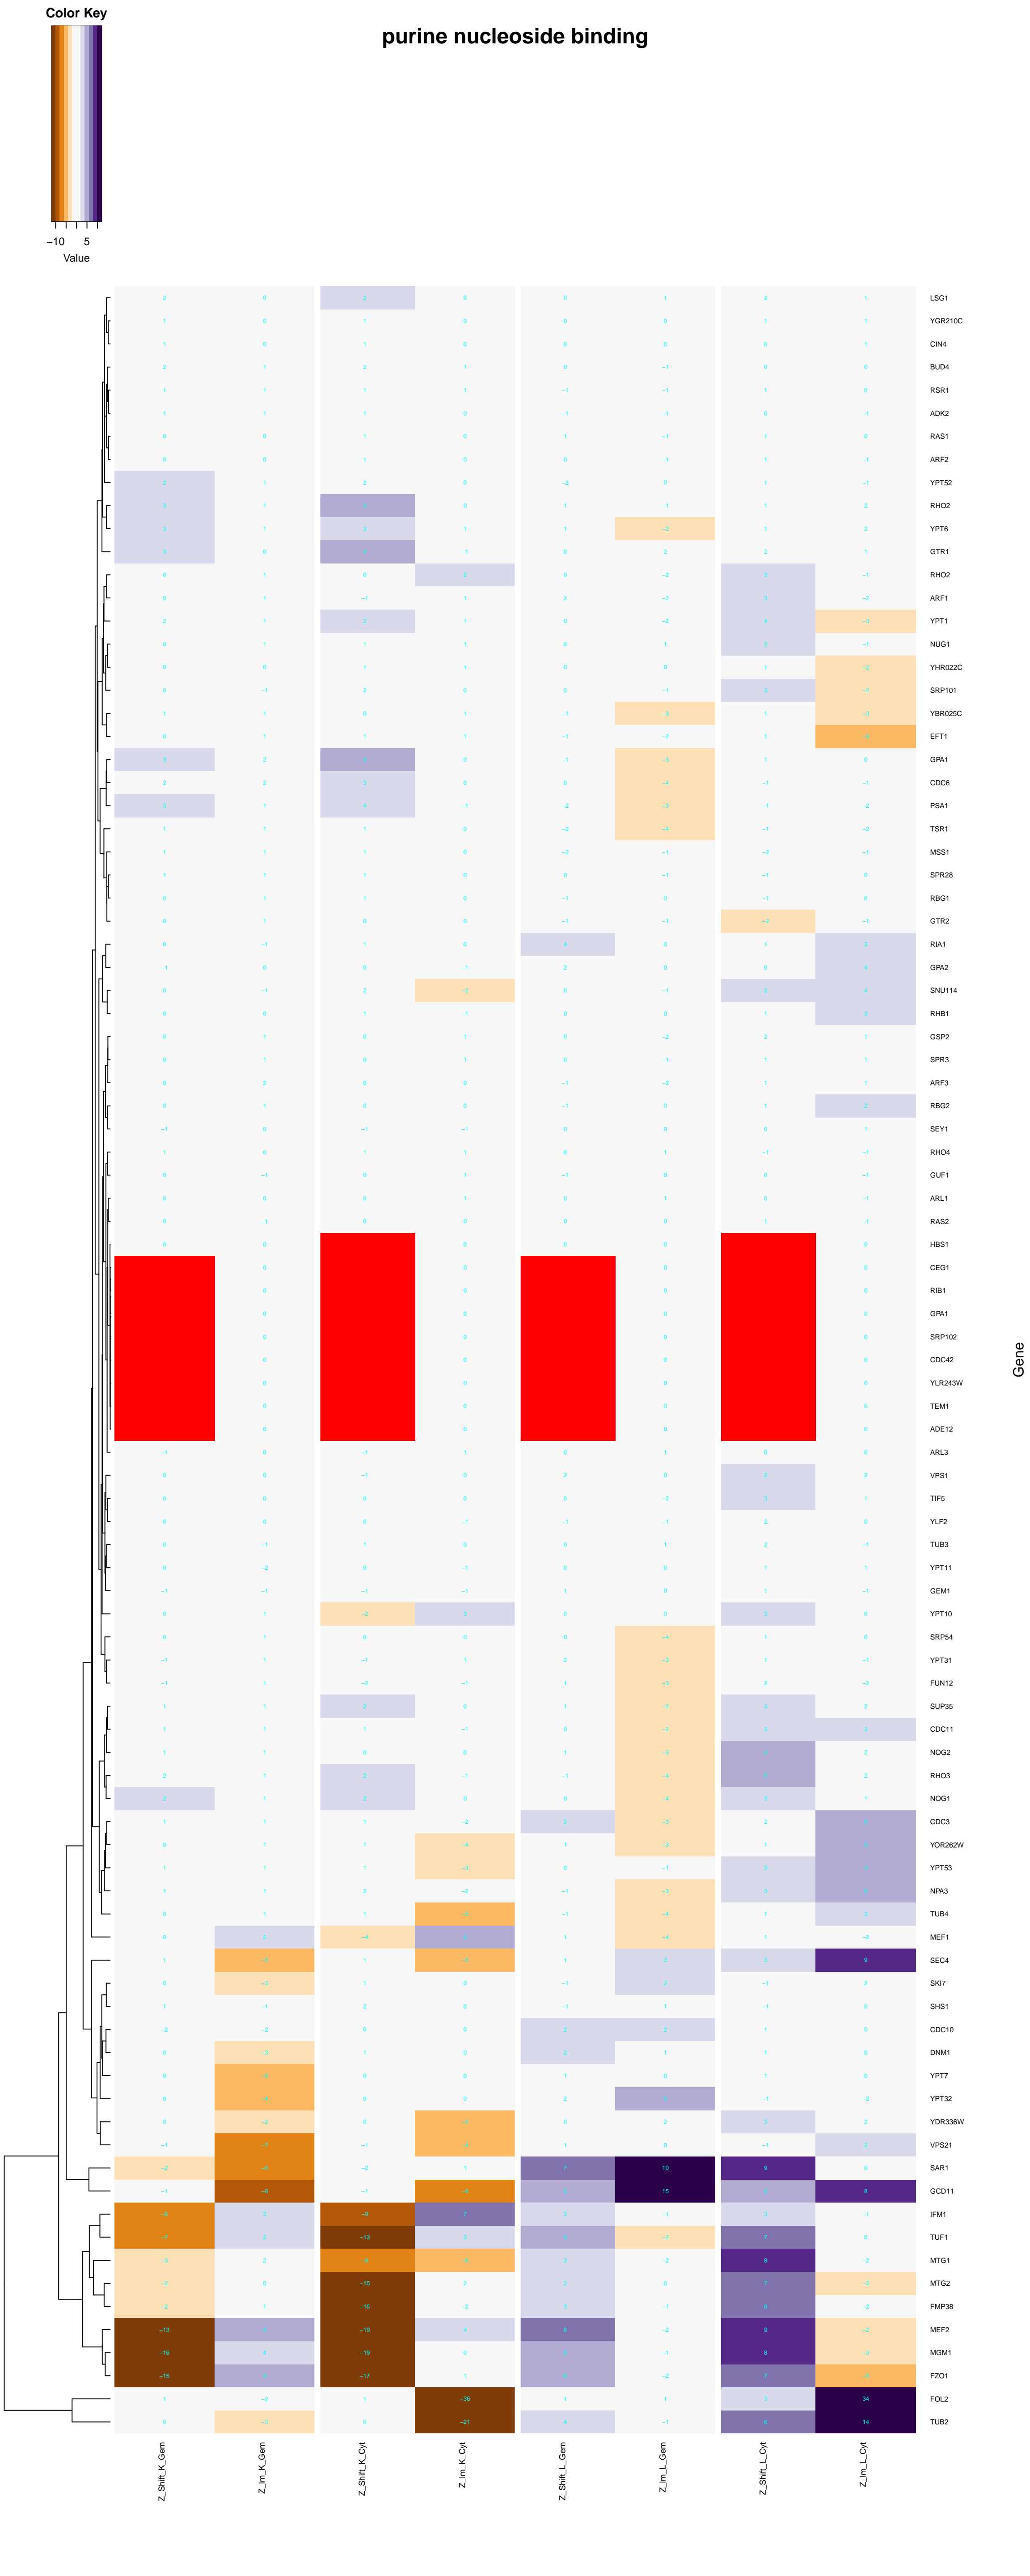

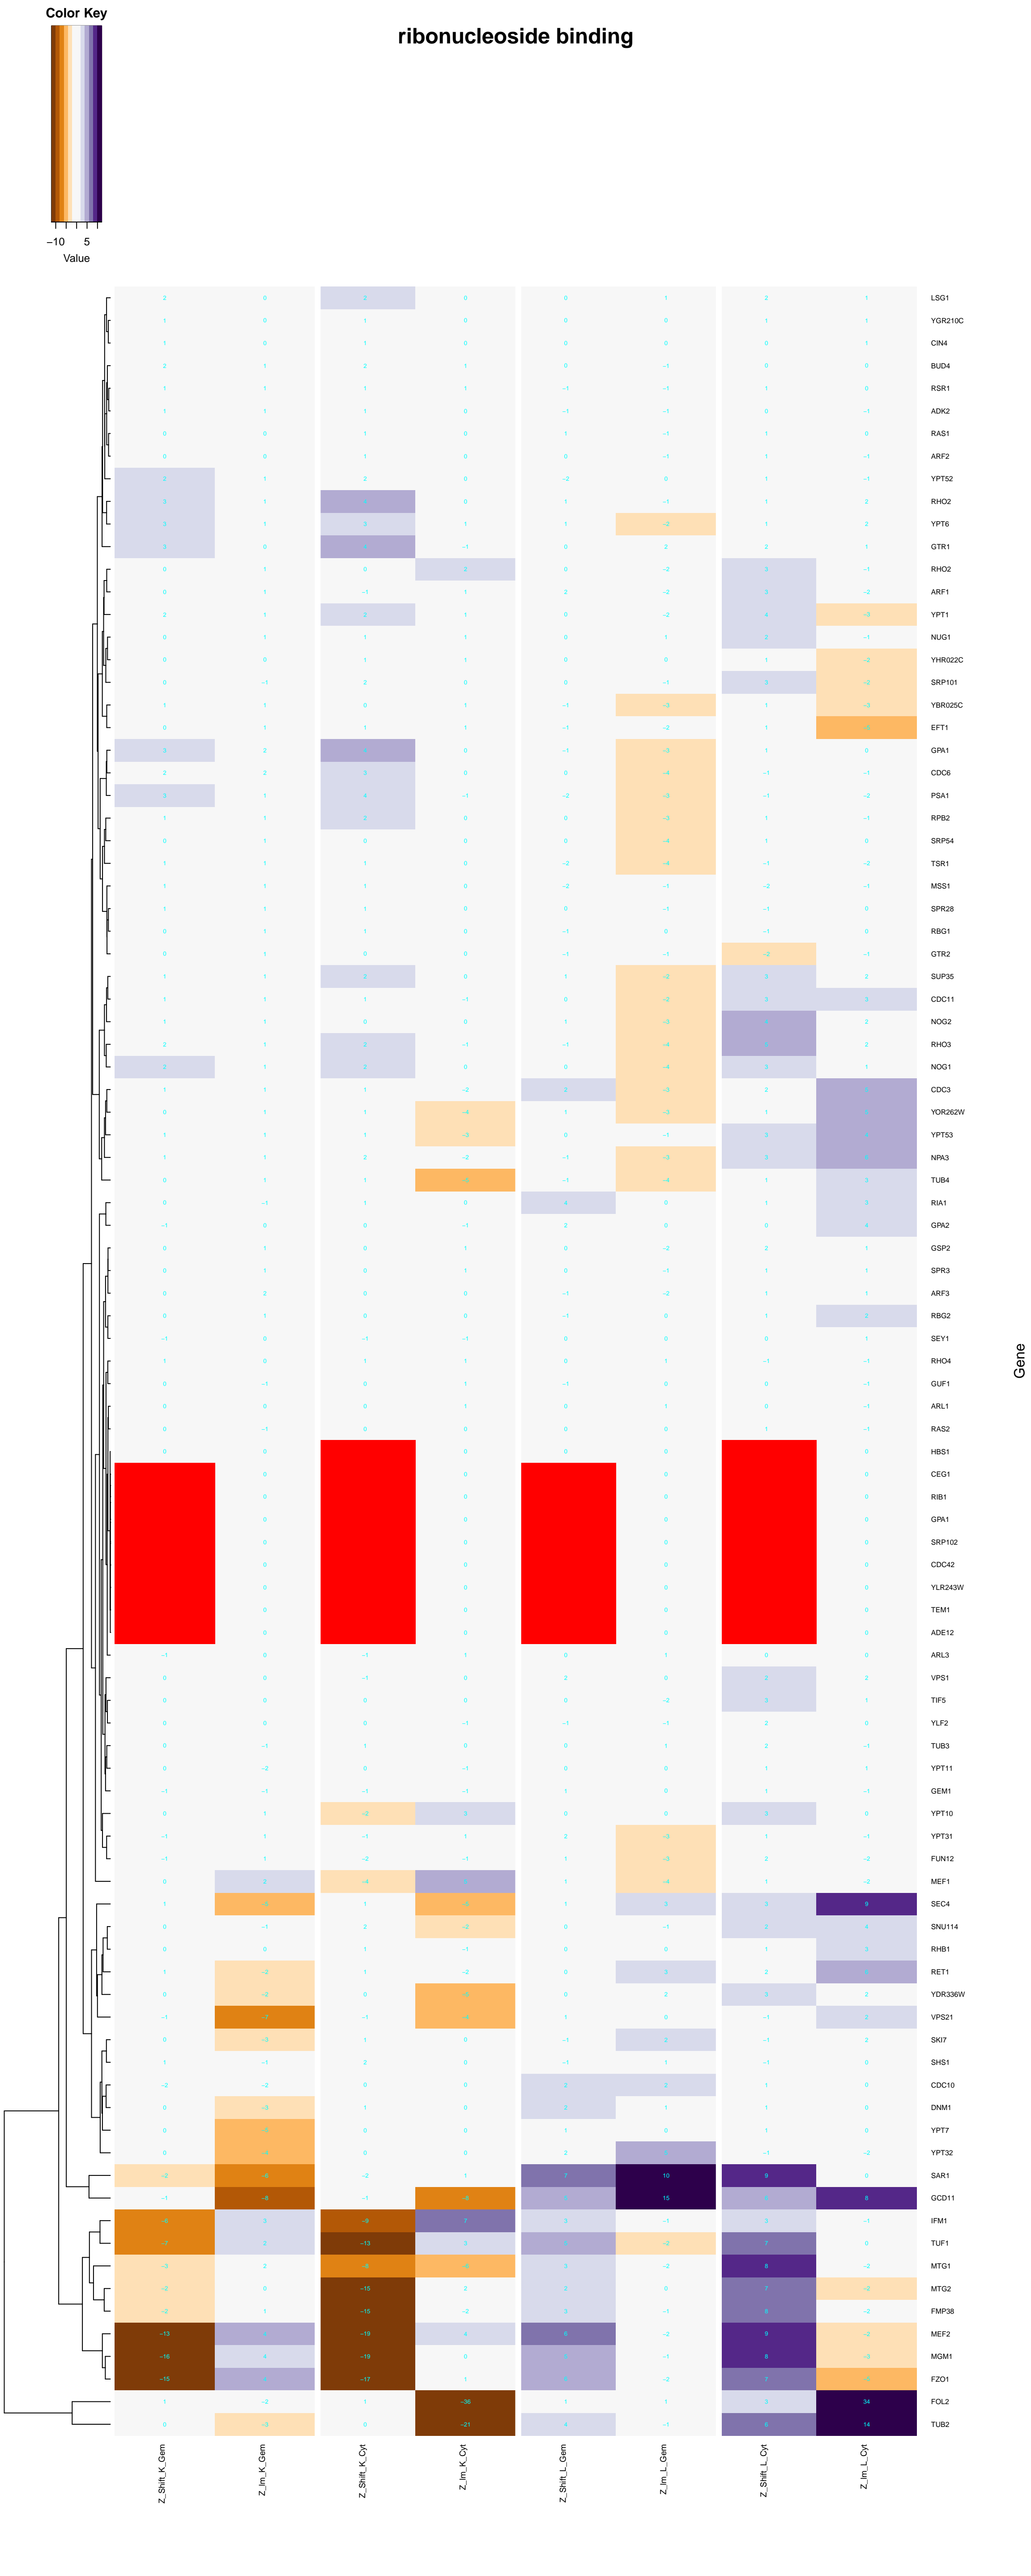

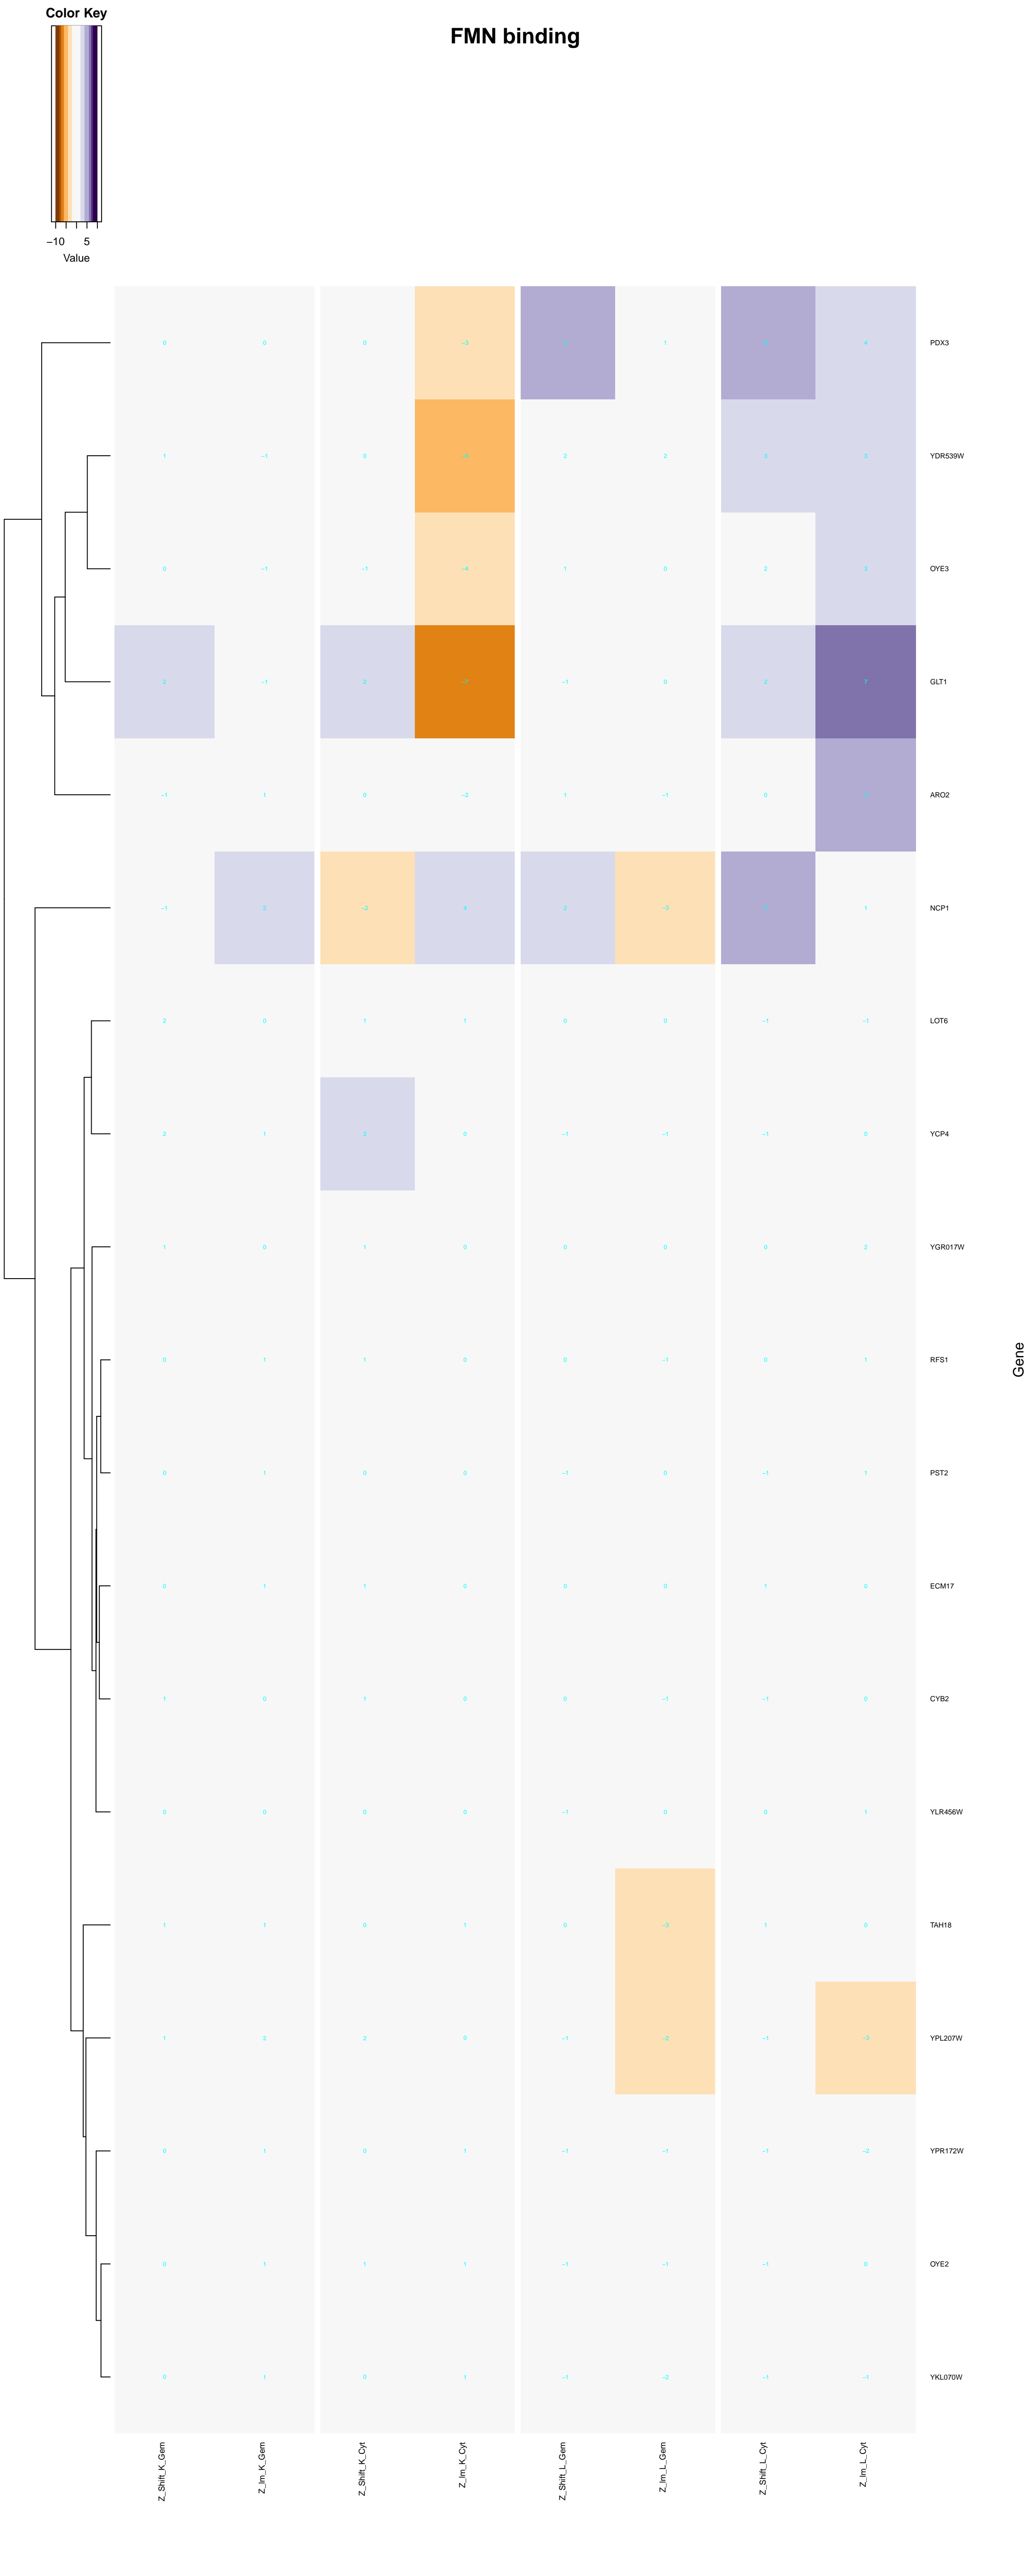

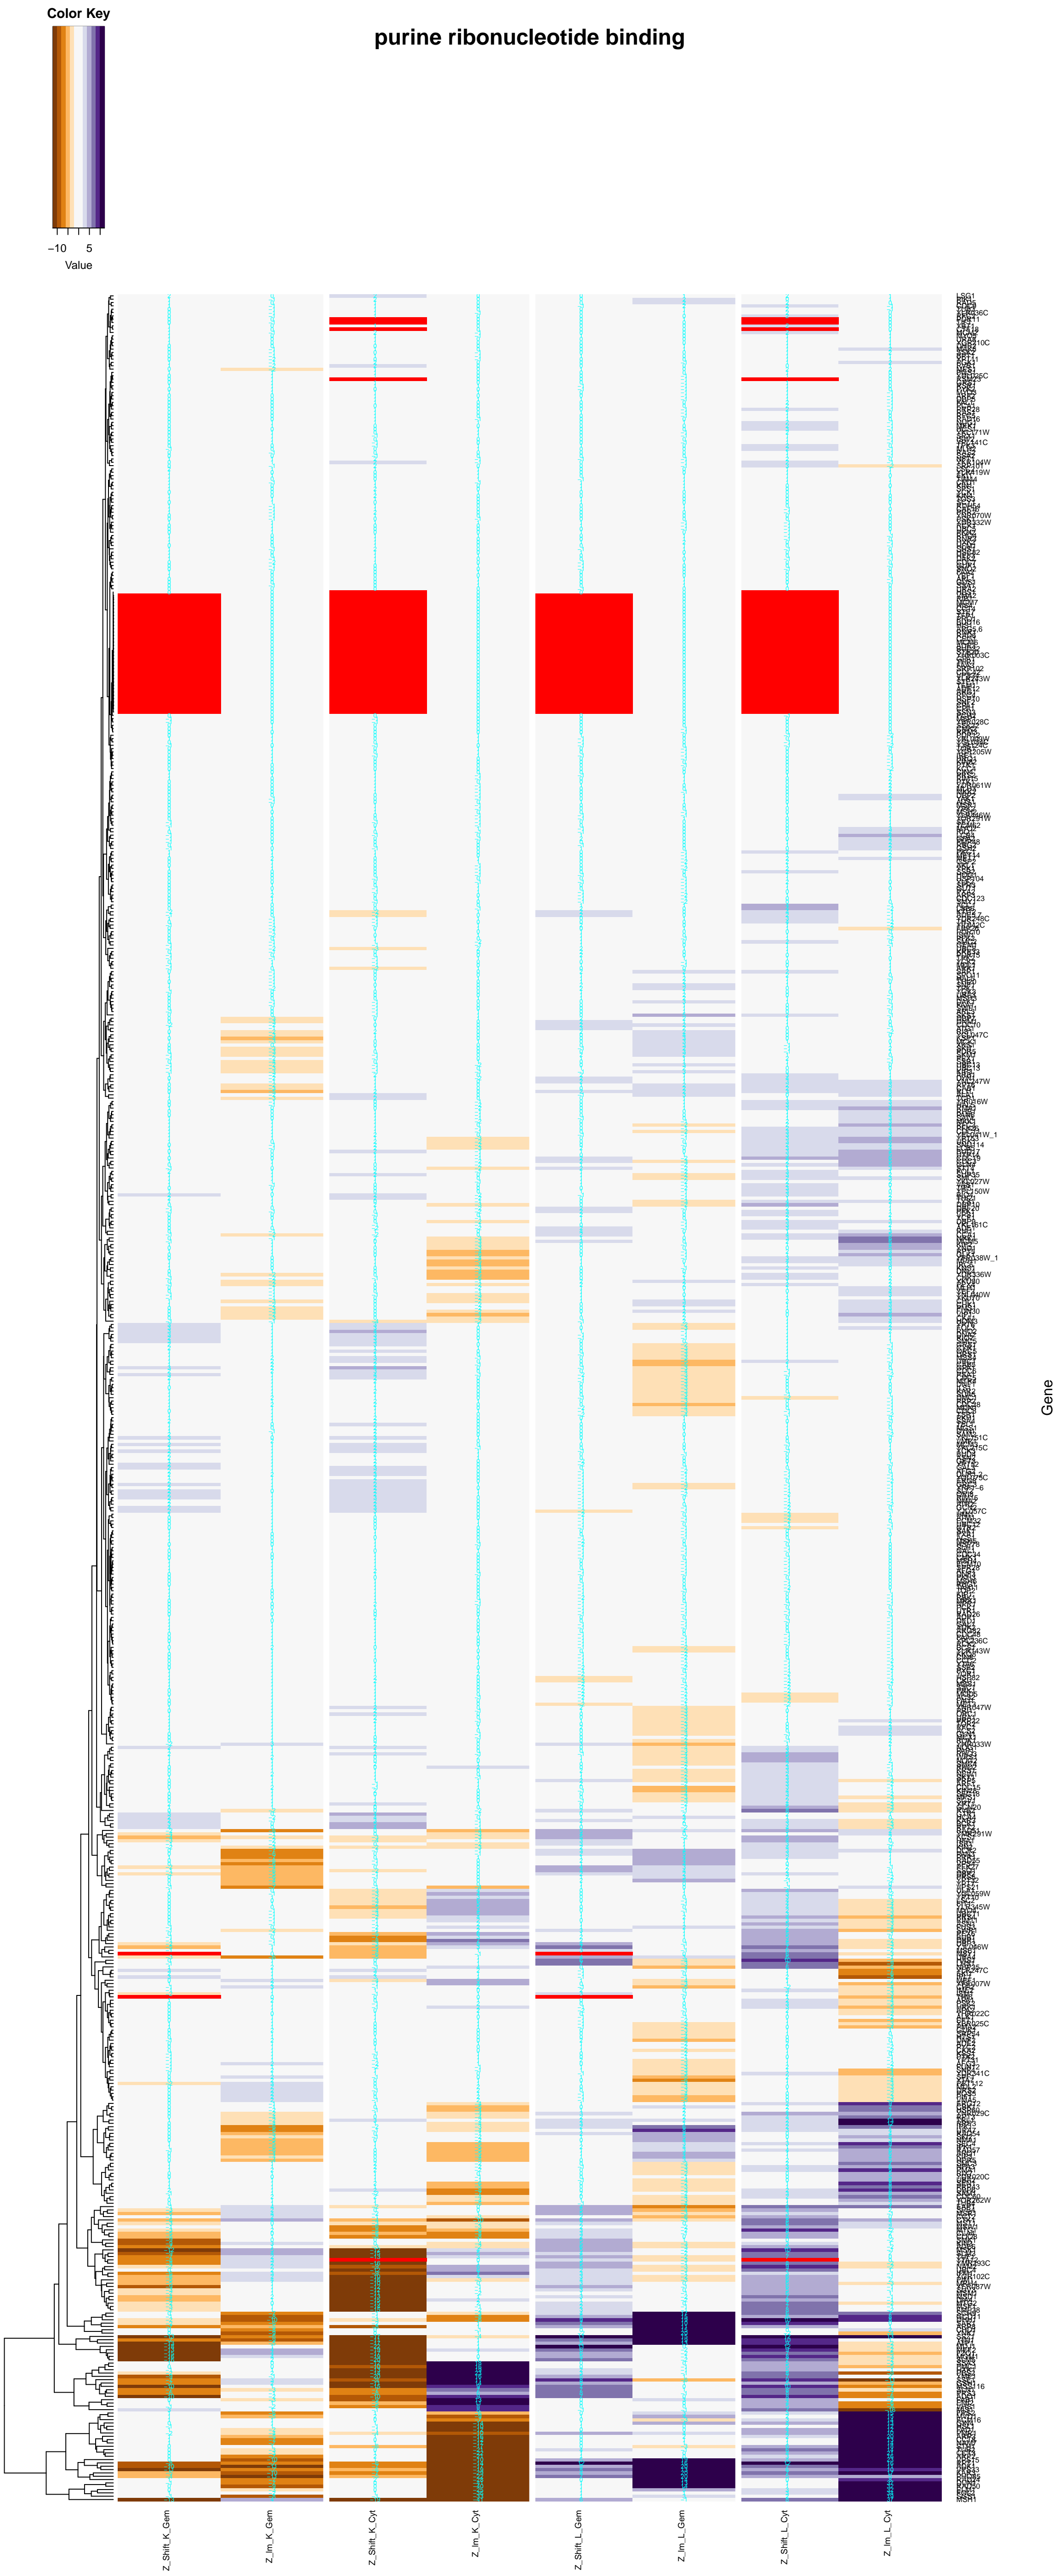

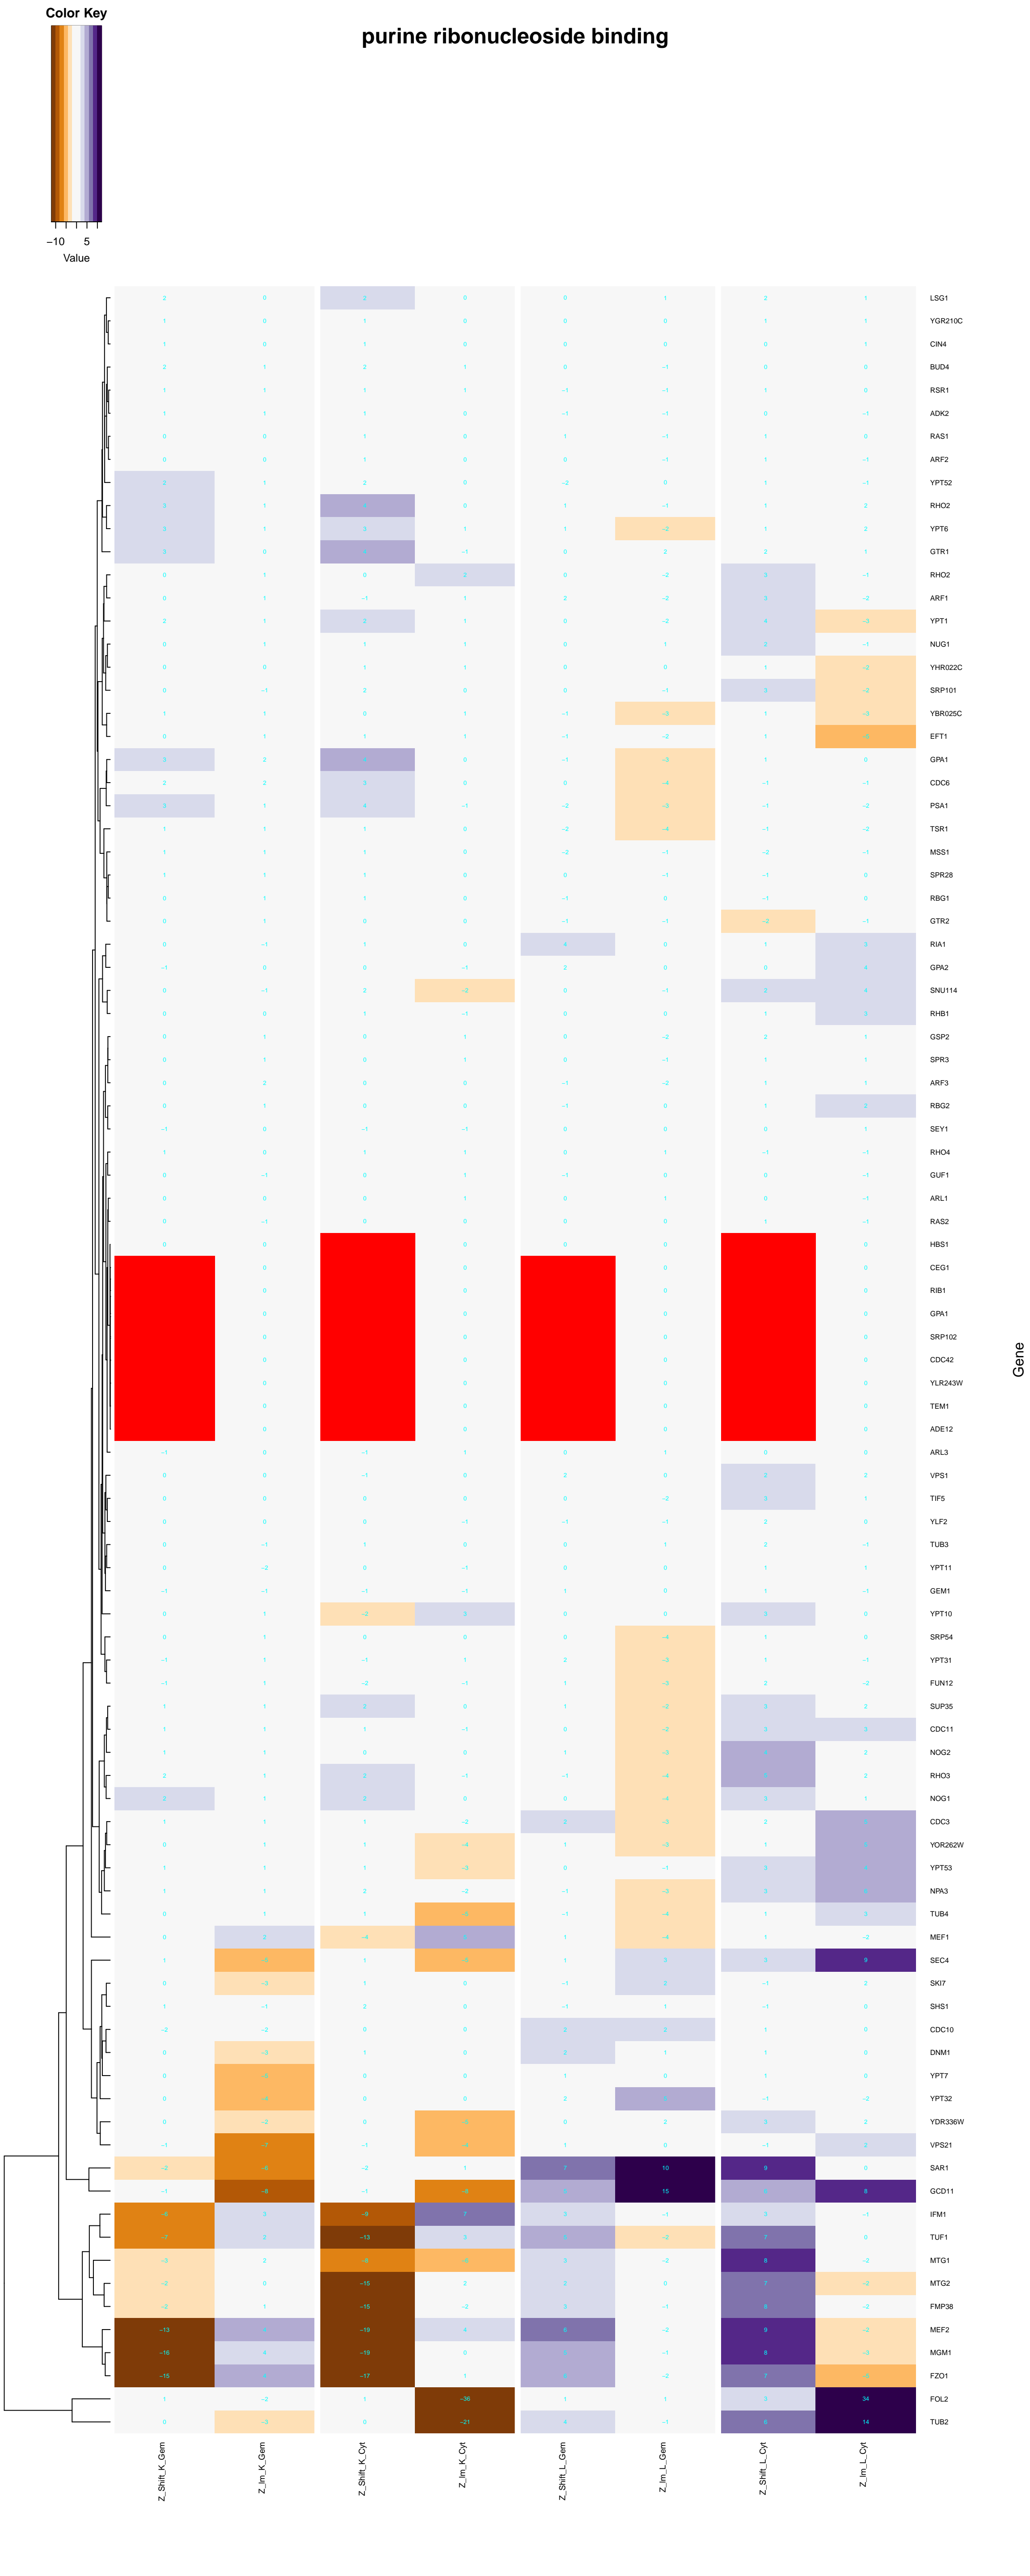



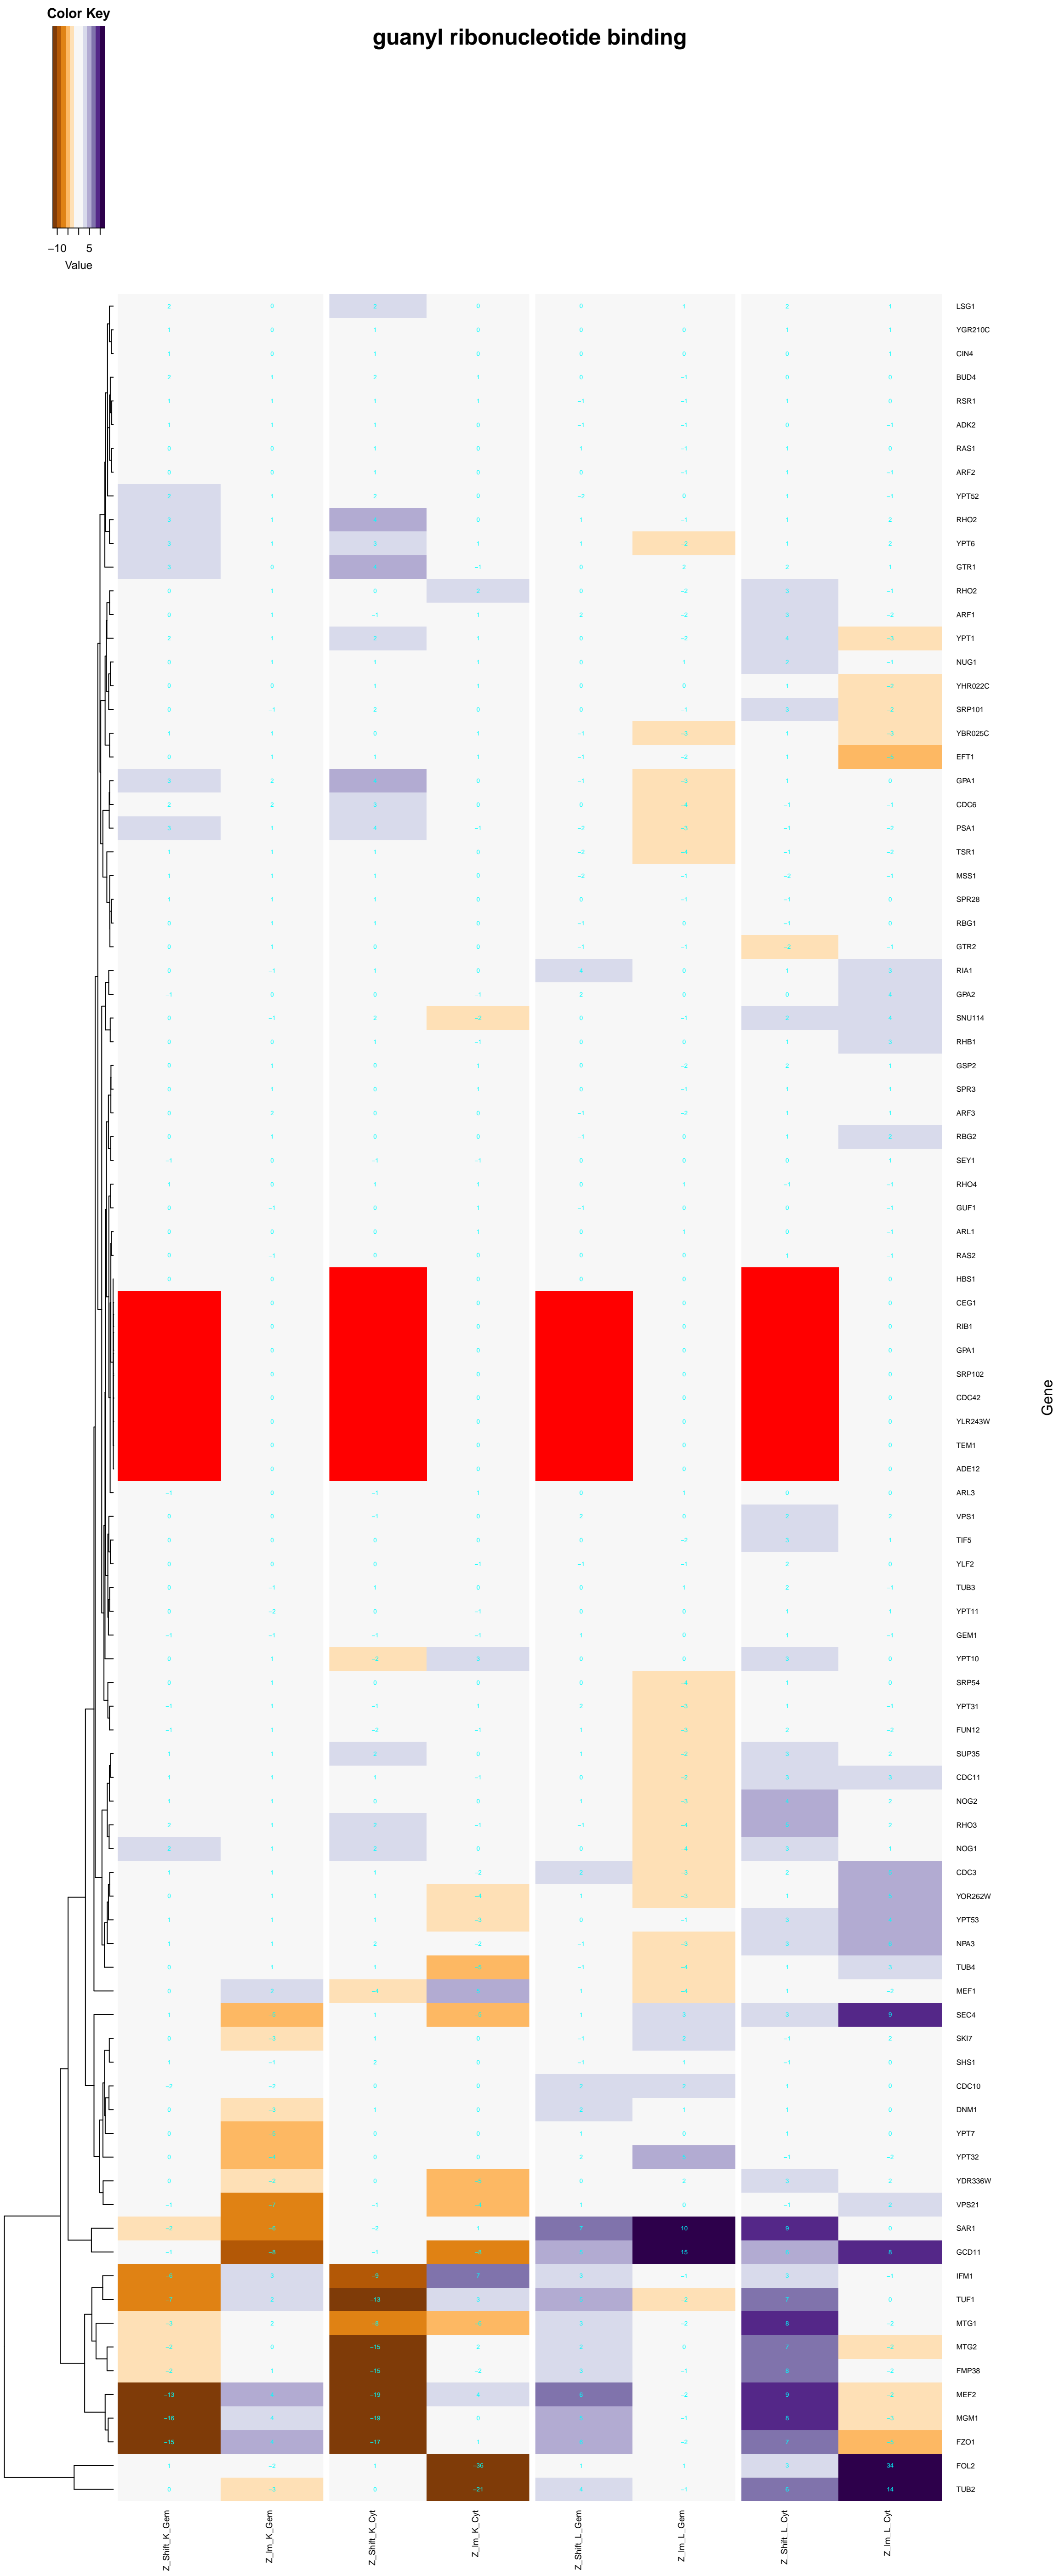

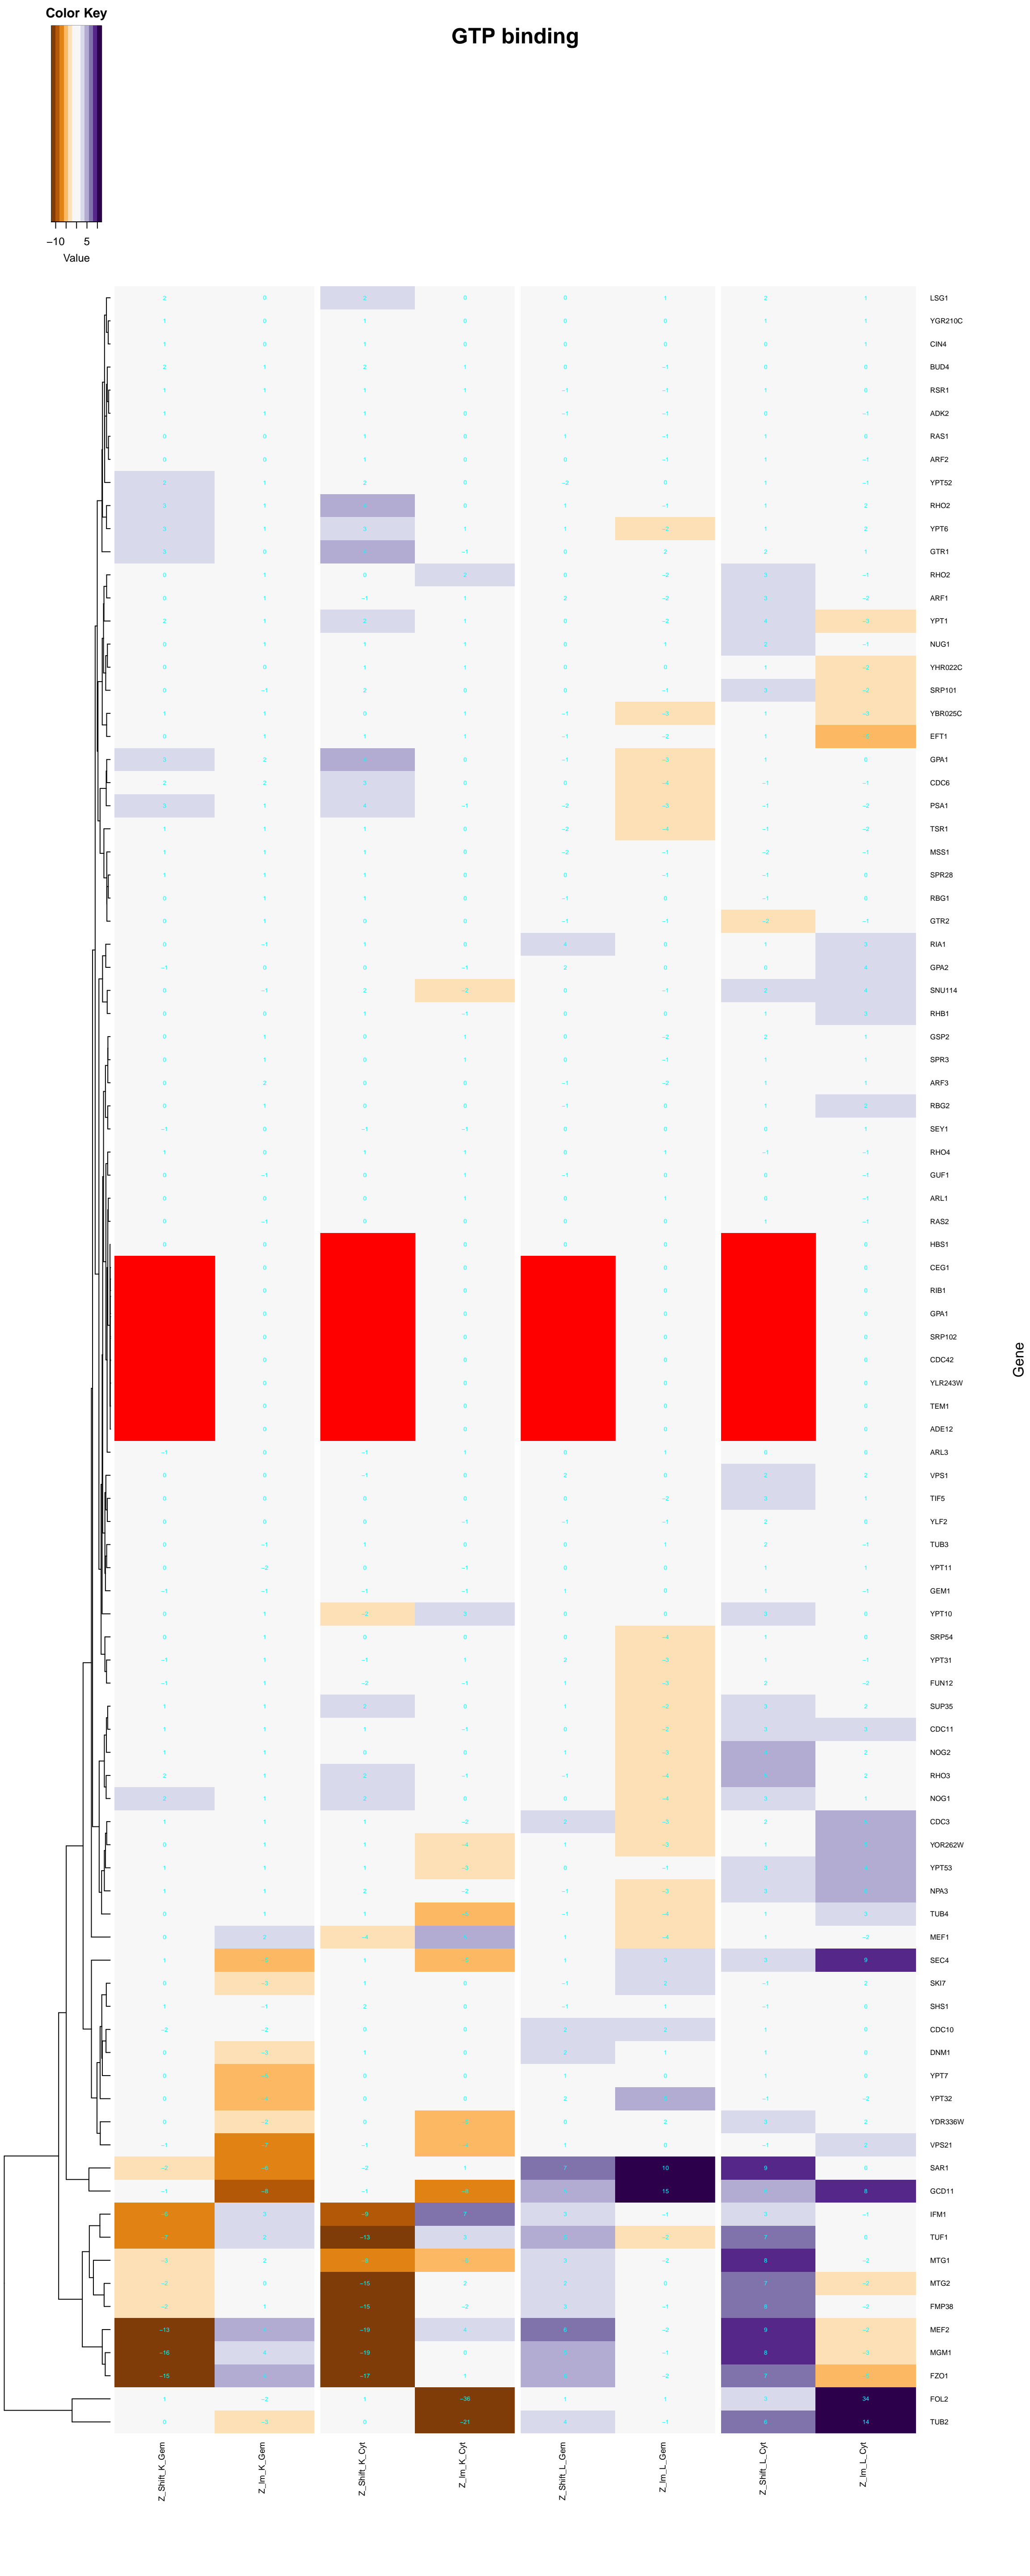



AMP binding

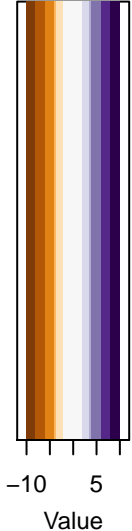

Gene

Supplement: s1 [file s1]

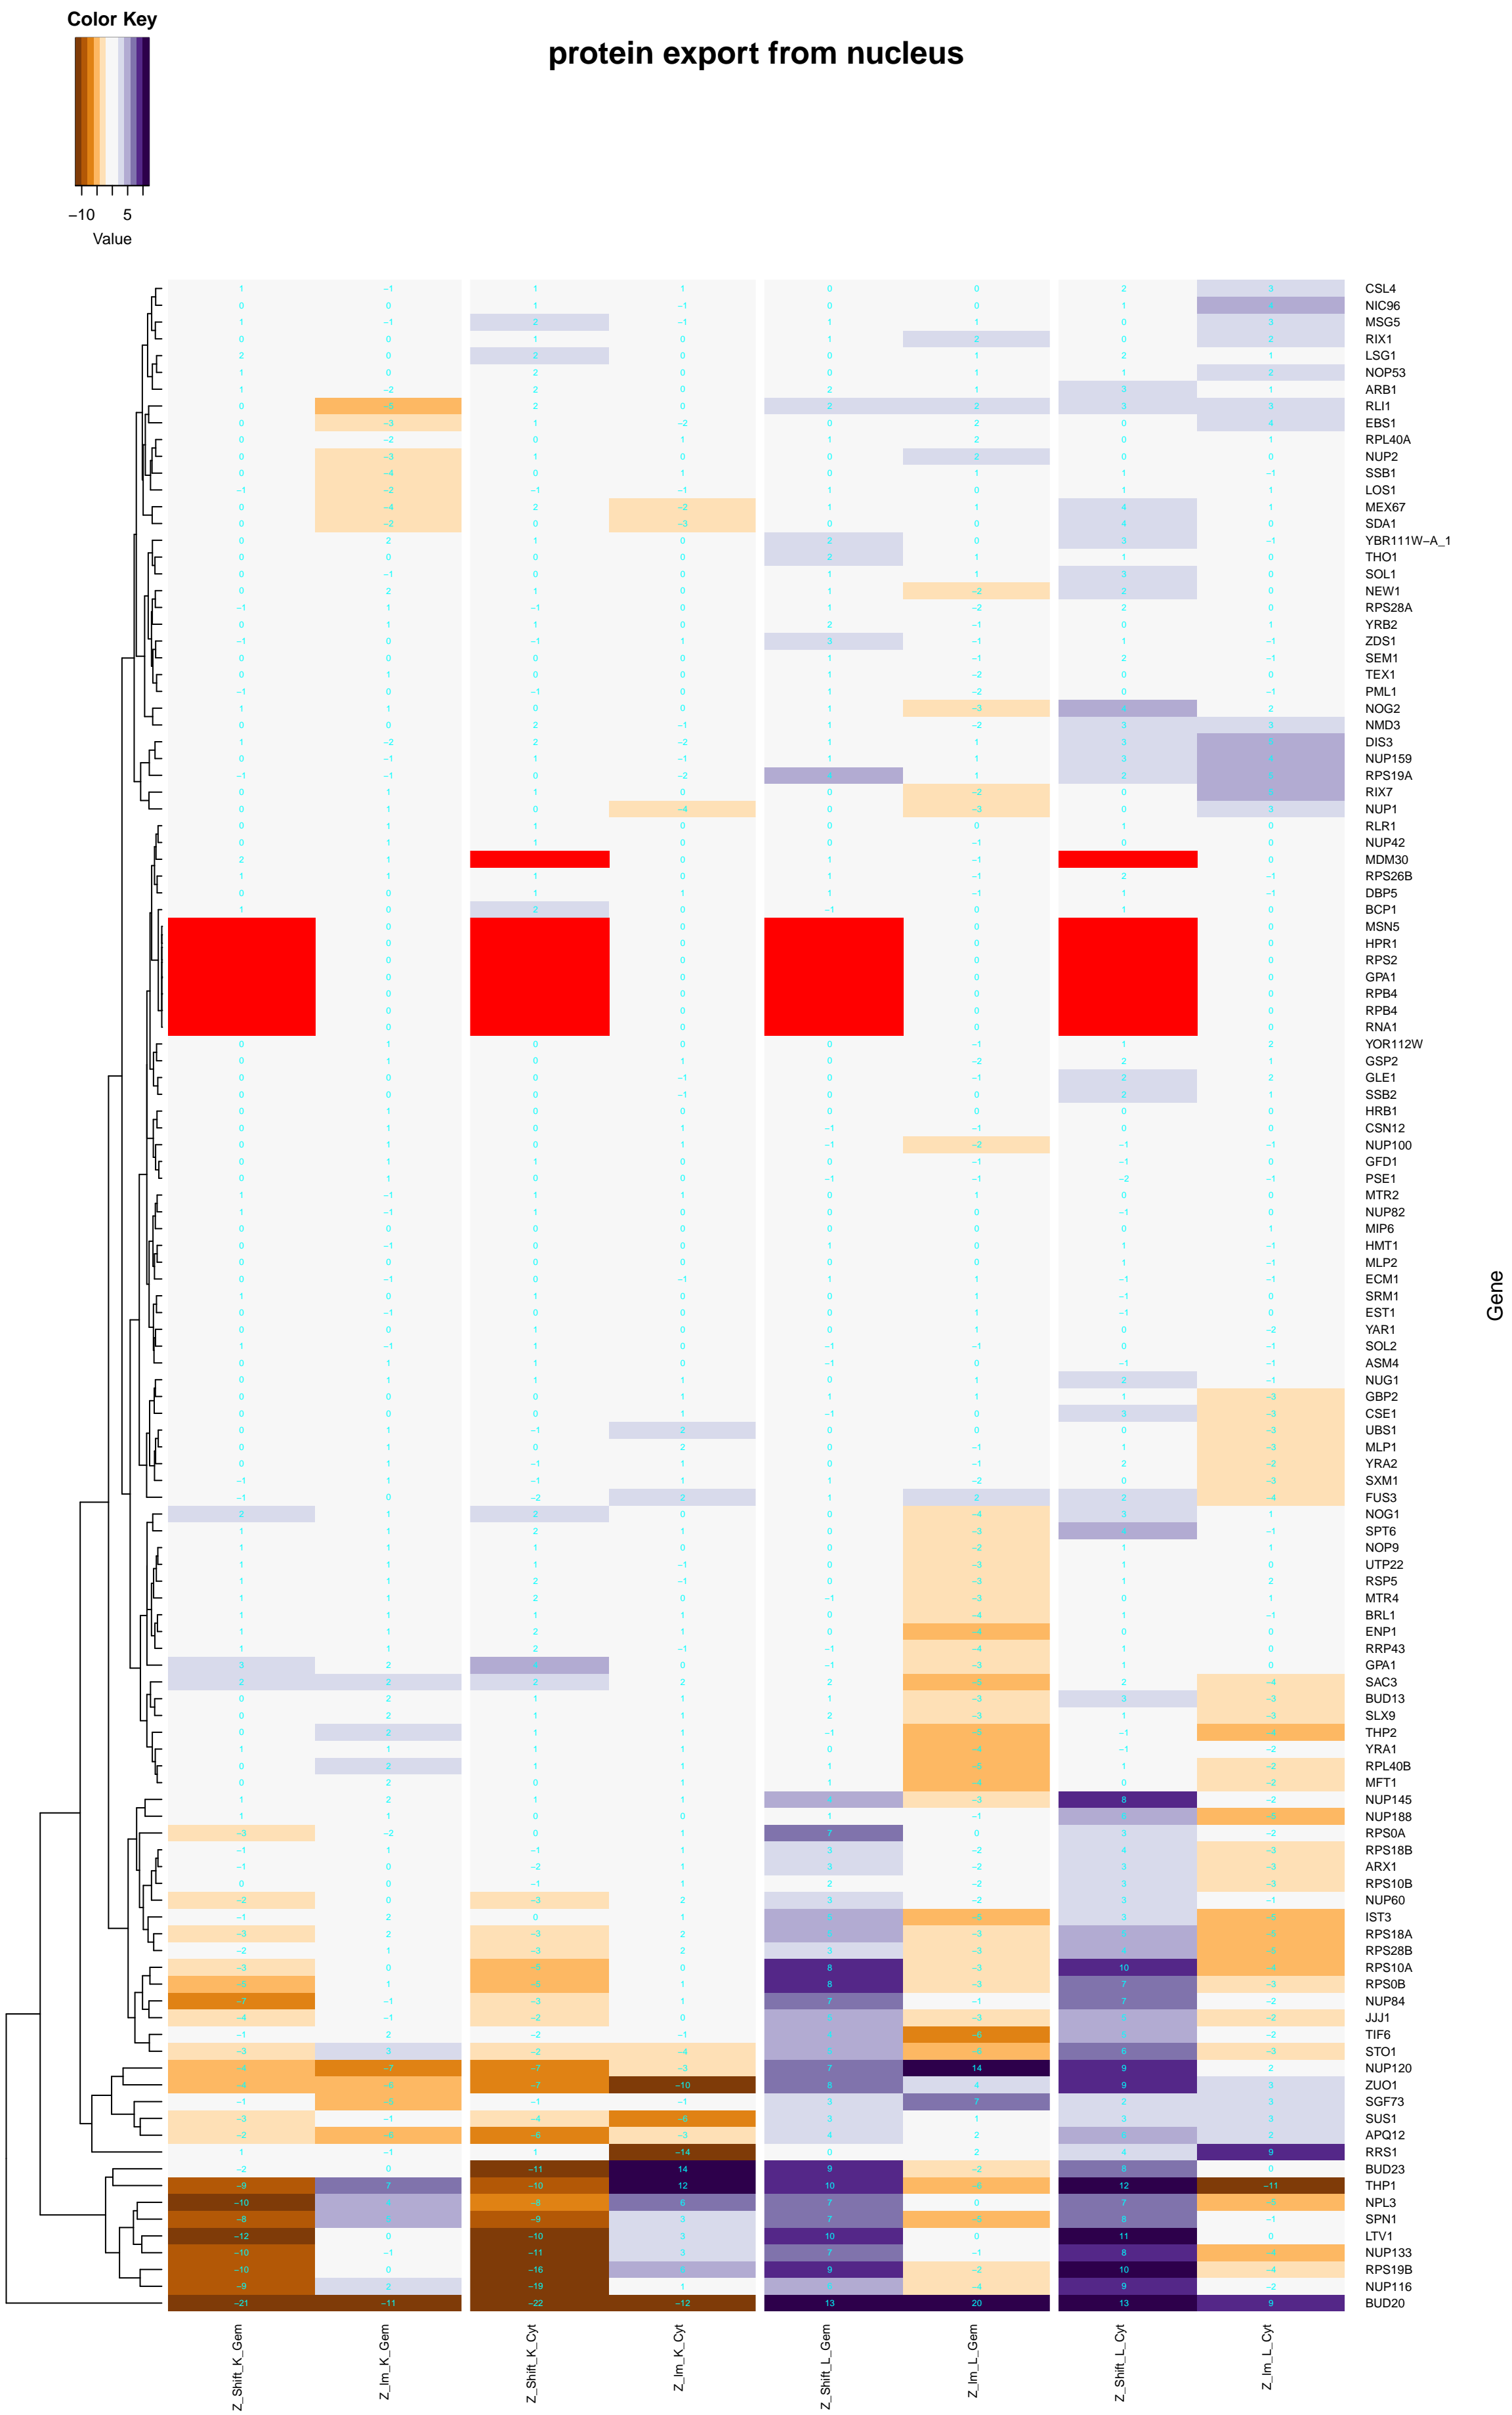

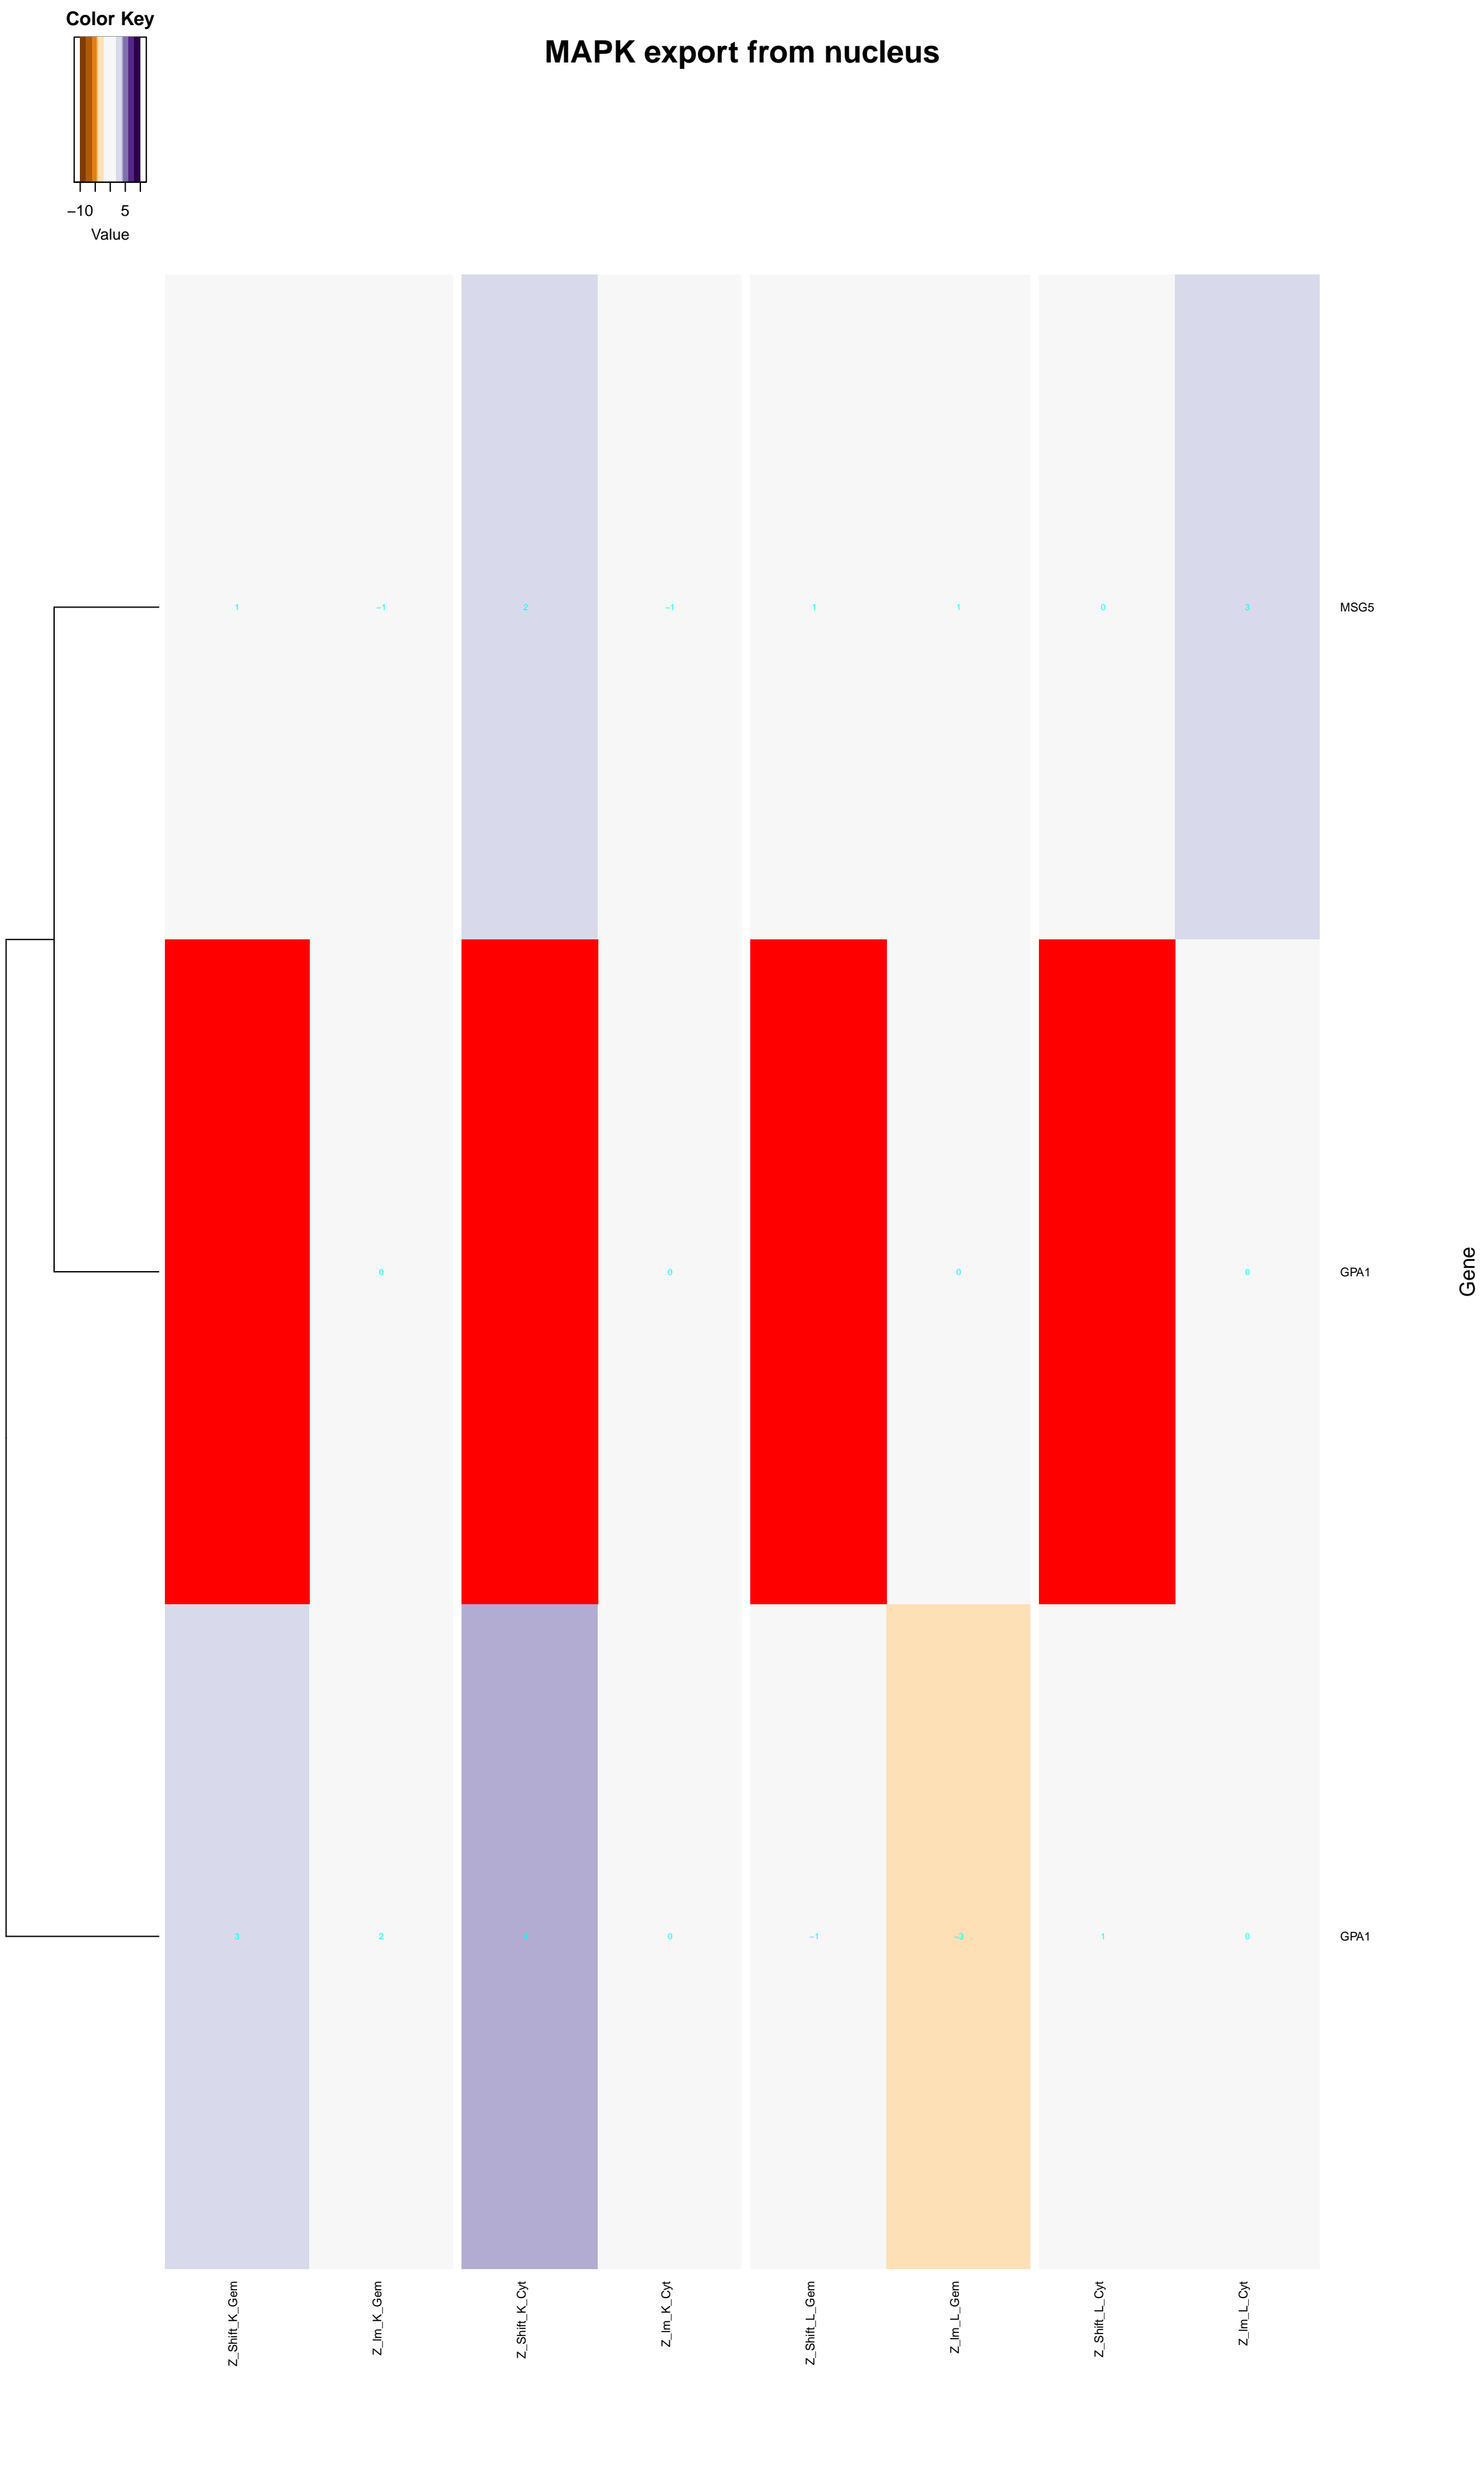













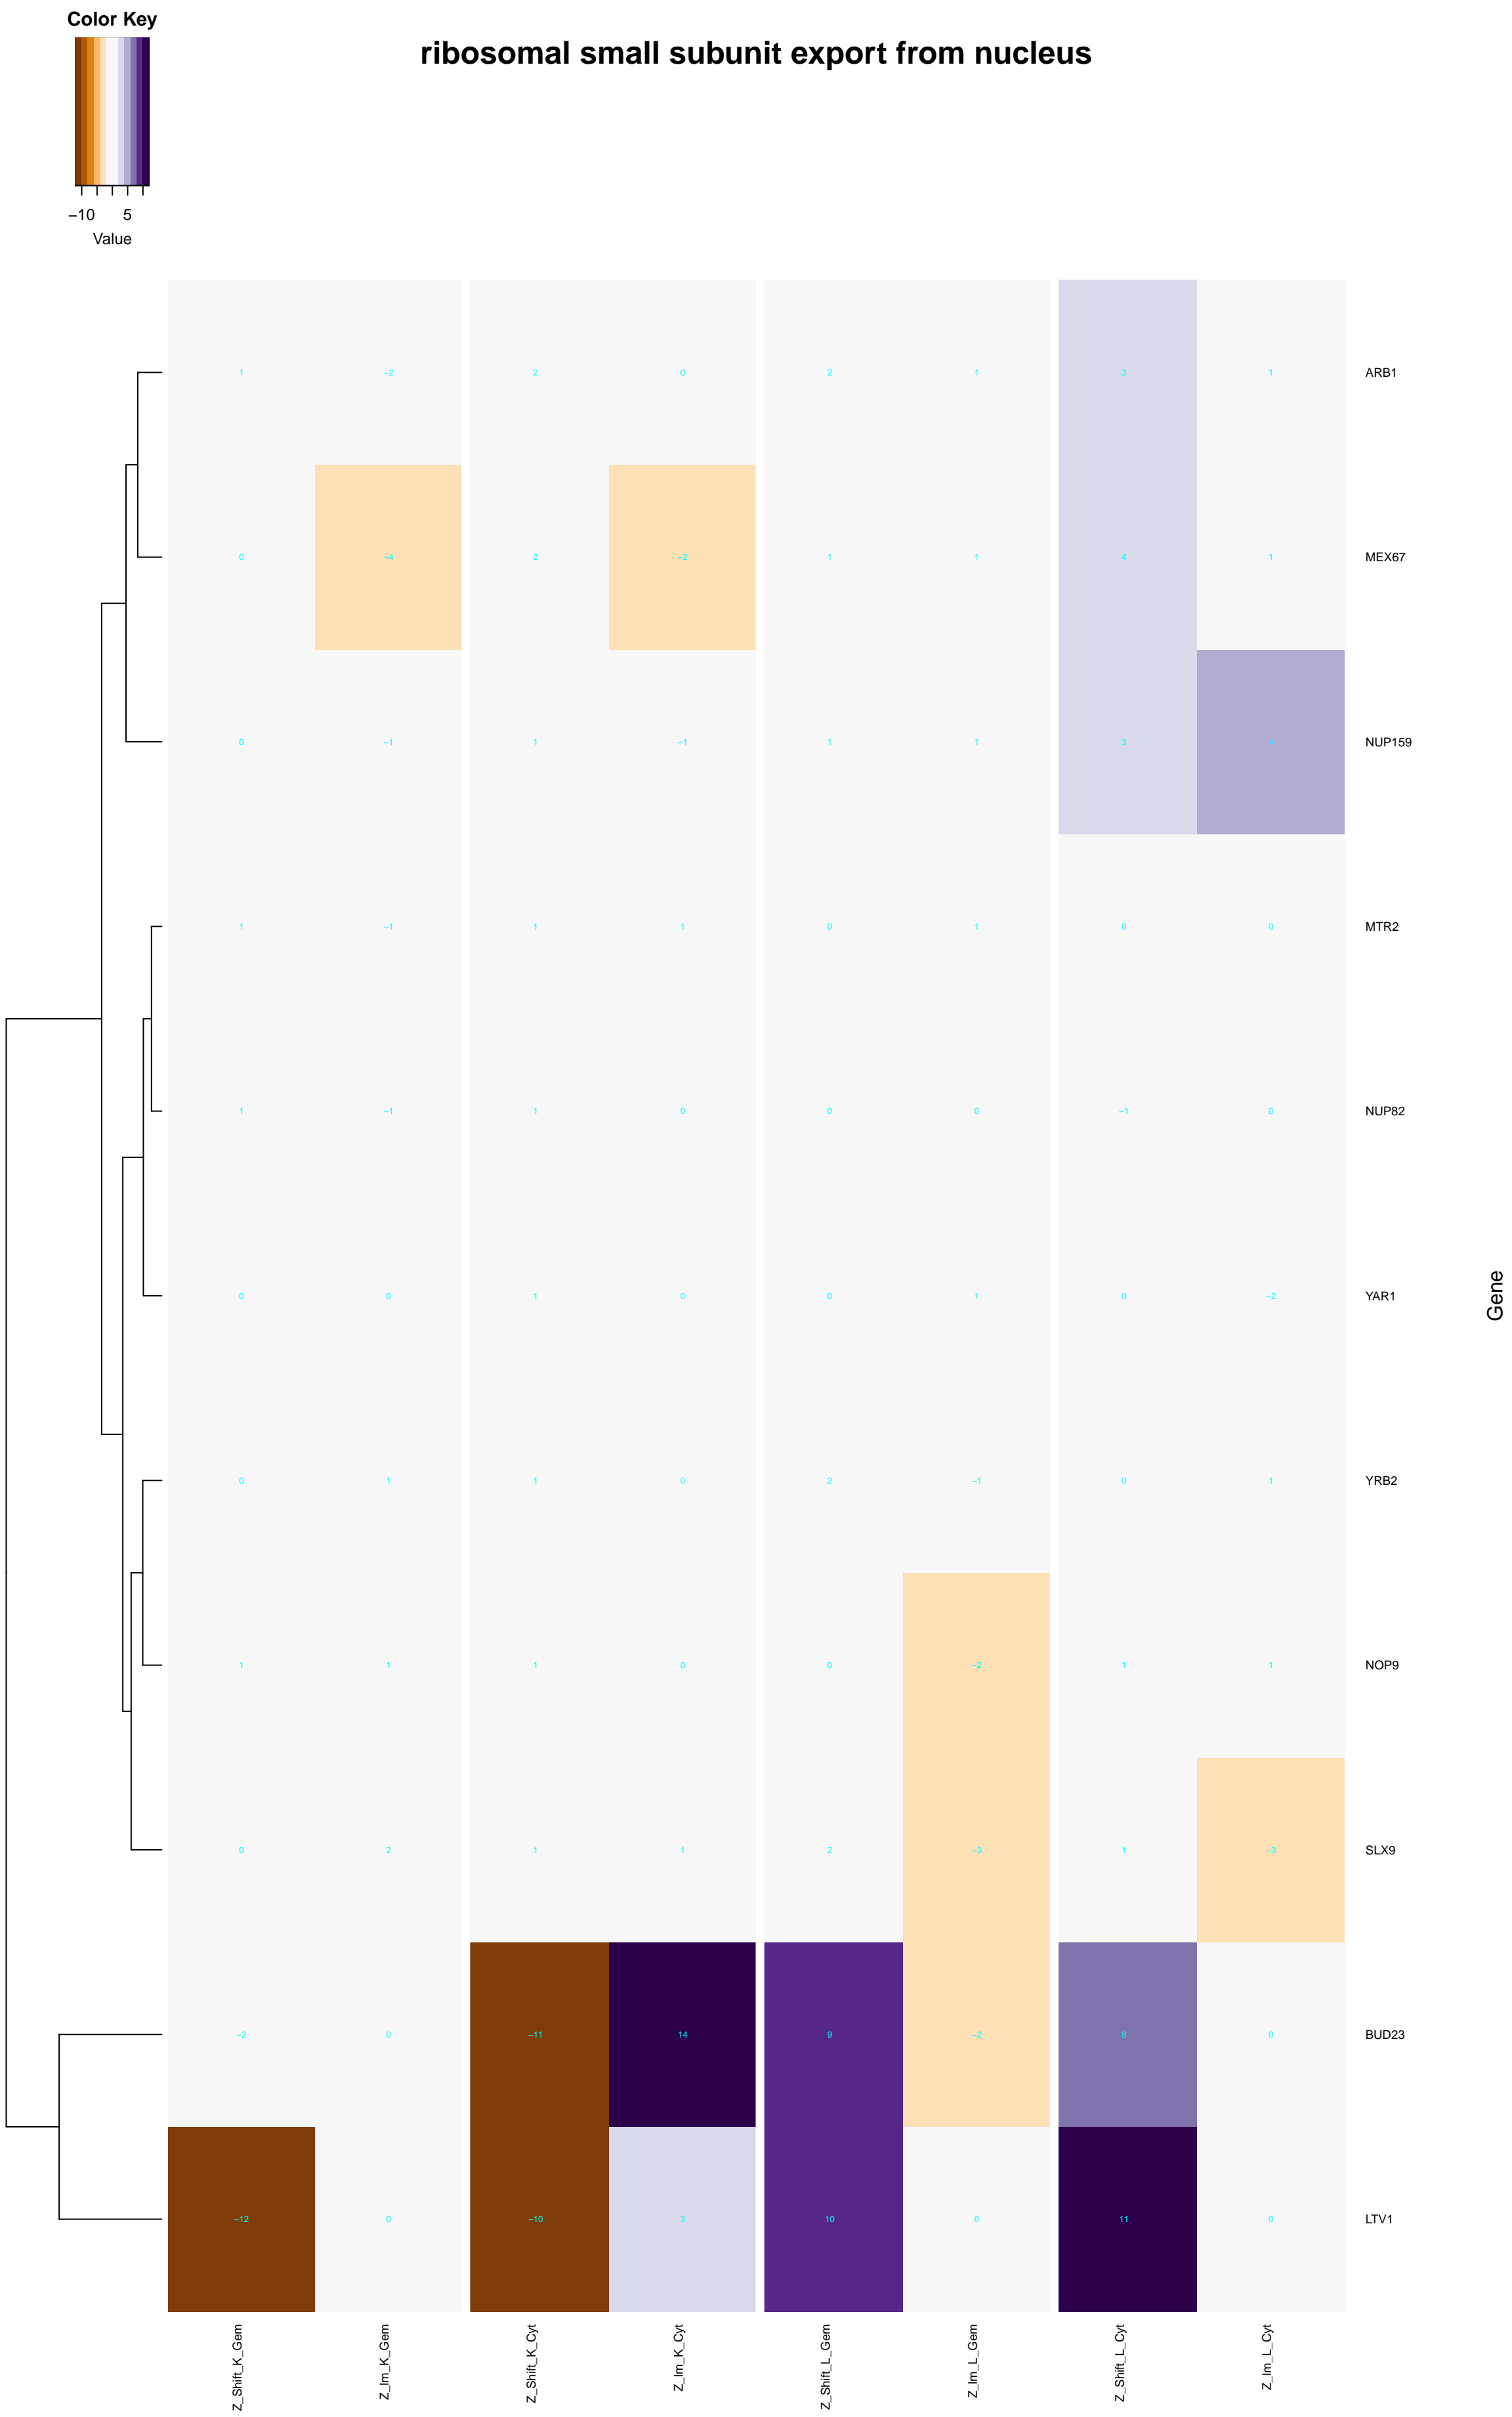

Supplement: s1 [file s1]

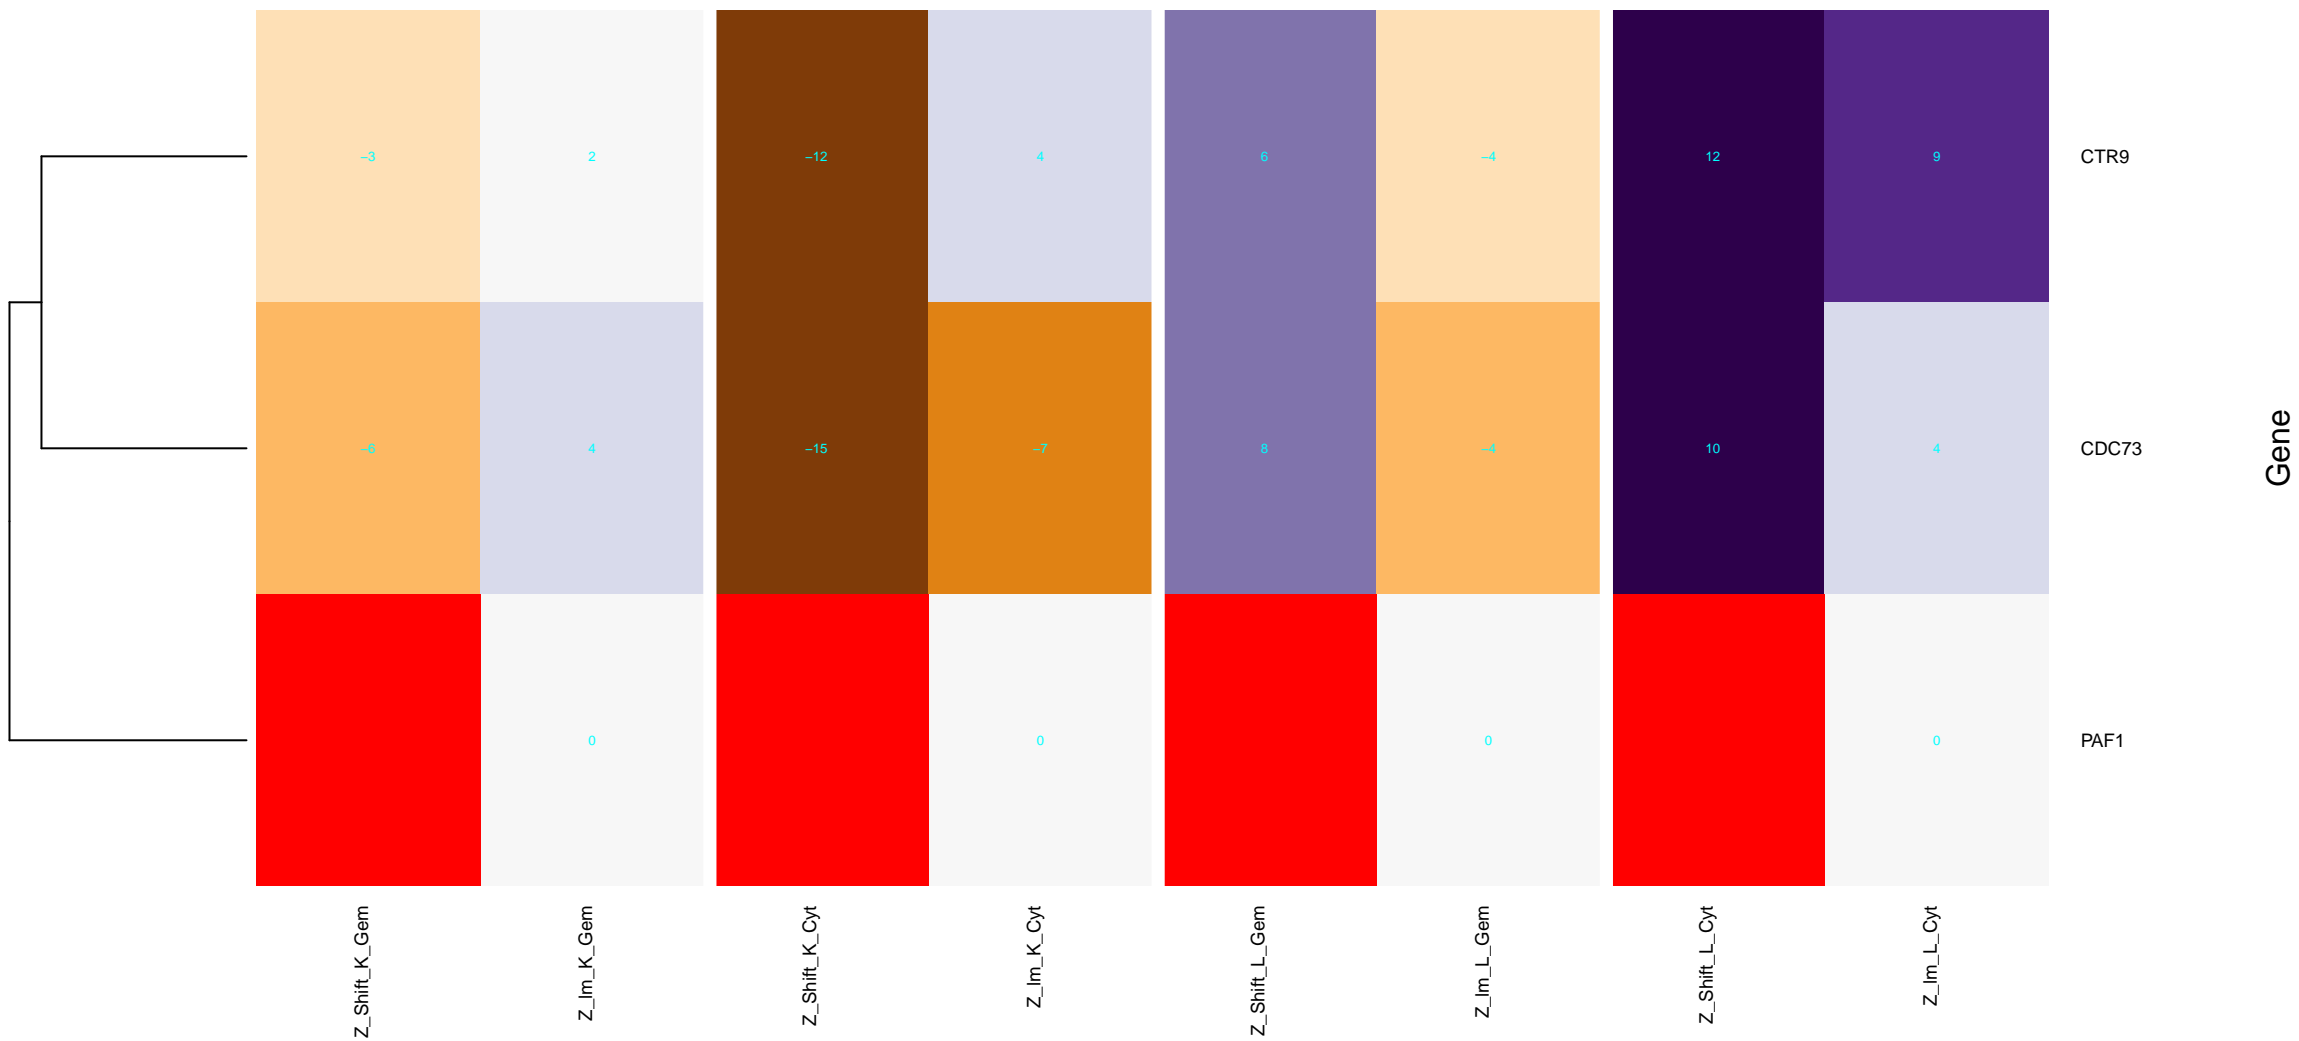

Supplement: s1 [file s1]

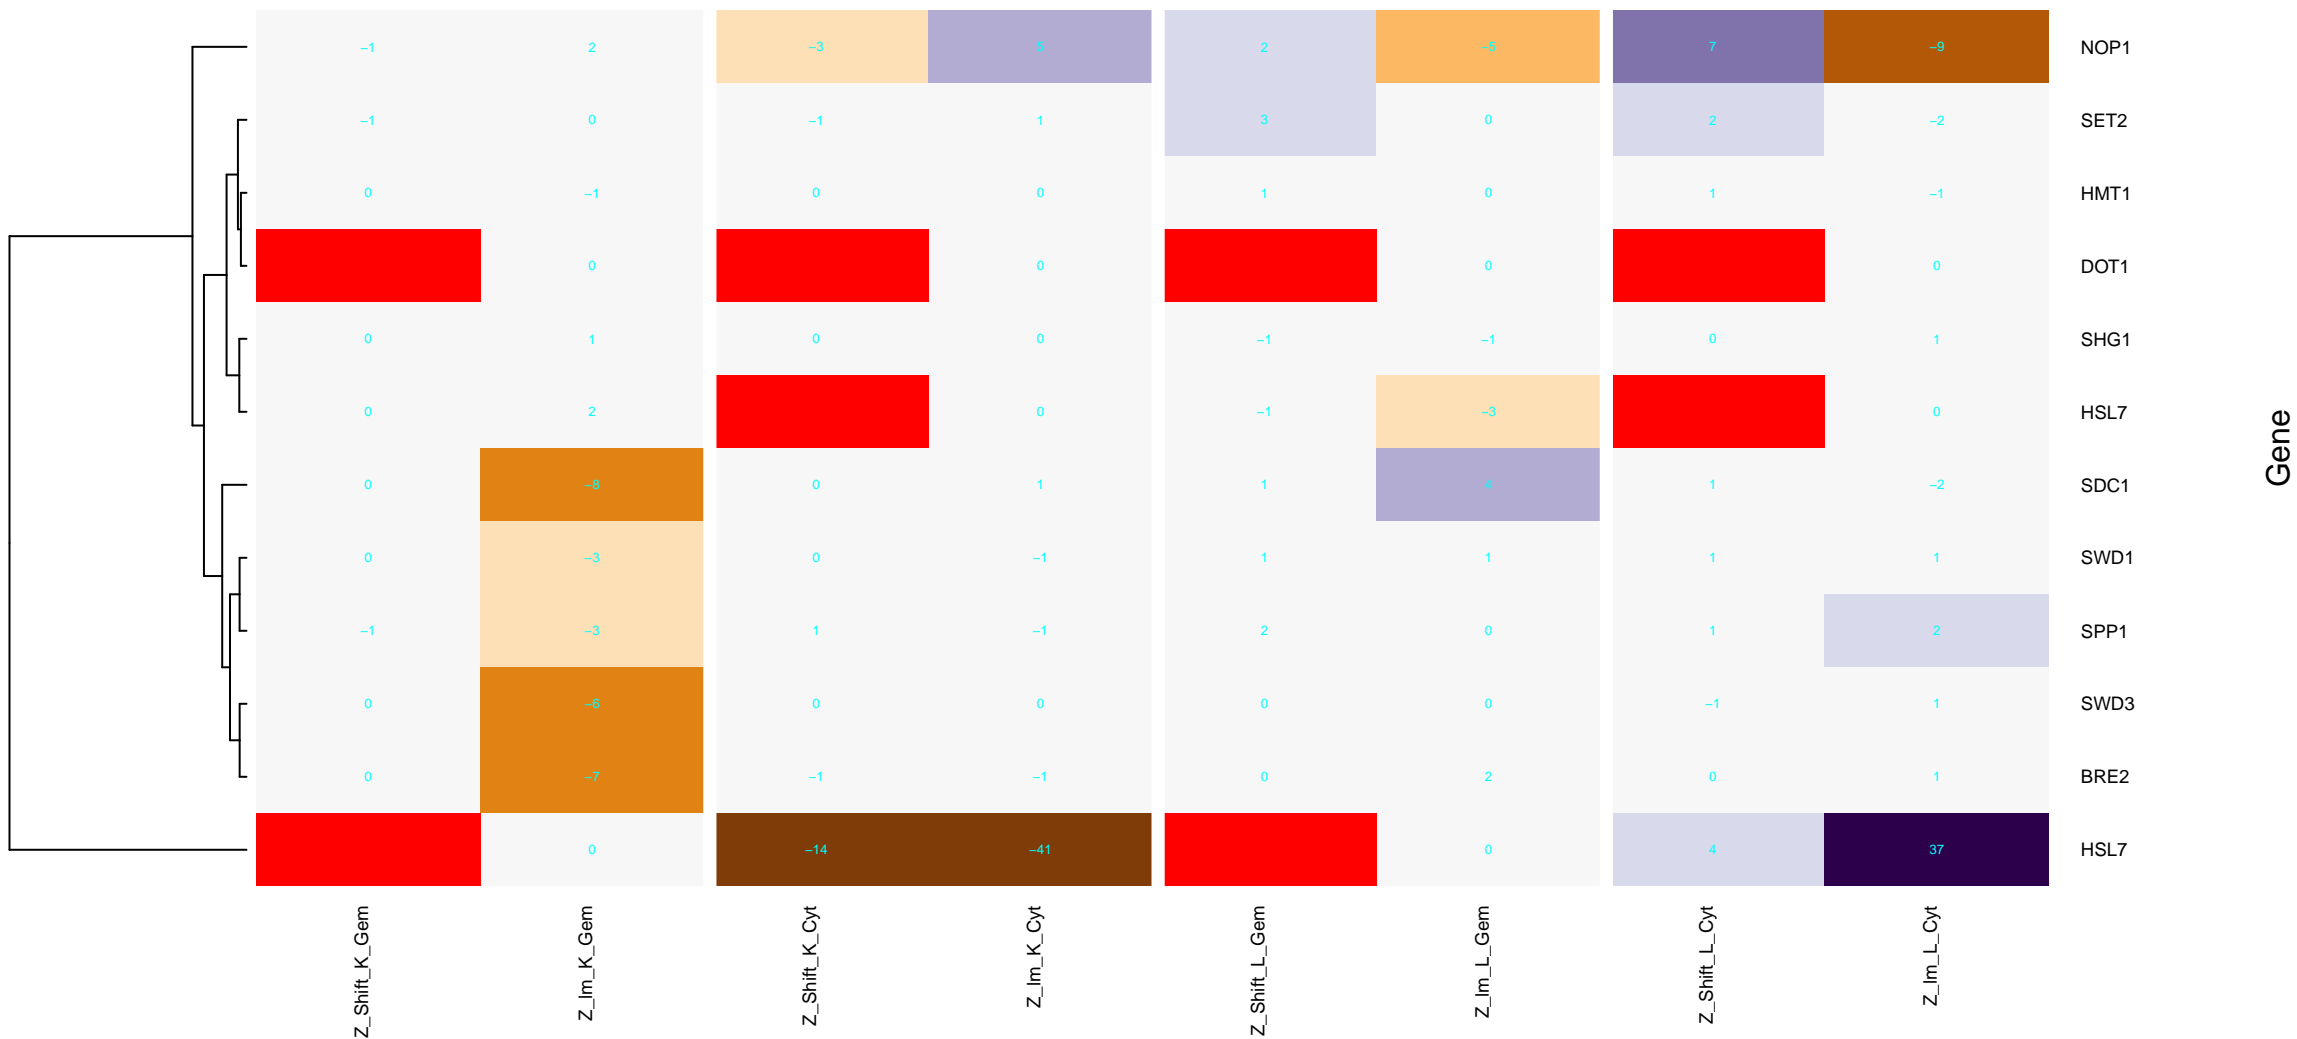

Supplement: s1 [file s1]

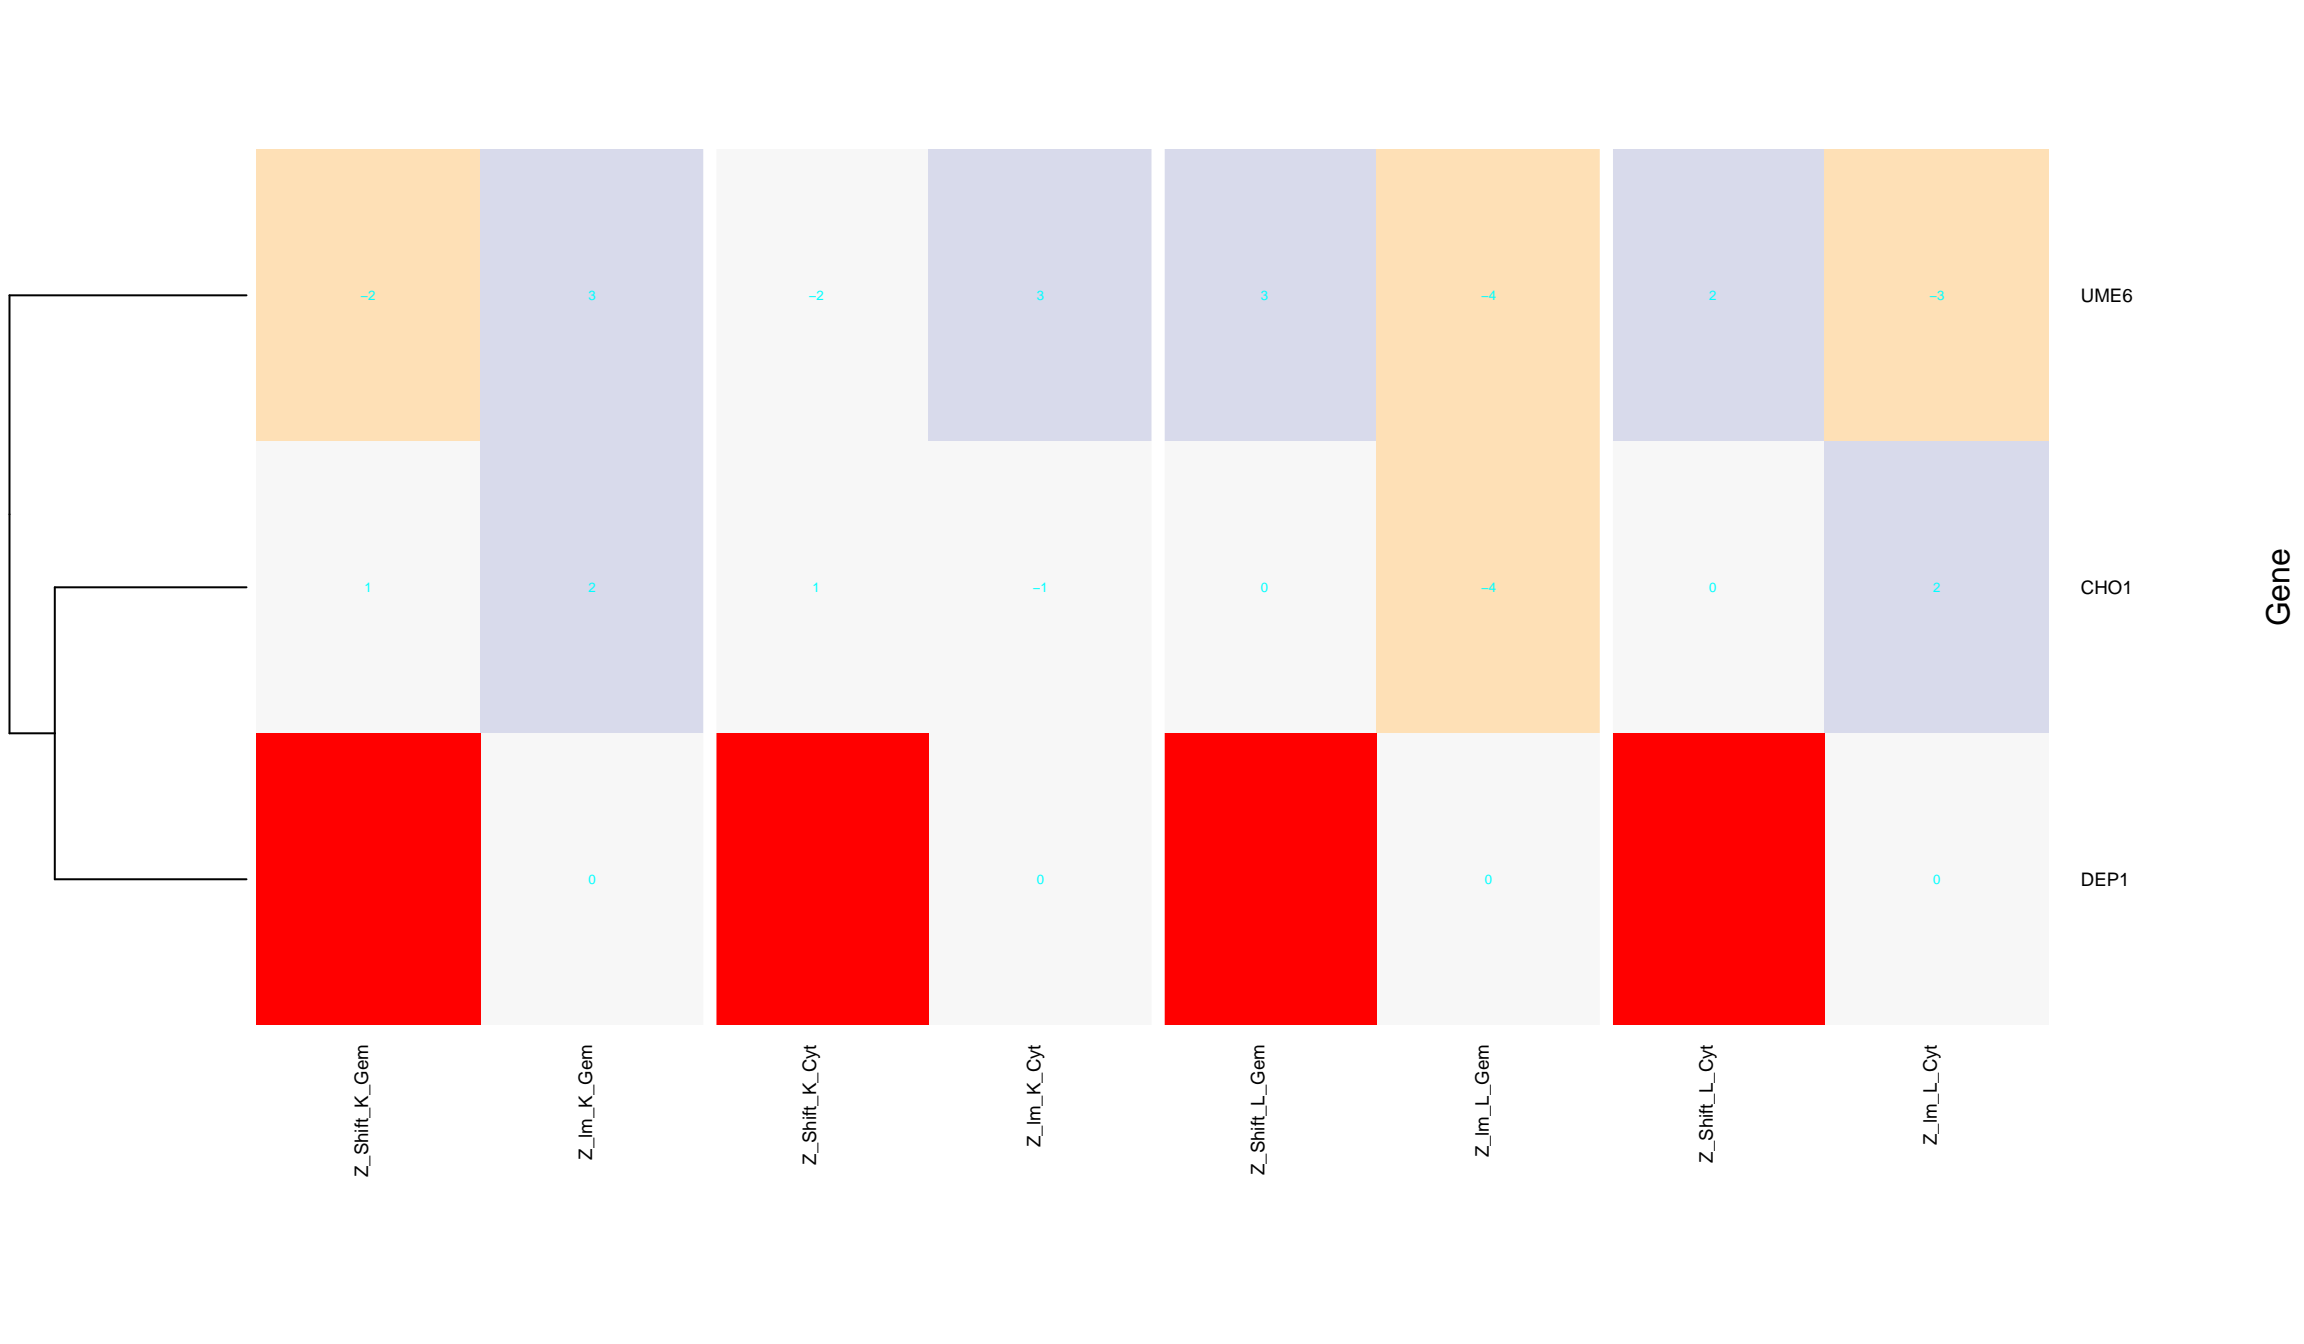

Supplement: s1 [file s1]

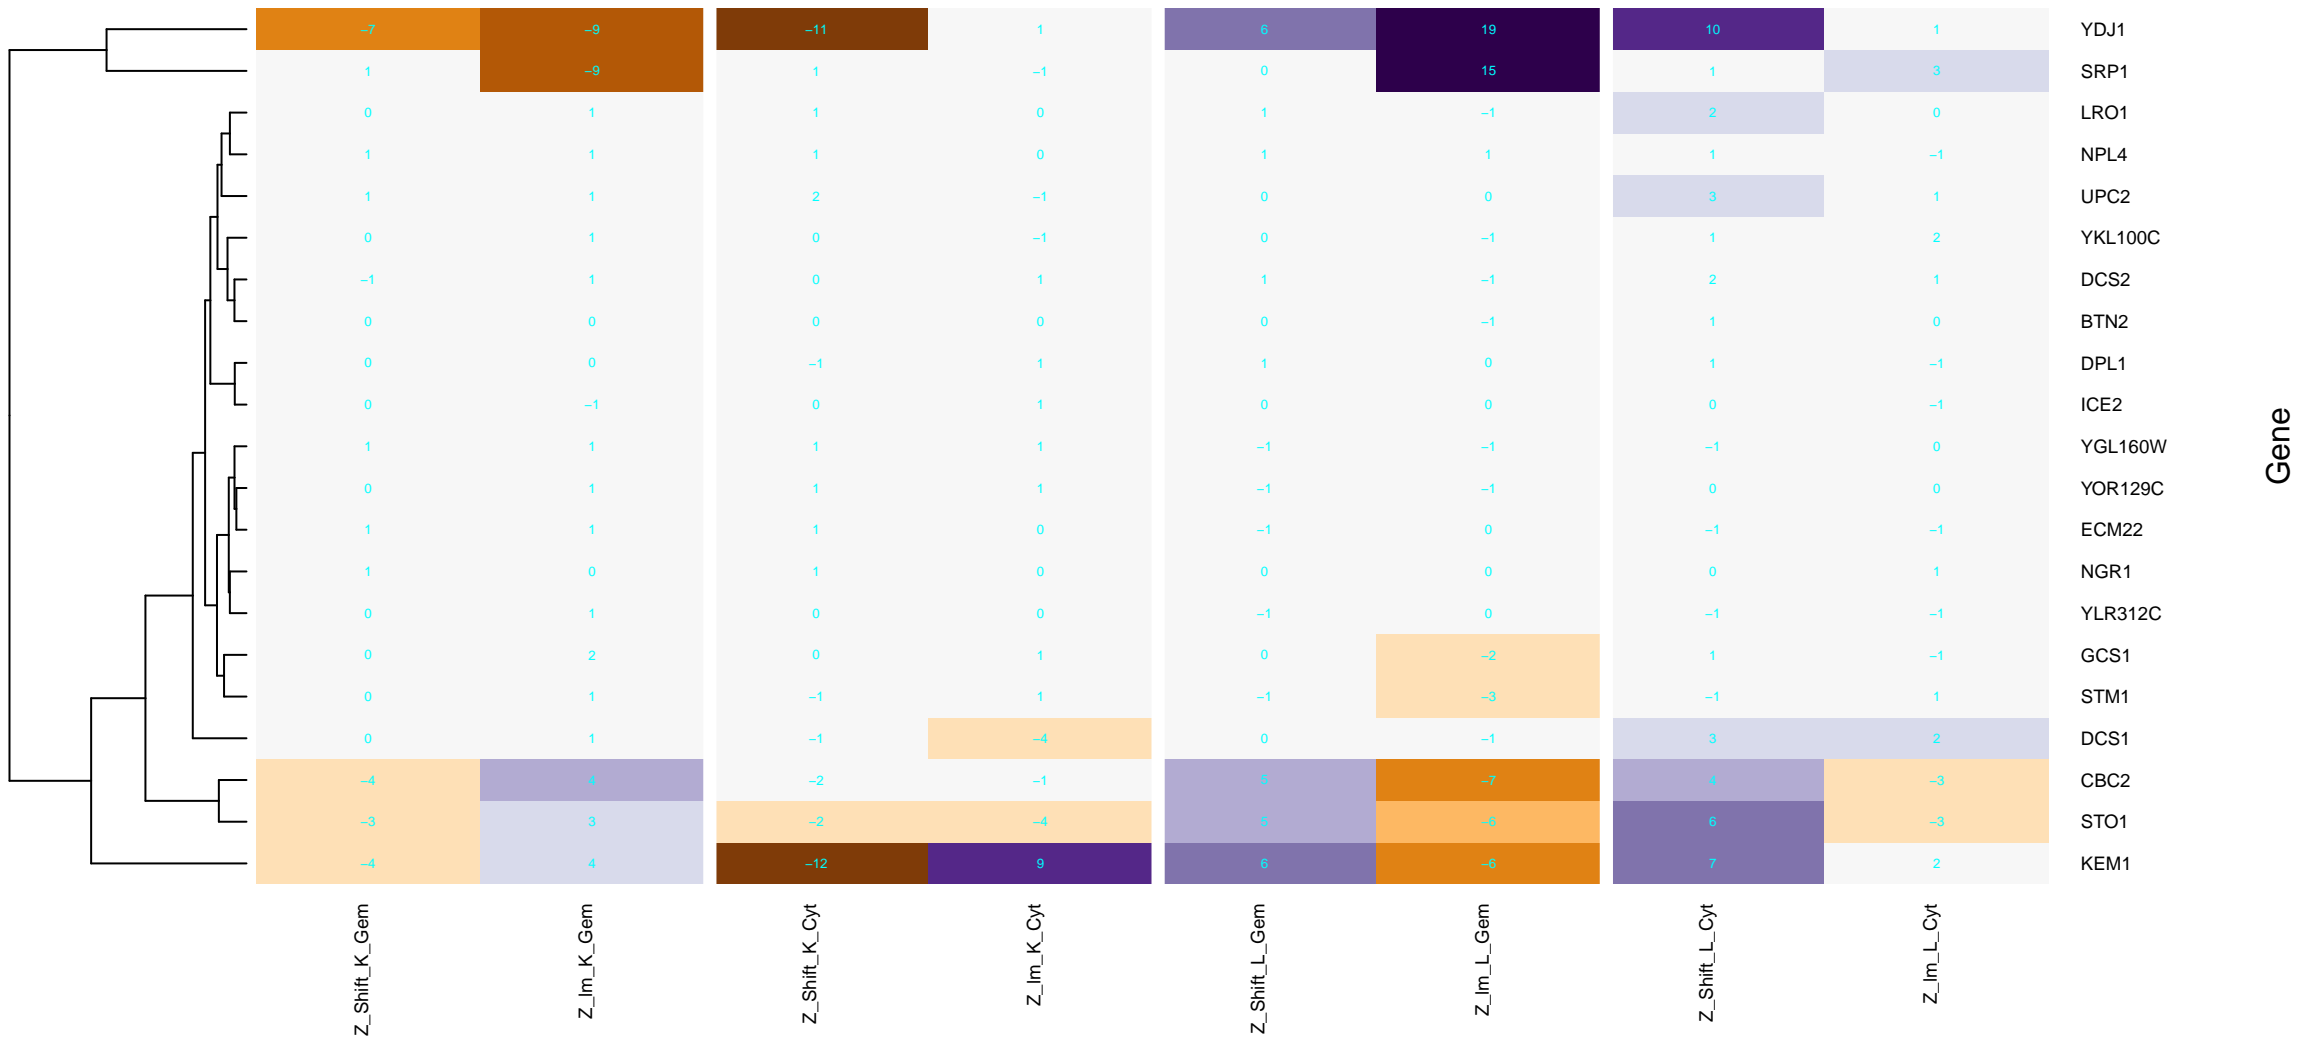

Supplement: s1 [file s1]

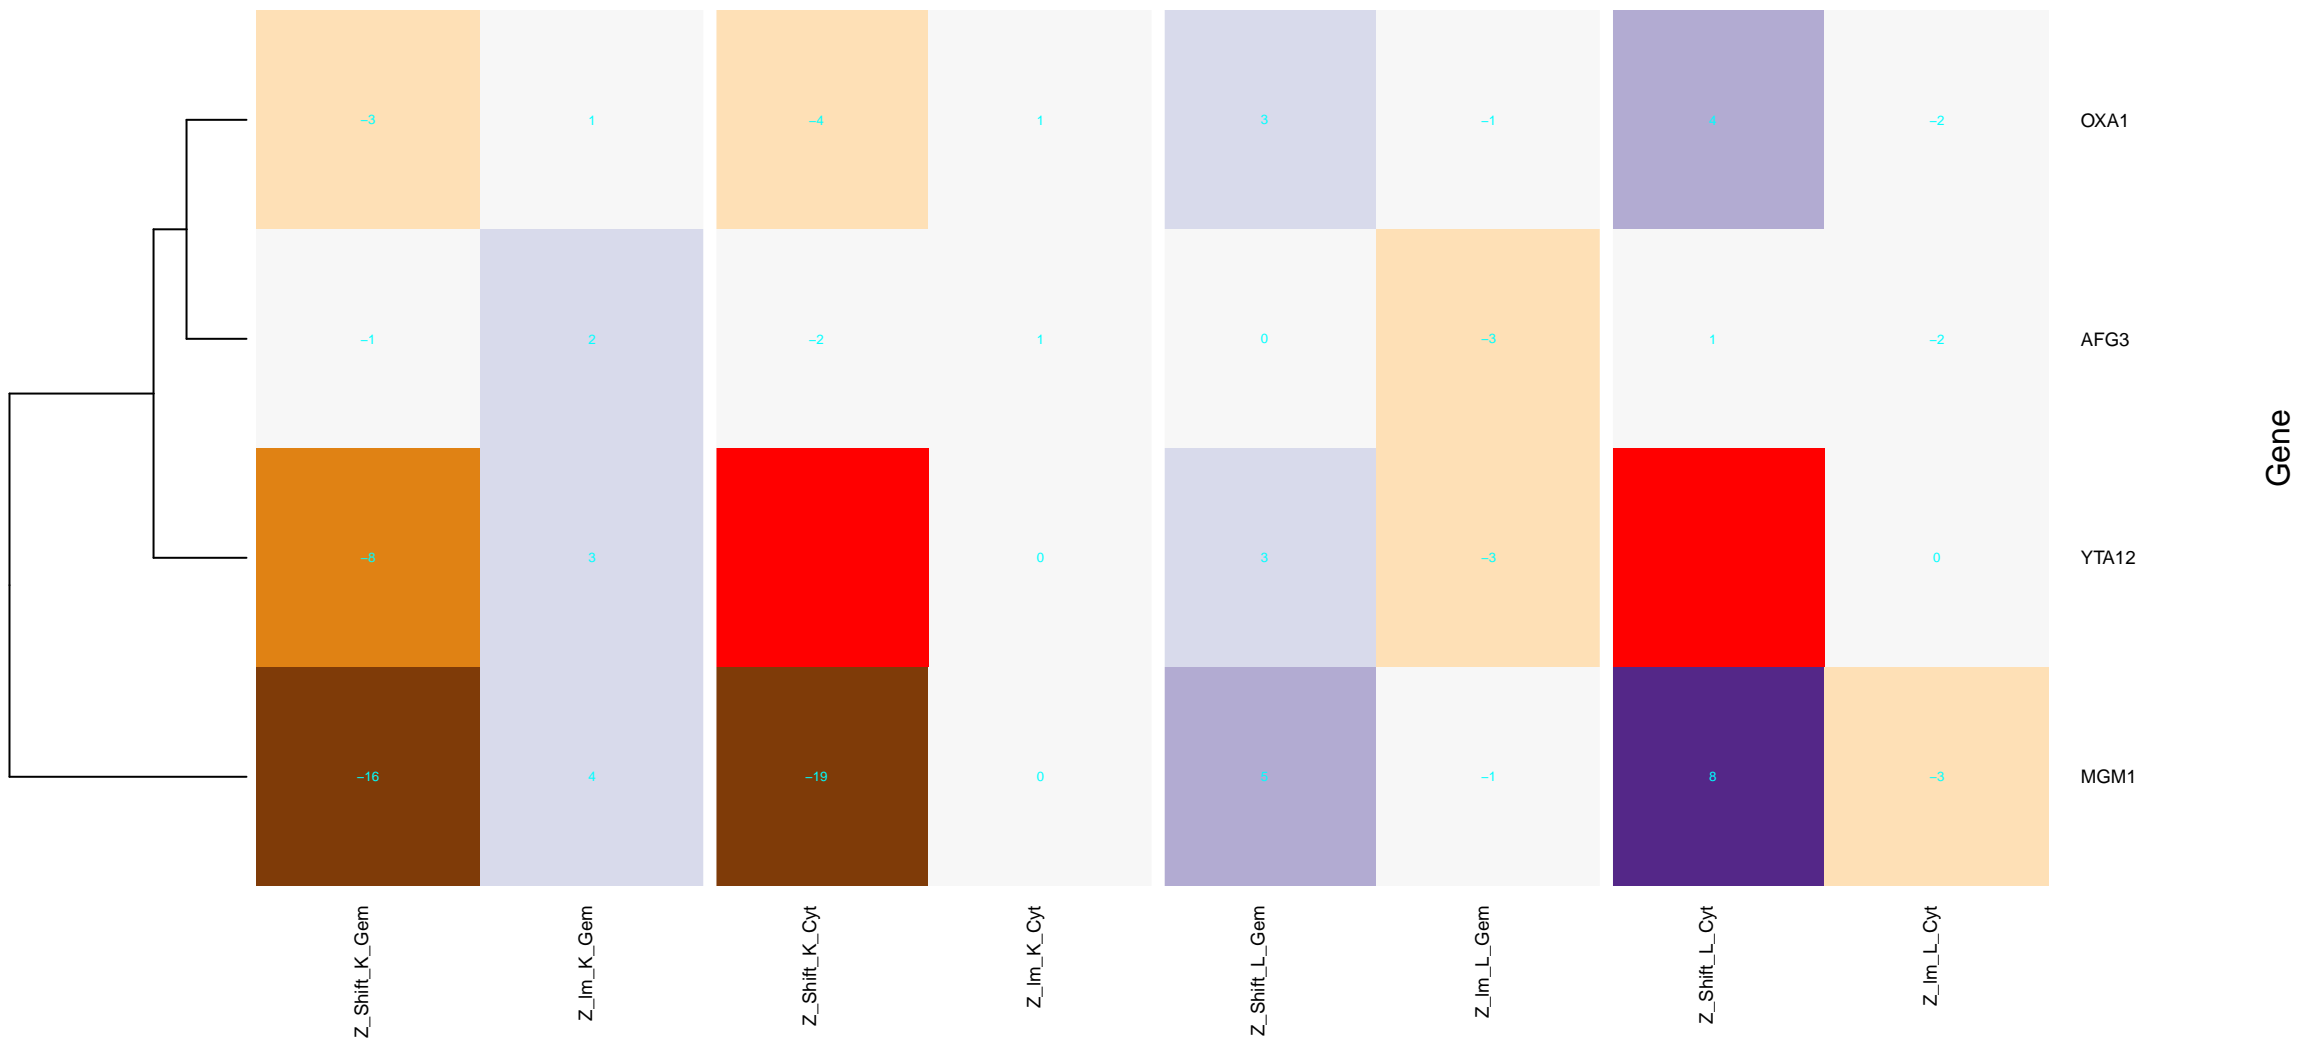

Supplement: s1 [file s1]



# tin-dependent protein catabolic process via the multivesicular body sorting pathway

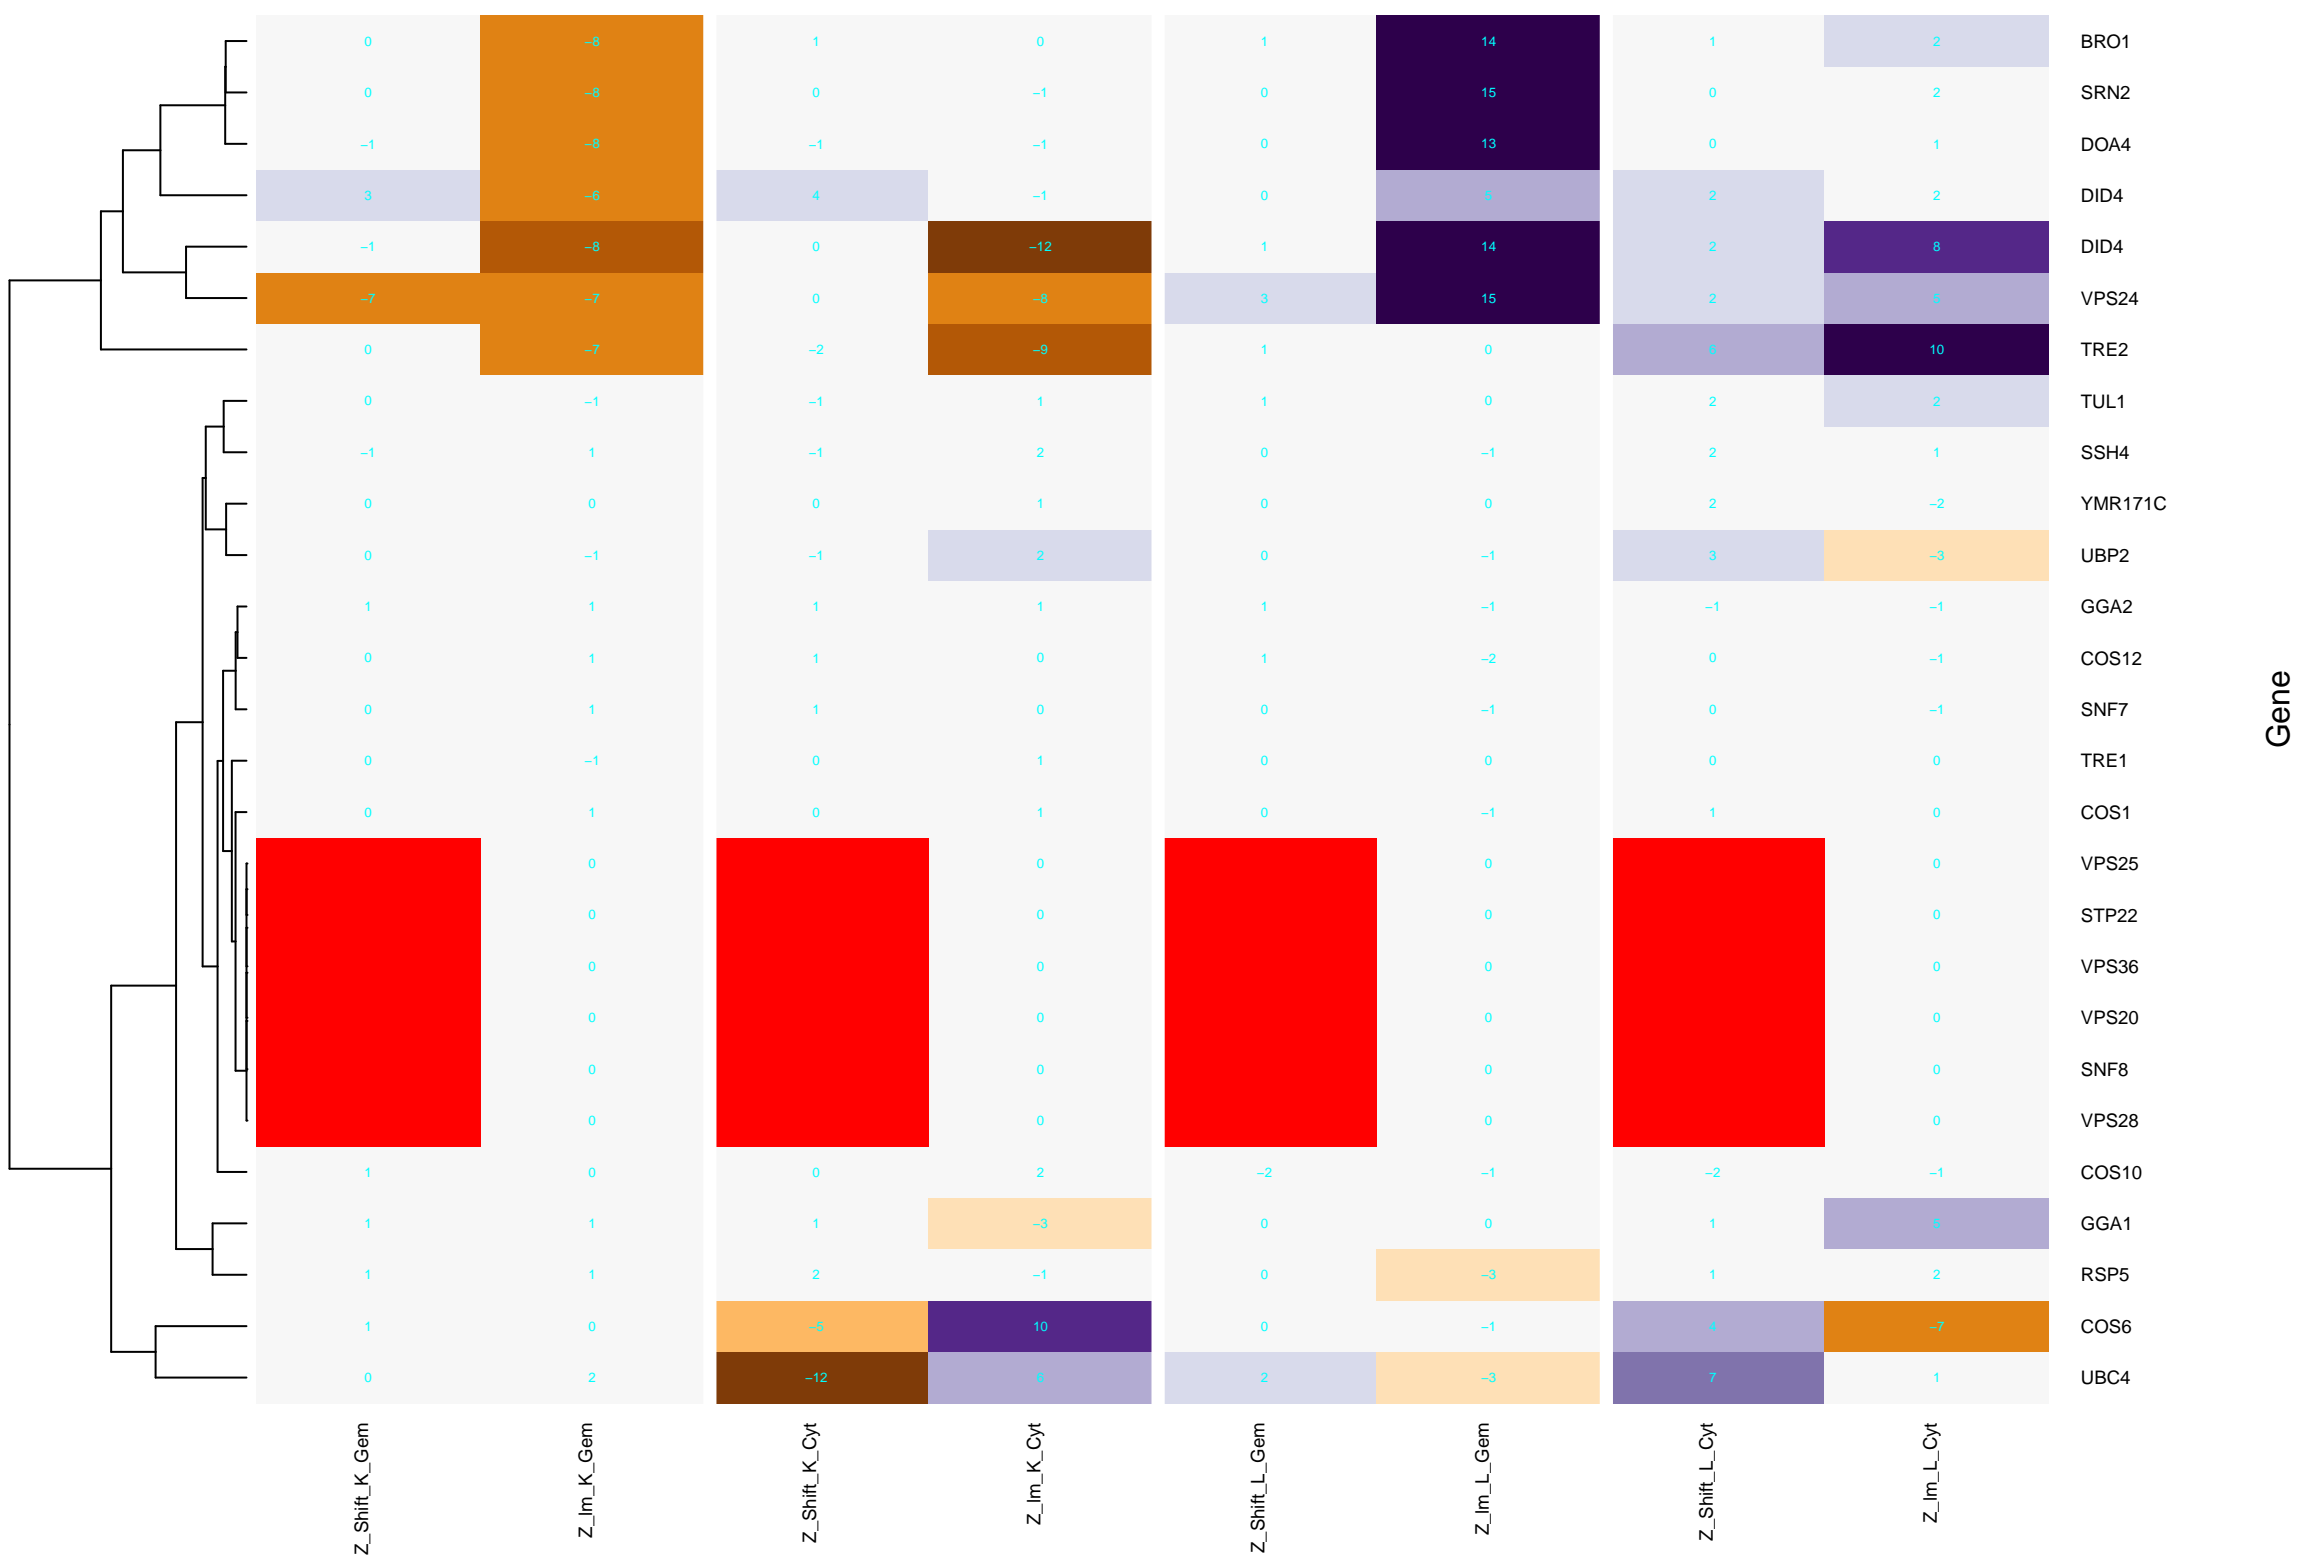

Supplement: s1 [file s1]

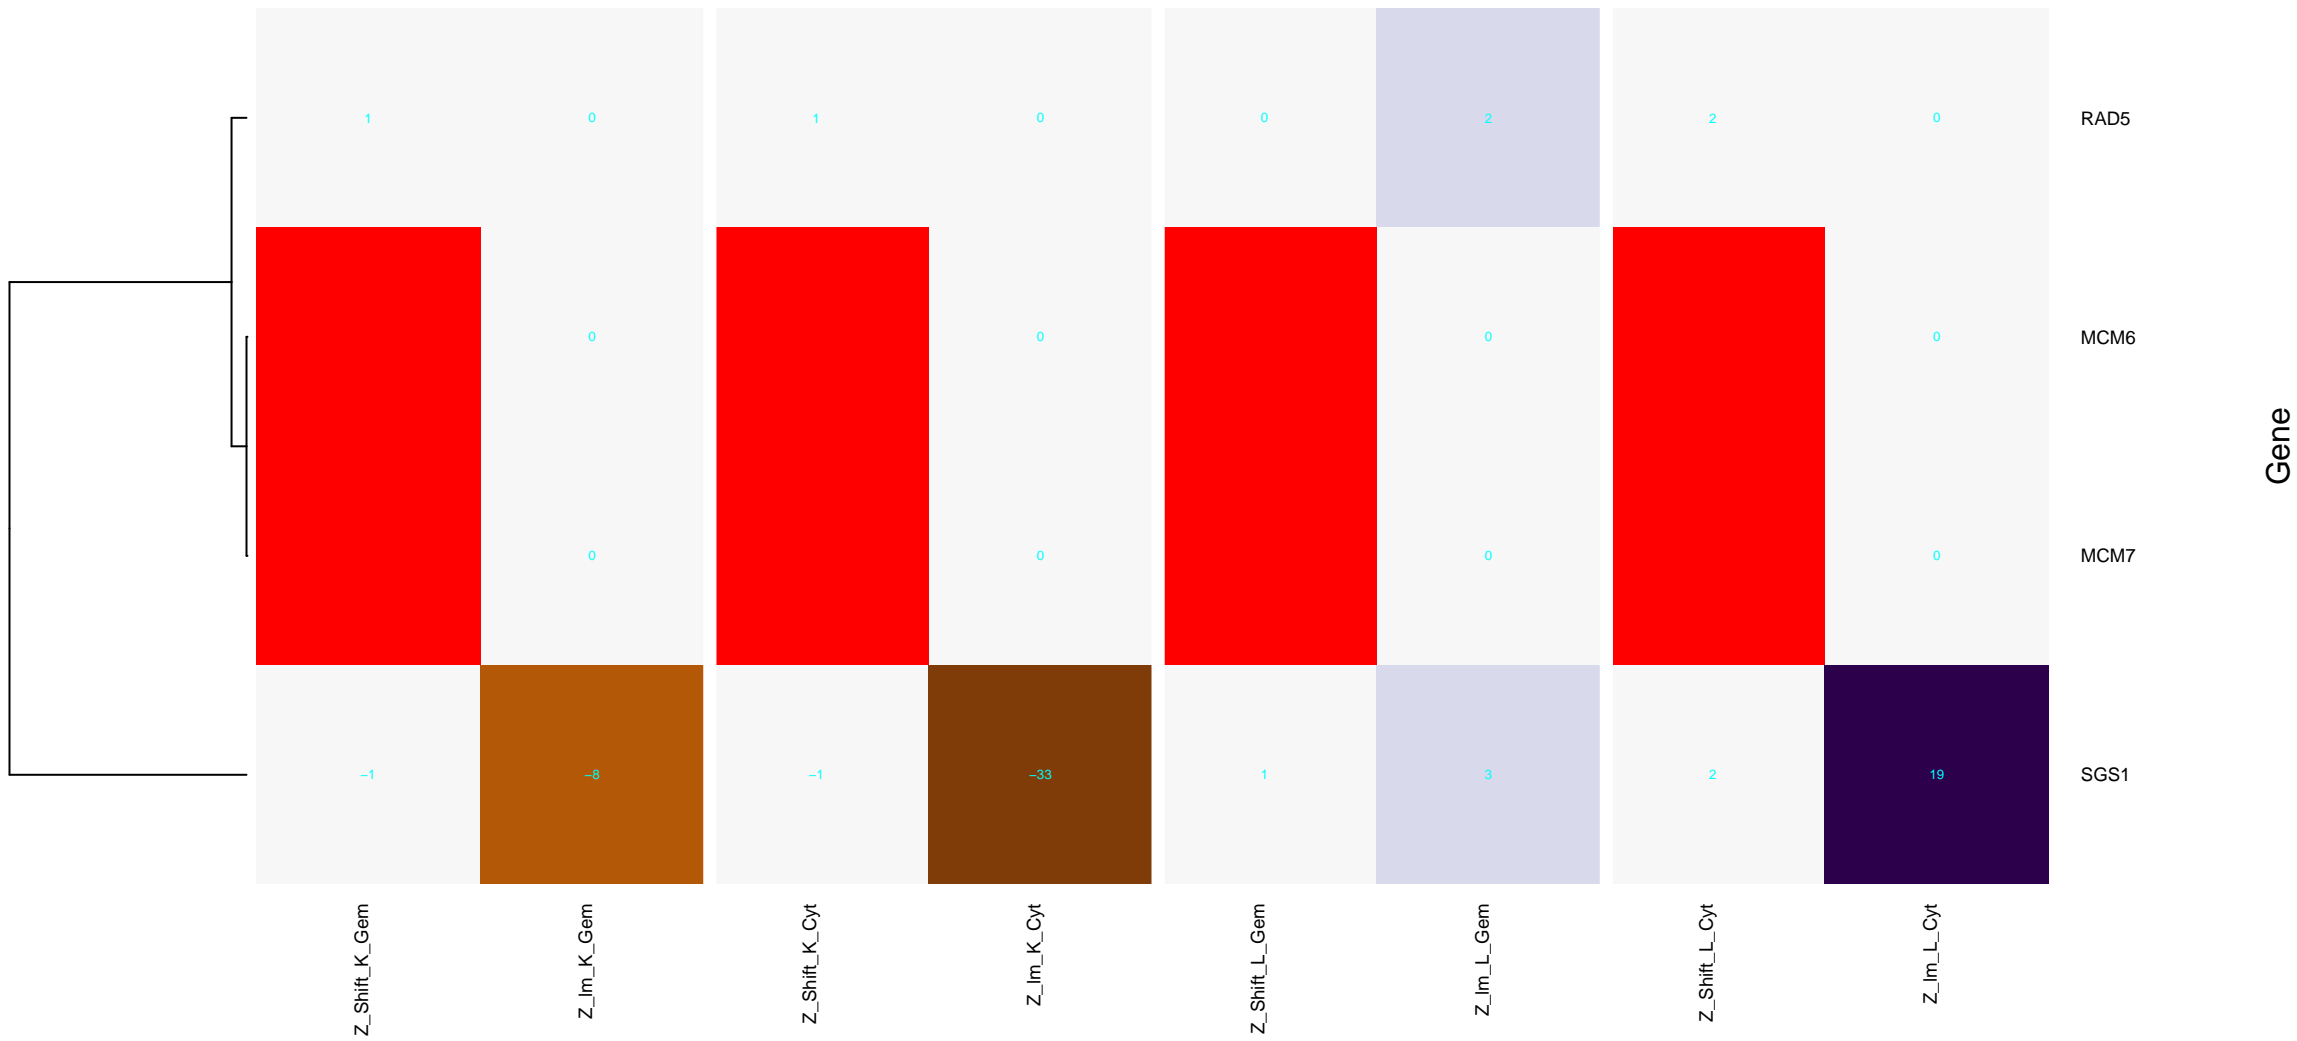

Supplement: s1 [file s1]

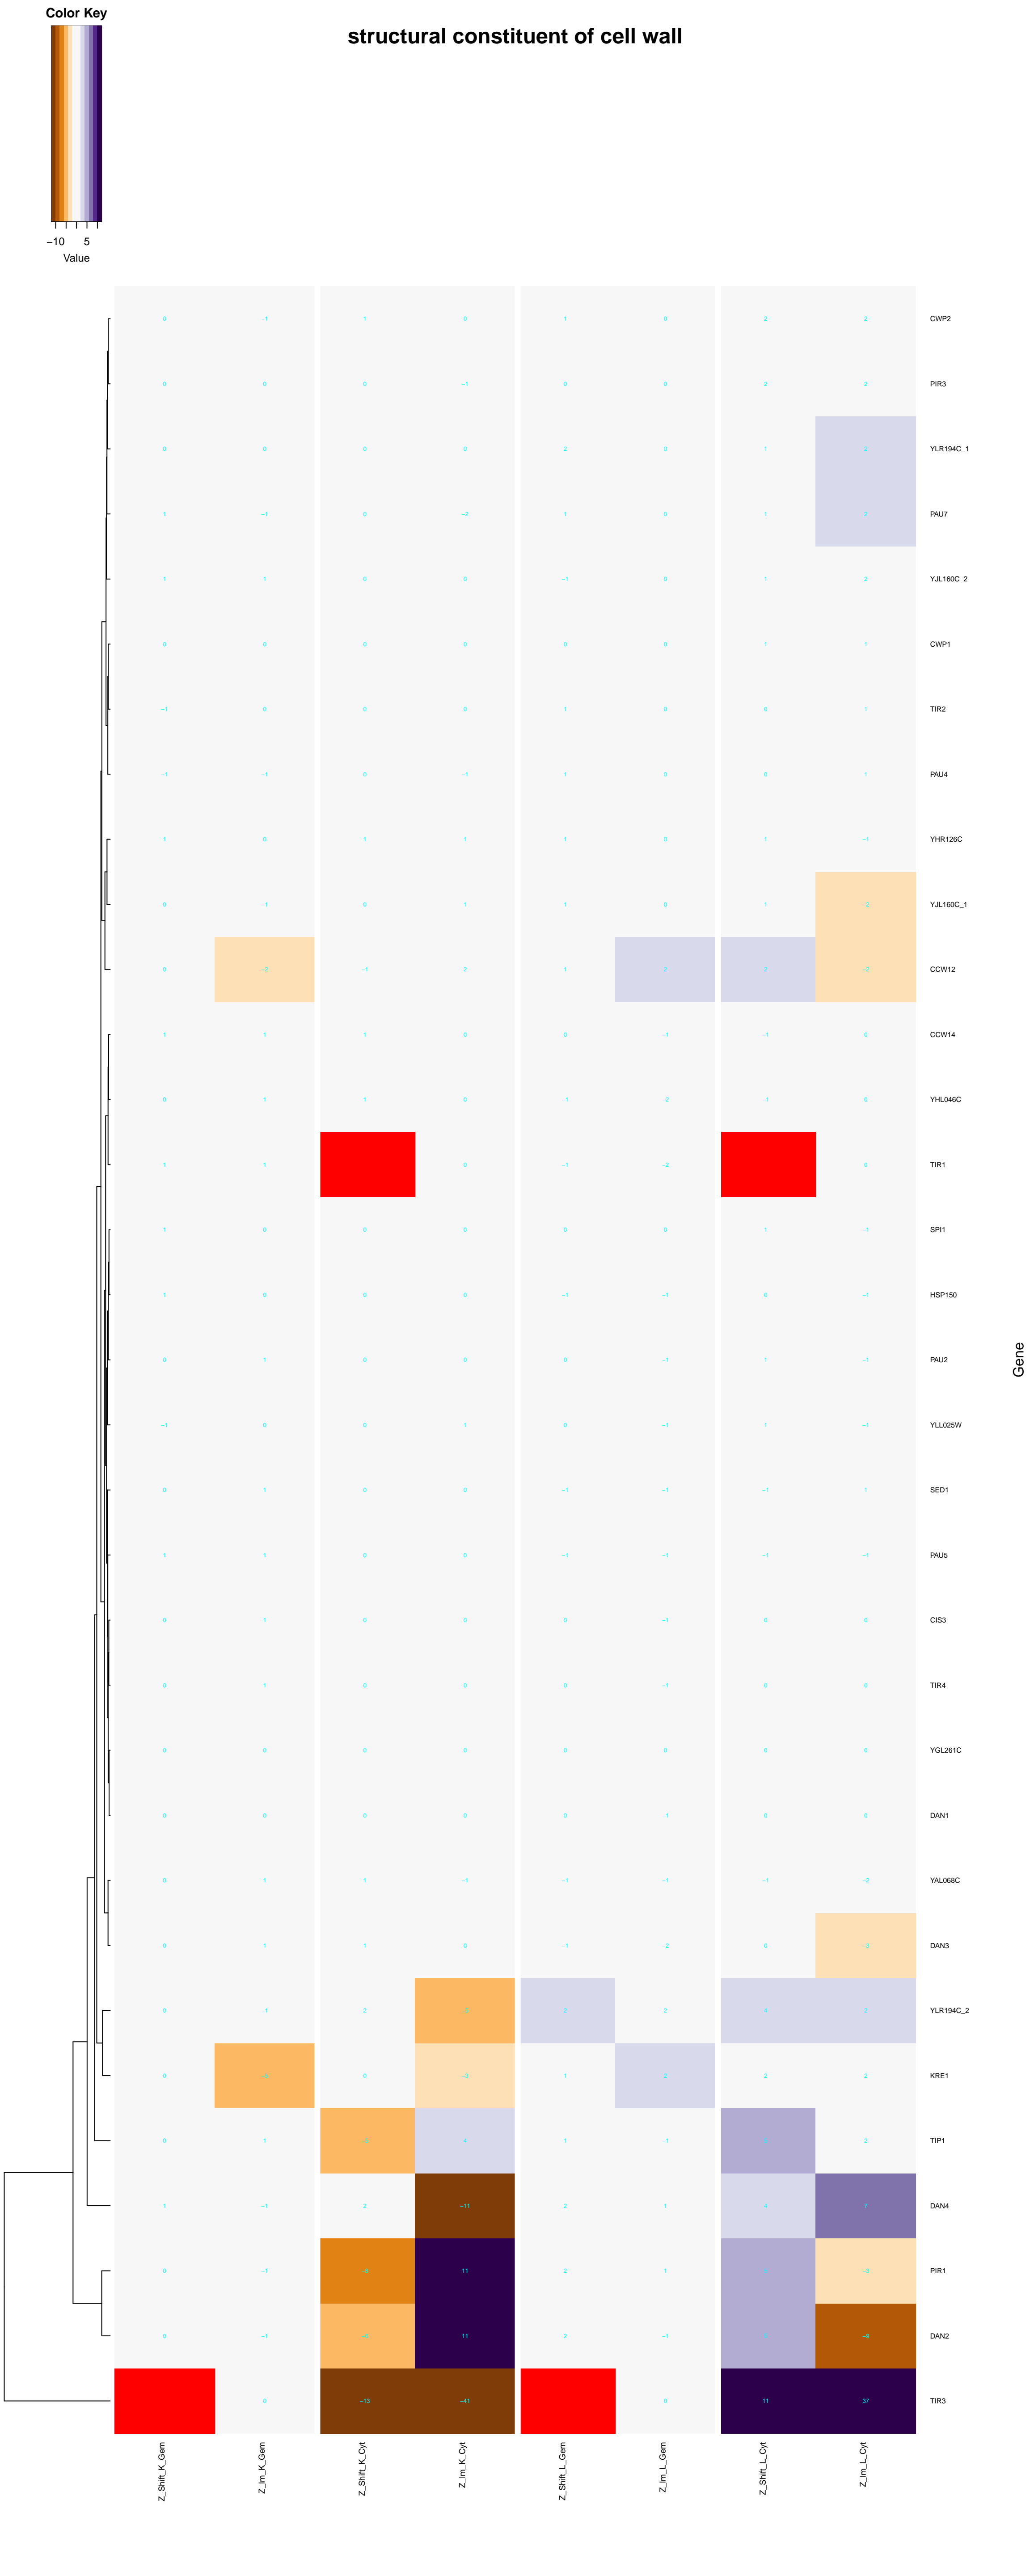

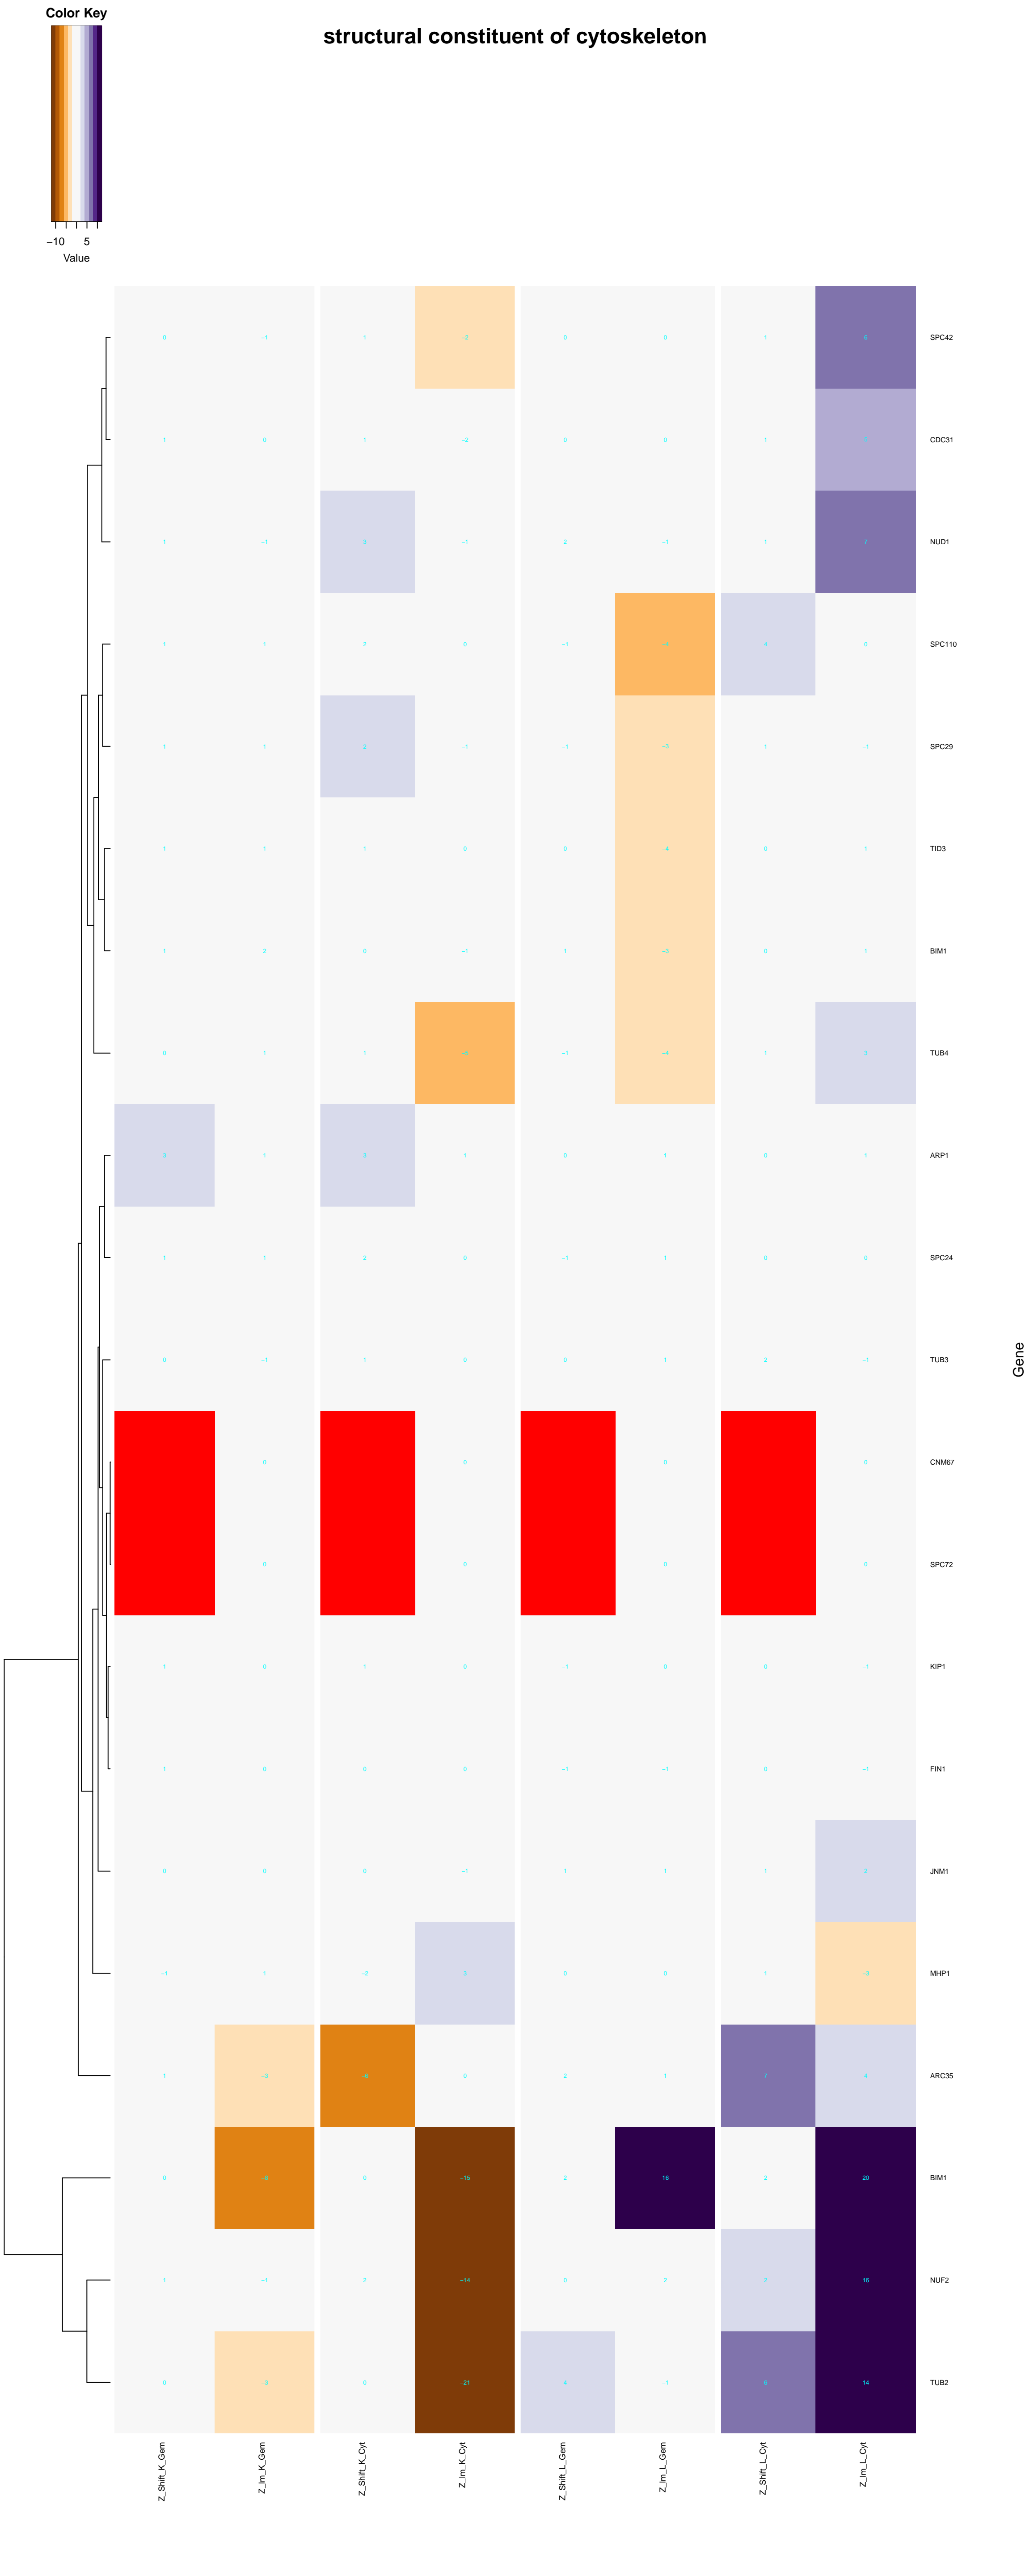

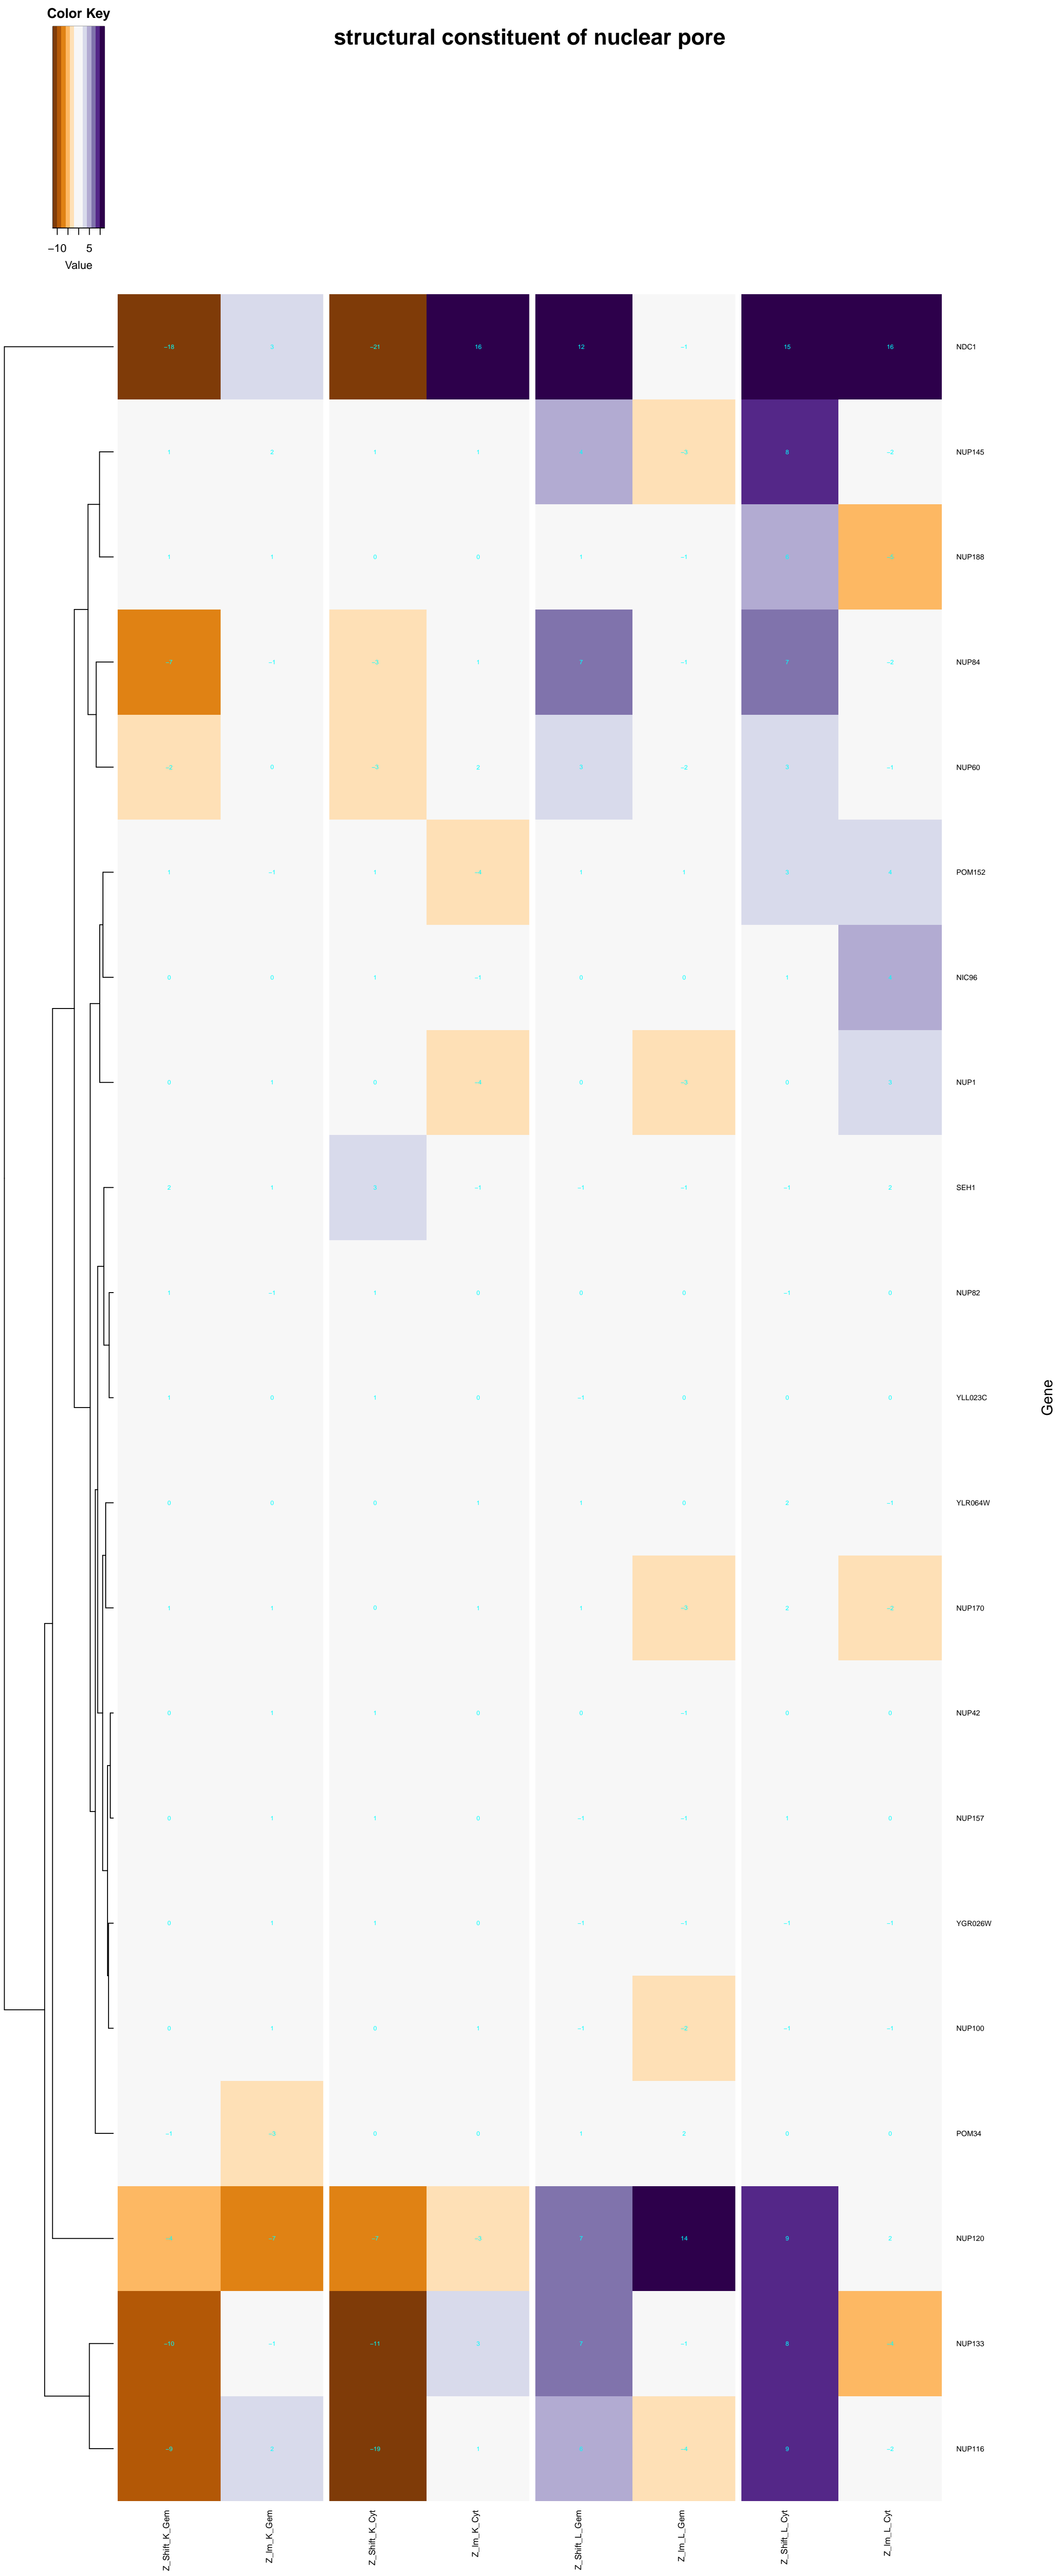

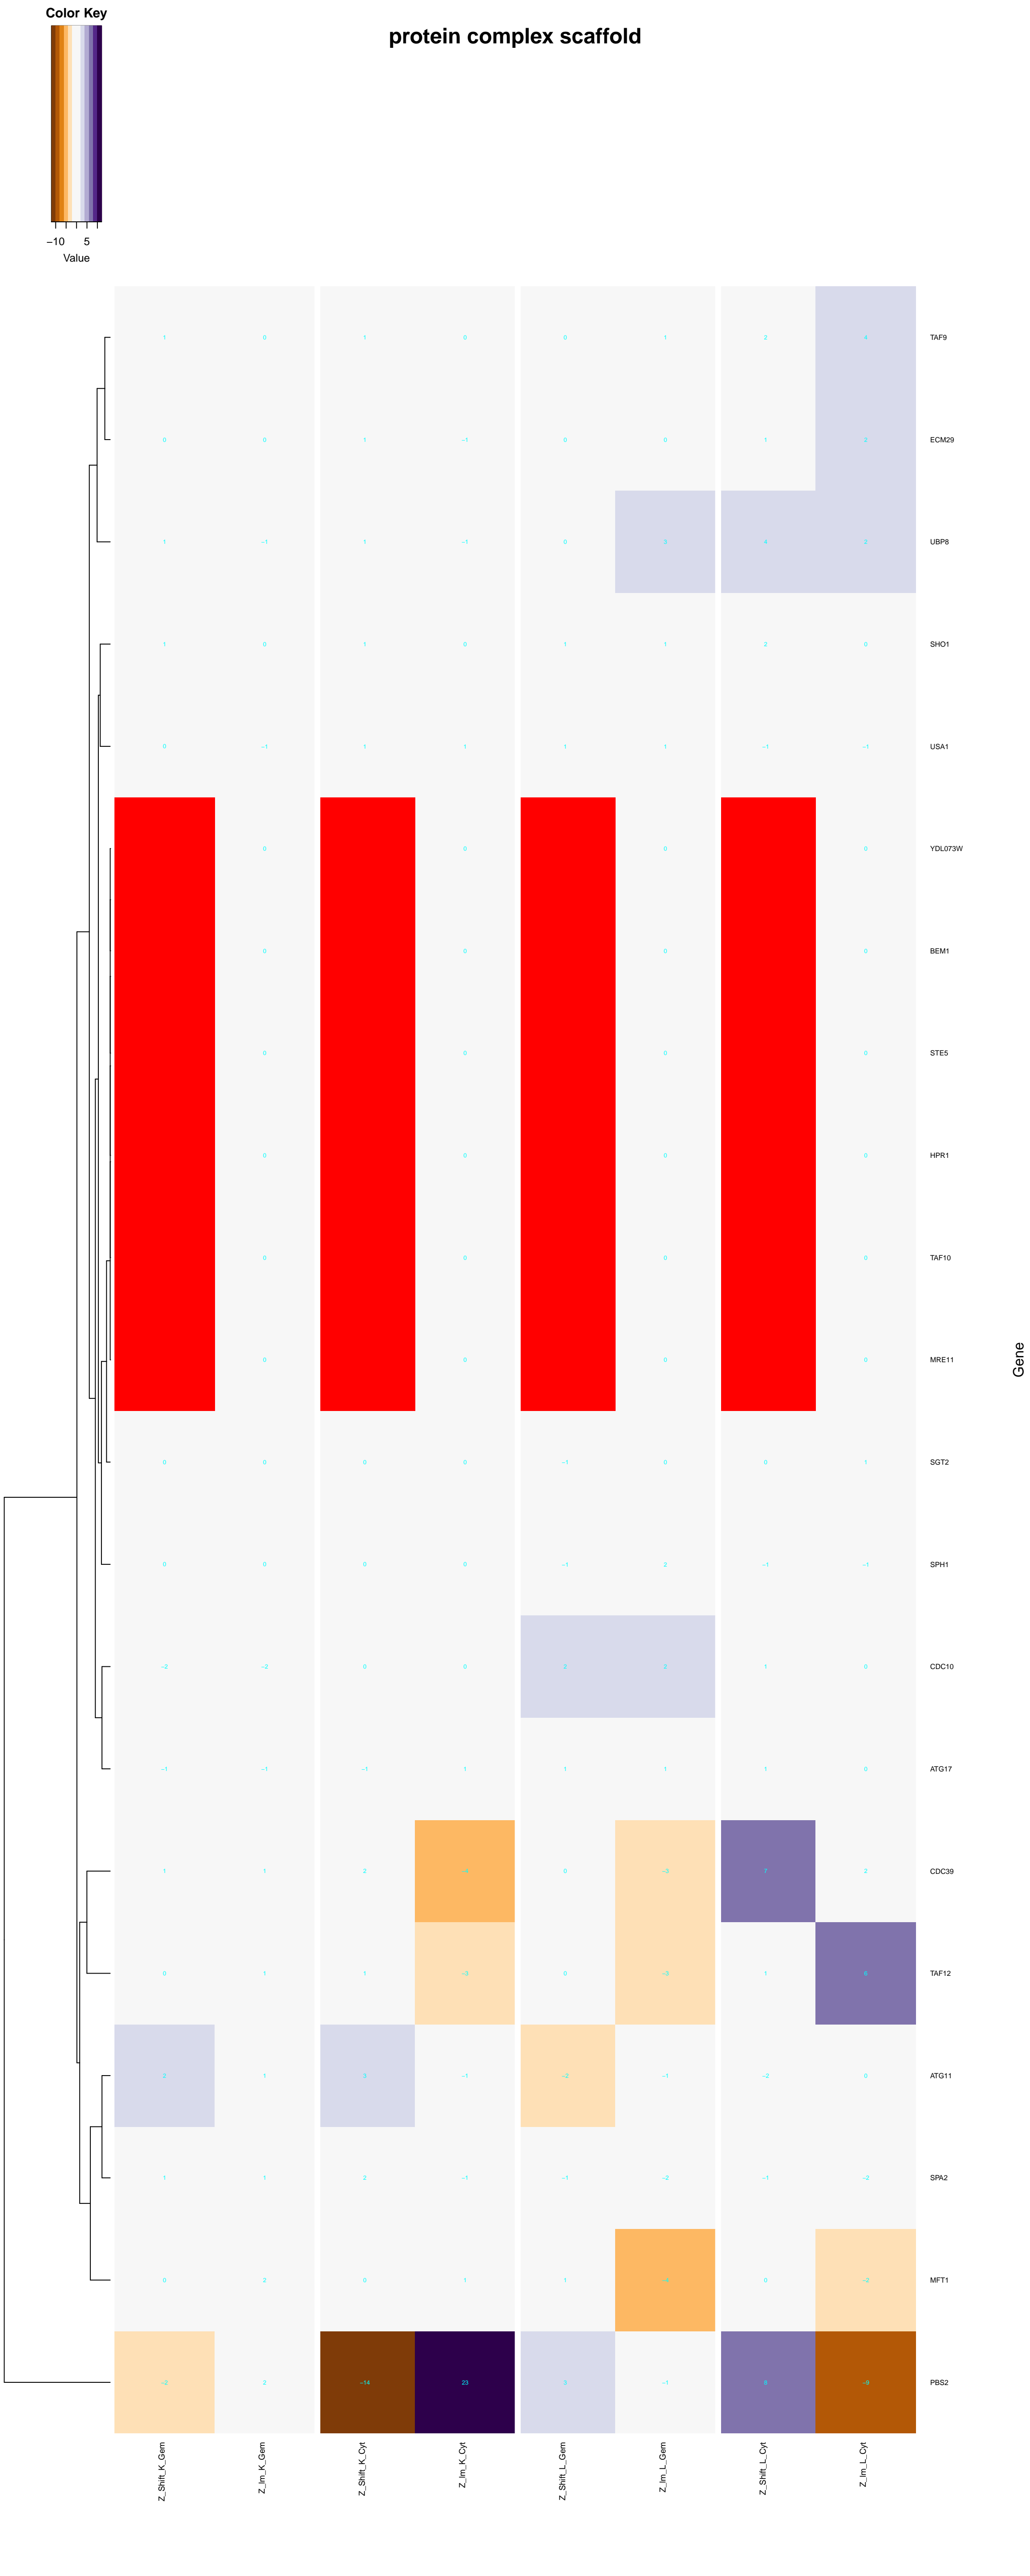

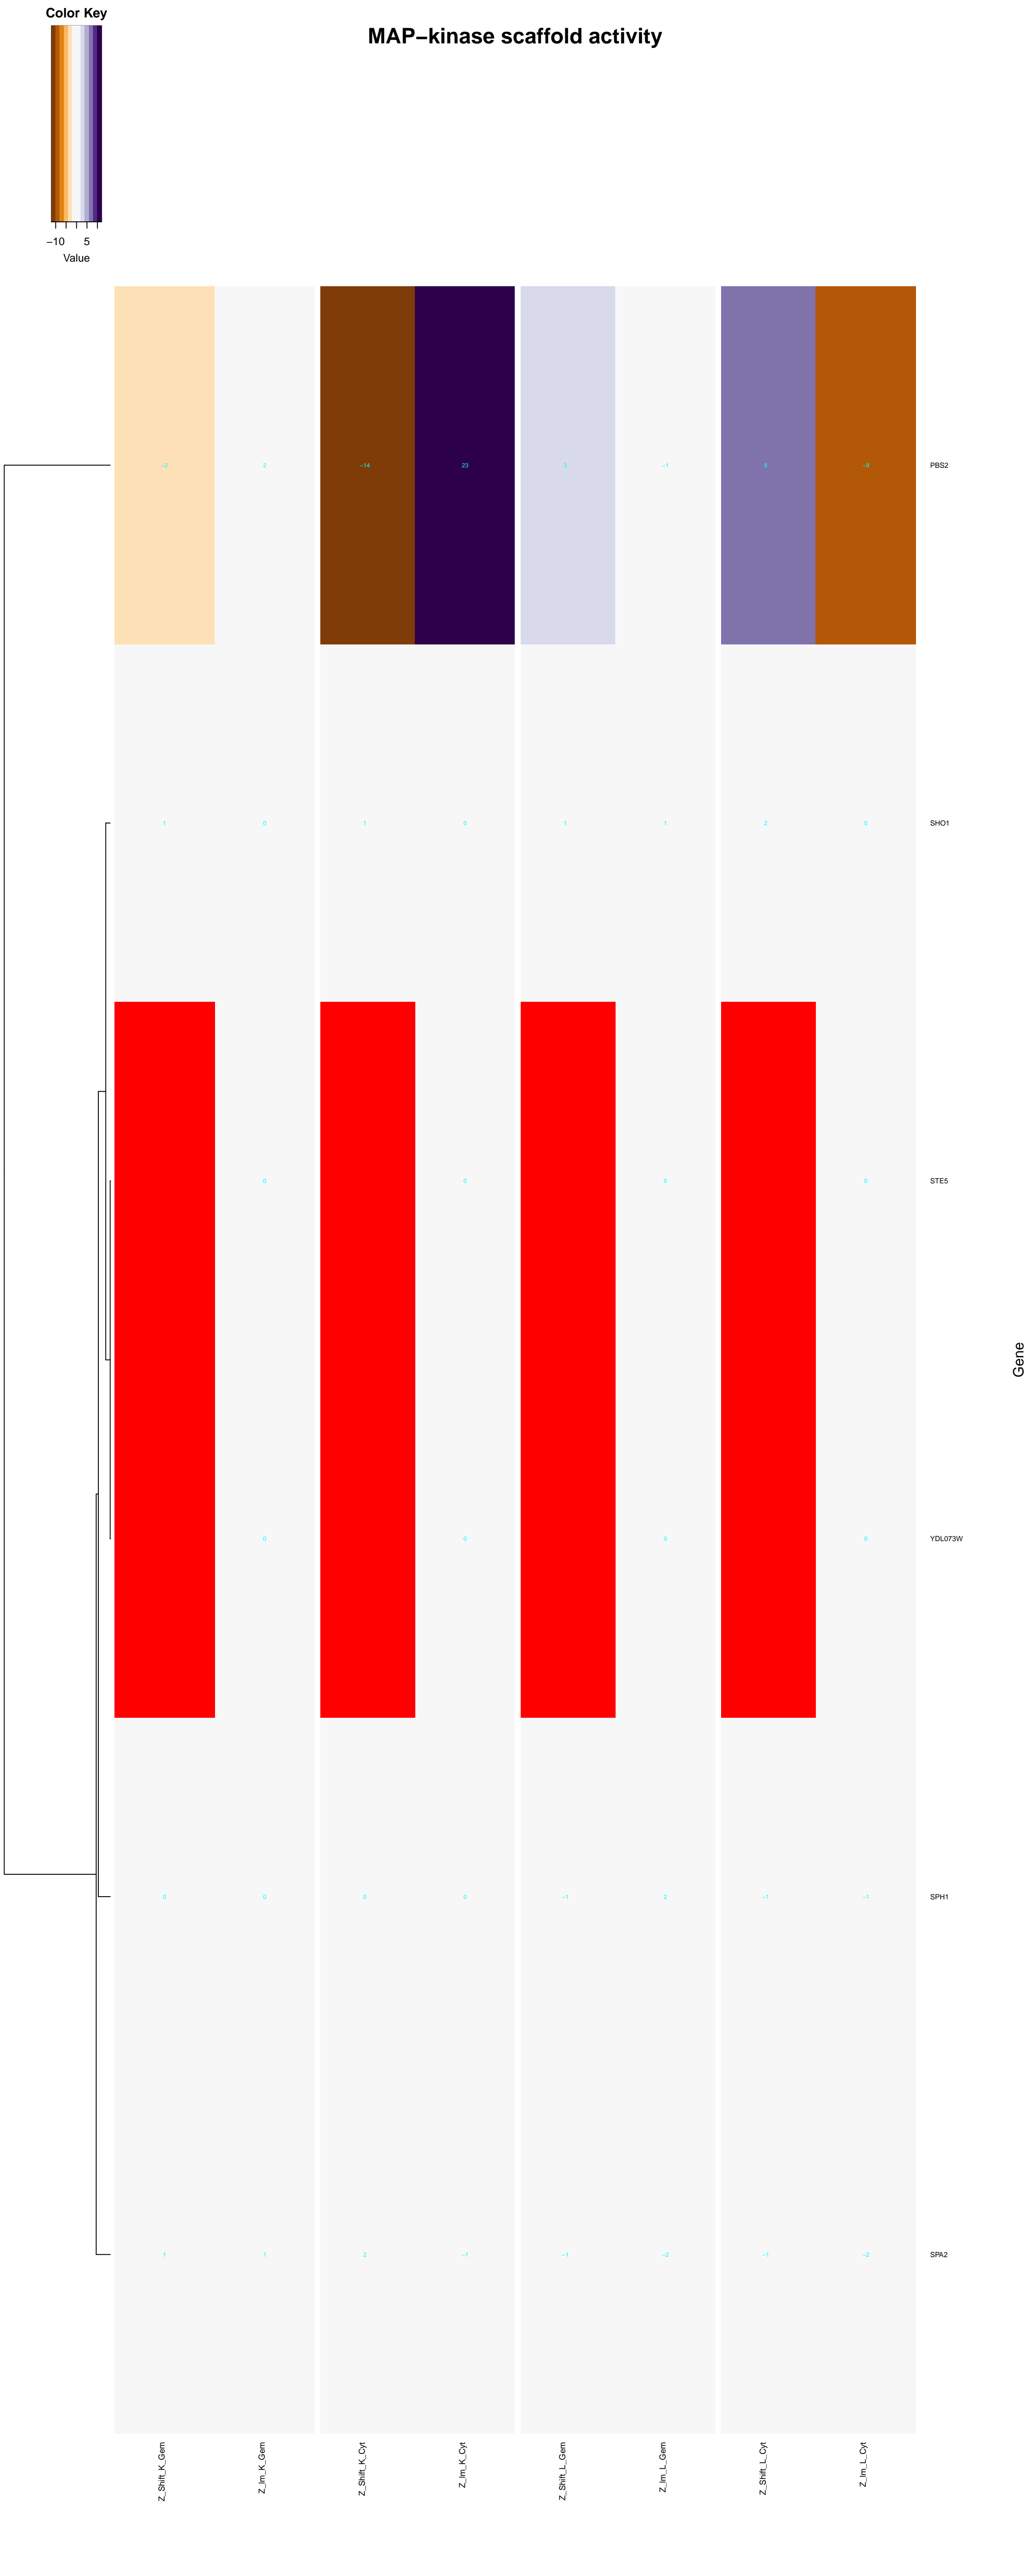

Supplement: s1 [file s1]

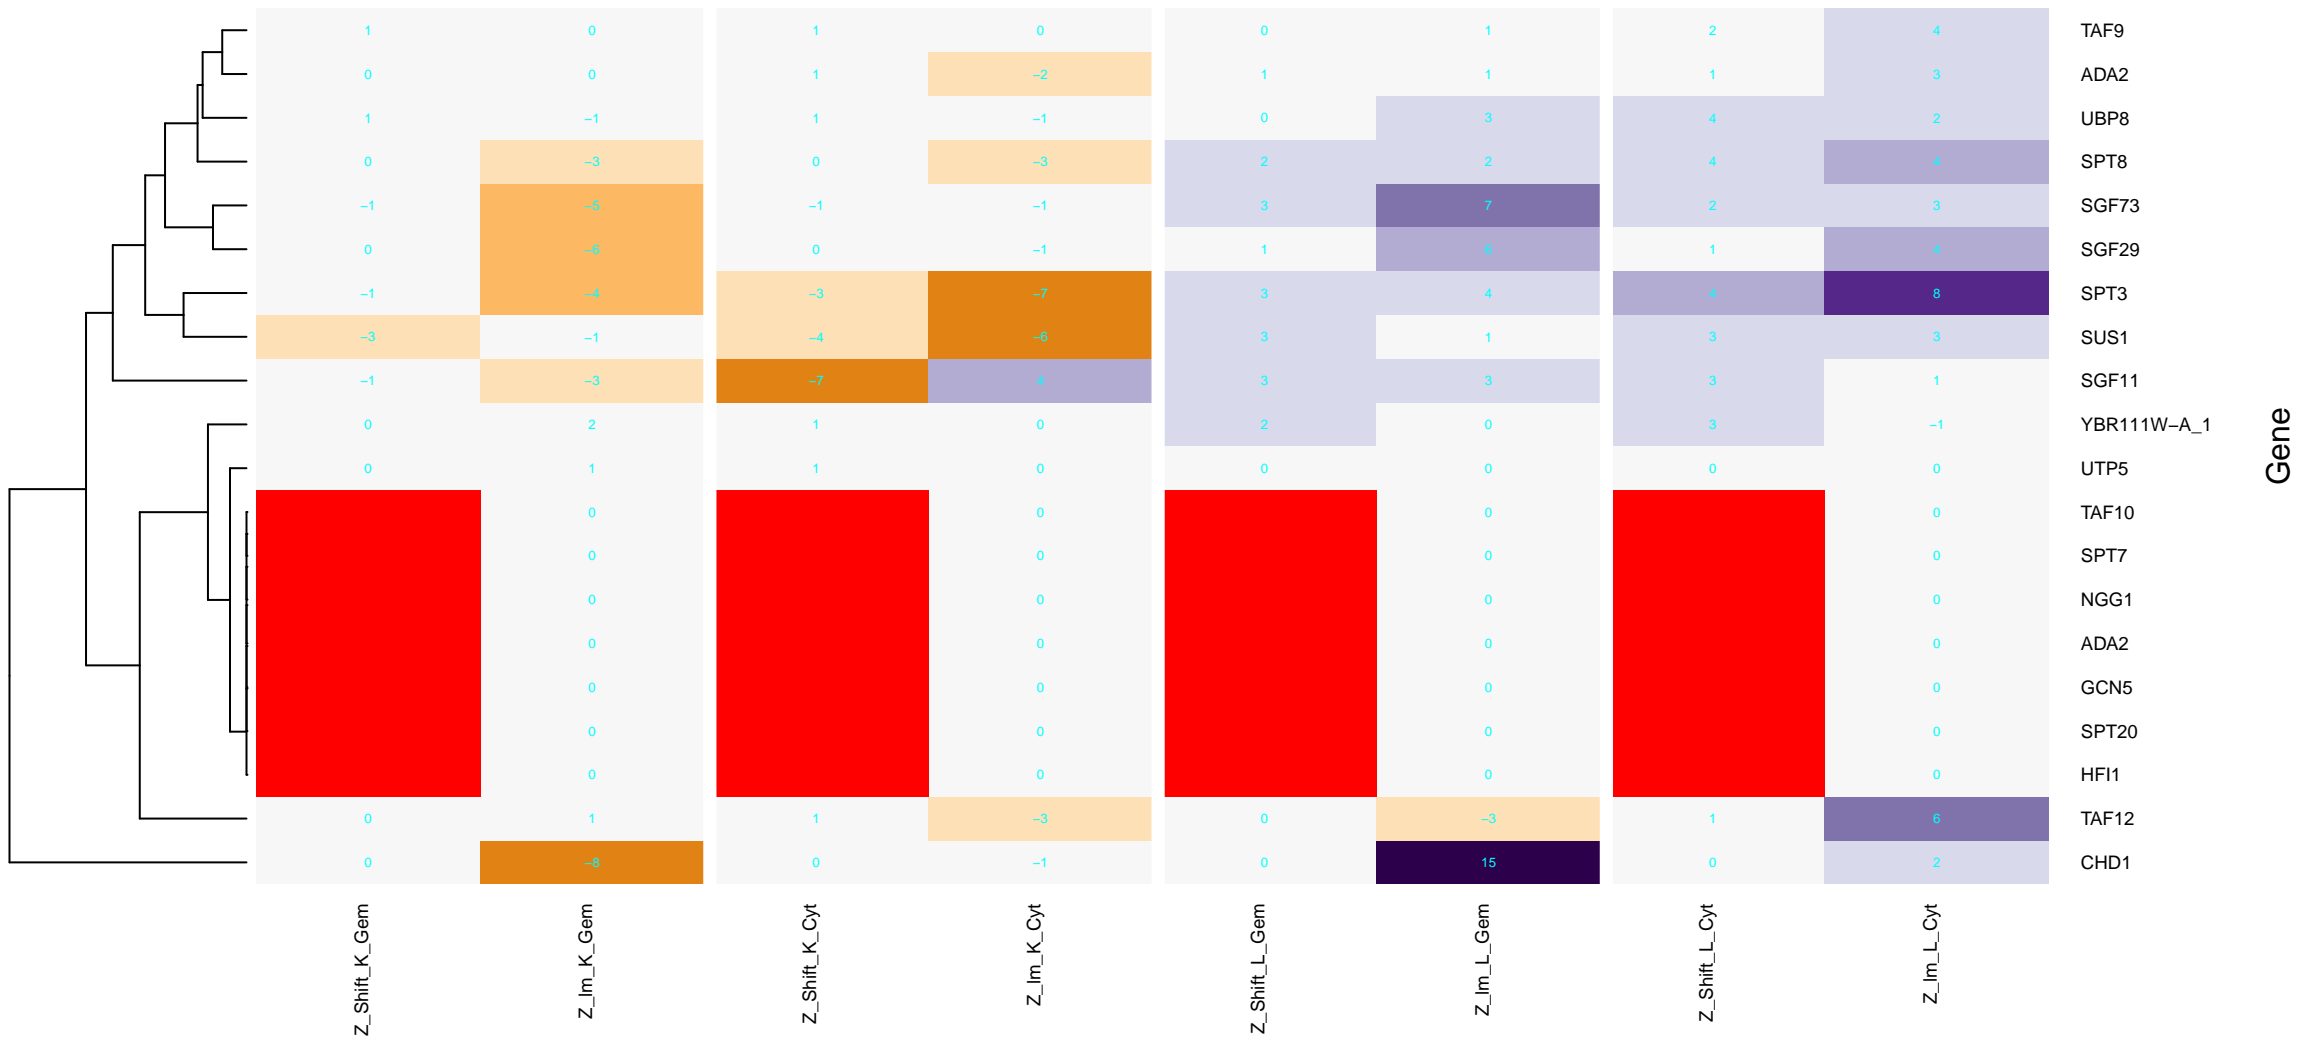

Supplement: s1 [file s1]

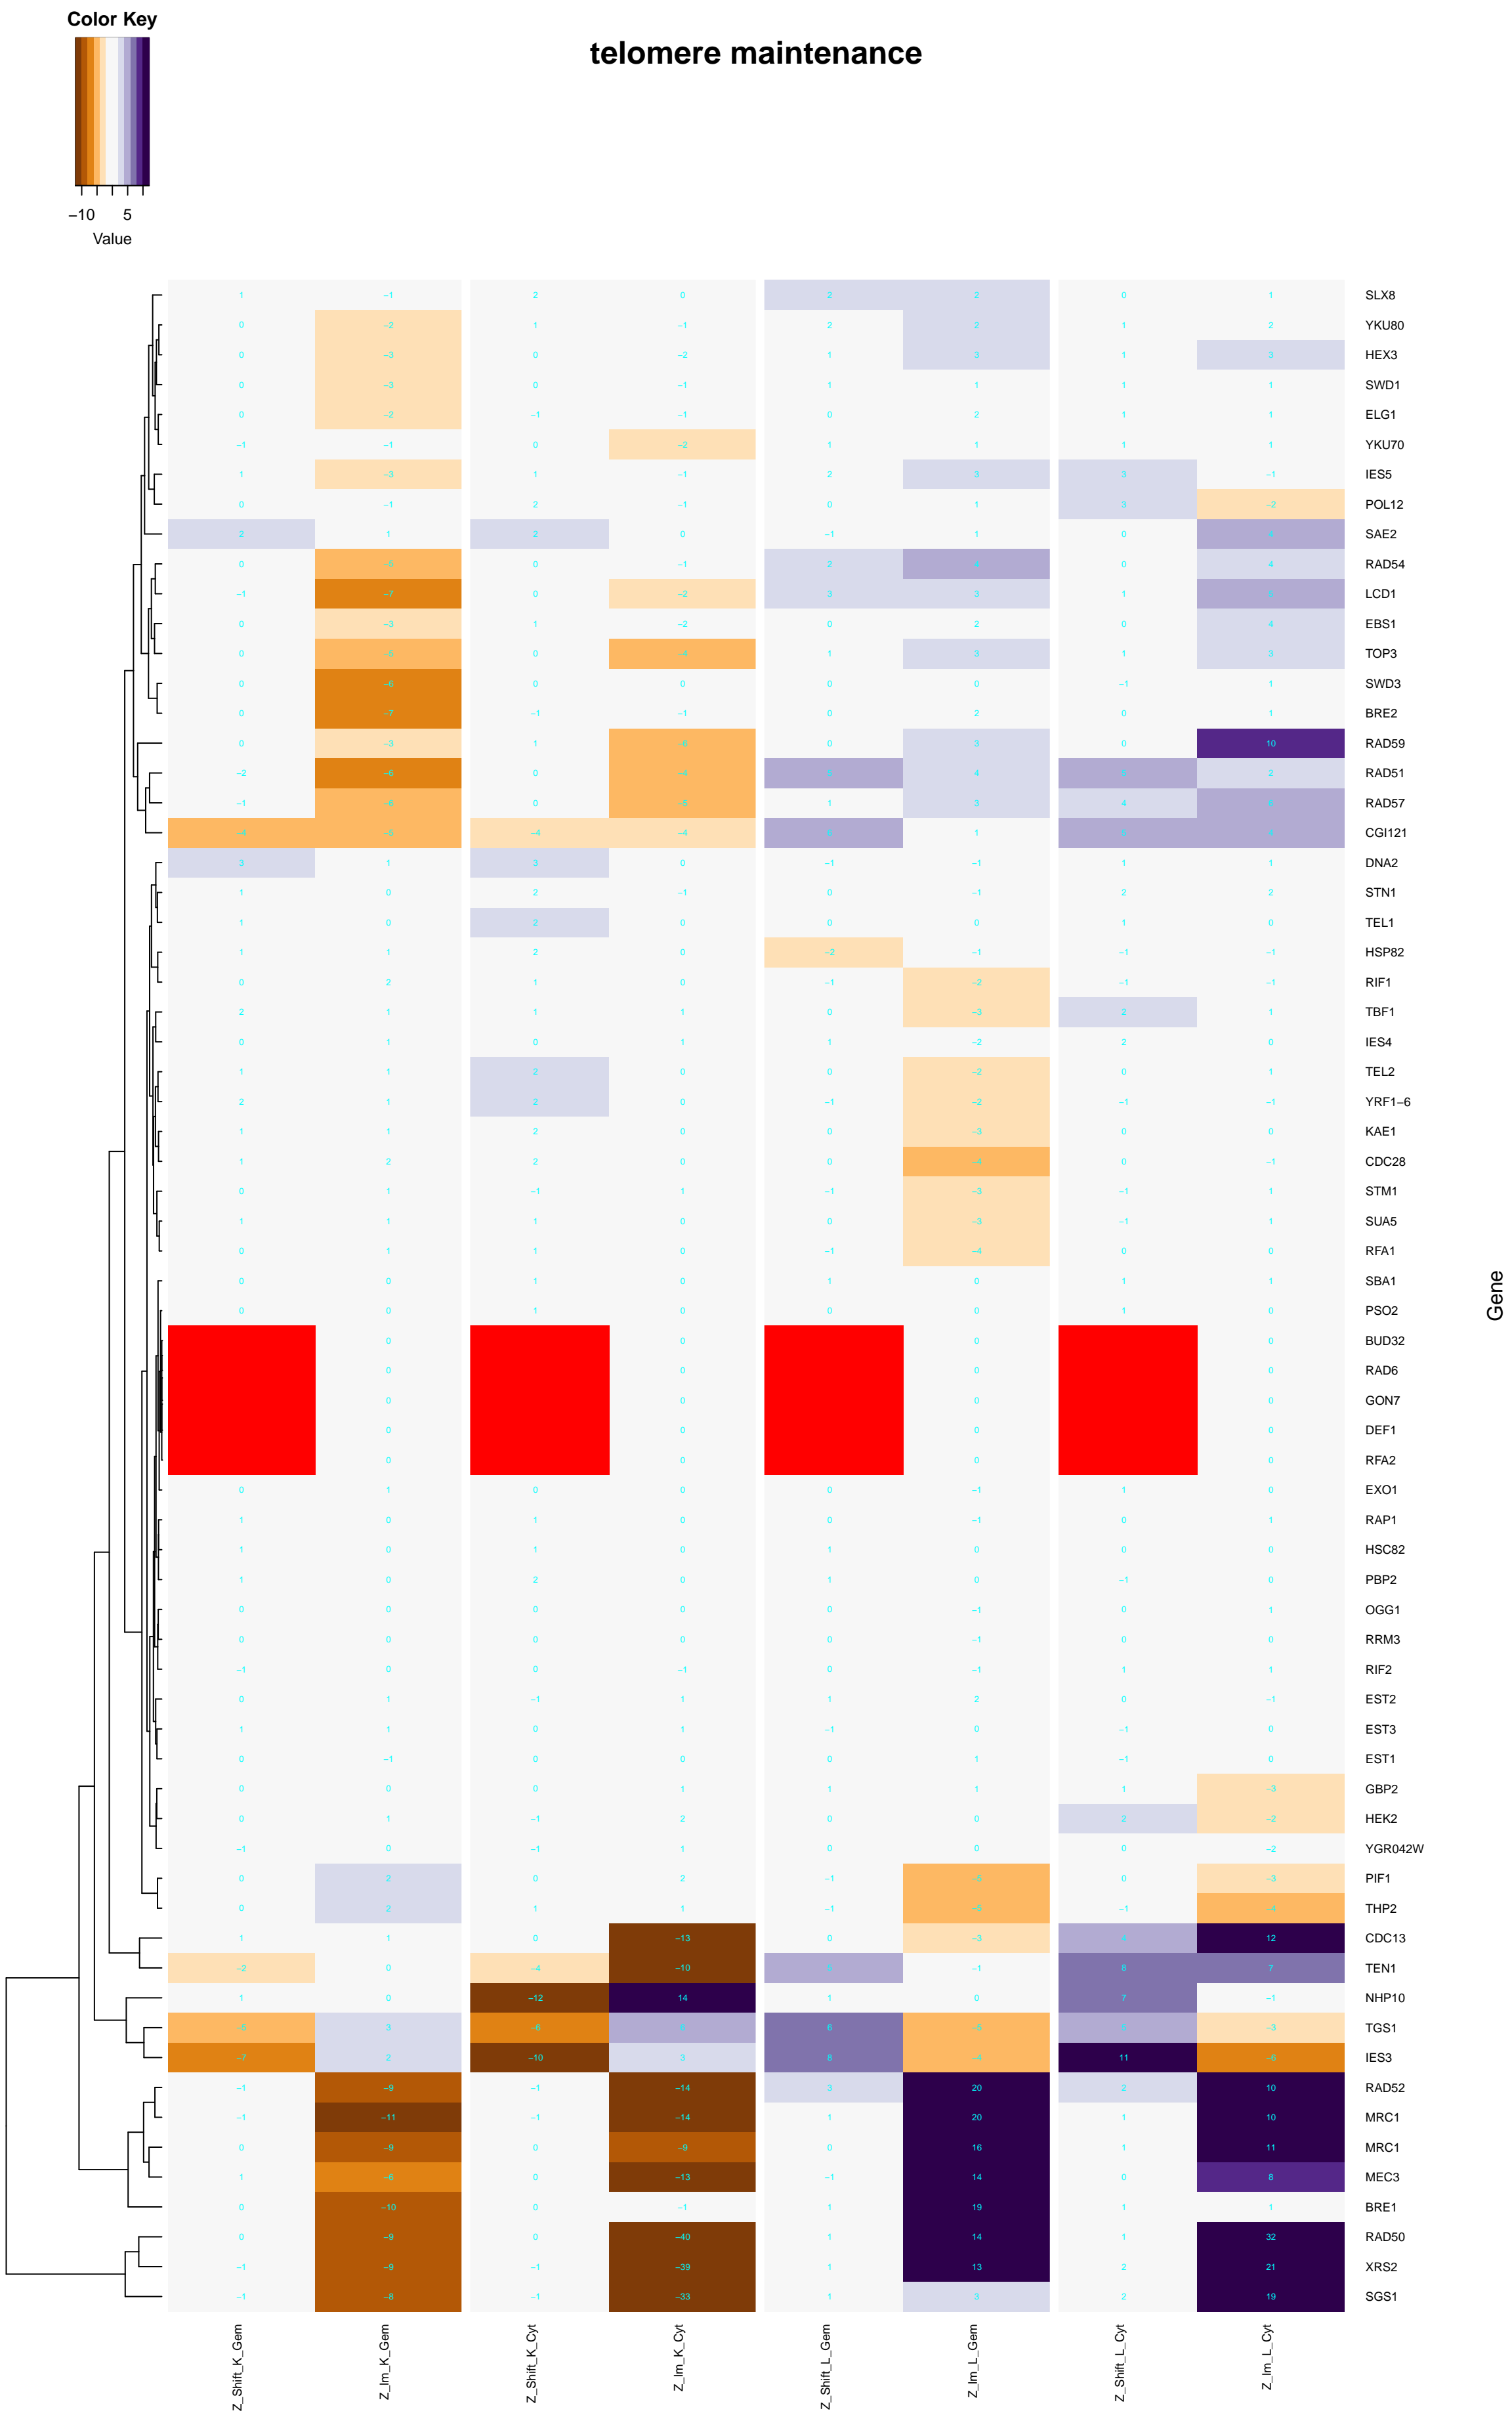

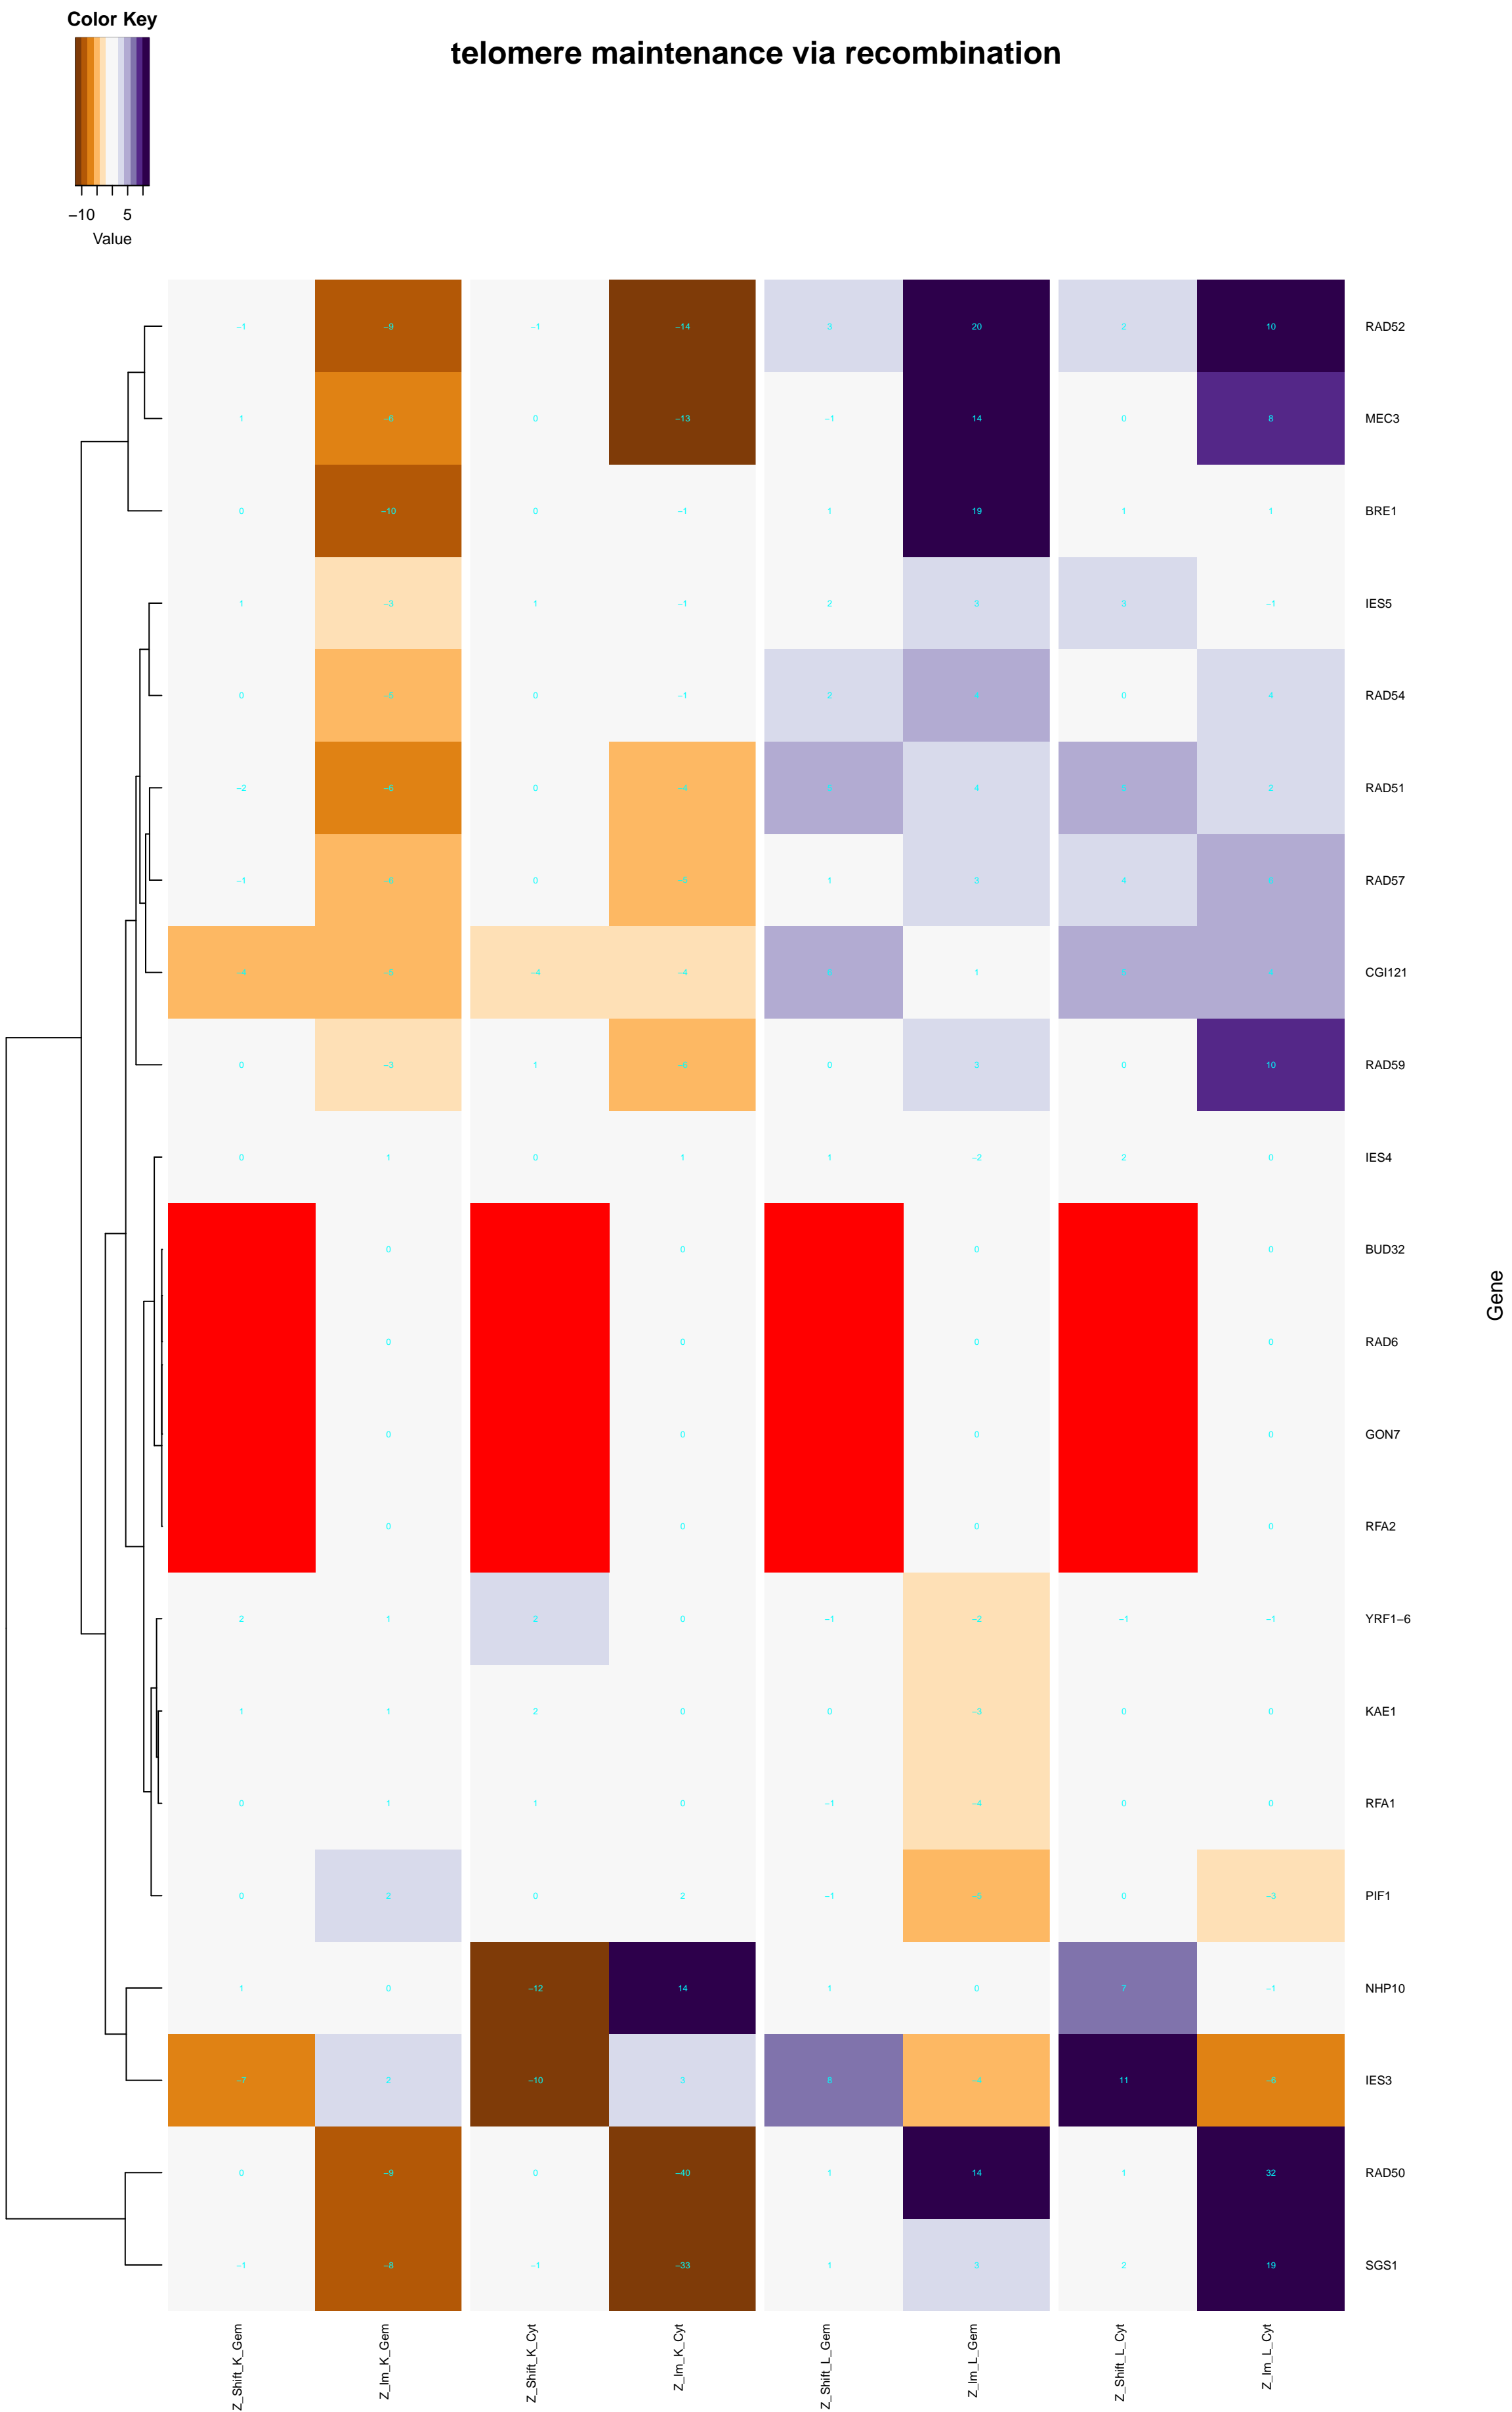

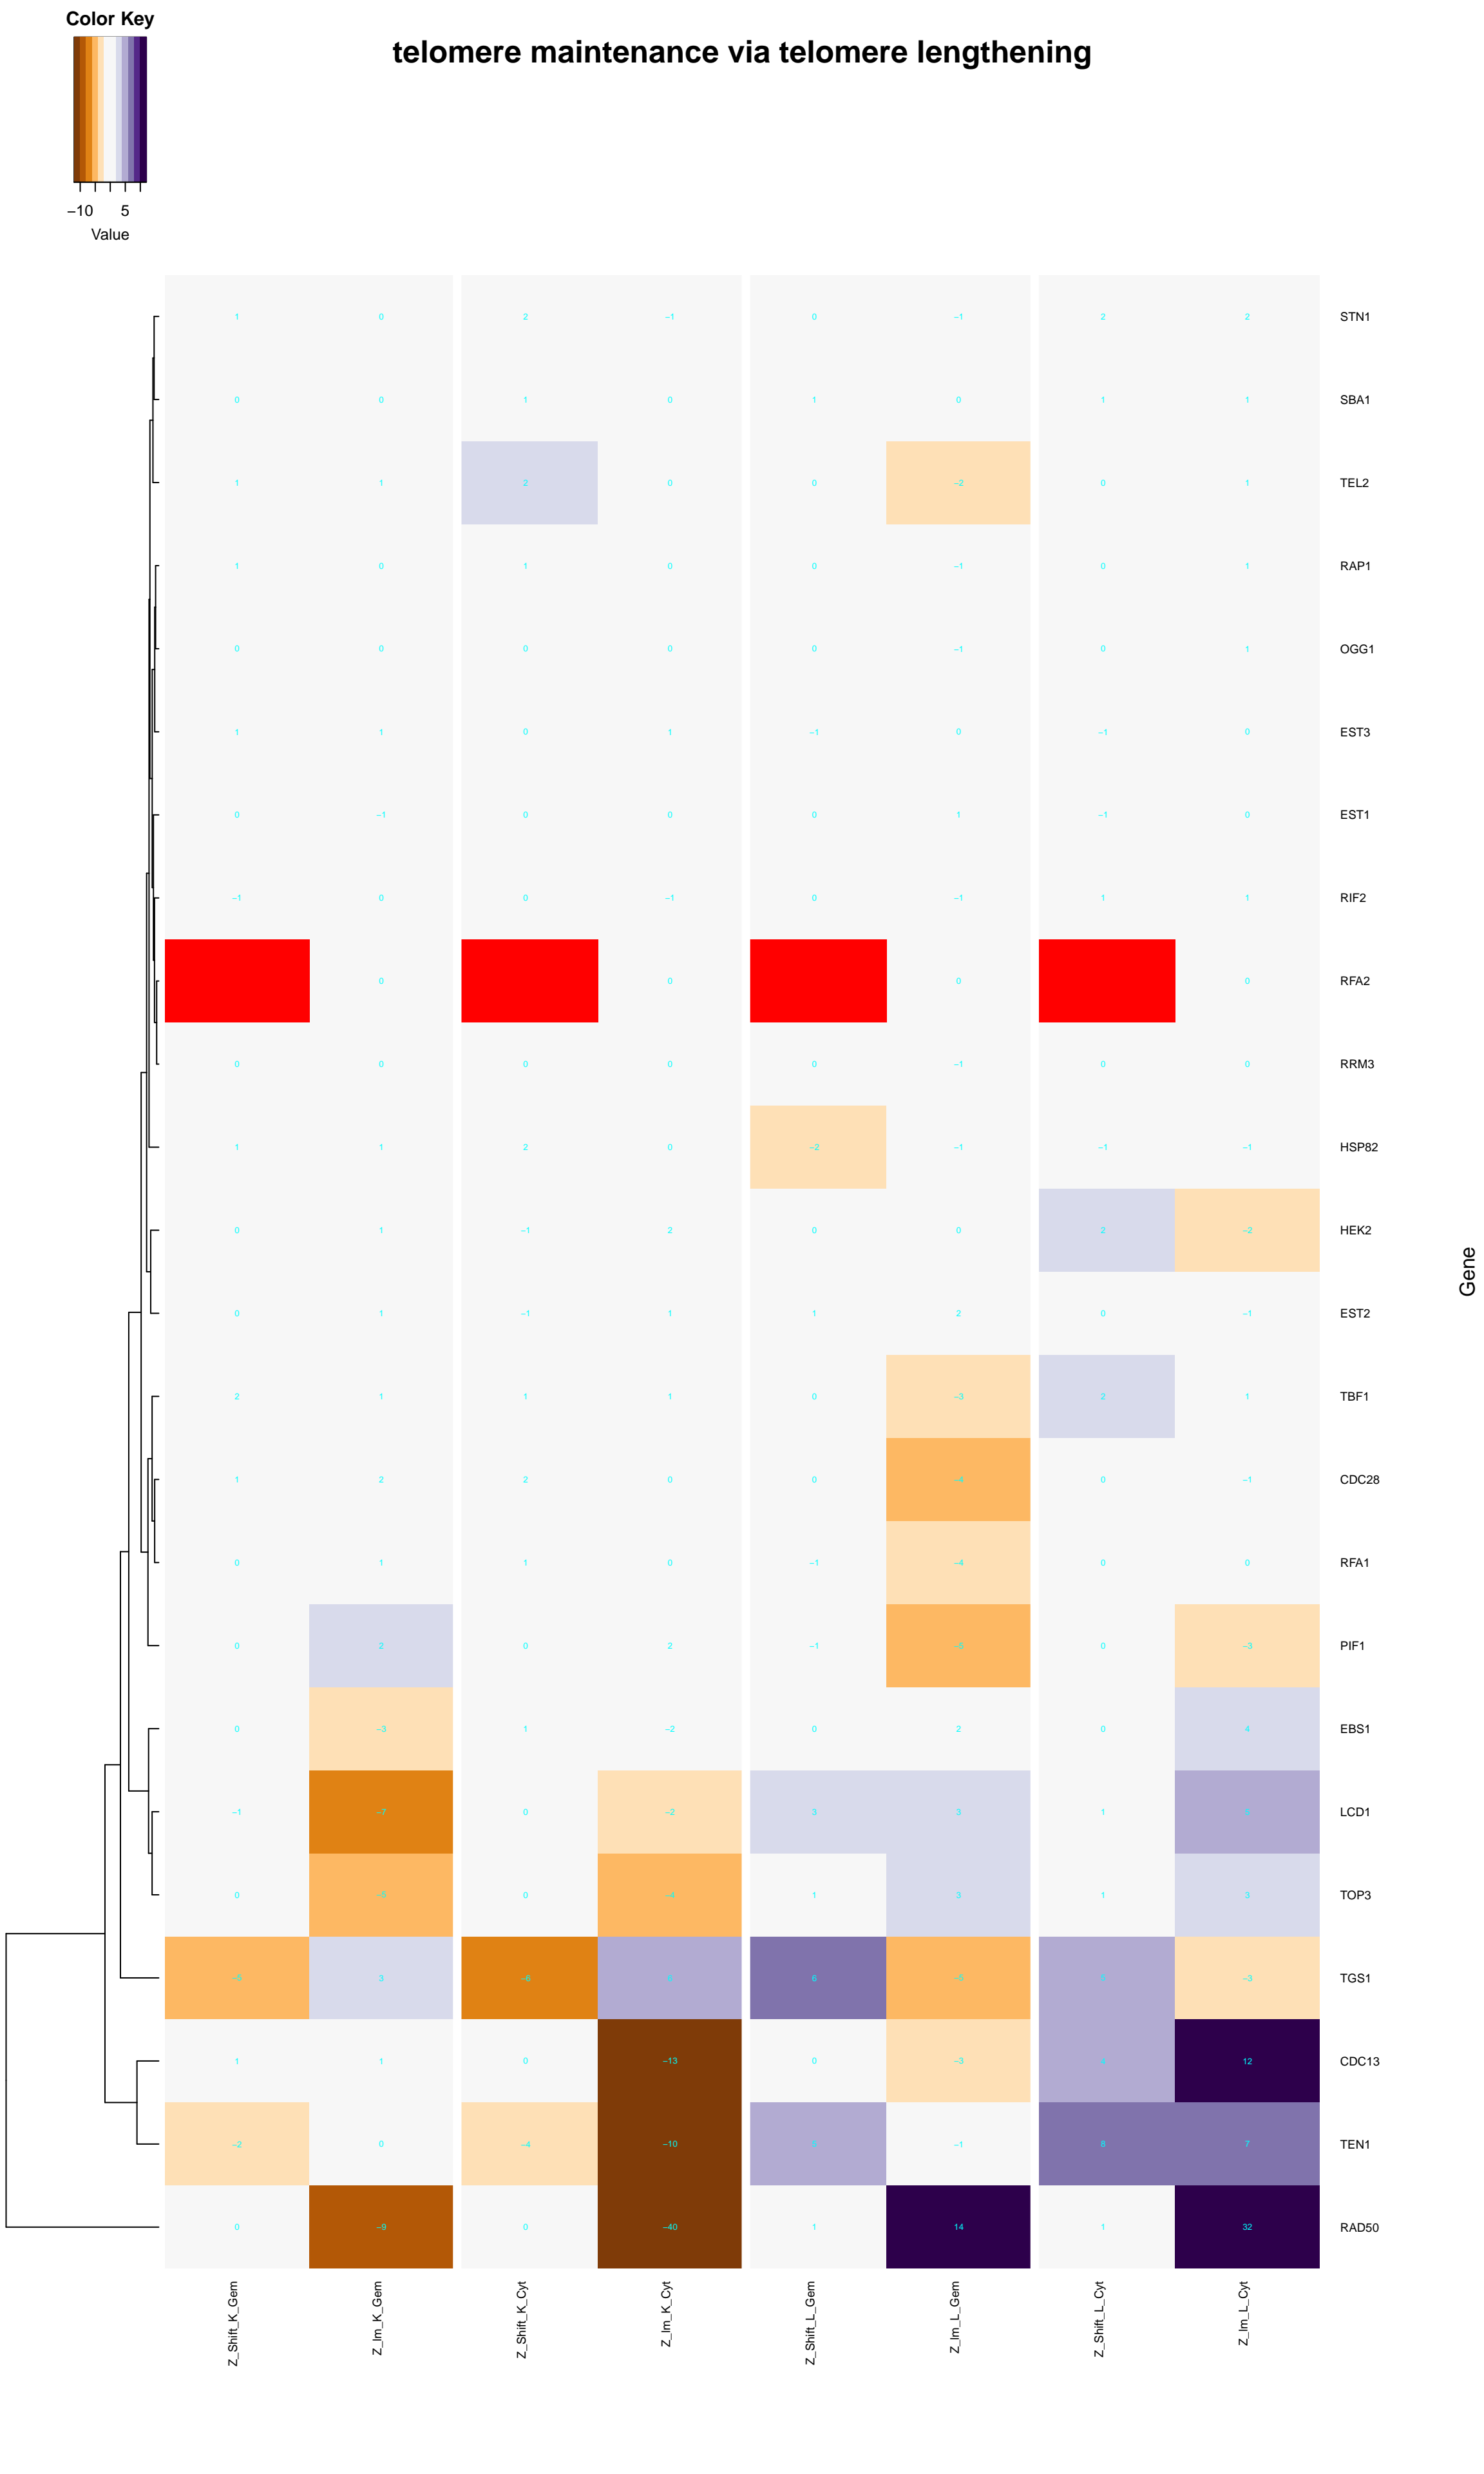

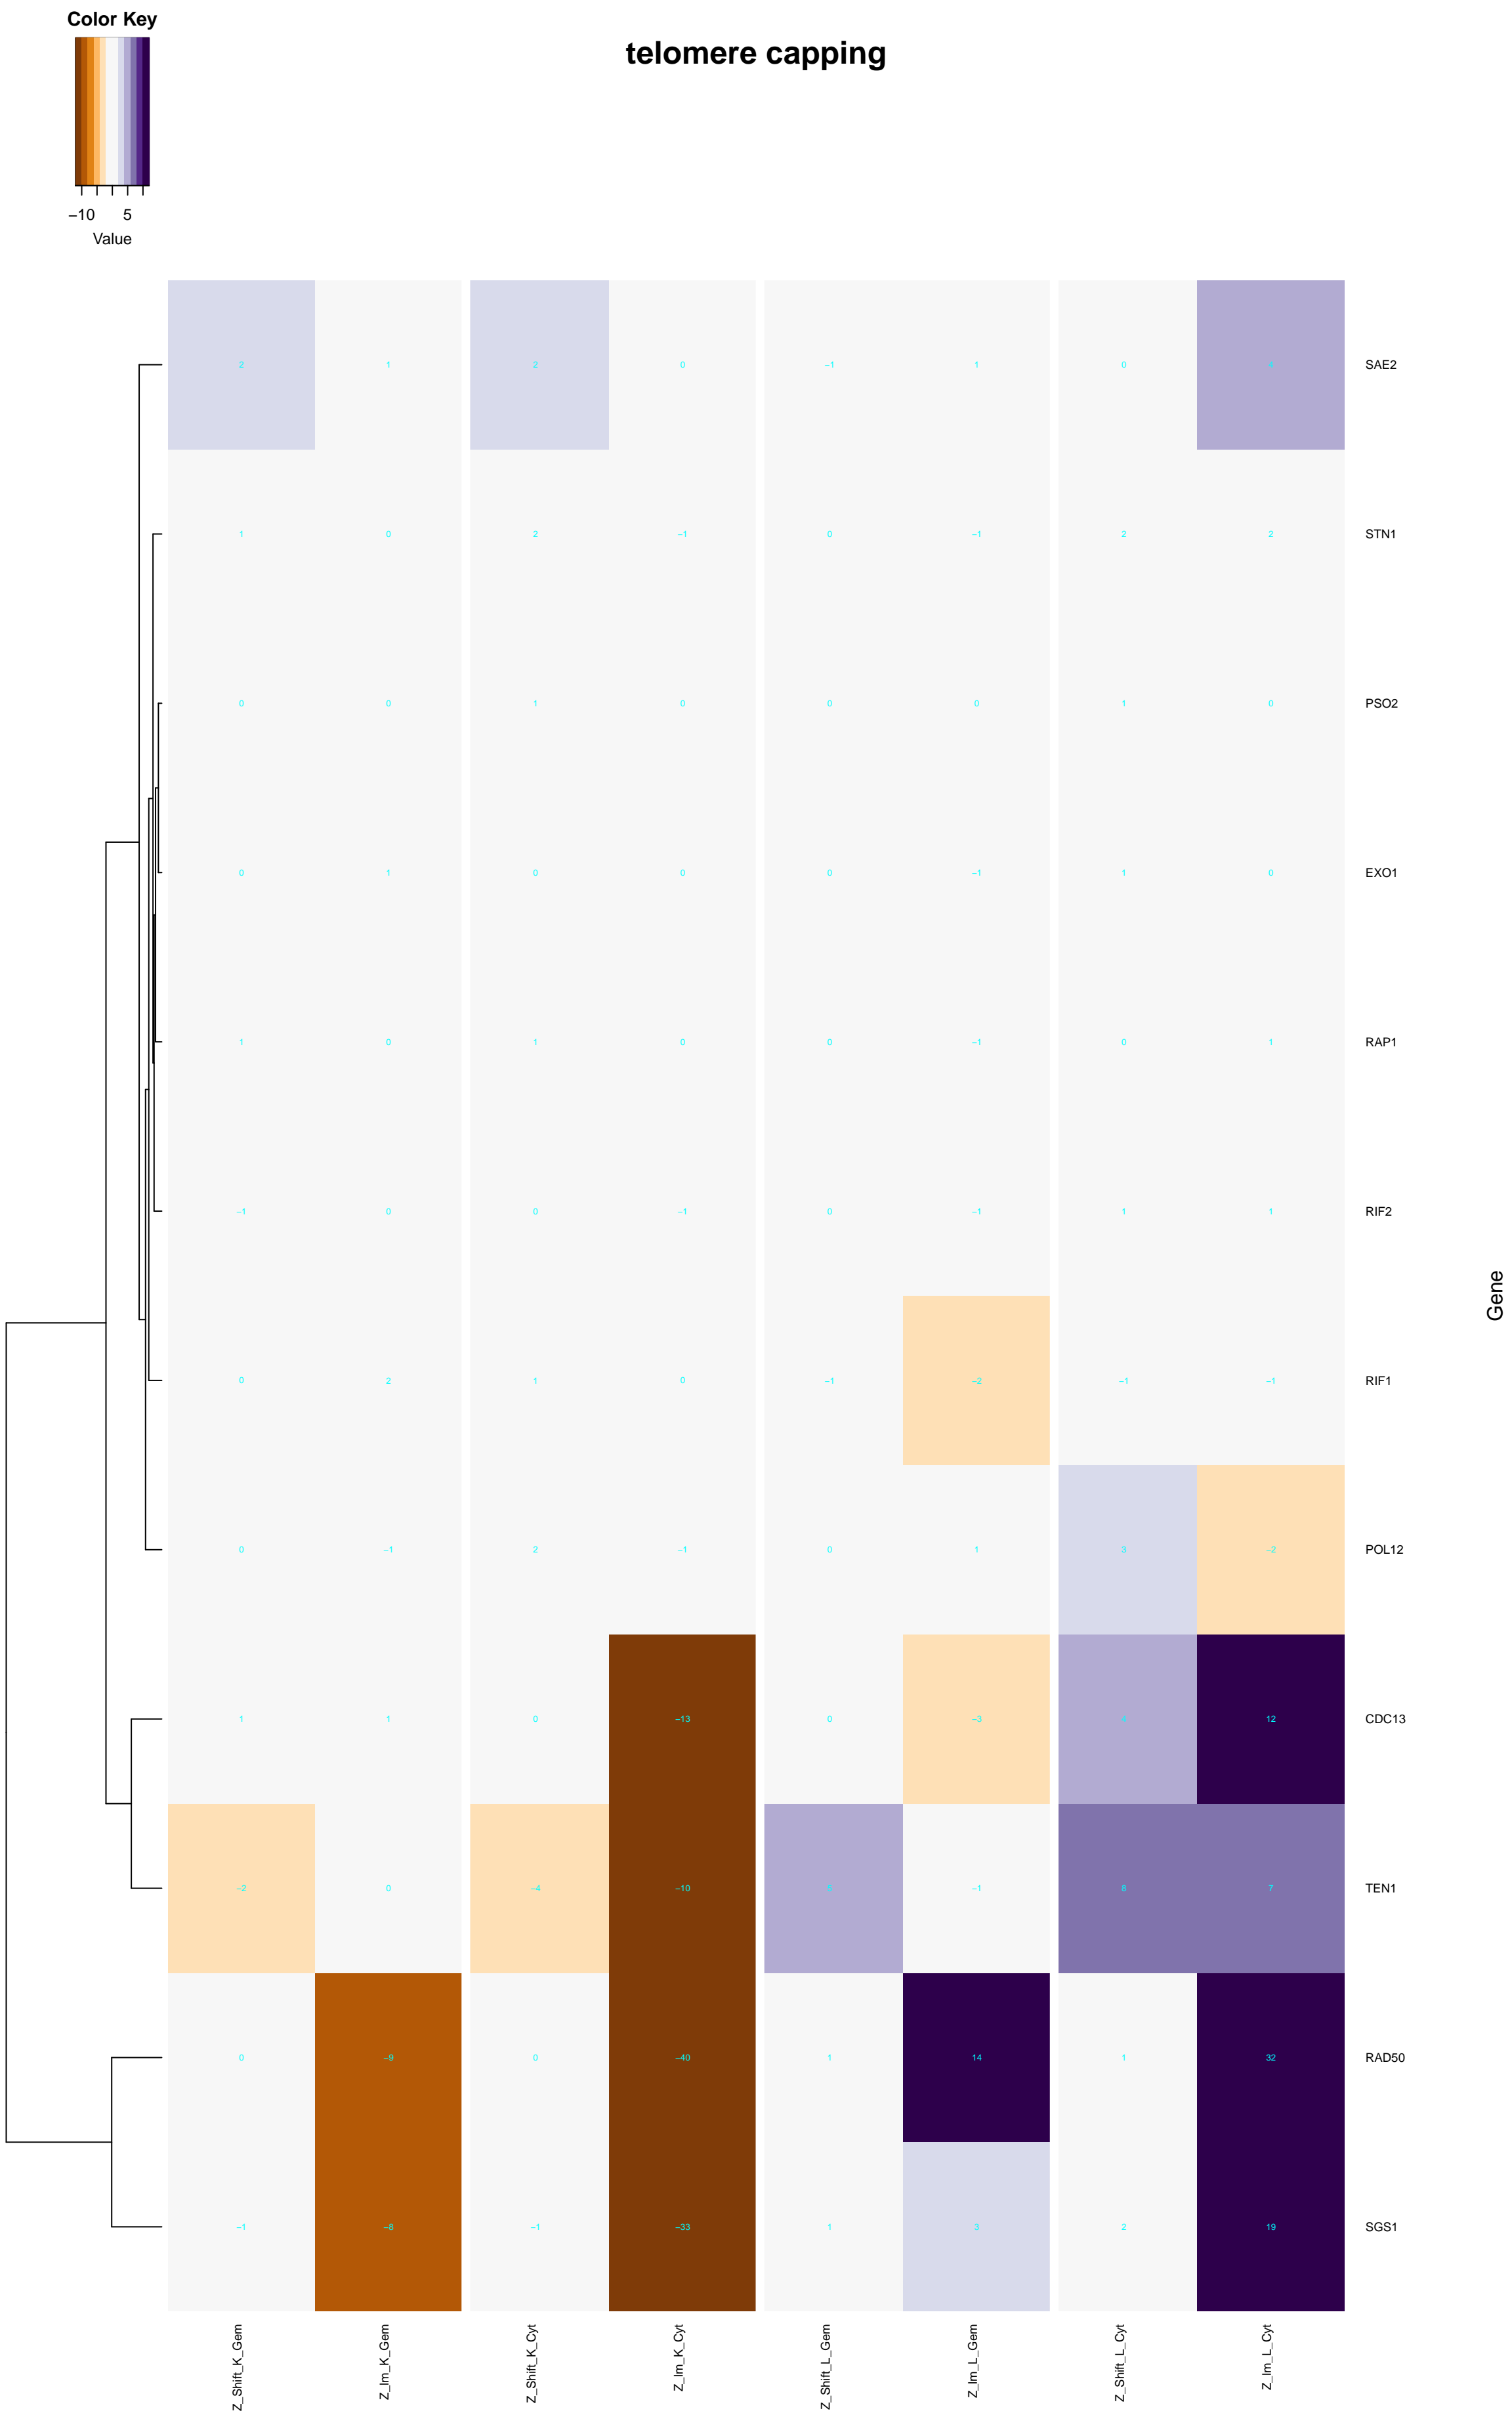

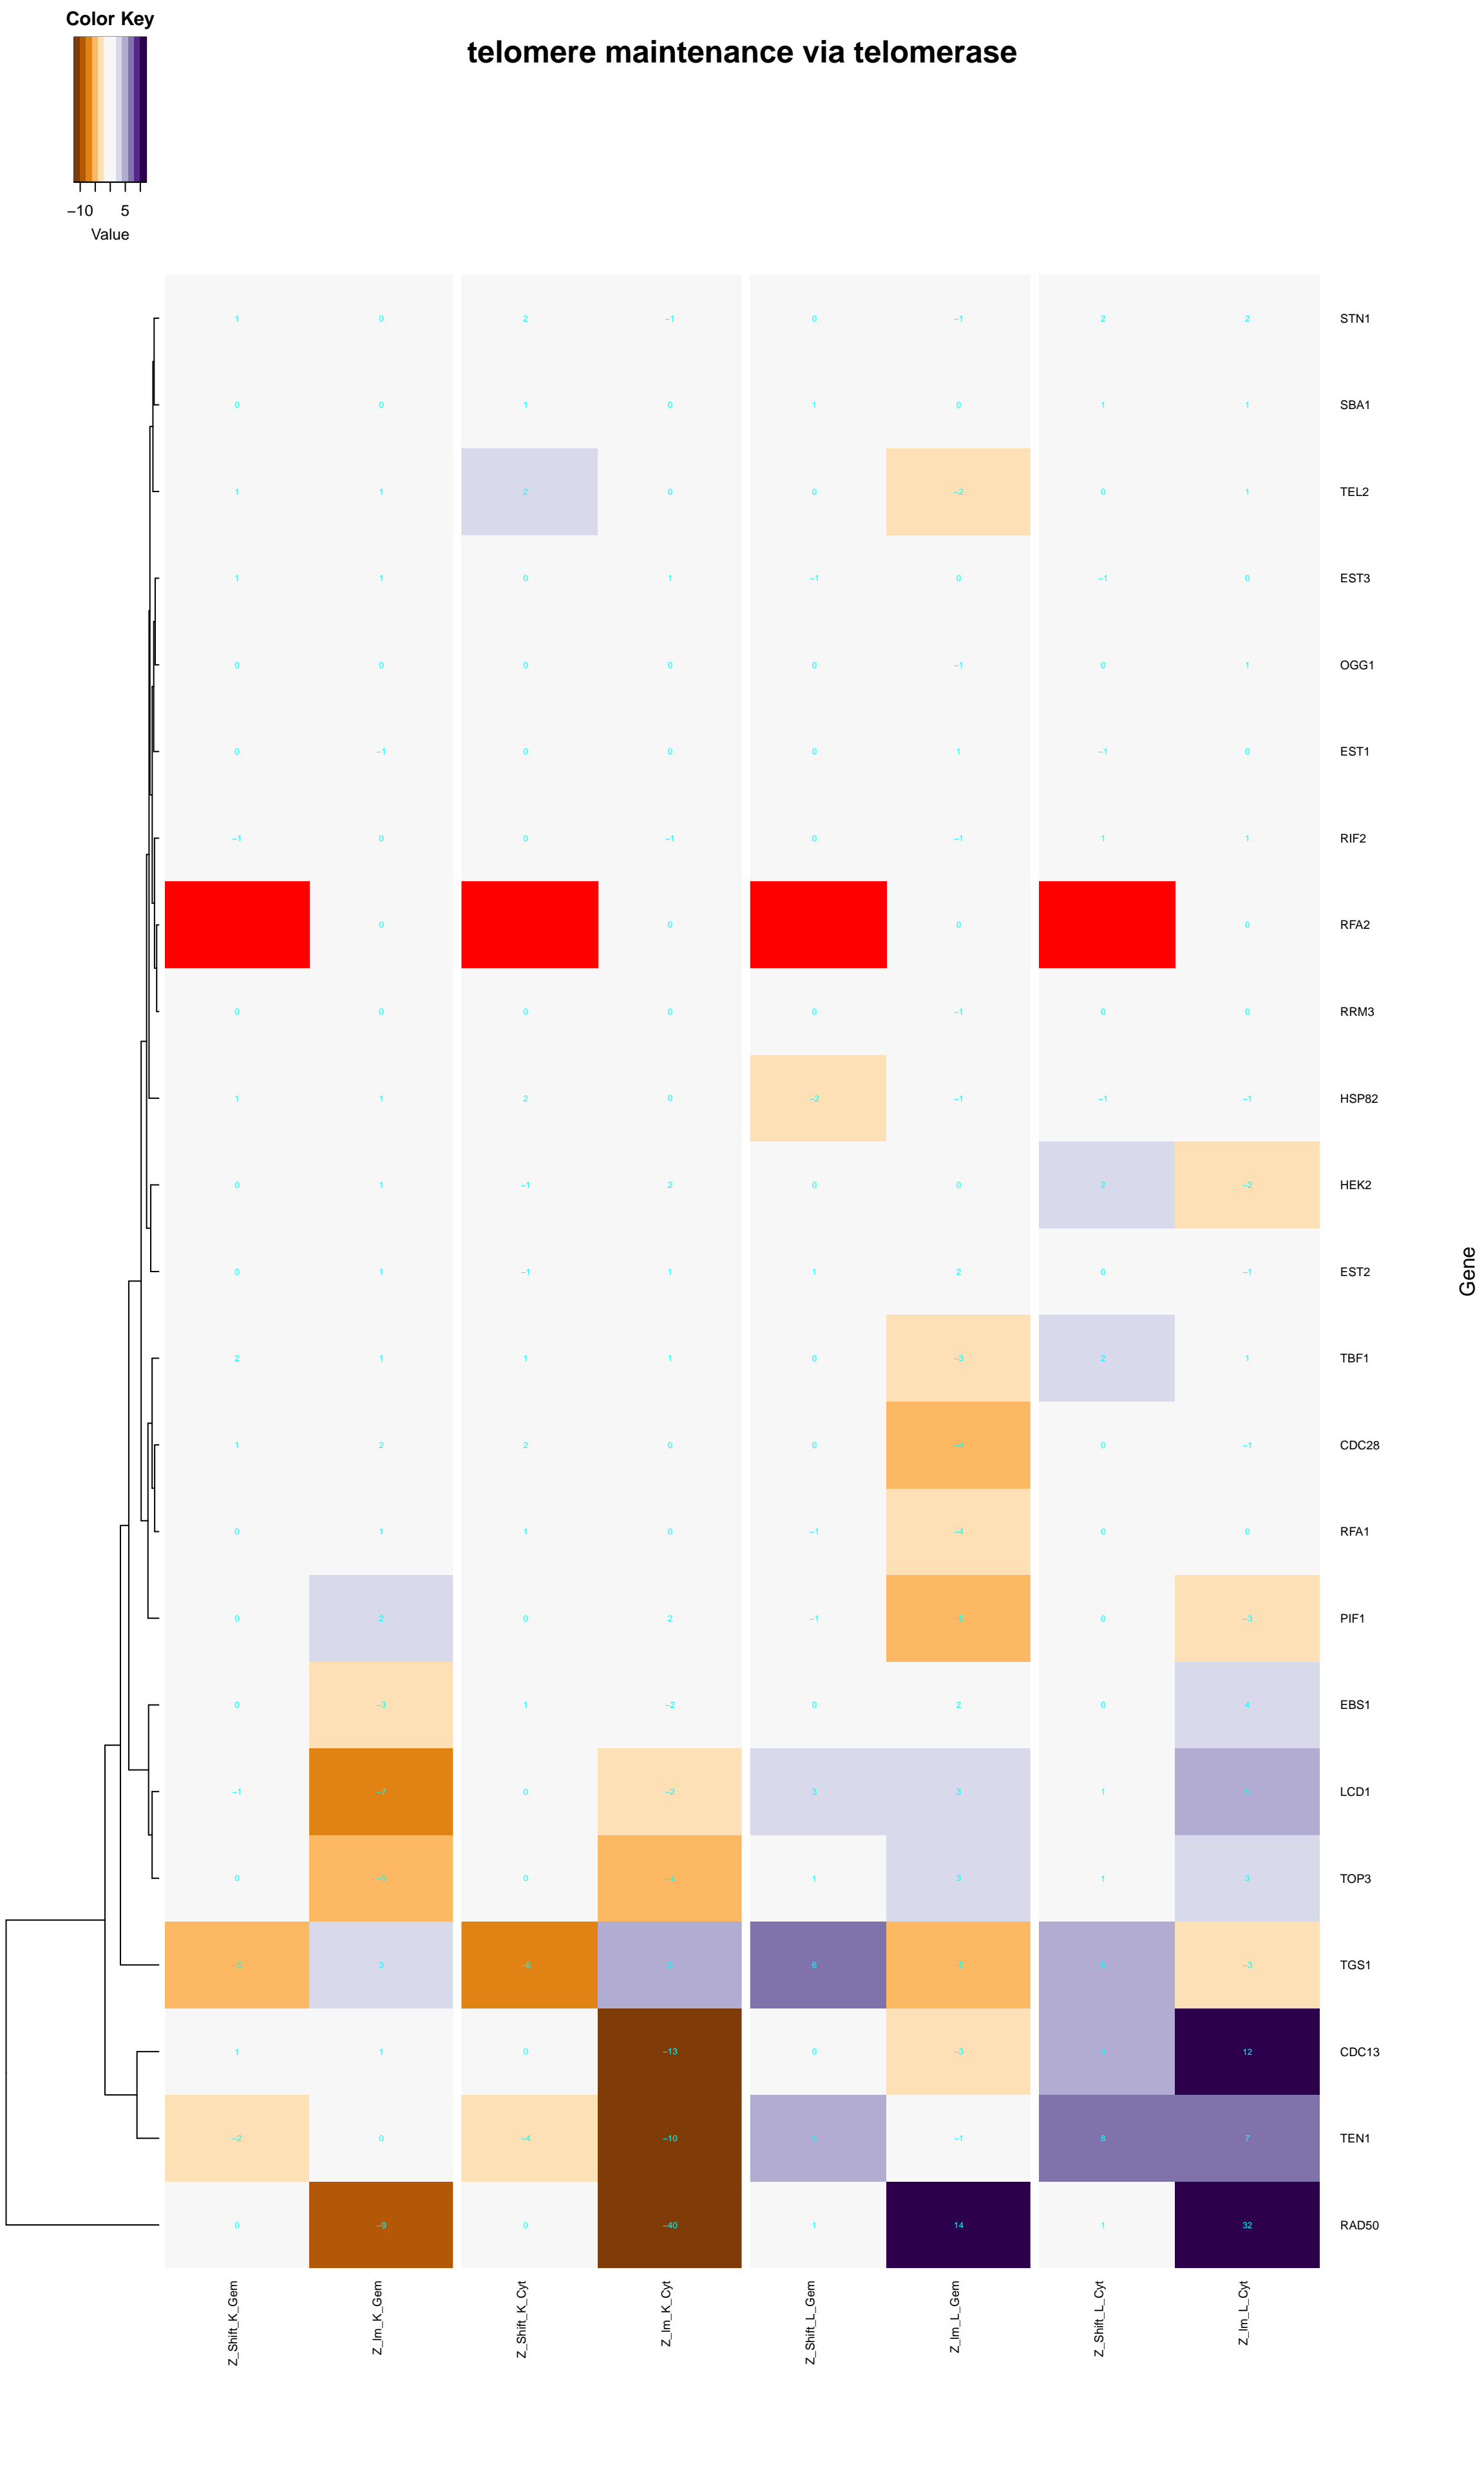

Supplement: s1 [file s1]

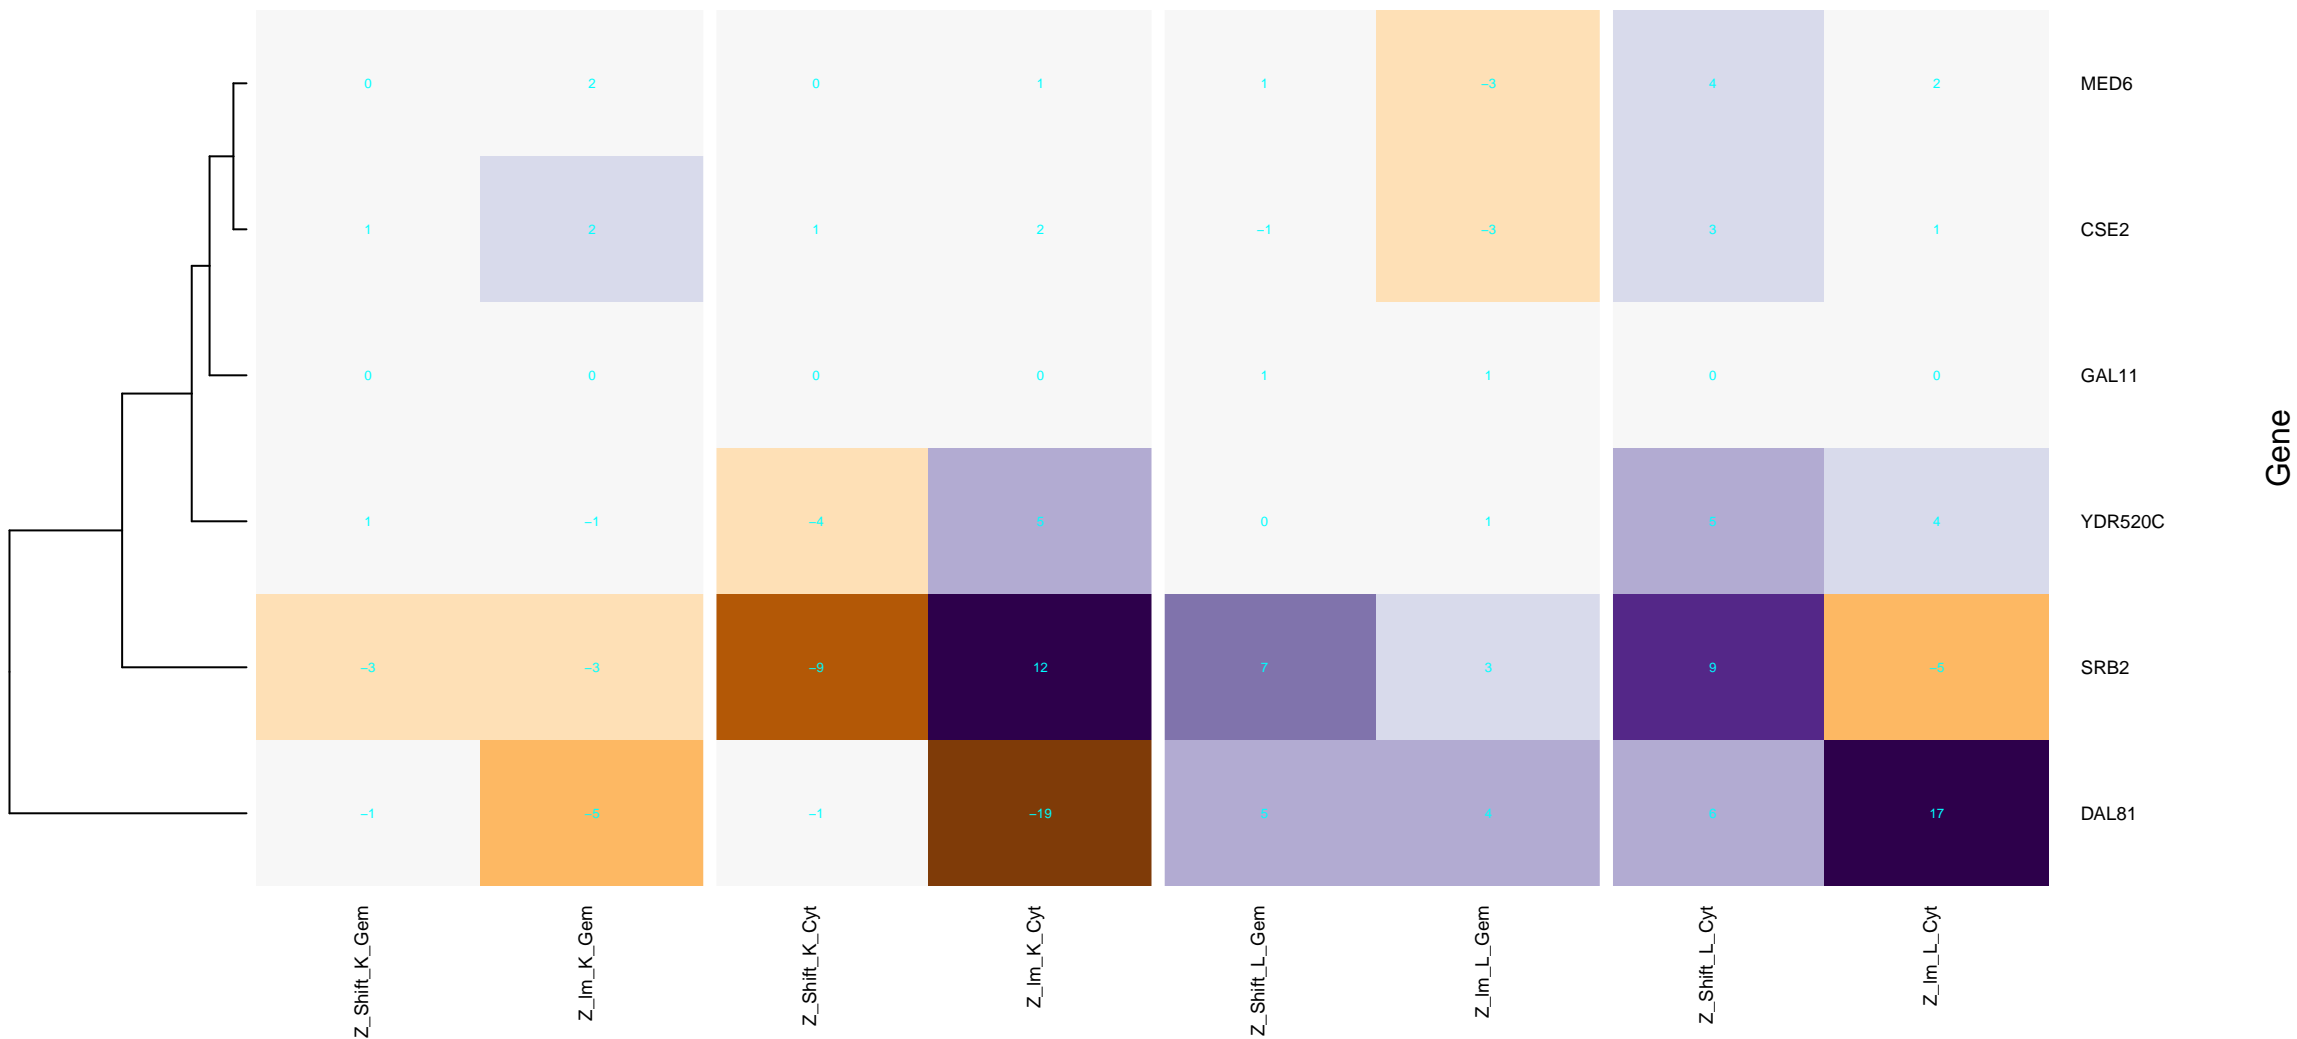

Supplement: s1 [file s1]

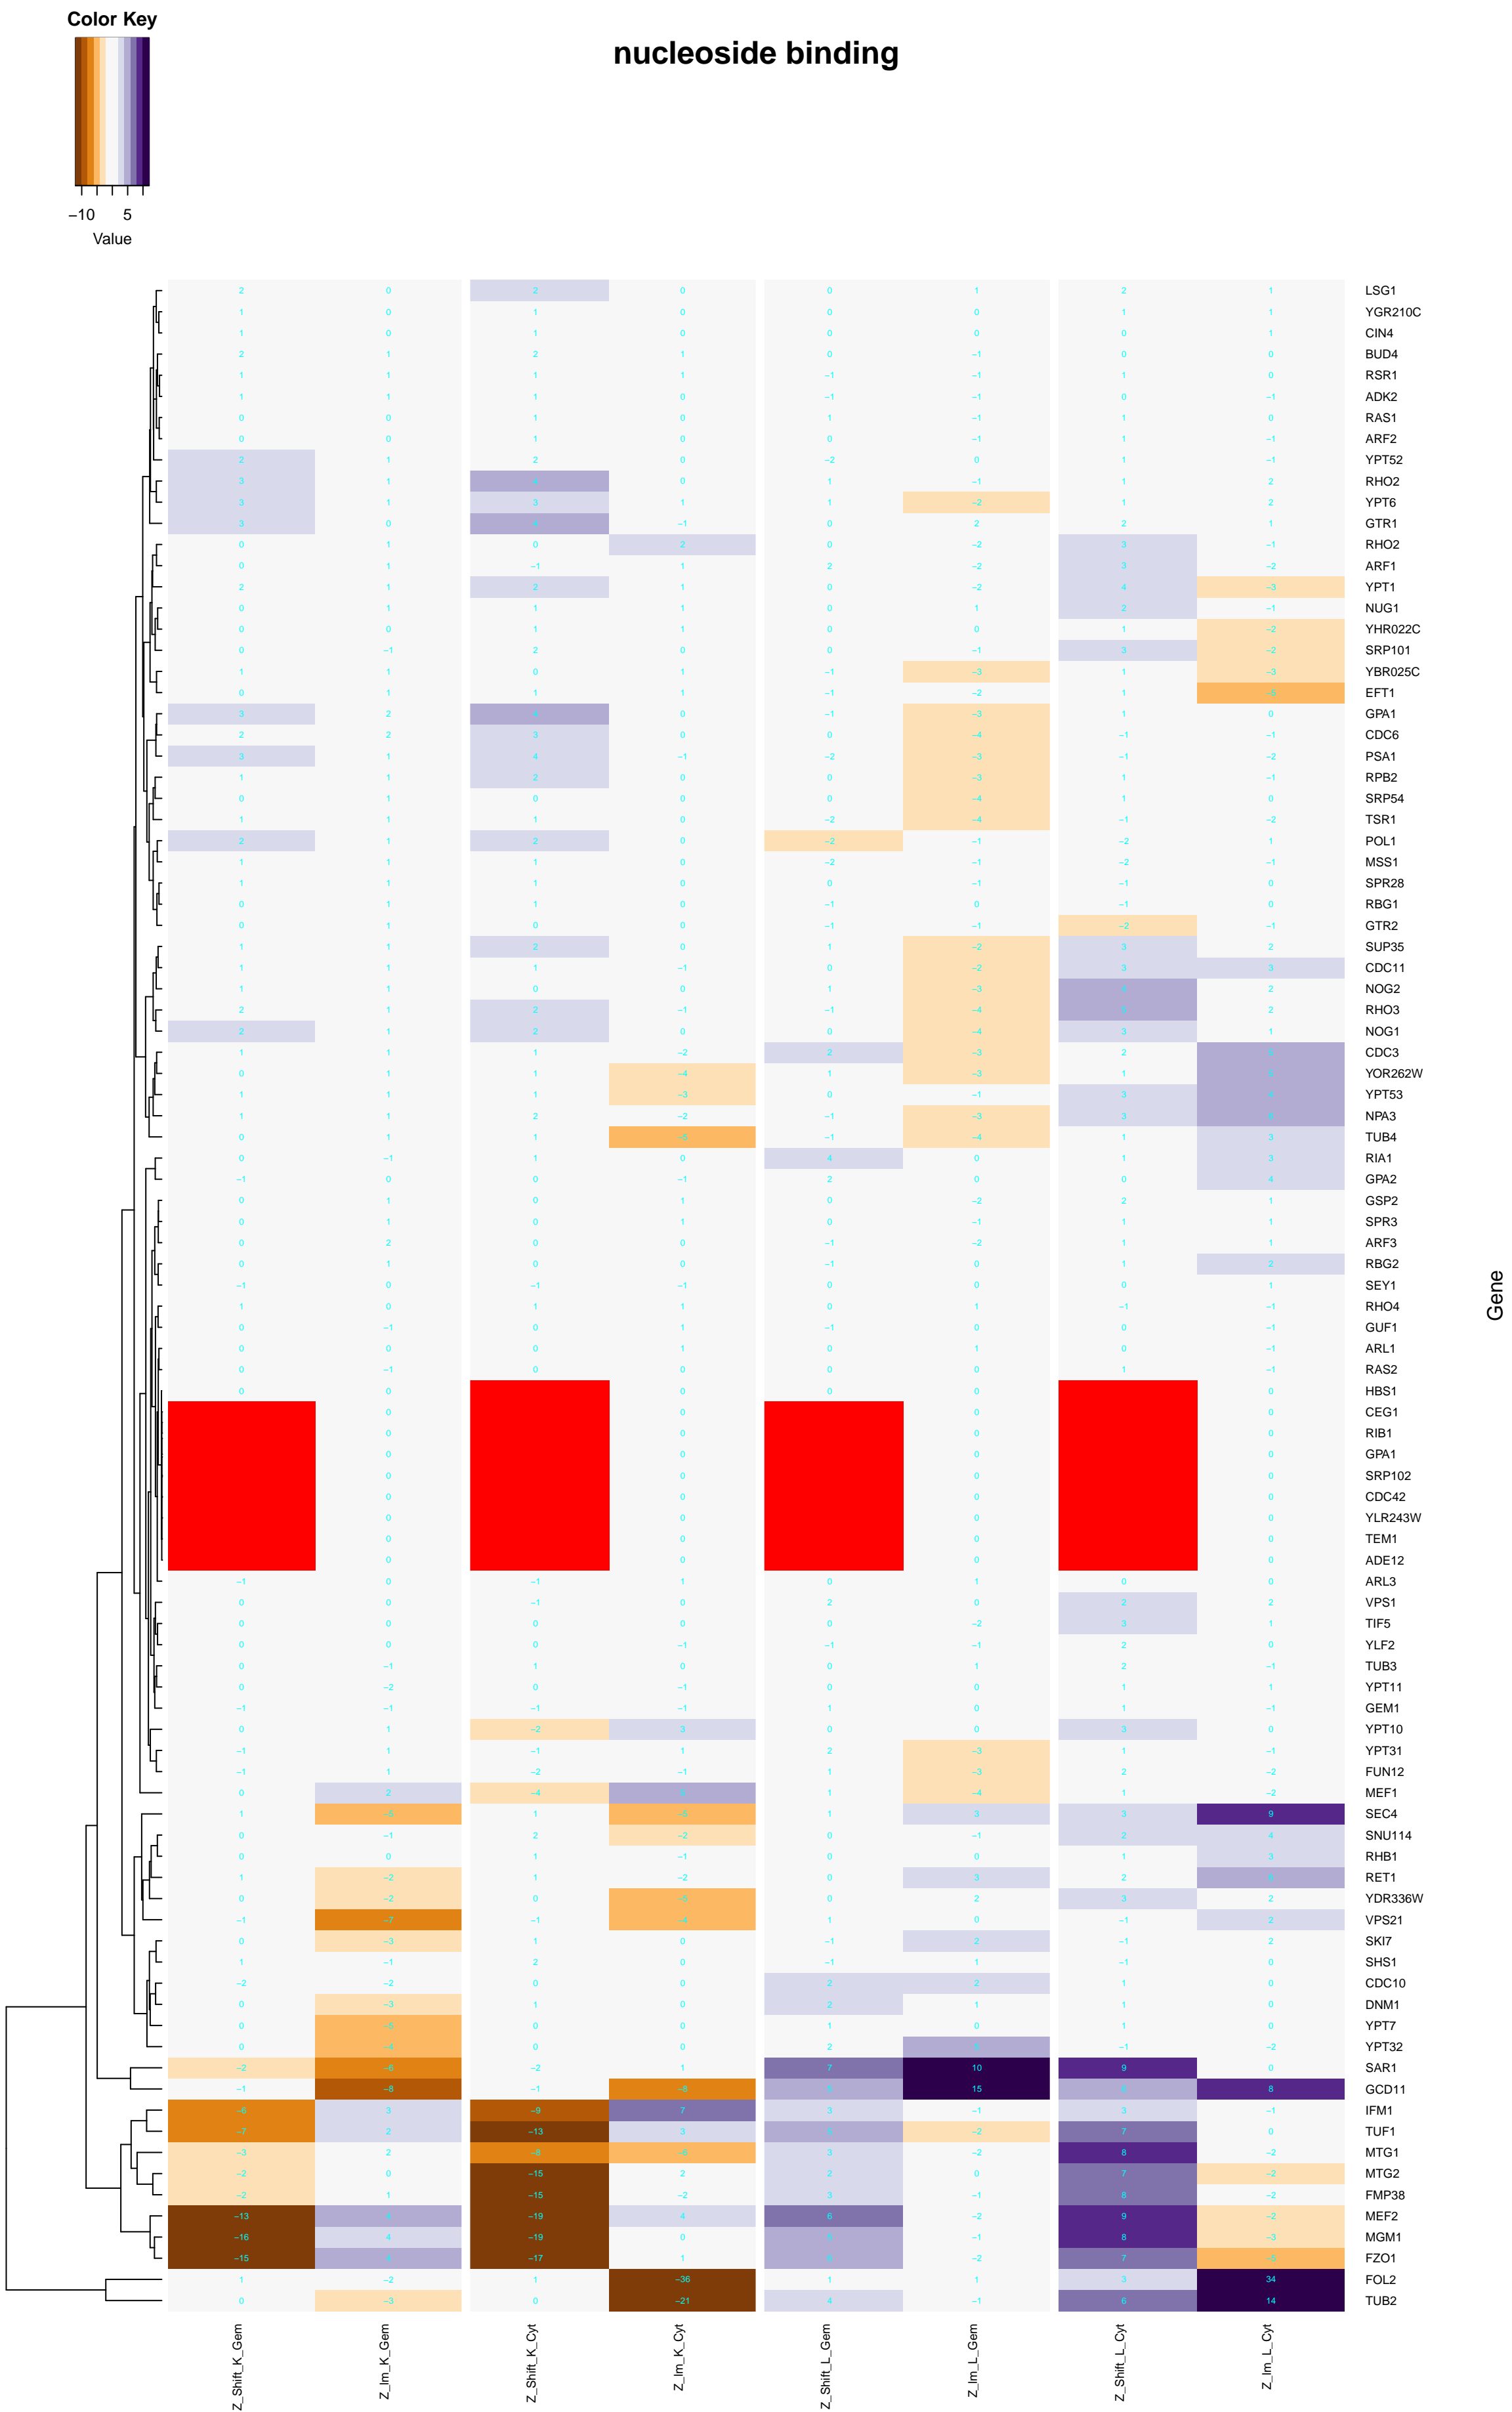

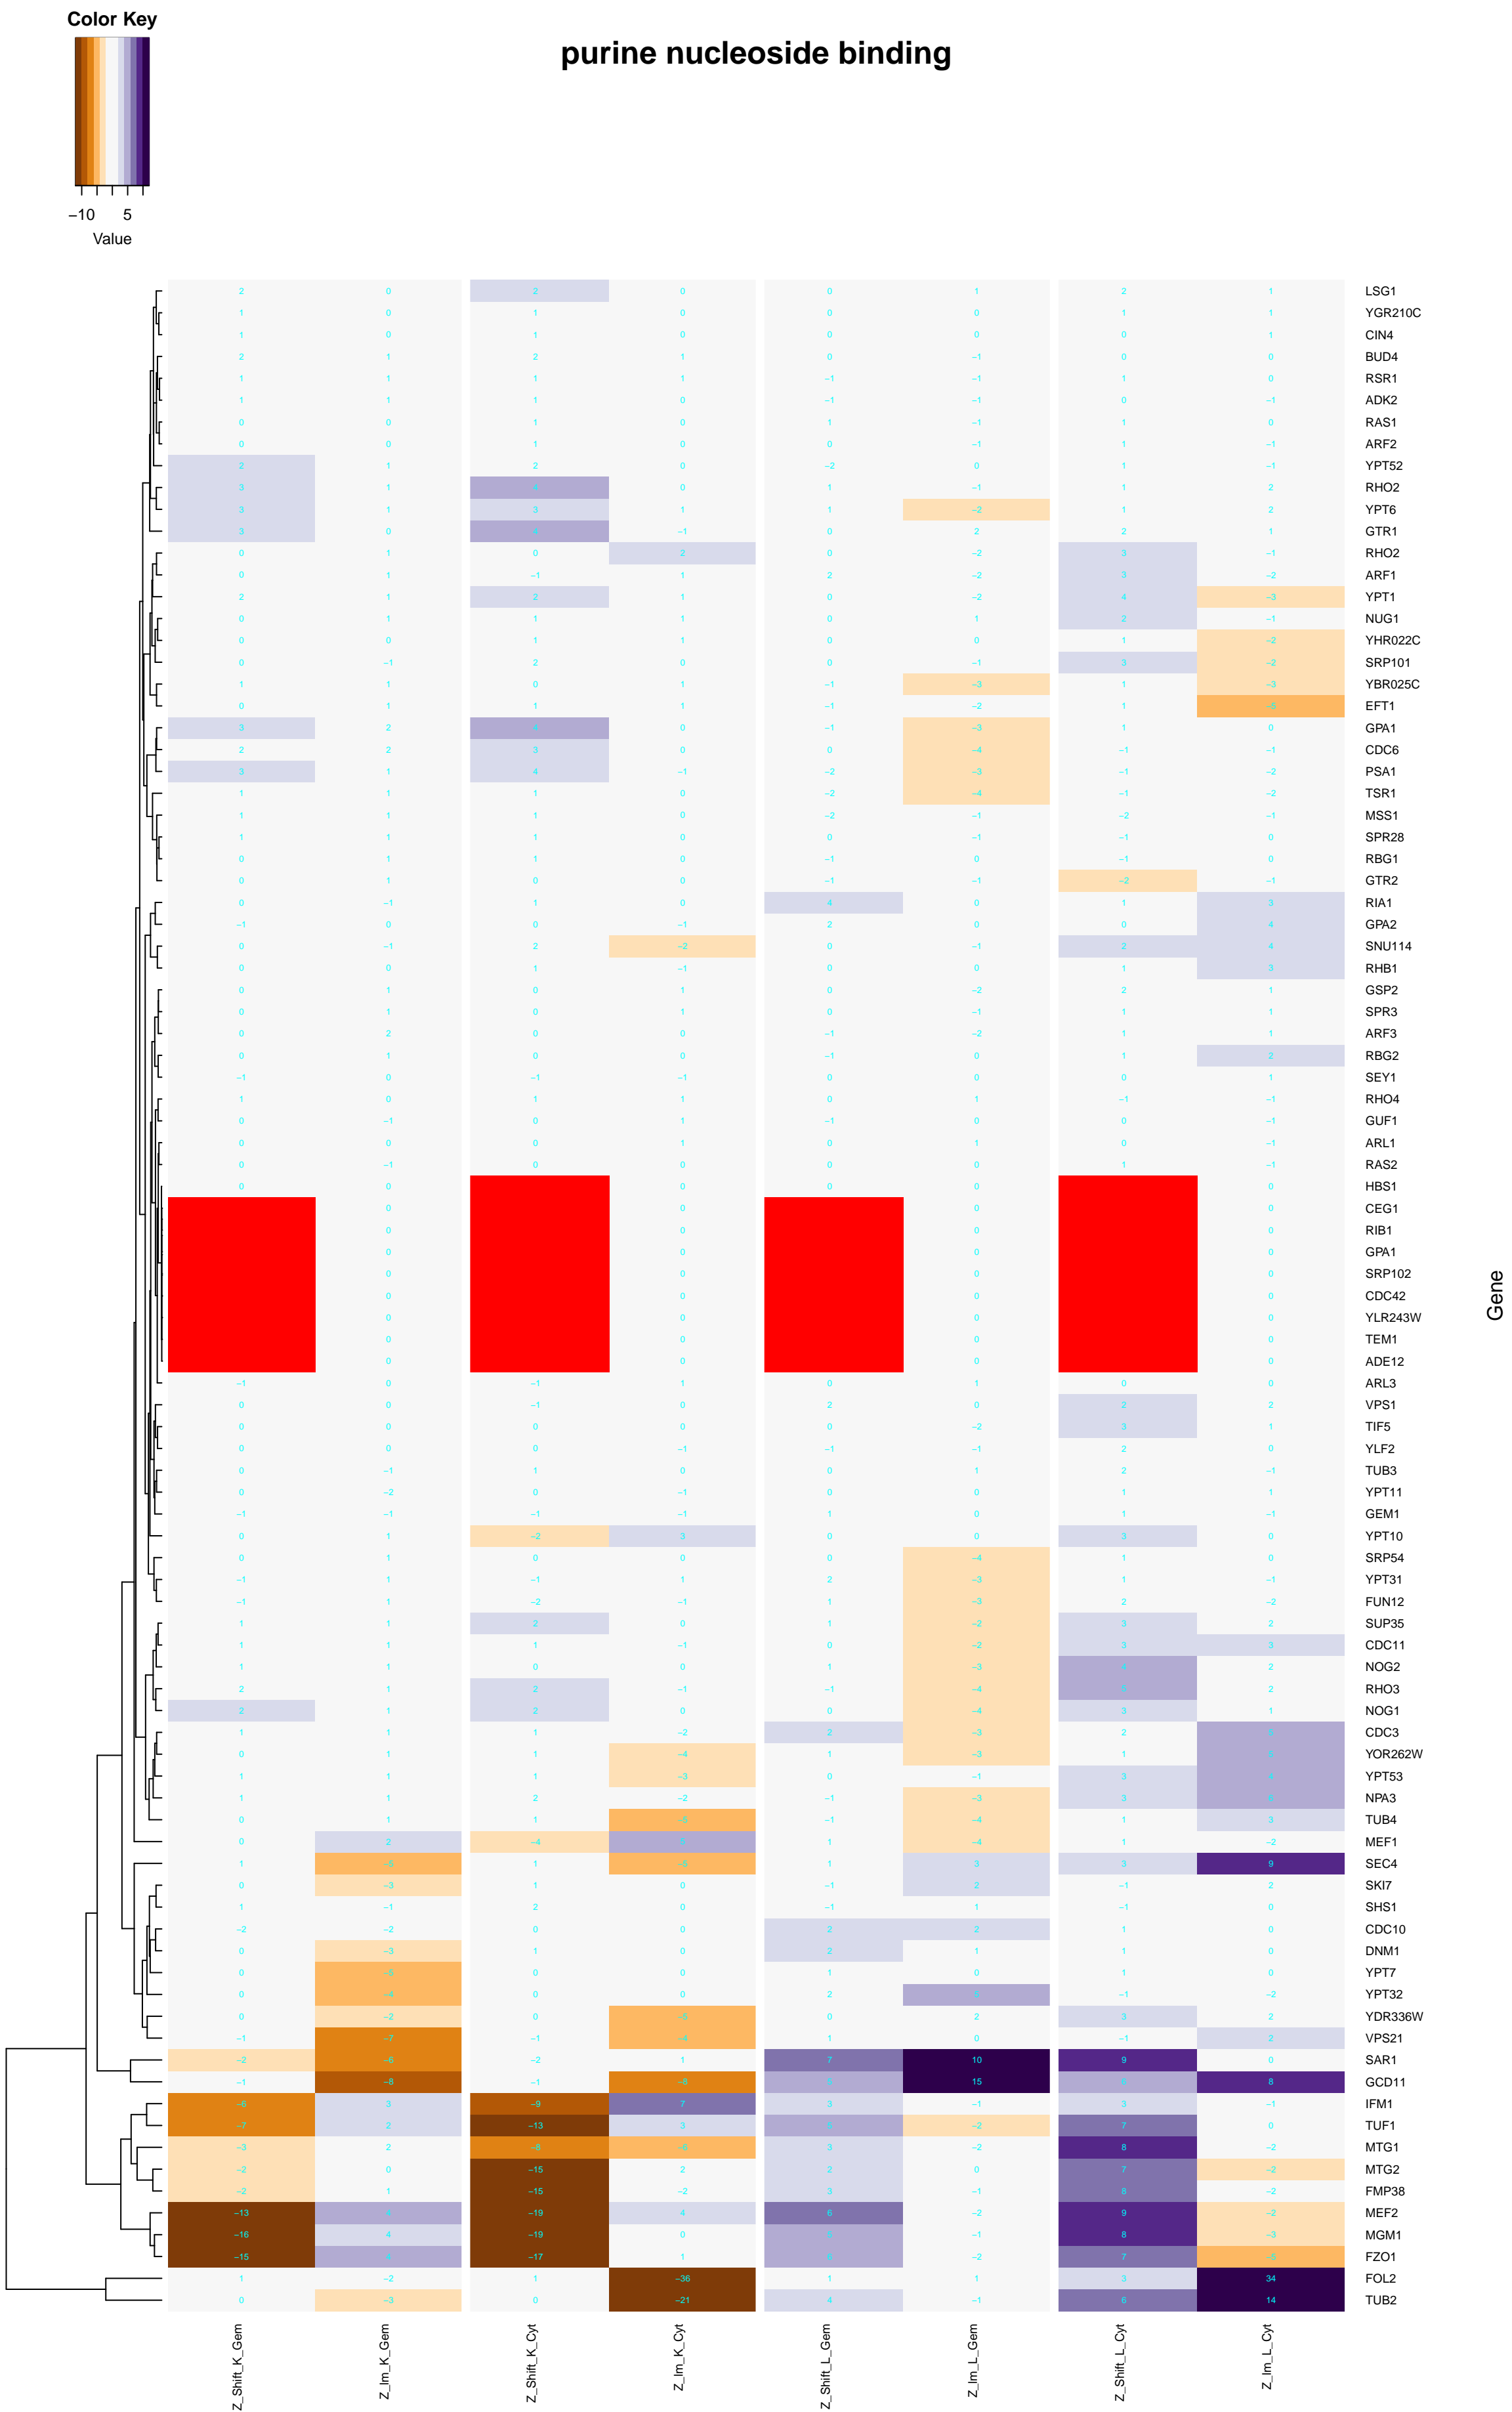

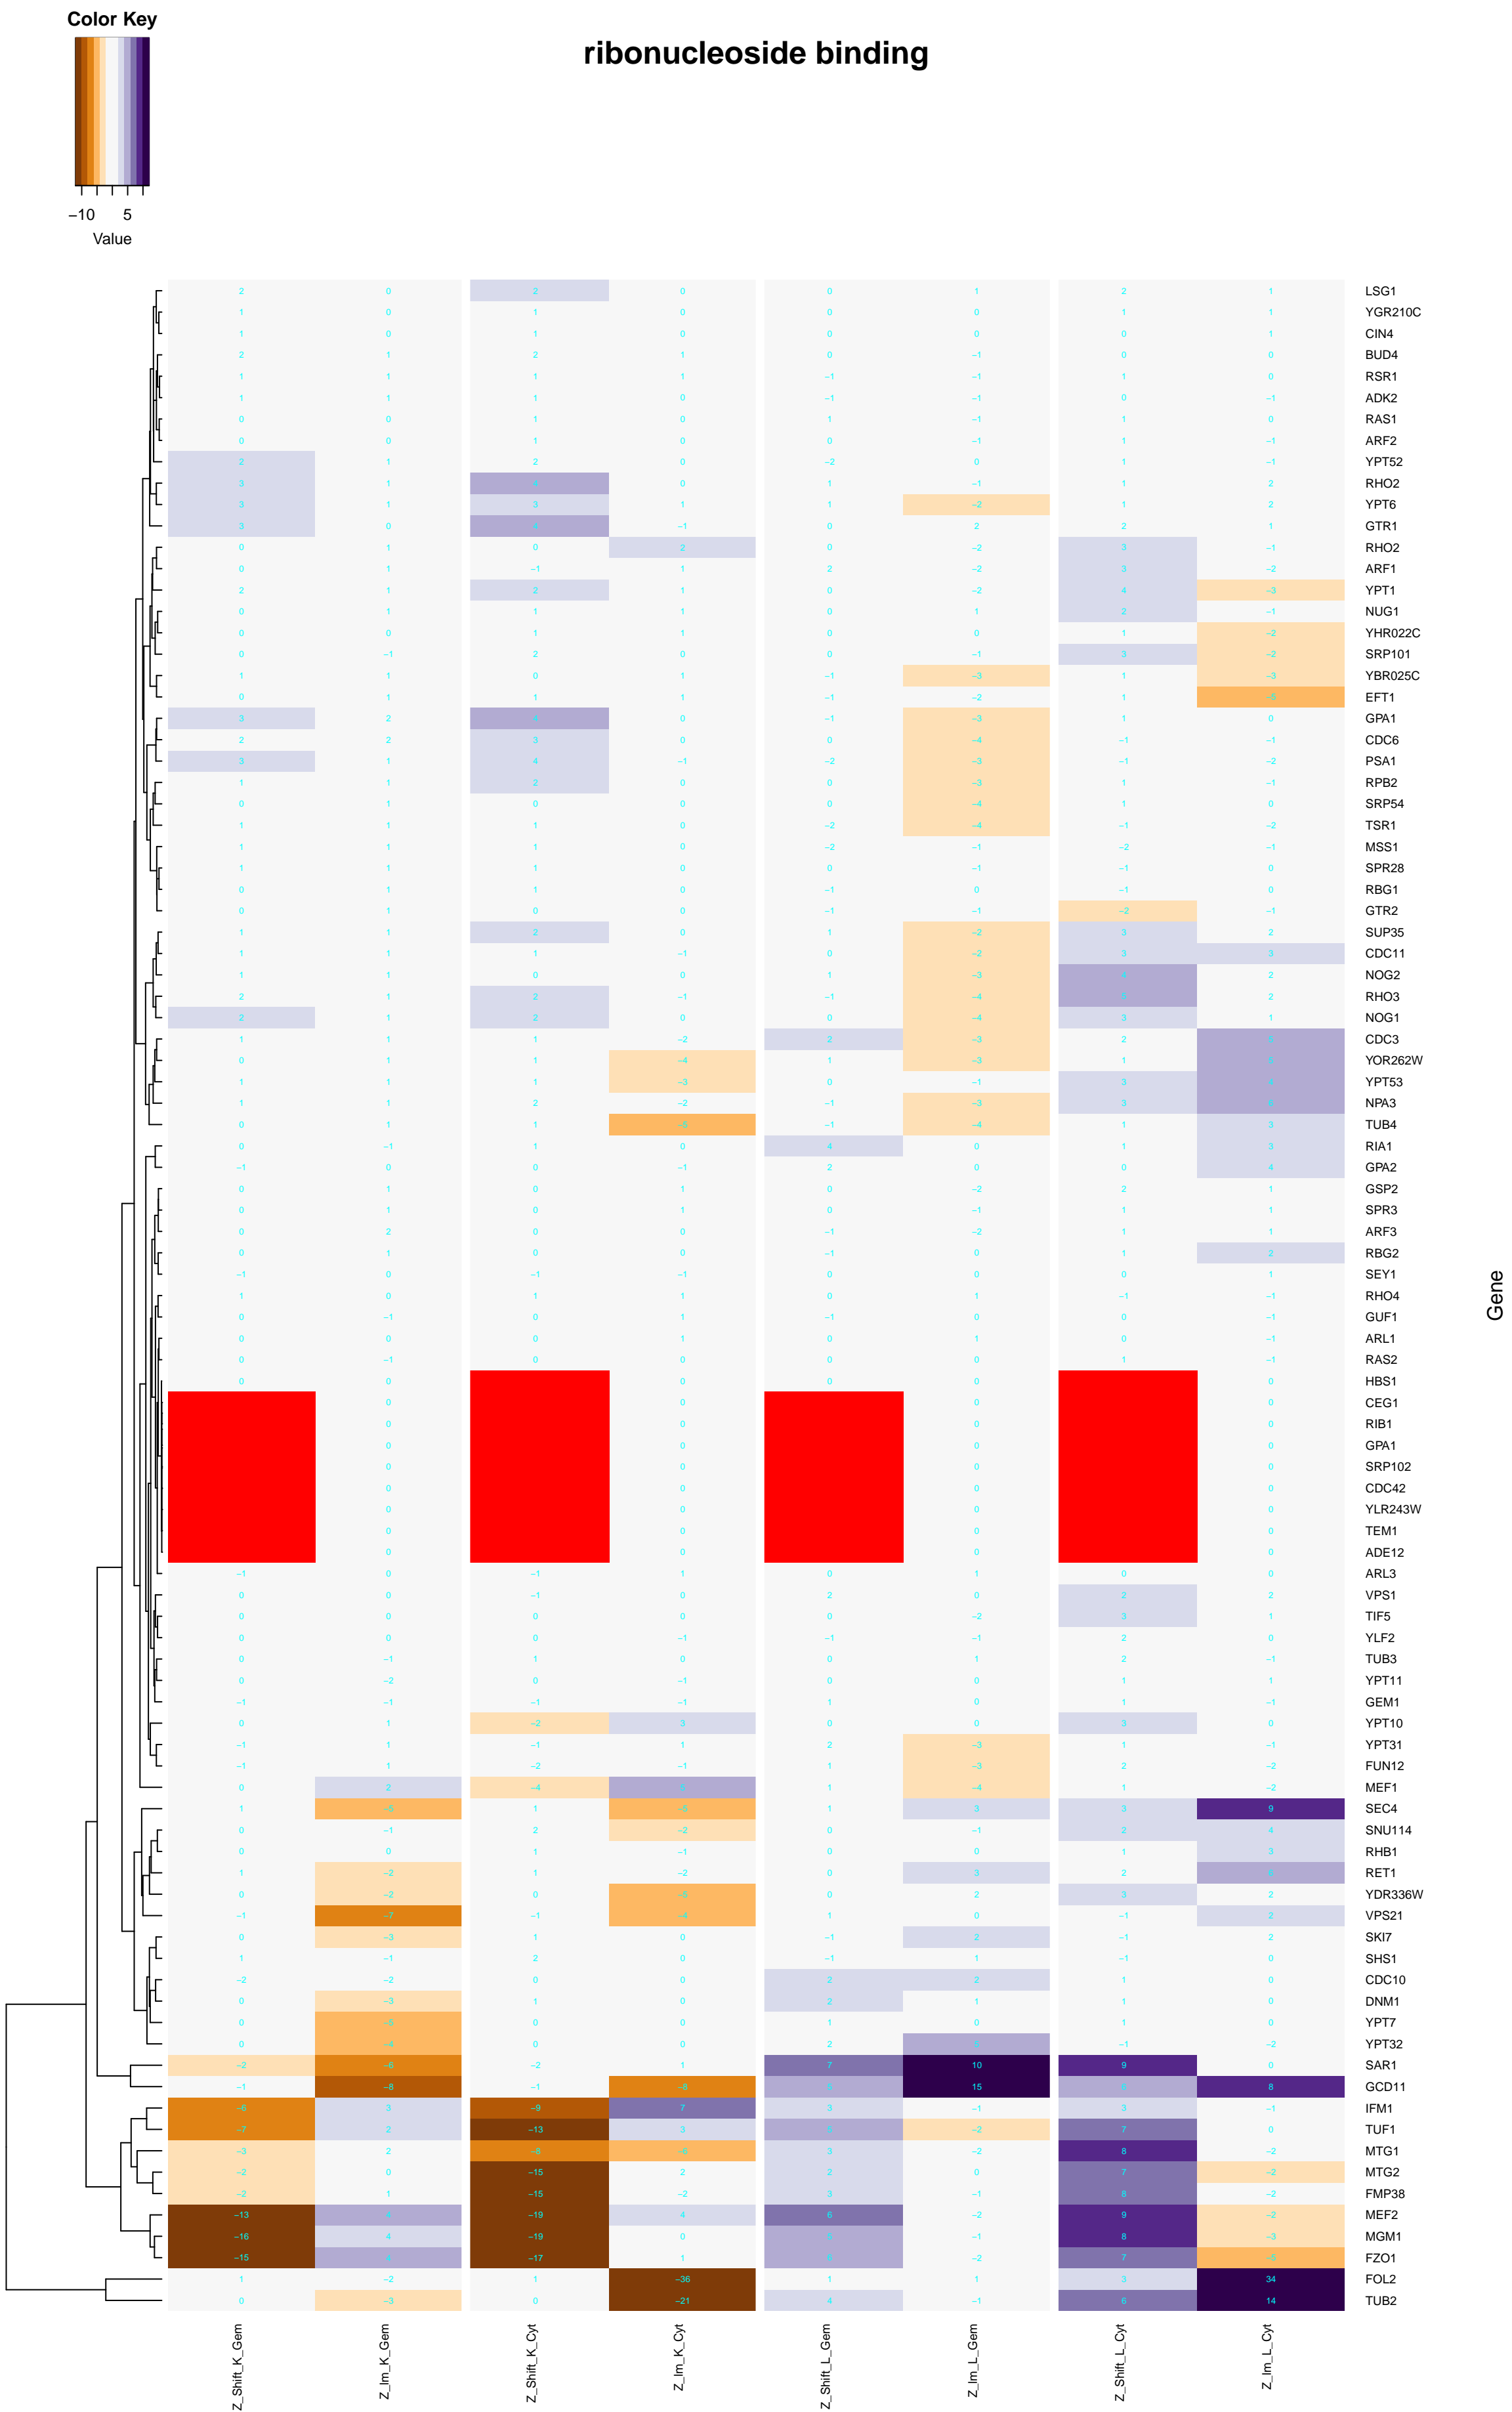

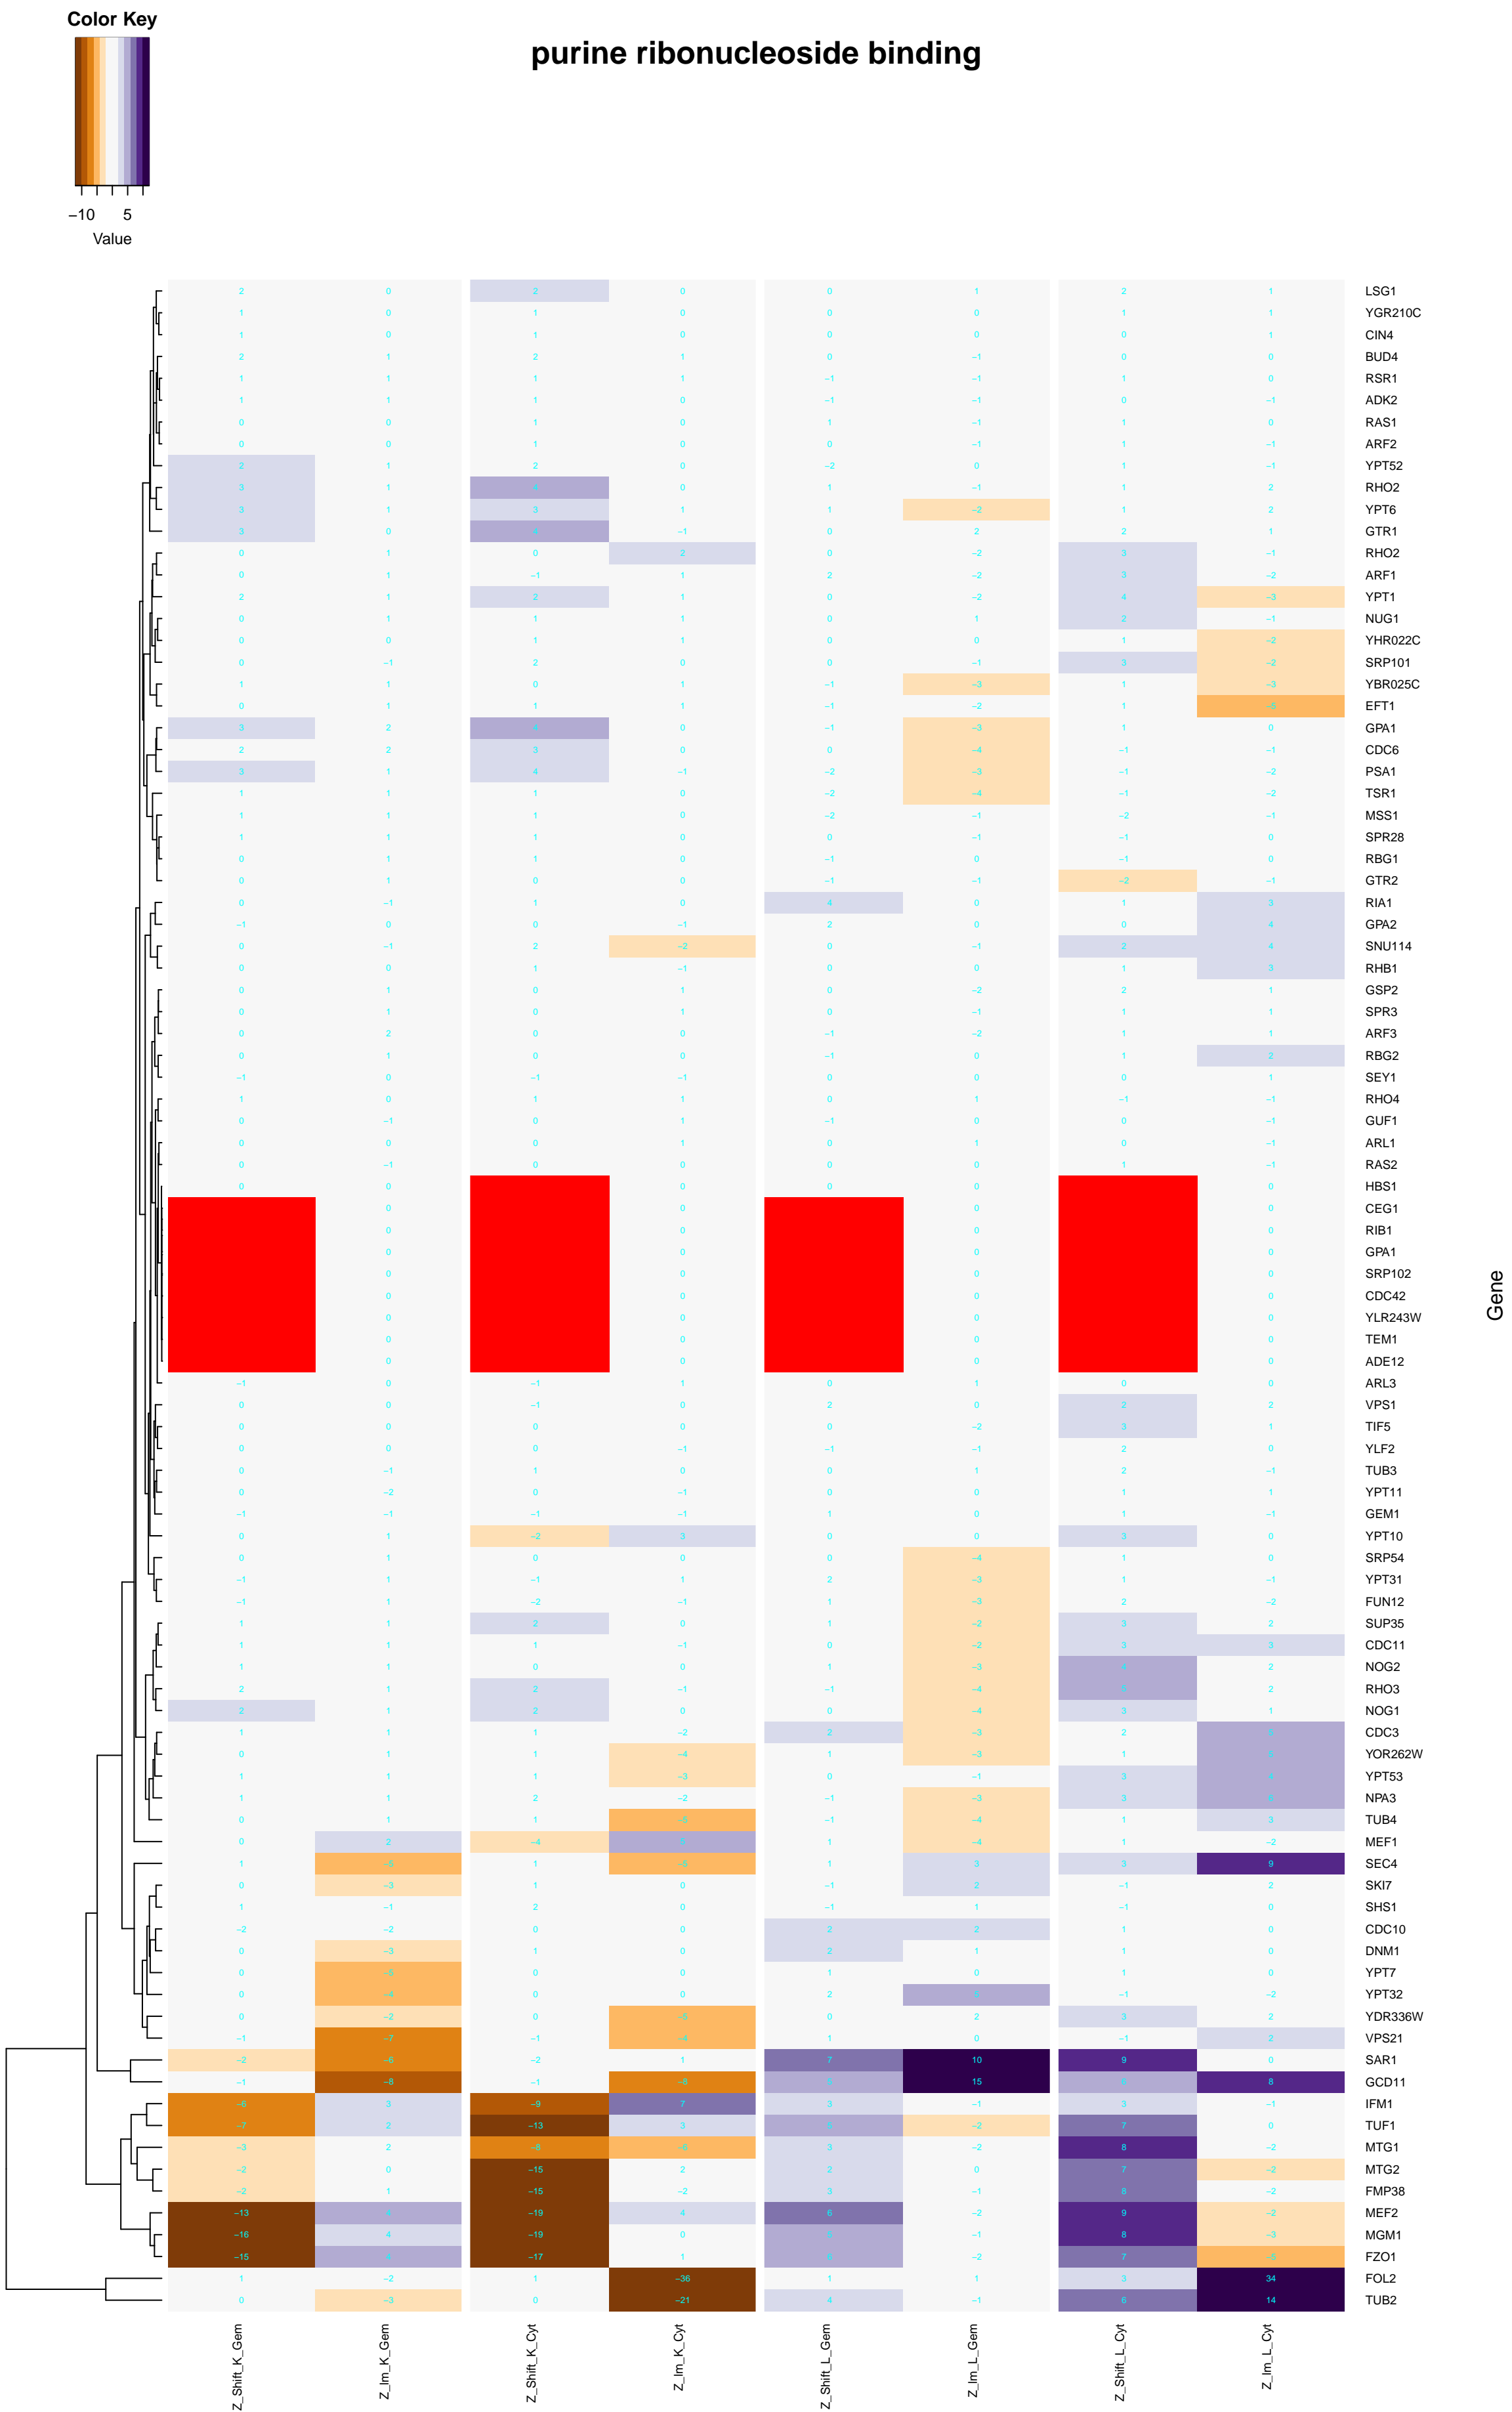



Supplement: s1 [file s1]

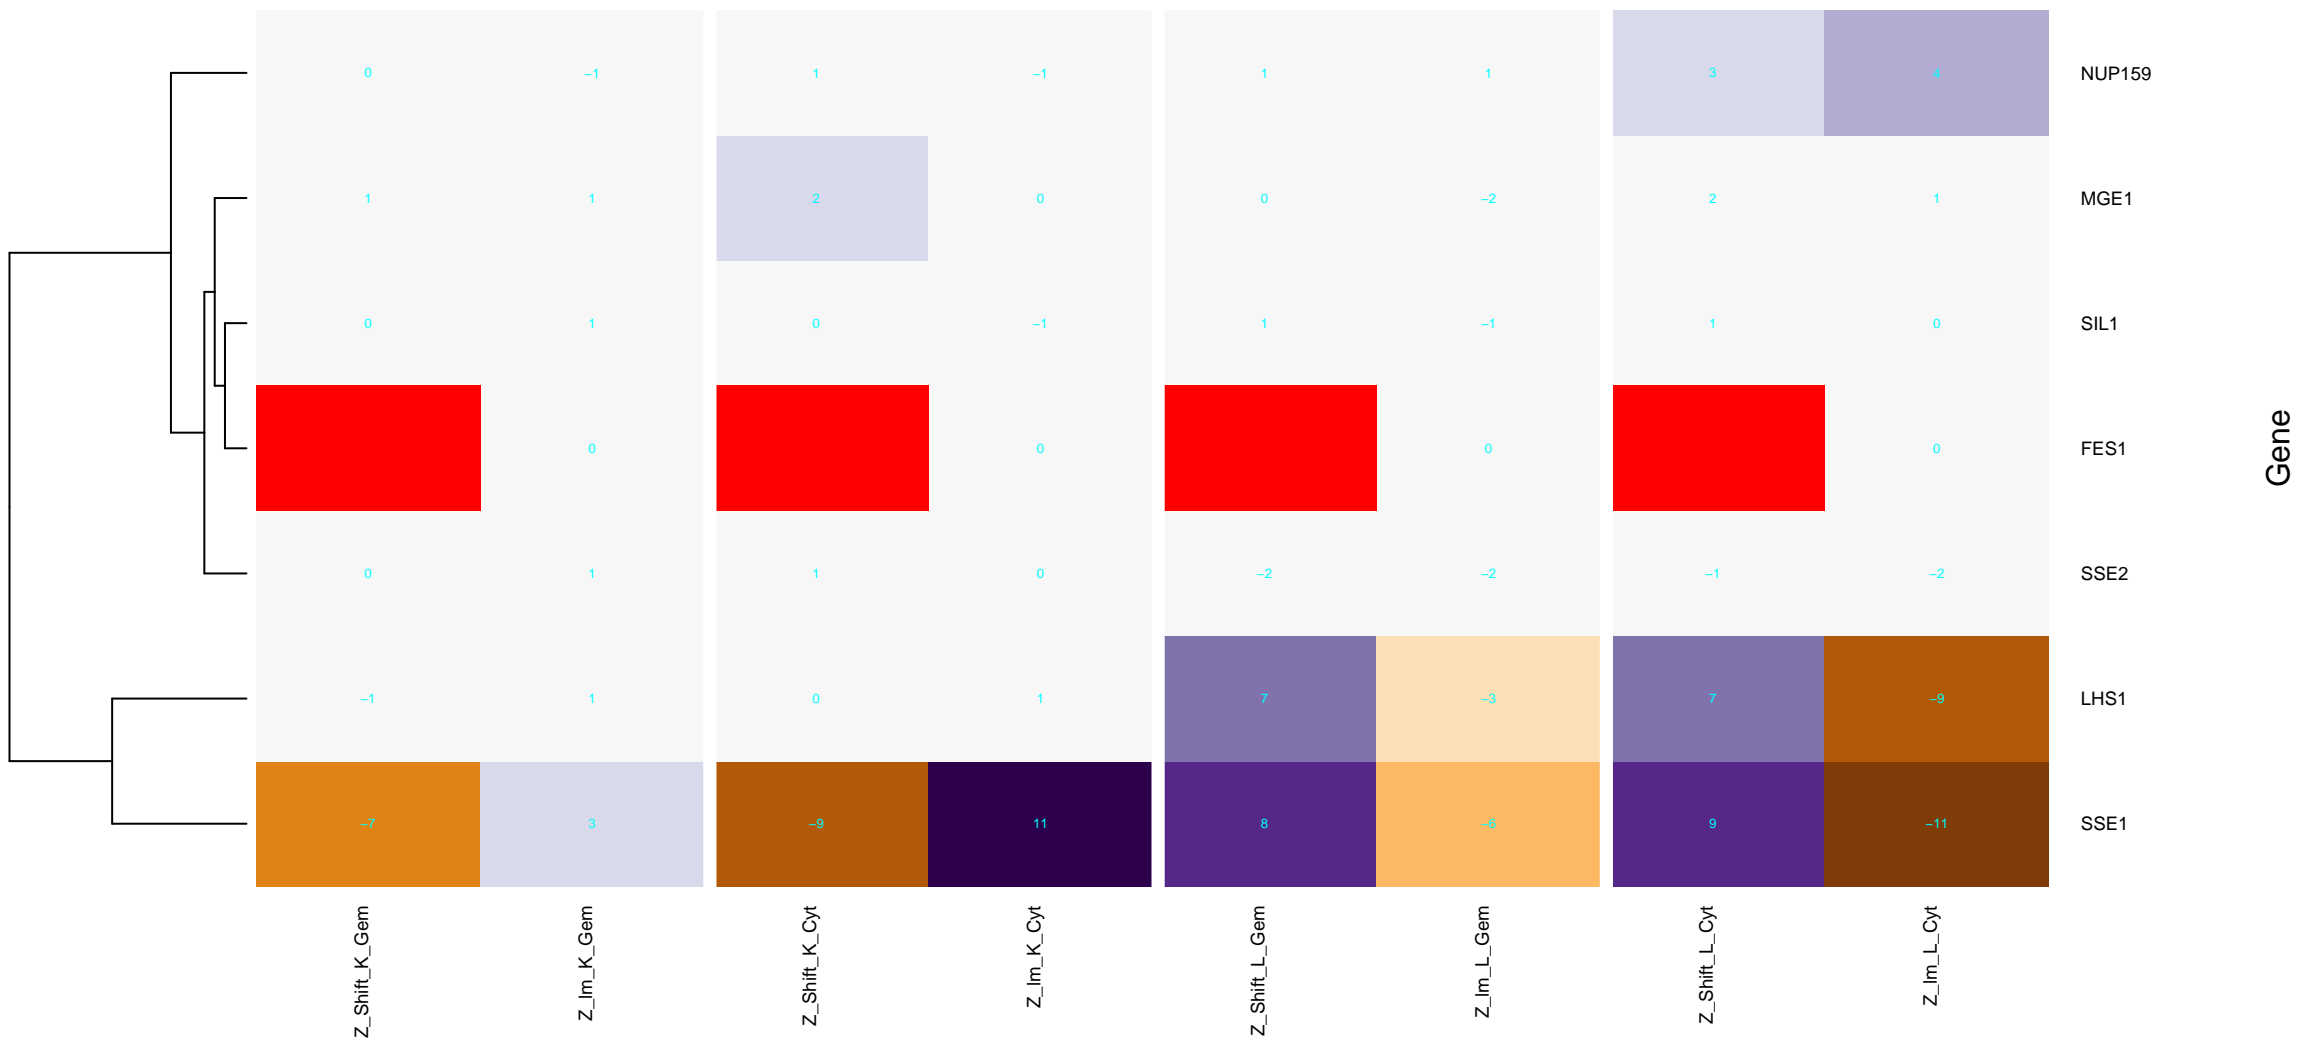

Supplement: s1 [file s1]

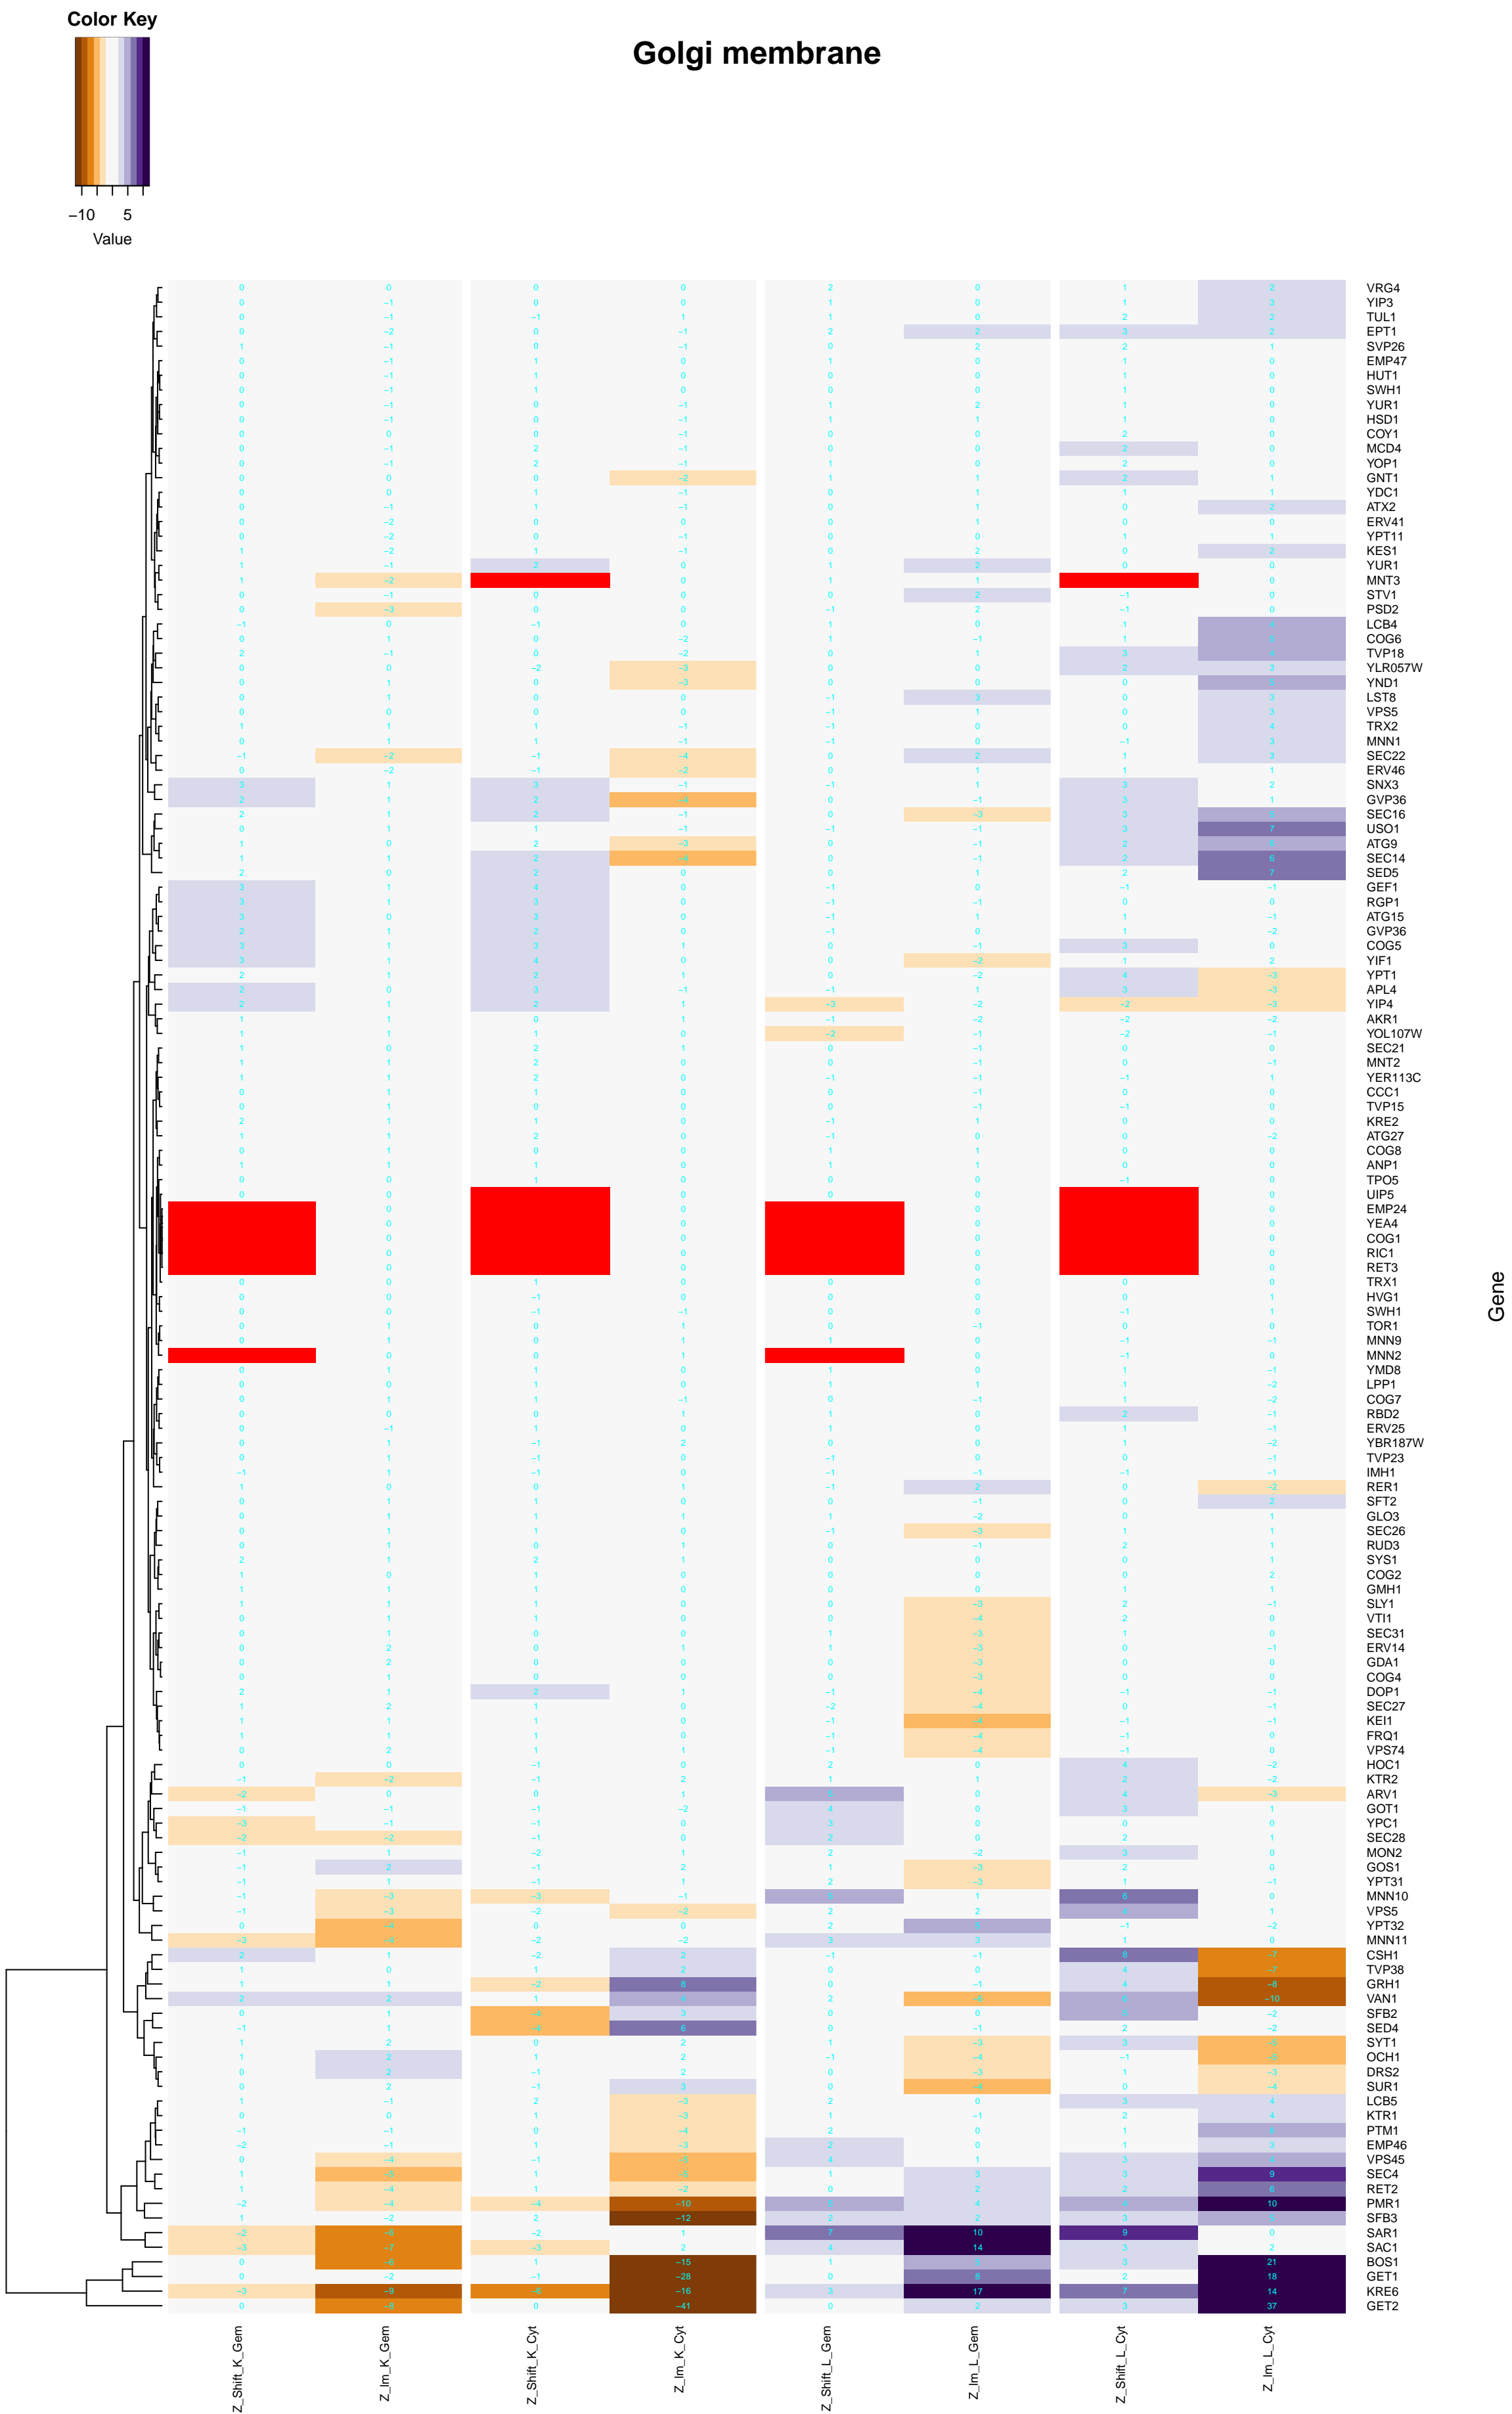

Supplement: s1 [file s1]

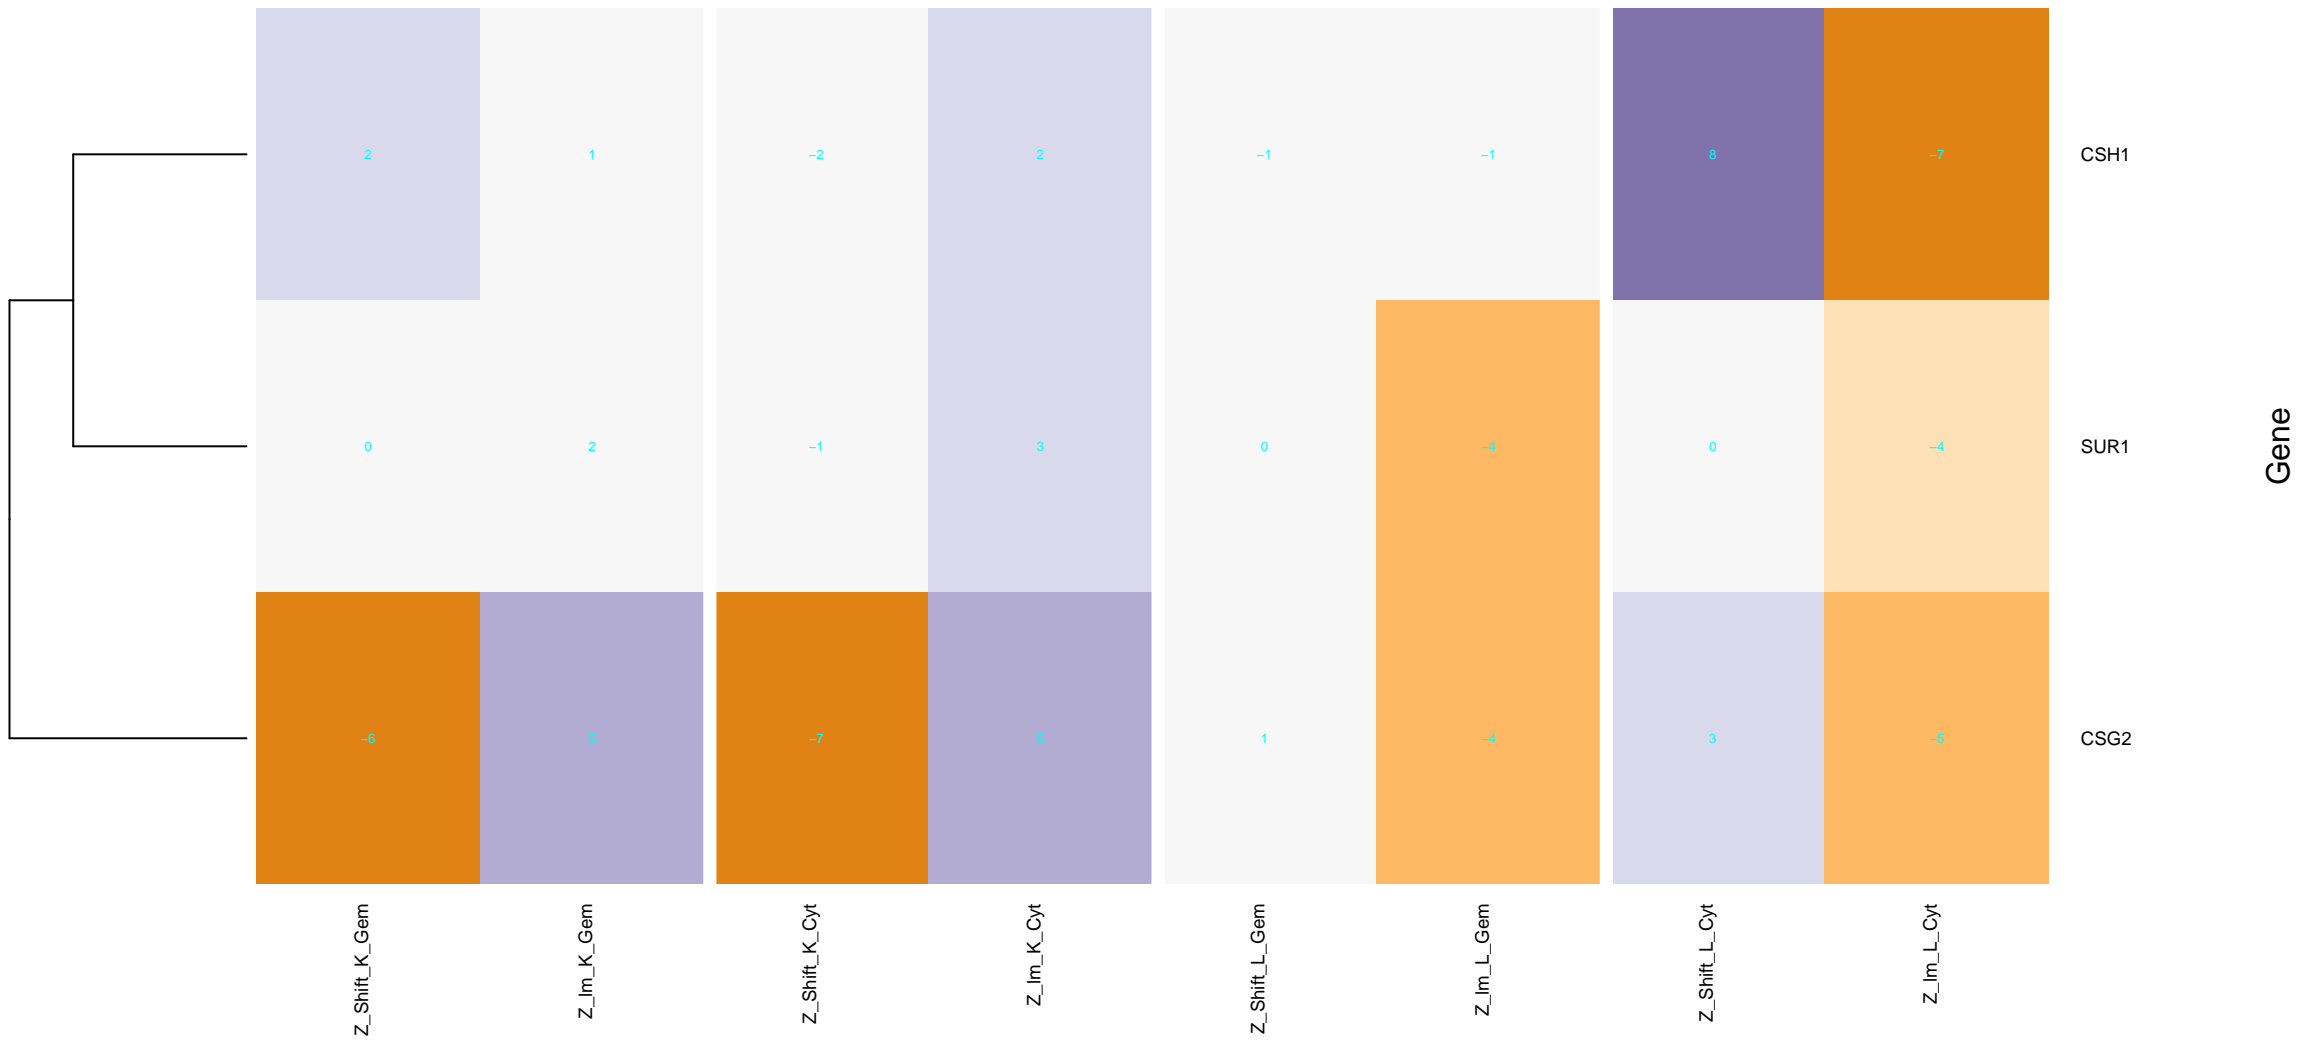

Supplement: s1 [file s1]

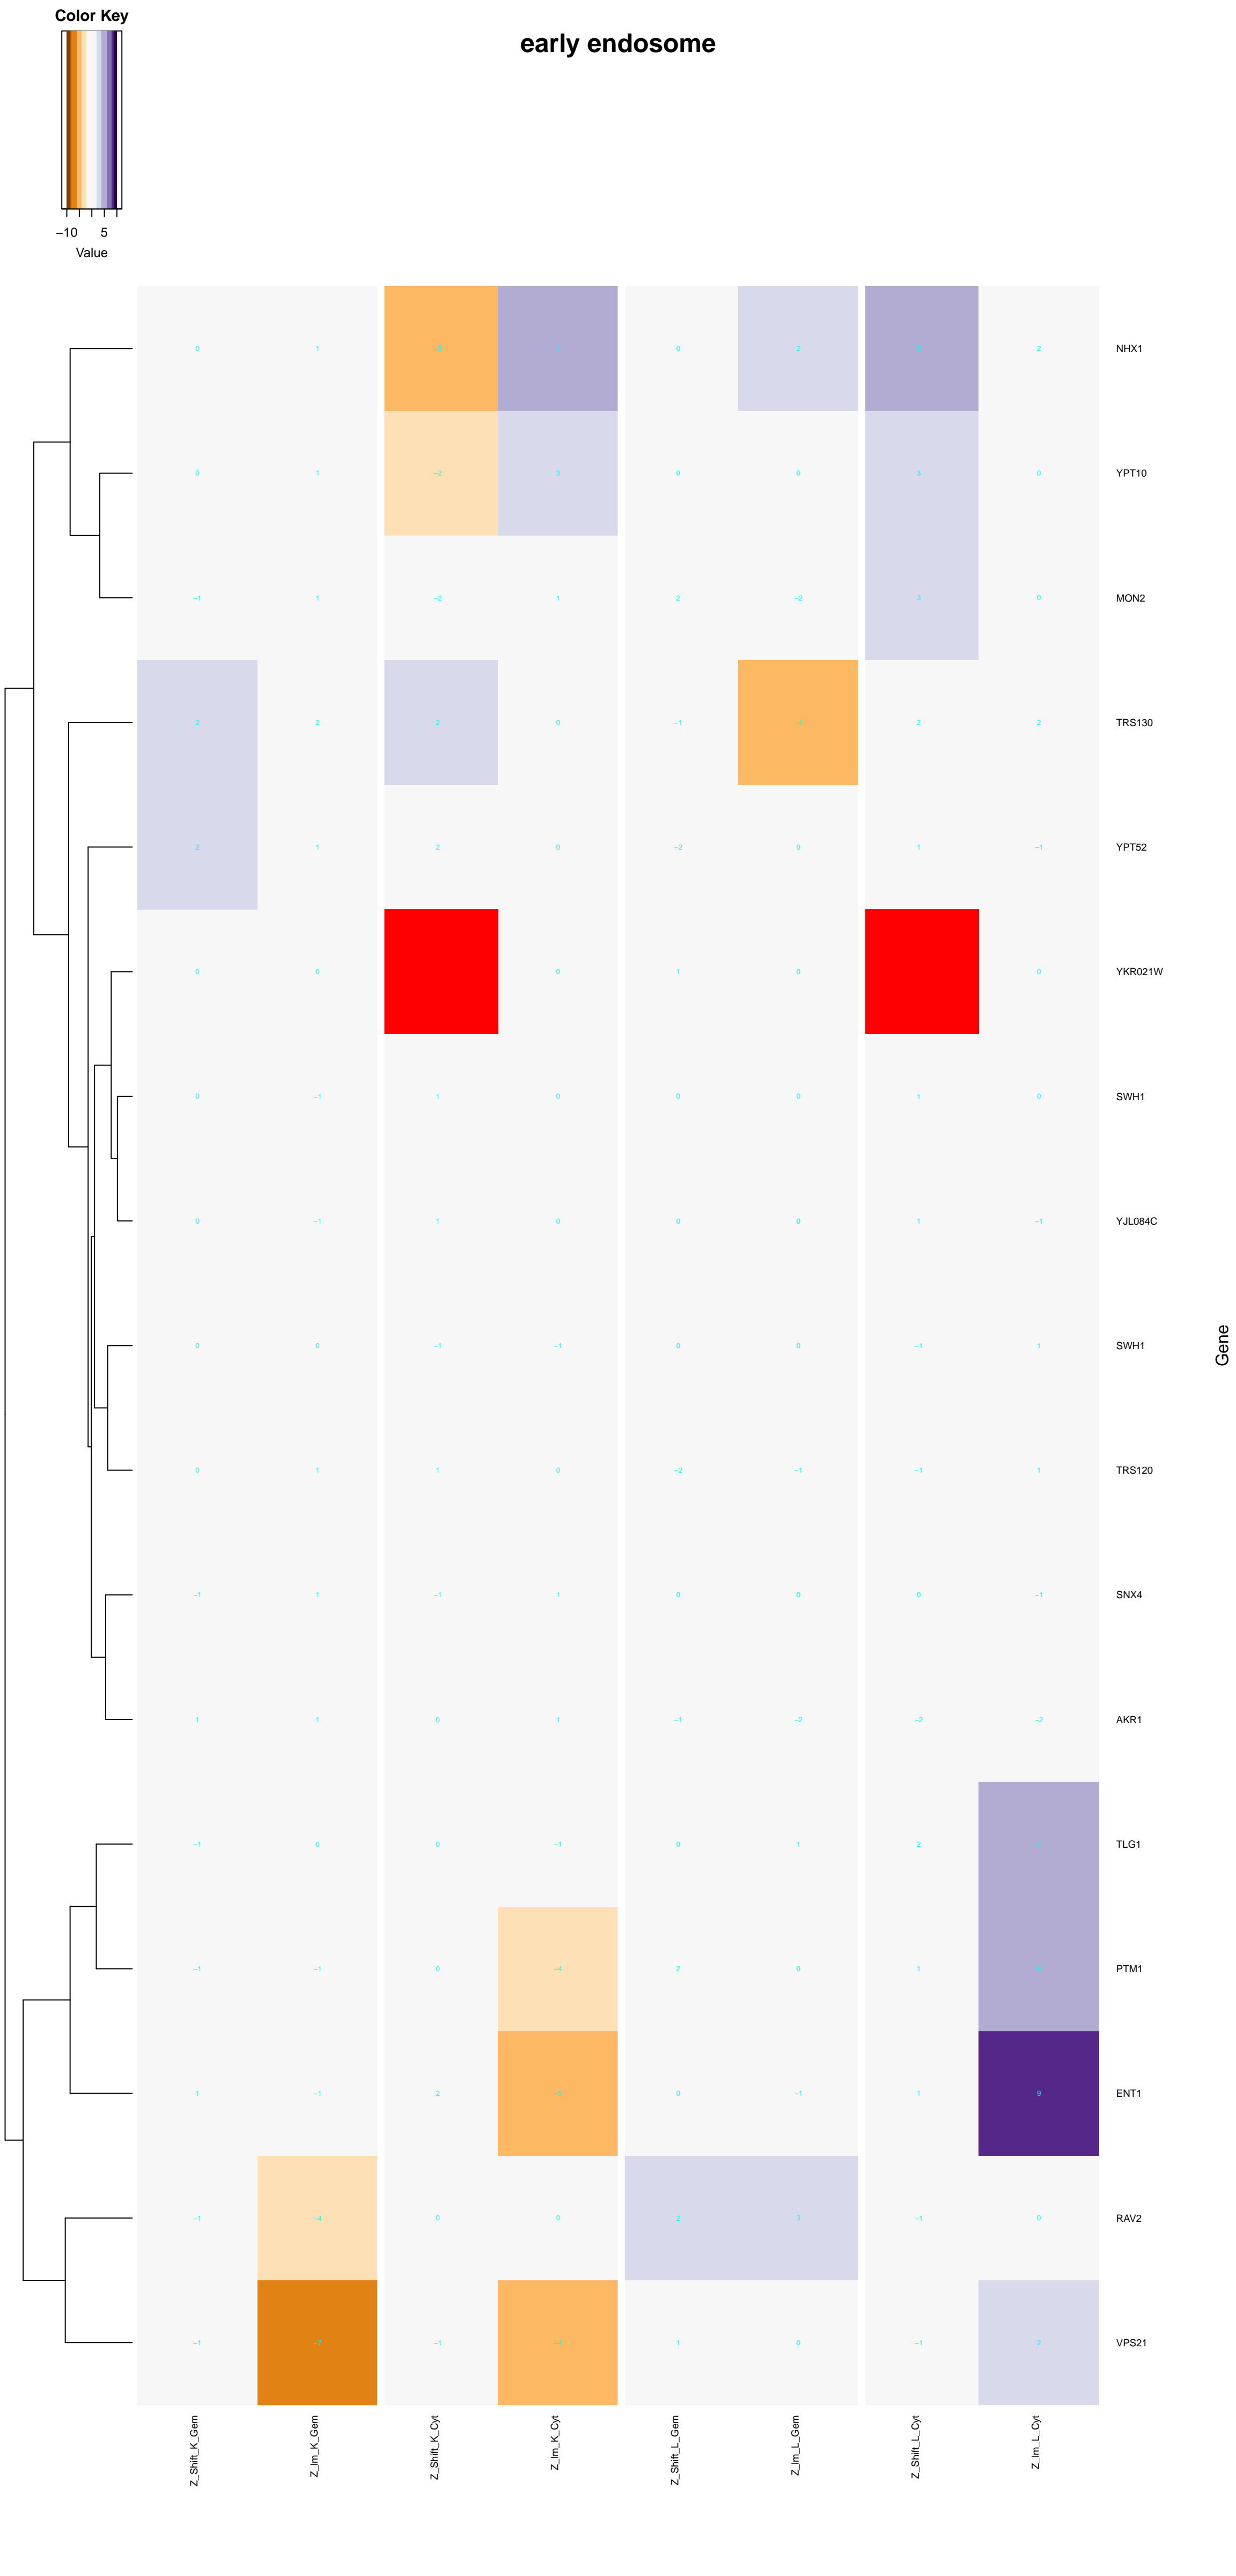

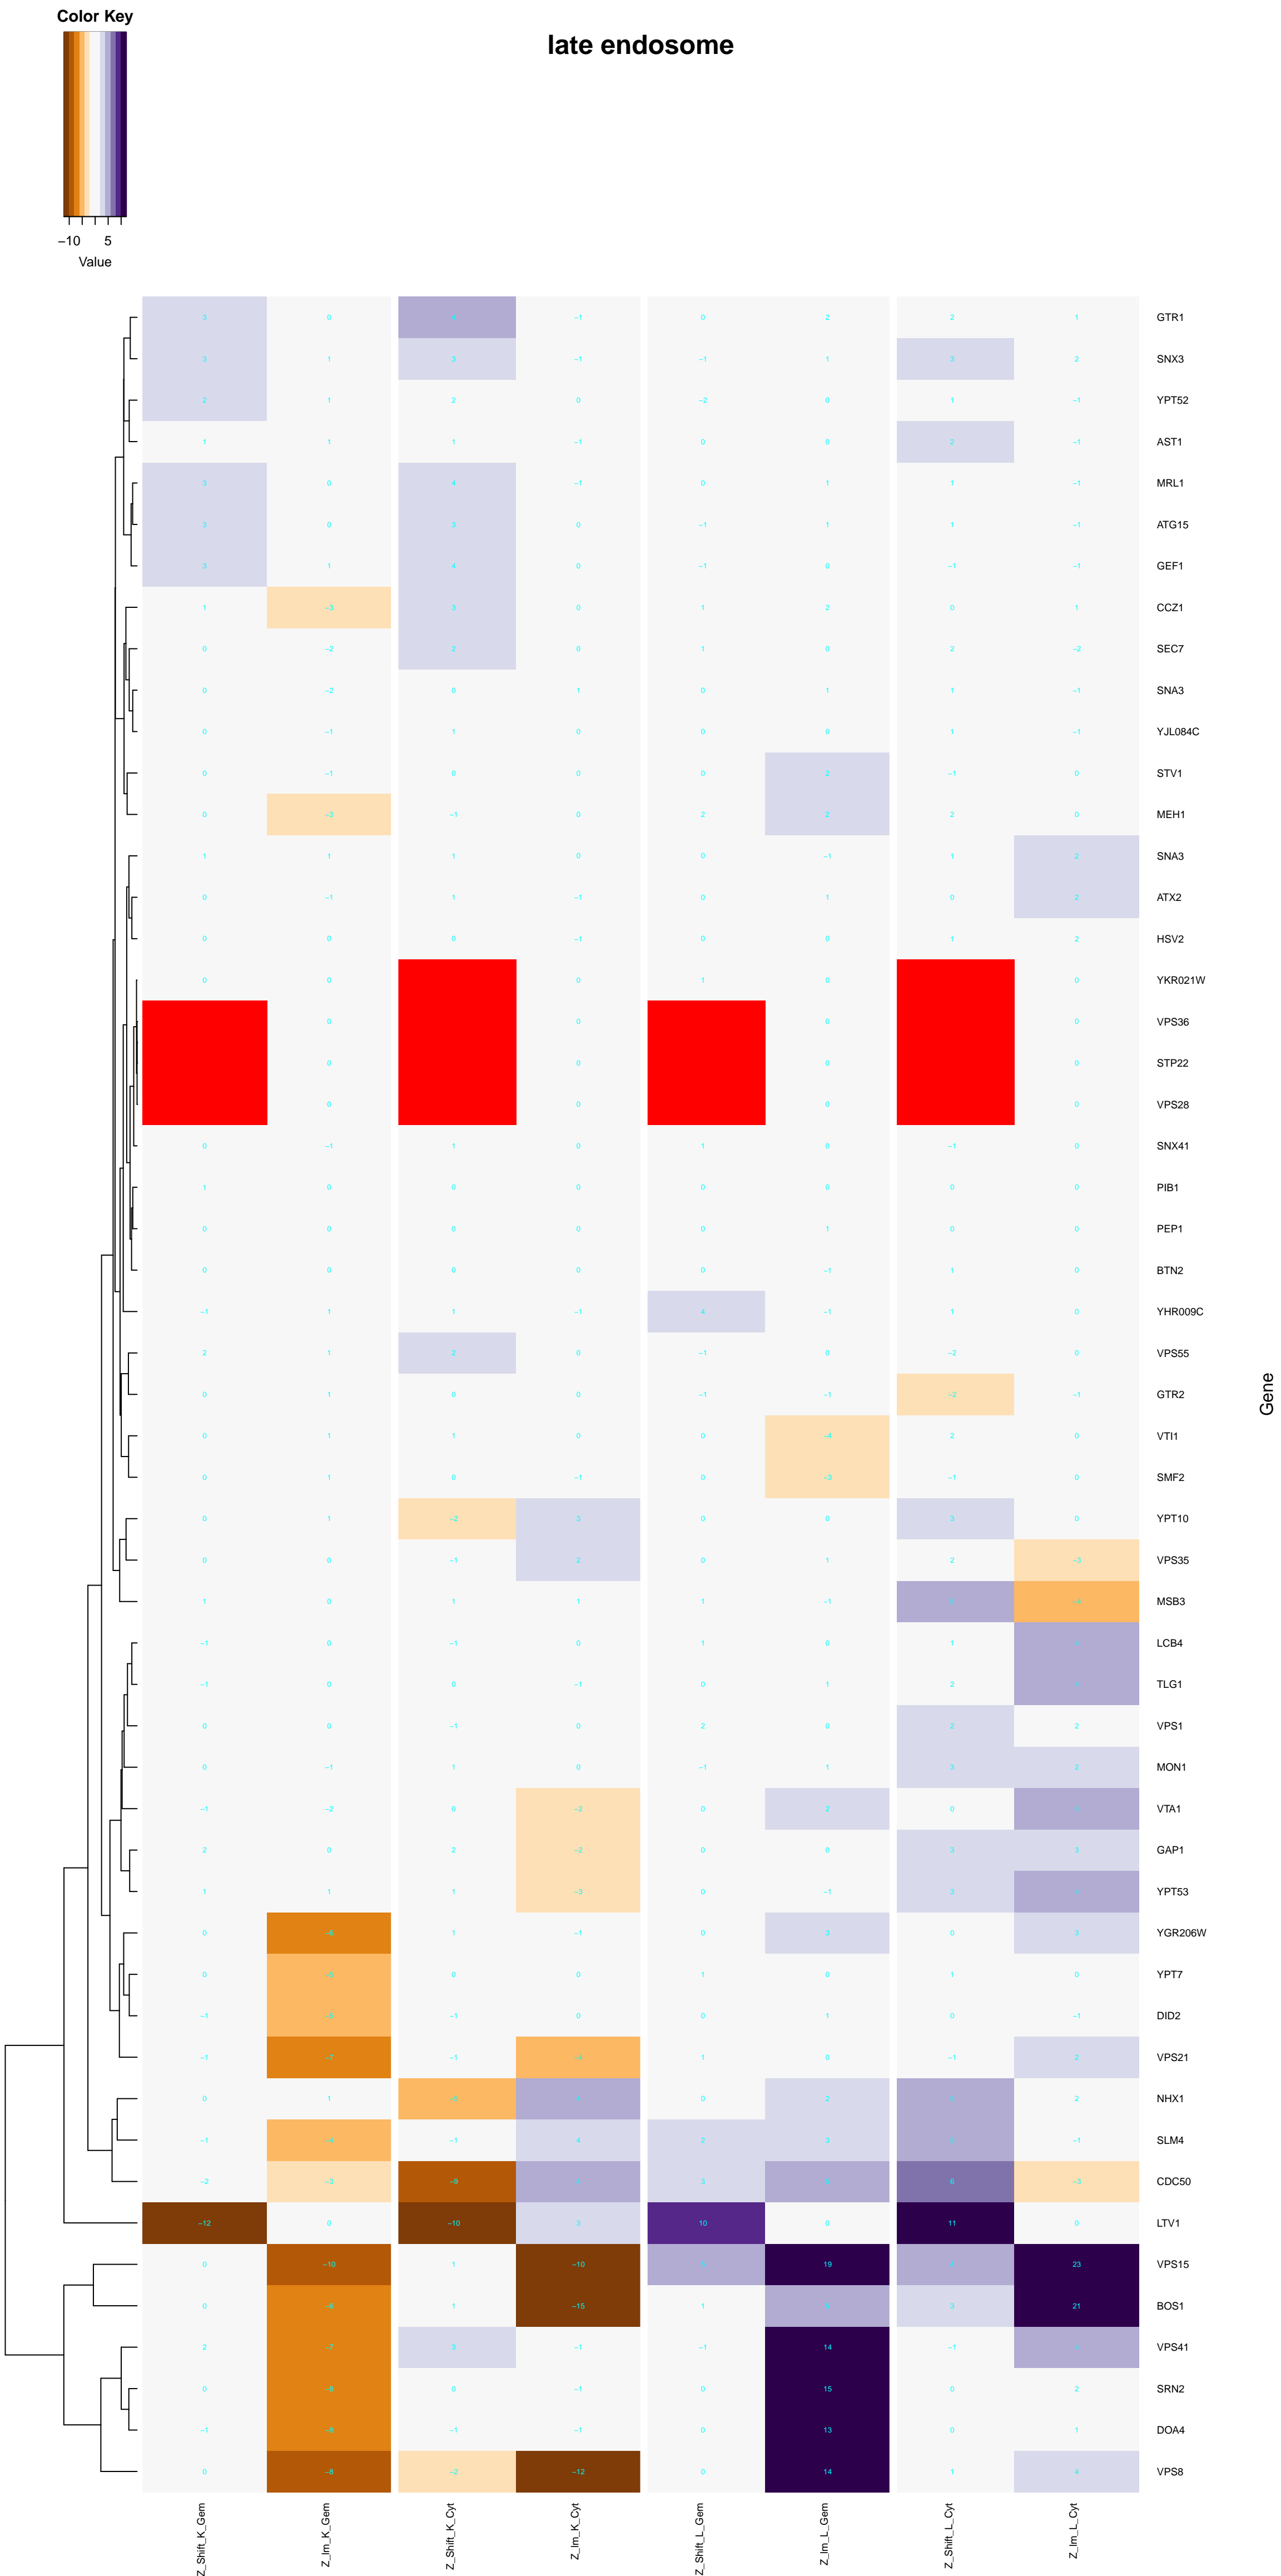

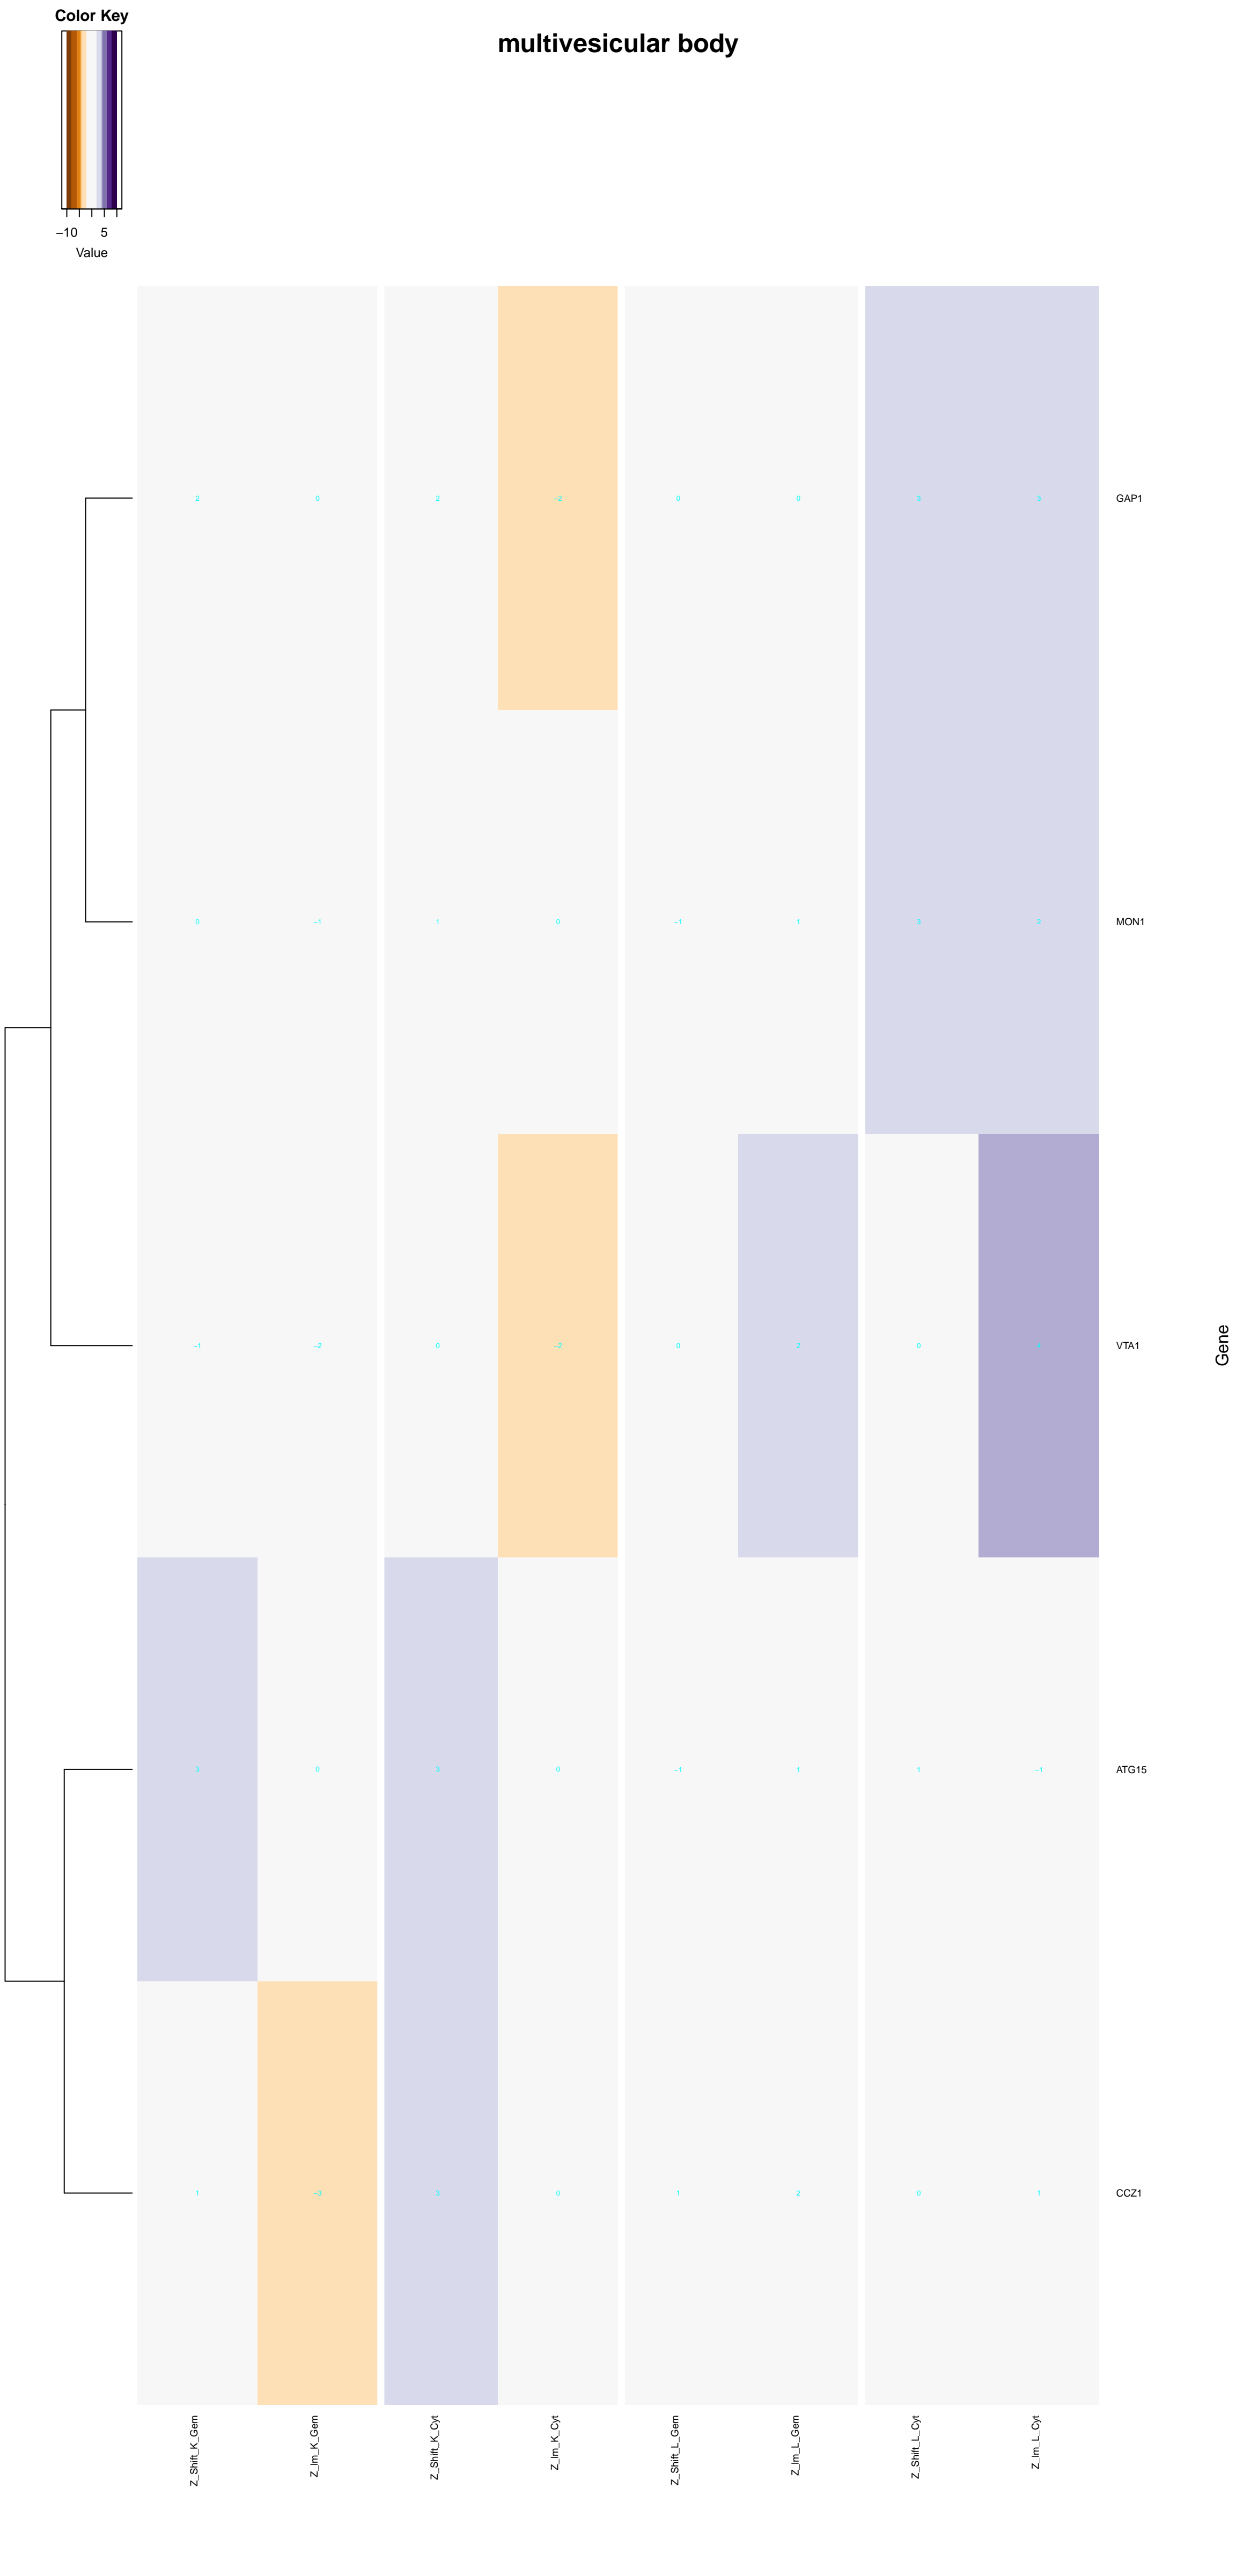

Supplement: s1 [file s1]

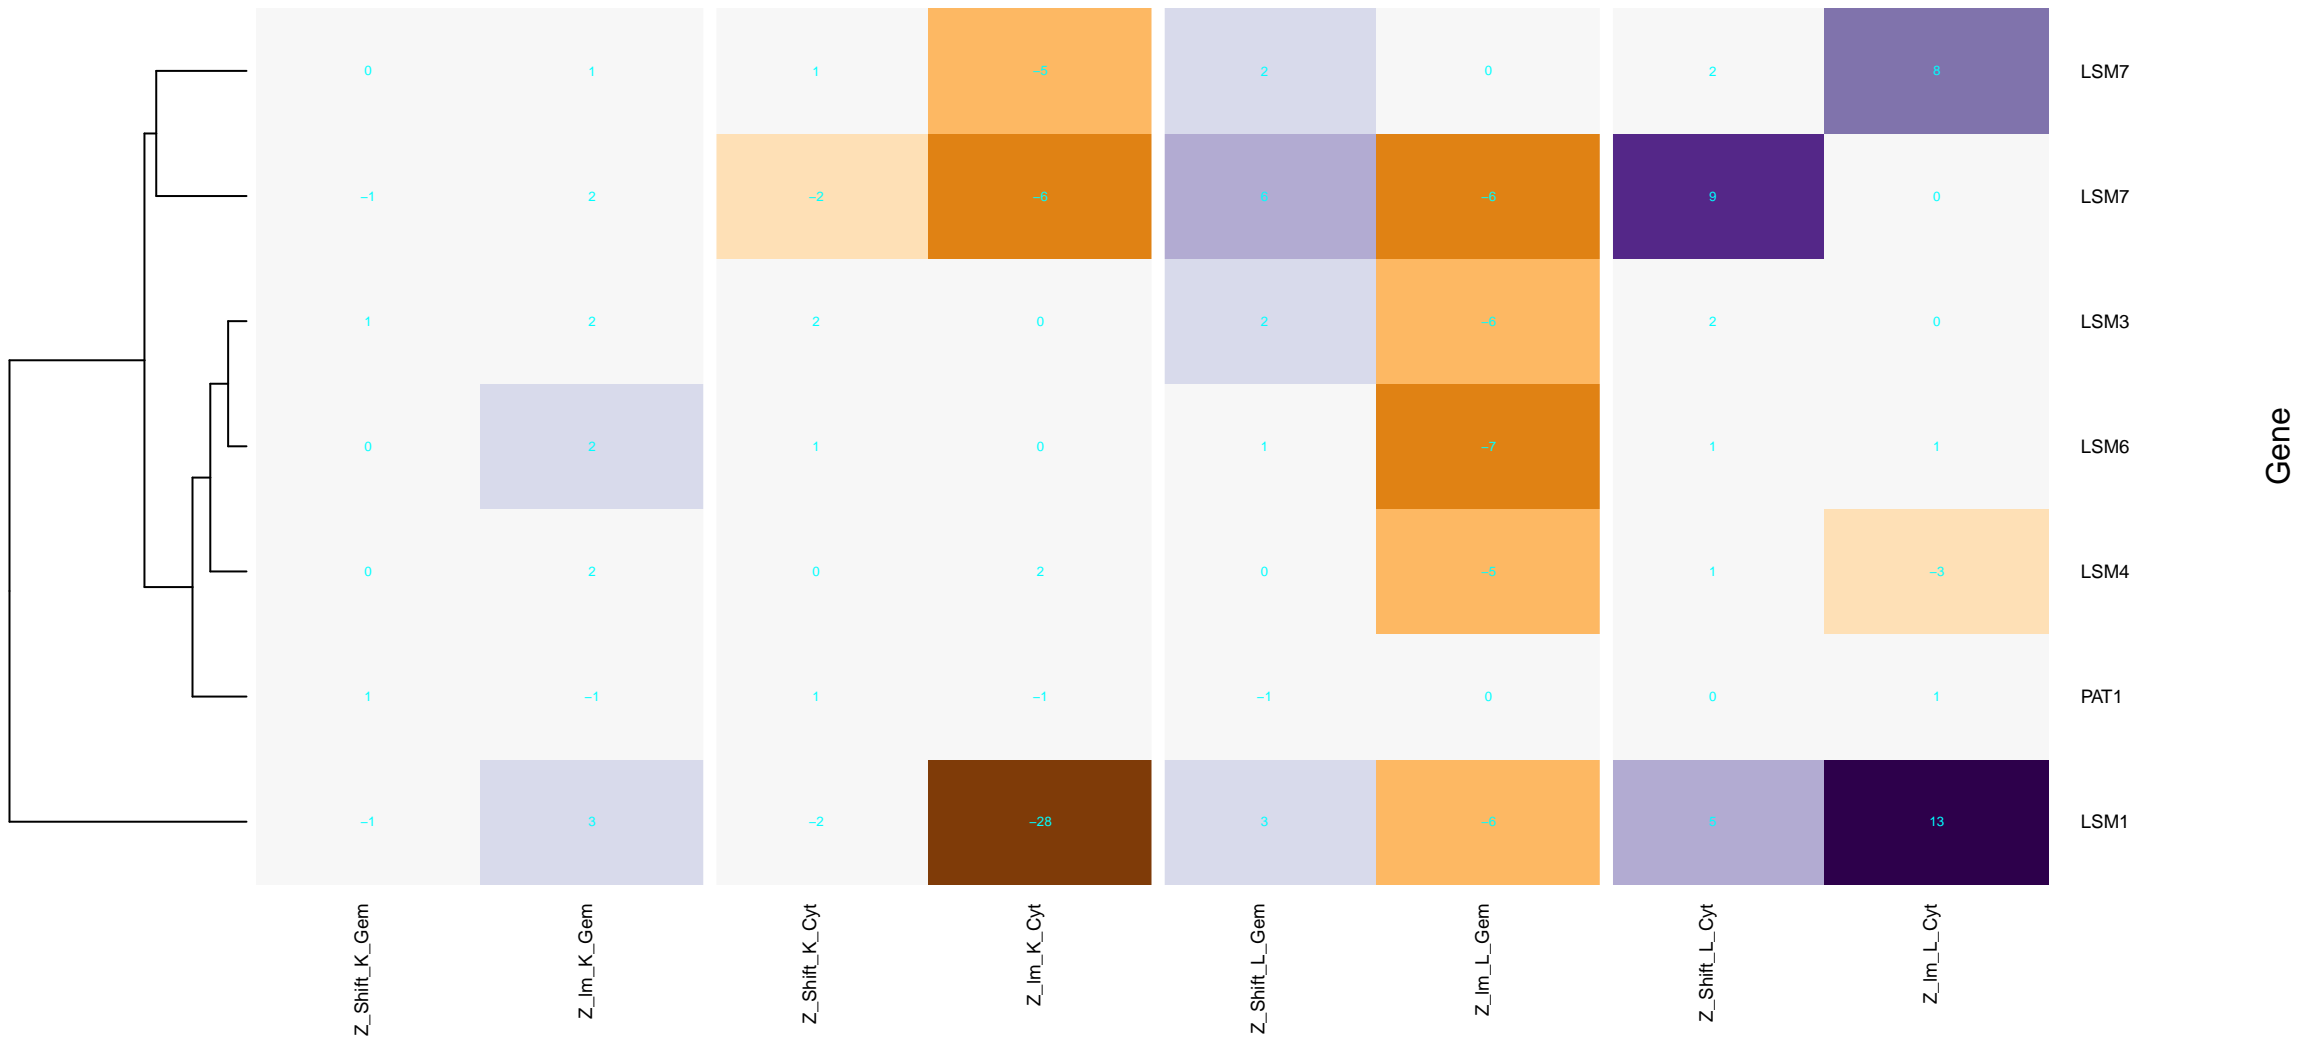

Supplement: s1 [file s1]

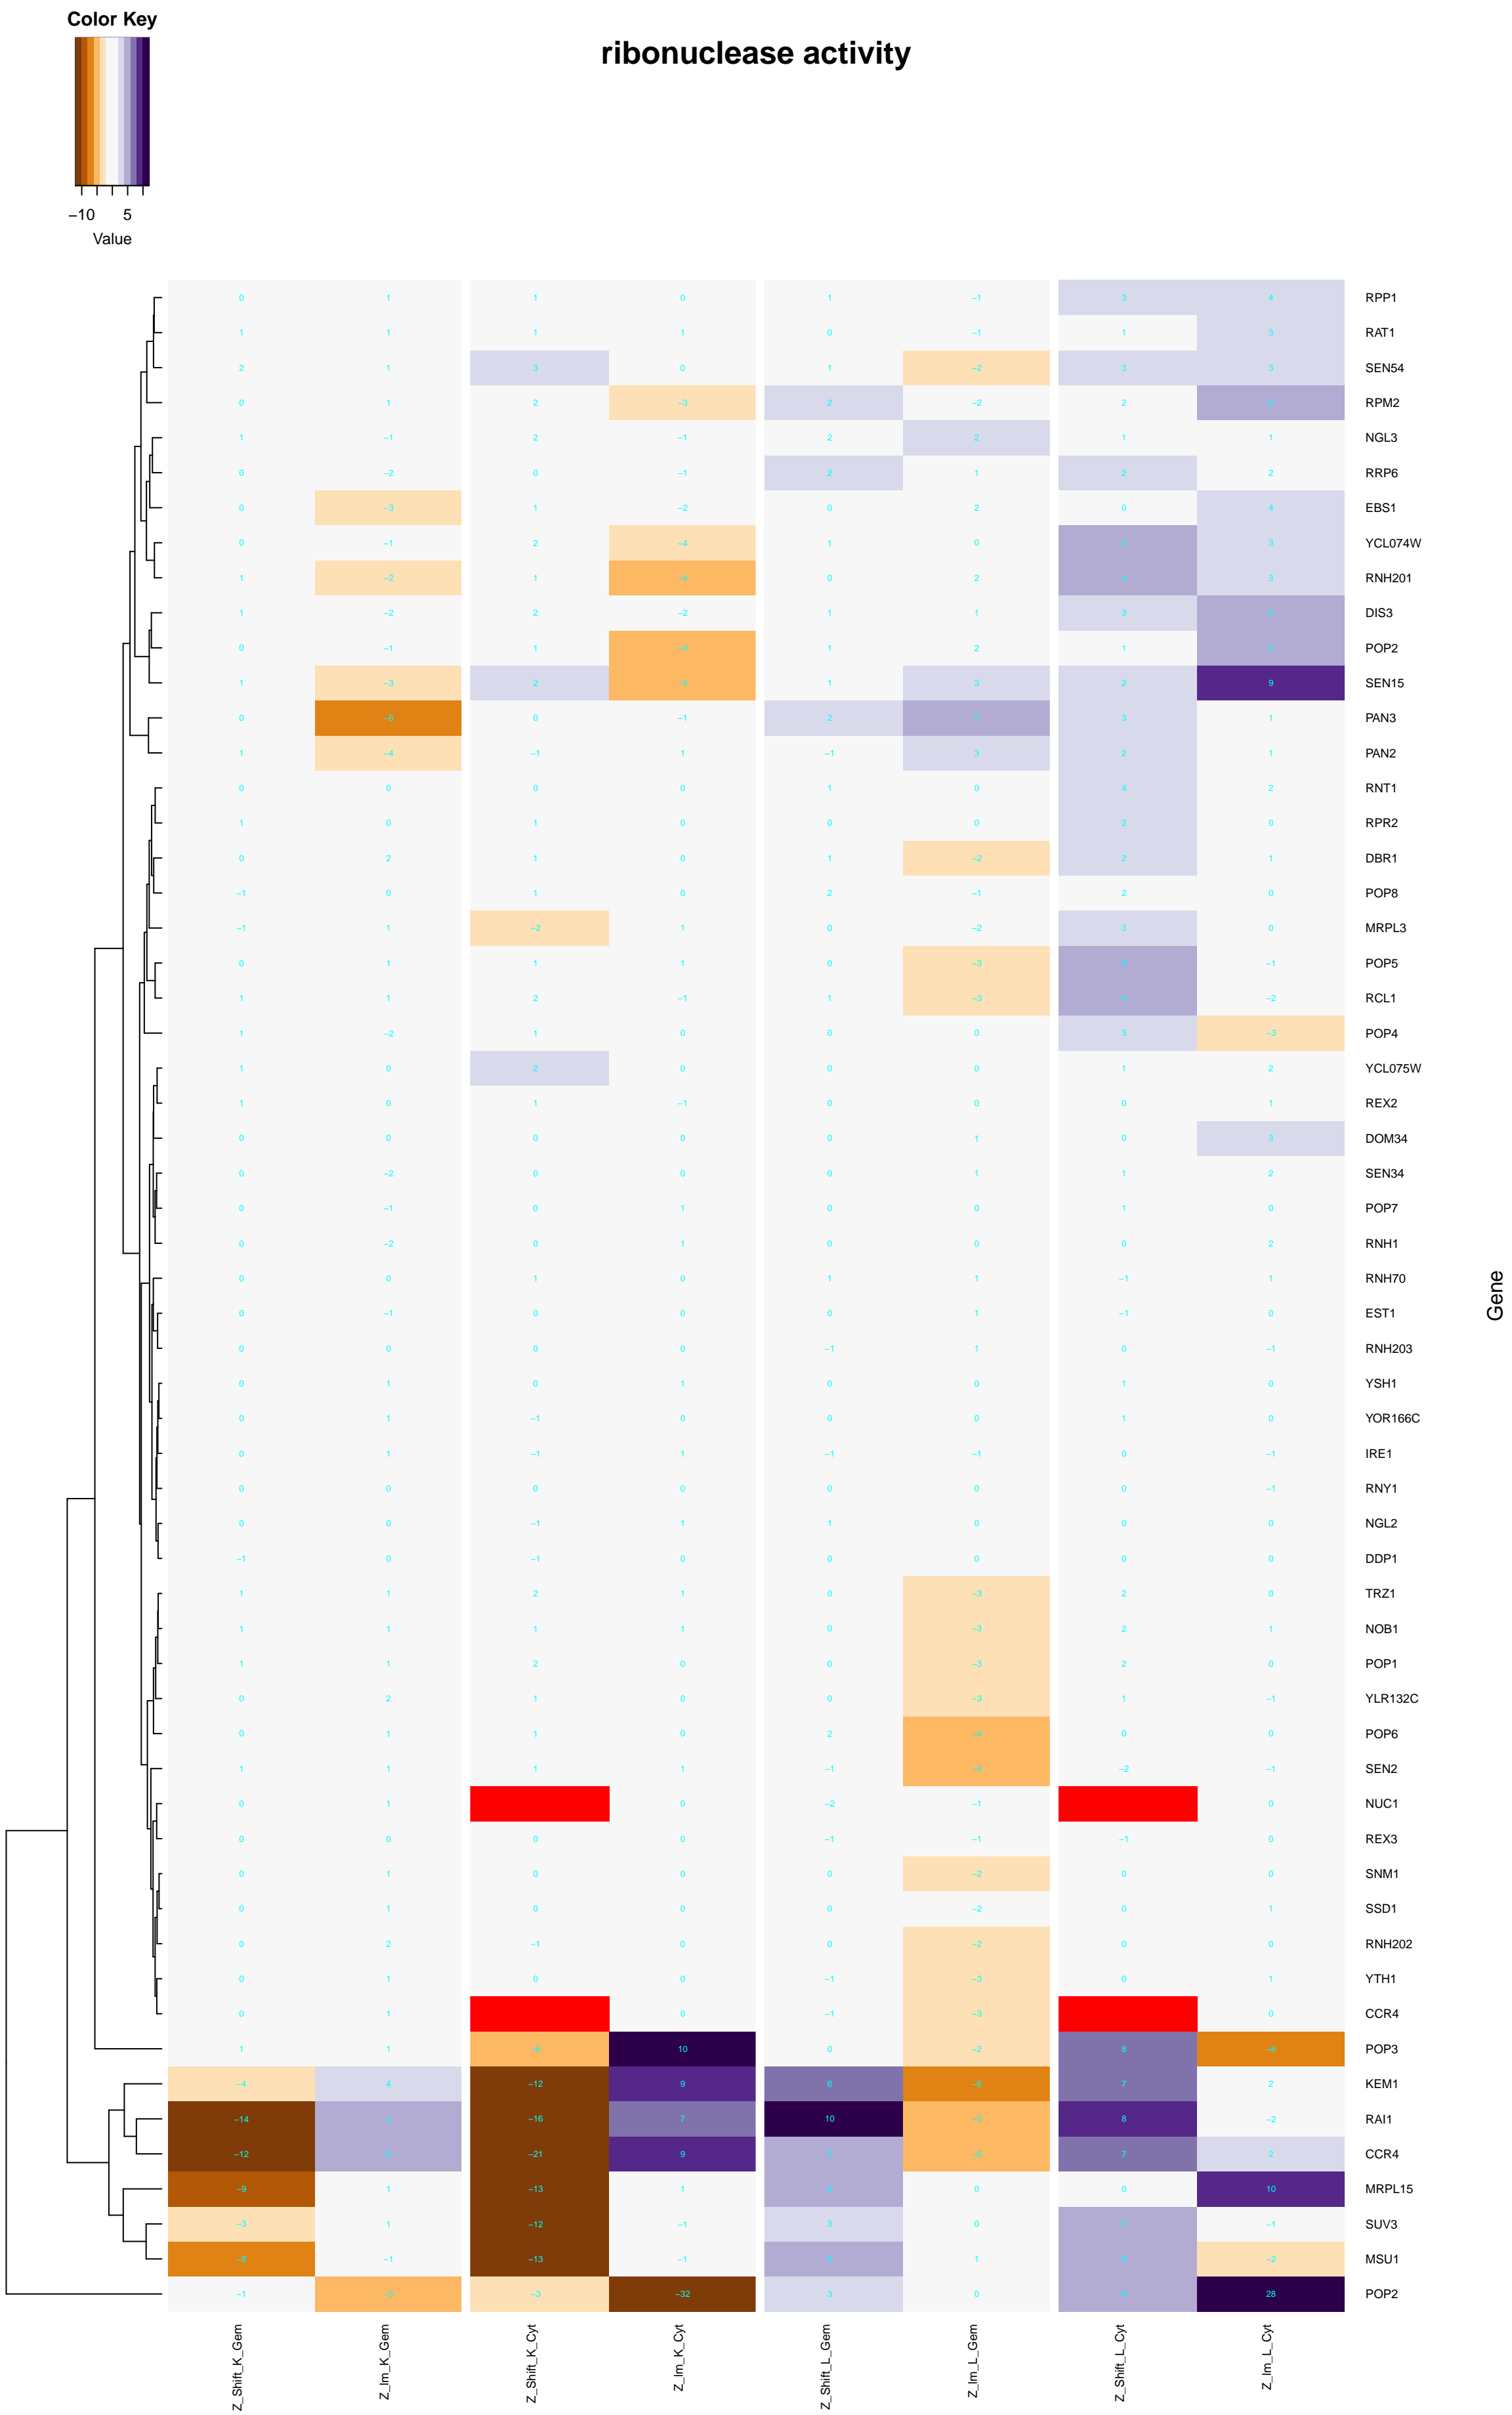

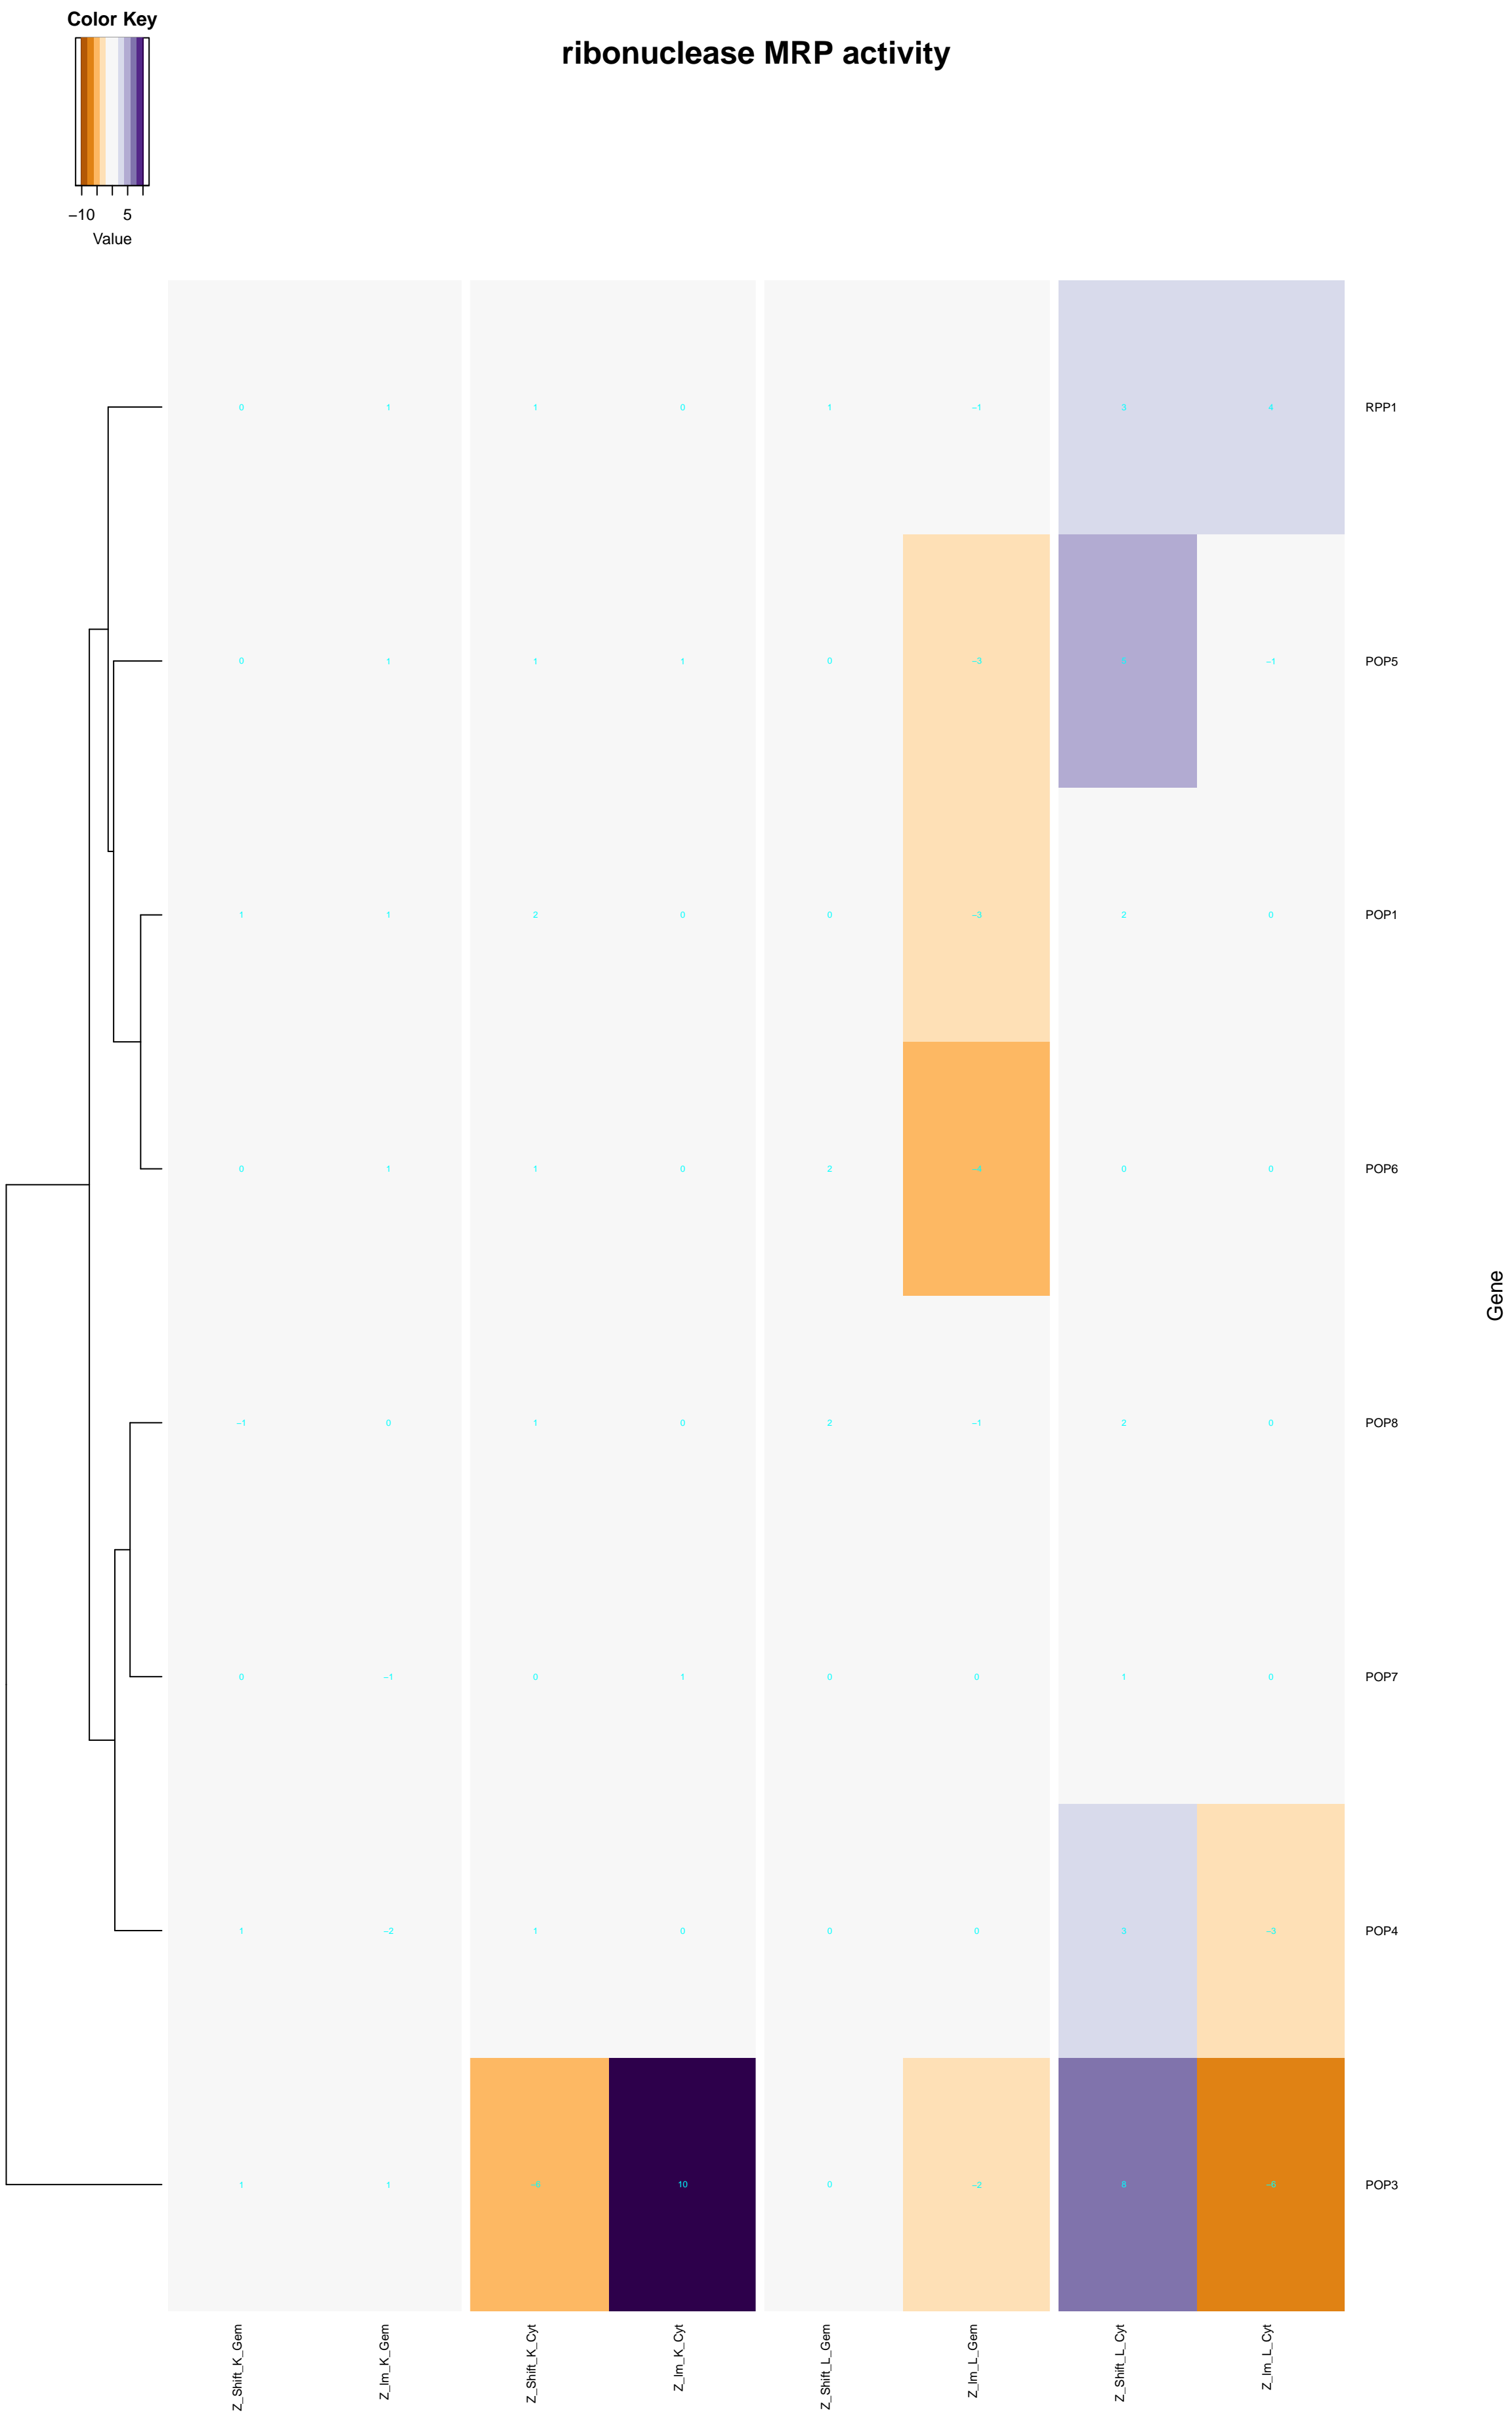

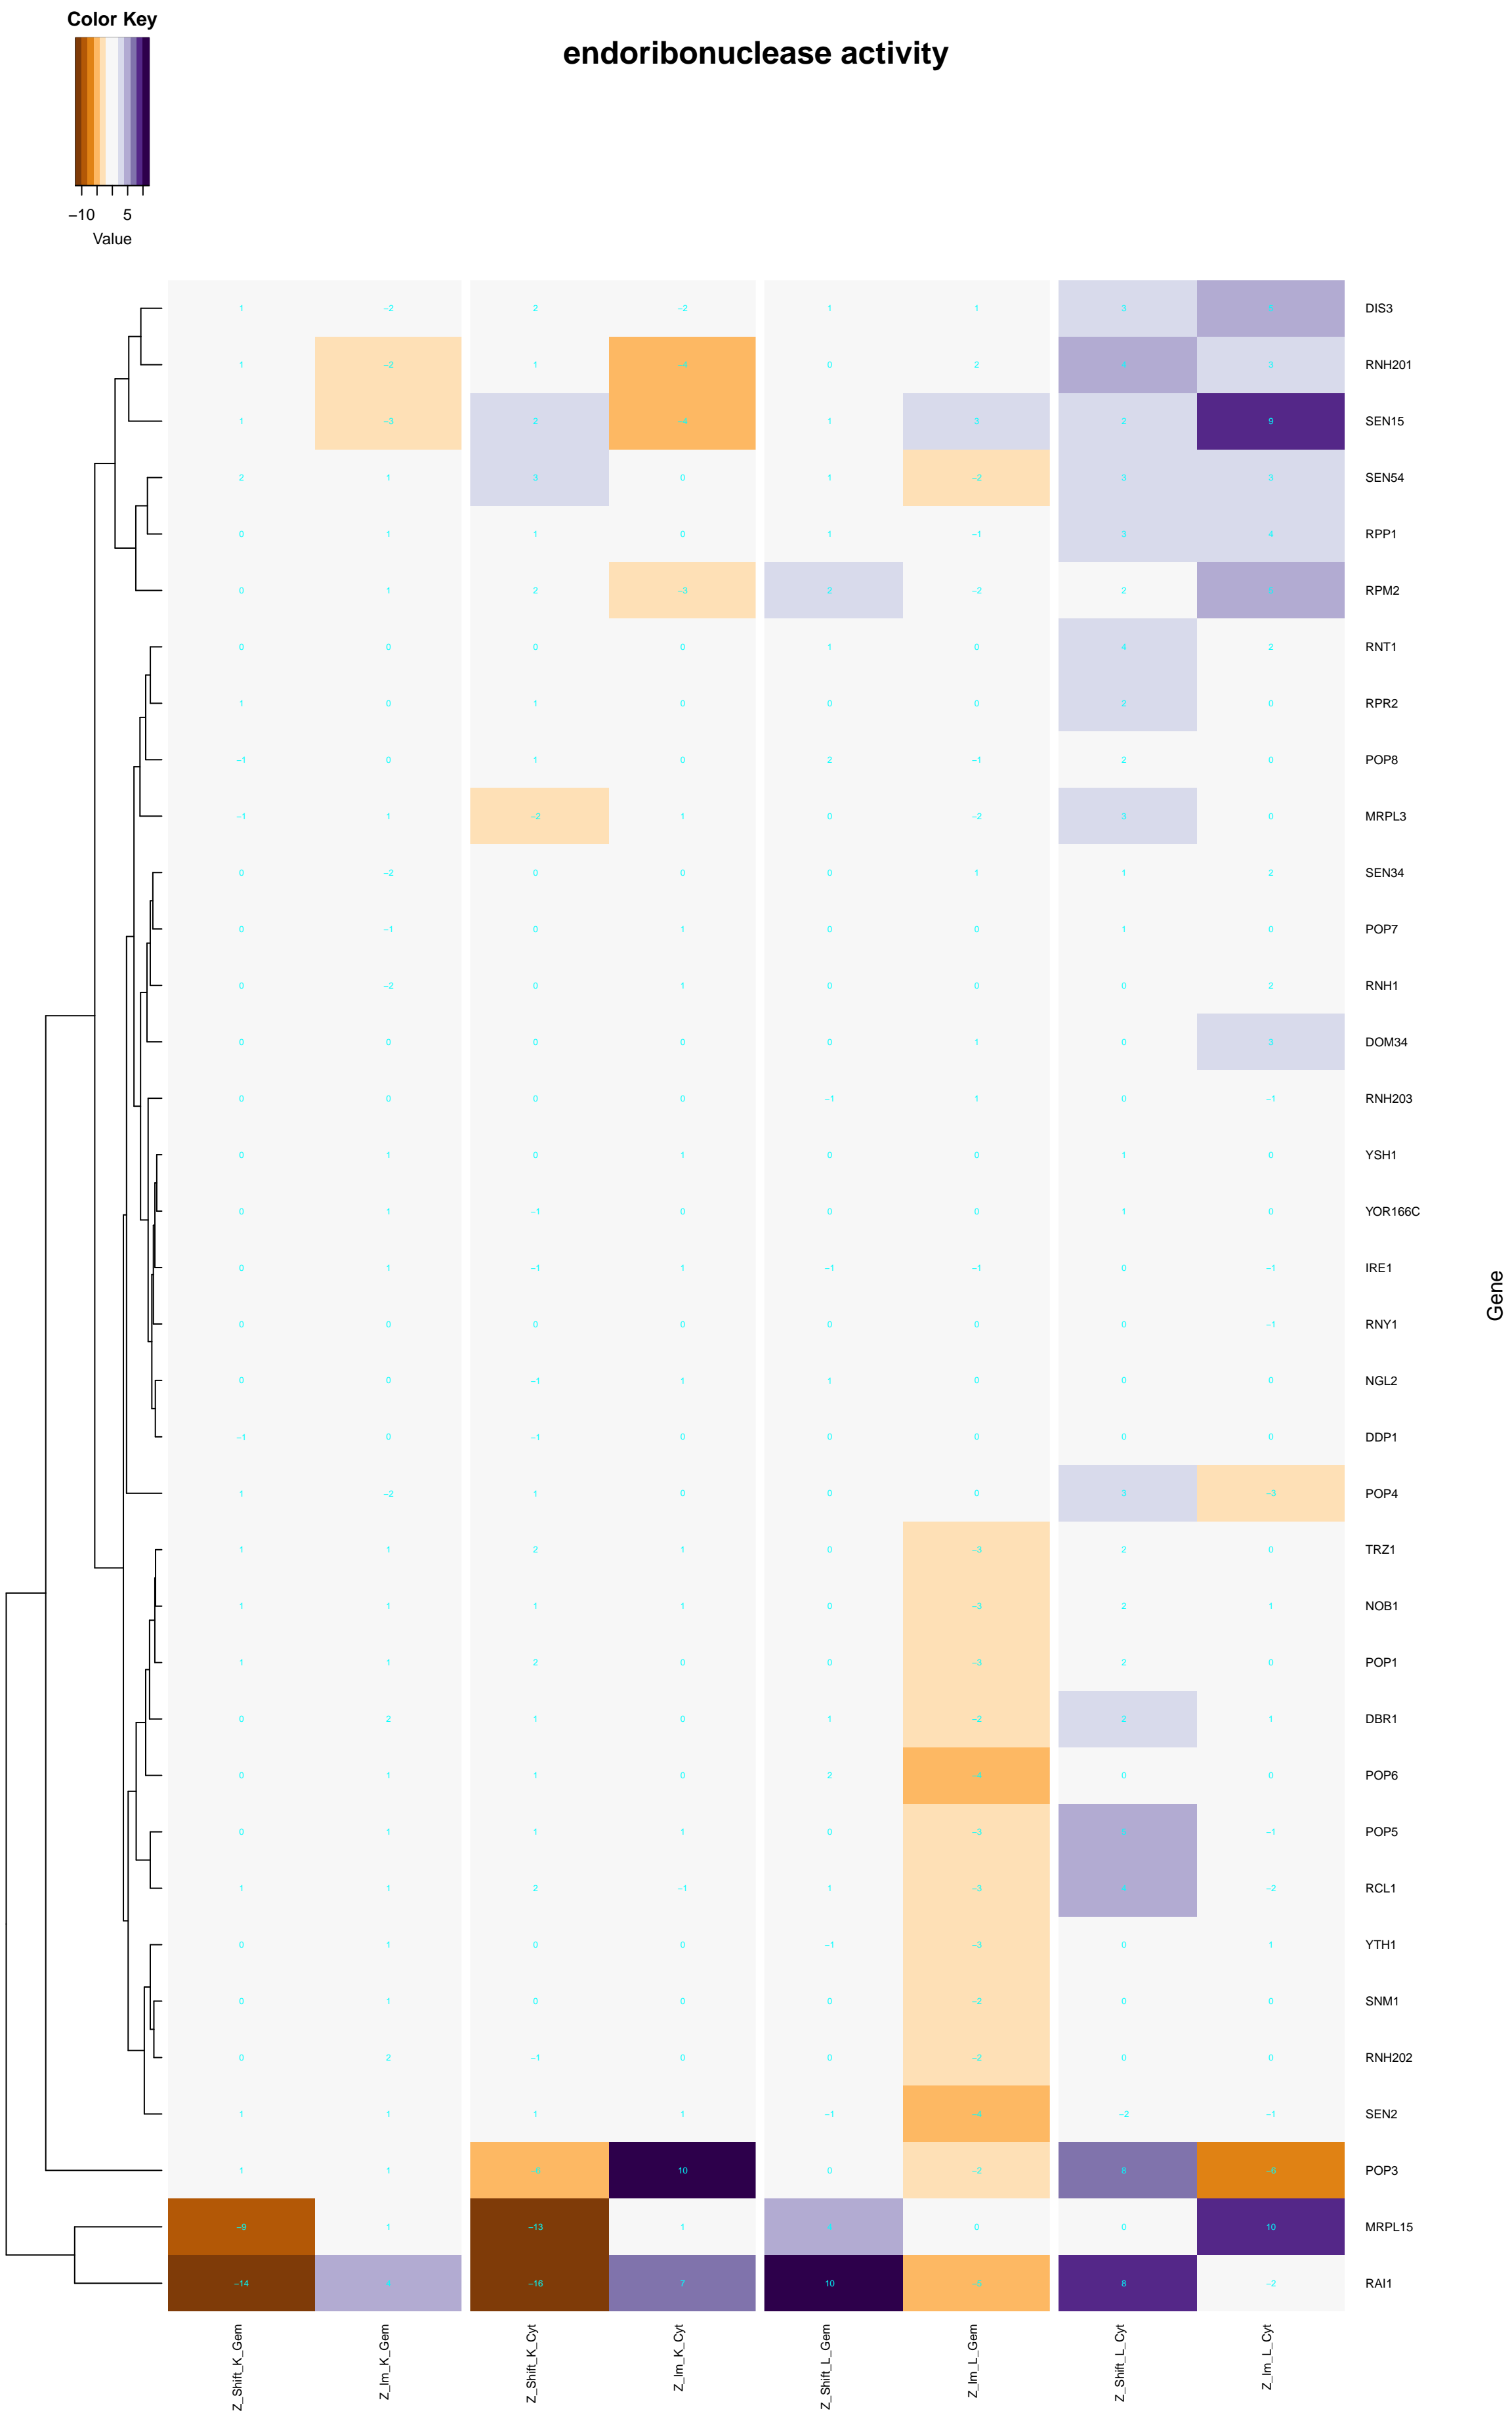

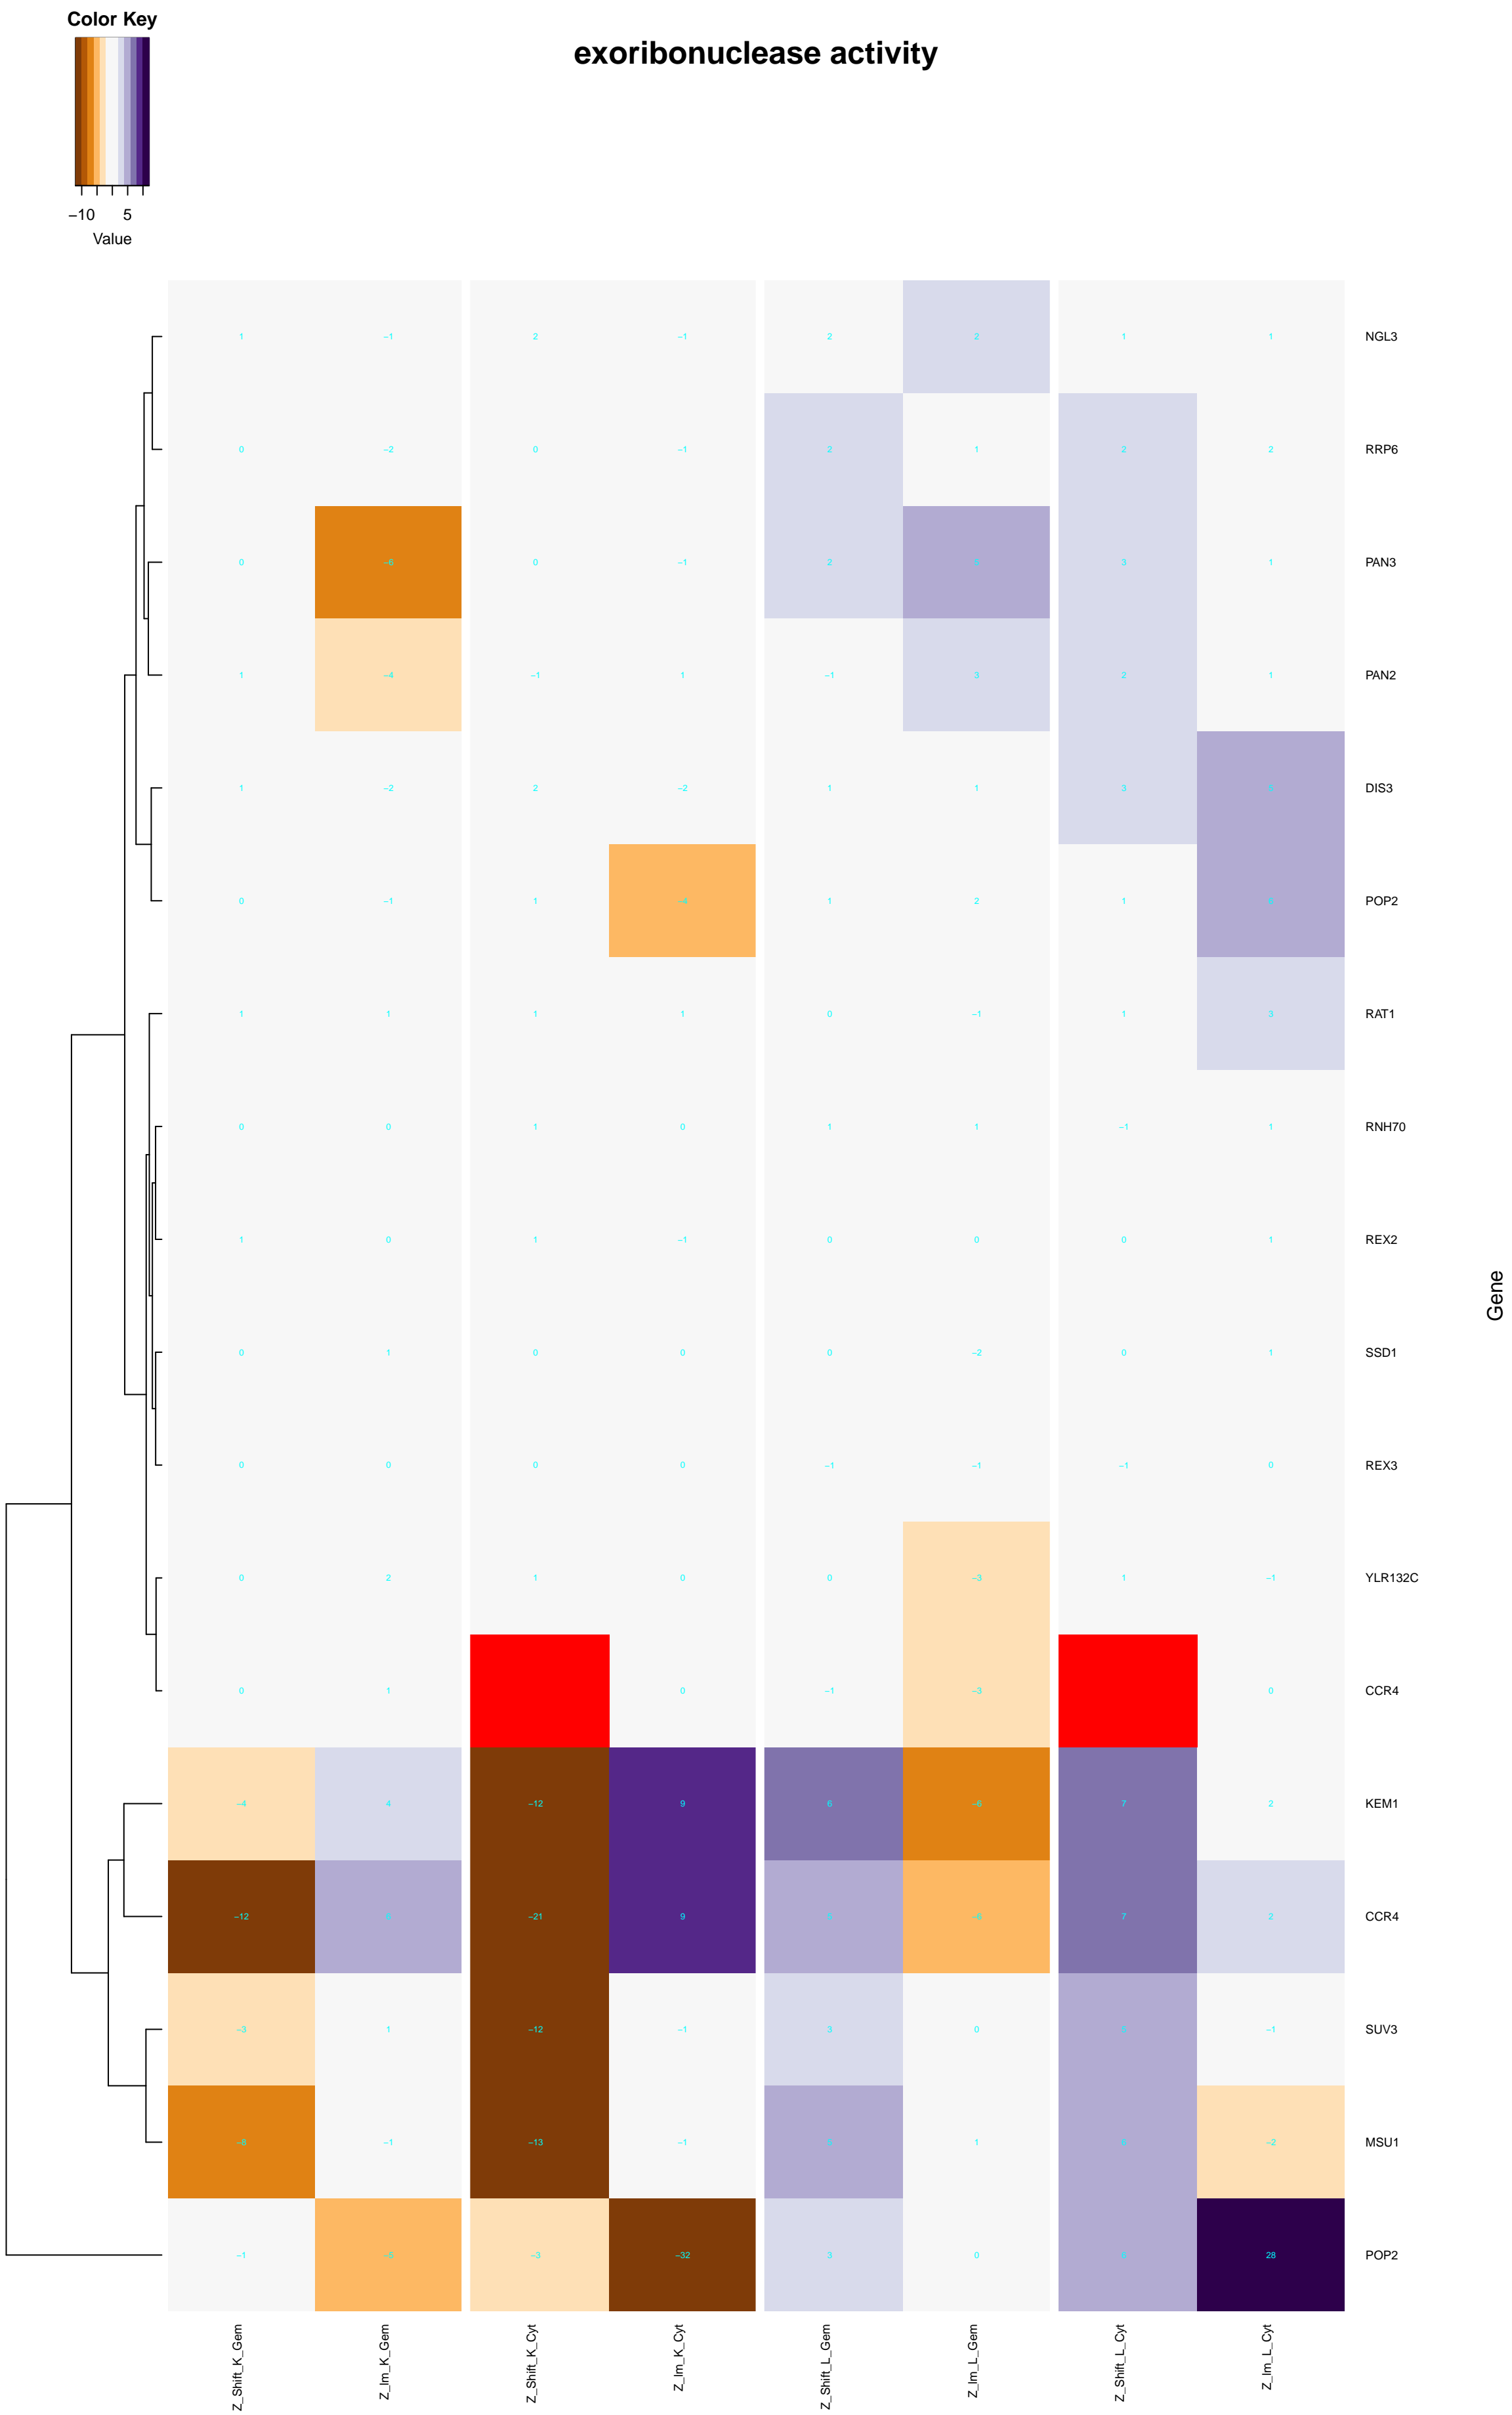

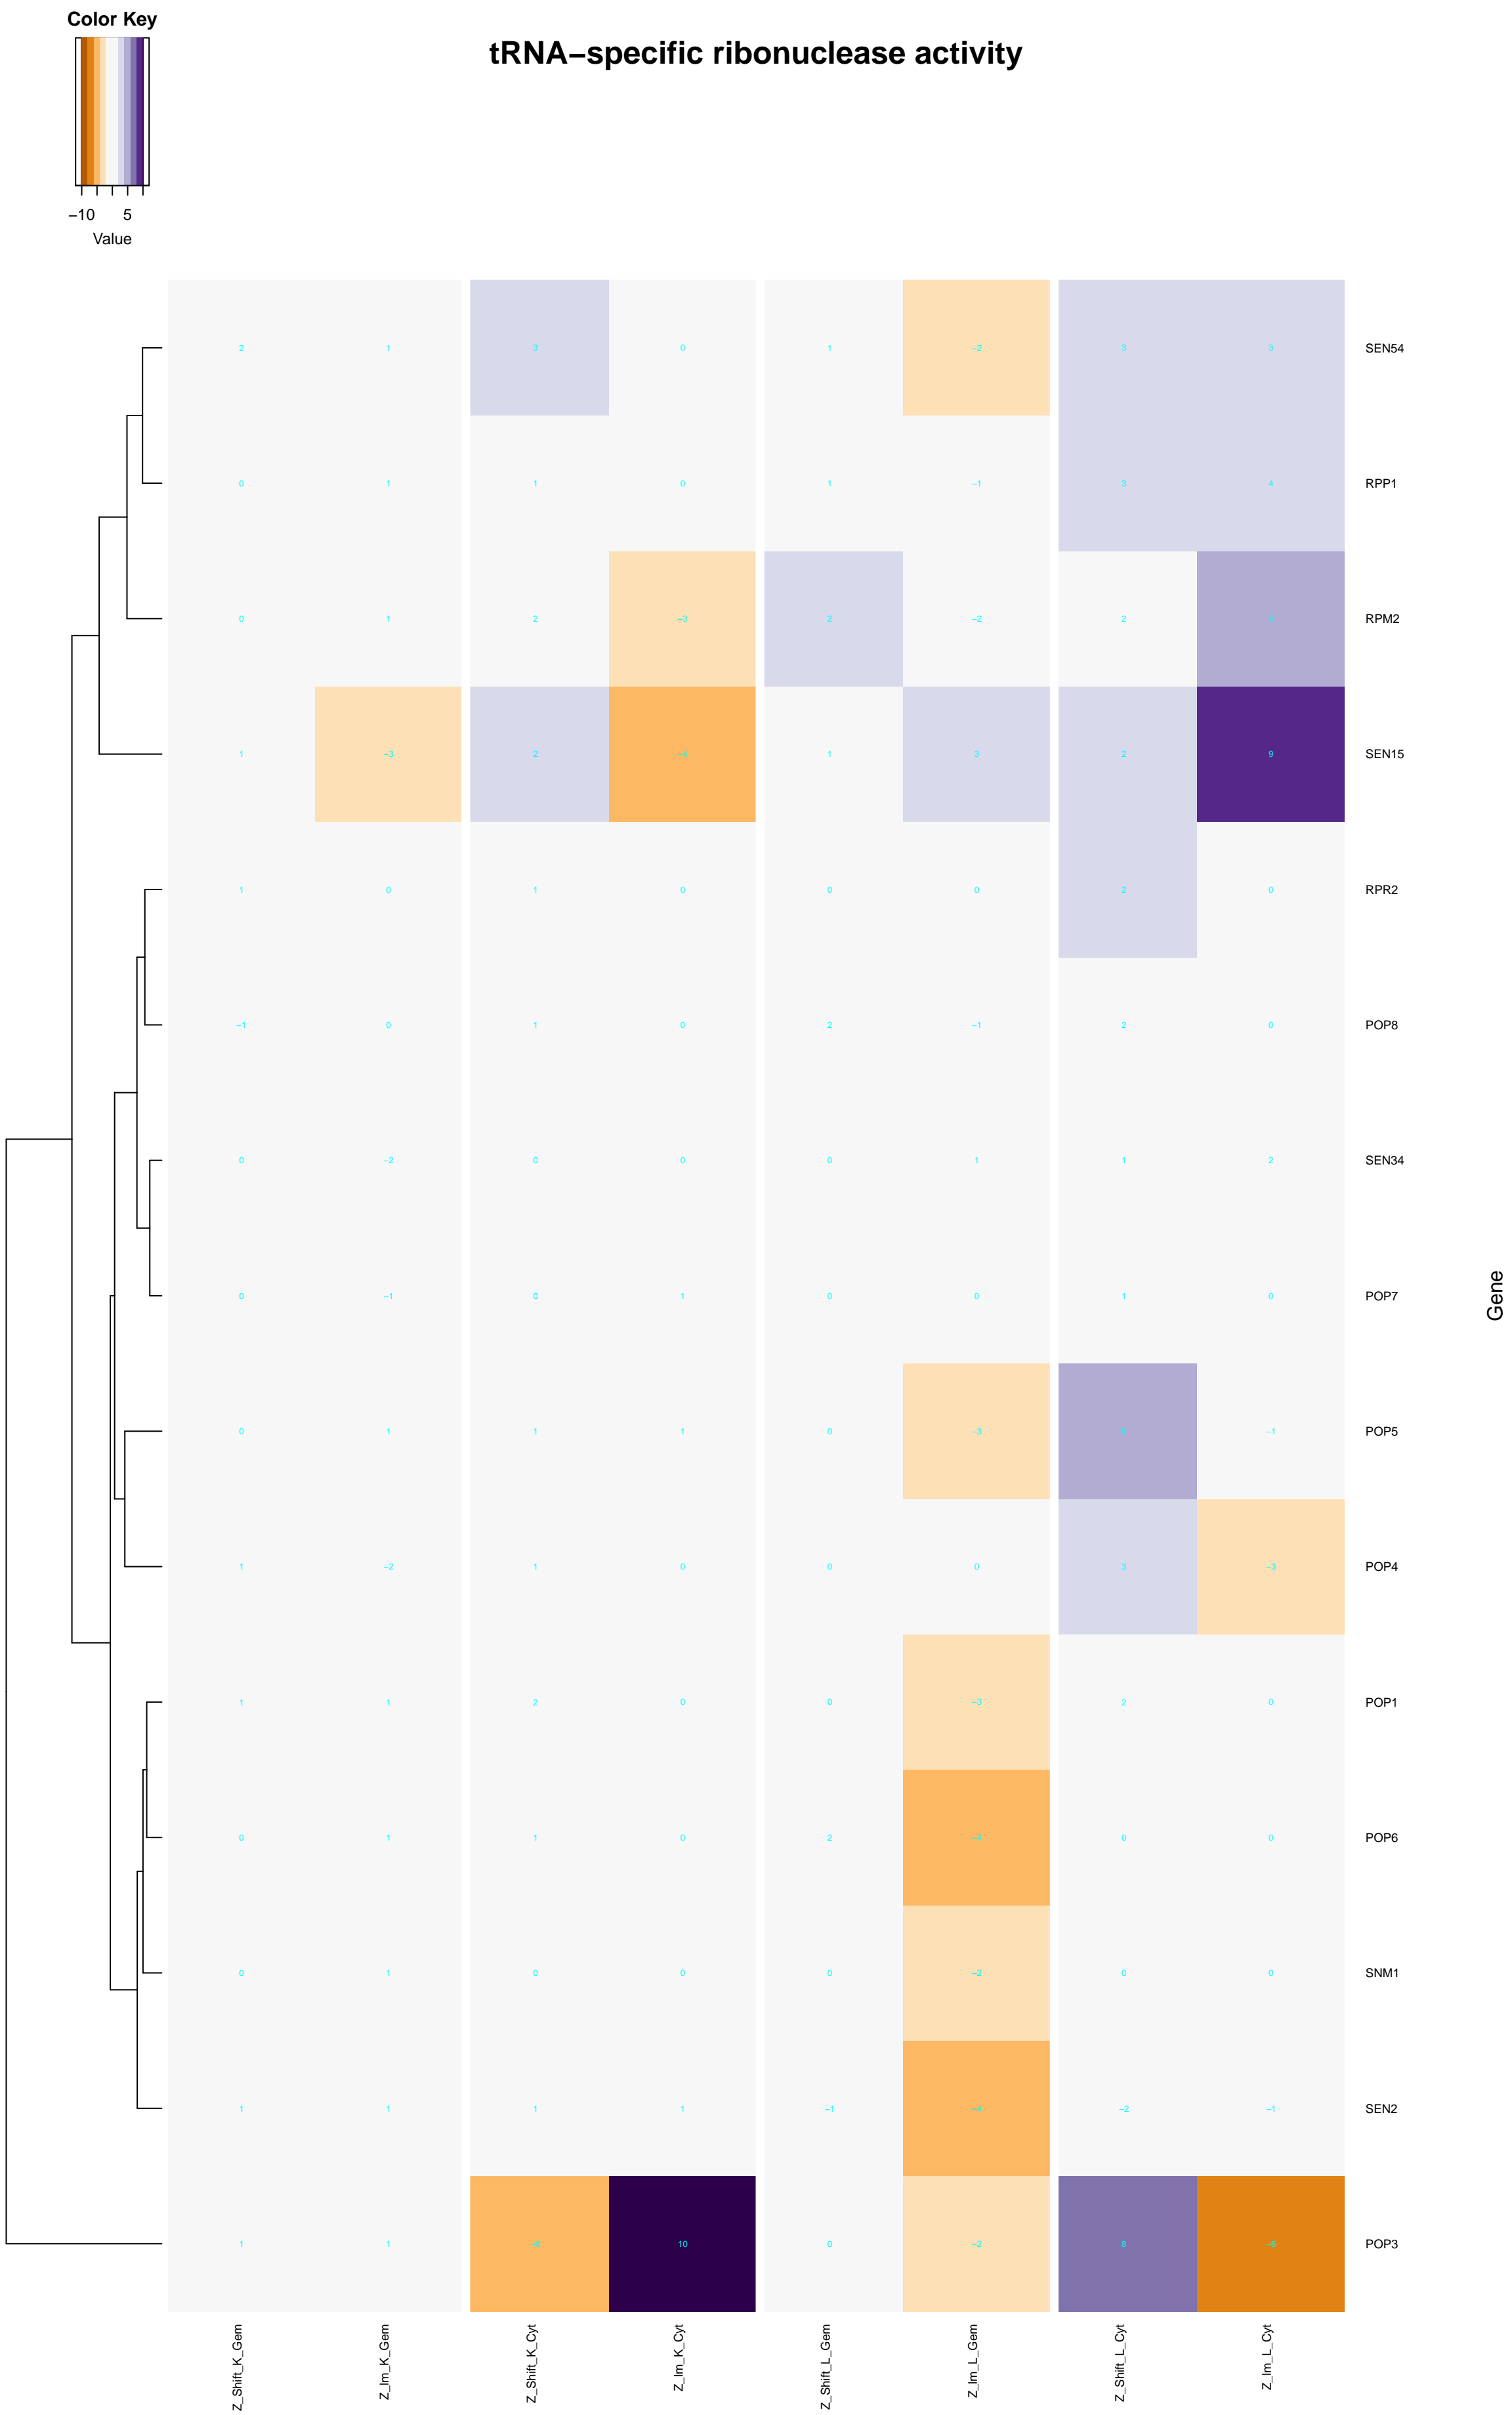

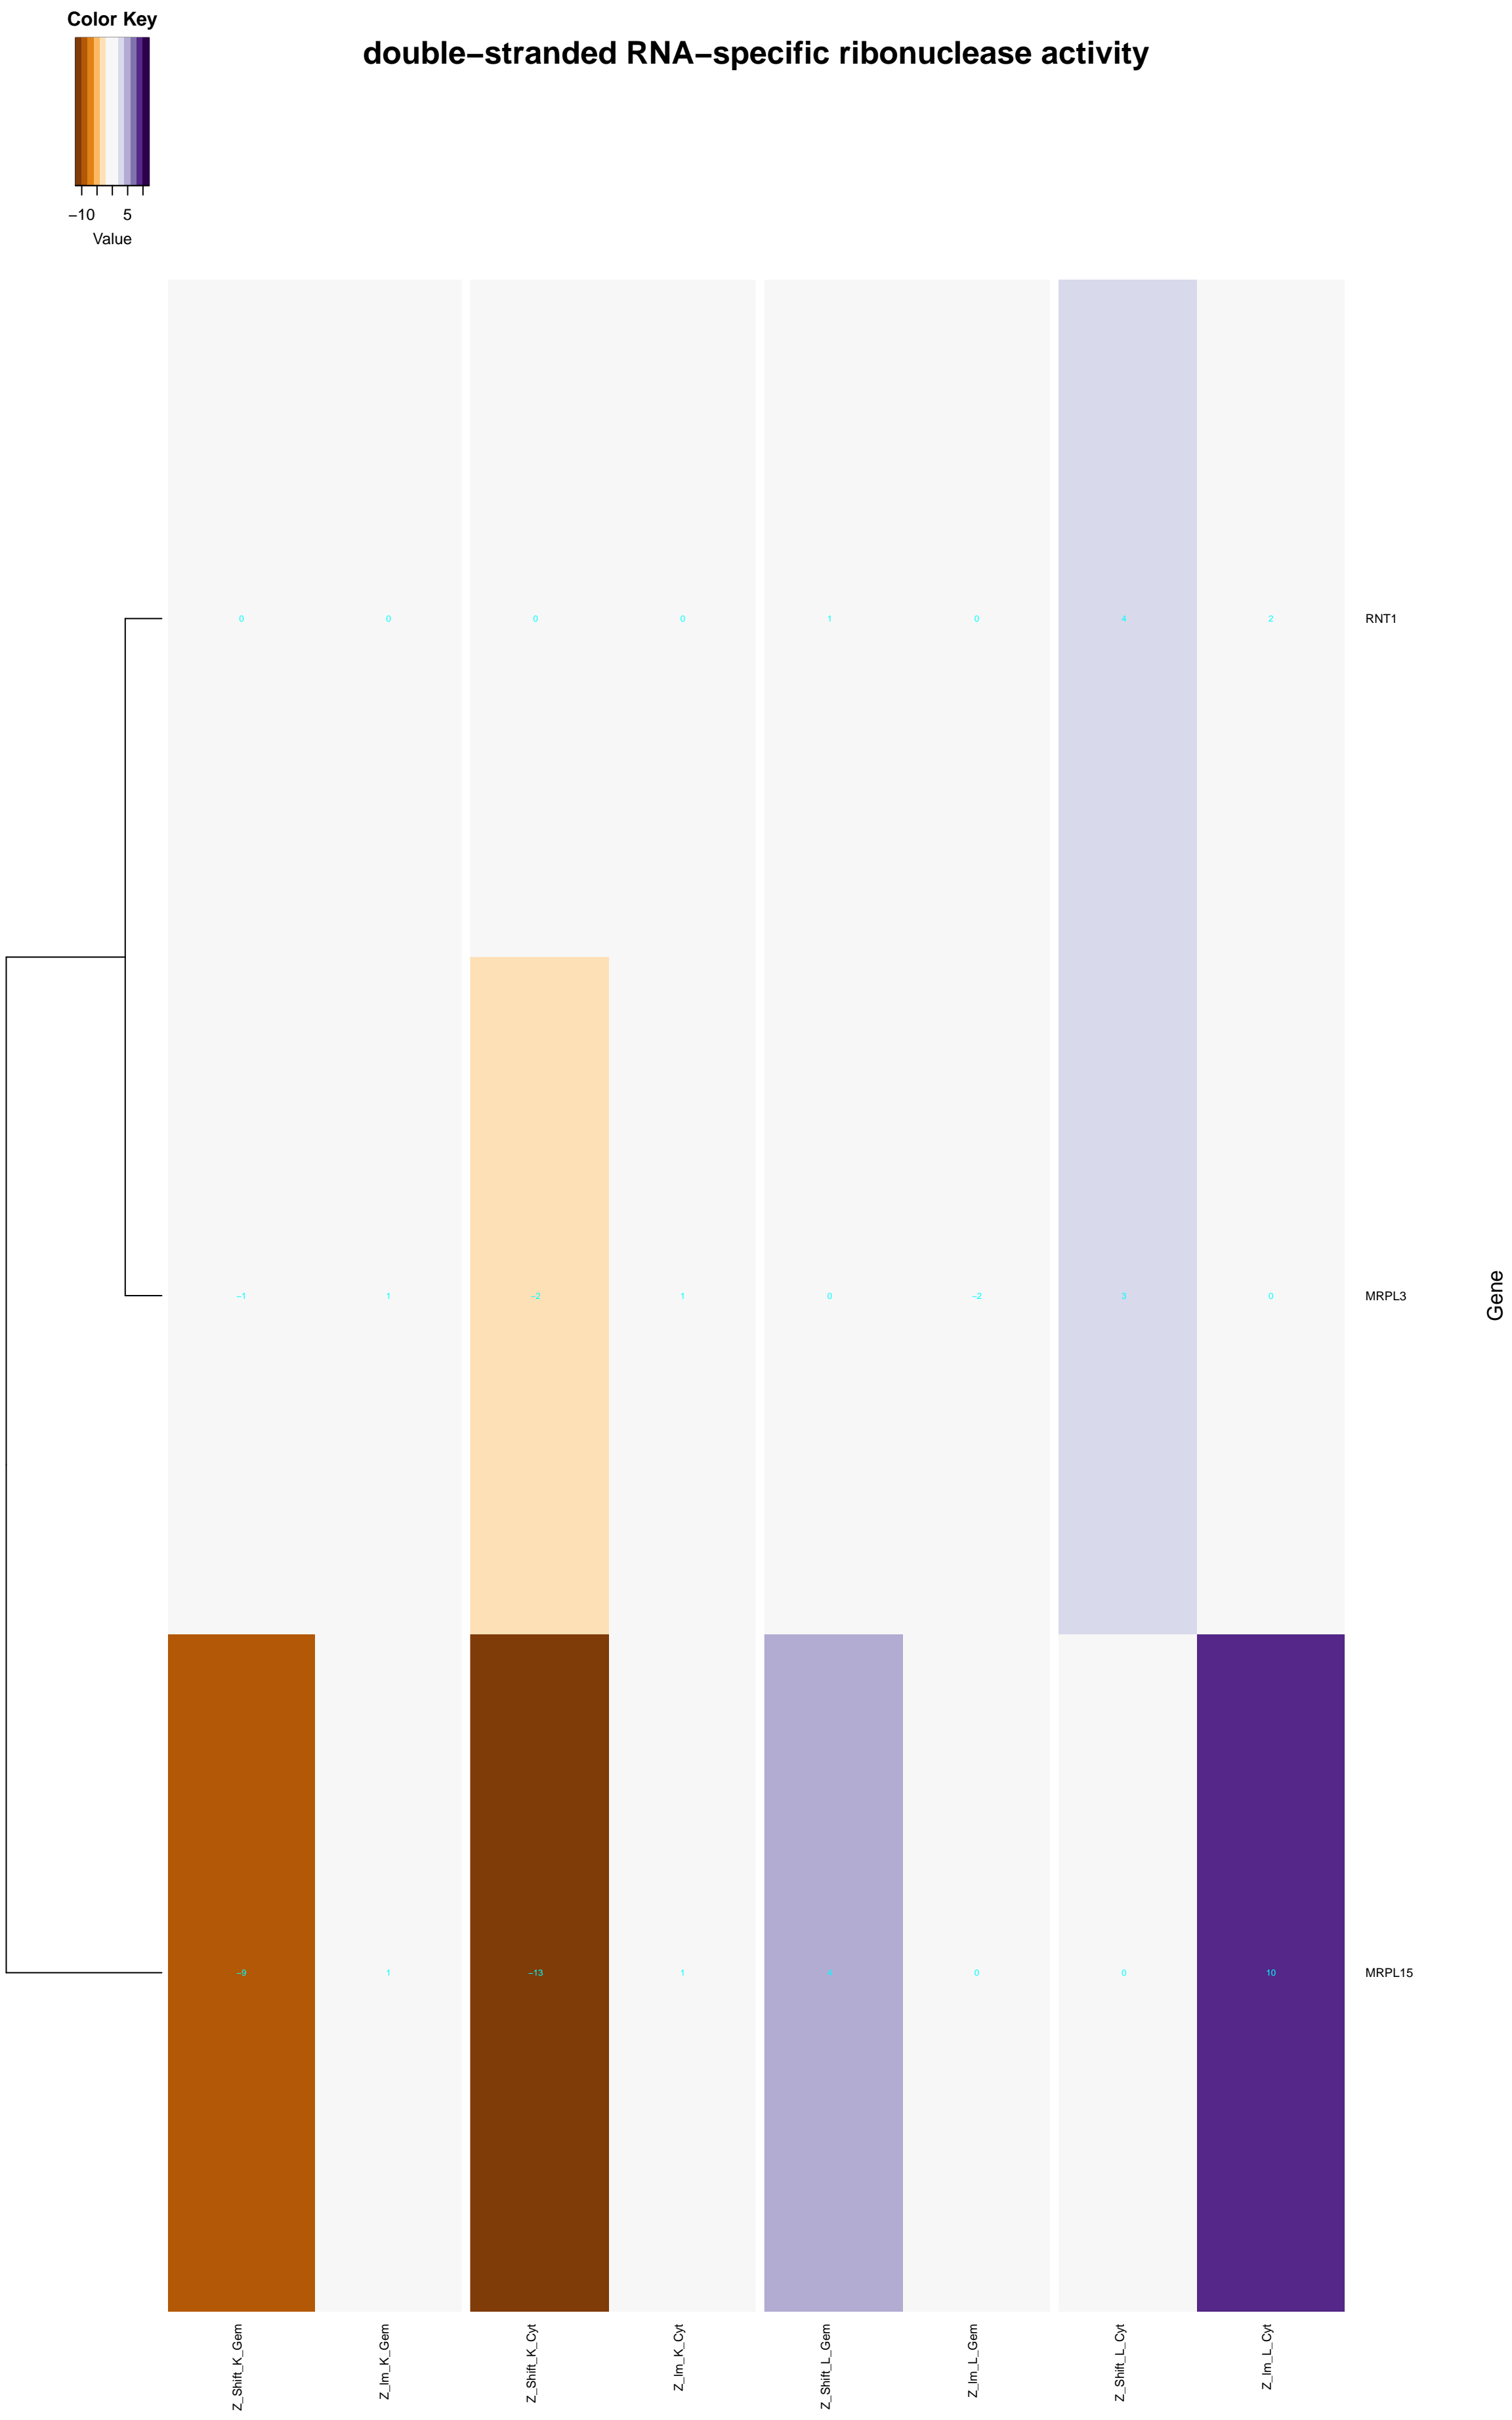

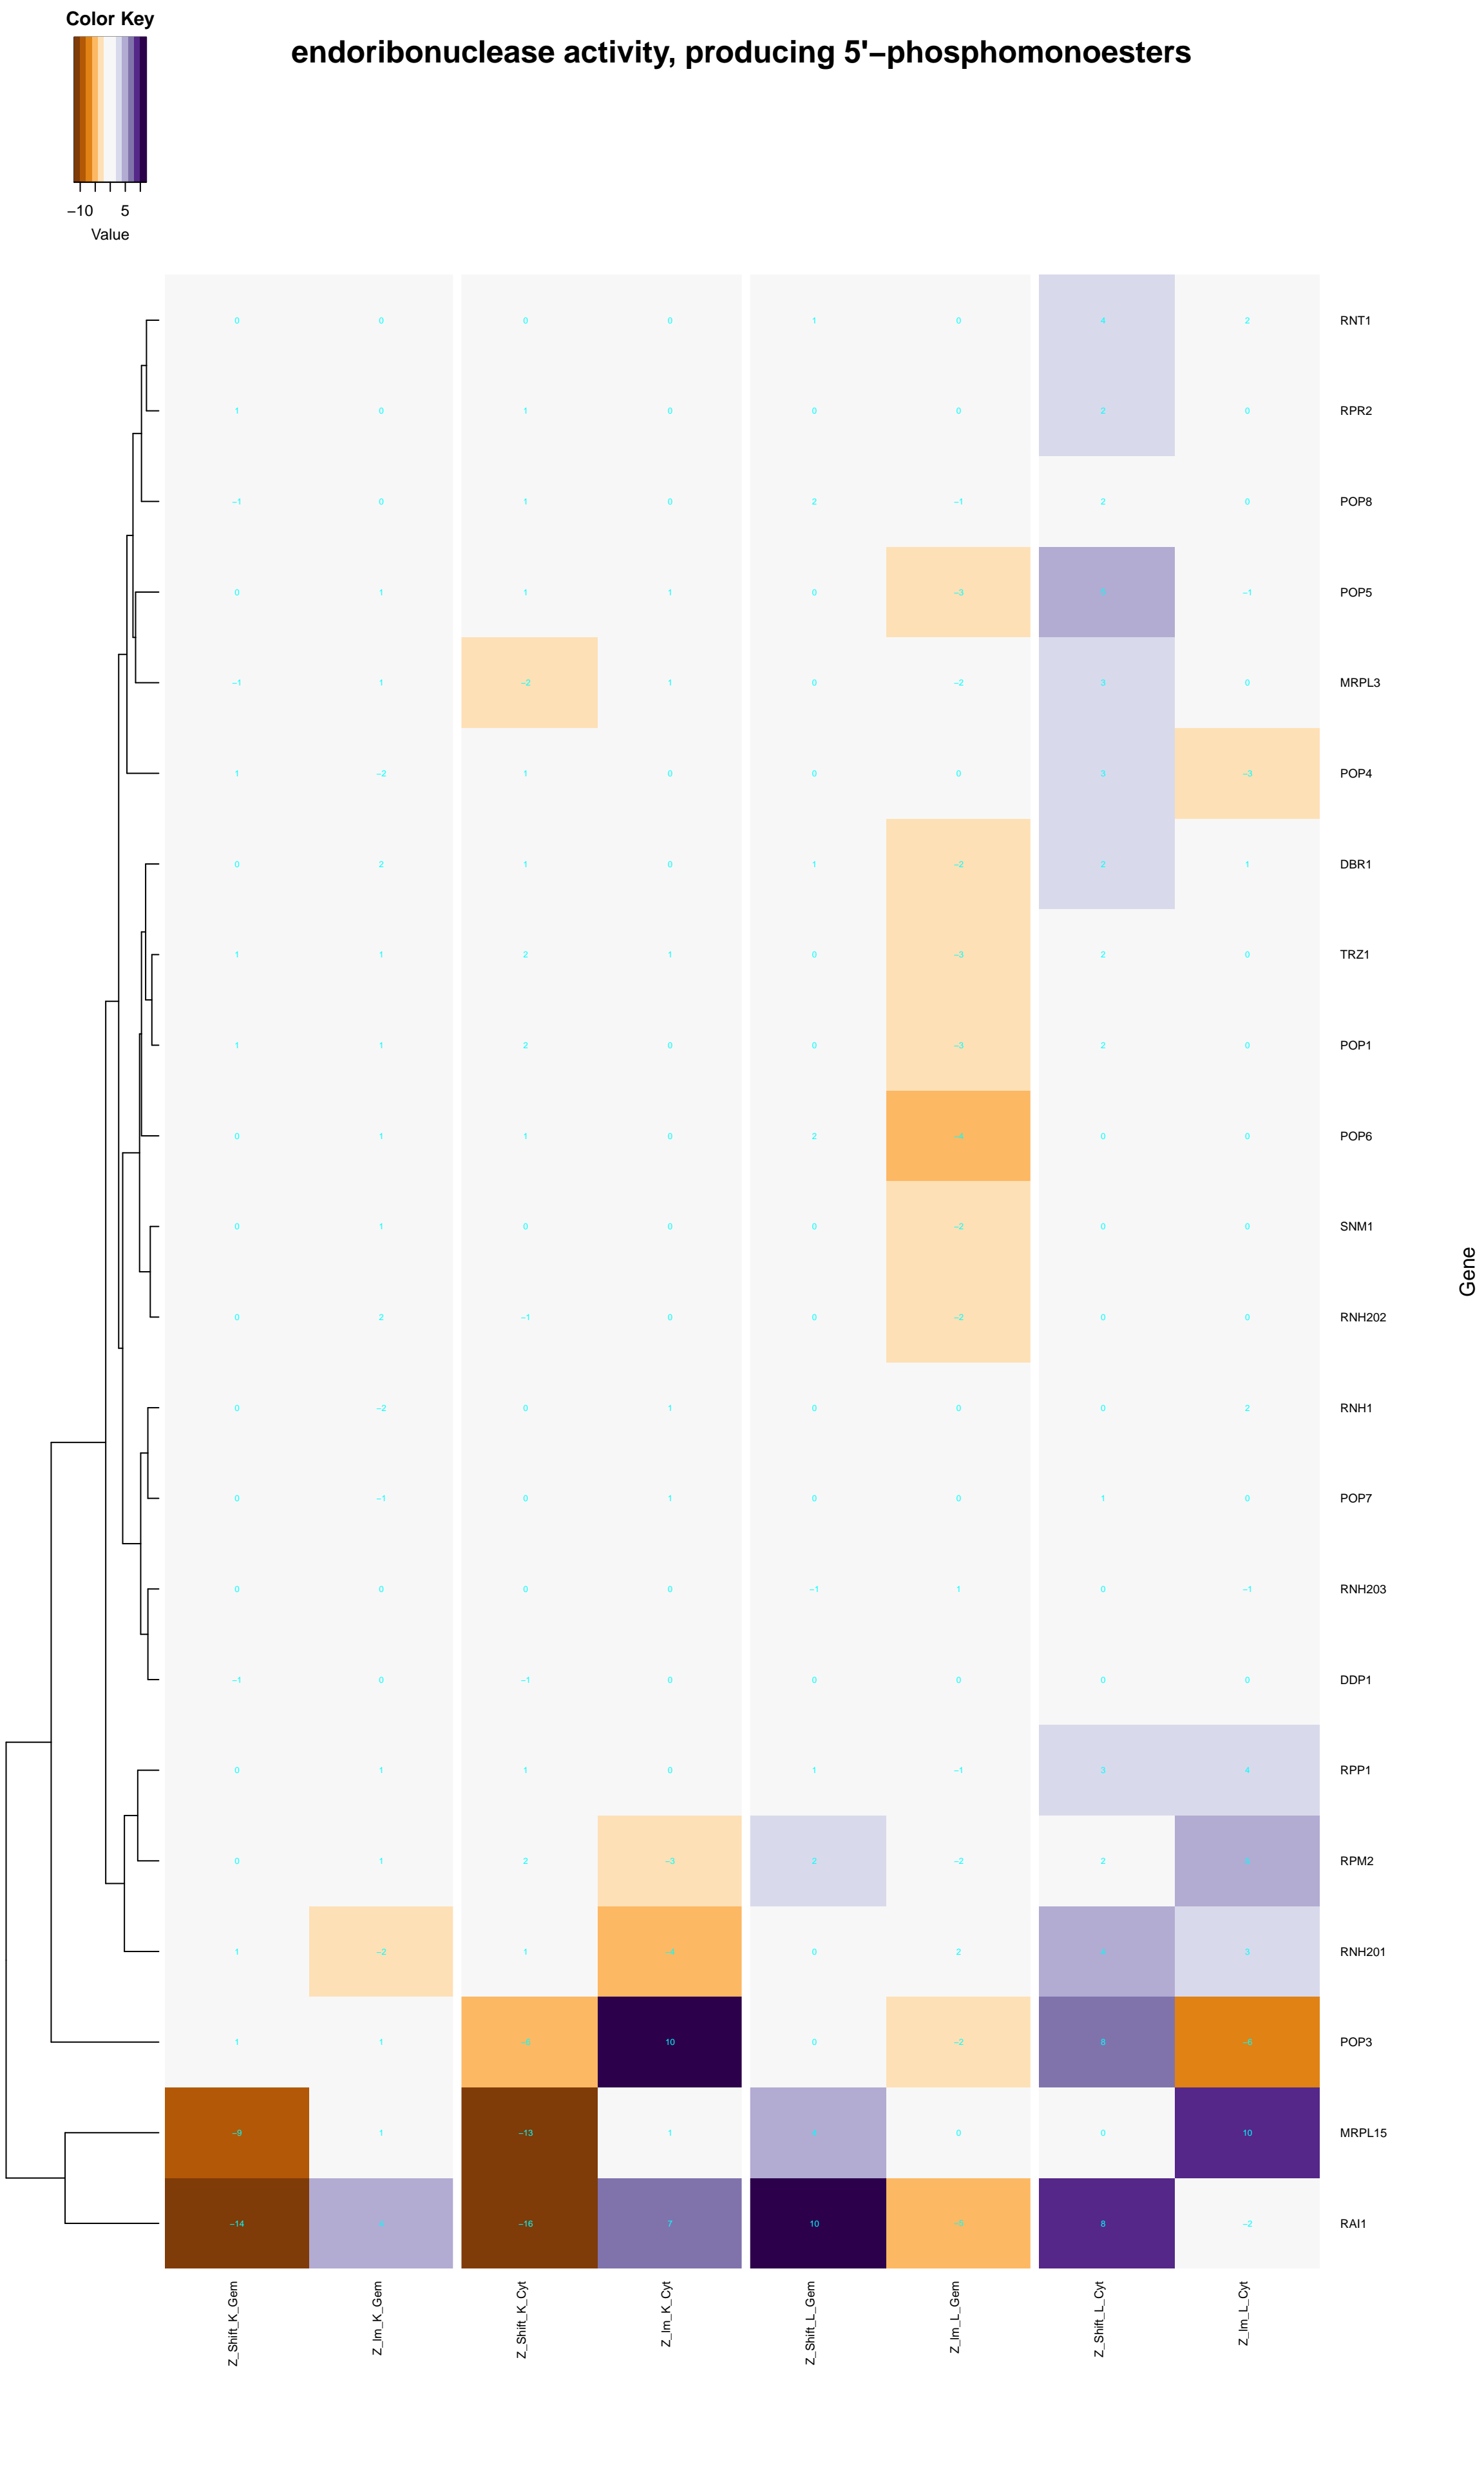

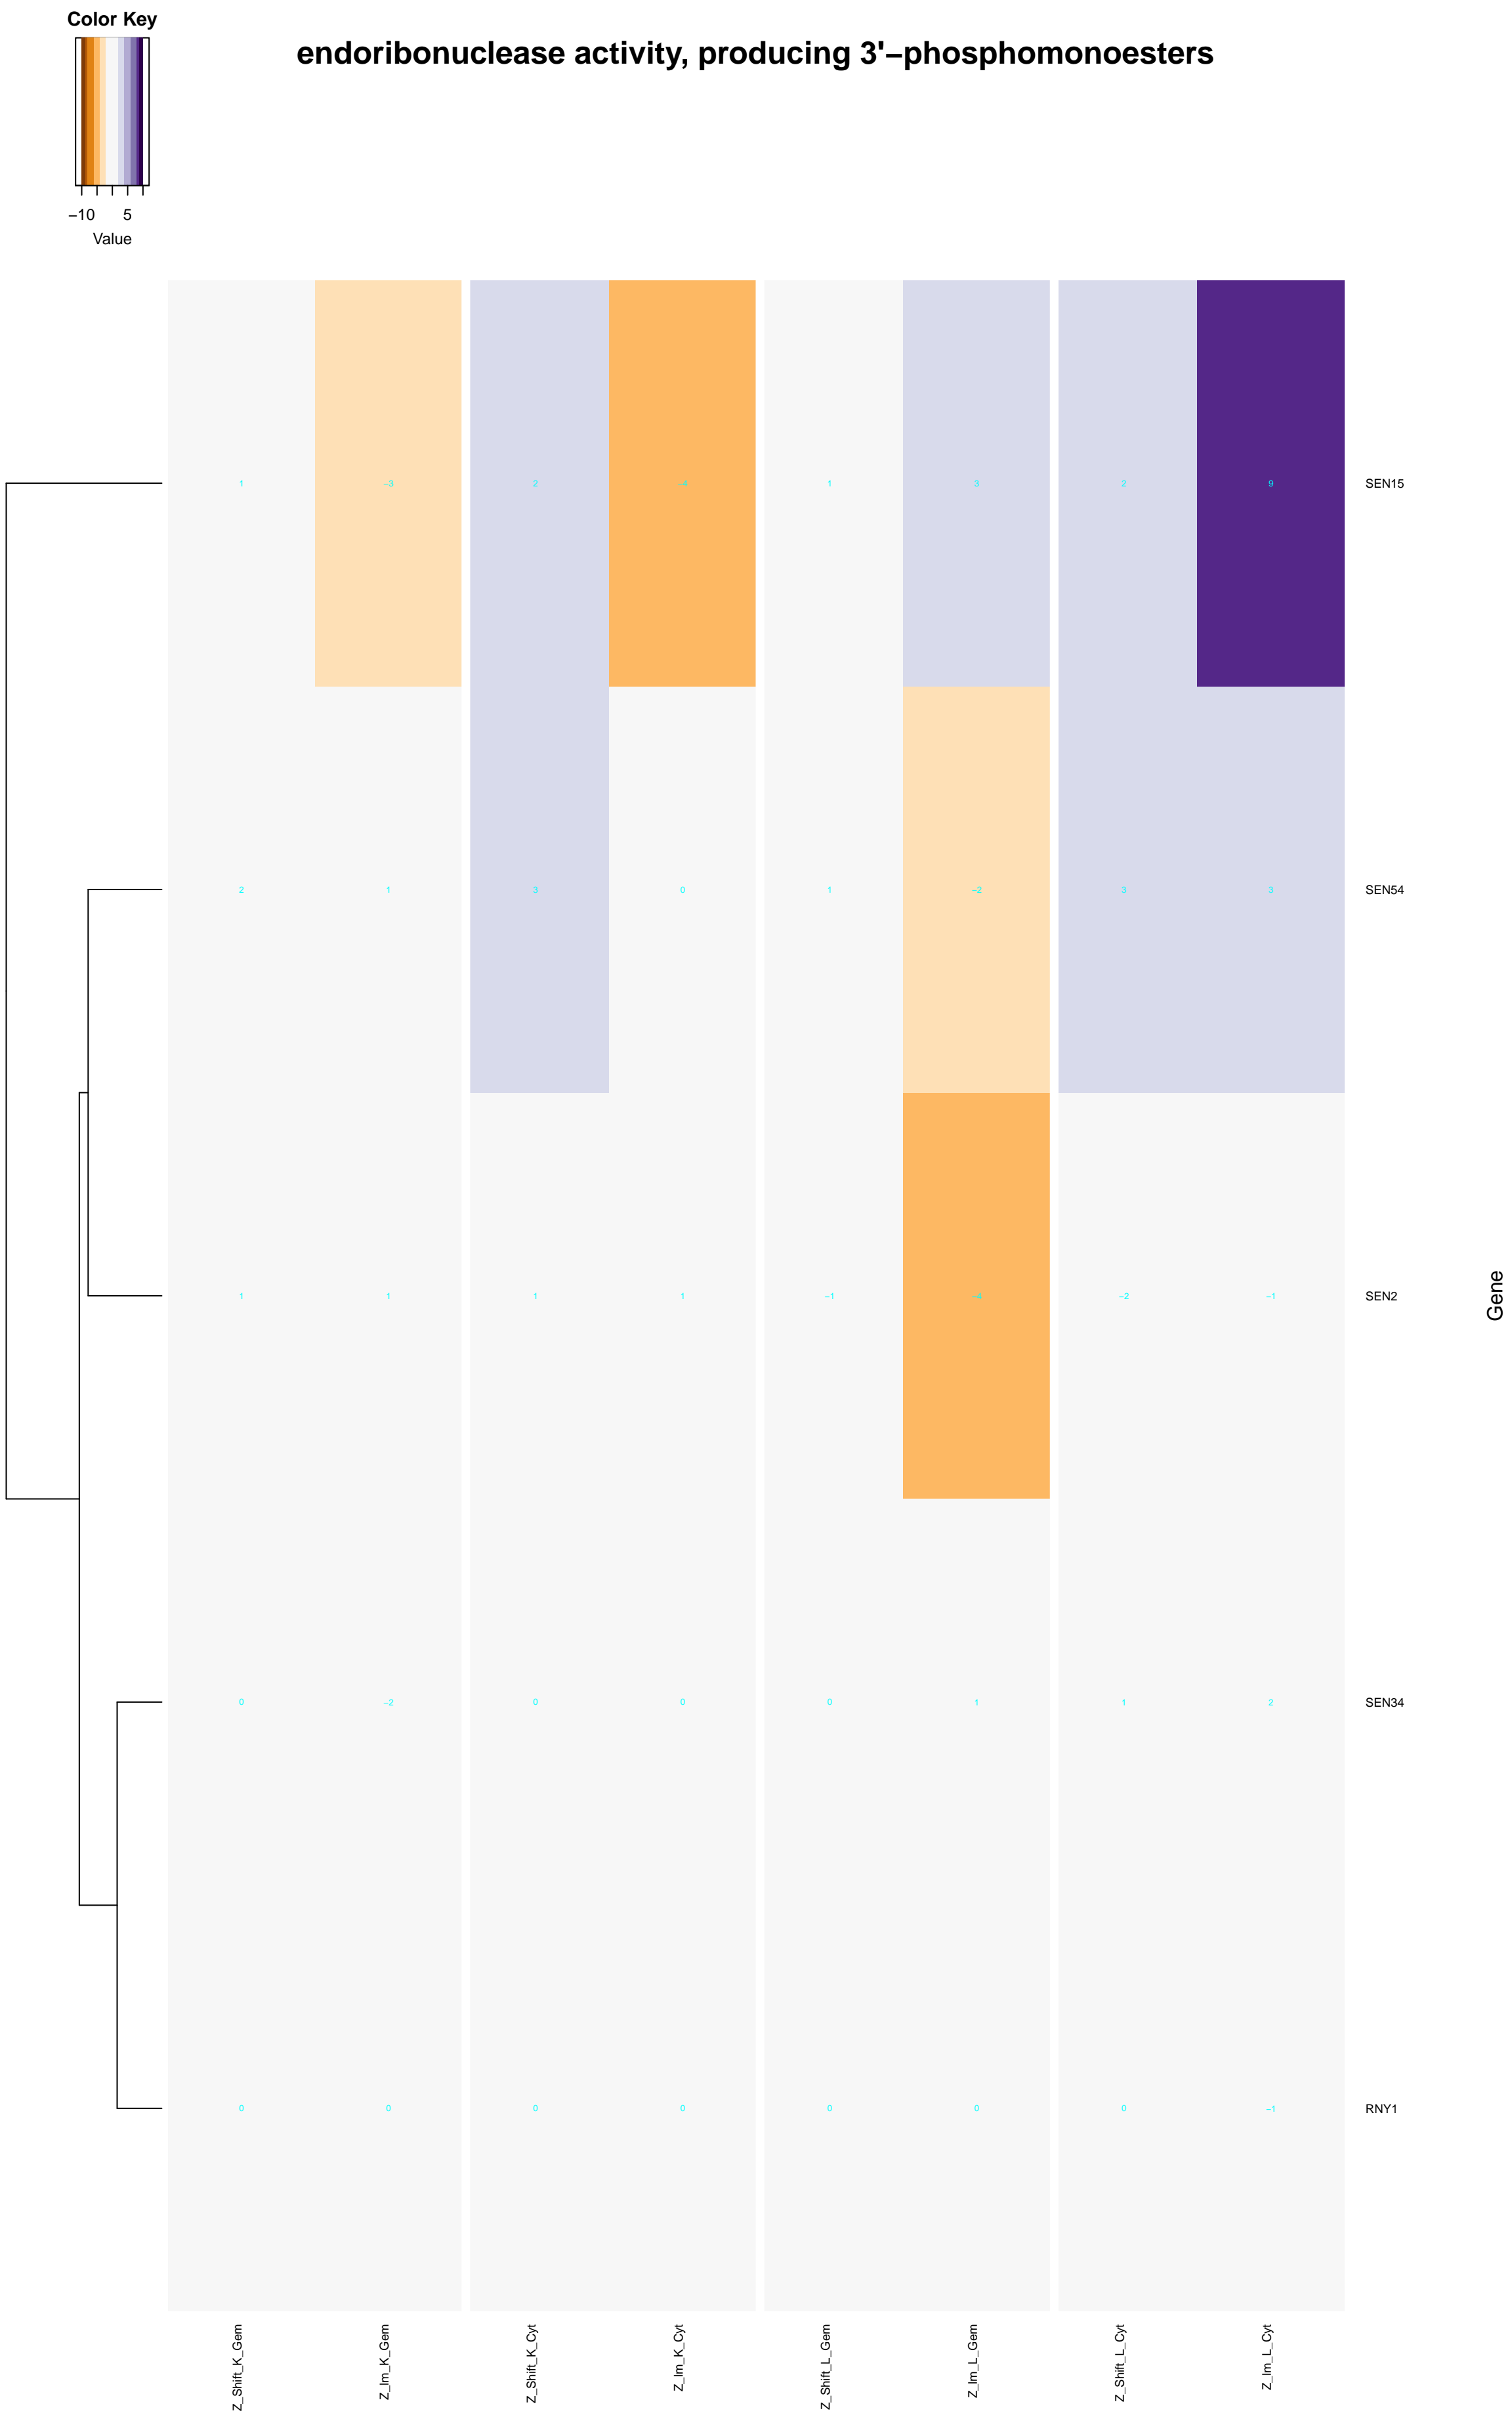



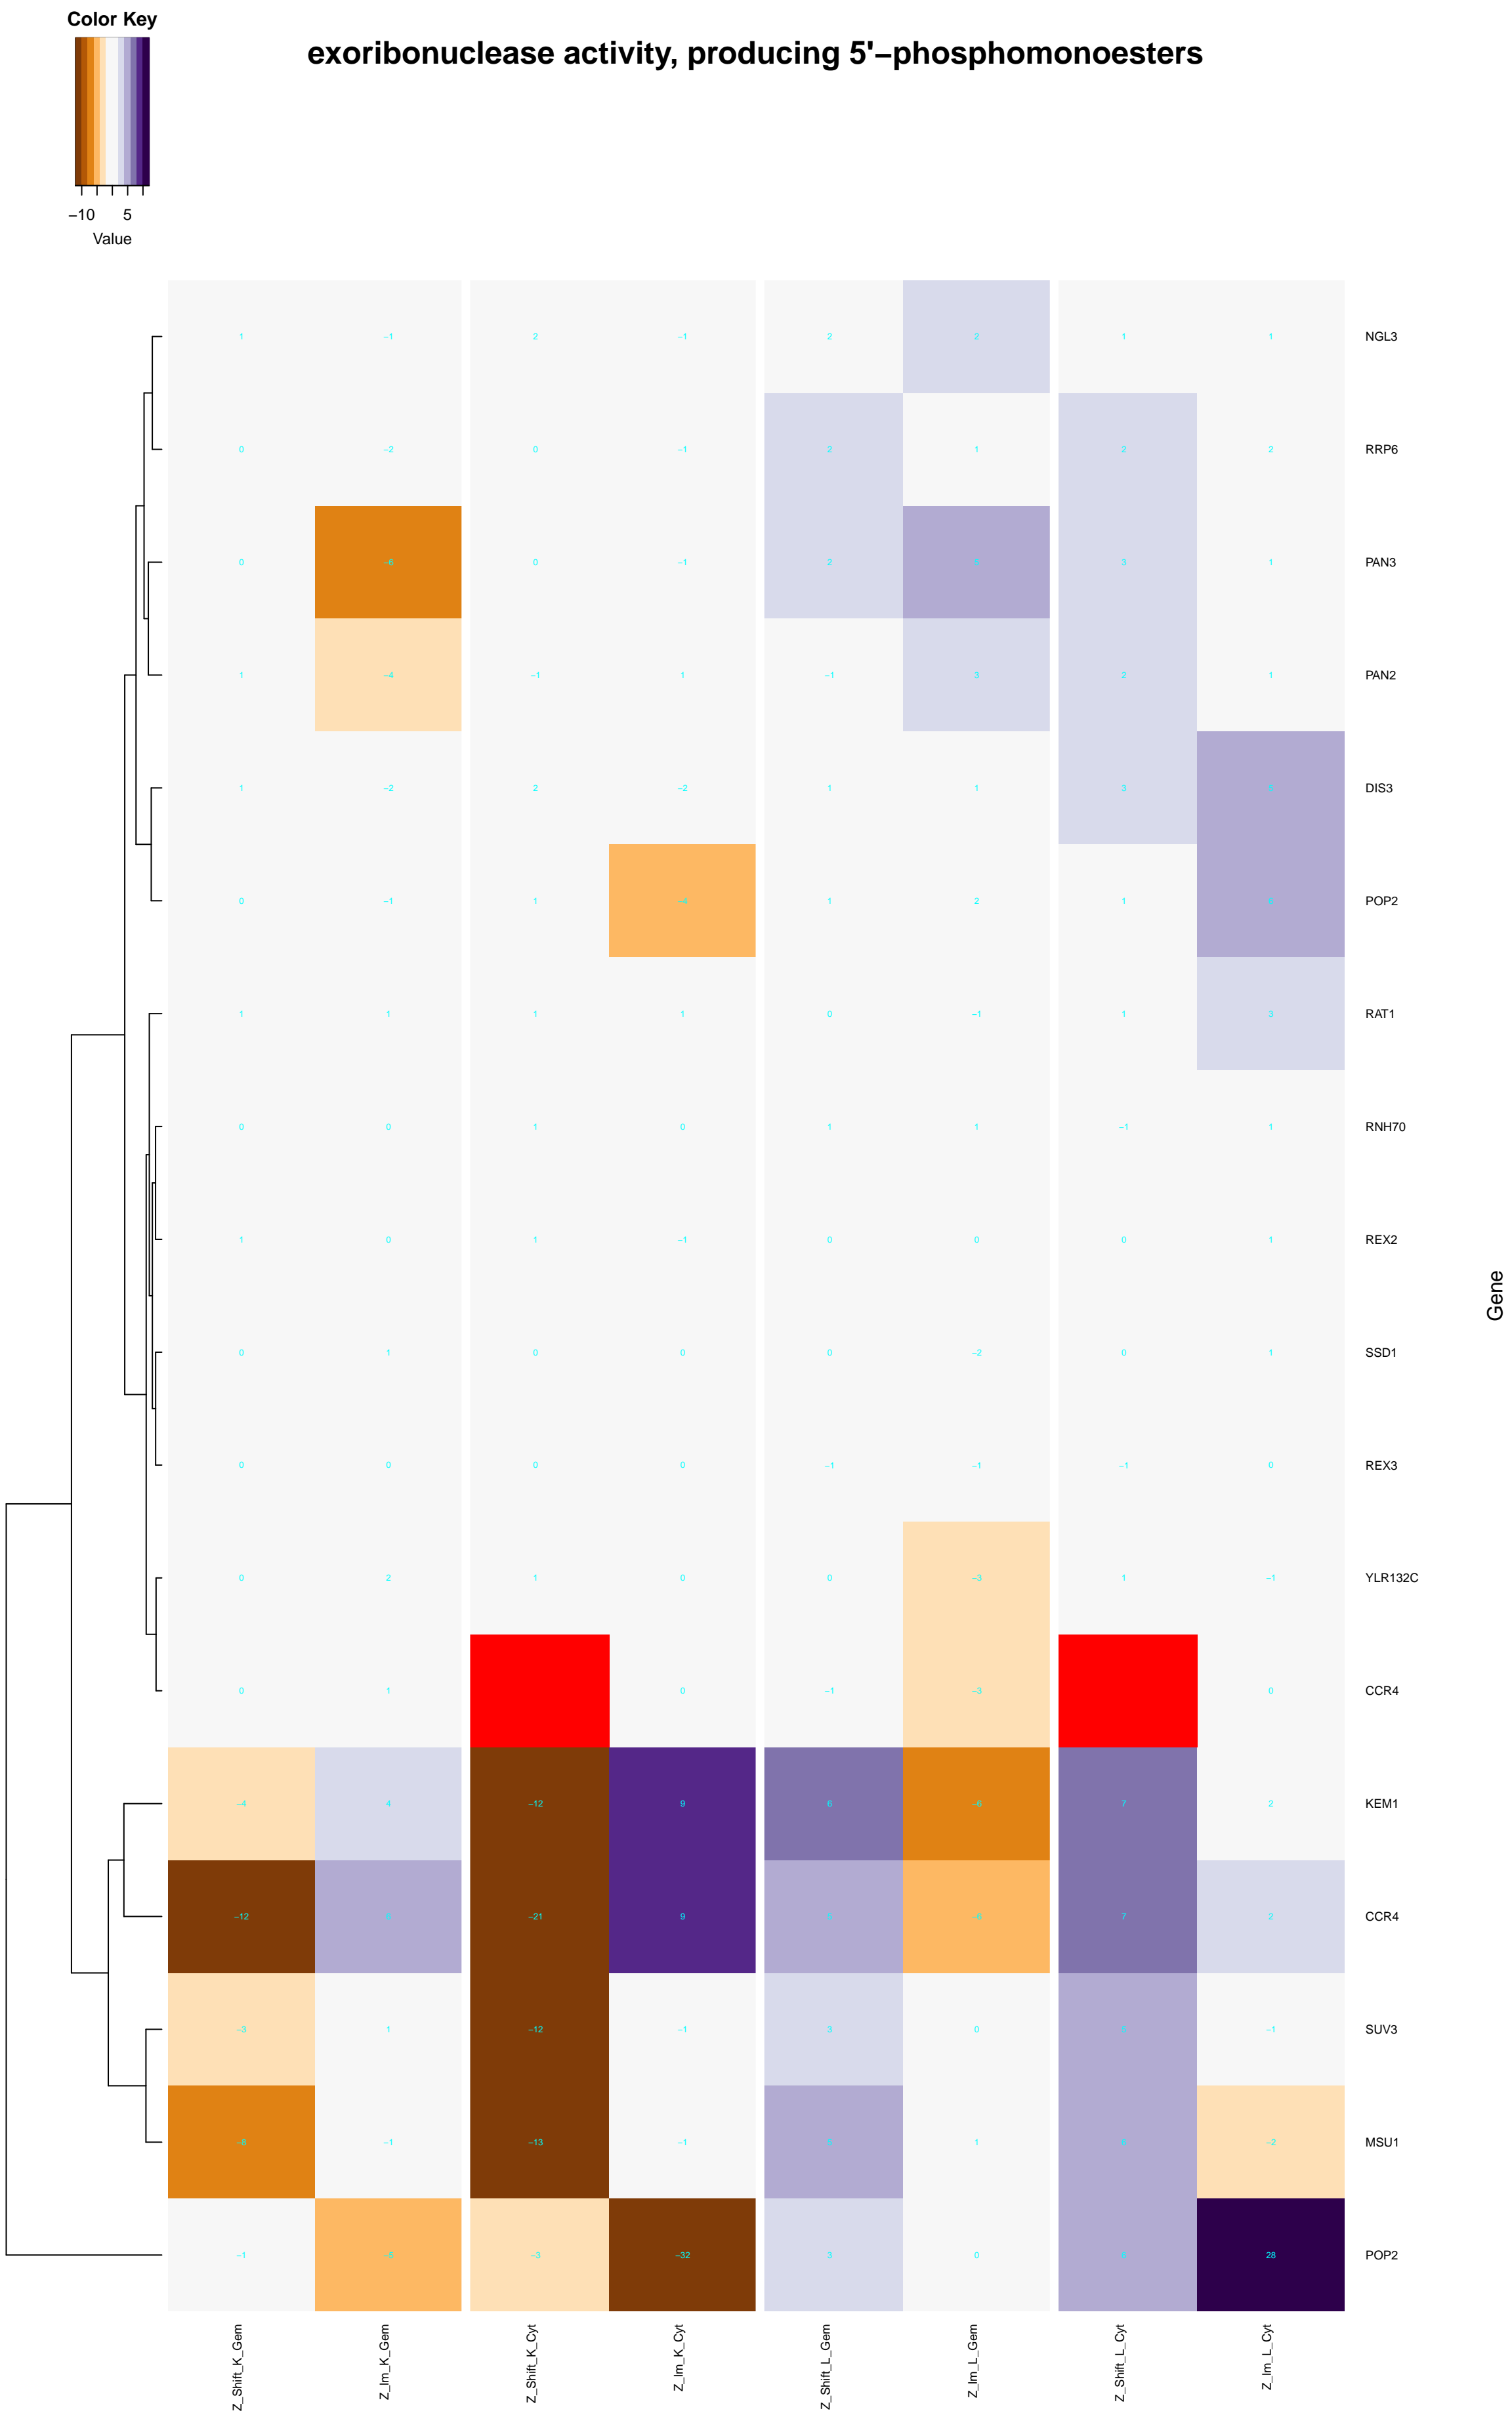

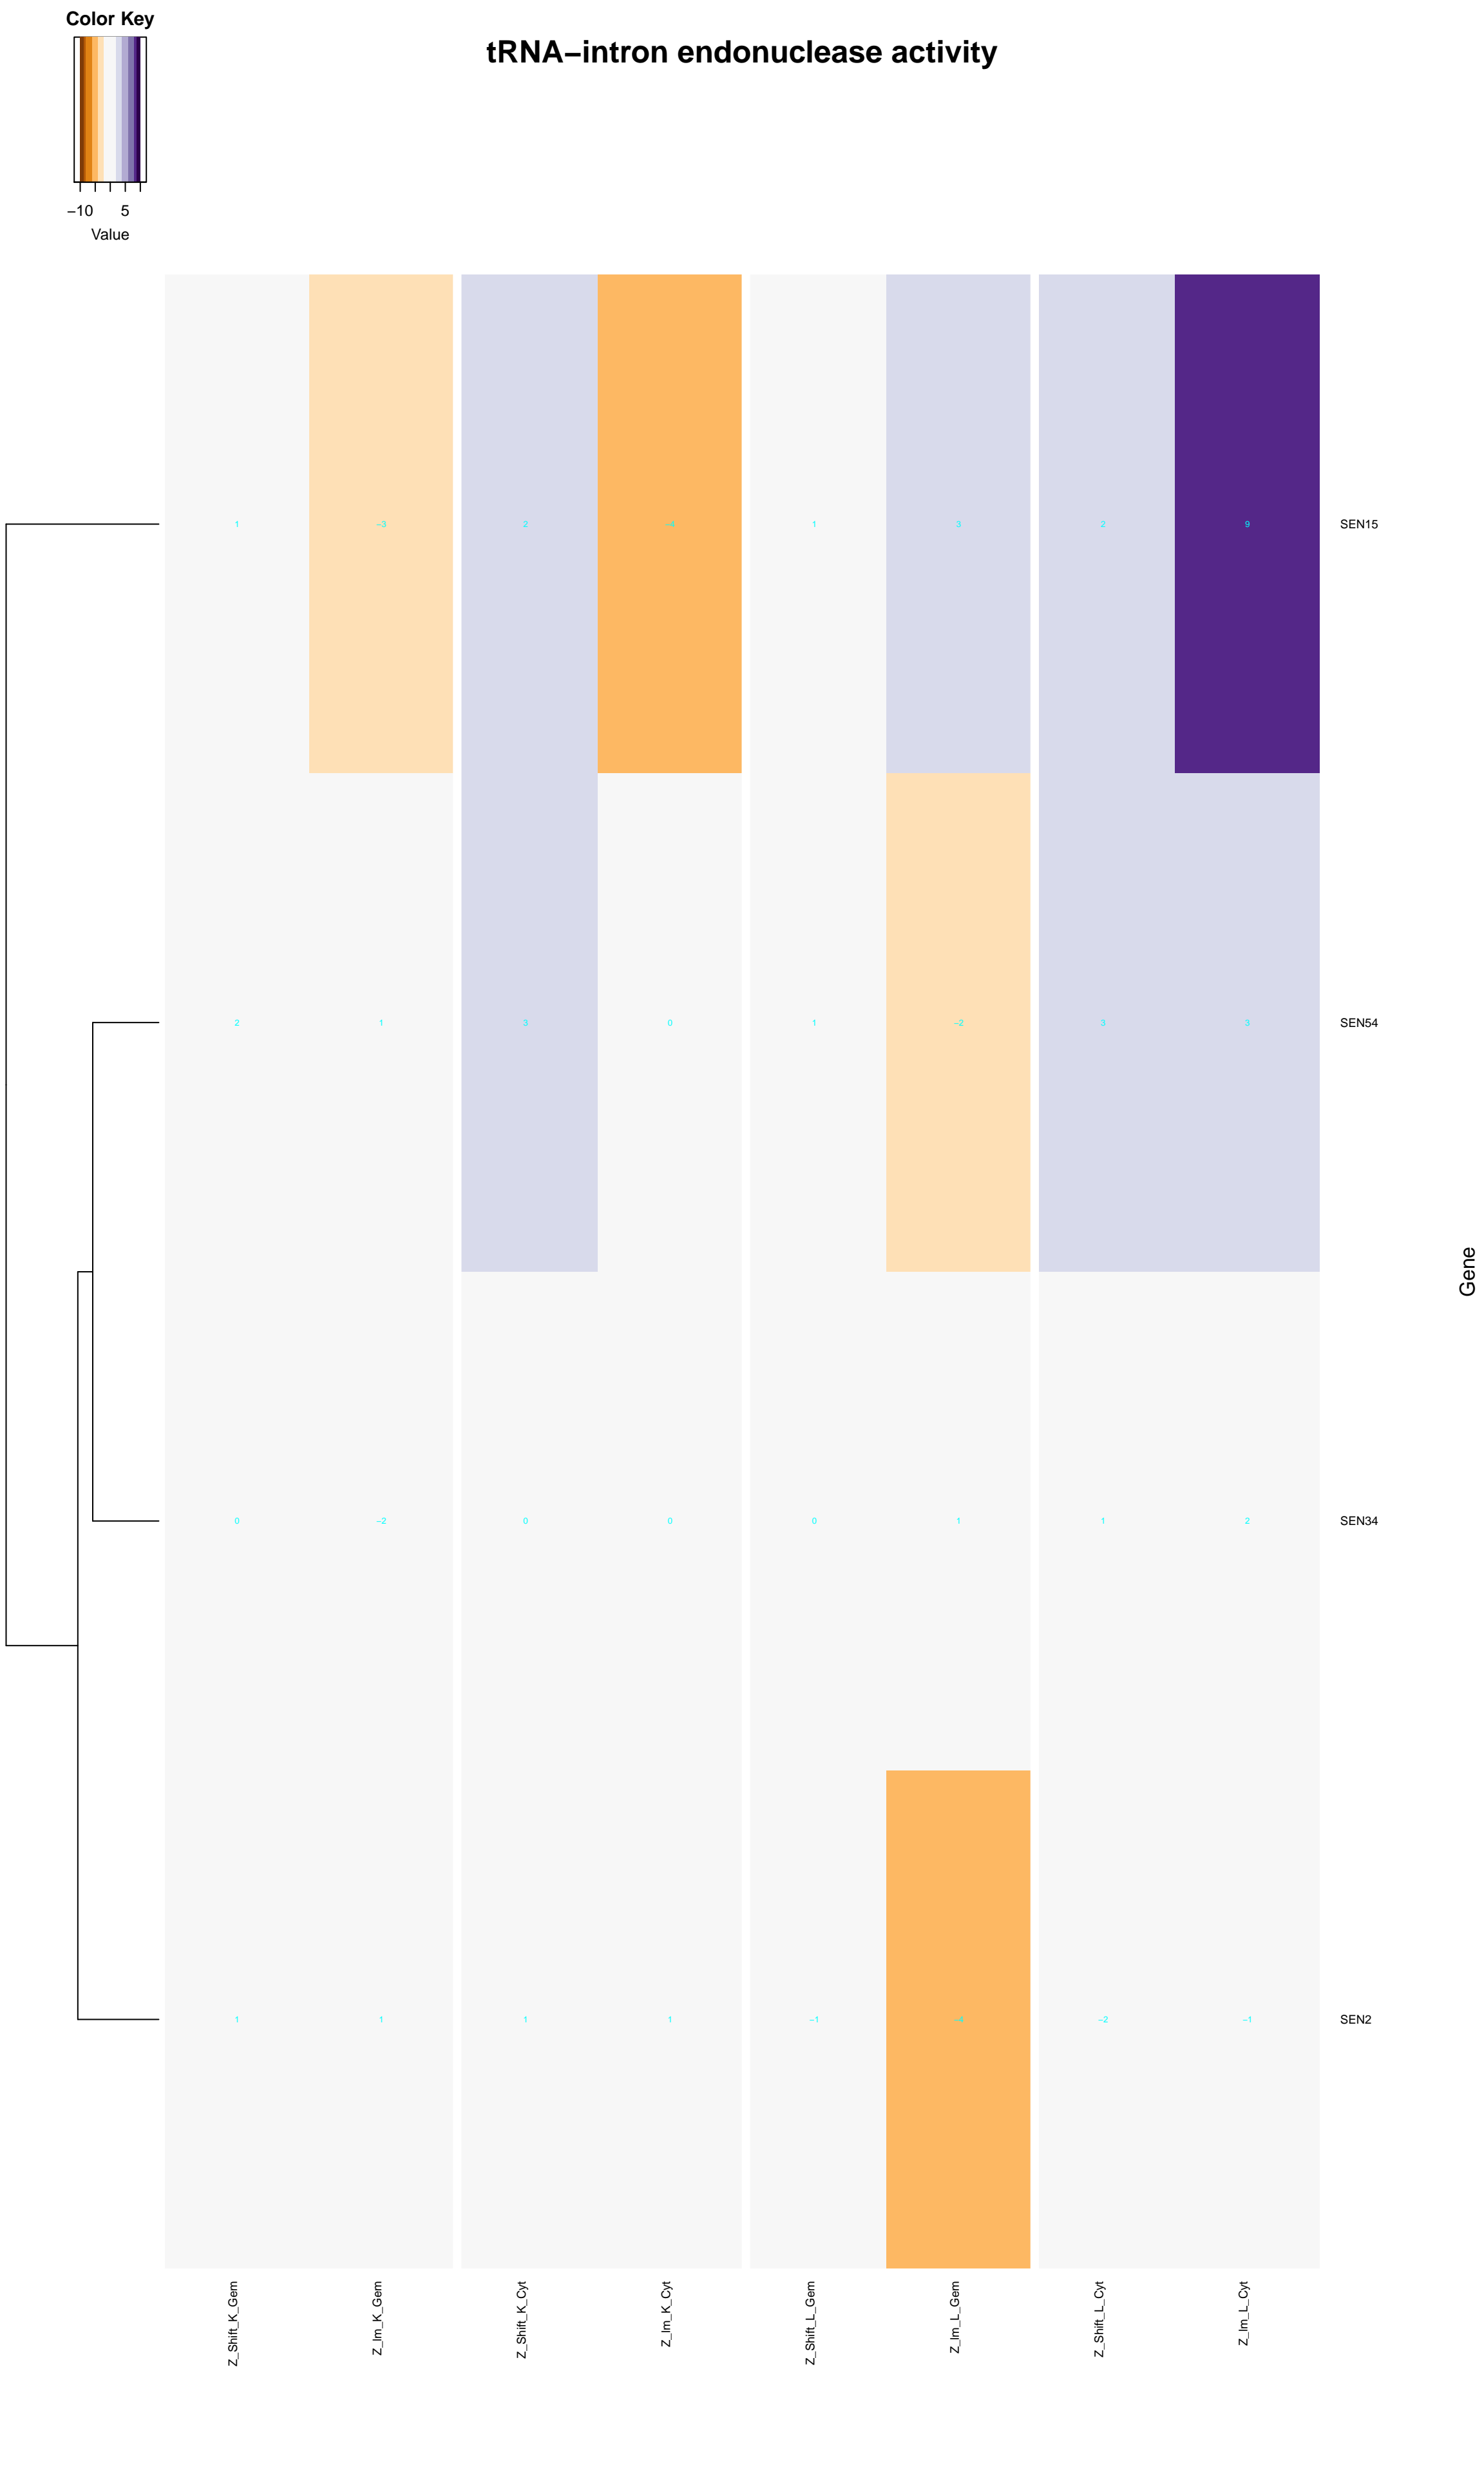

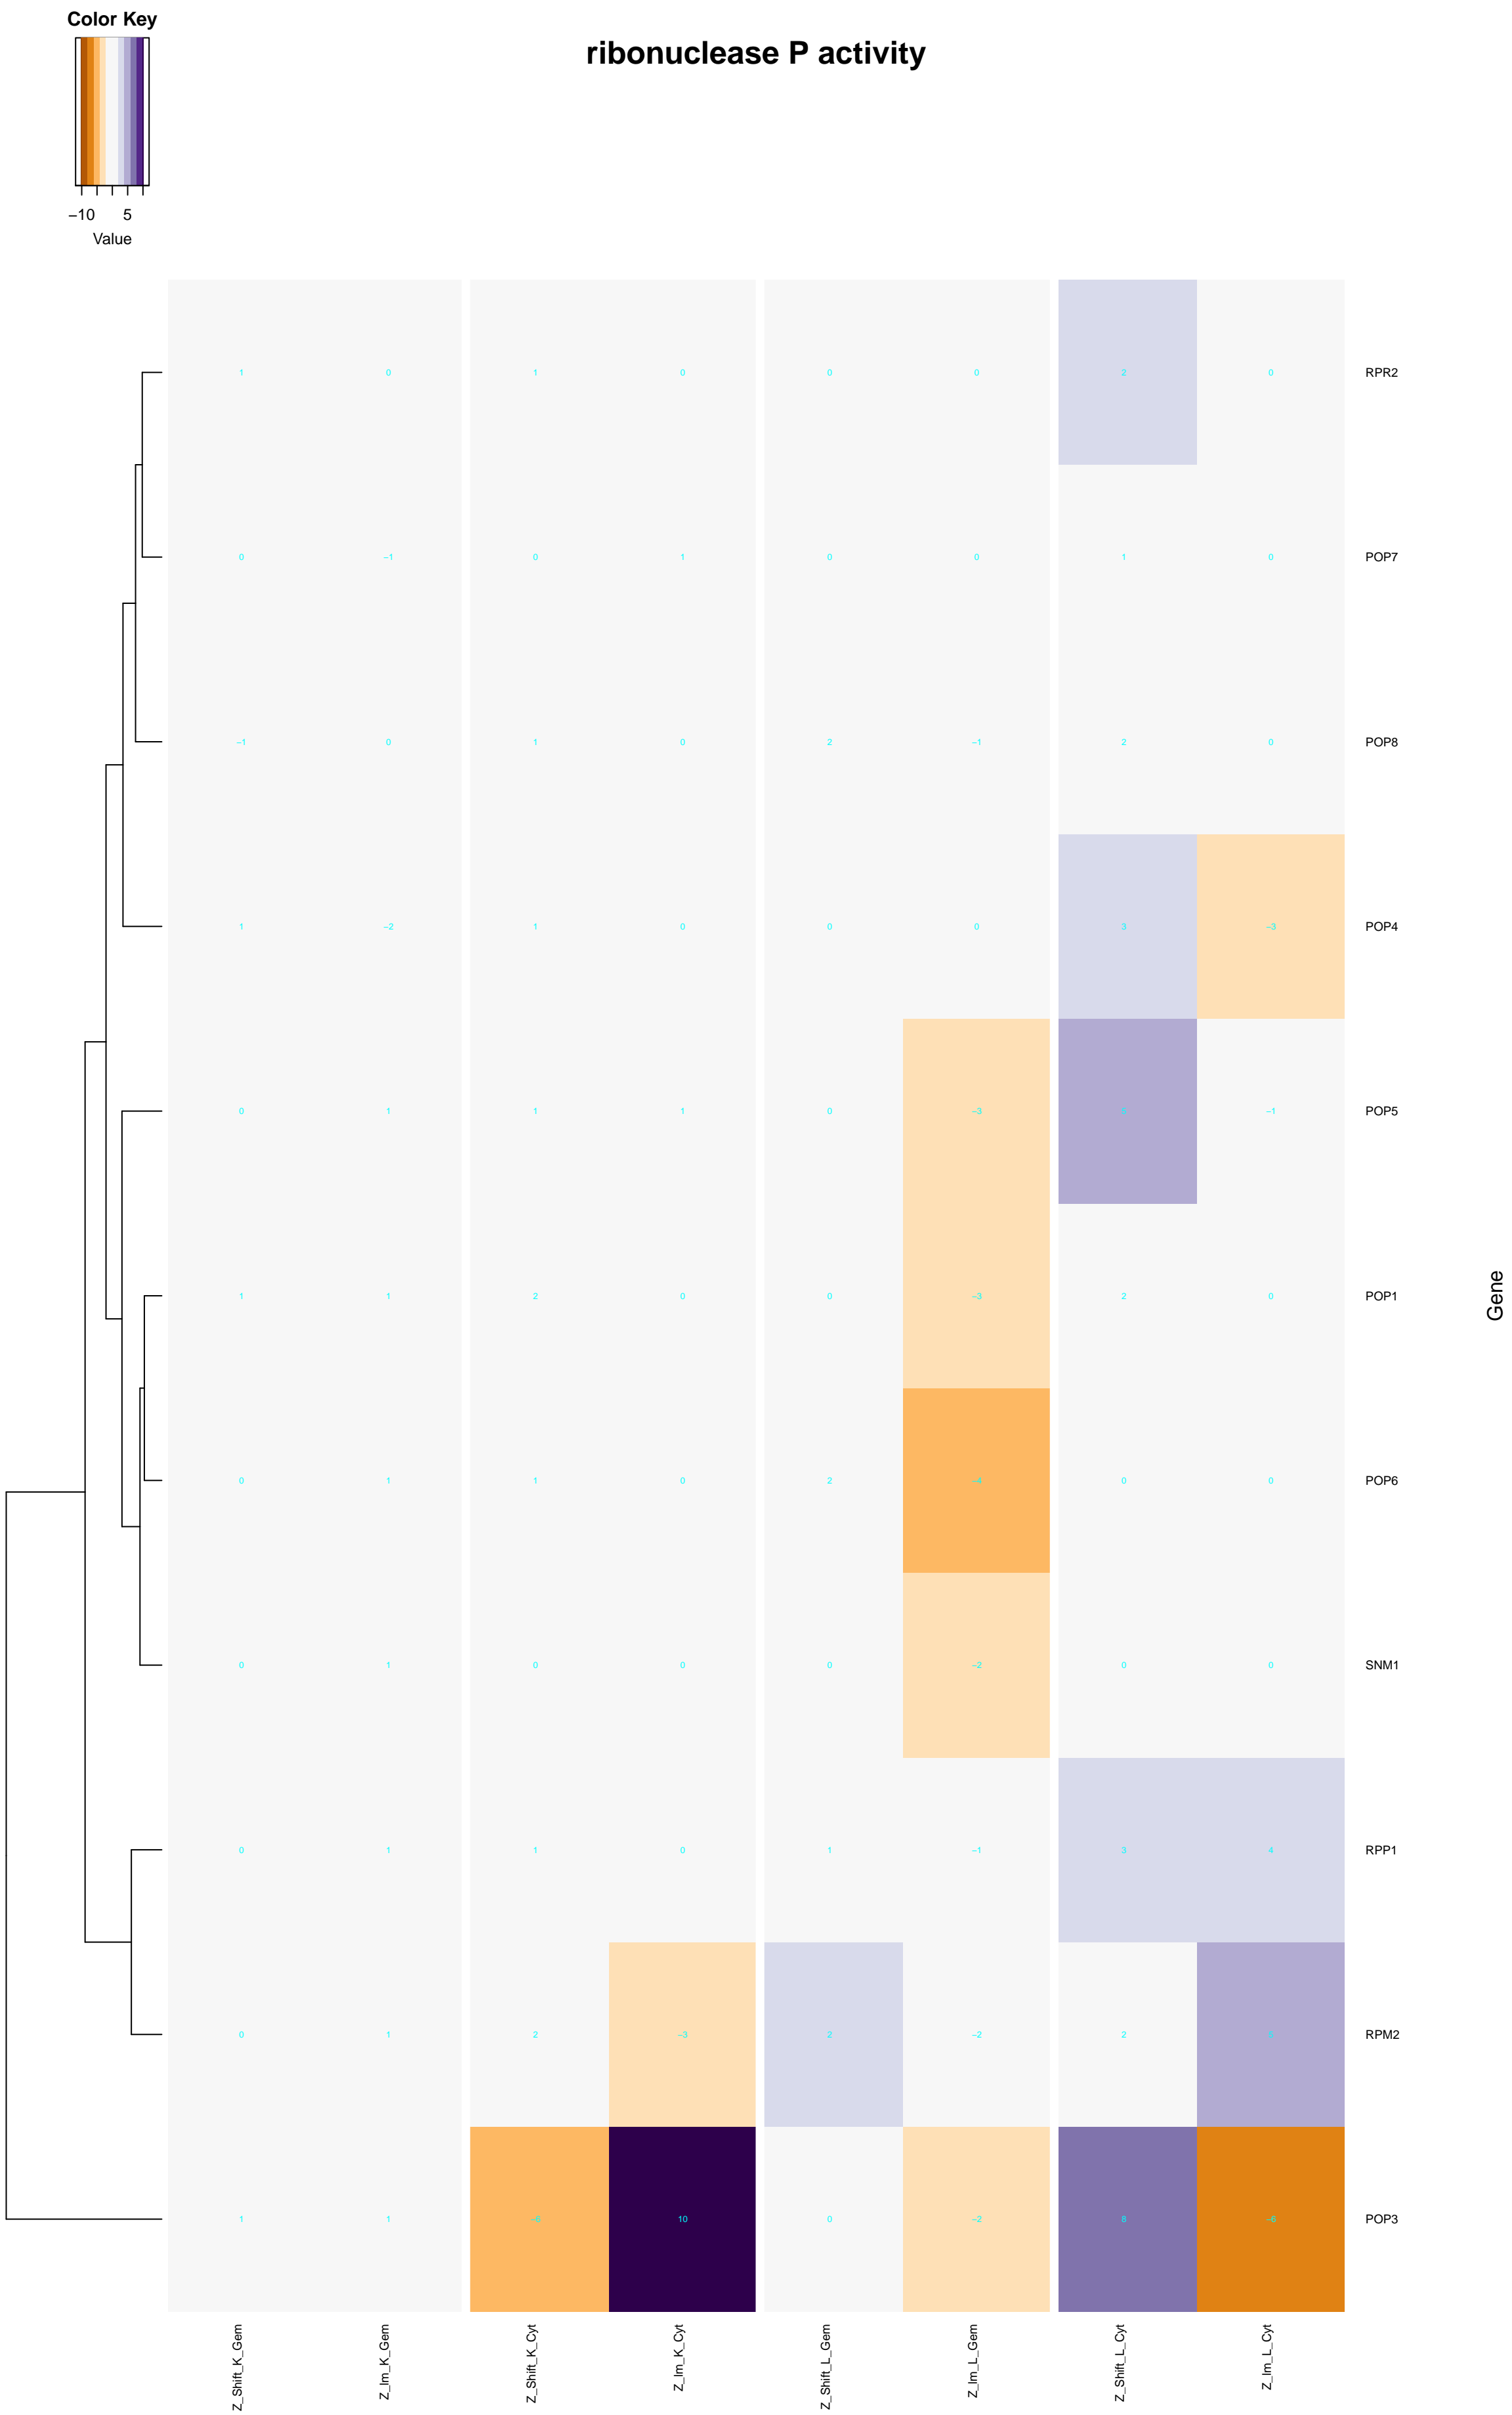

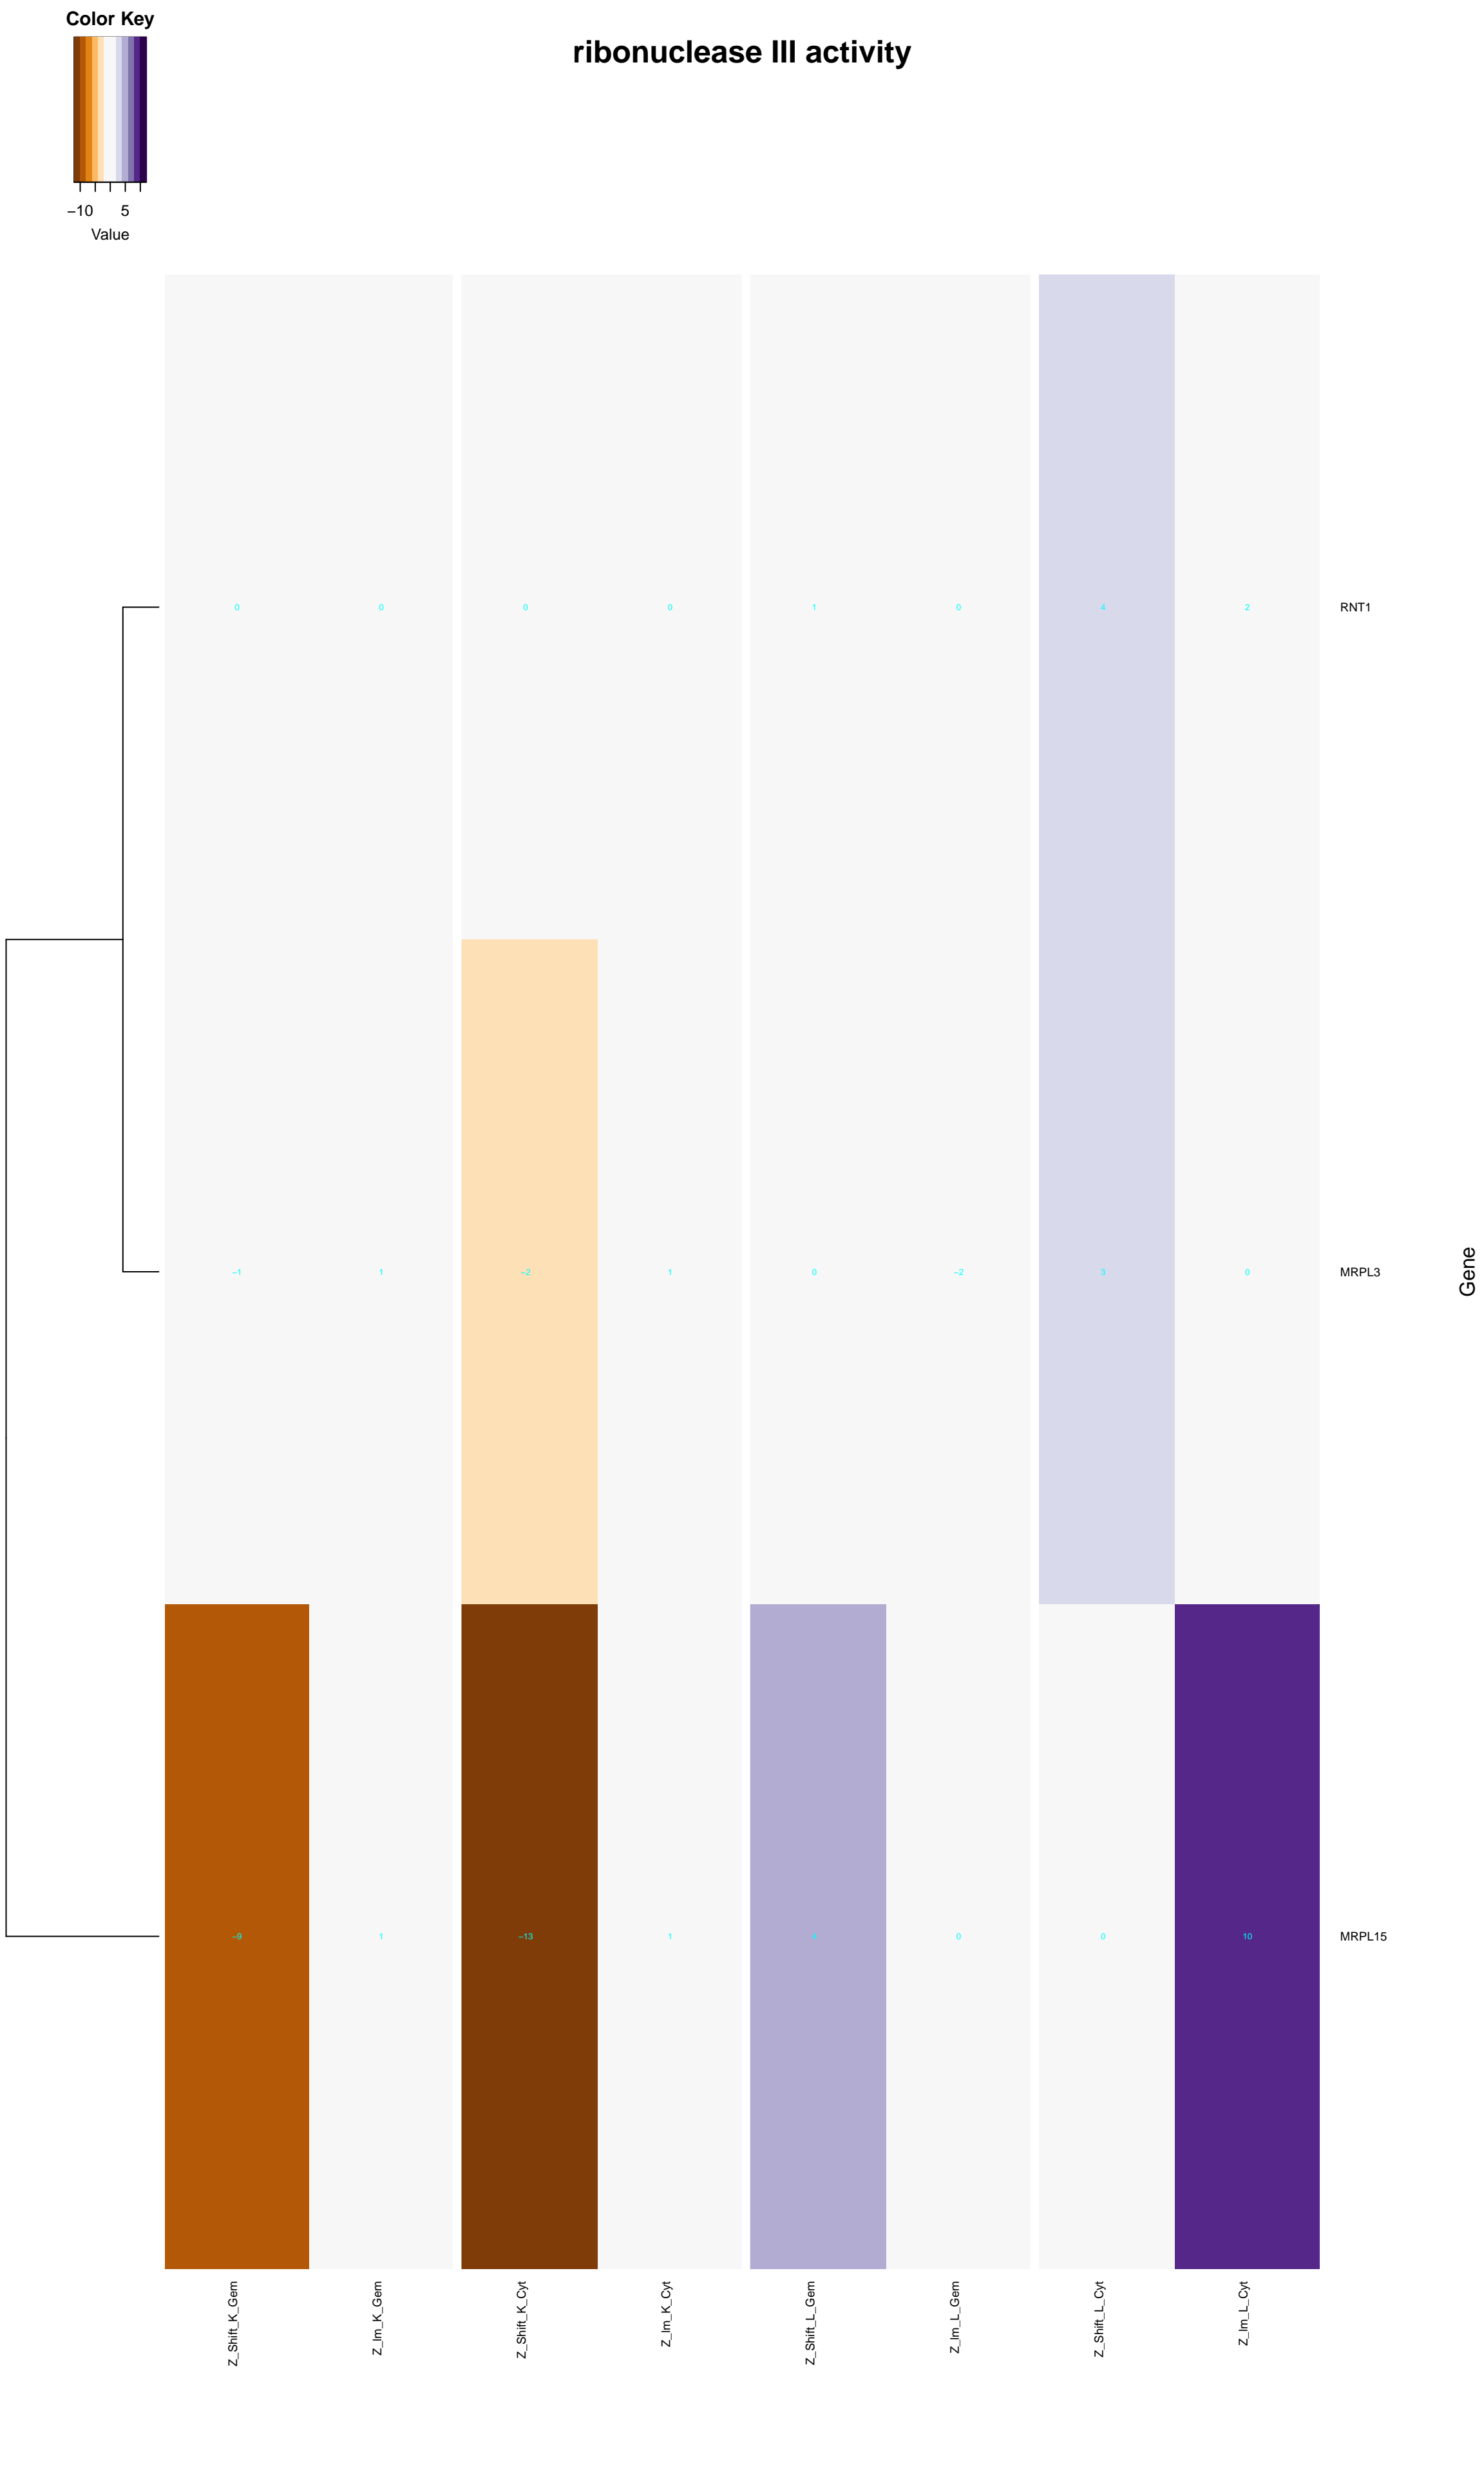

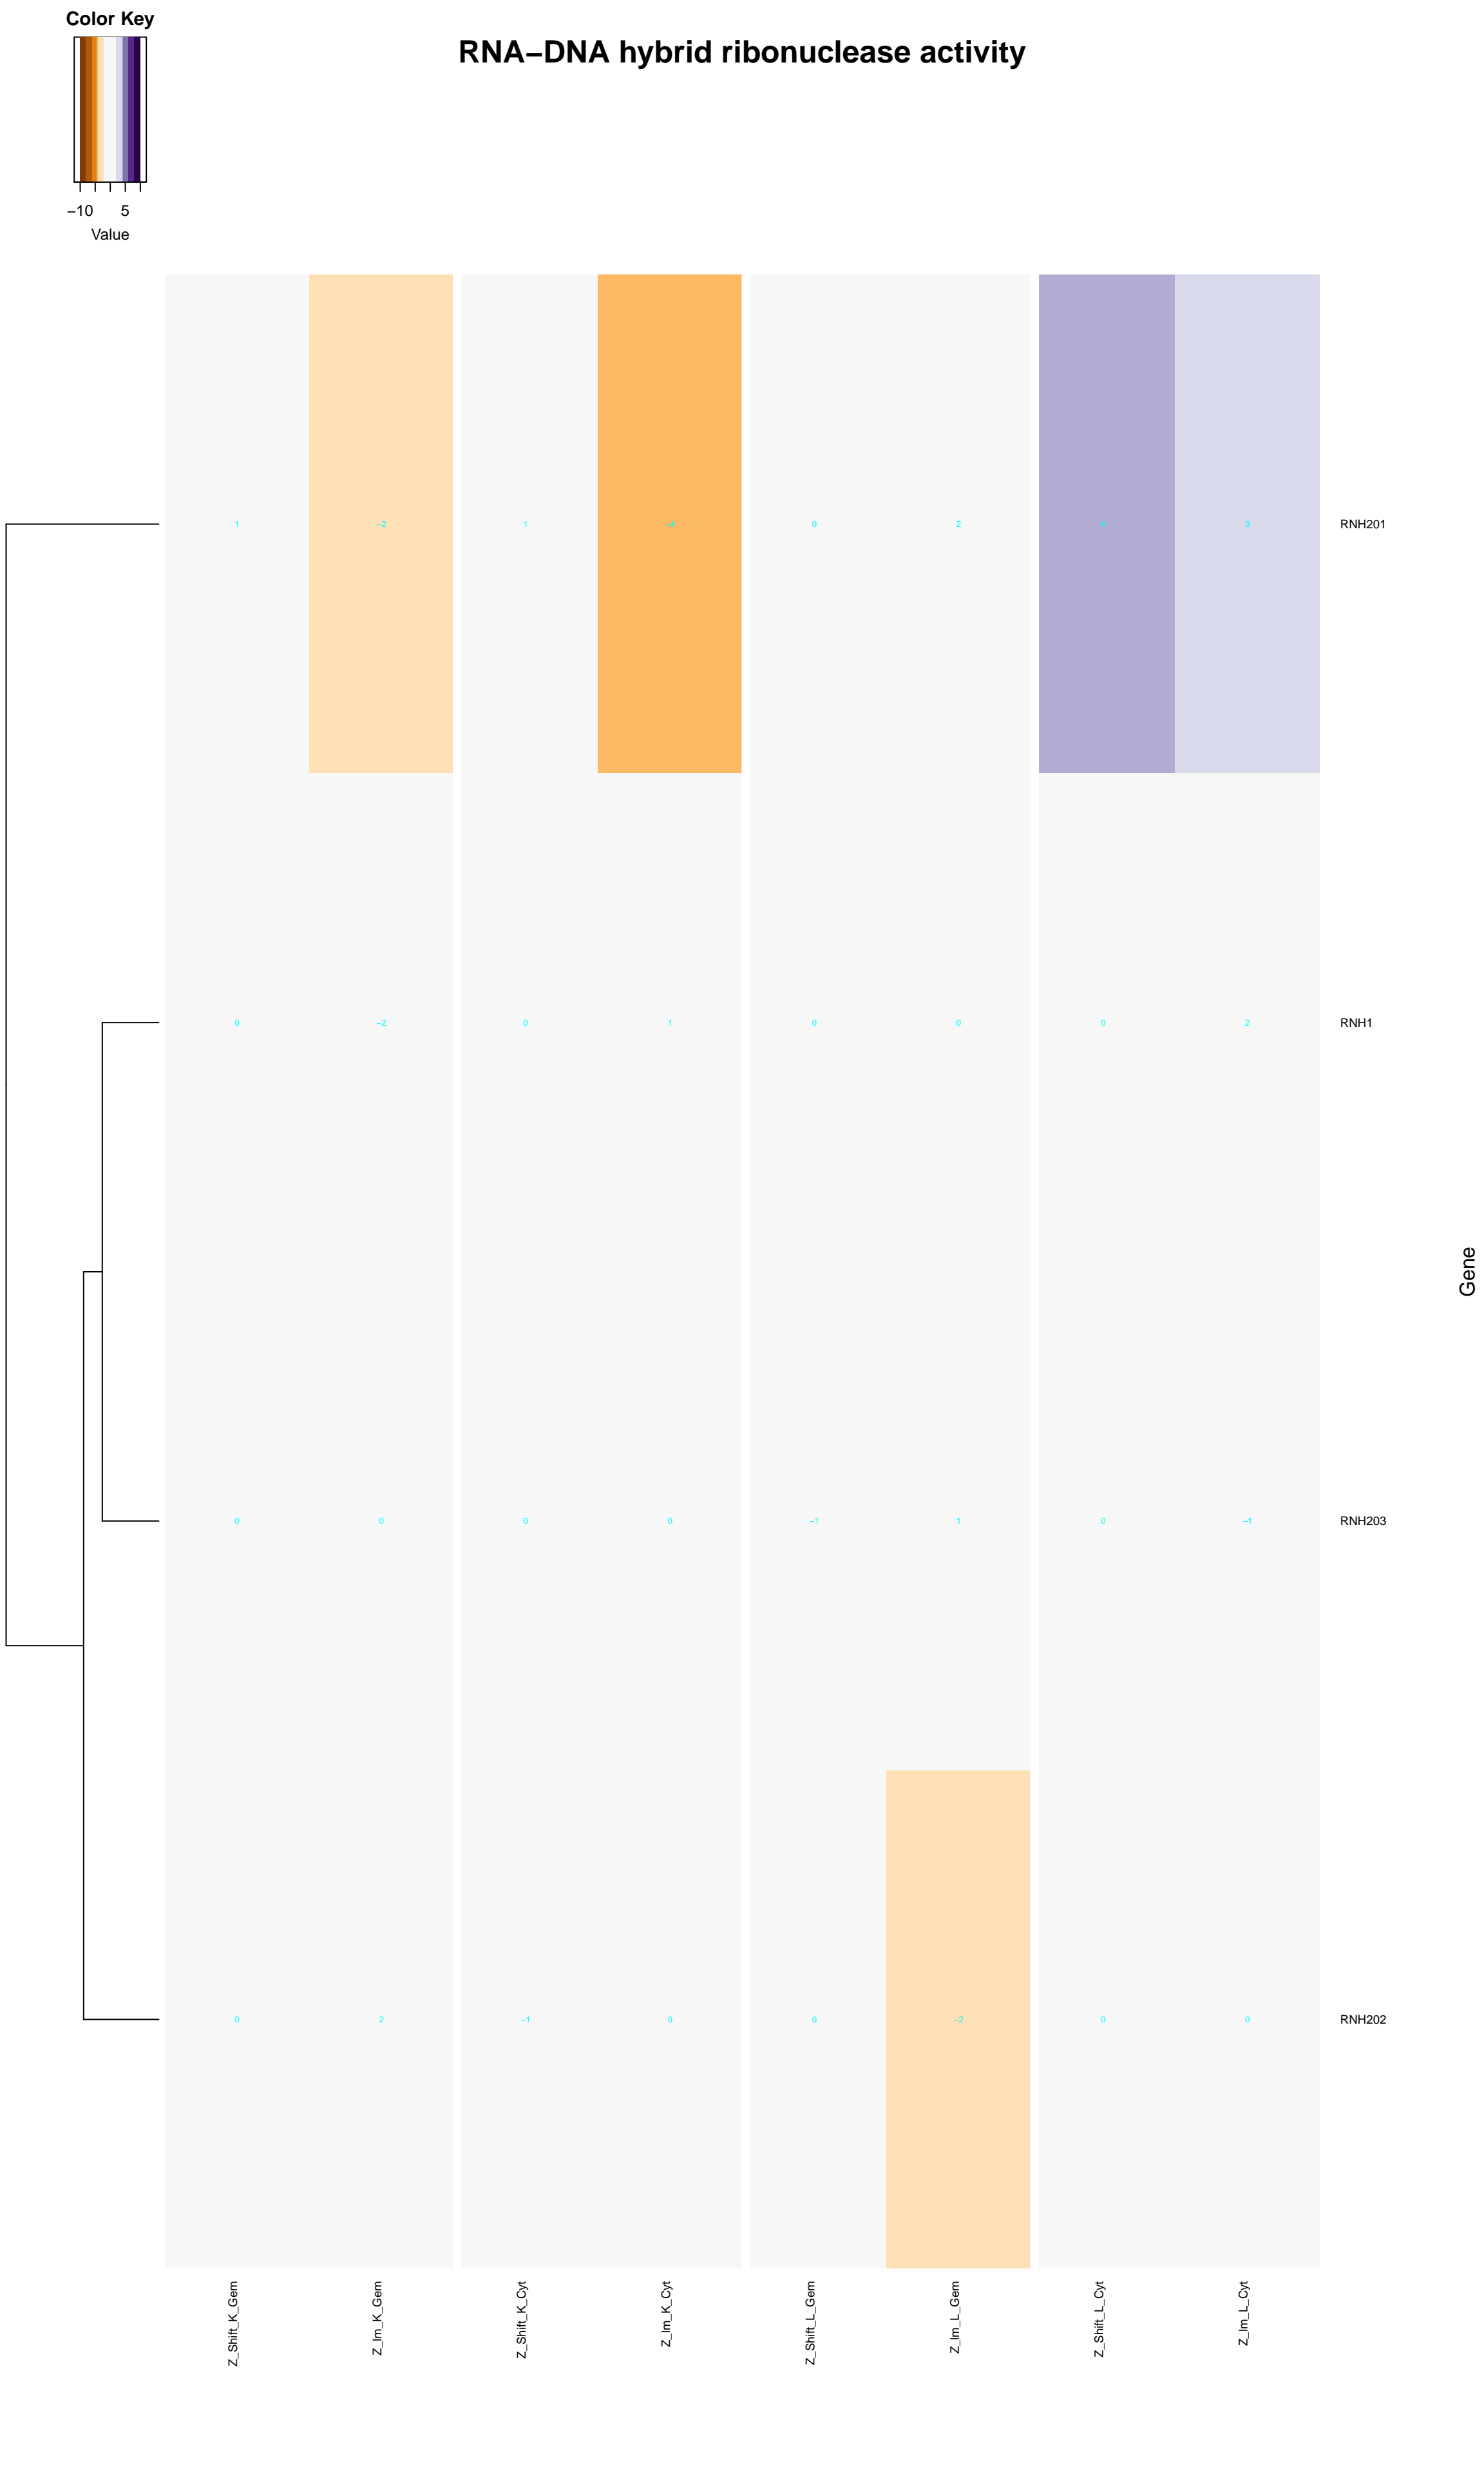

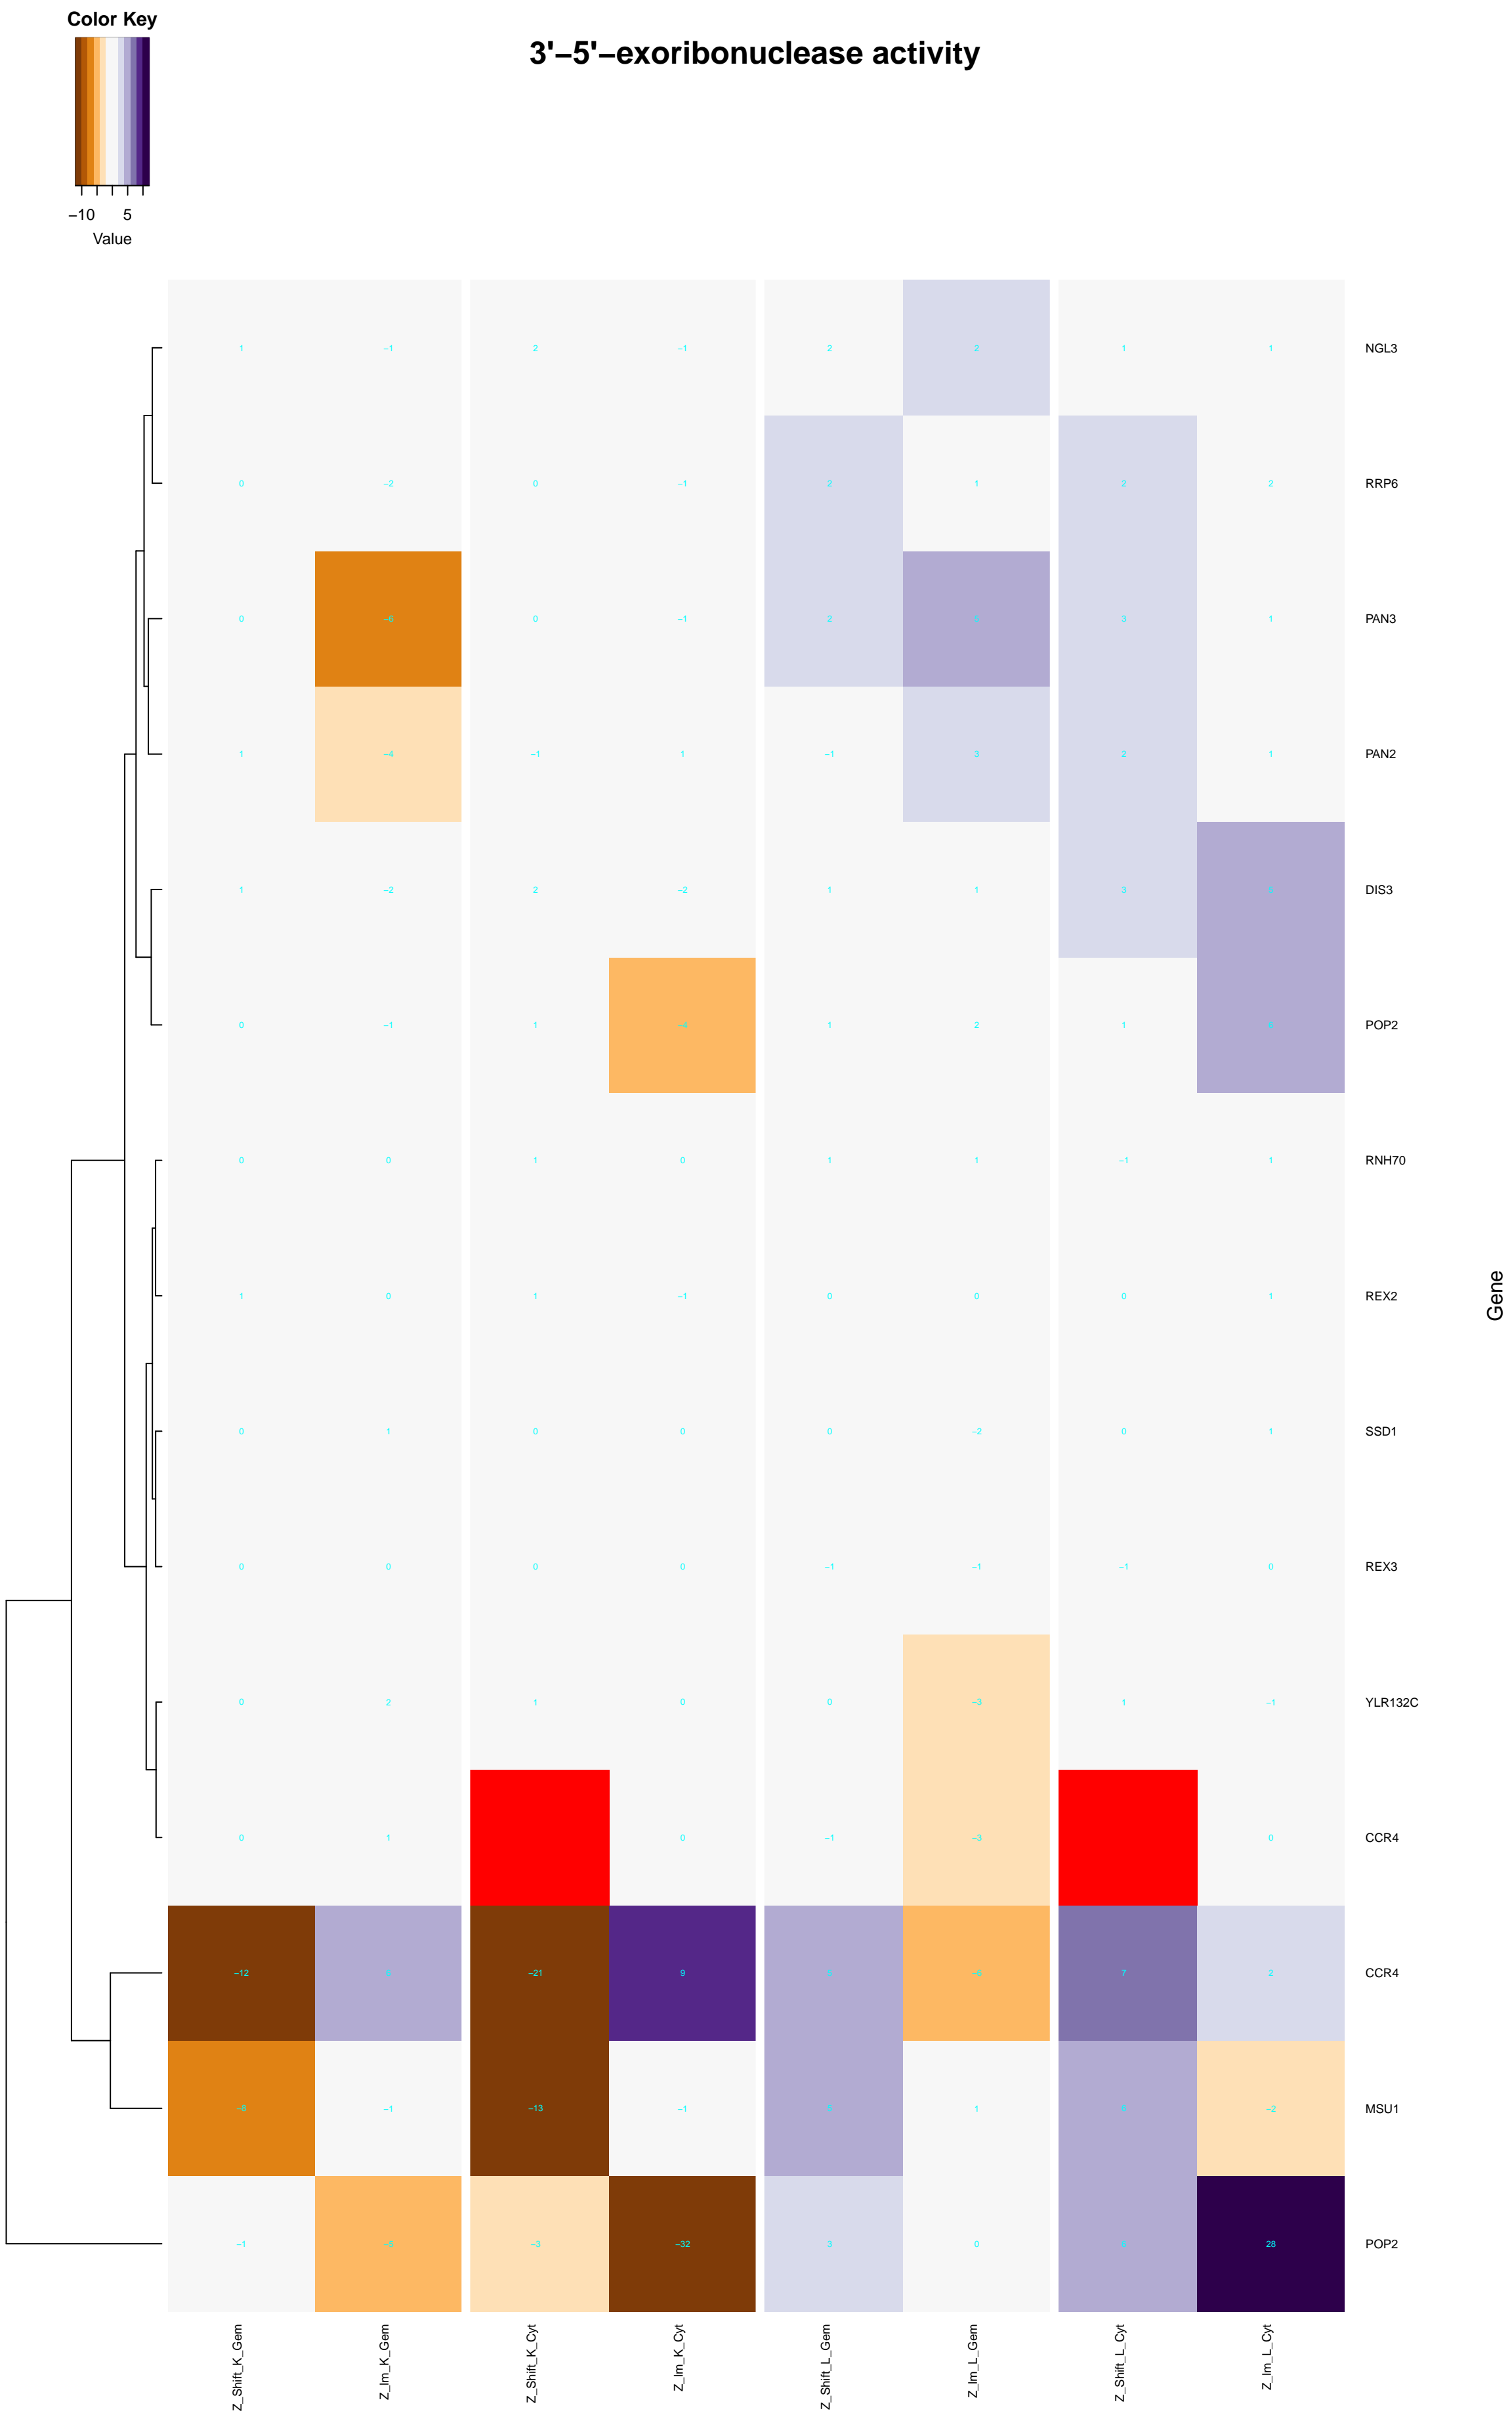

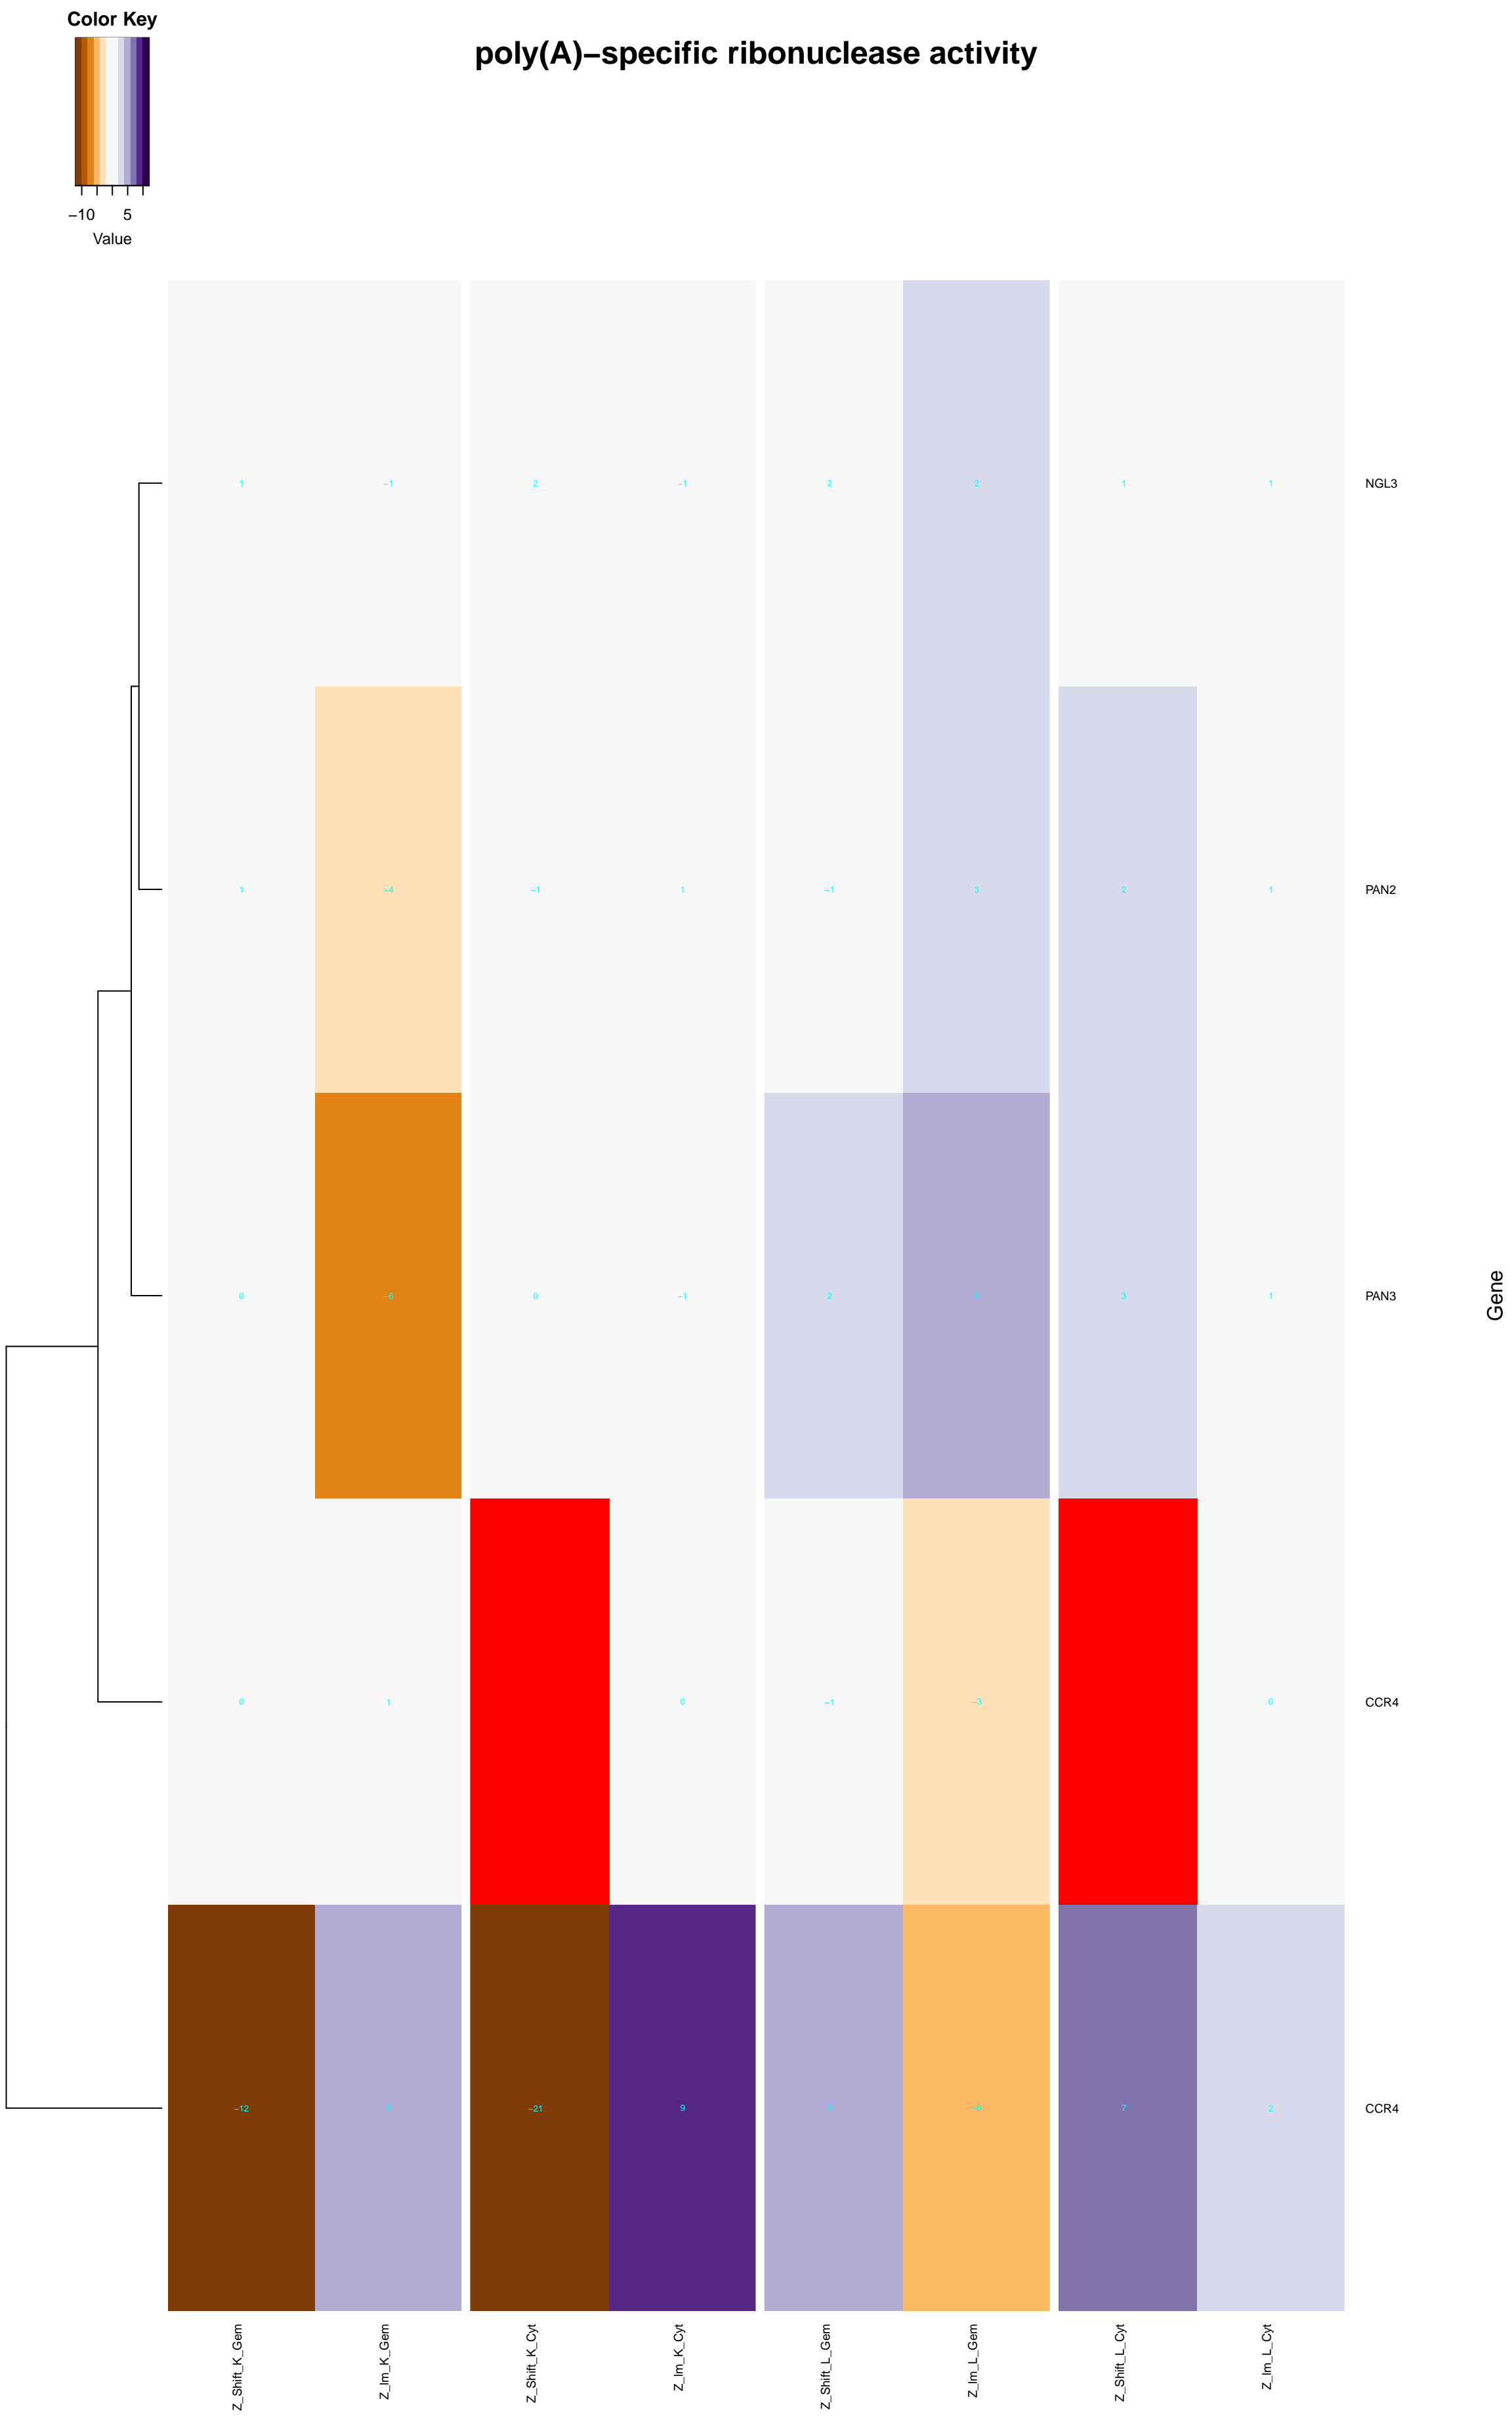

Supplement: s1 [file s1]

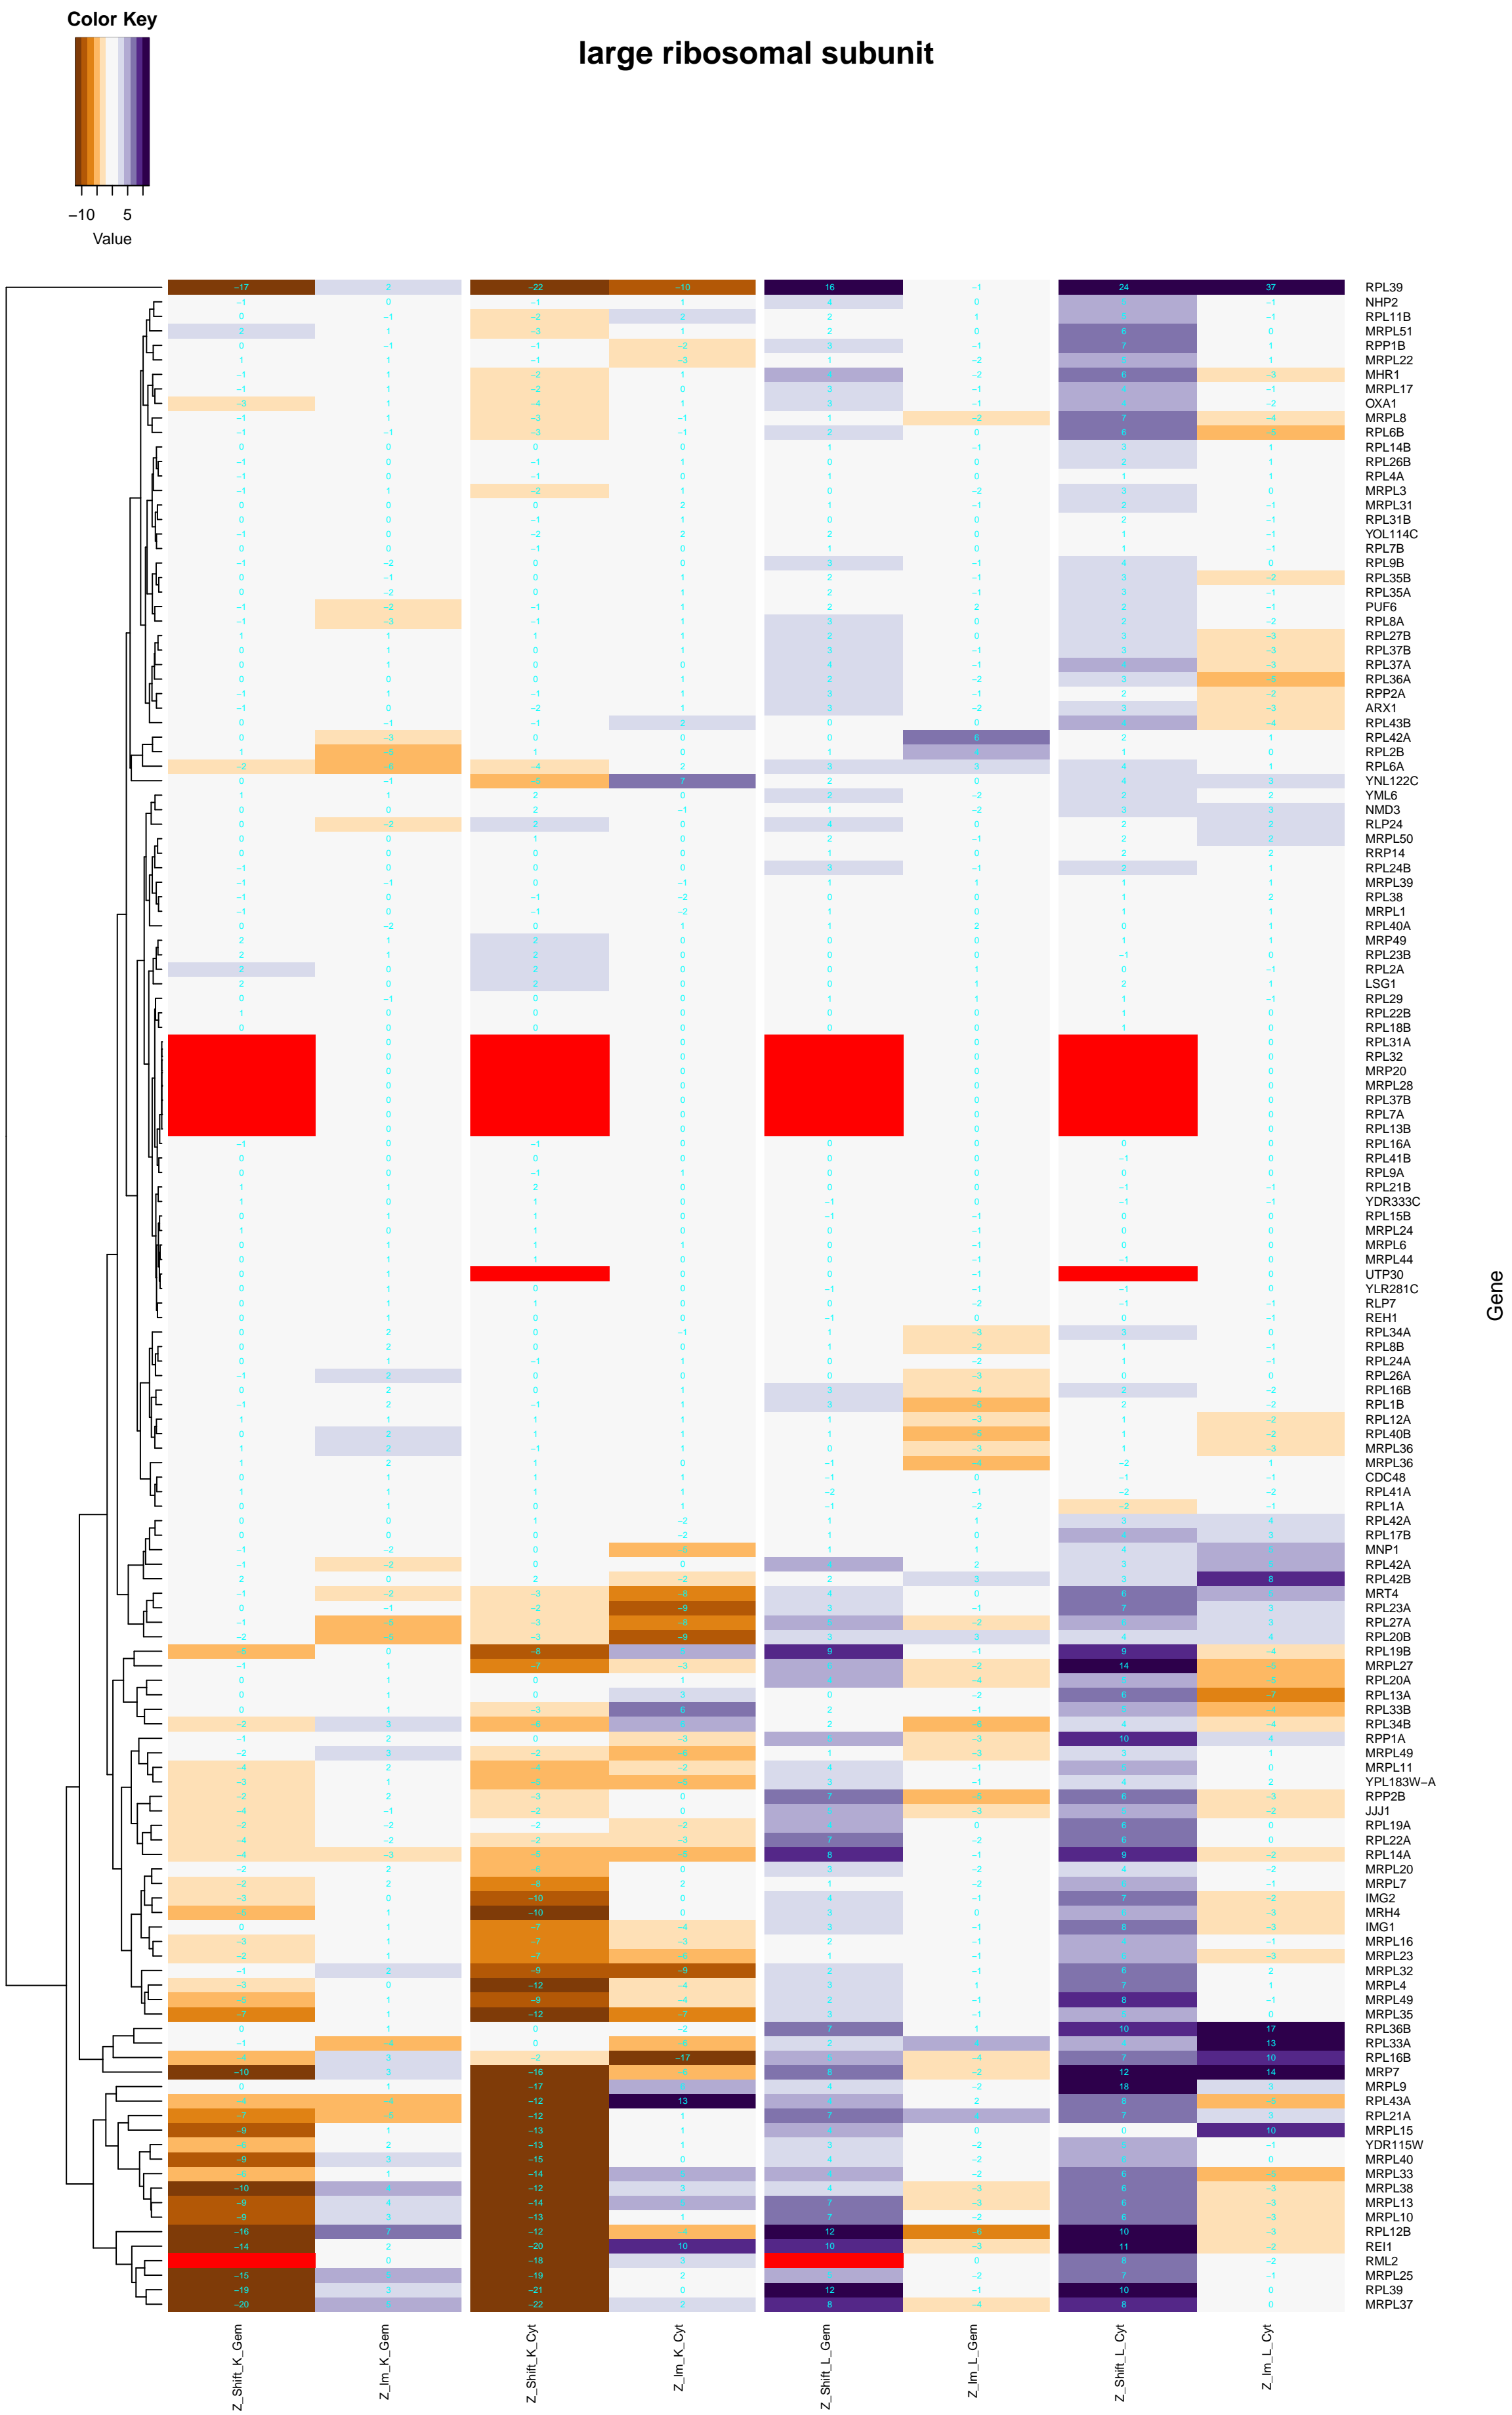

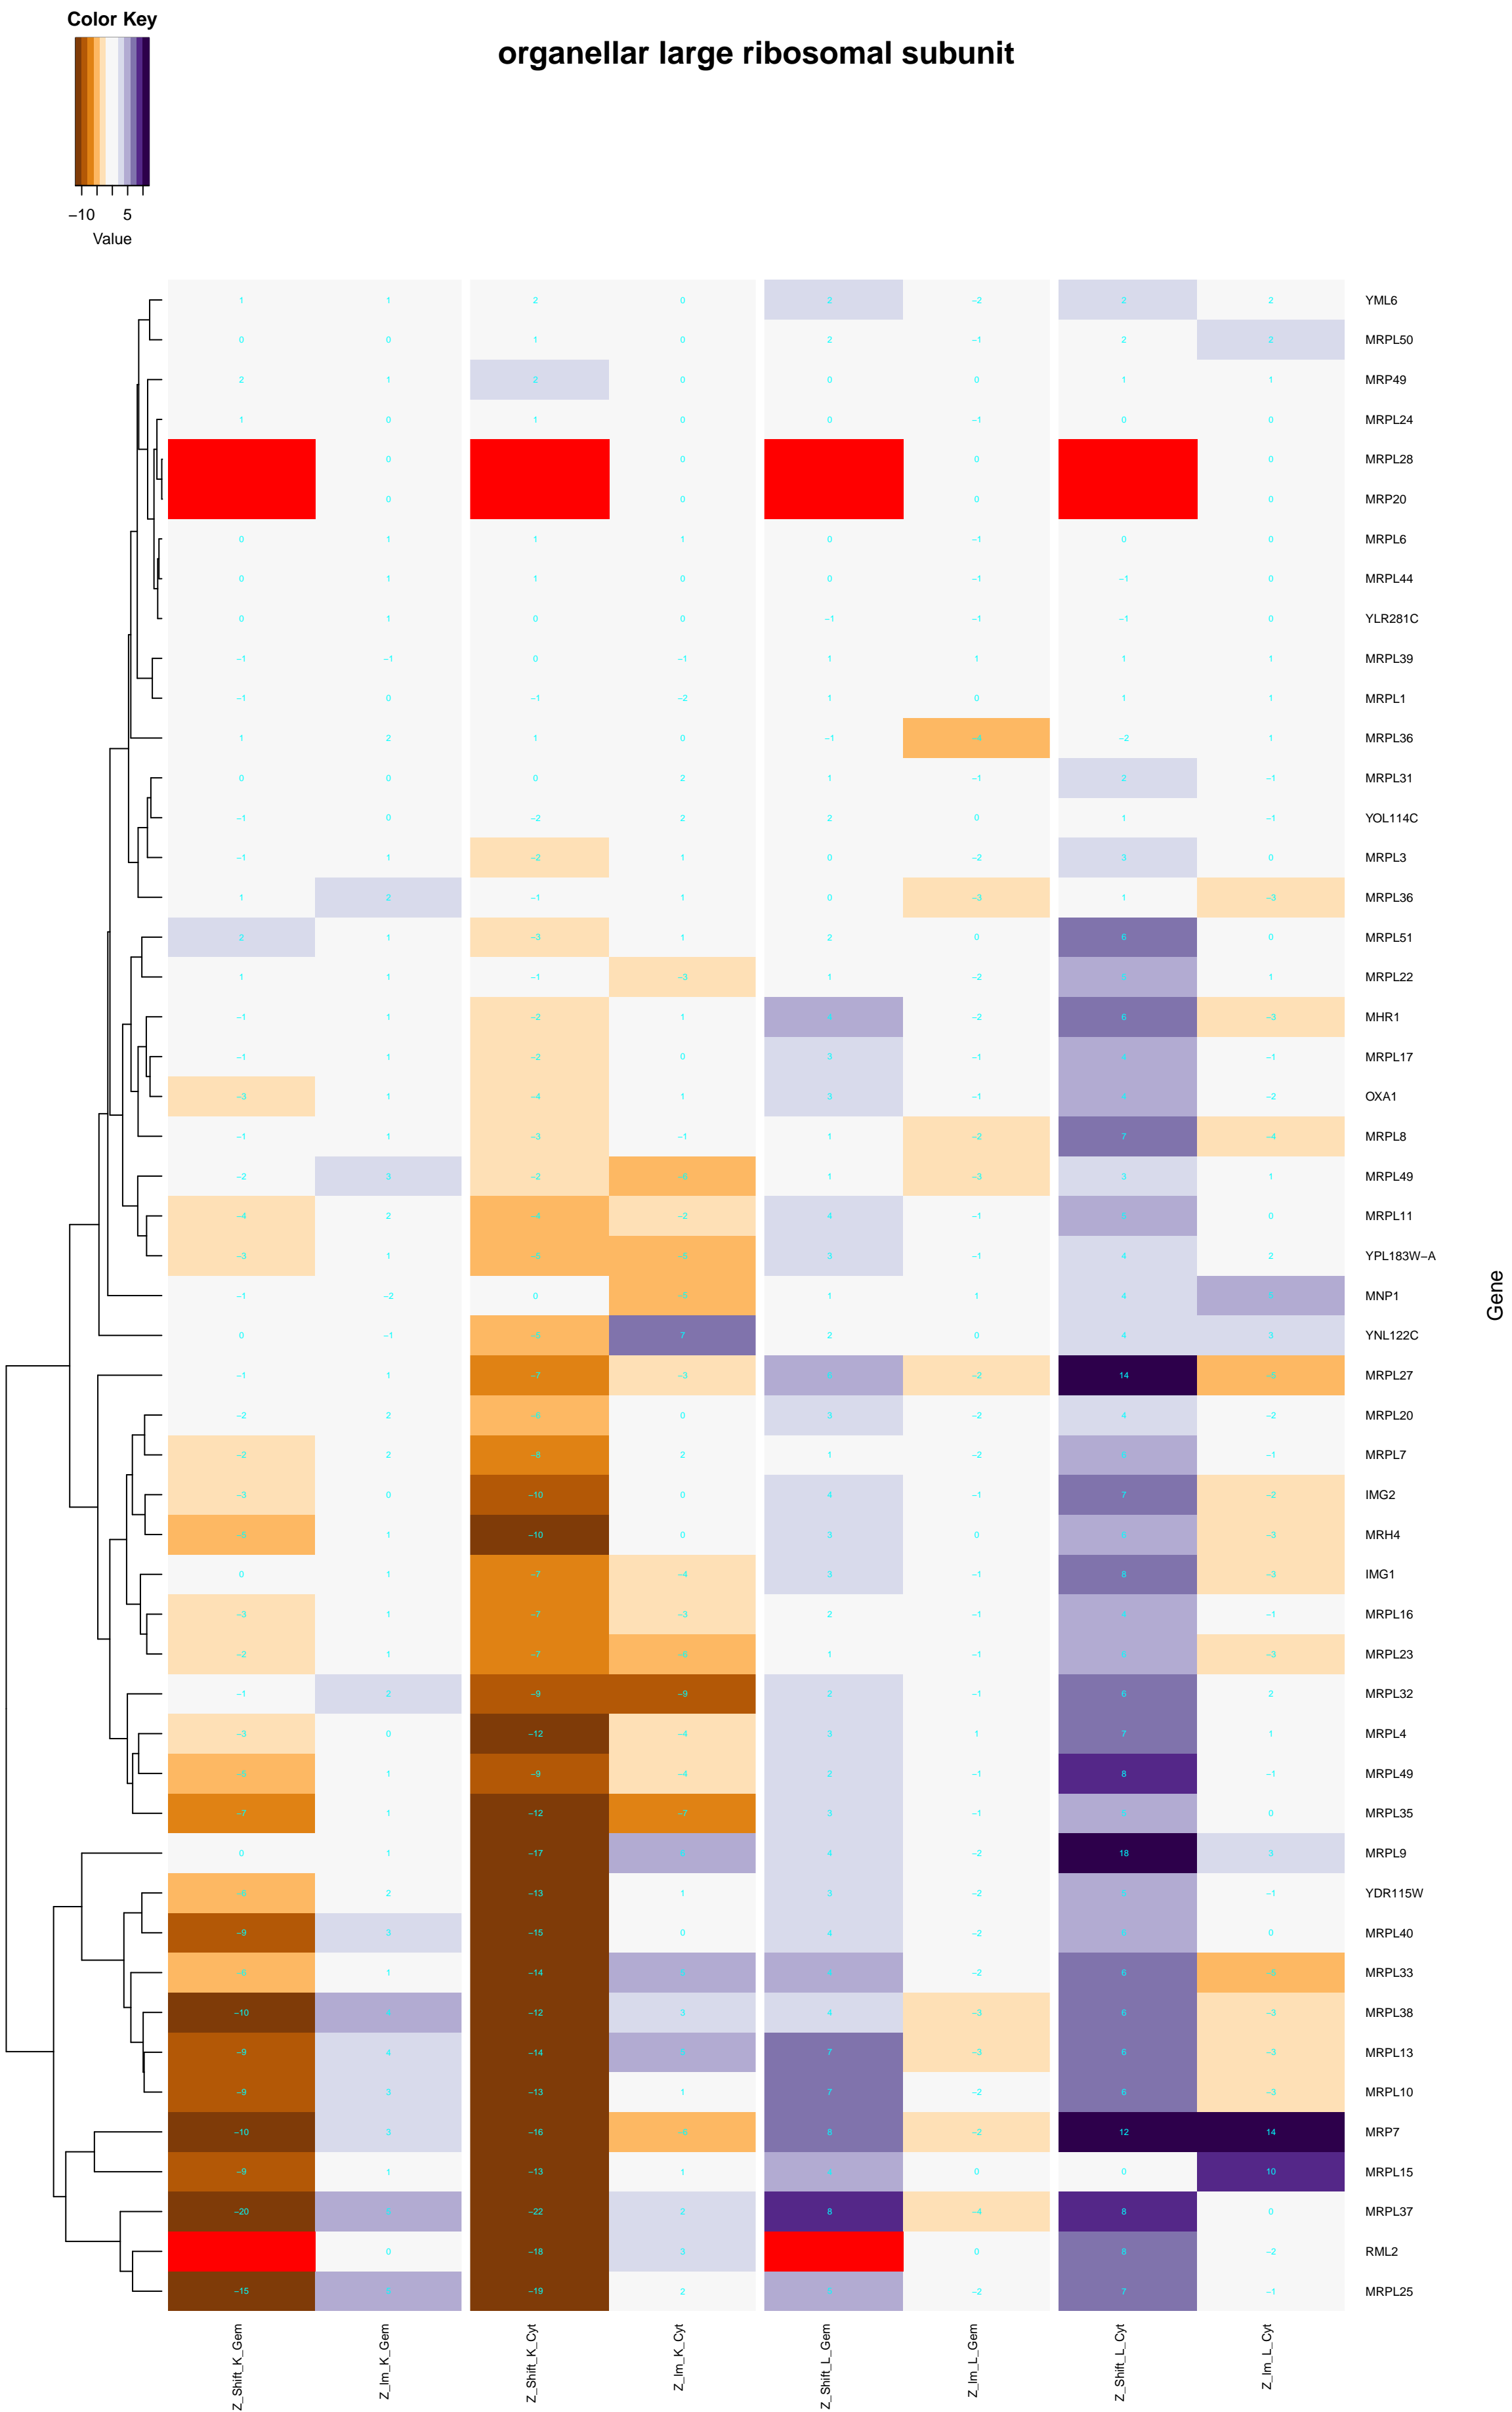

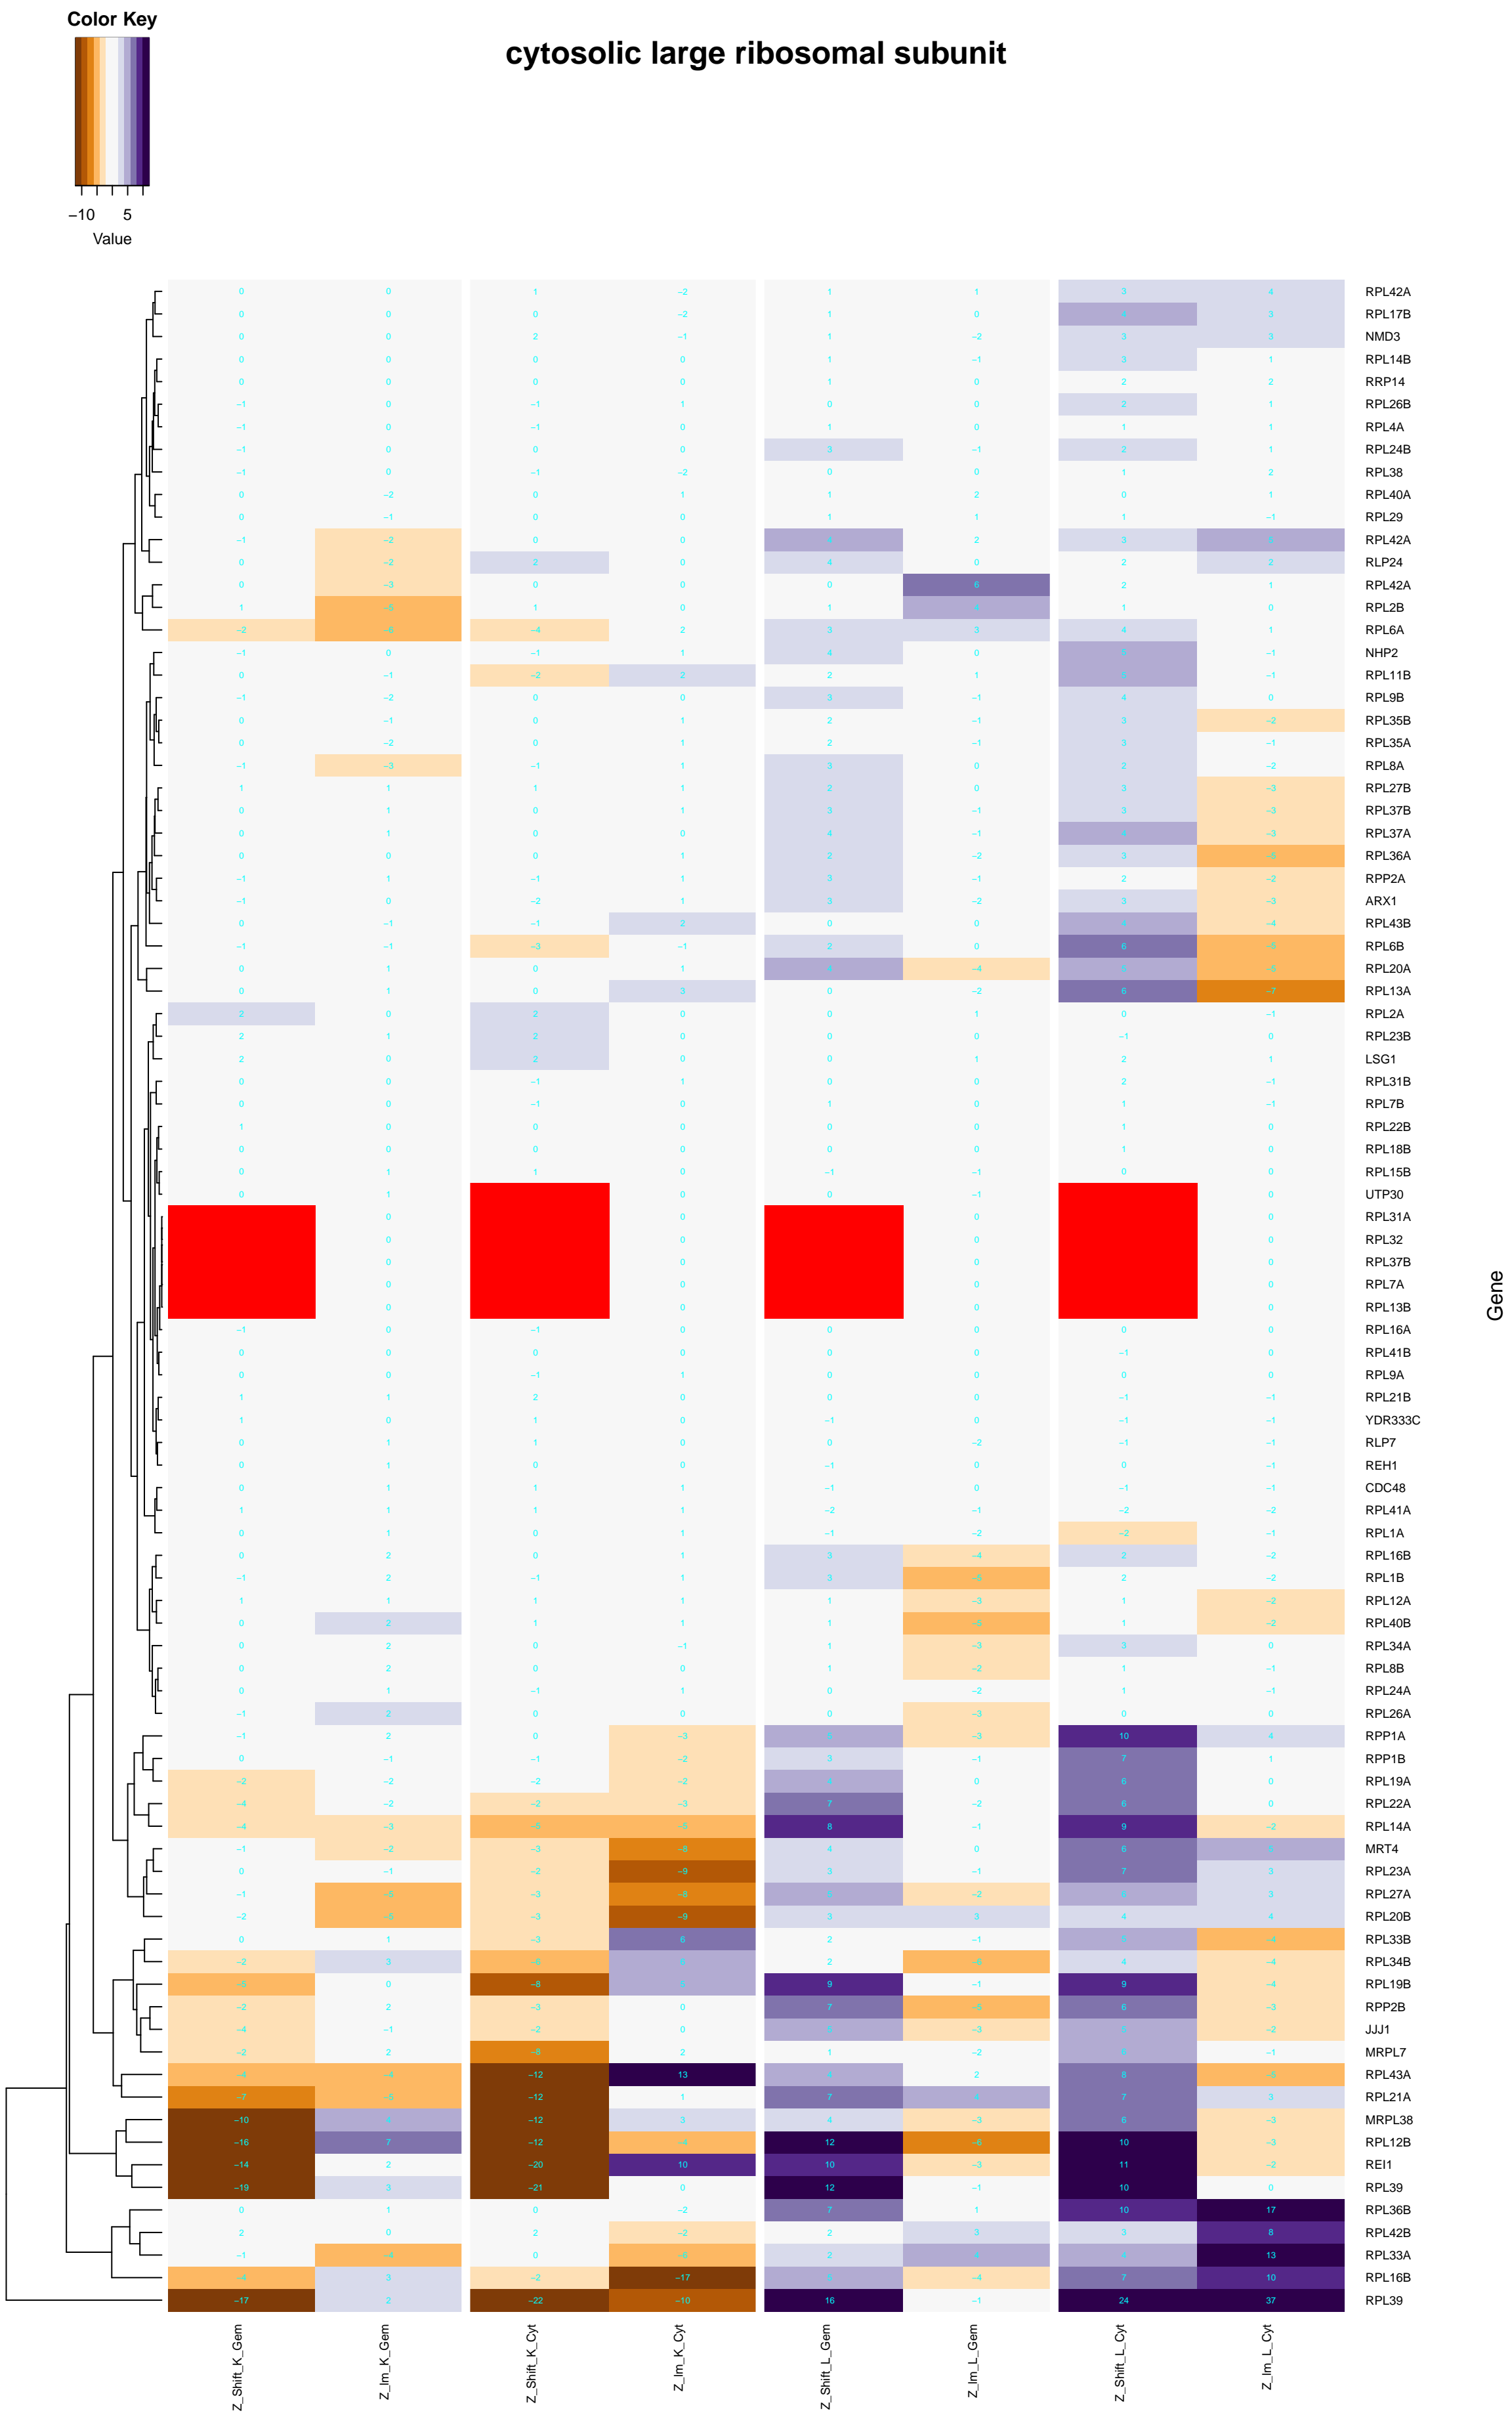

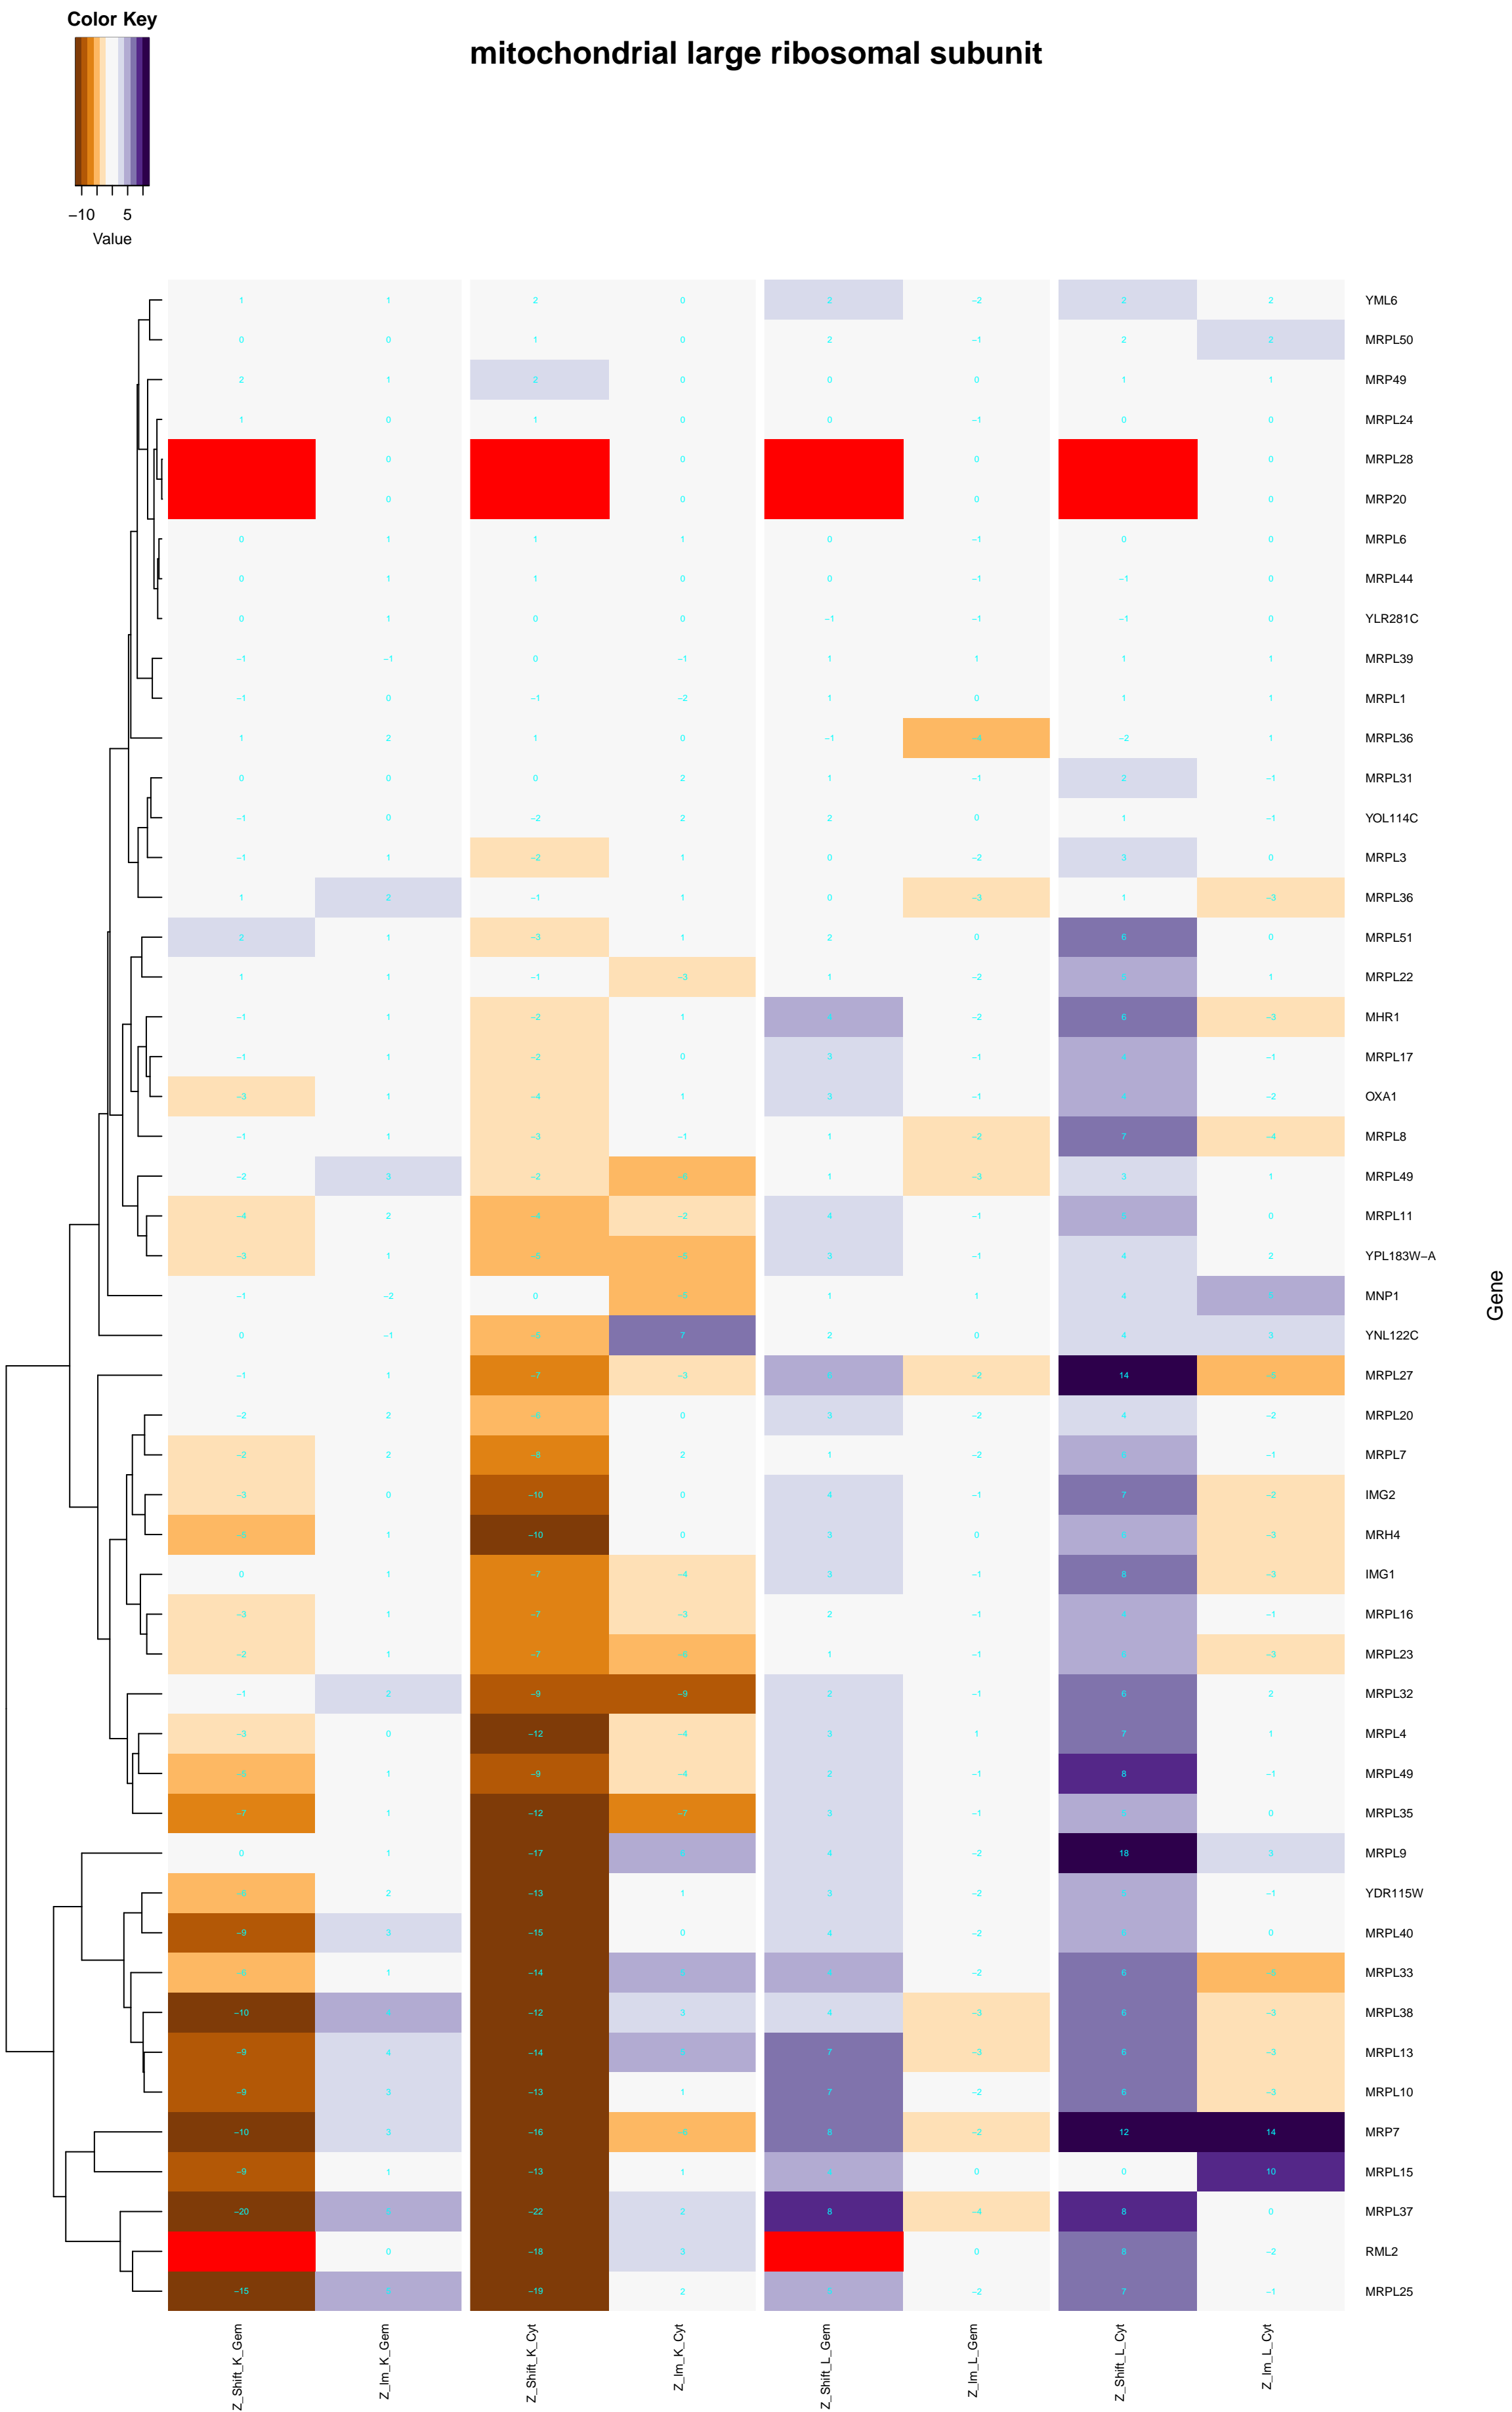

Supplement: s1 [file s1]

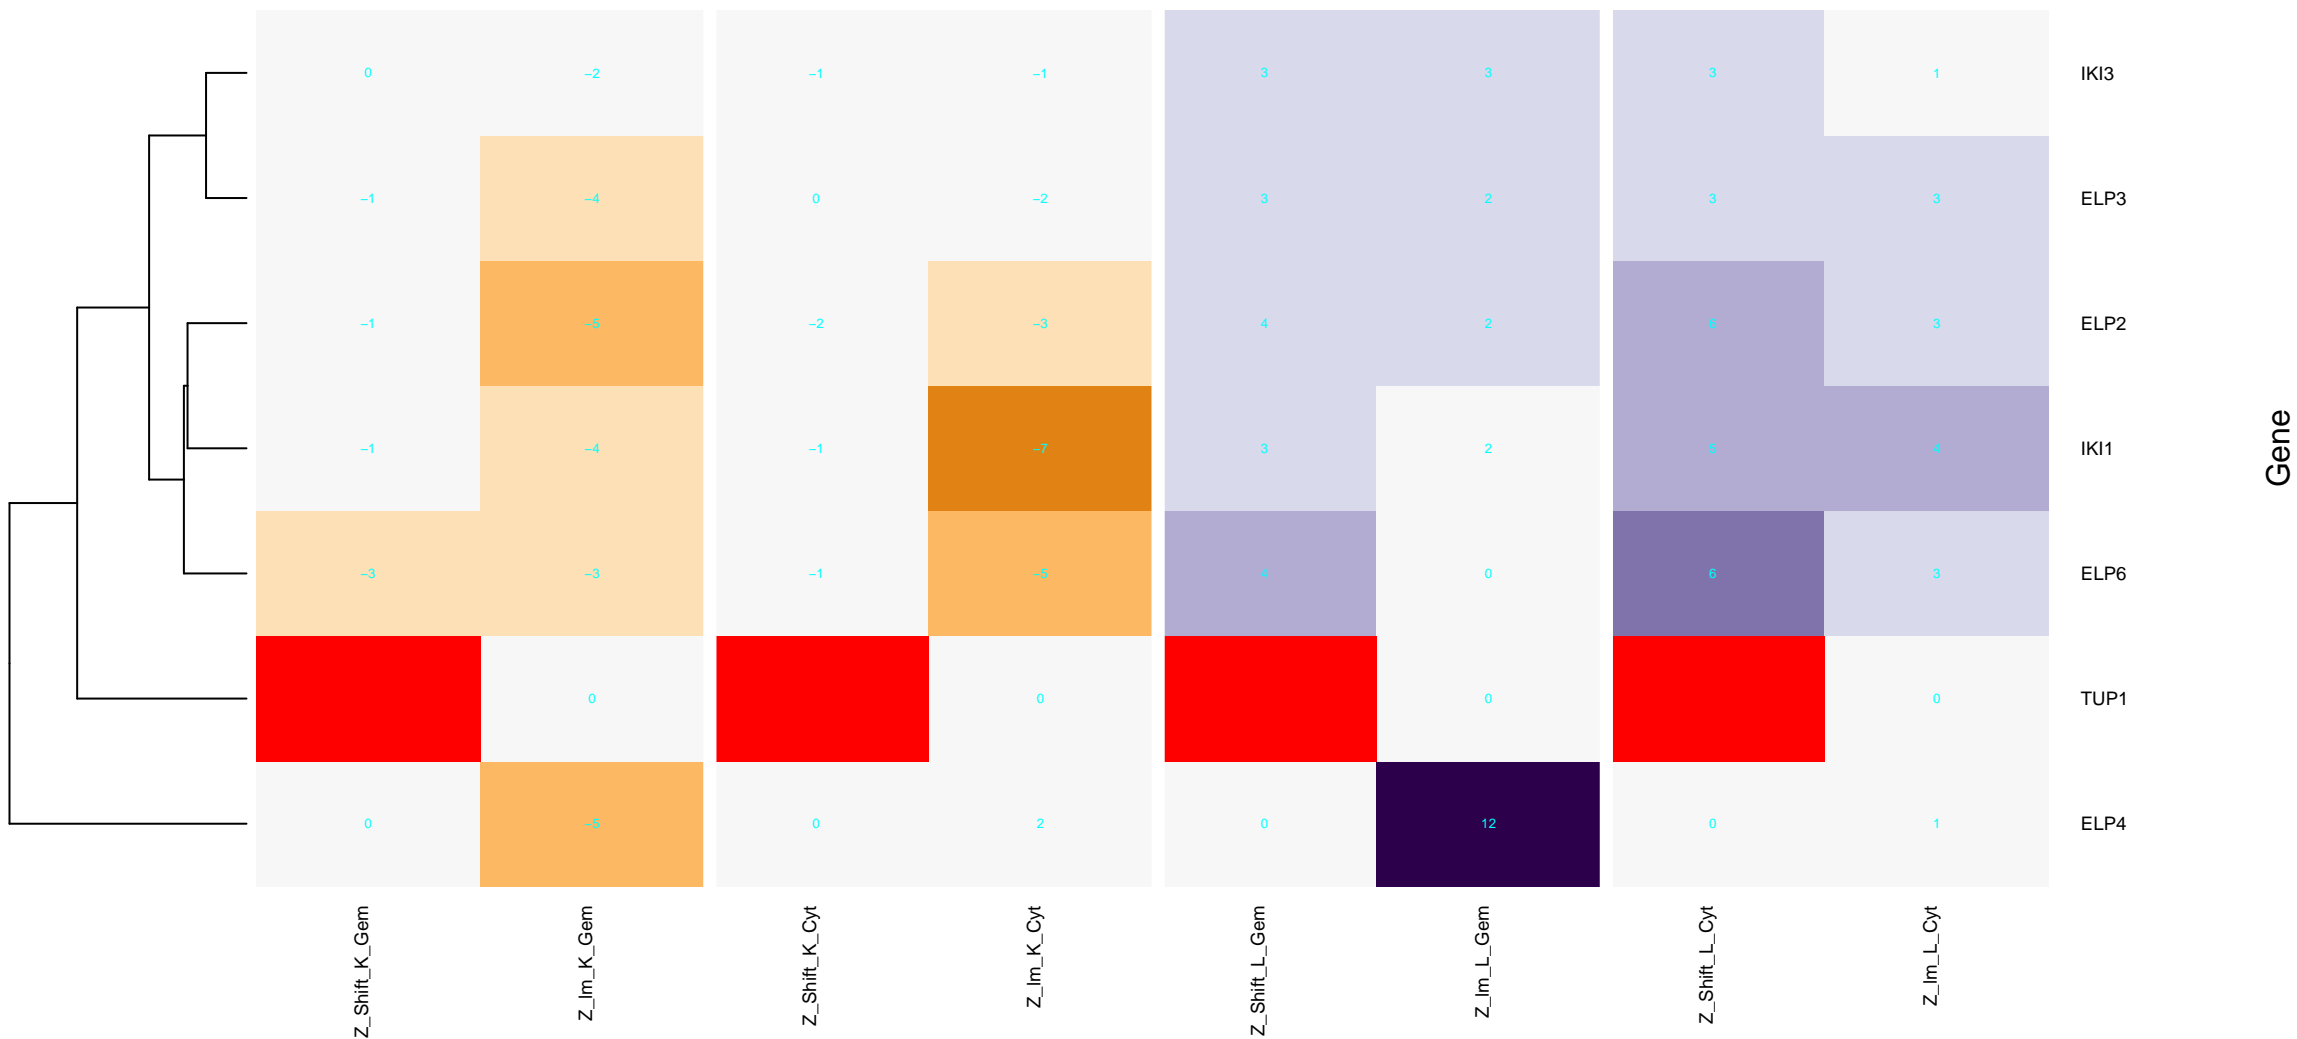

Supplement: s1 [file s1]

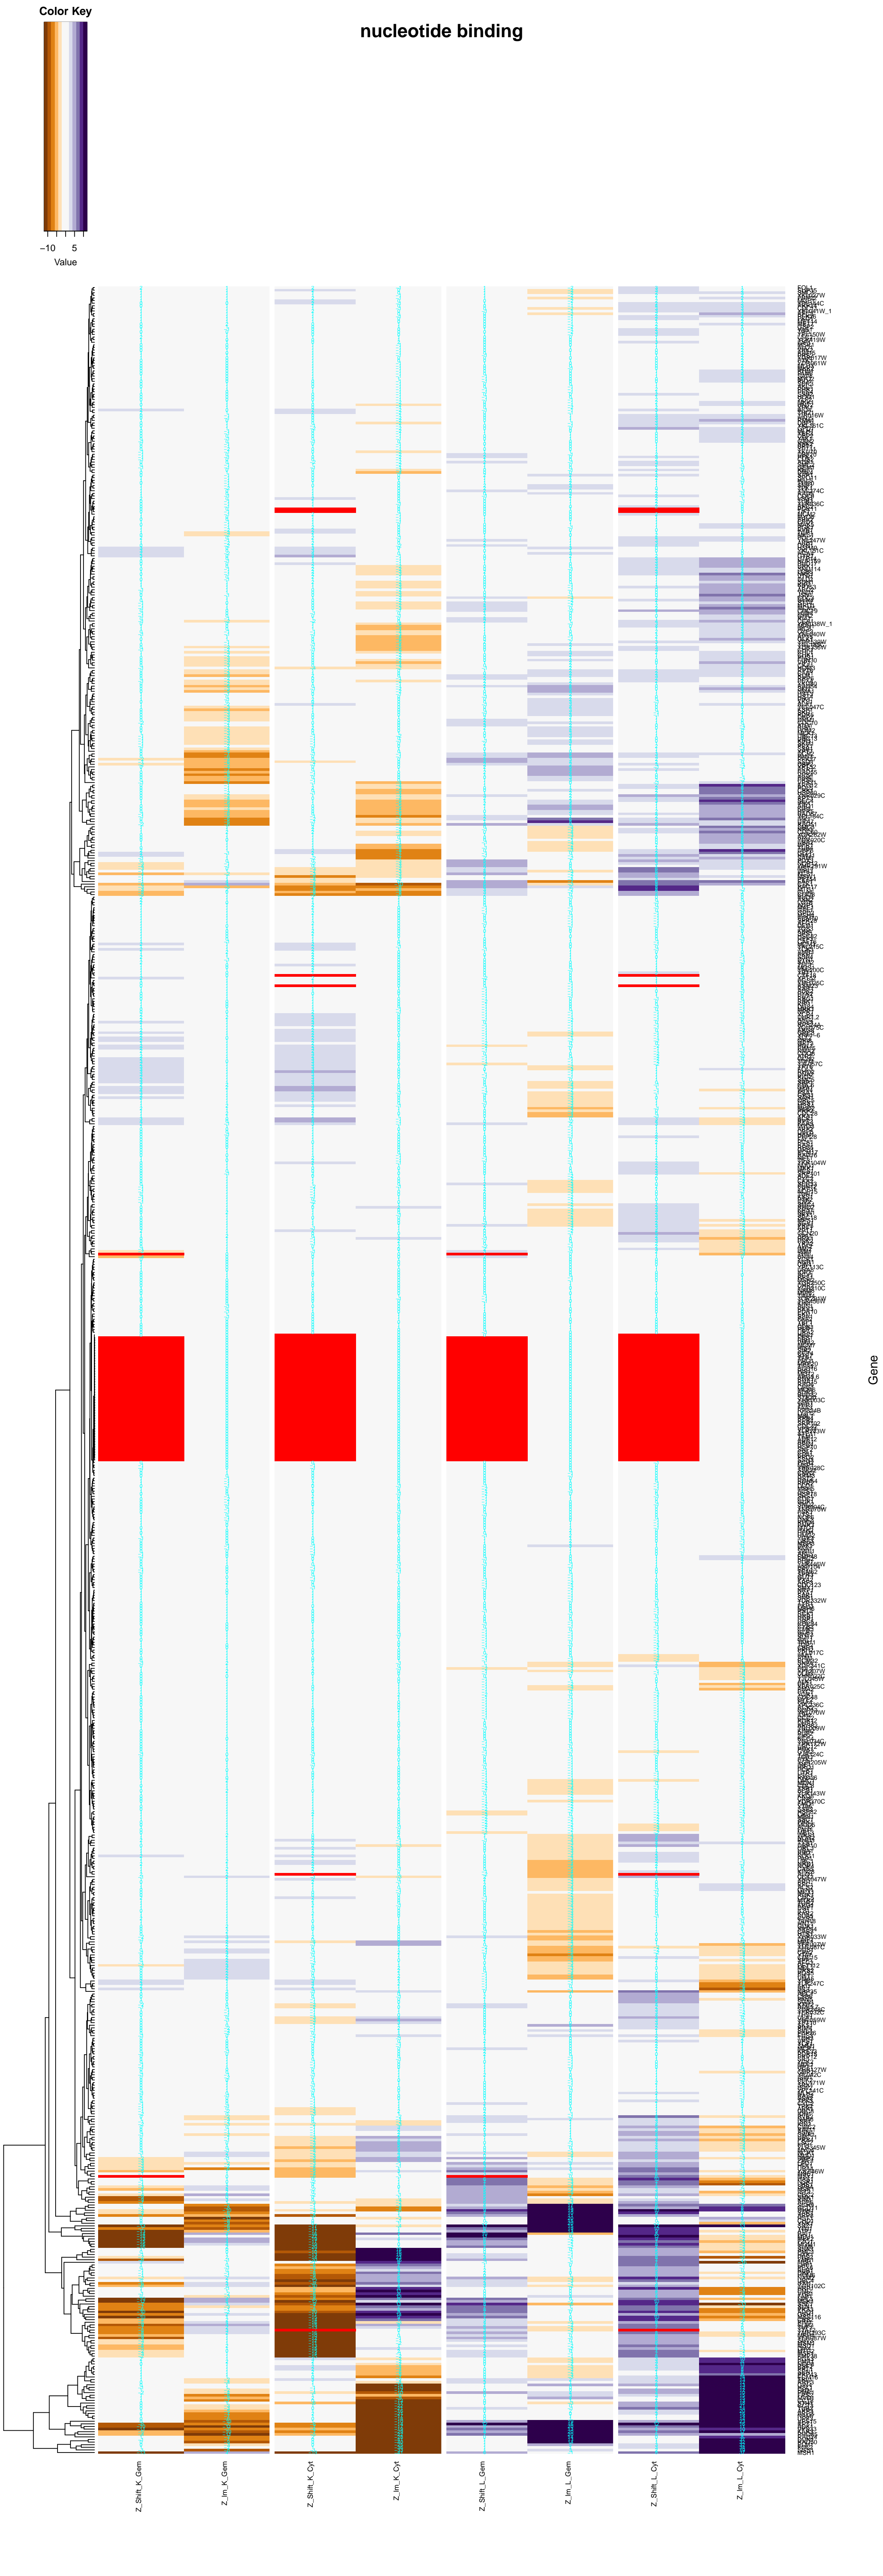

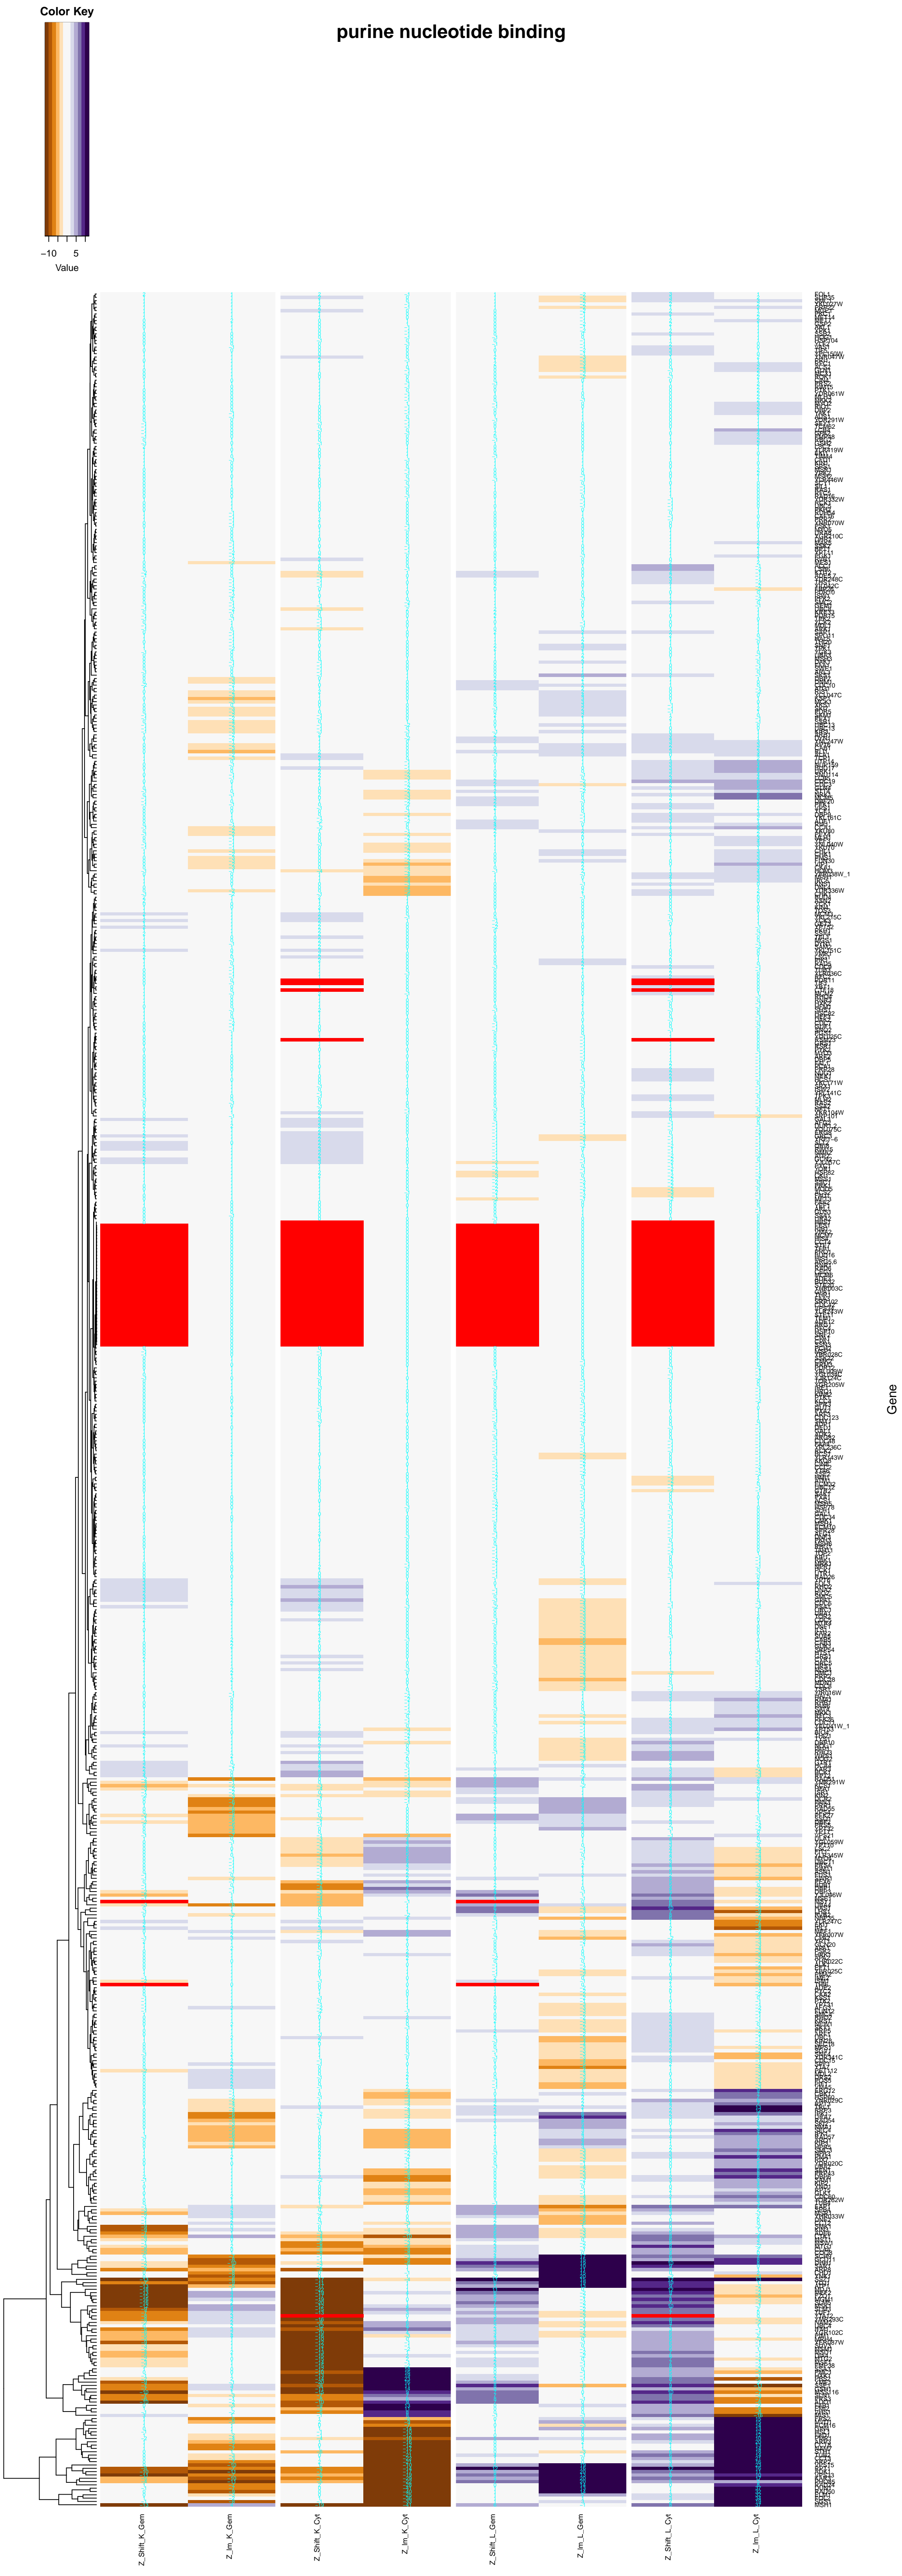

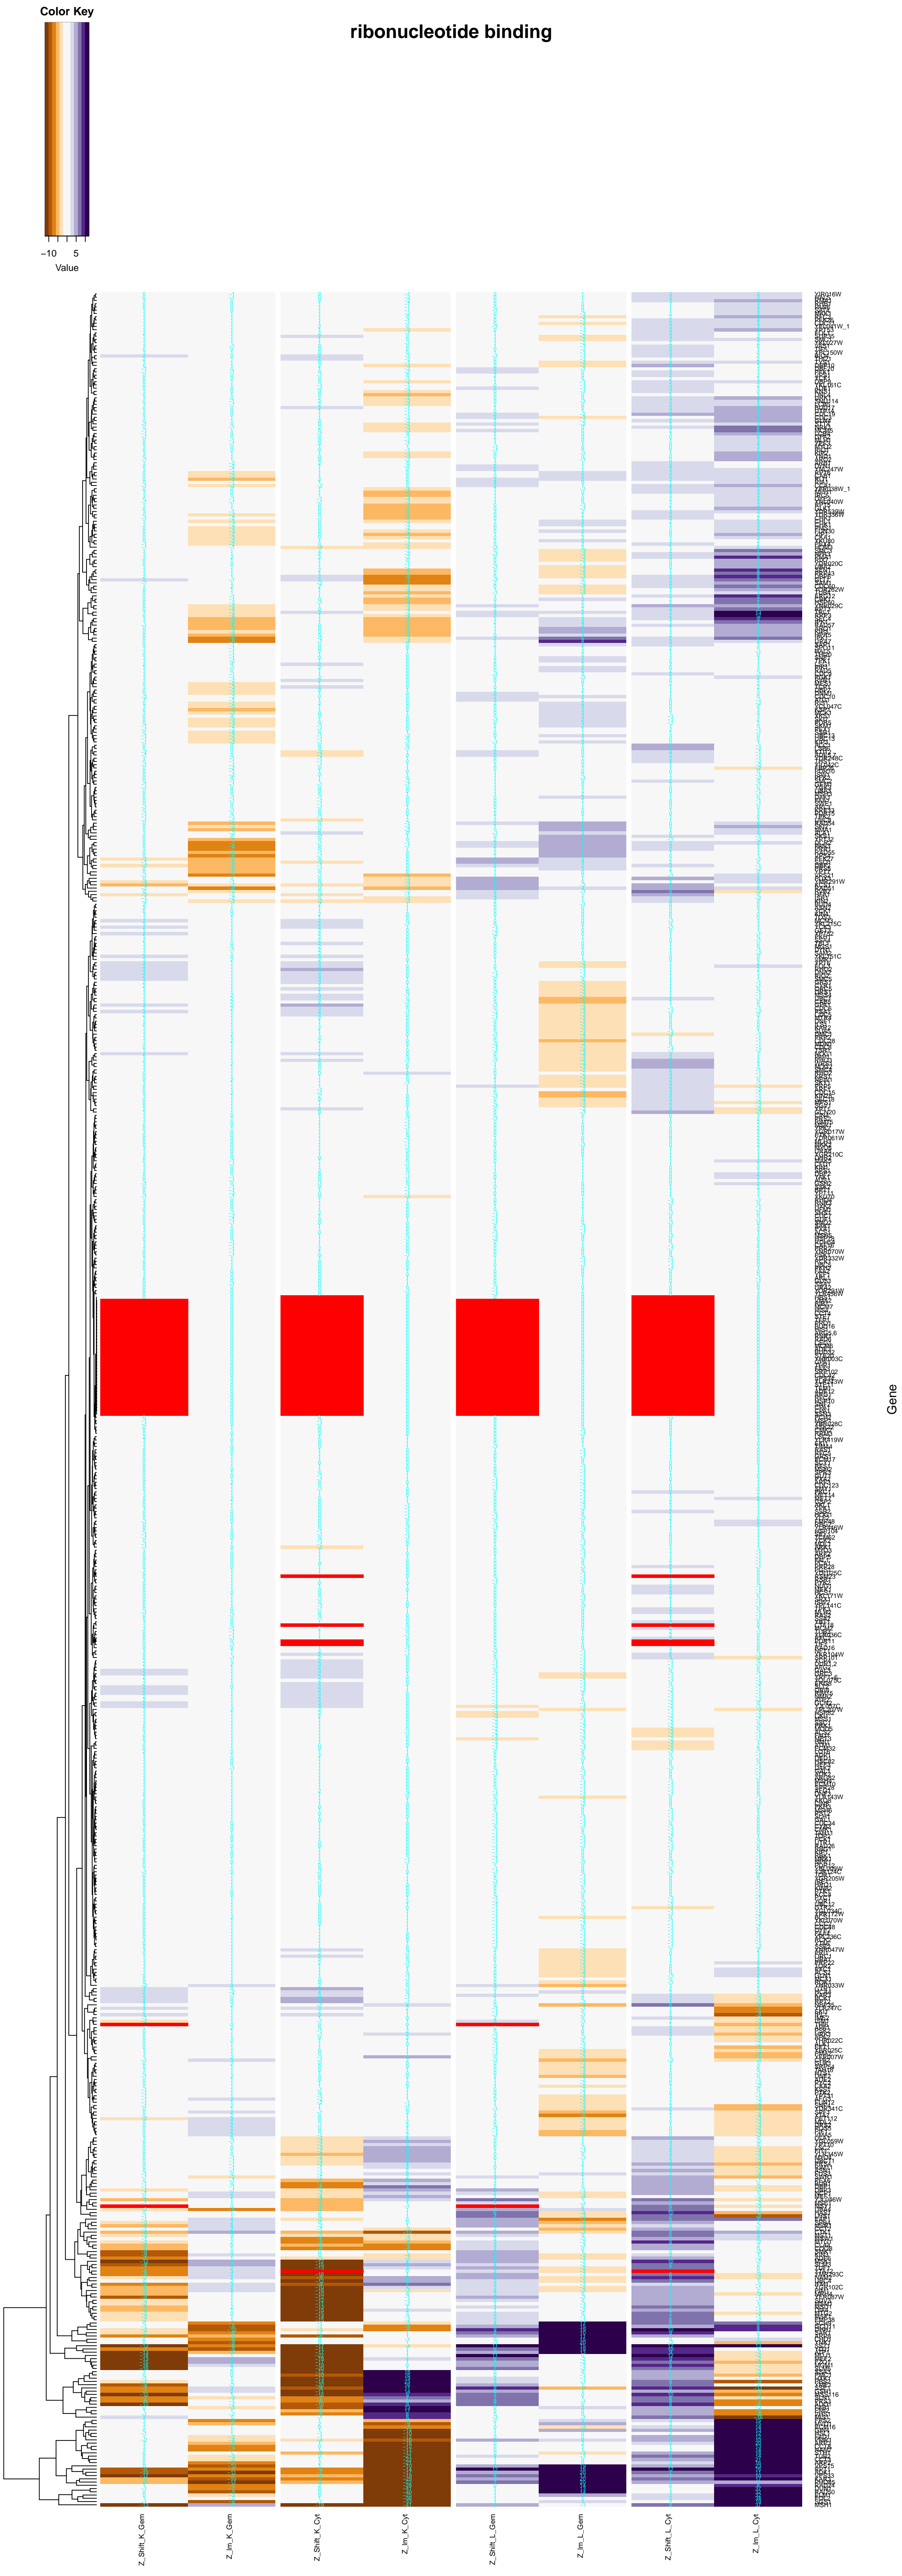

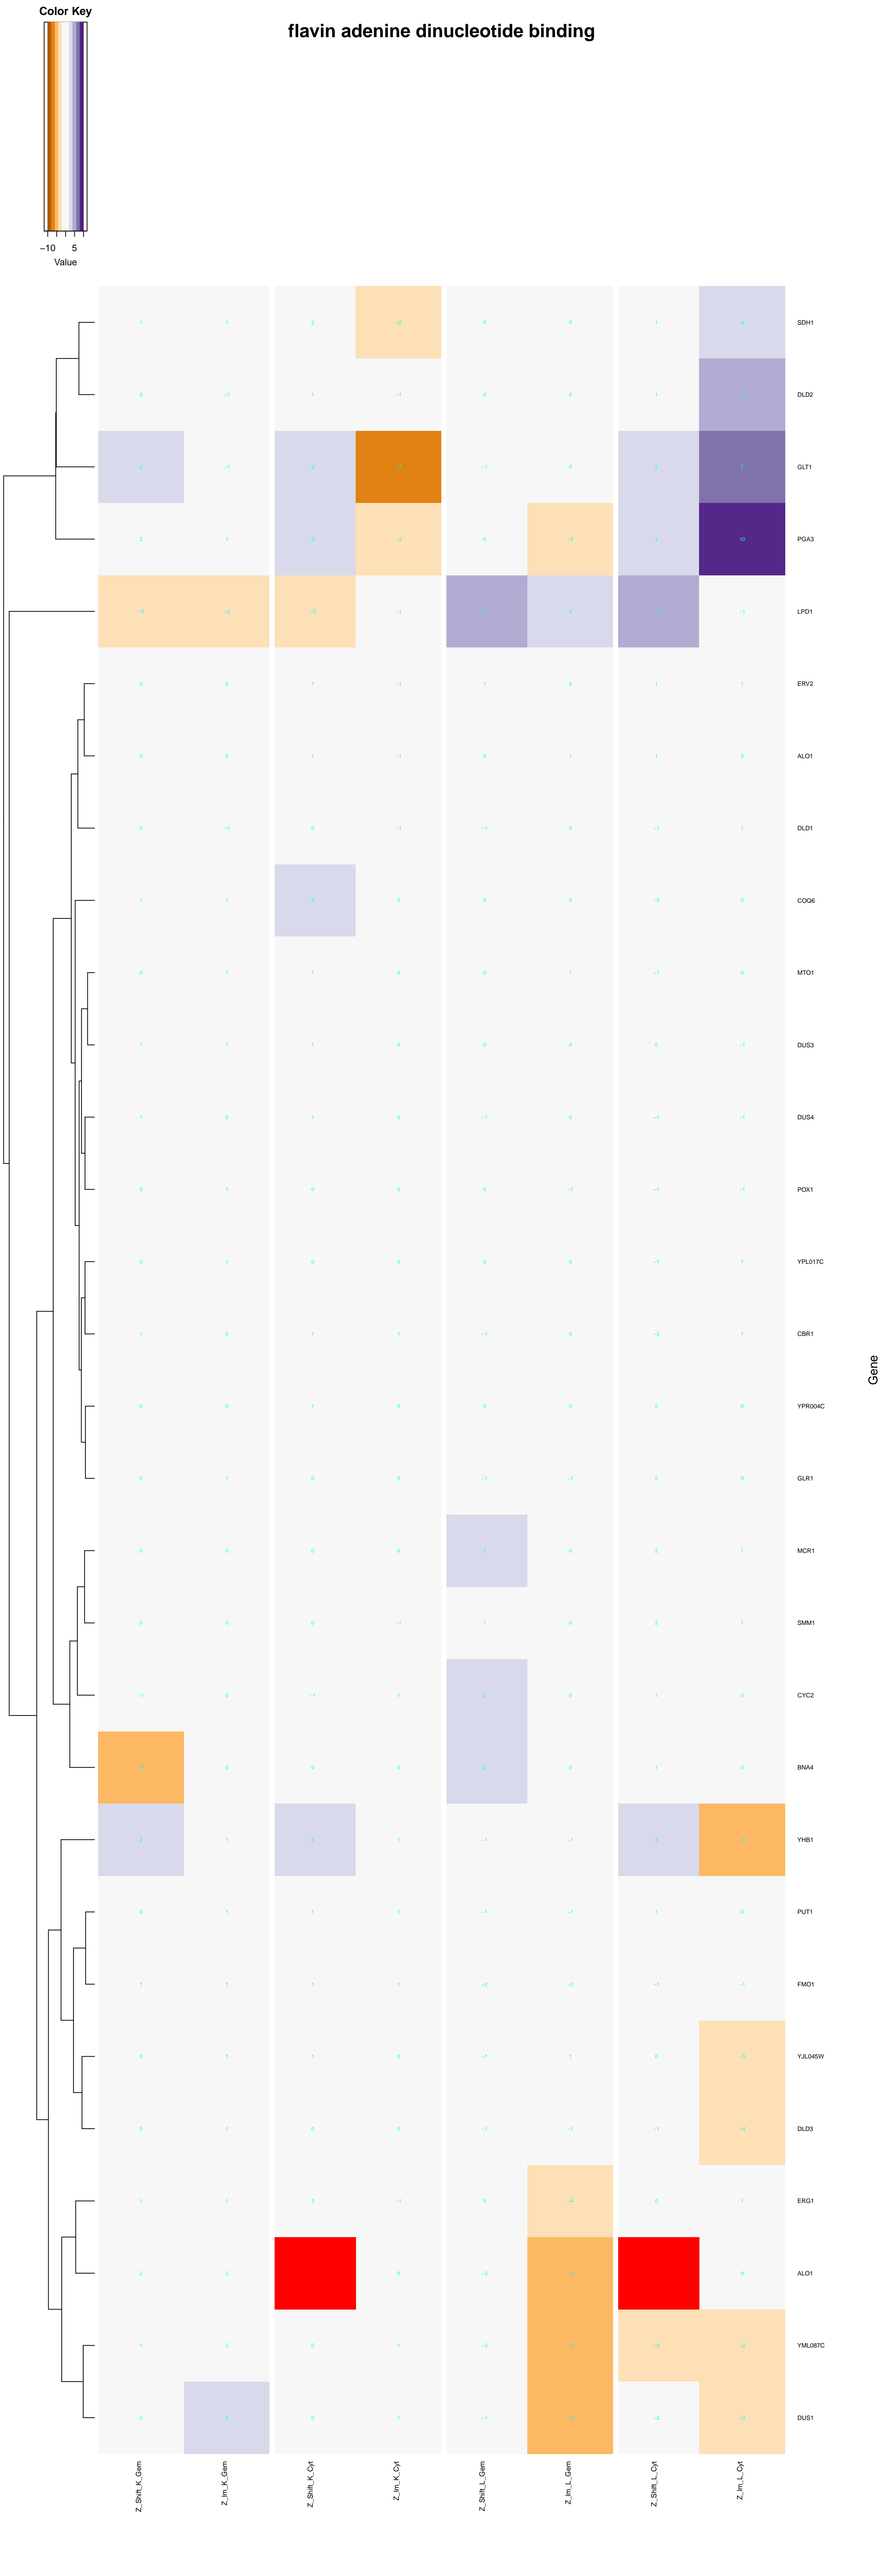

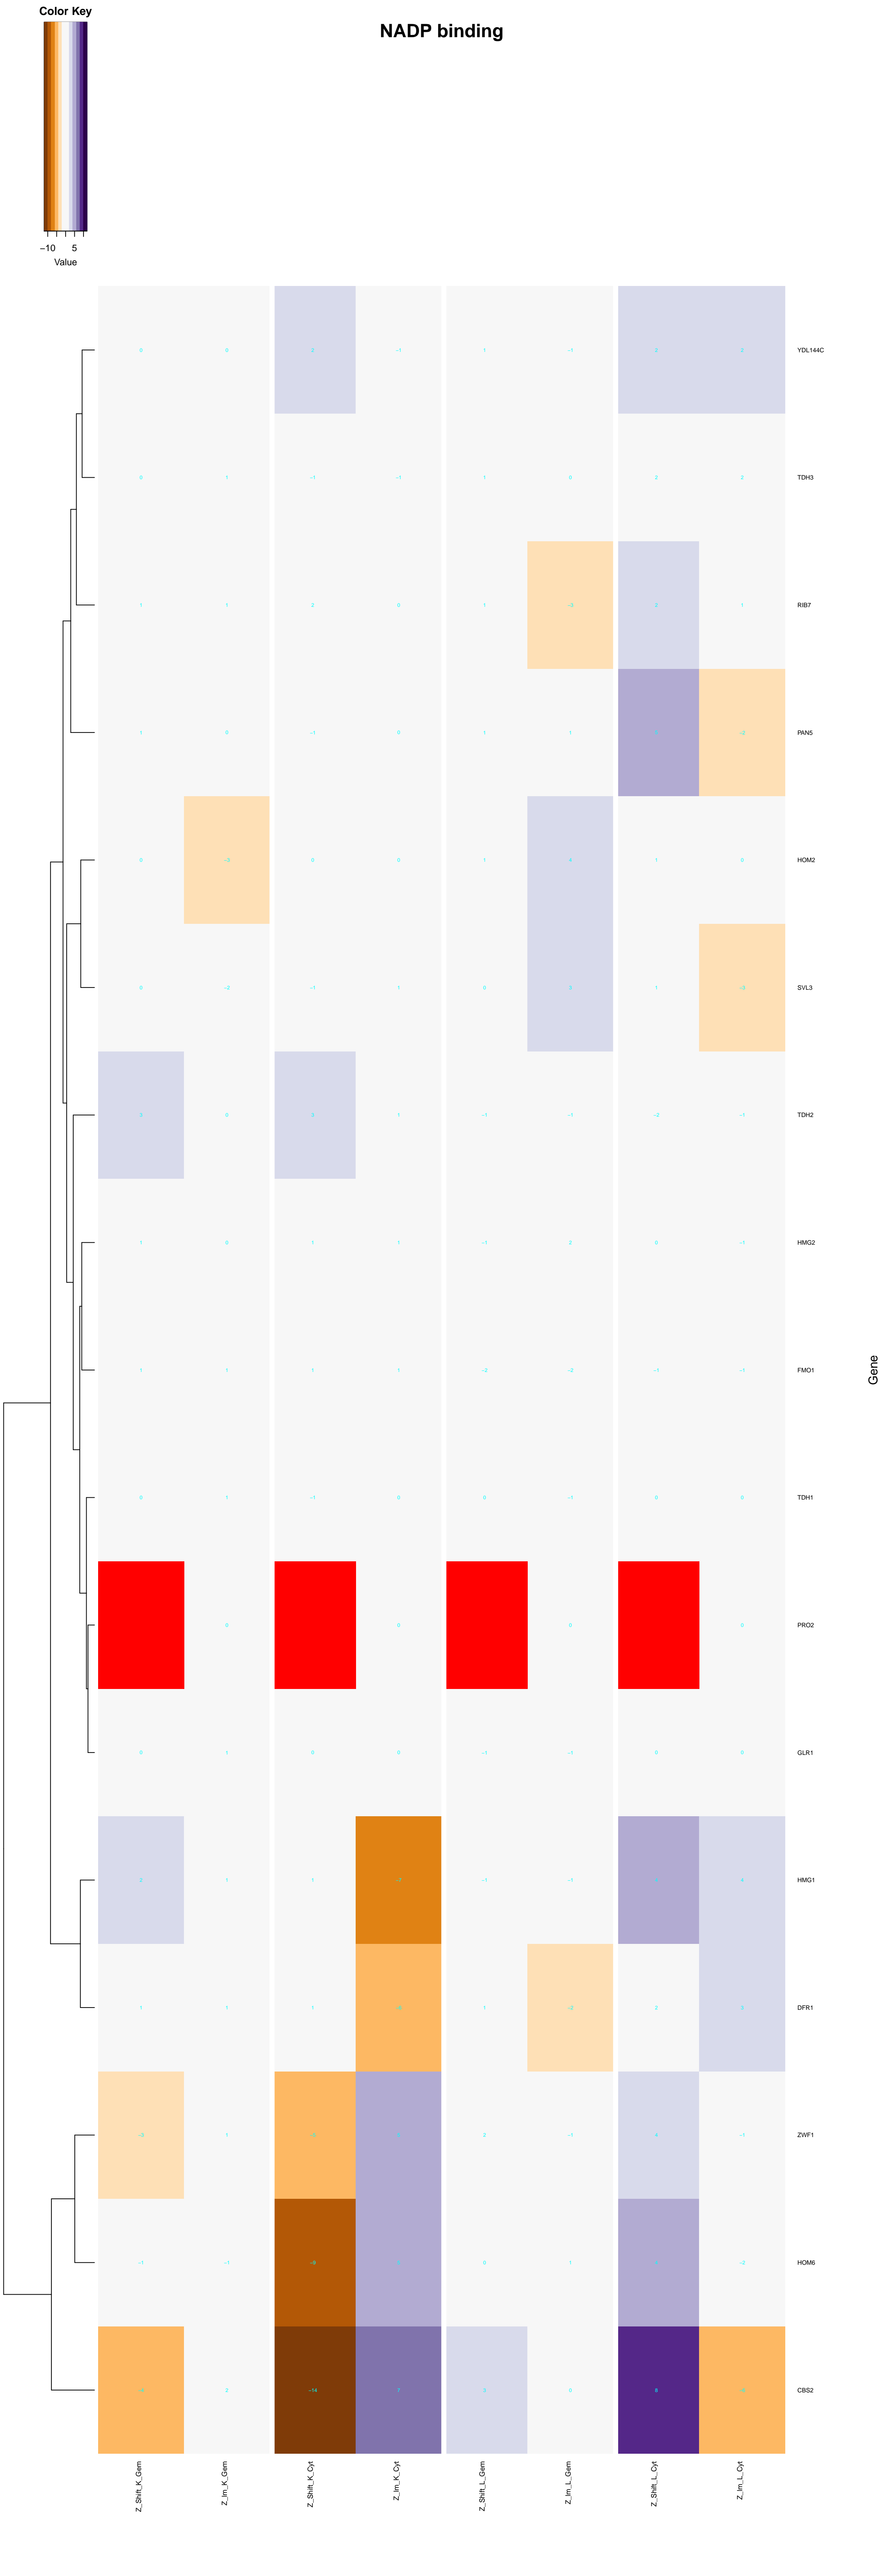

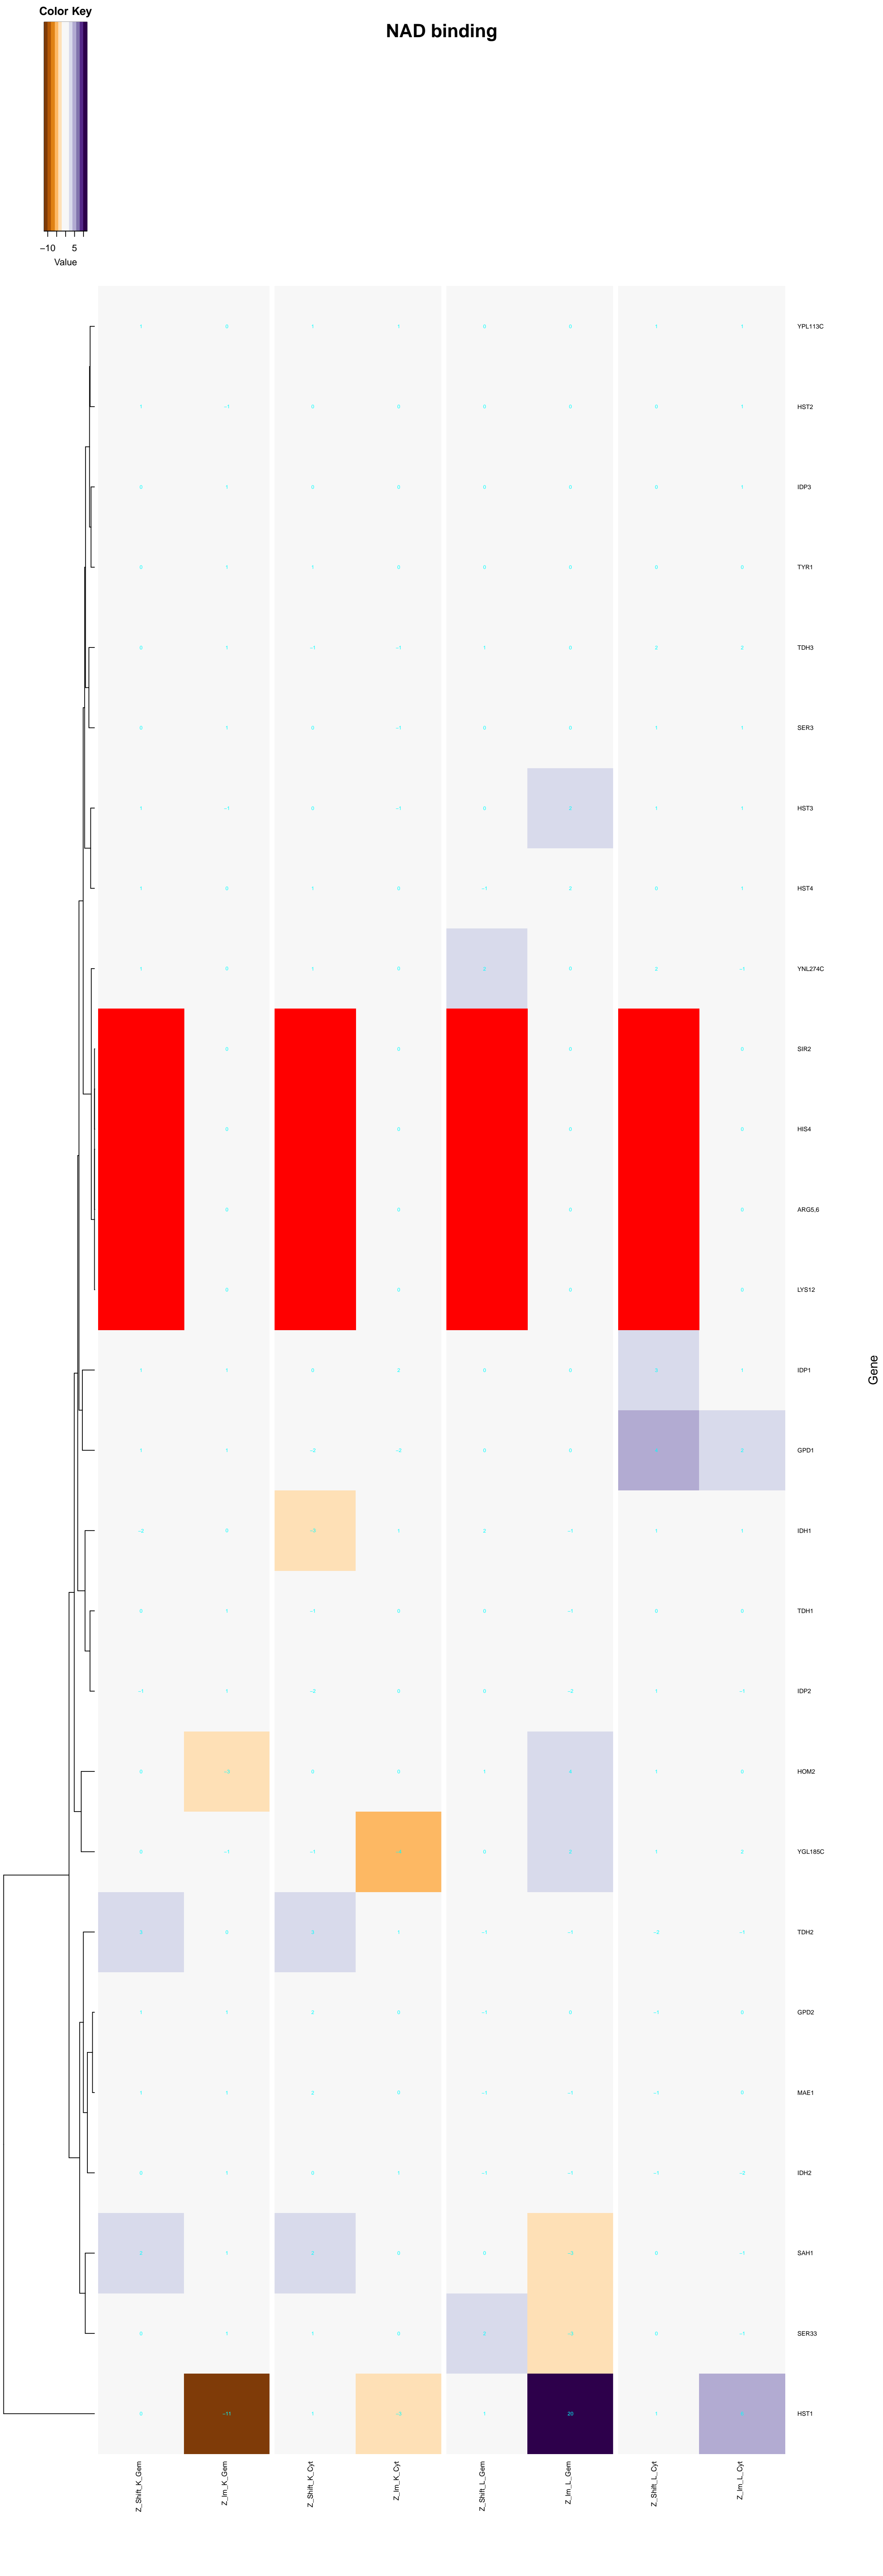

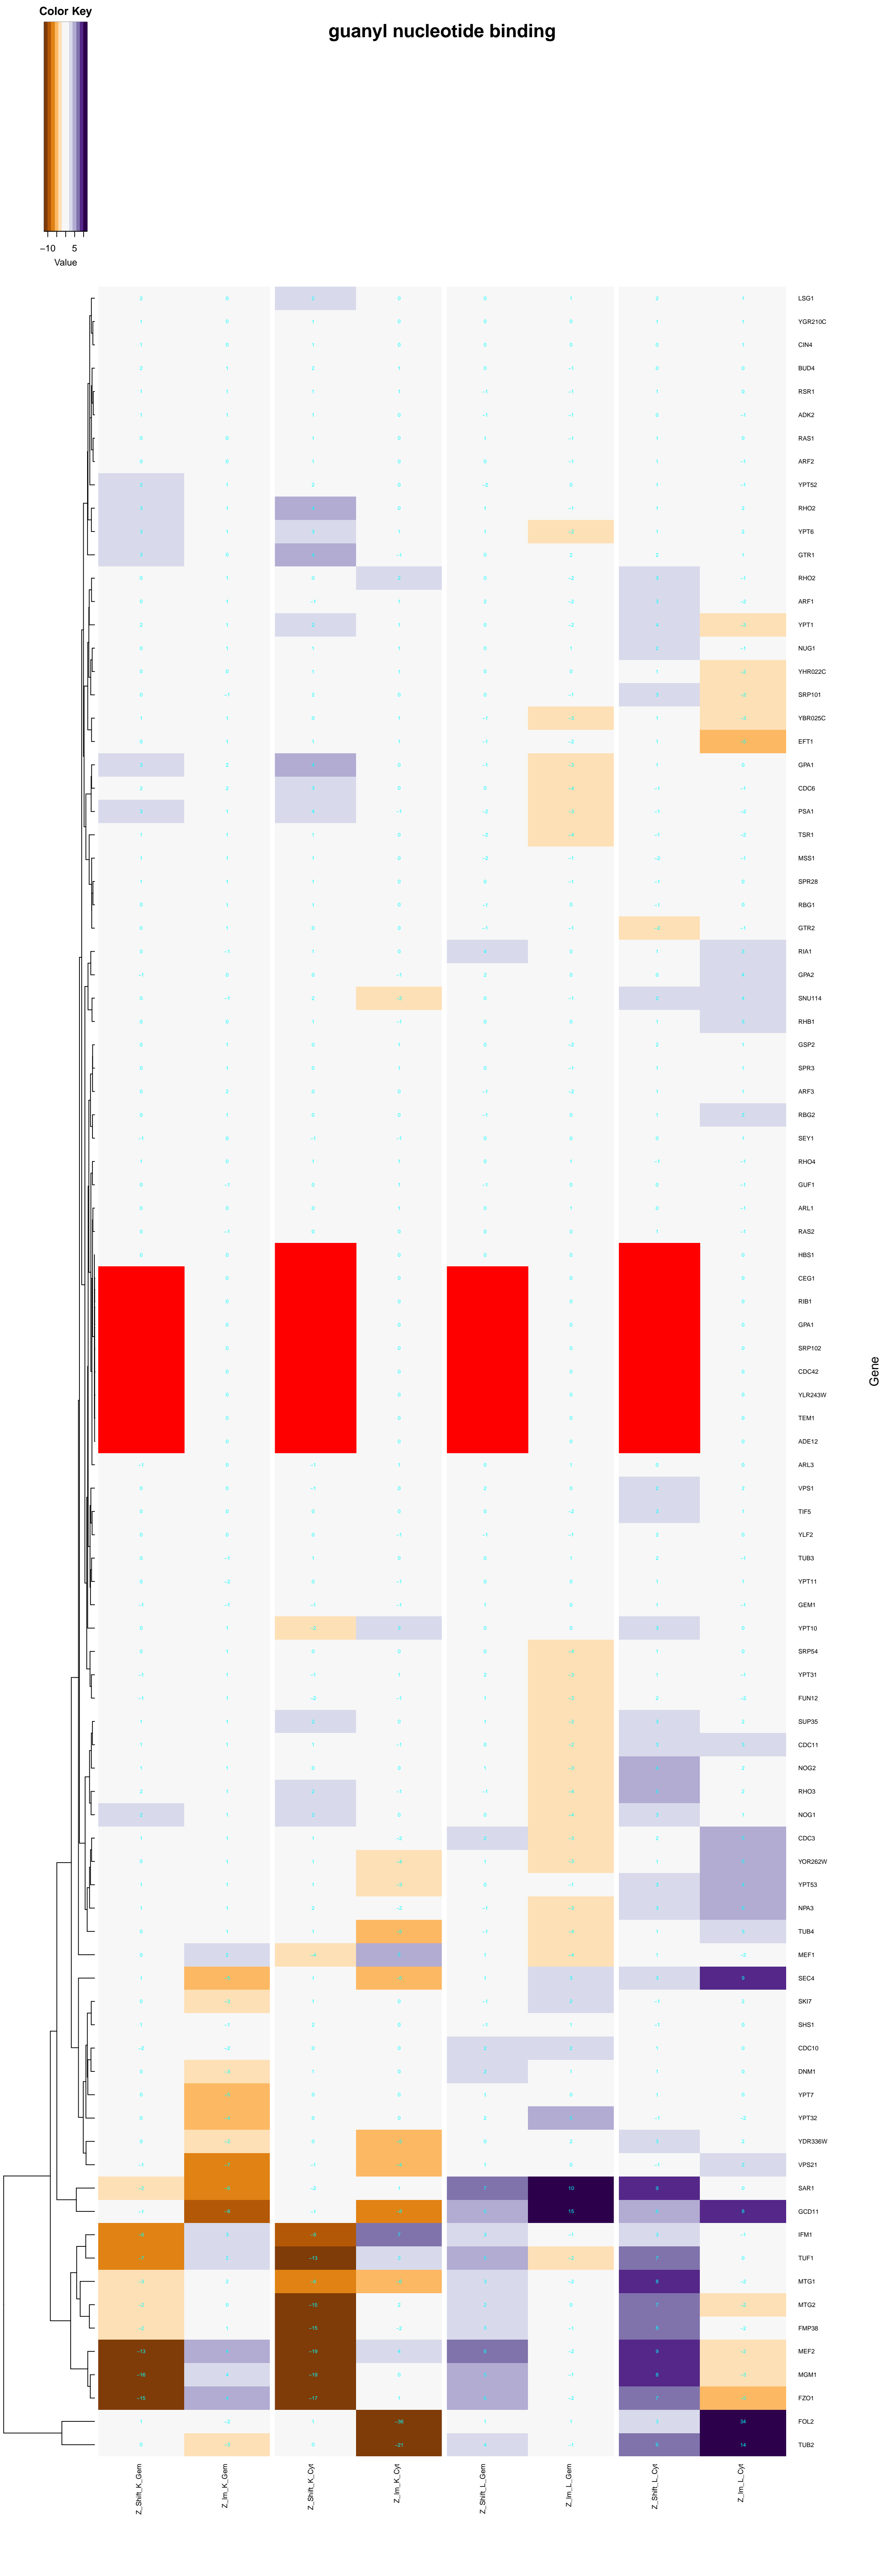





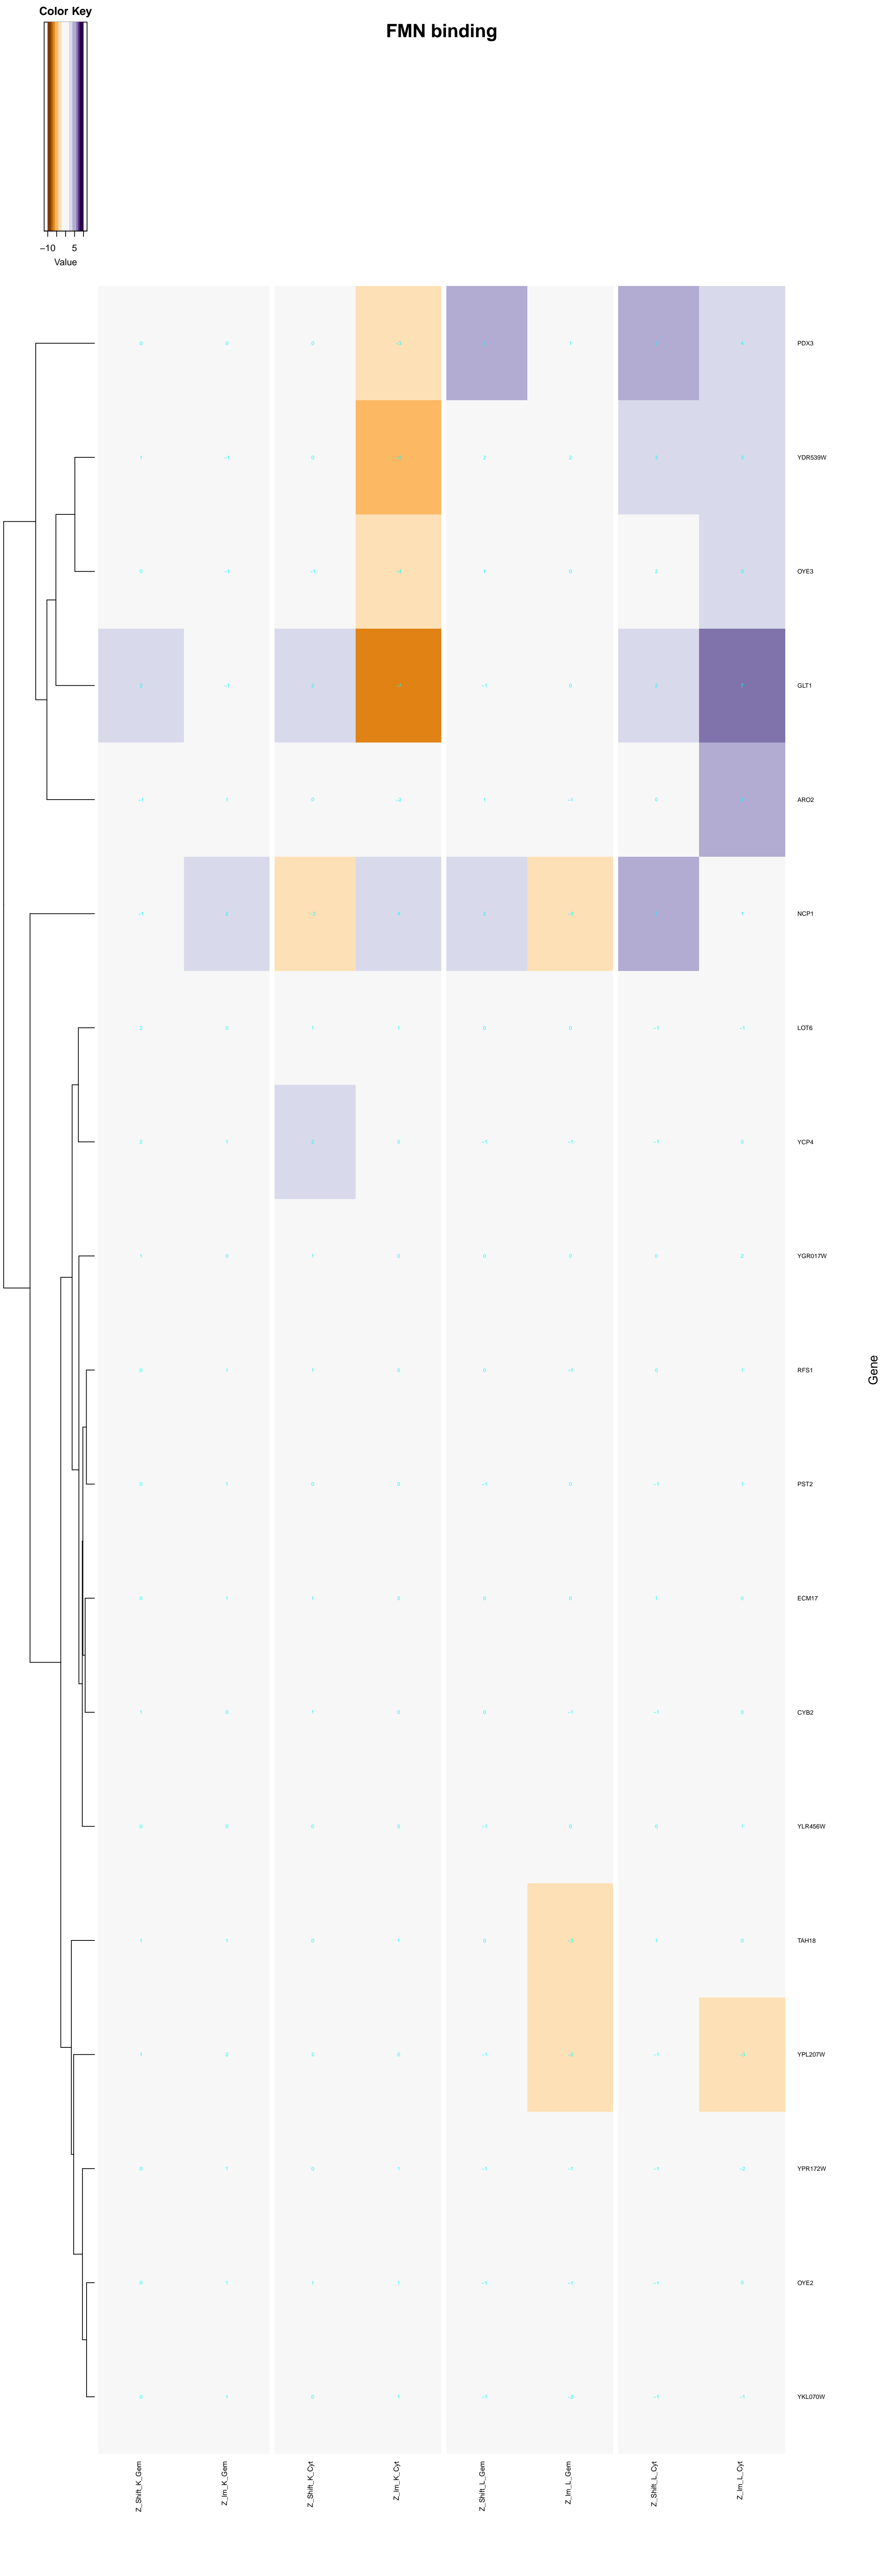

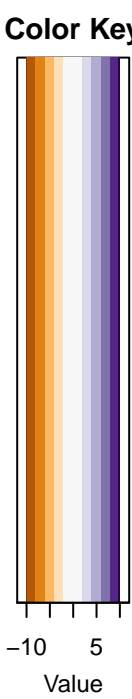

FAD binding

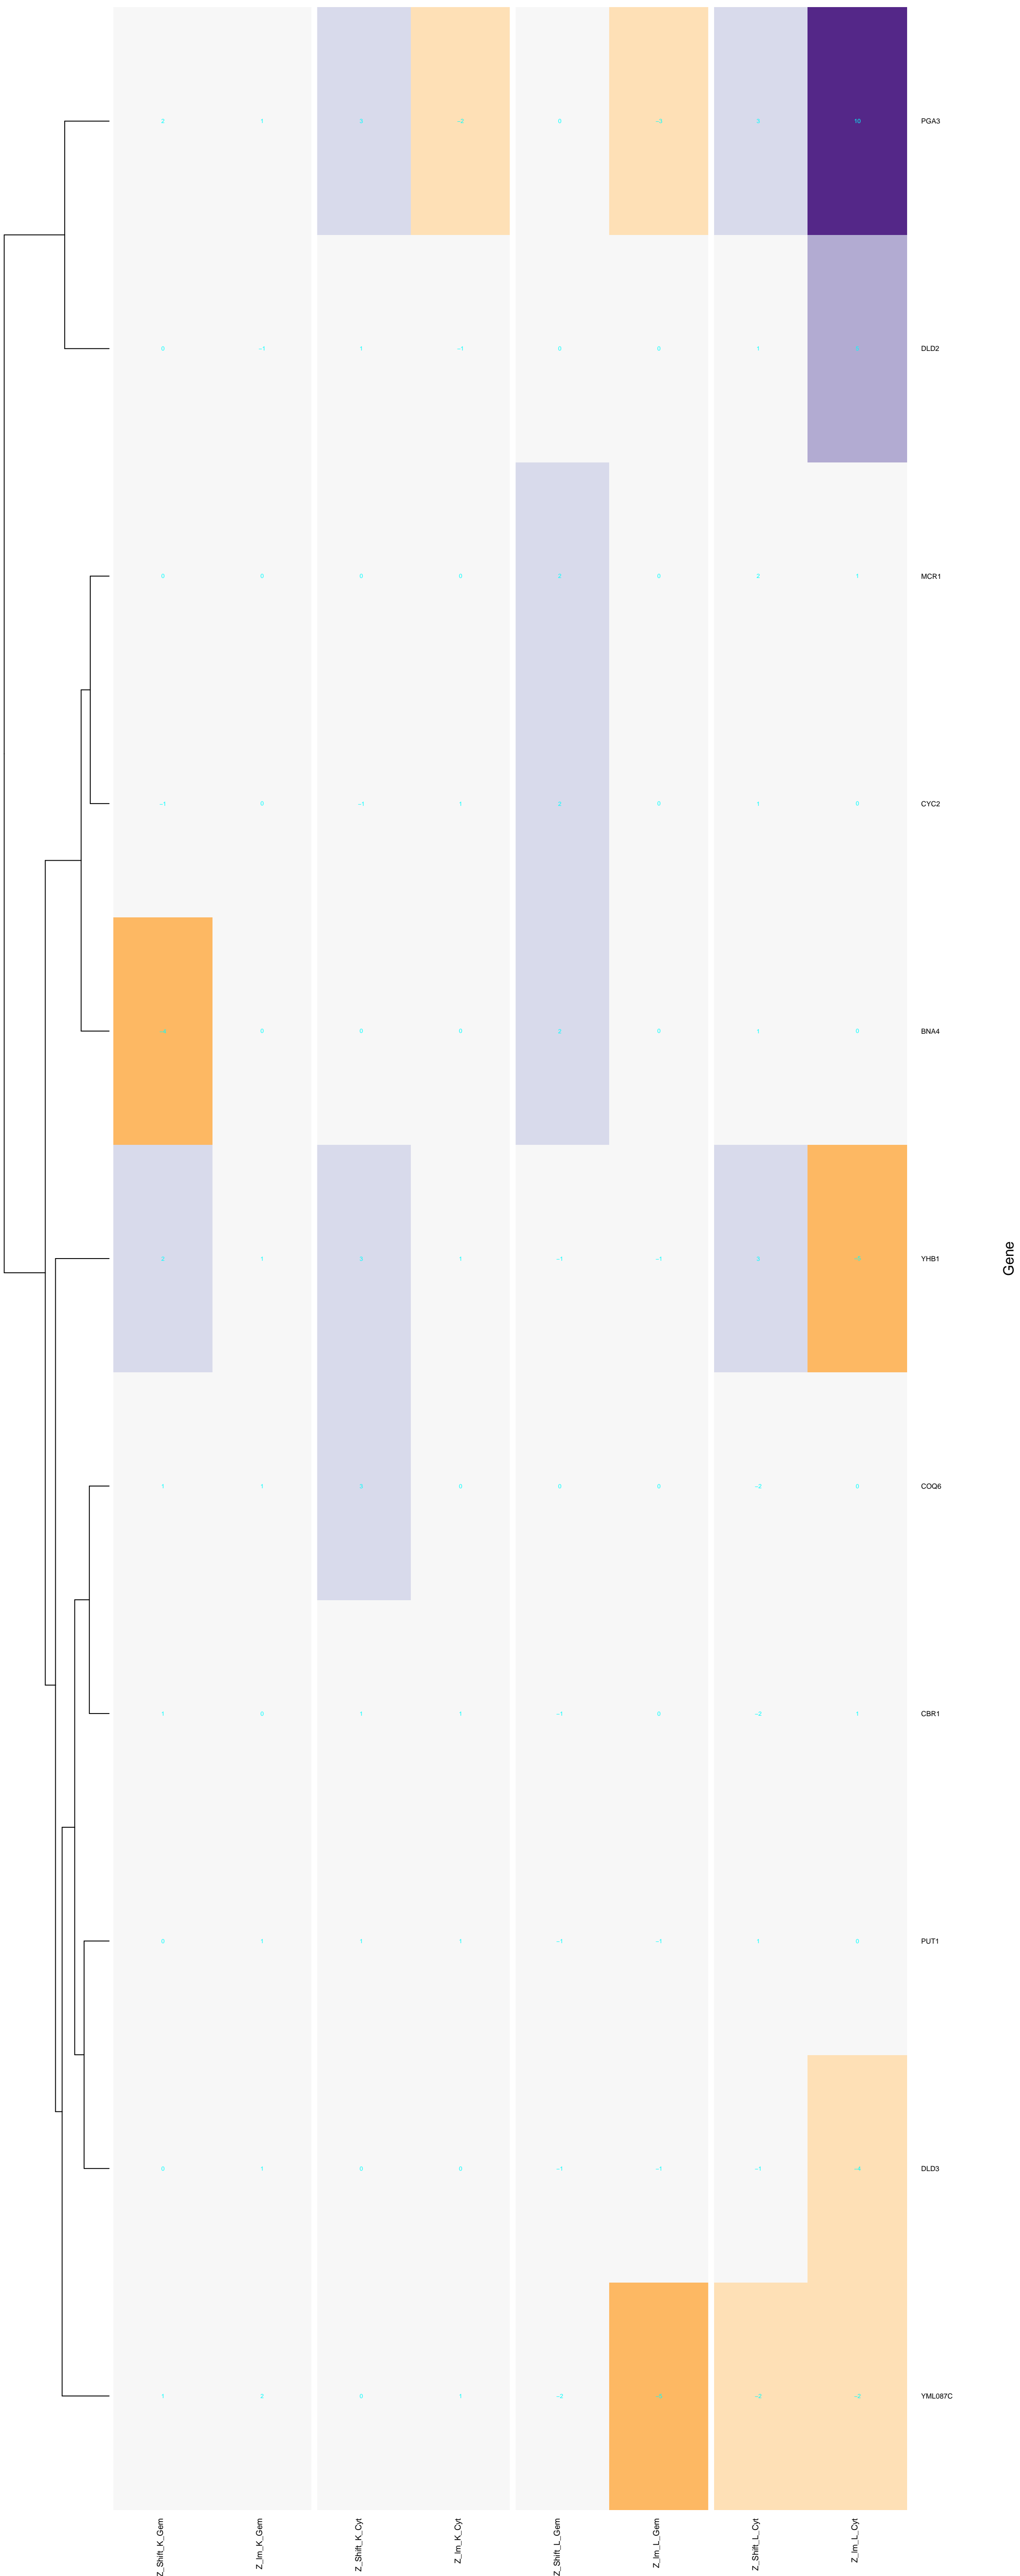

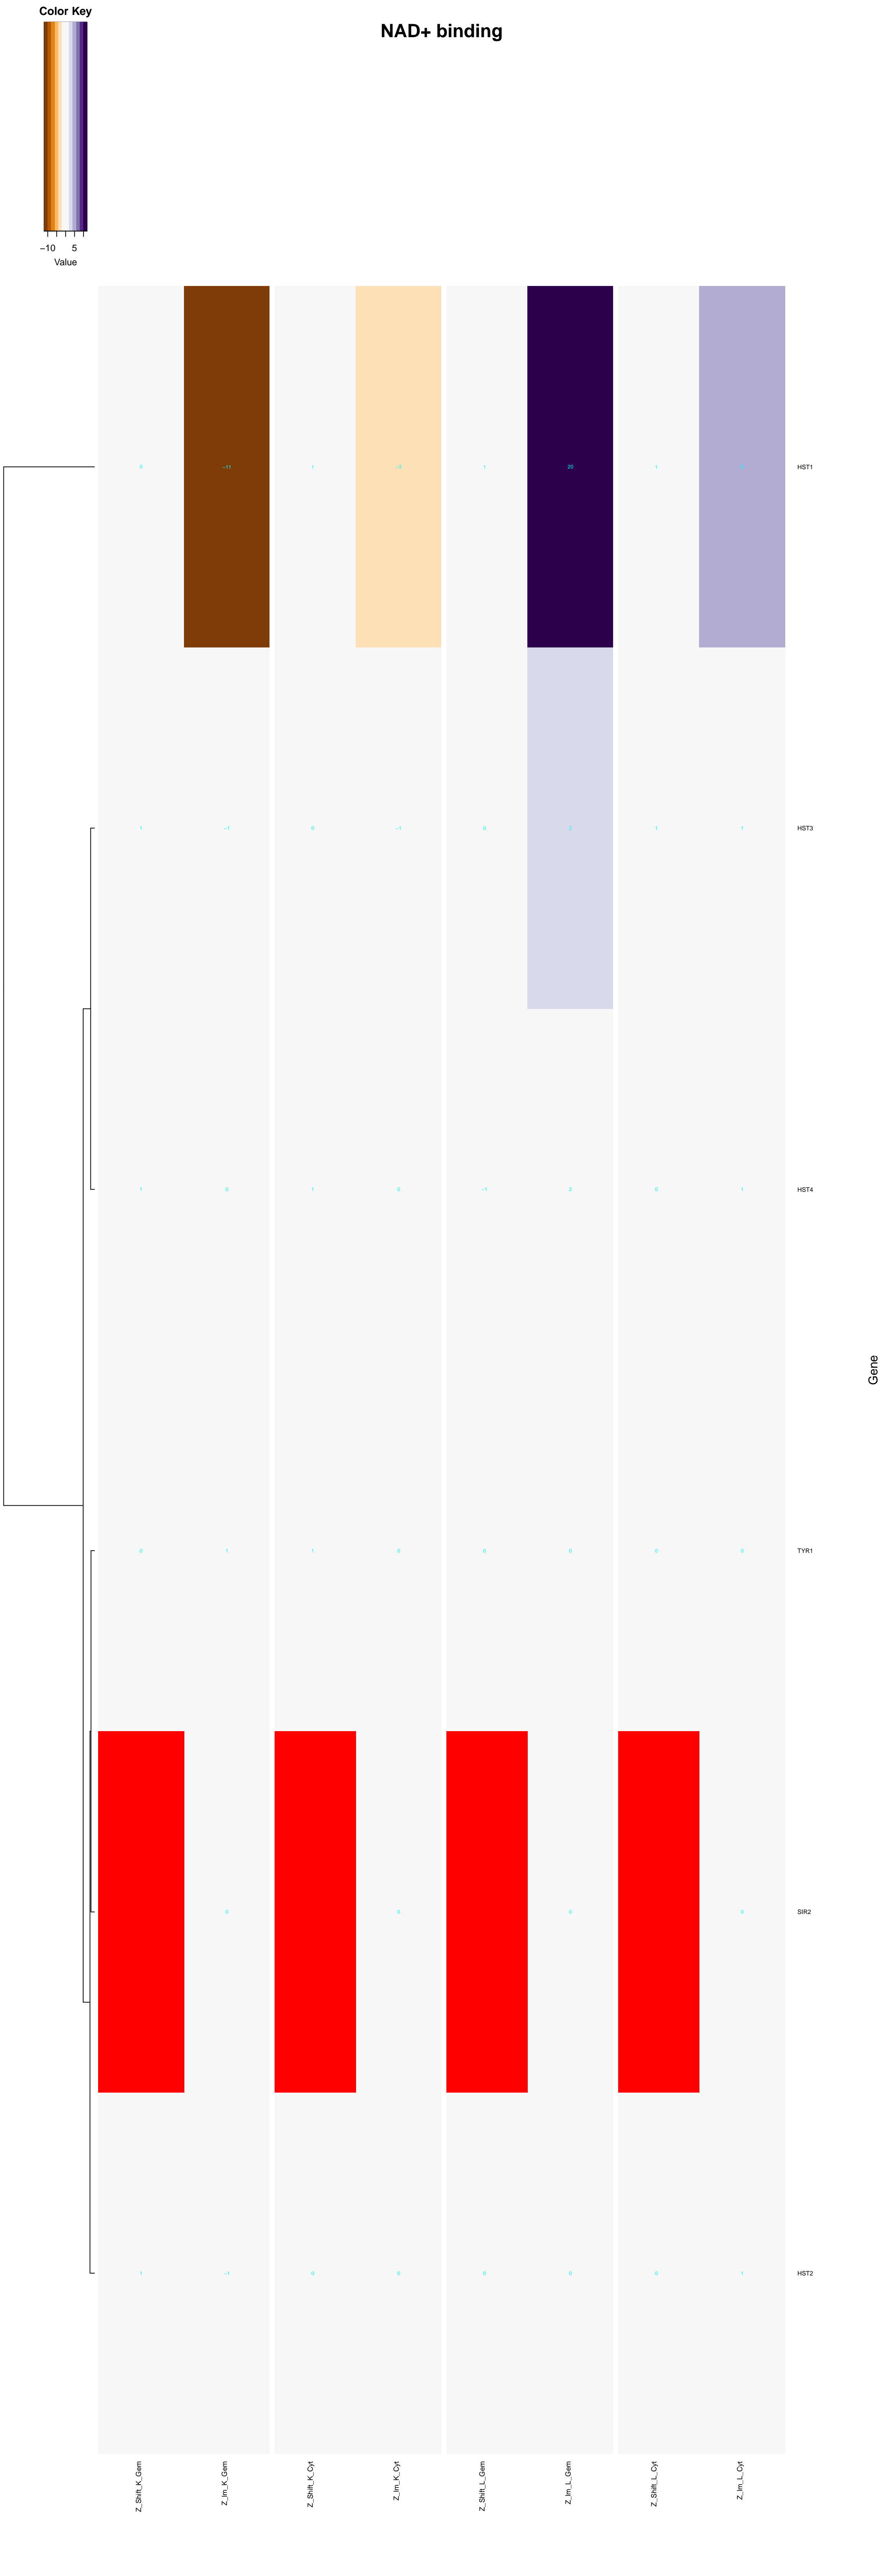

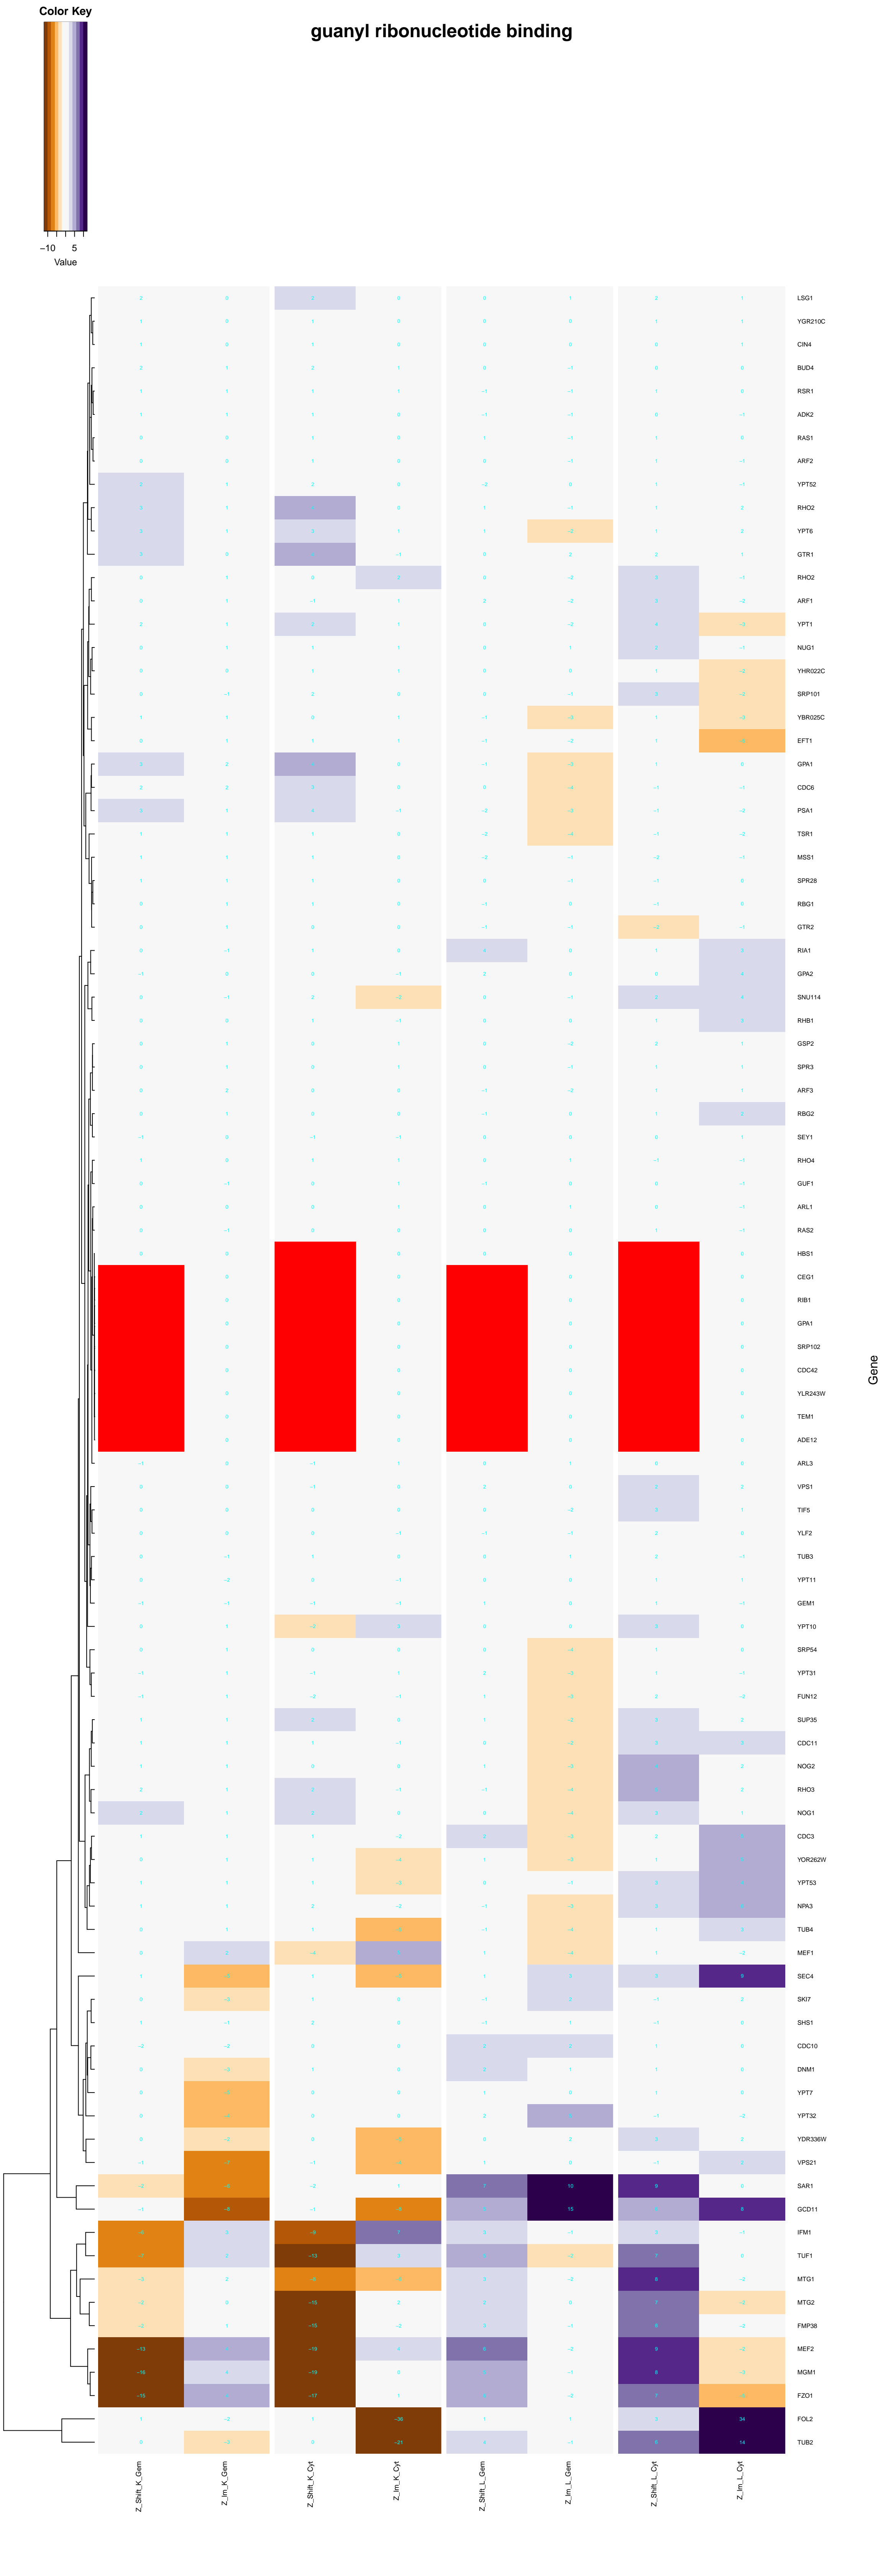

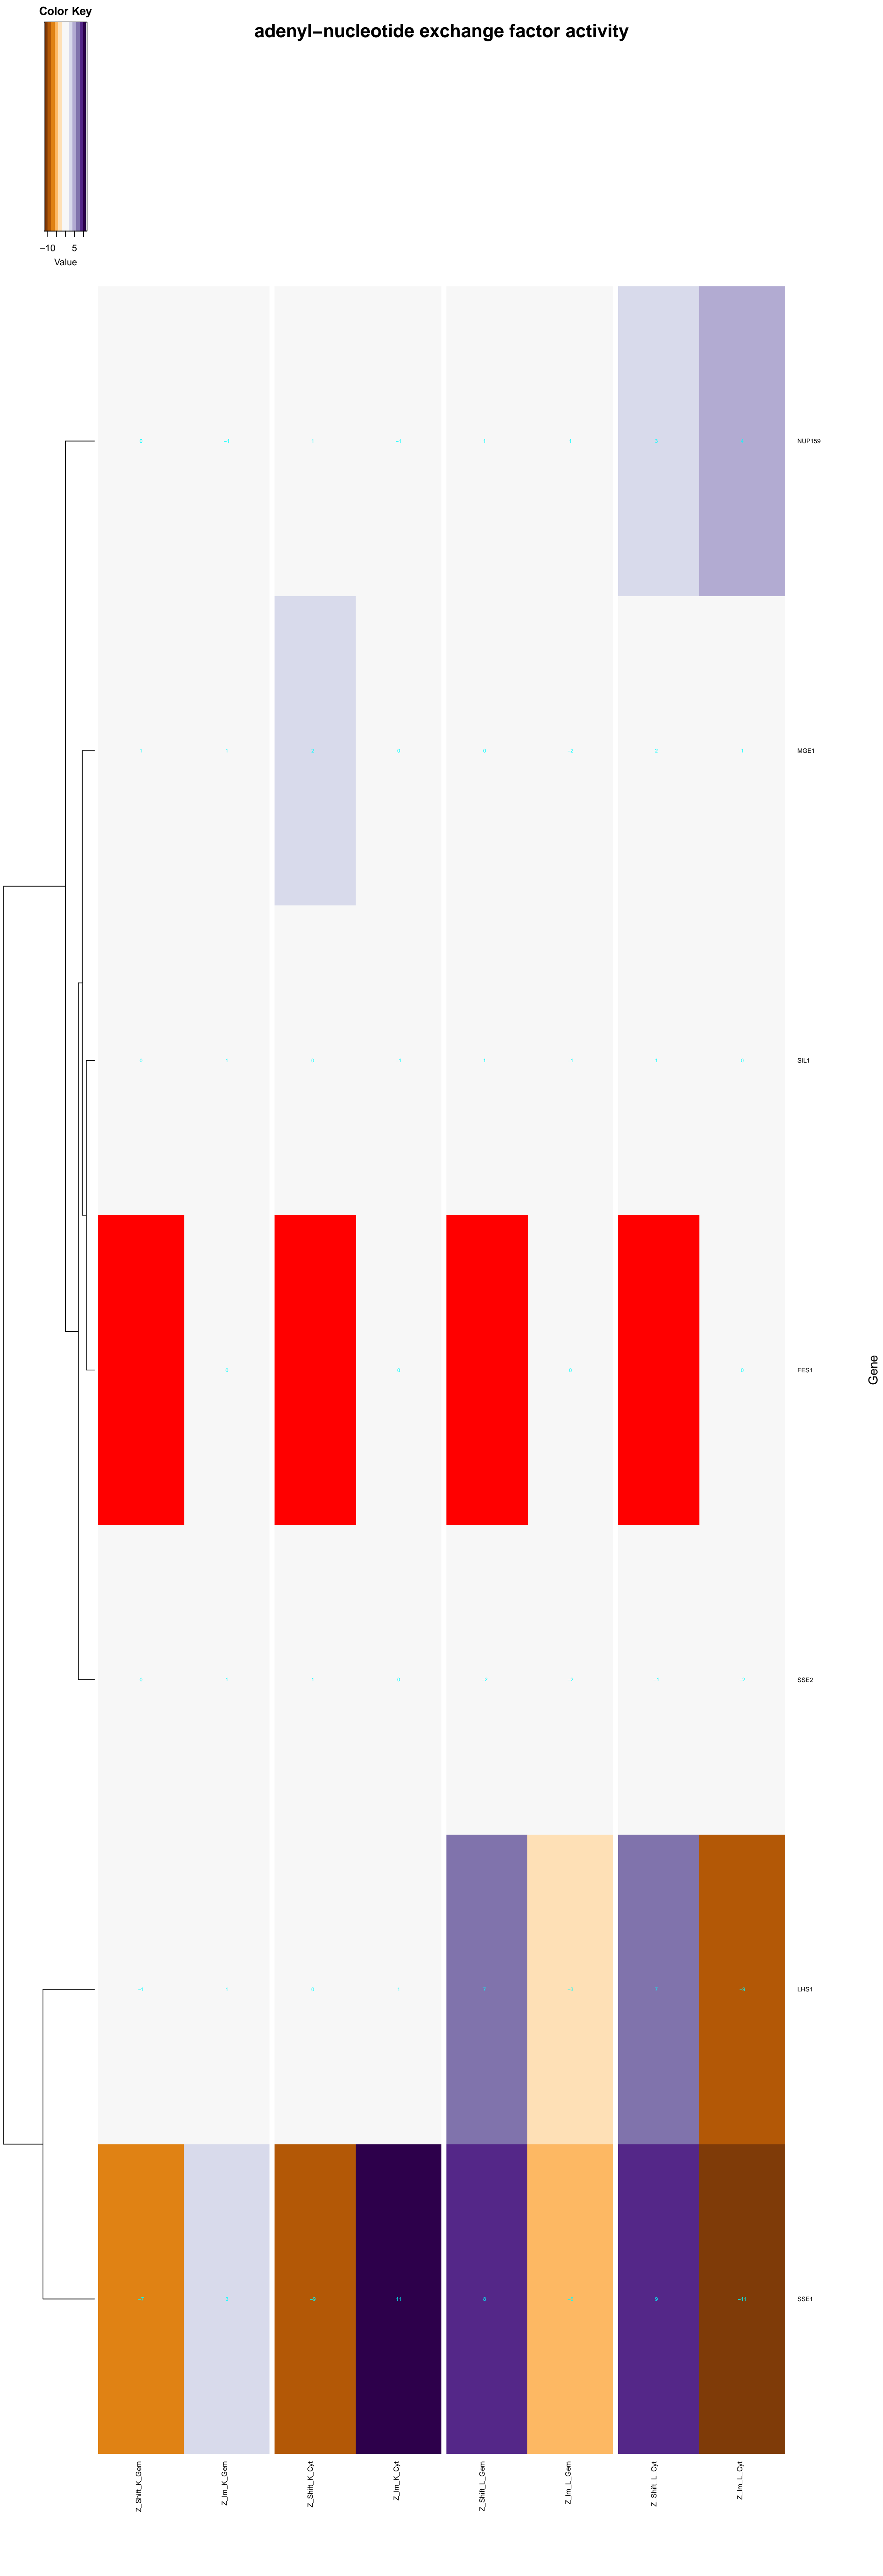

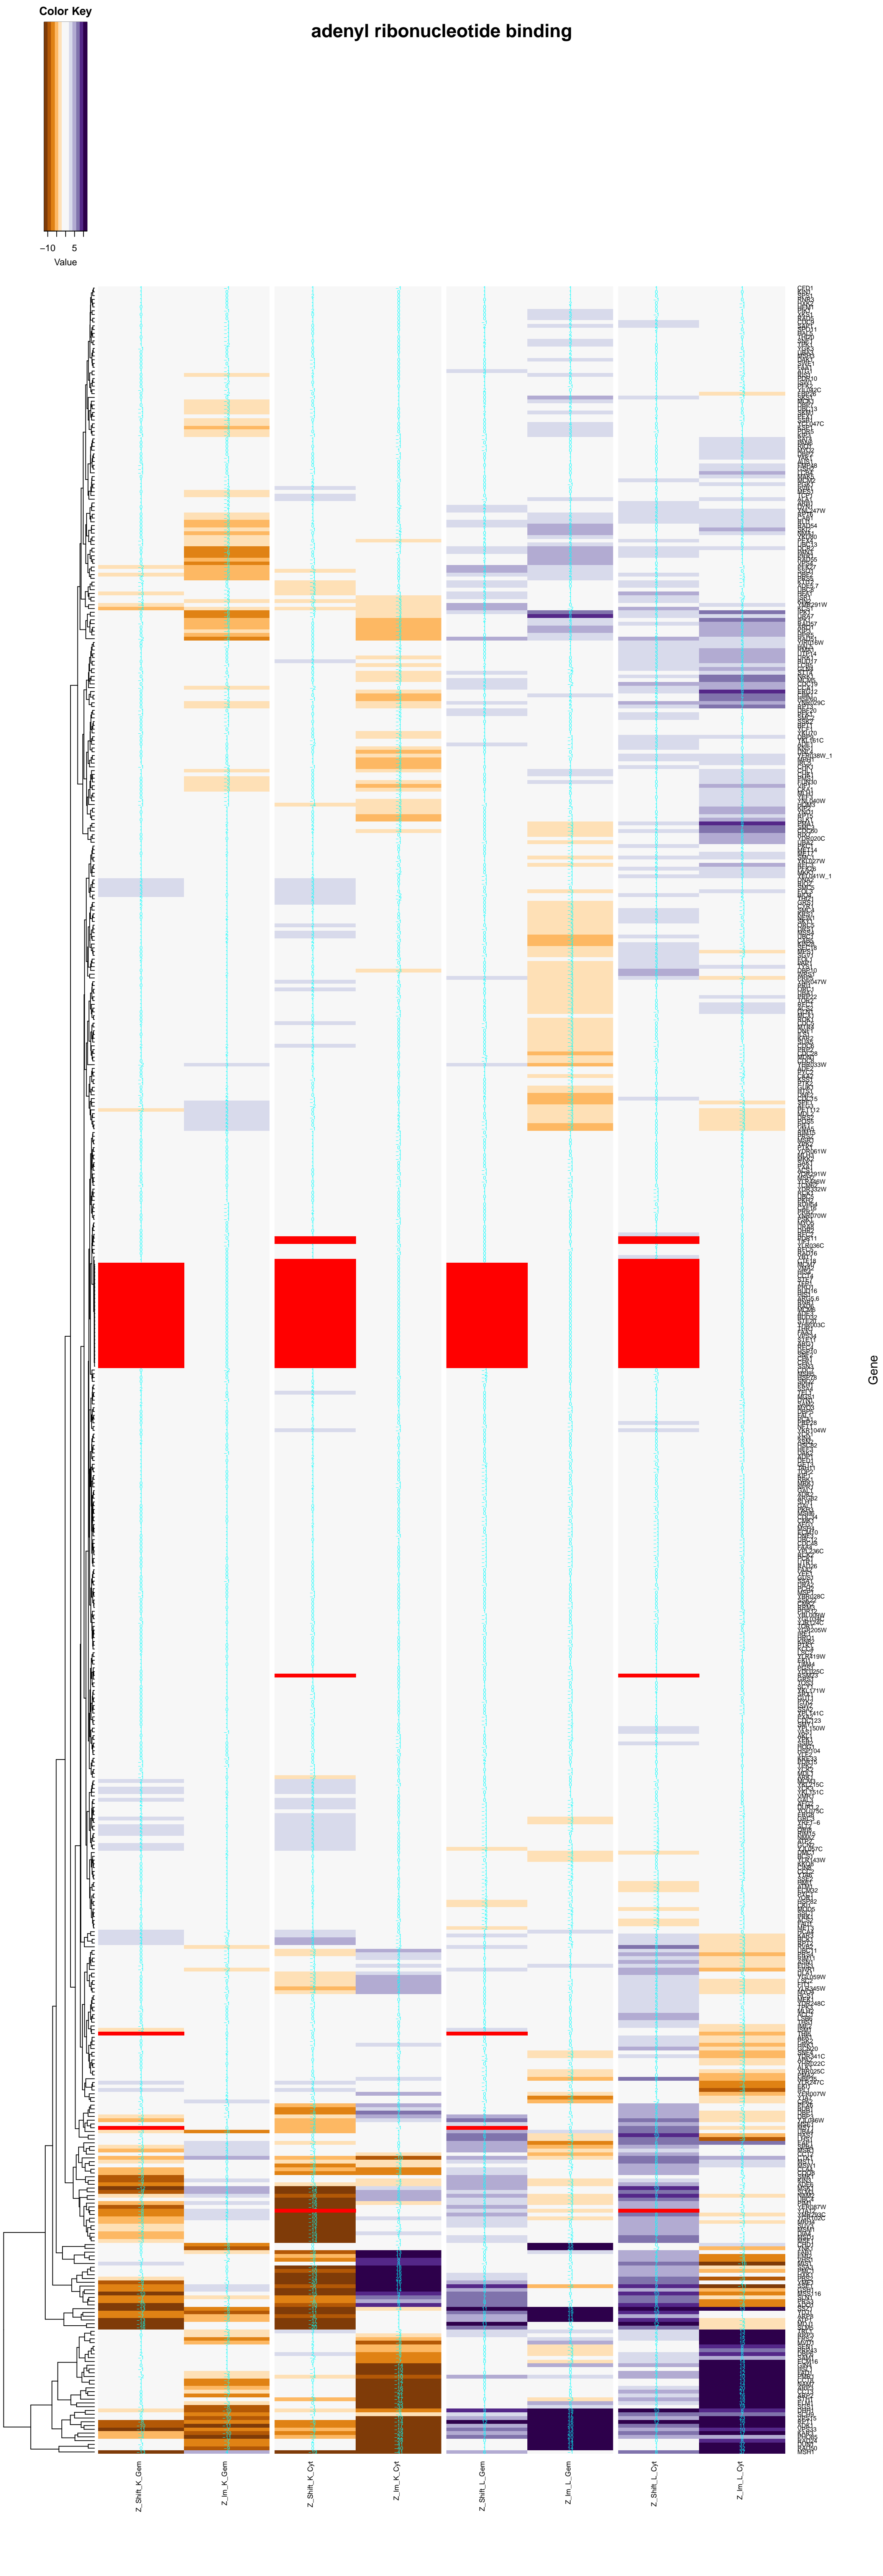

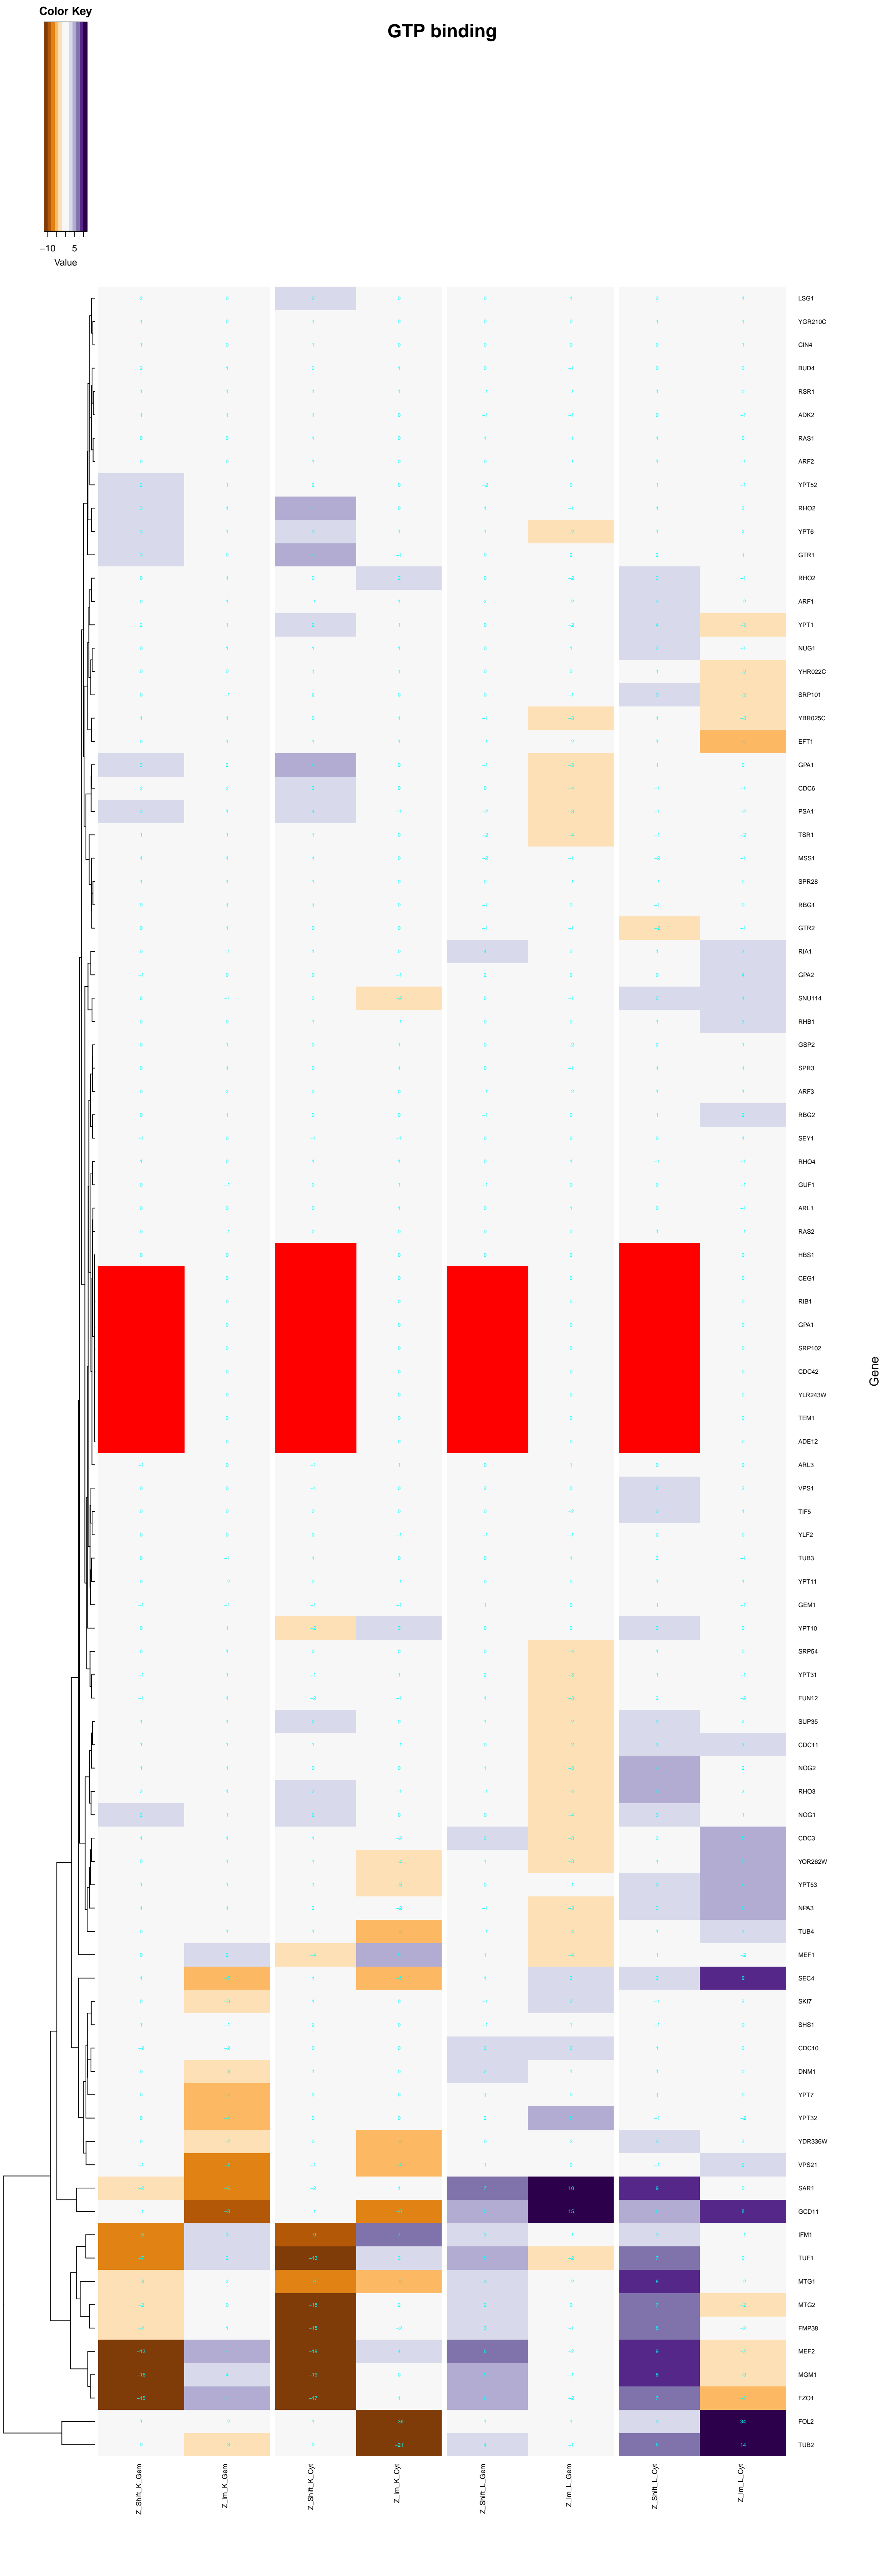

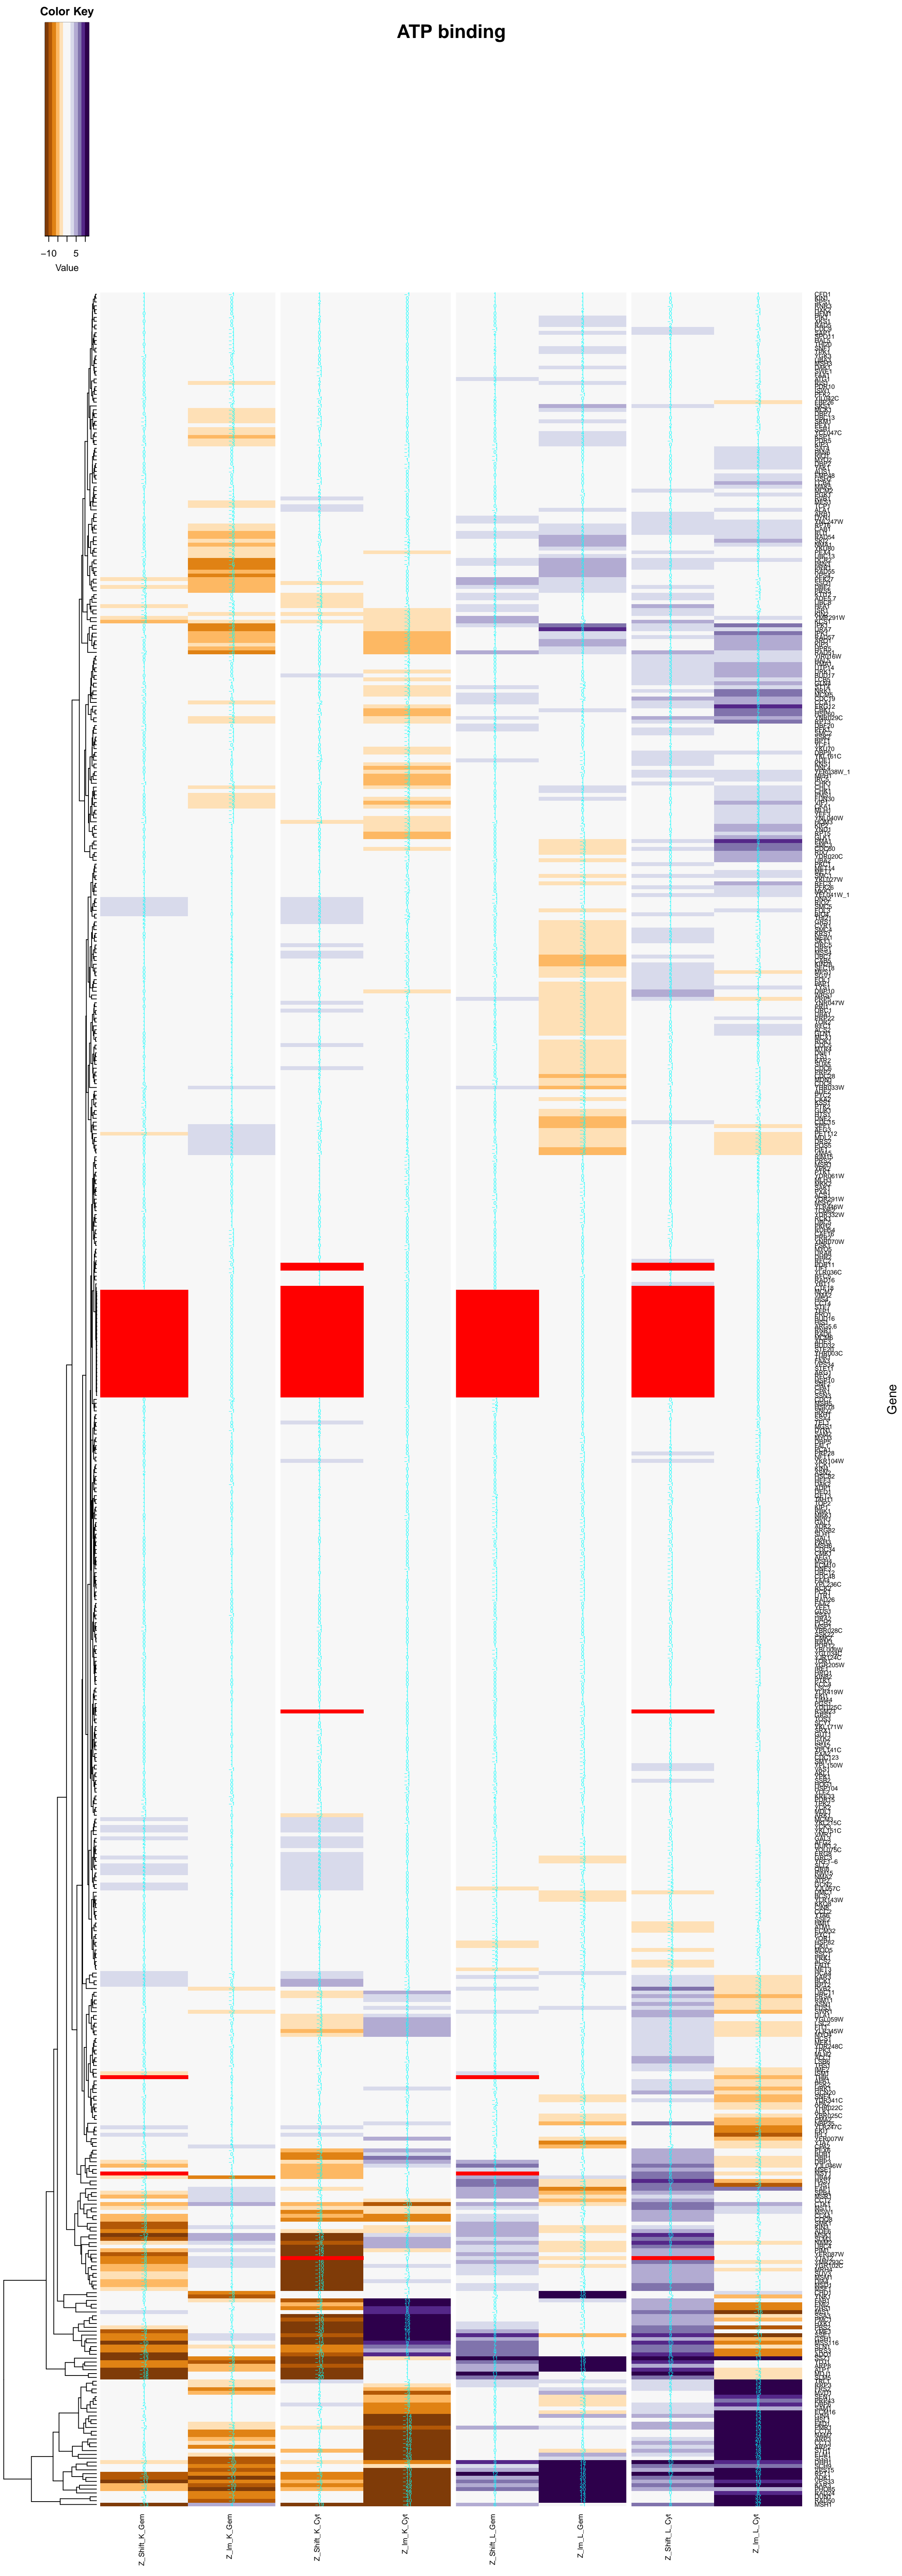

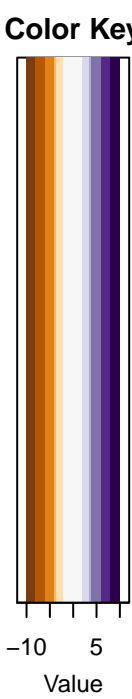

AMP binding

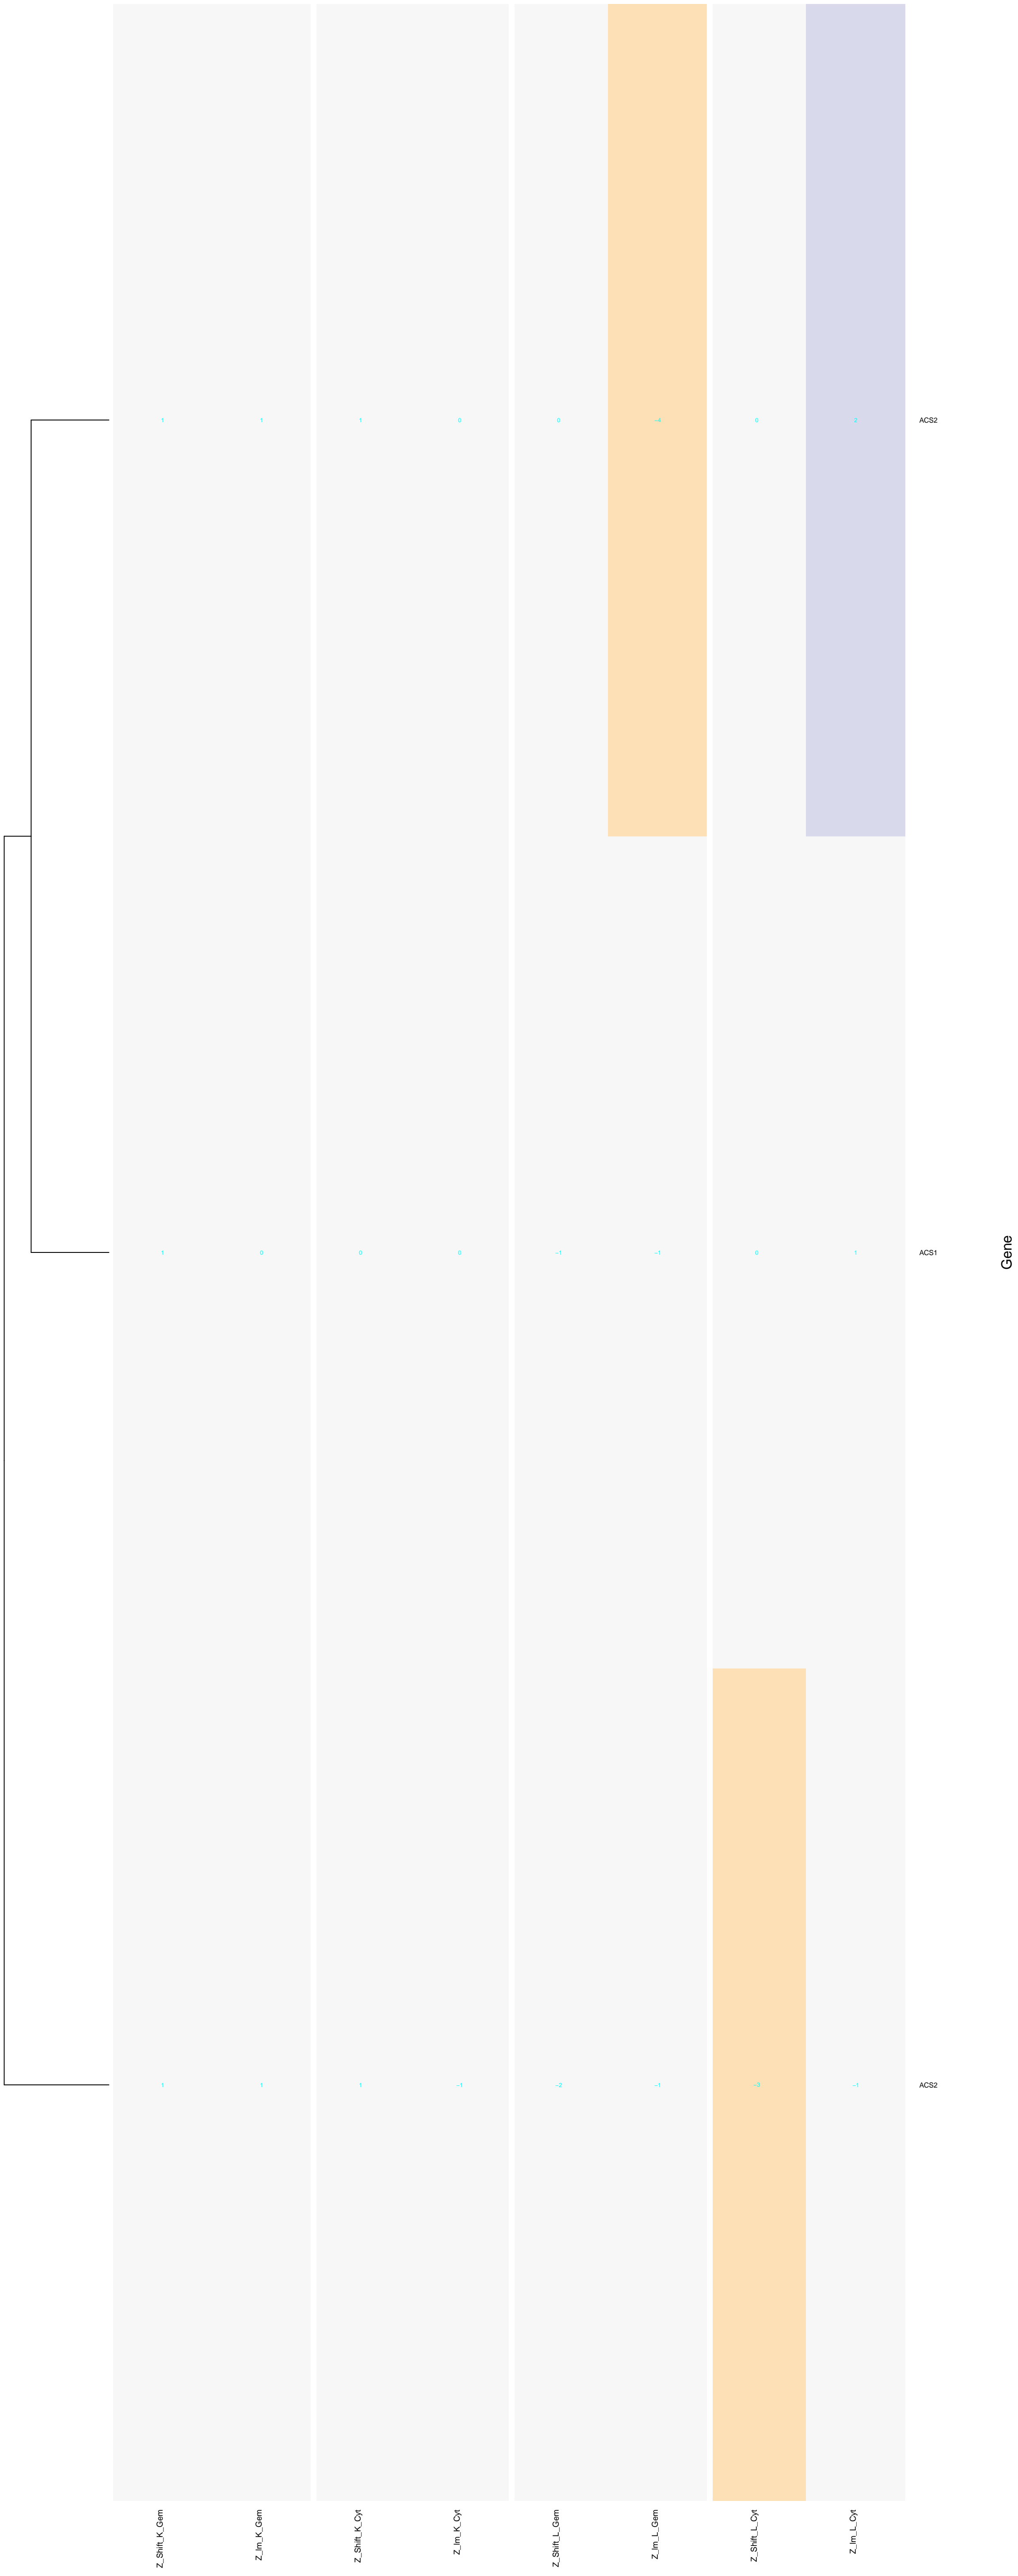

Supplement: s1 [file s1]

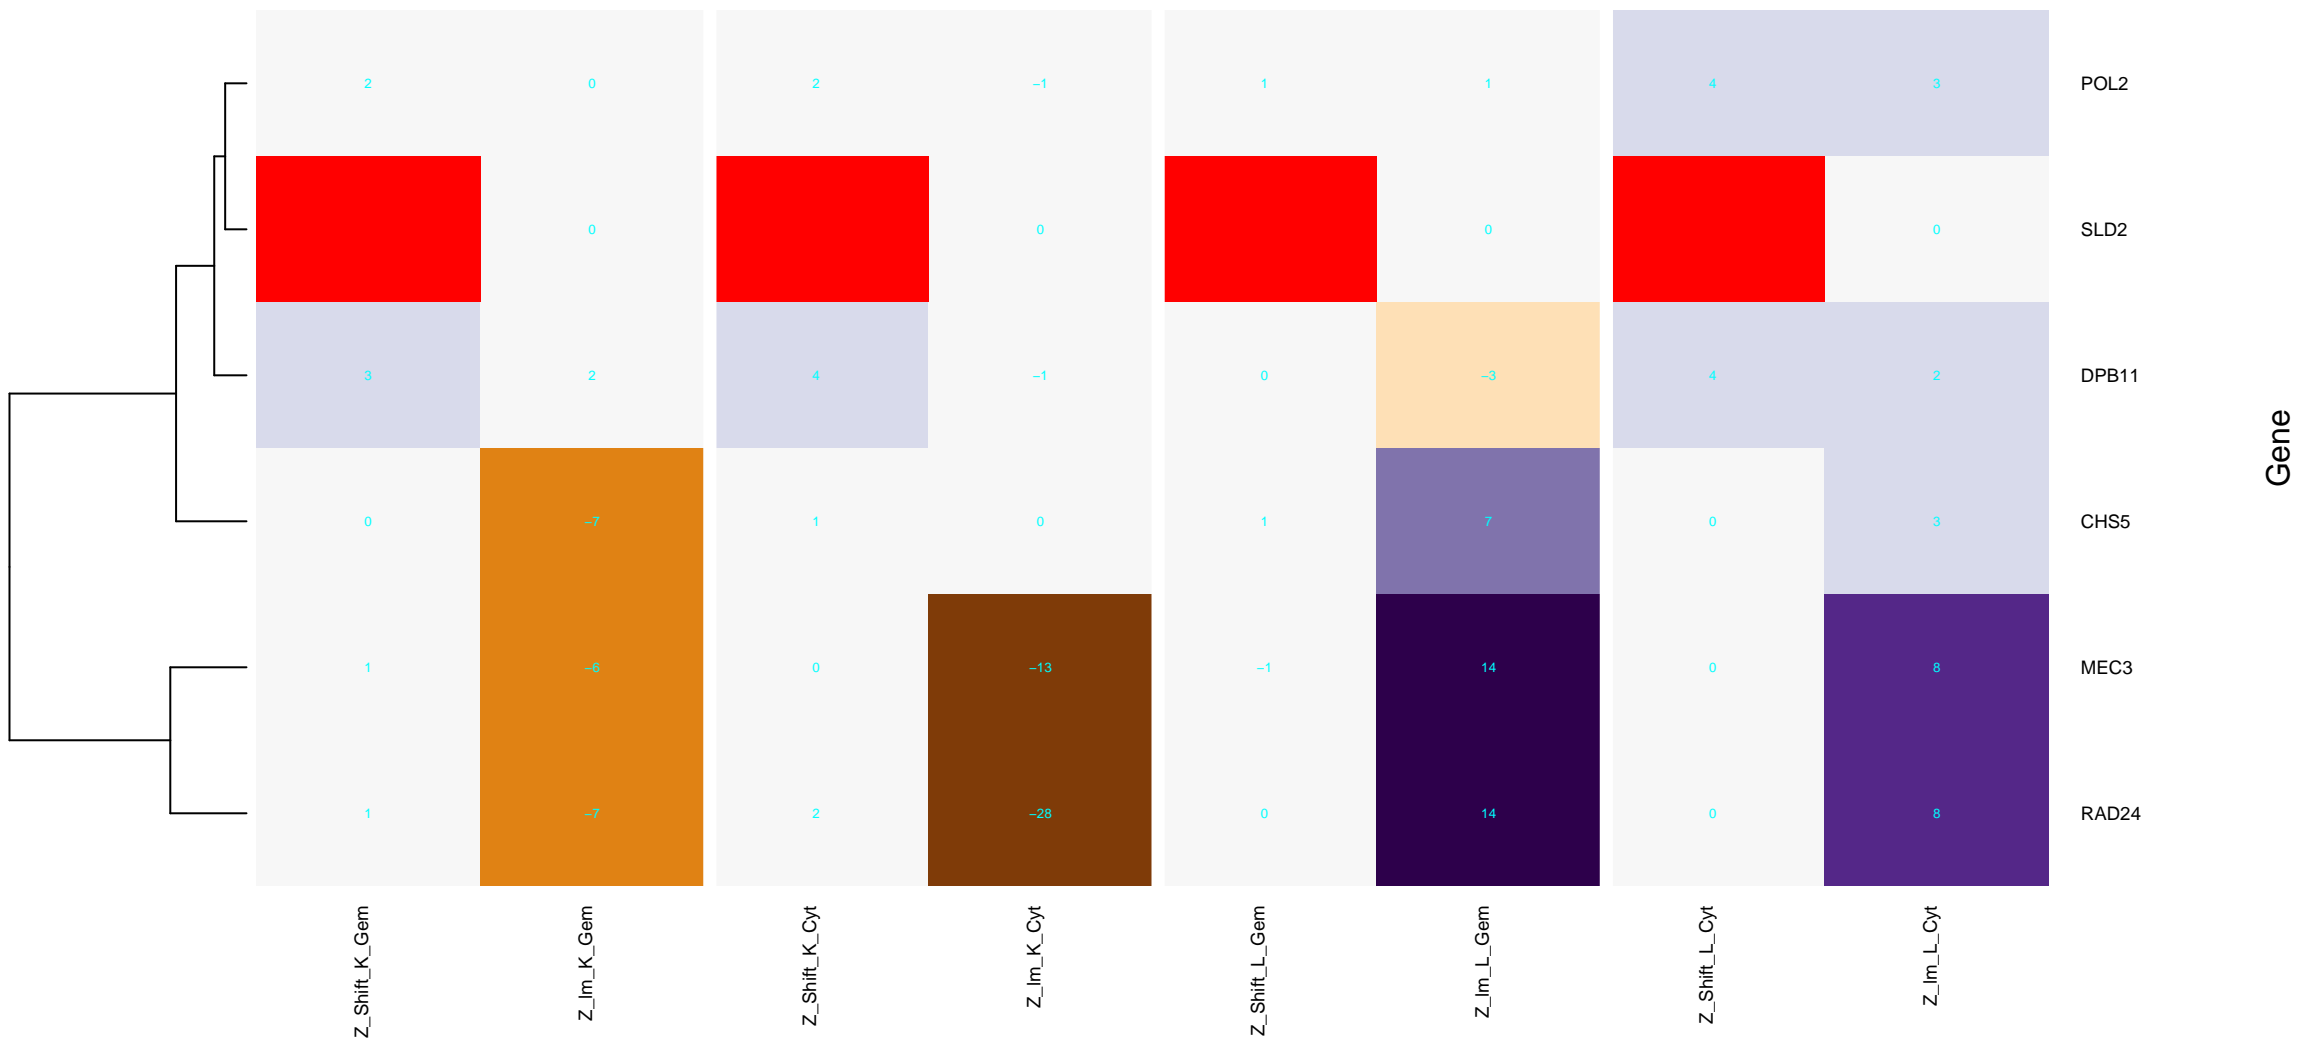

Supplement: s1 [file s1]

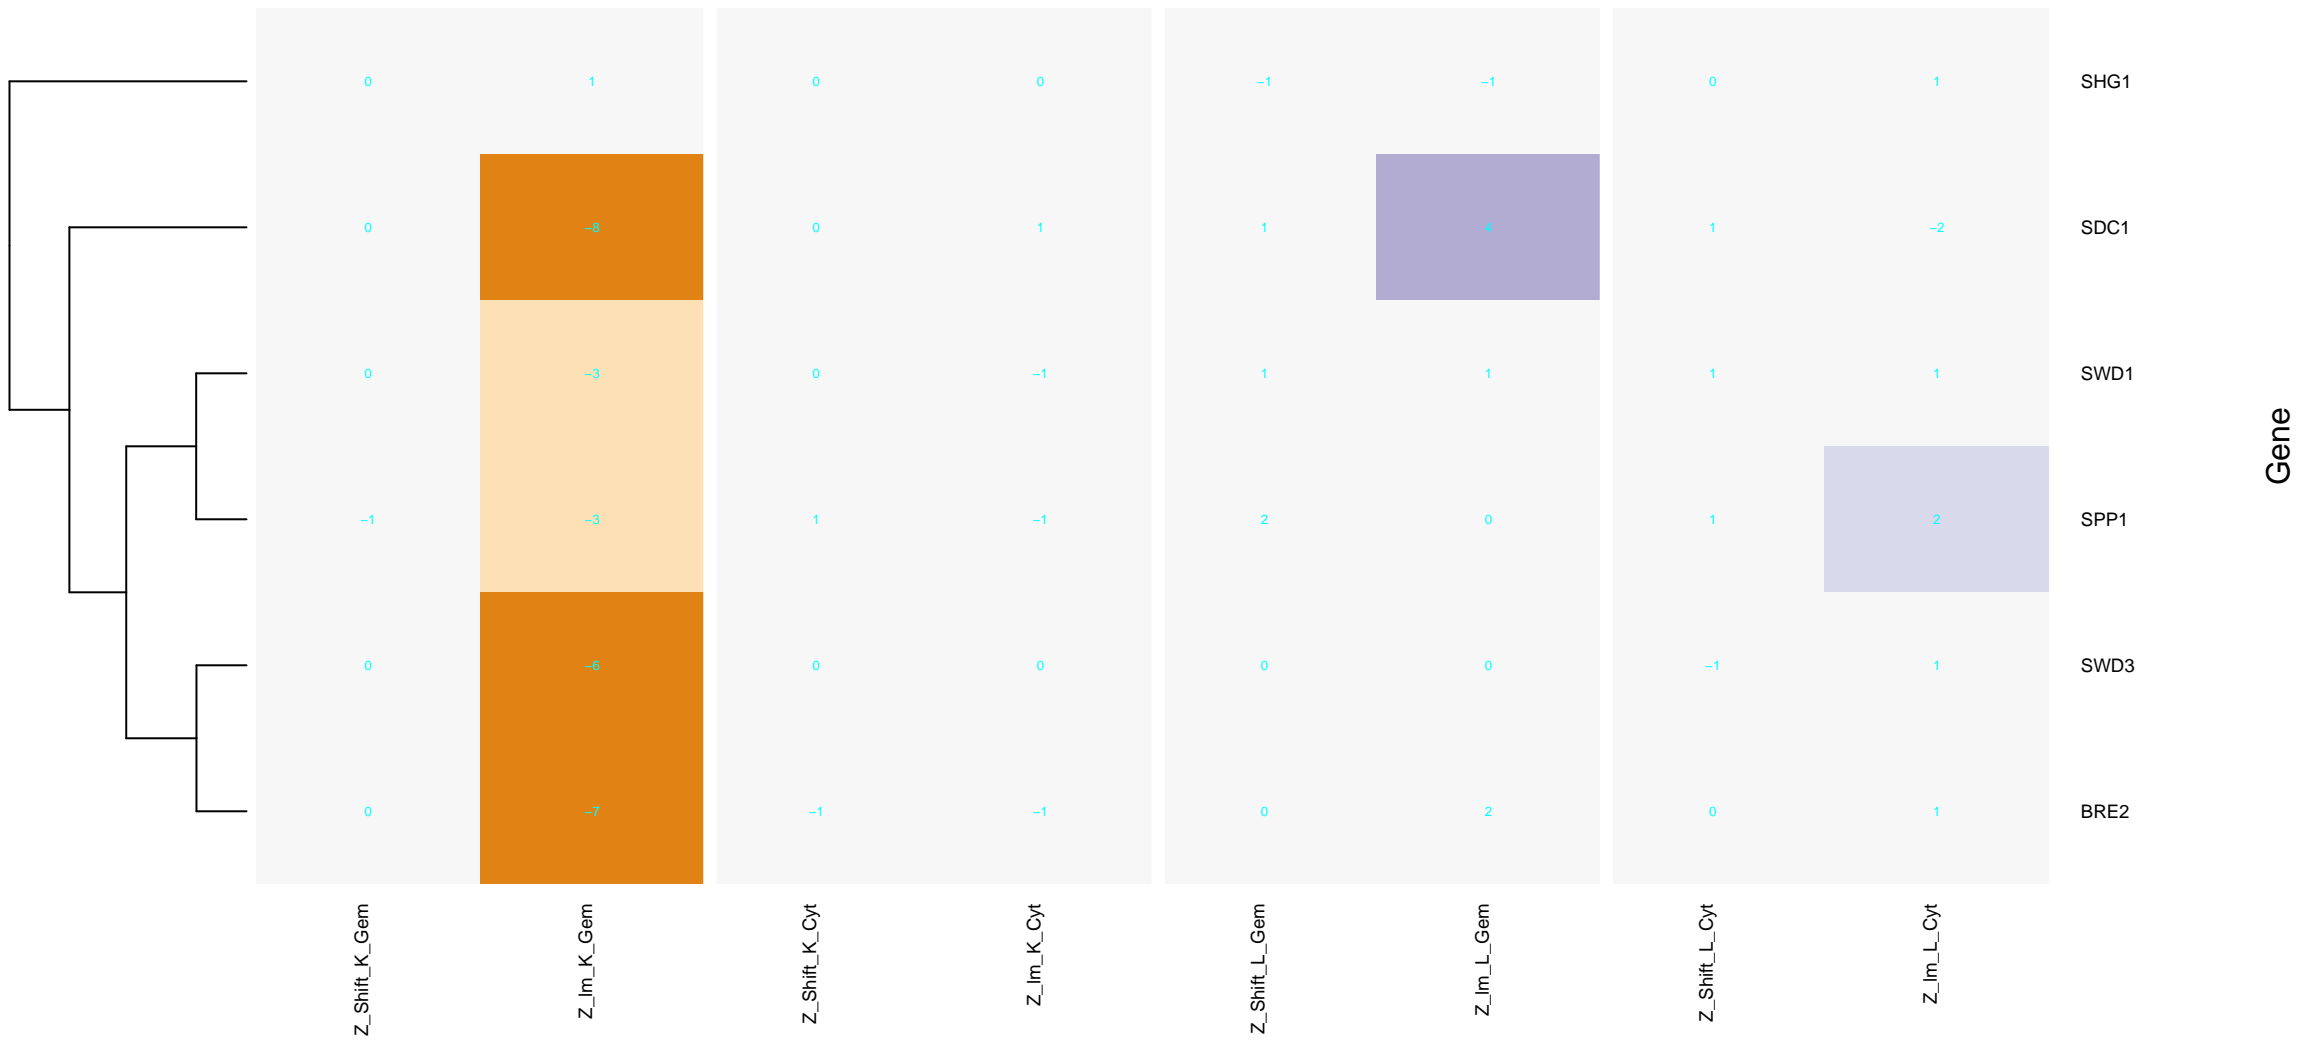

Supplement: s1 [file s1]

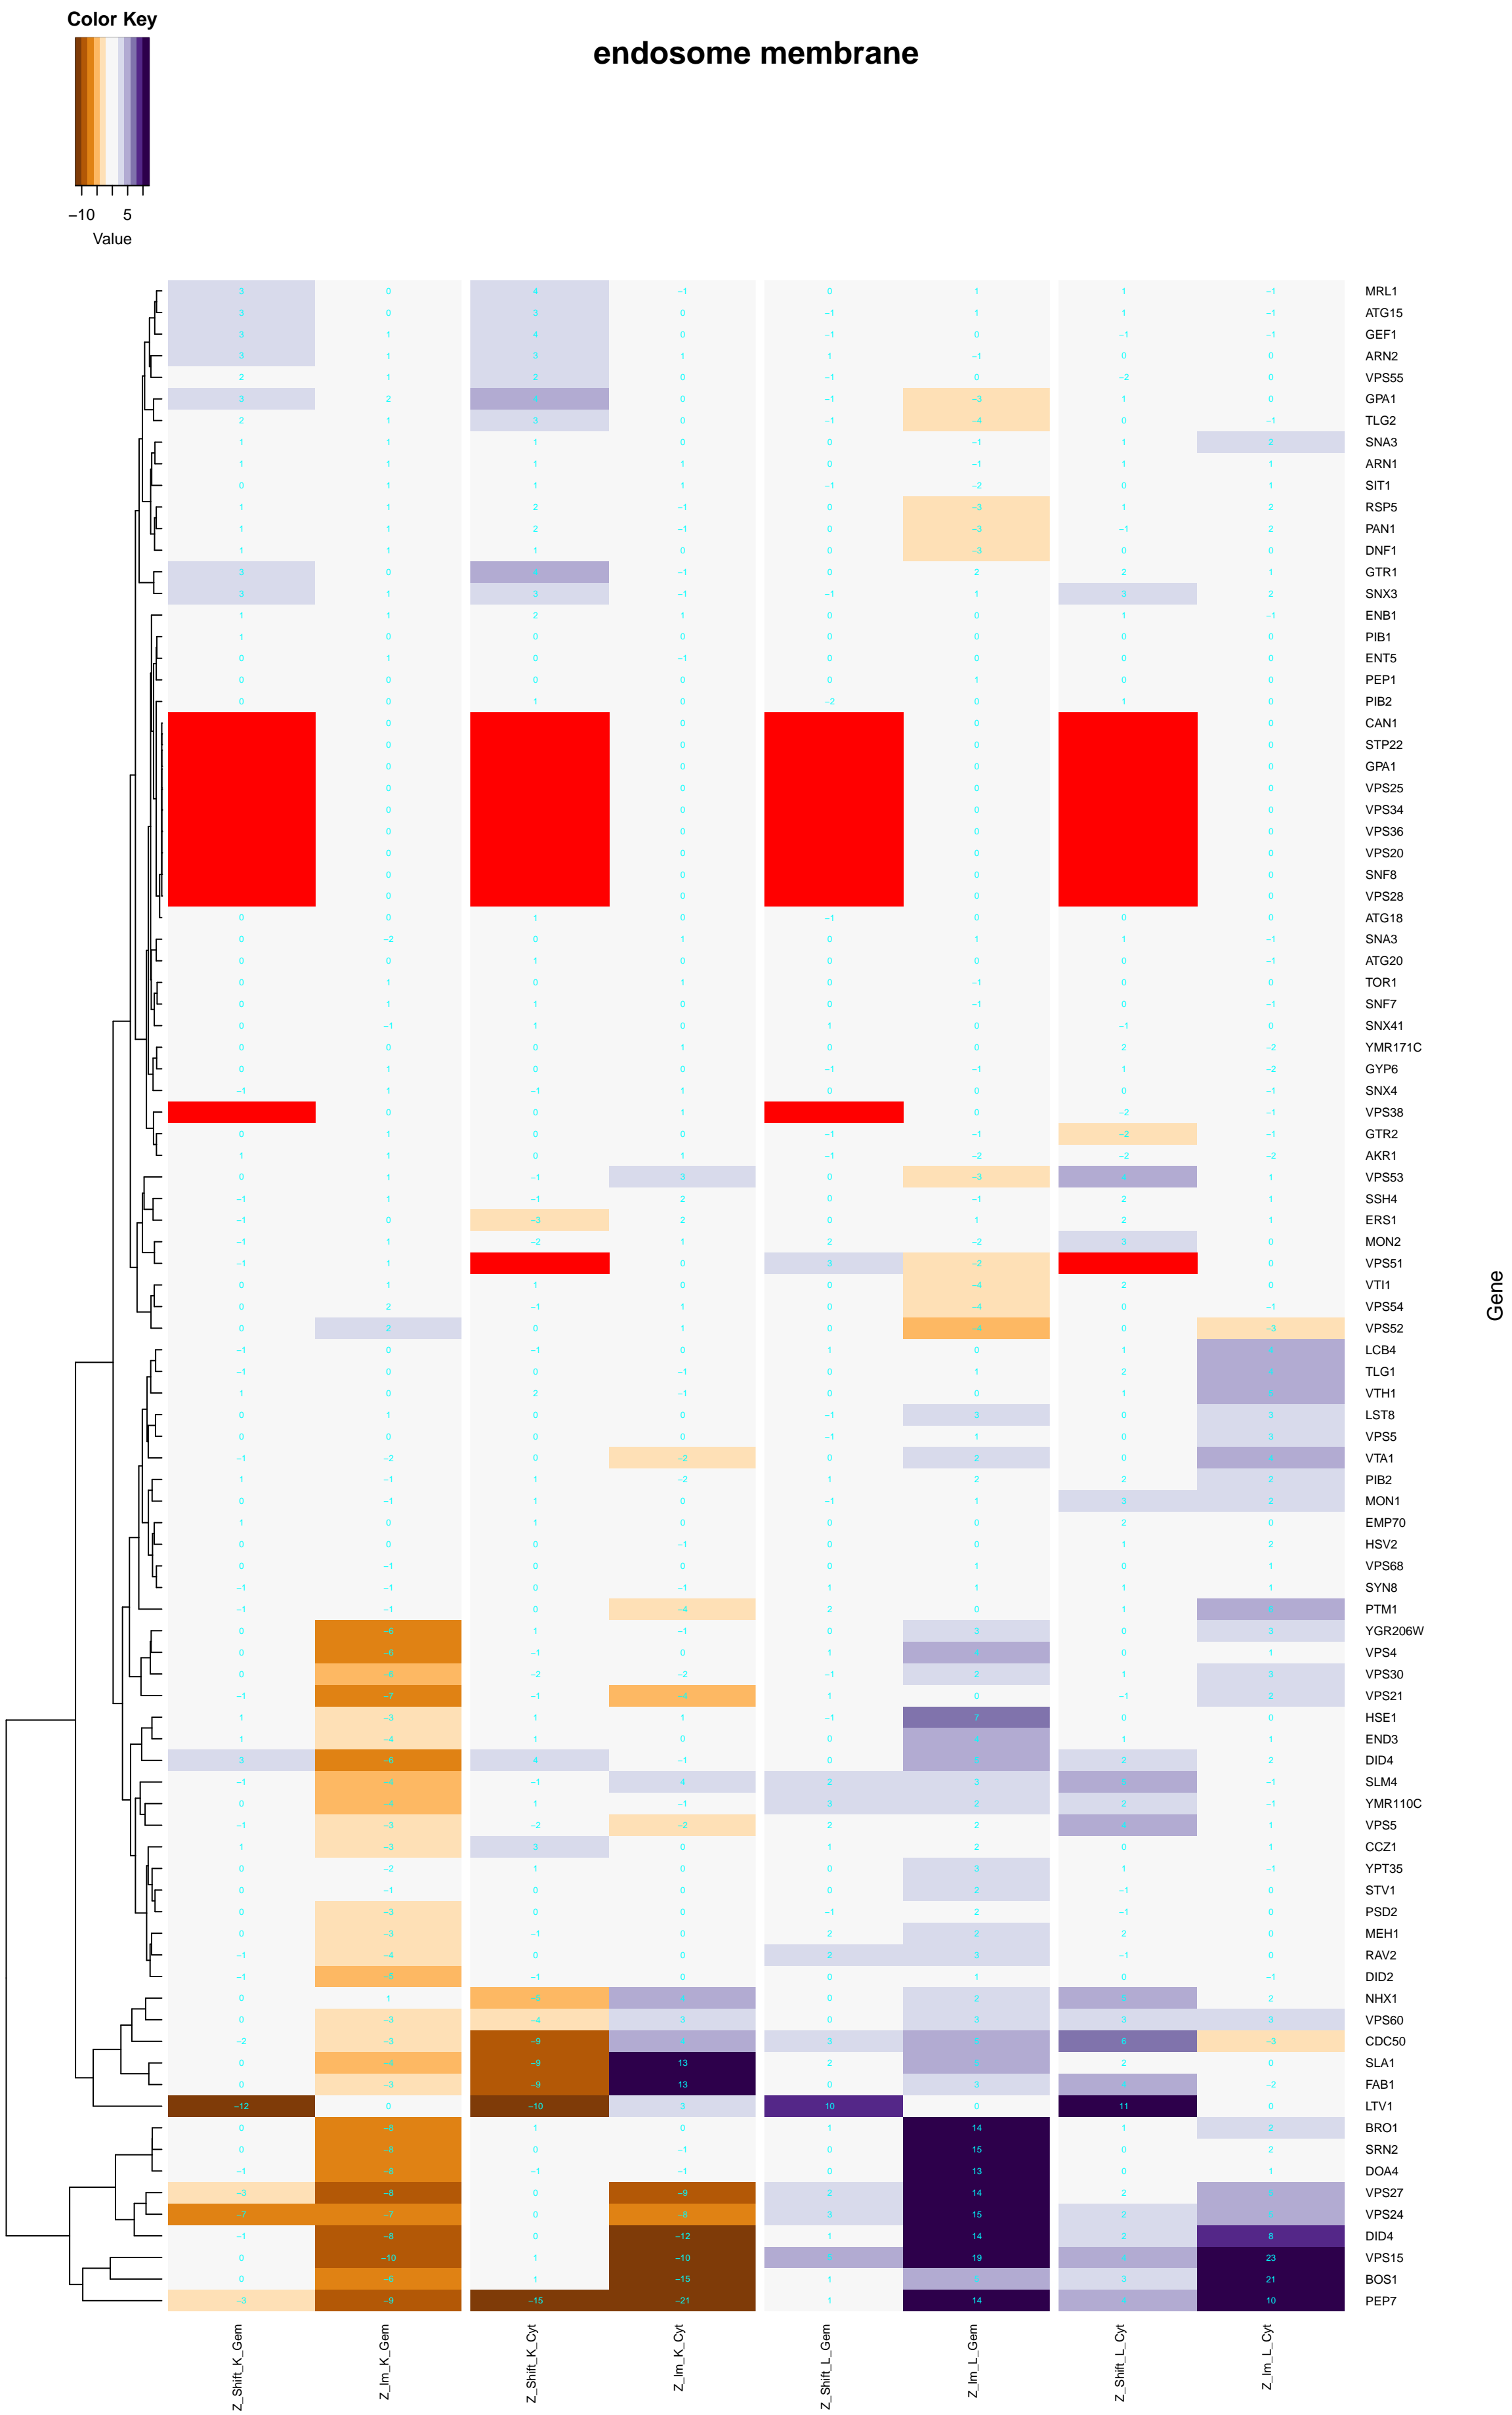

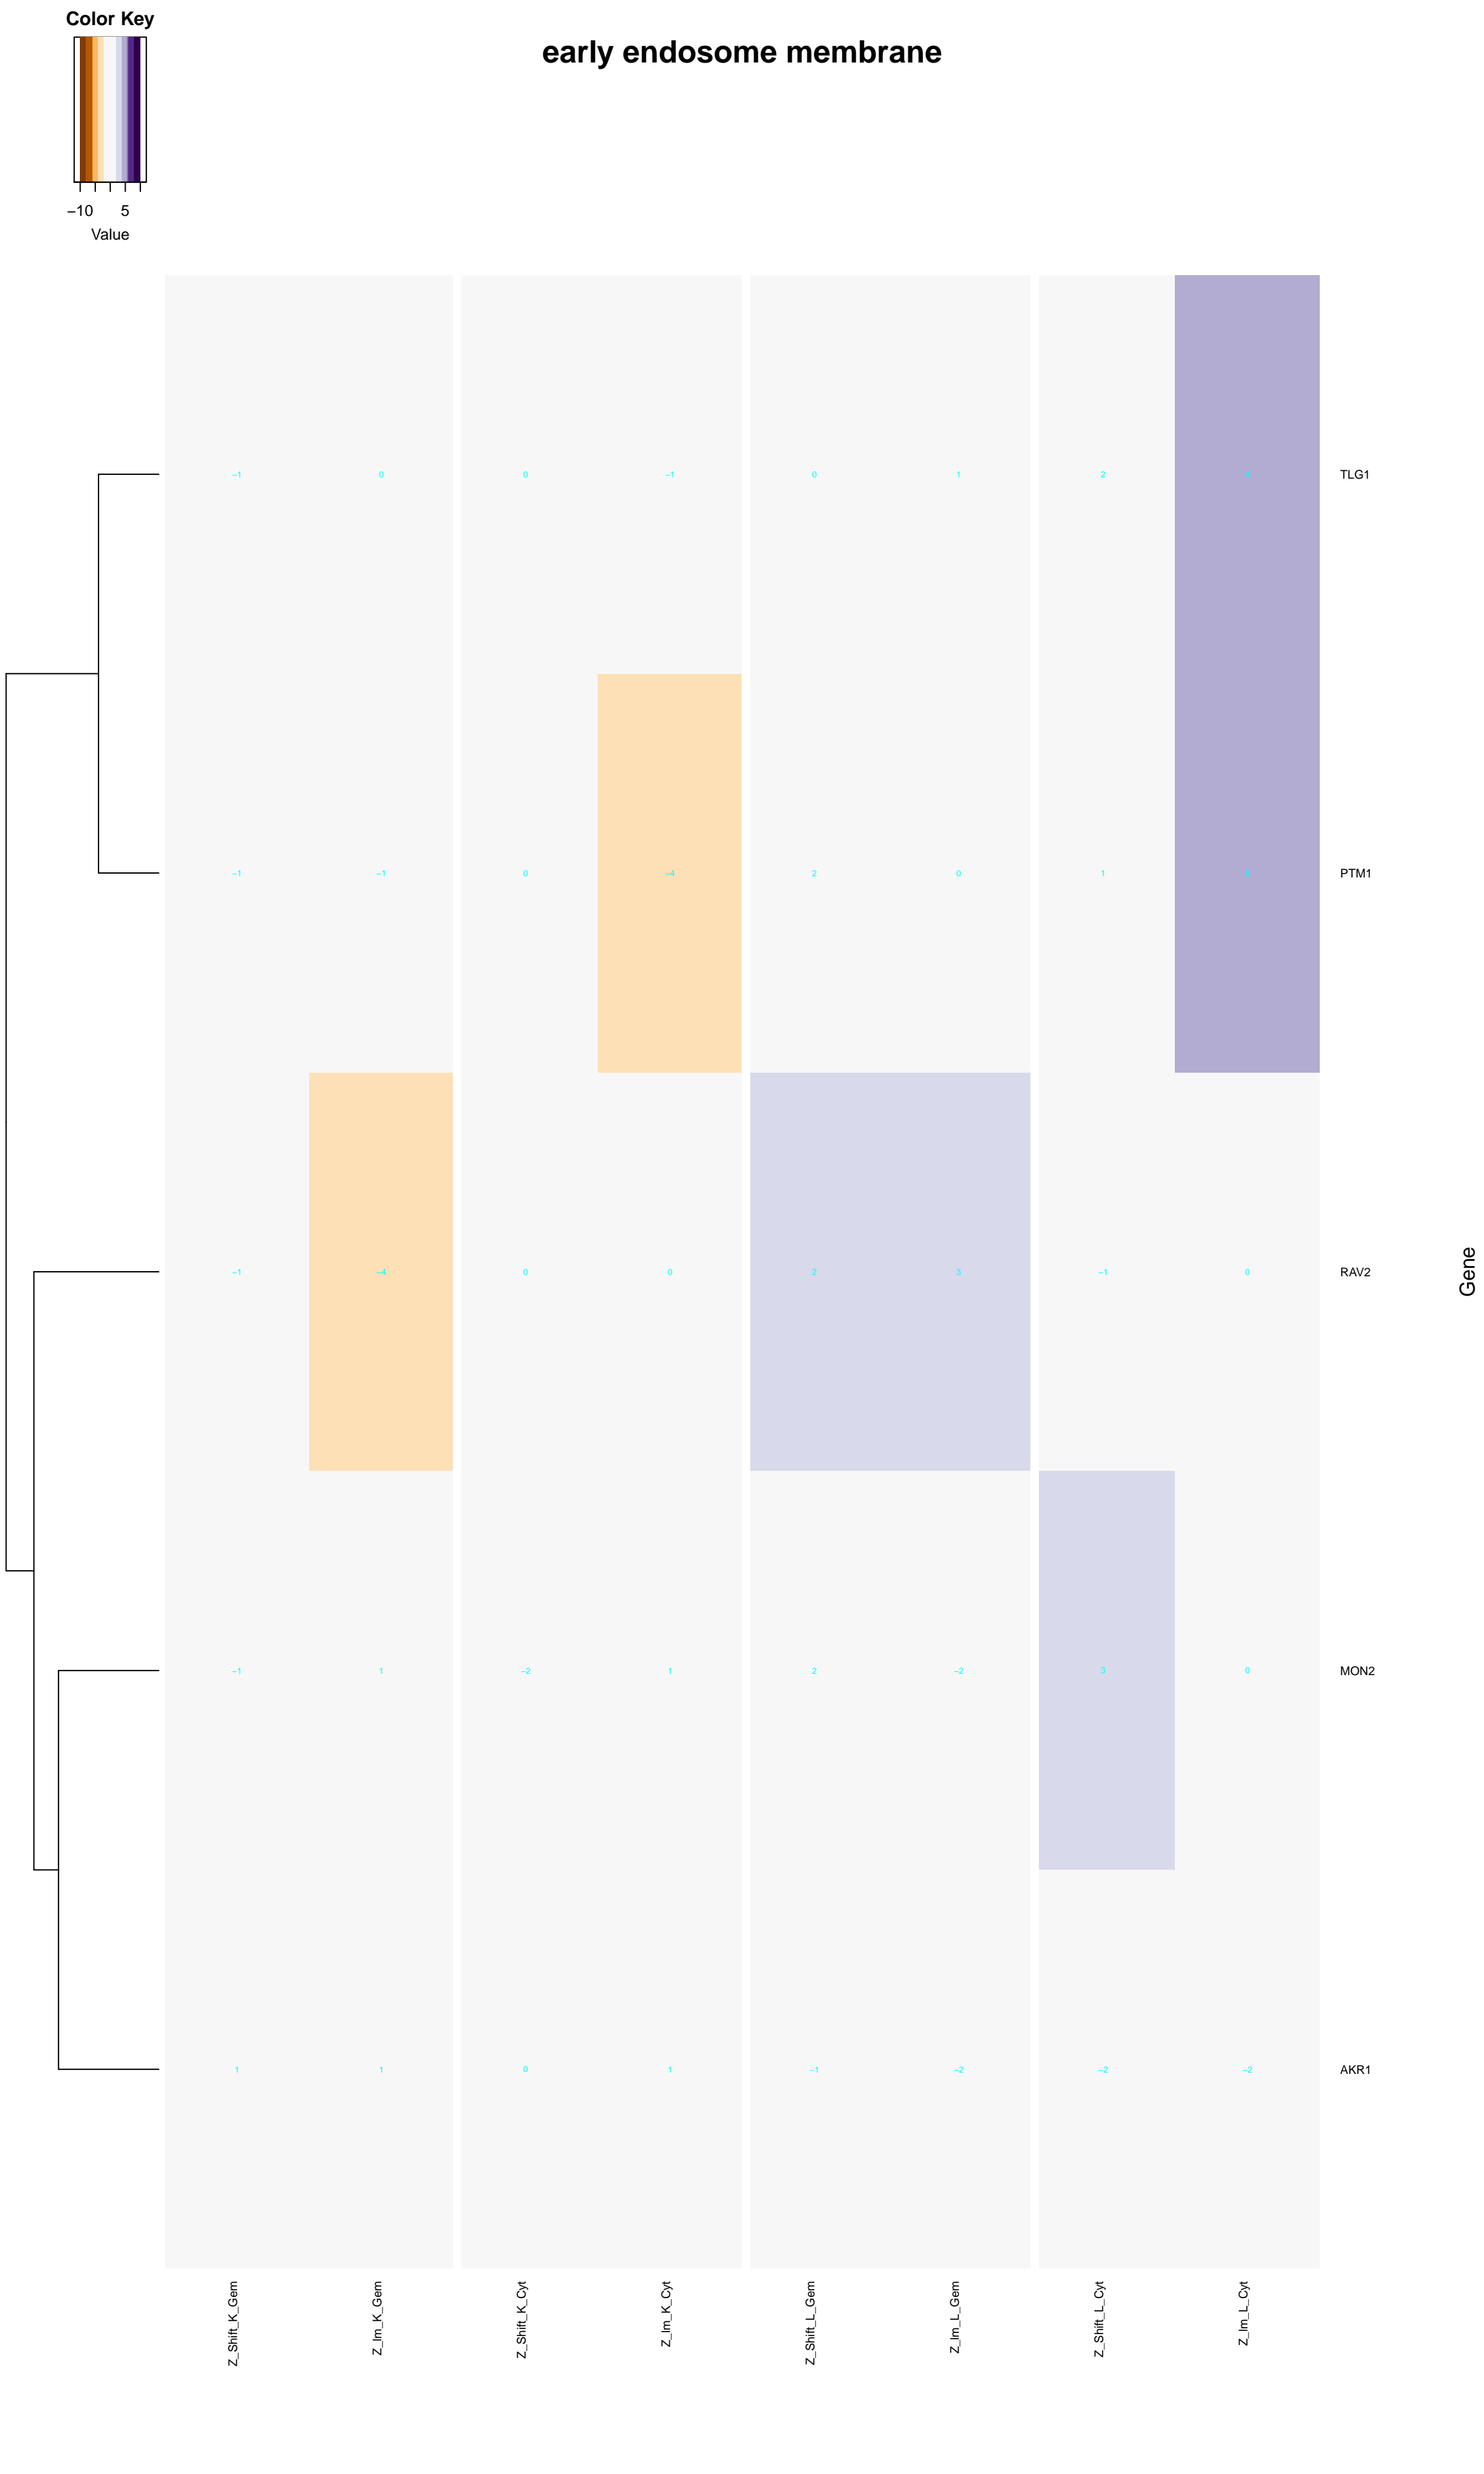

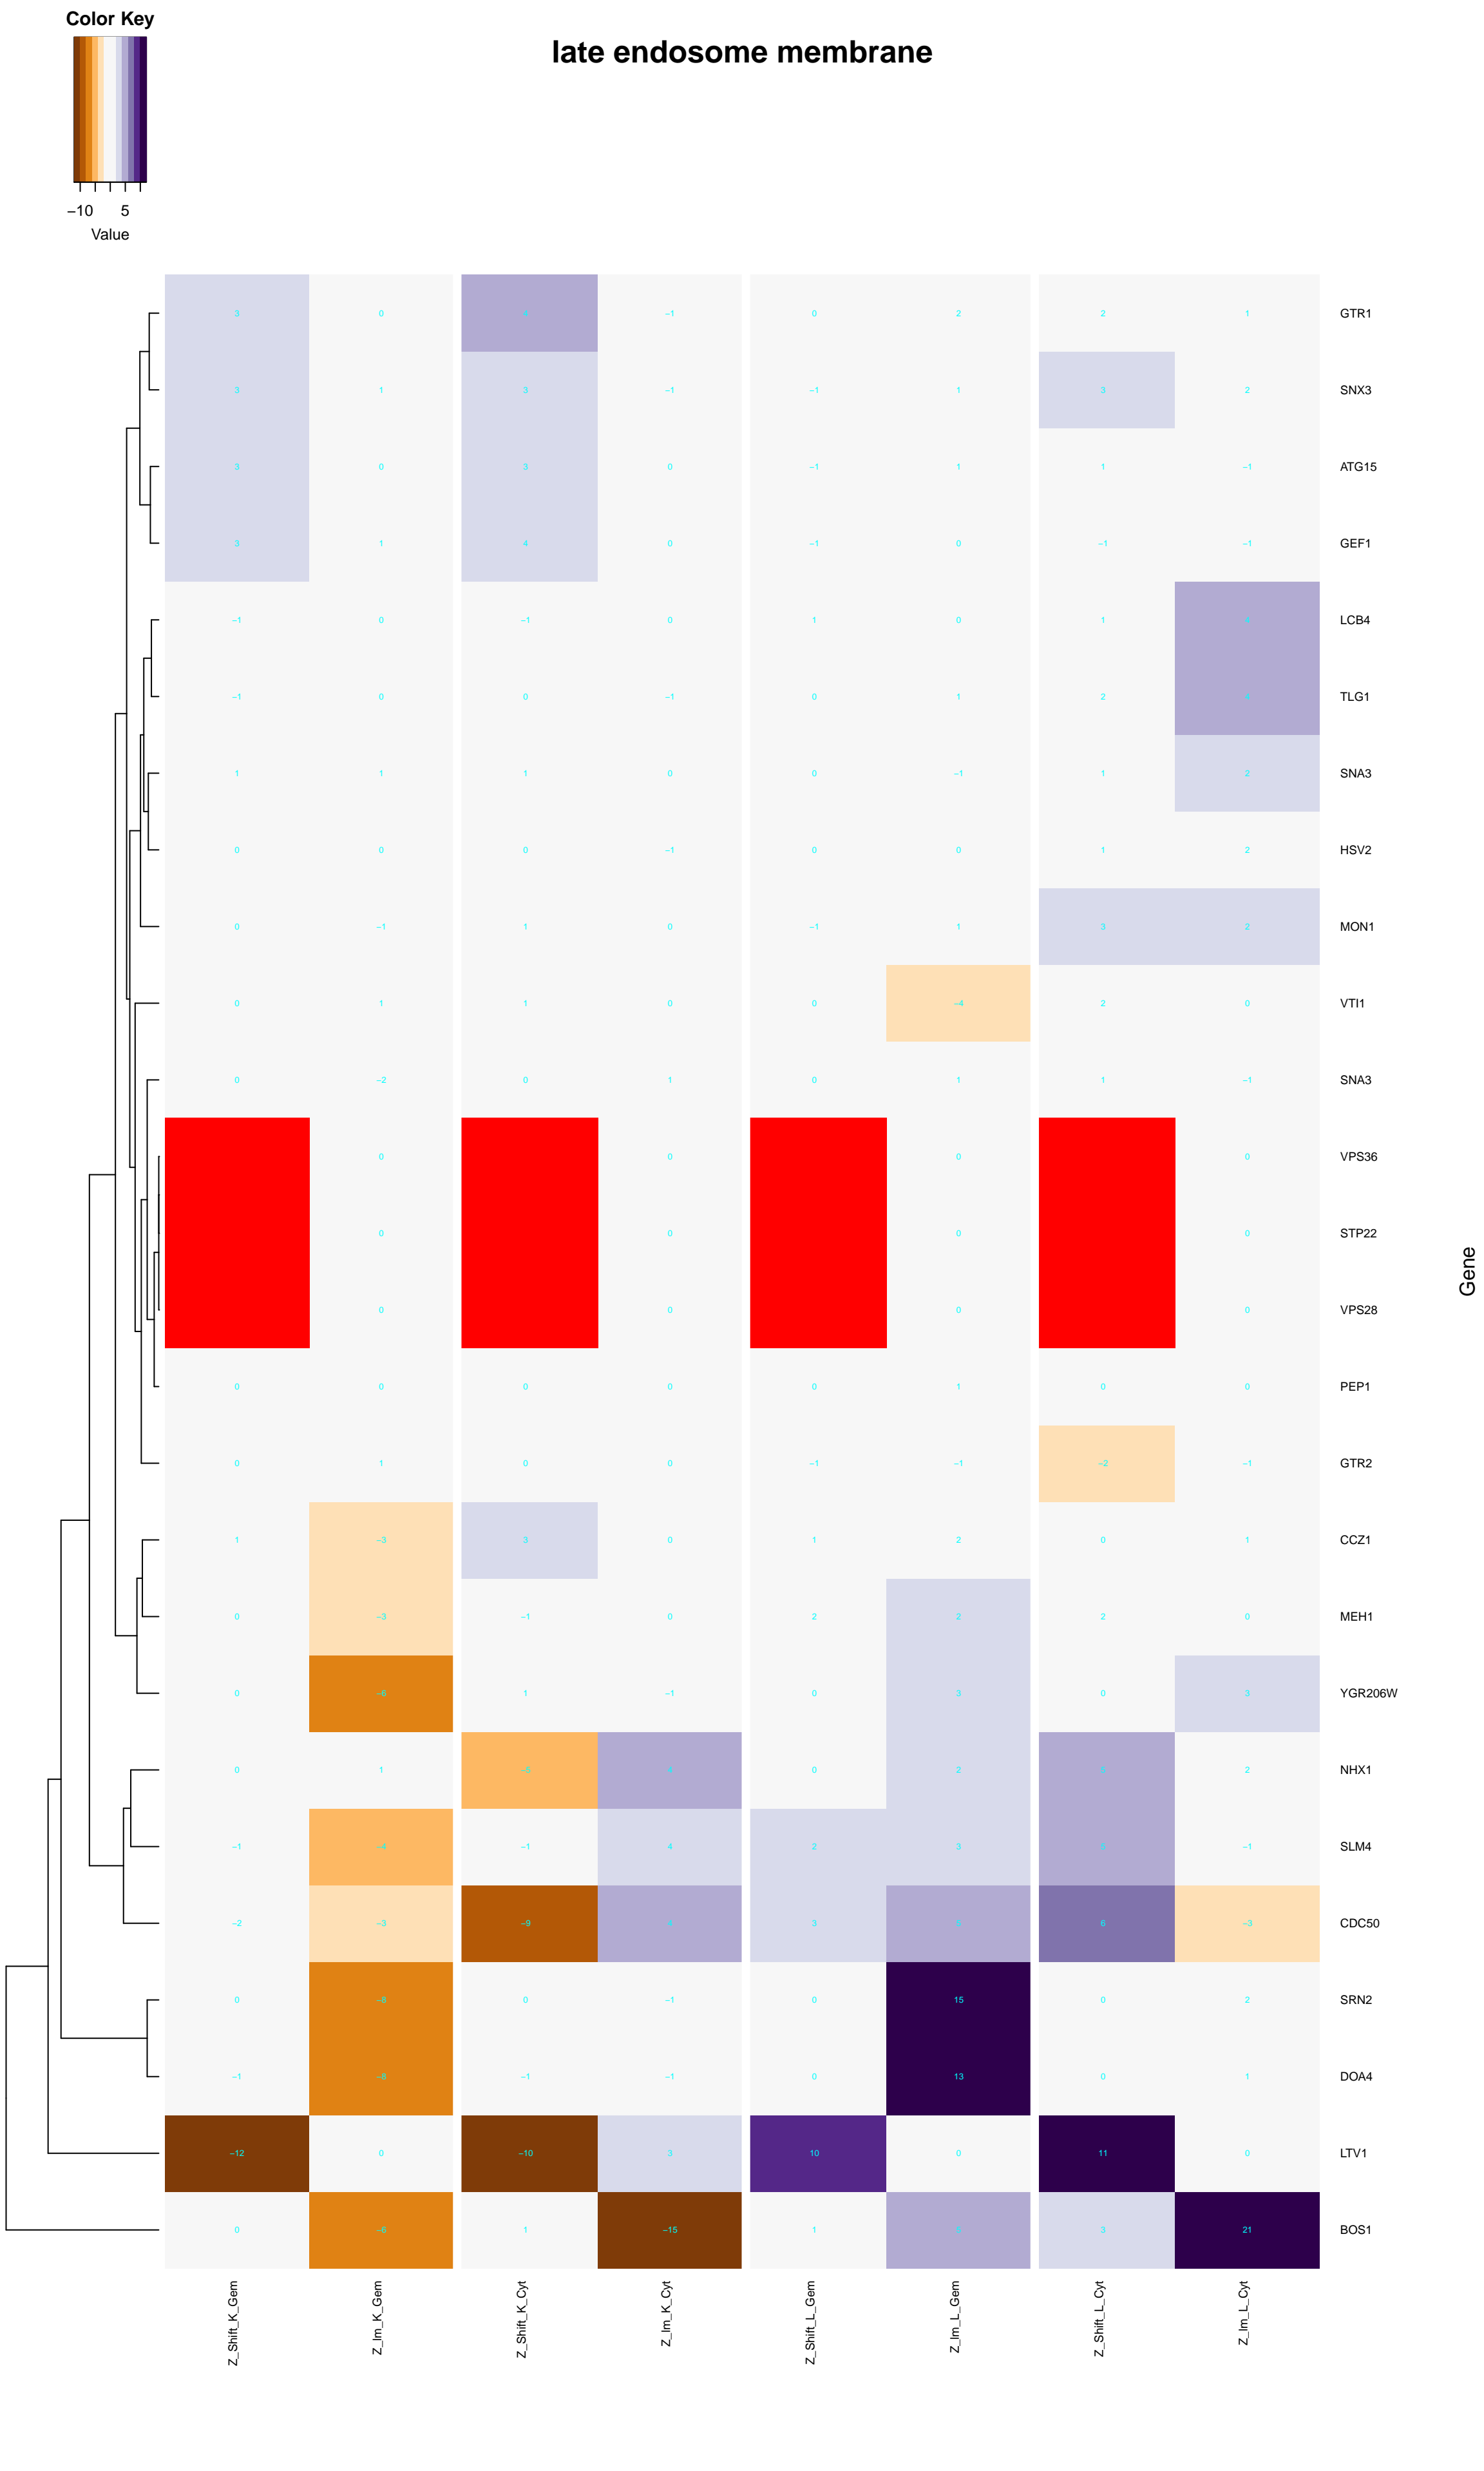

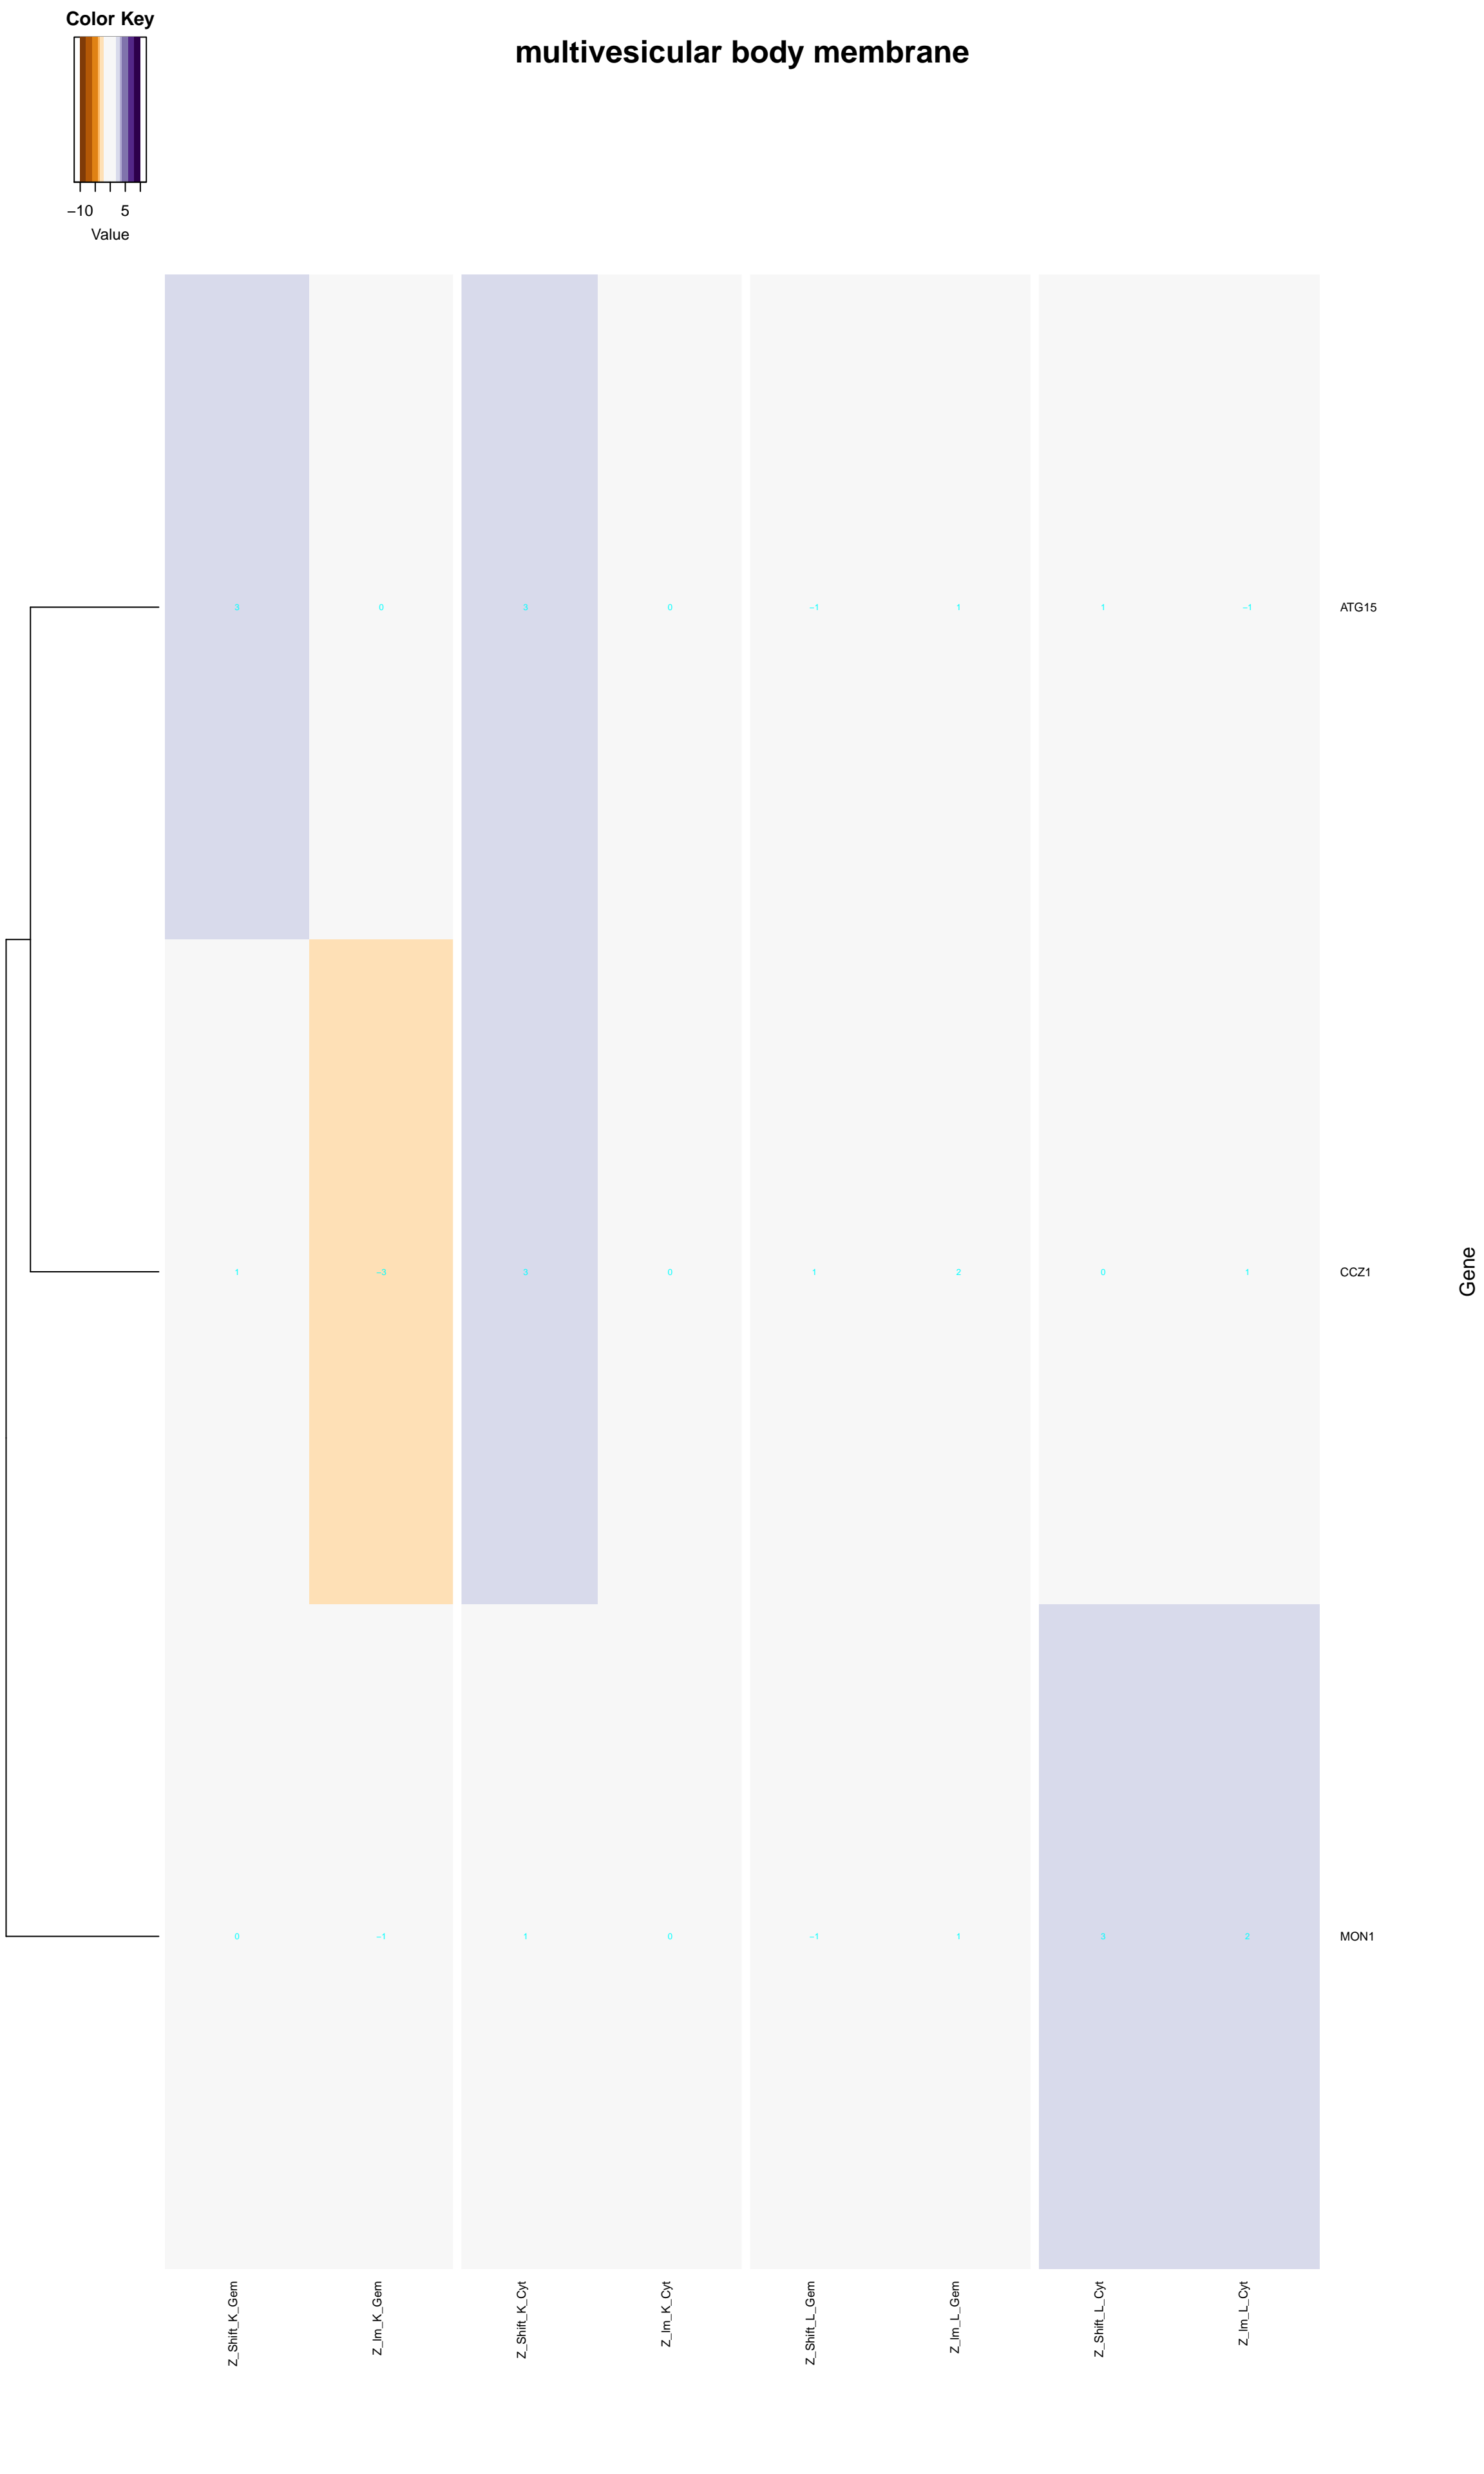

Supplement: s1 [file s1]

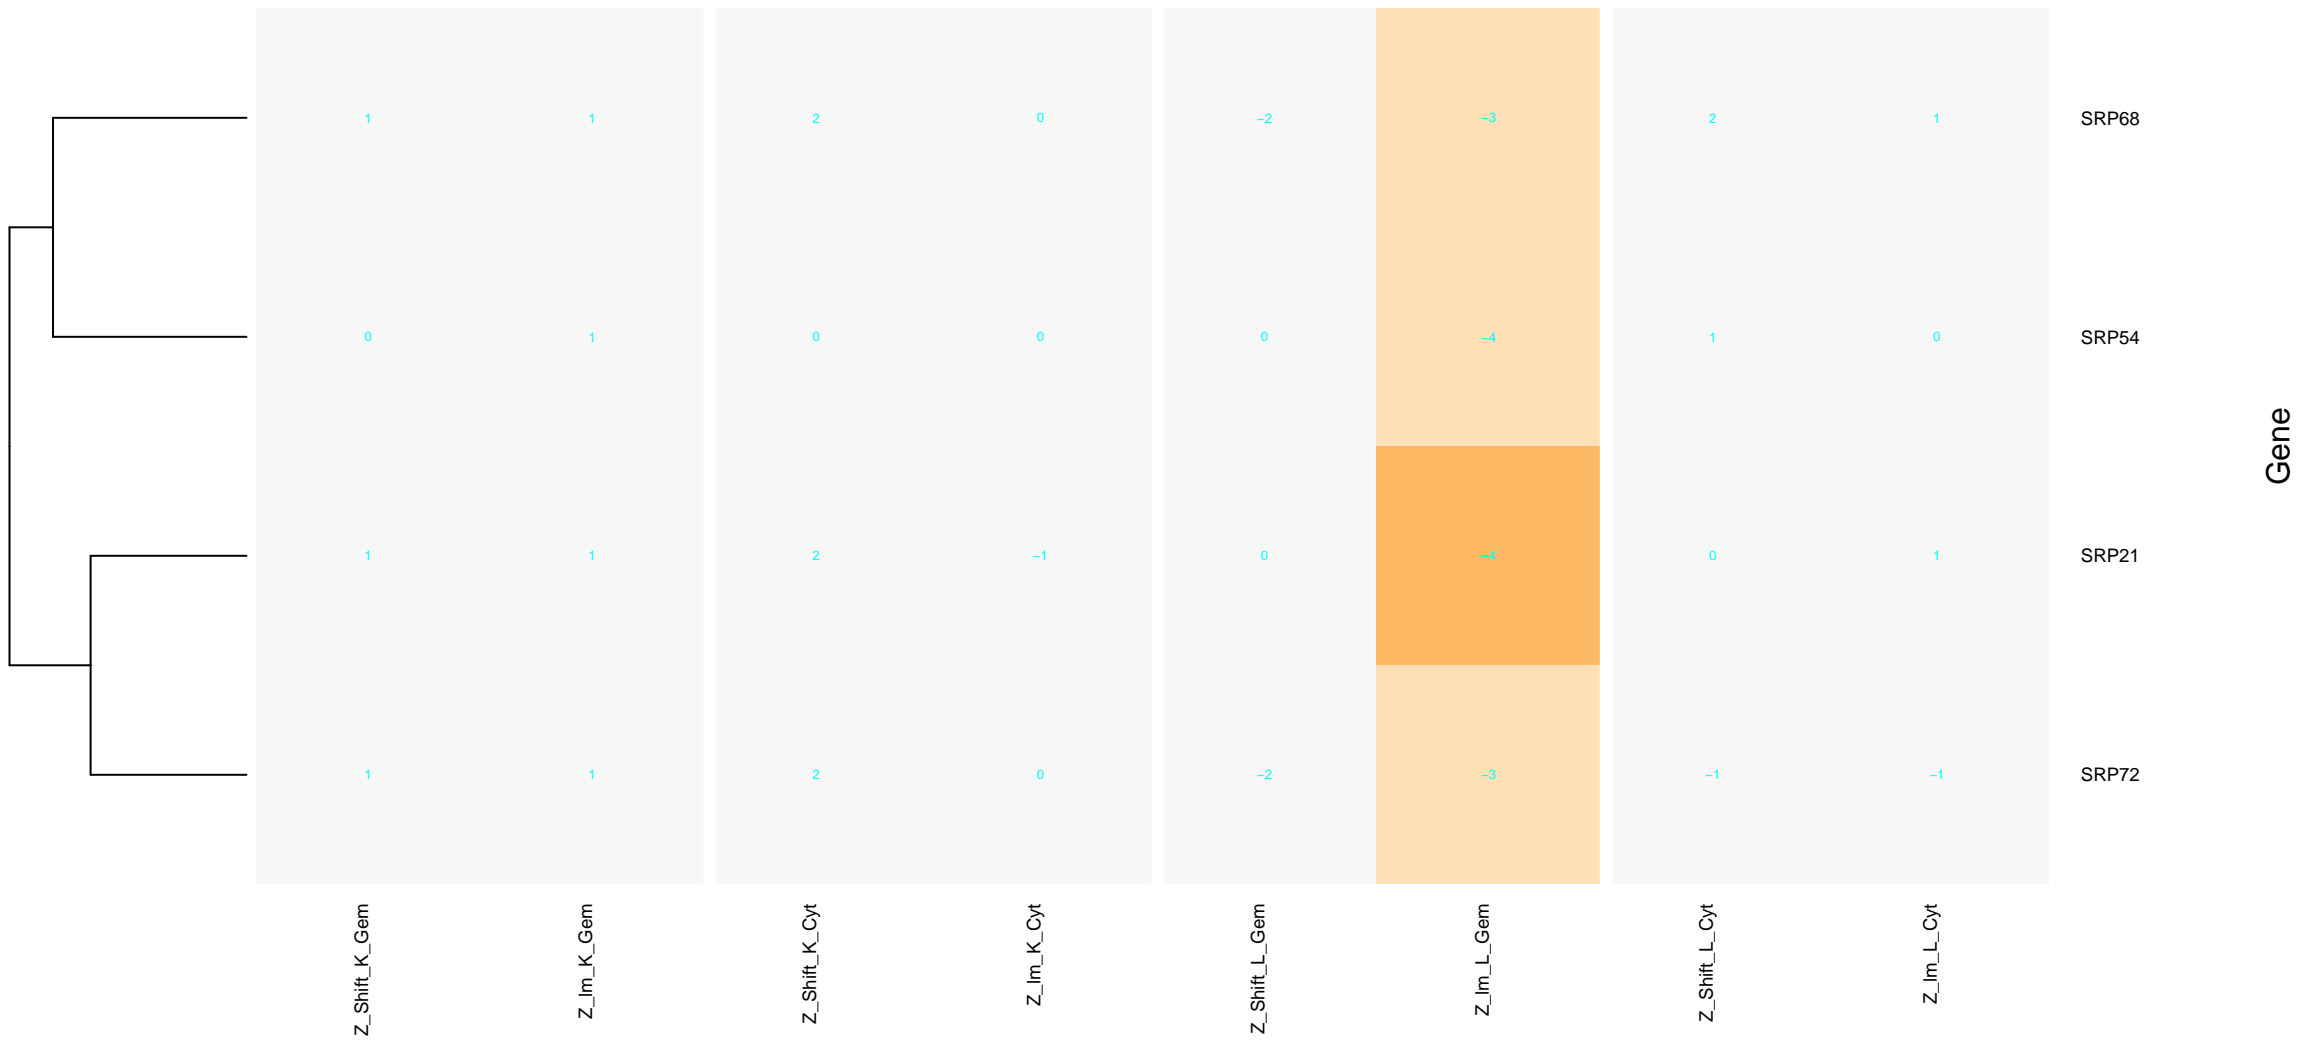

Supplement: s1 [file s1]



# DNA replication origin binding

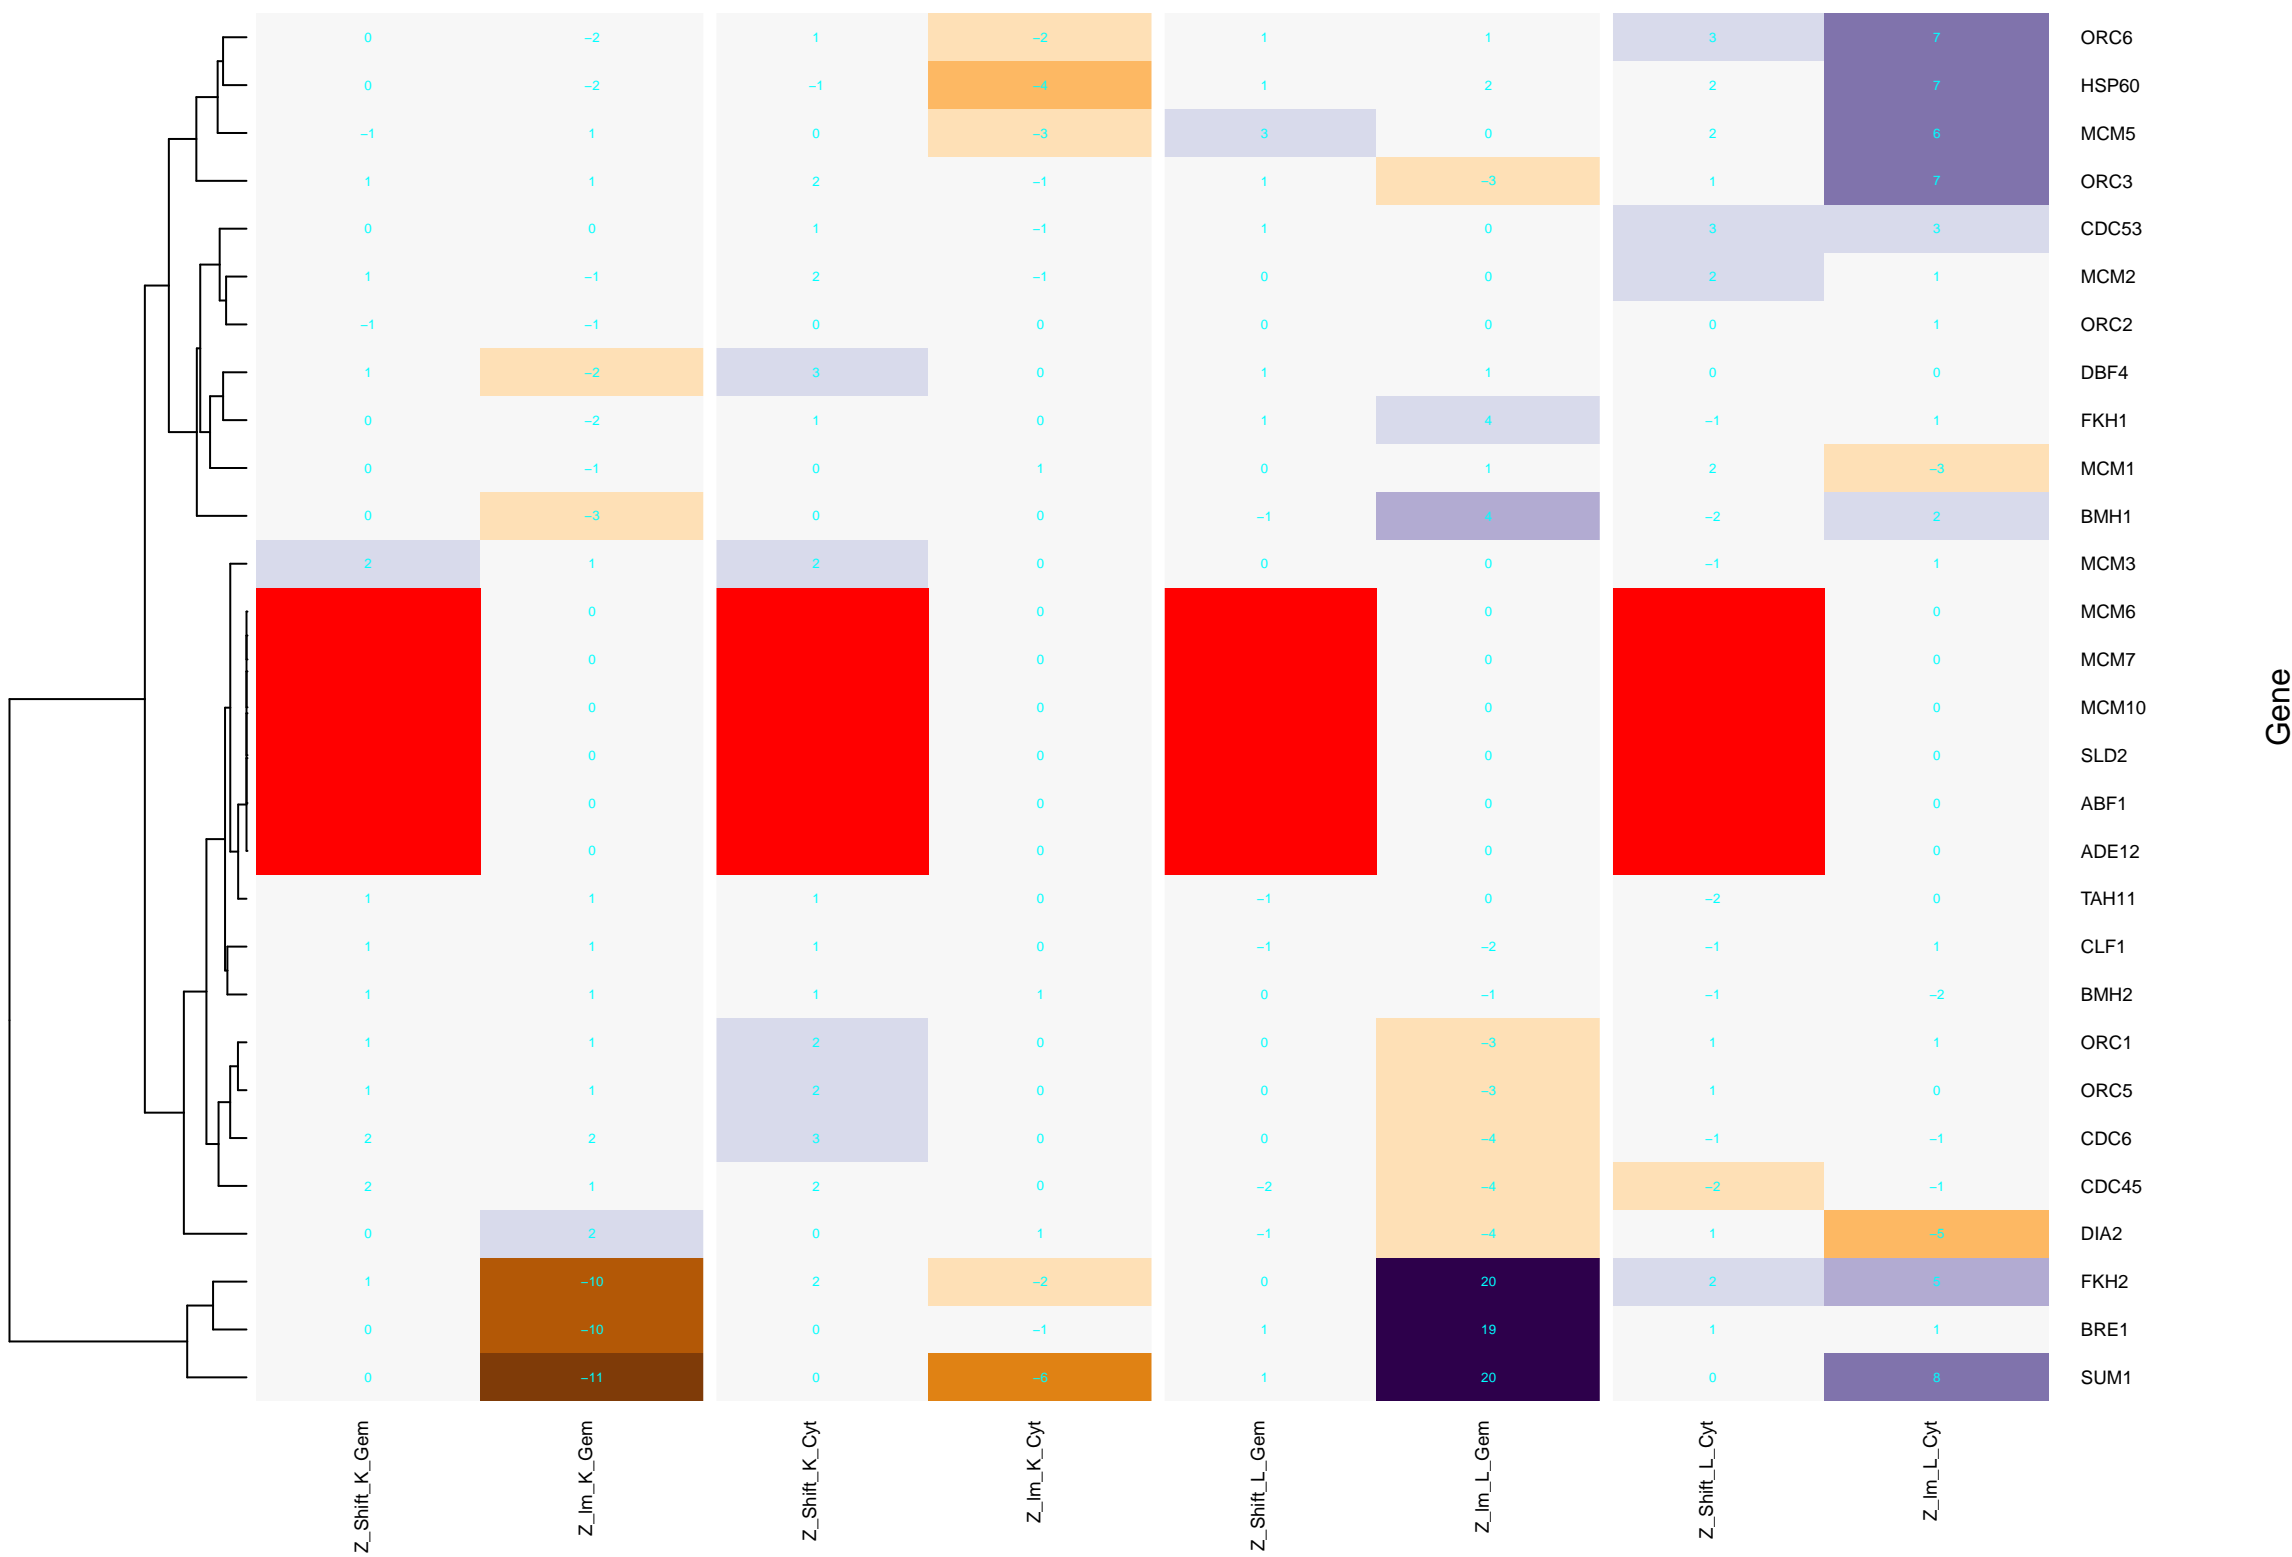

Supplement: s1 [file s1]
