# Supplementary figures and images for: A Humanized Yeast Phenomic Model of Deoxycytidine Kinase to Predict Genetic Buffering of Nucleoside Analog Cytotoxicity (part 3 of 4)
Source: MDPI journal article supplement (doi:10.3390/genes10100770), 2019-09-30

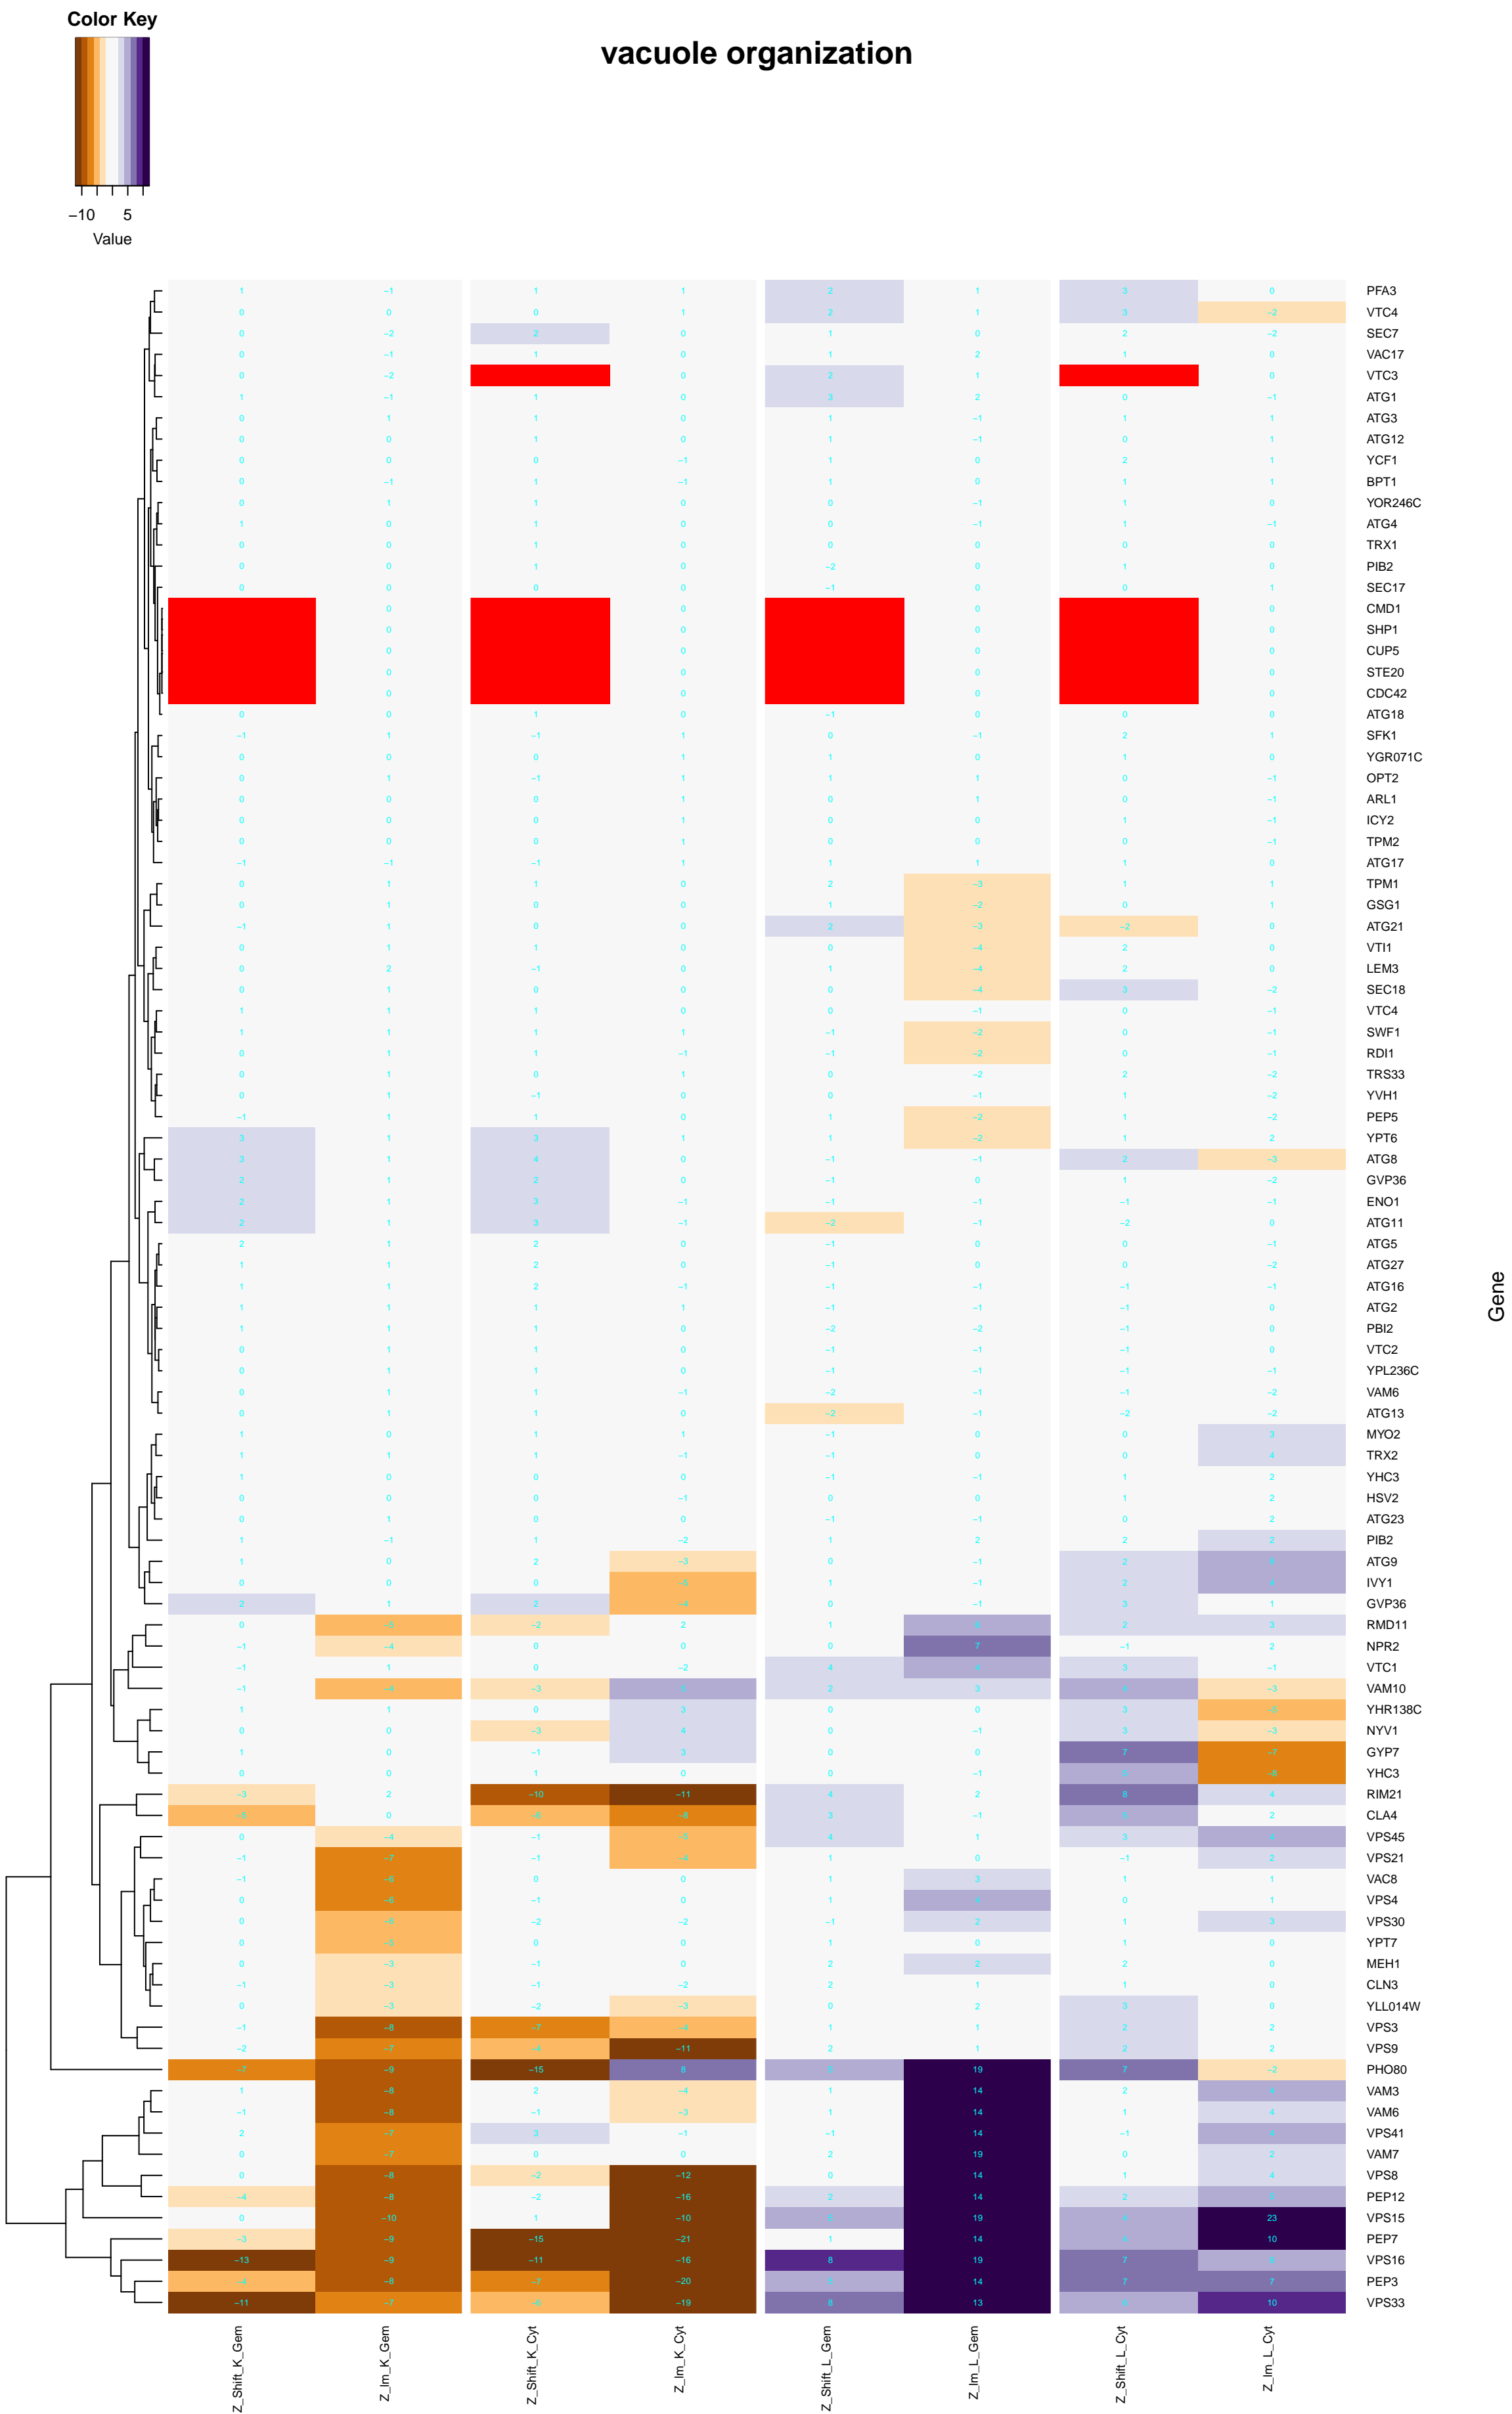

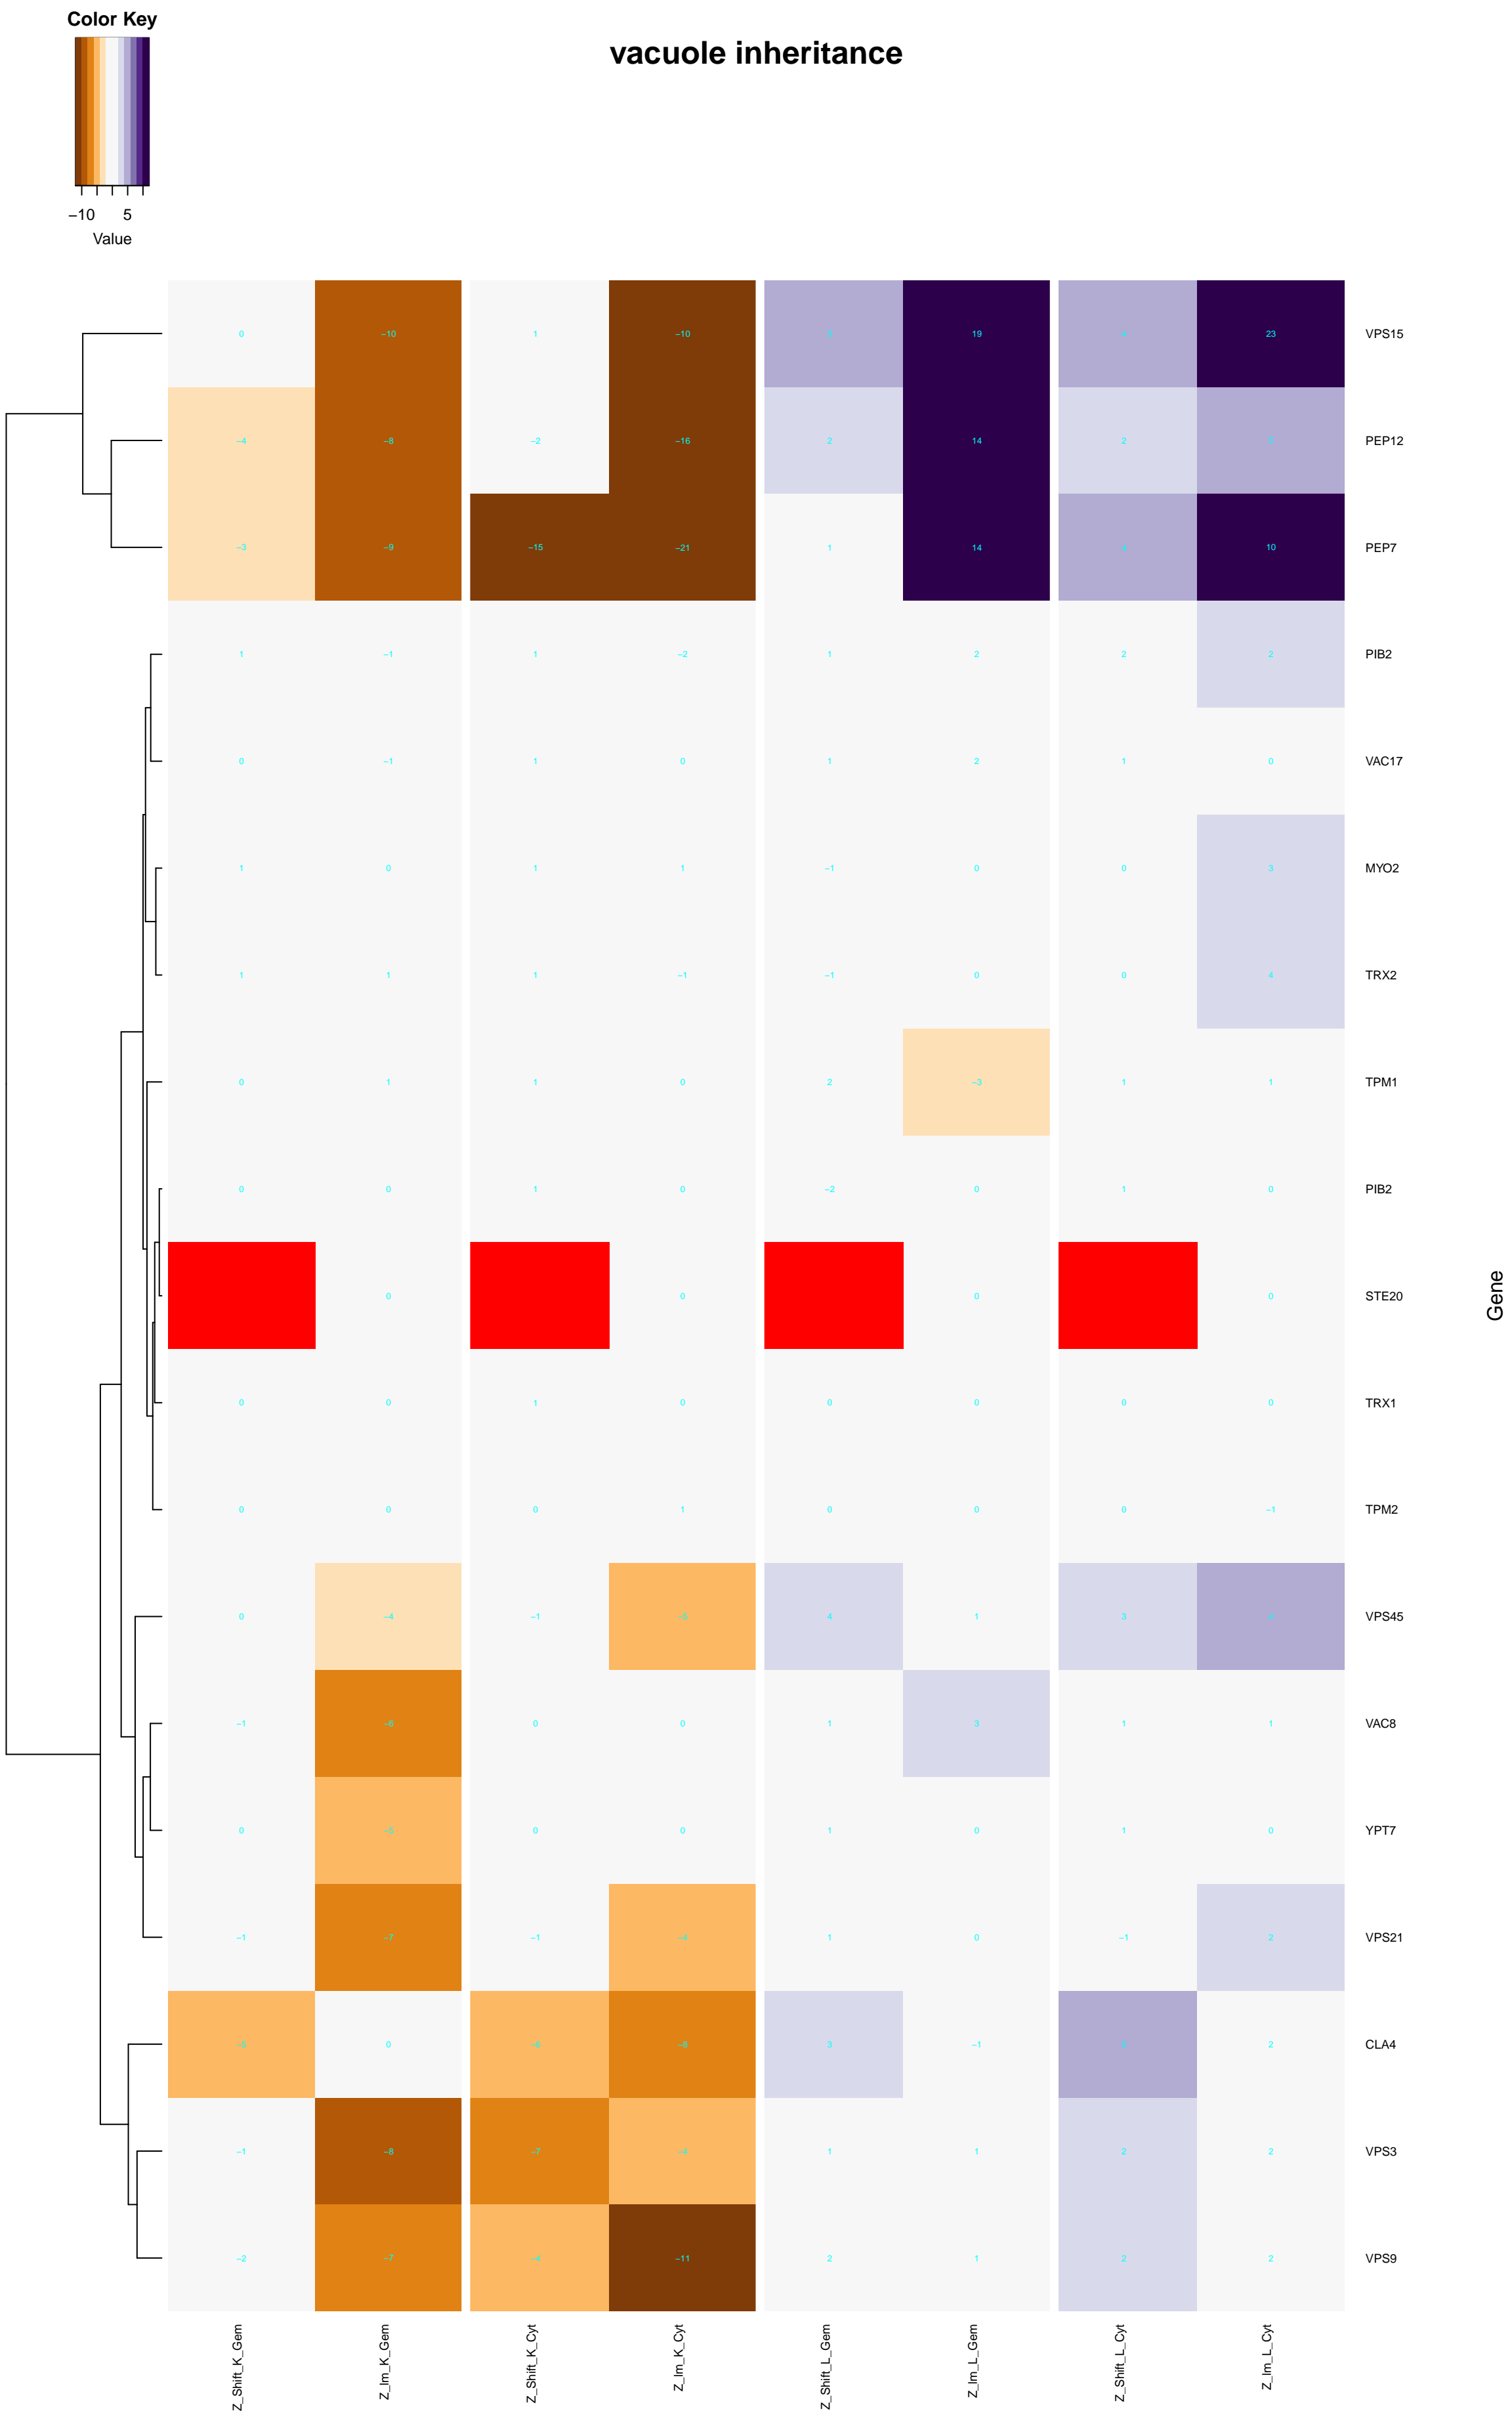

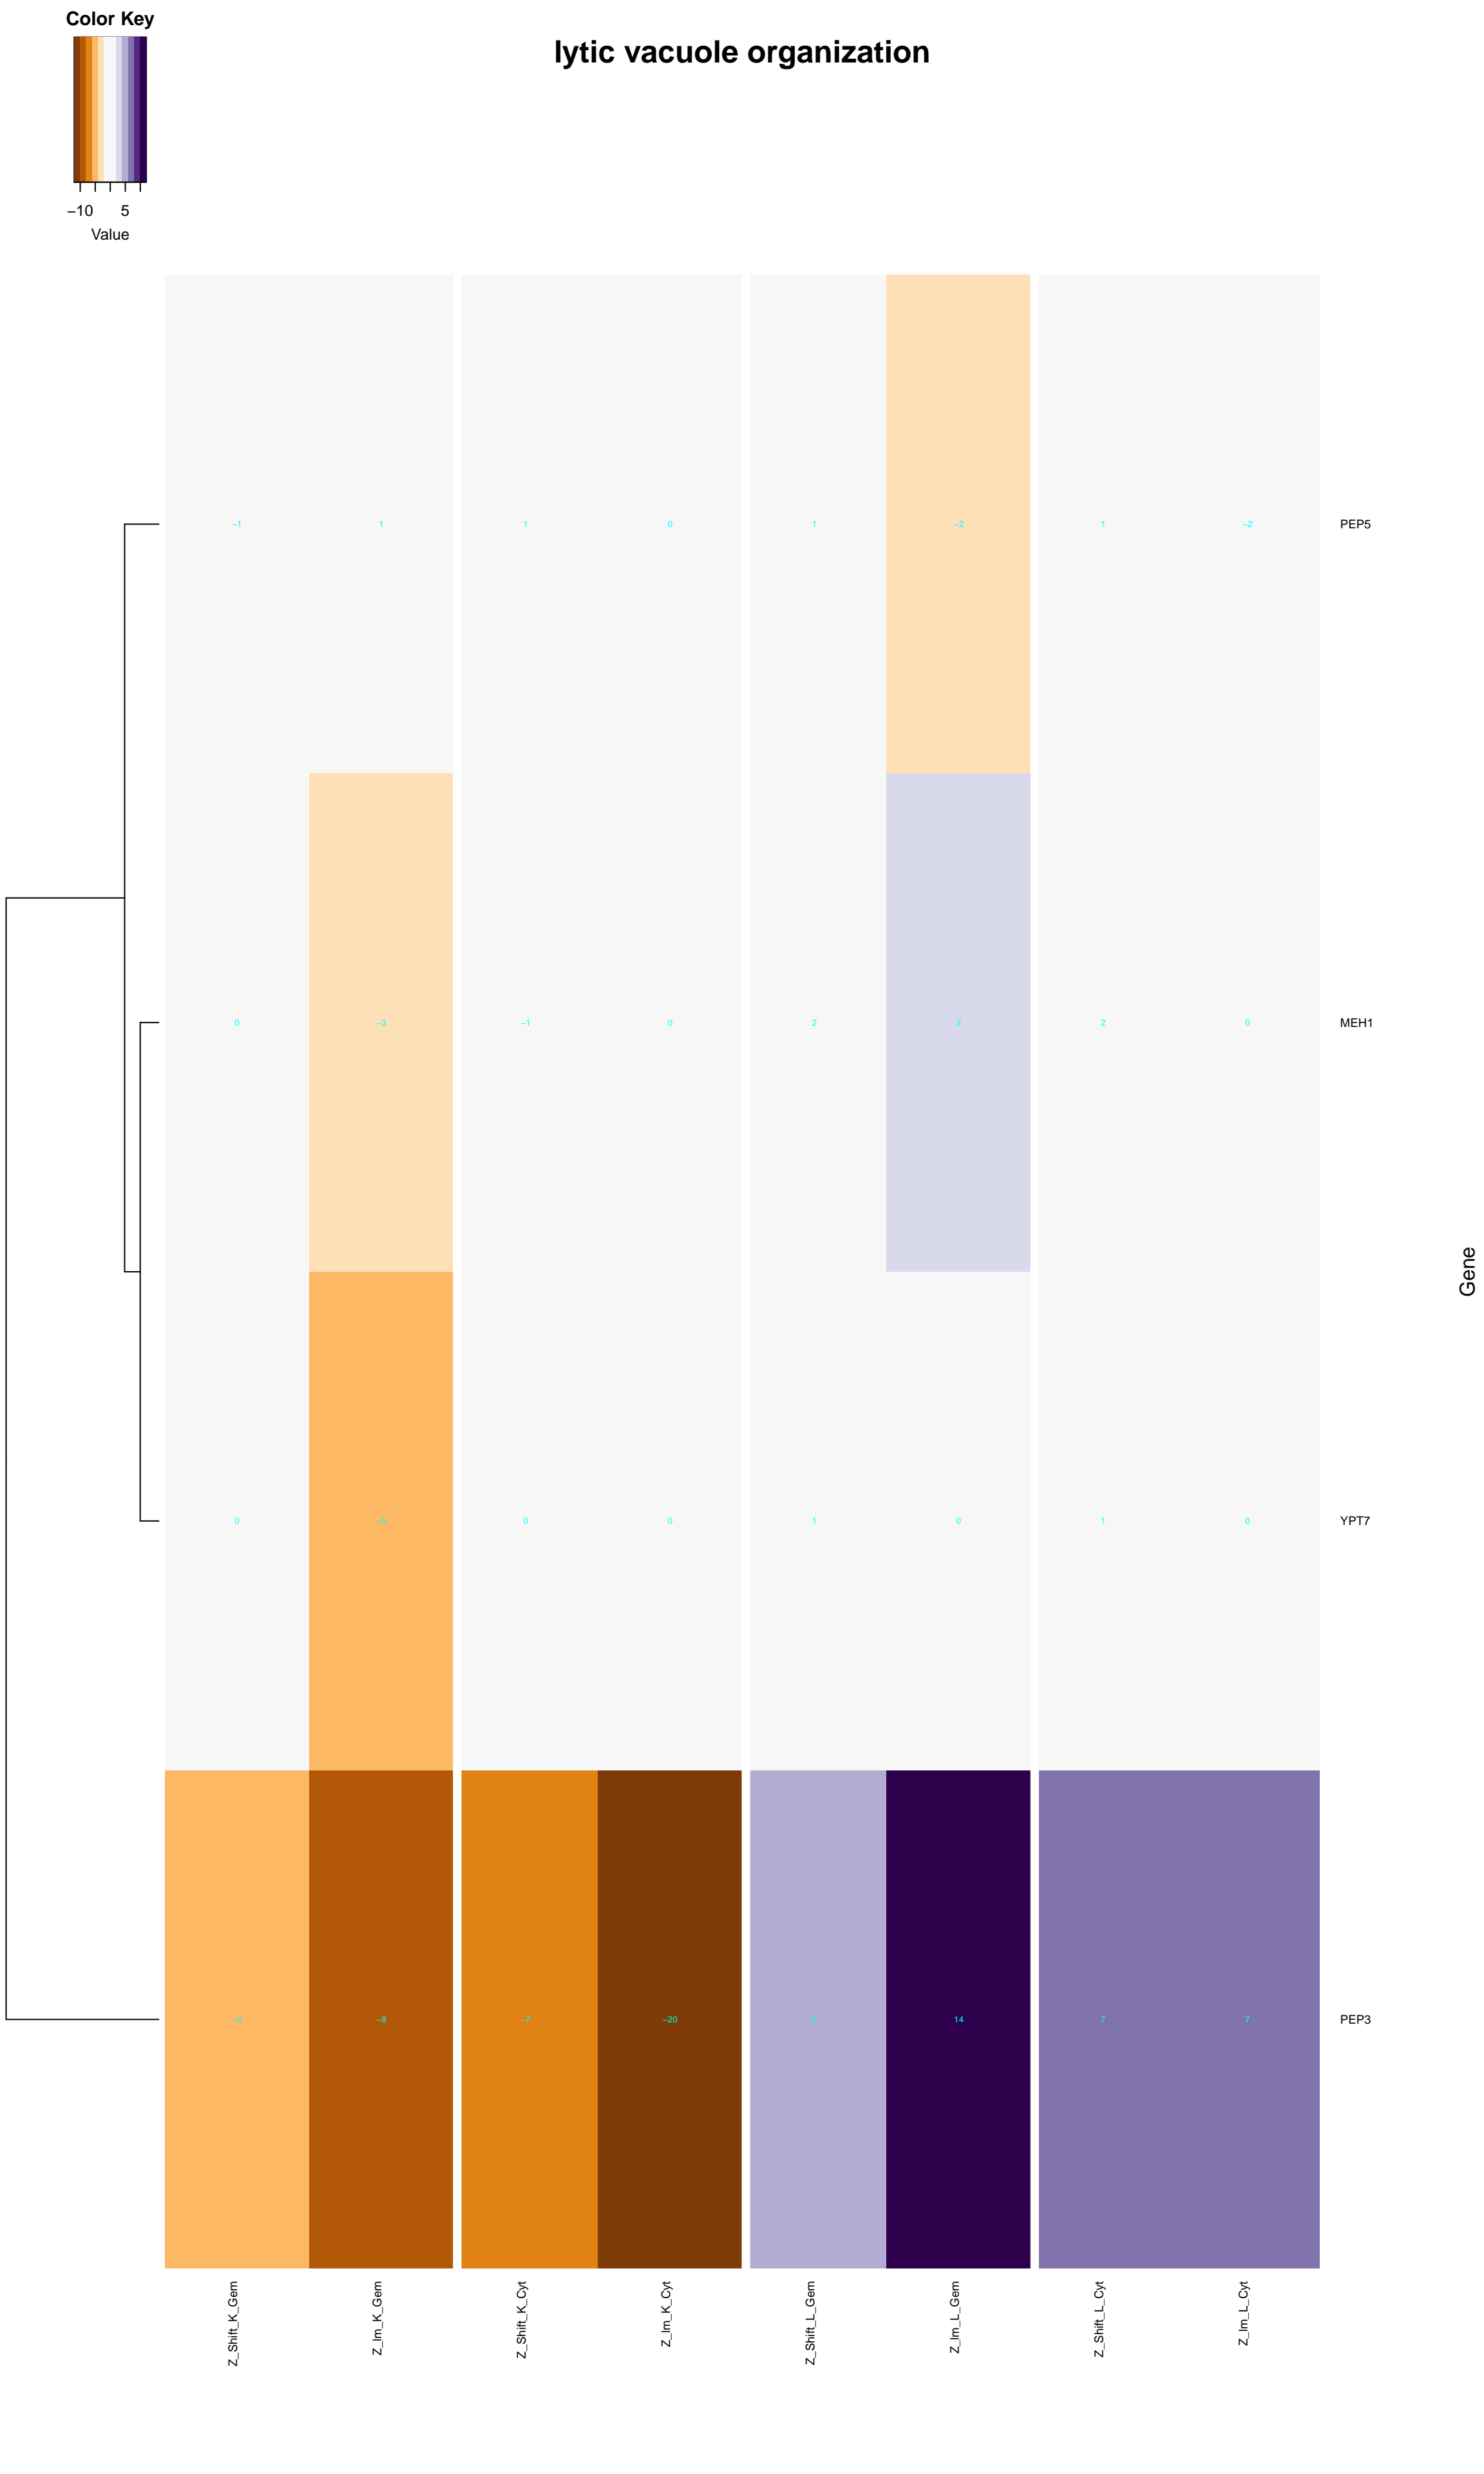

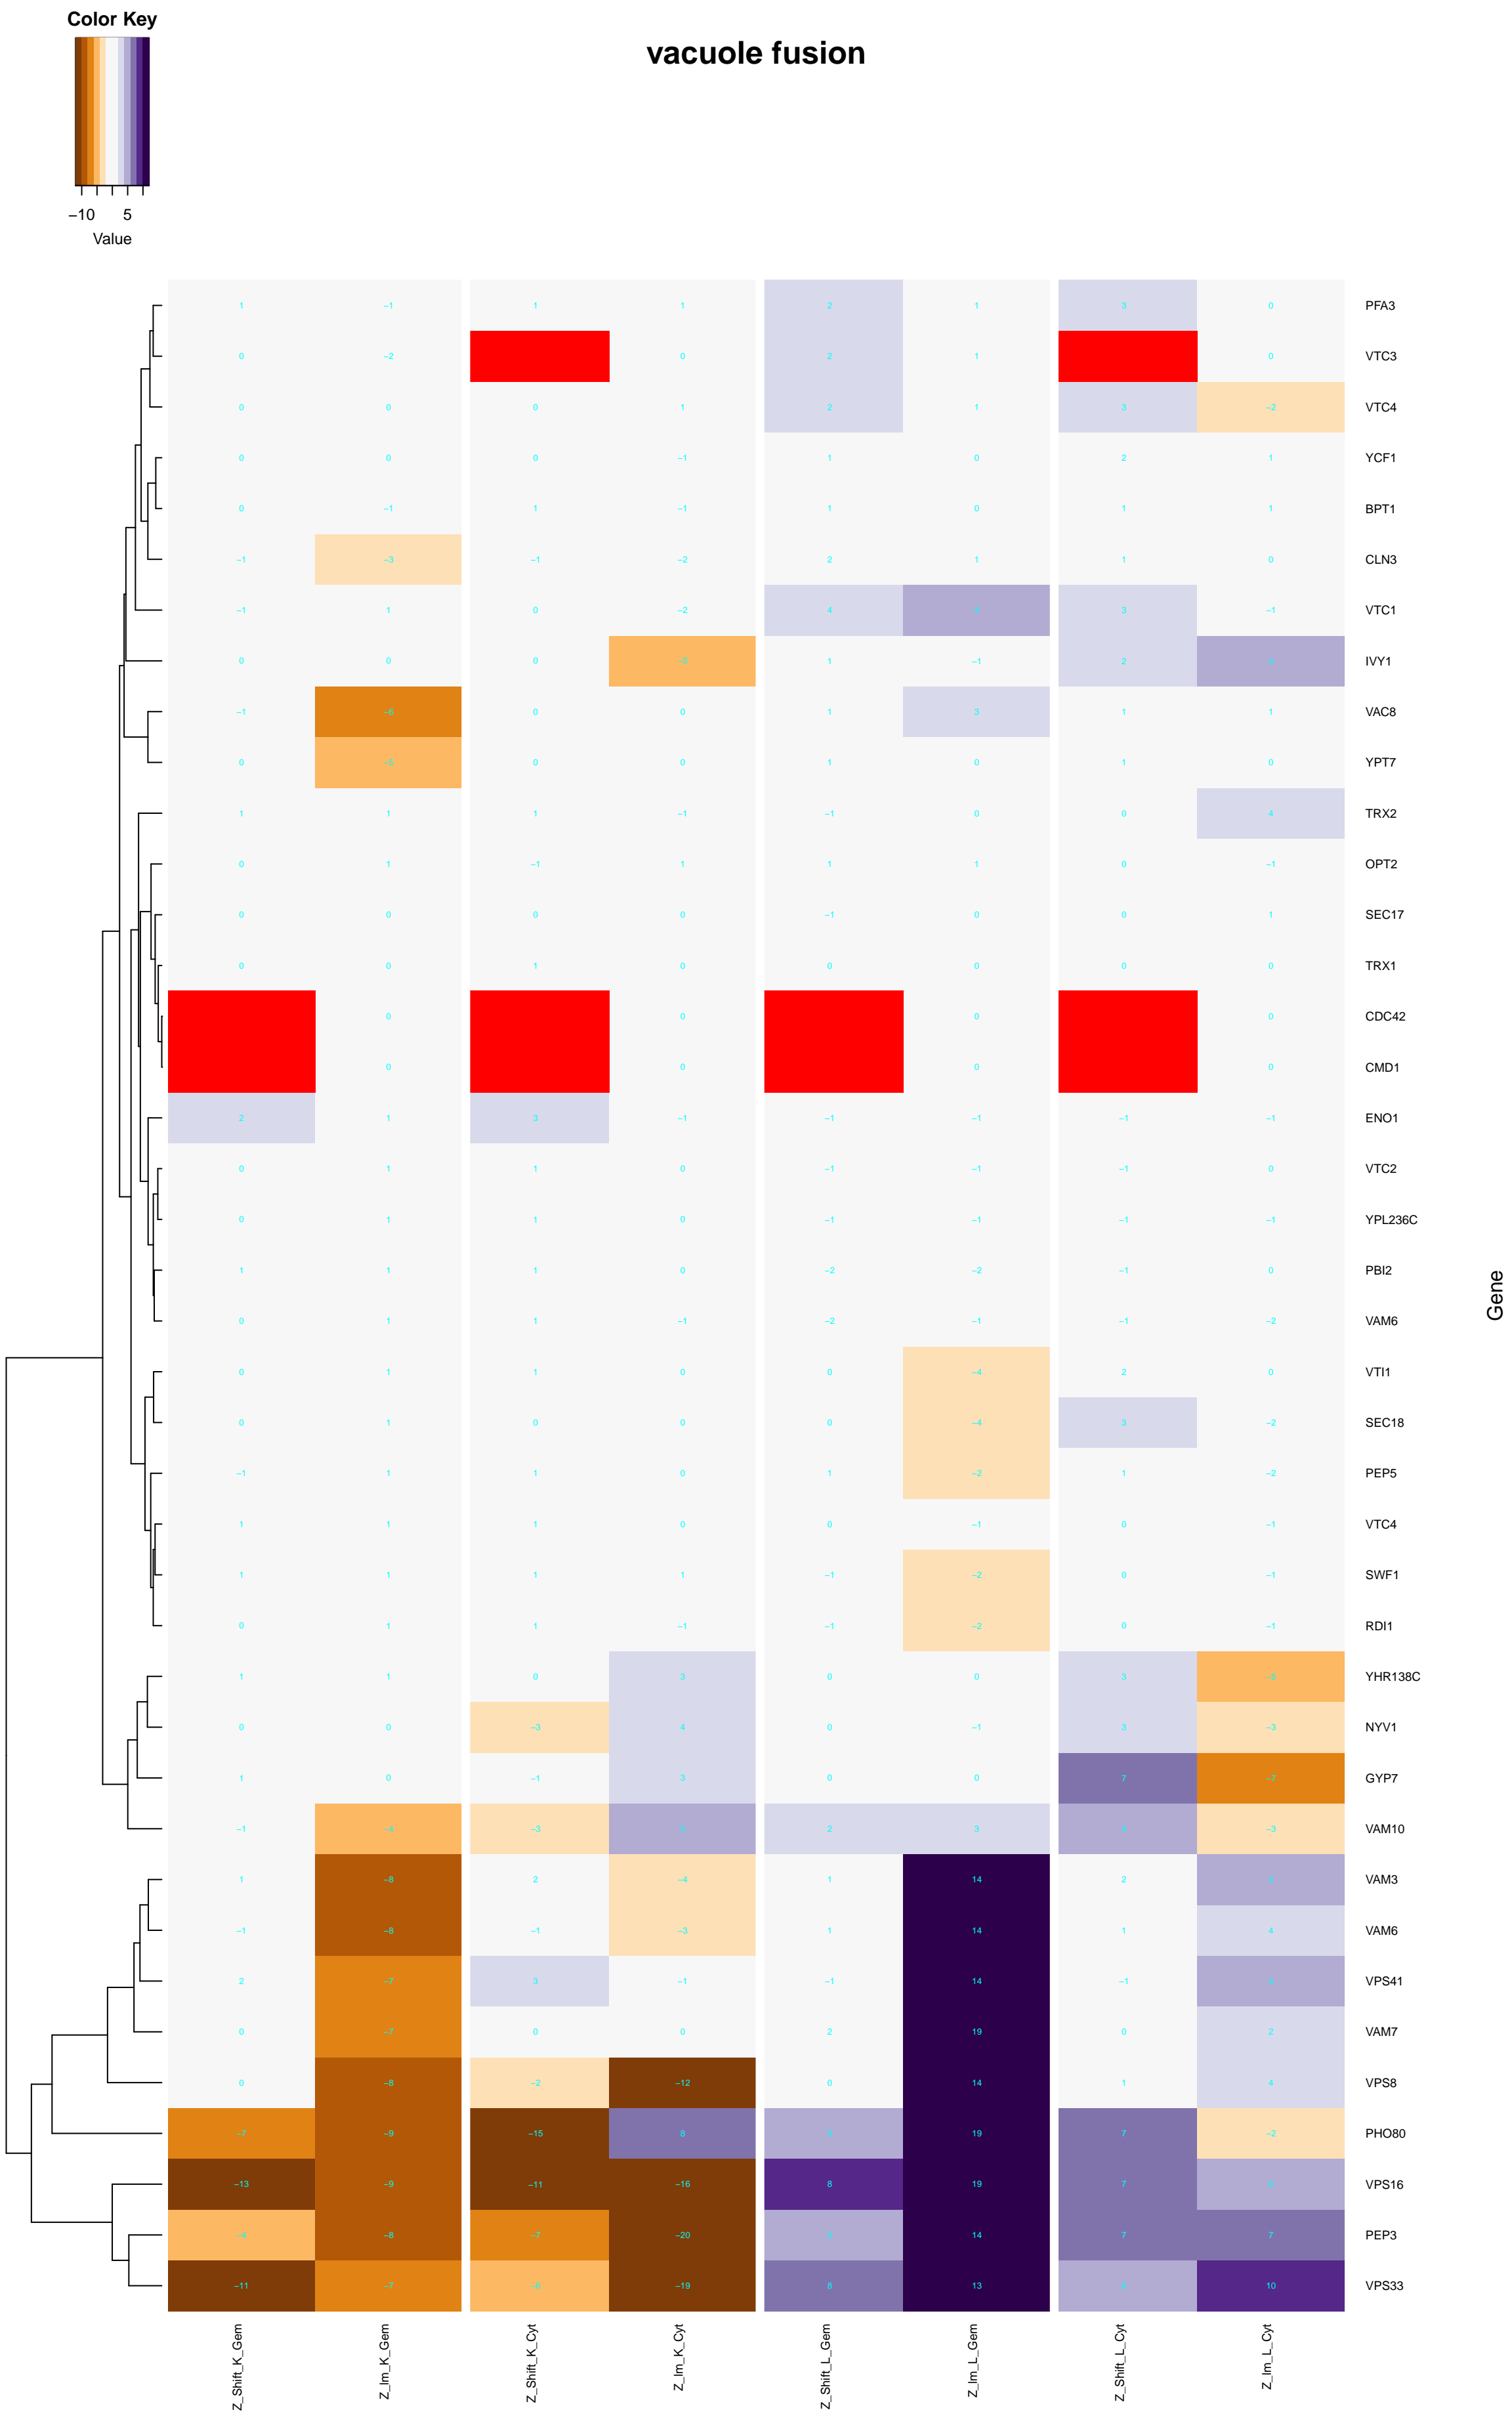

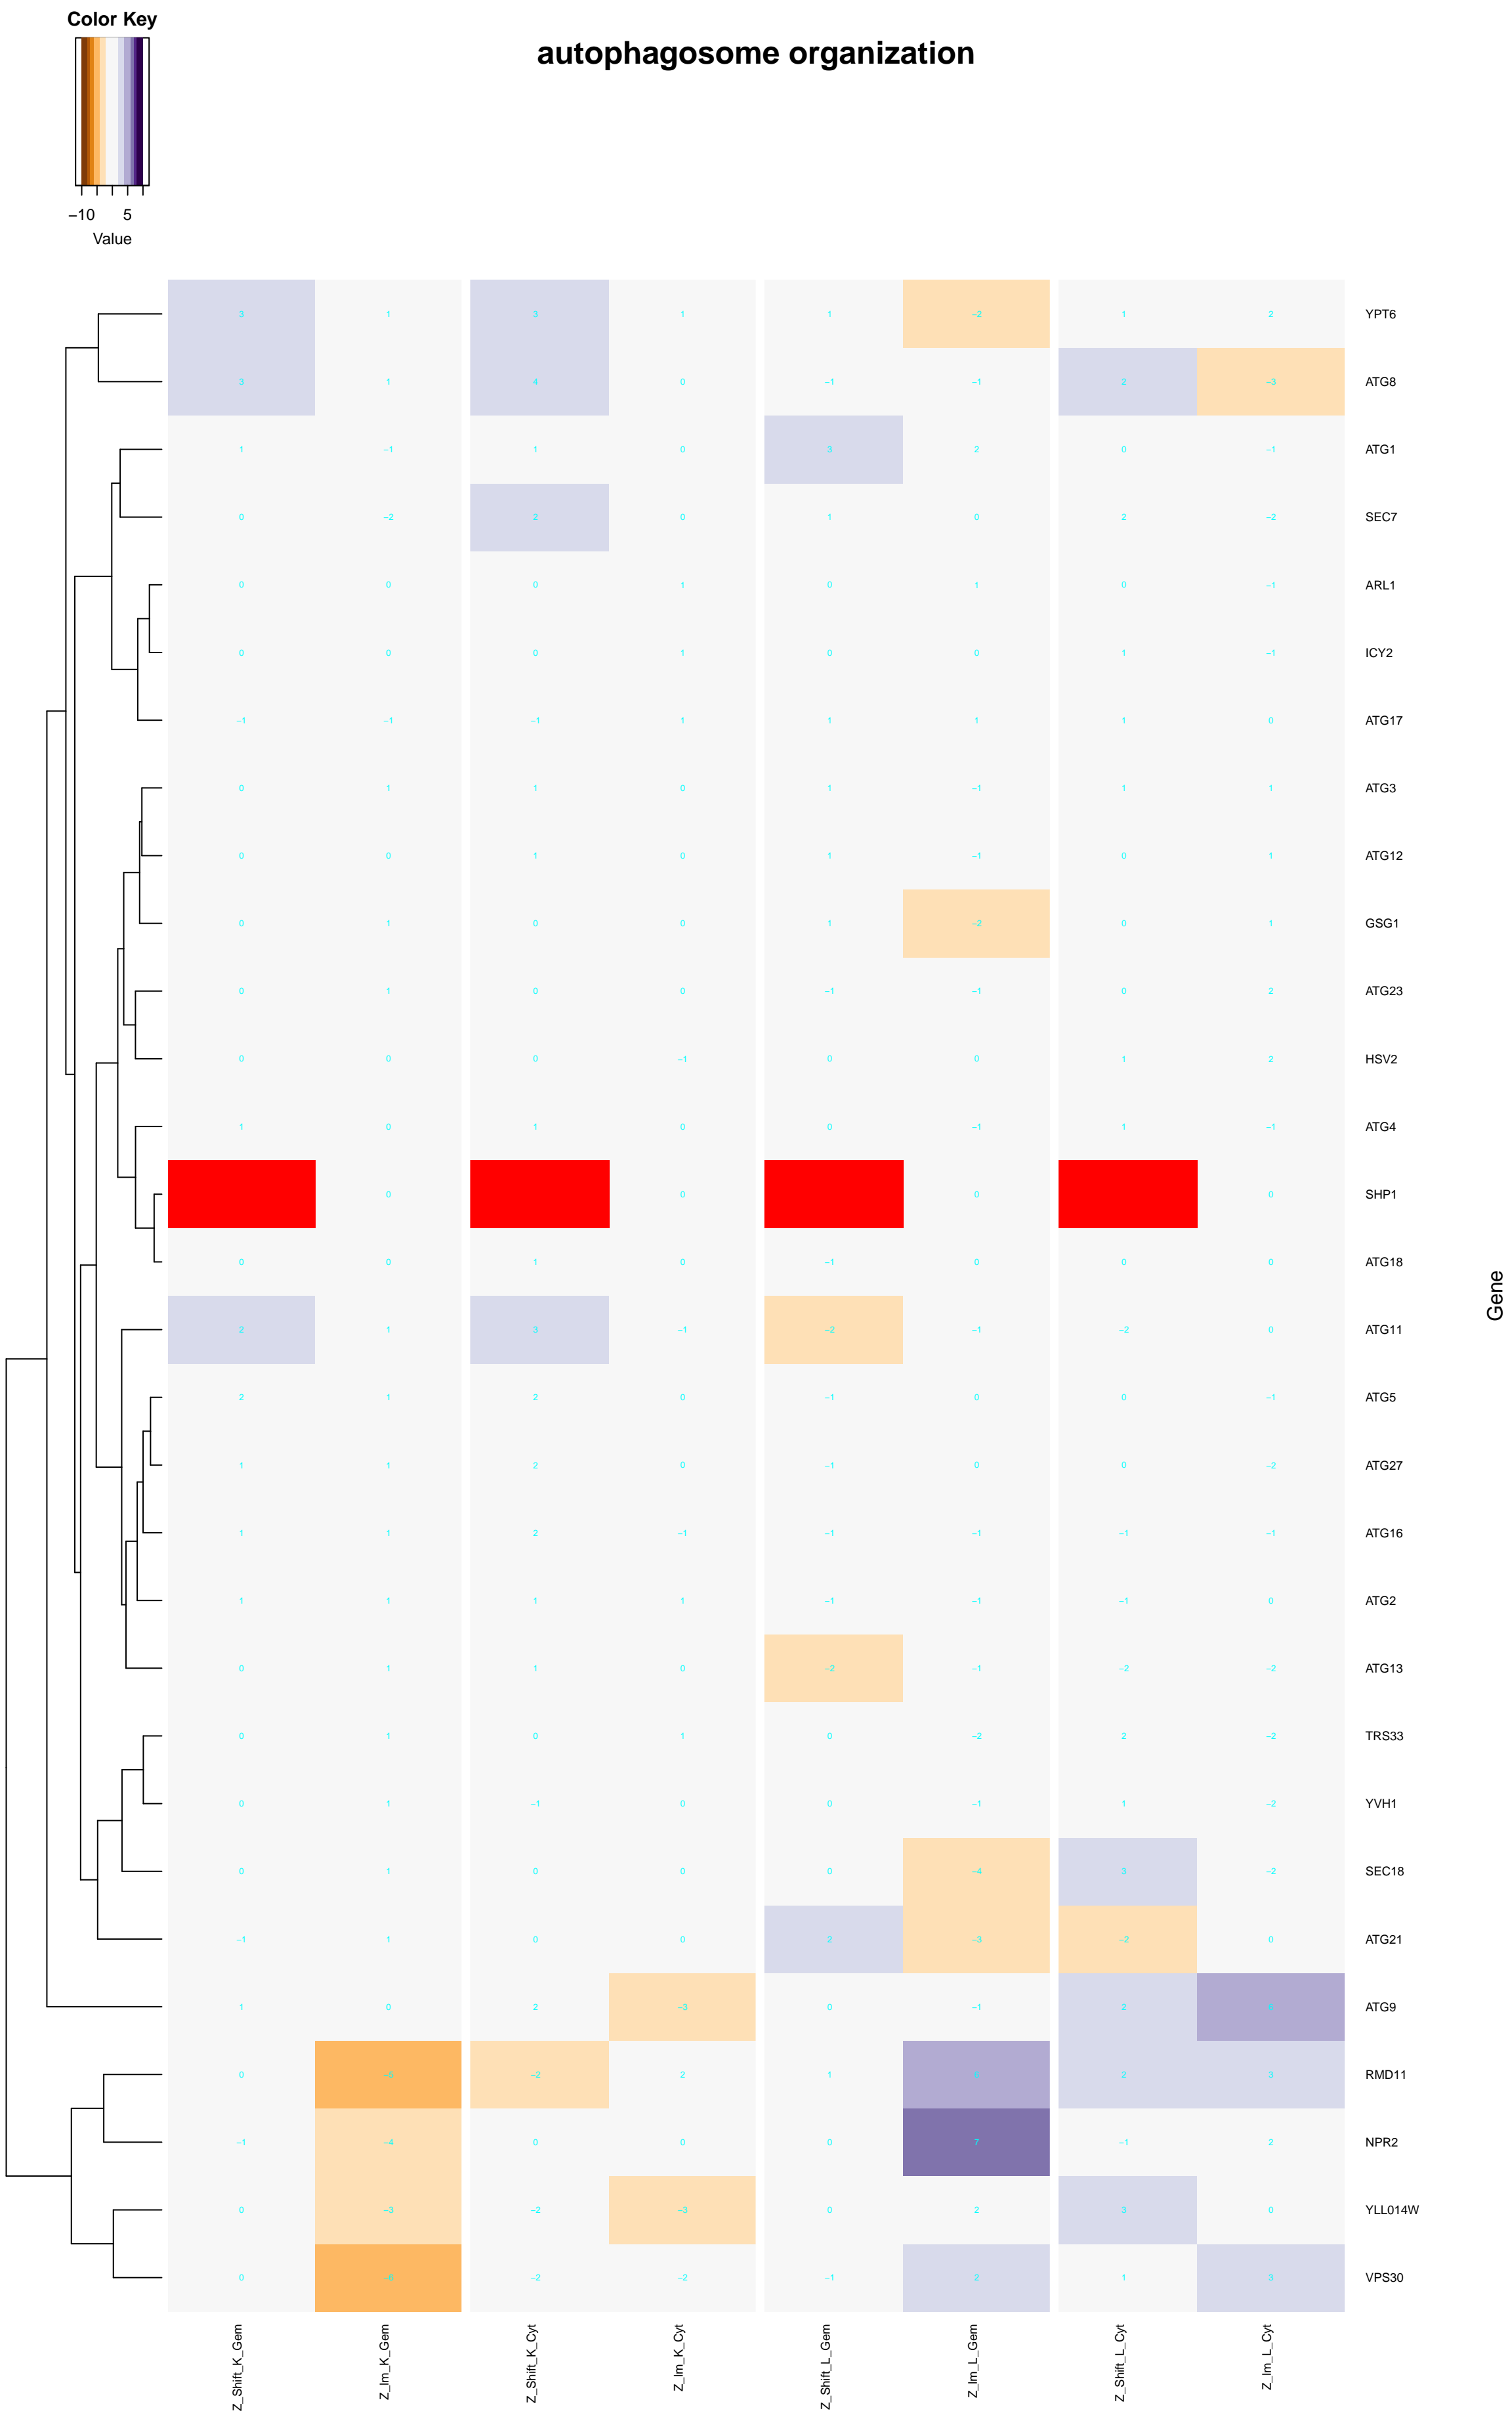

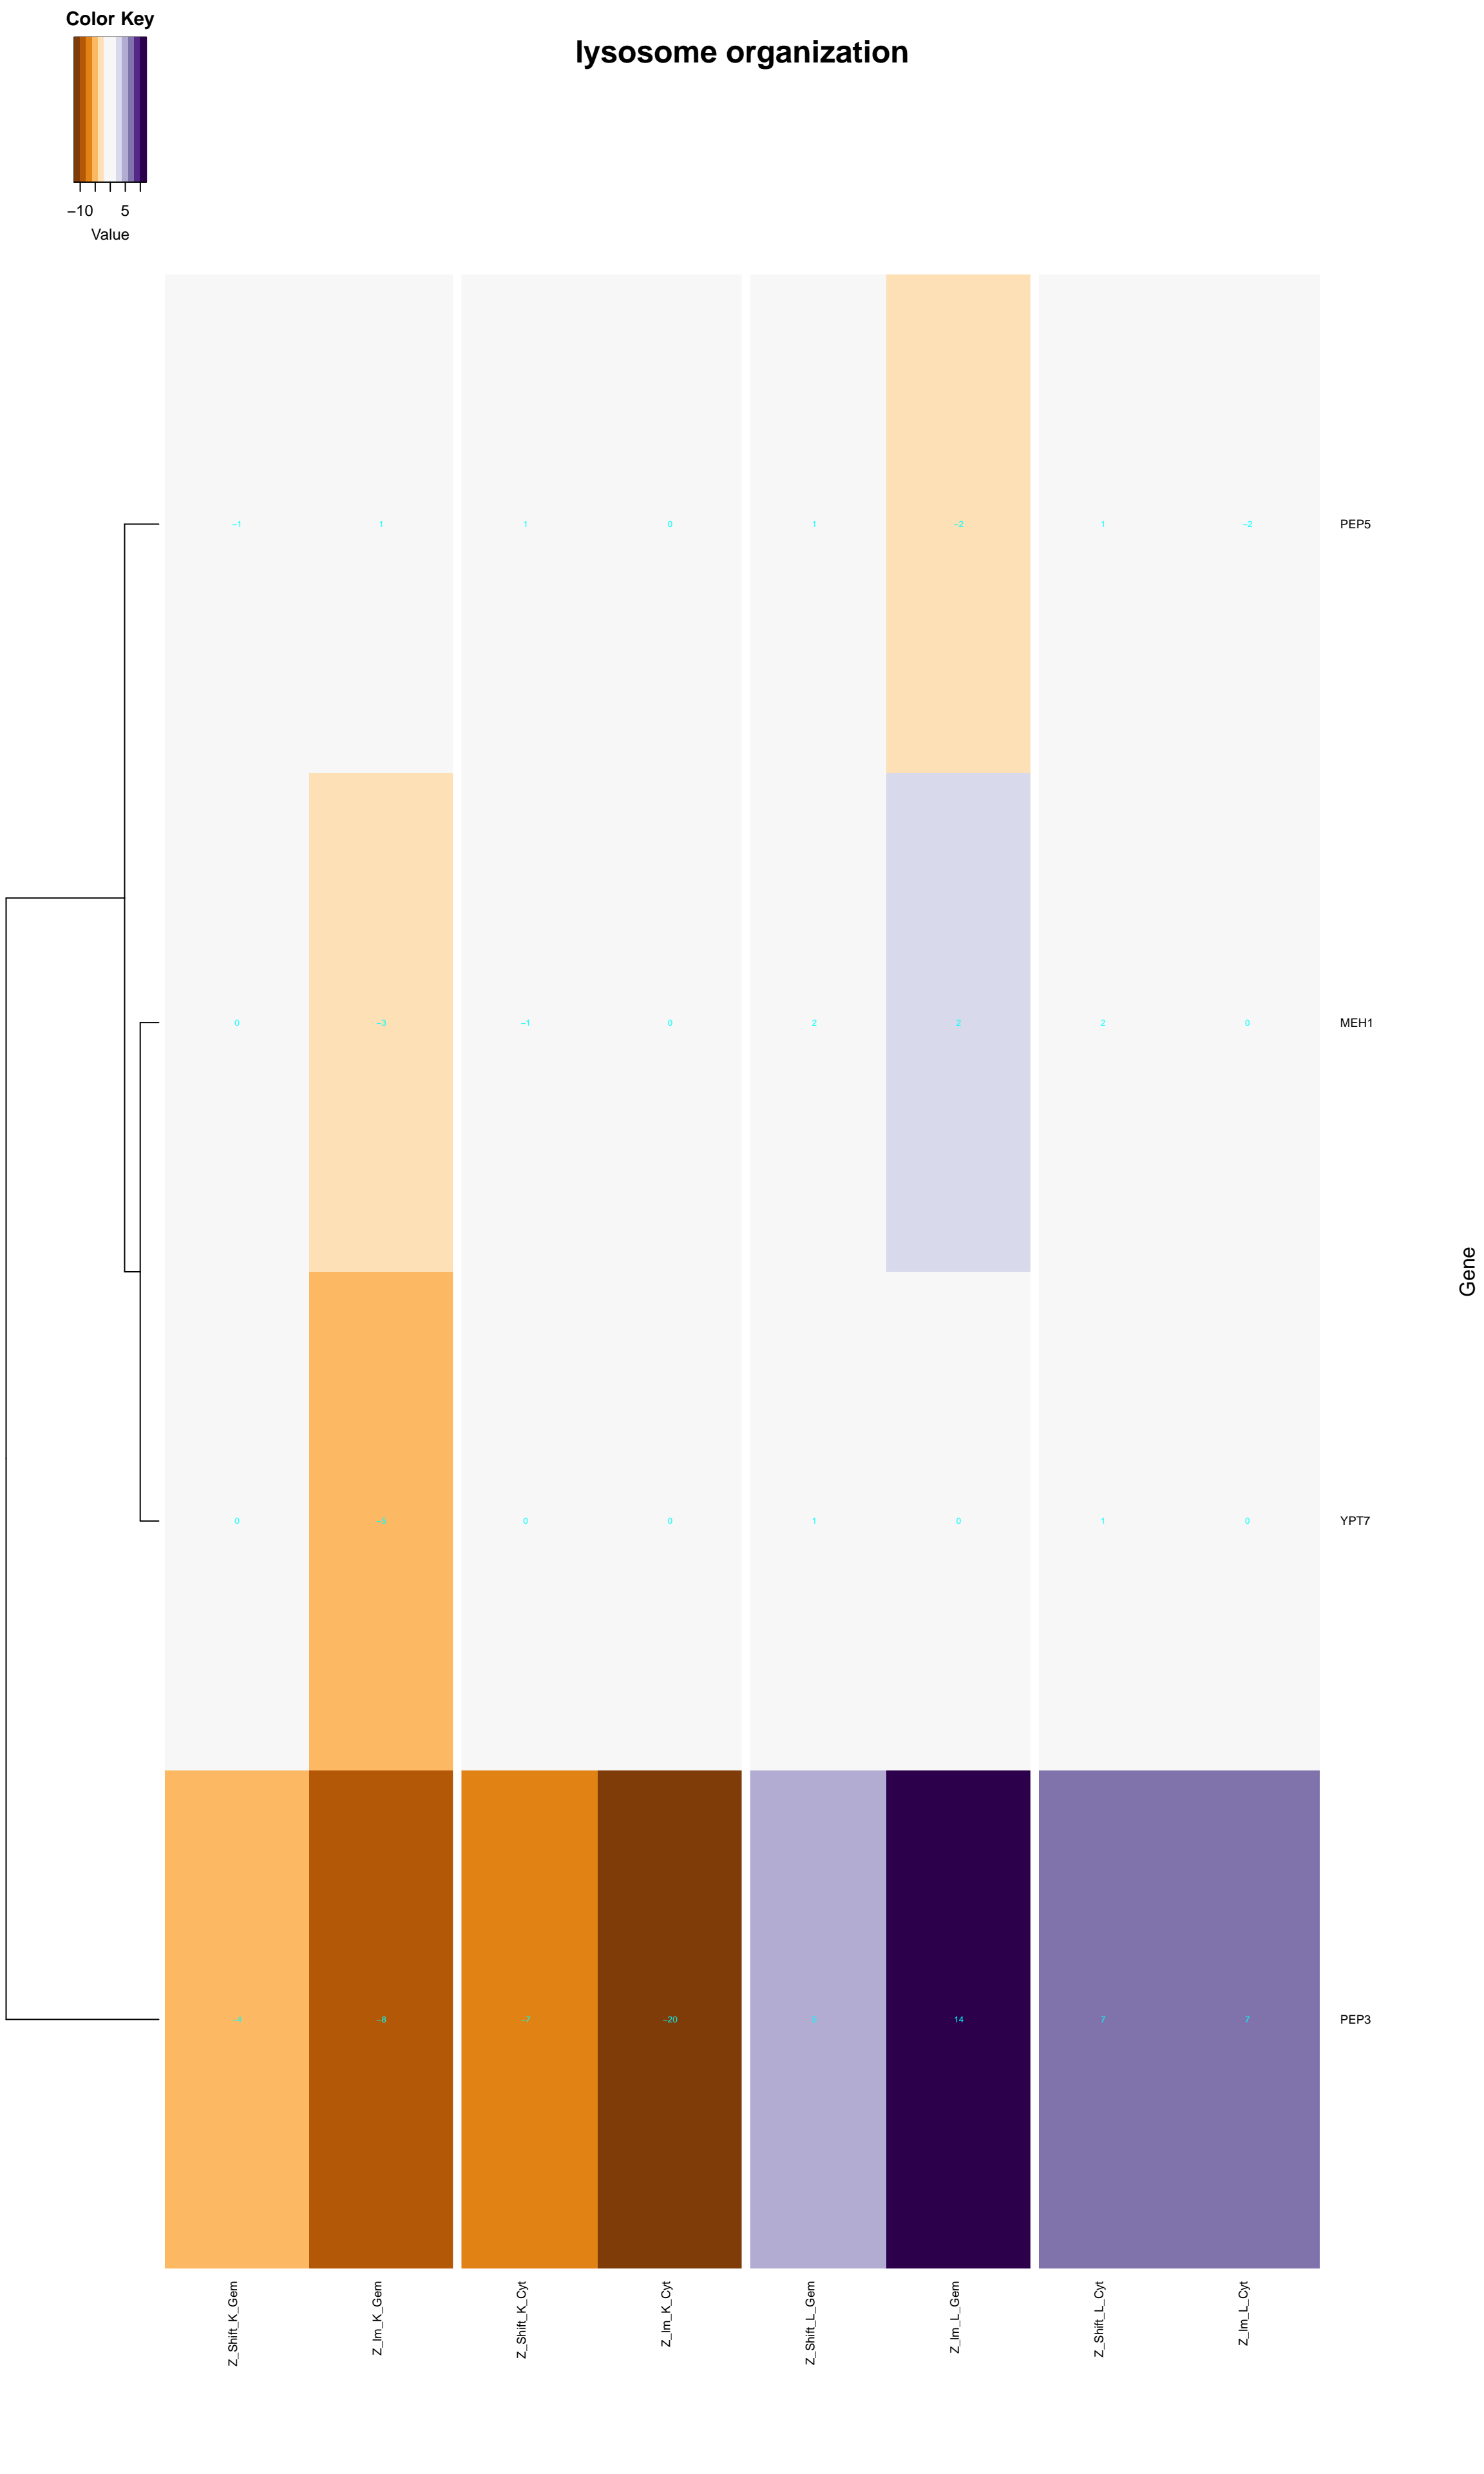

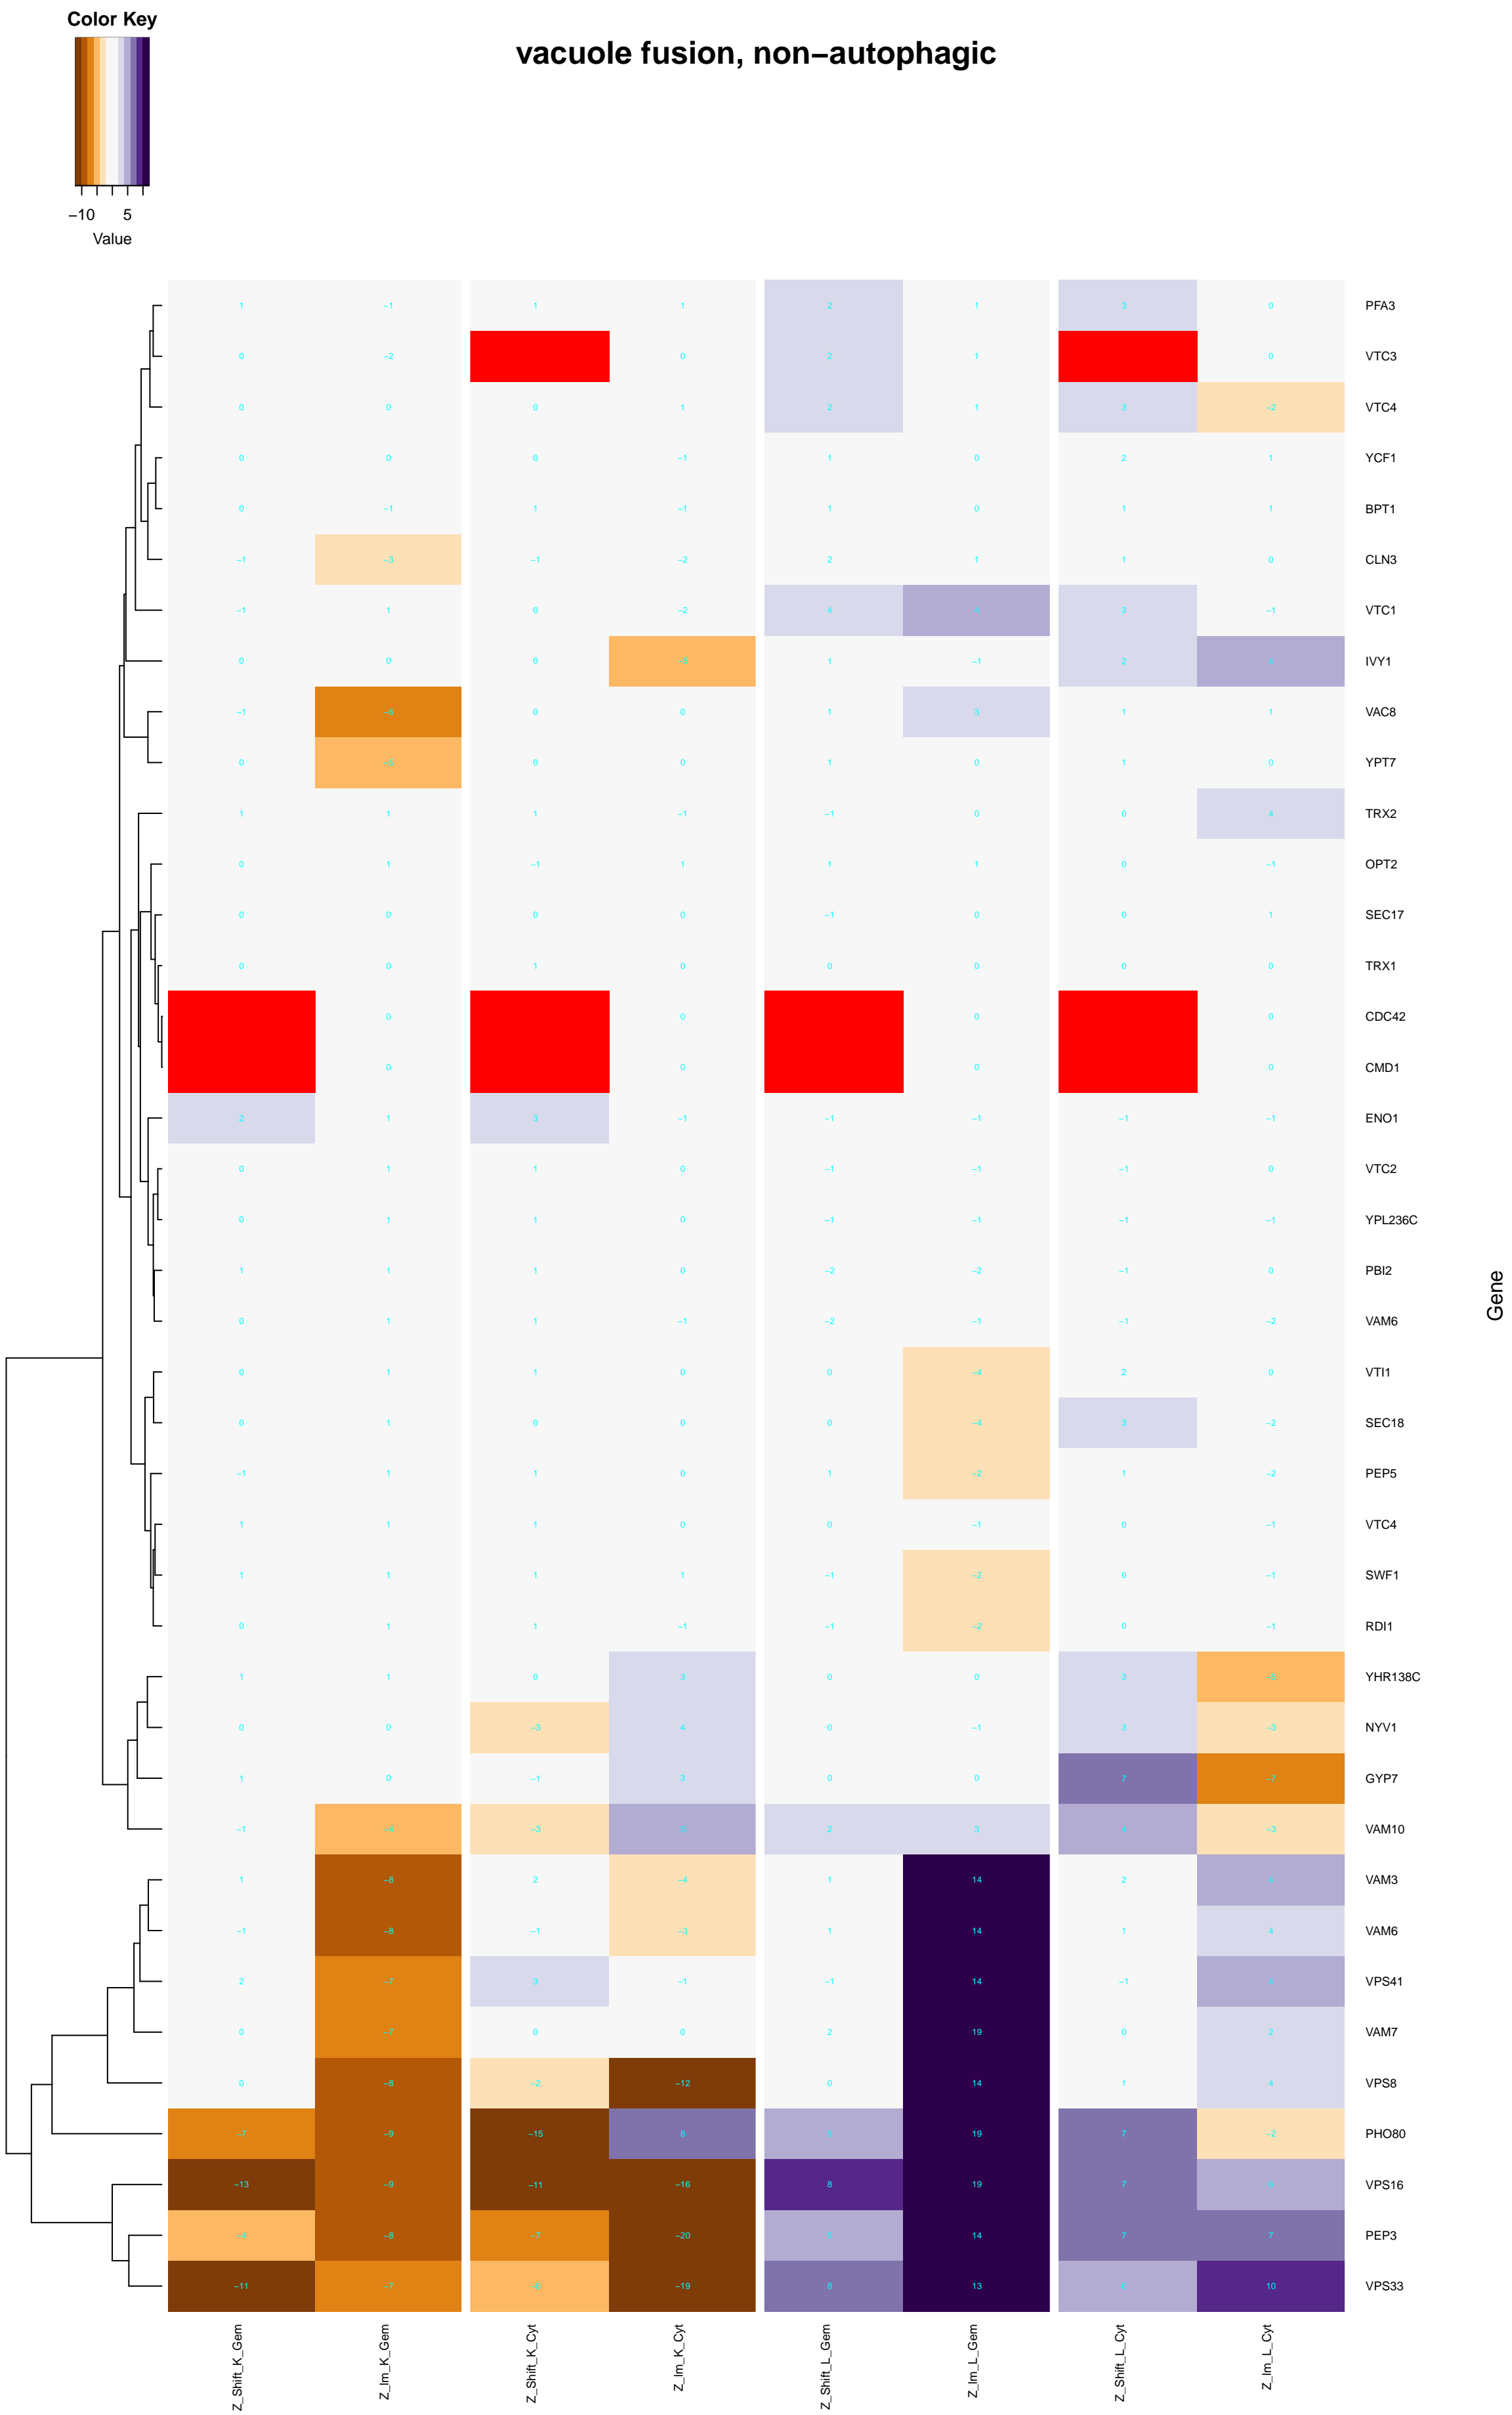

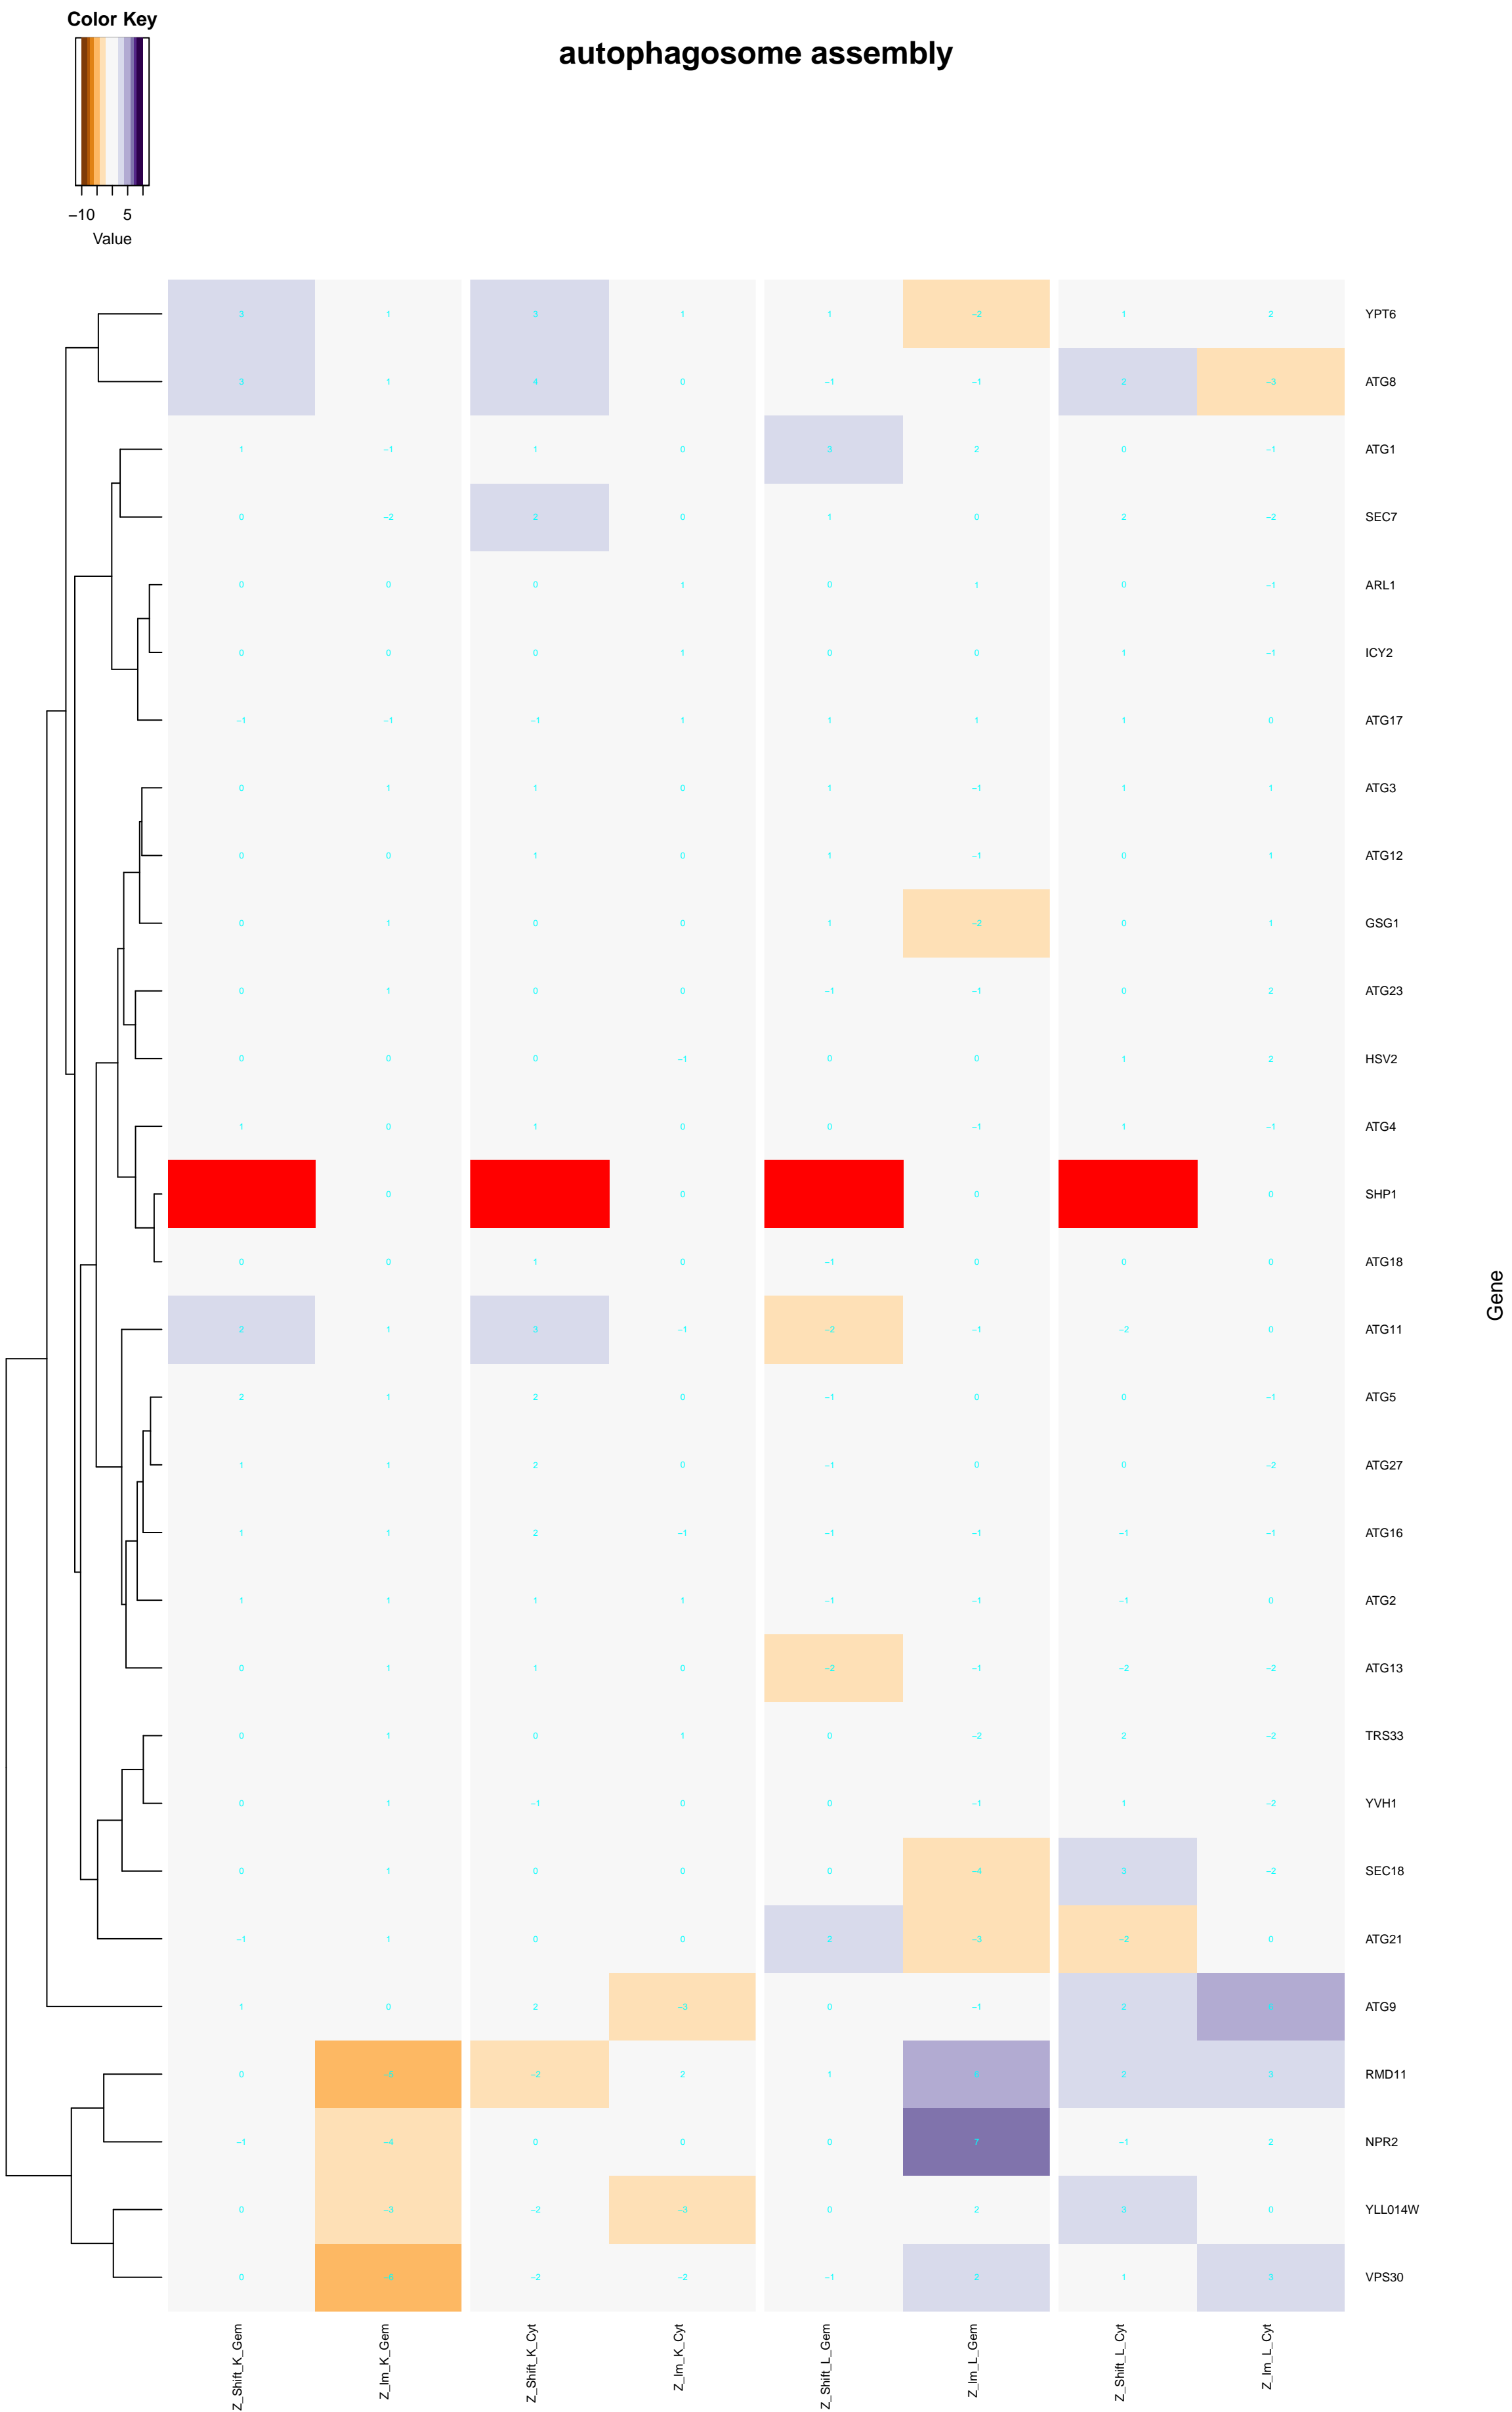

Supplement: s1 [file s1]

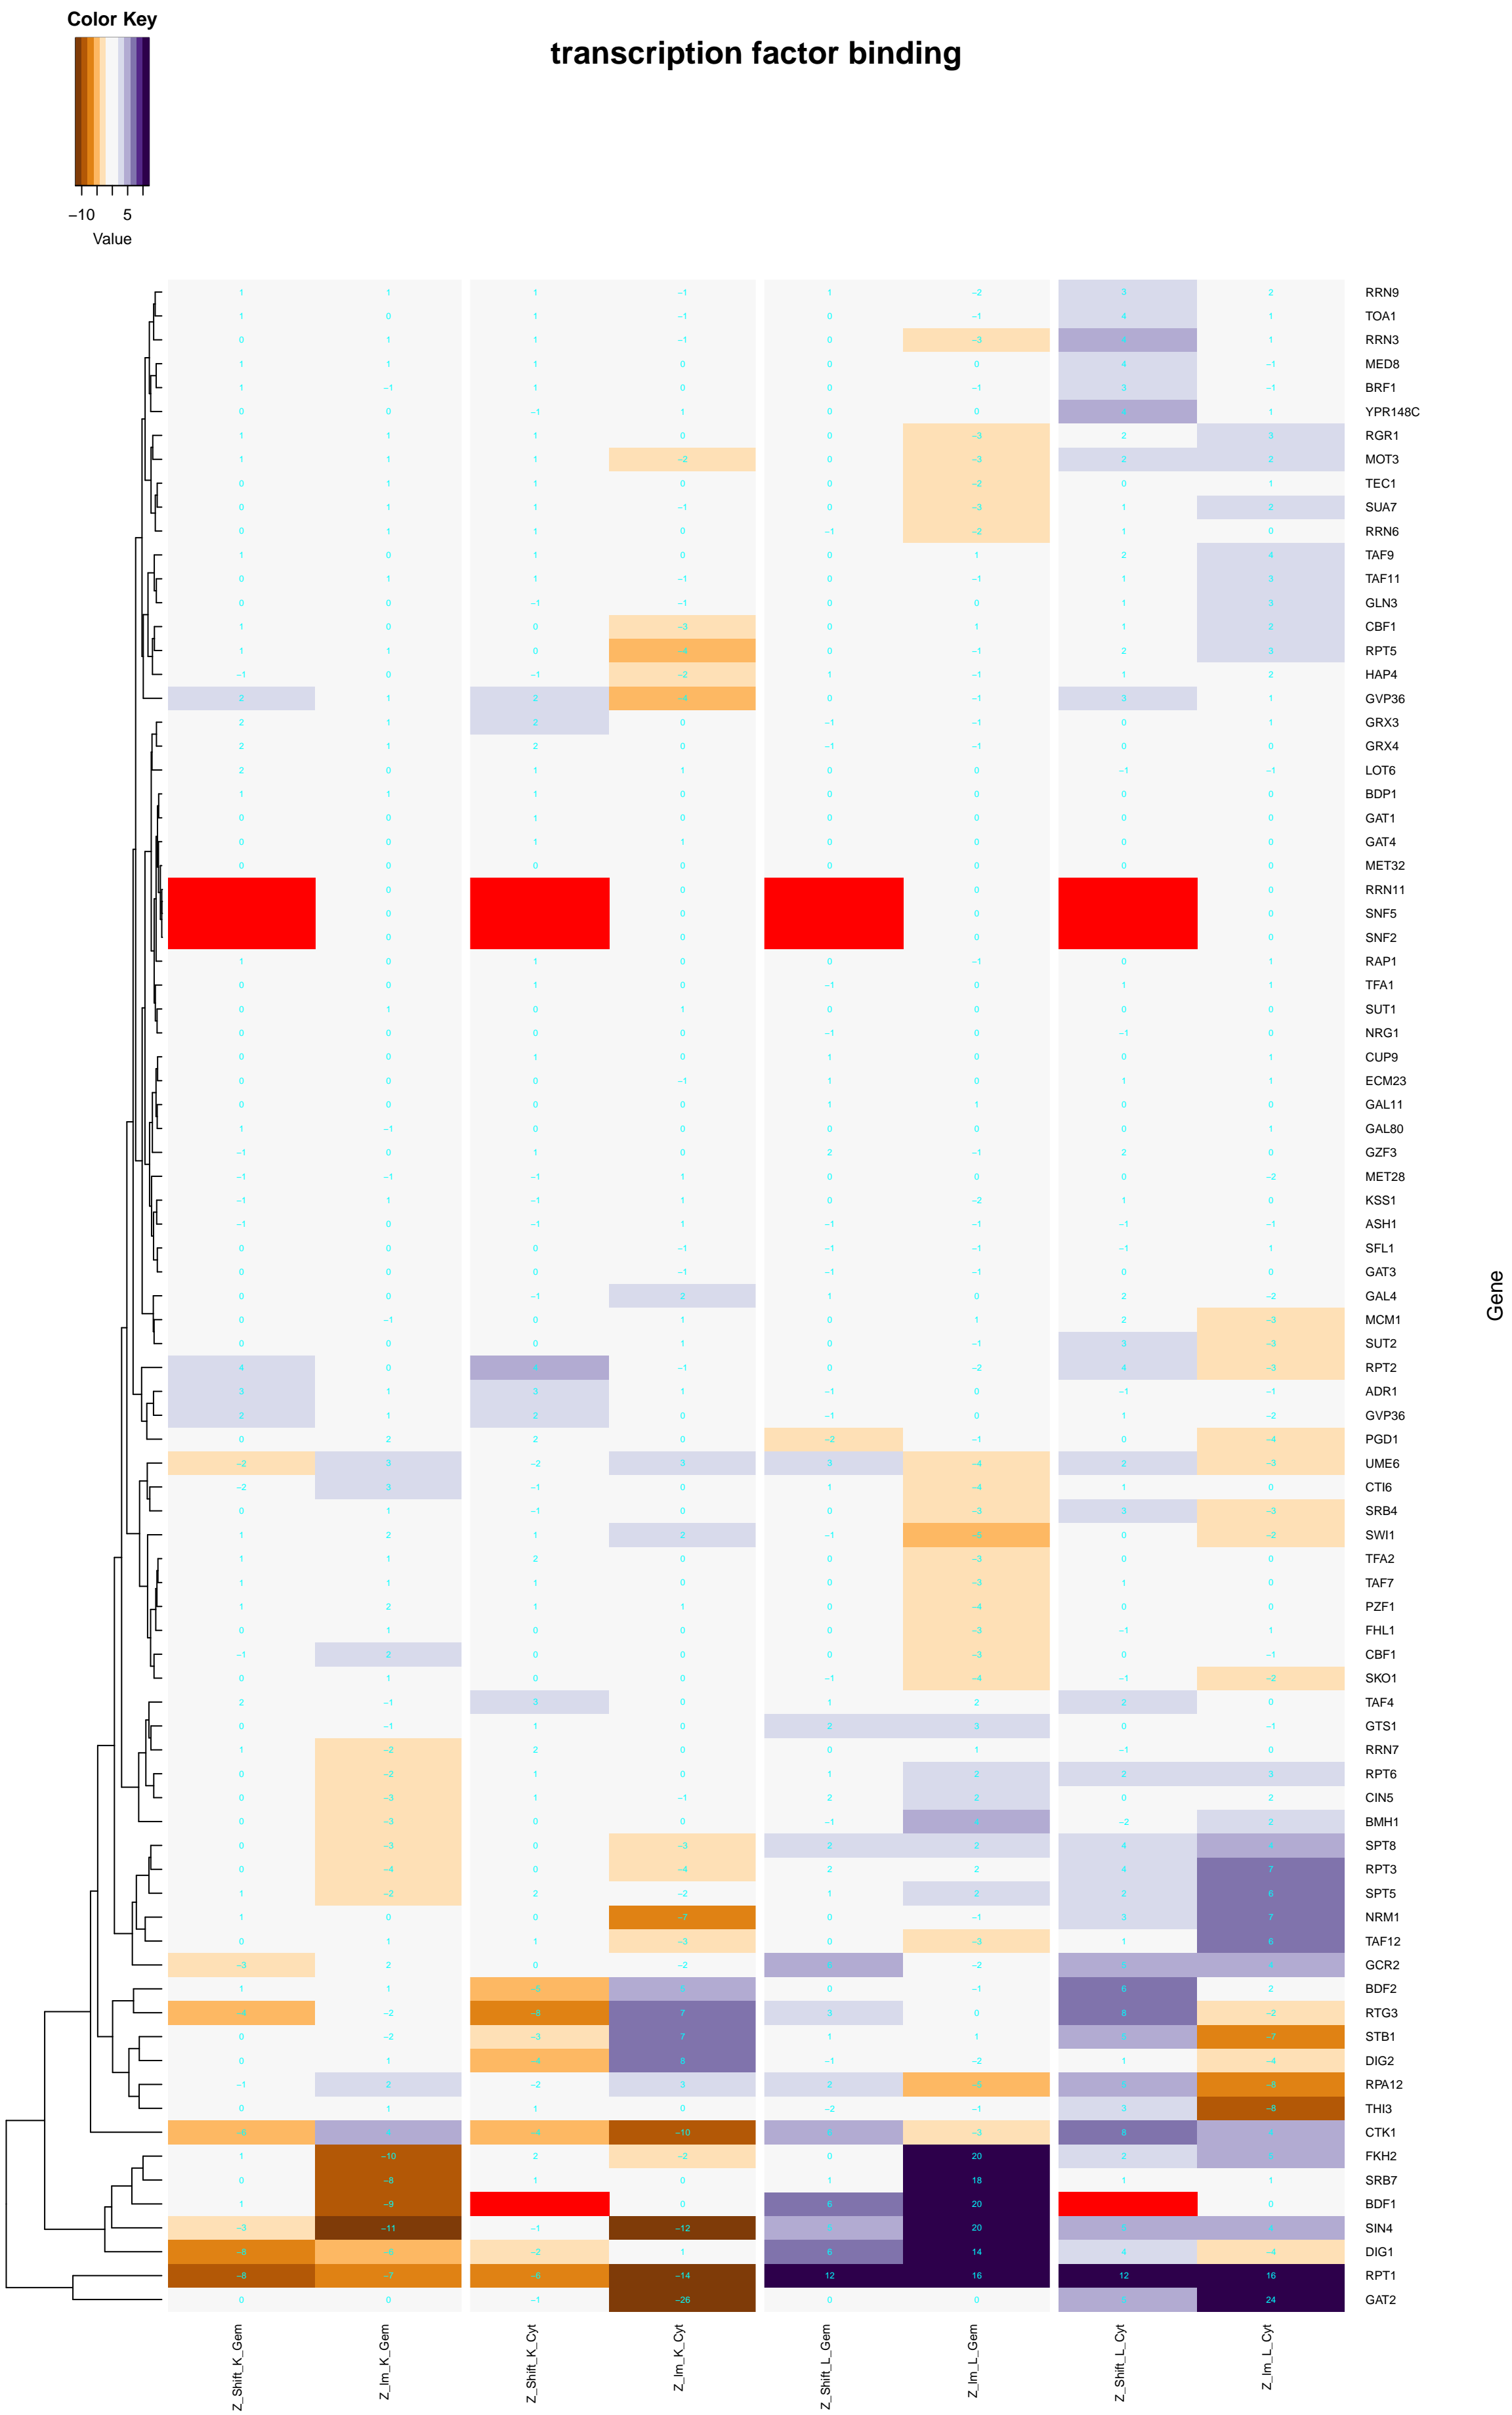

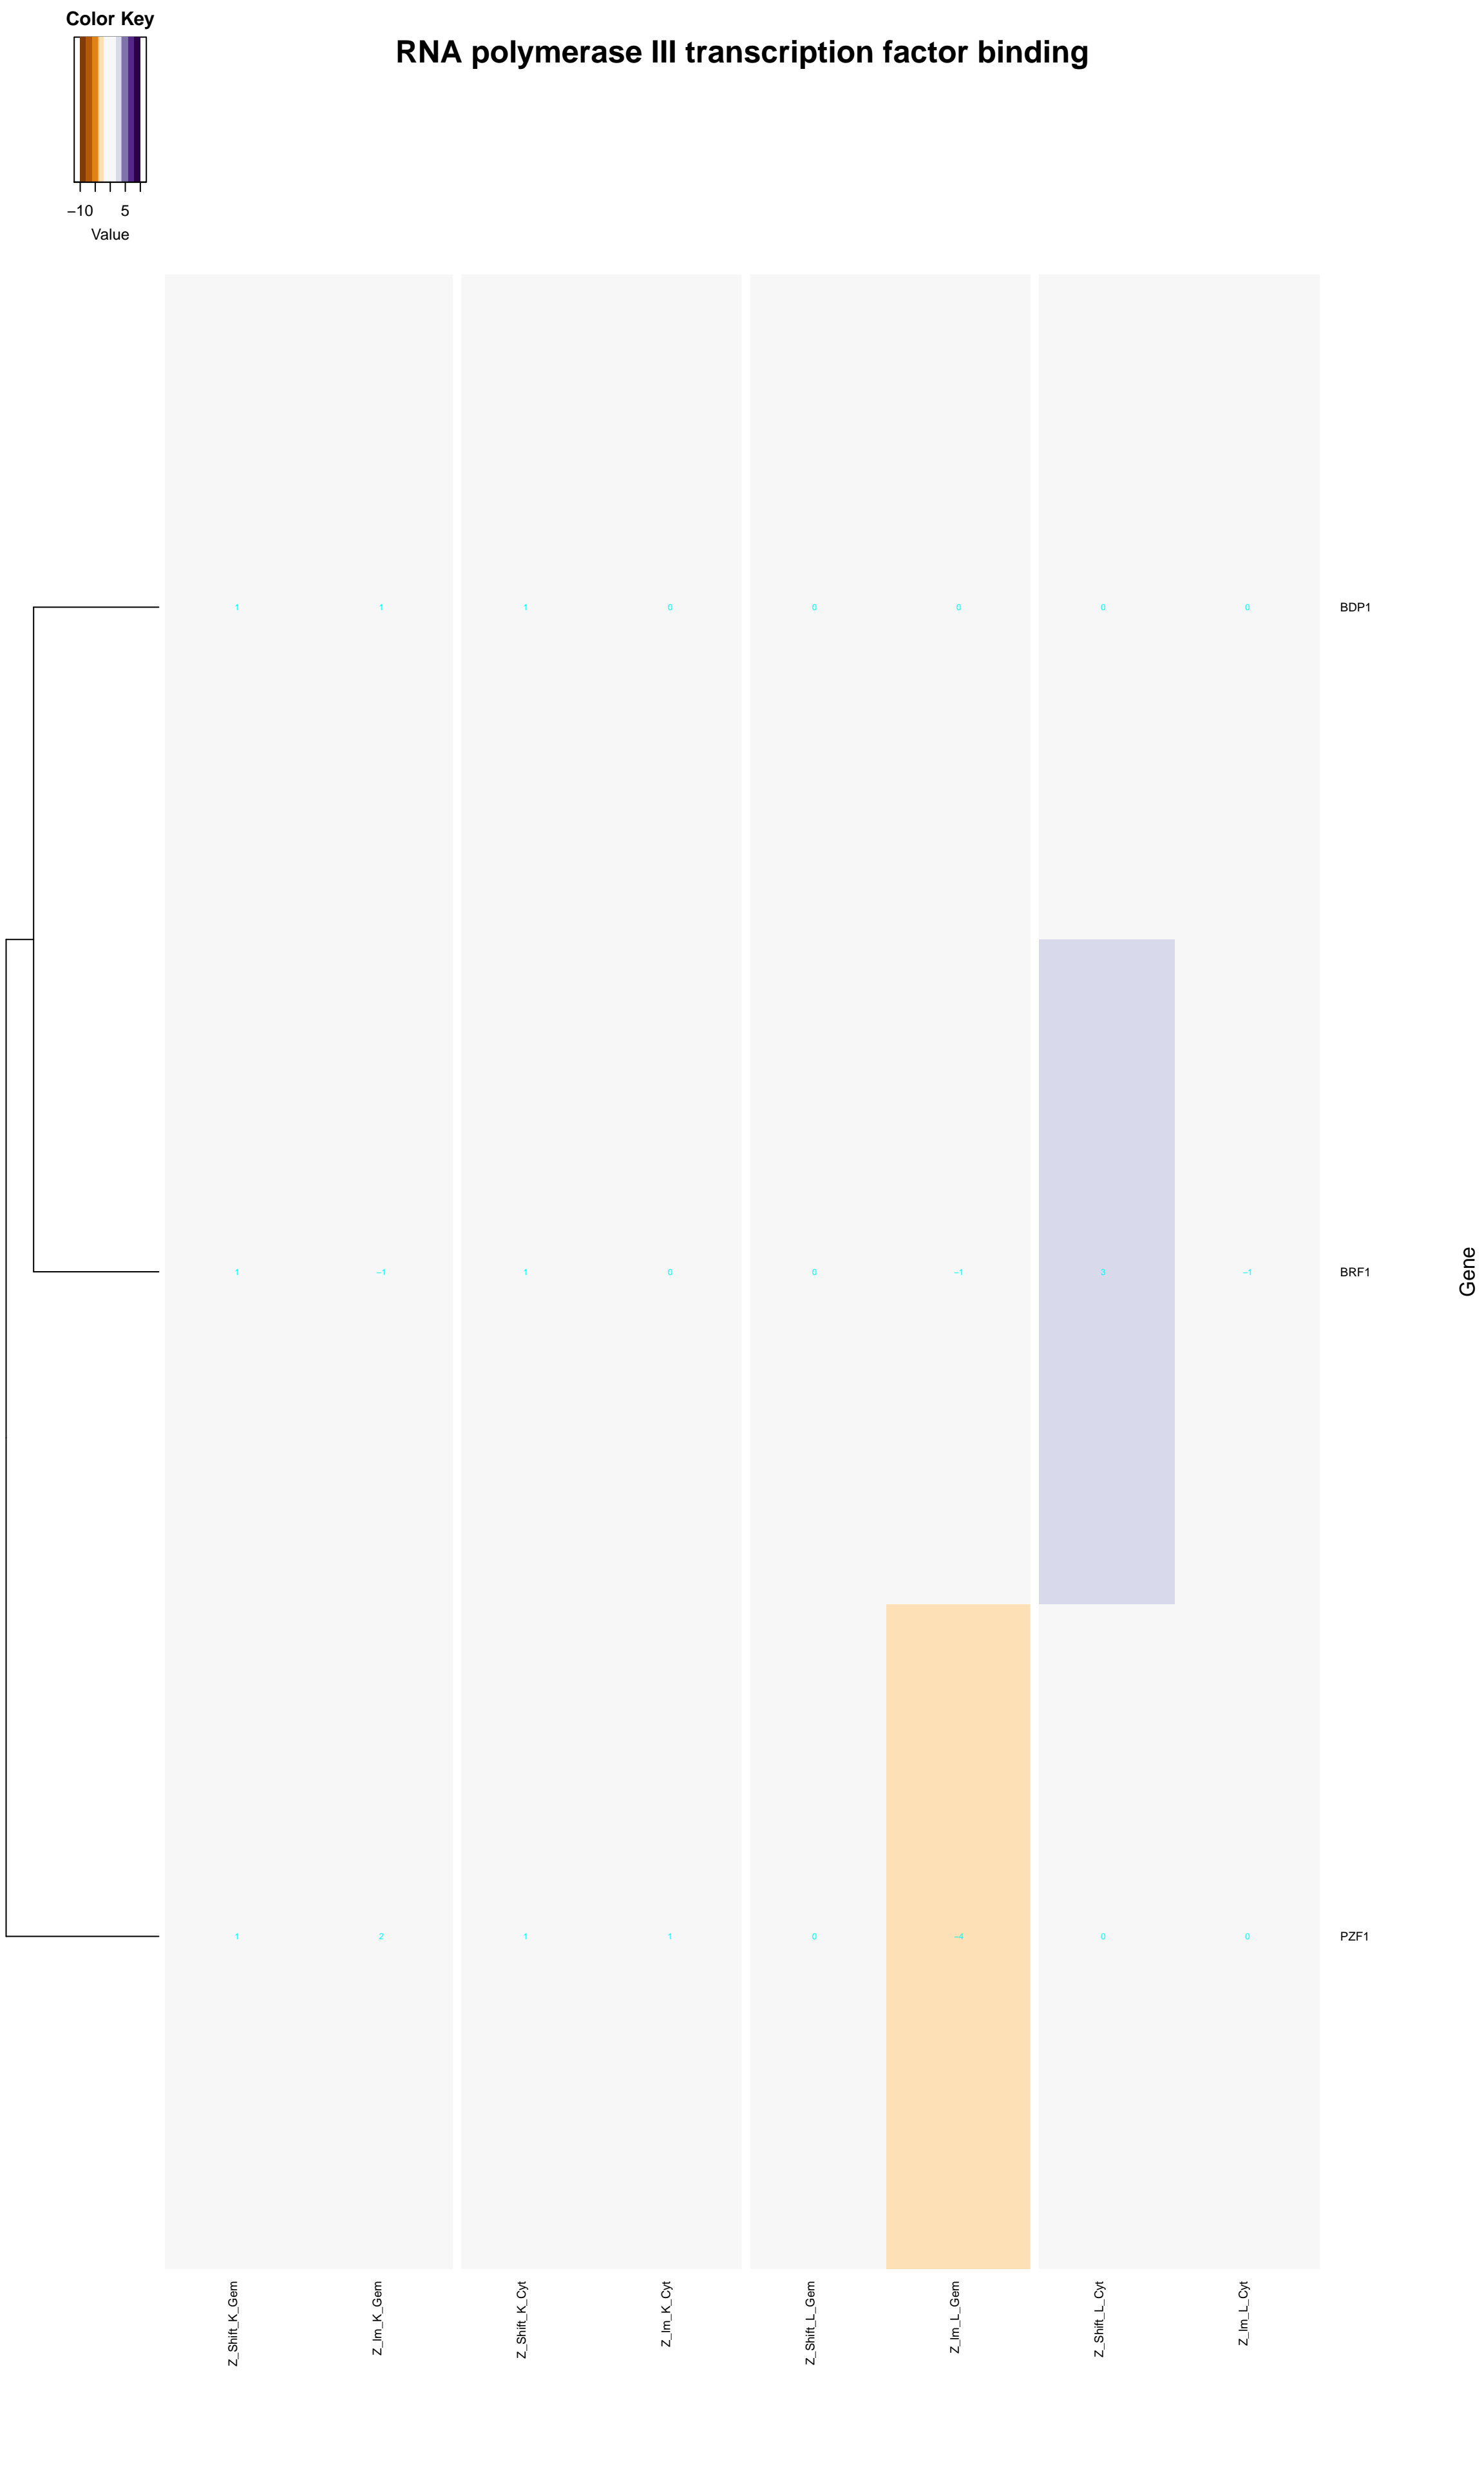

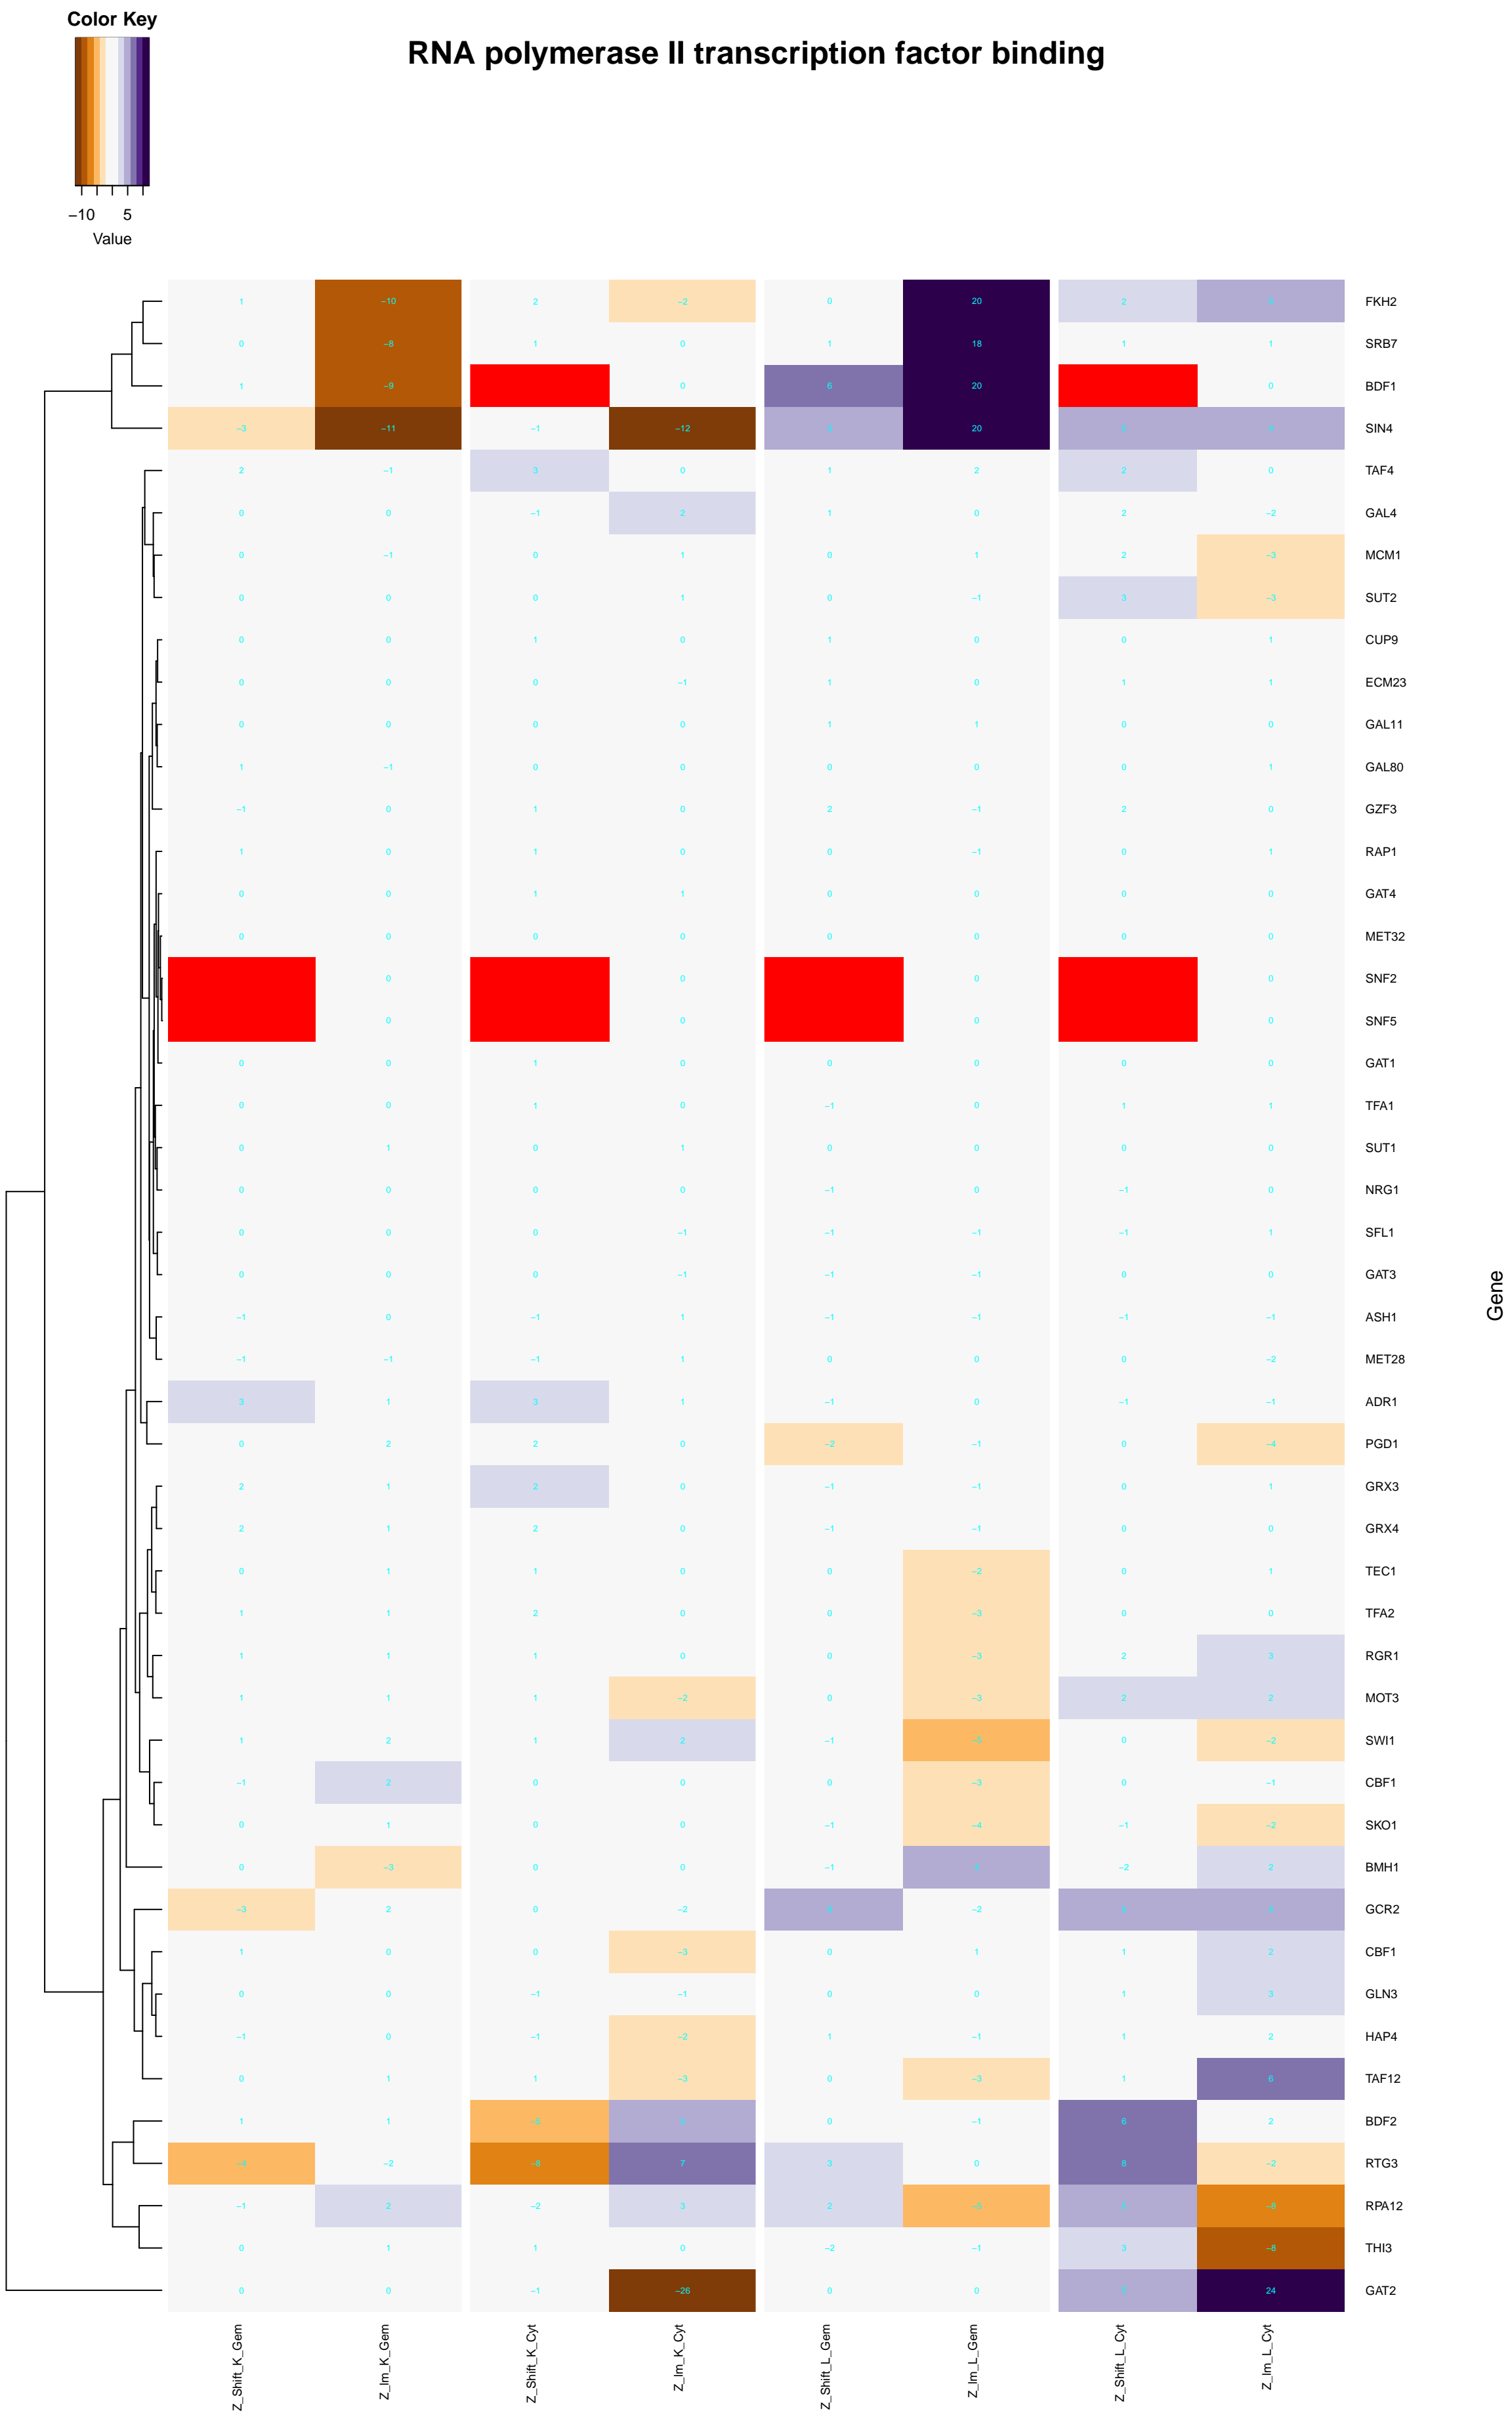

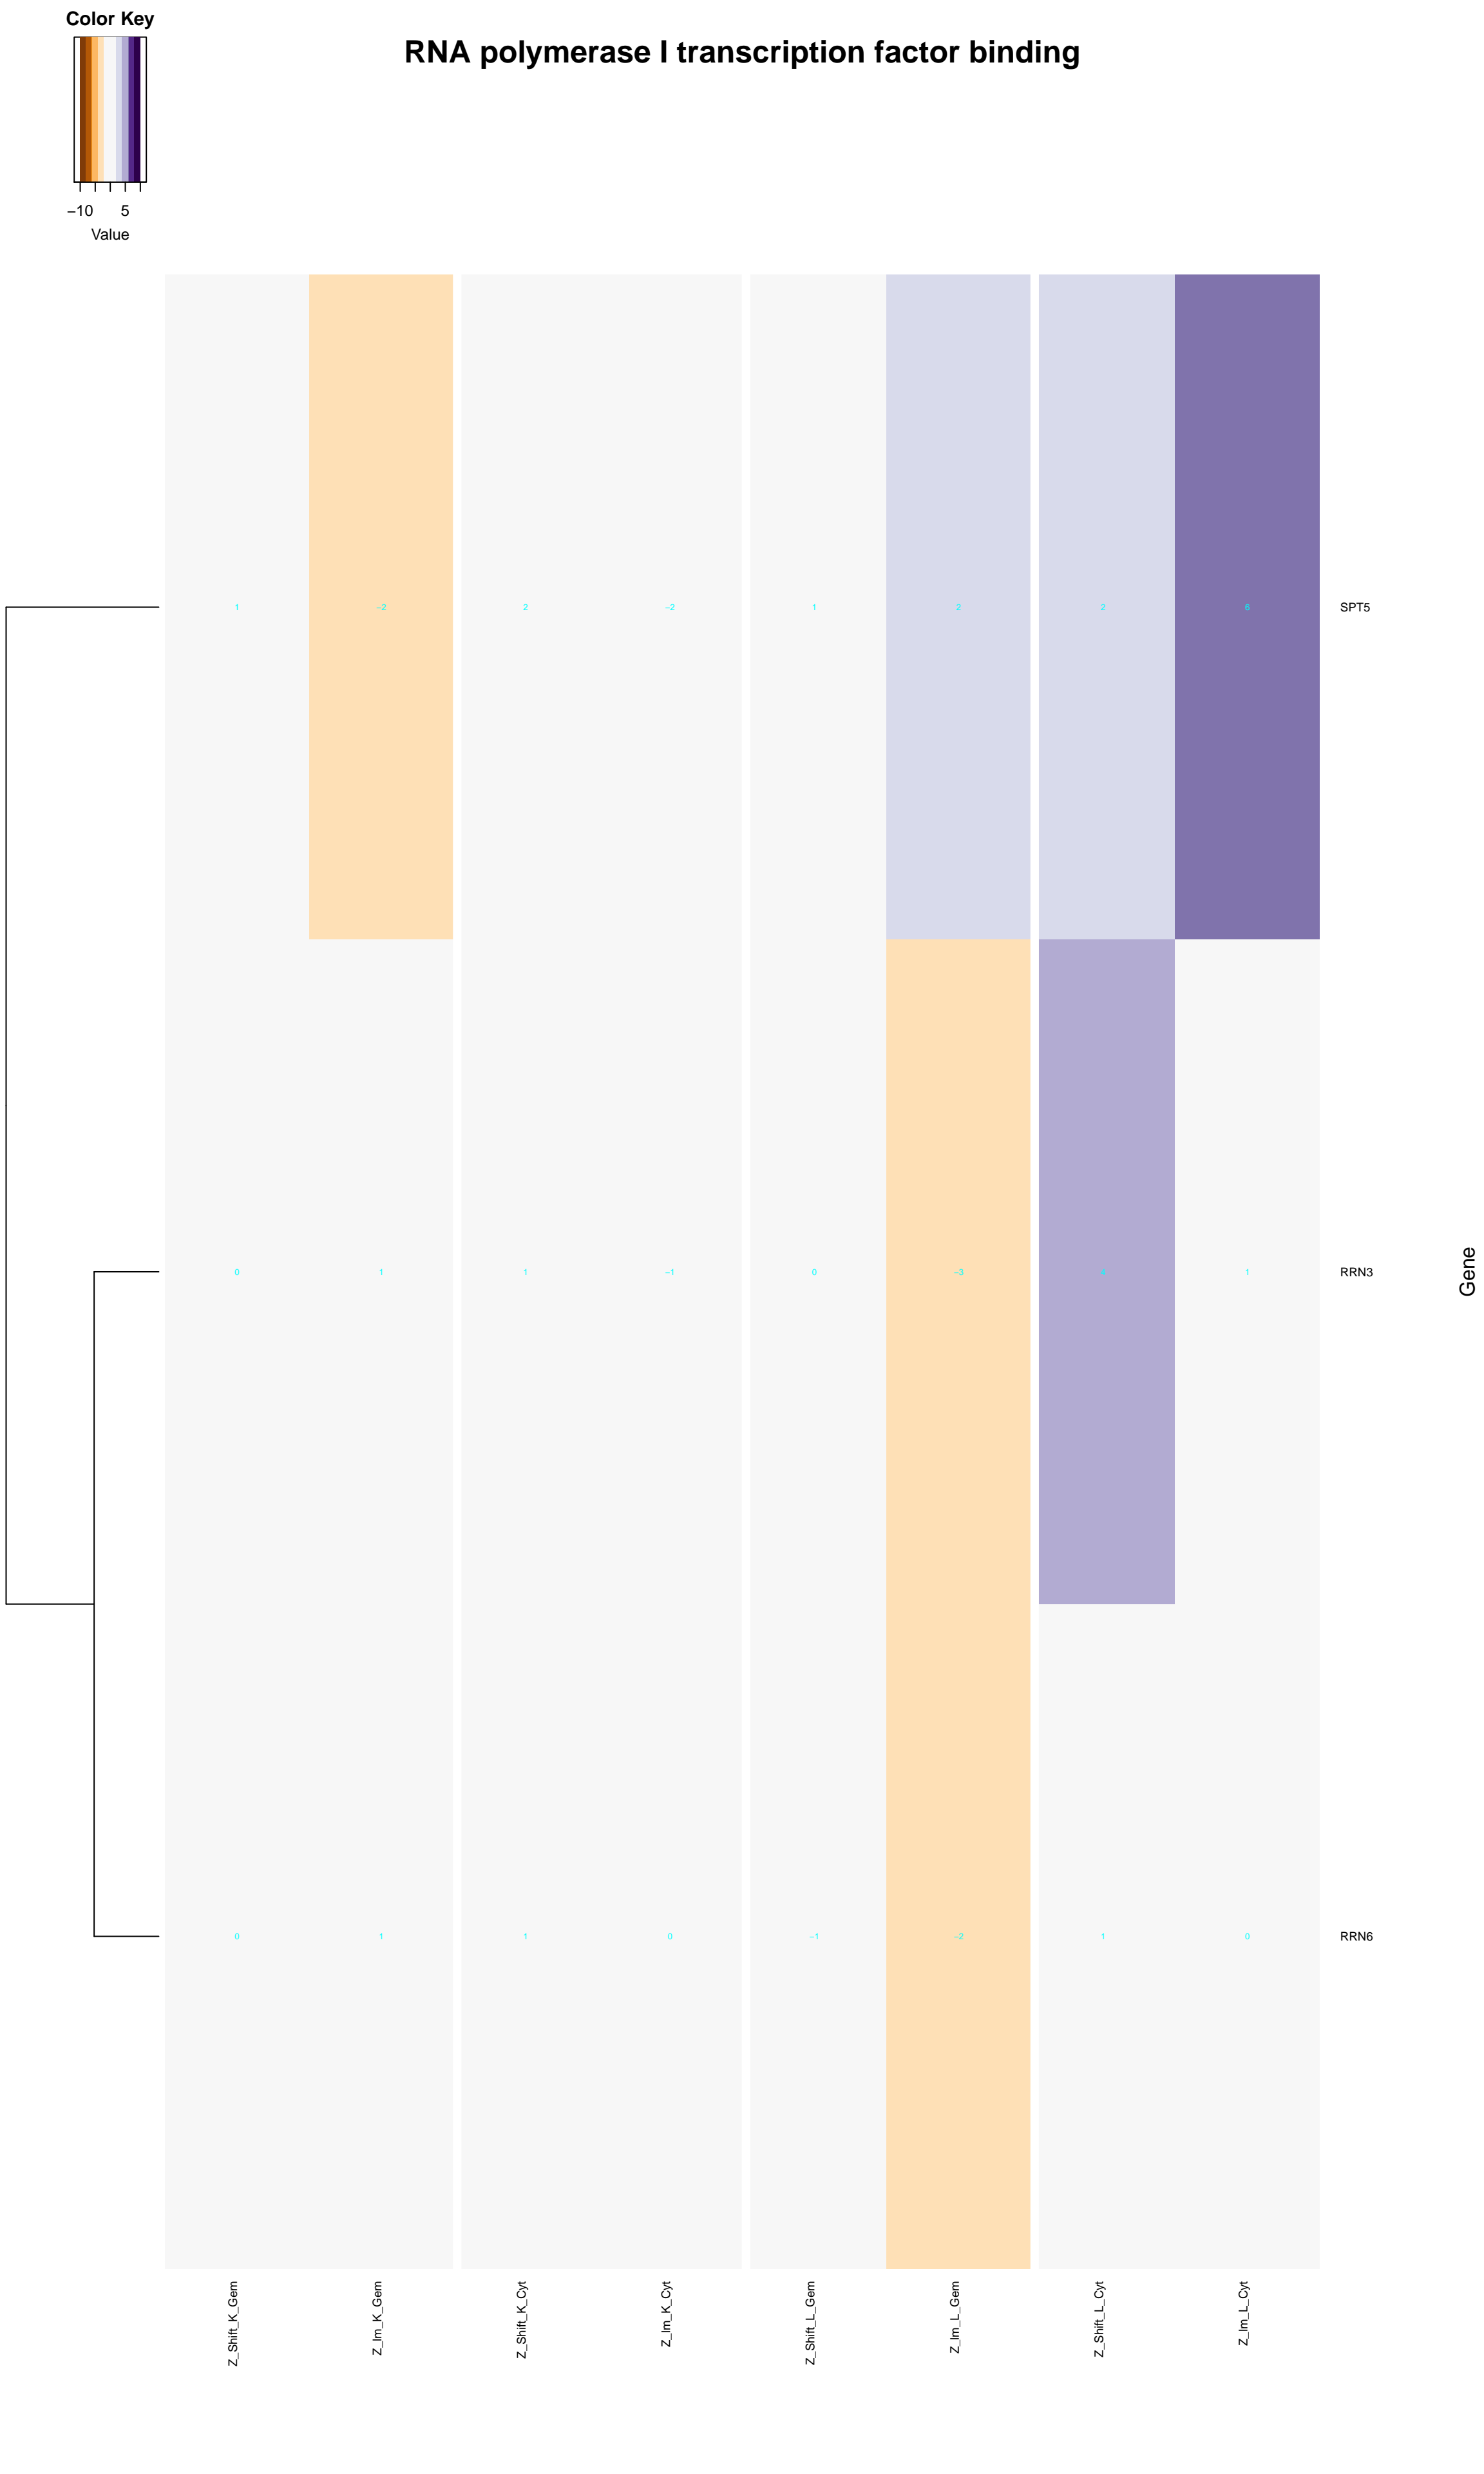

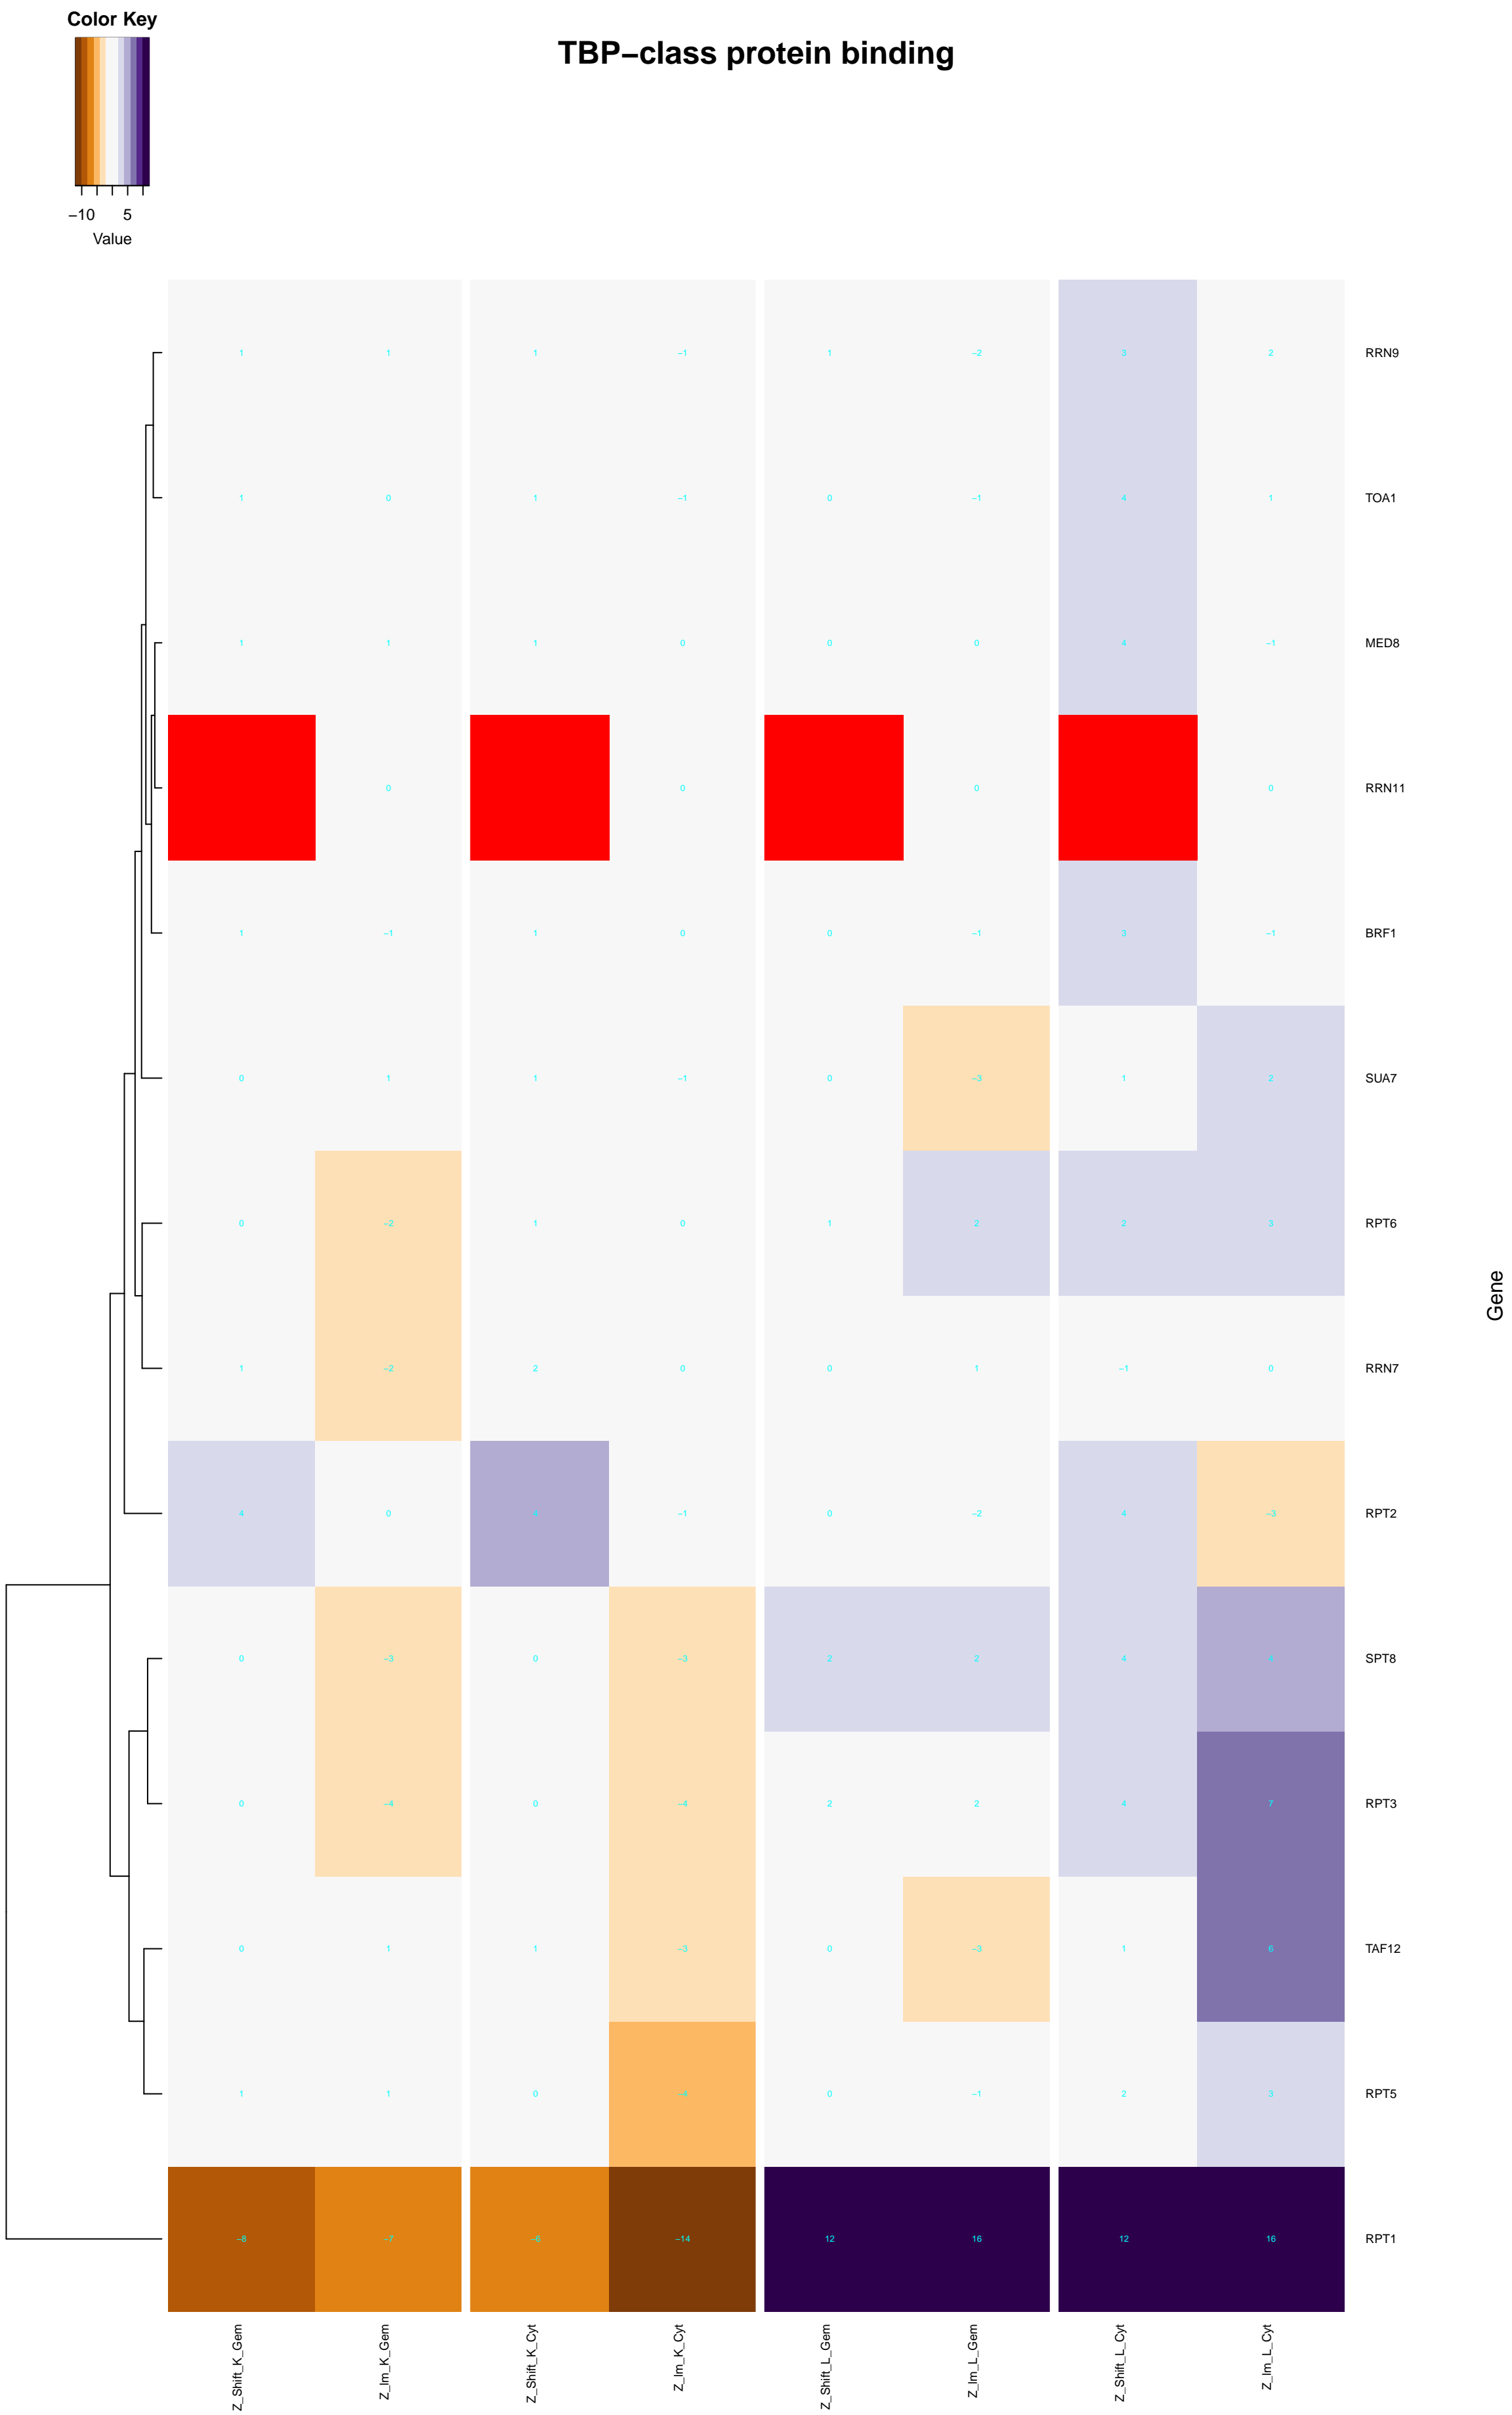

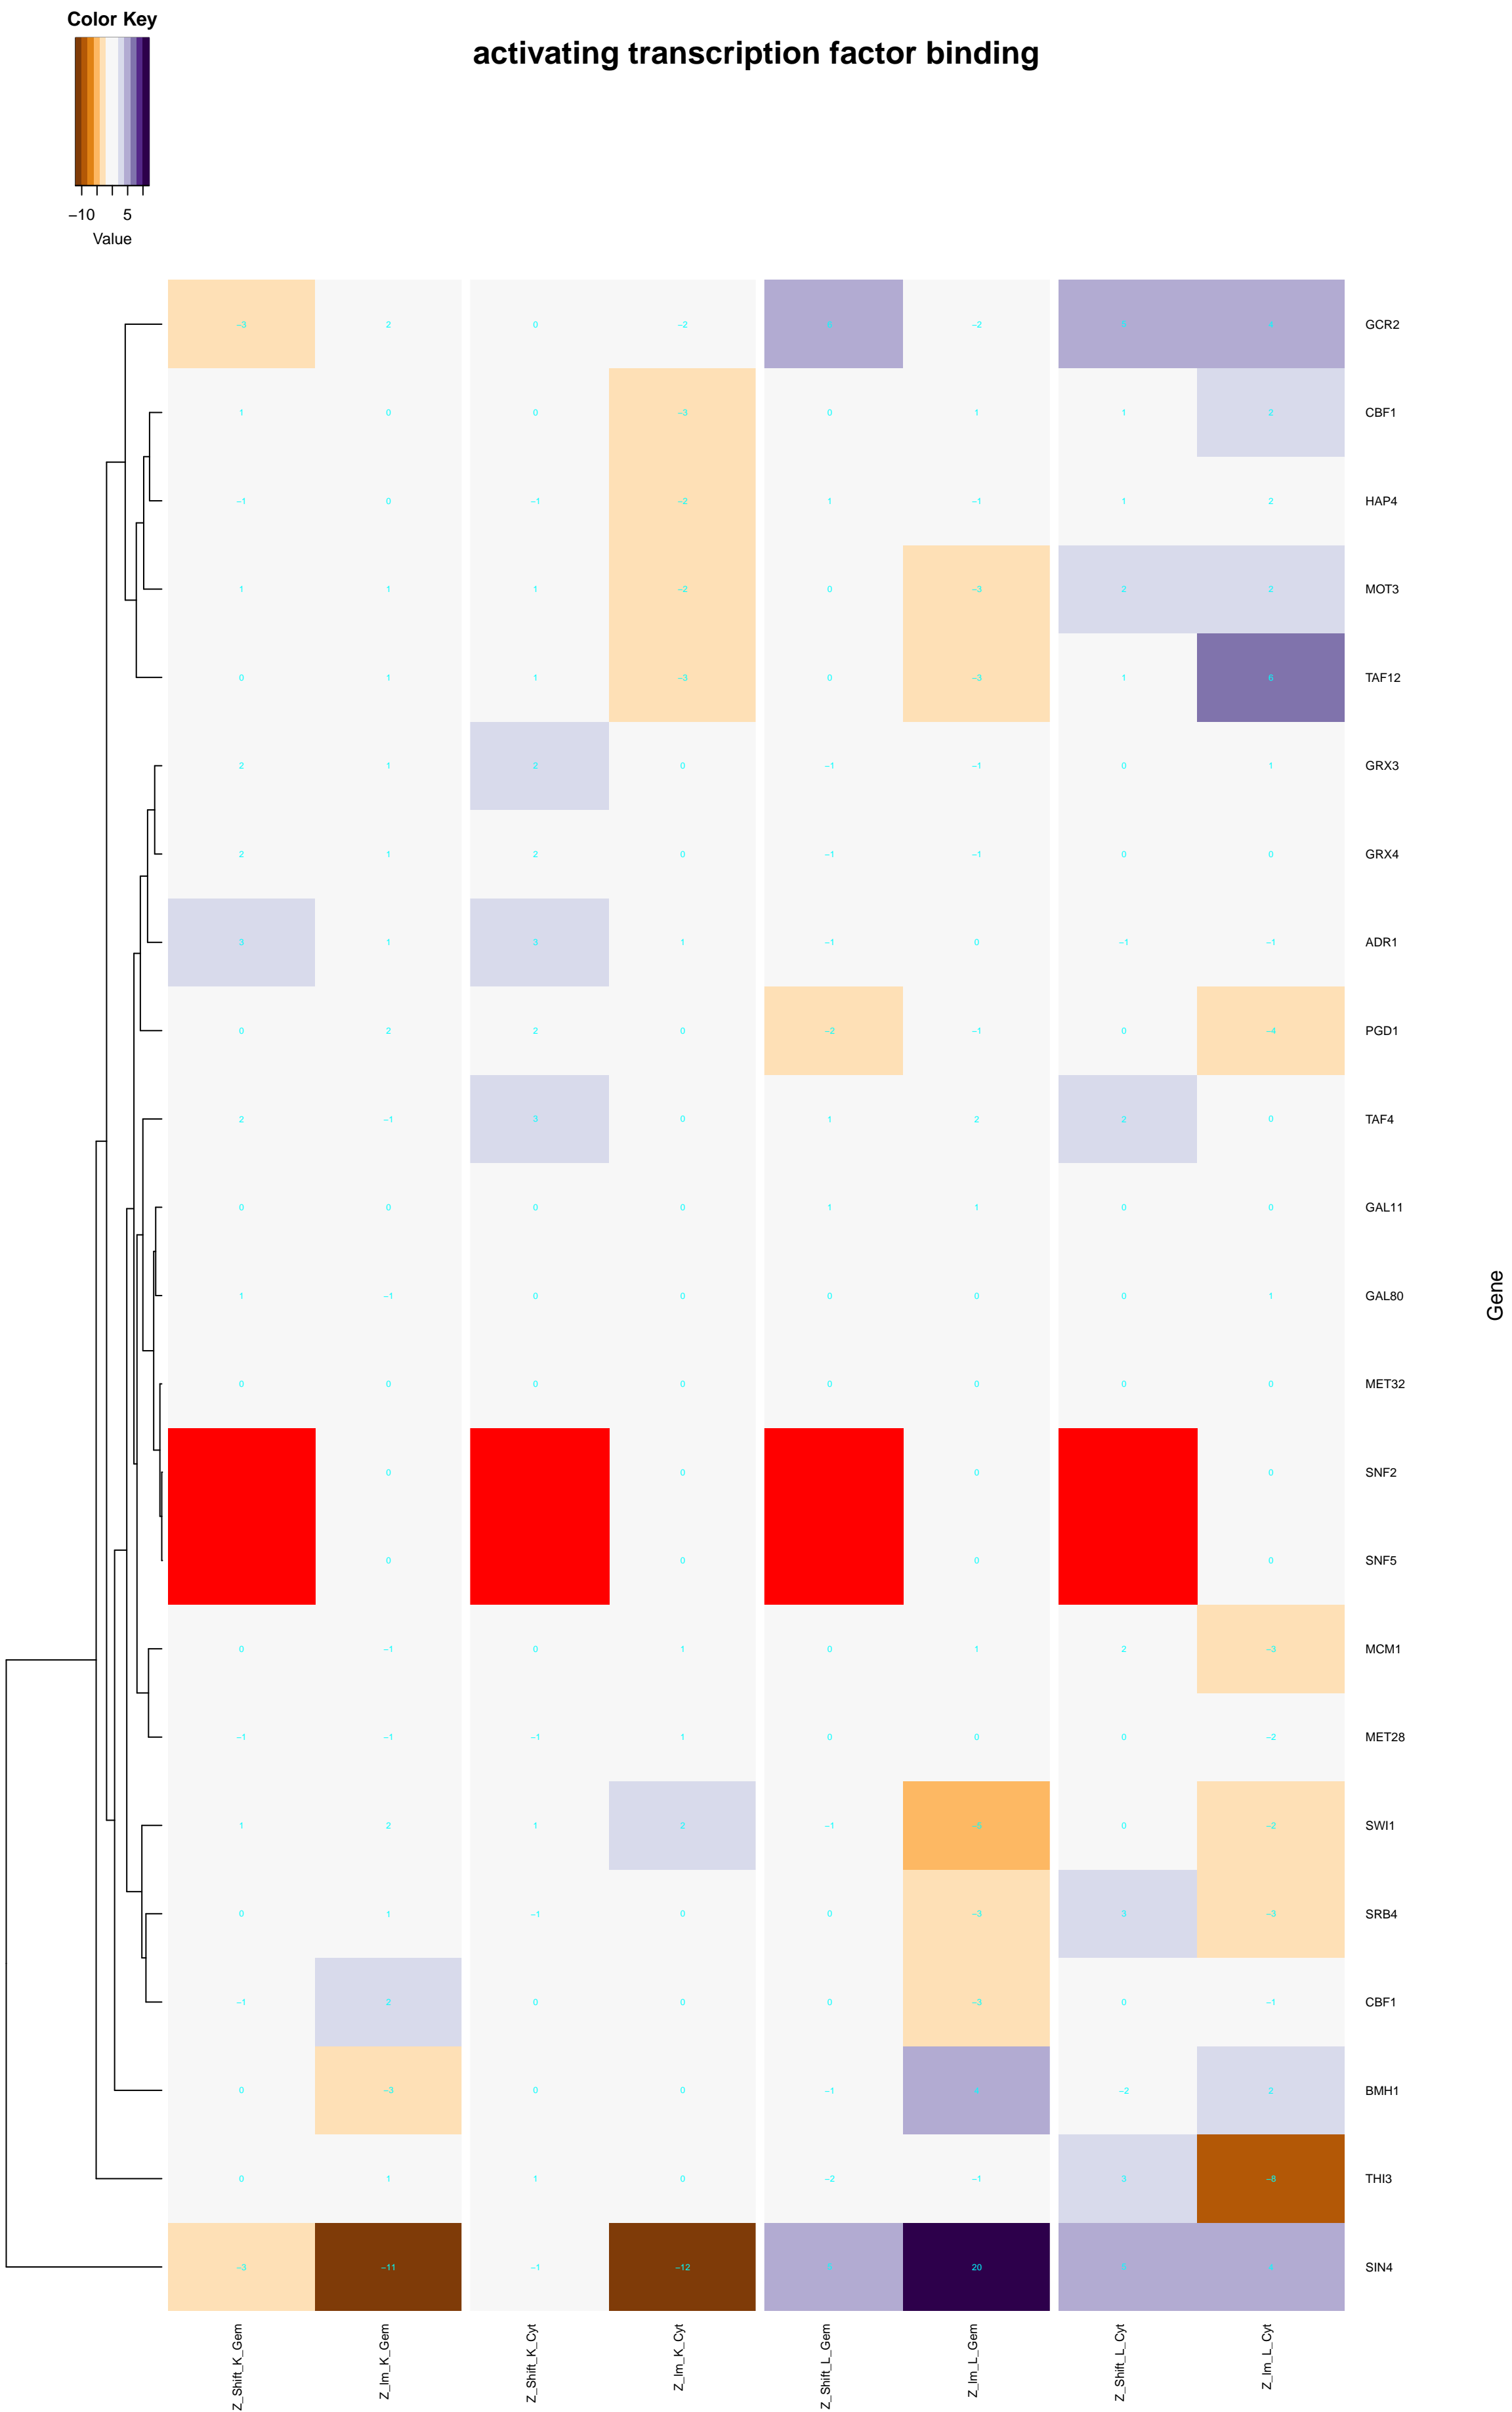

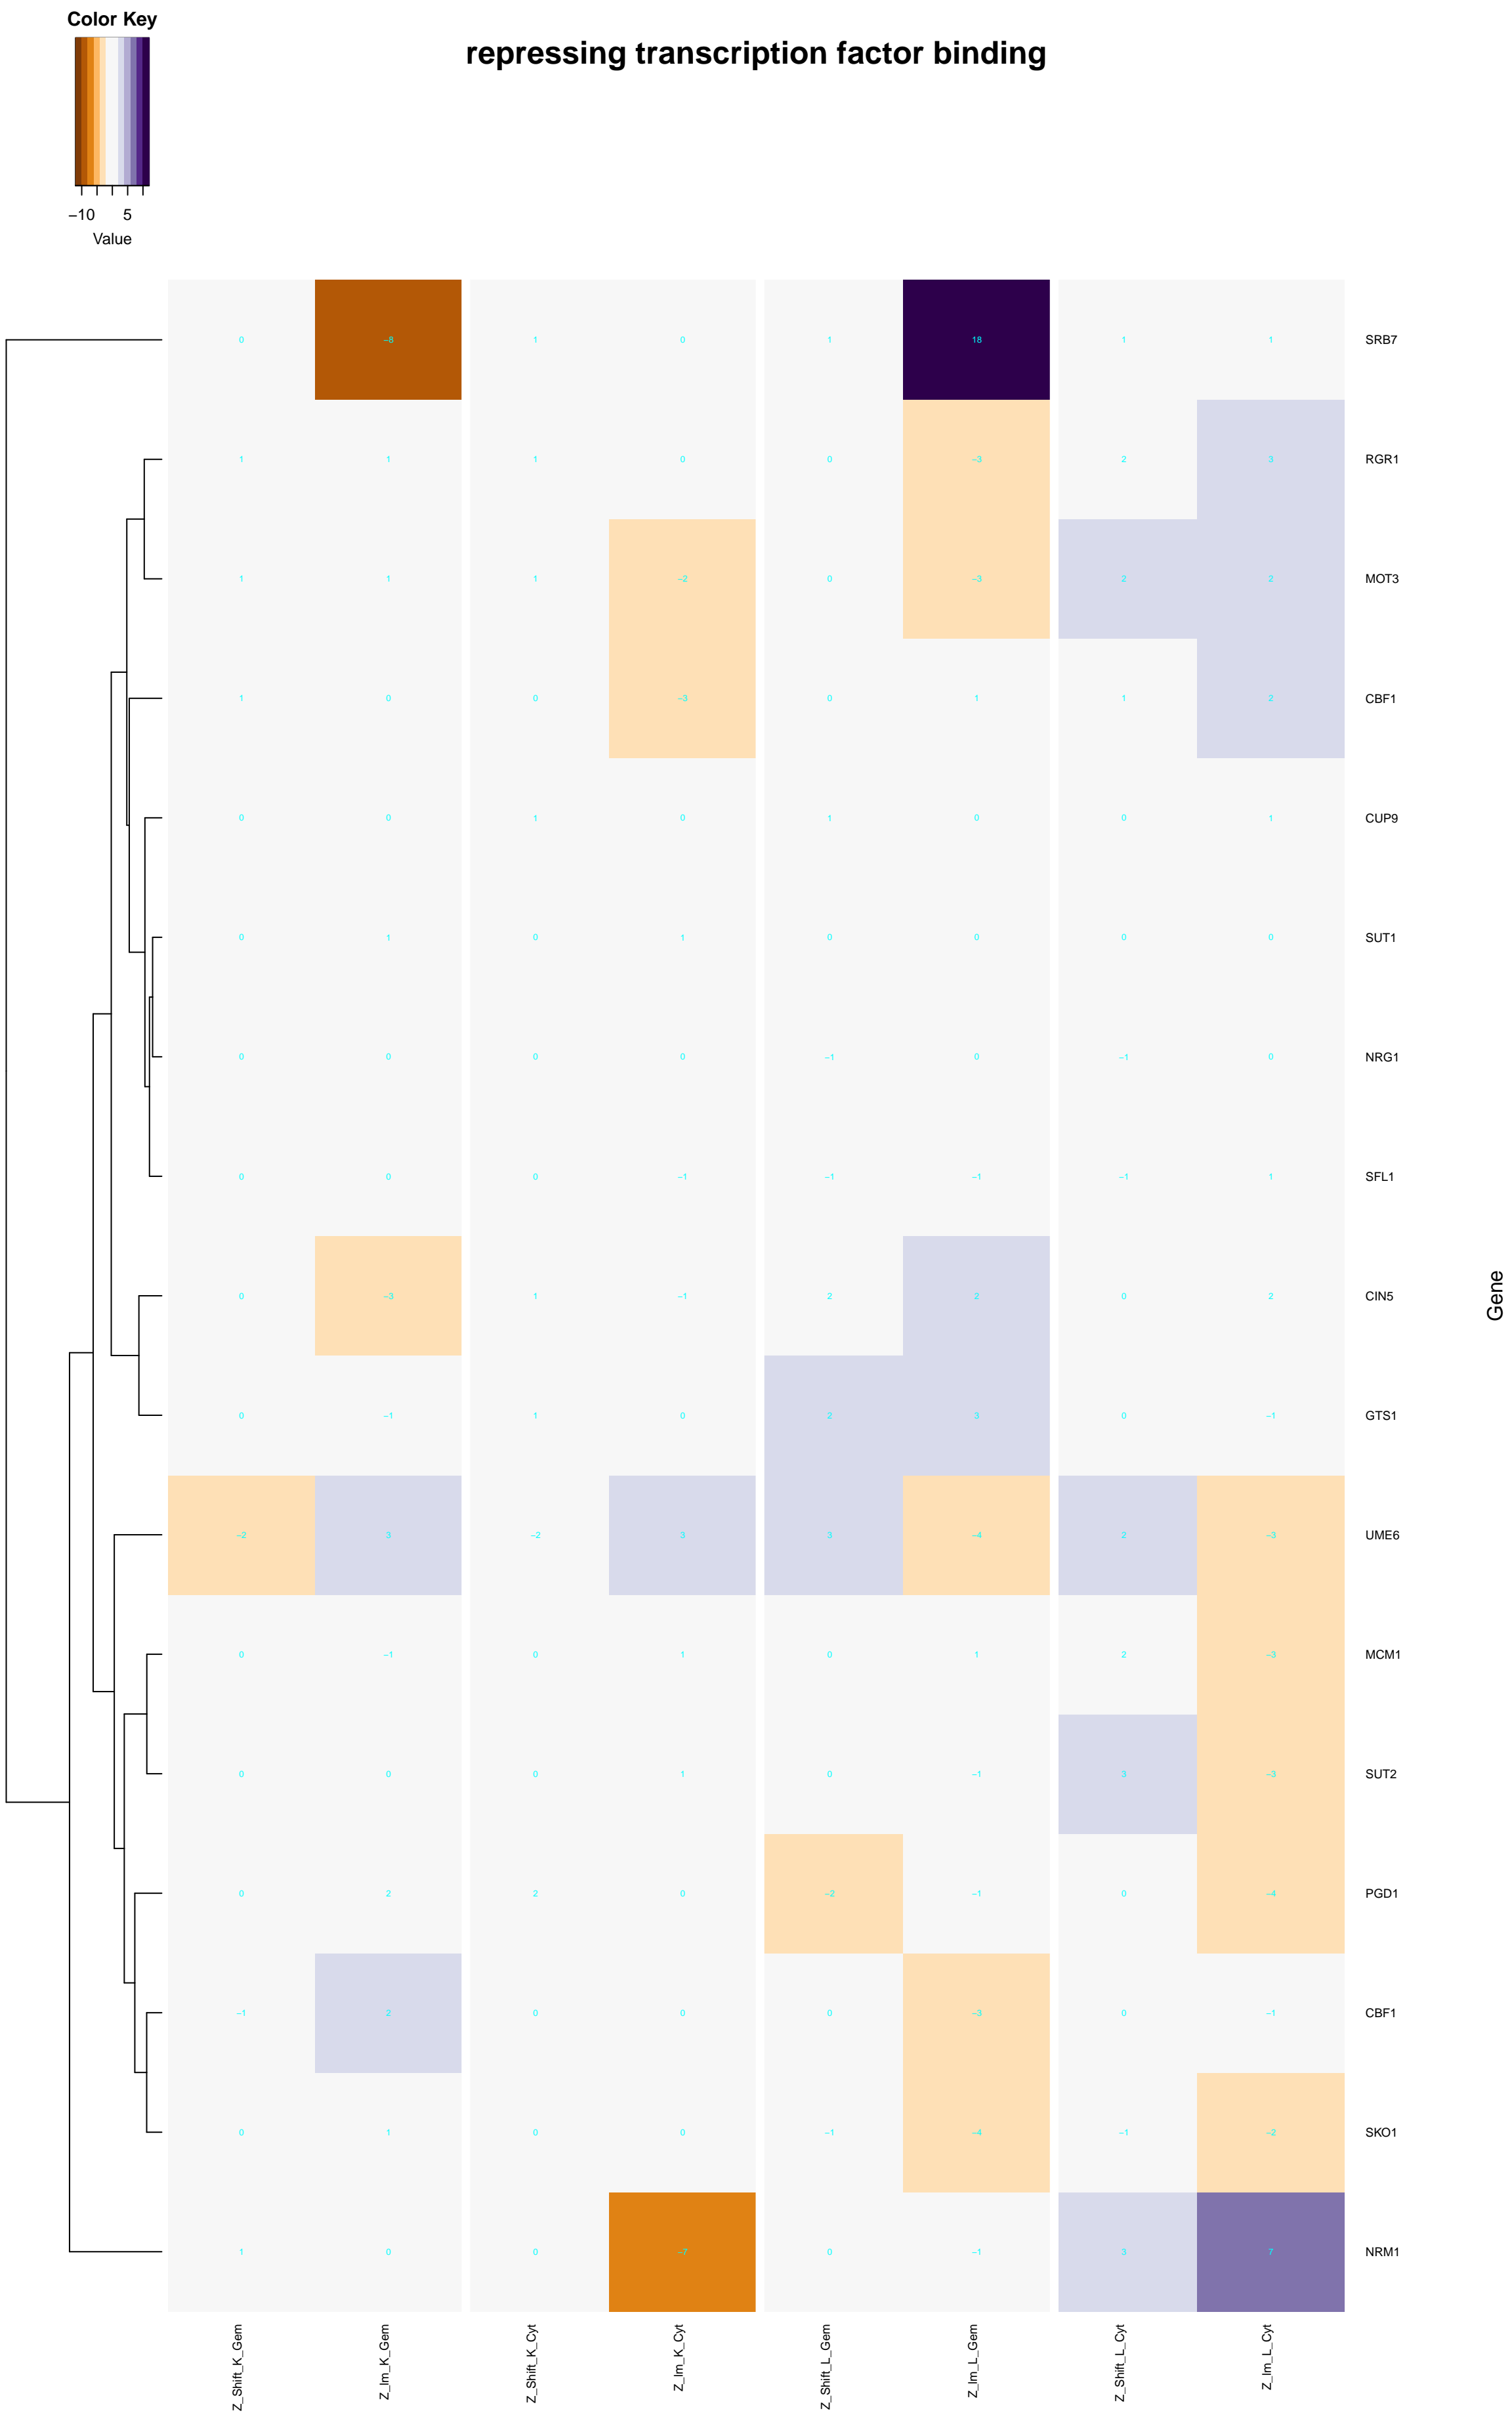

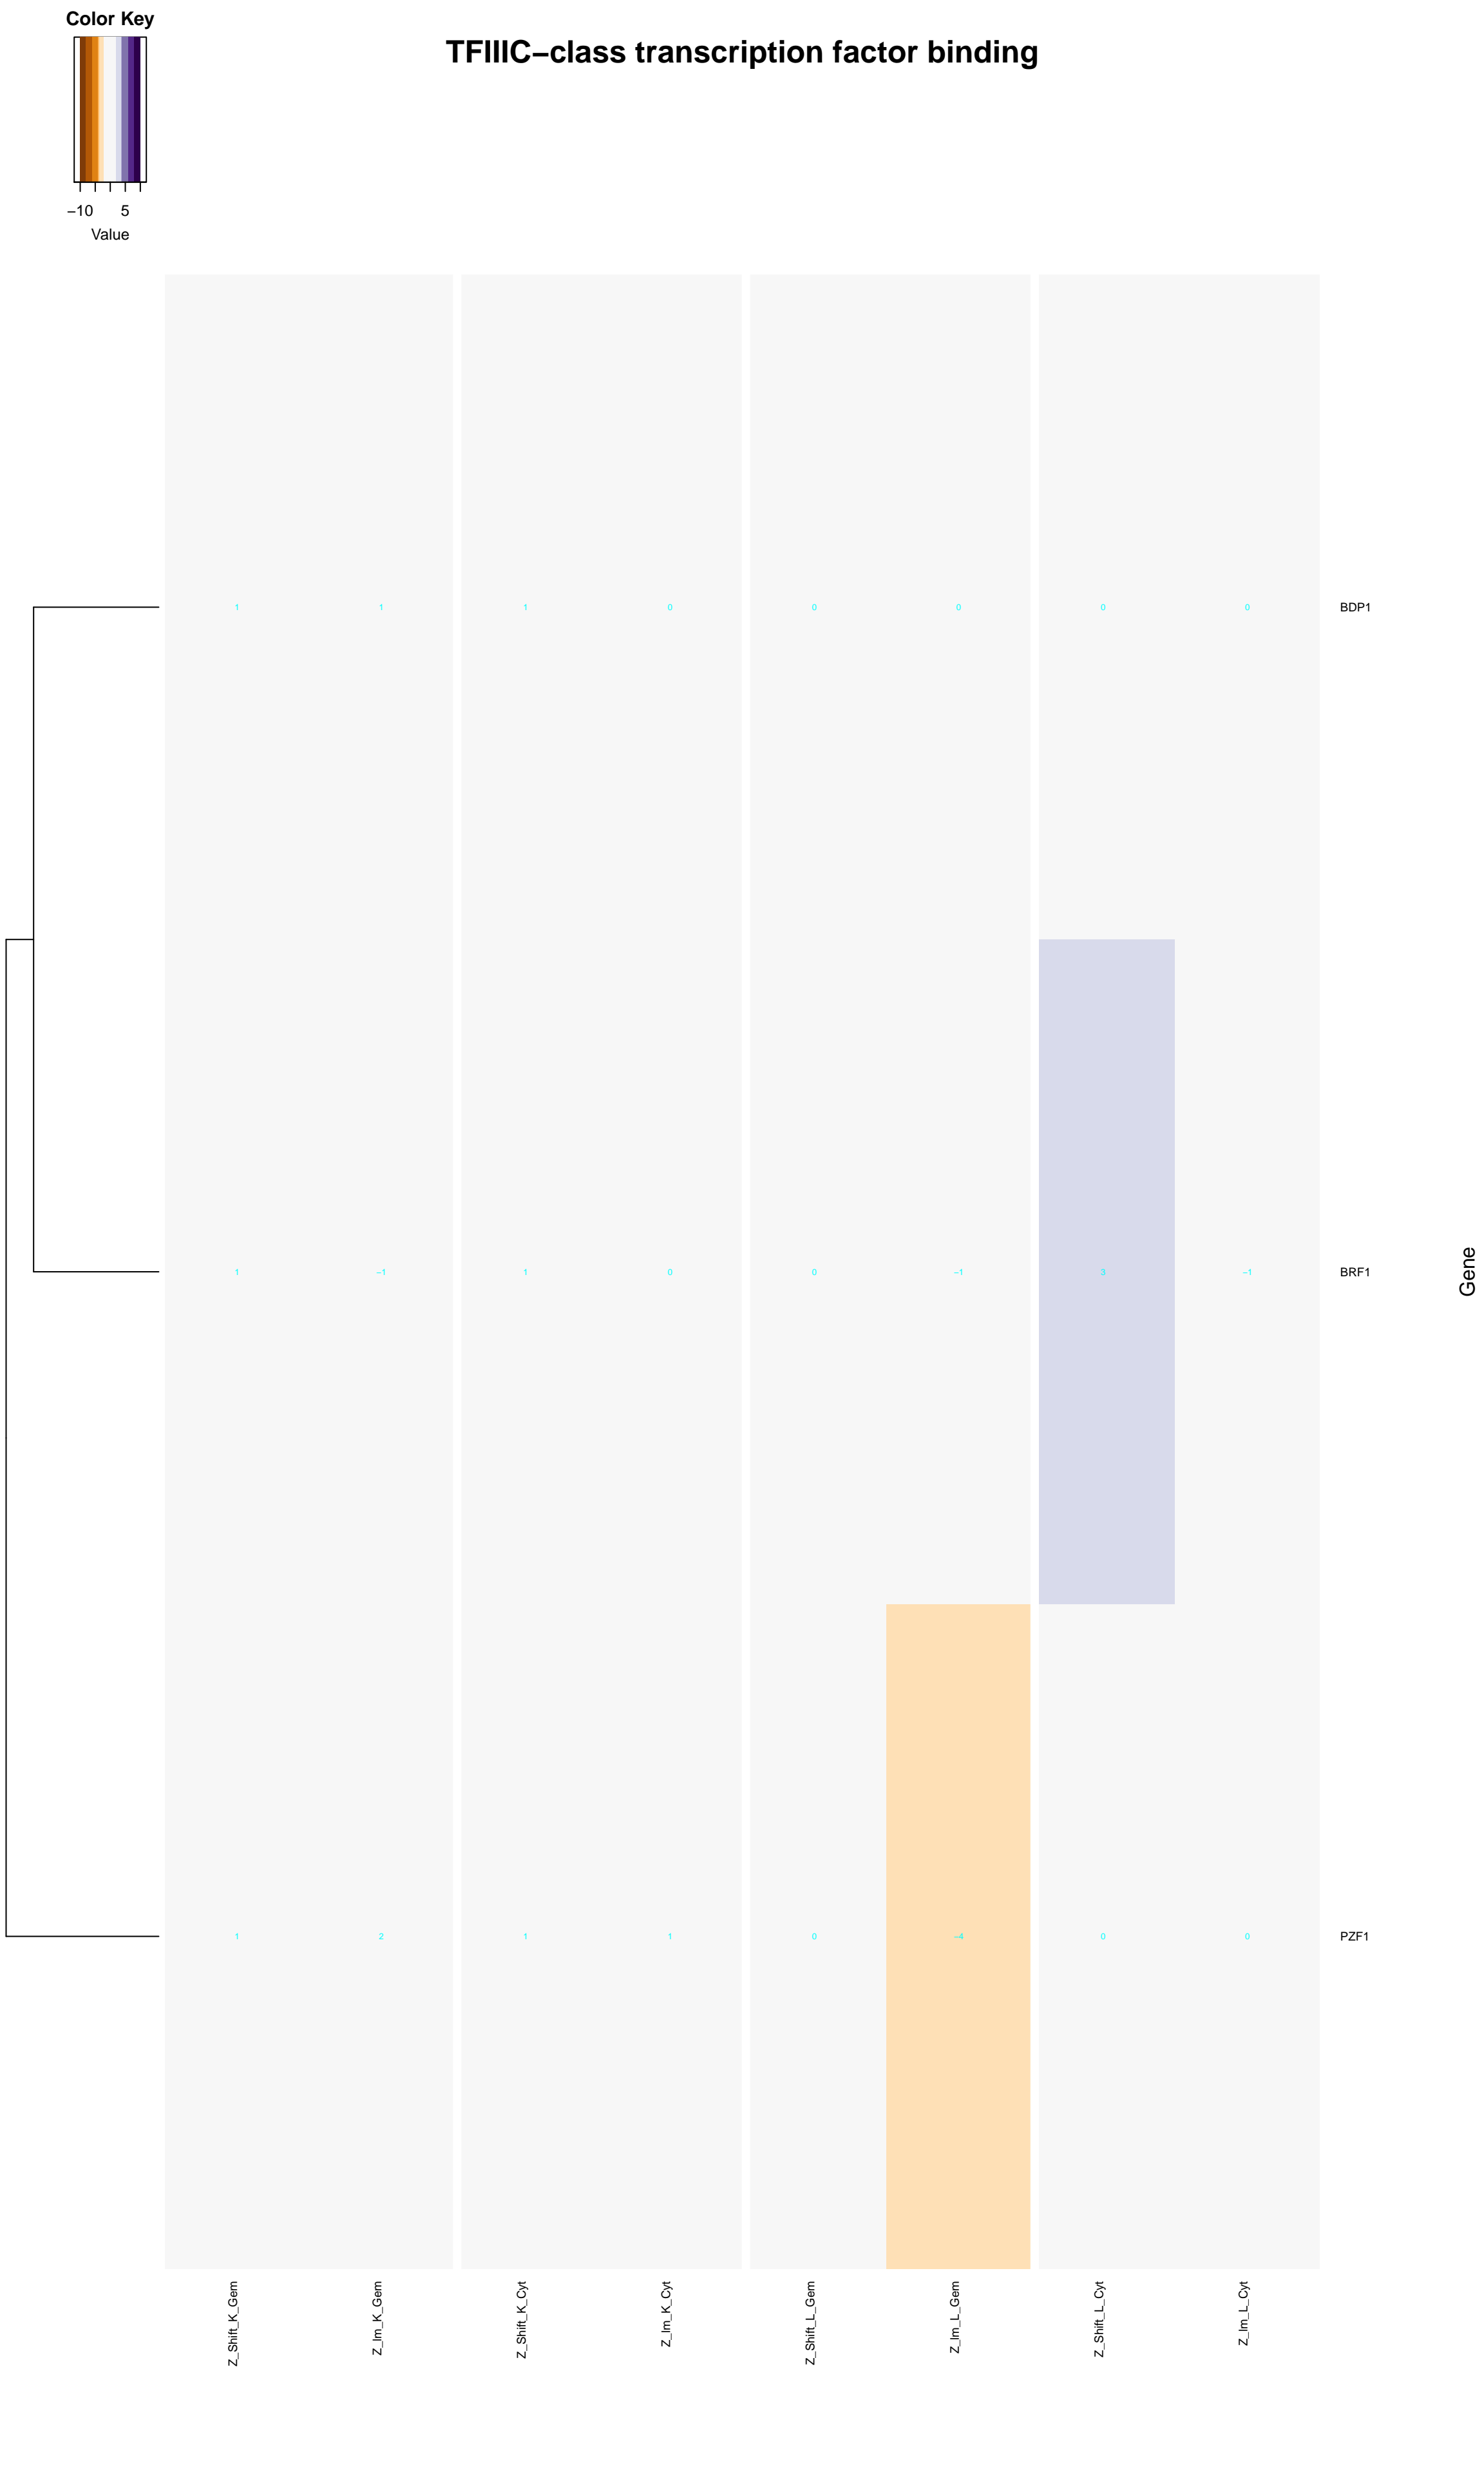

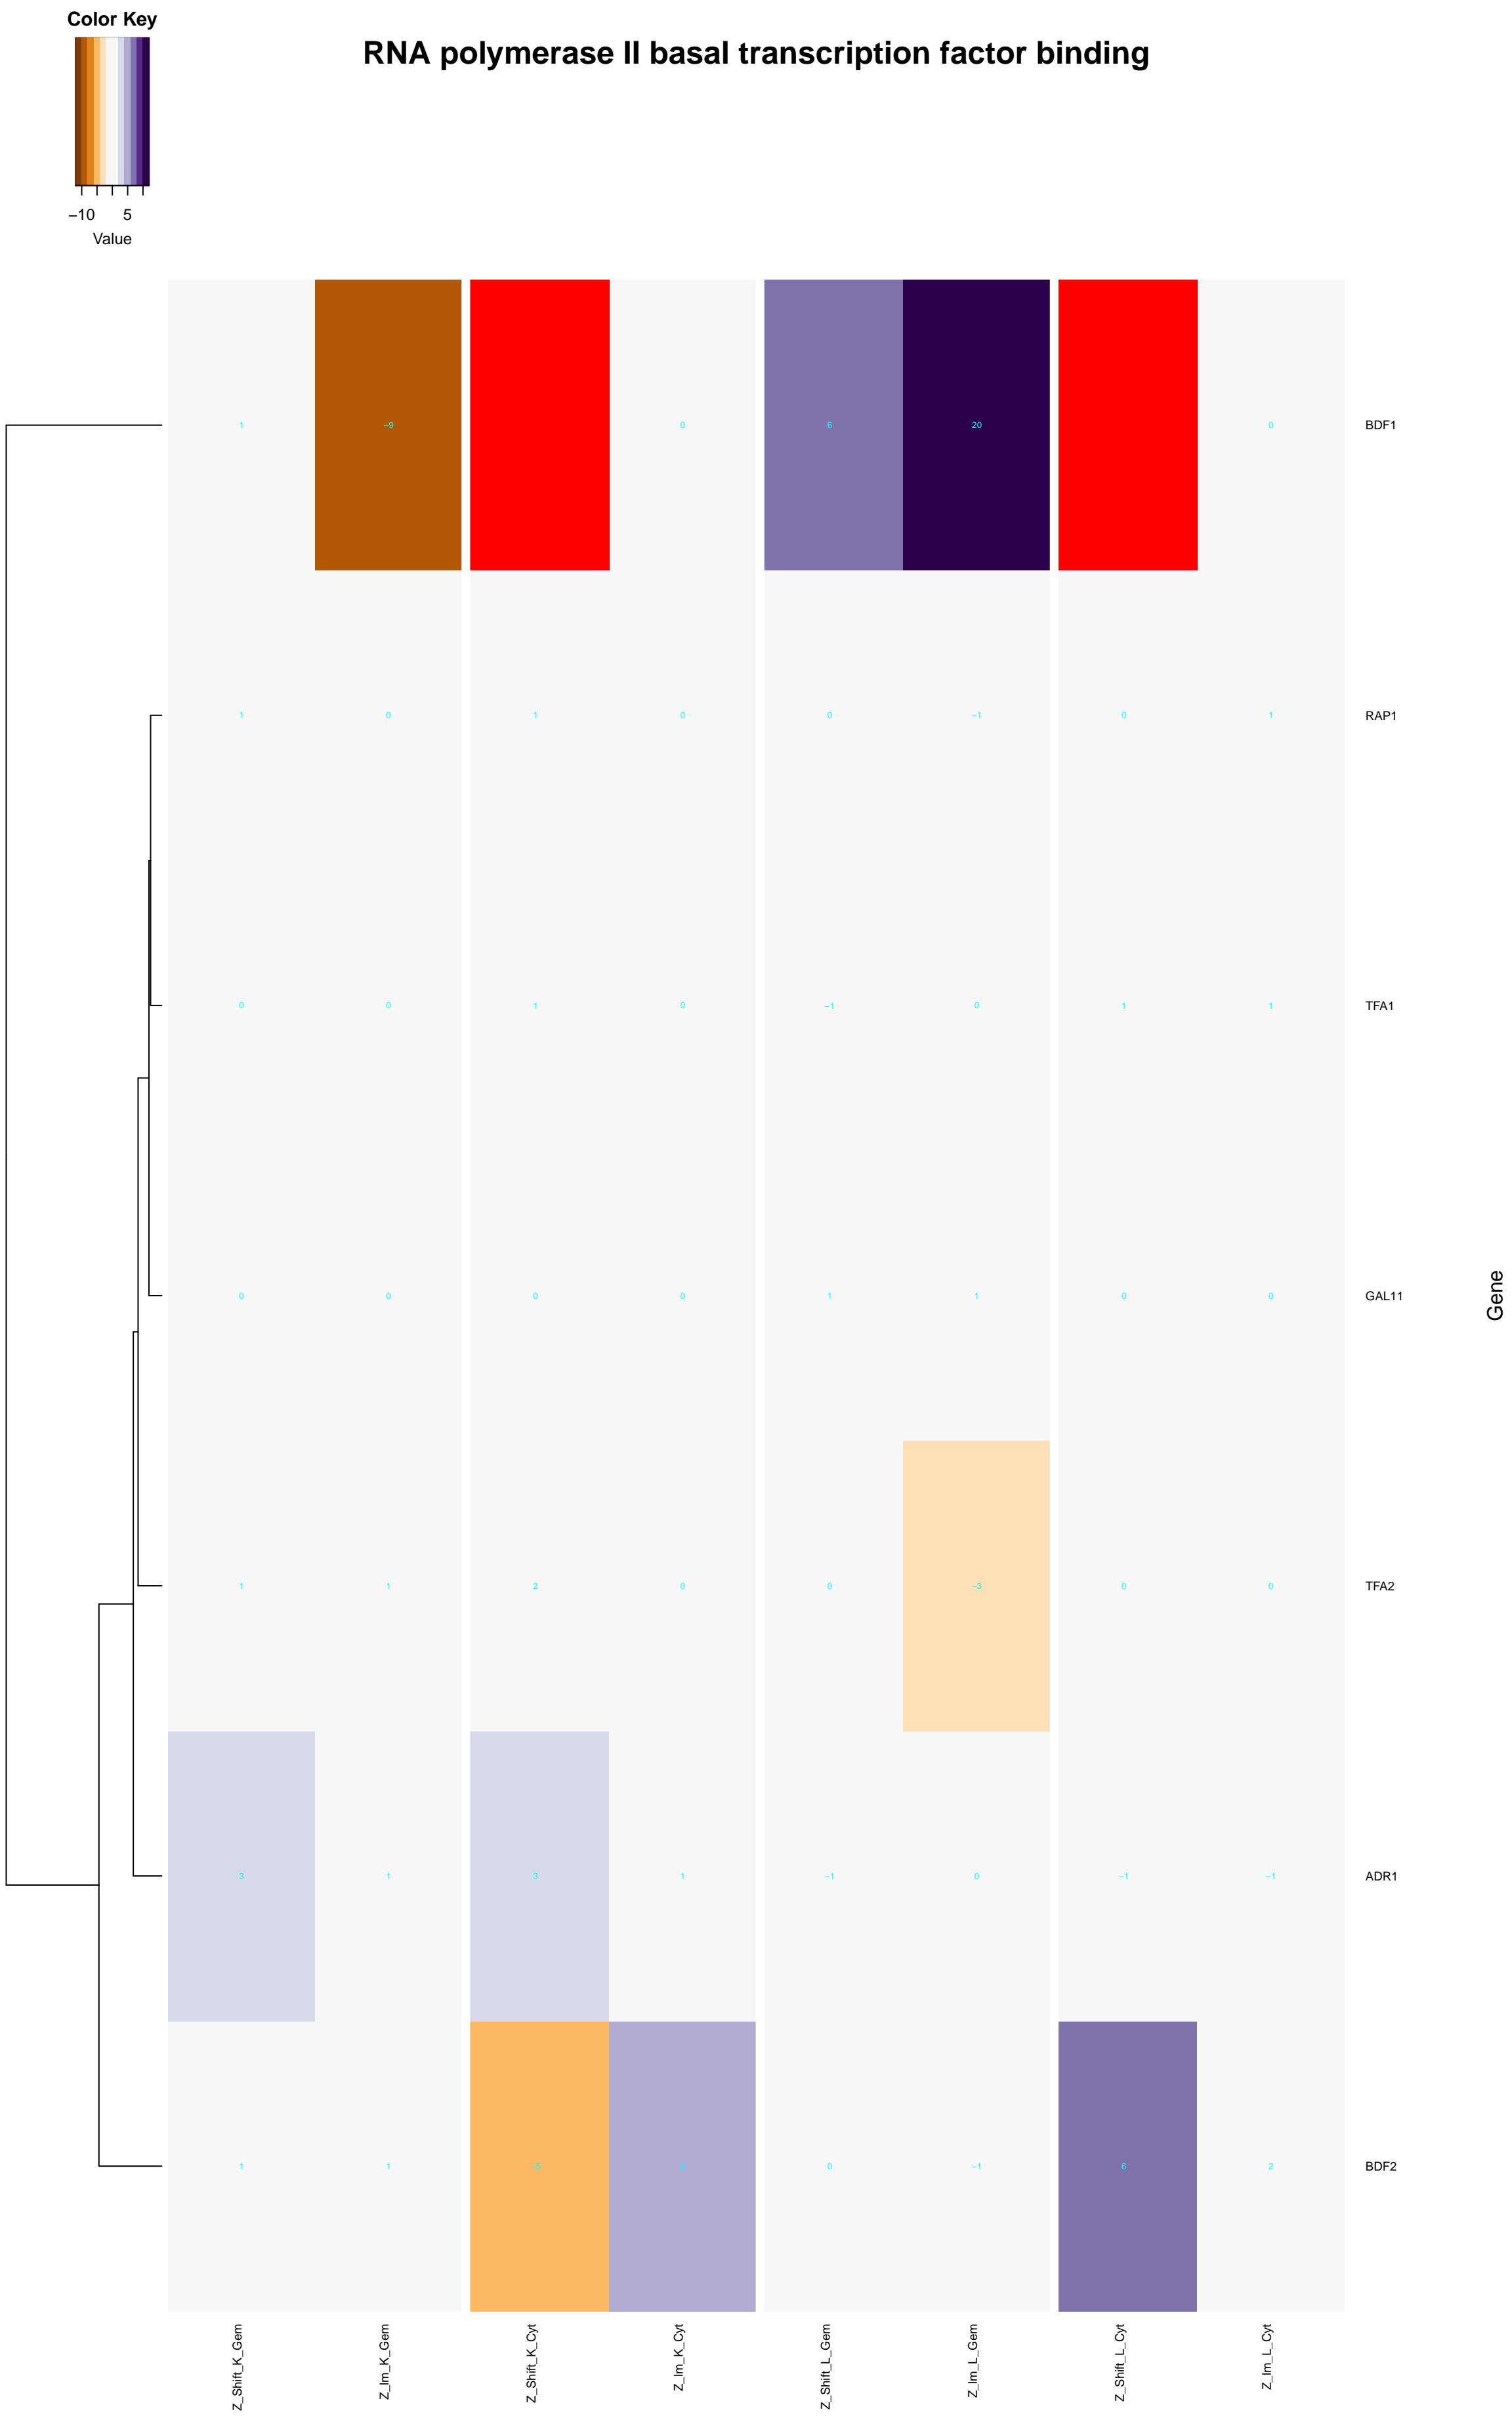

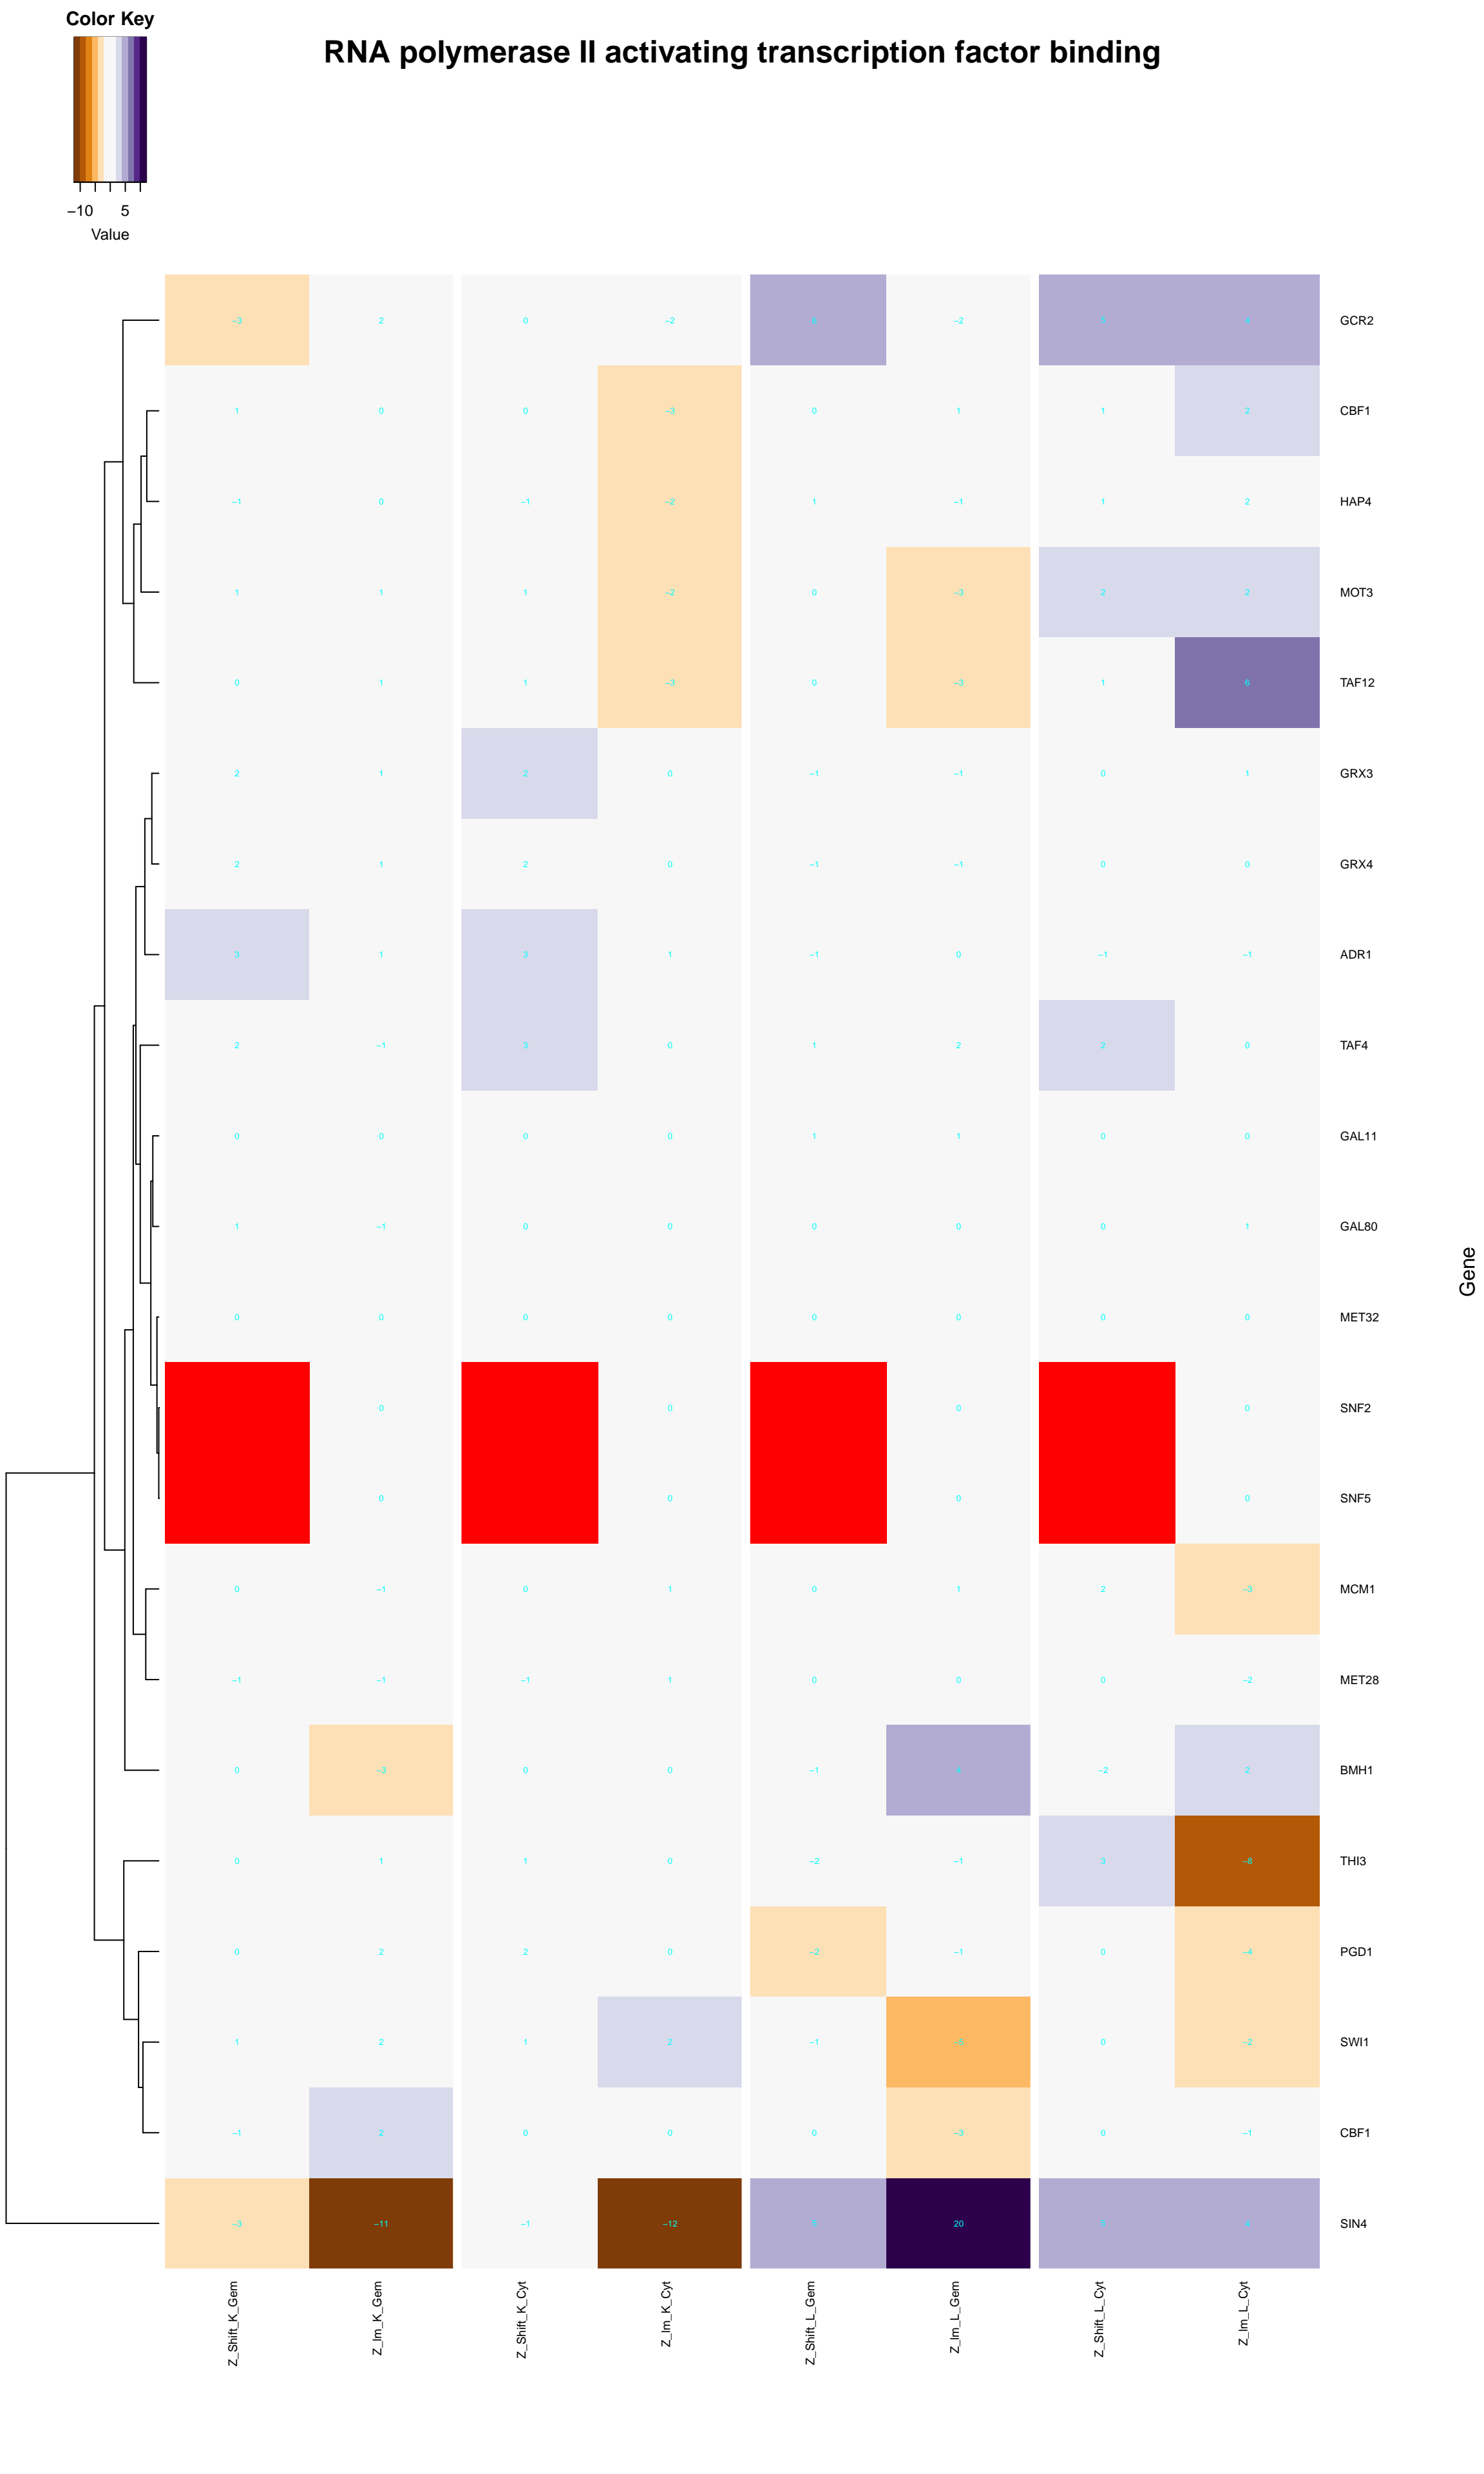

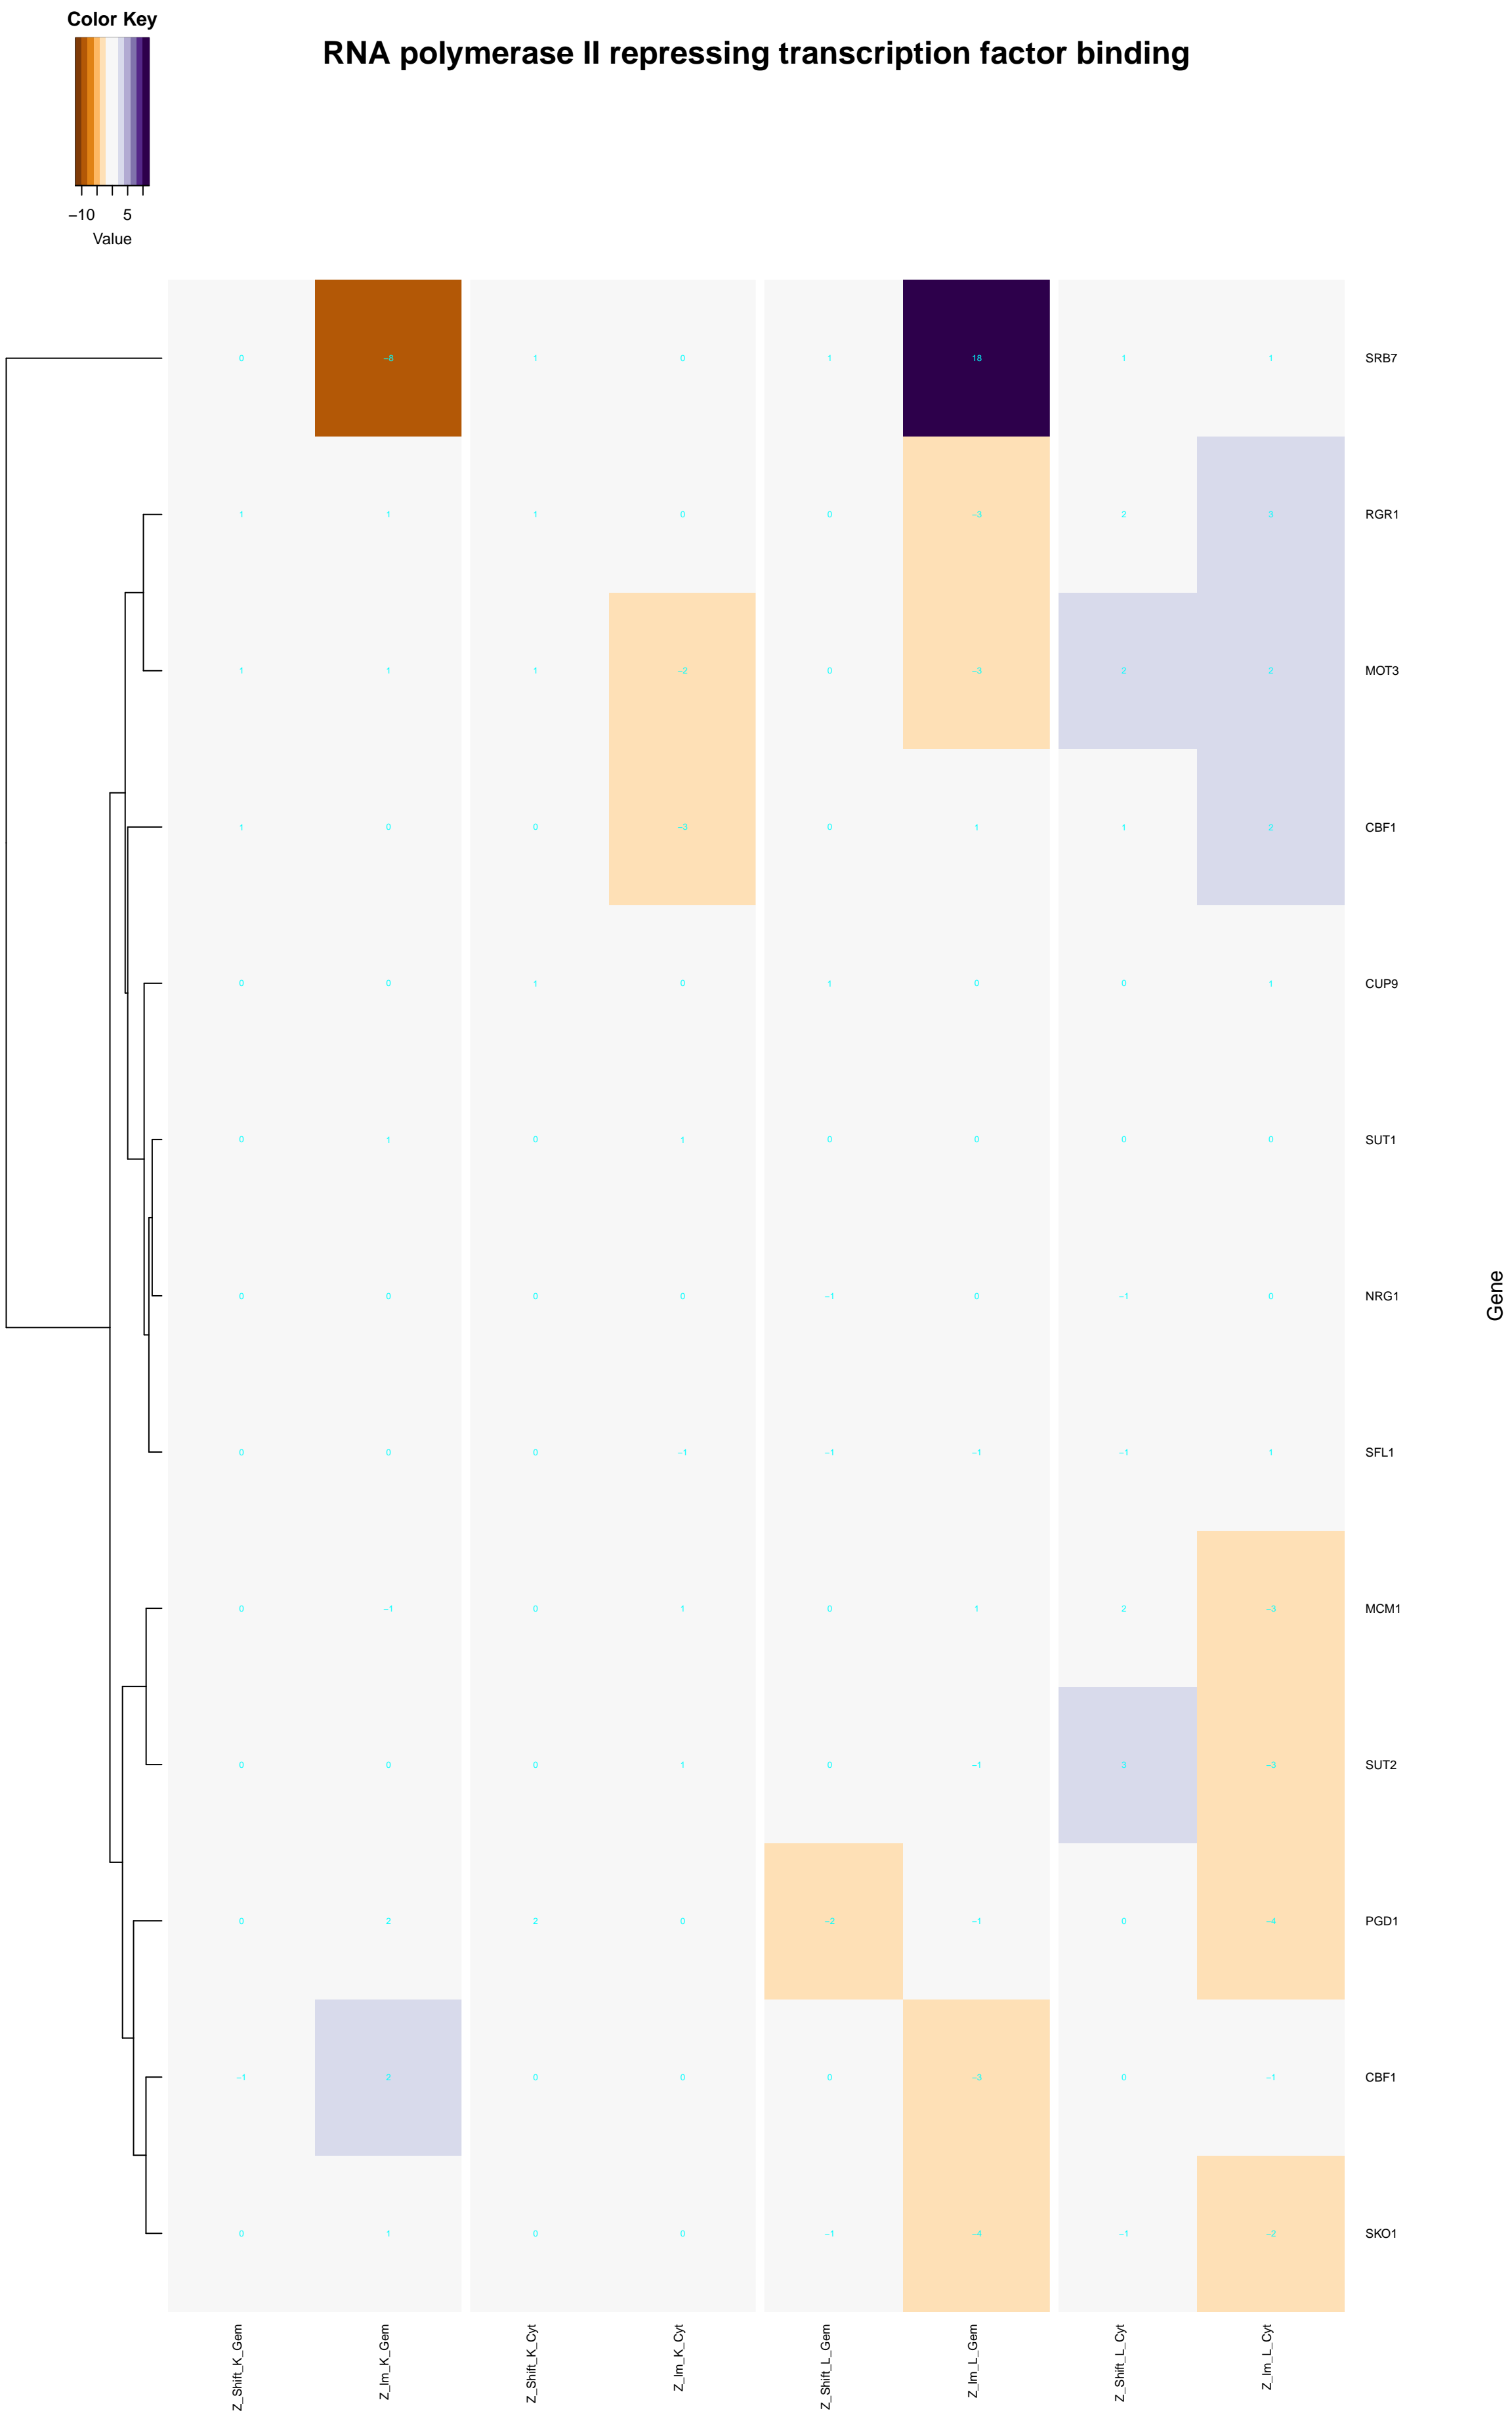

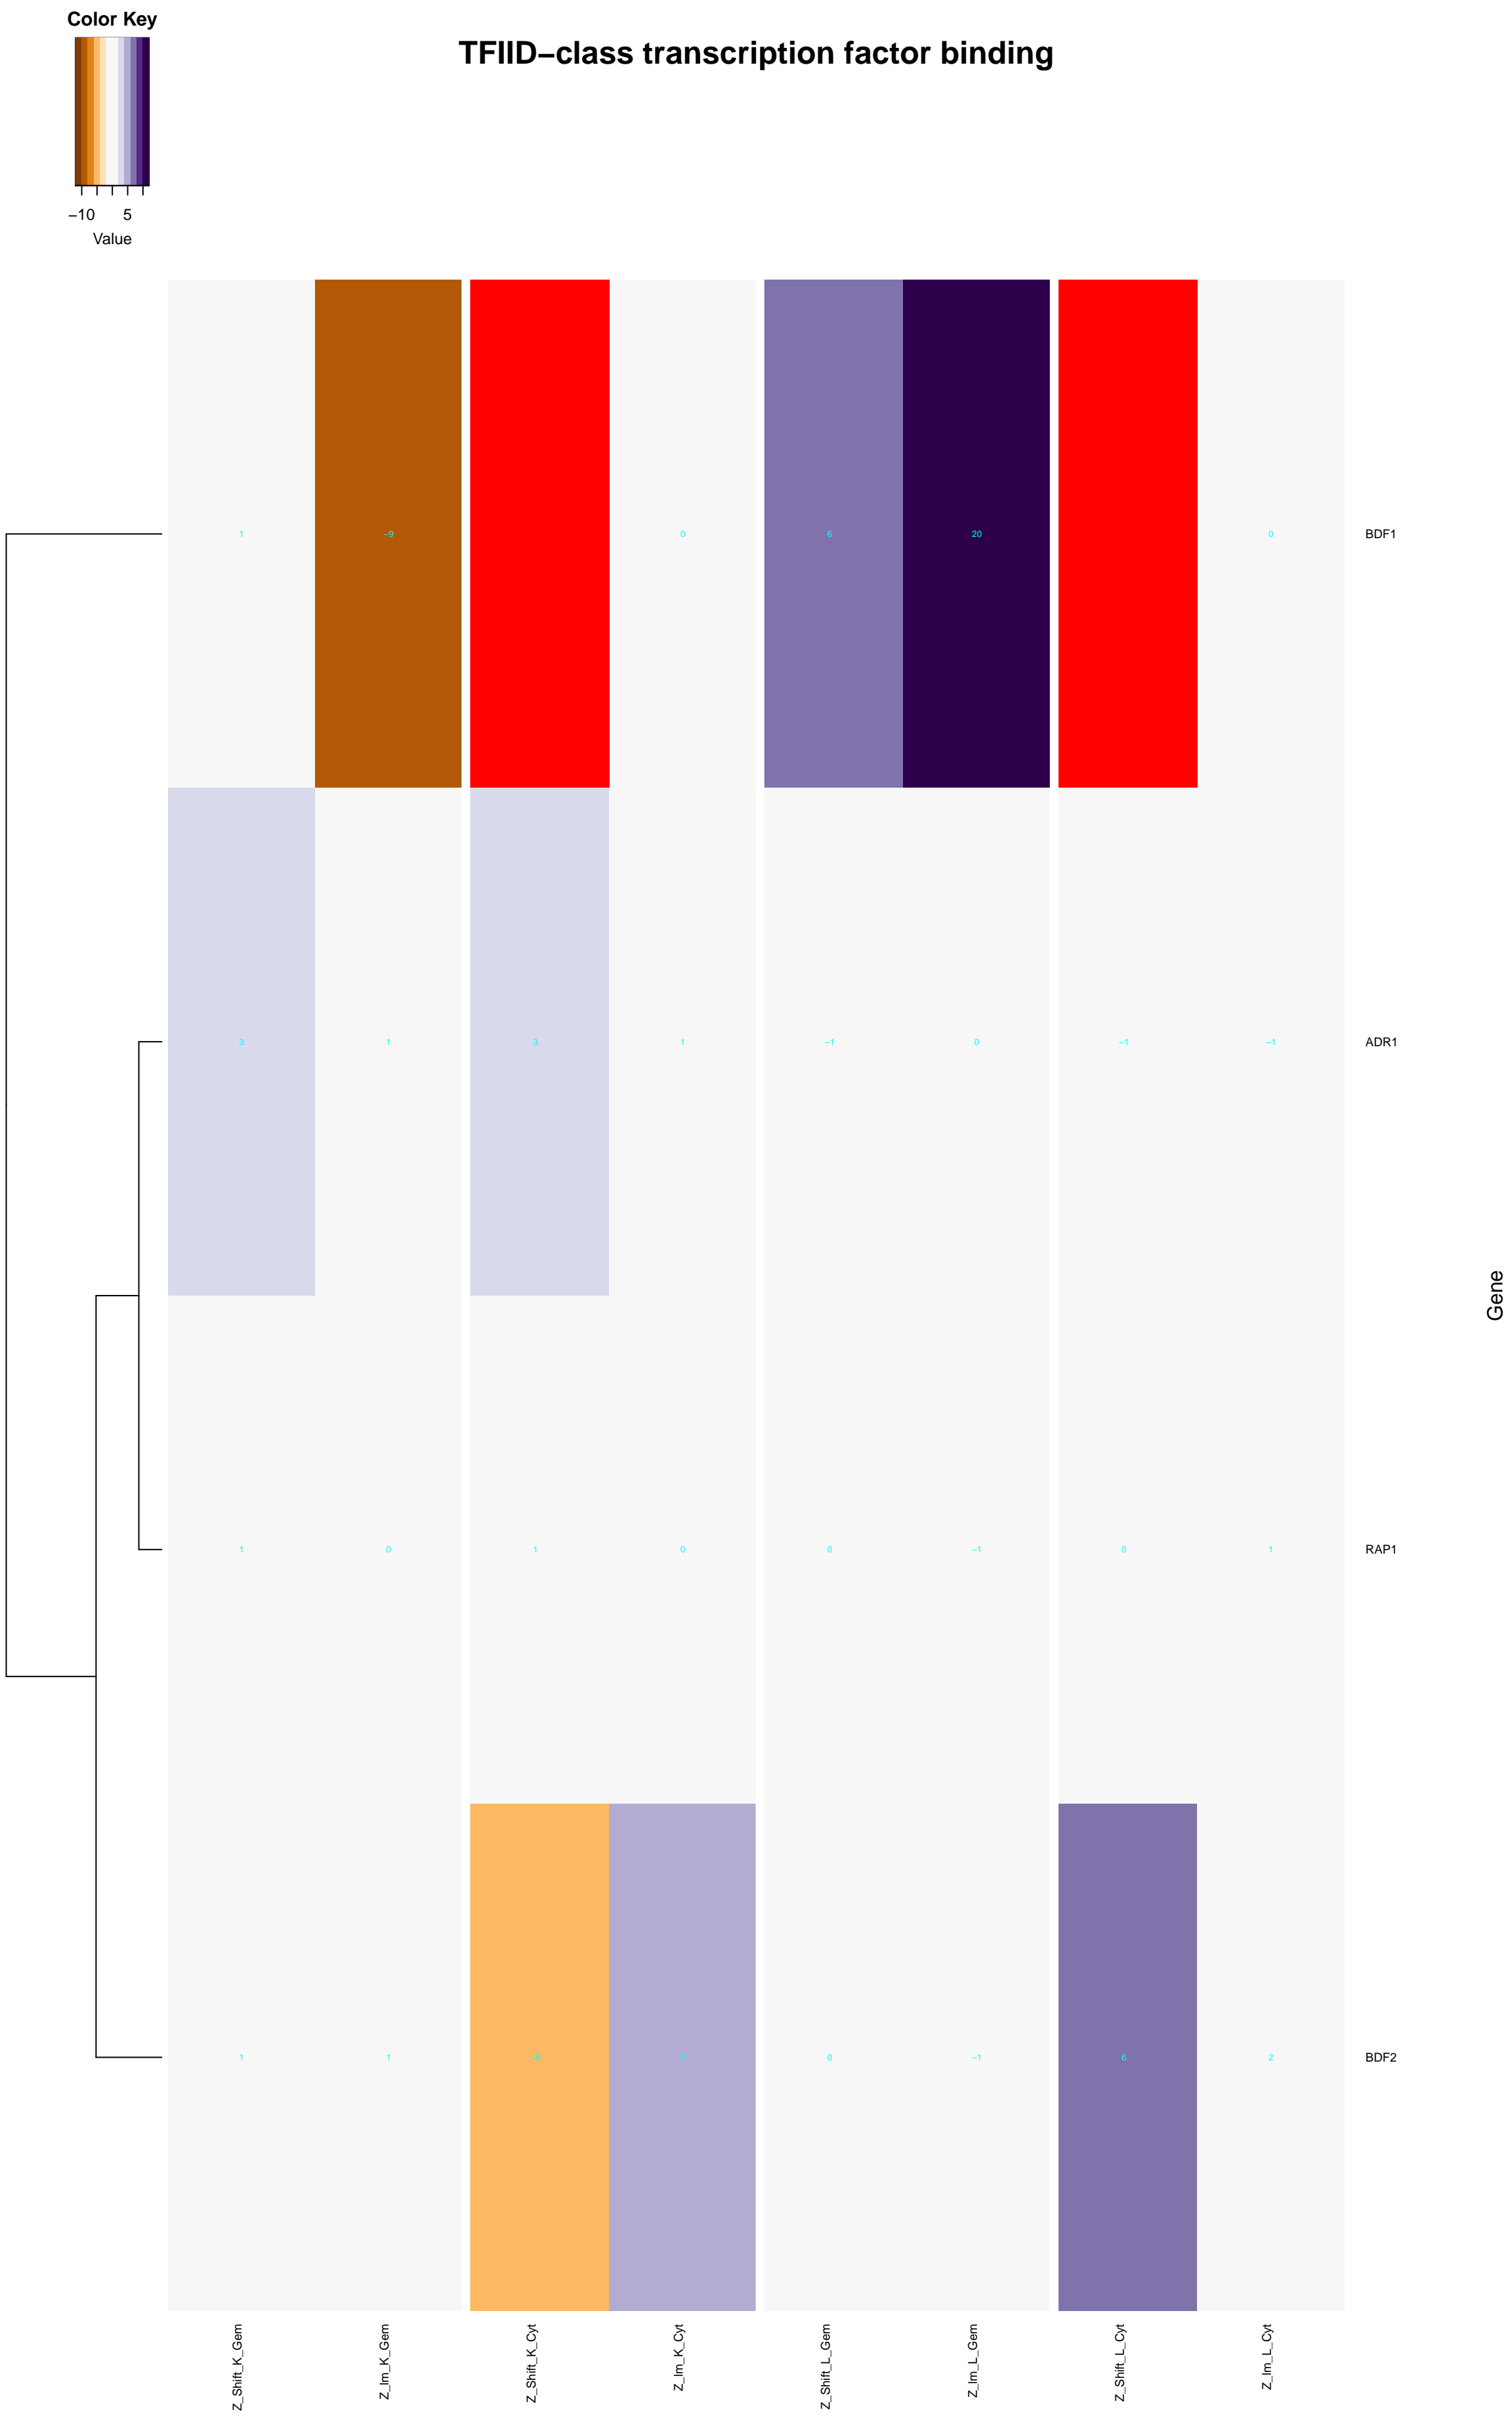

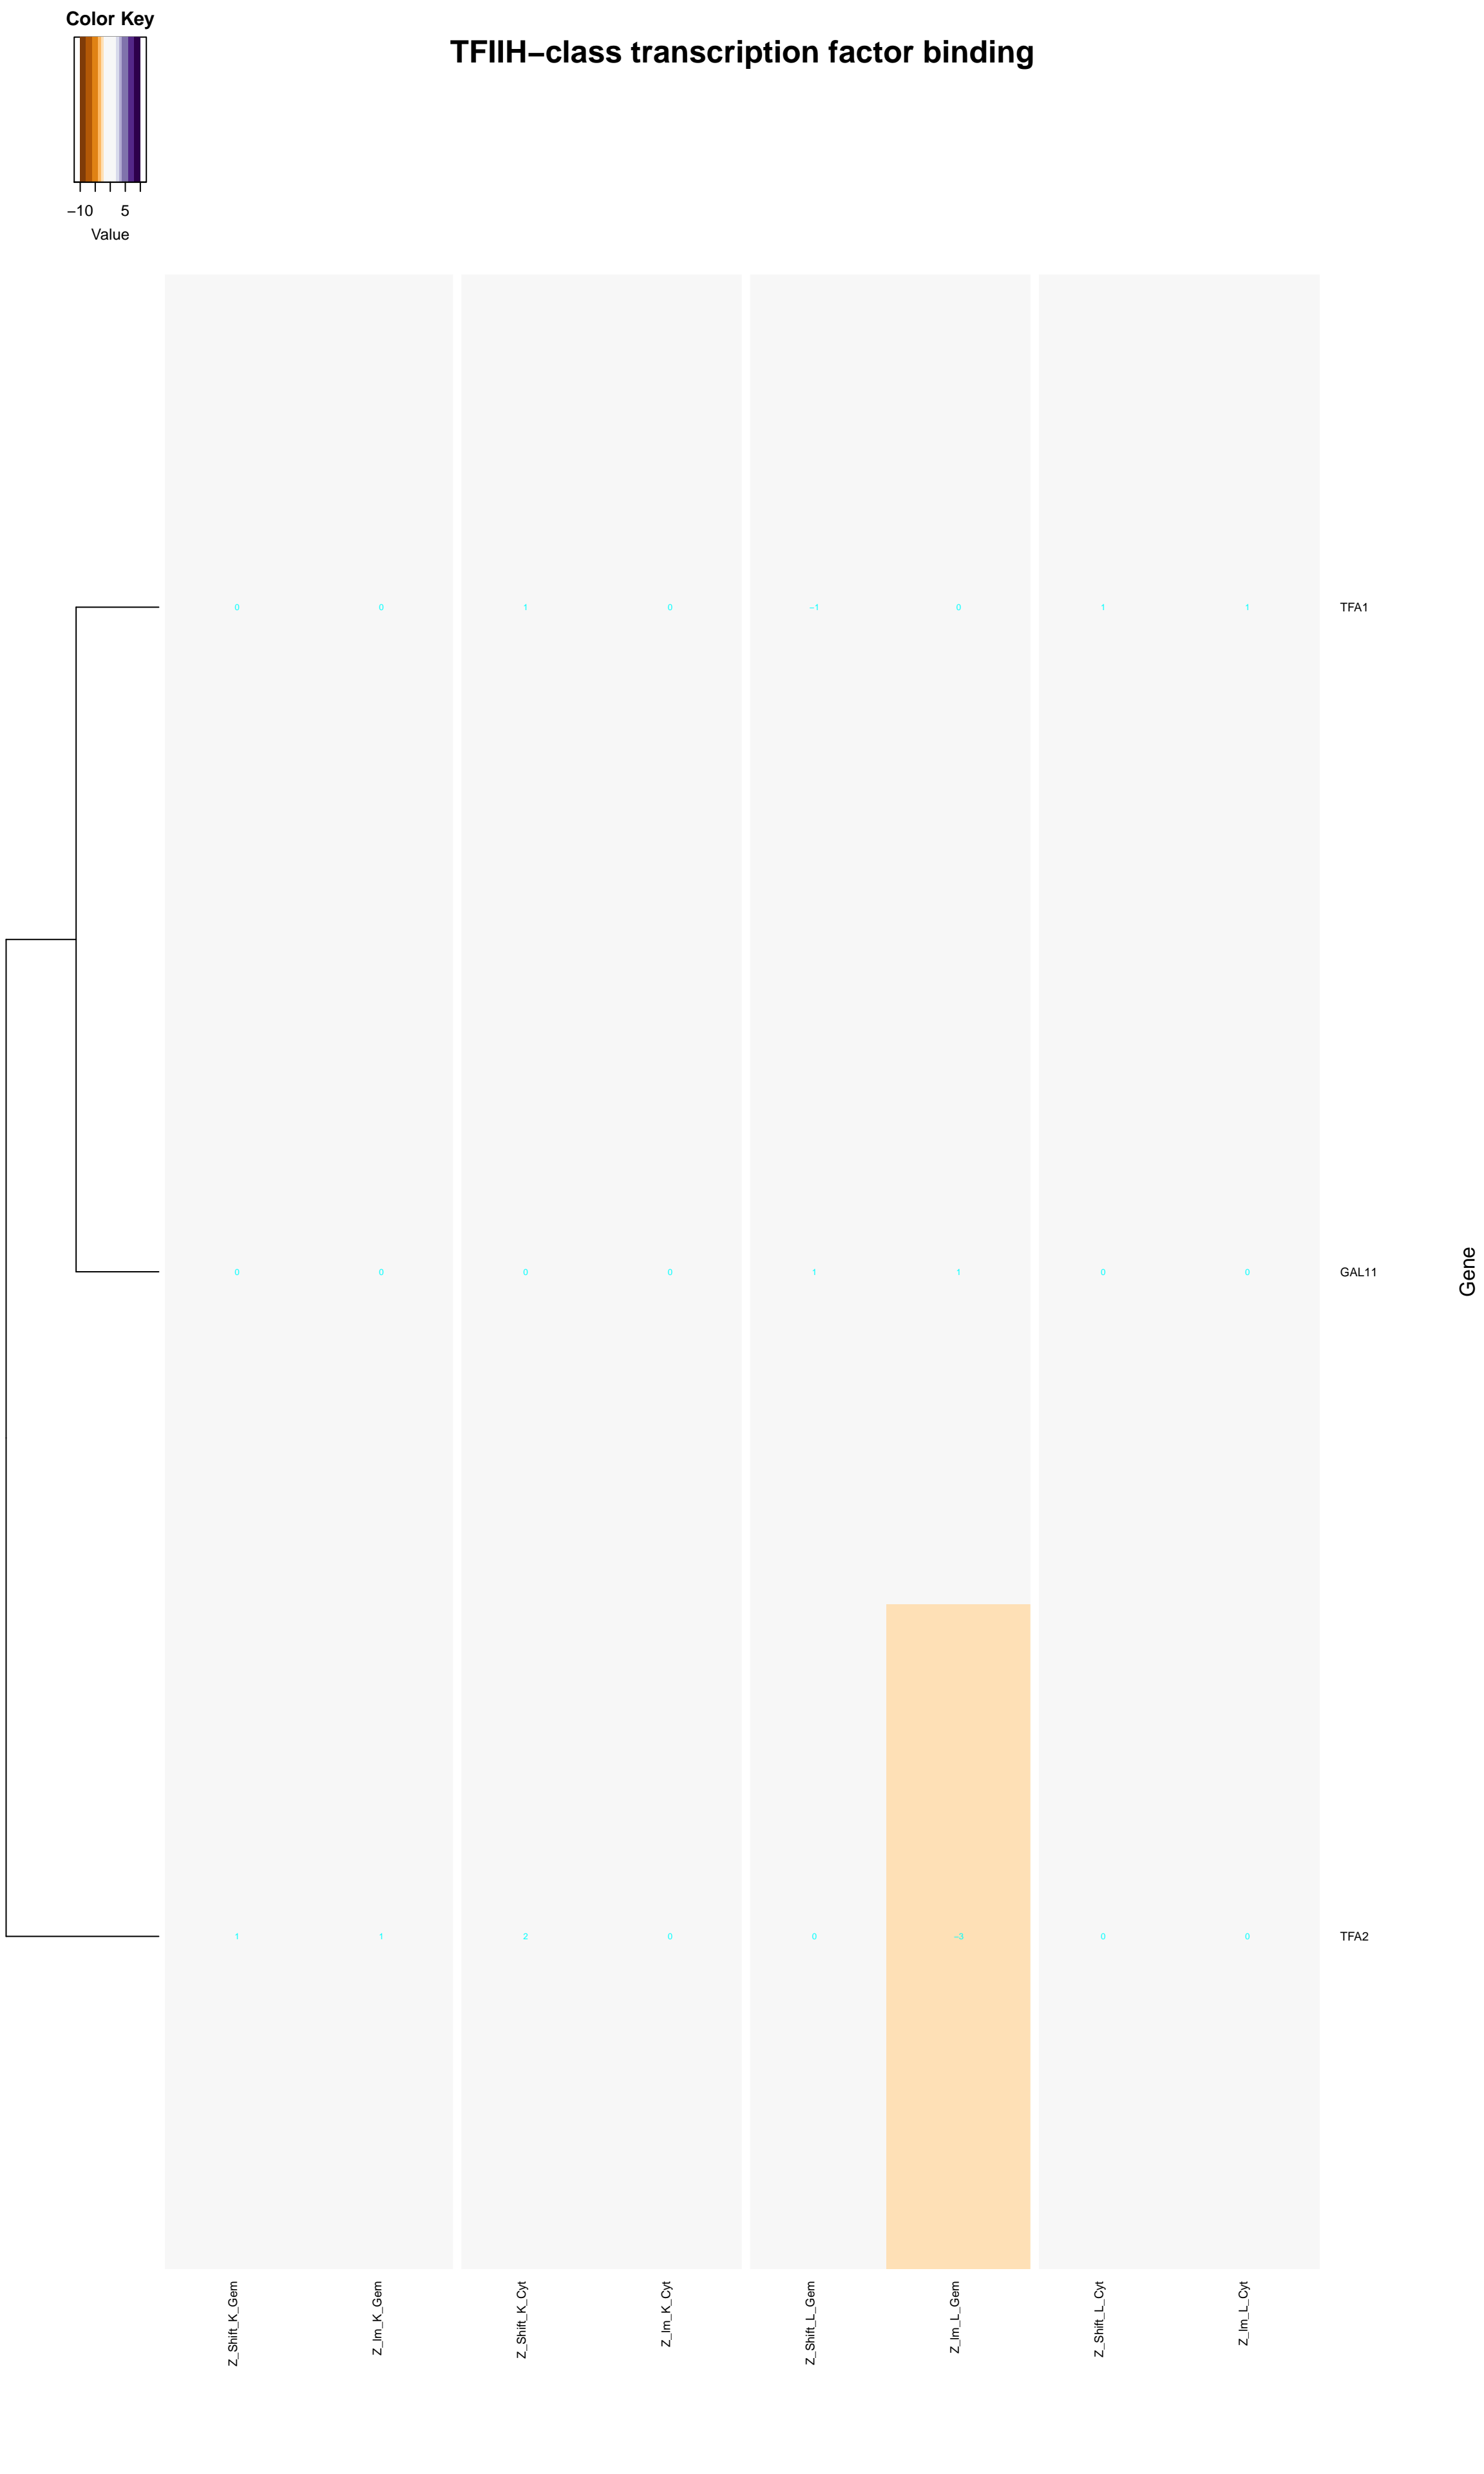

Supplement: s1 [file s1]

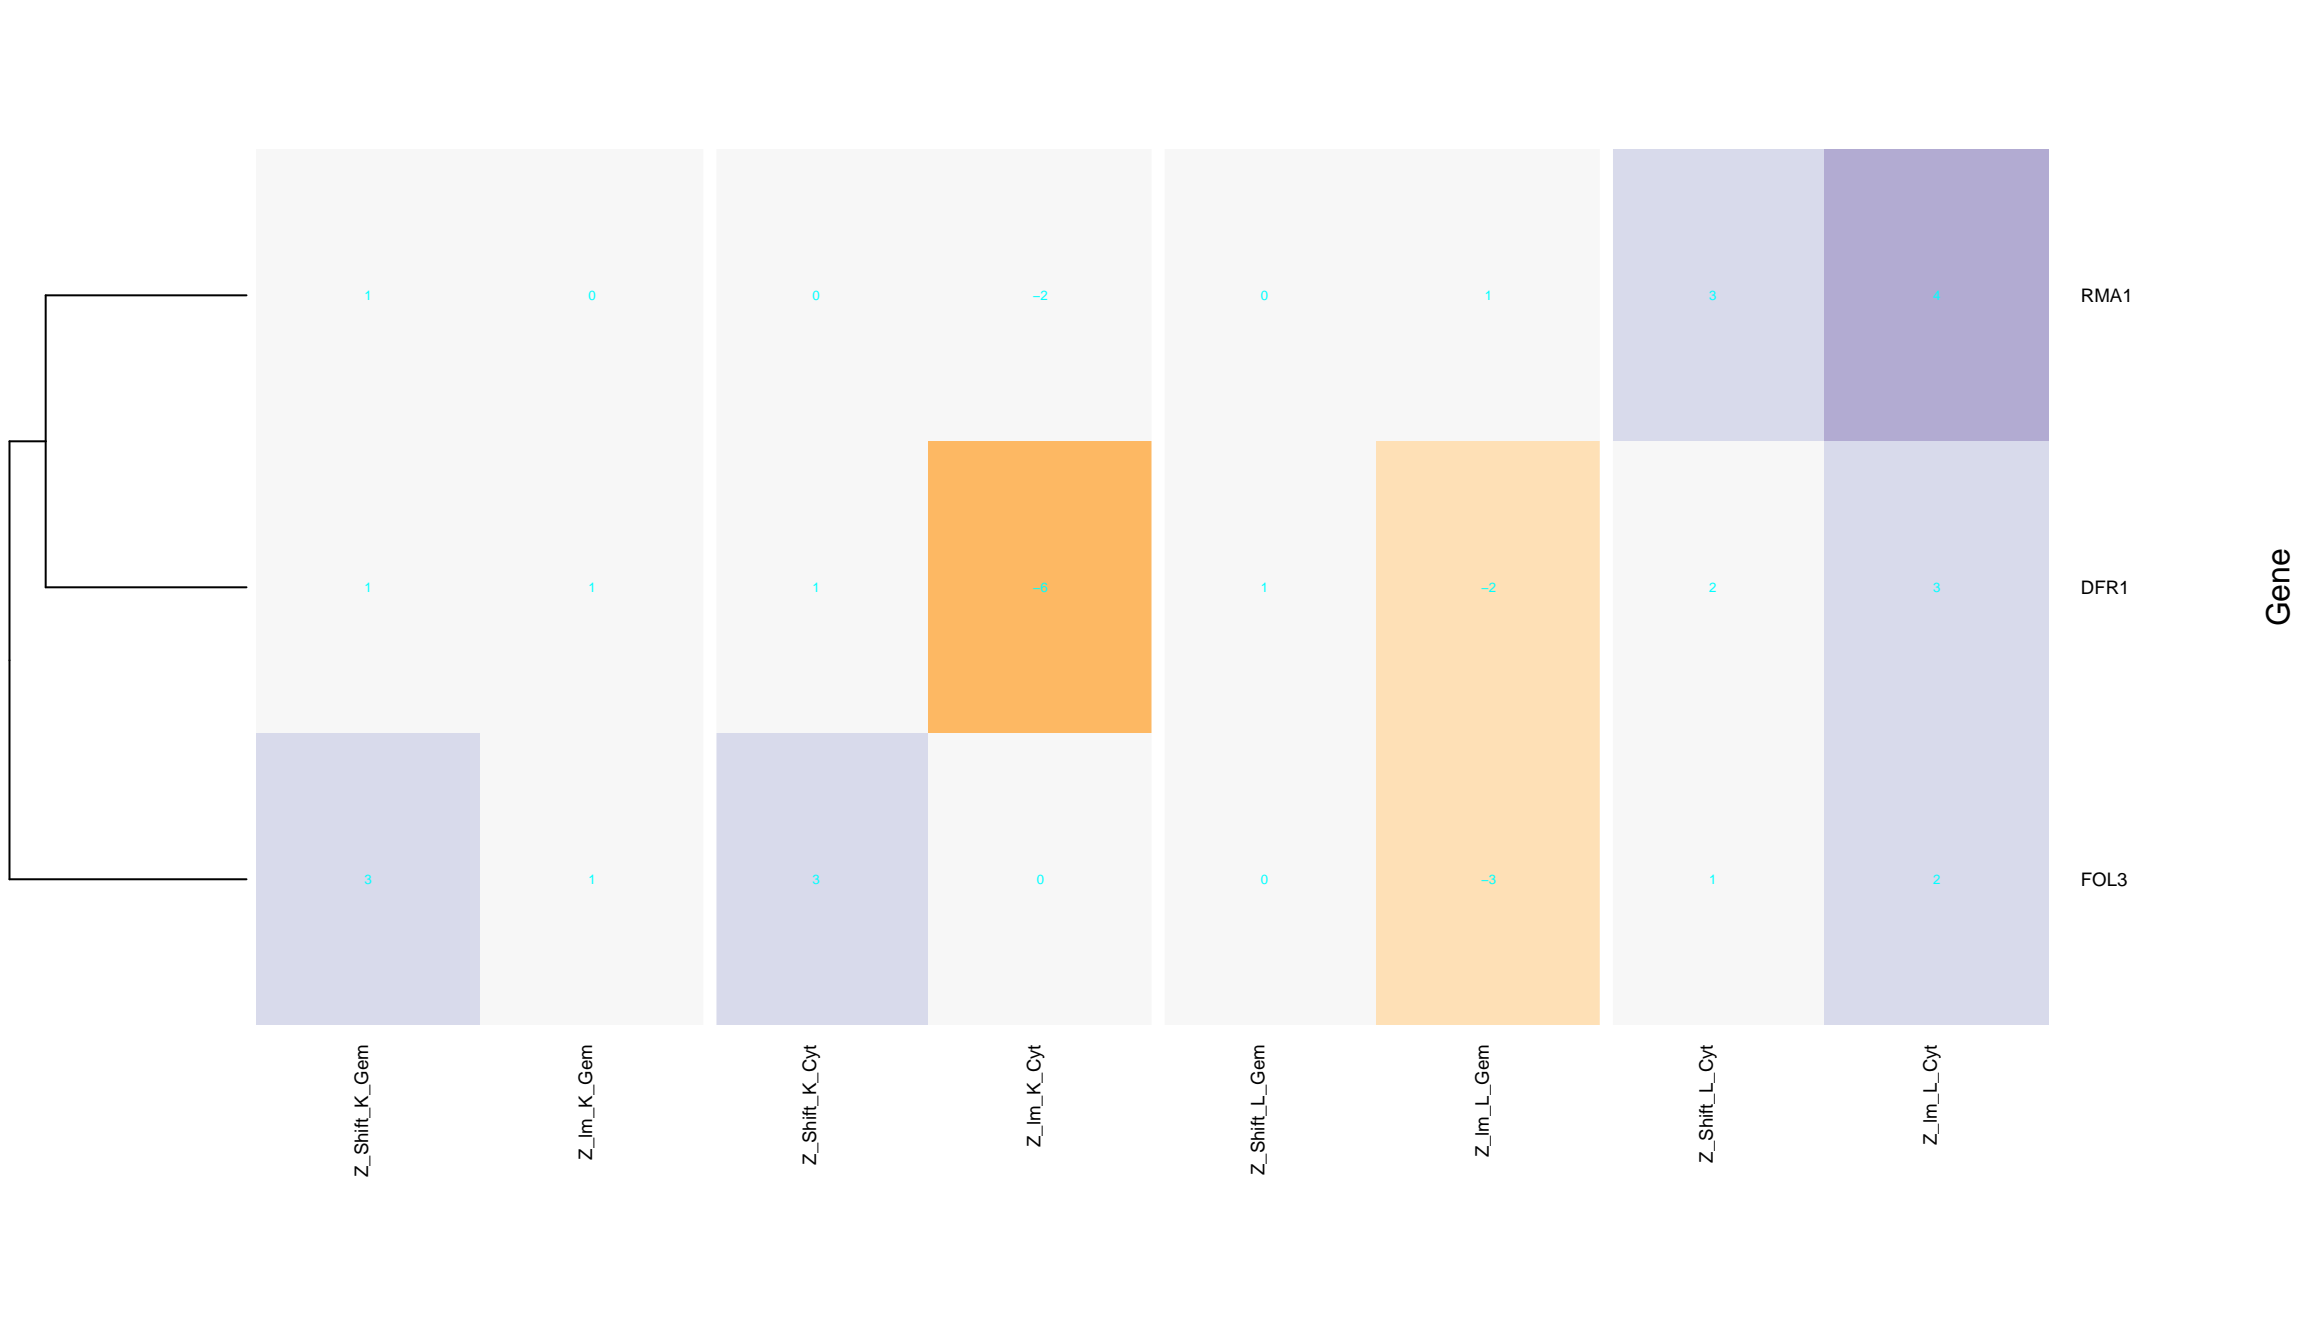

Supplement: s1 [file s1]

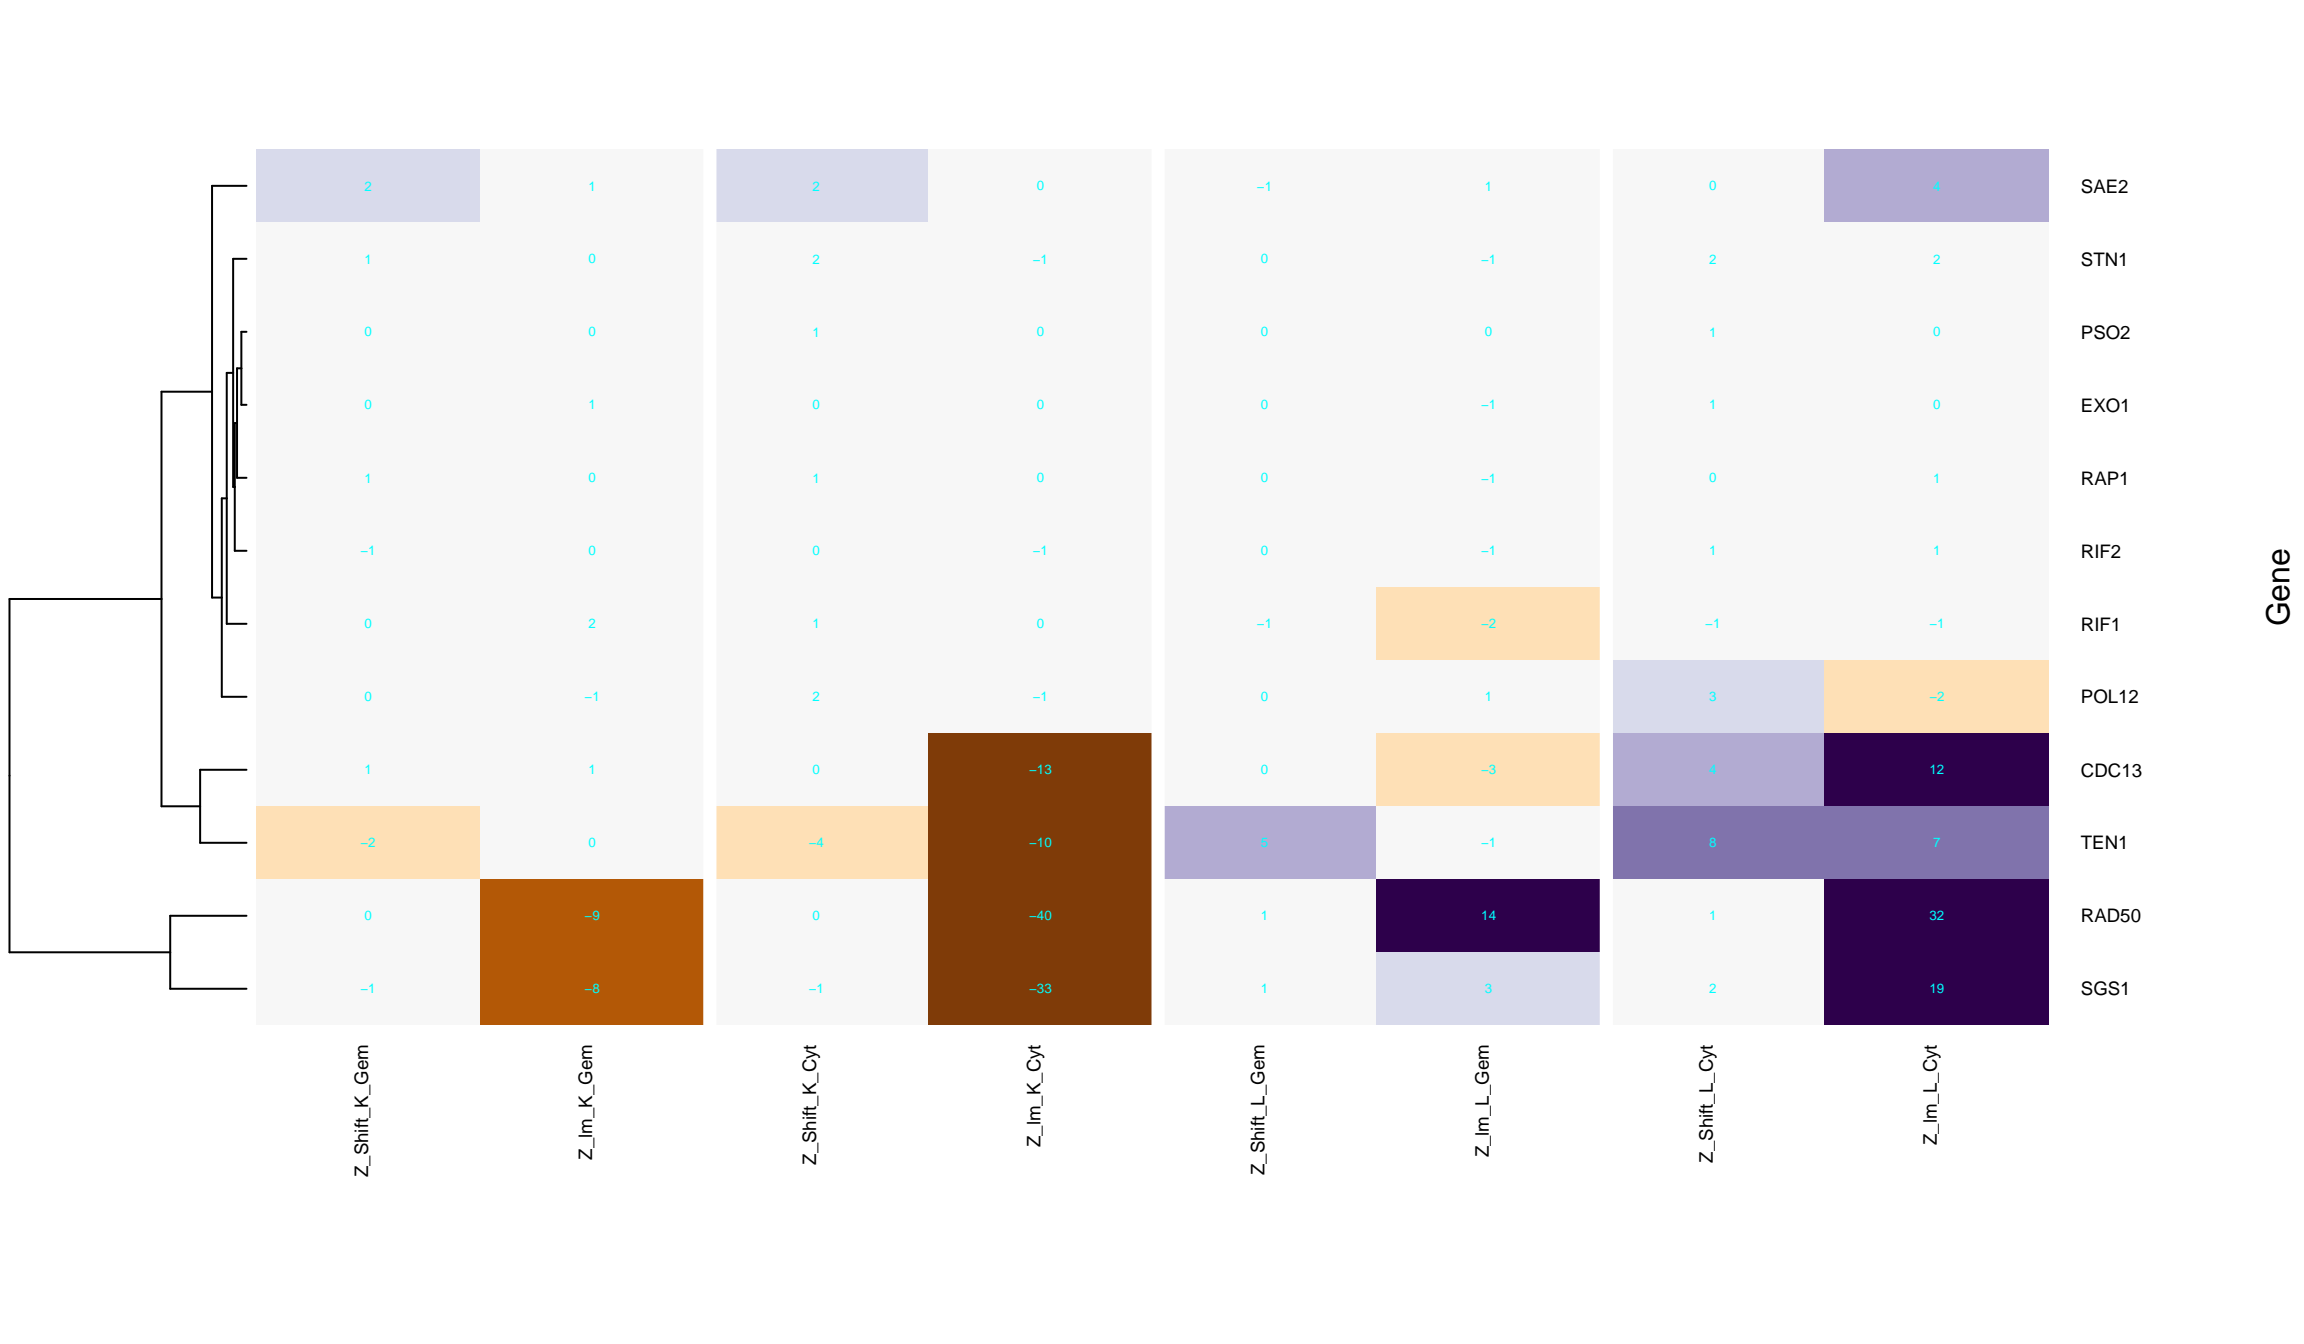

Supplement: s1 [file s1]

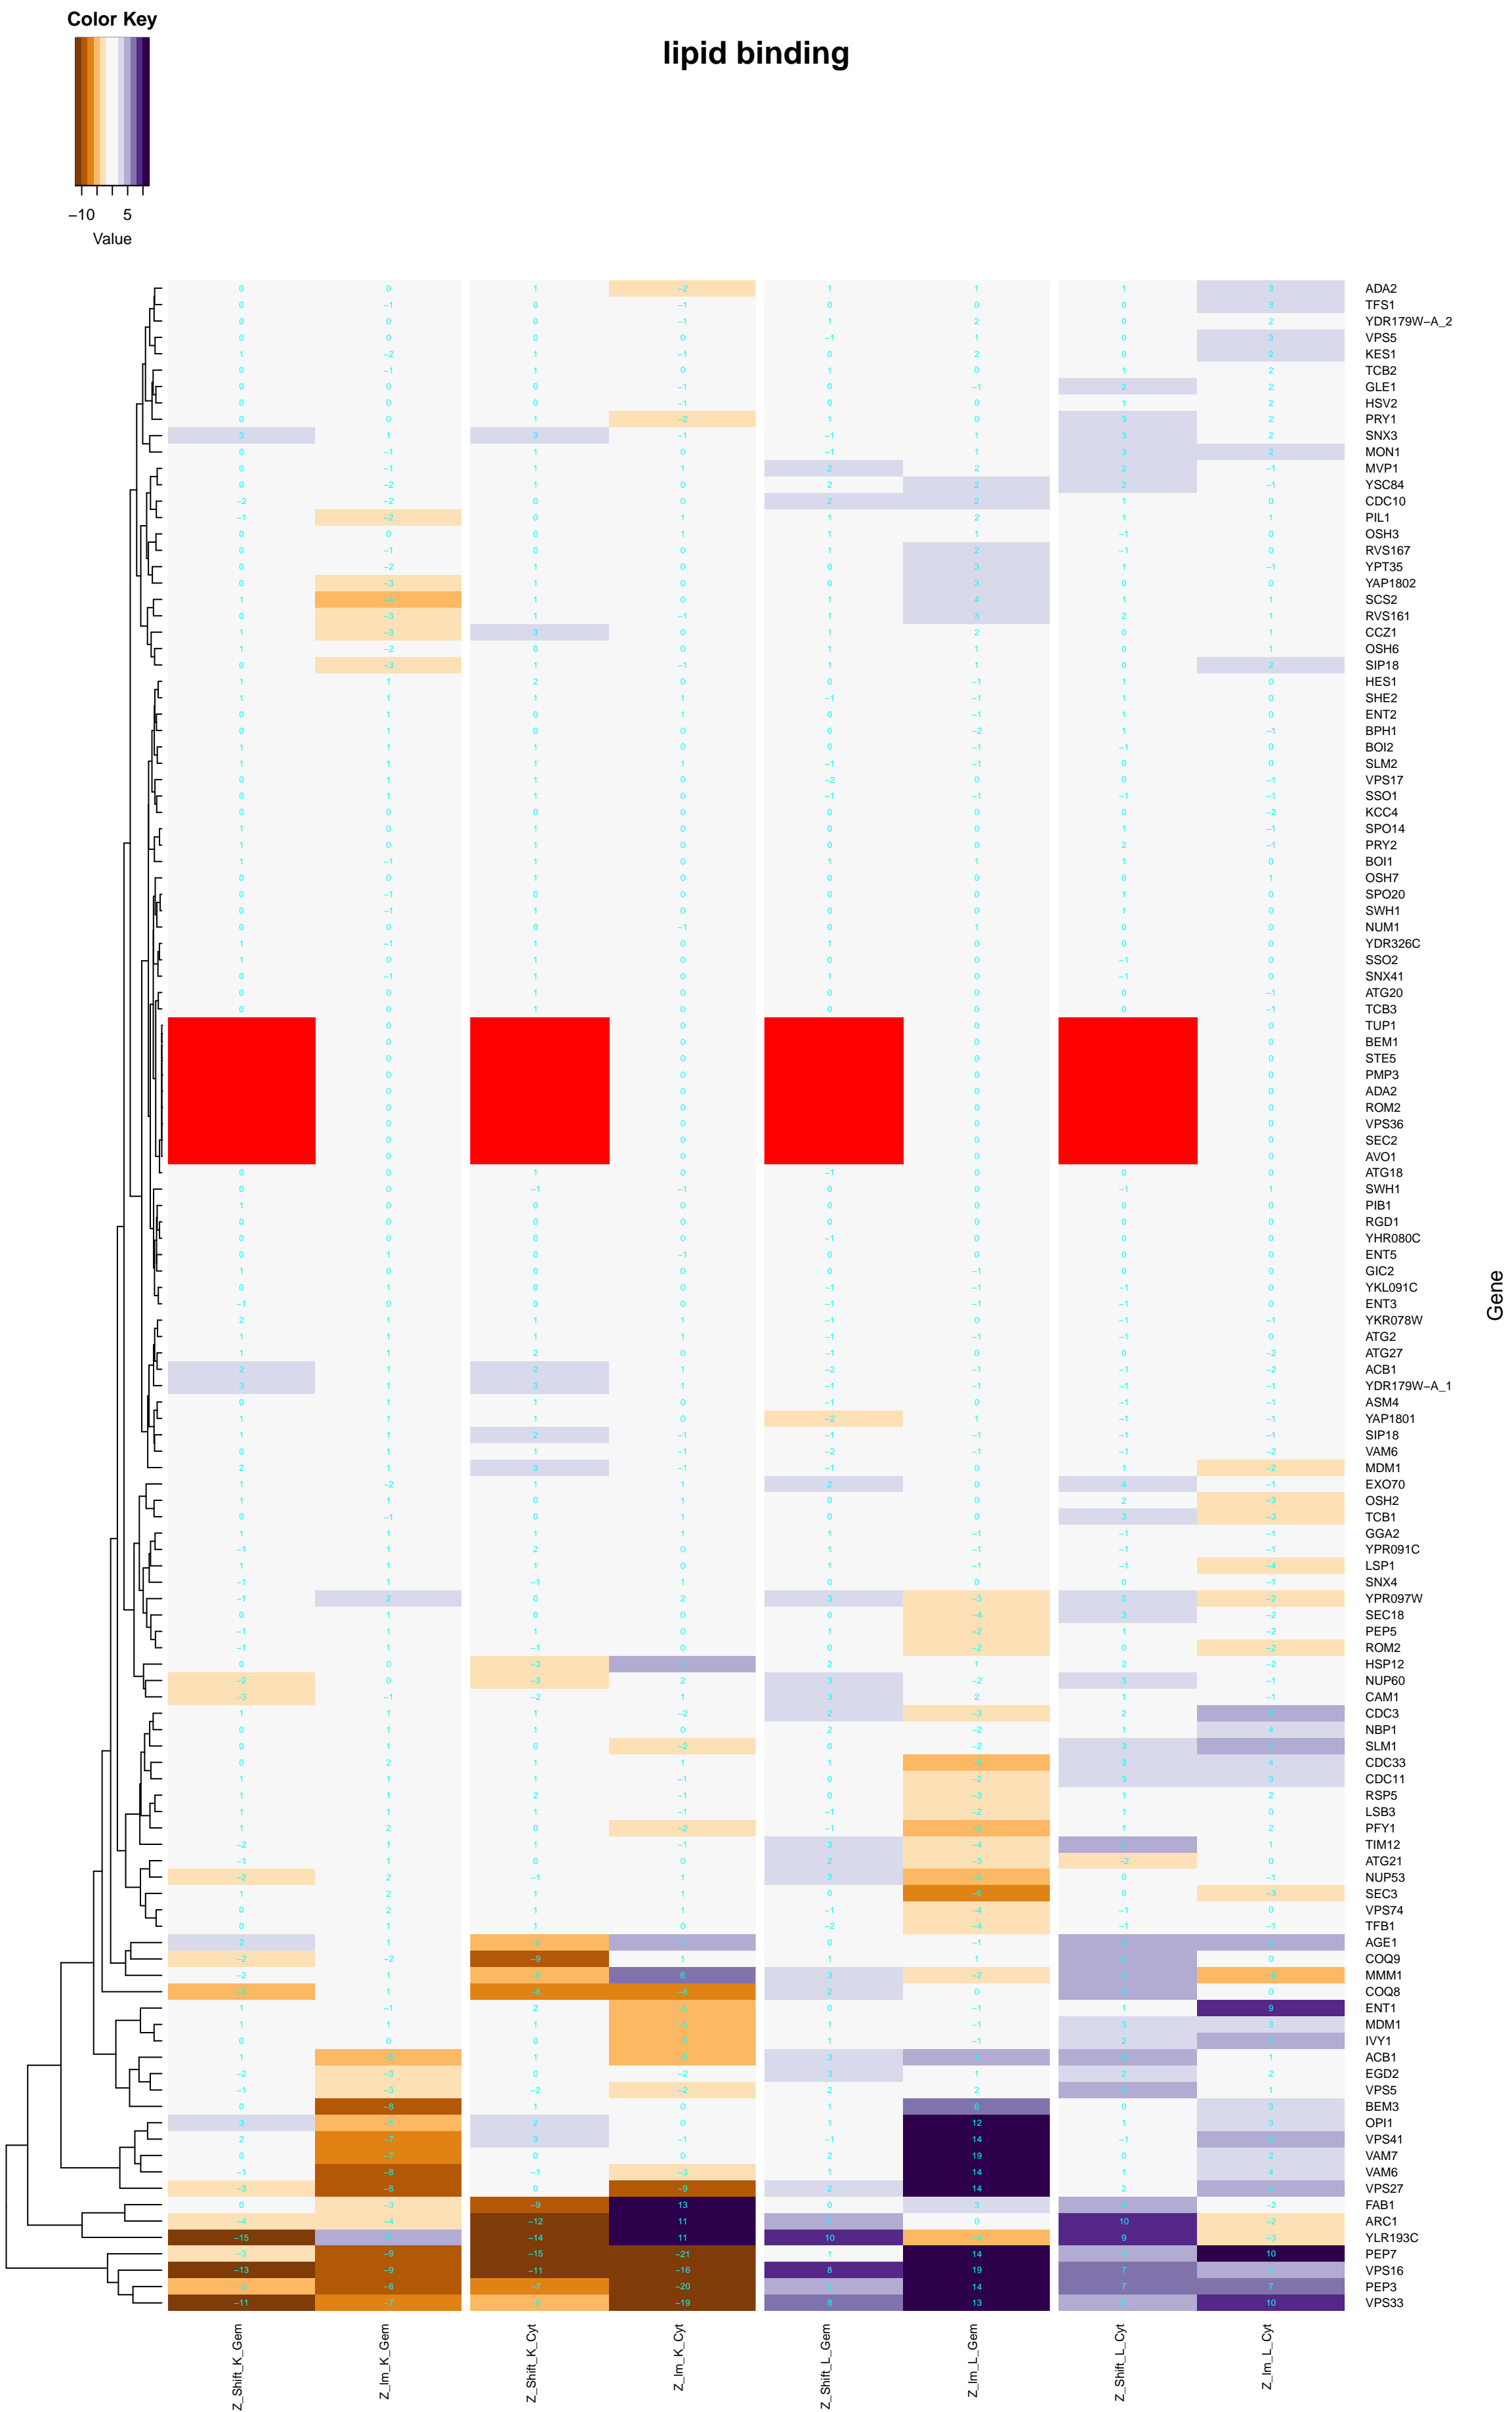

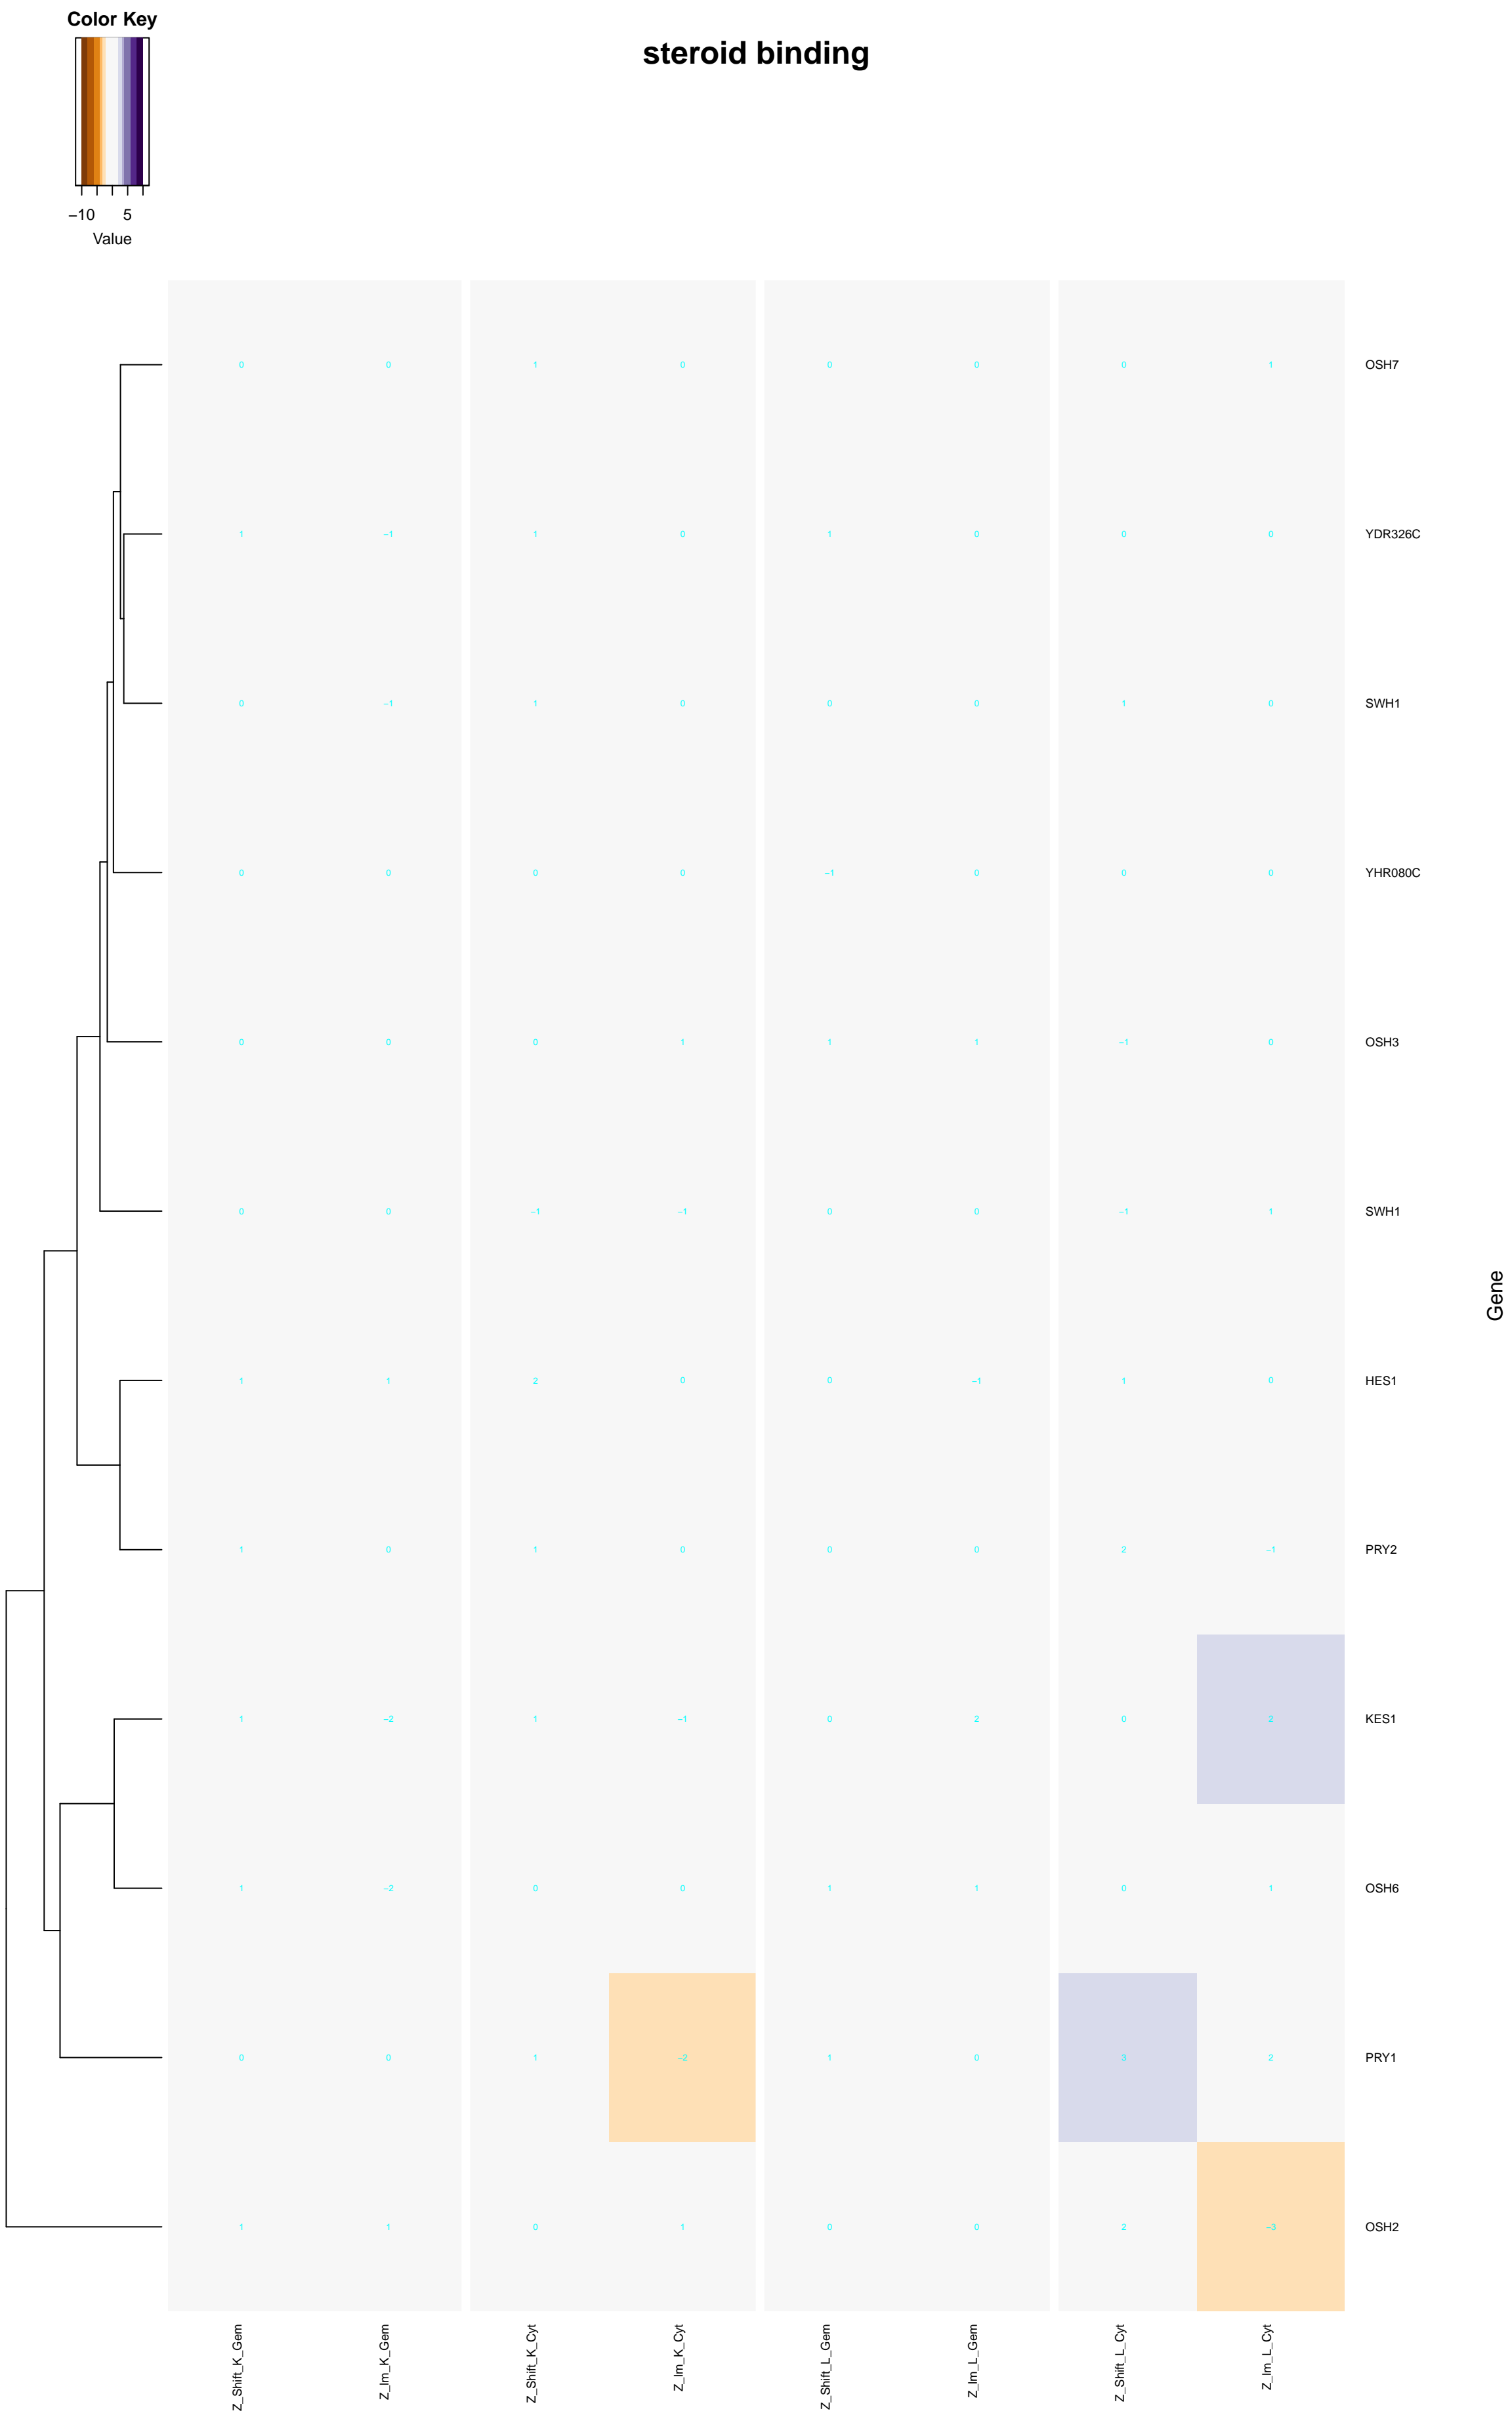

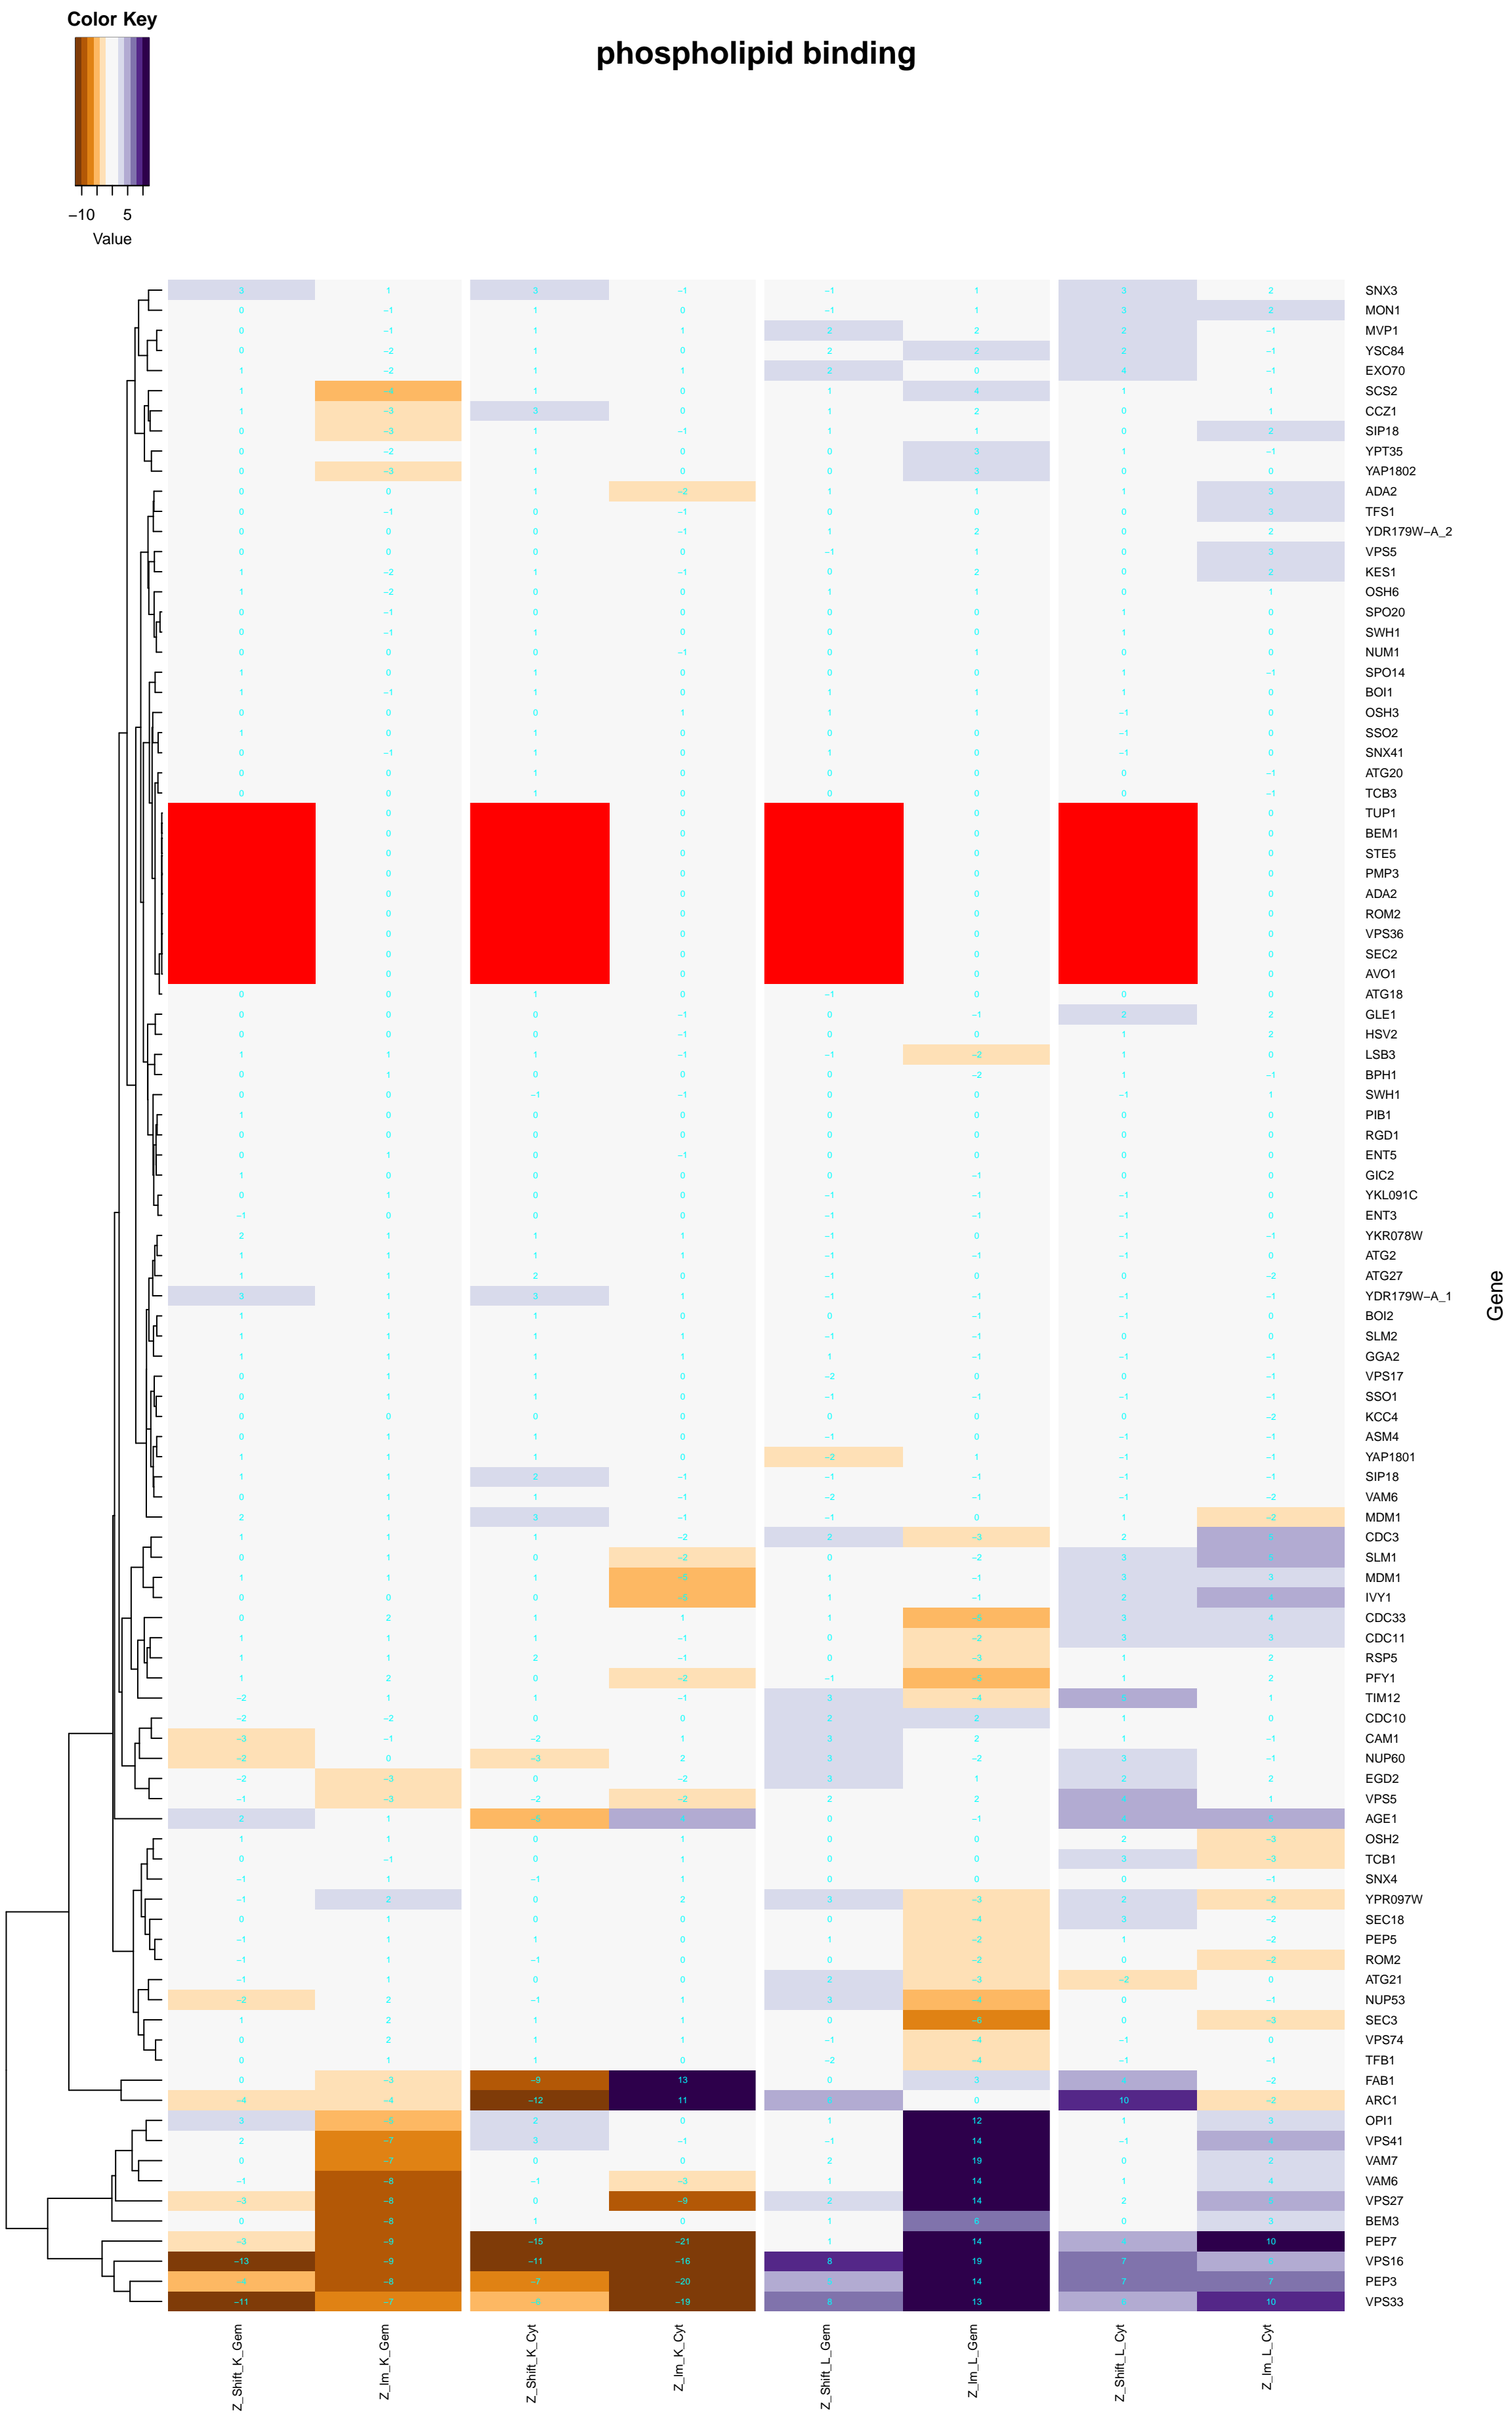

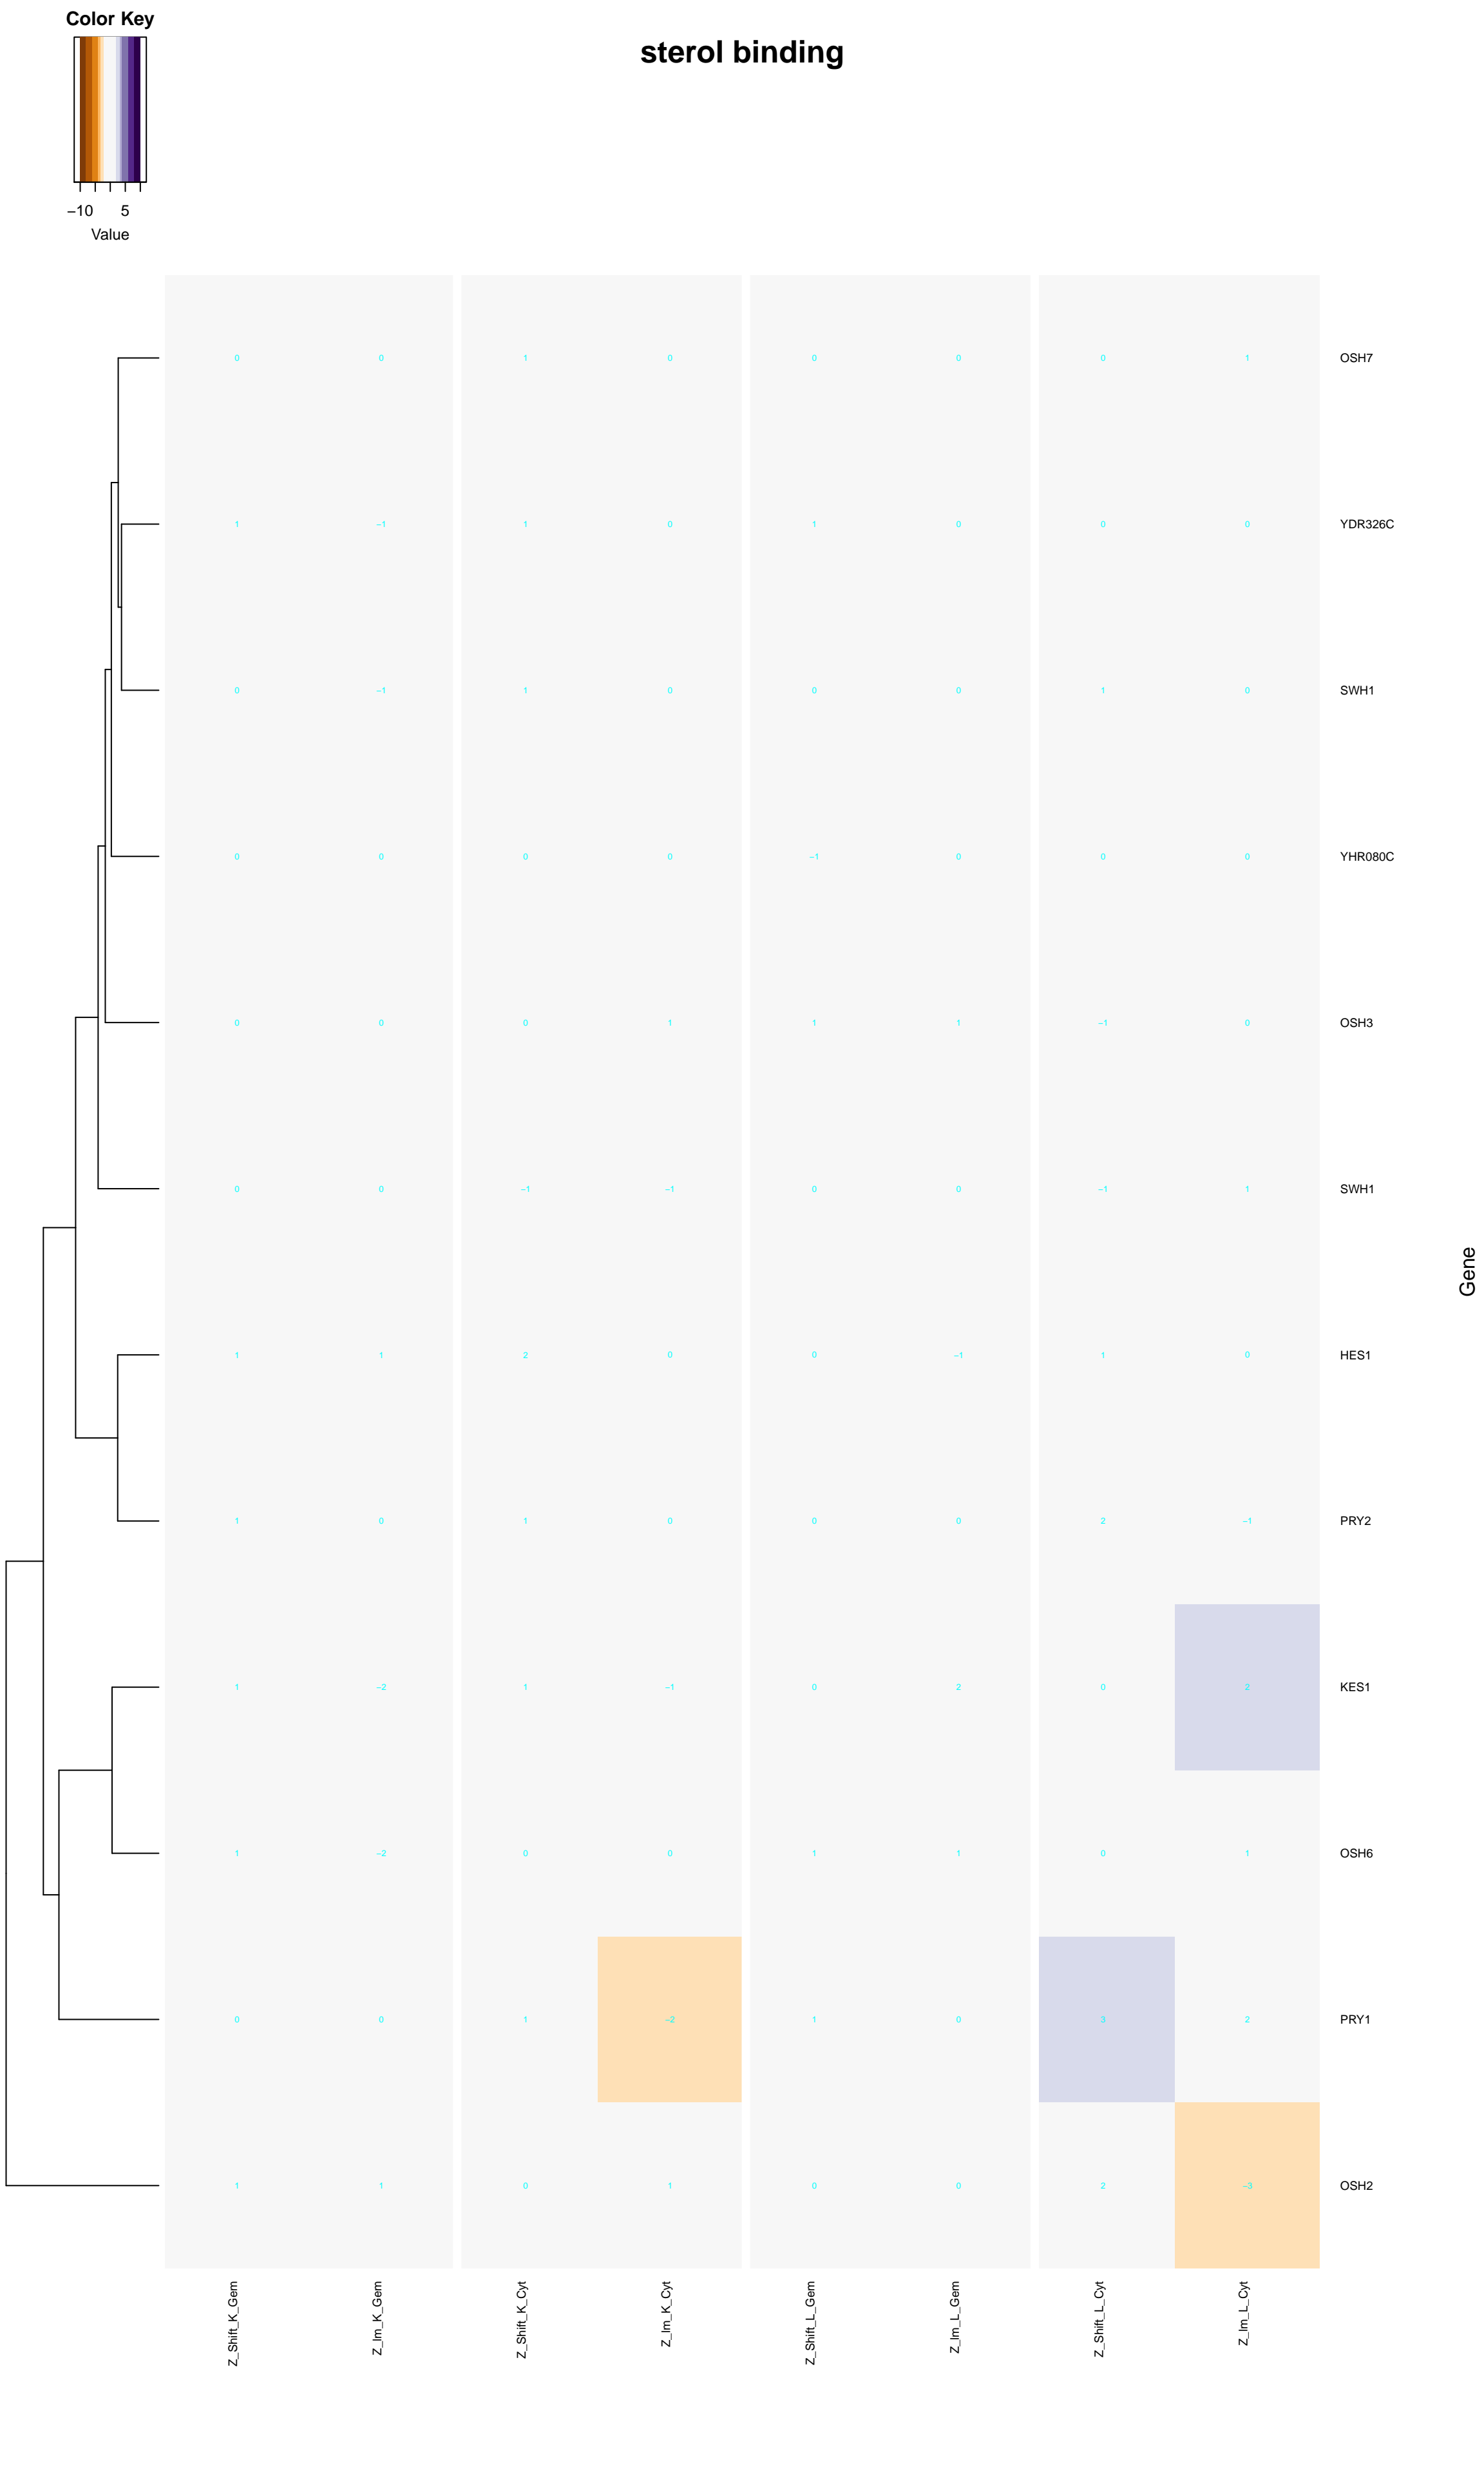

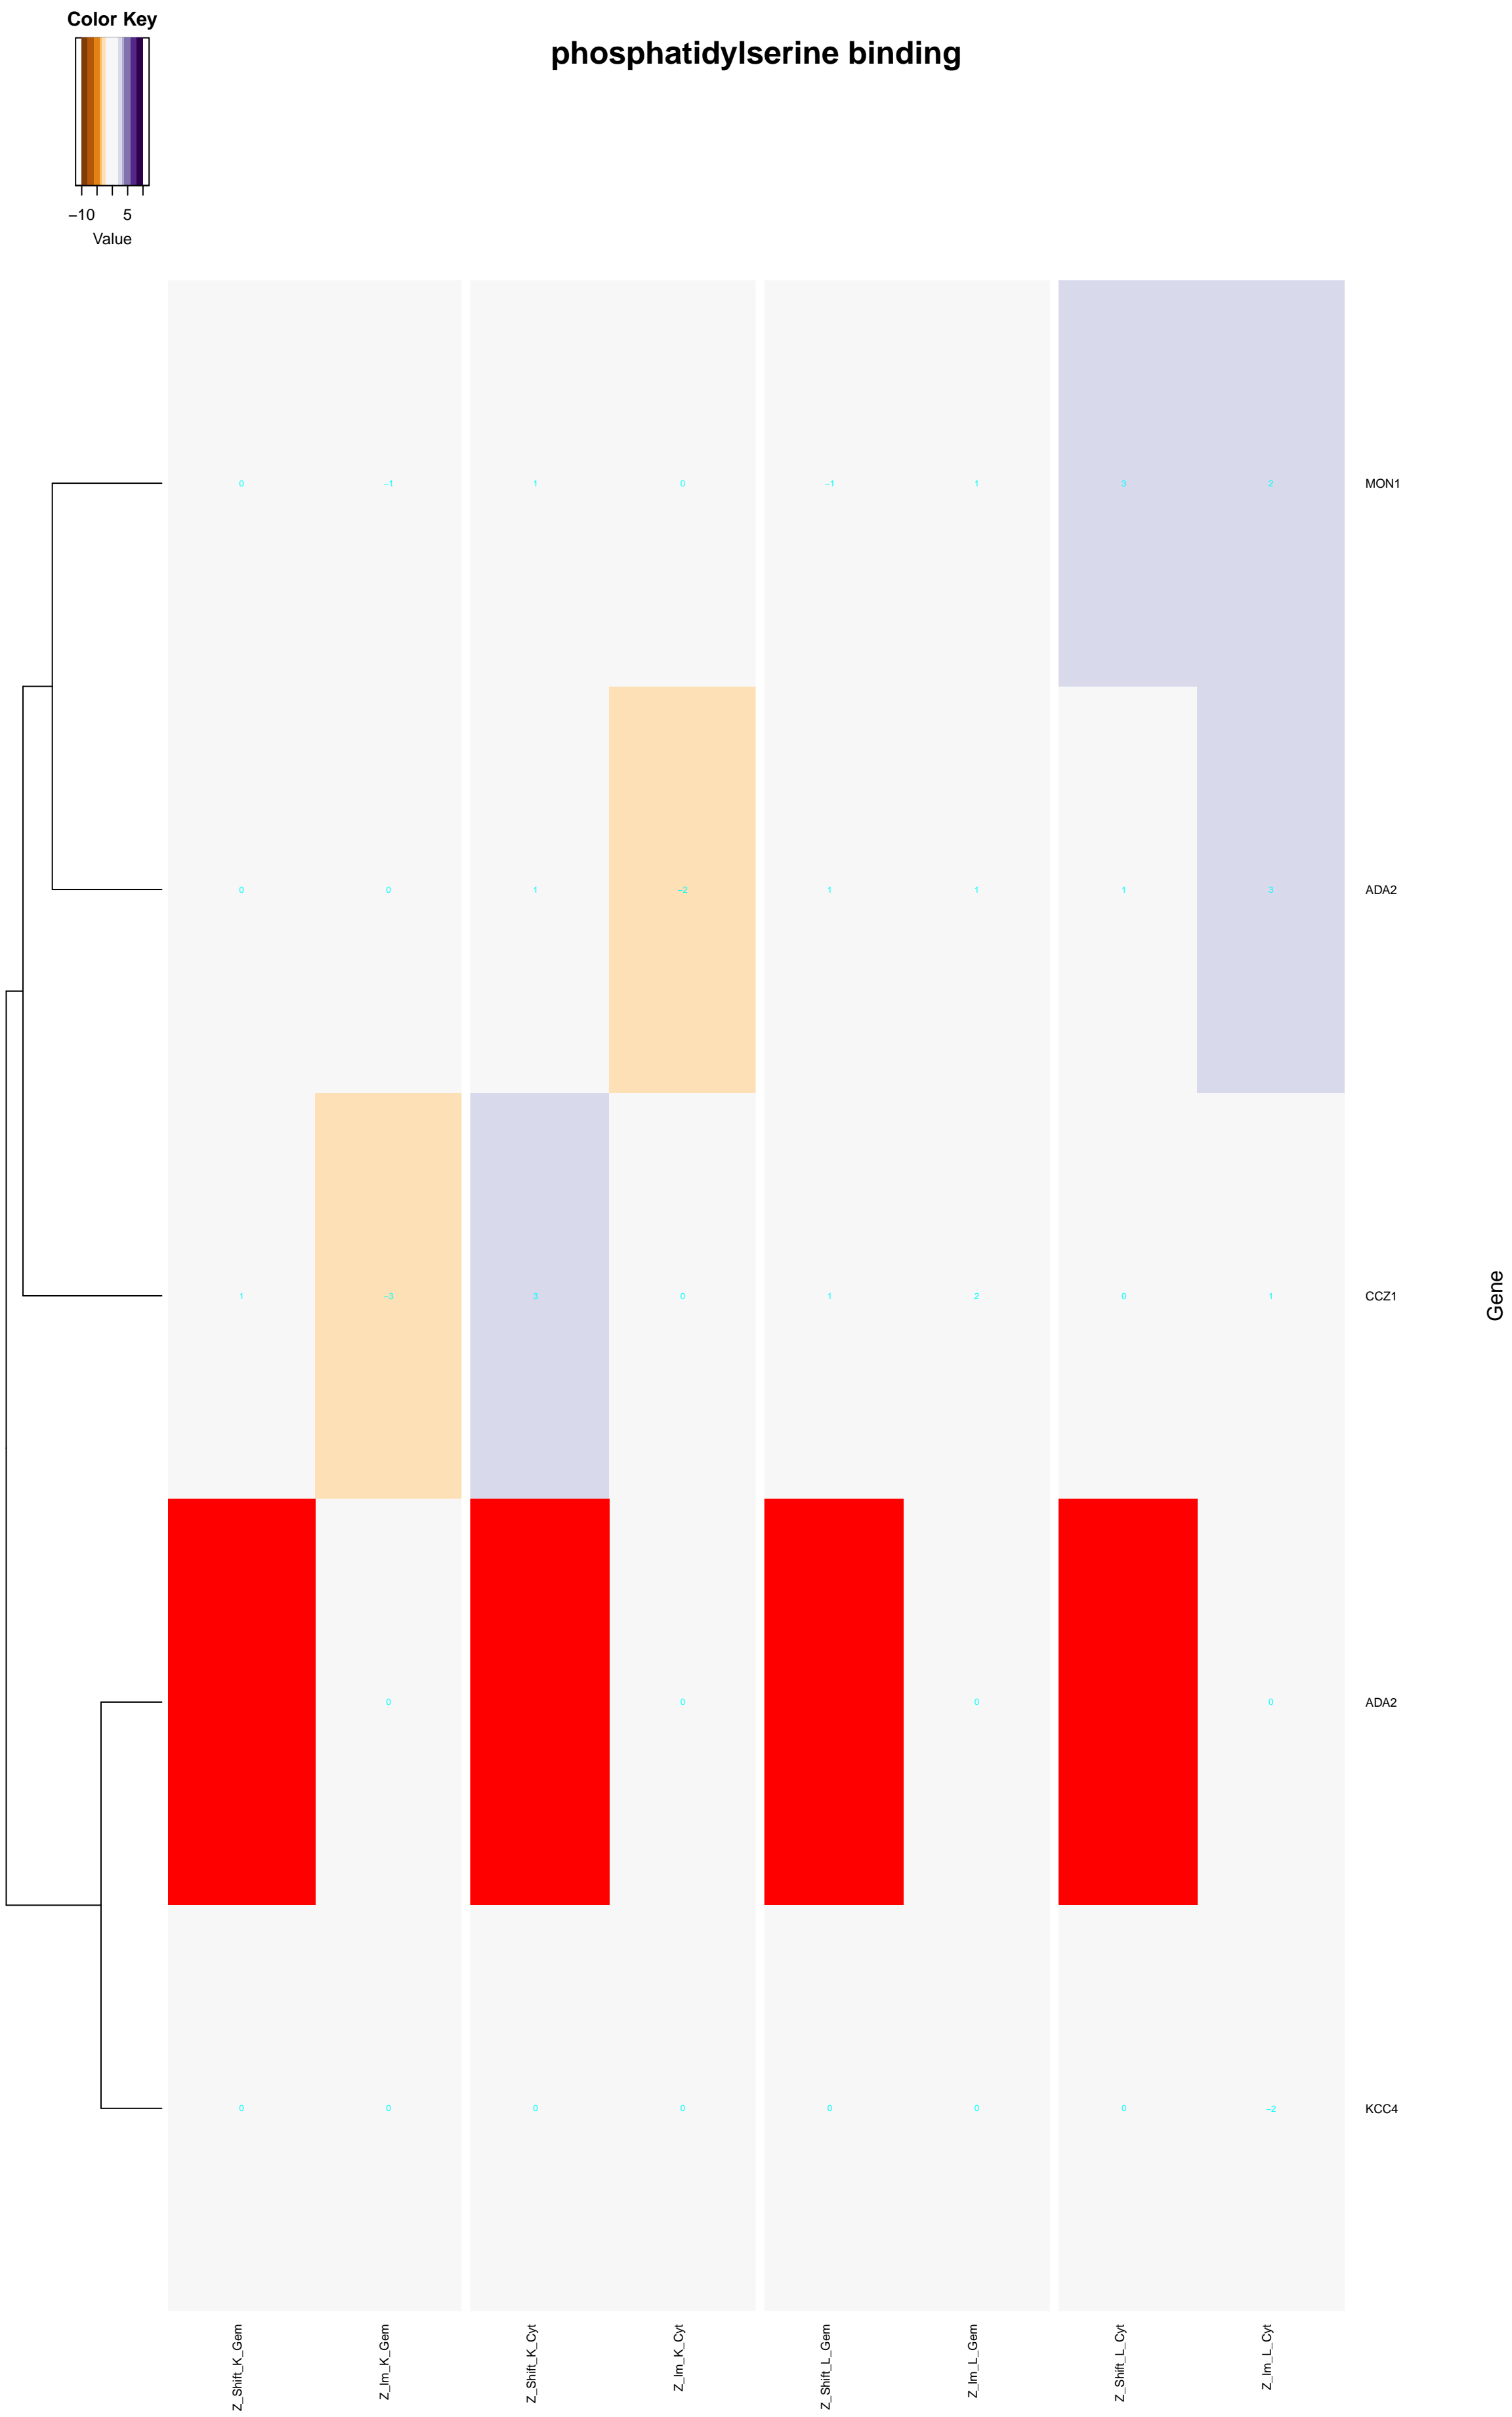

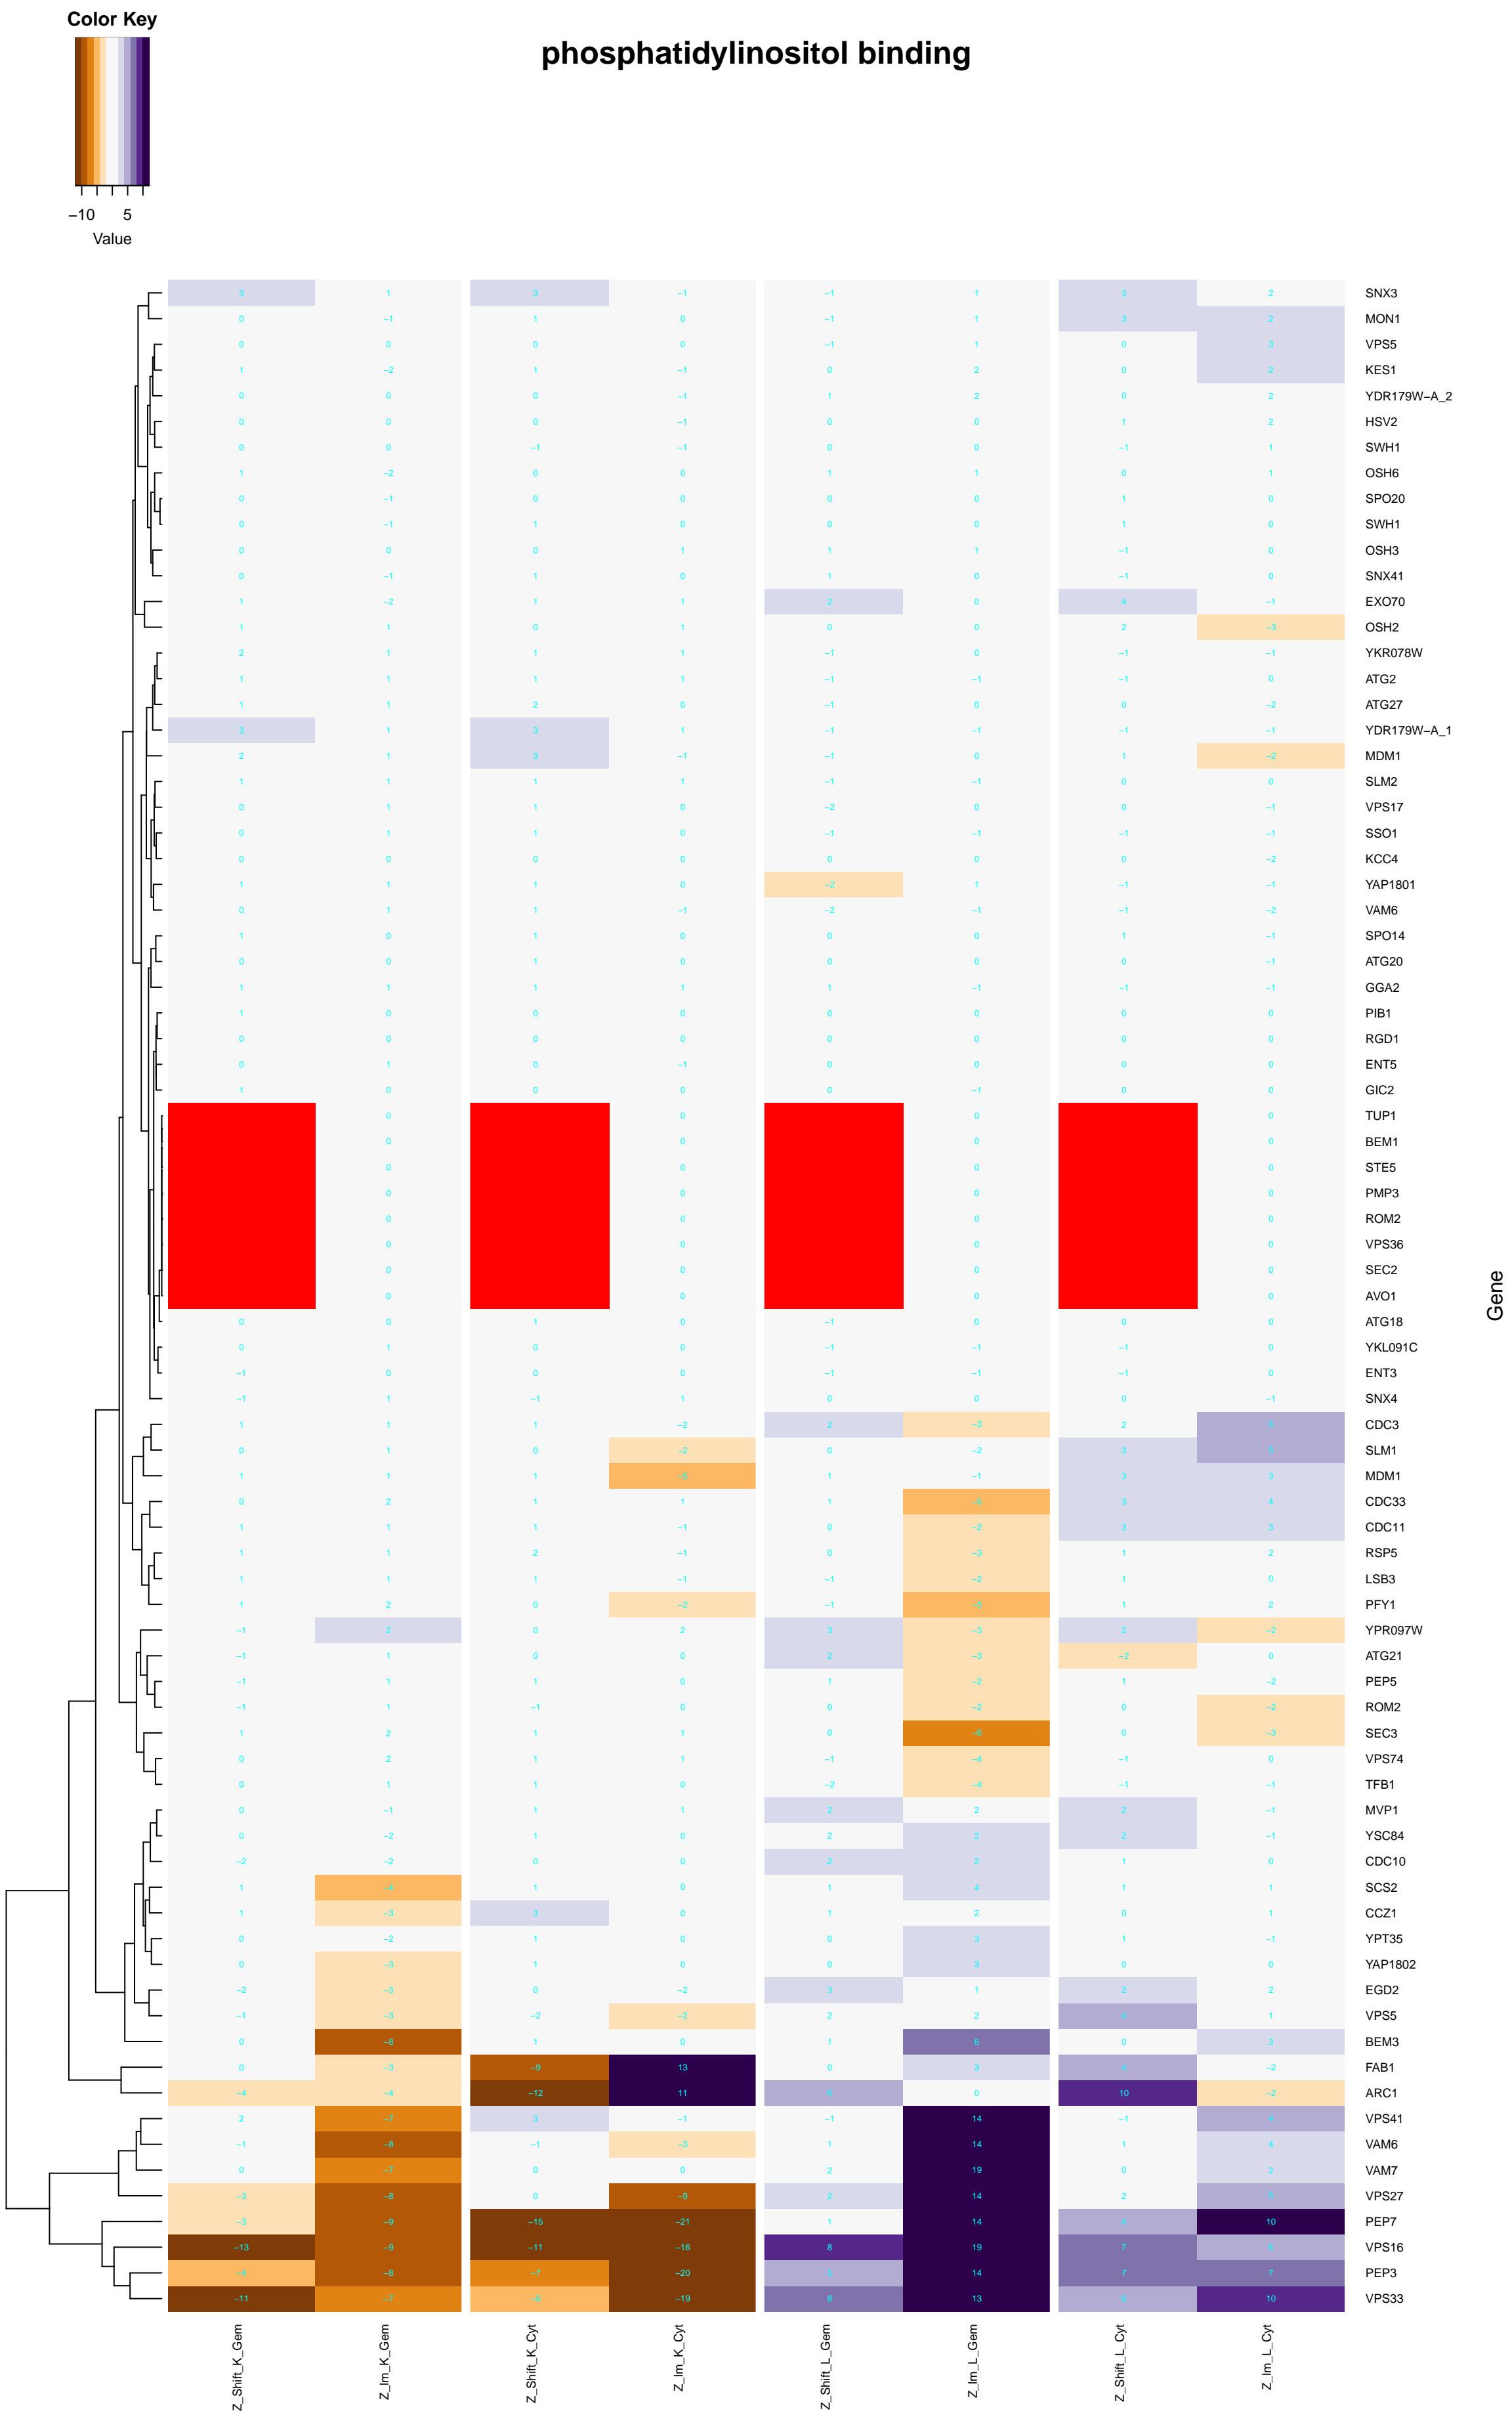

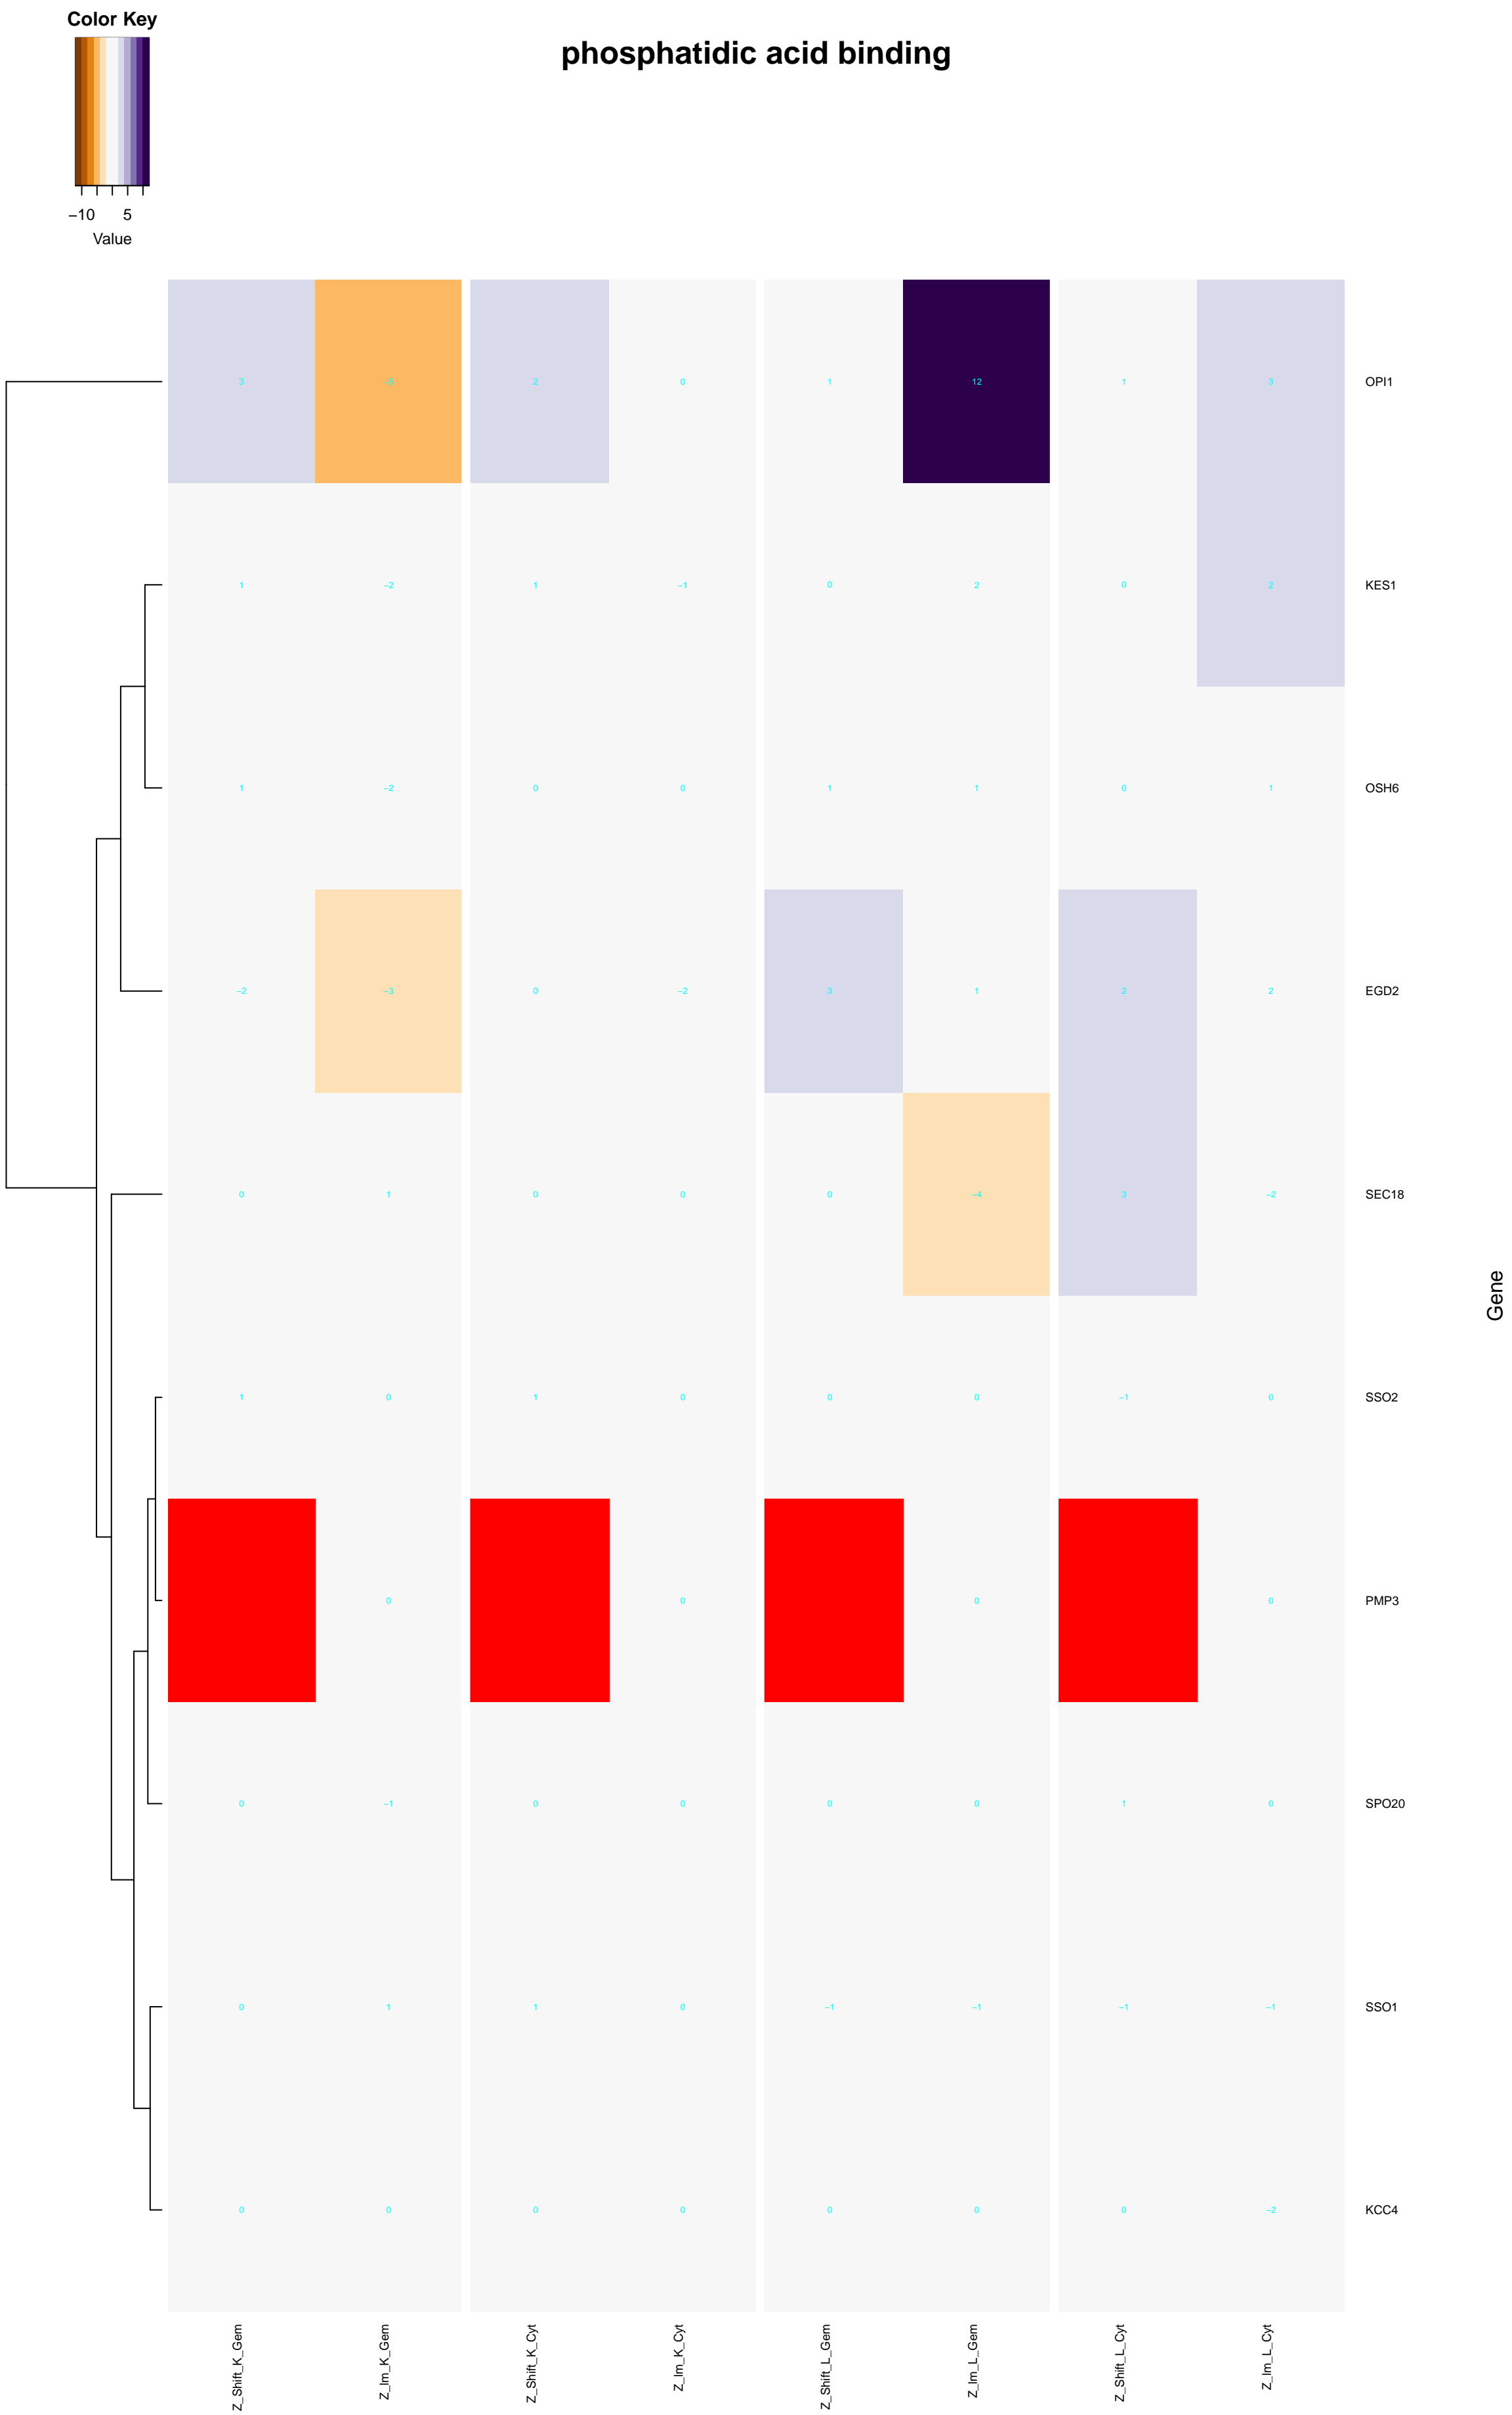

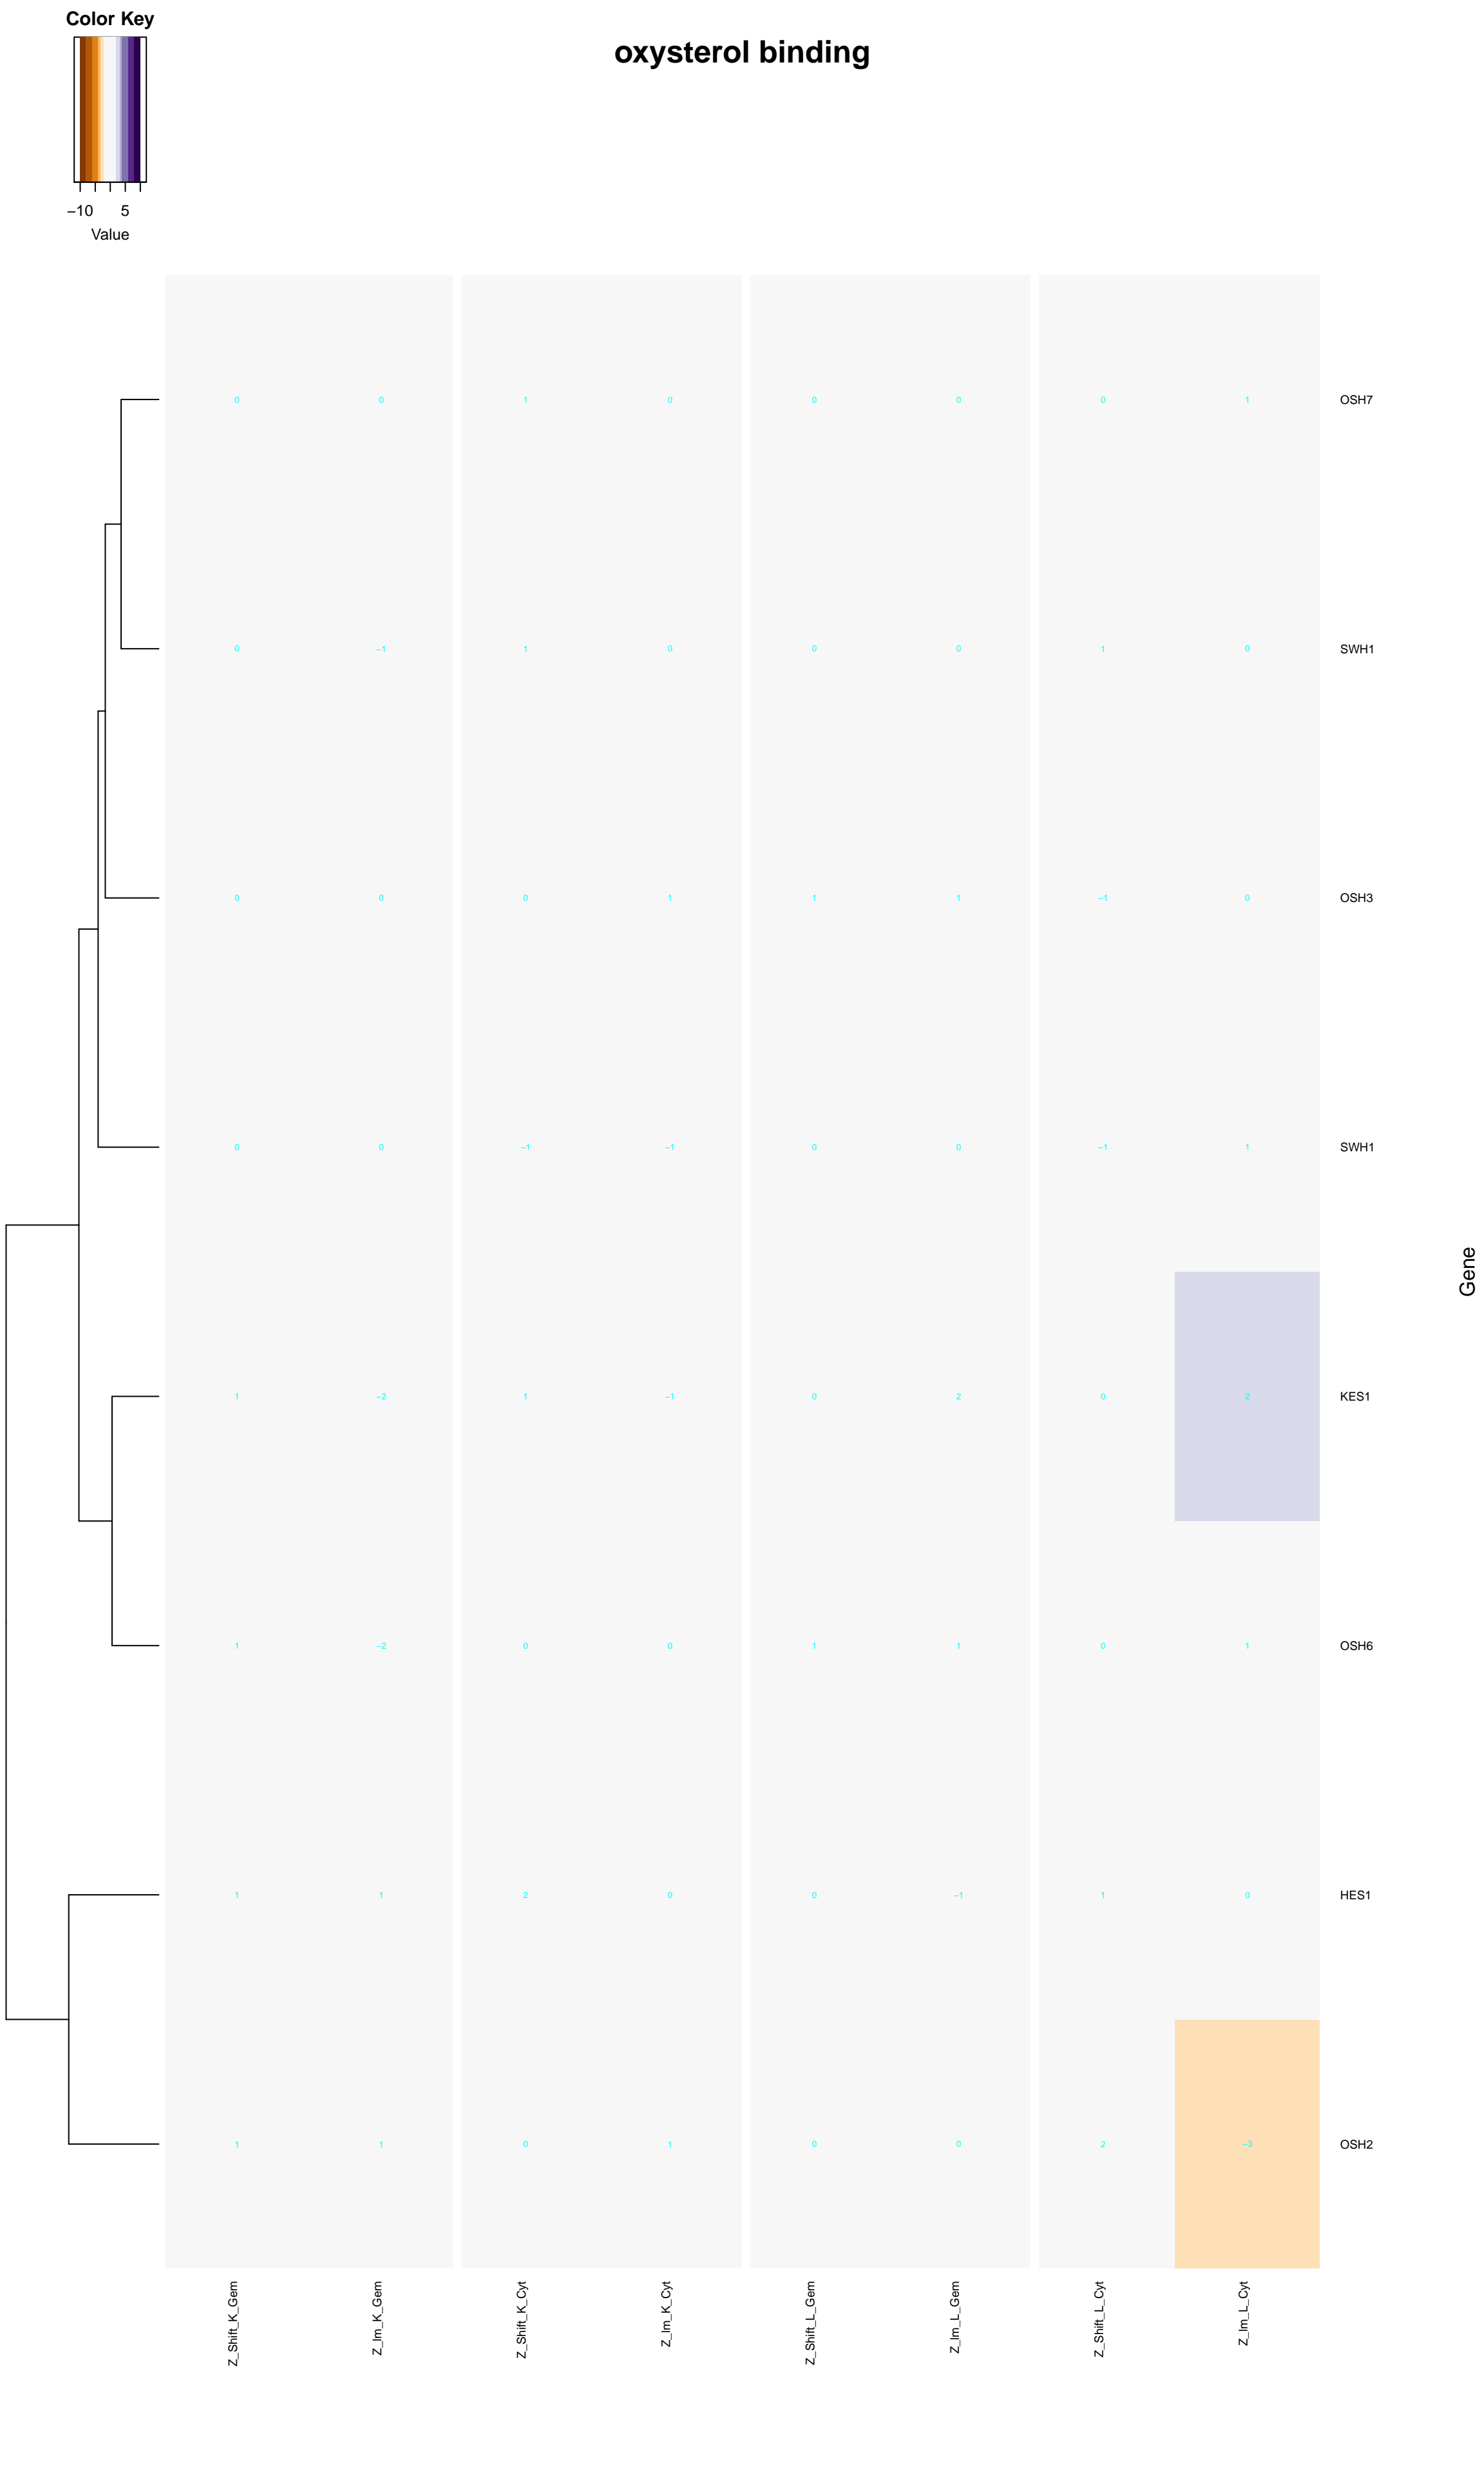

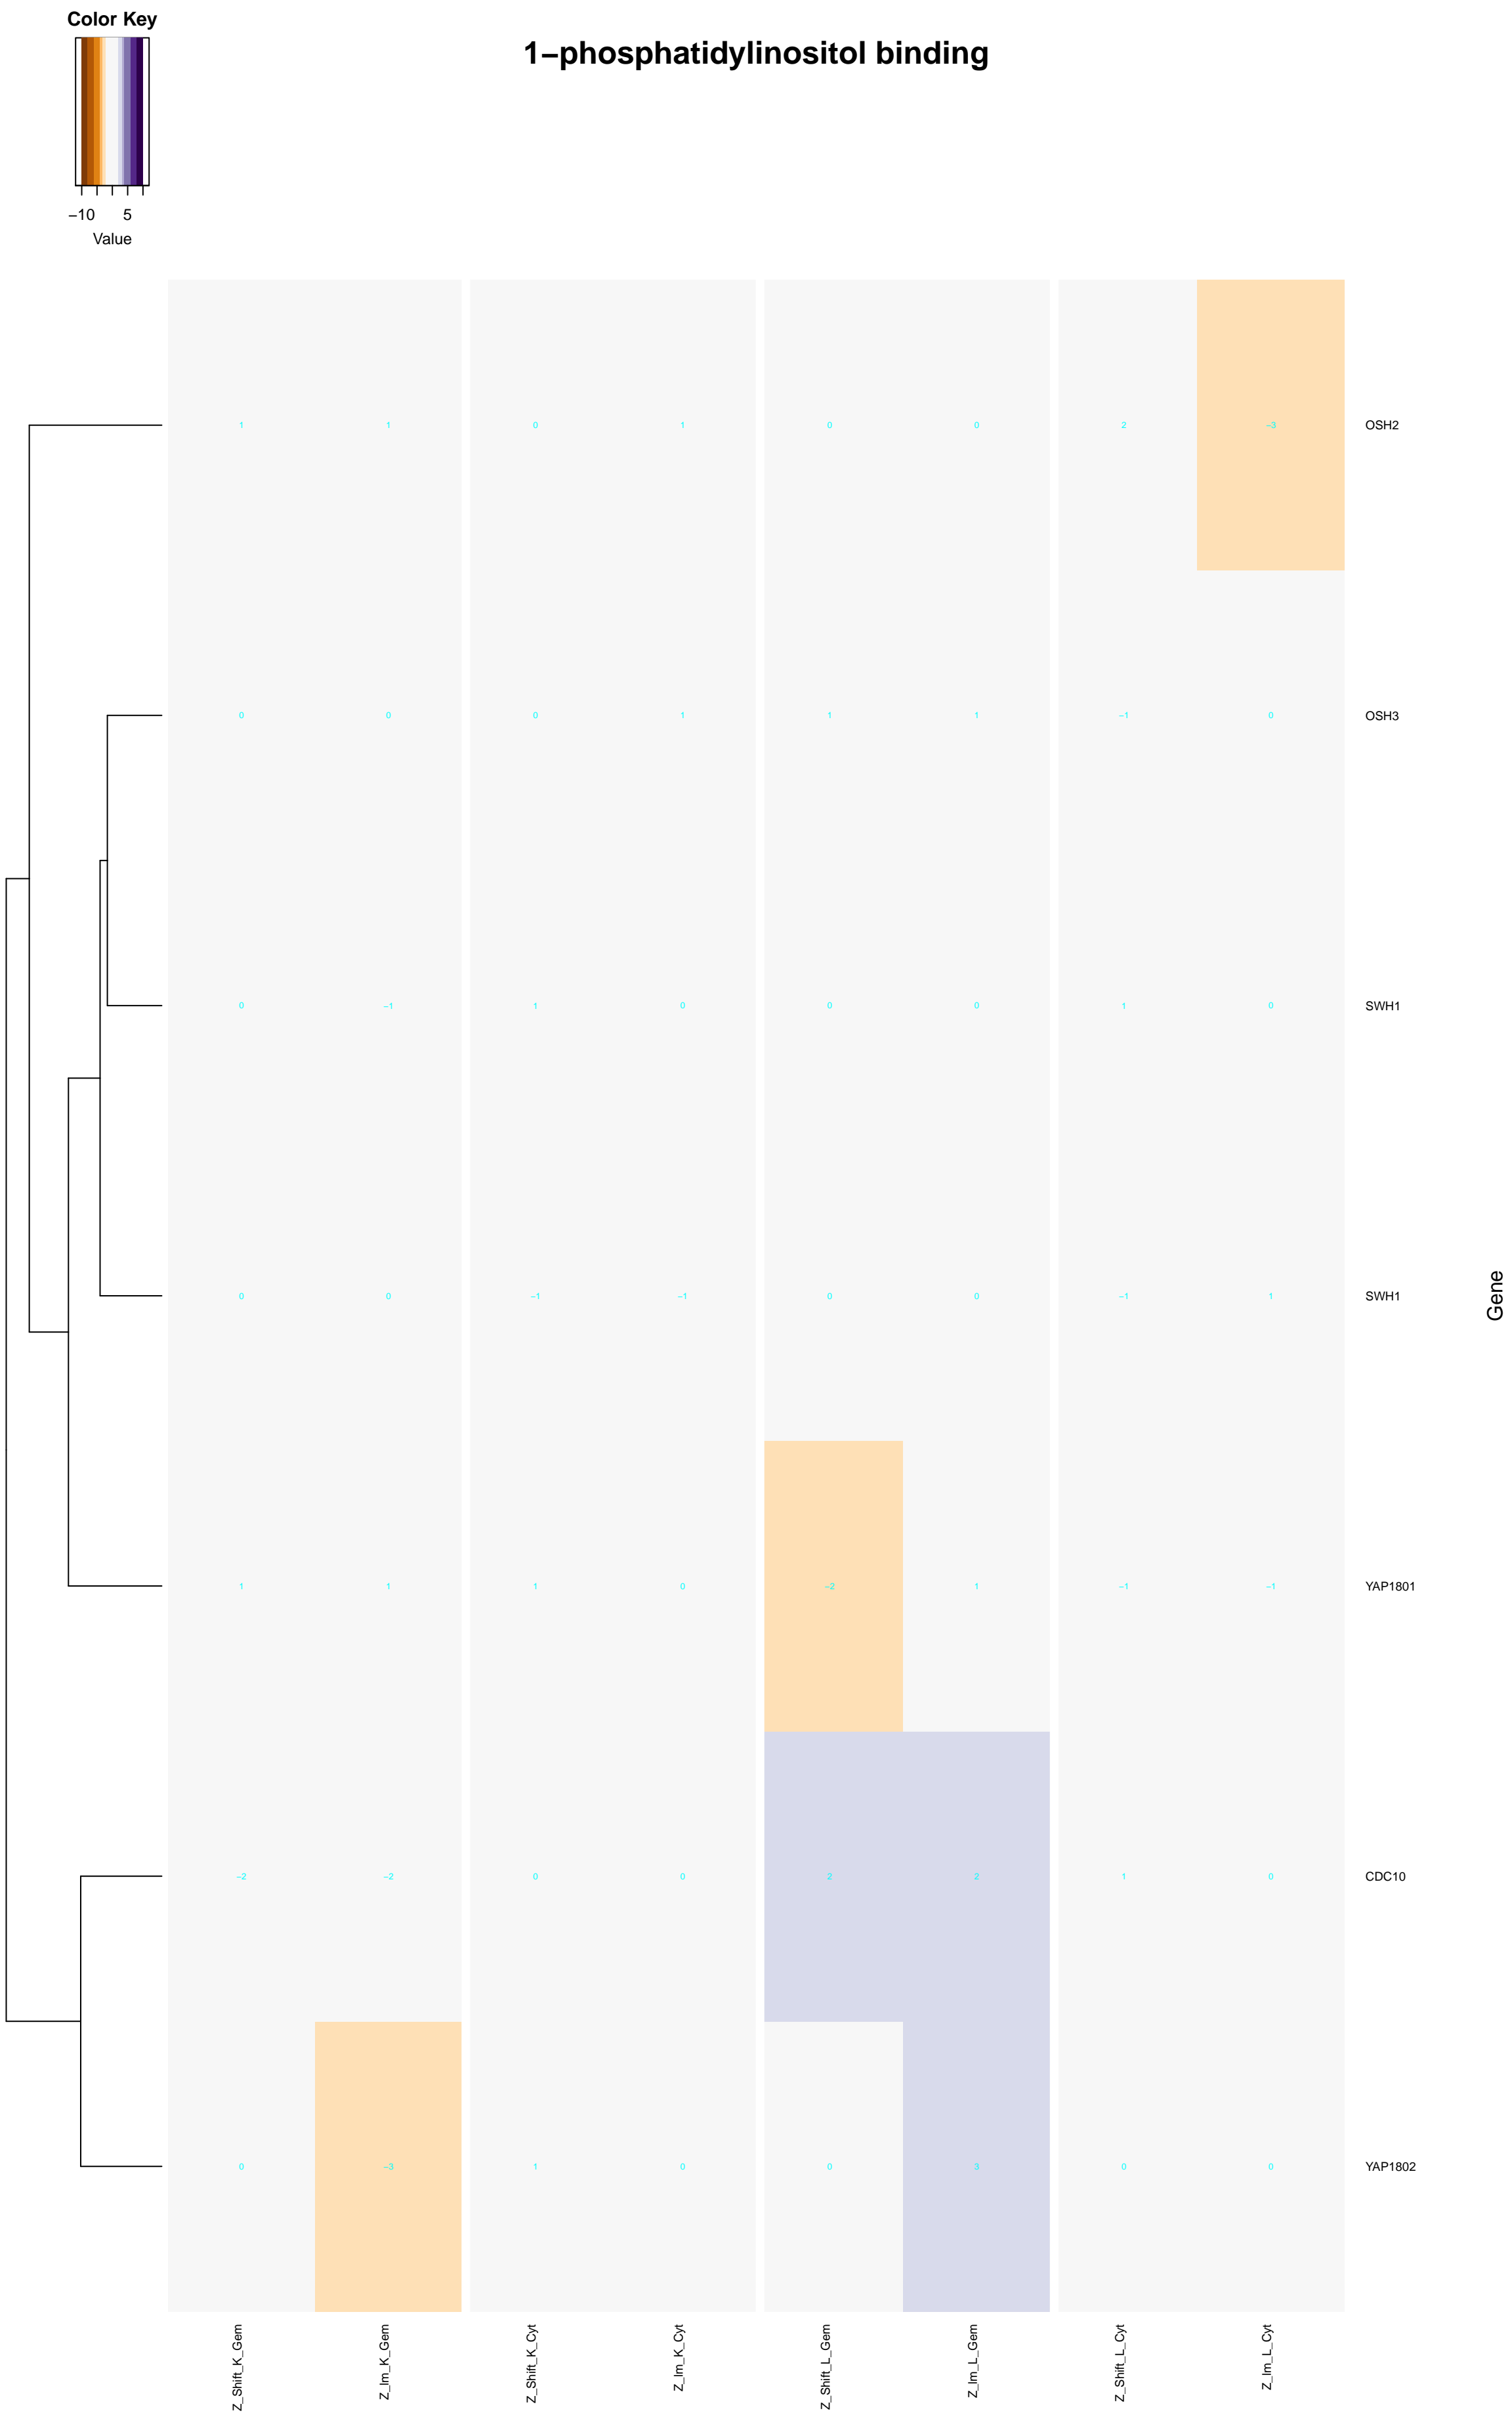

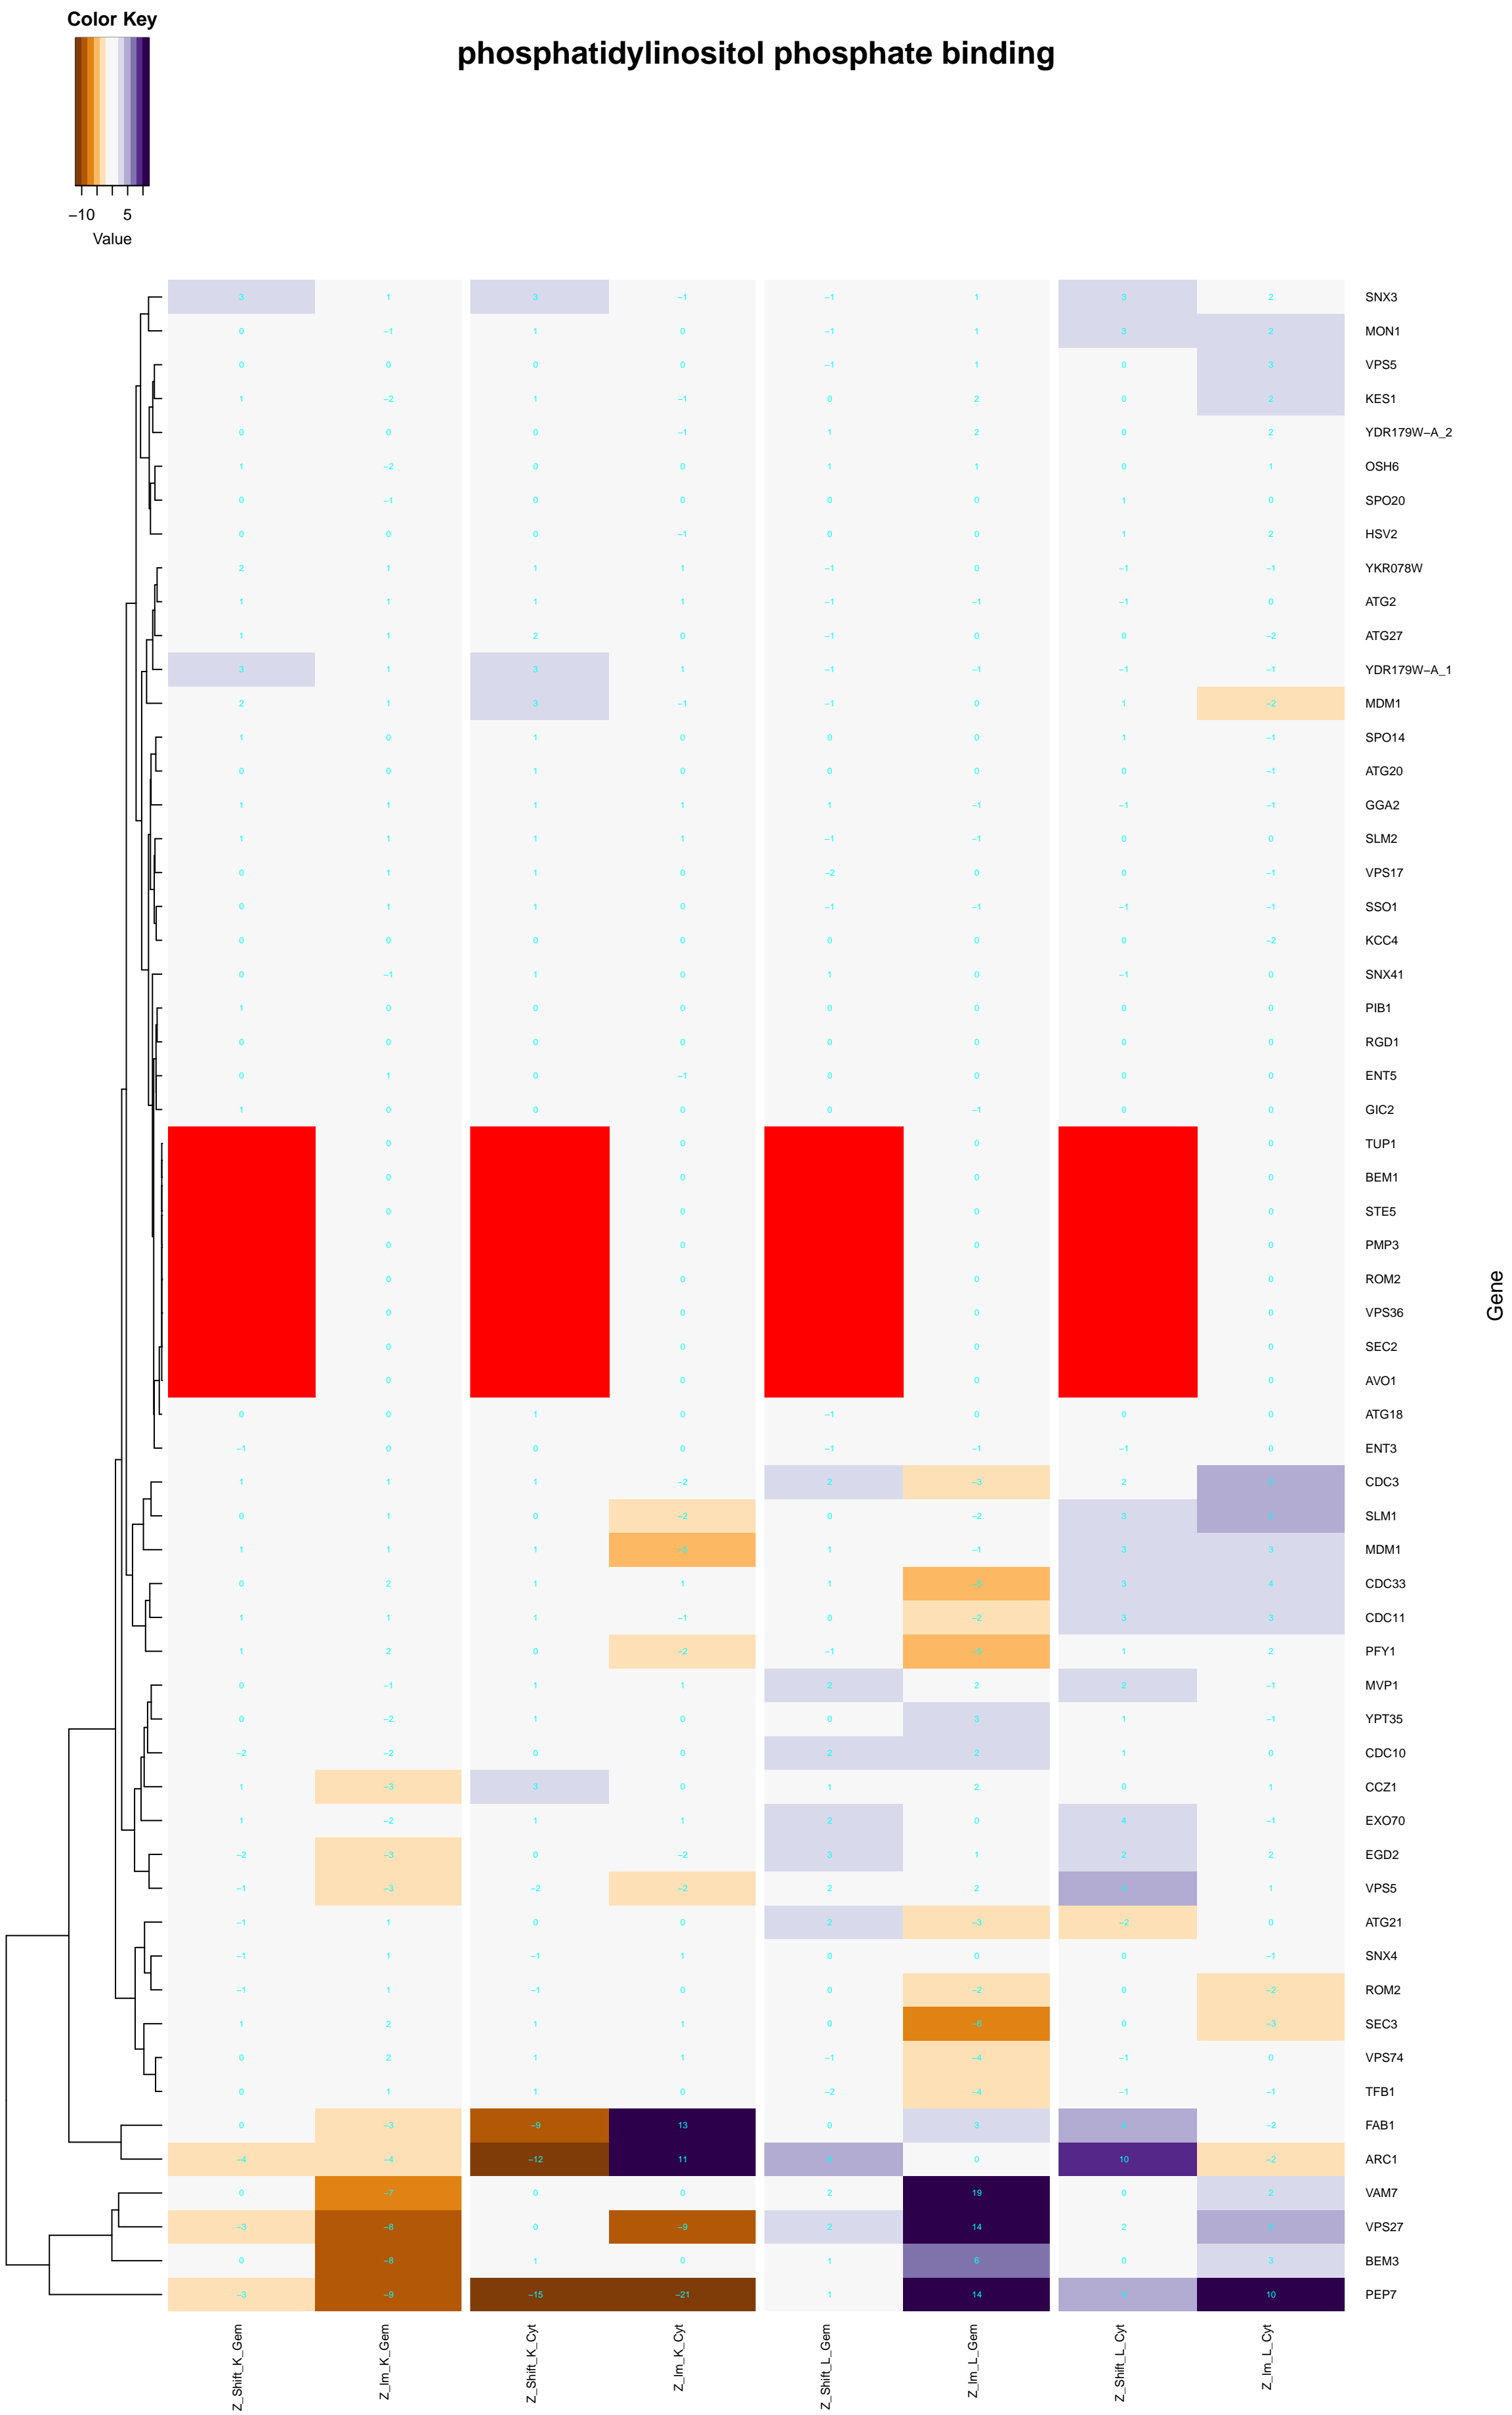

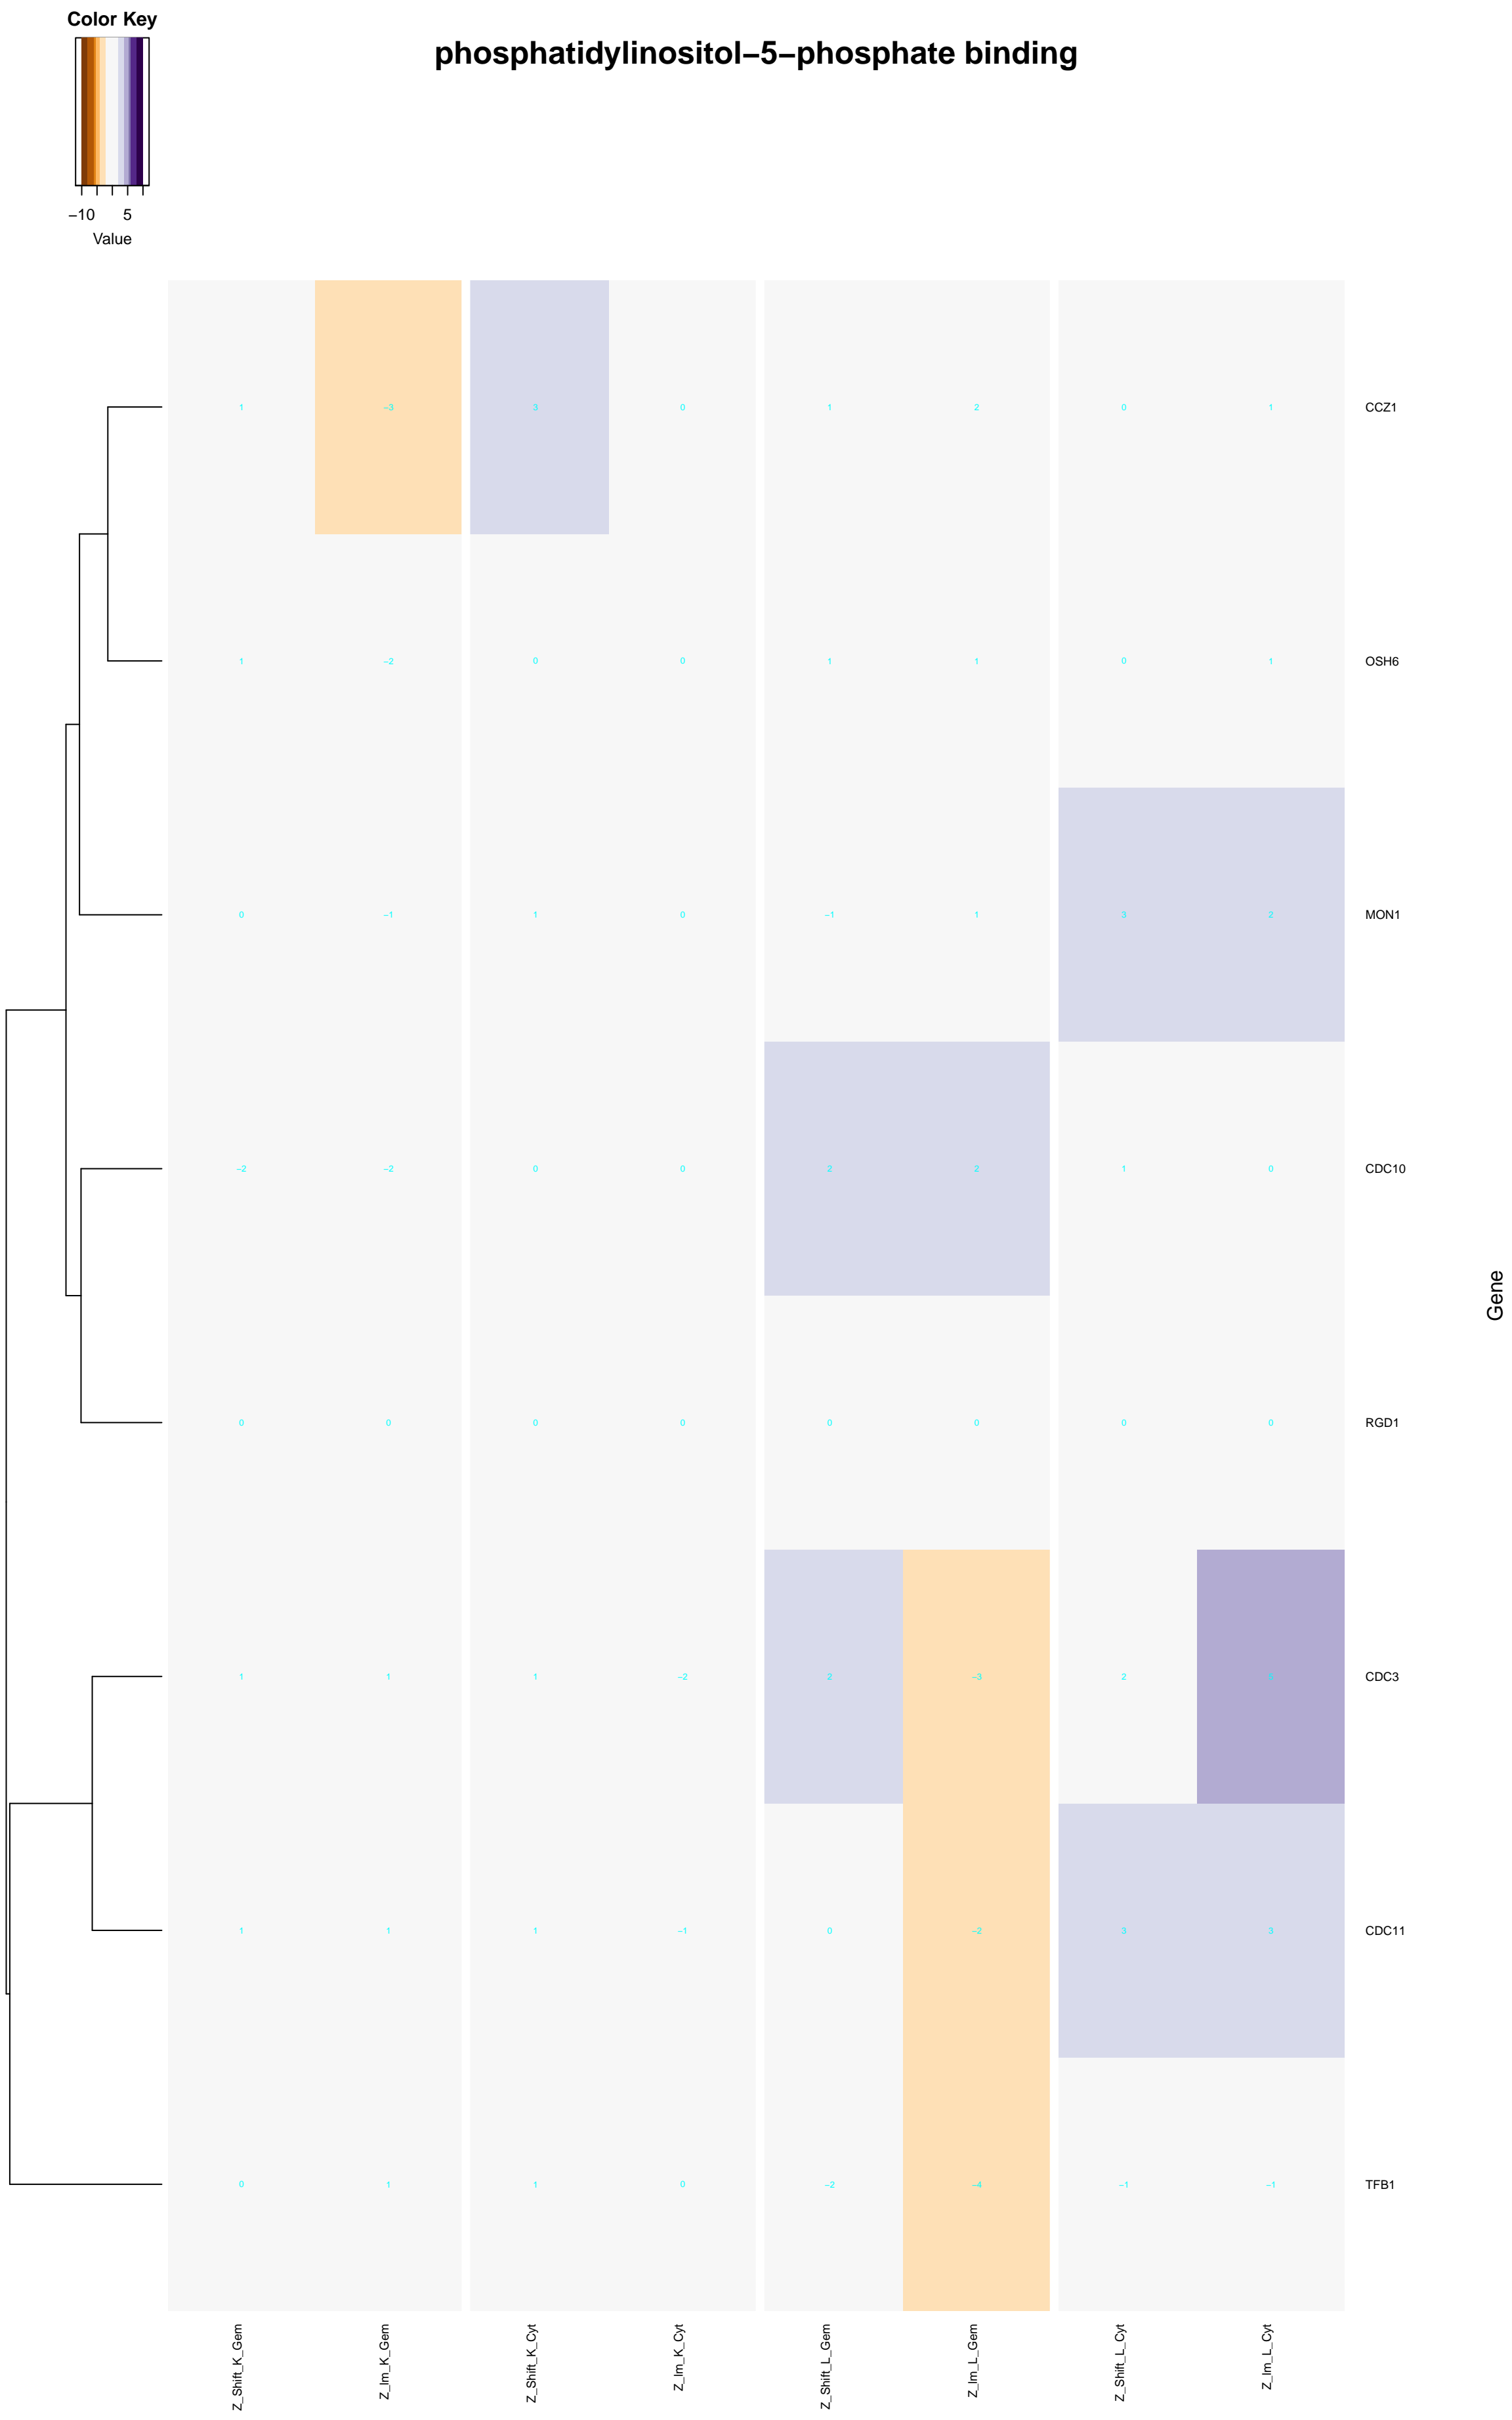

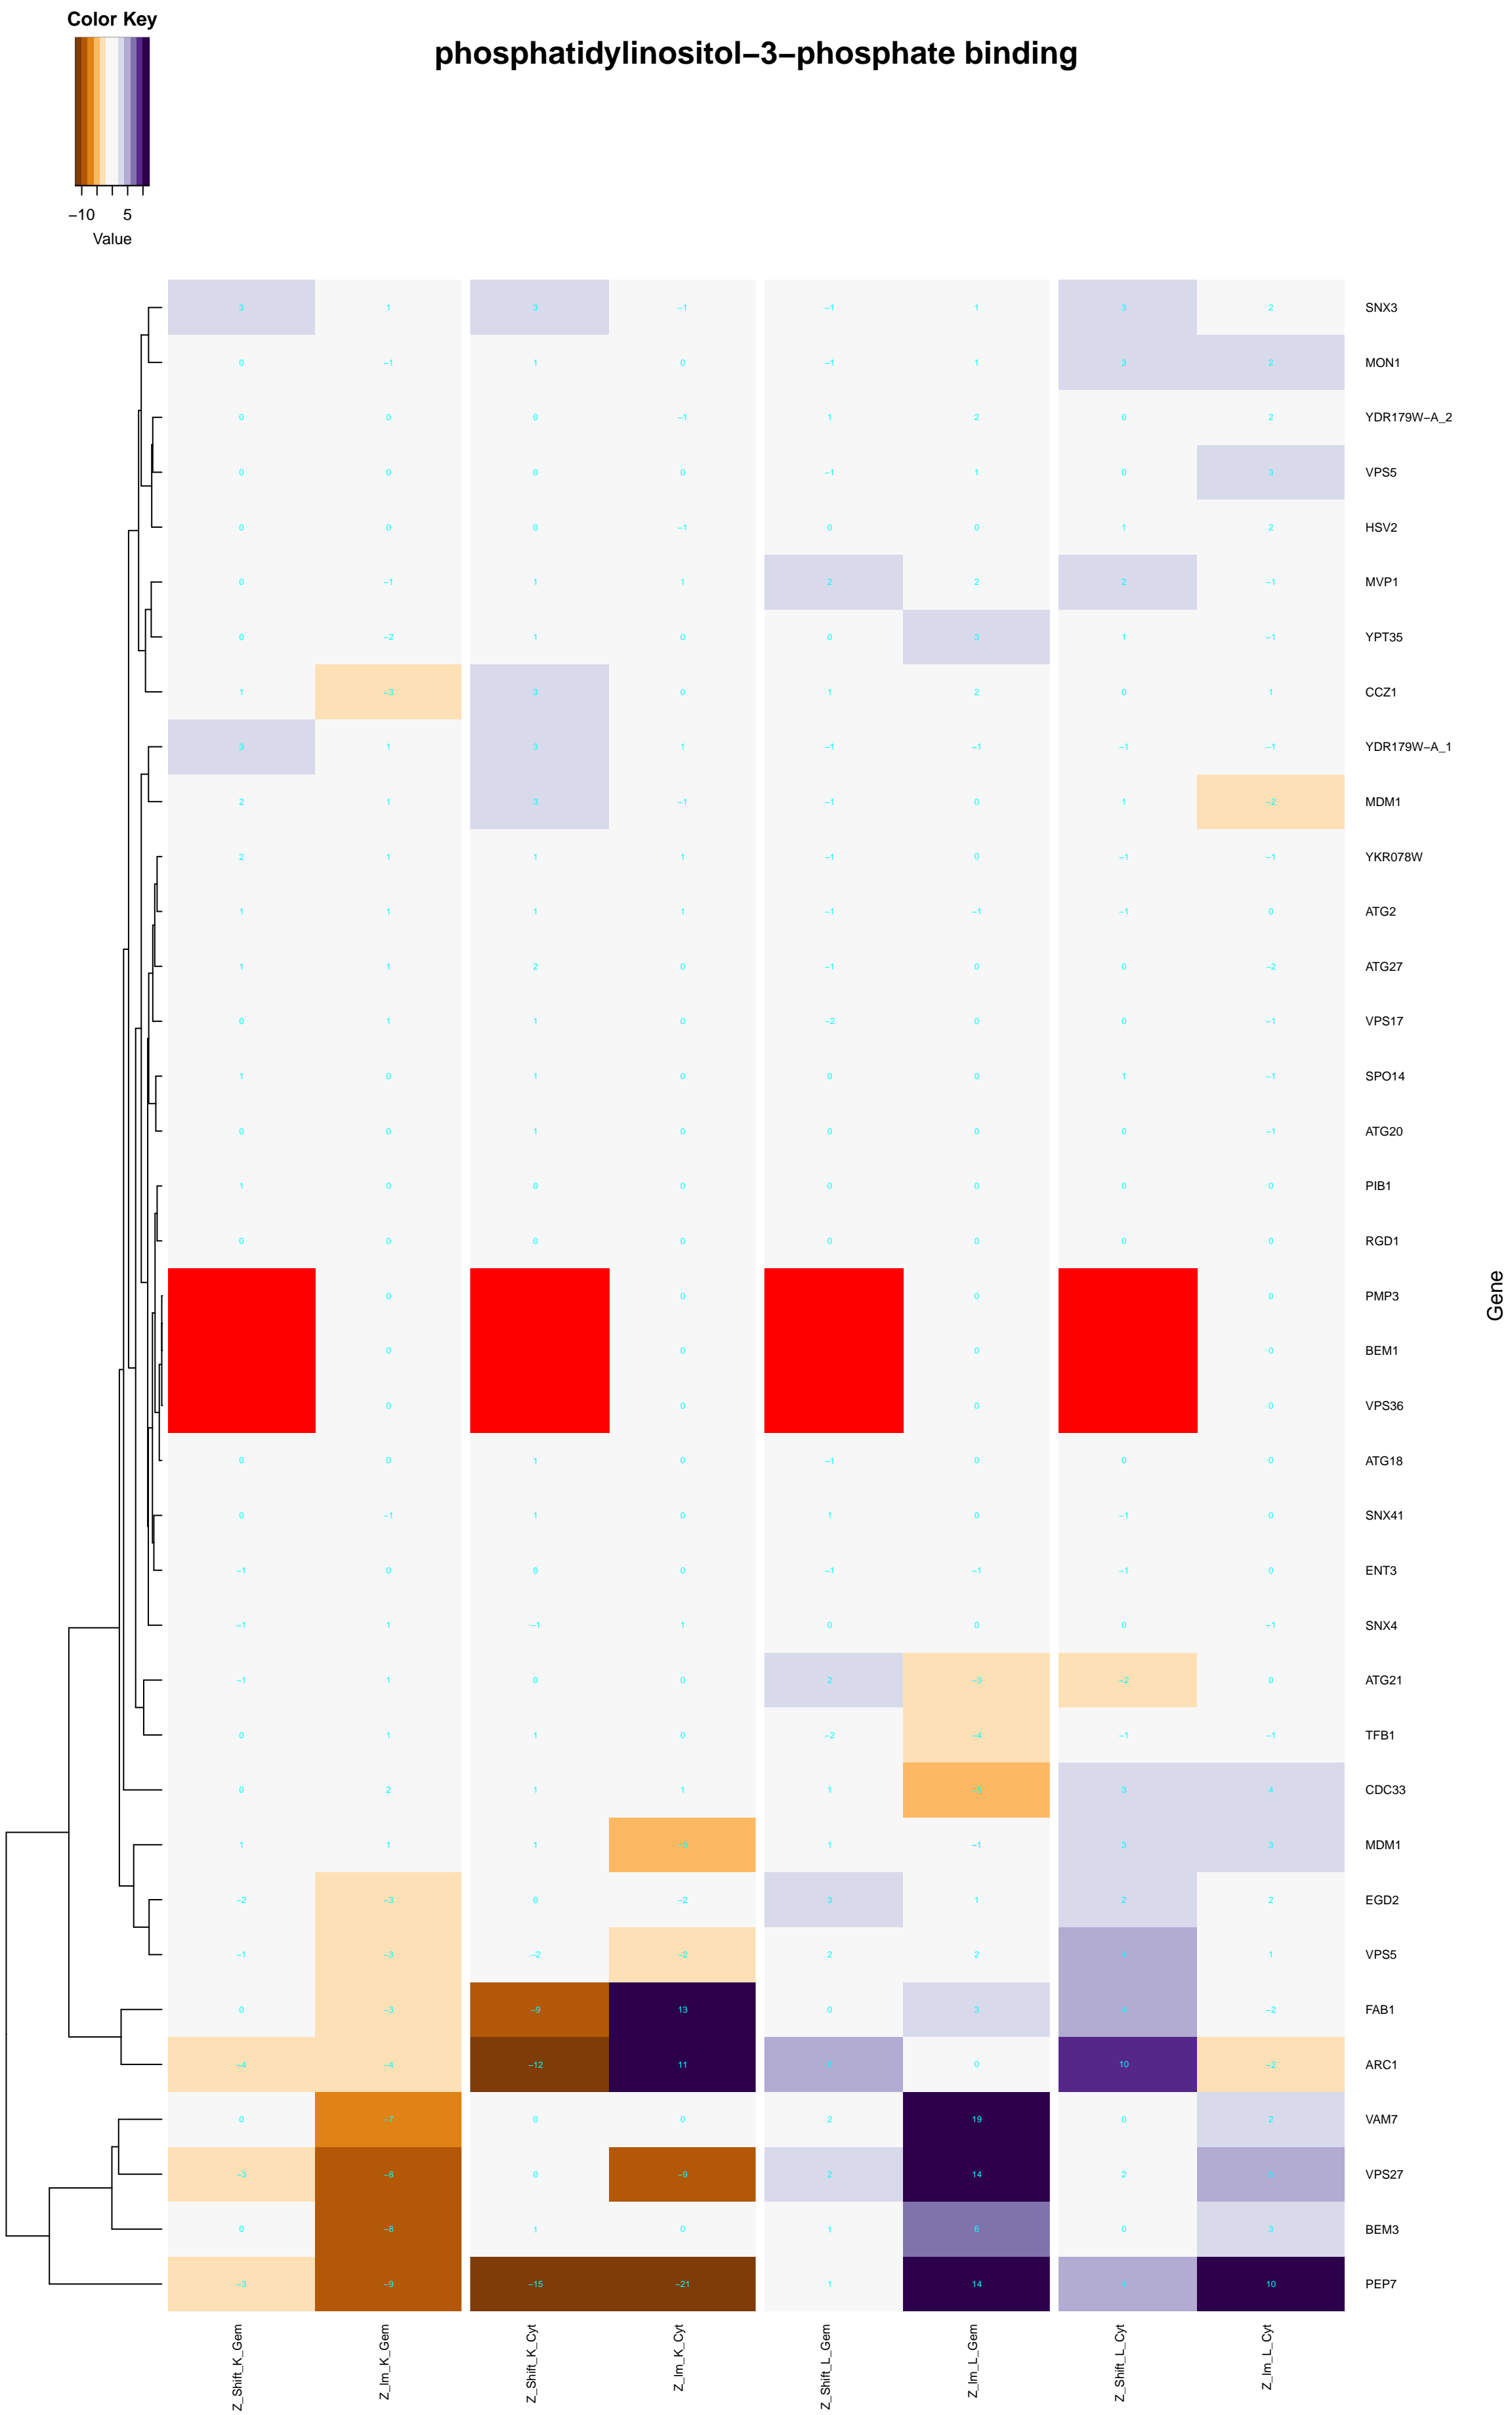

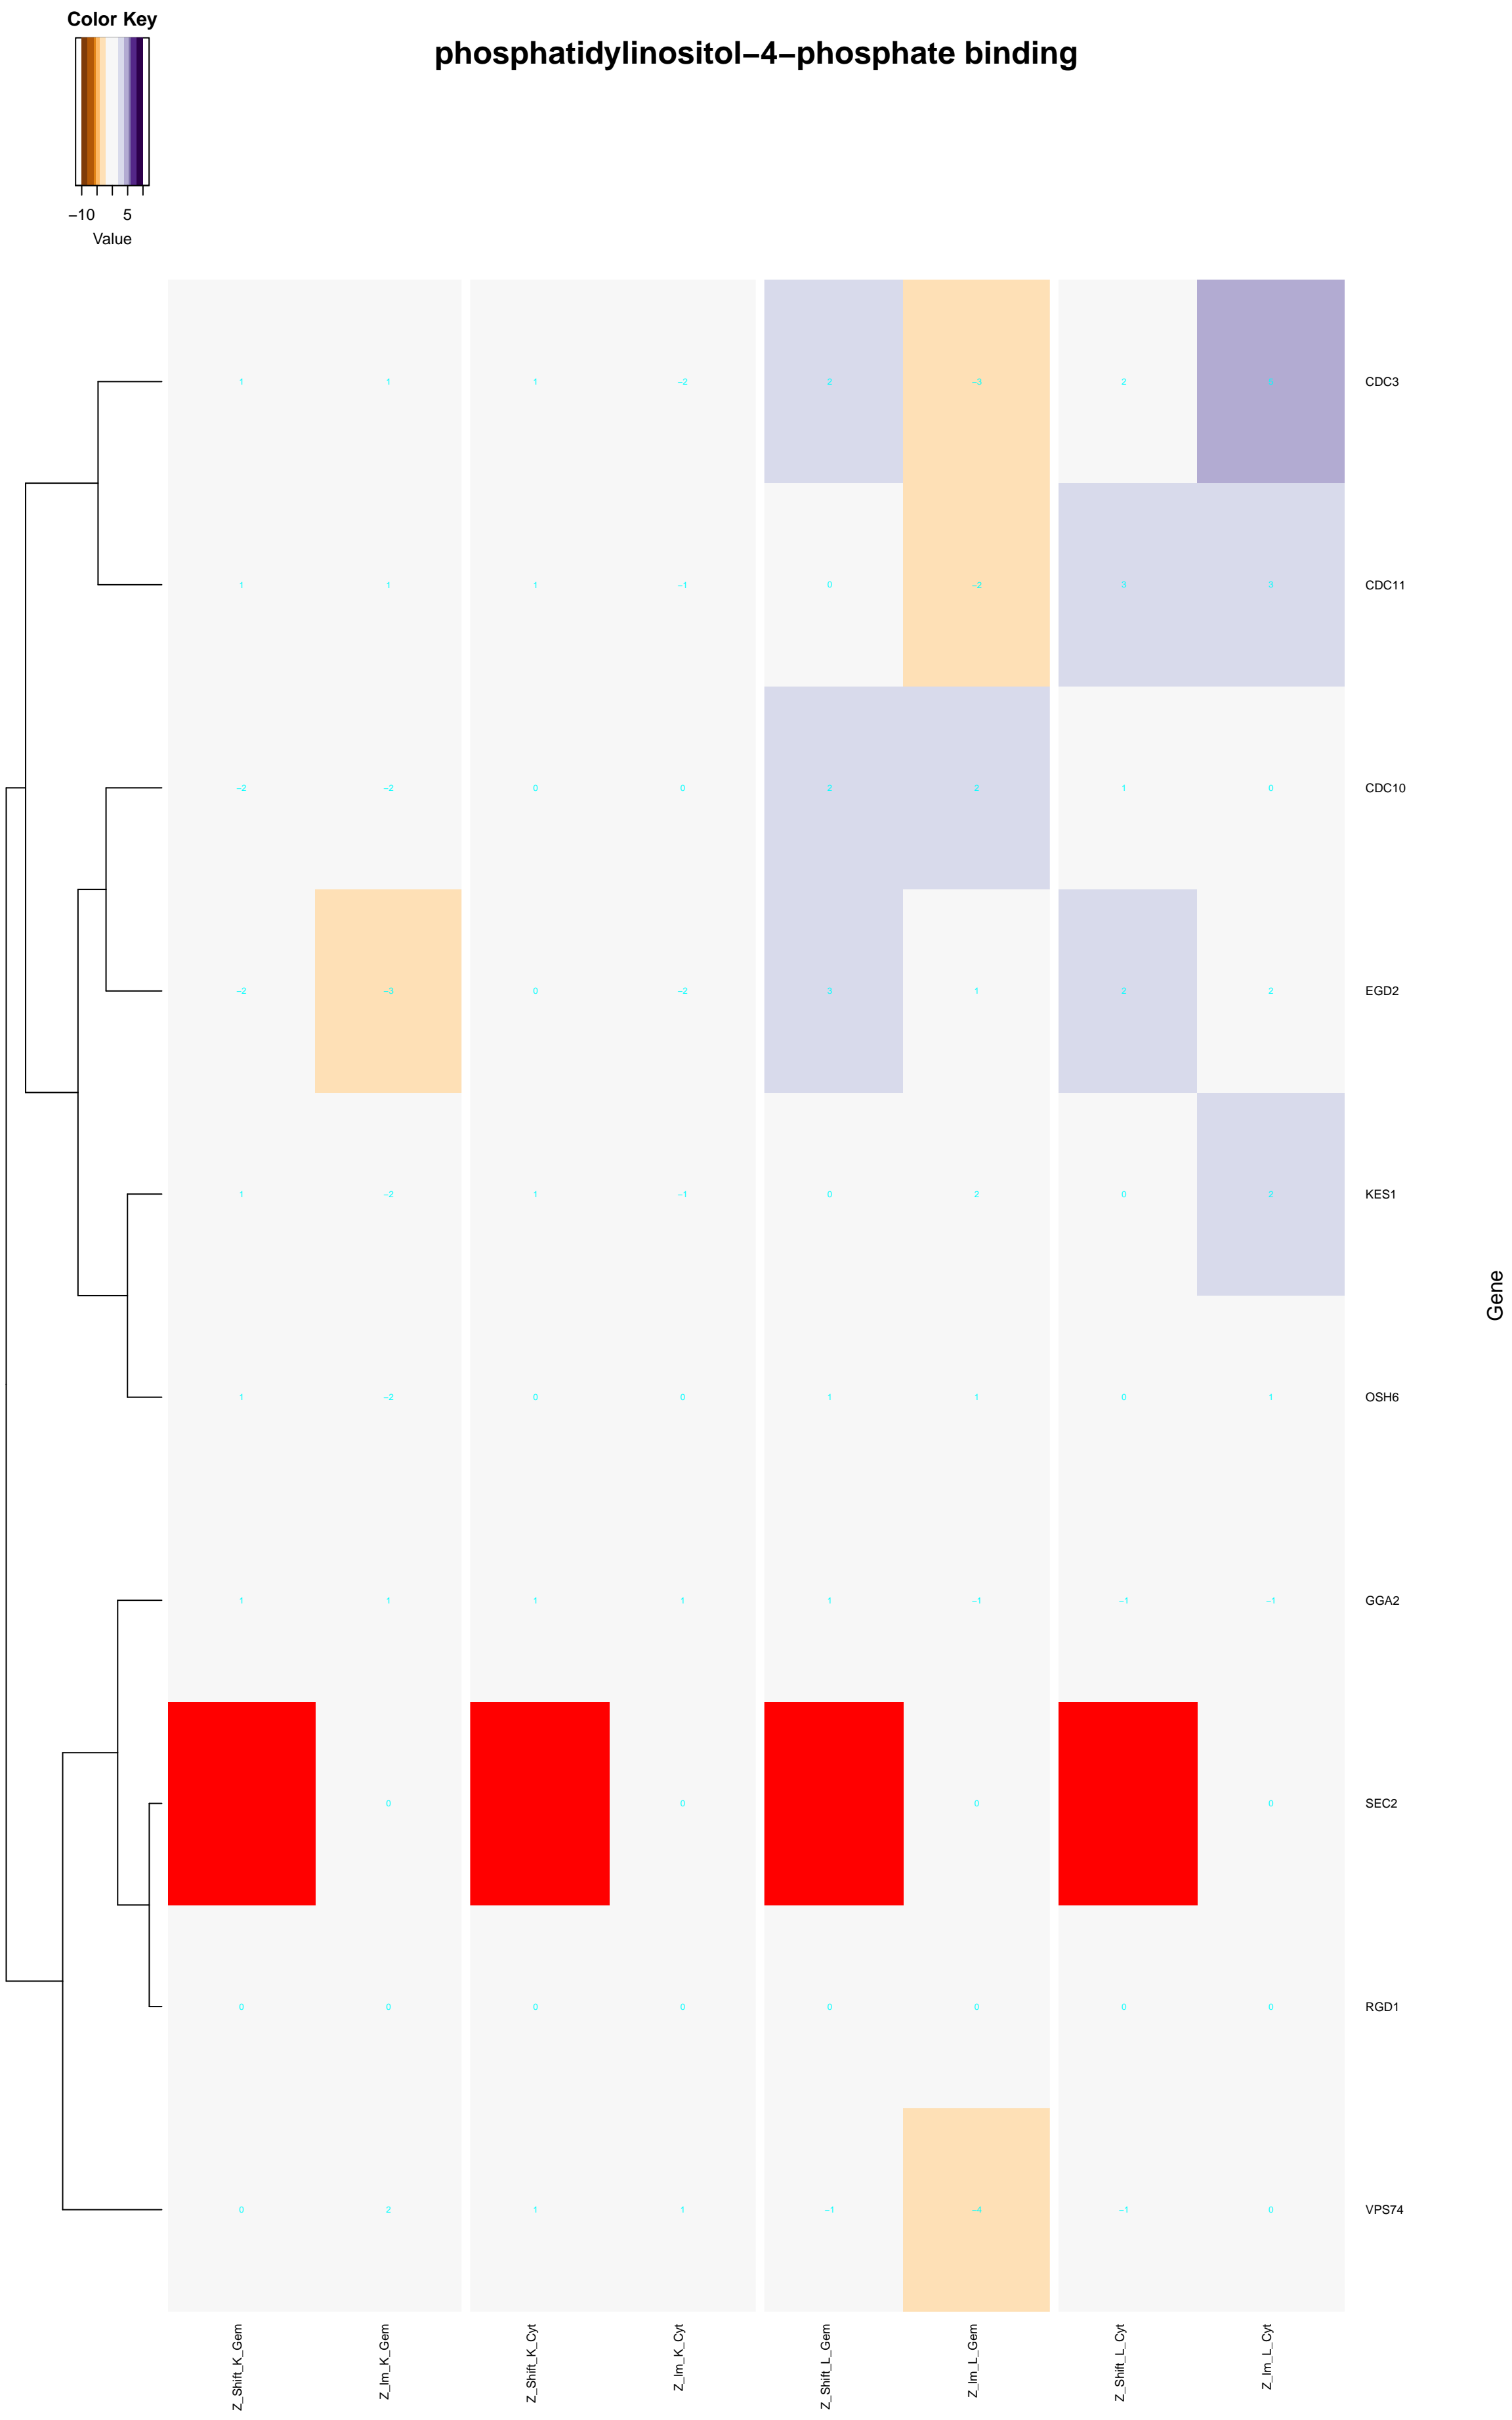

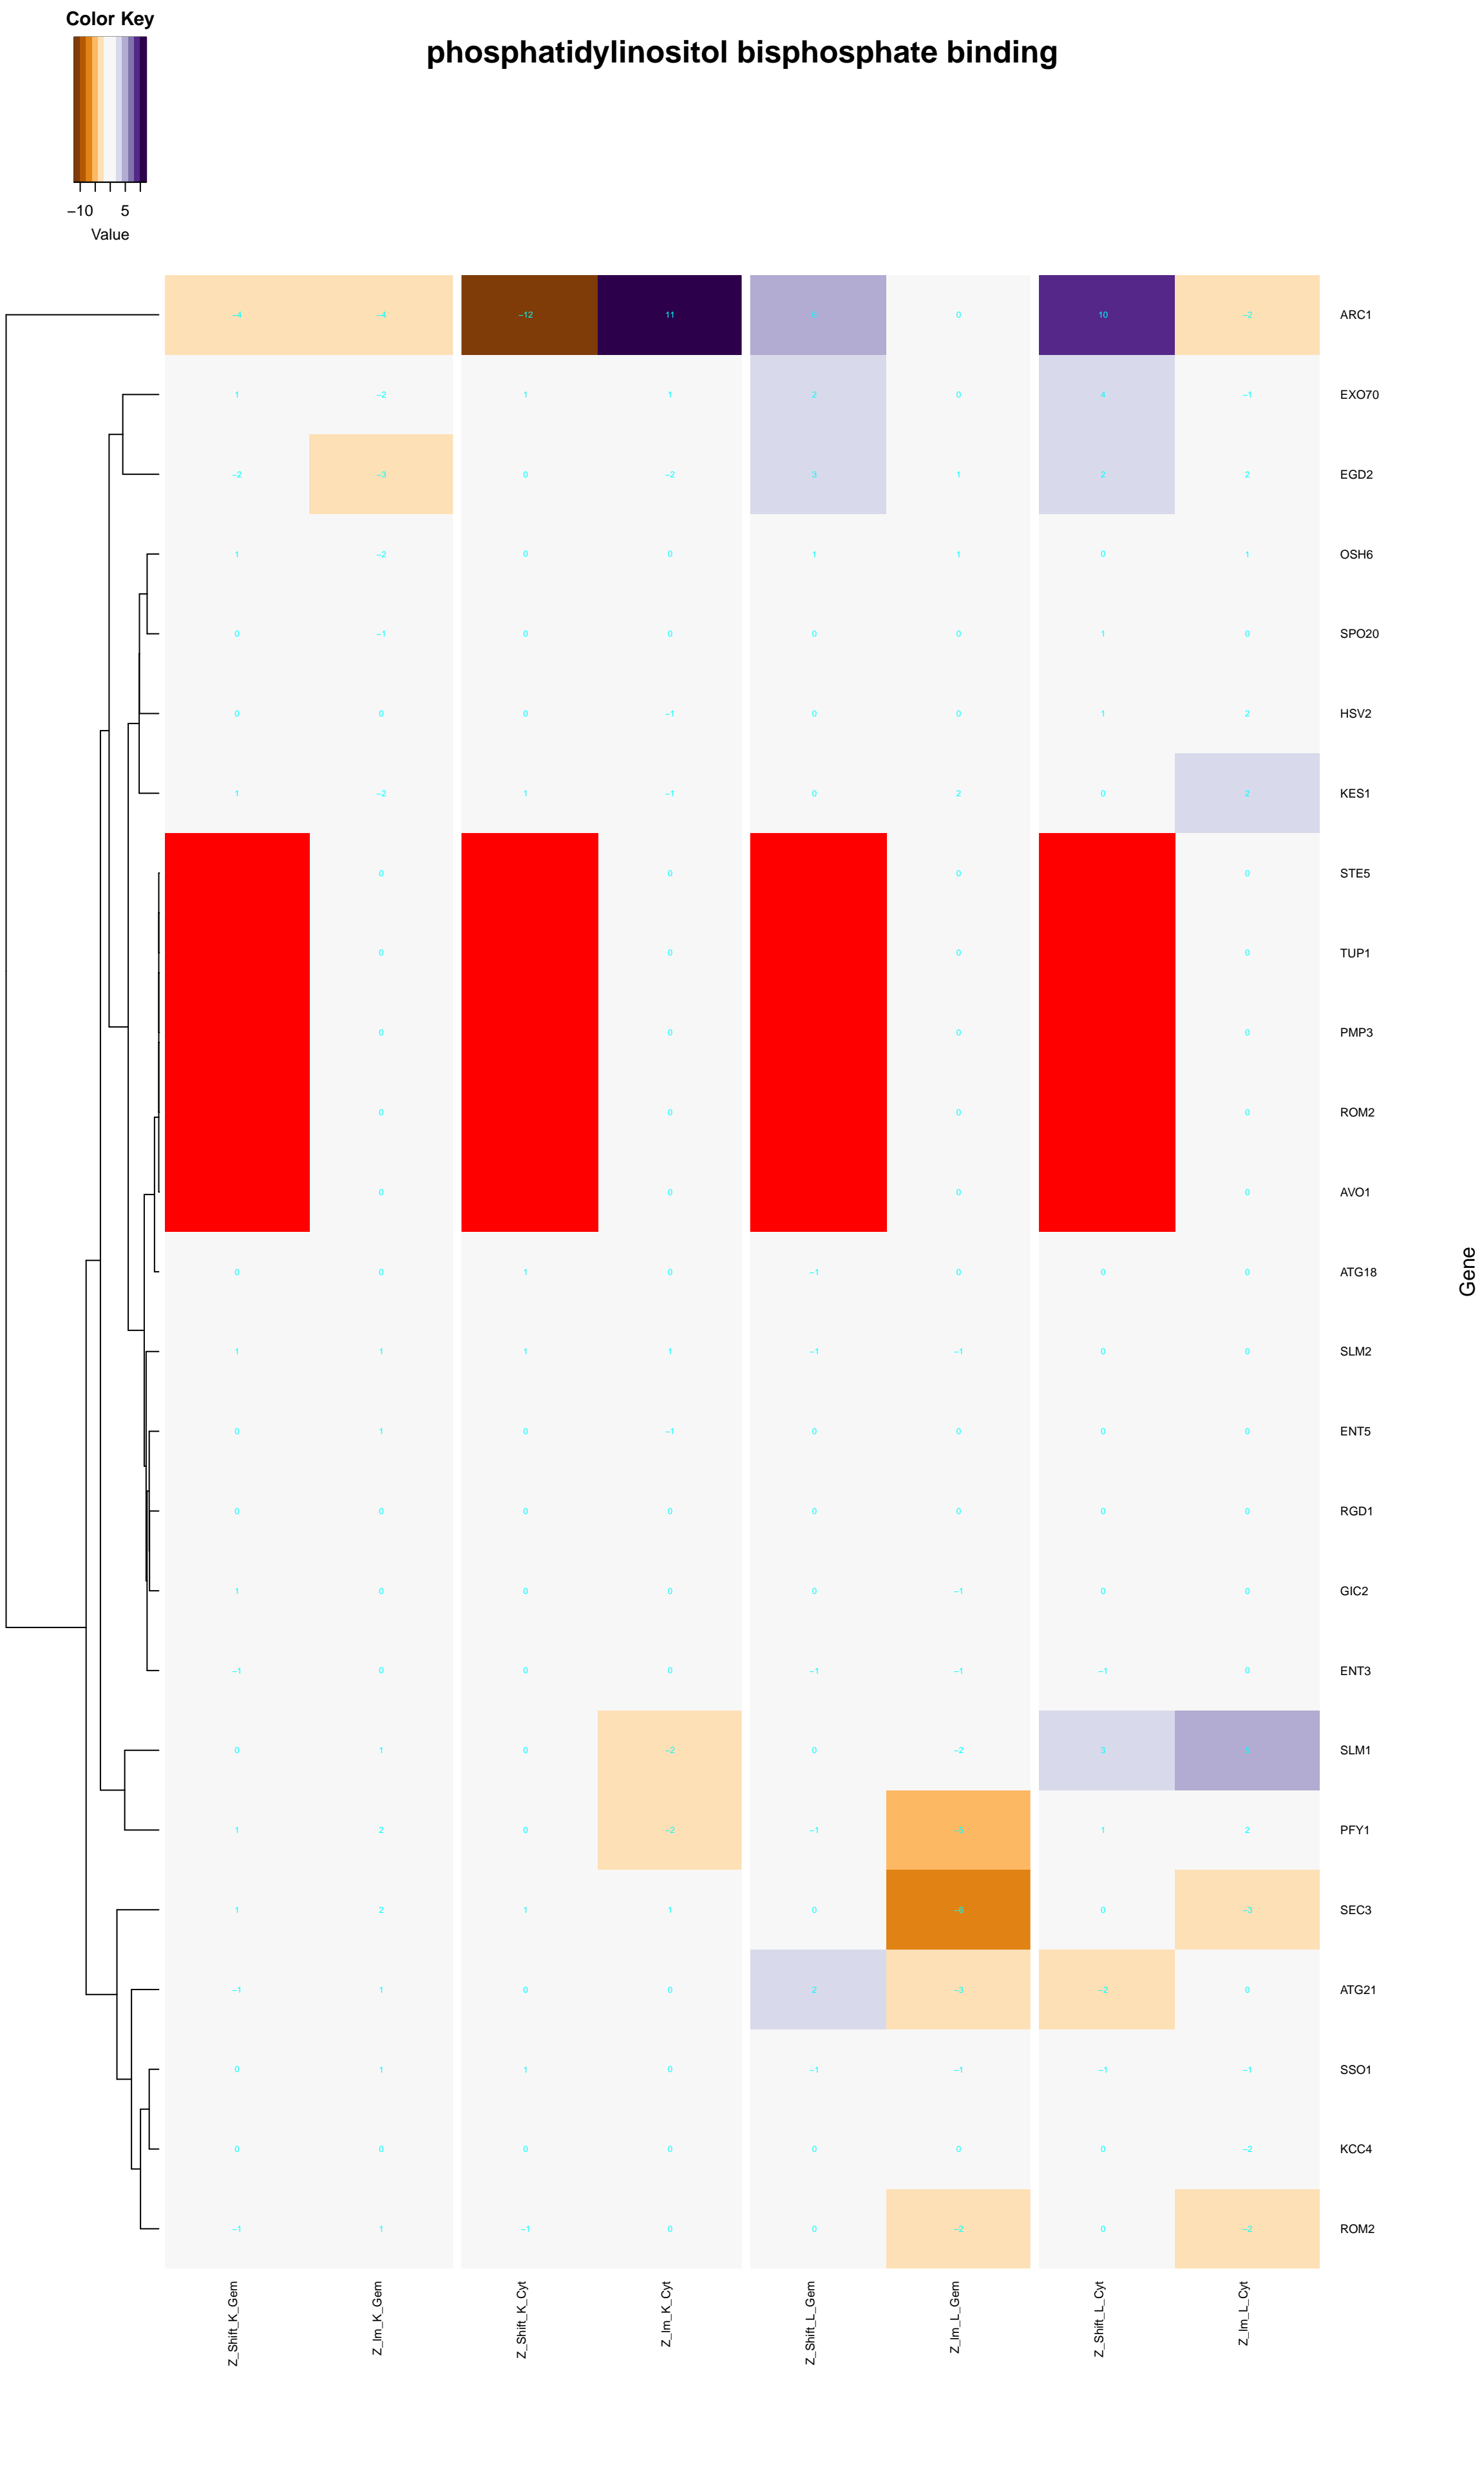

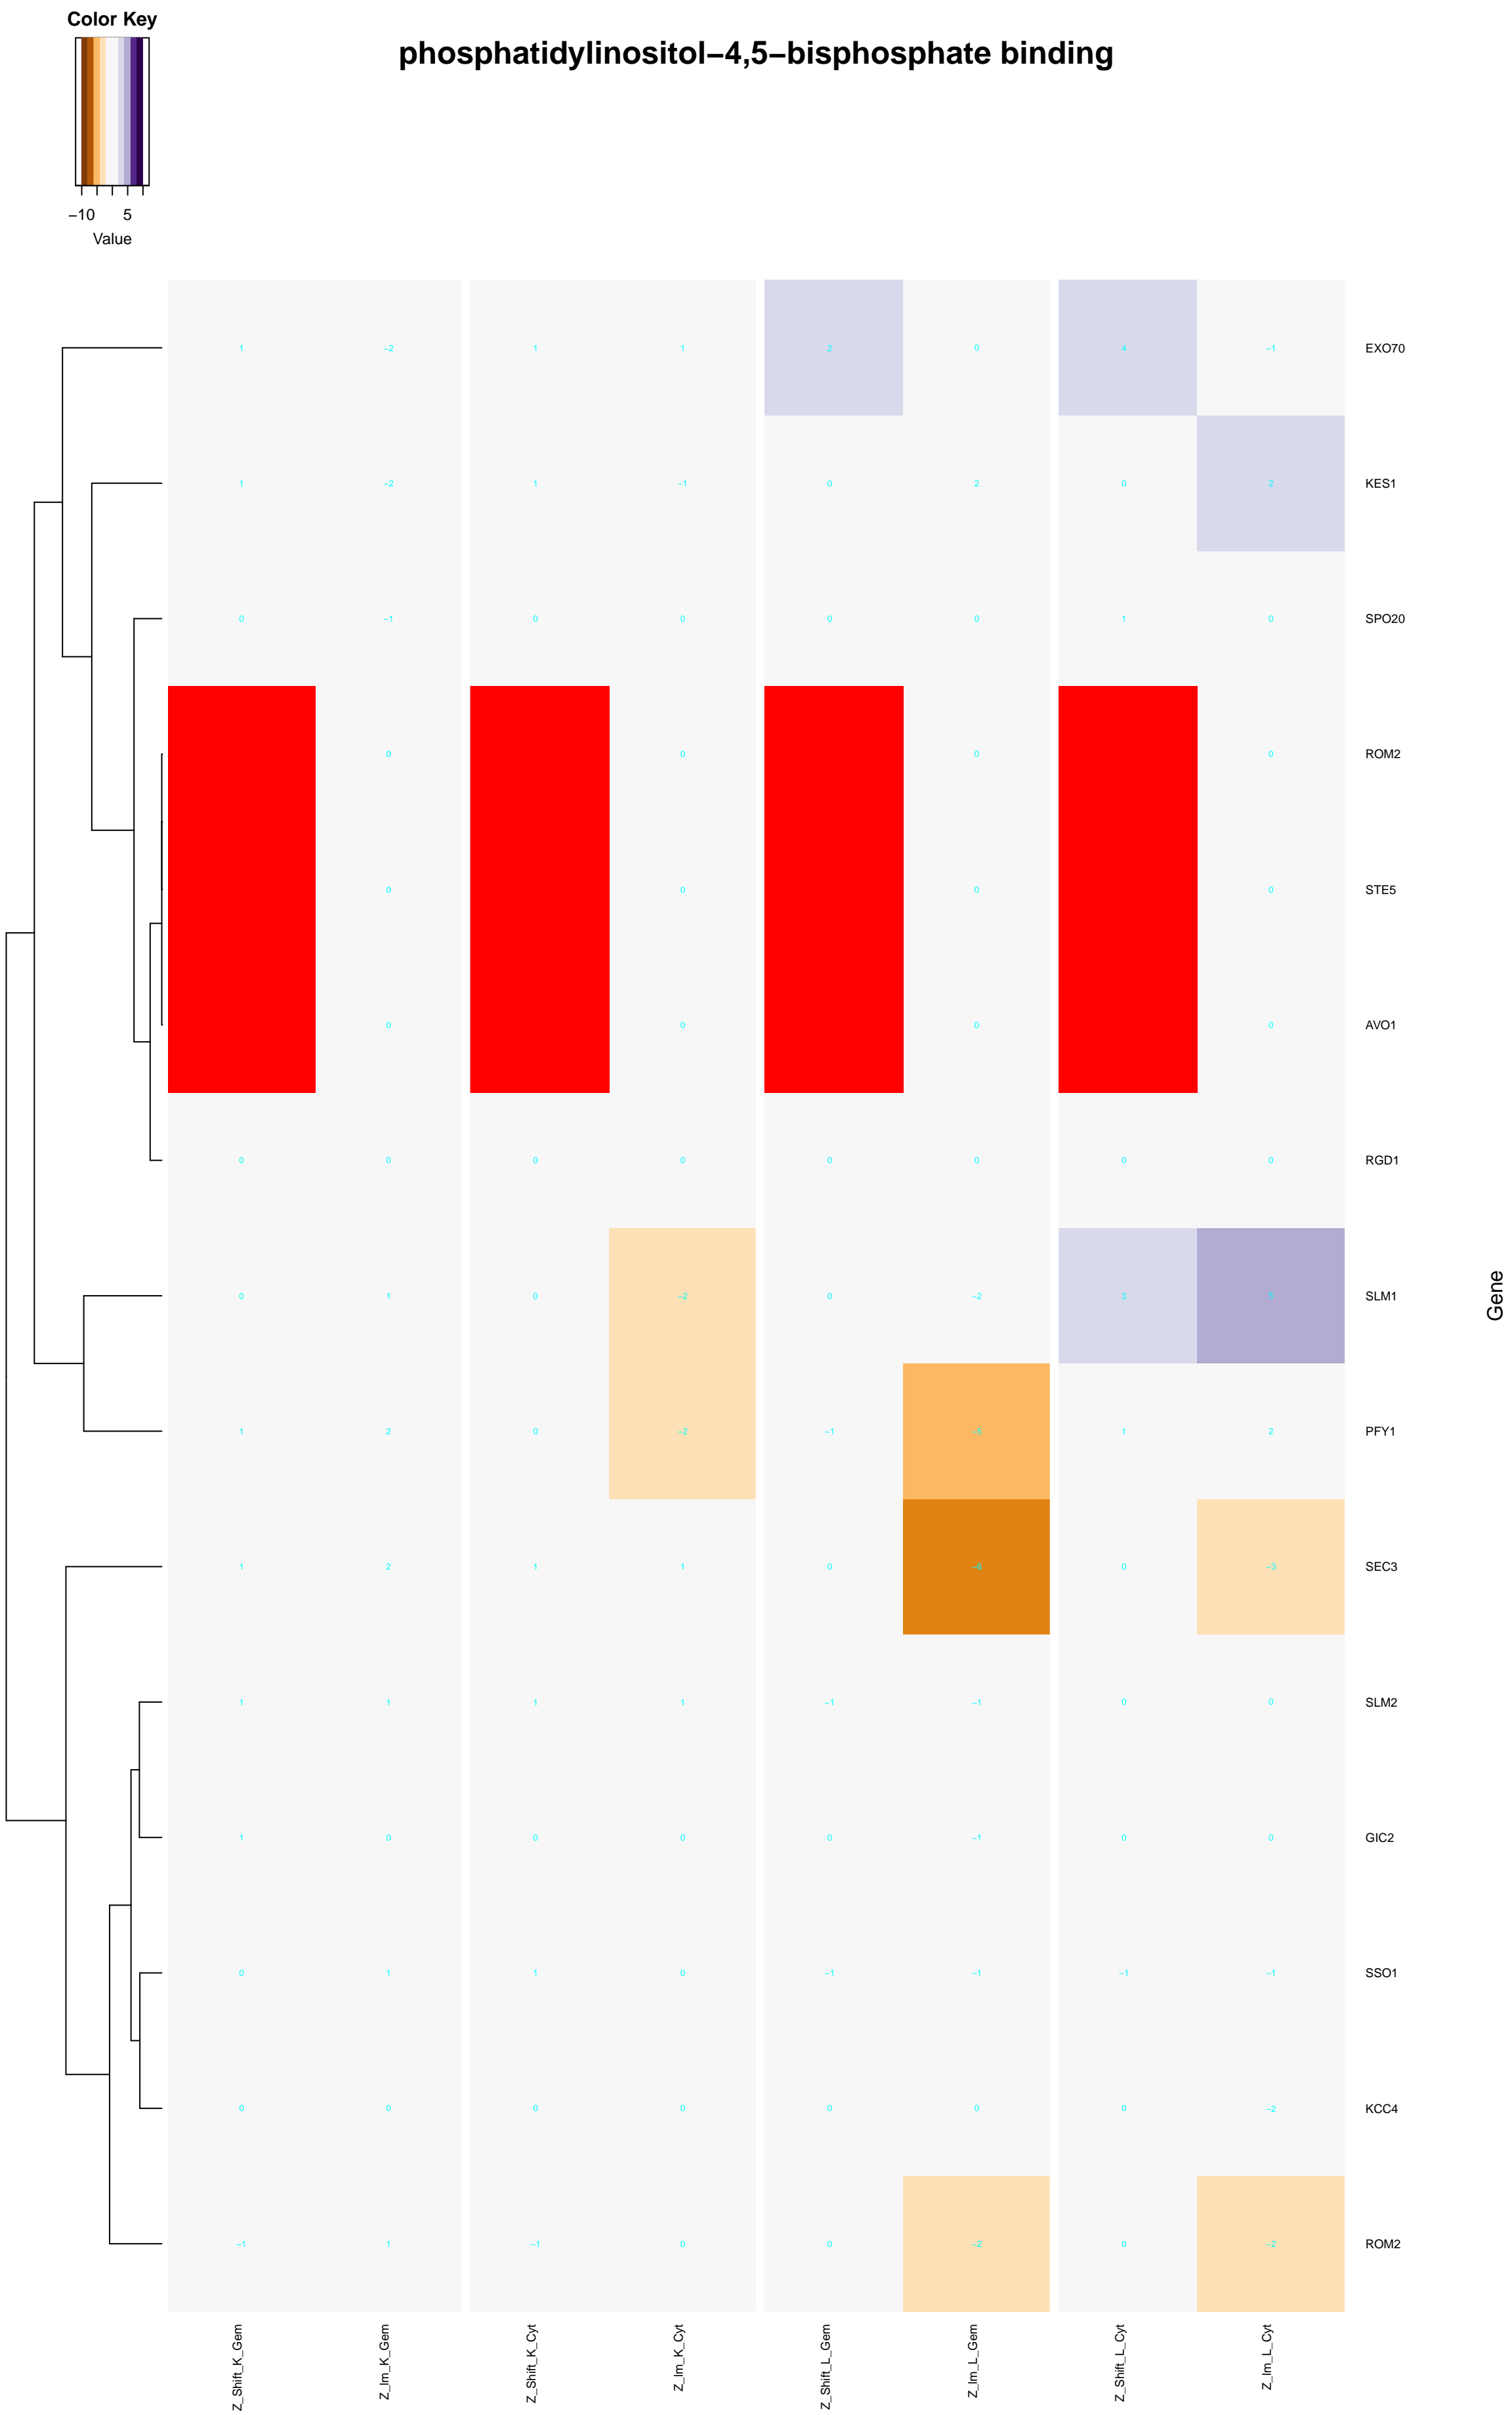

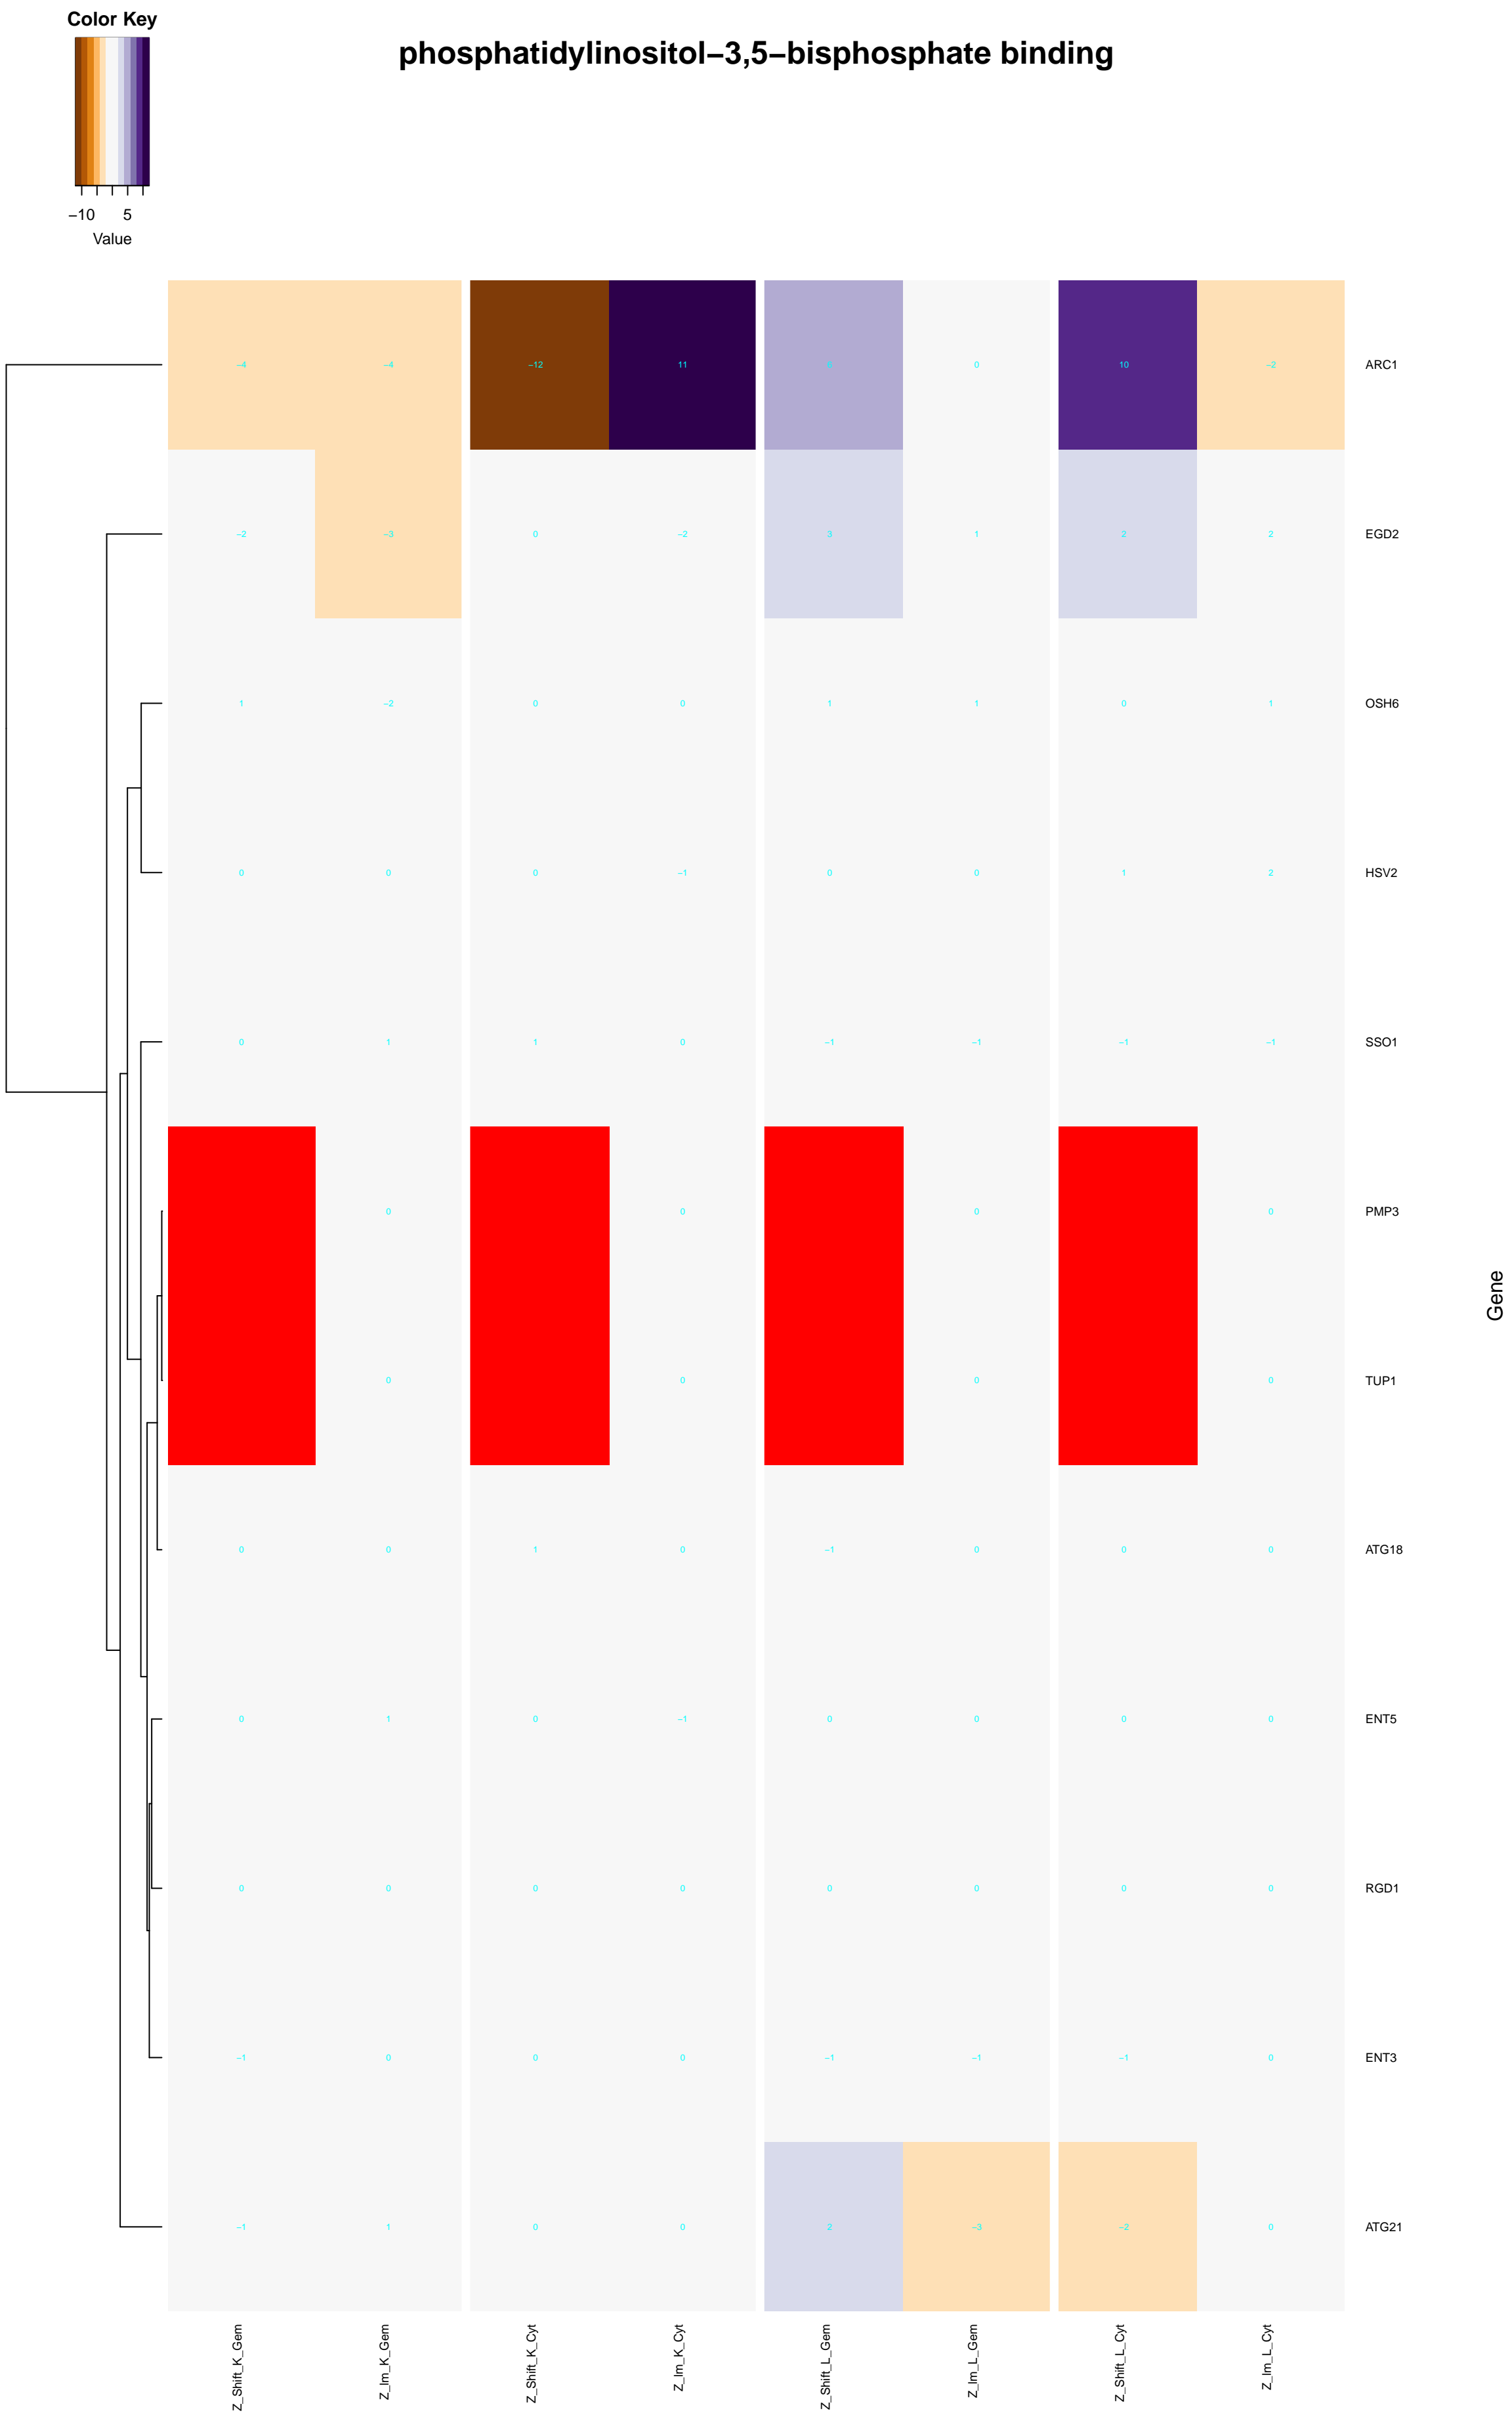

Supplement: s1 [file s1]

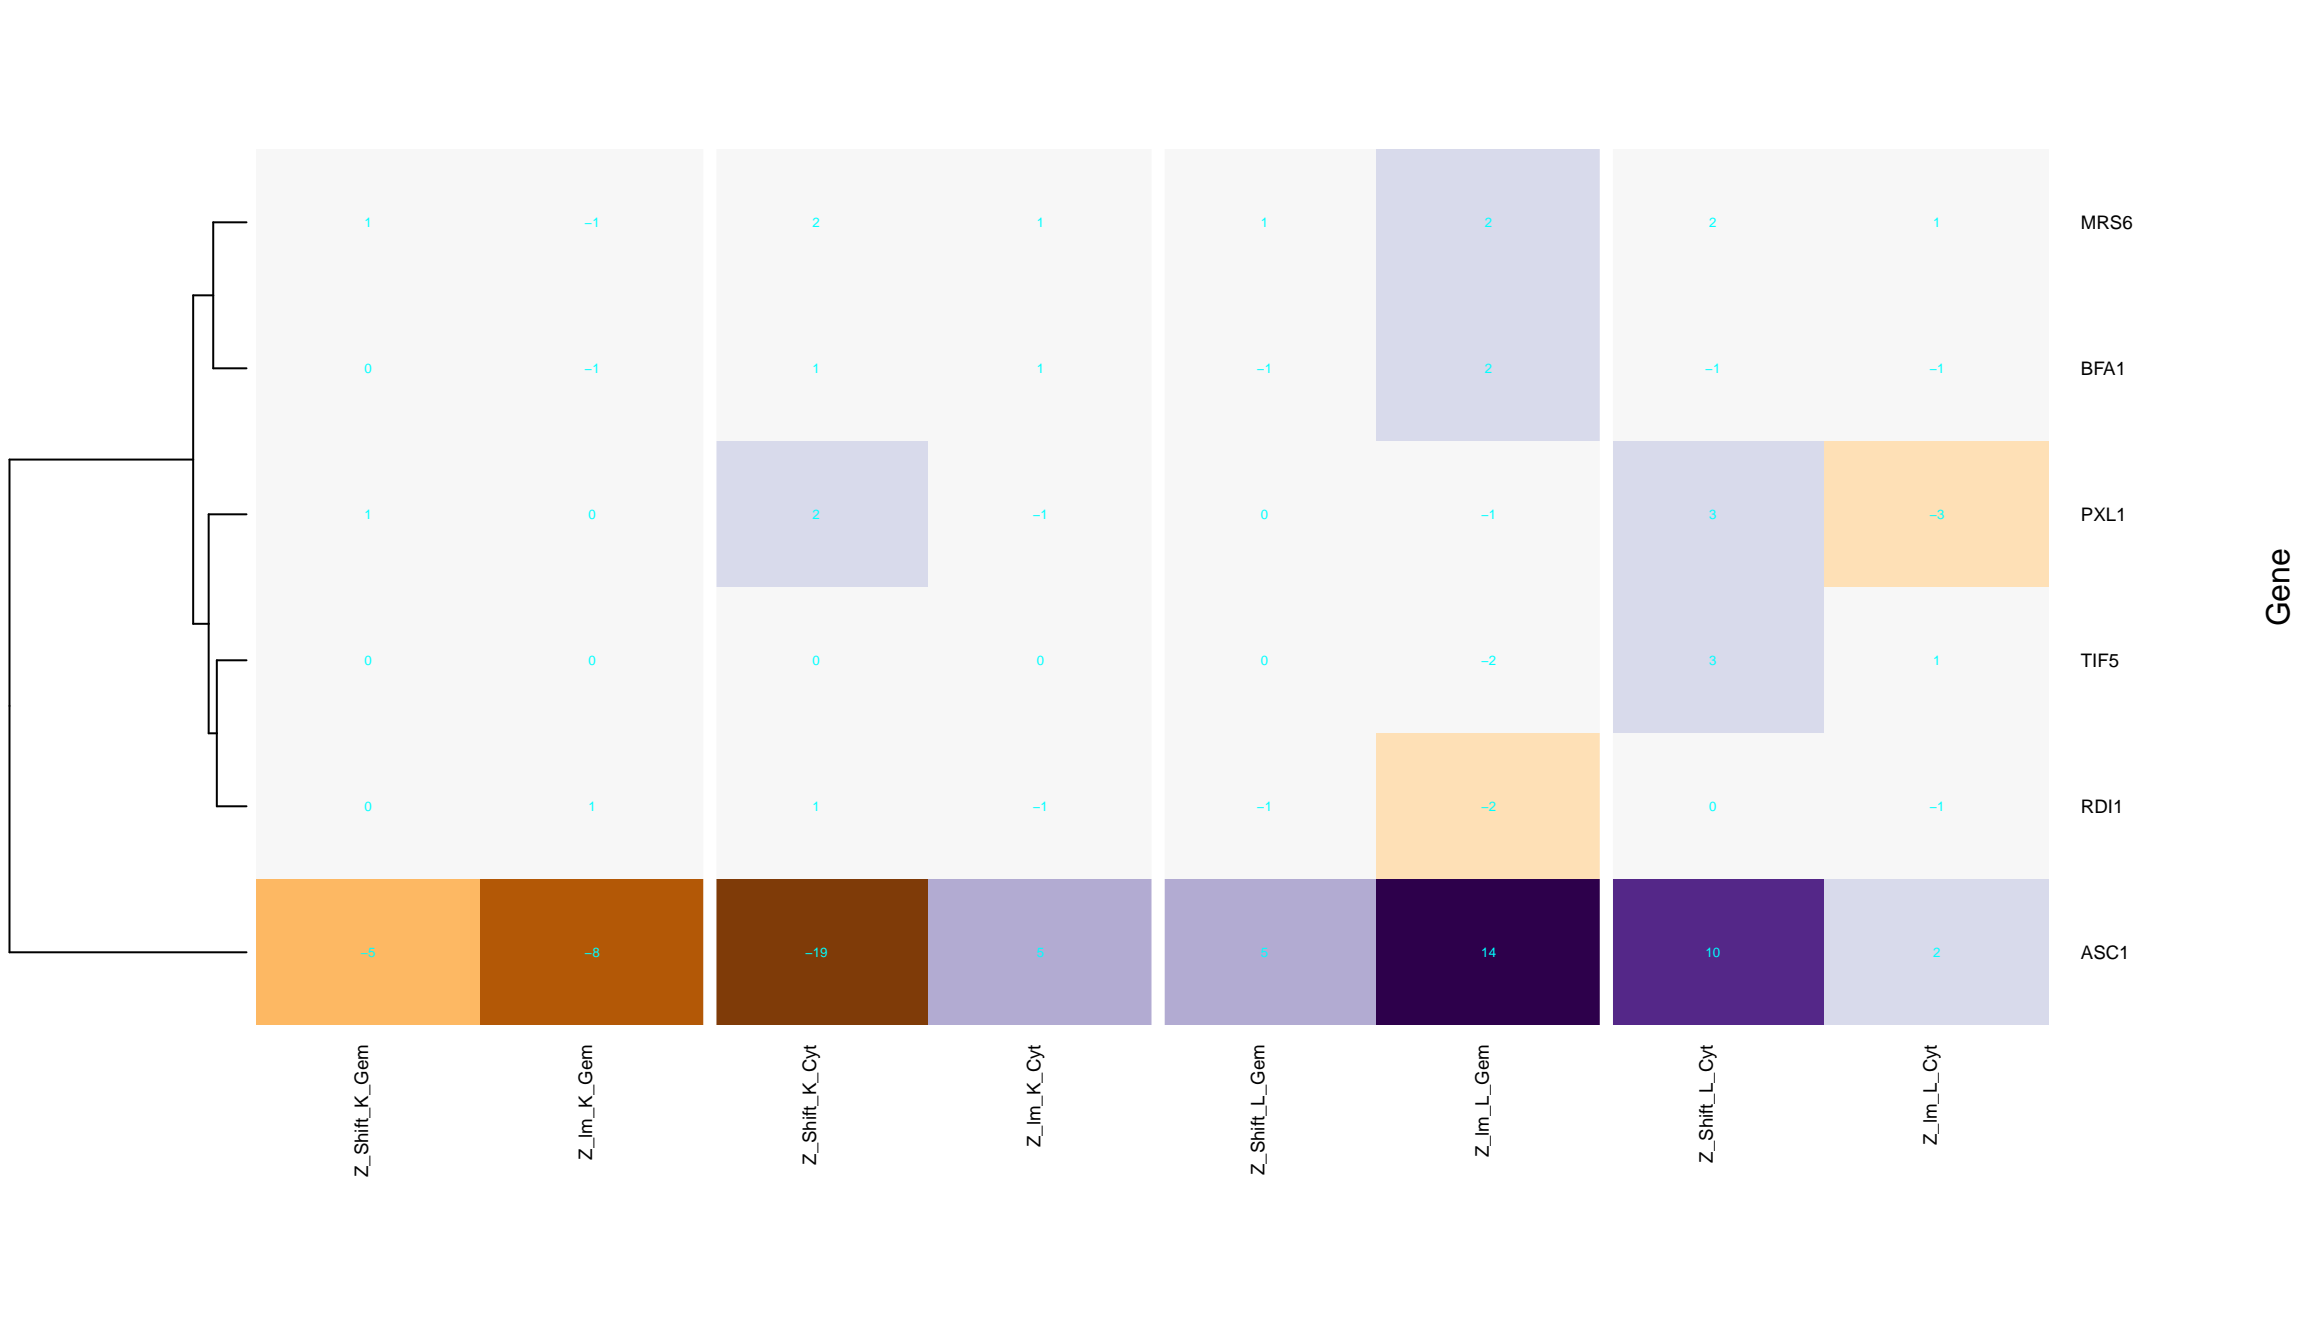

Supplement: s1 [file s1]

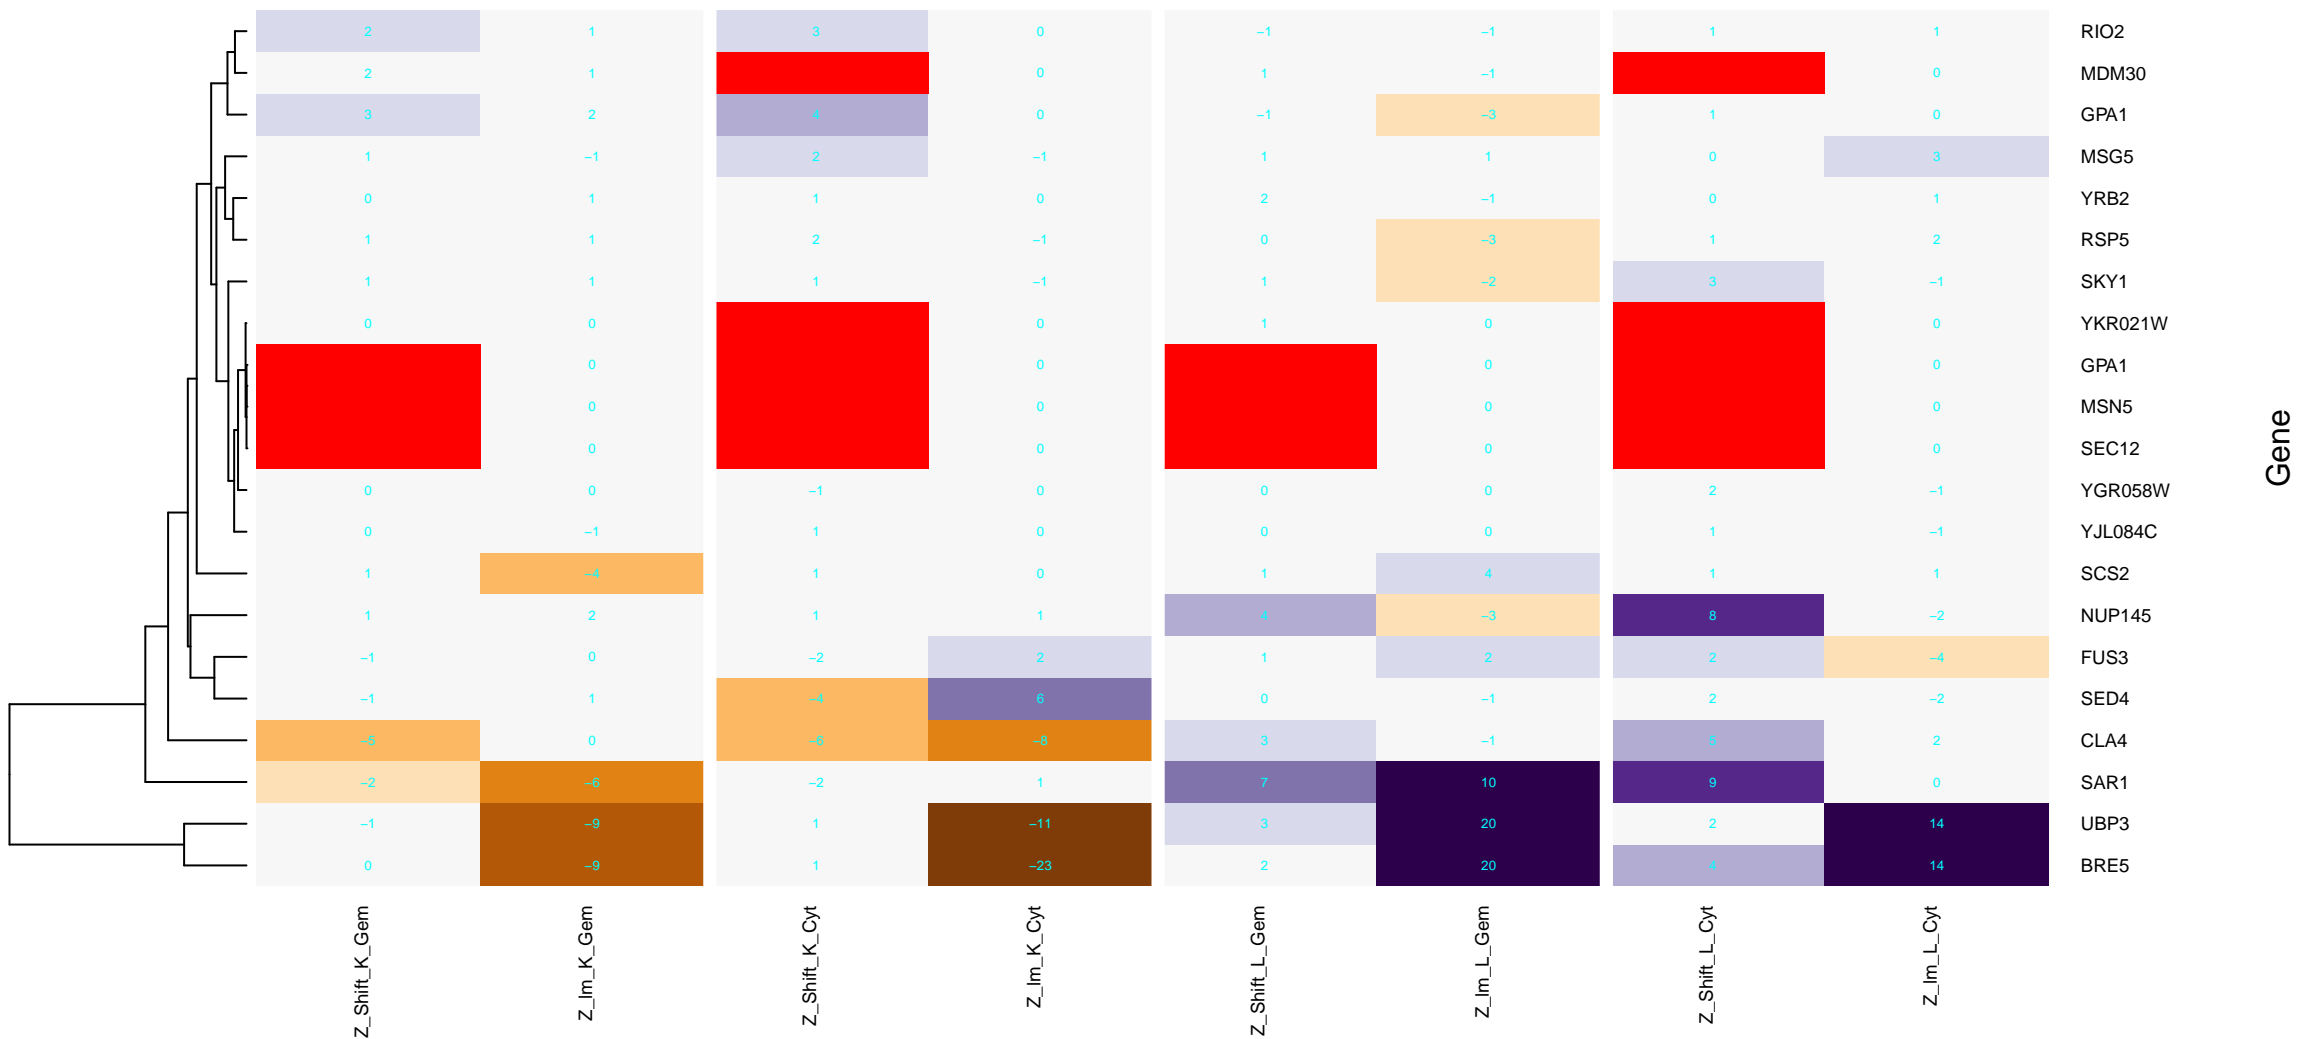

Supplement: s1 [file s1]

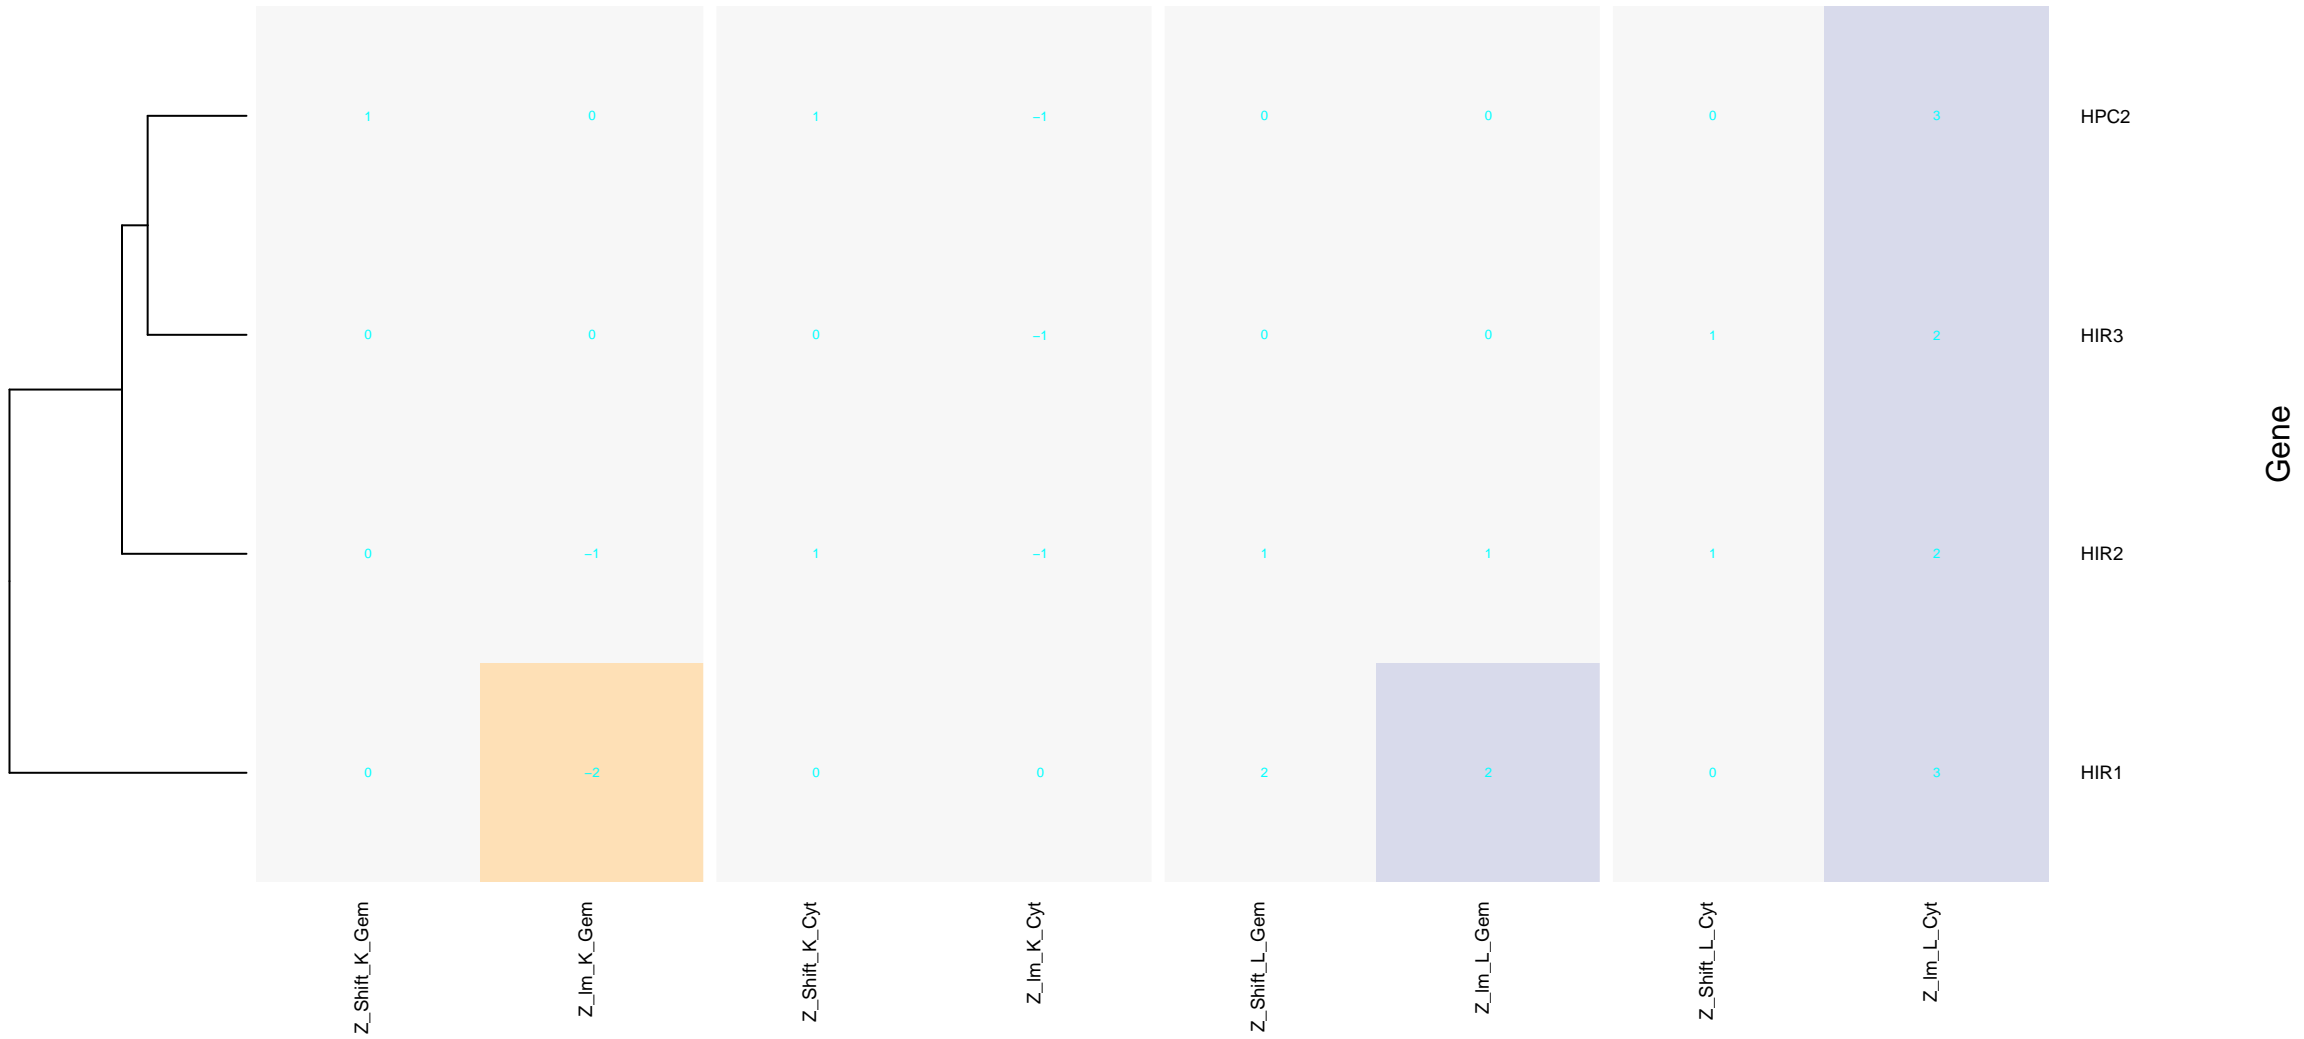

Supplement: s1 [file s1]

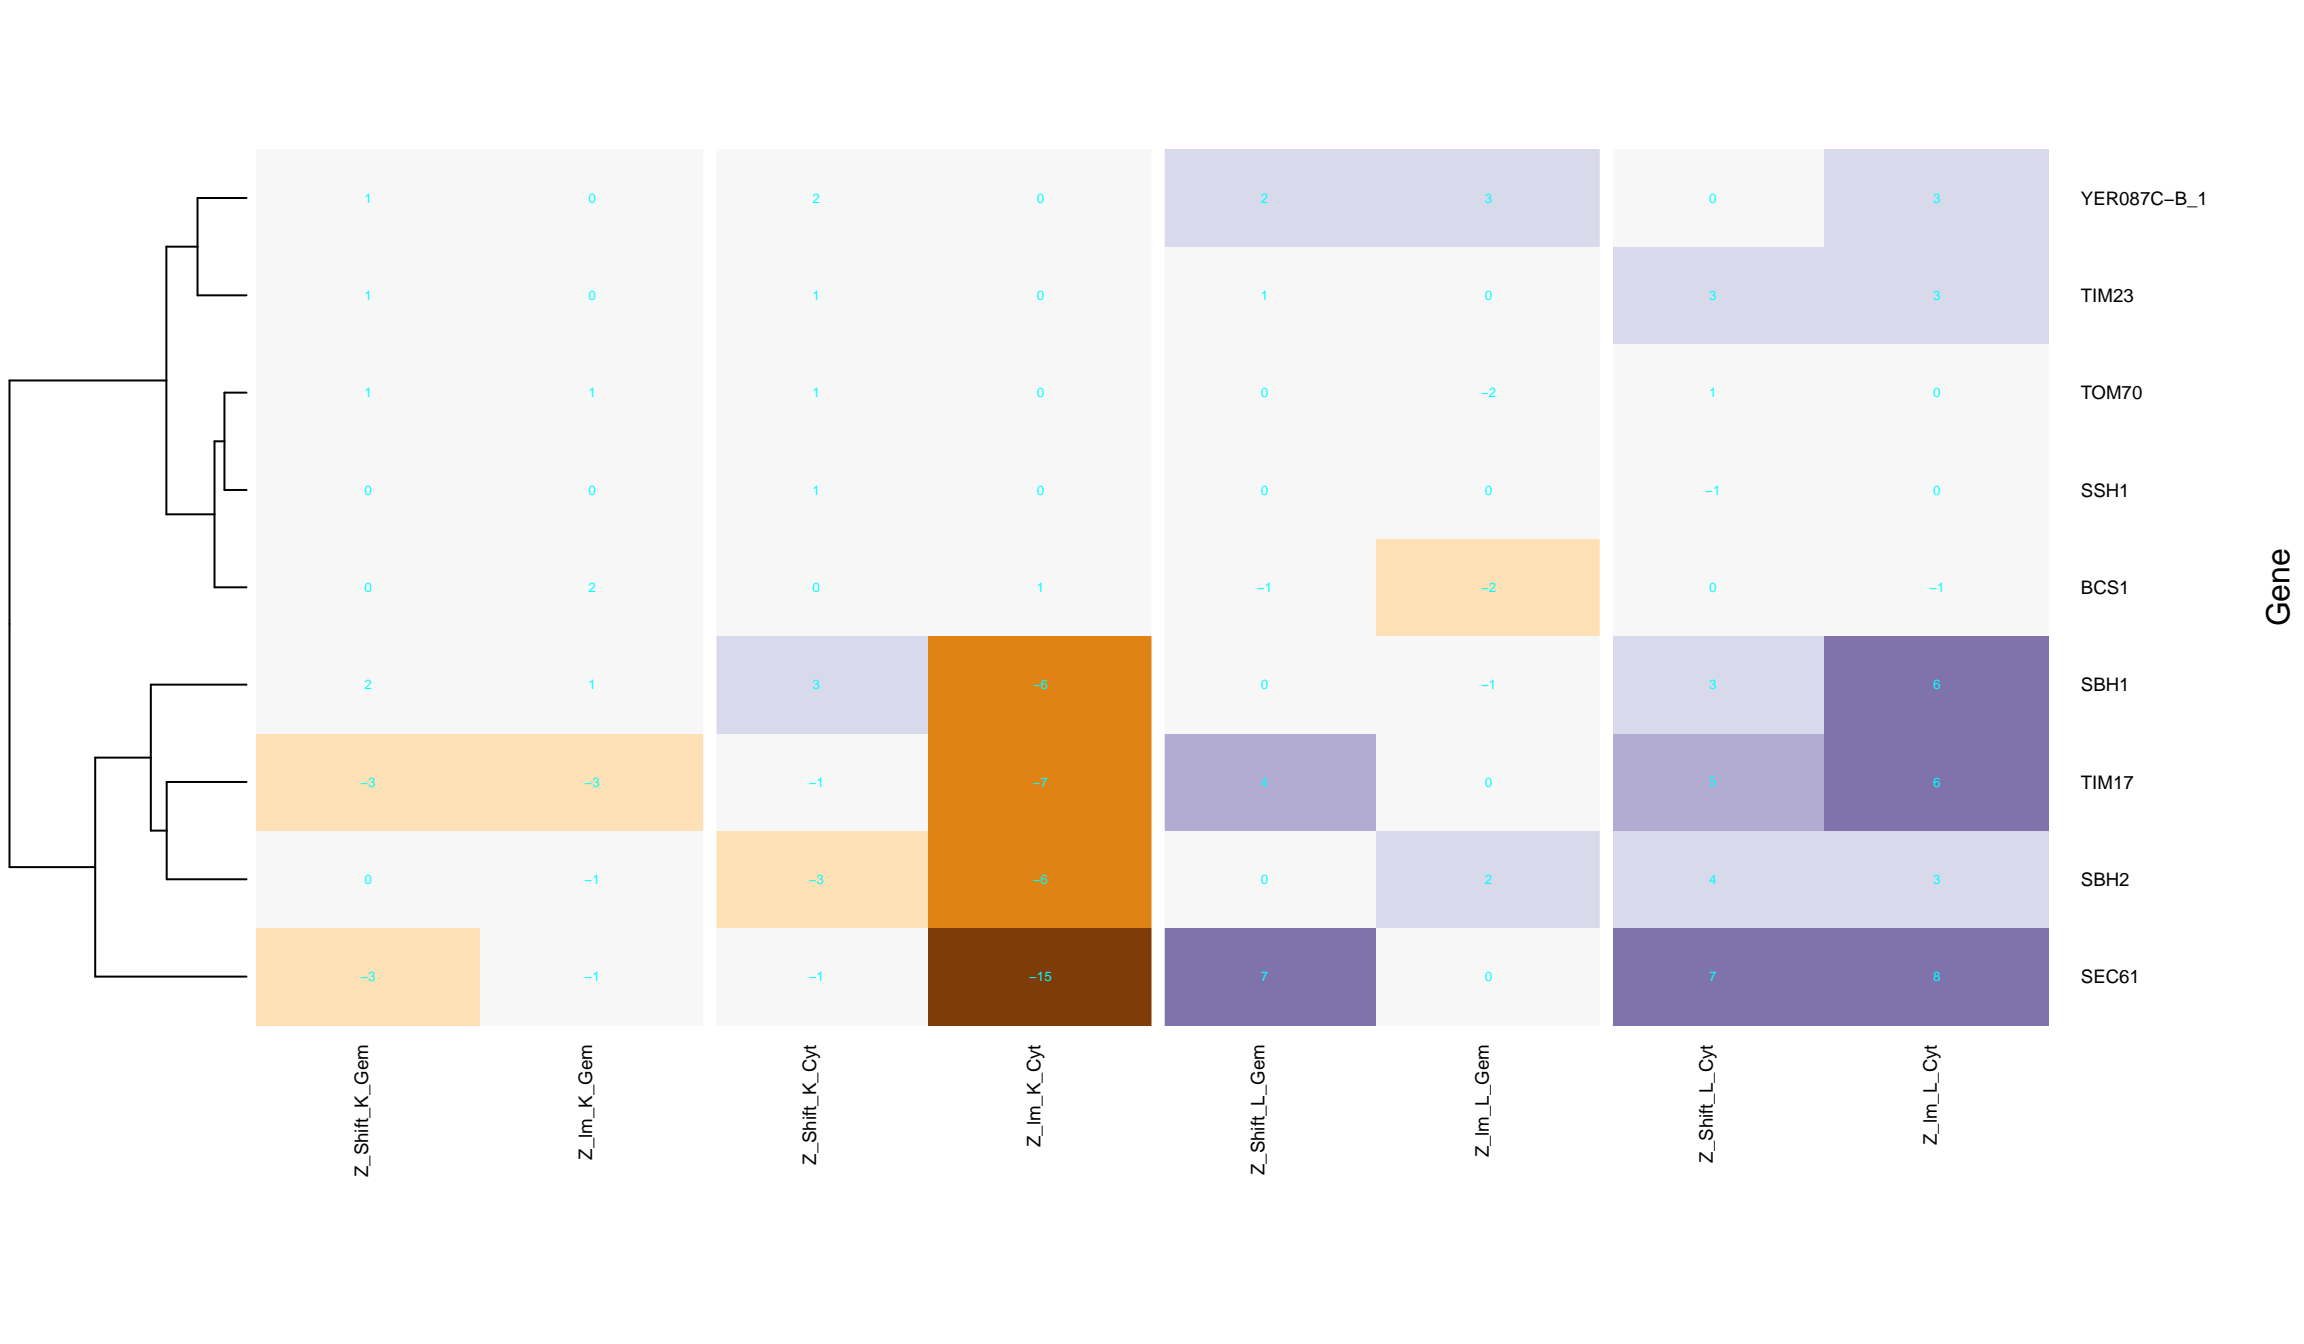

Supplement: s1 [file s1]

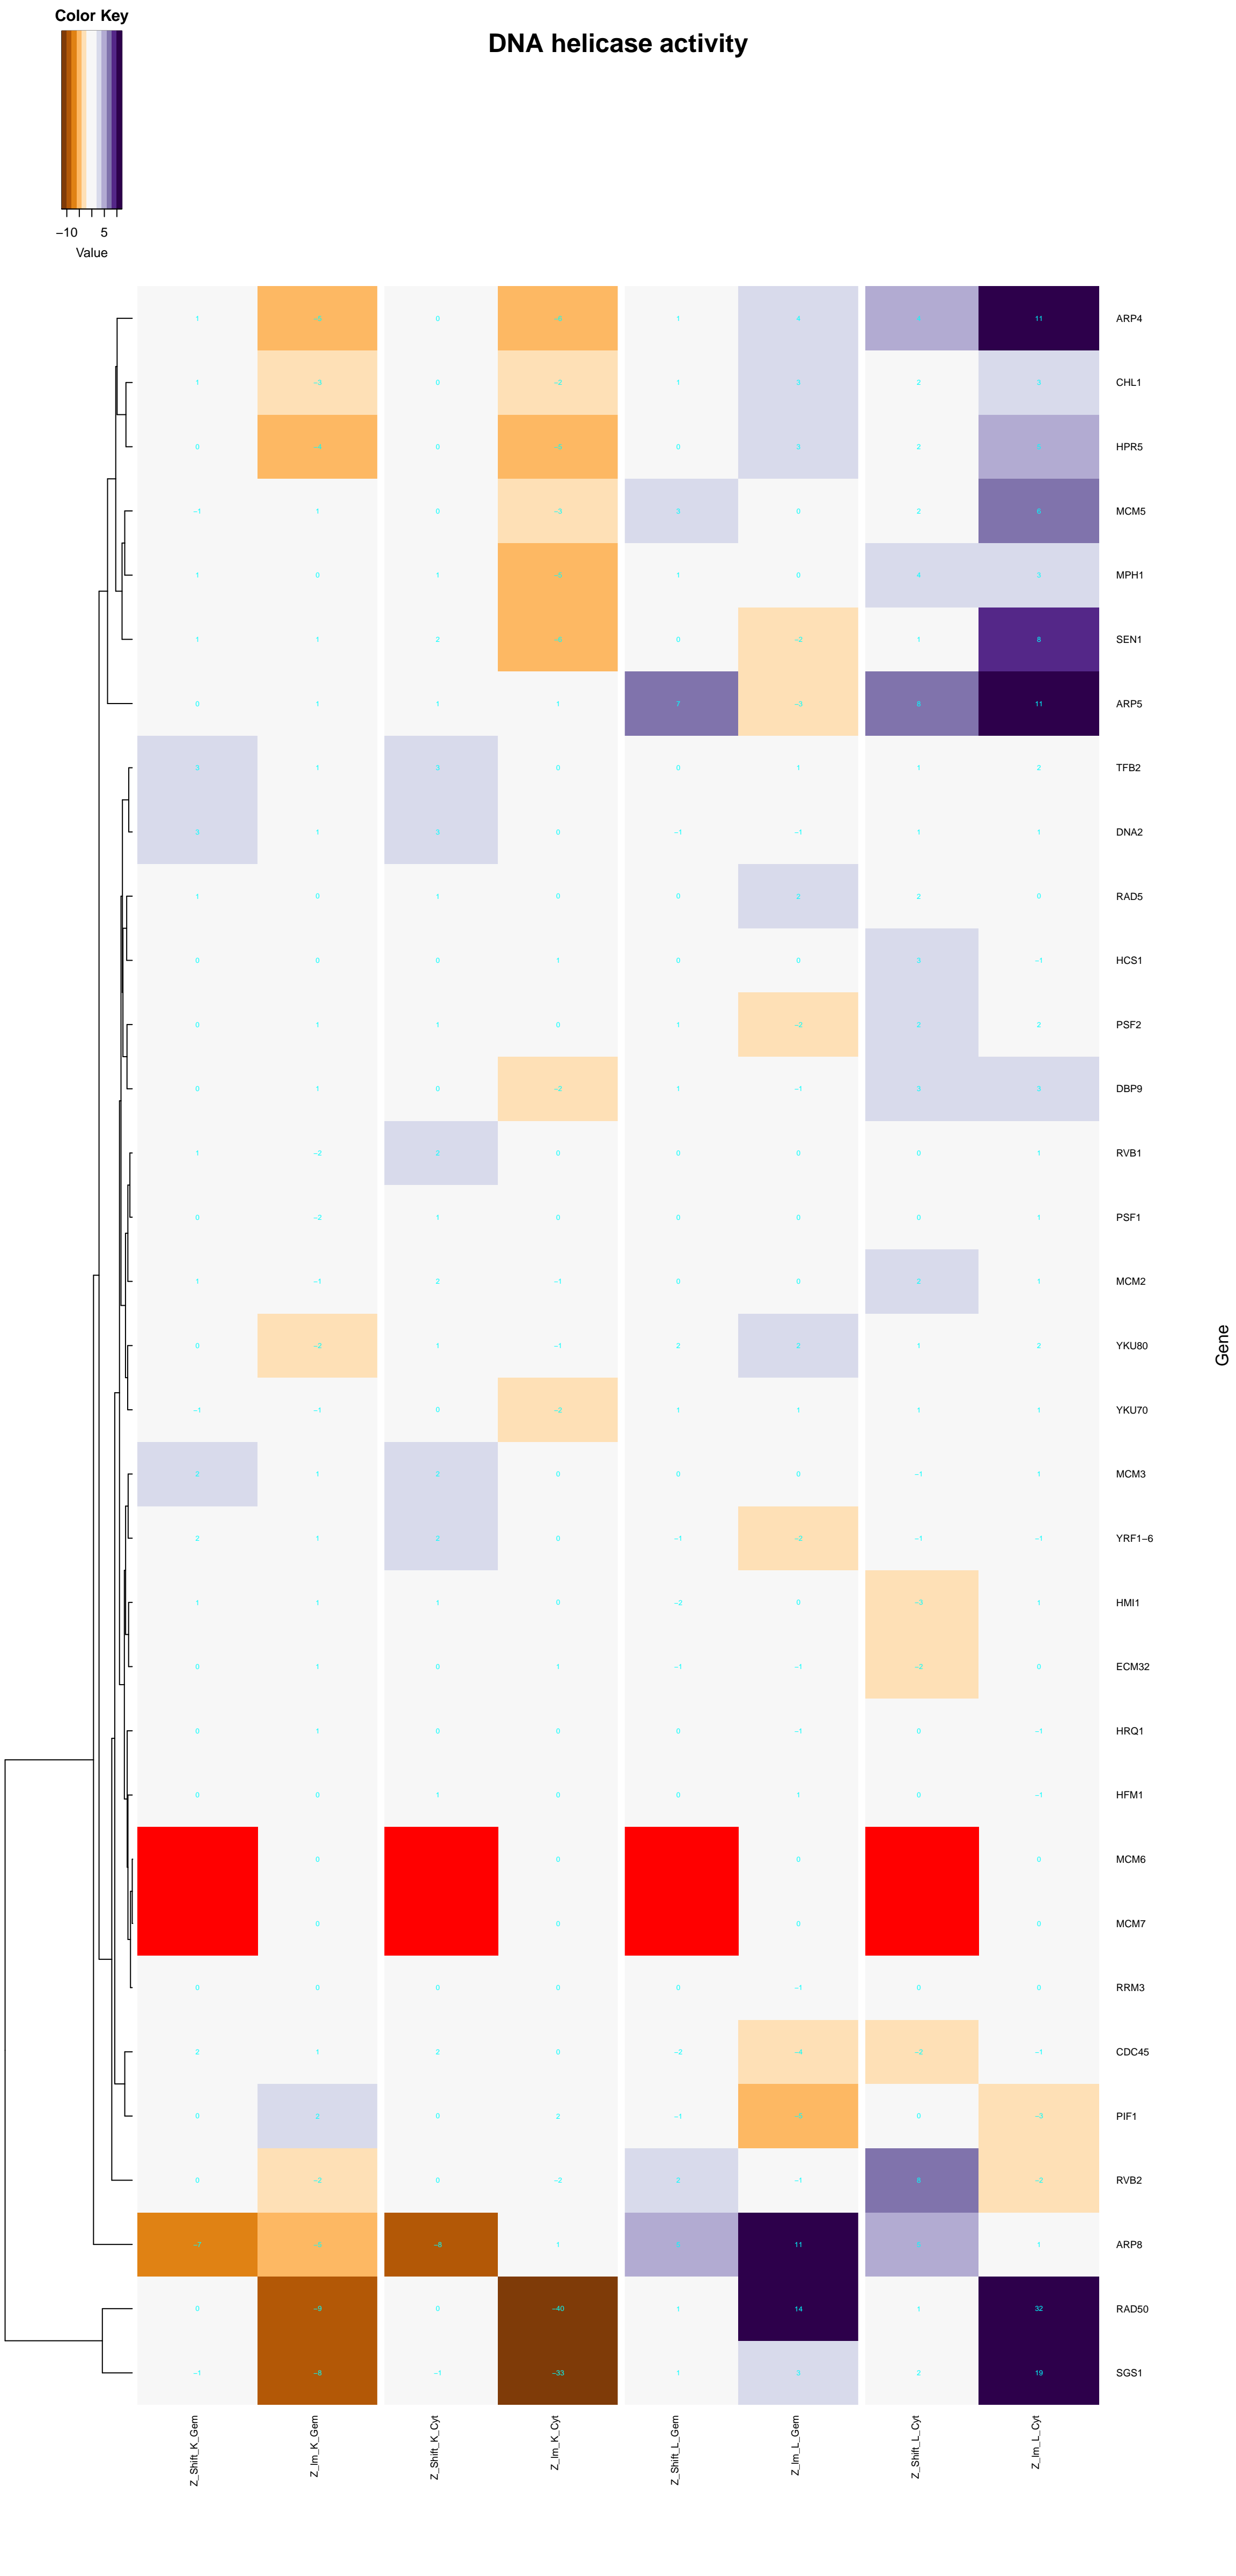



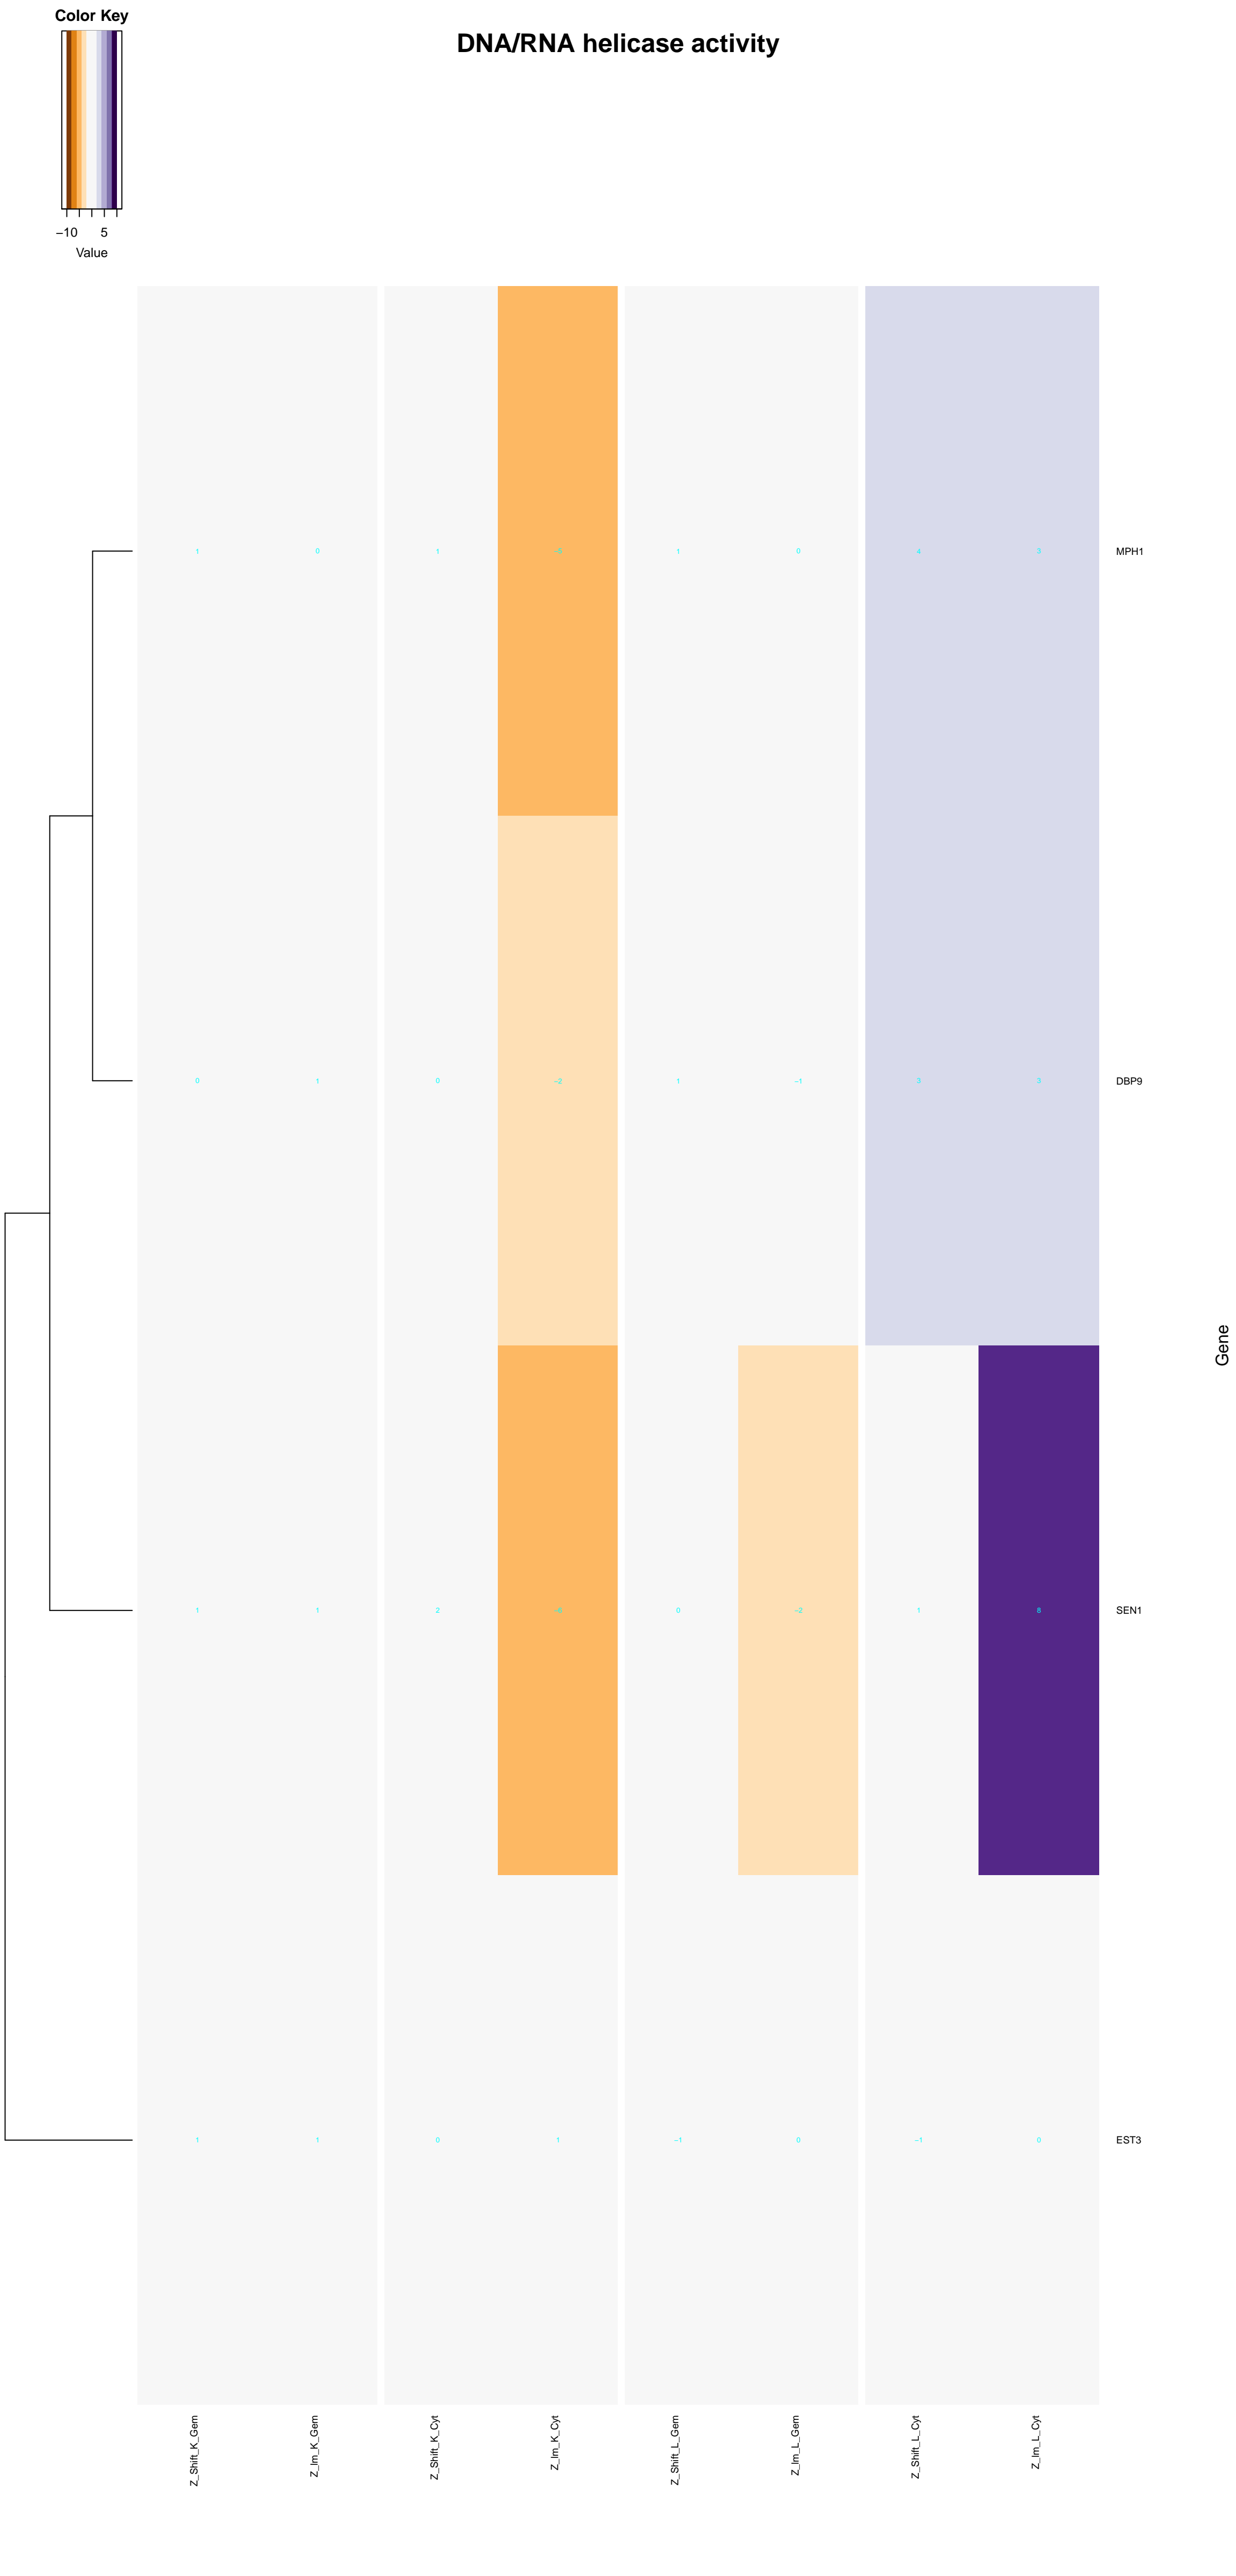

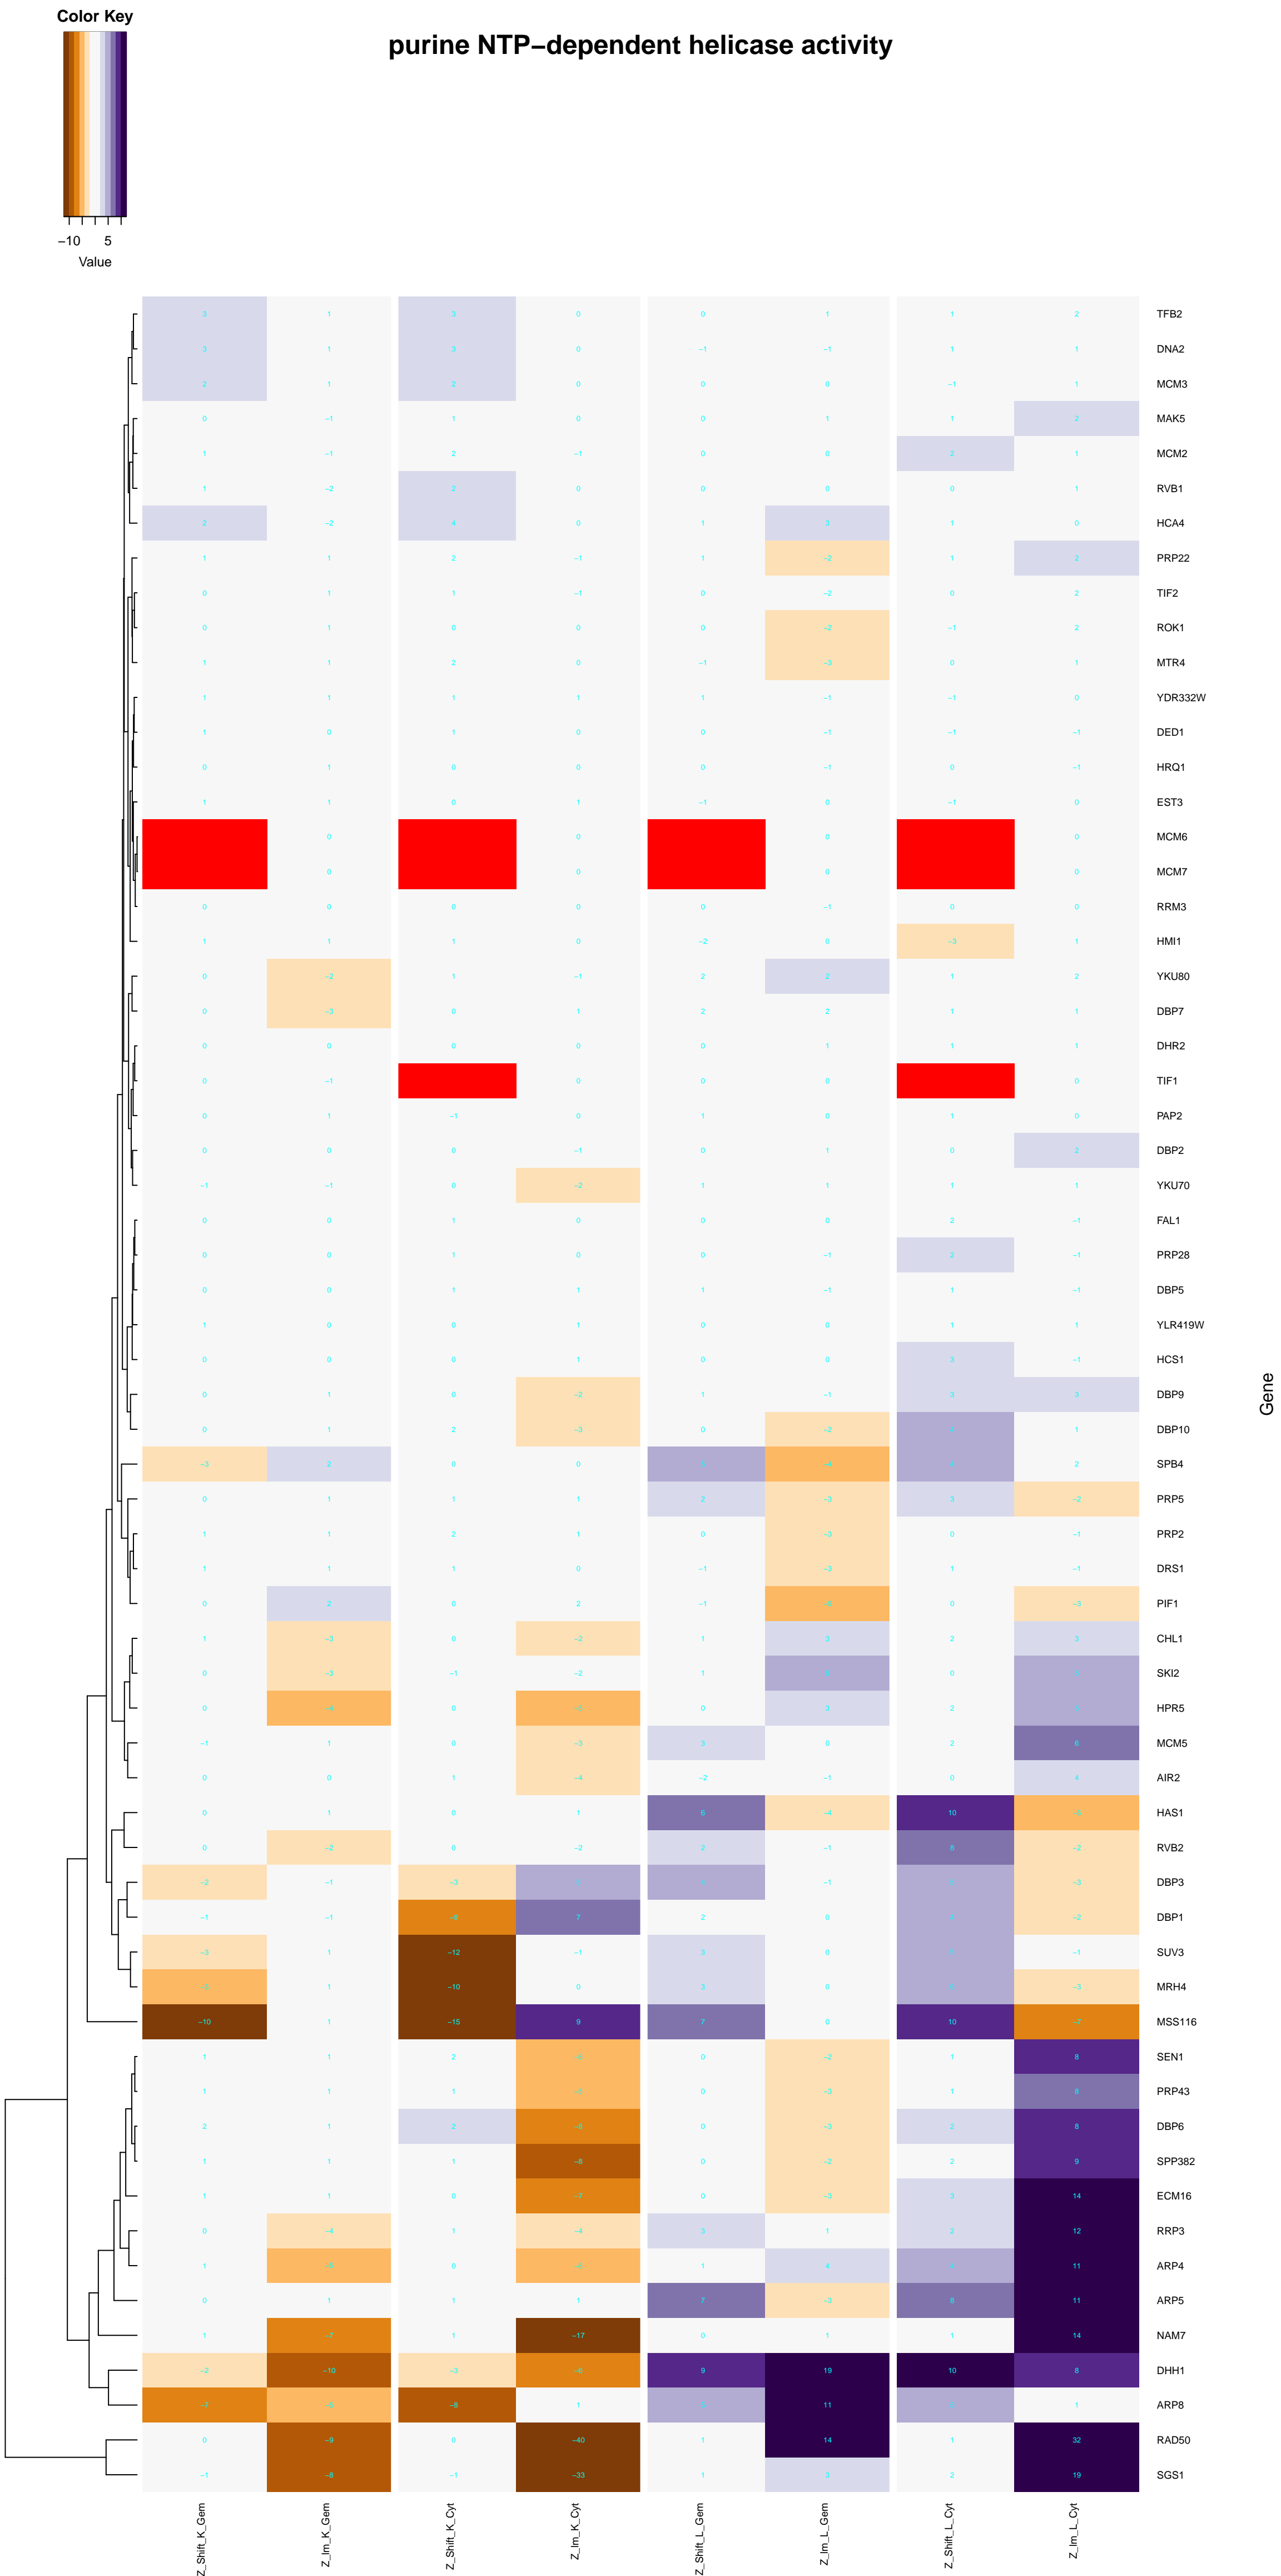

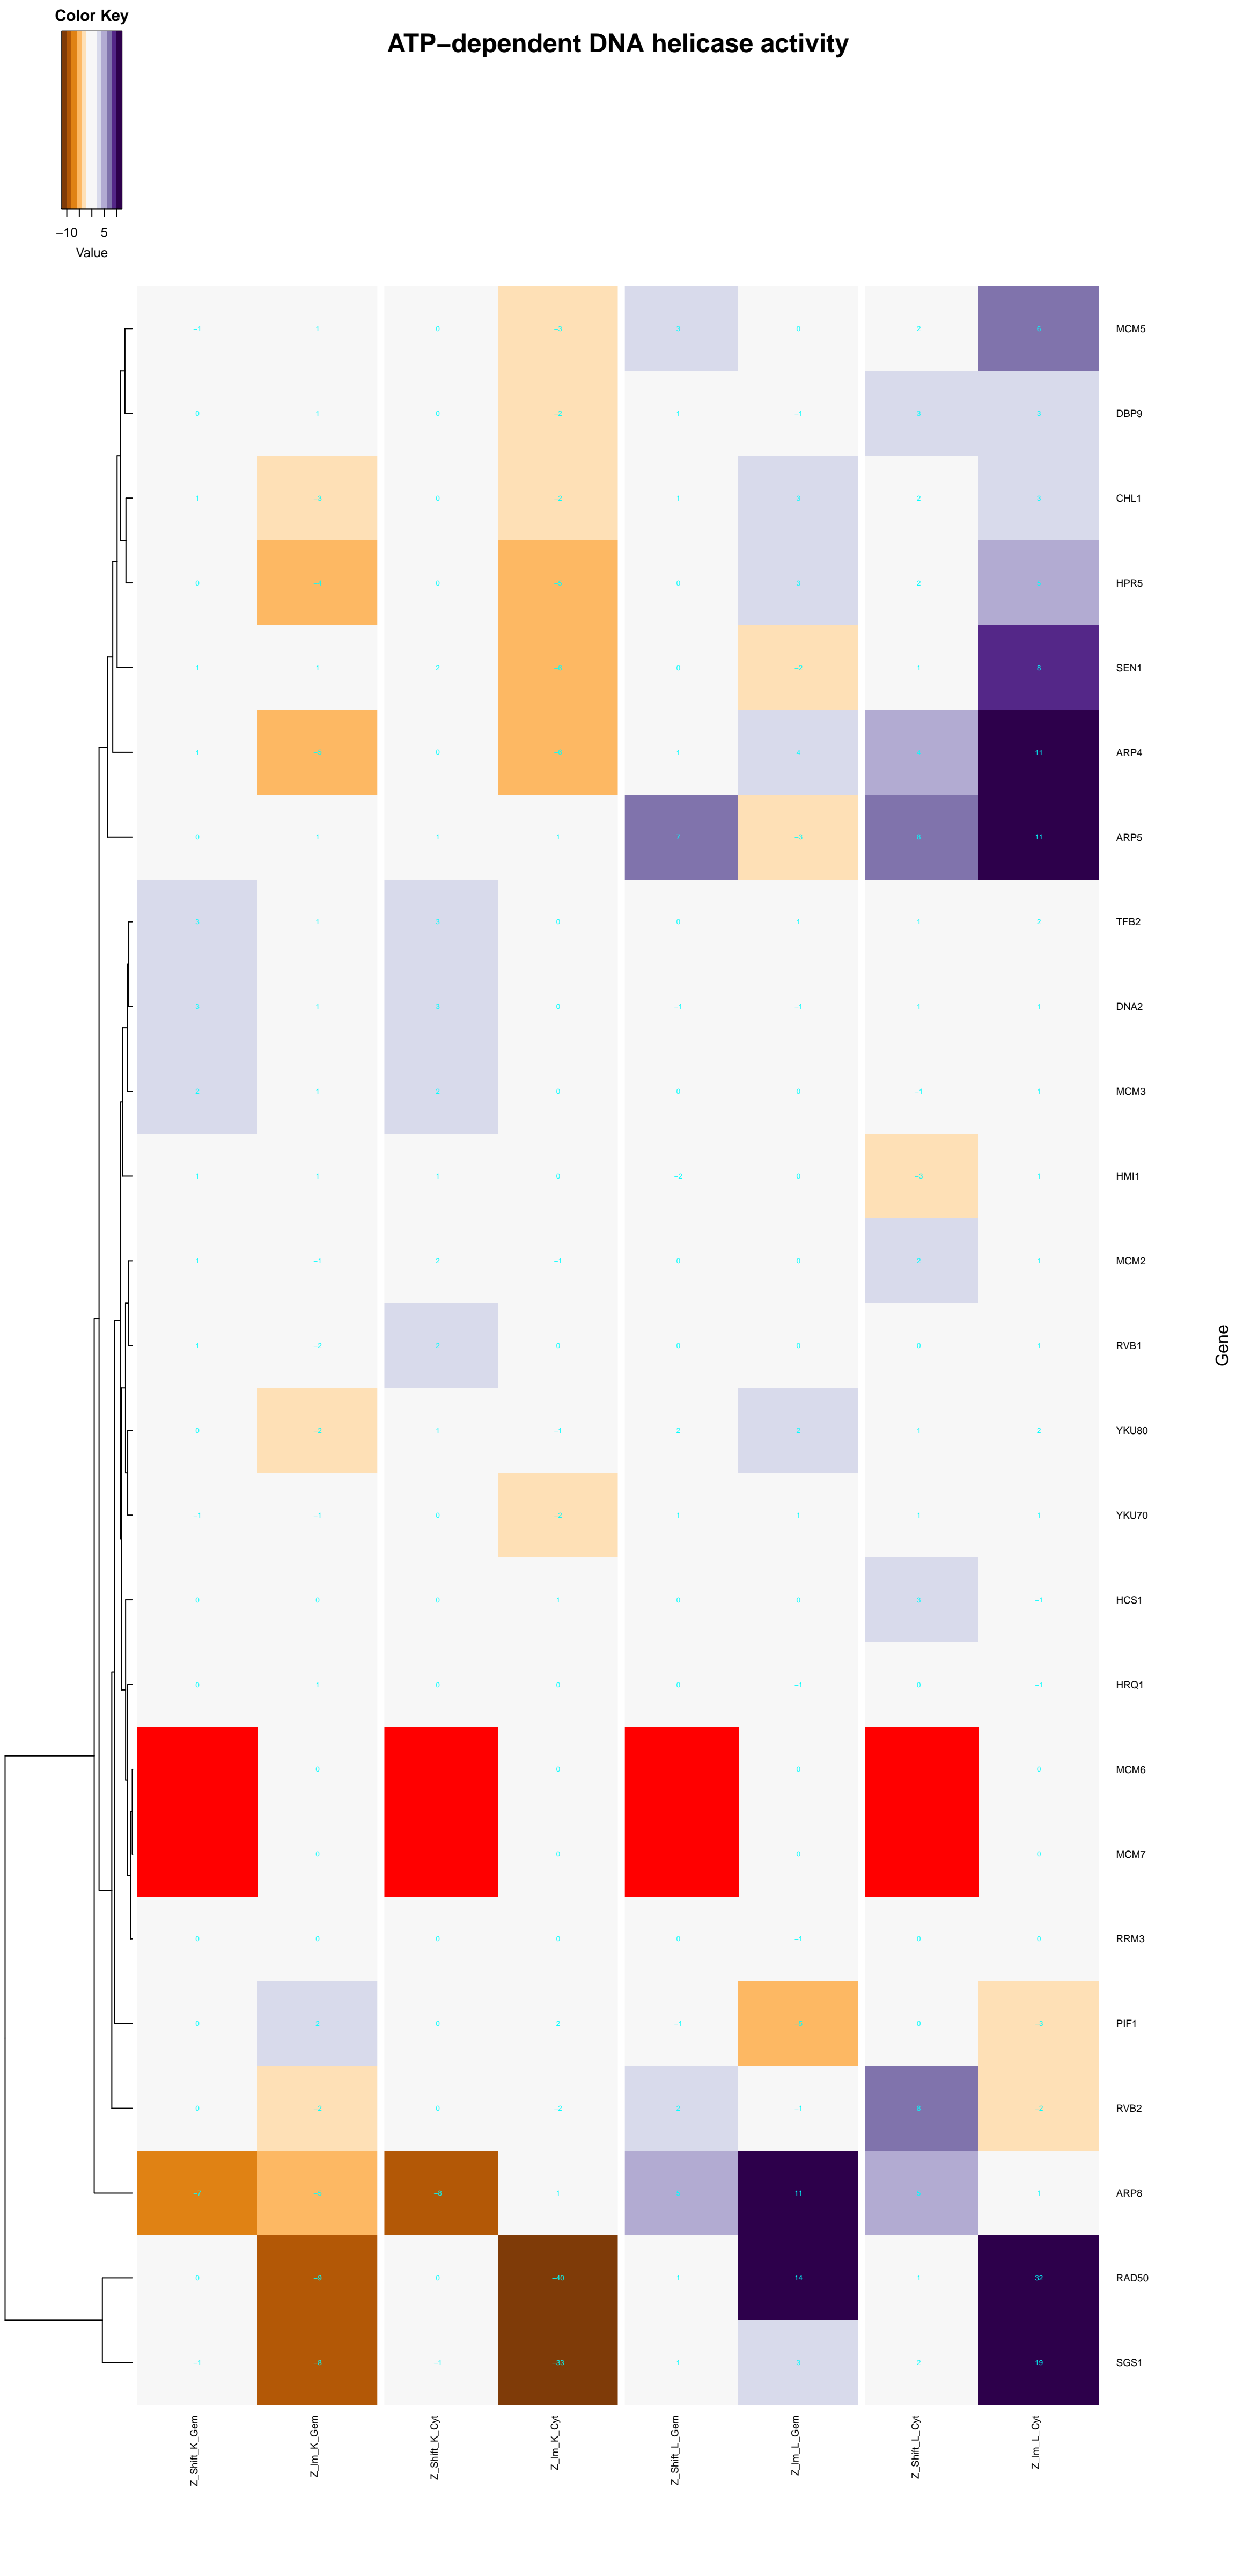

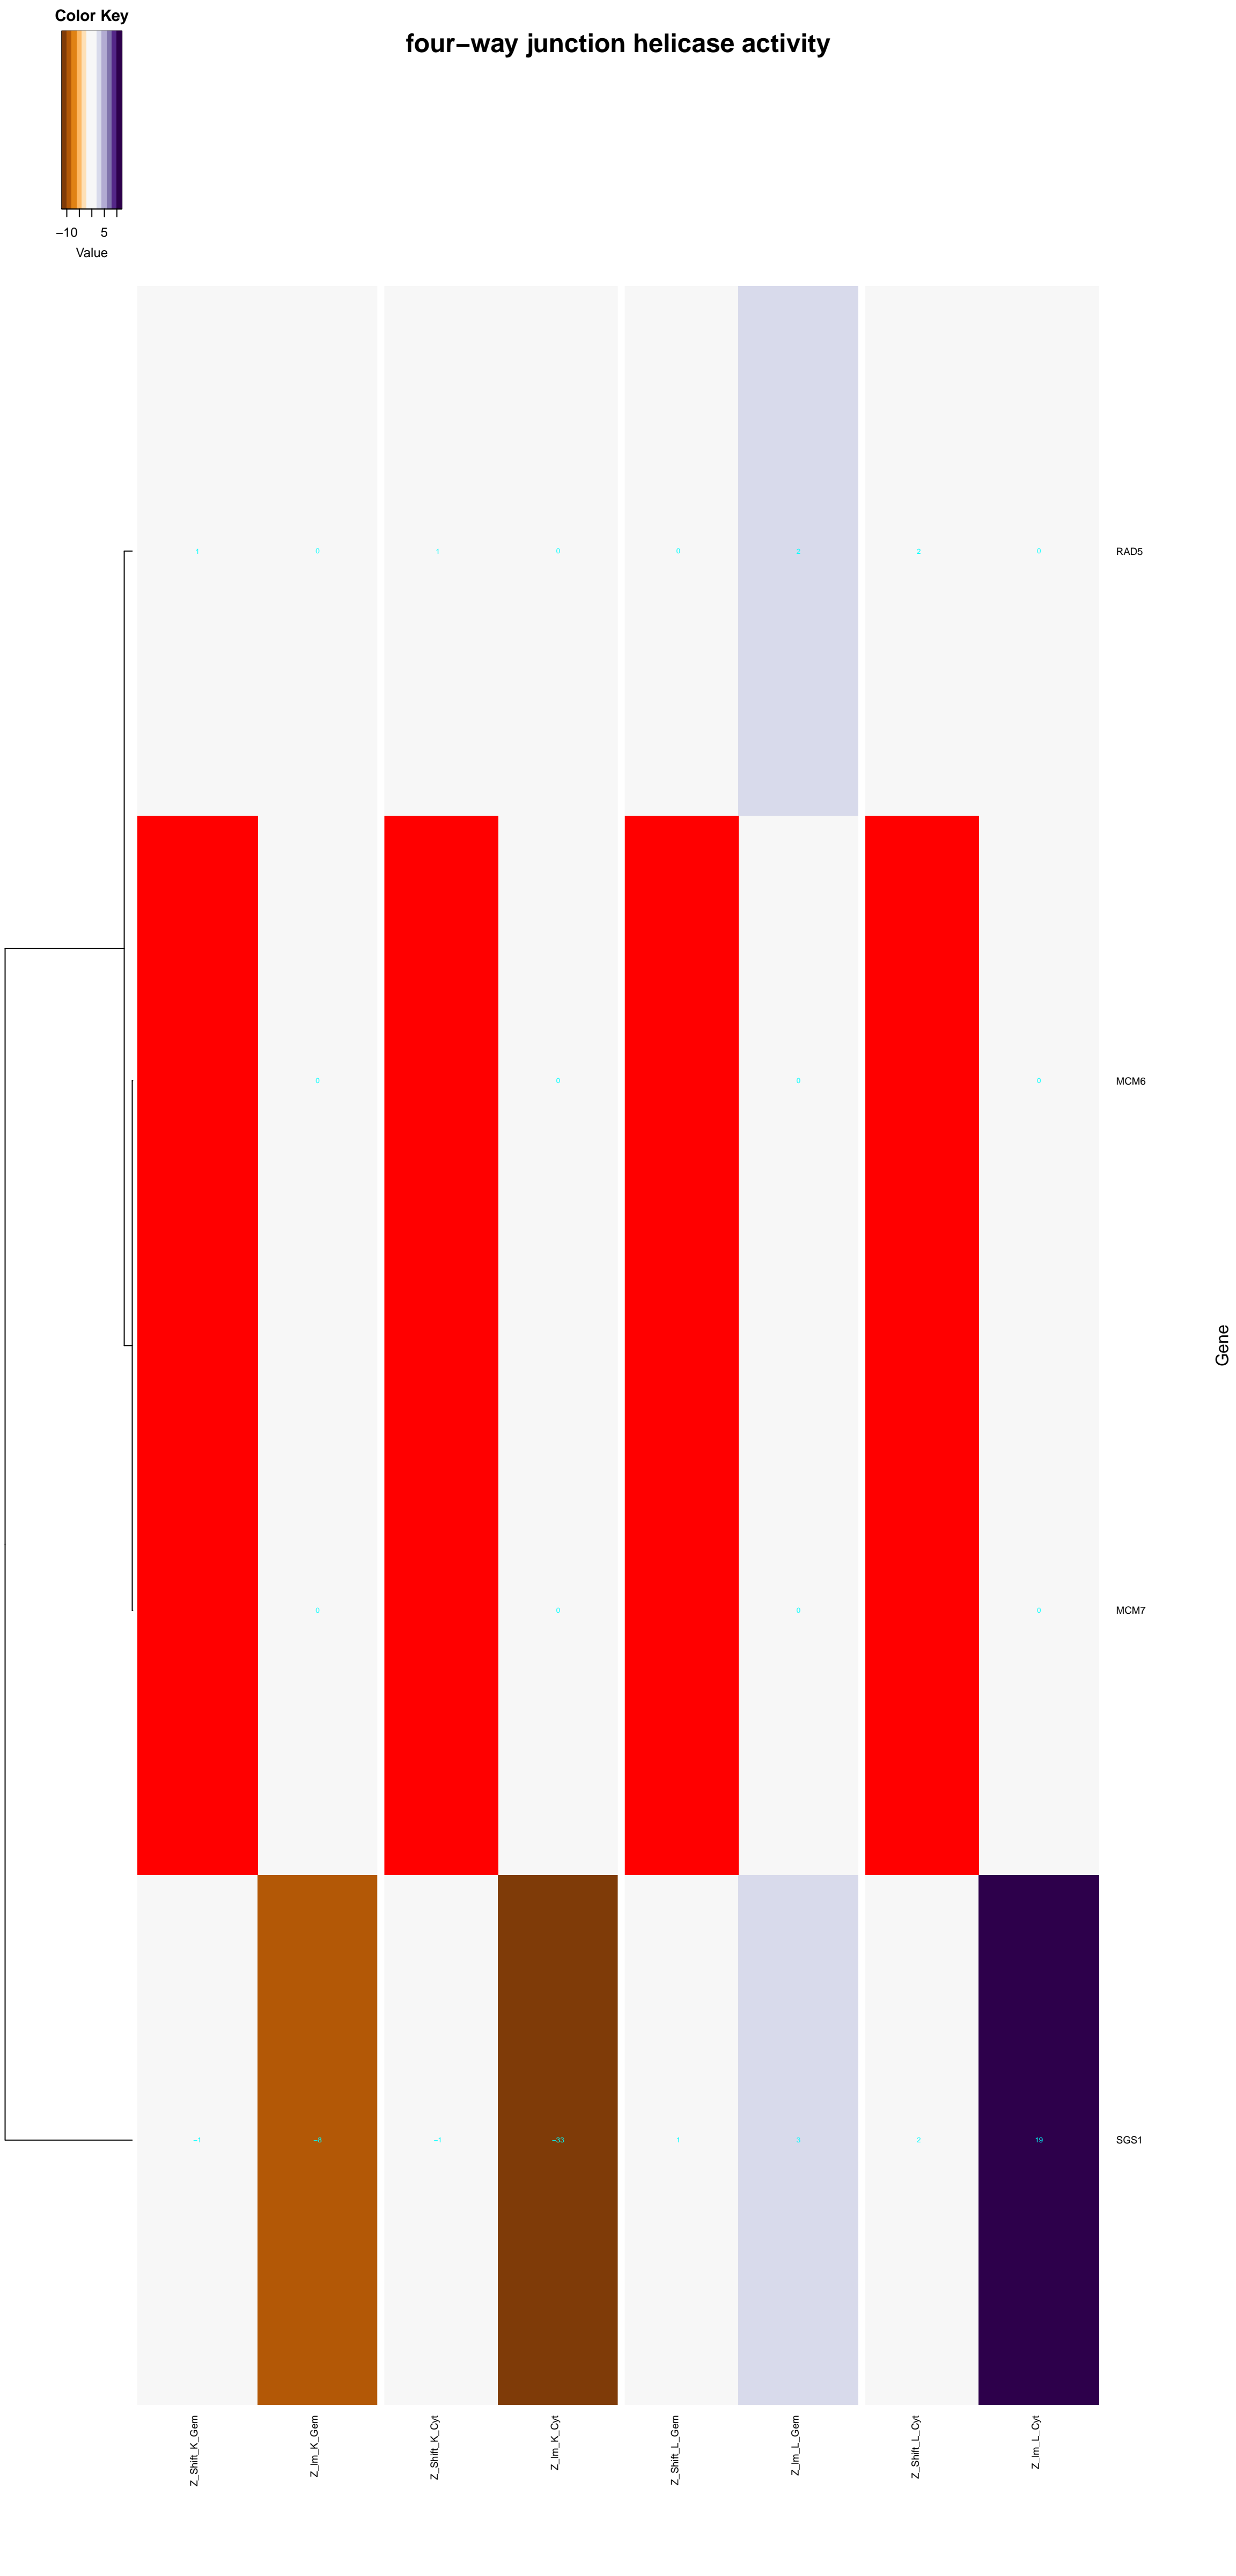

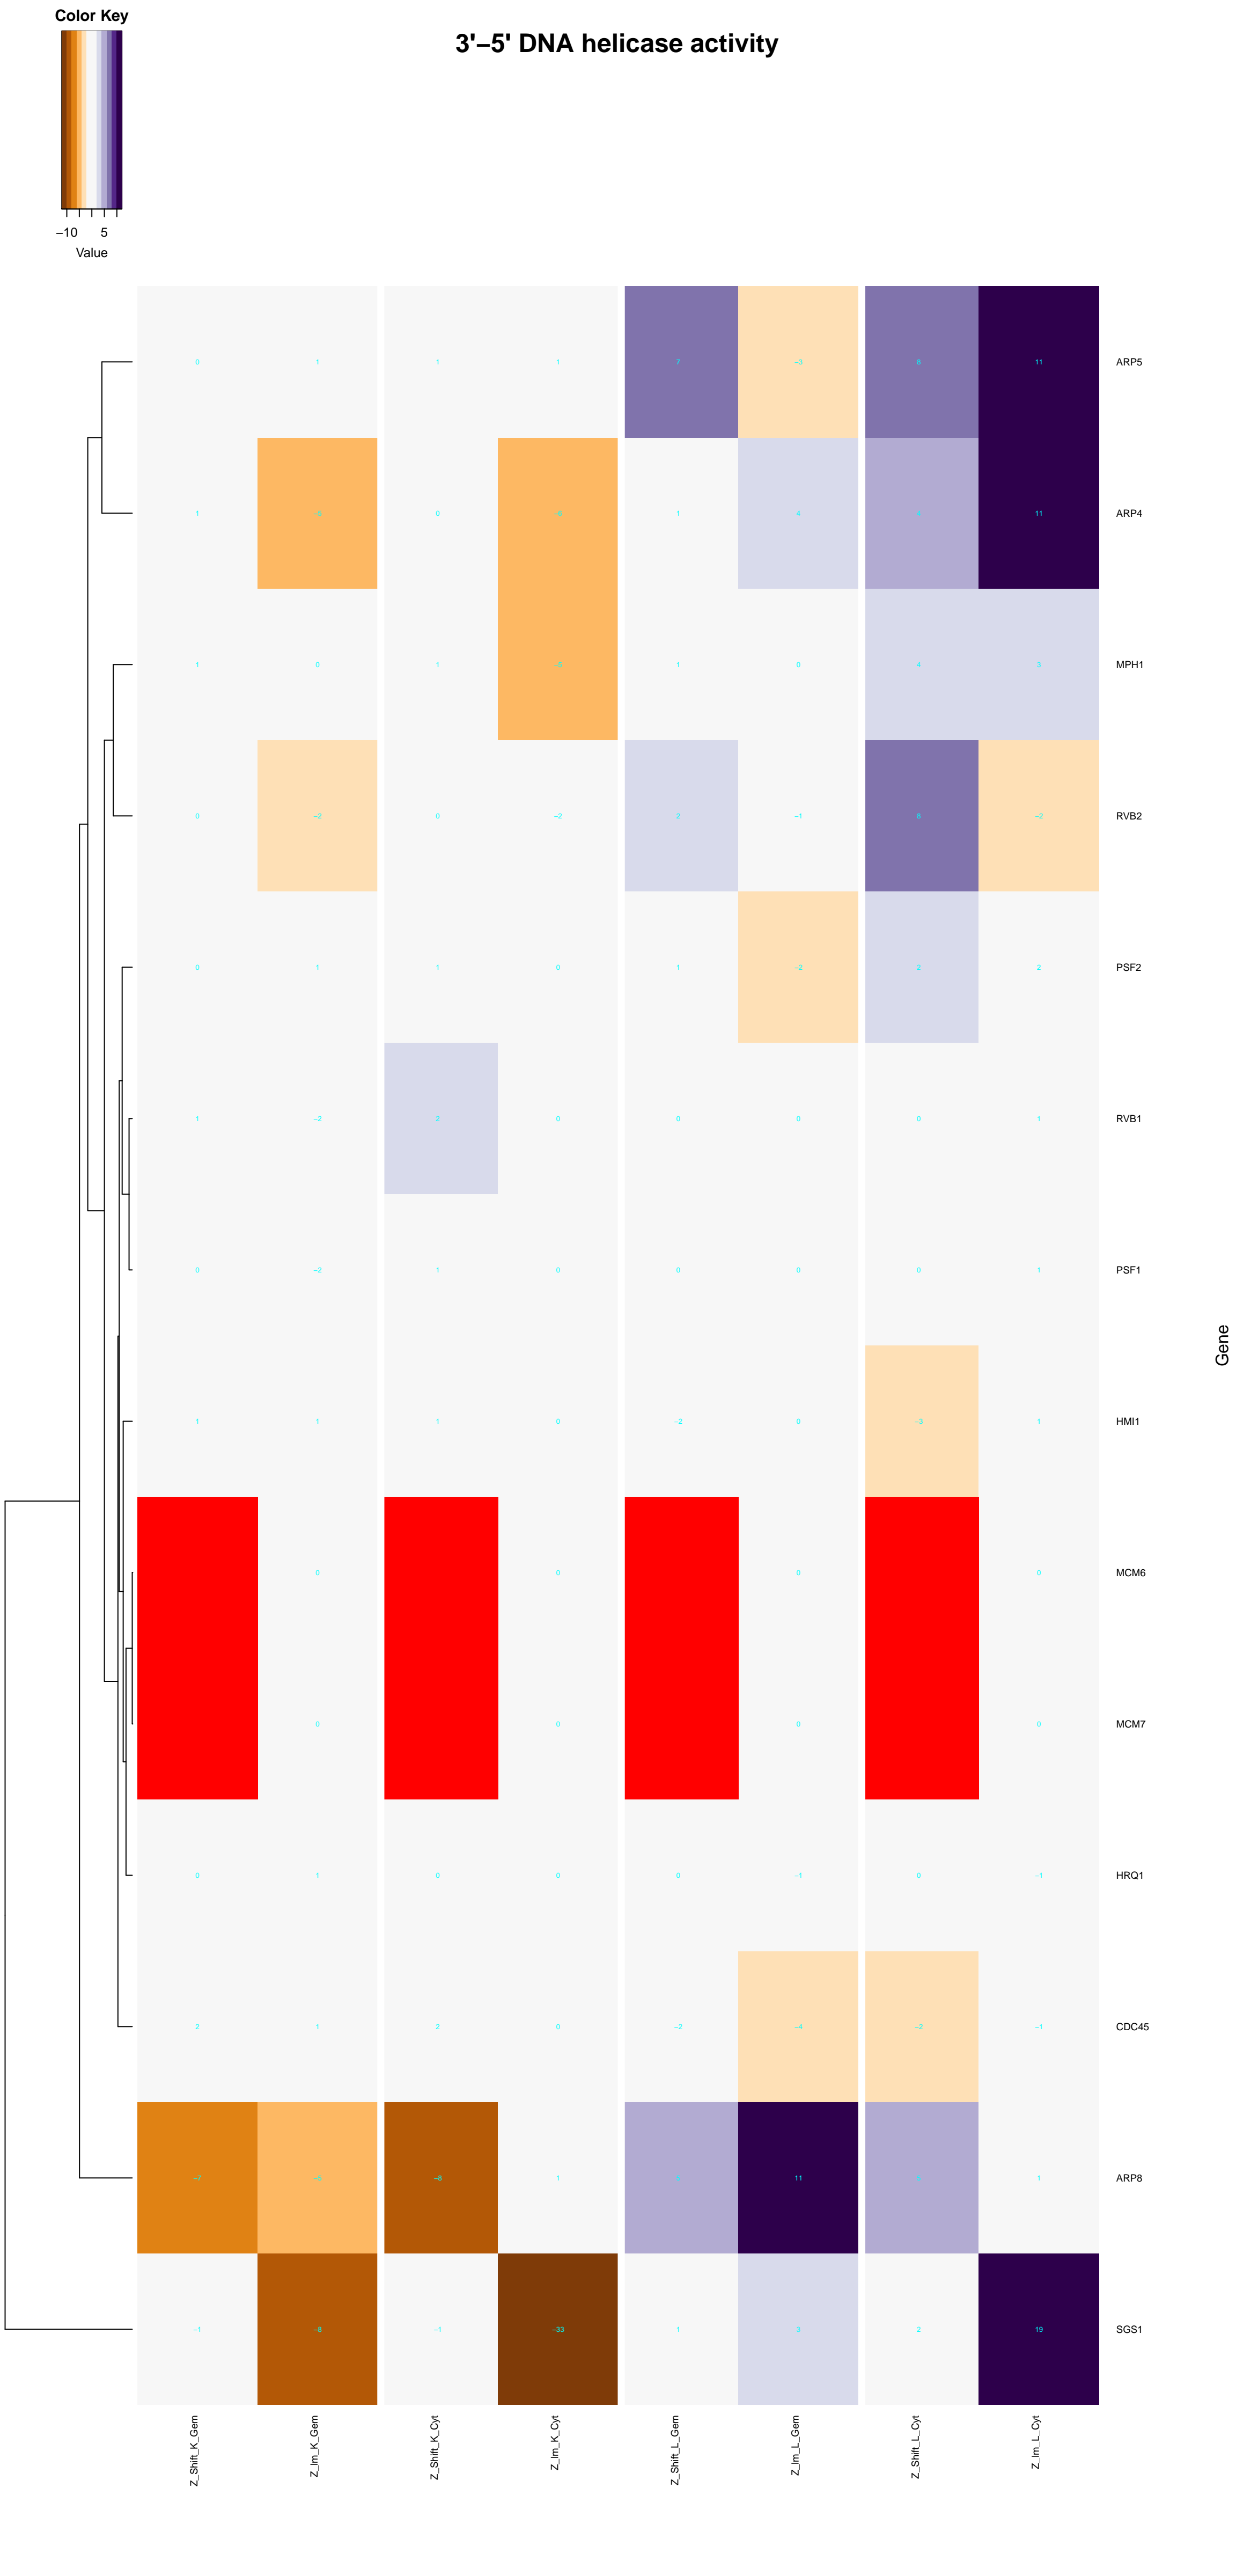

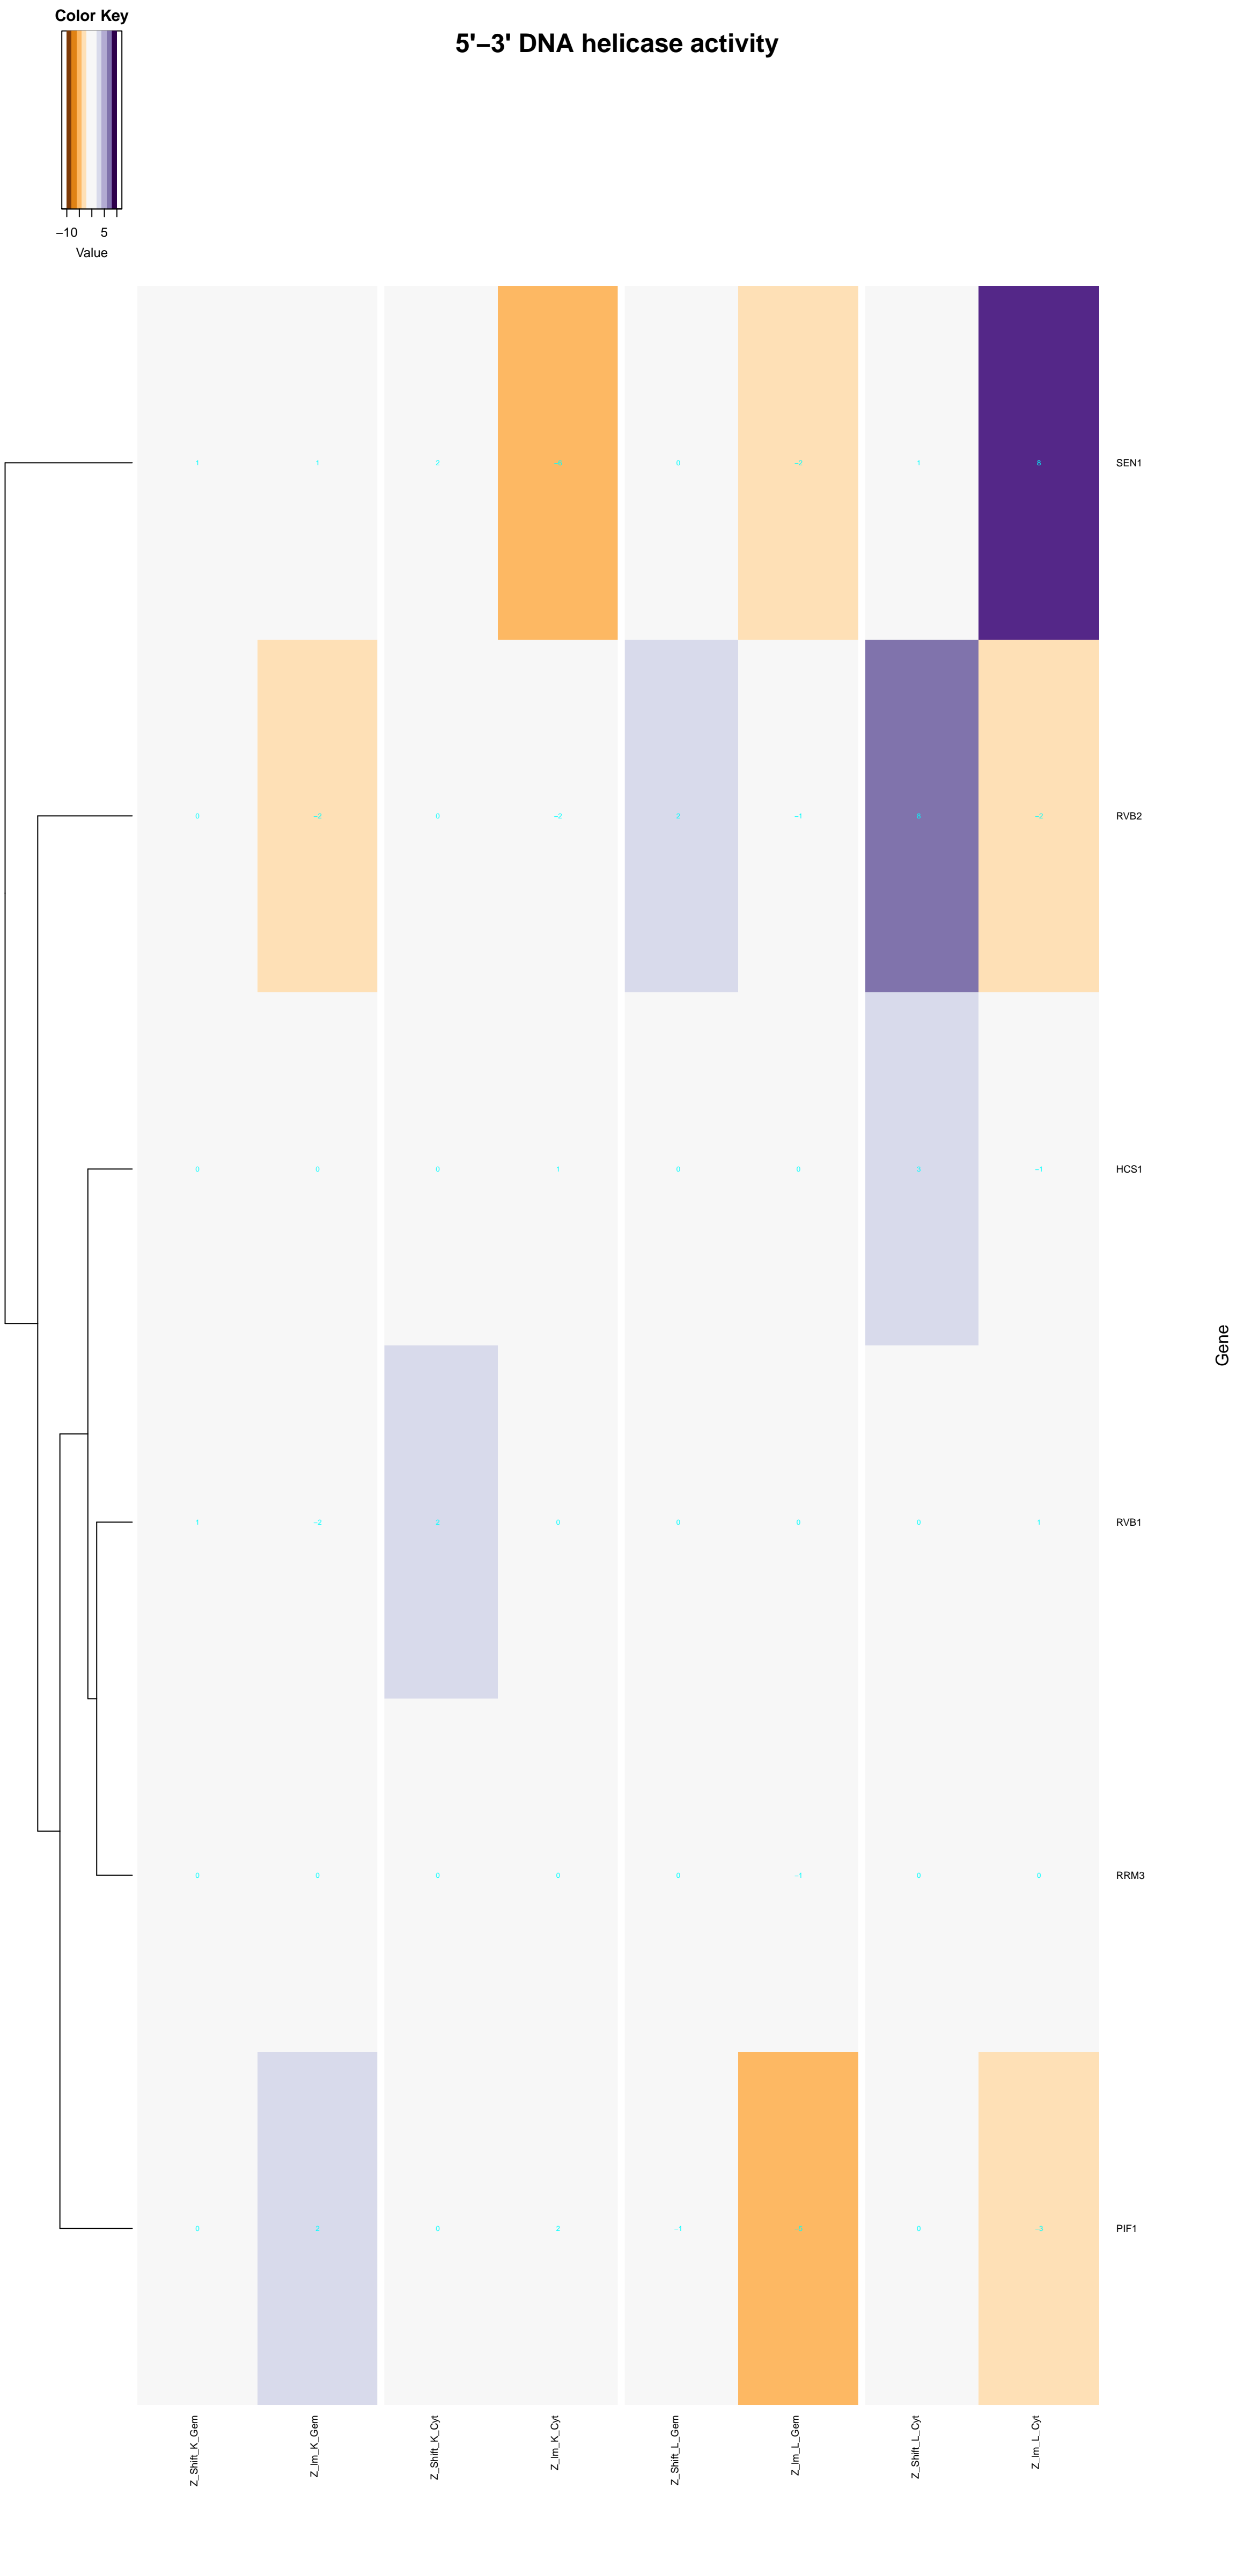



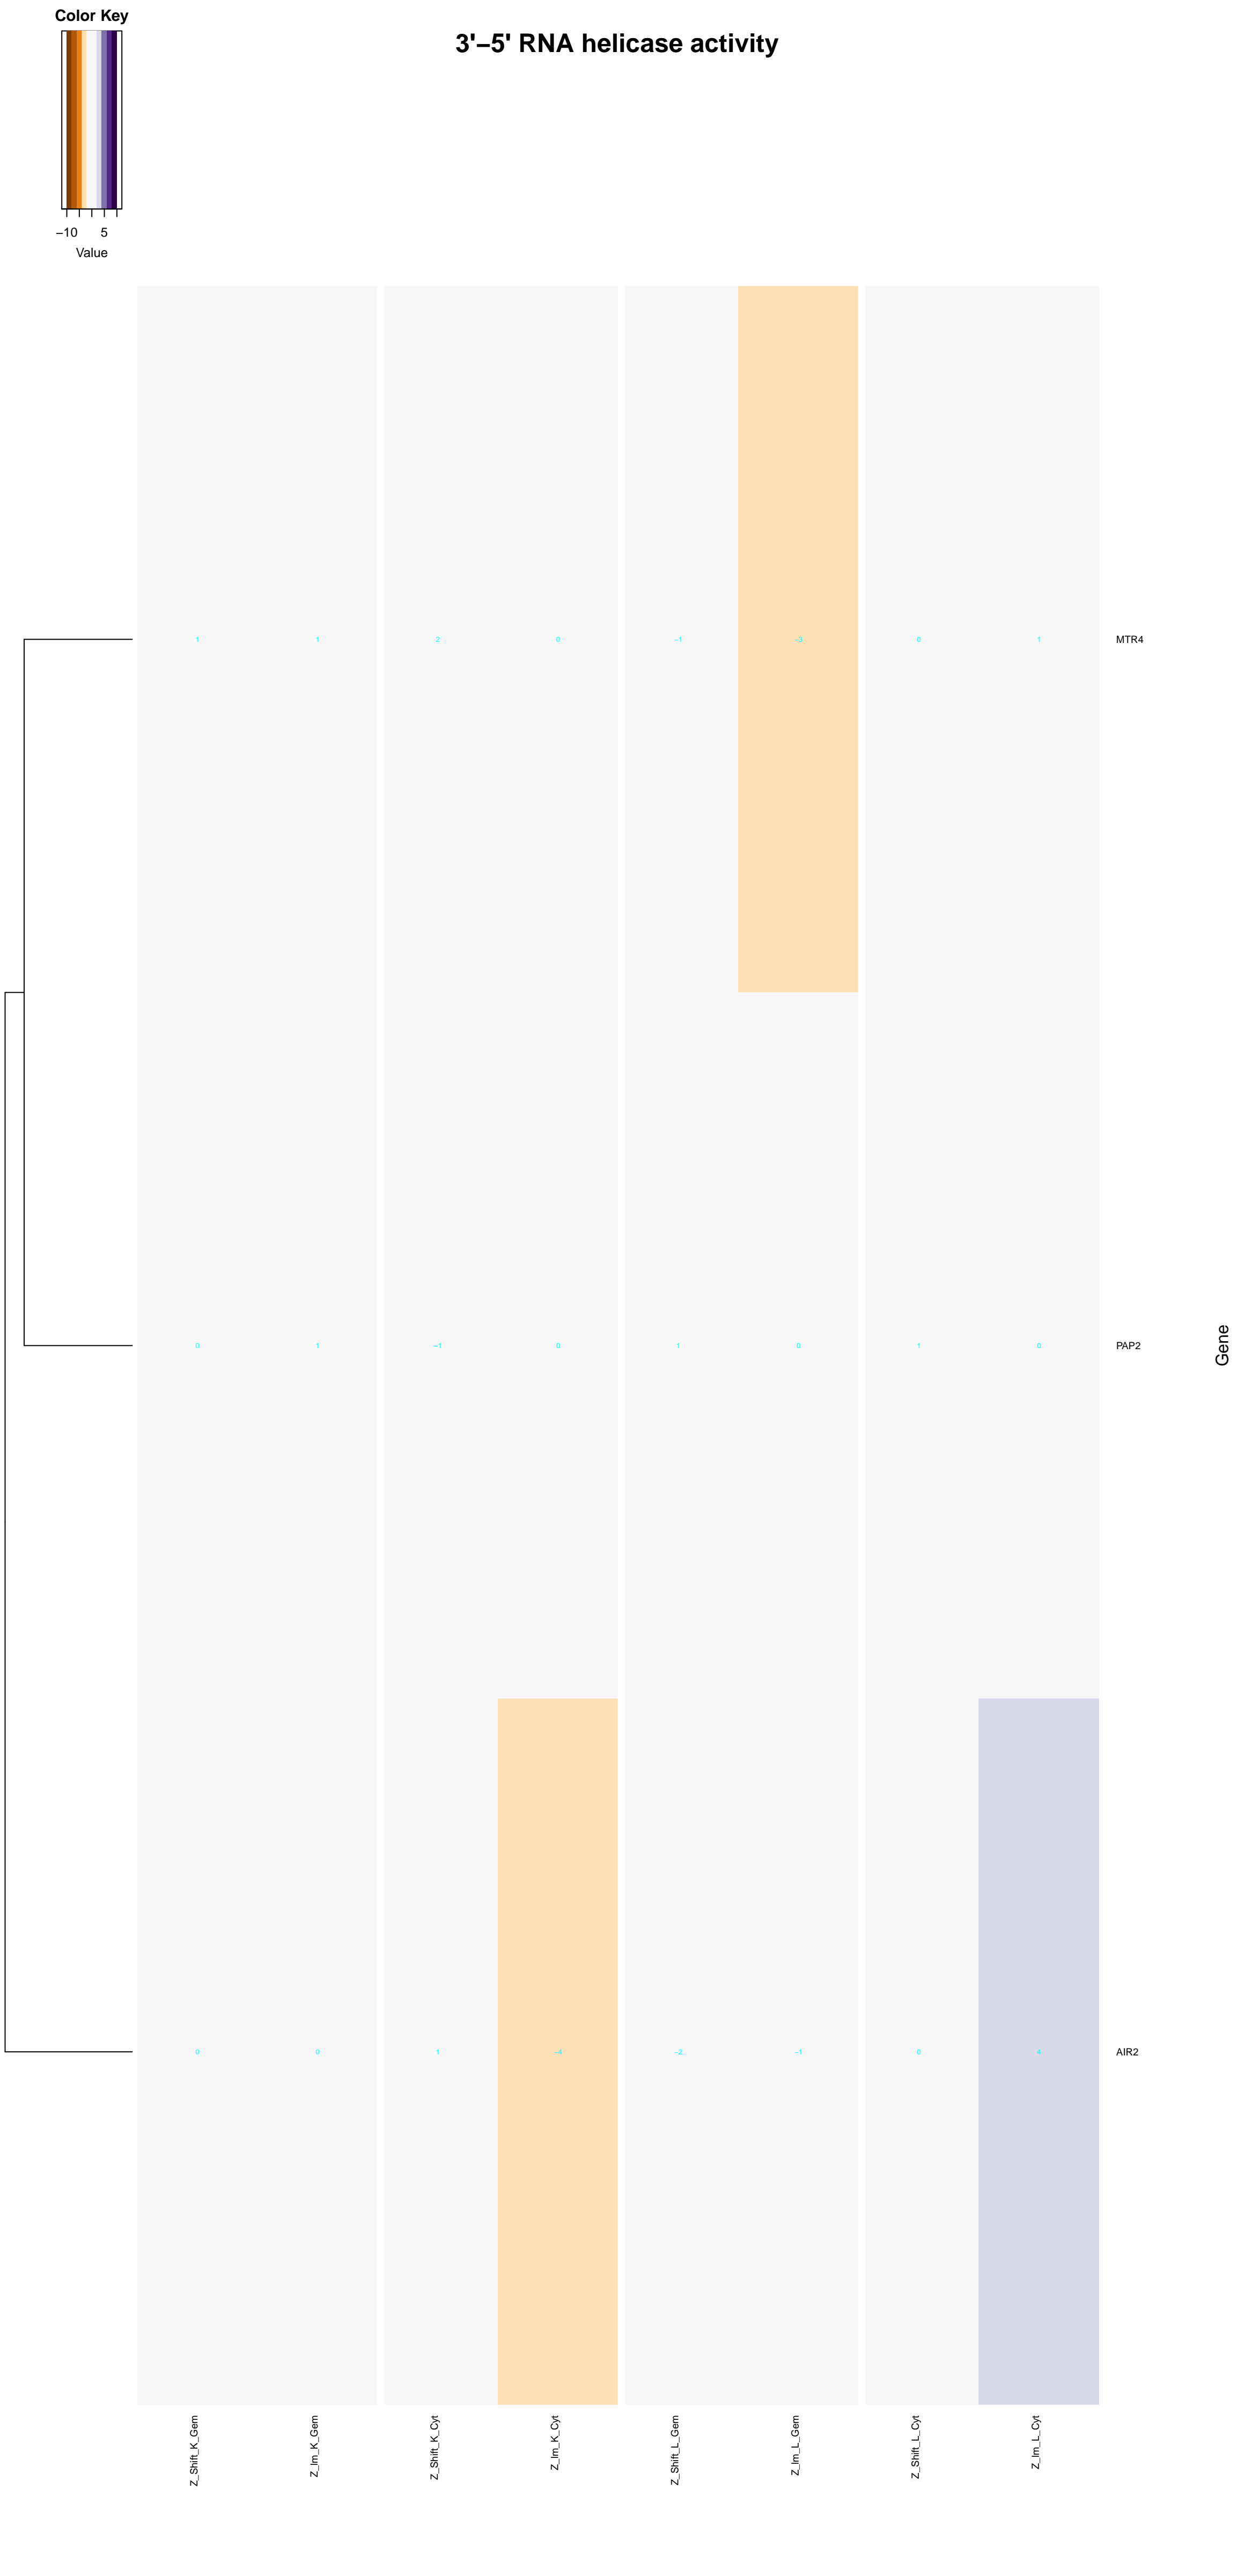

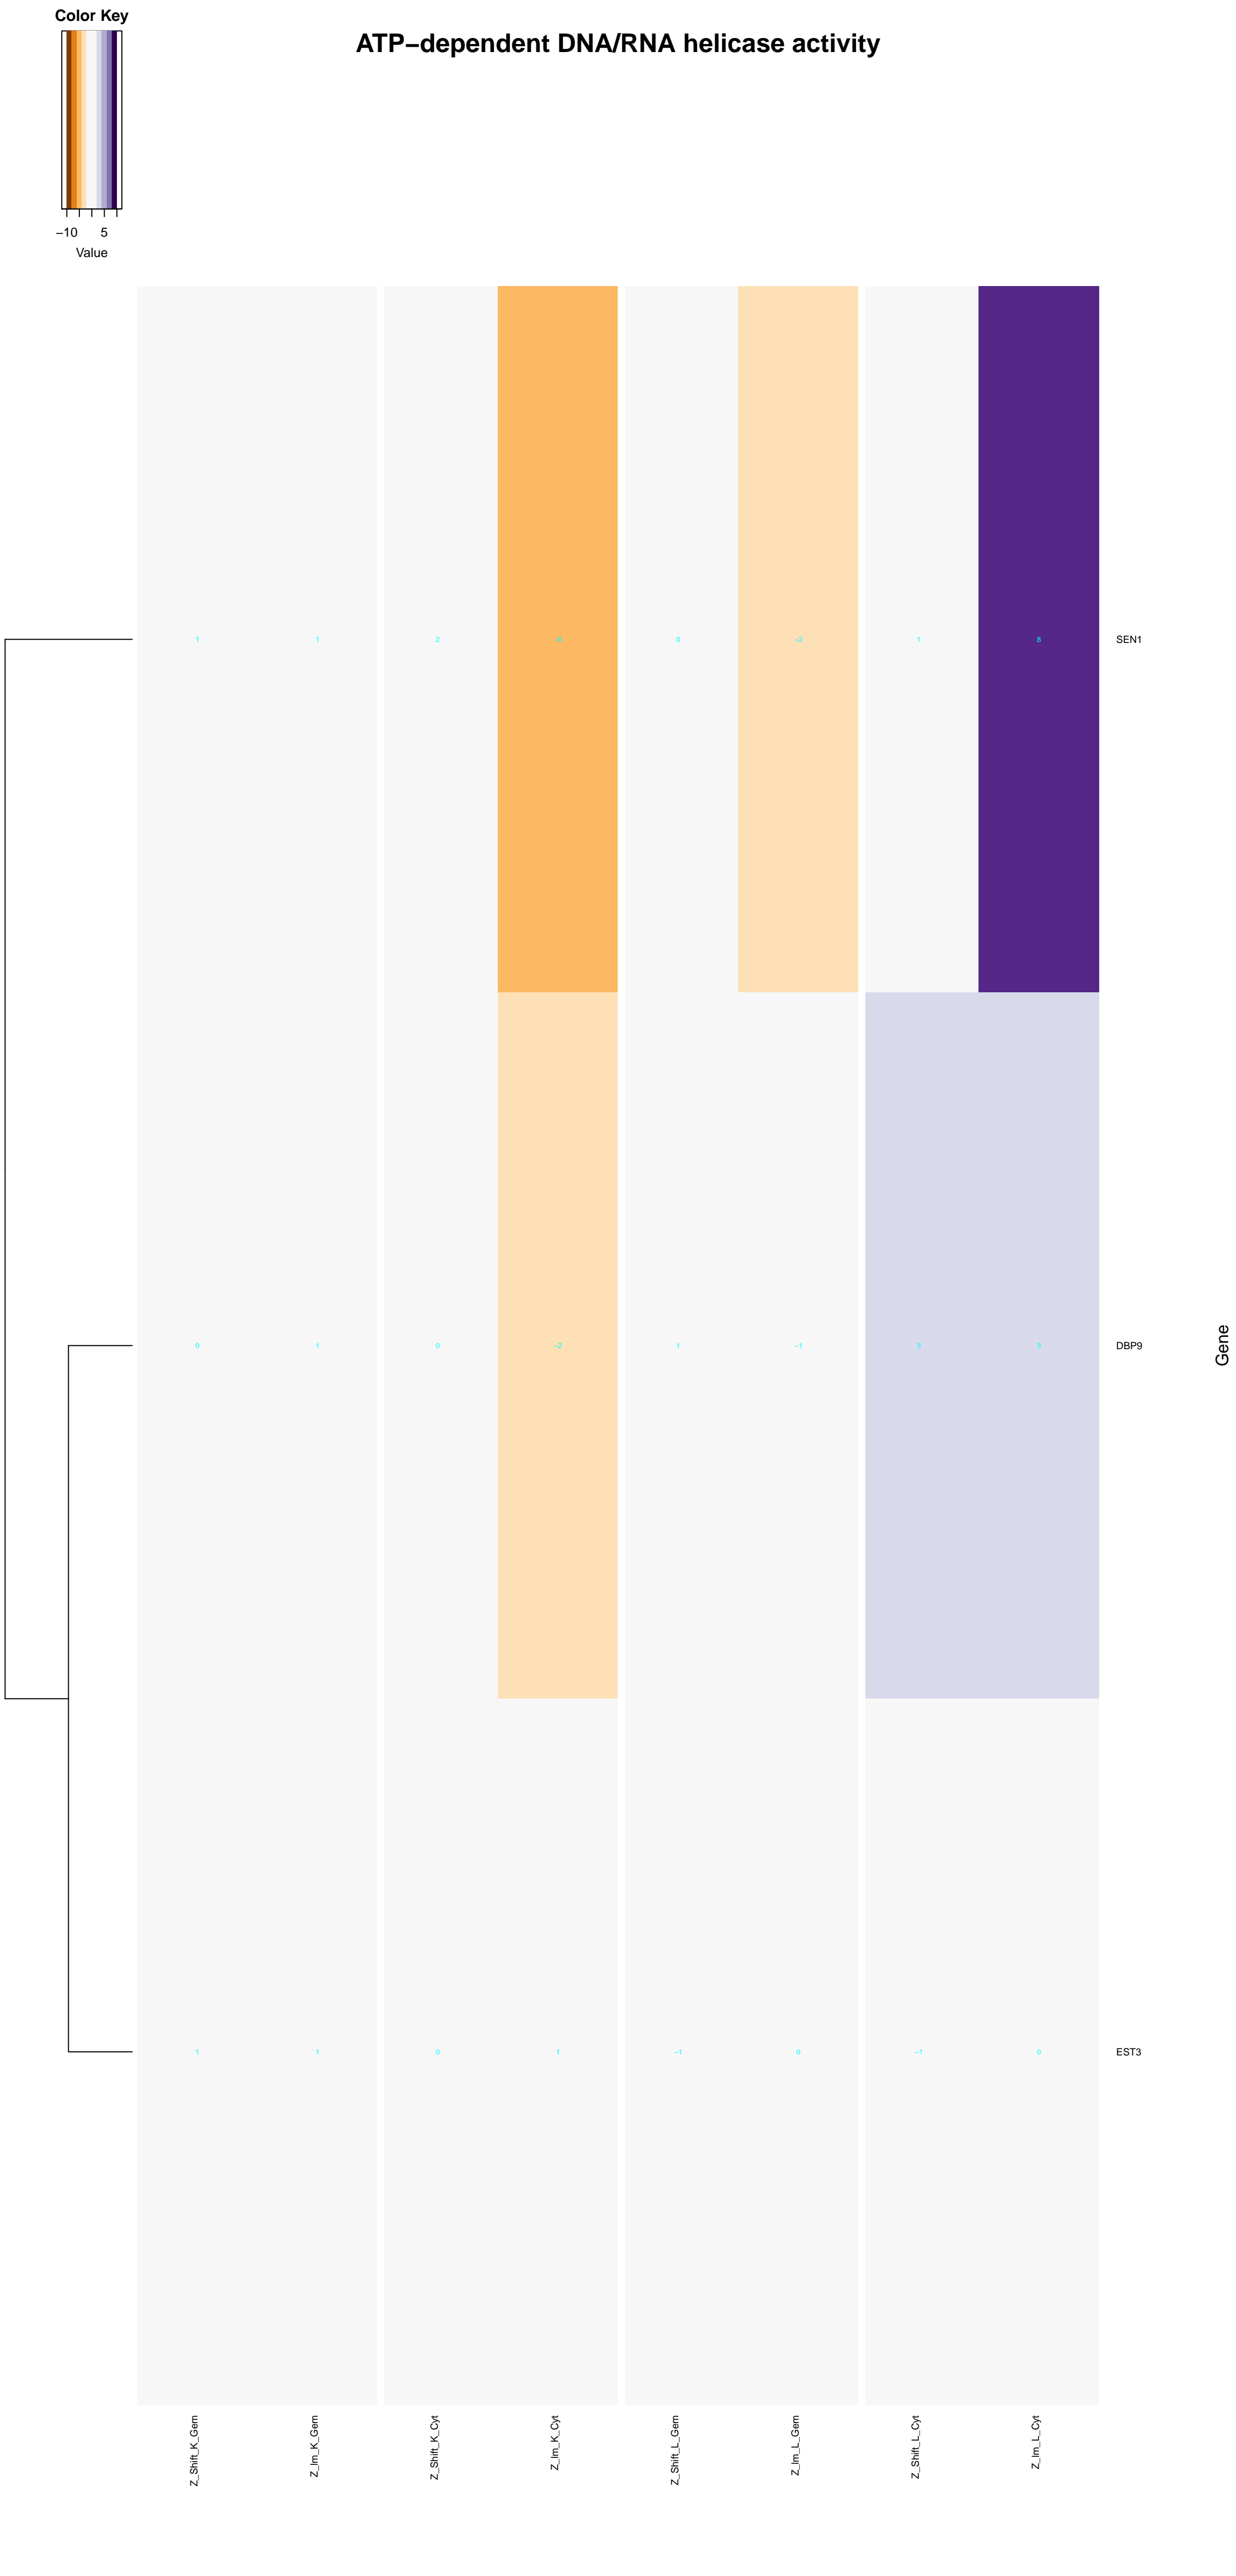



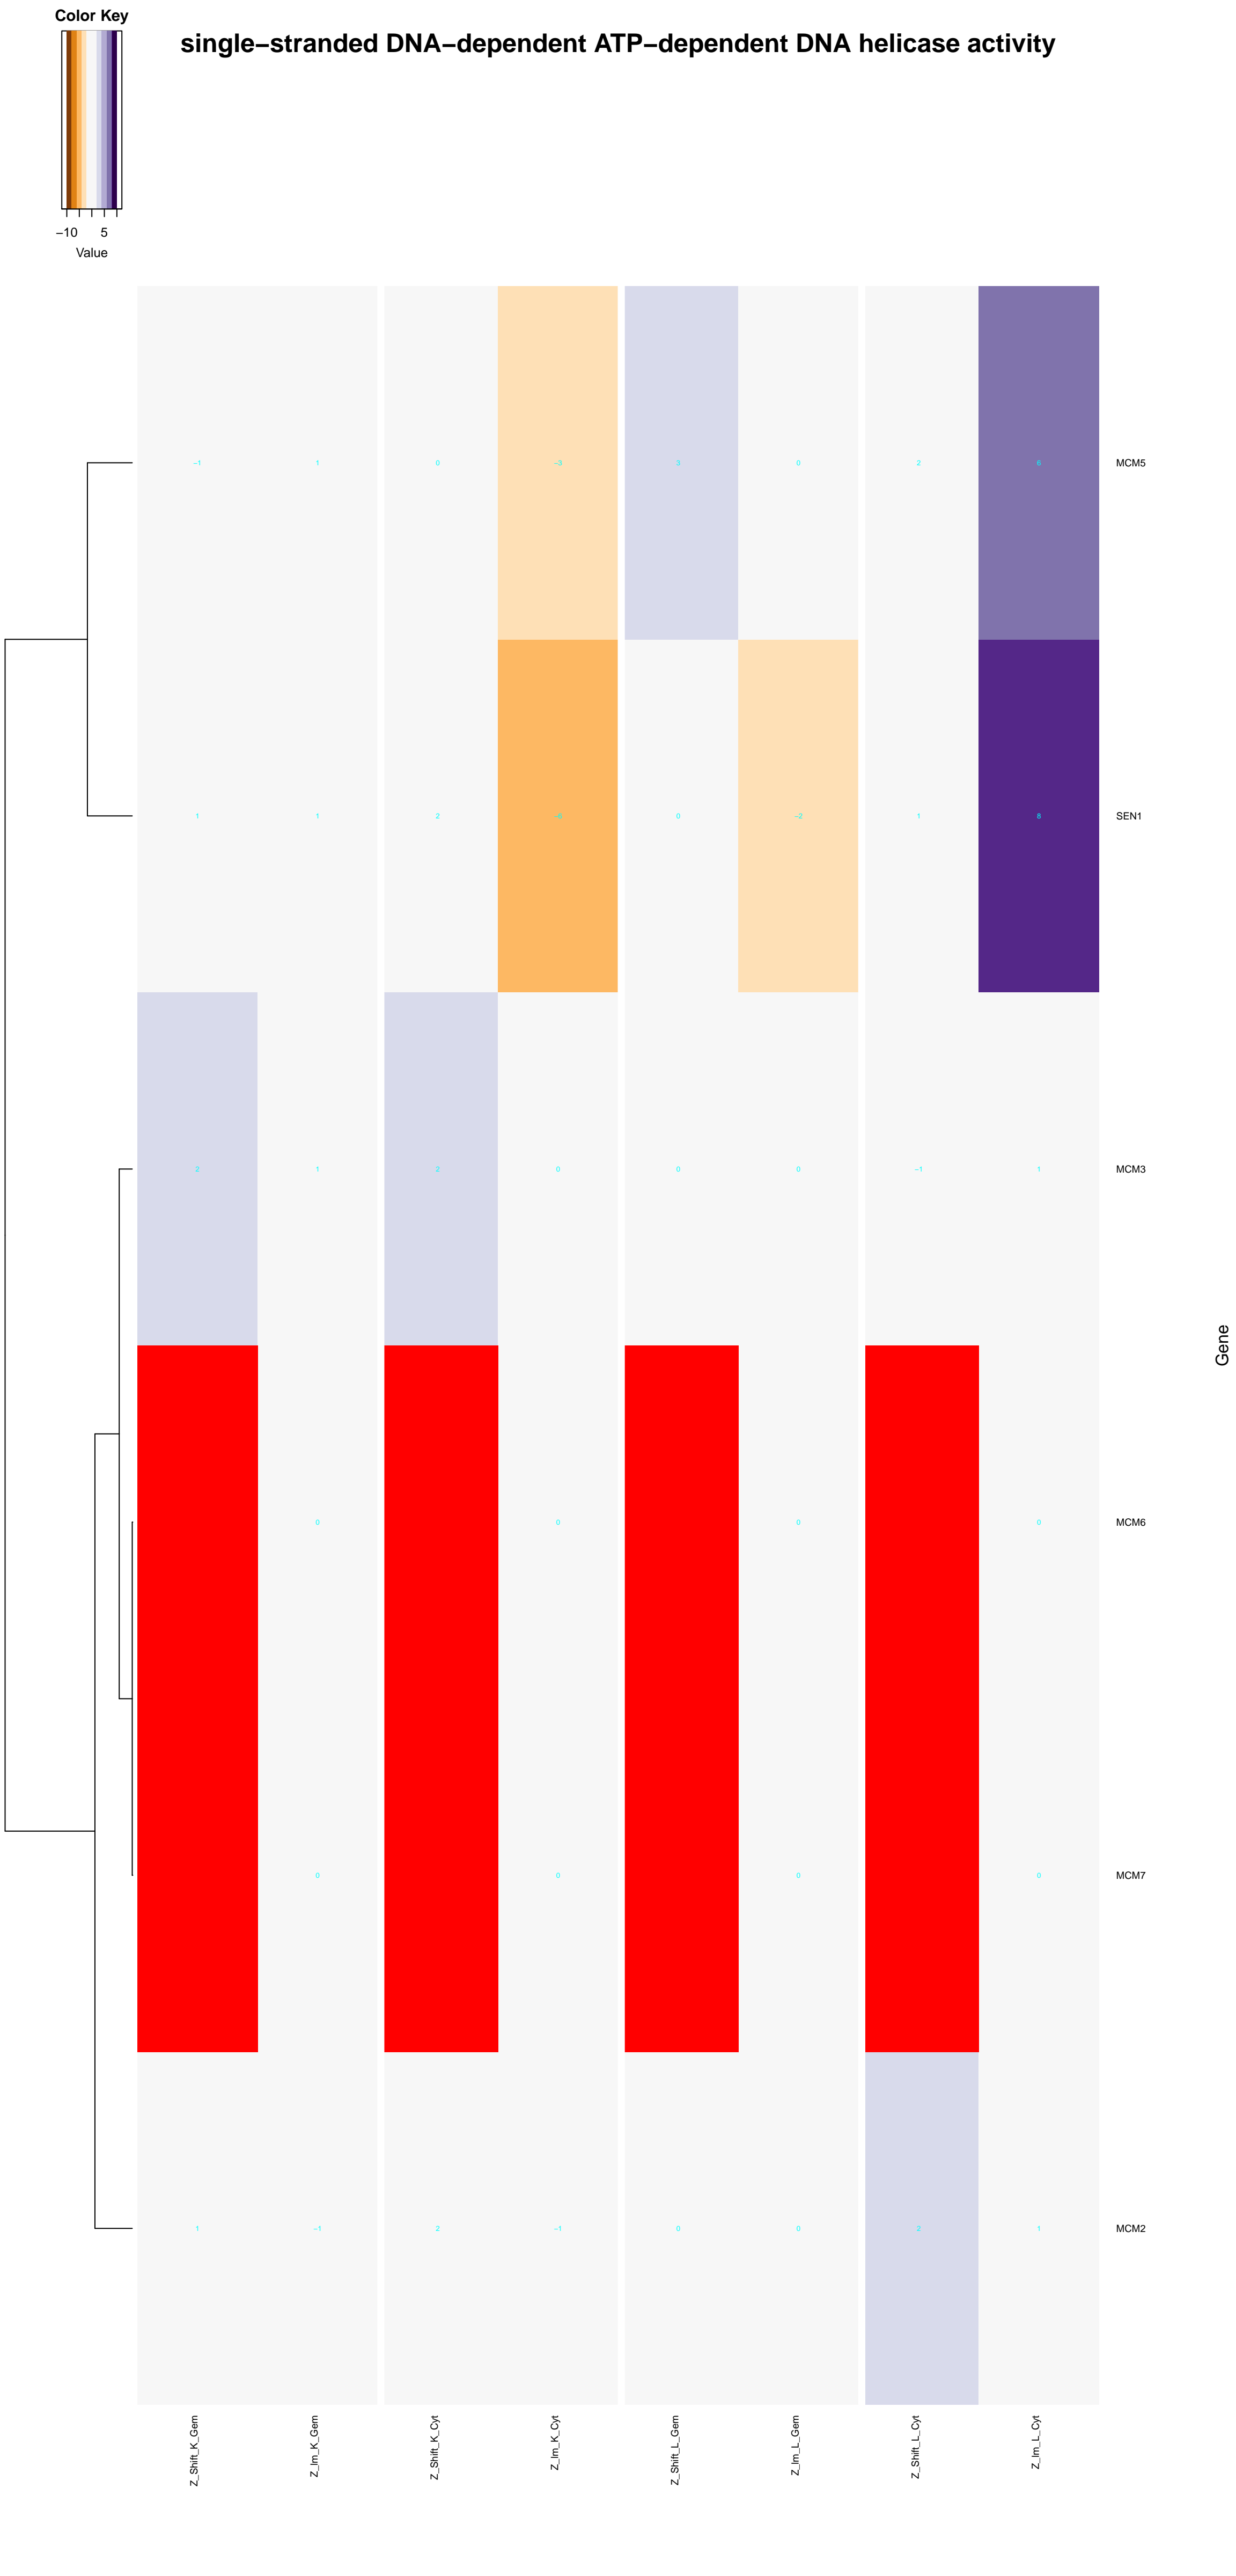

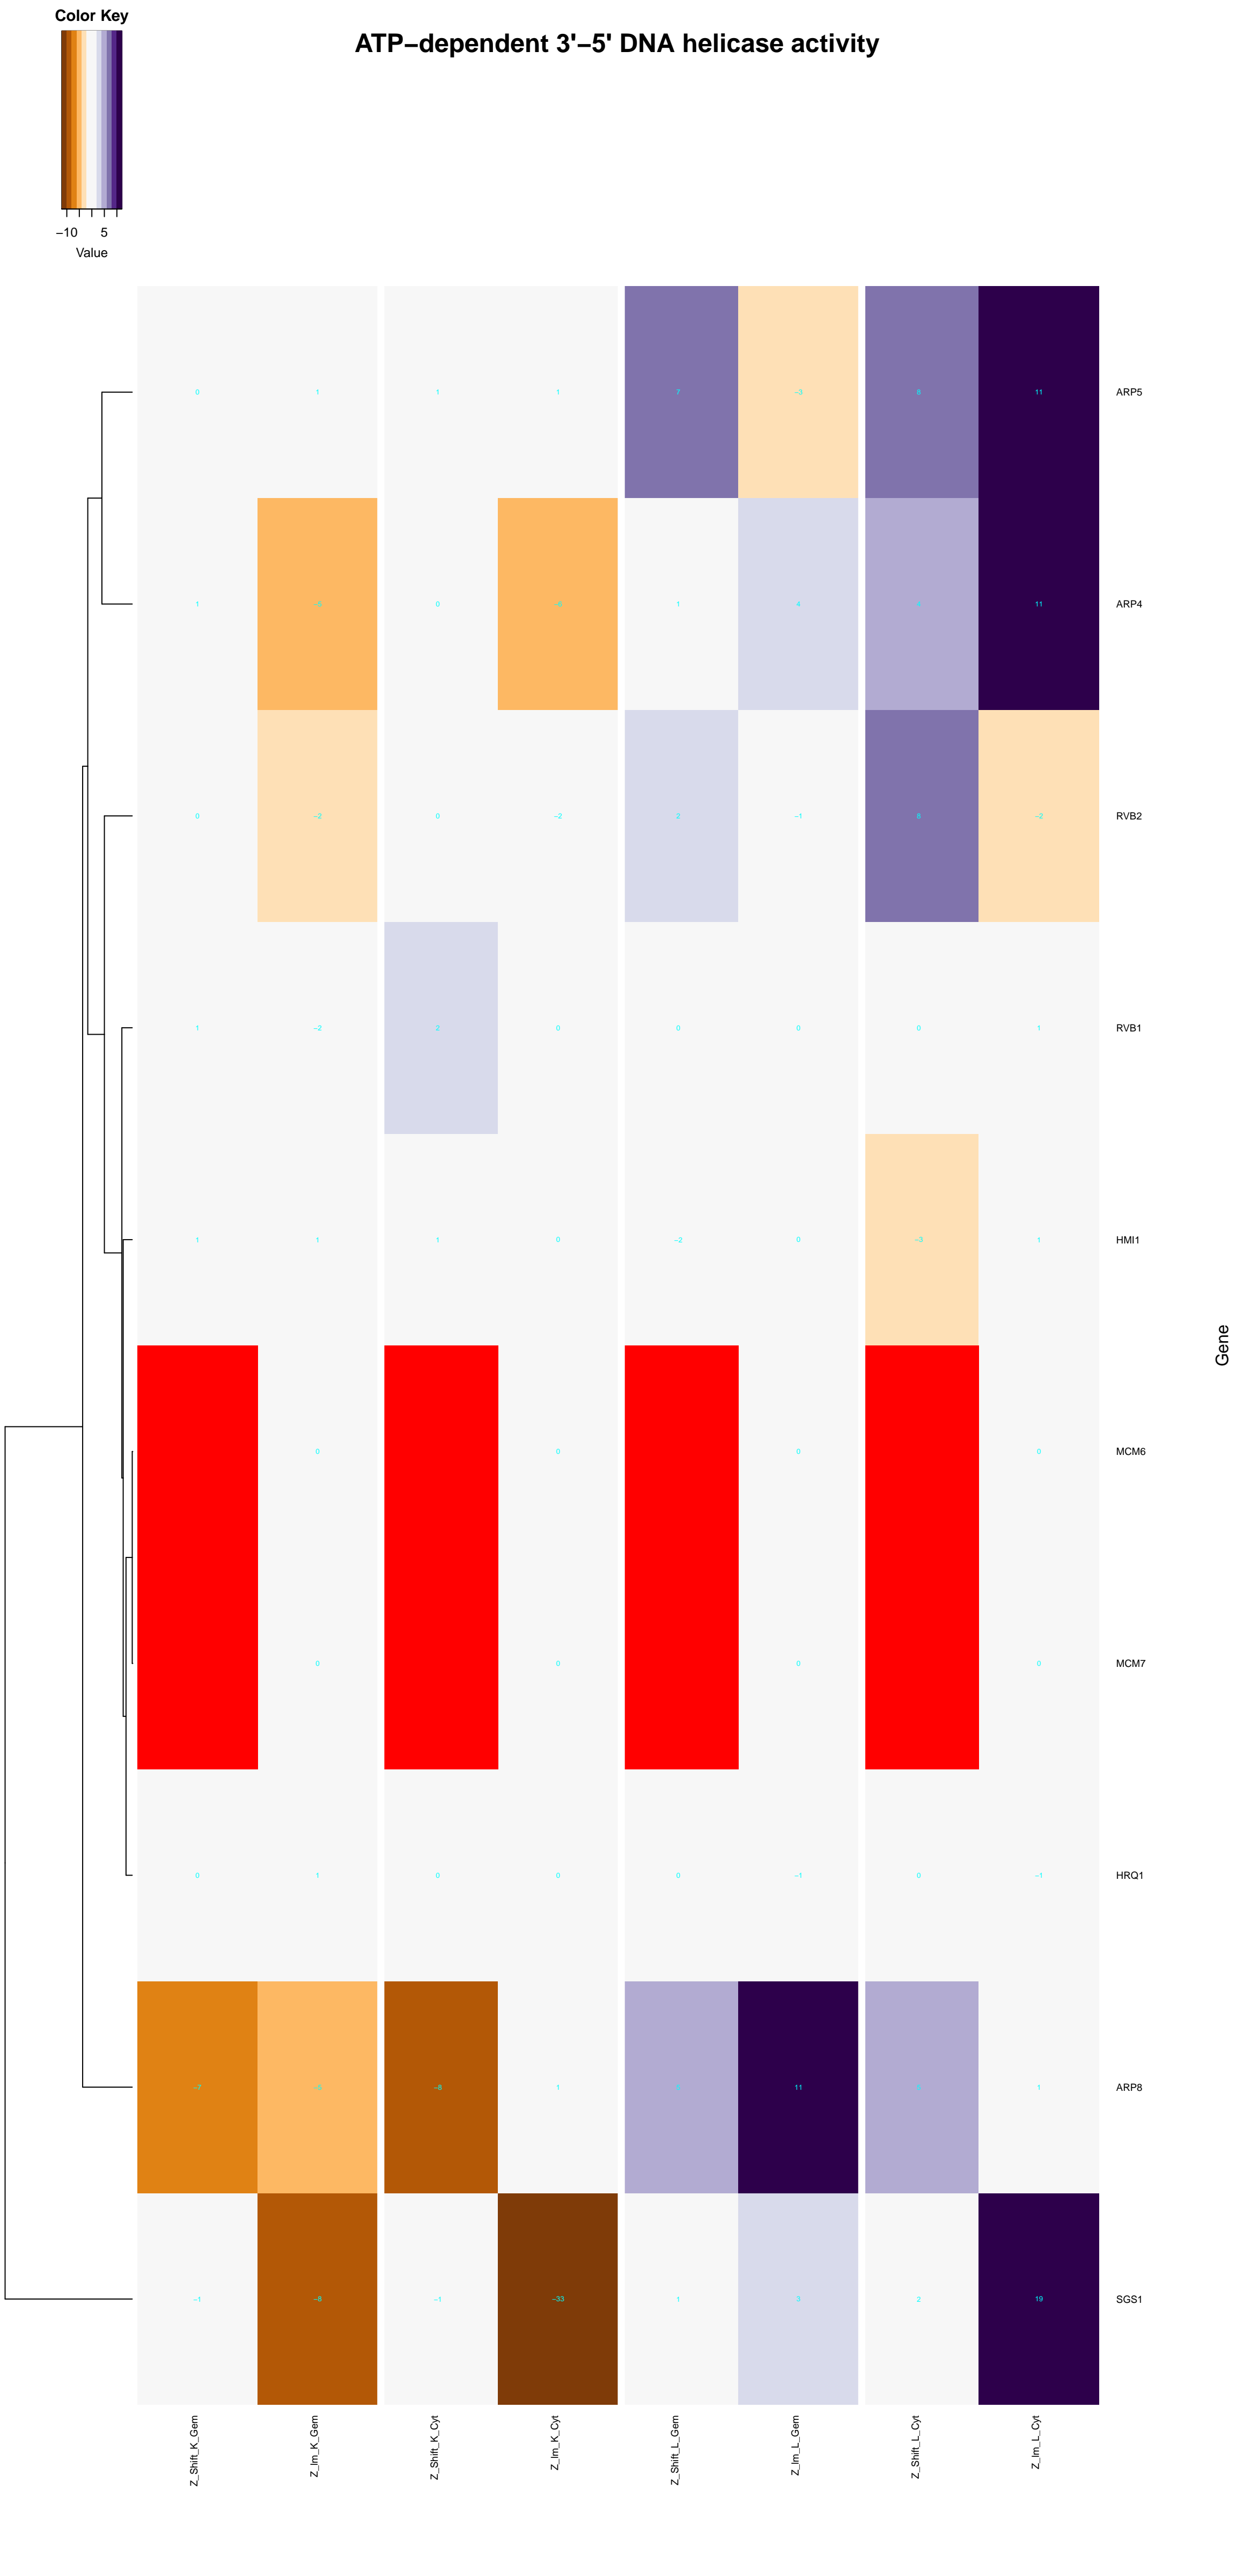

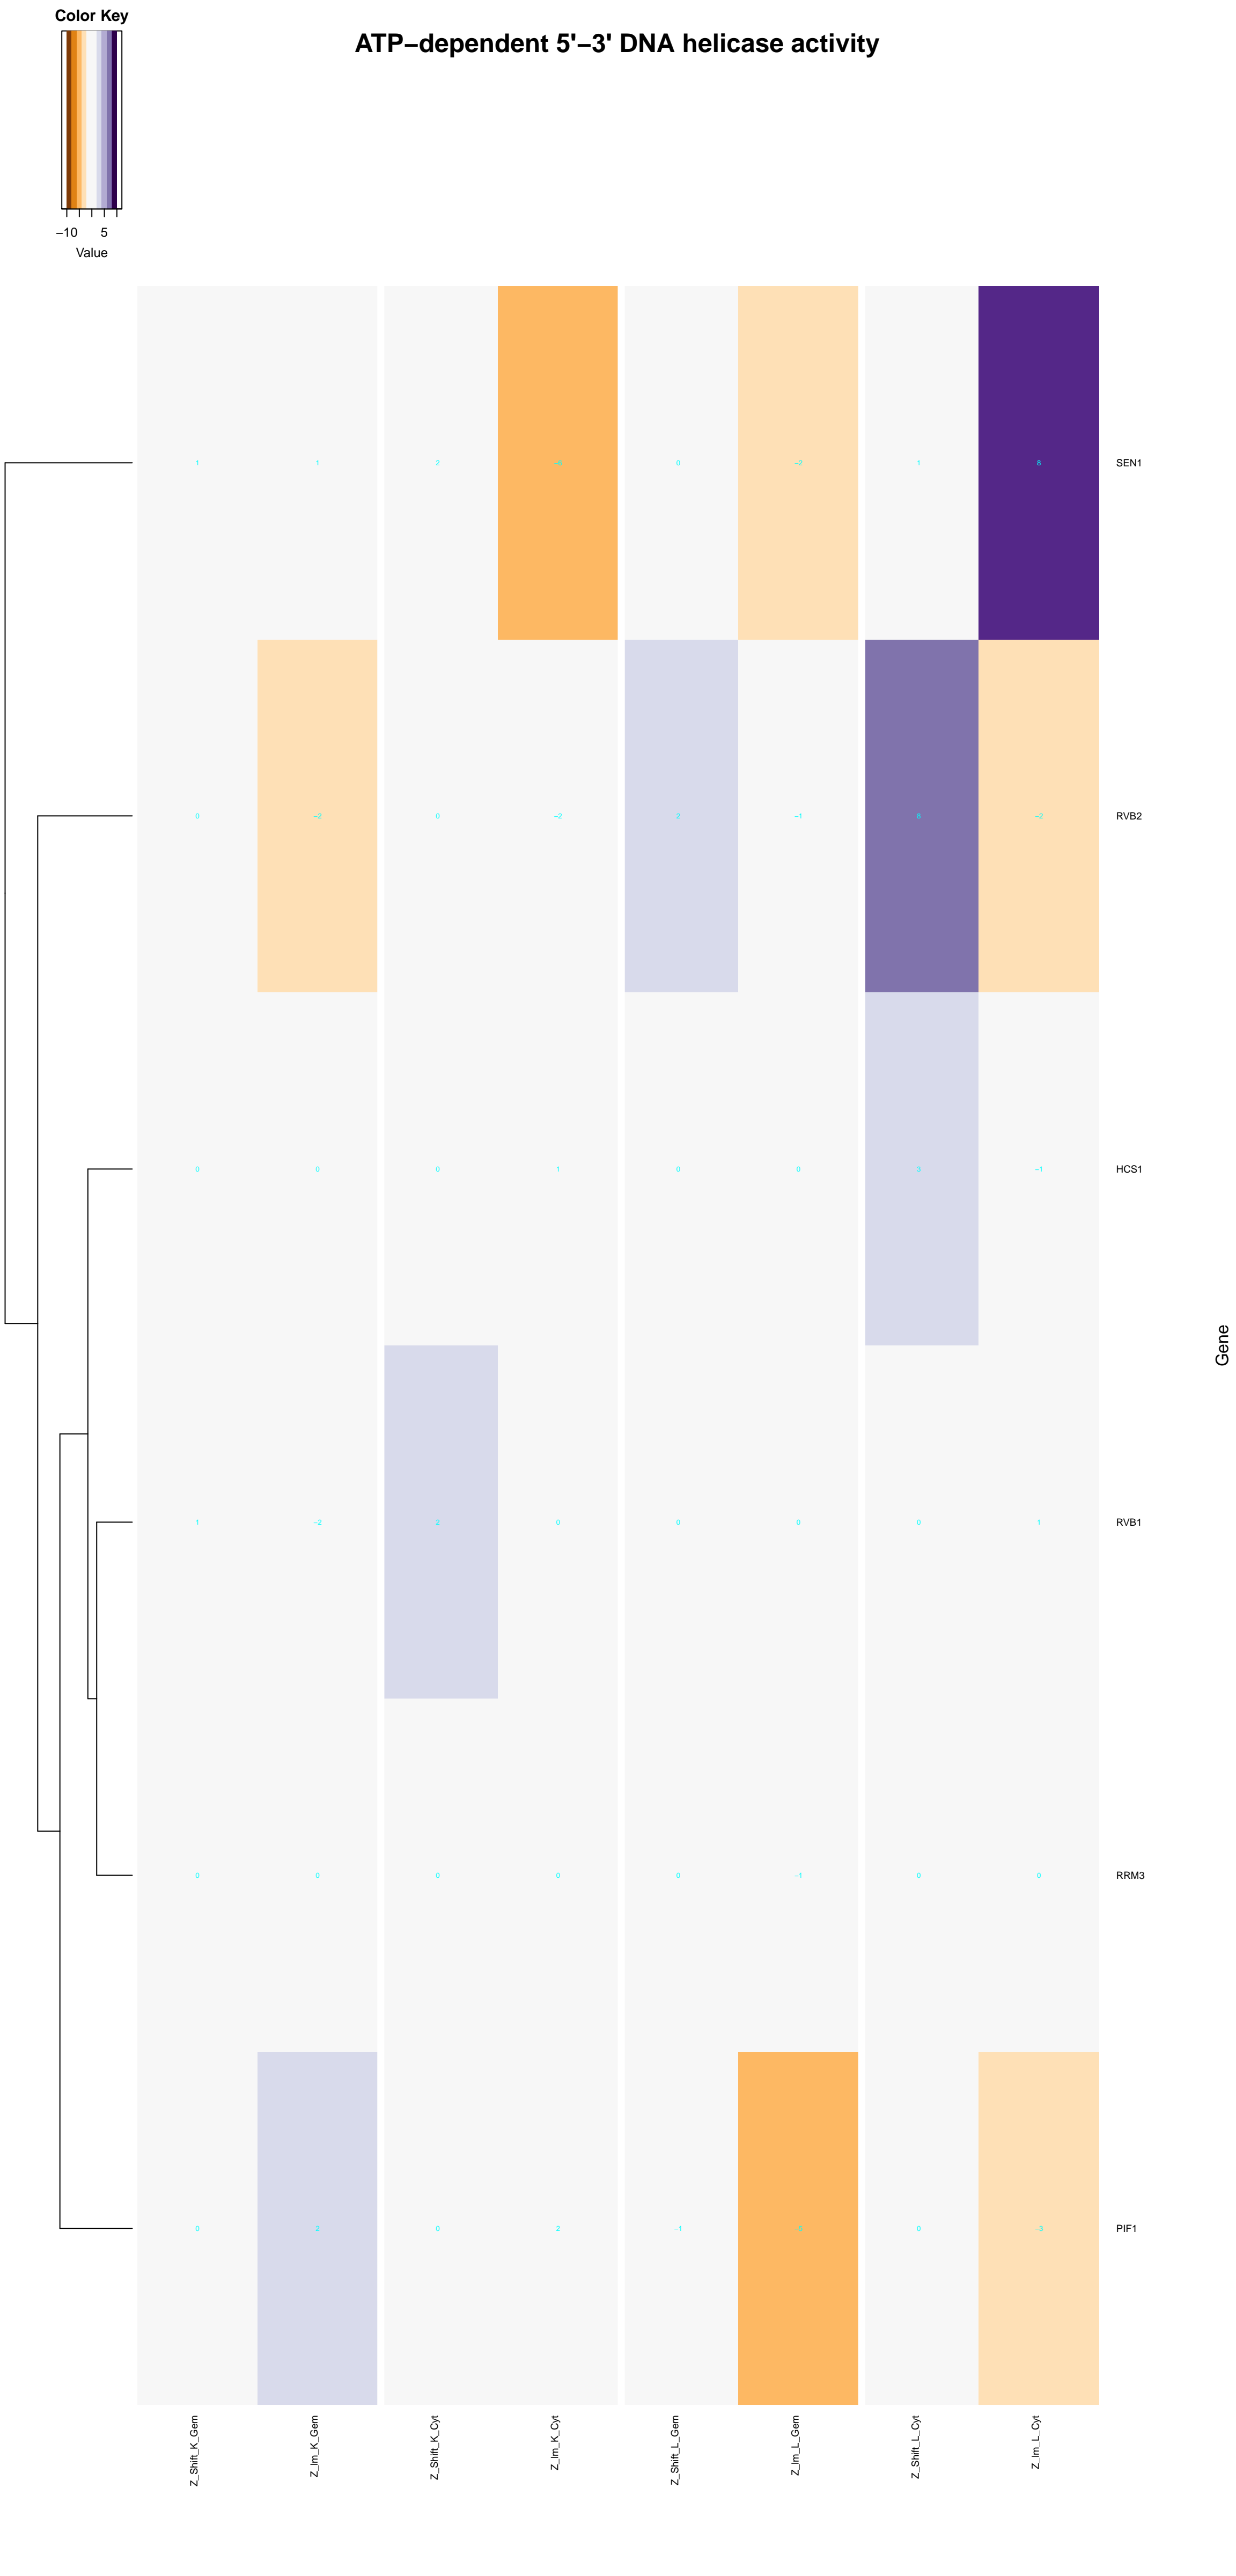

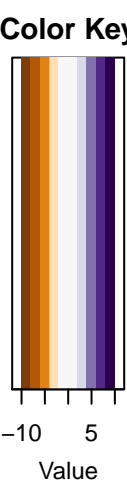

ATP-dependent 3'-5' RNA helicase activity

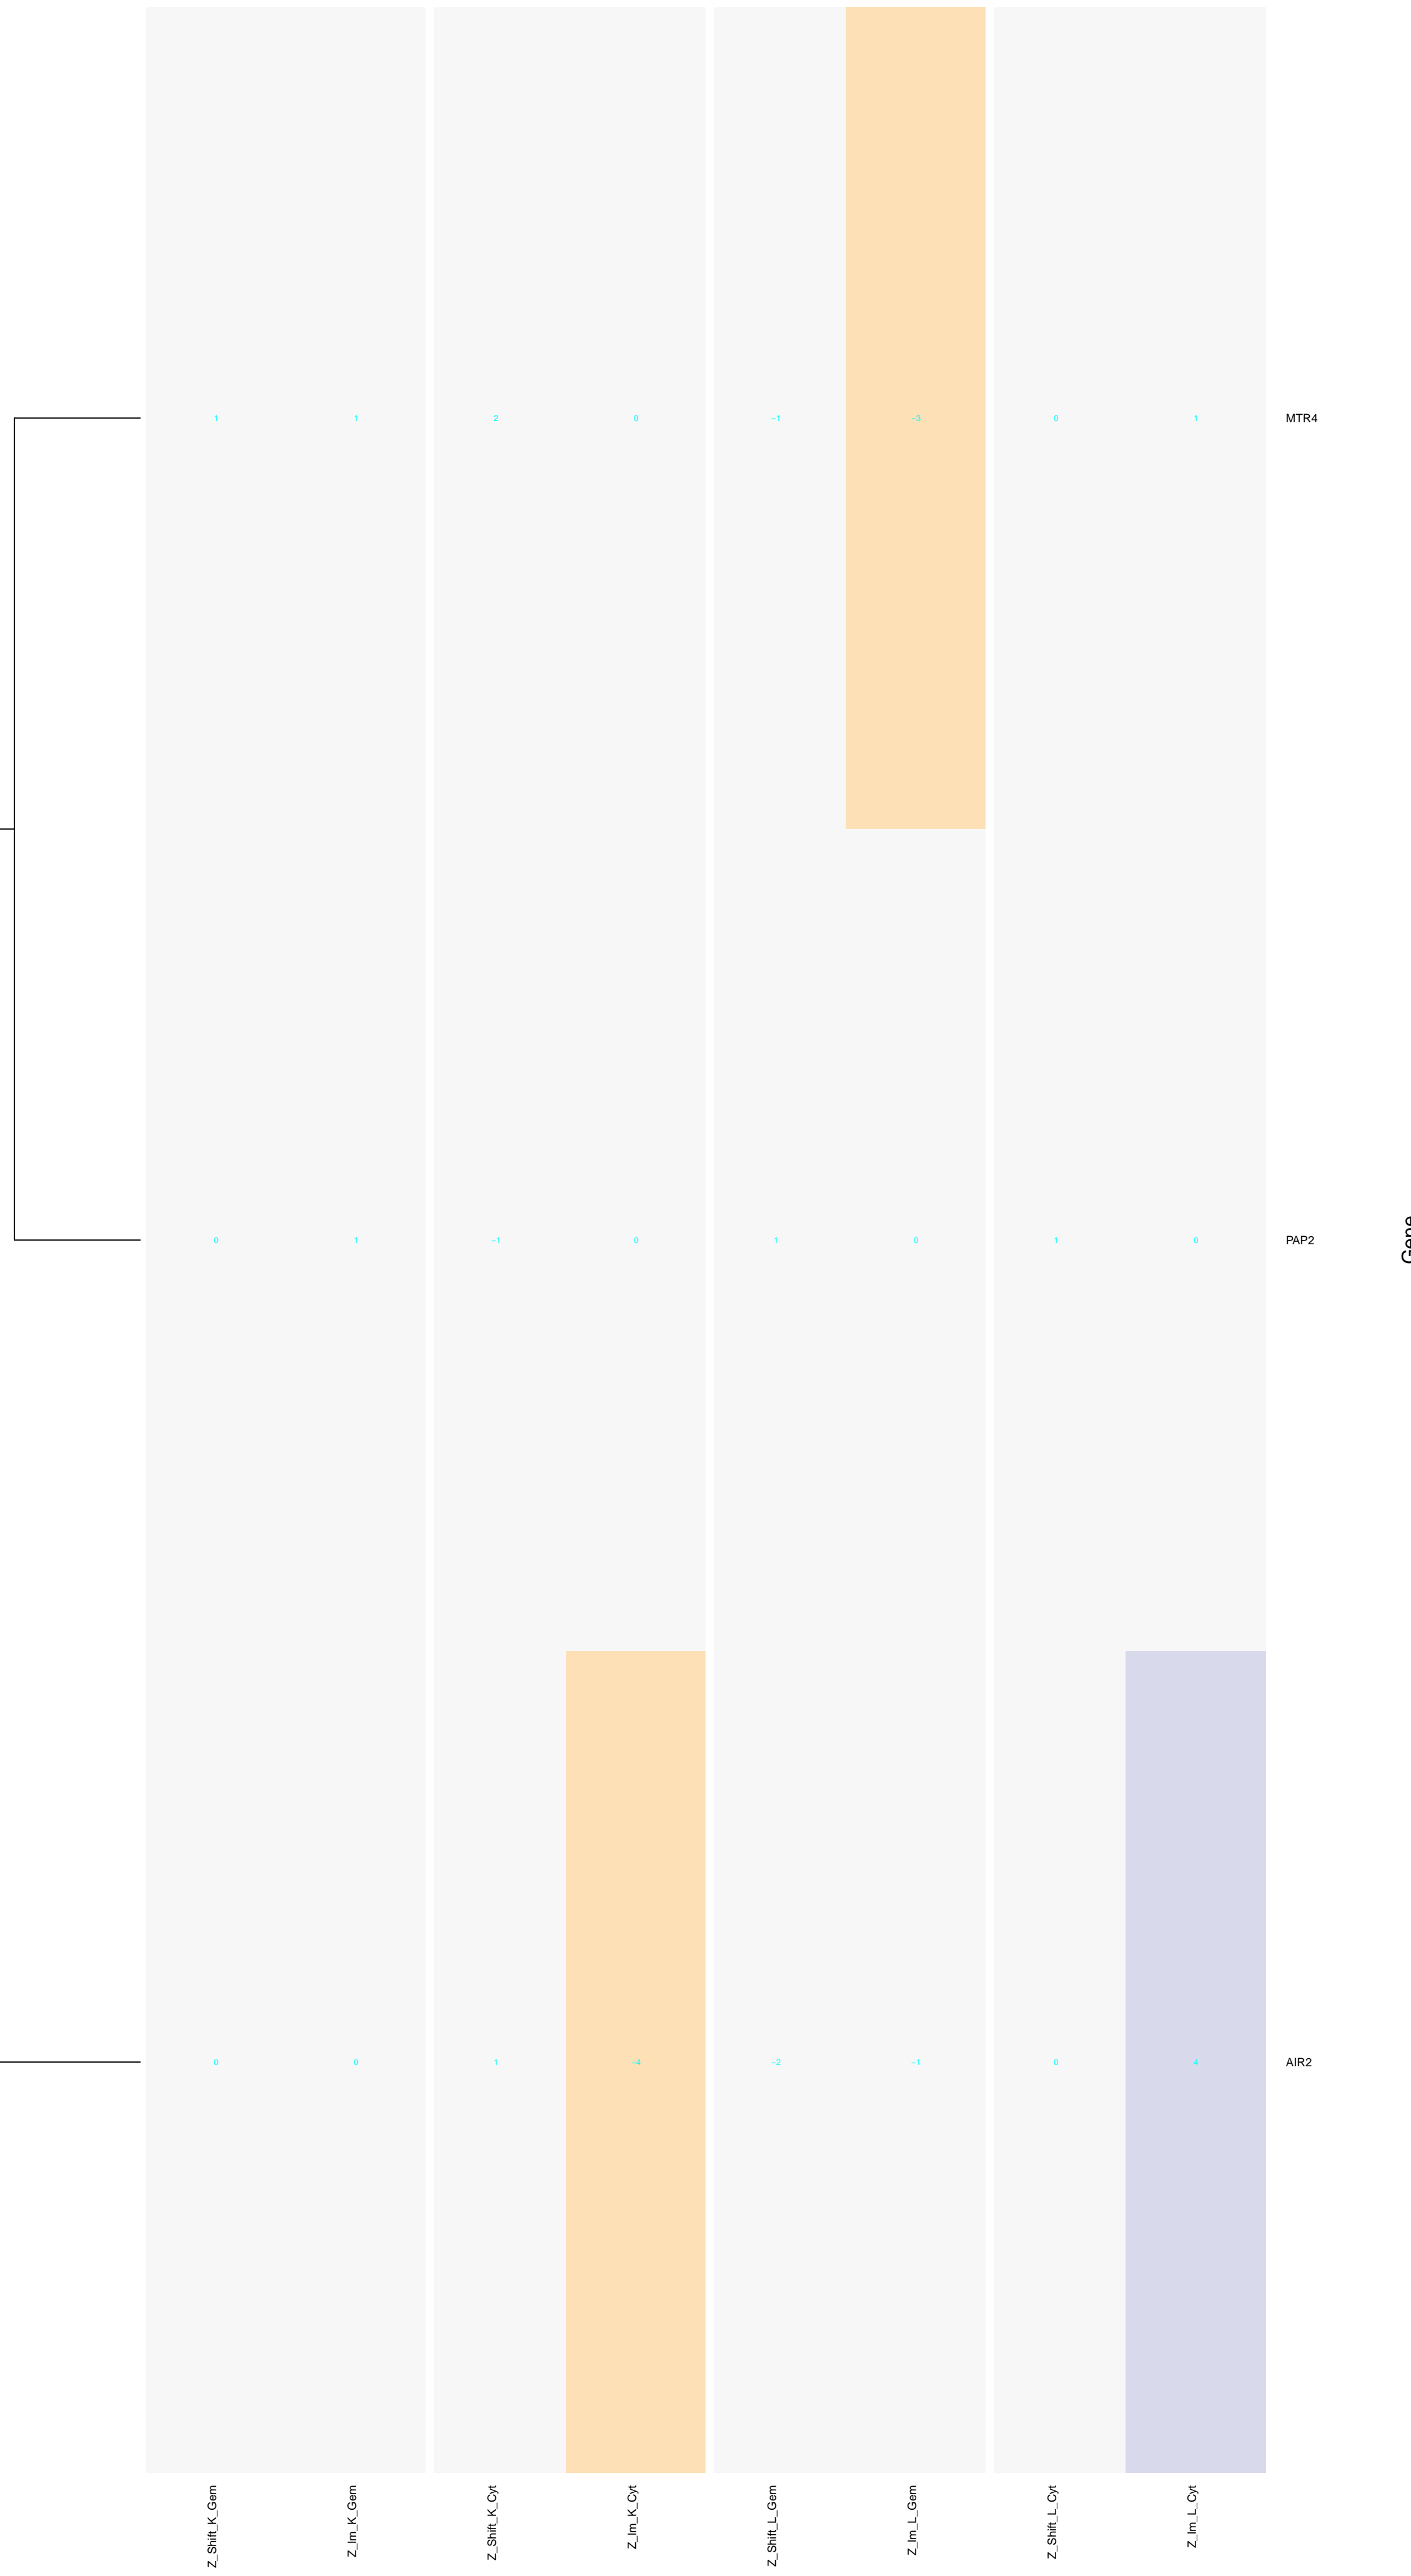

Supplement: s1 [file s1]

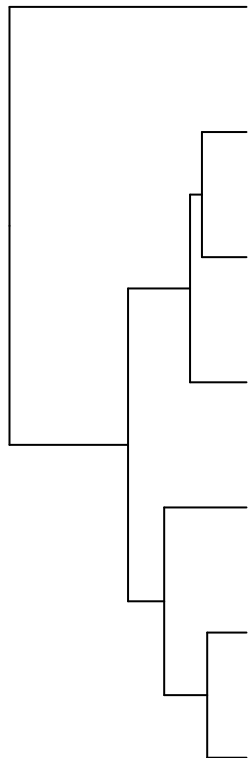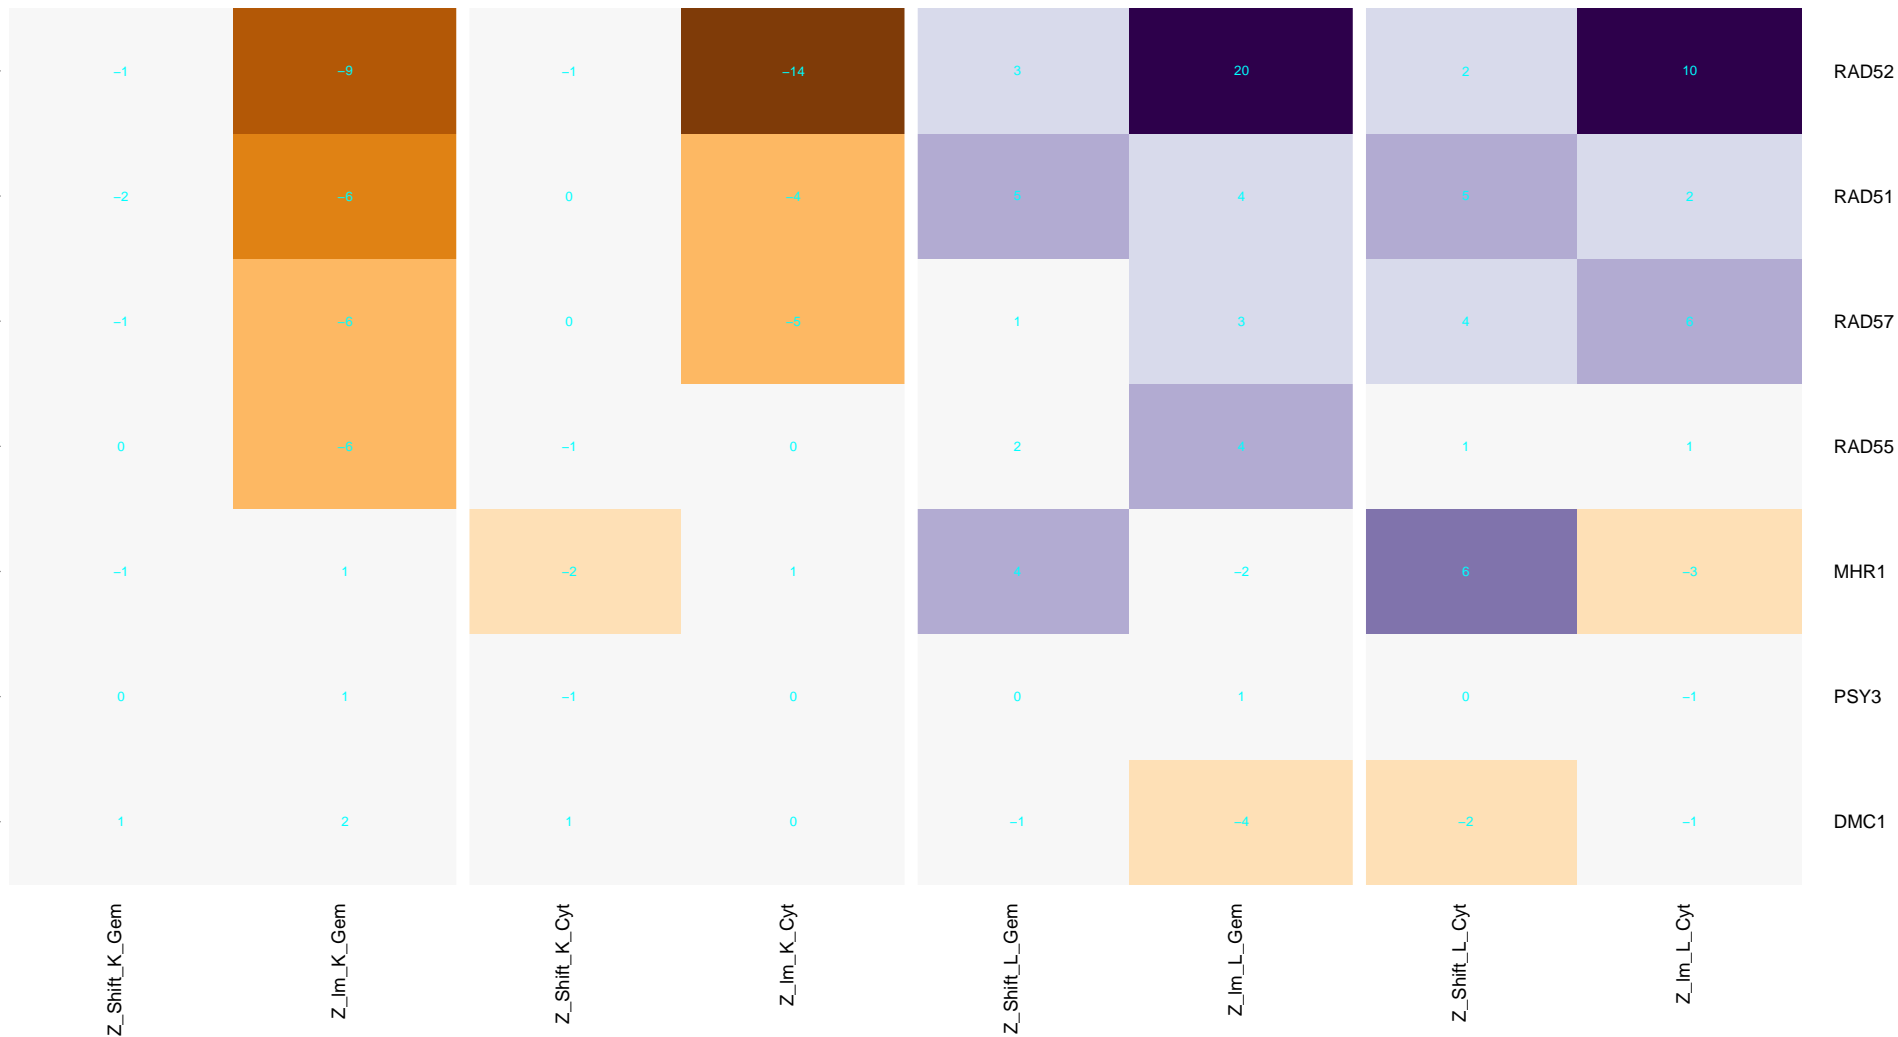

Supplement: s1 [file s1]

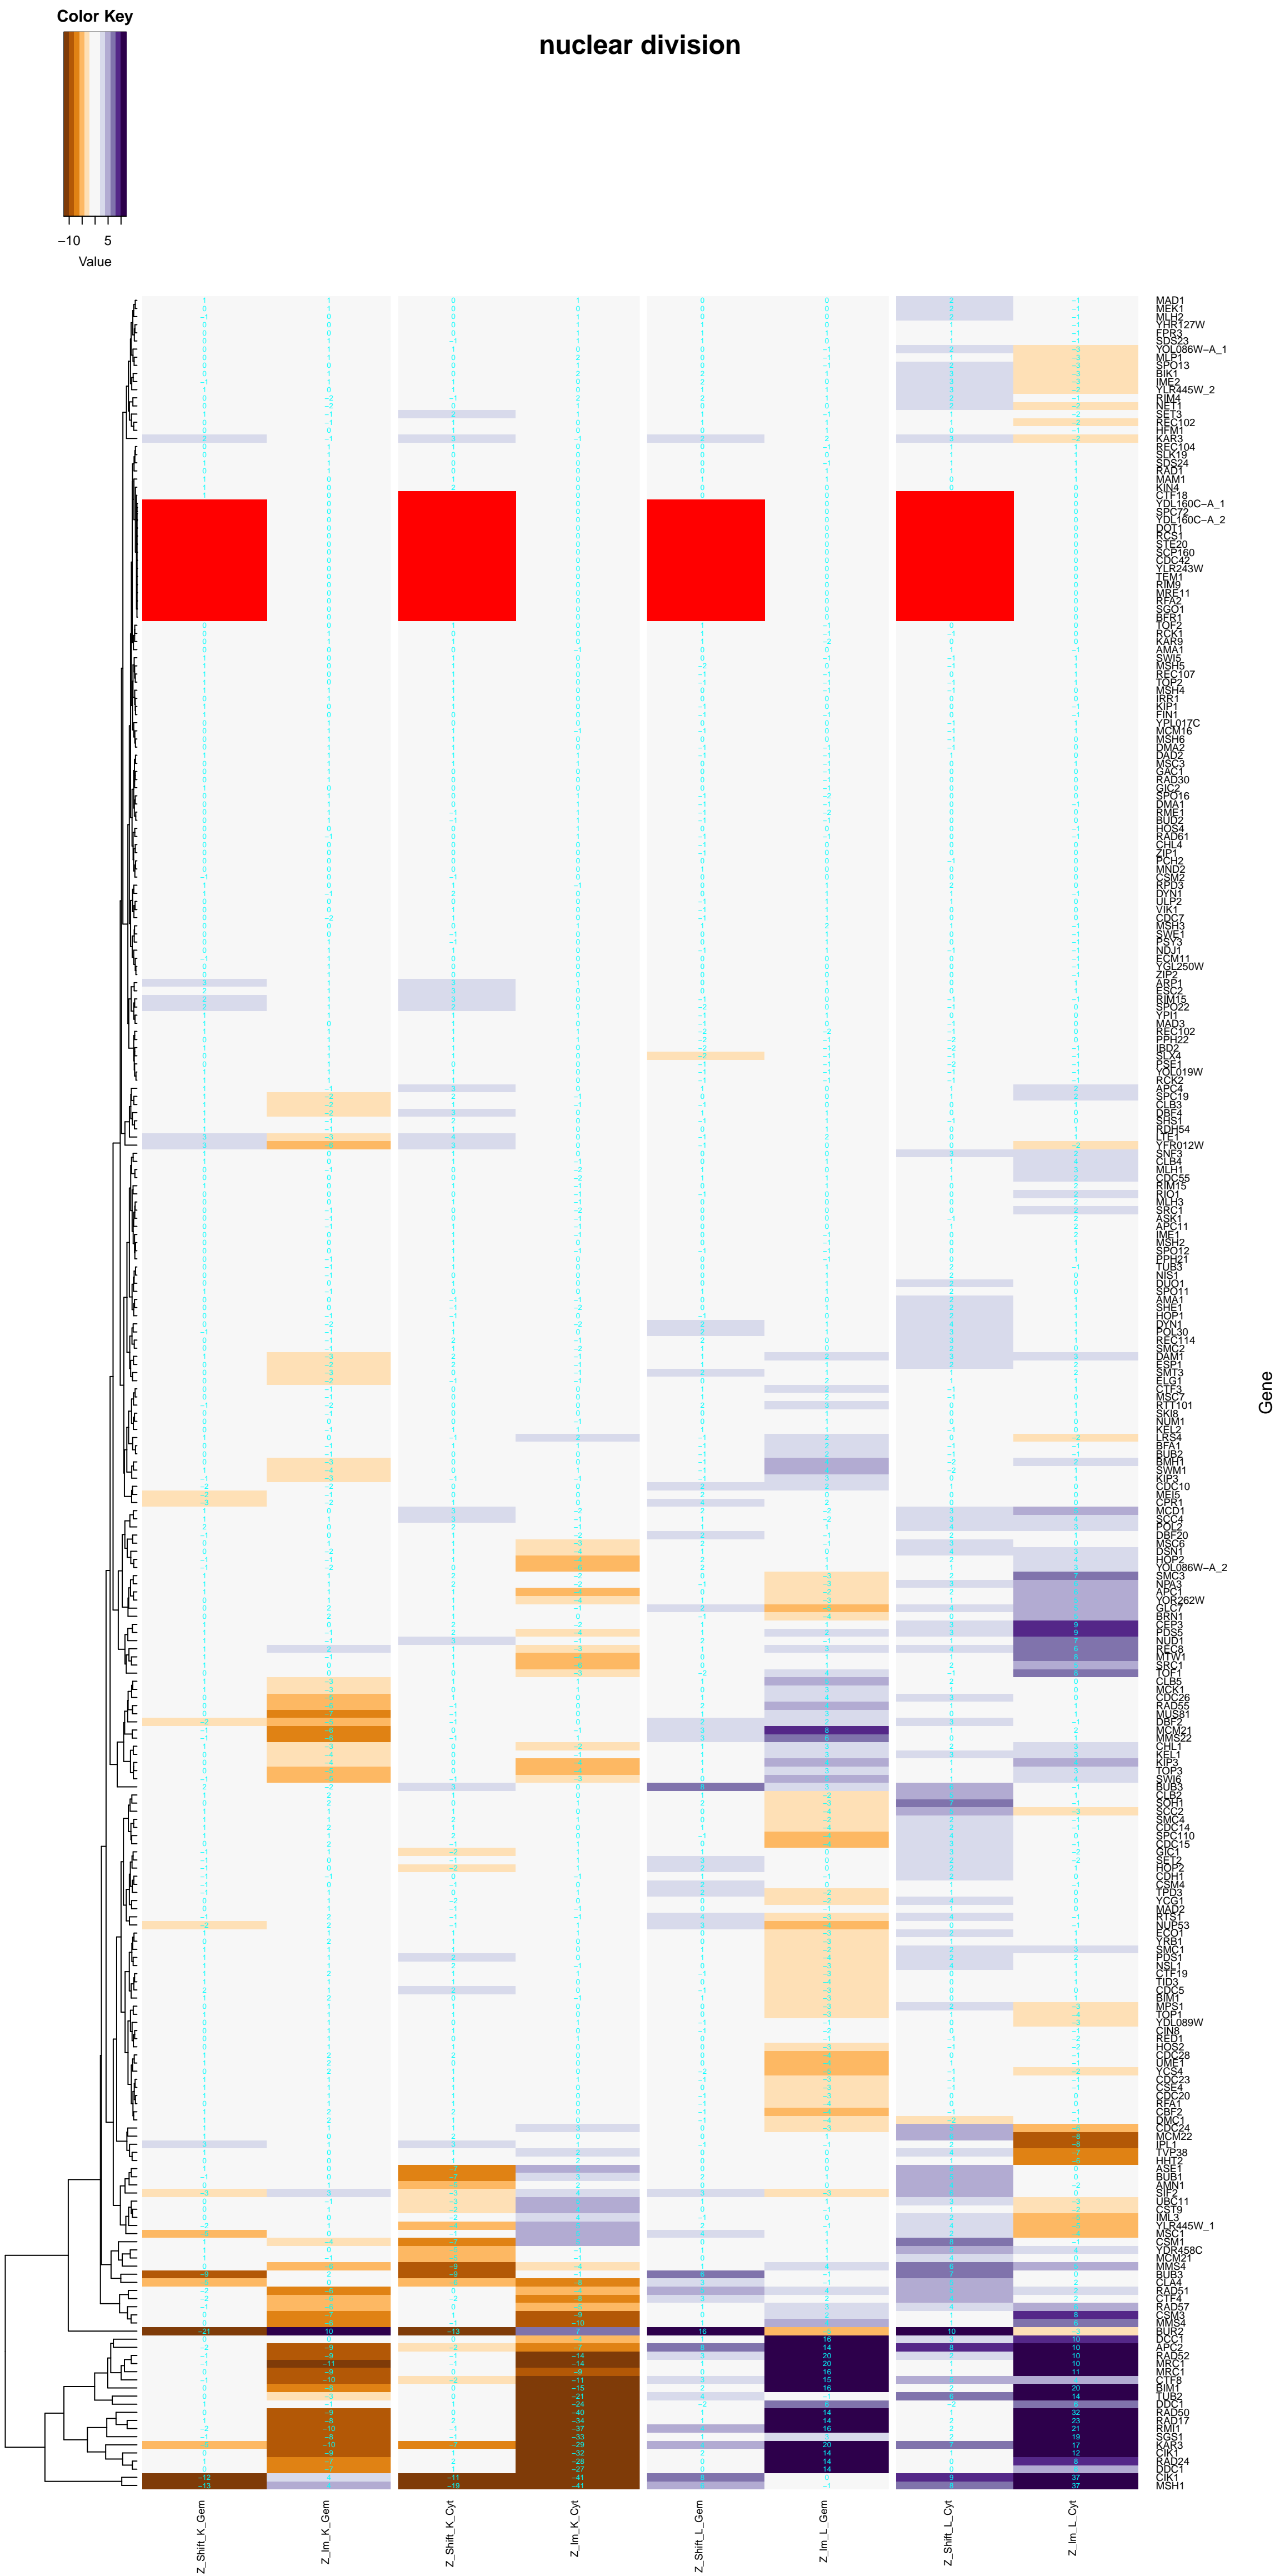

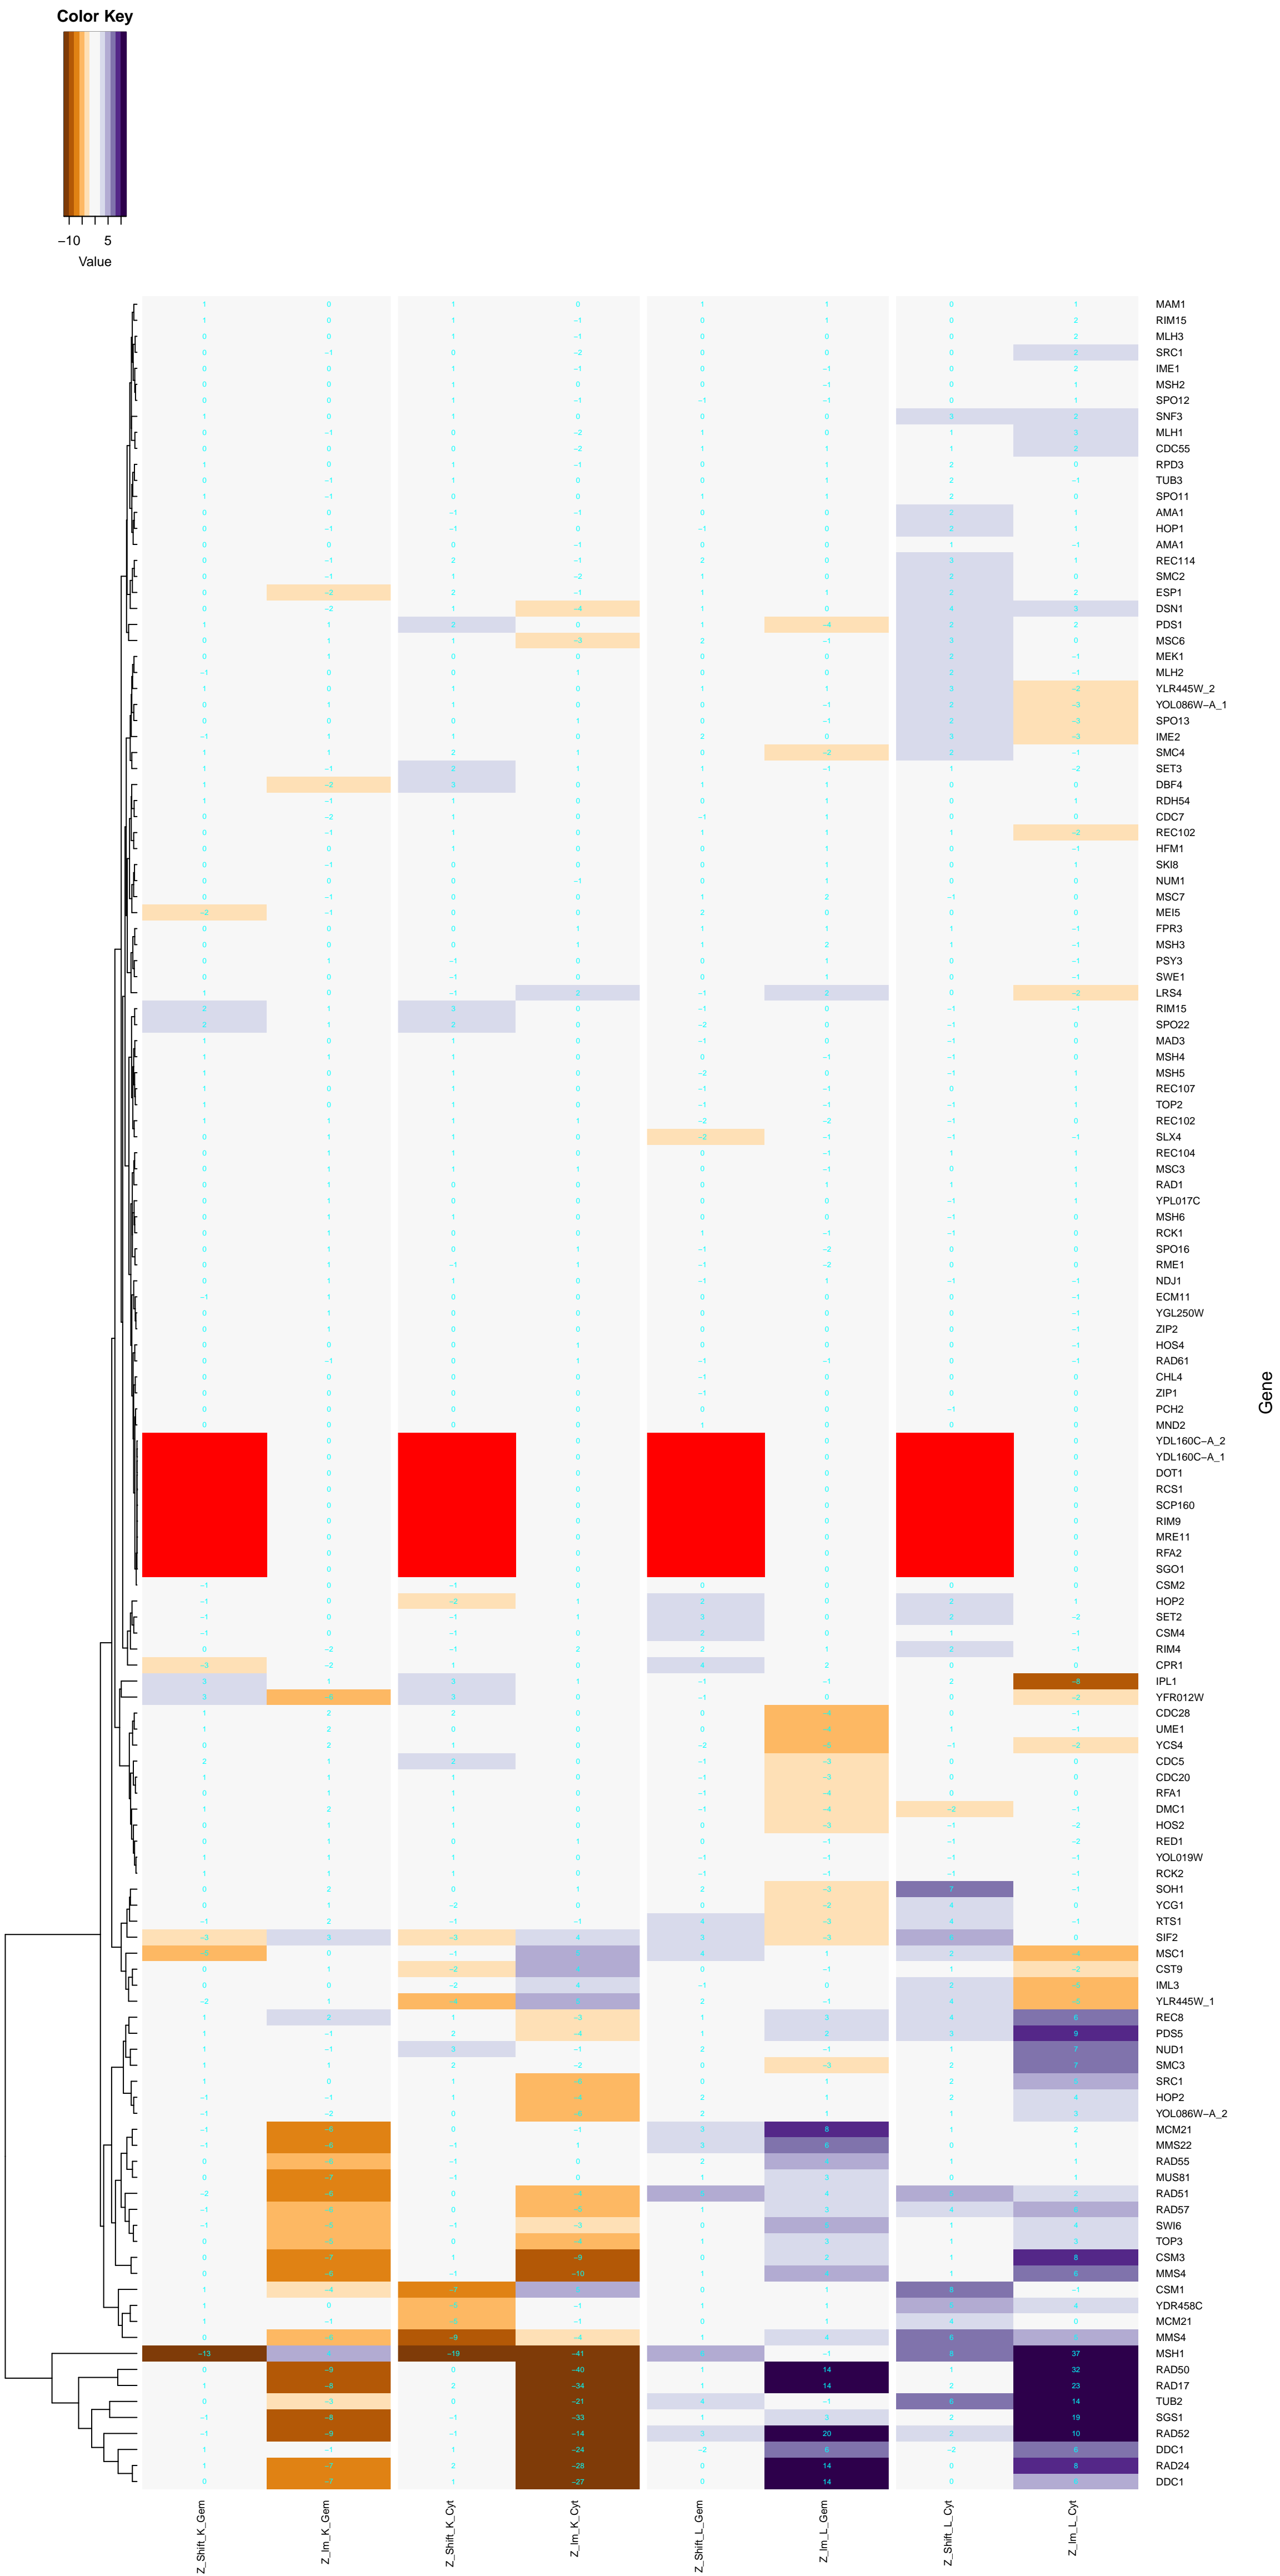

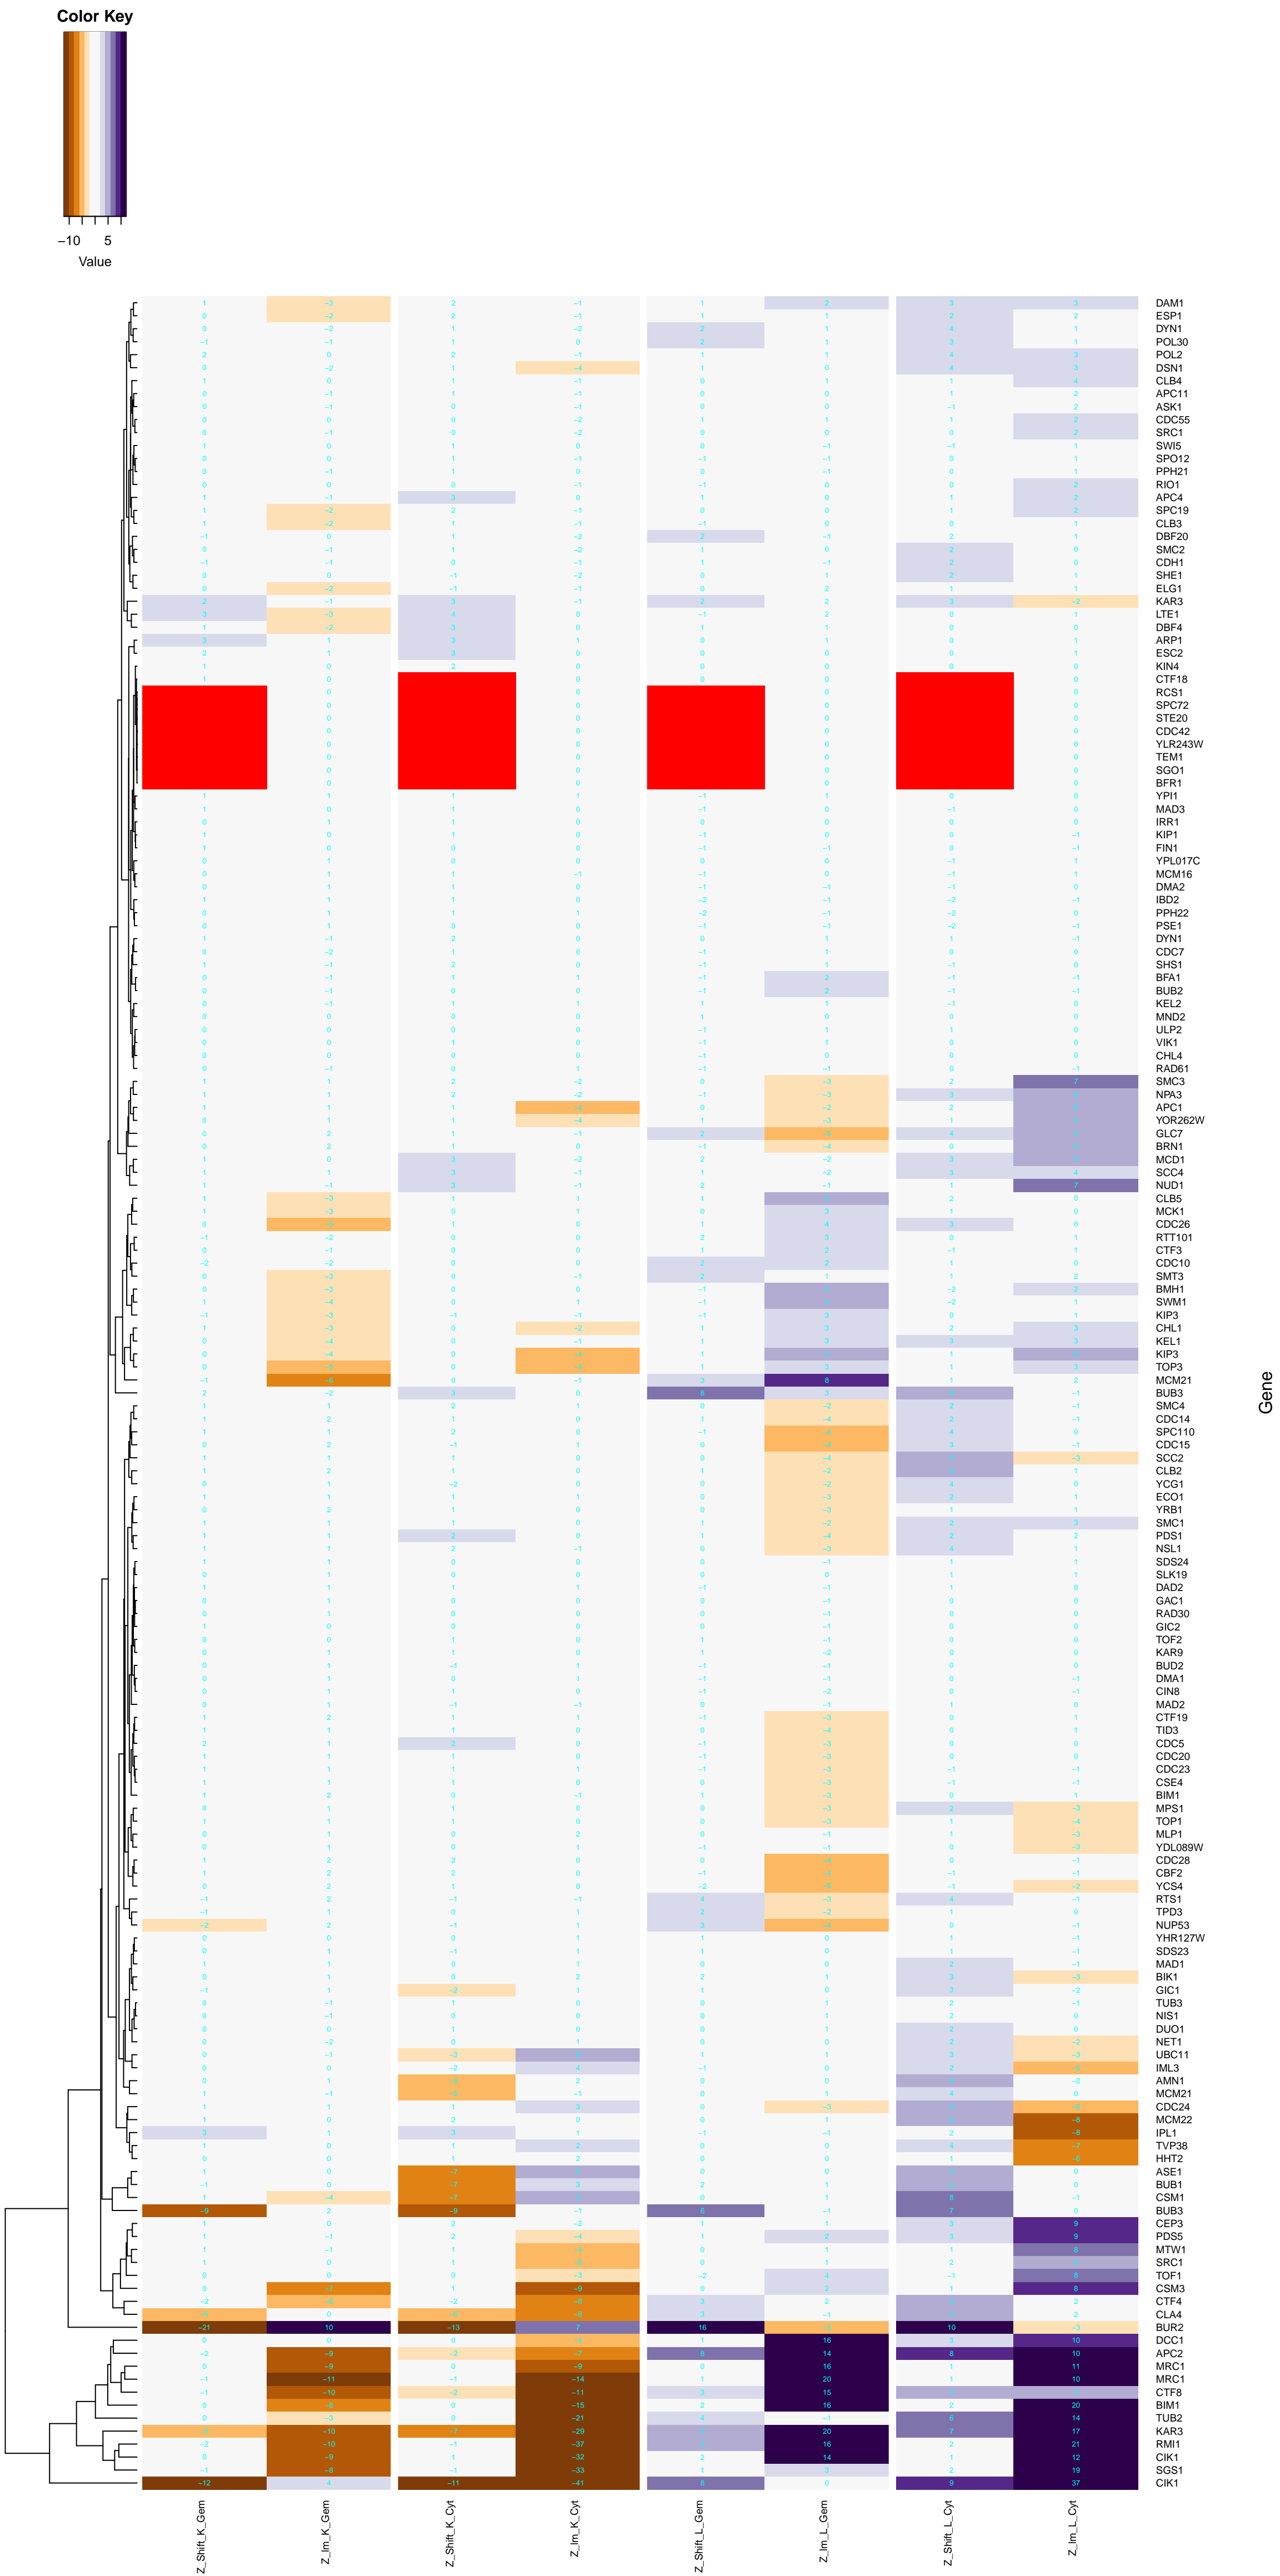

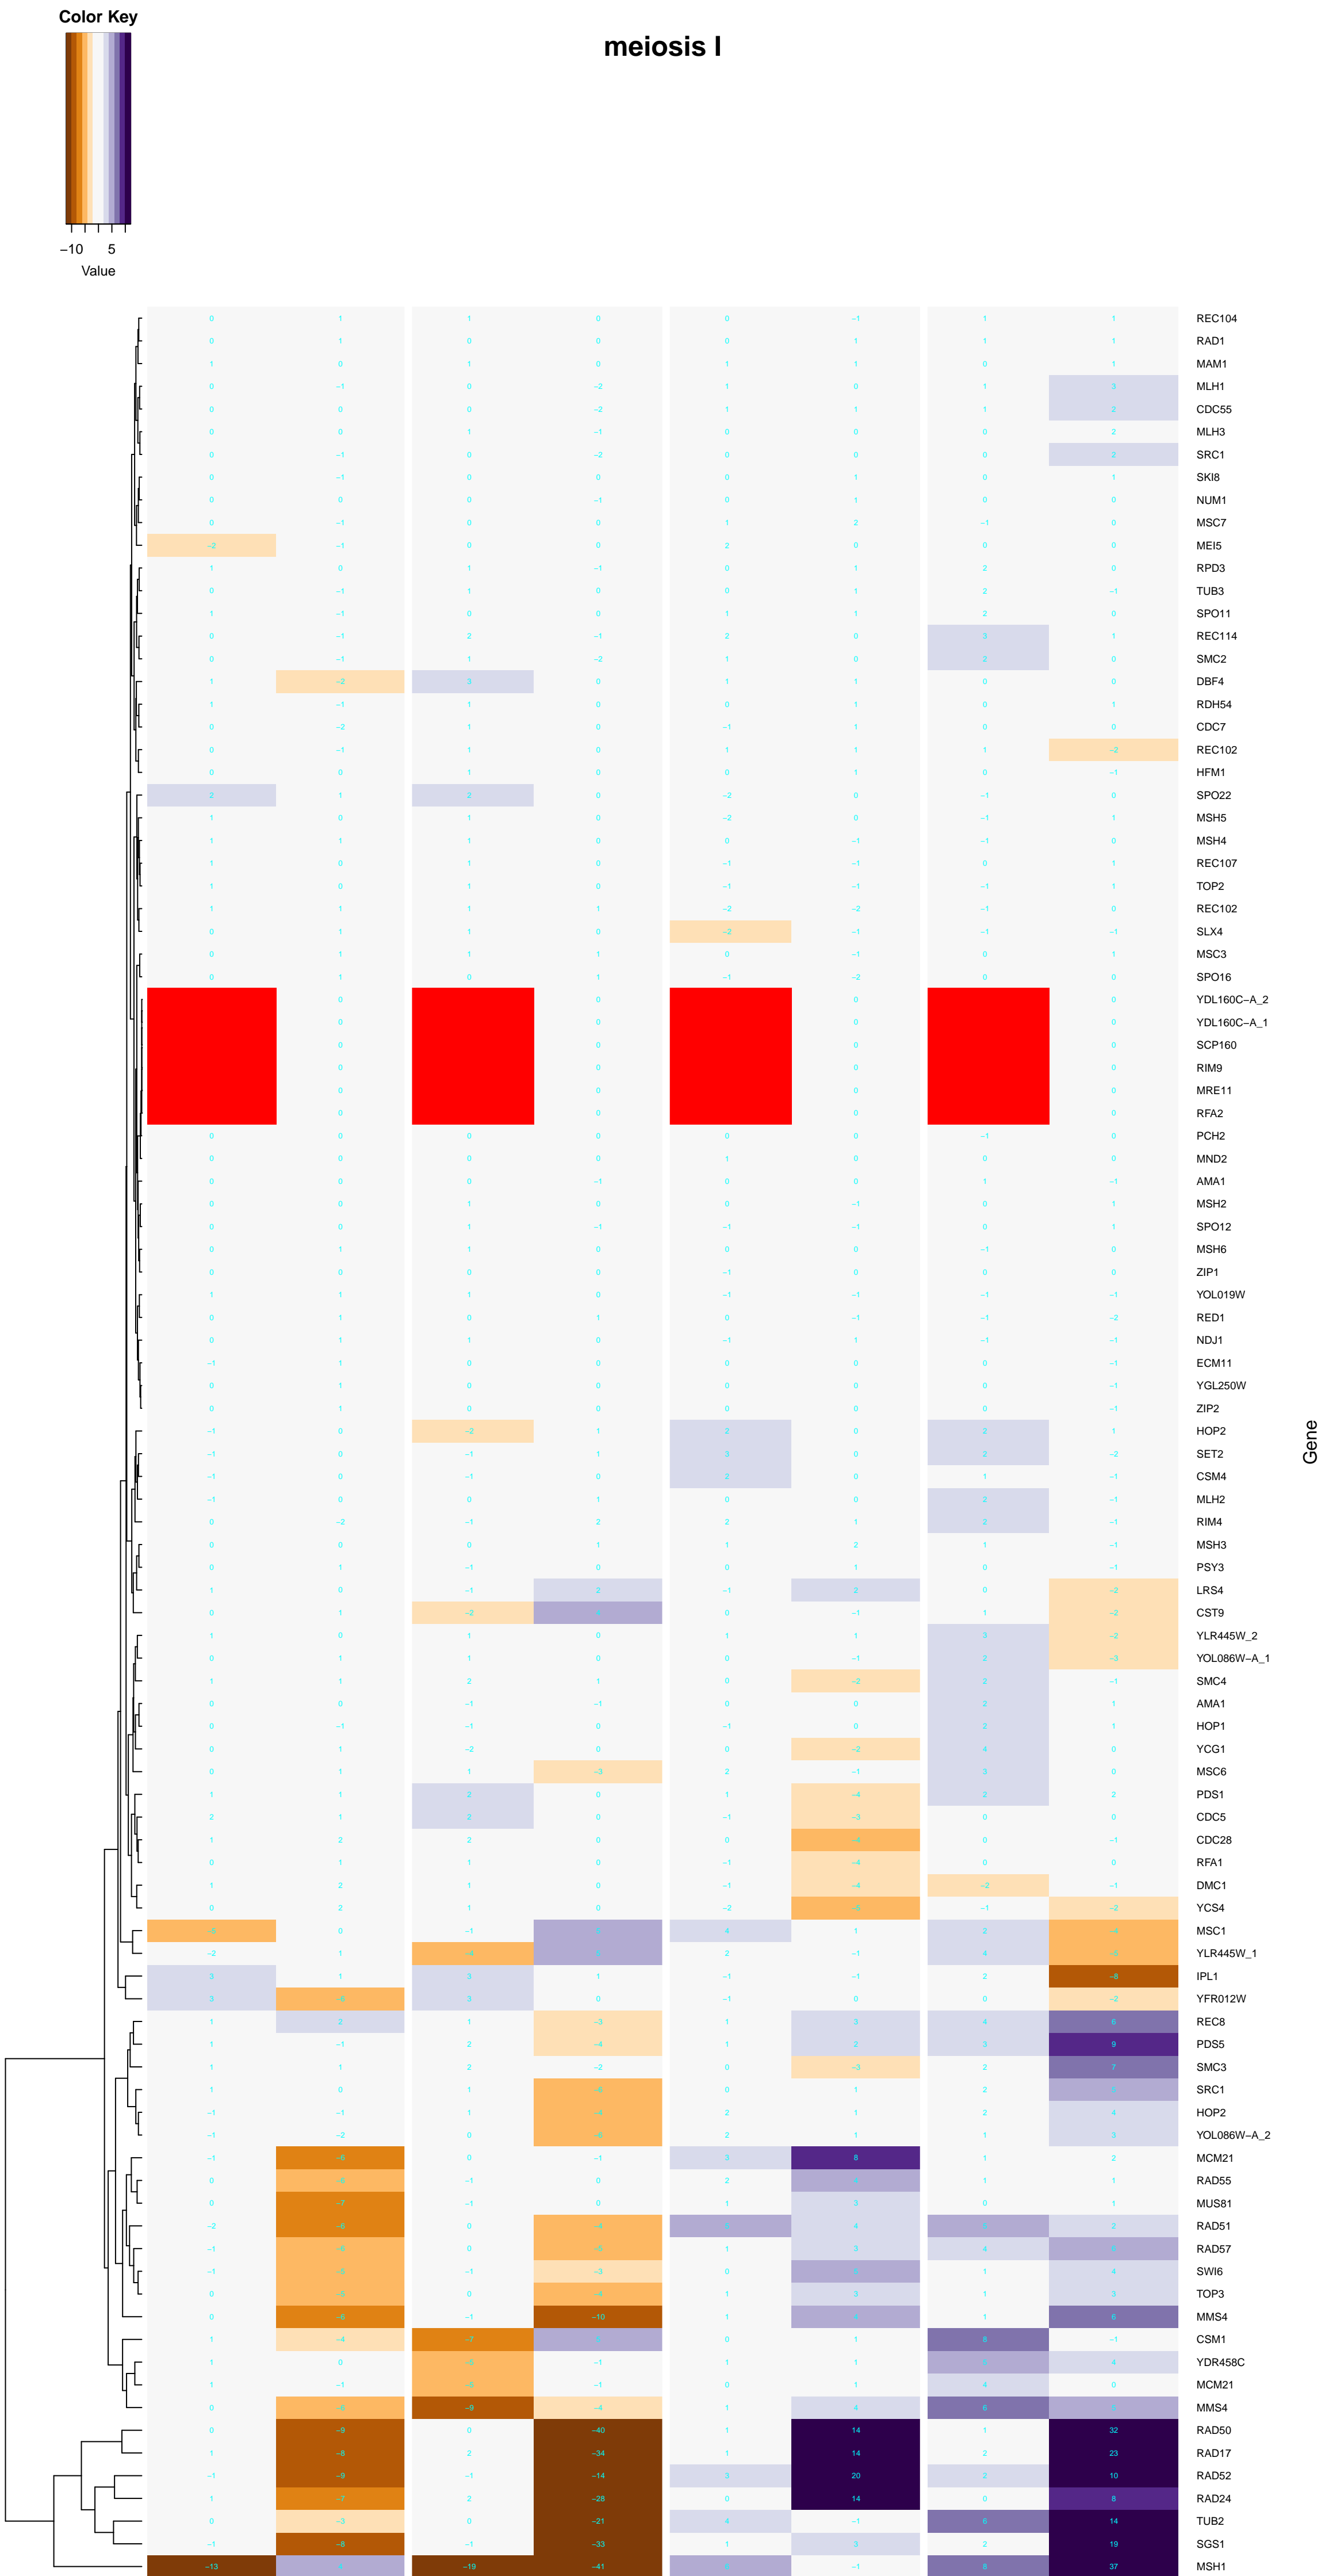

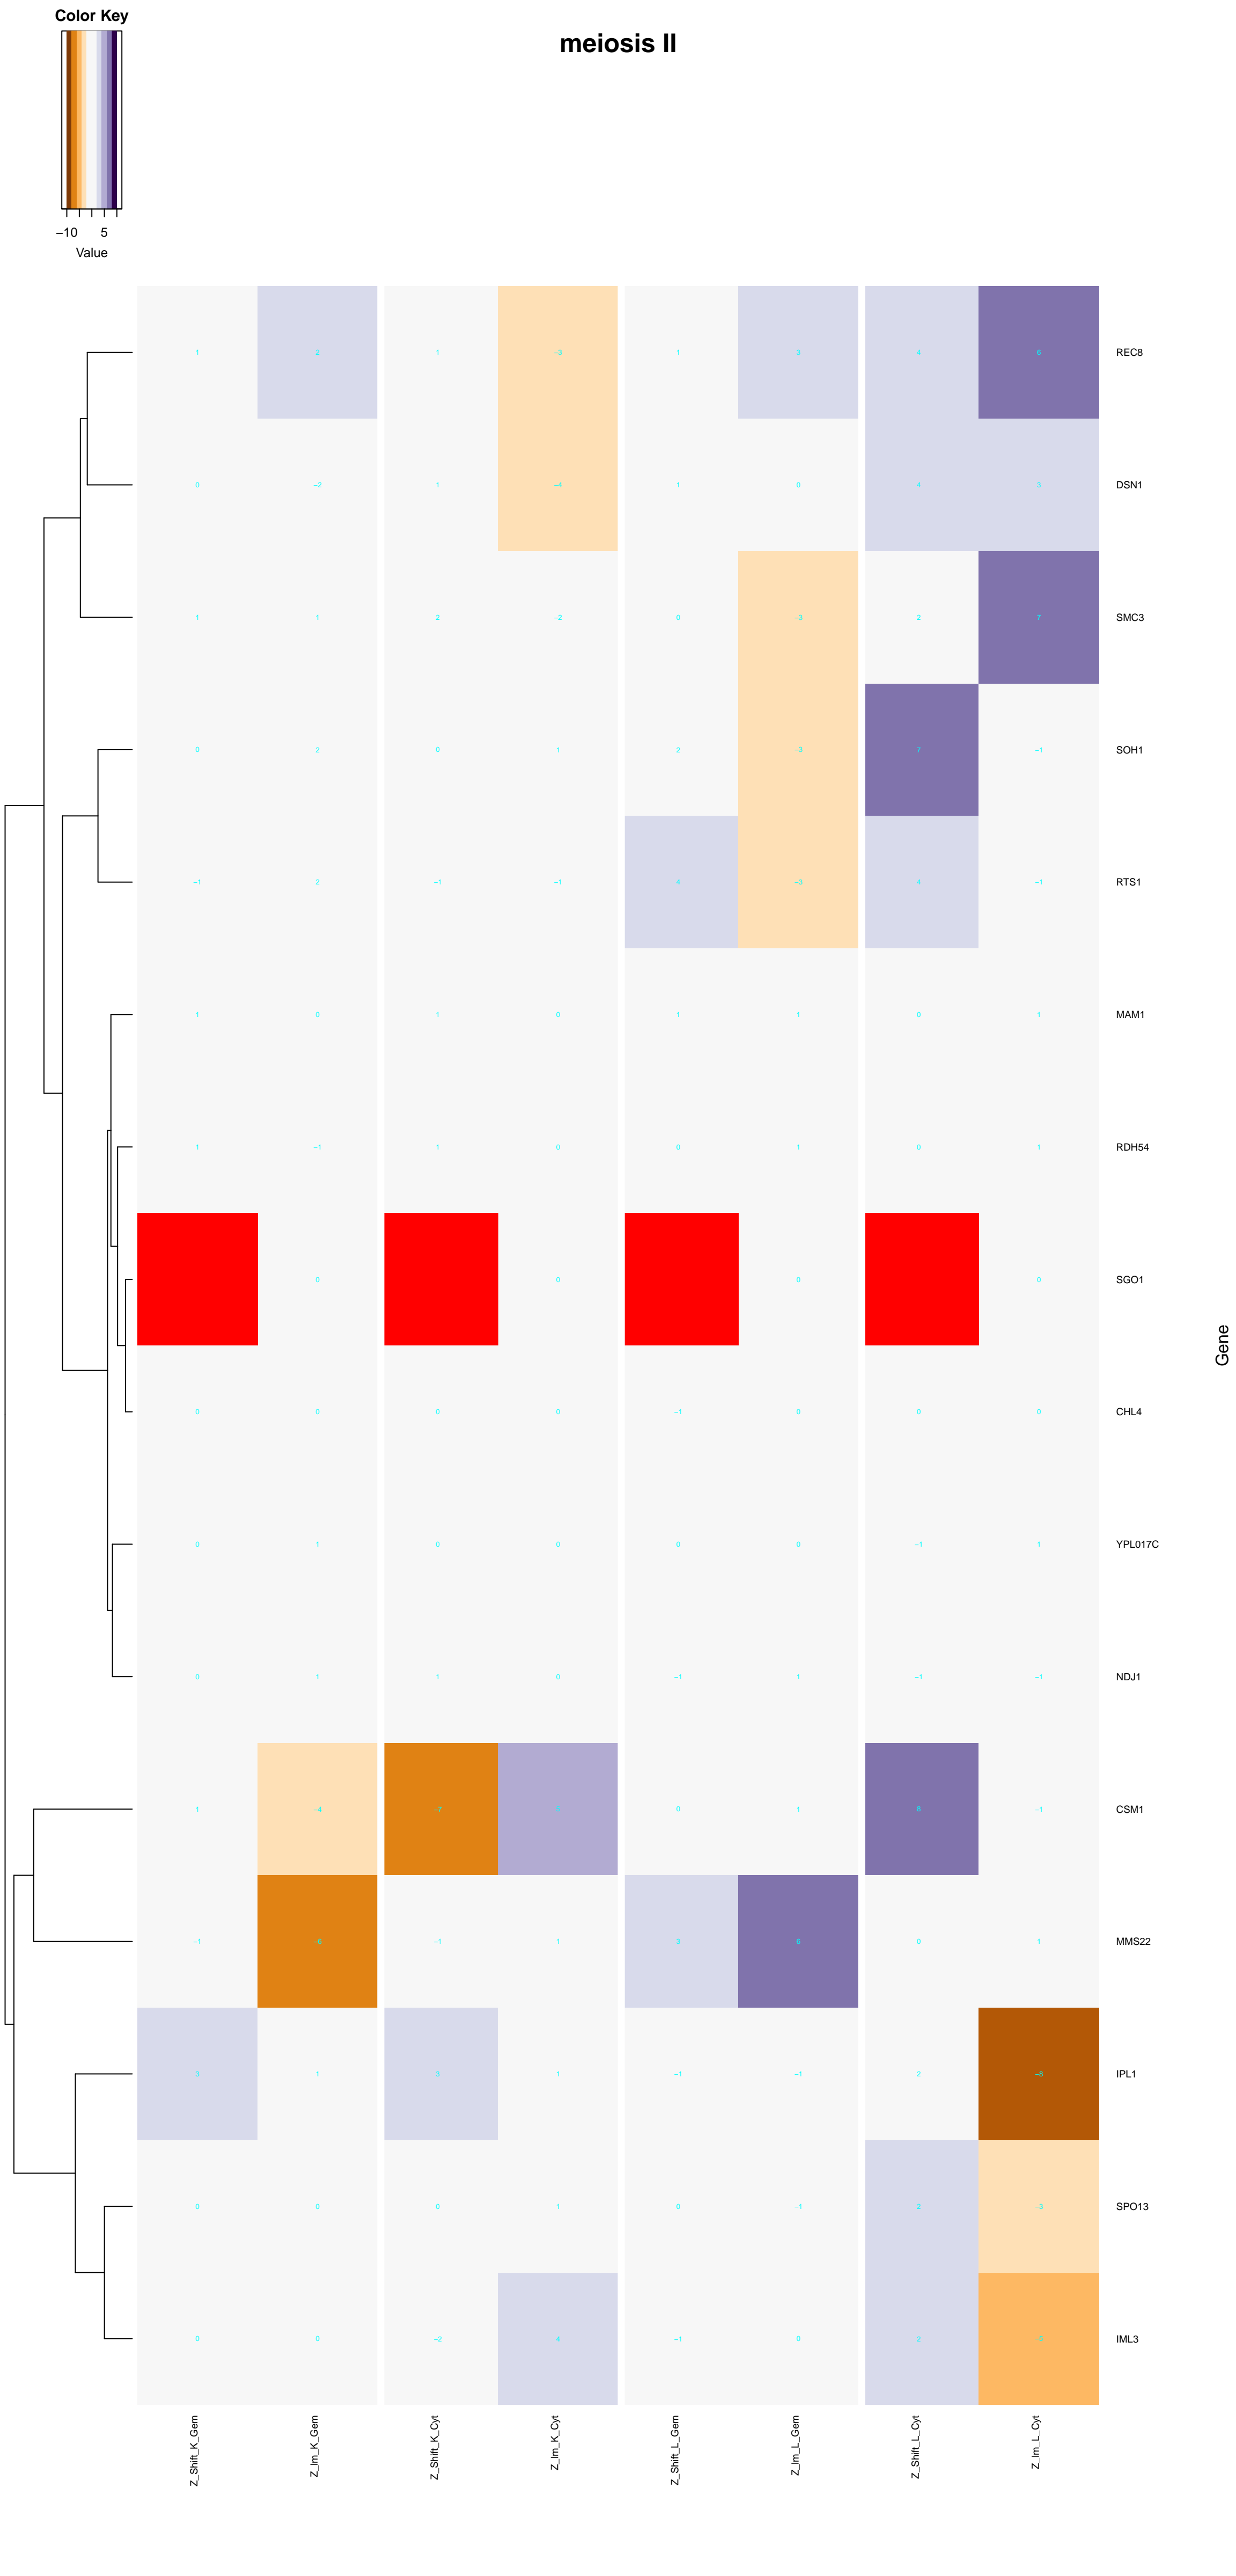

Supplement: s1 [file s1]

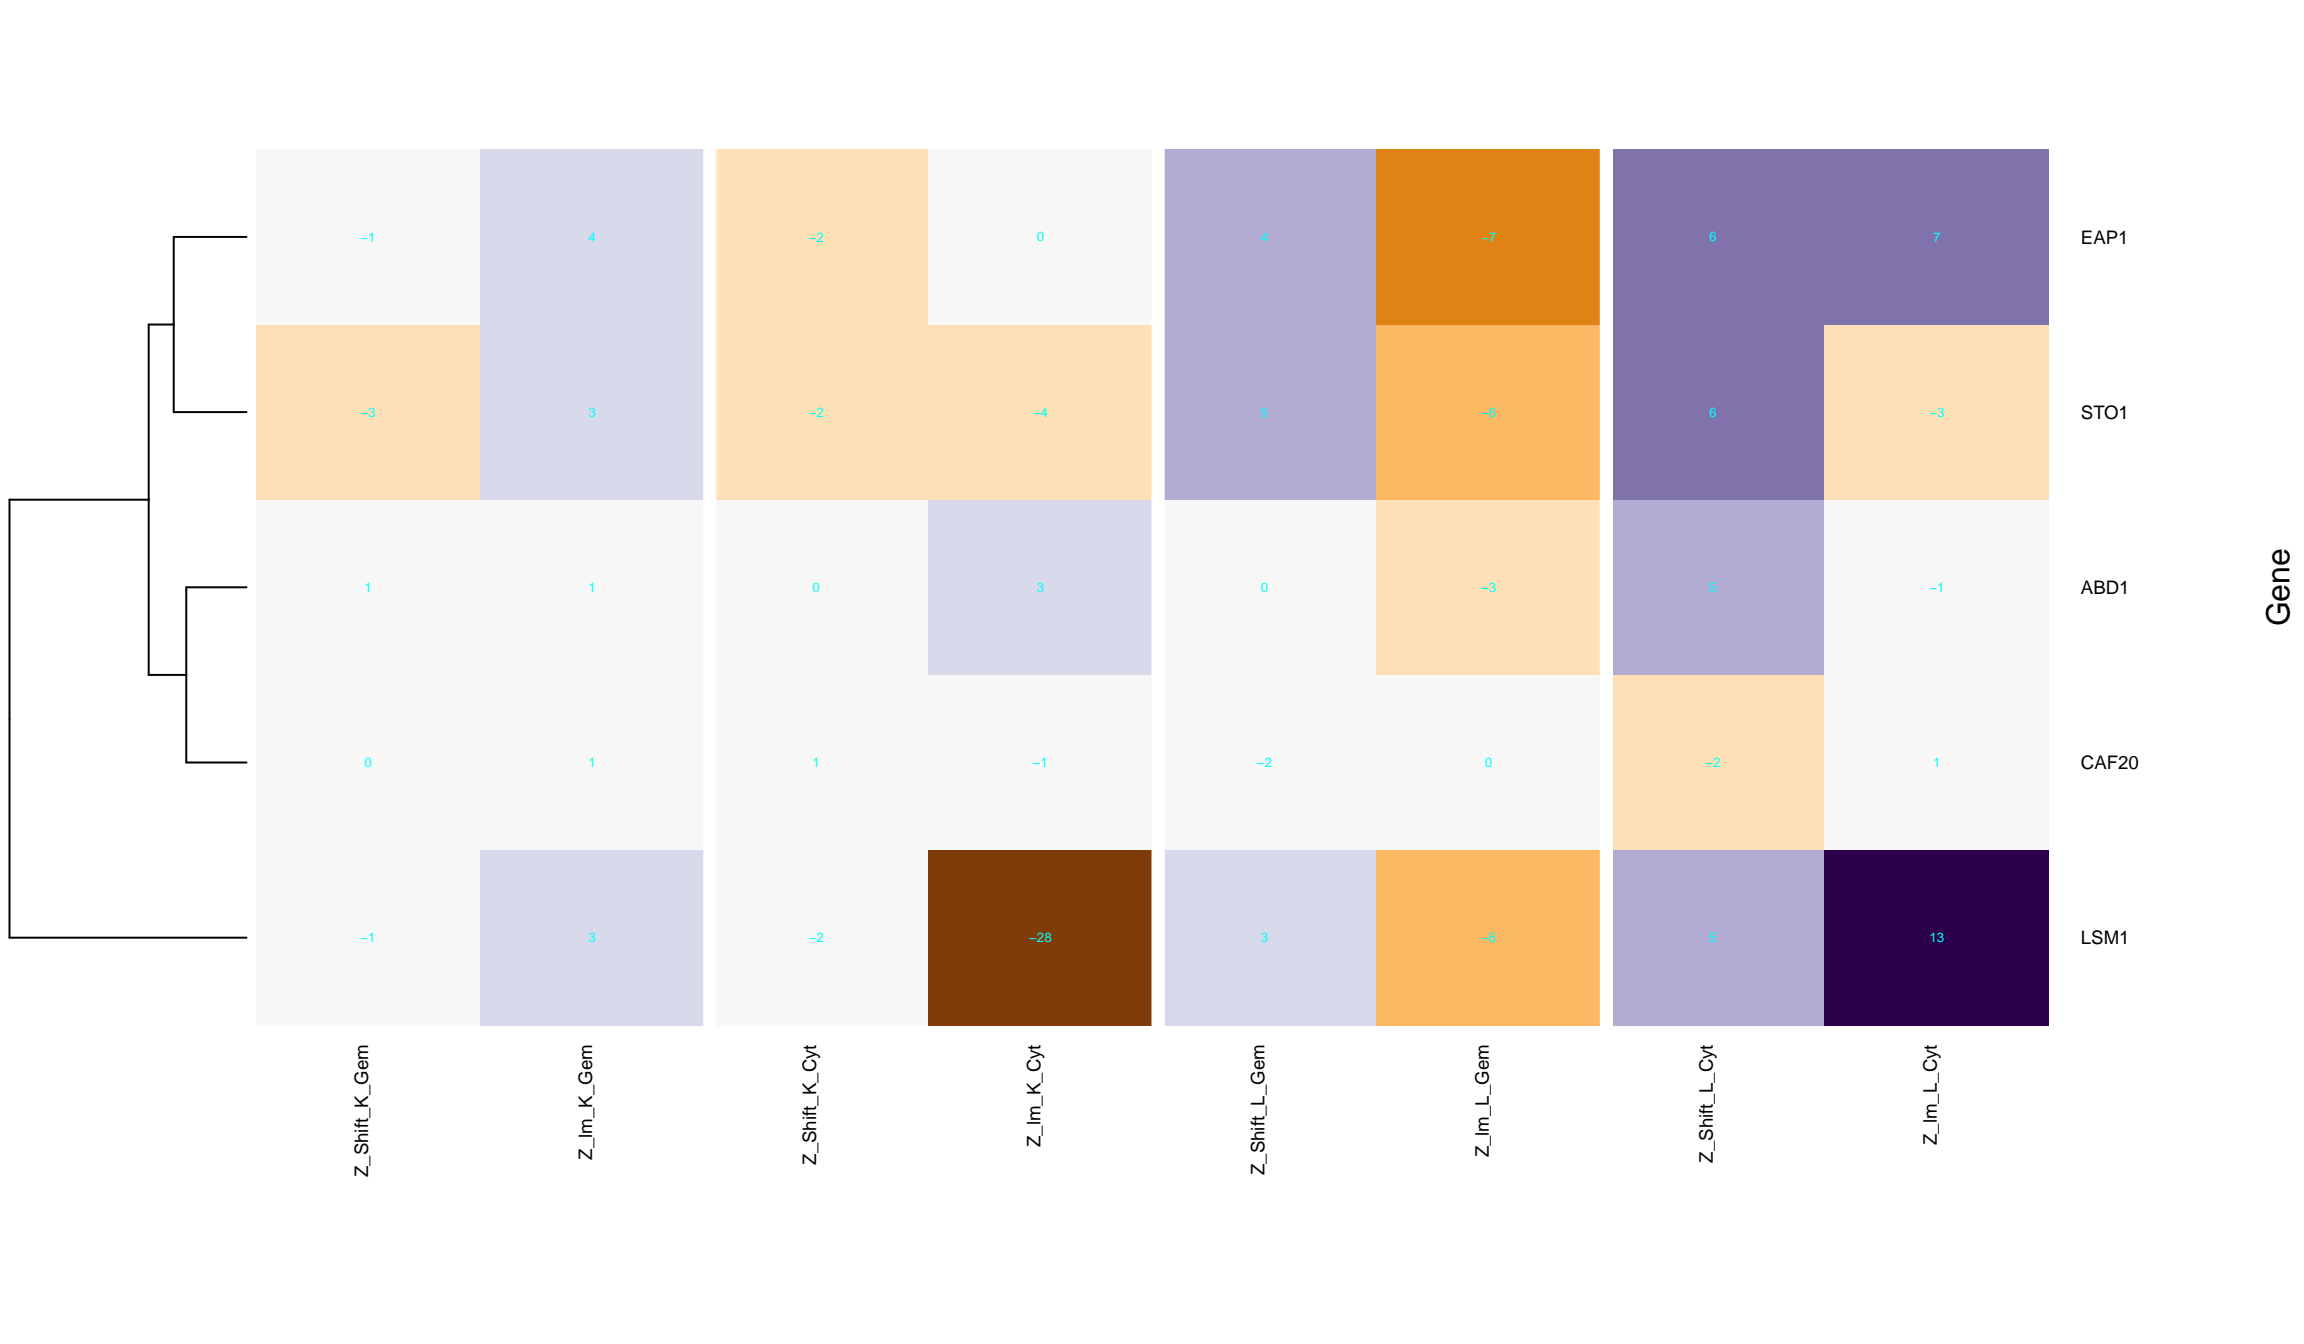

Supplement: s1 [file s1]

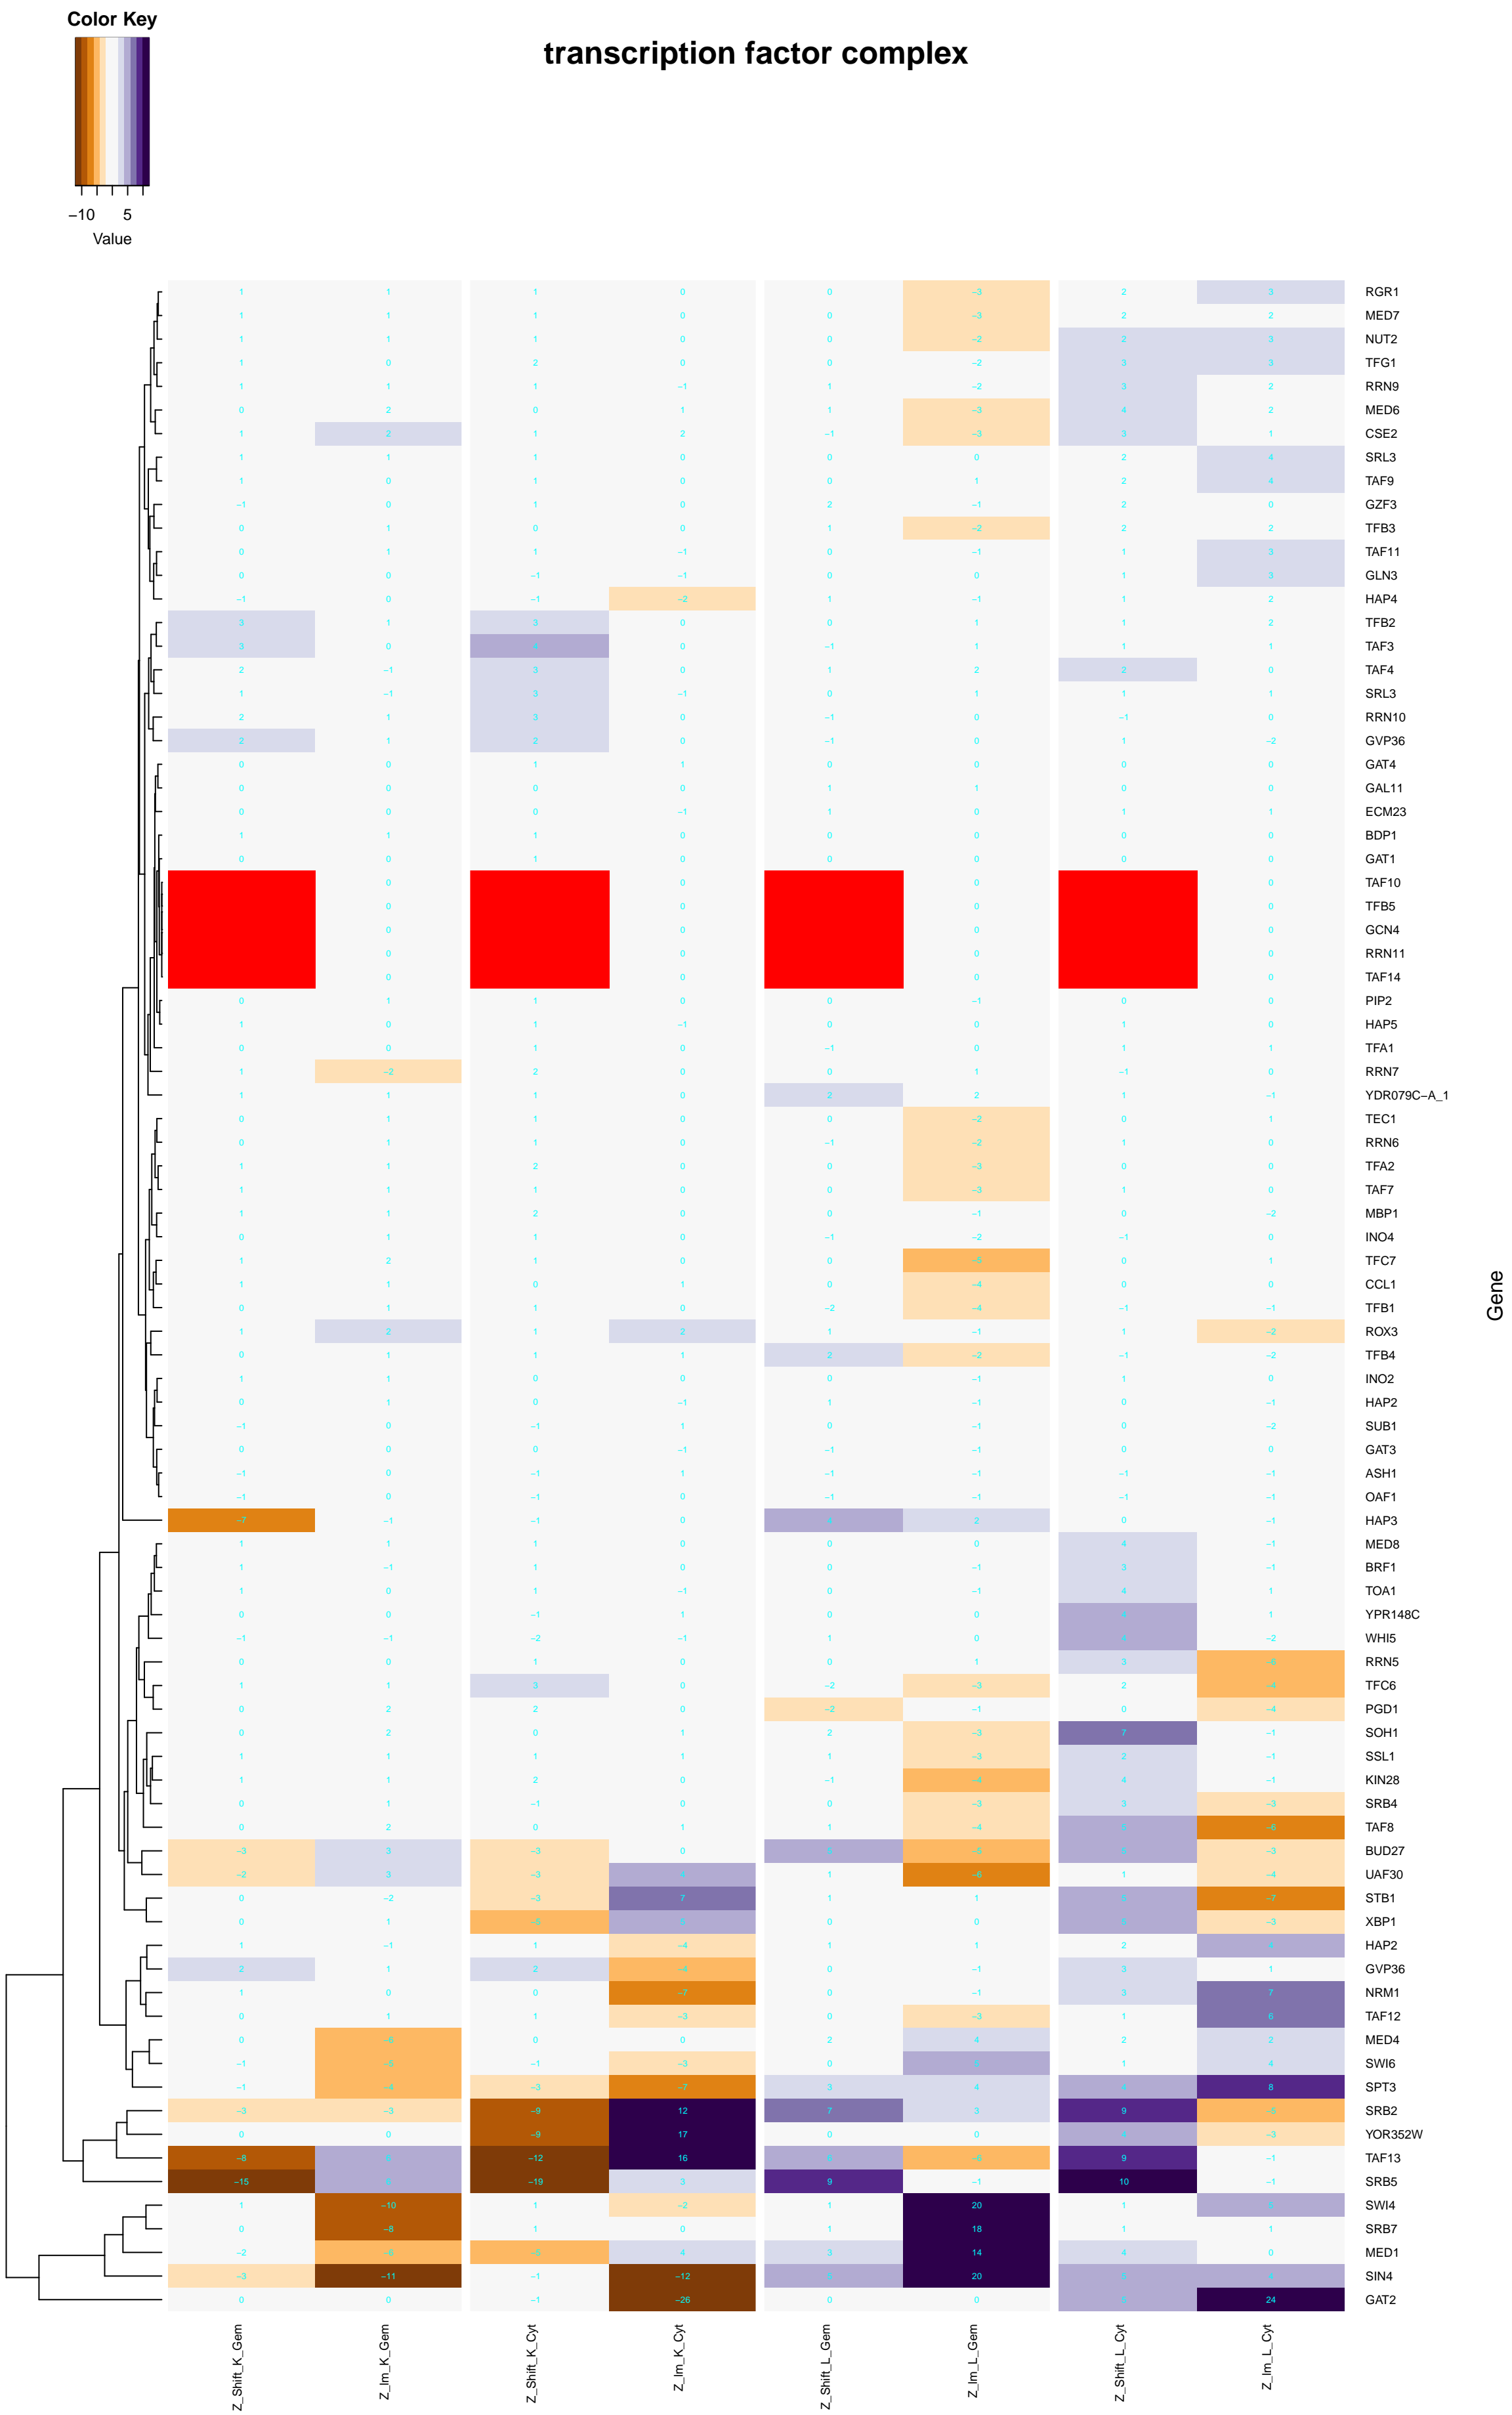

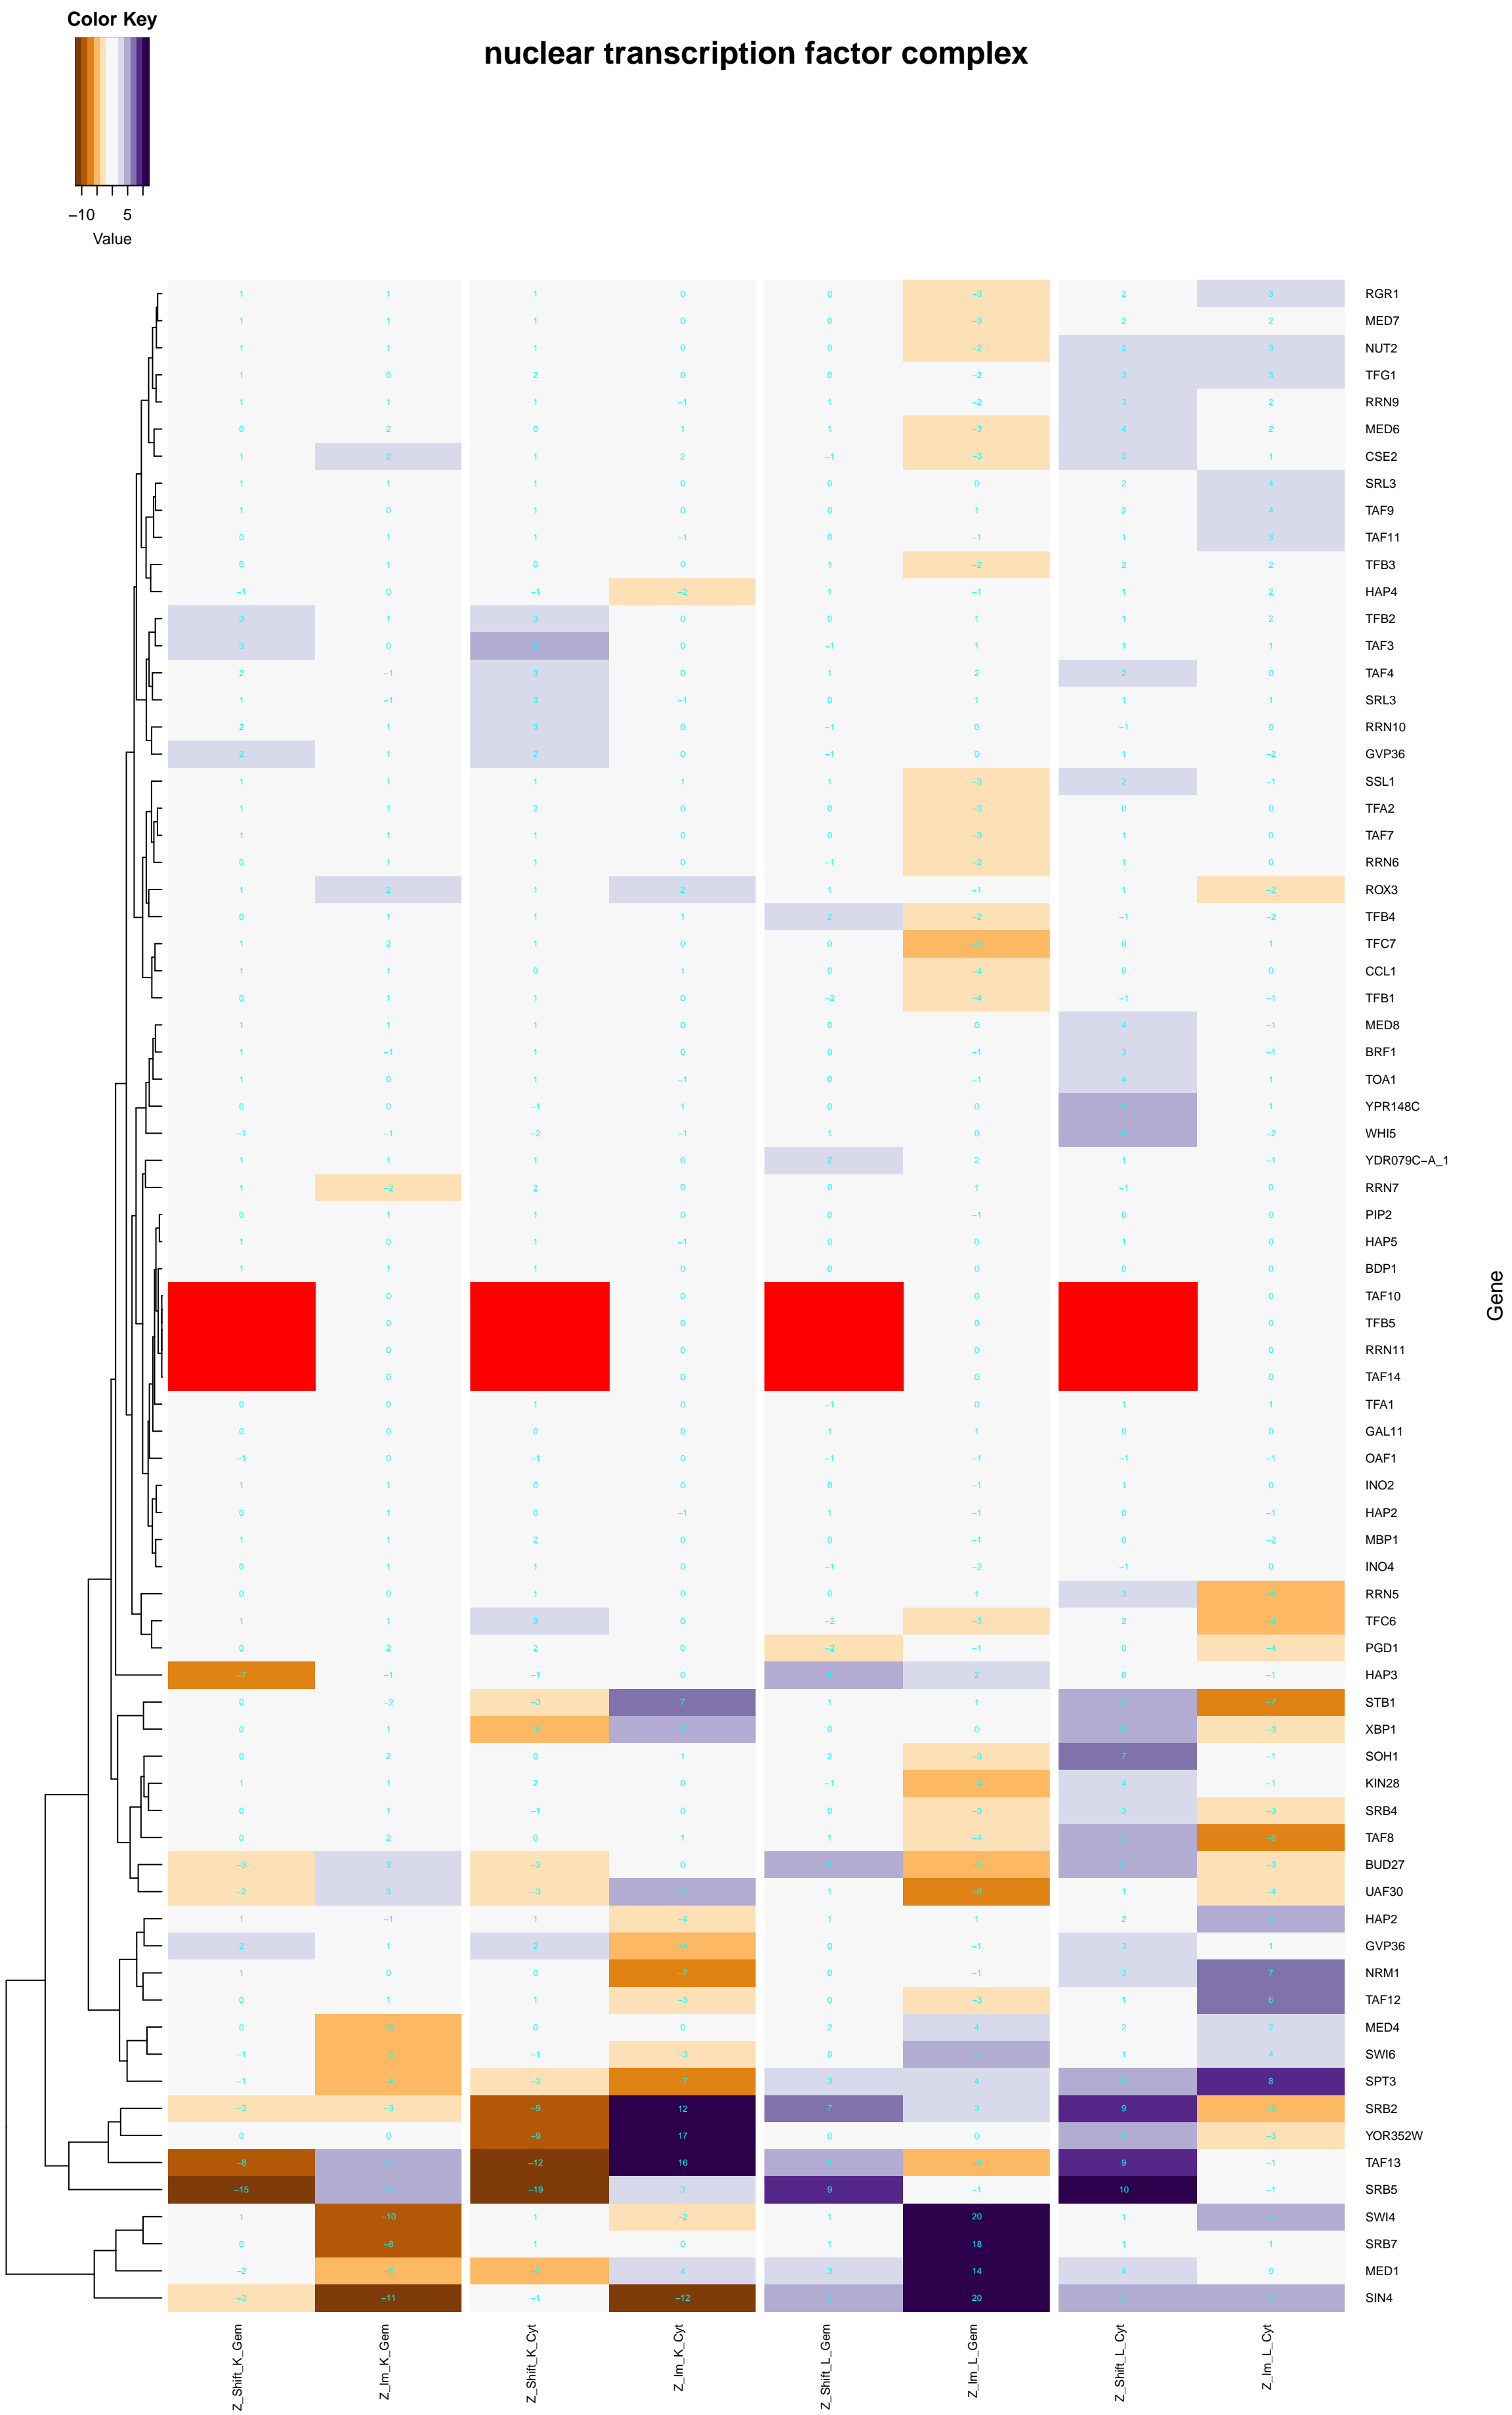

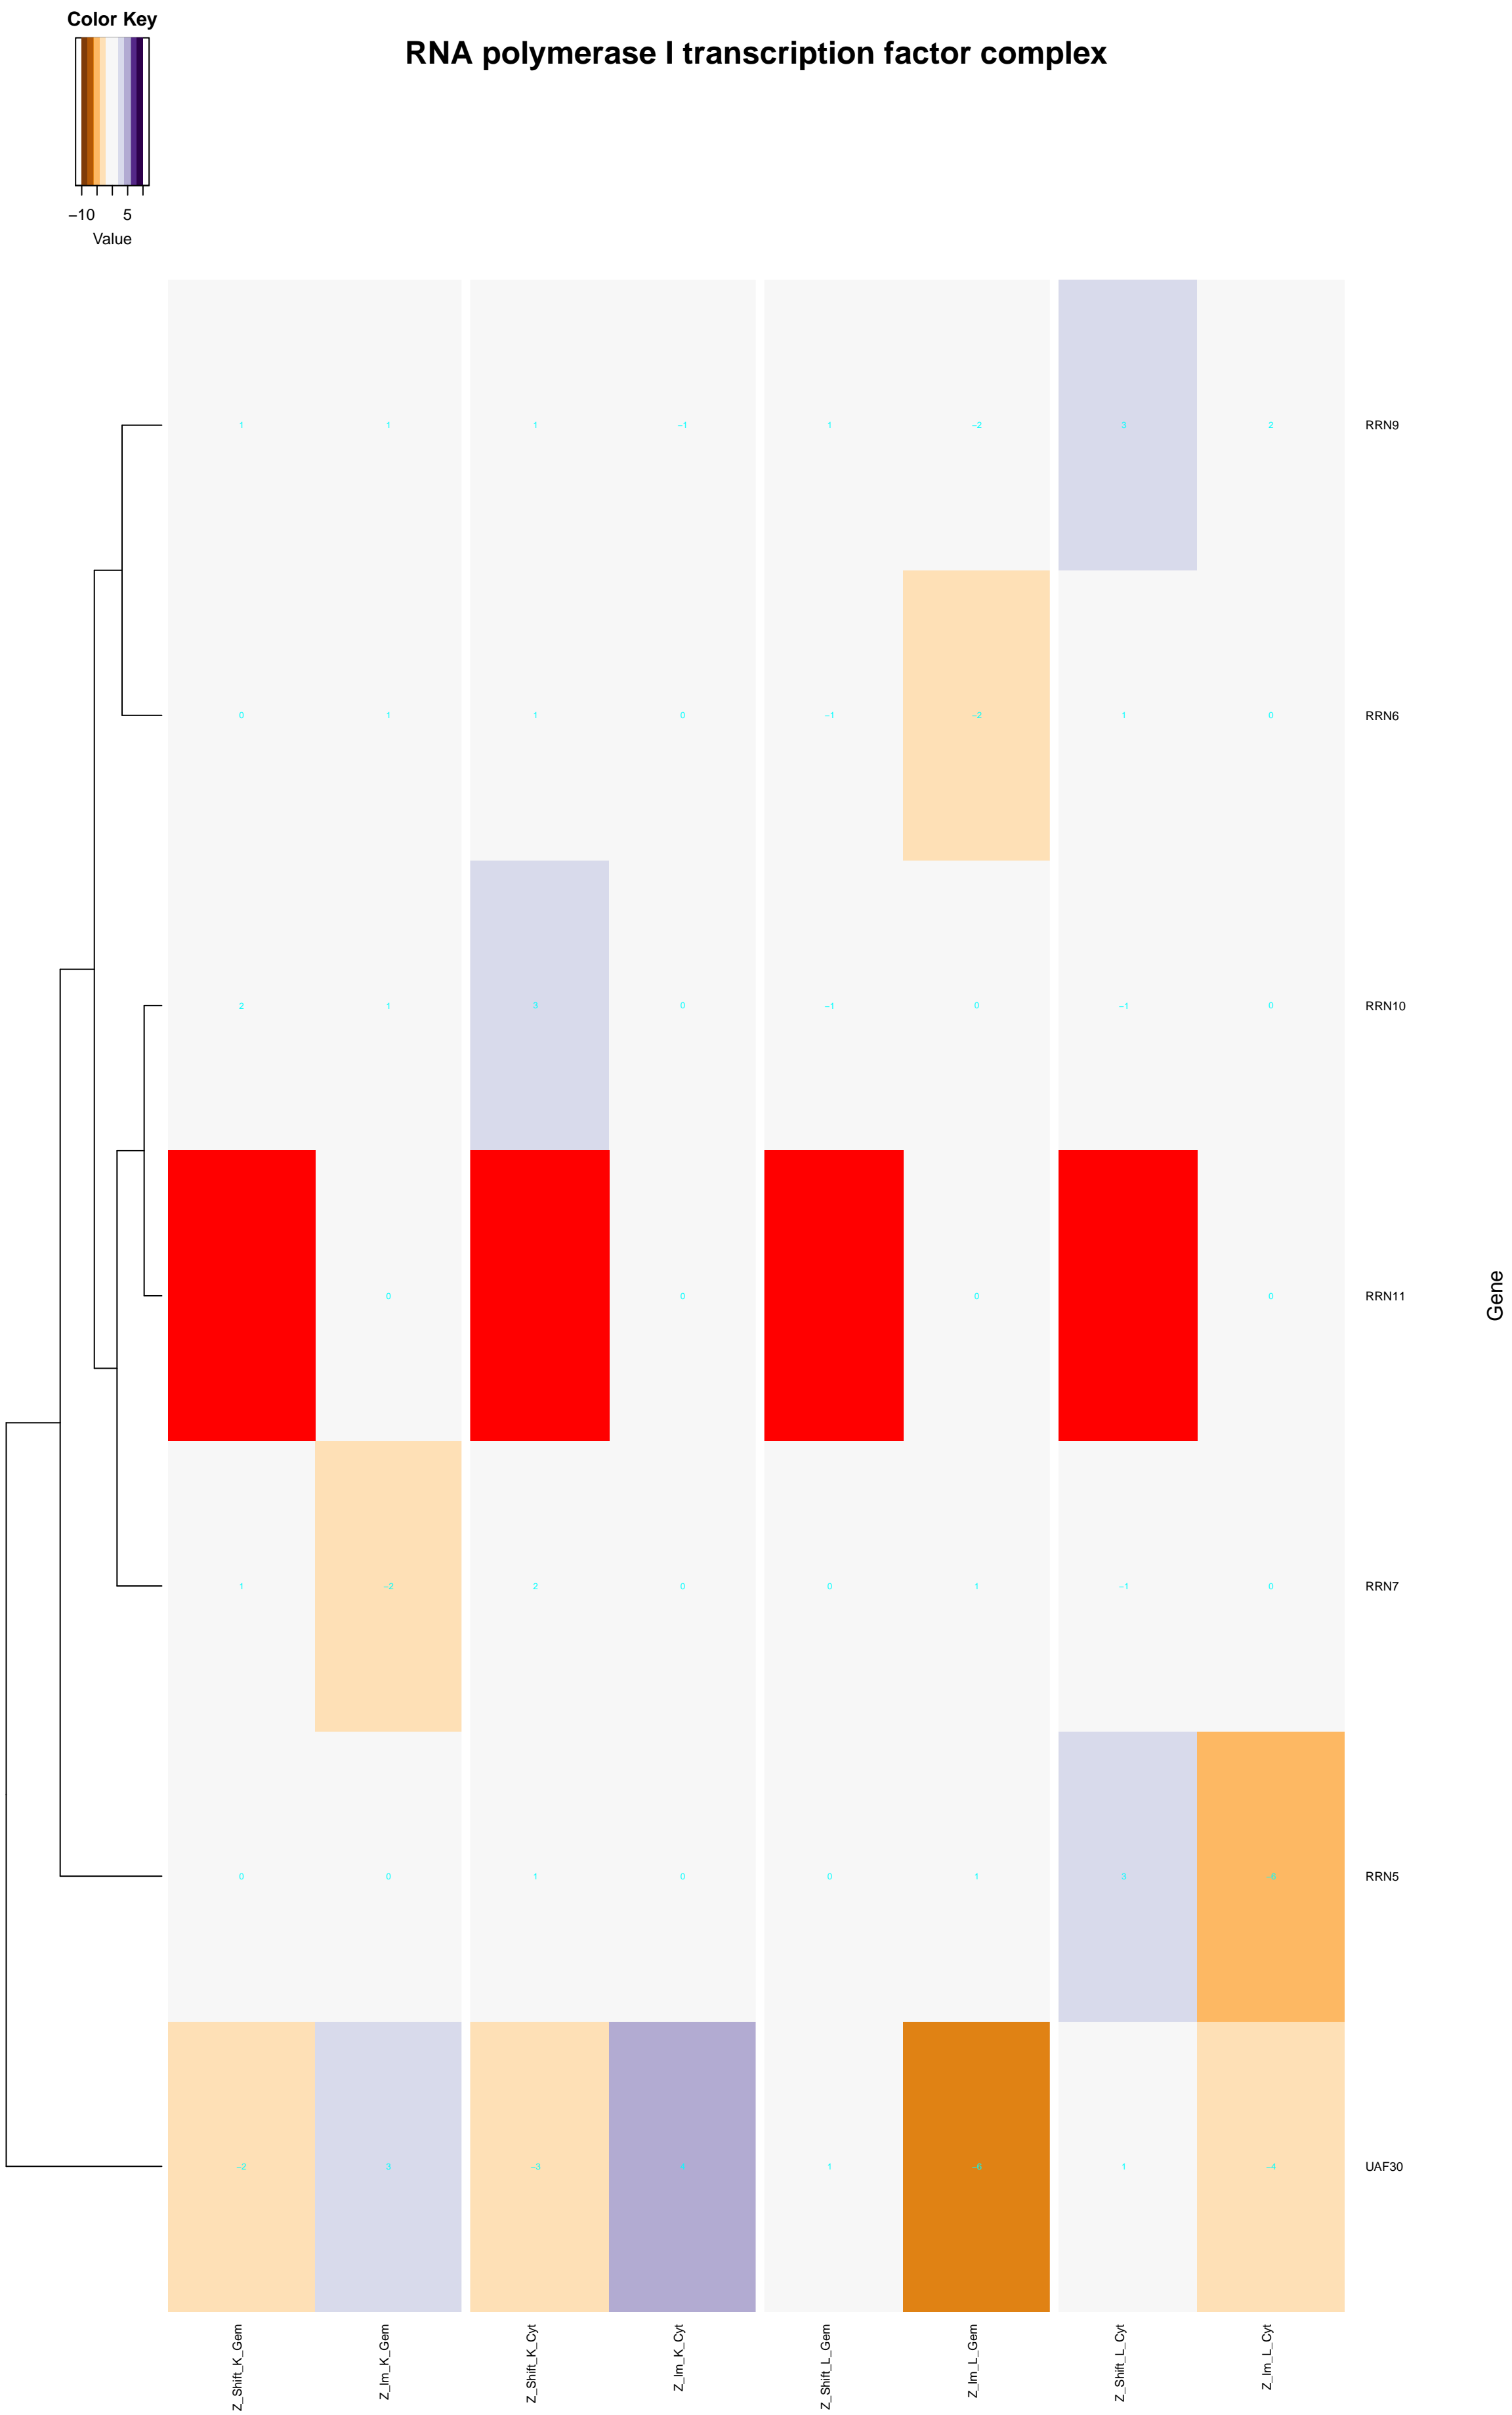

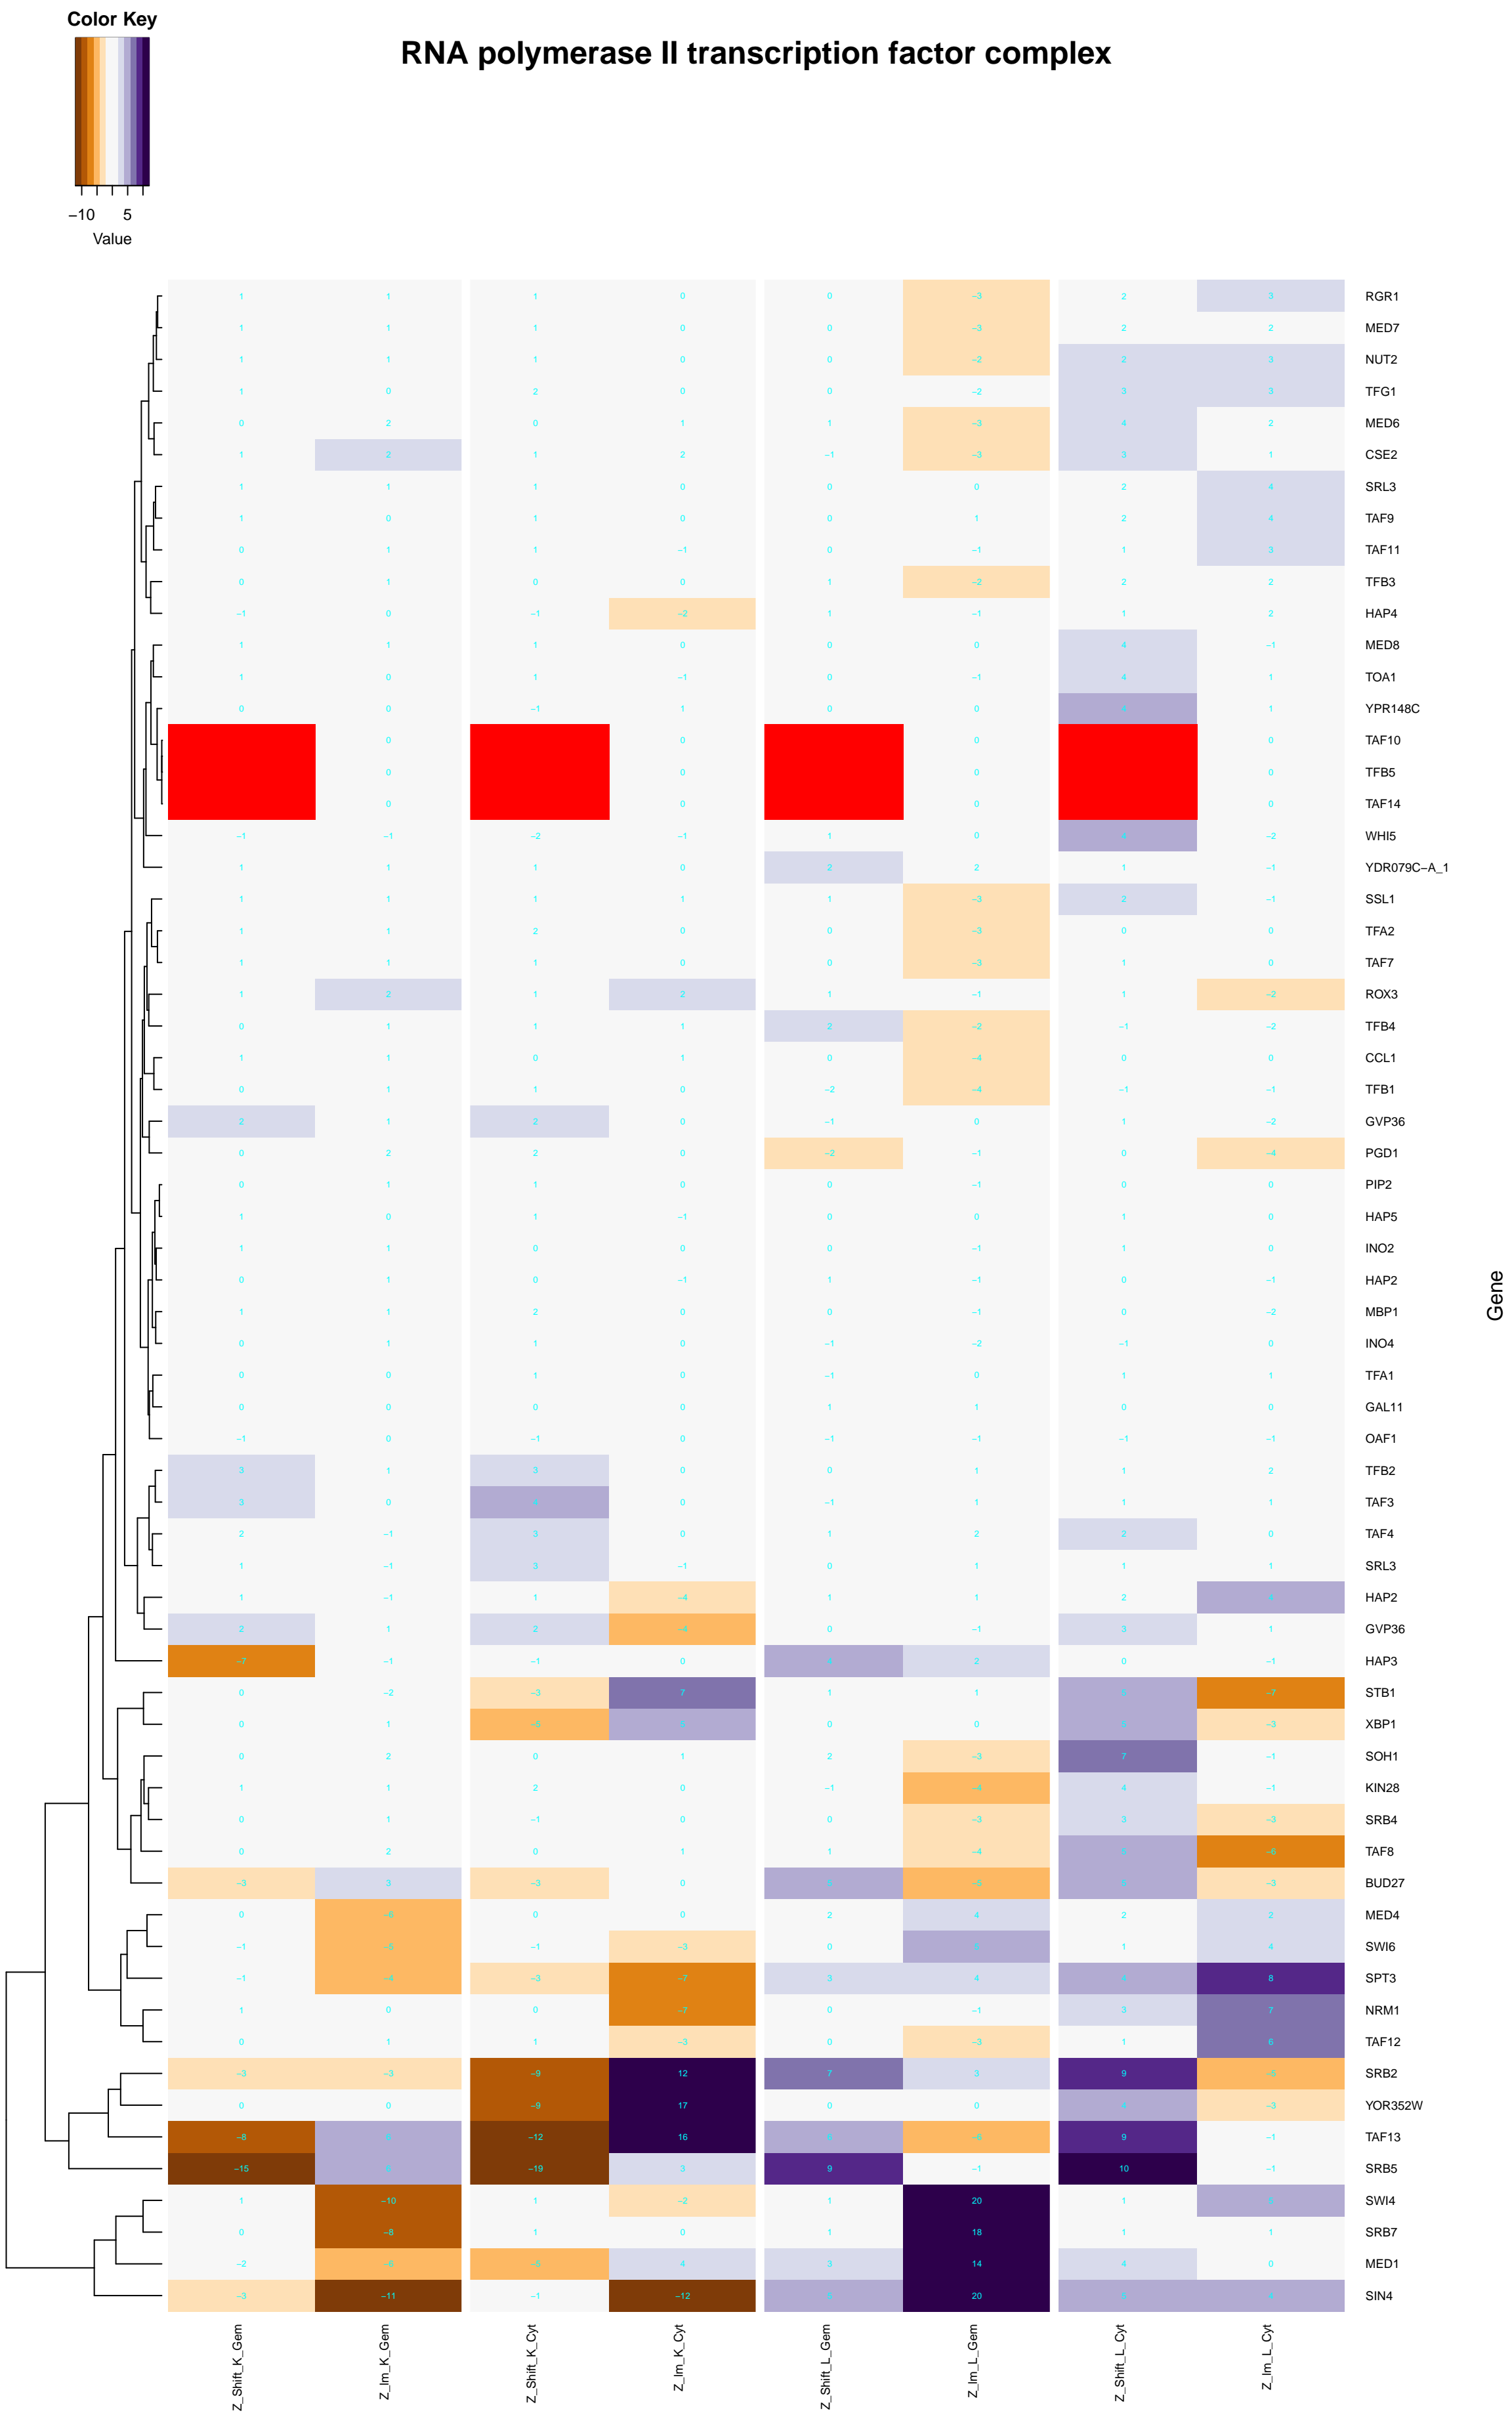

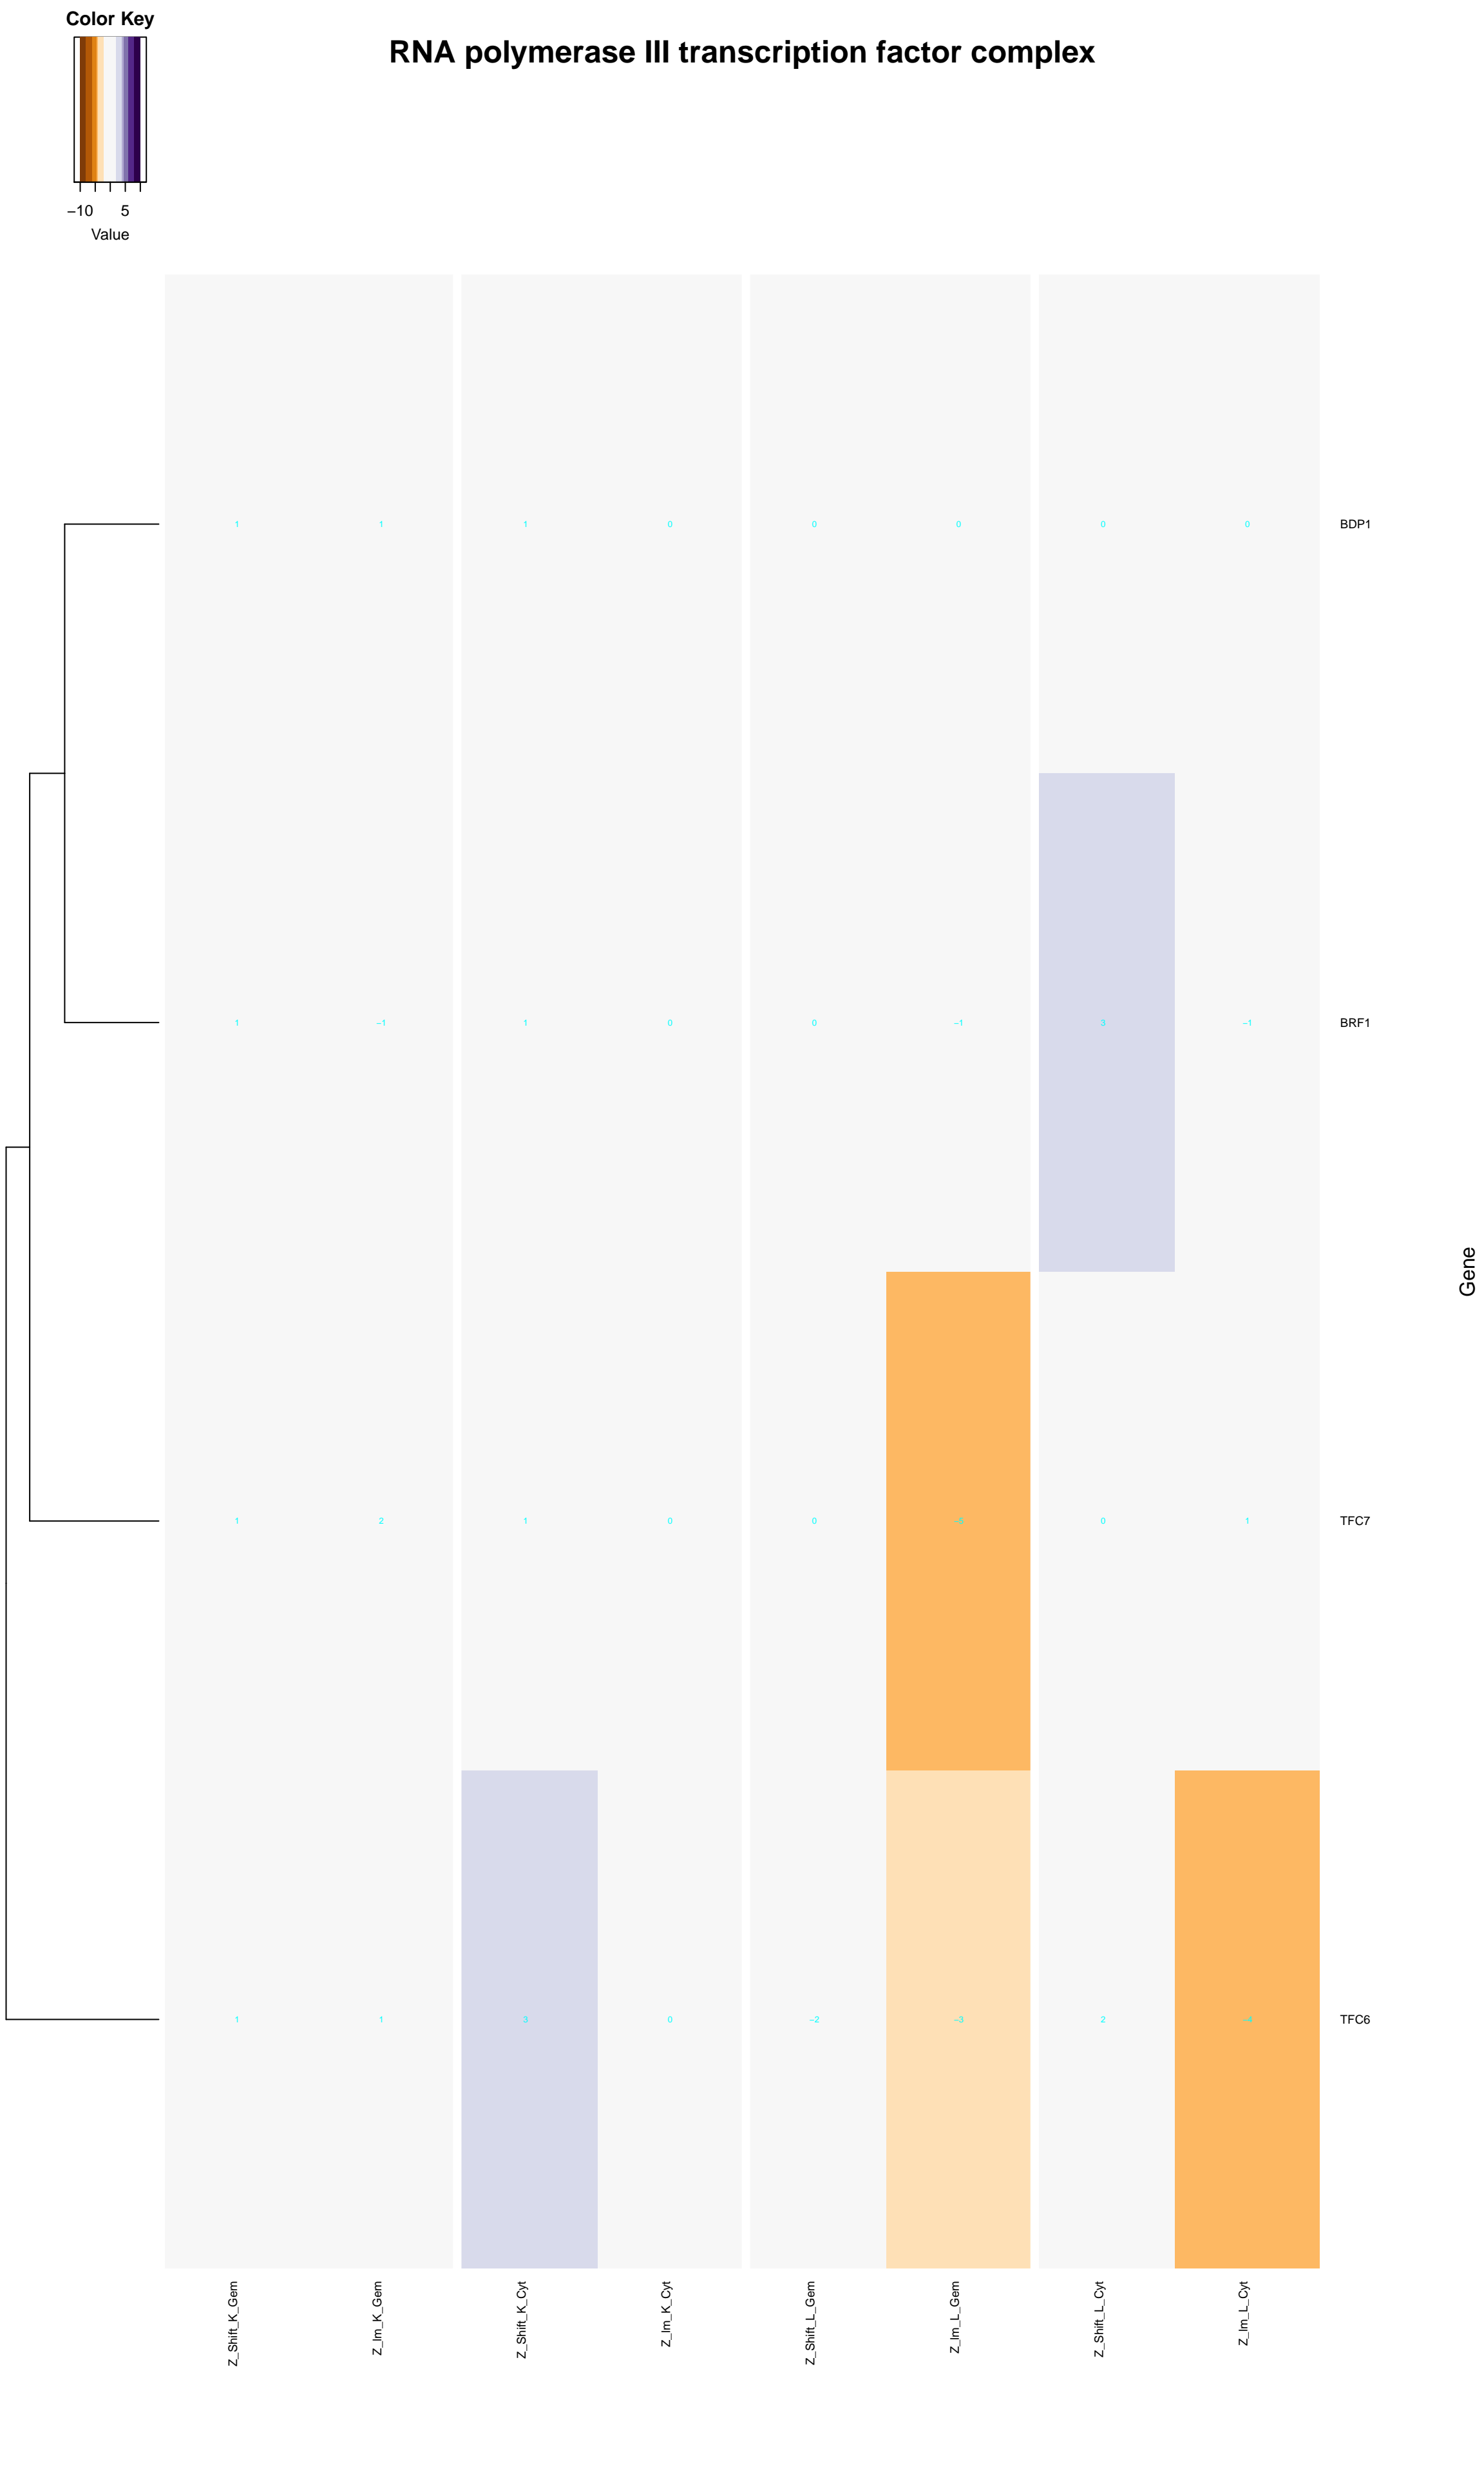

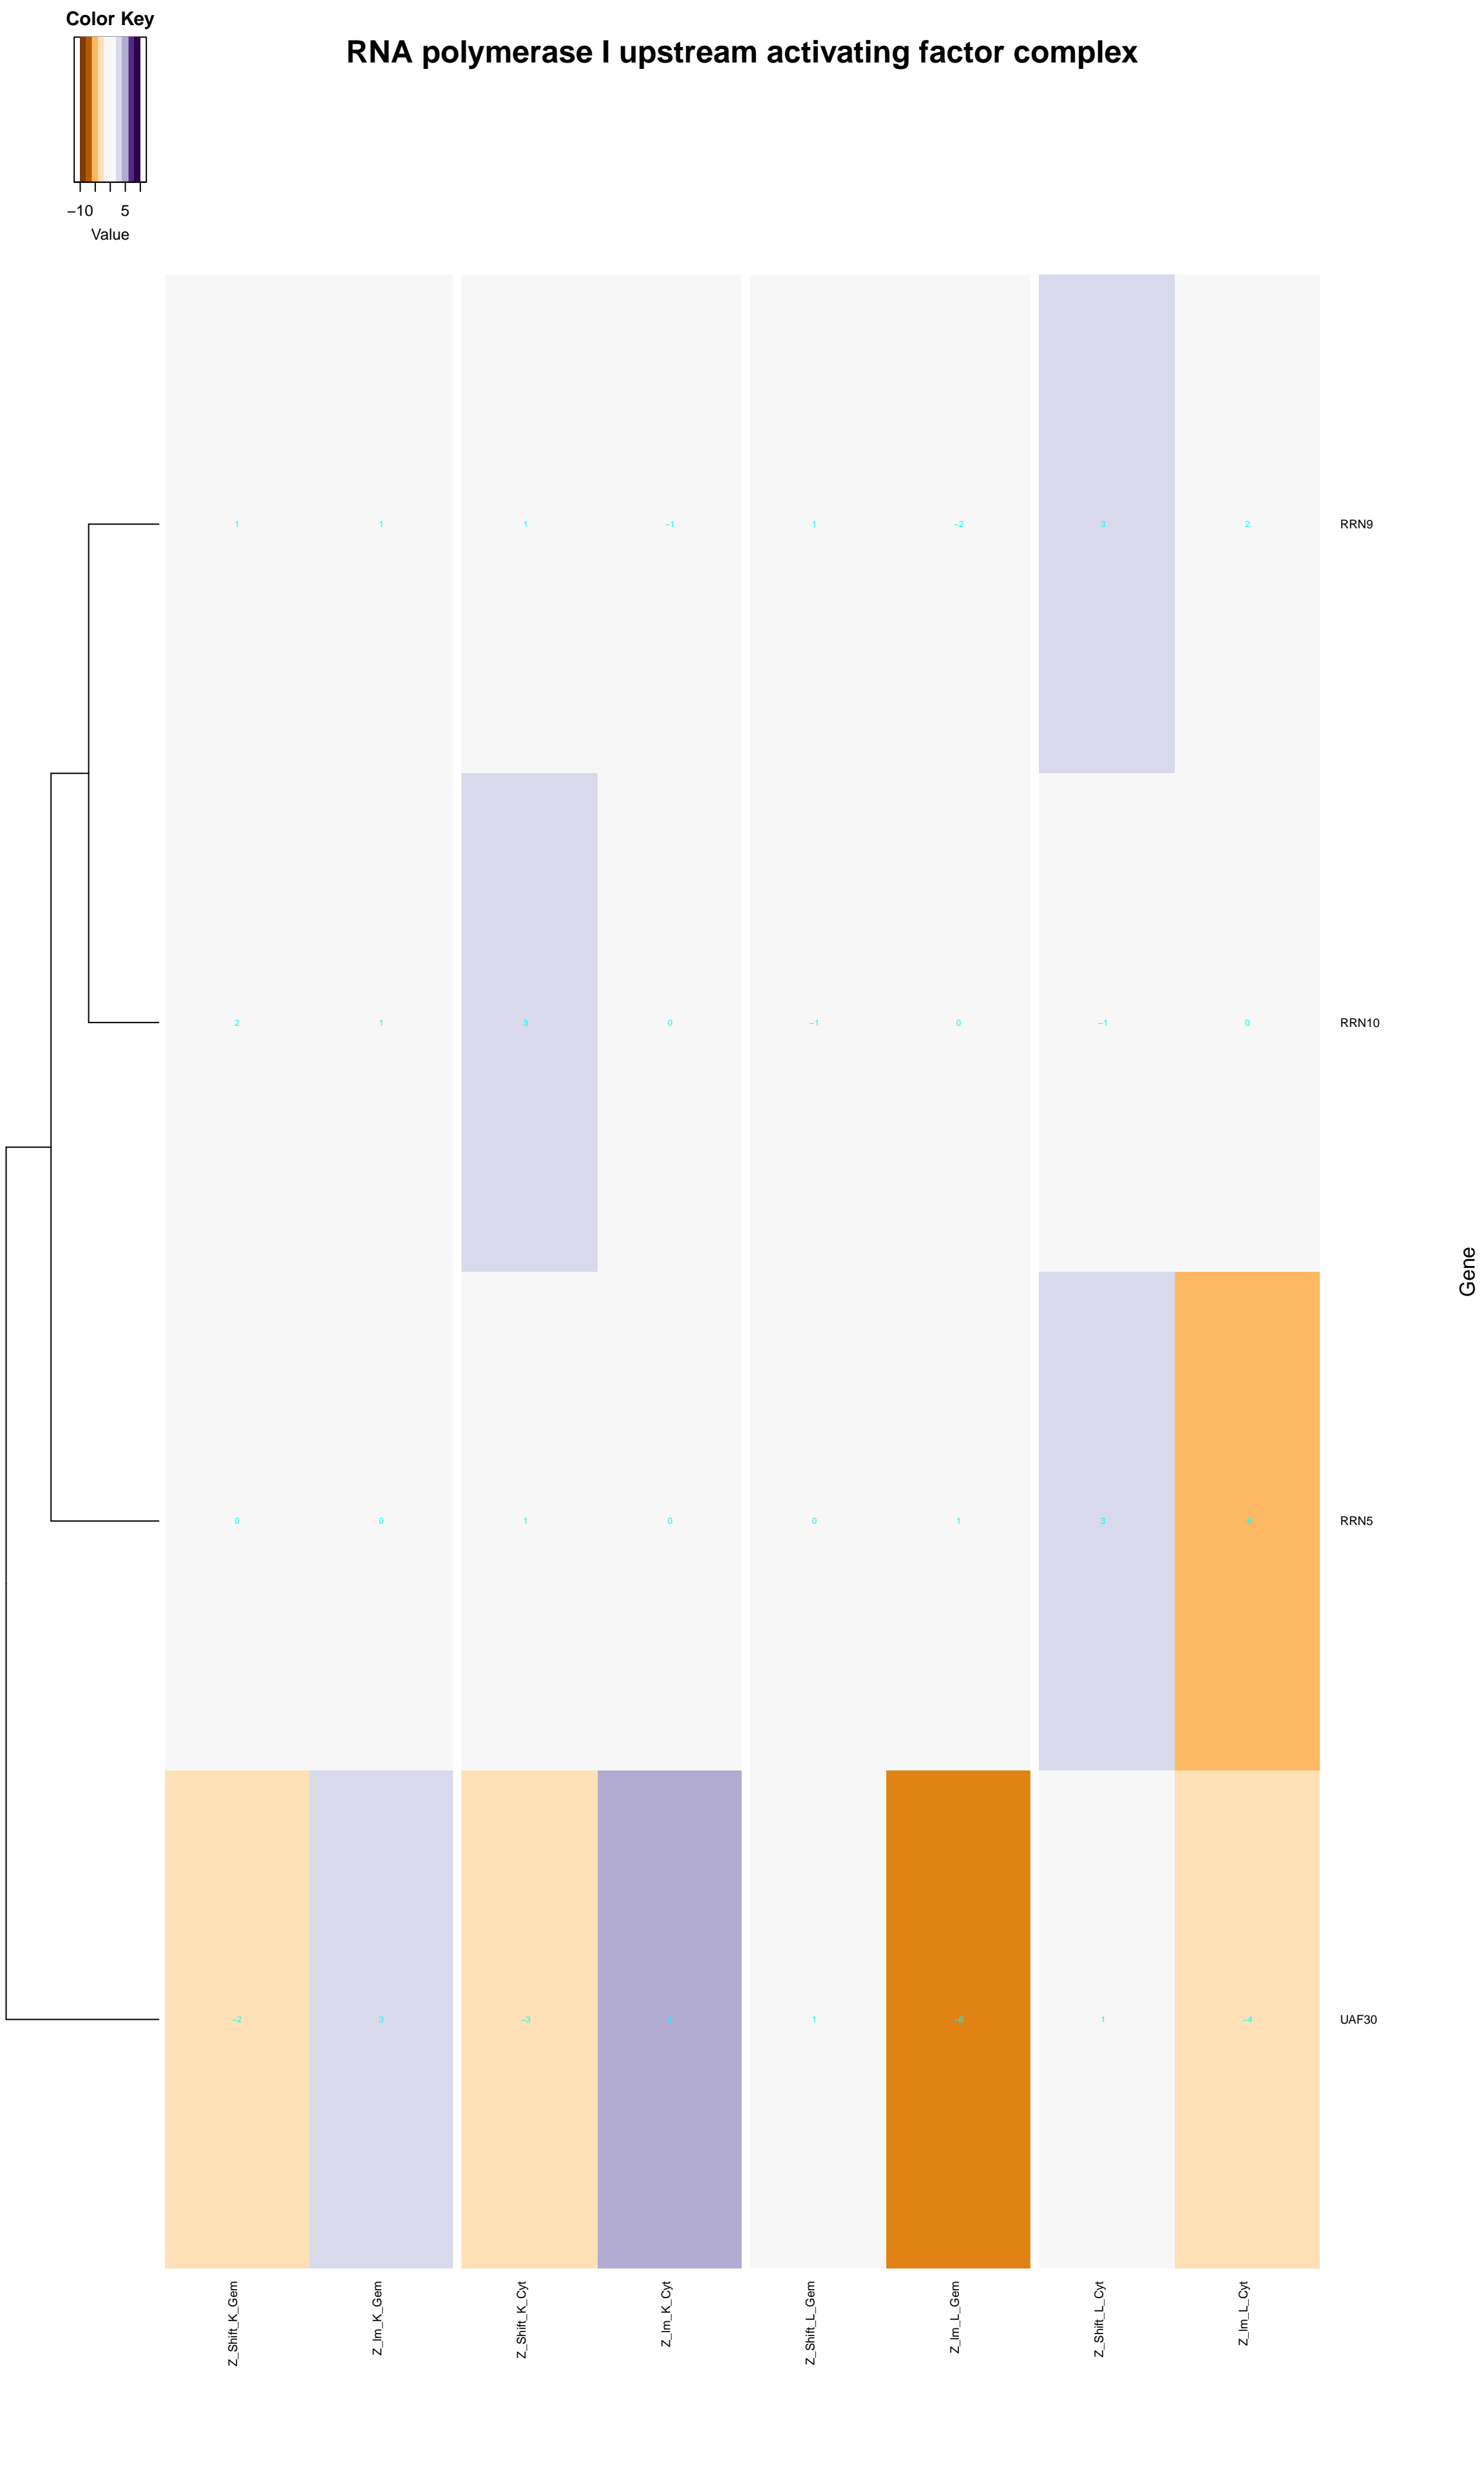

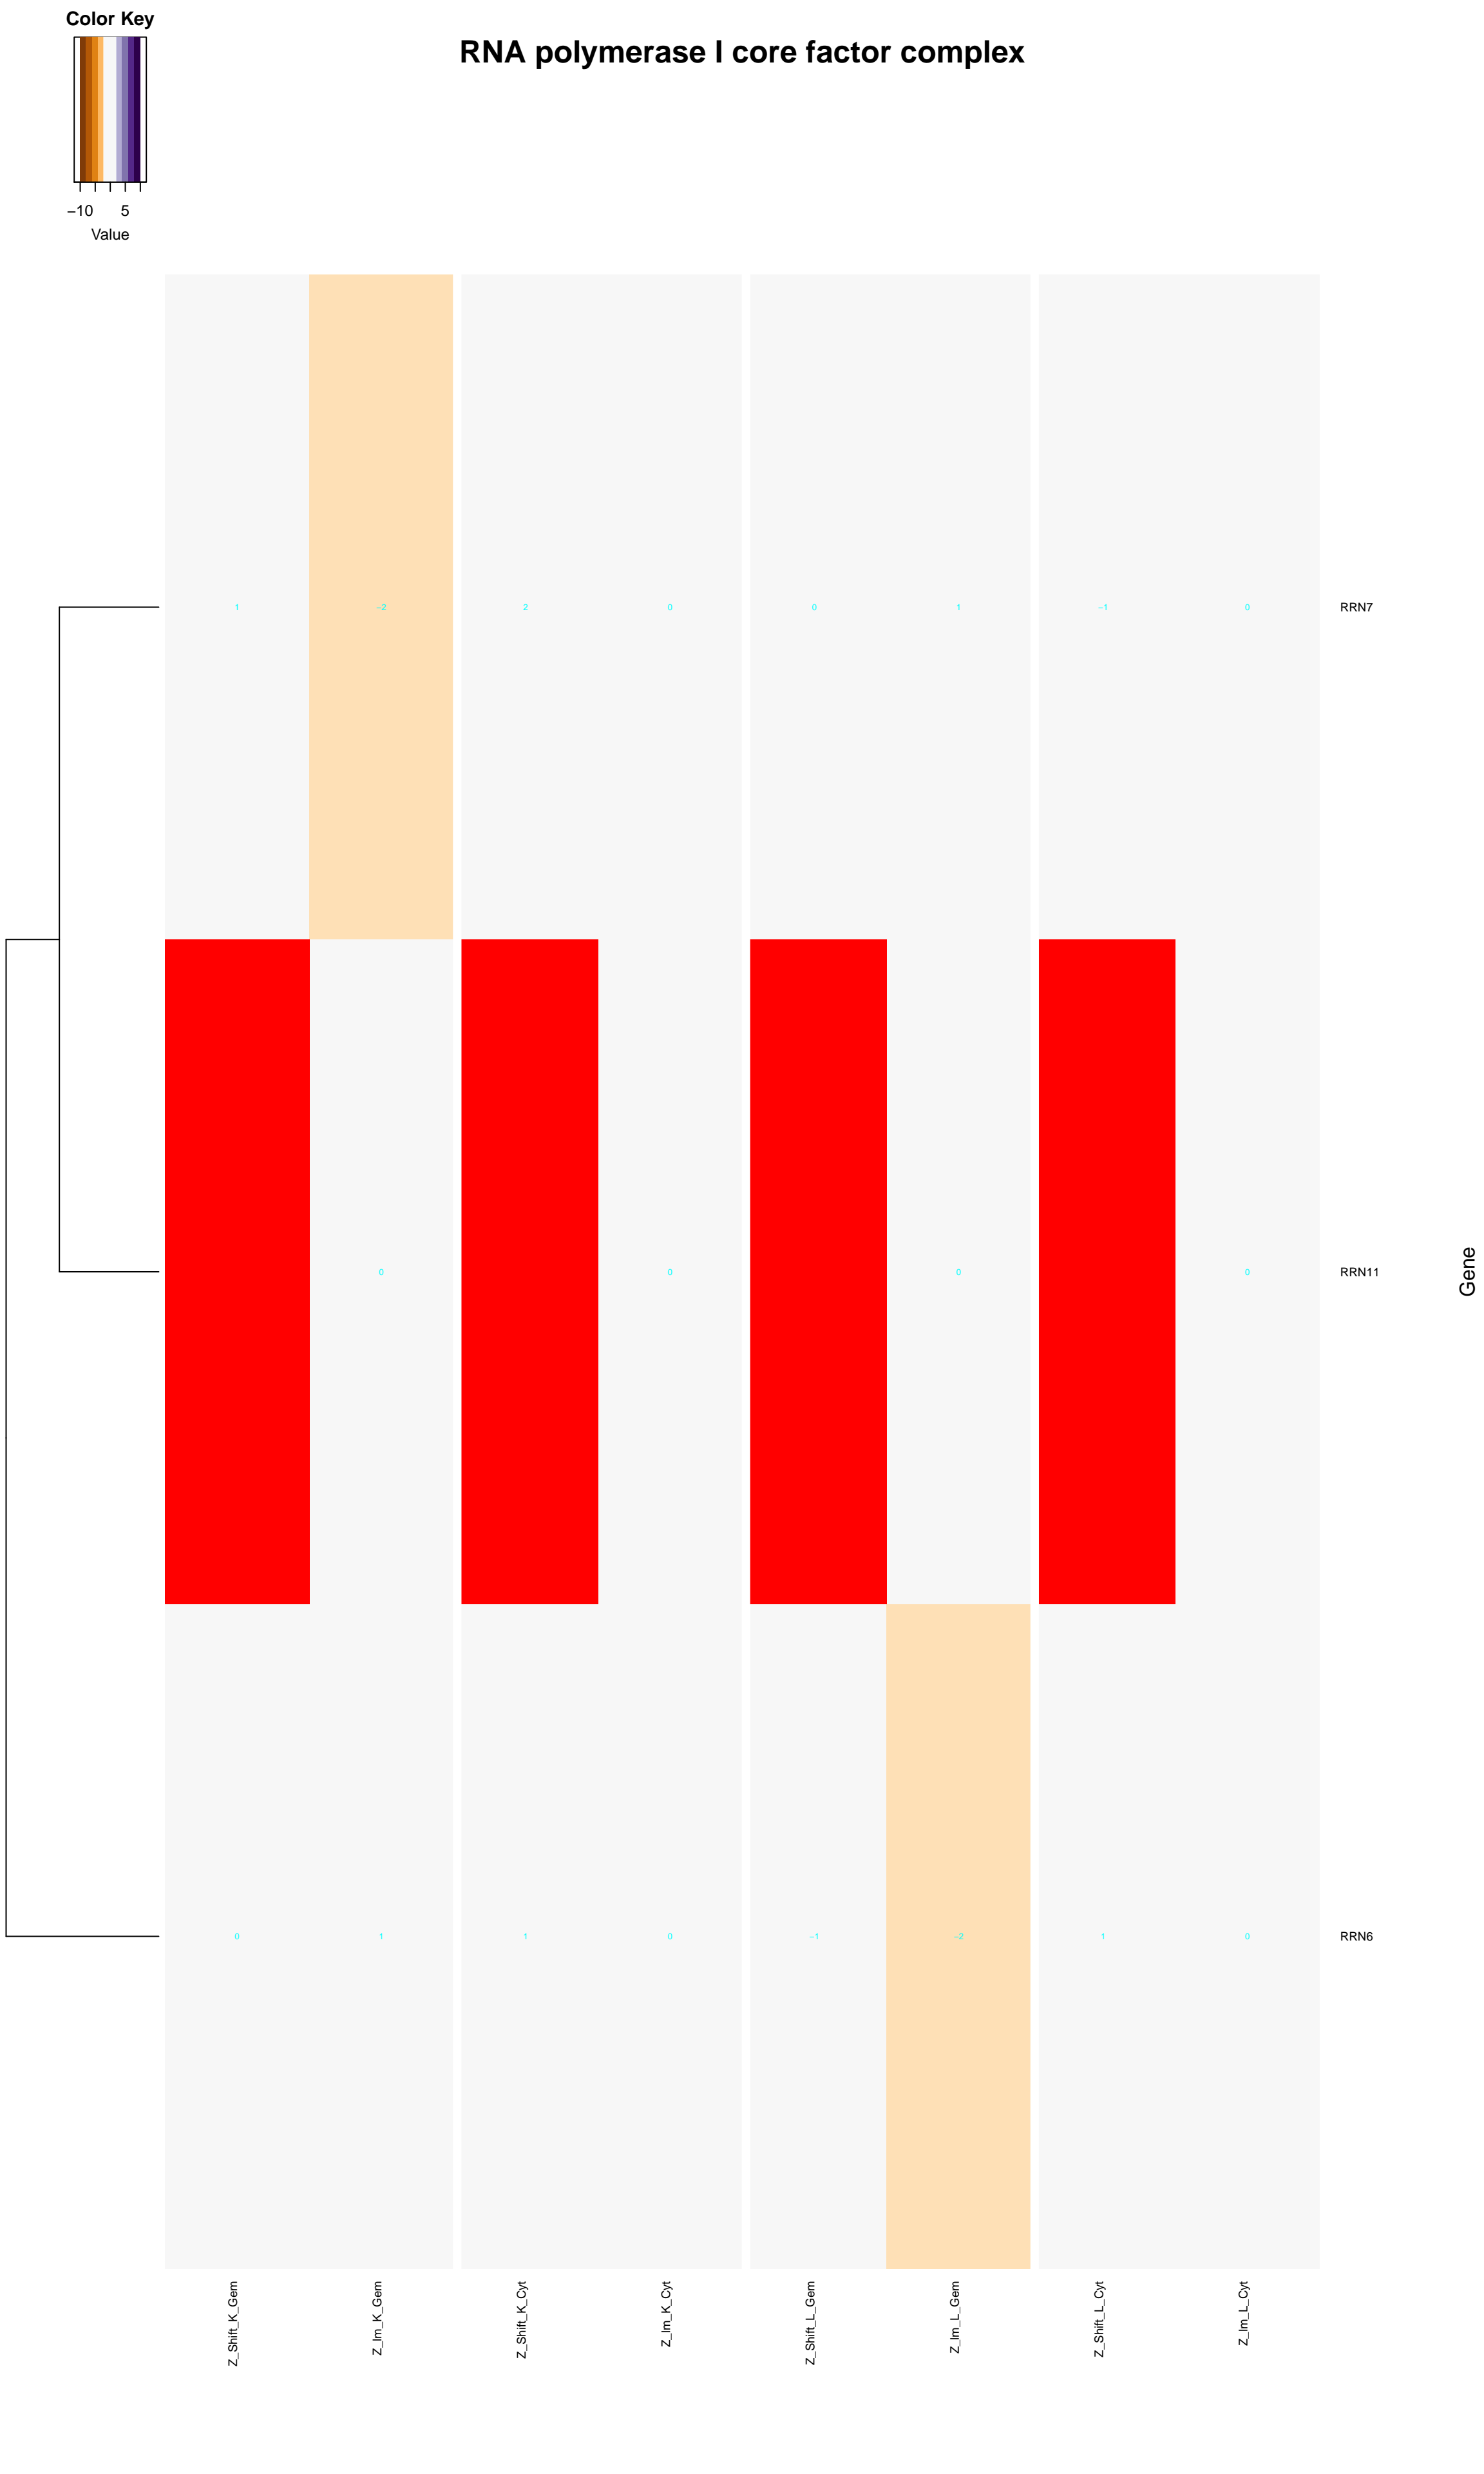

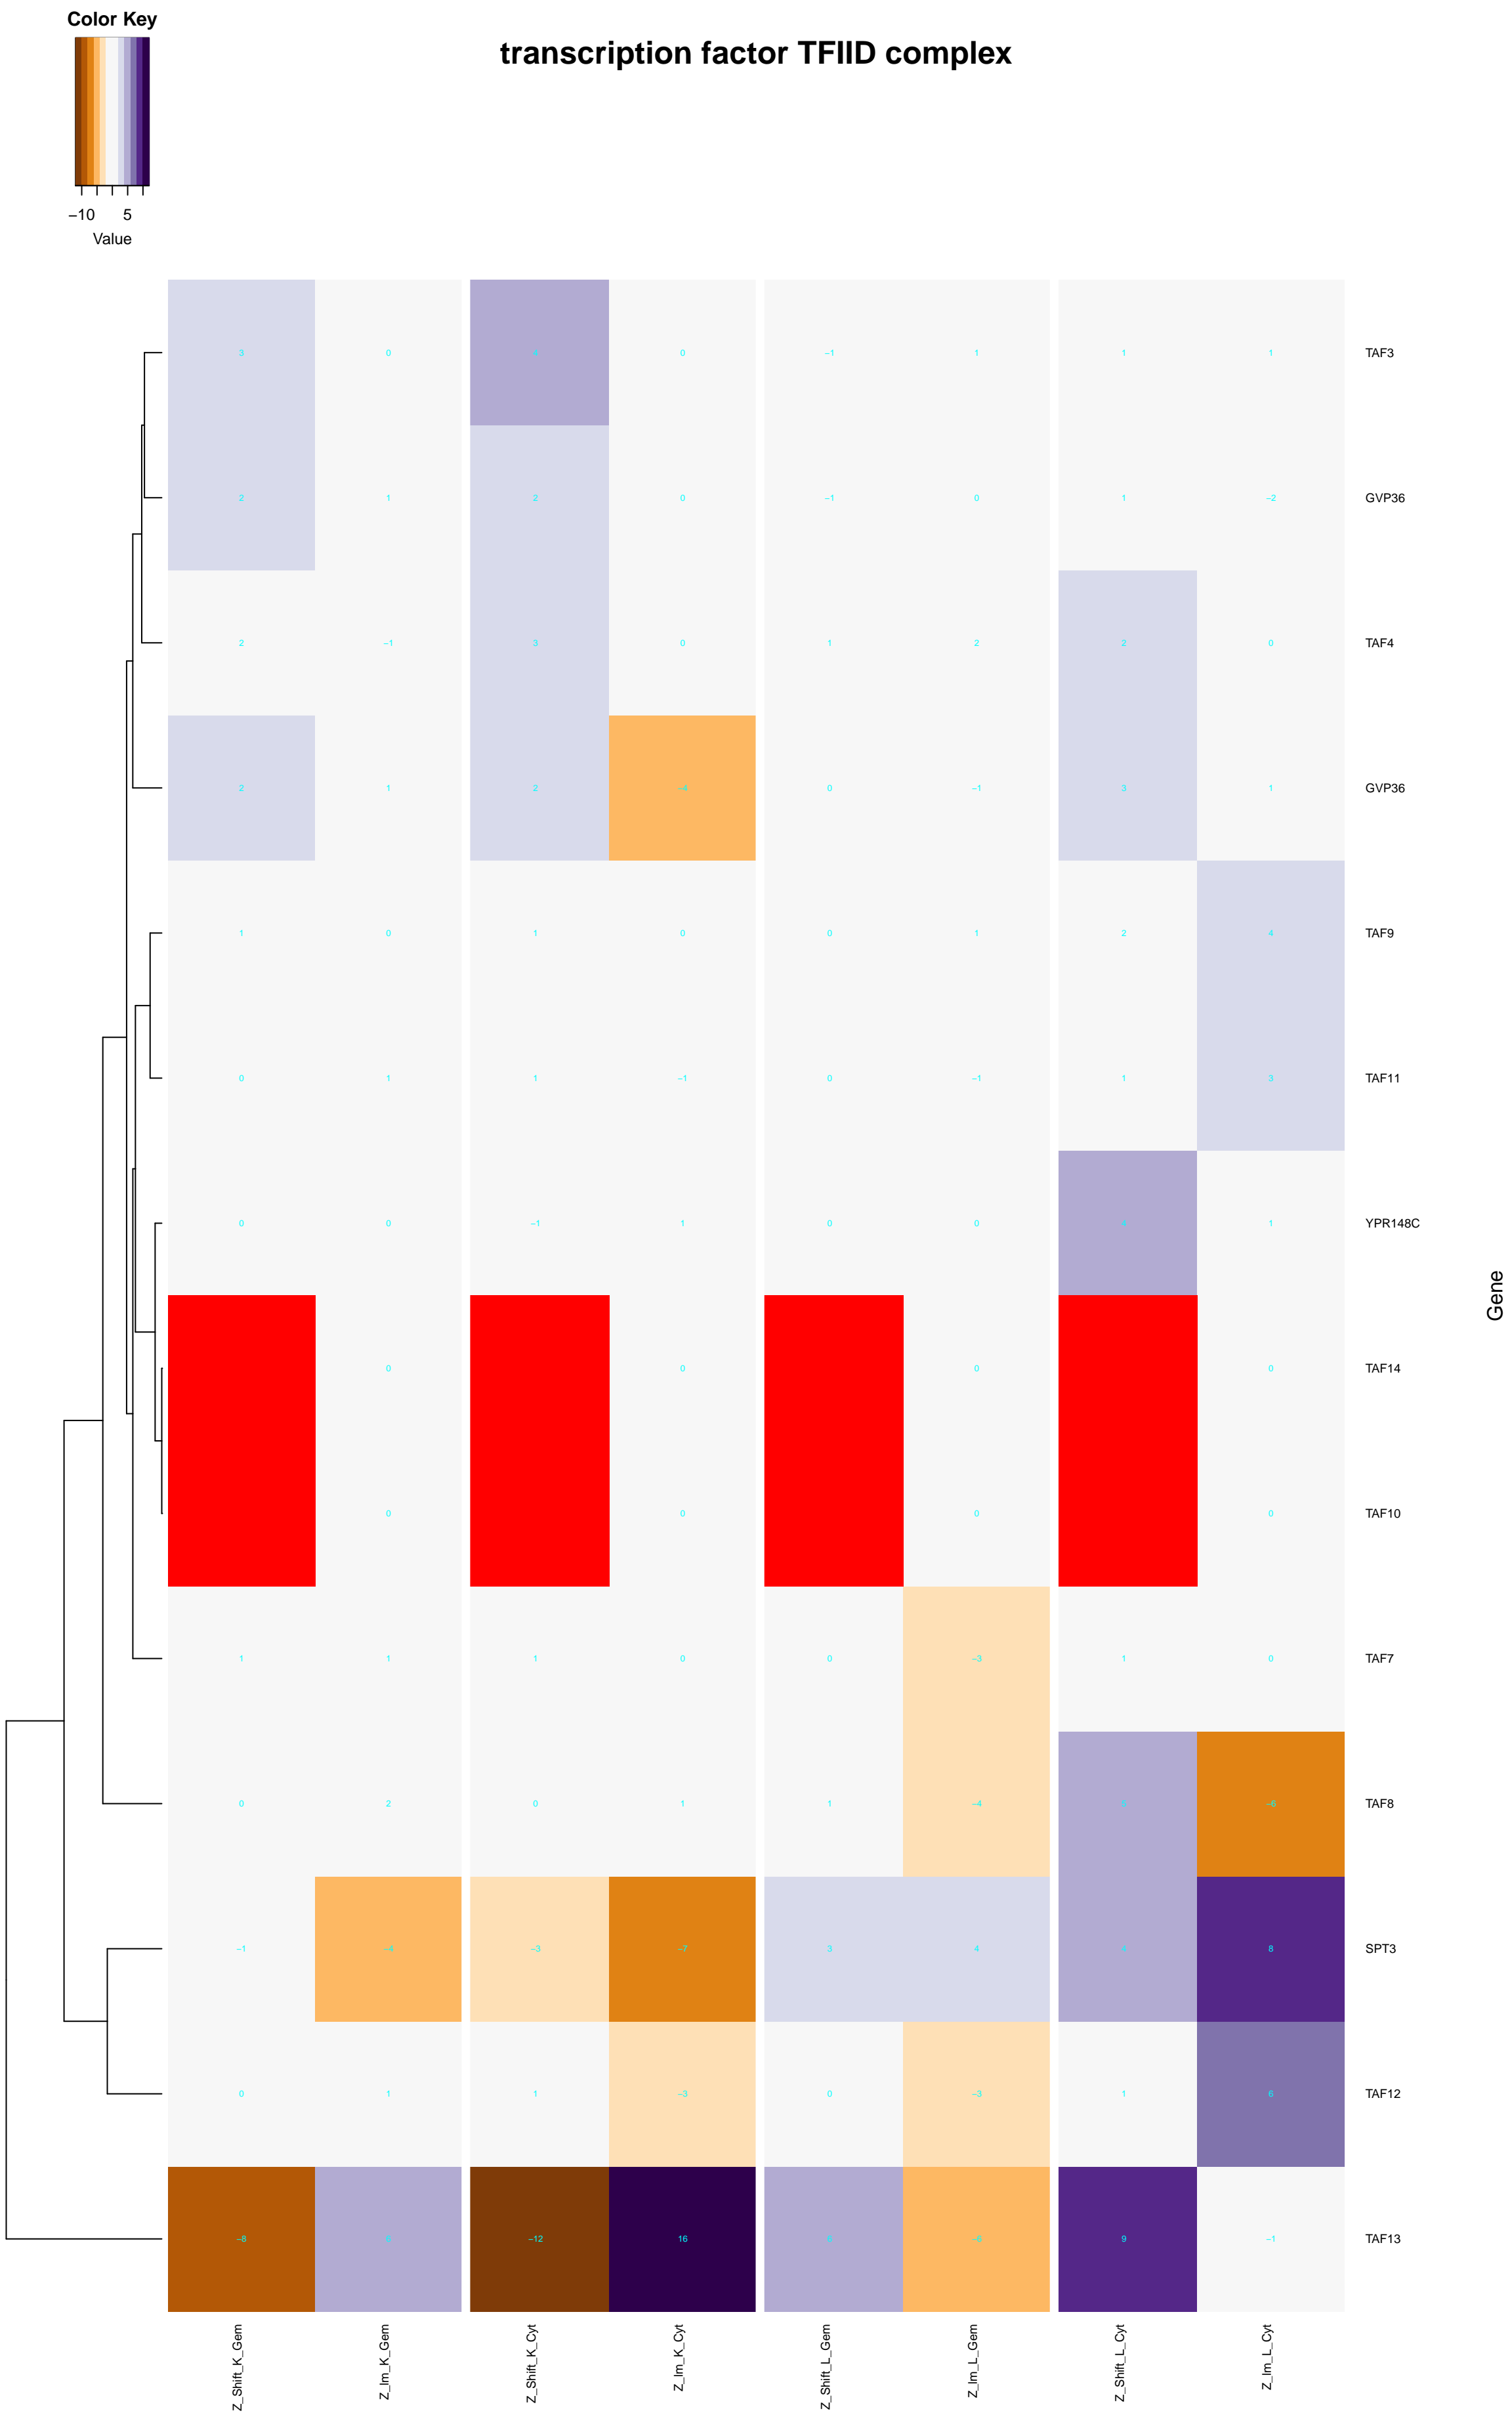



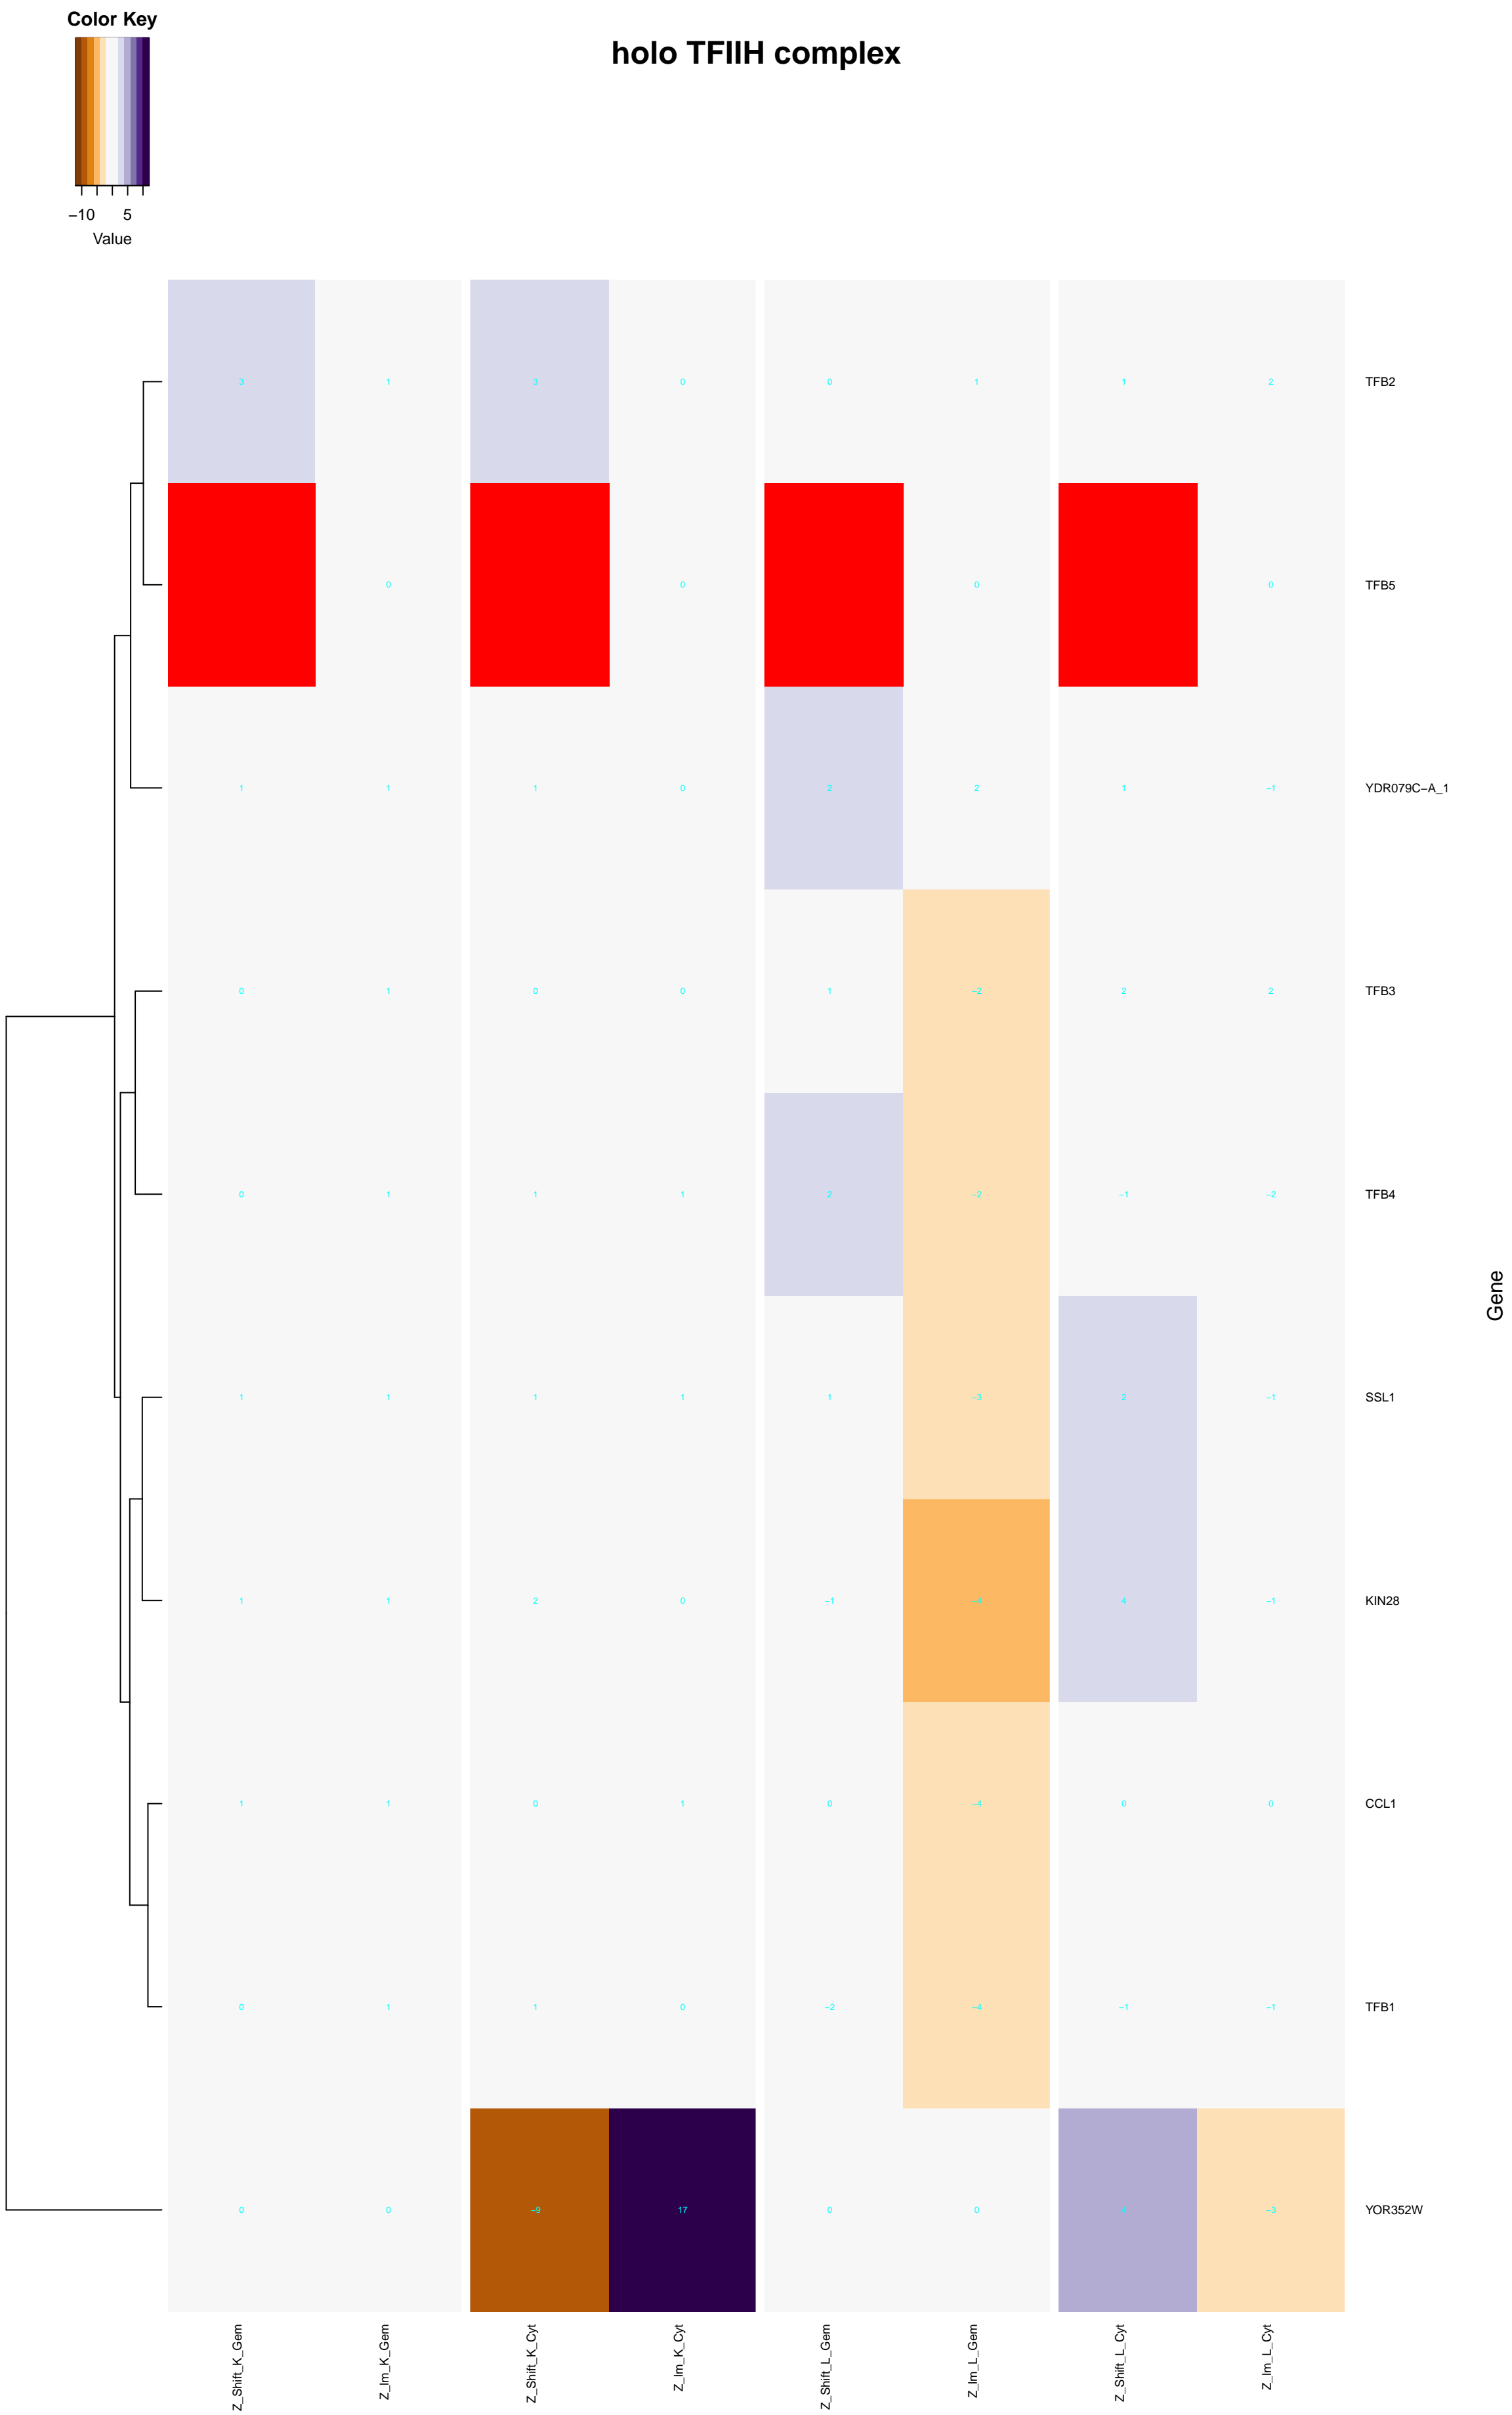

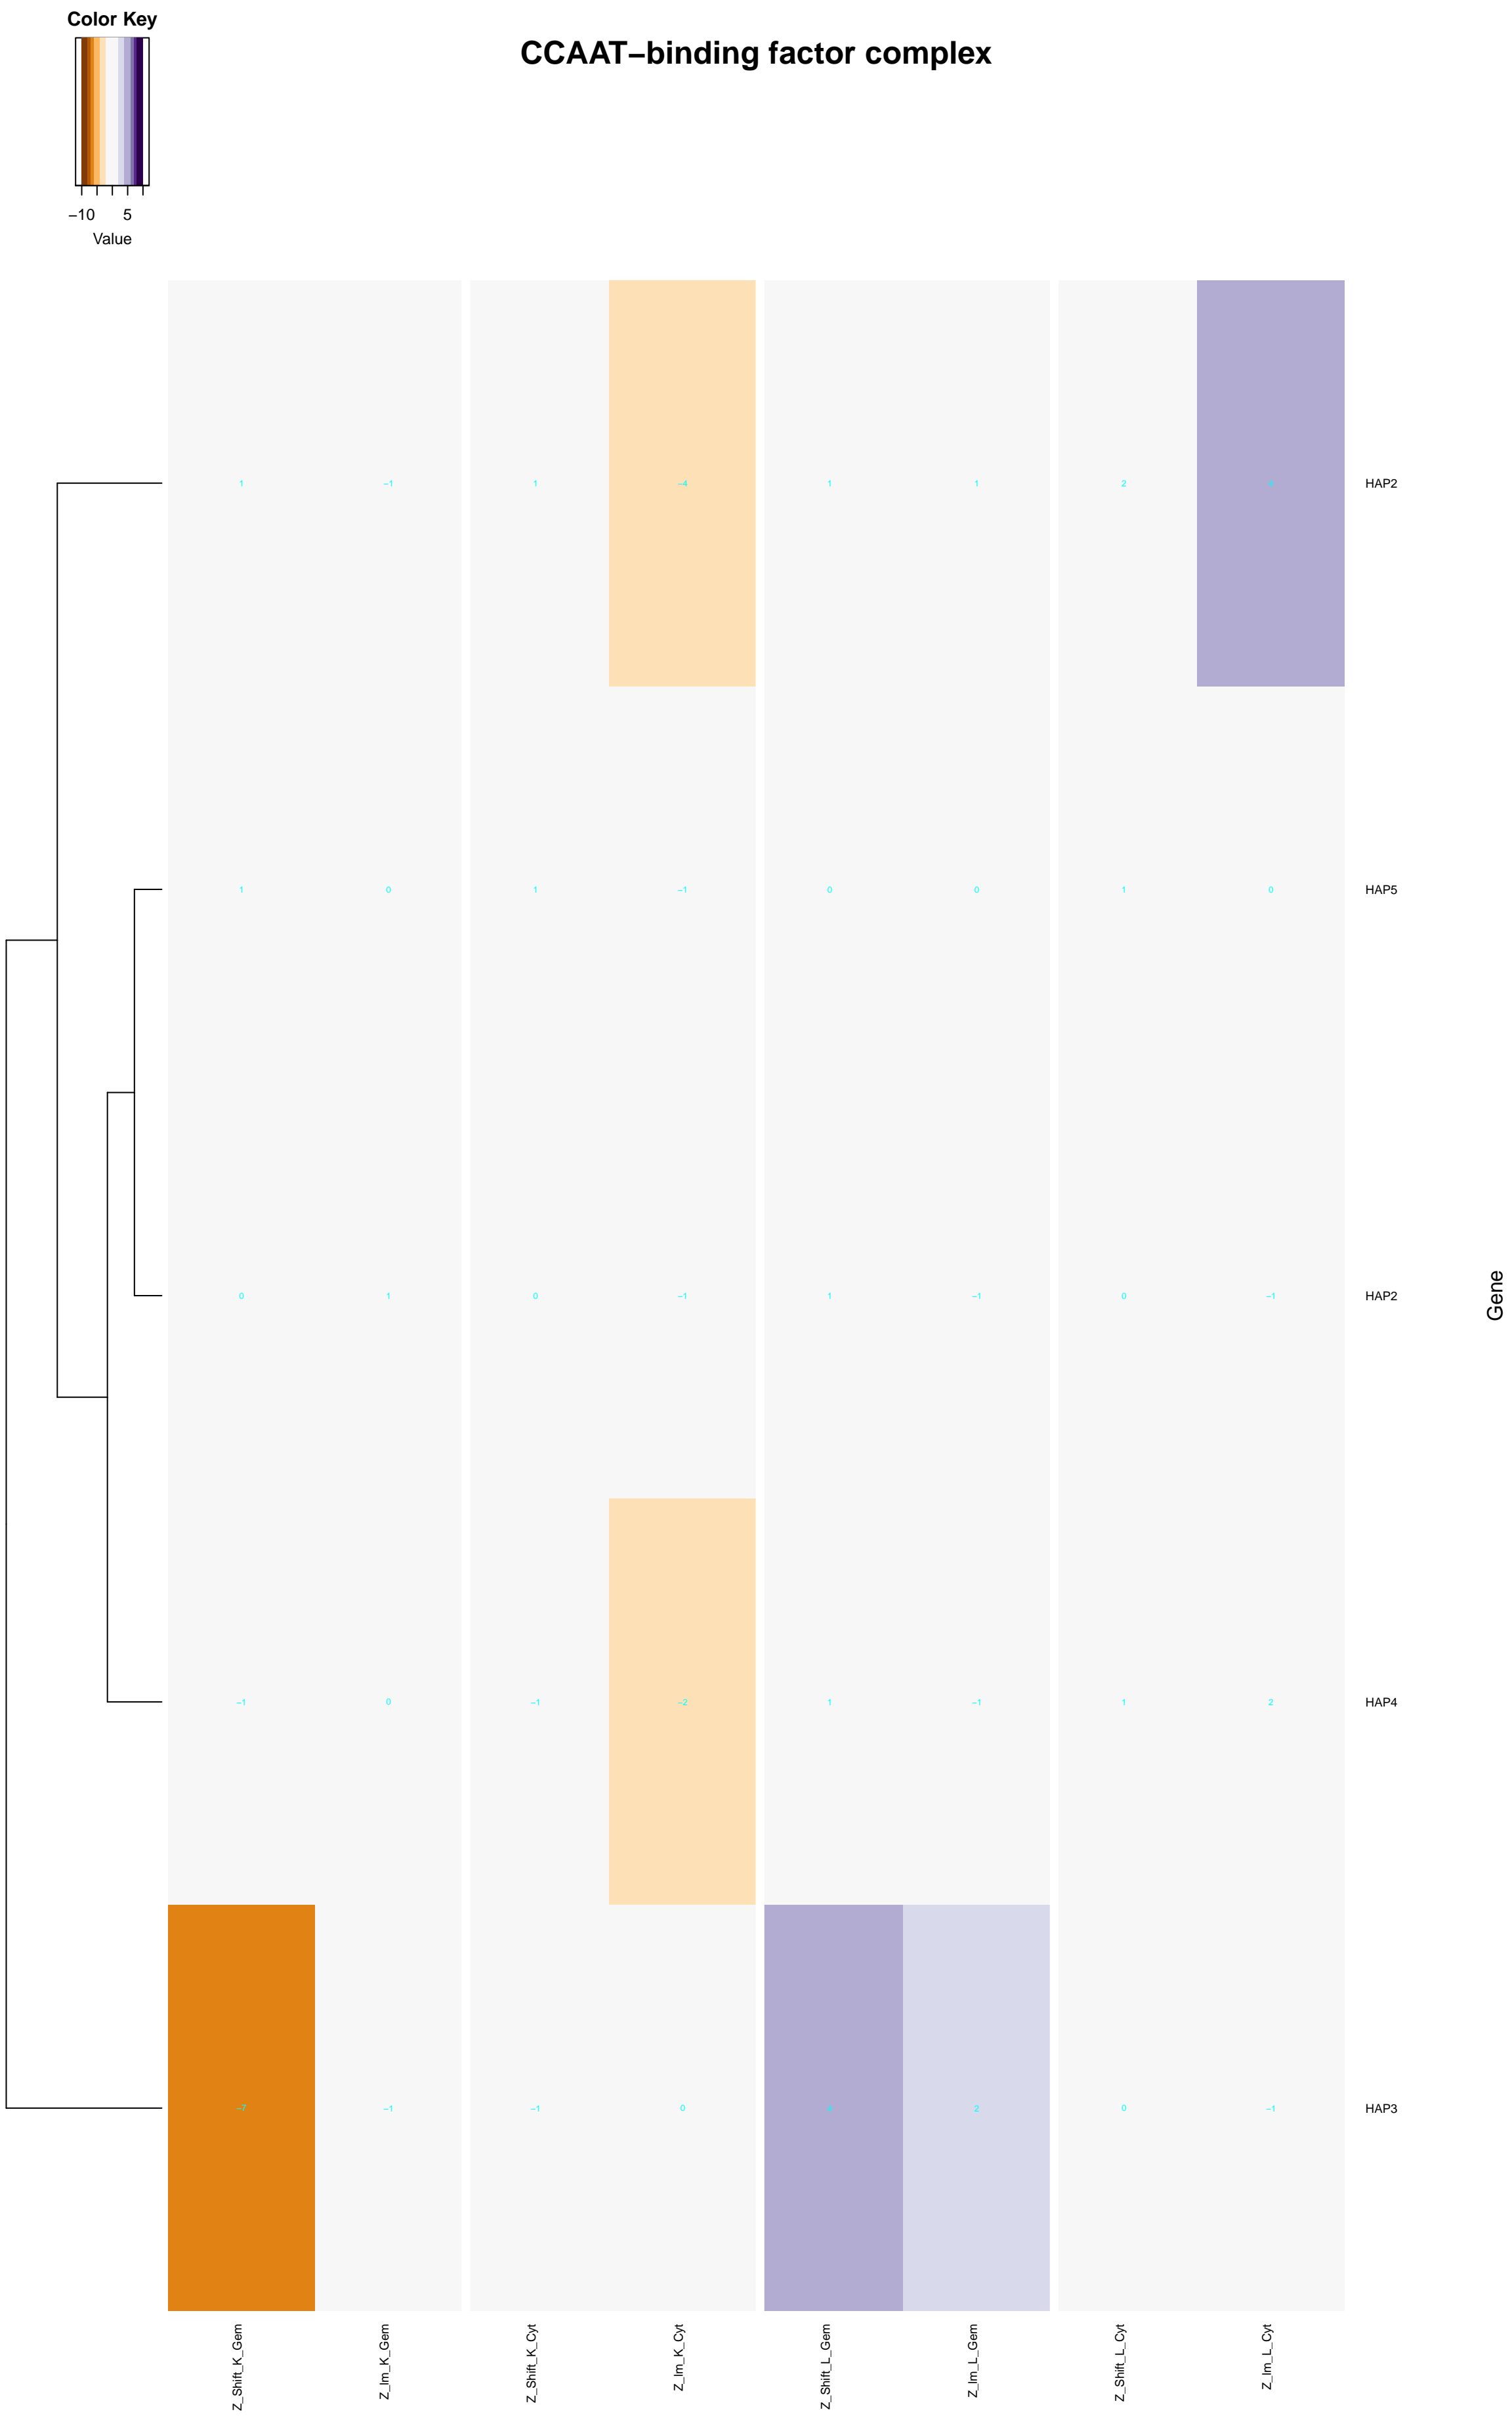

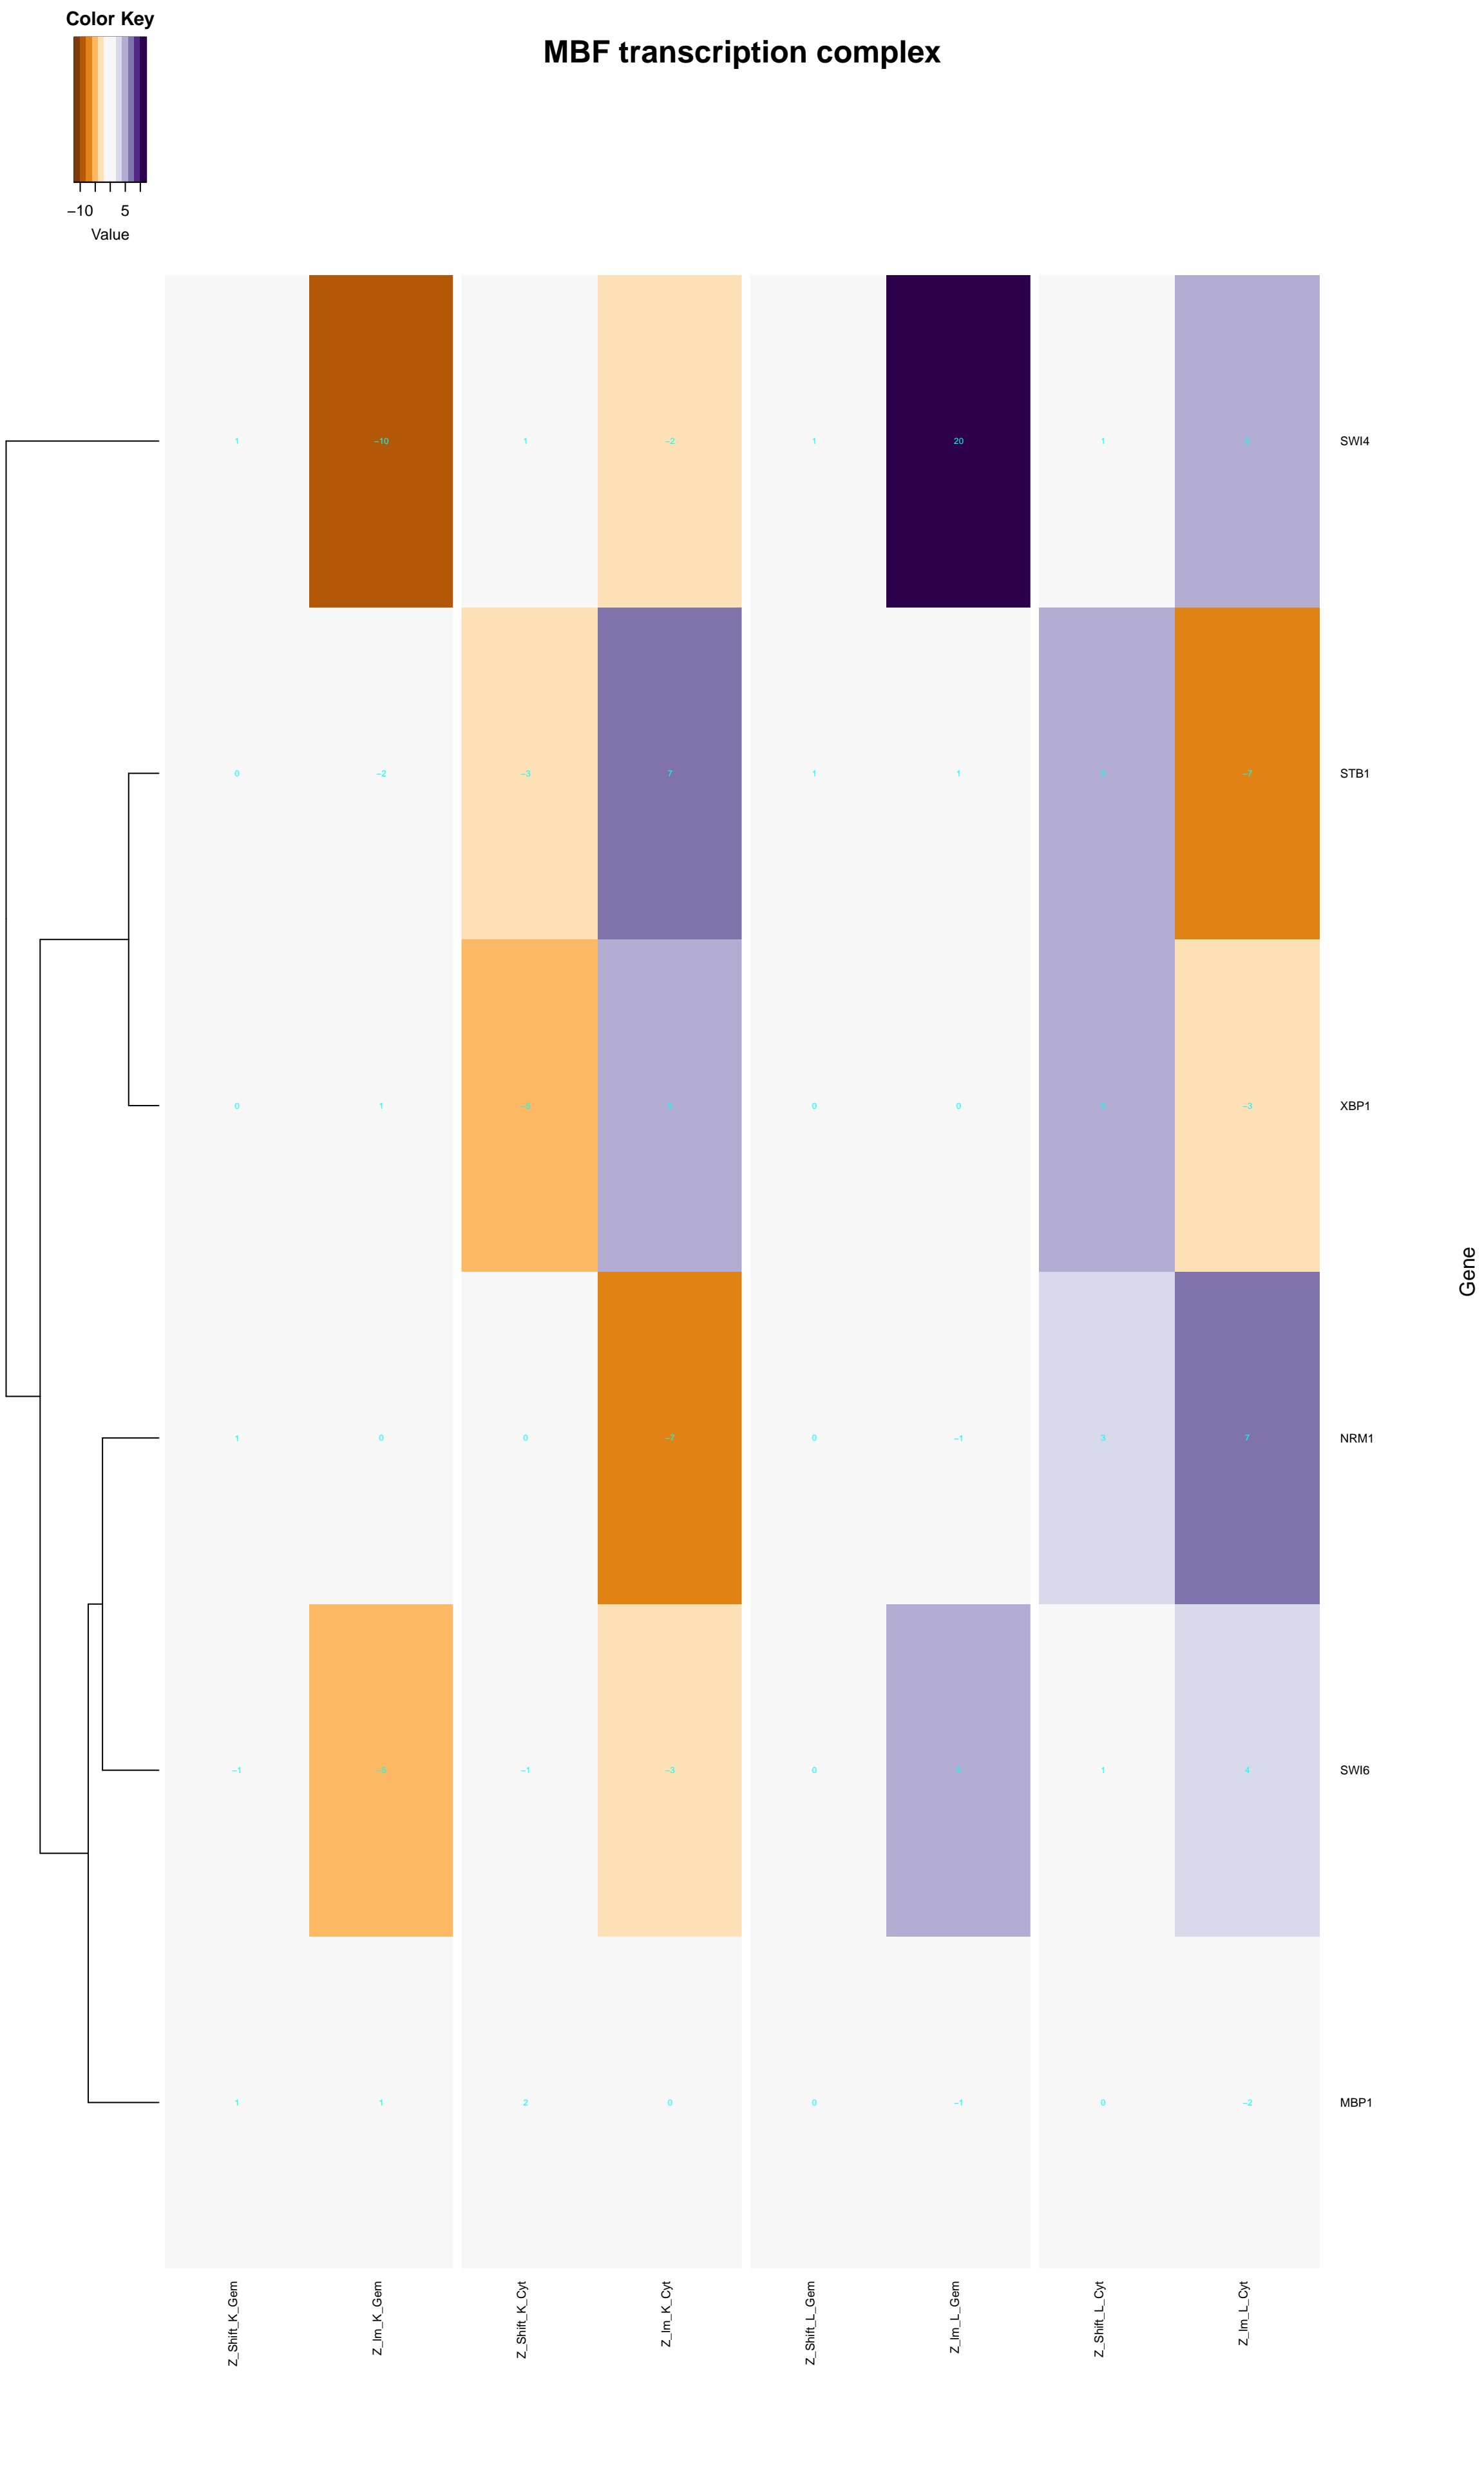

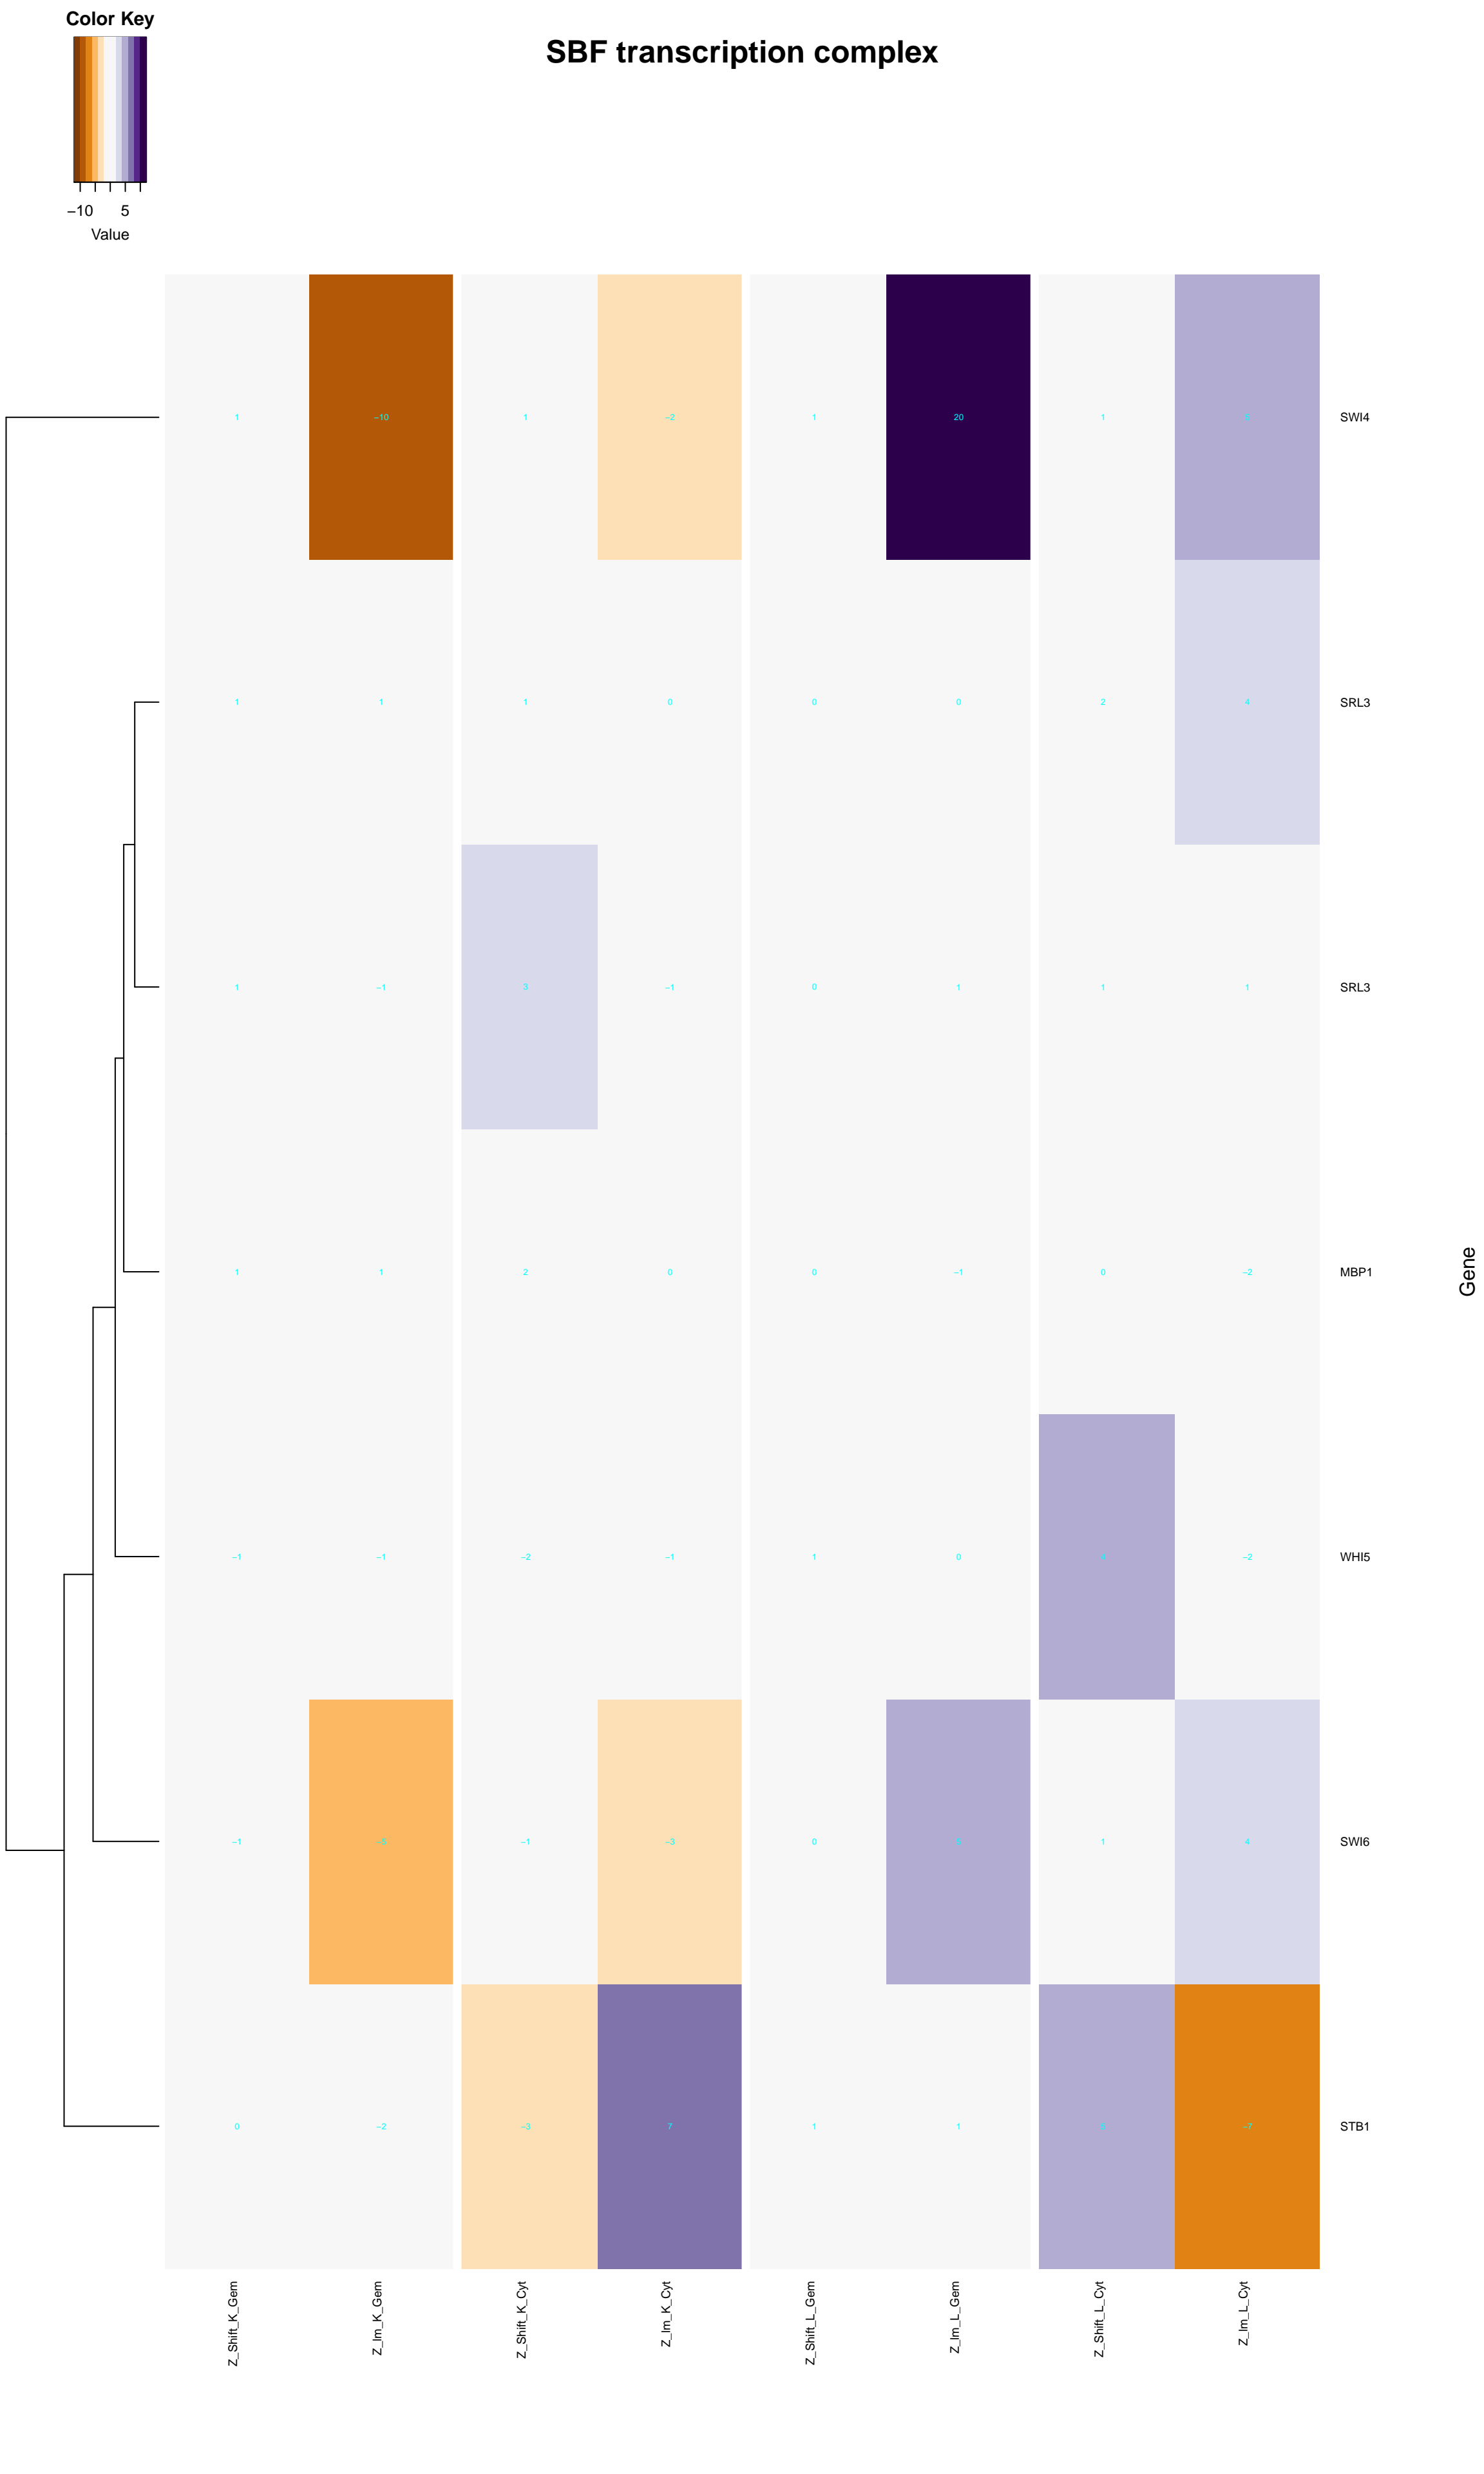

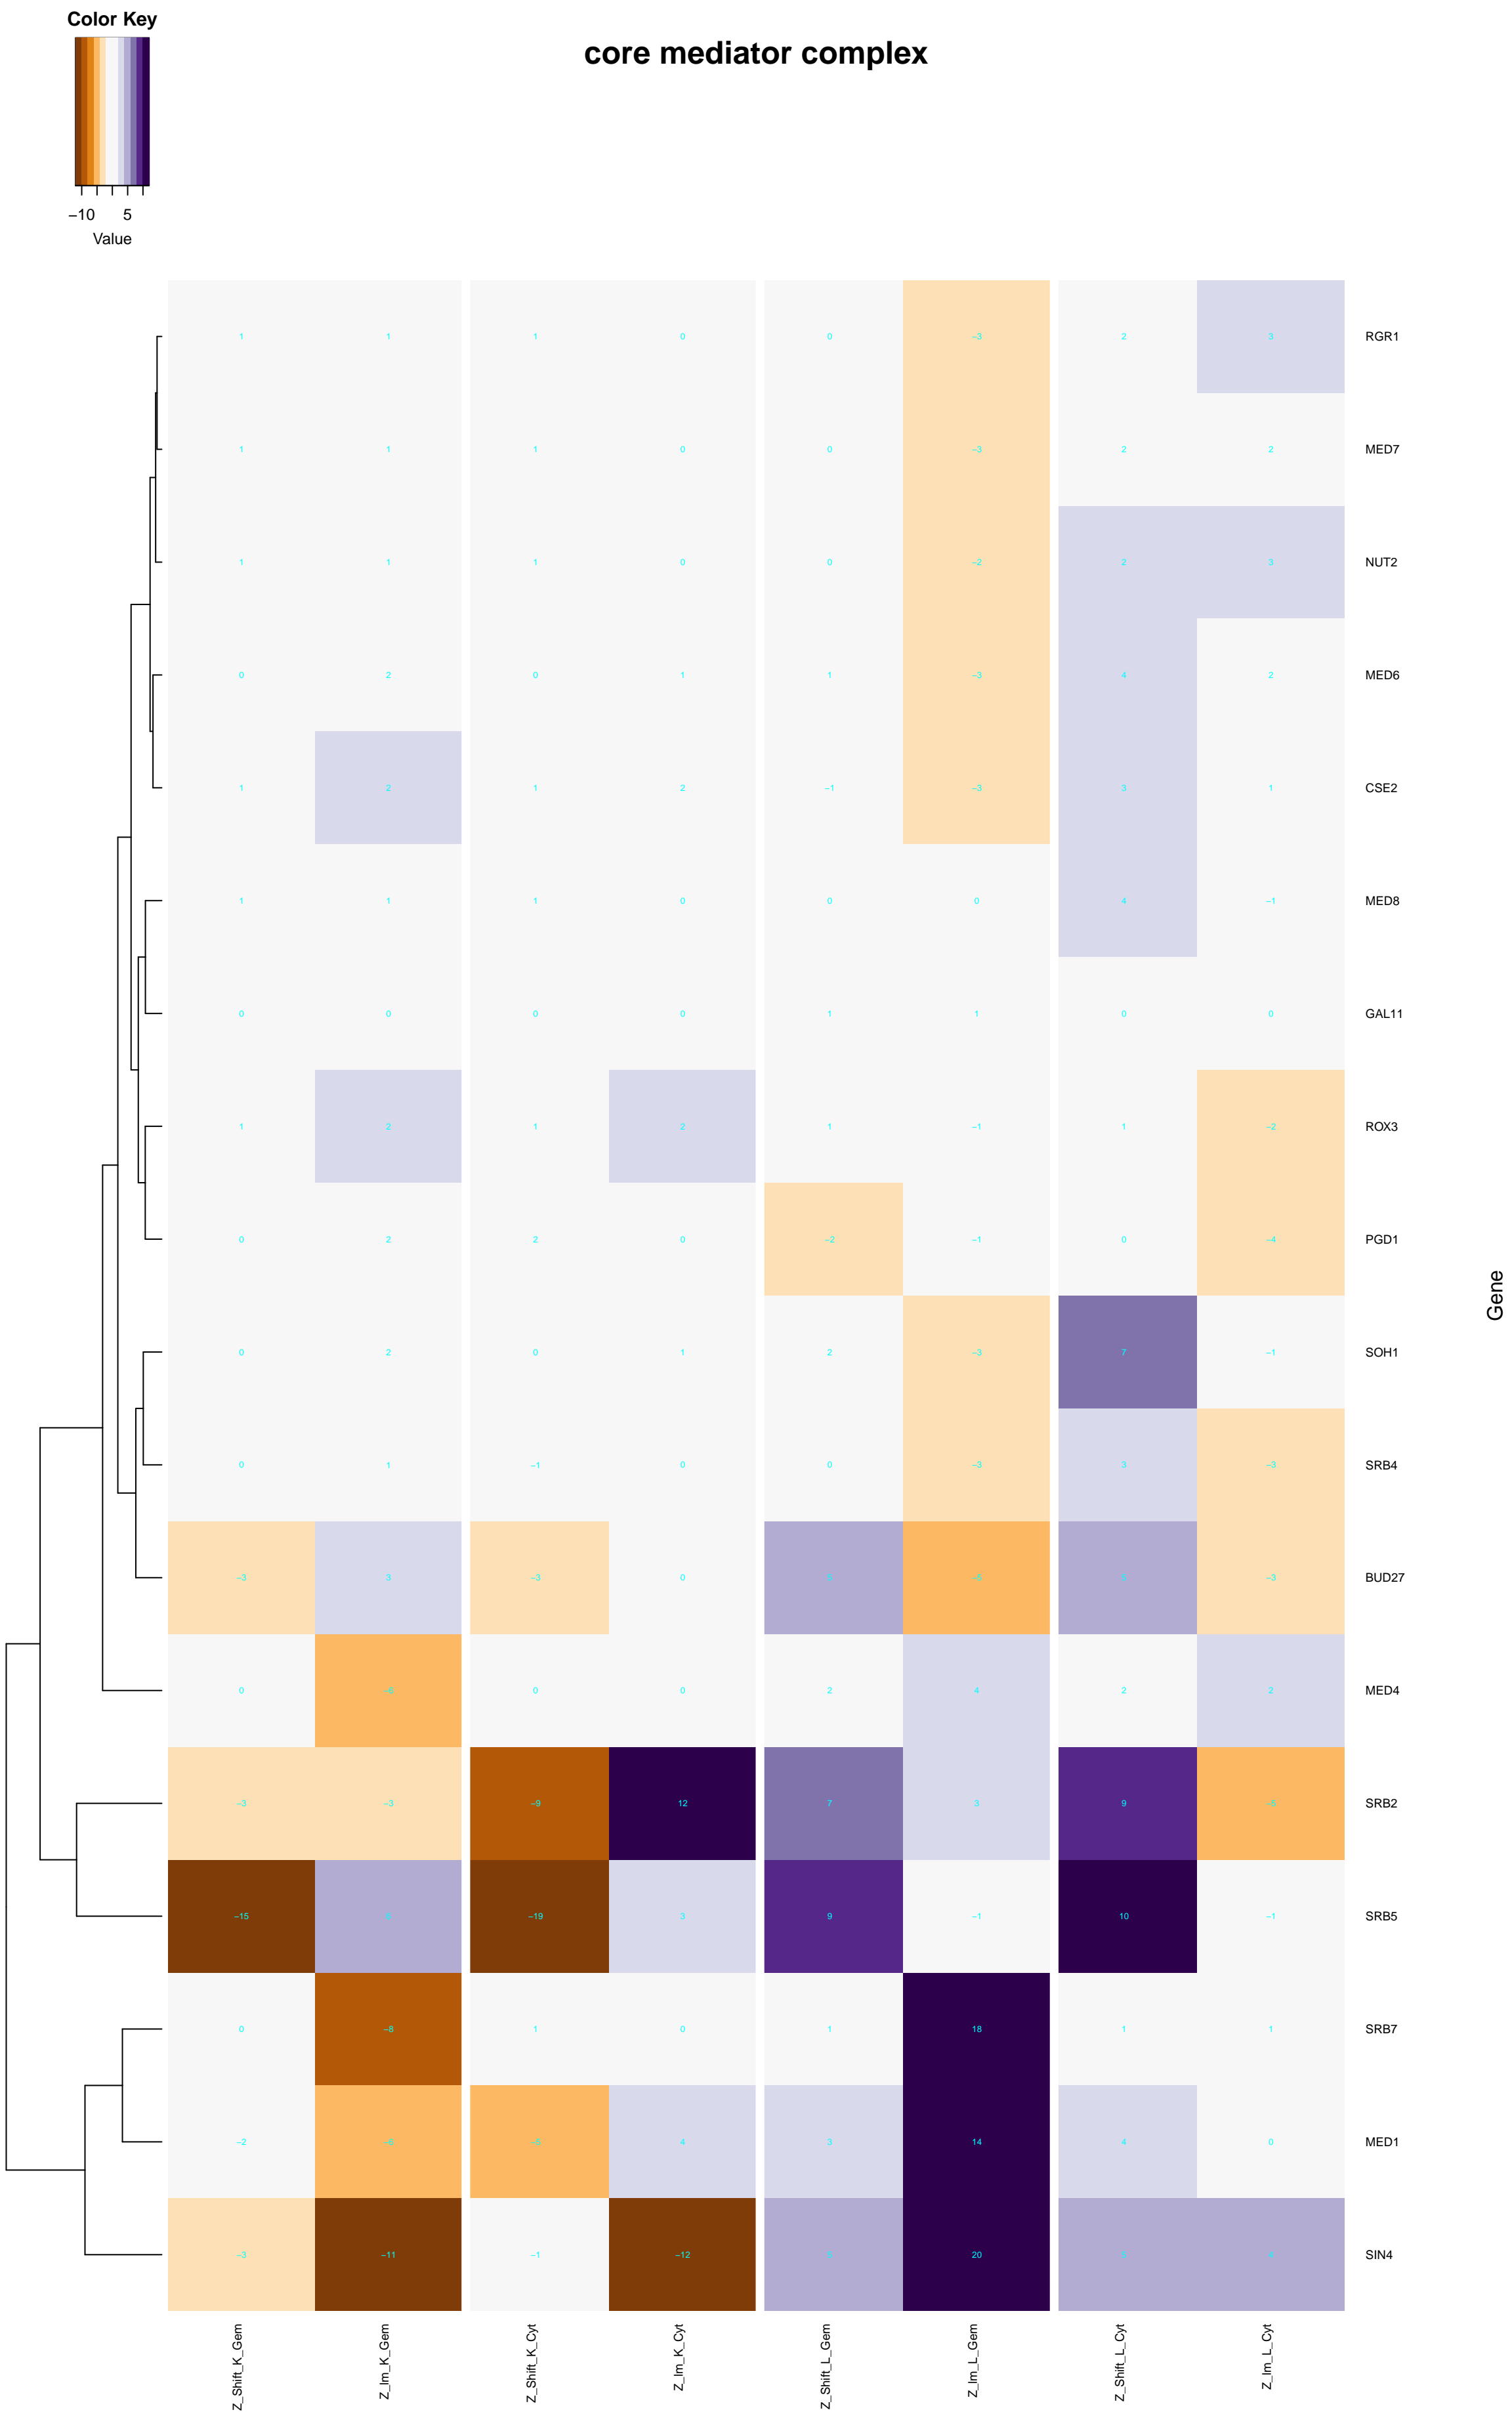

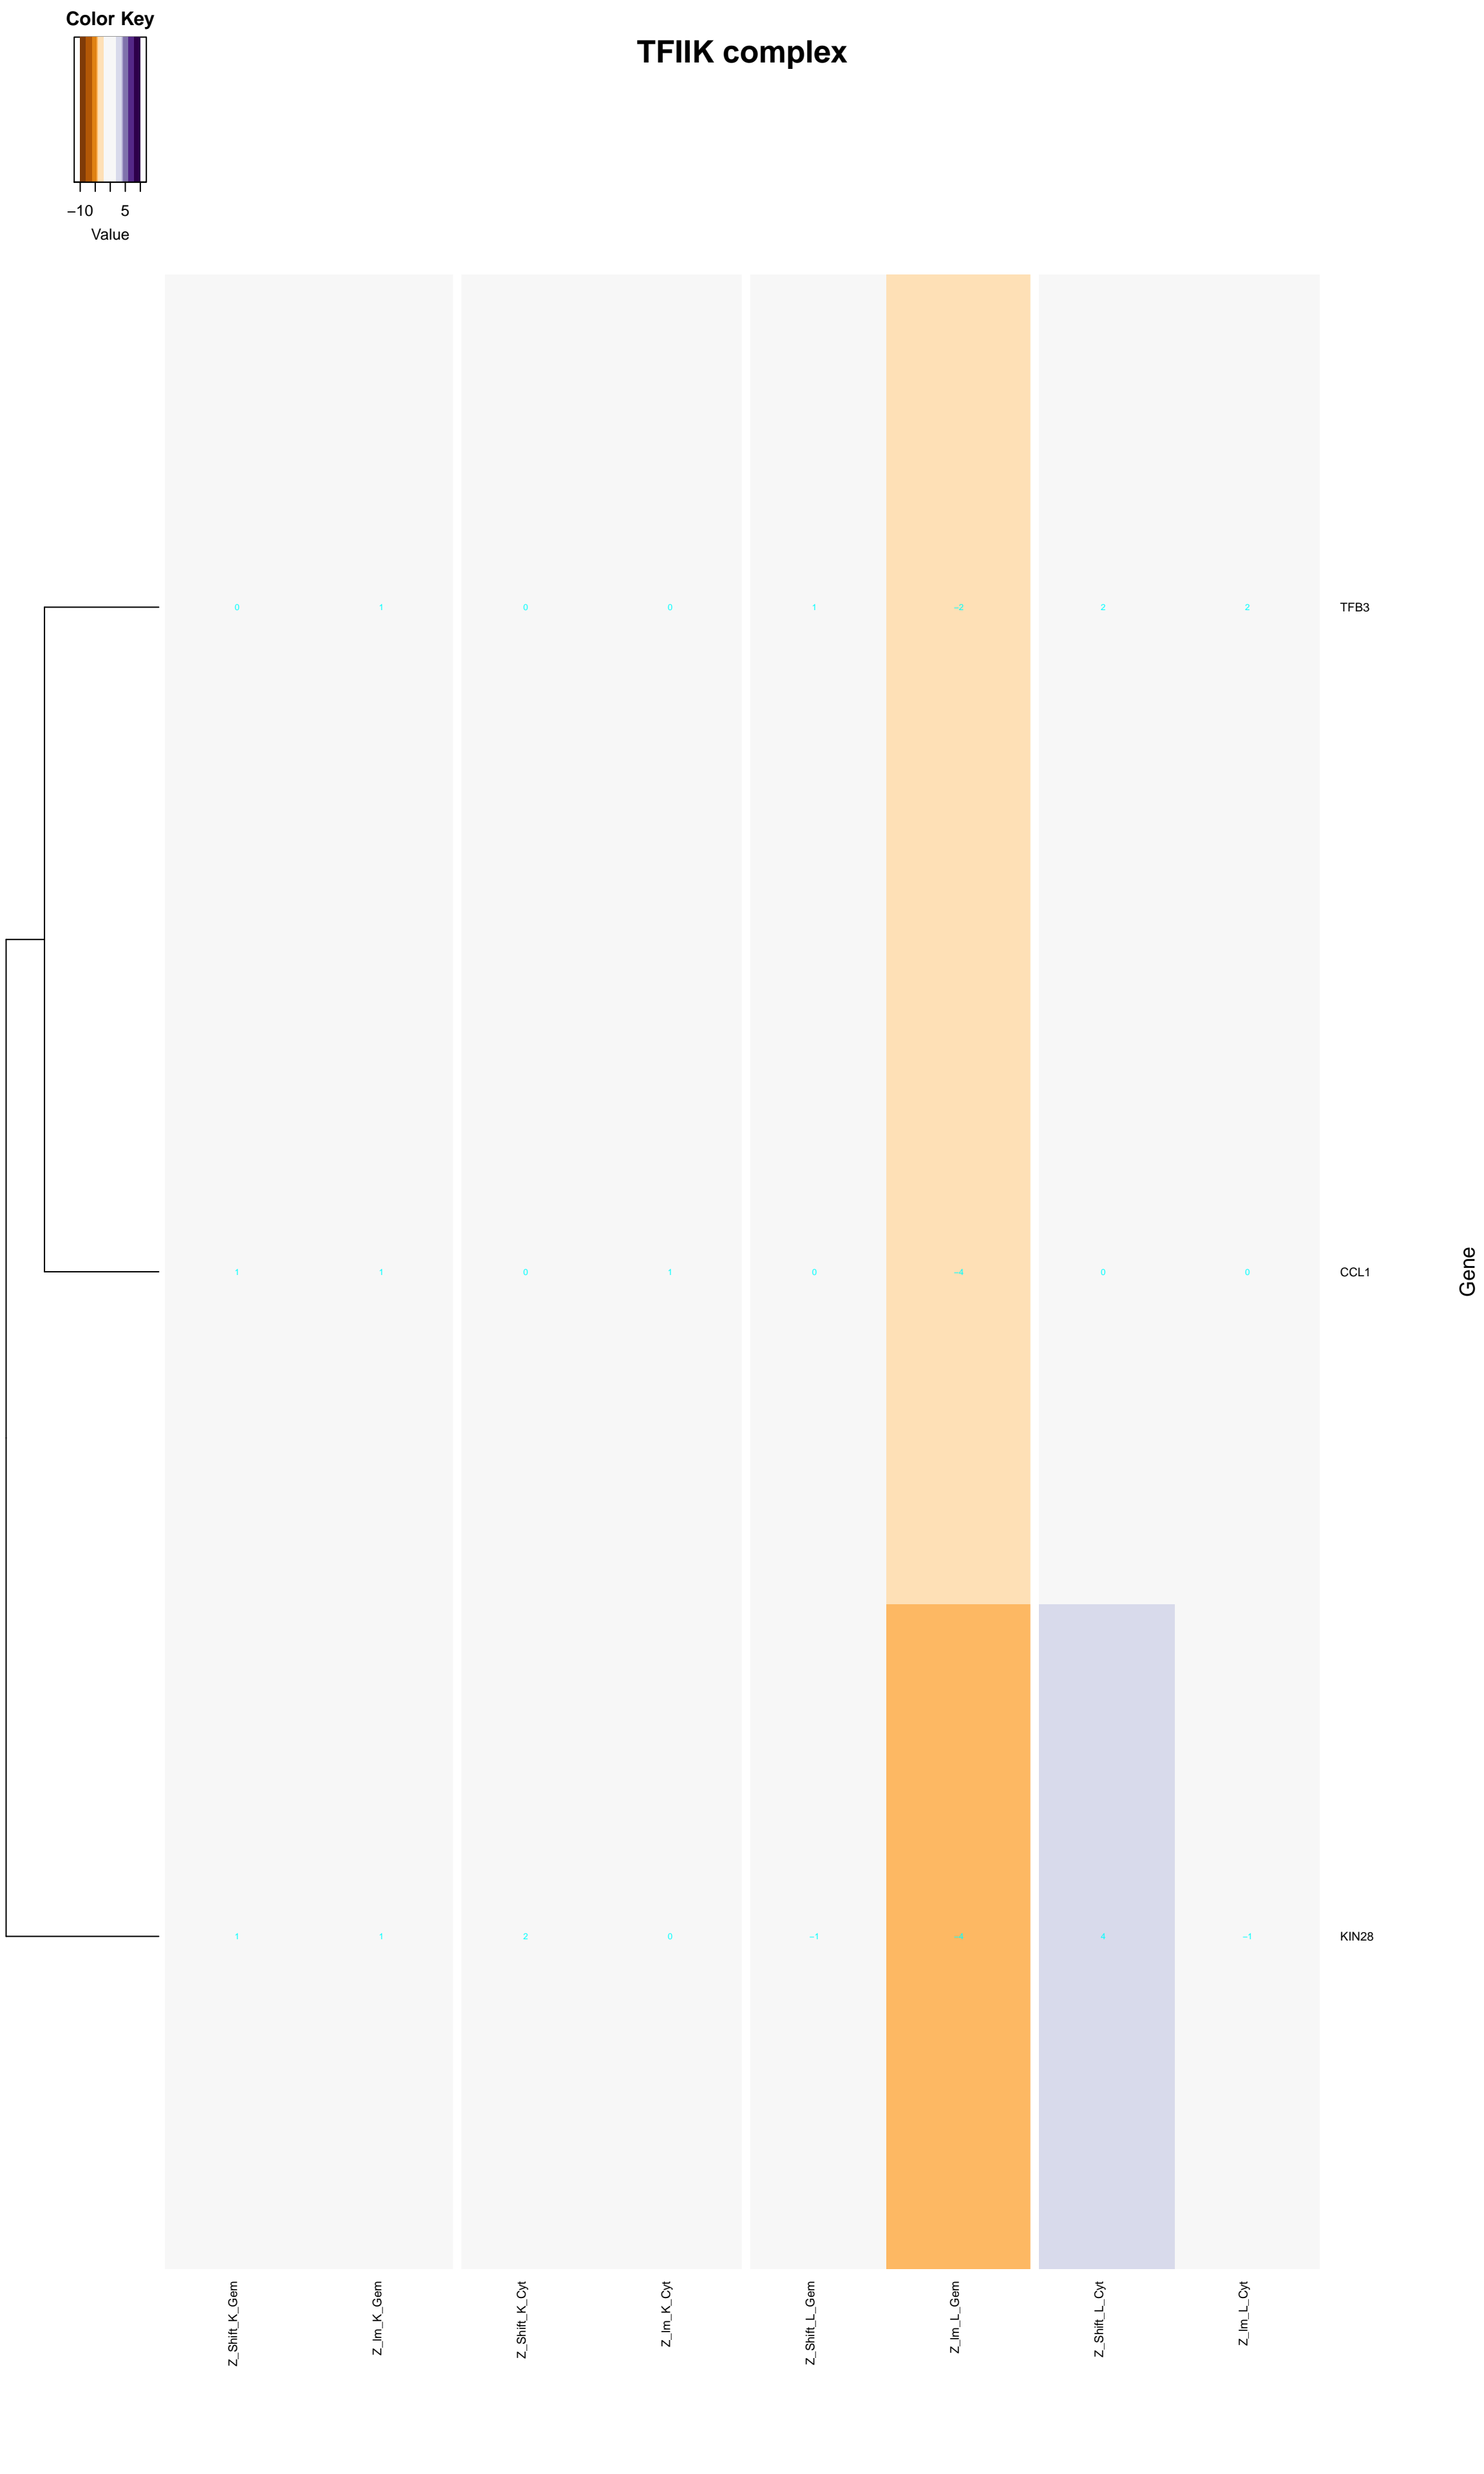

Supplement: s1 [file s1]

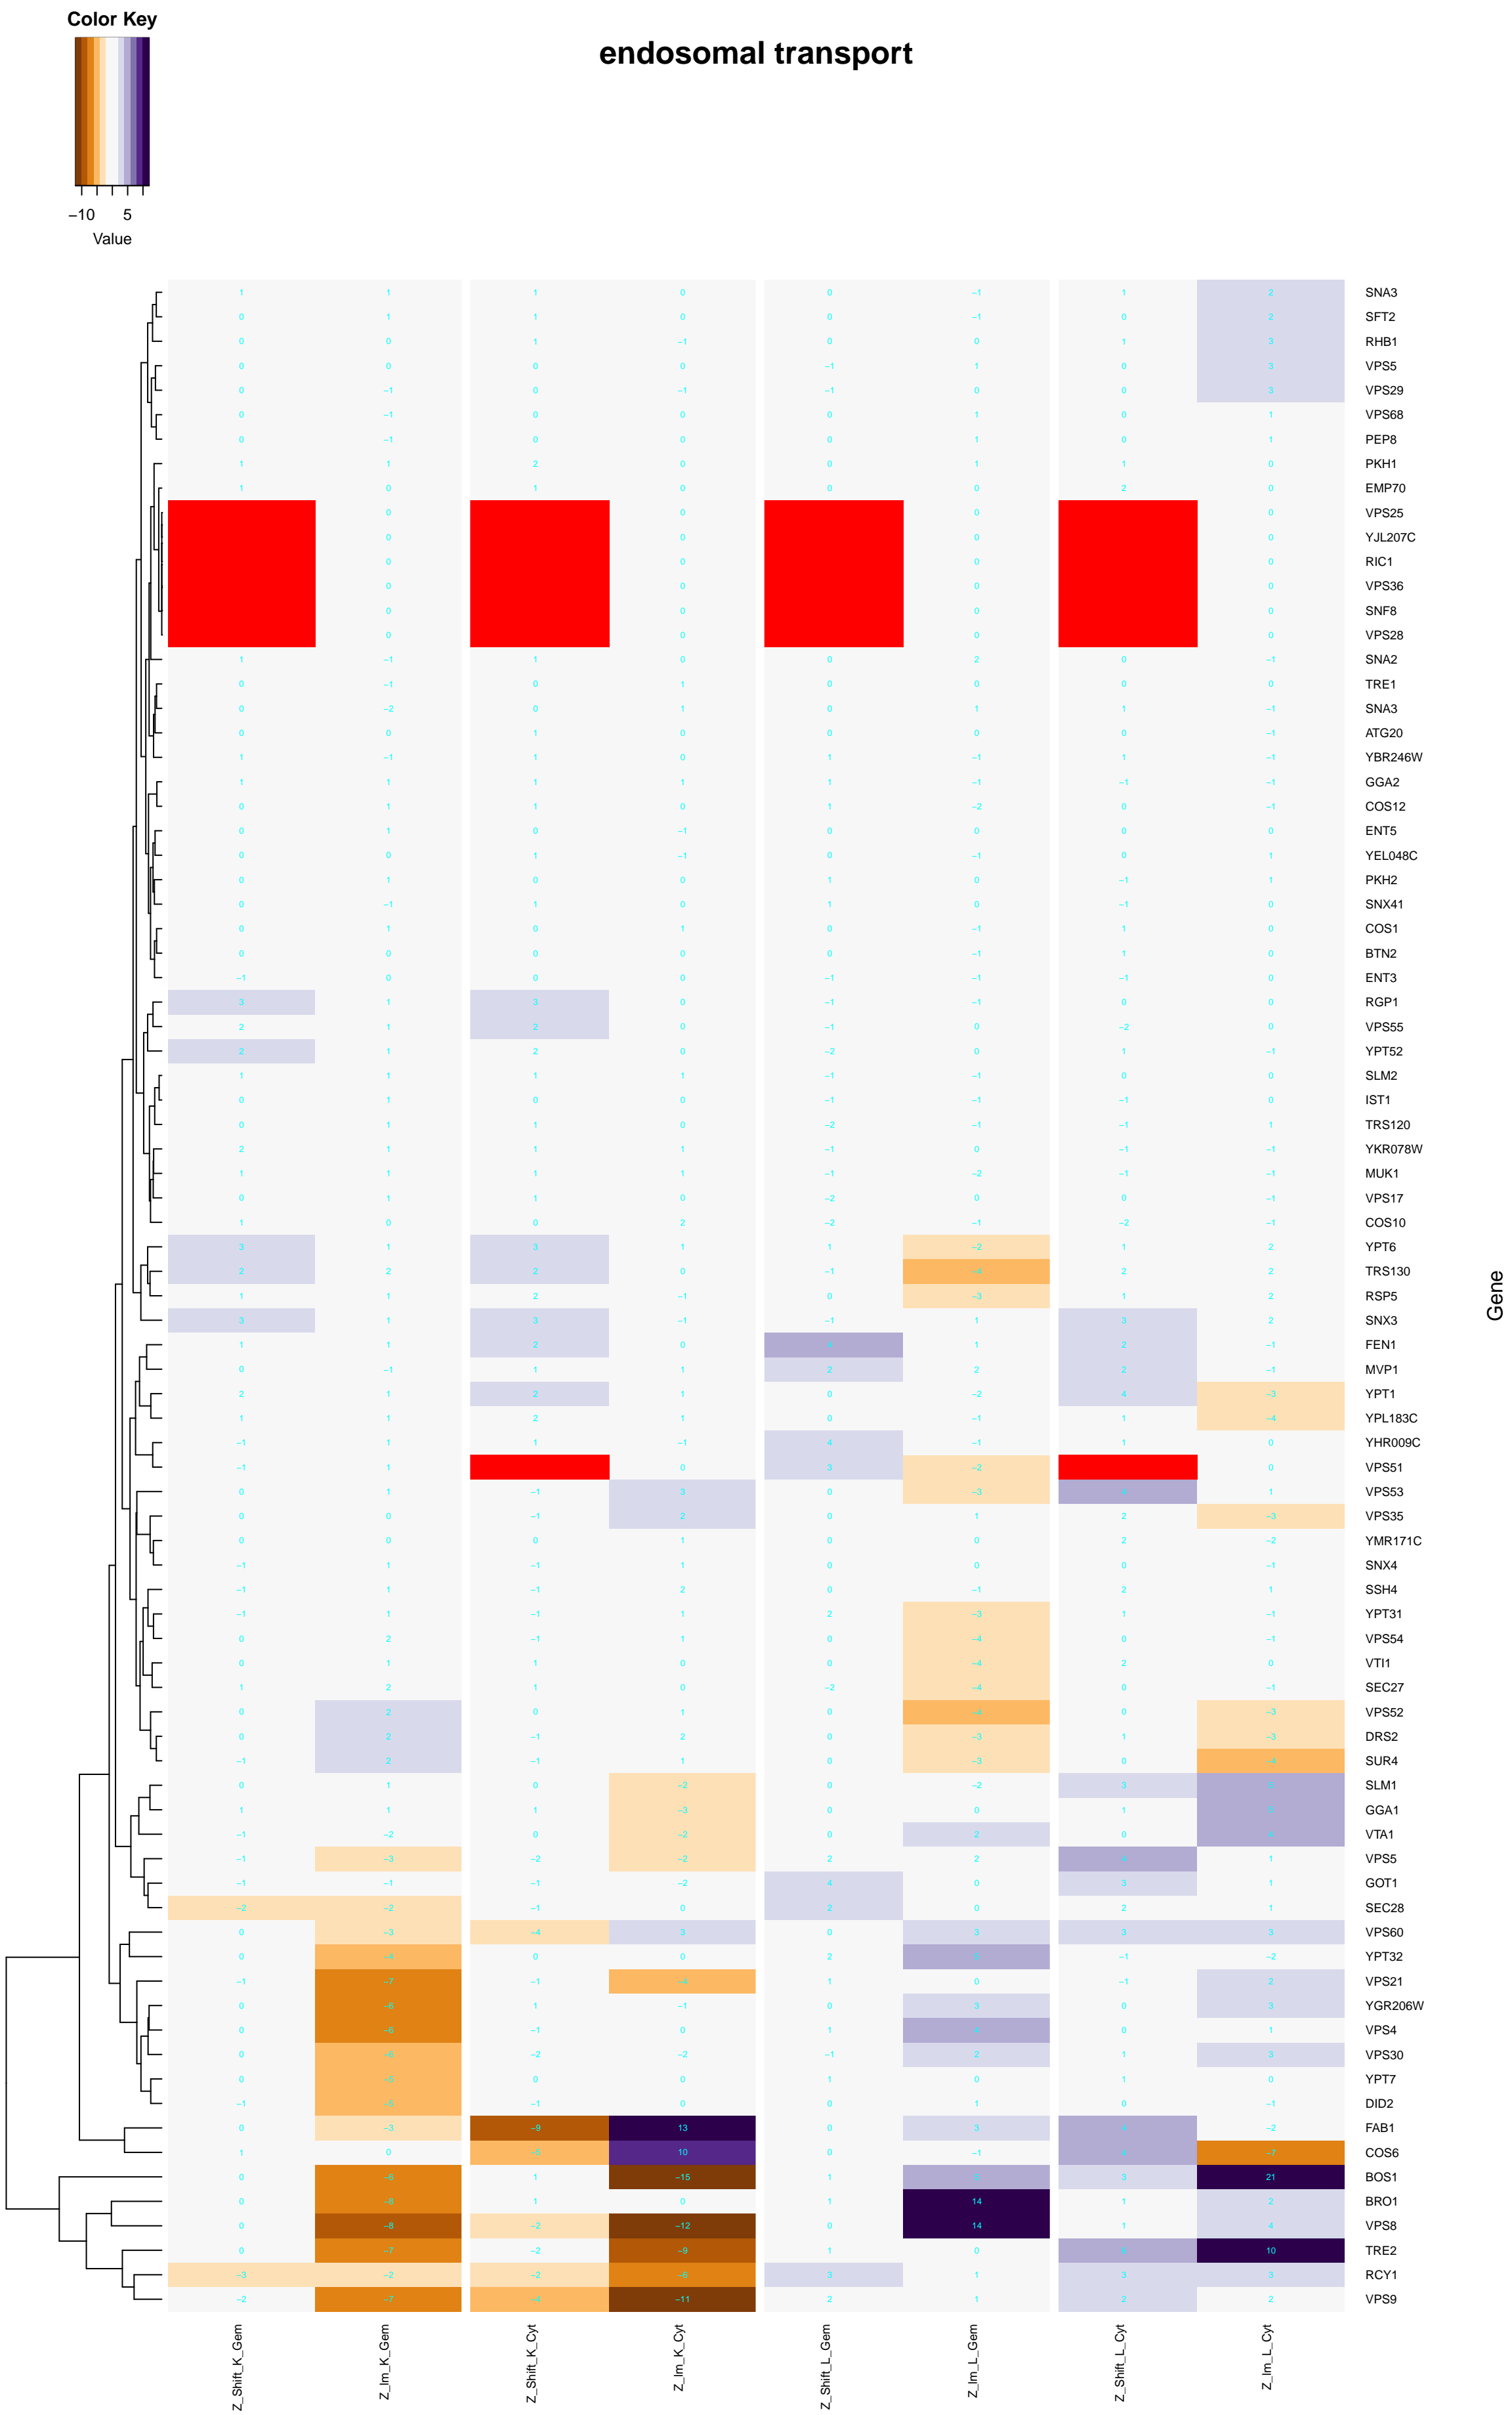

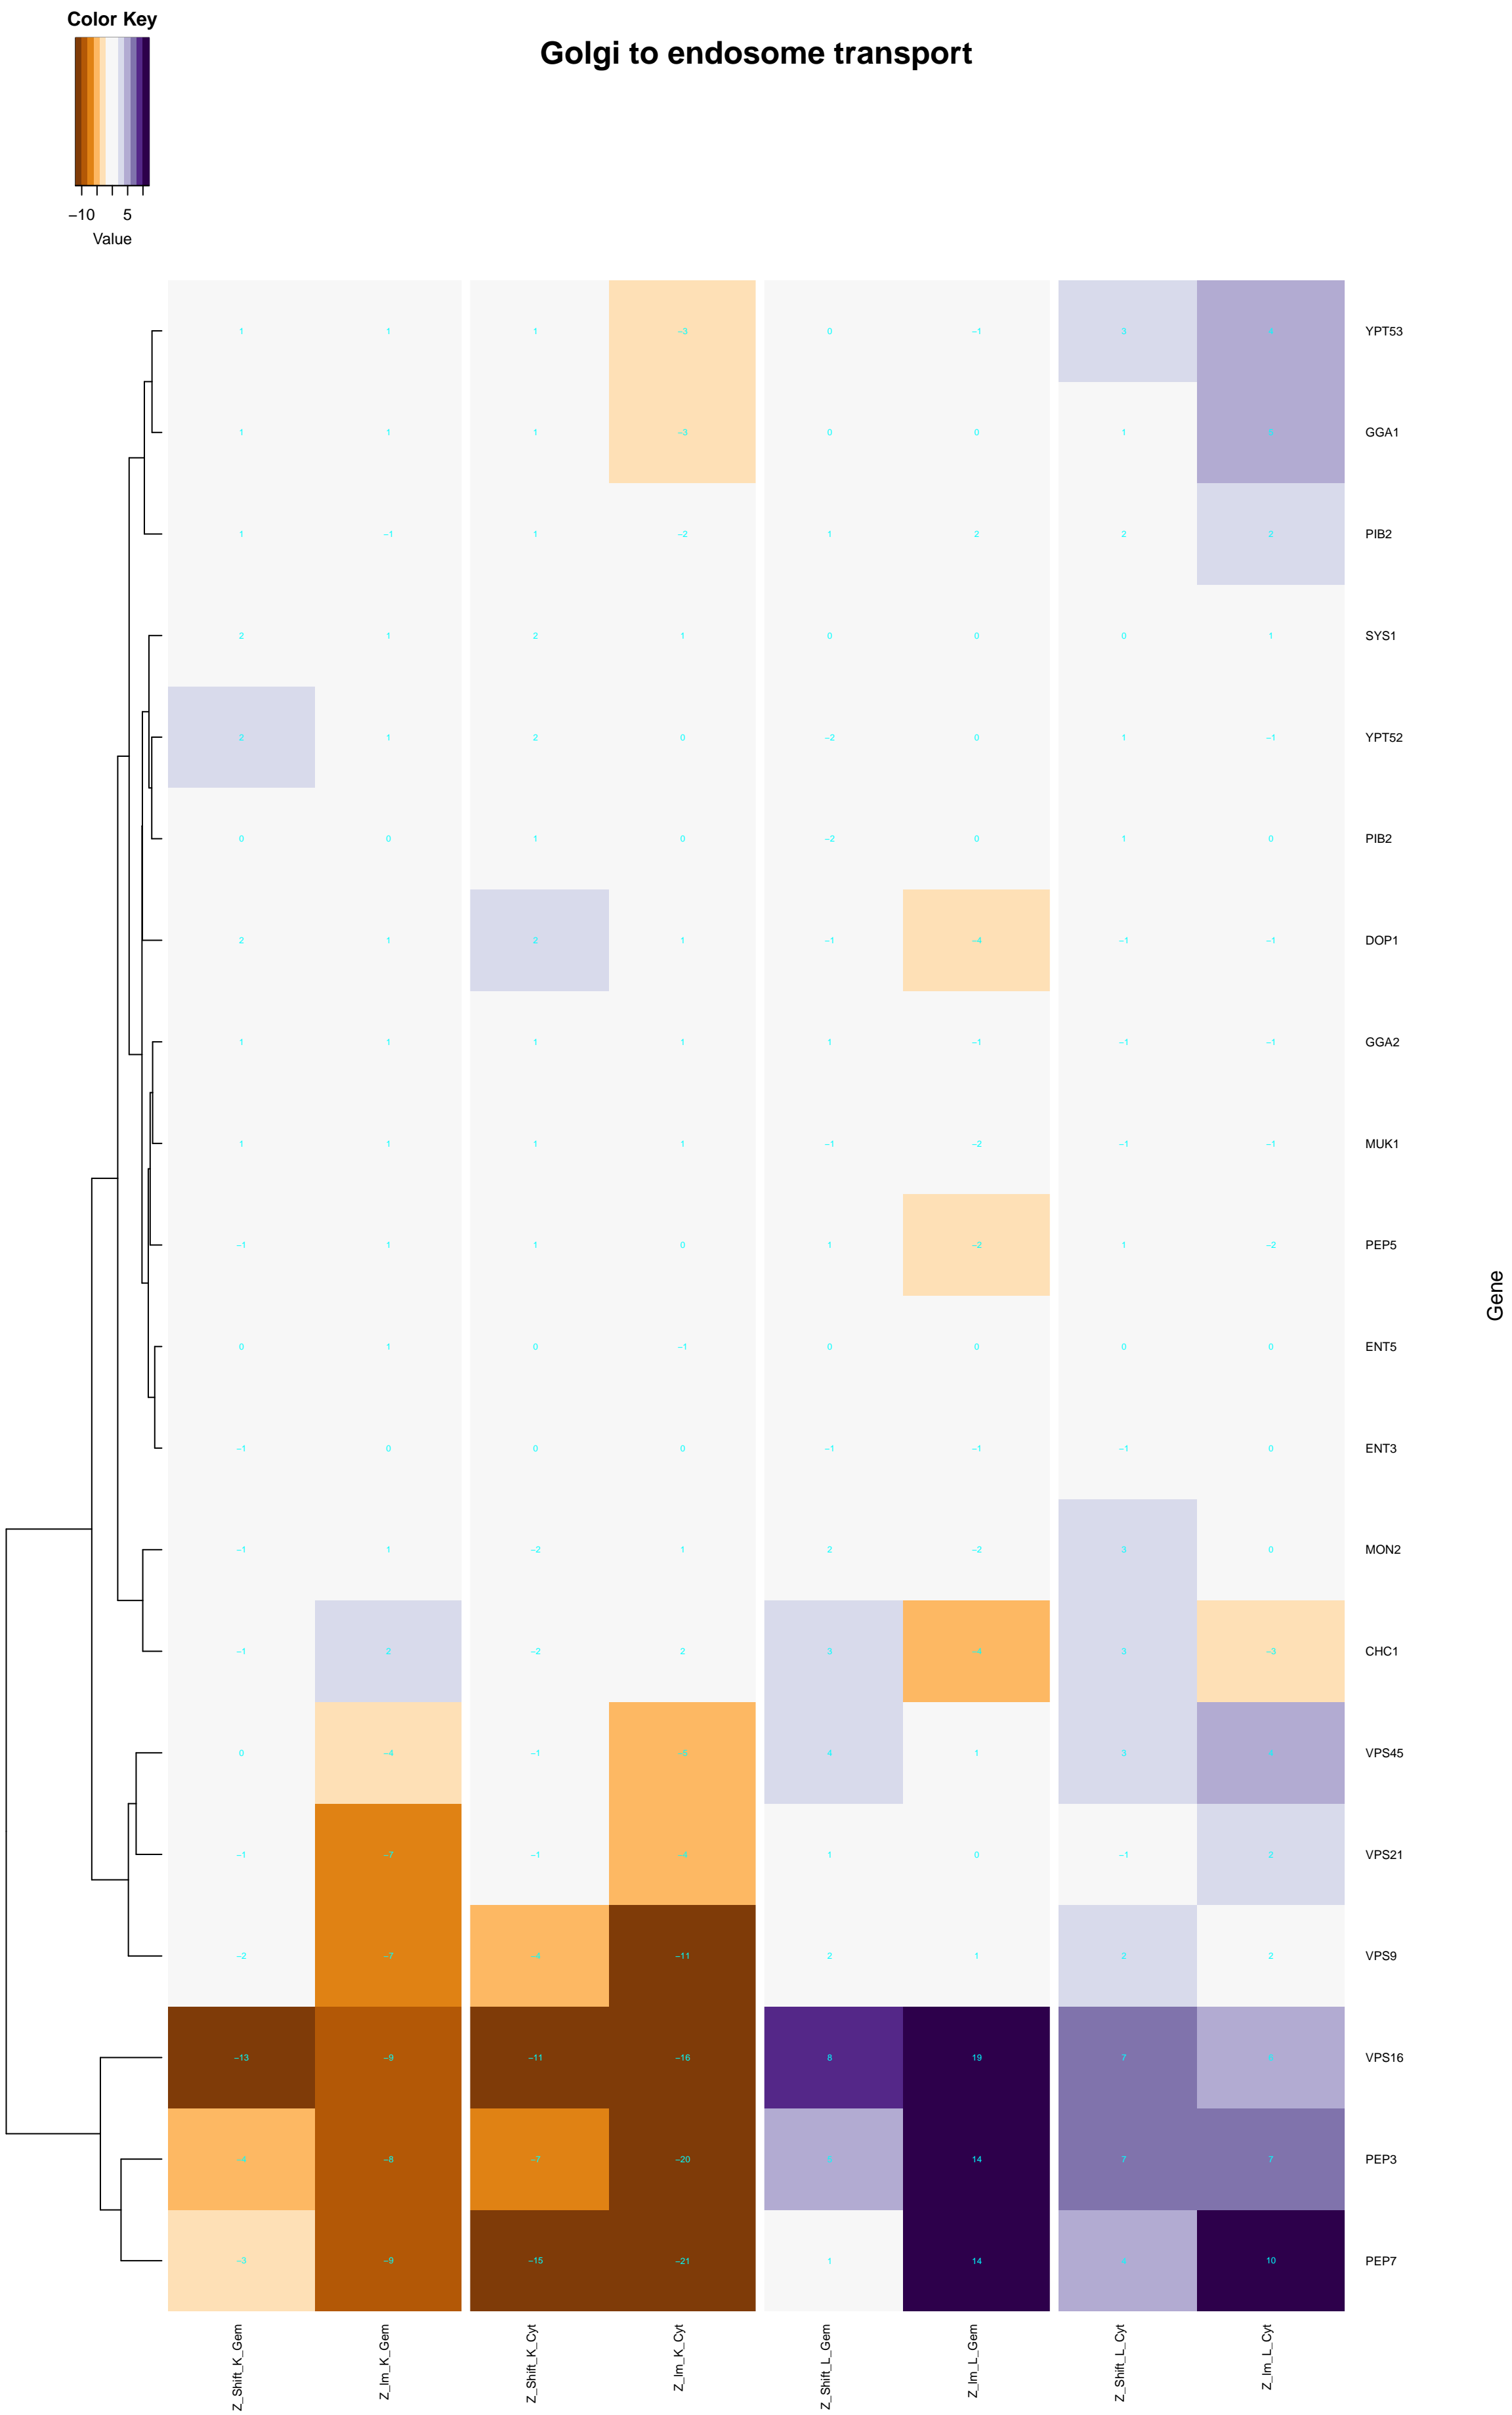

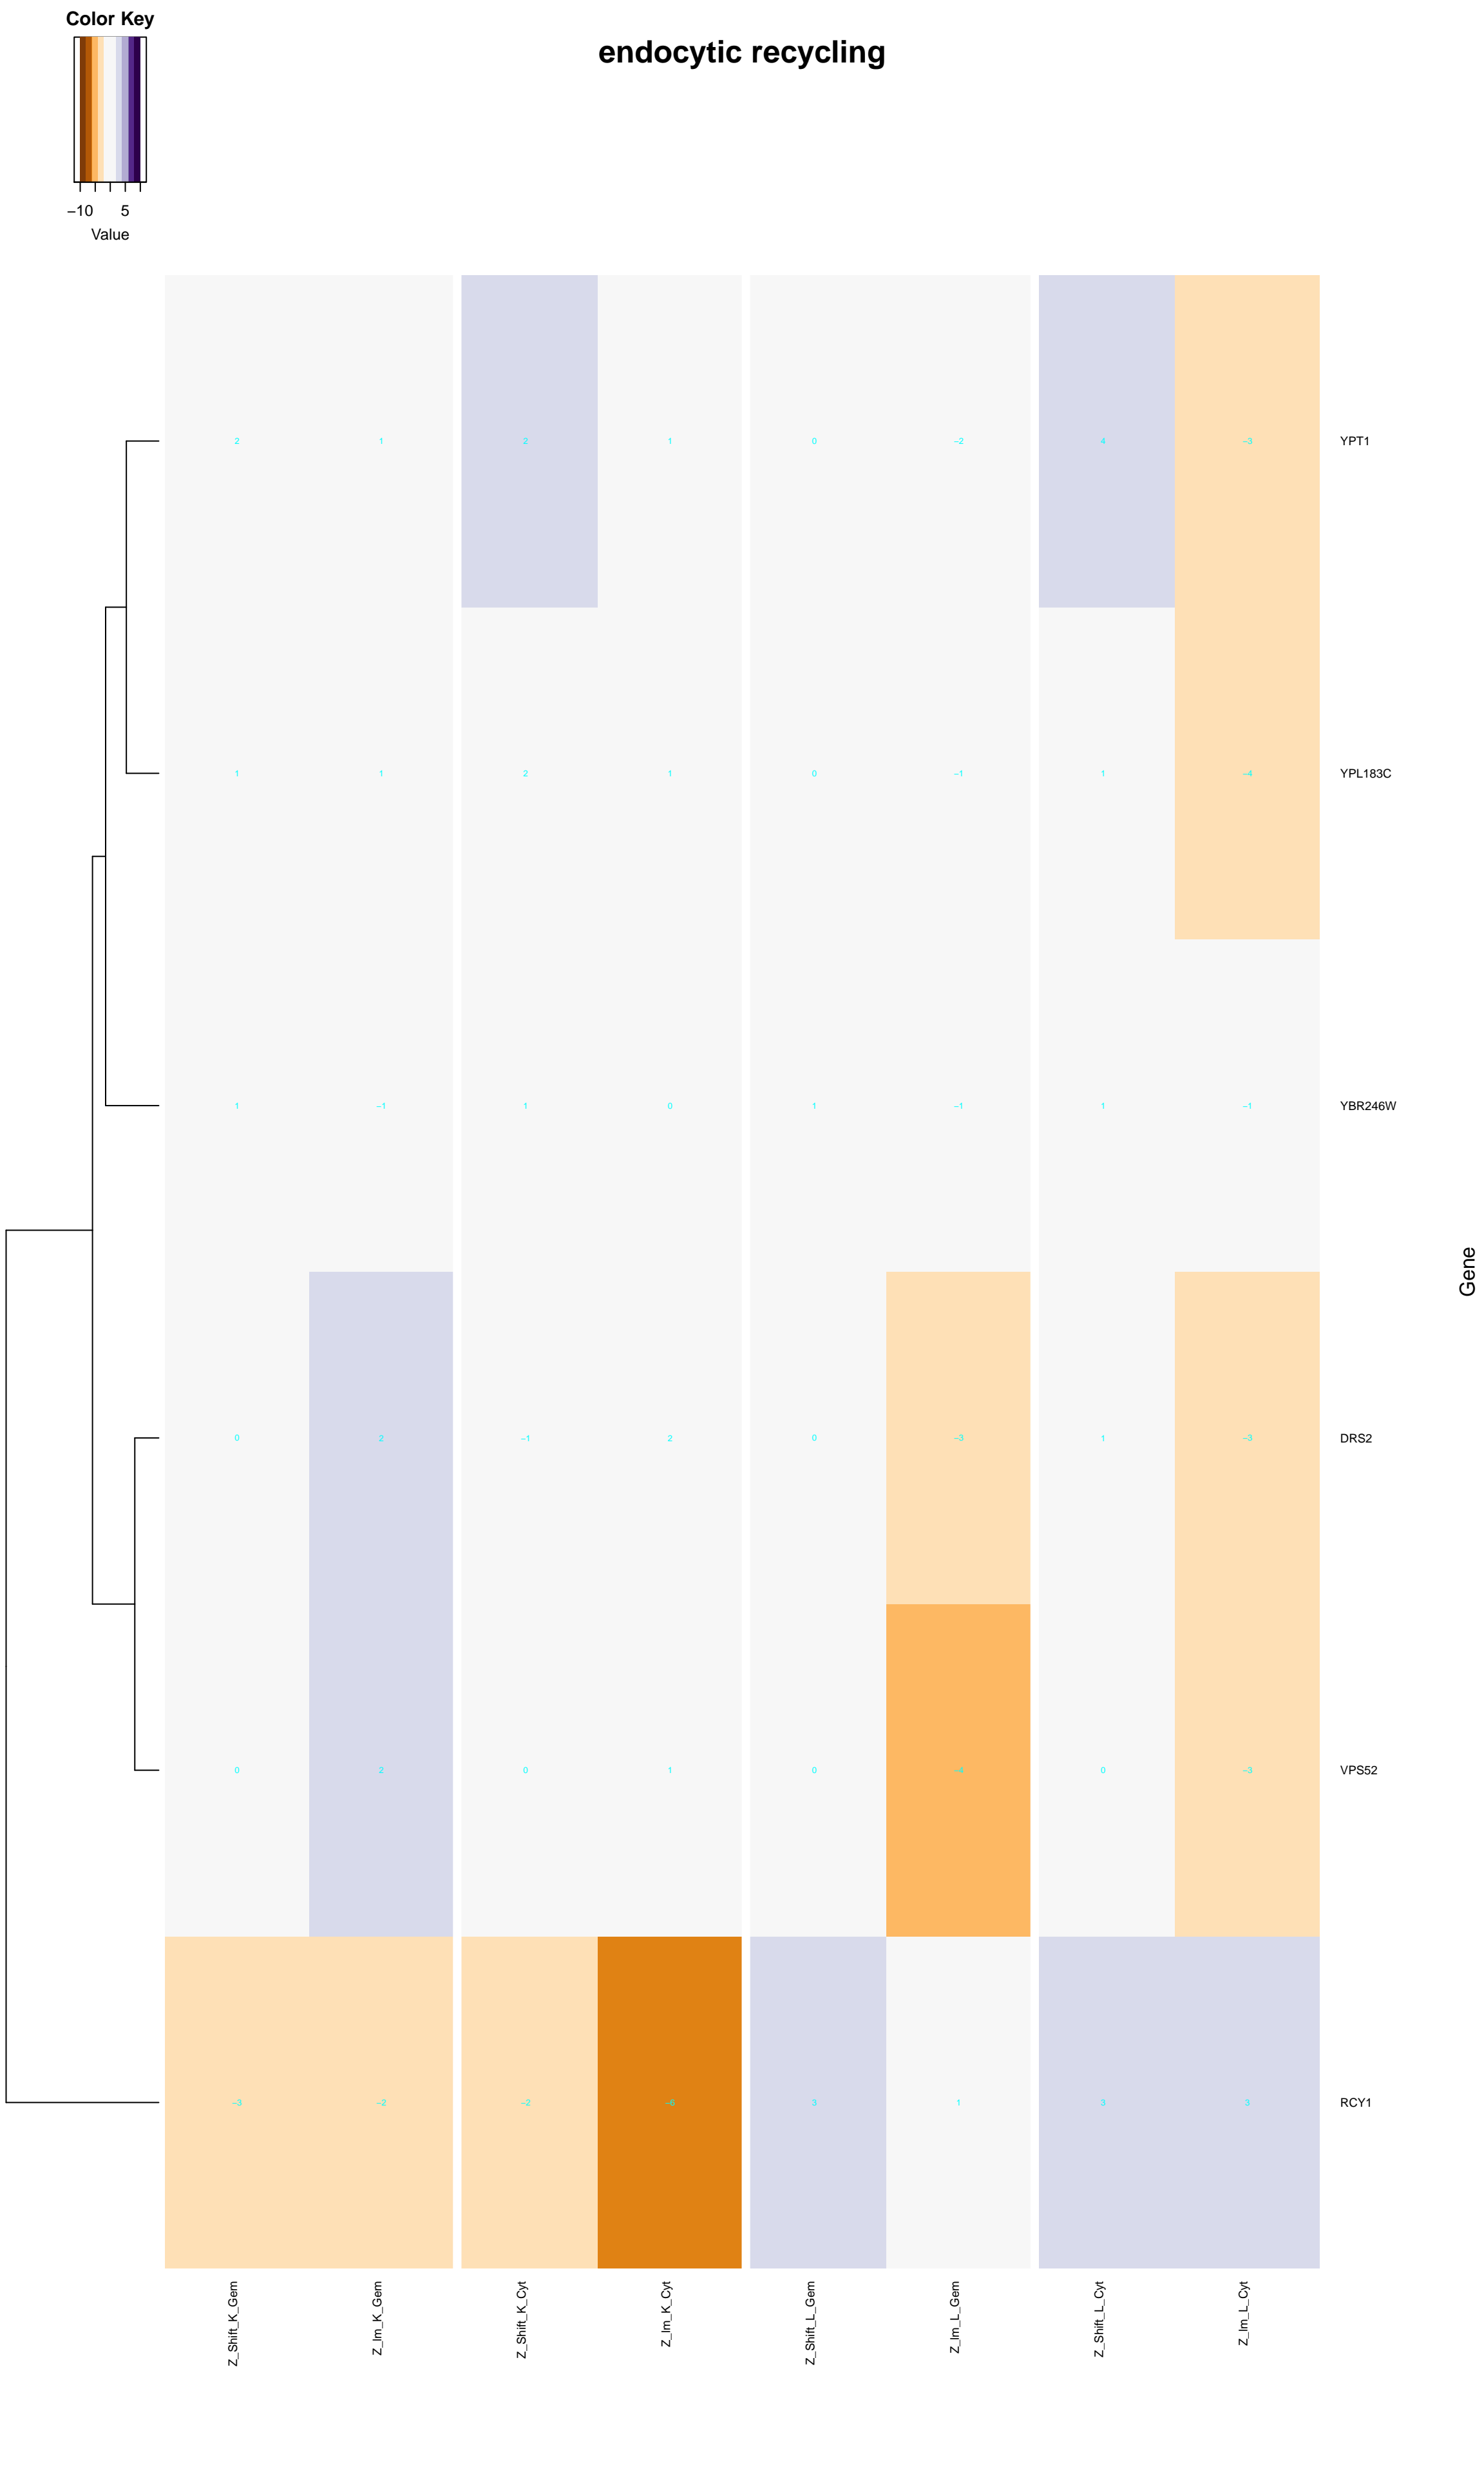

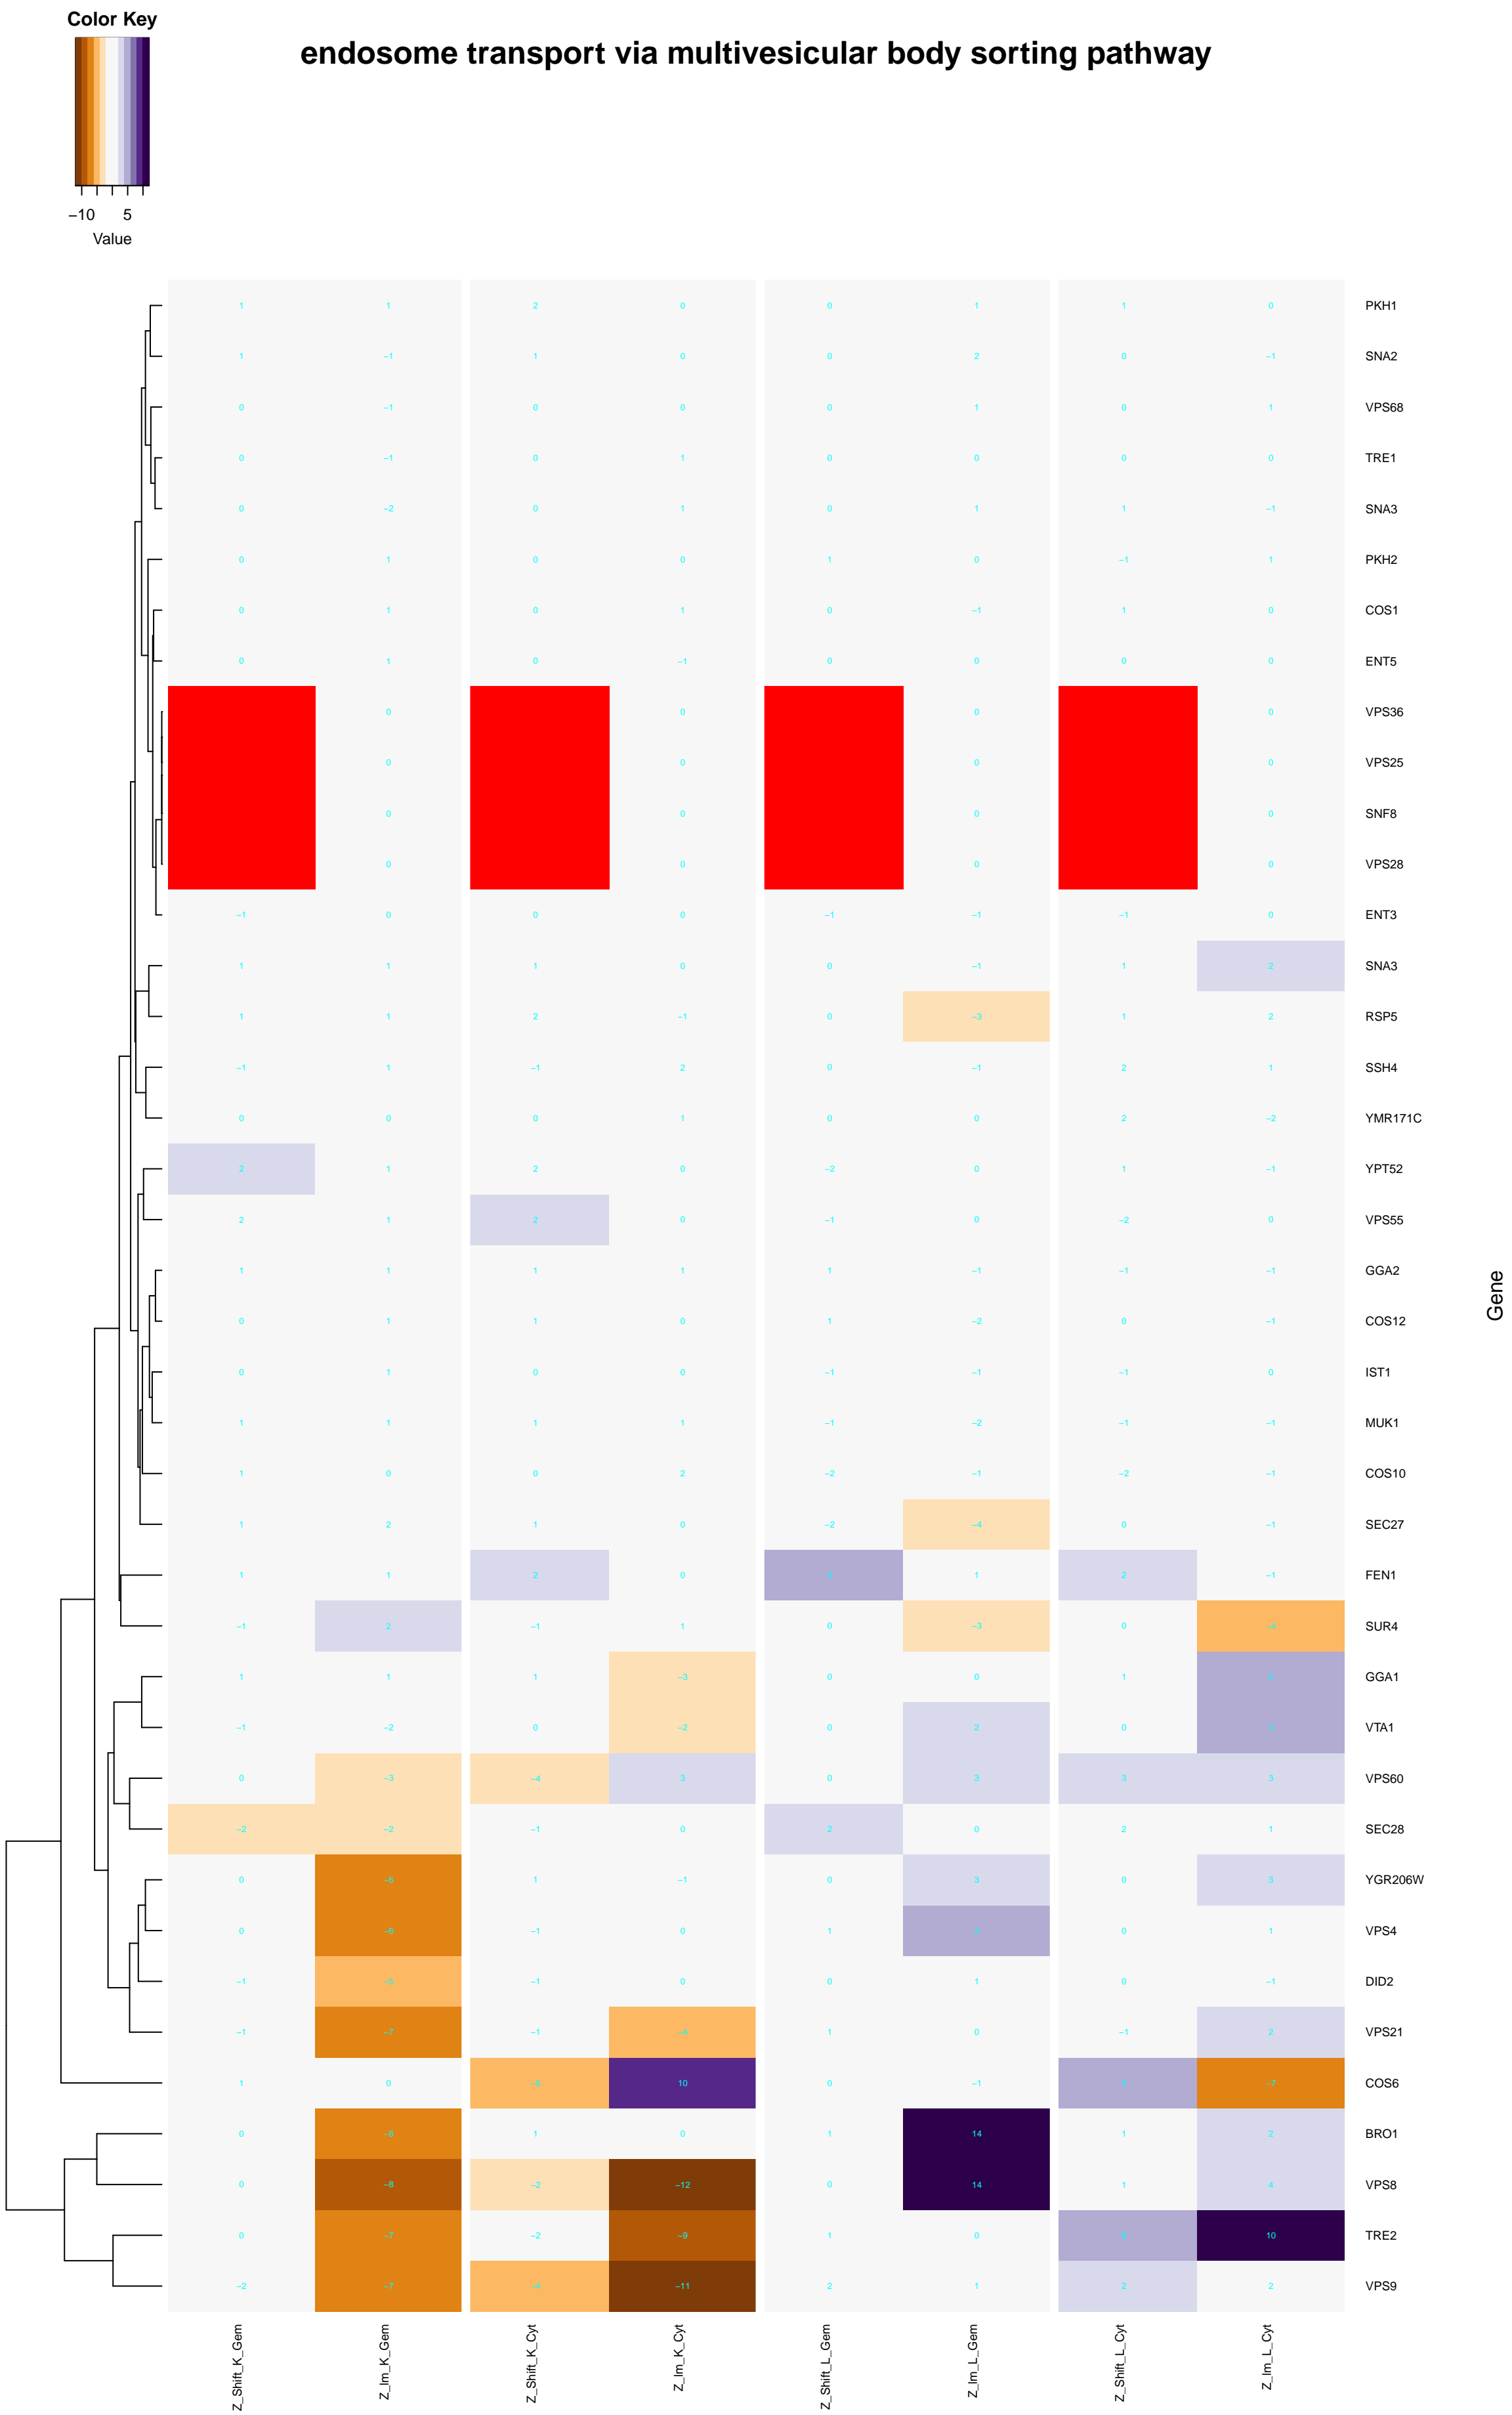

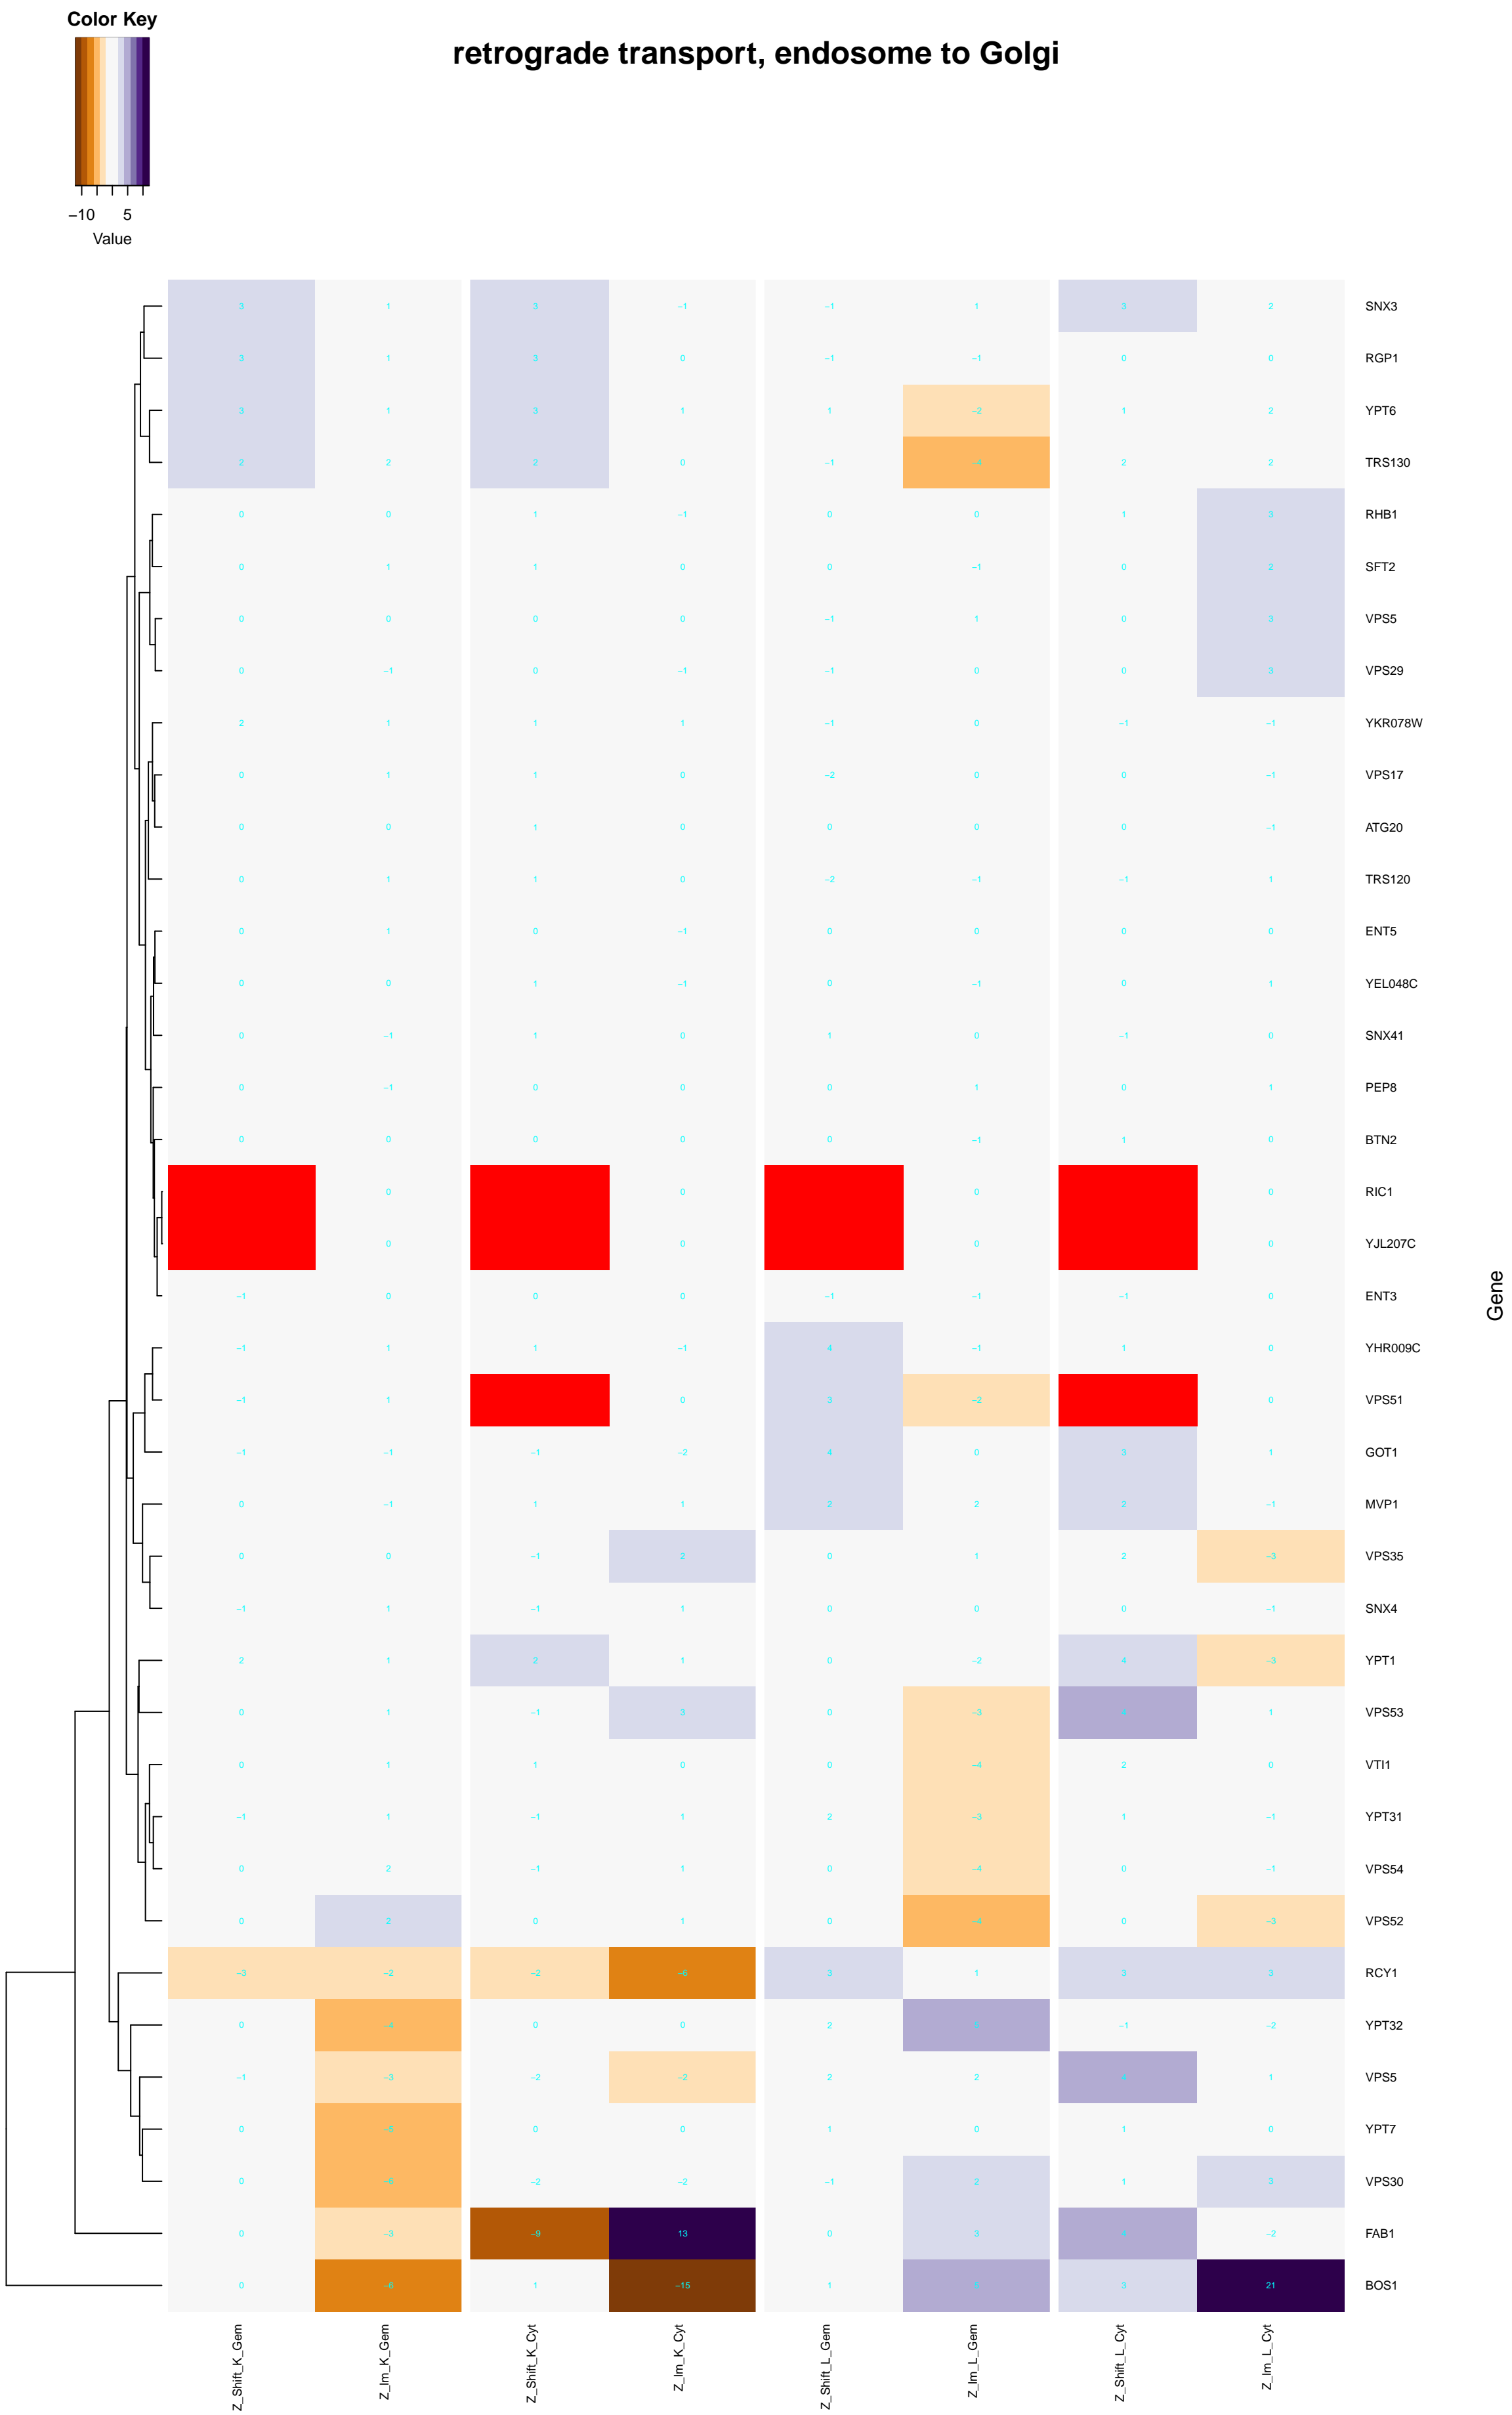

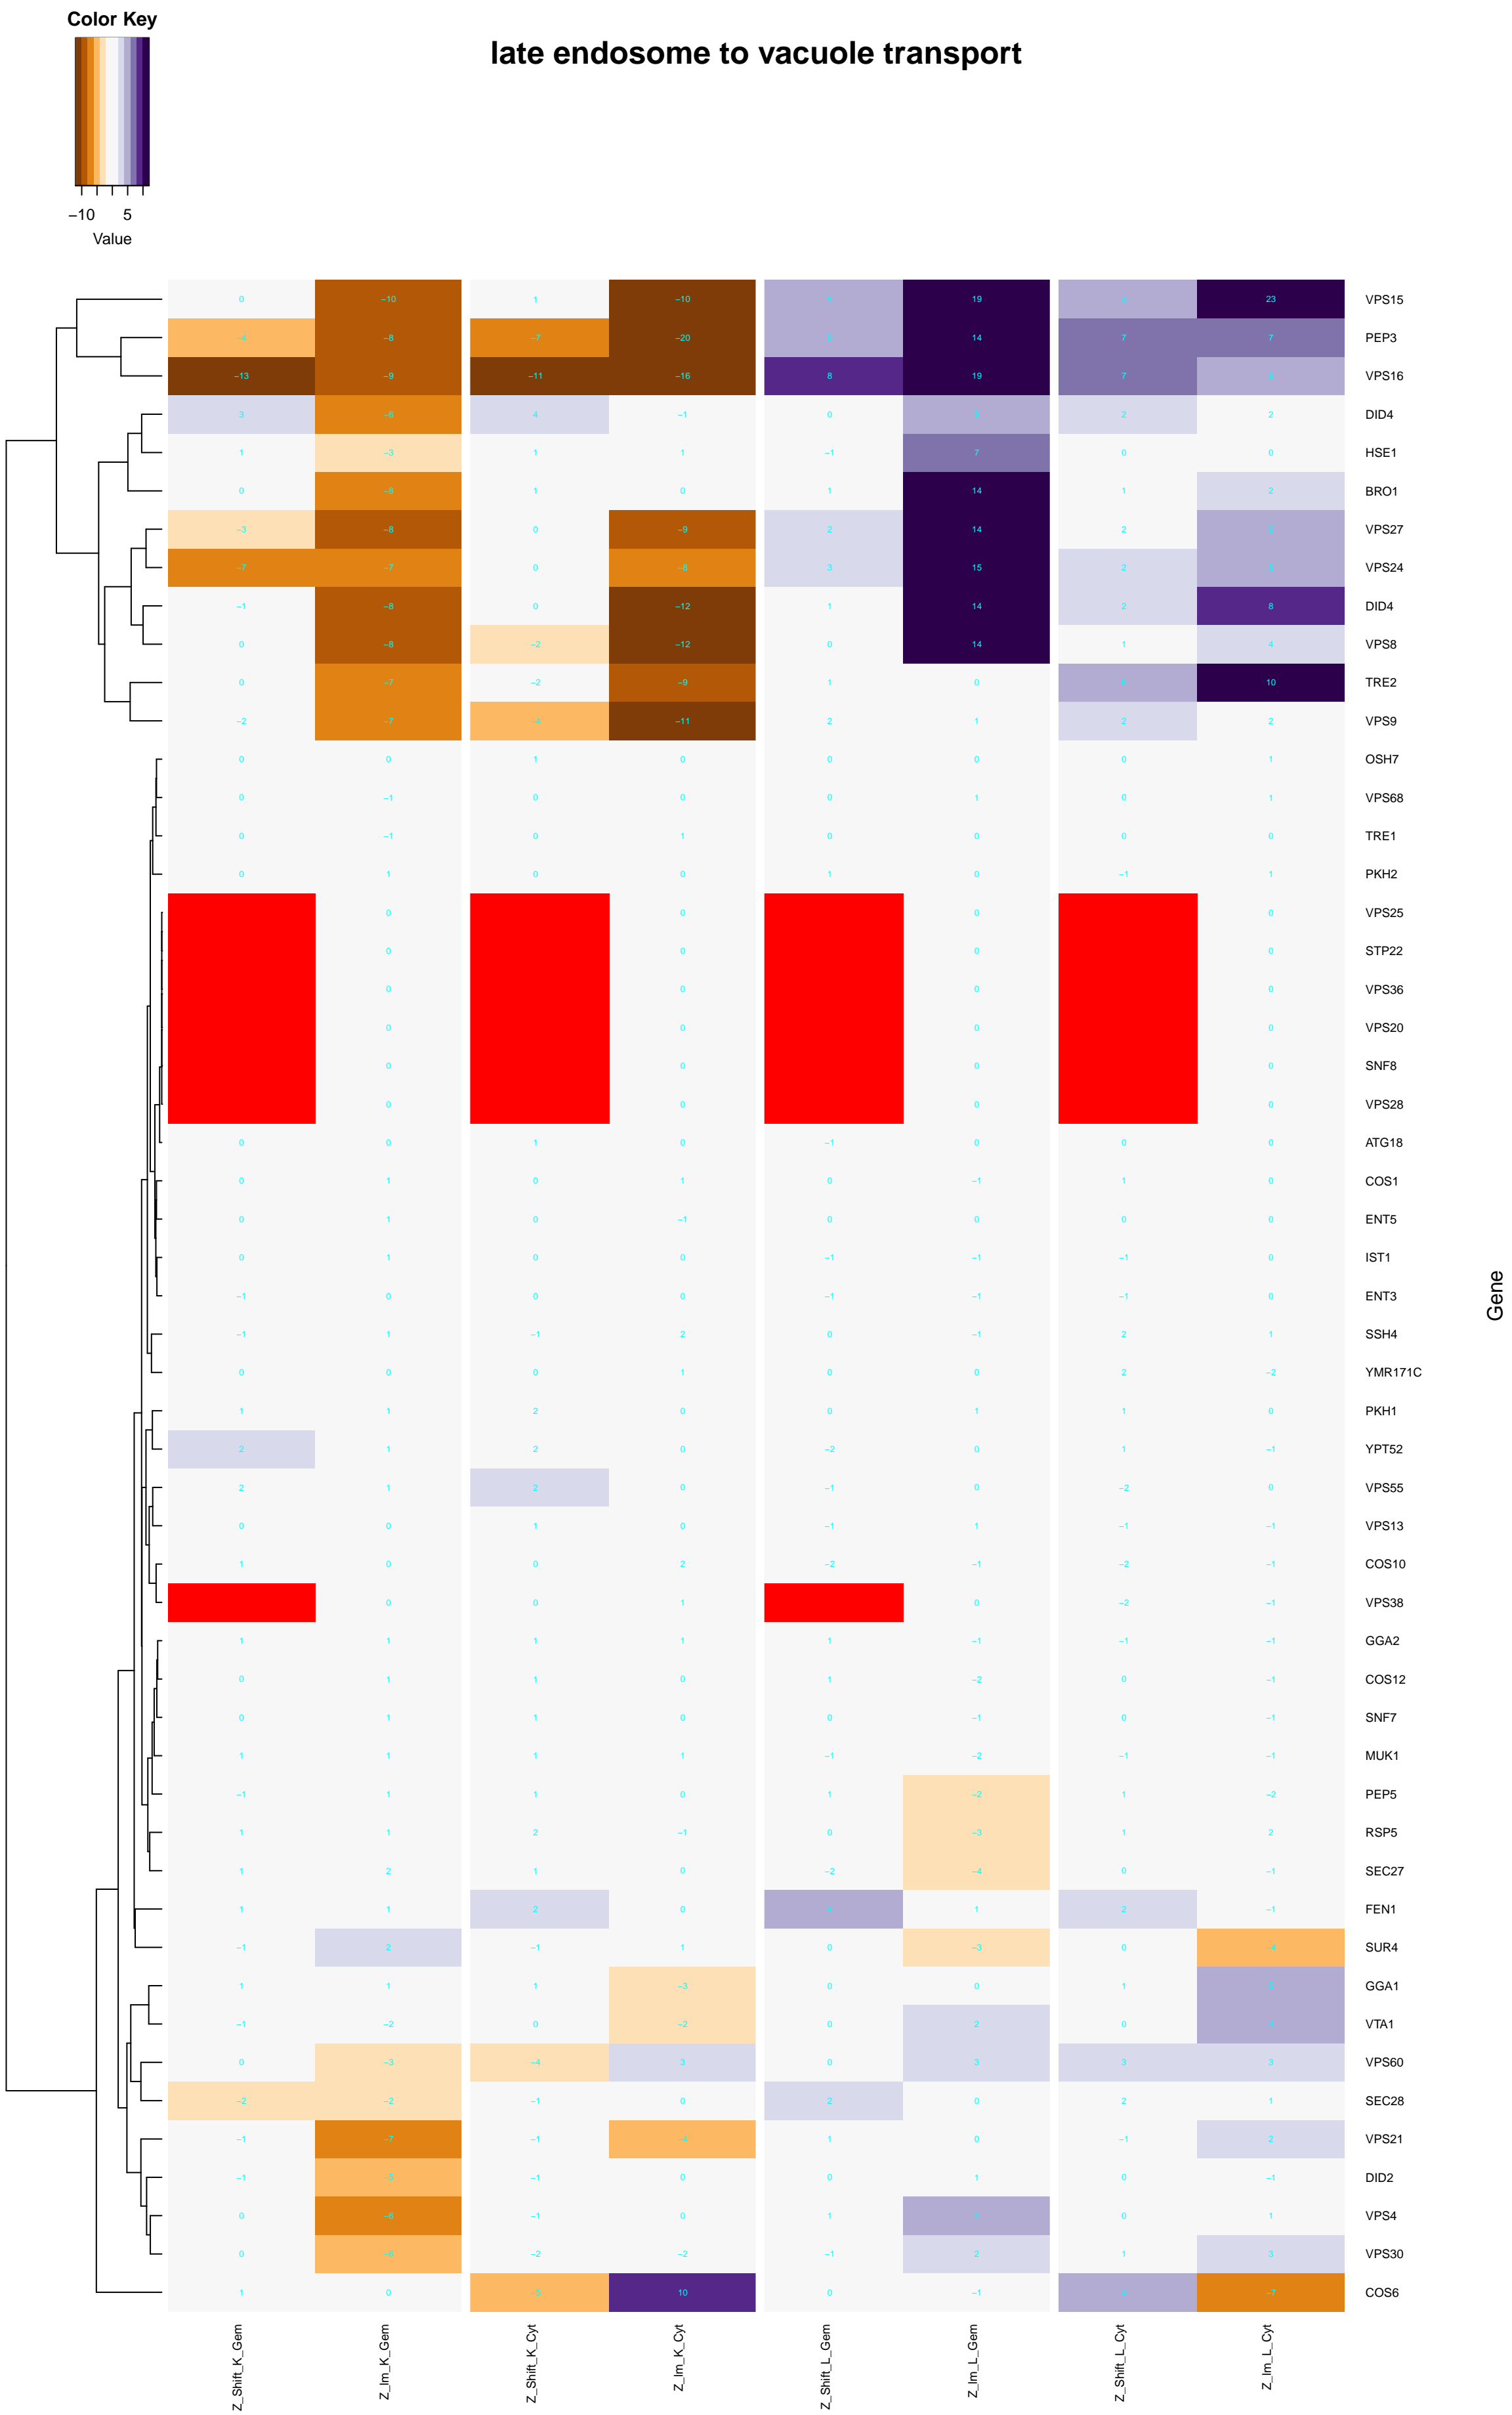

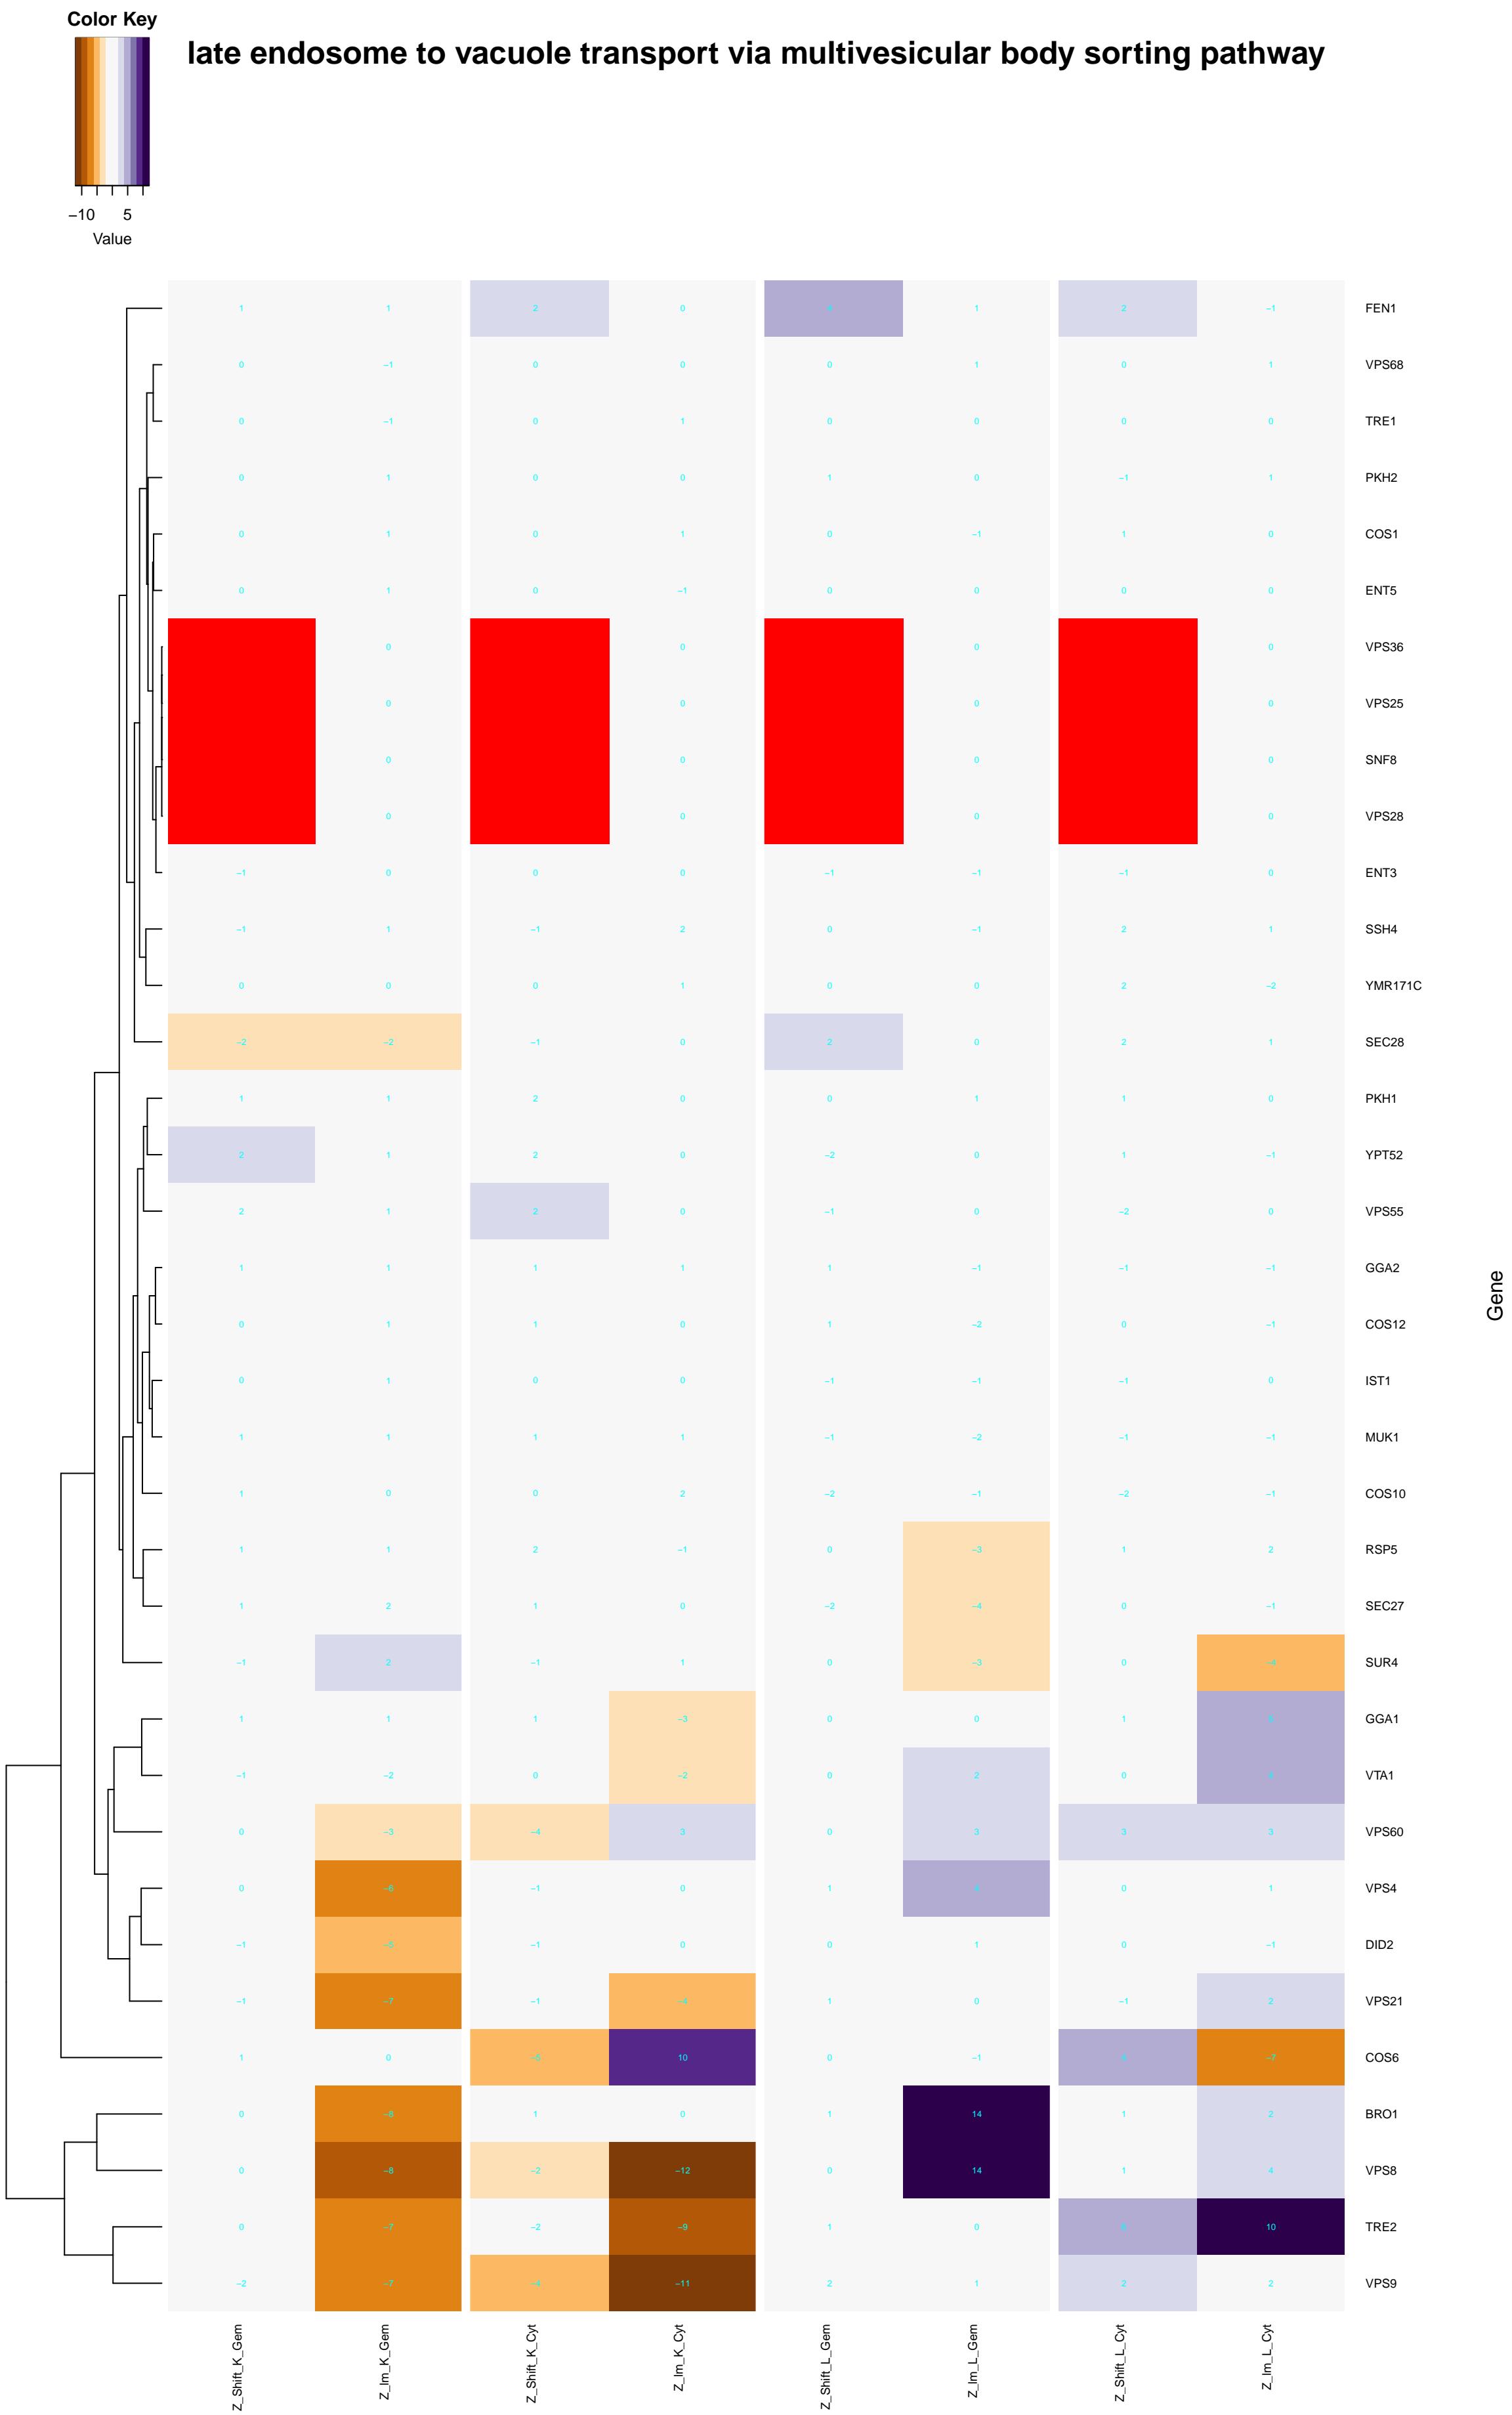

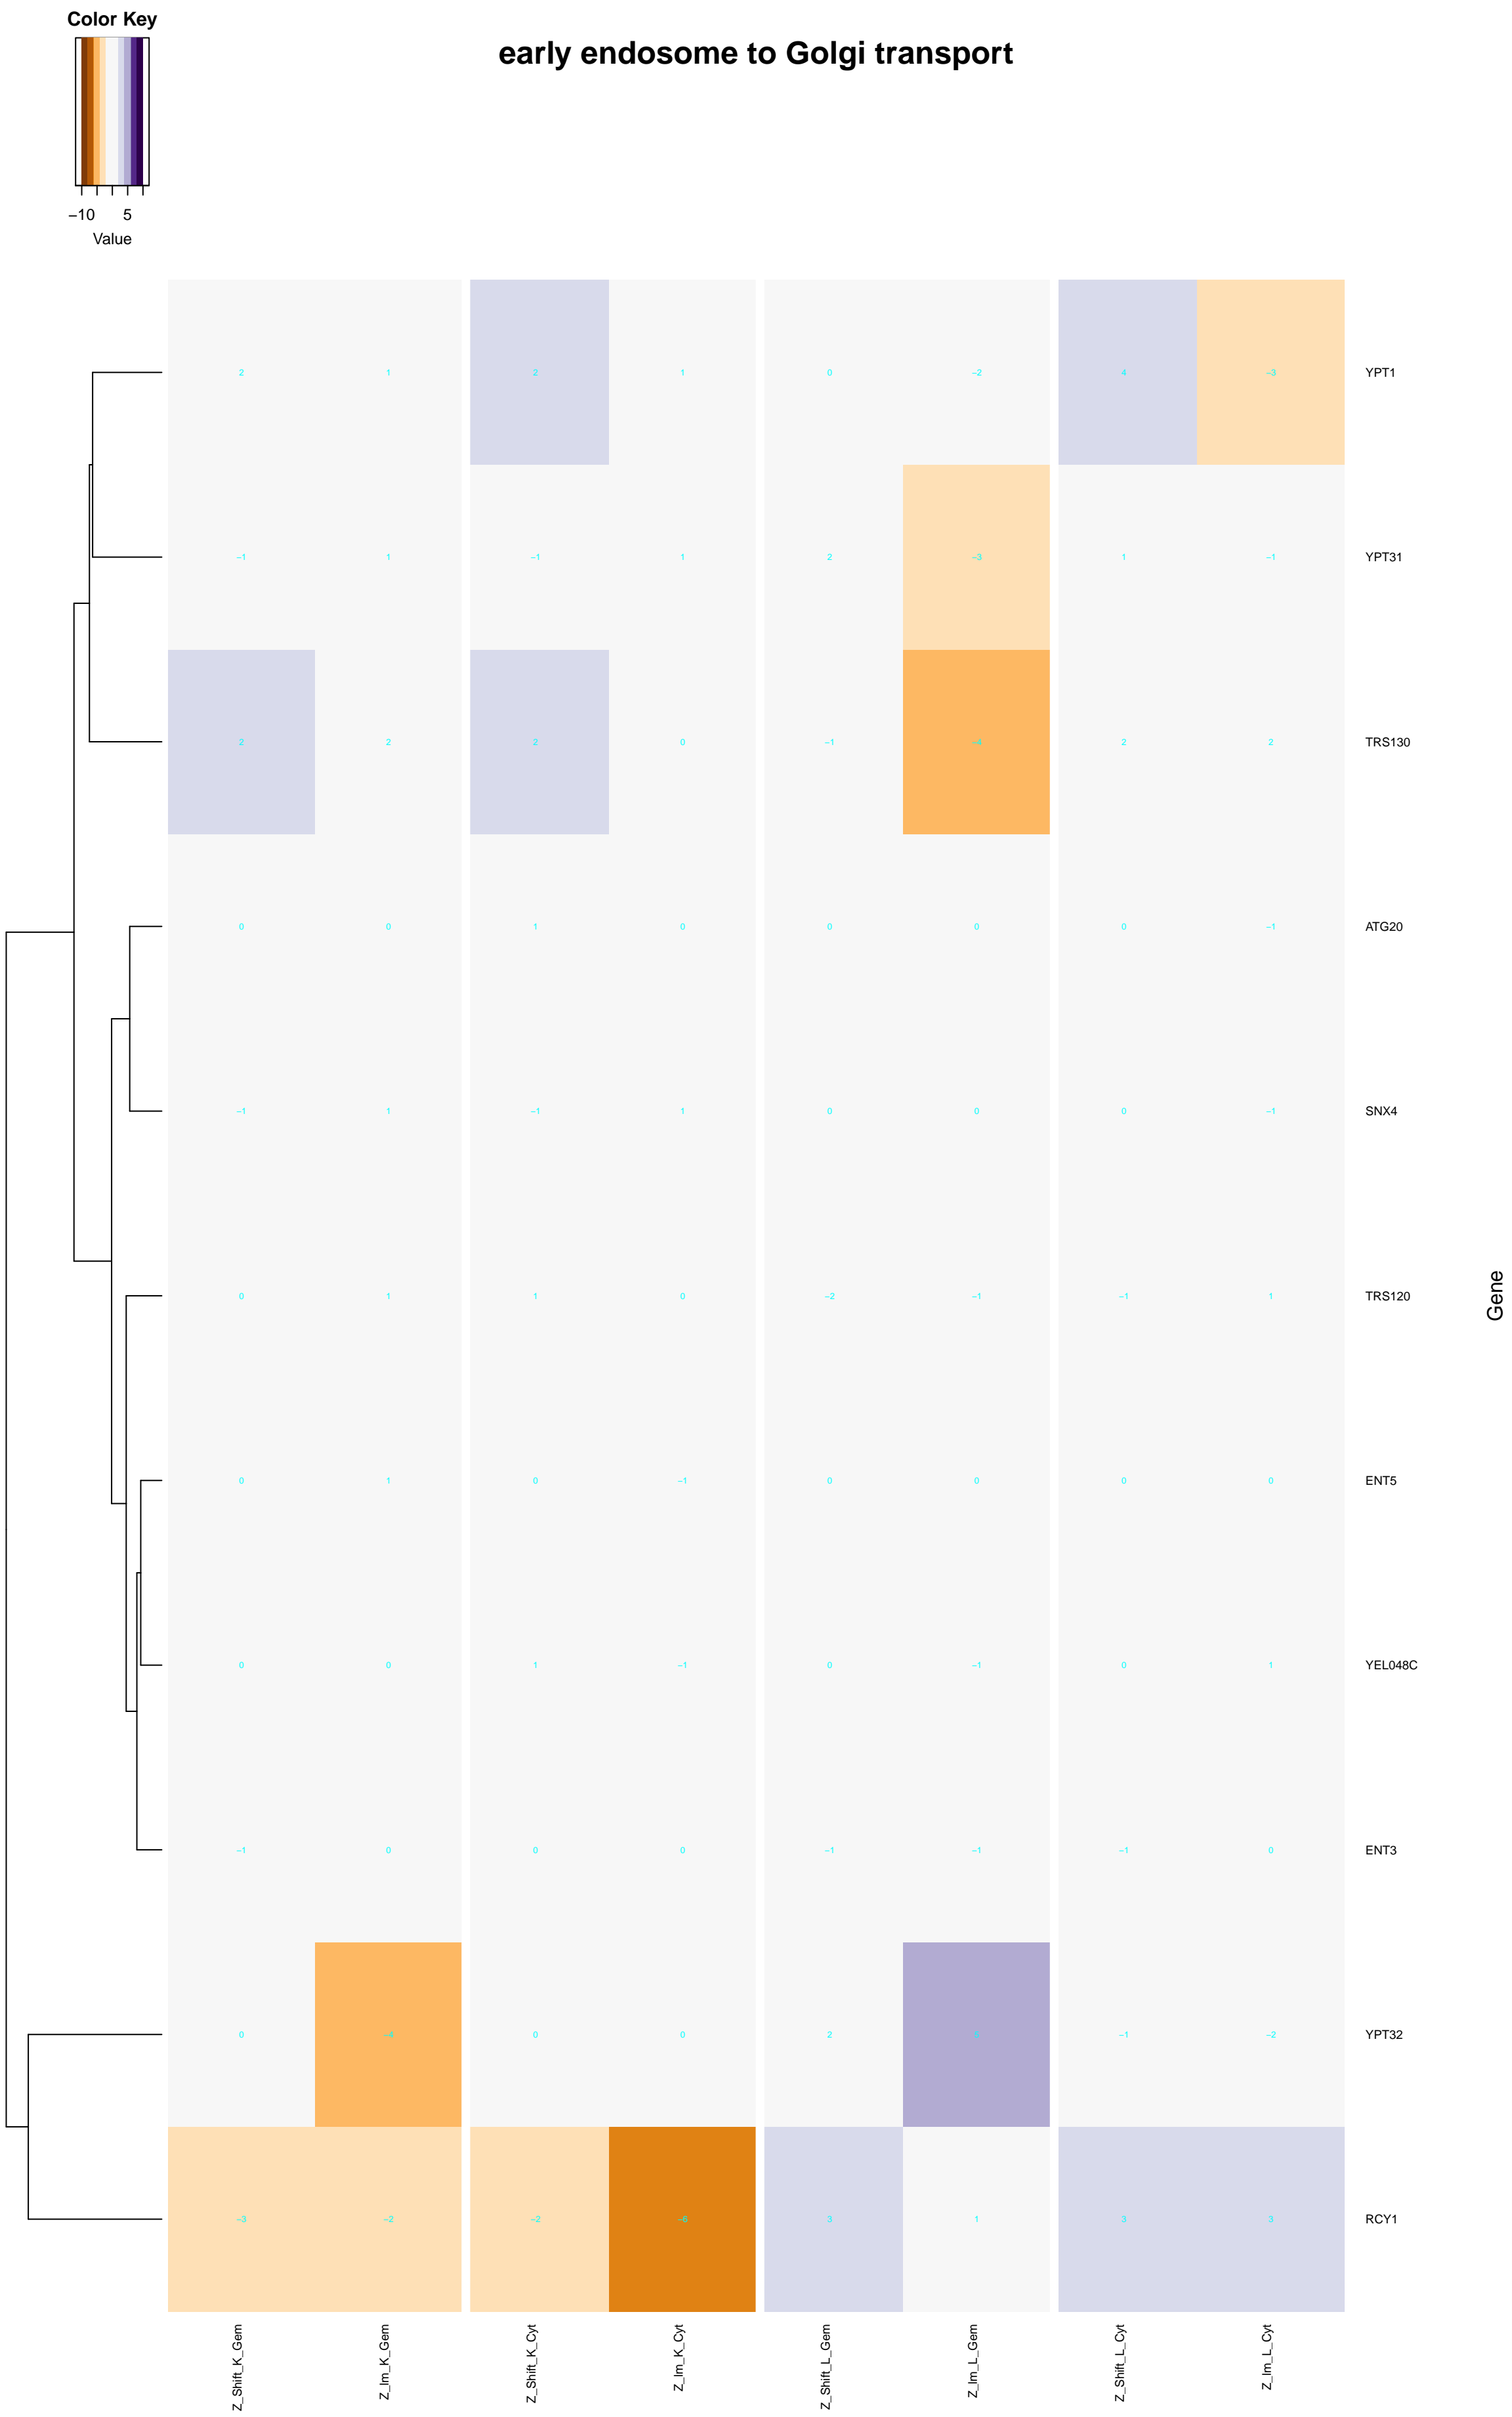

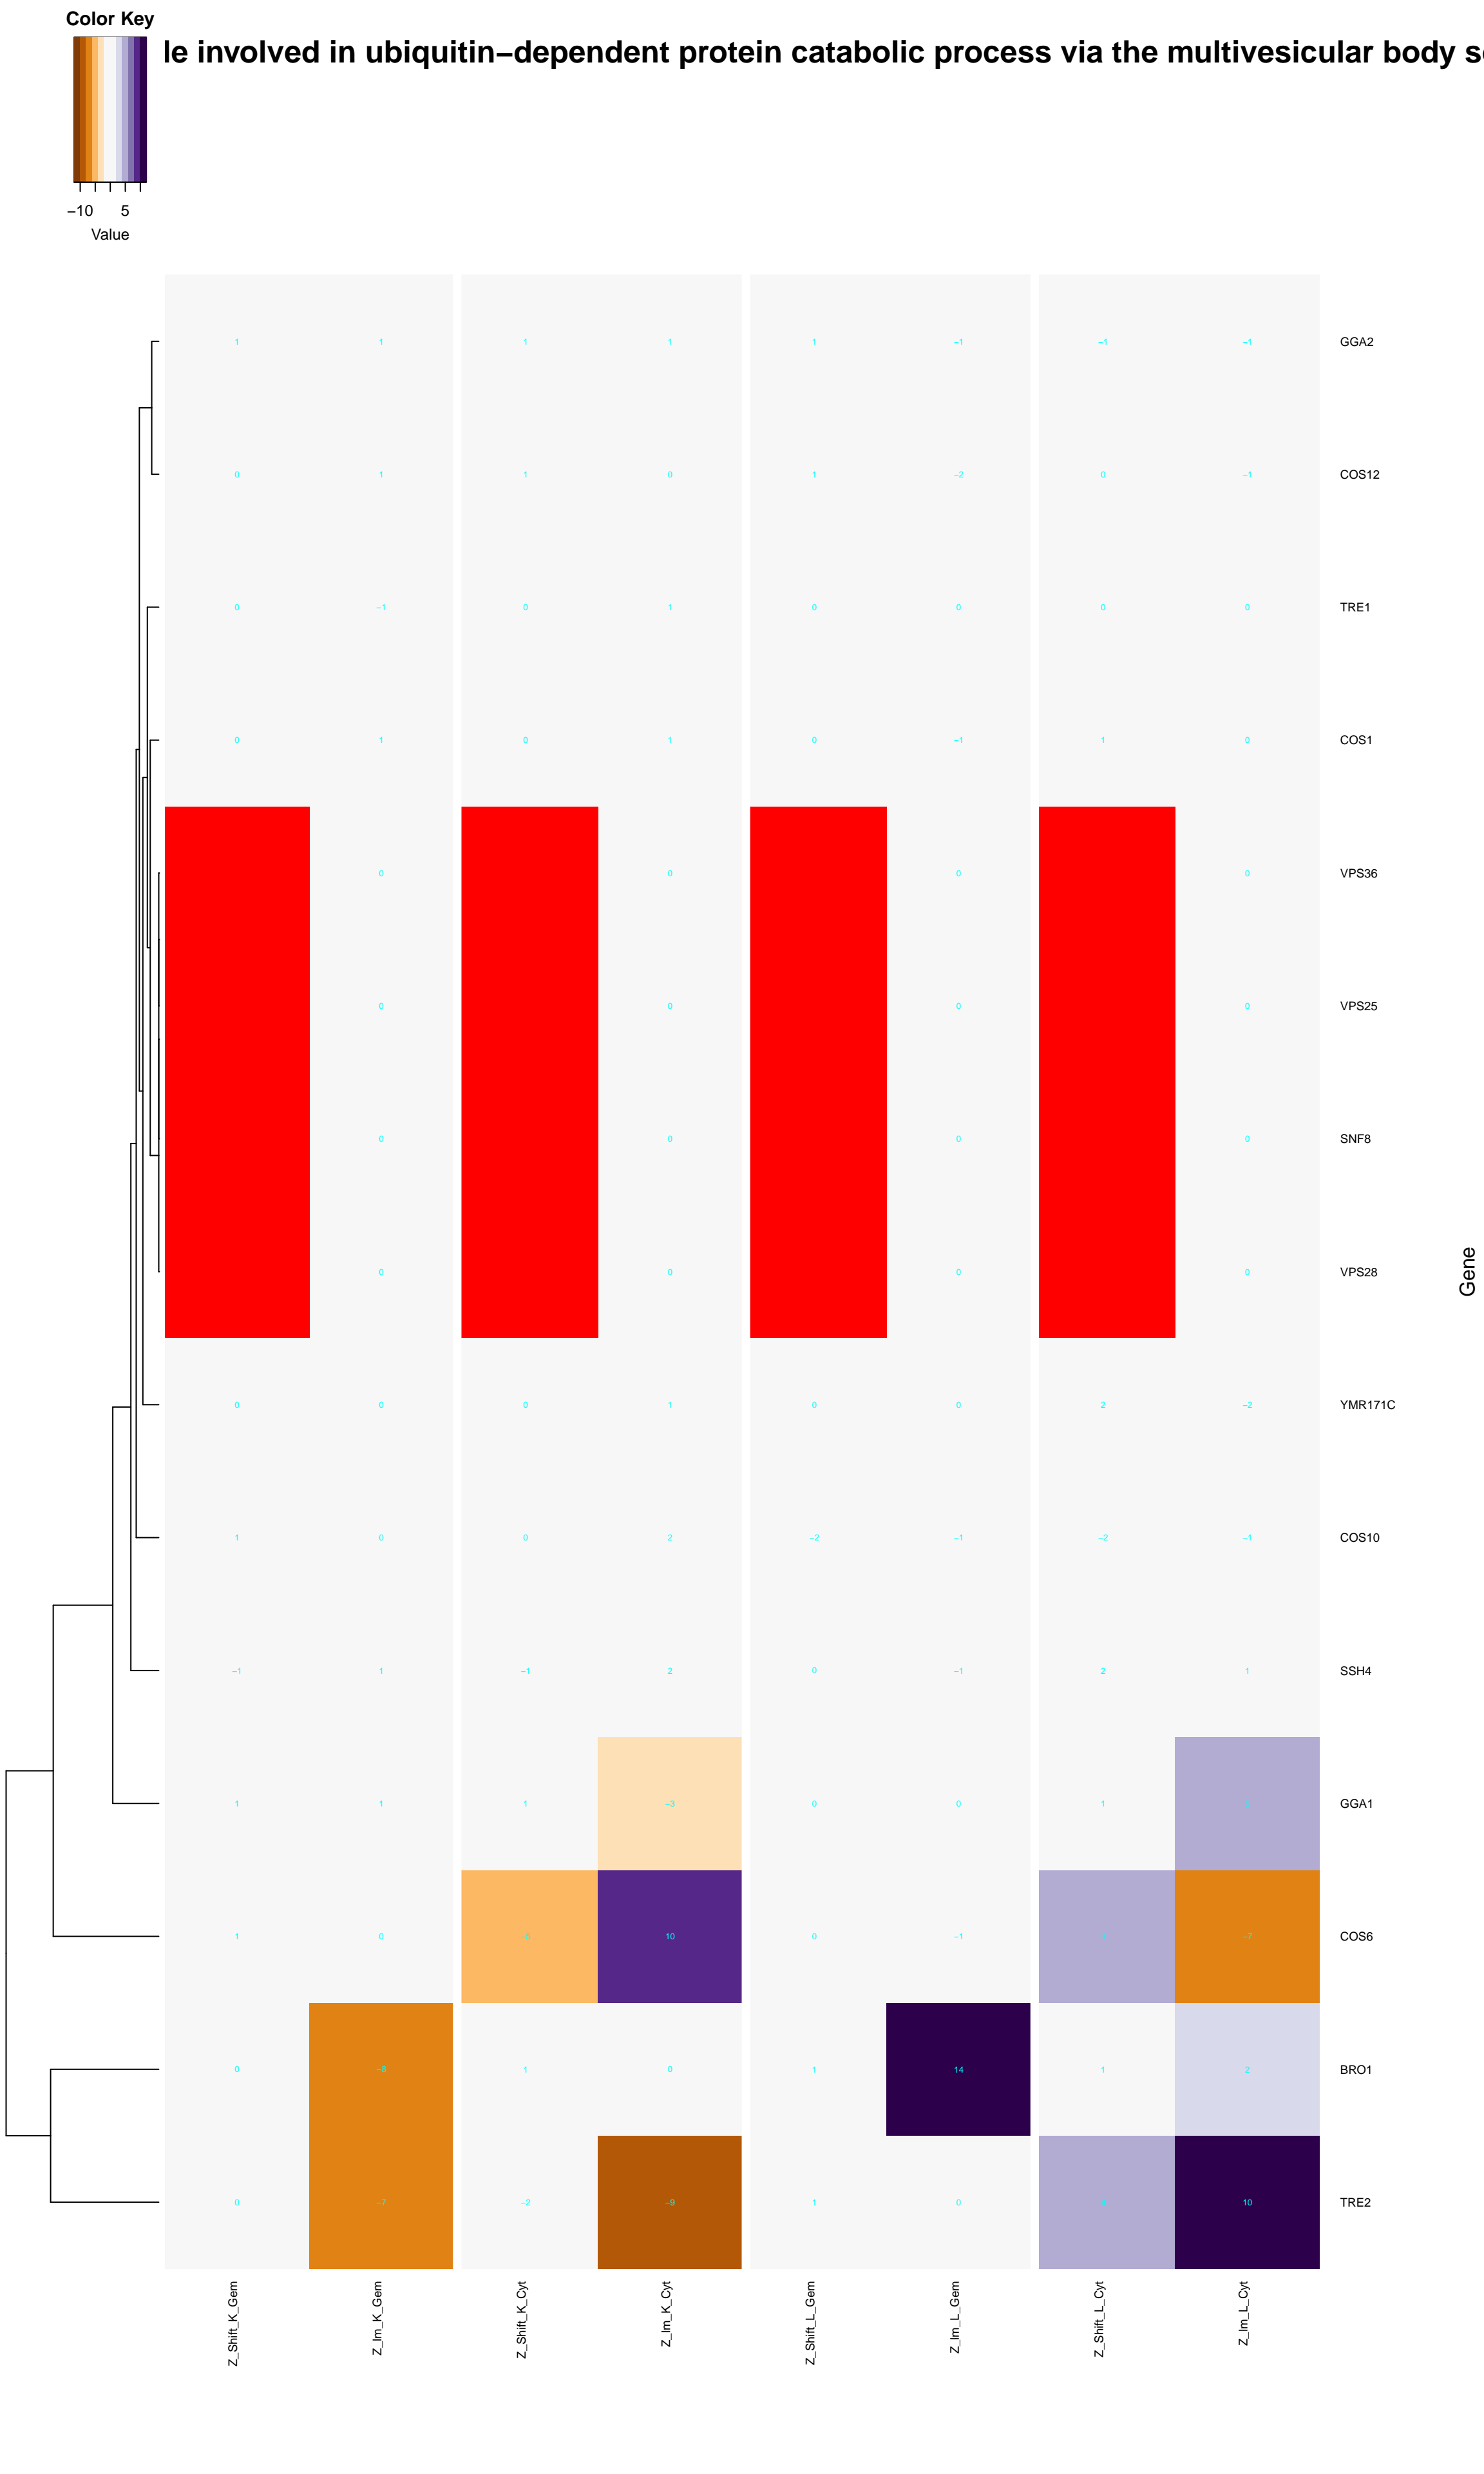

Supplement: s1 [file s1]

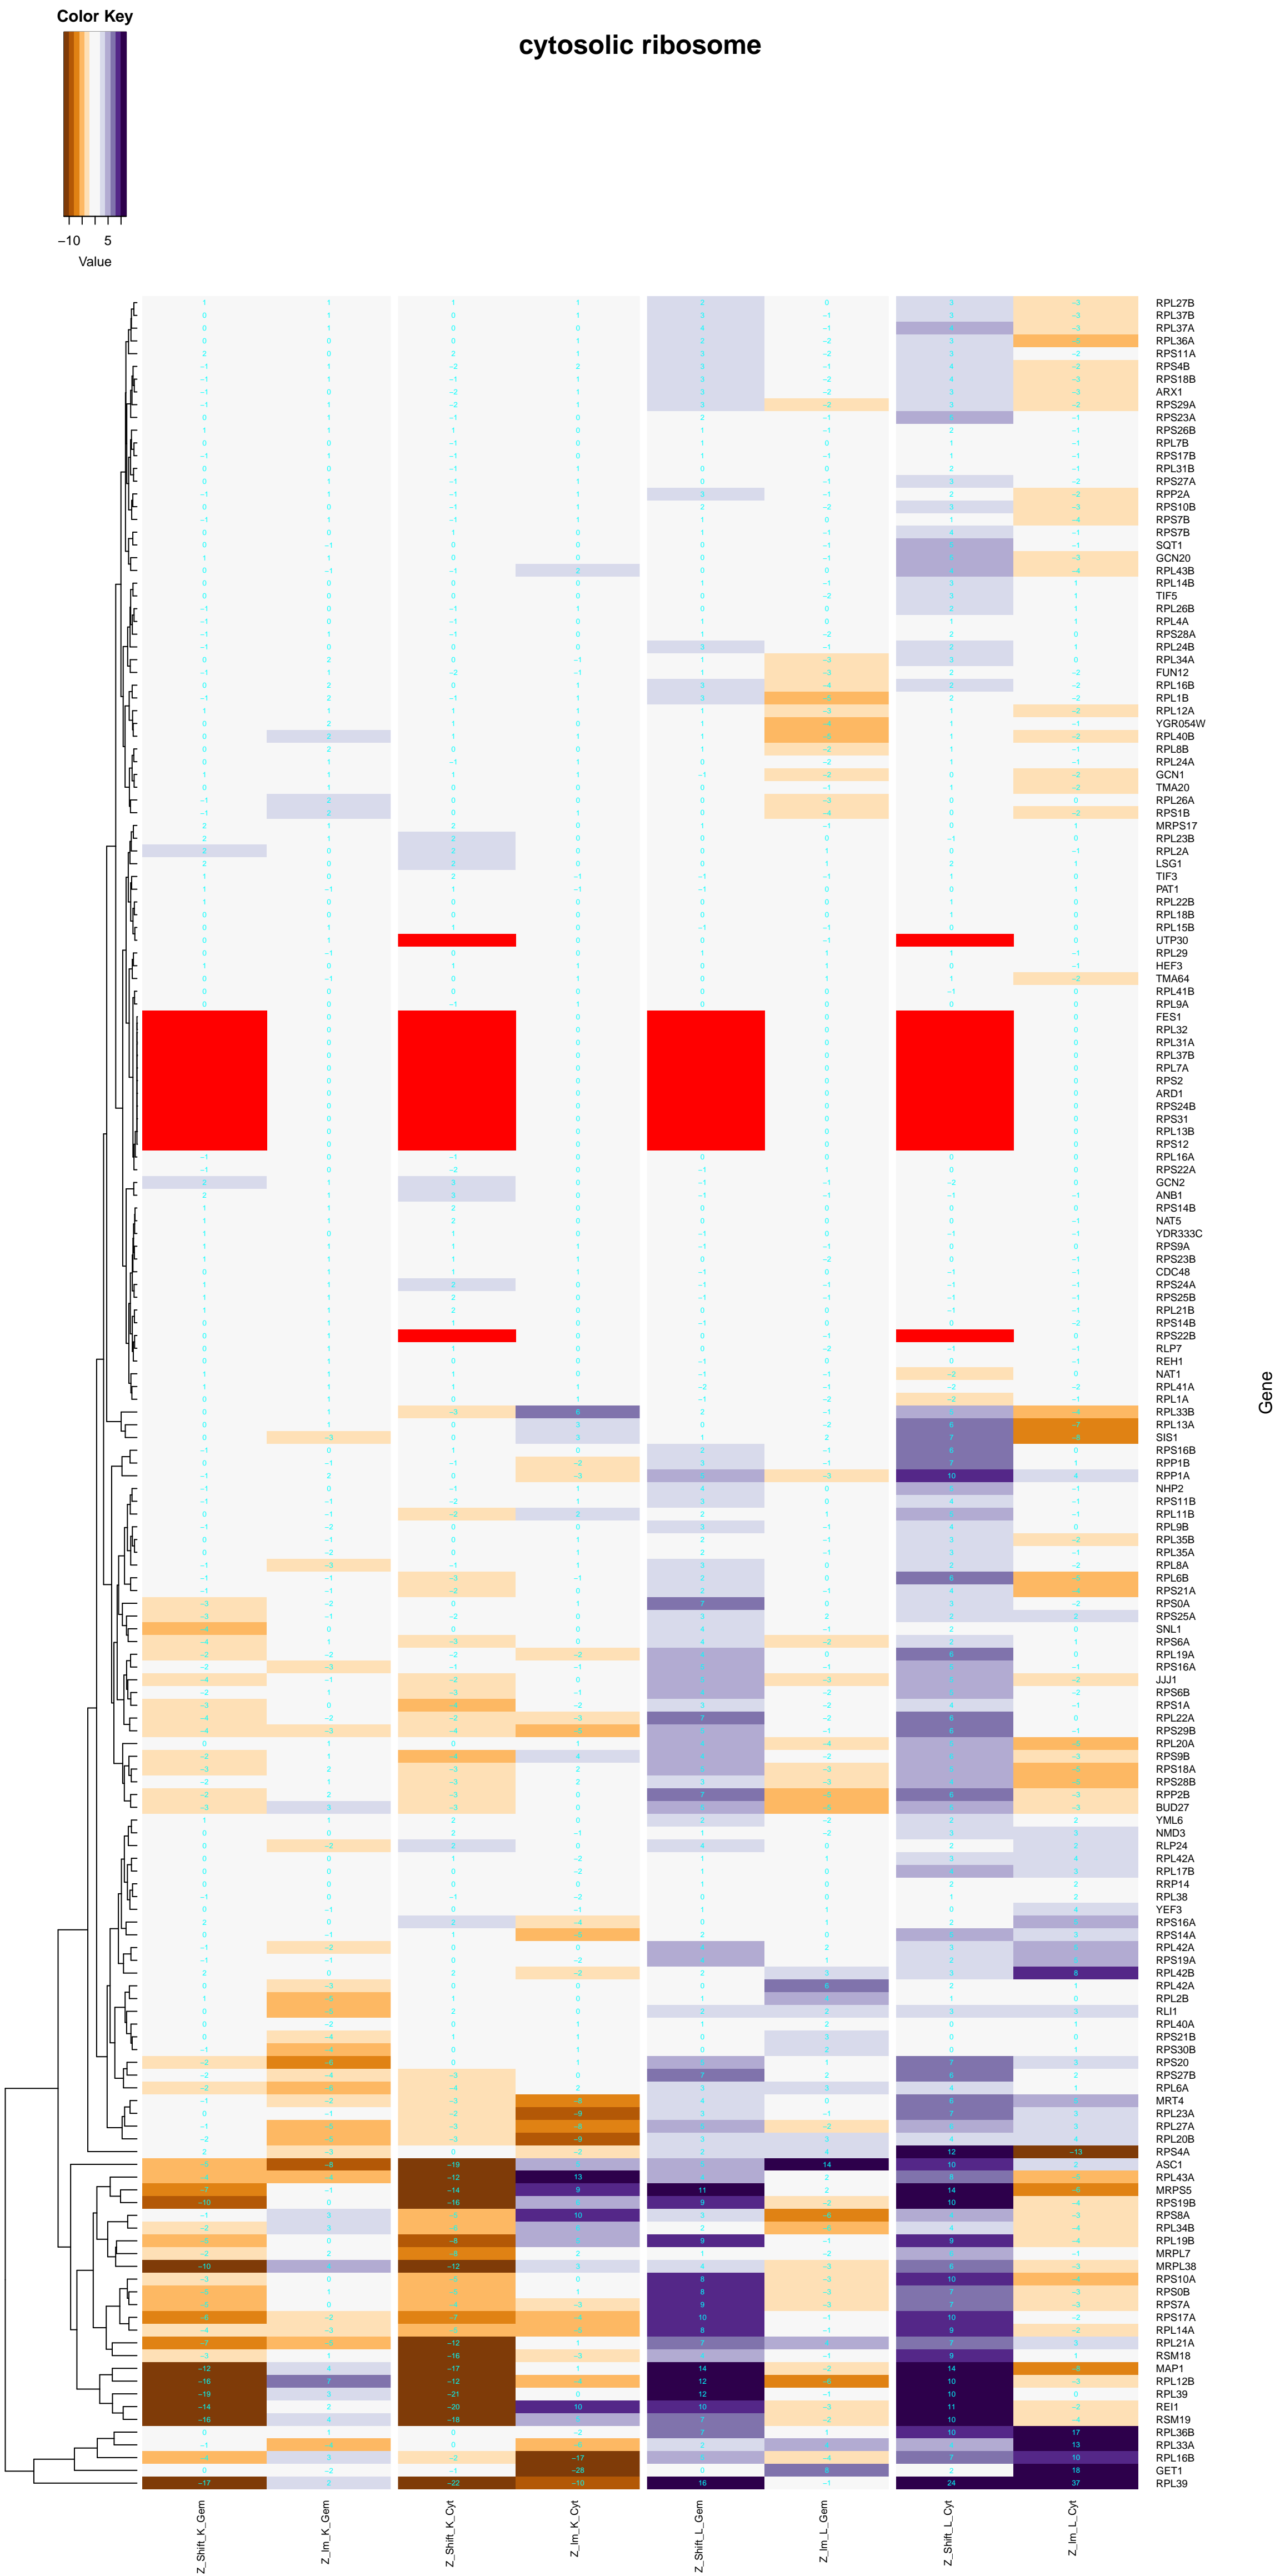

Supplement: s1 [file s1]

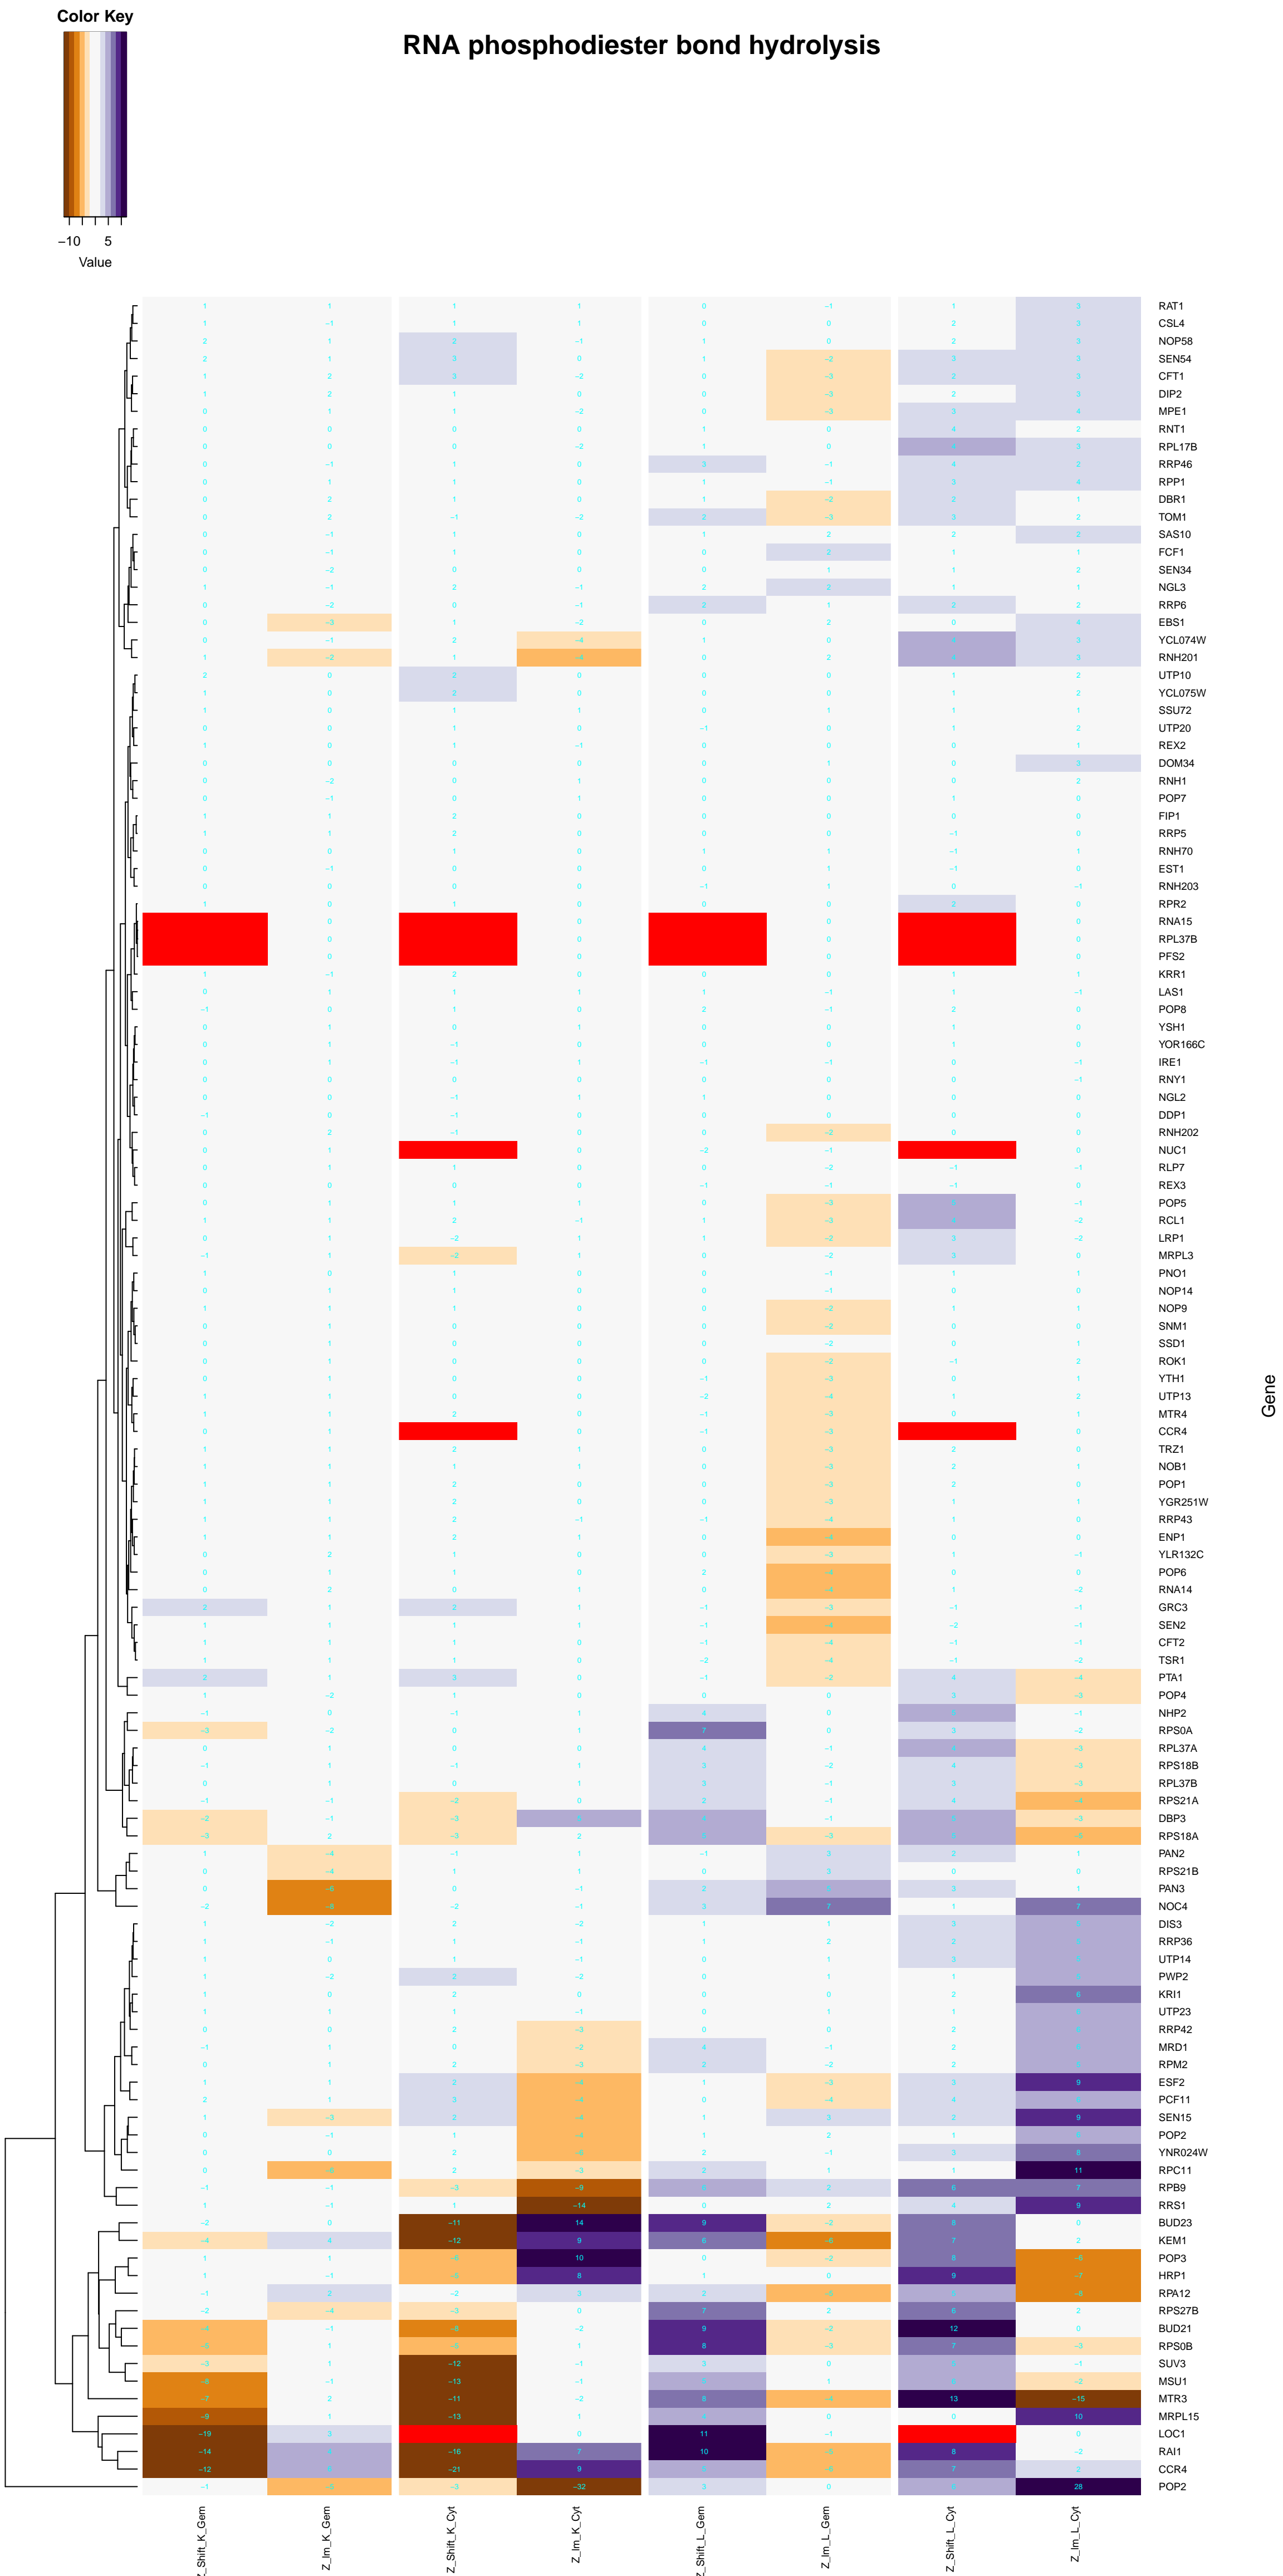

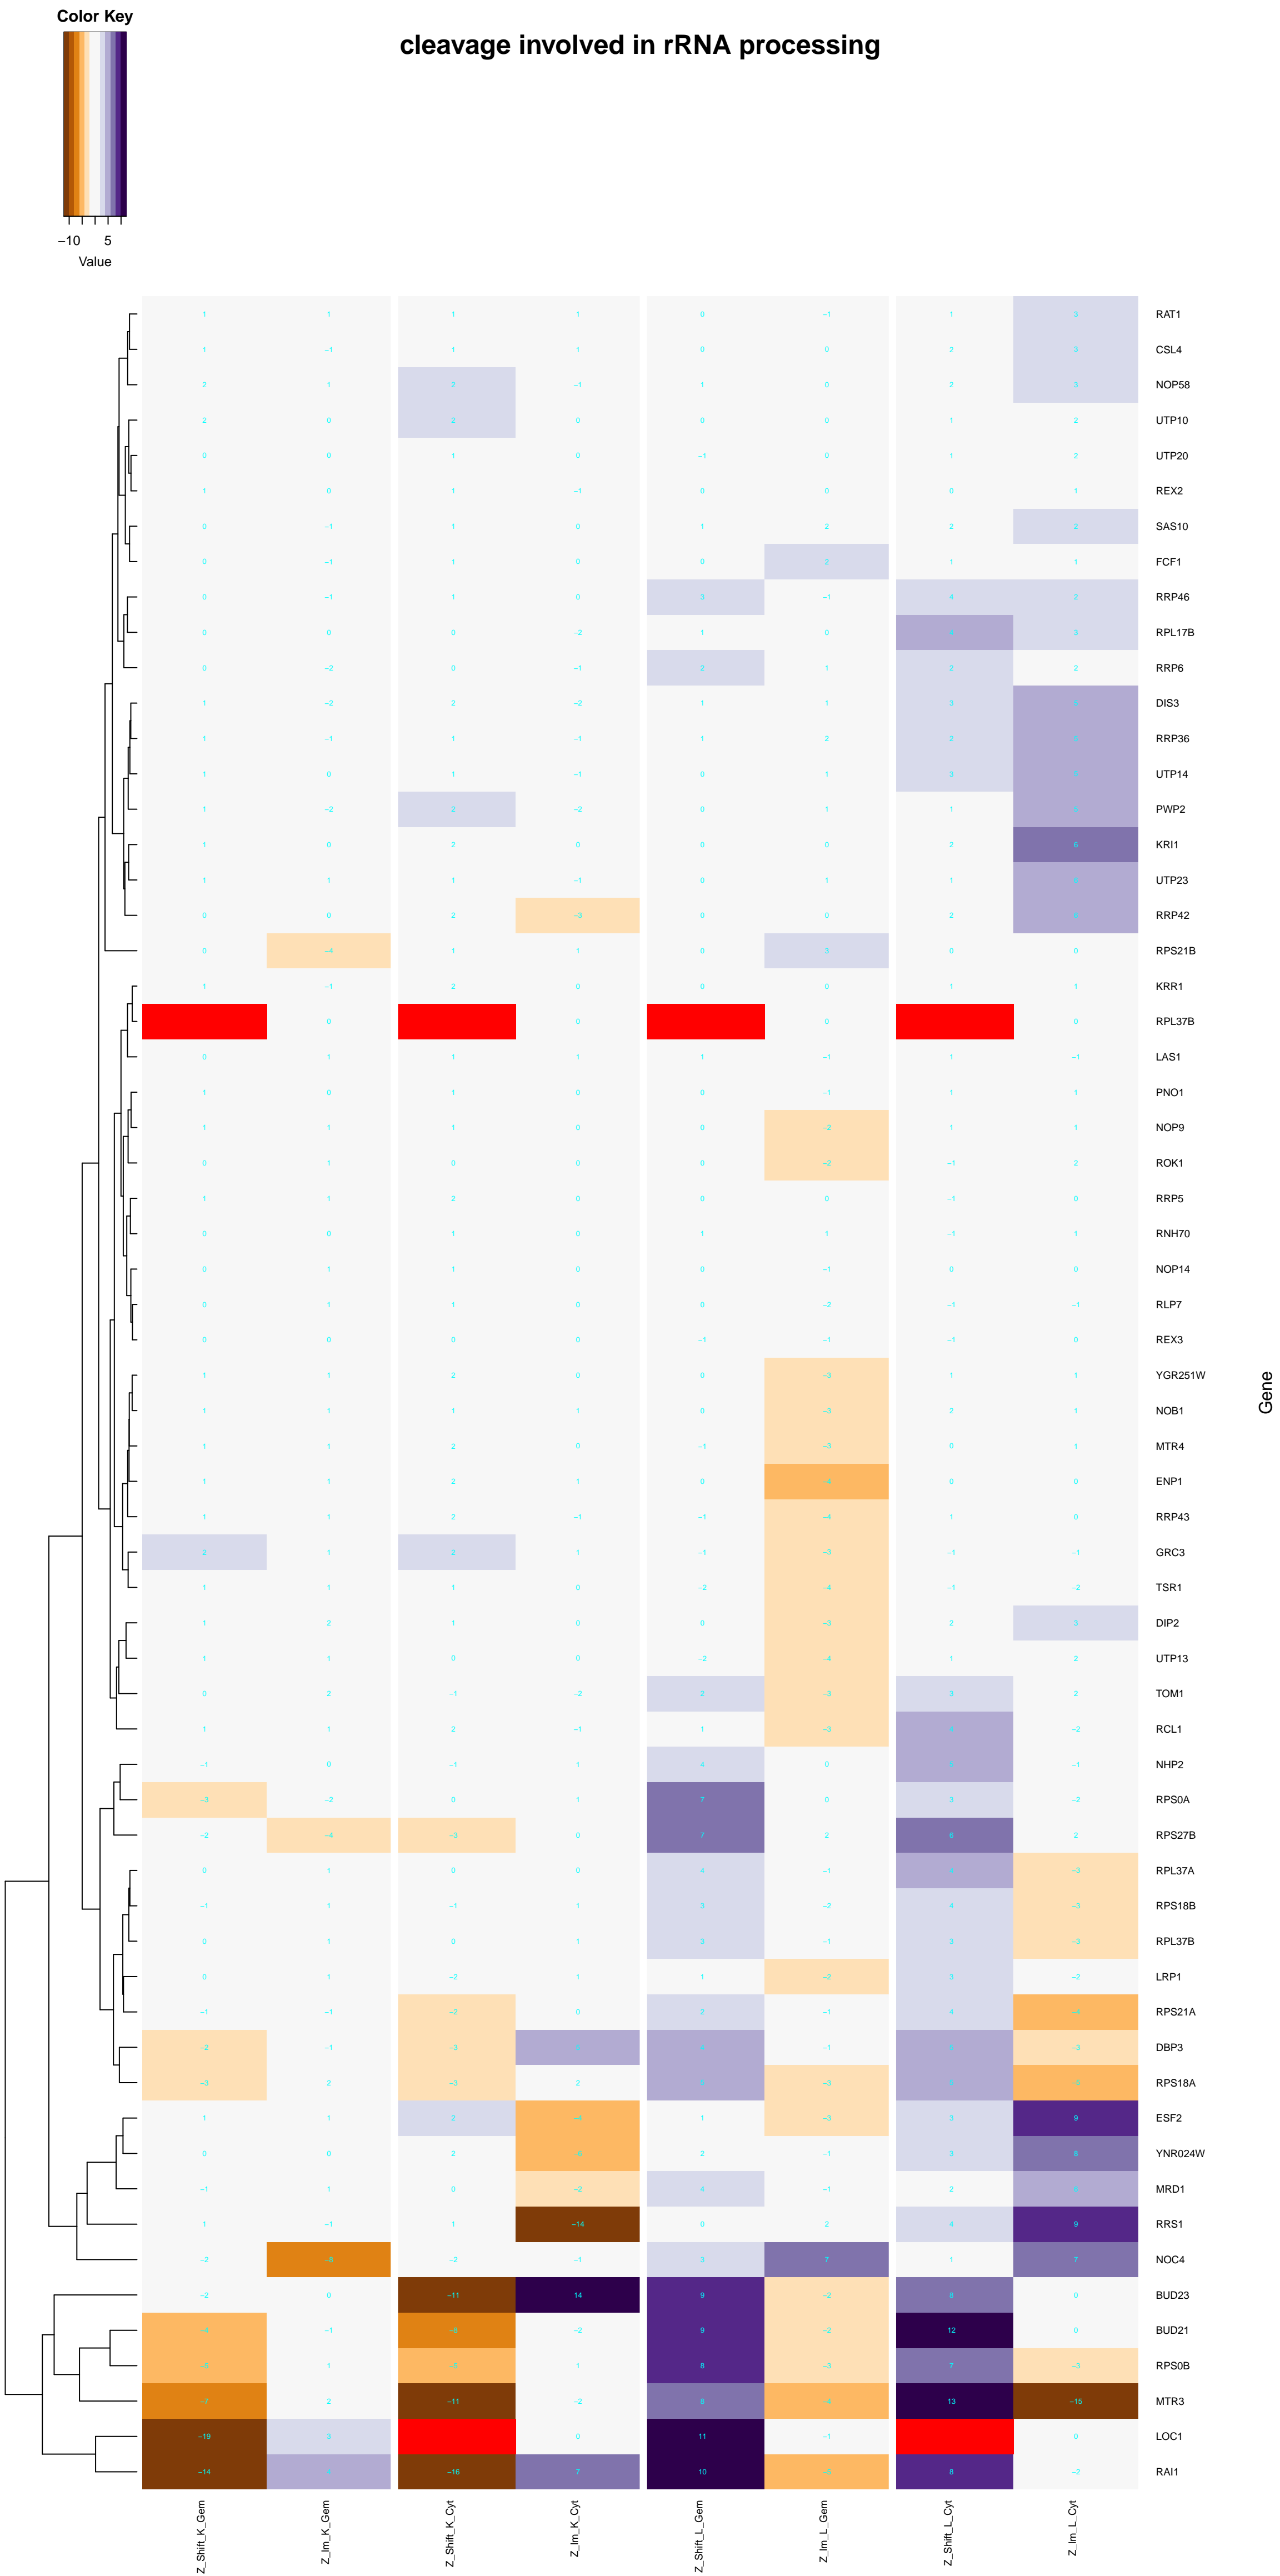

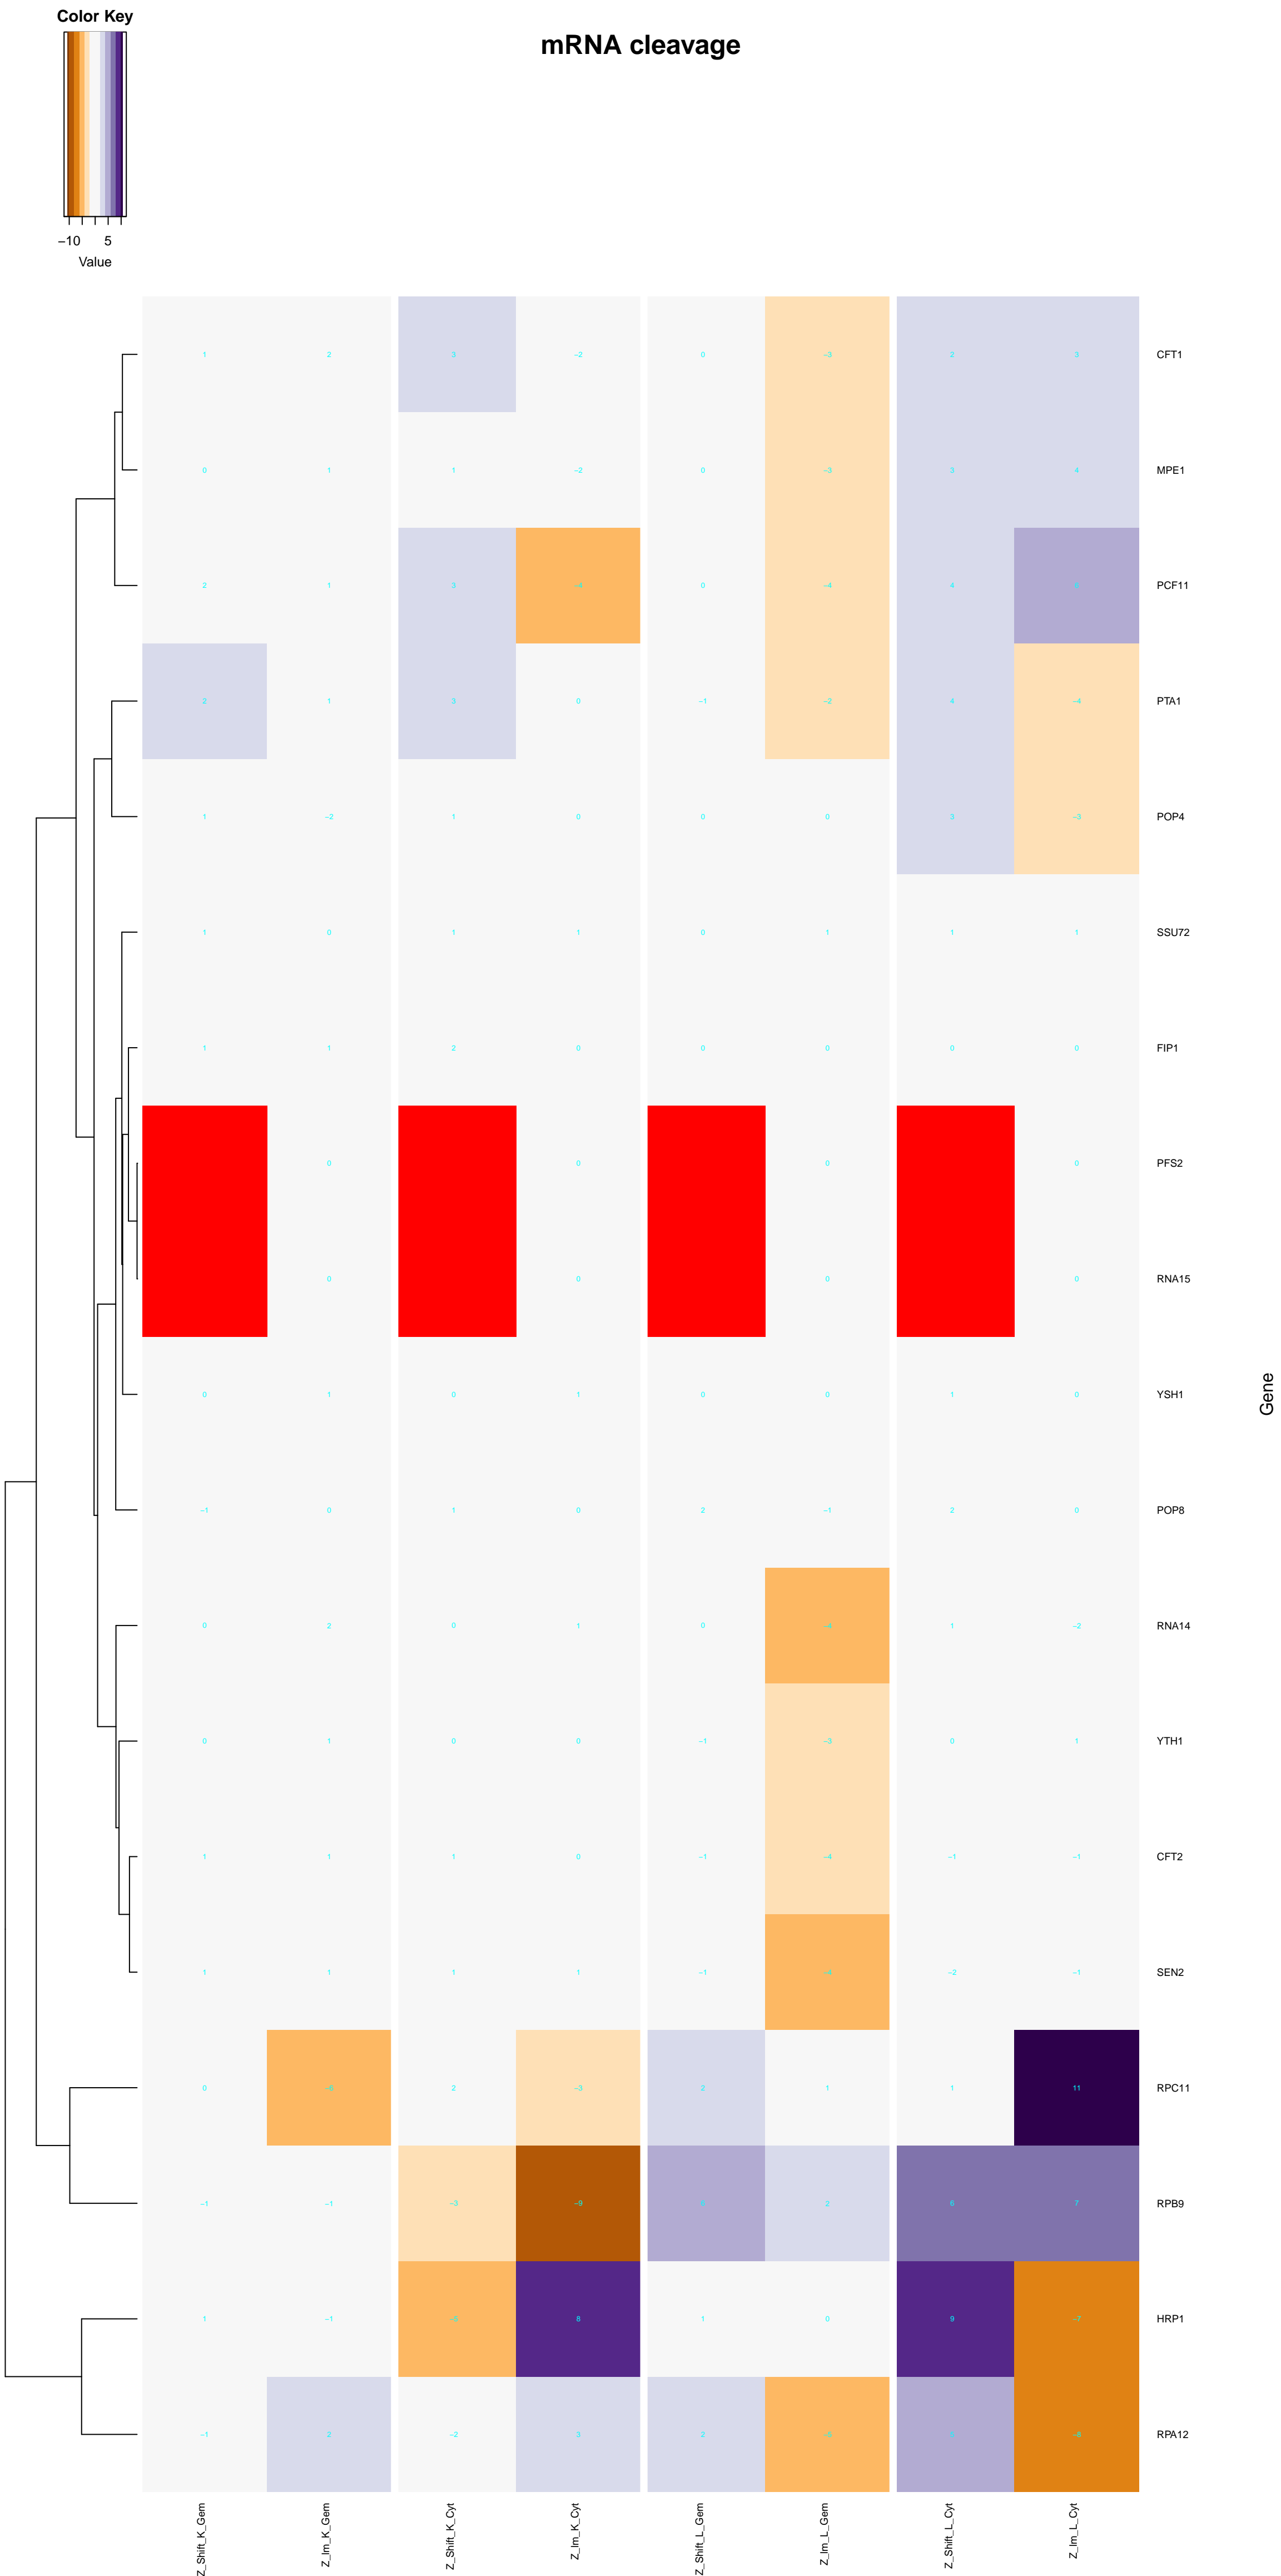

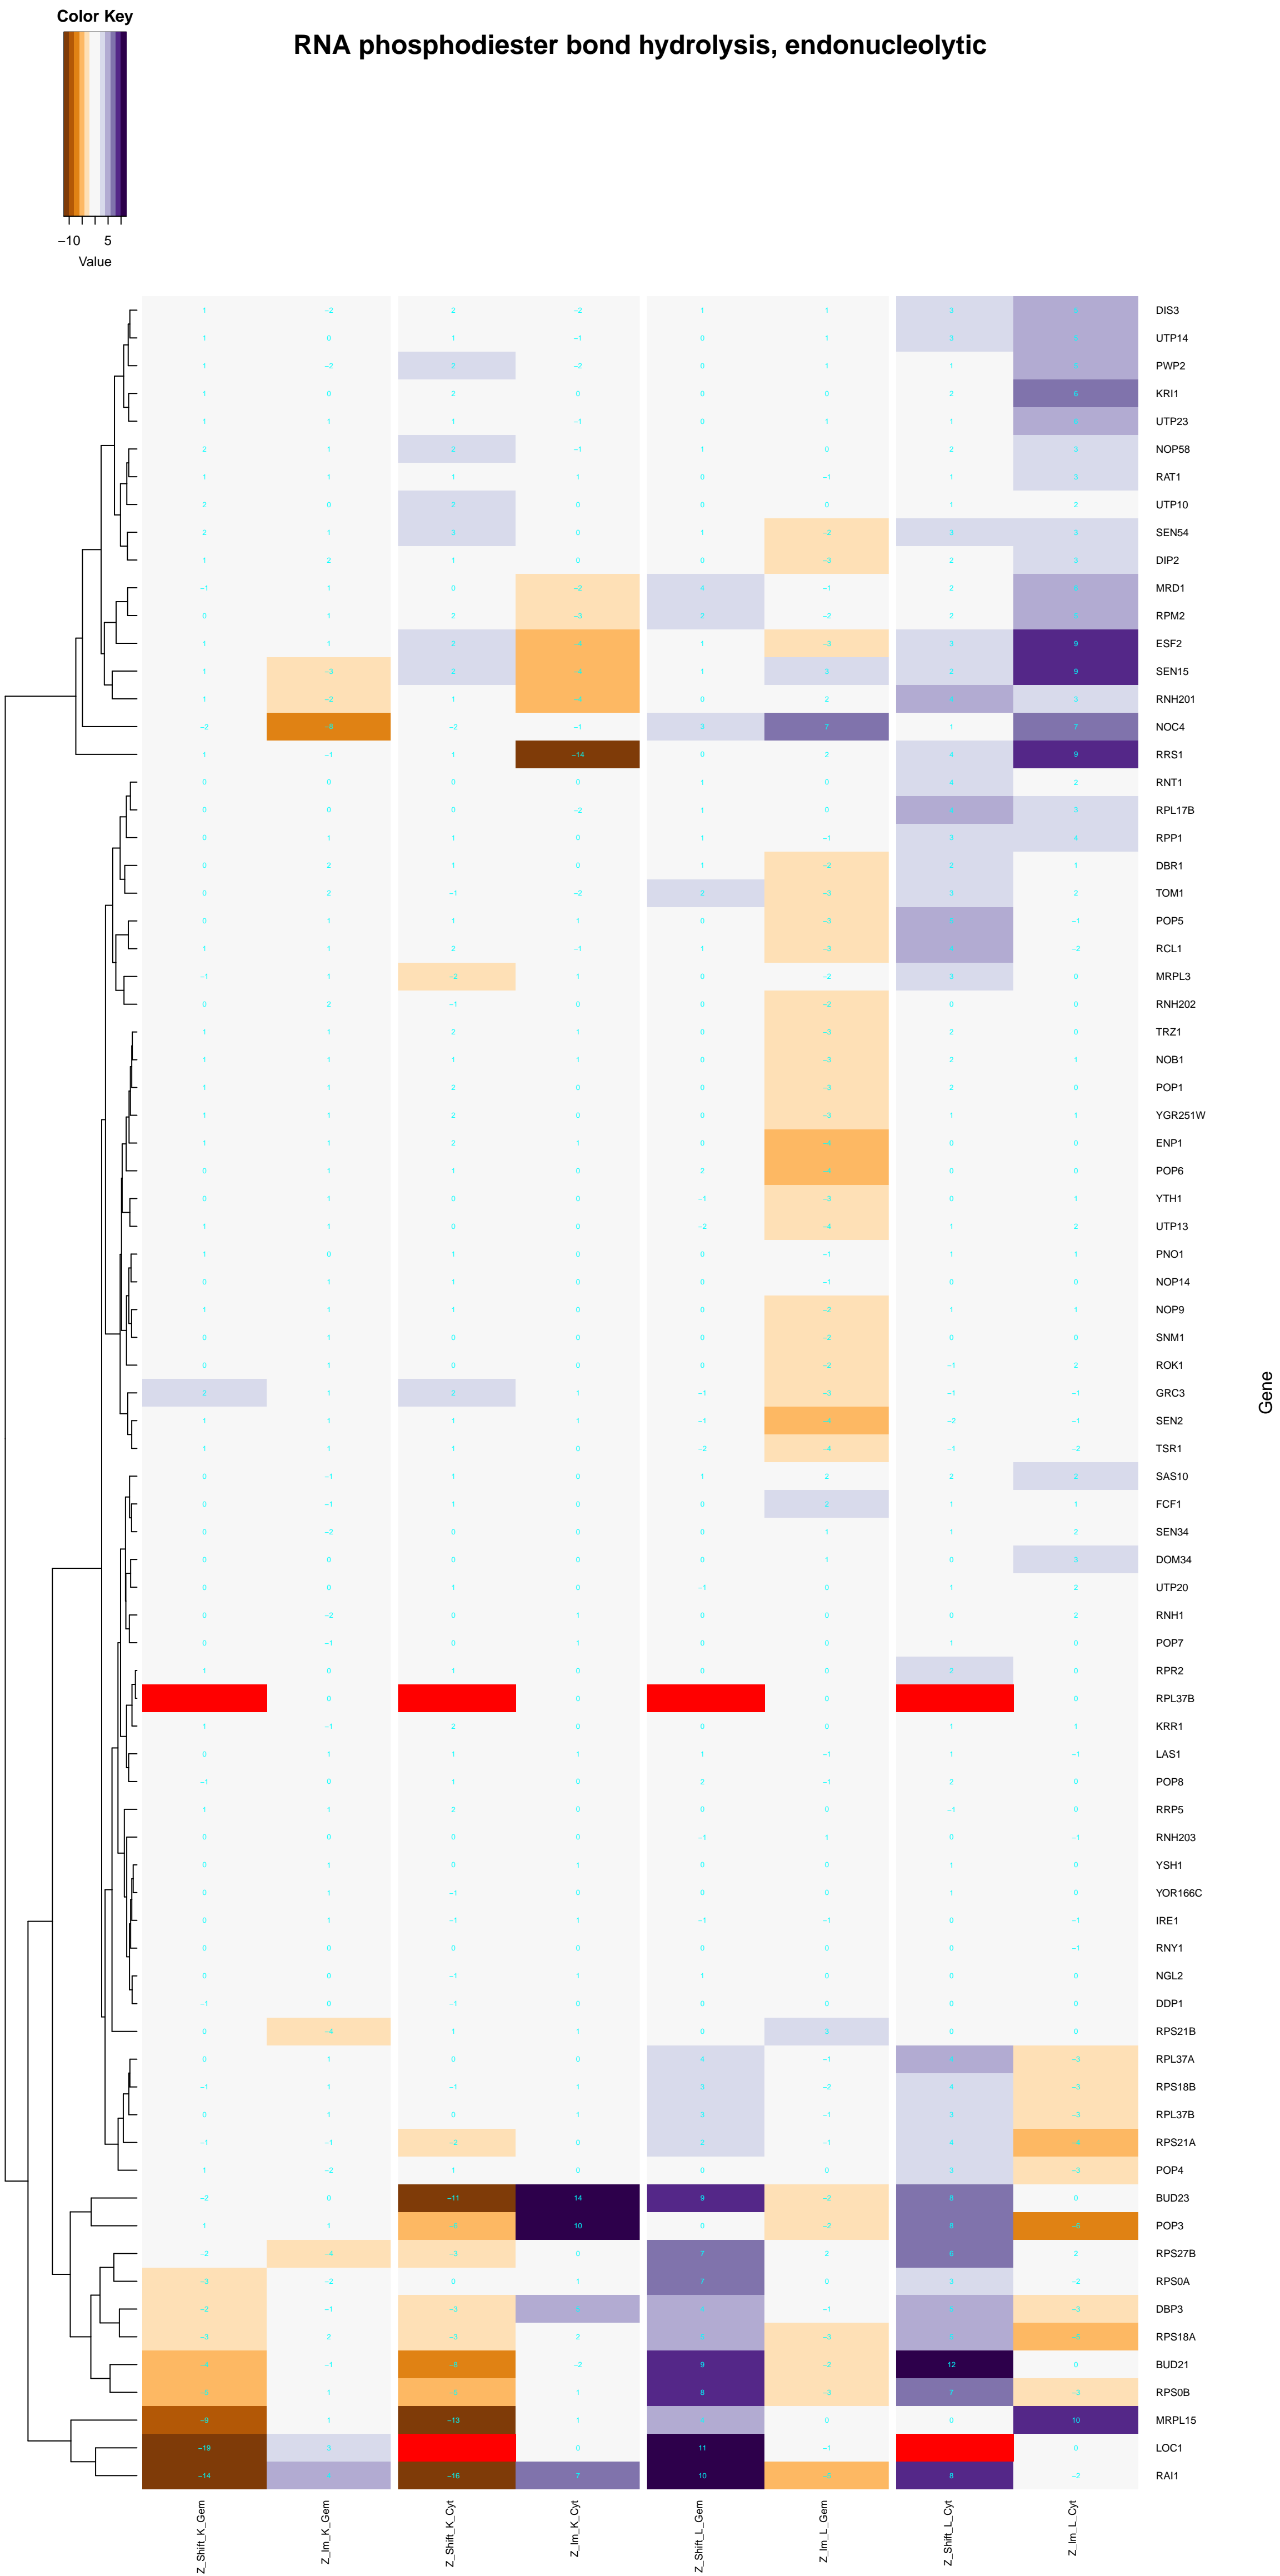

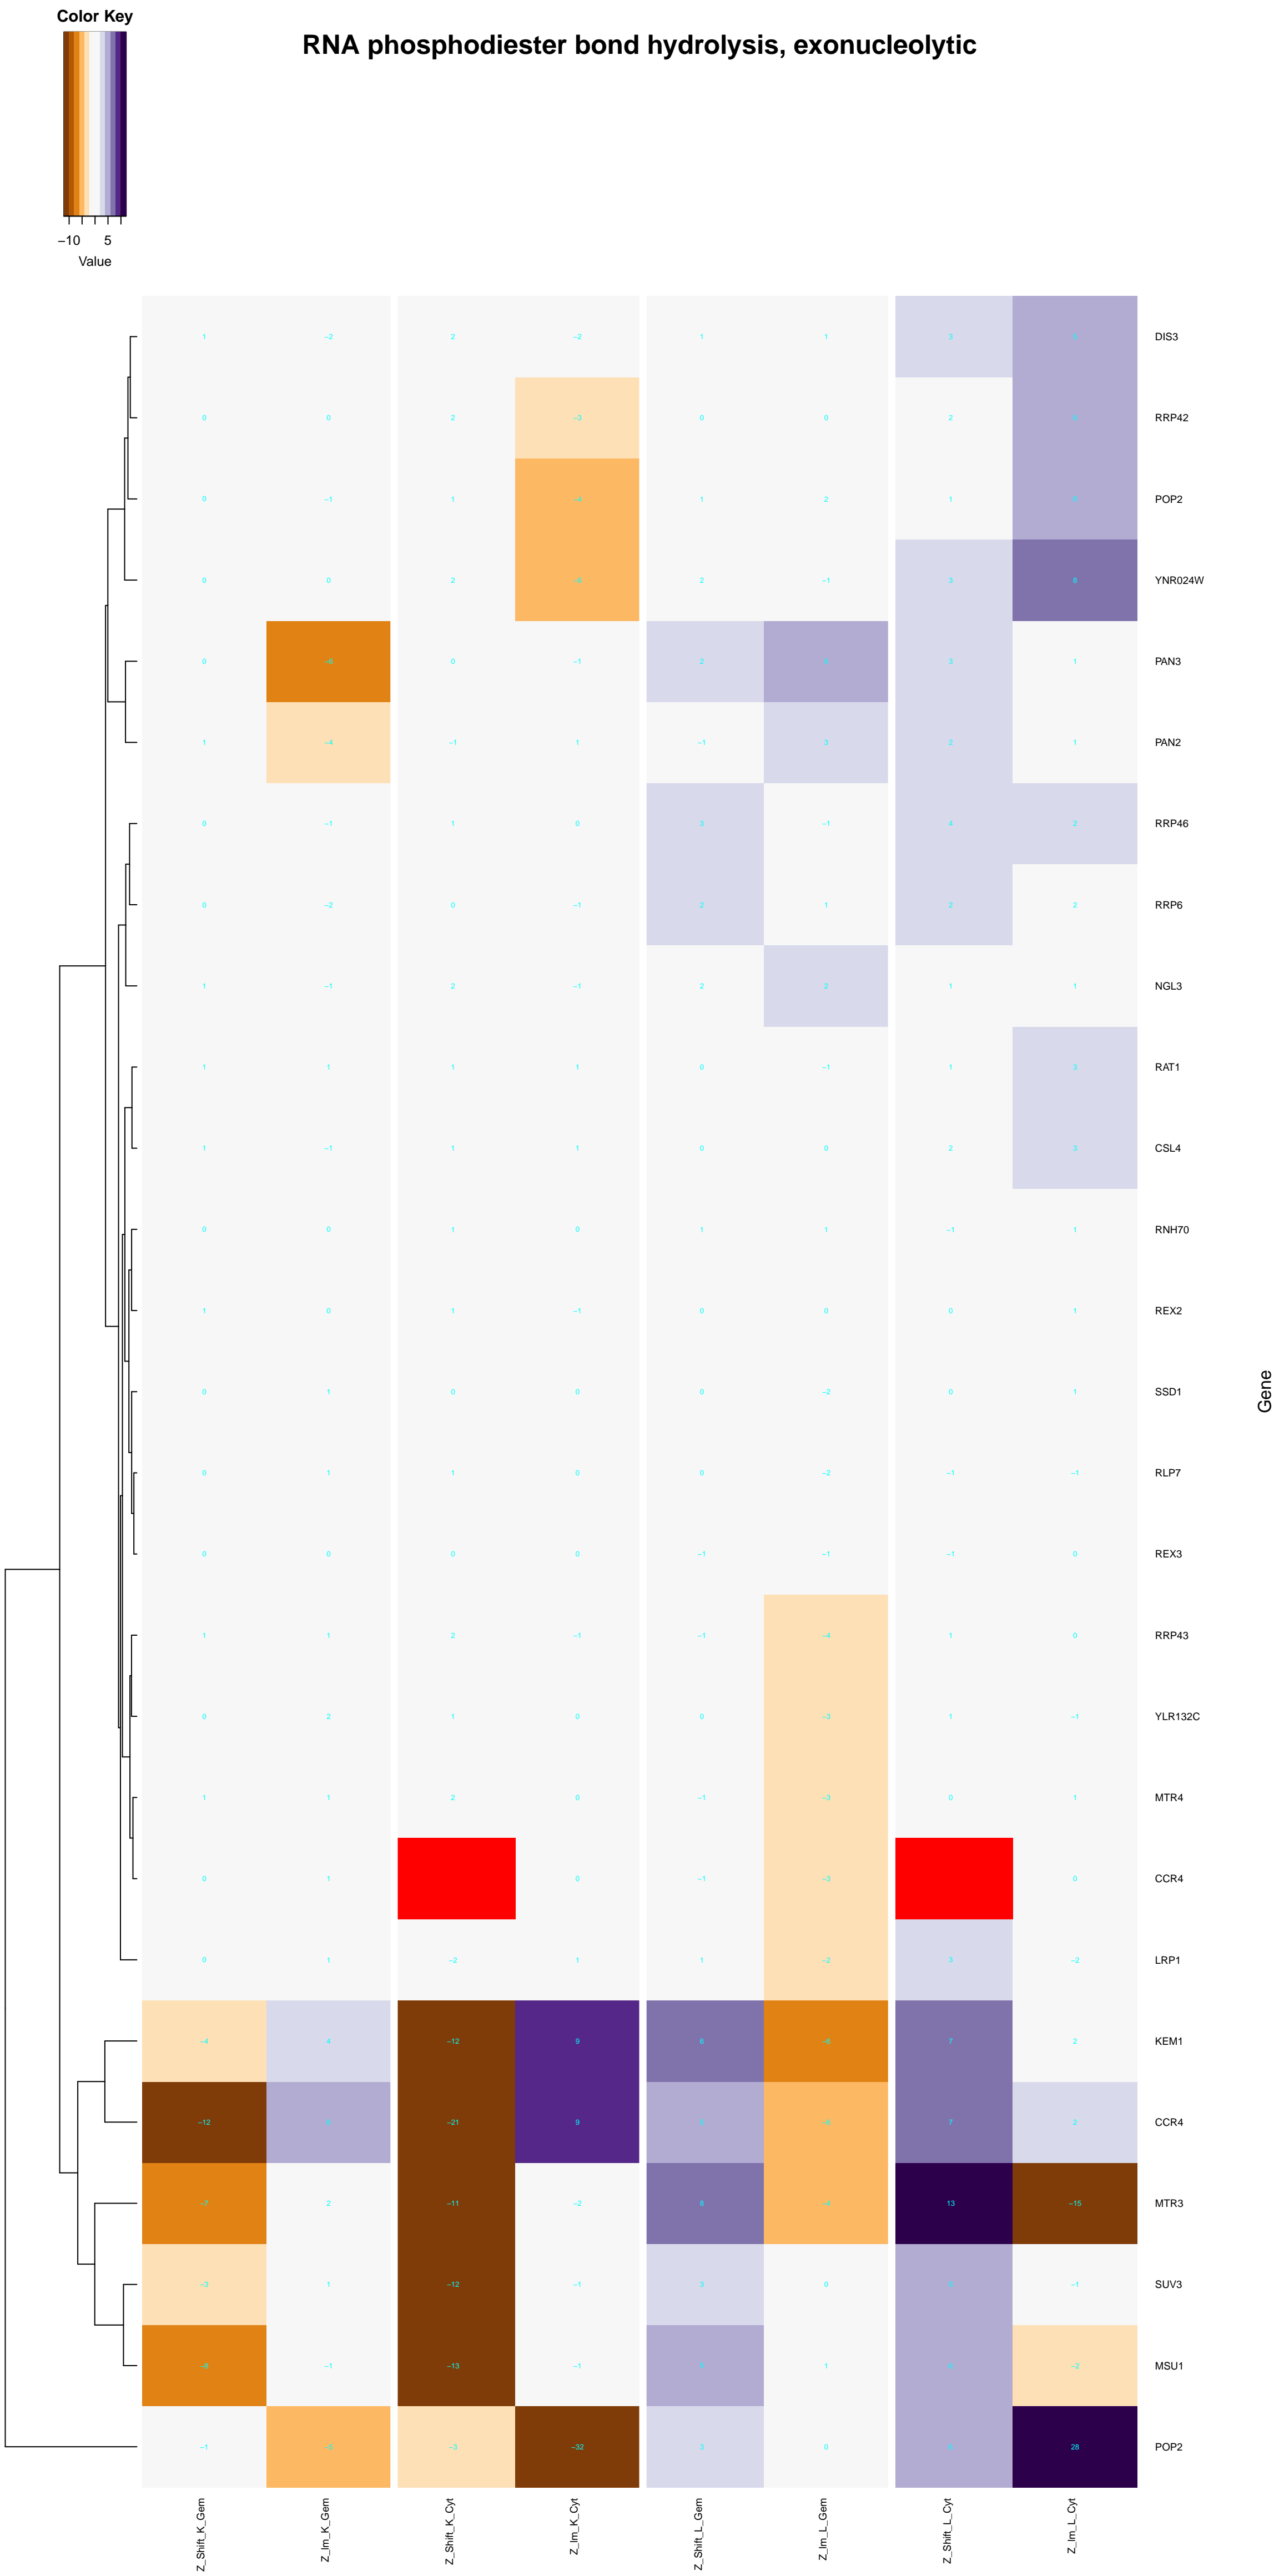

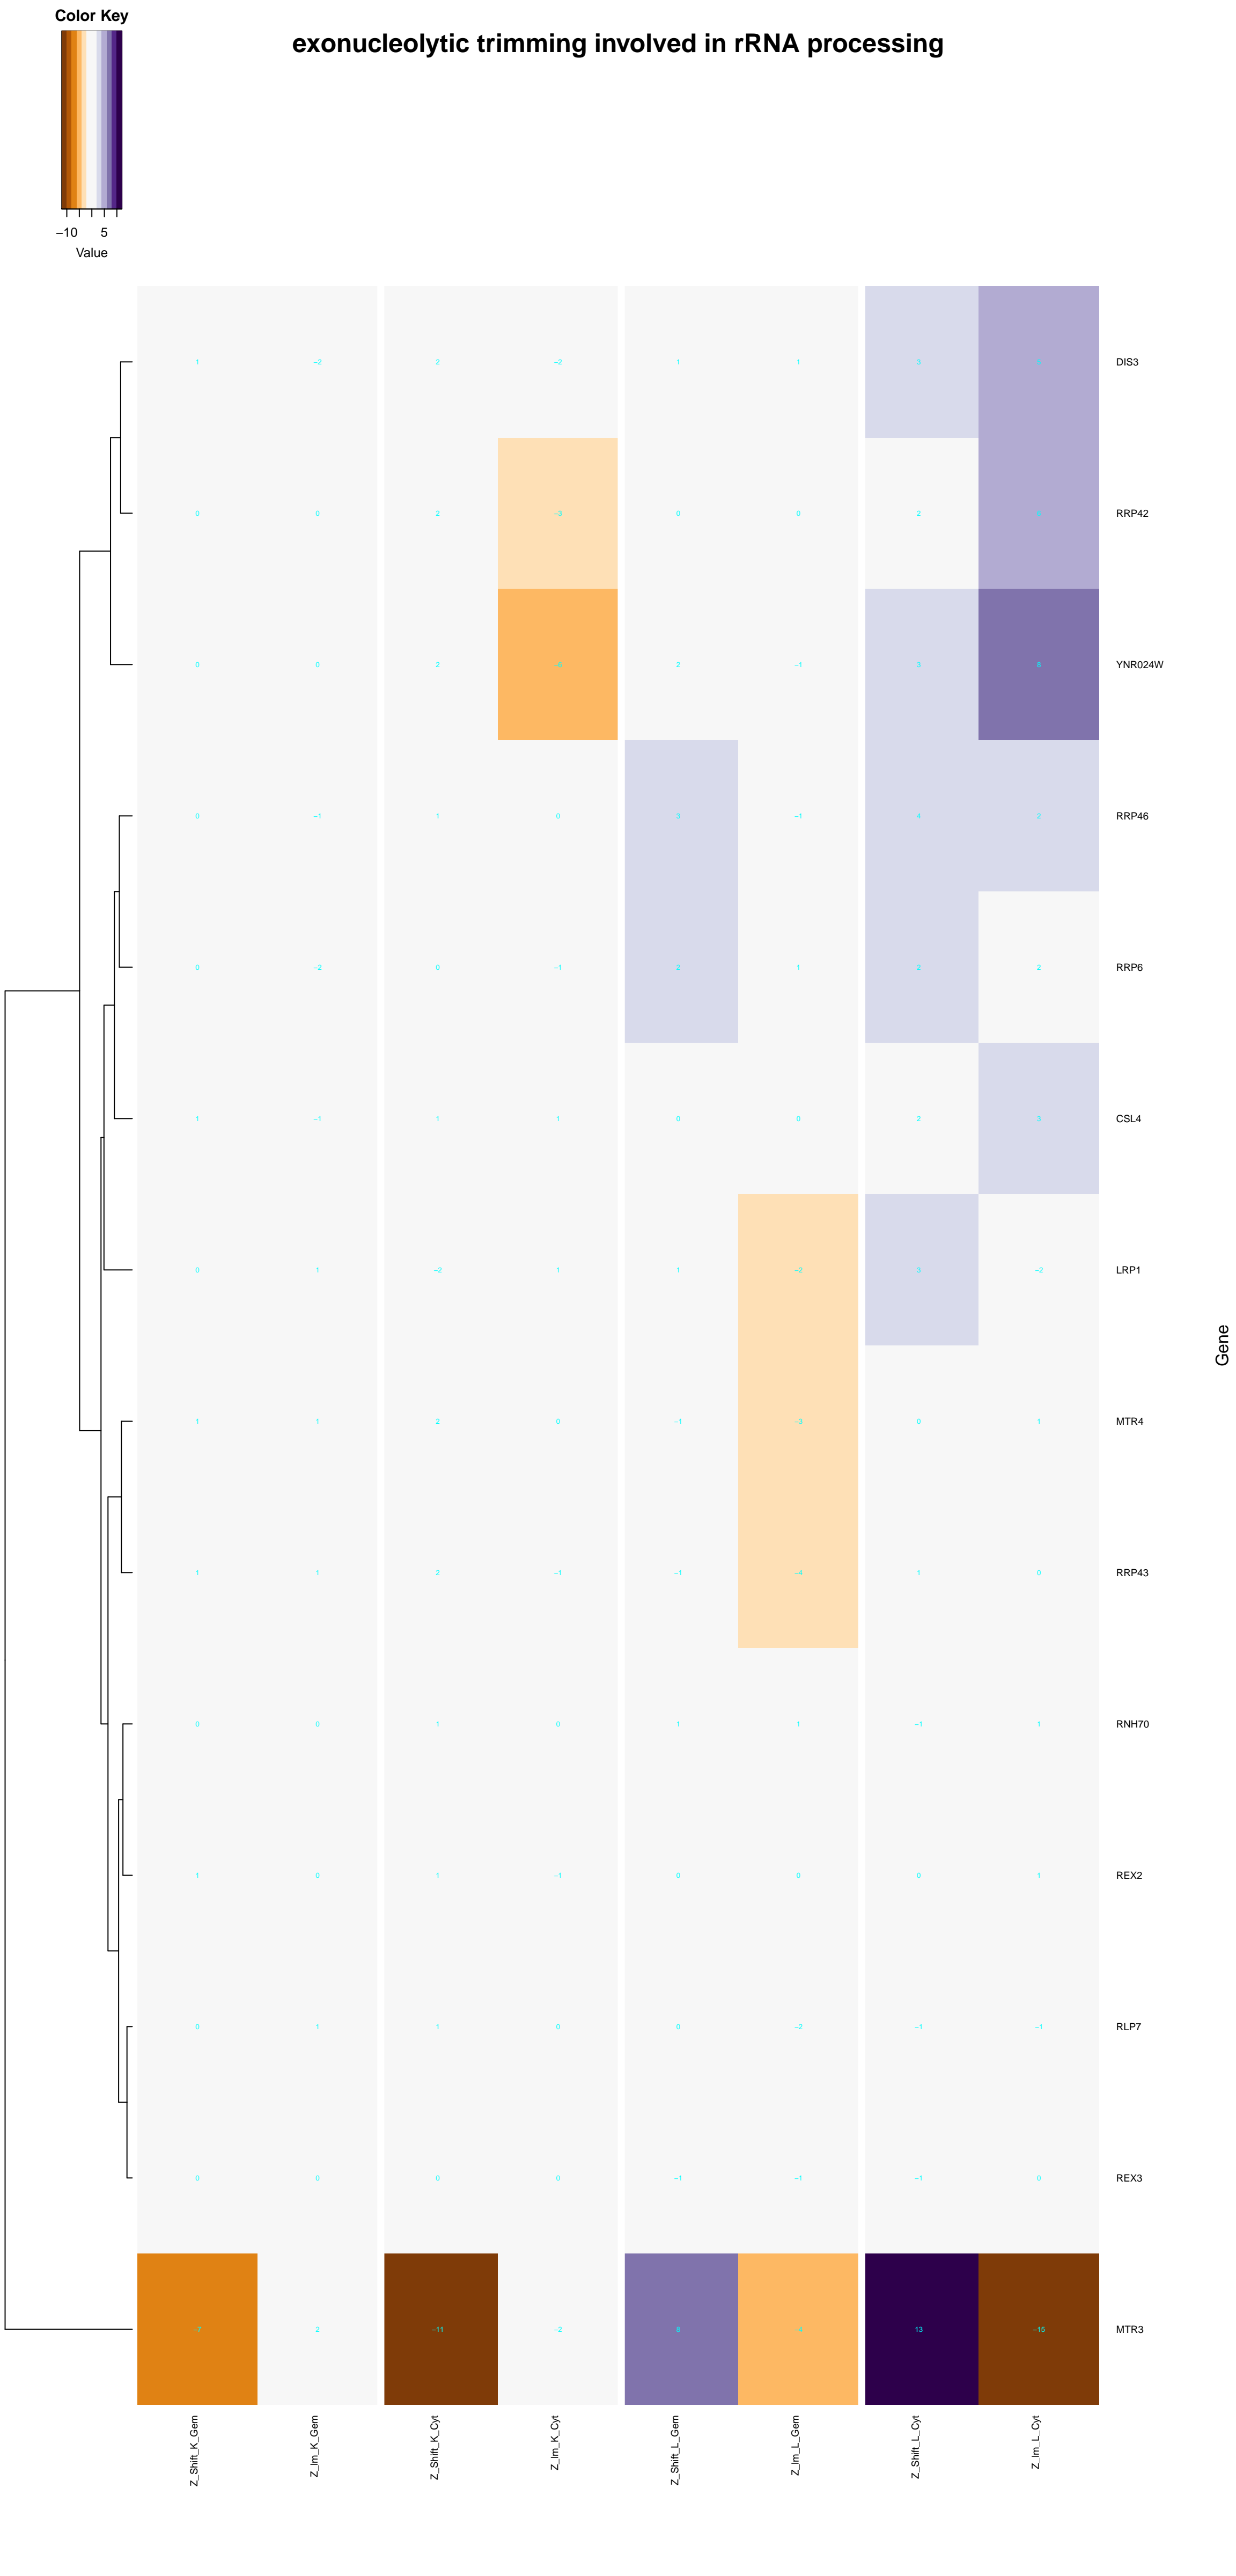

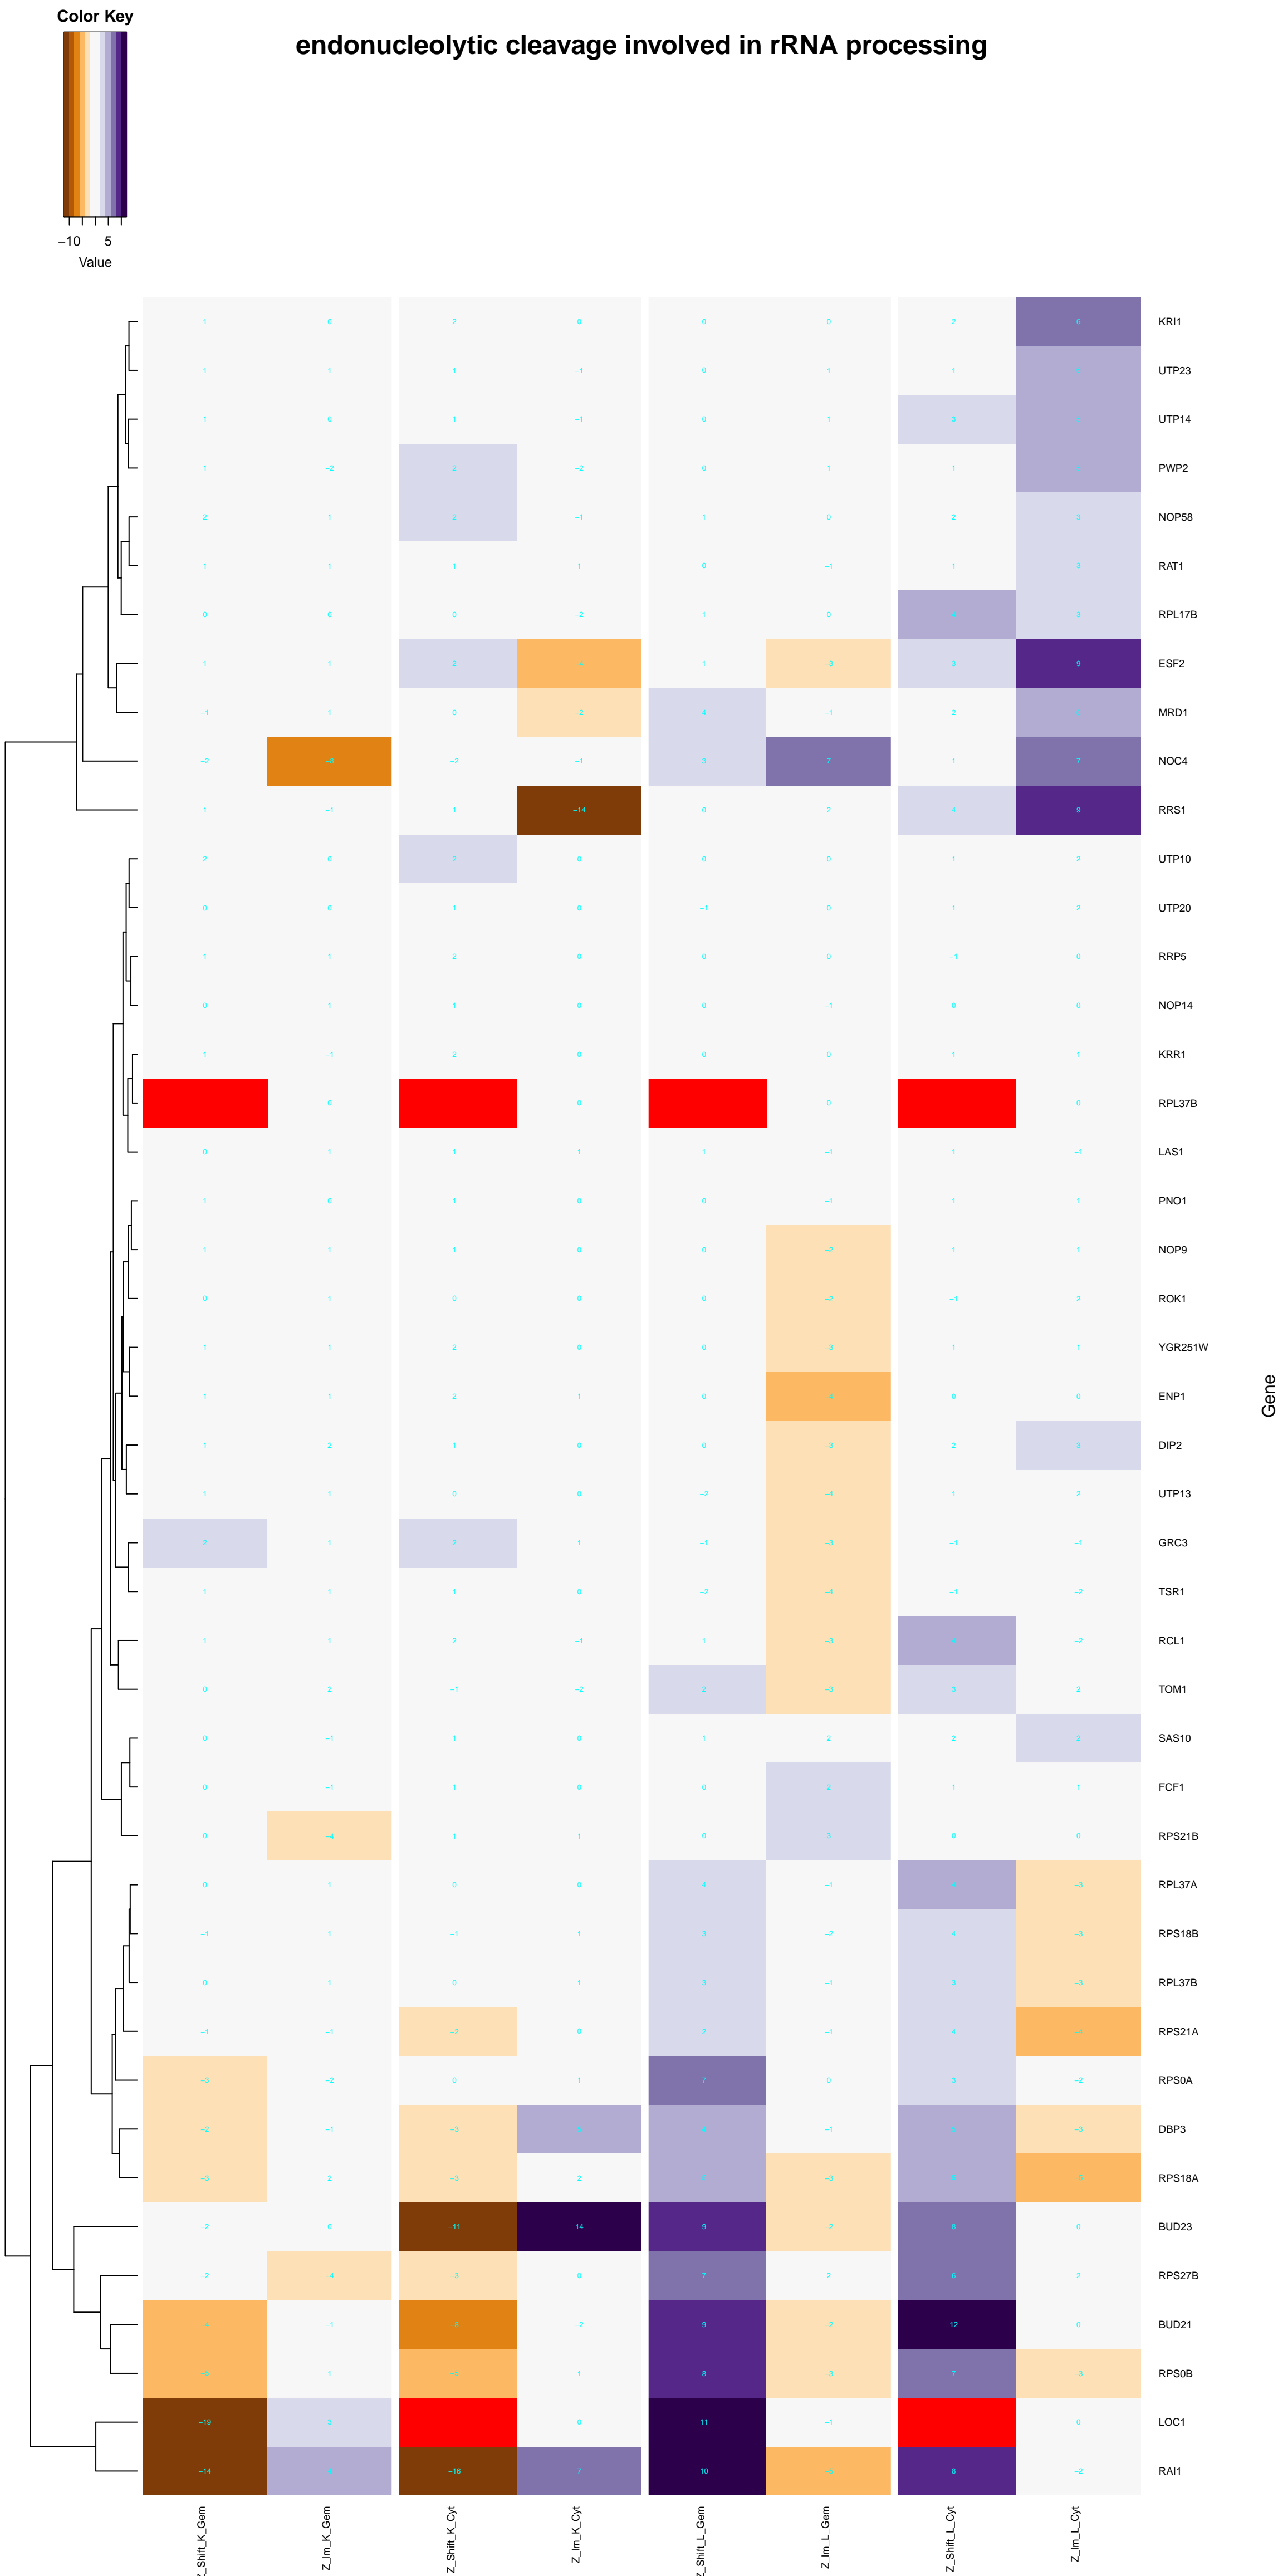

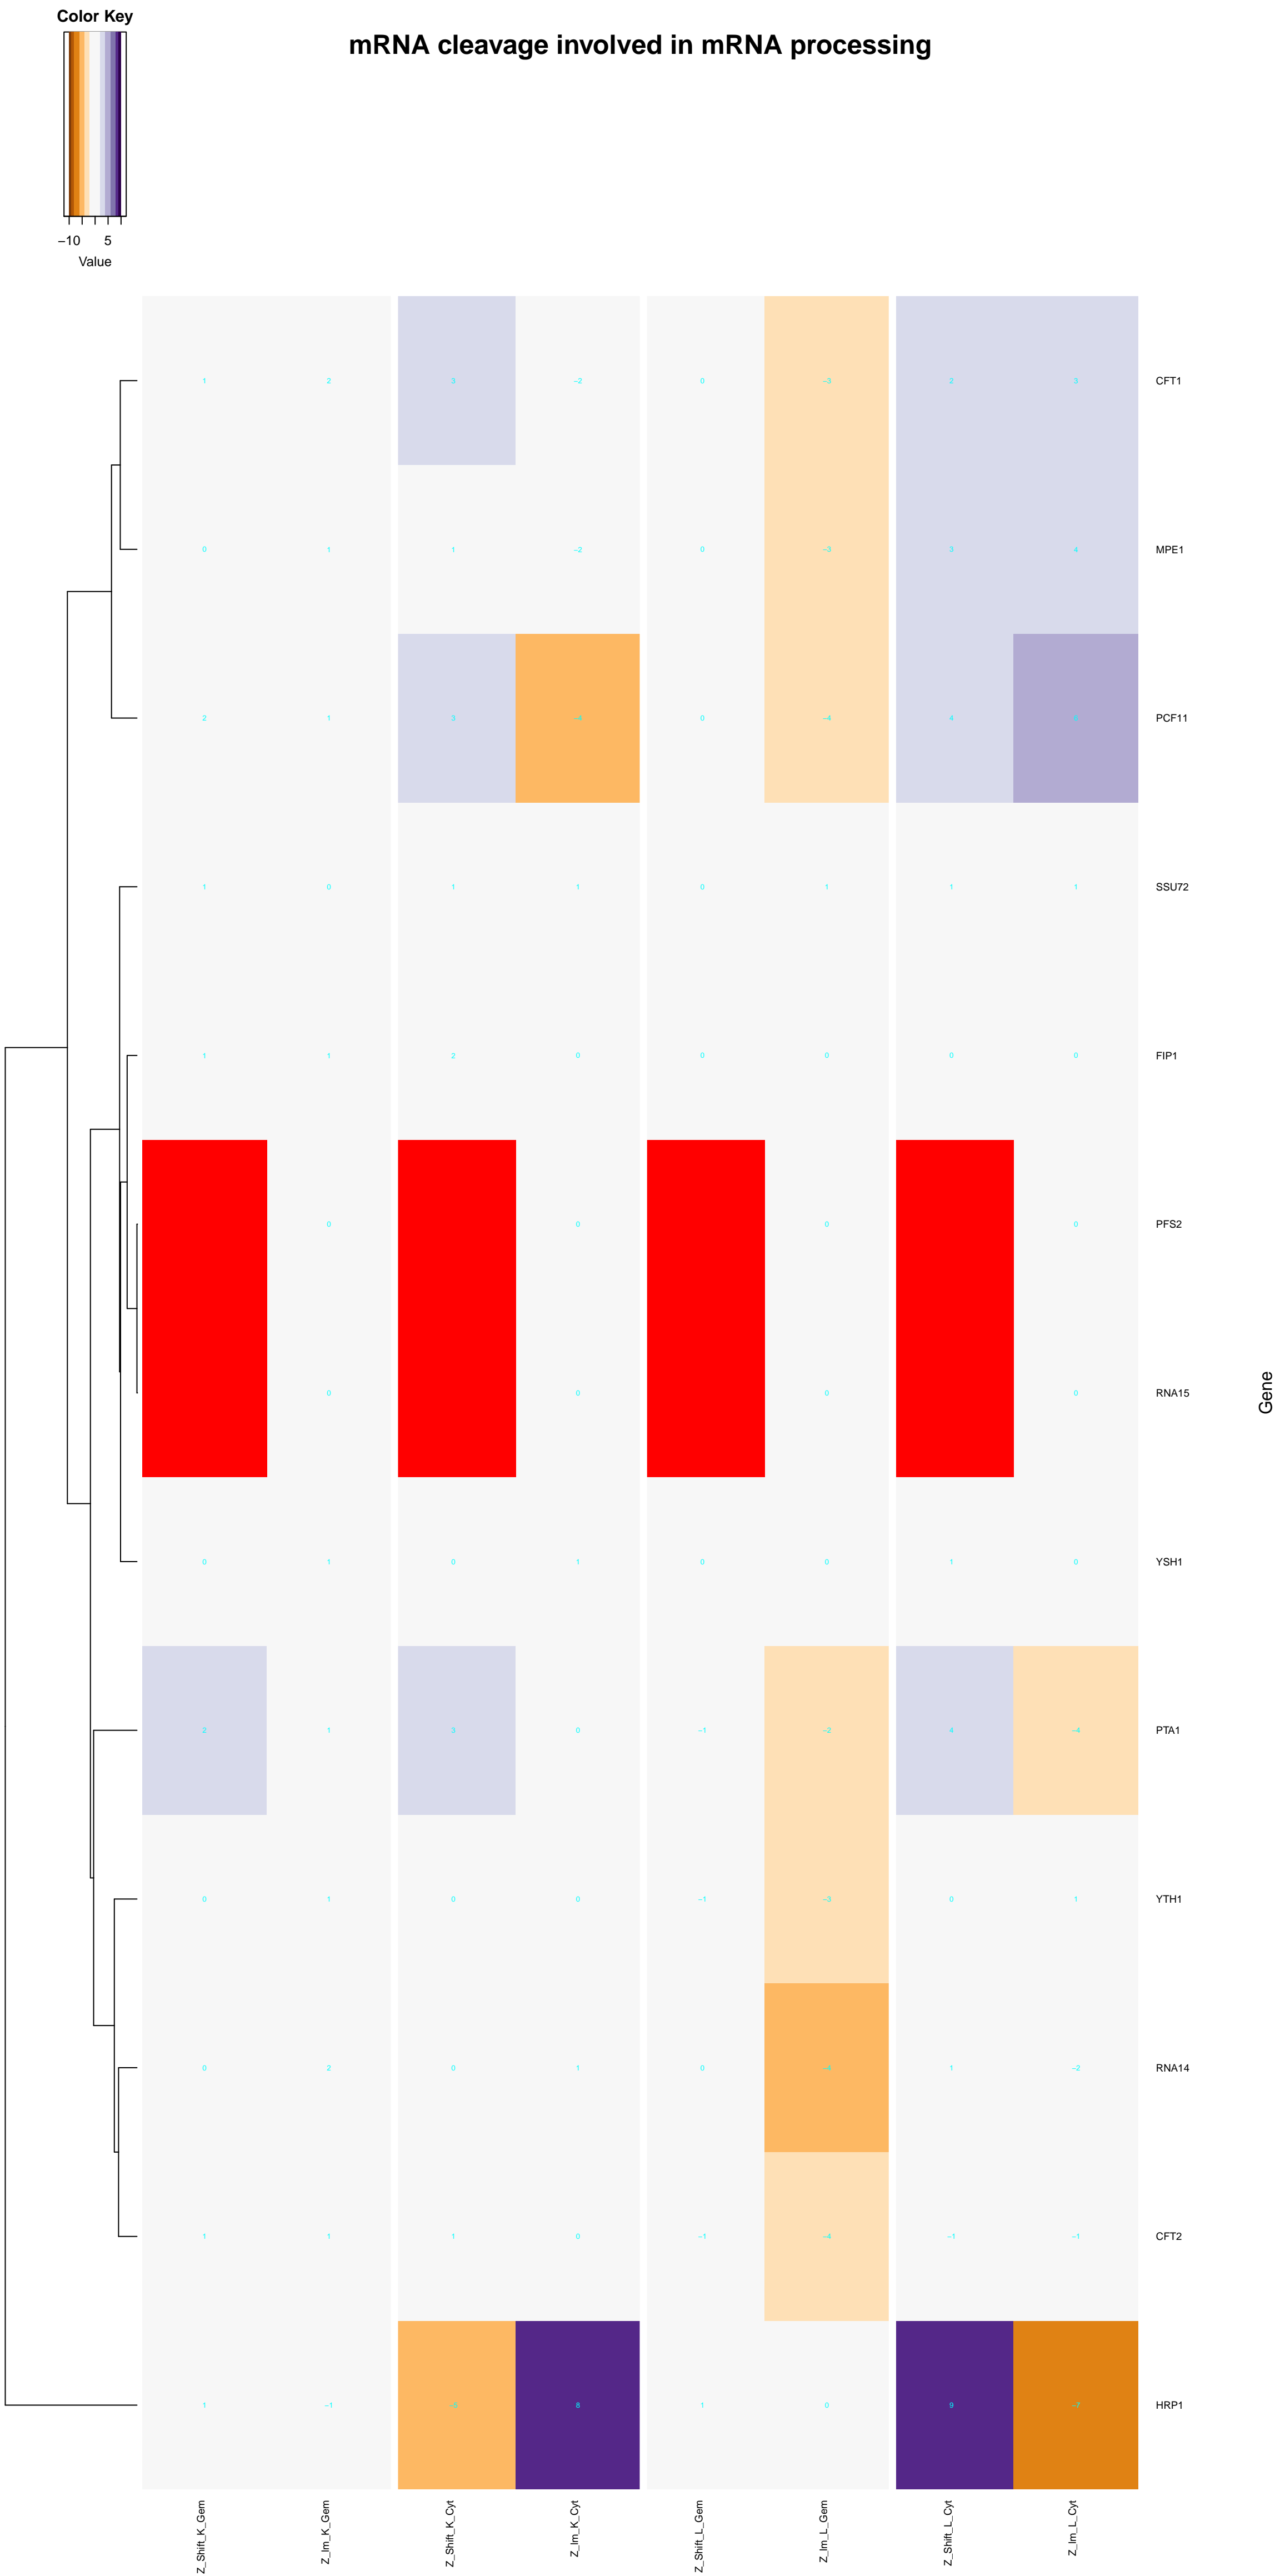



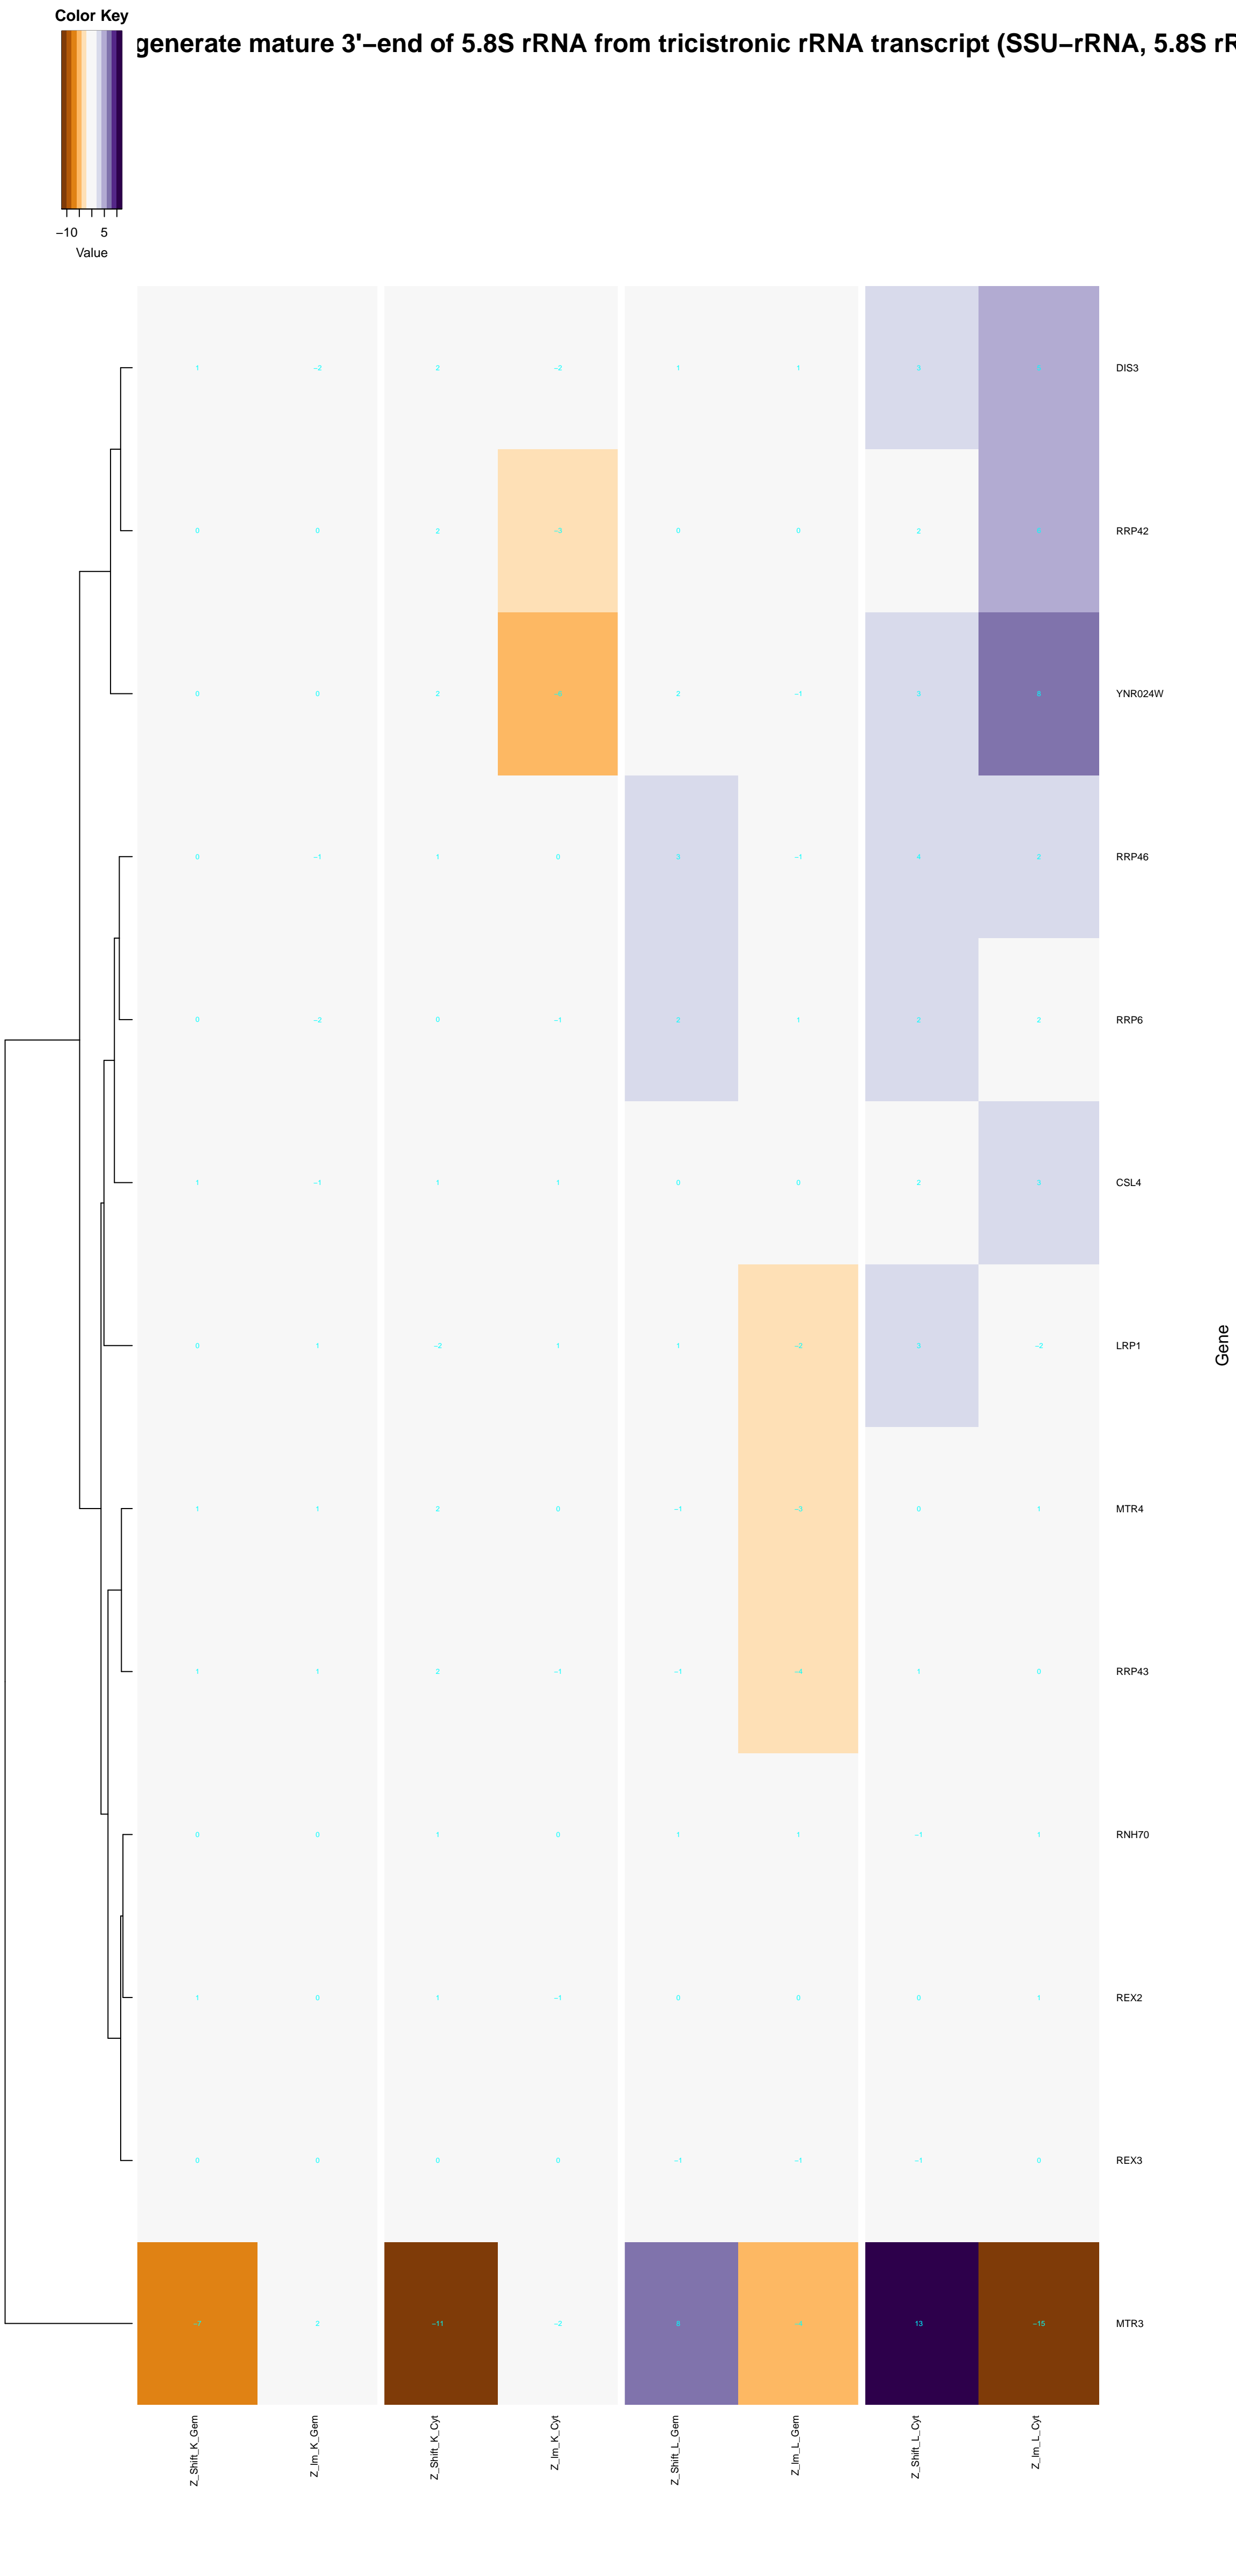

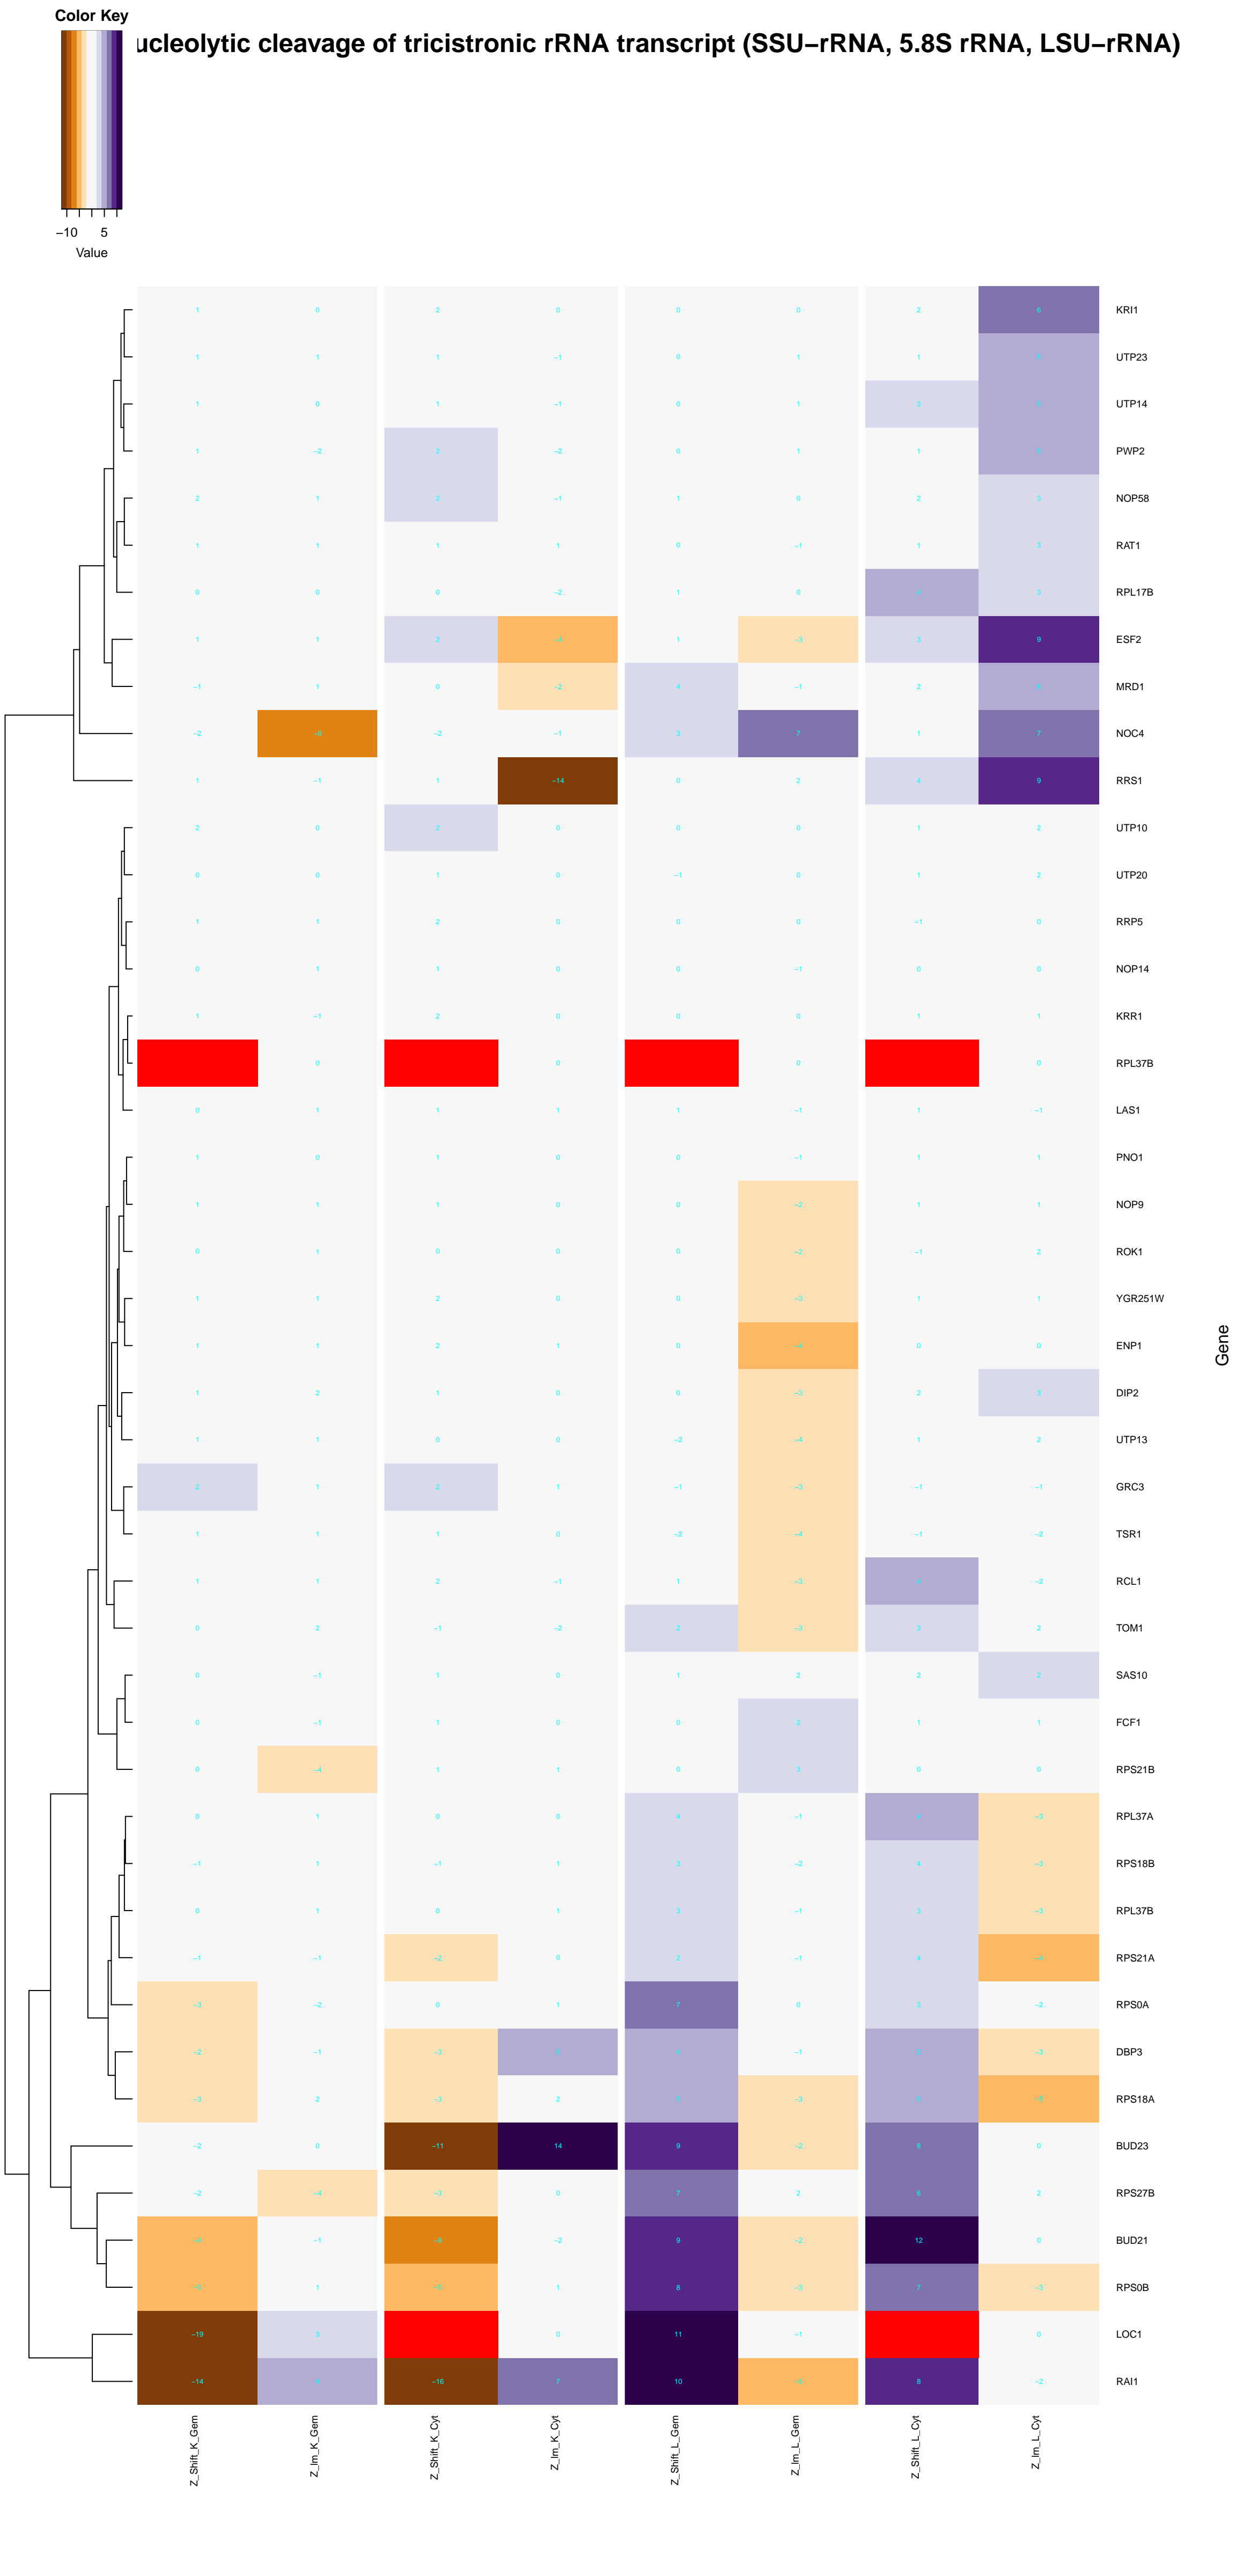

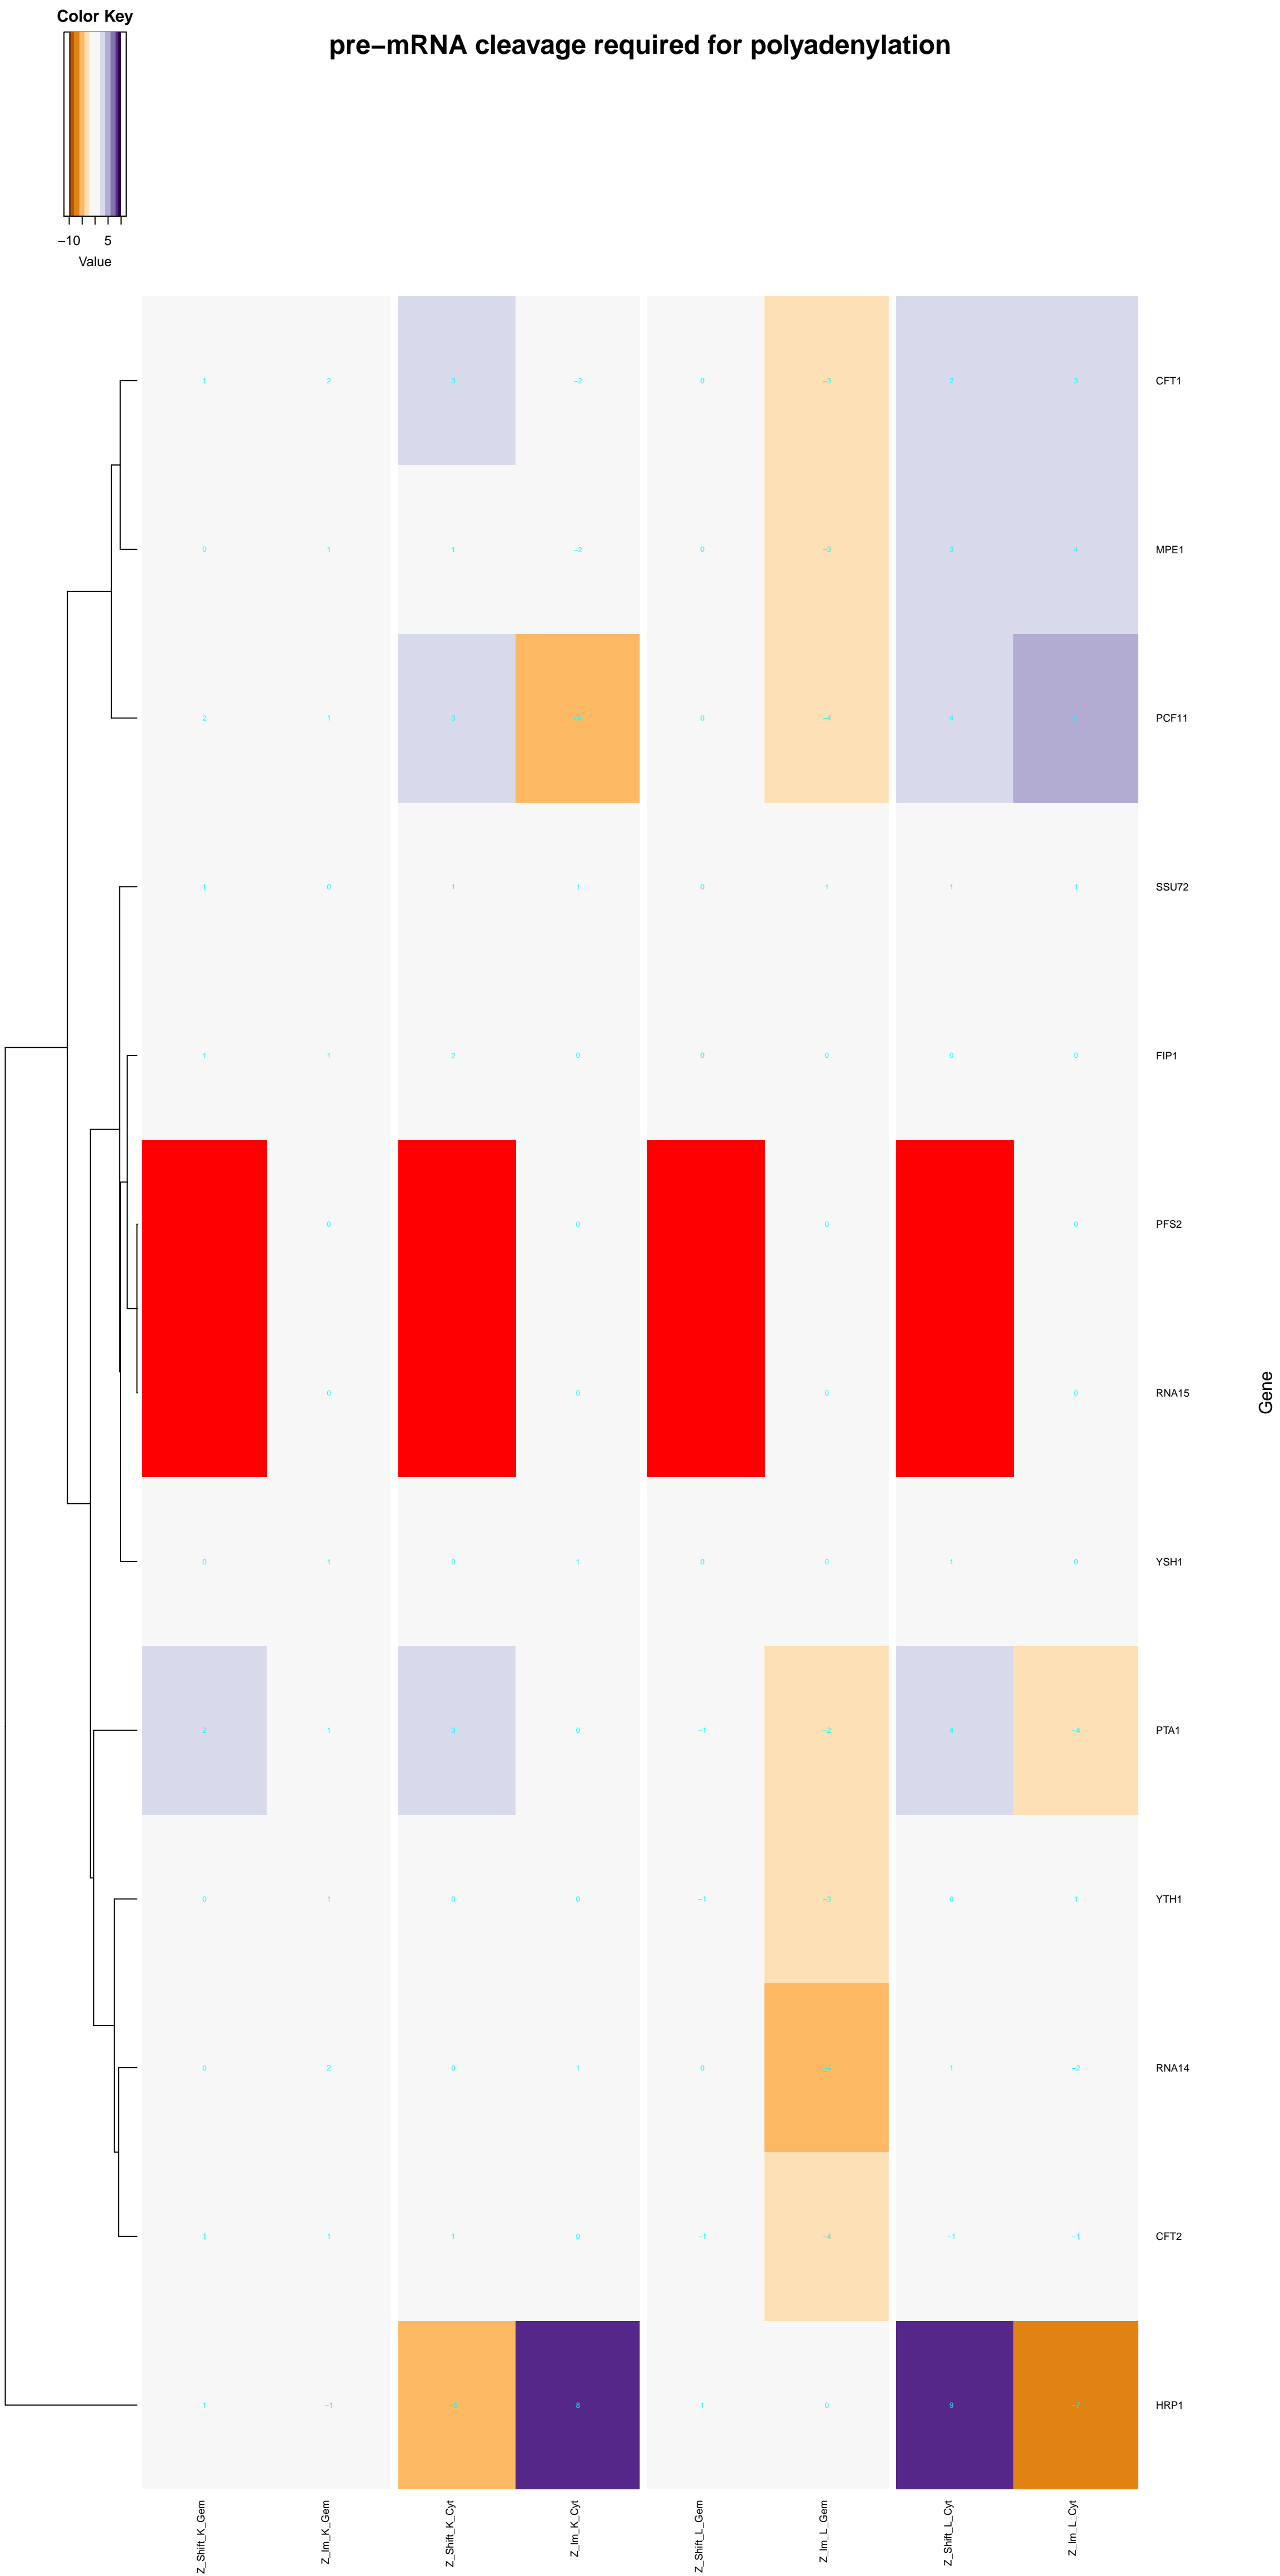

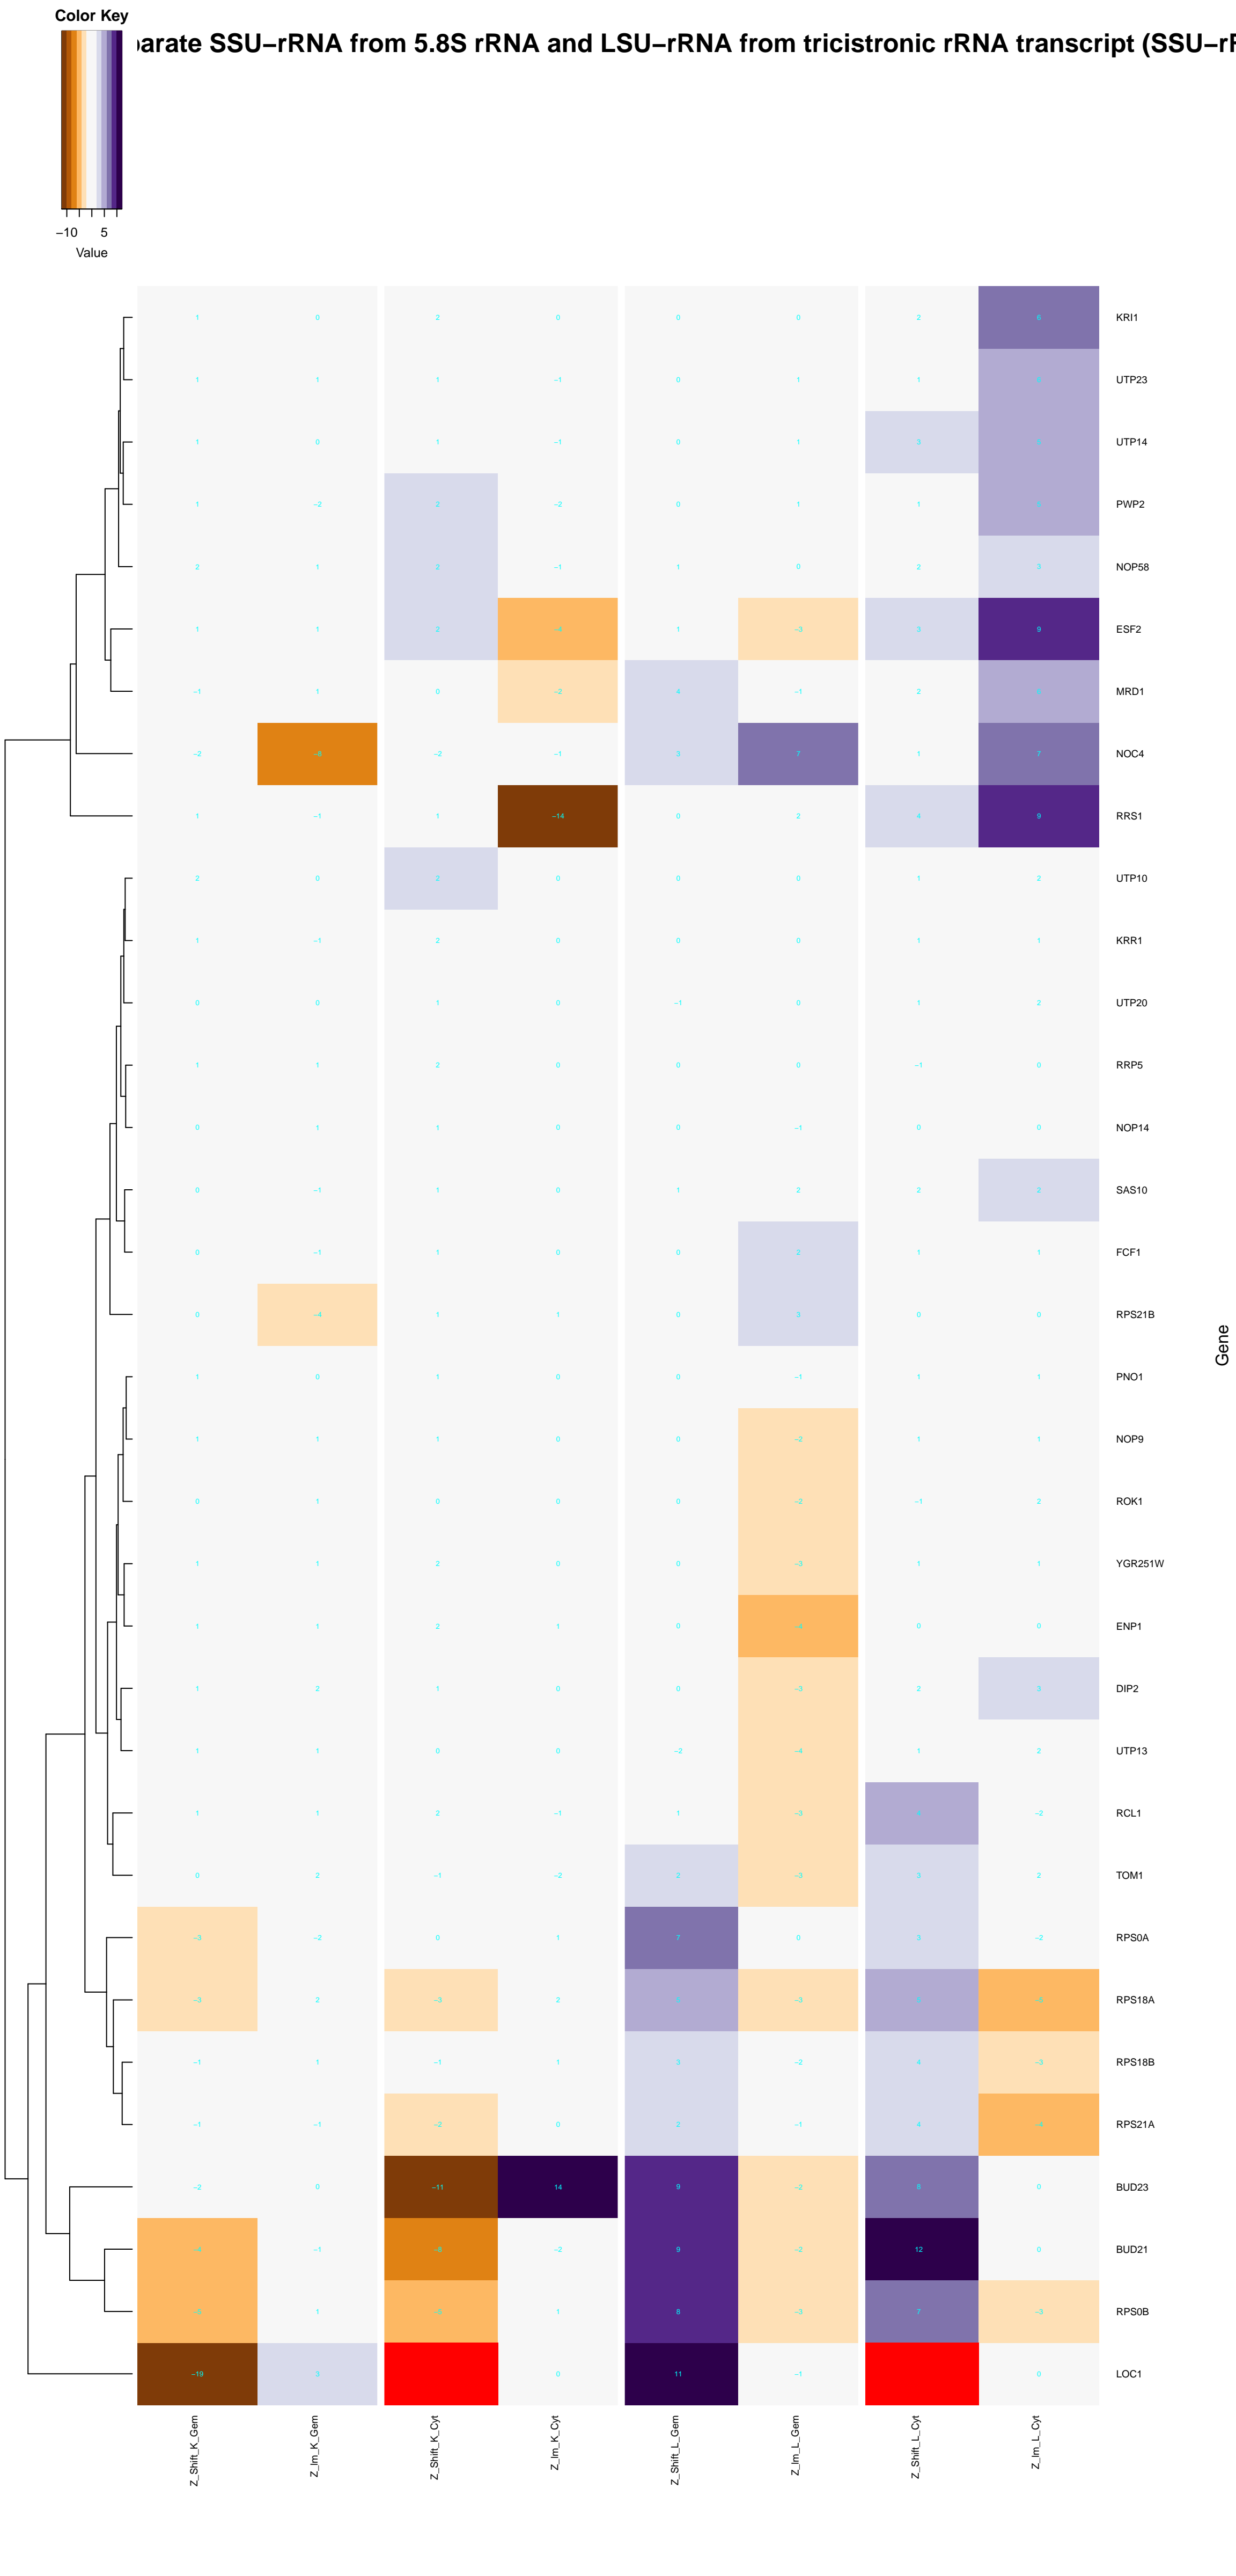

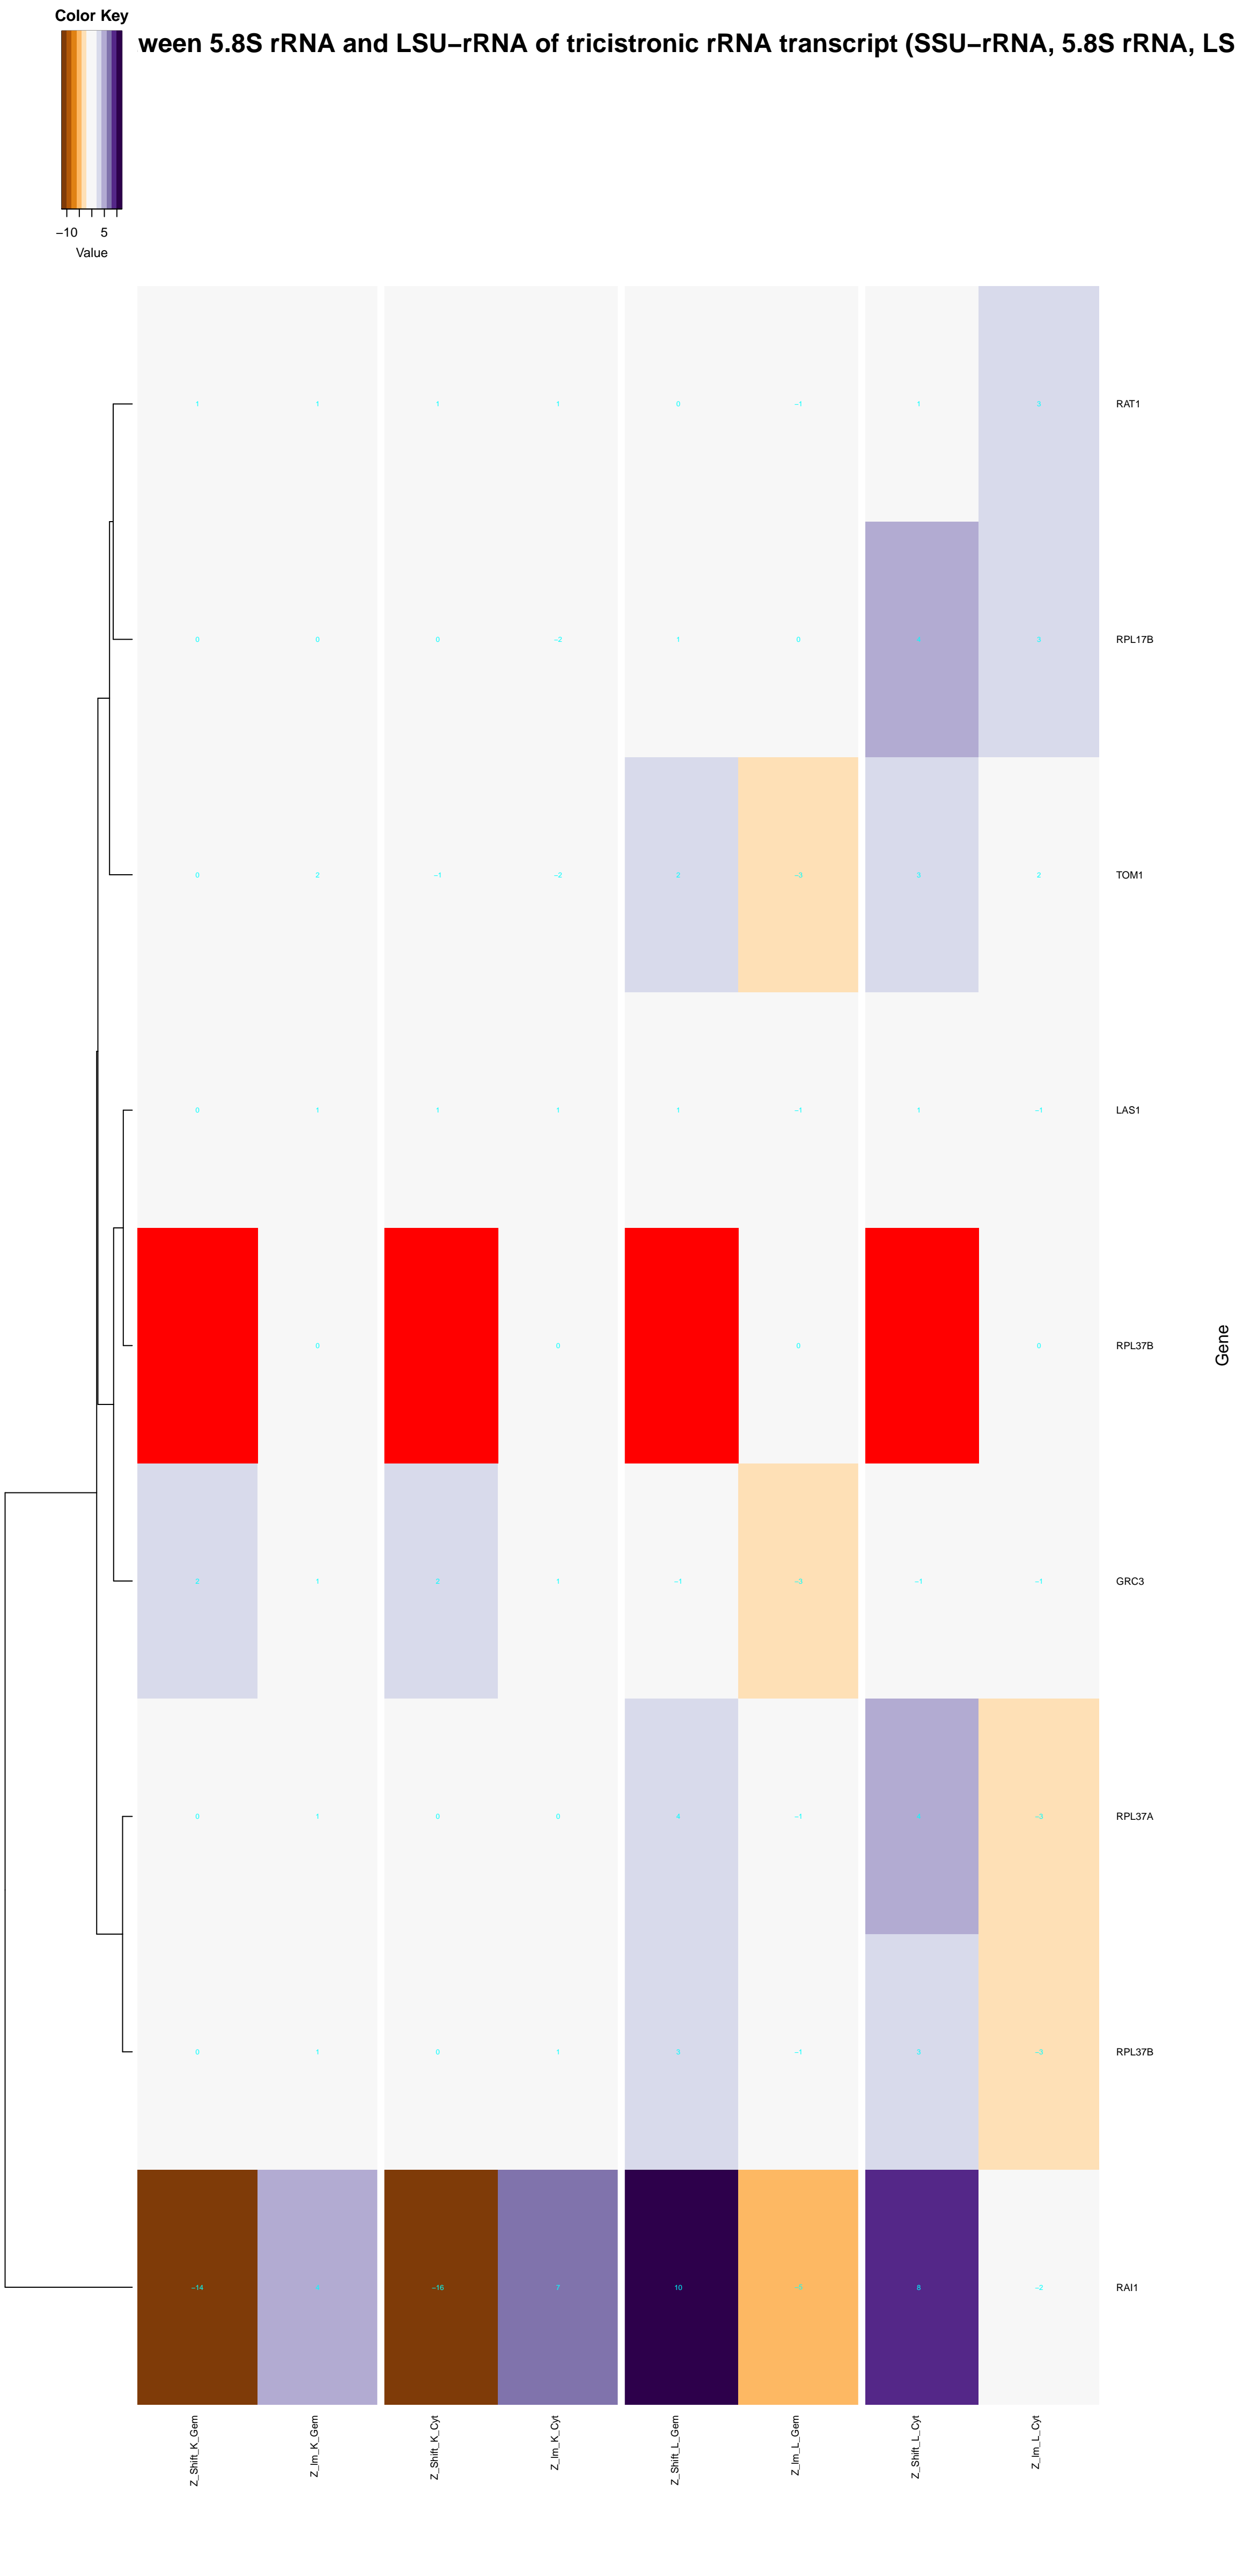

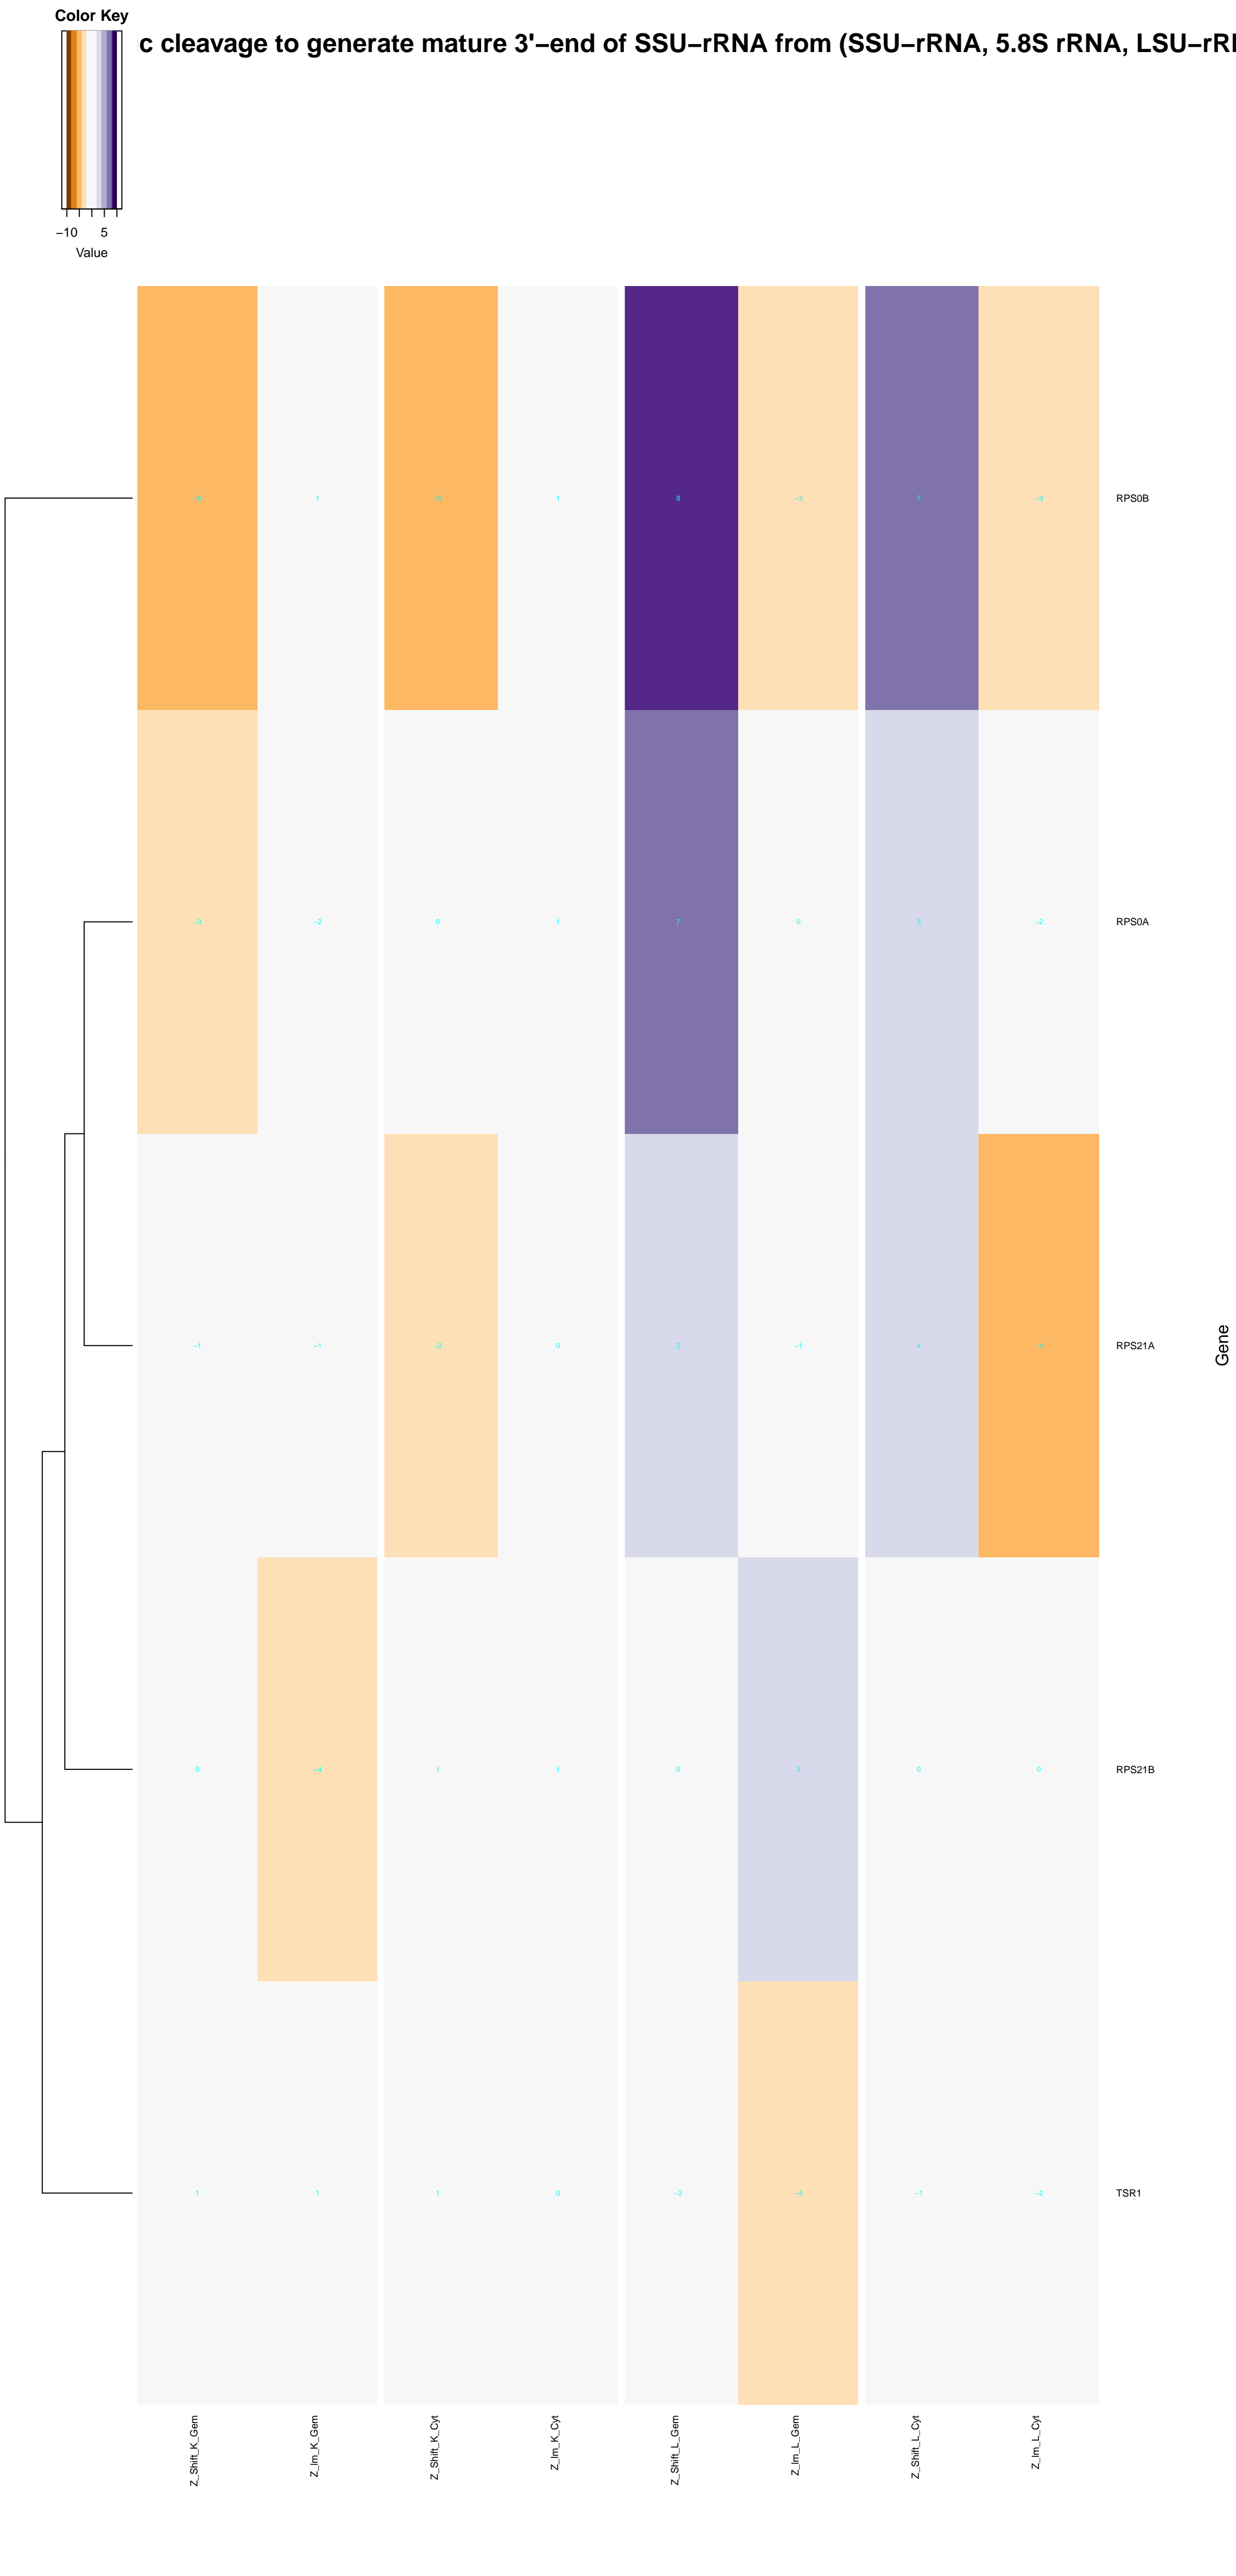

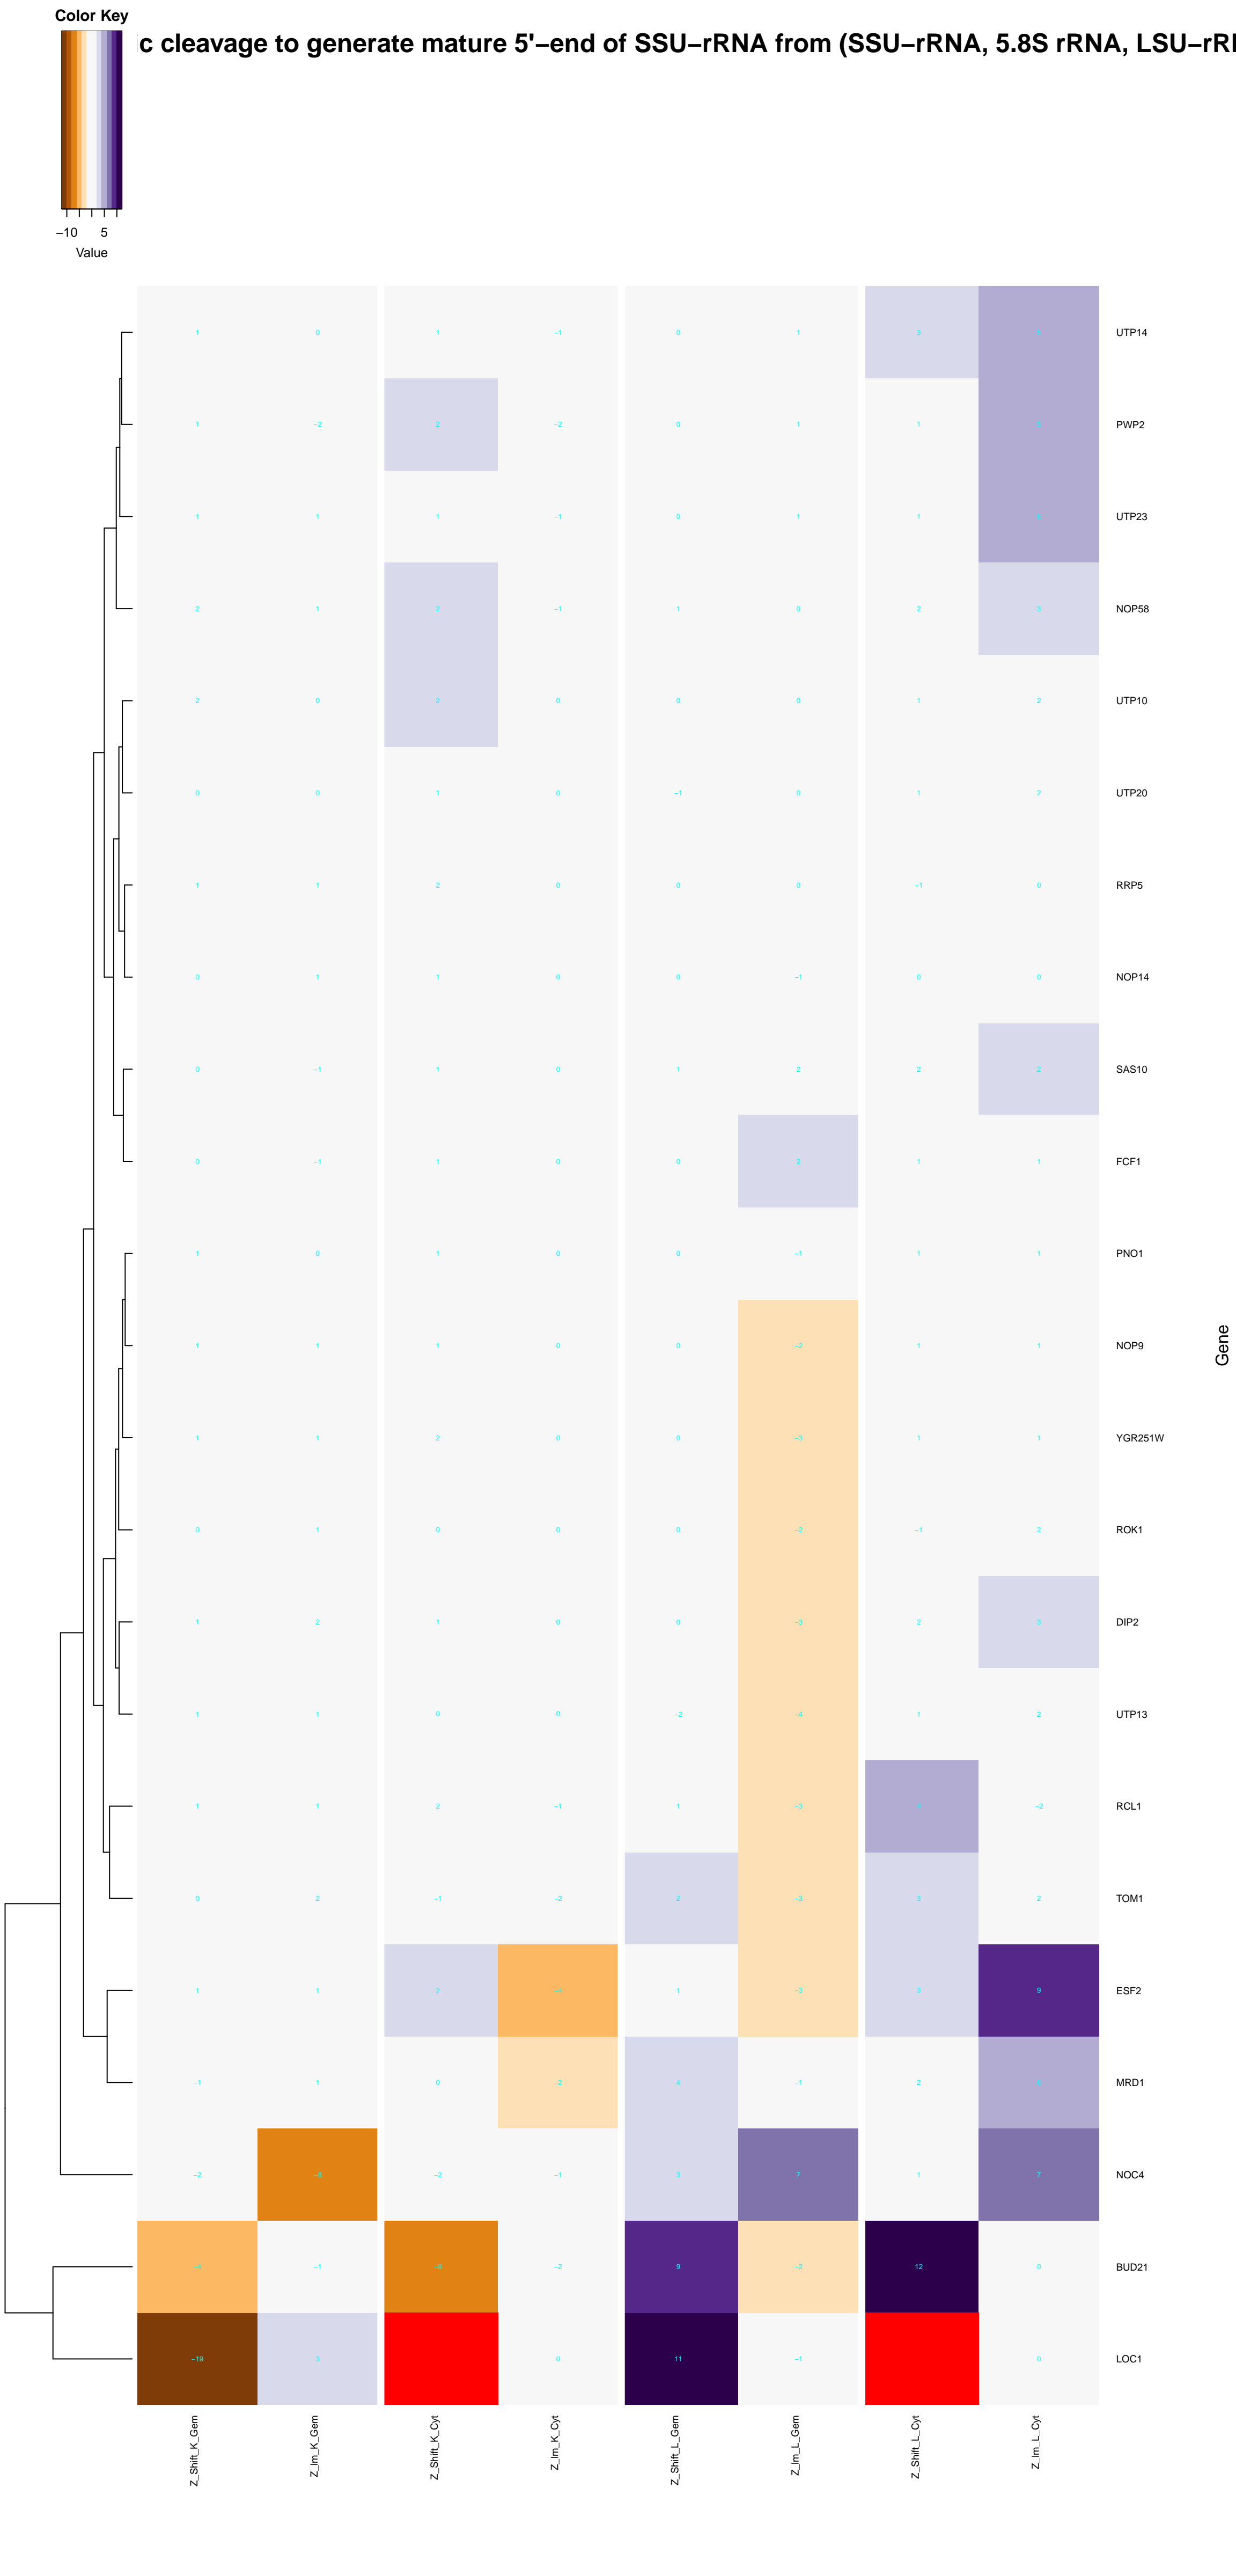

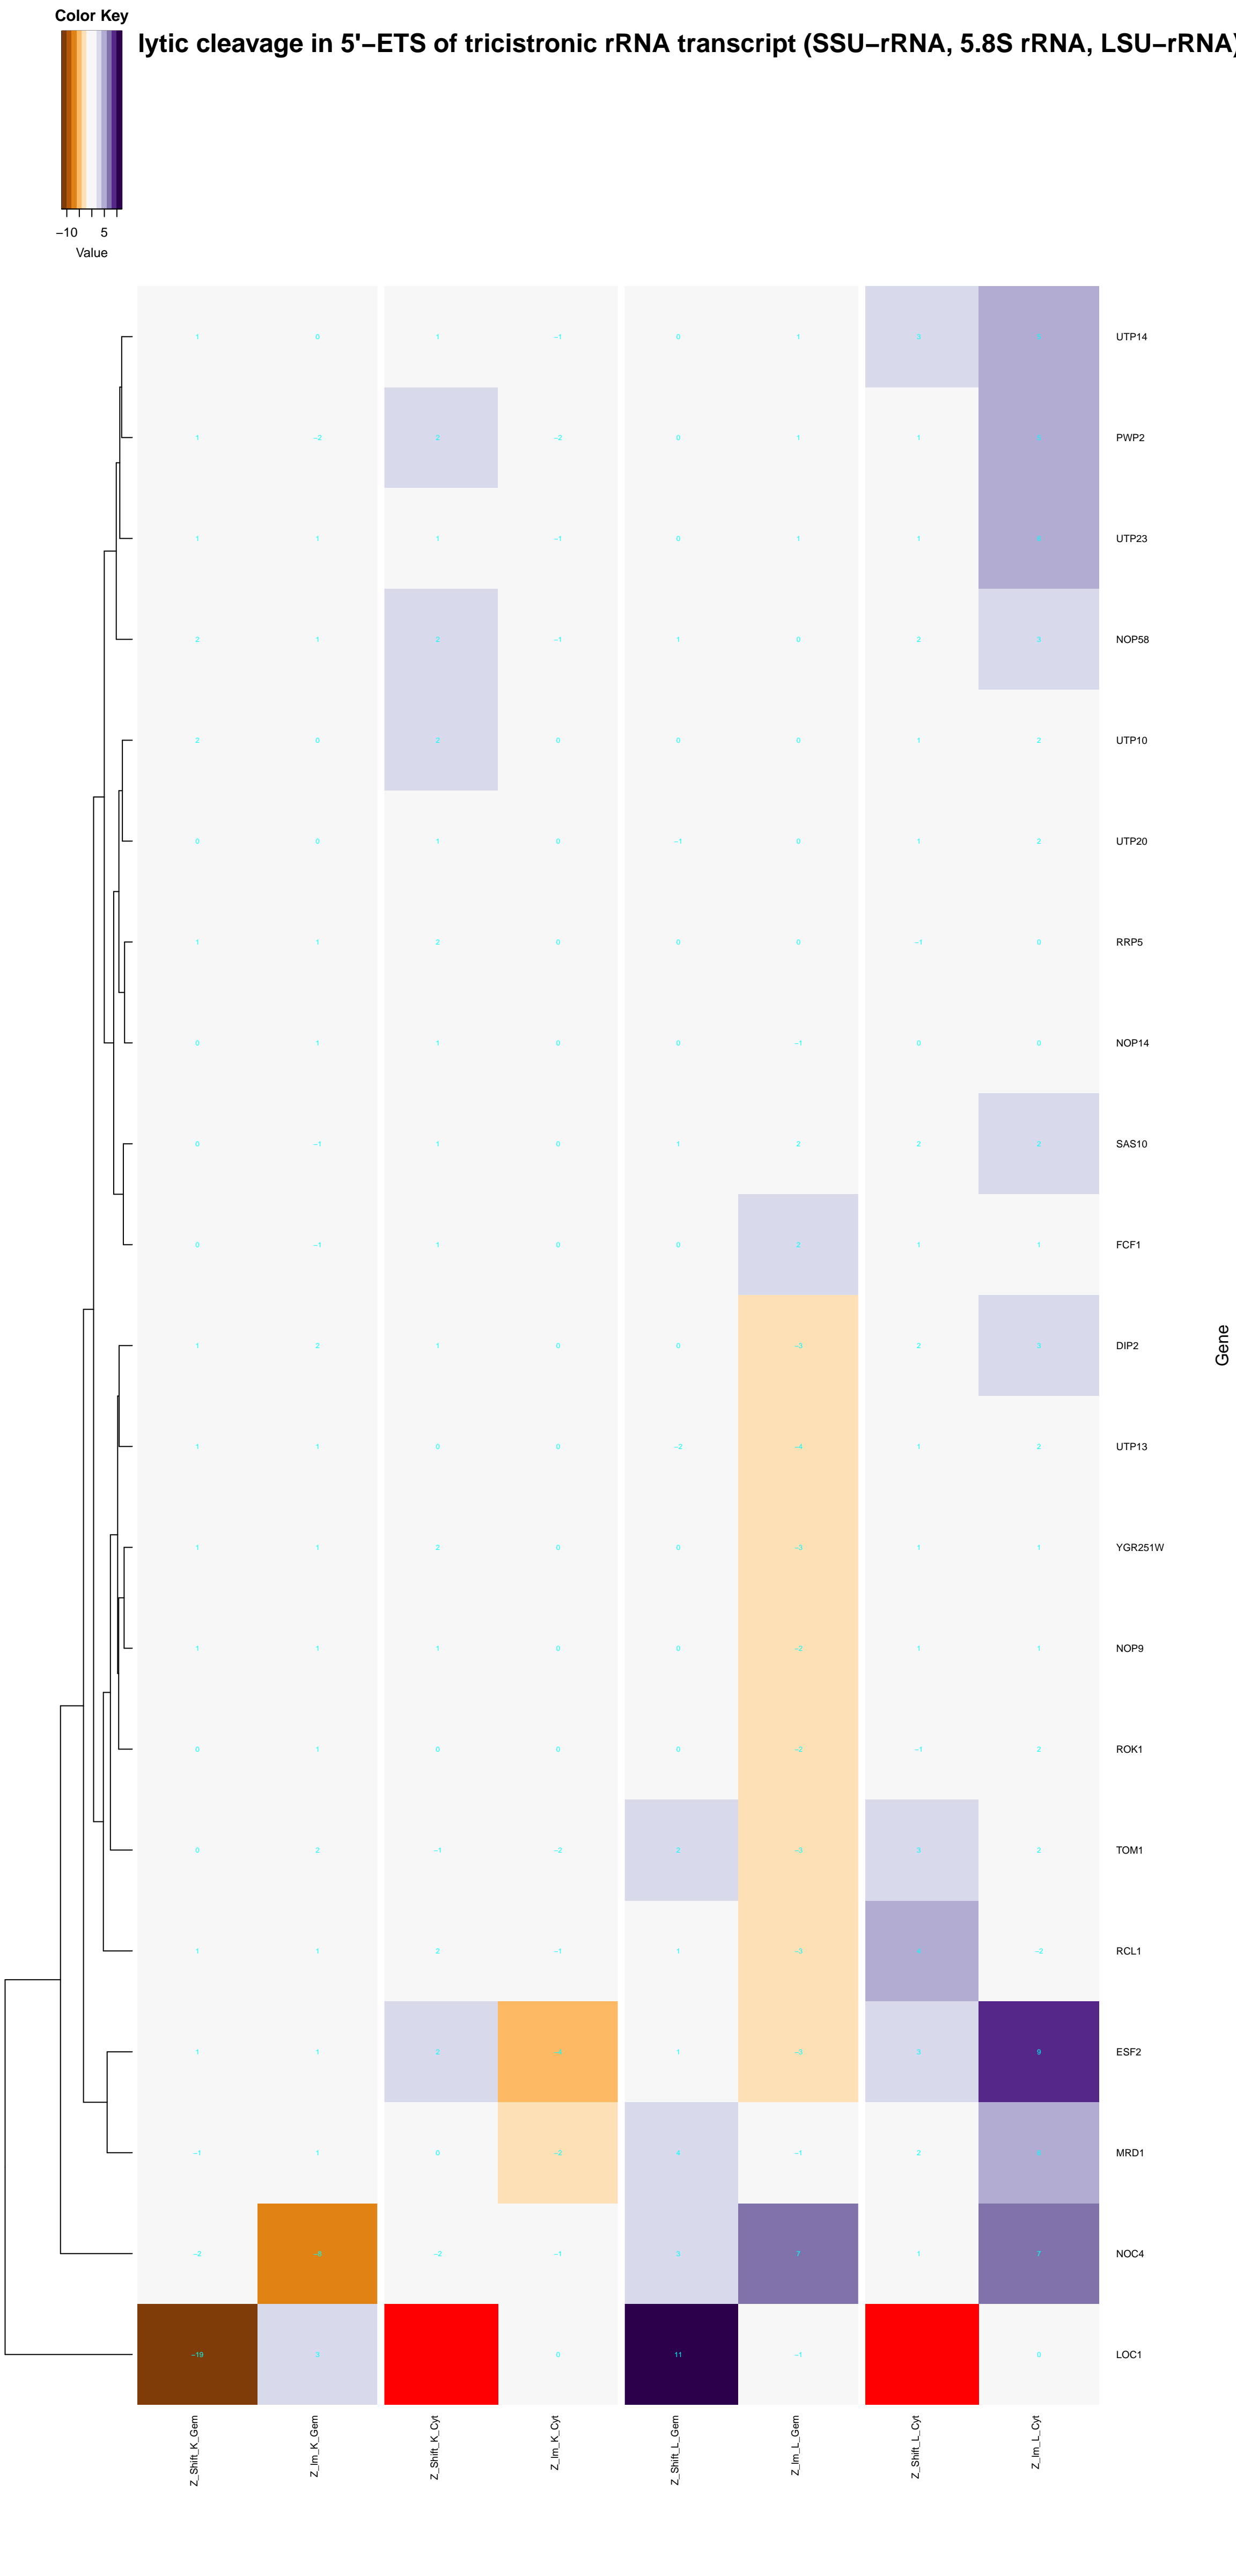

Supplement: s1 [file s1]

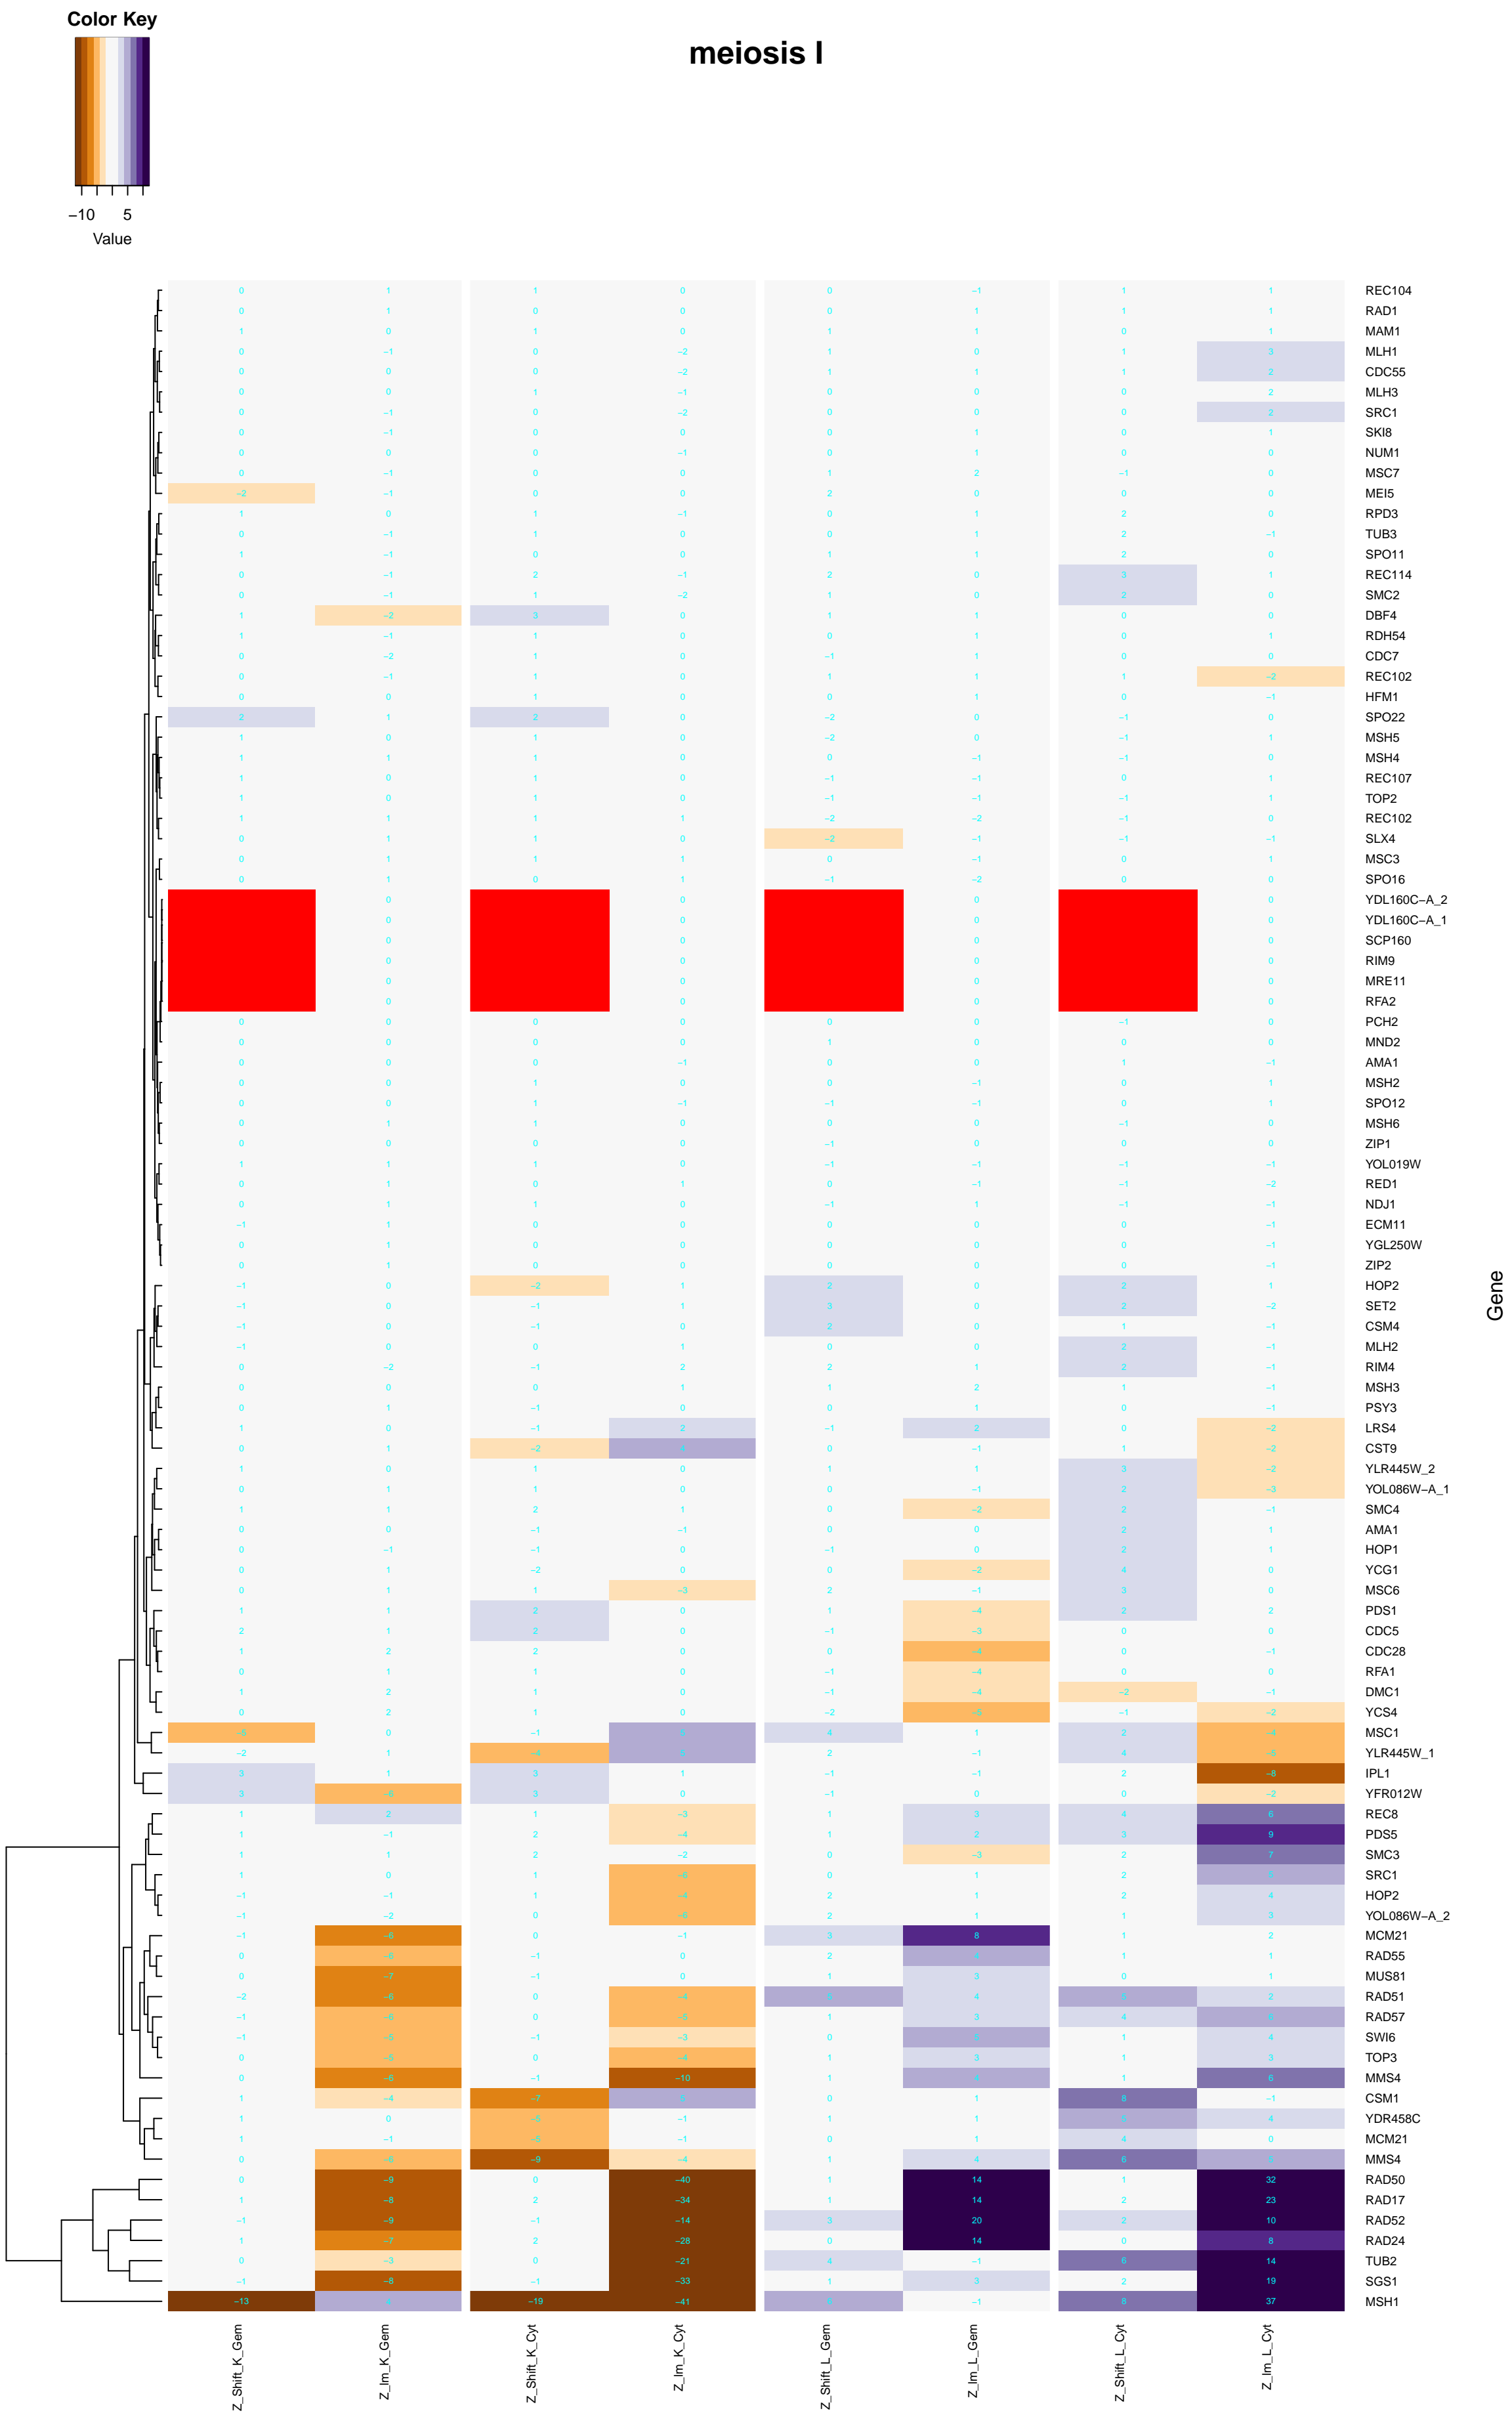

Supplement: s1 [file s1]

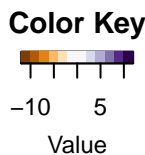

**transport vesicle**

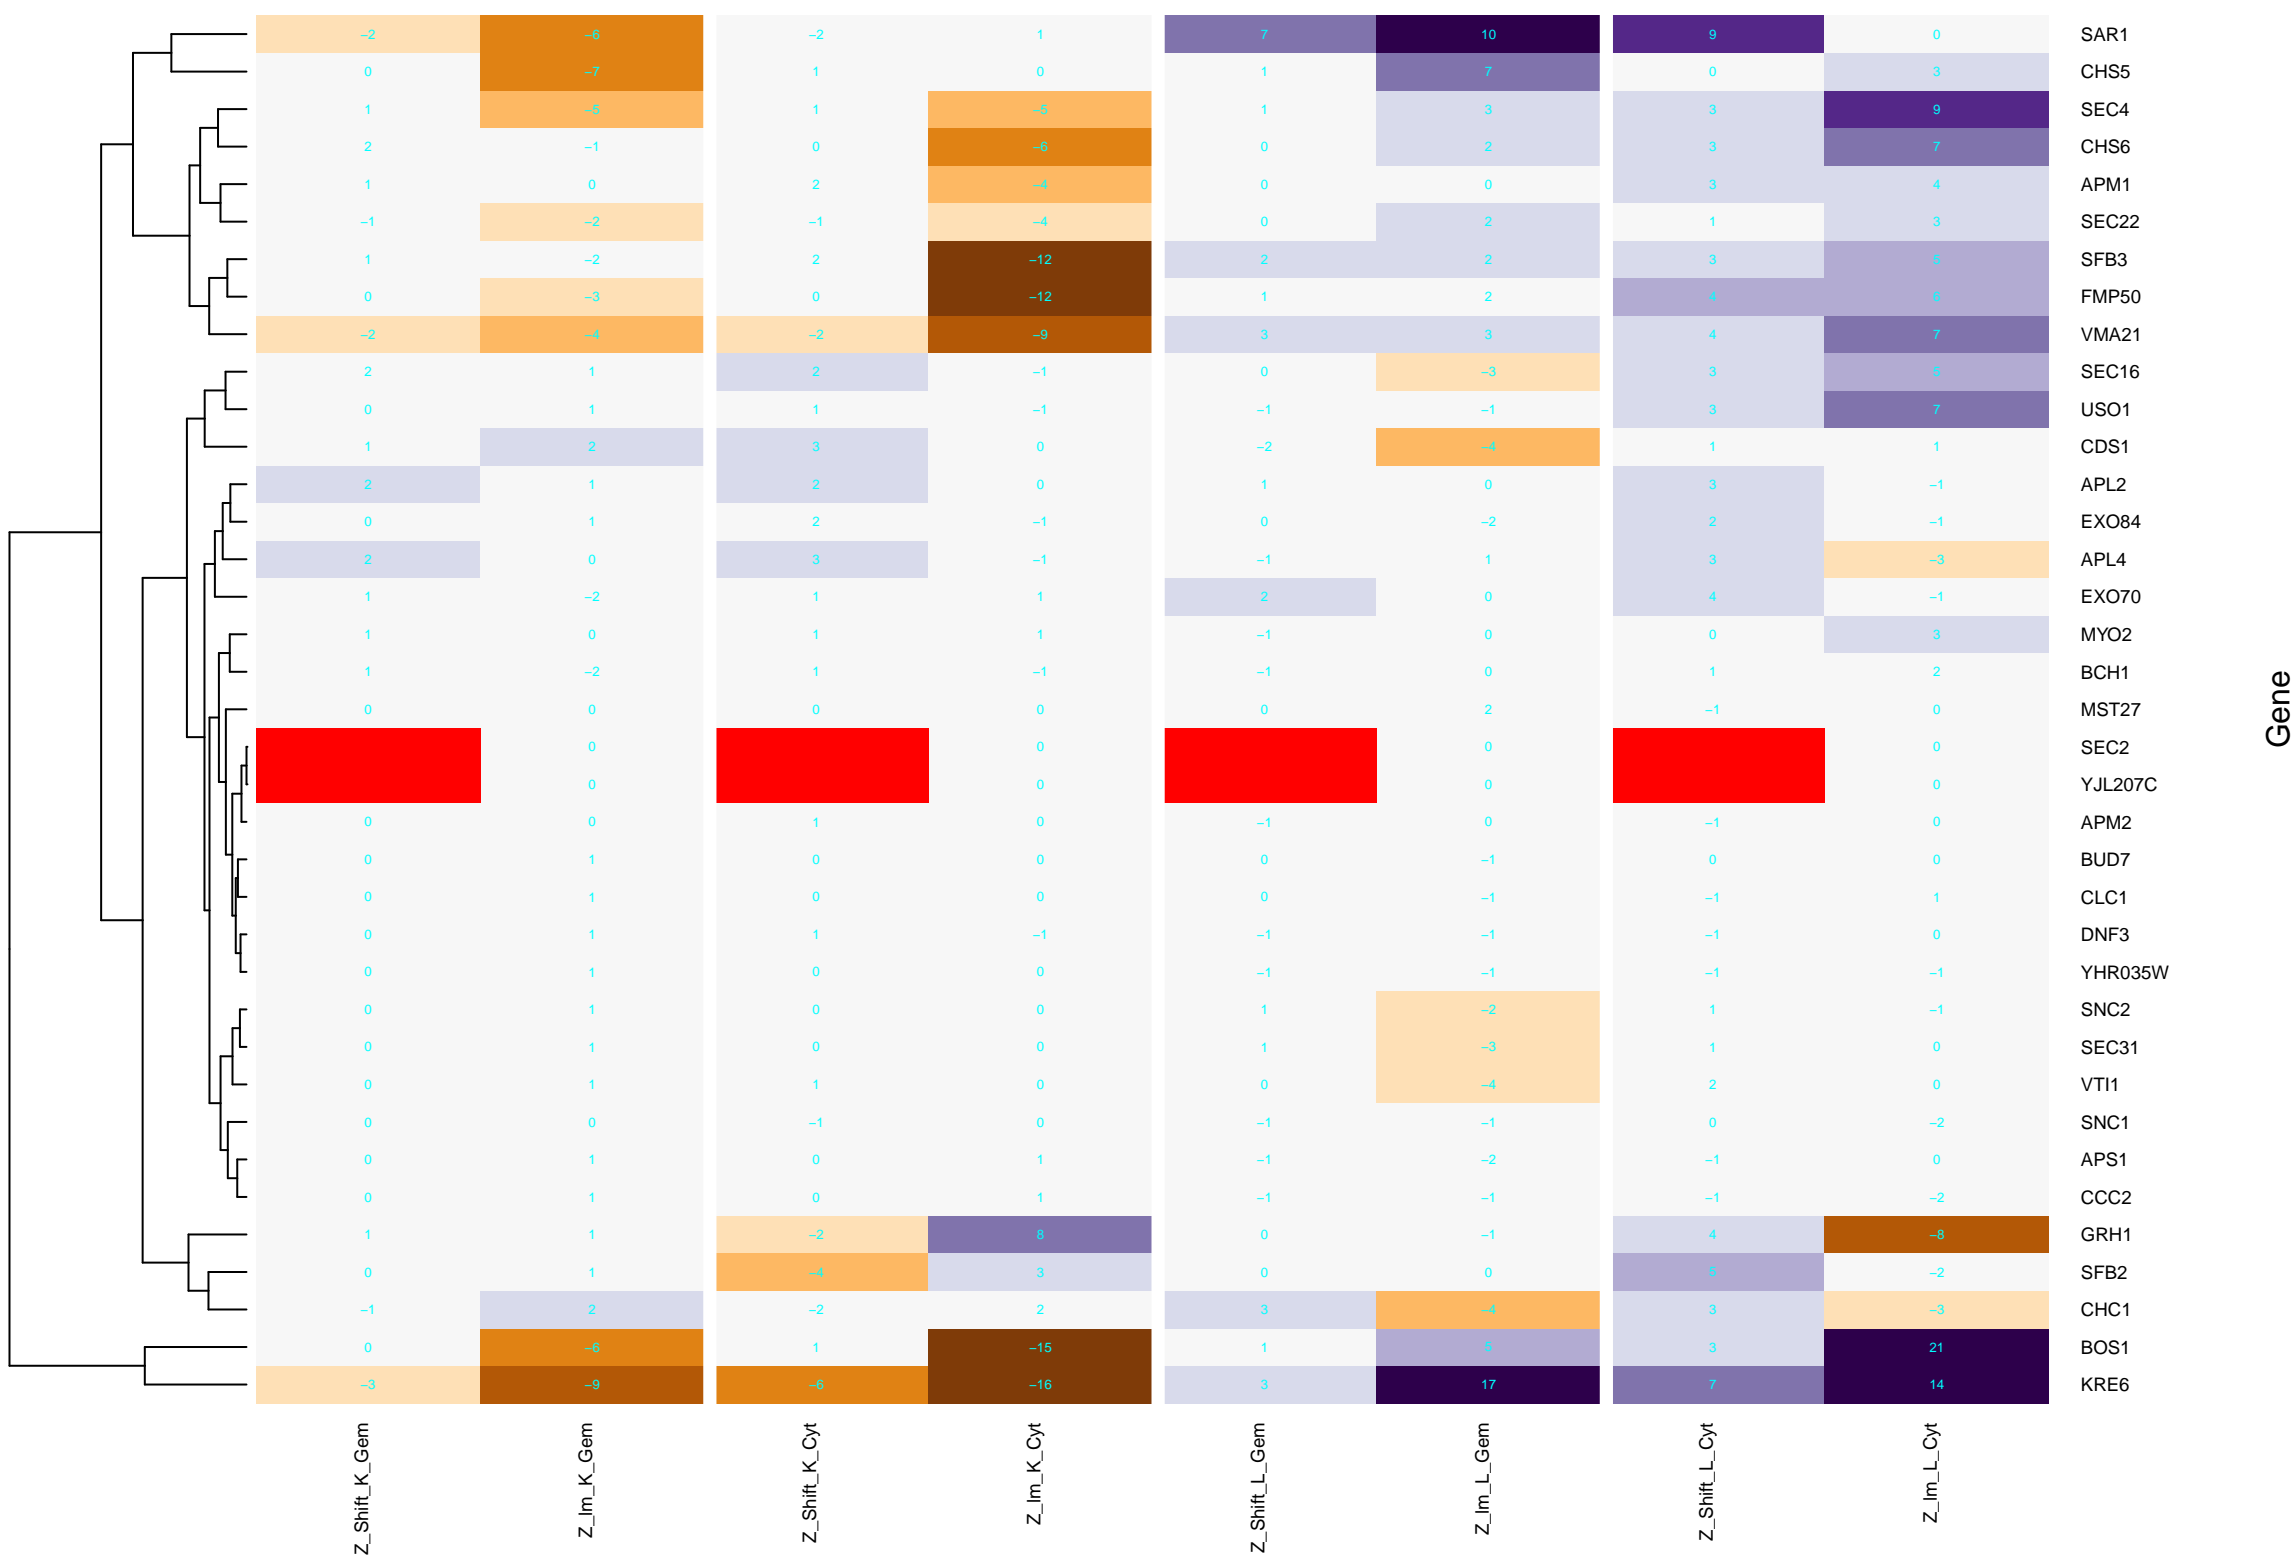

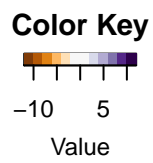

# ER to Golgi transport vesicle

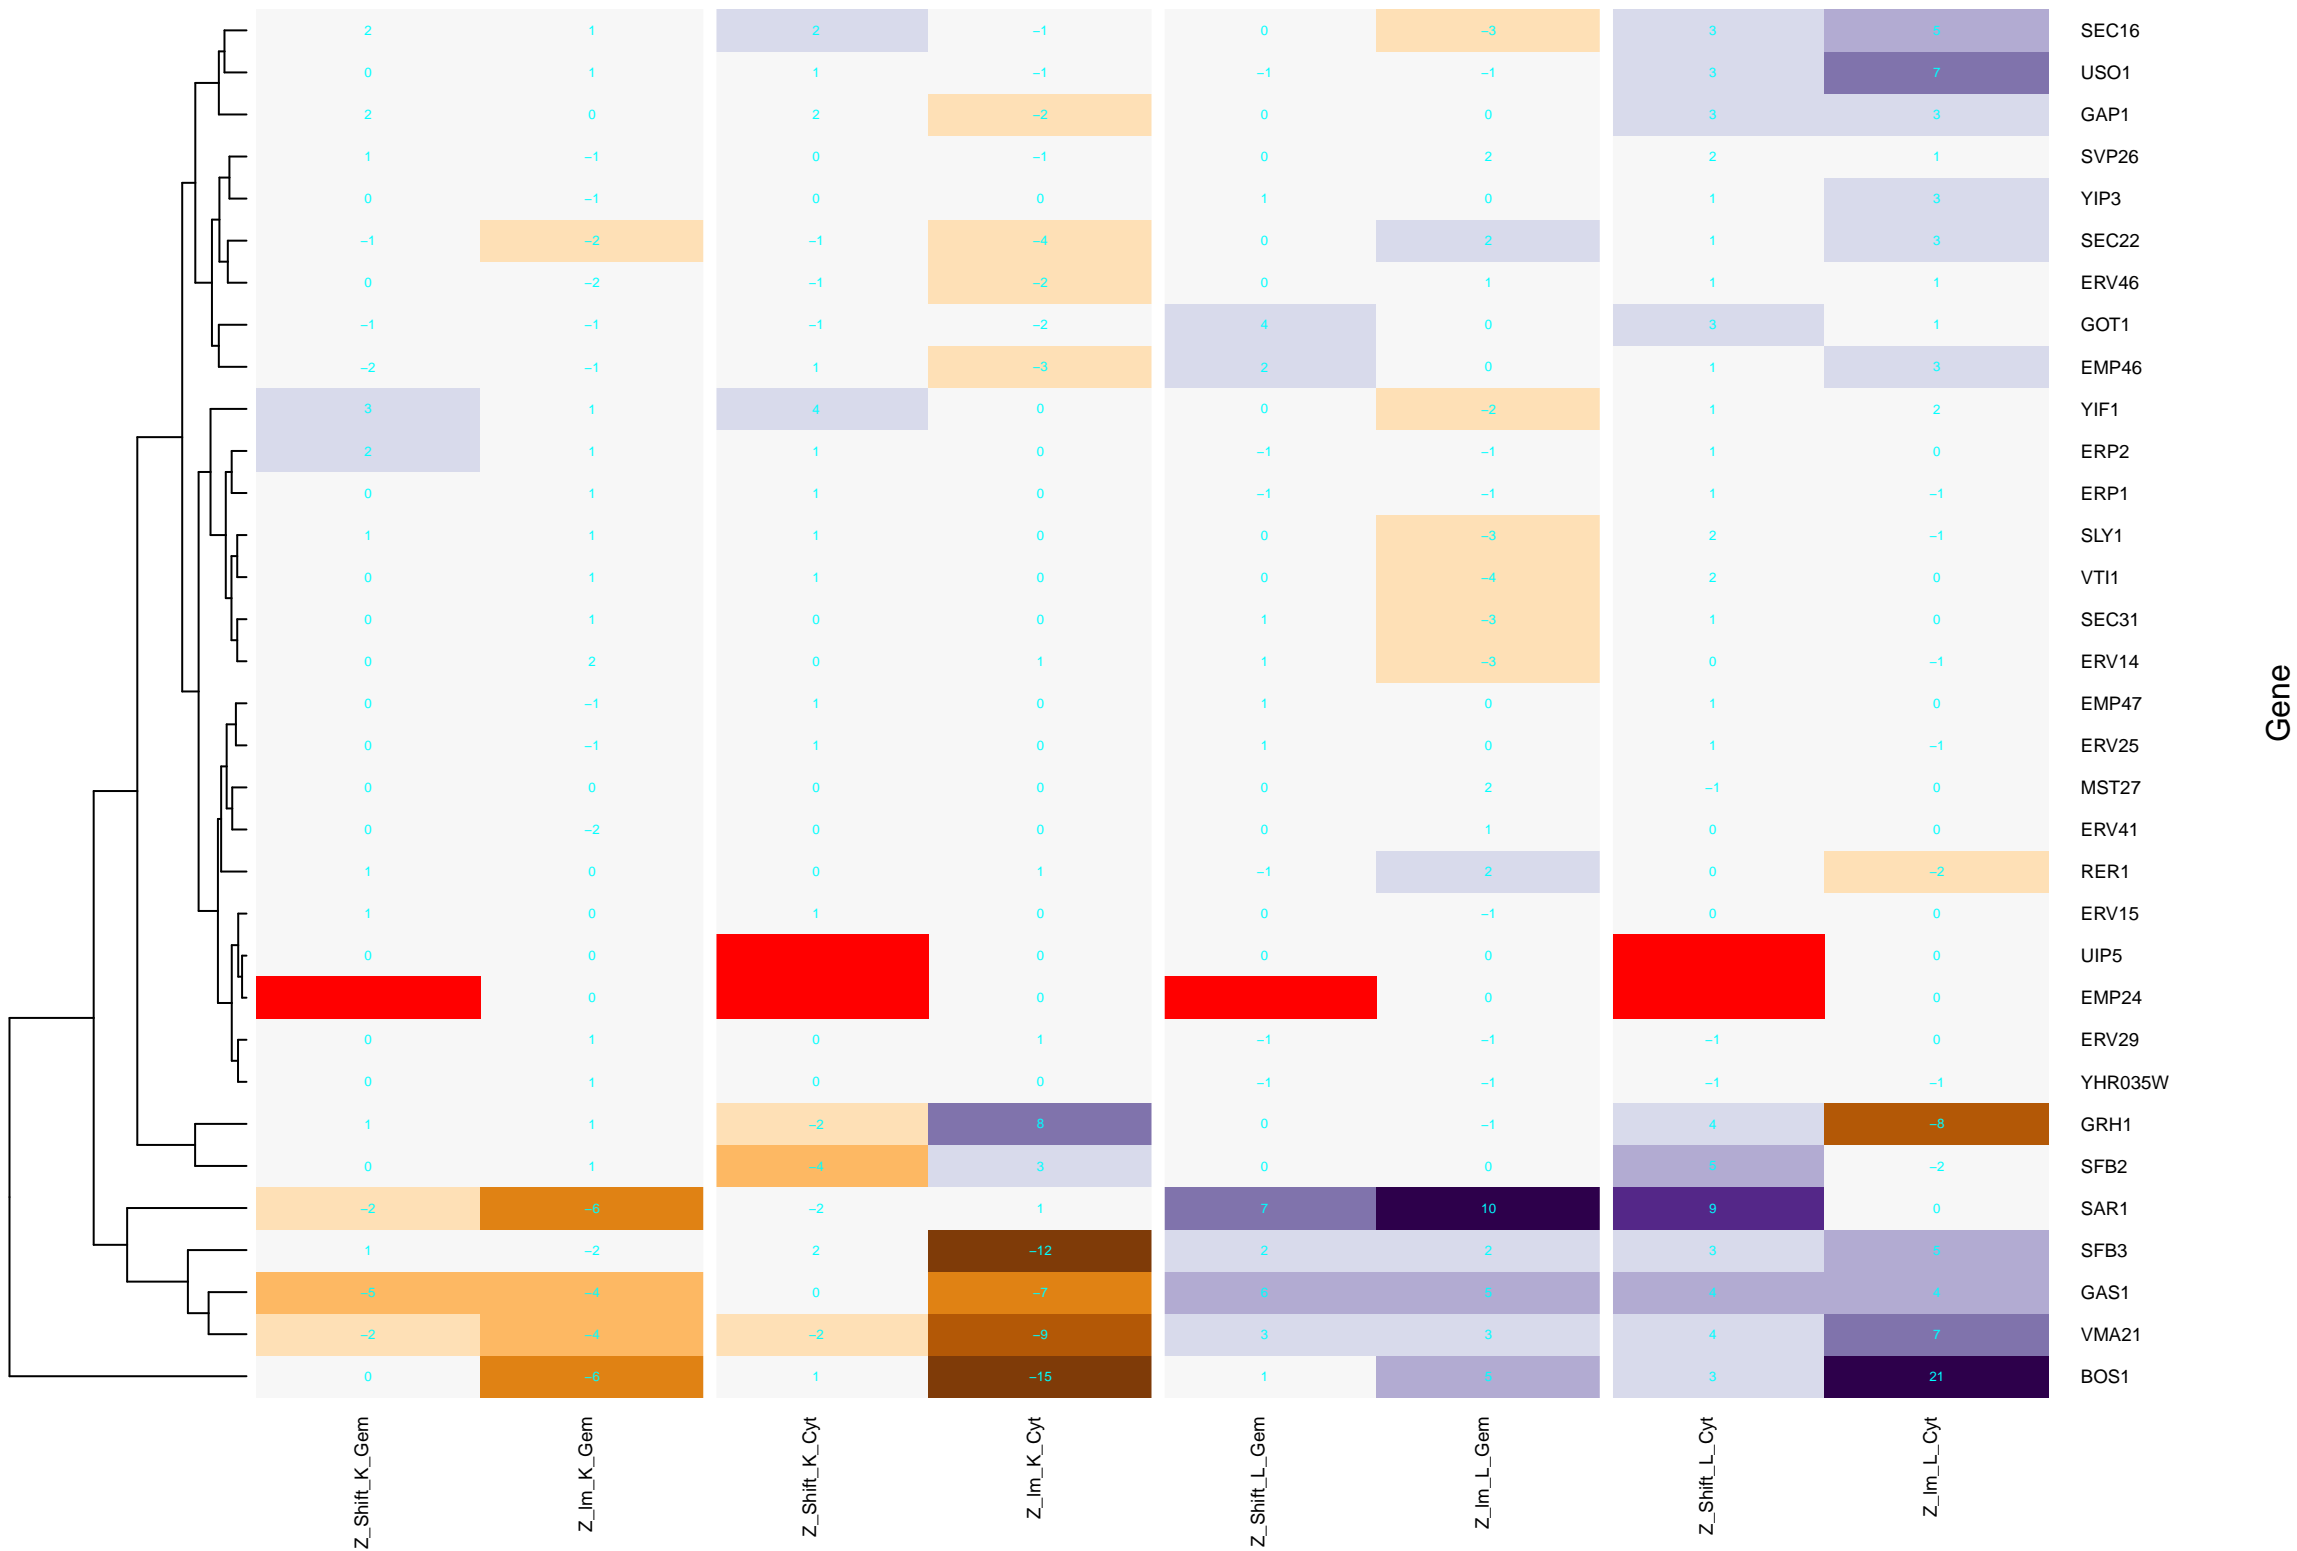

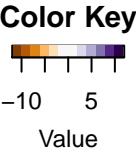

**trans-Golgi network transport vesicle**

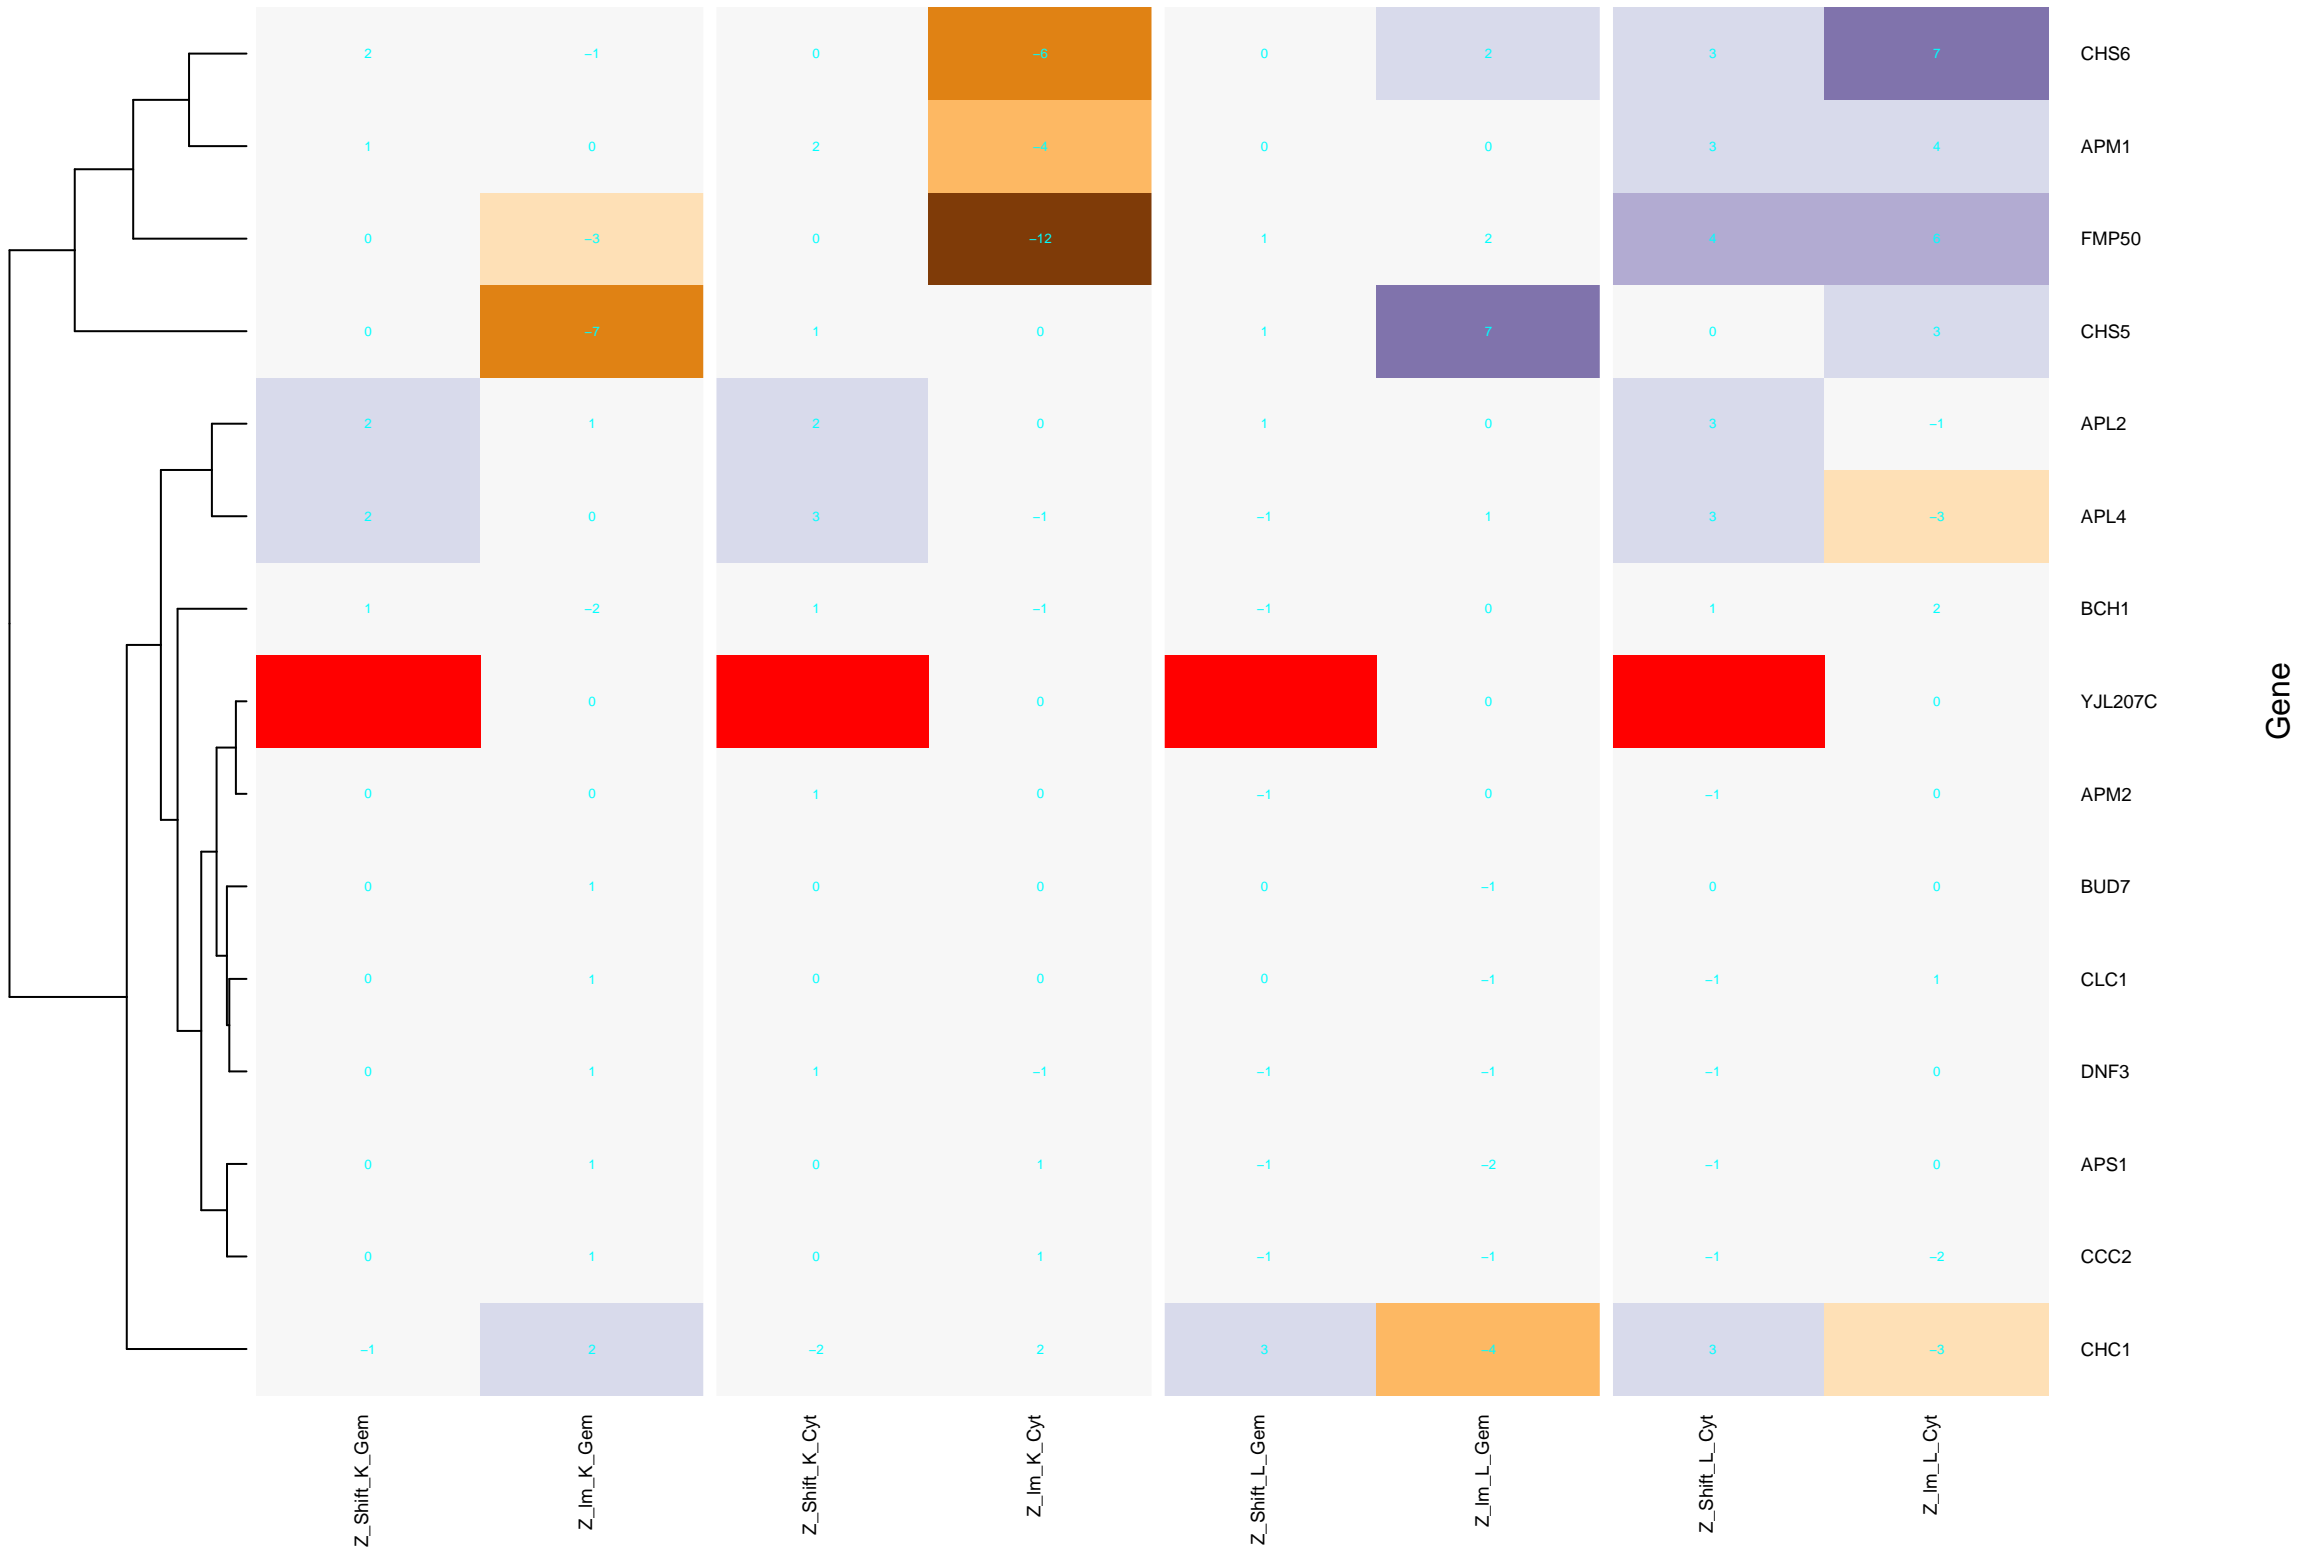

Supplement: s1 [file s1]

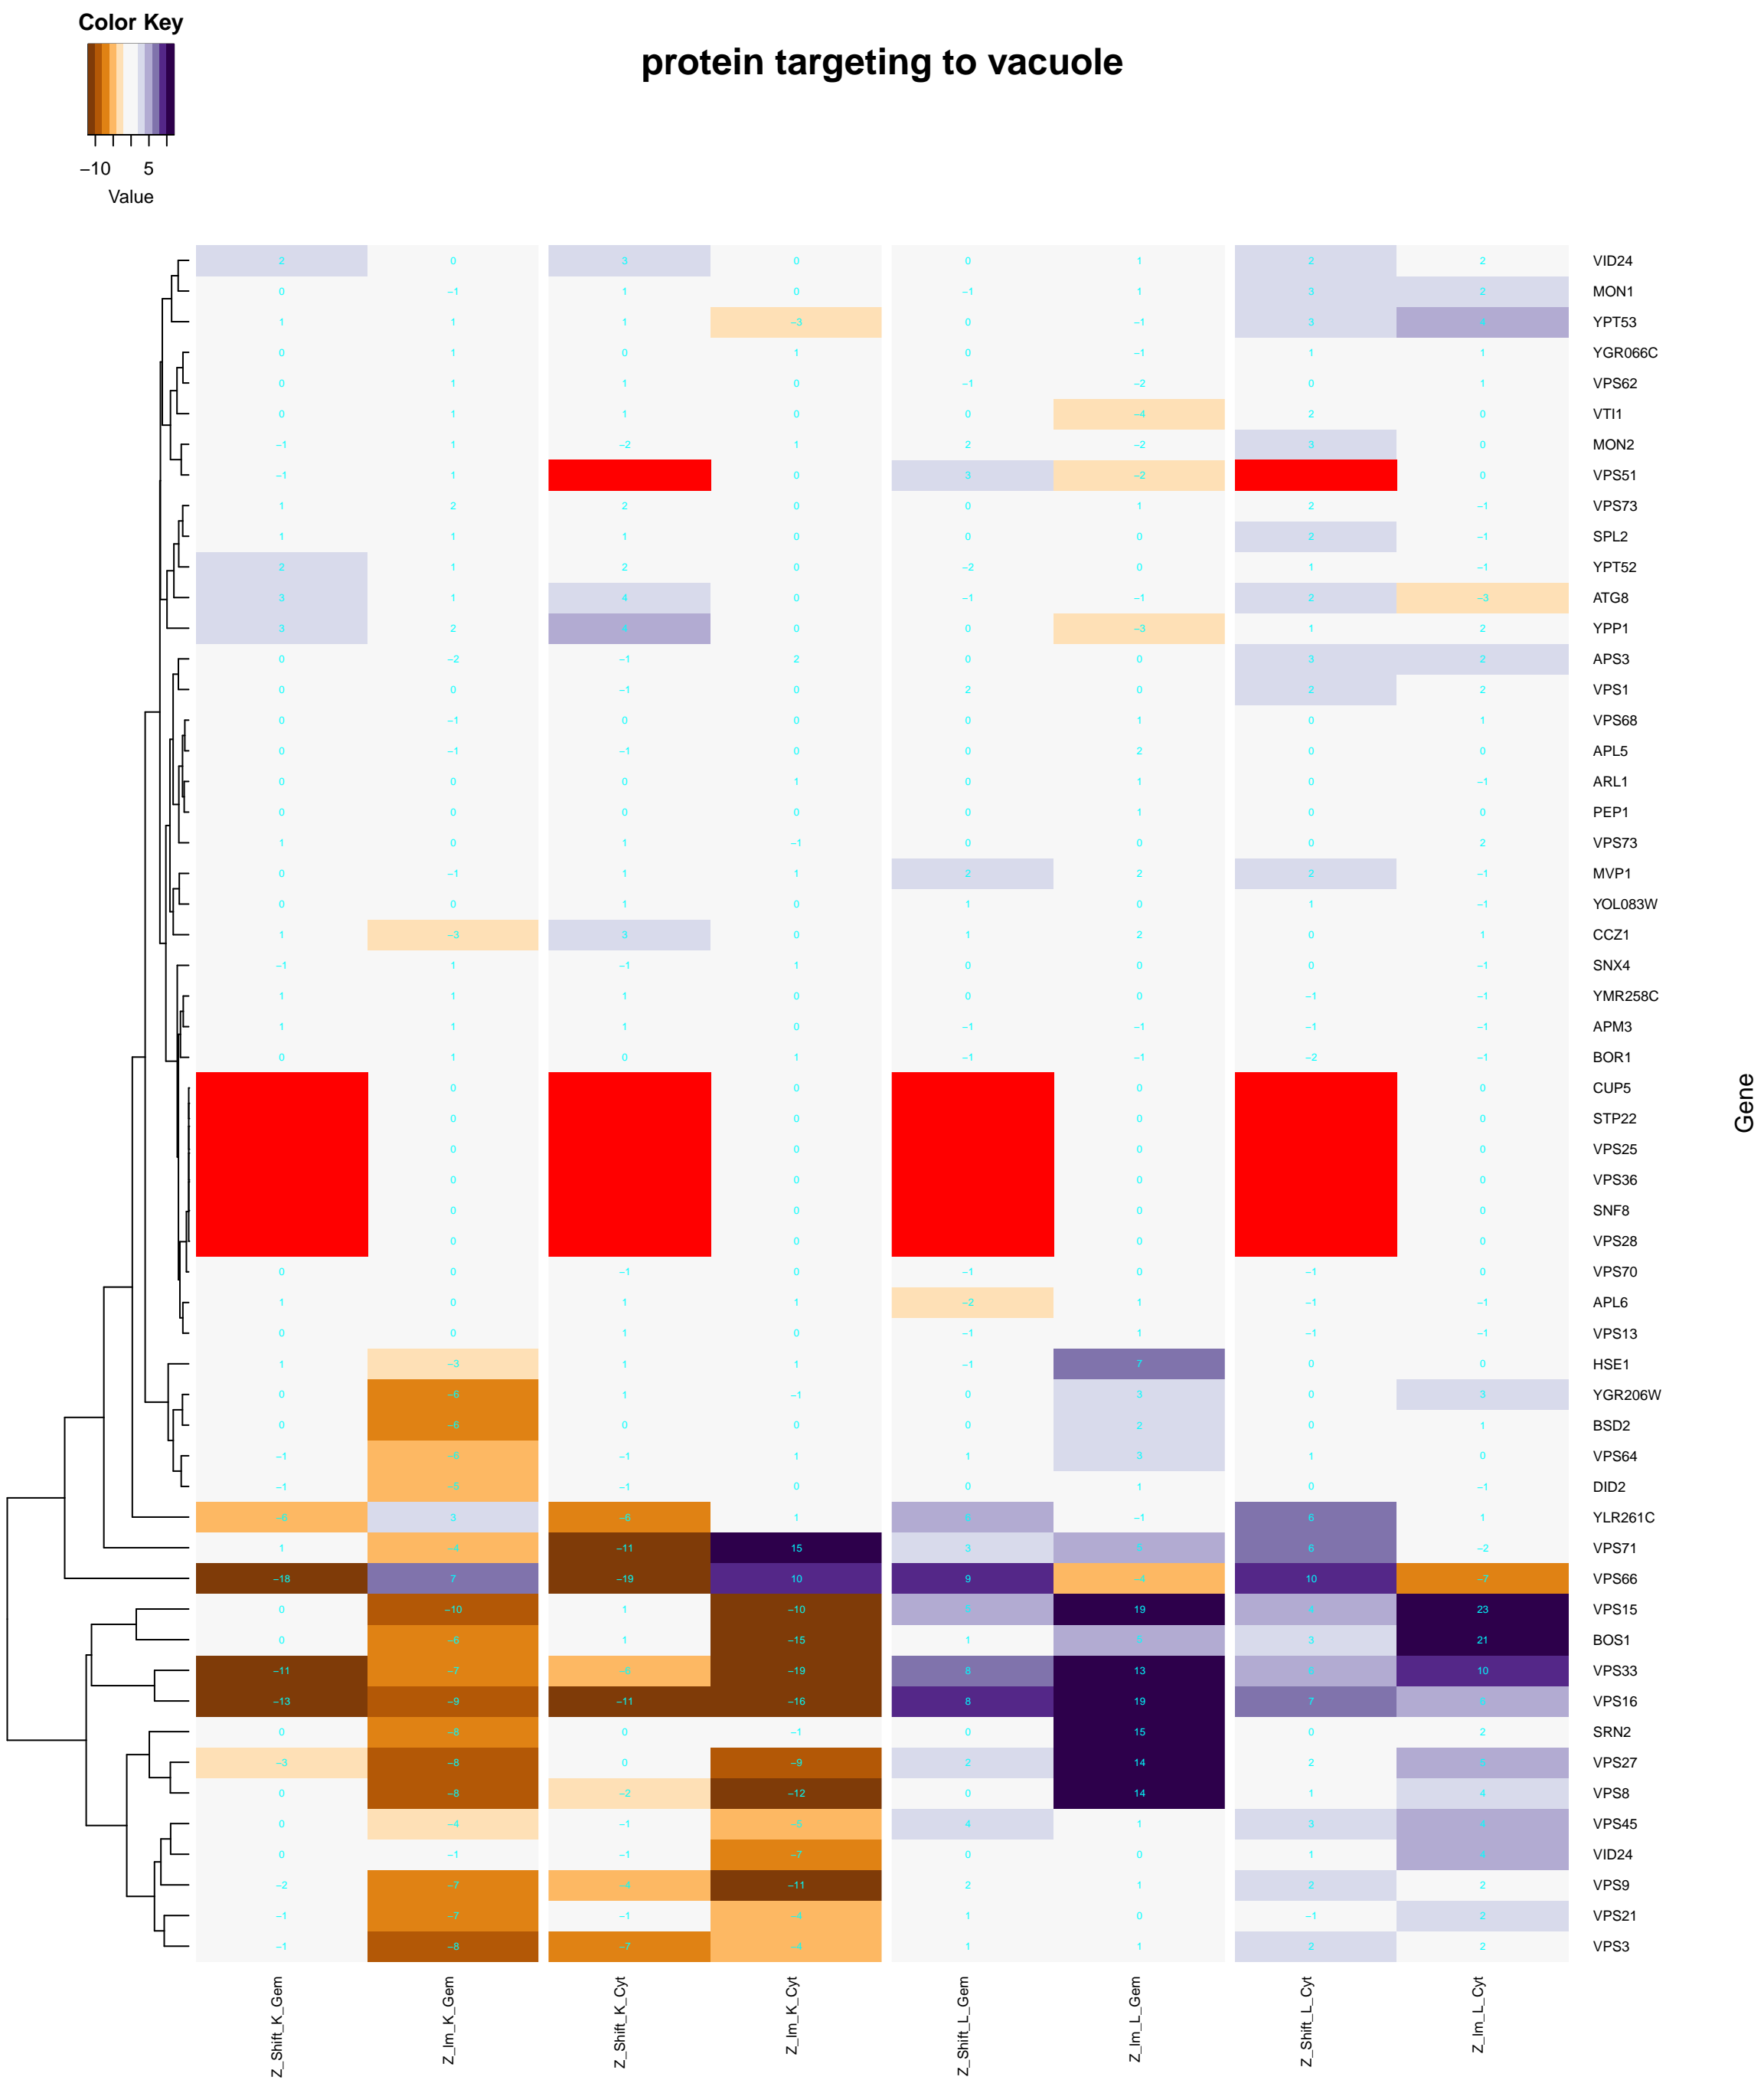

## CVT pathway

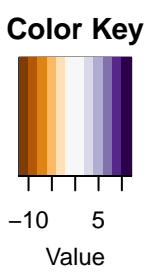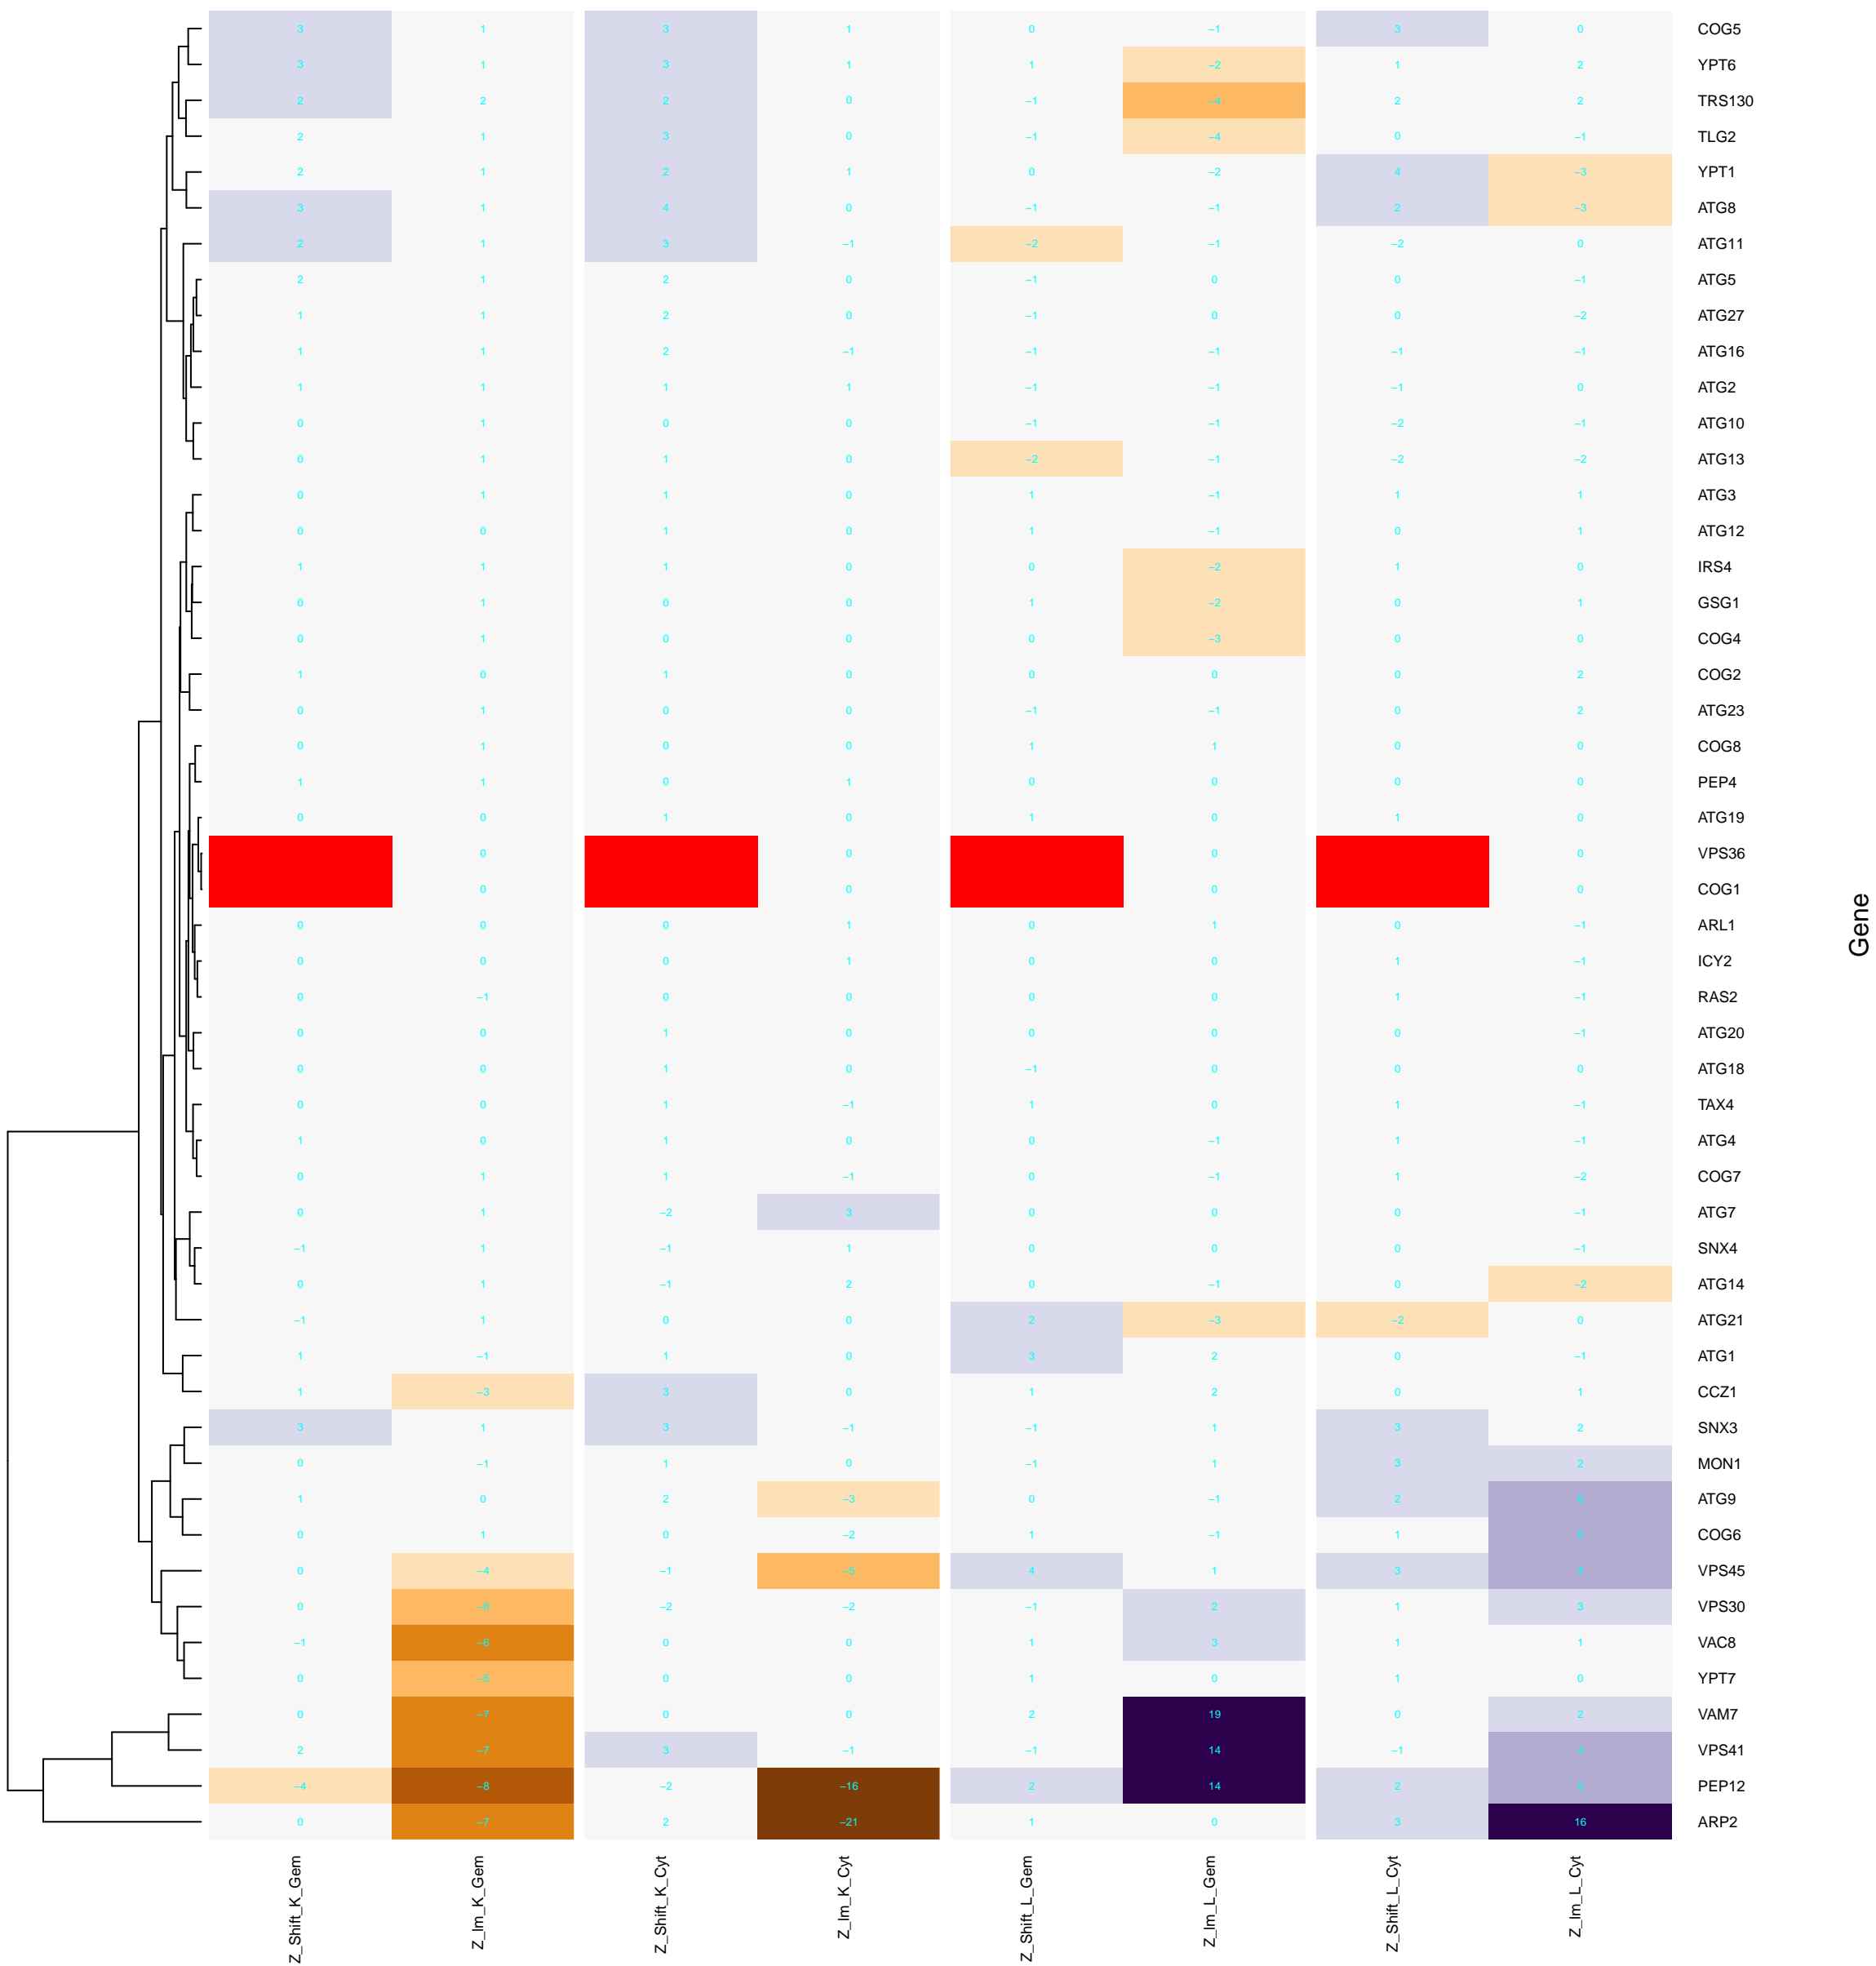

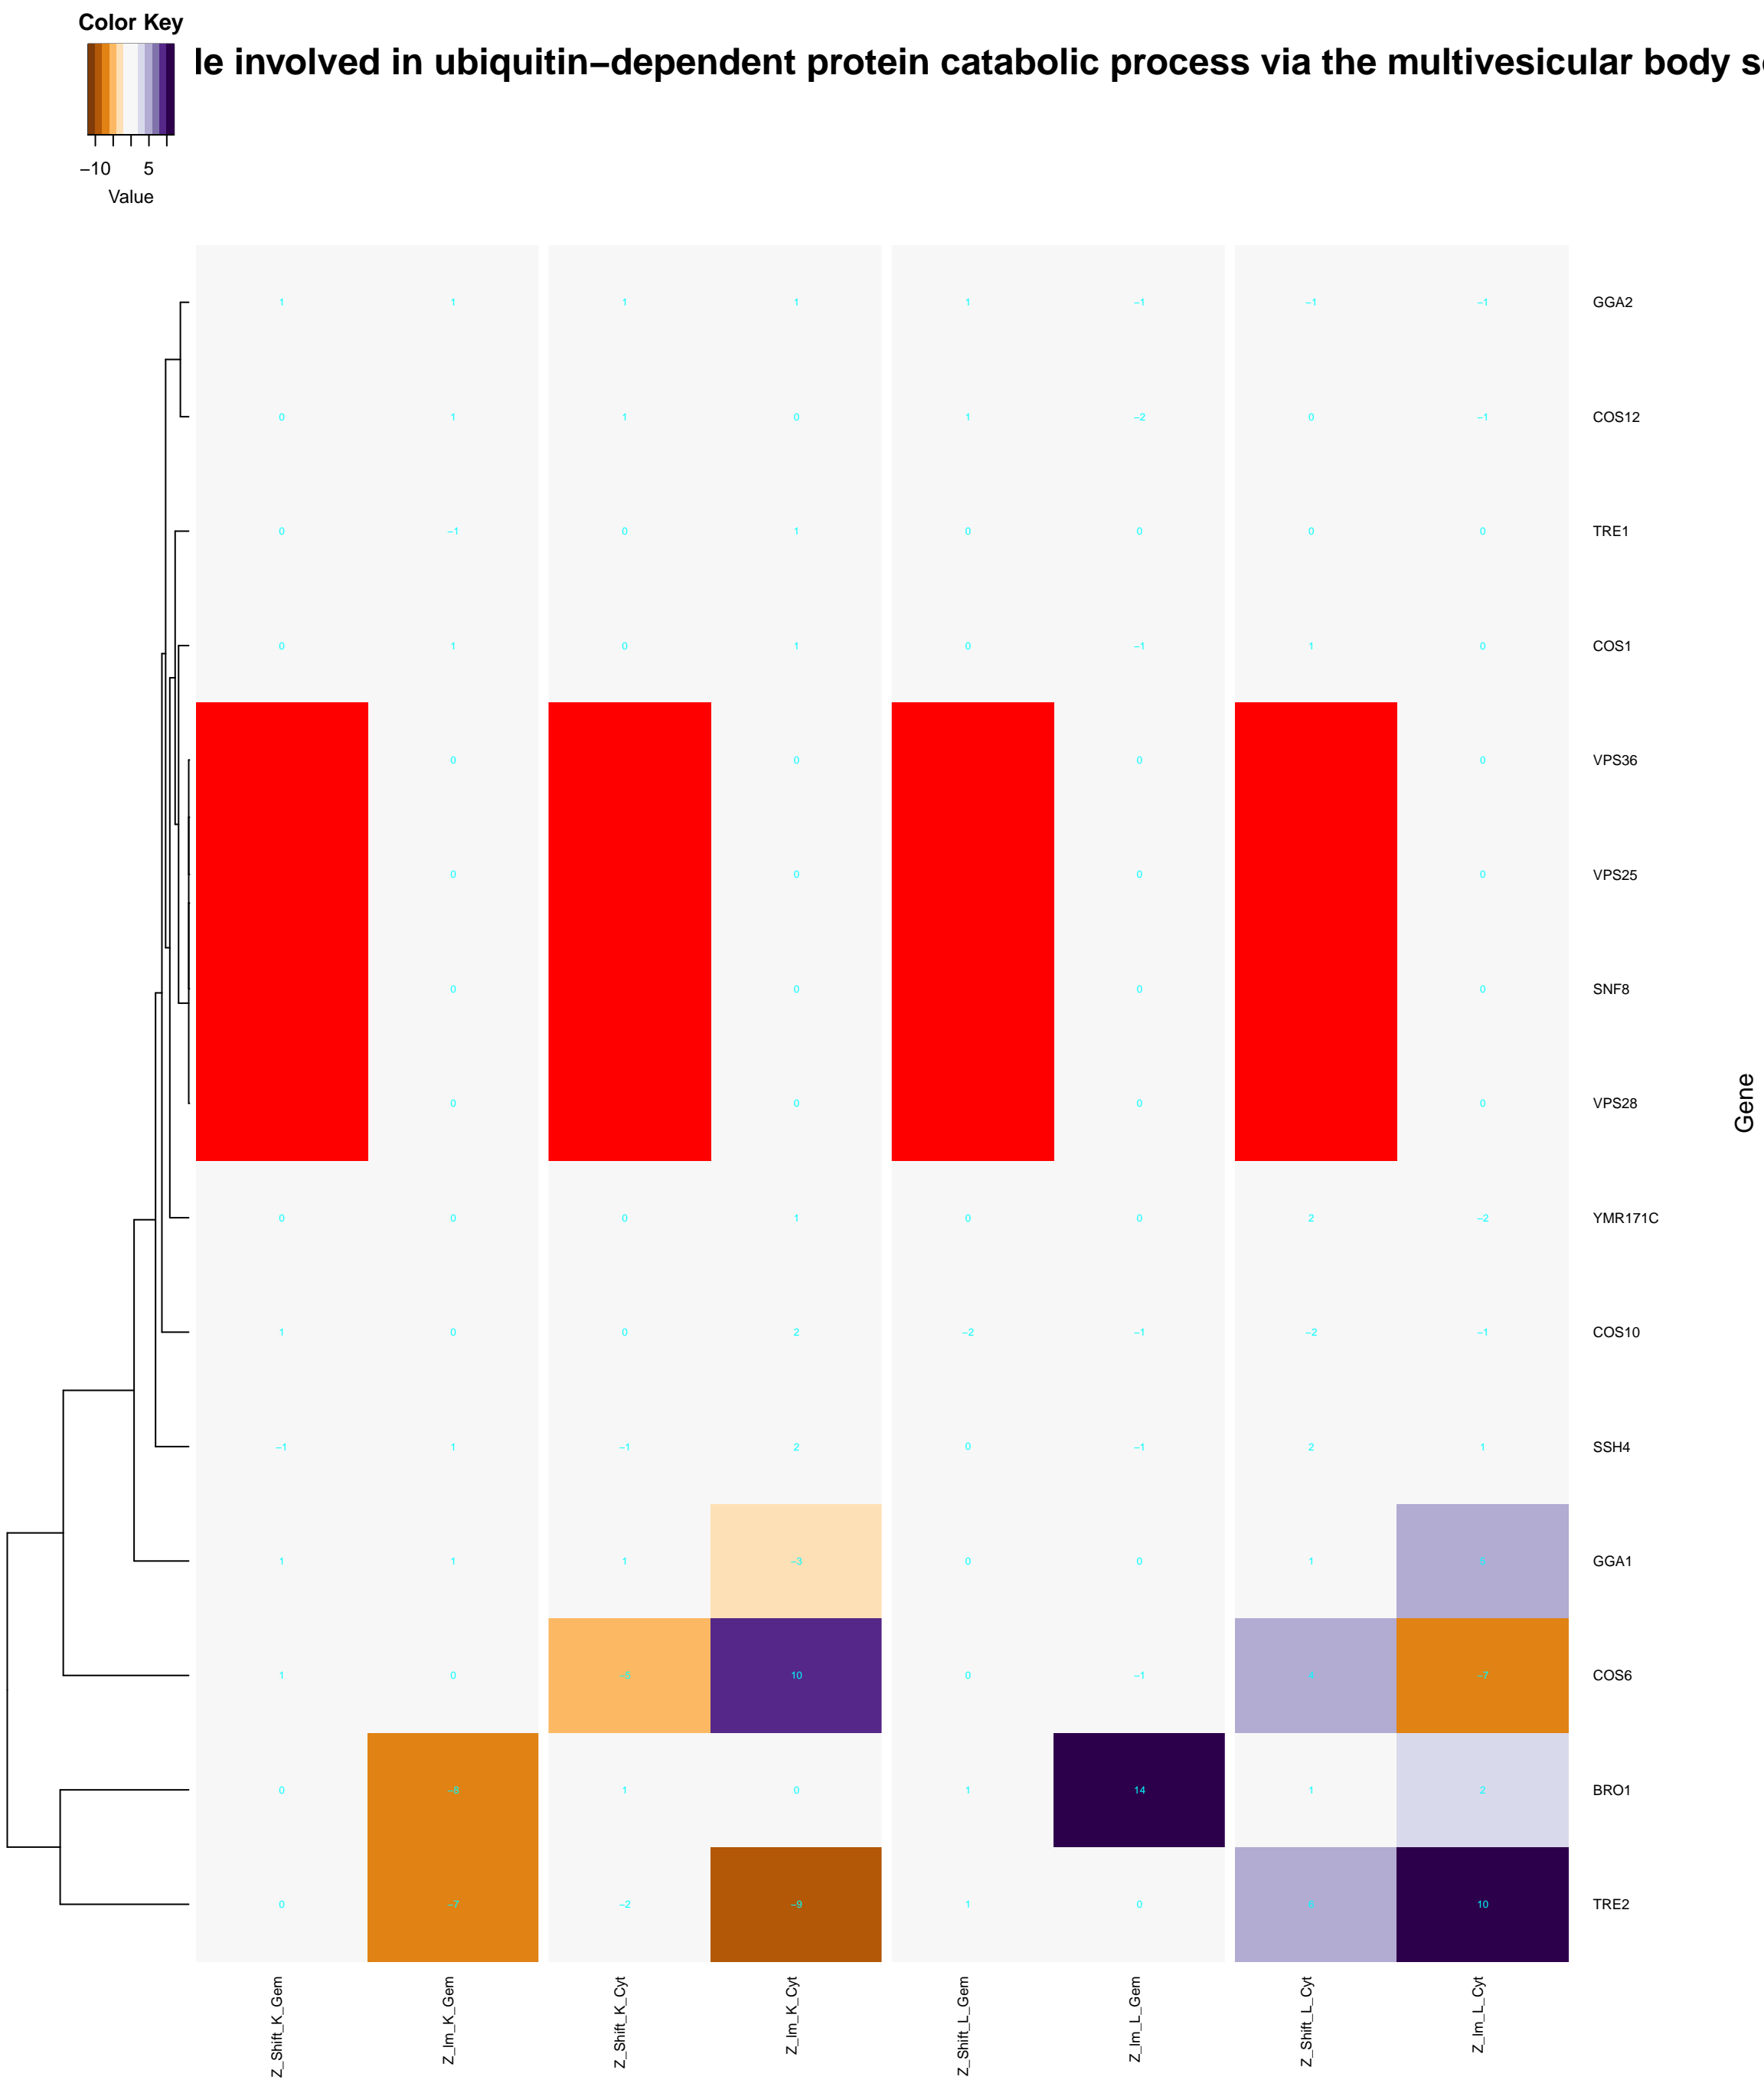

Supplement: s1 [file s1]

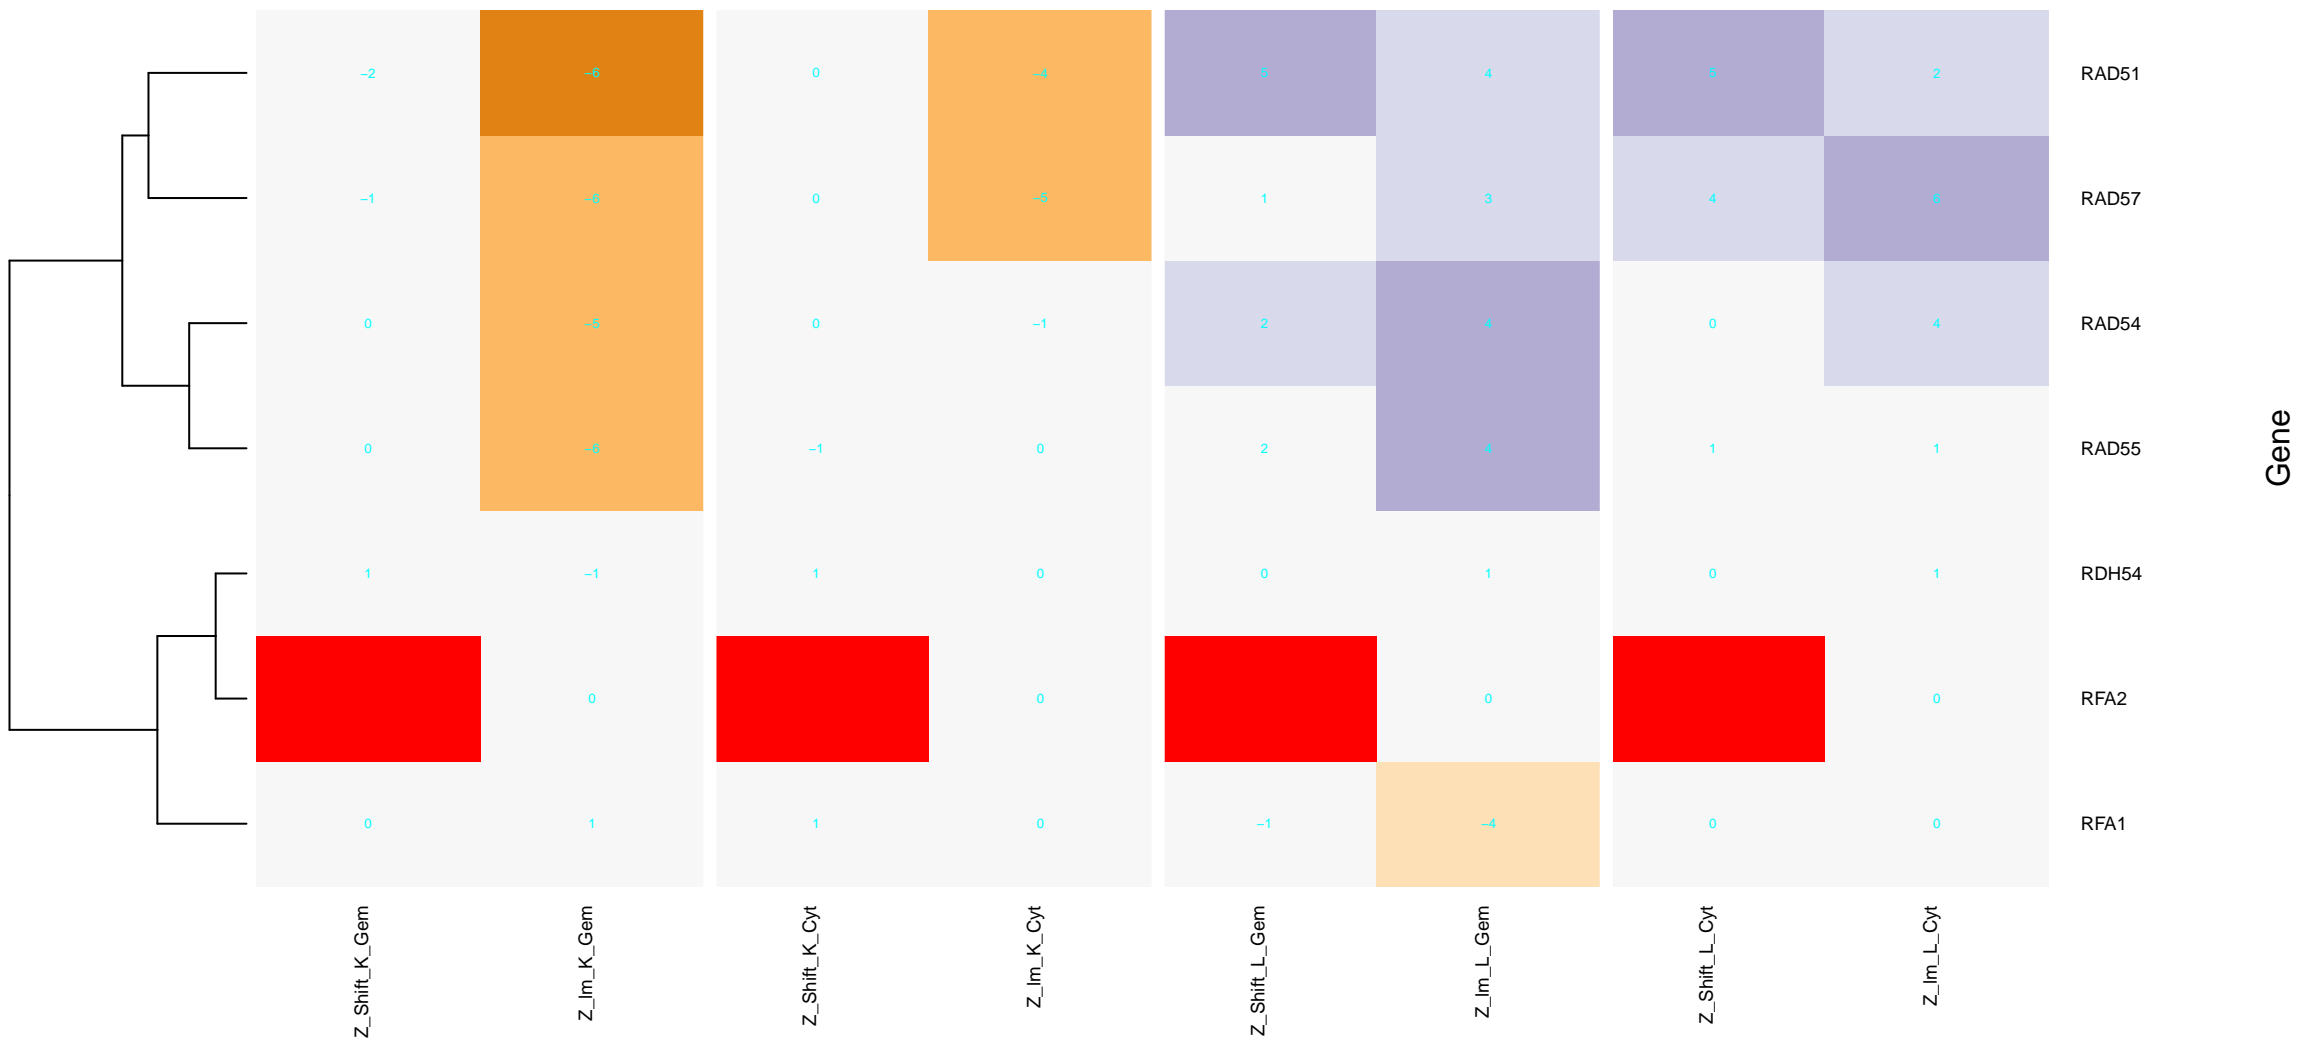

Supplement: s1 [file s1]

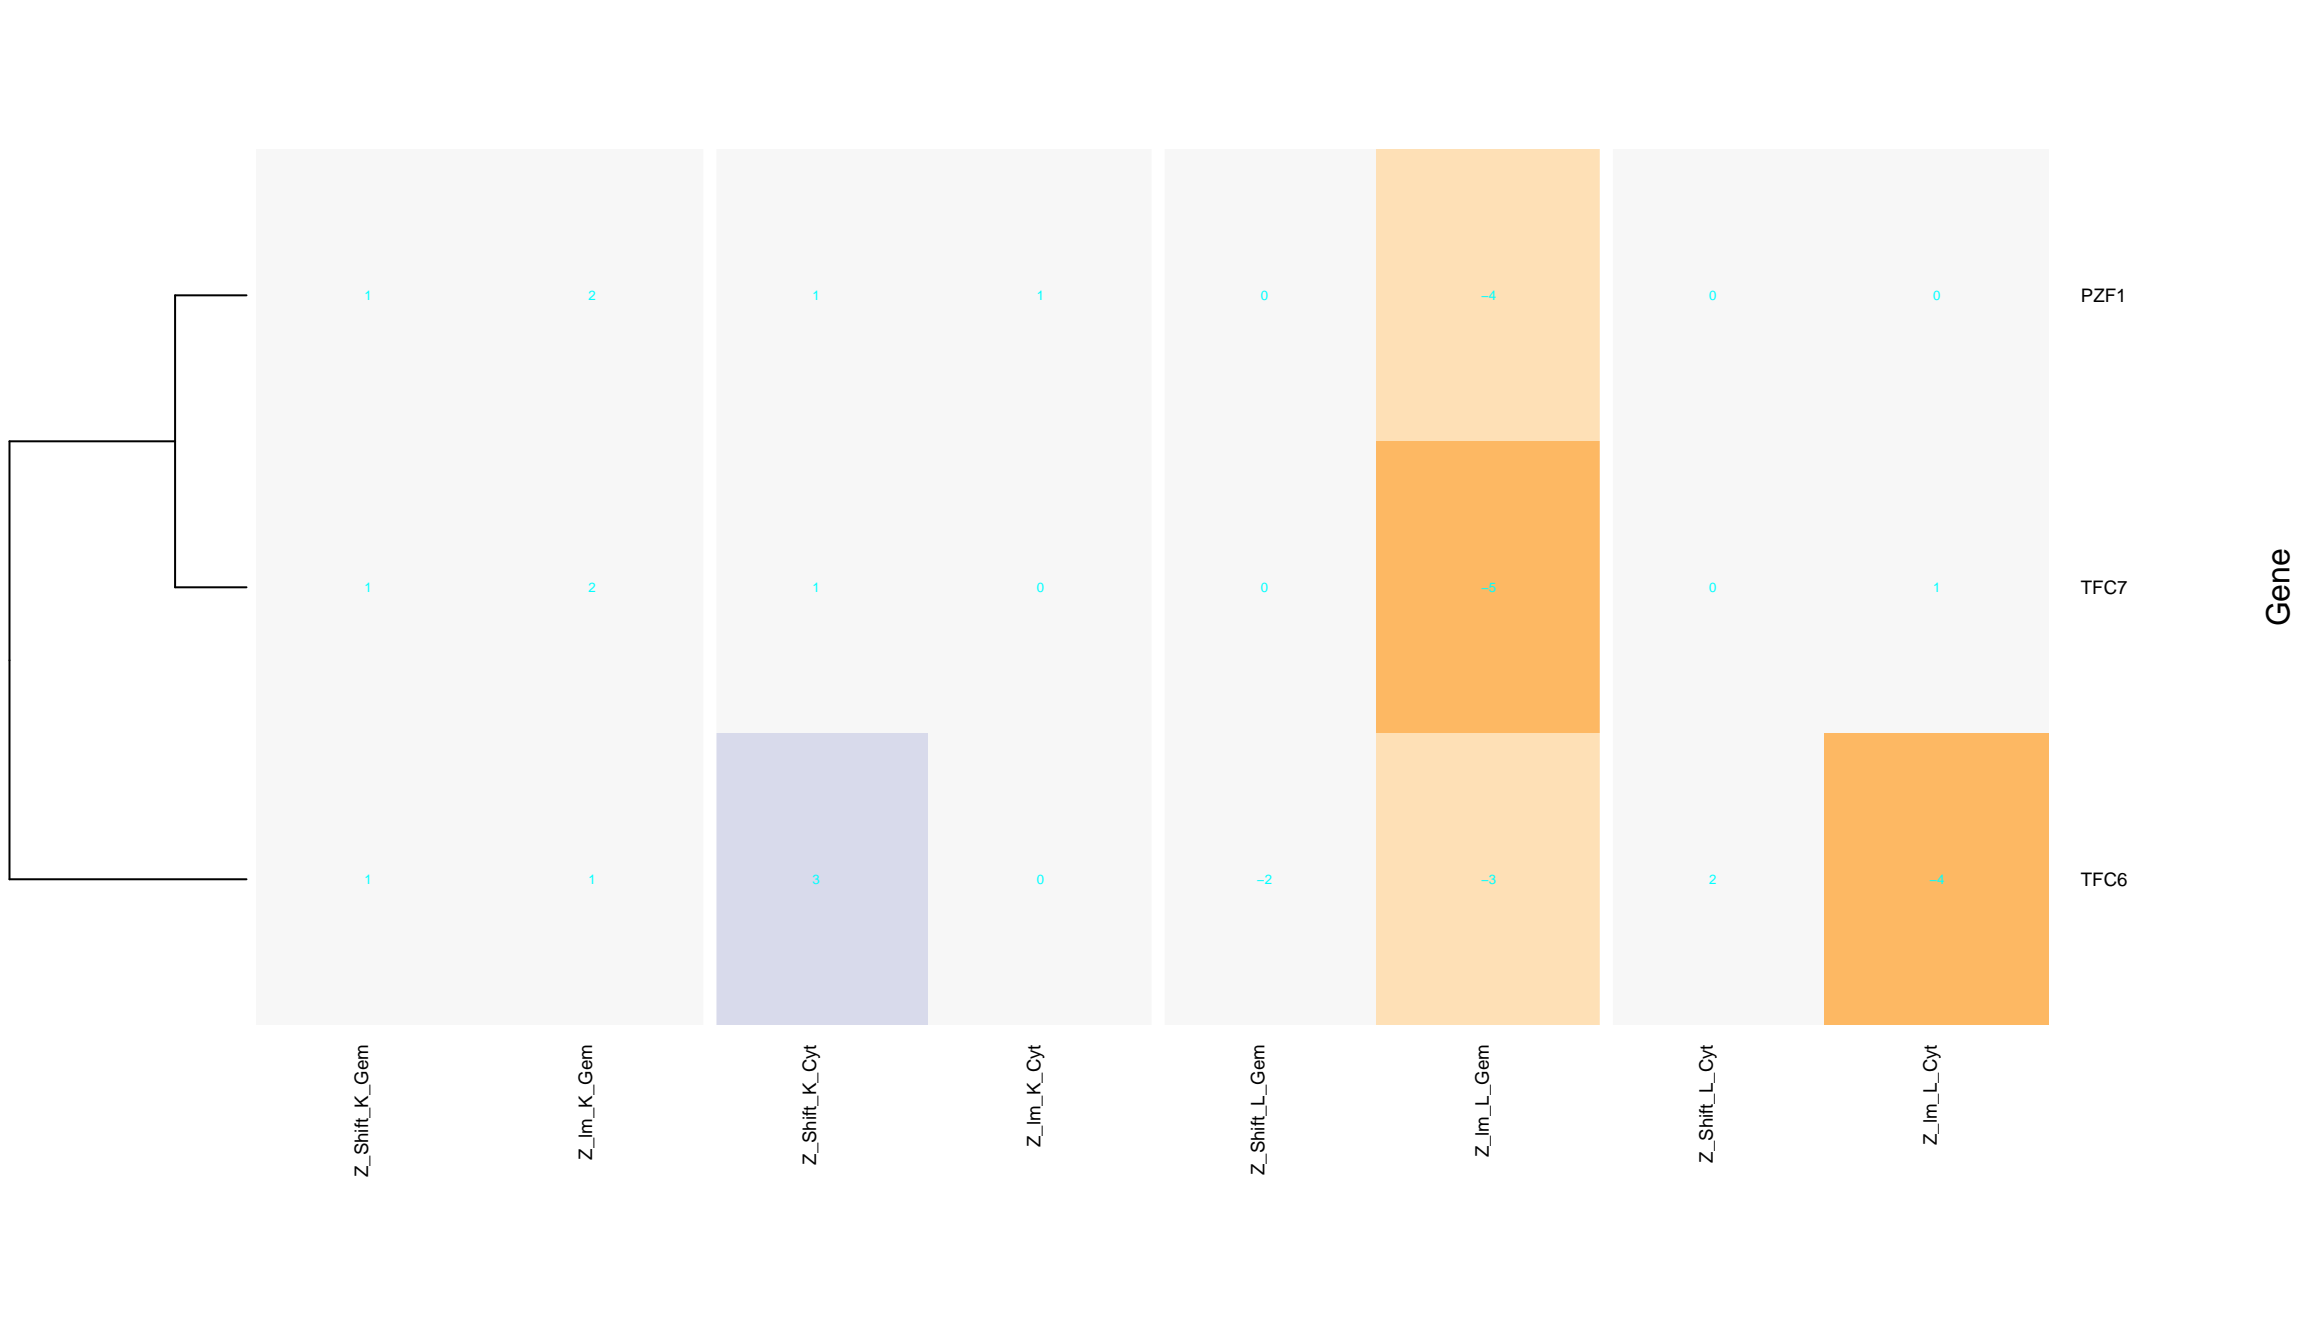

Supplement: s1 [file s1]

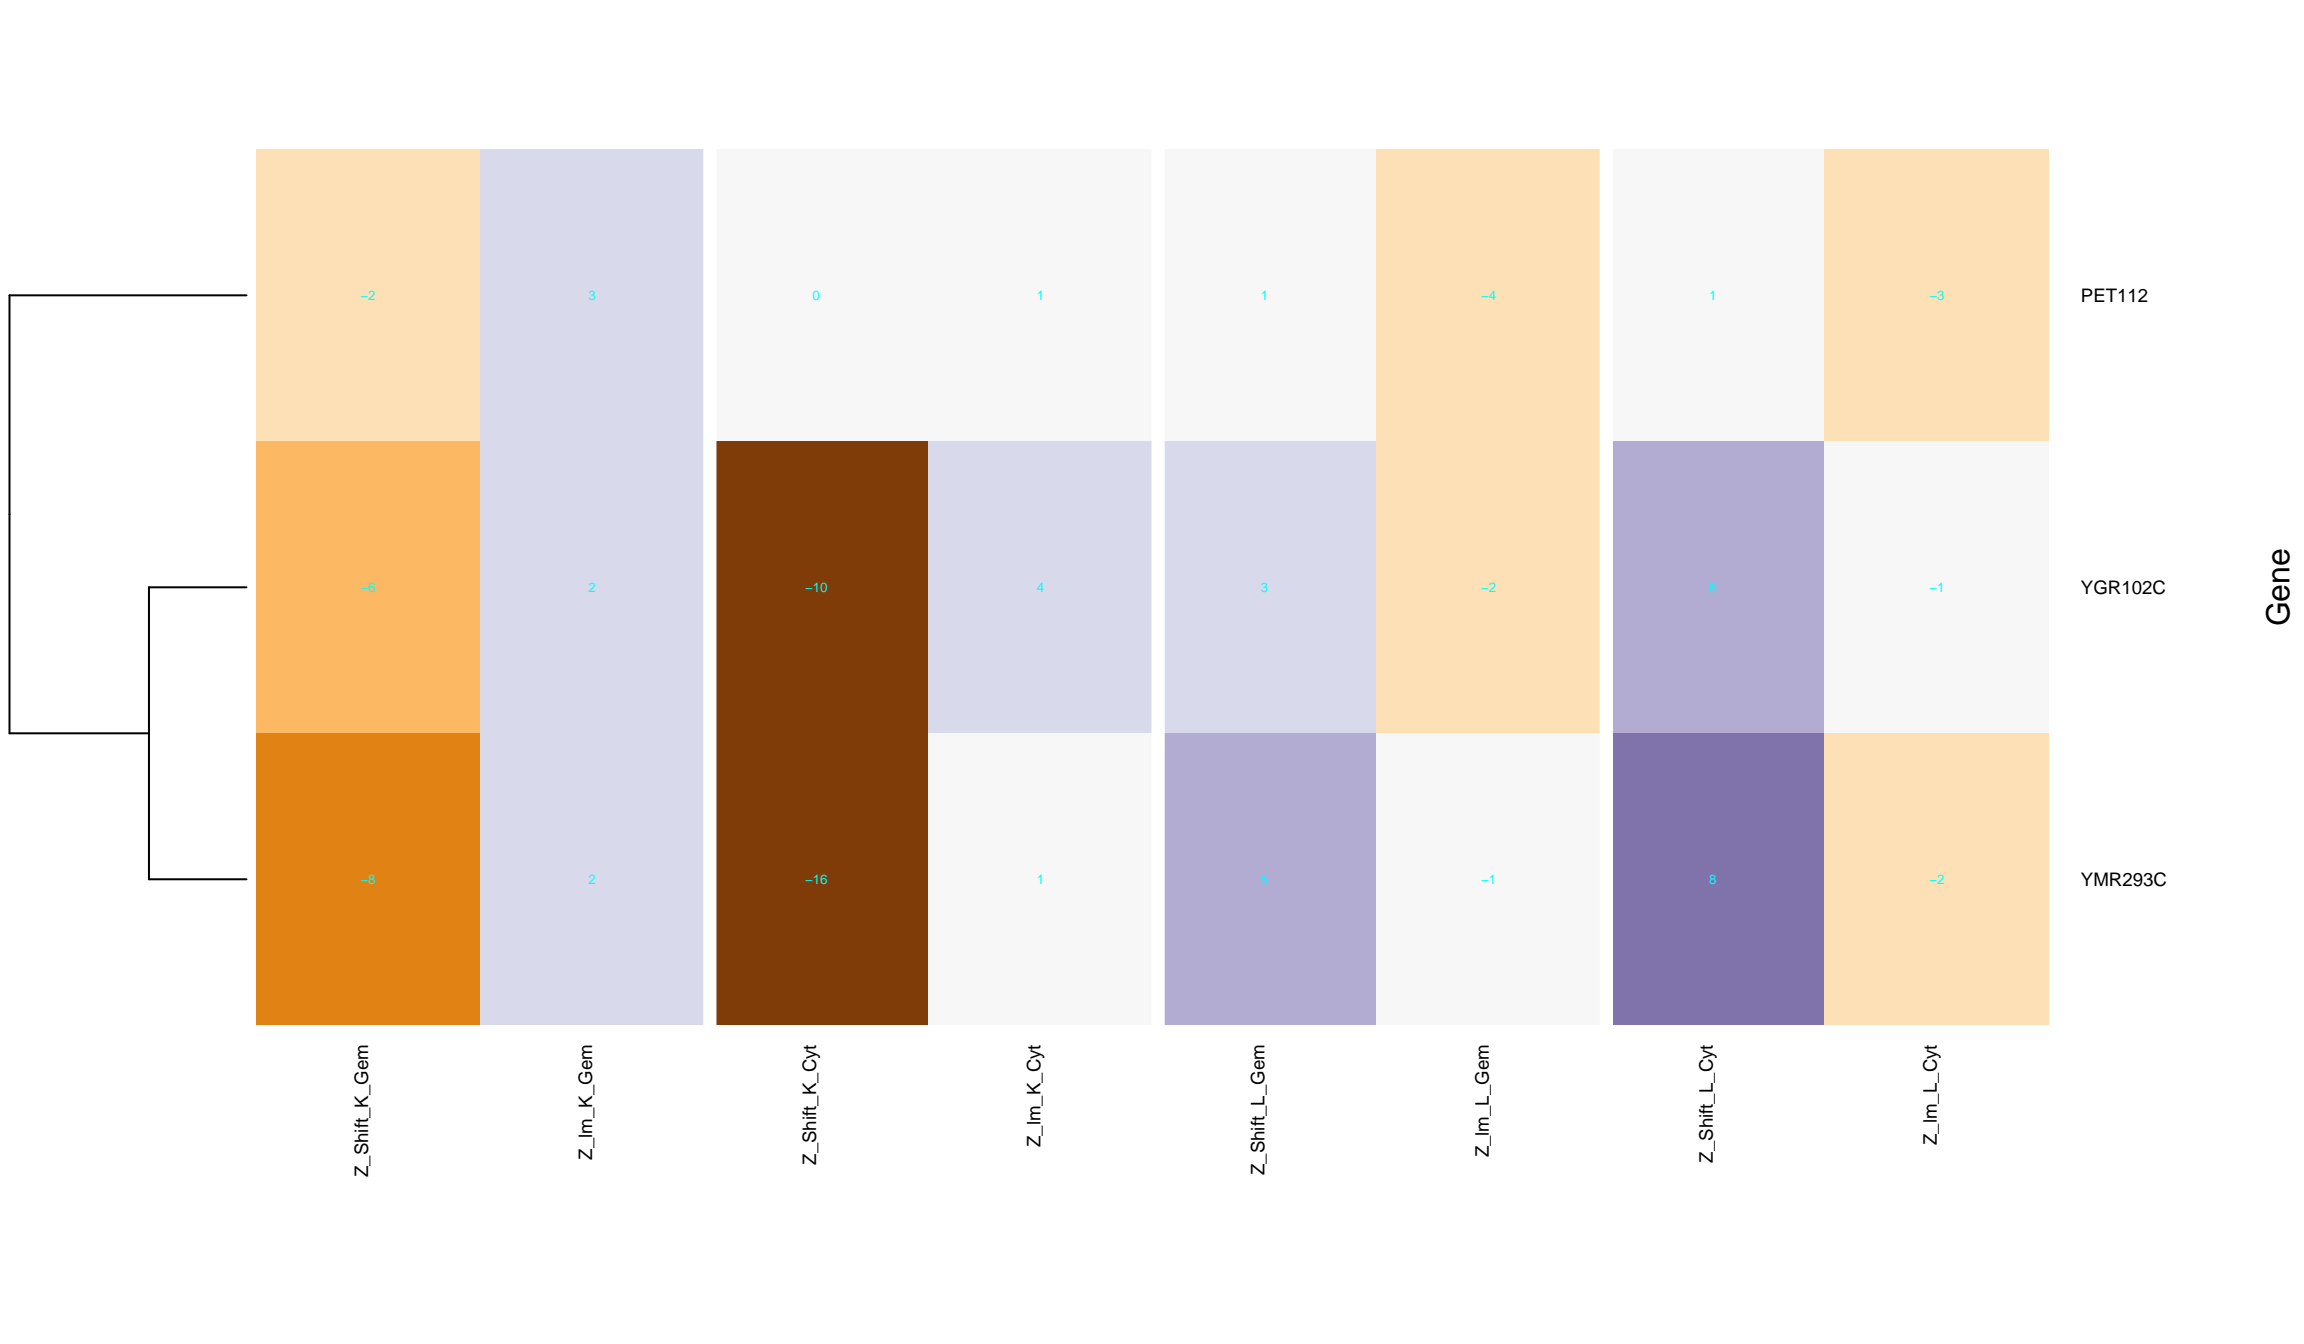

Supplement: s1 [file s1]

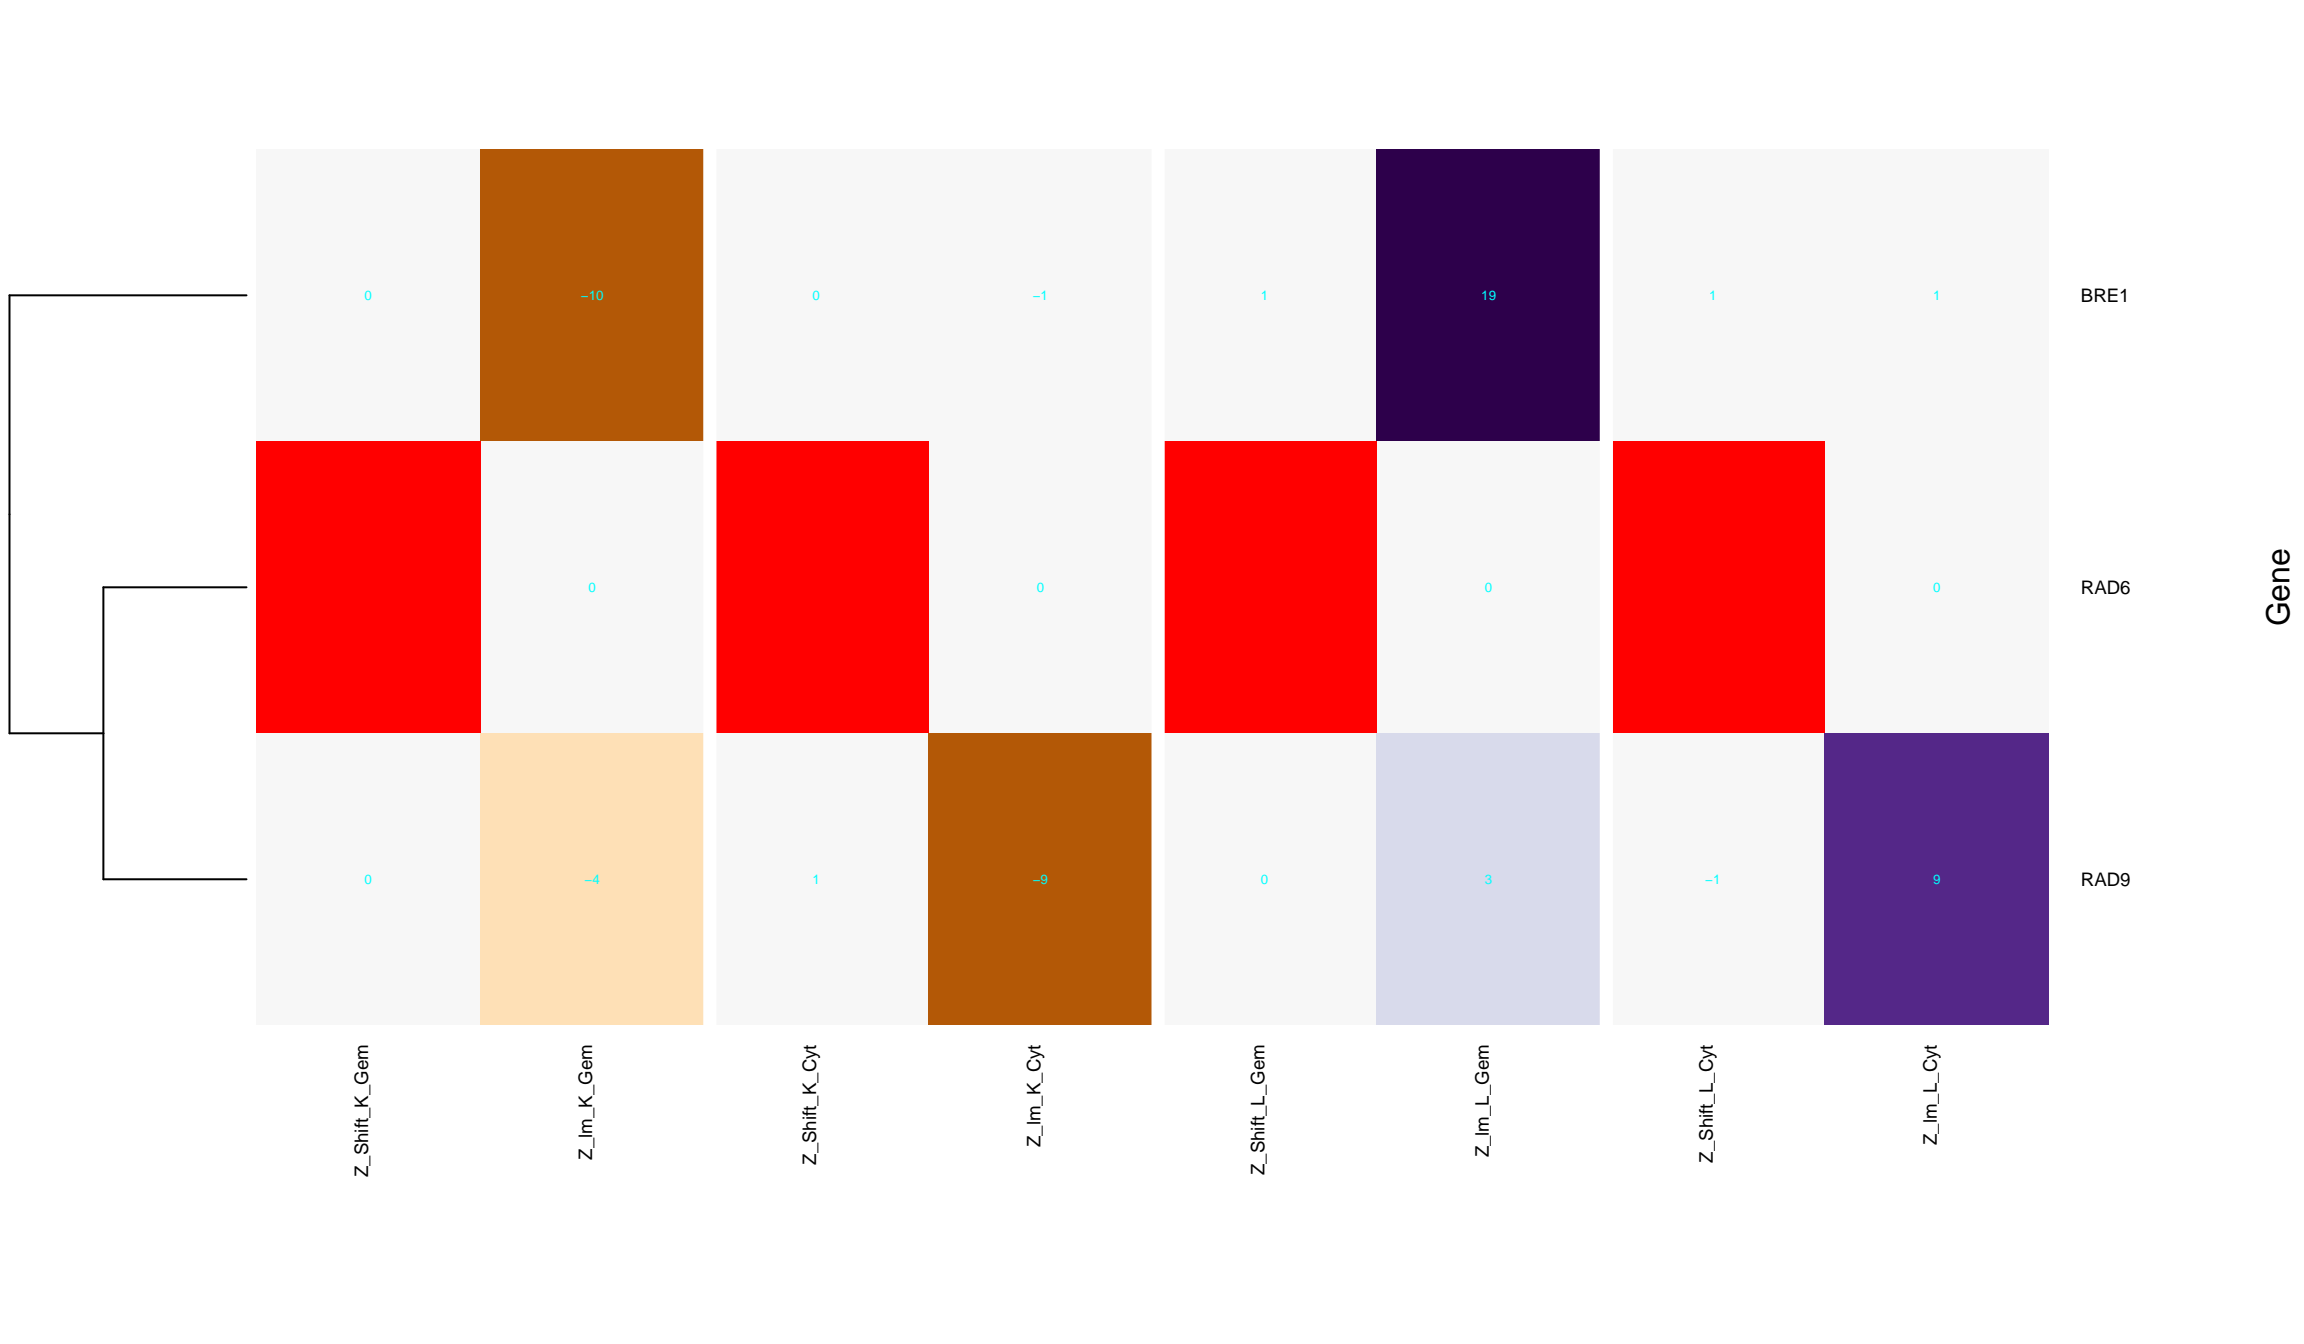

Supplement: s1 [file s1]

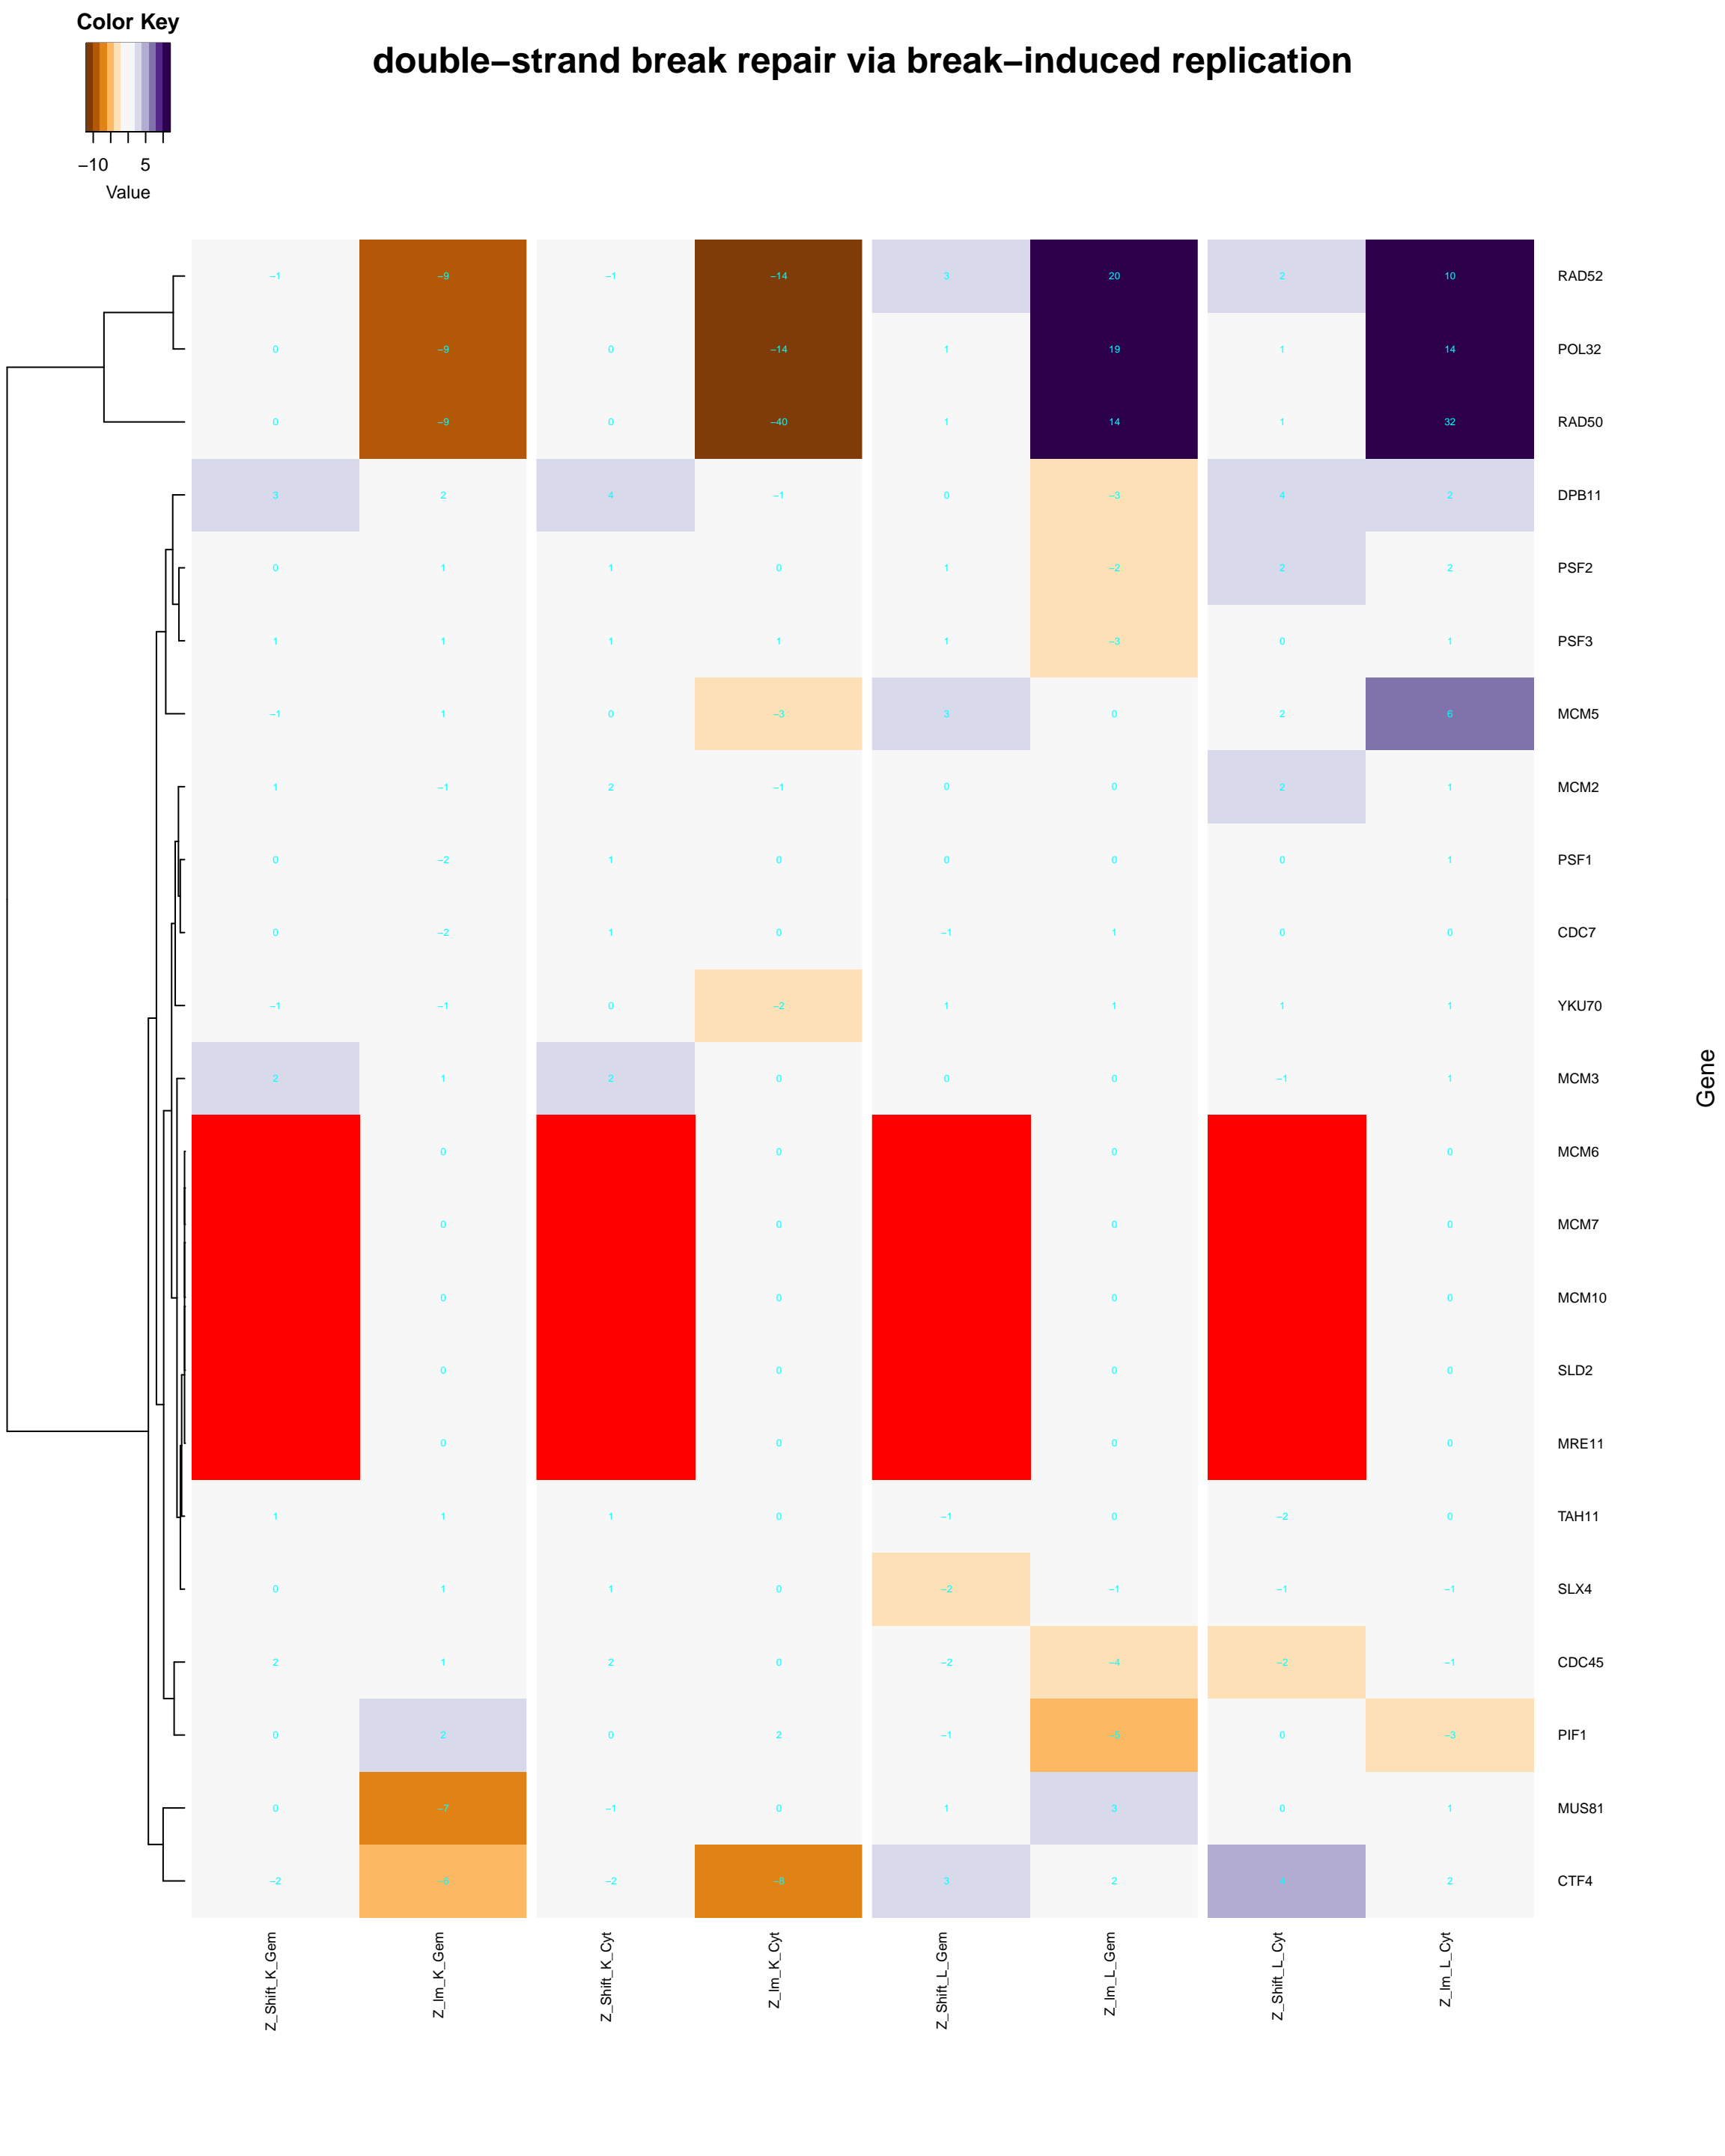

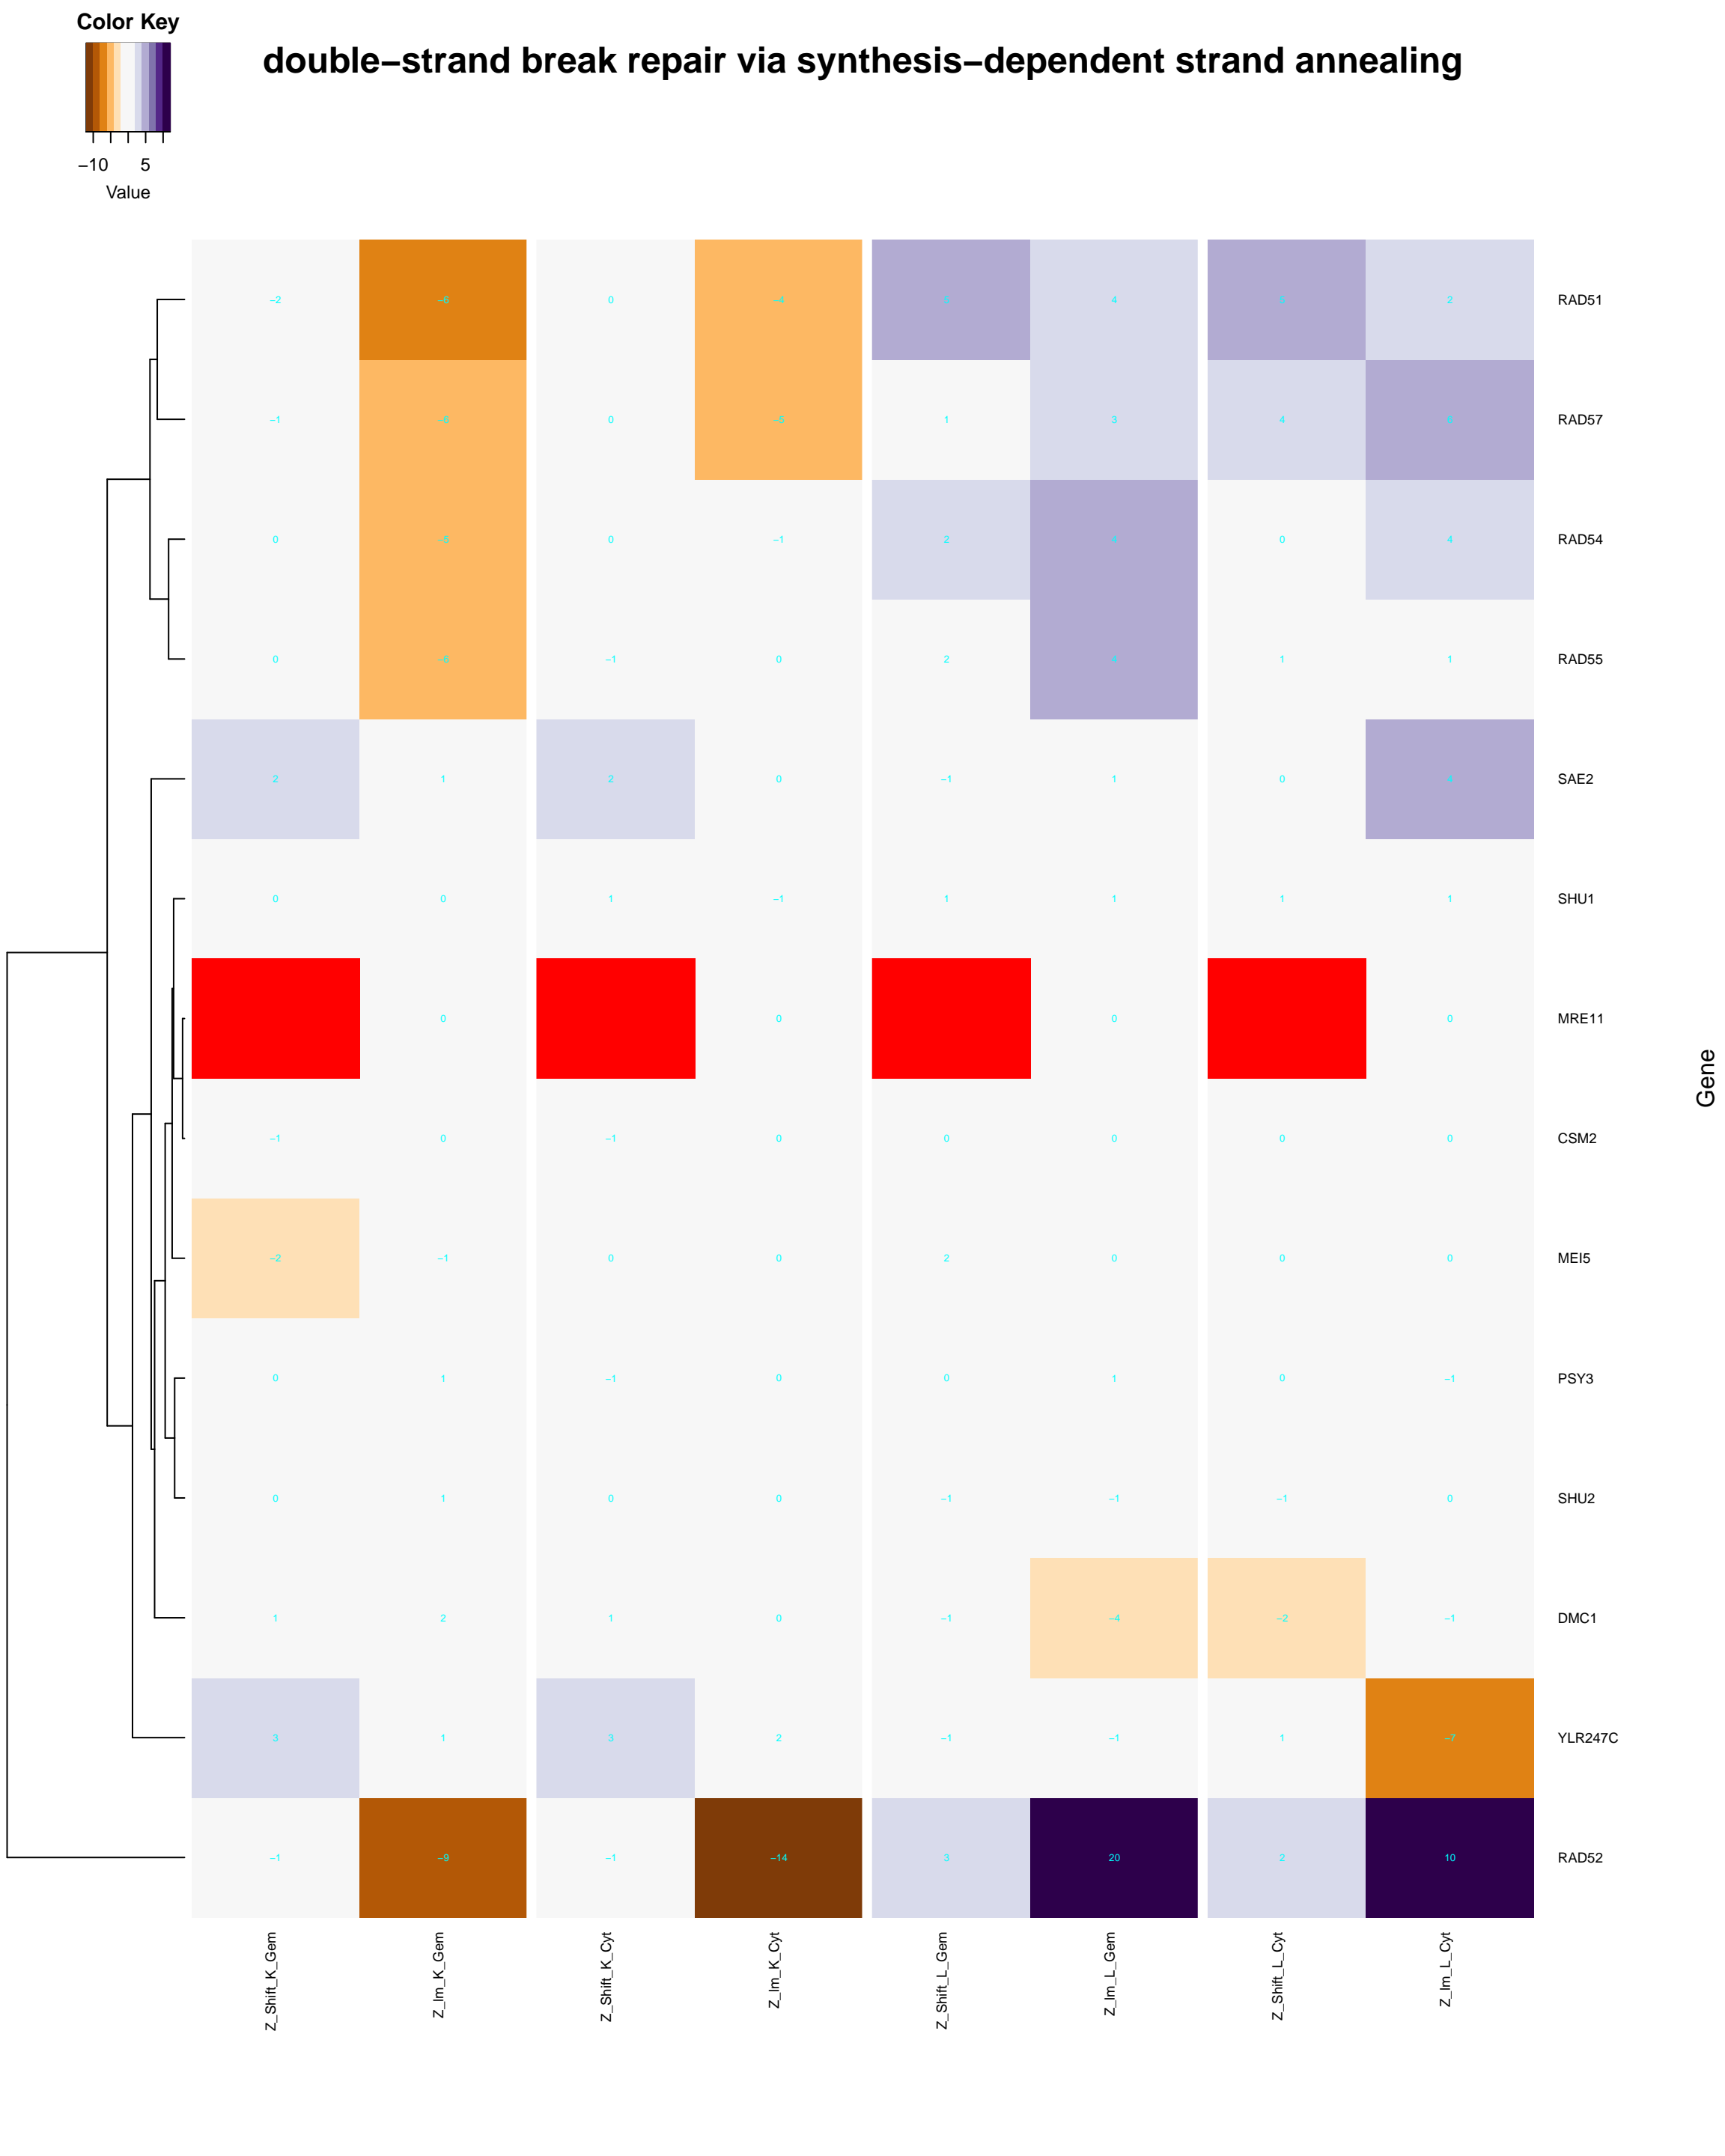

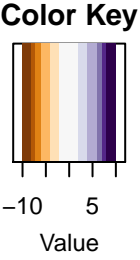

replication-born double-strand break repair via sister chromatid exchange

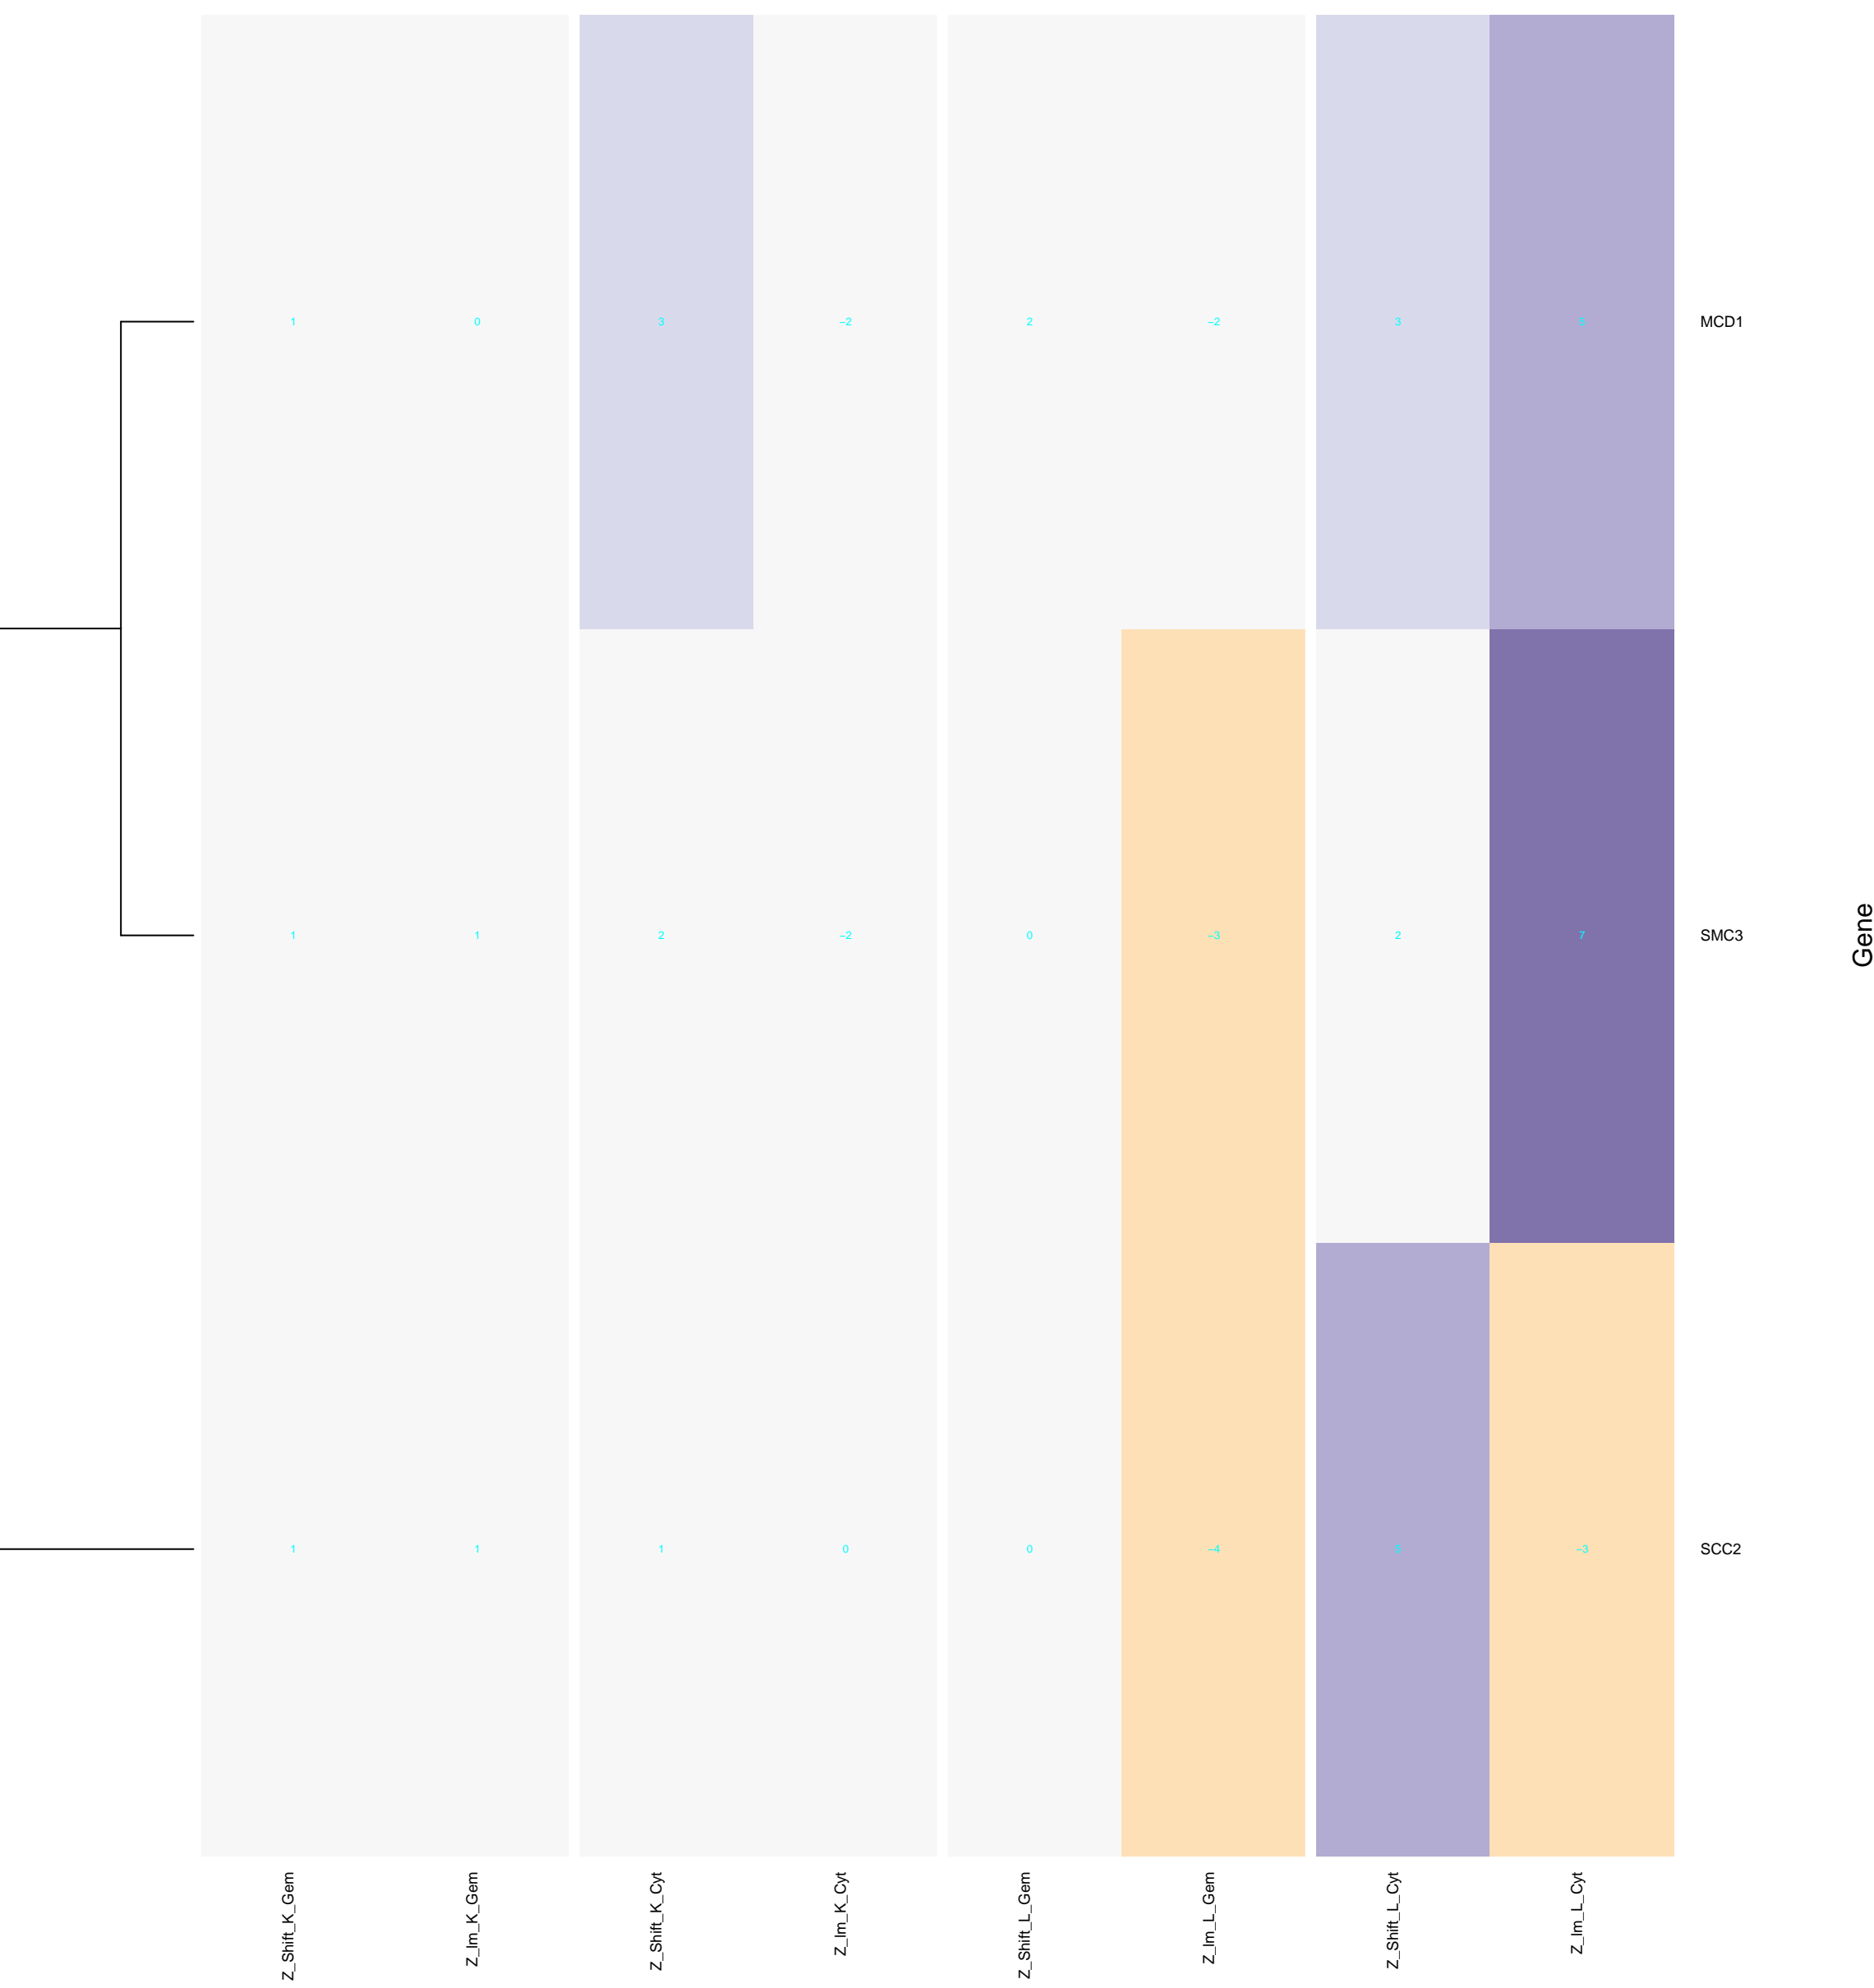

Supplement: s1 [file s1]

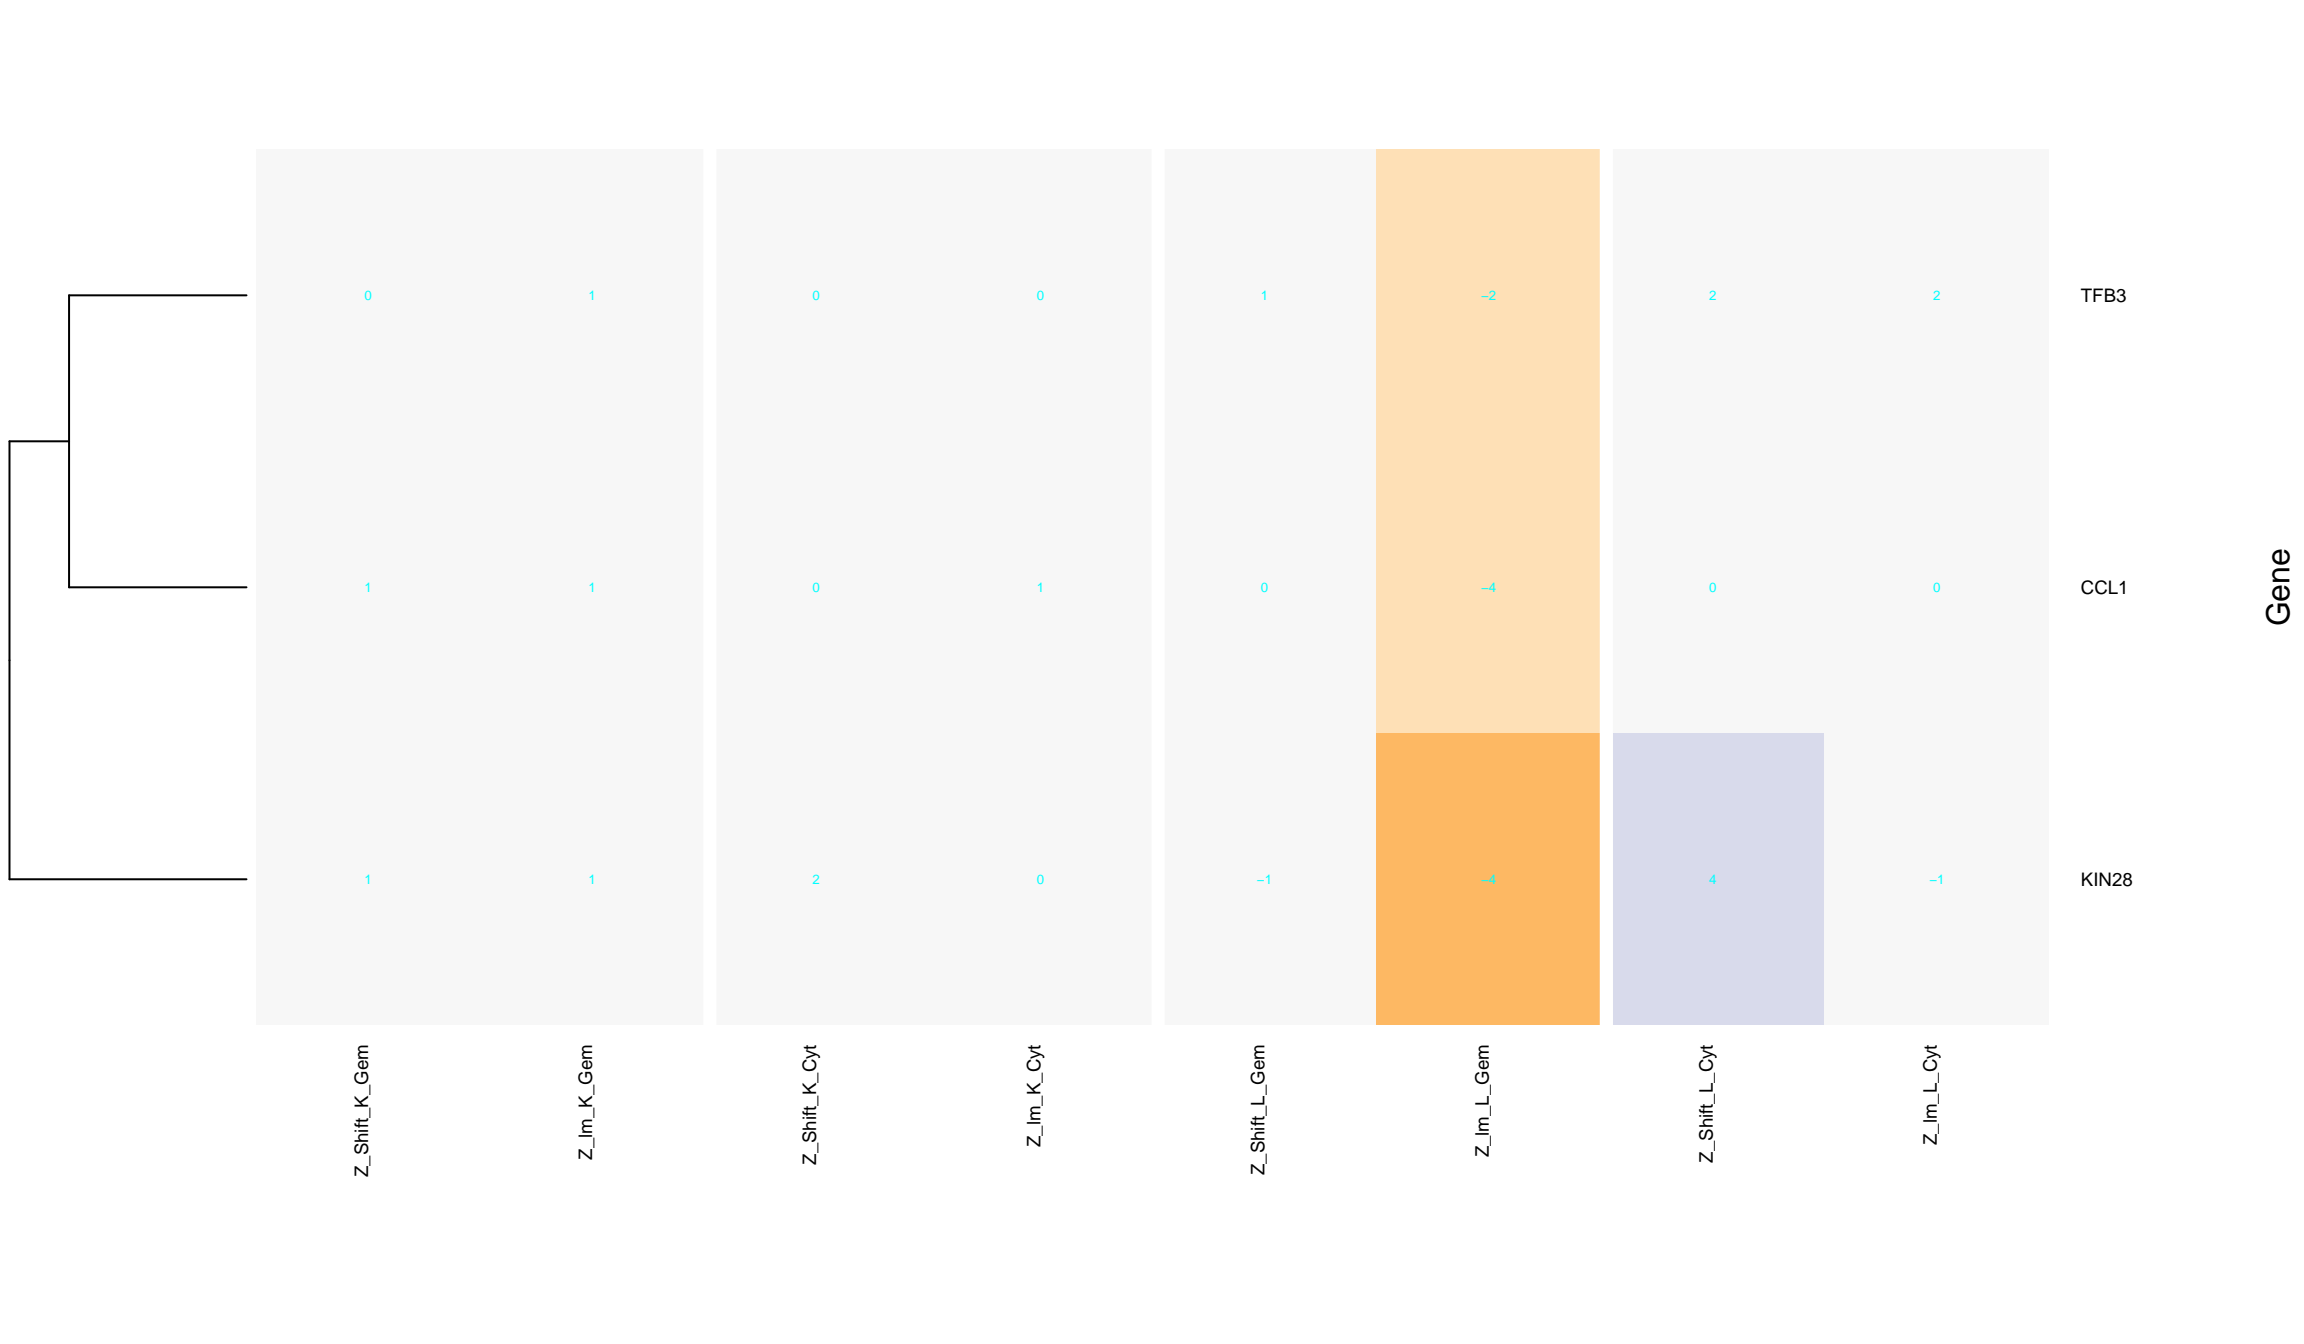

Supplement: s1 [file s1]

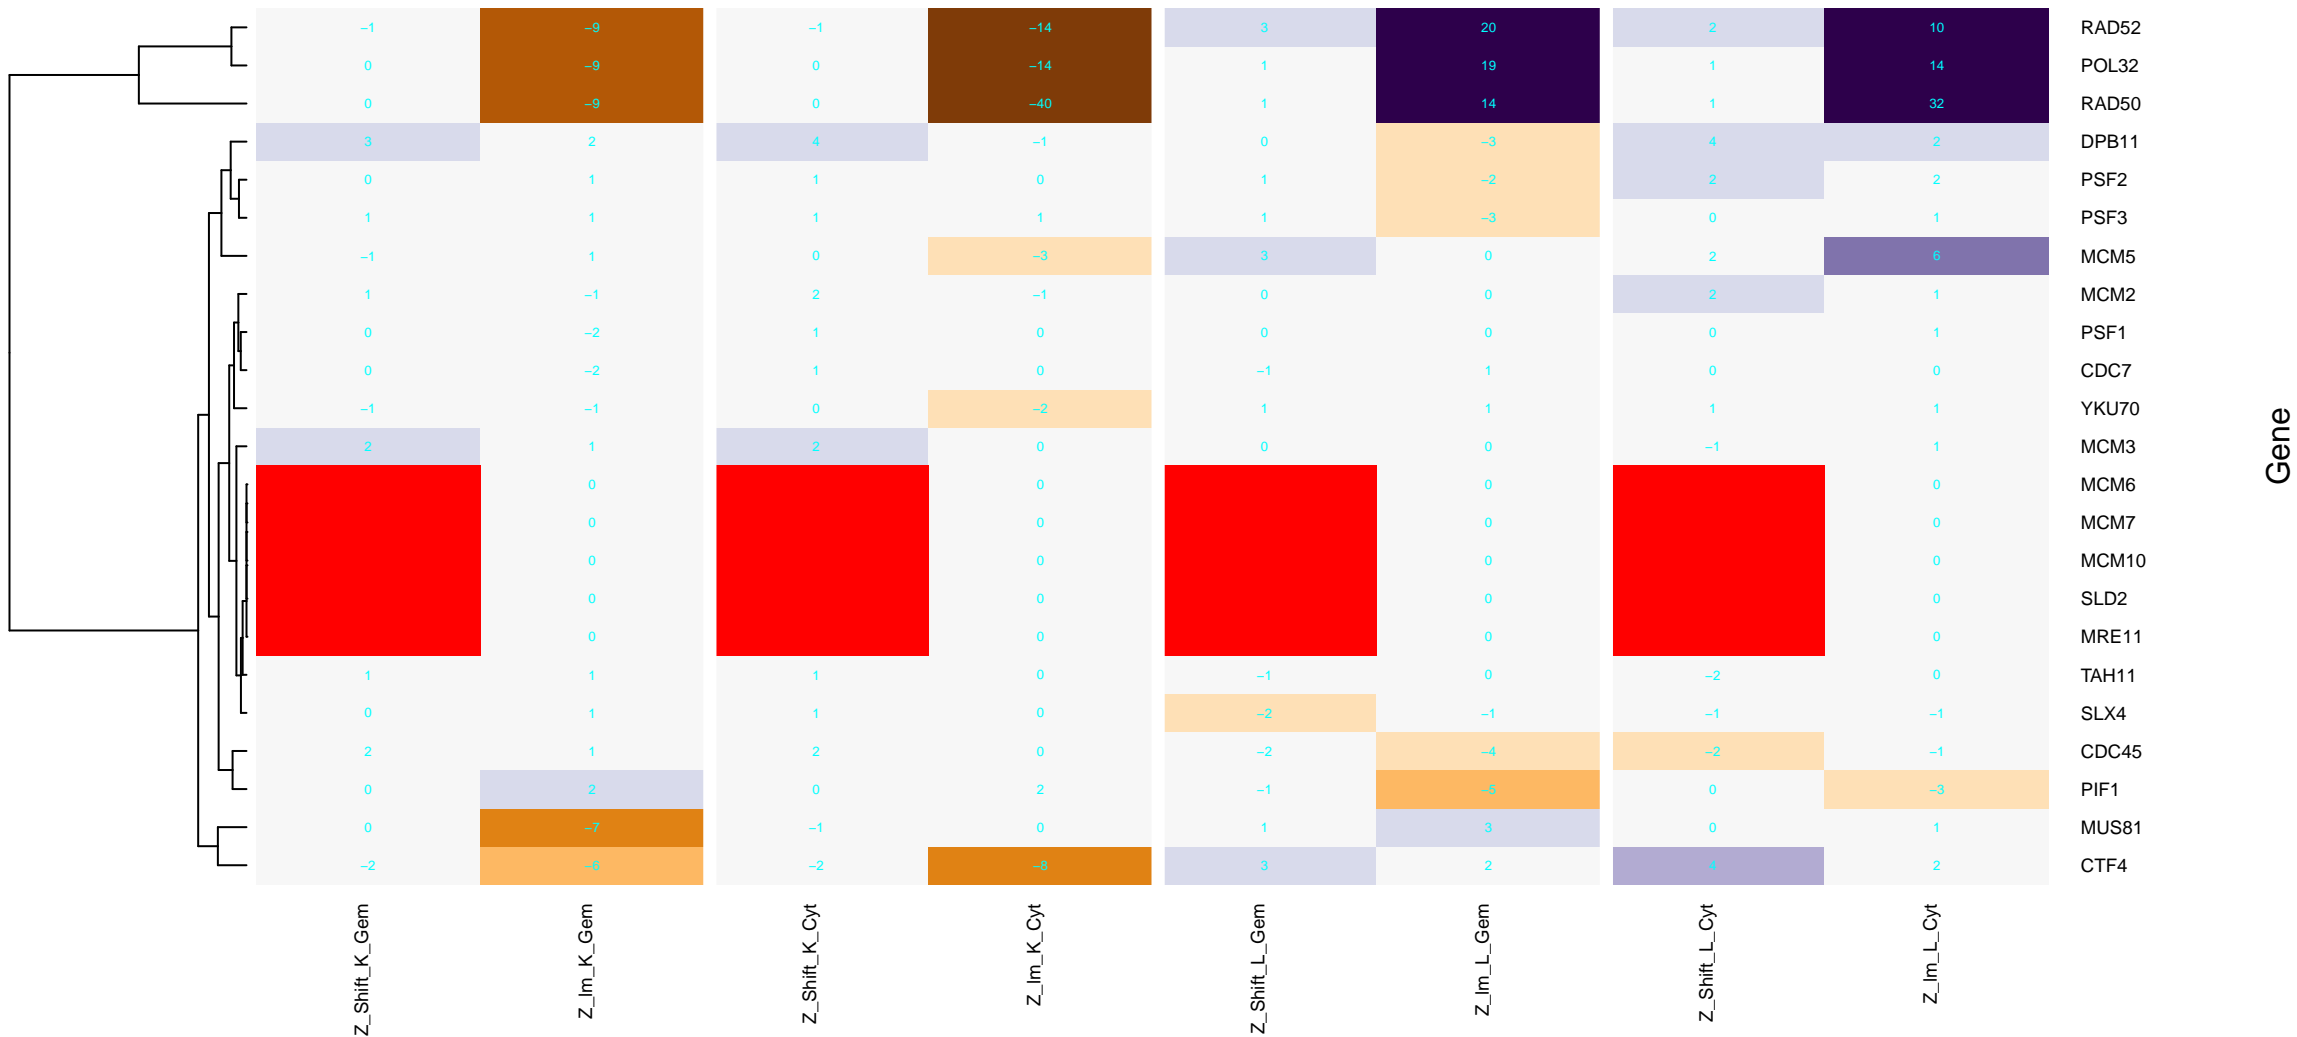

Supplement: s1 [file s1]

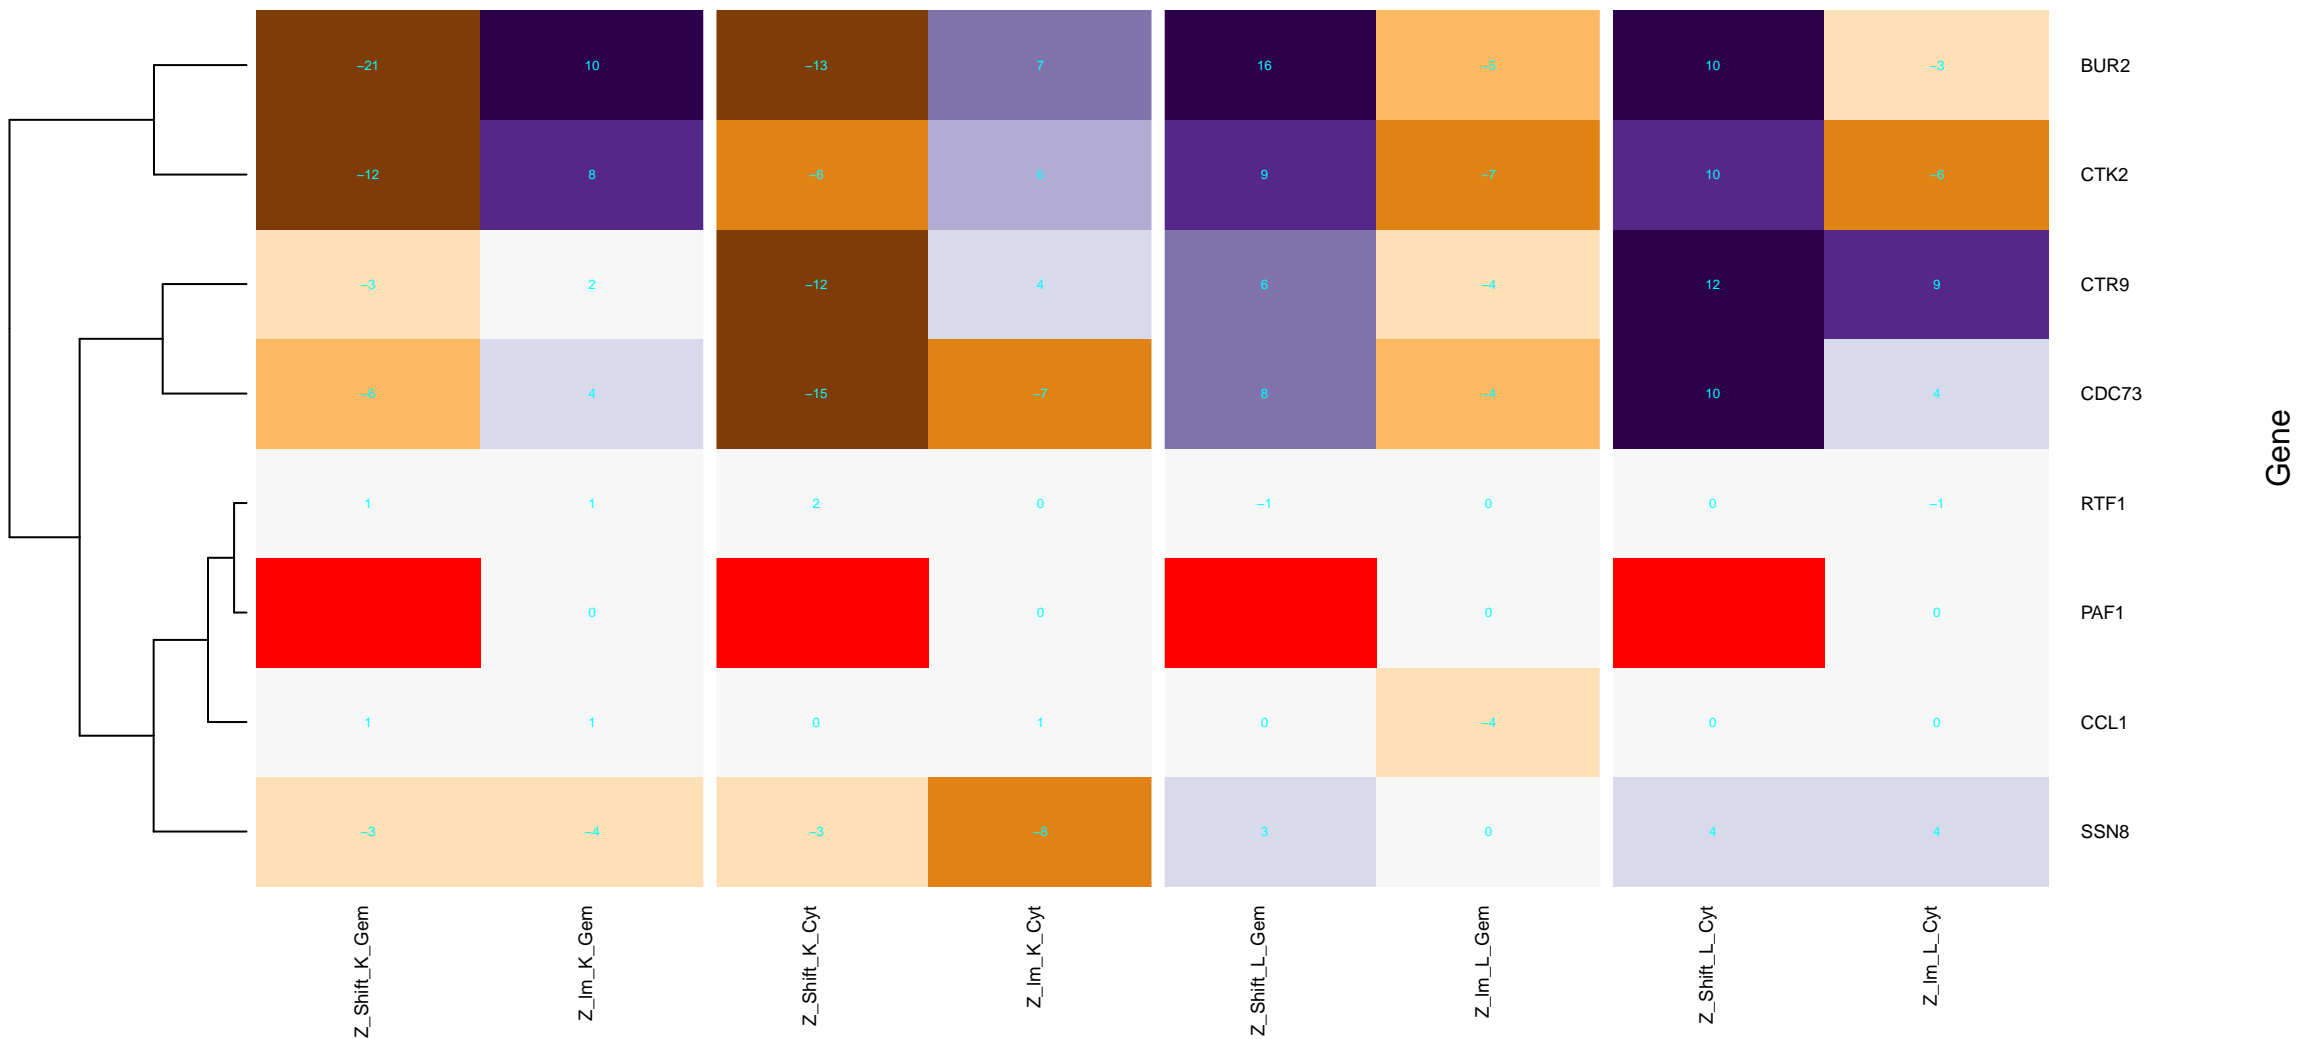

Supplement: s1 [file s1]

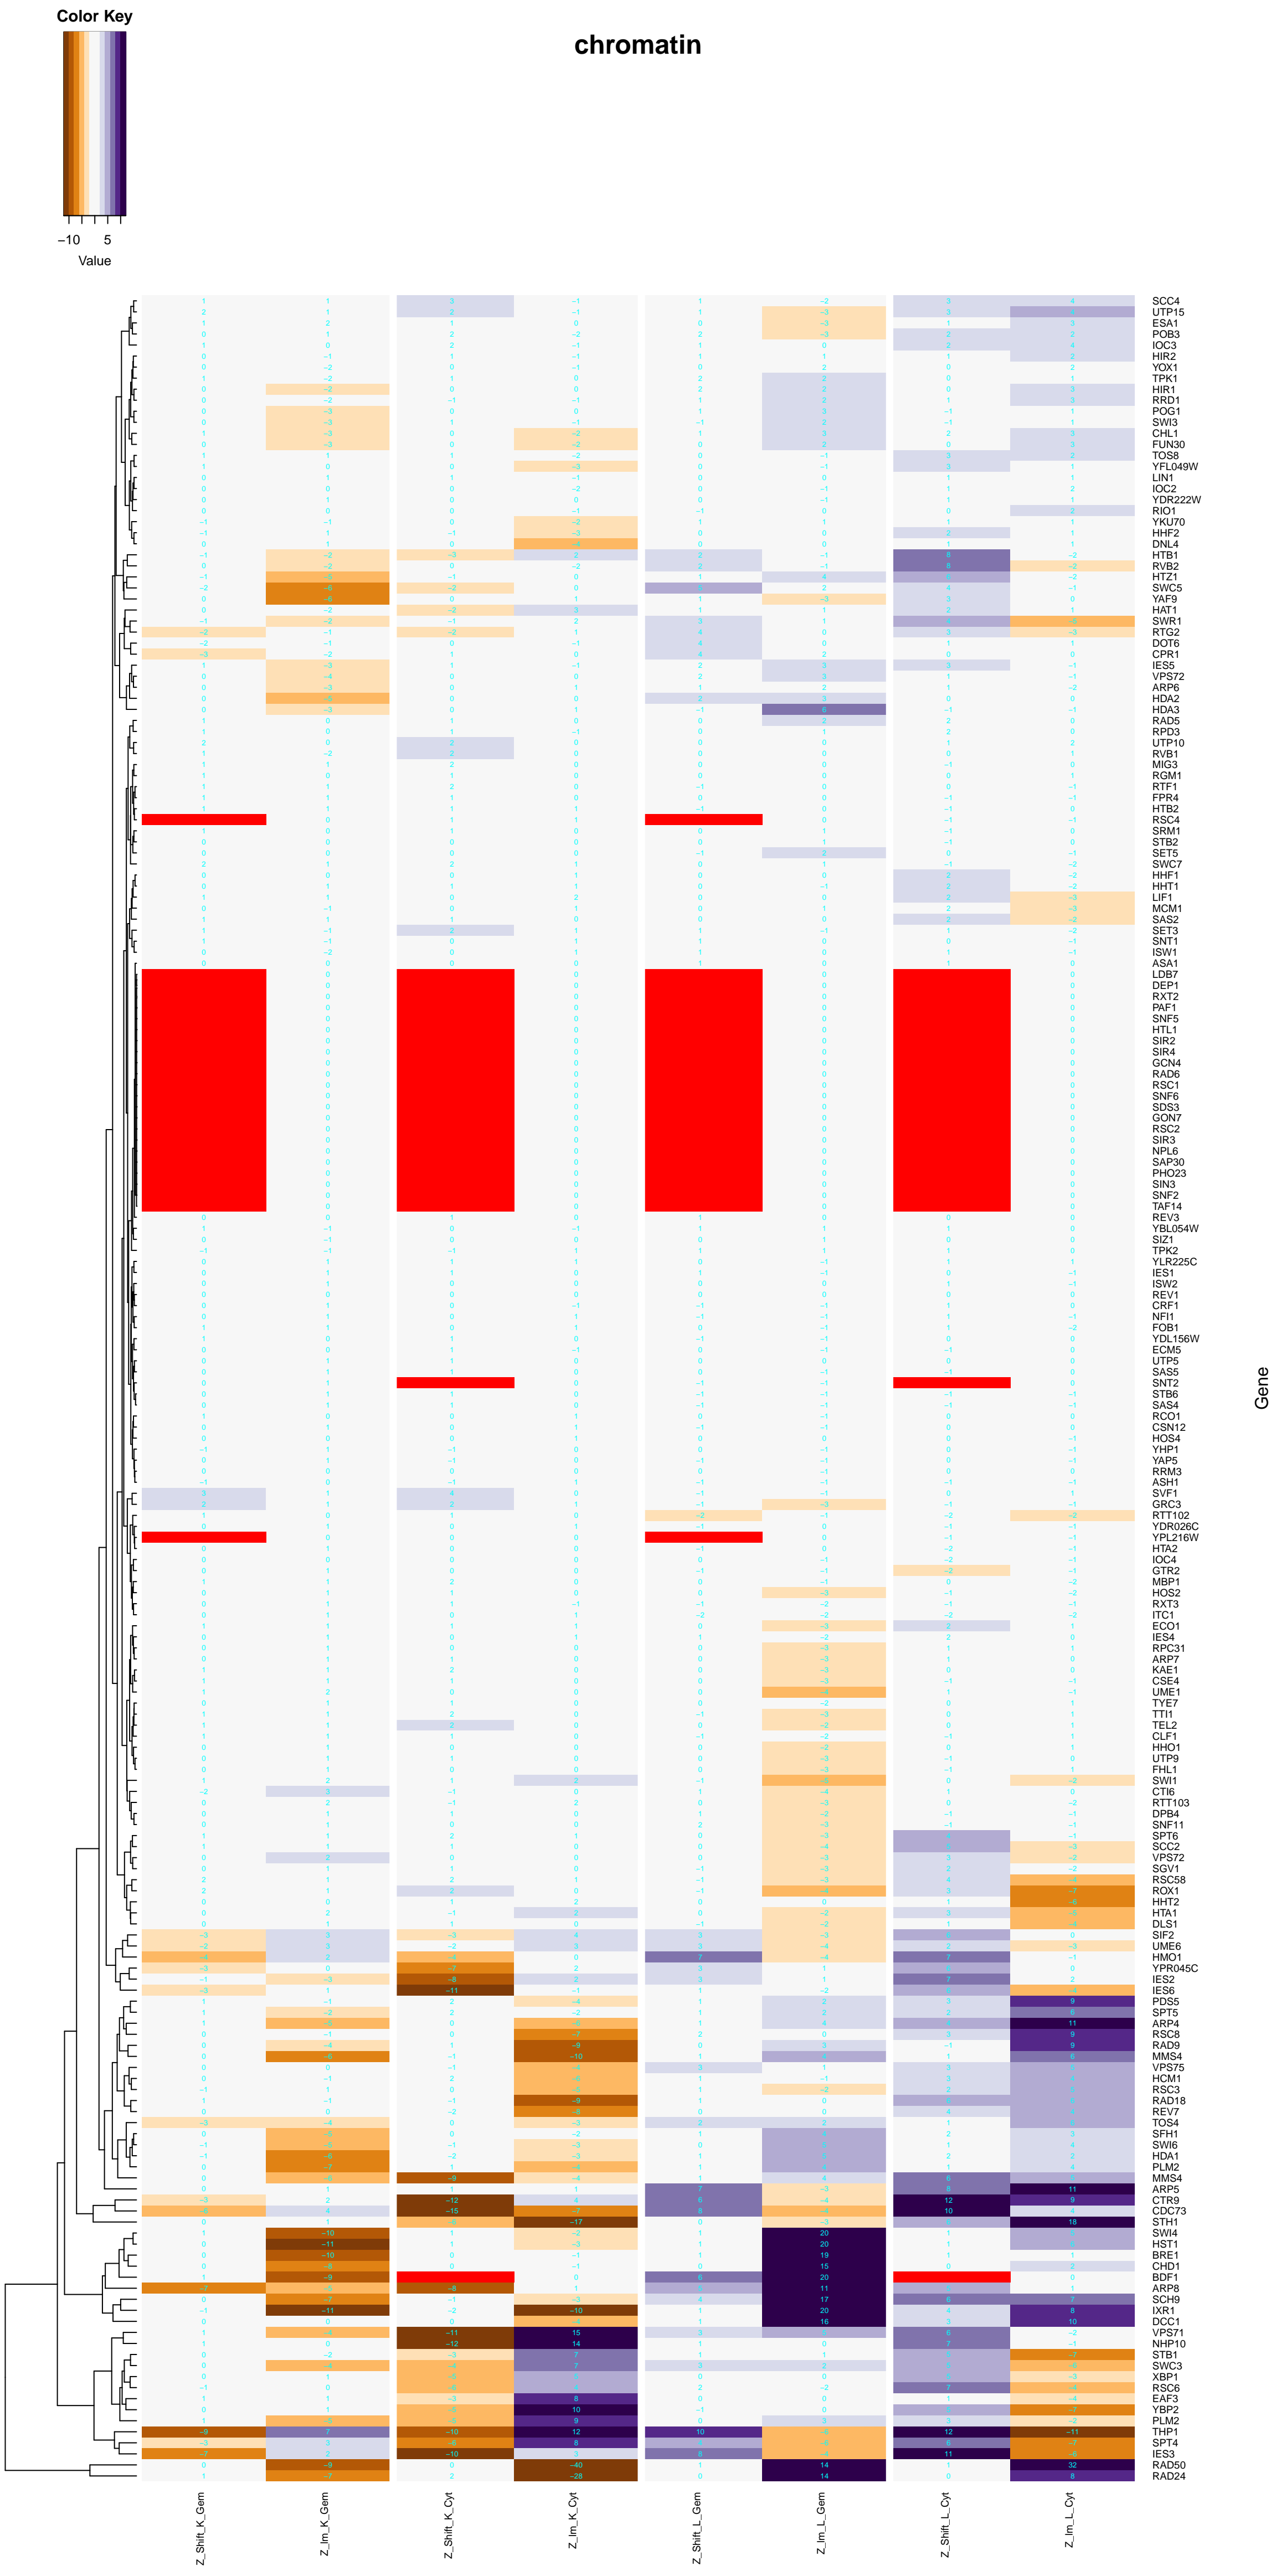

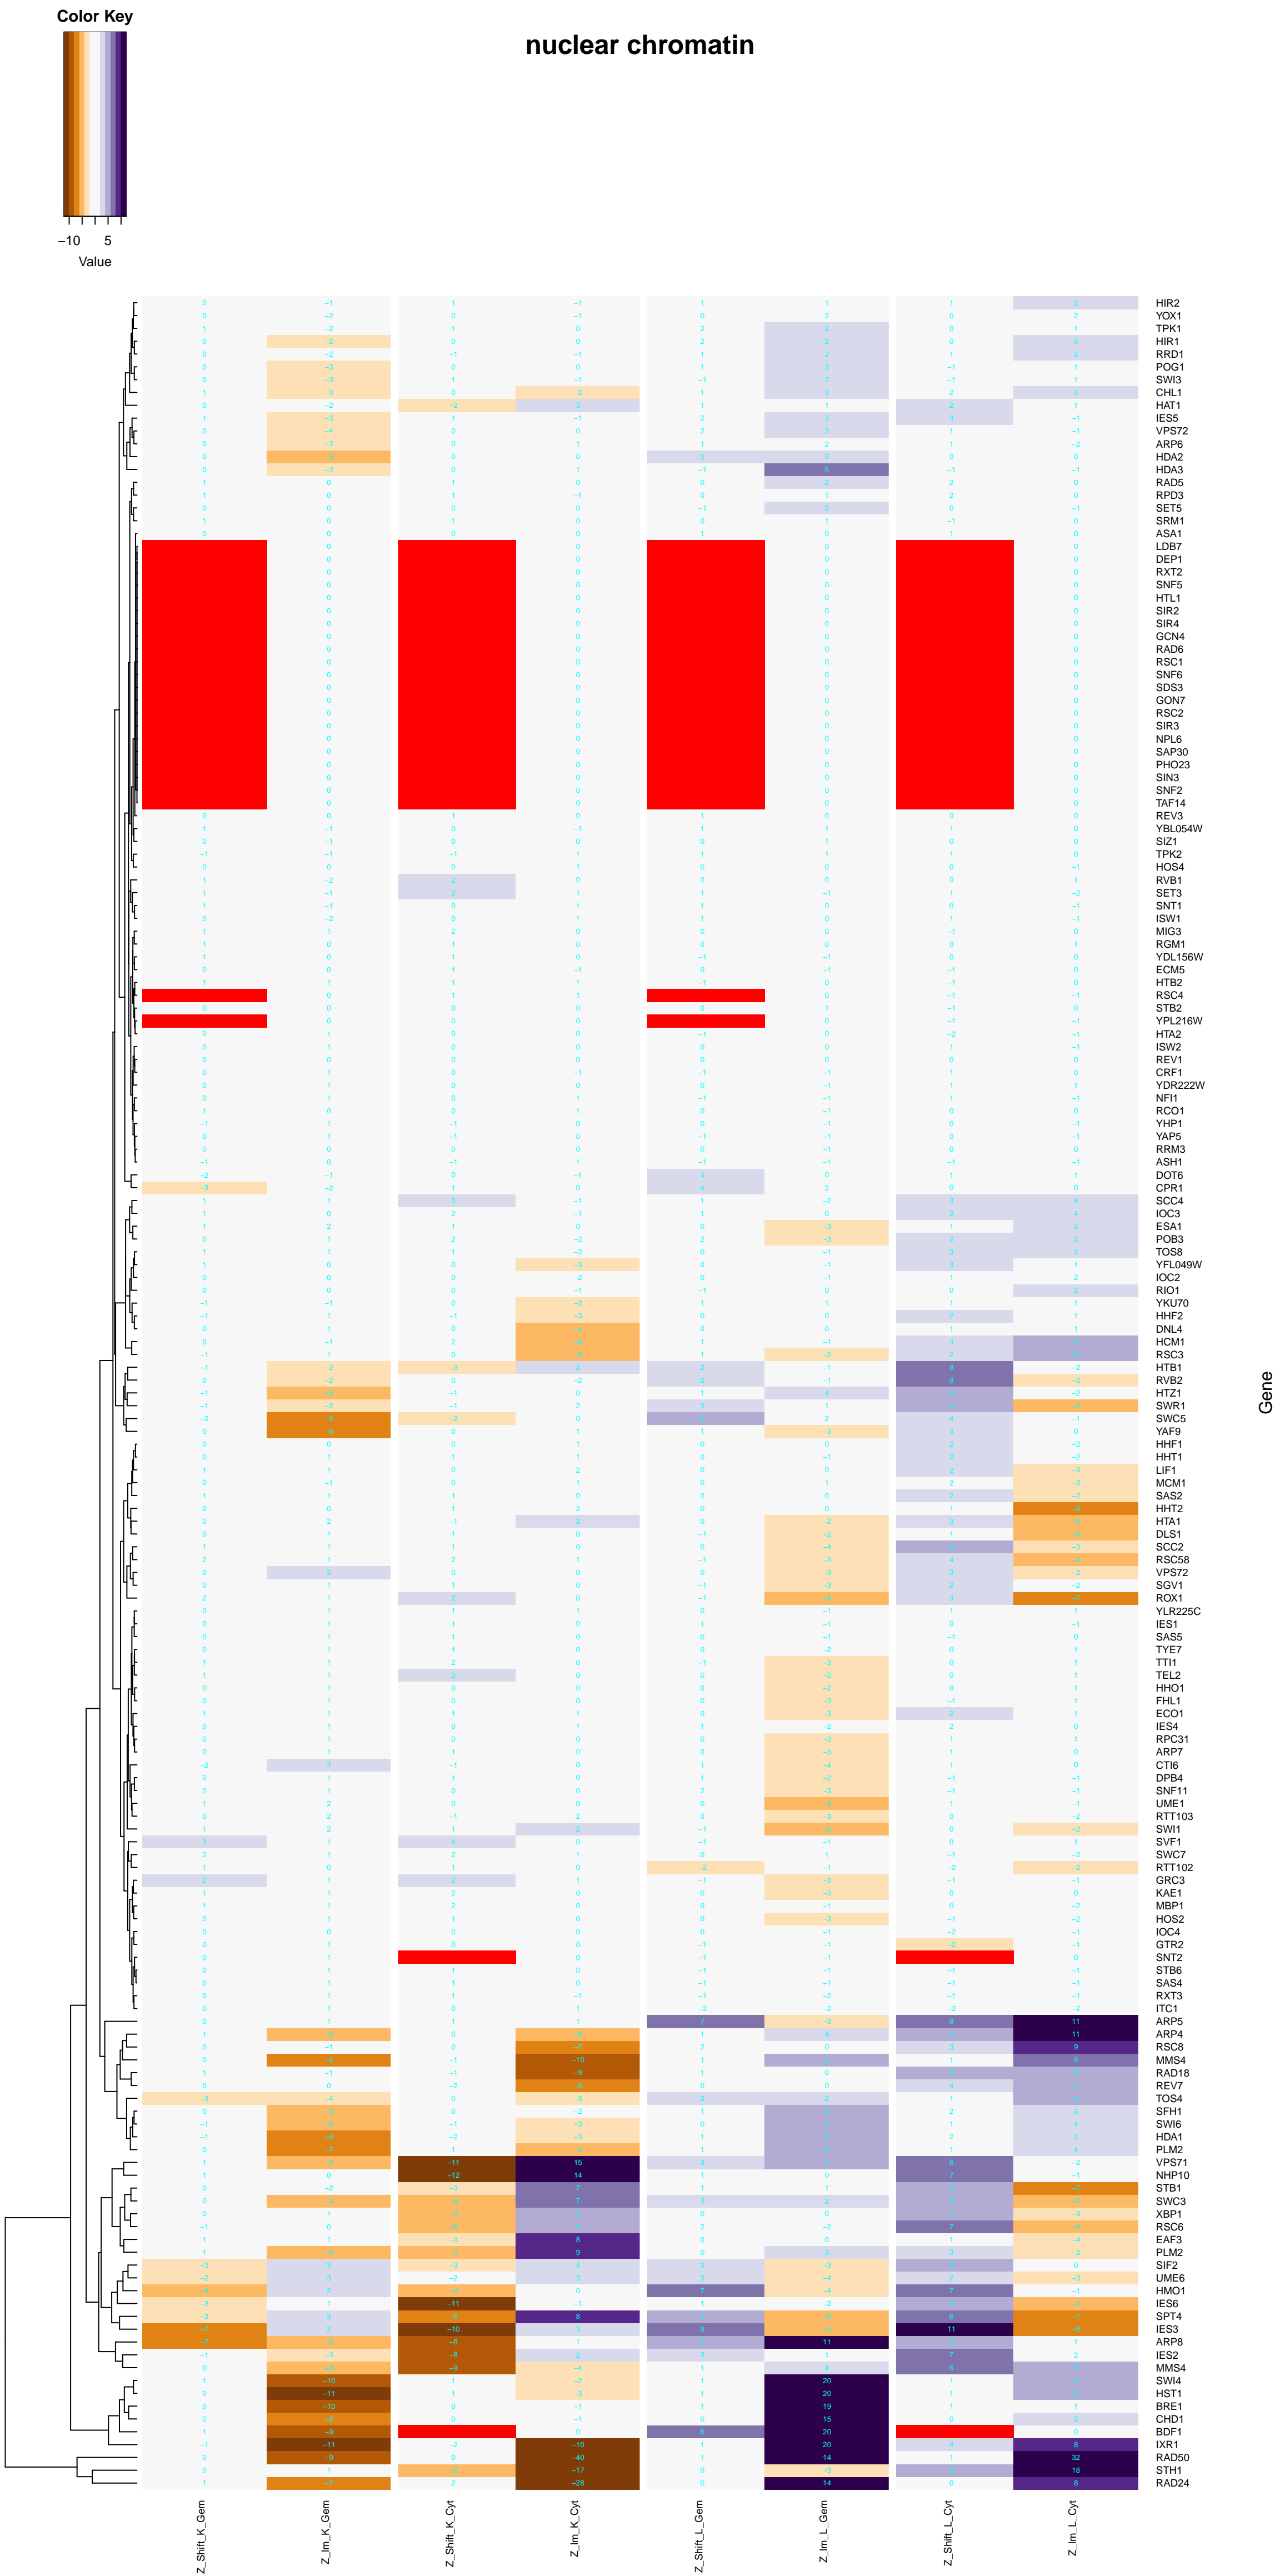

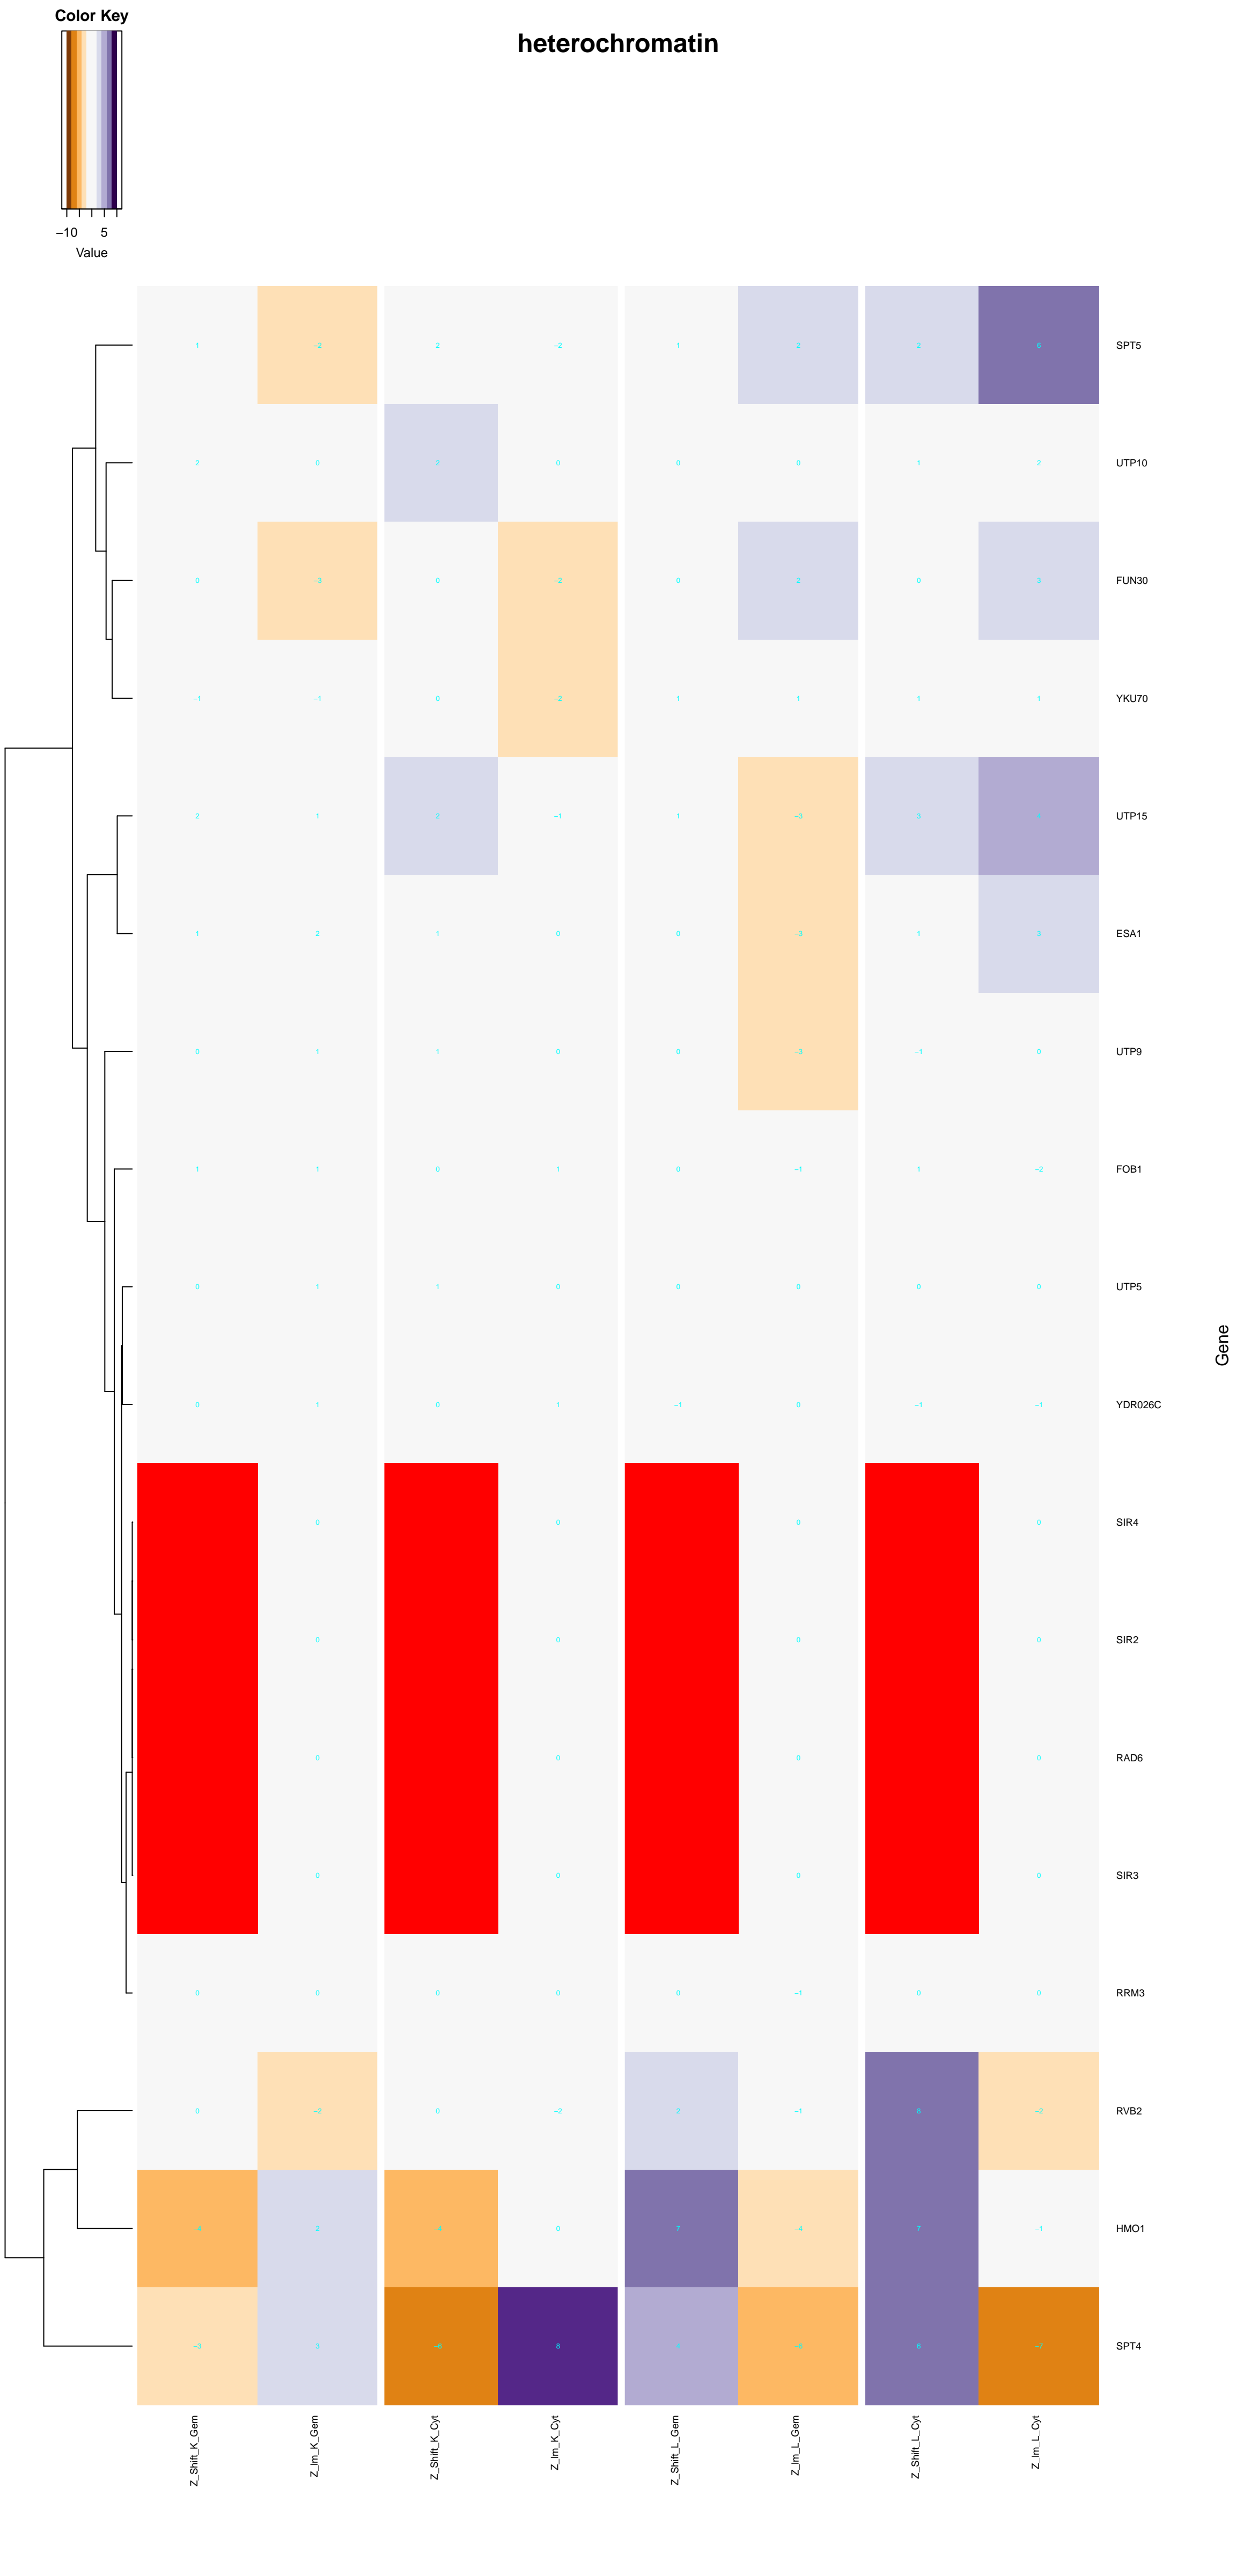

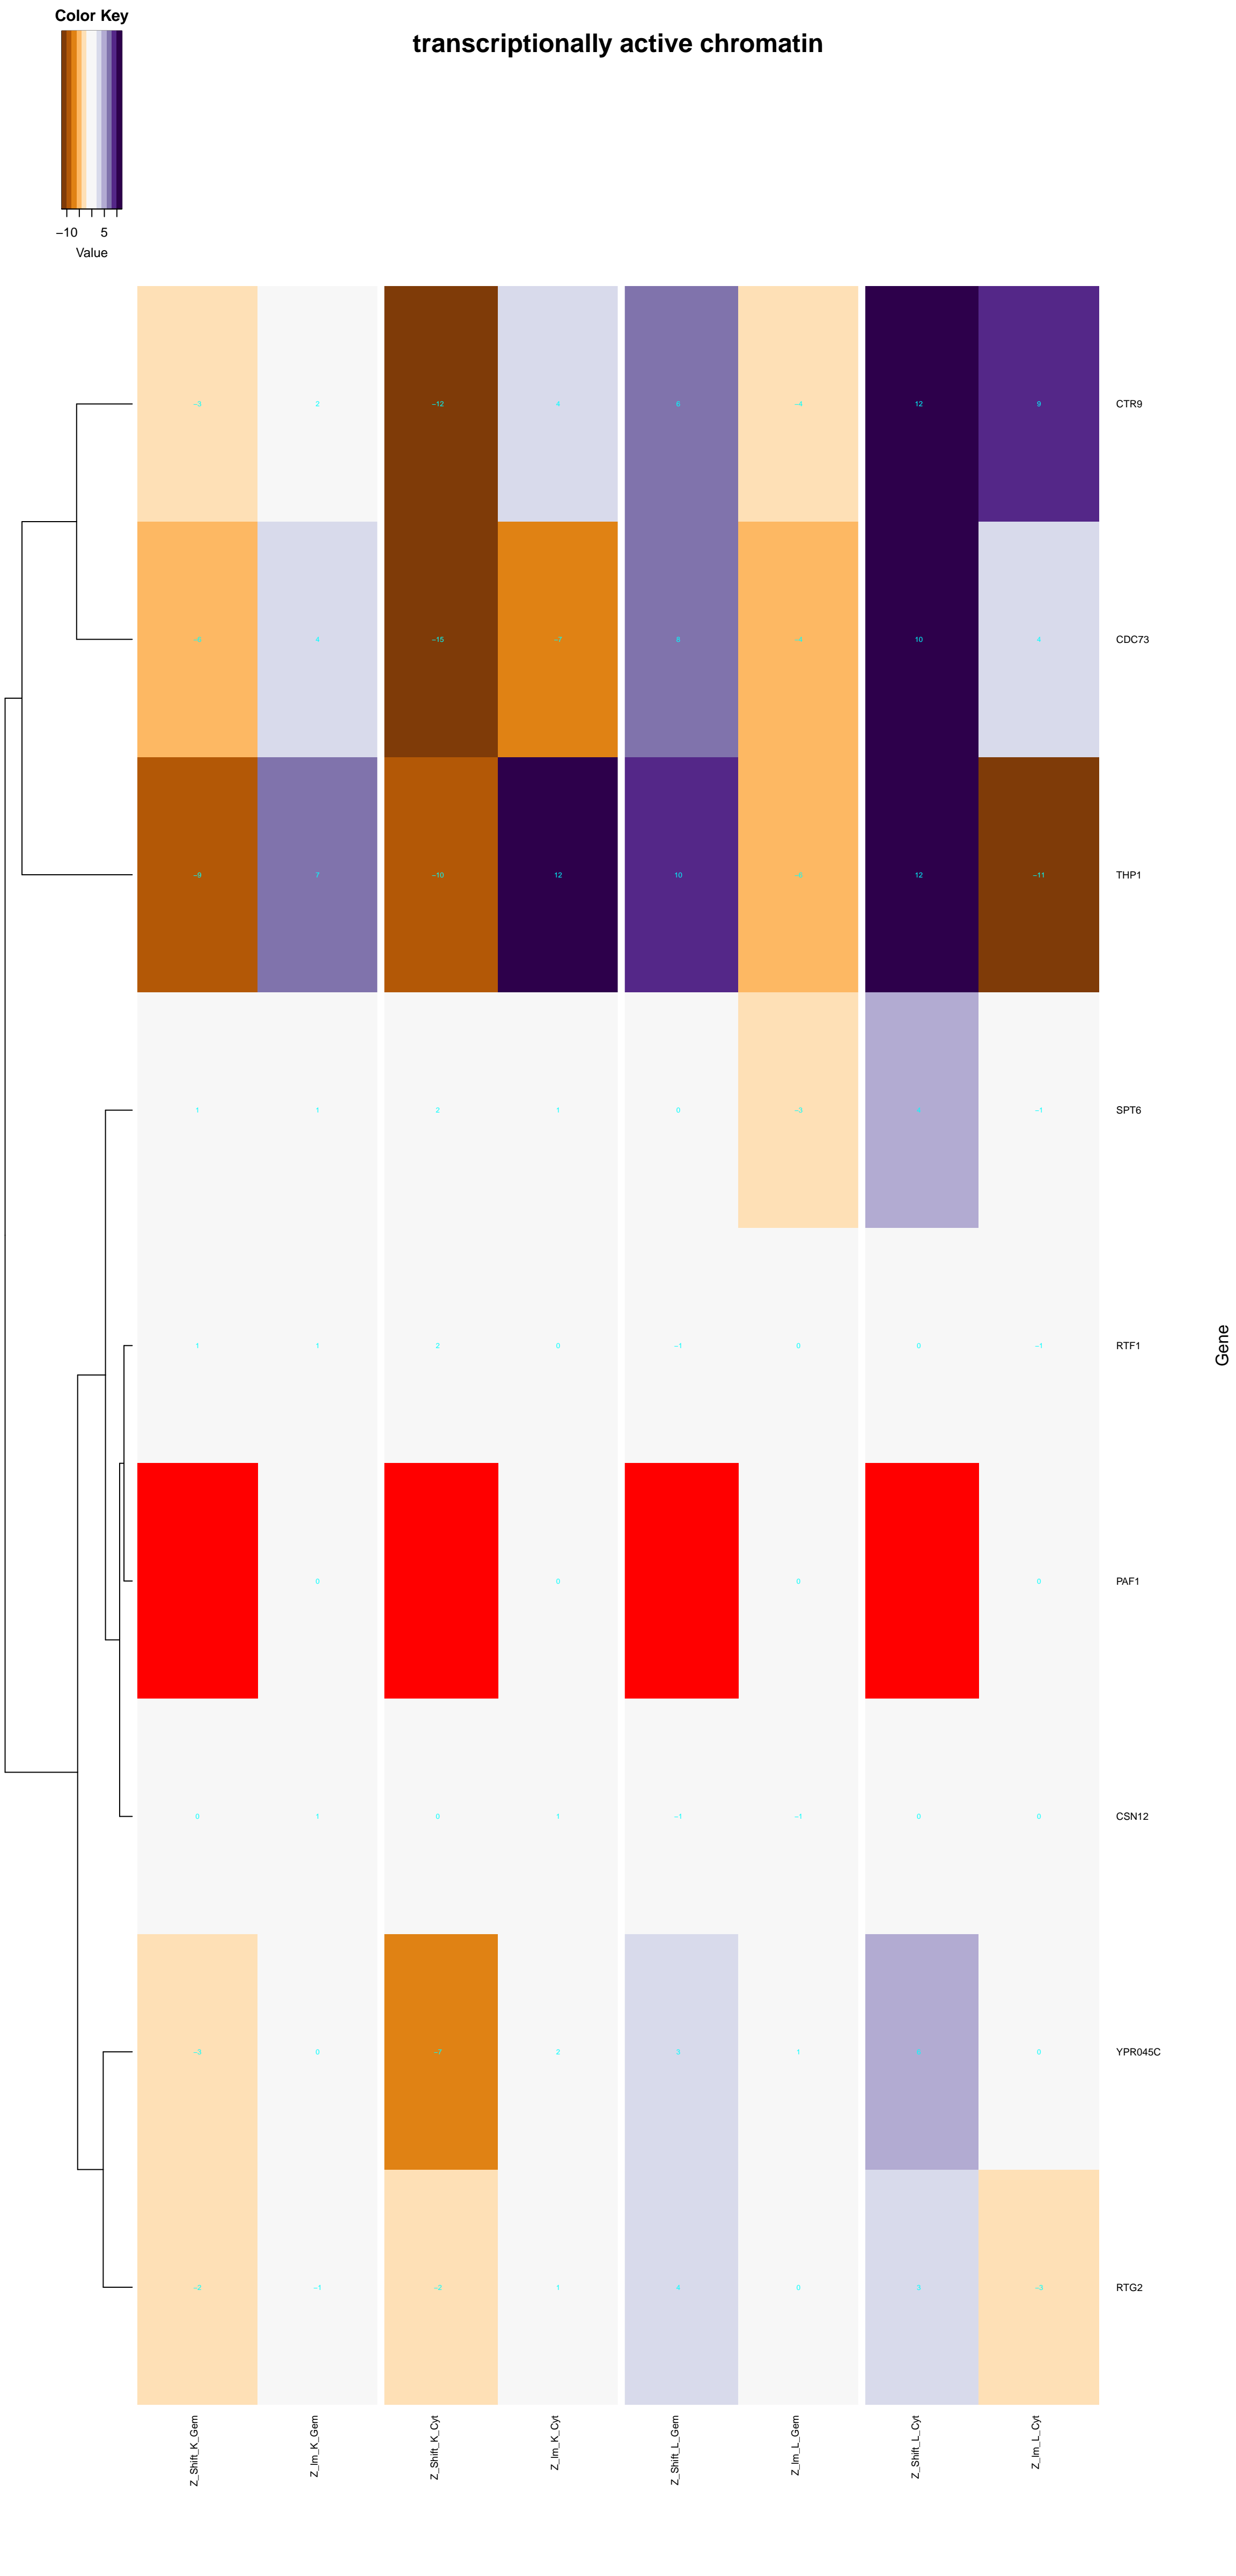

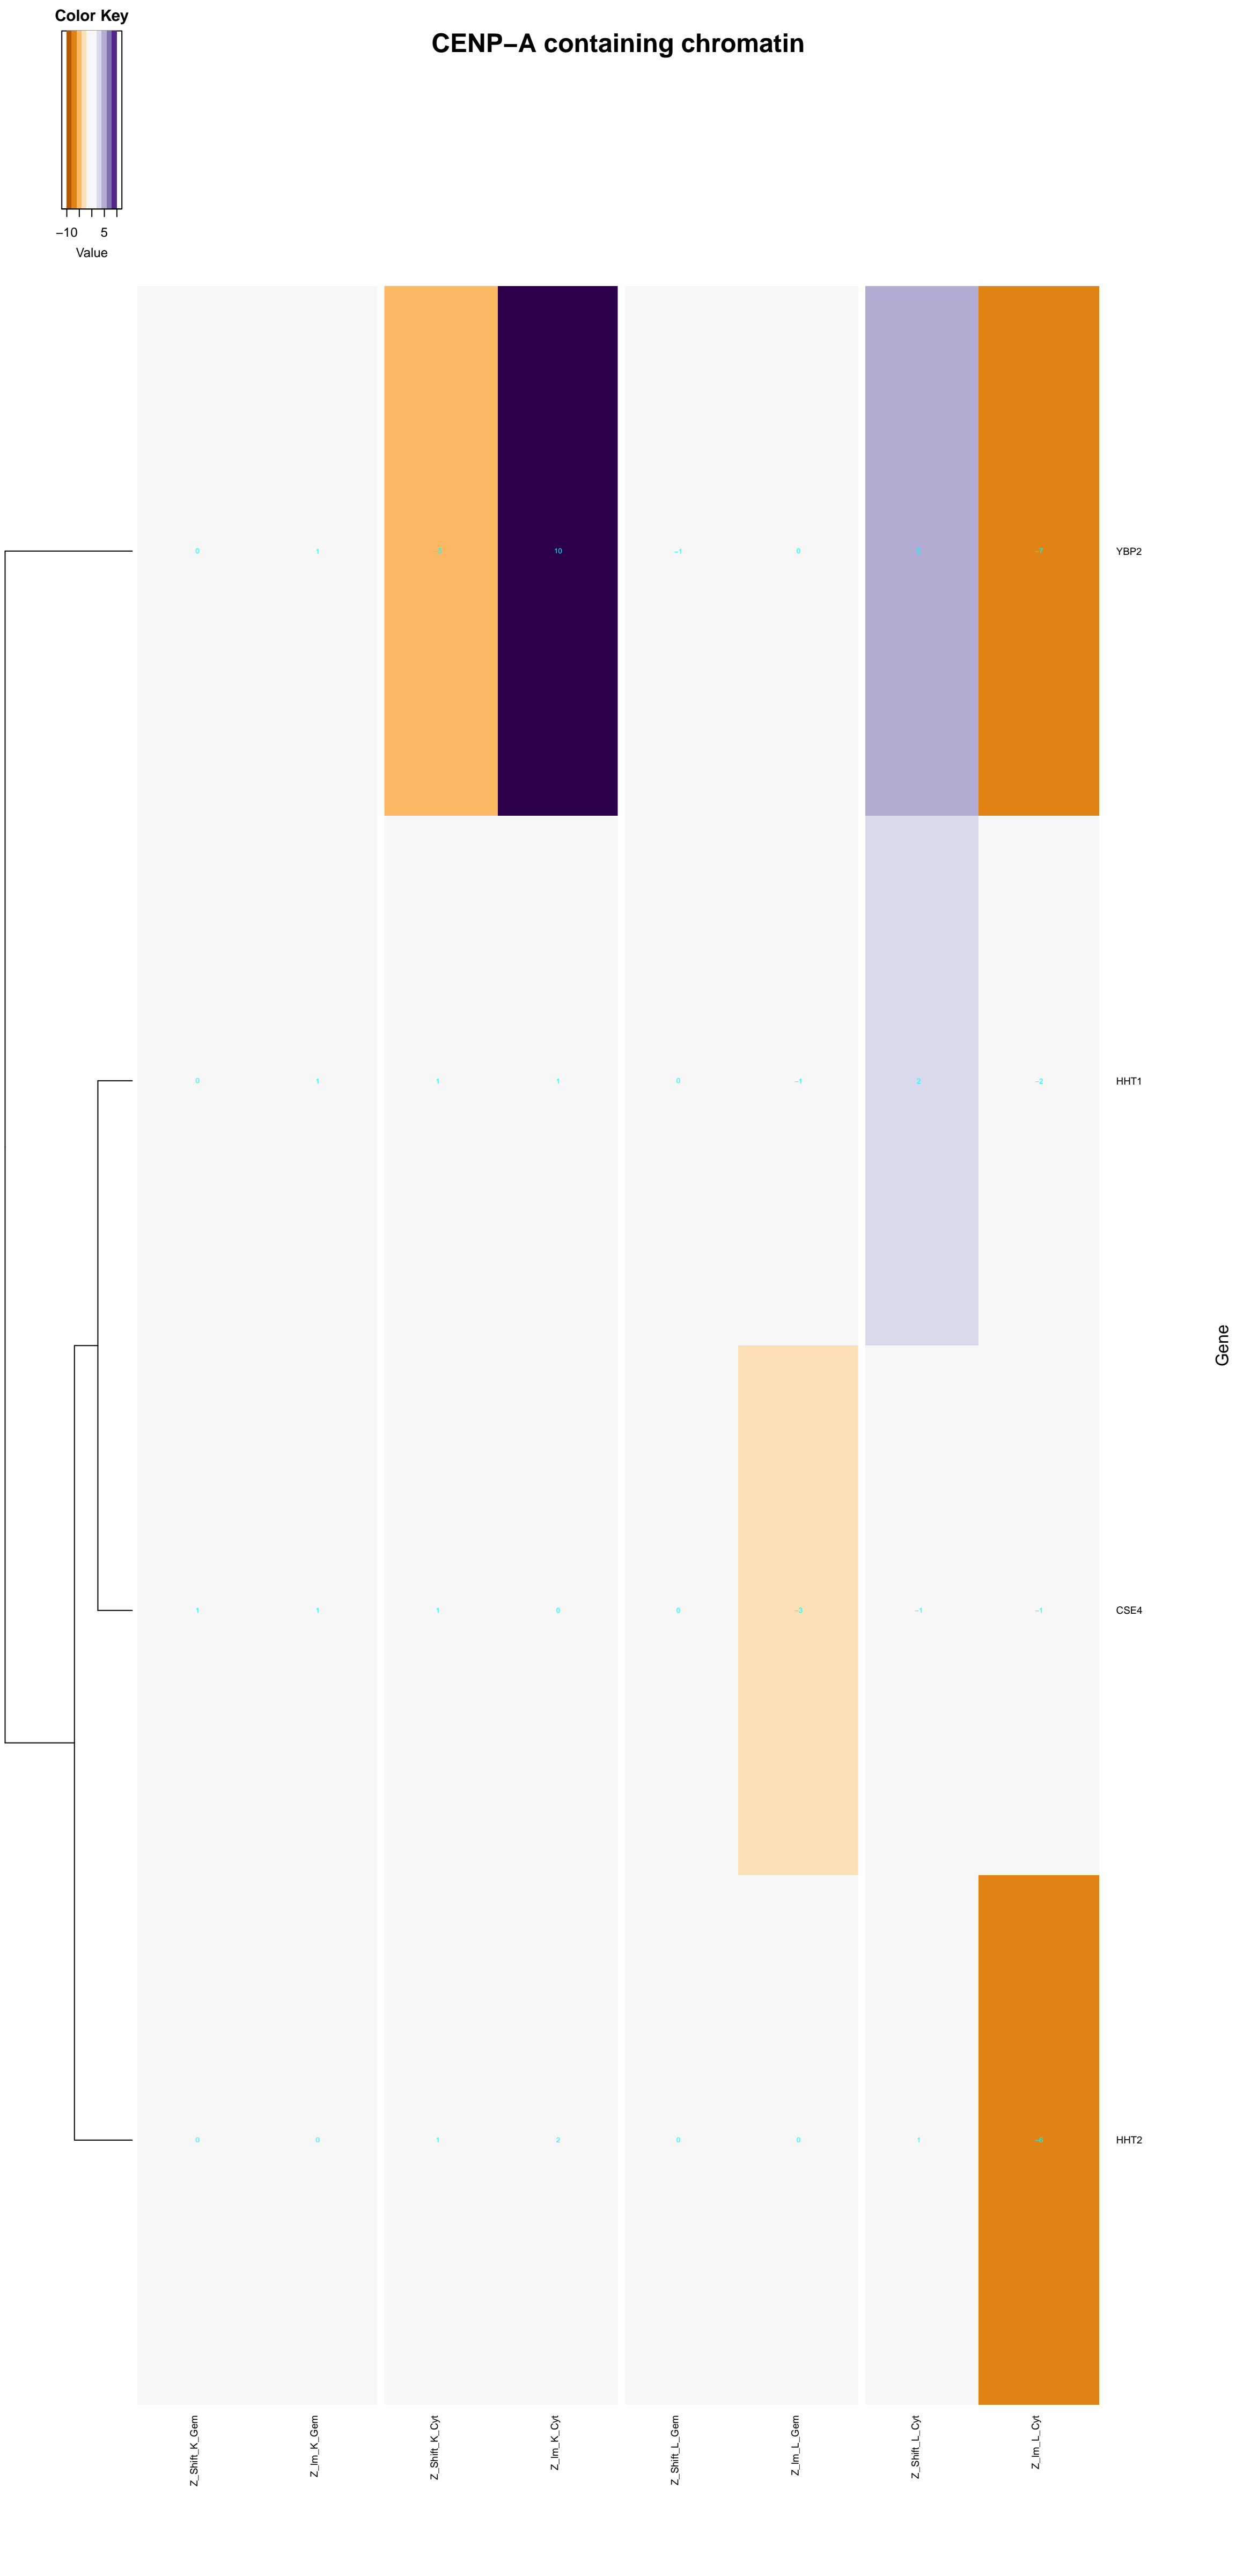

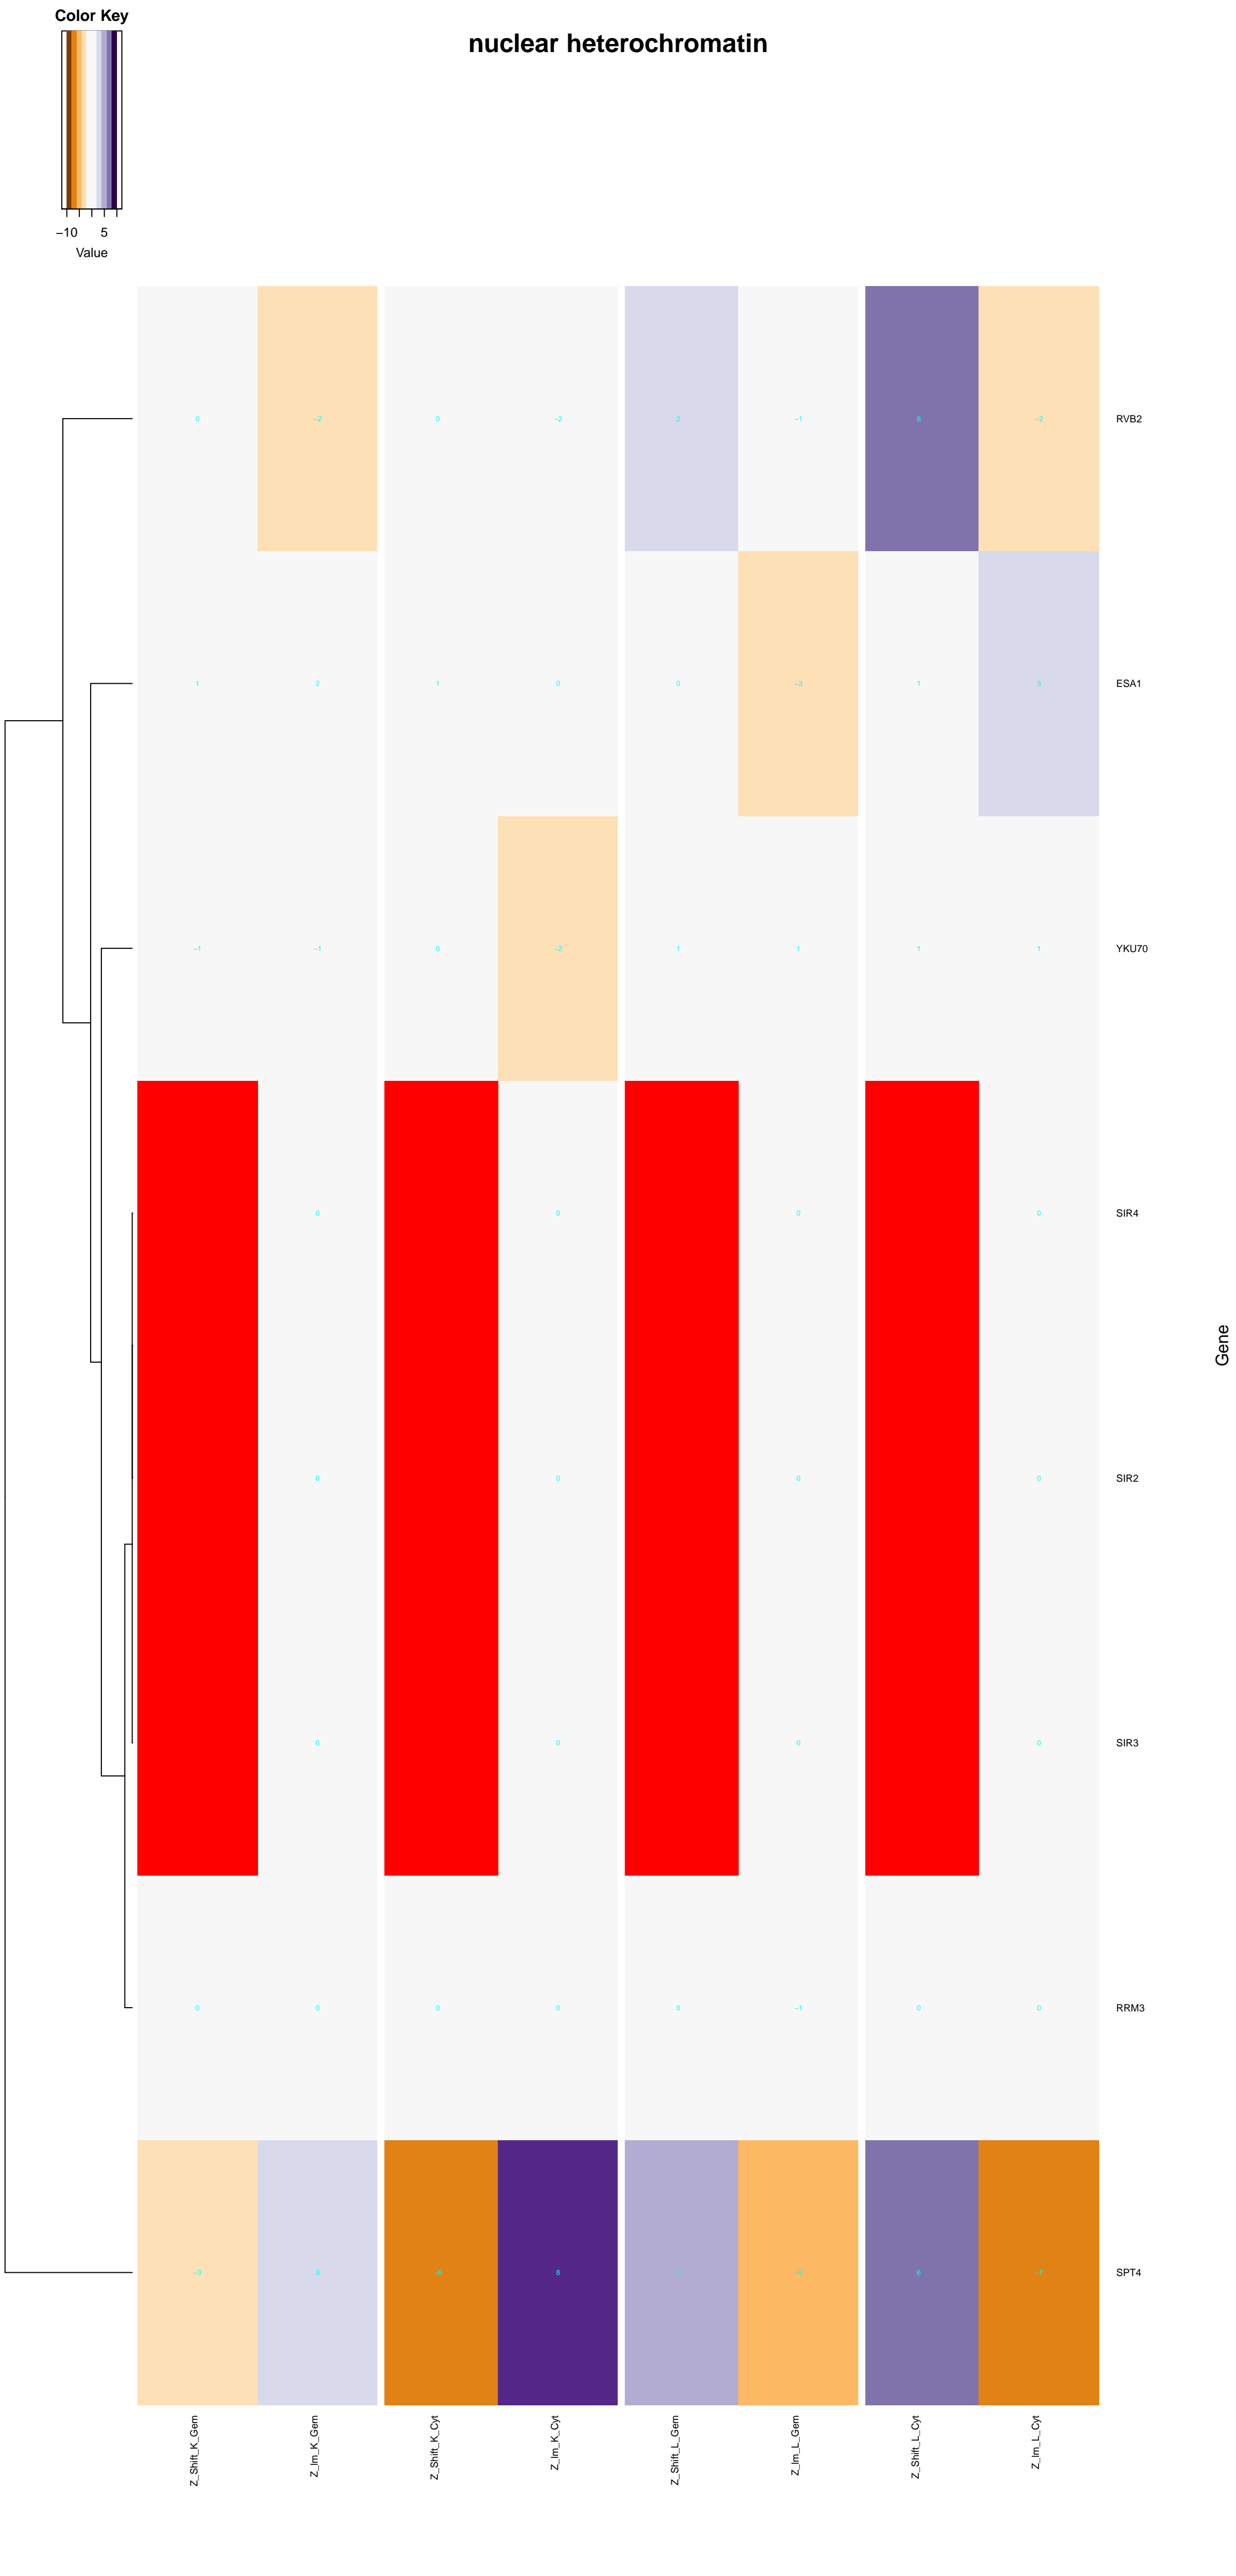

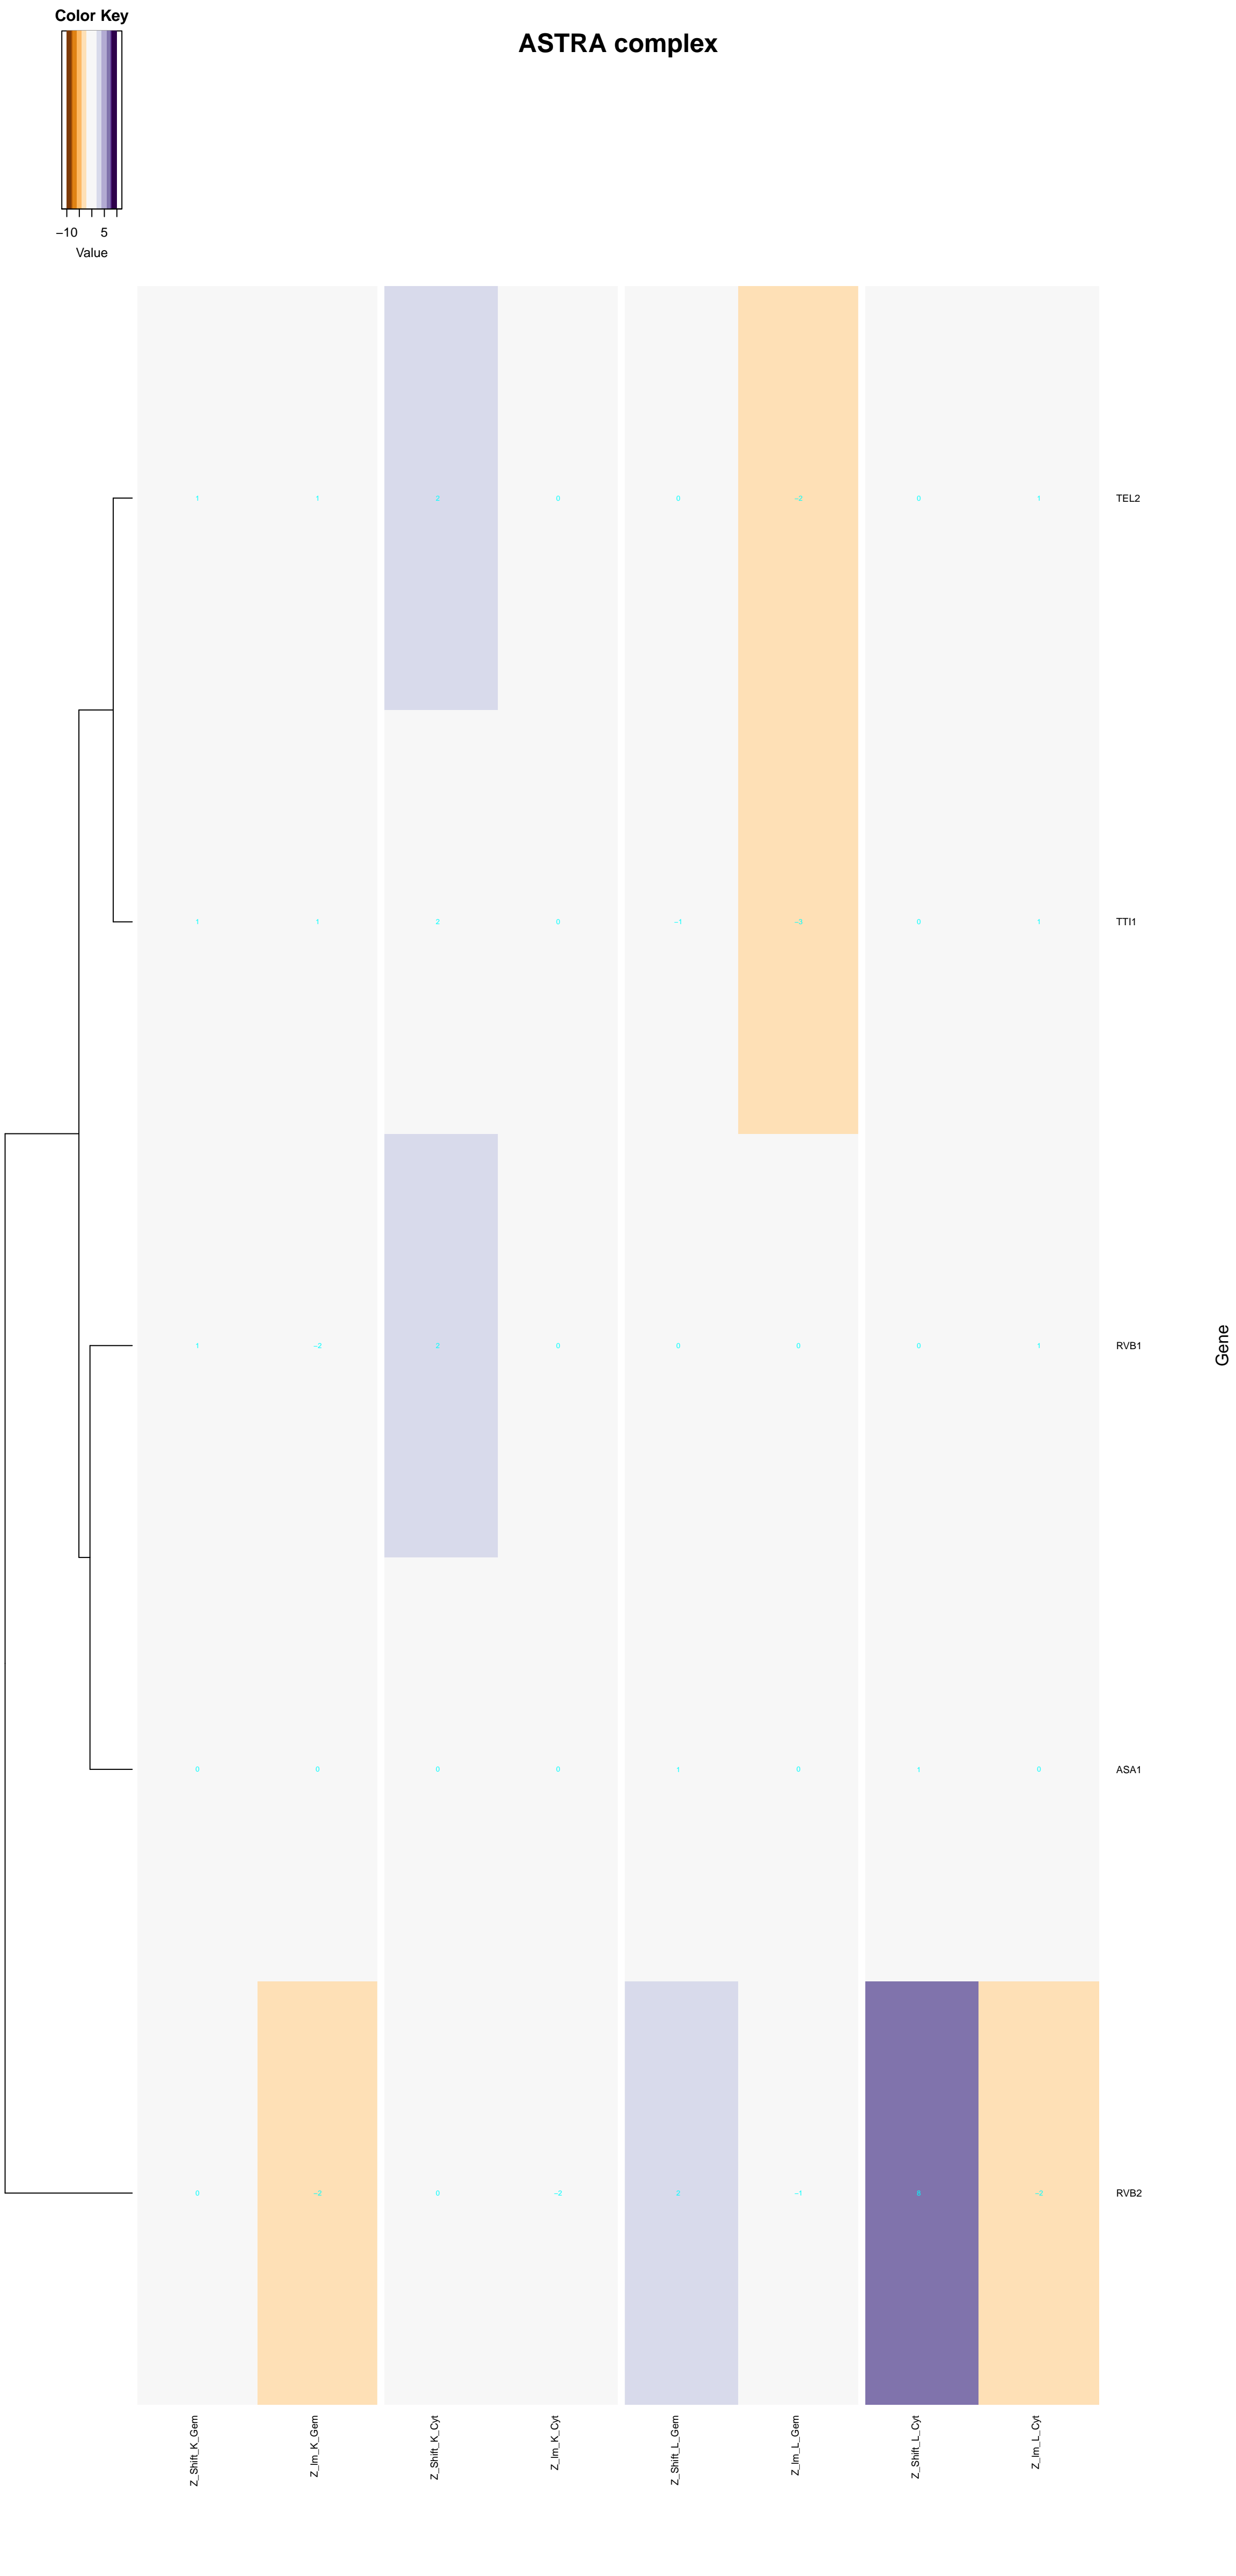

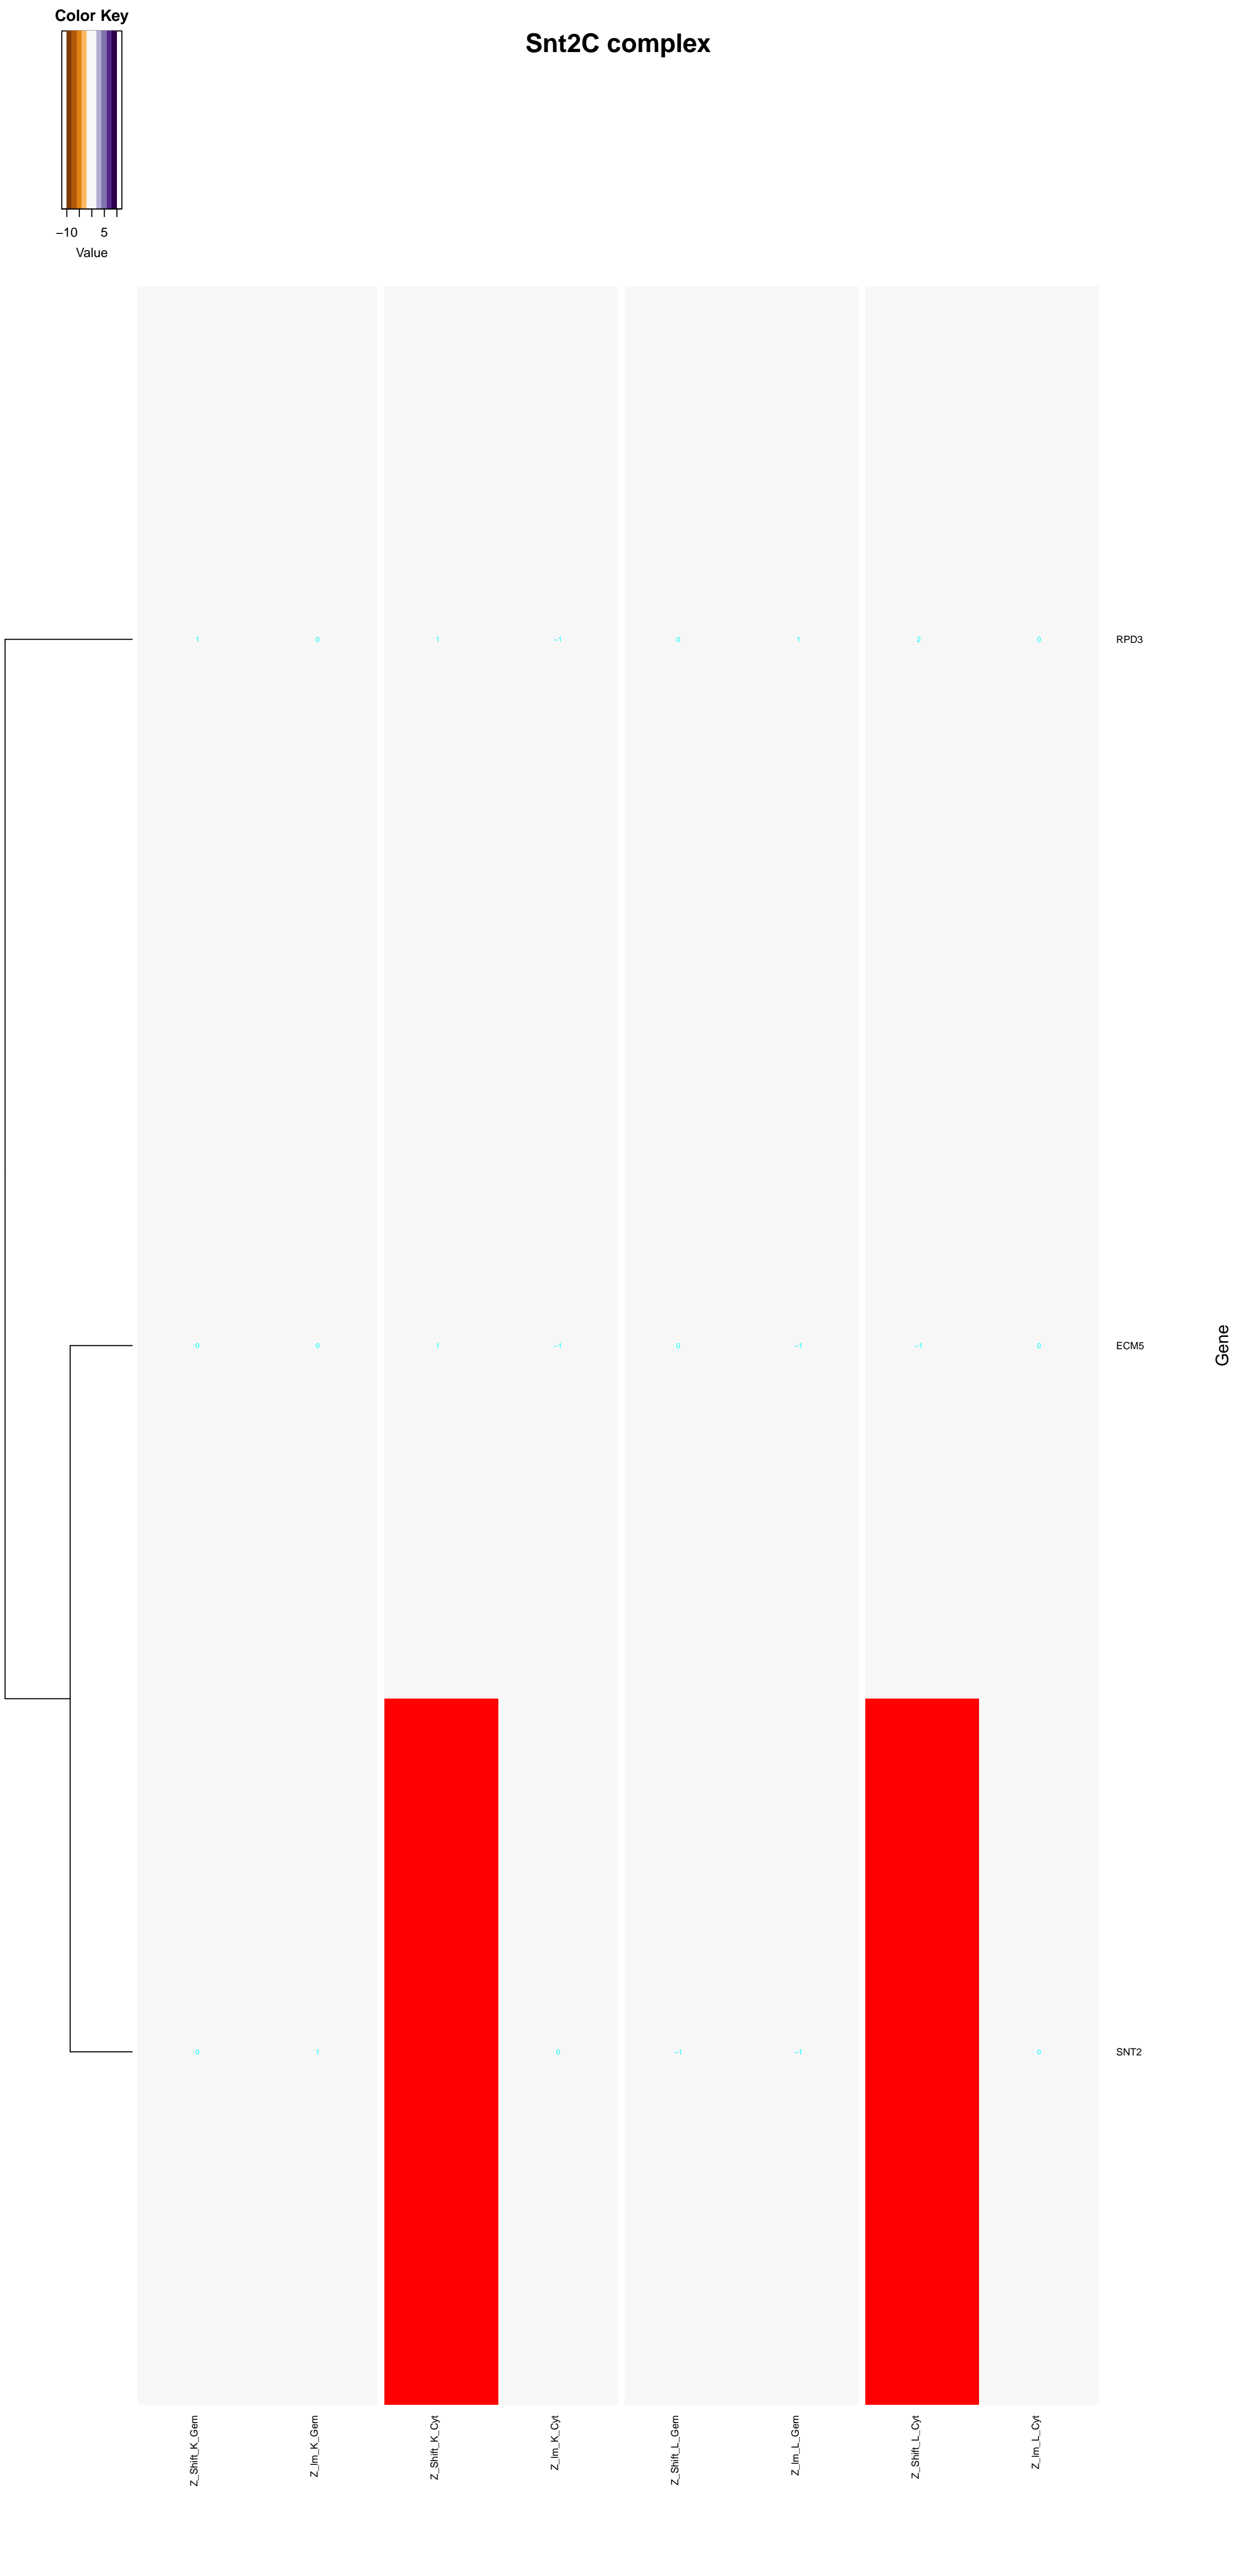

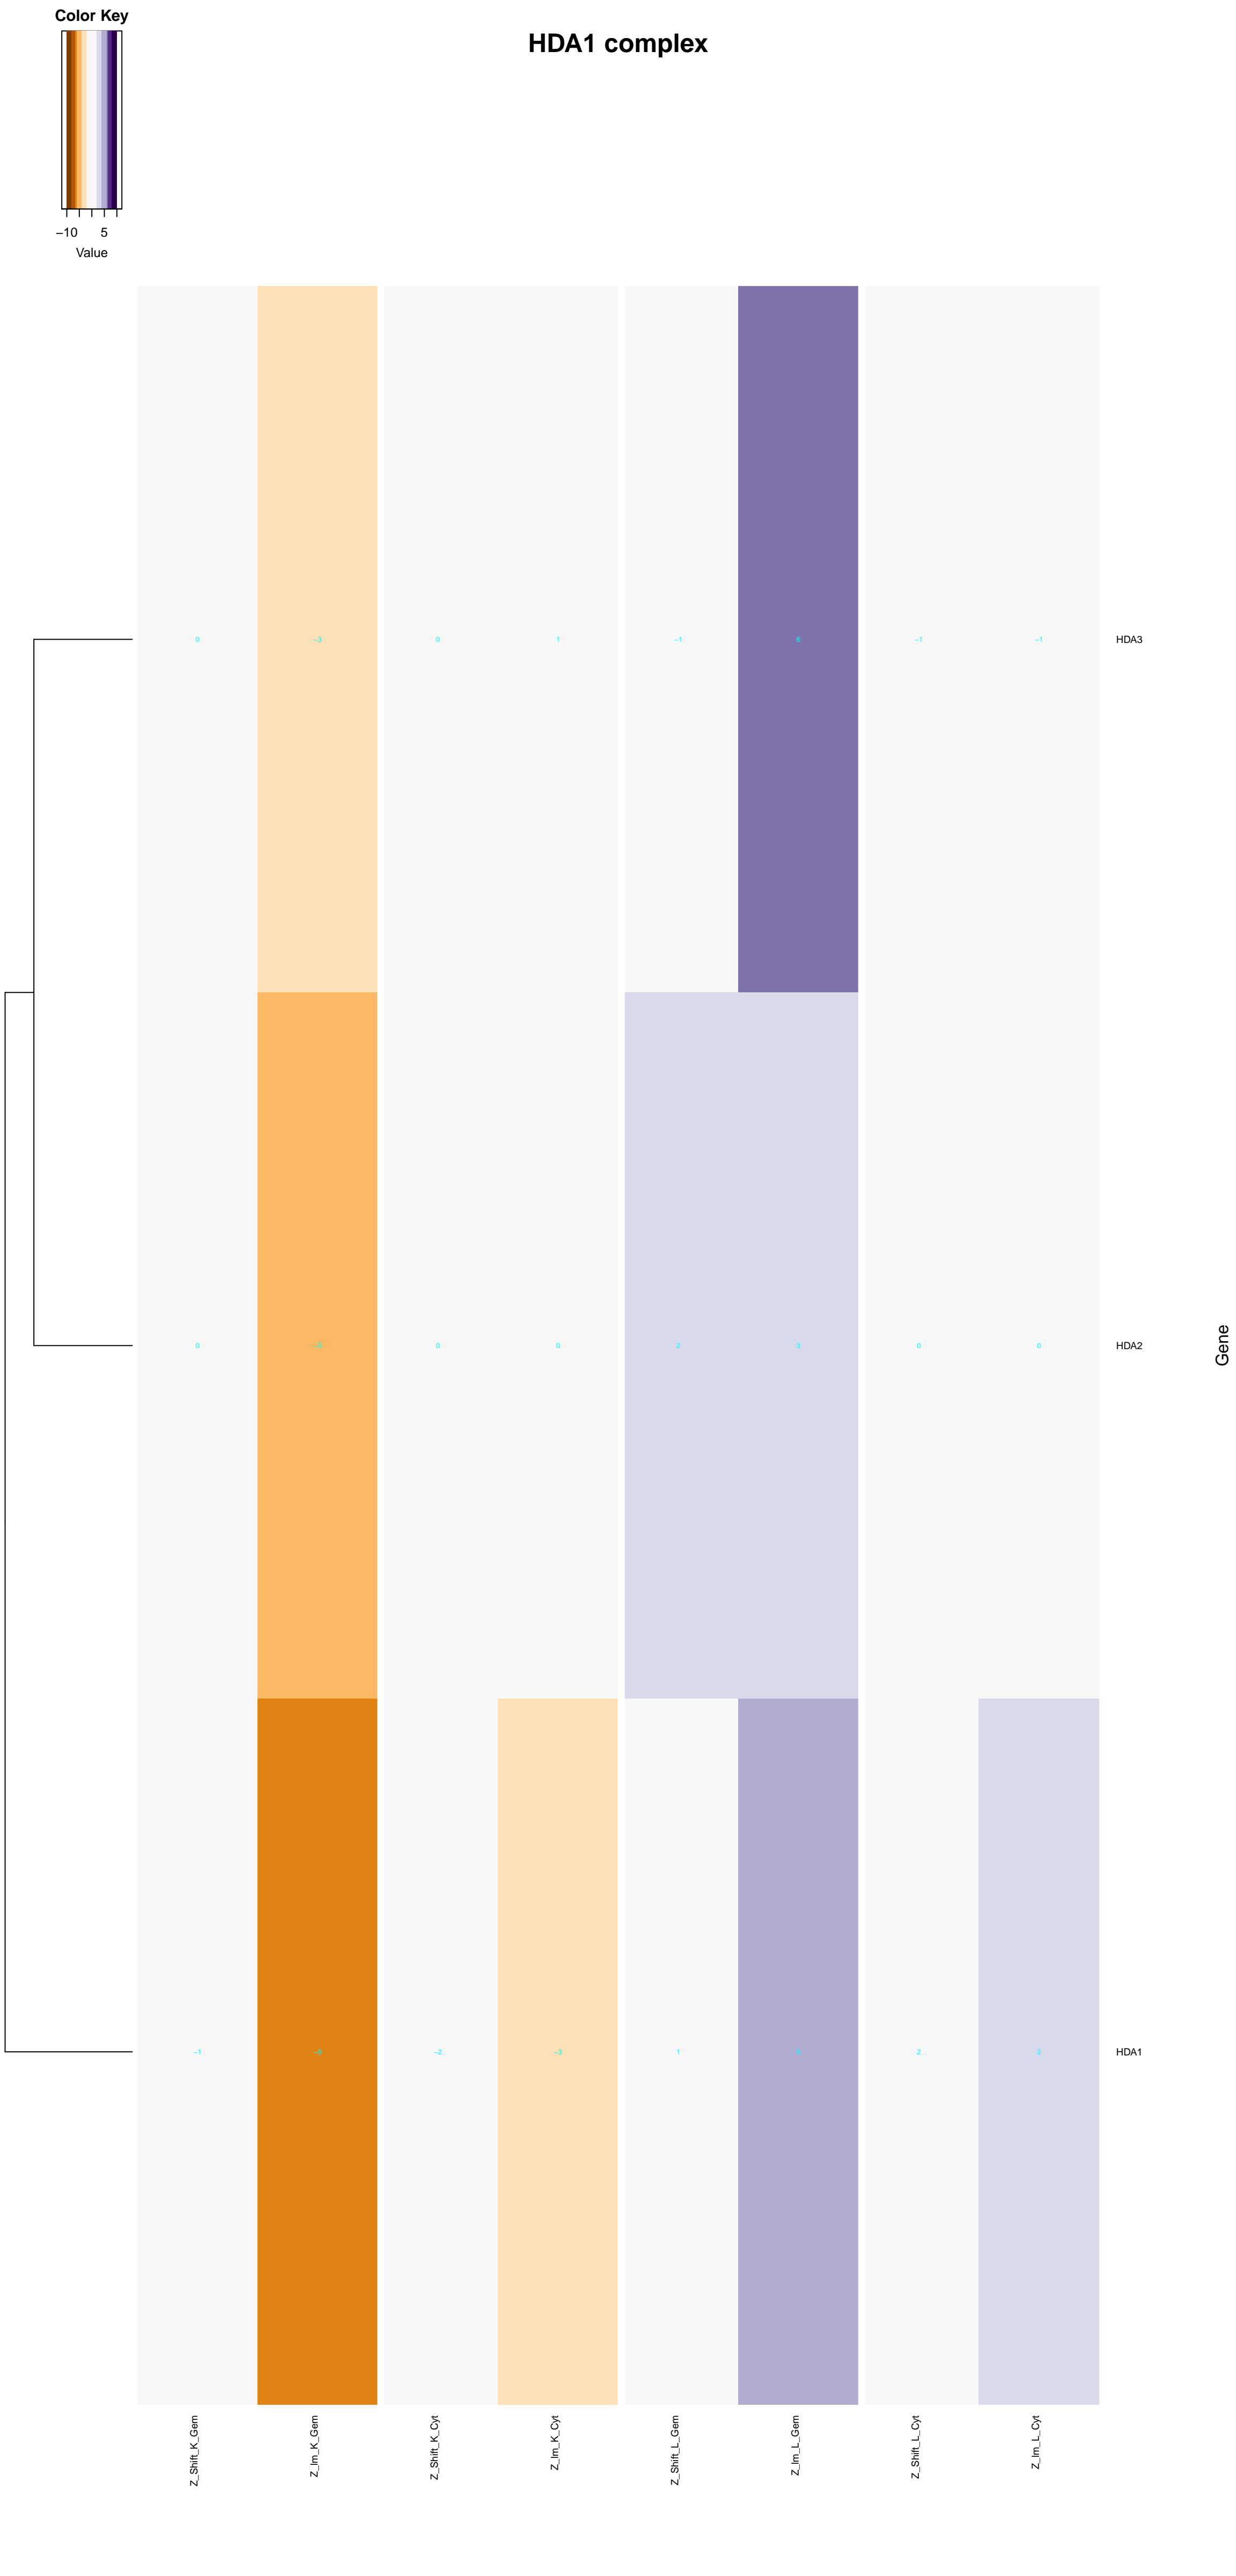

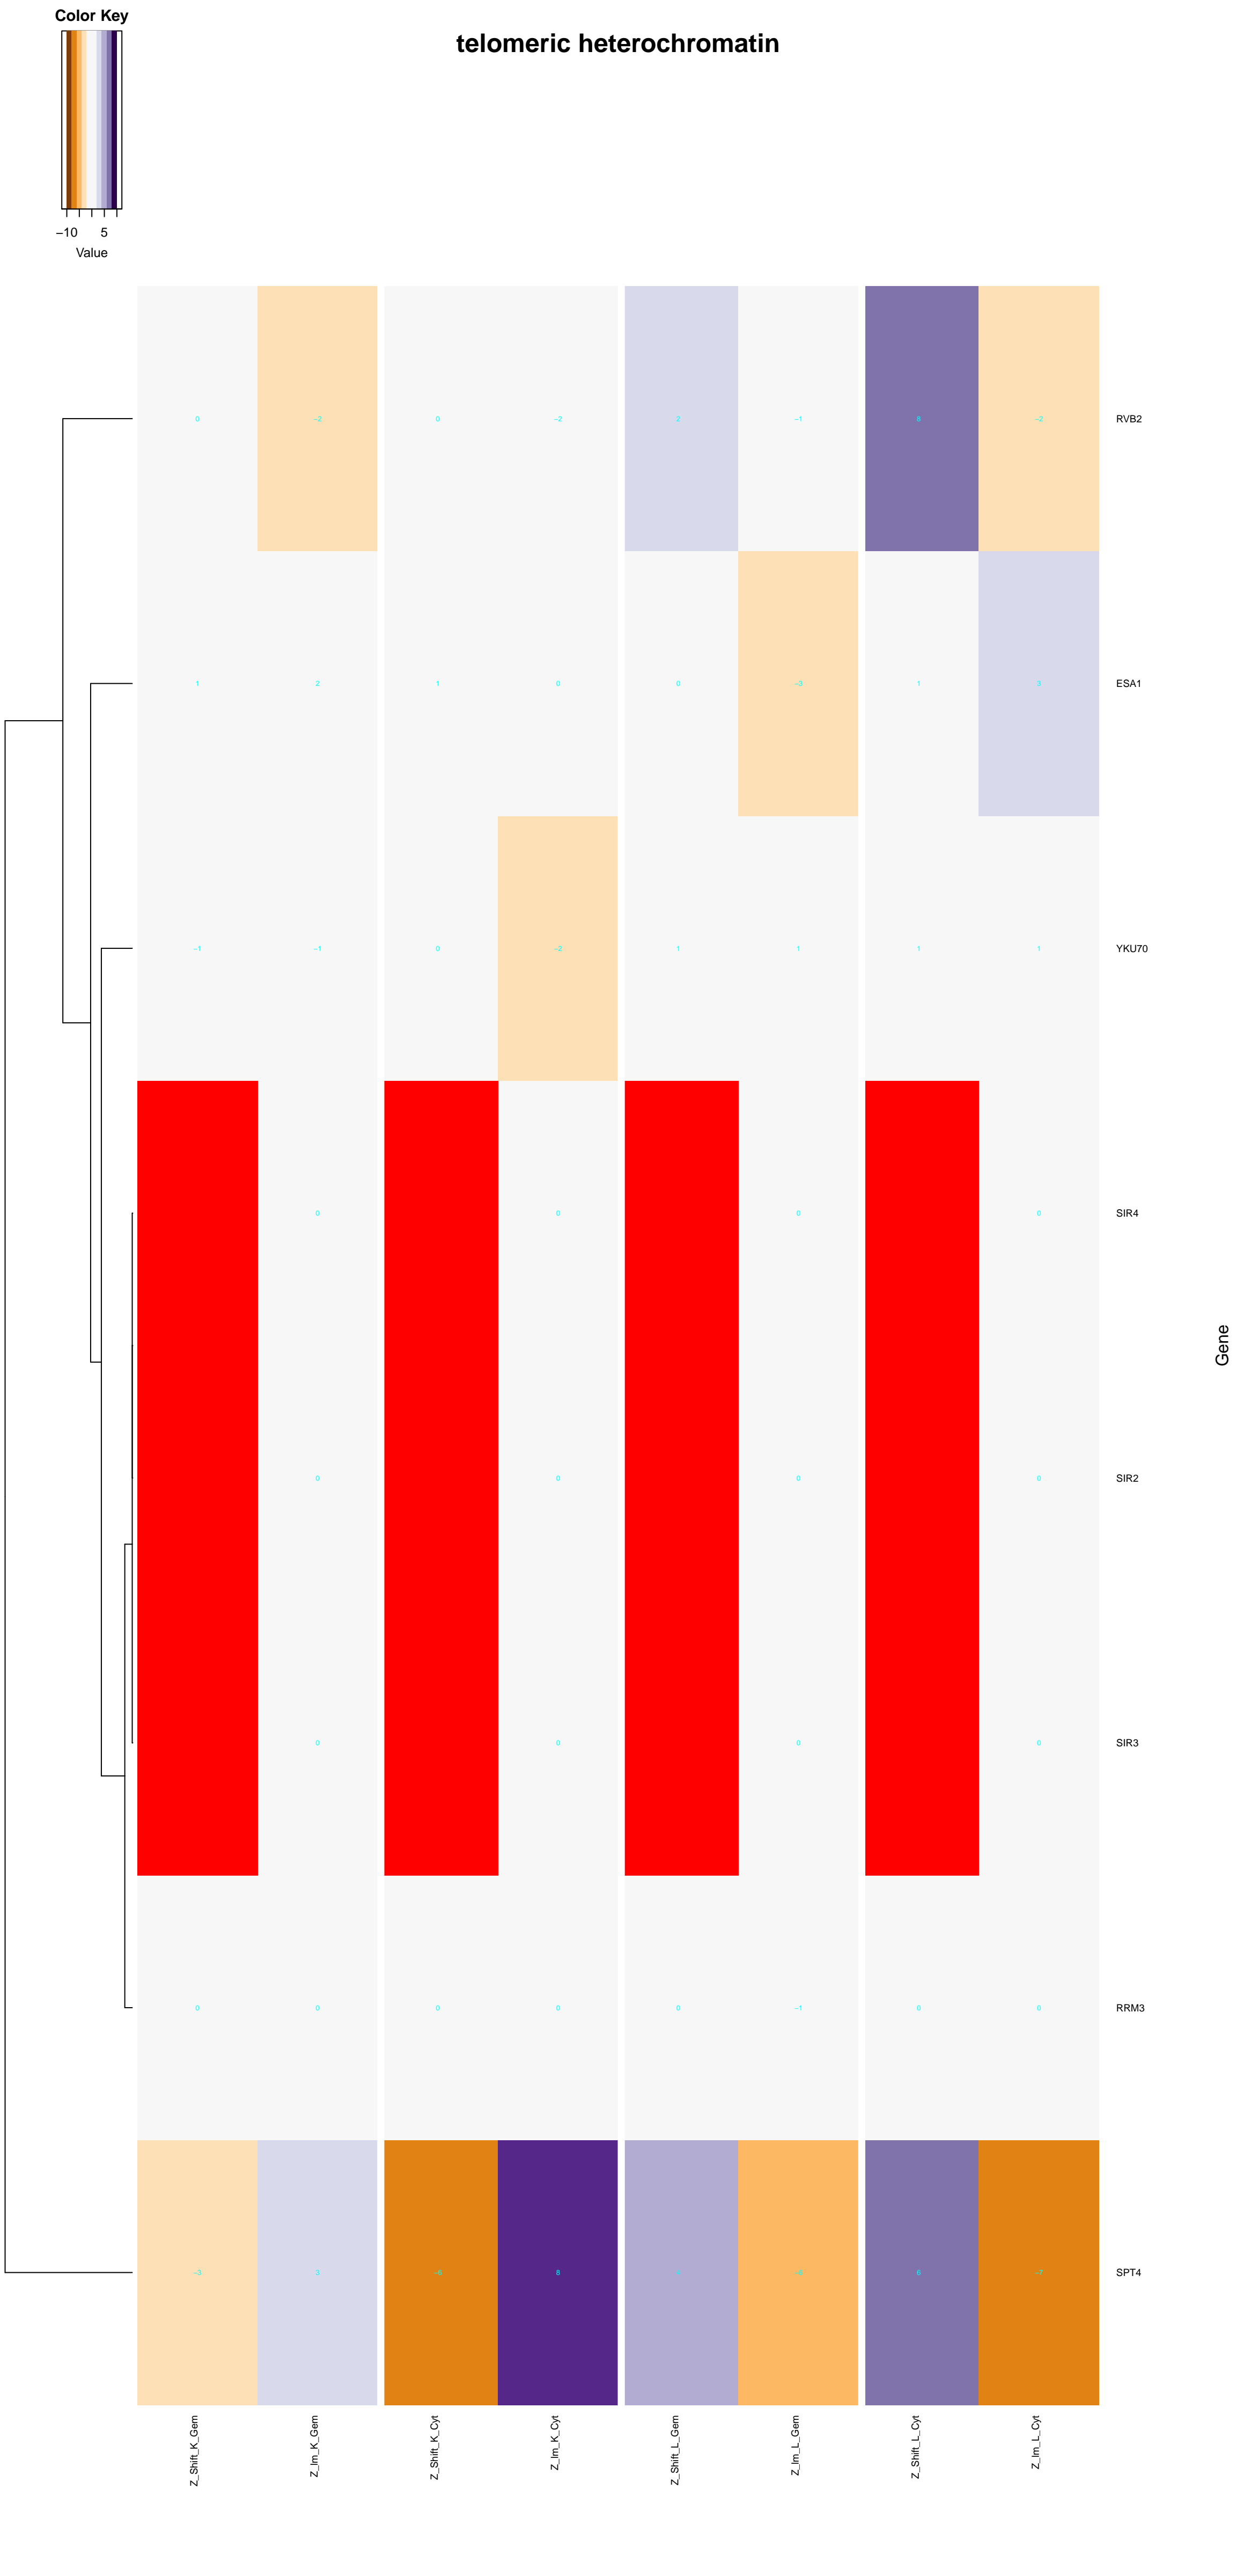

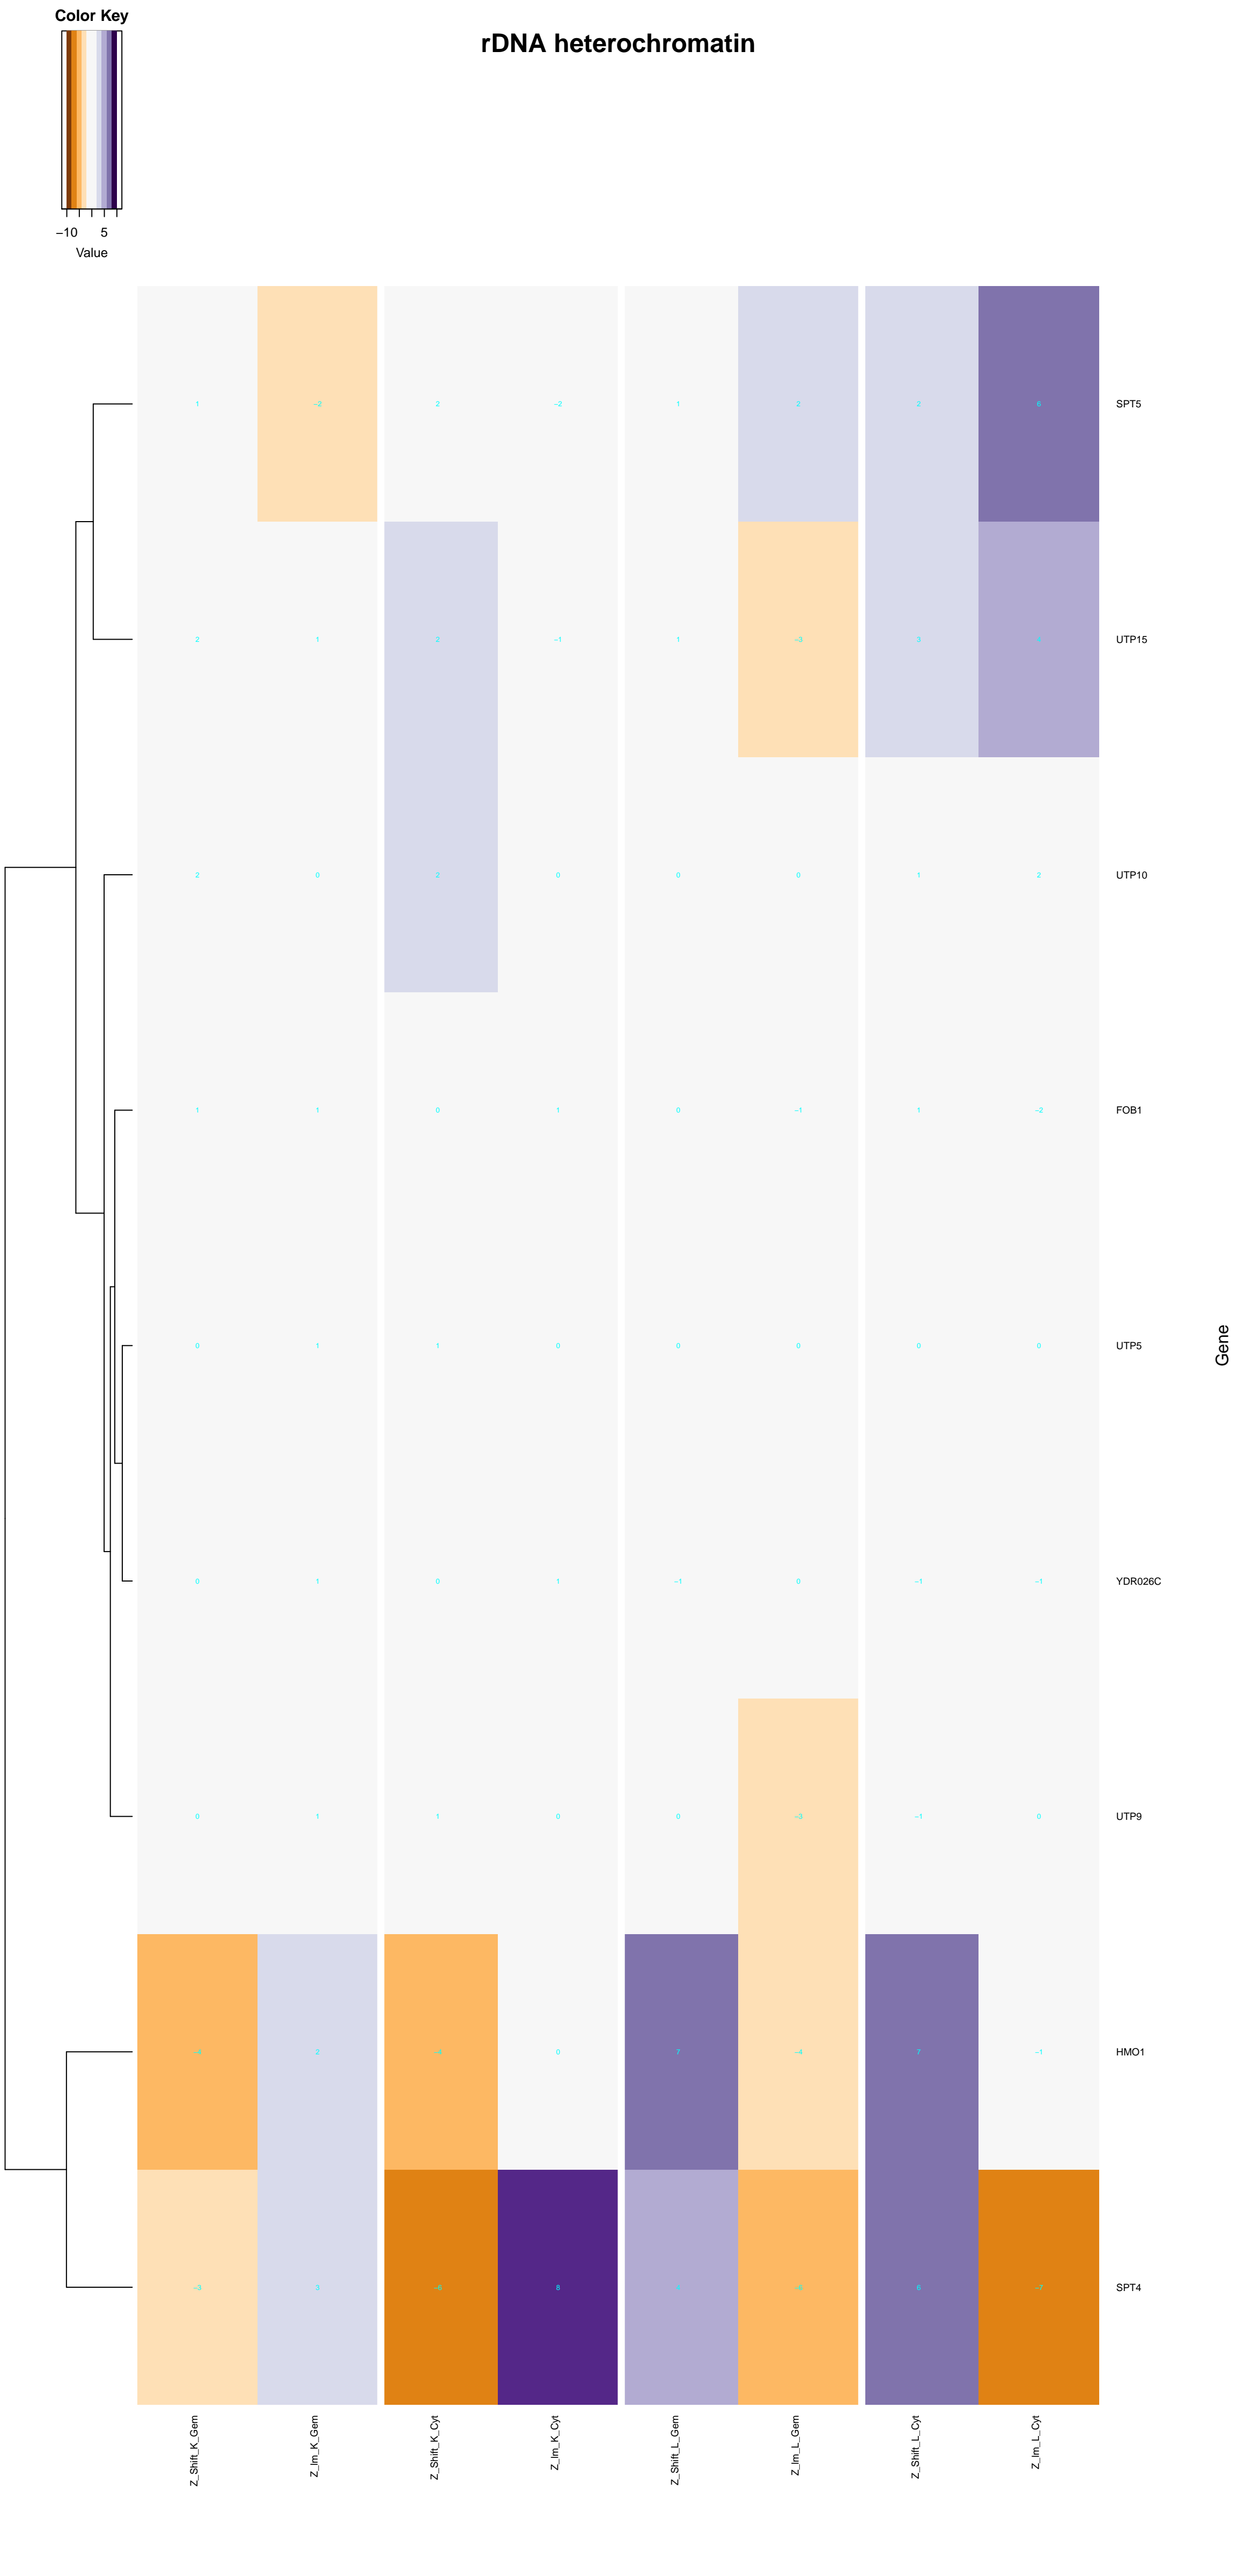

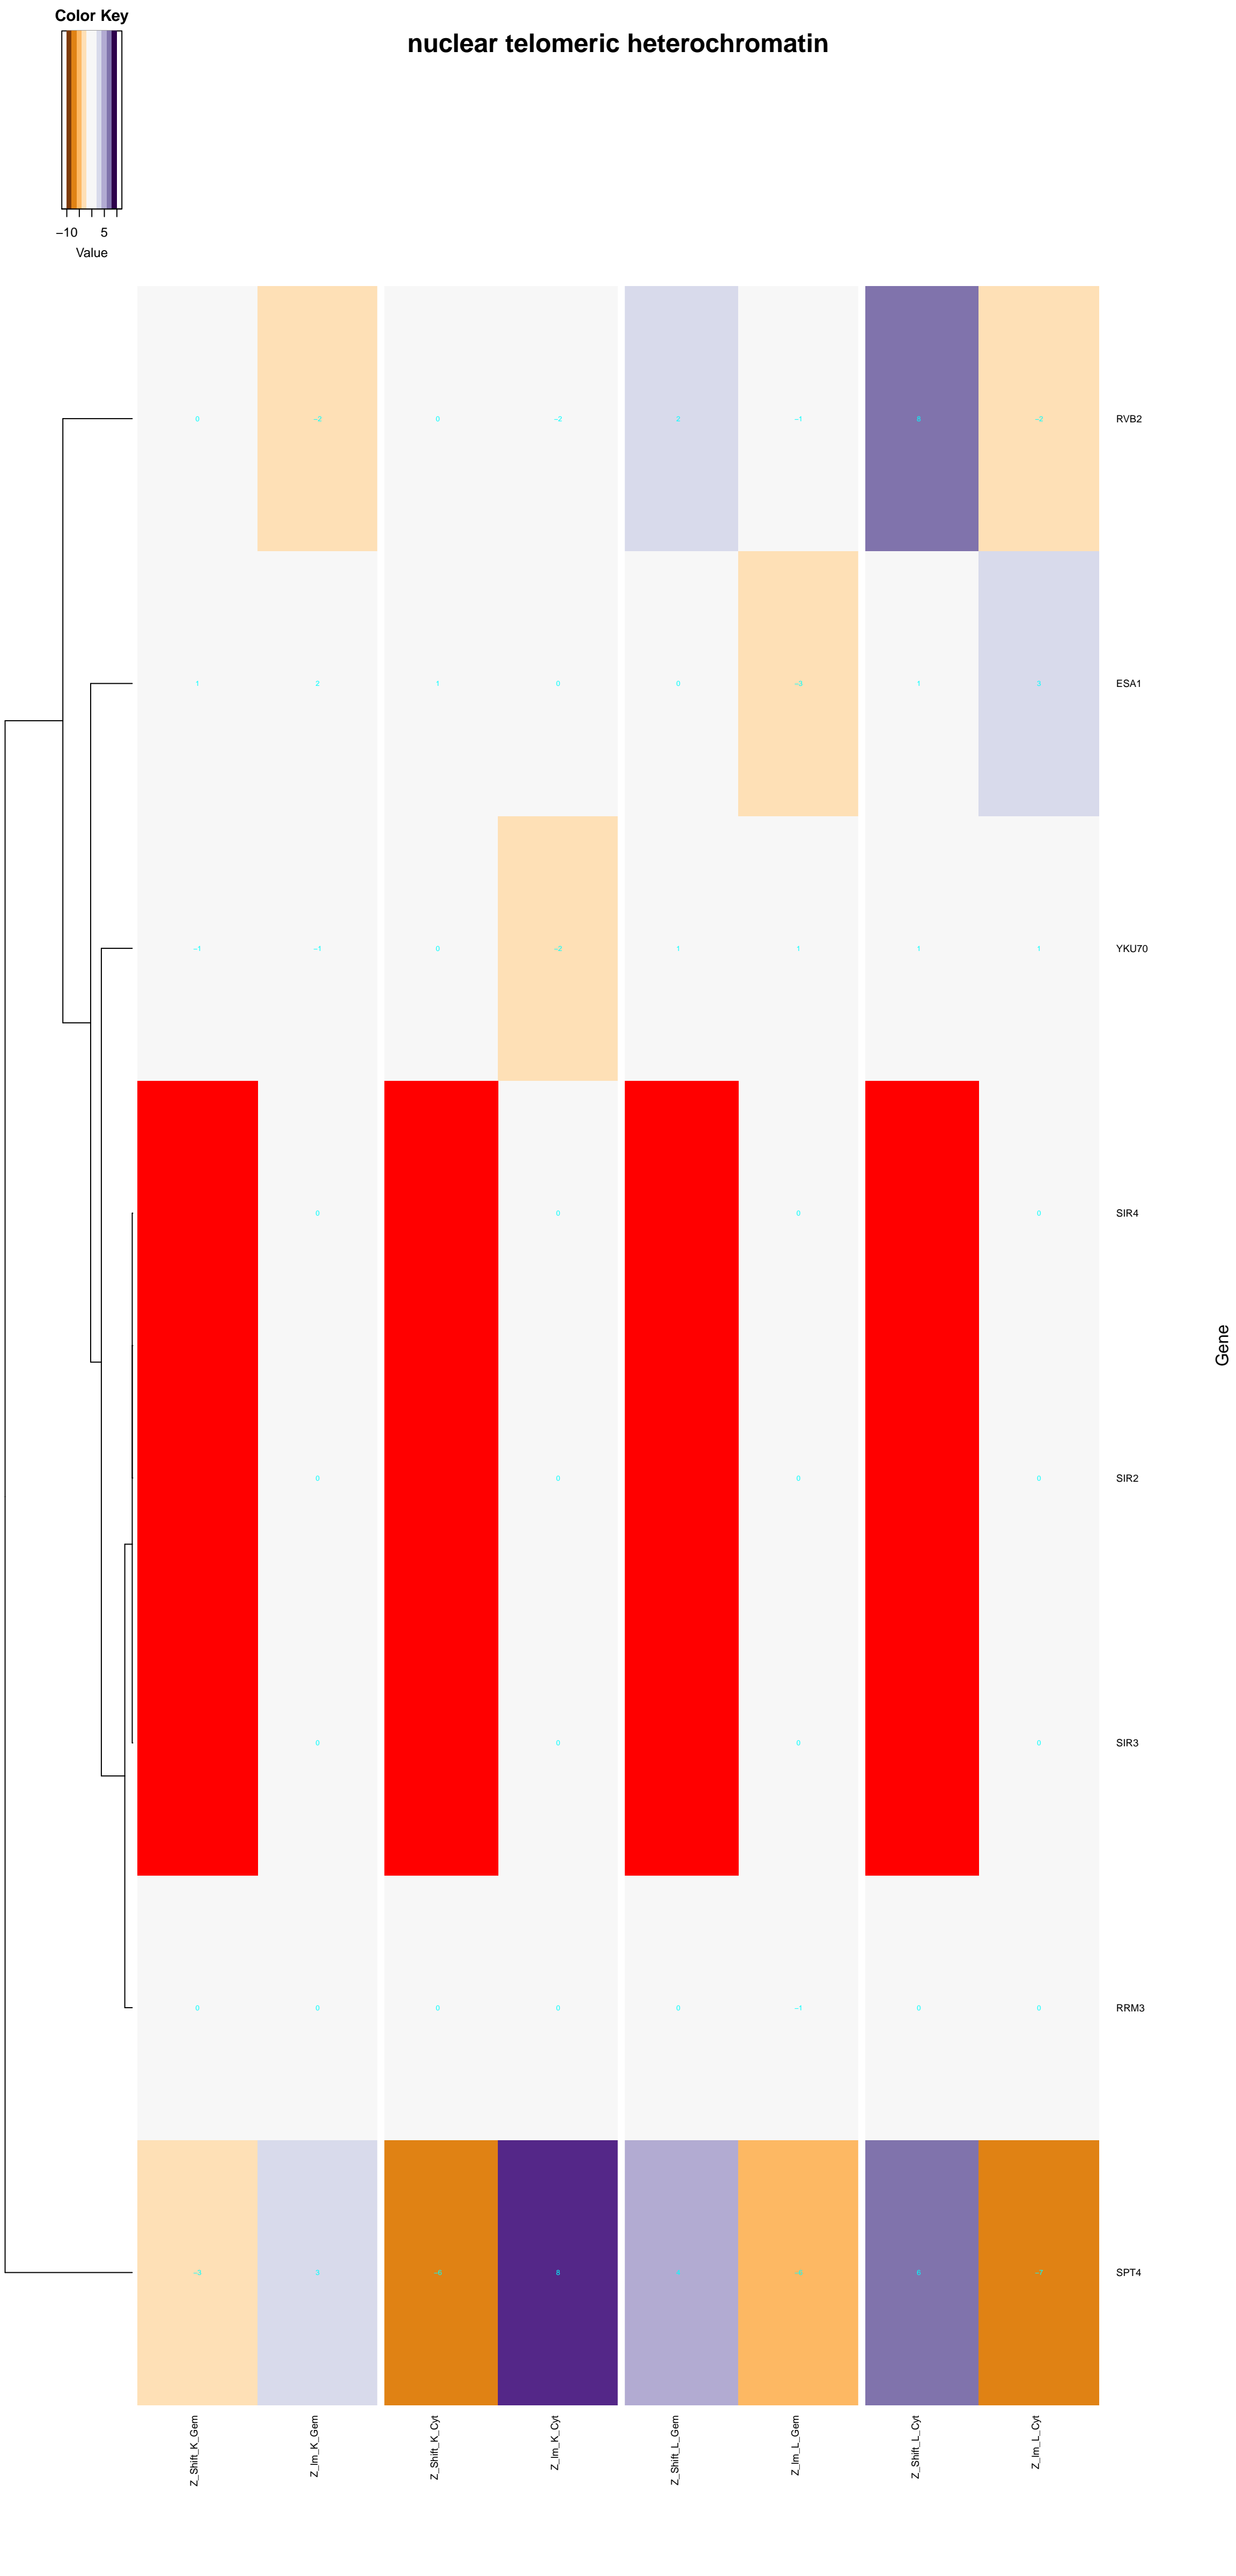

Supplement: s1 [file s1]



Supplement: s1 [file s1]

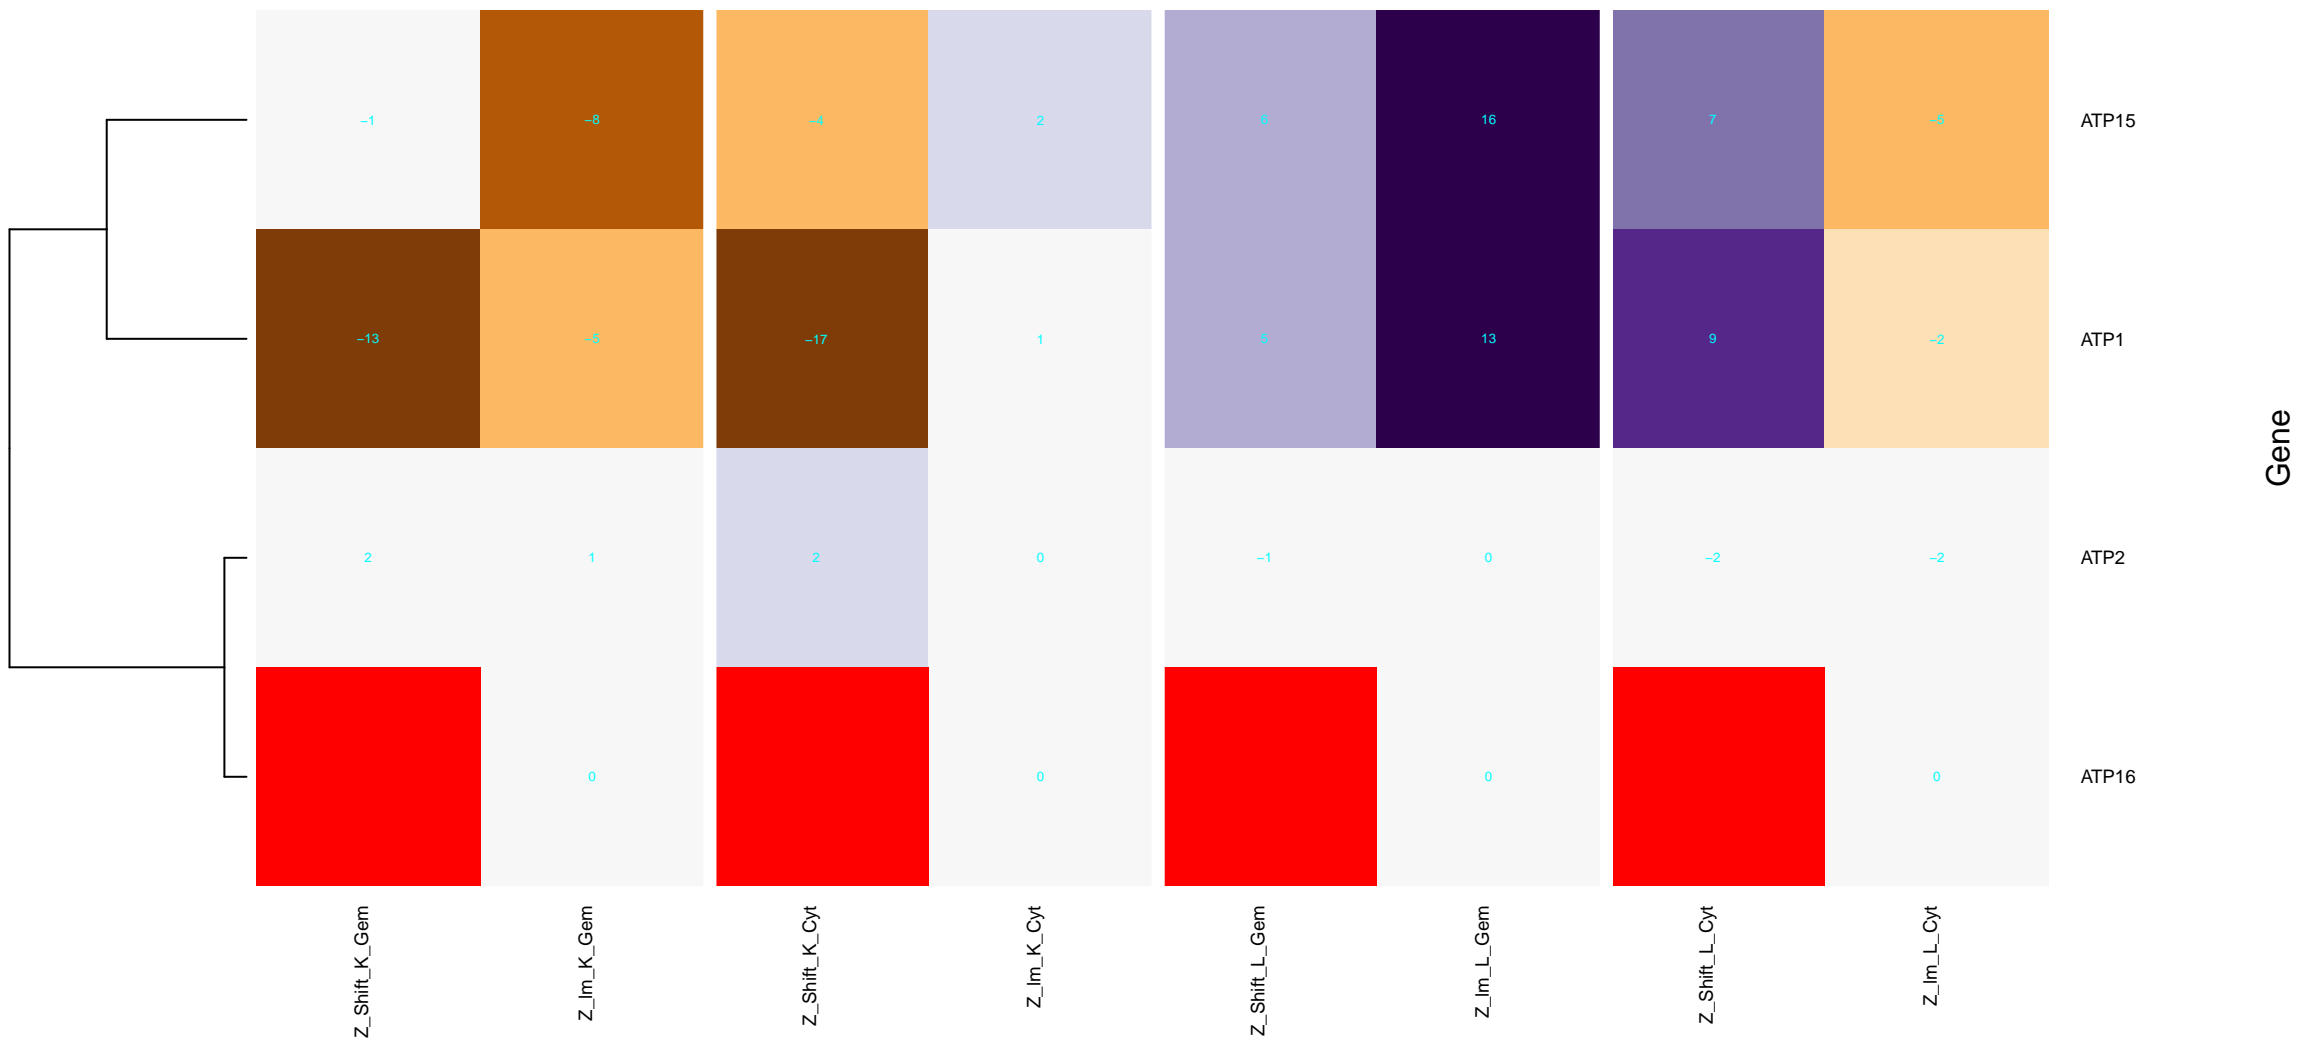

Supplement: s1 [file s1]

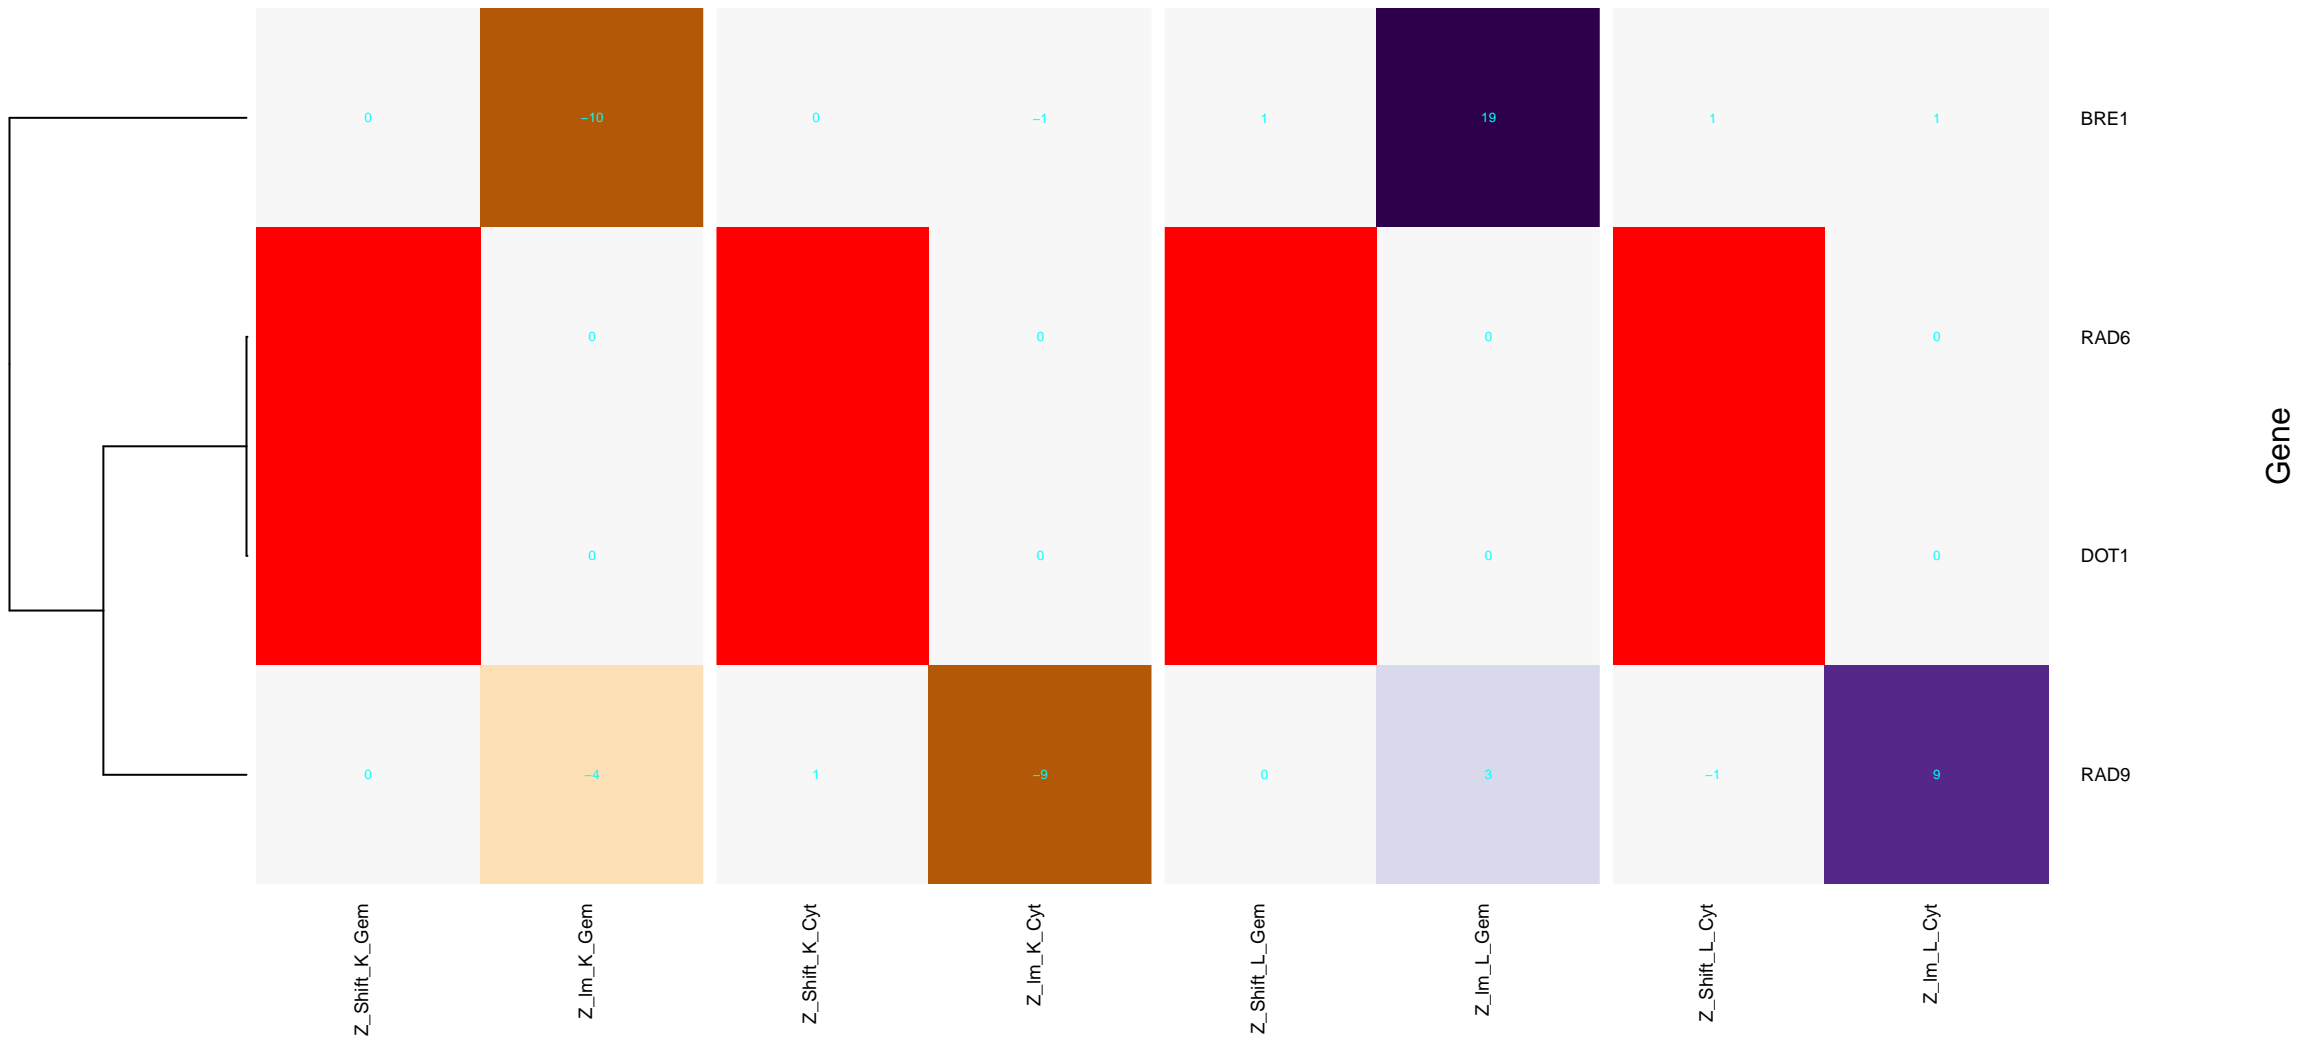

Supplement: s1 [file s1]

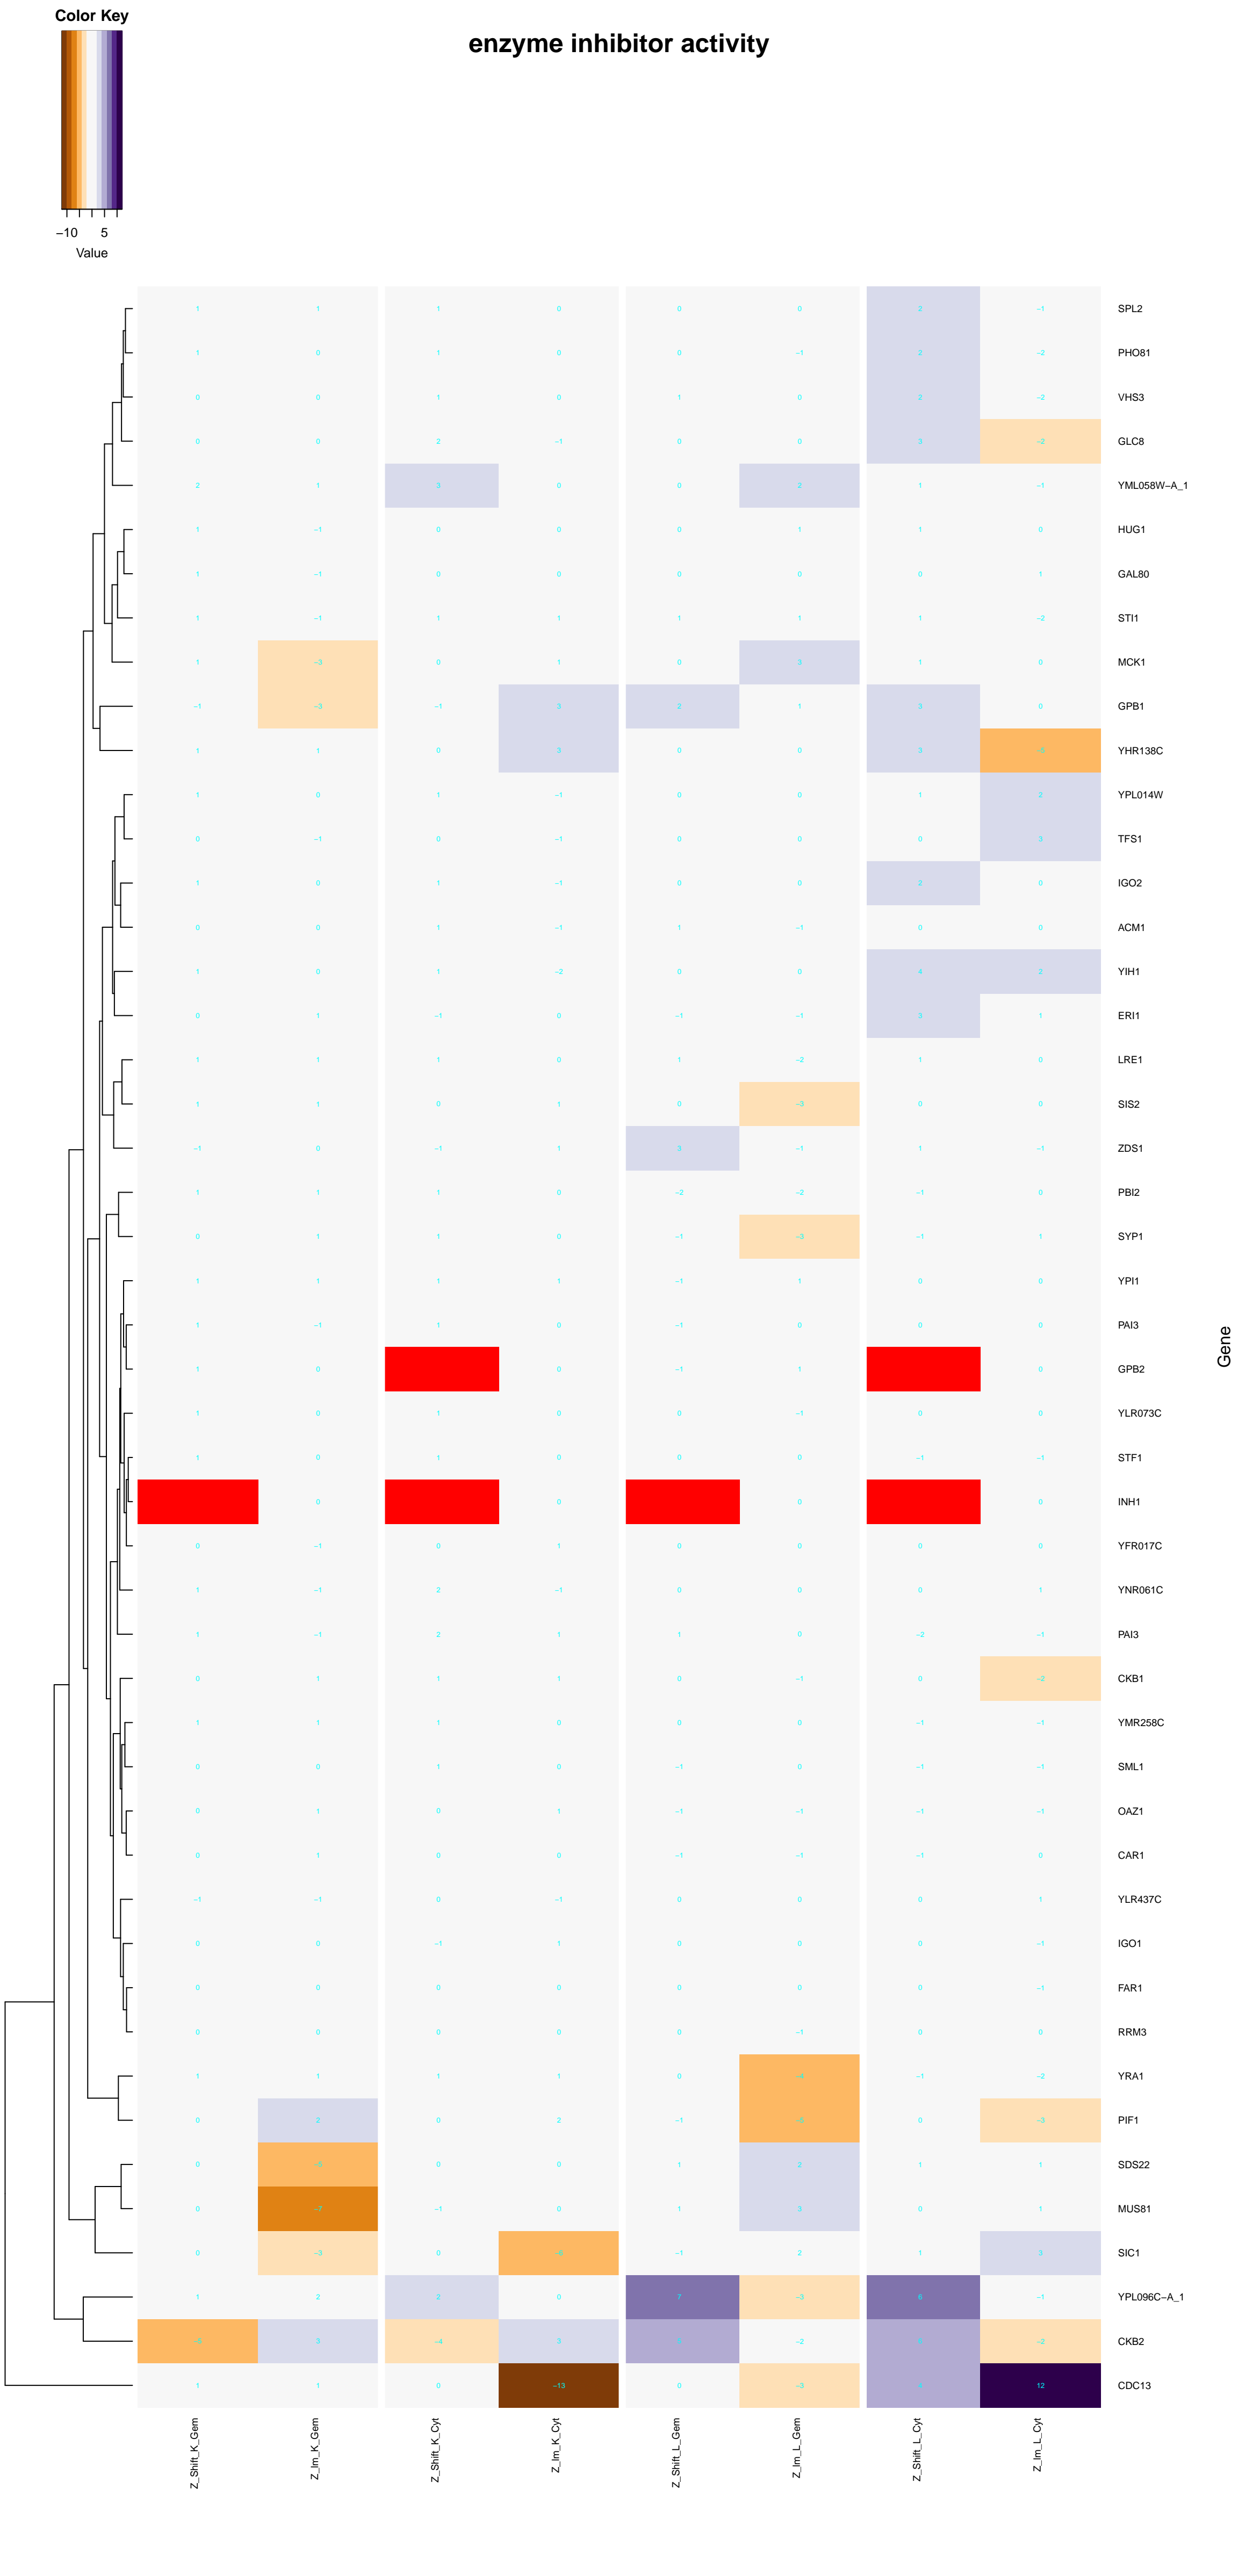

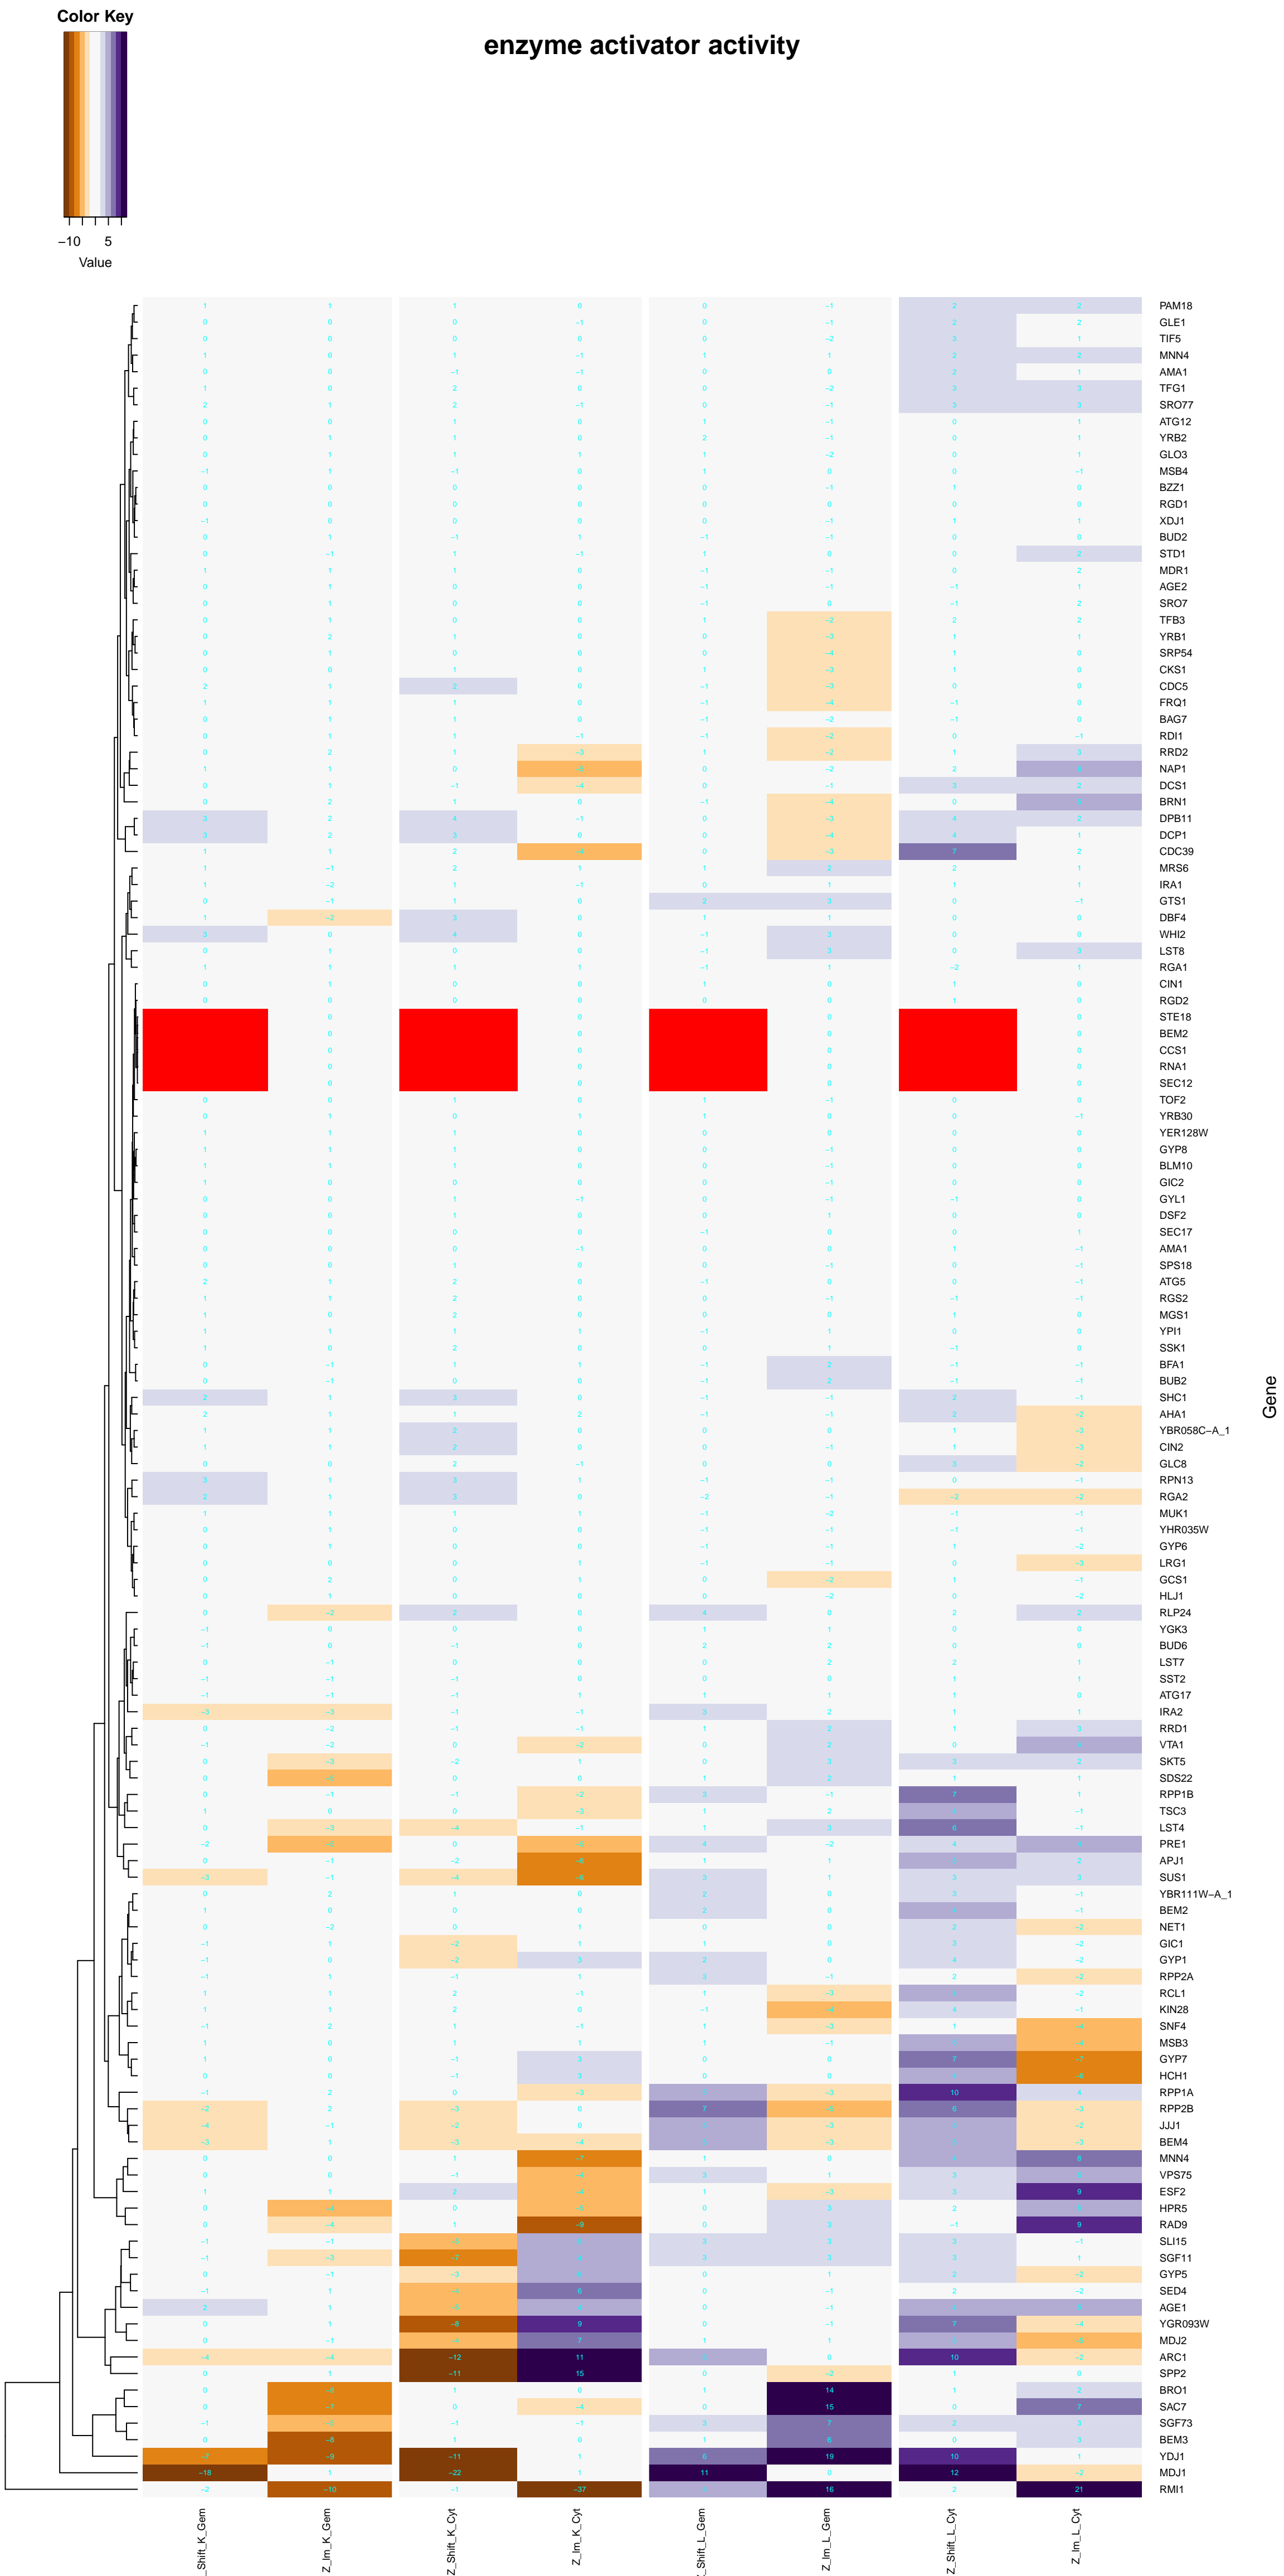

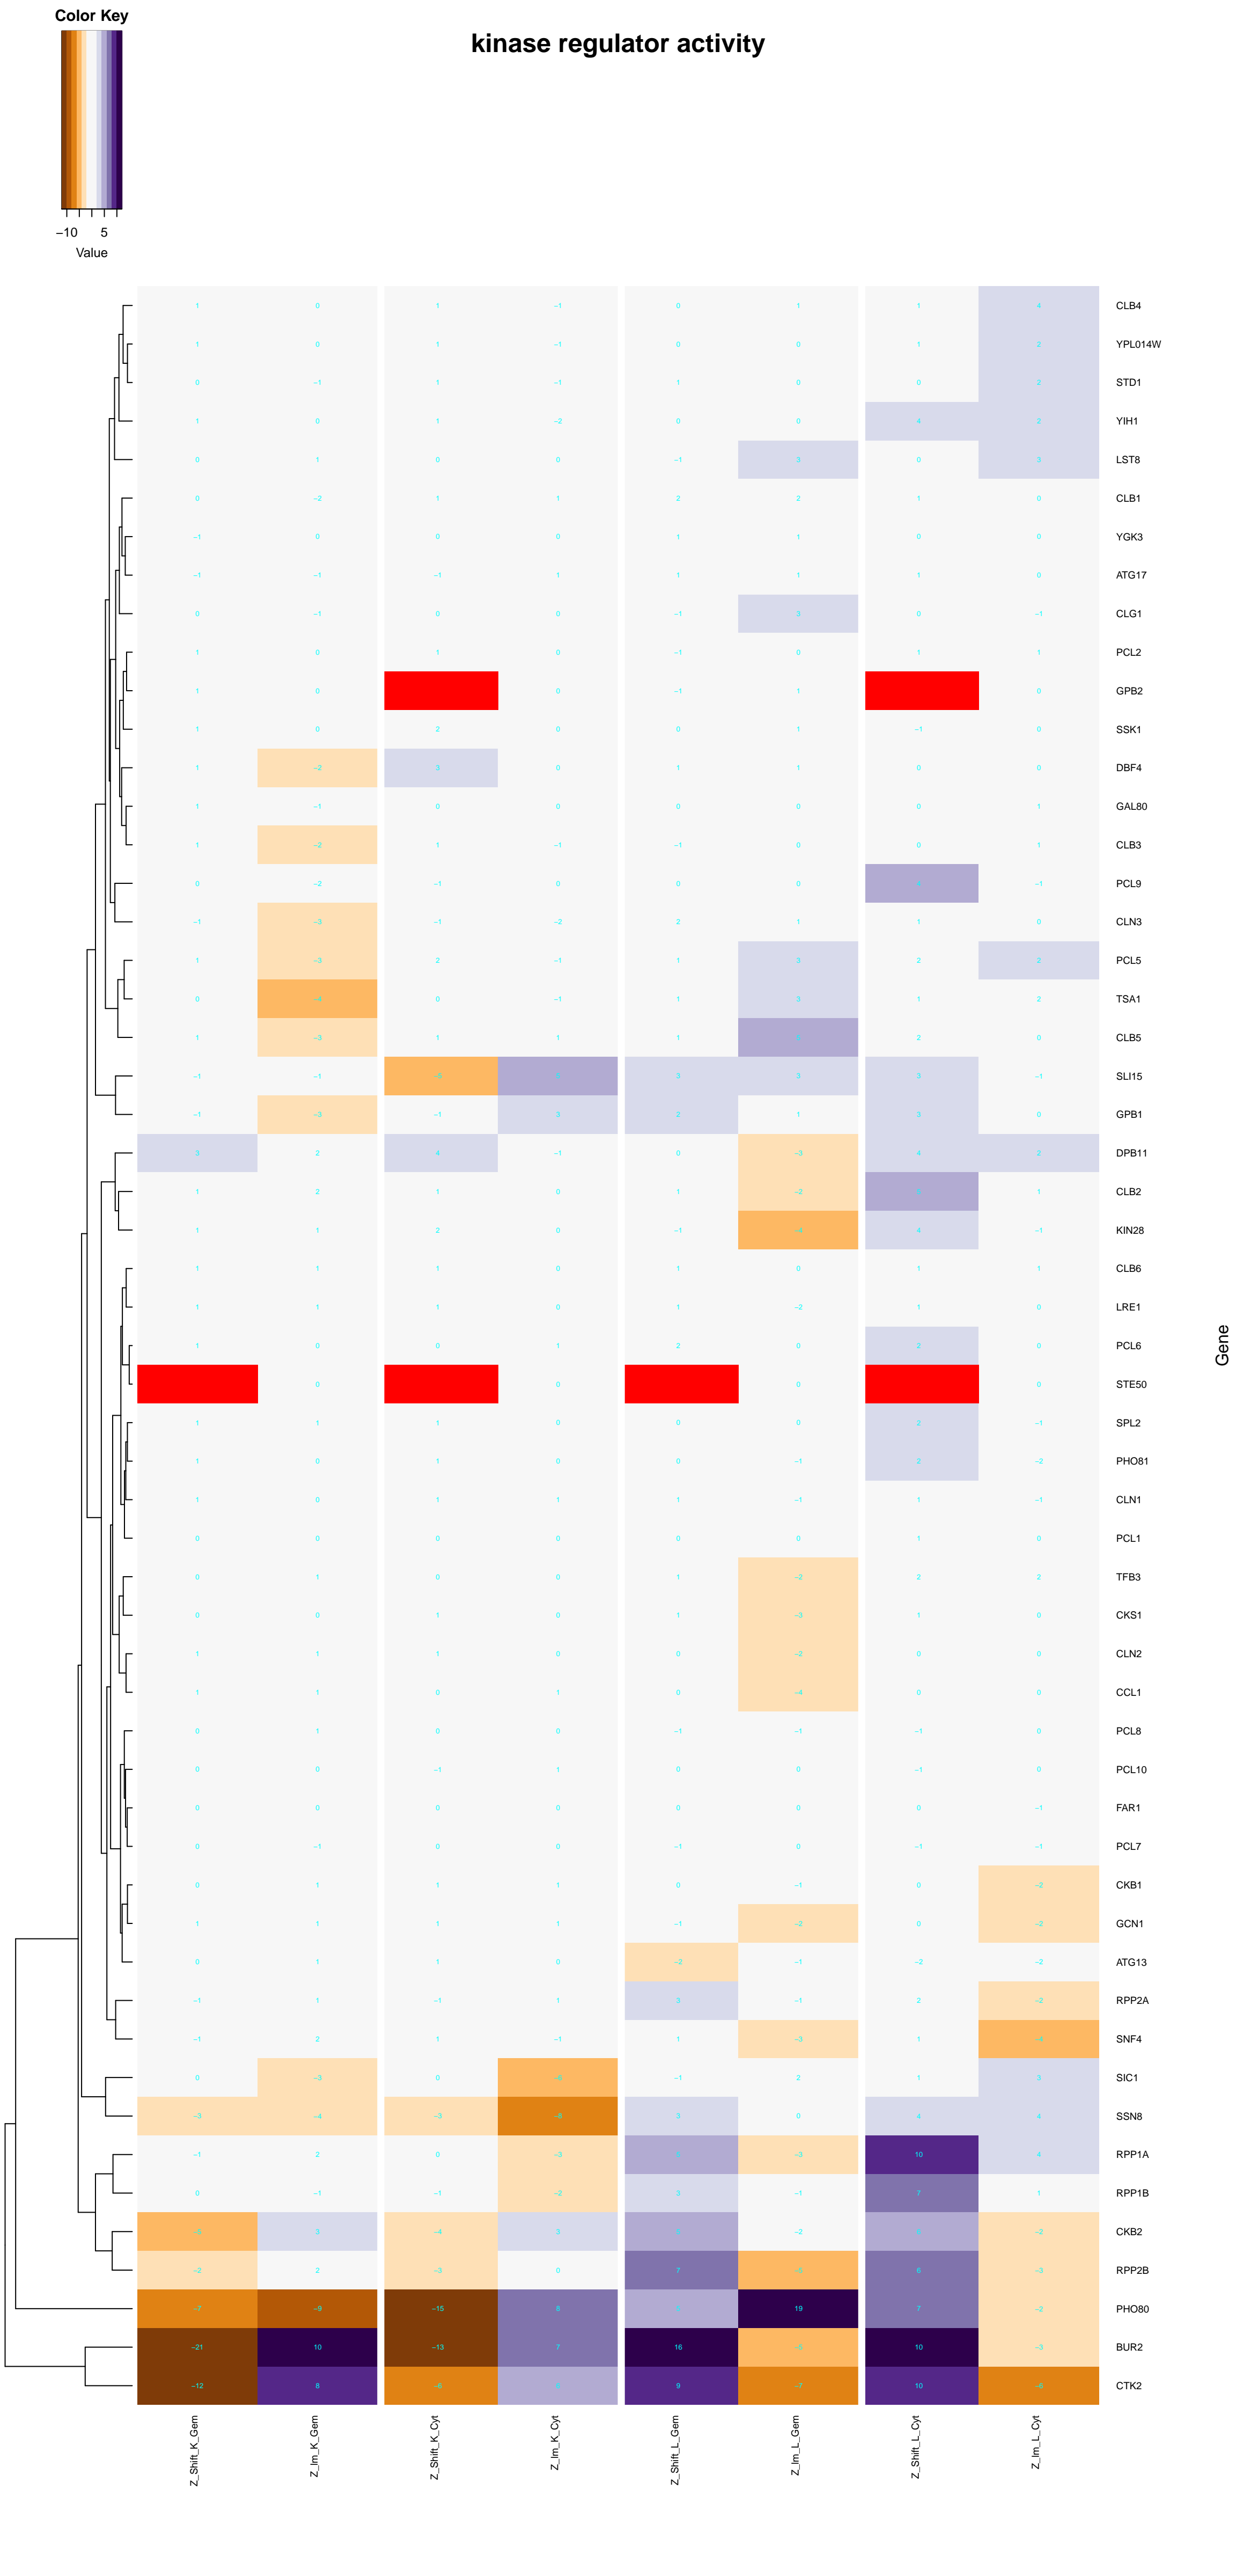

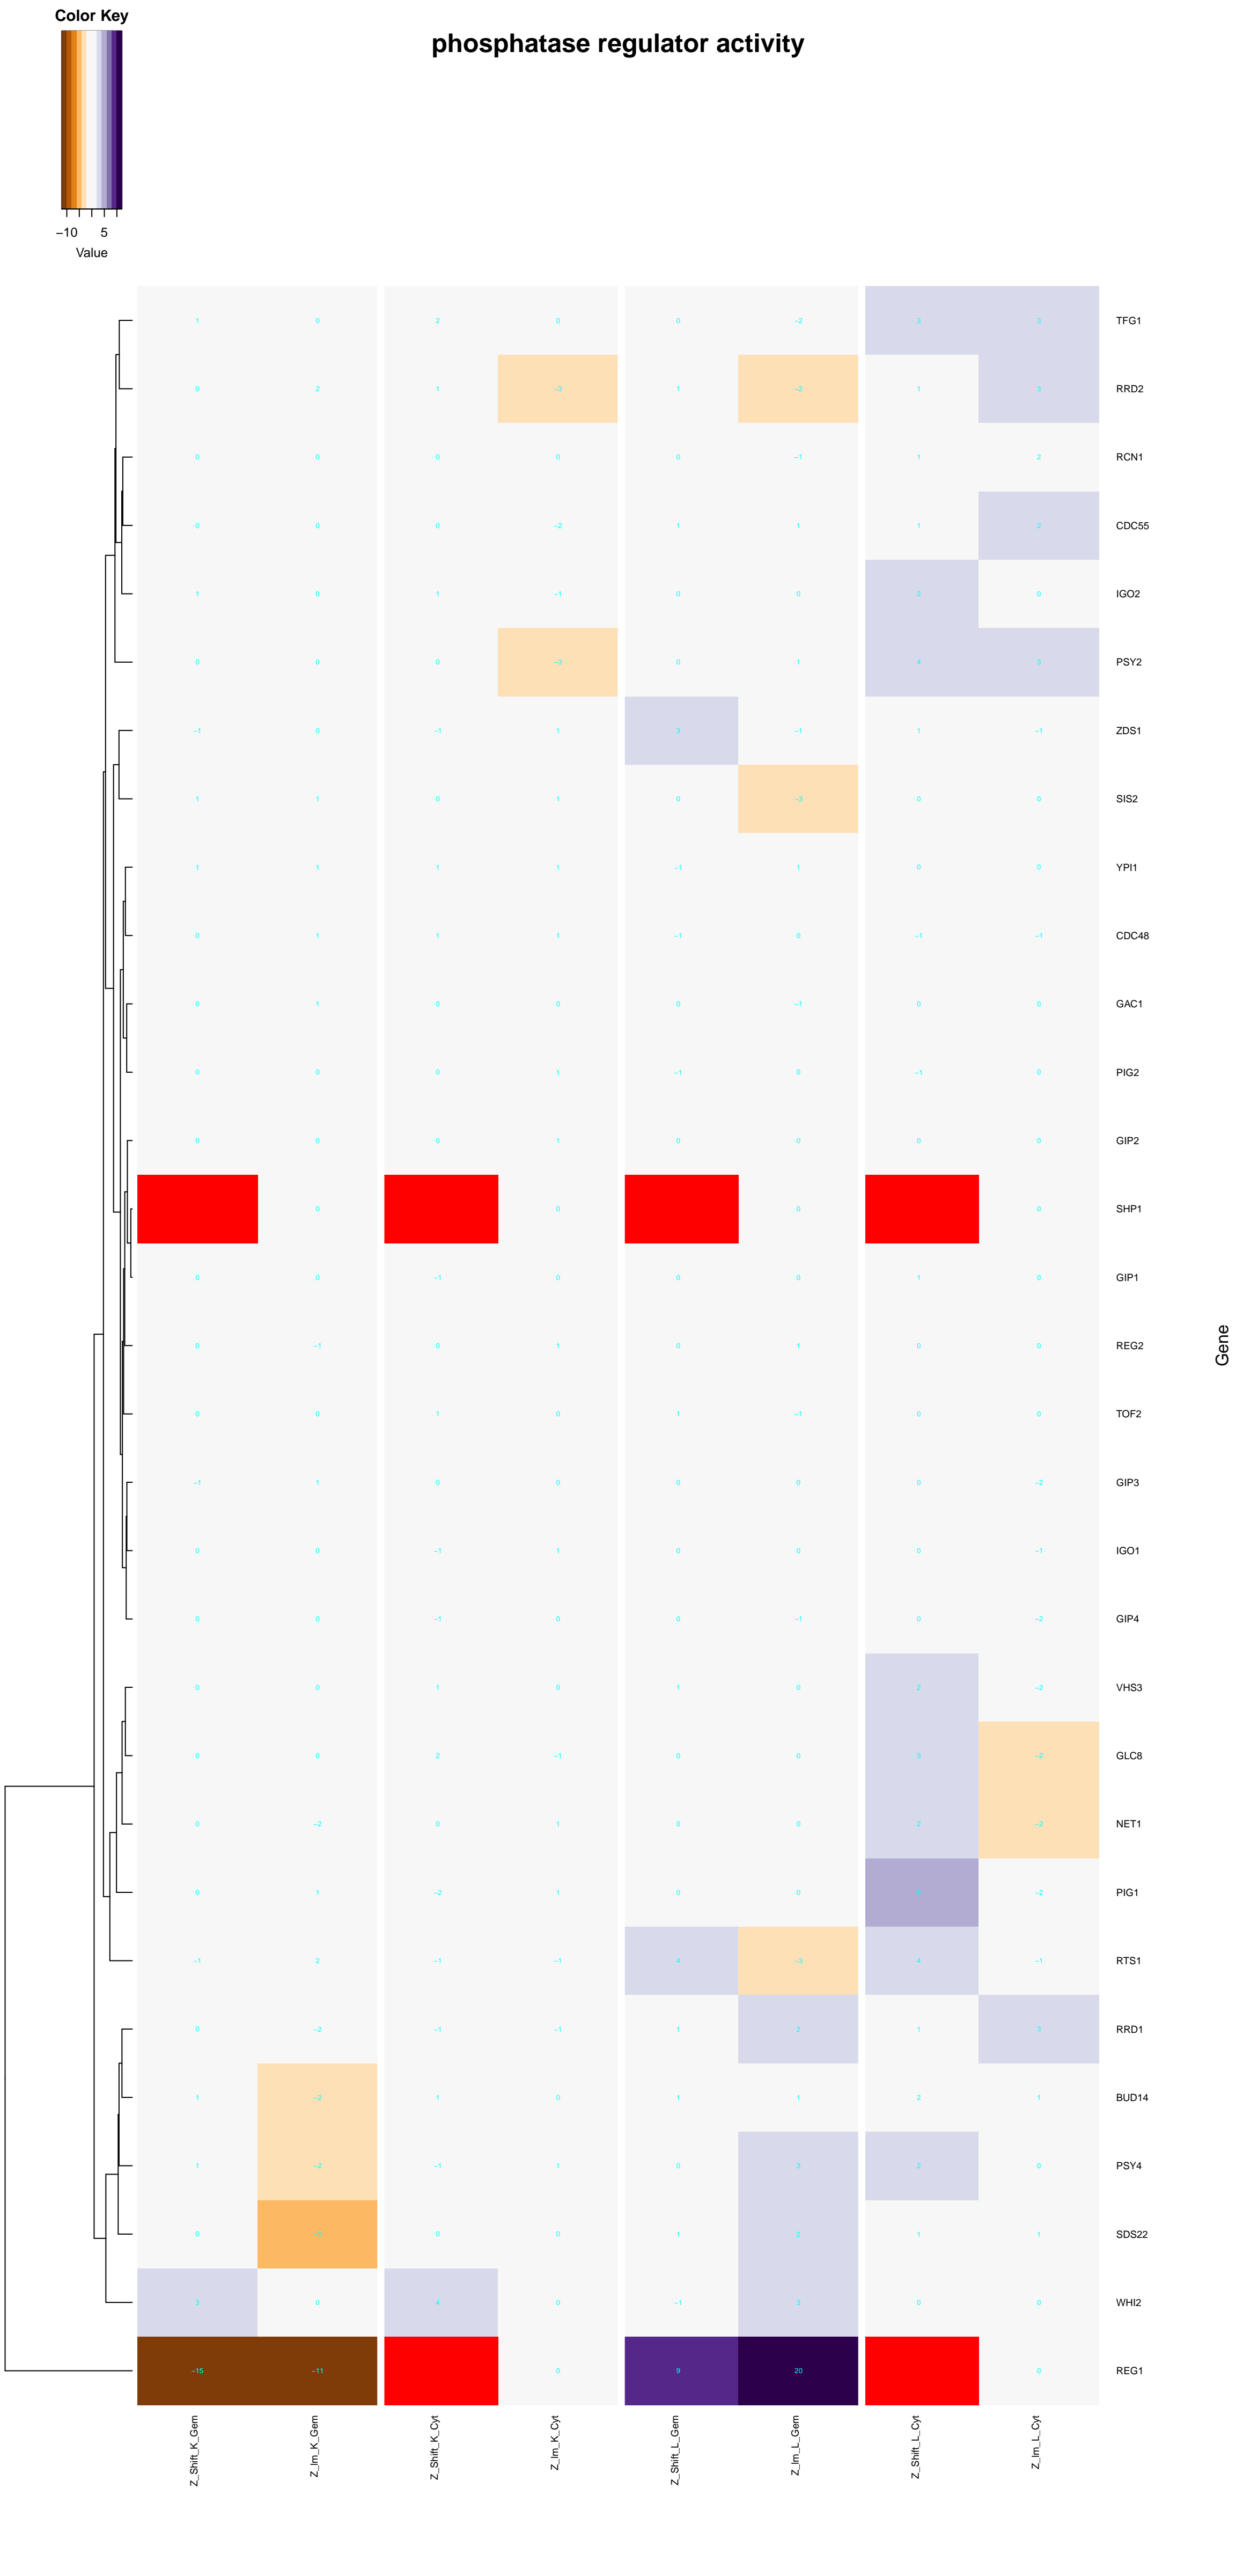

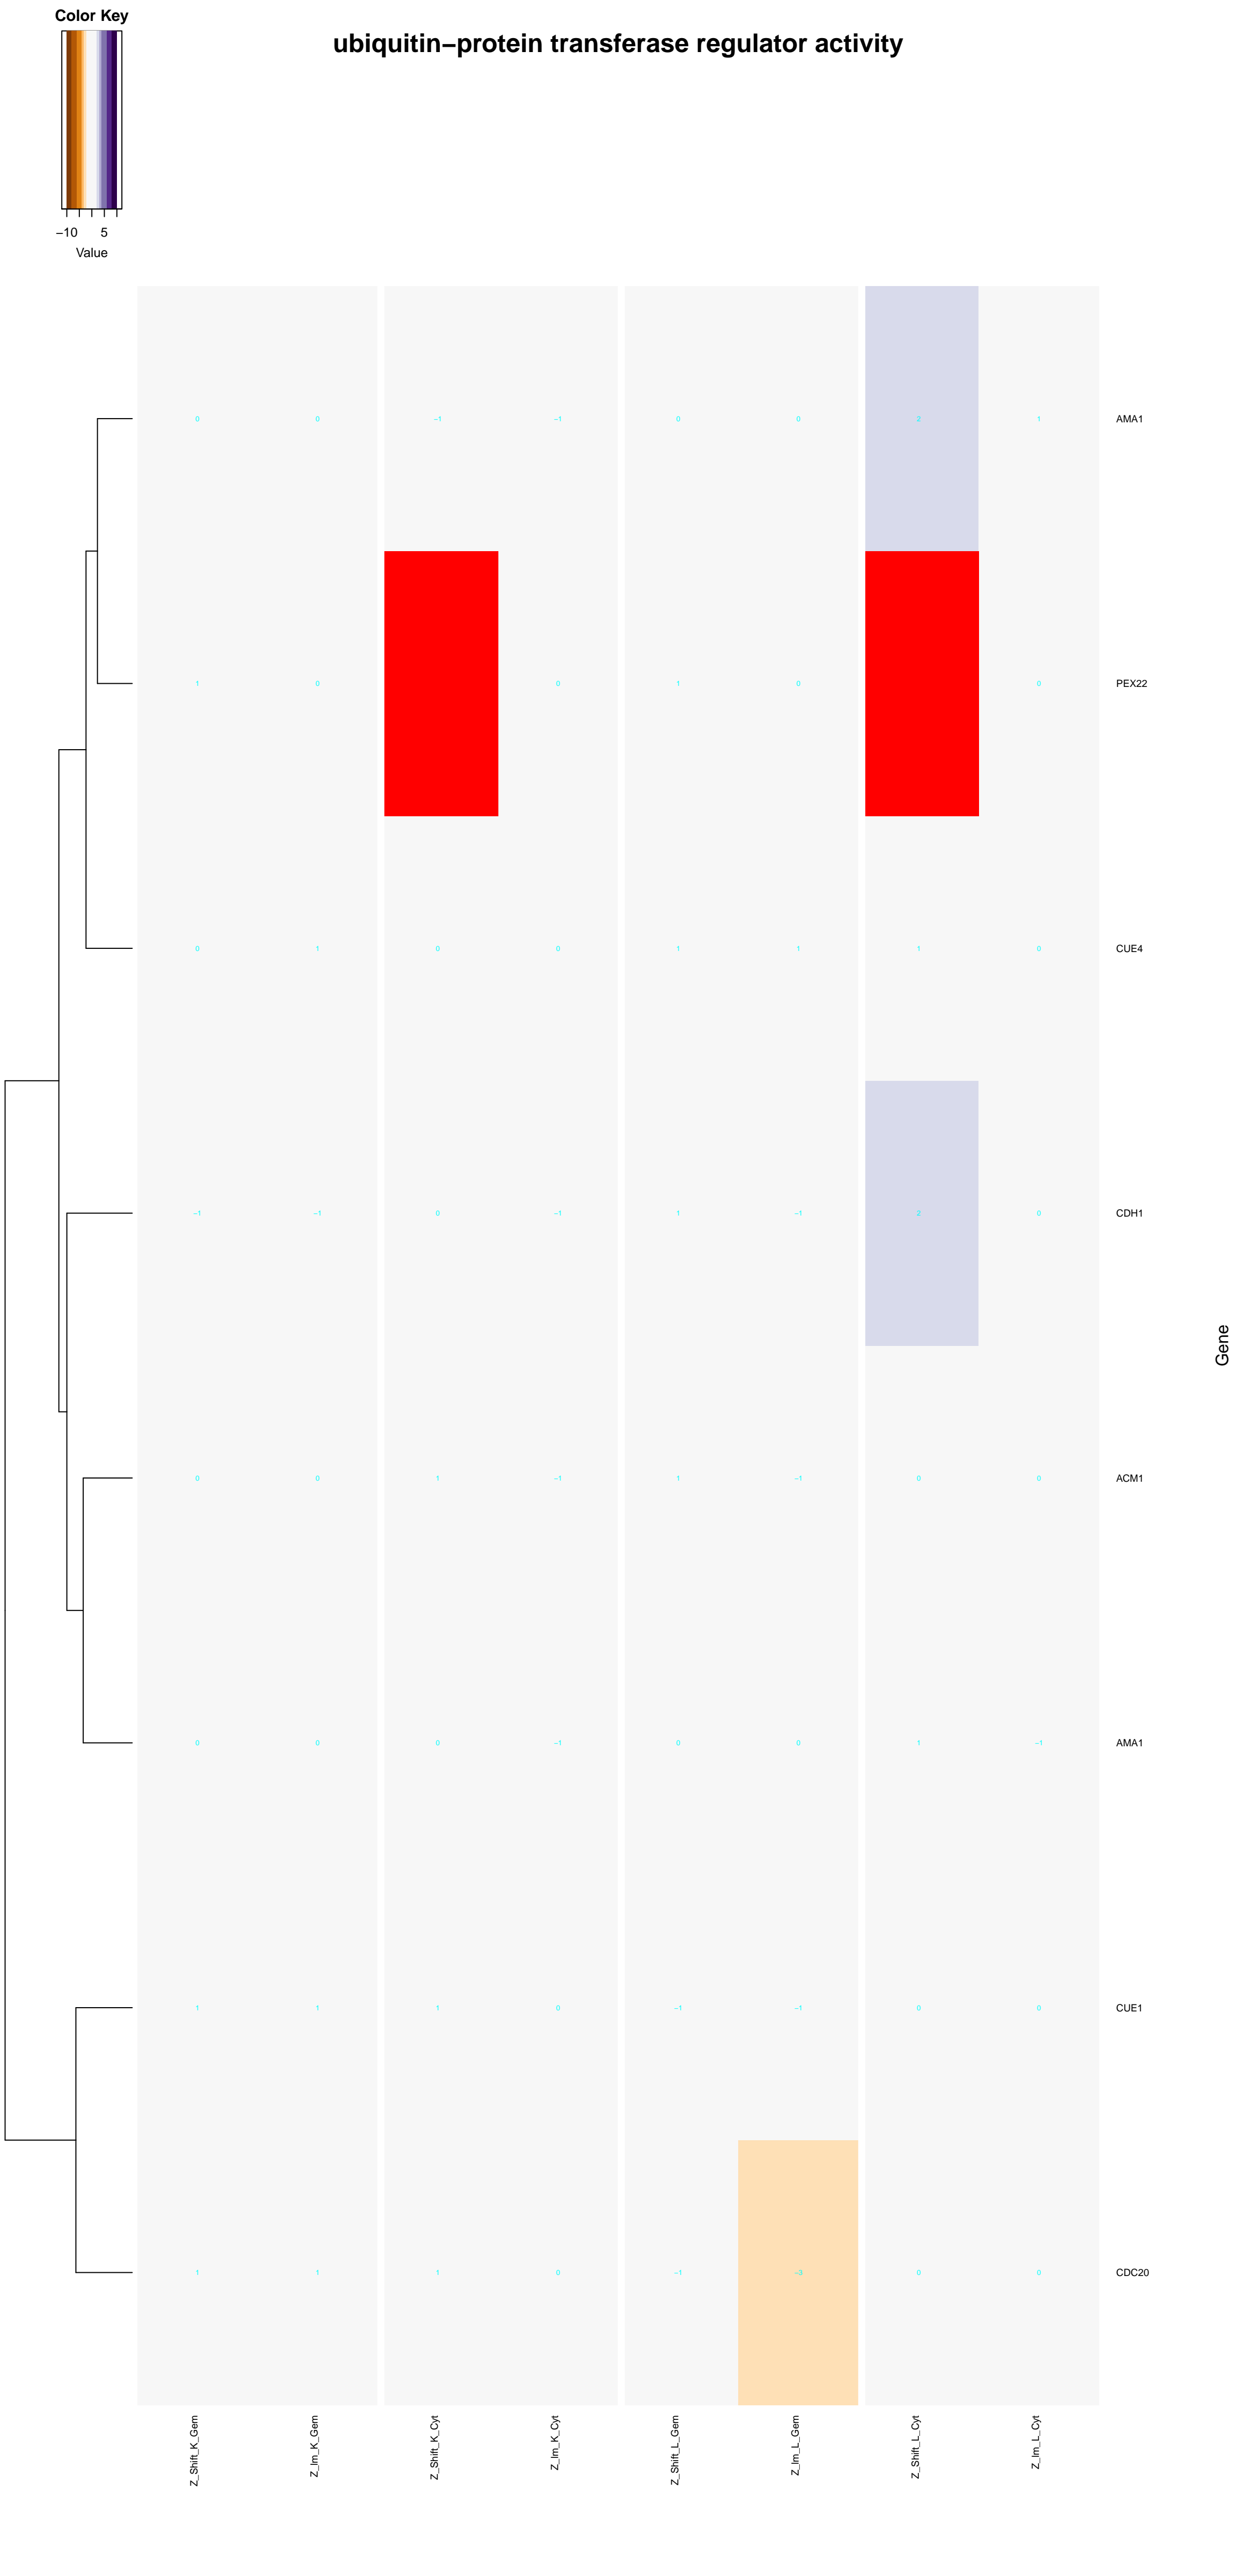



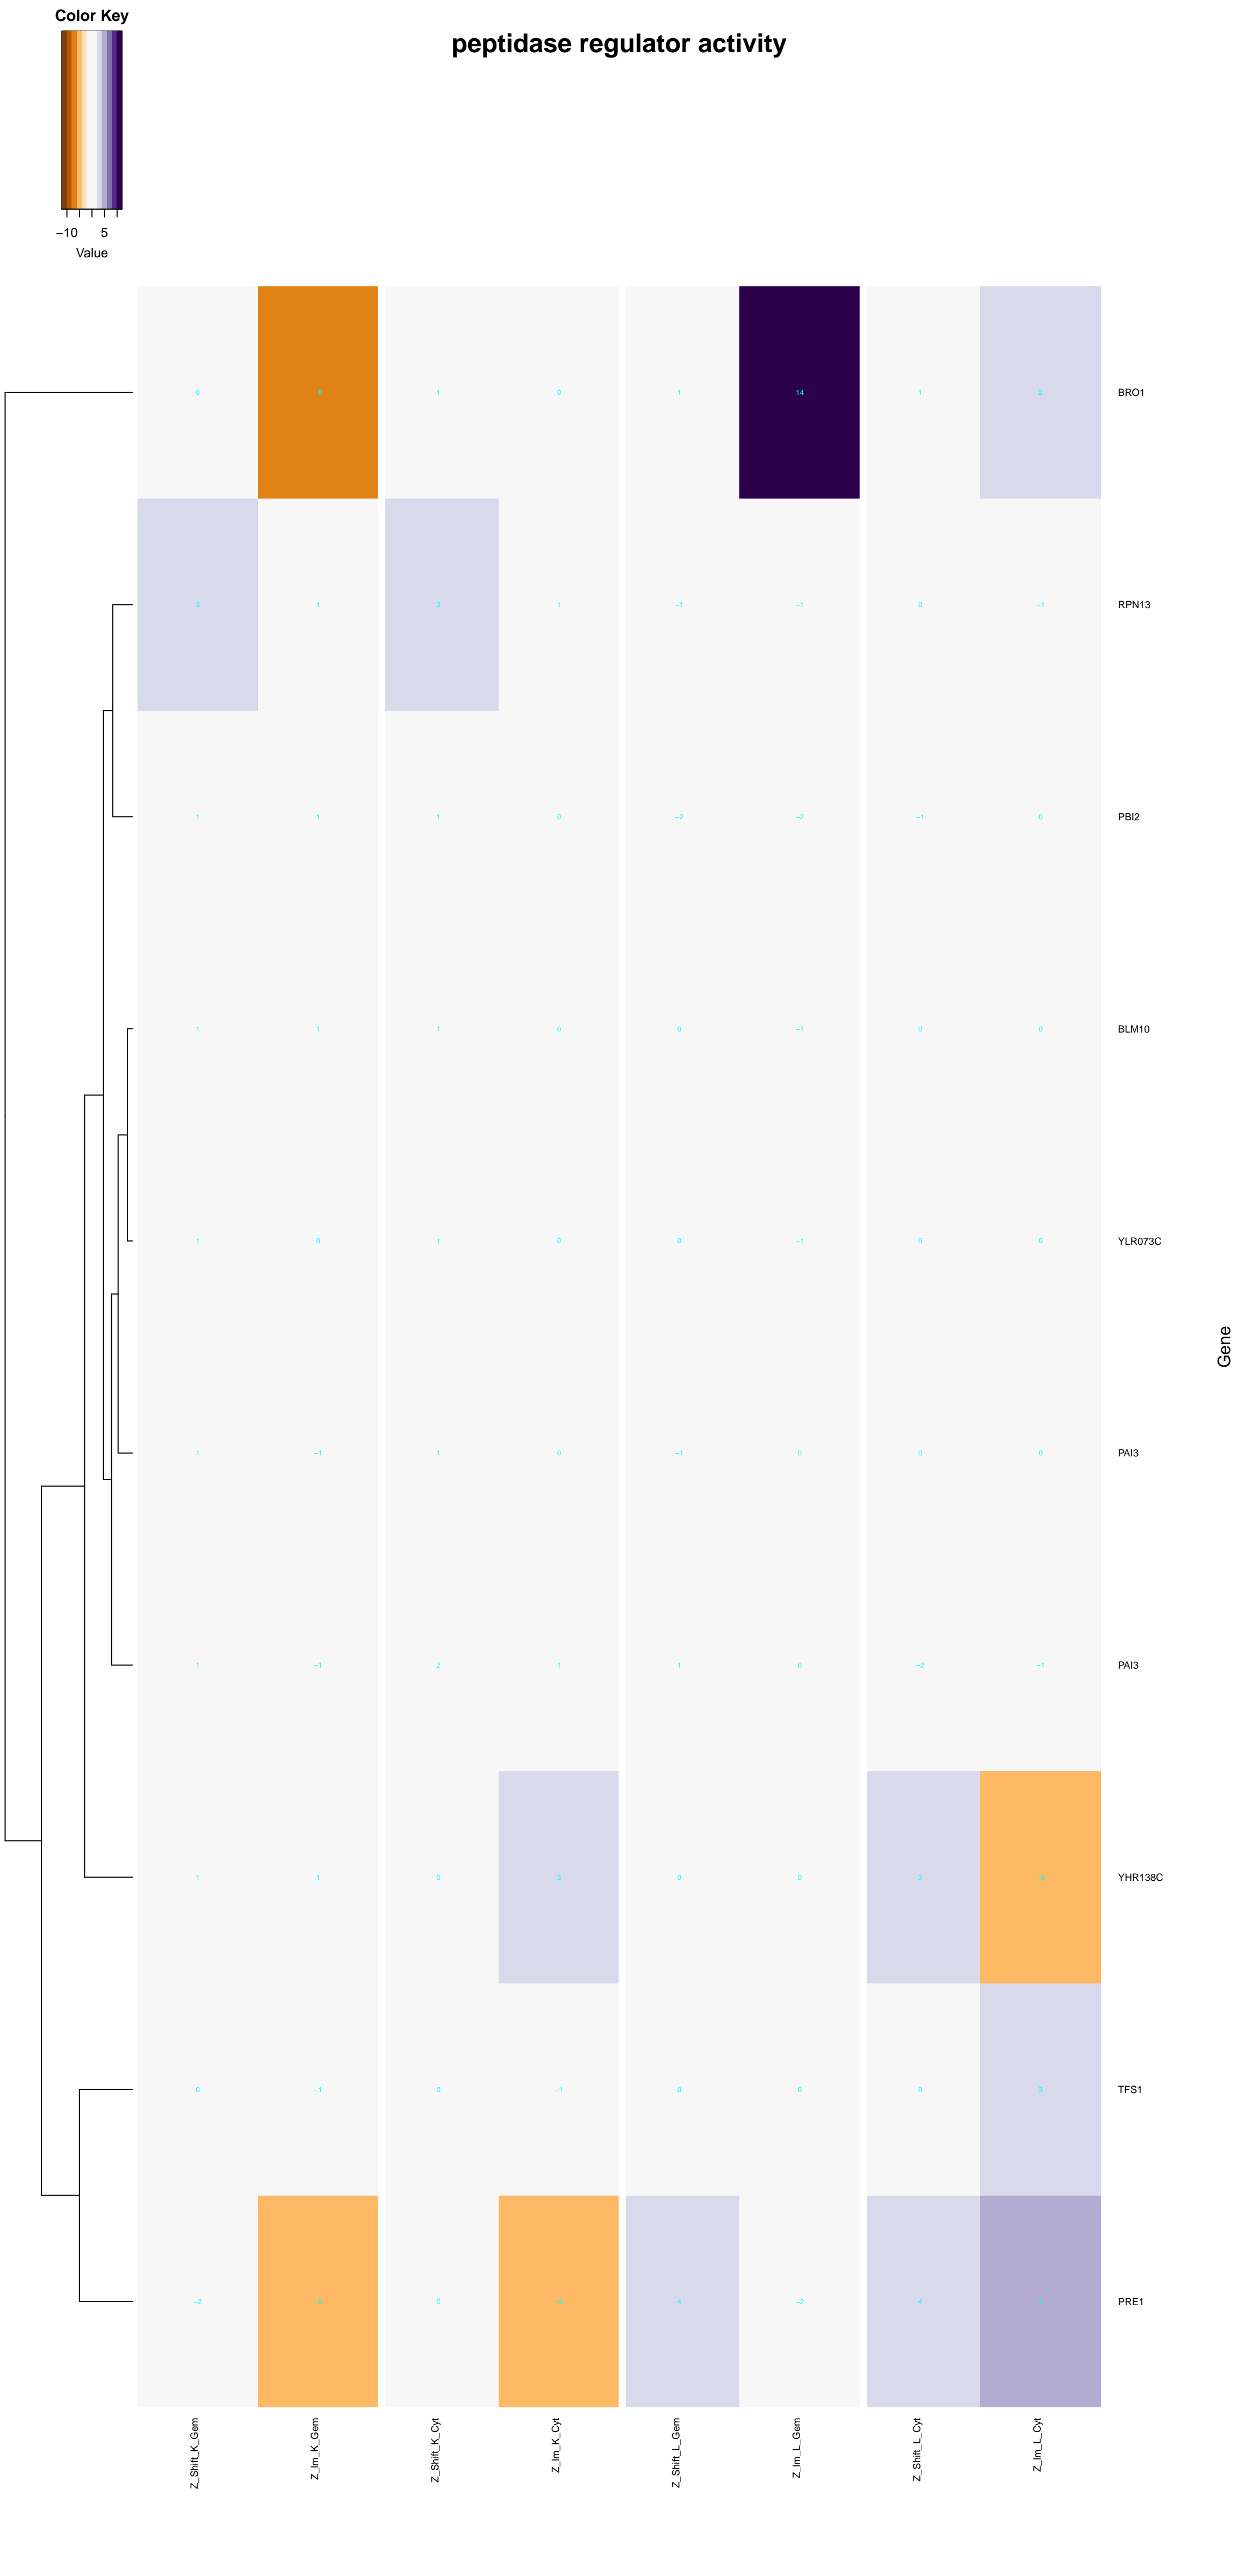



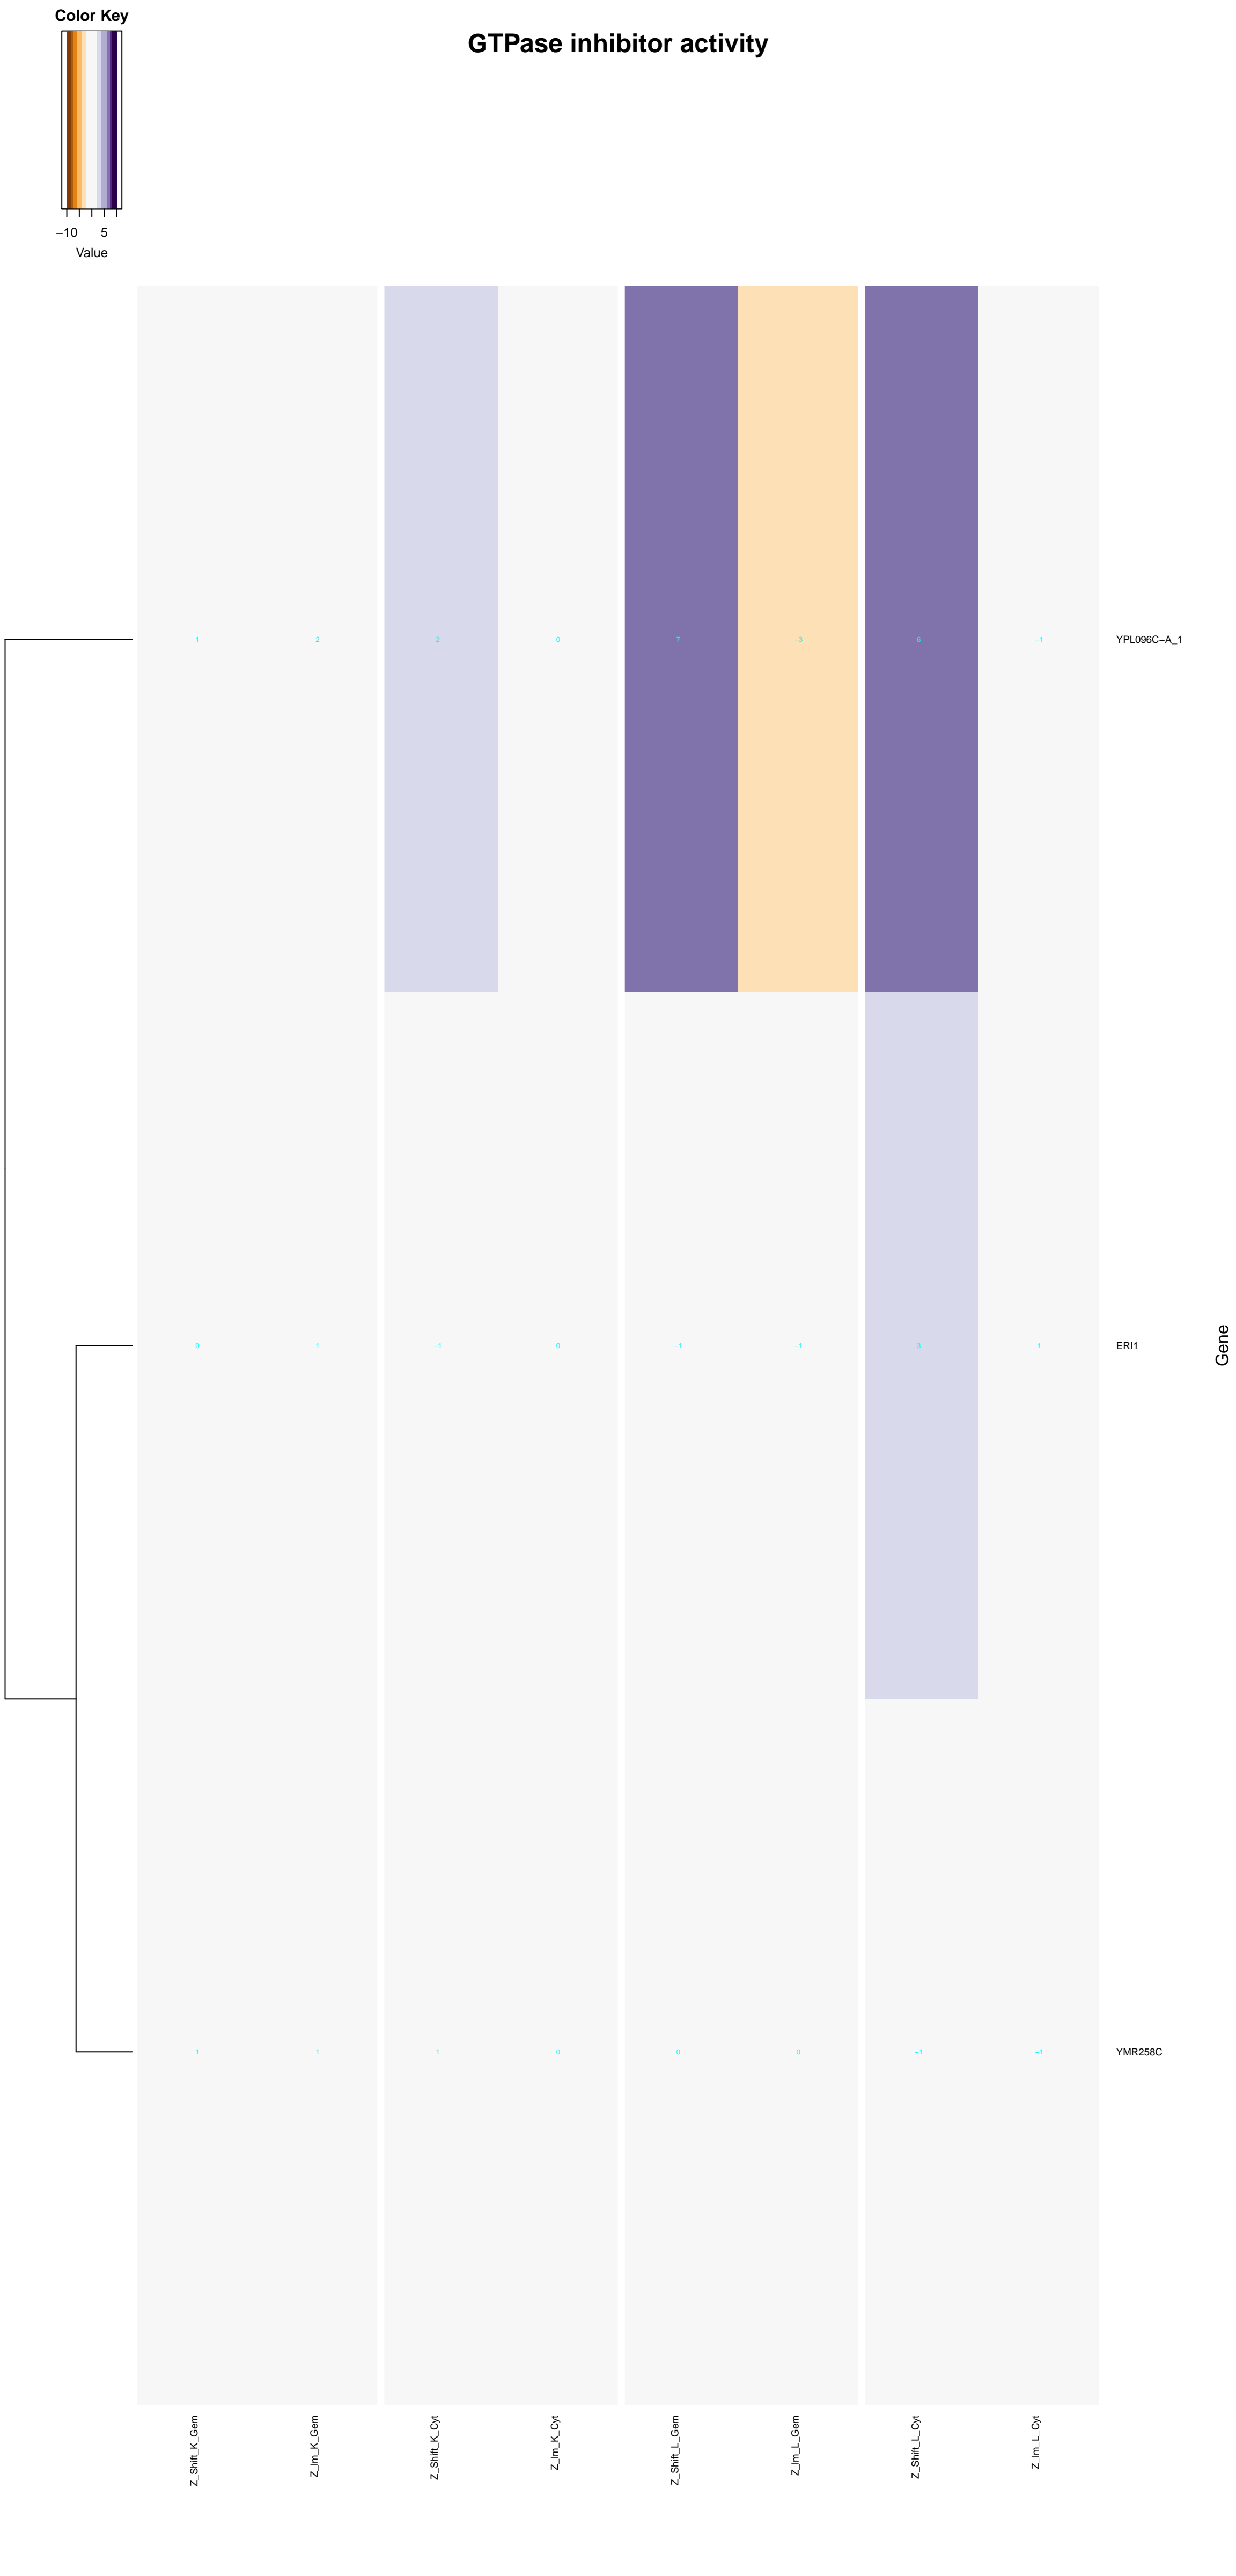

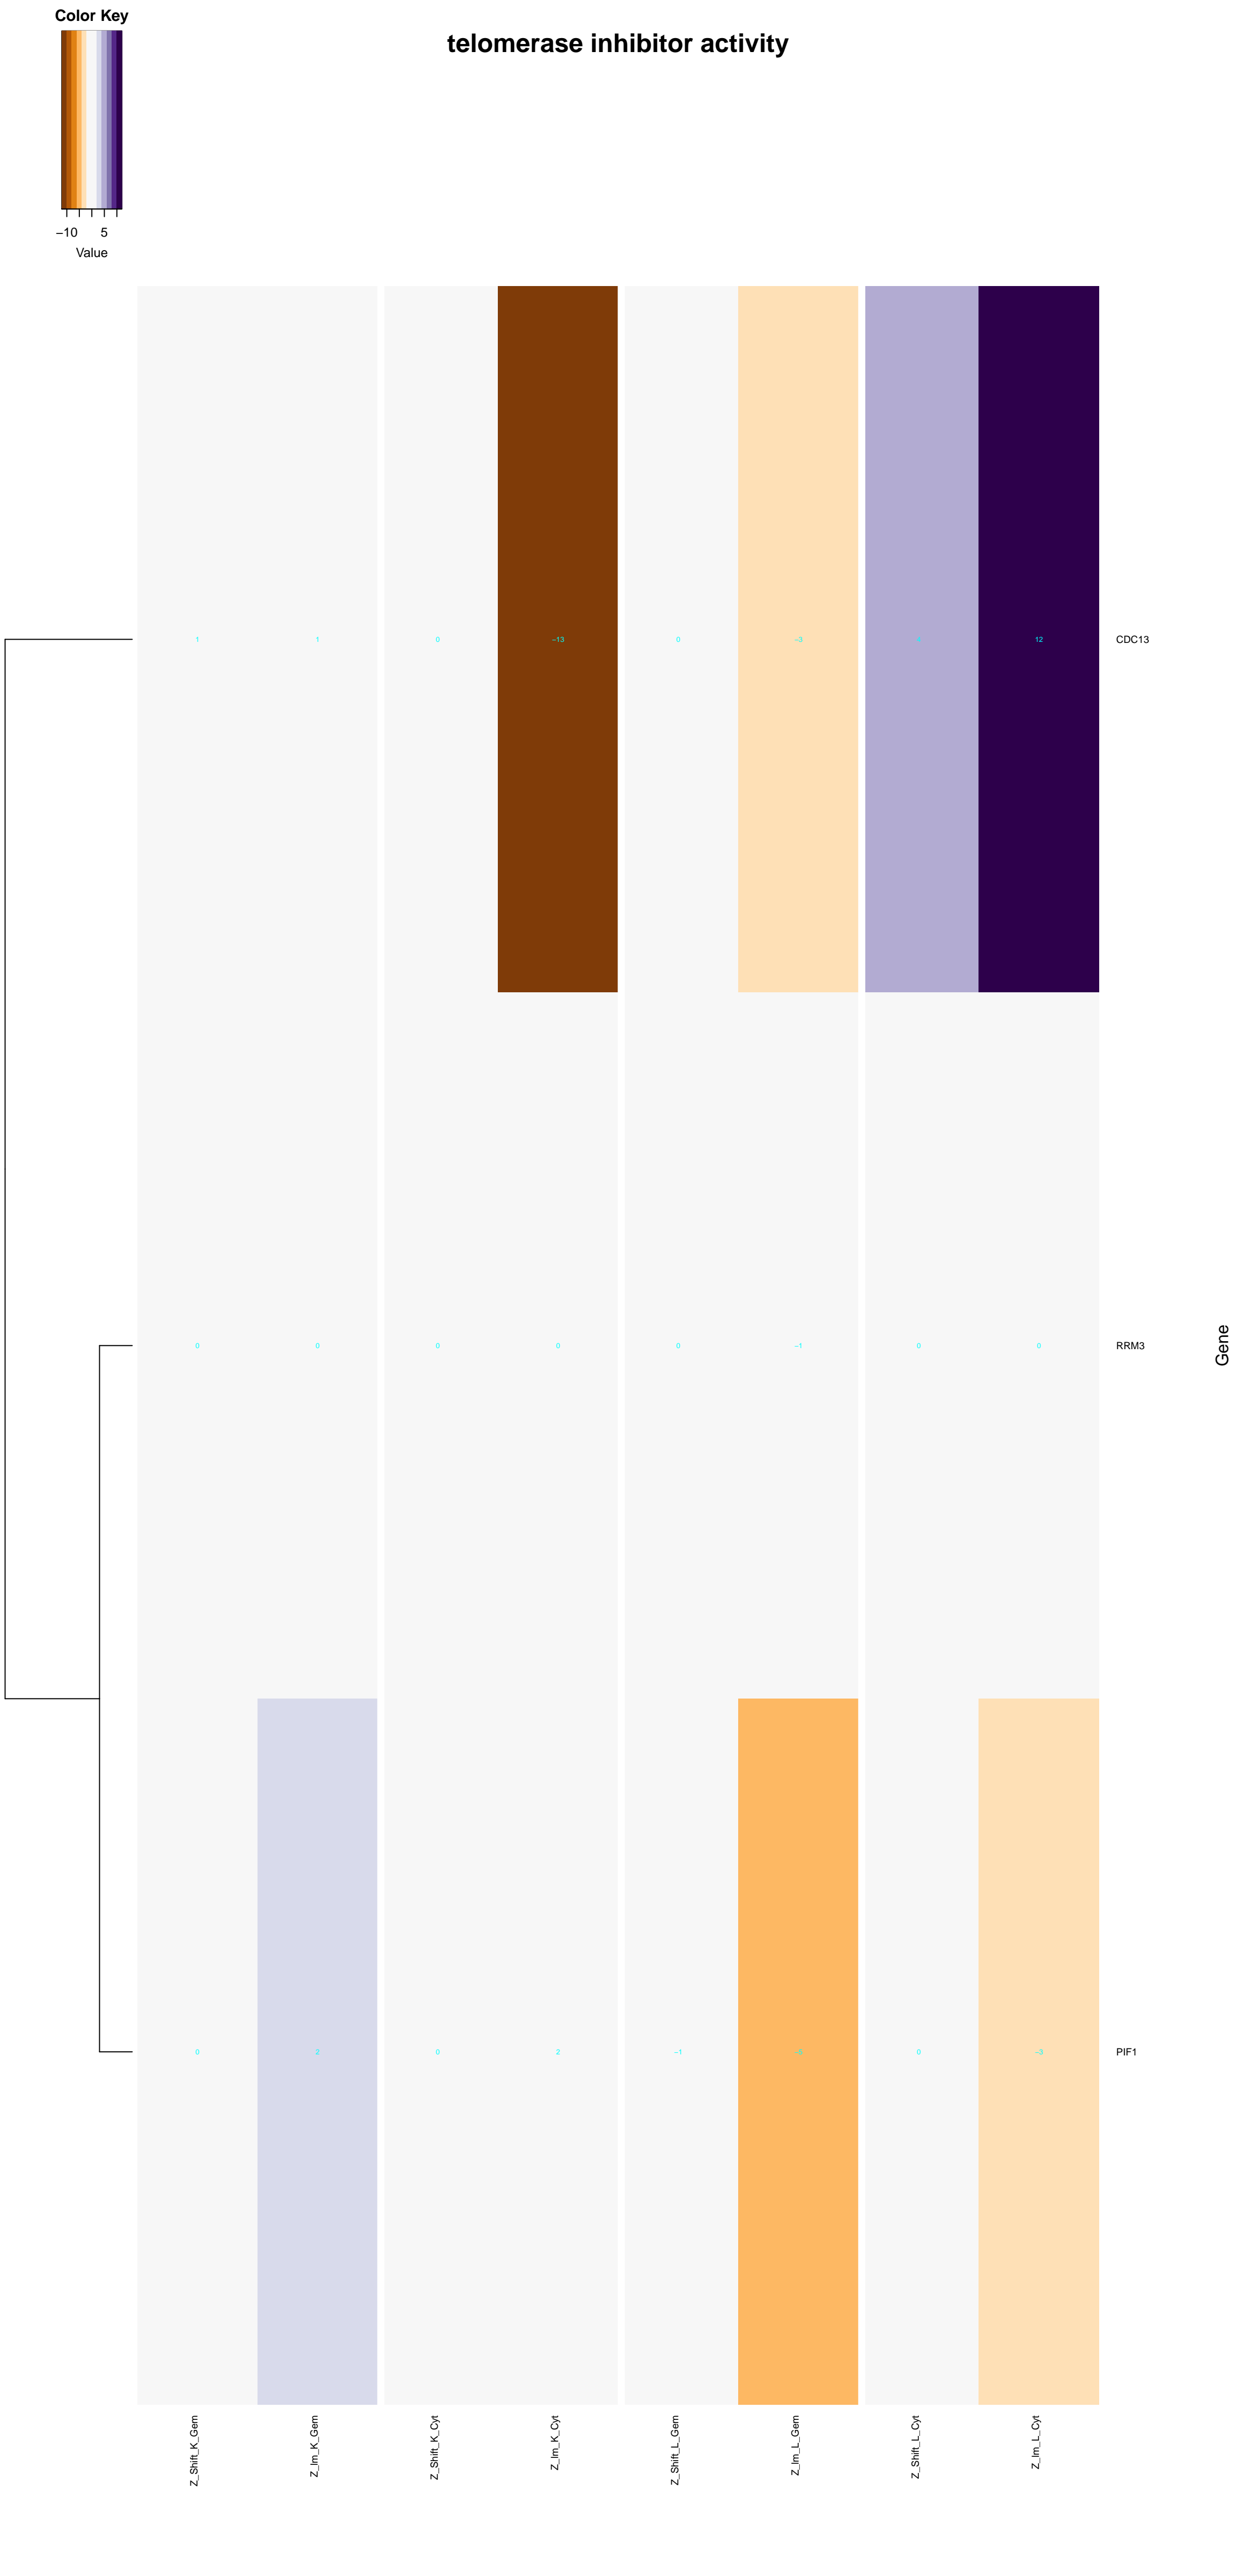

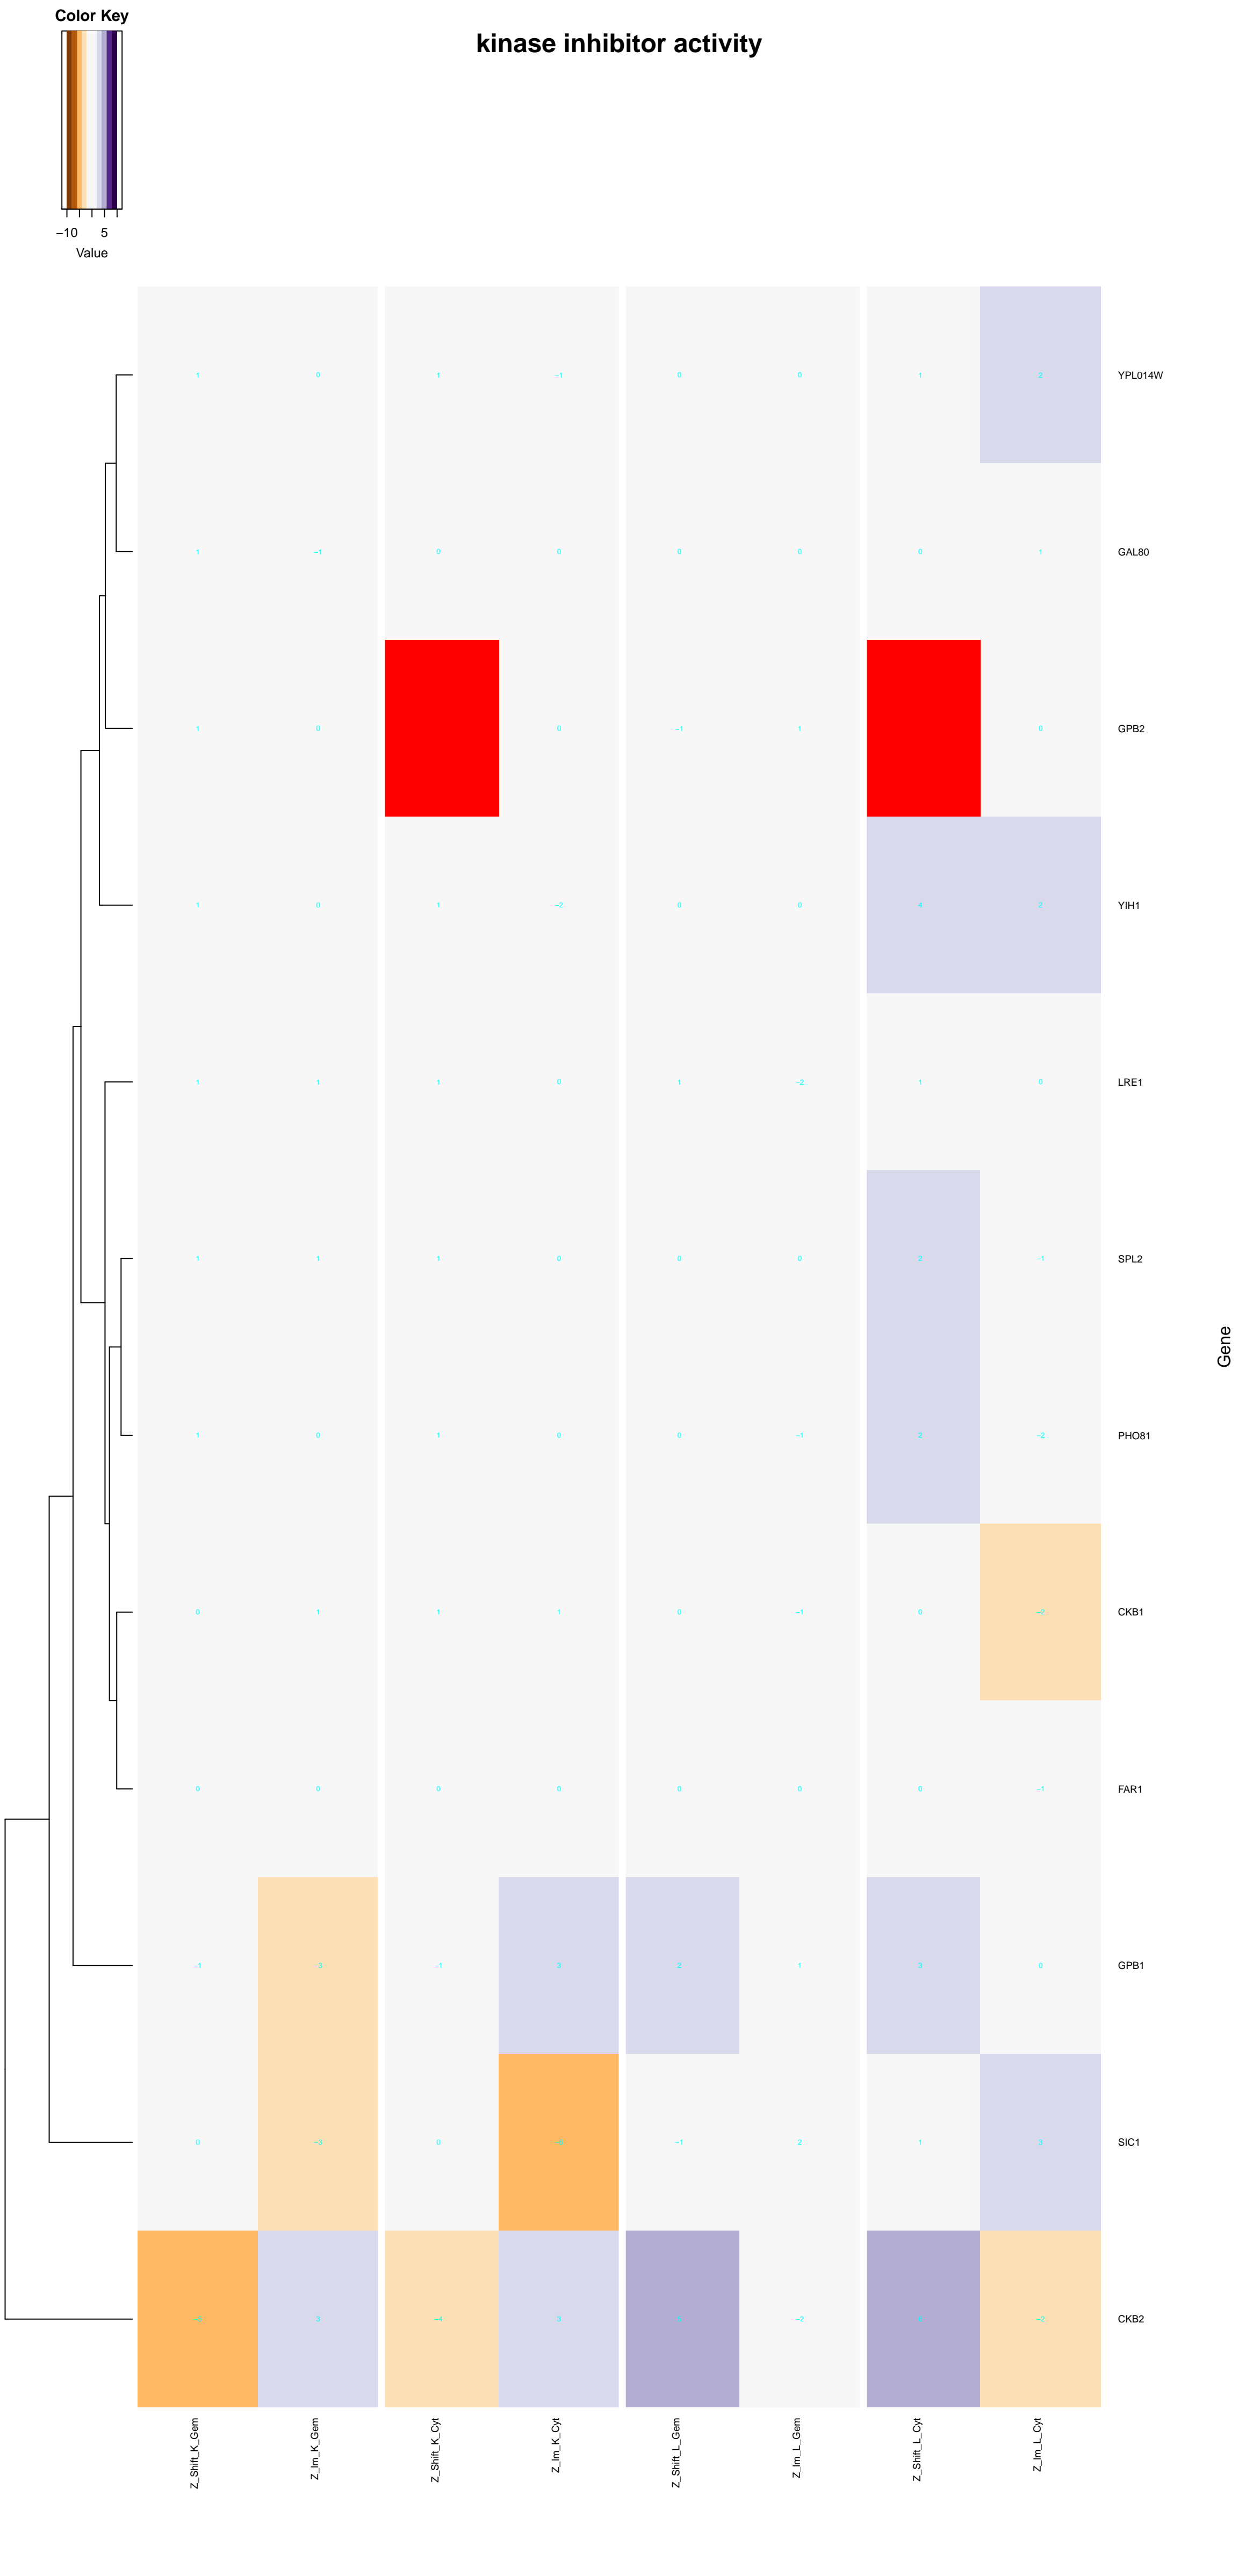

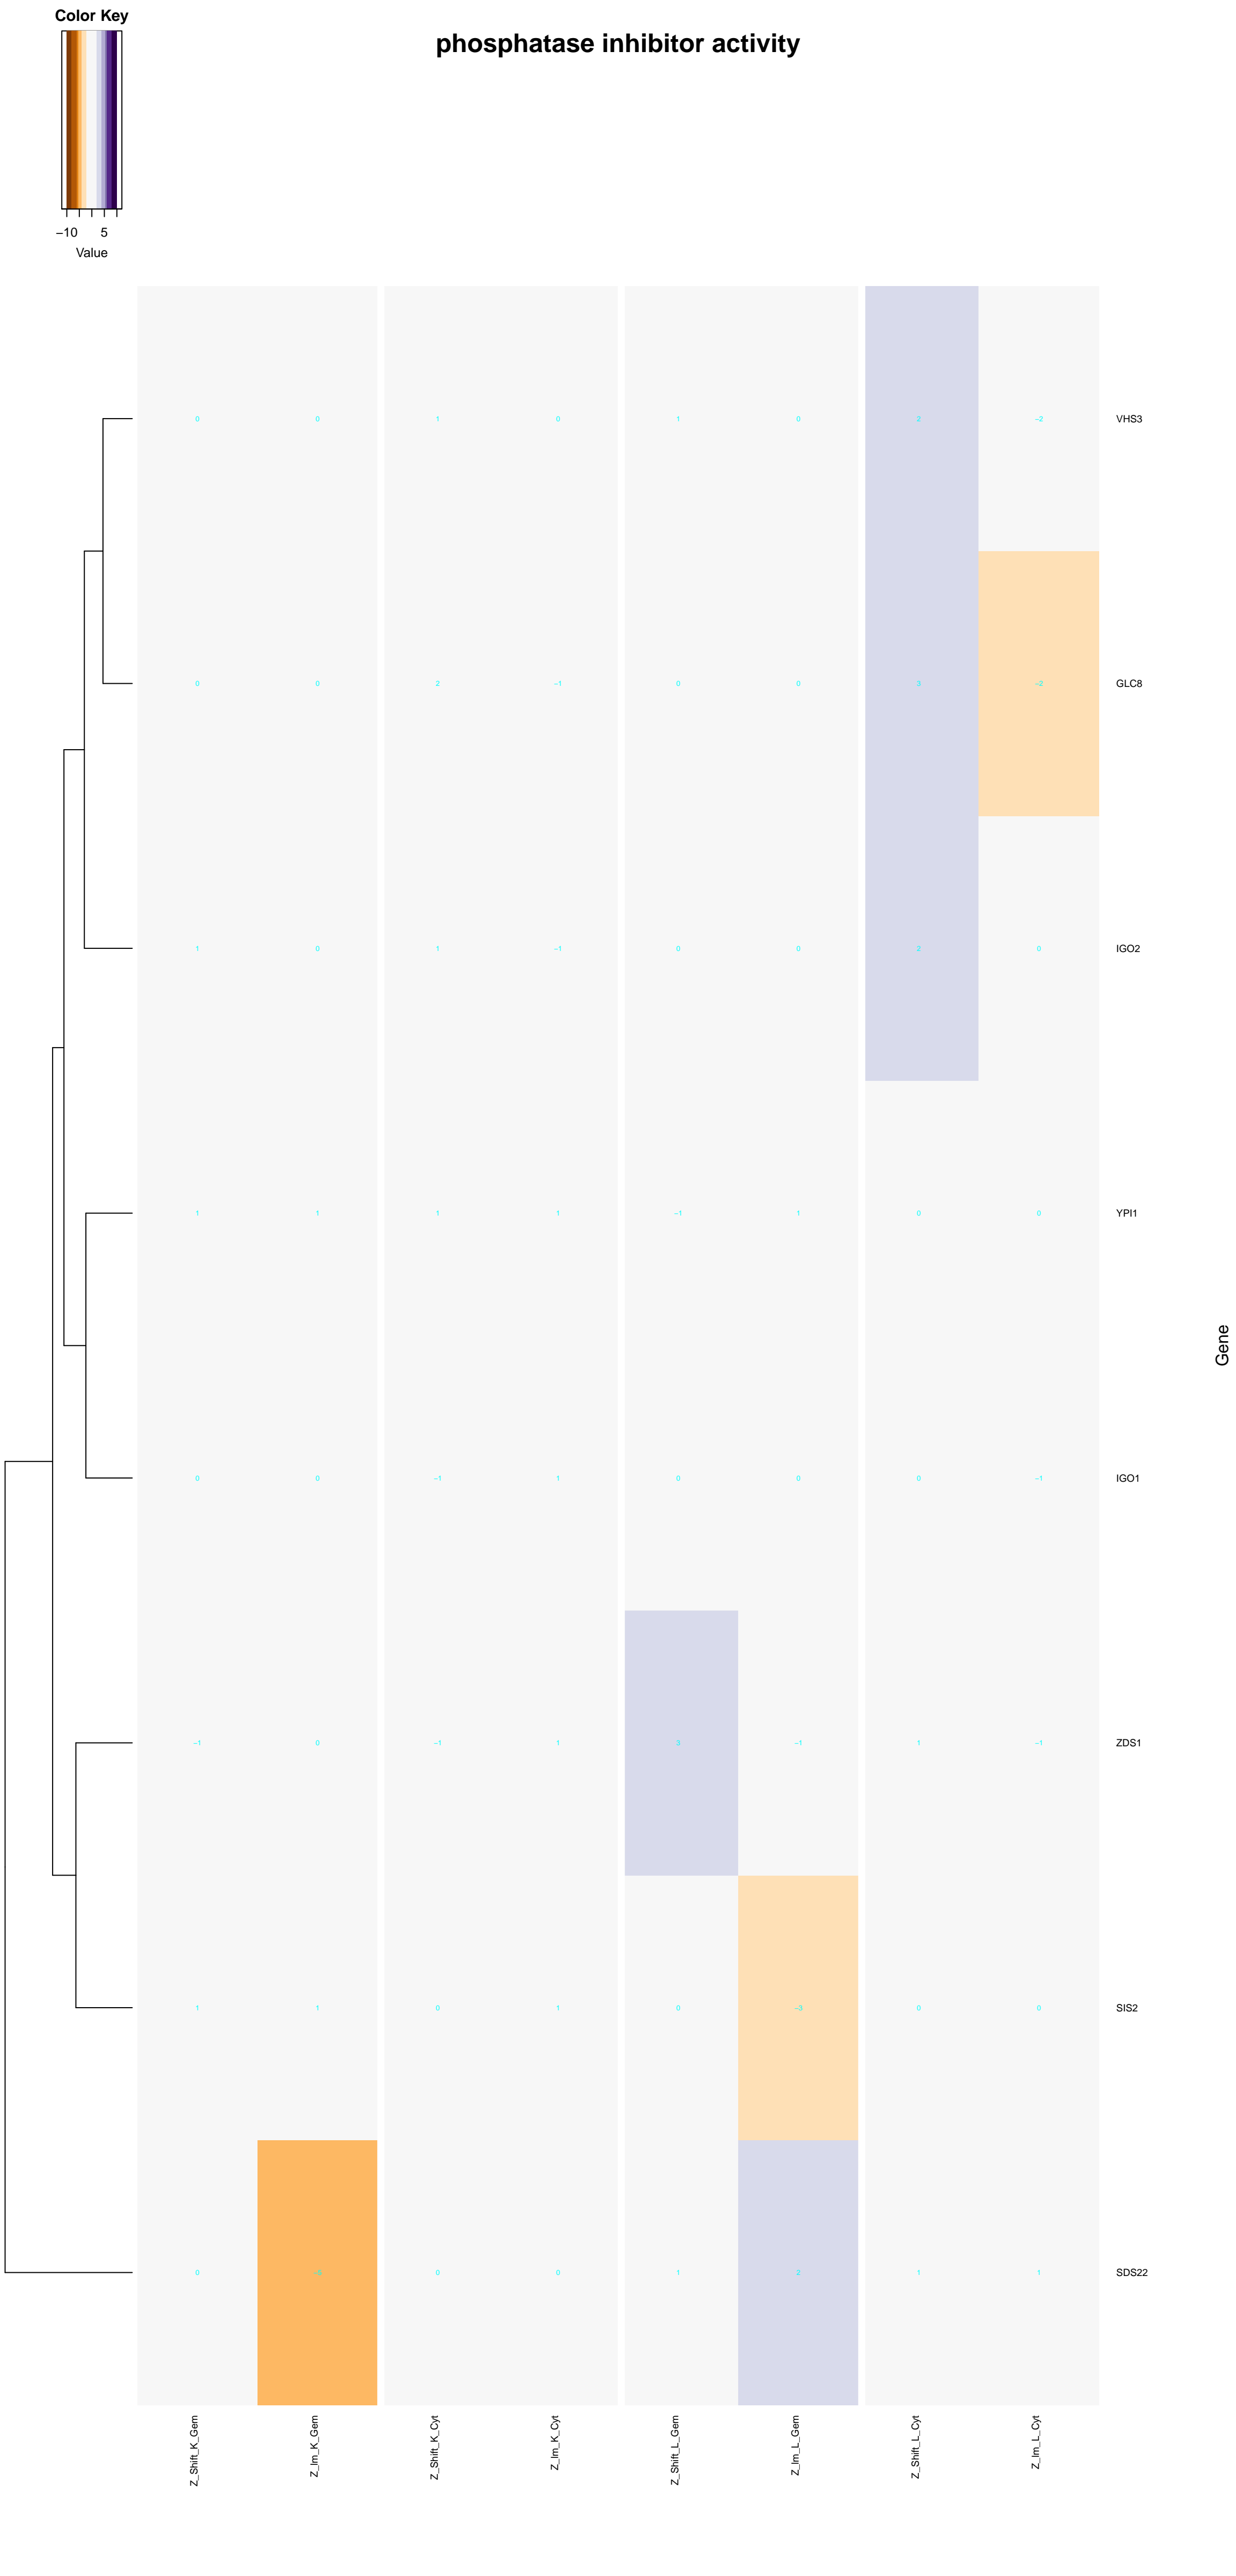

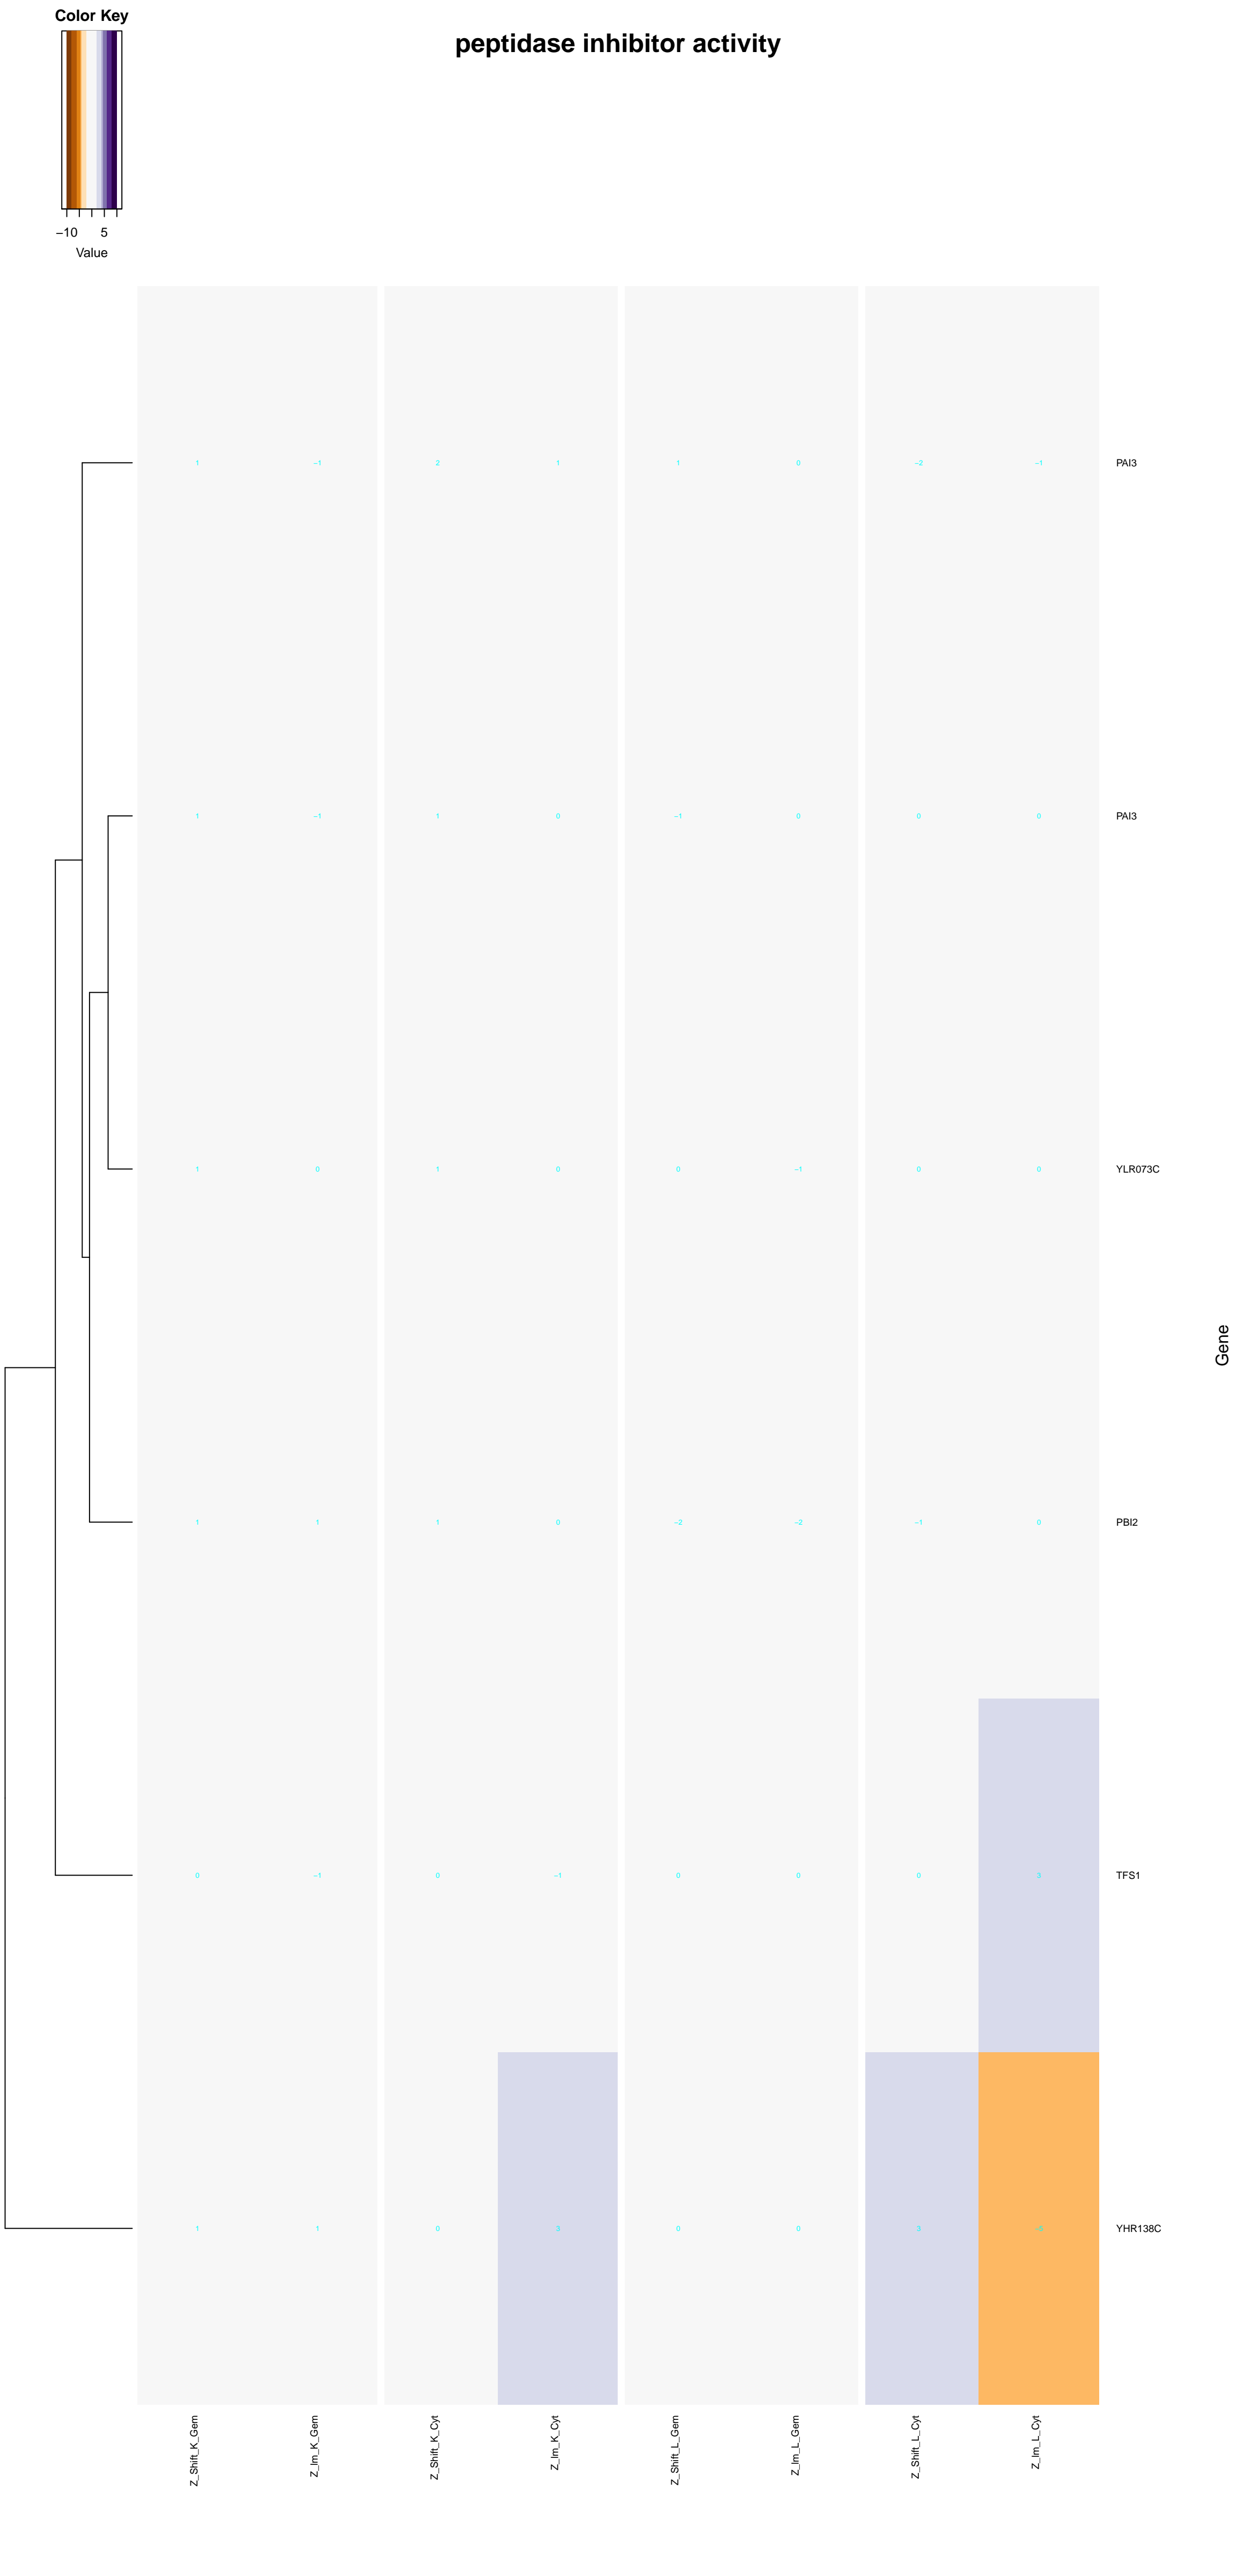

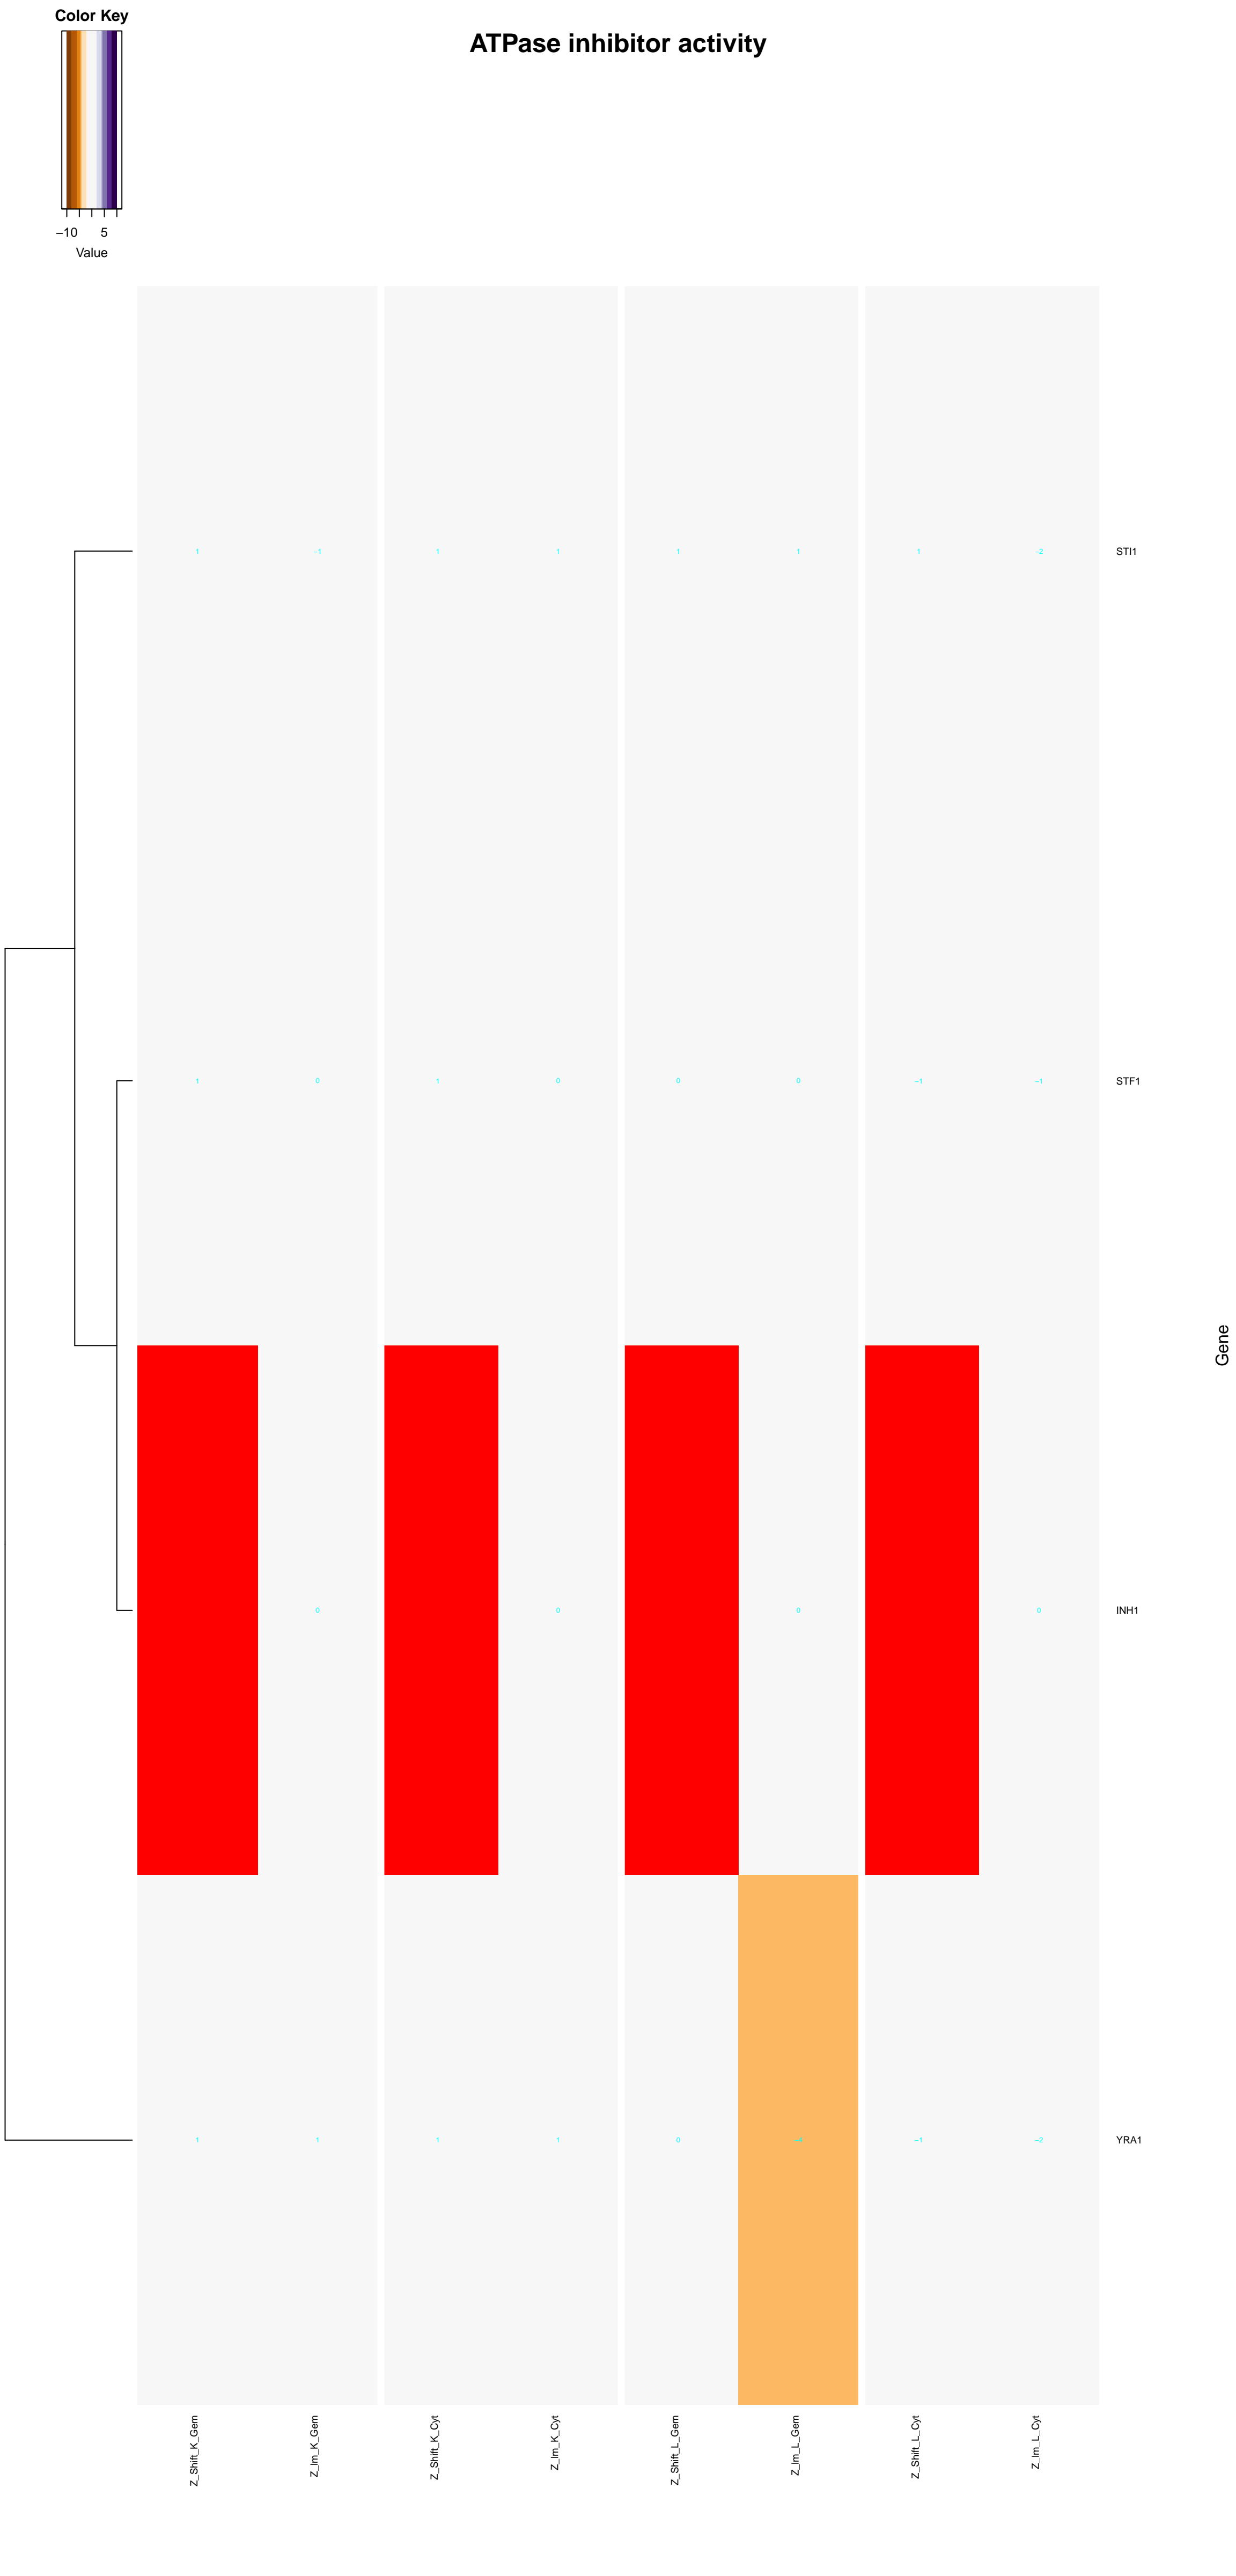

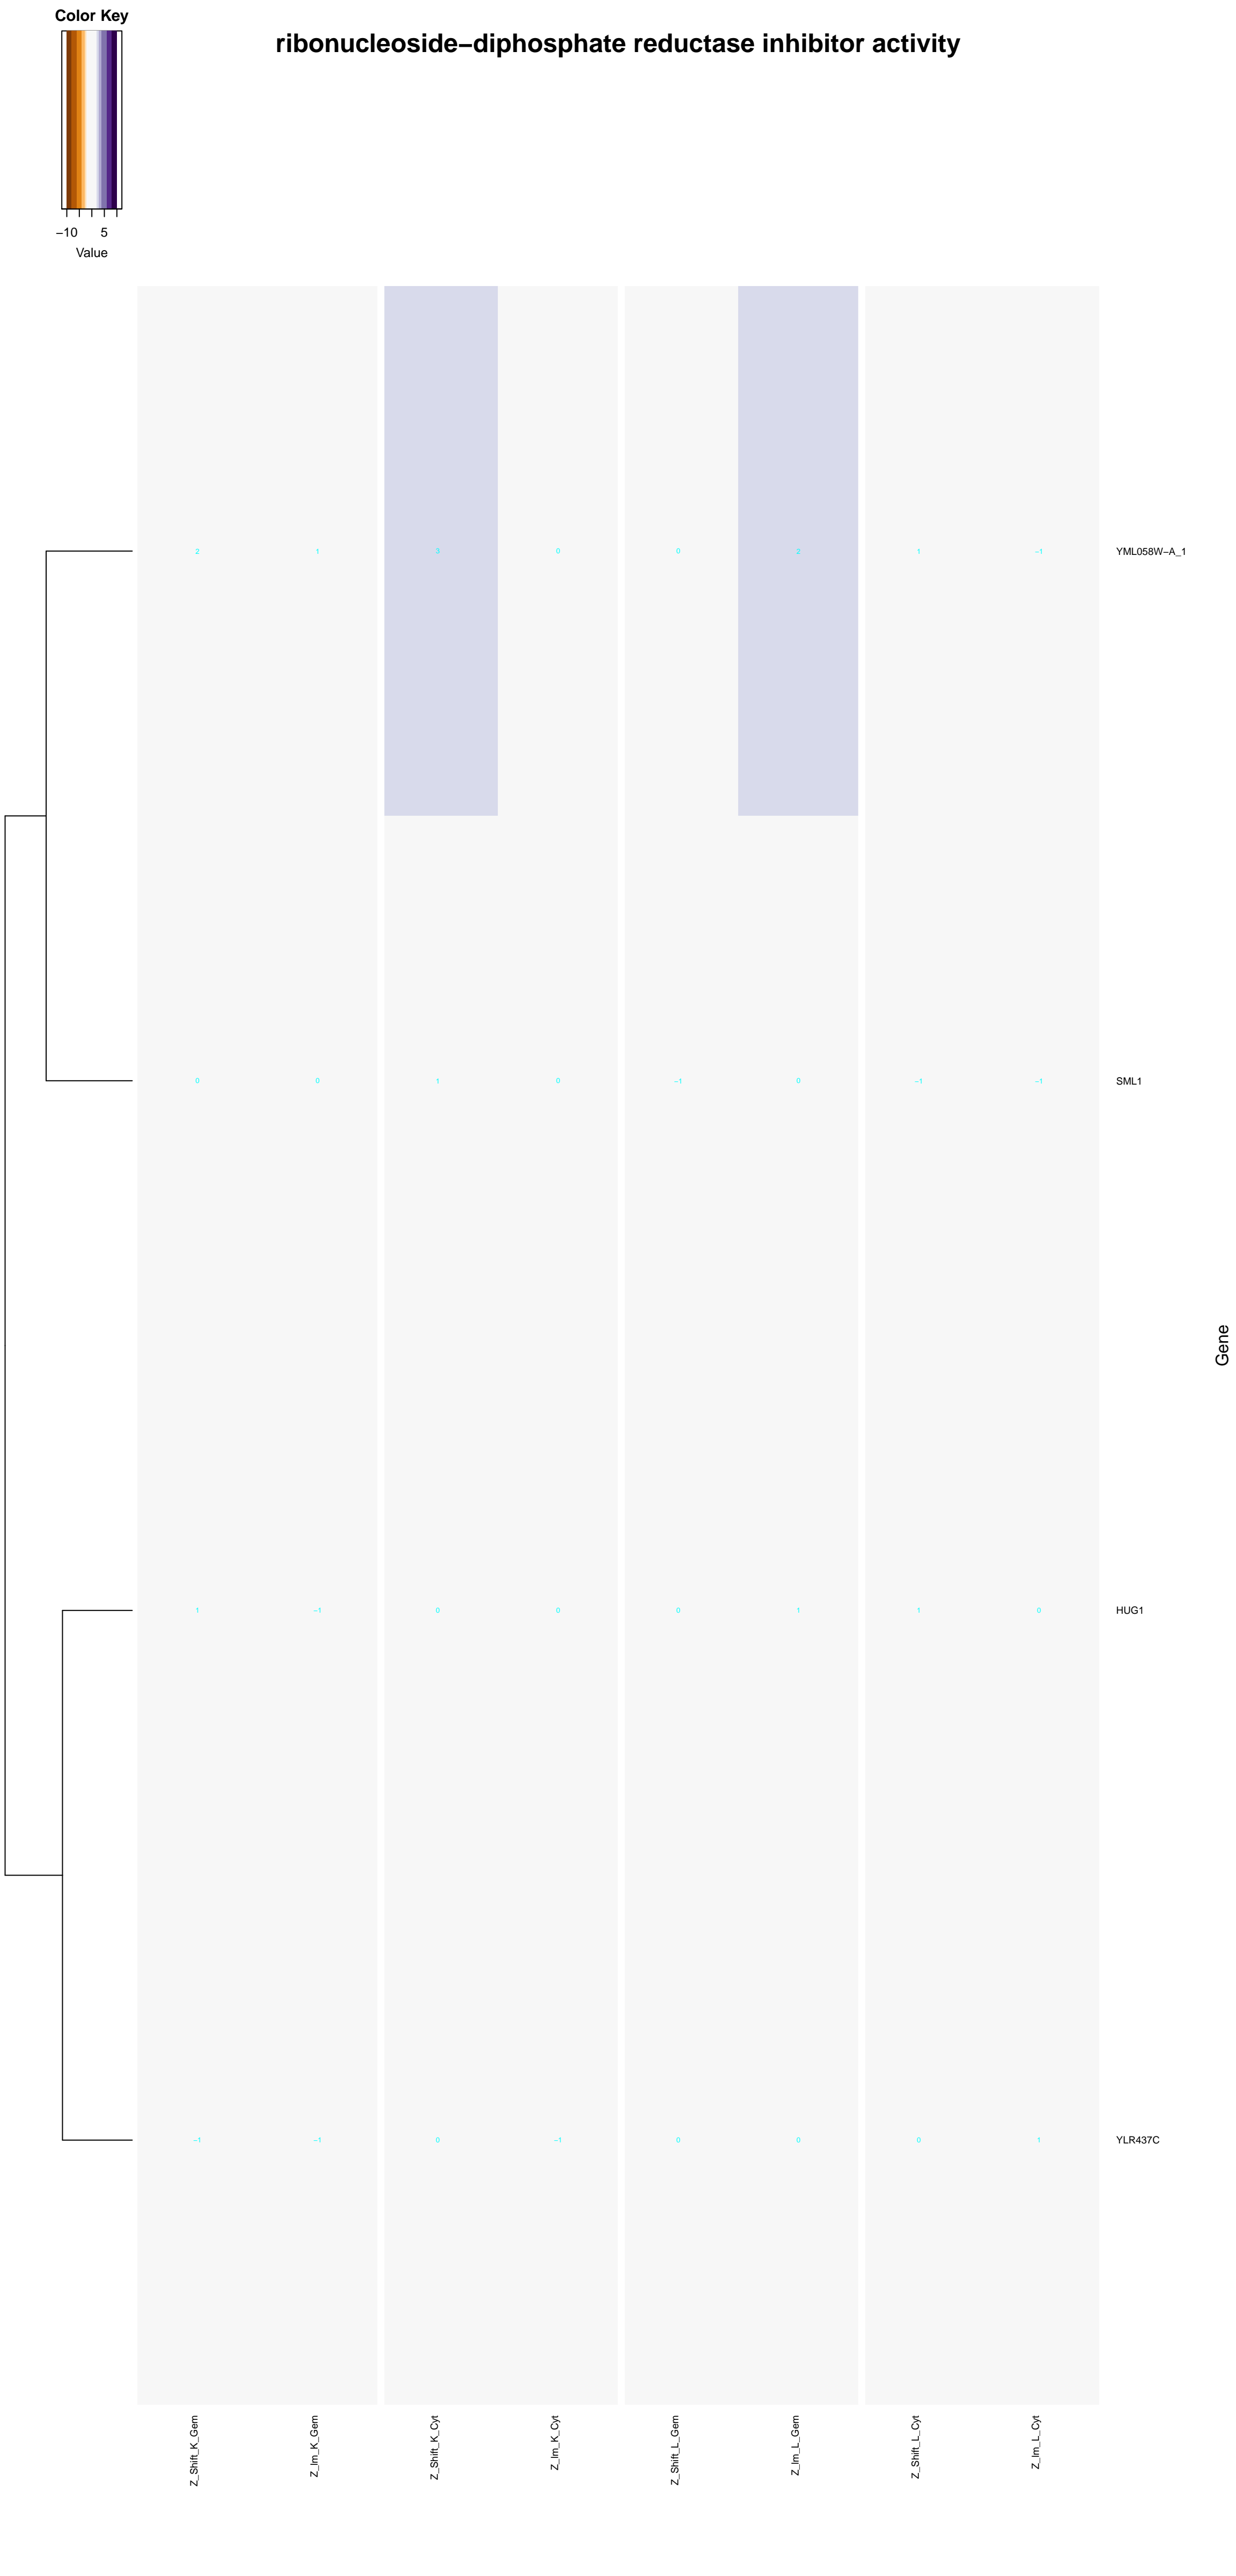

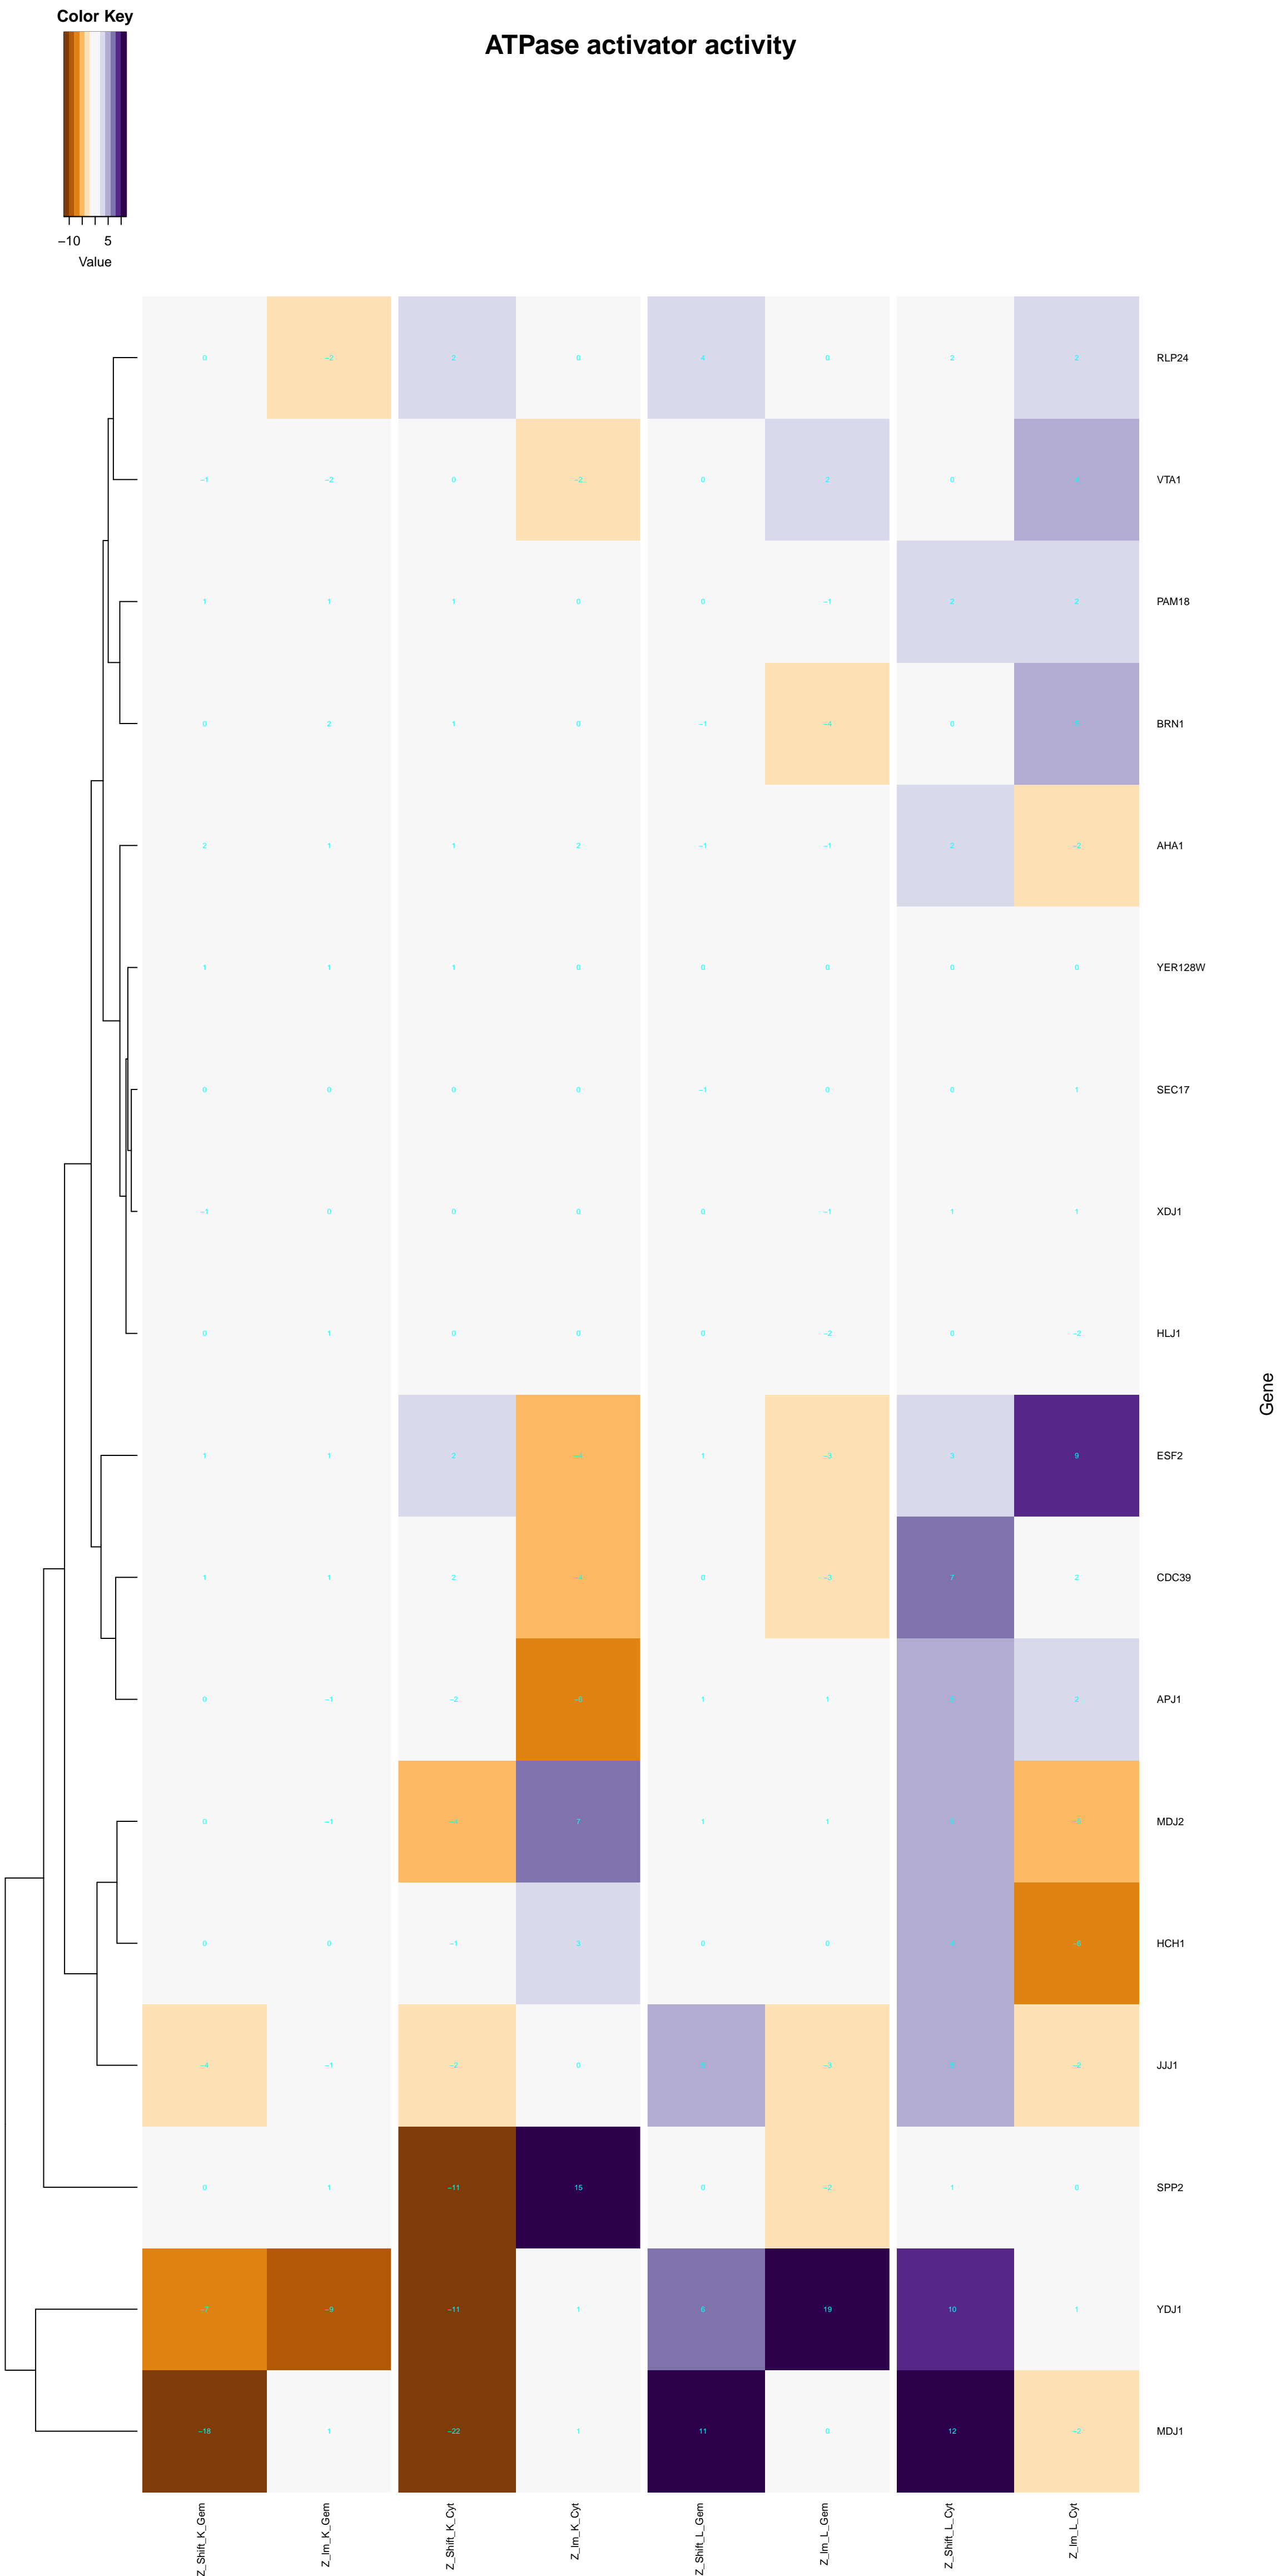



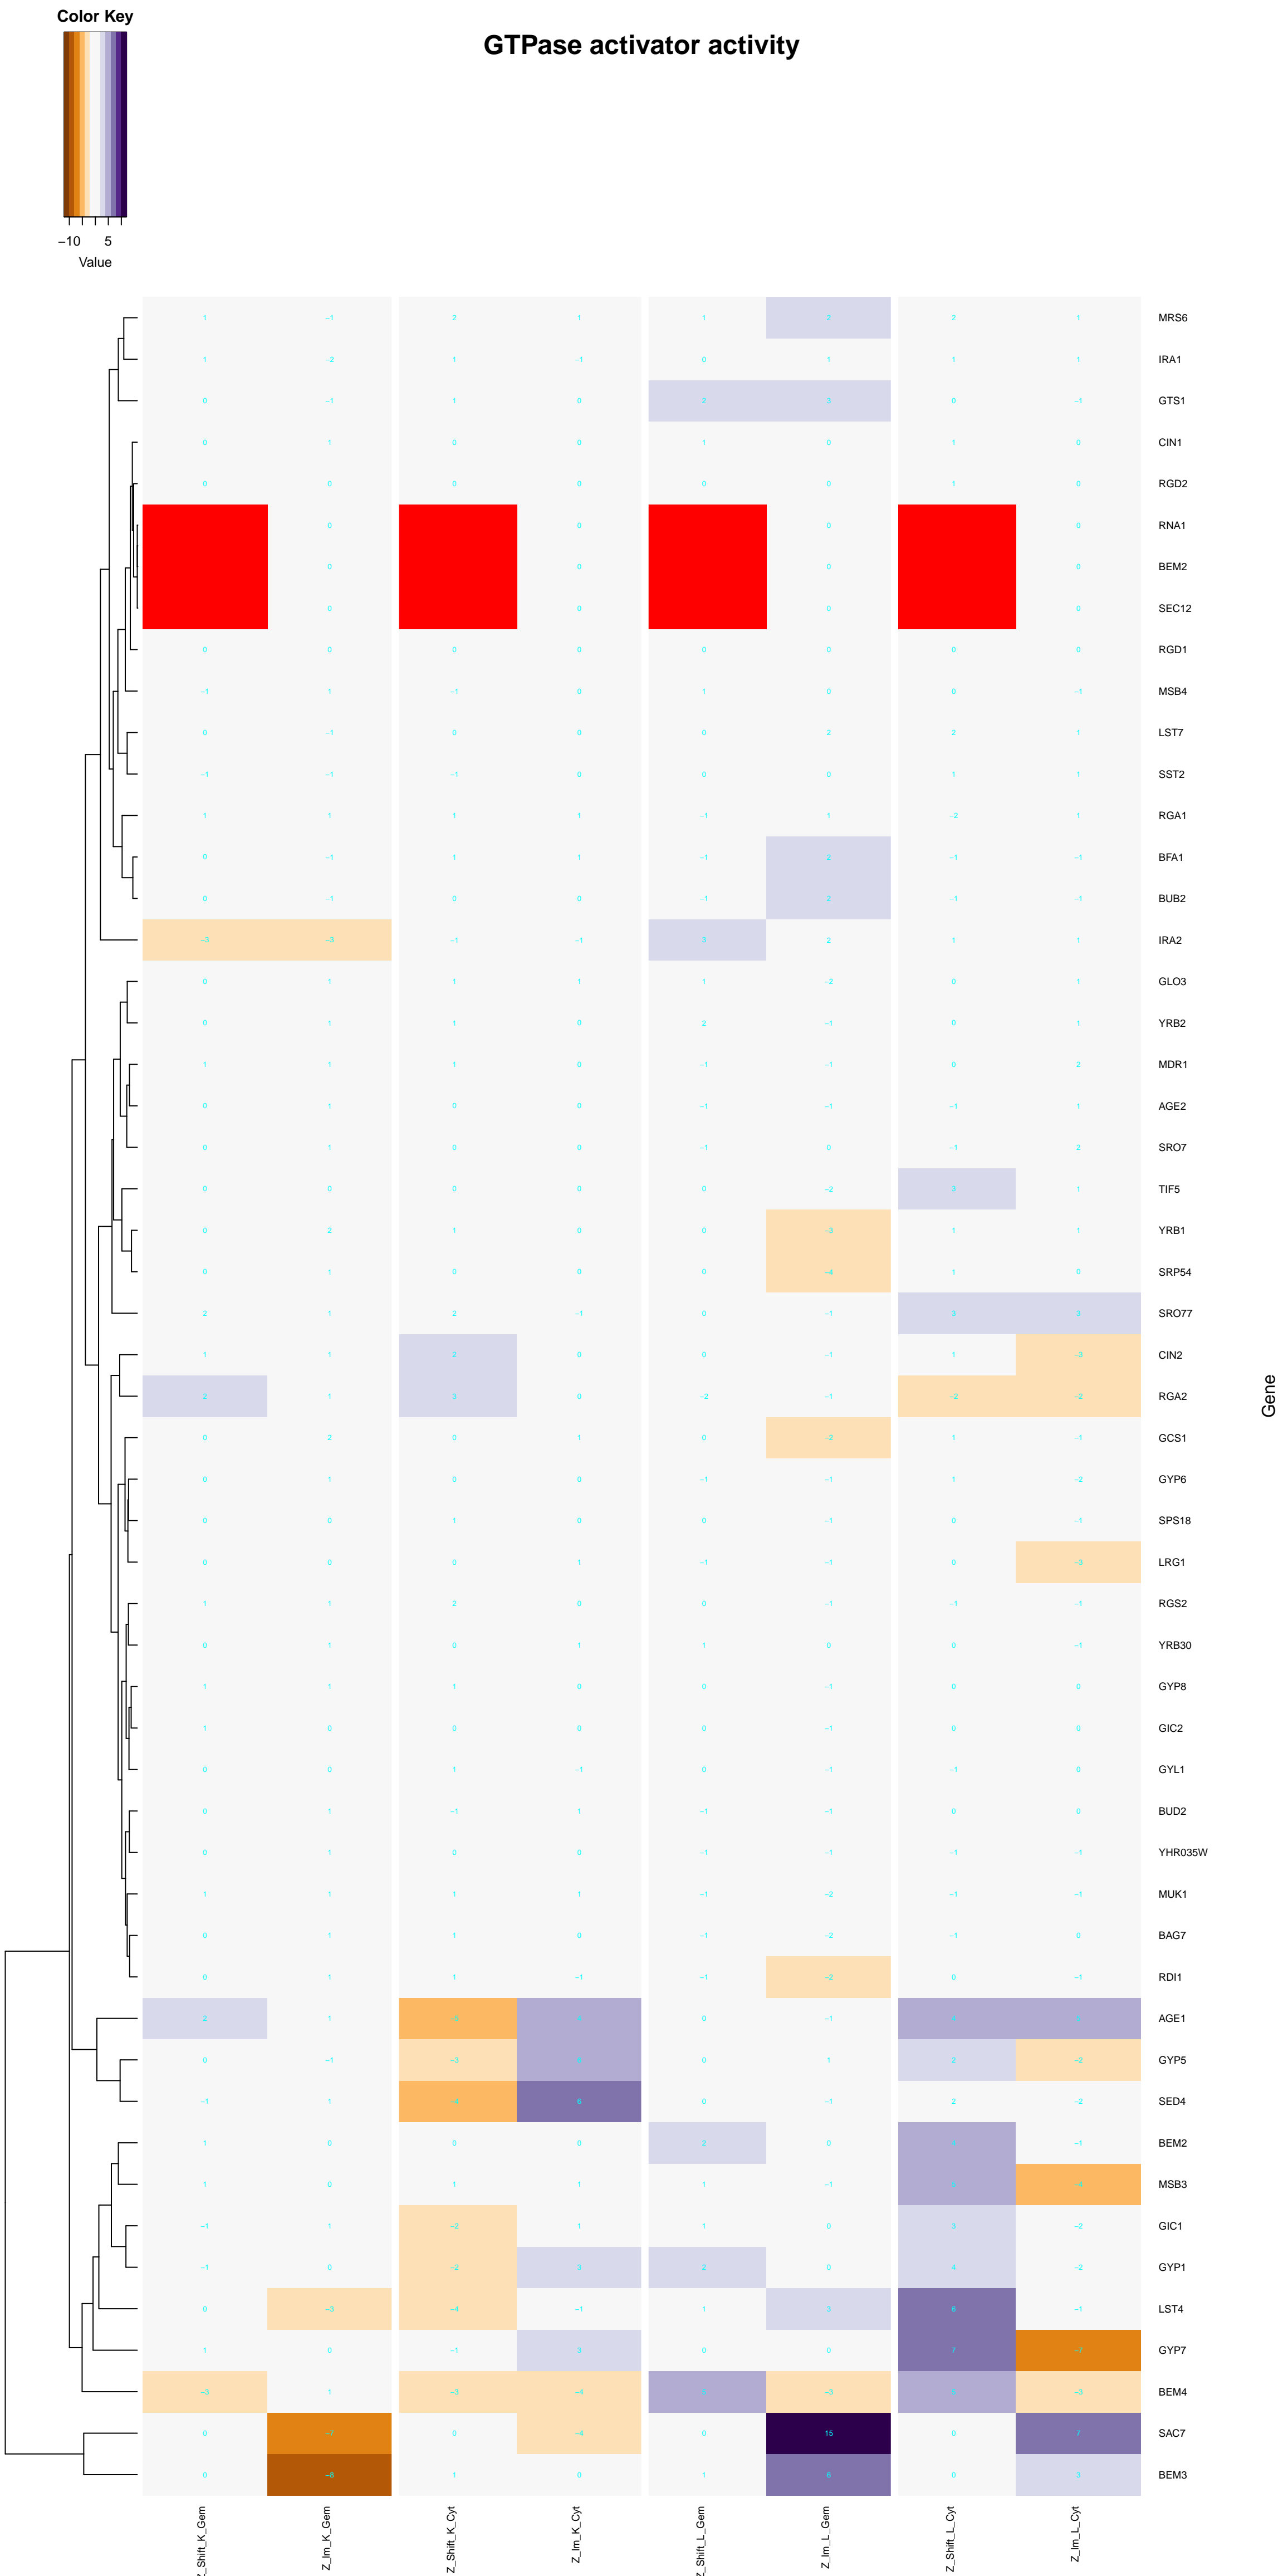

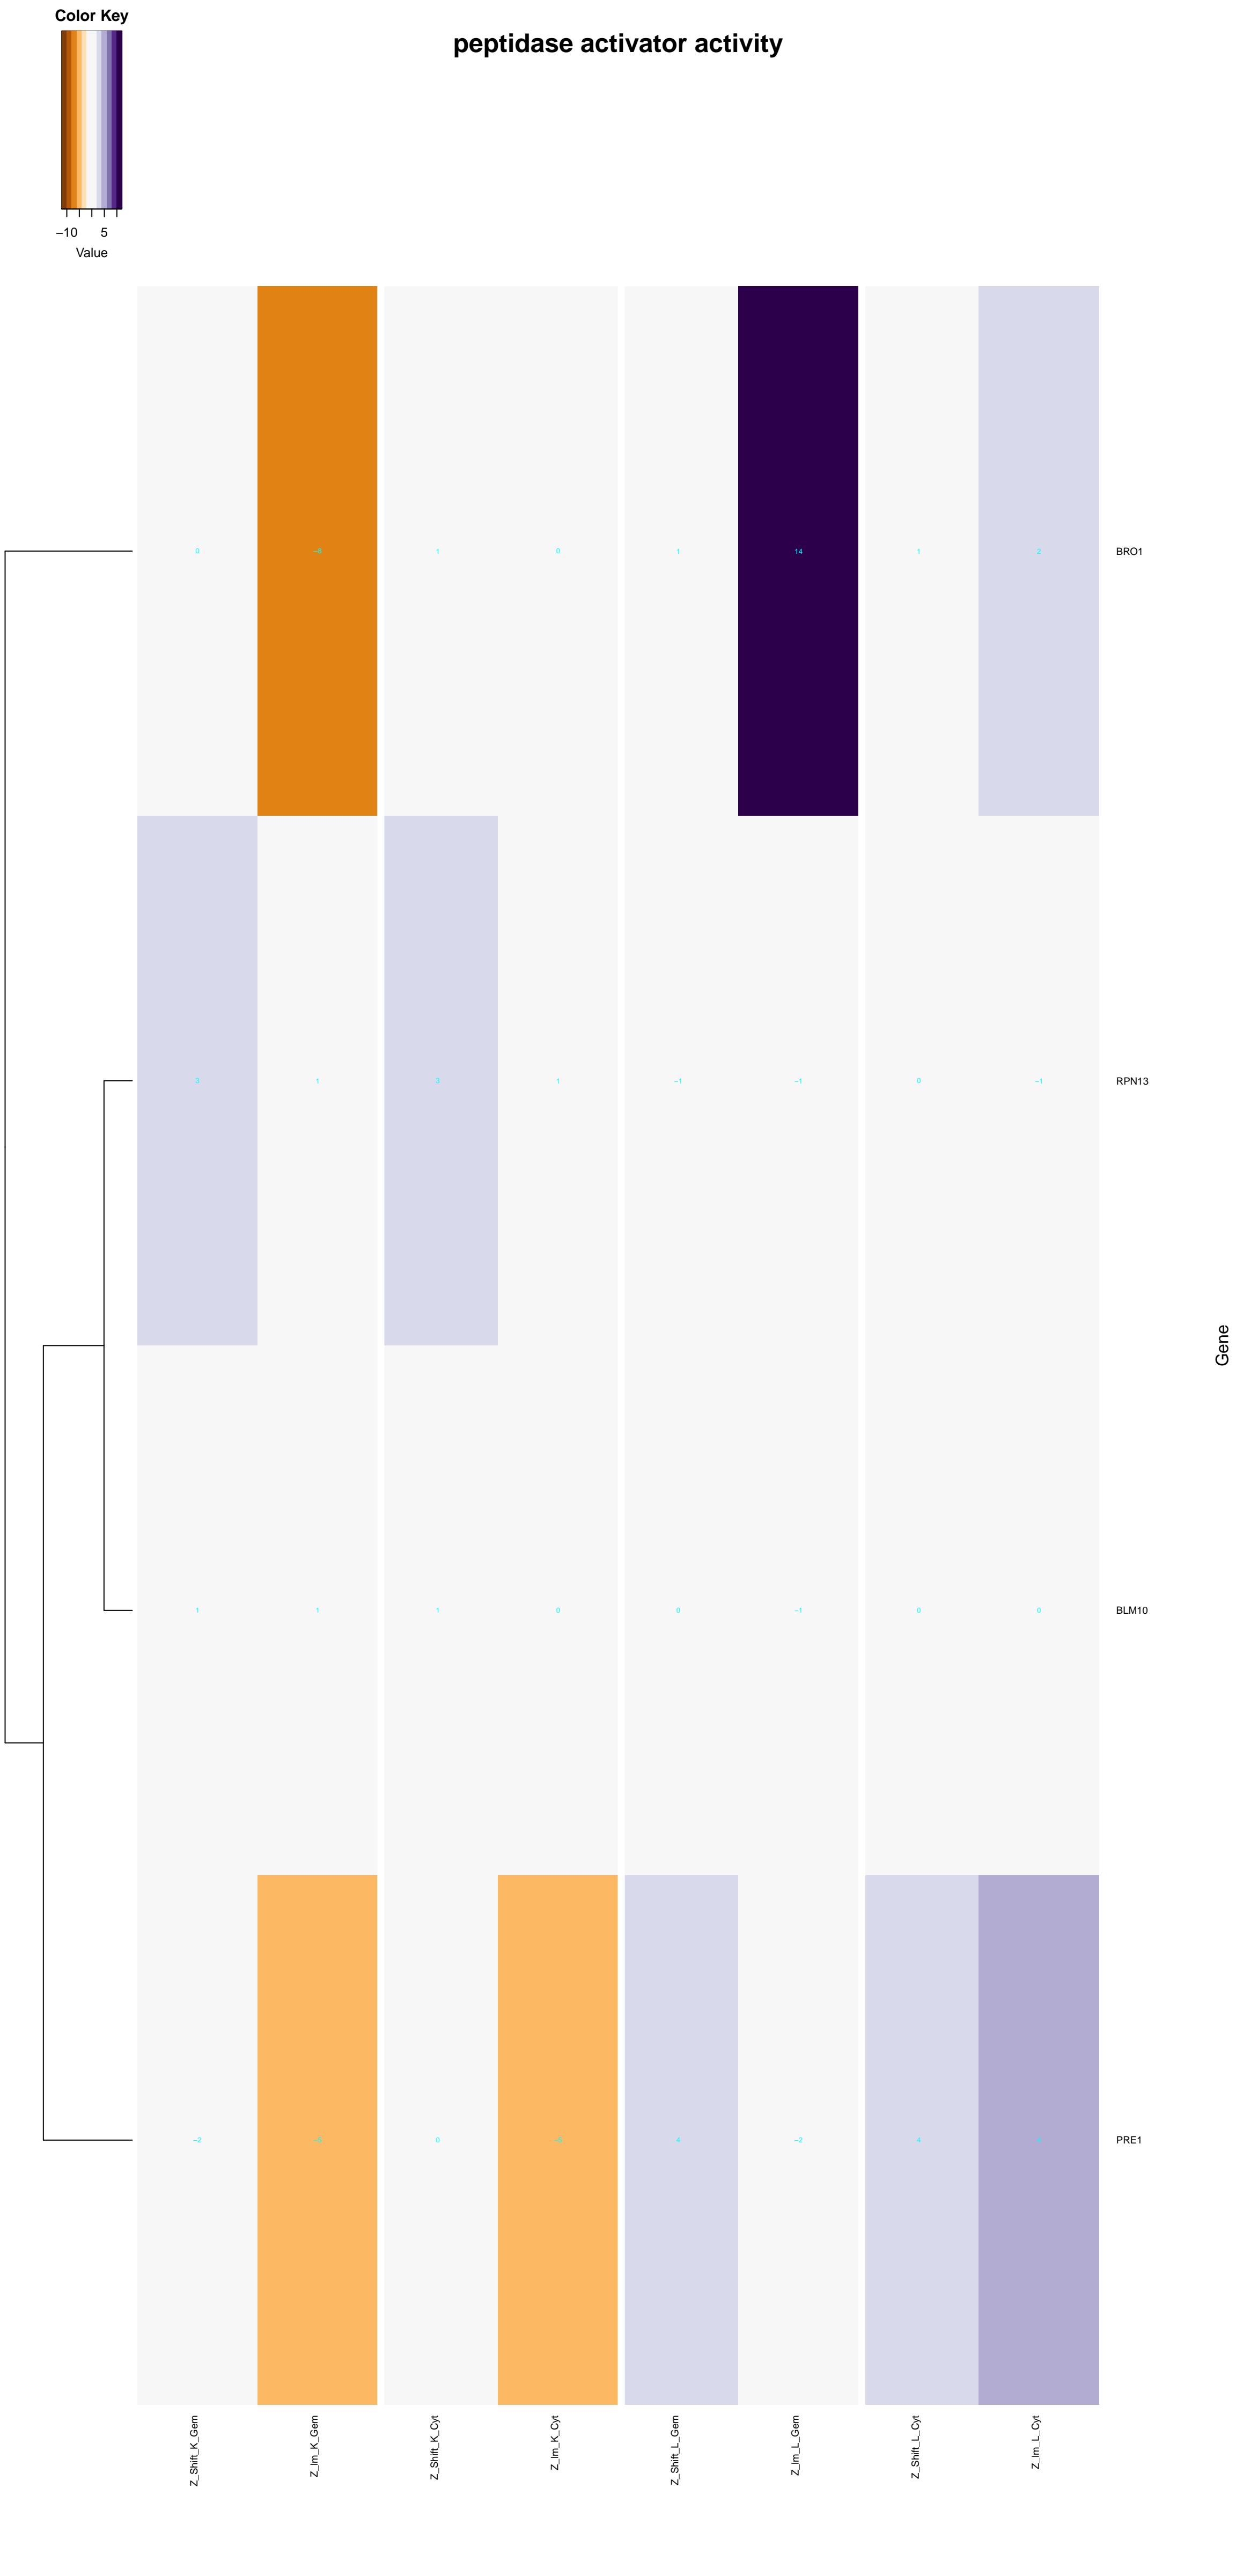

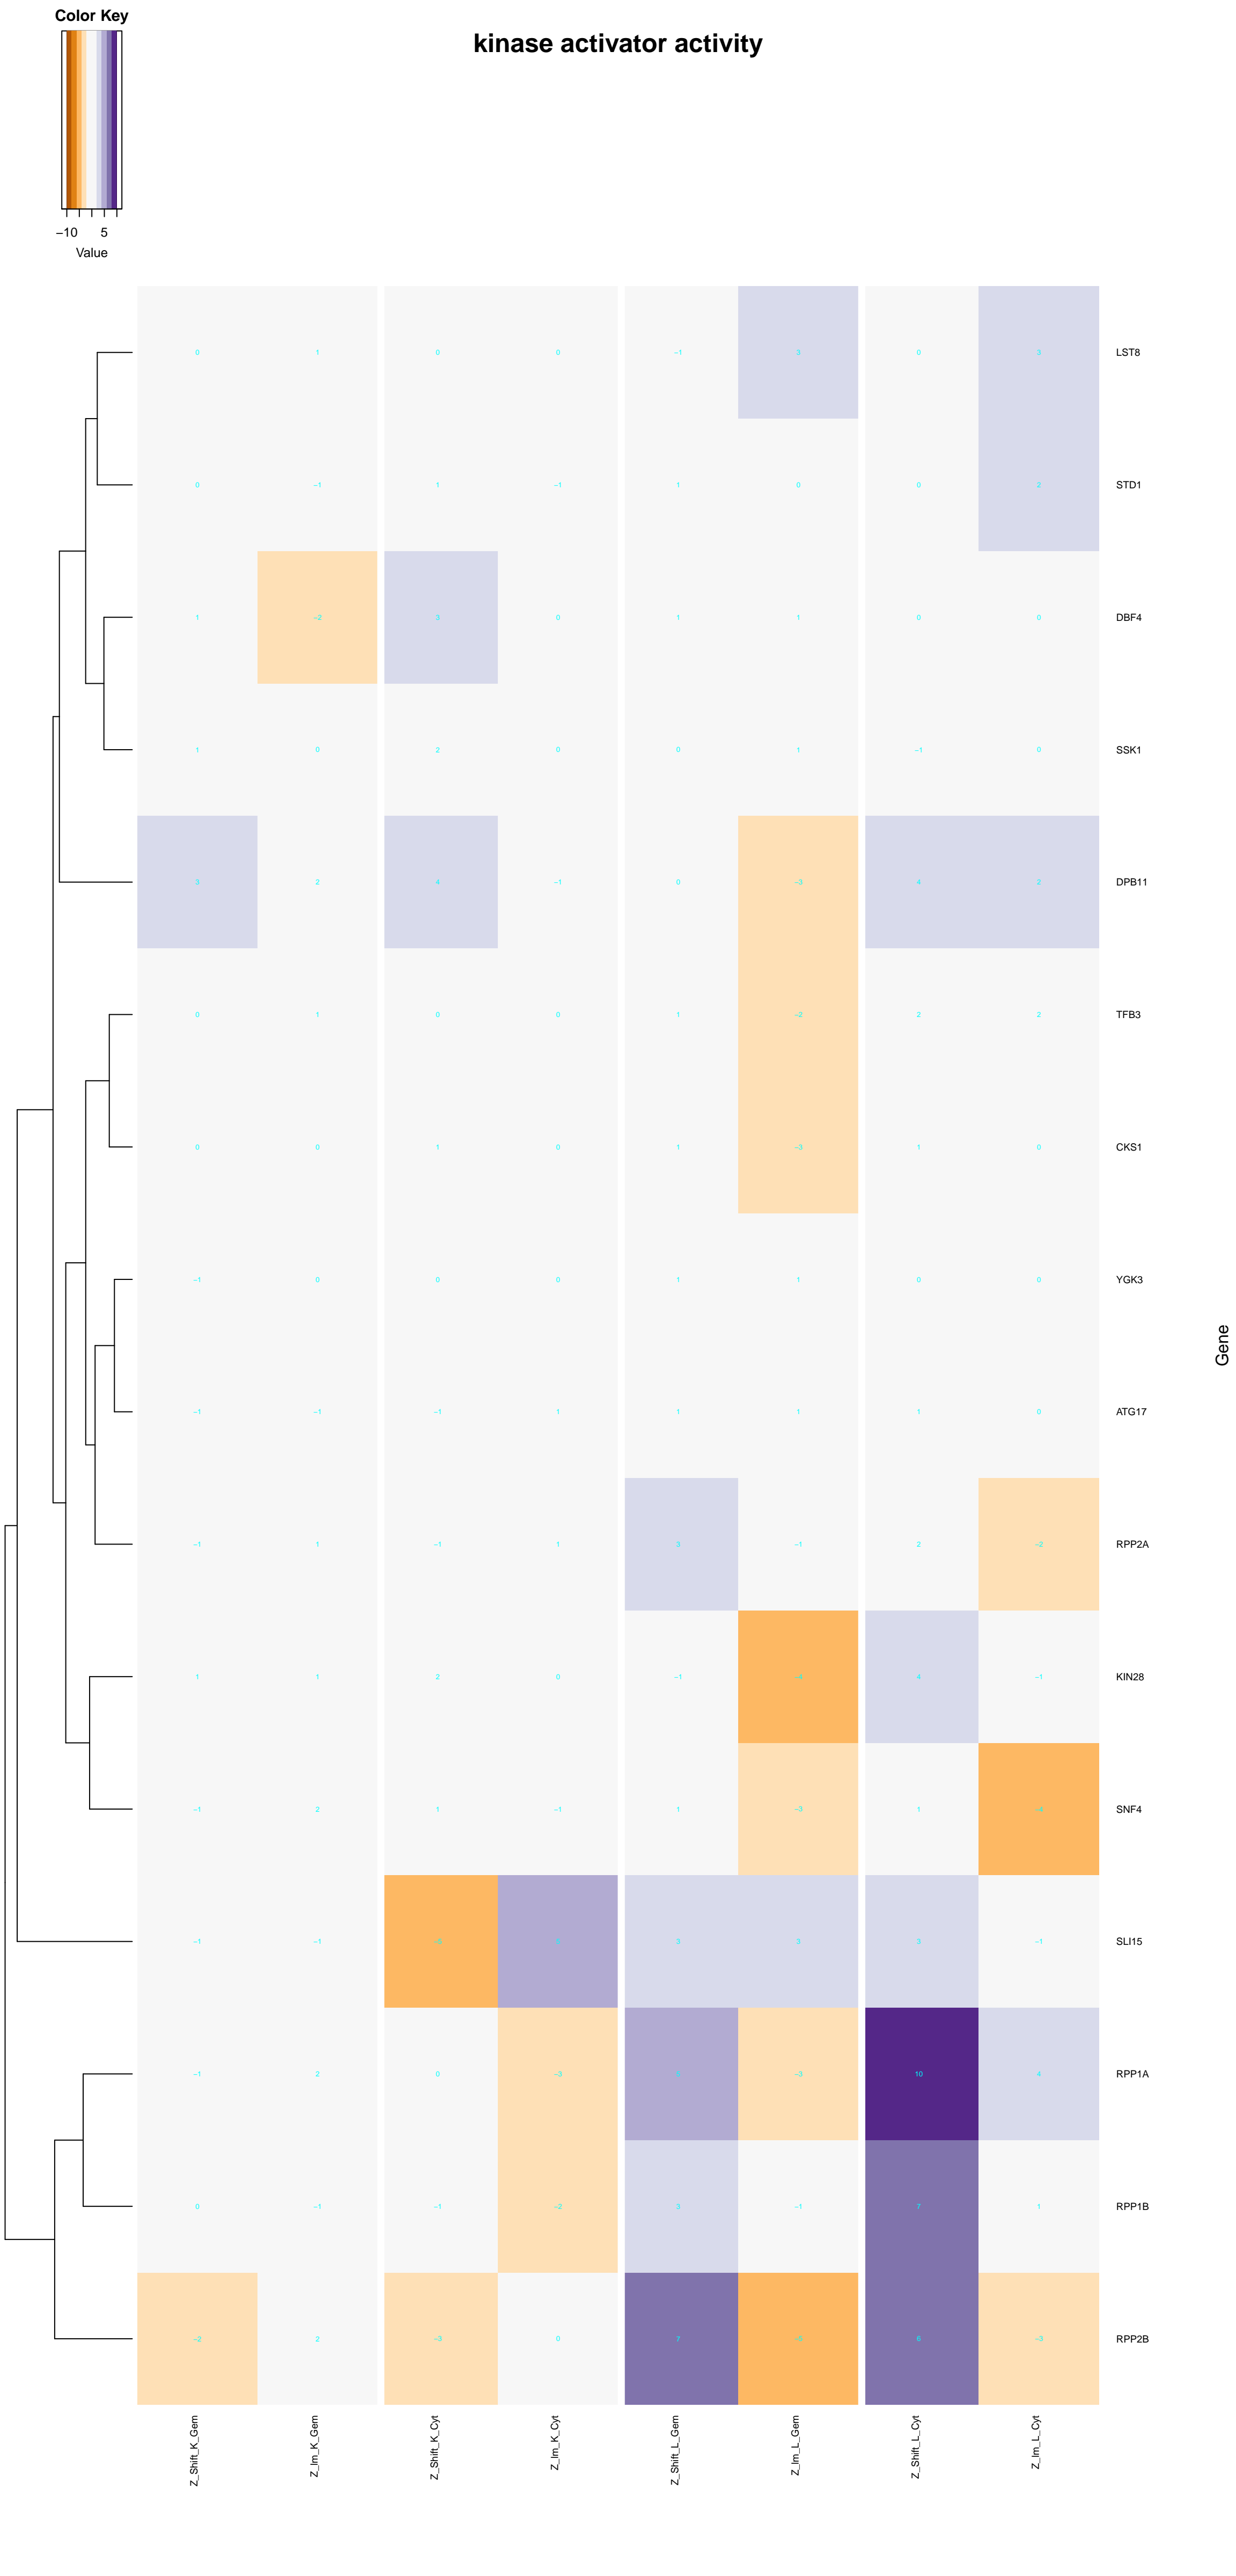

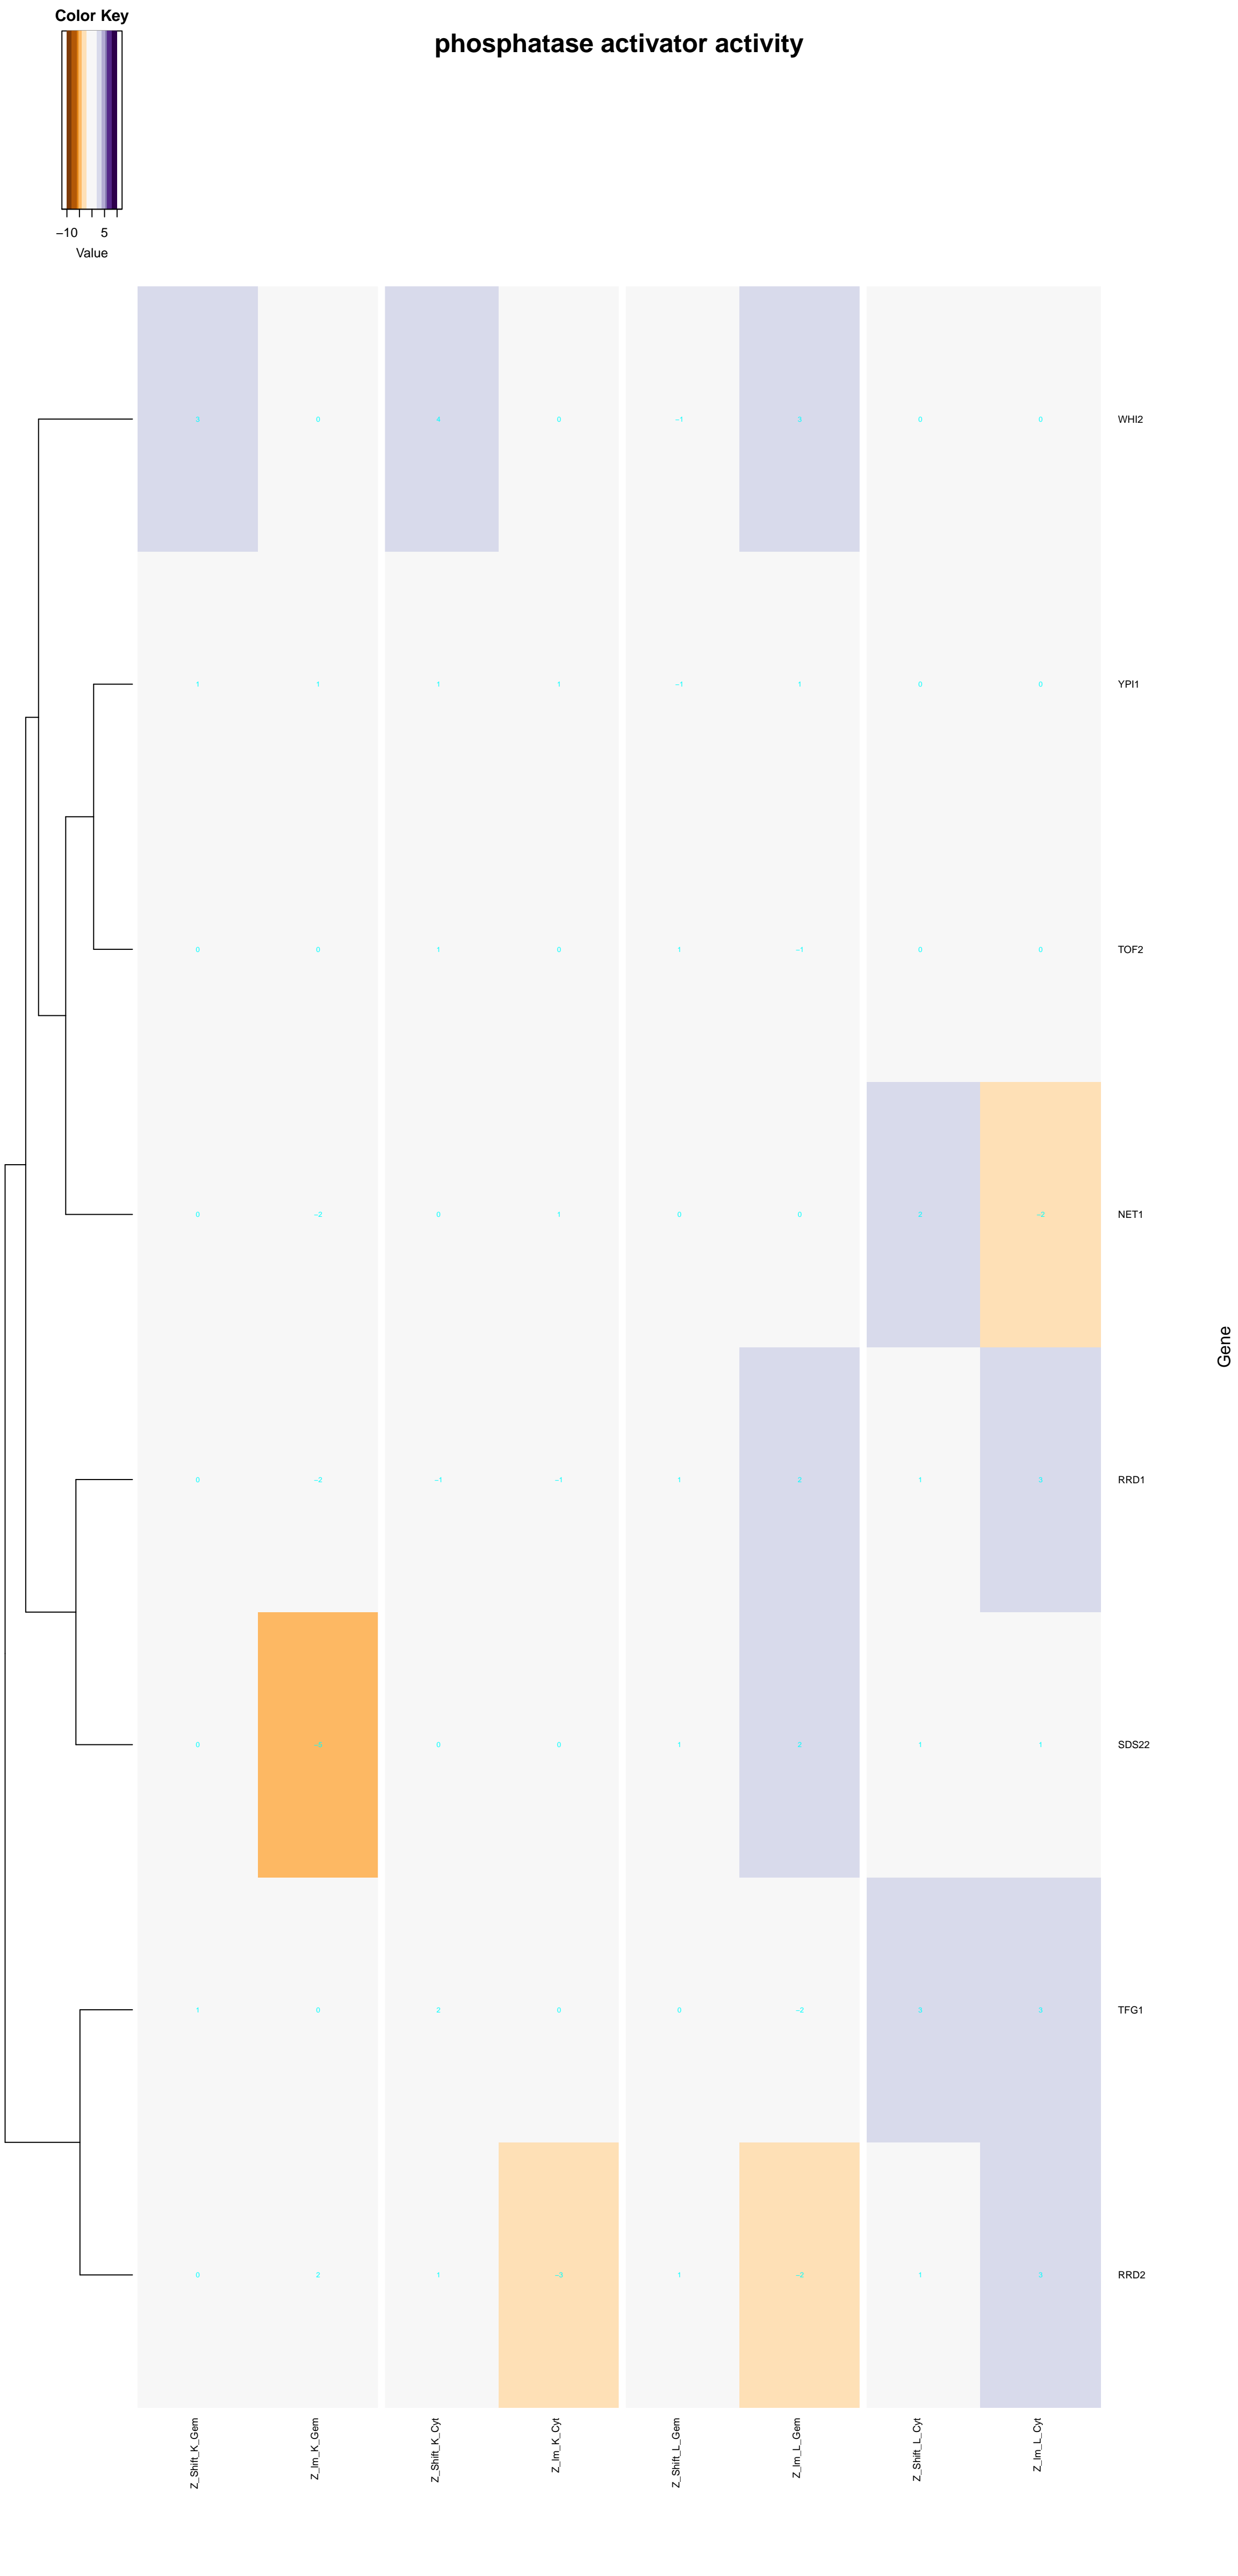

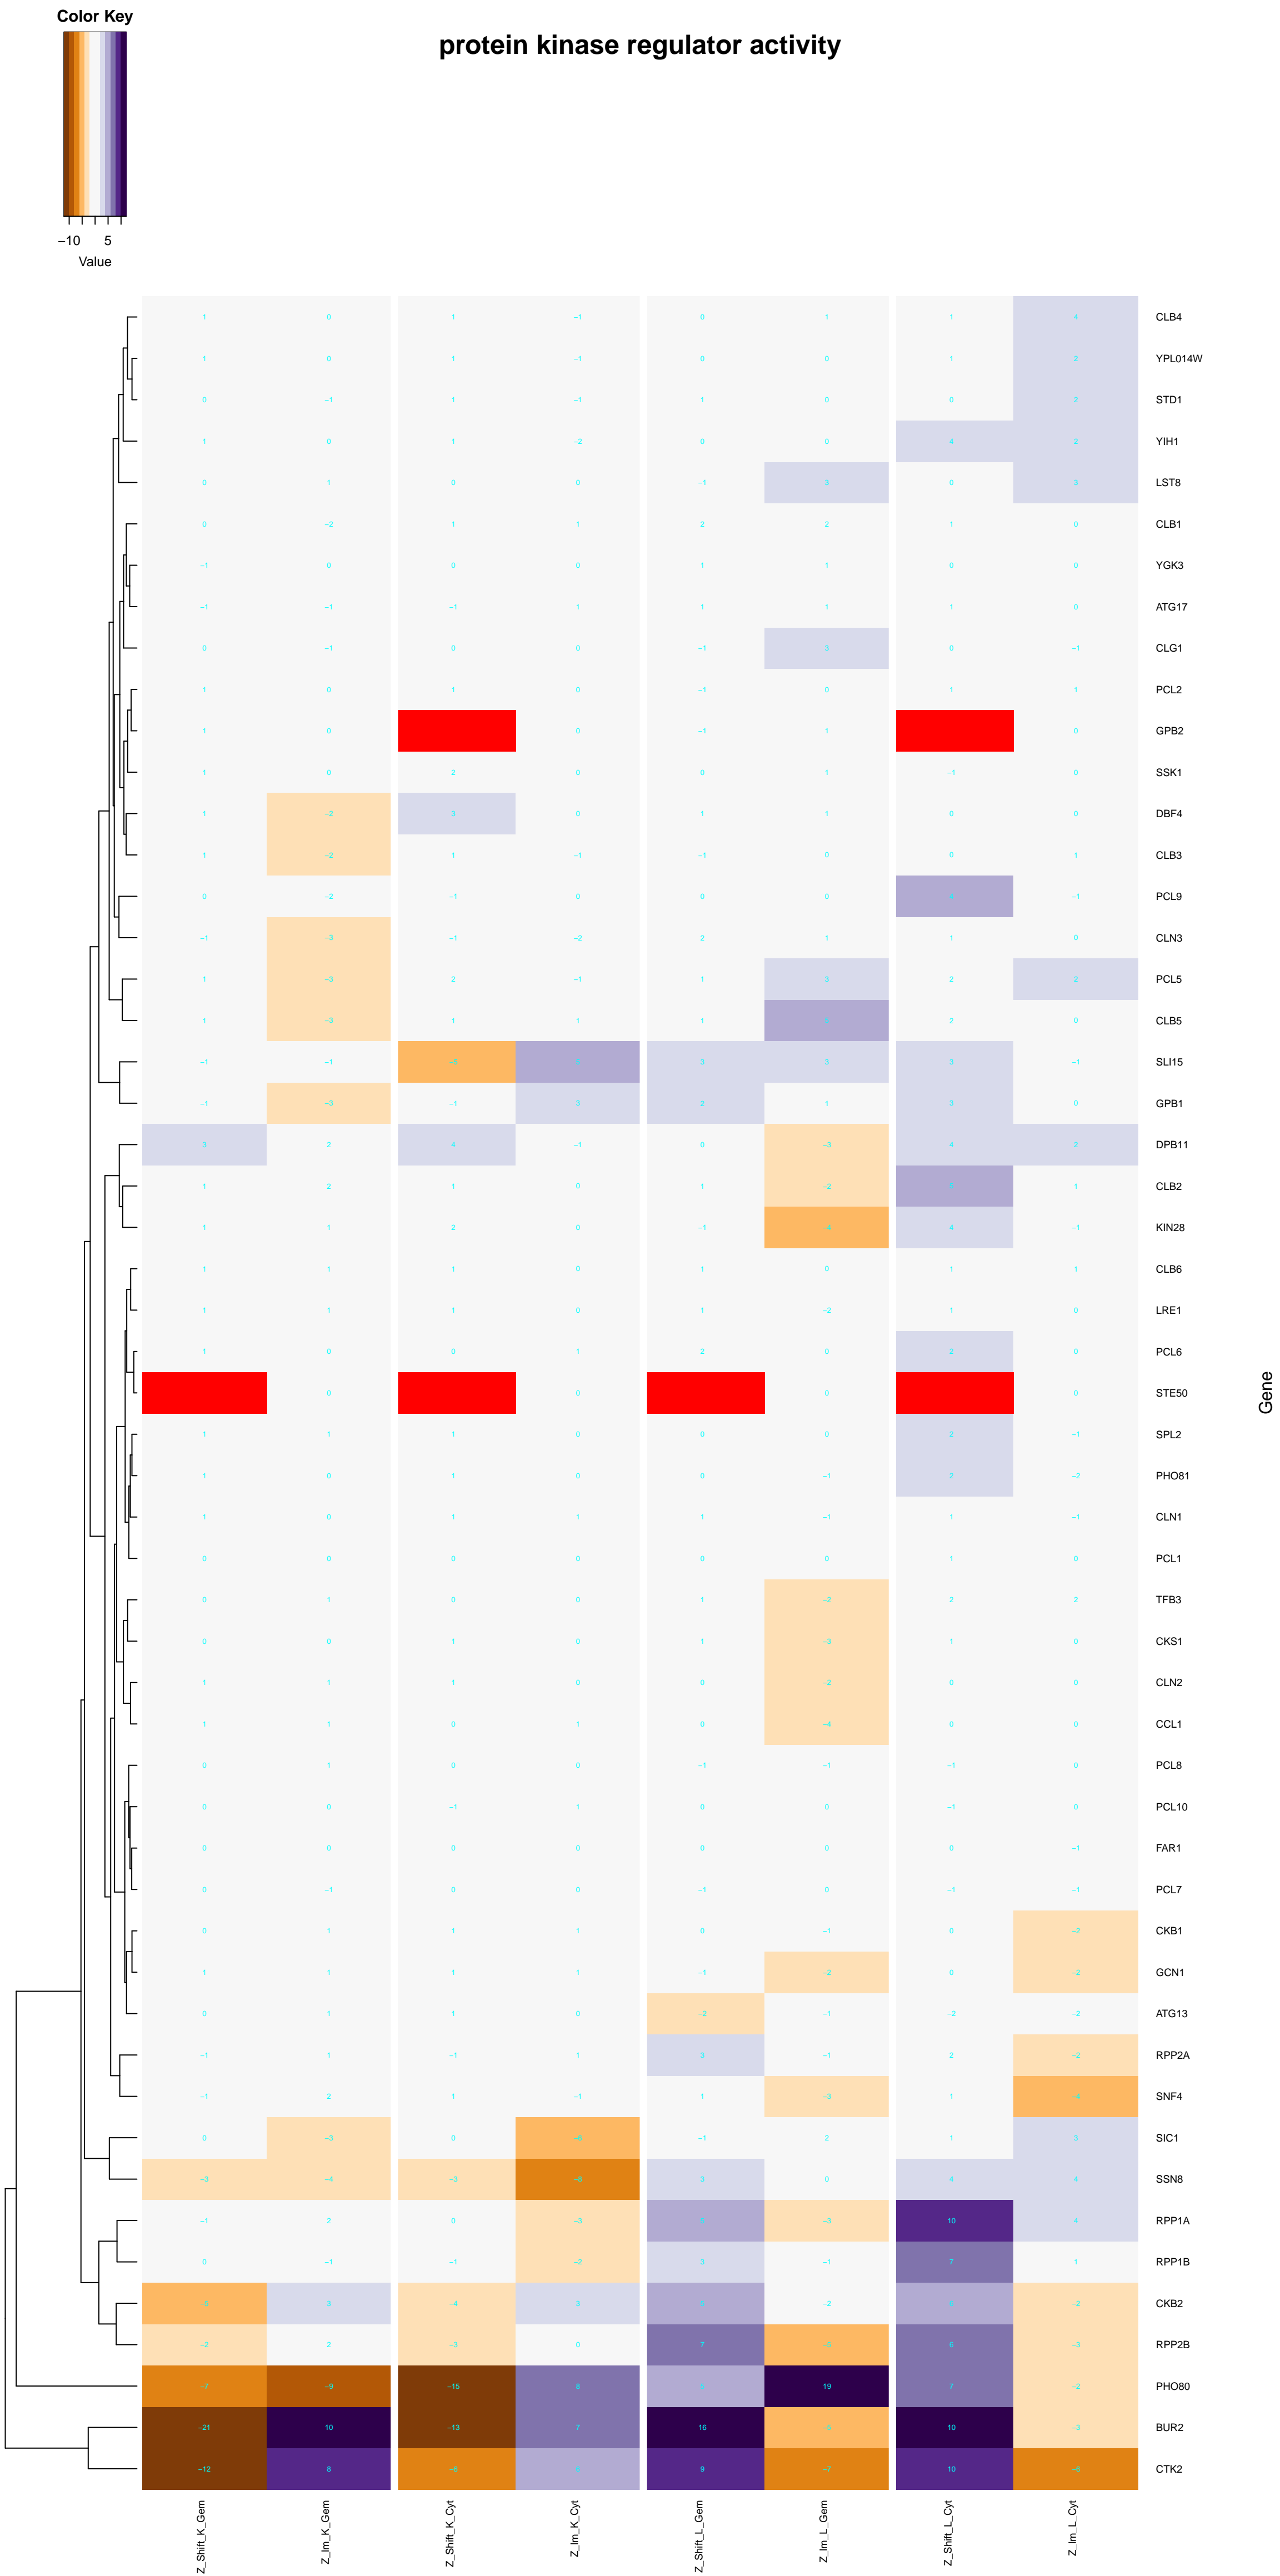

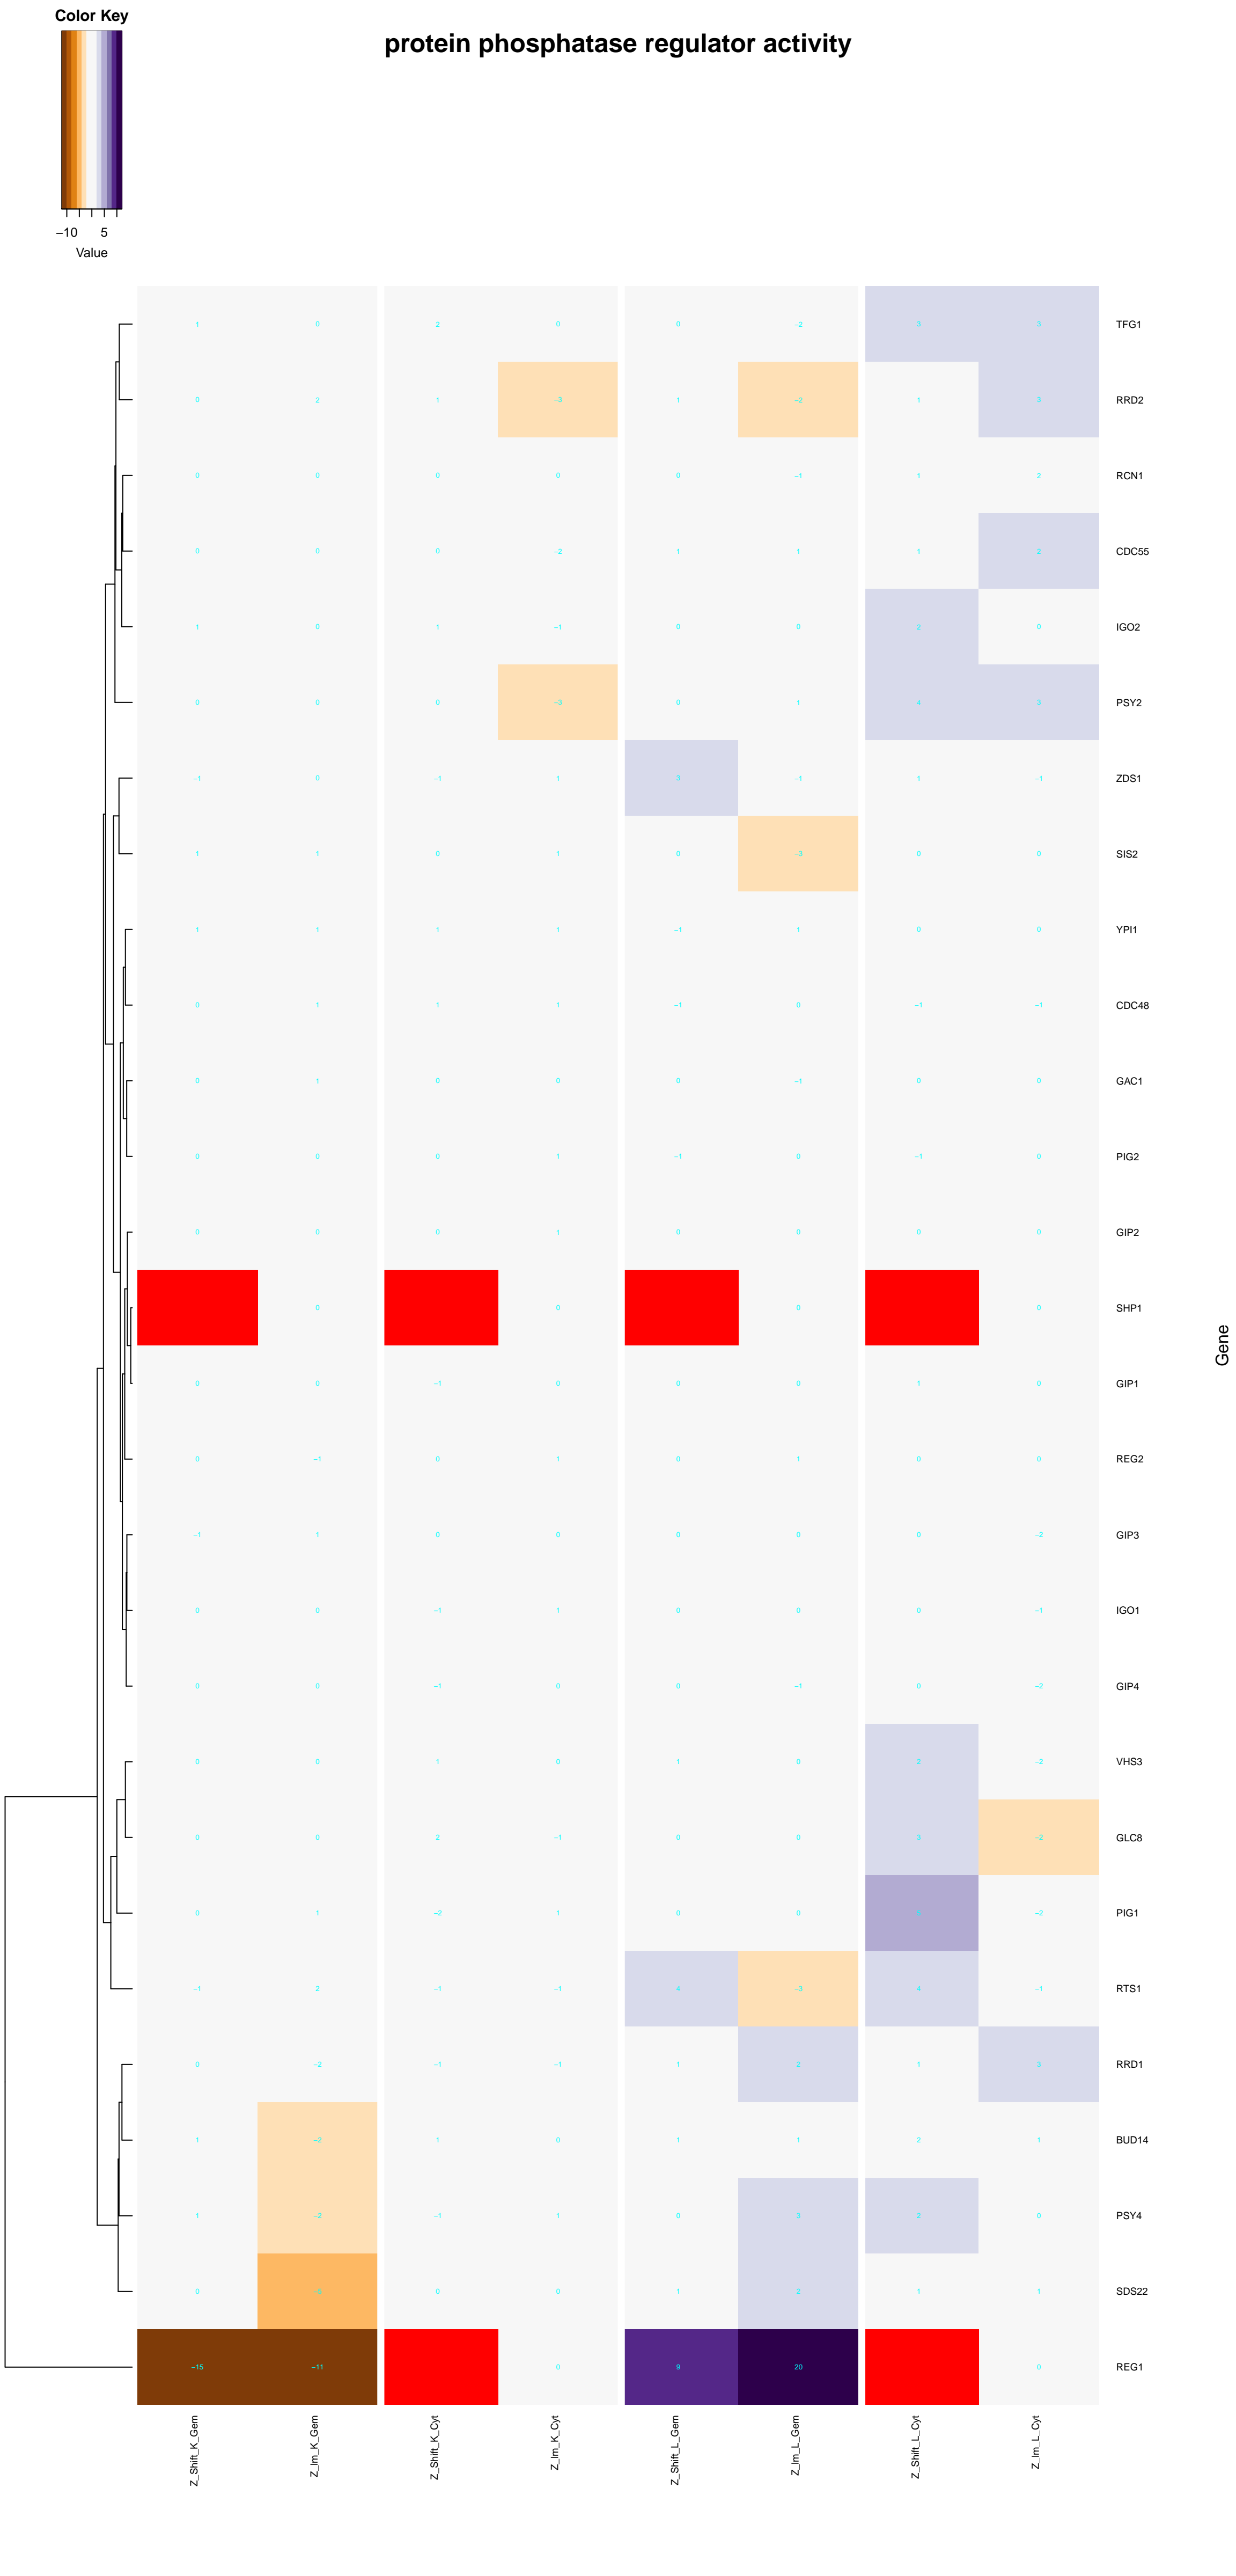

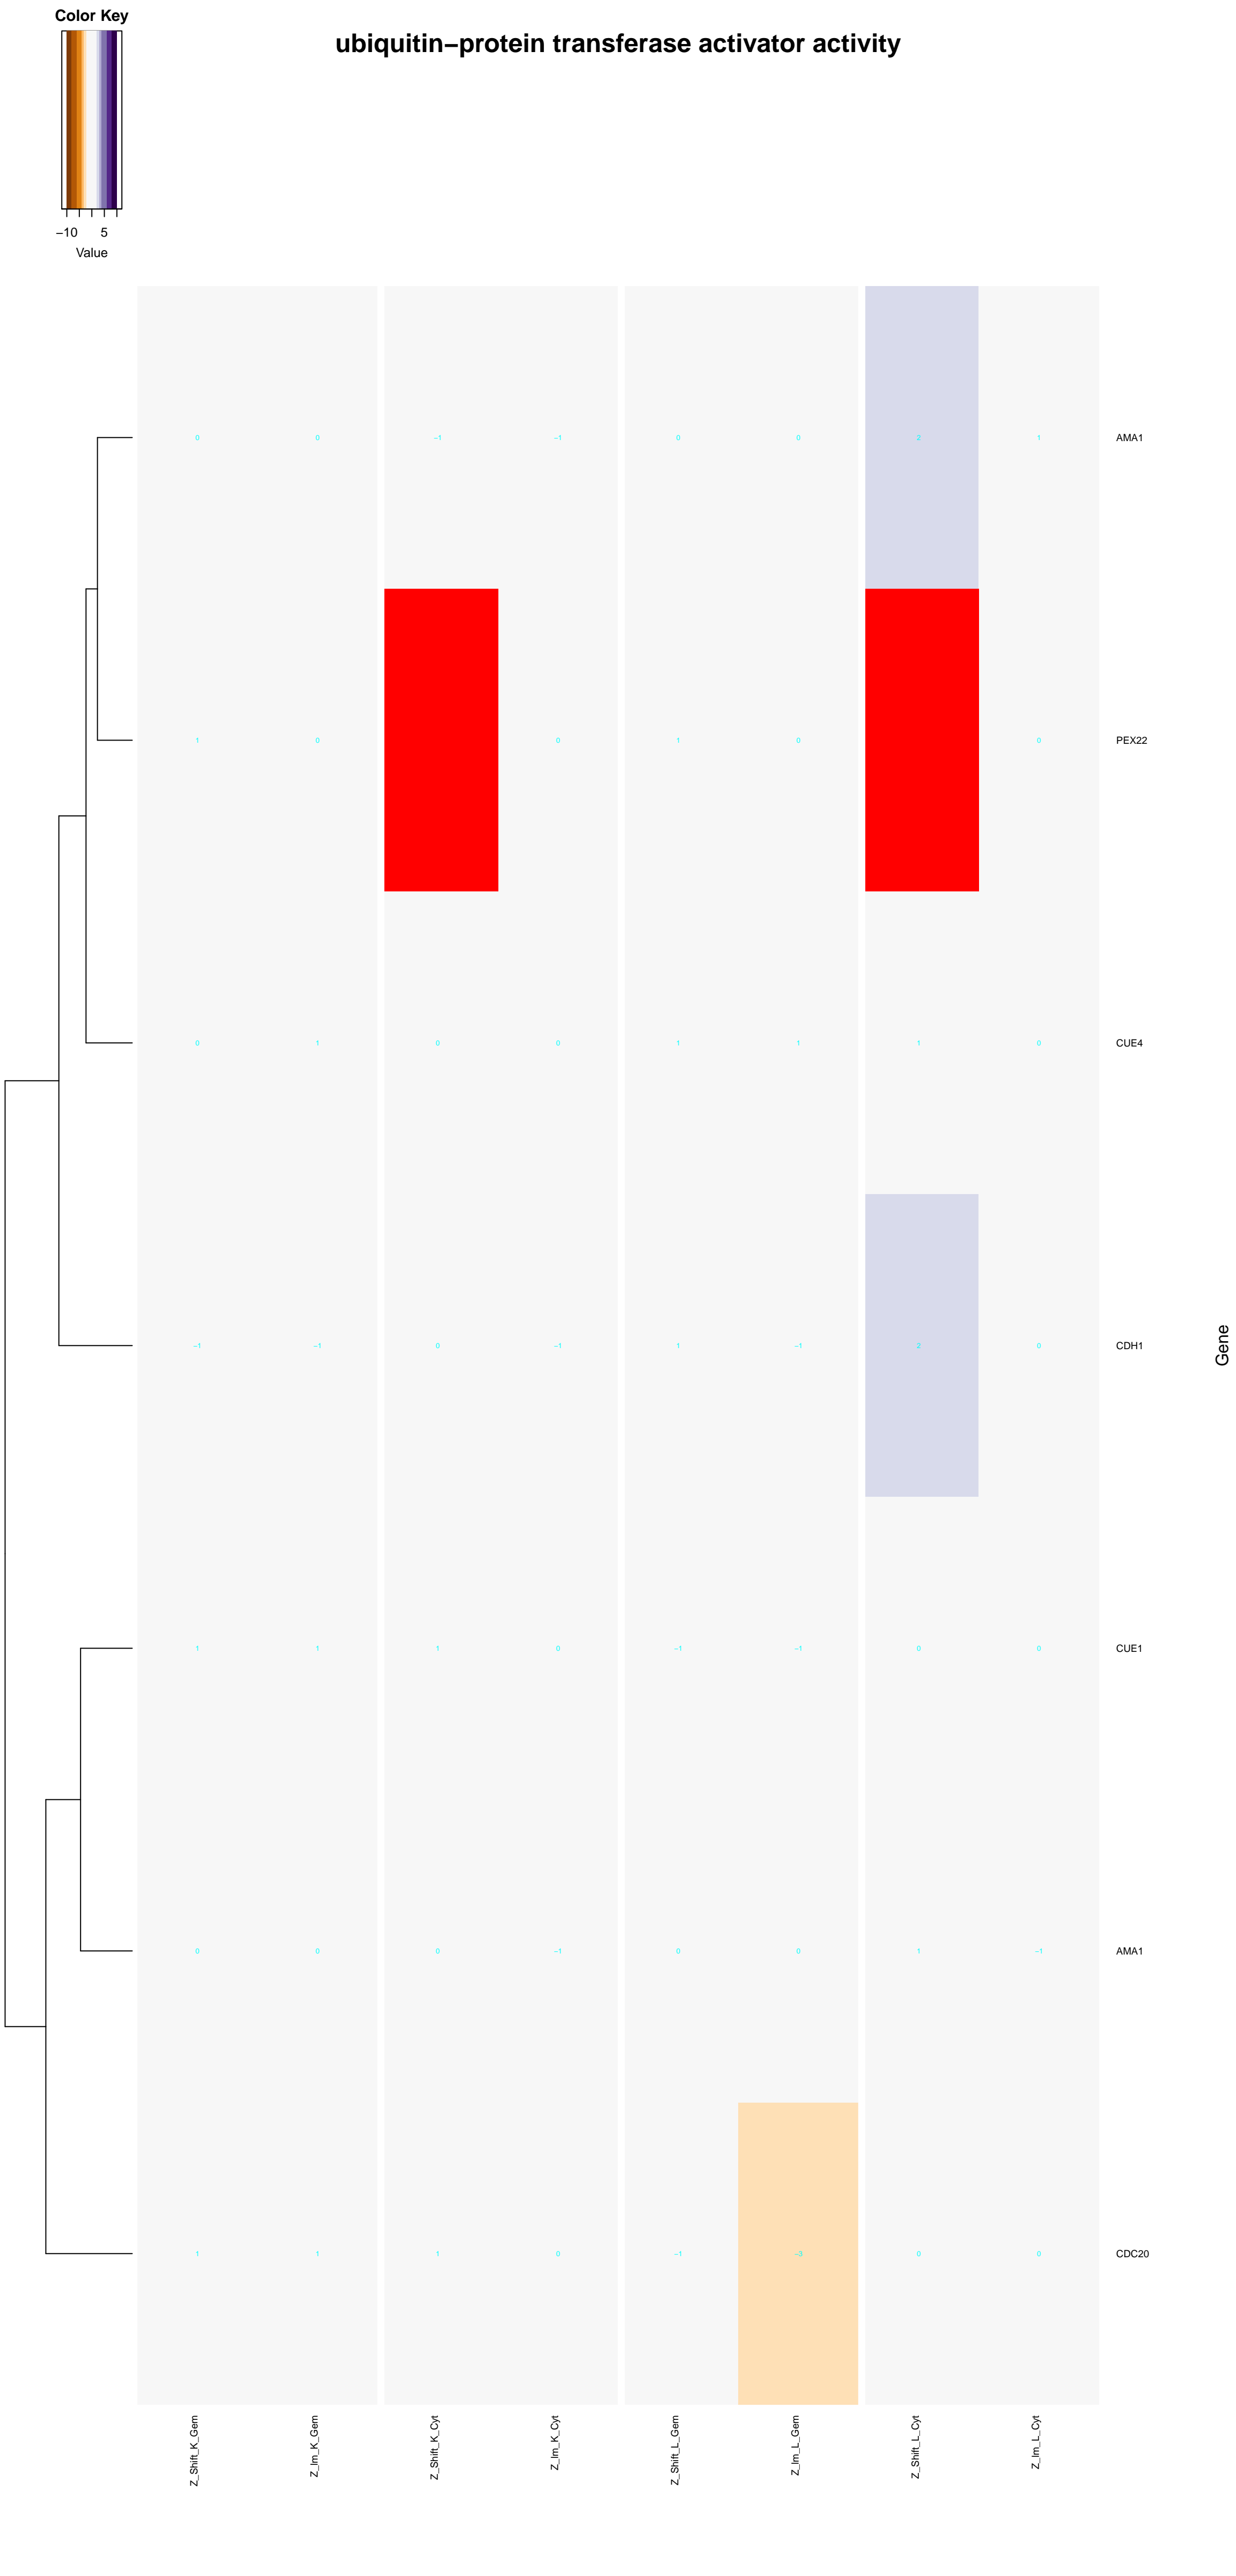

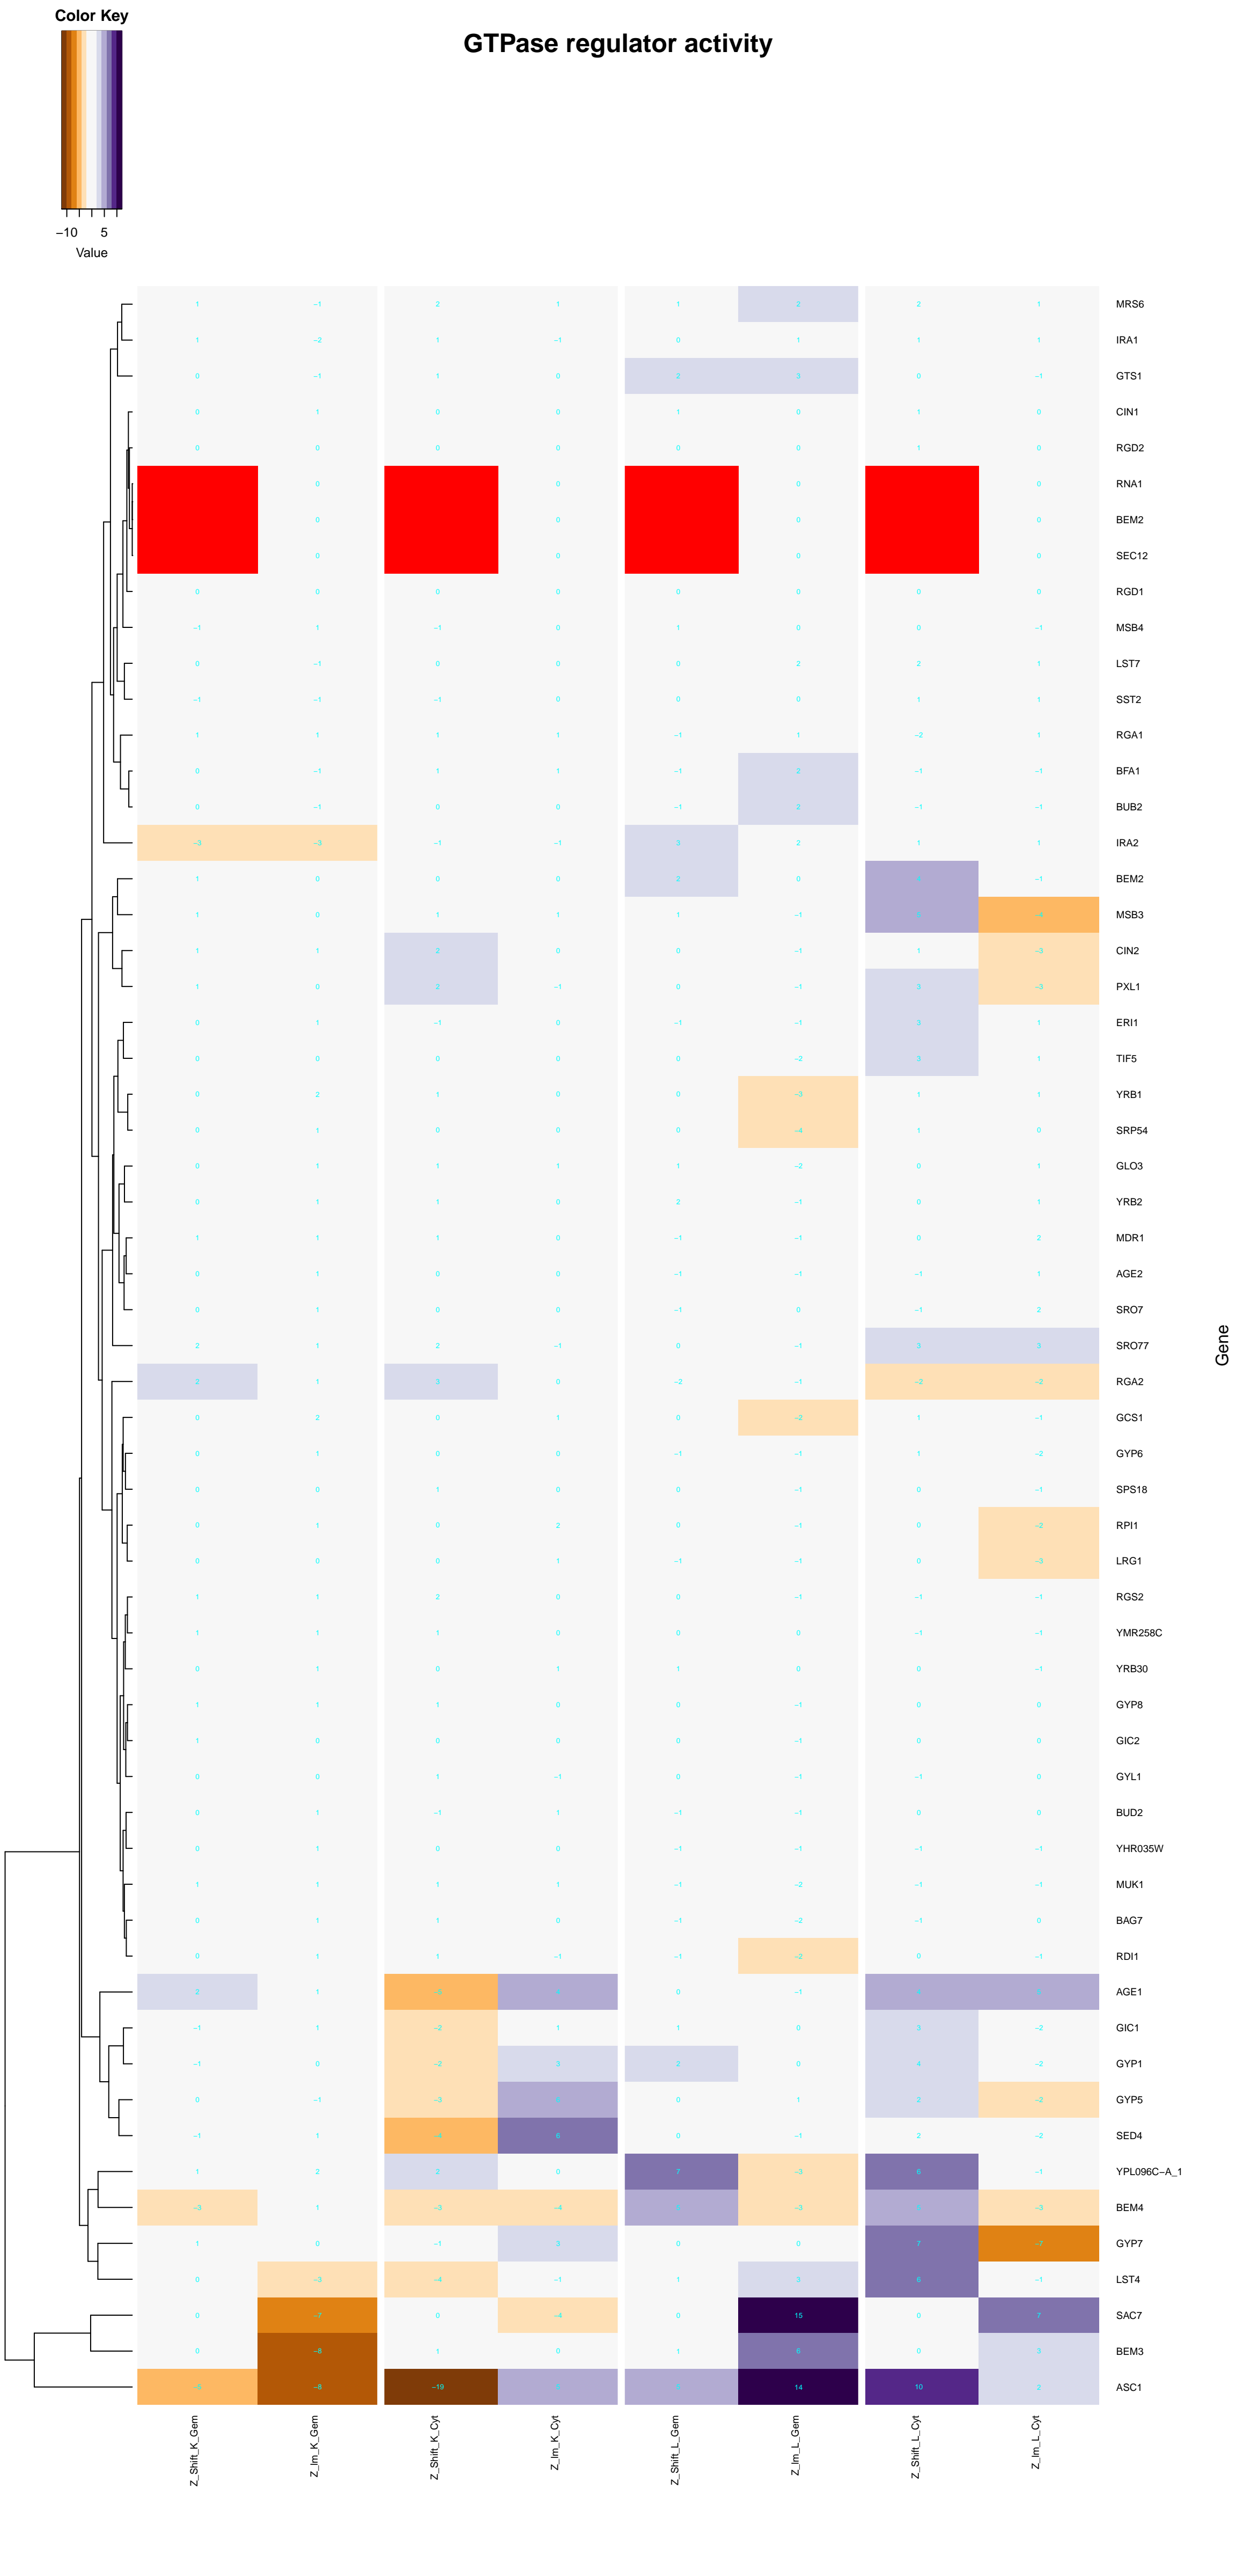



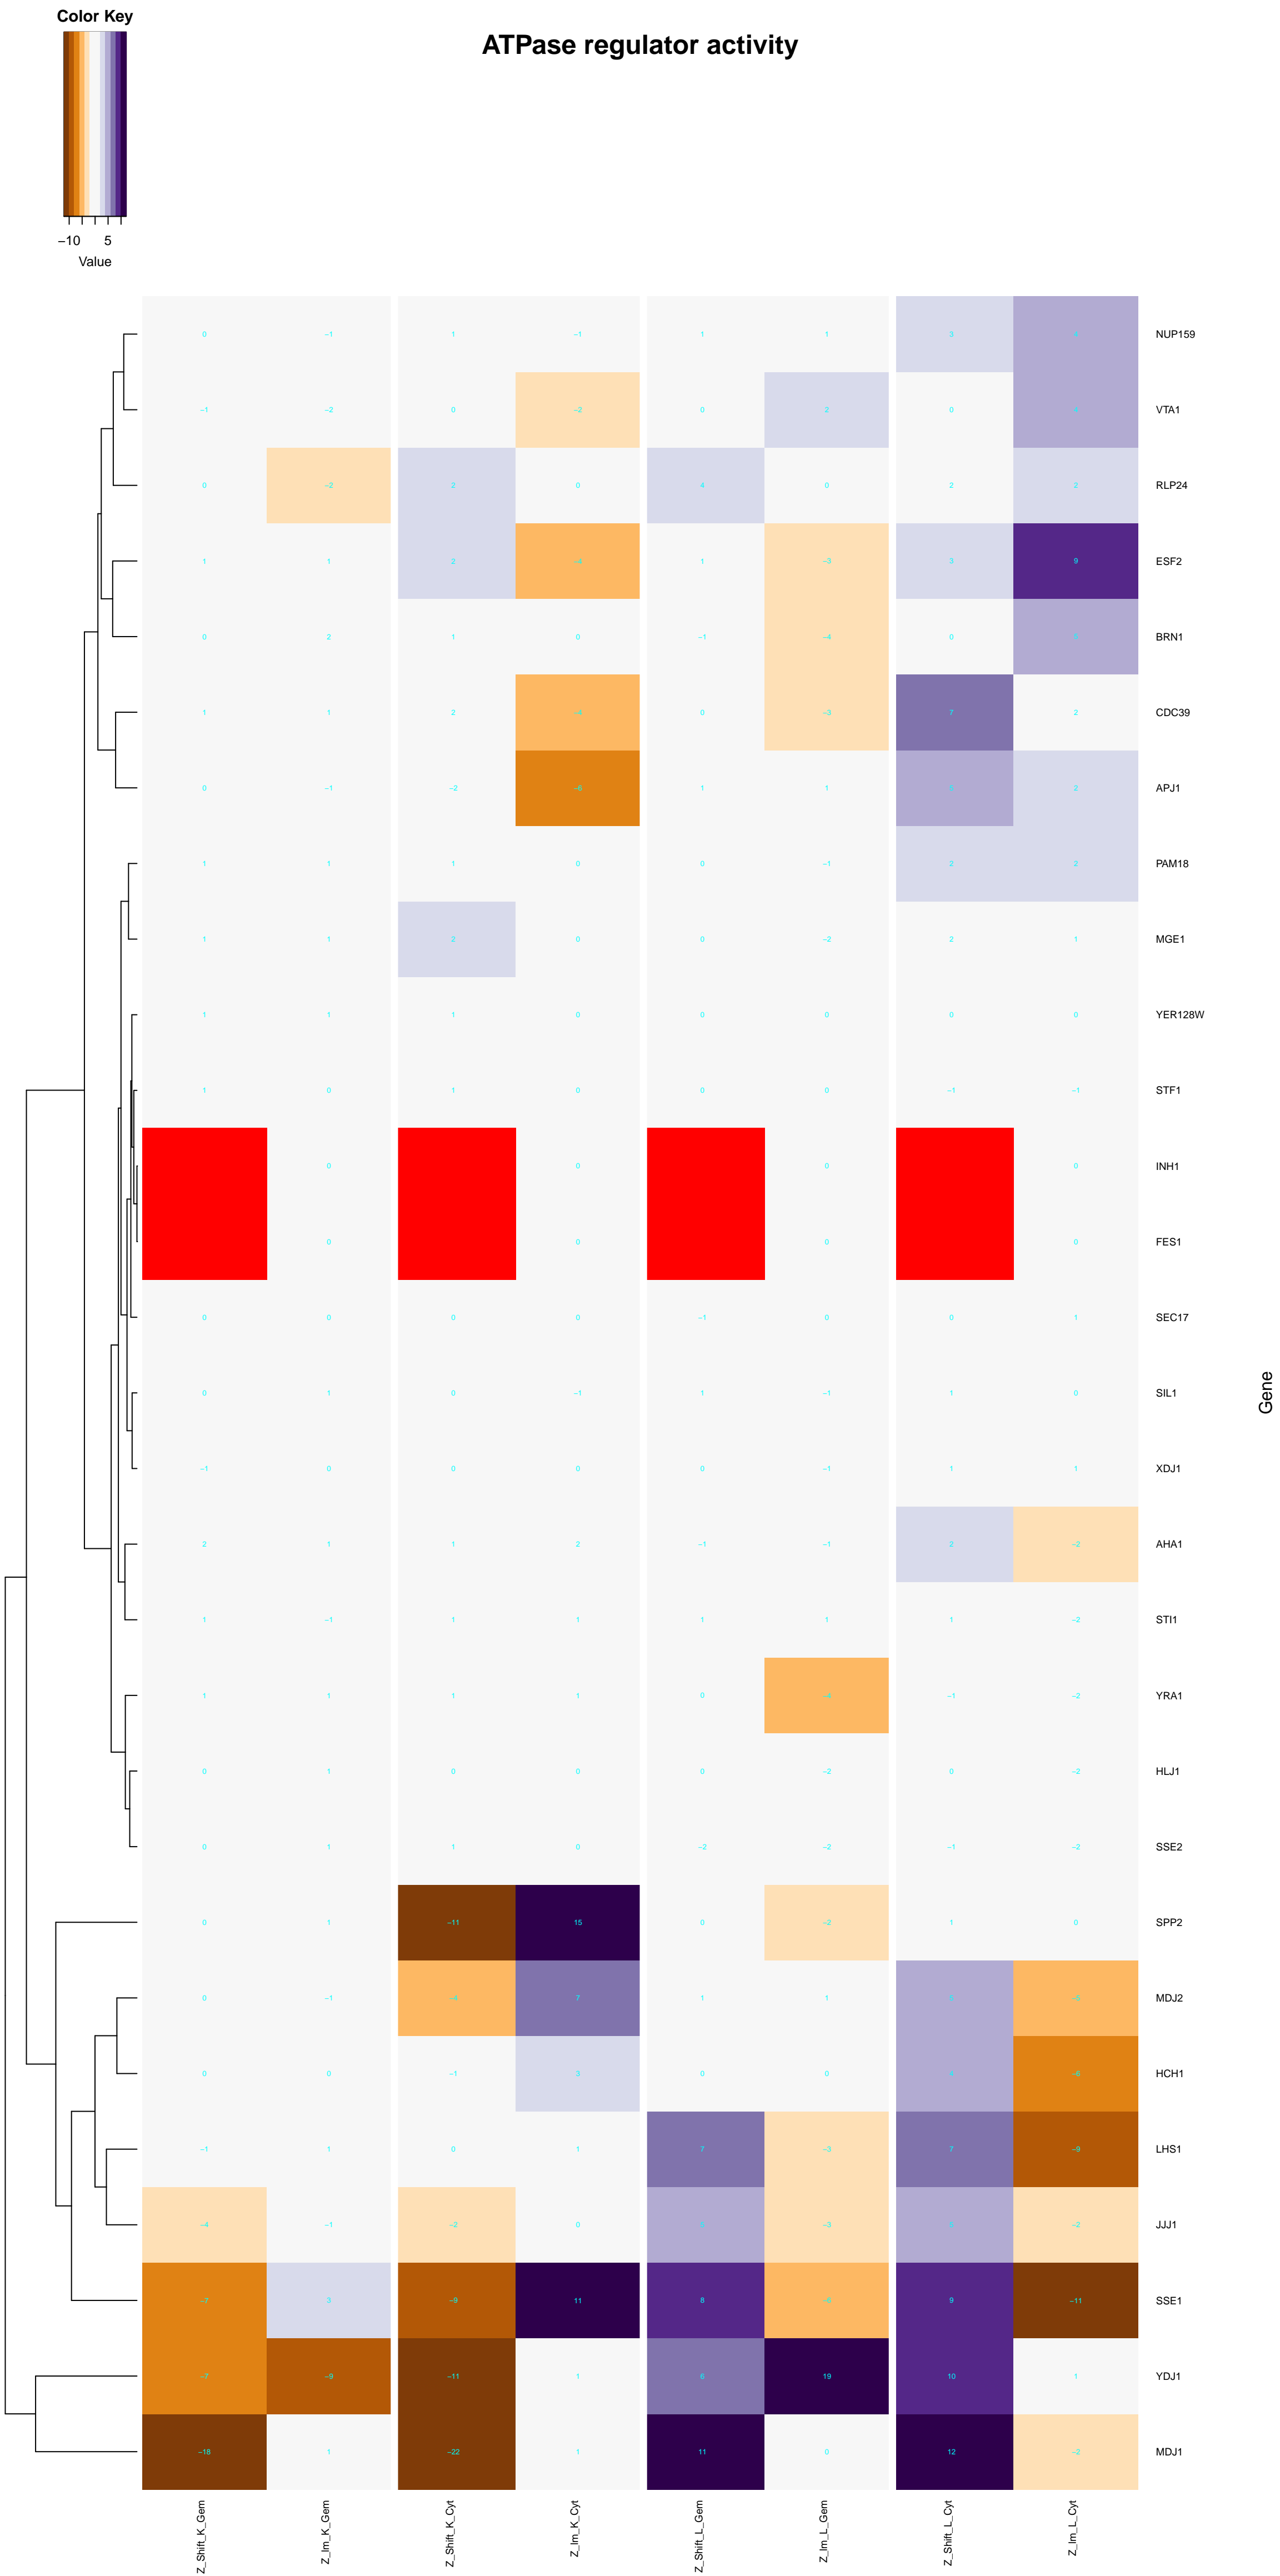

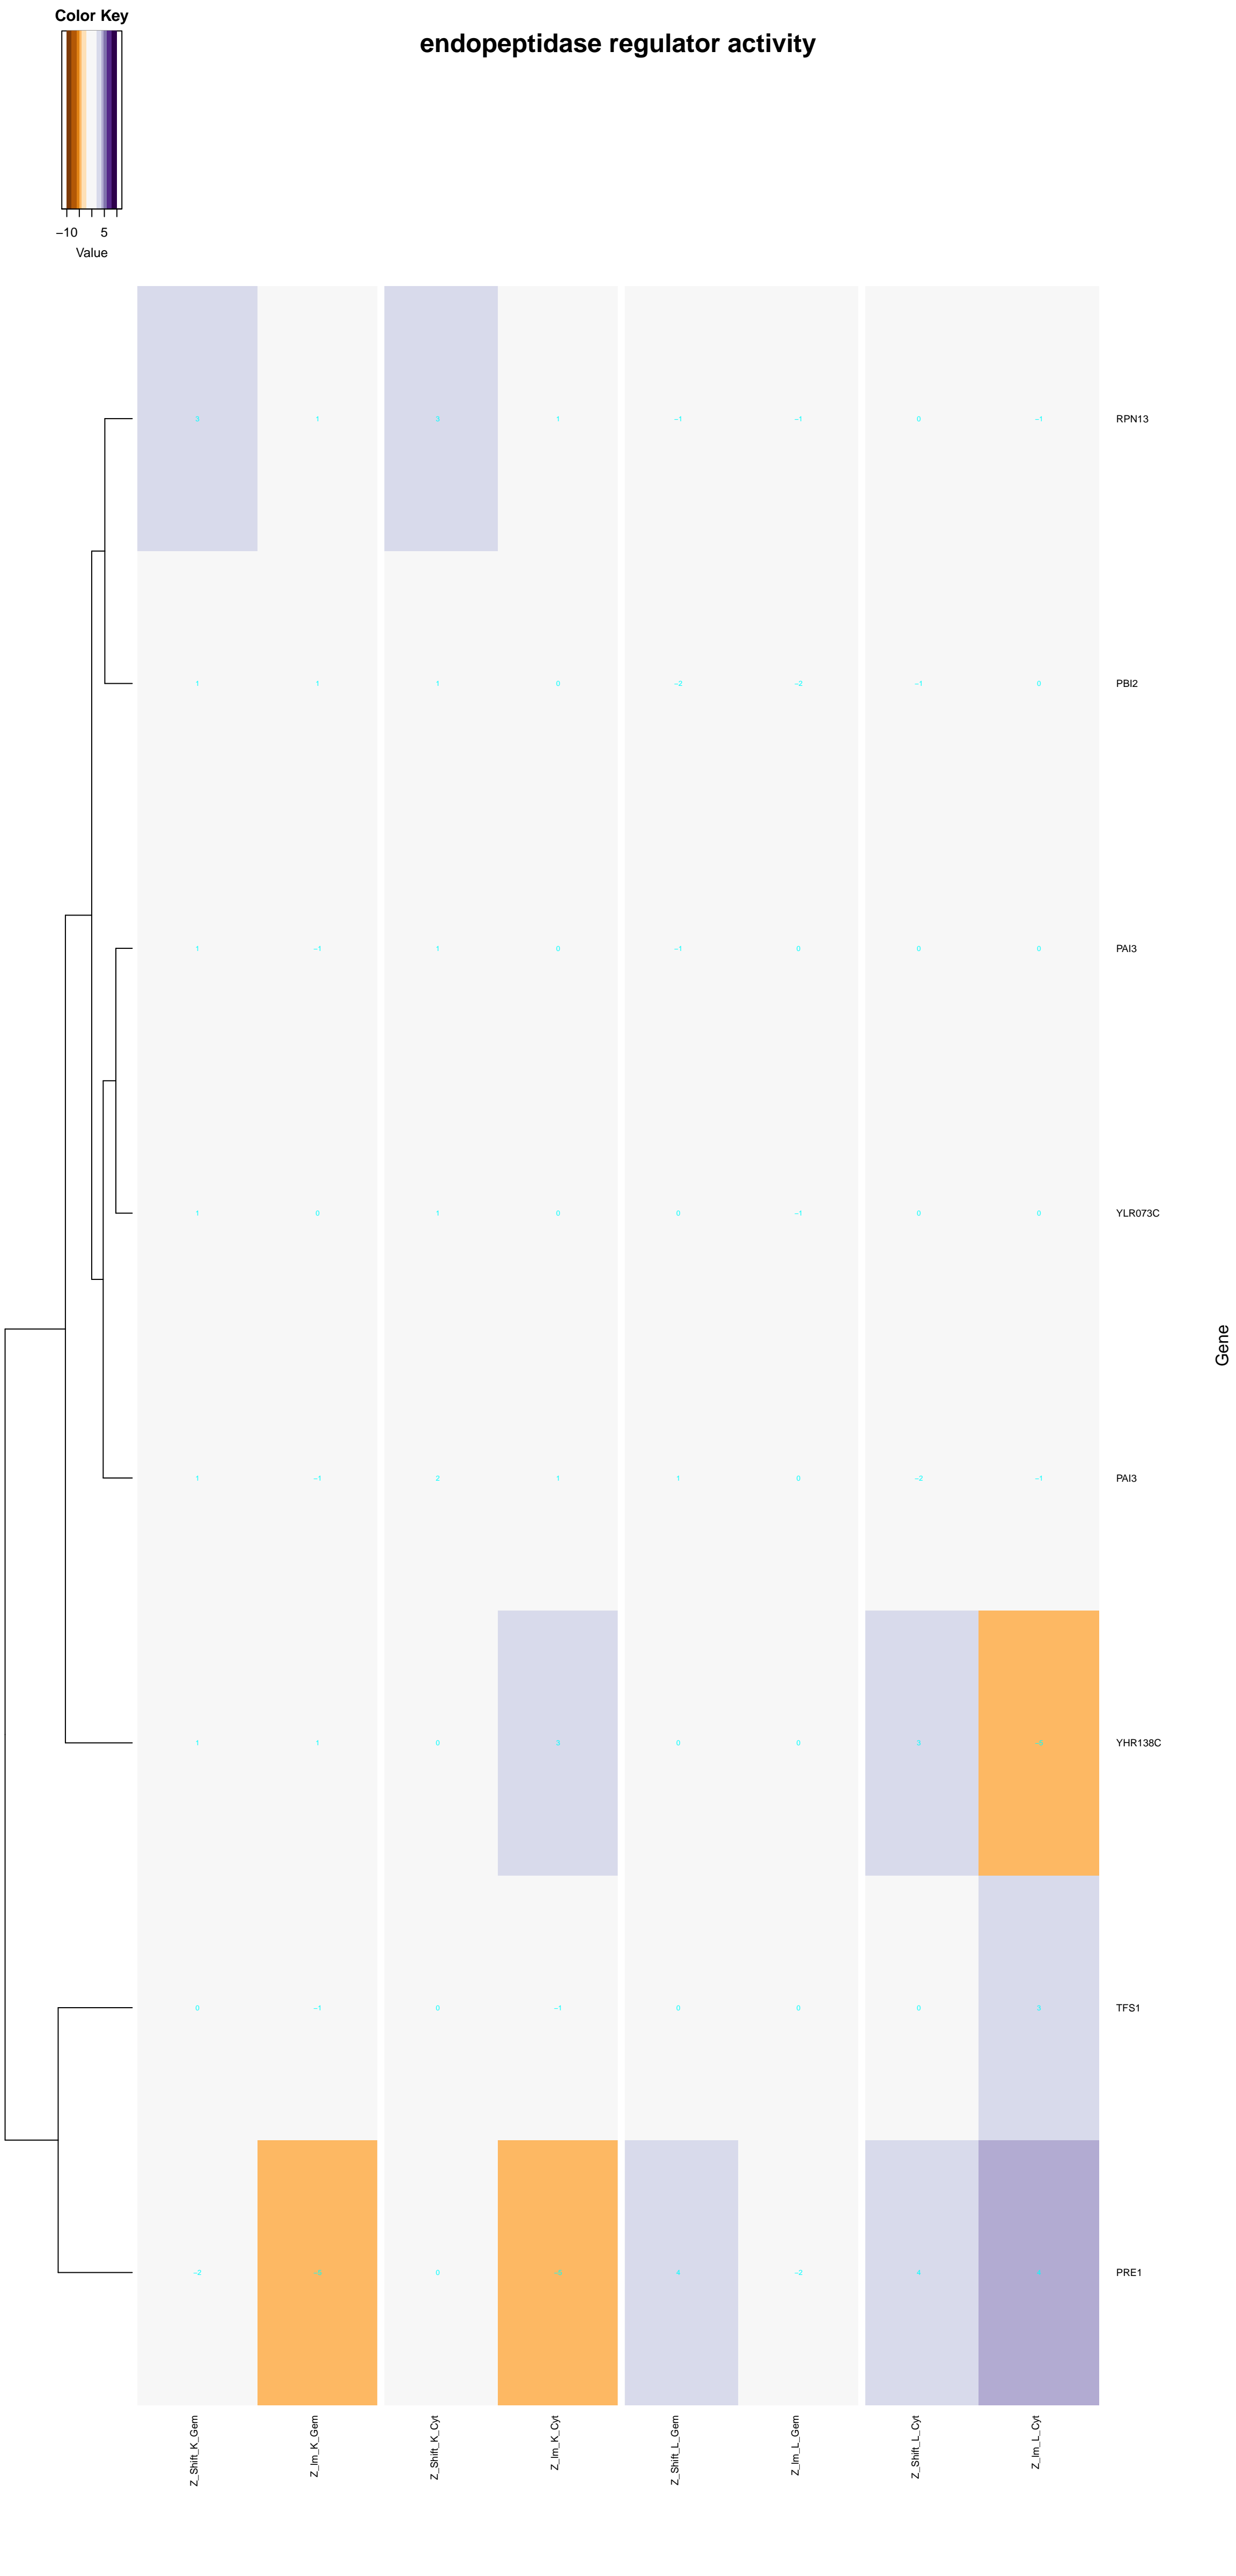

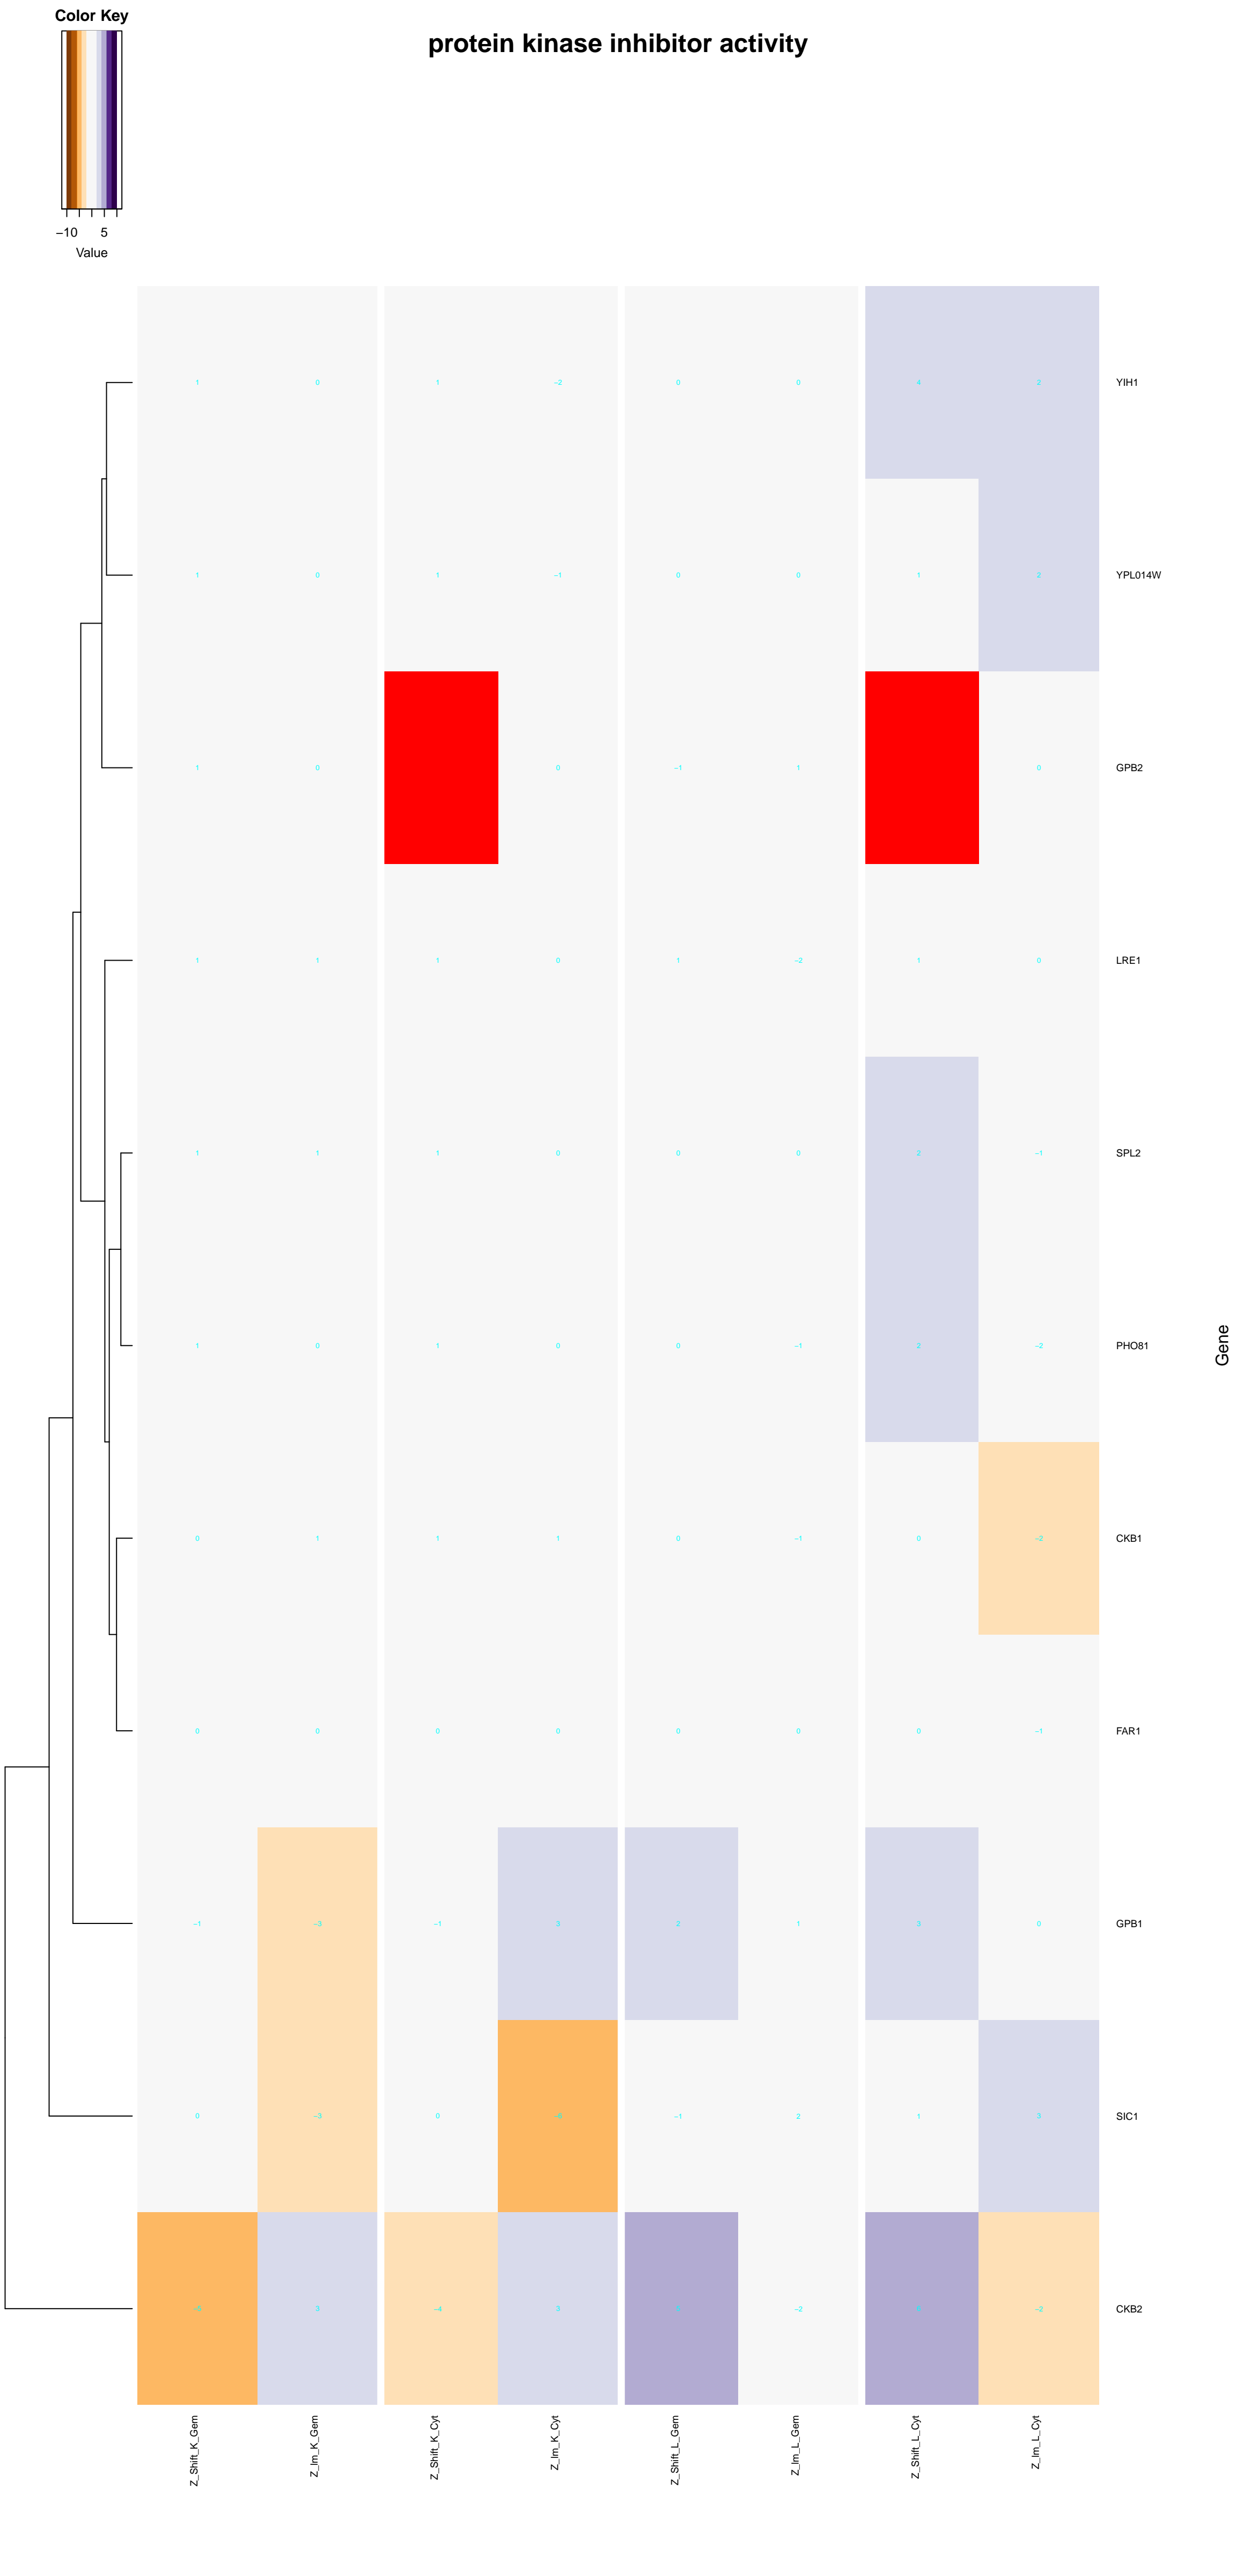

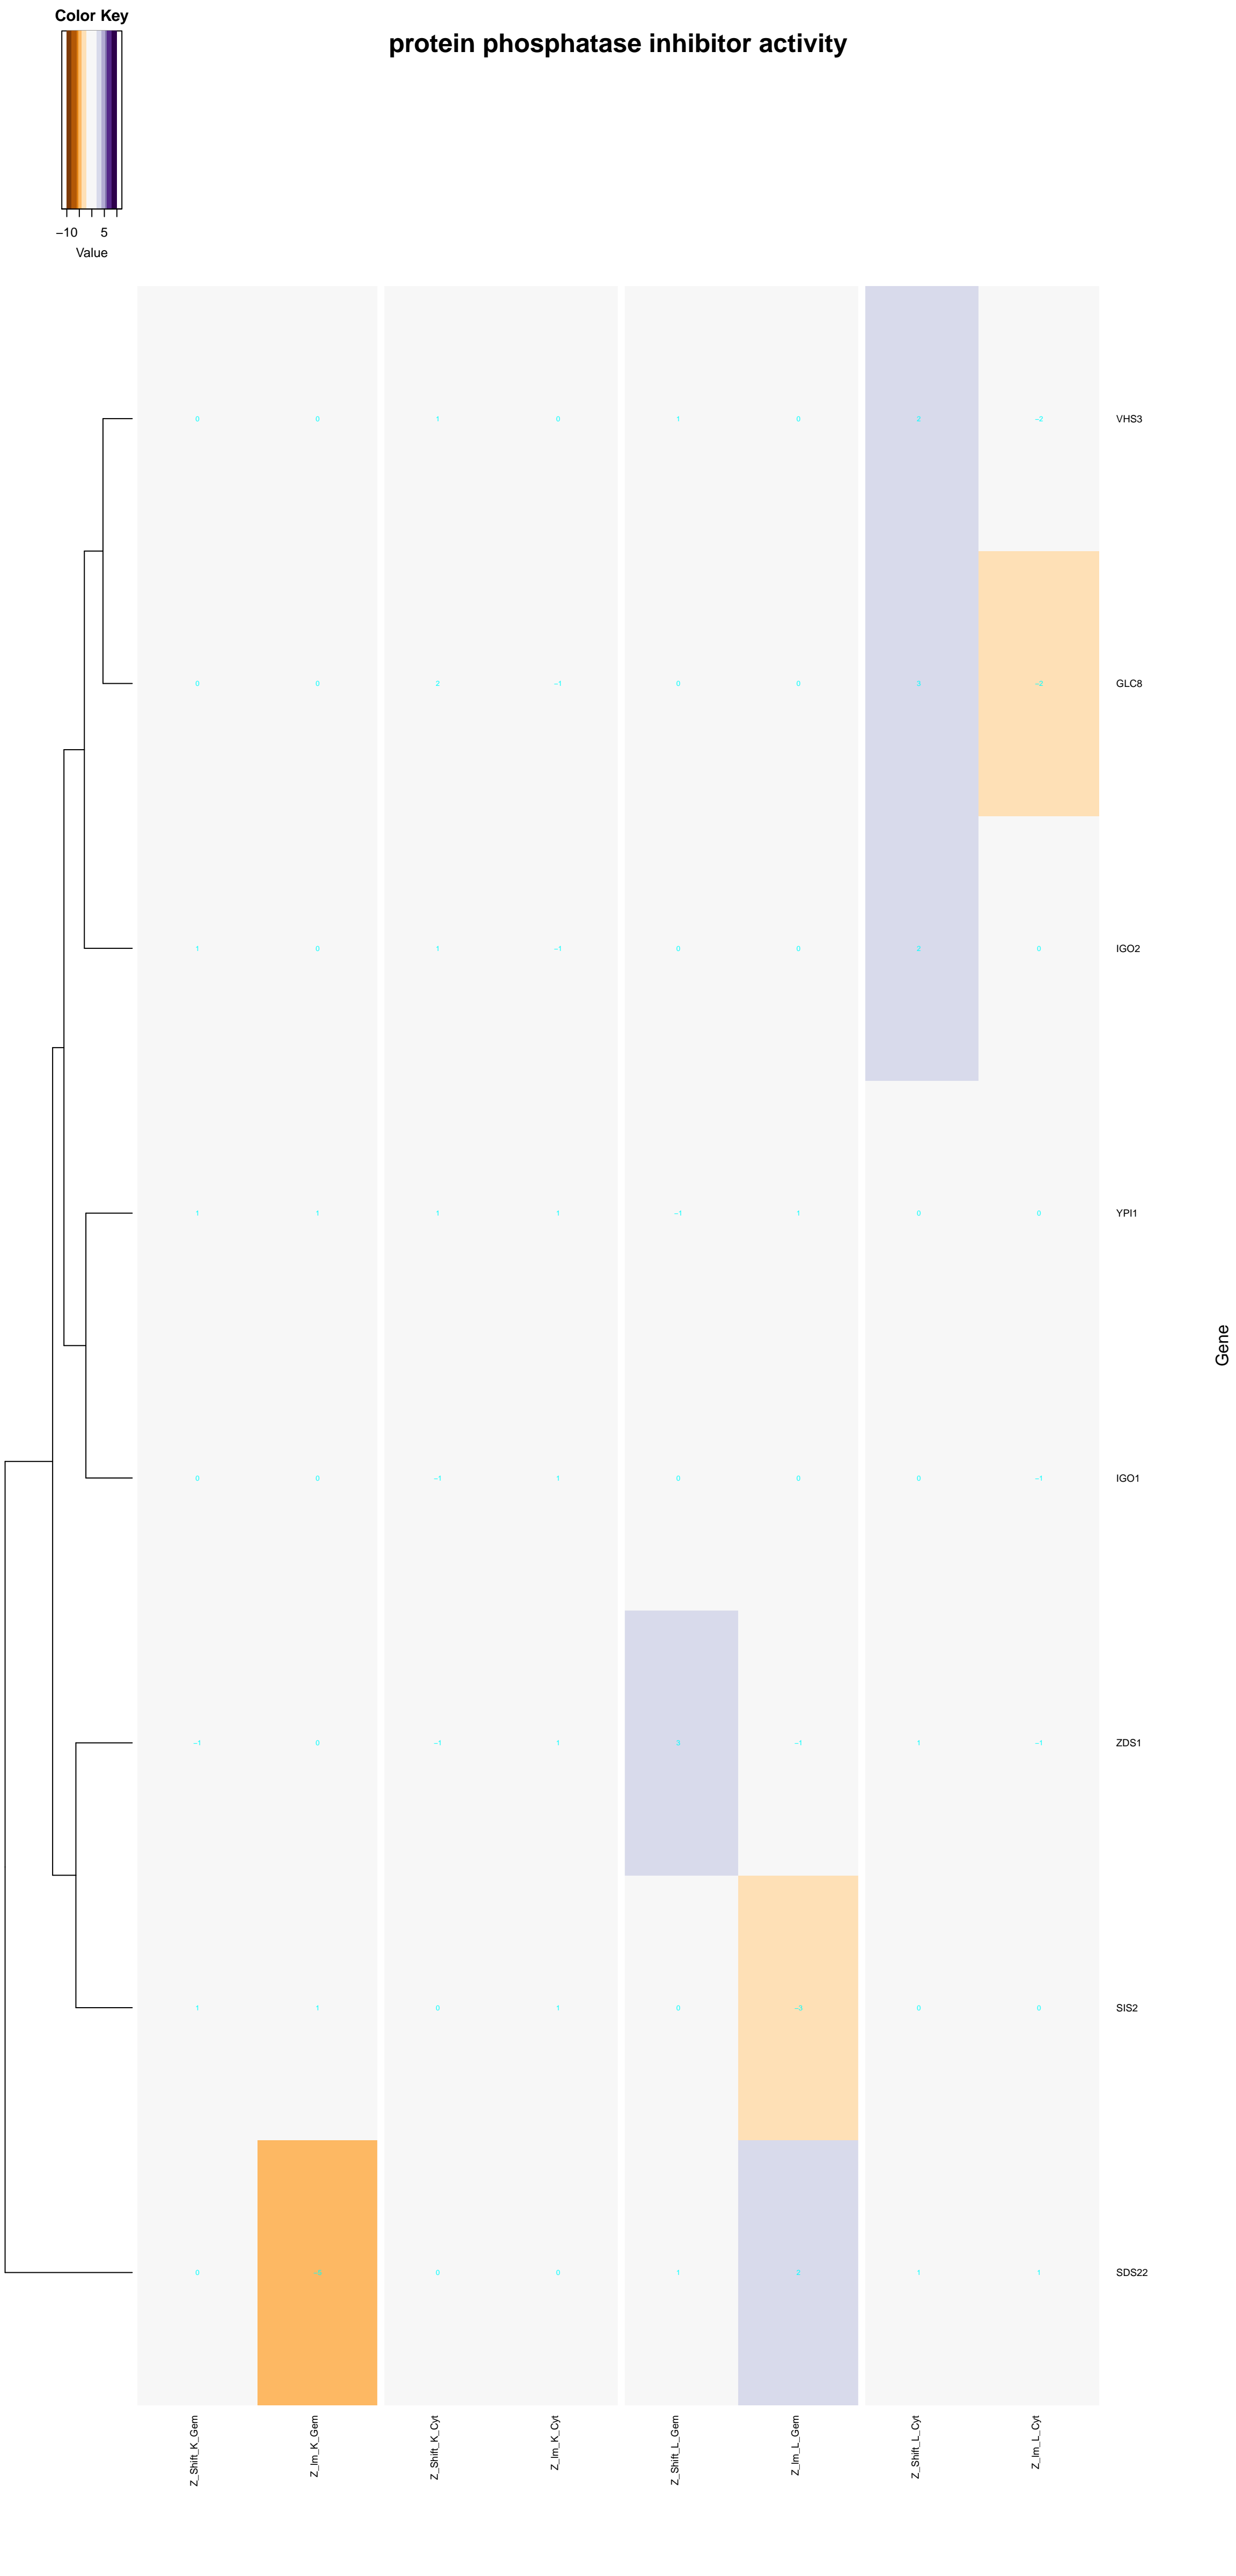

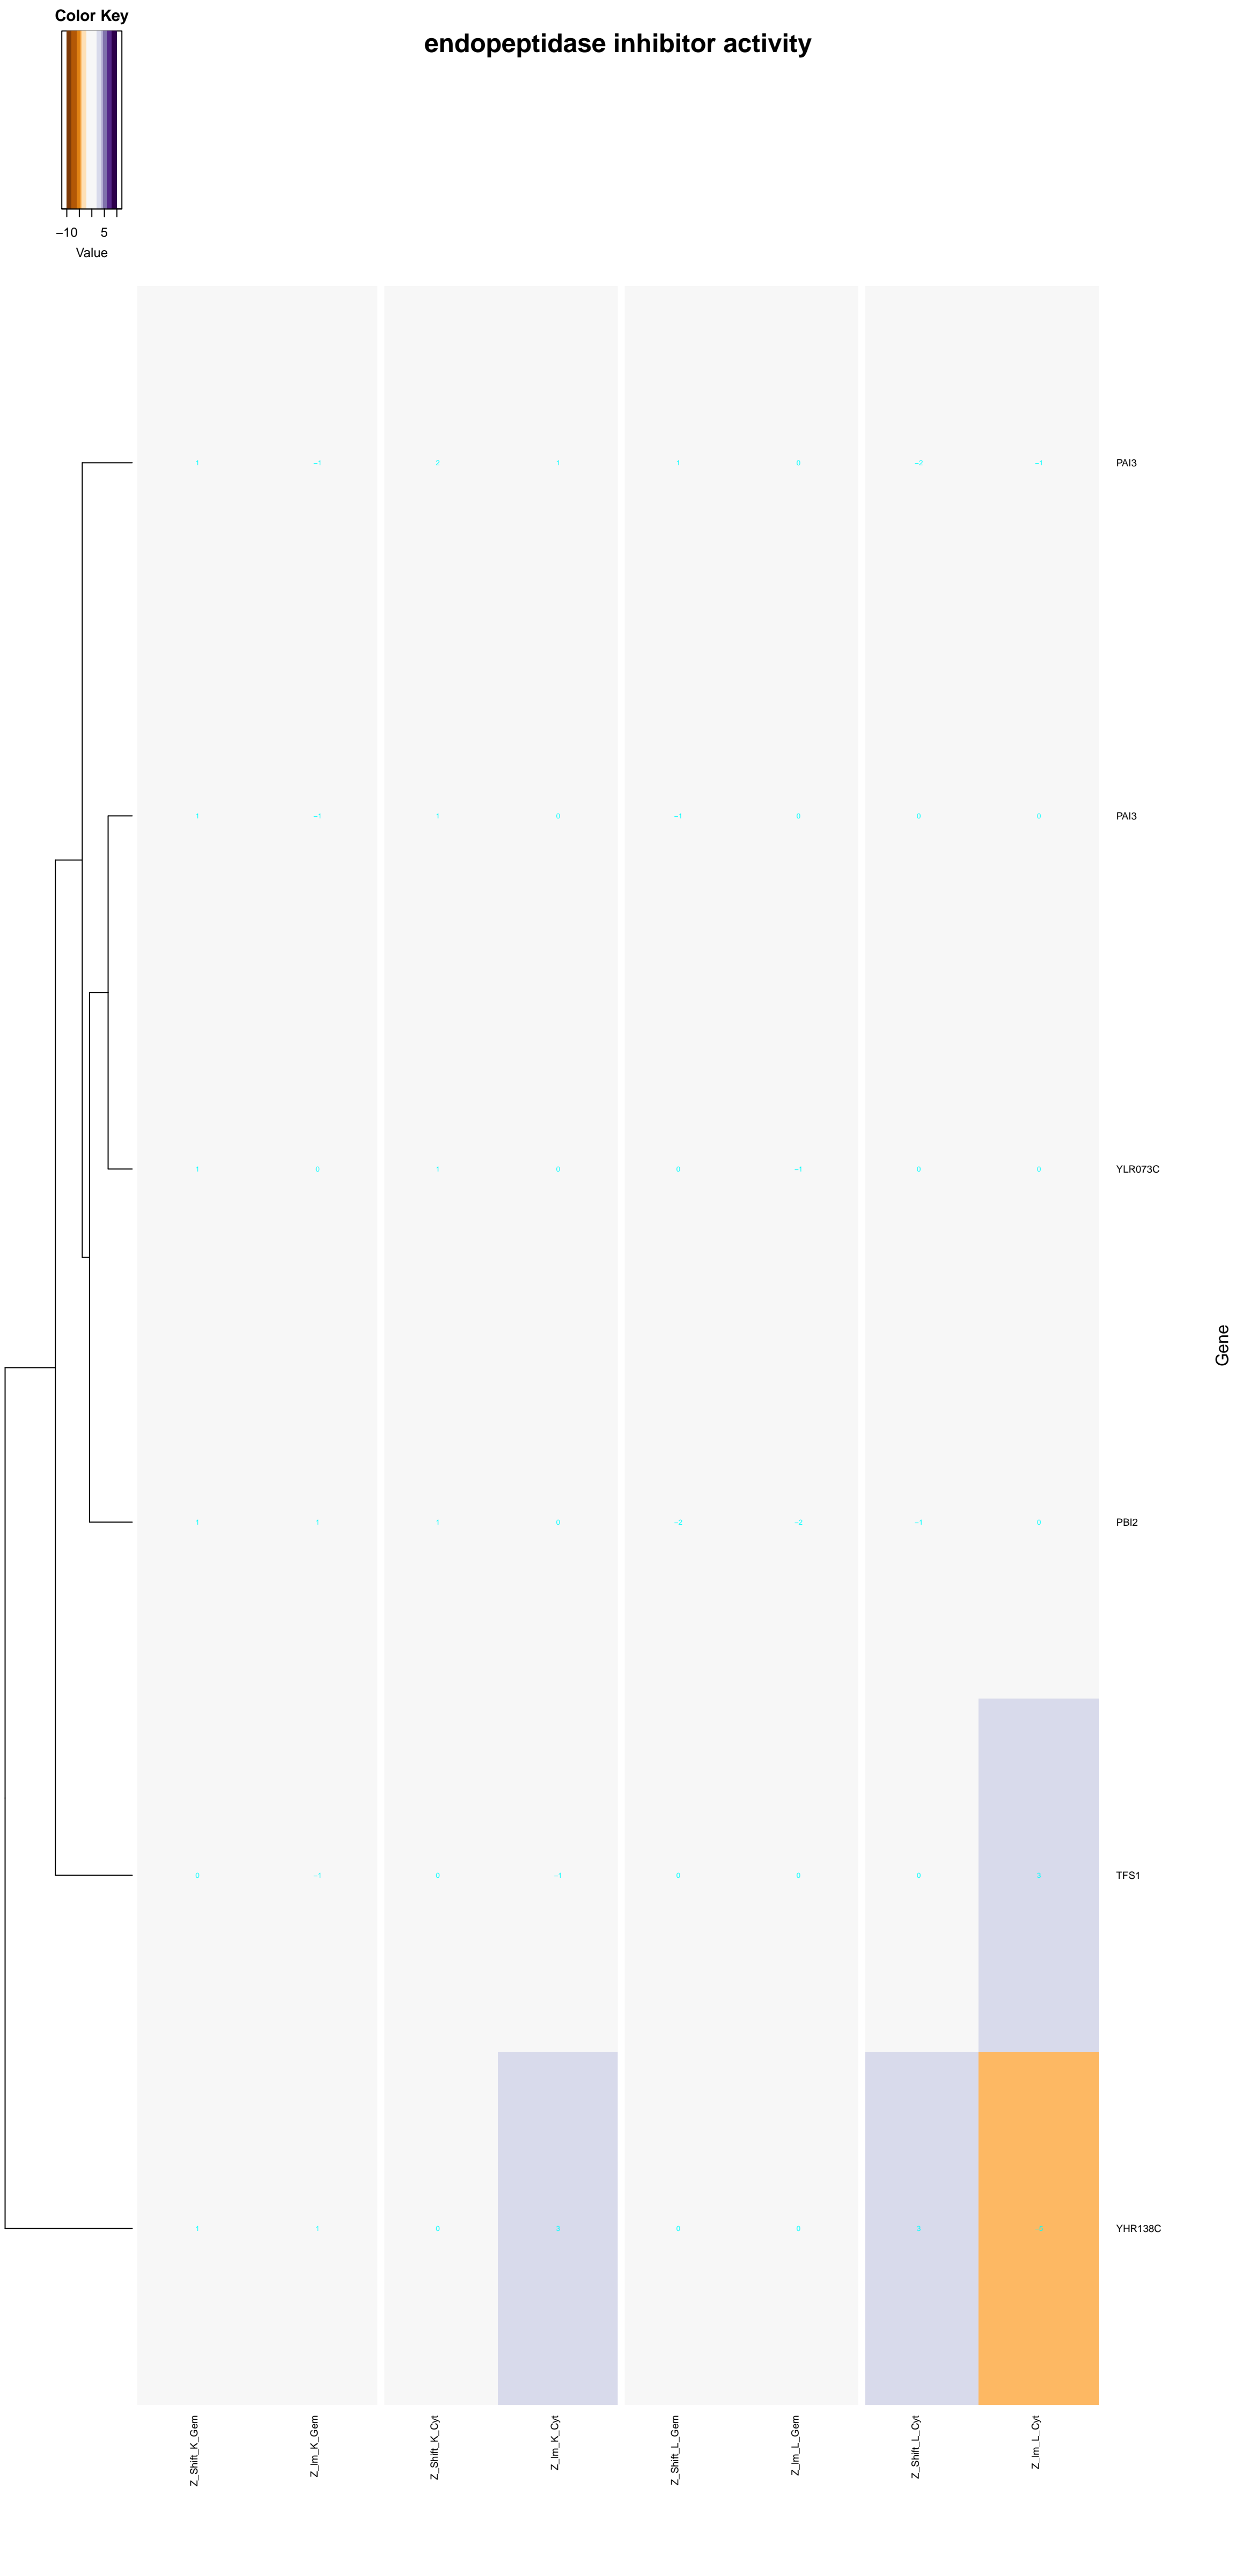

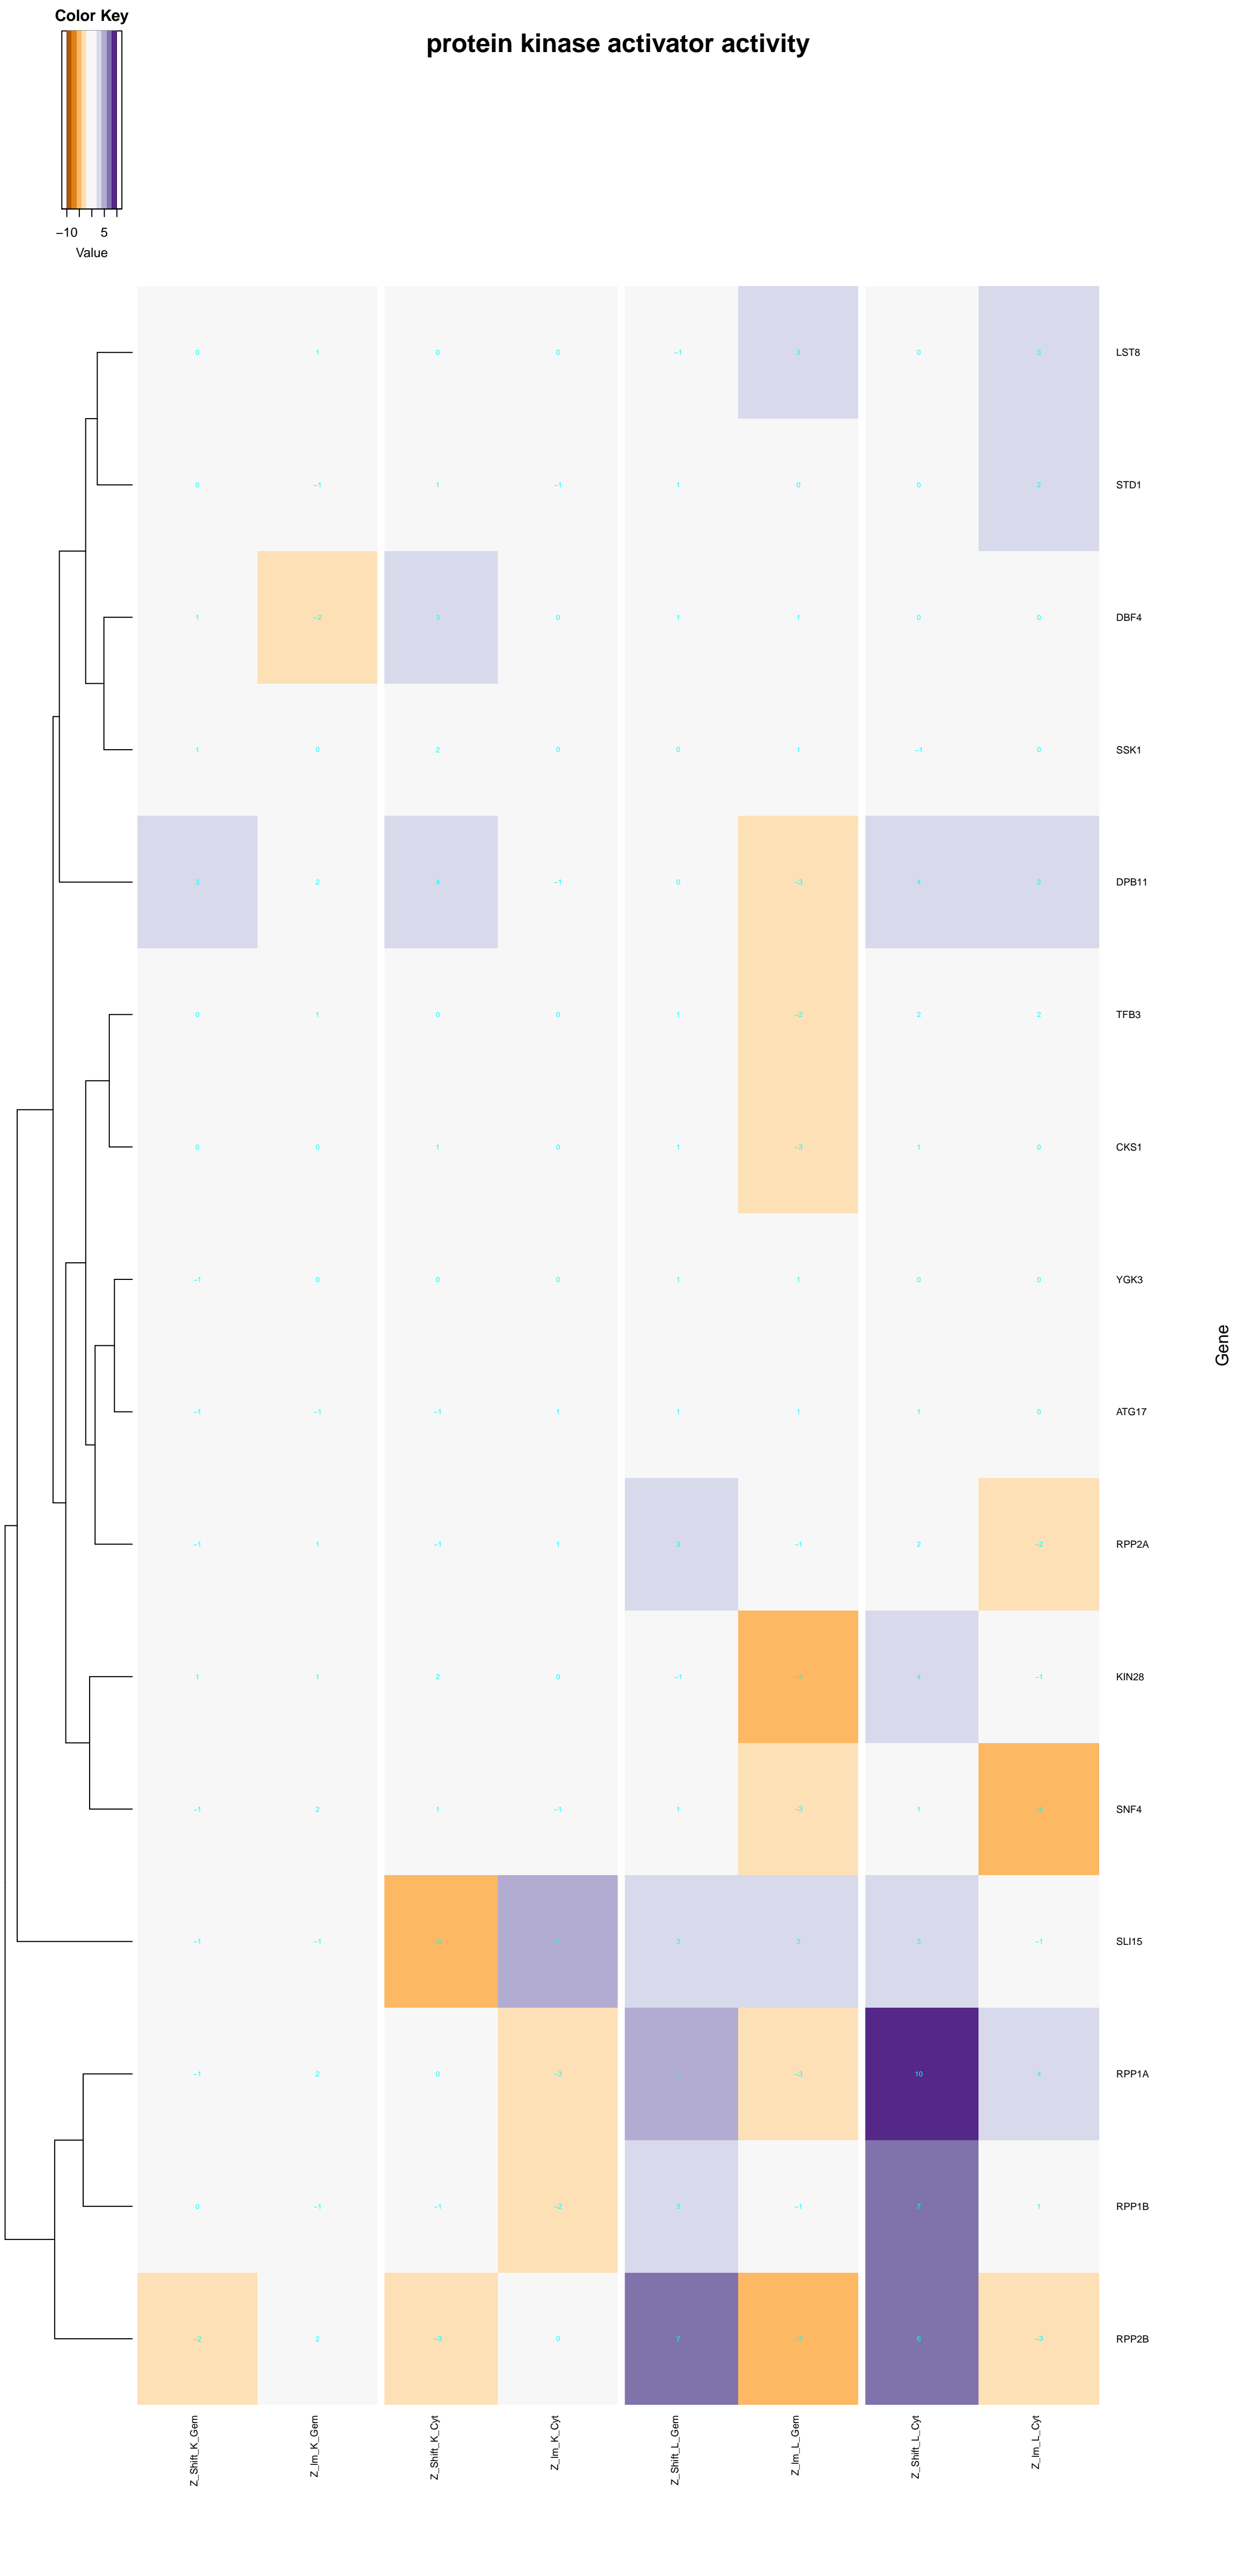

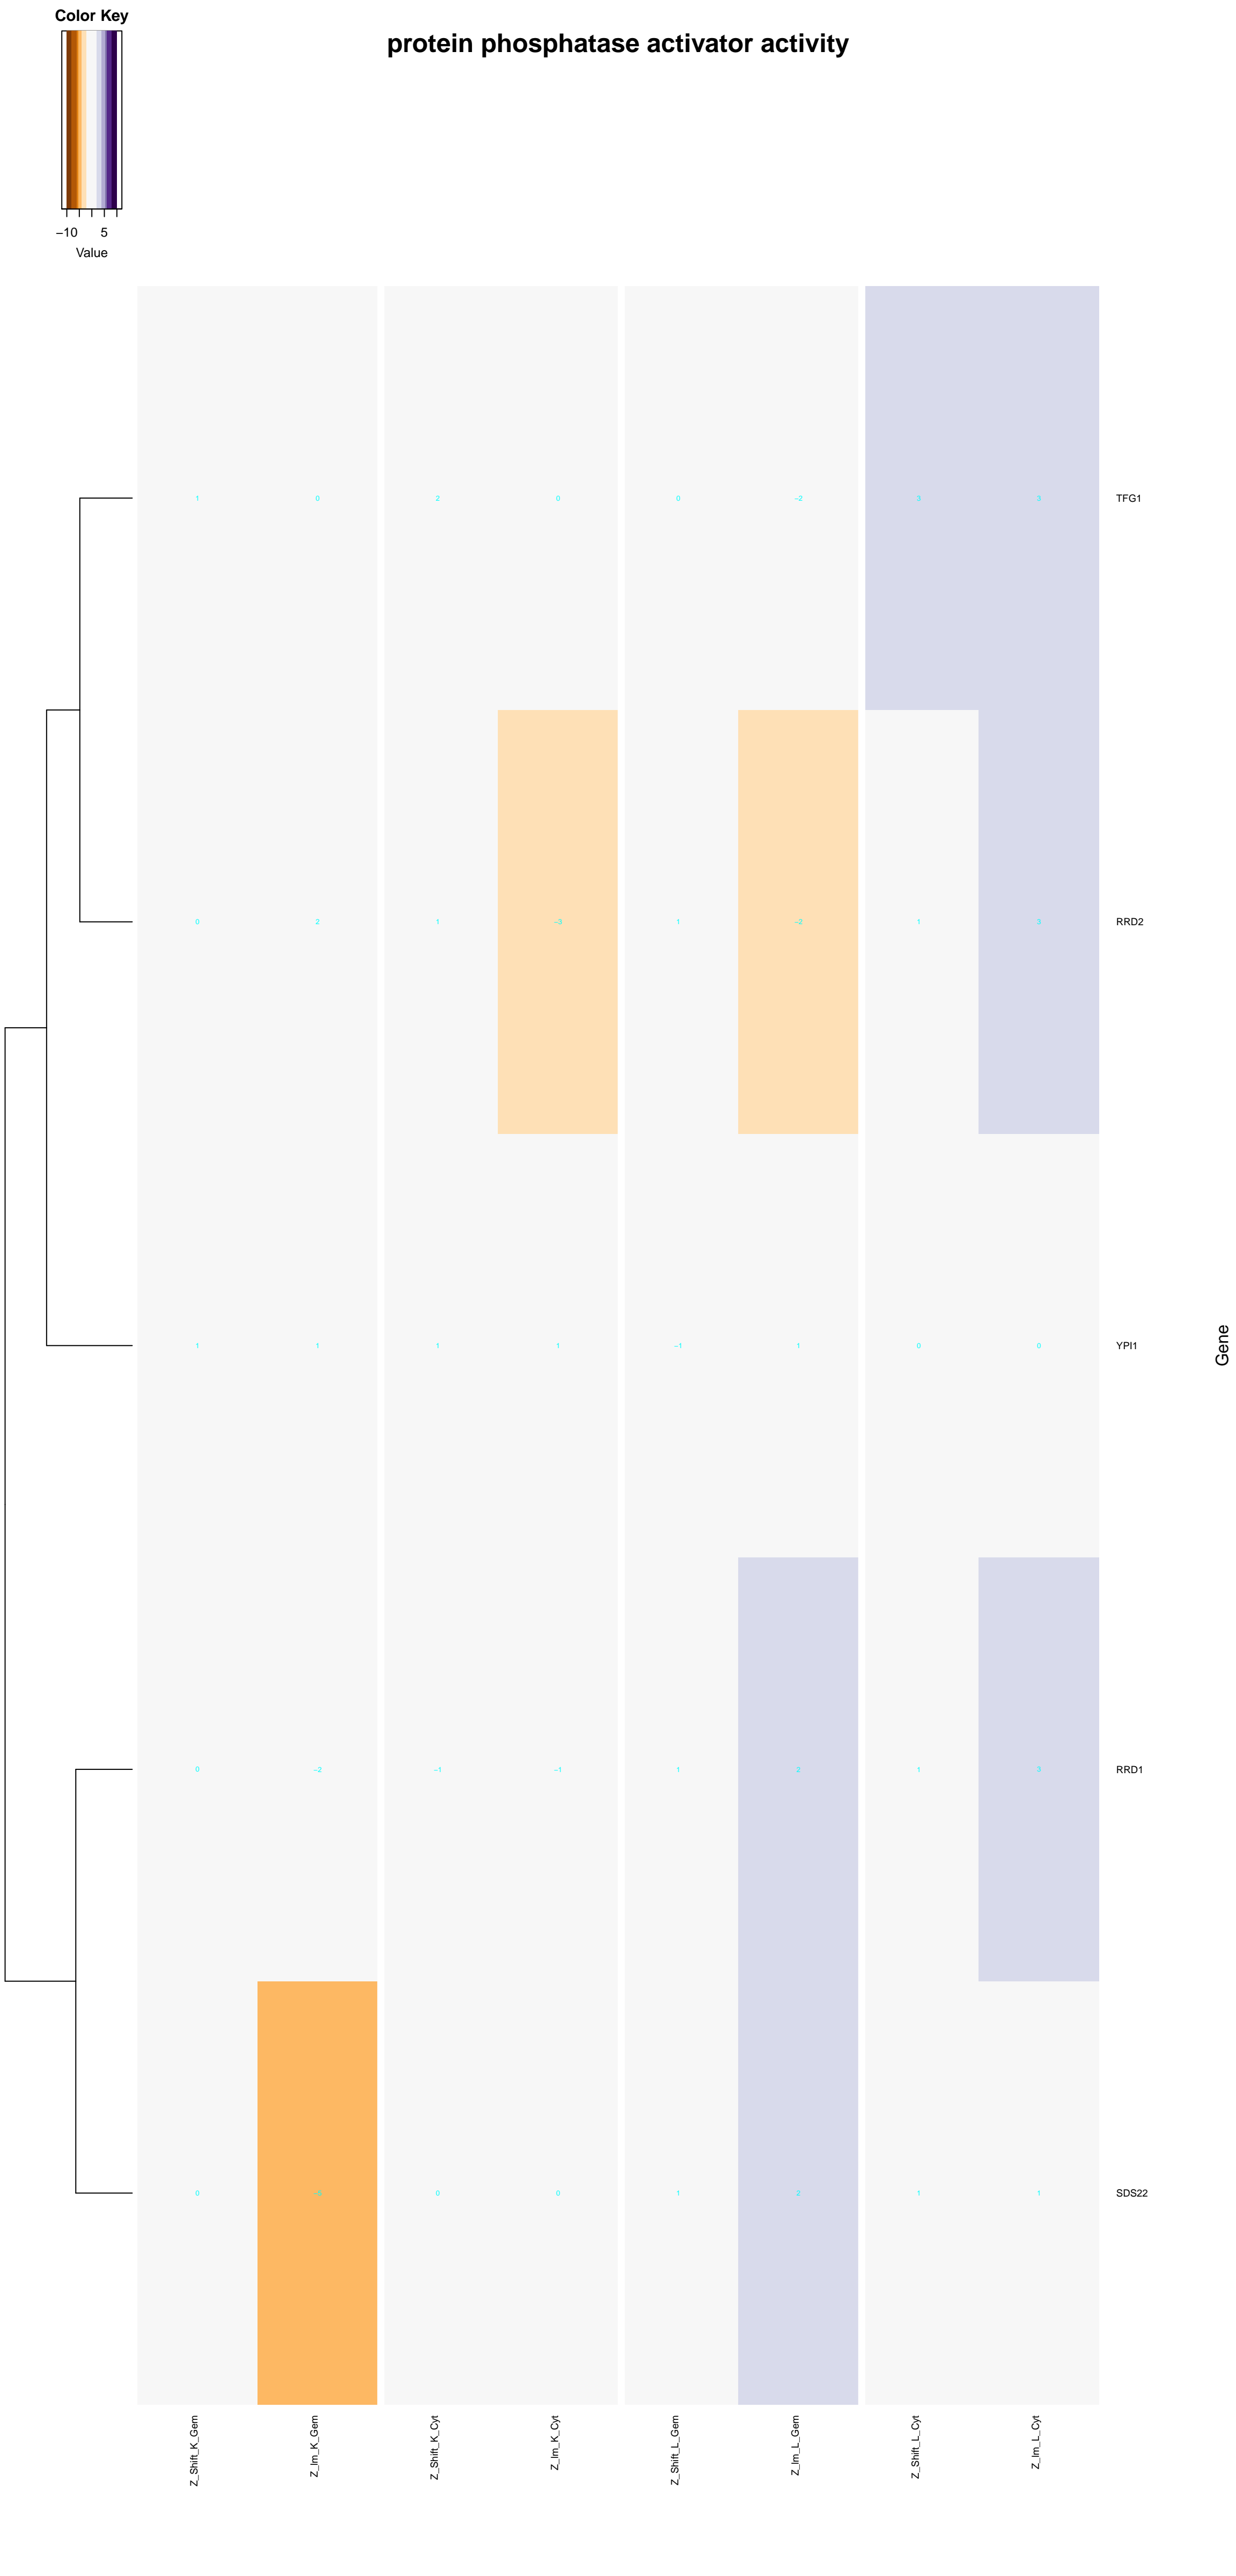

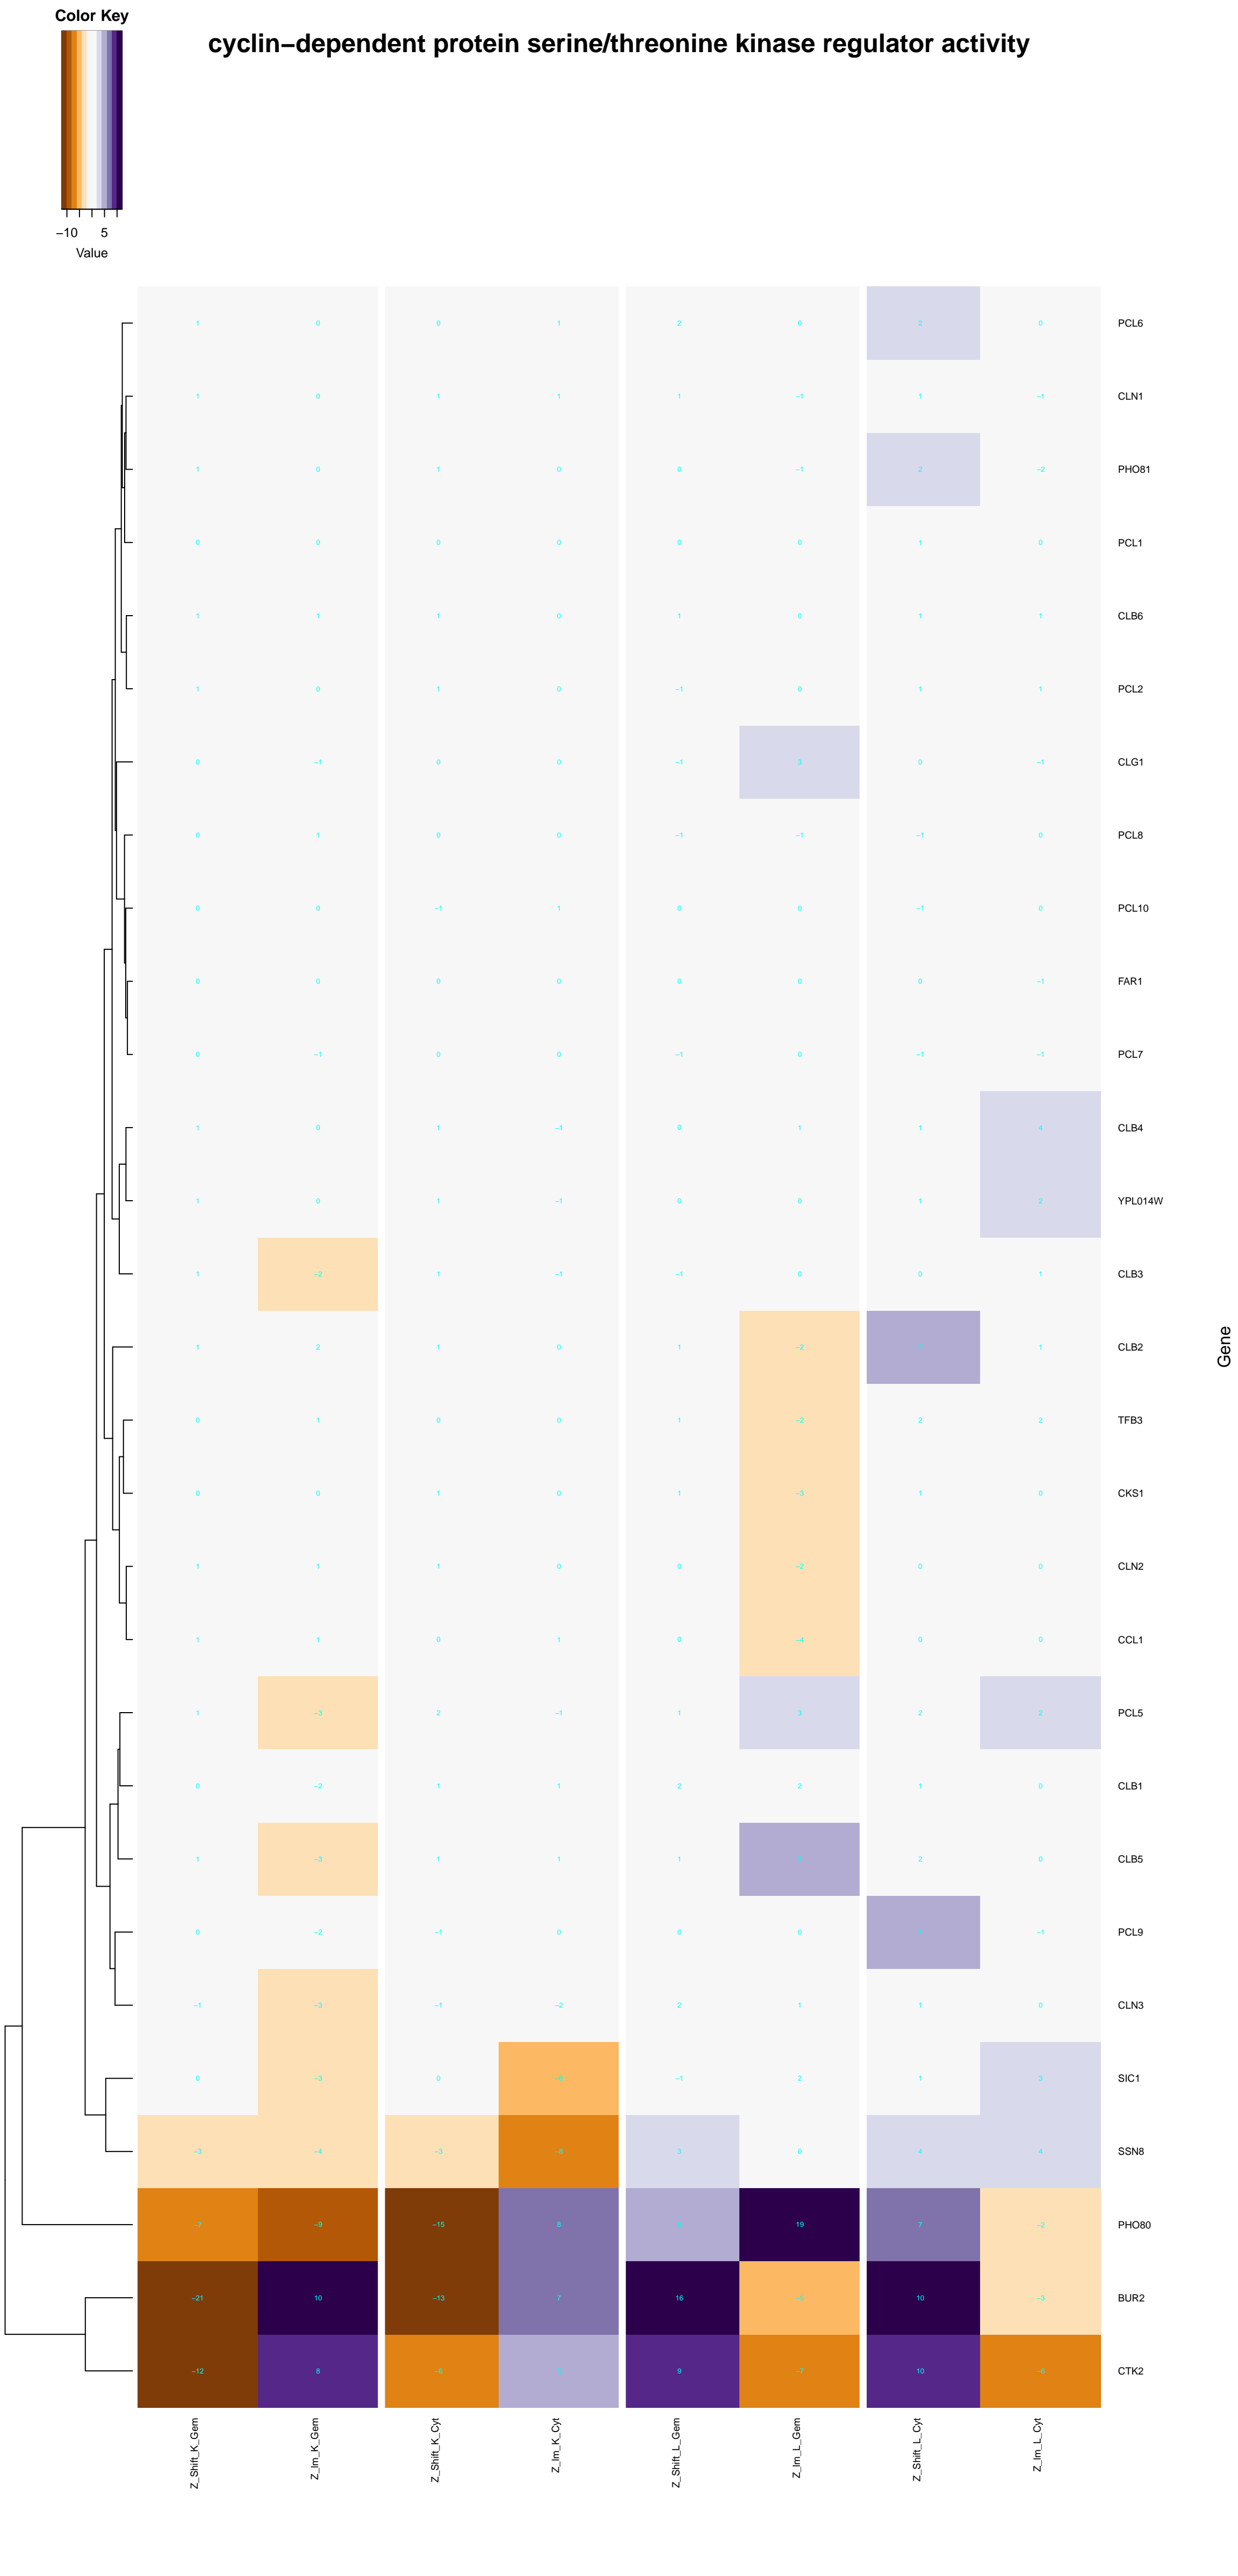



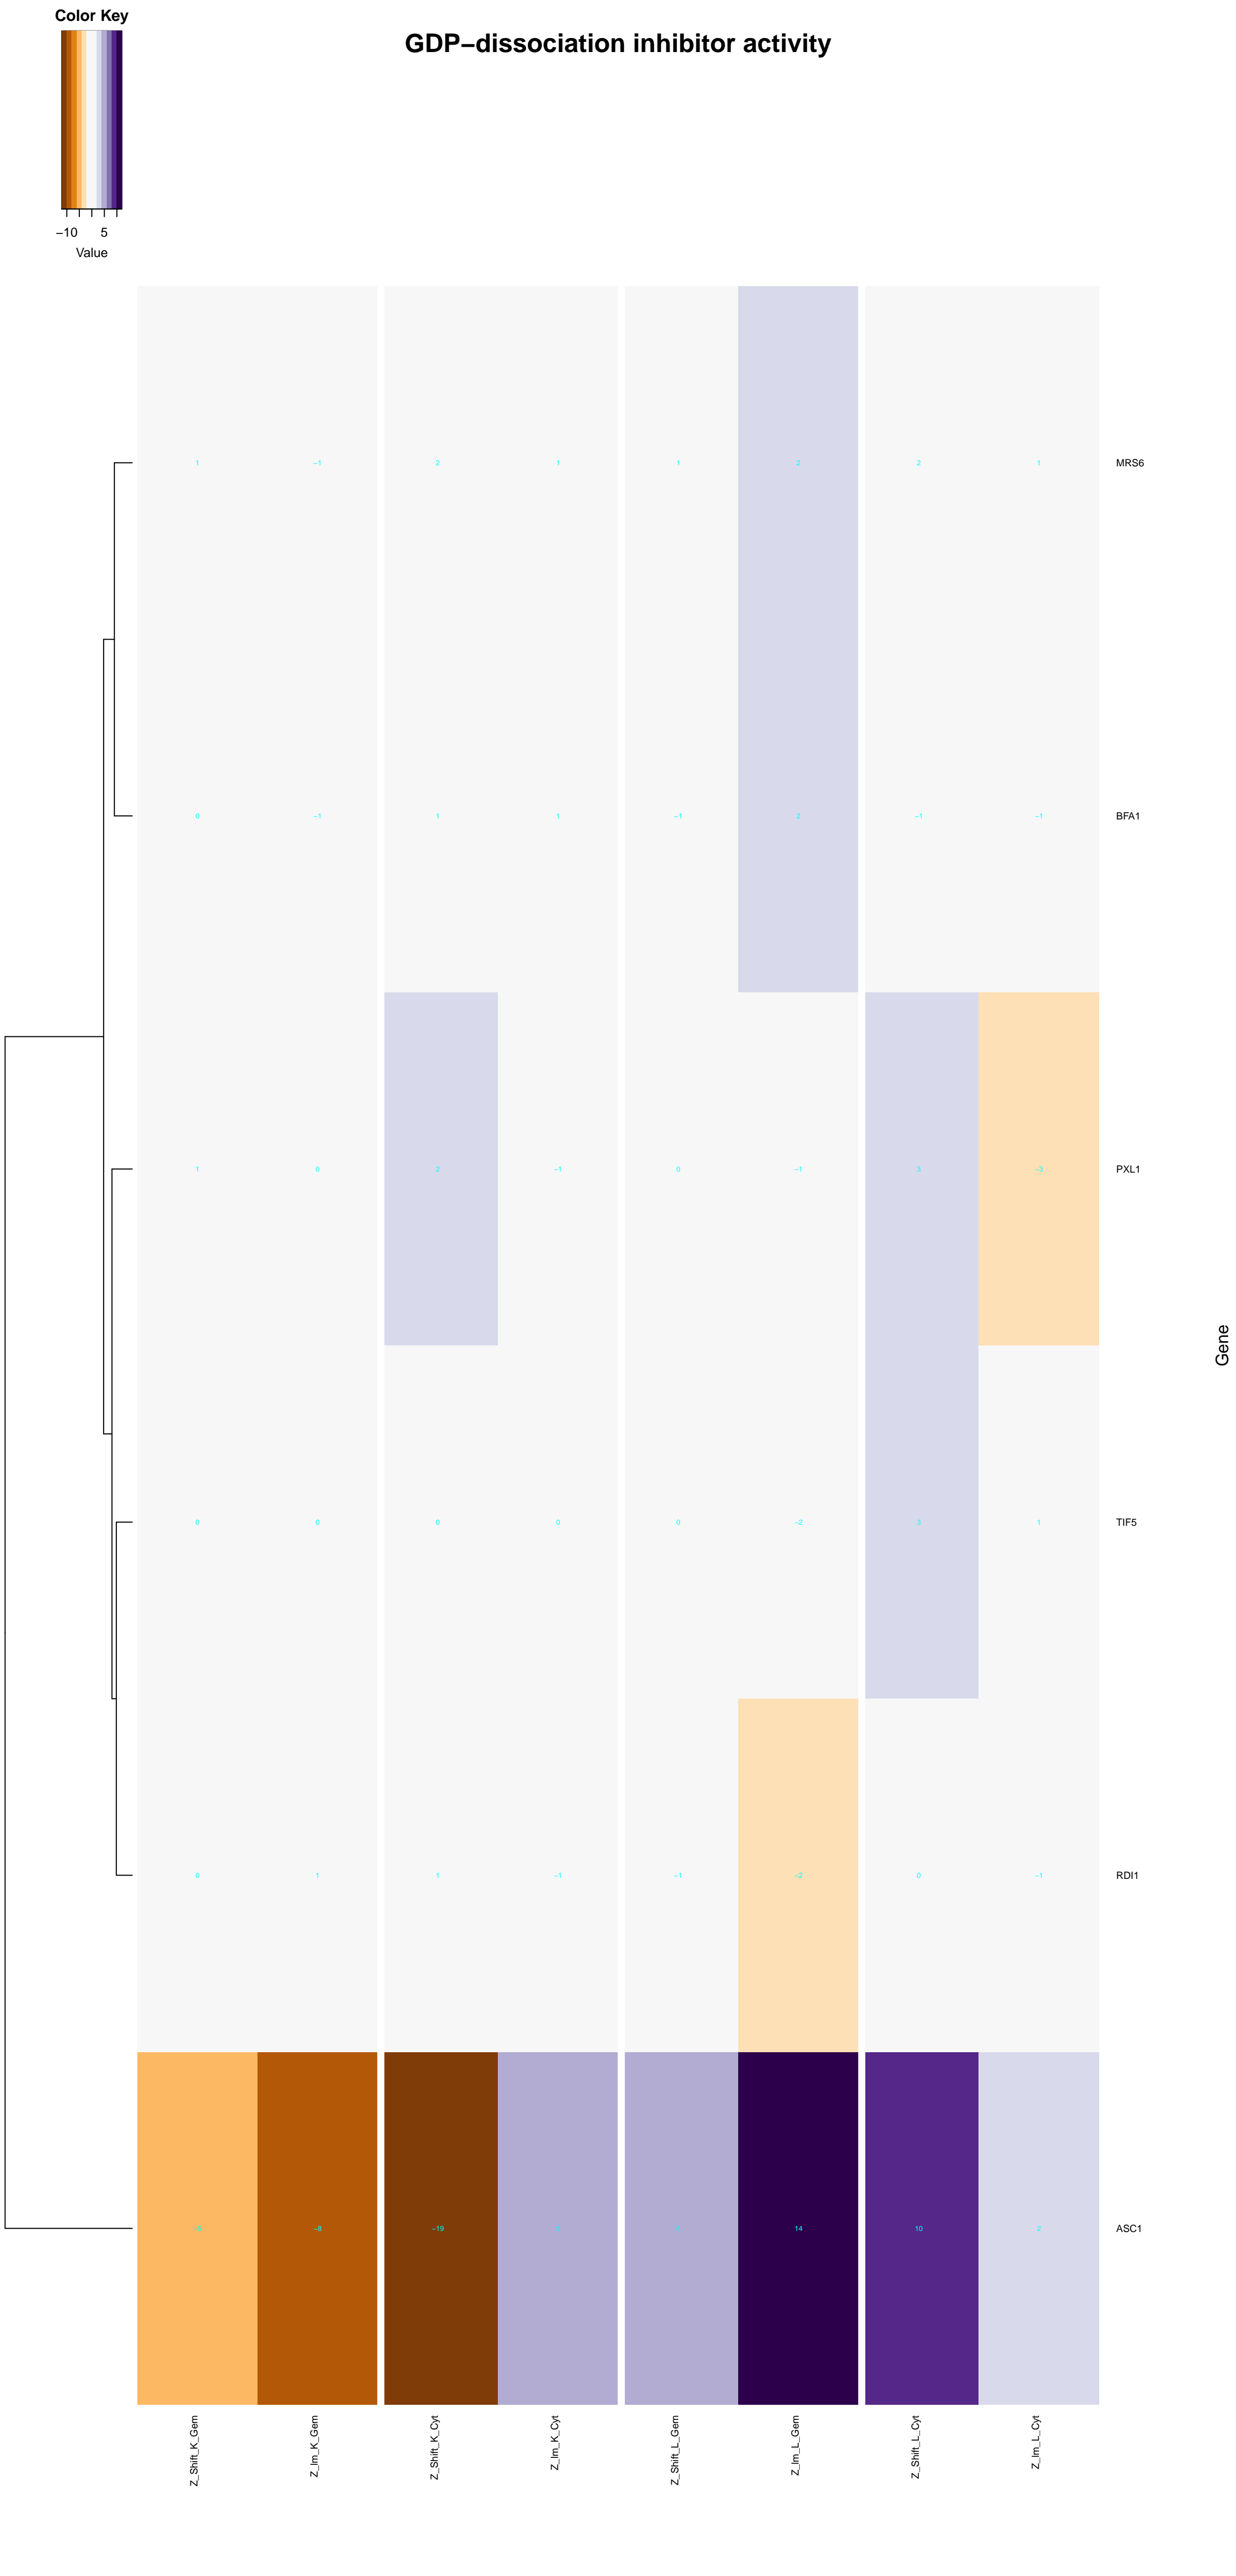

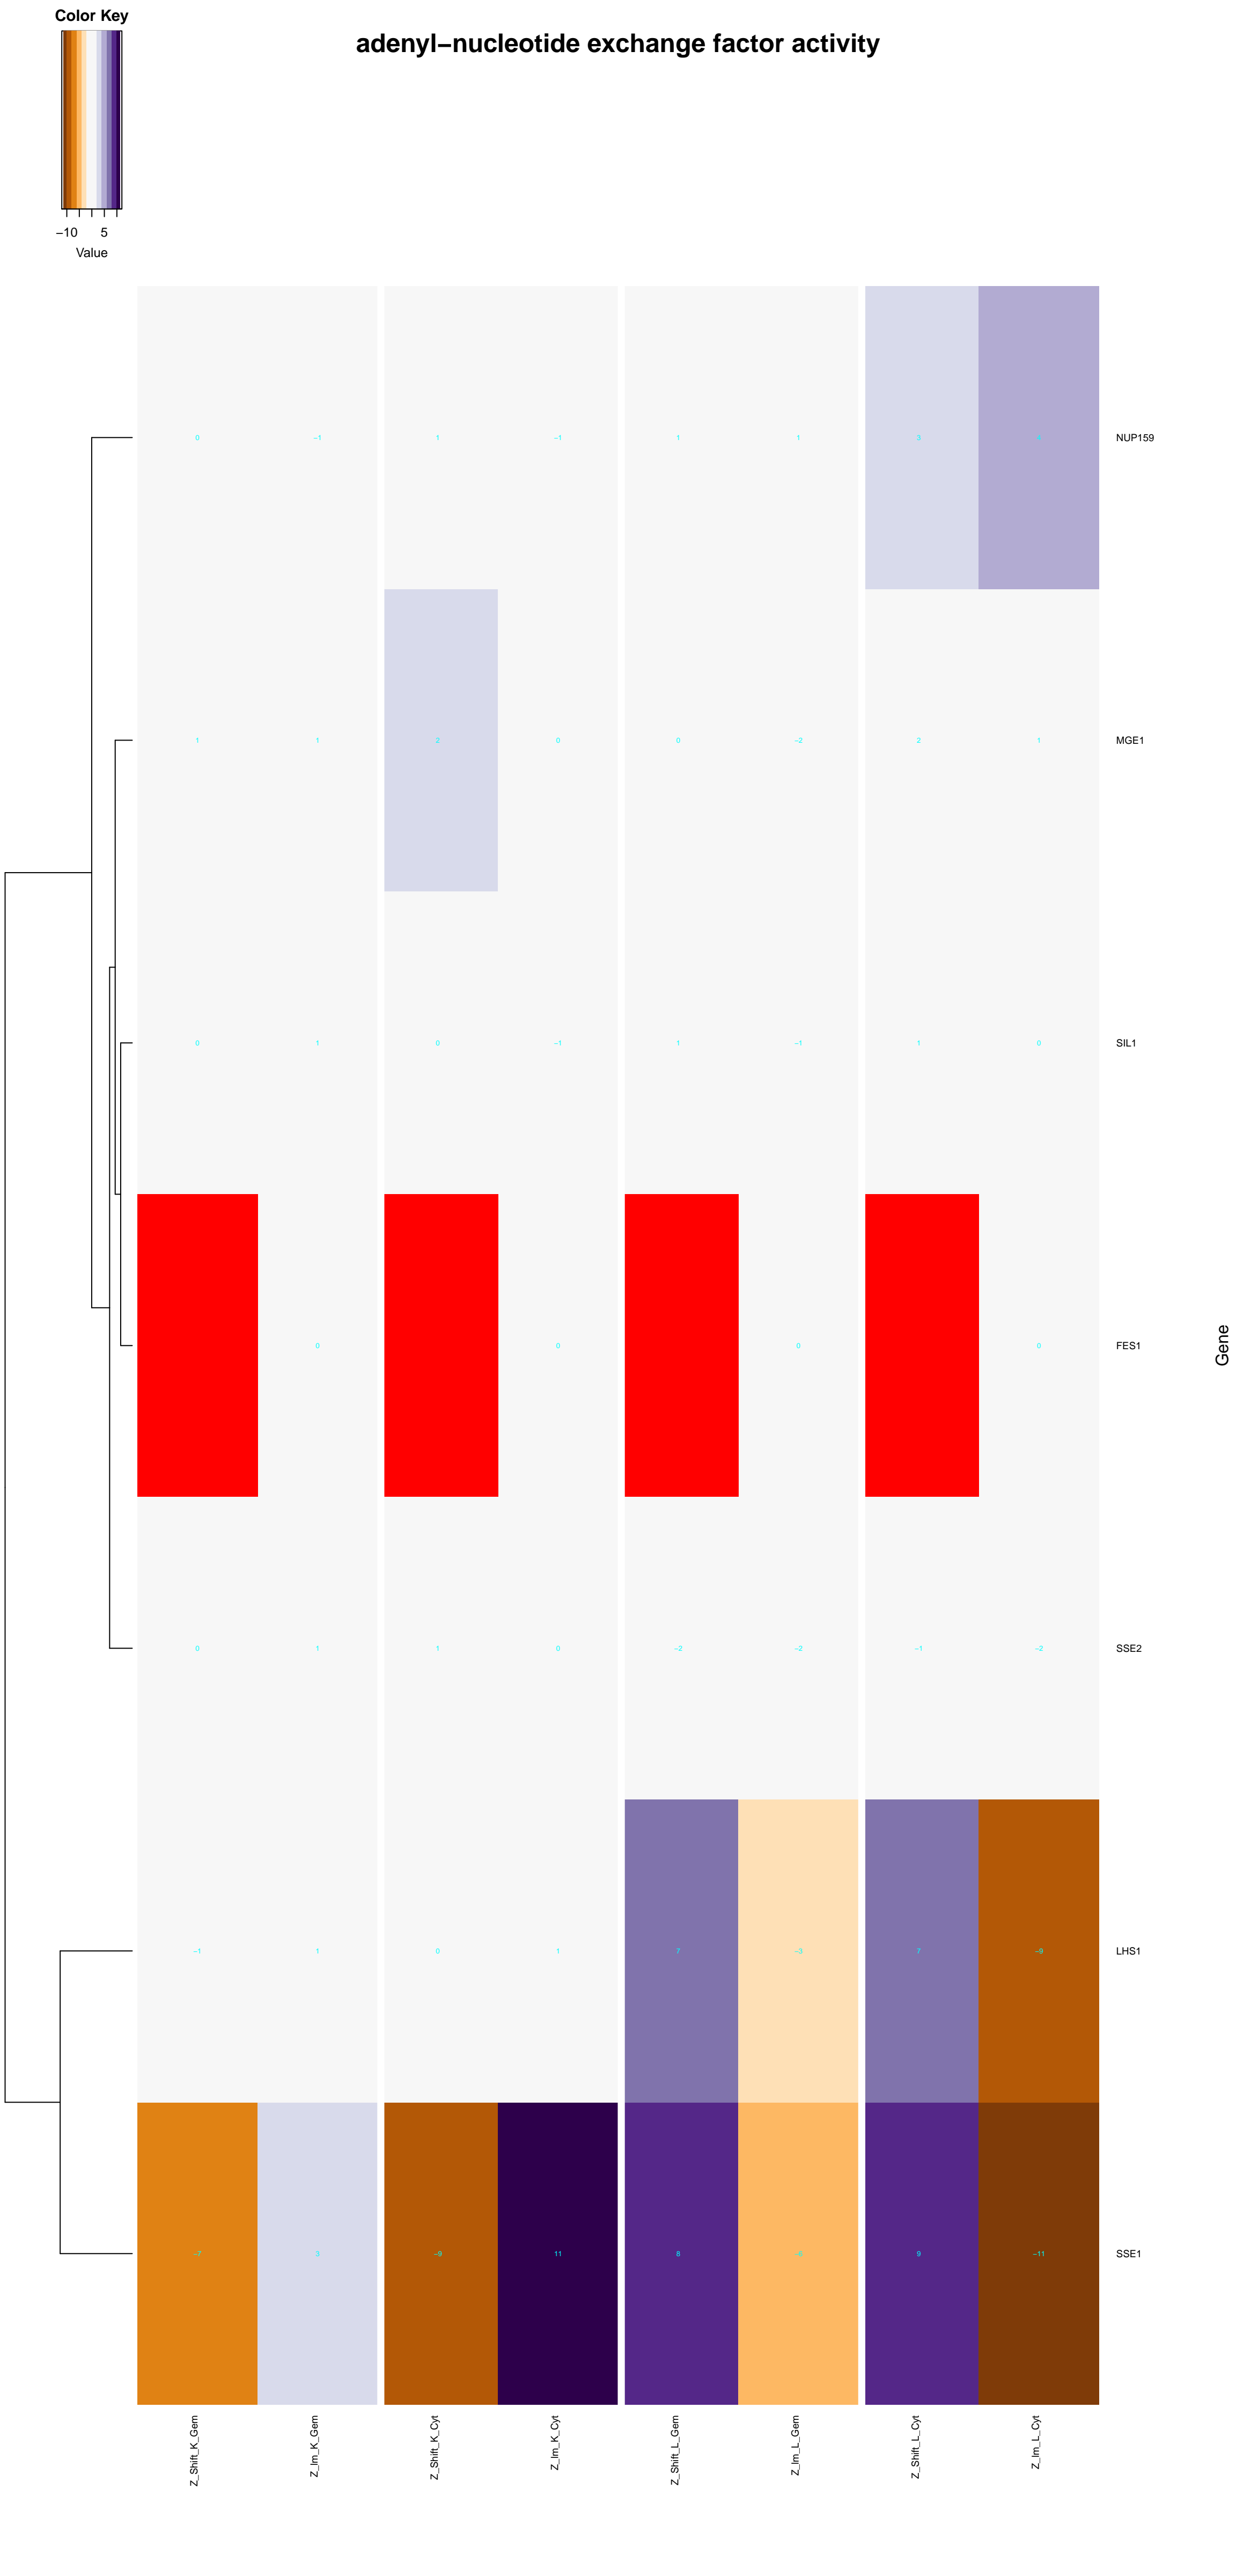

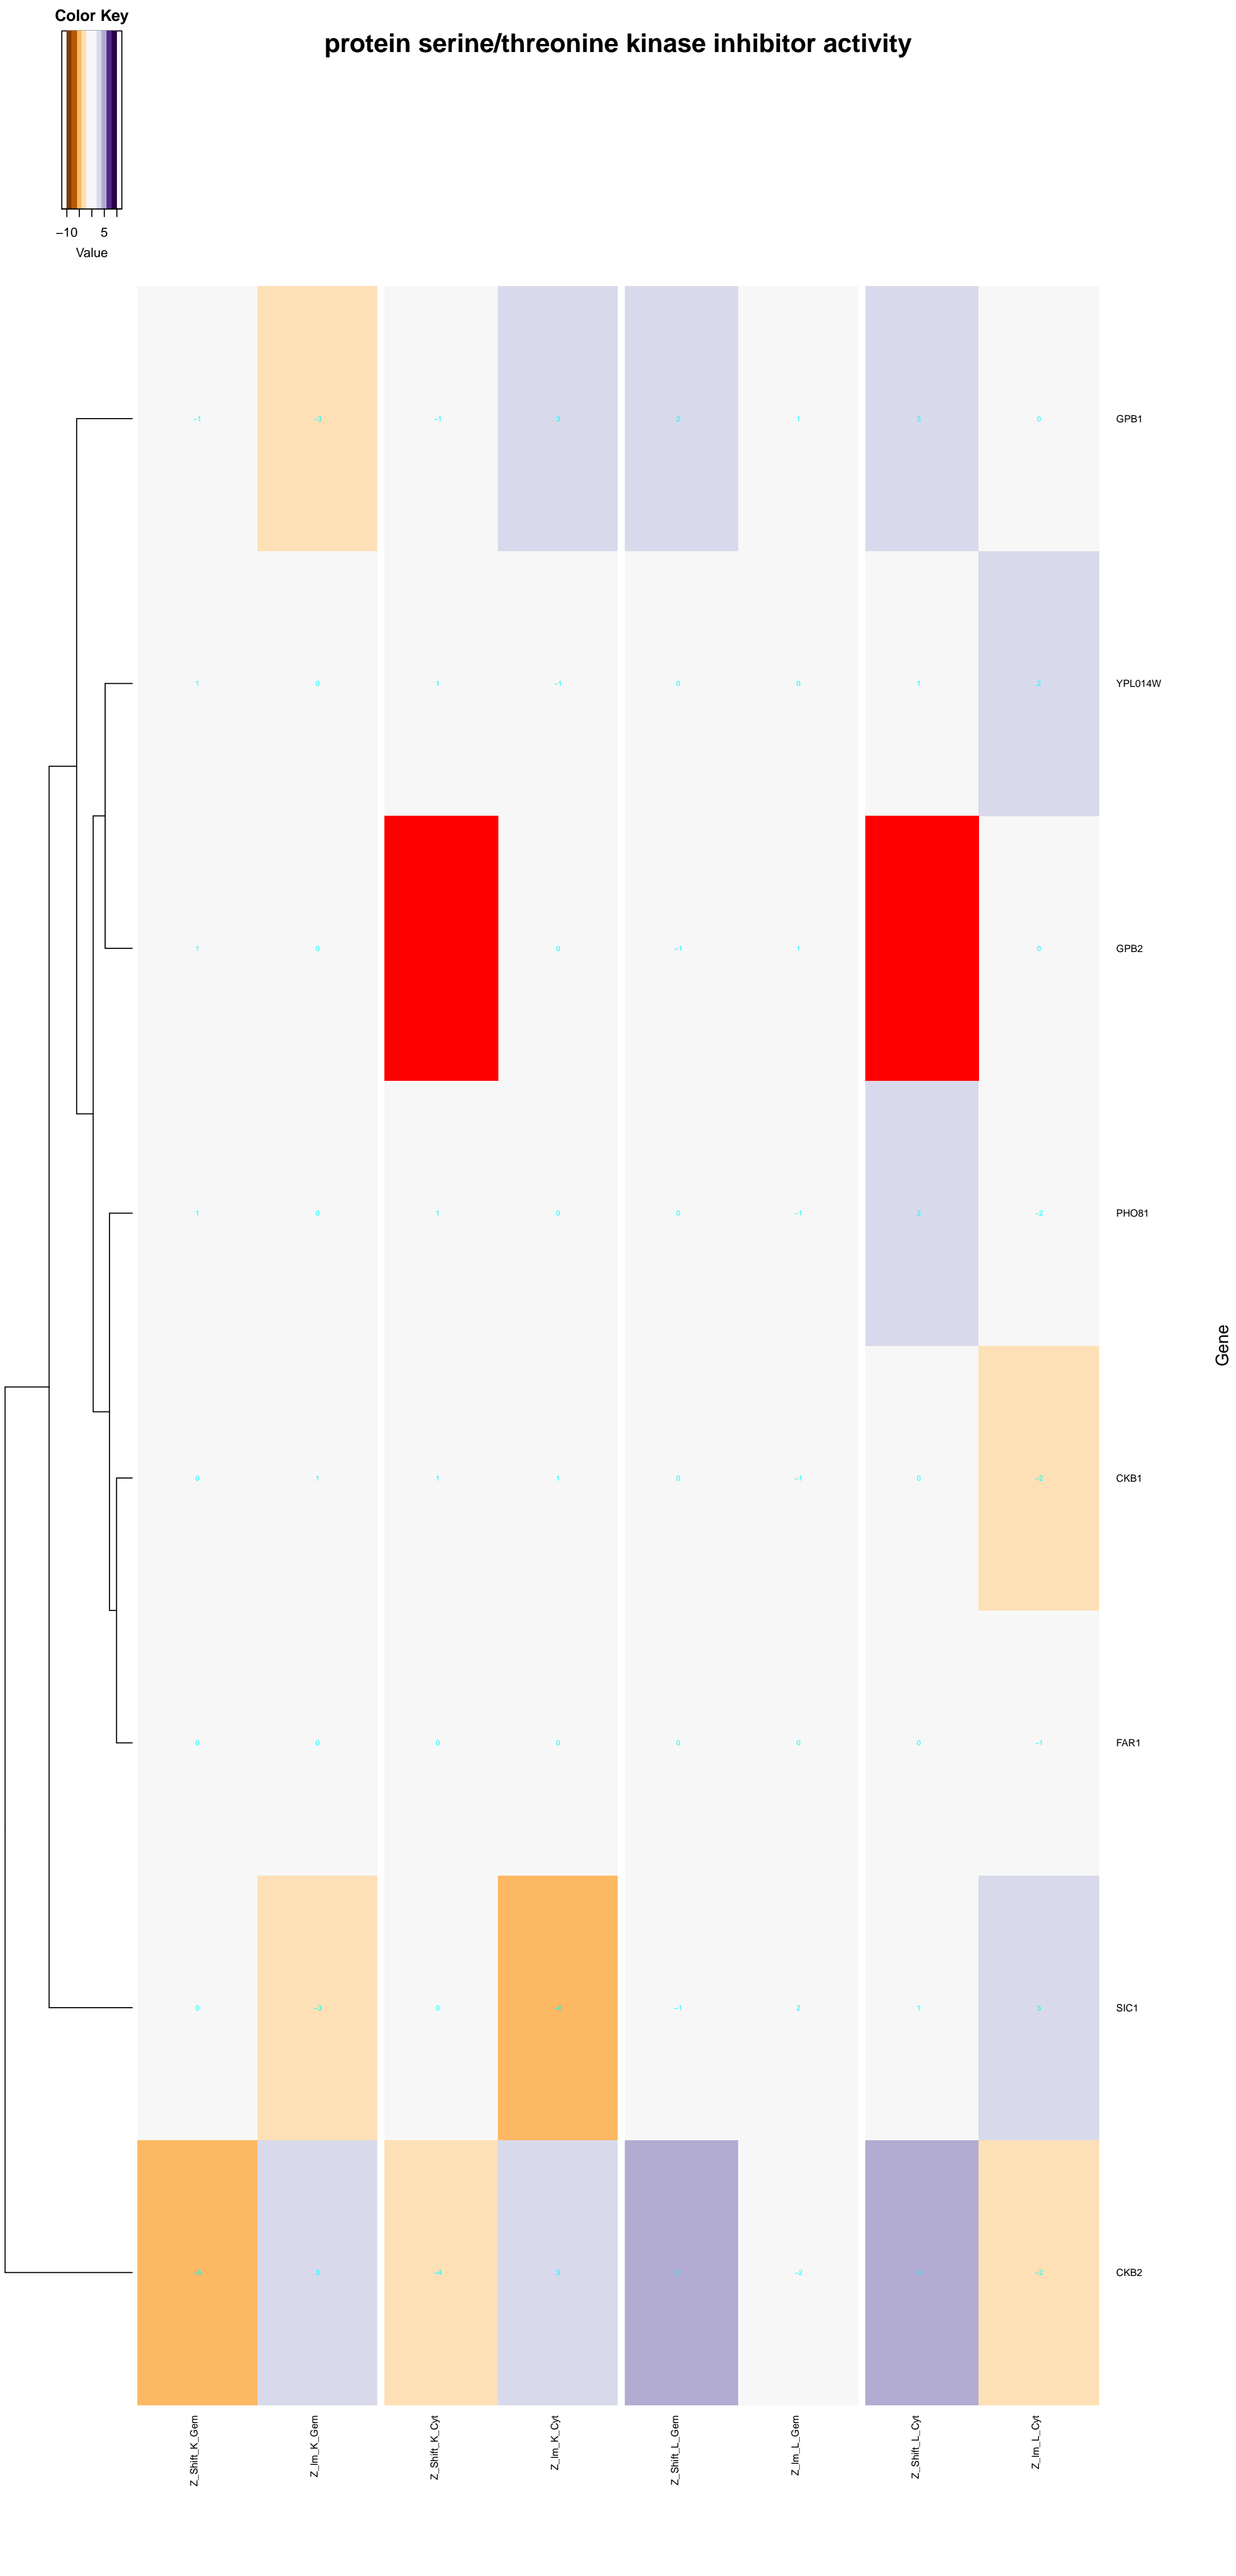

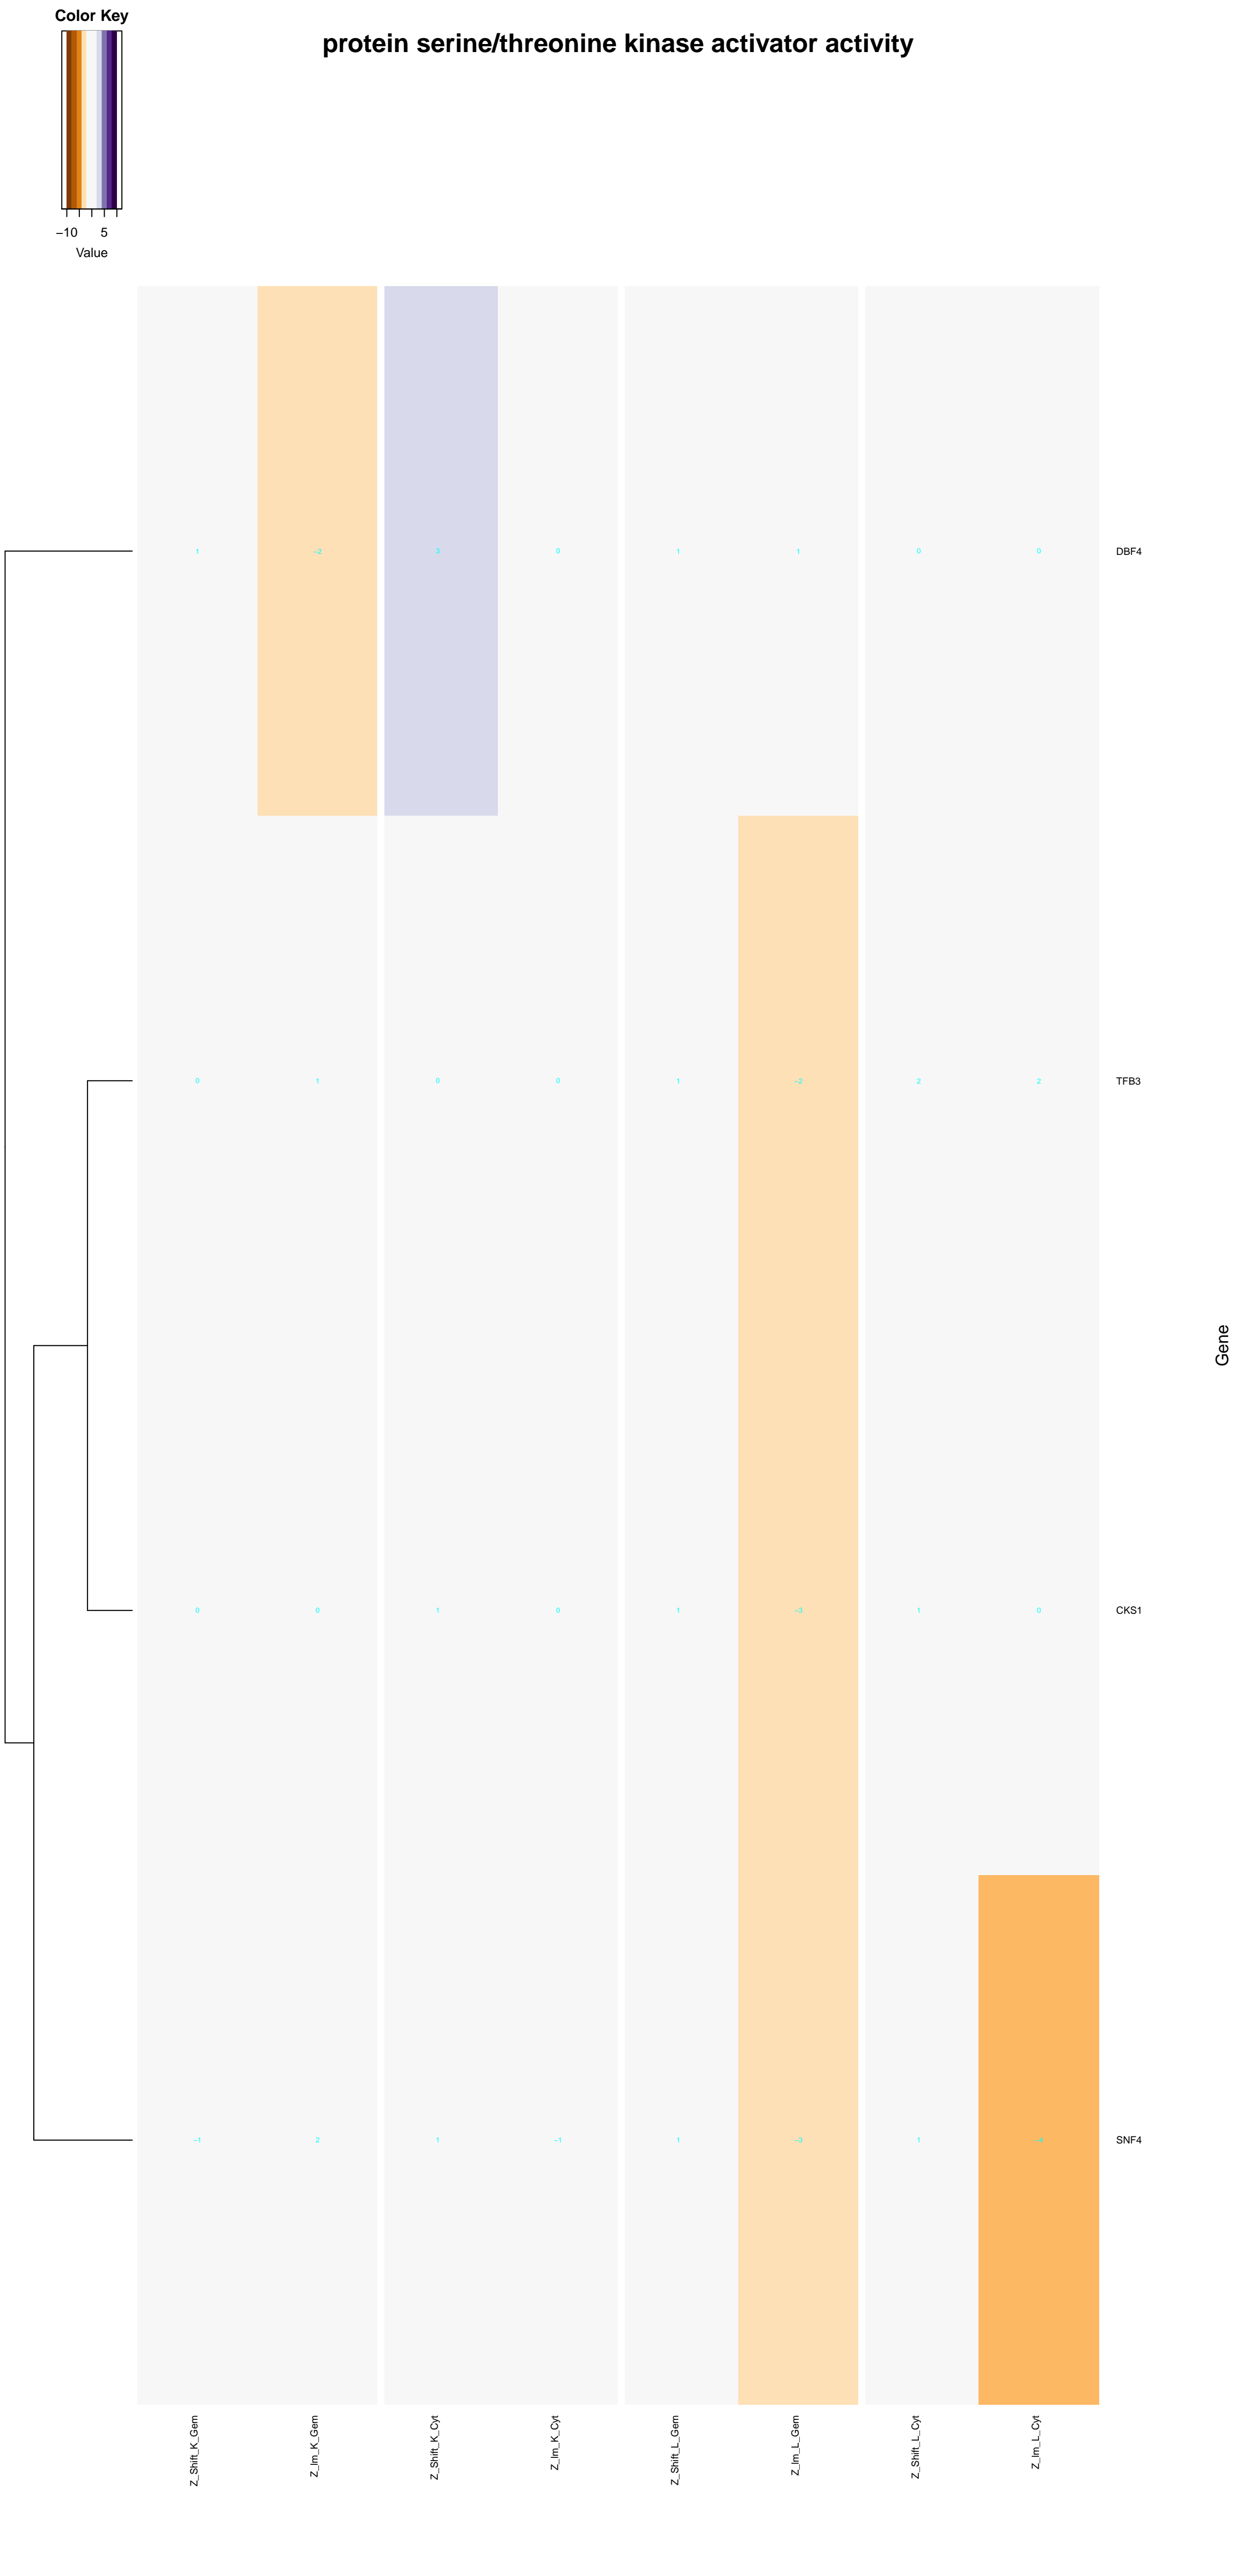

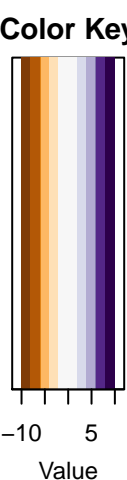

cyclin-dependent protein serine/threonine kinase inhibitor activity

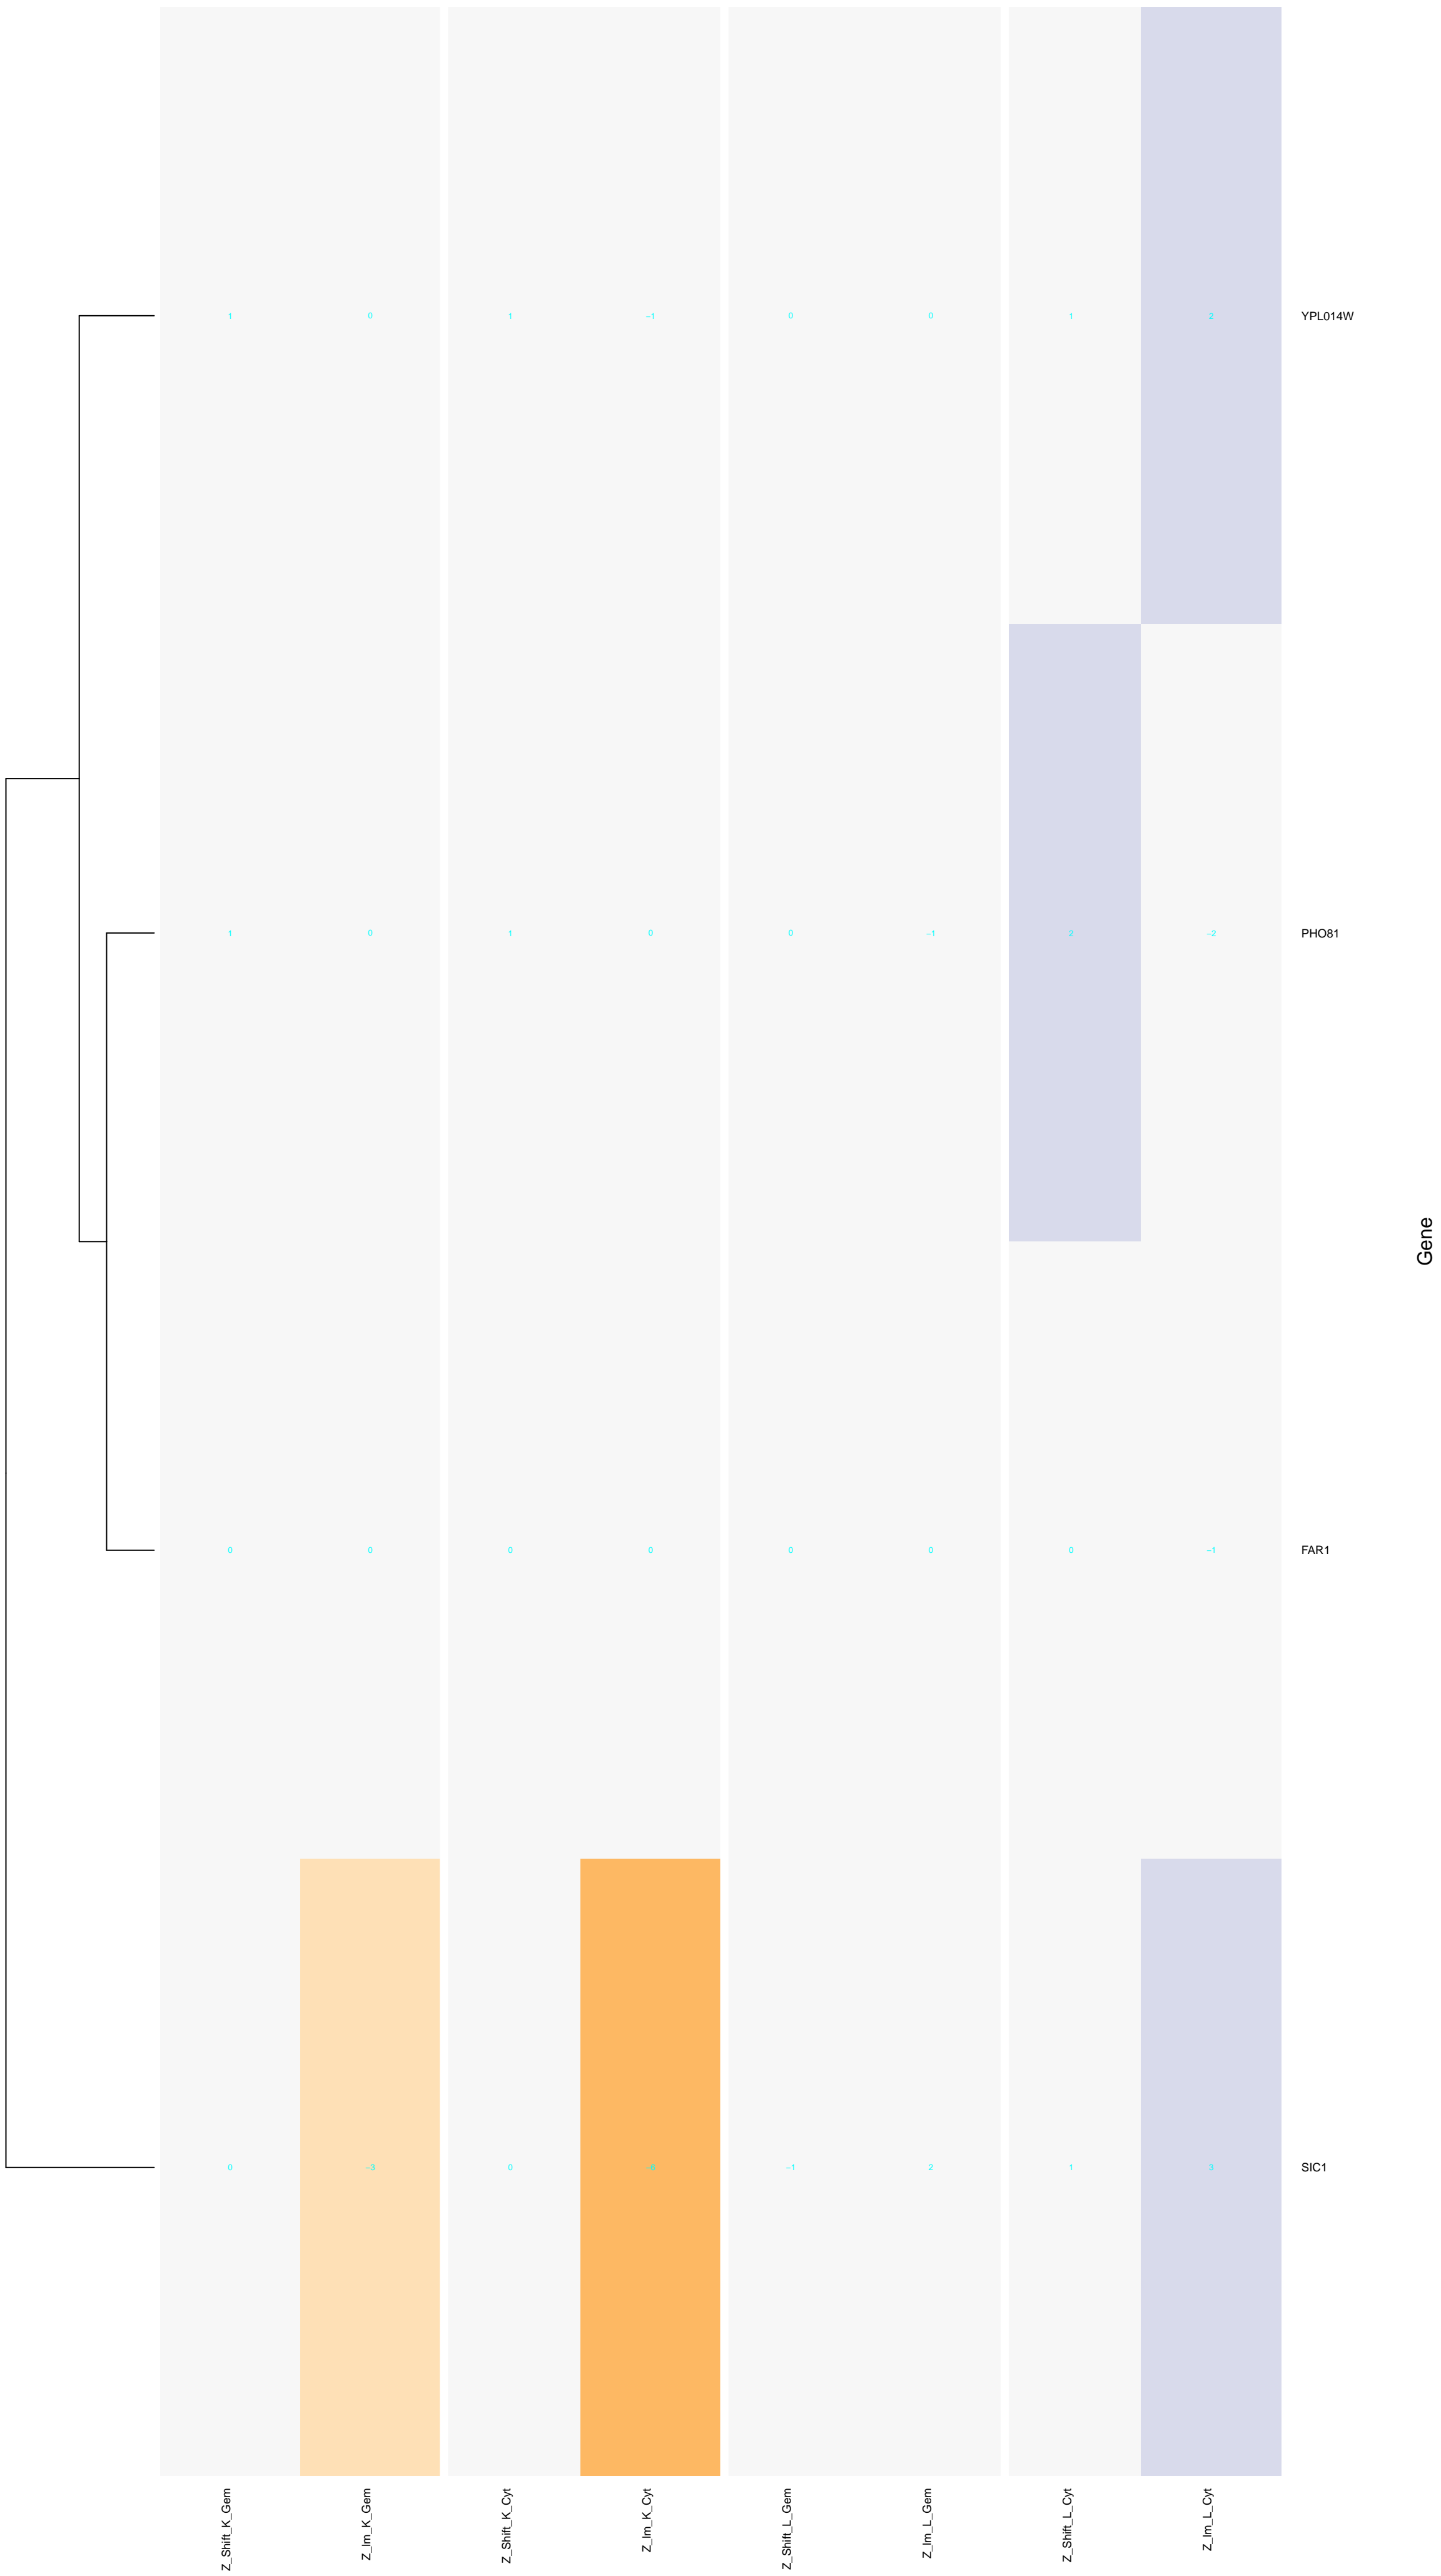

Supplement: s1 [file s1]

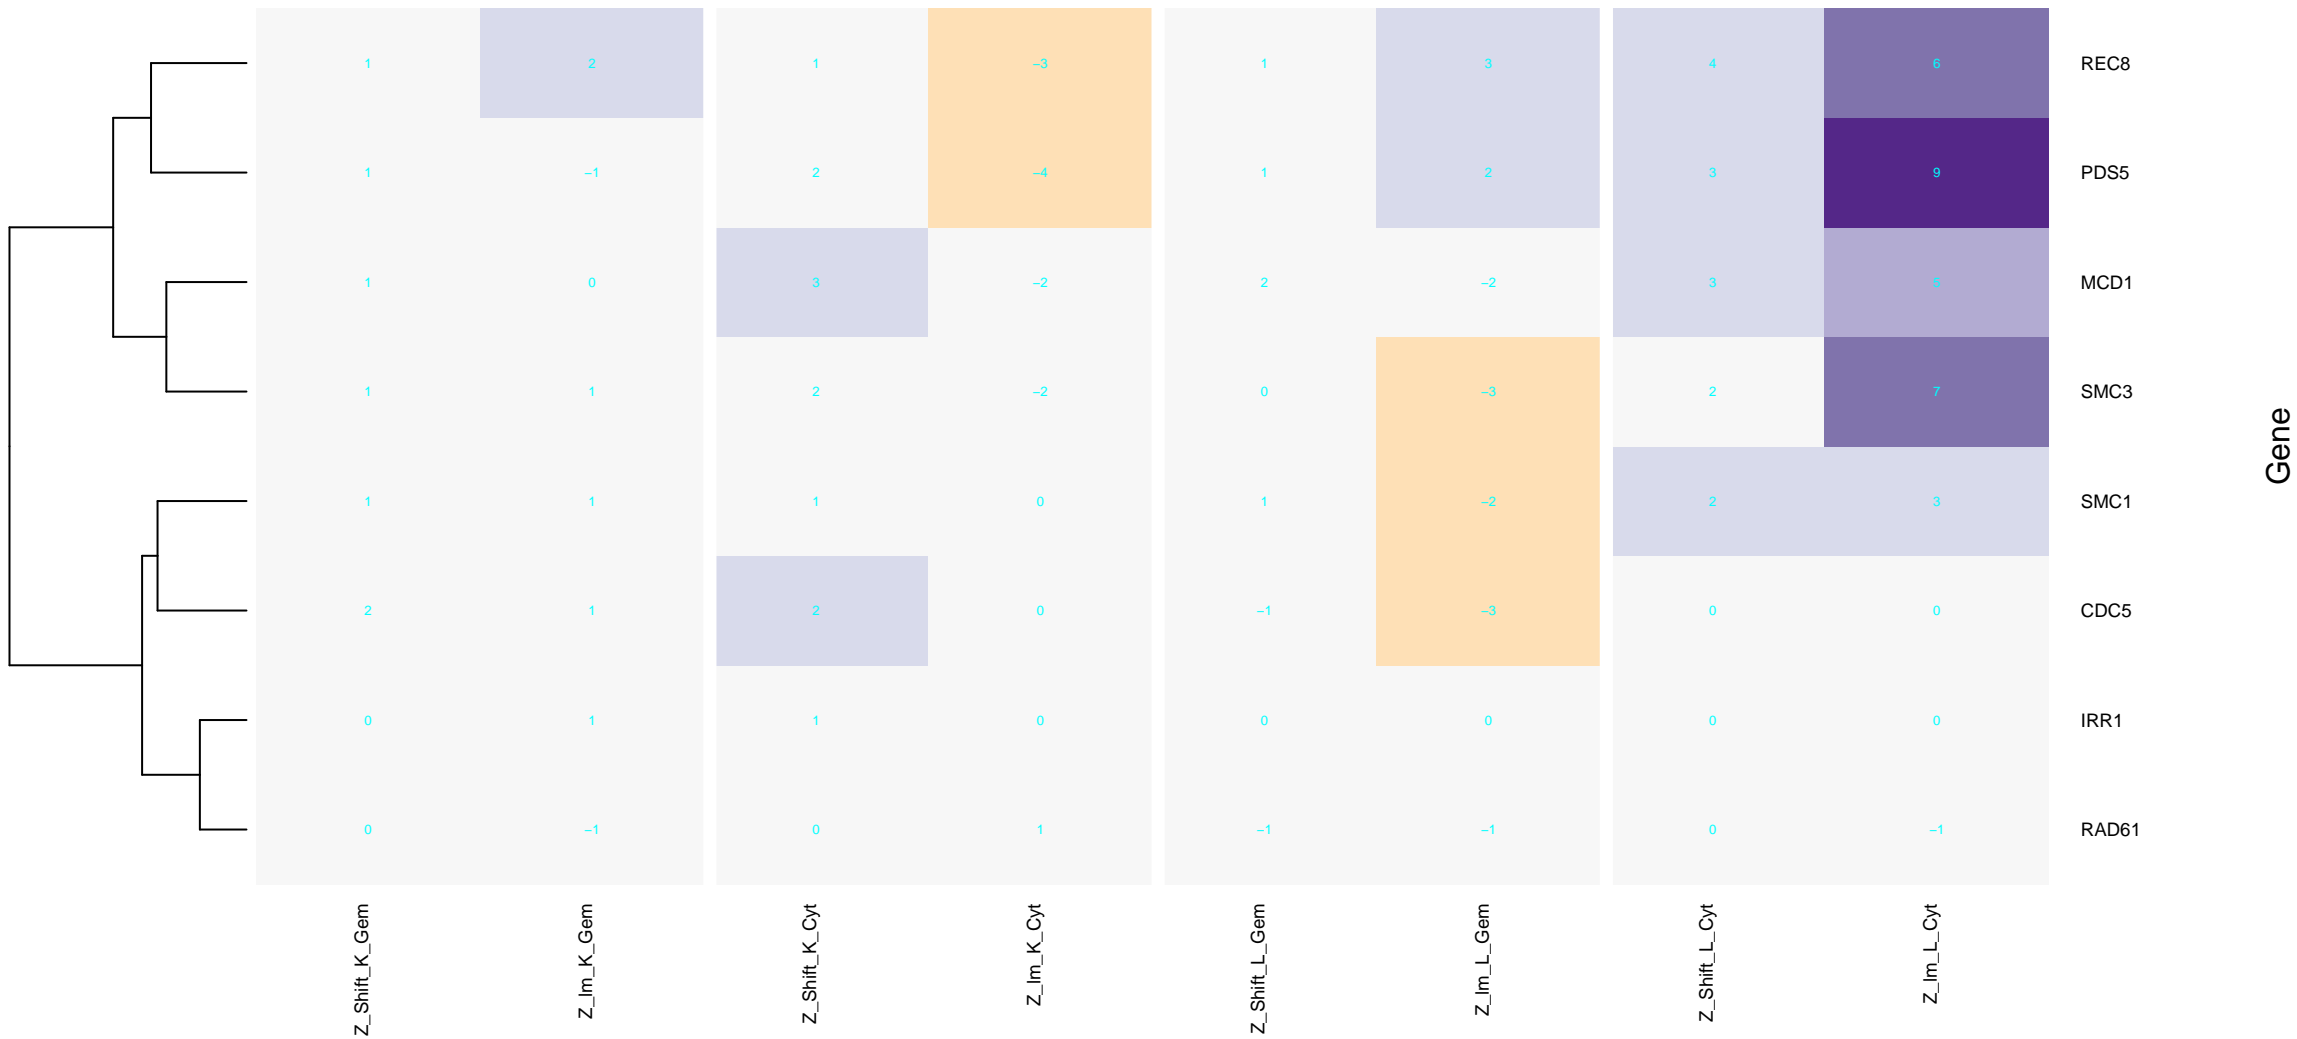

Supplement: s1 [file s1]

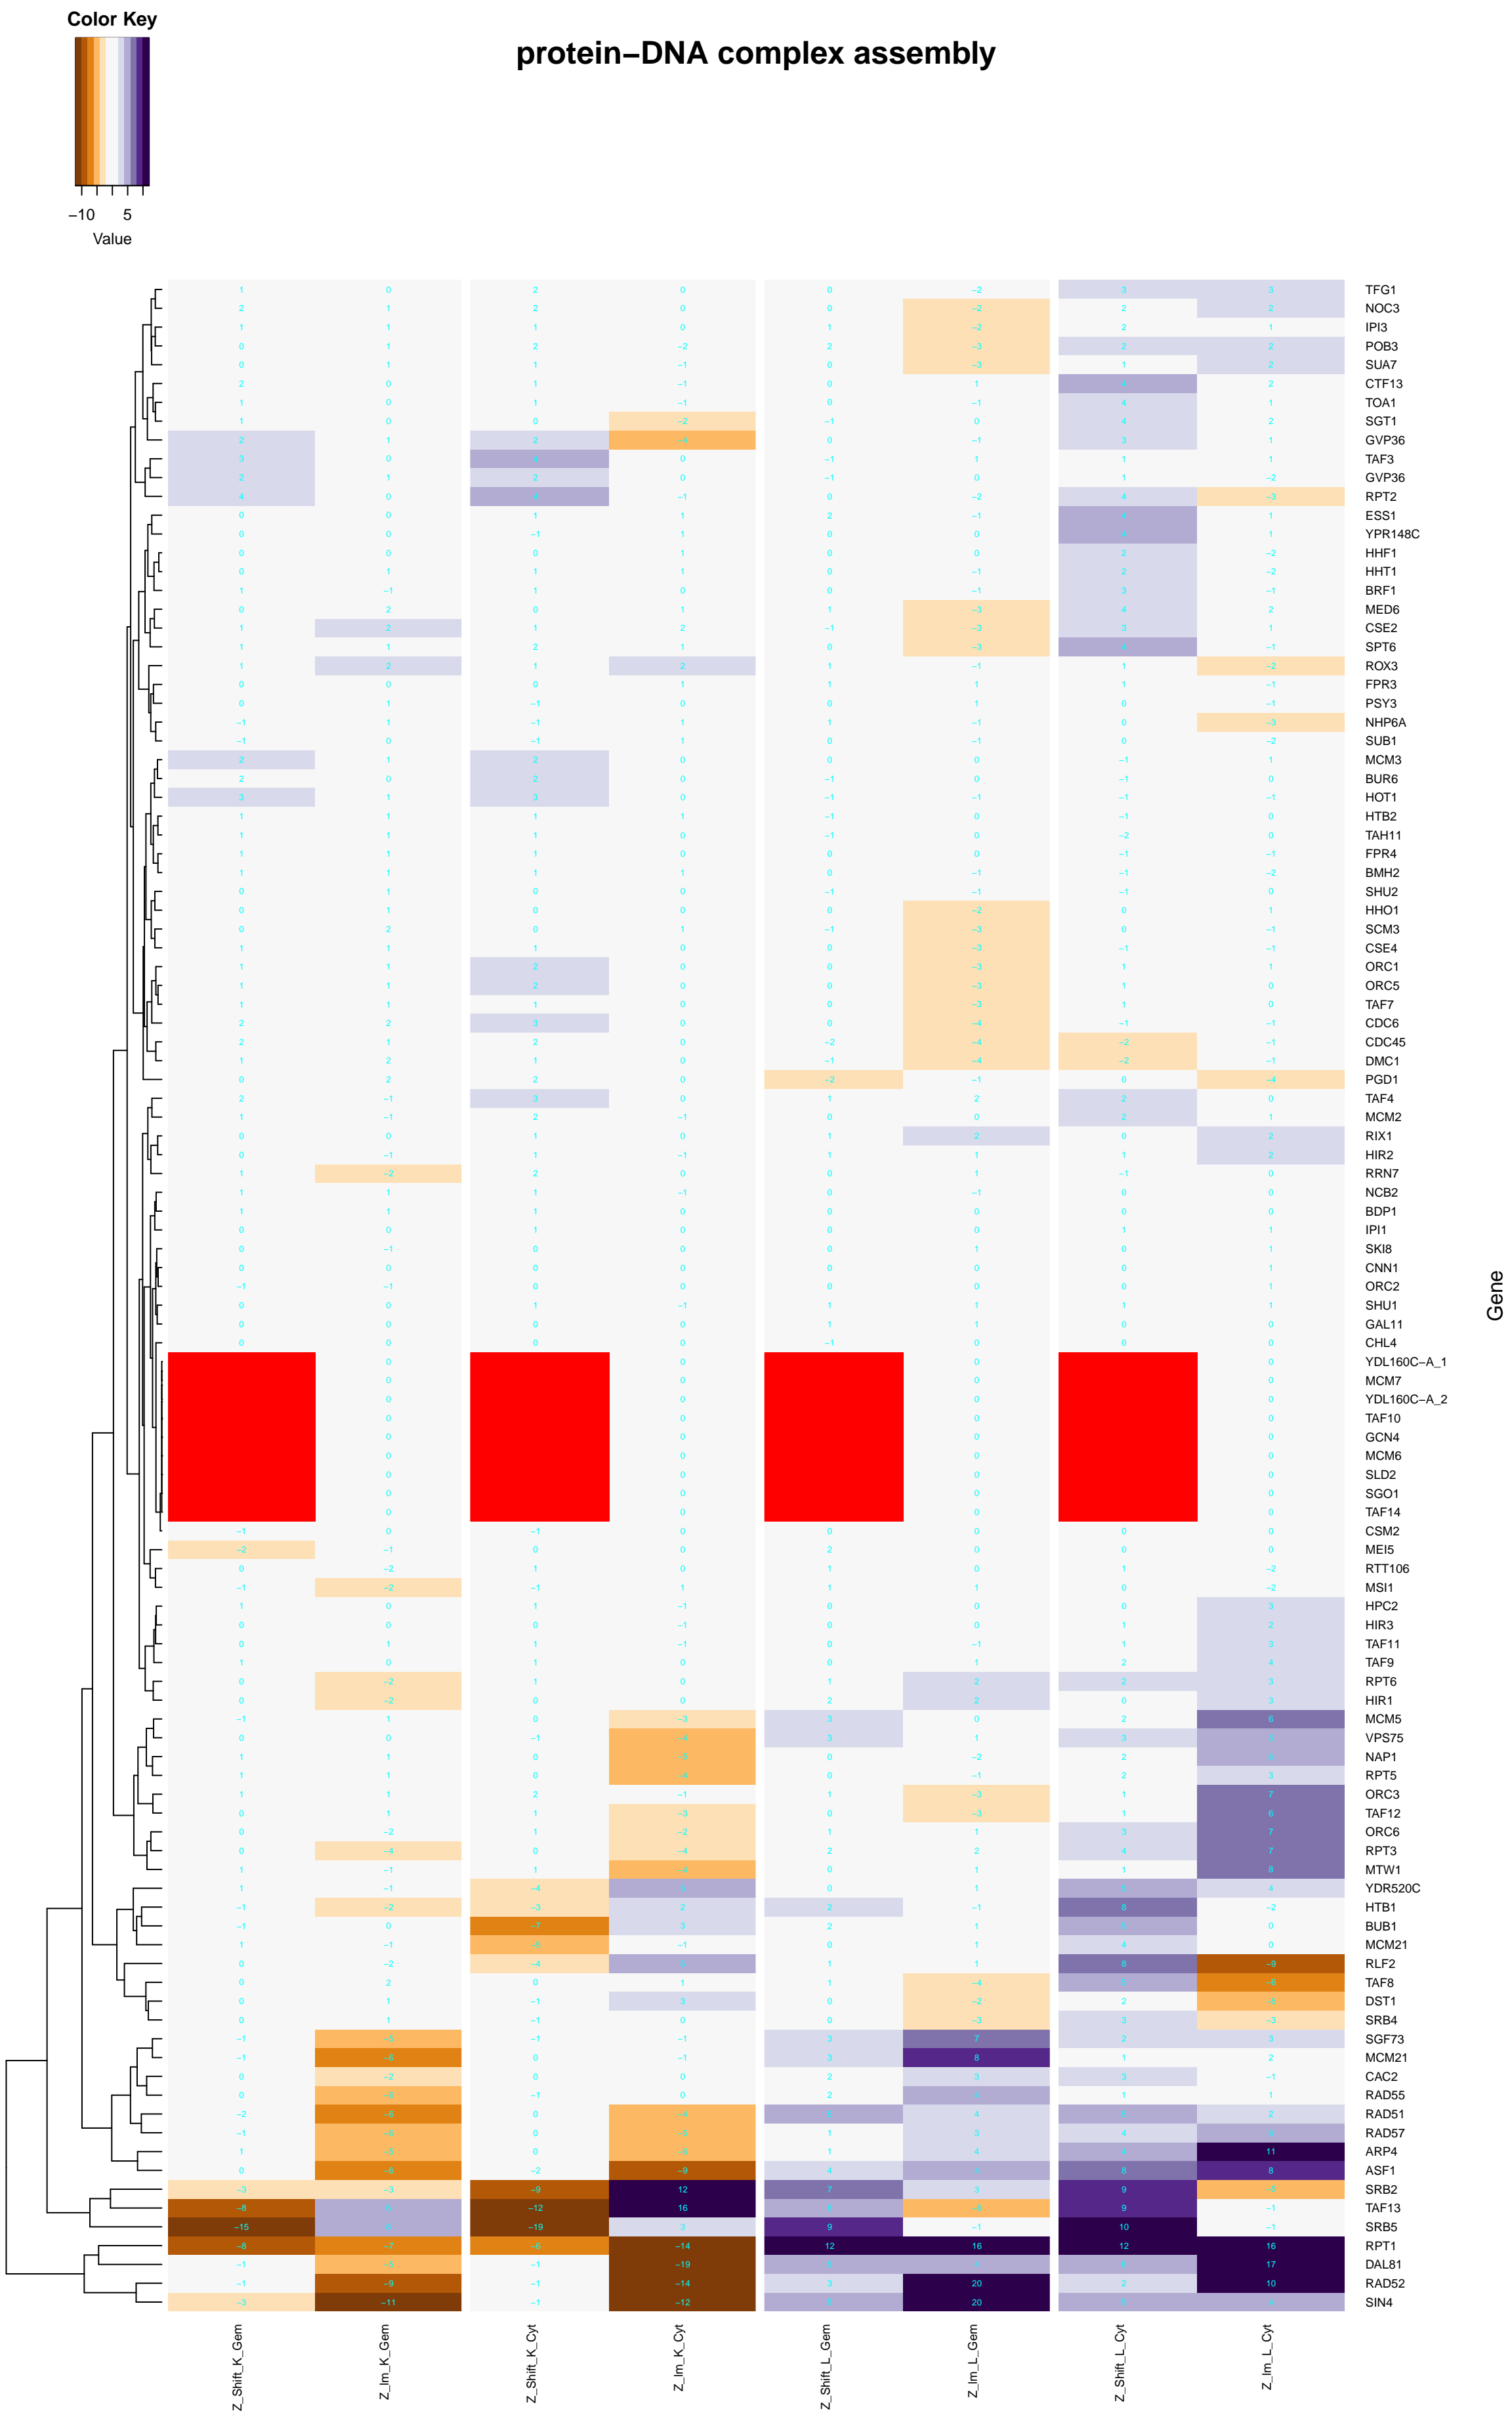

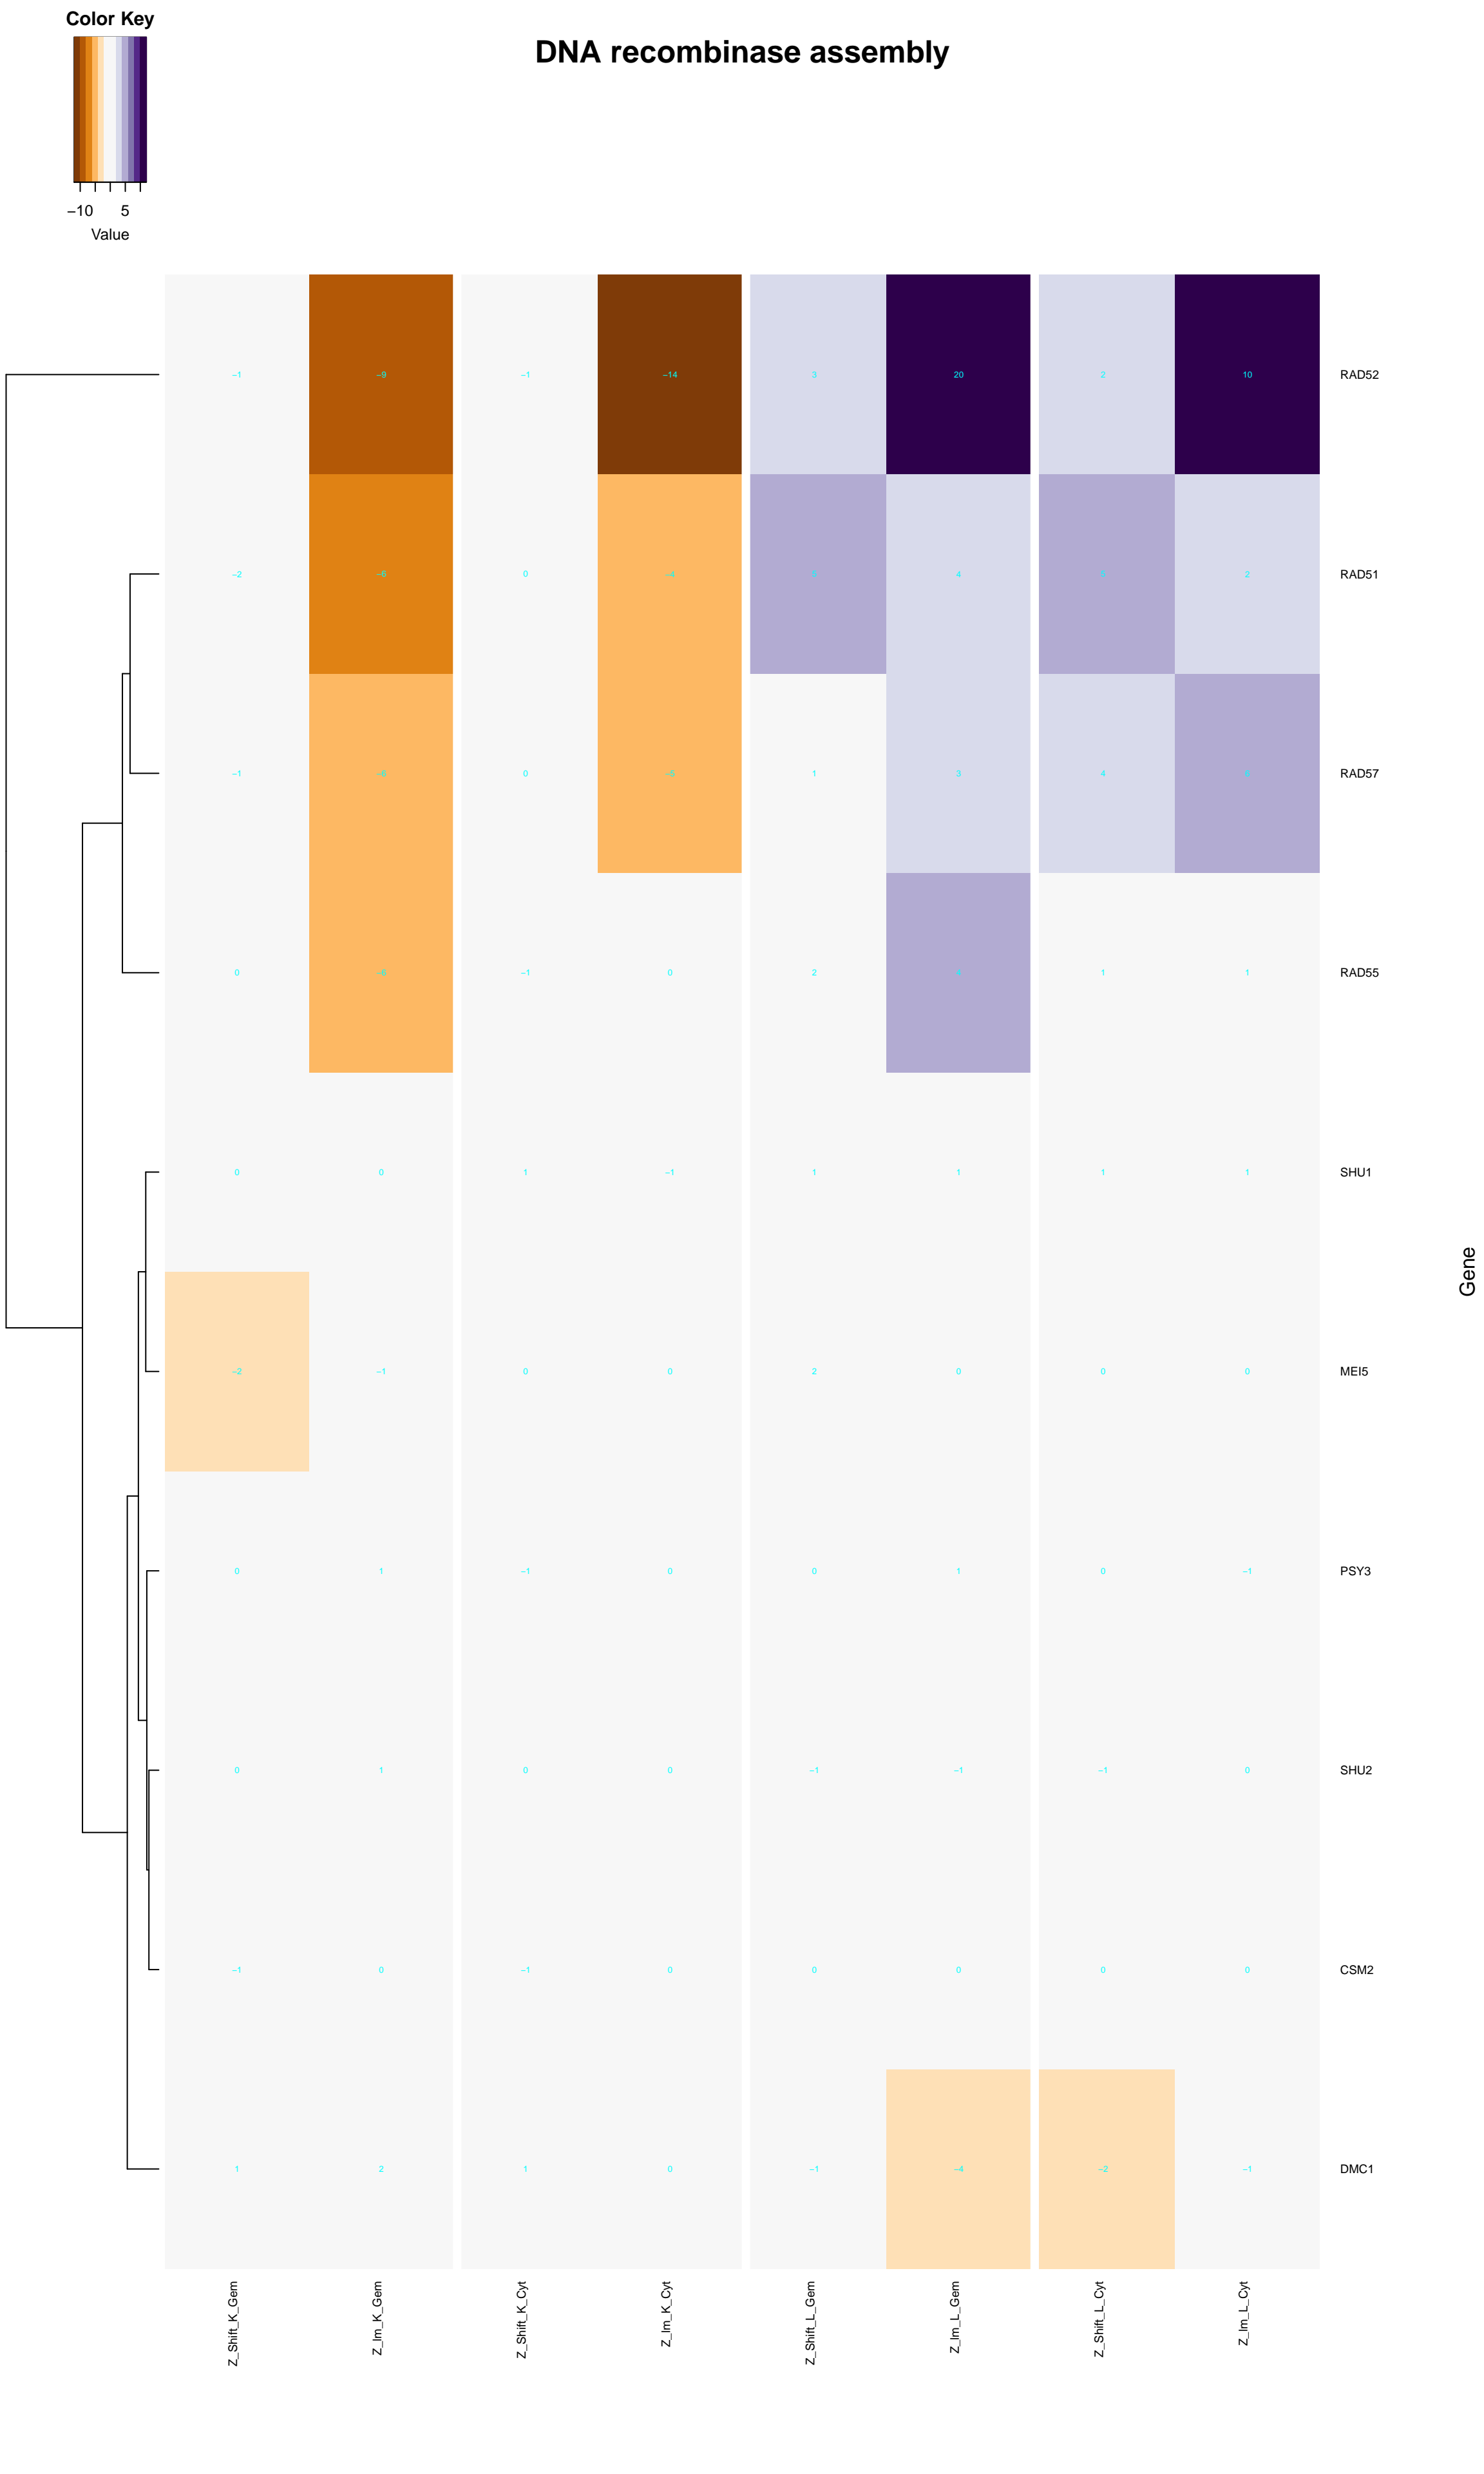

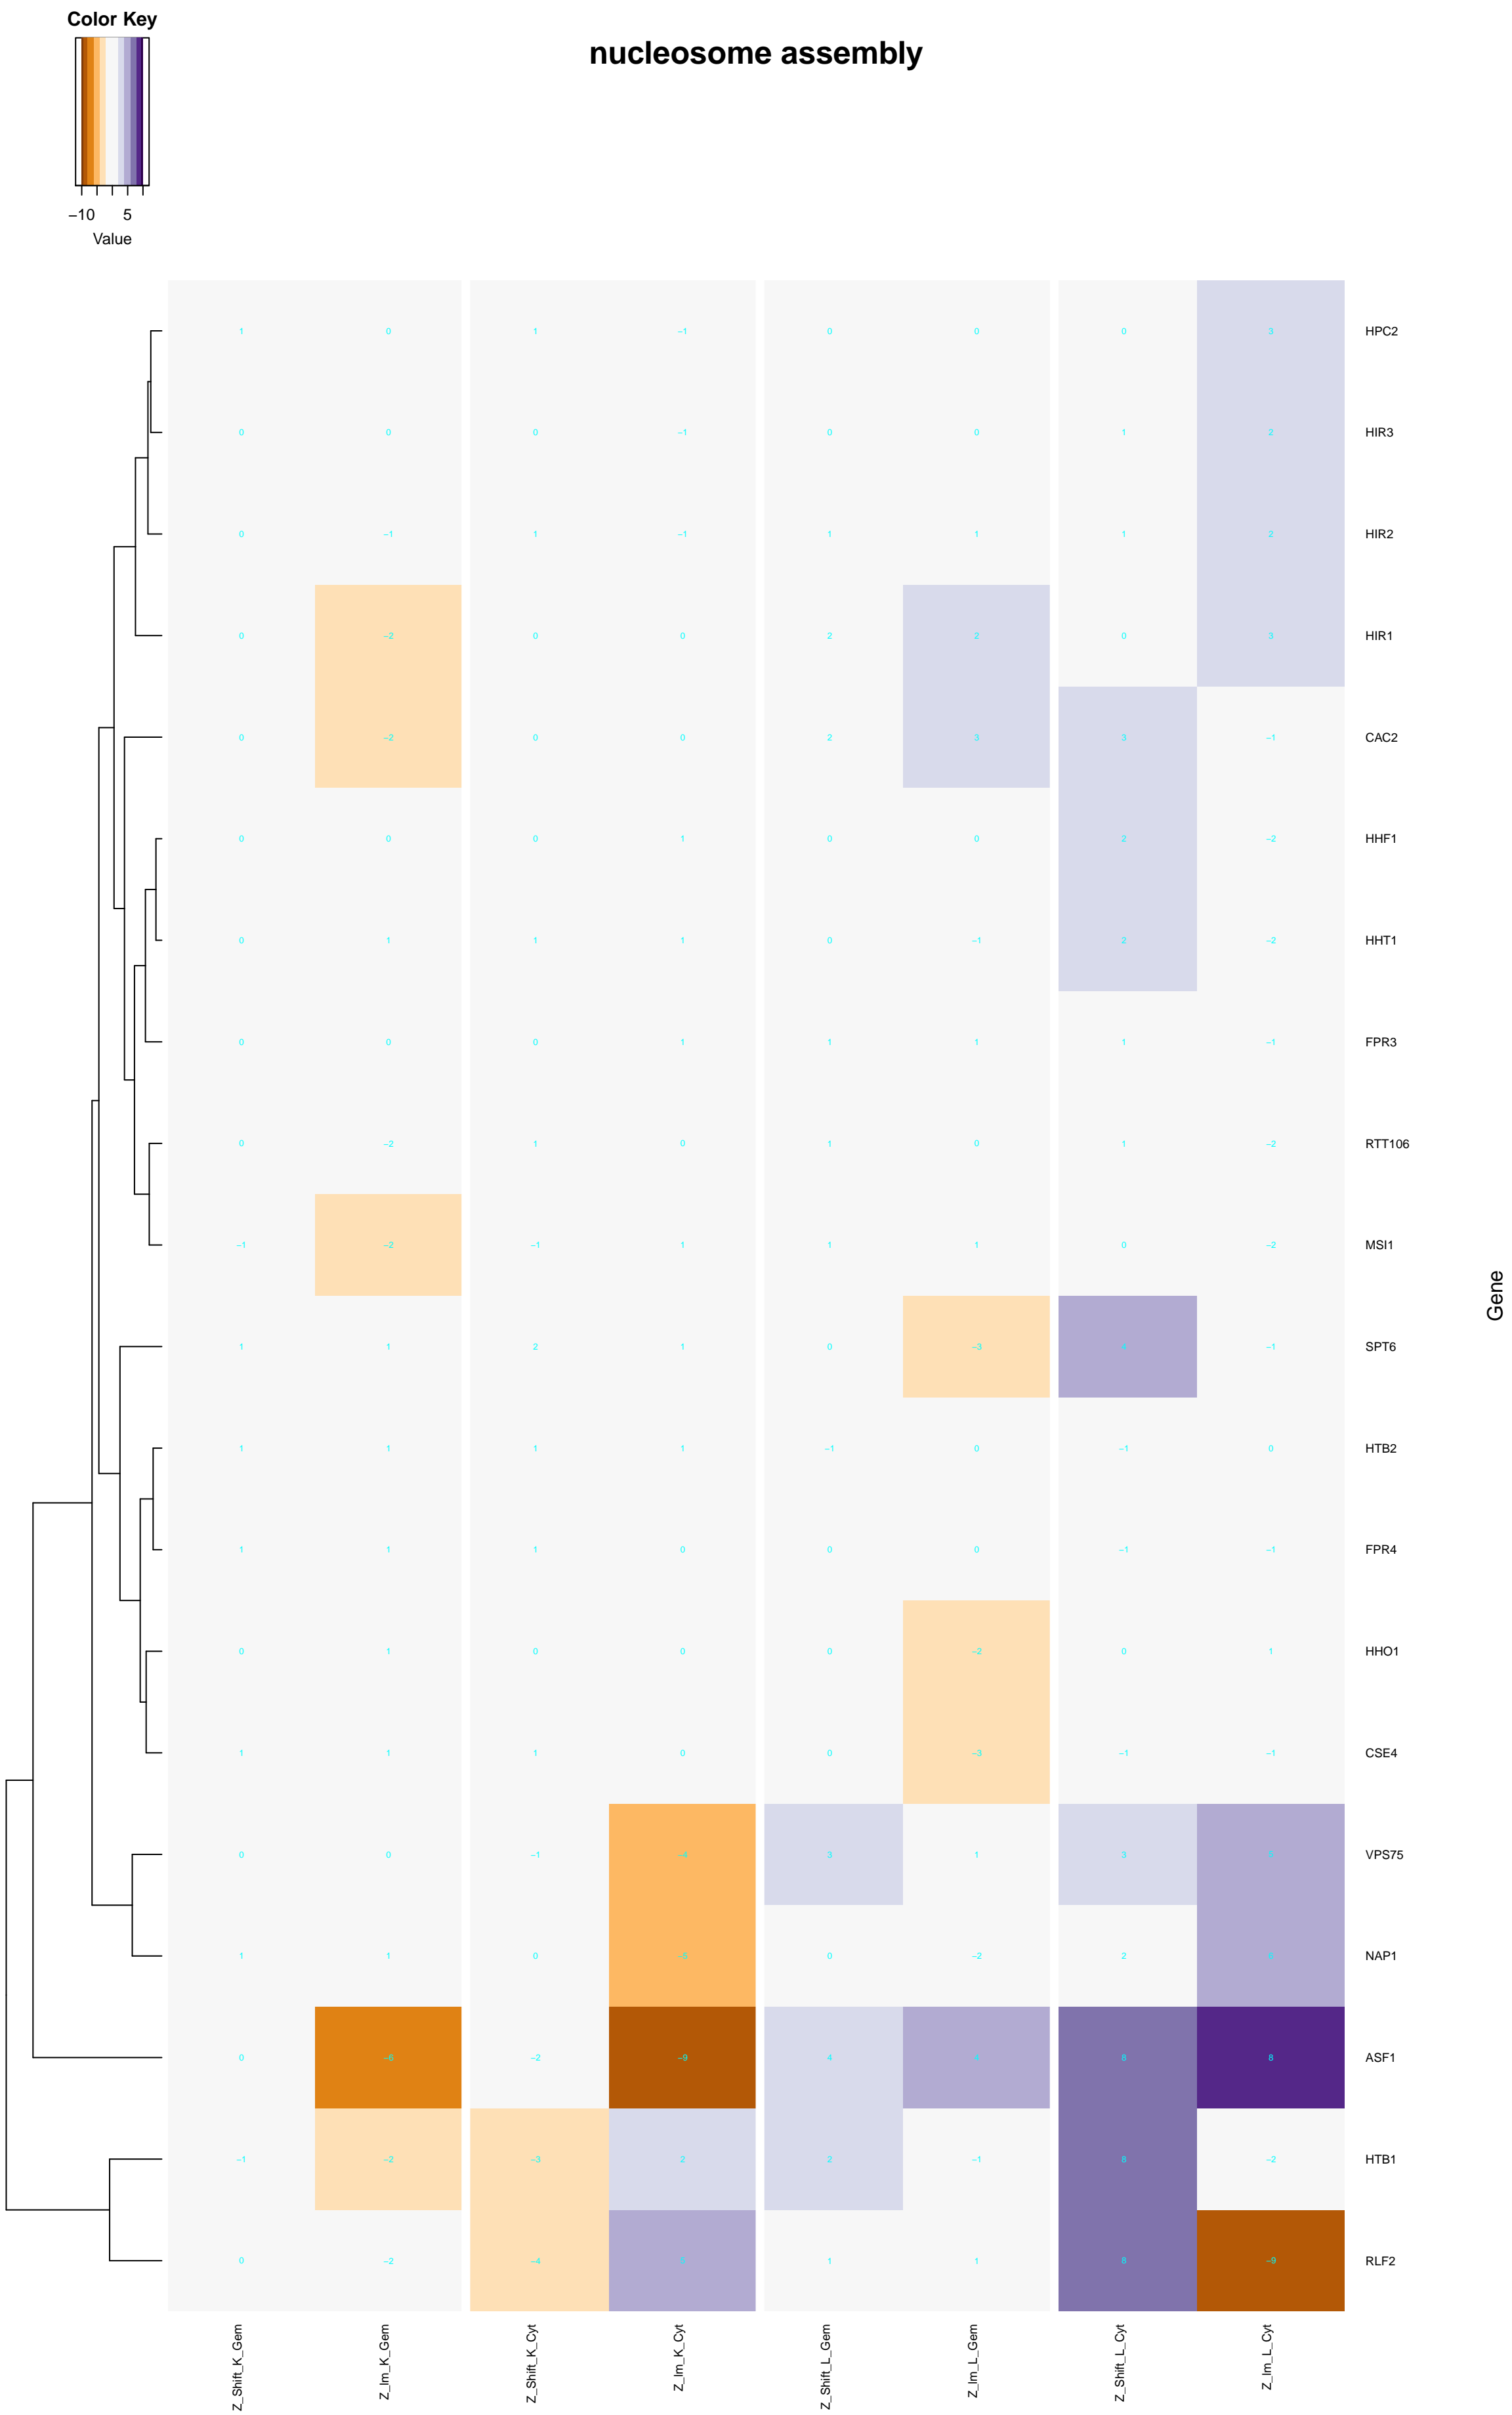

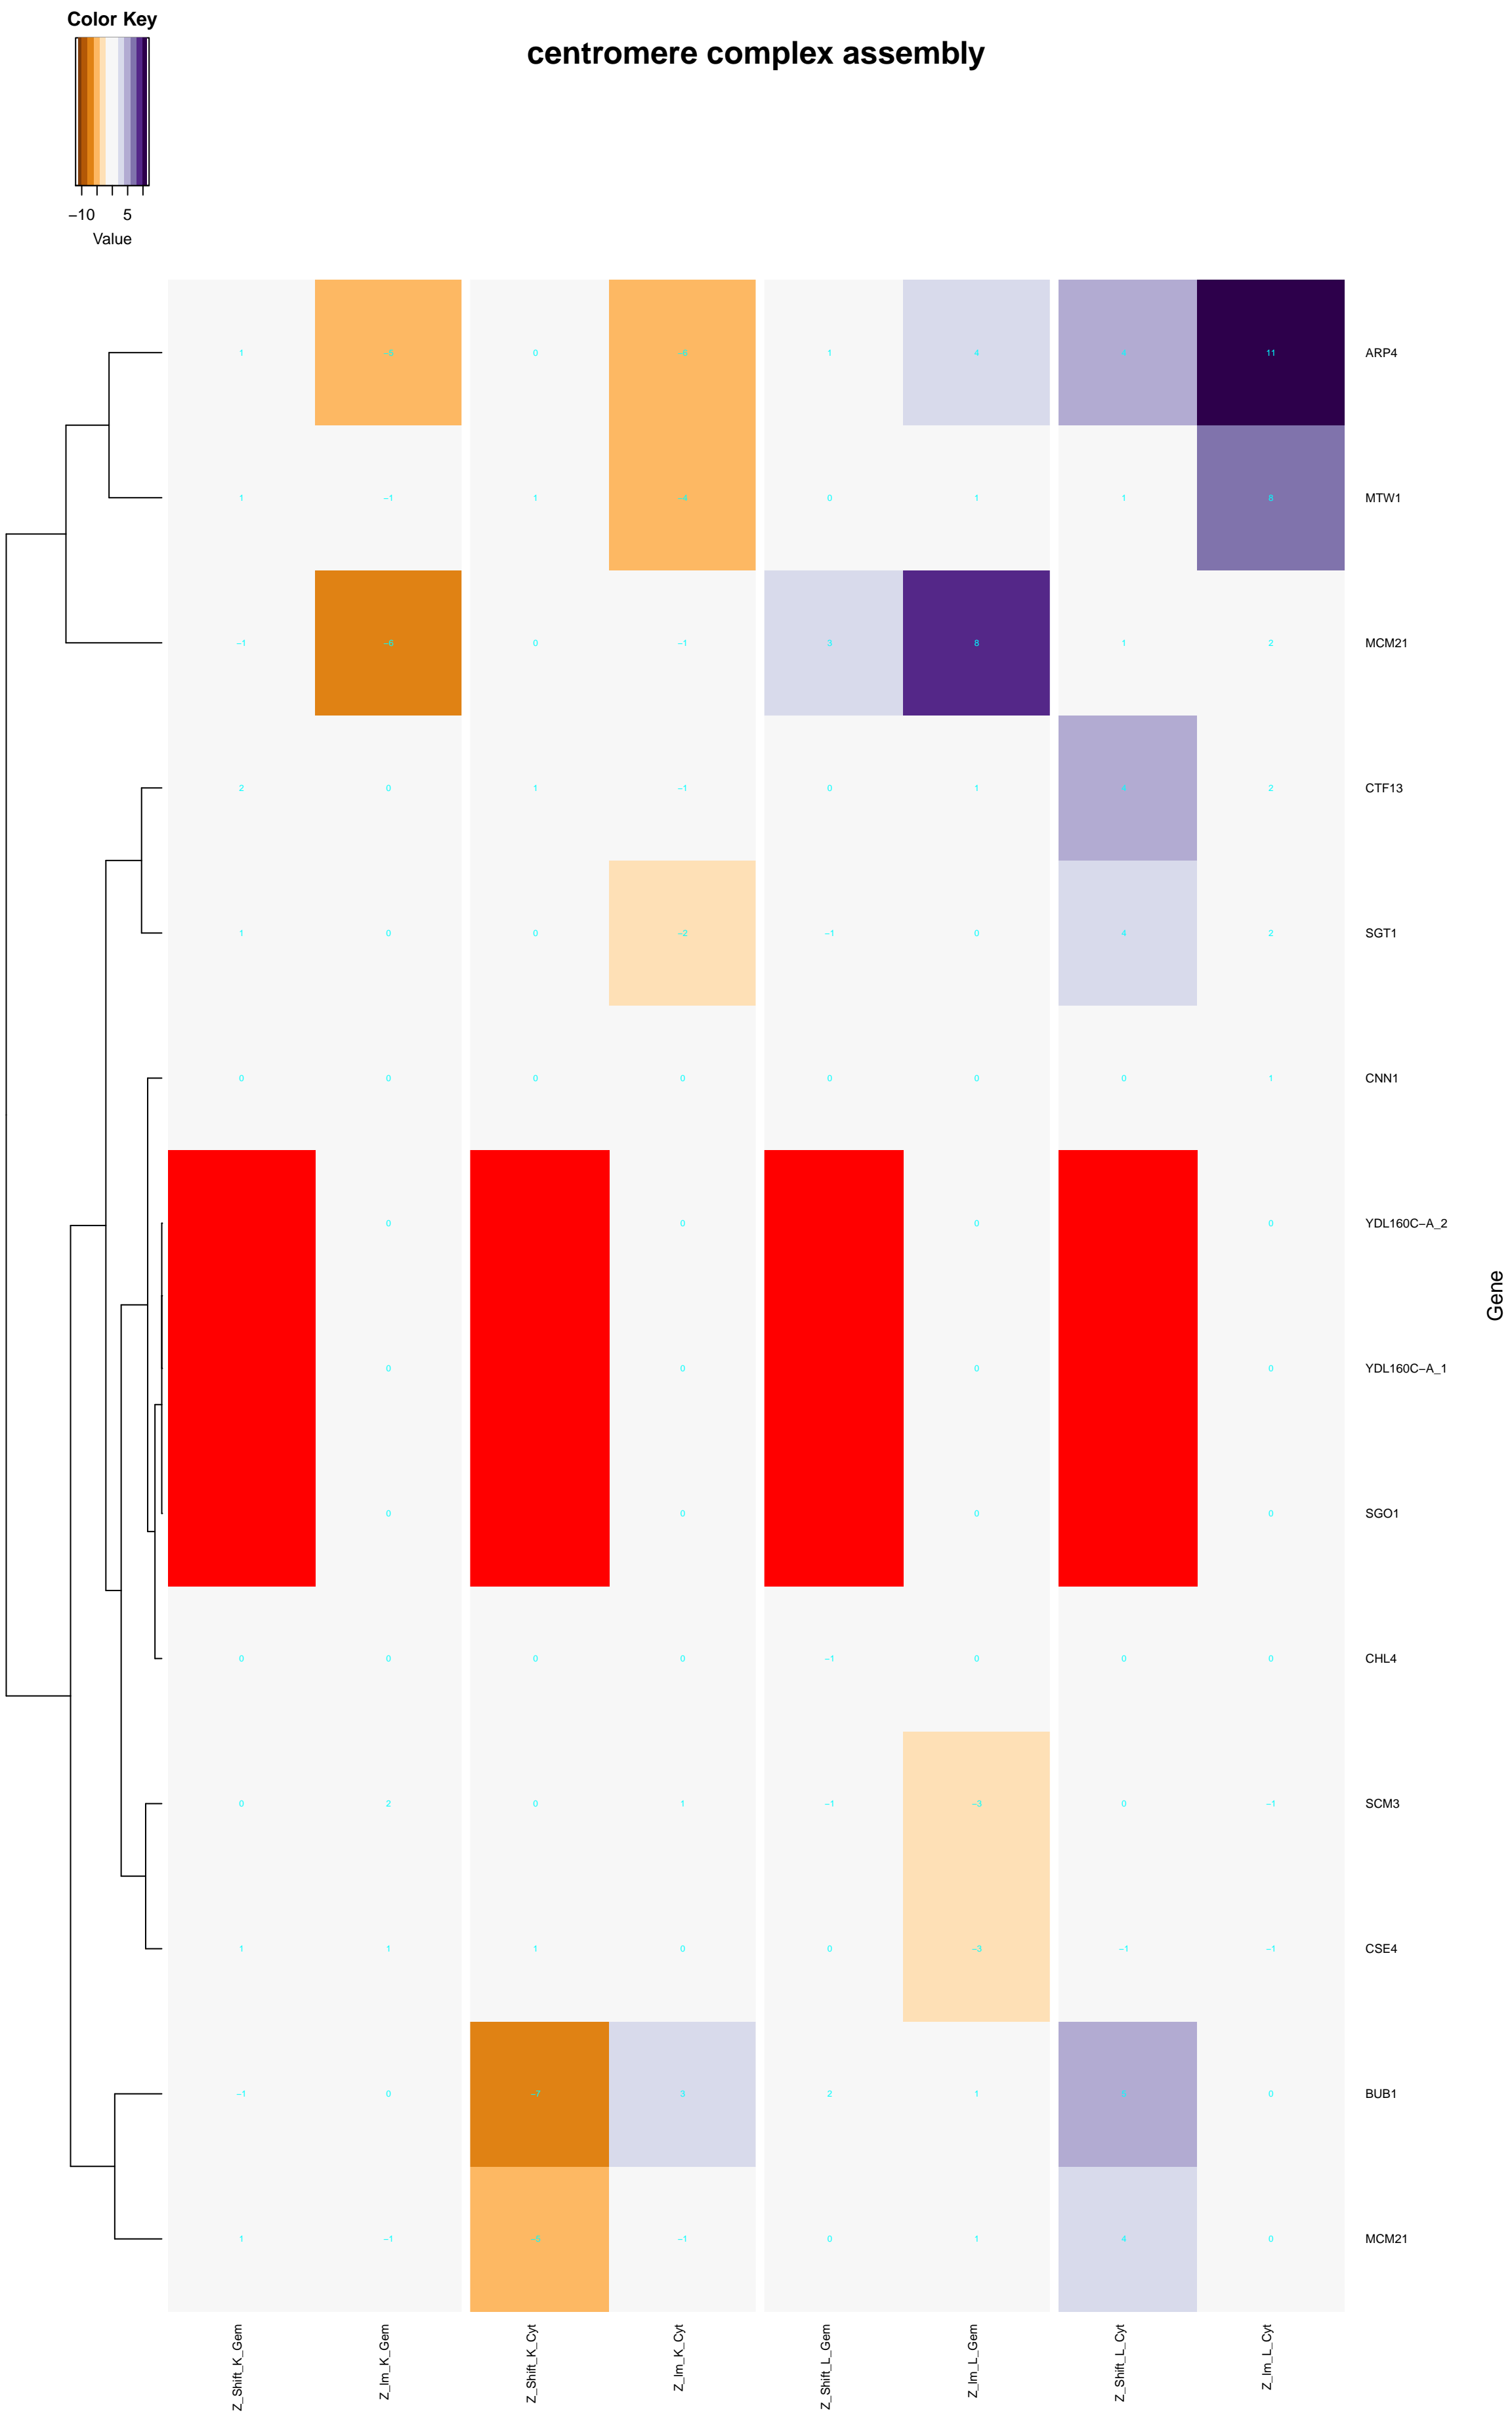

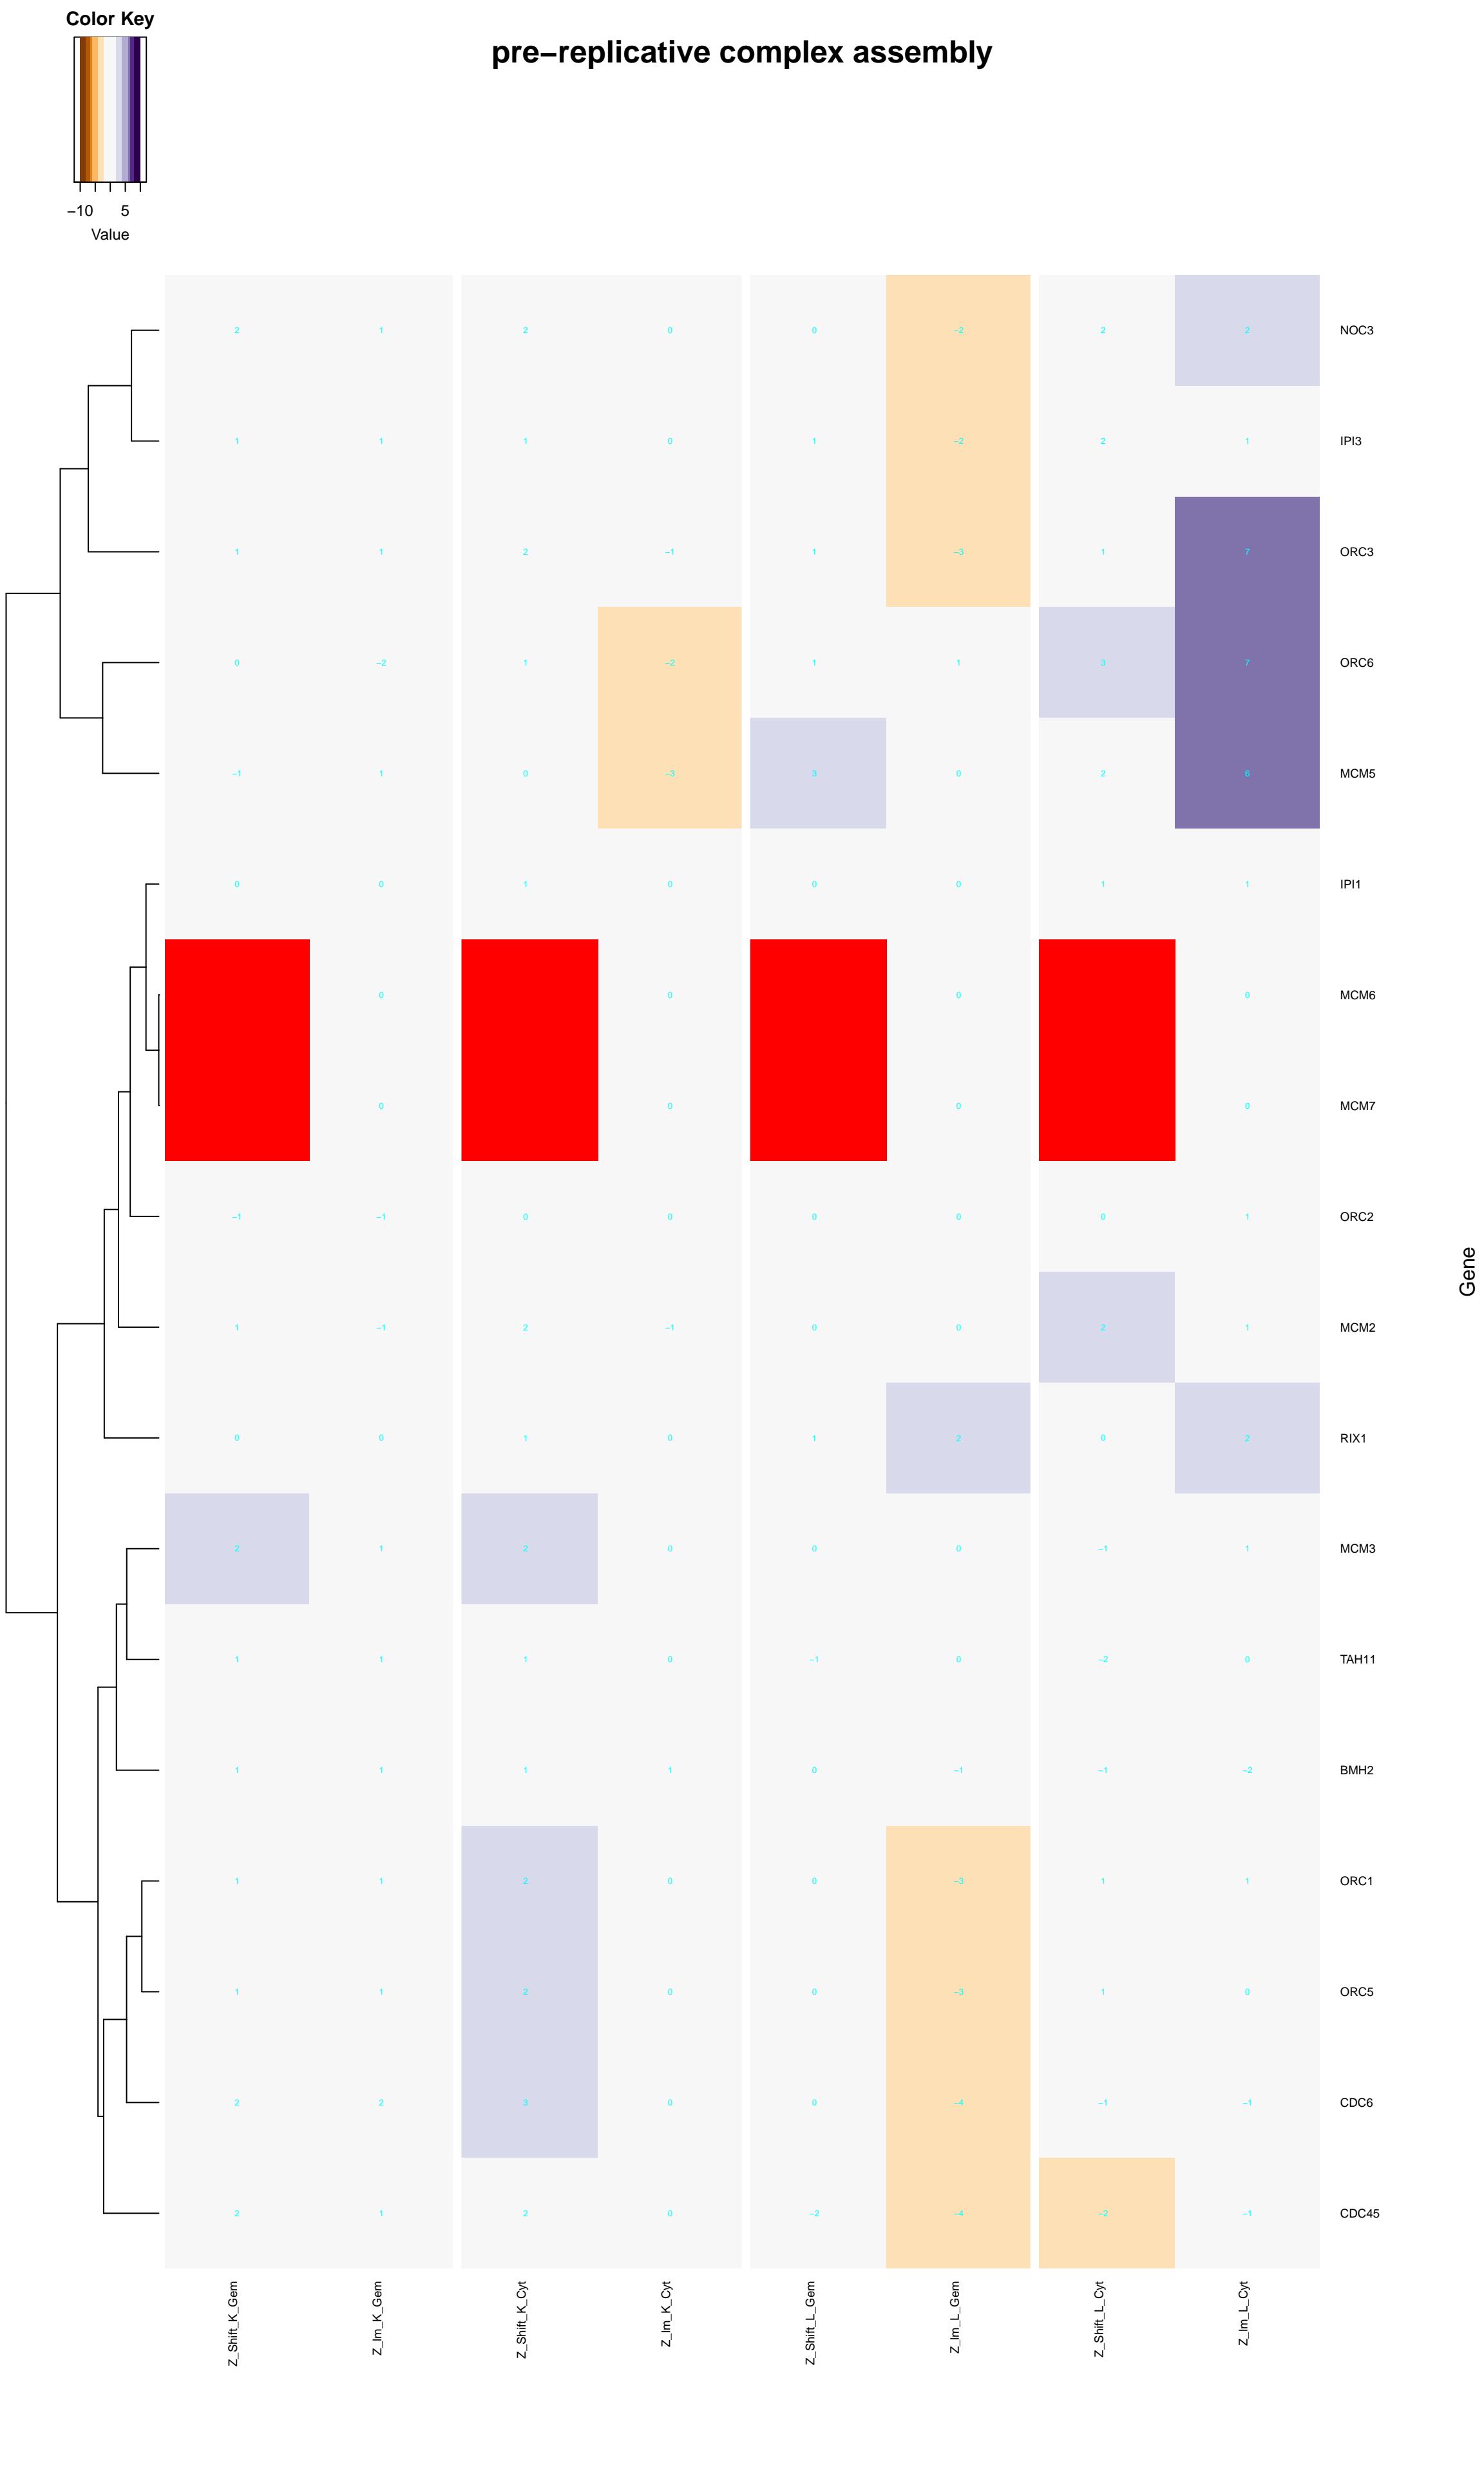

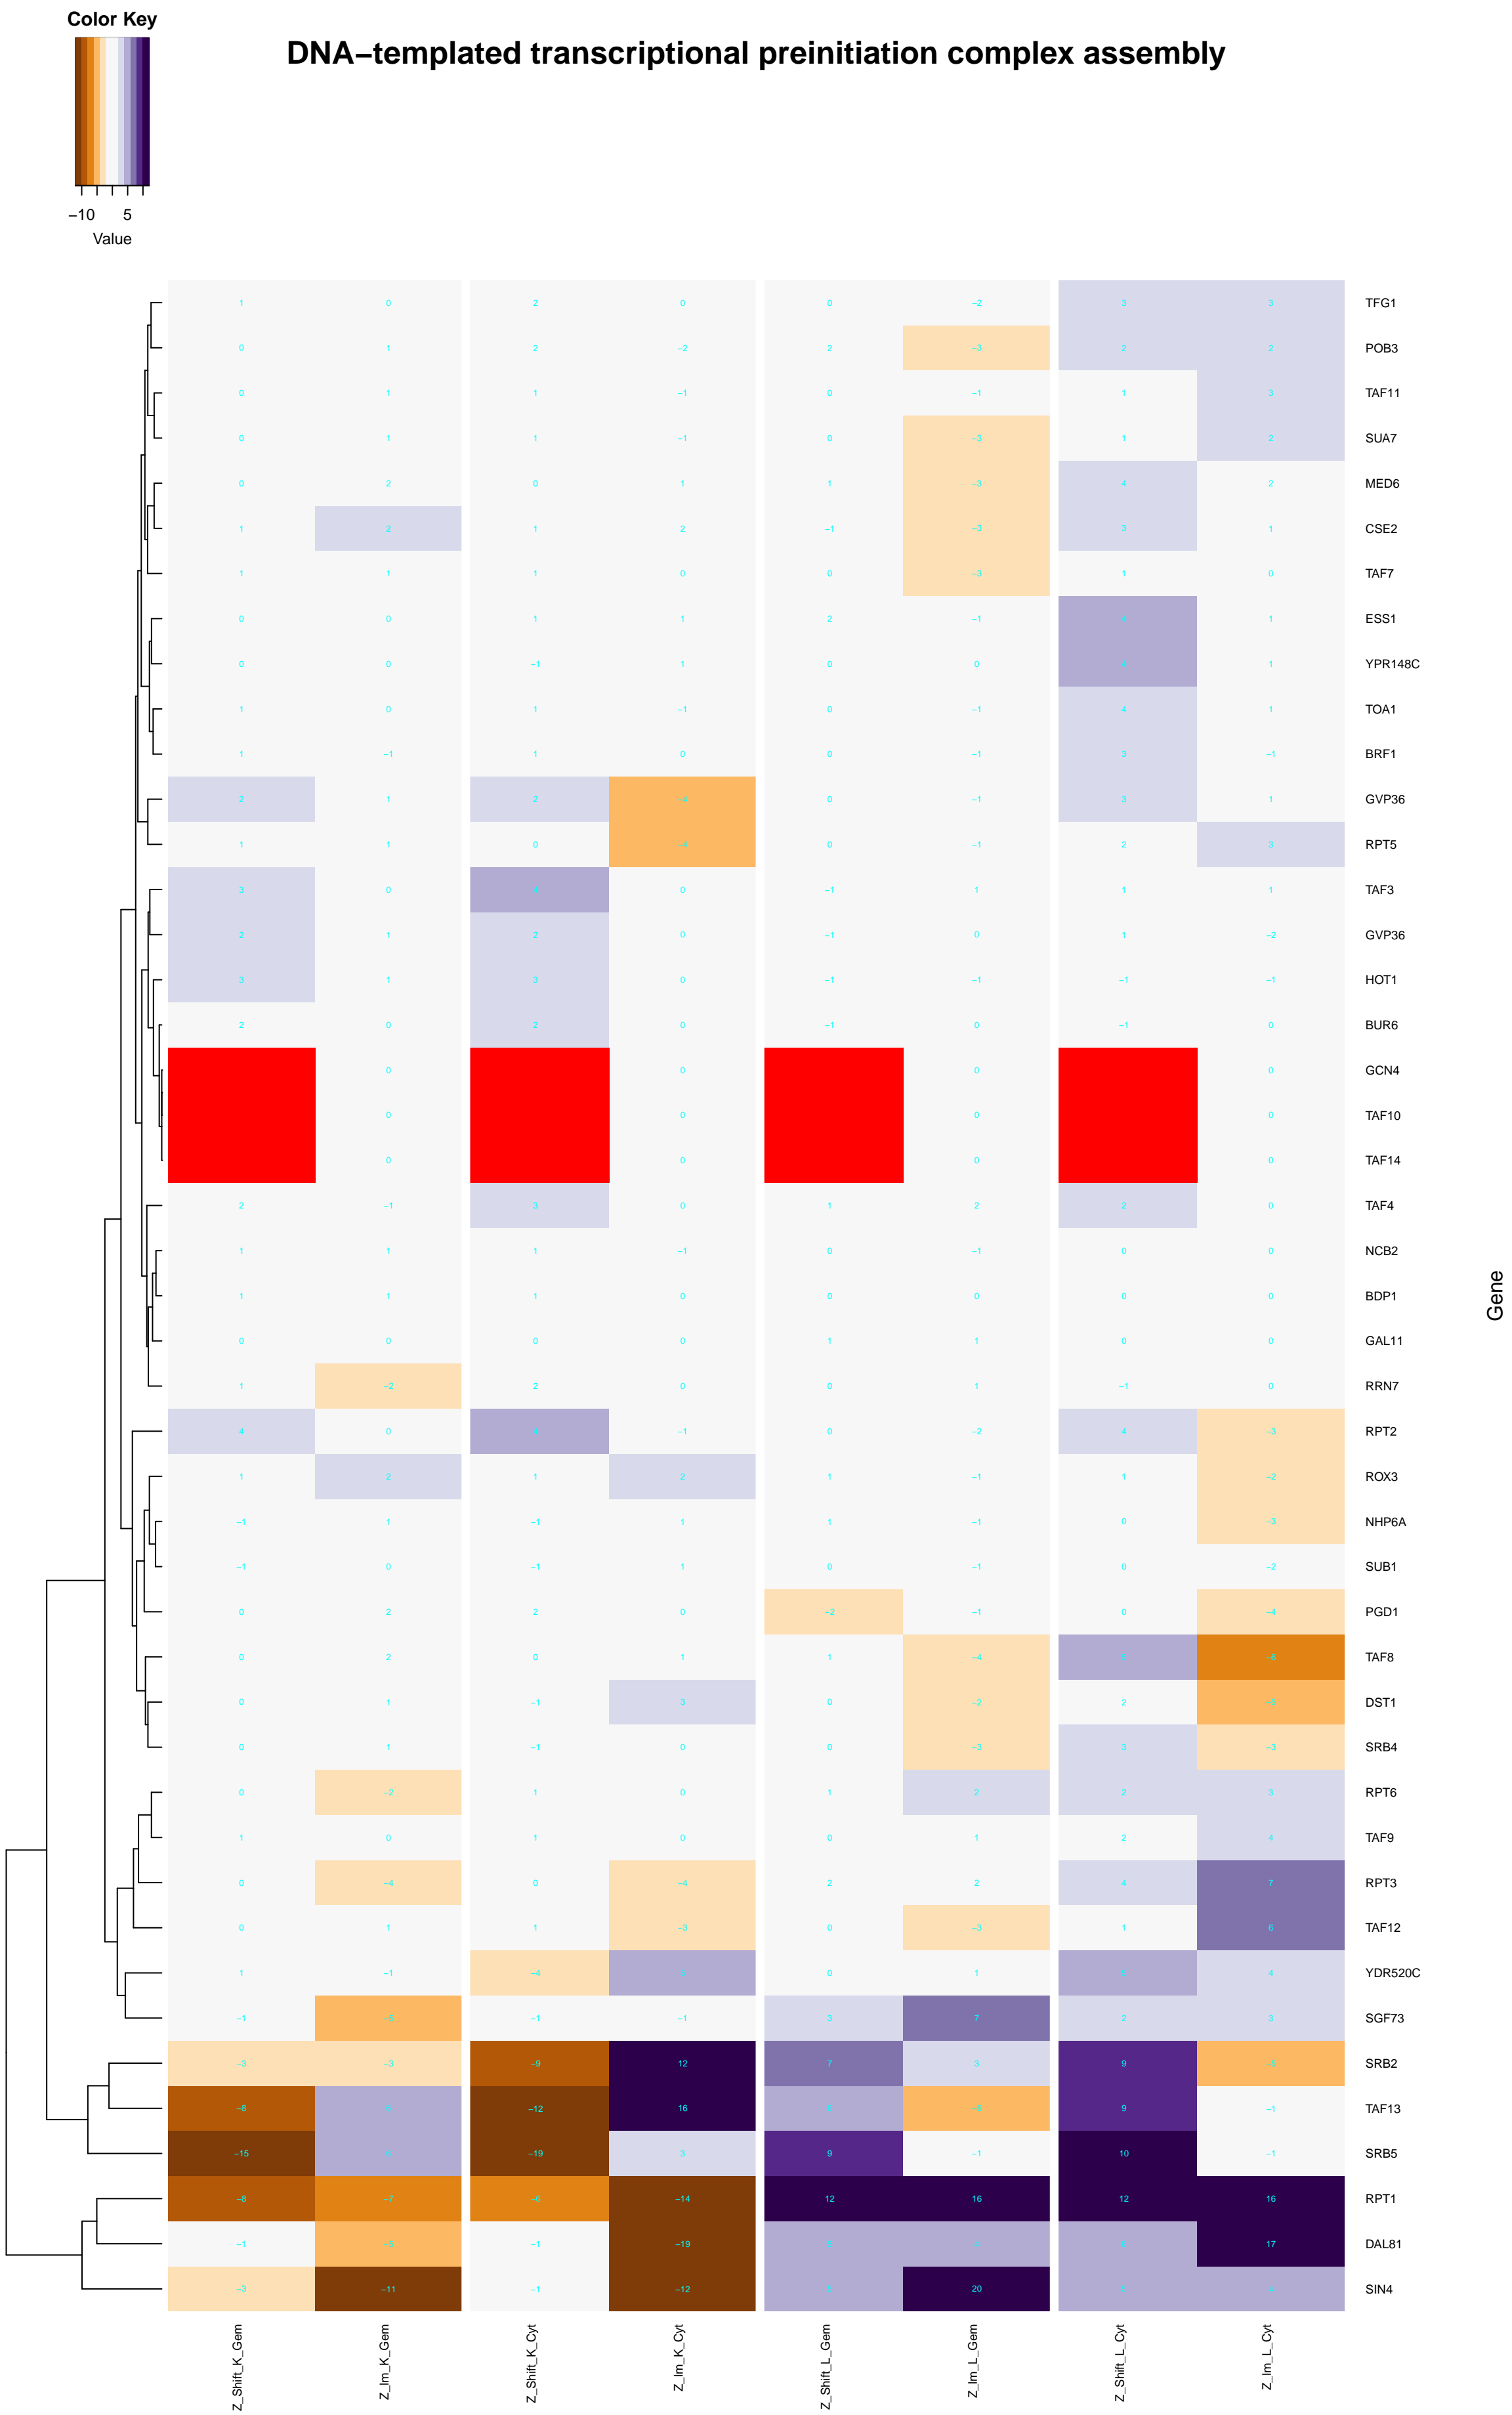

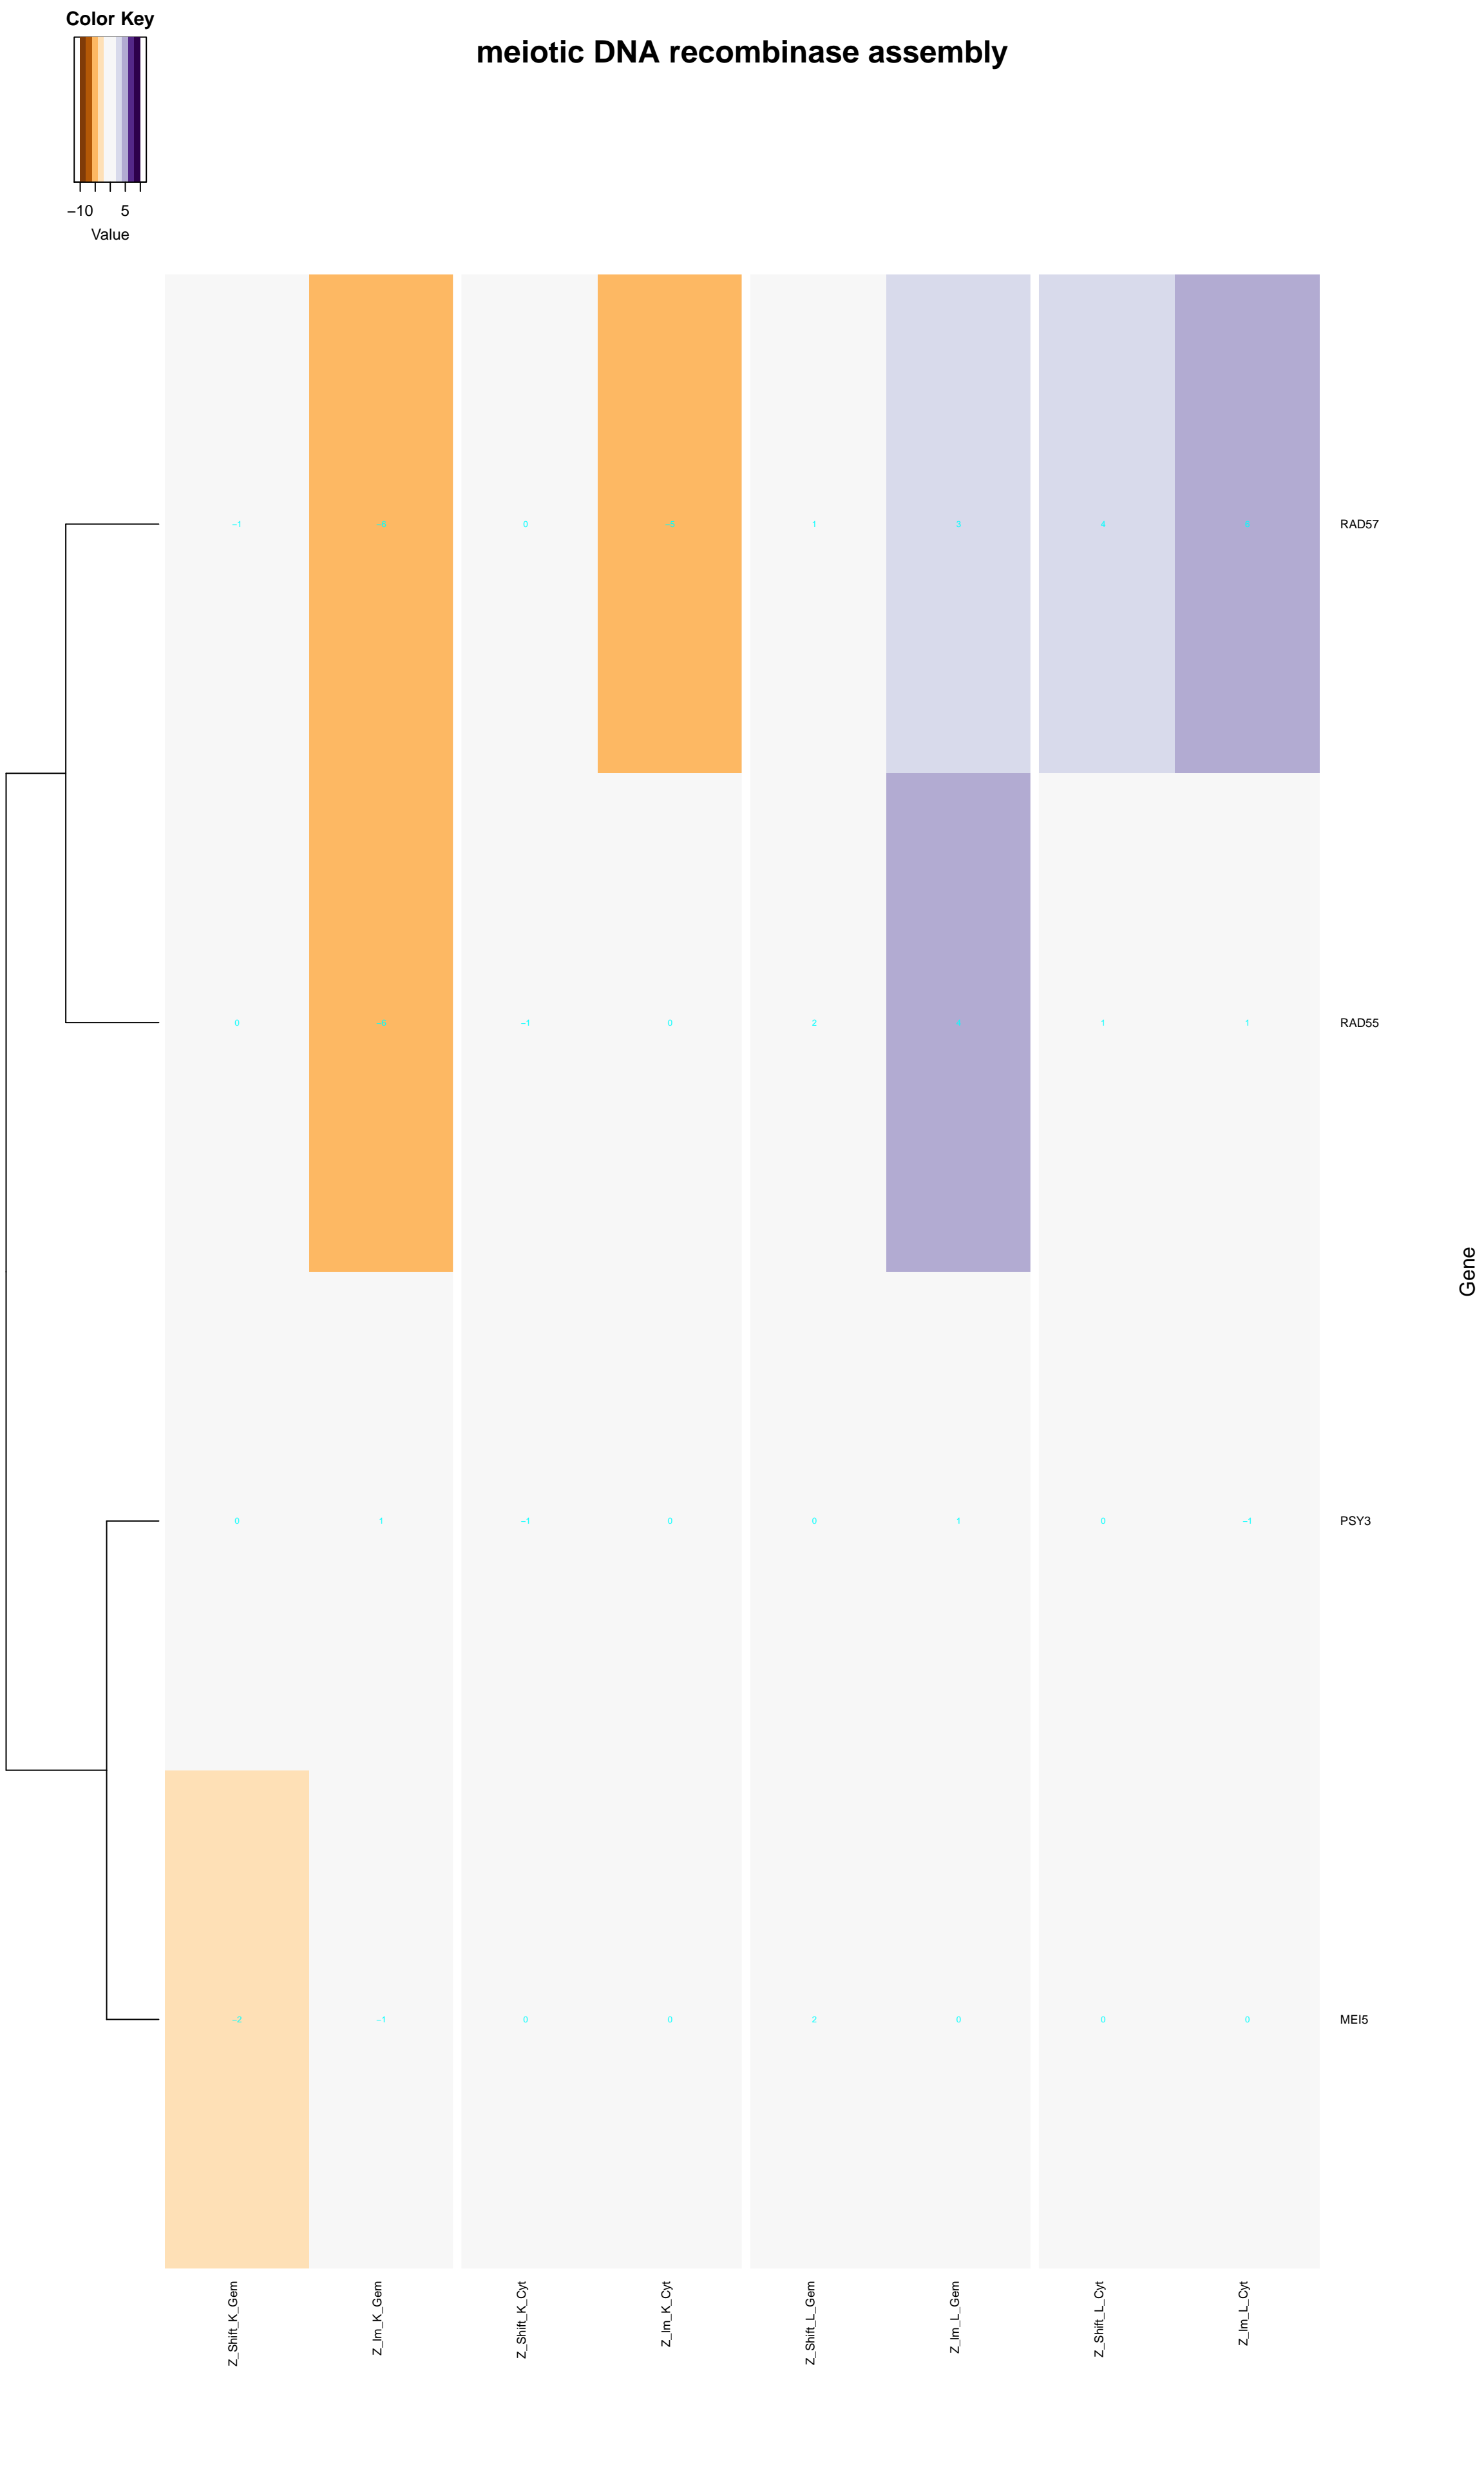

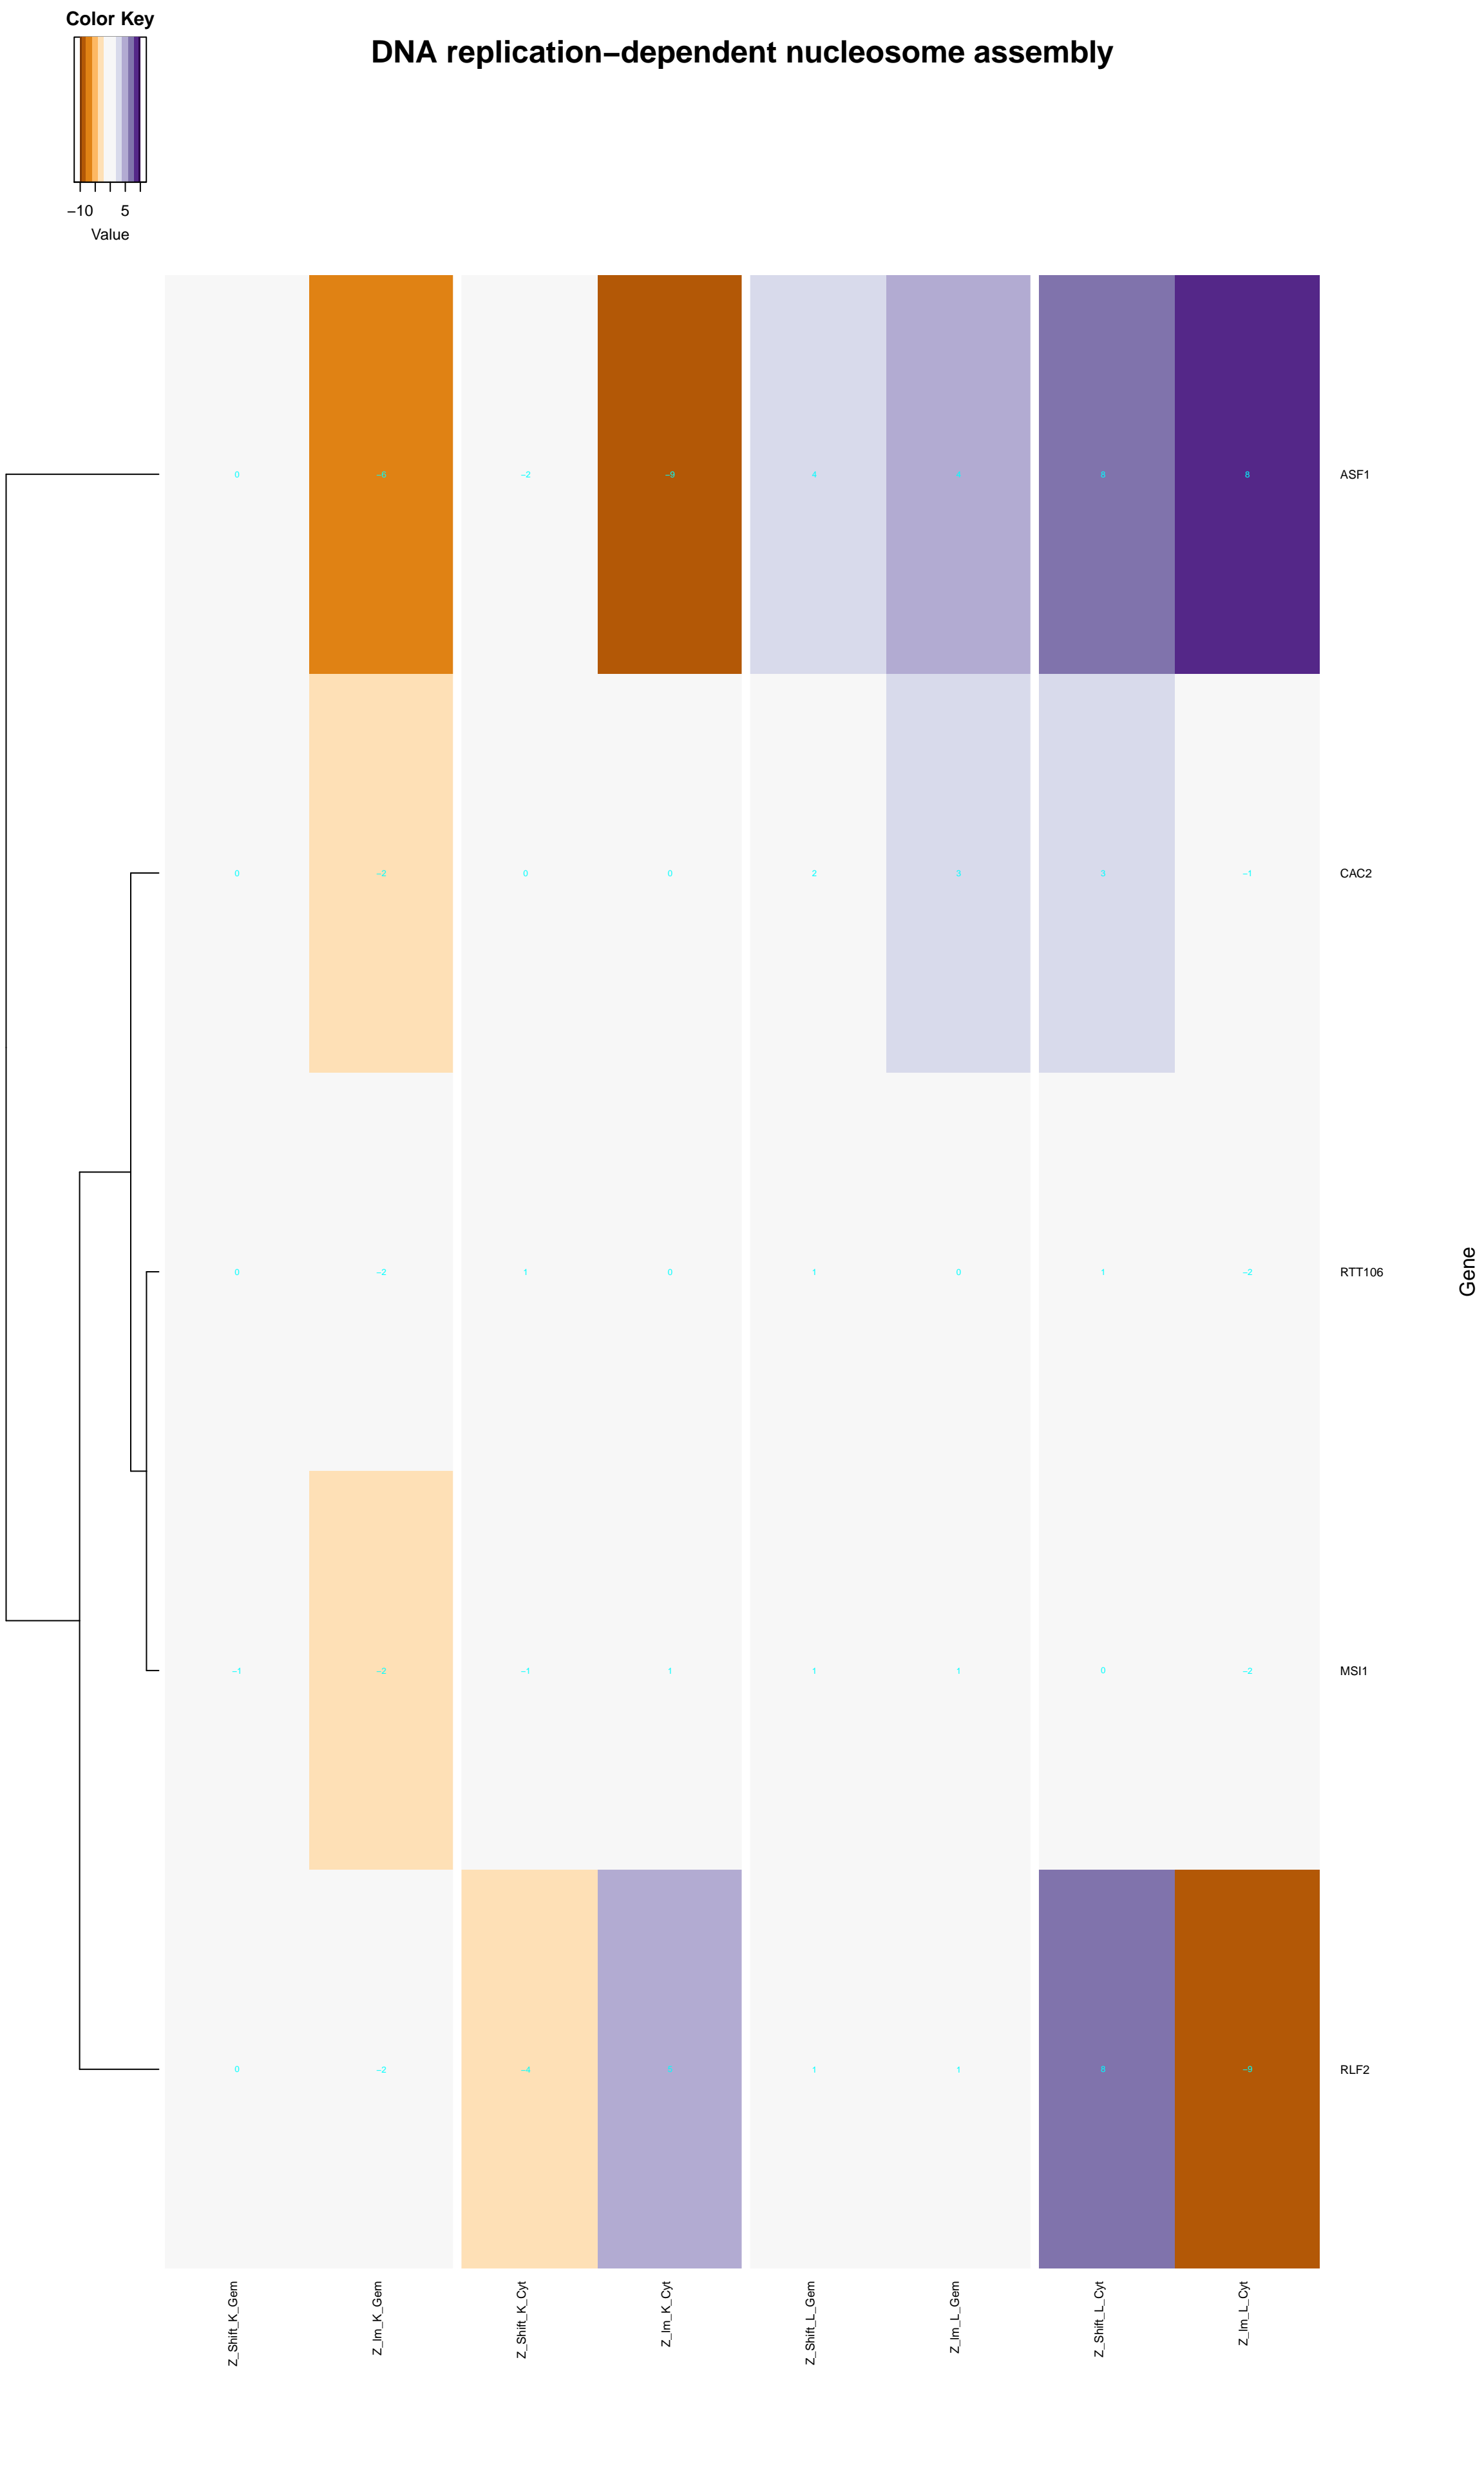



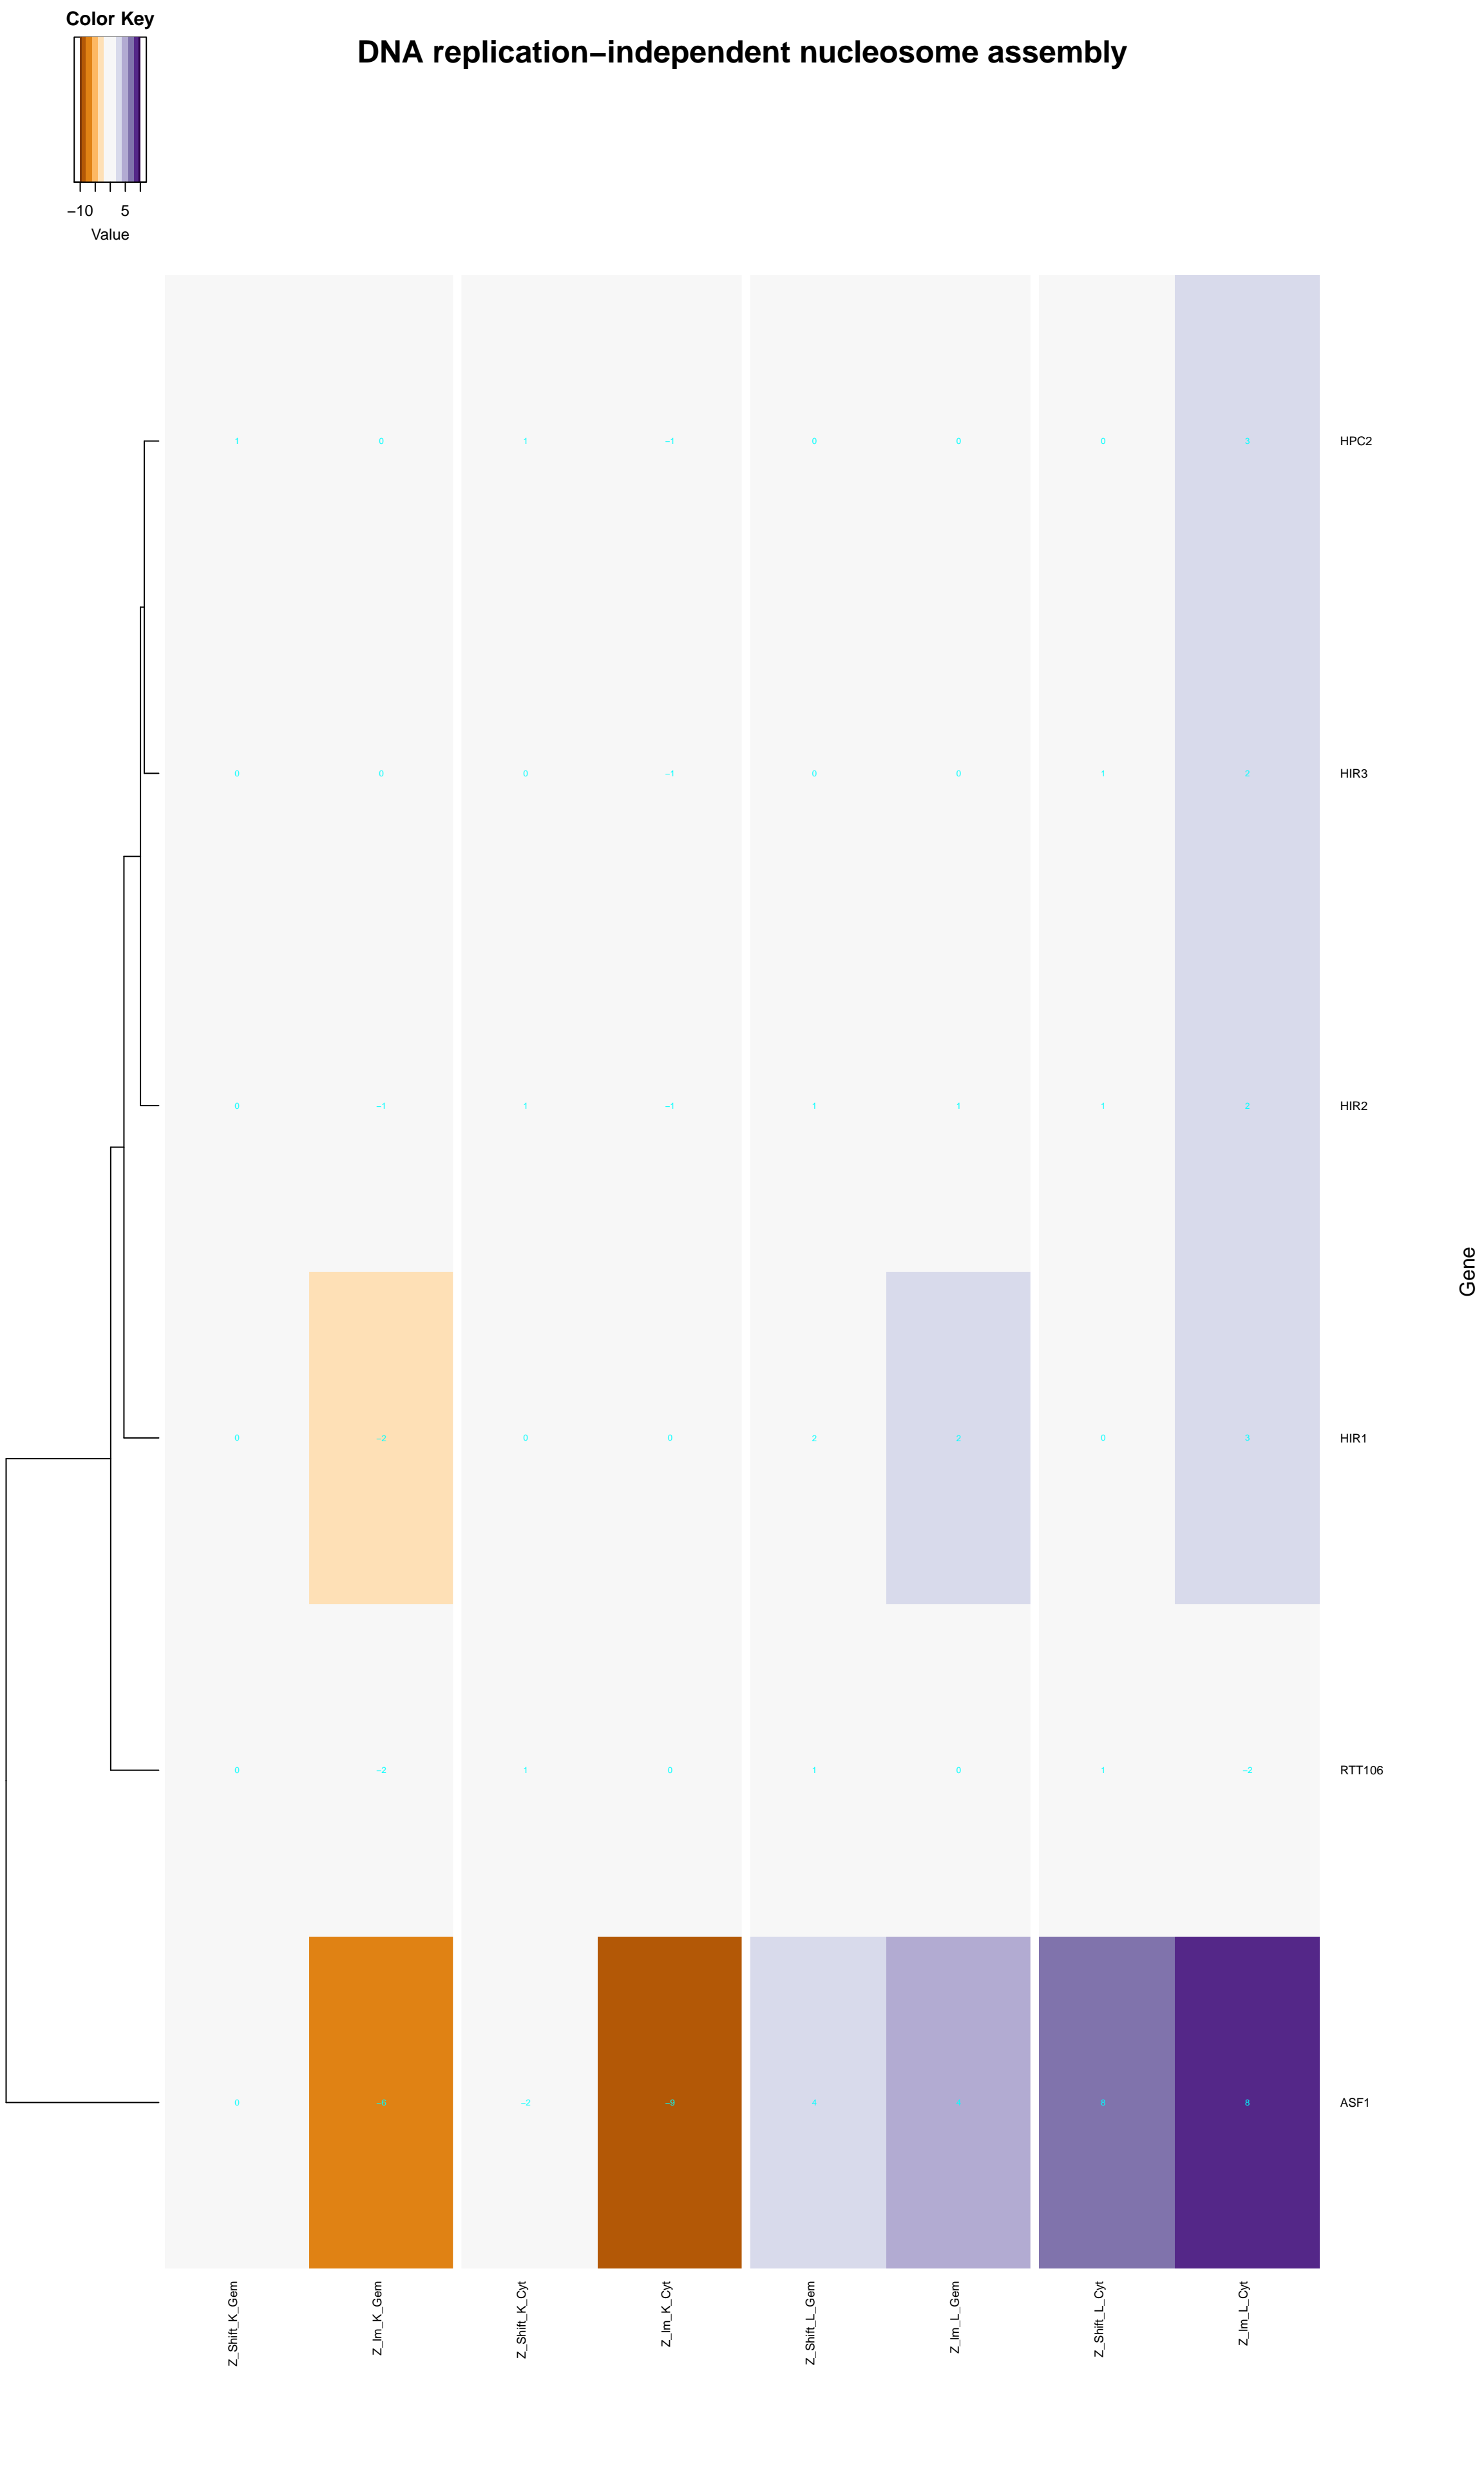

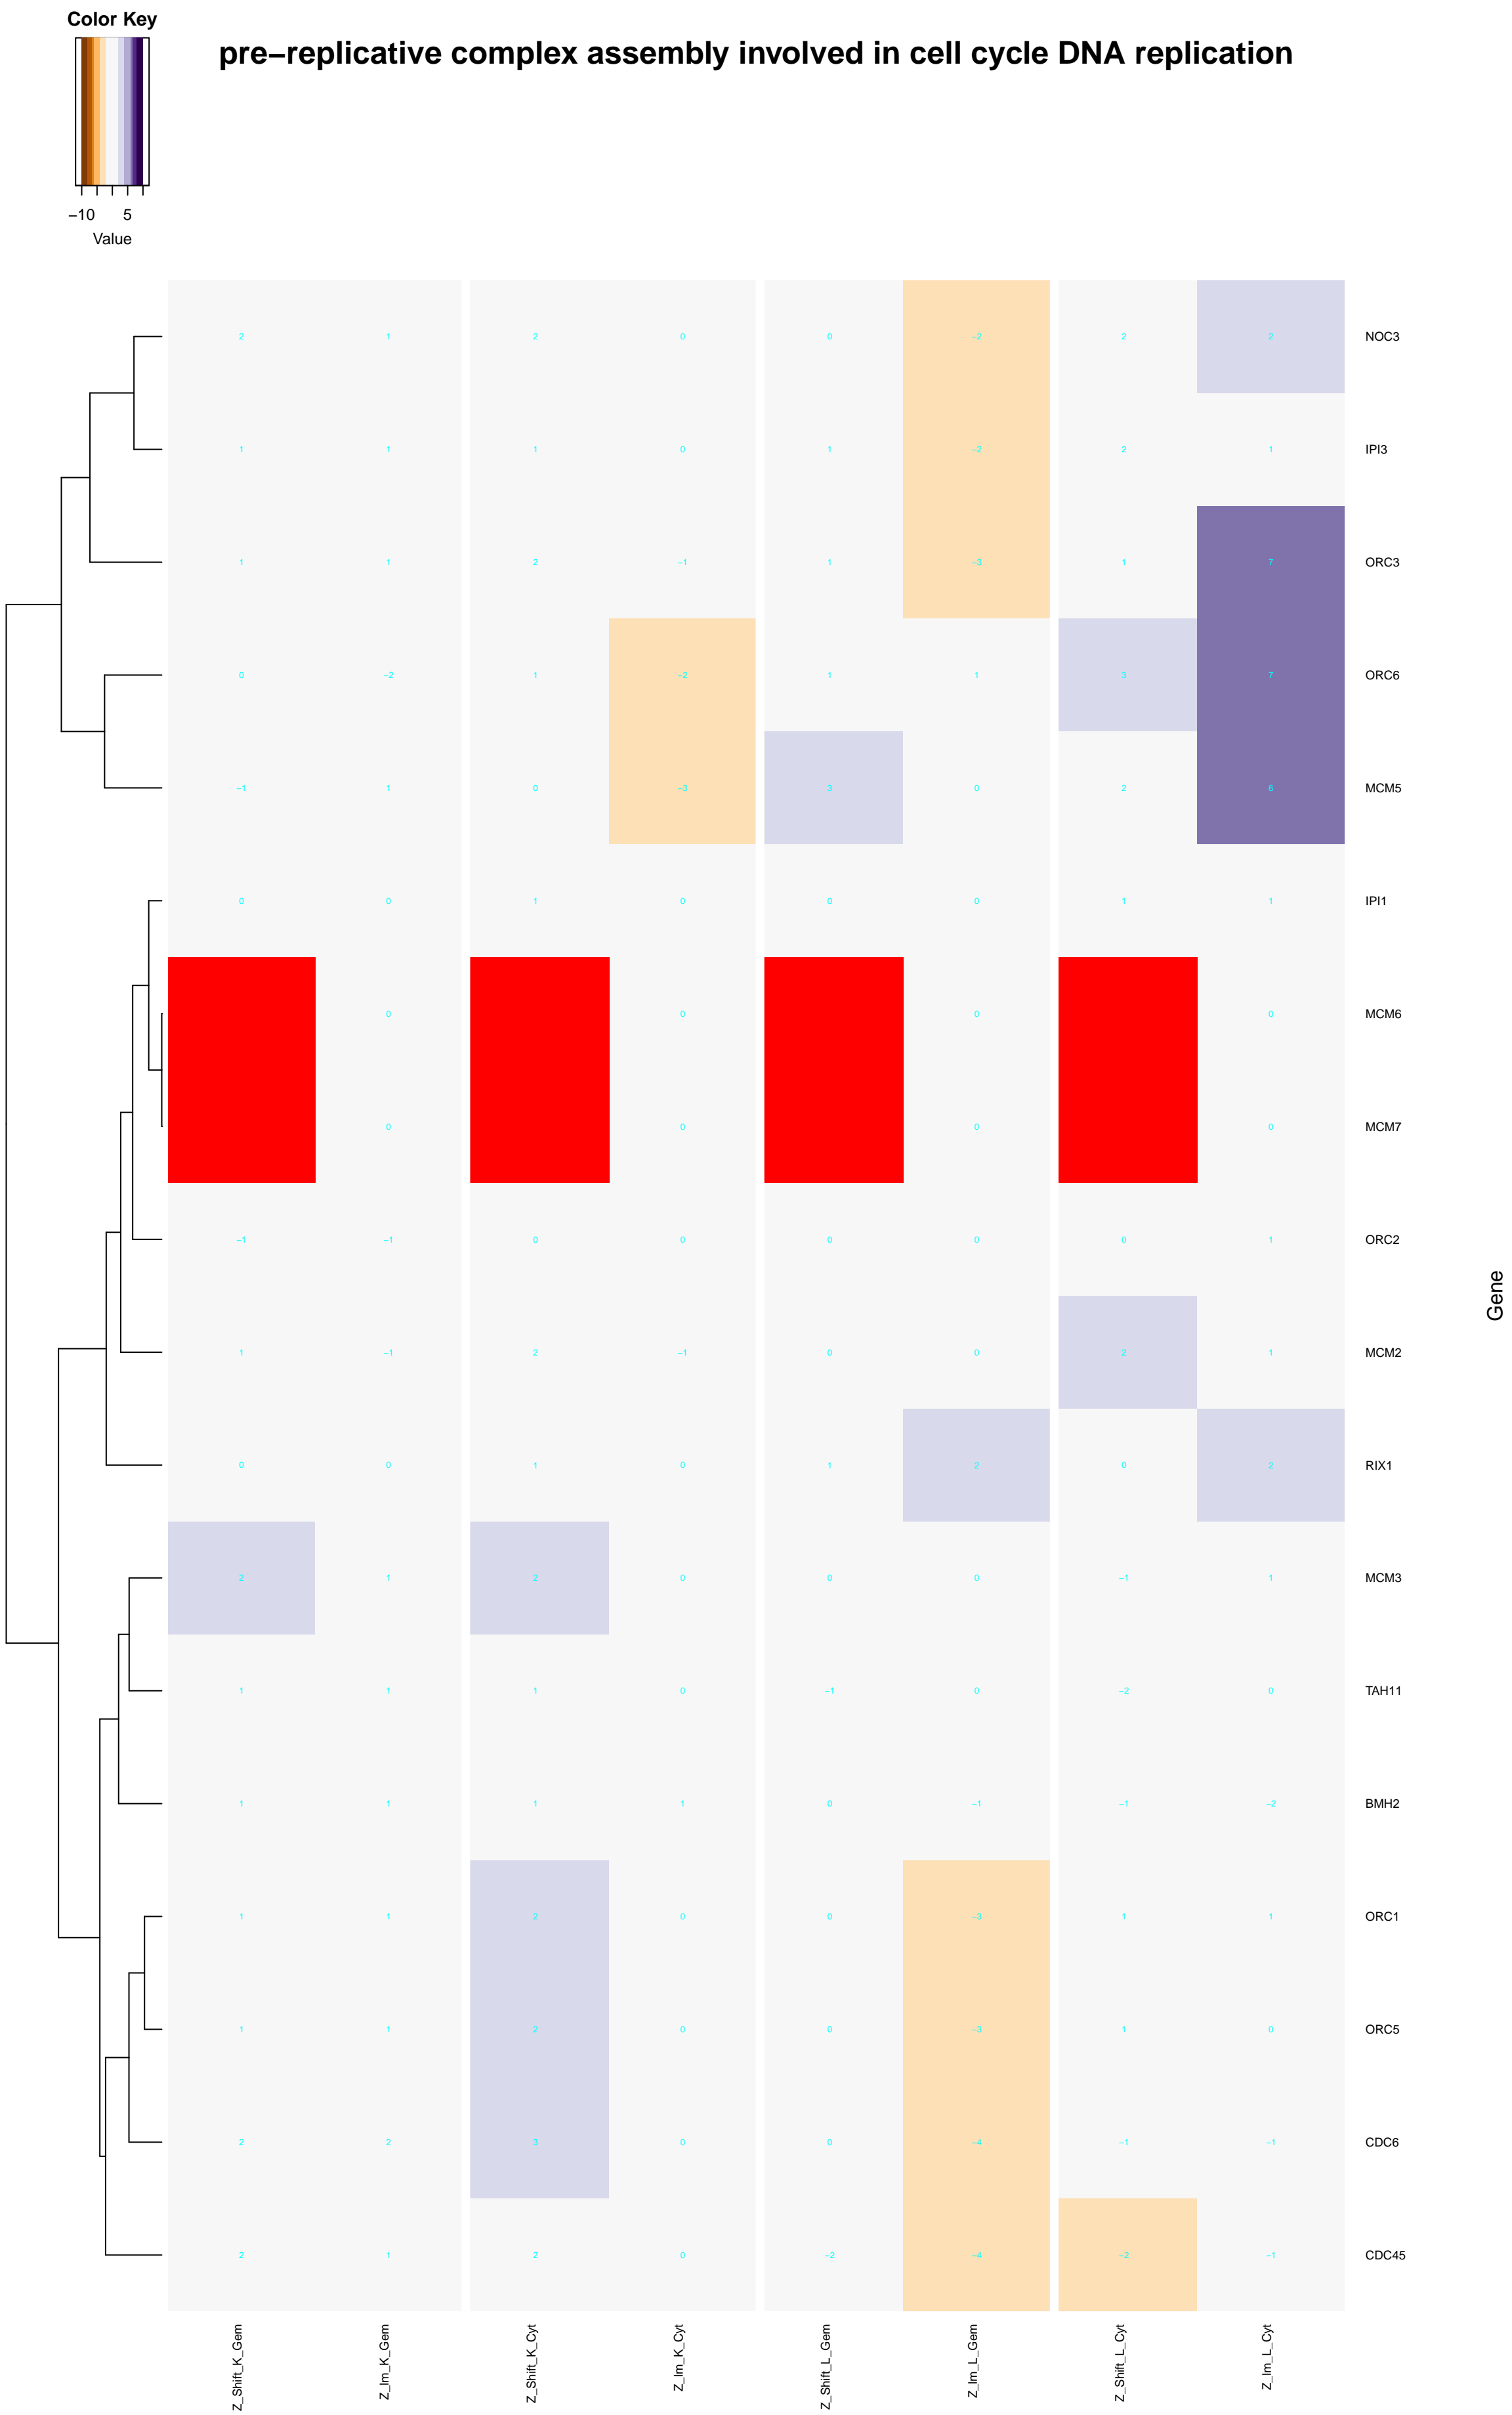

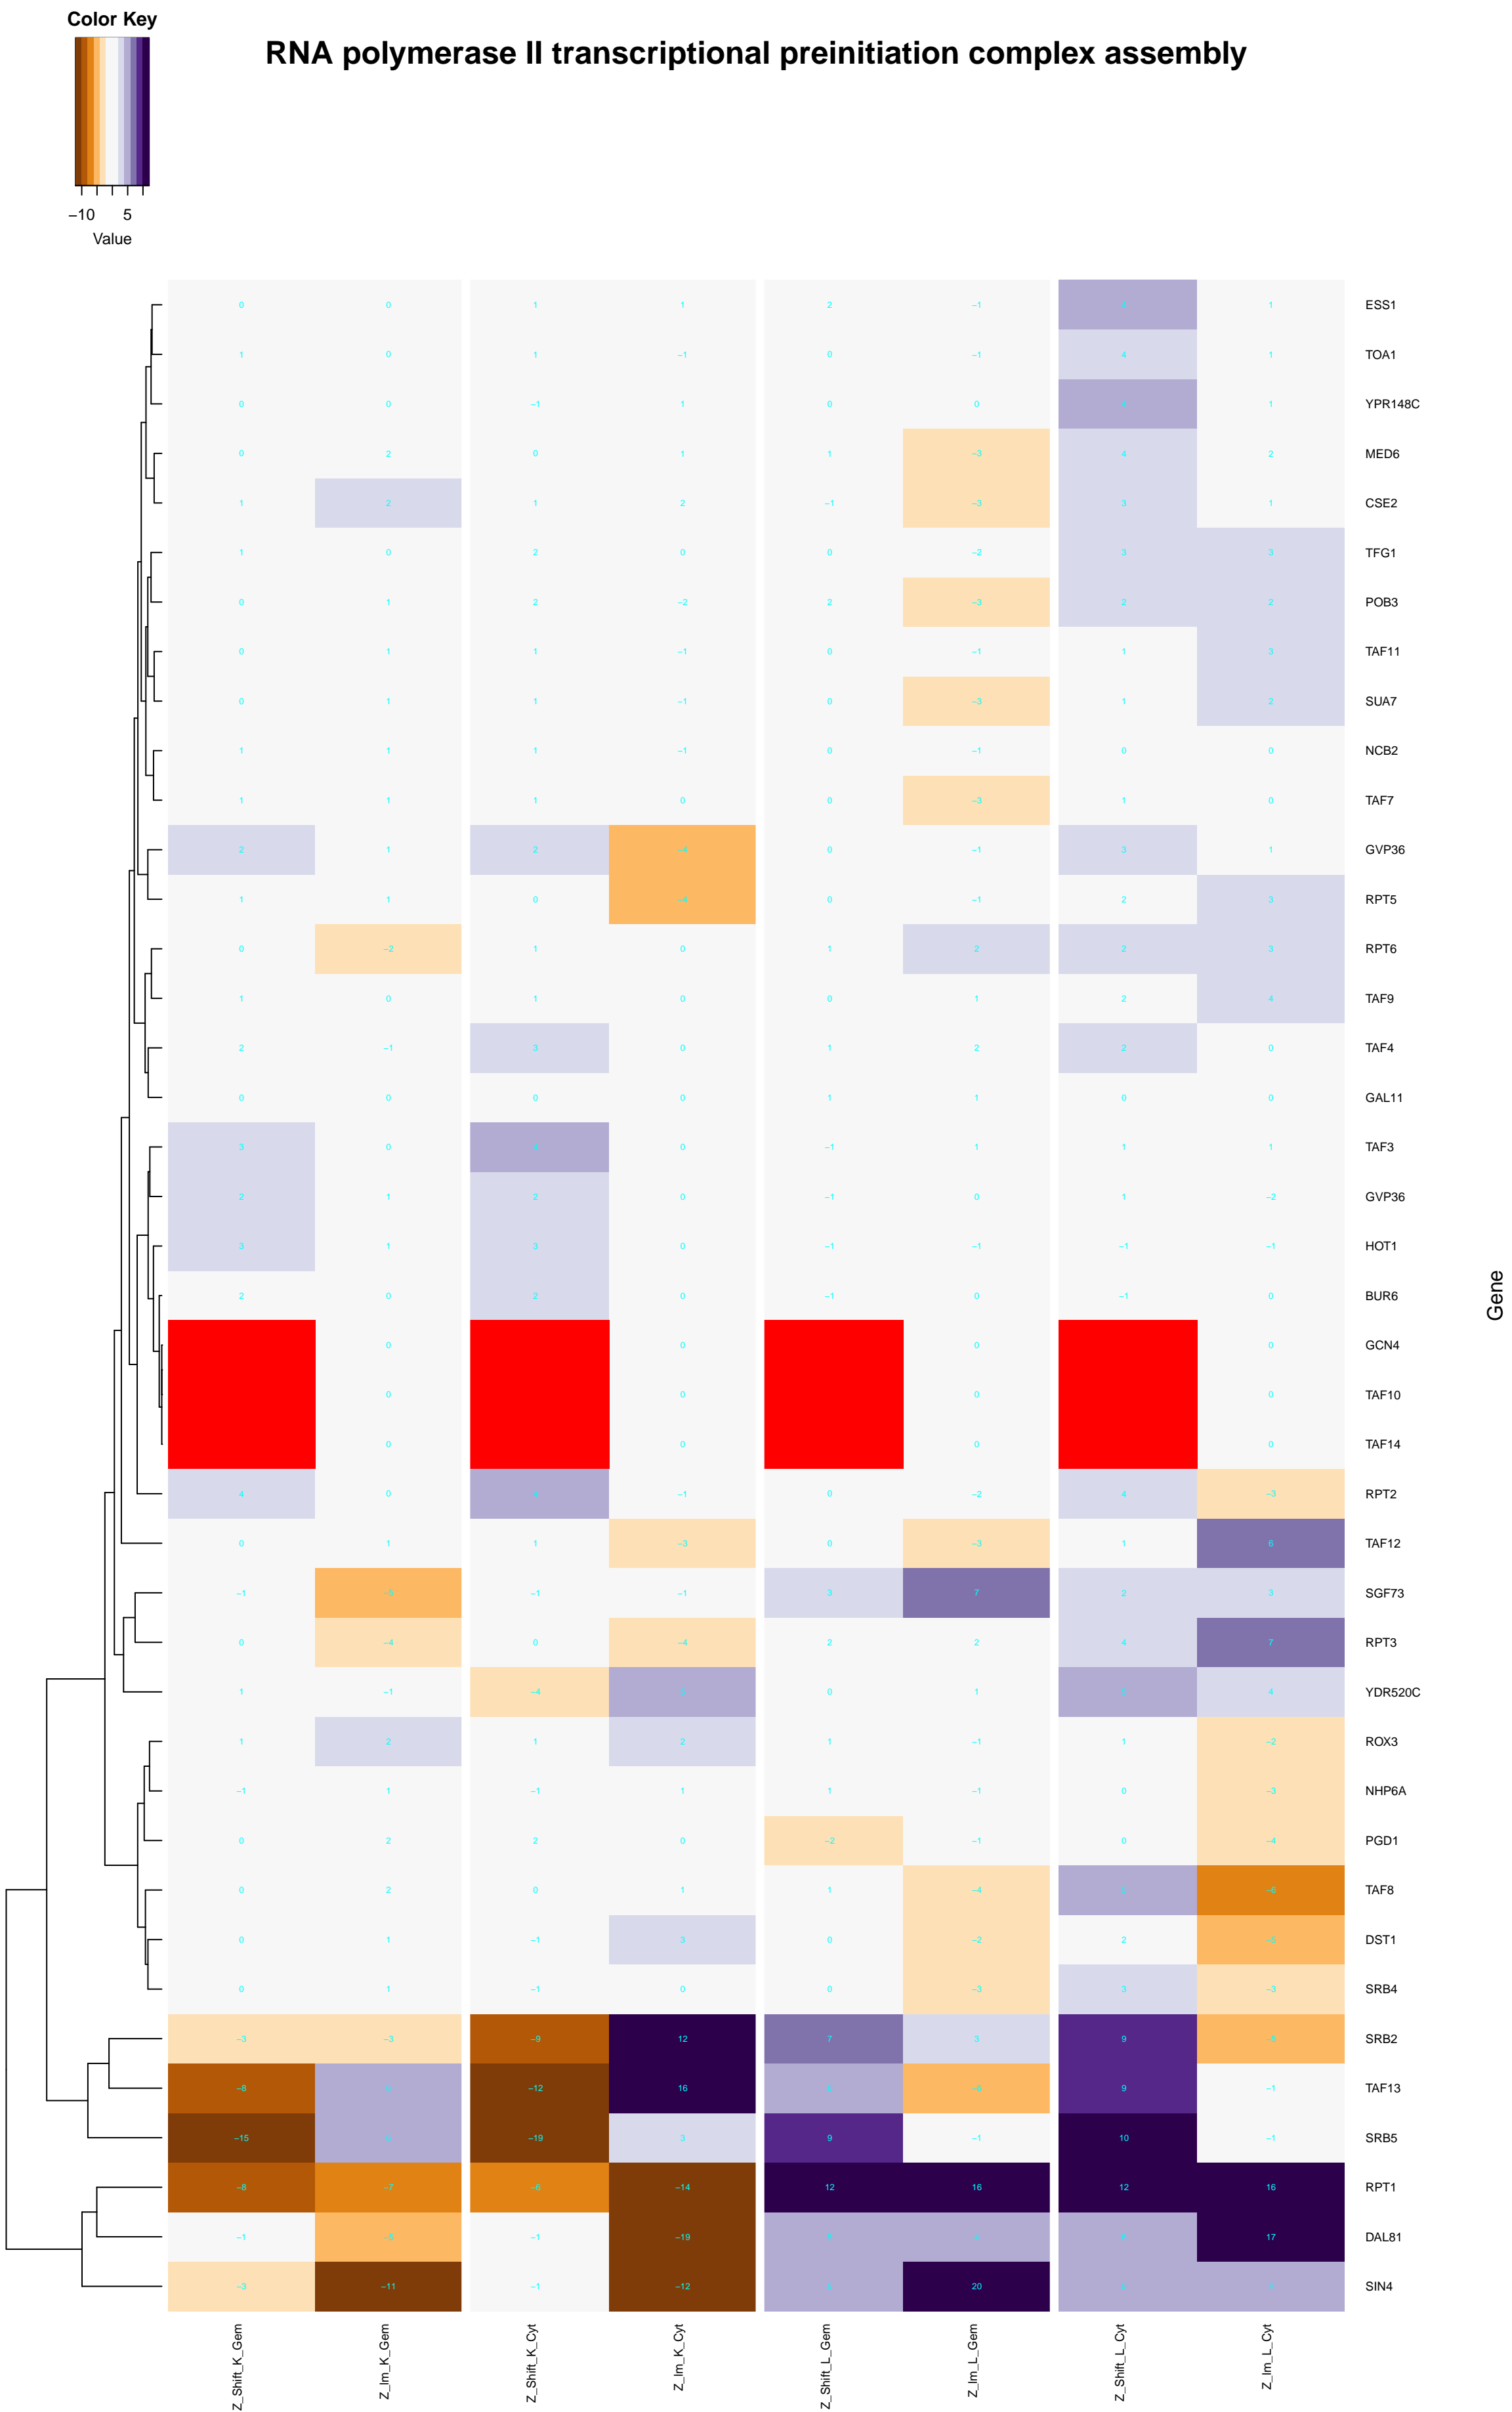

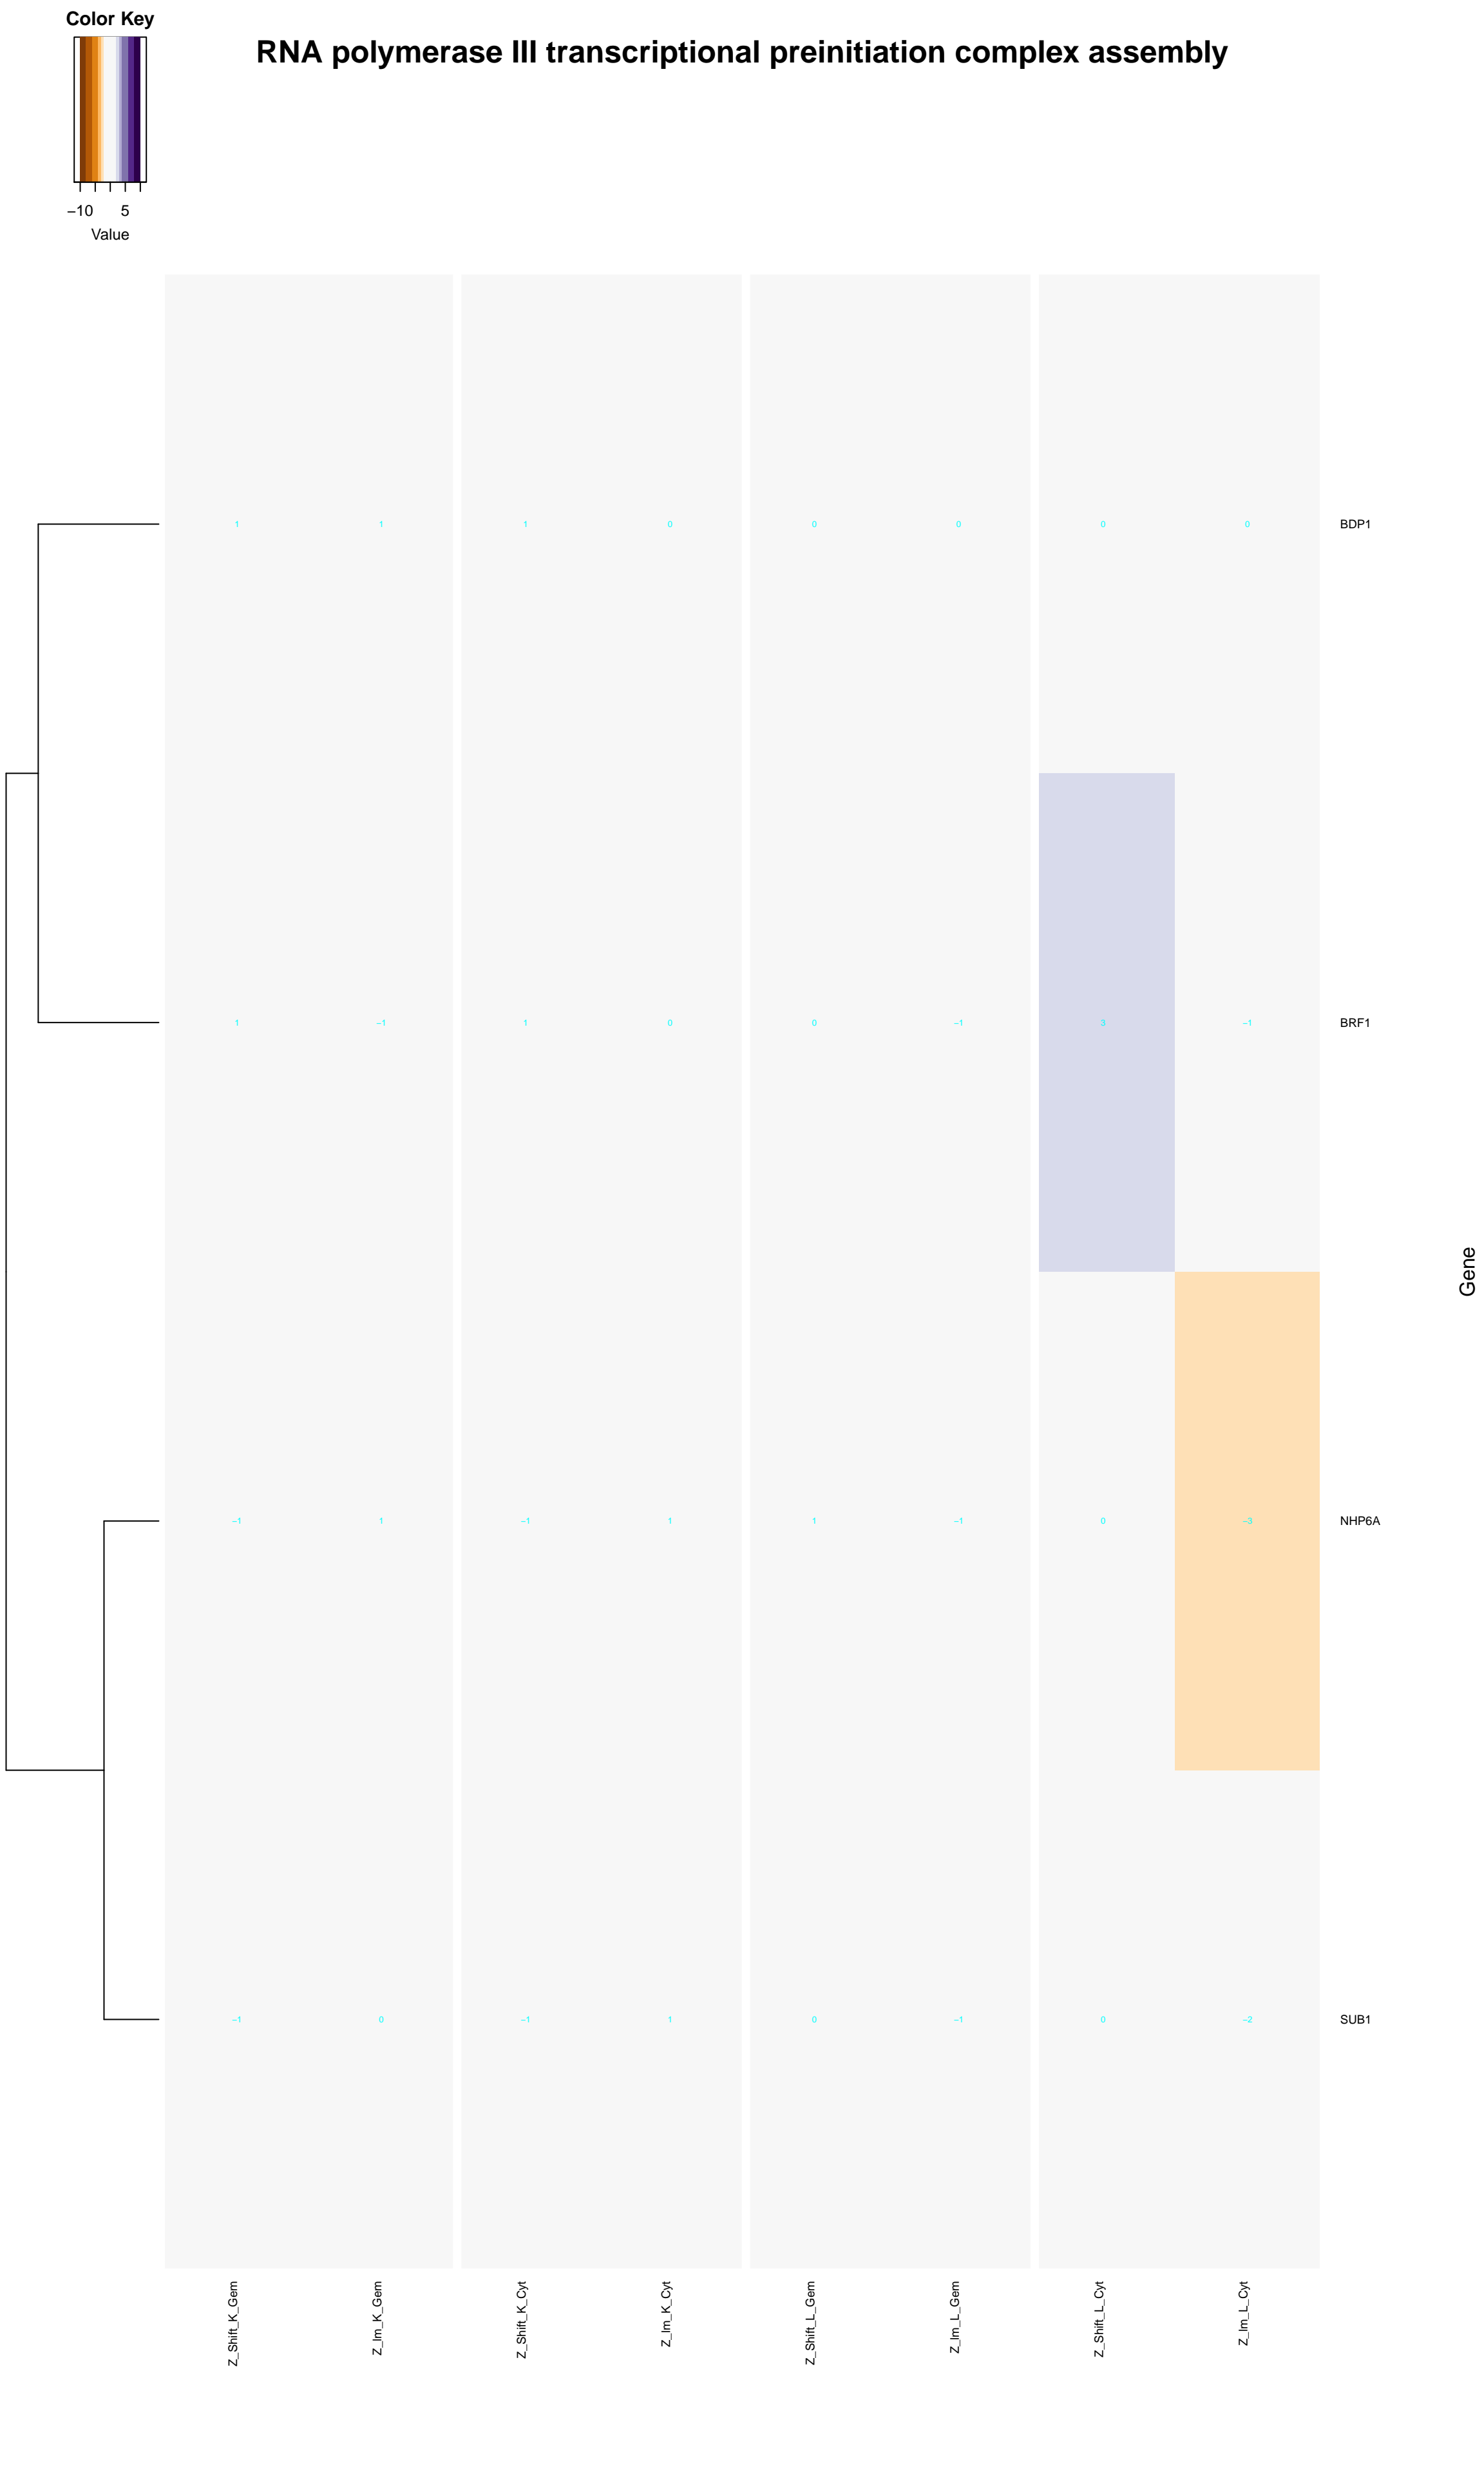

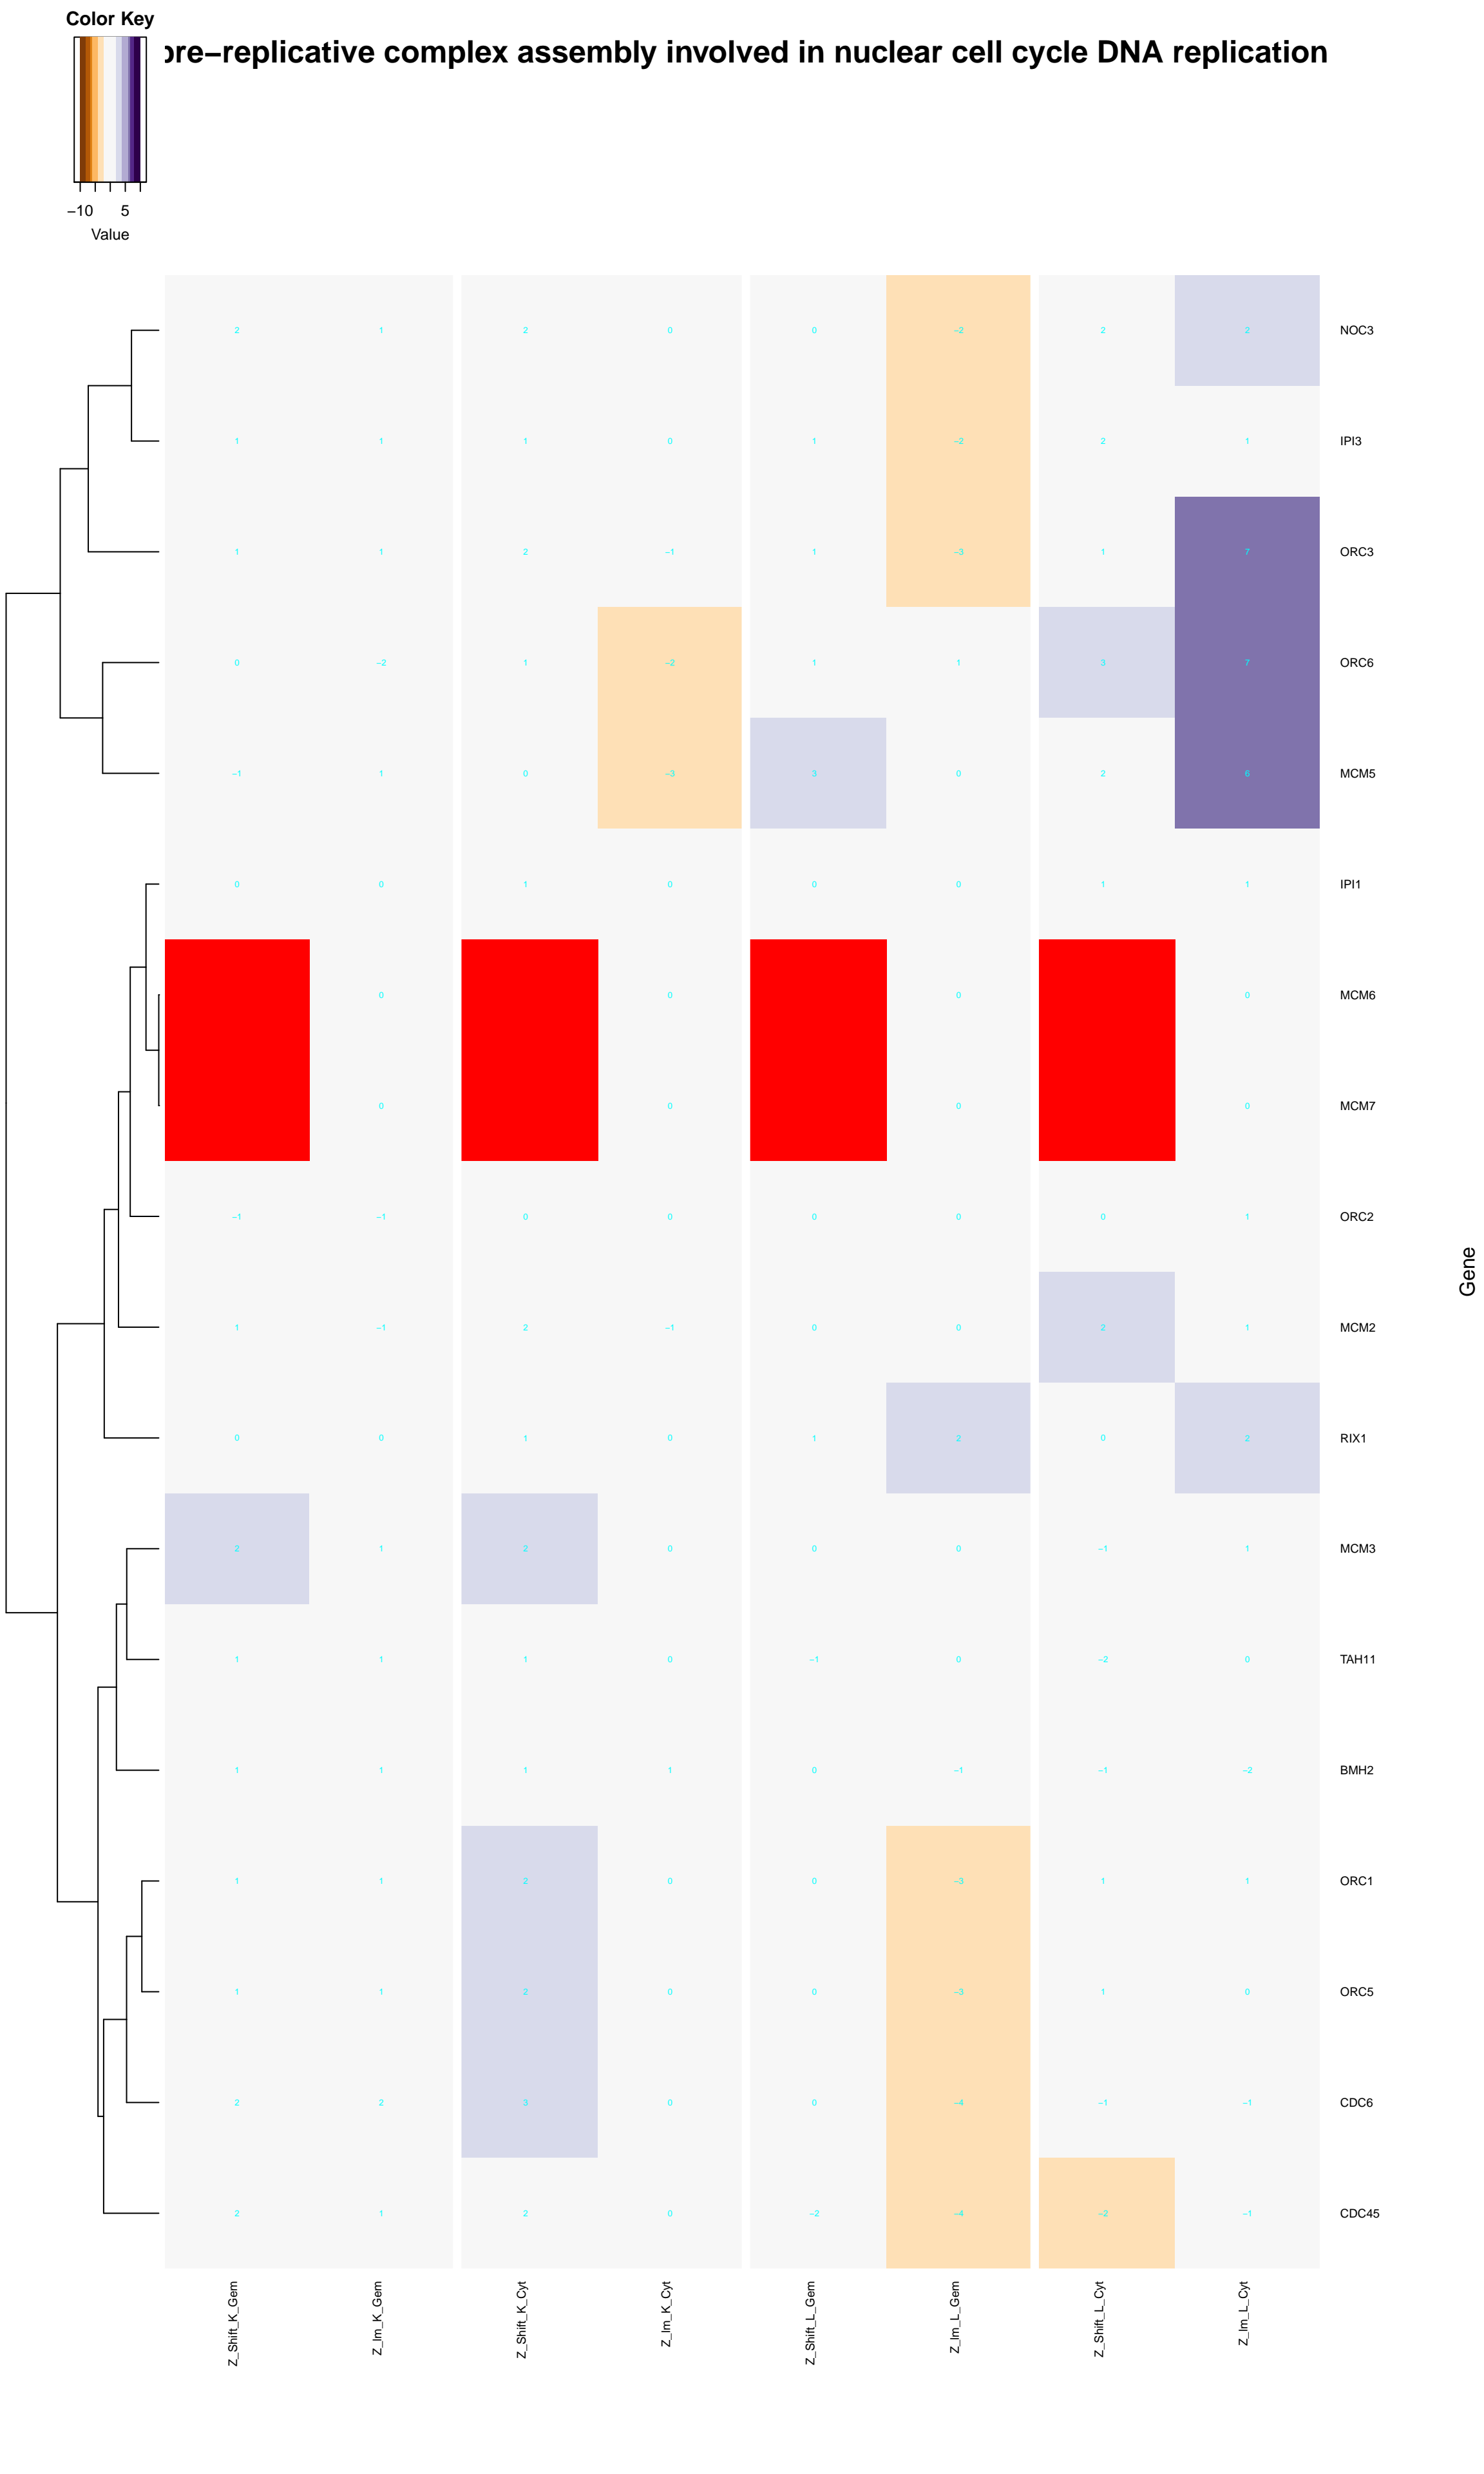

Supplement: s1 [file s1]

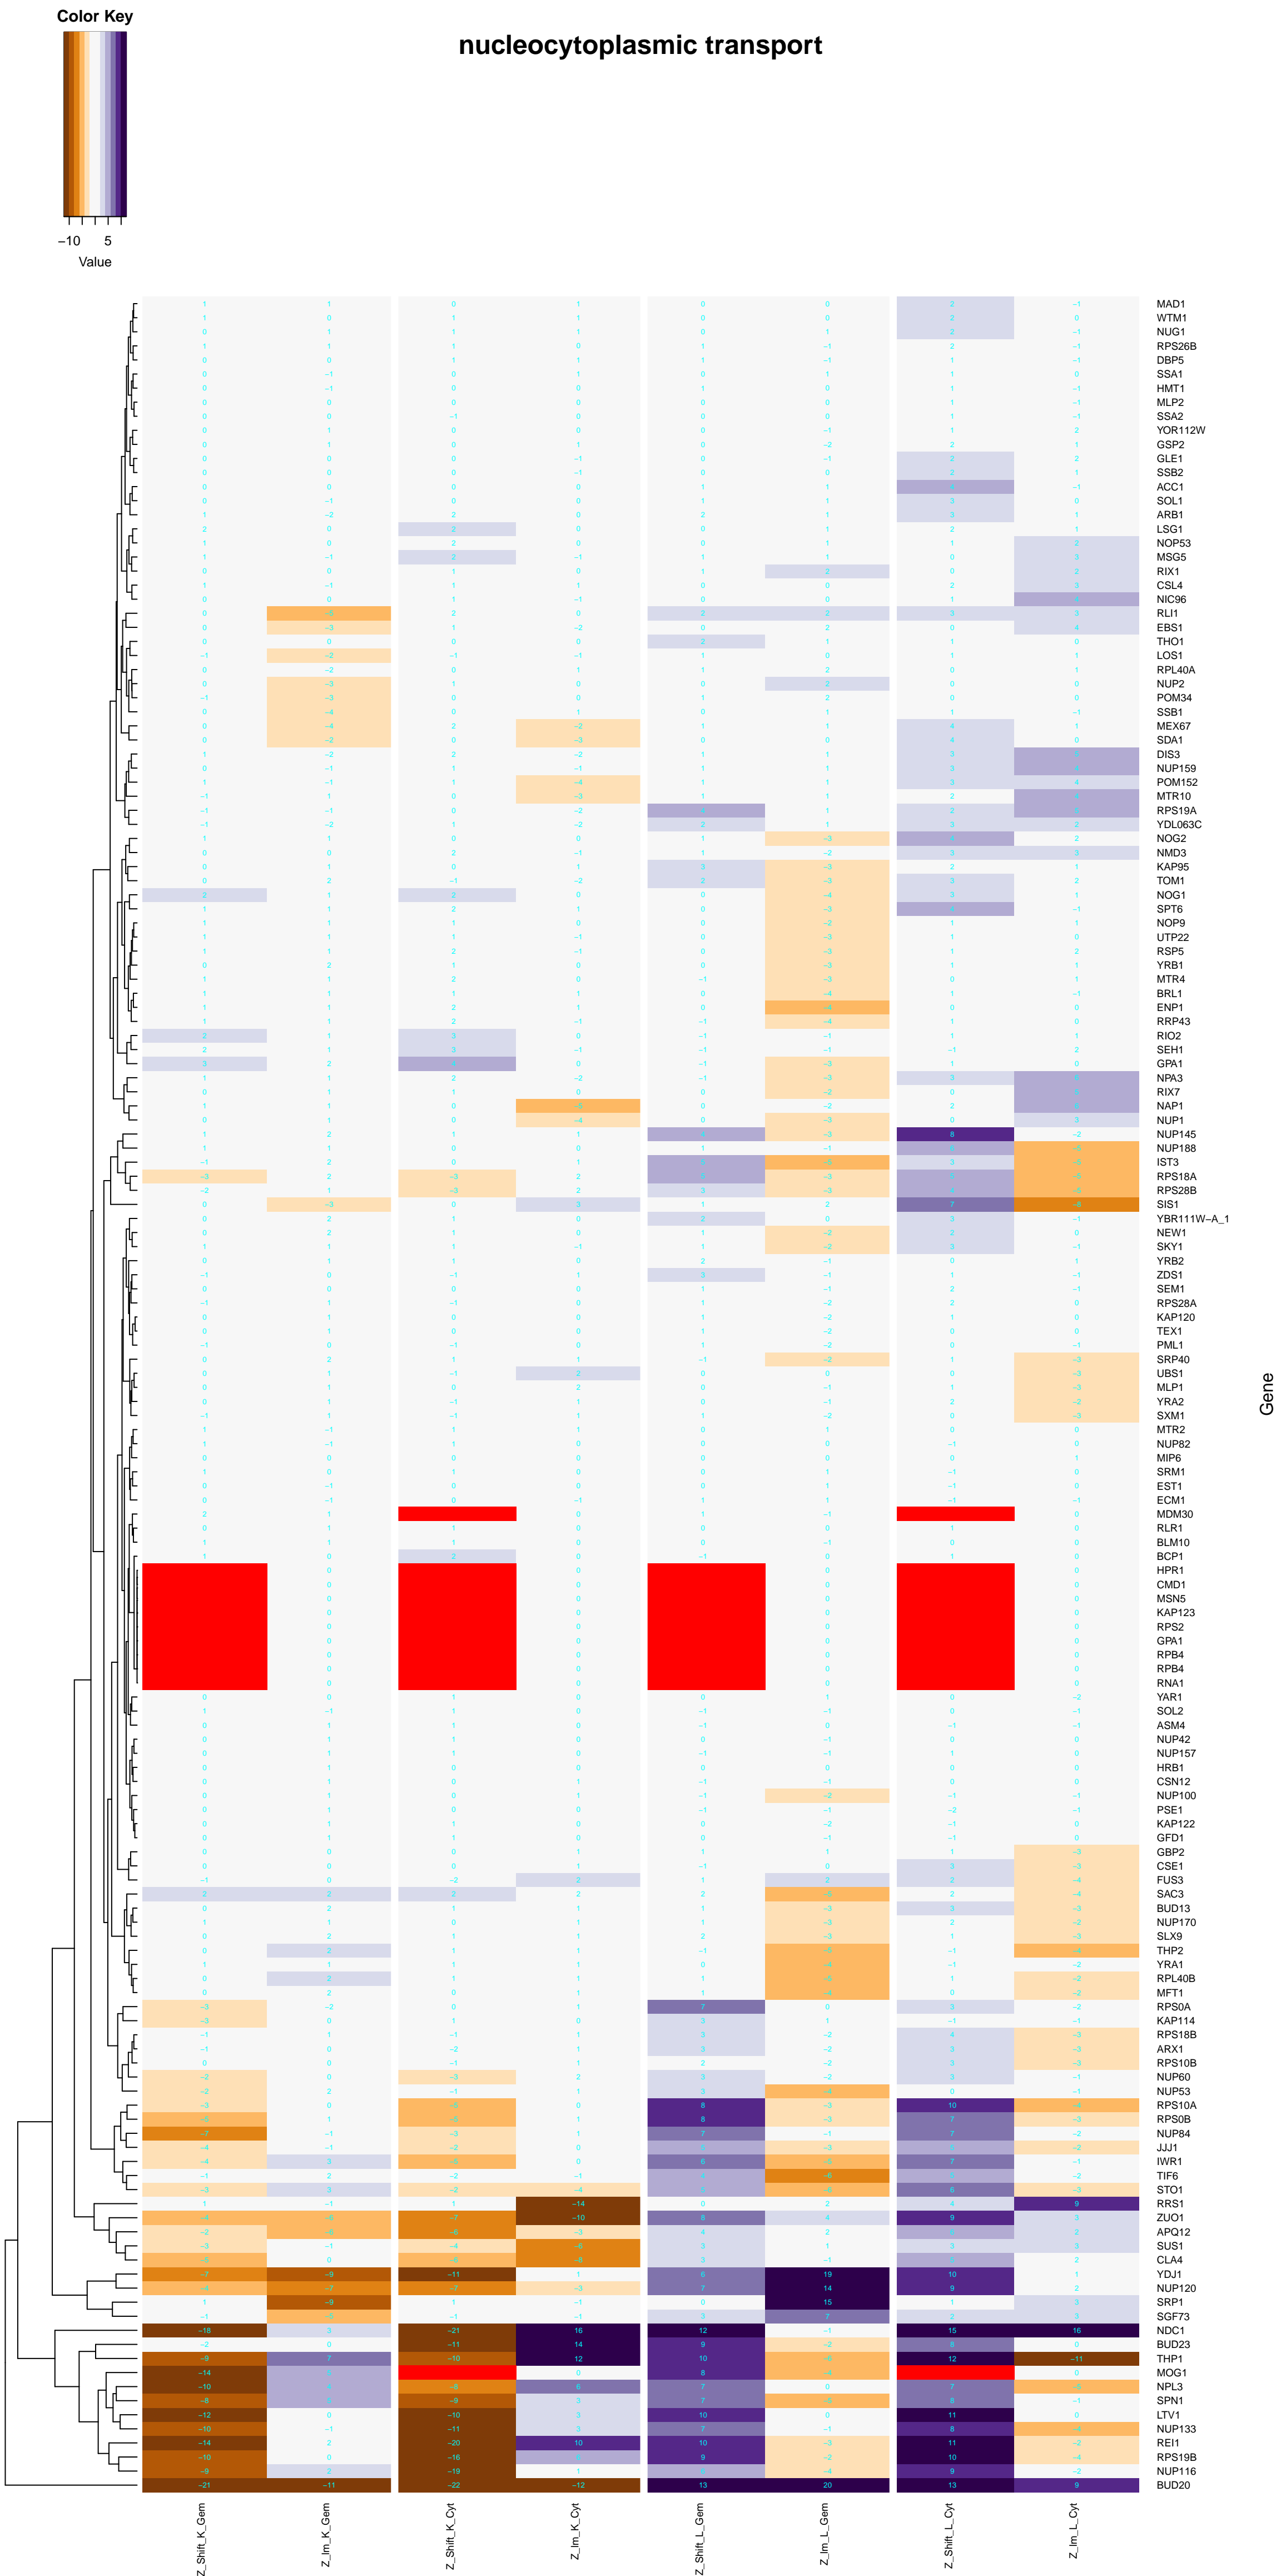

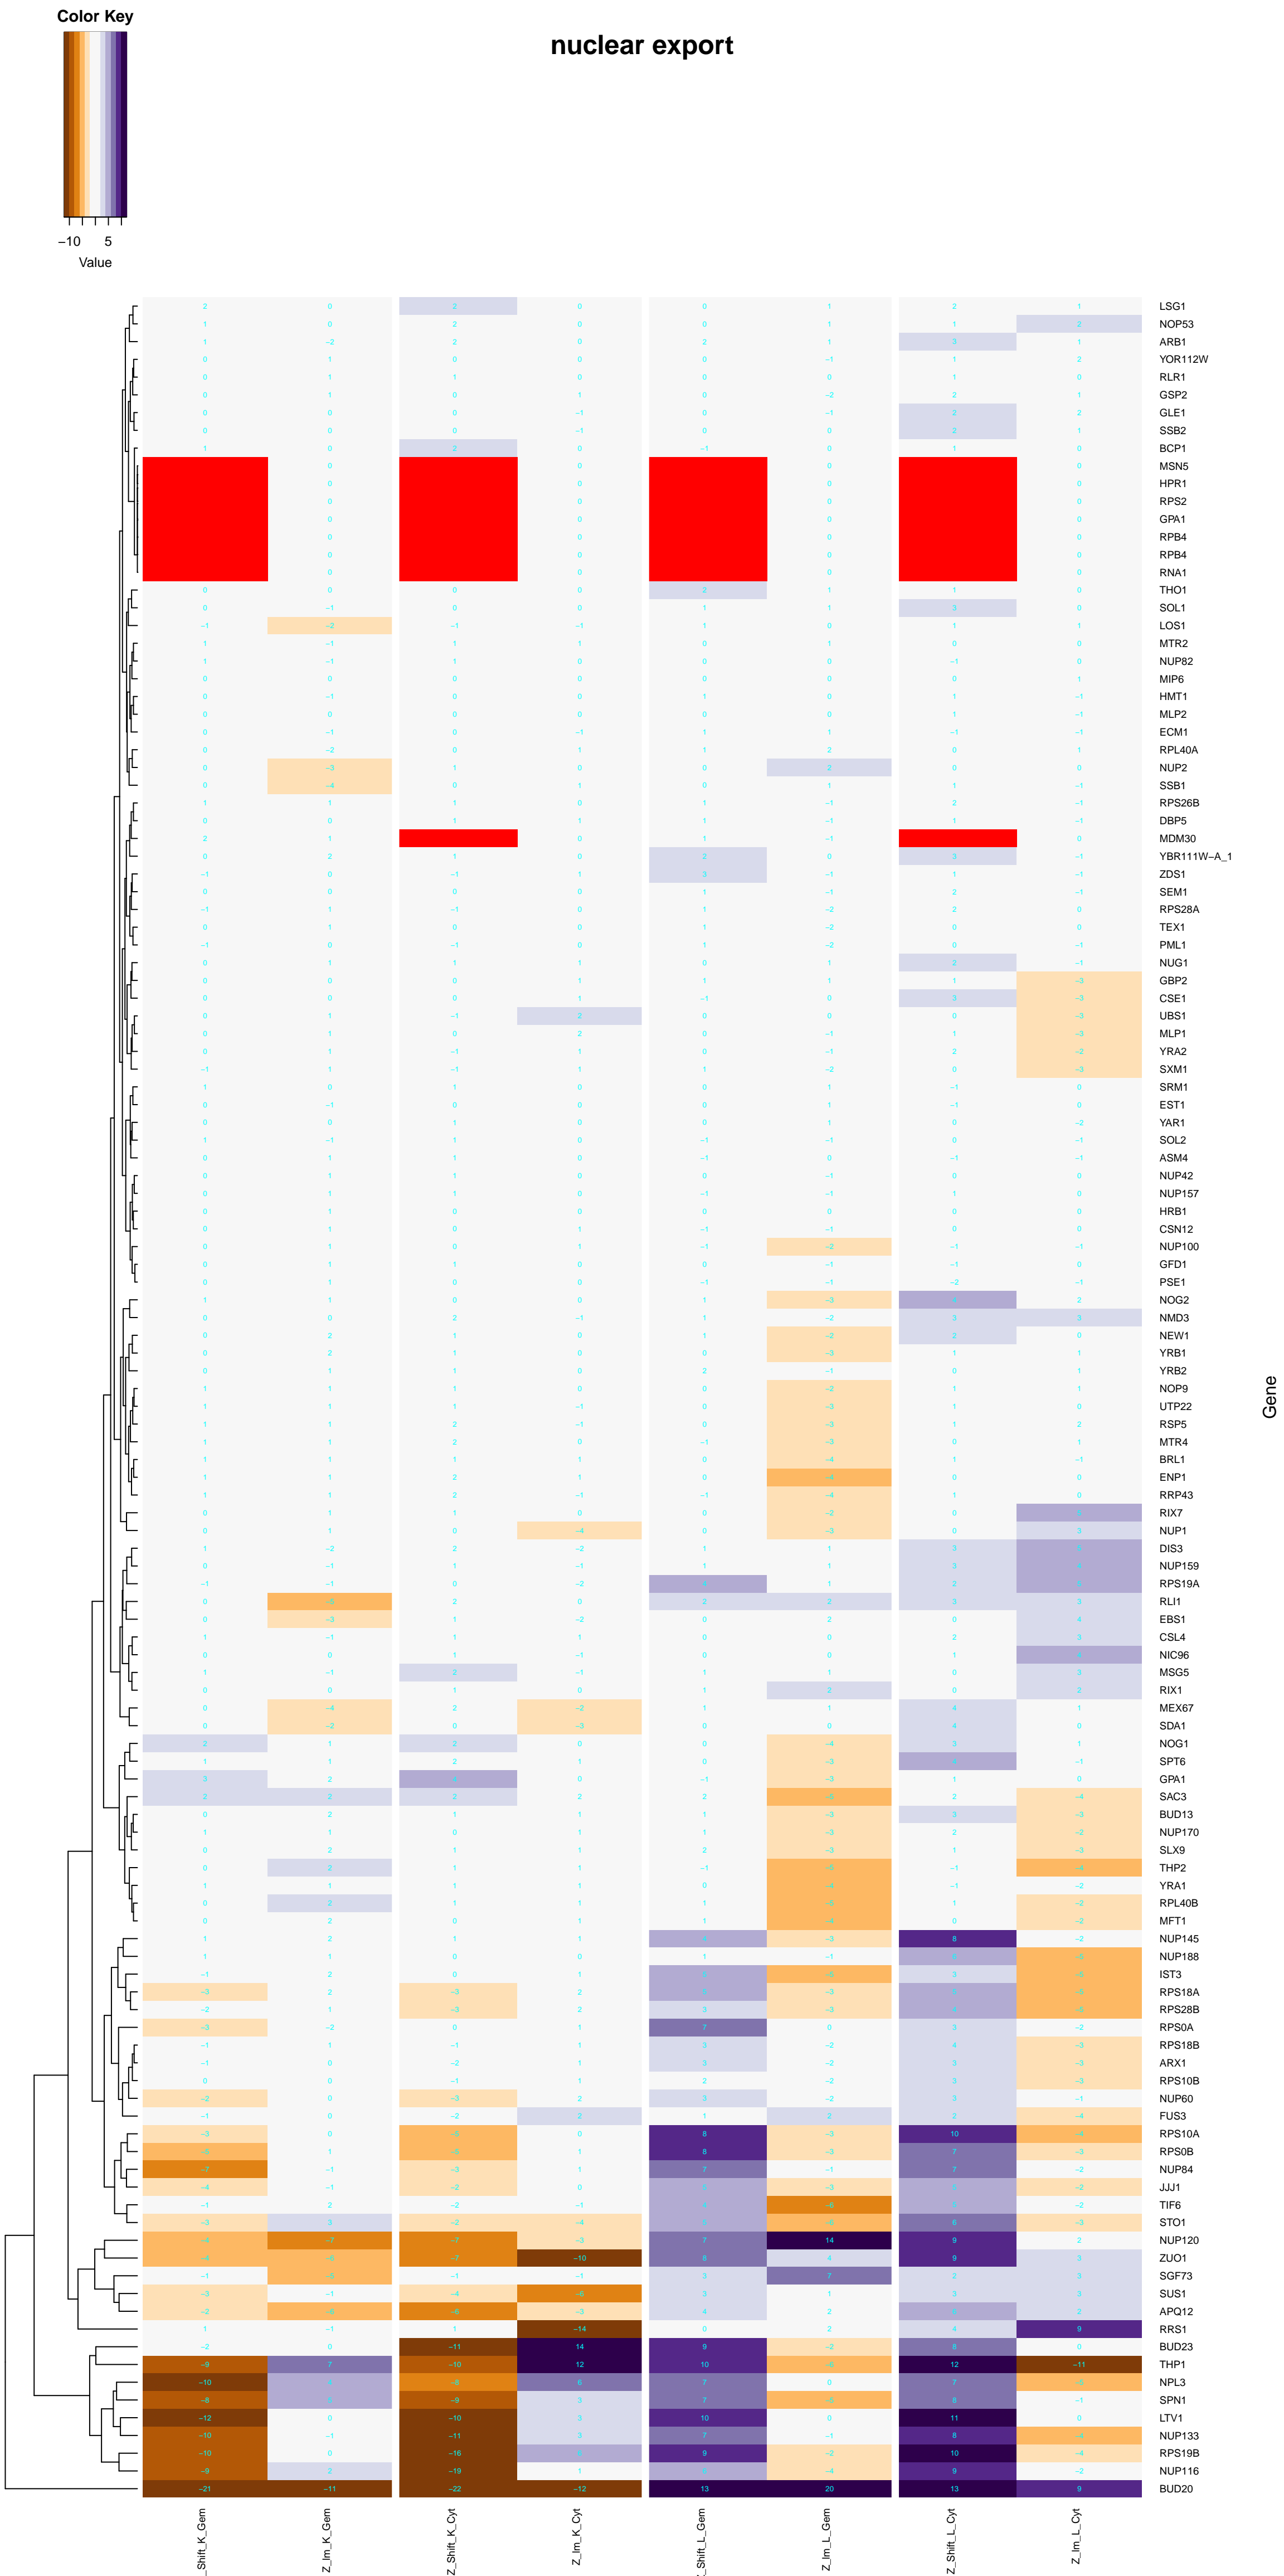

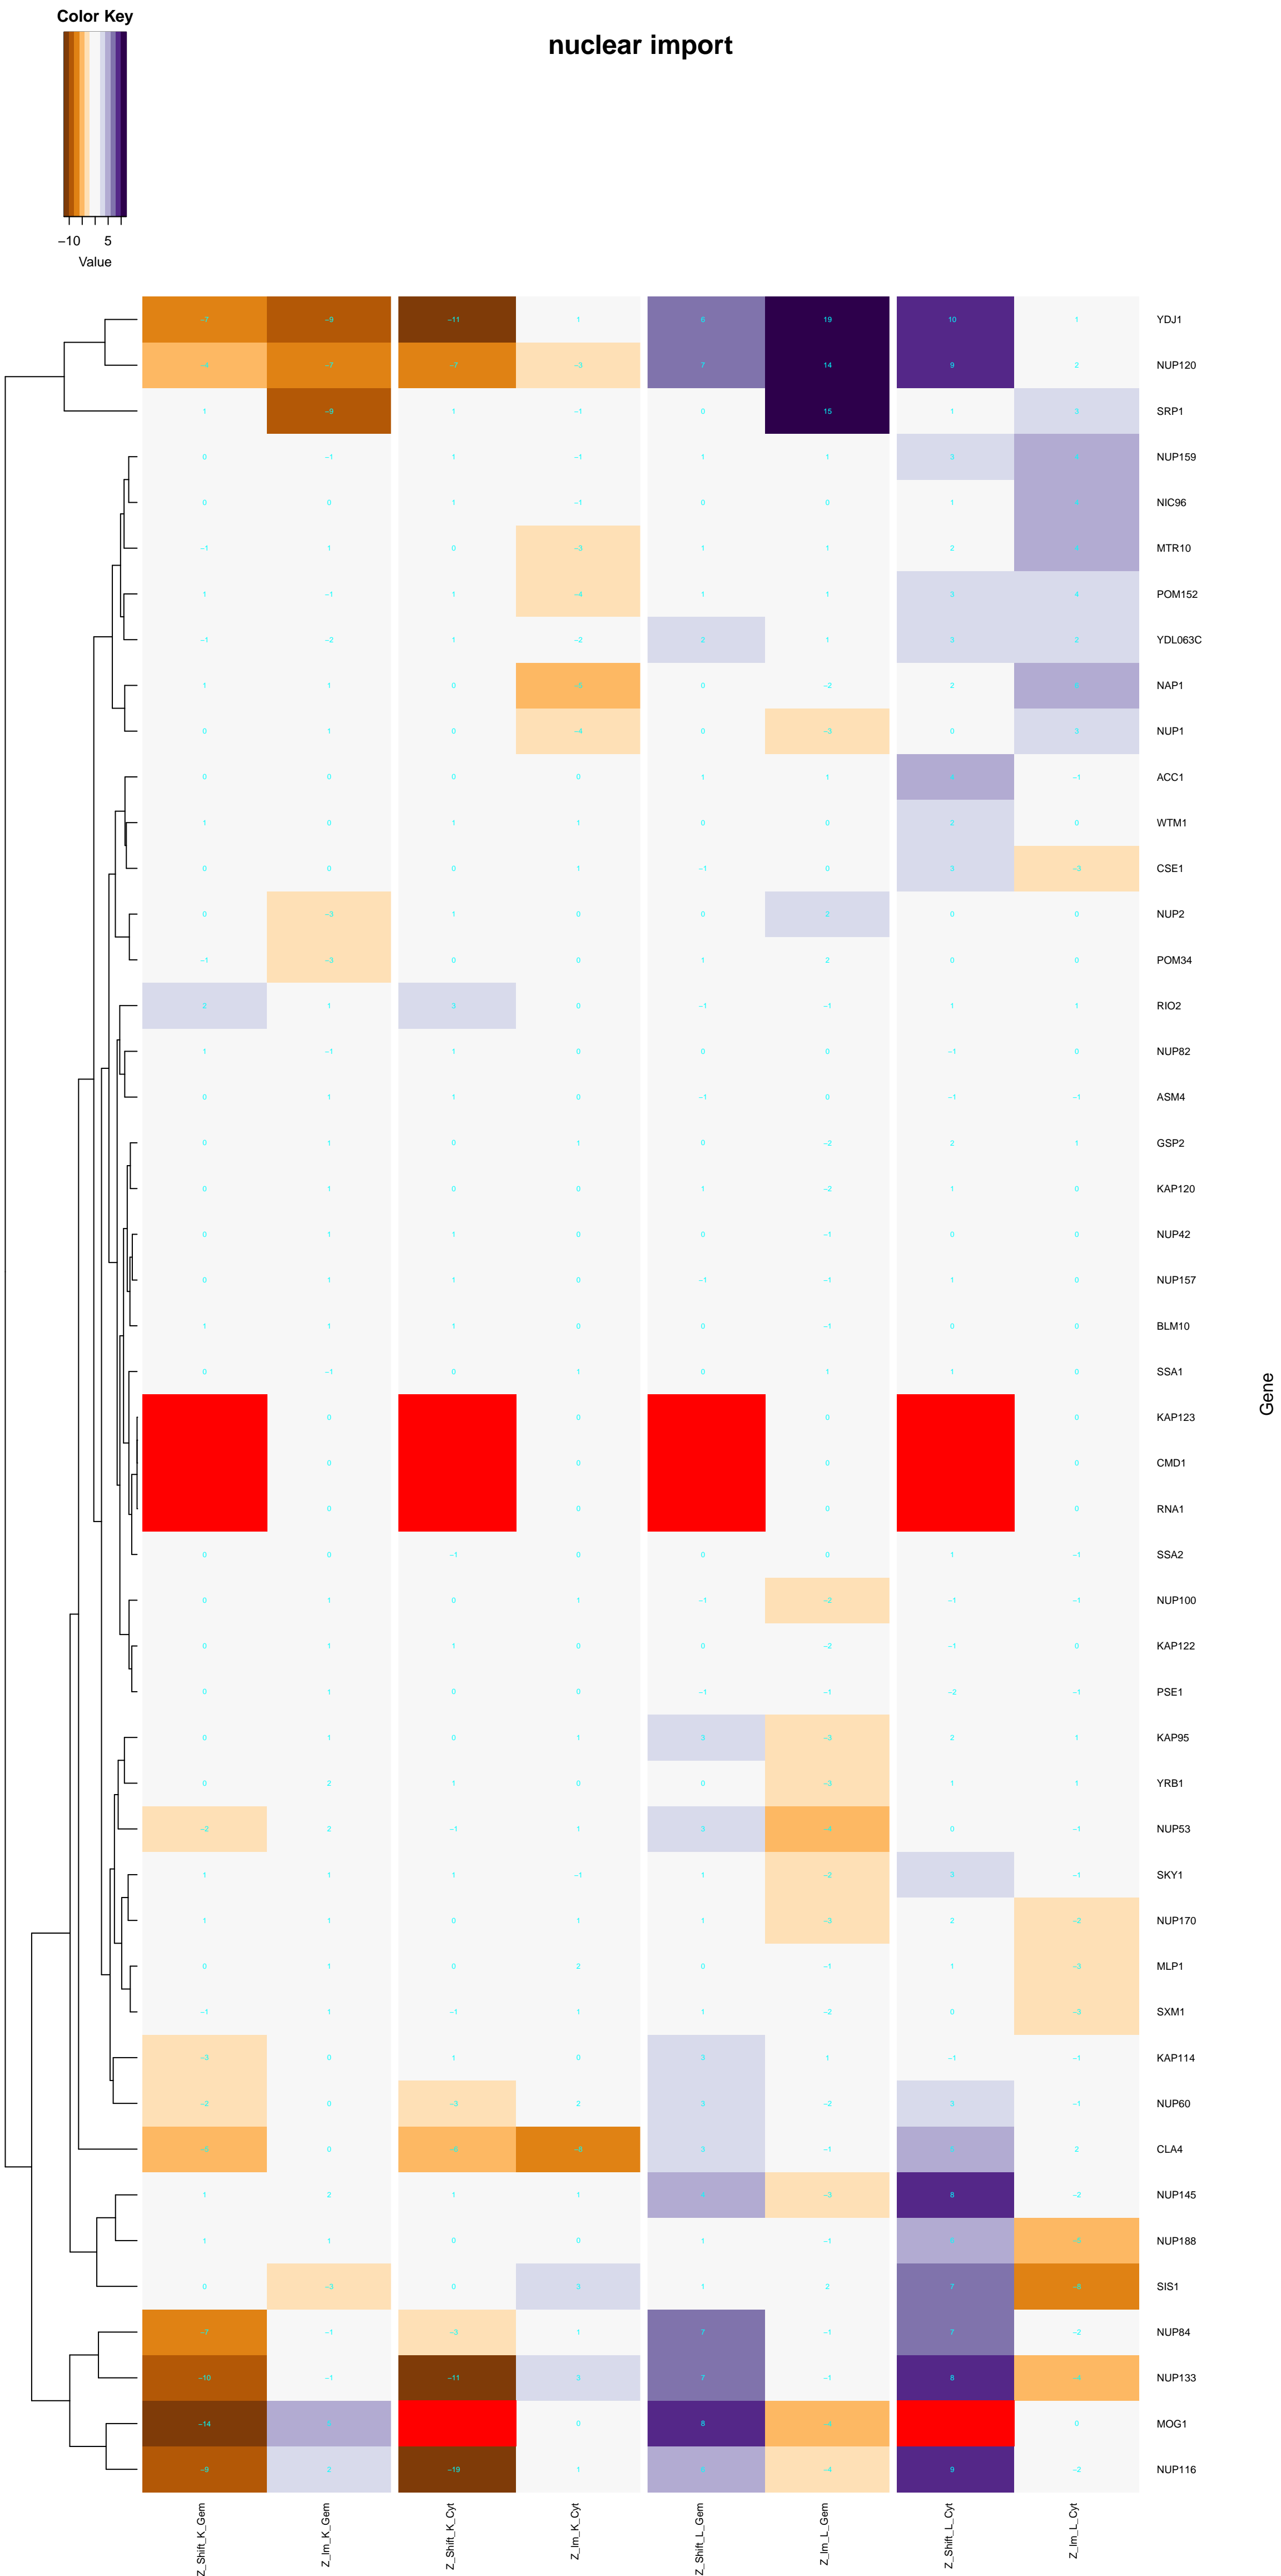

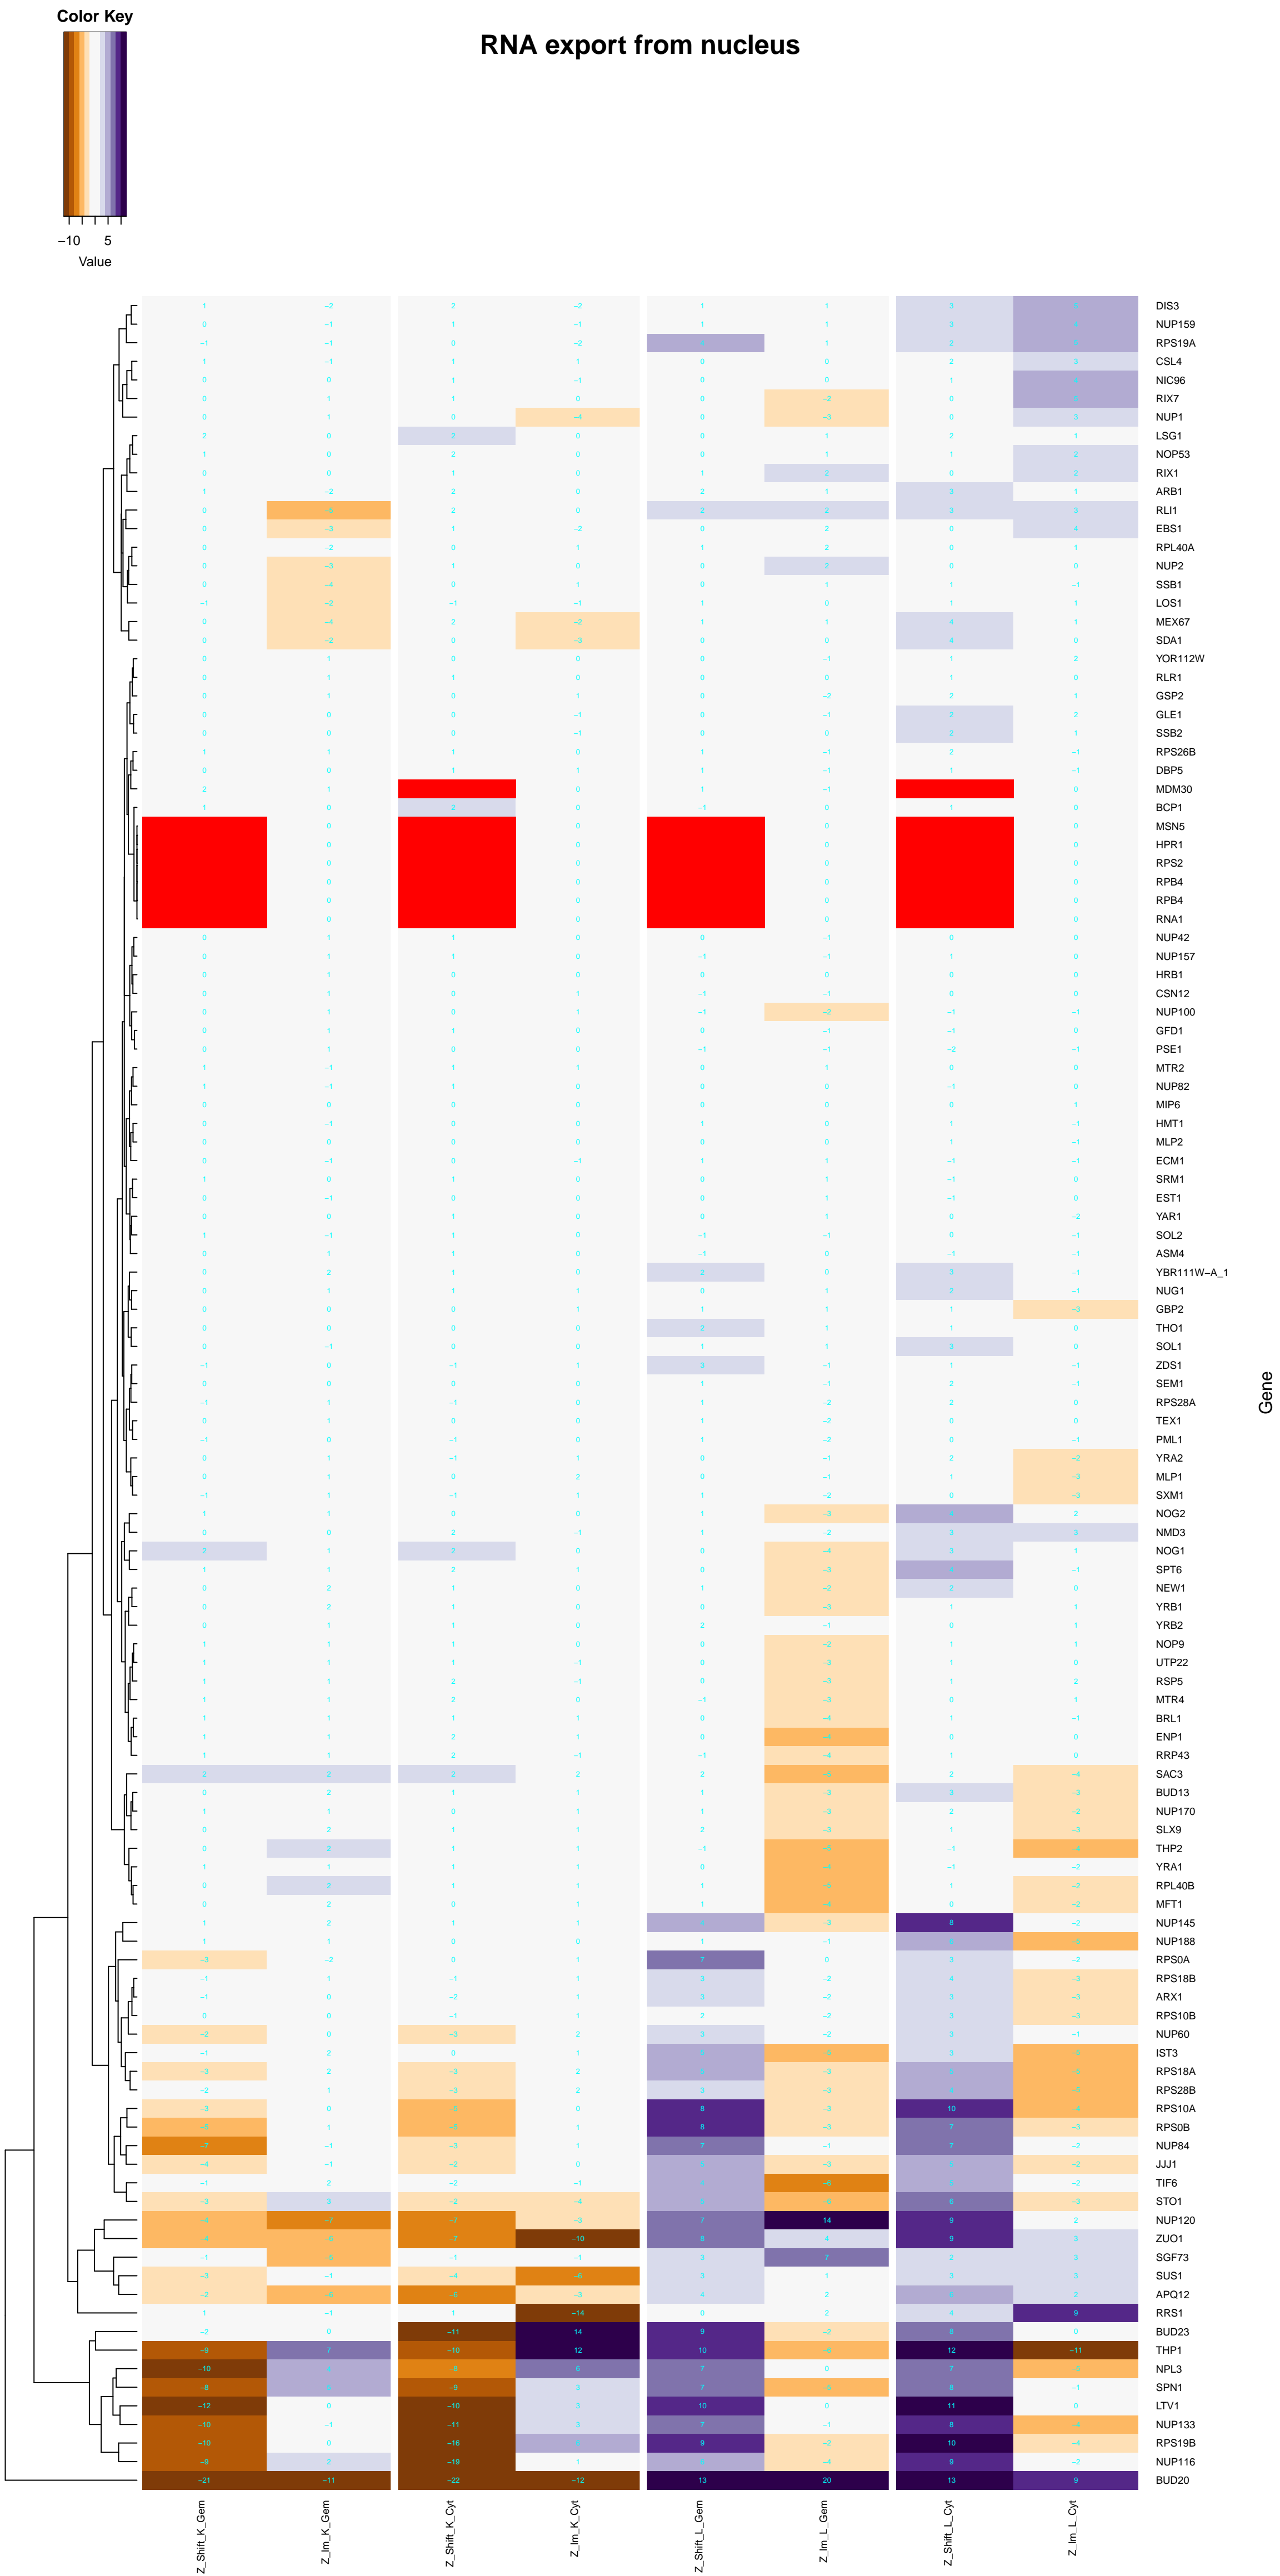

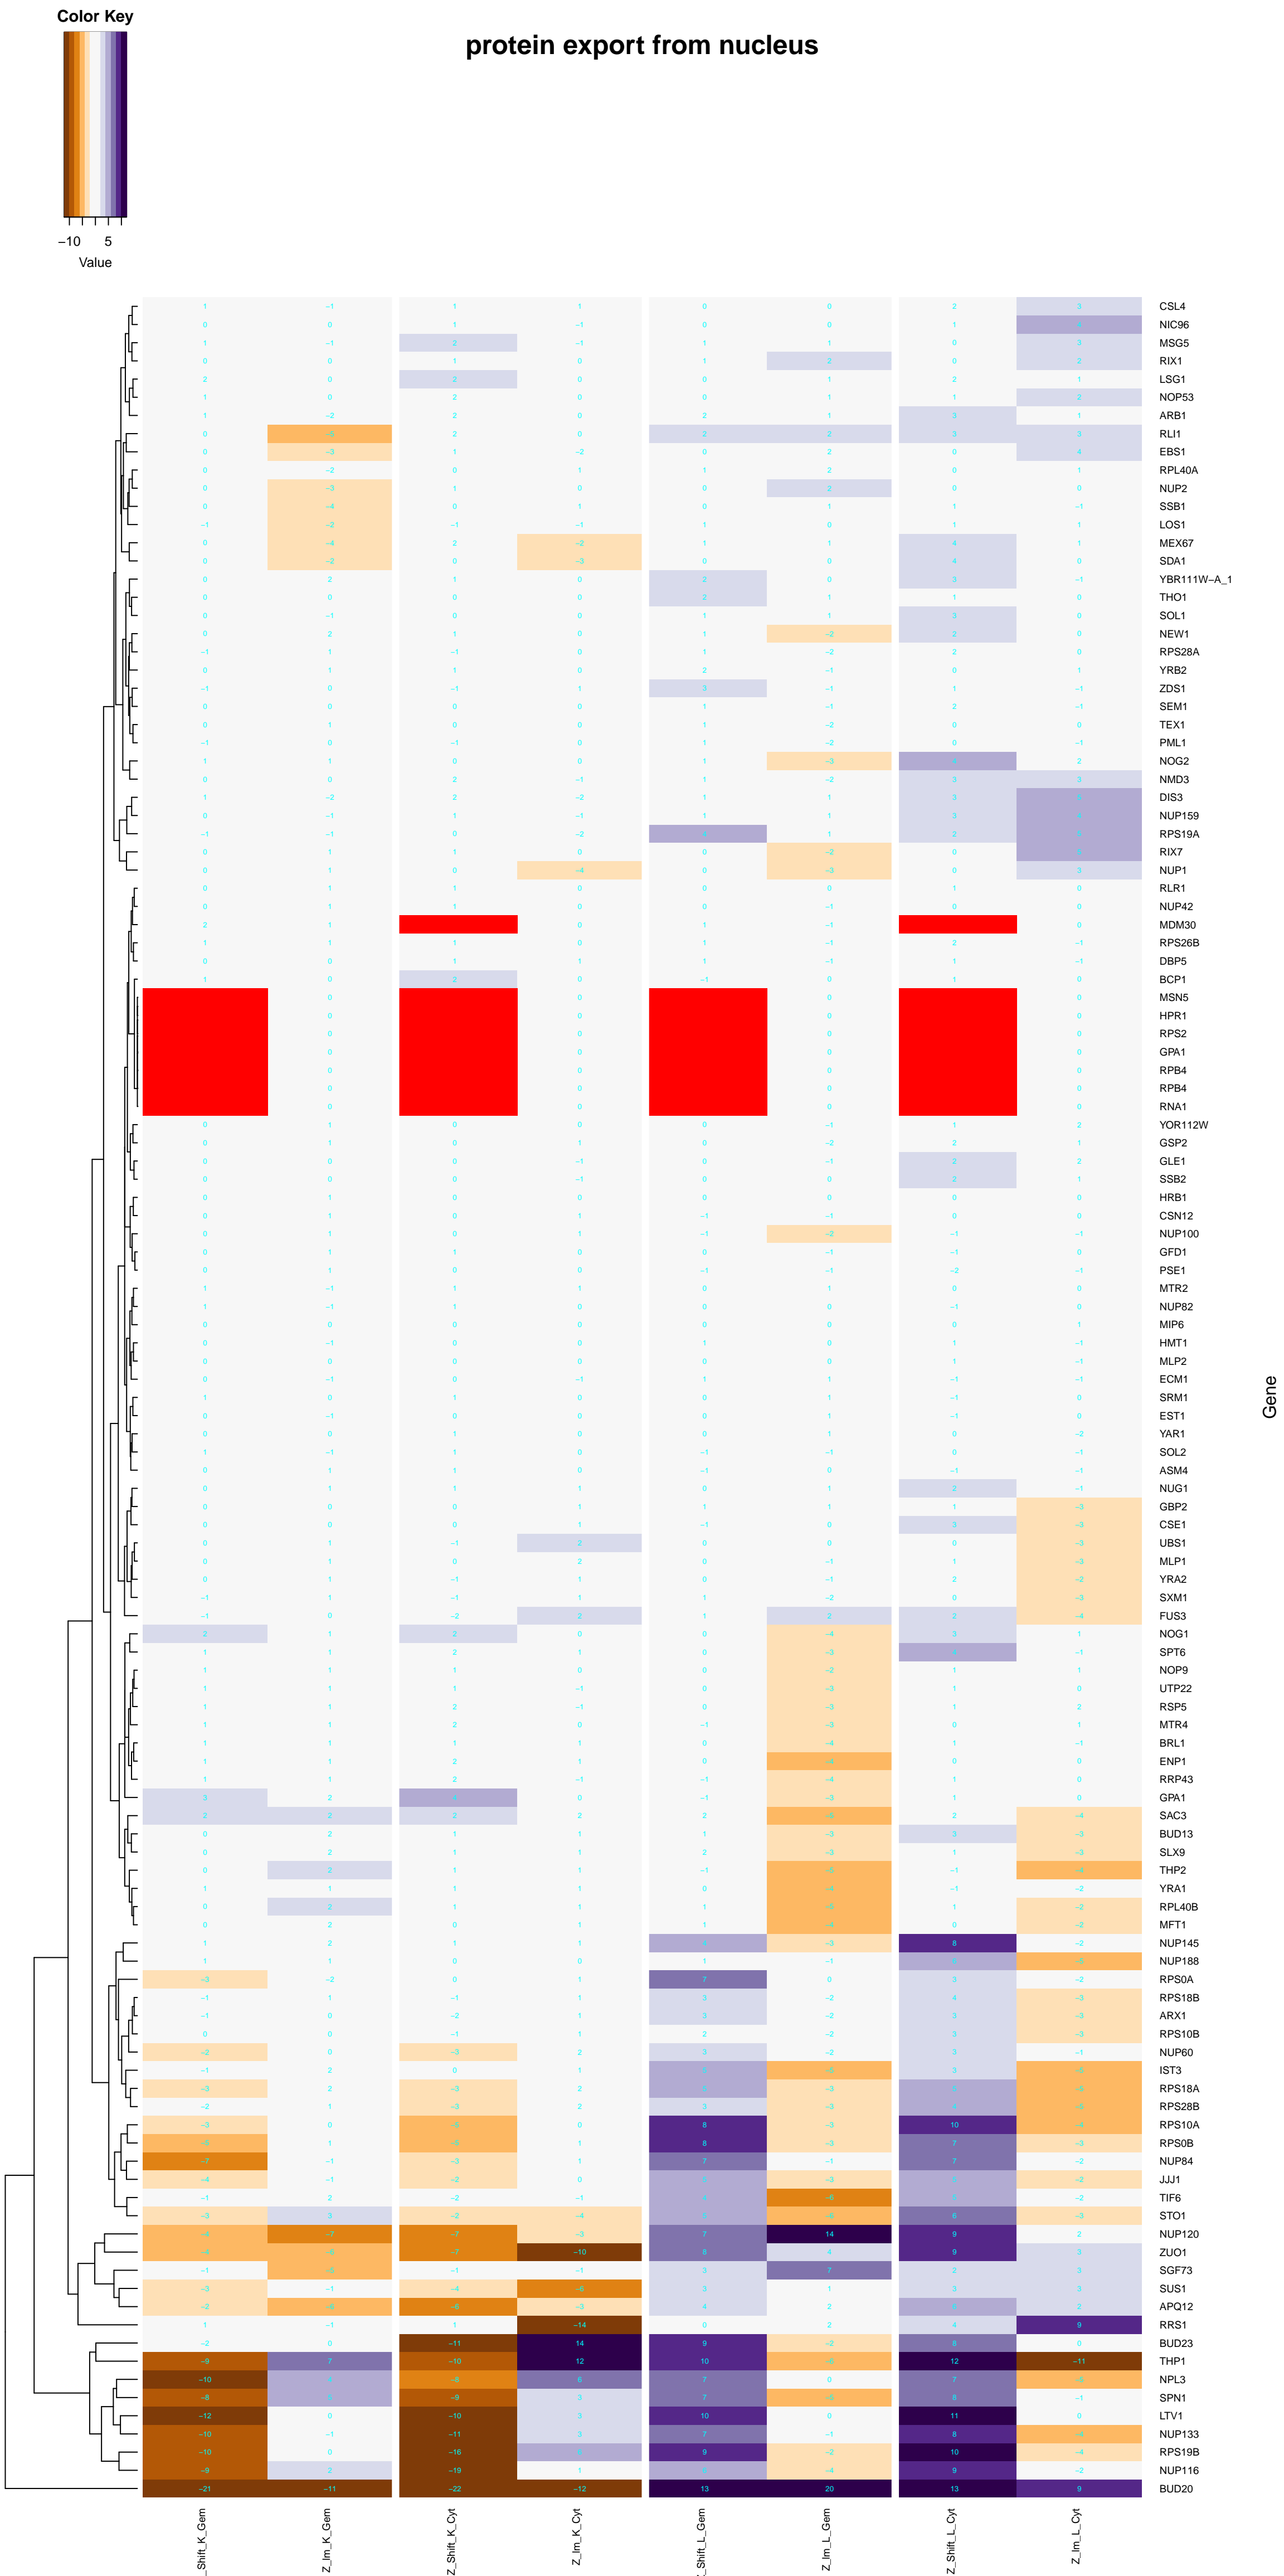

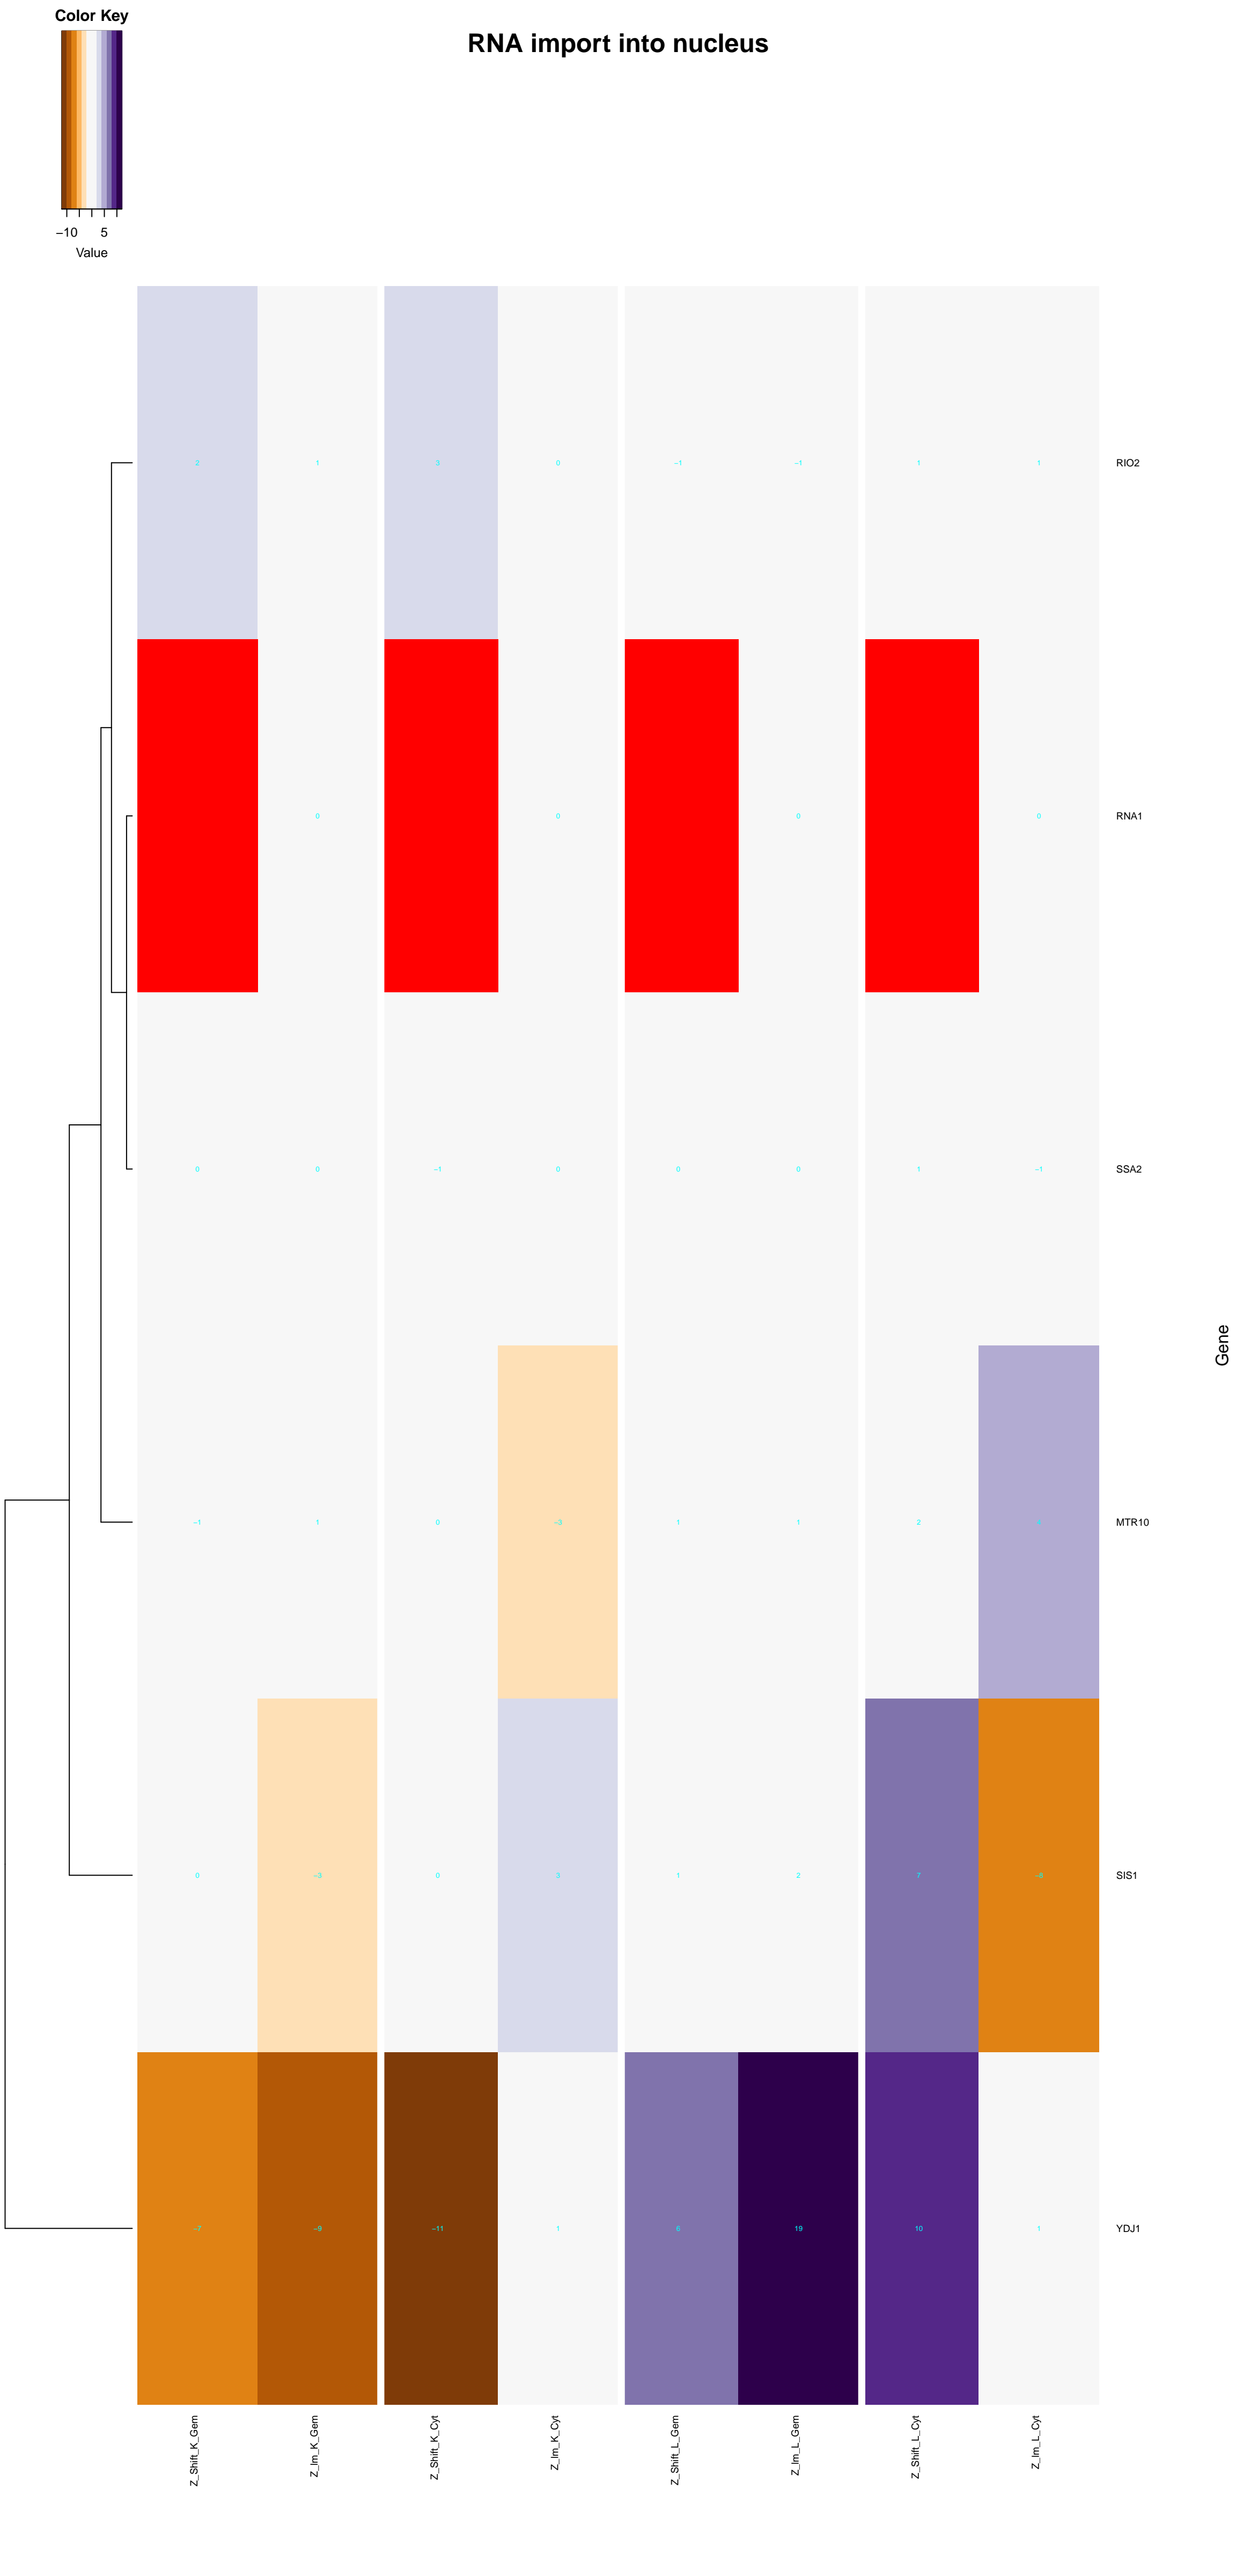

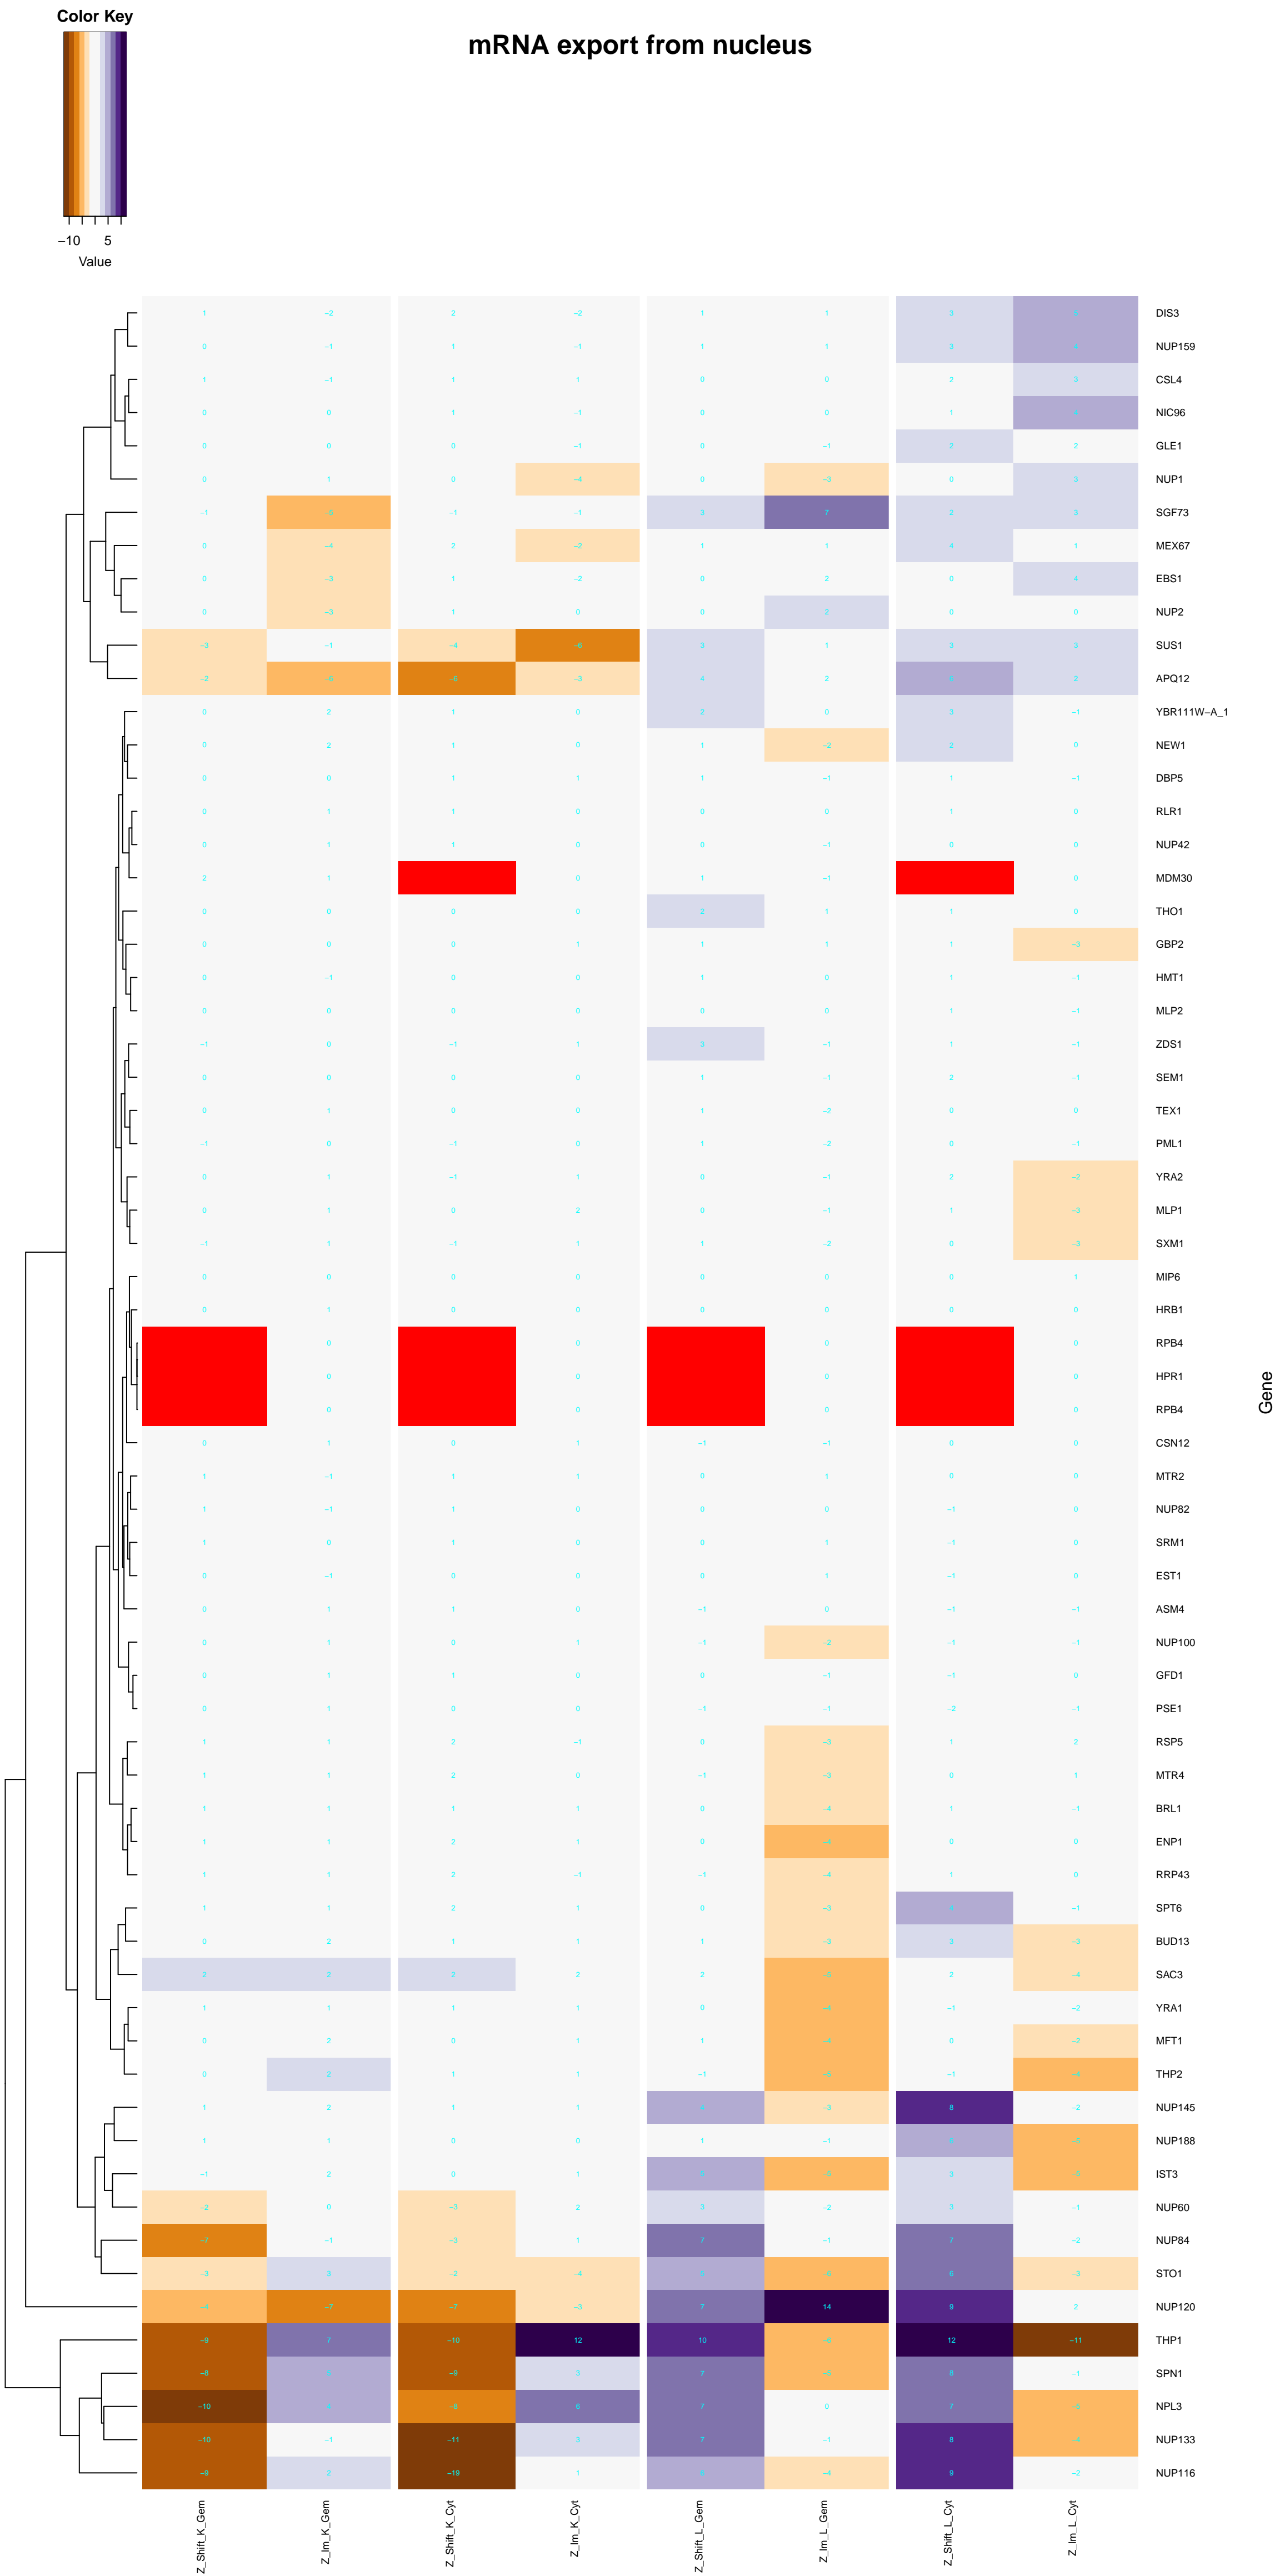

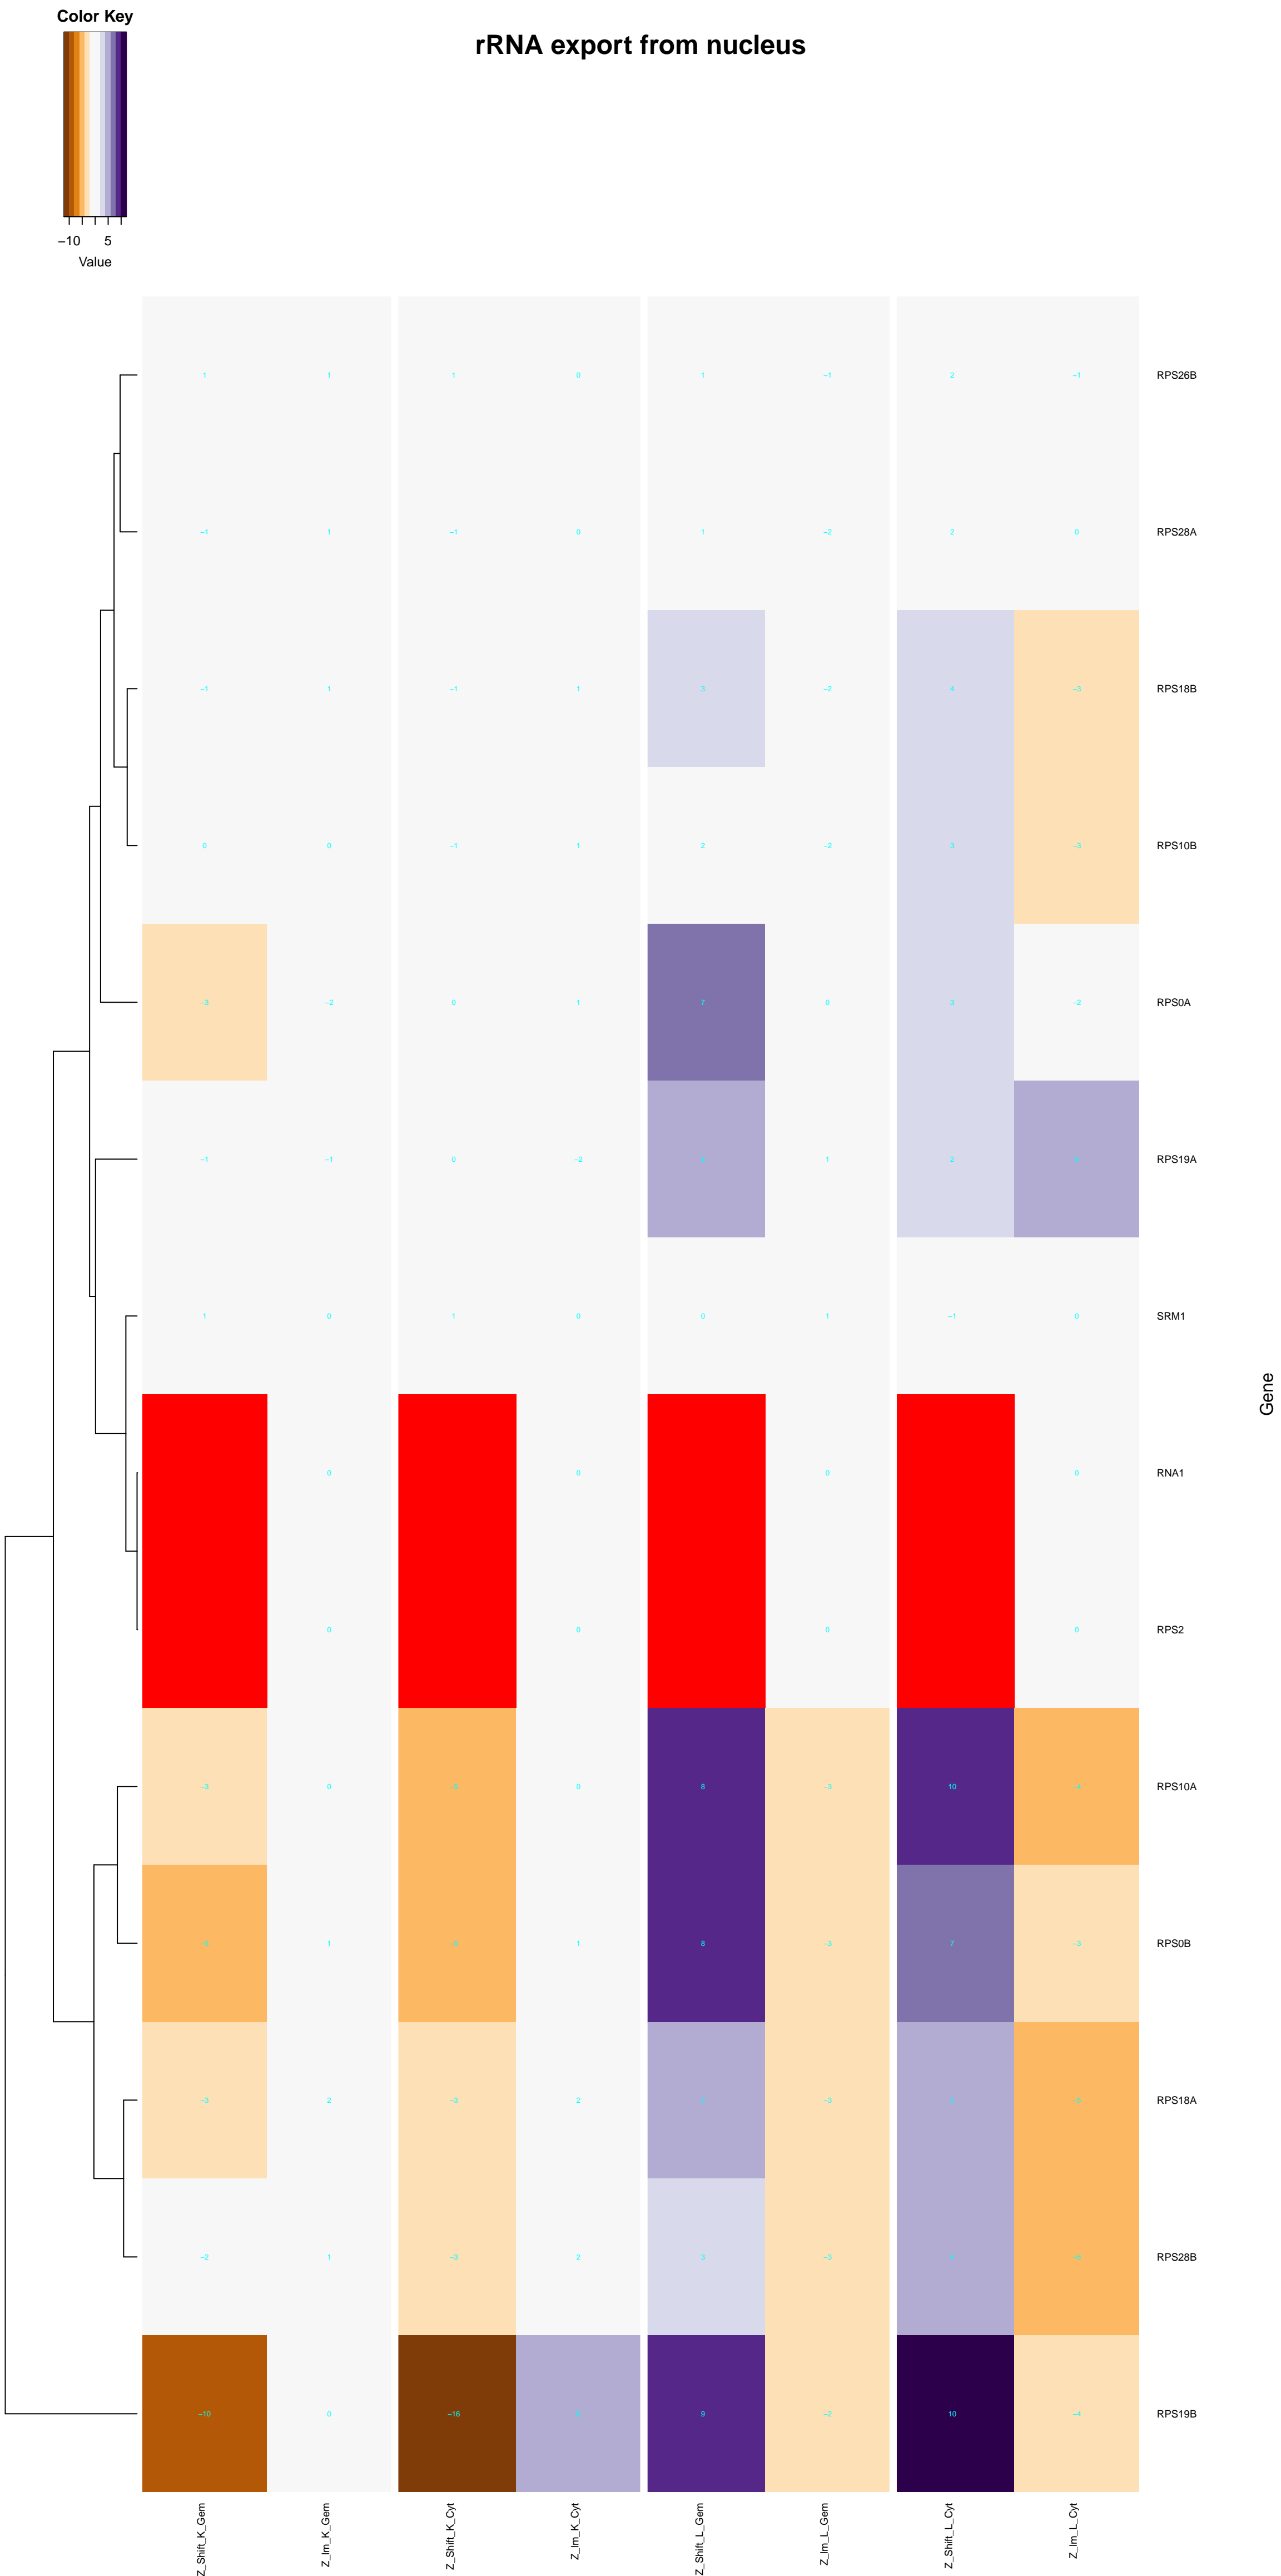



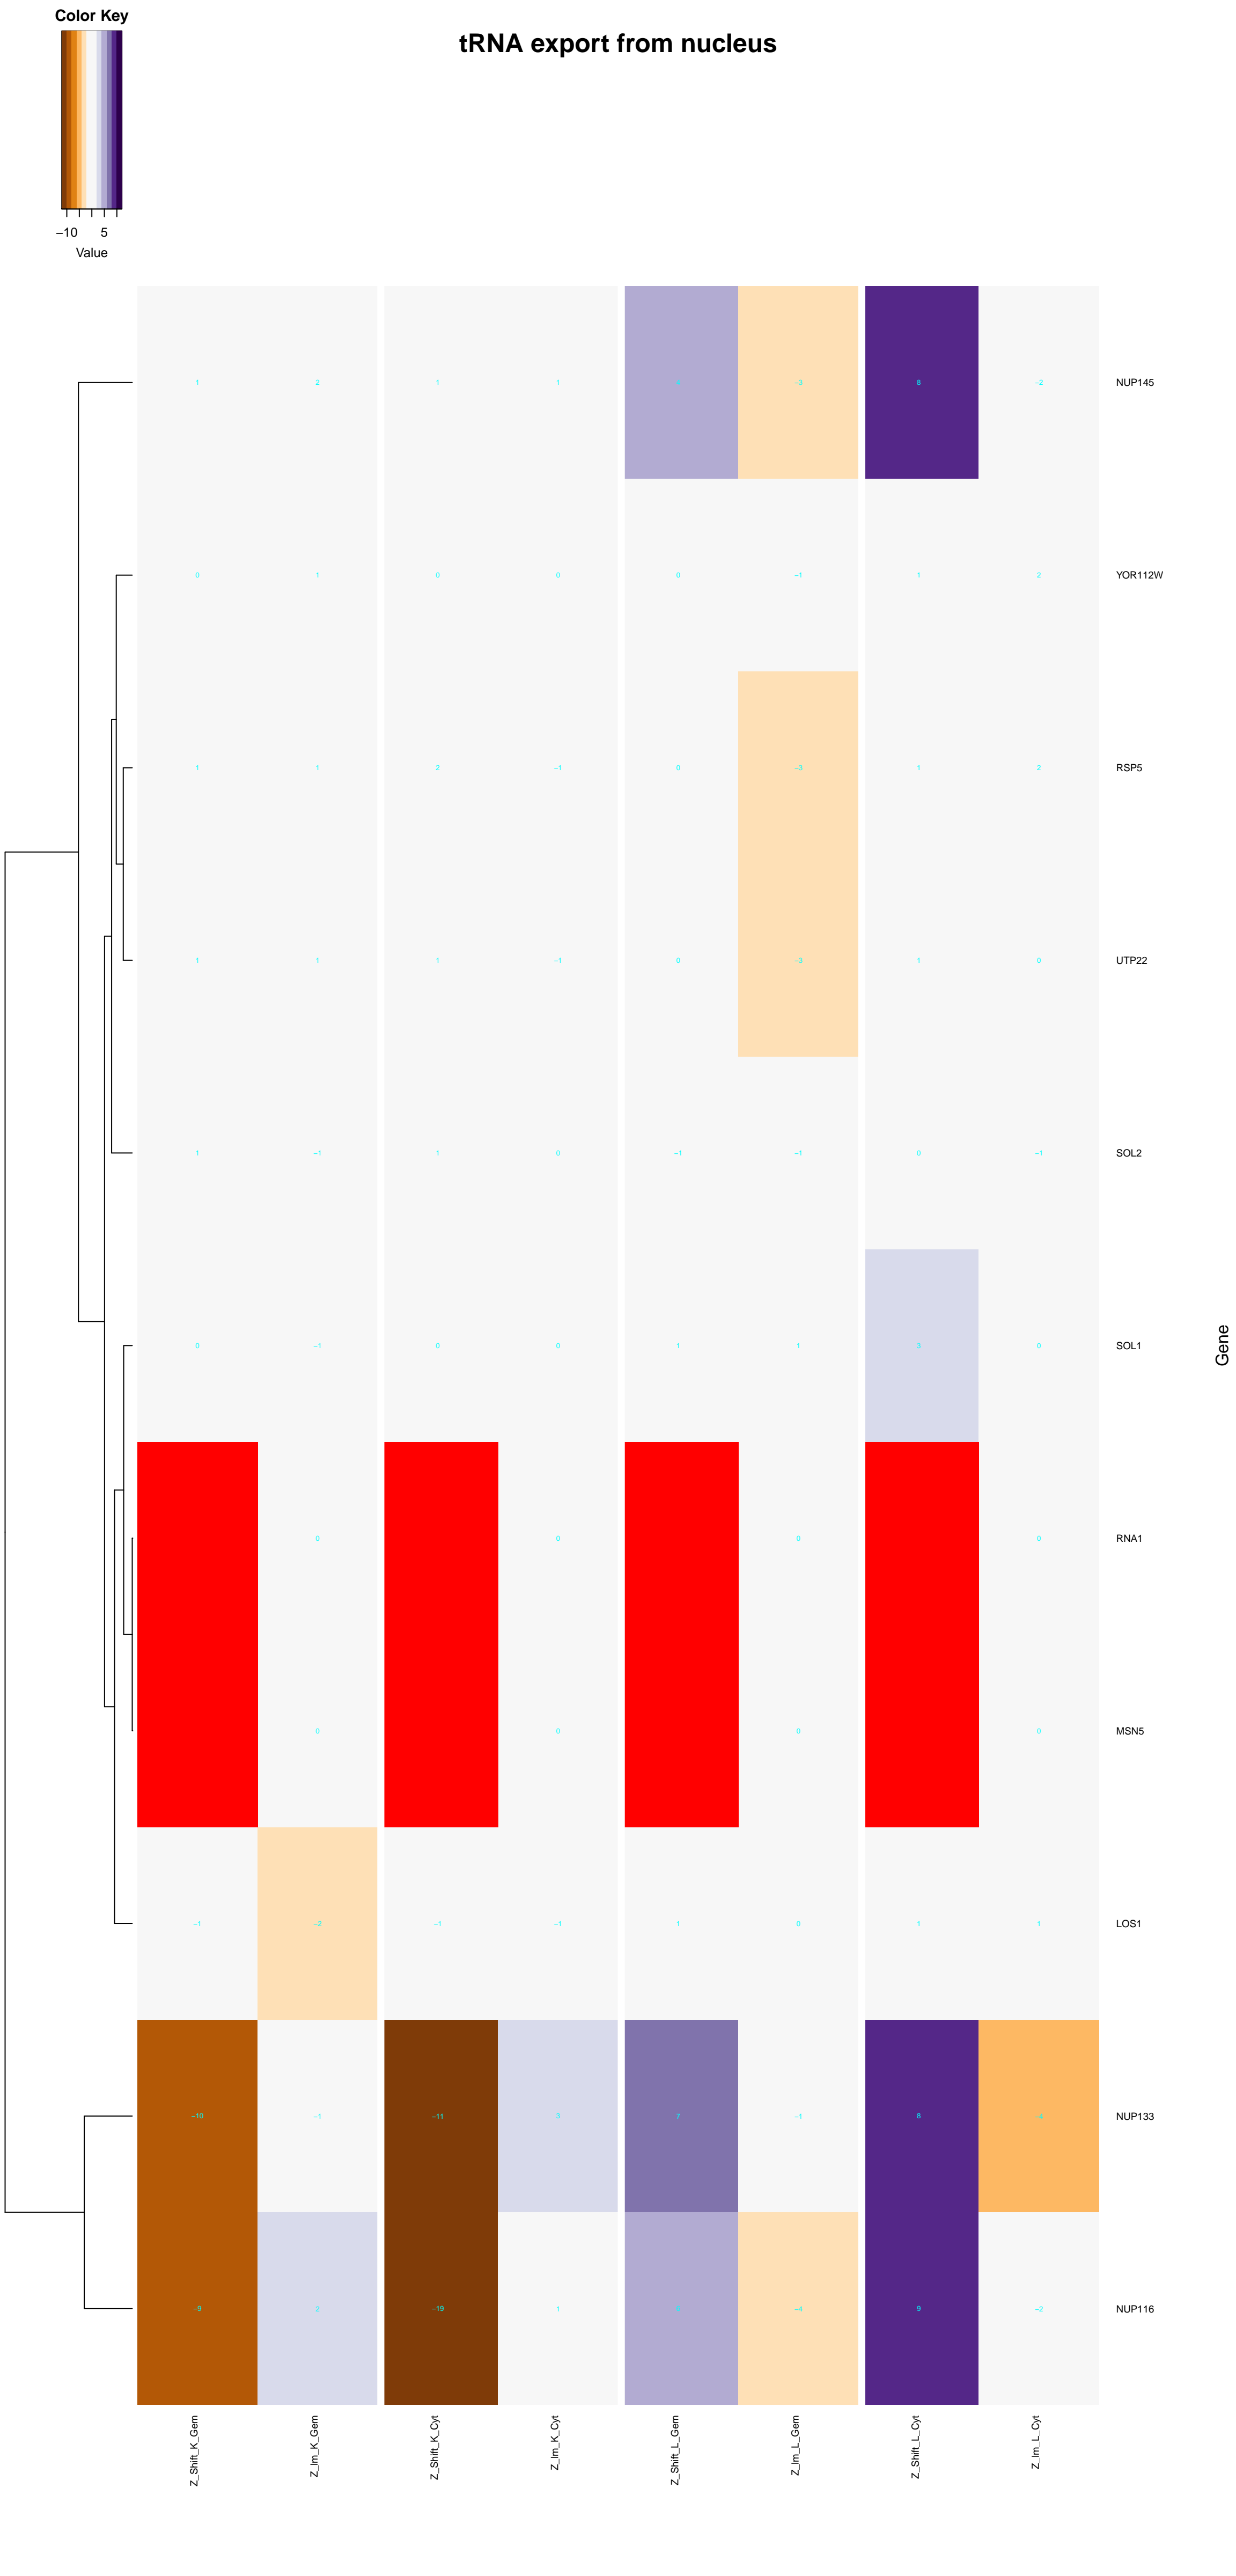

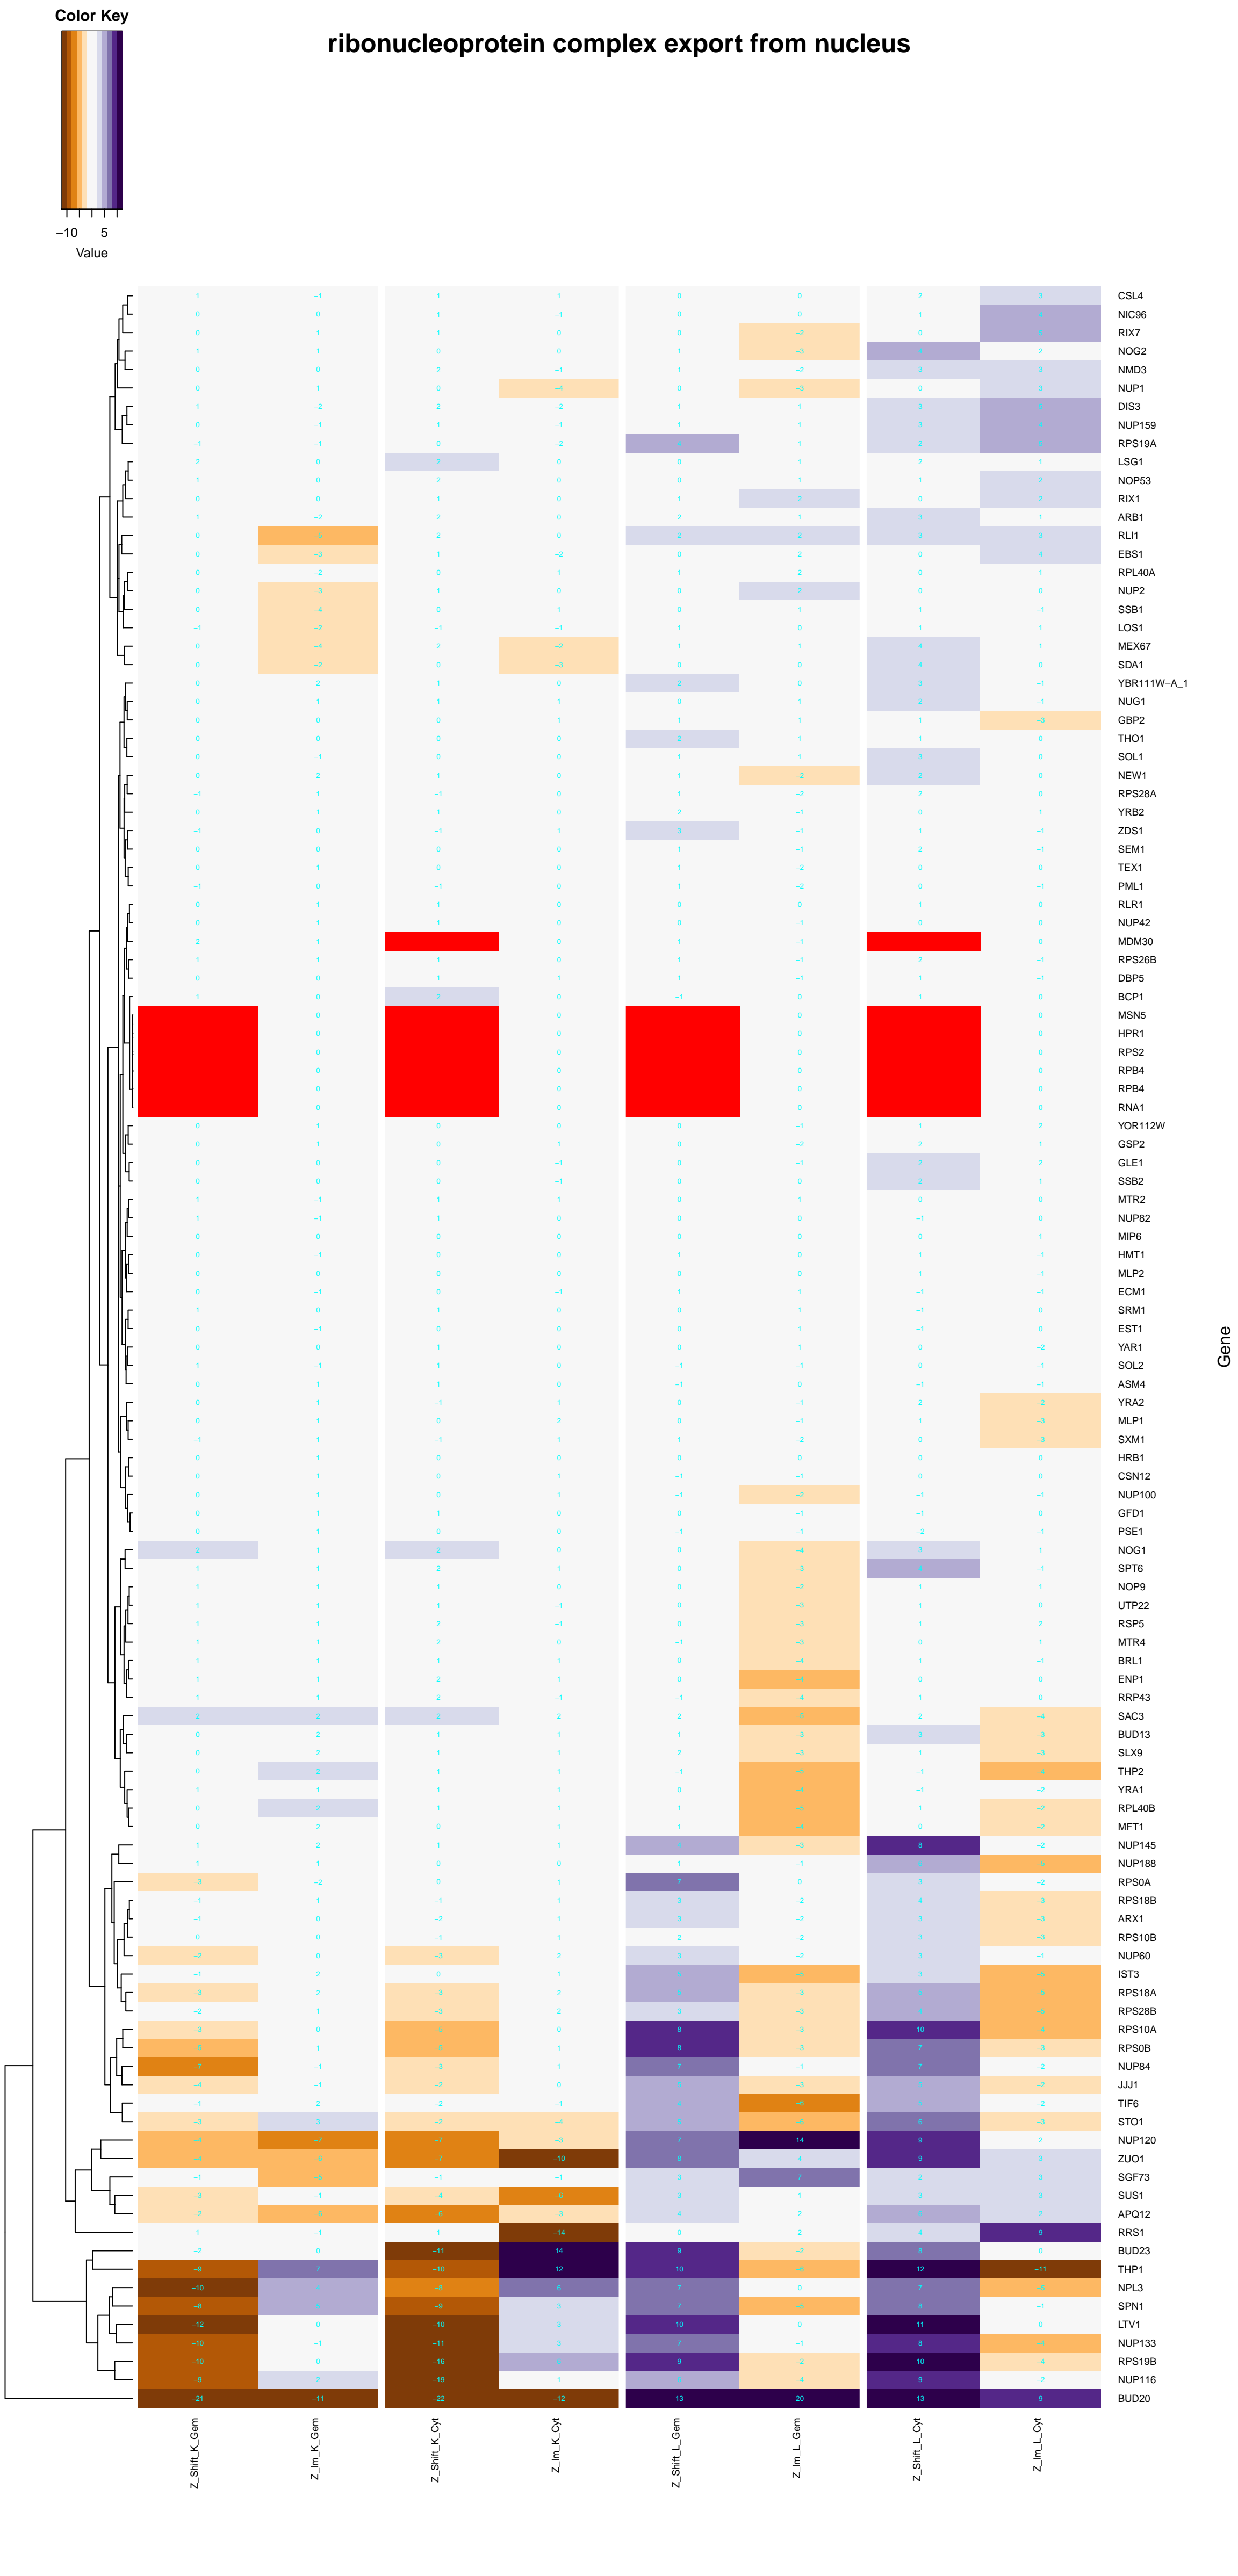

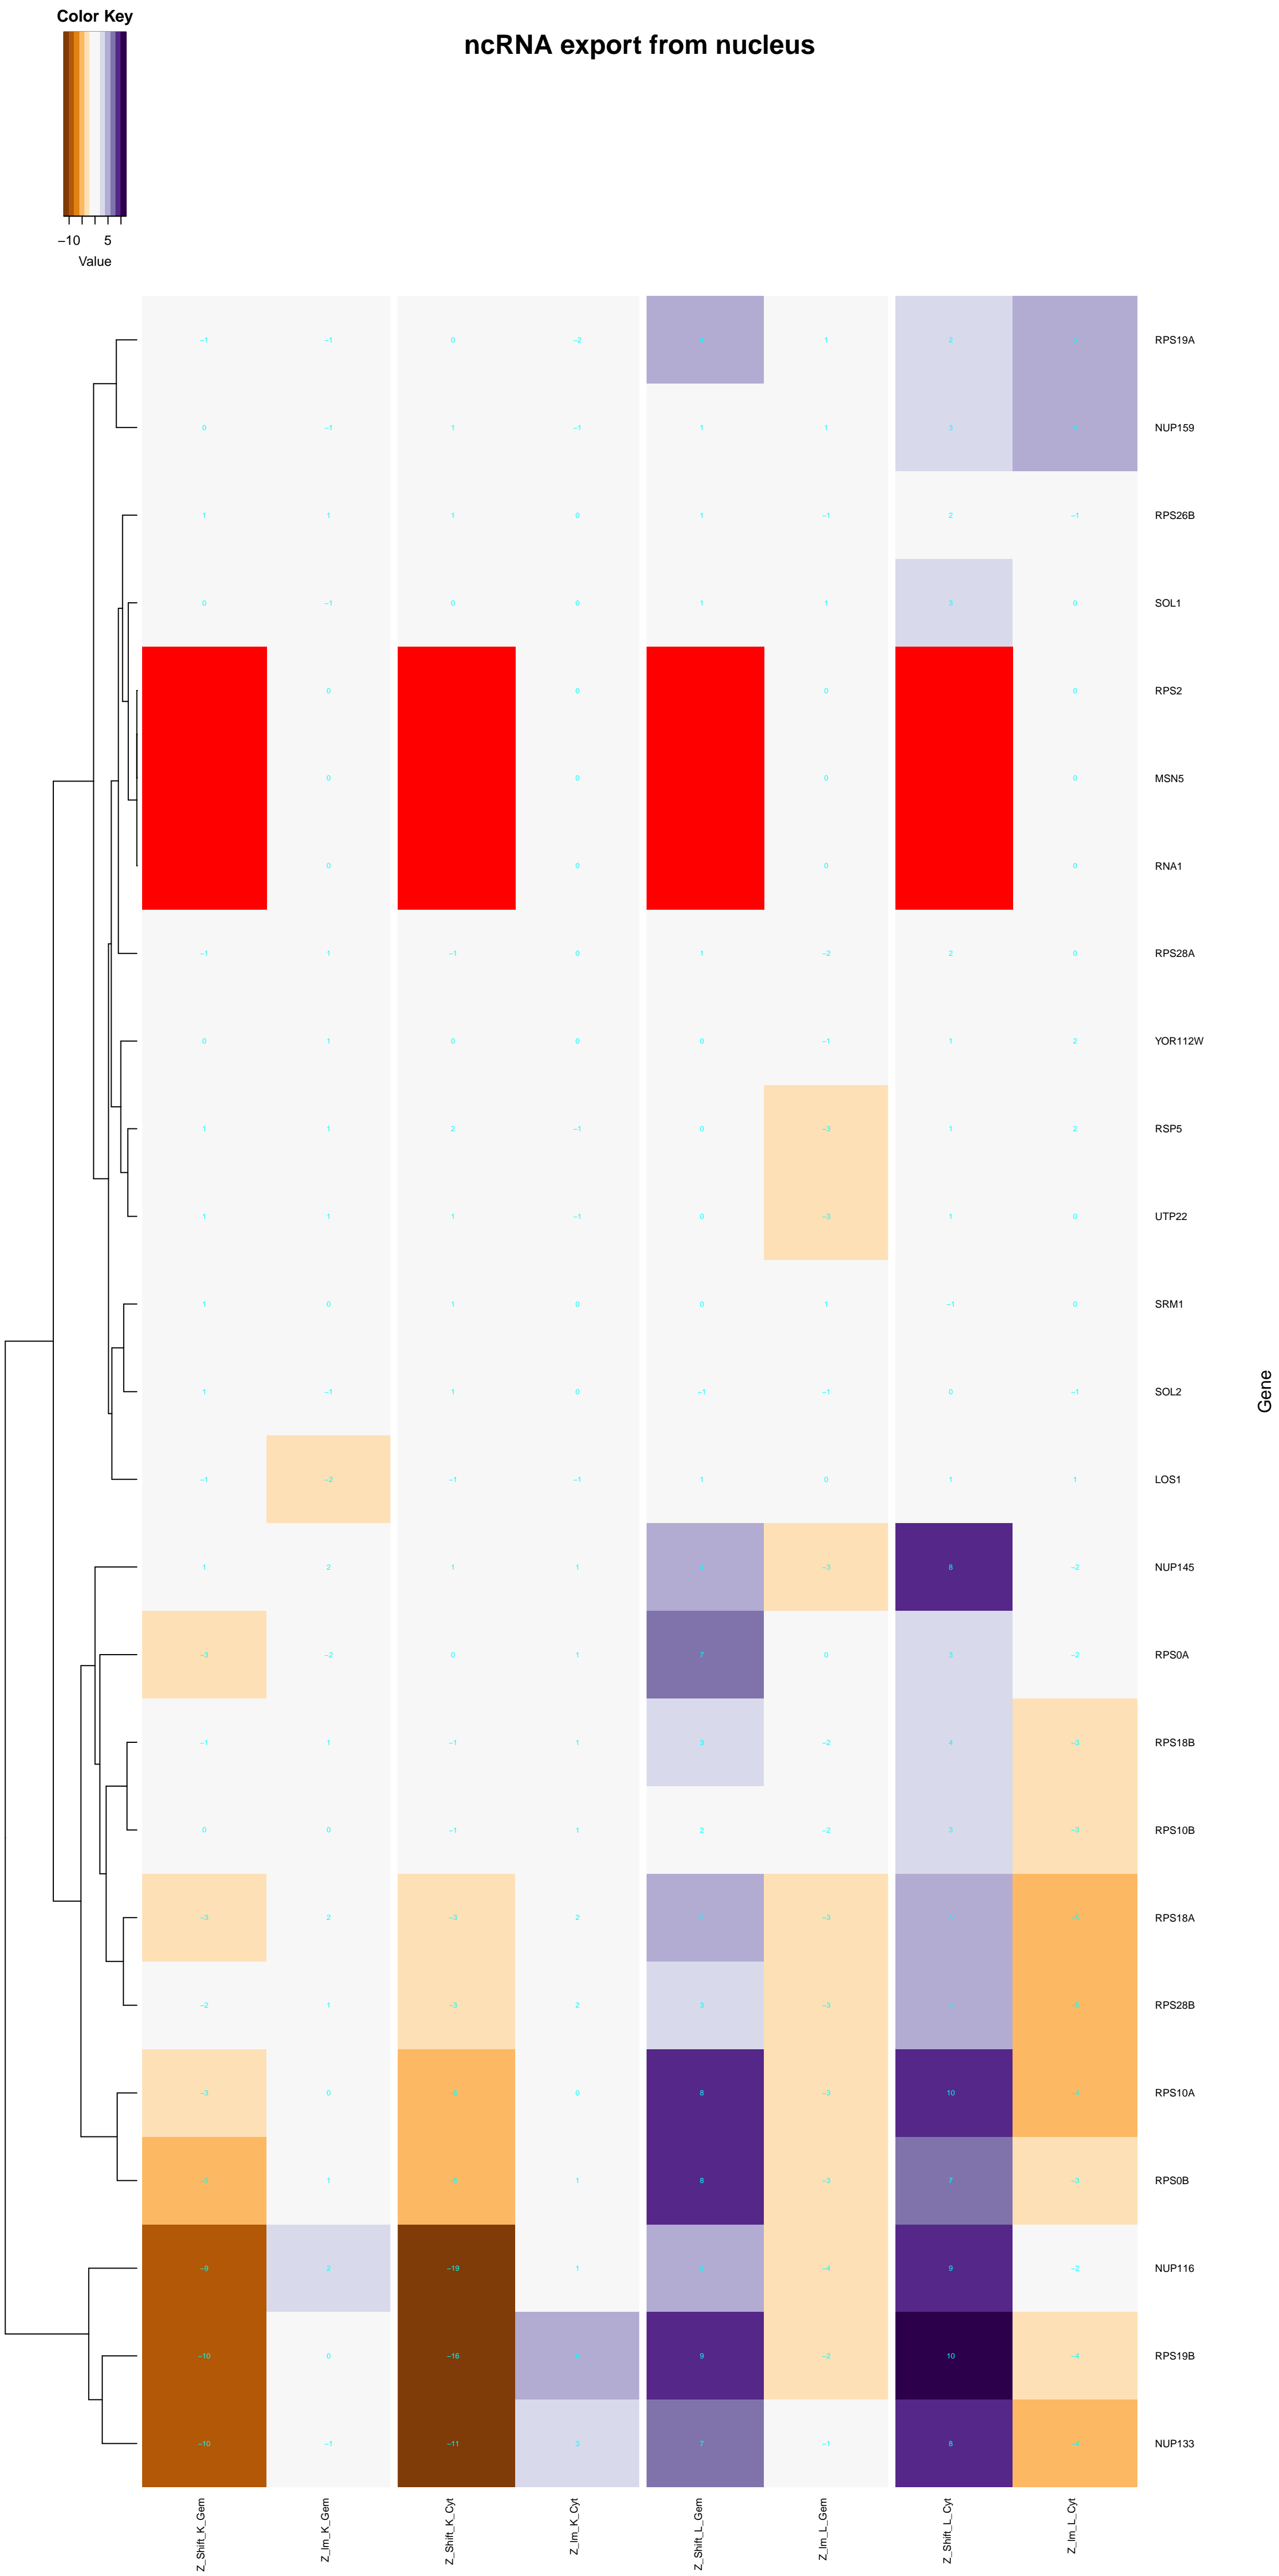

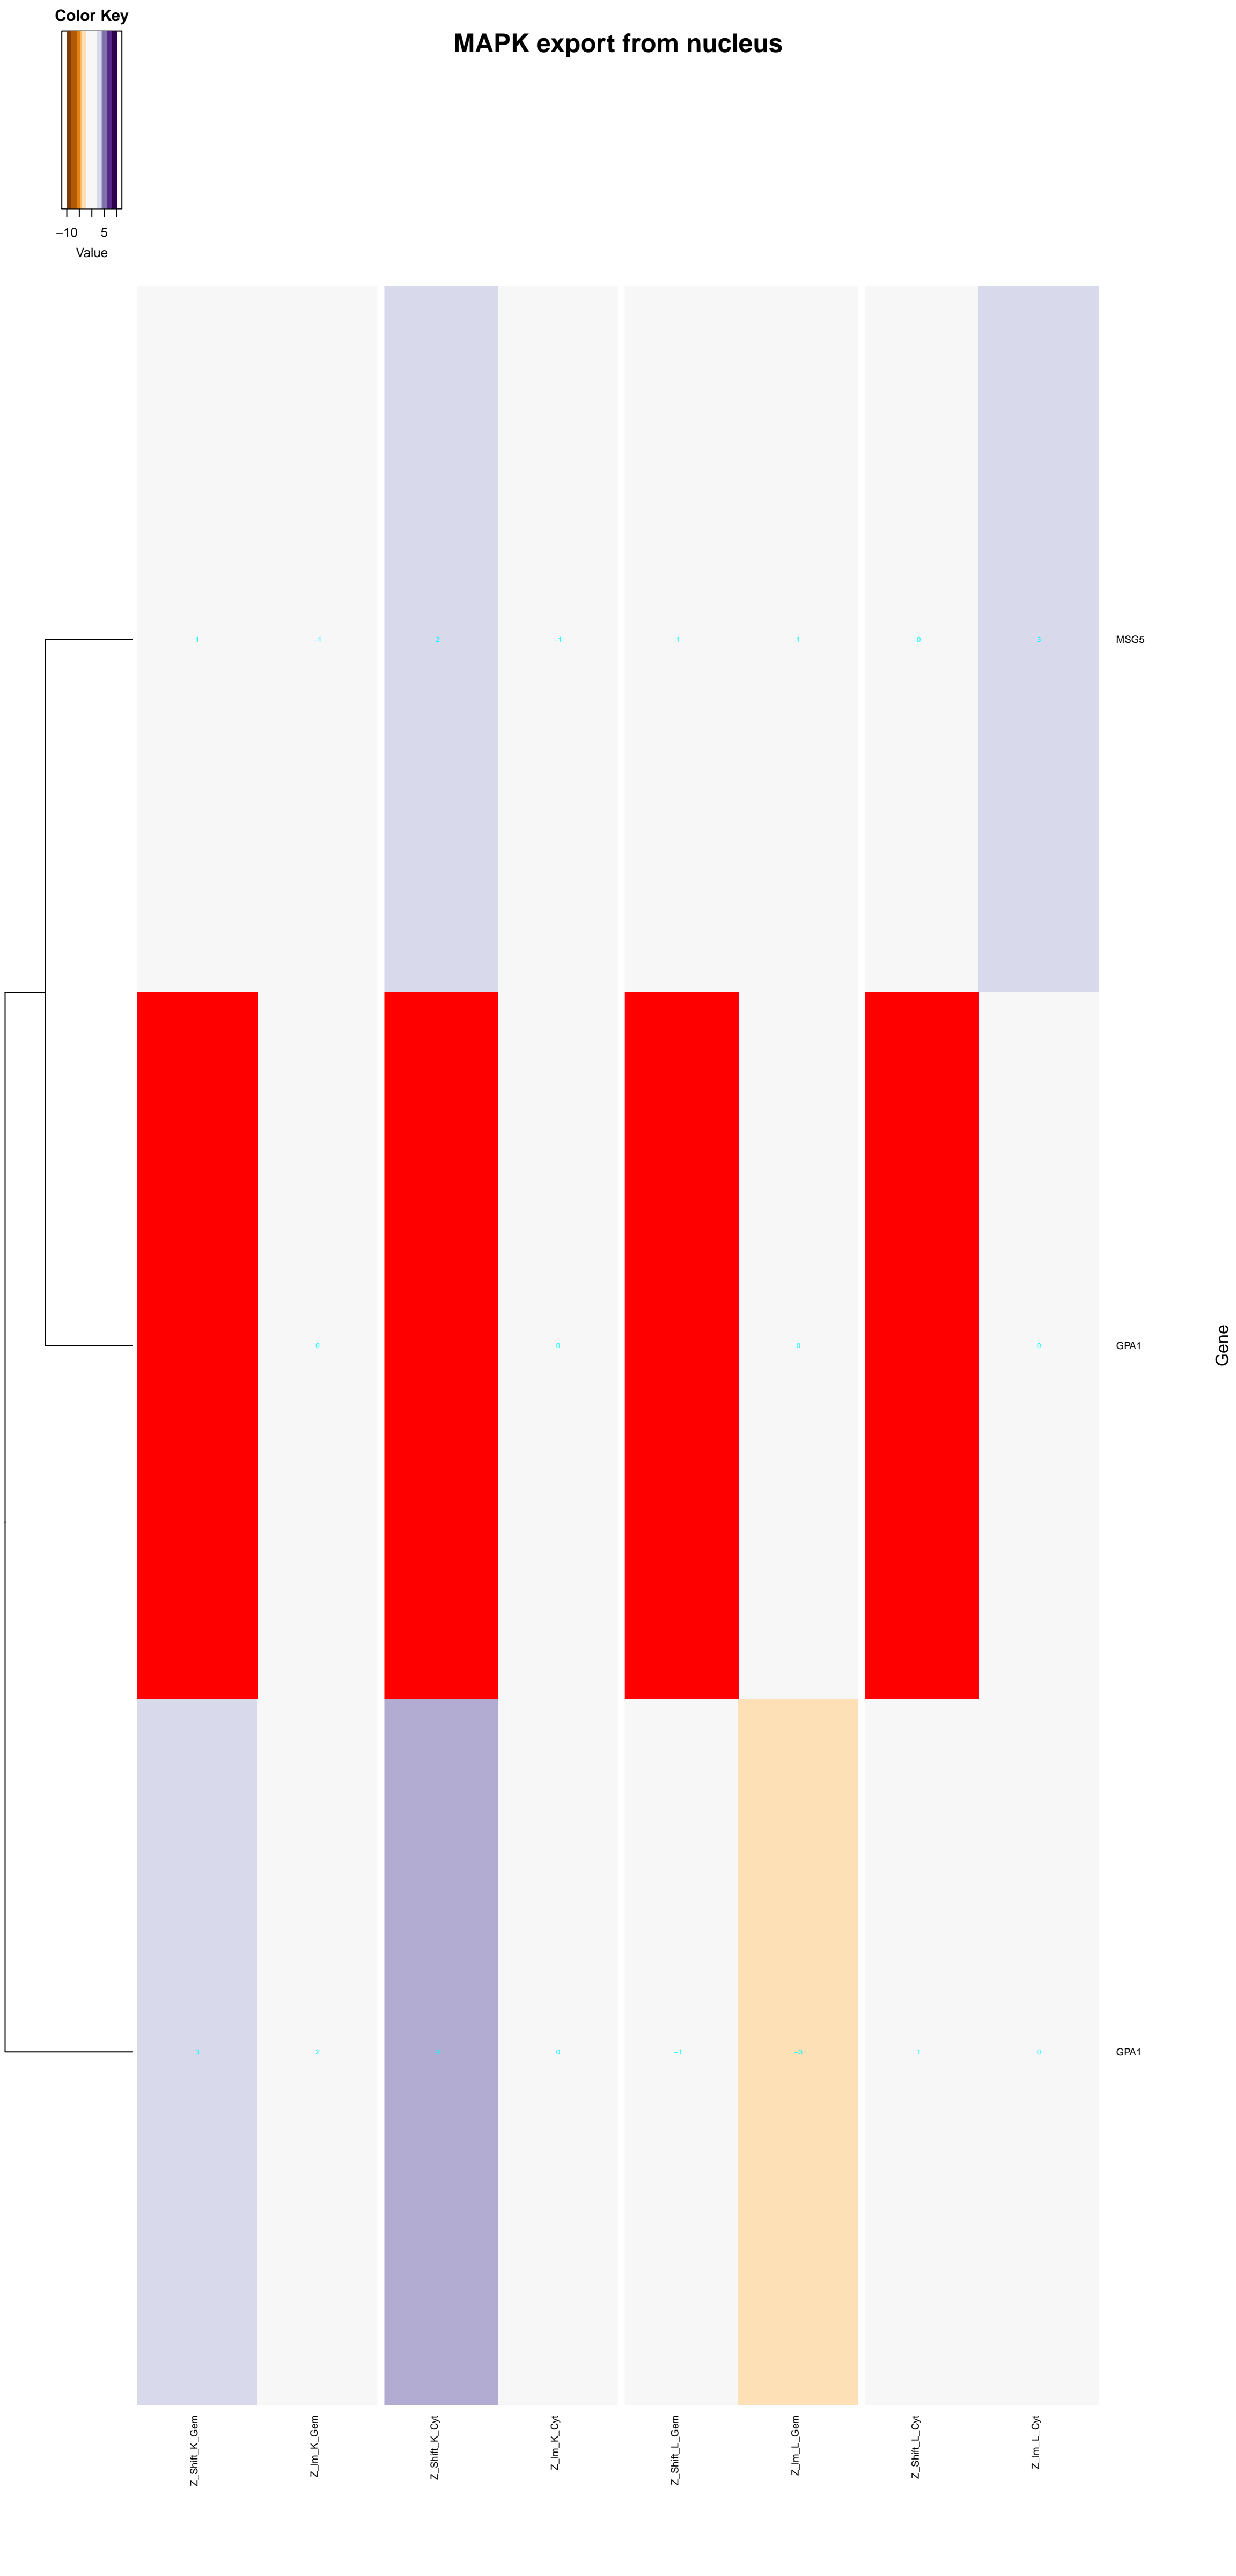

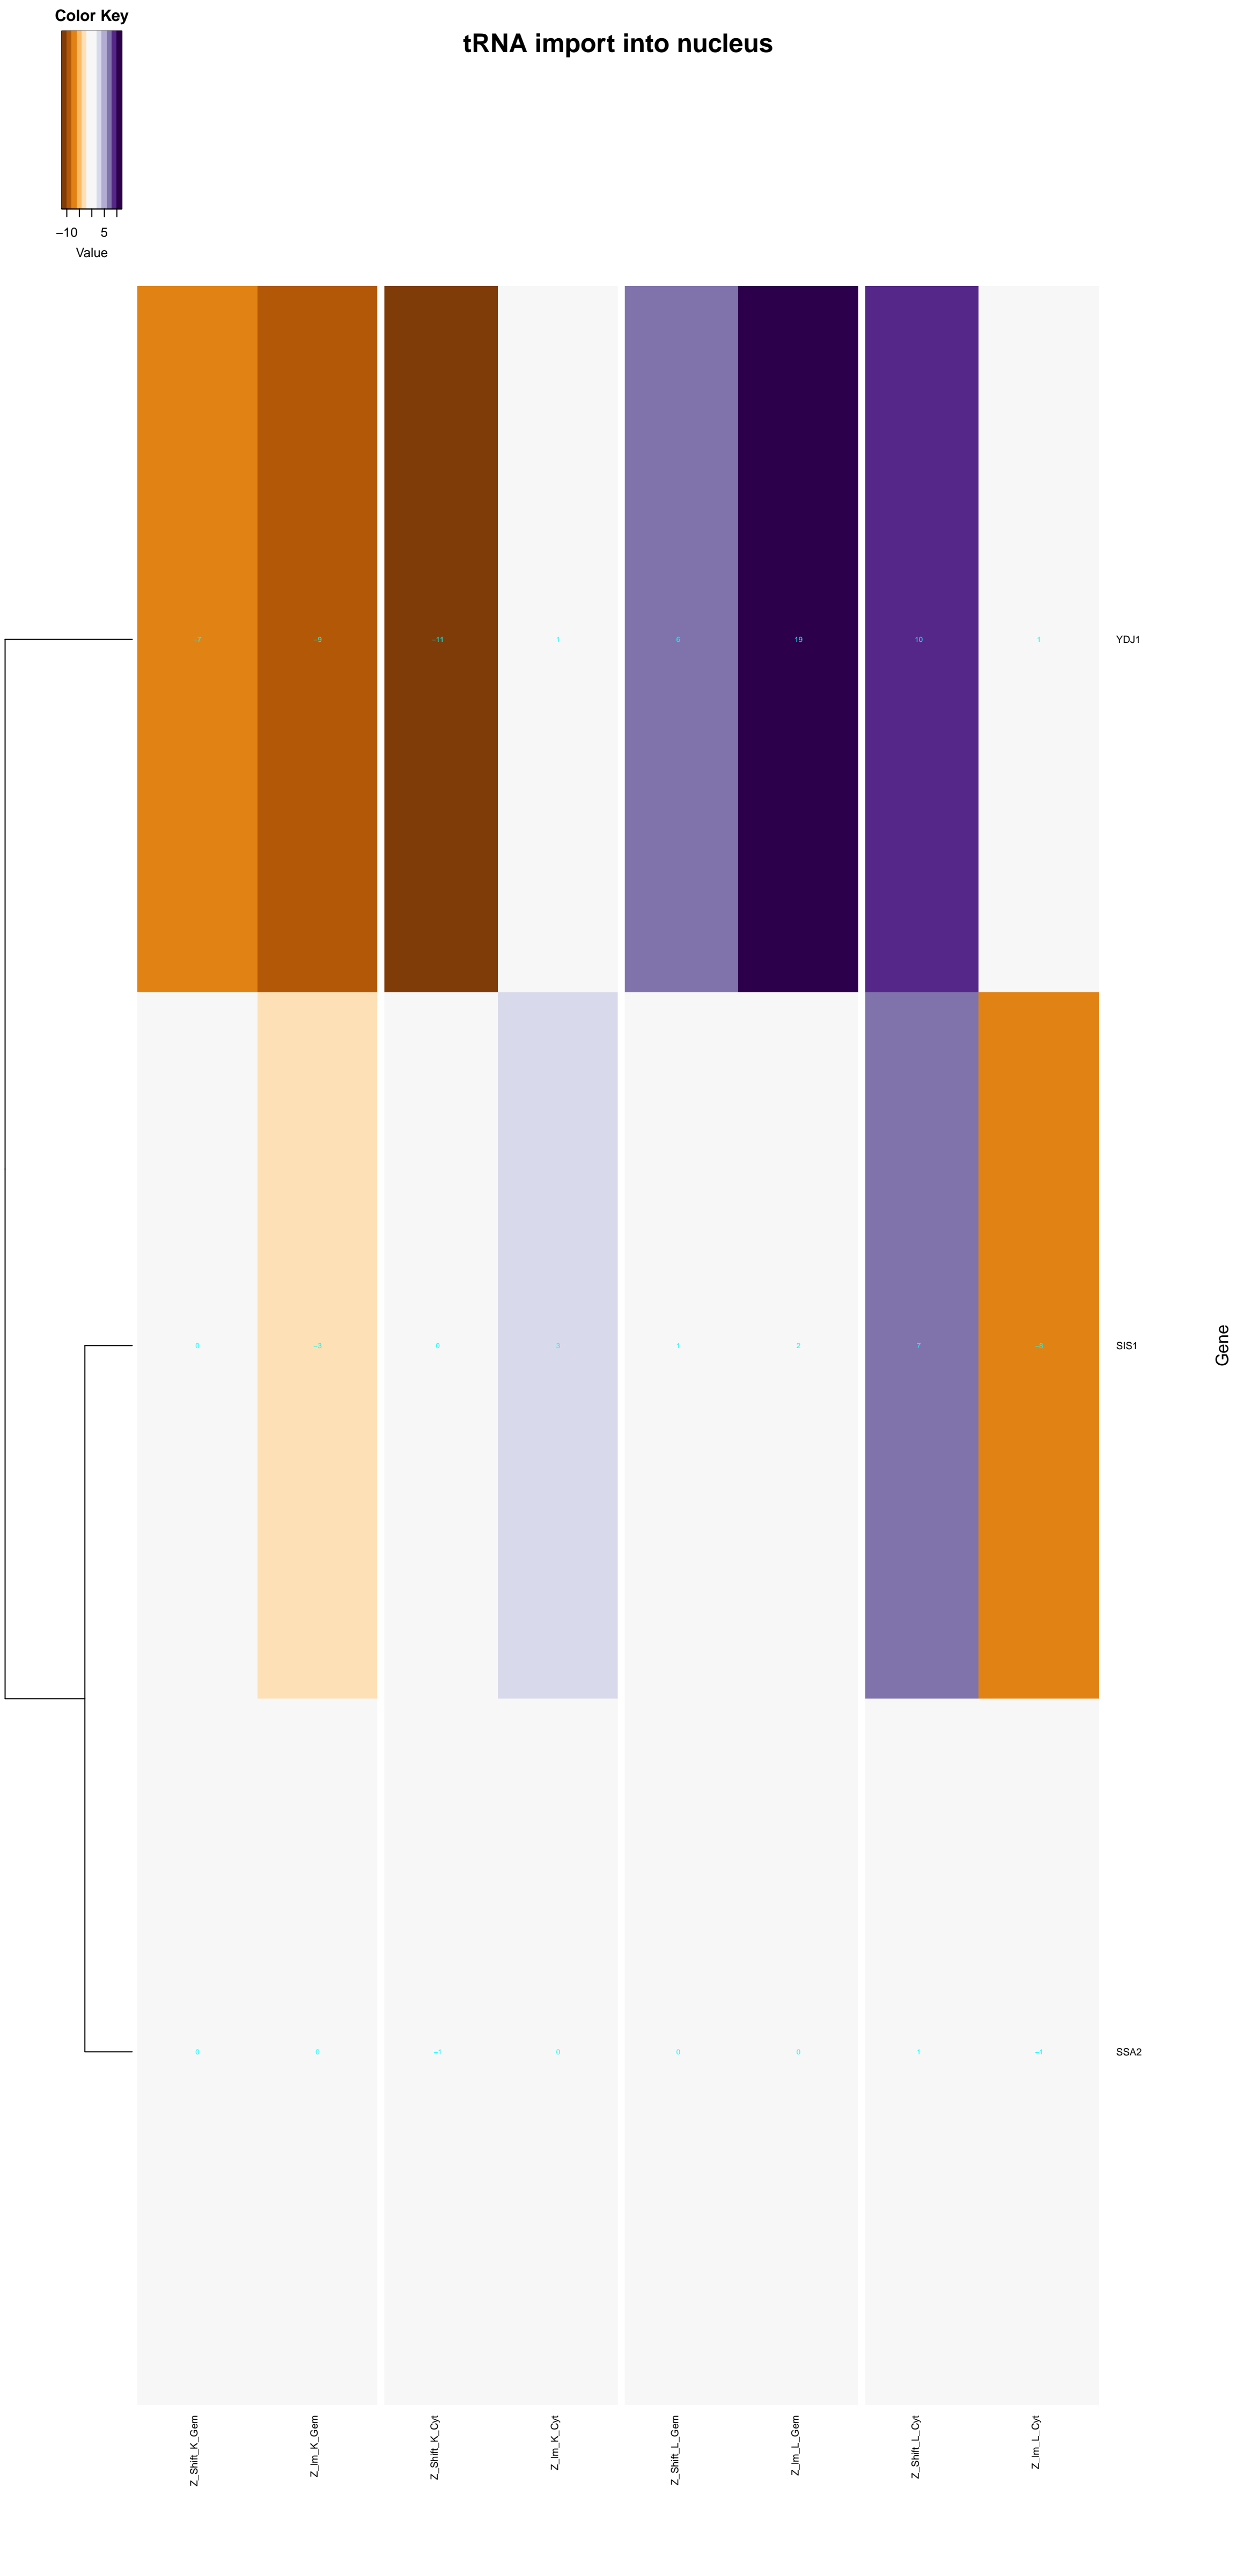

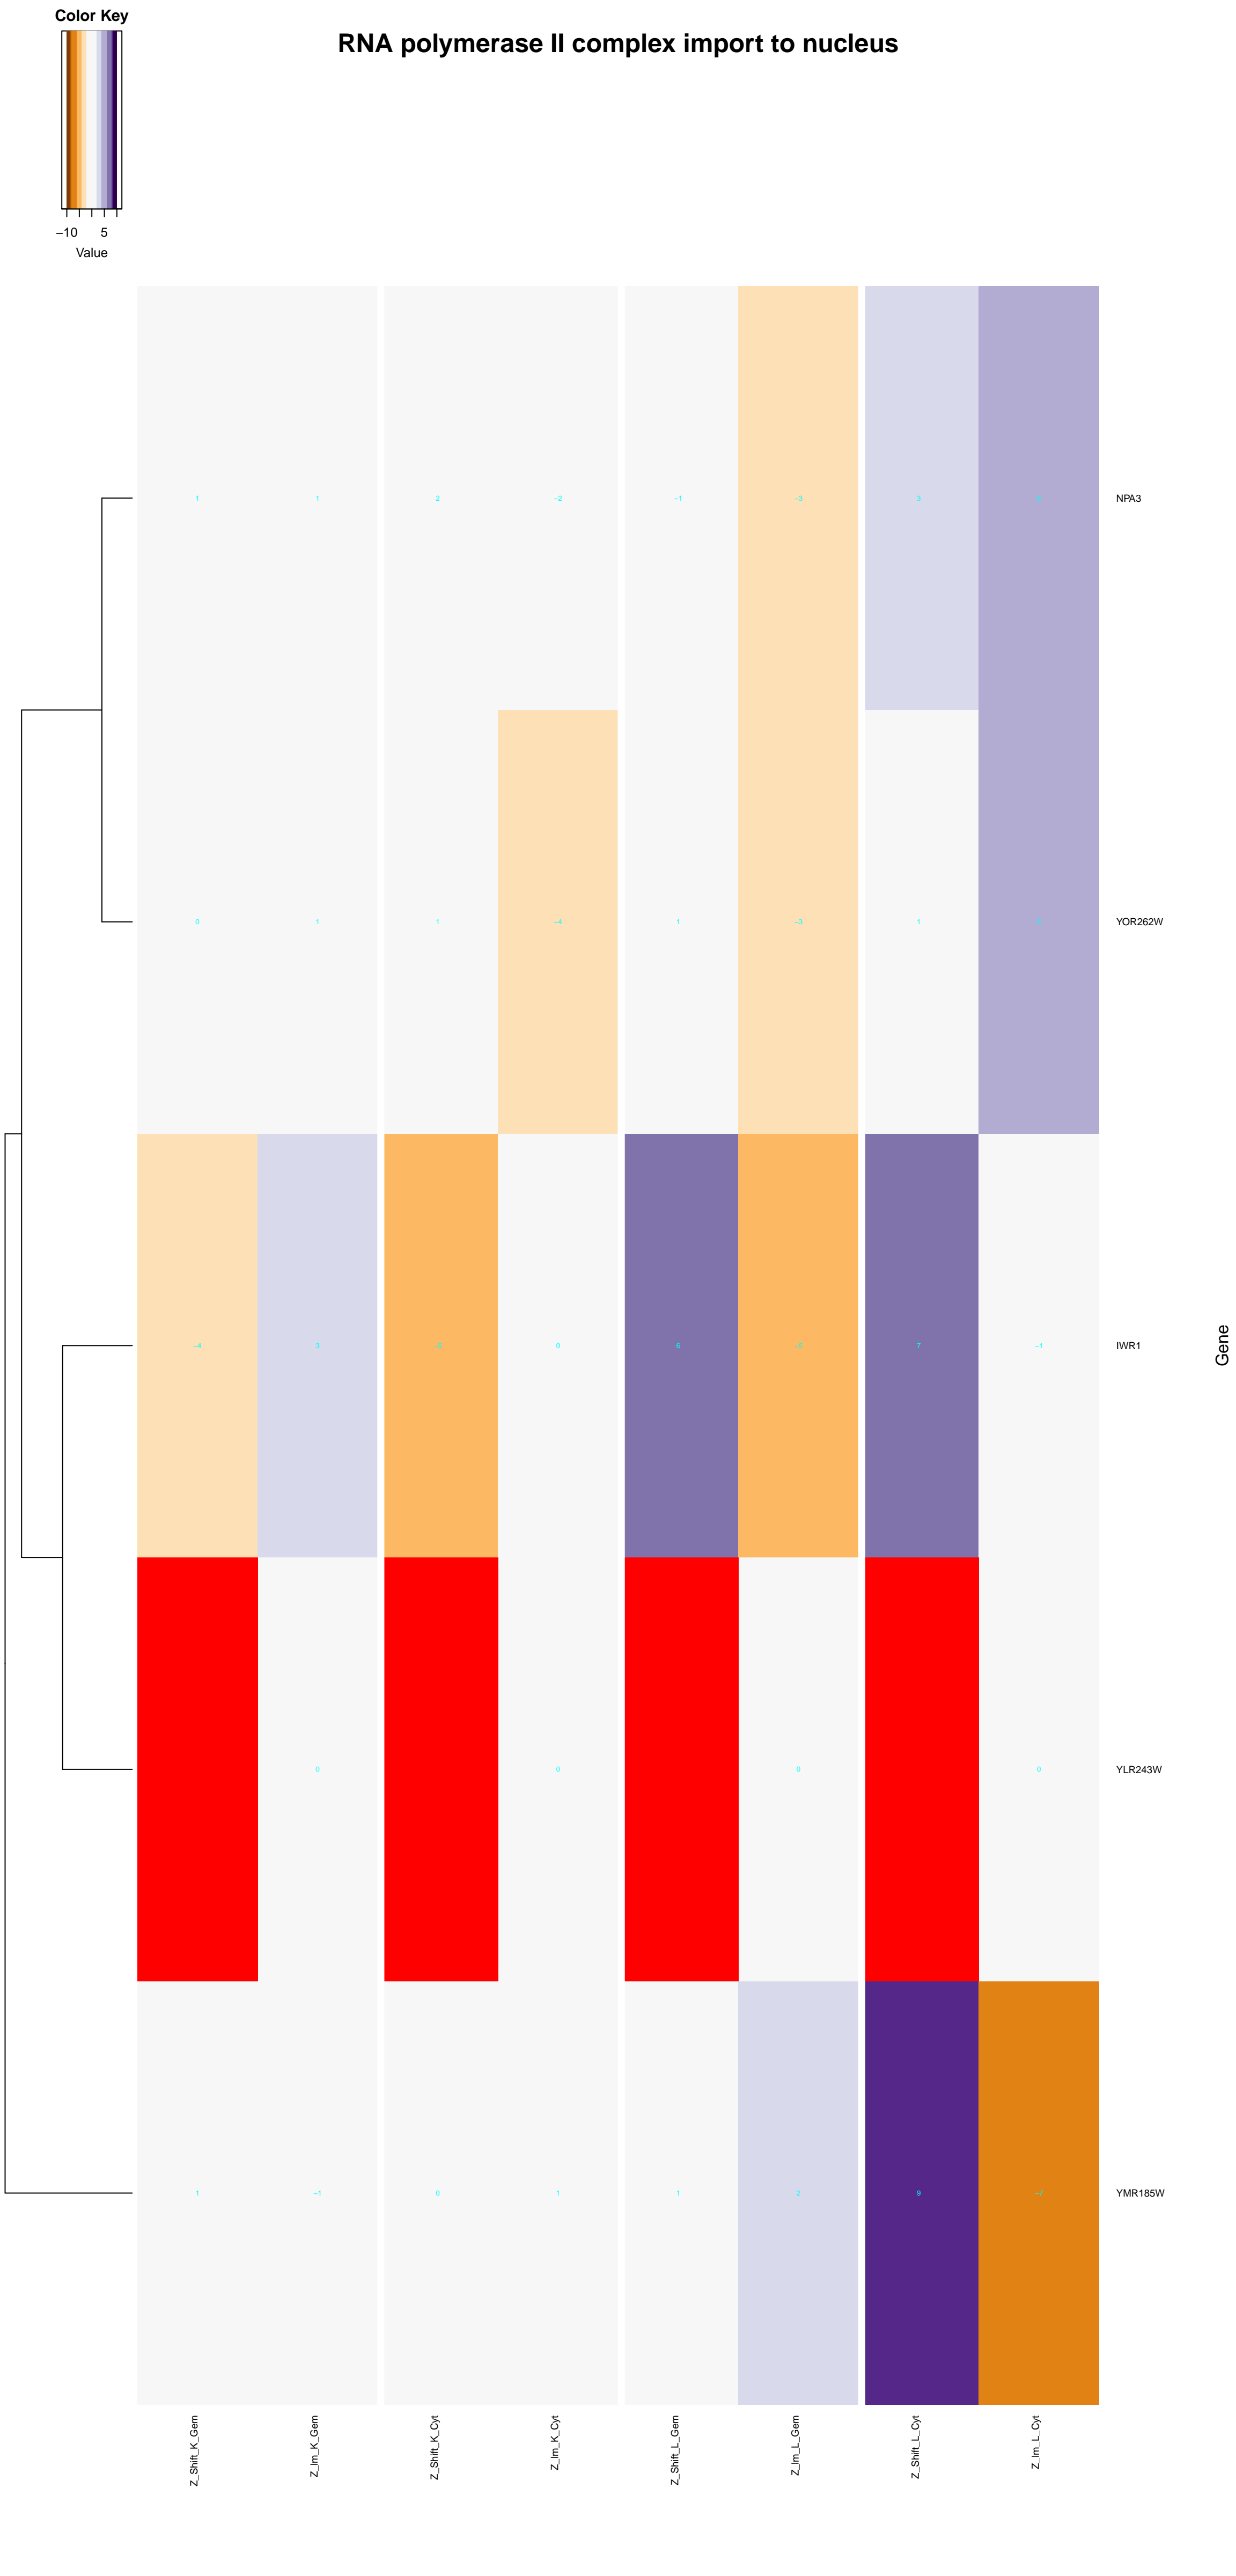

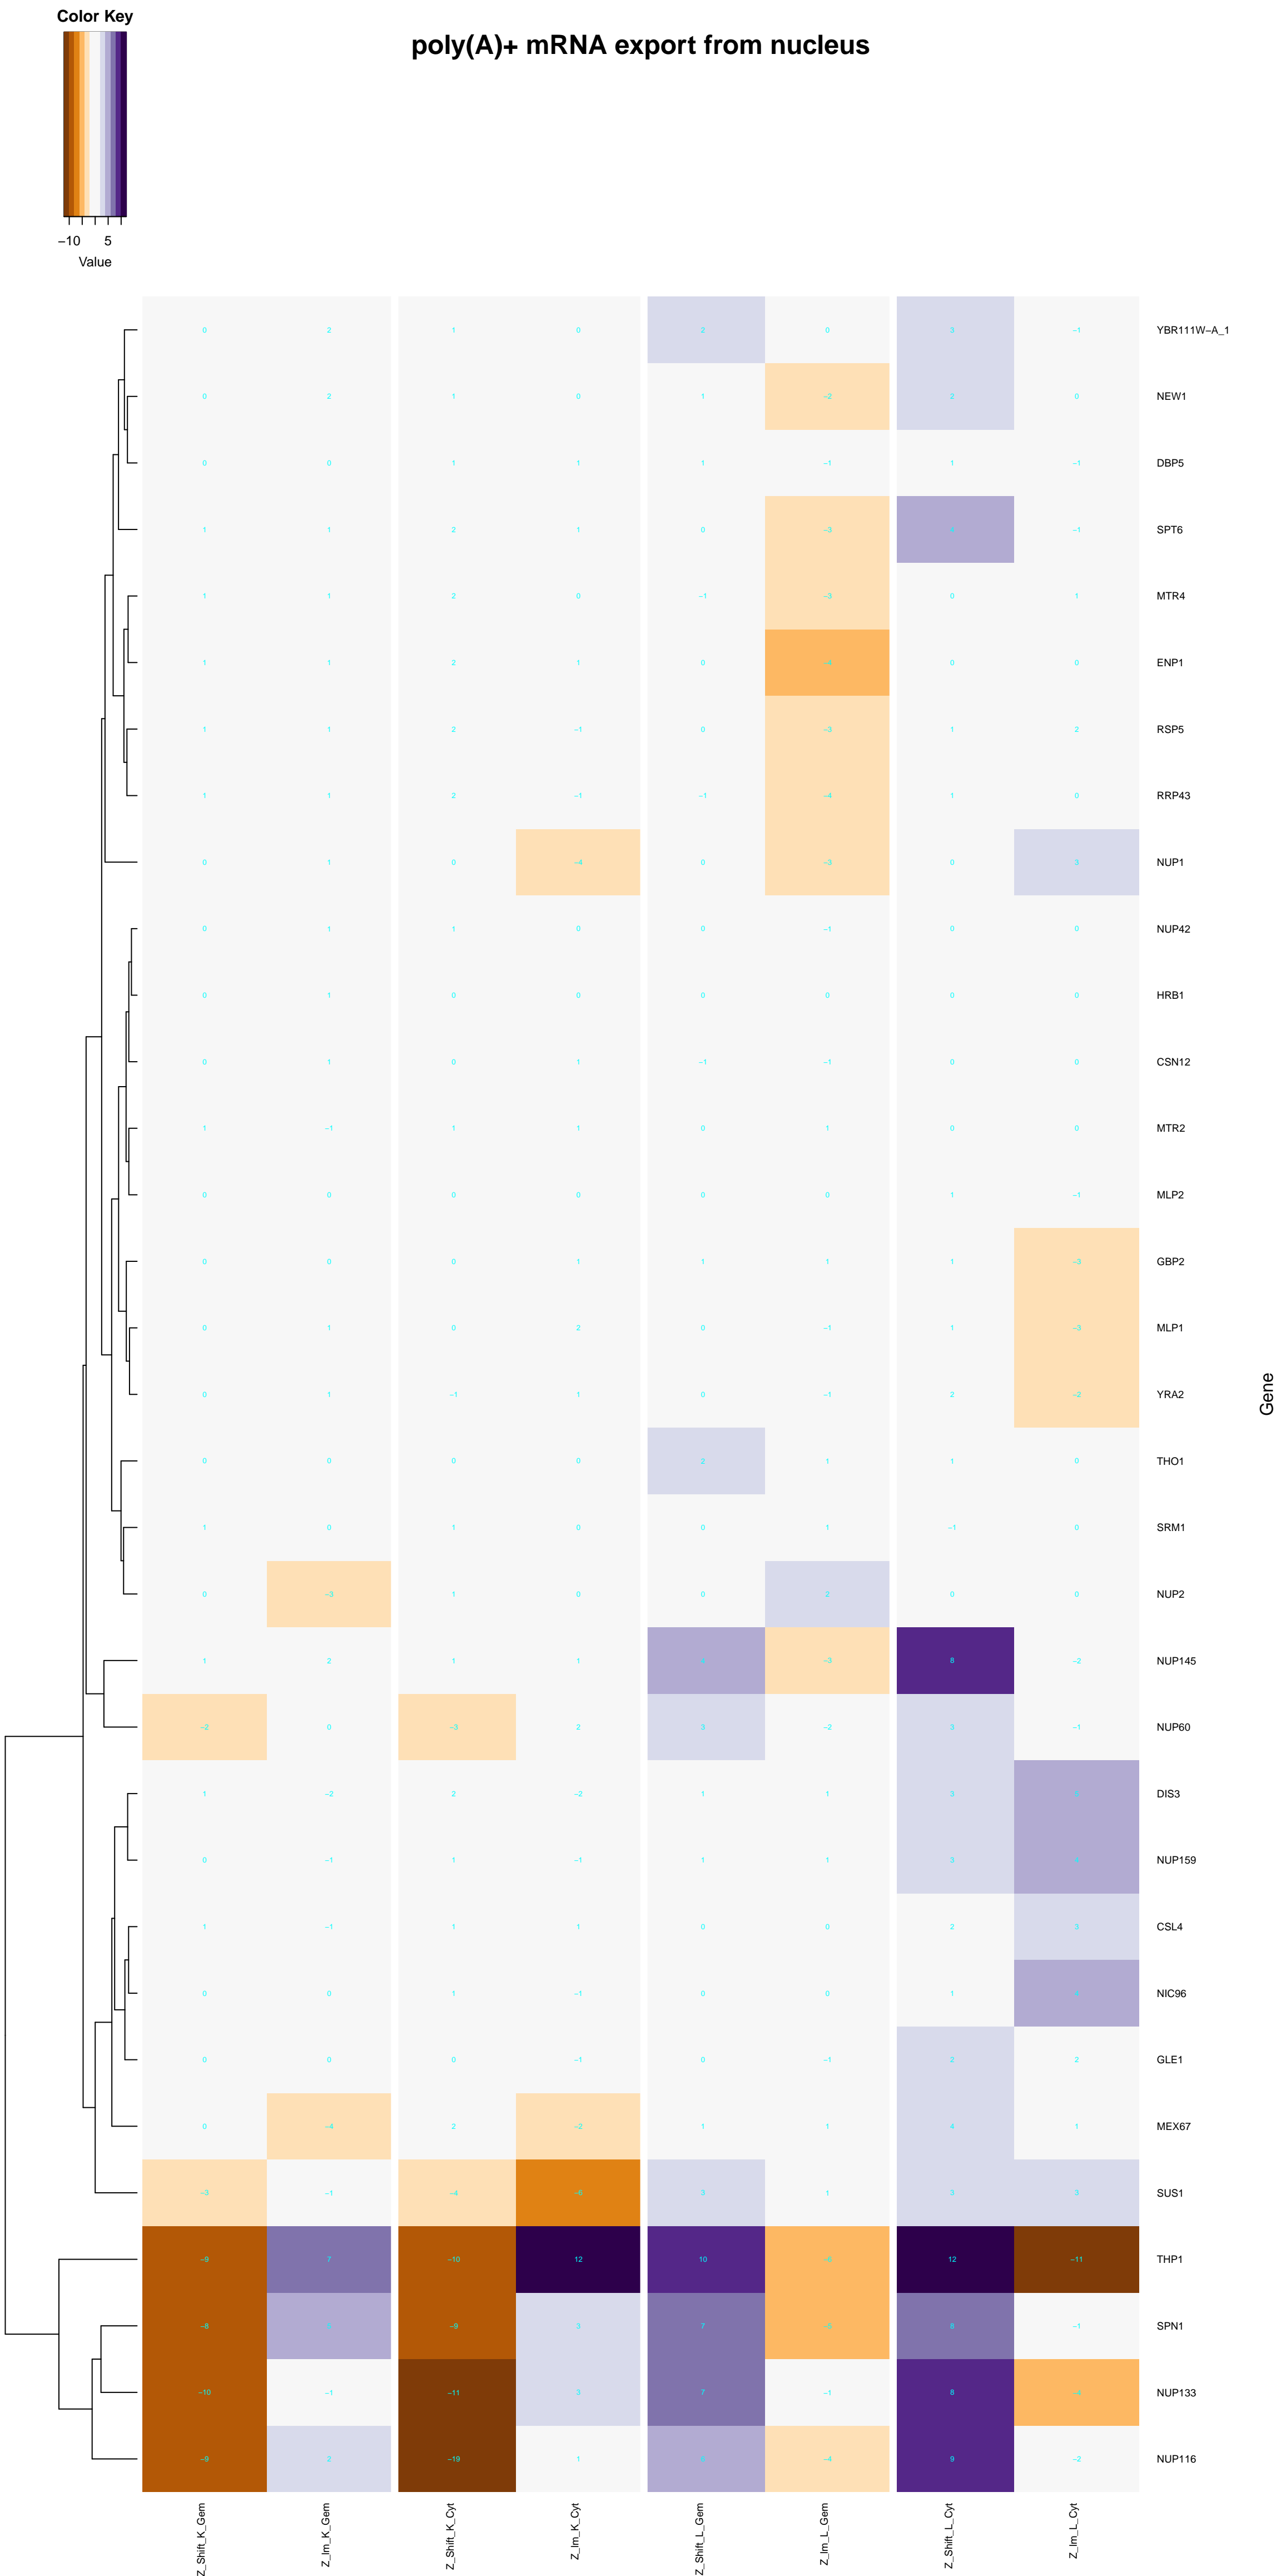

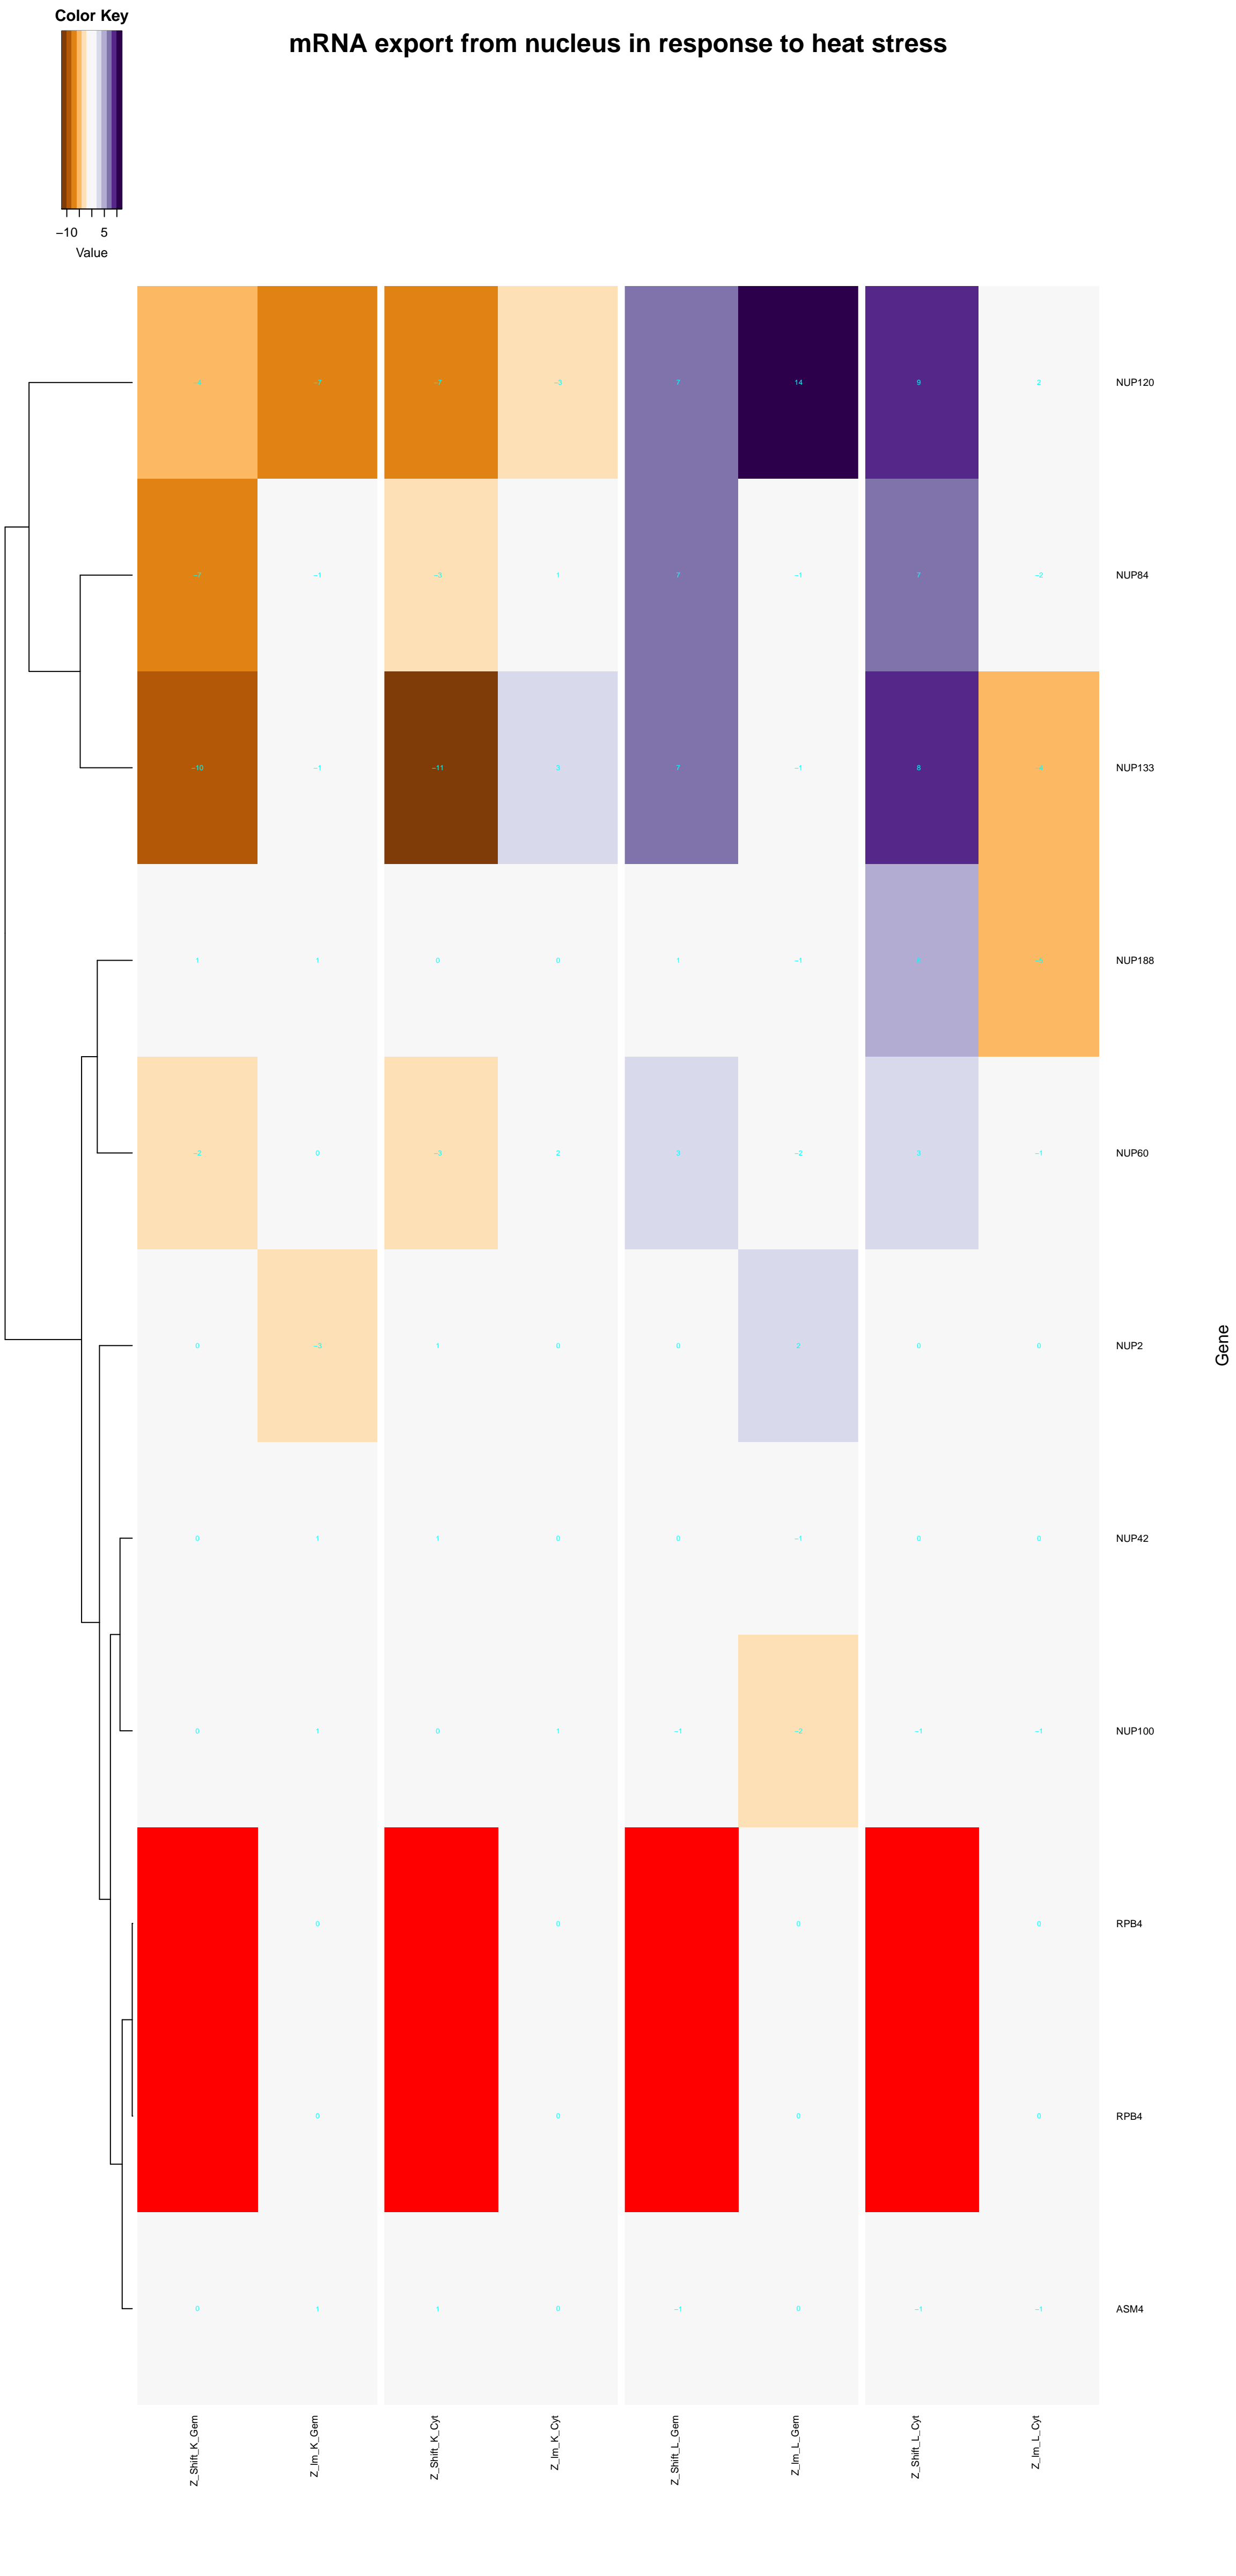



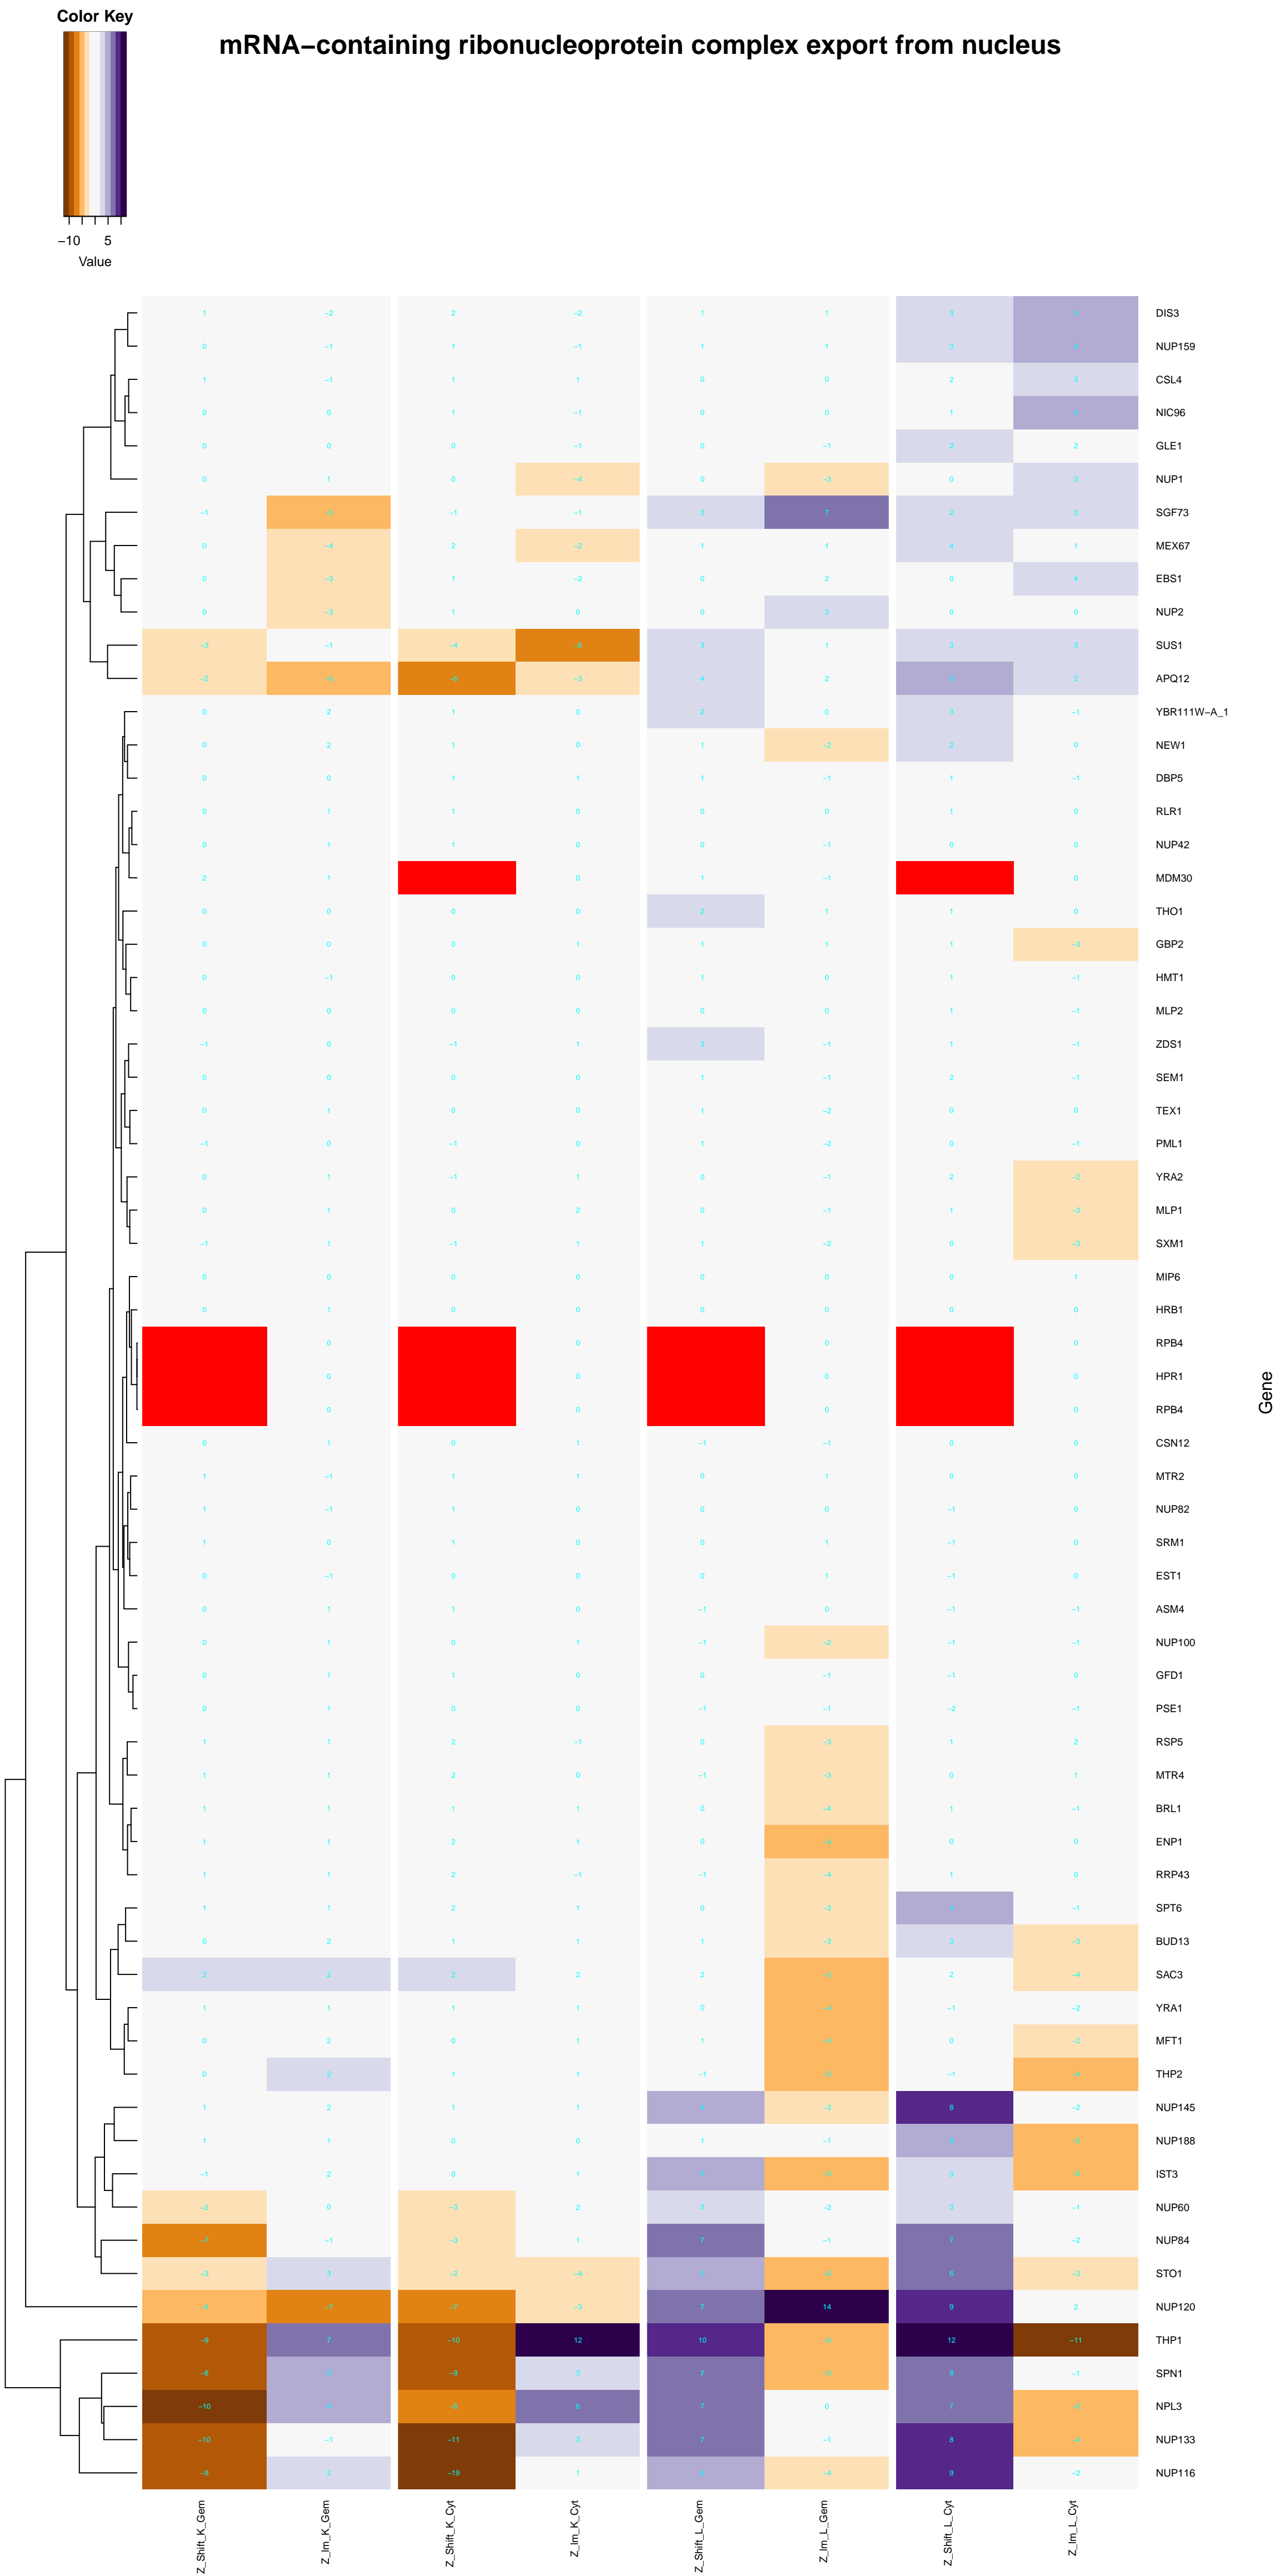

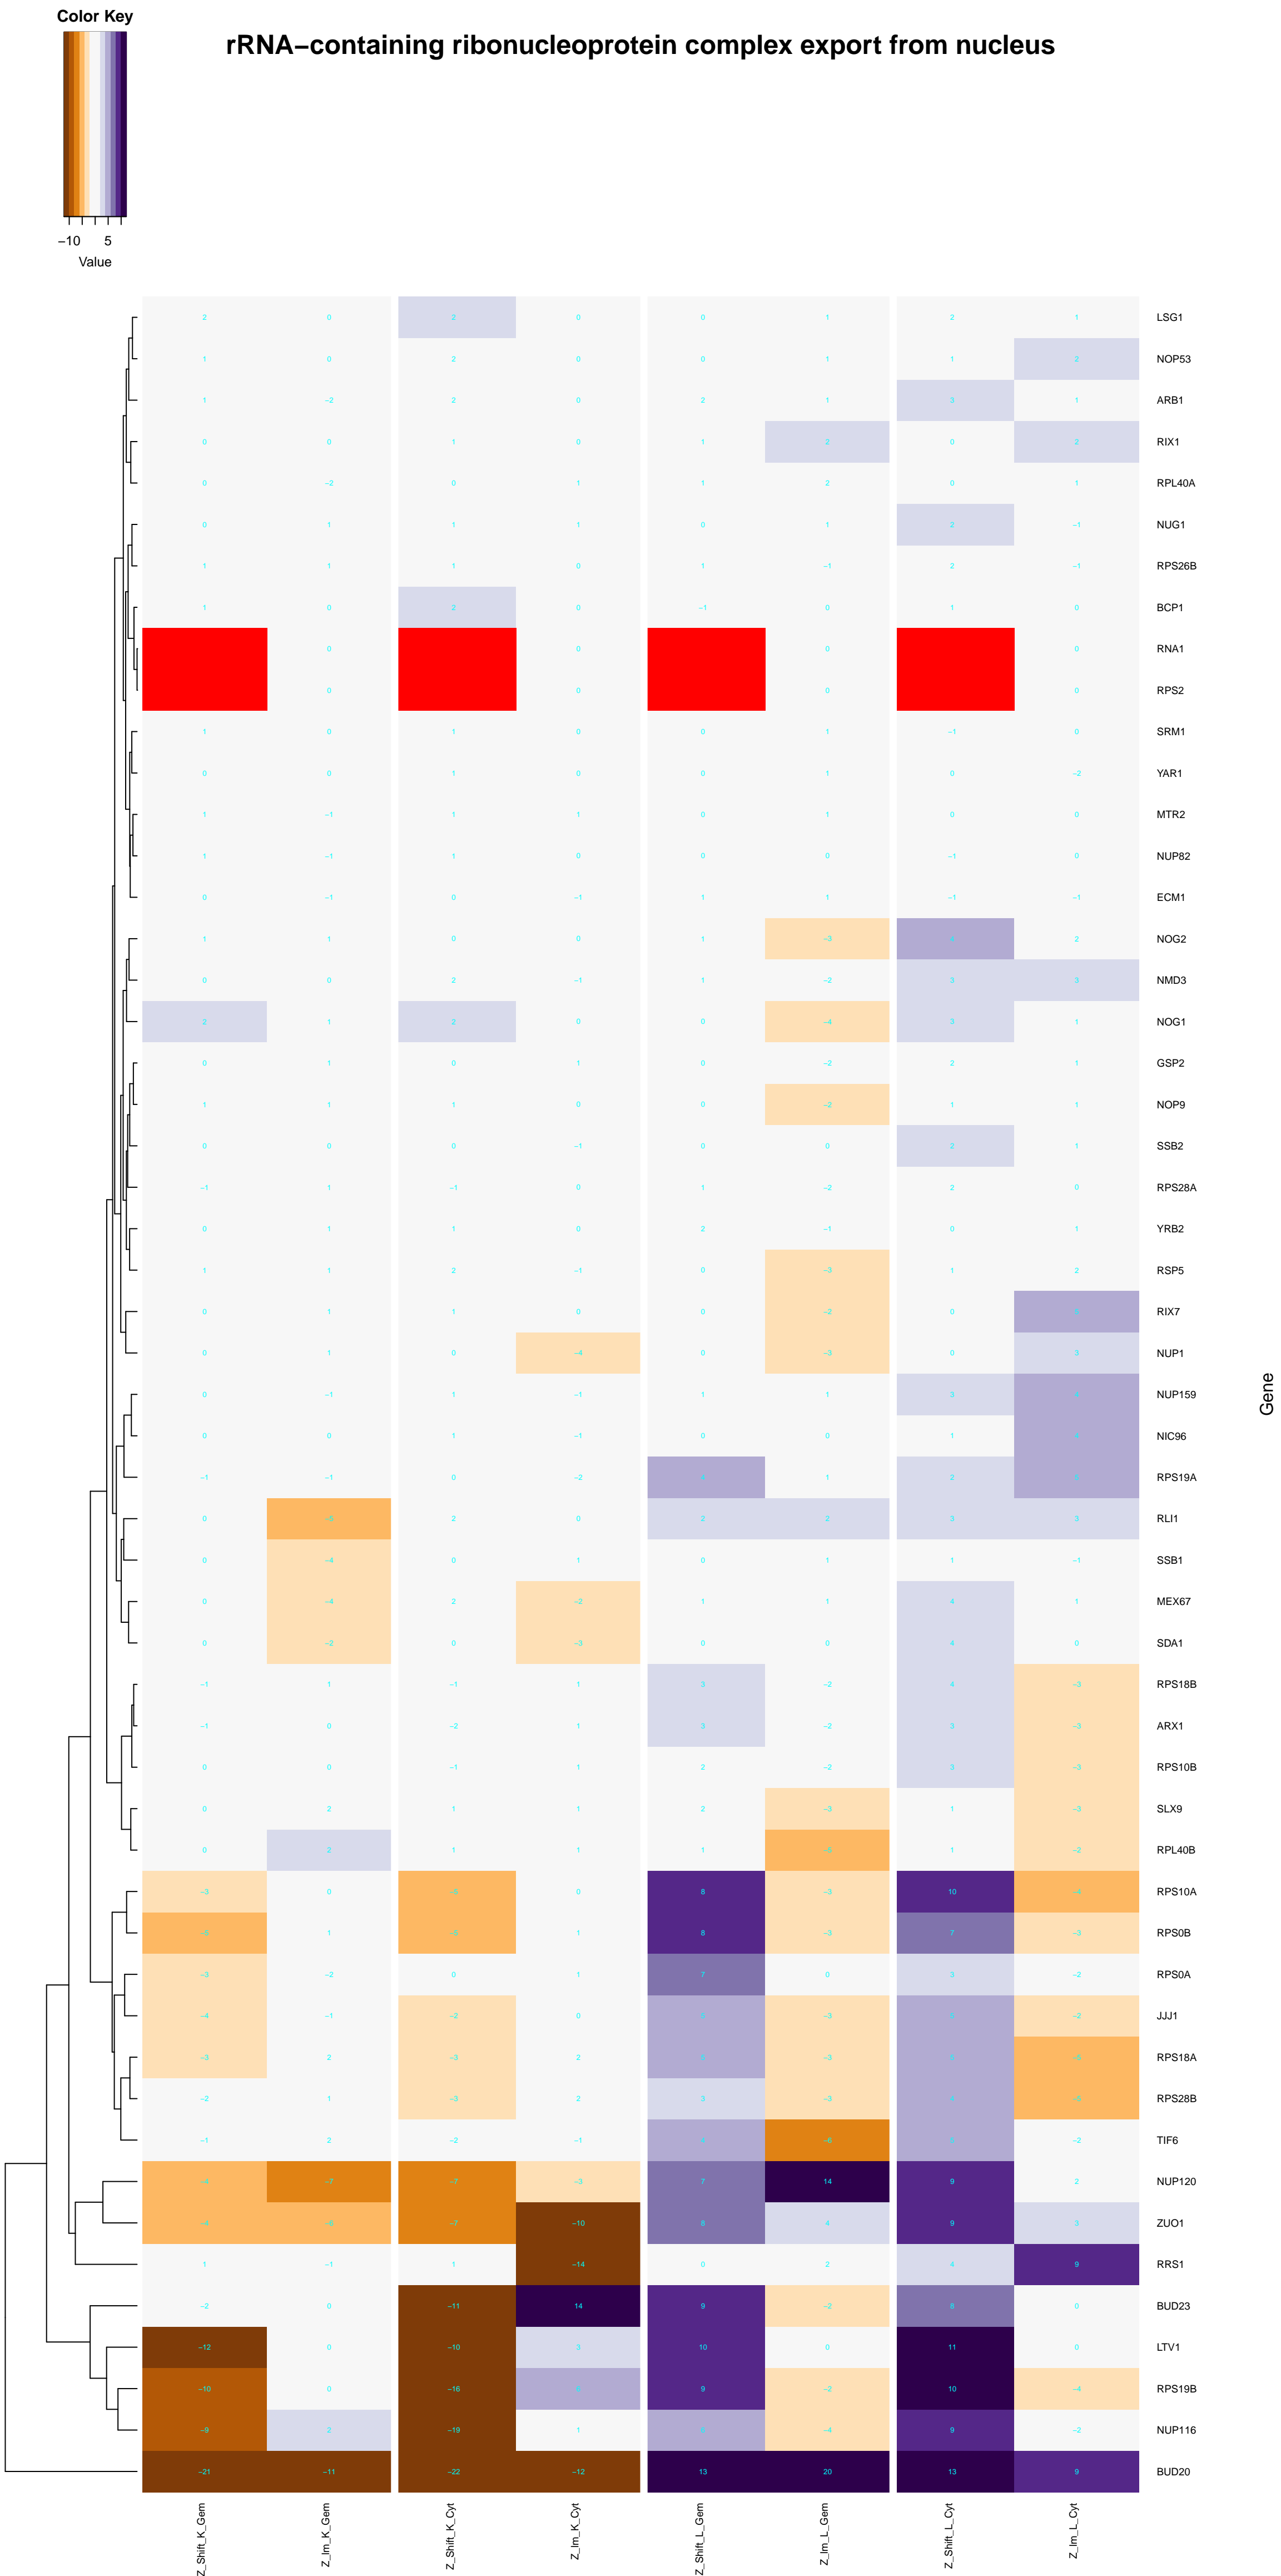

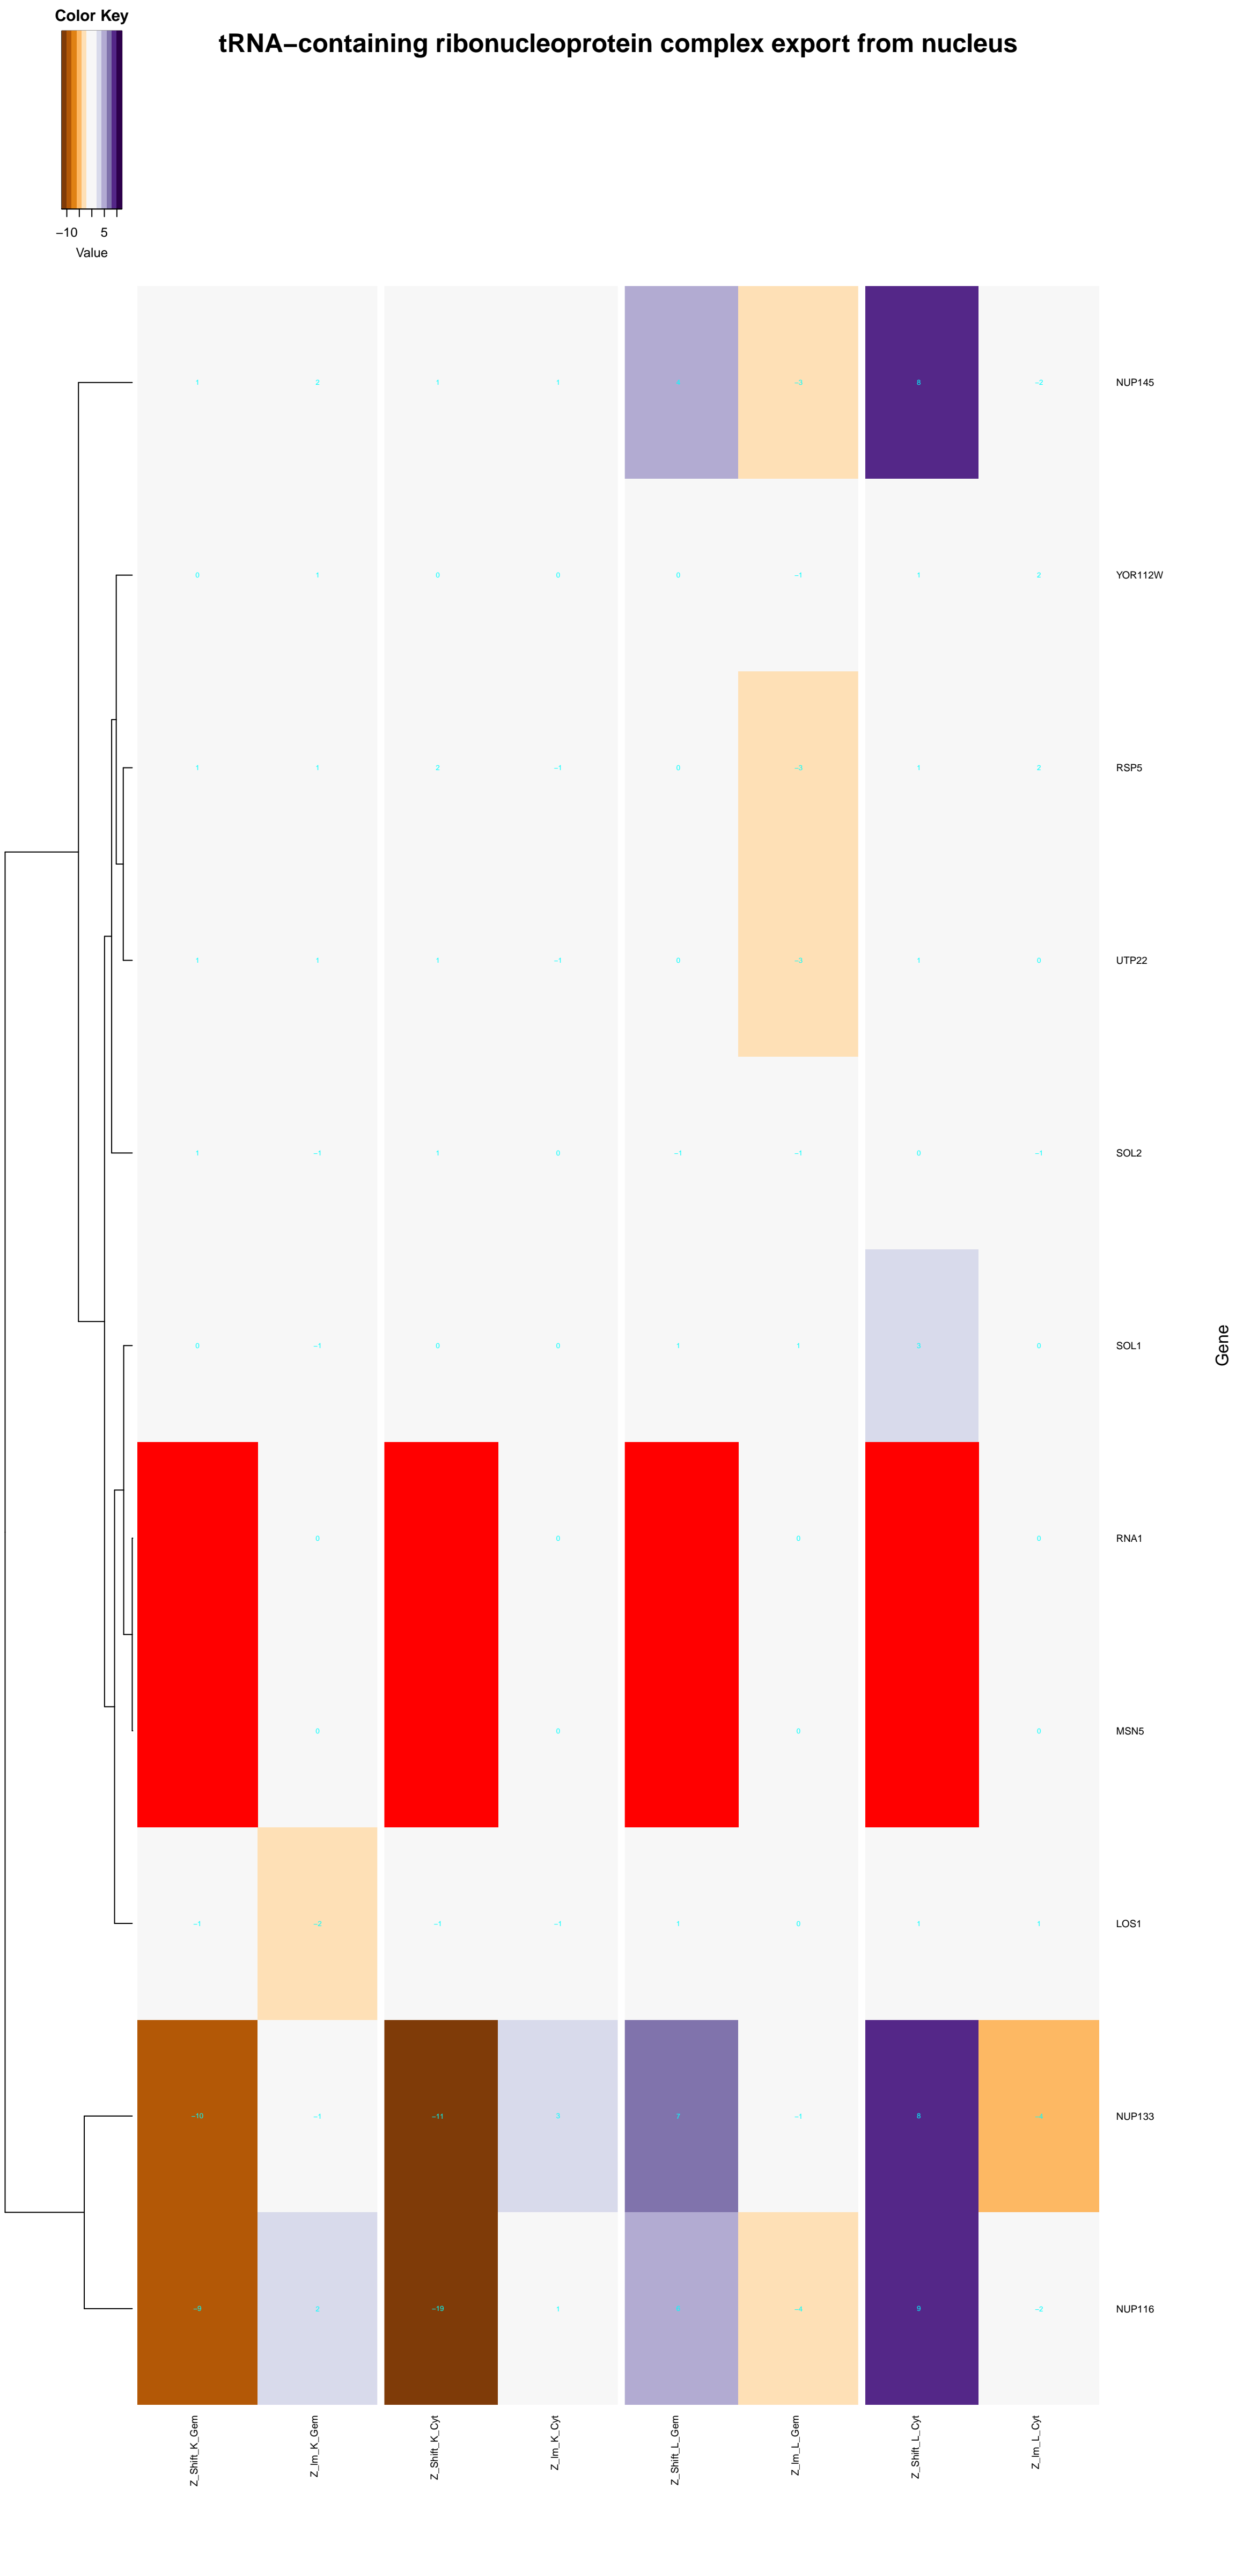

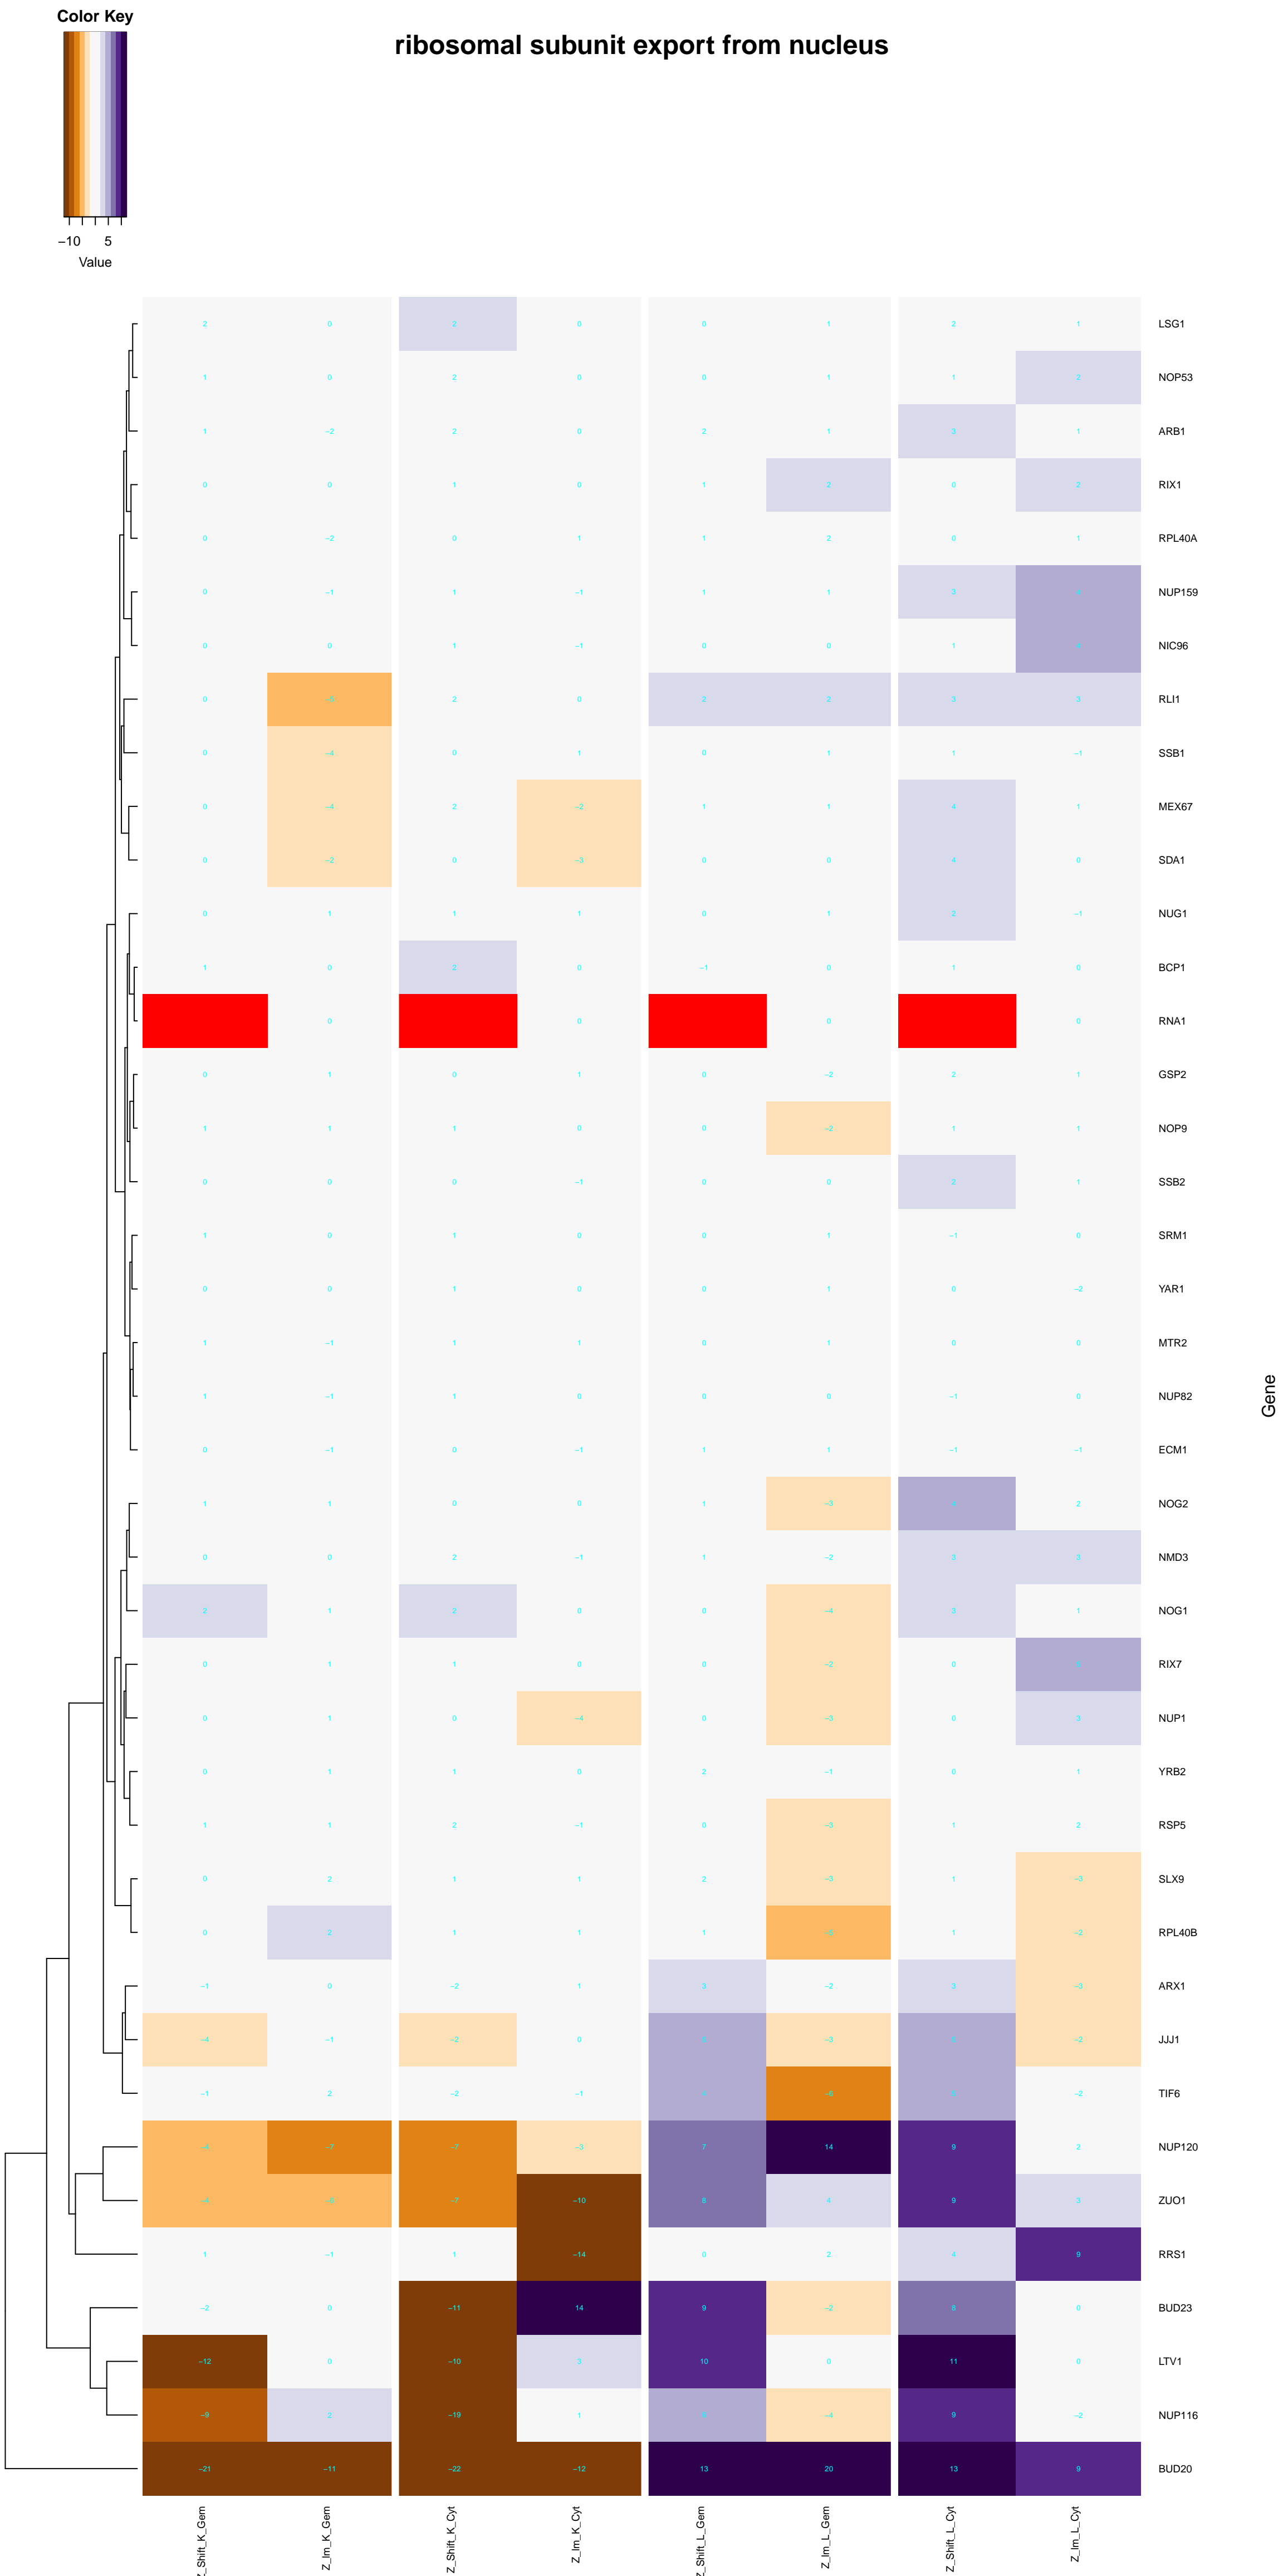

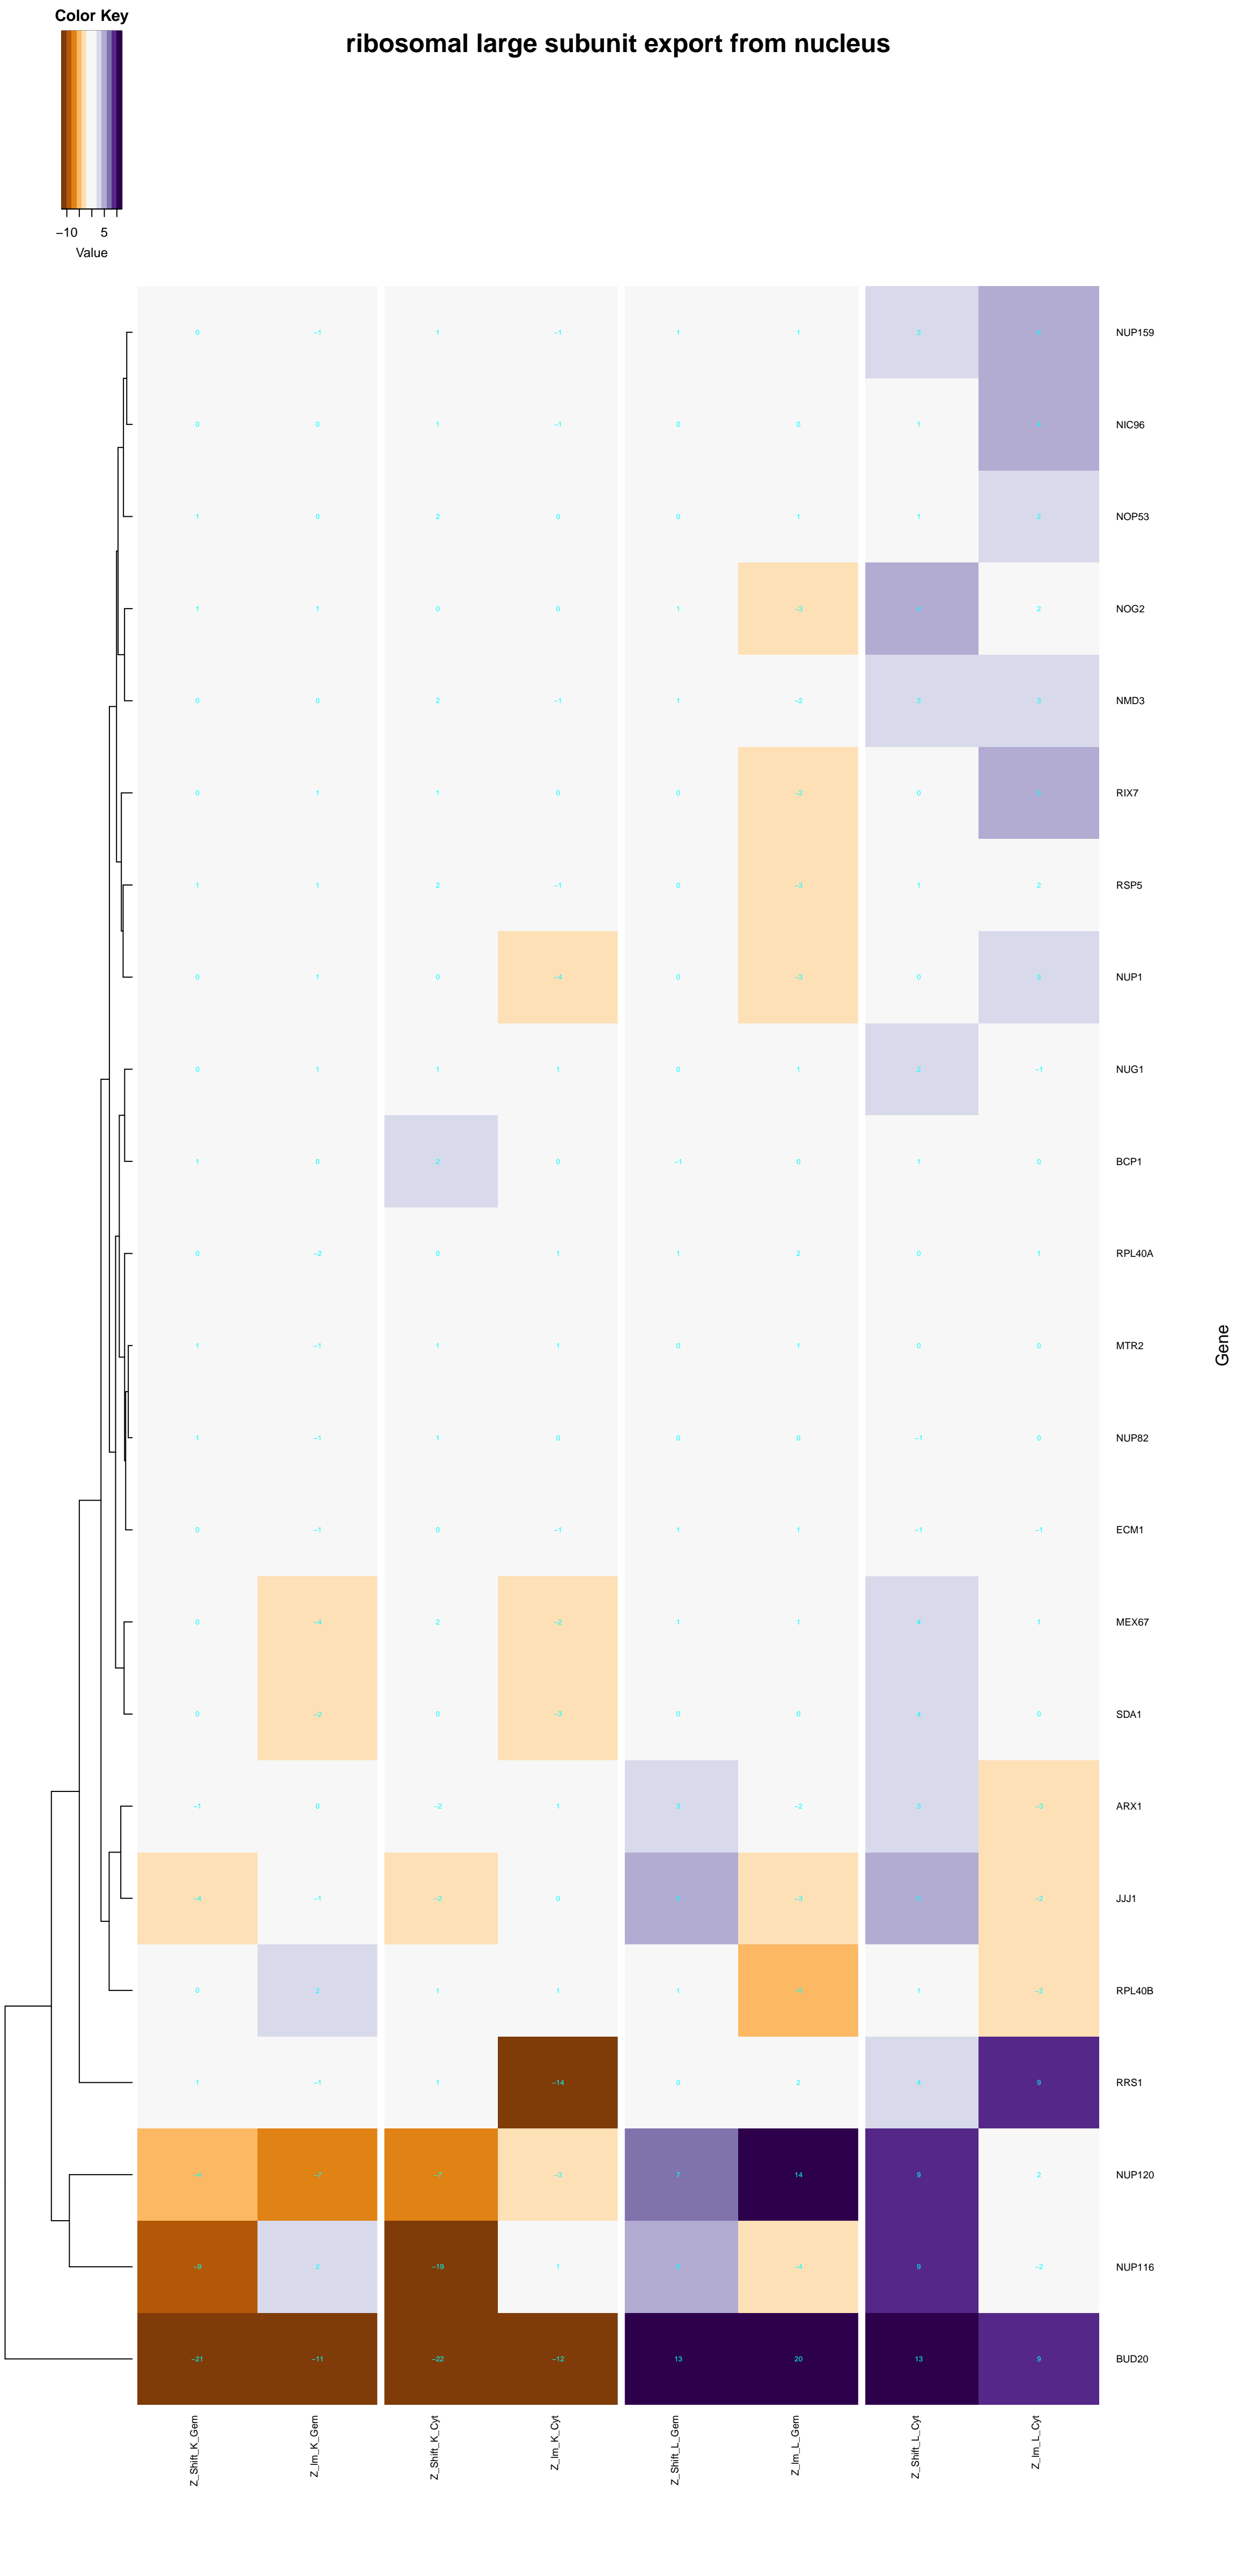

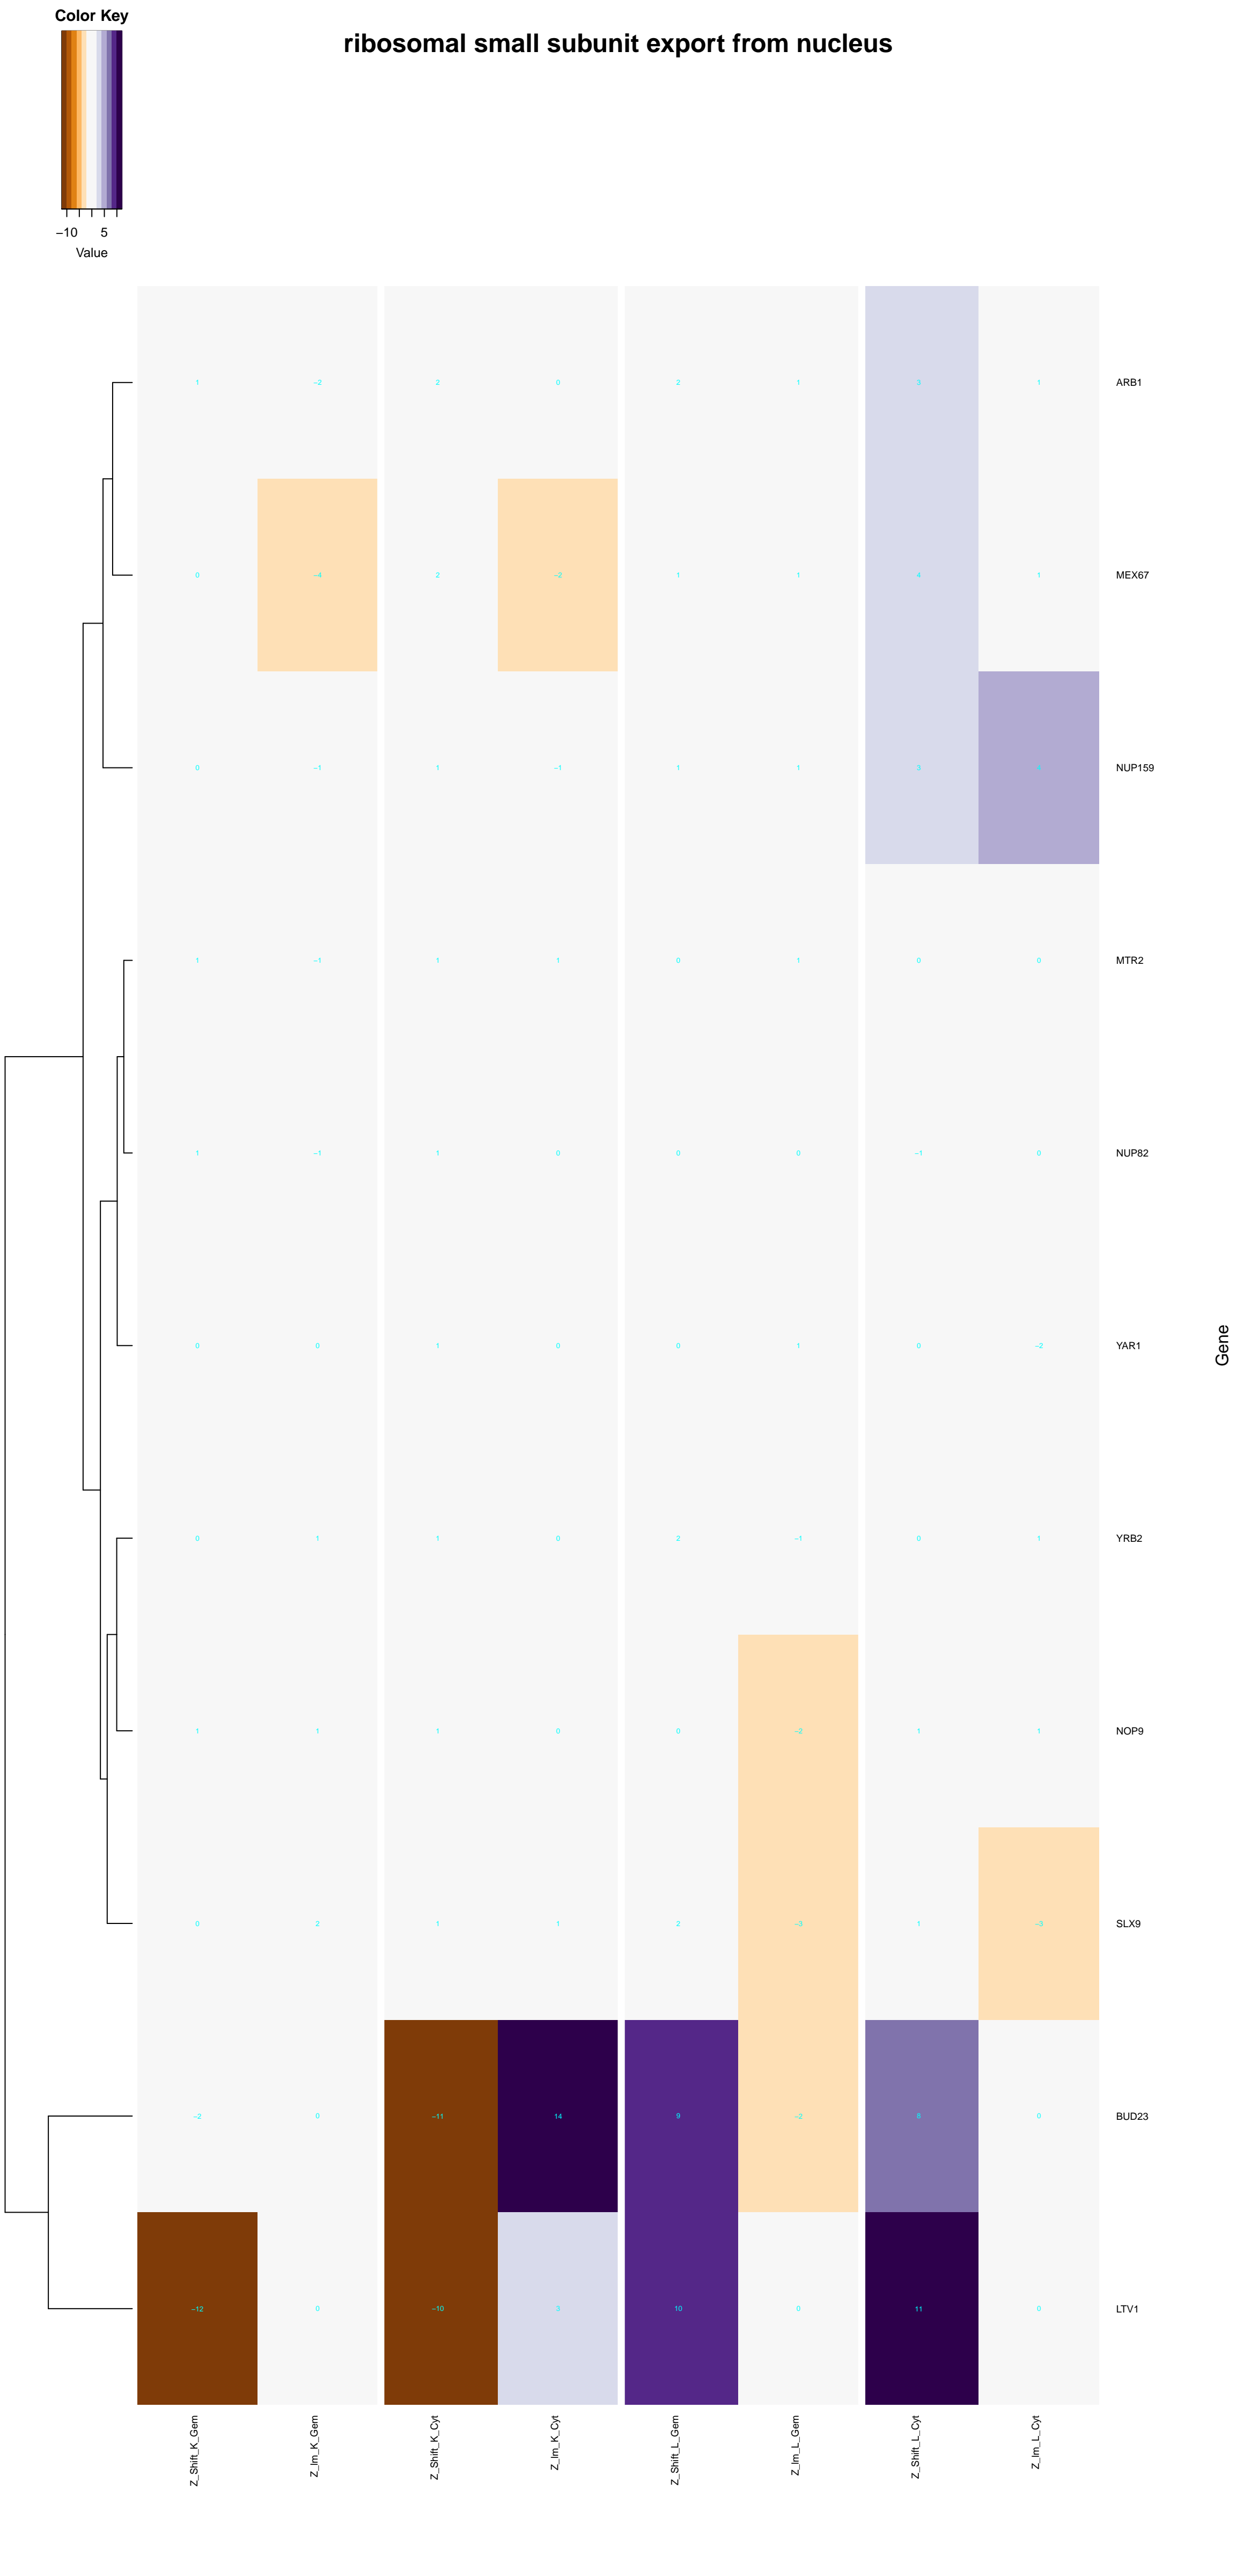

Supplement: s1 [file s1]

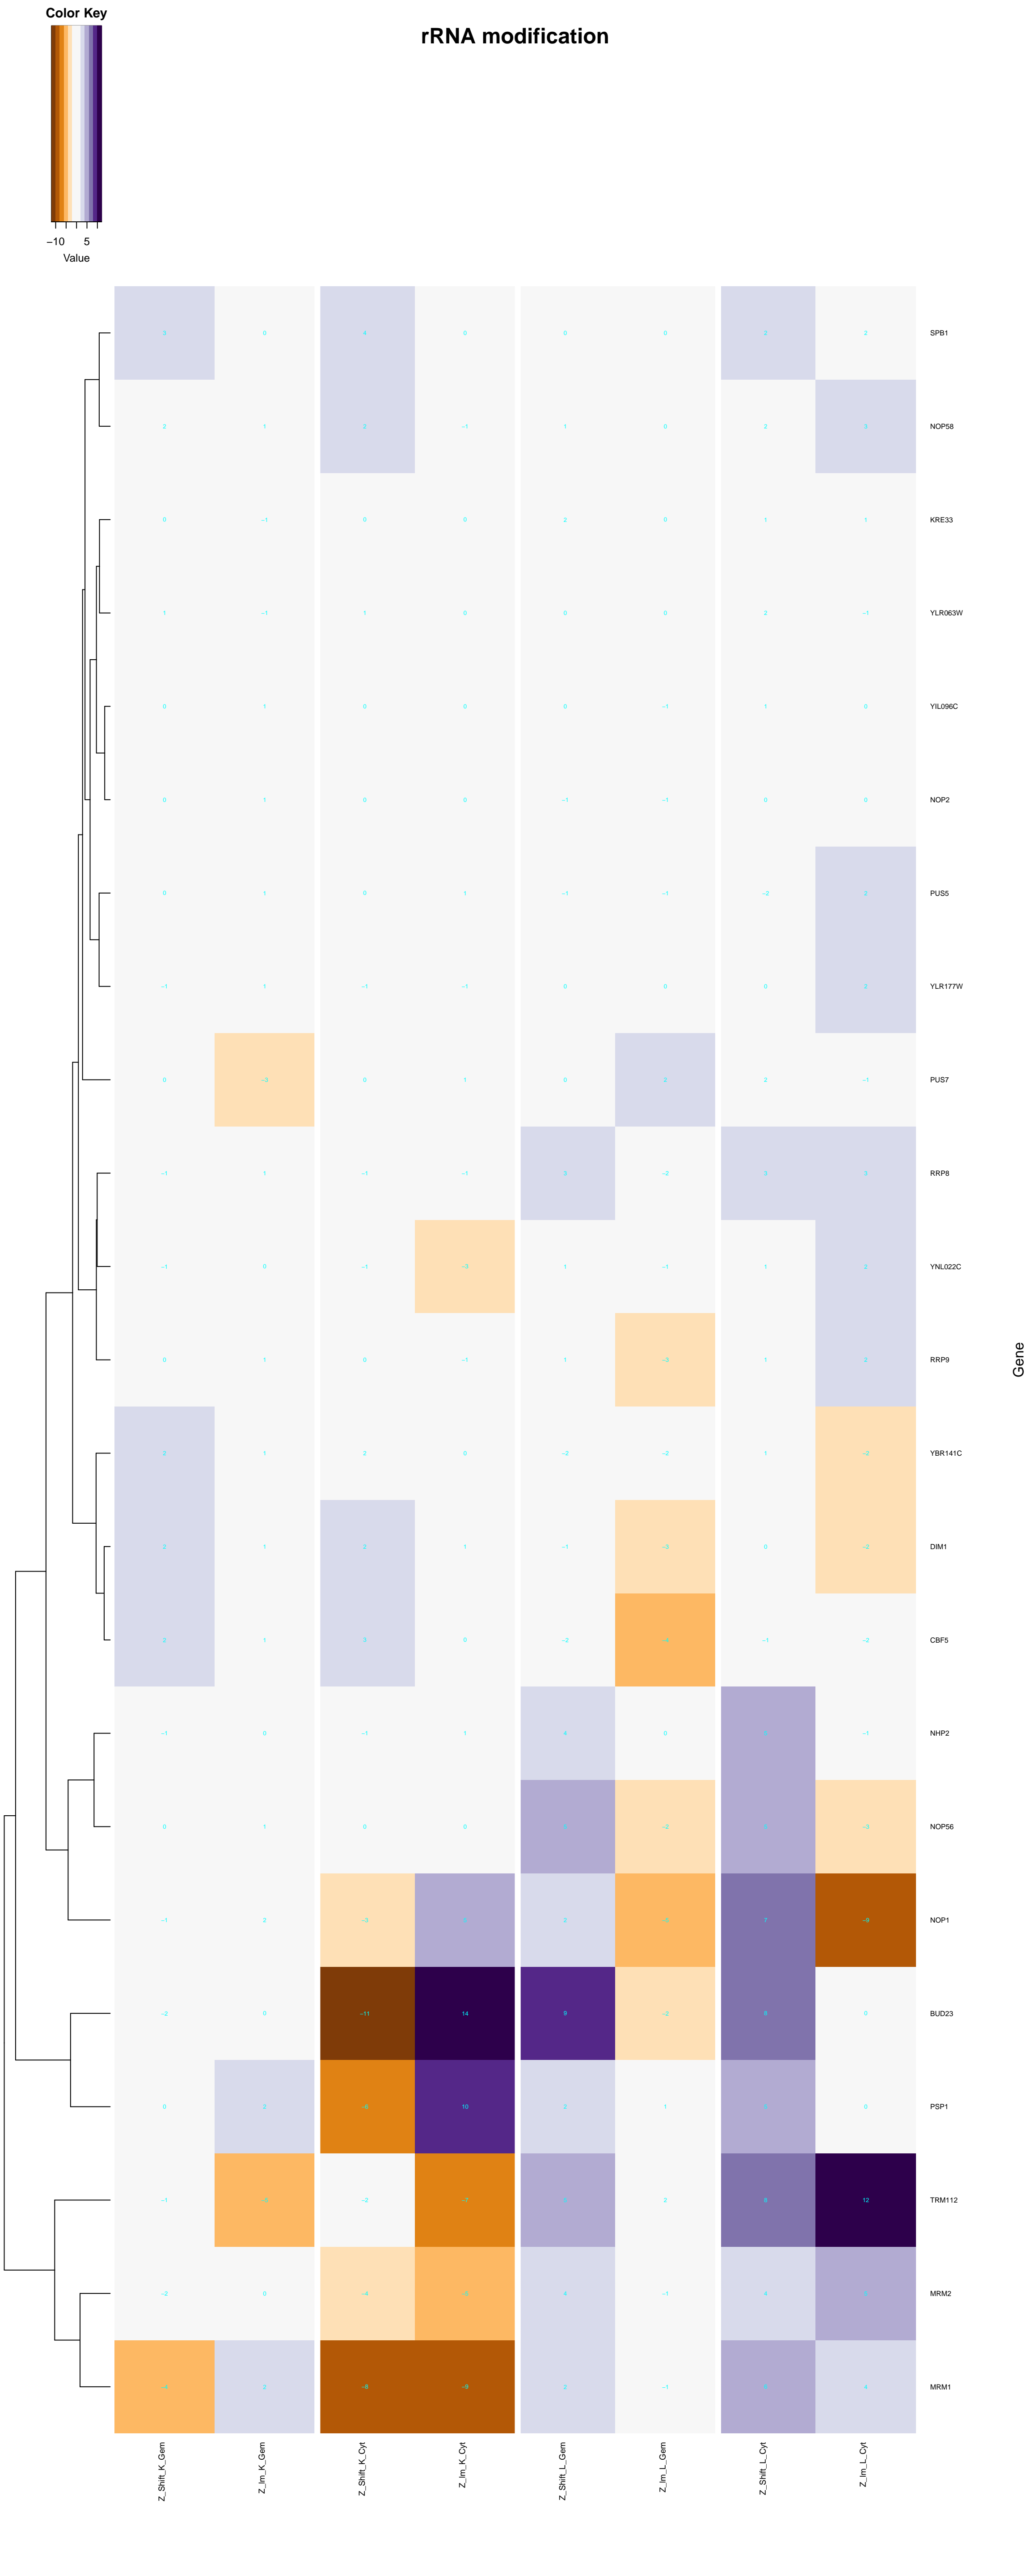

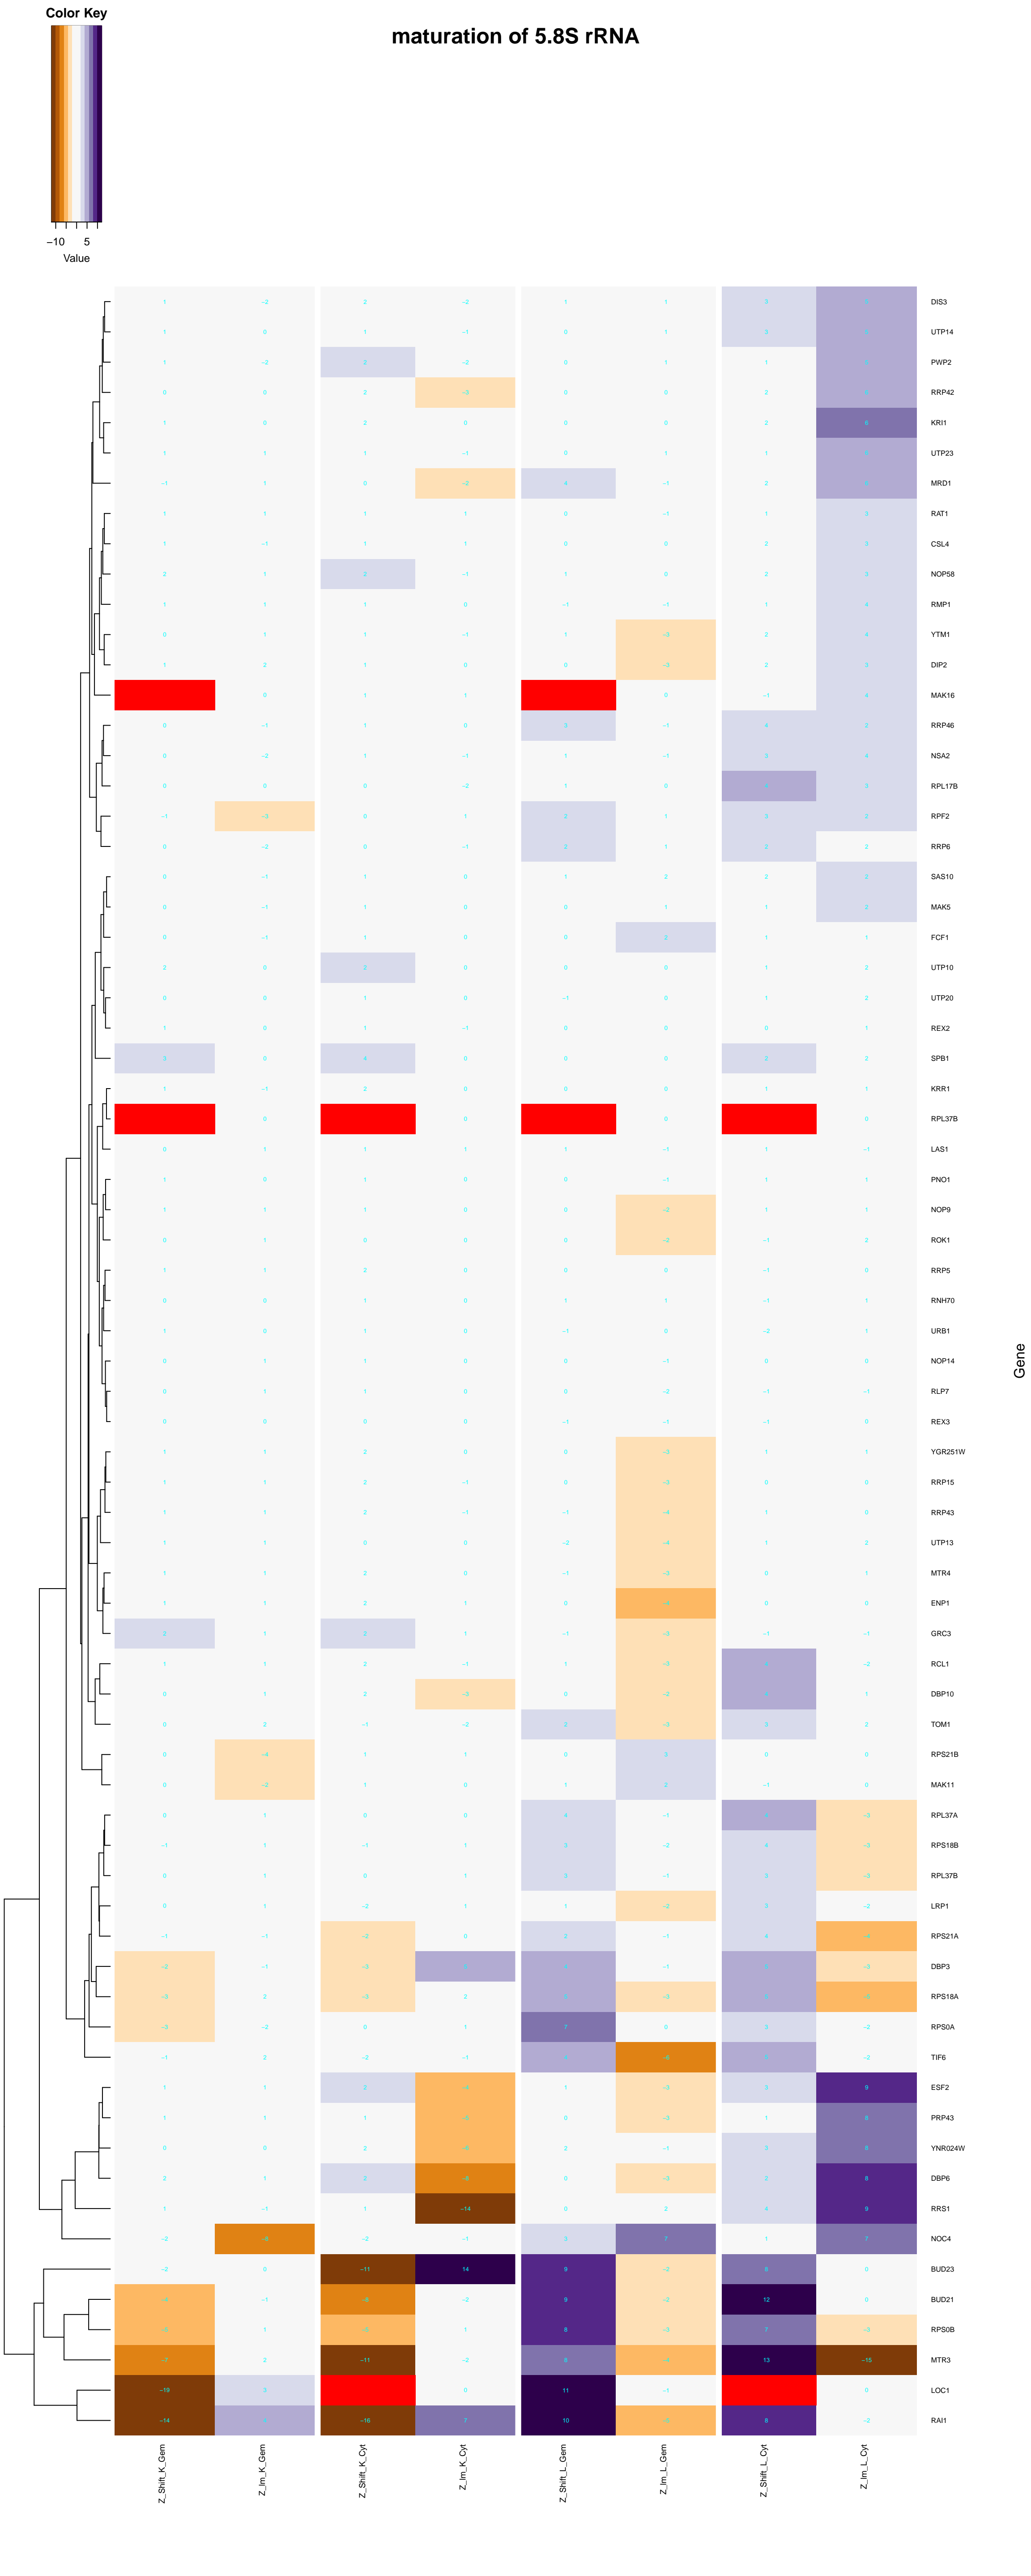

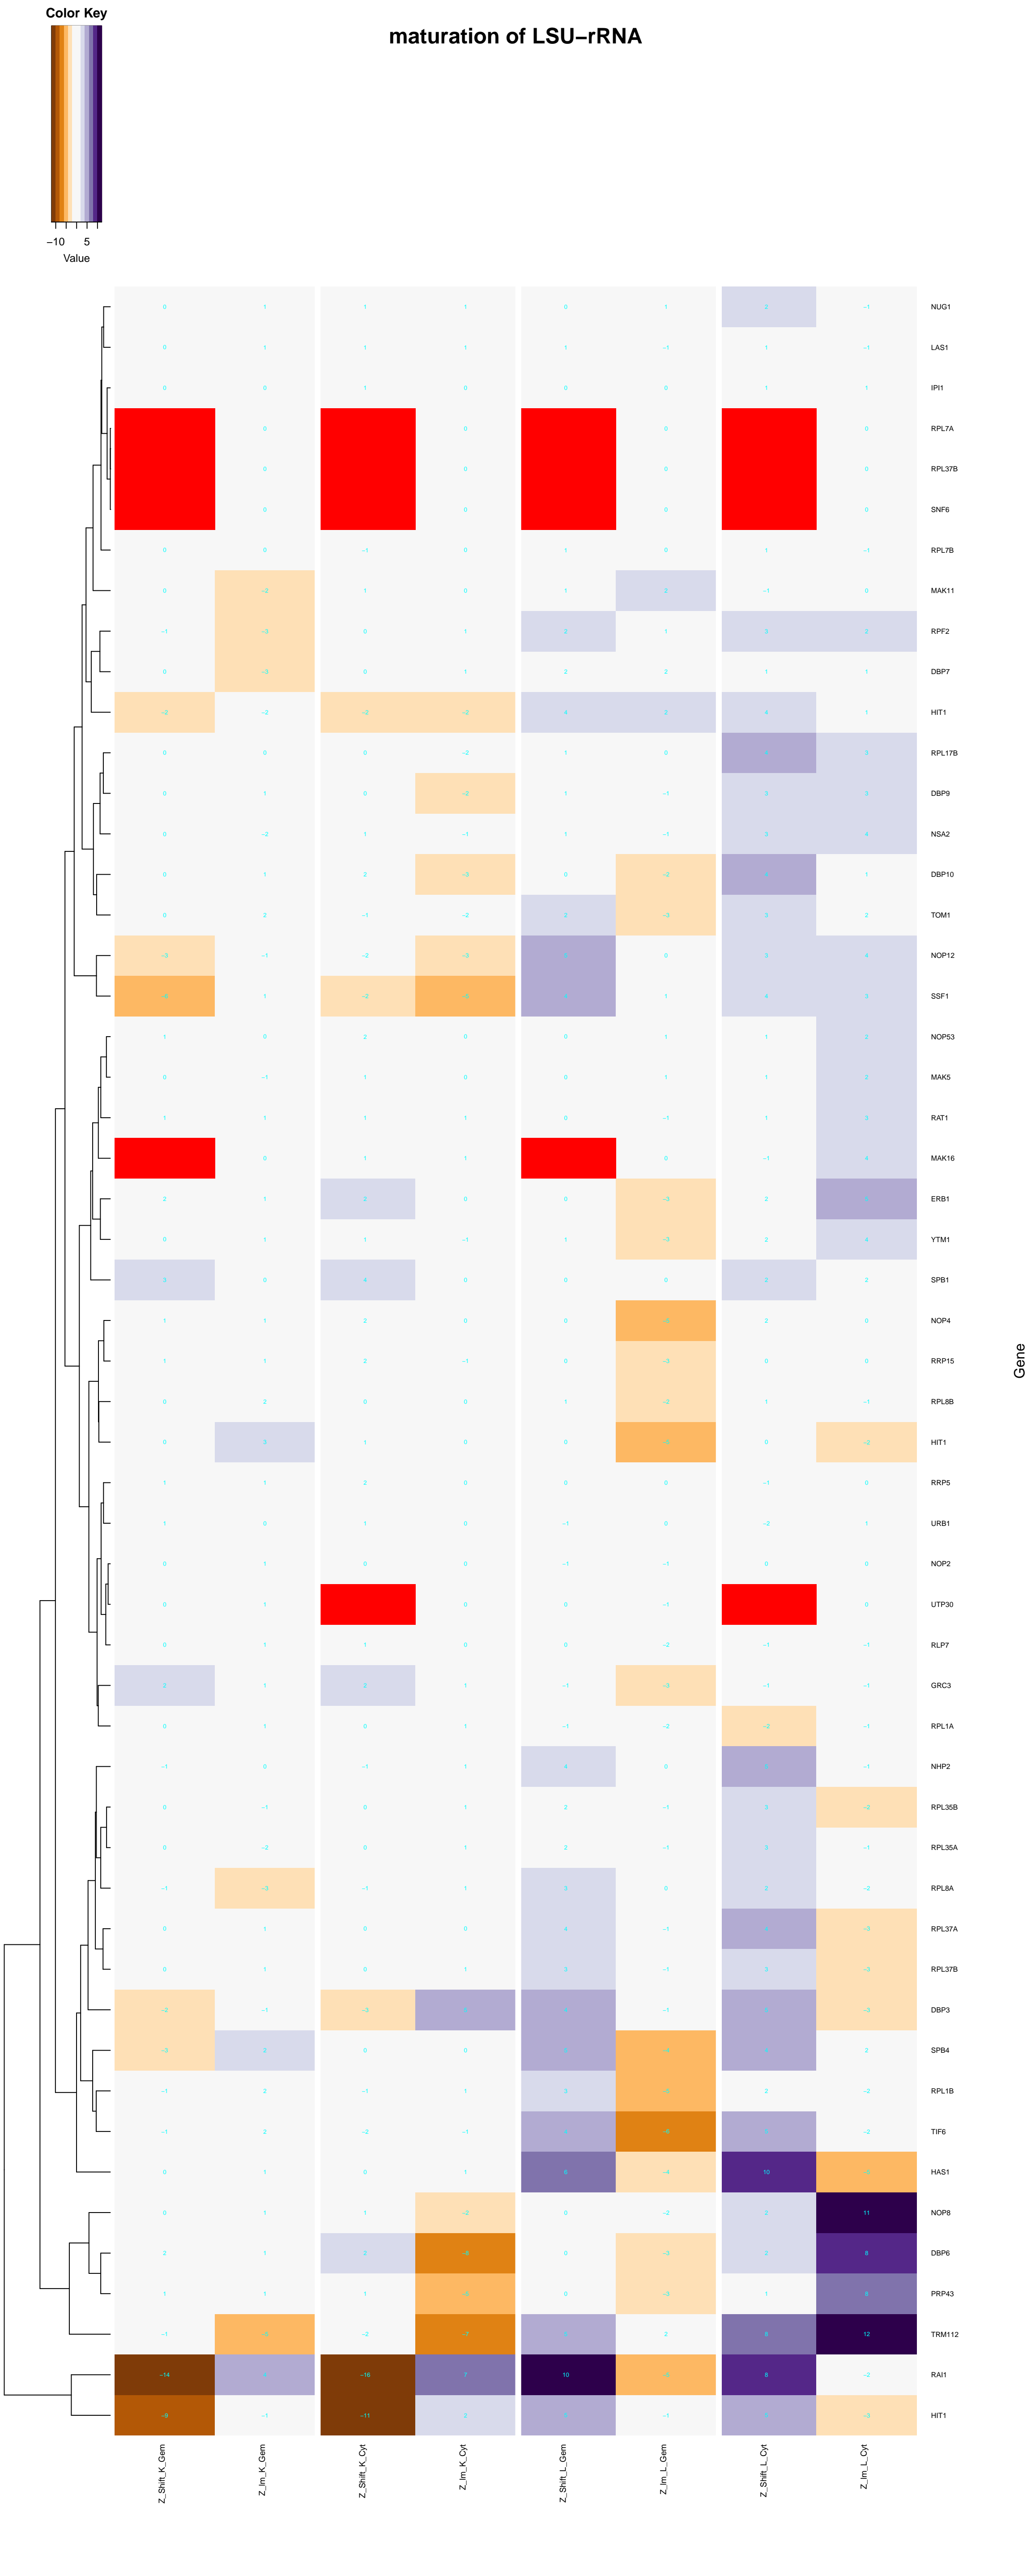

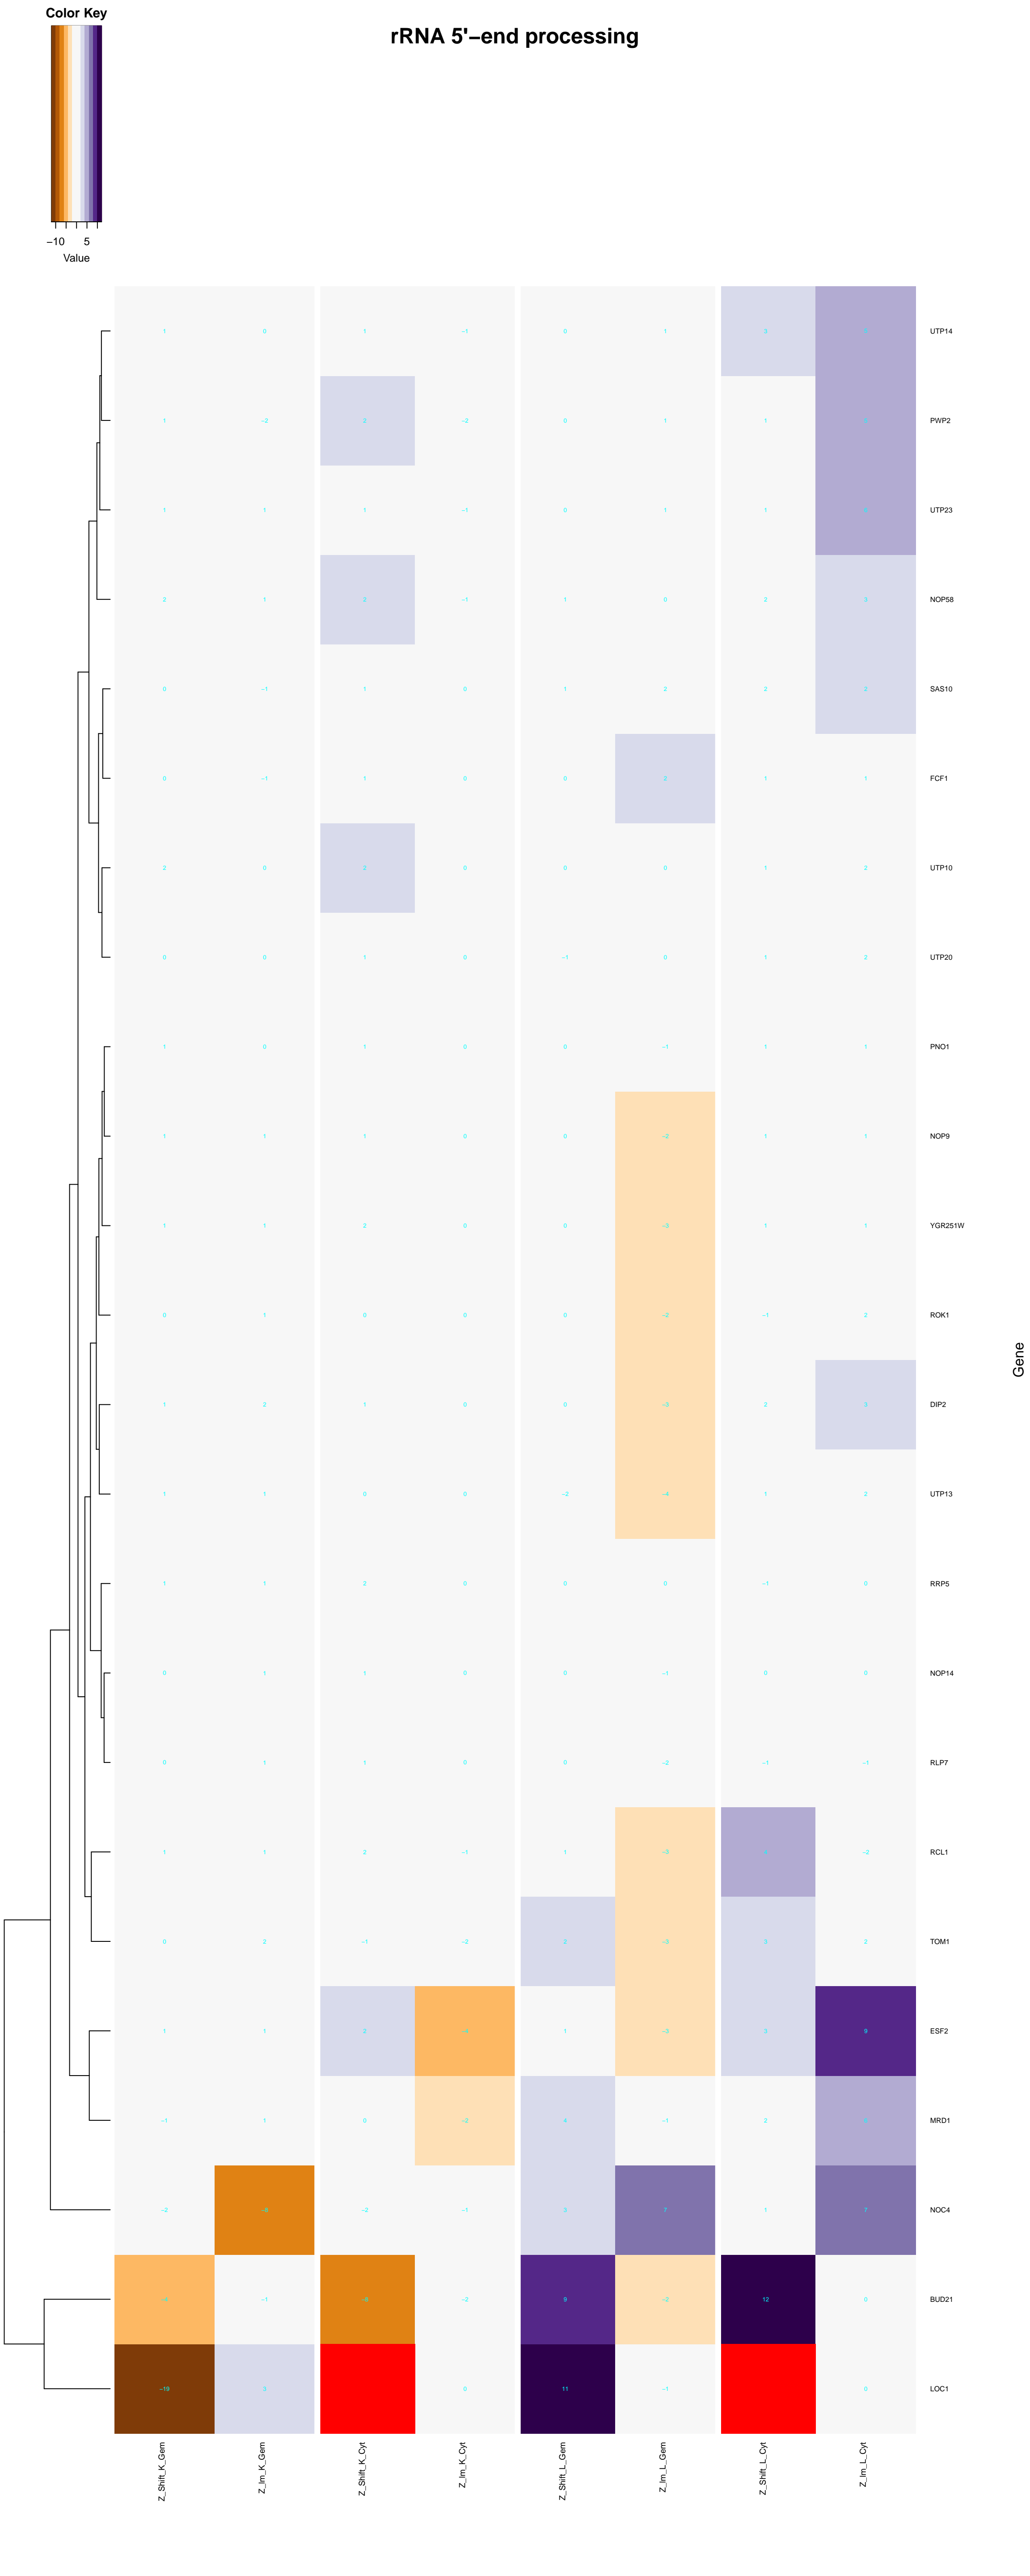

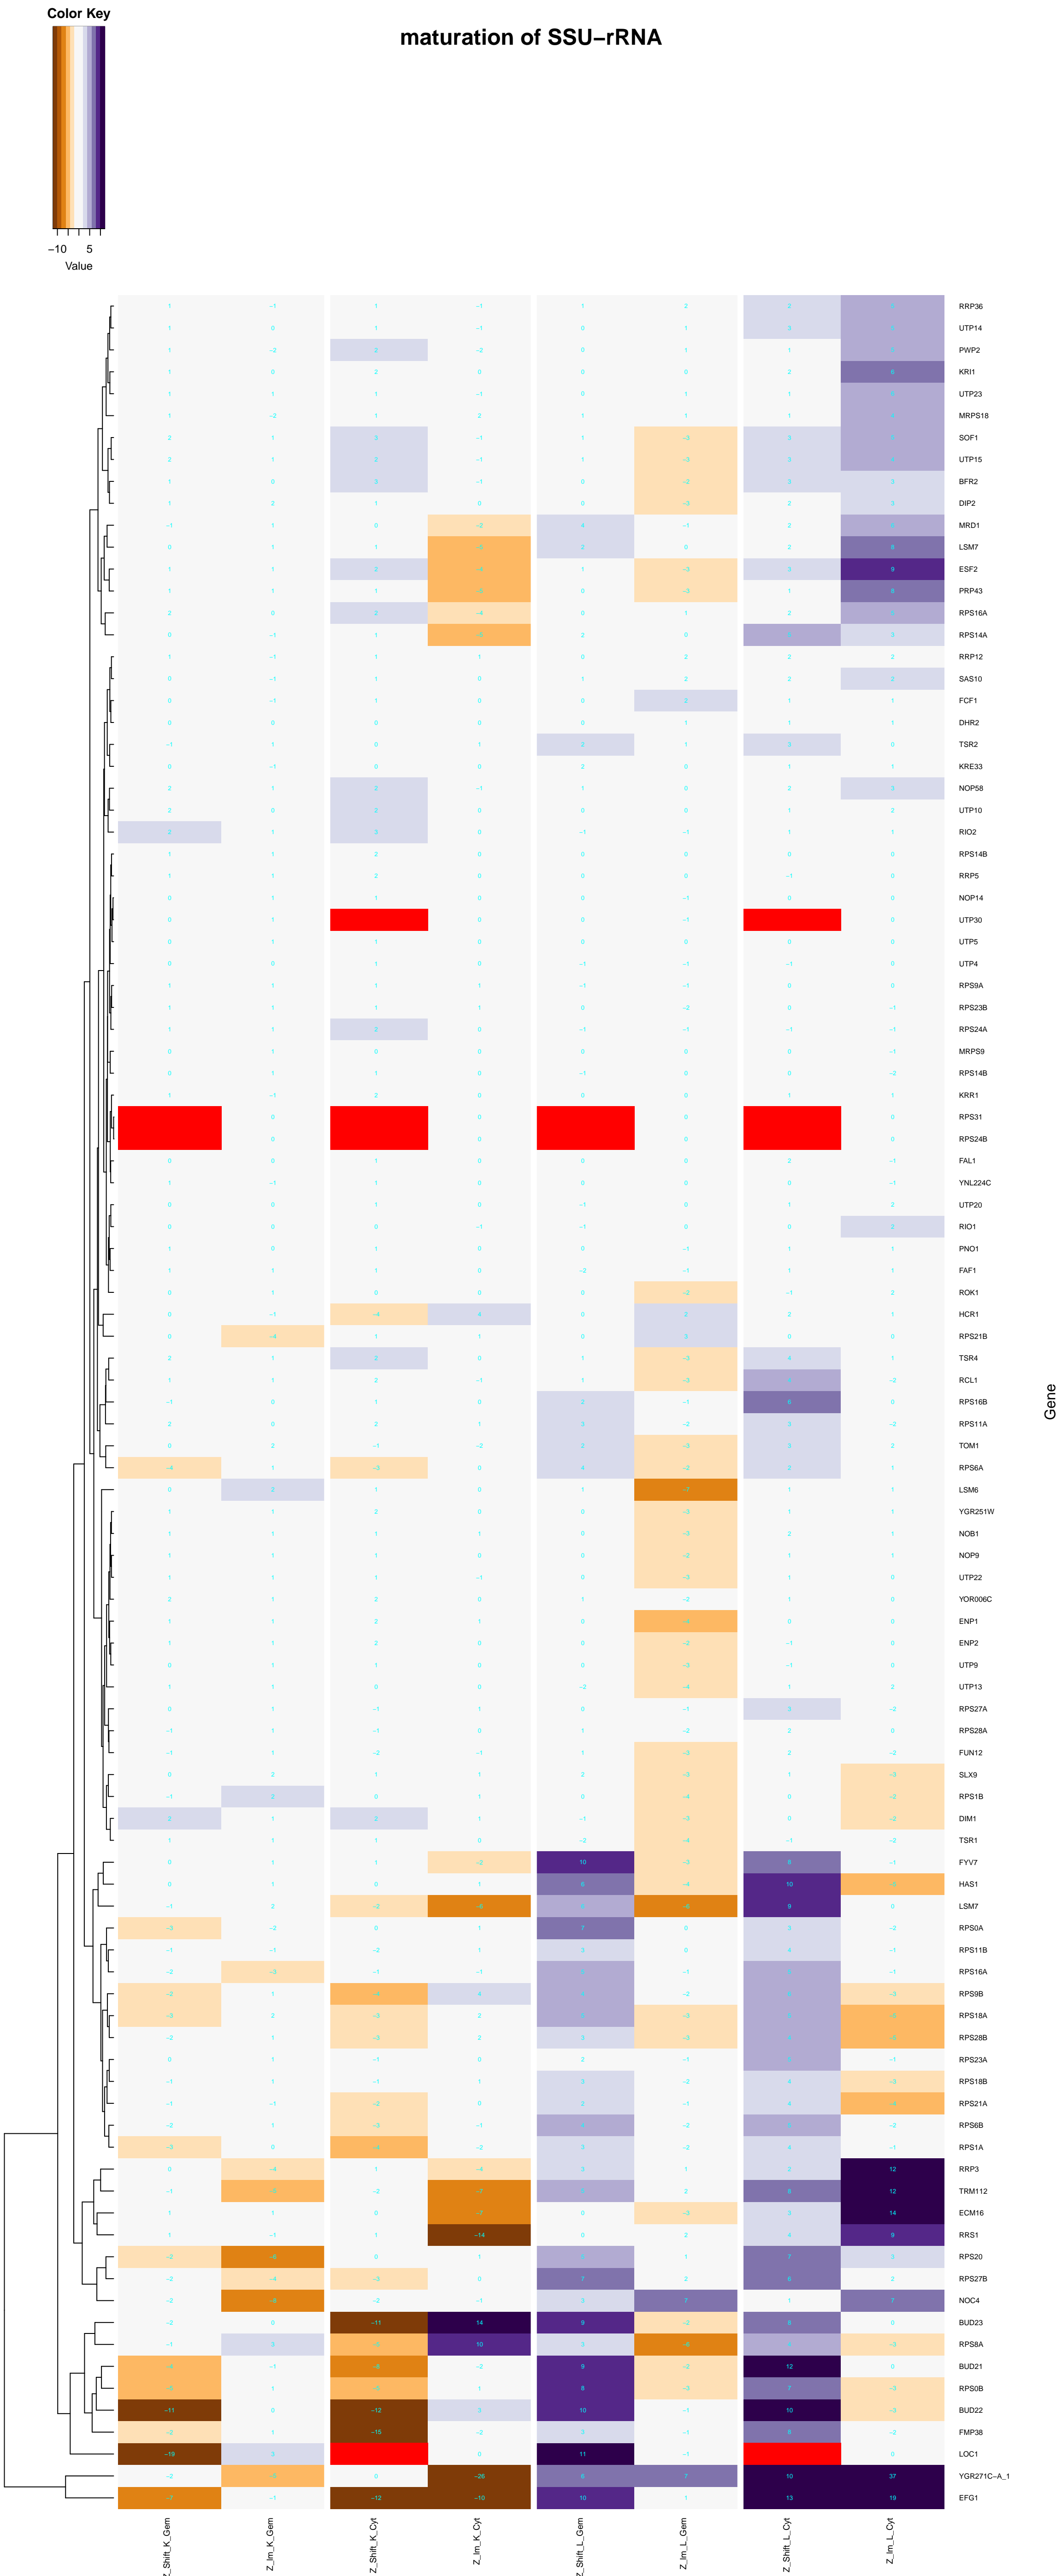

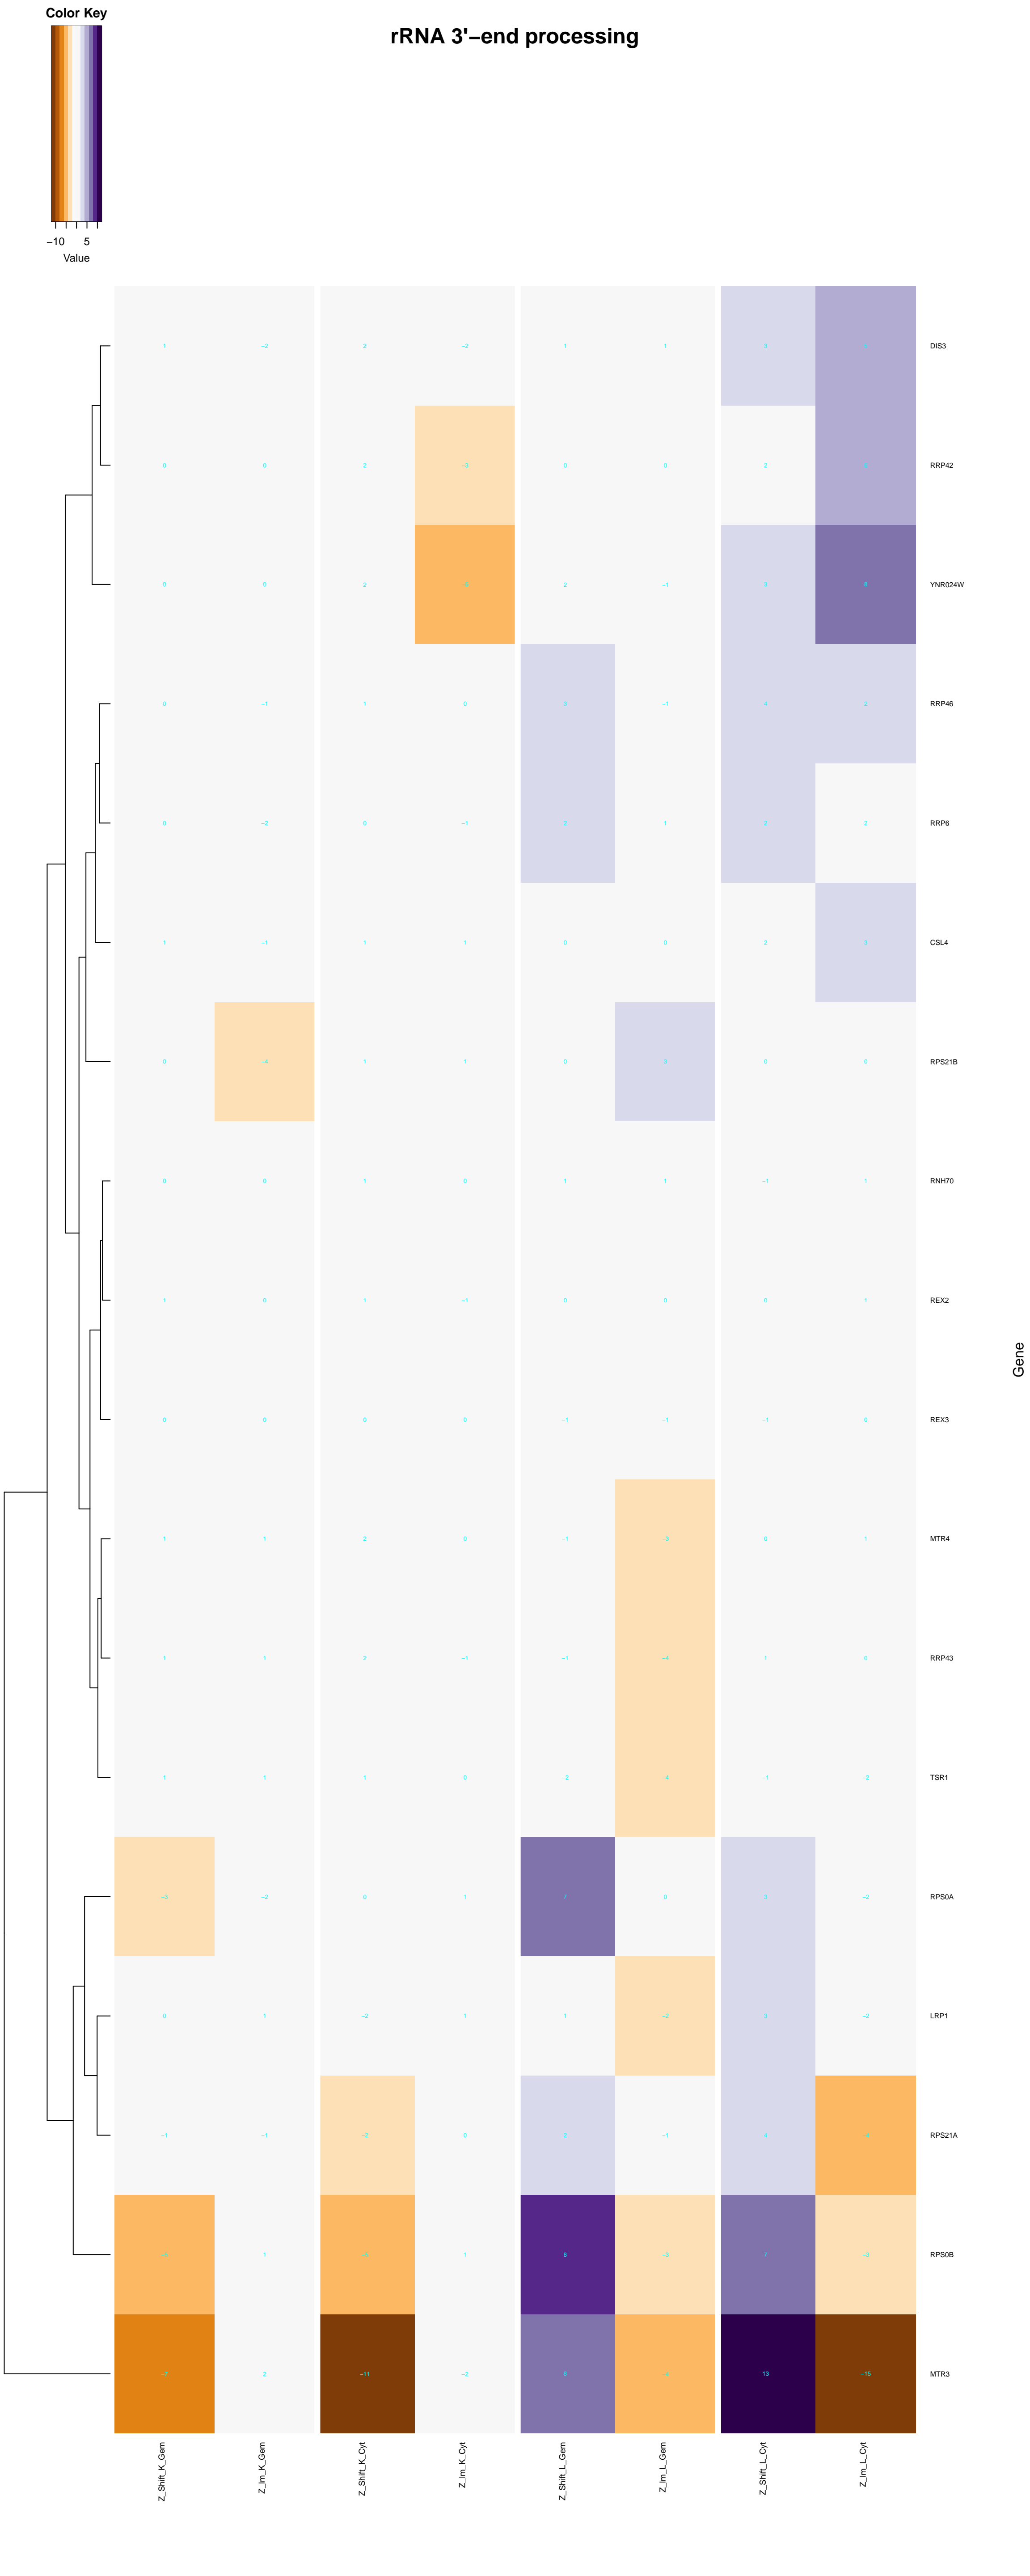

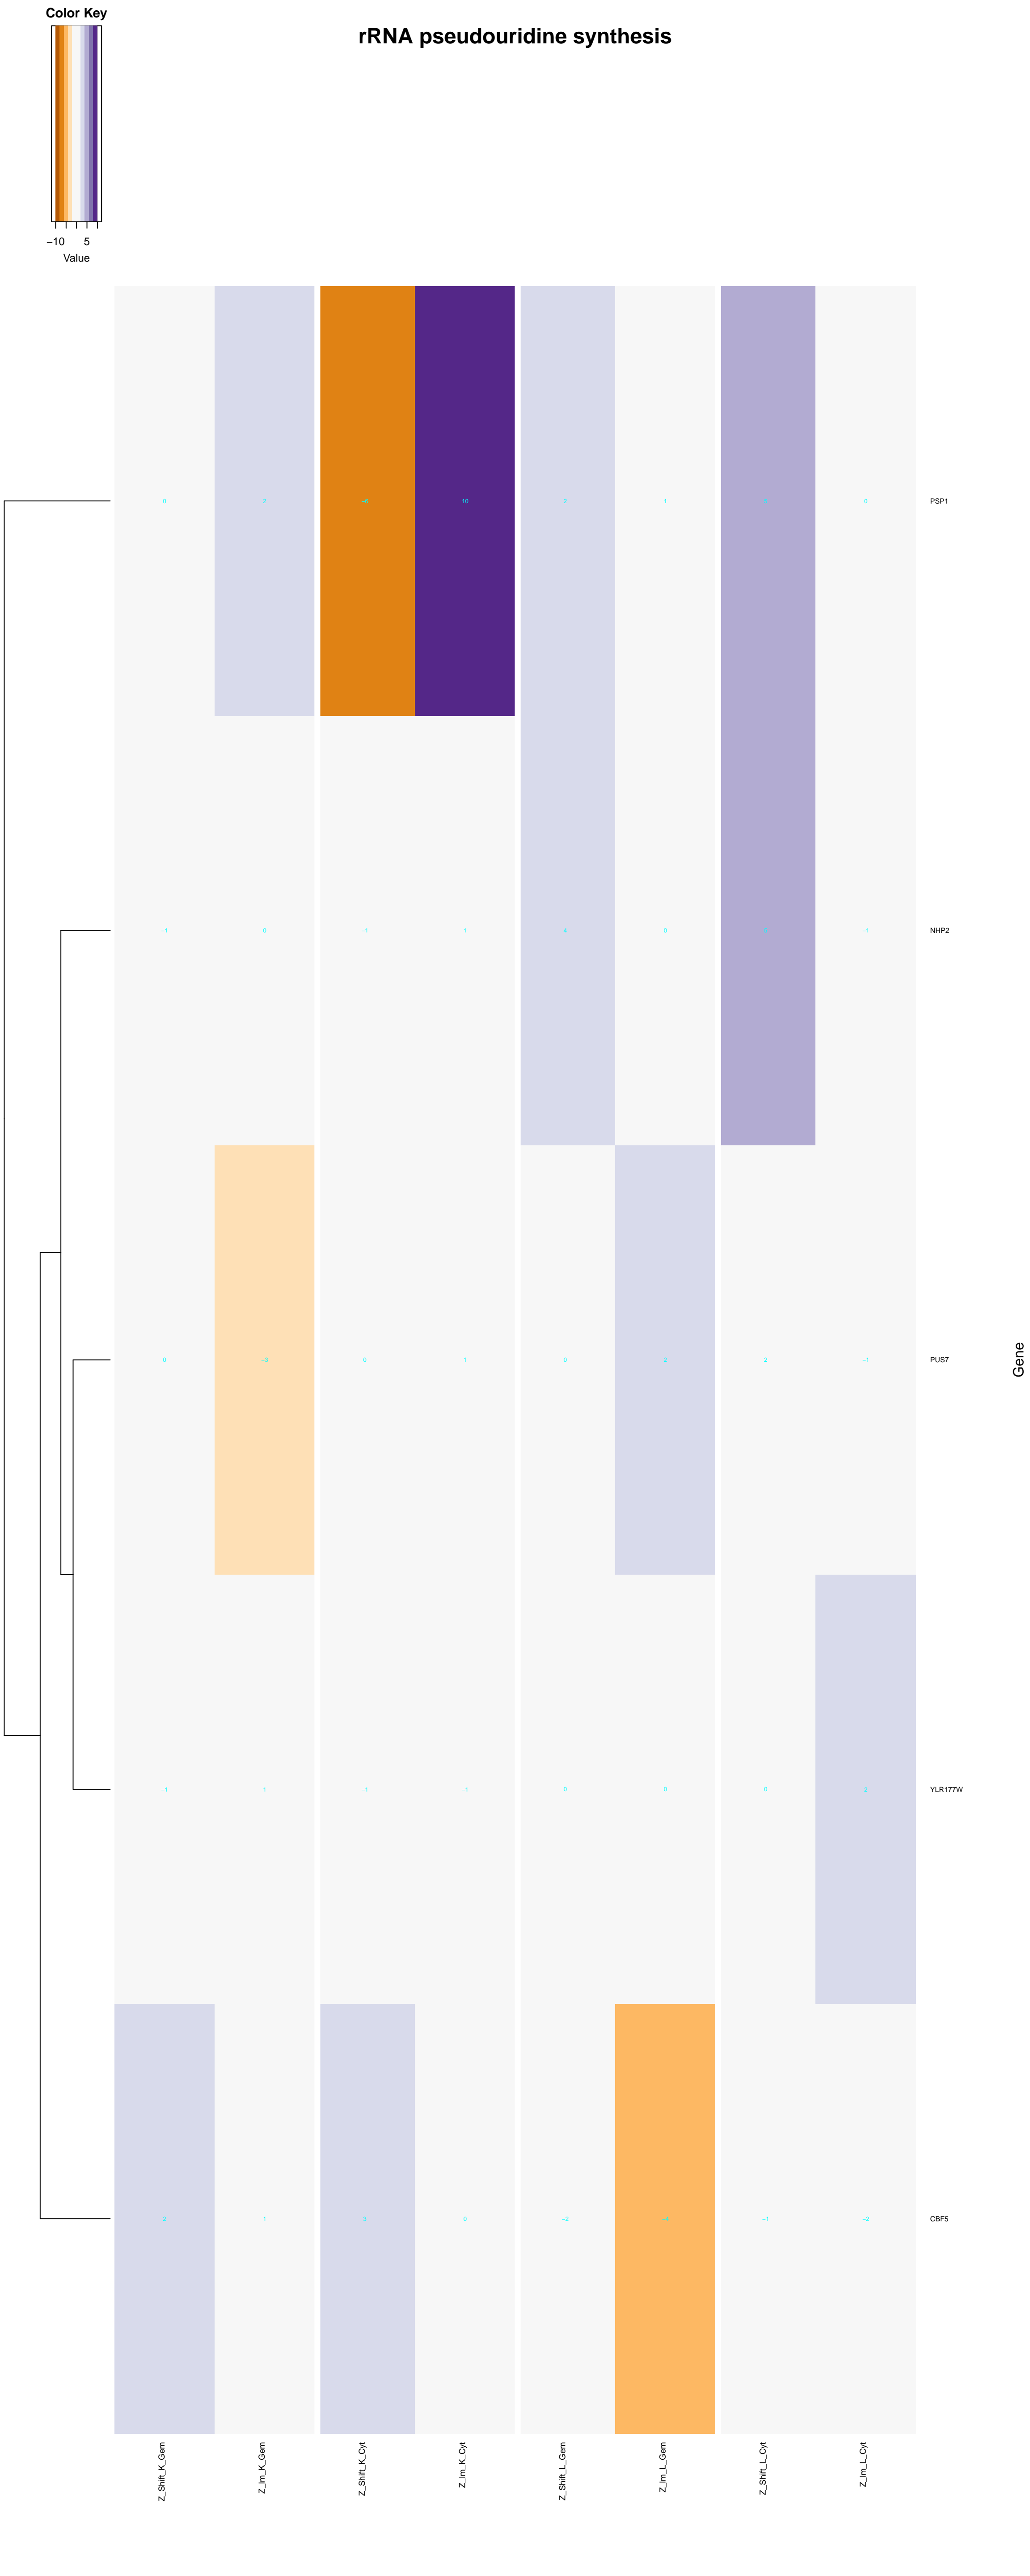



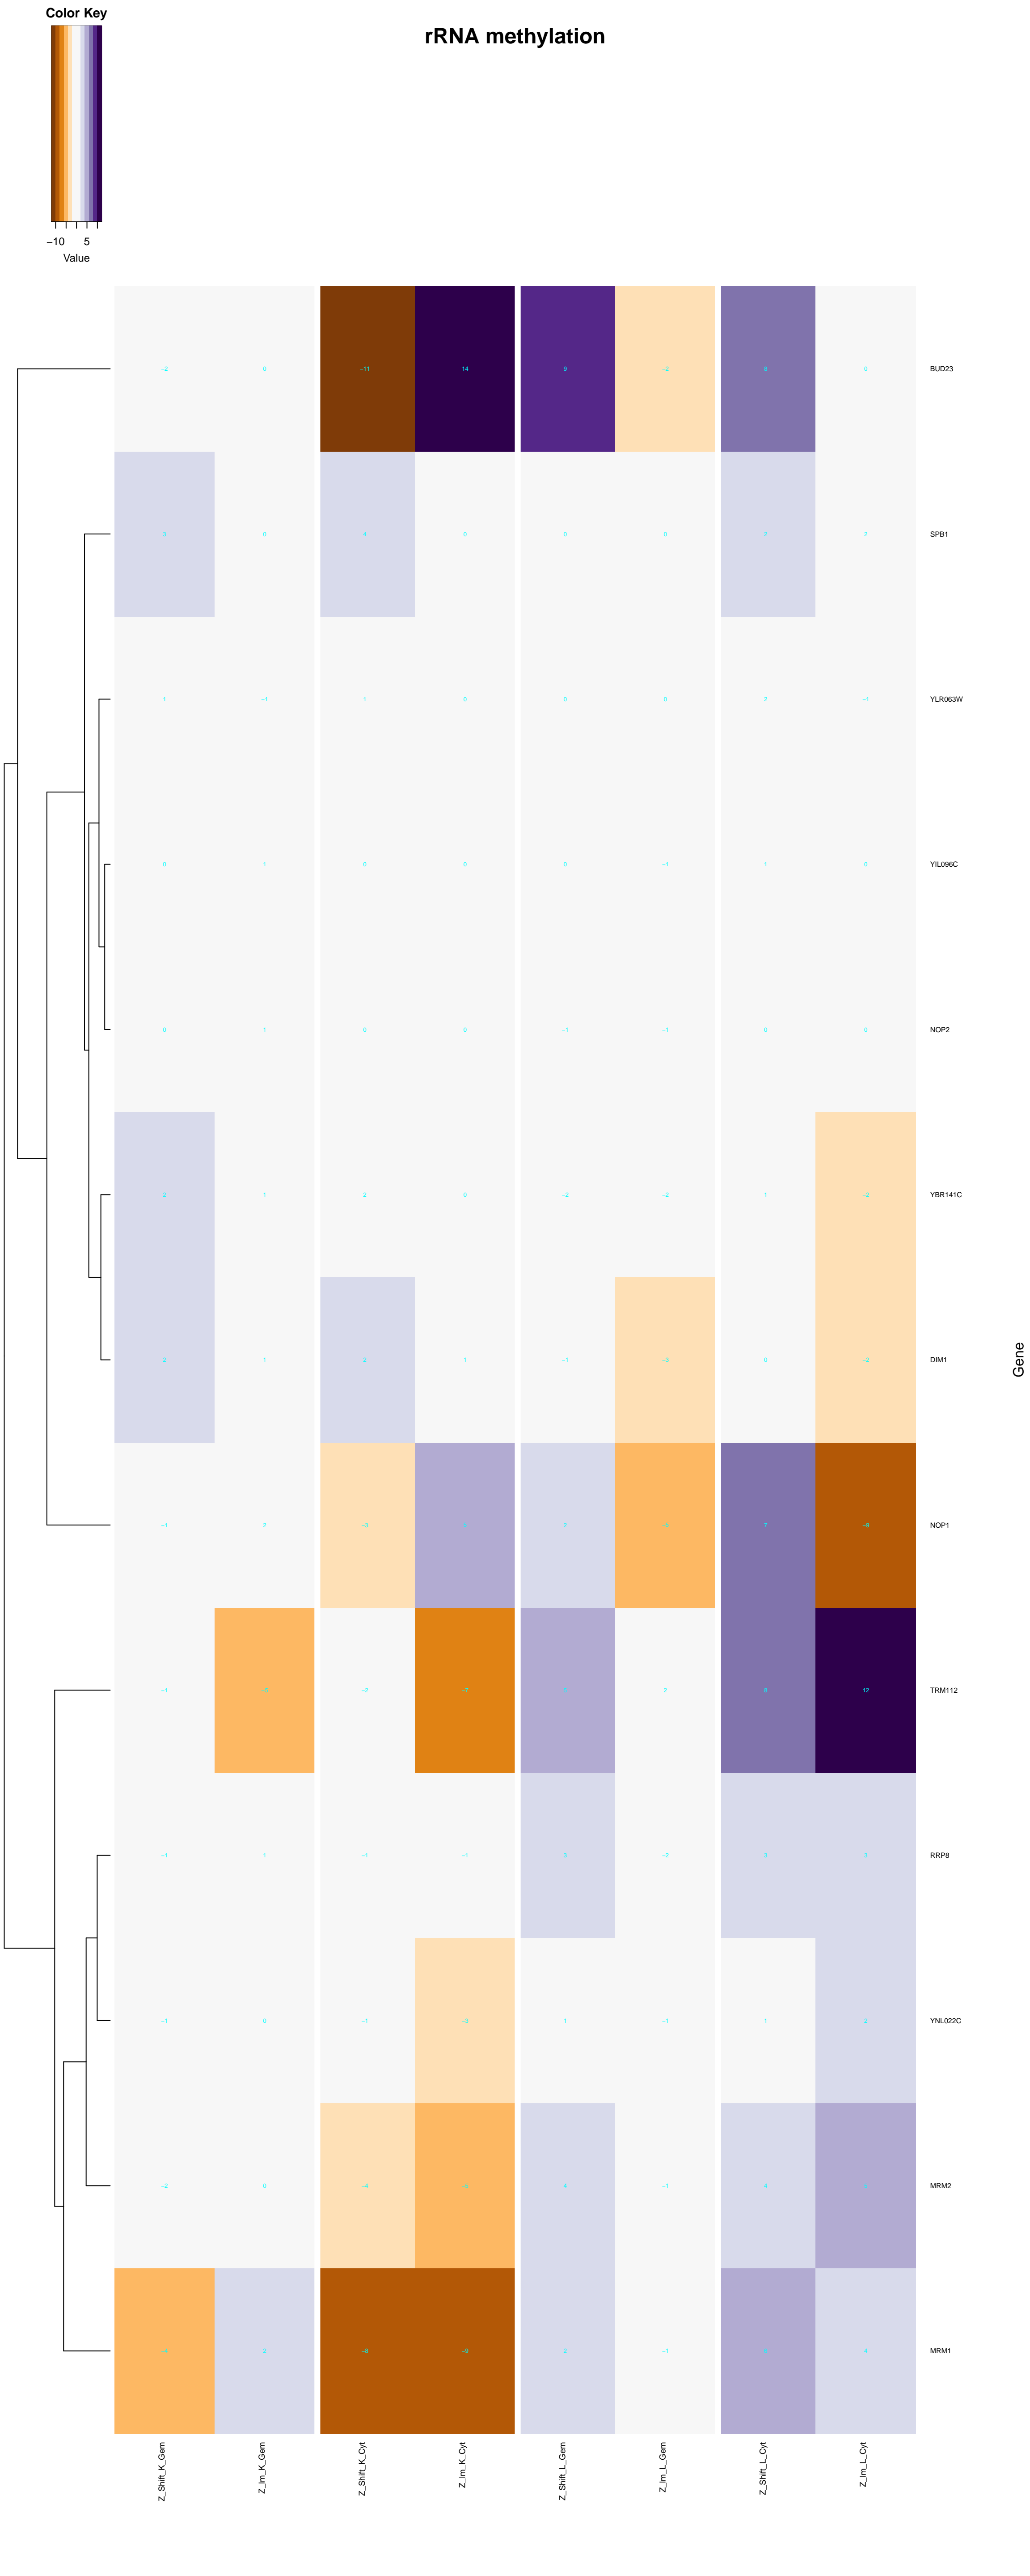

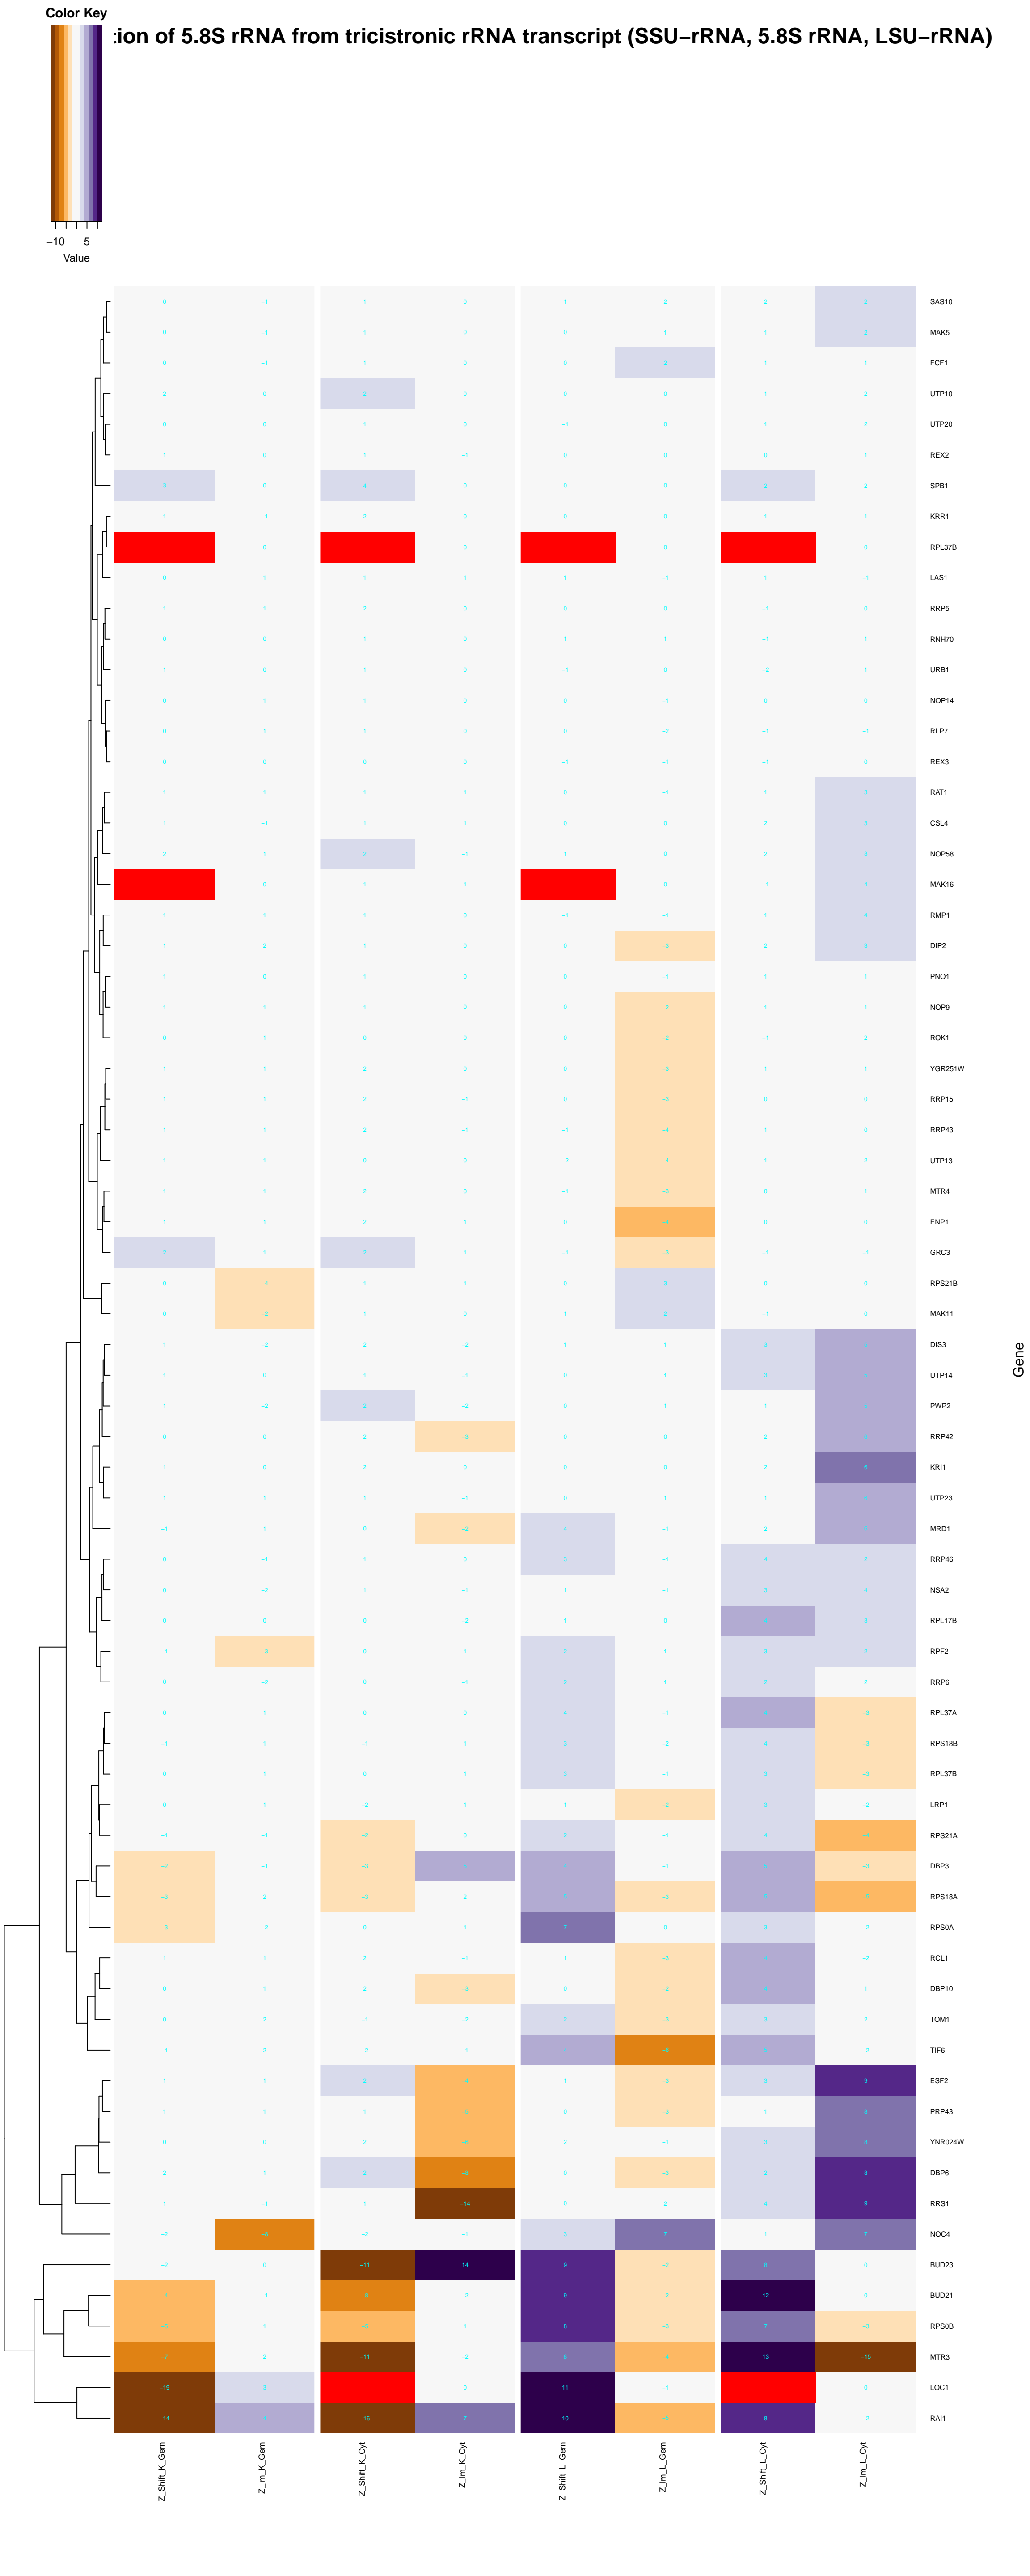

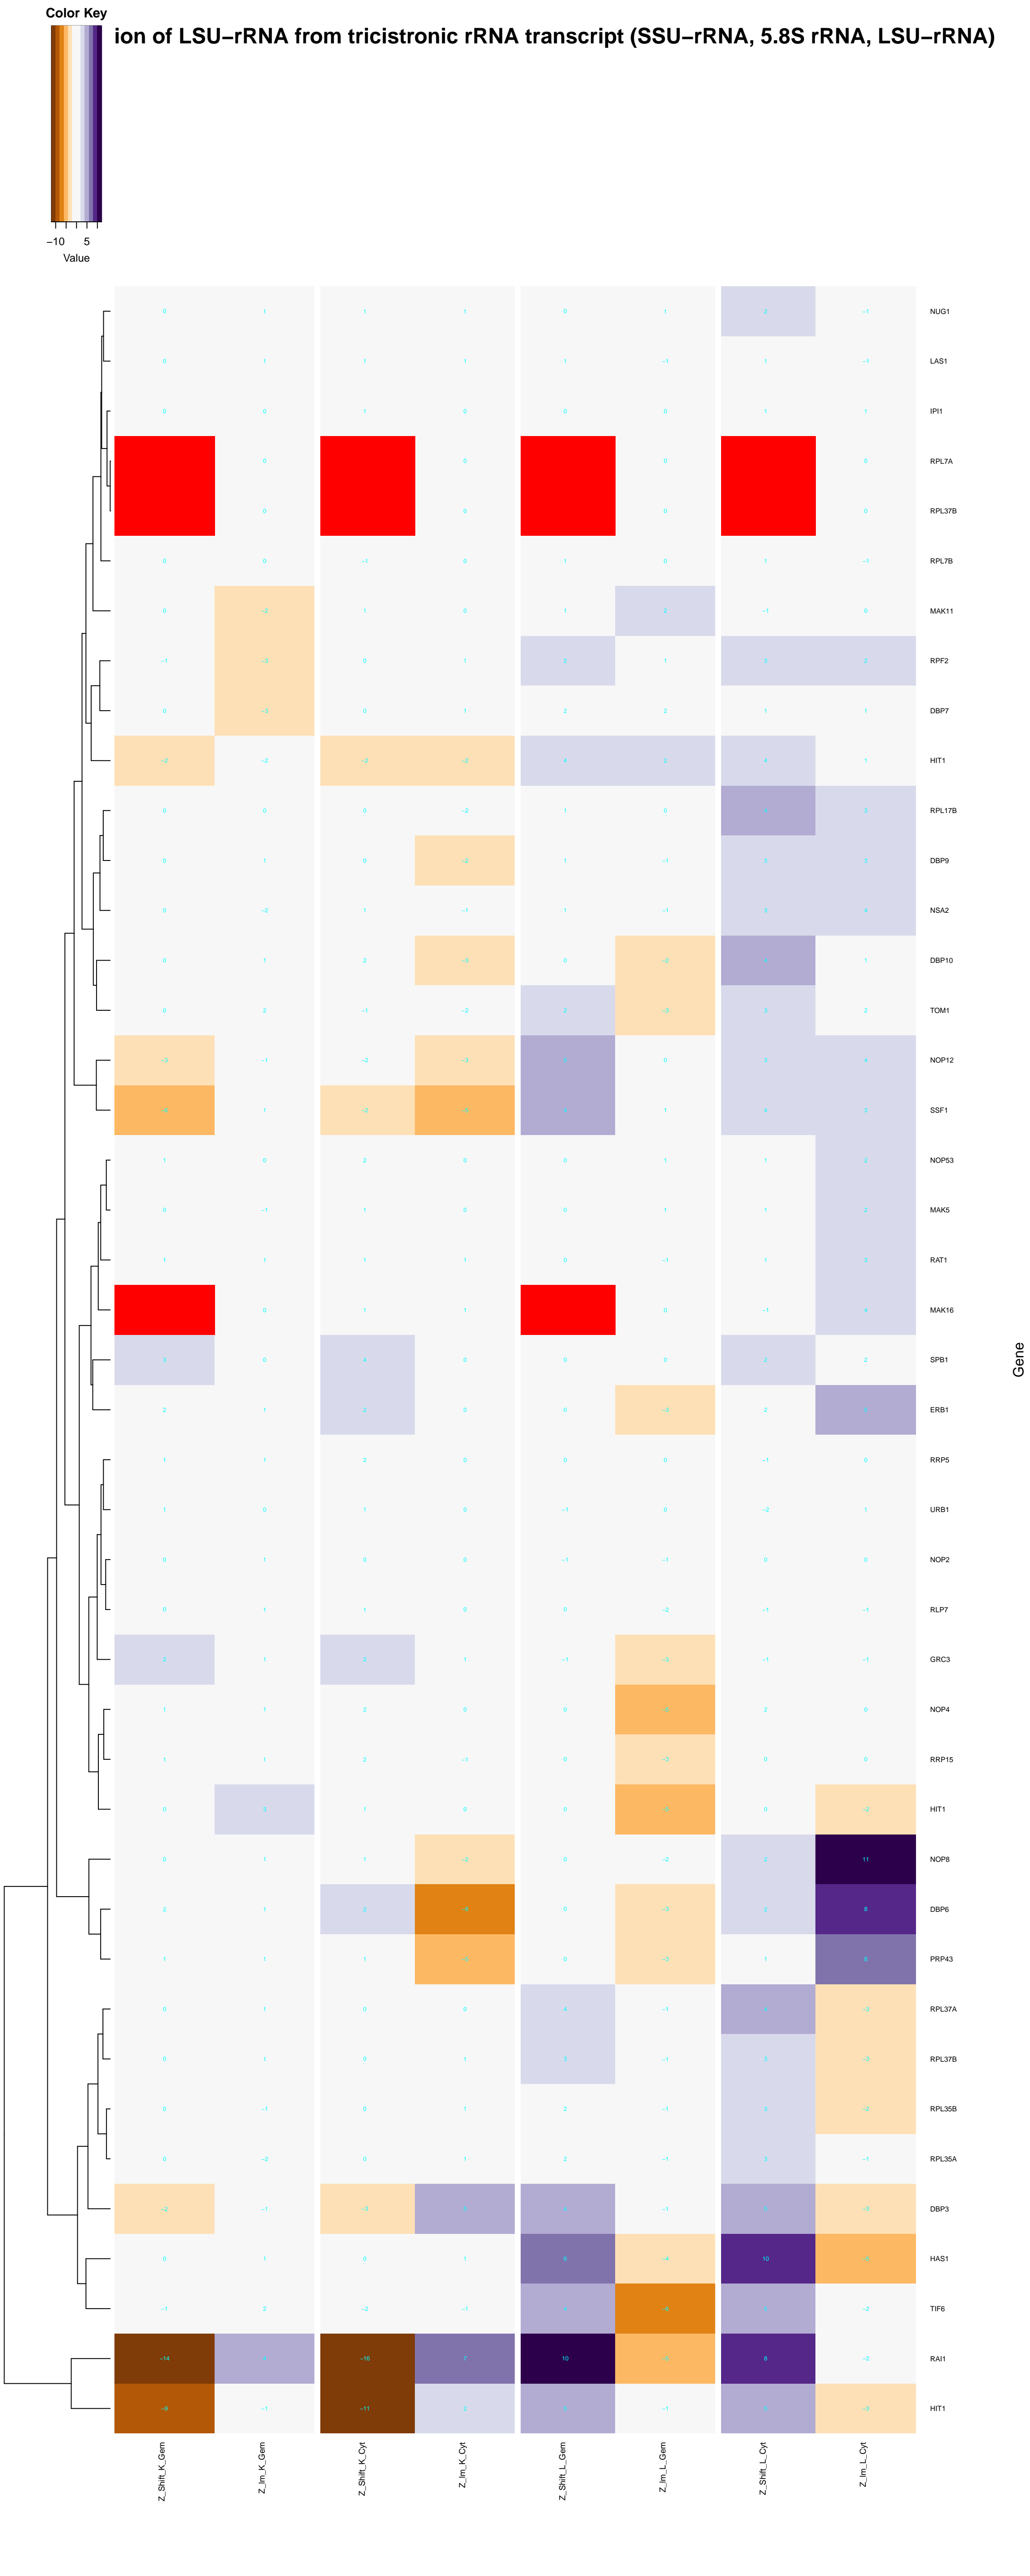

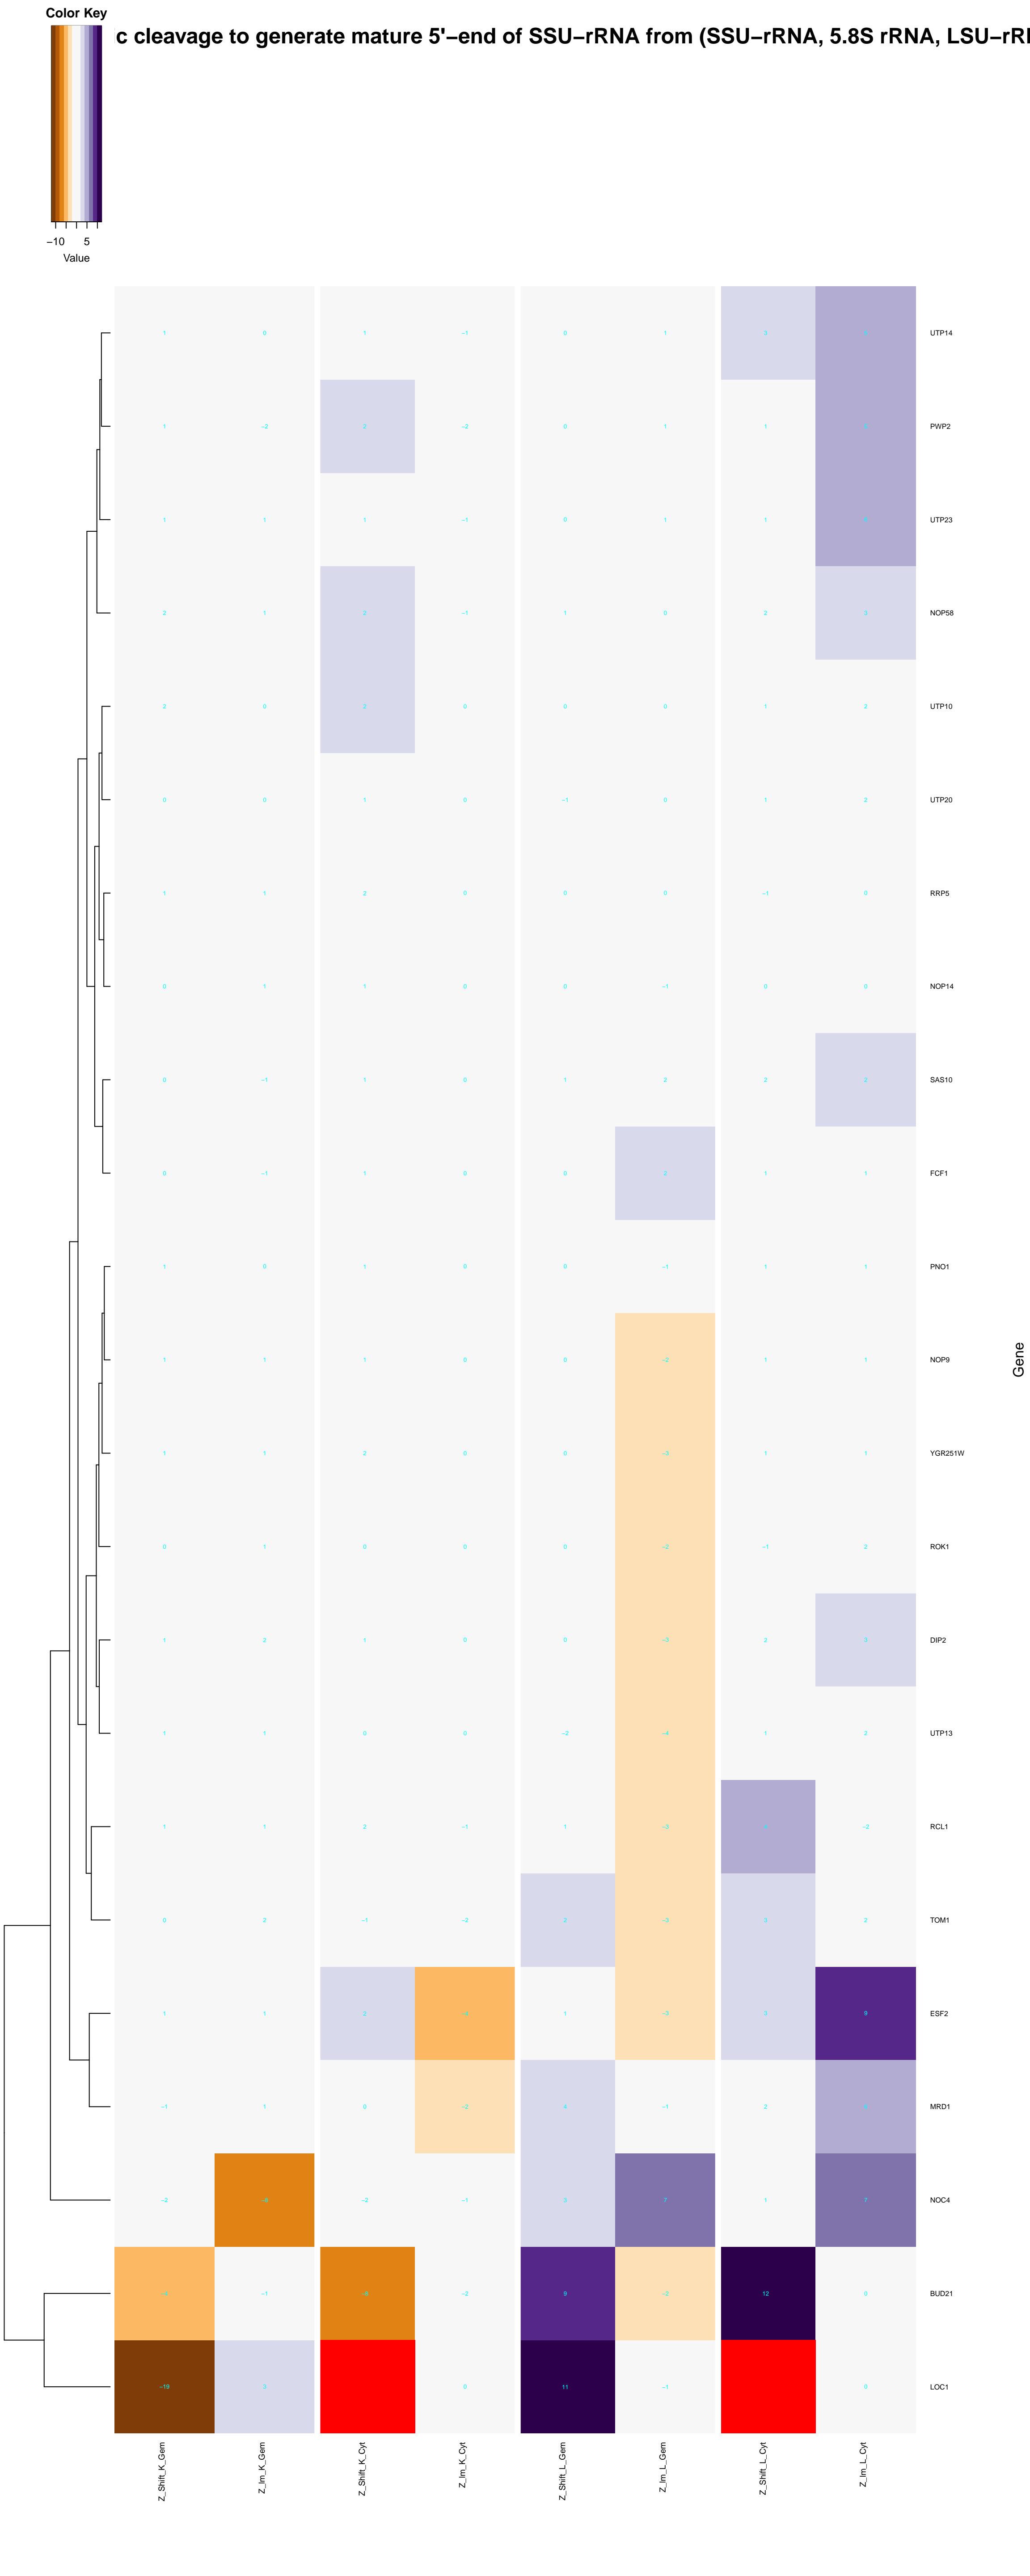

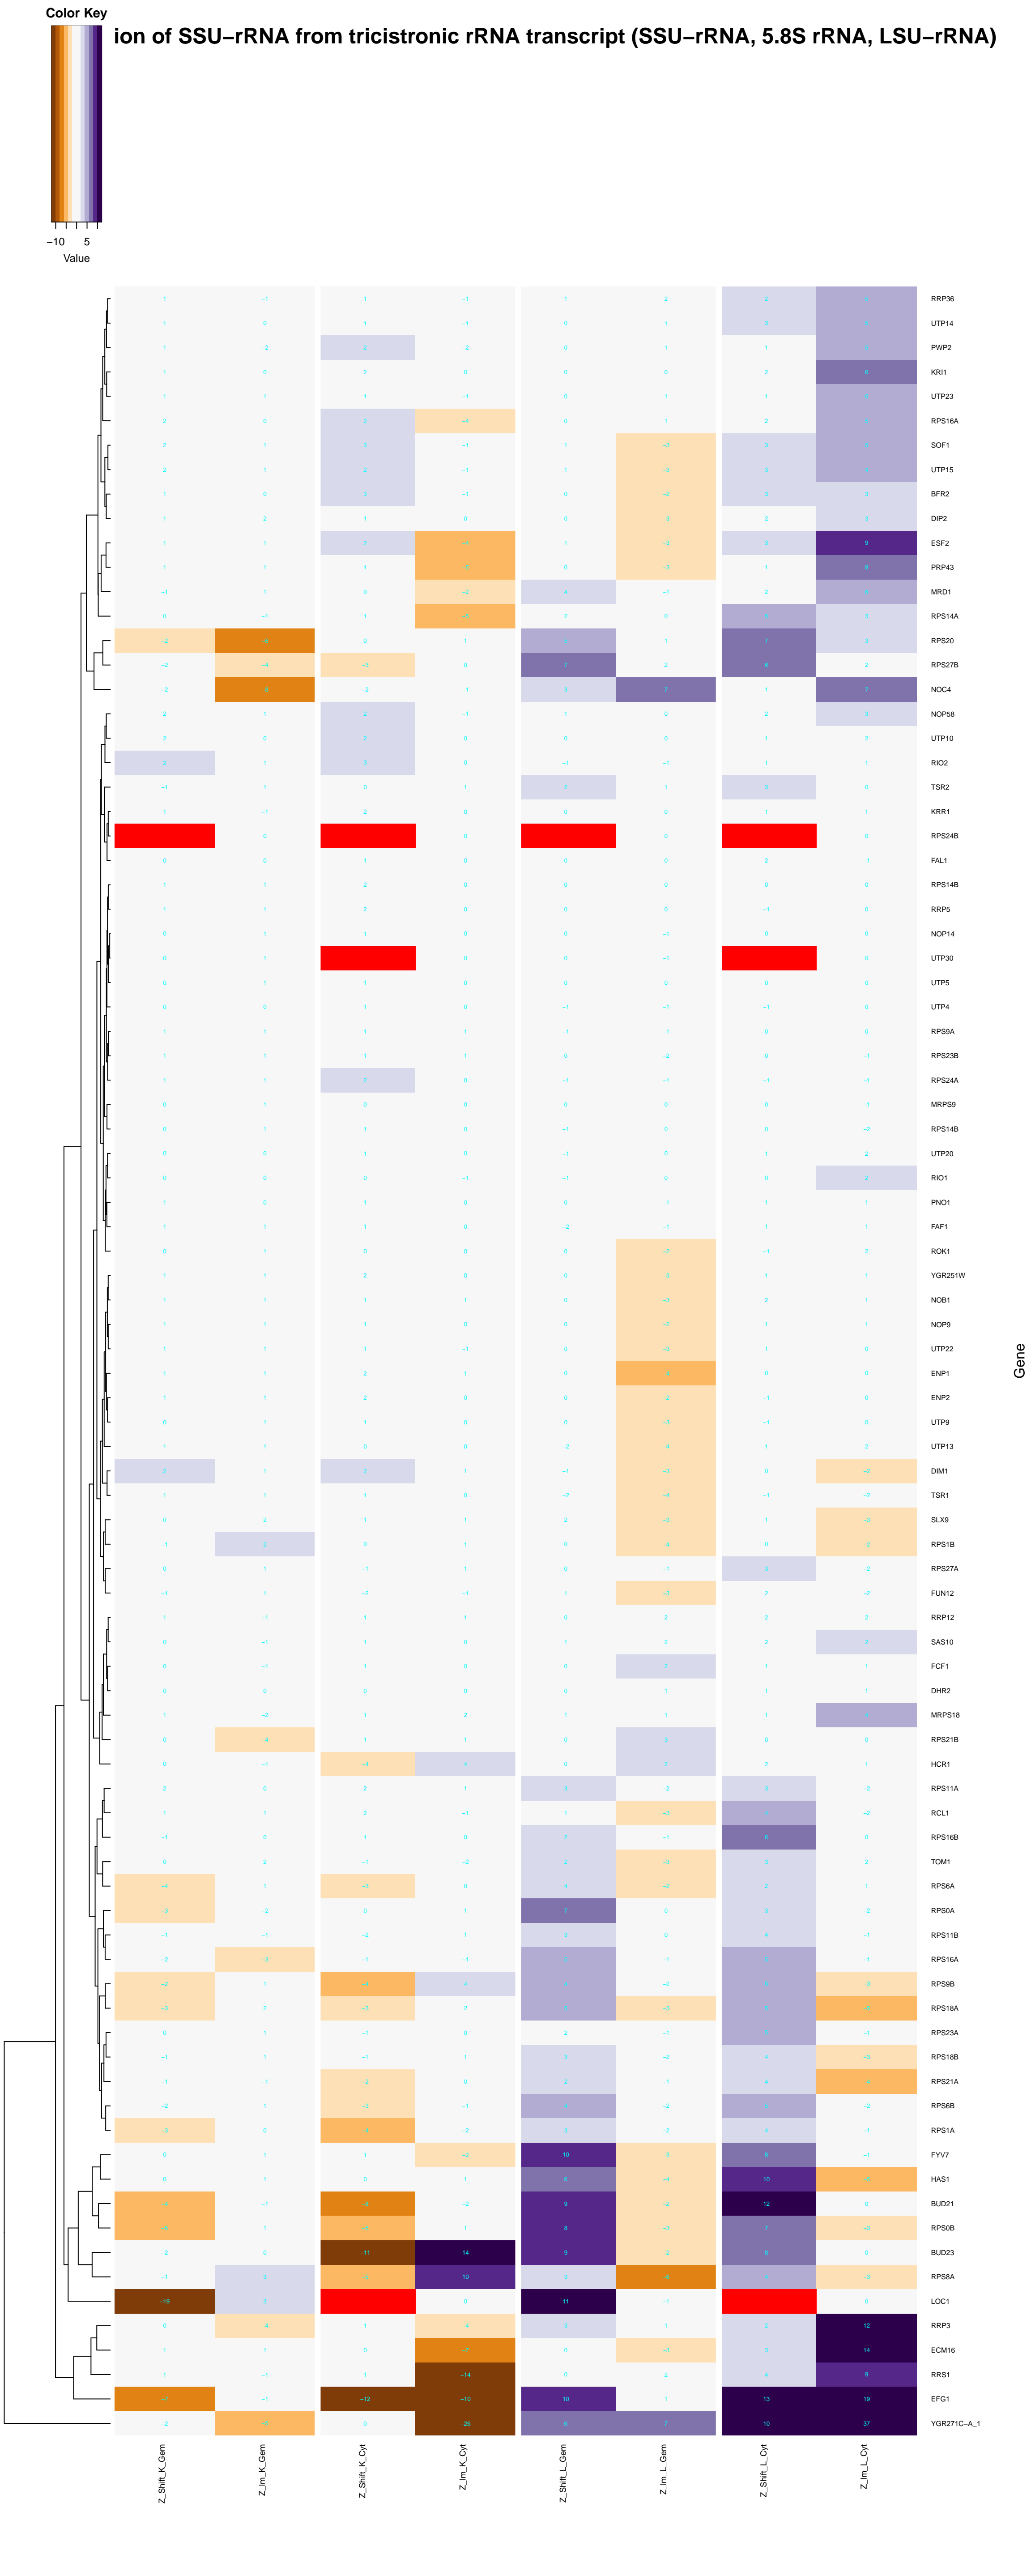

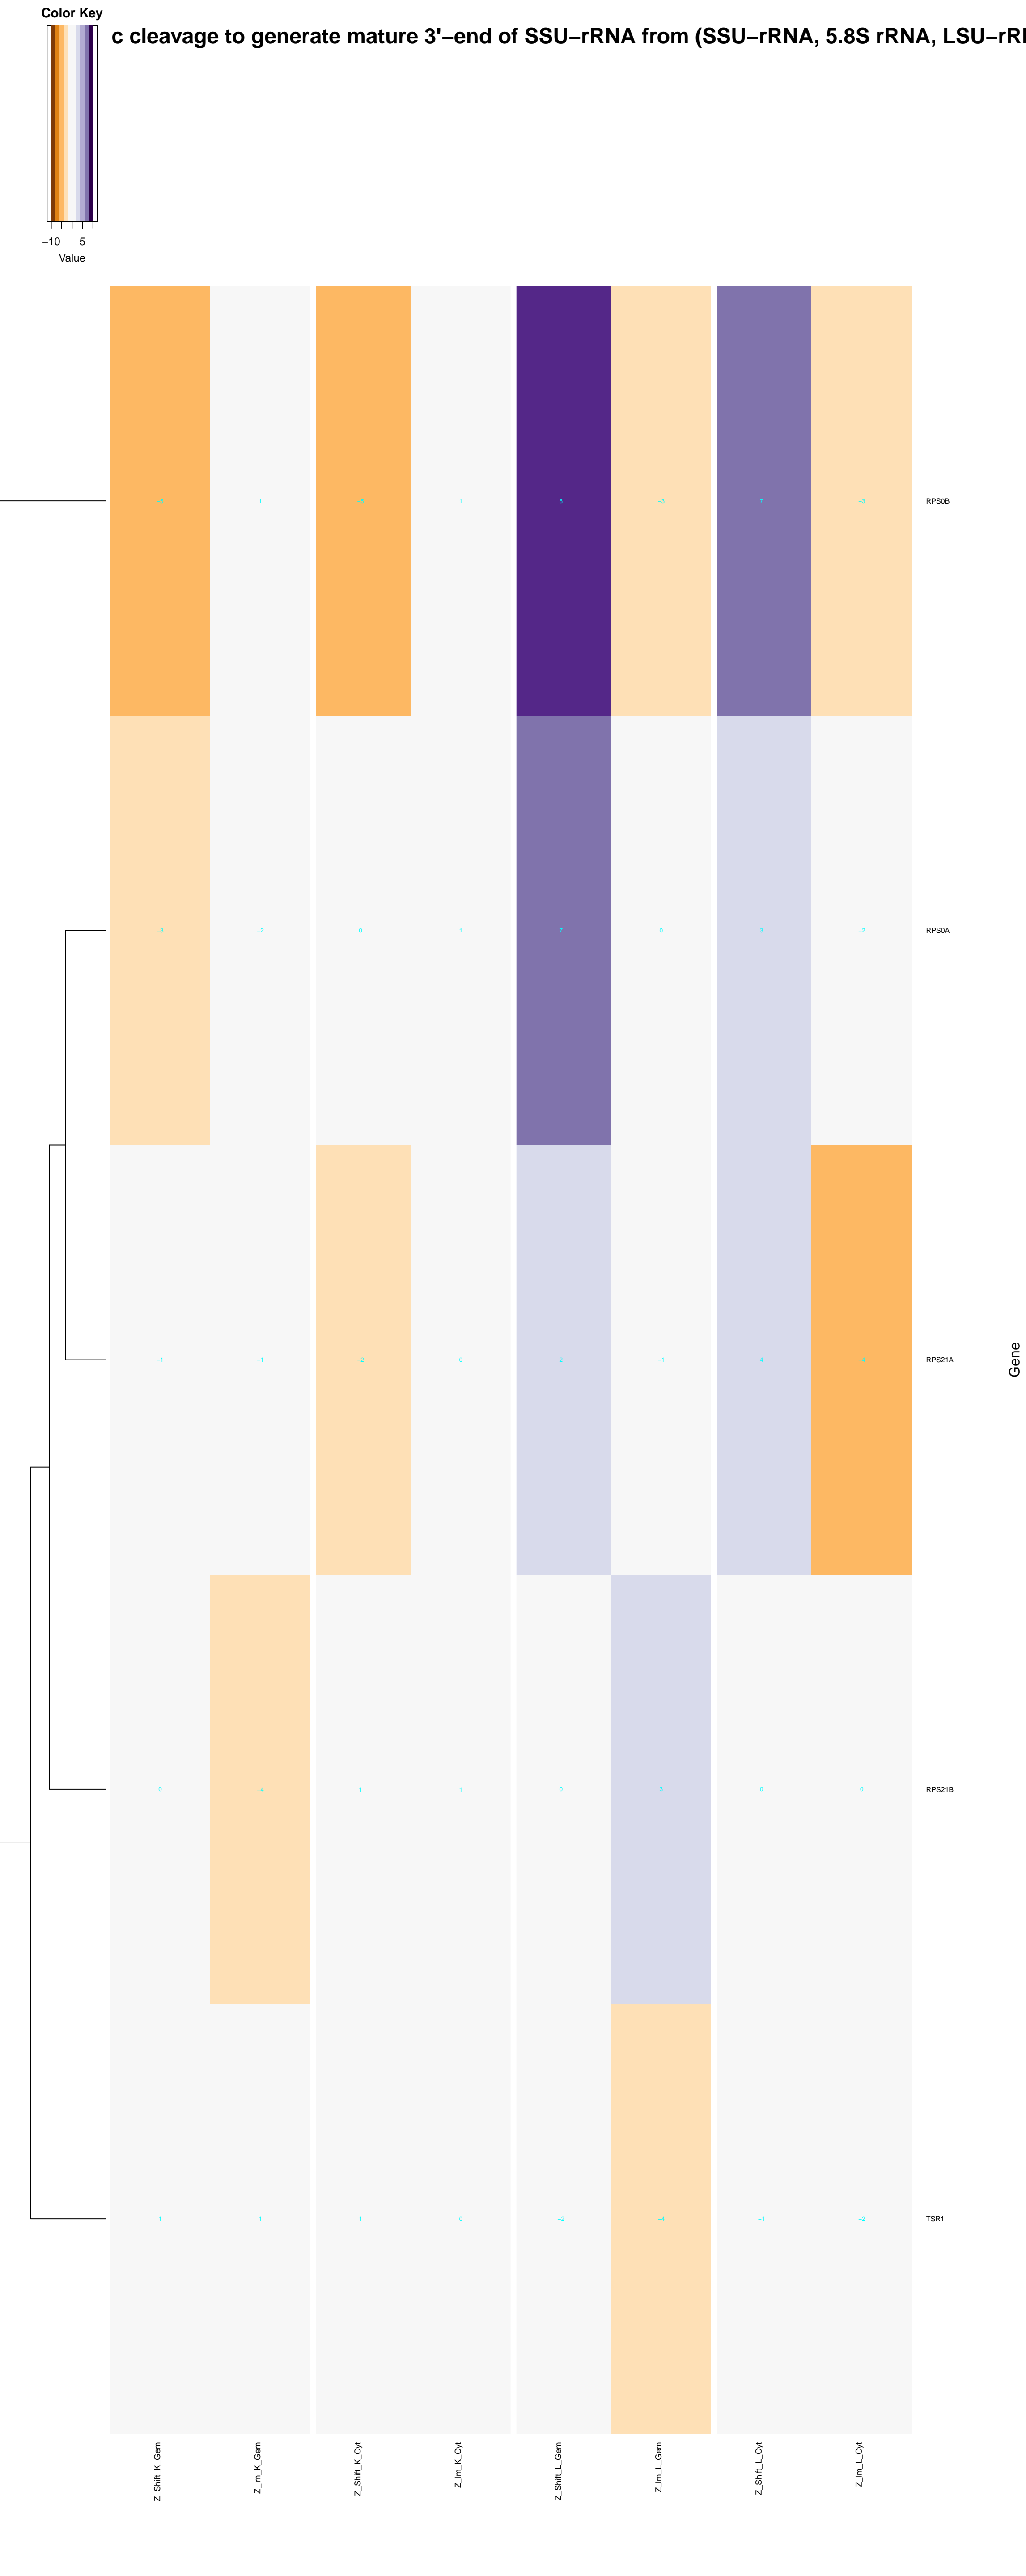

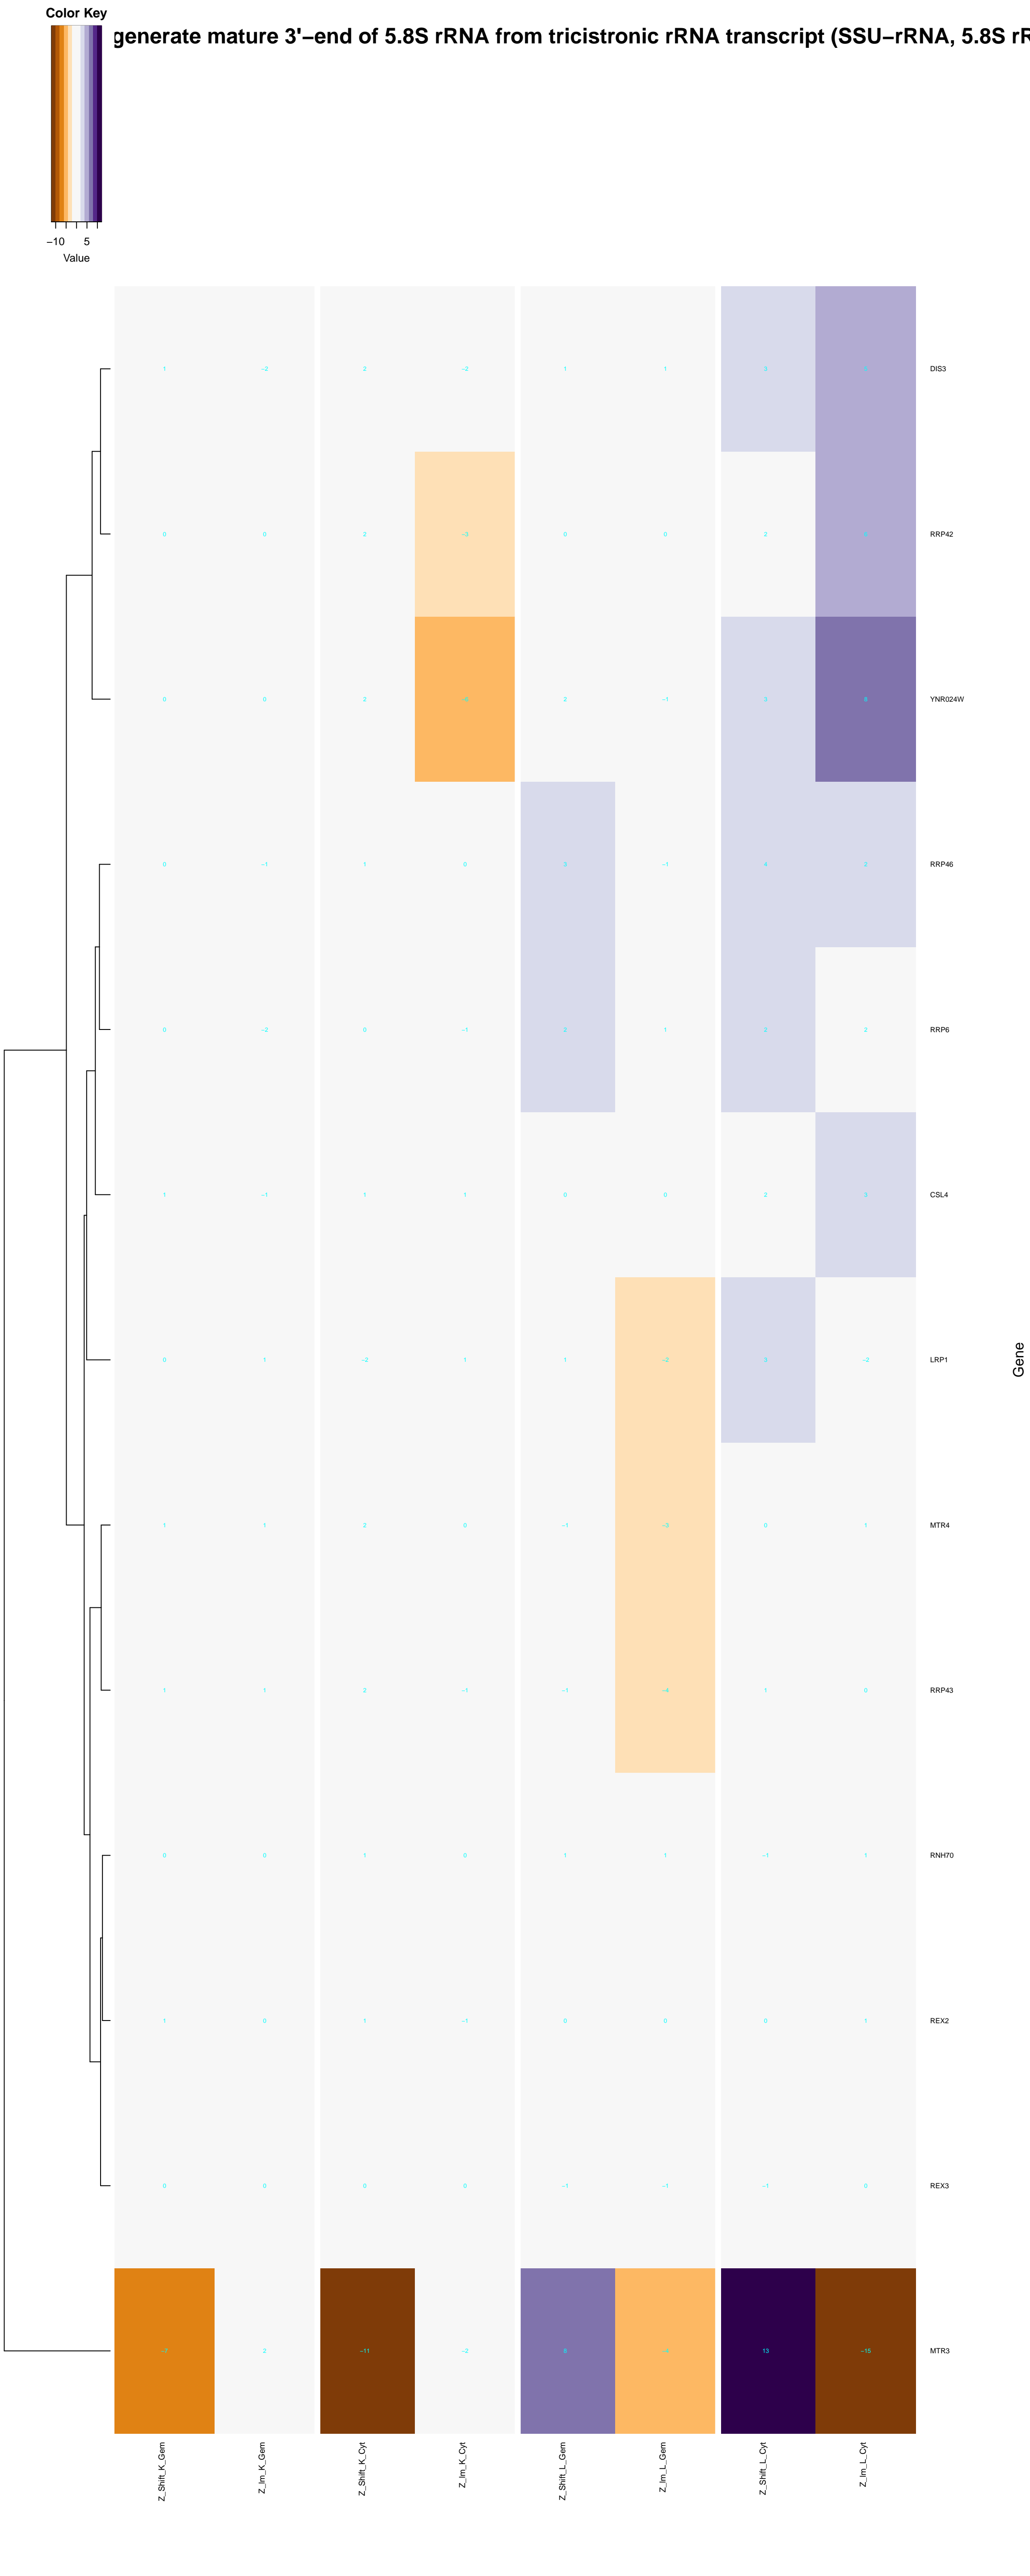

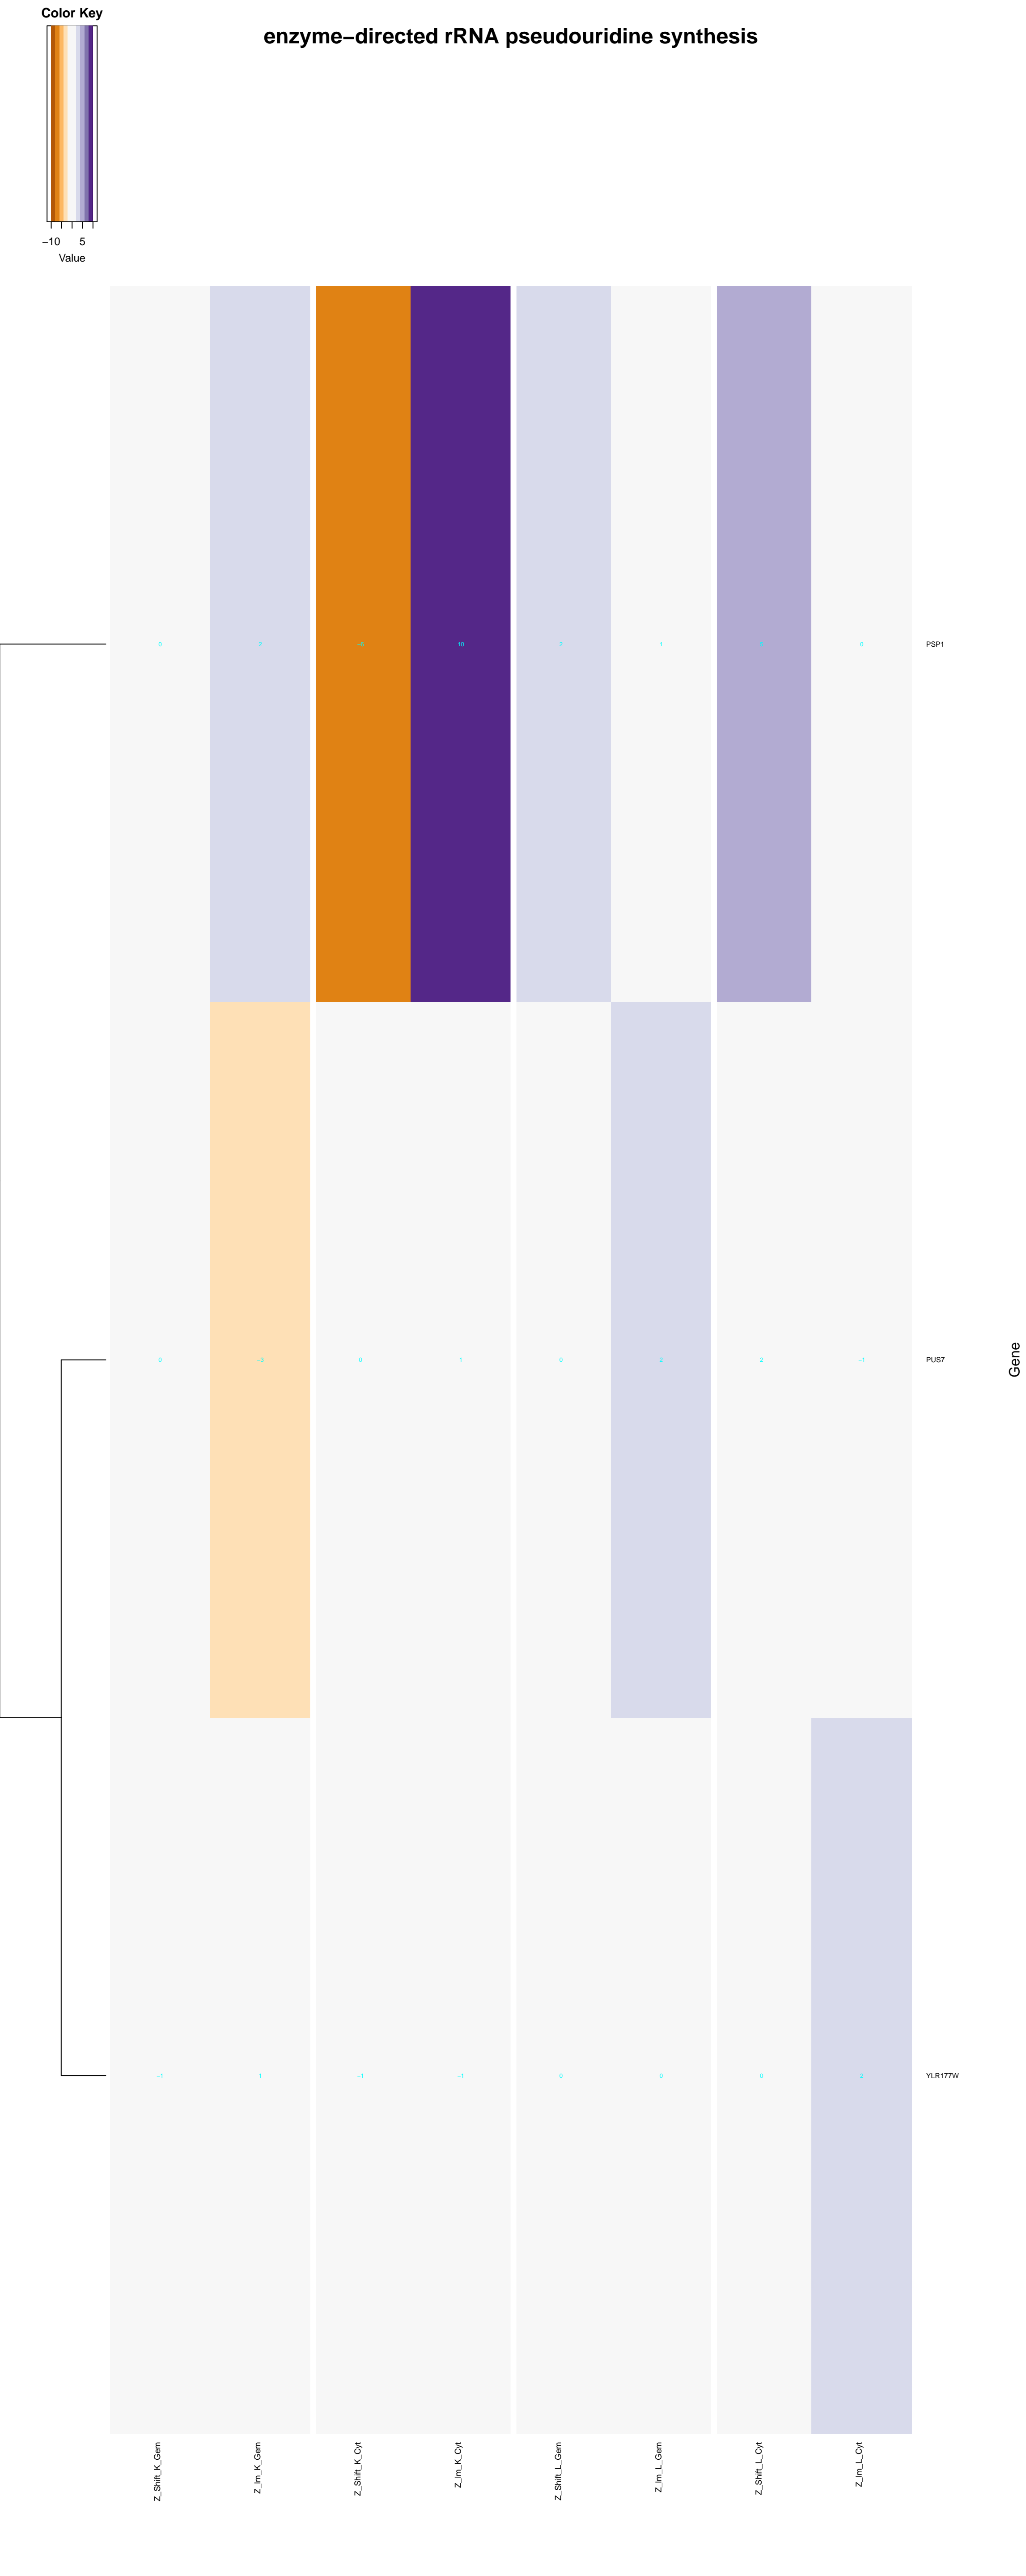



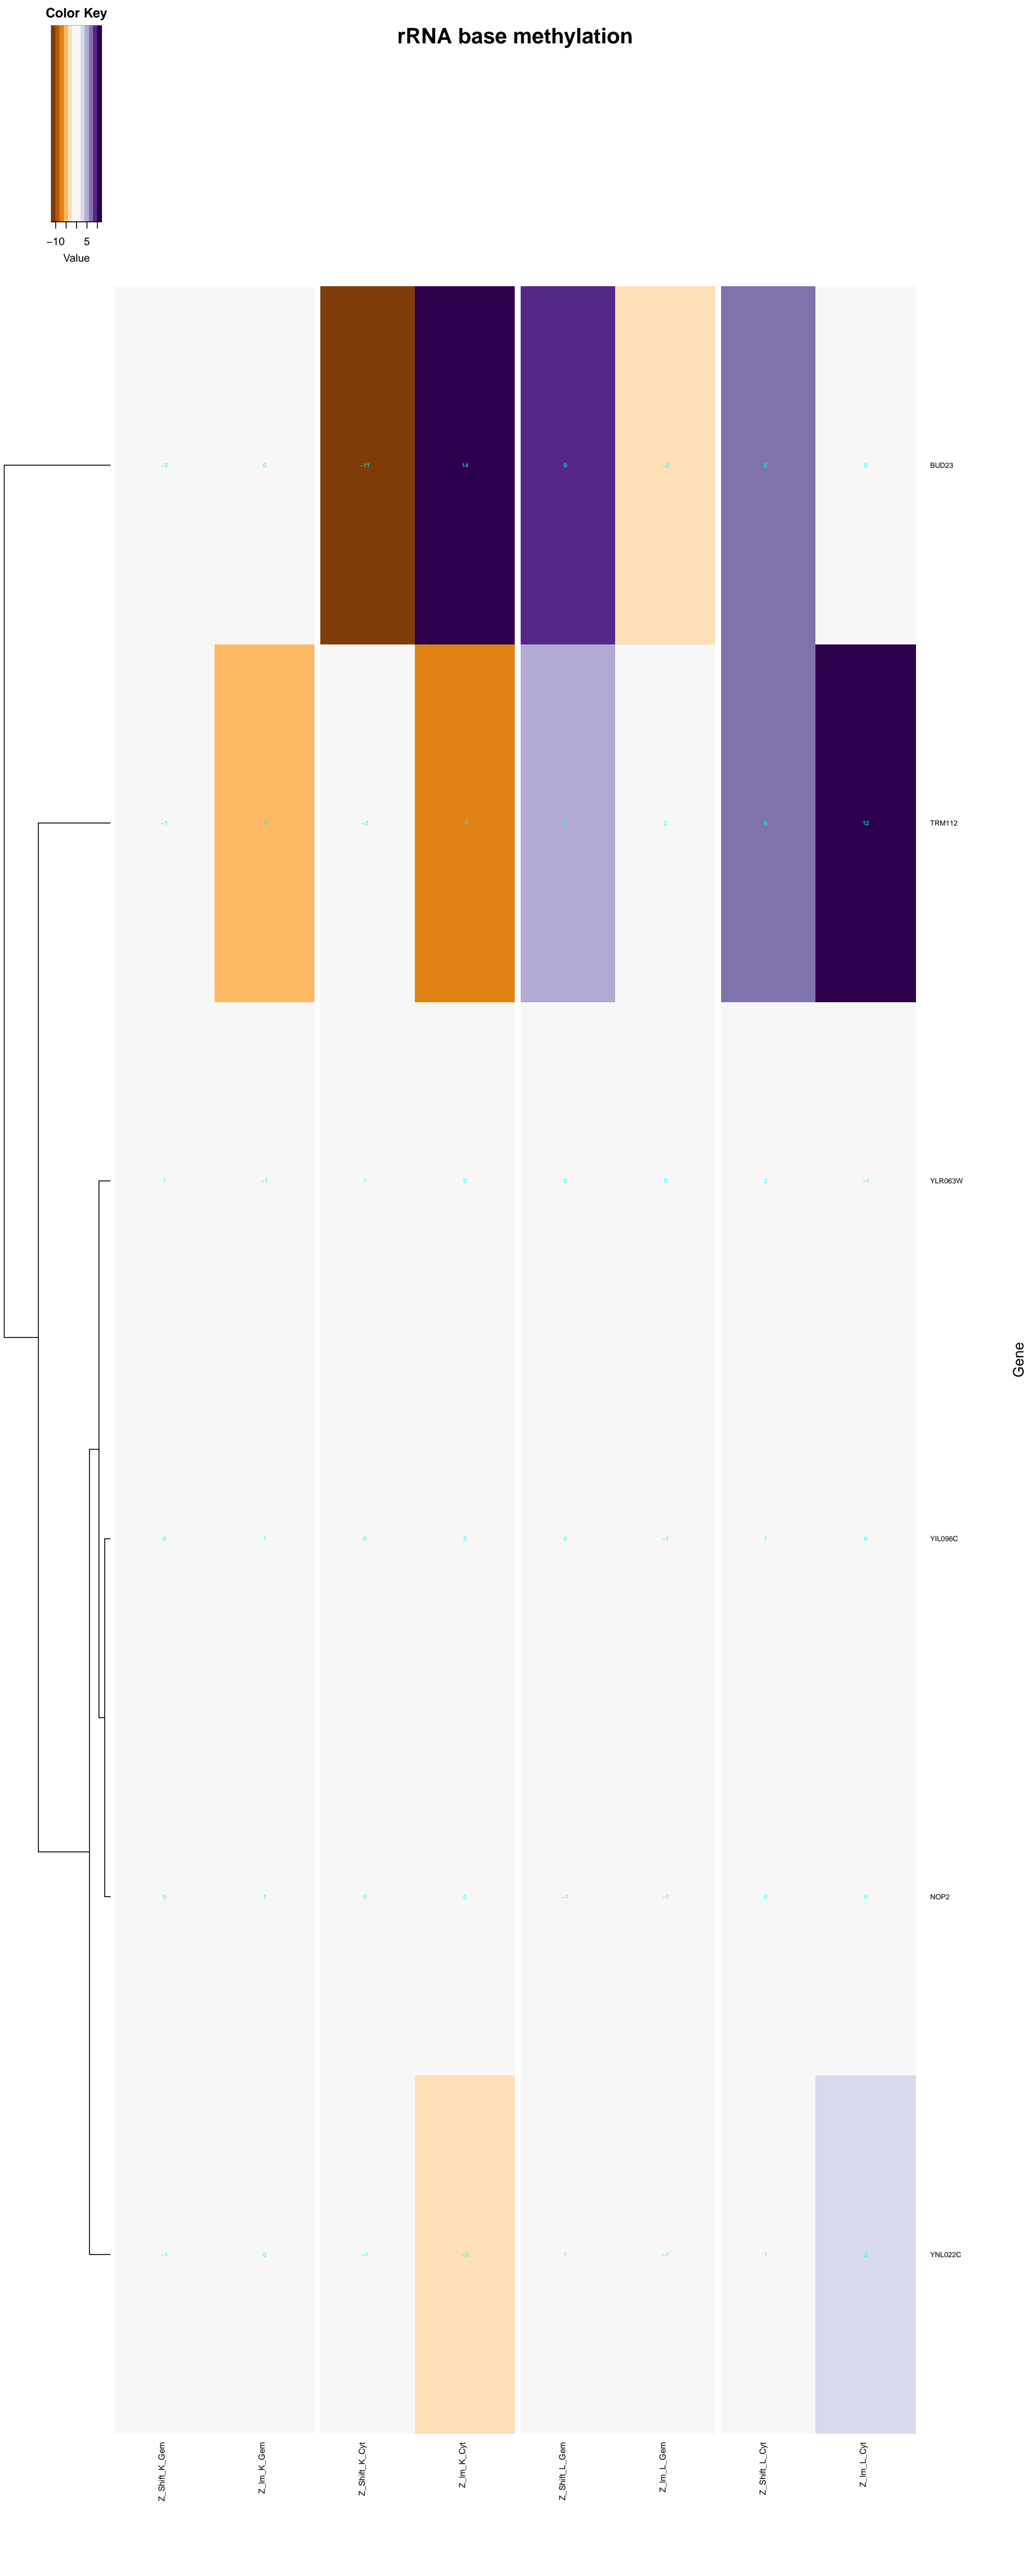

Supplement: s1 [file s1]

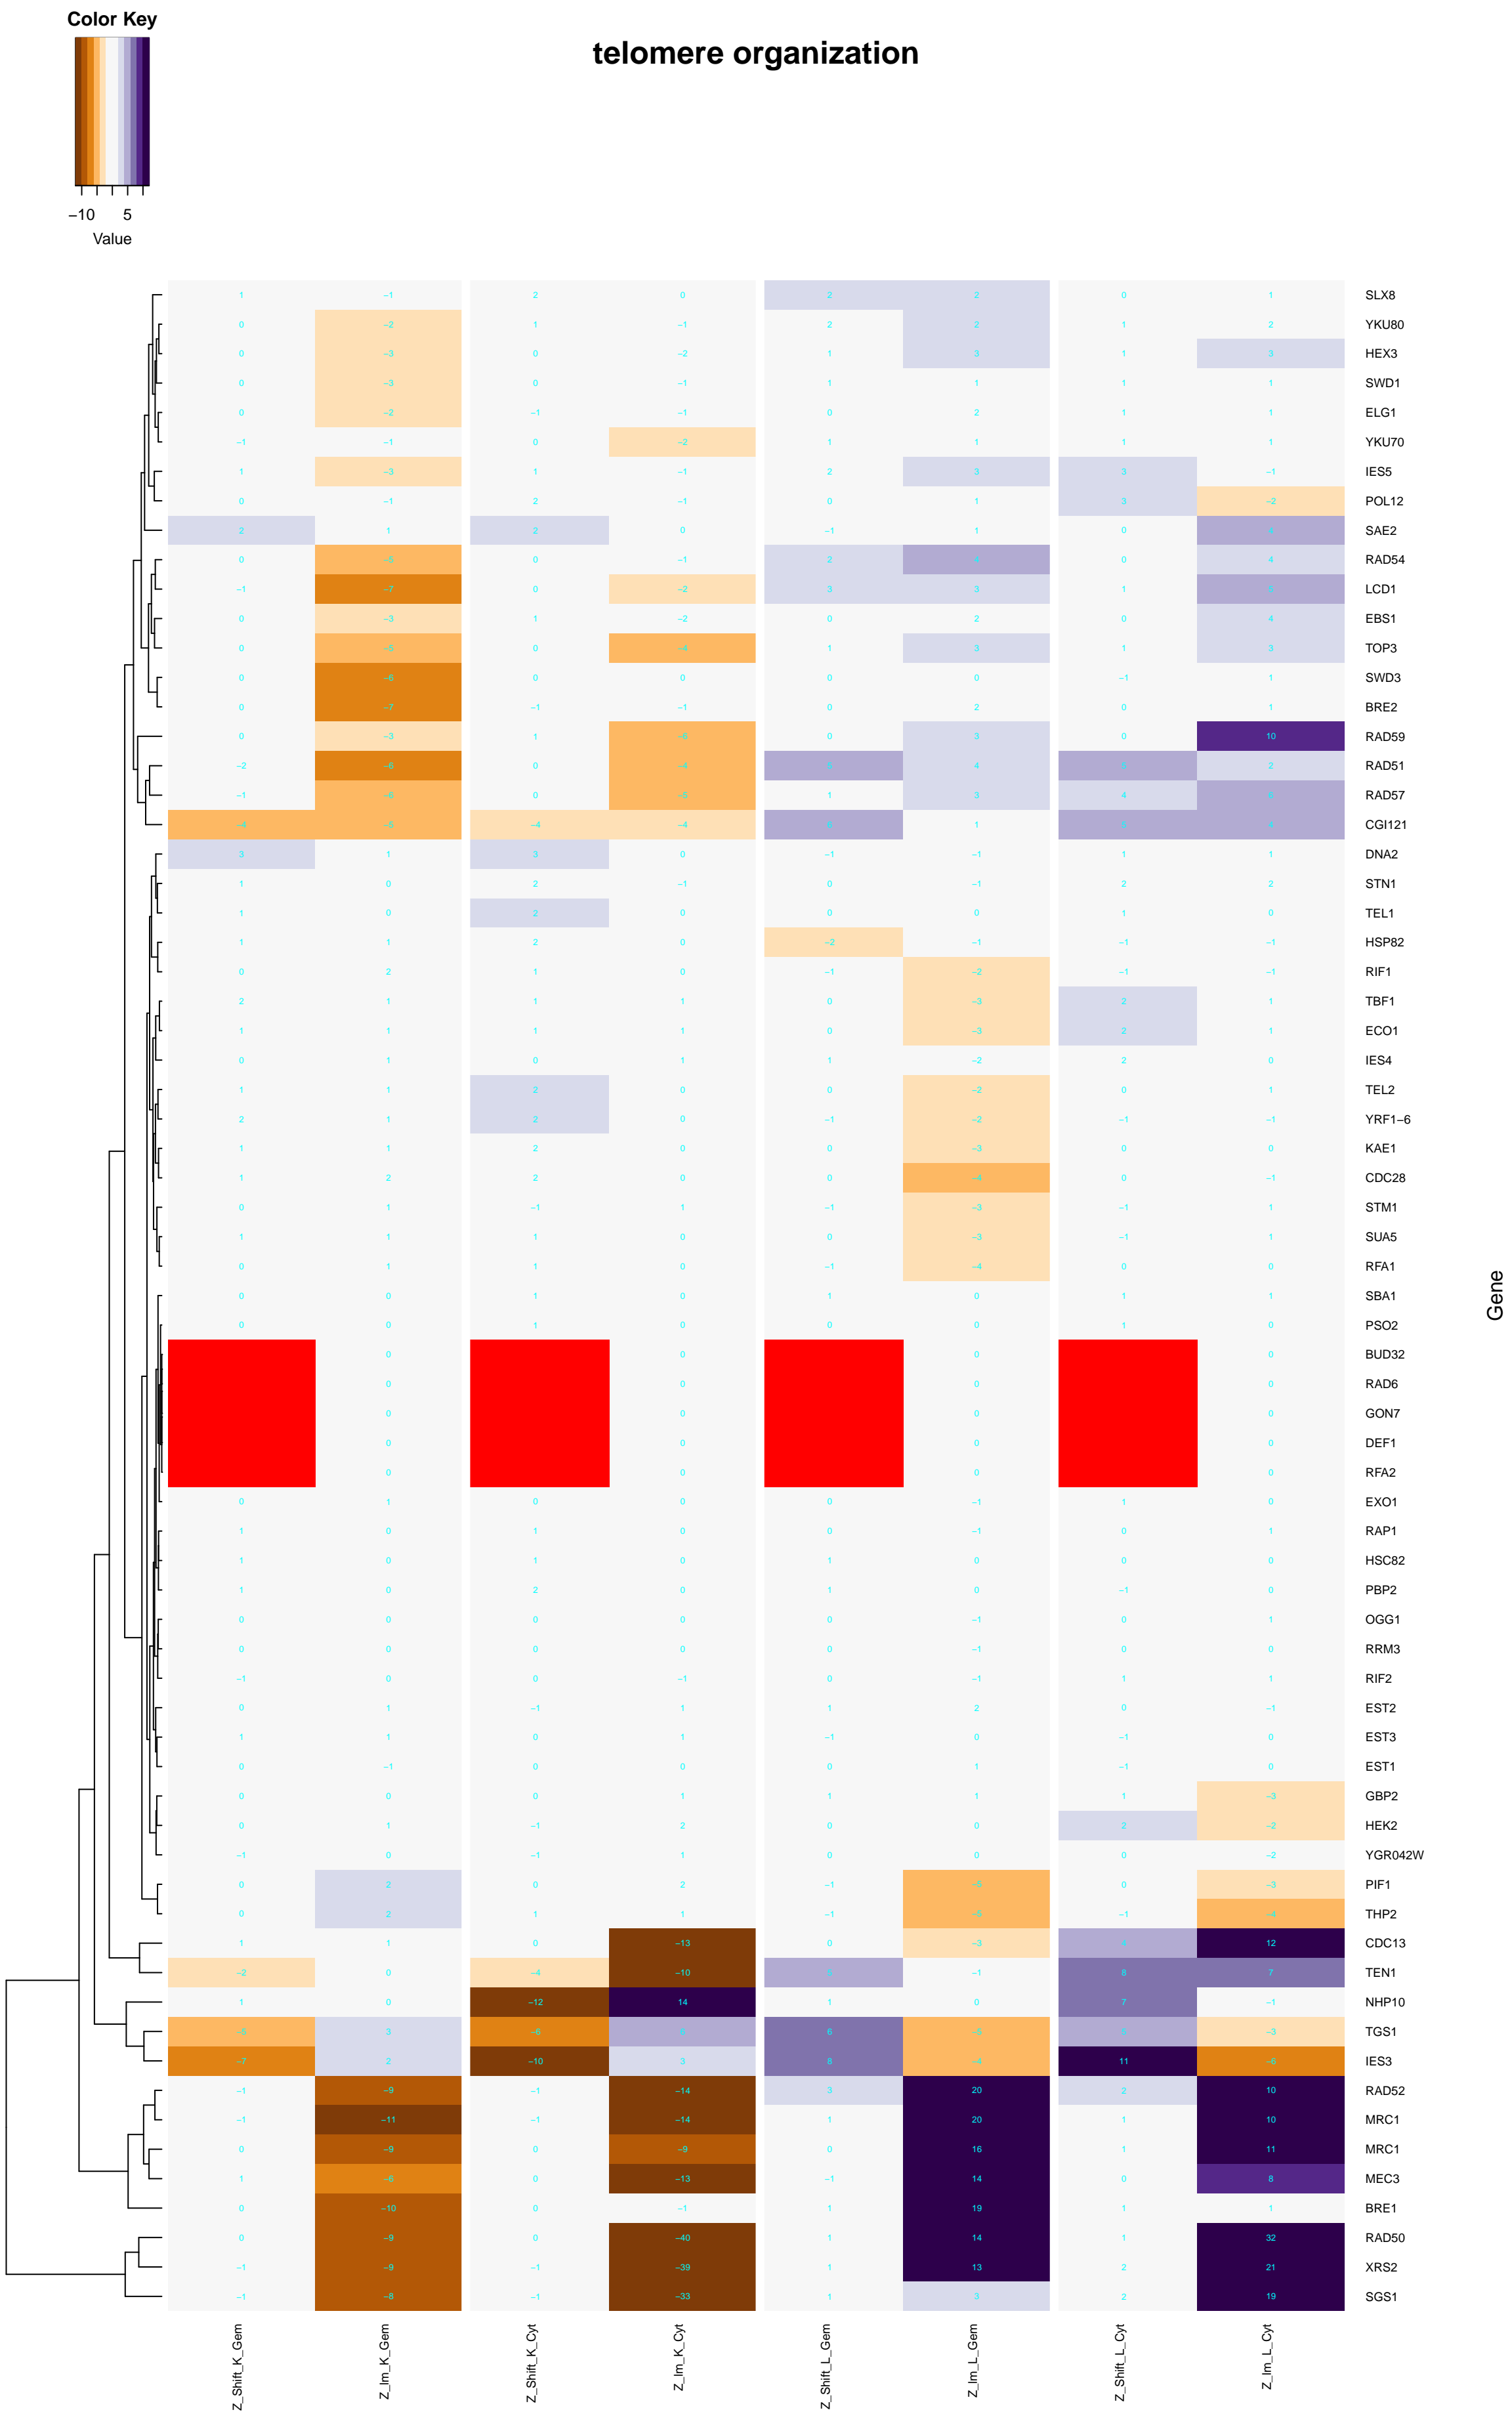

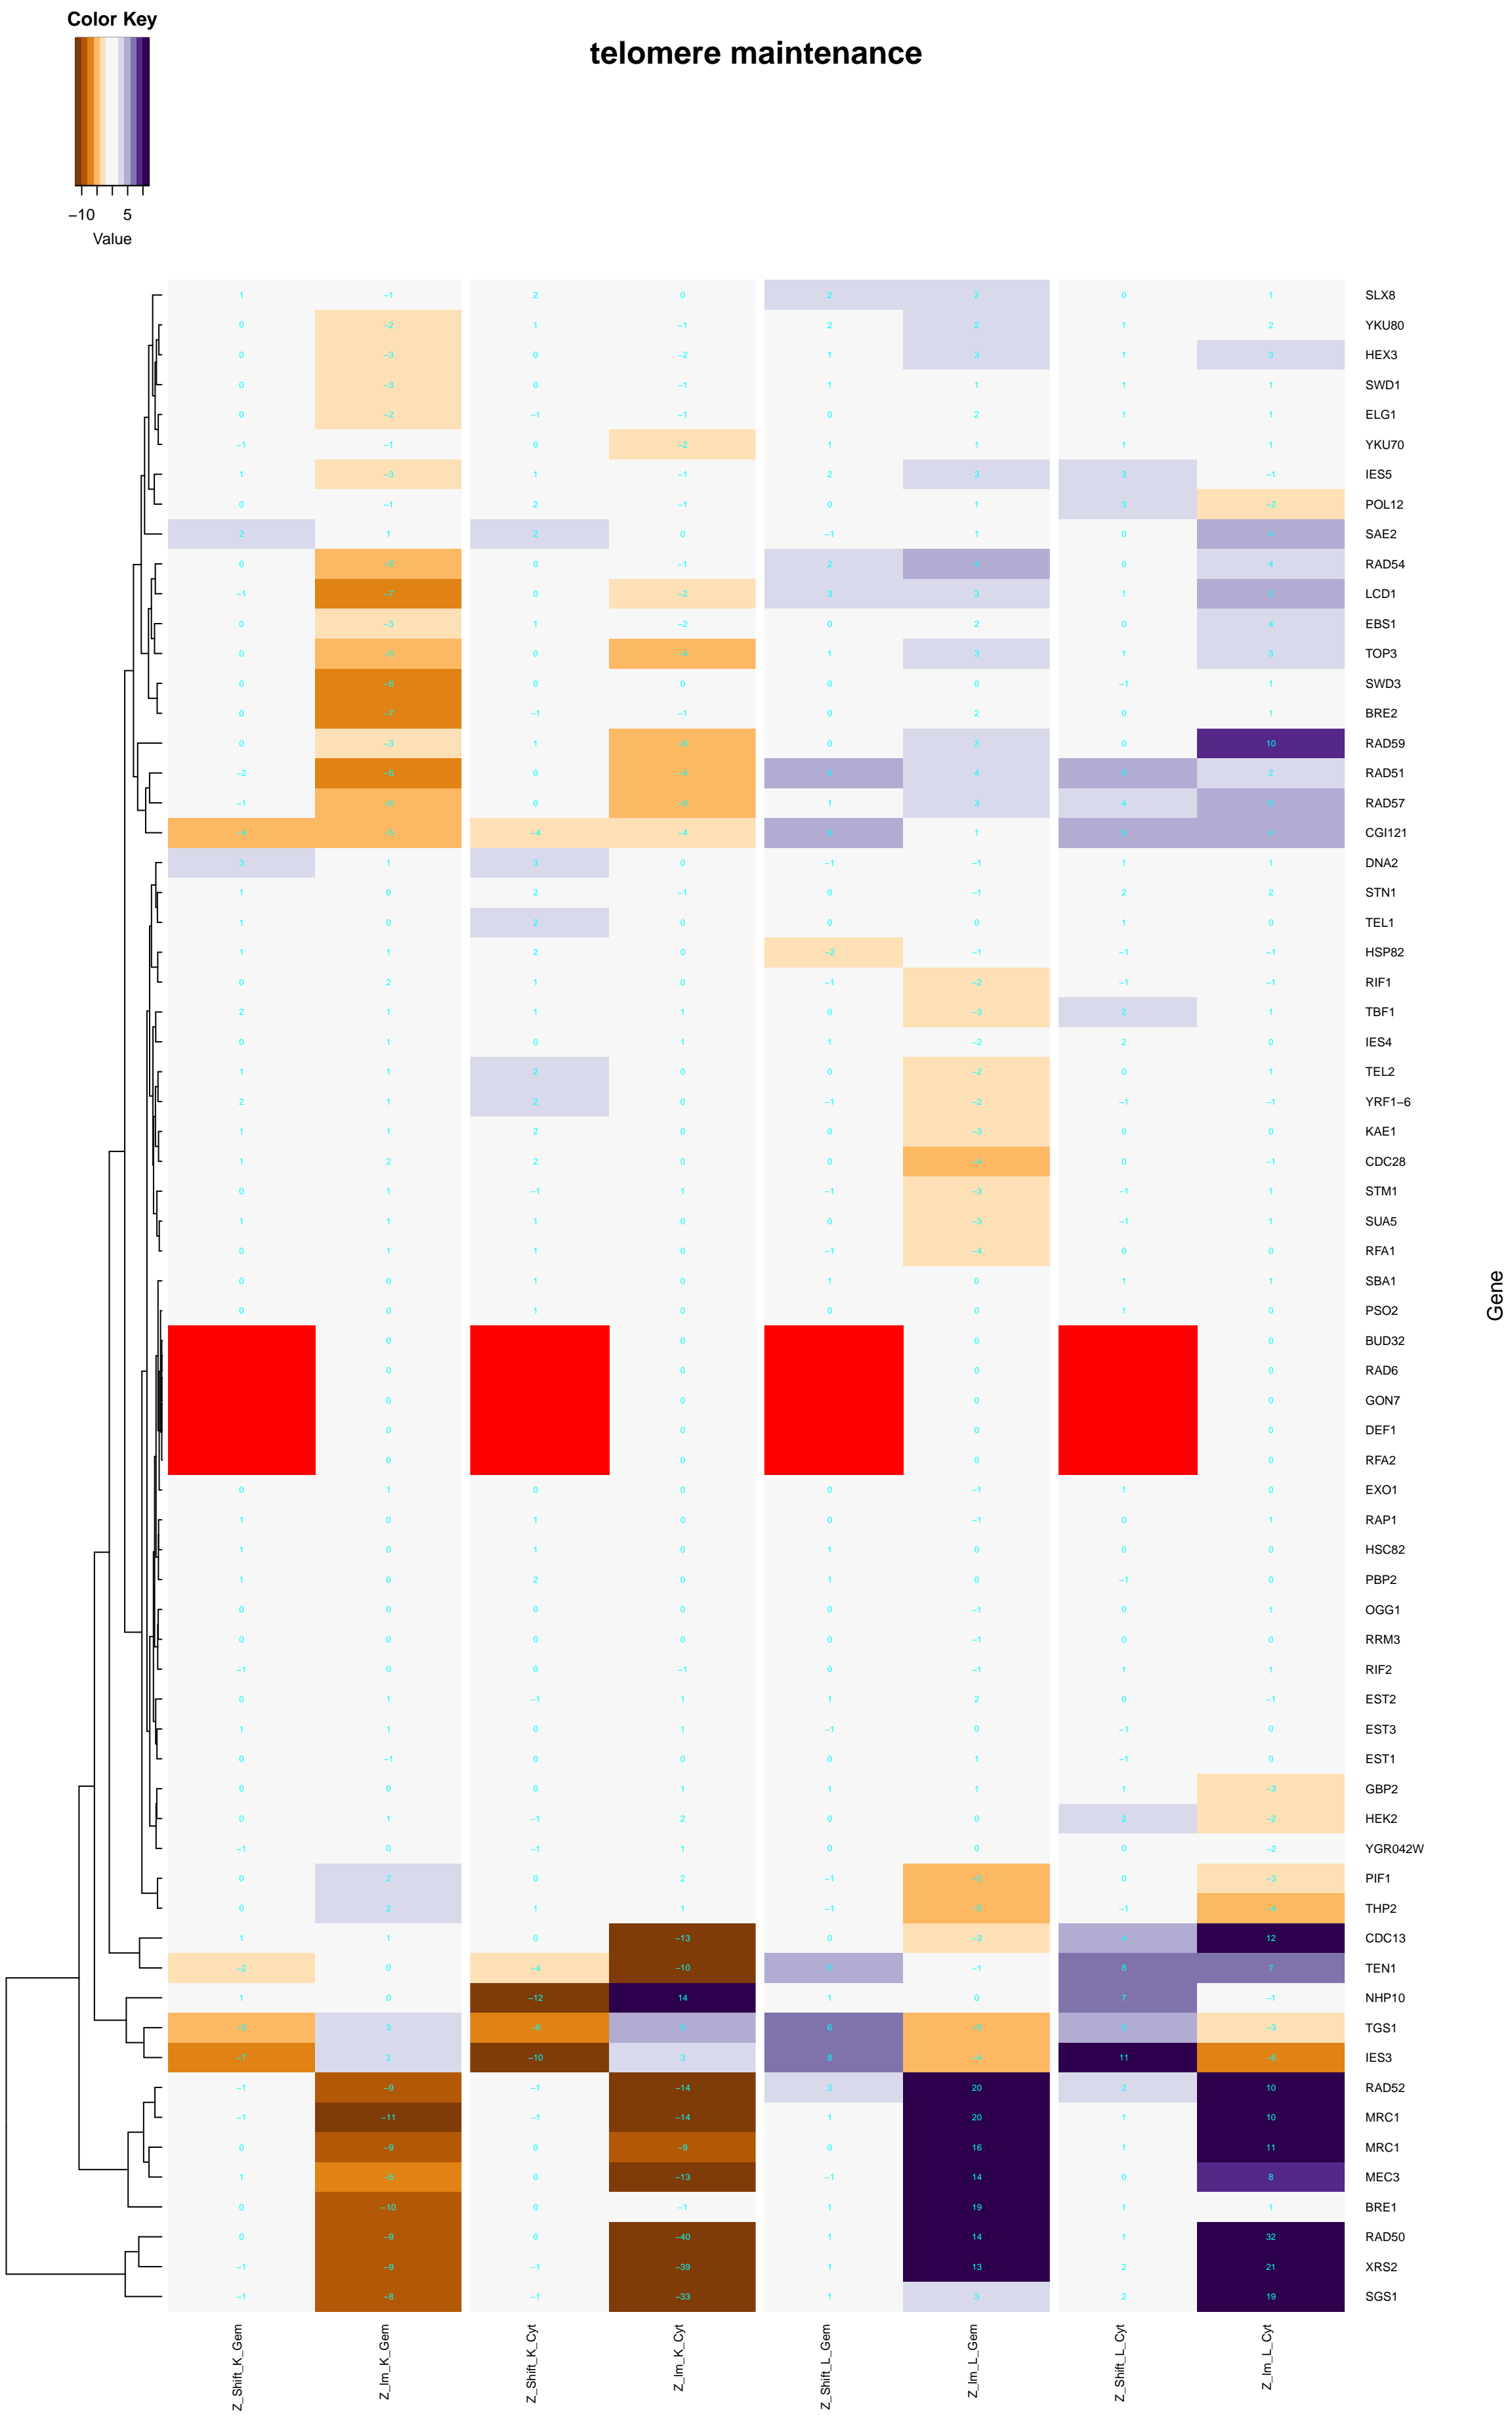

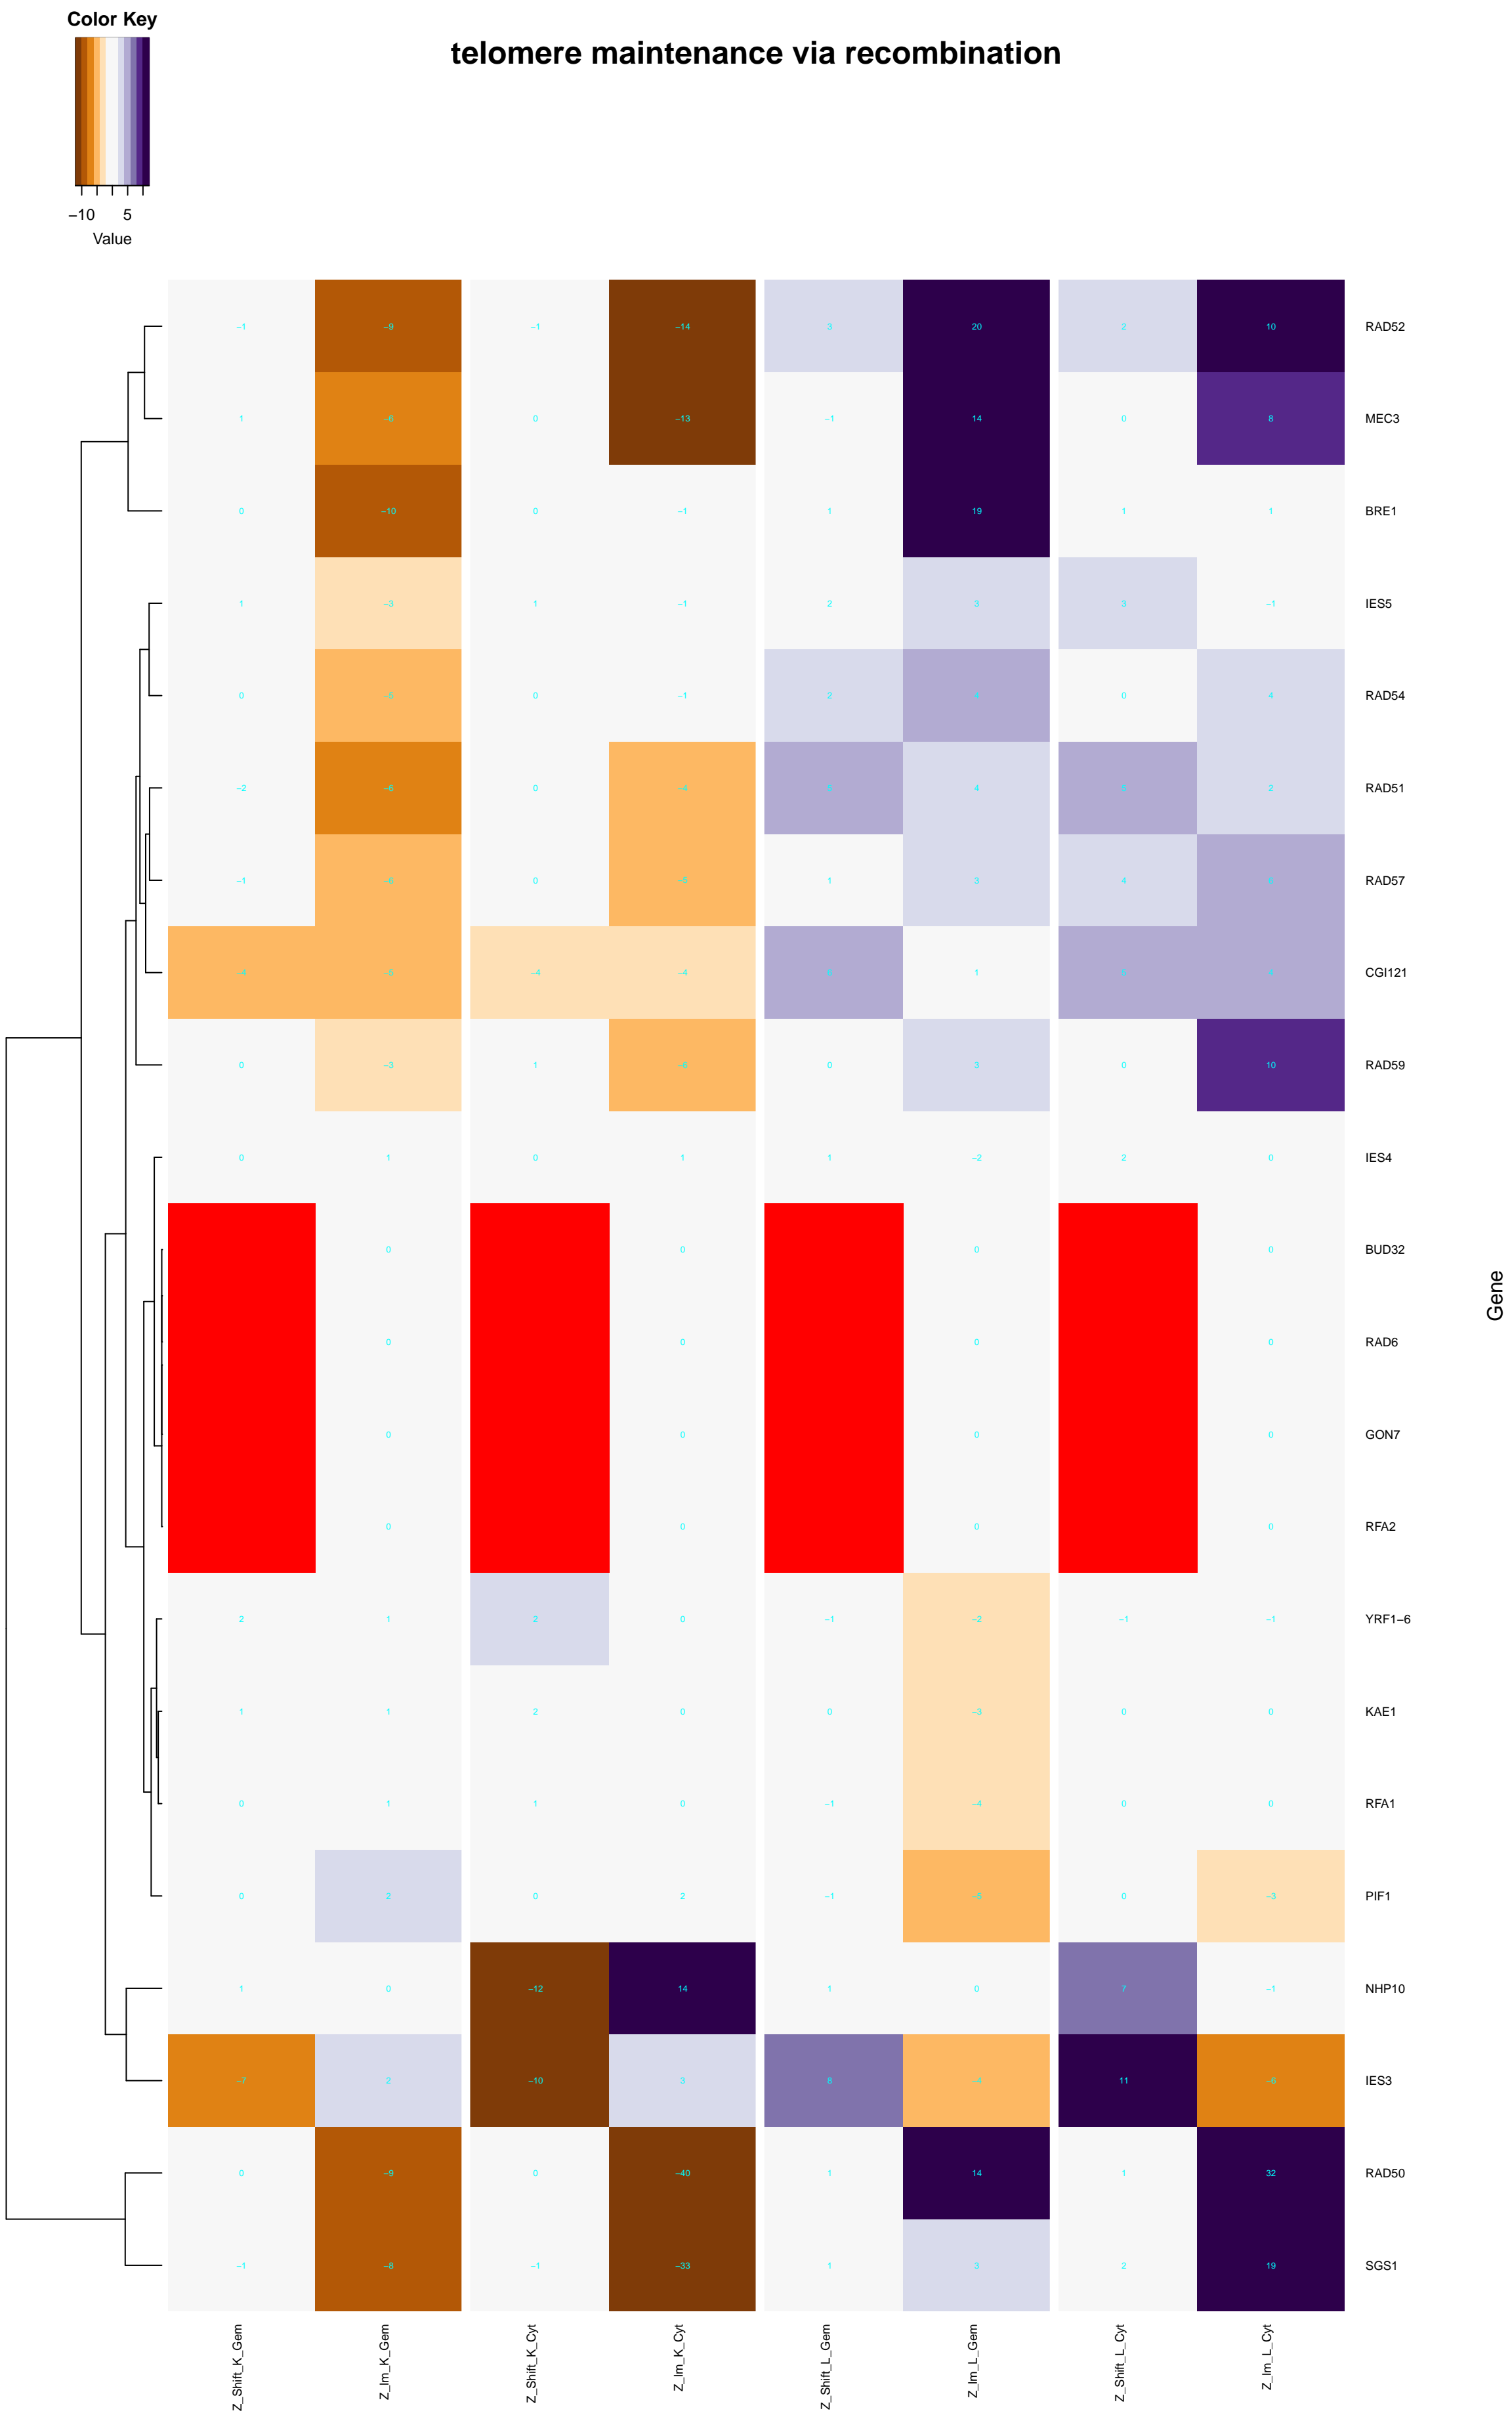

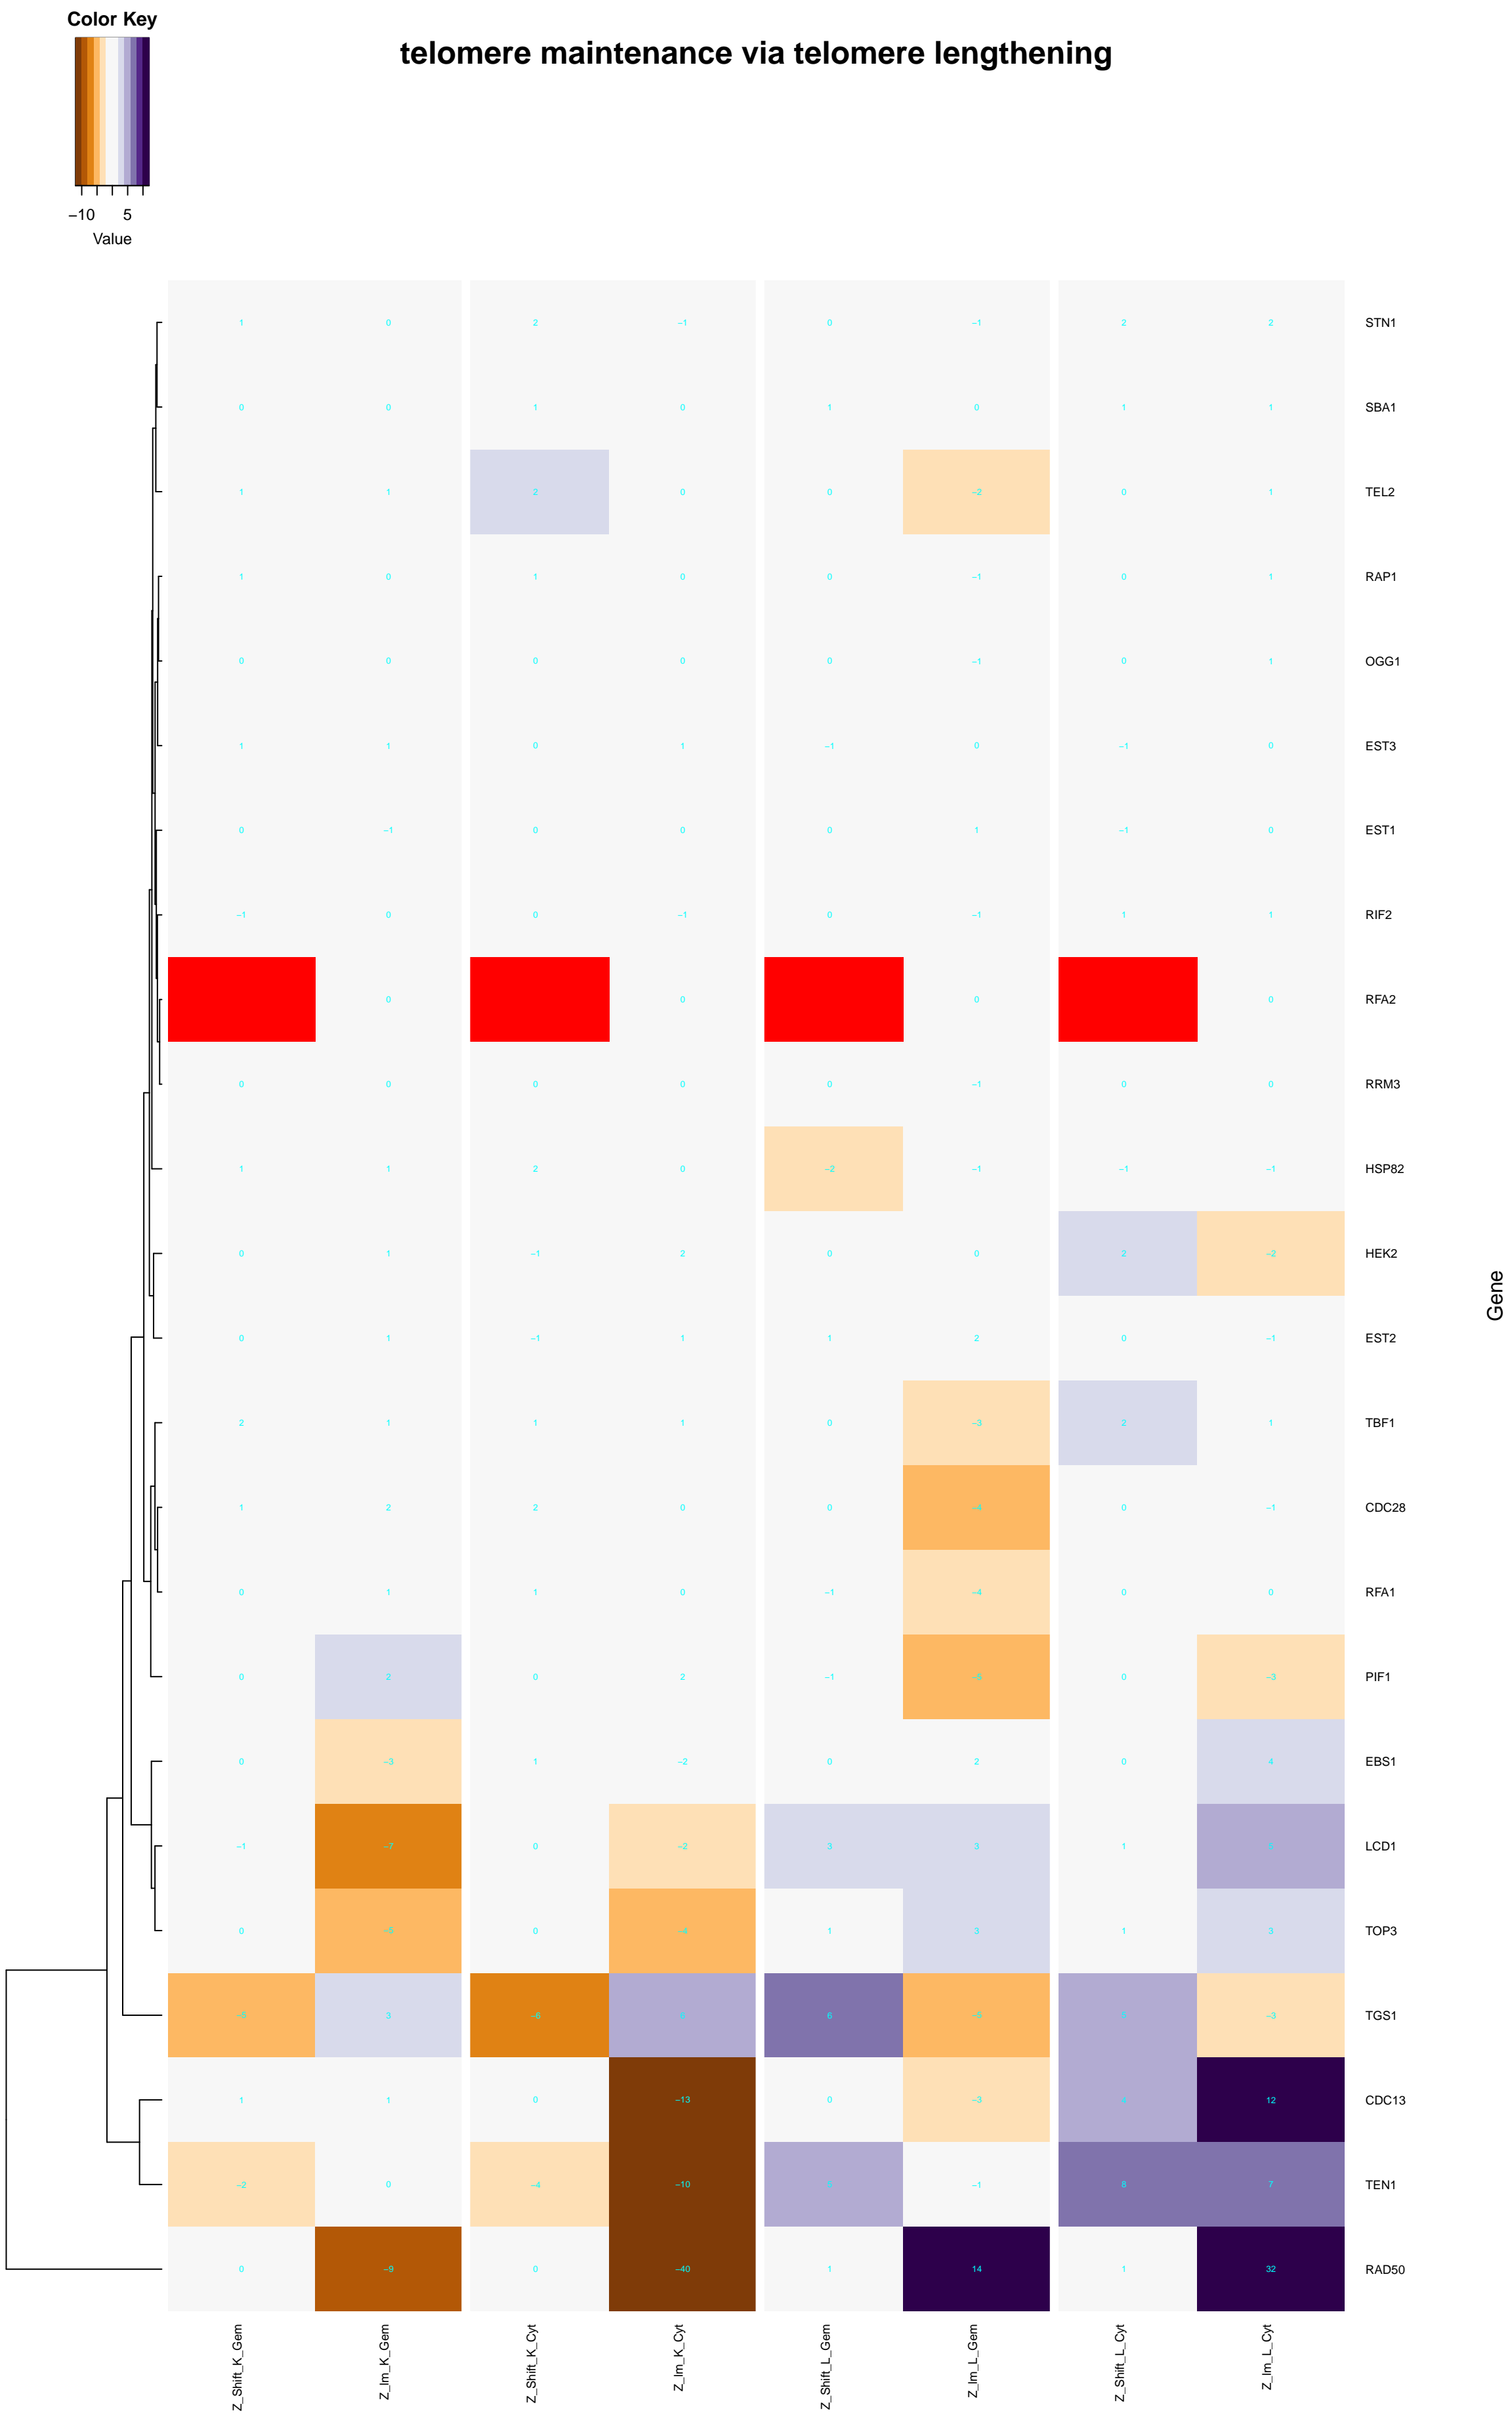

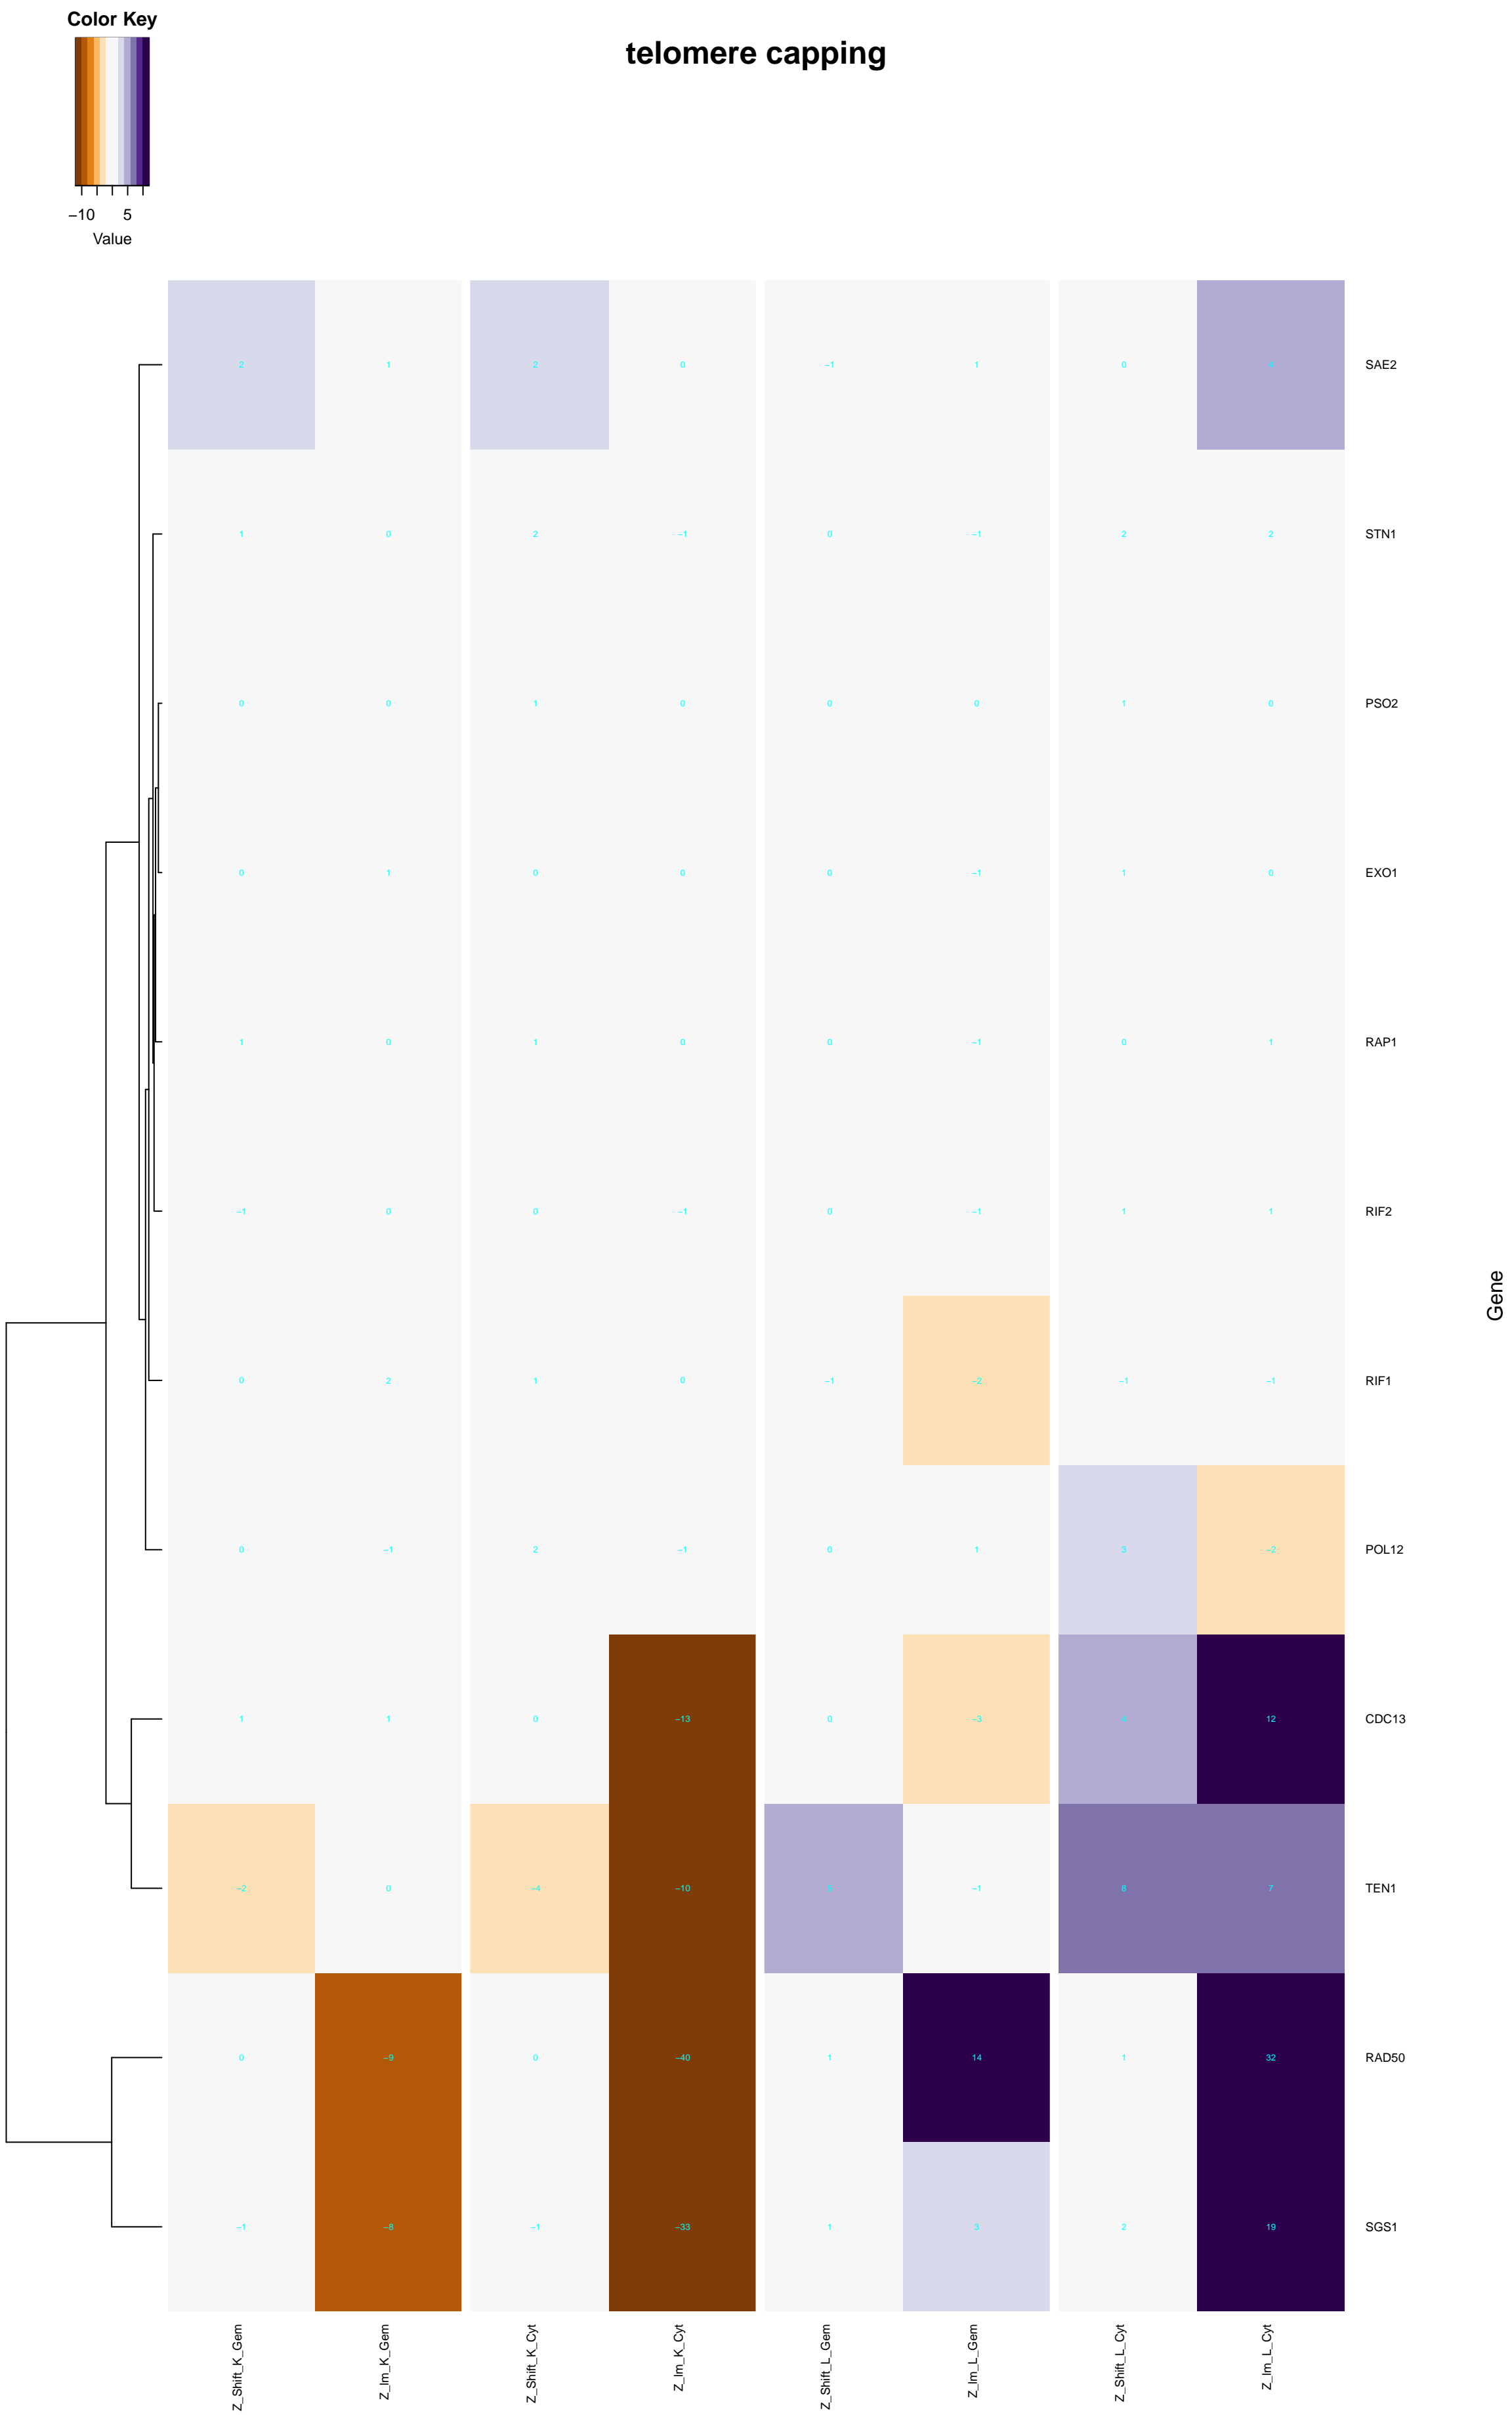

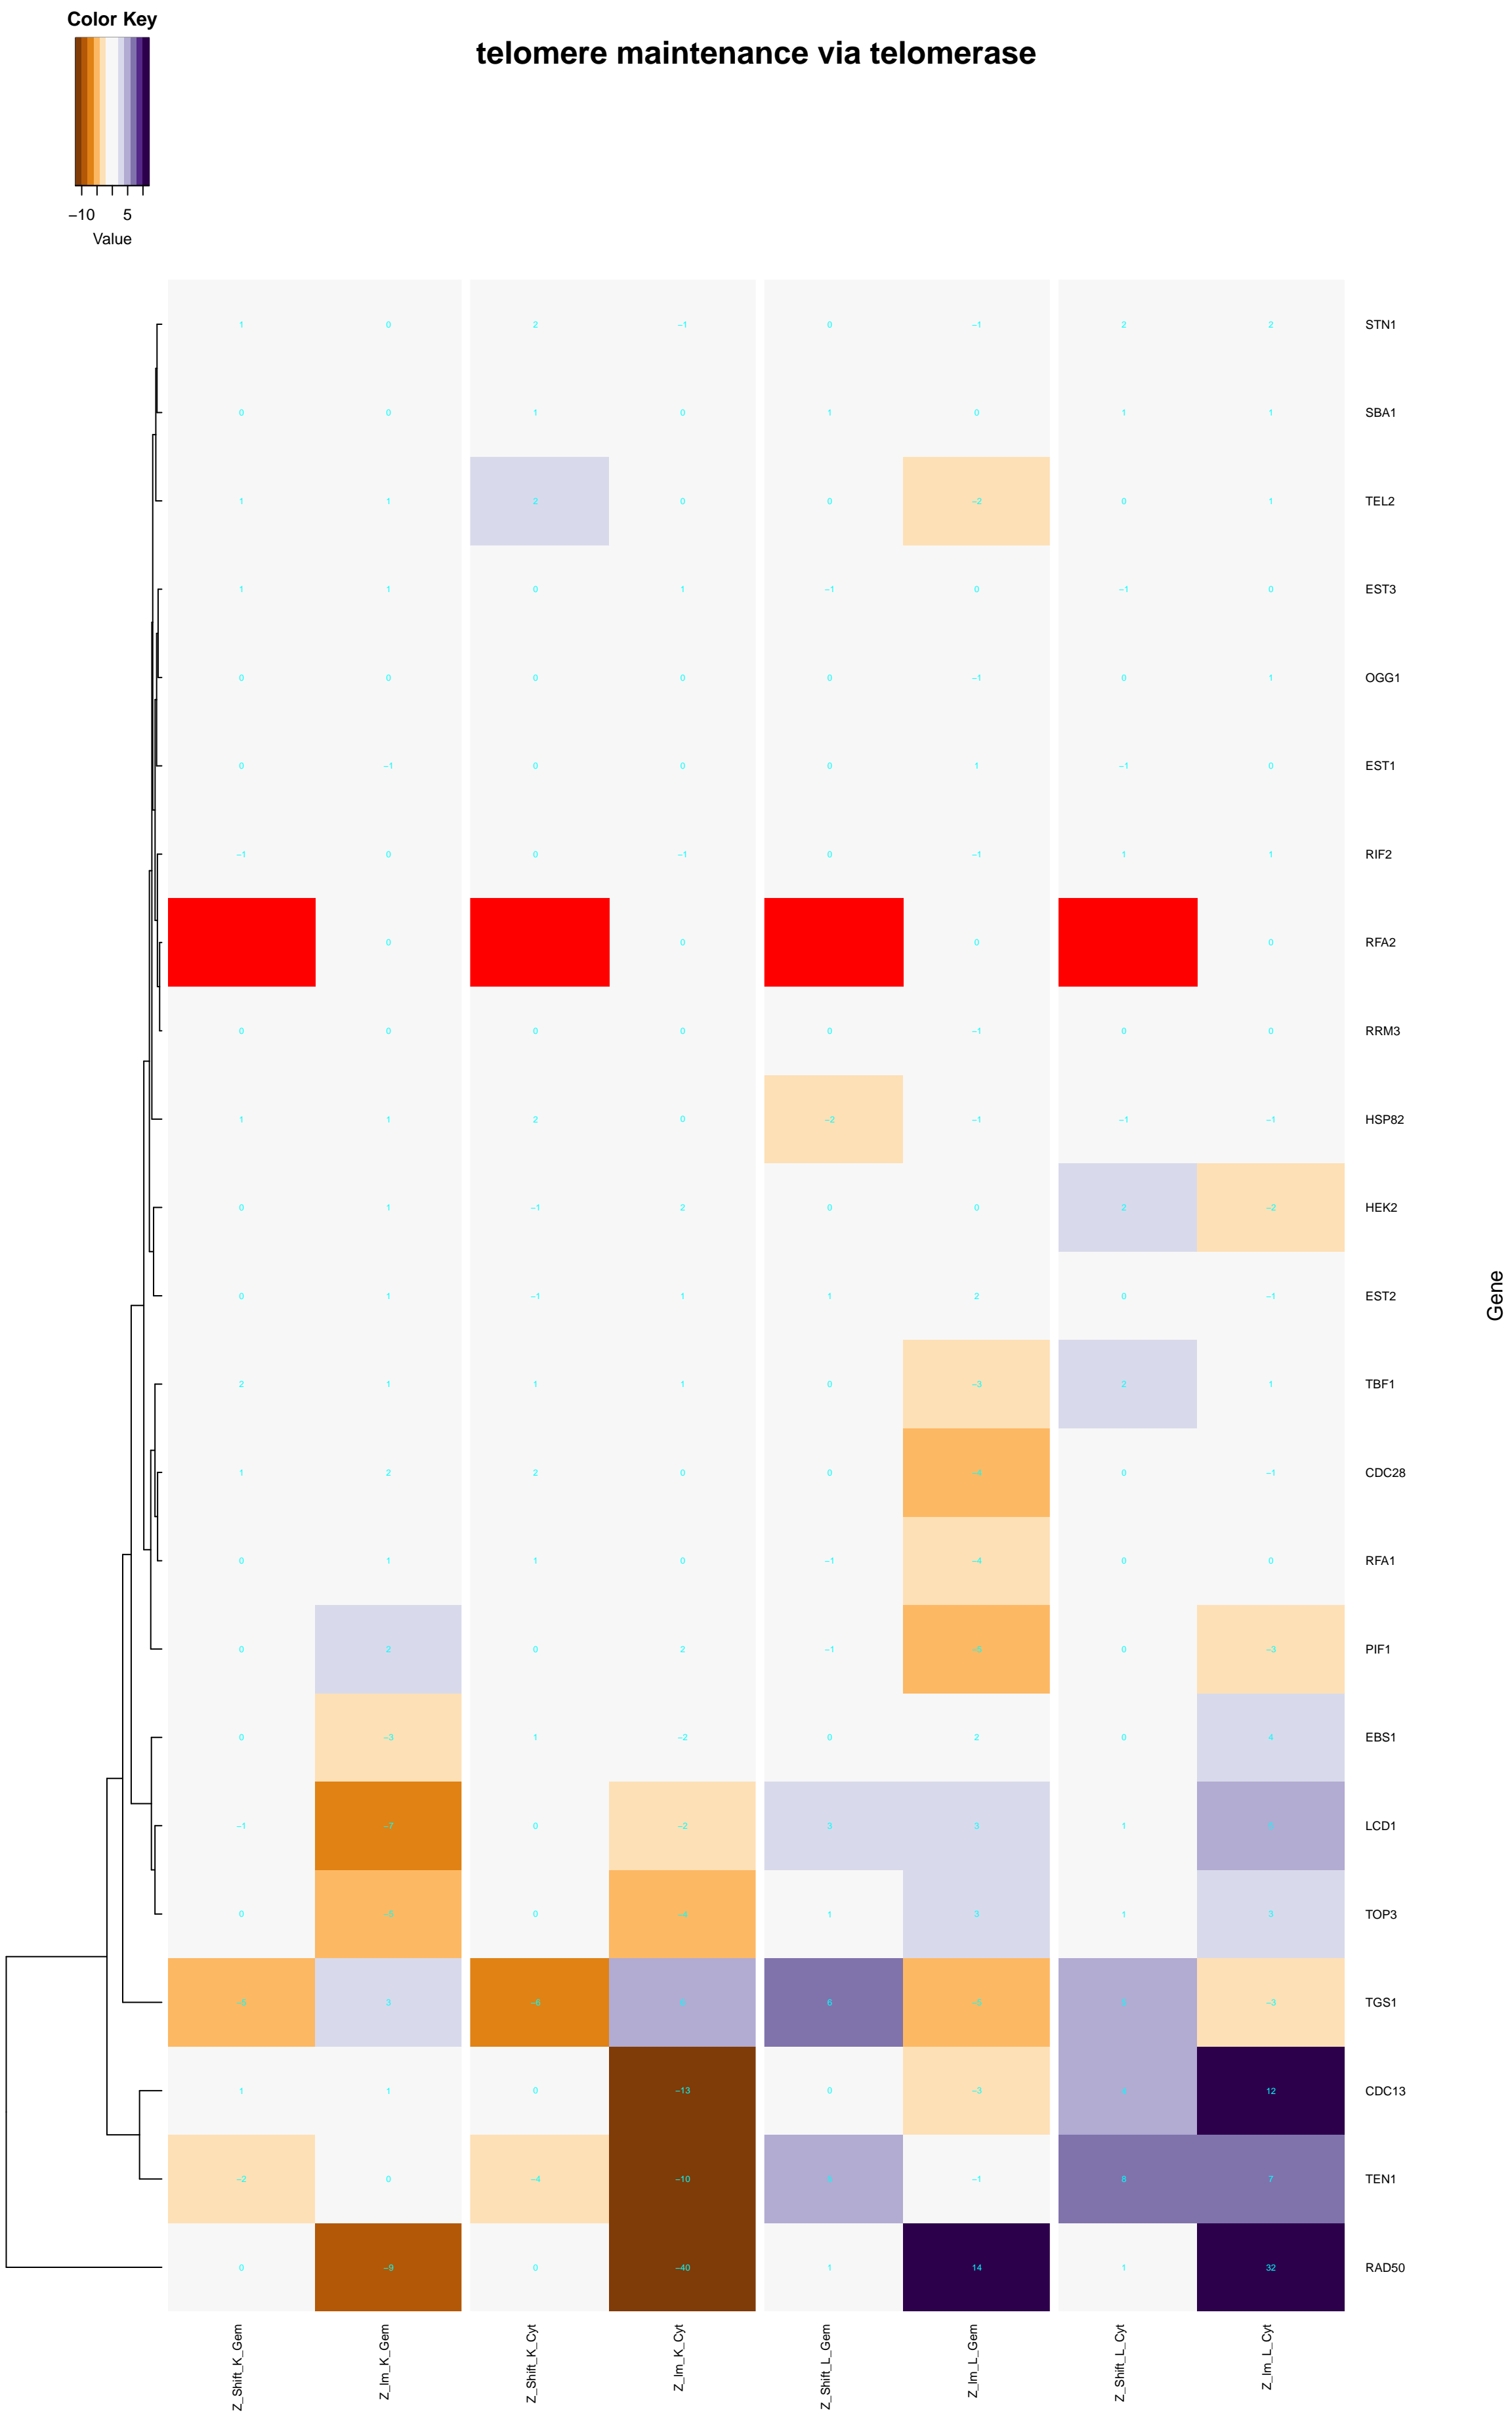

Supplement: s1 [file s1]

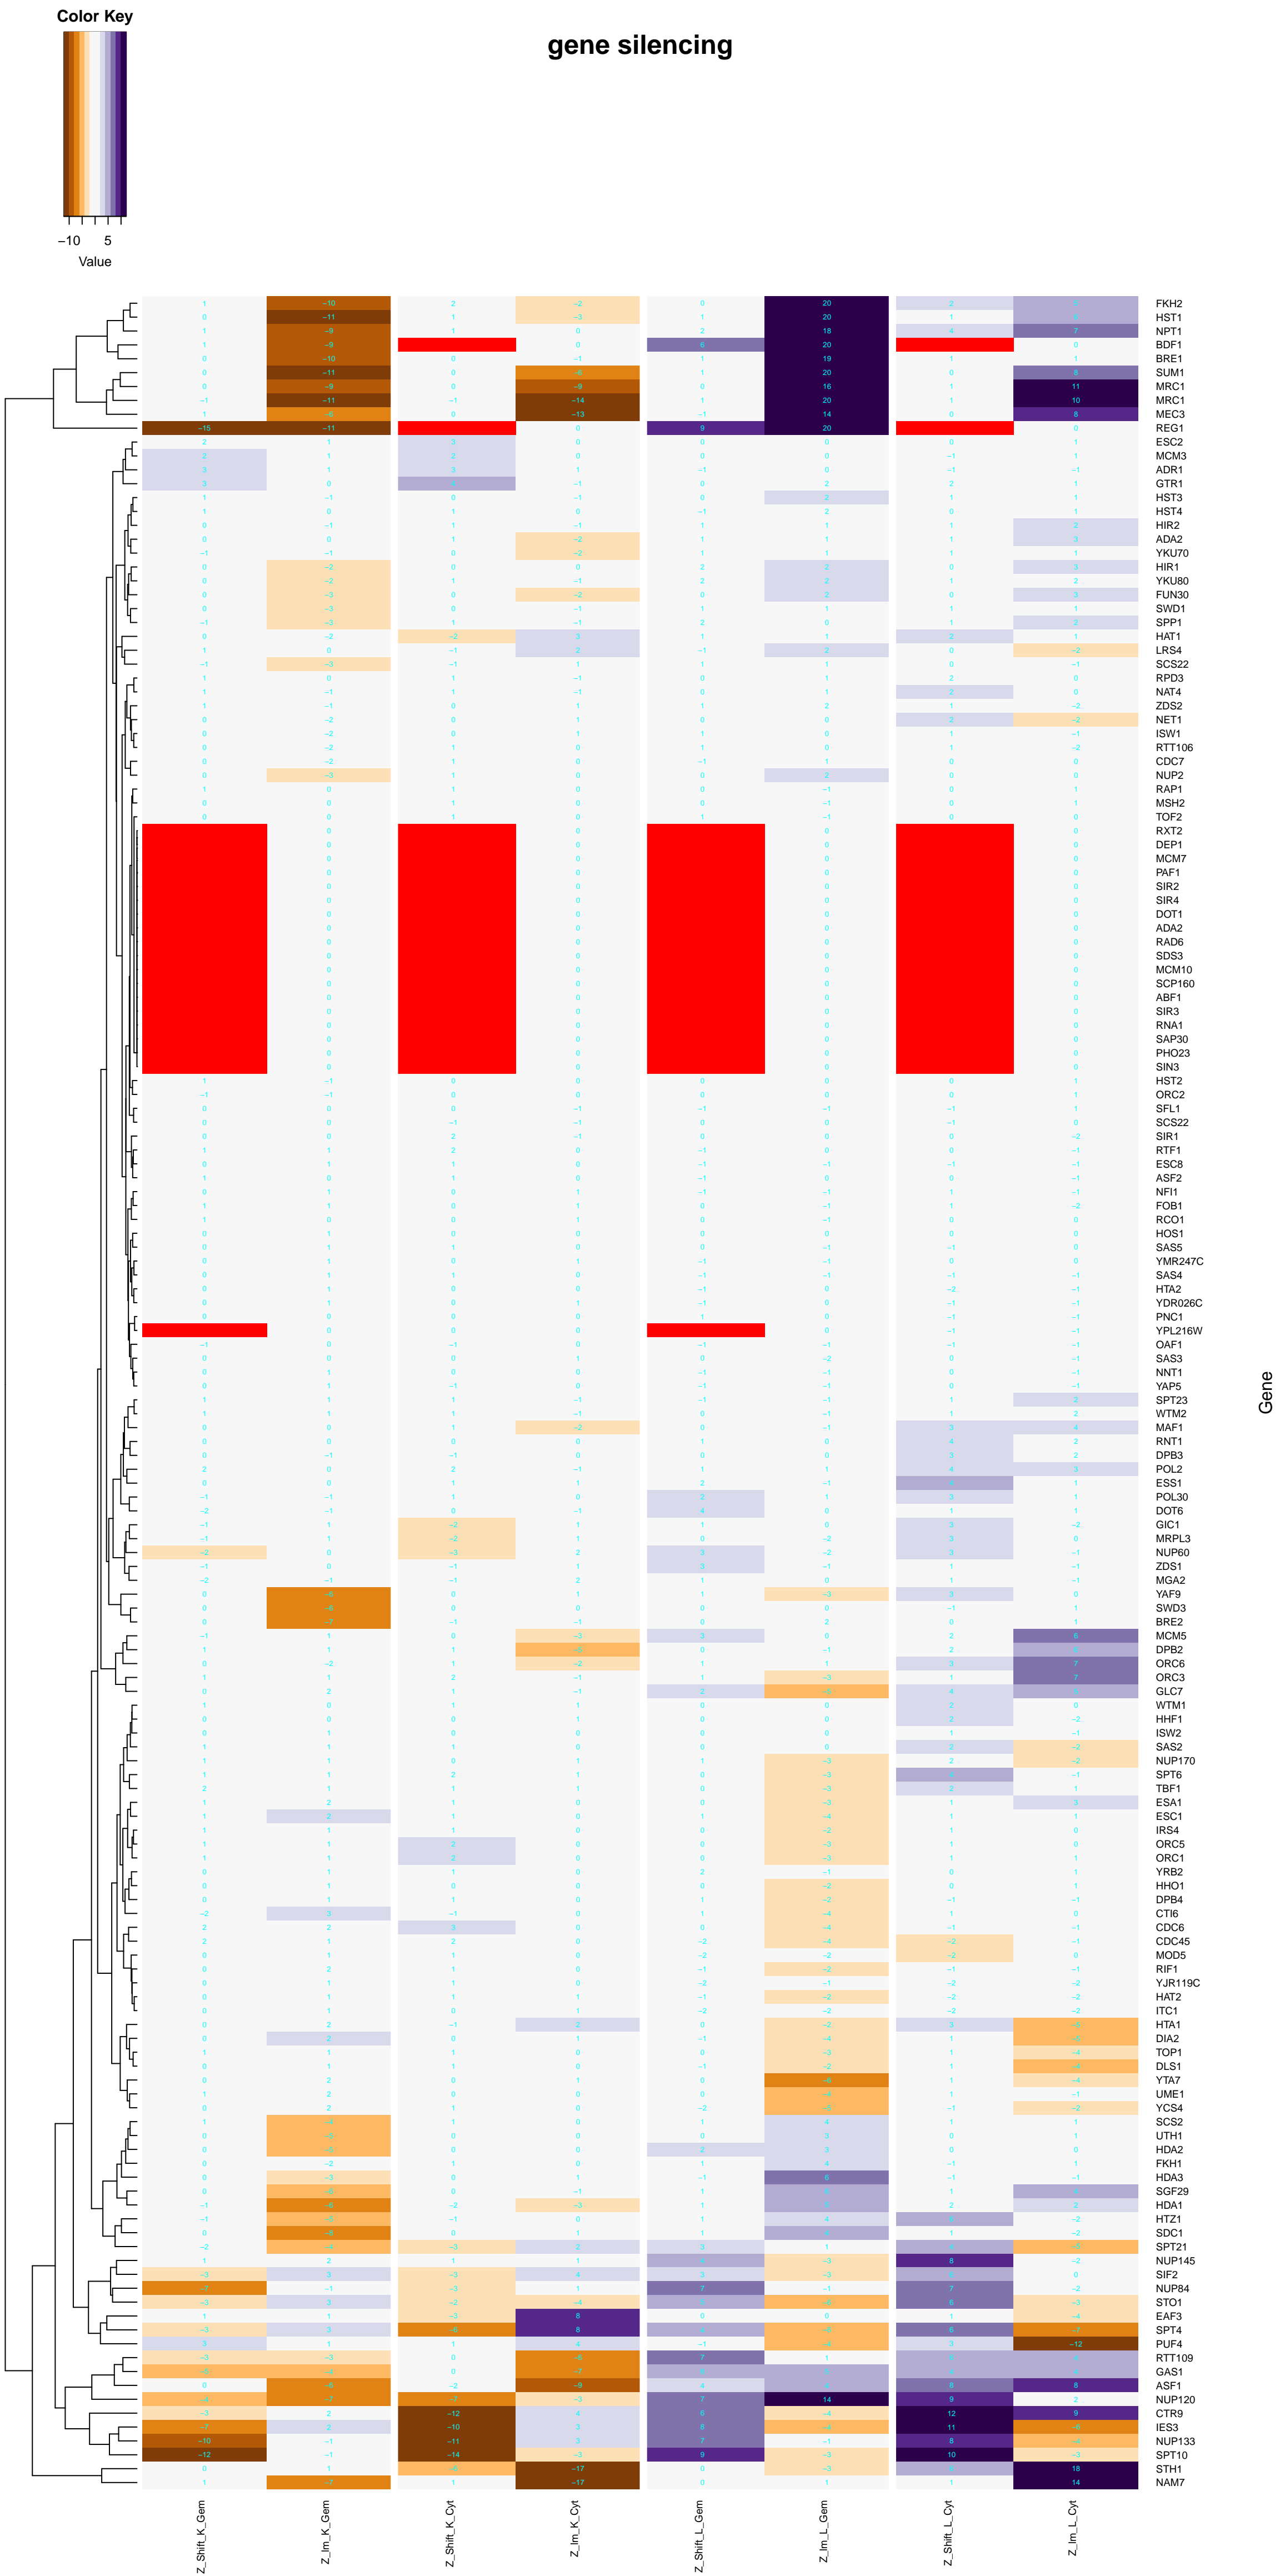

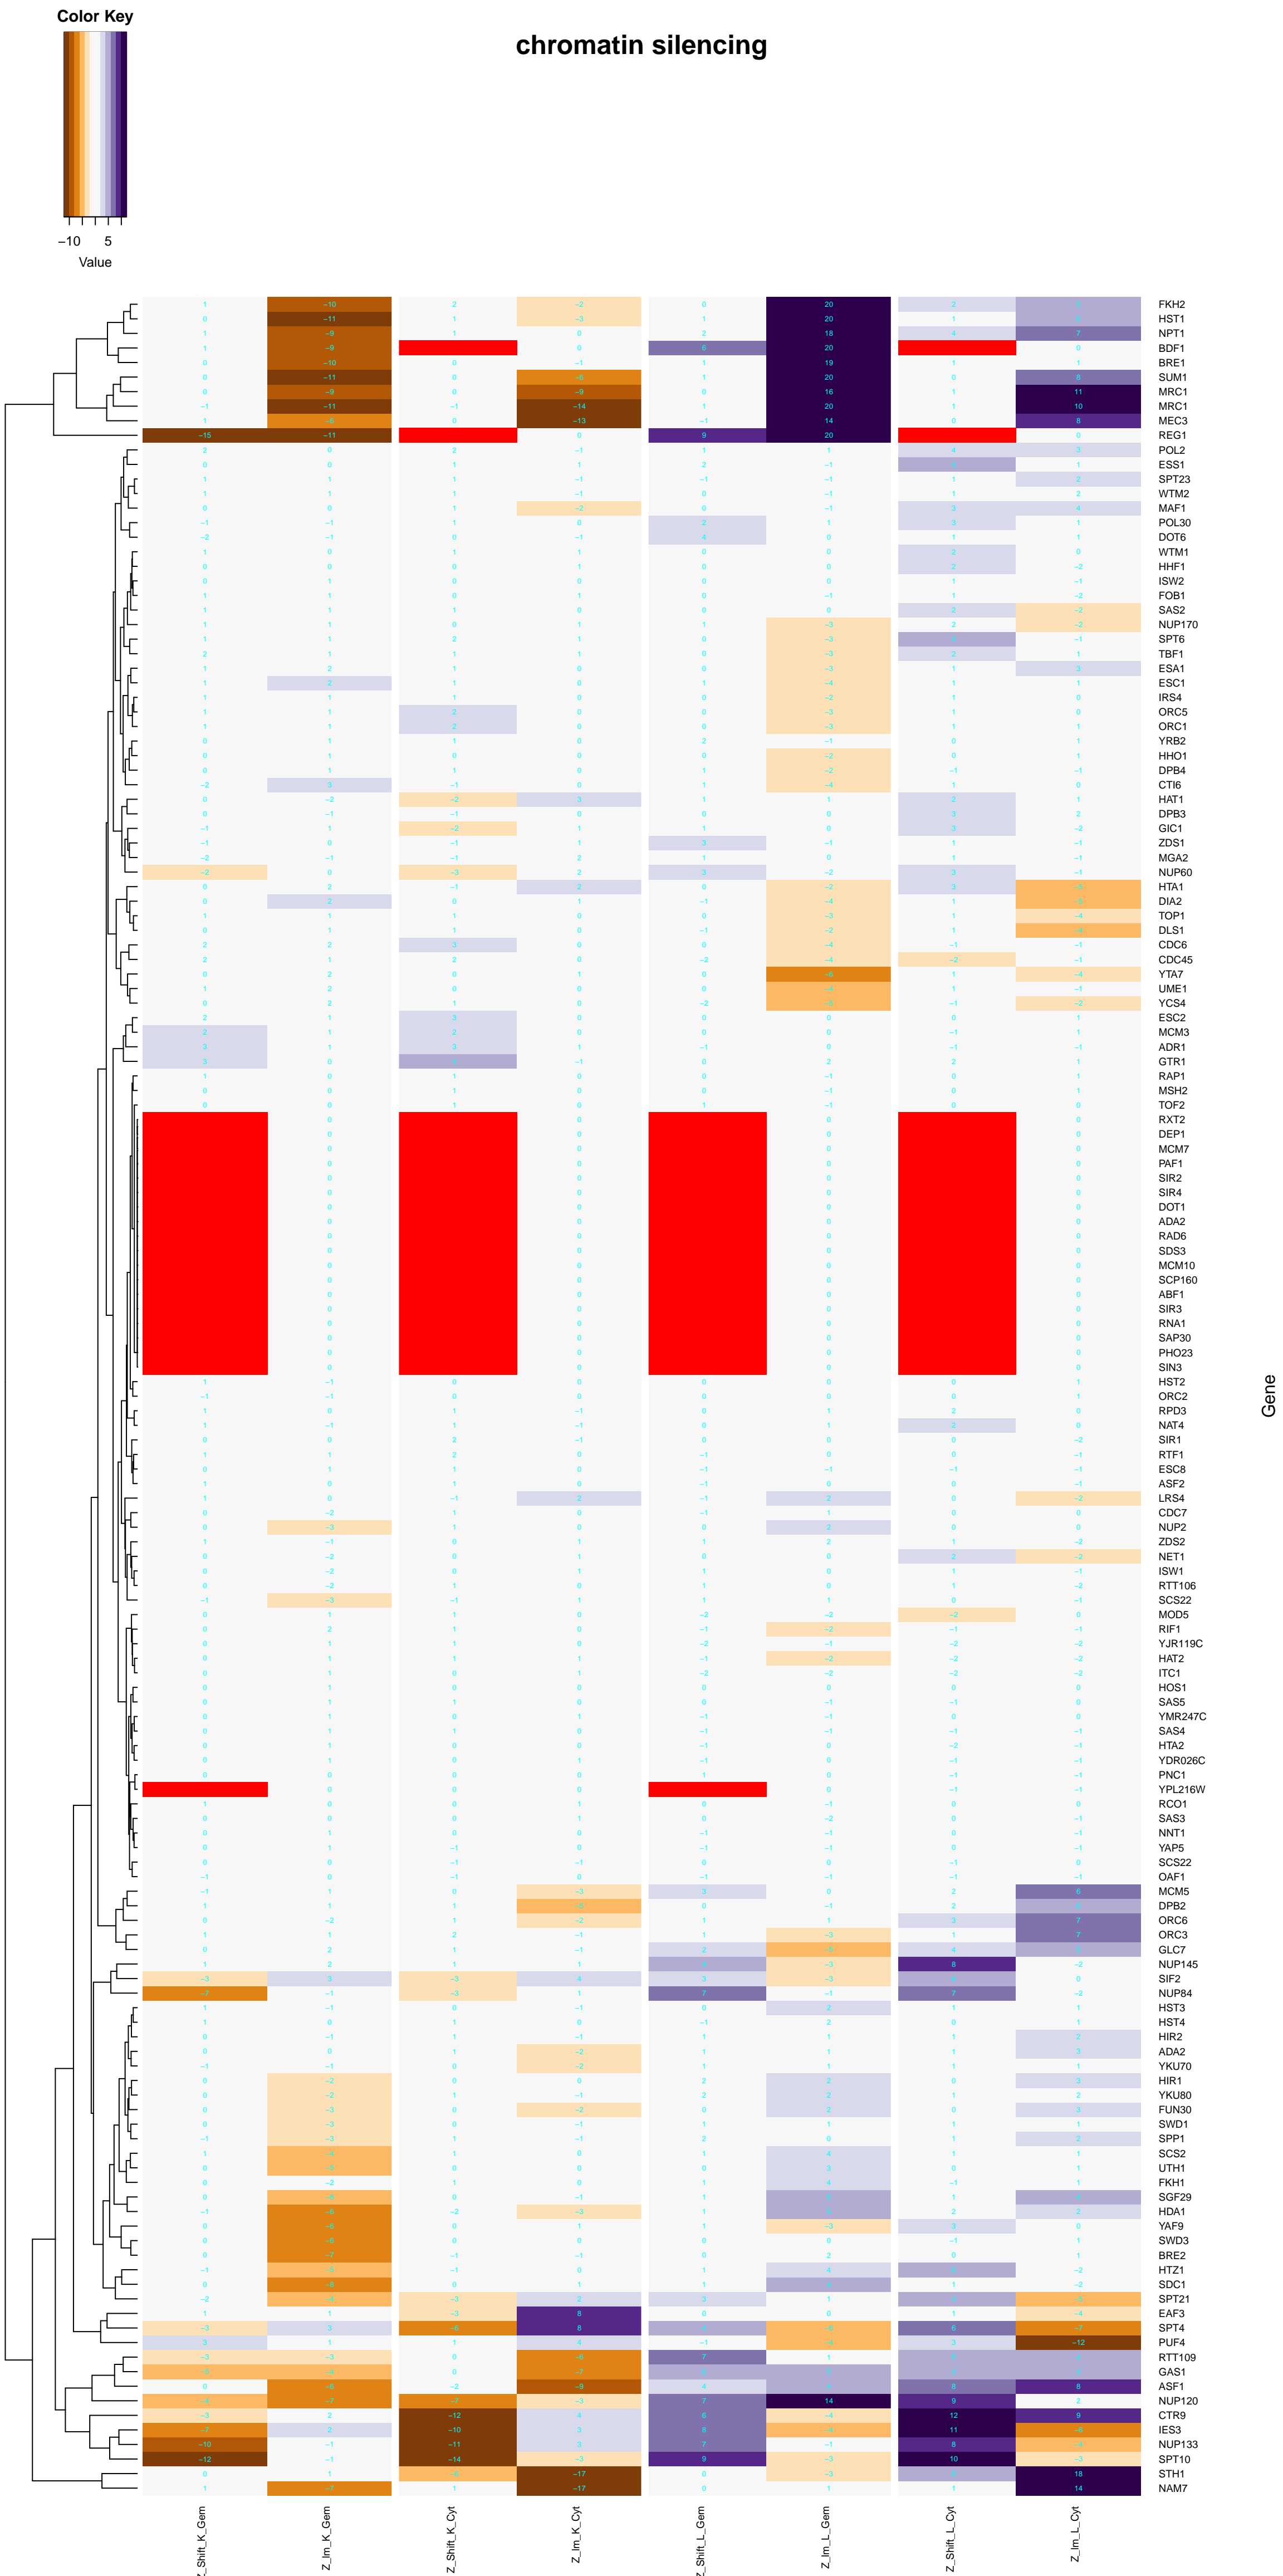

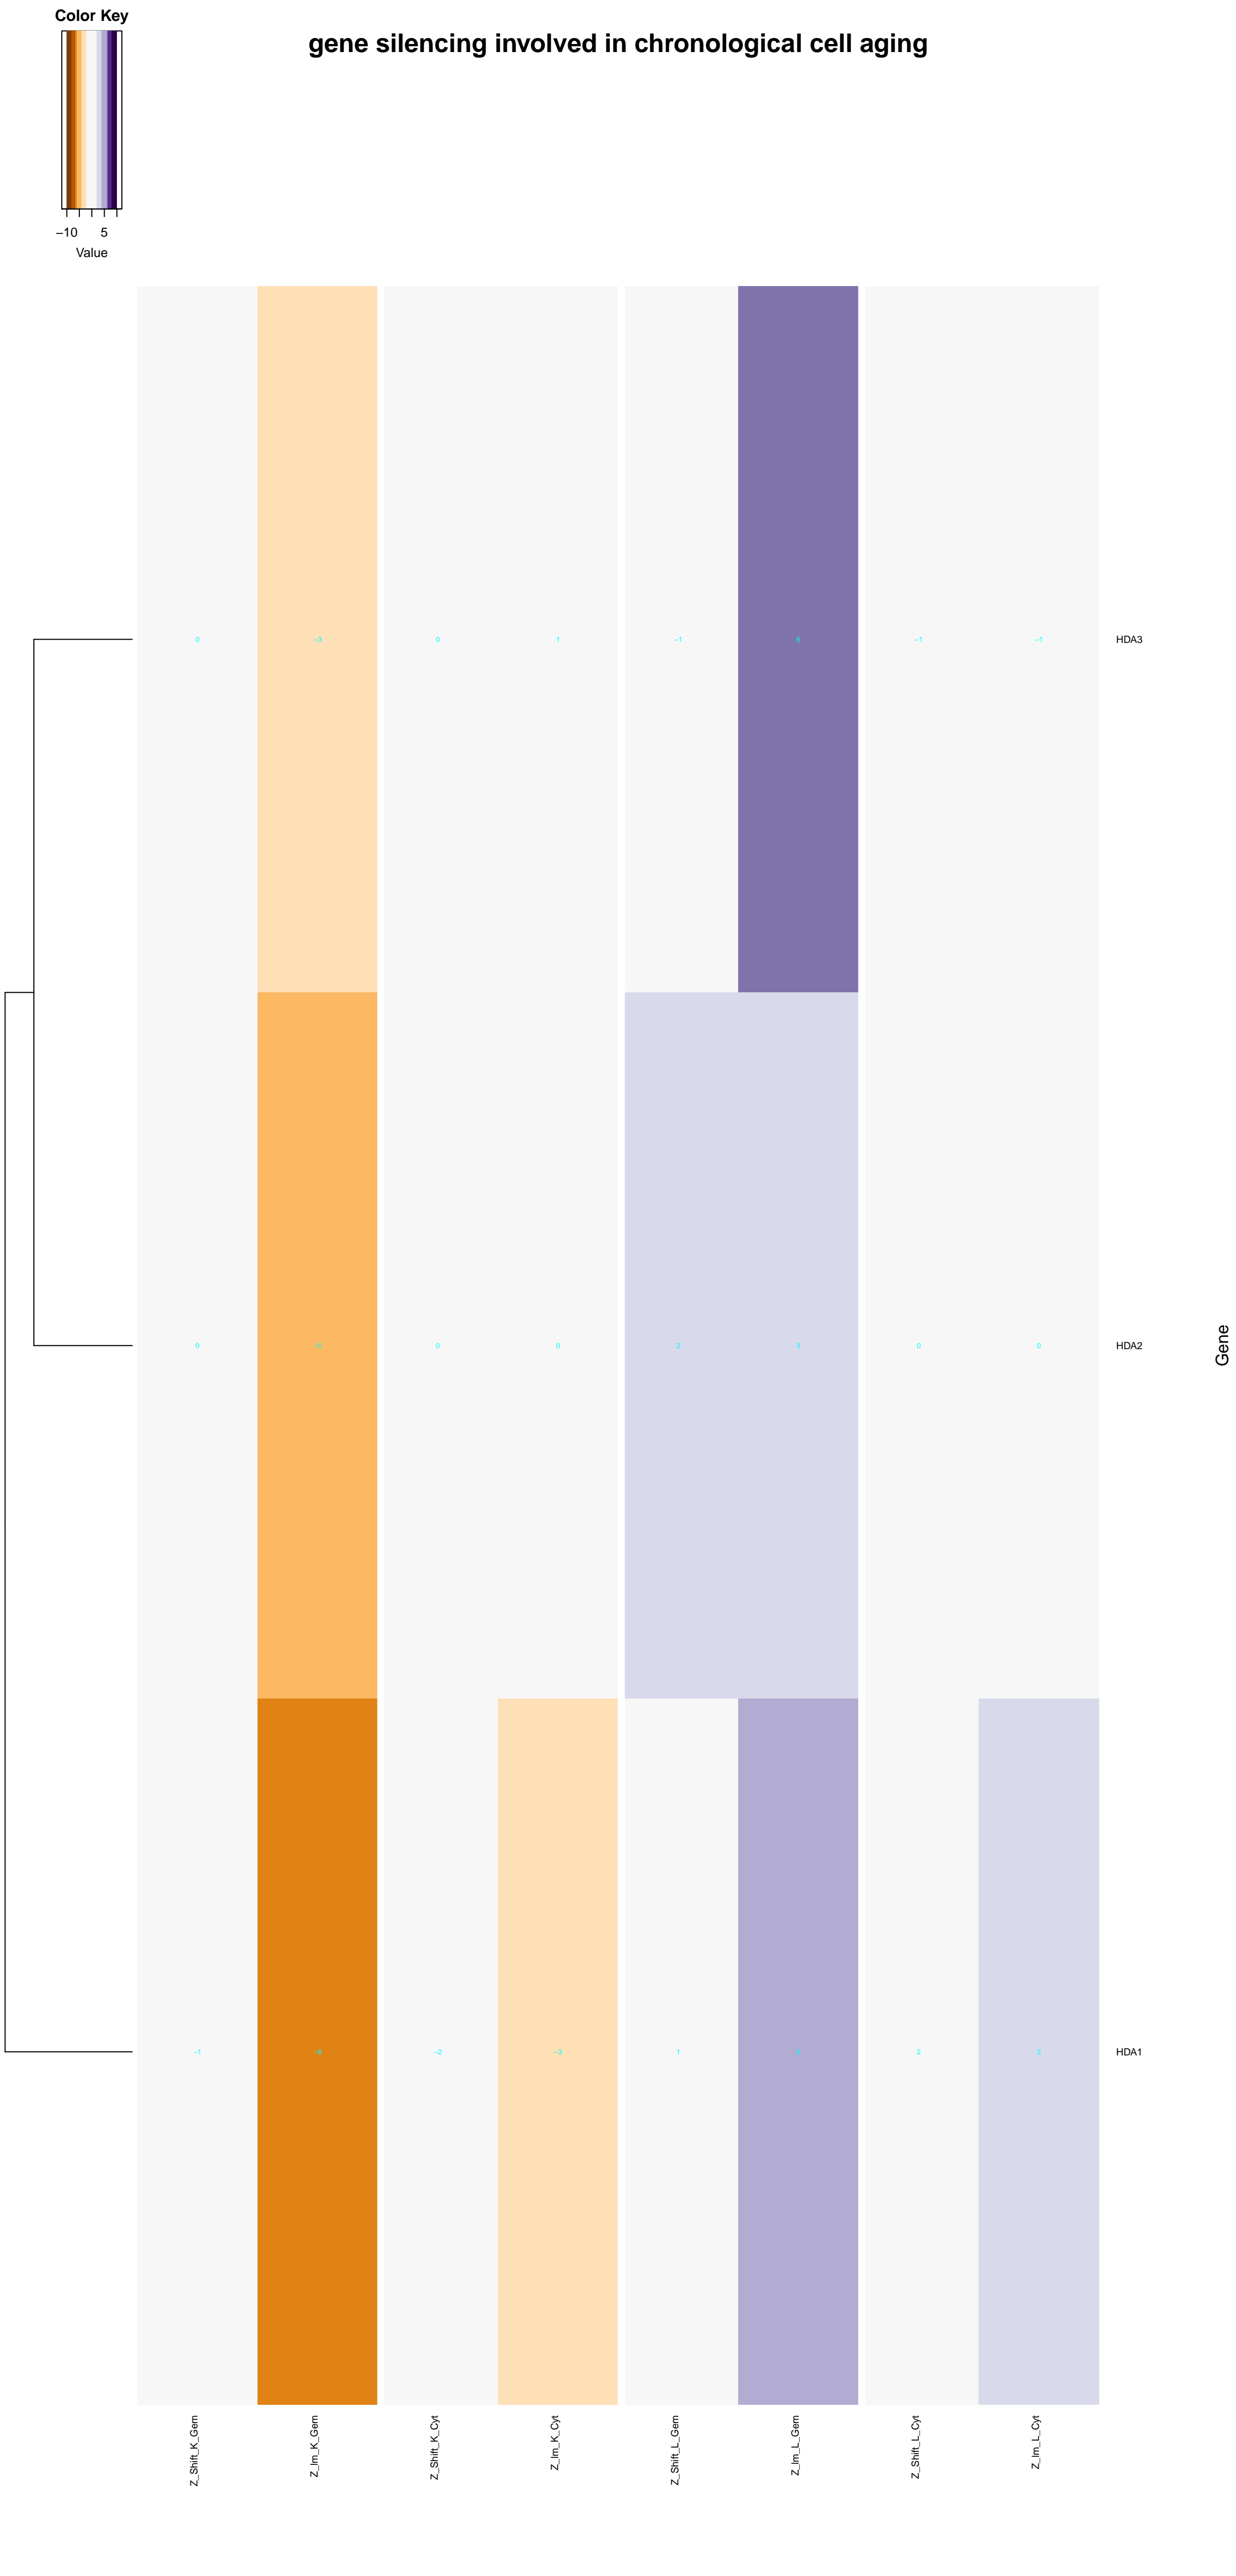

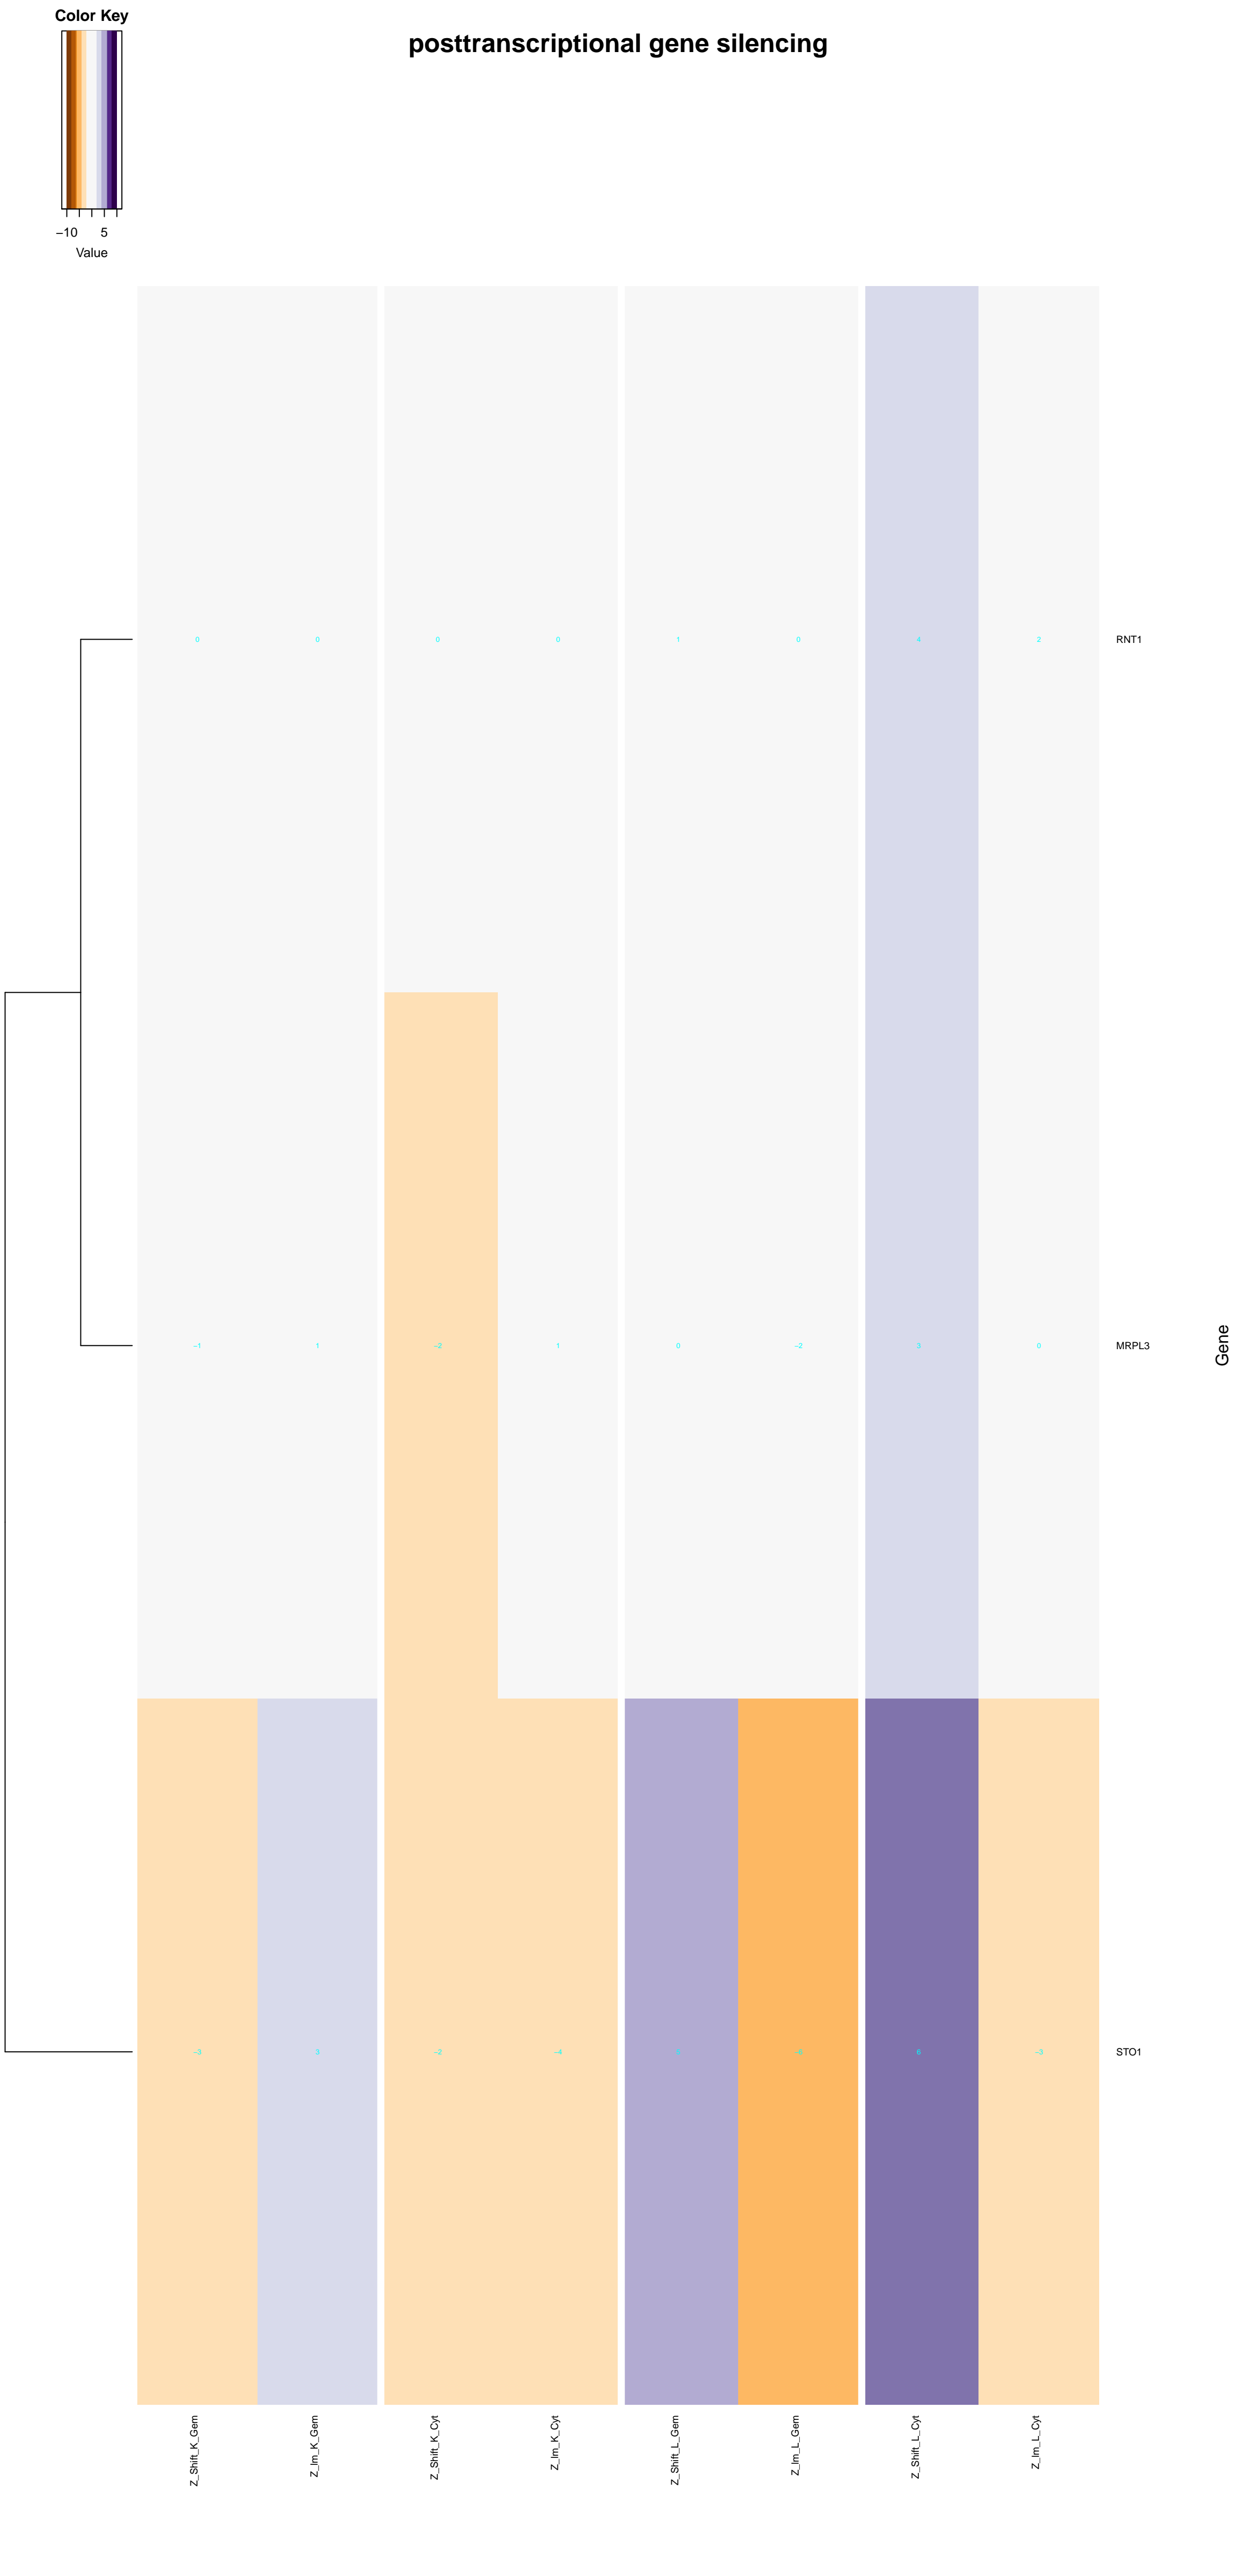

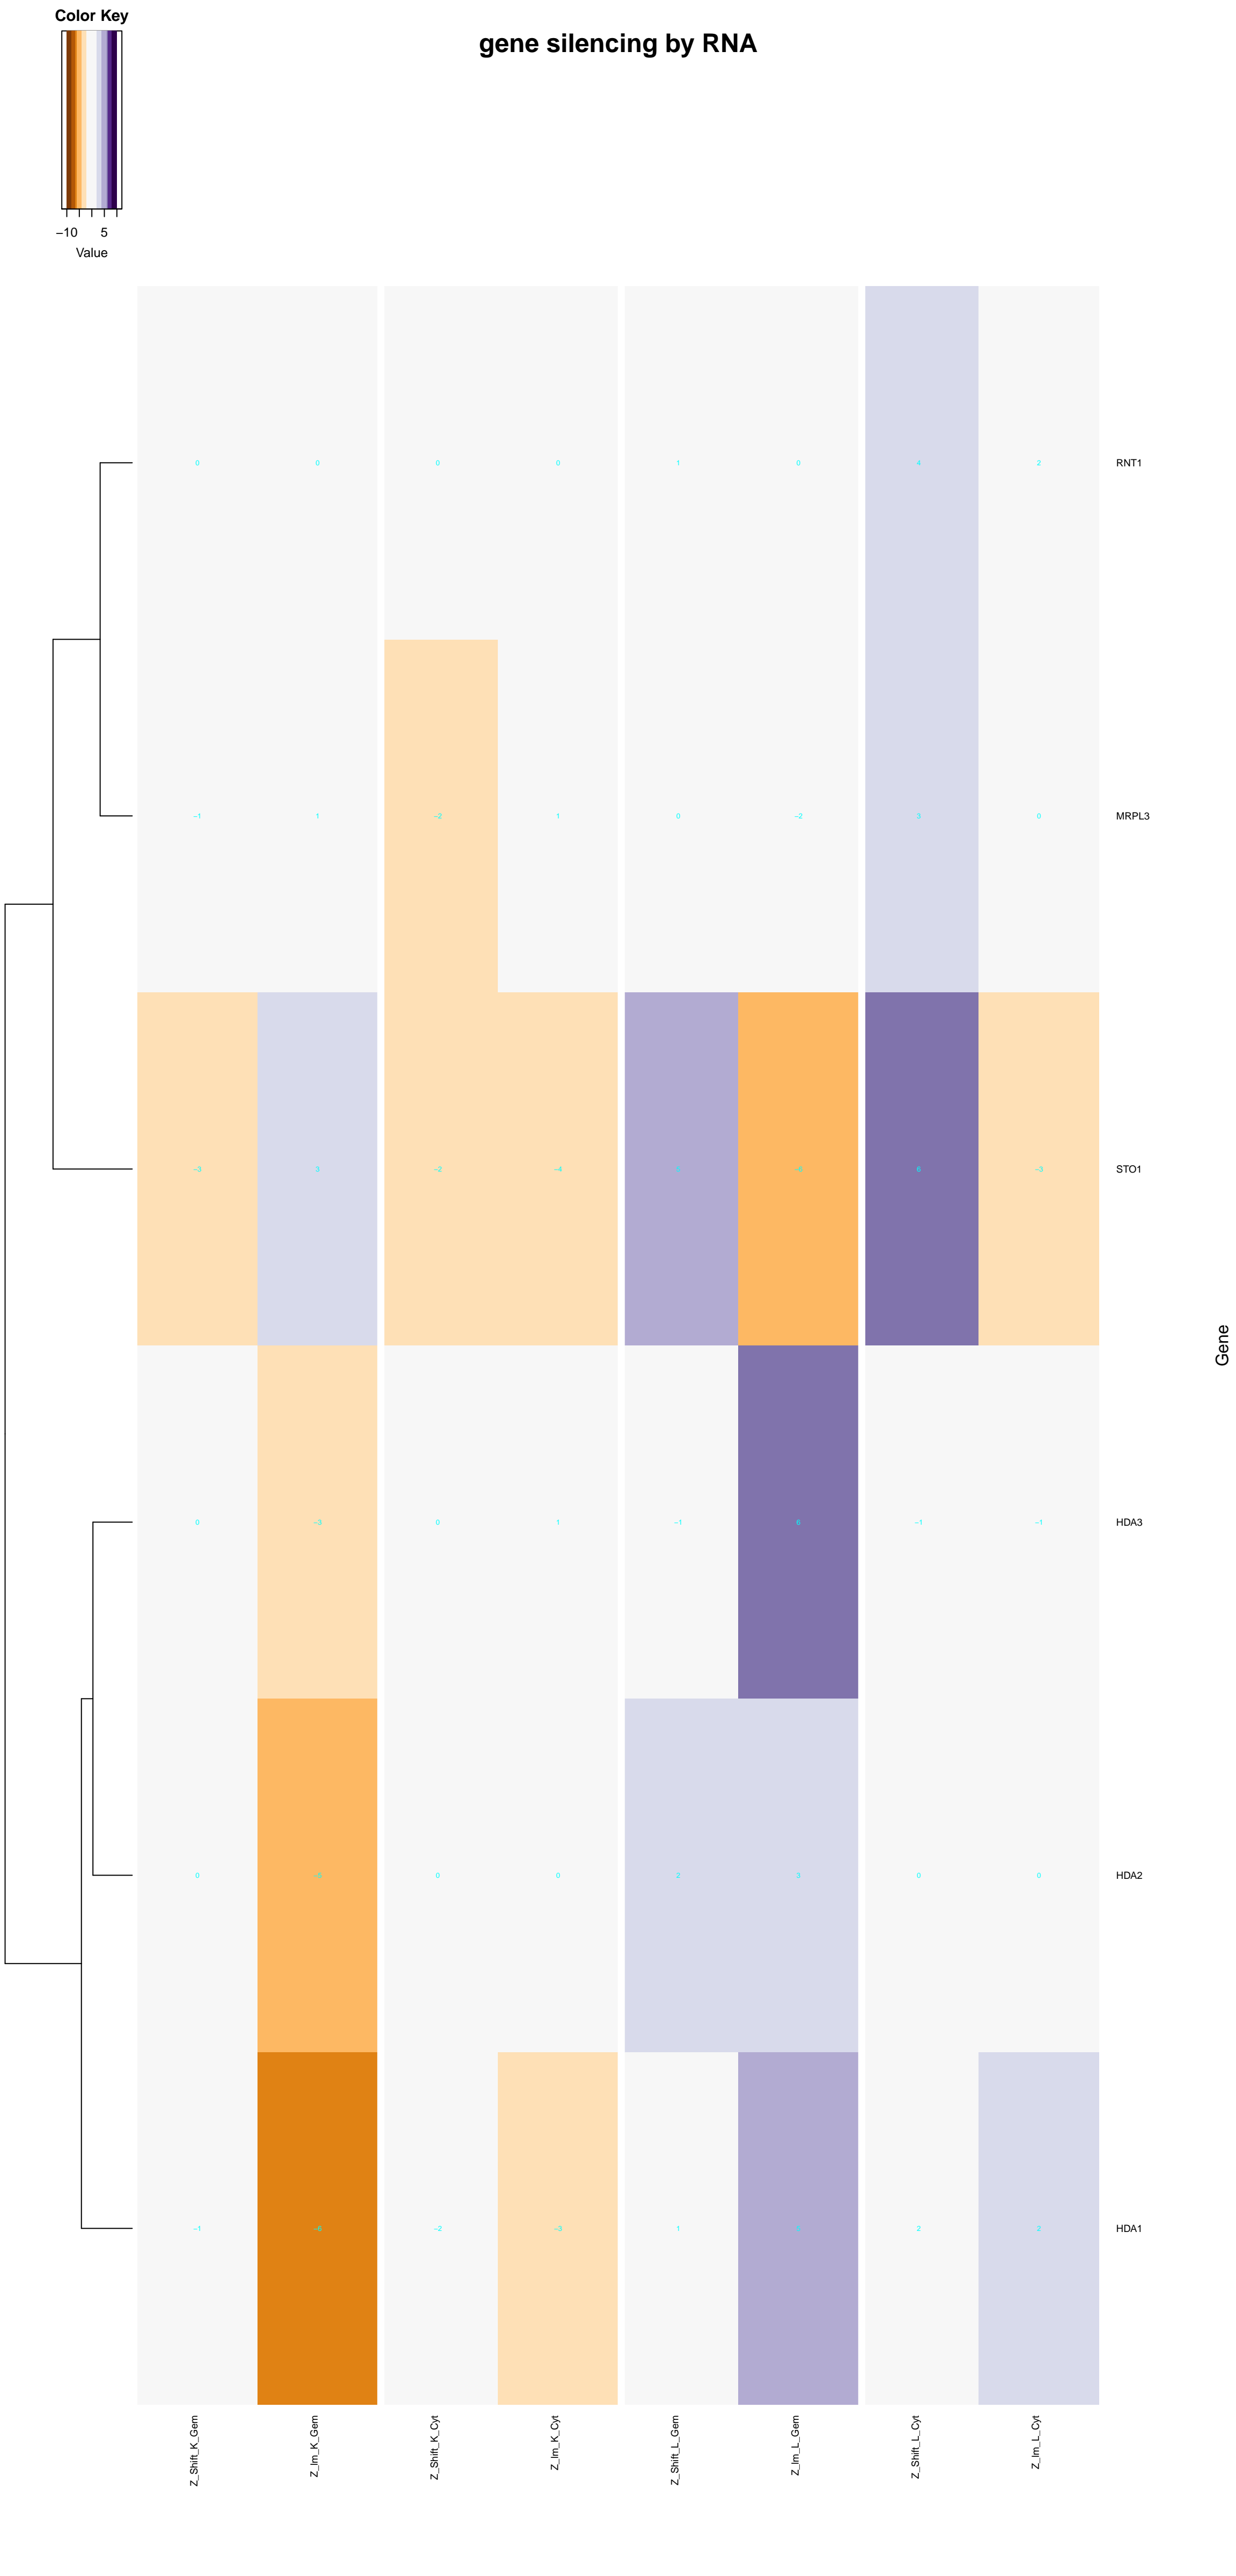

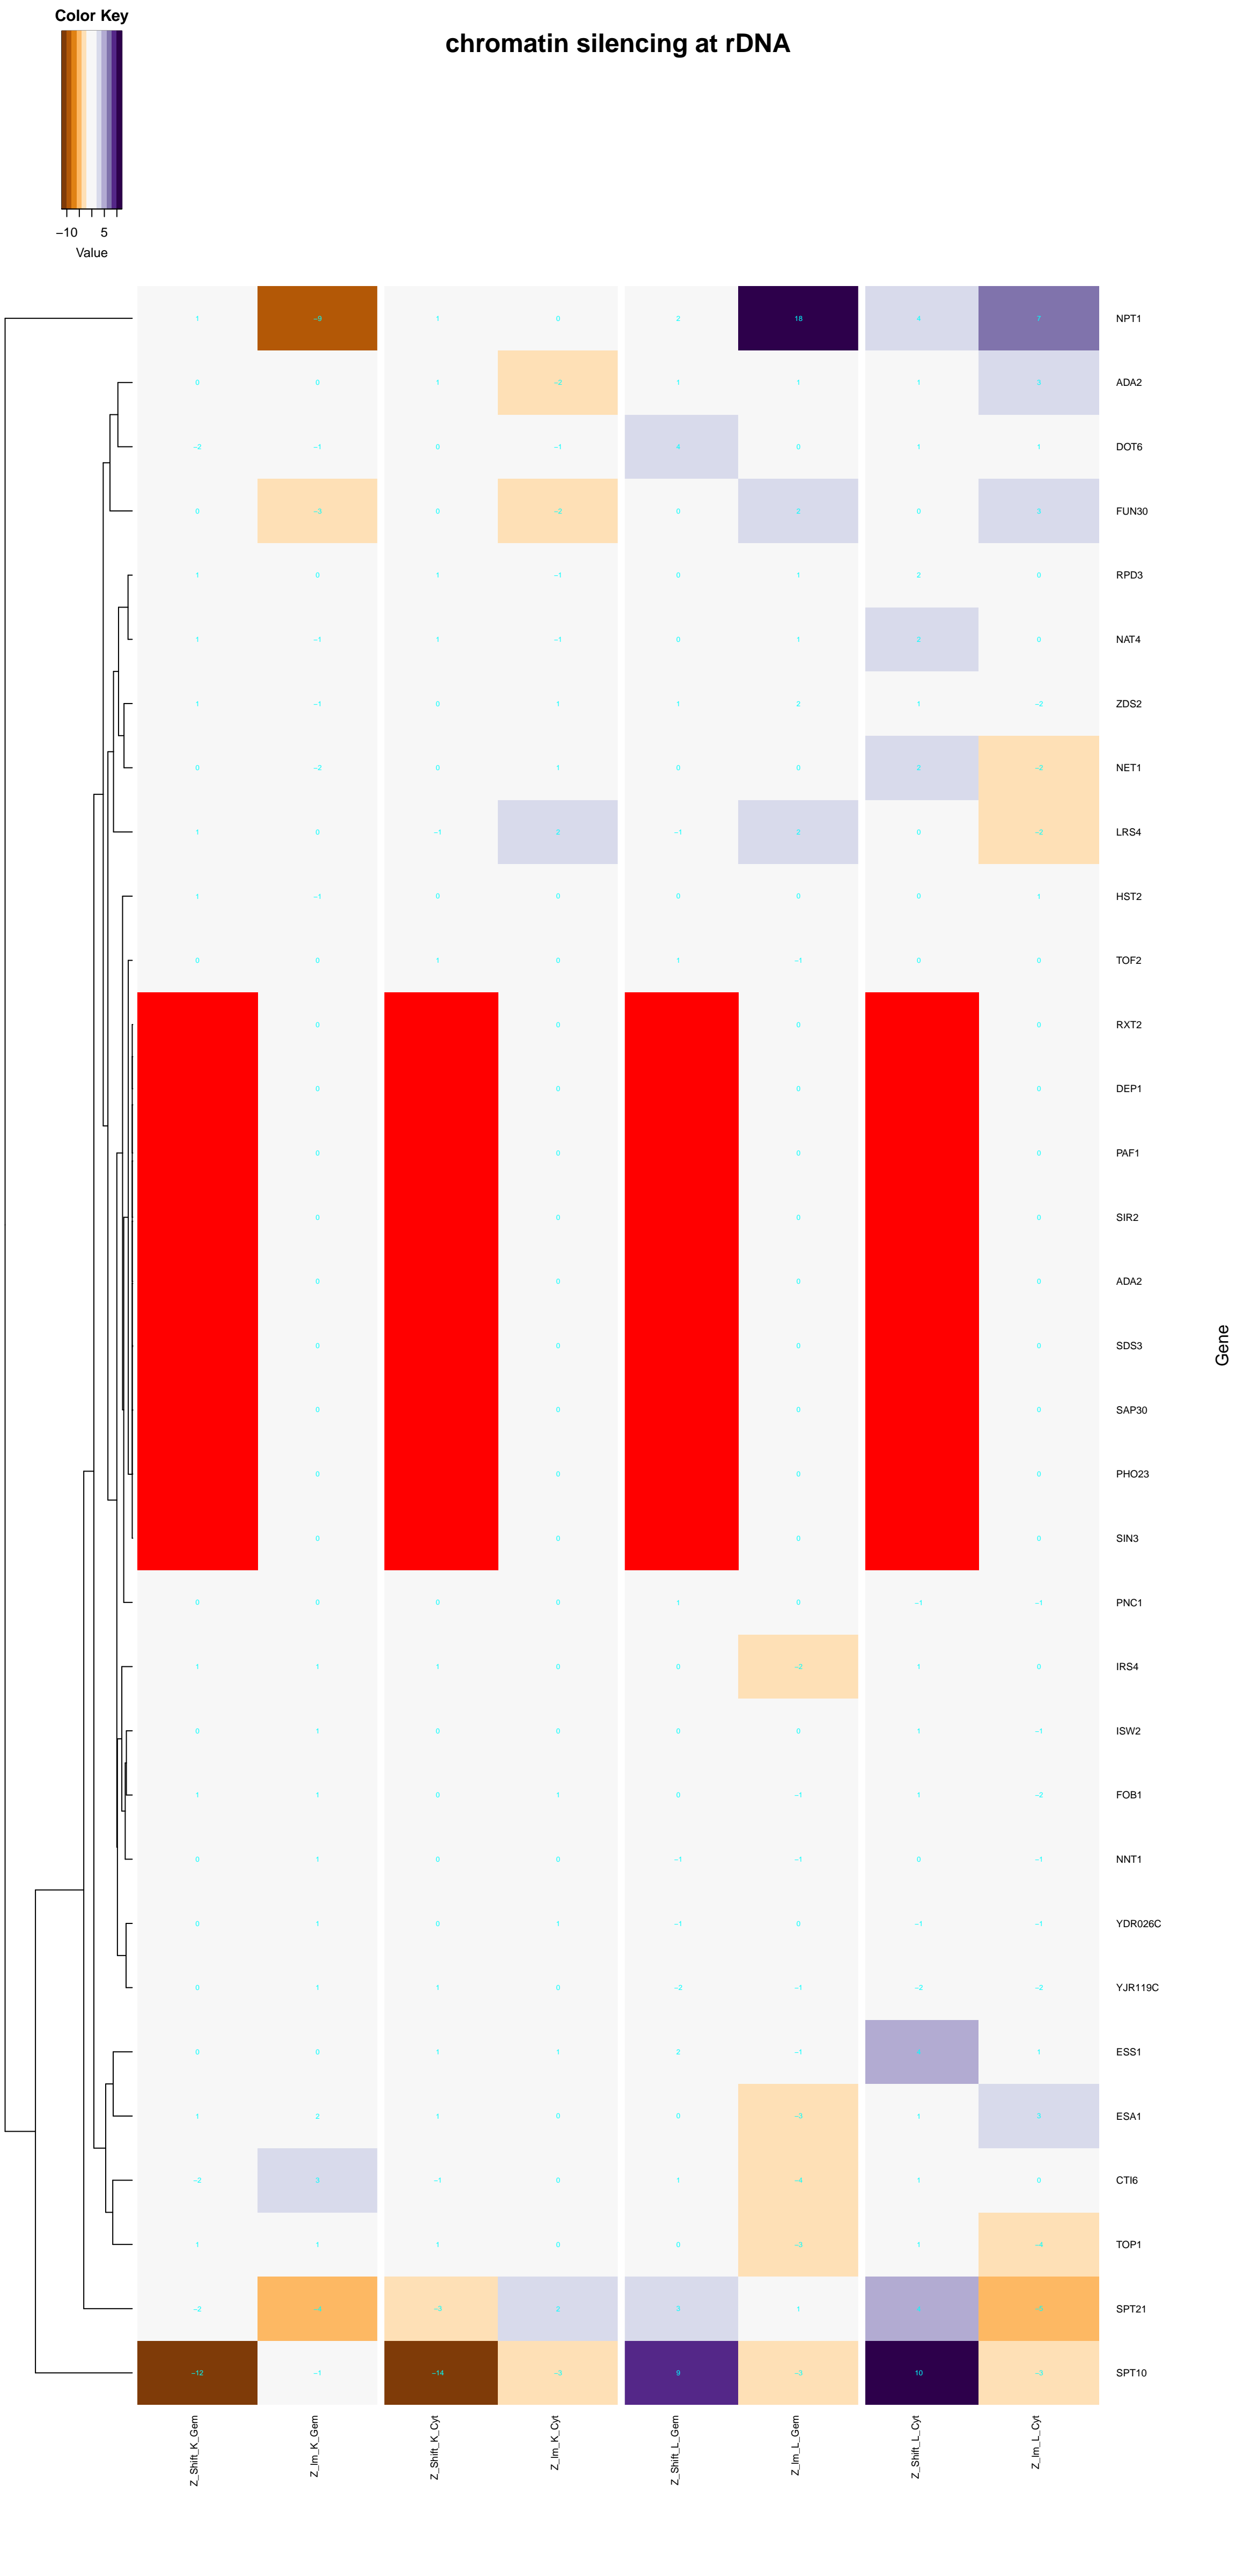

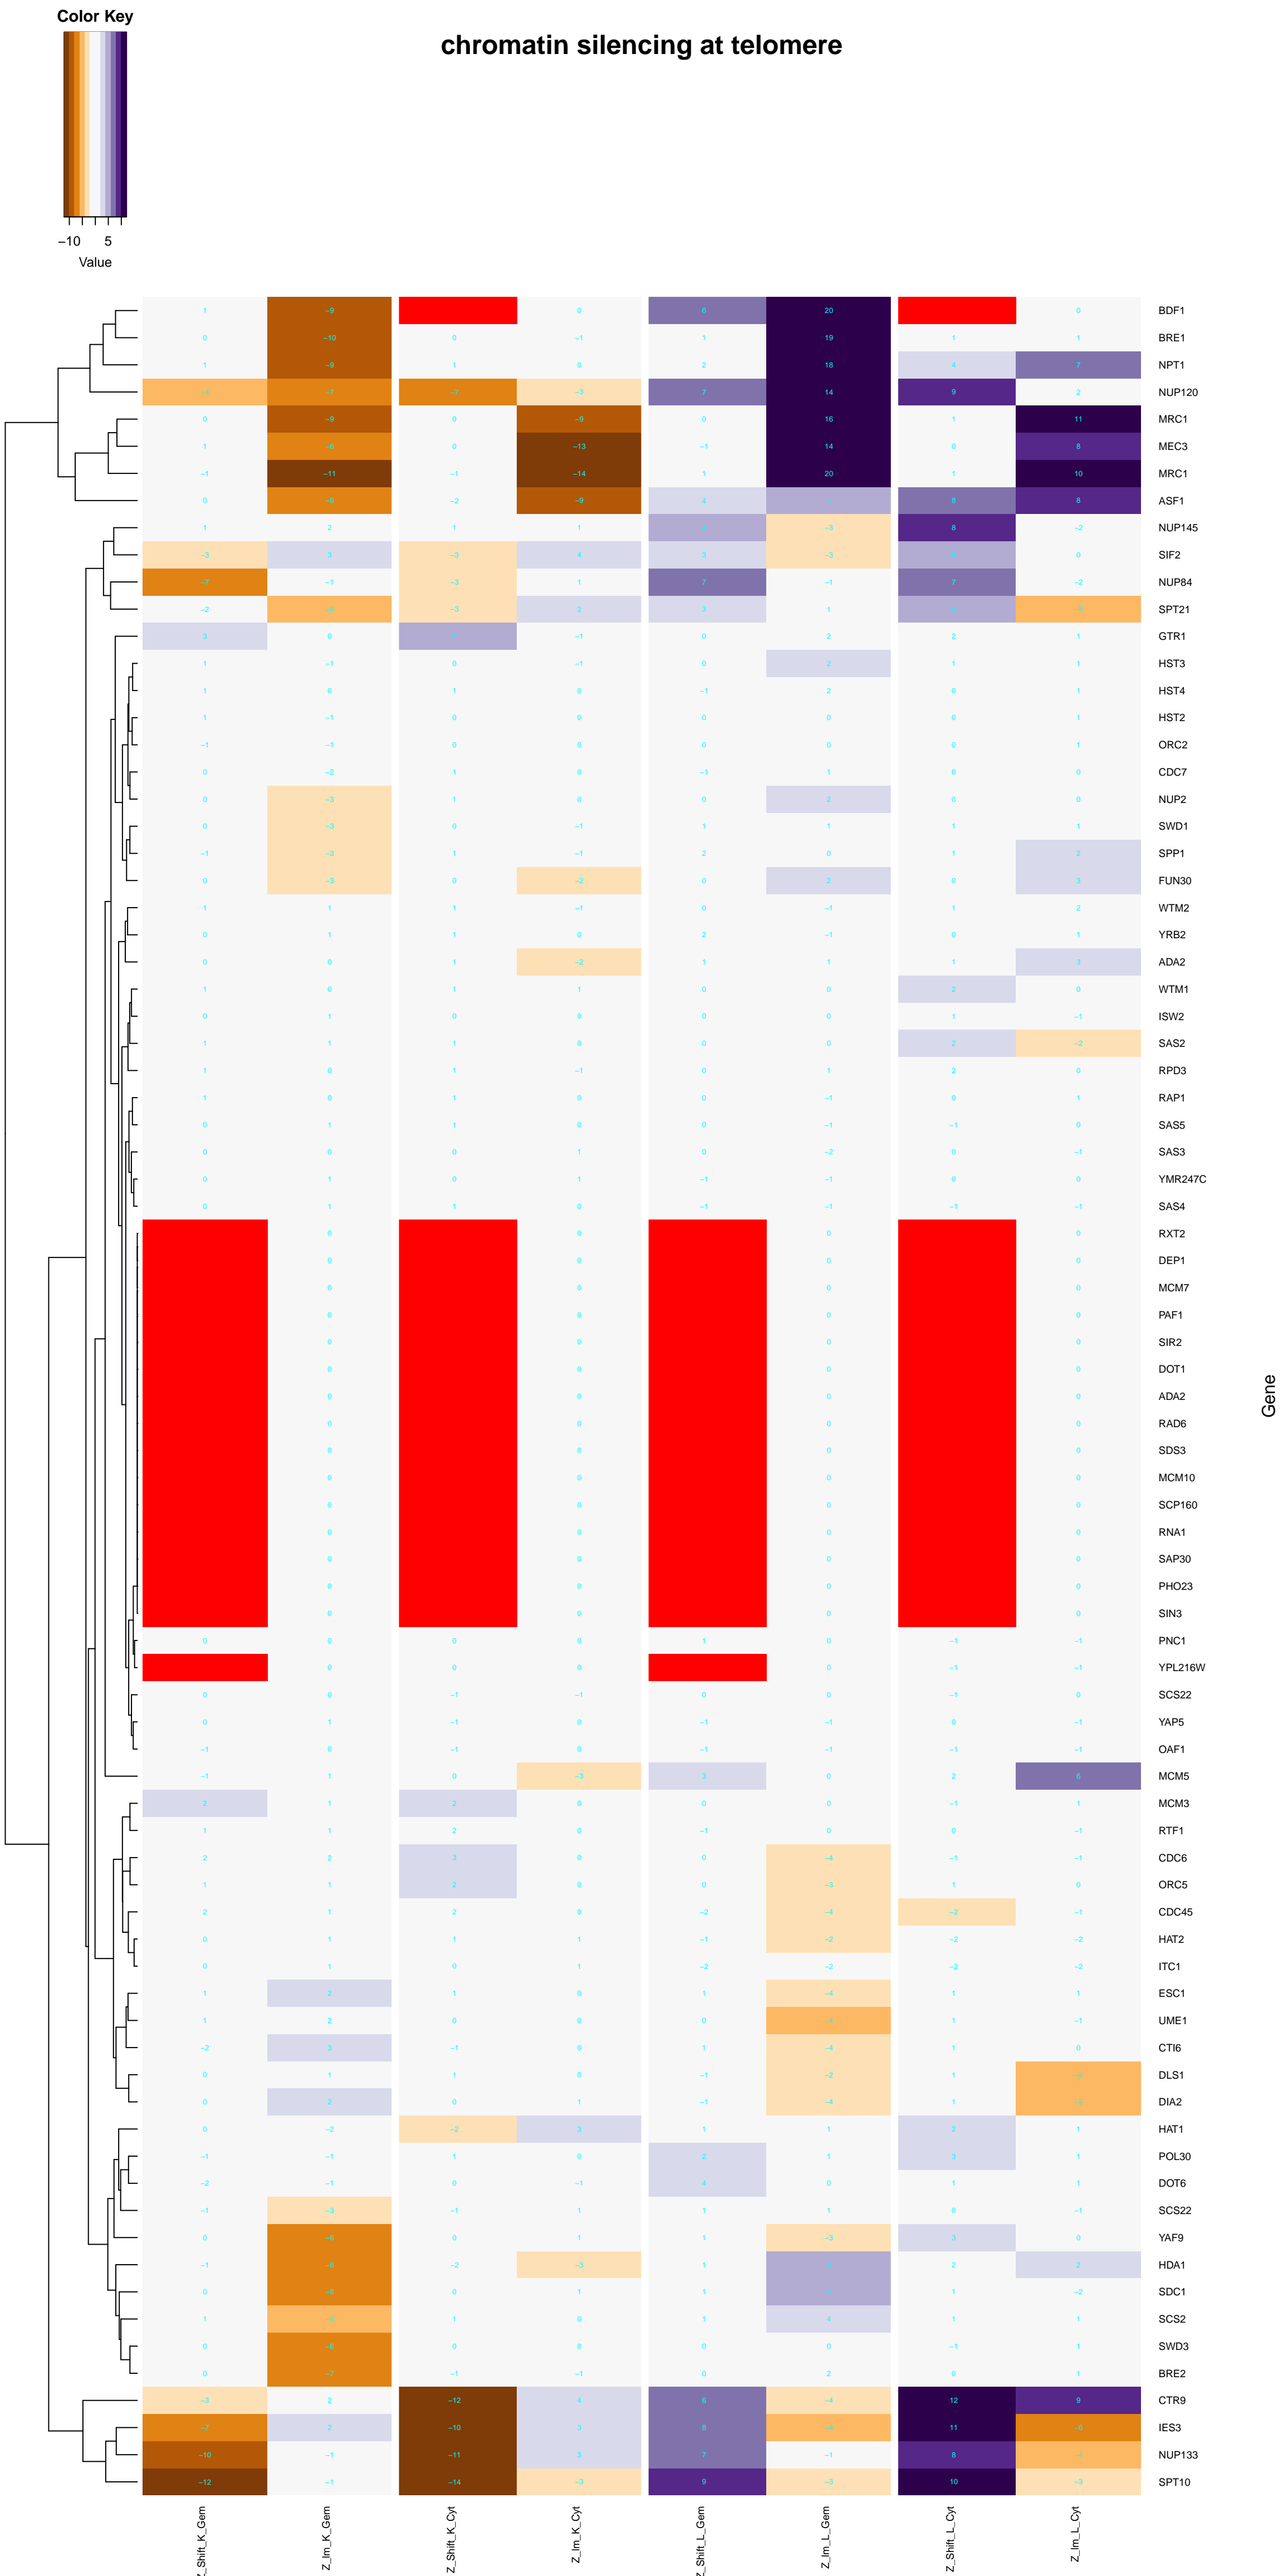

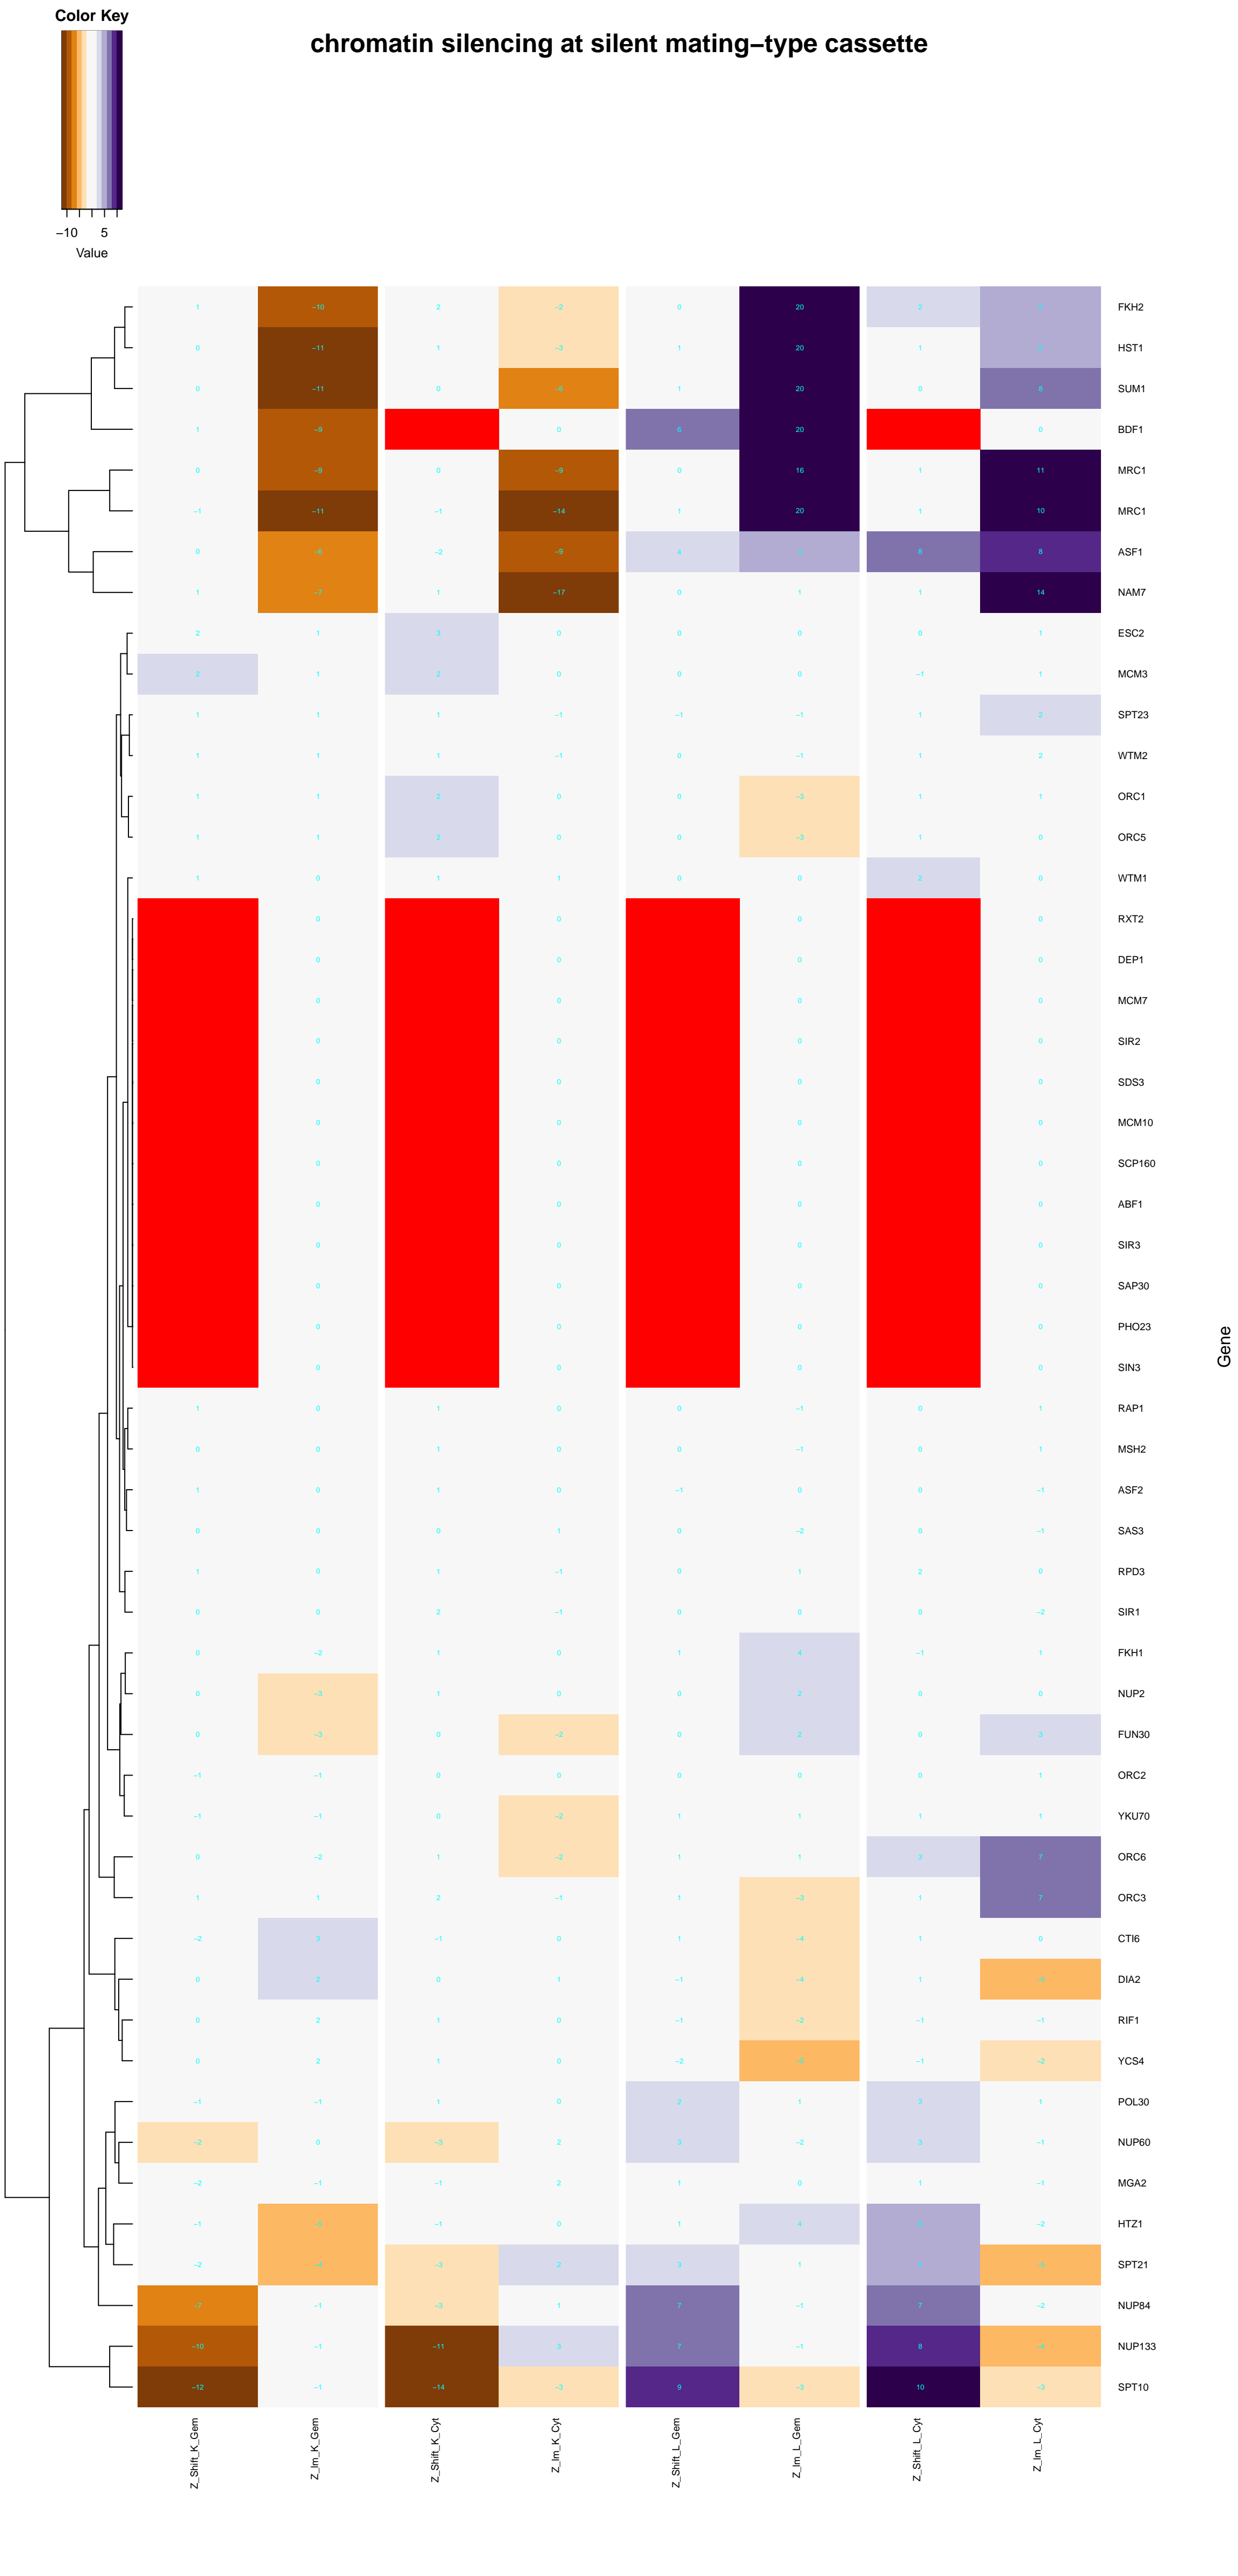

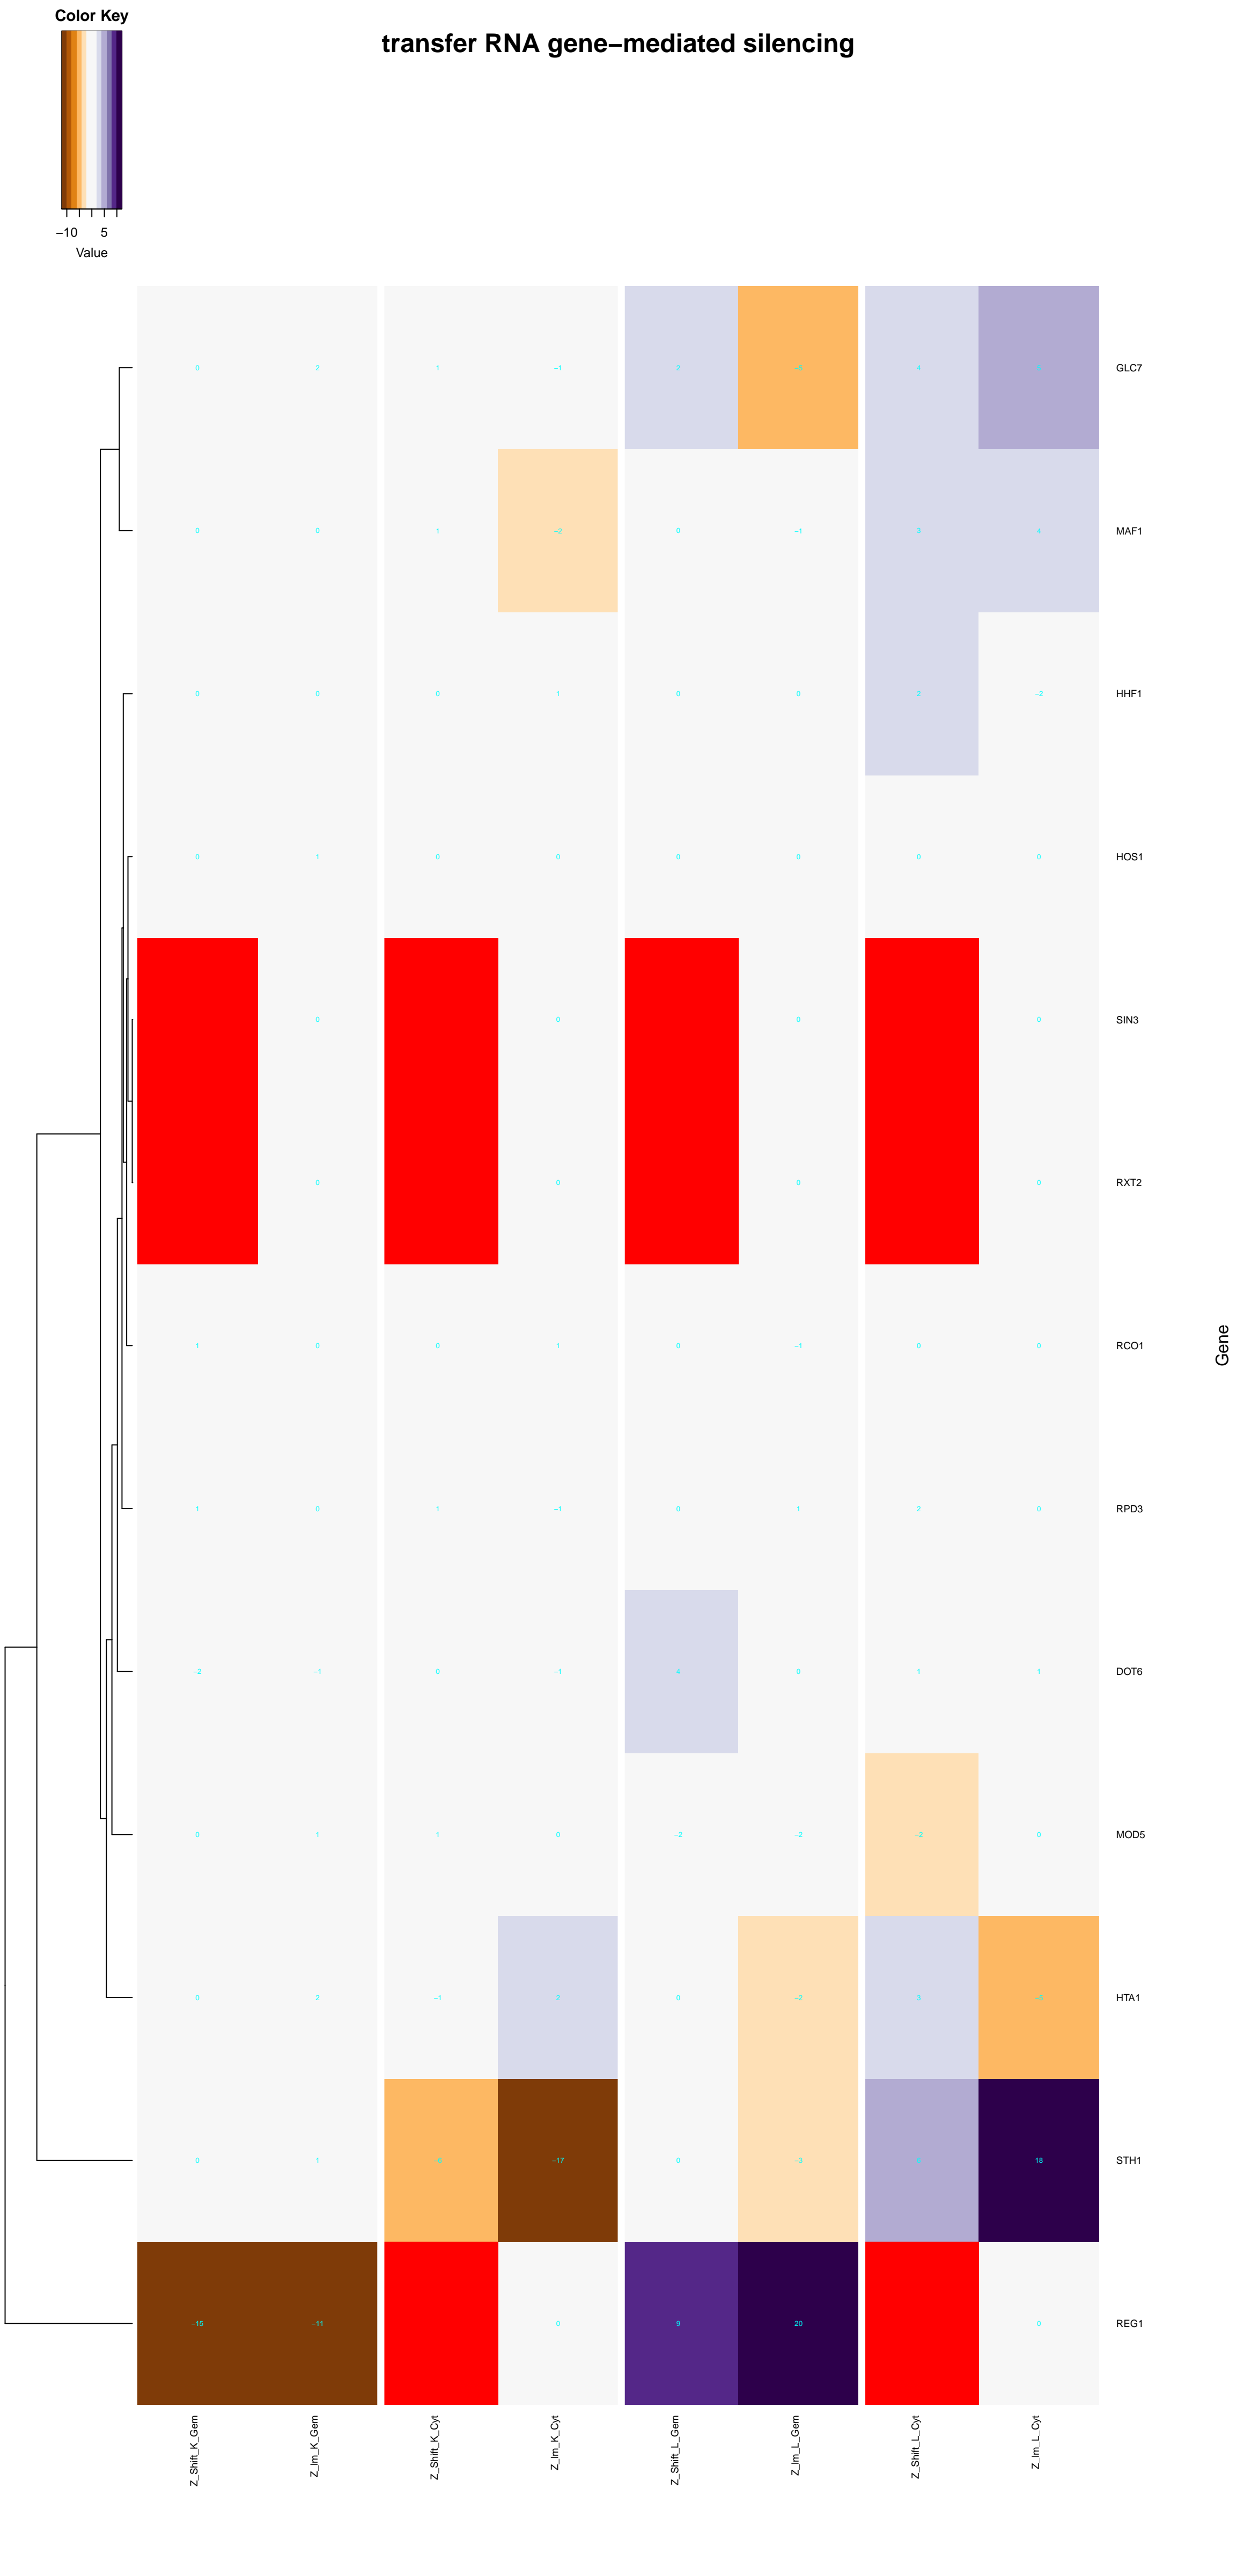

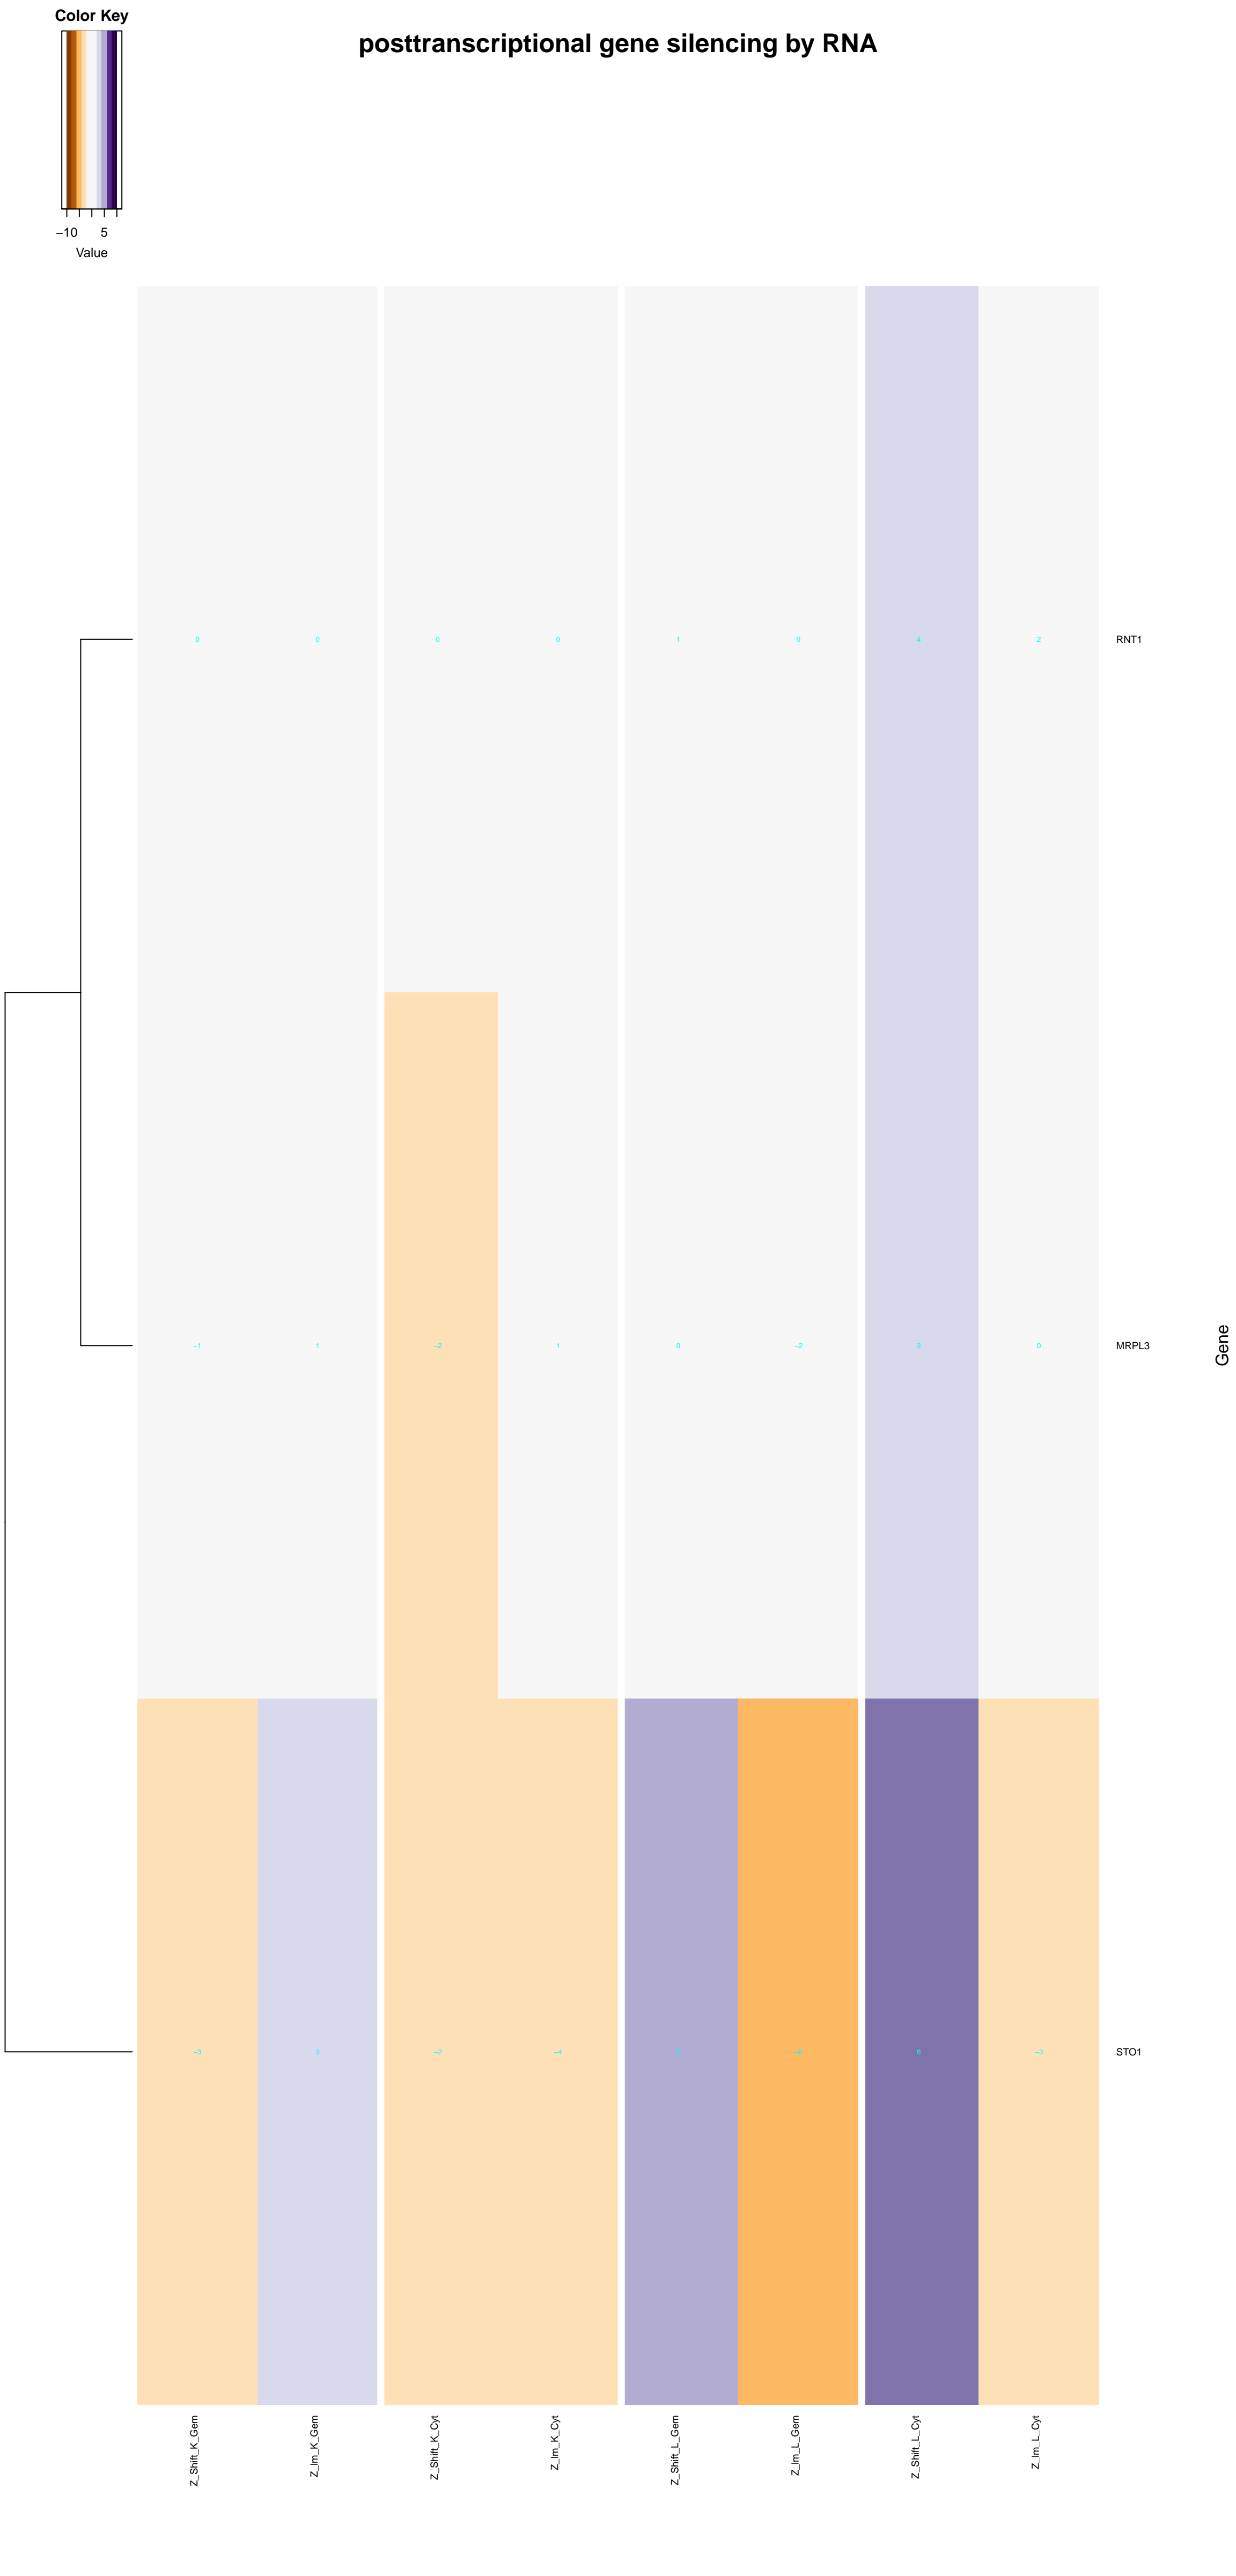

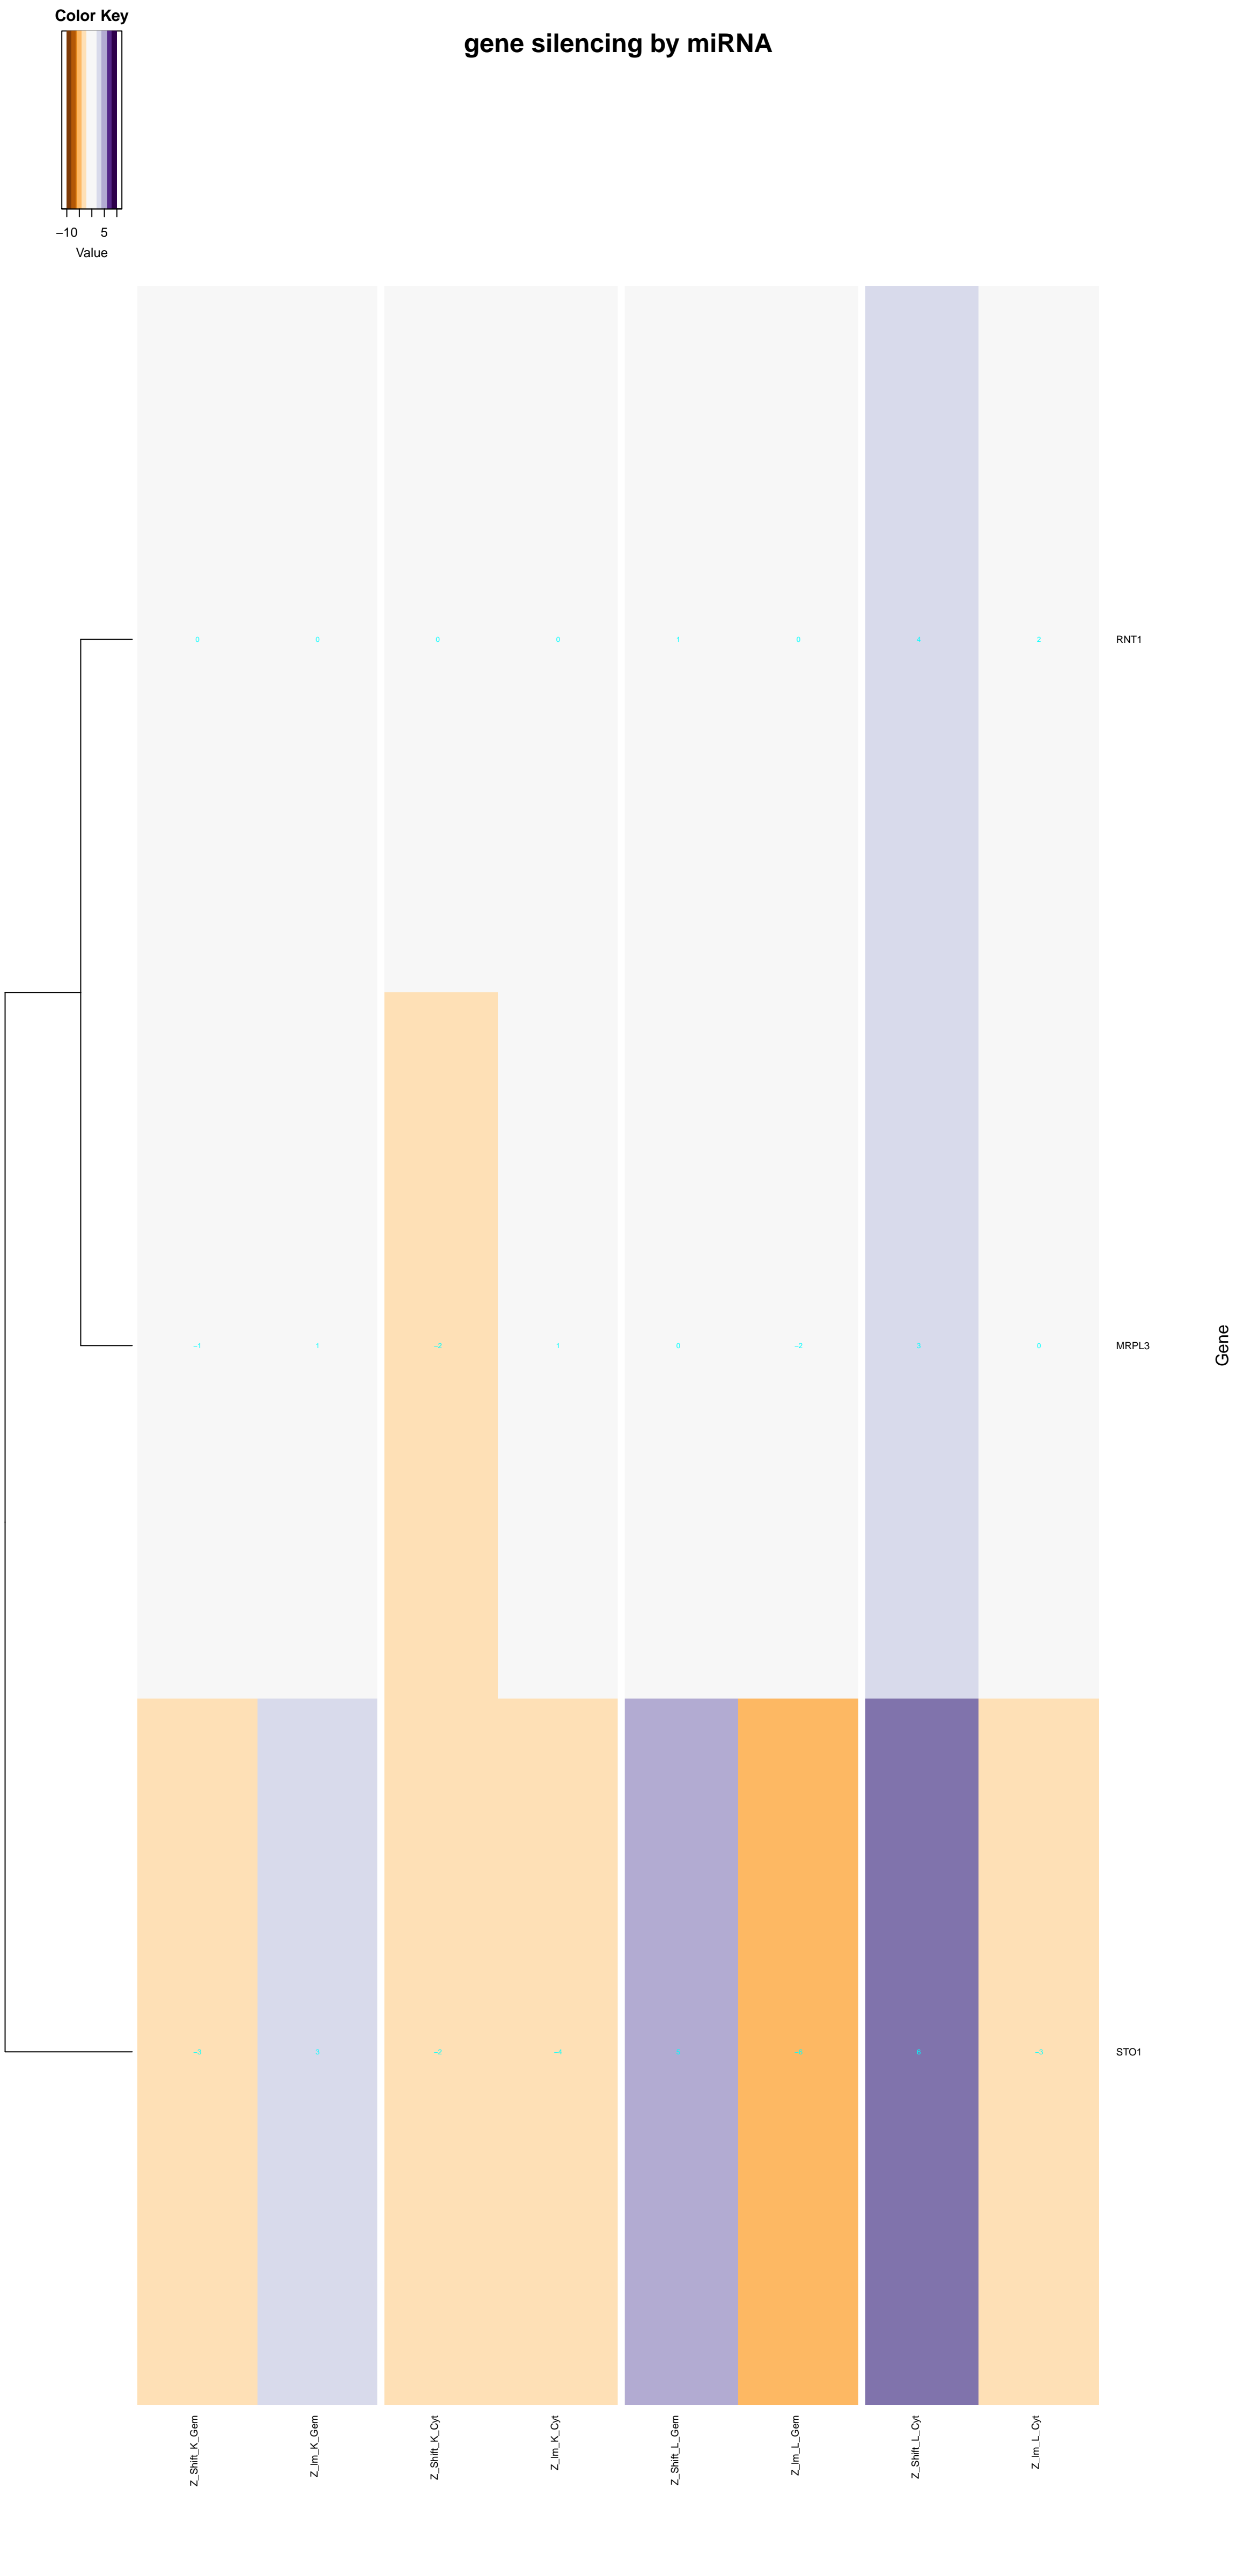

Supplement: s1 [file s1]

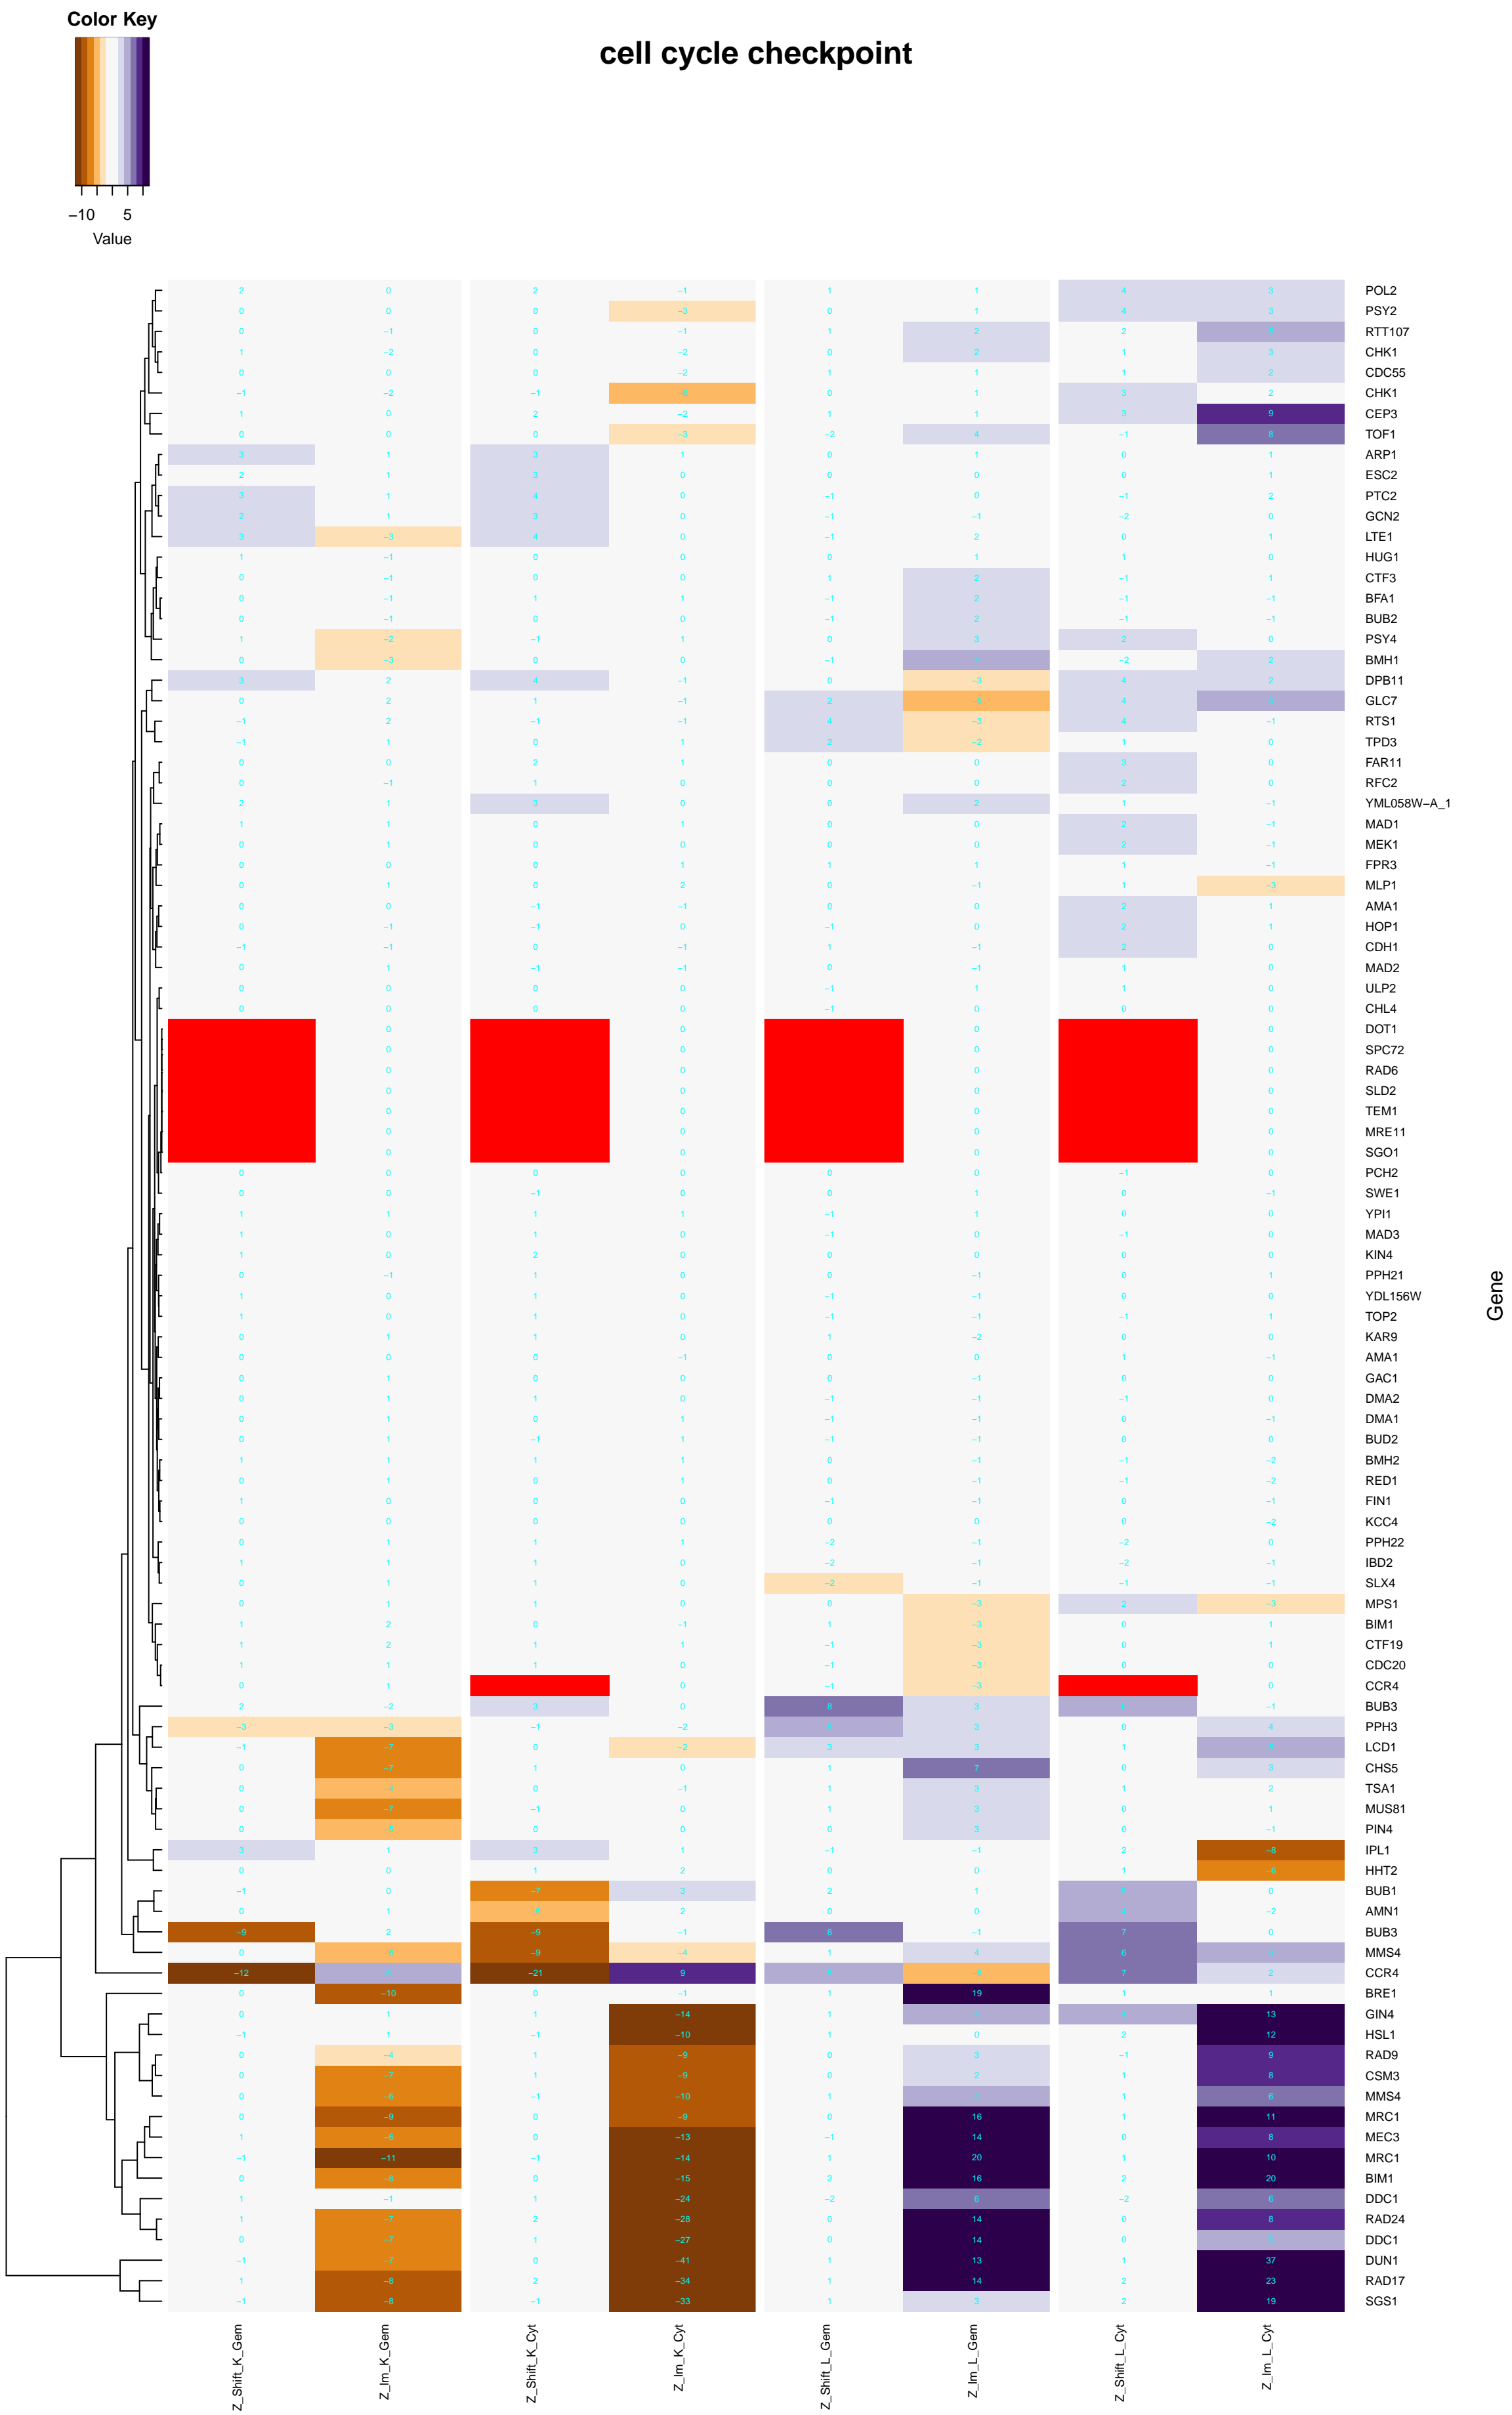

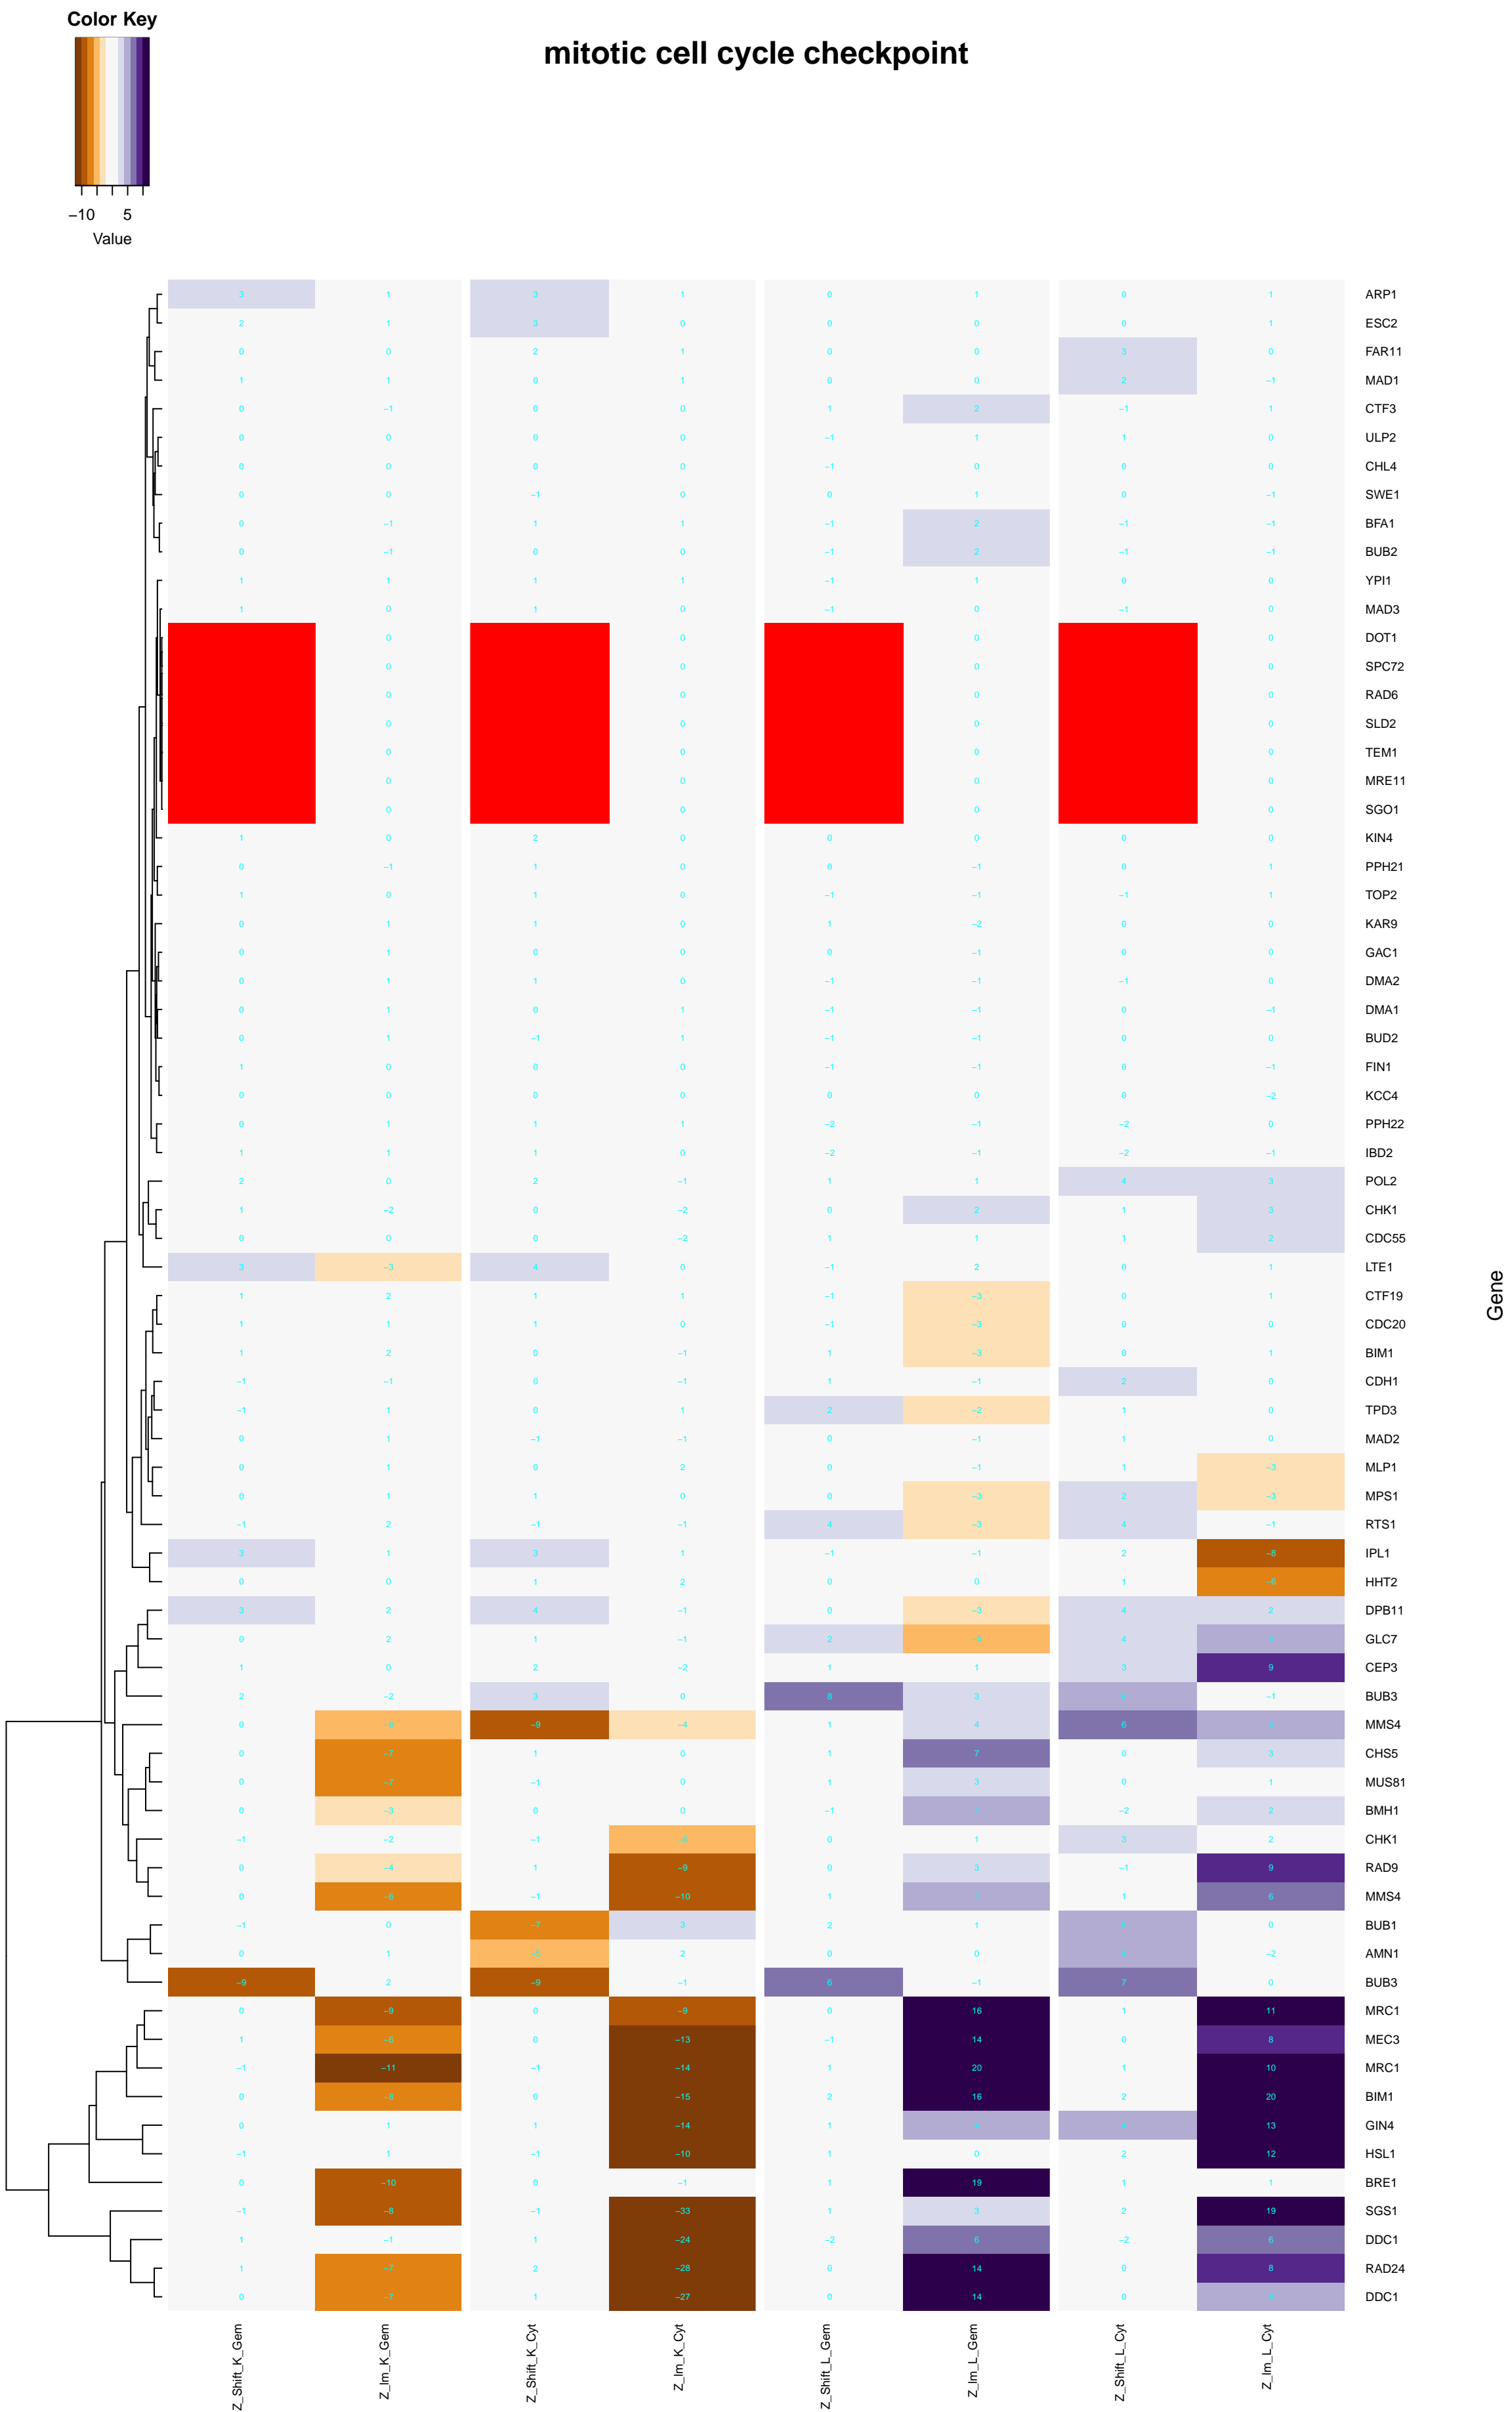

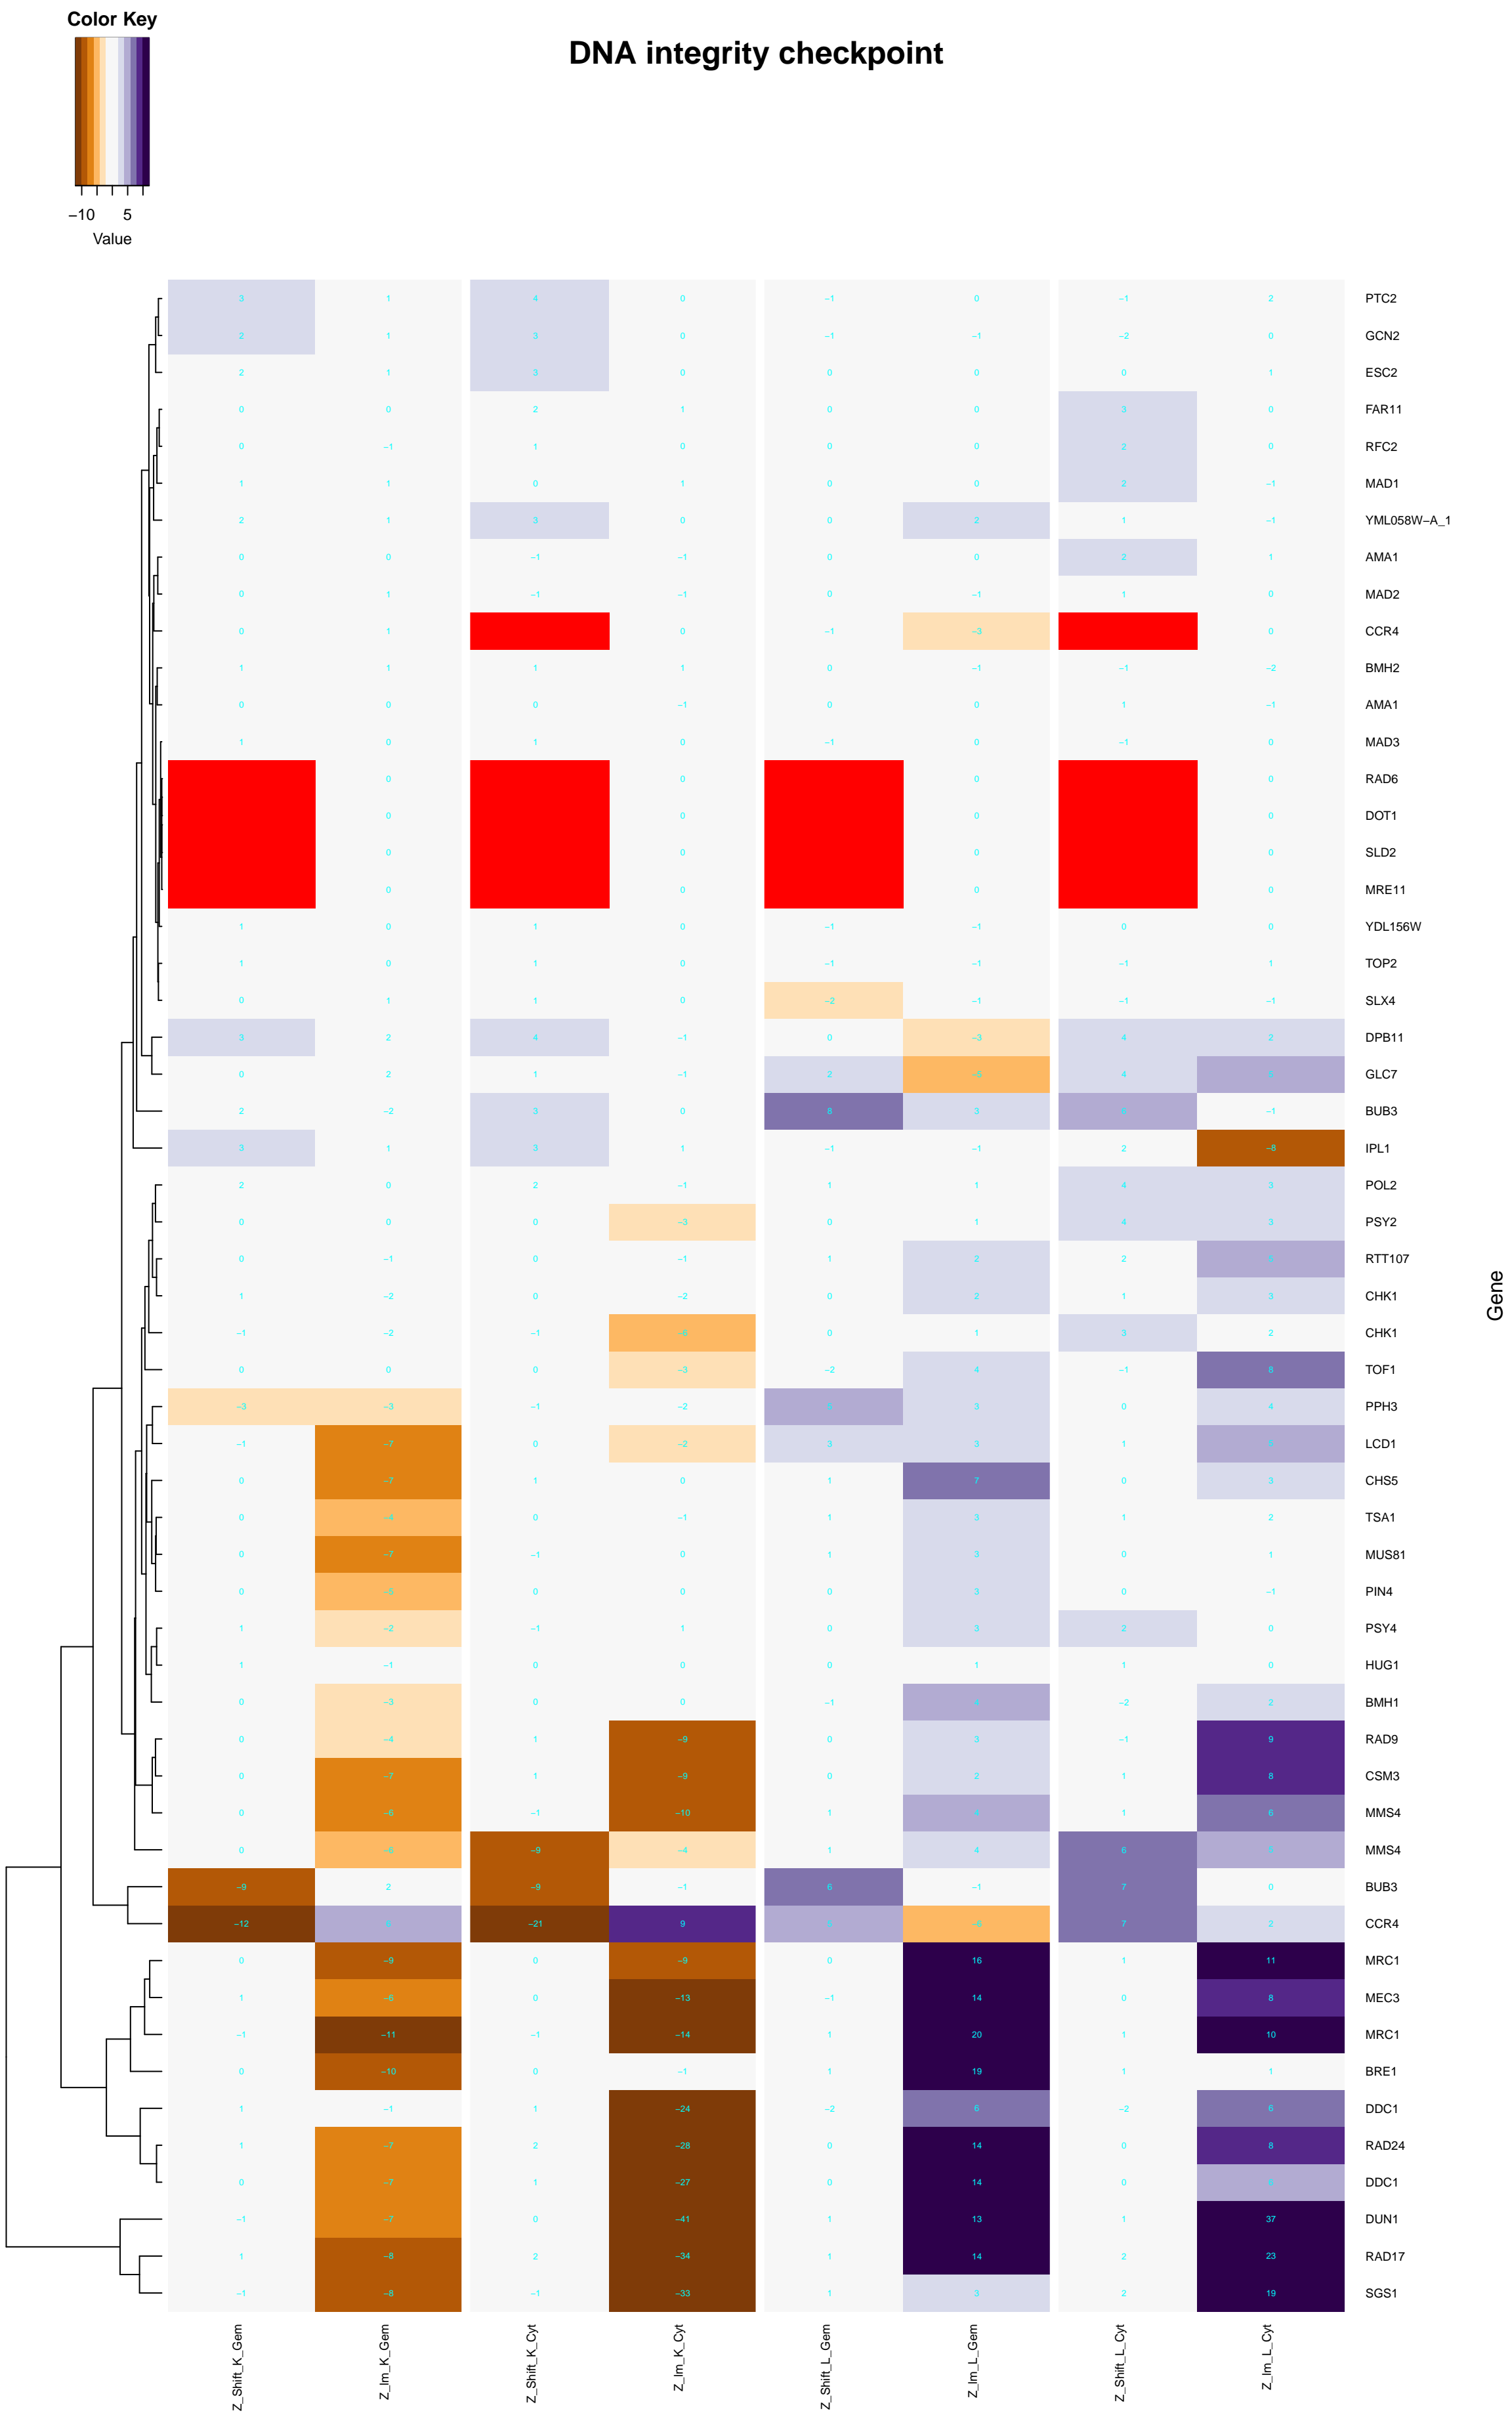

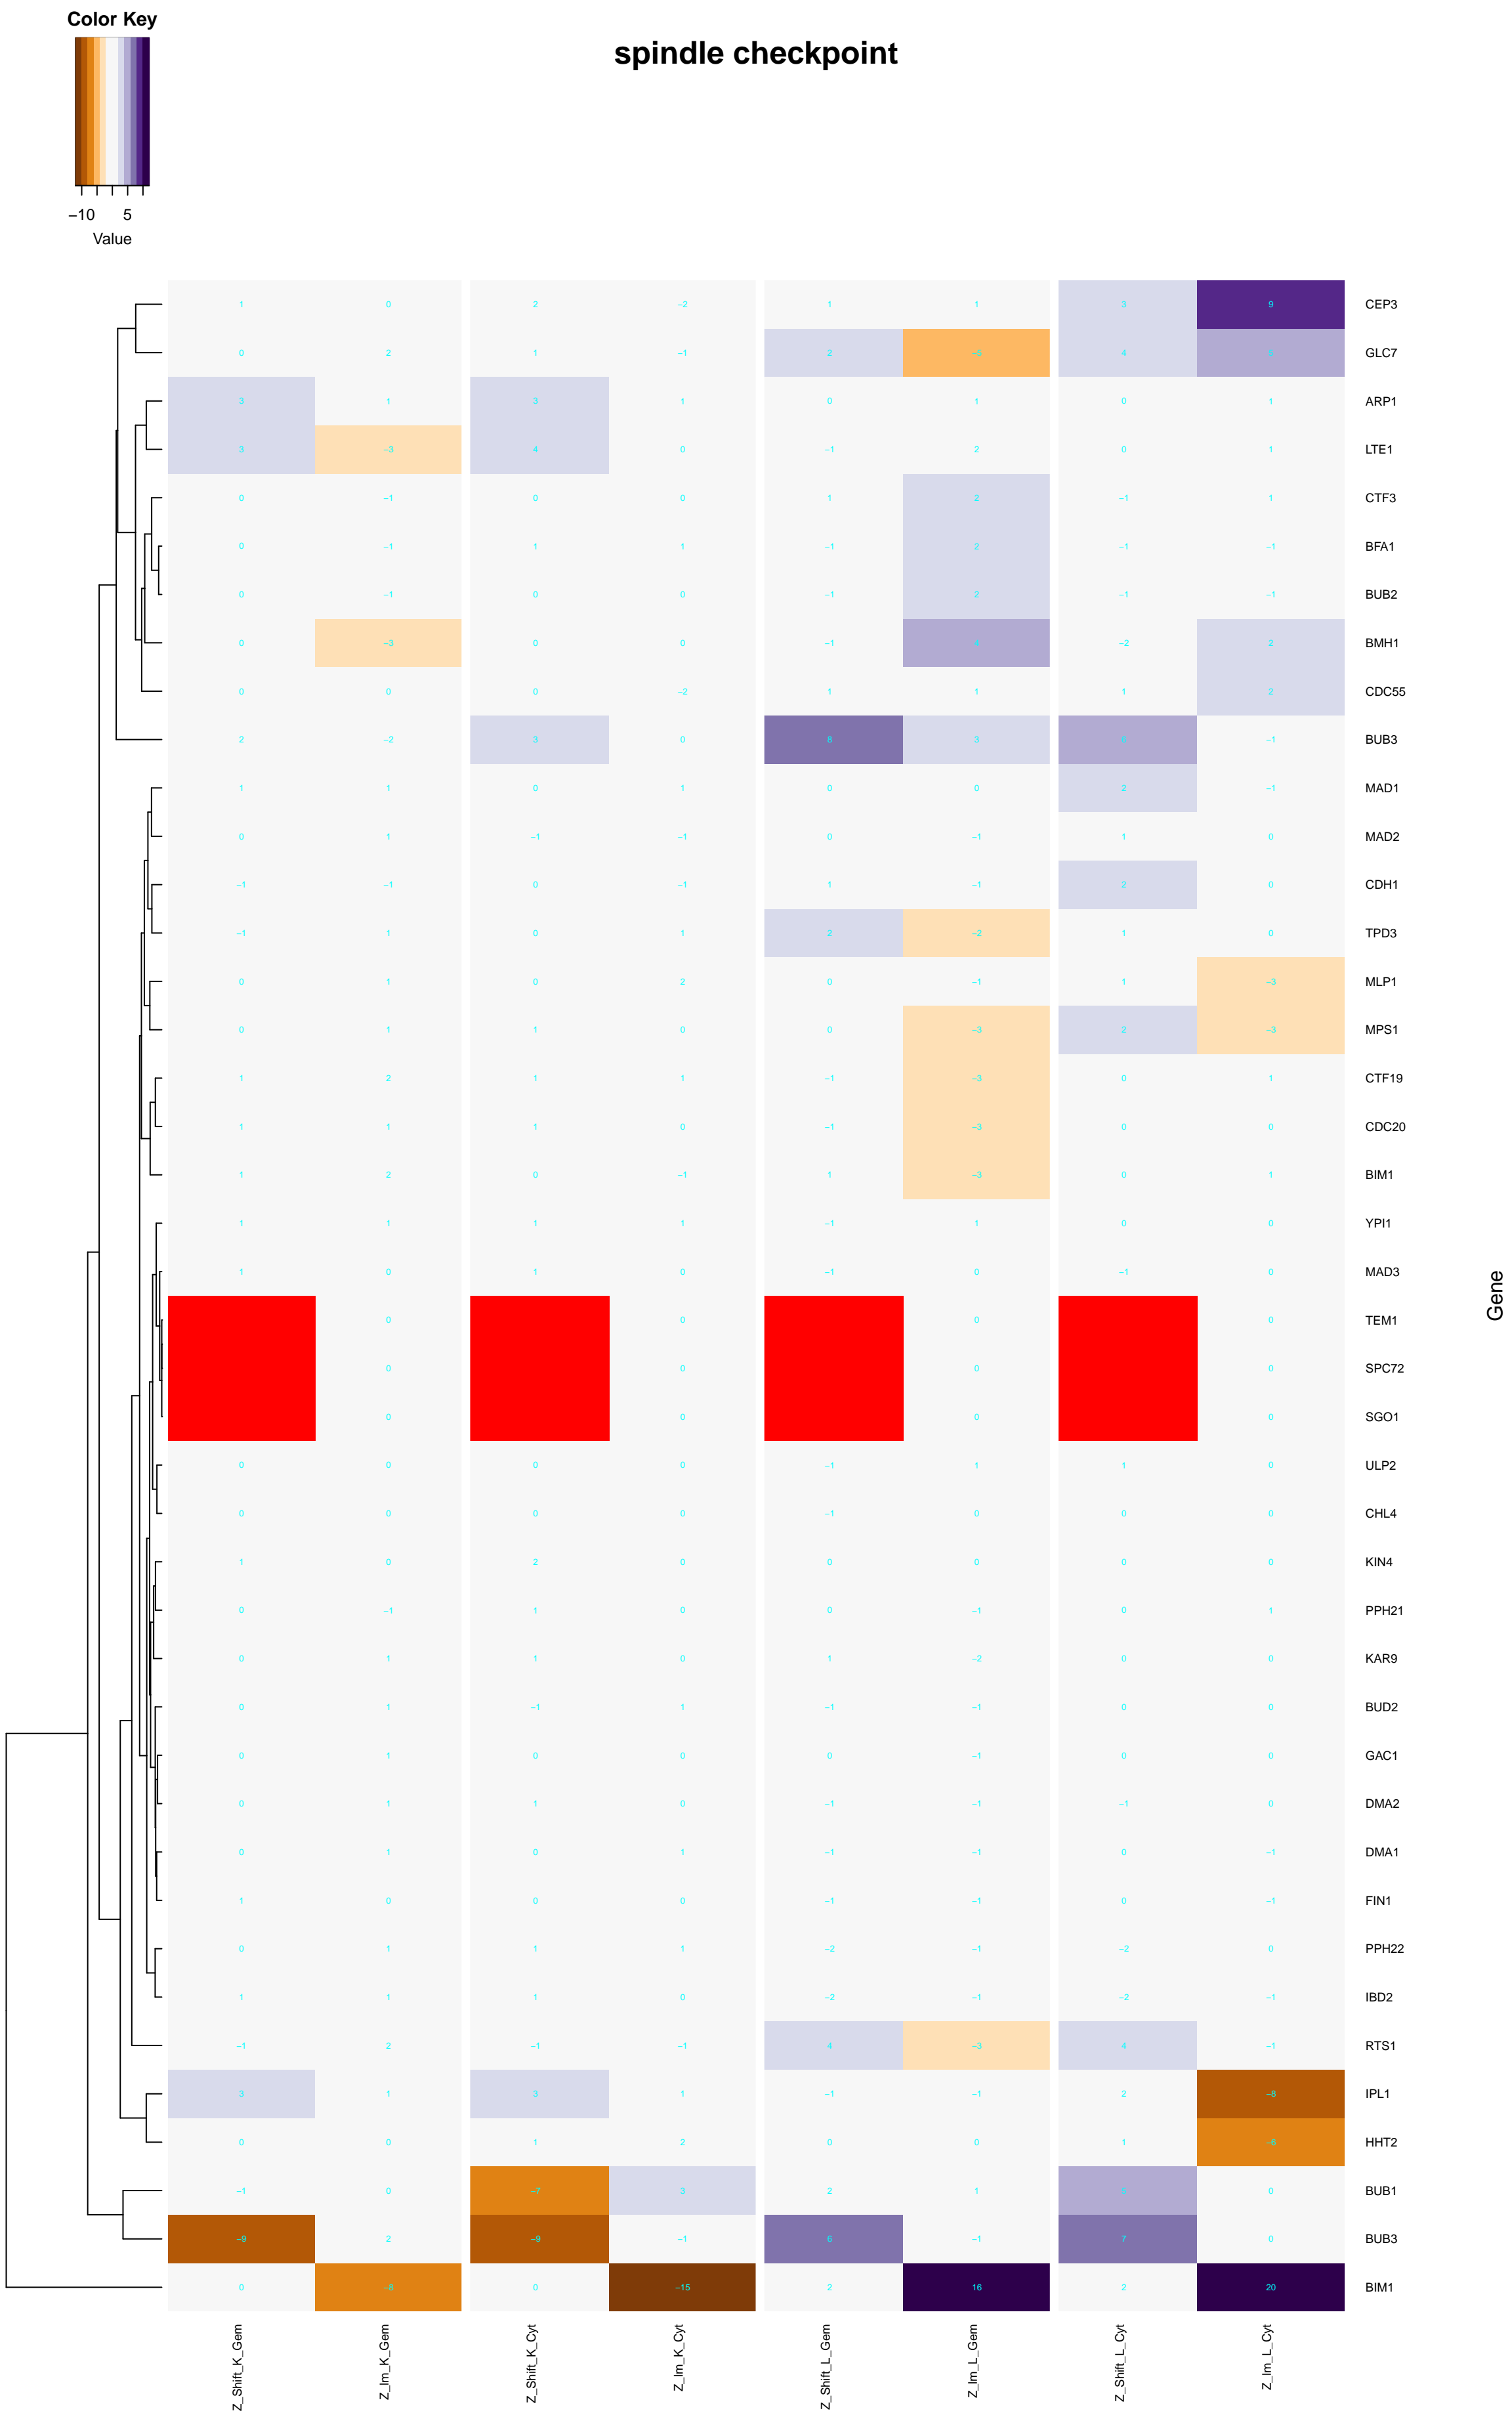

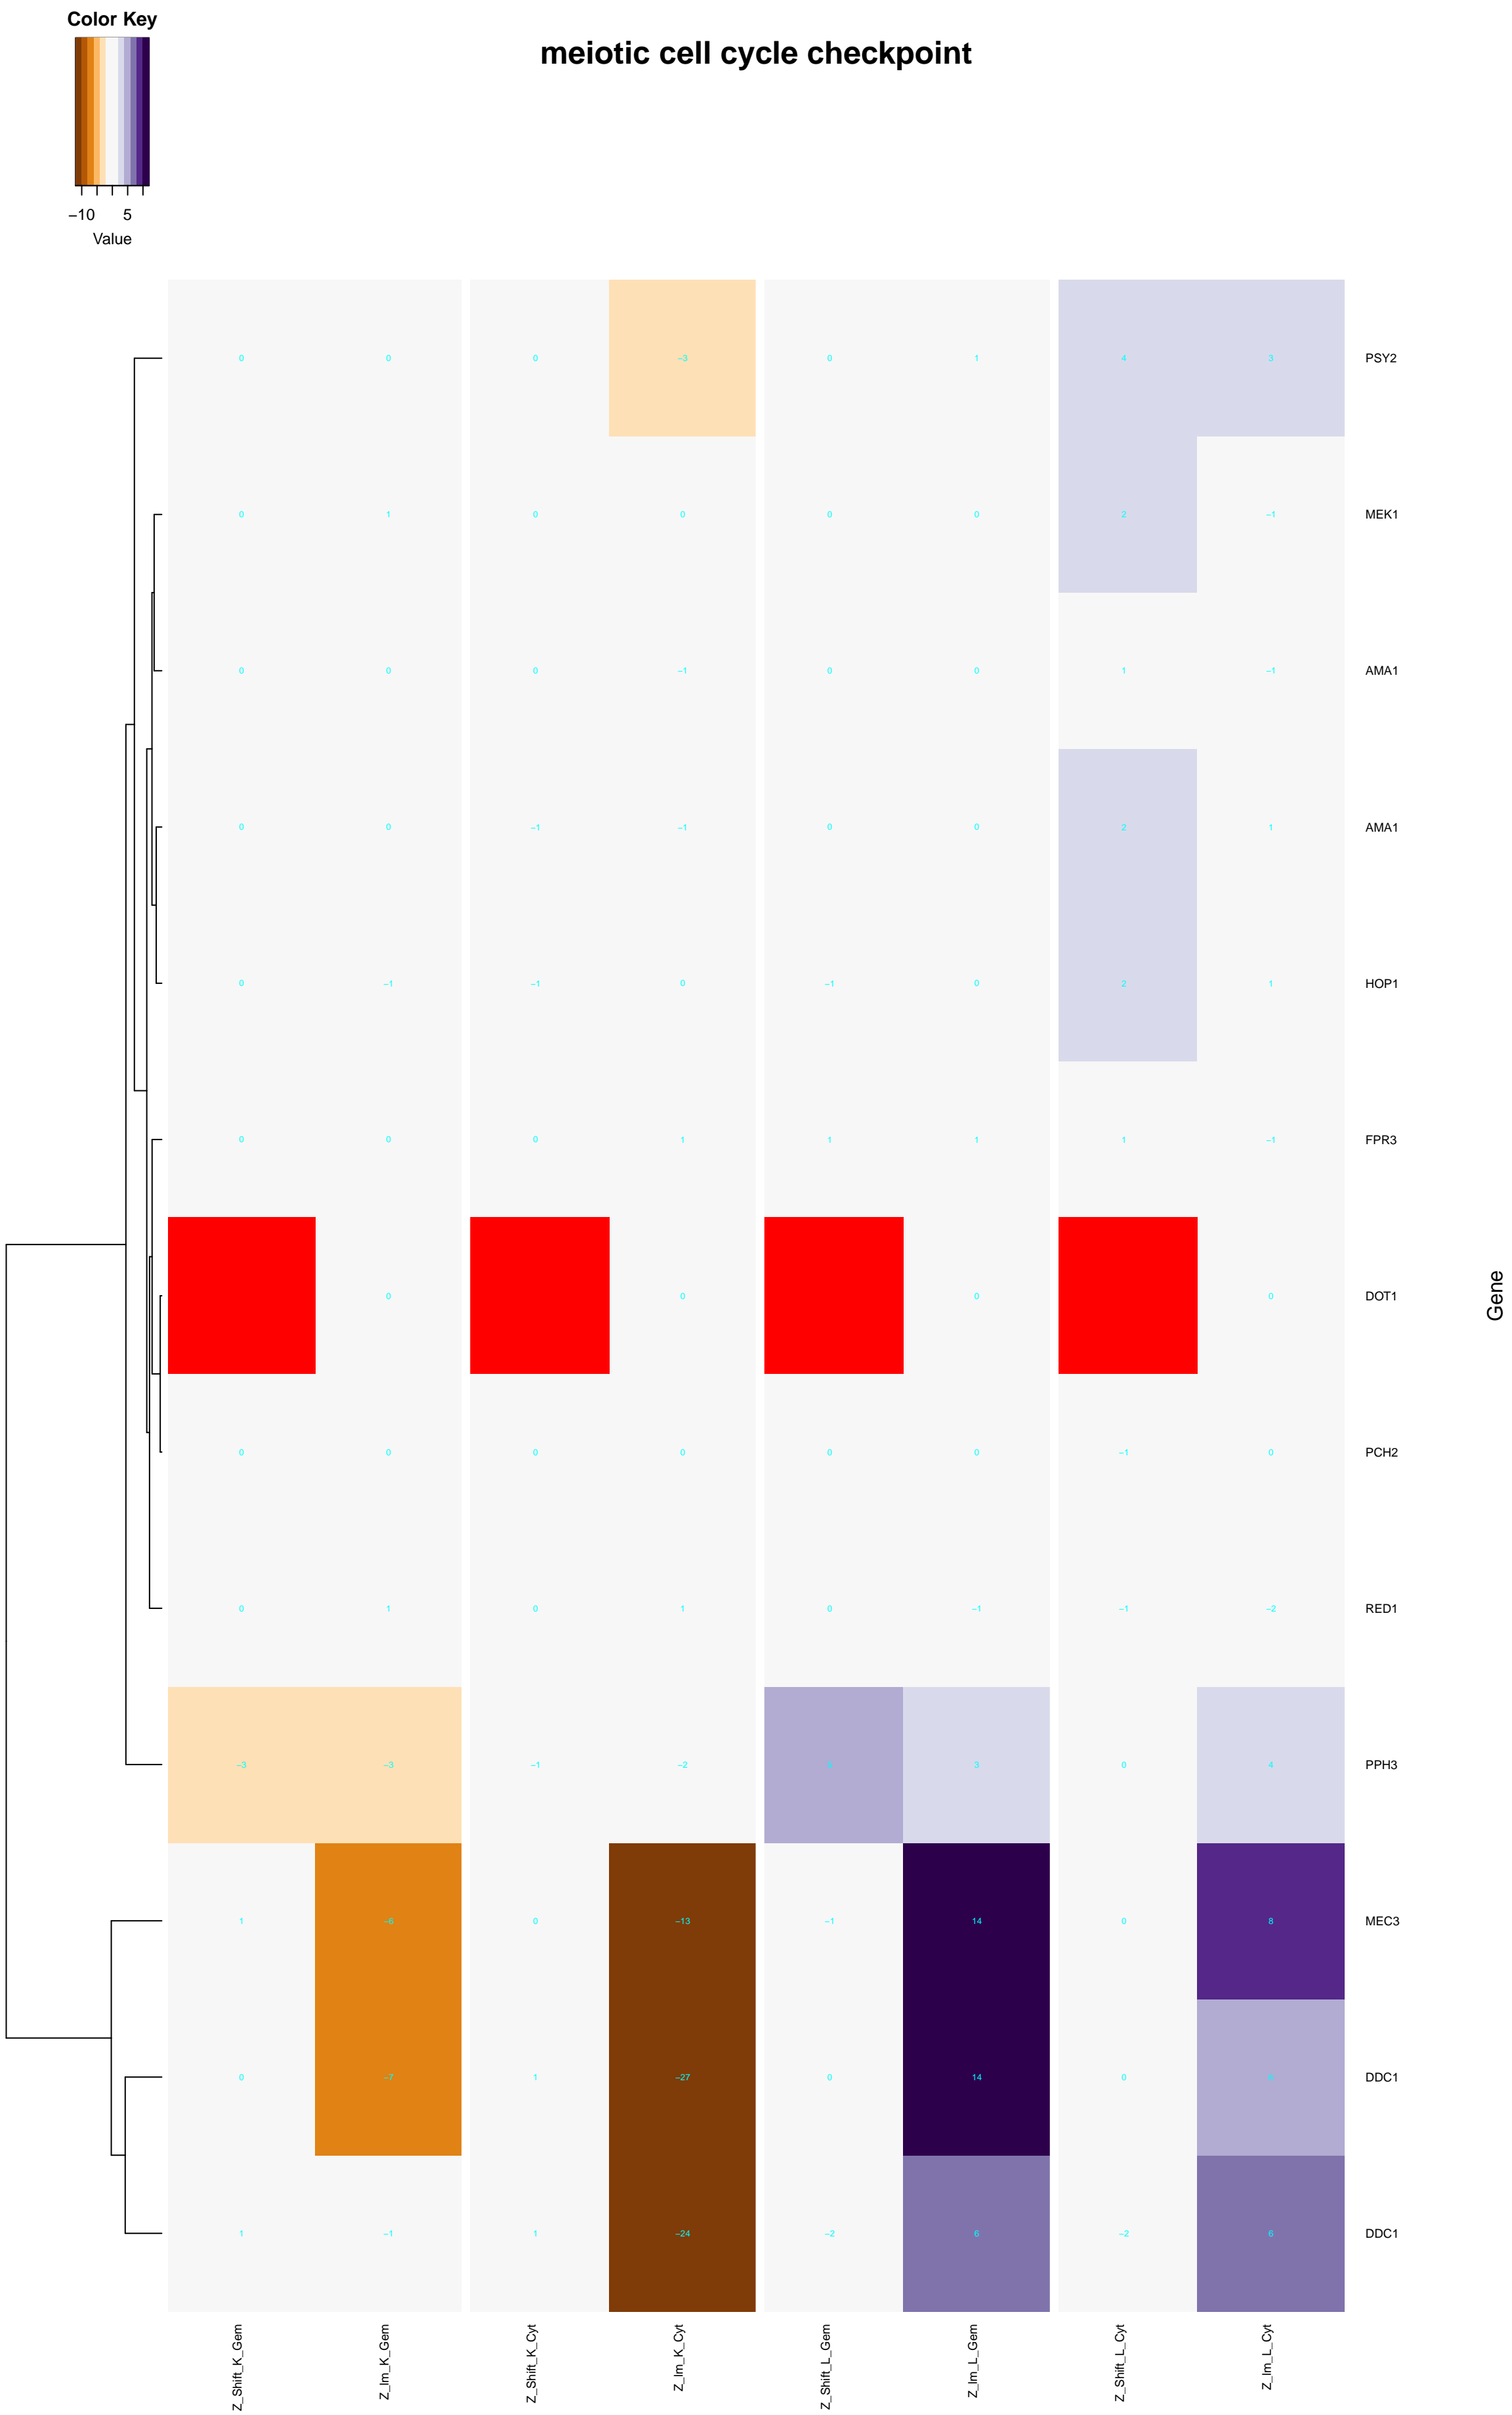

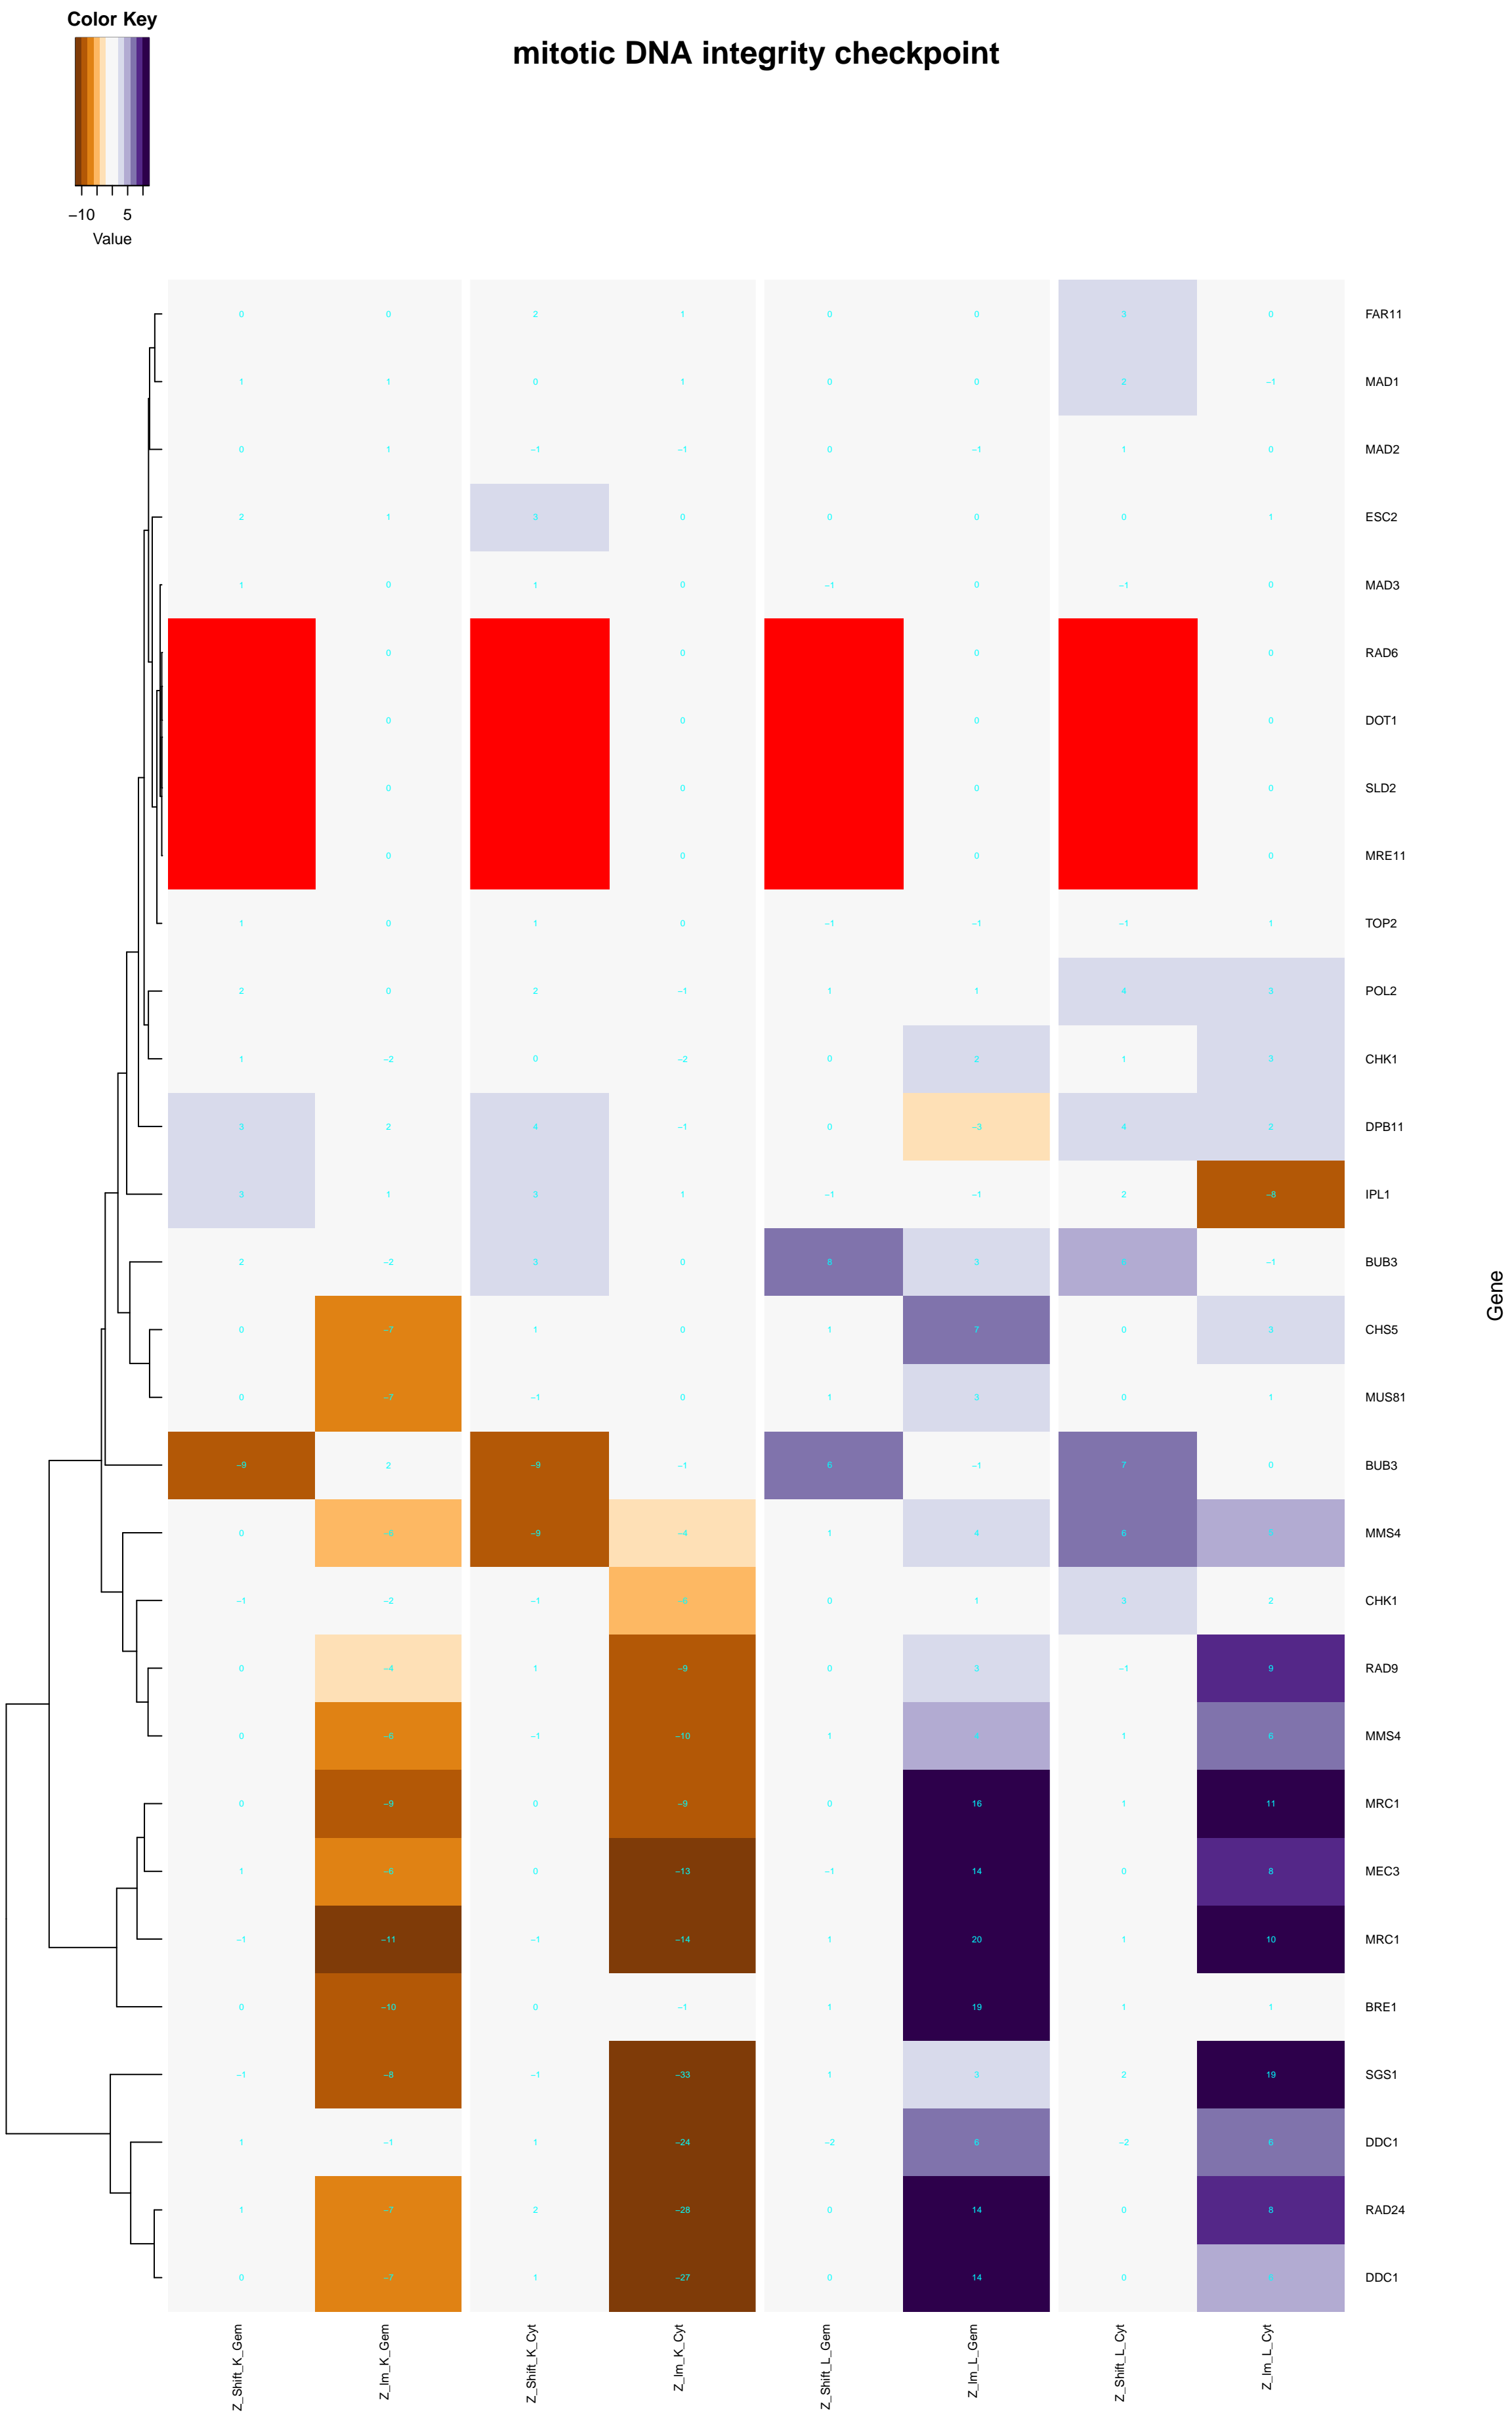

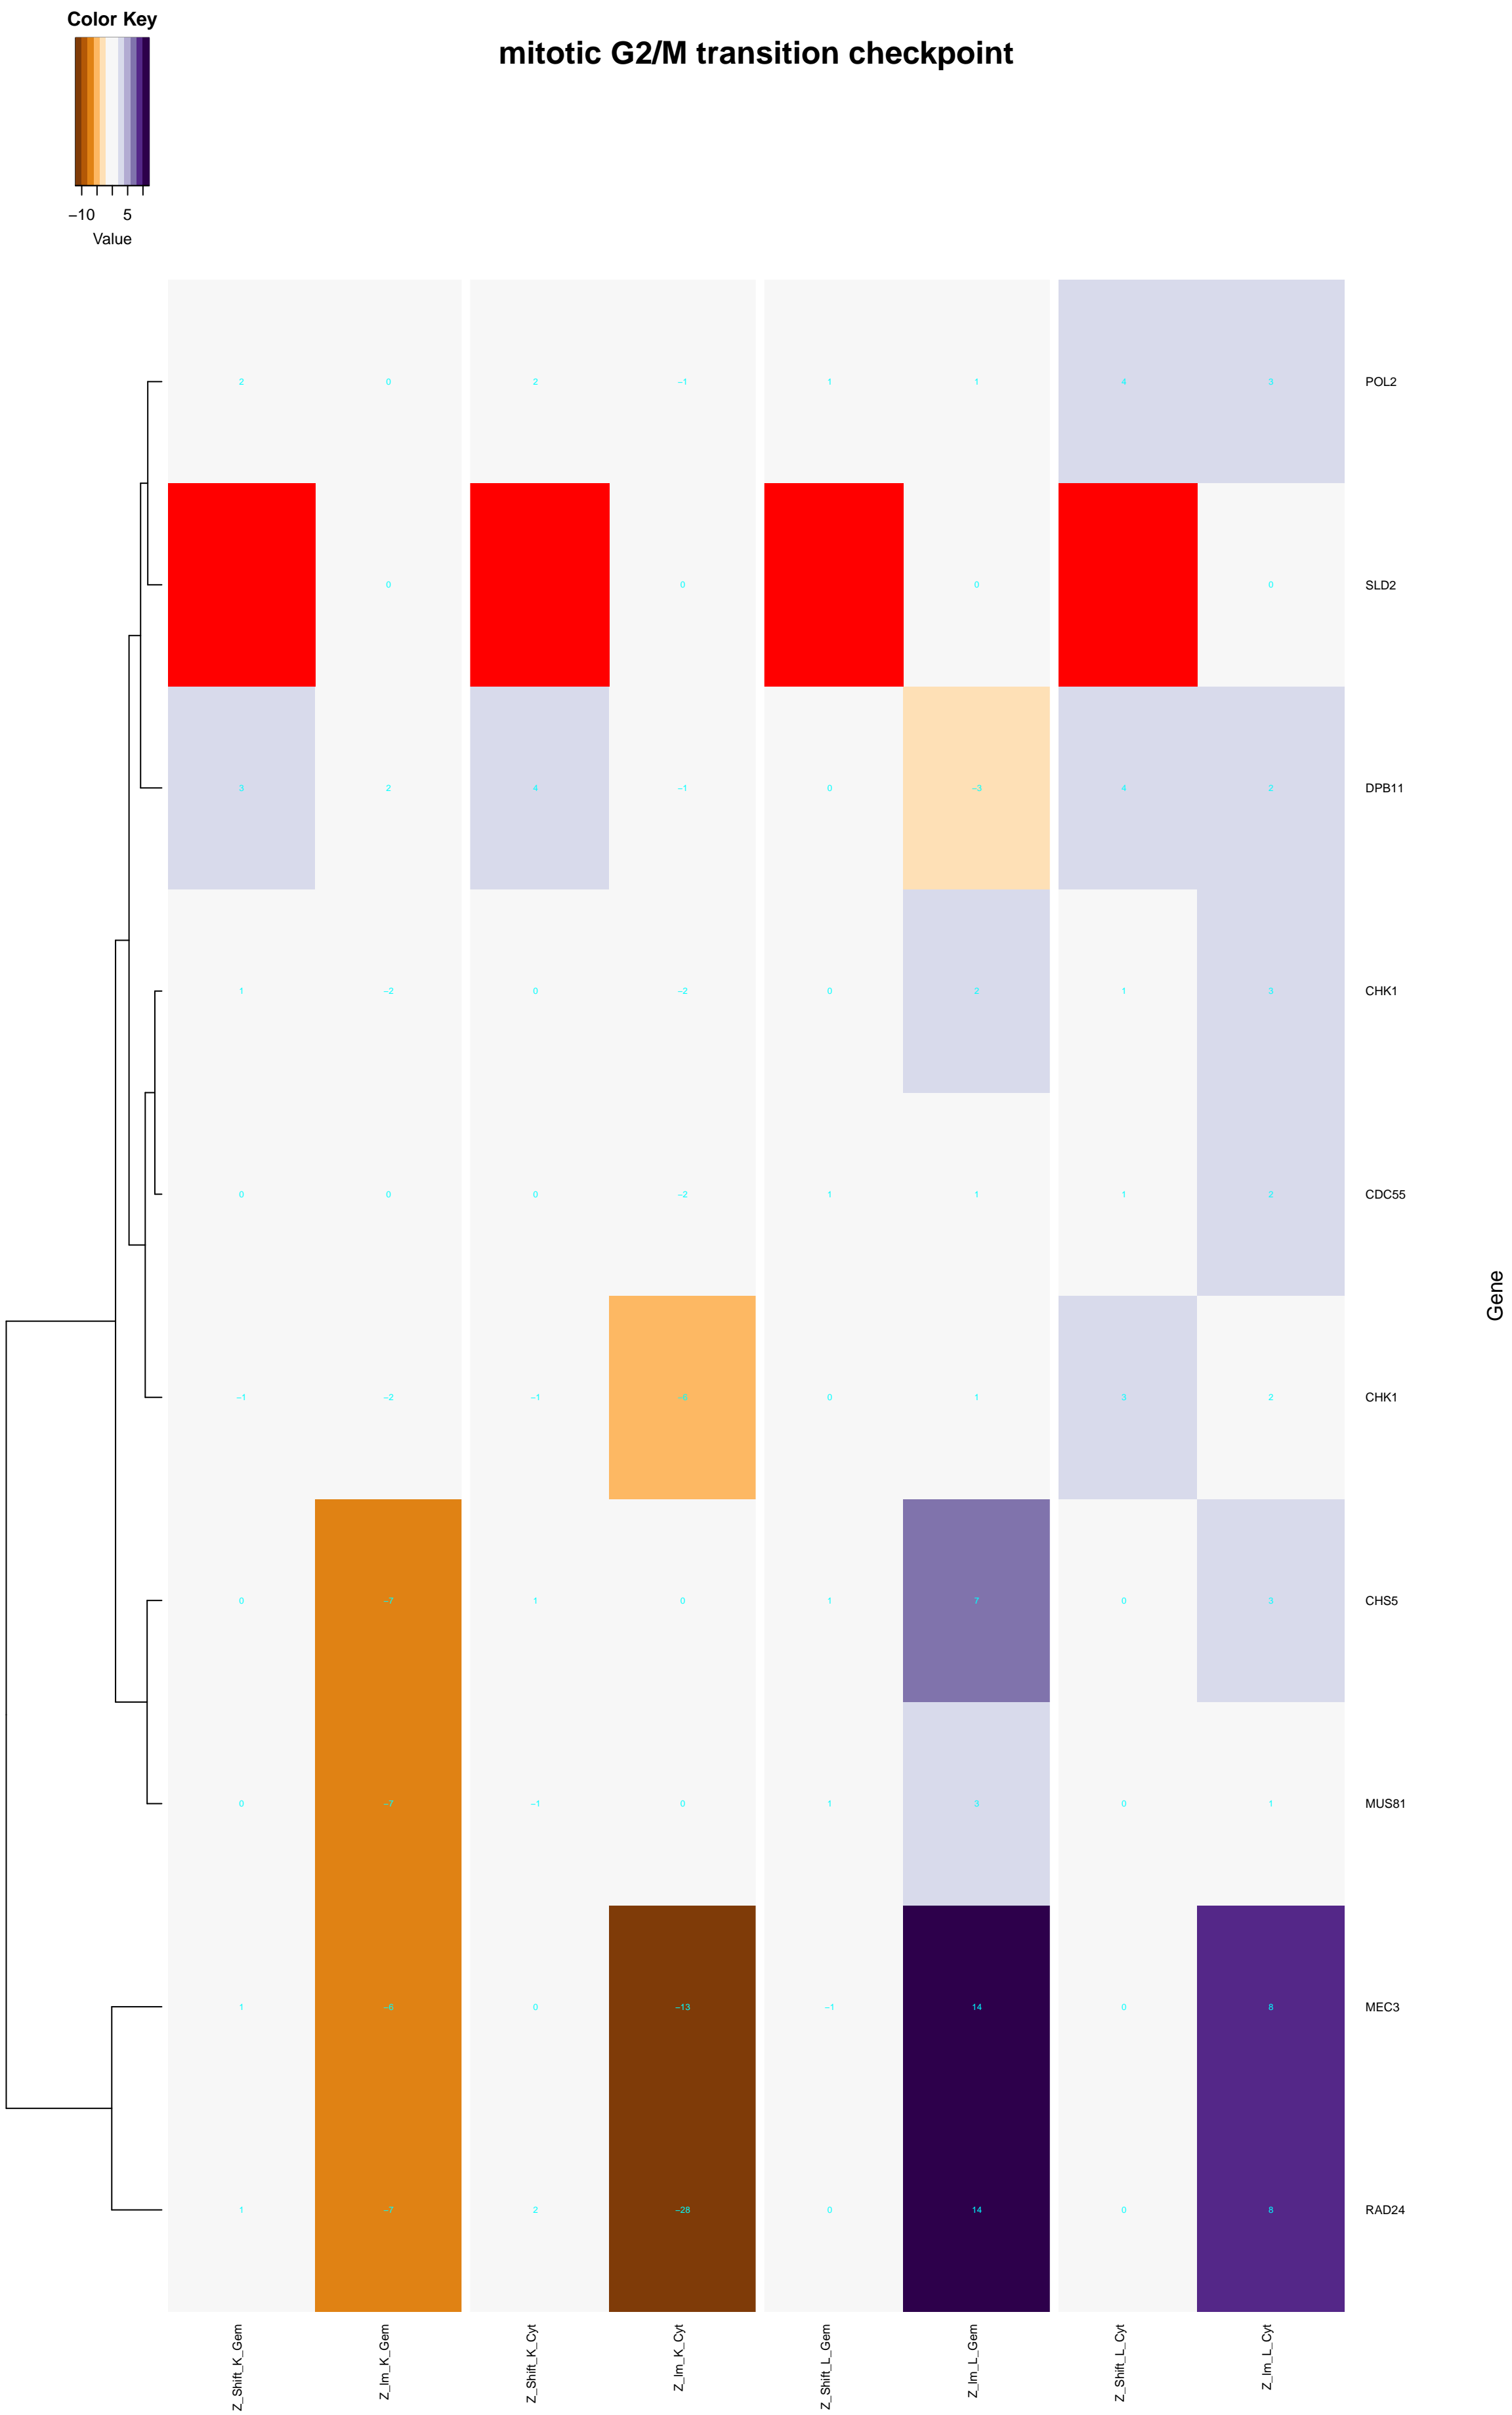

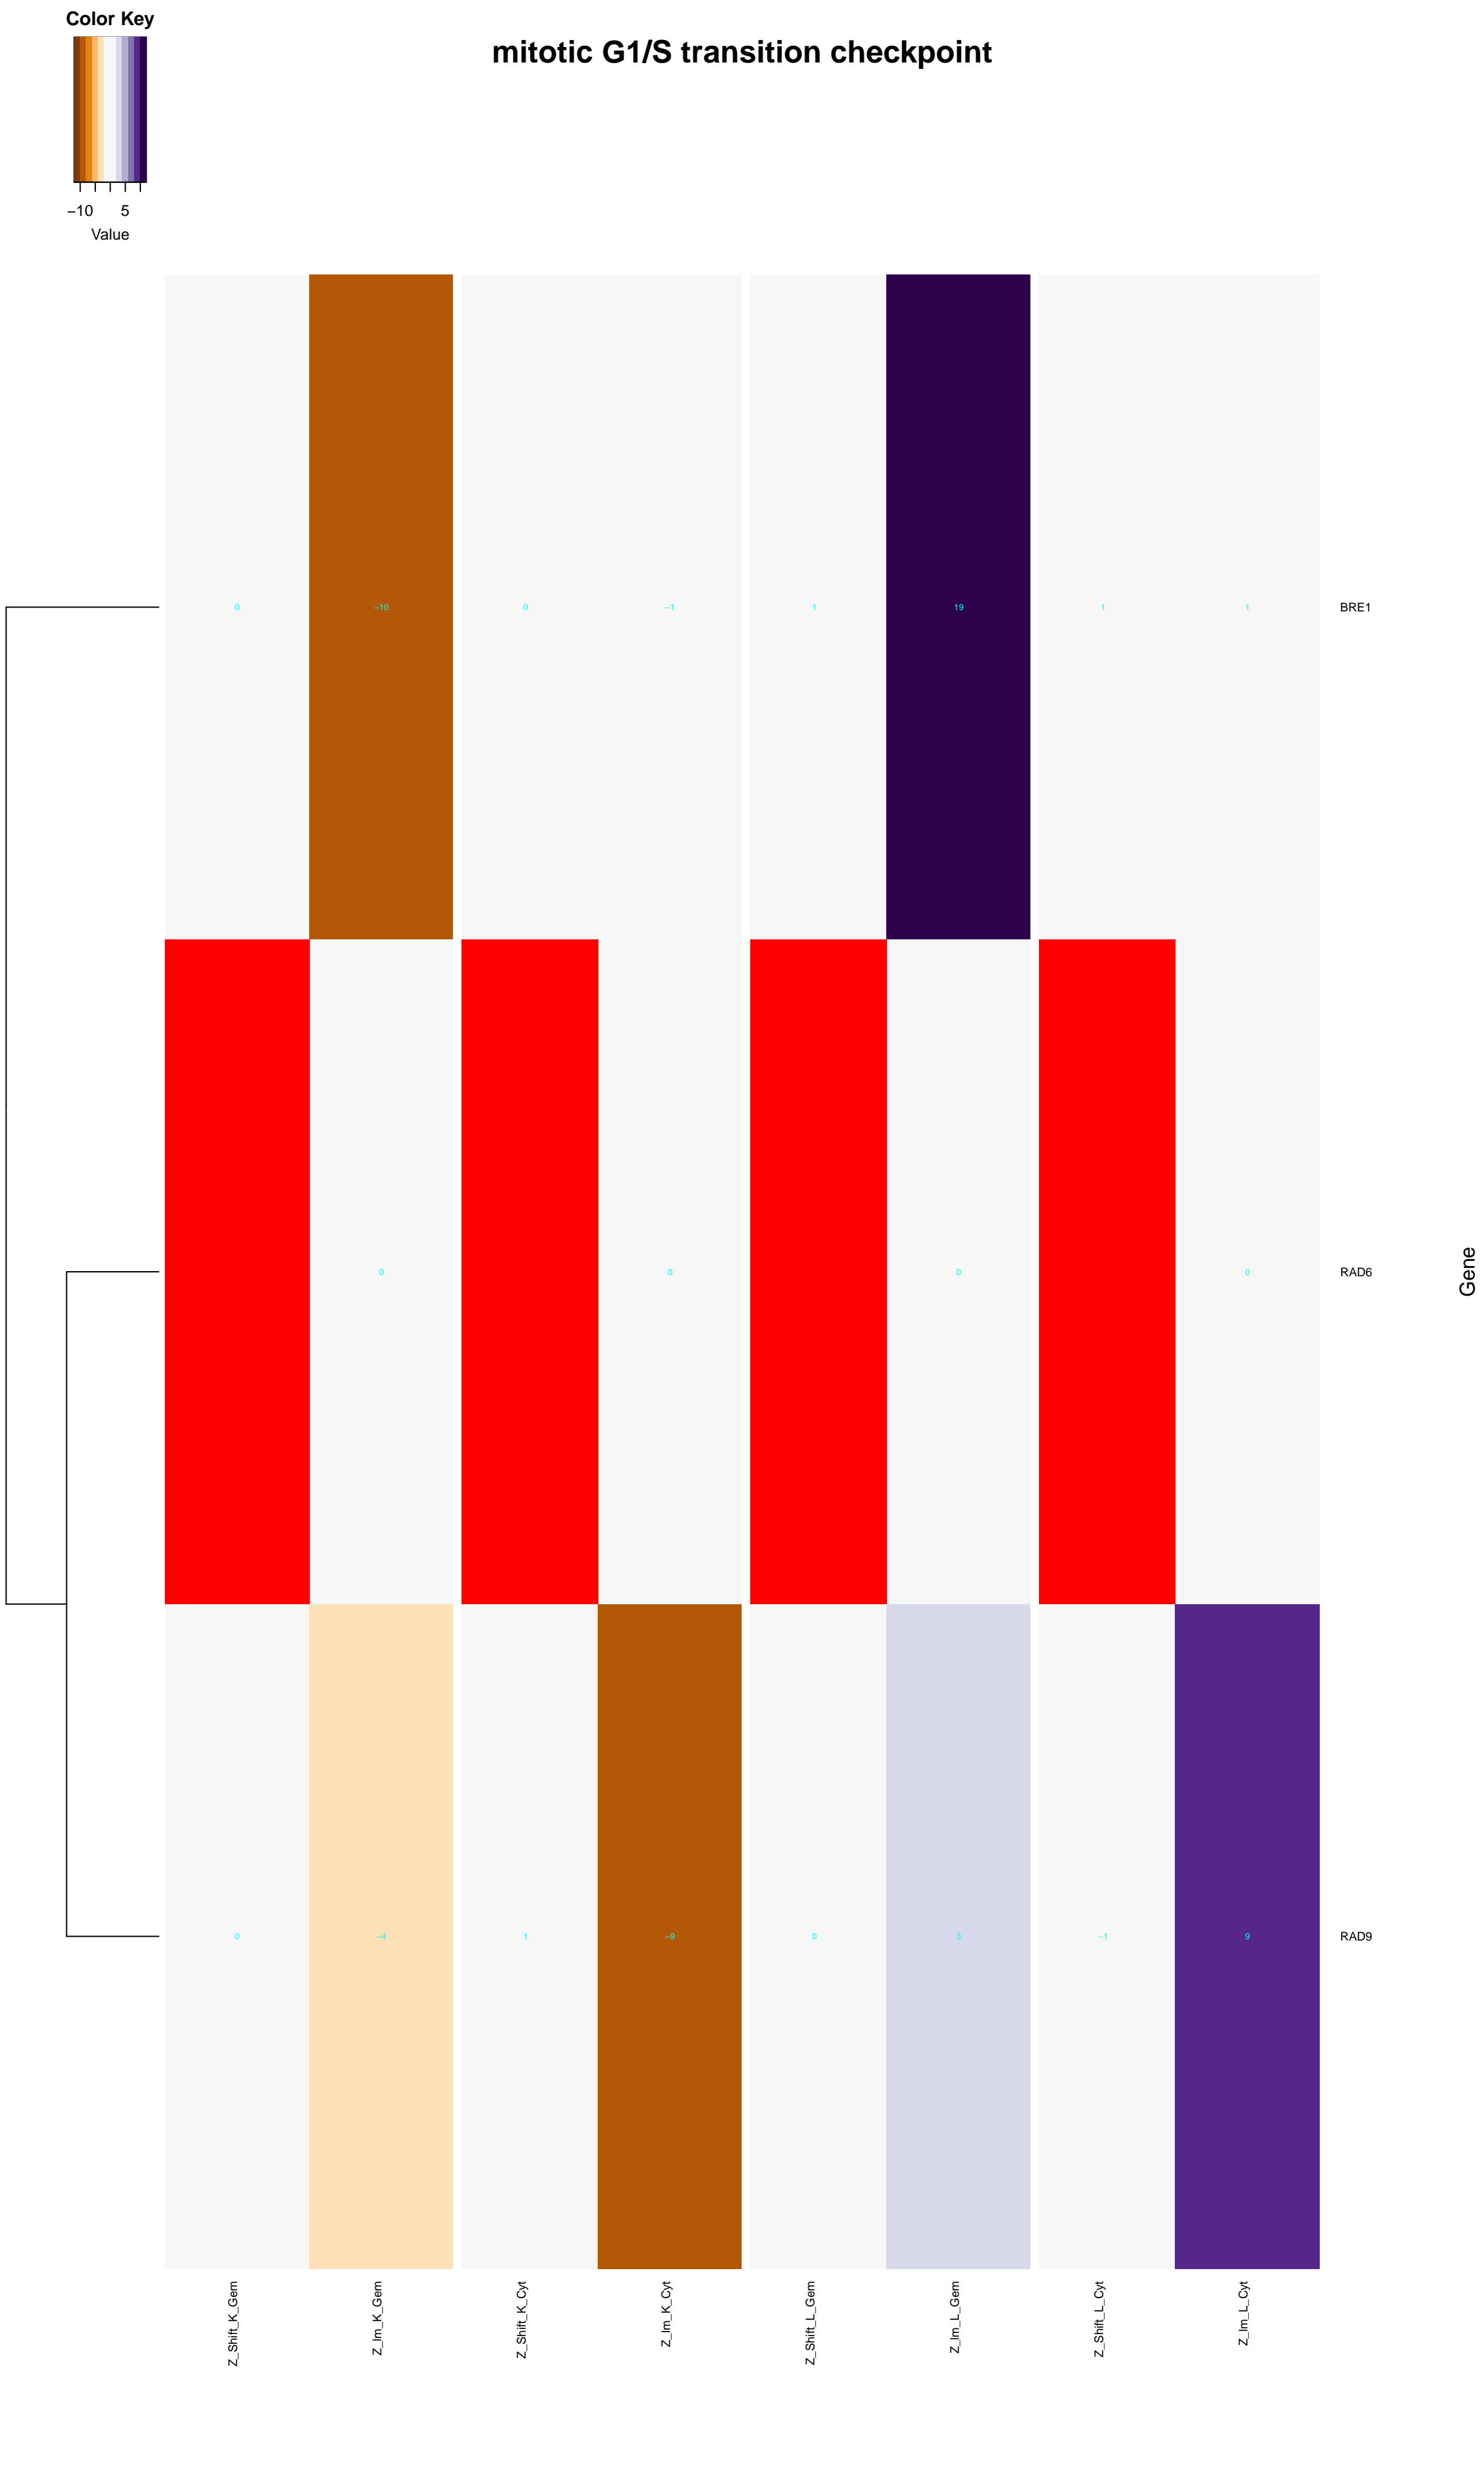

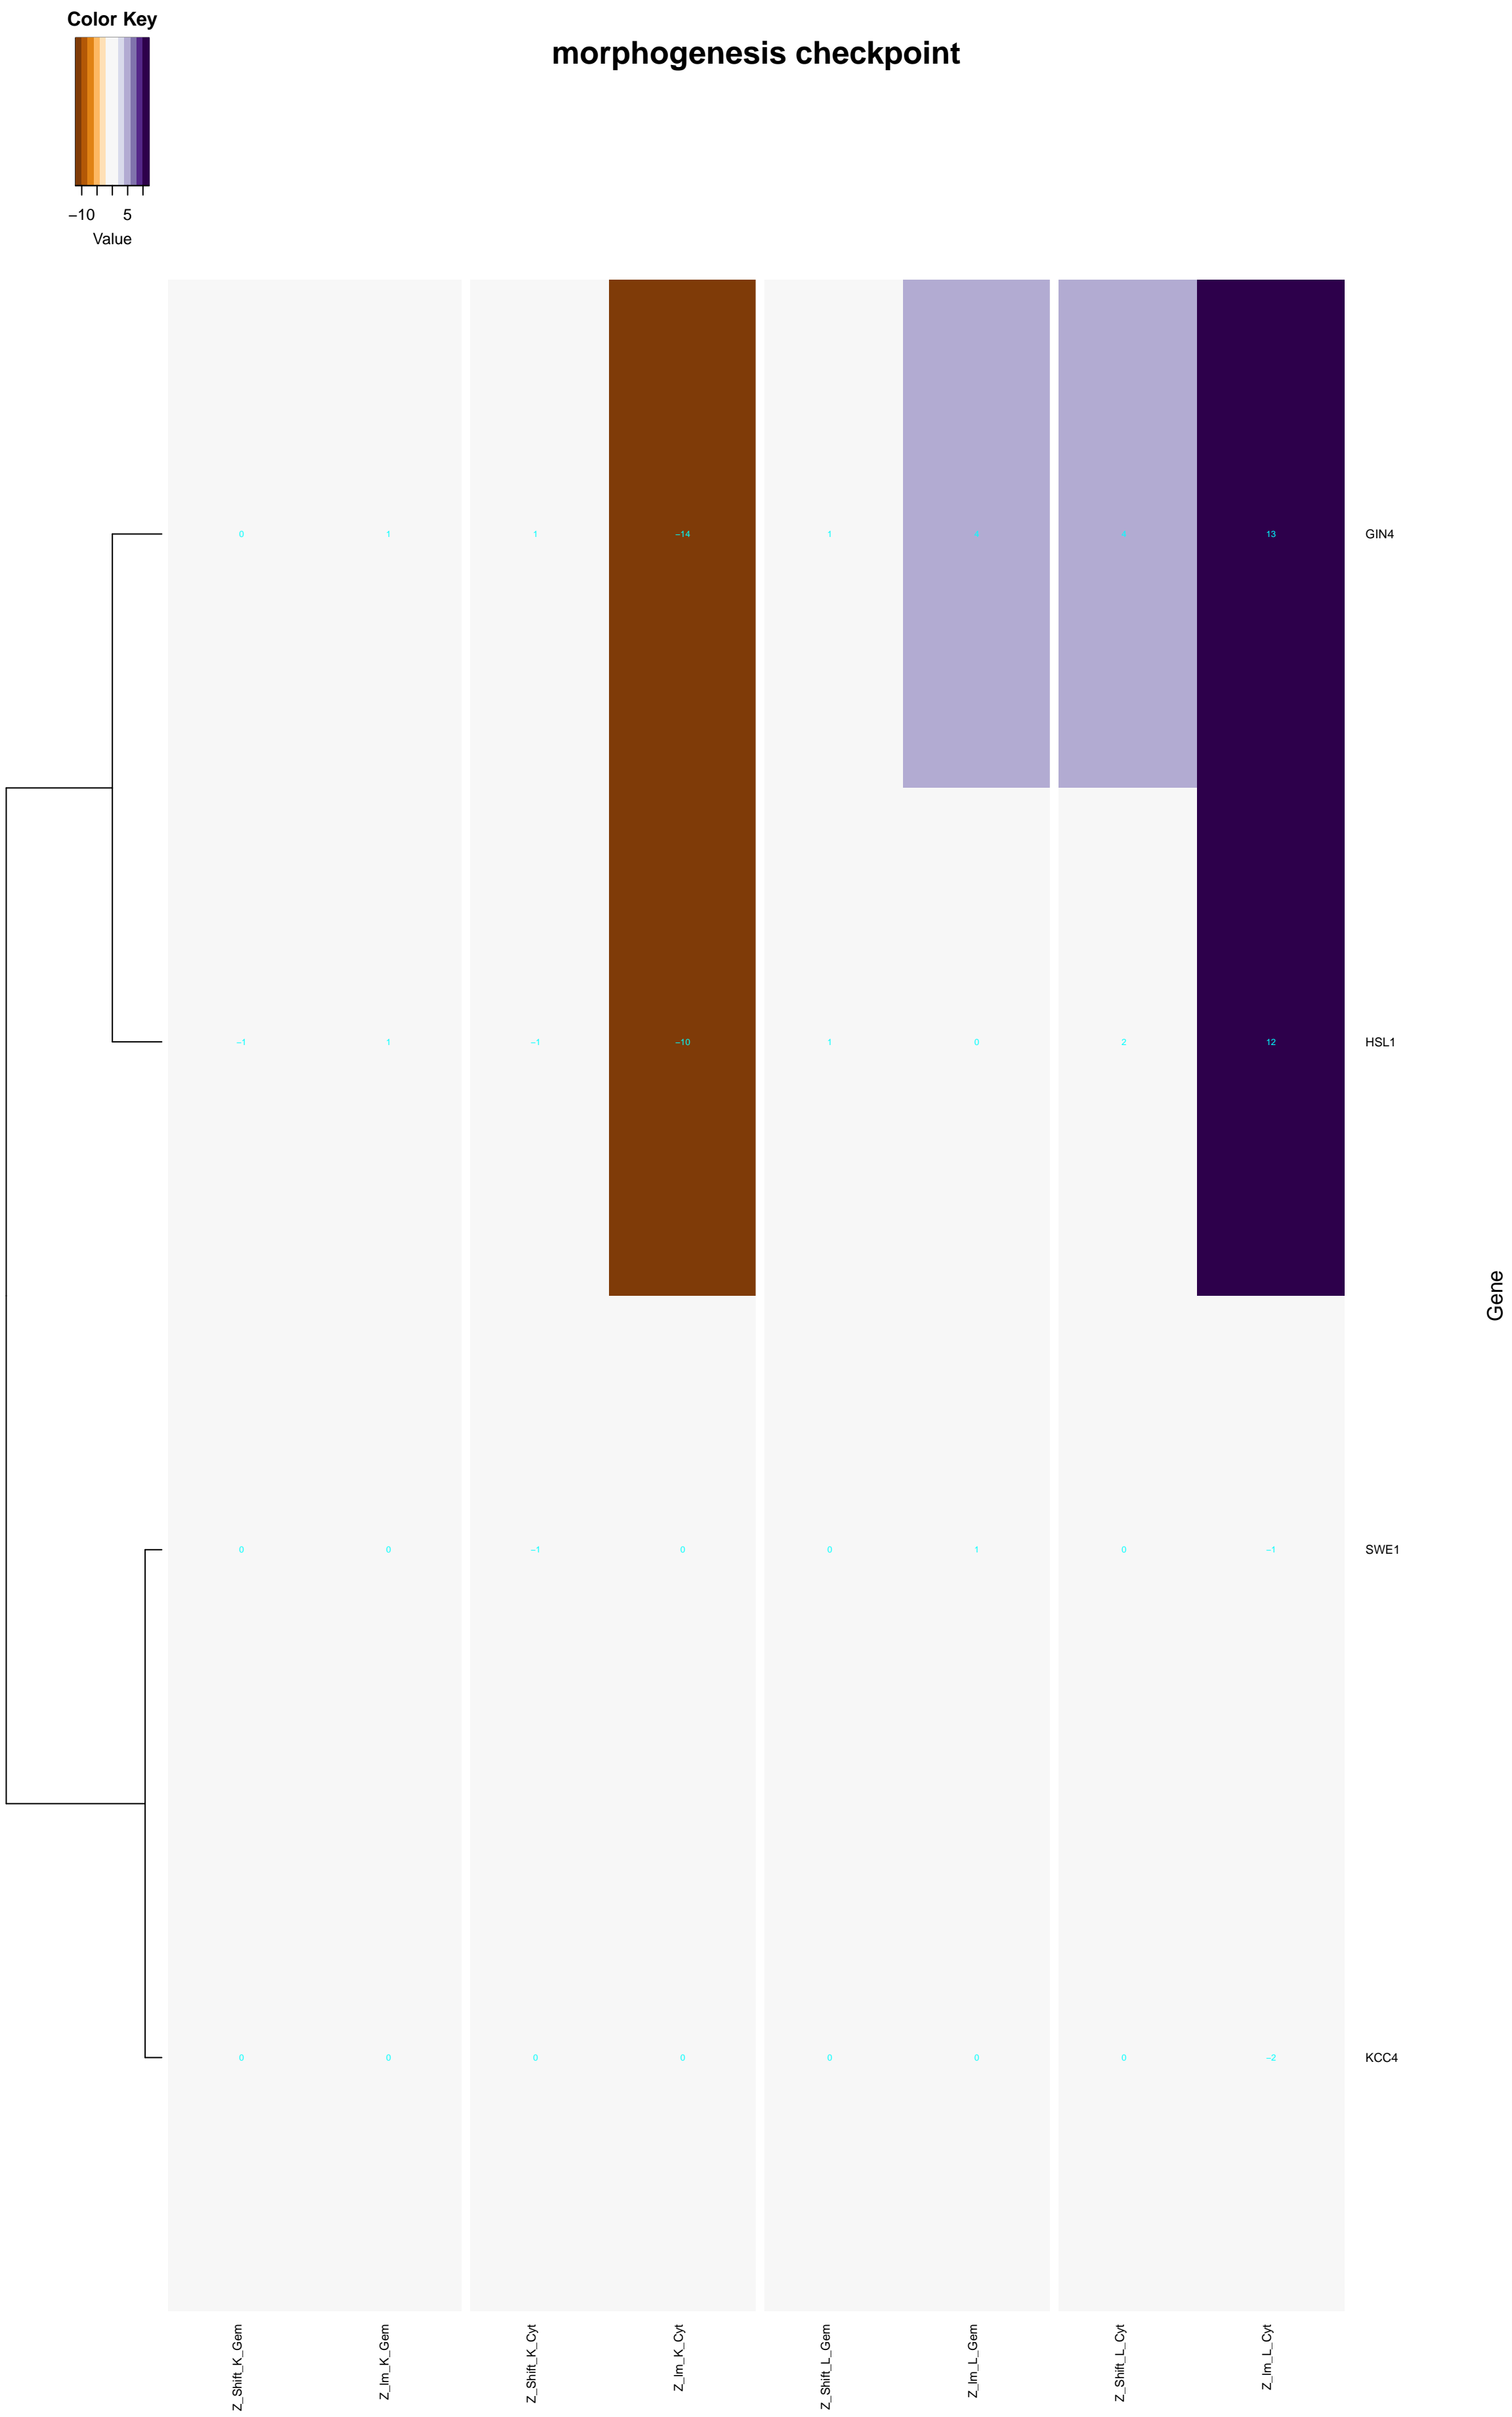

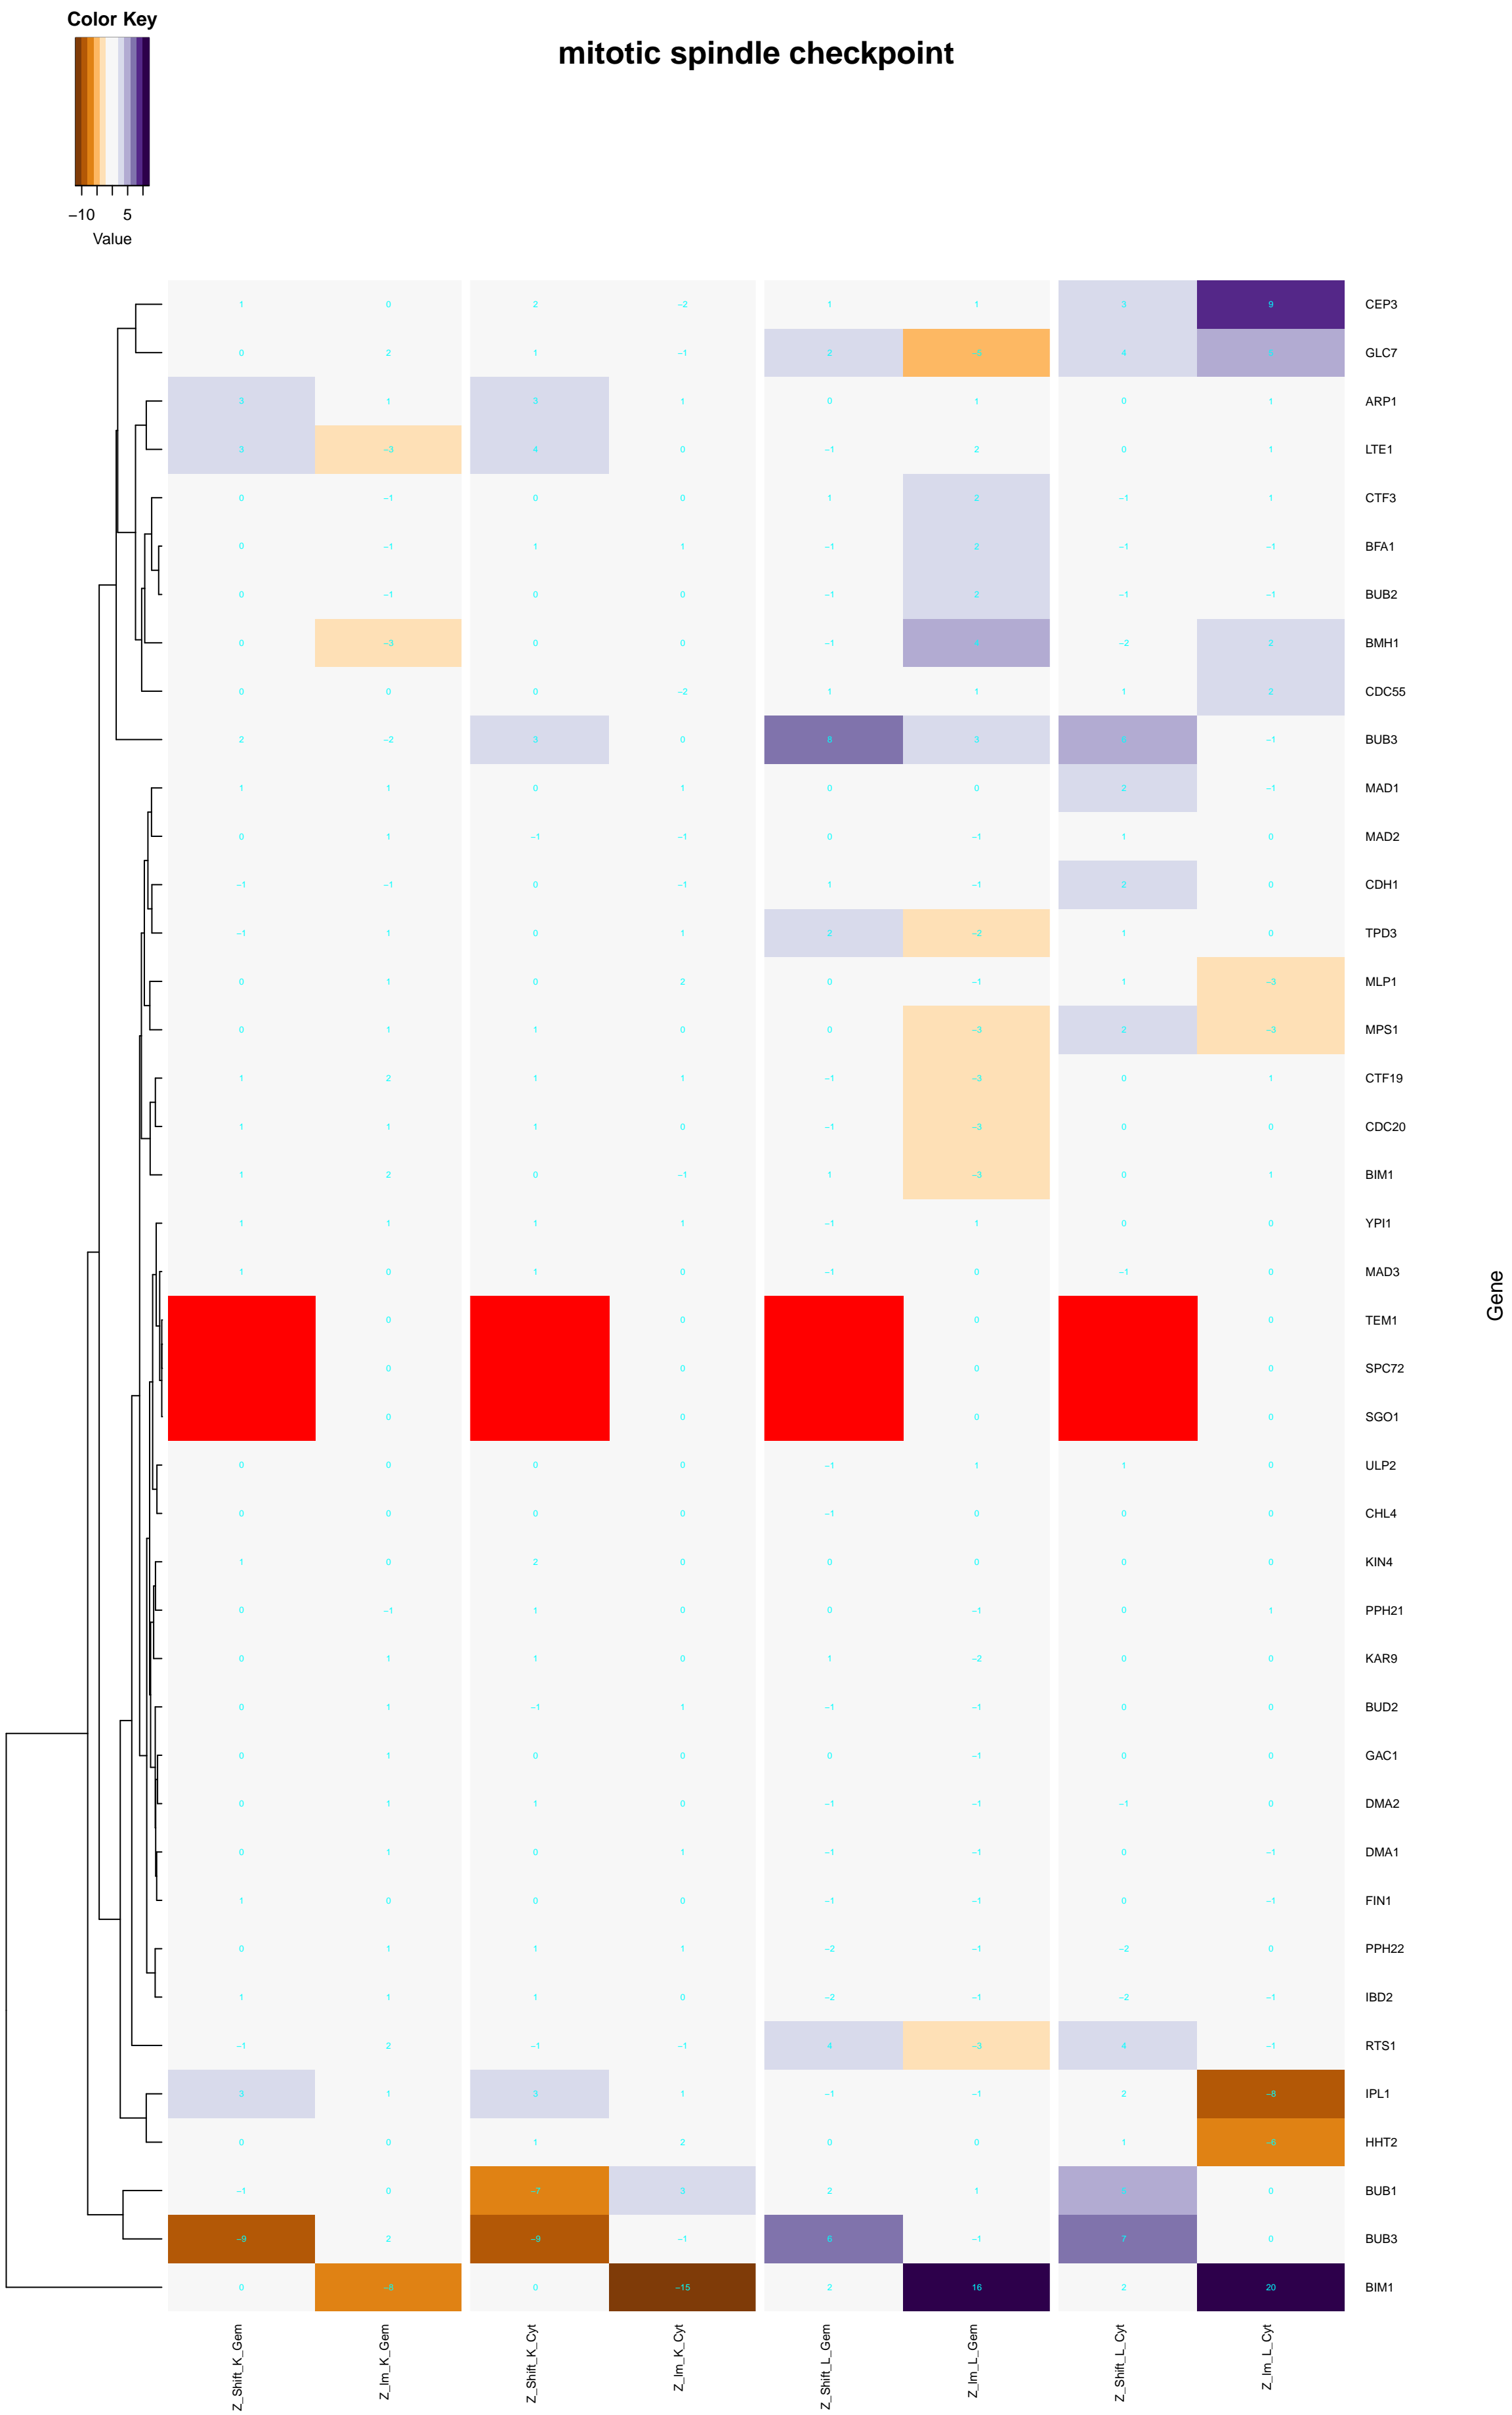

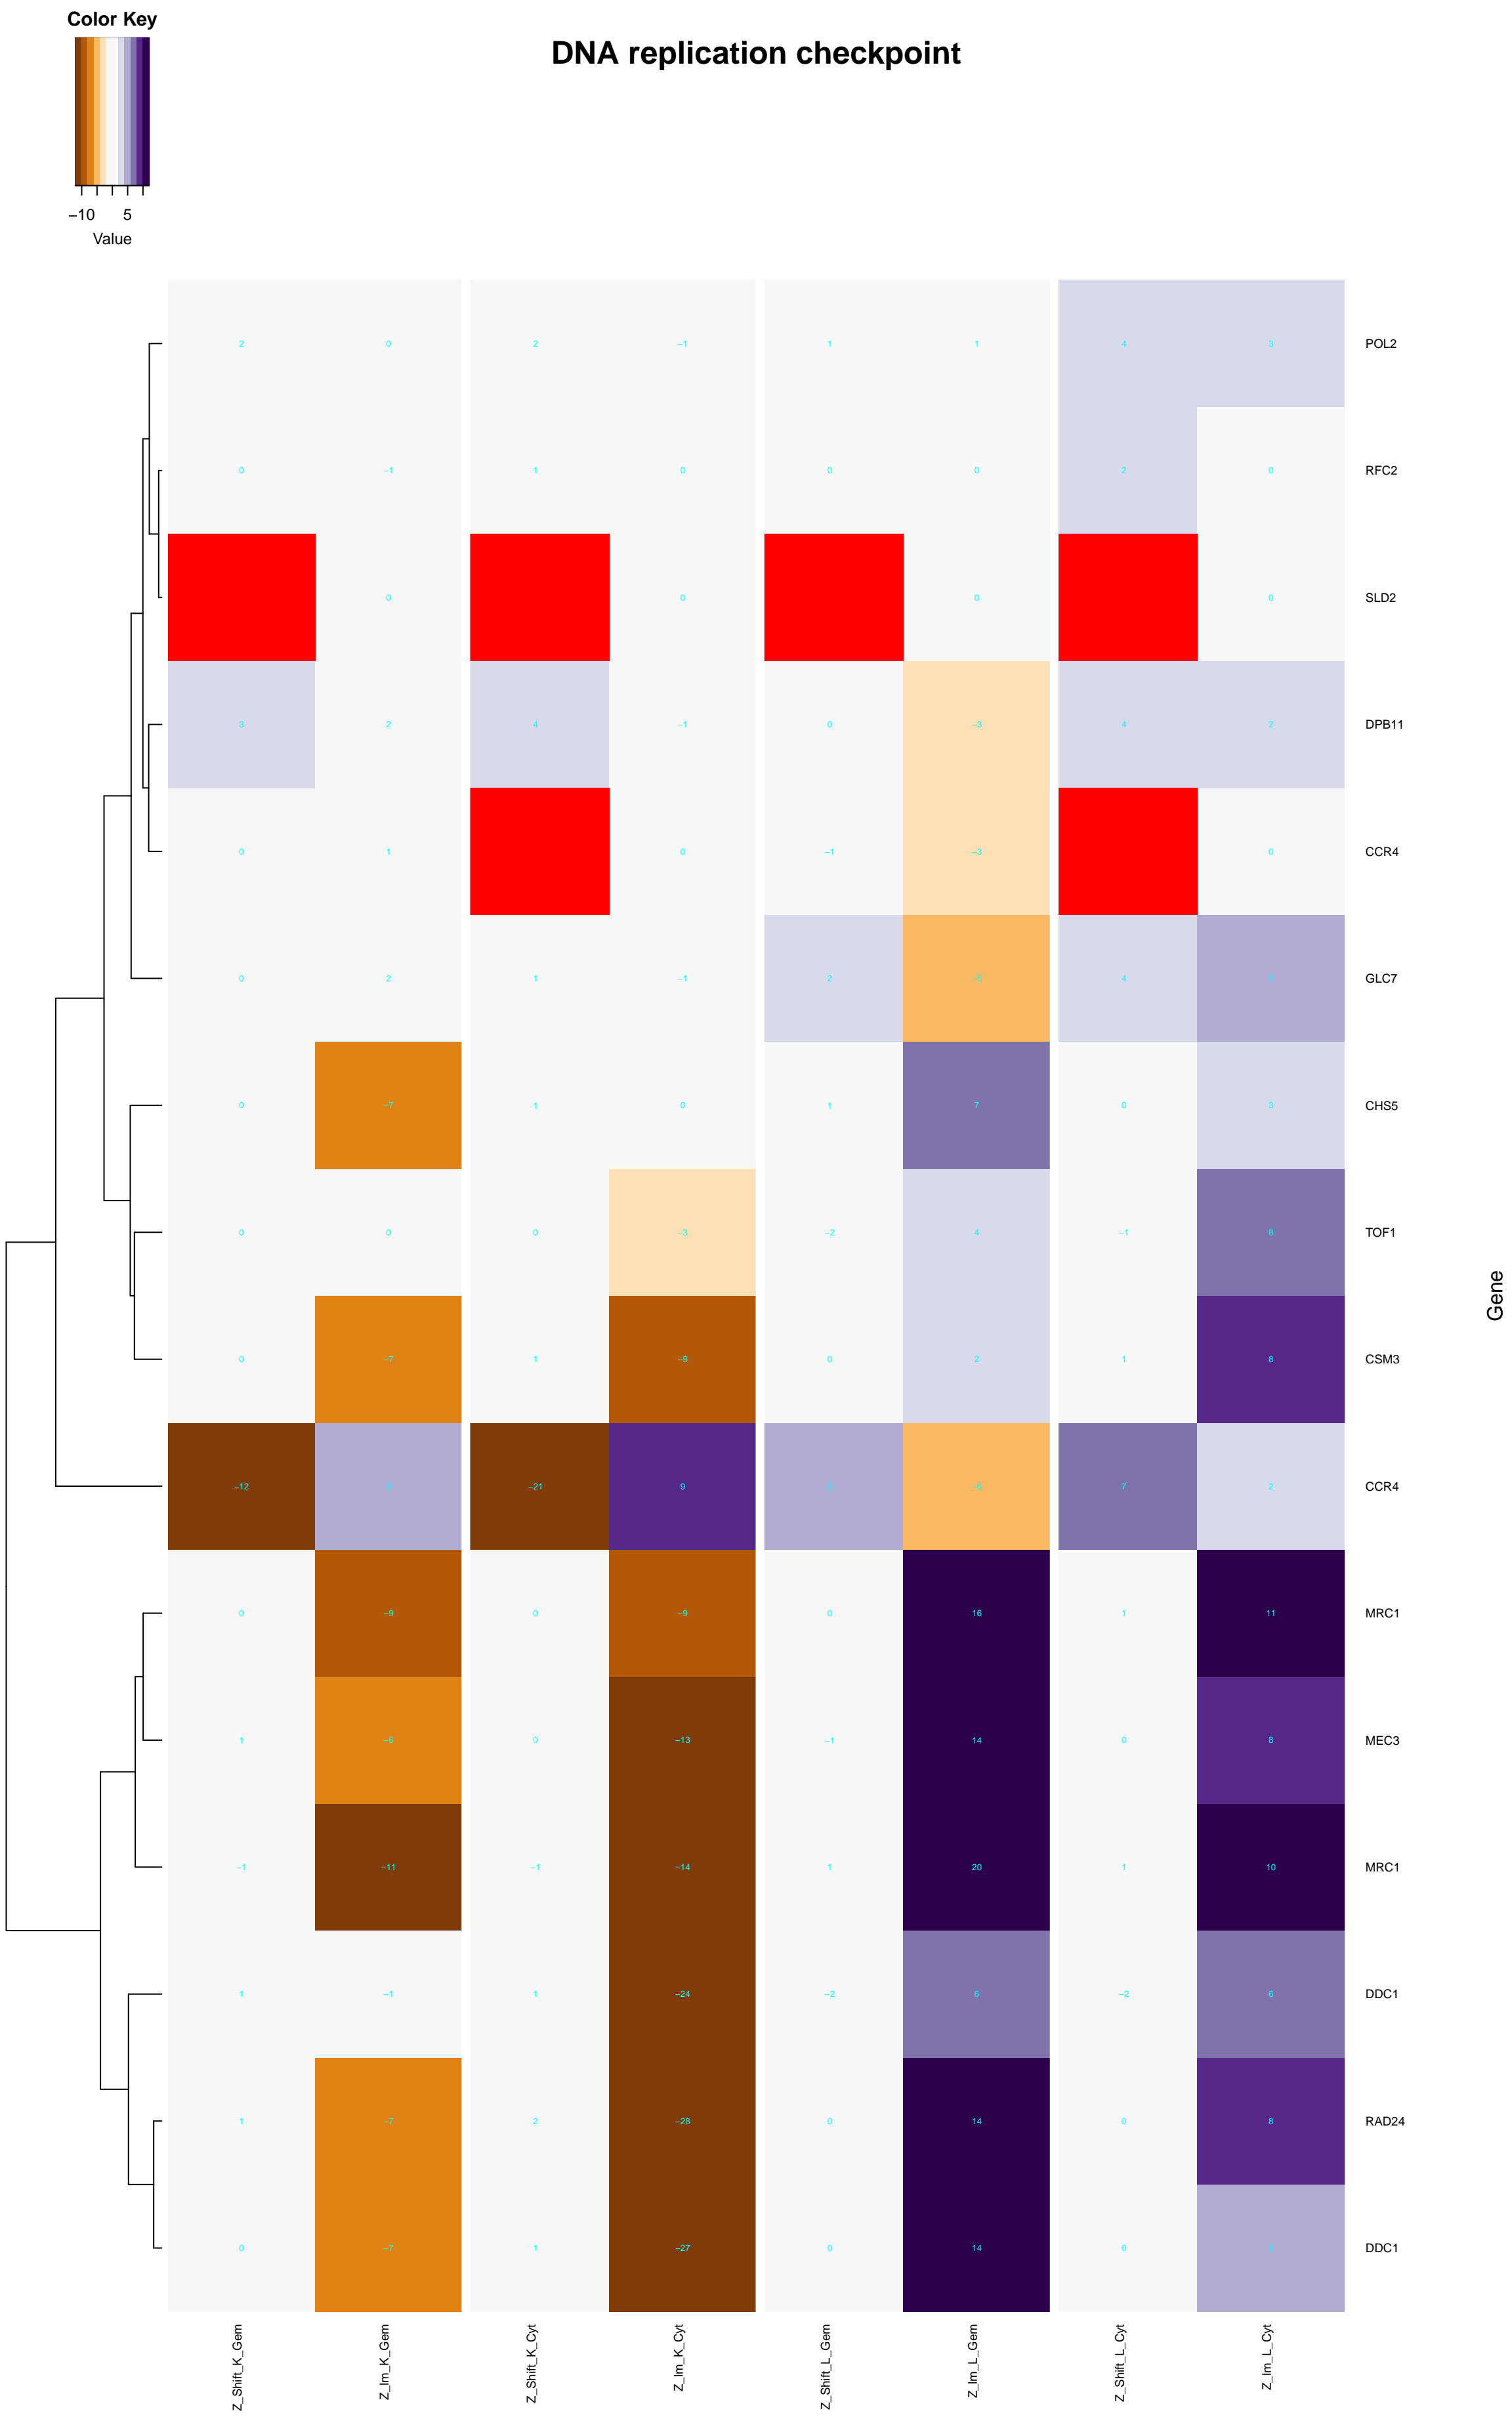

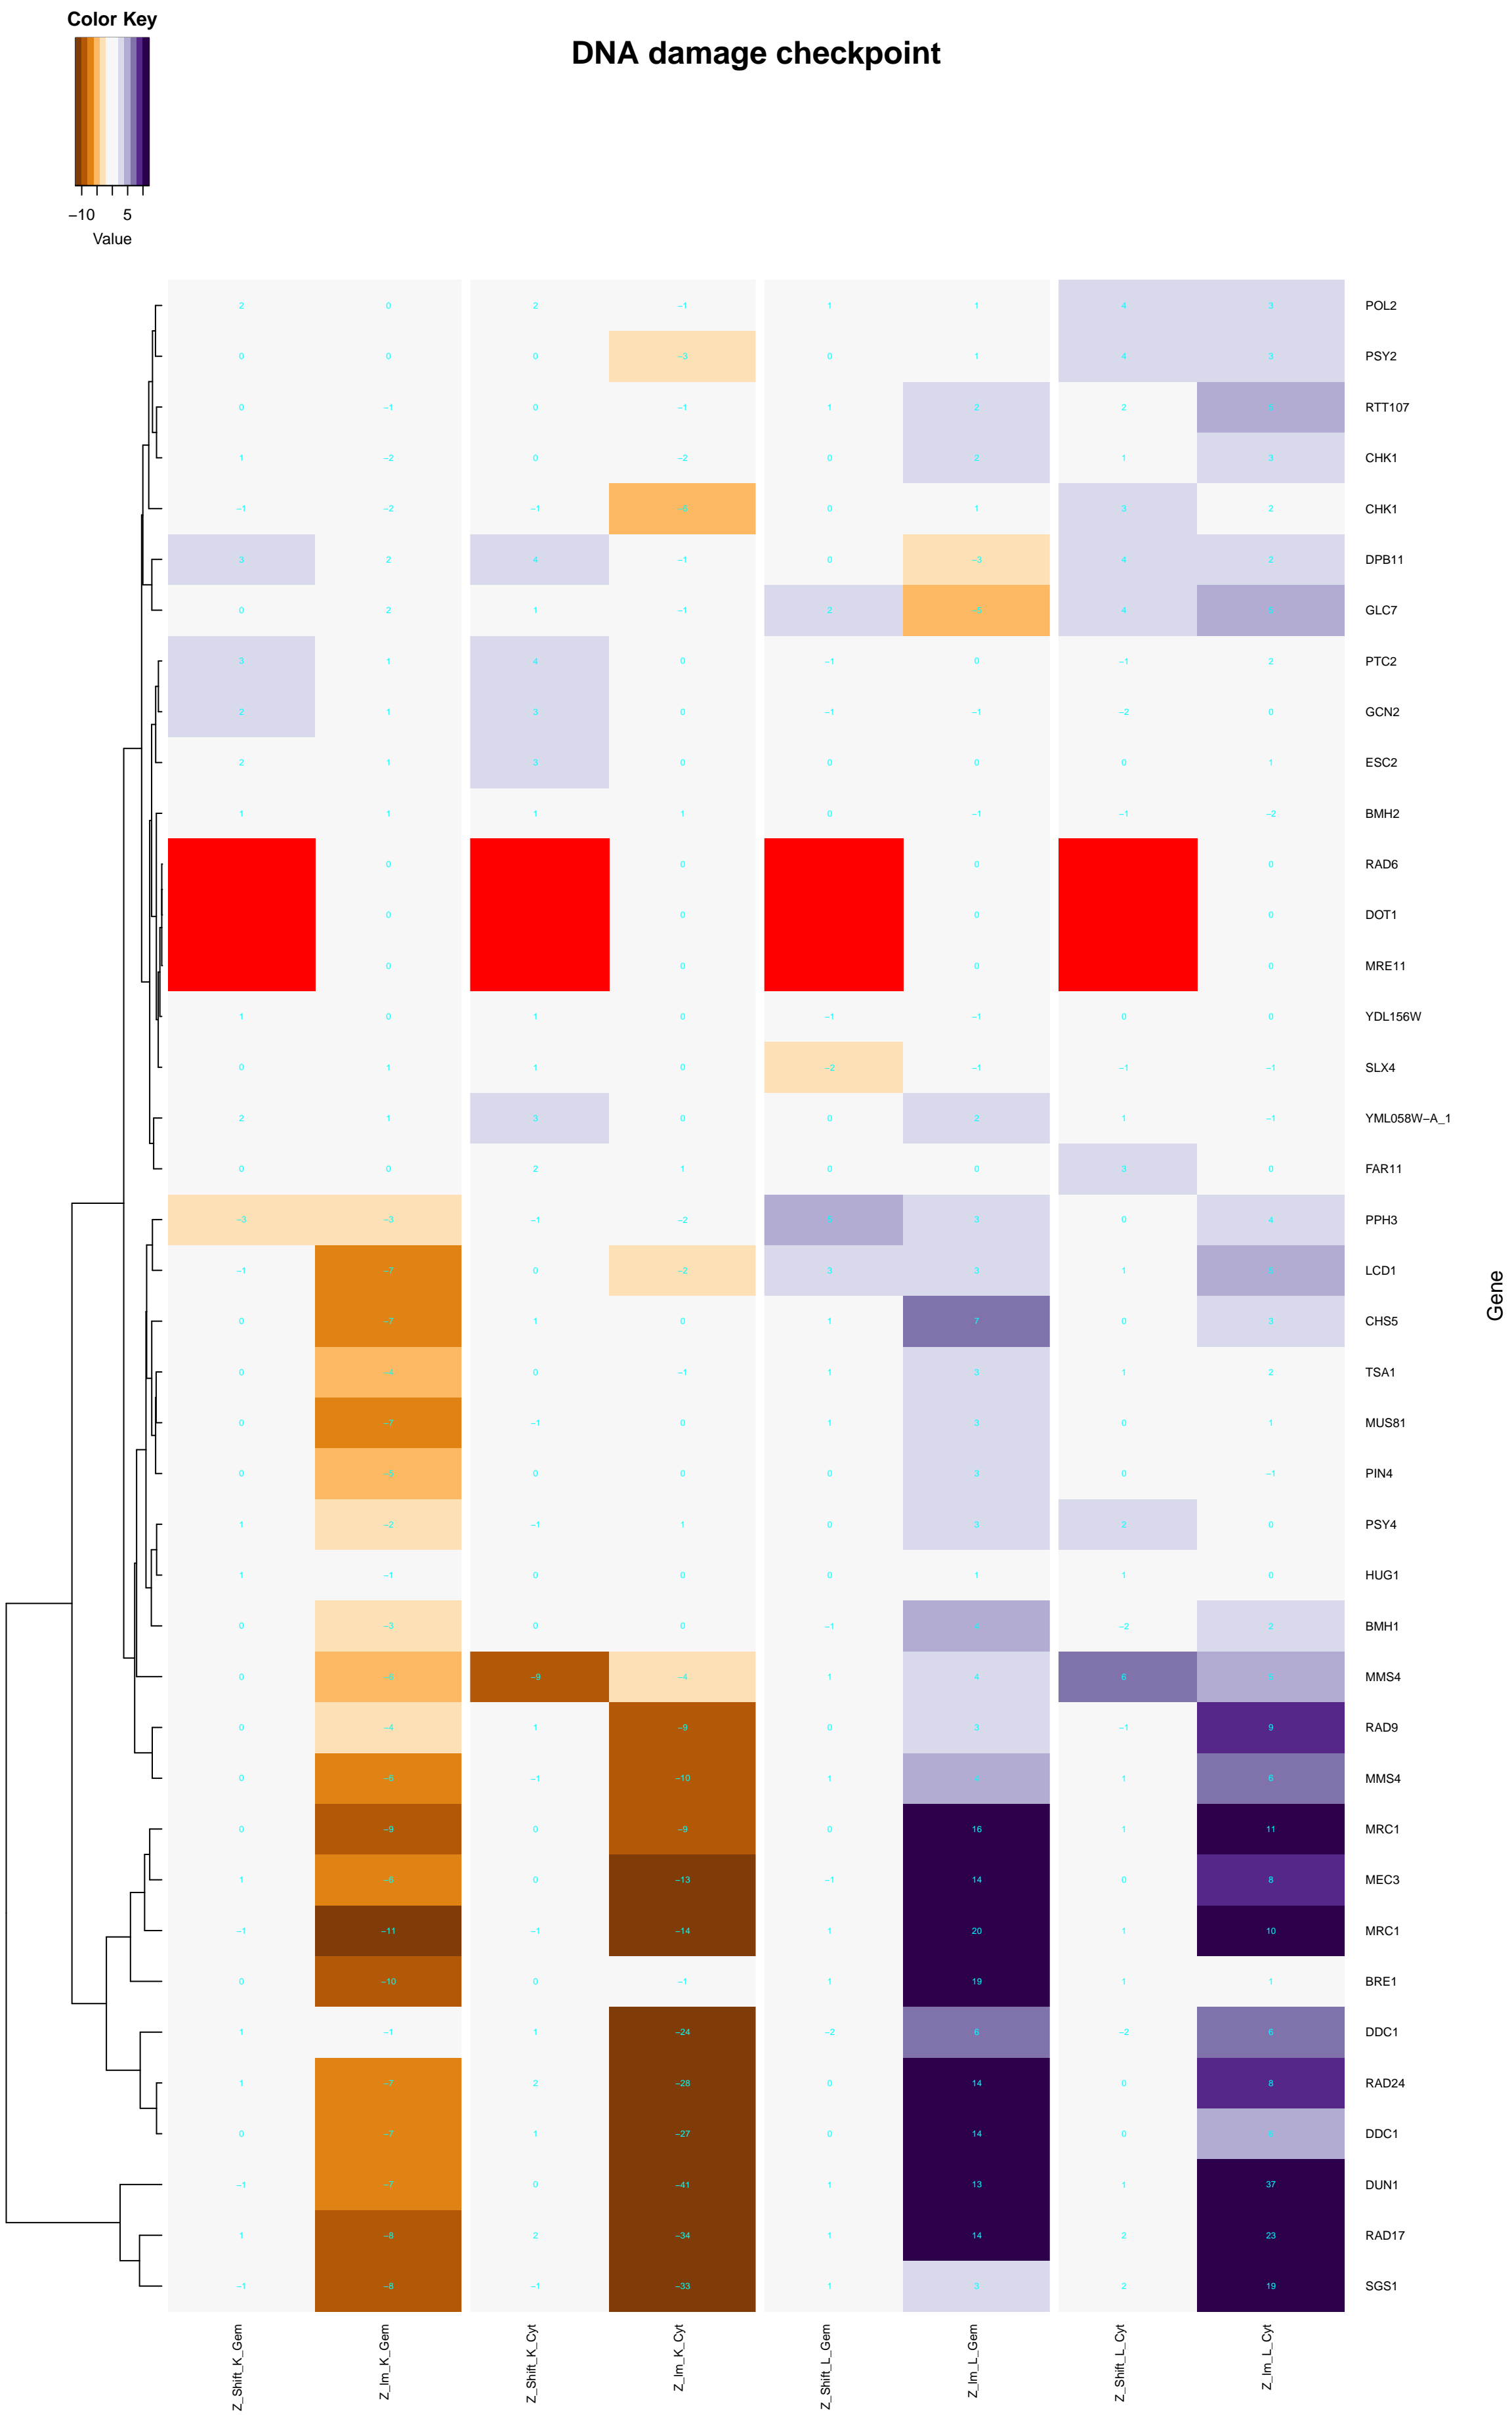

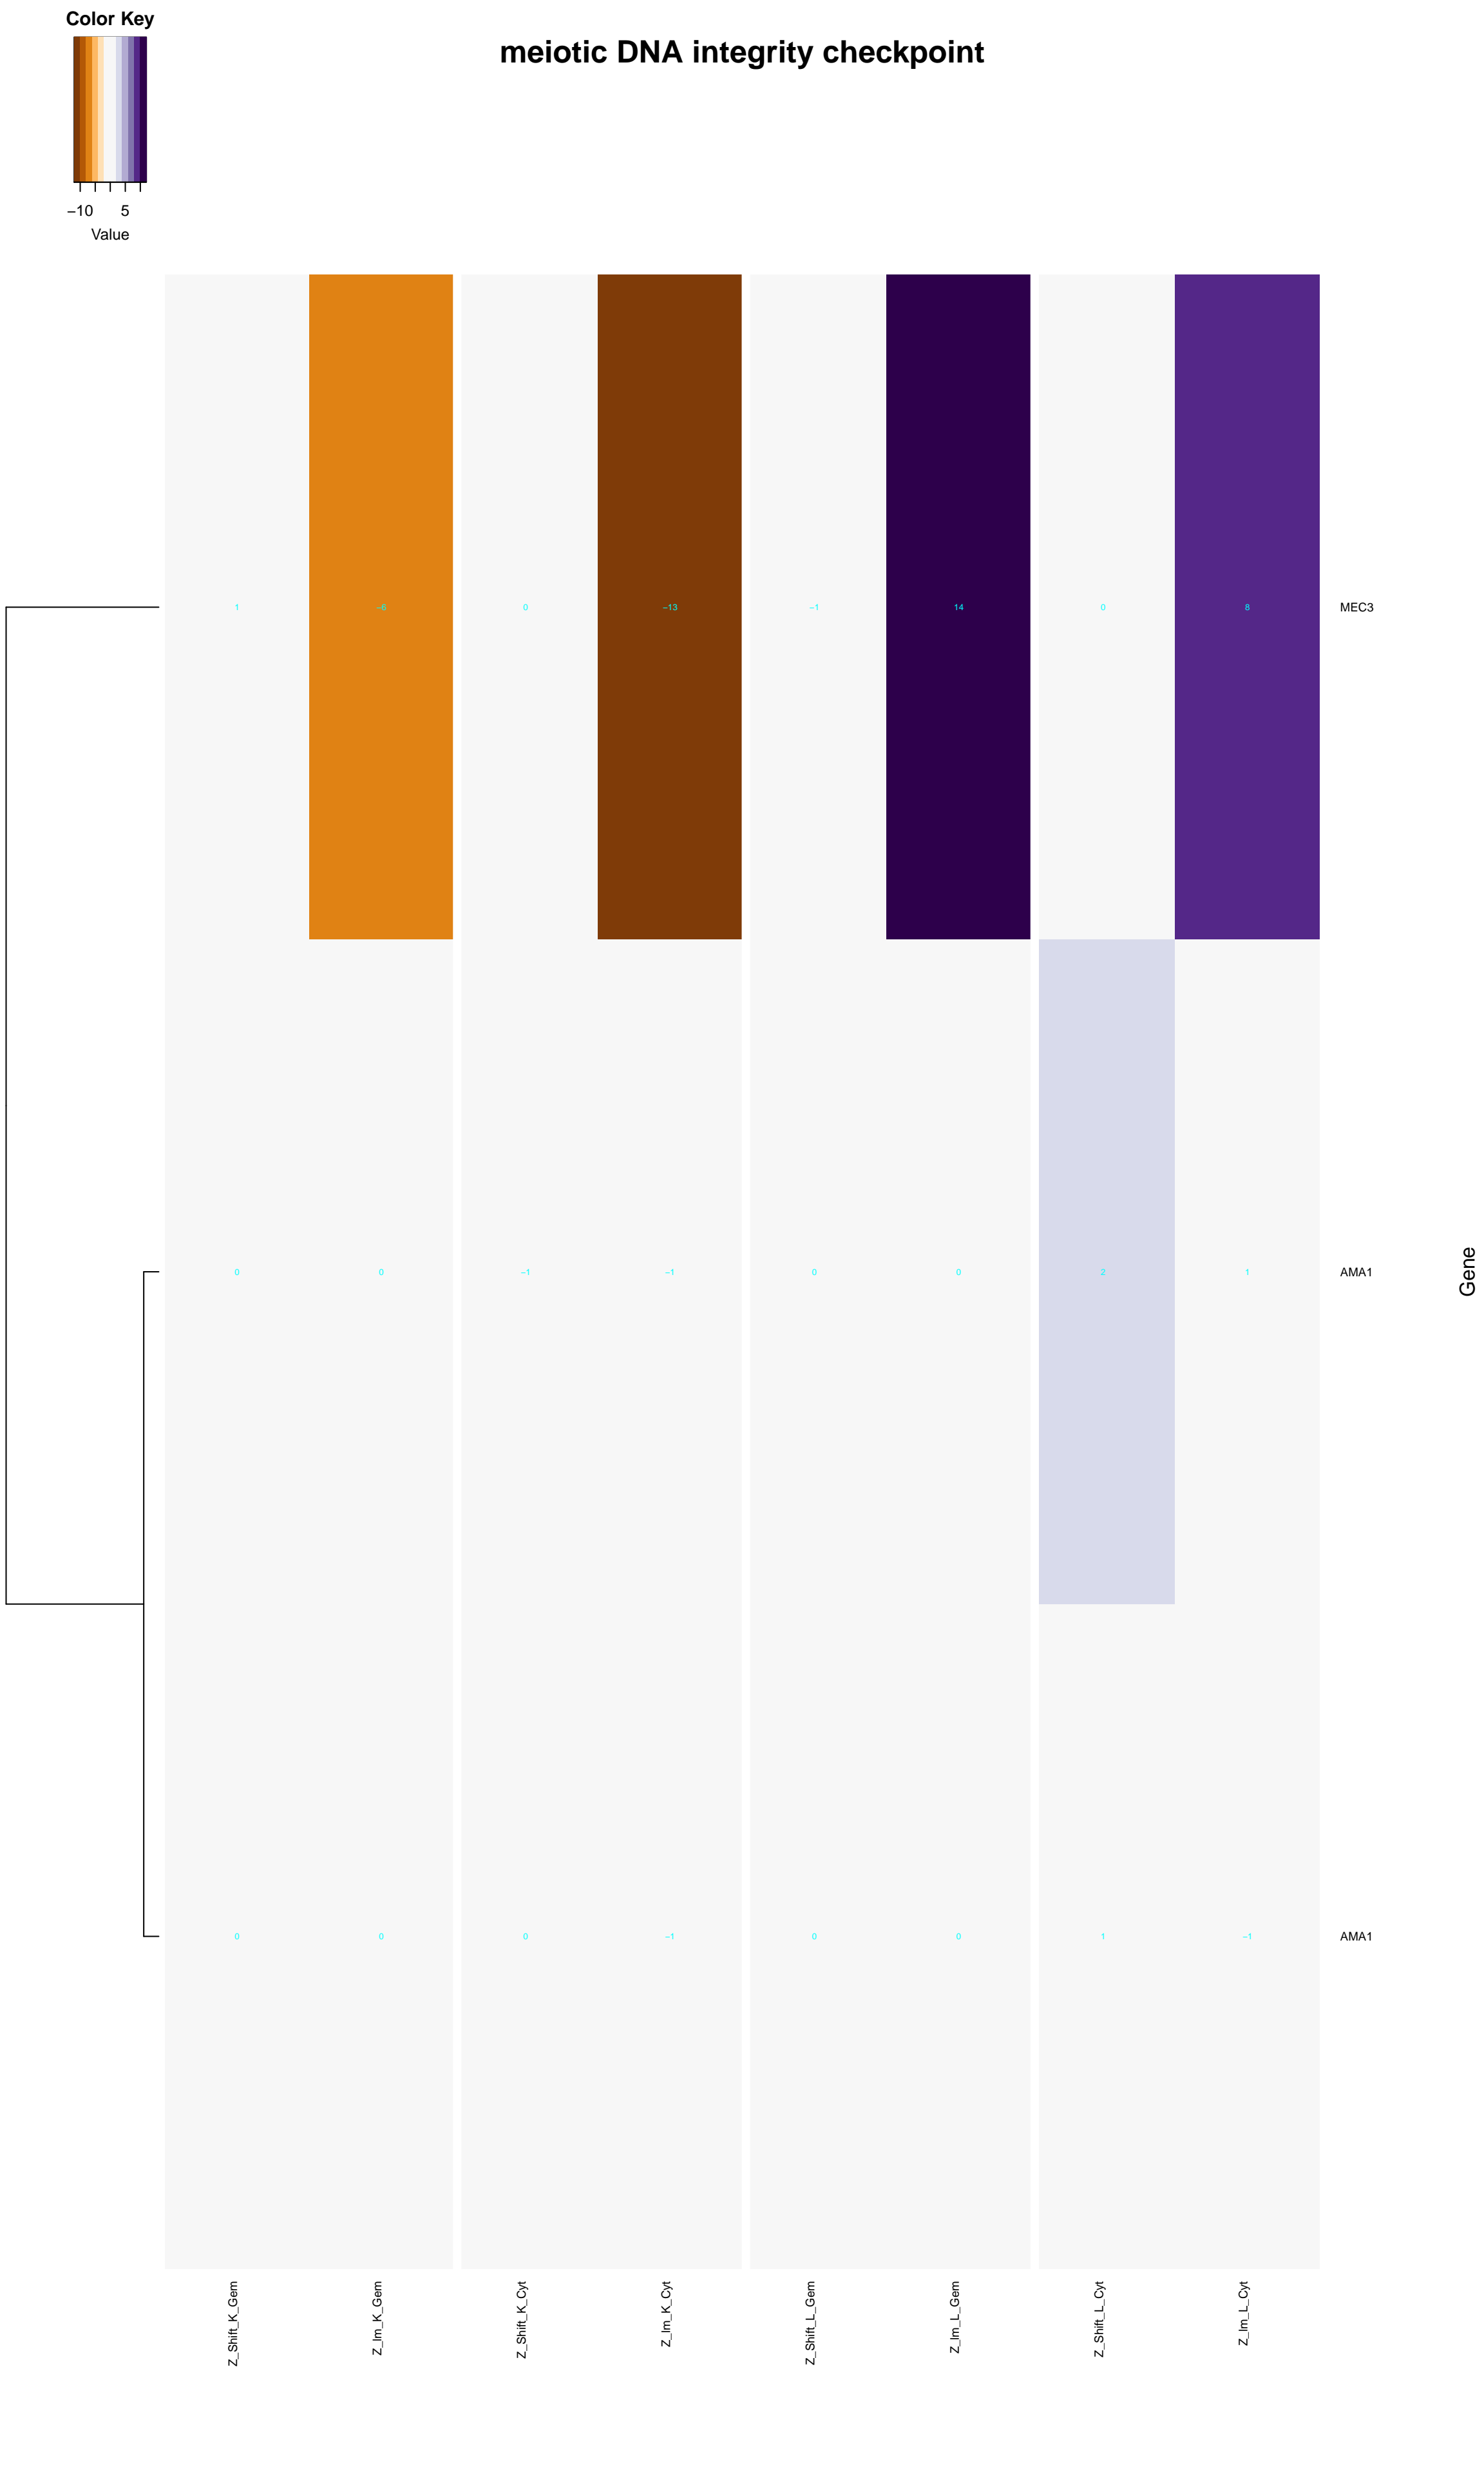

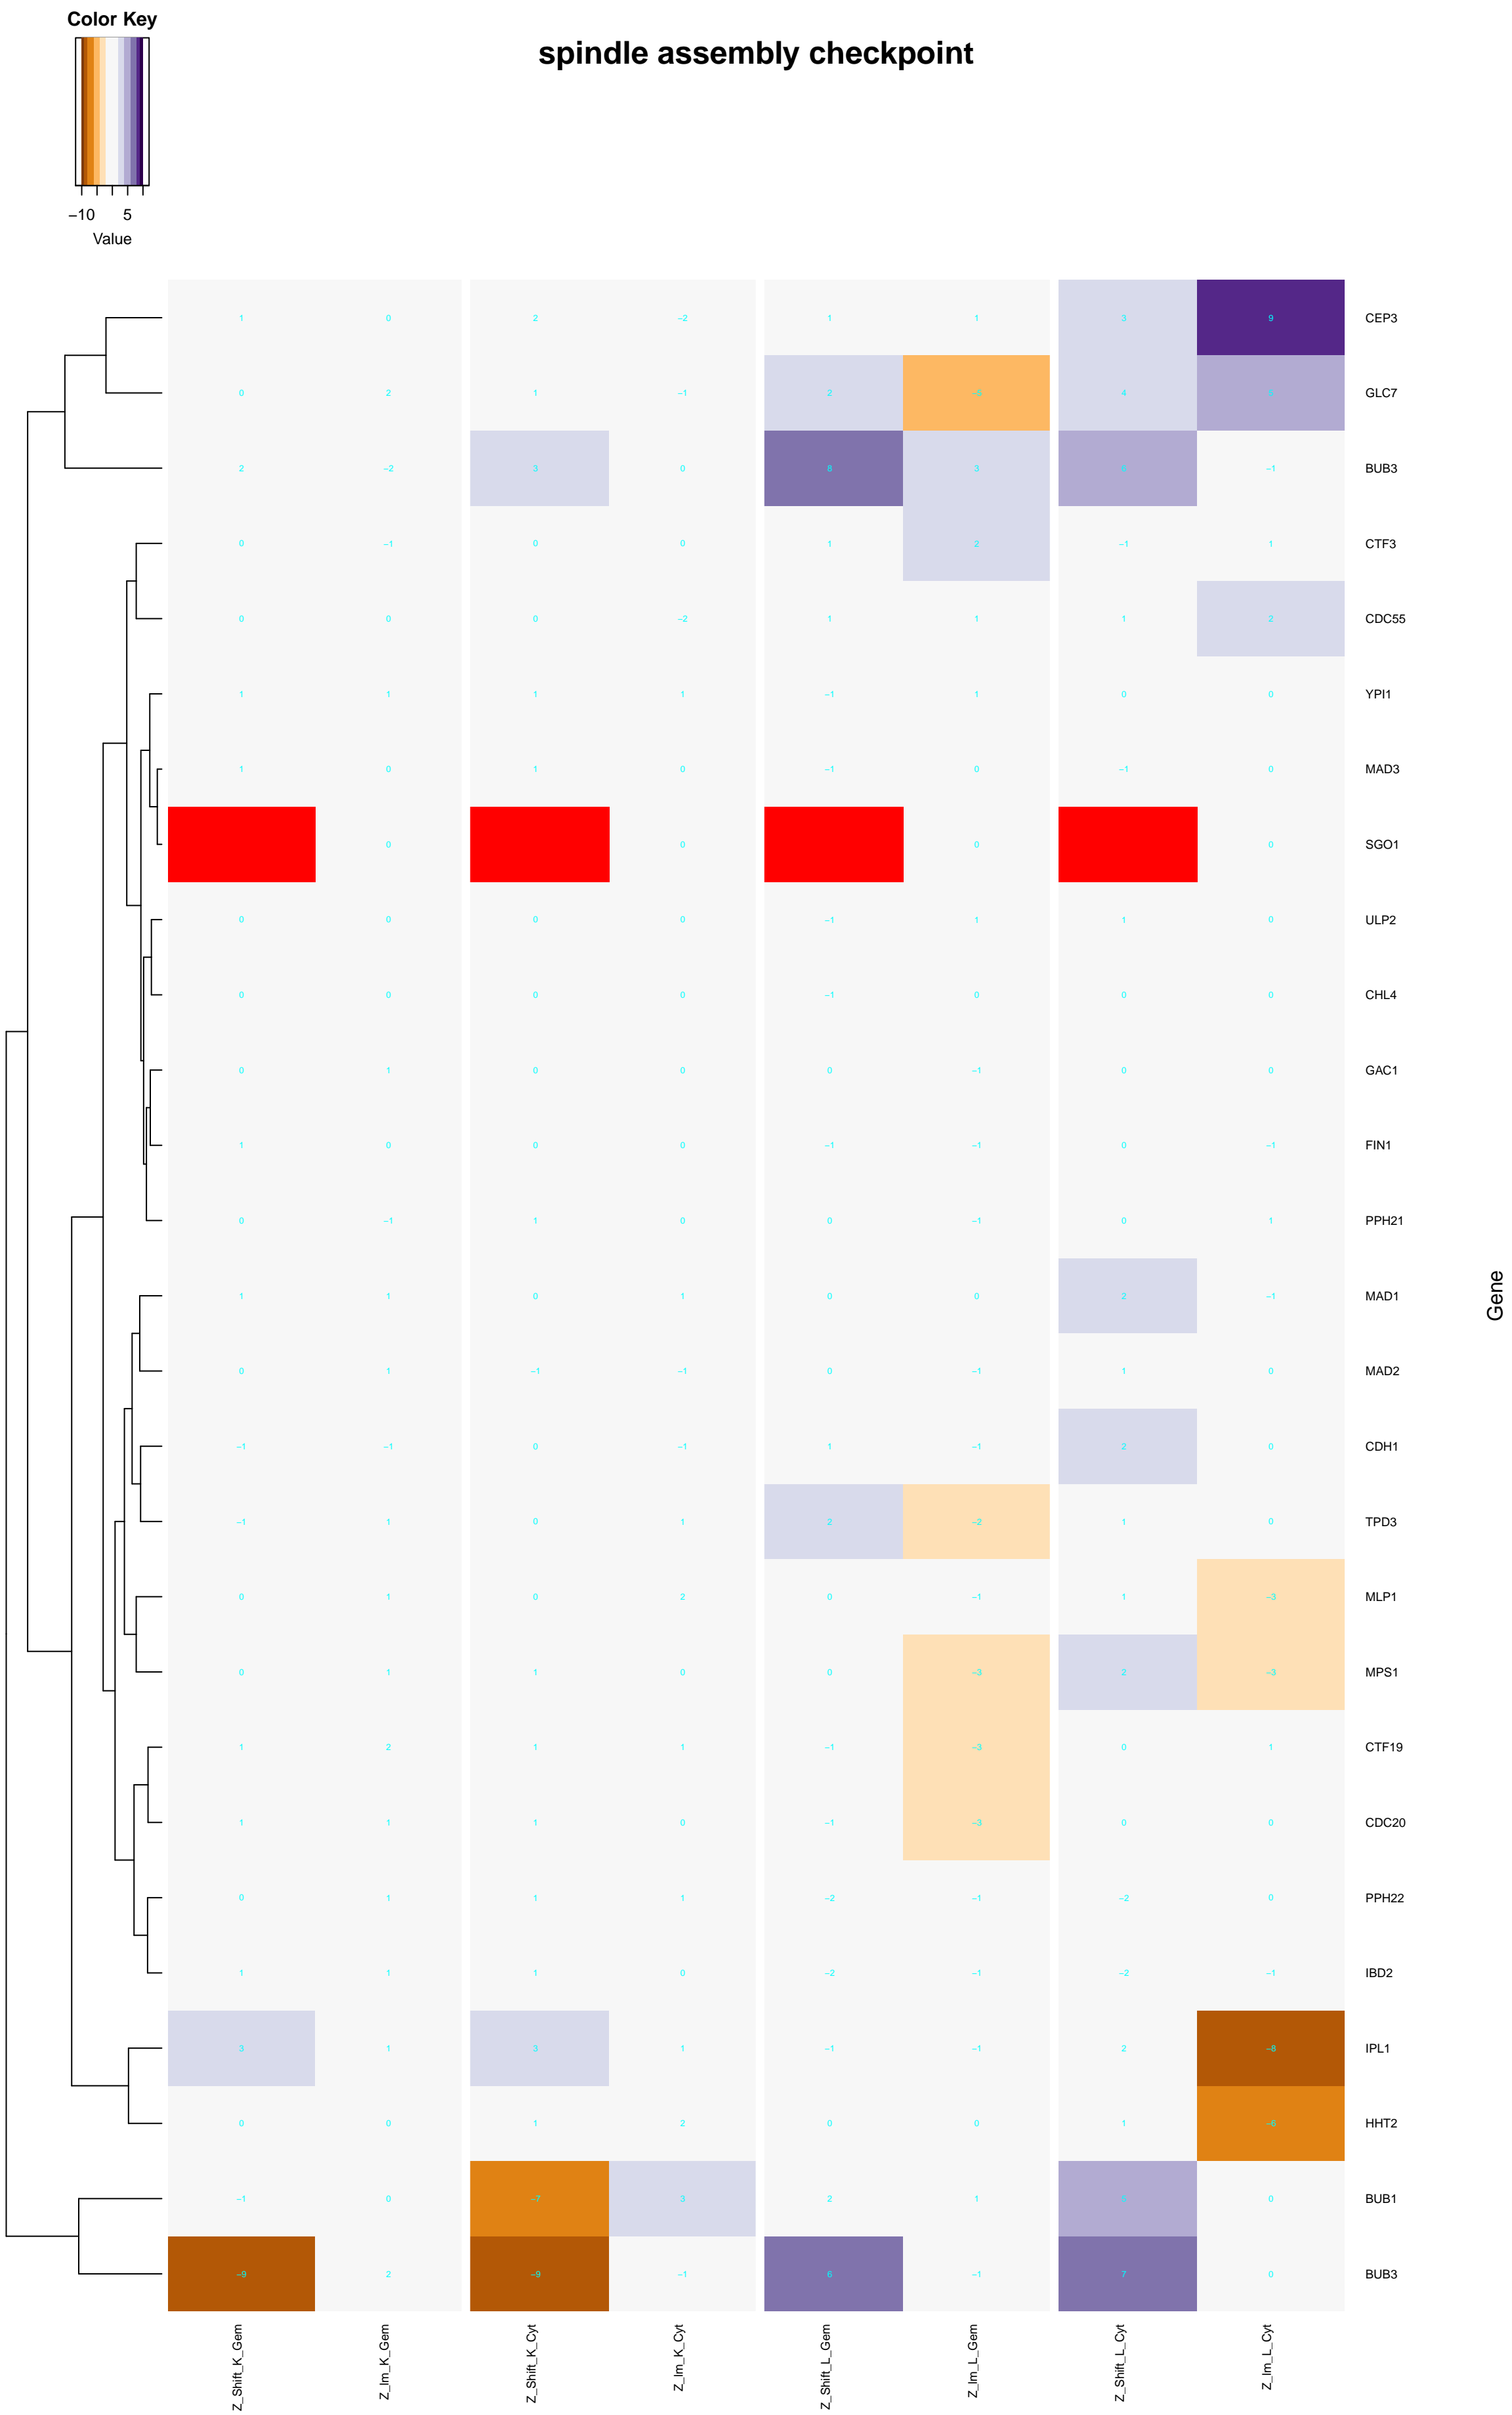

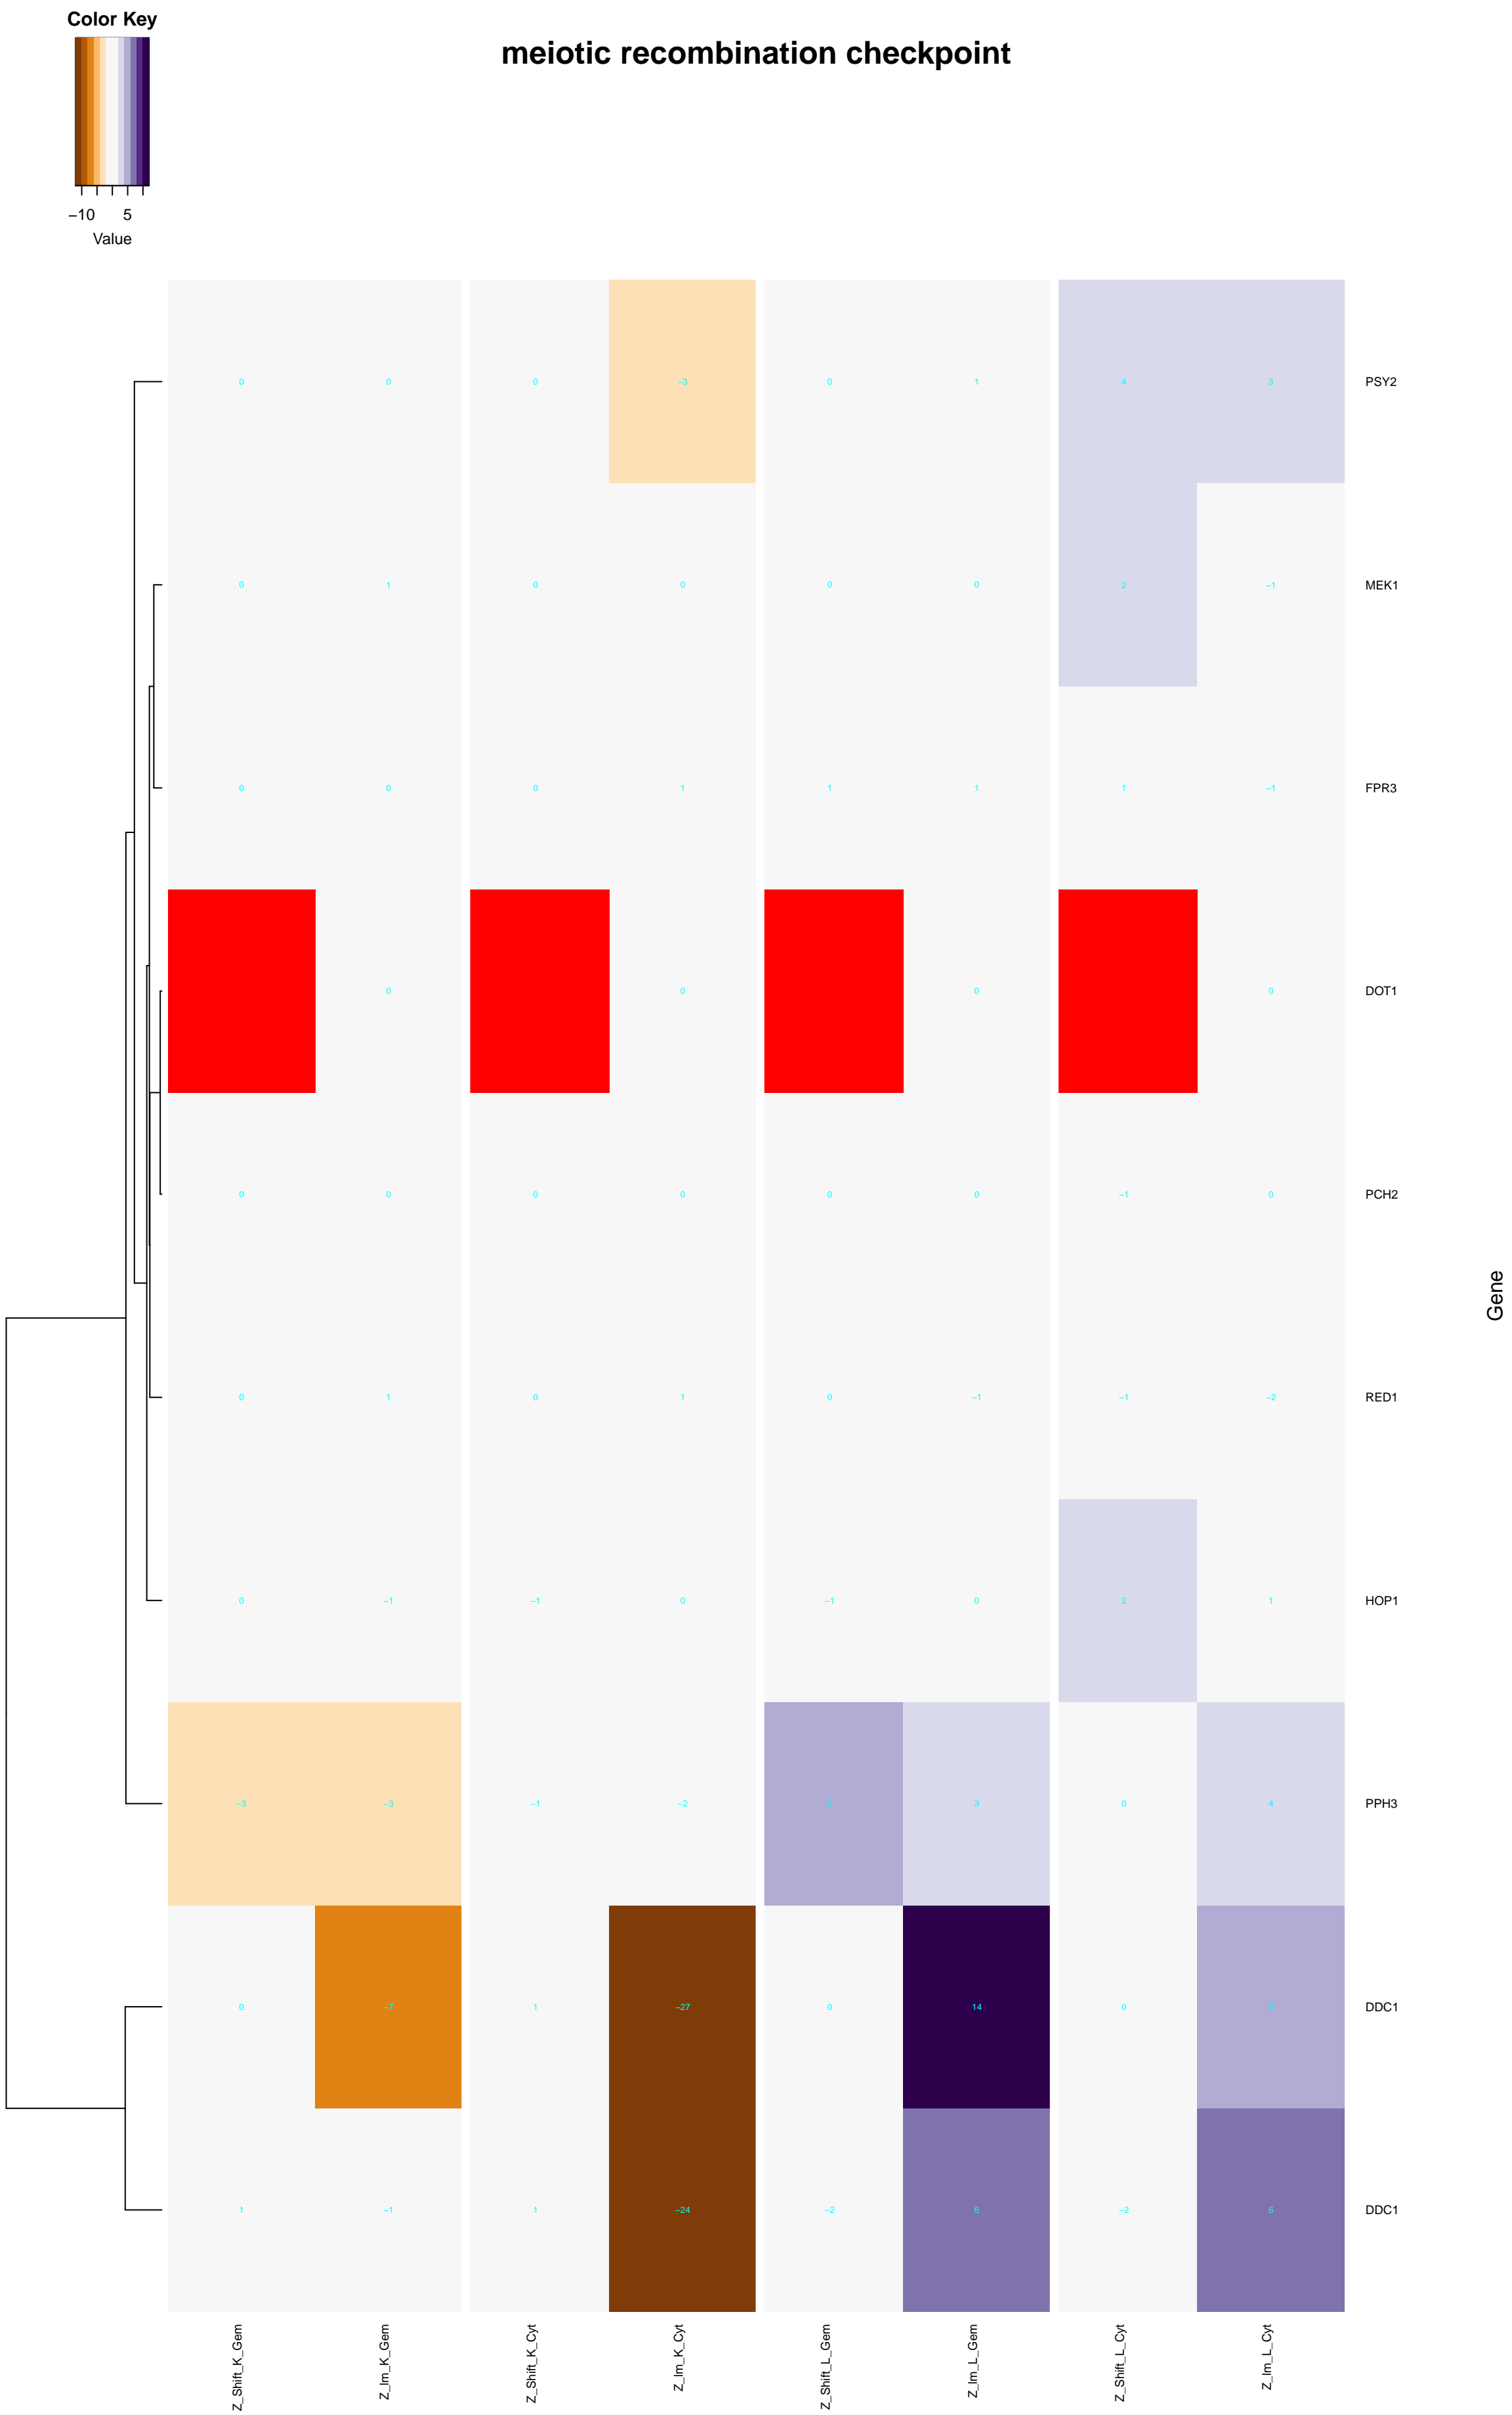

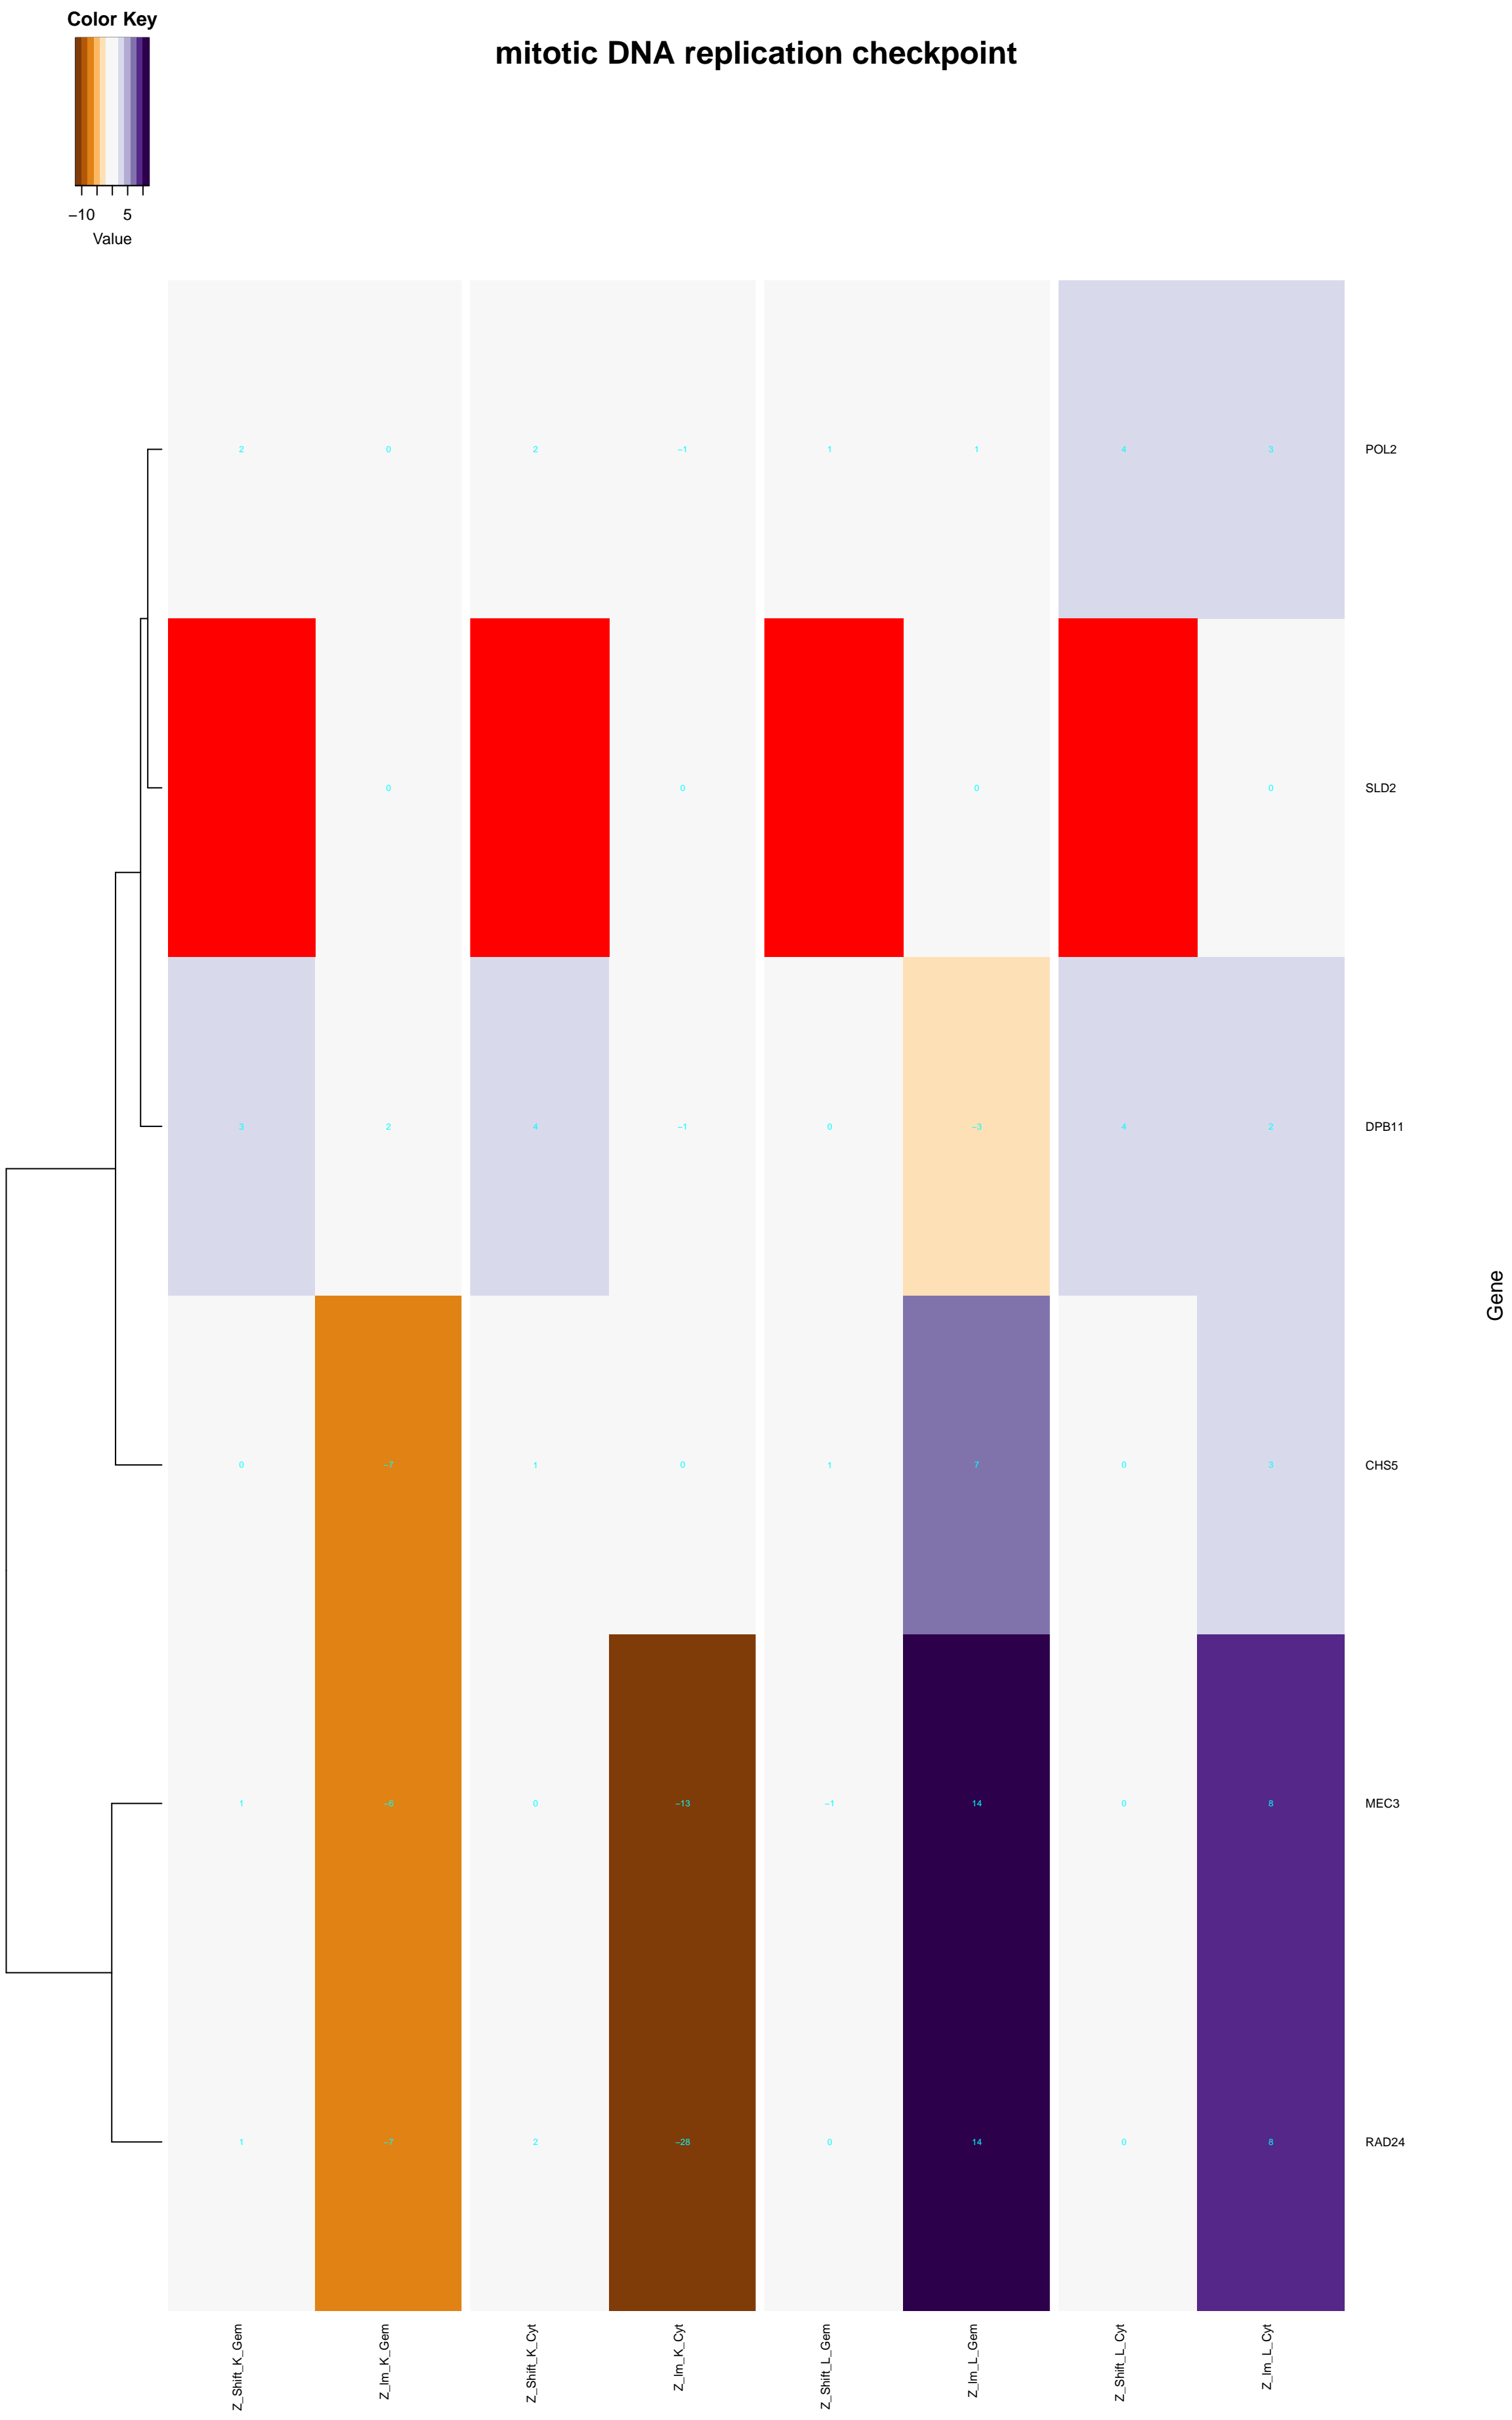

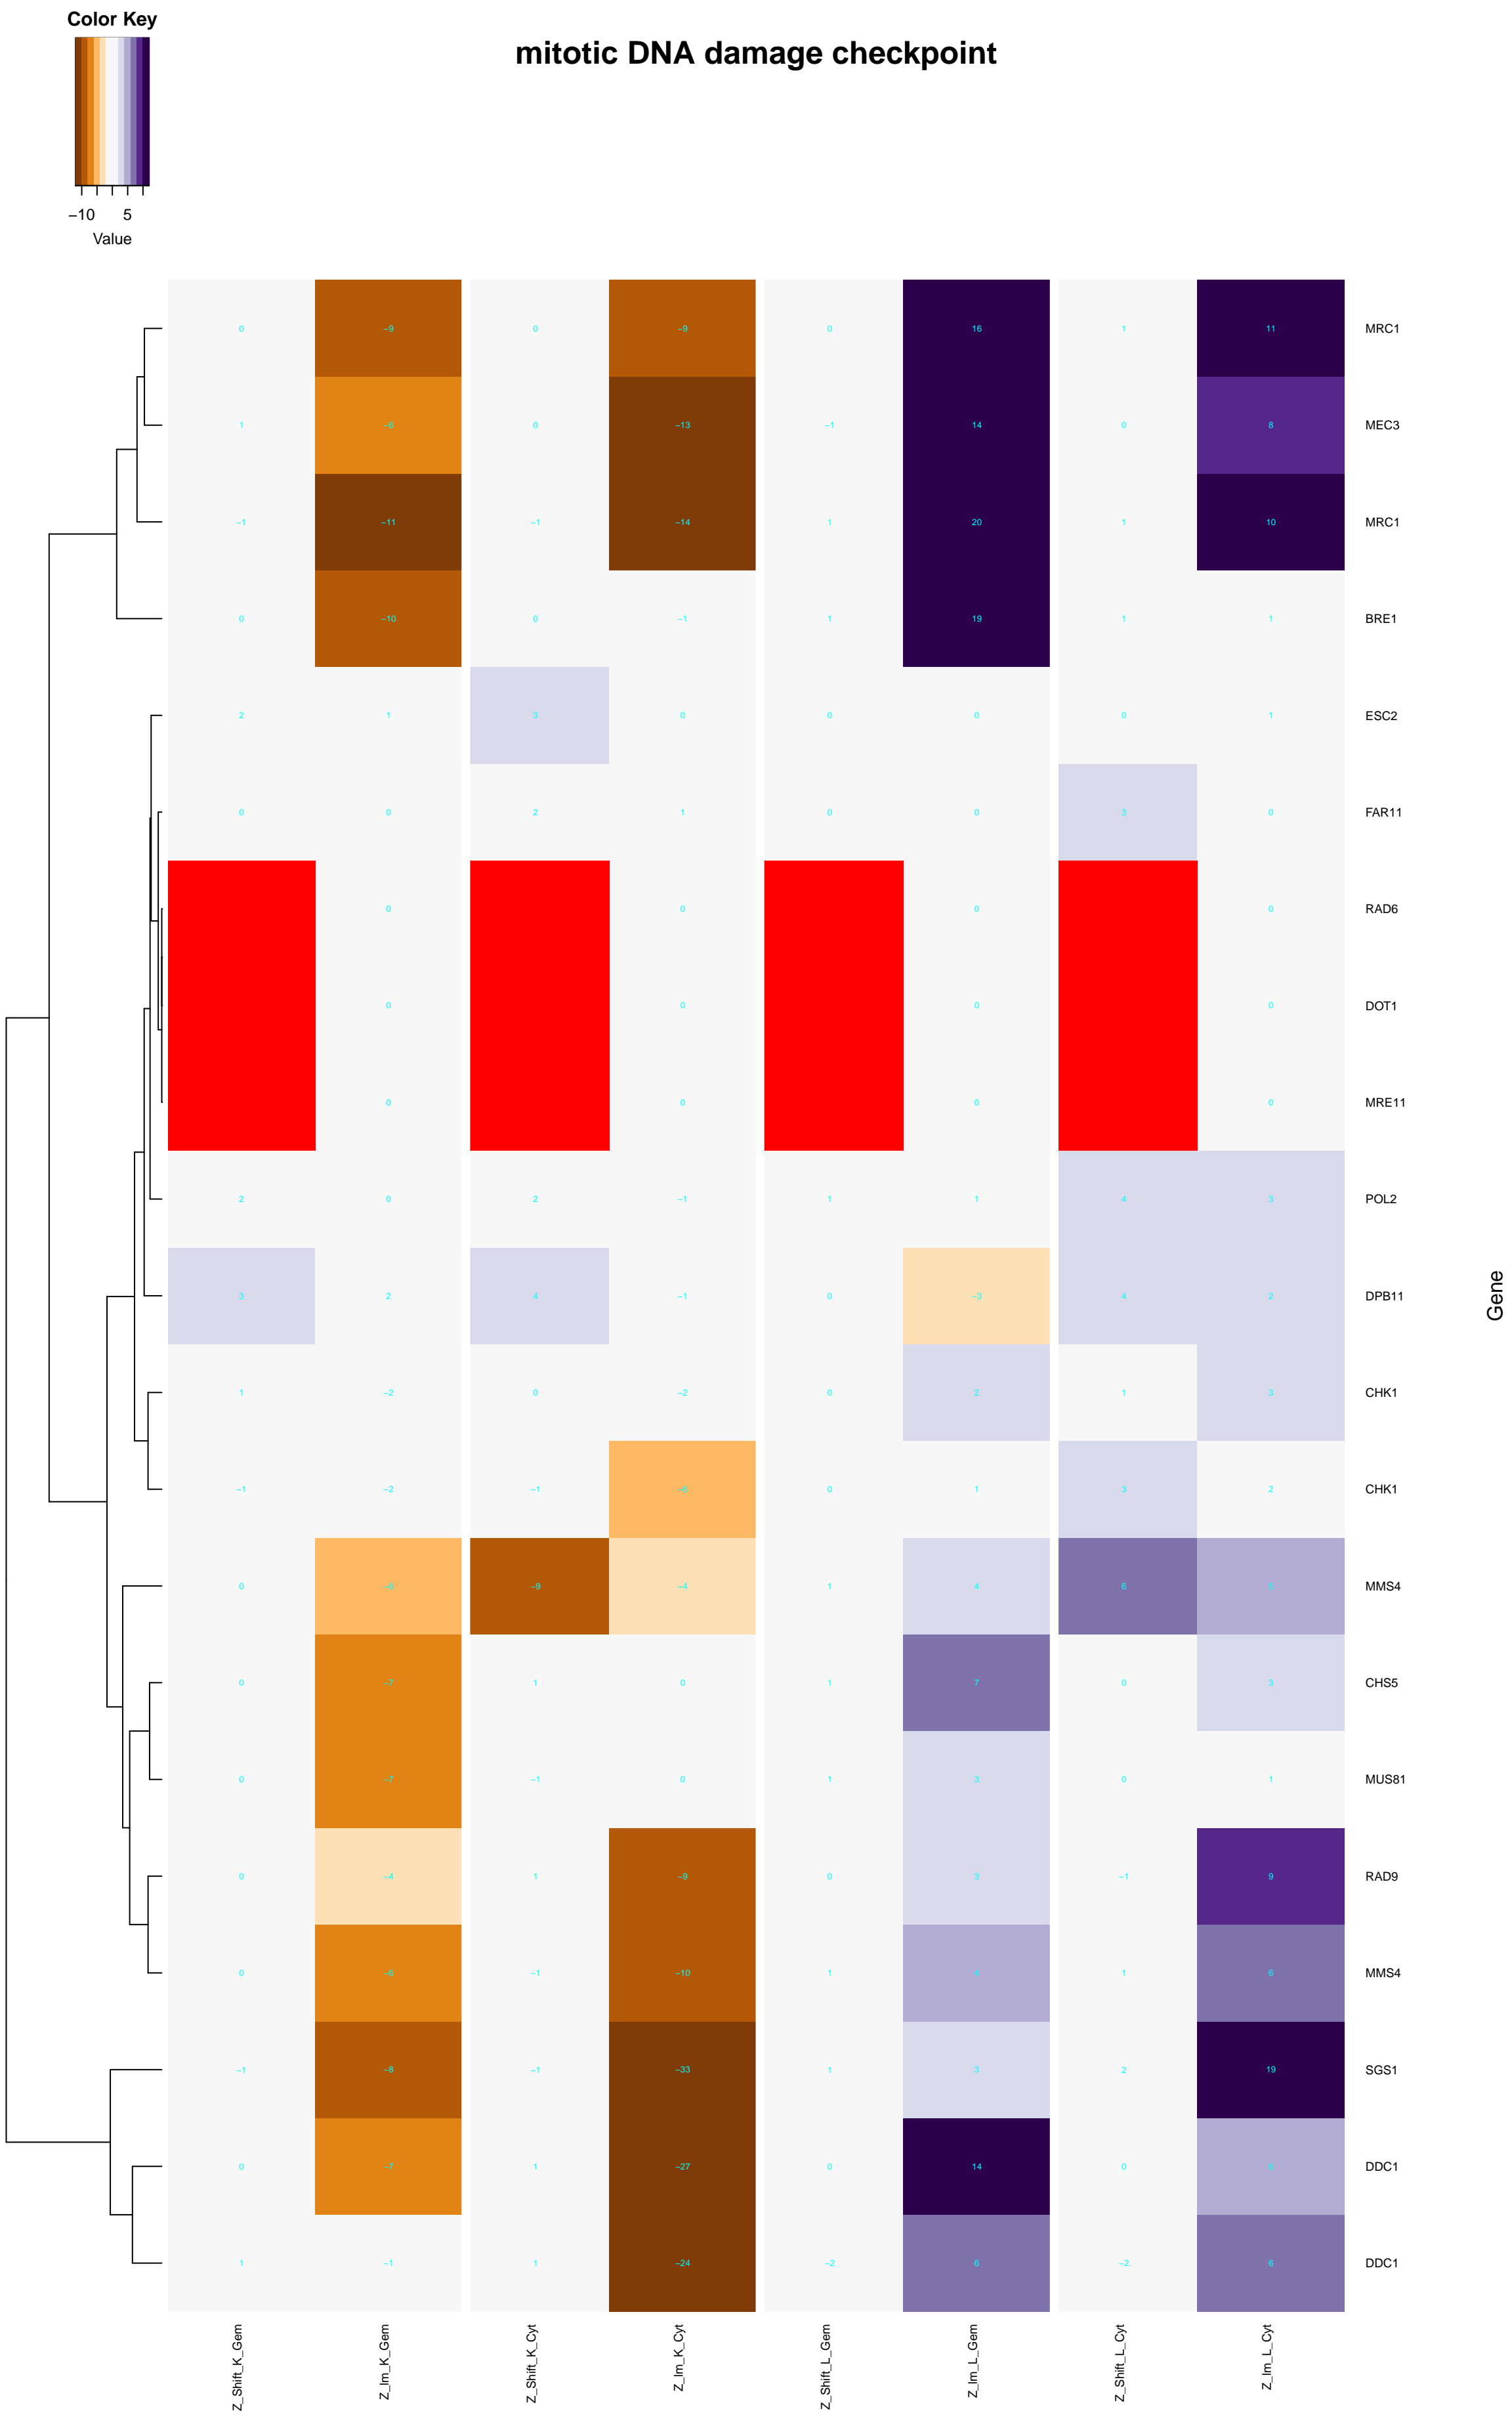

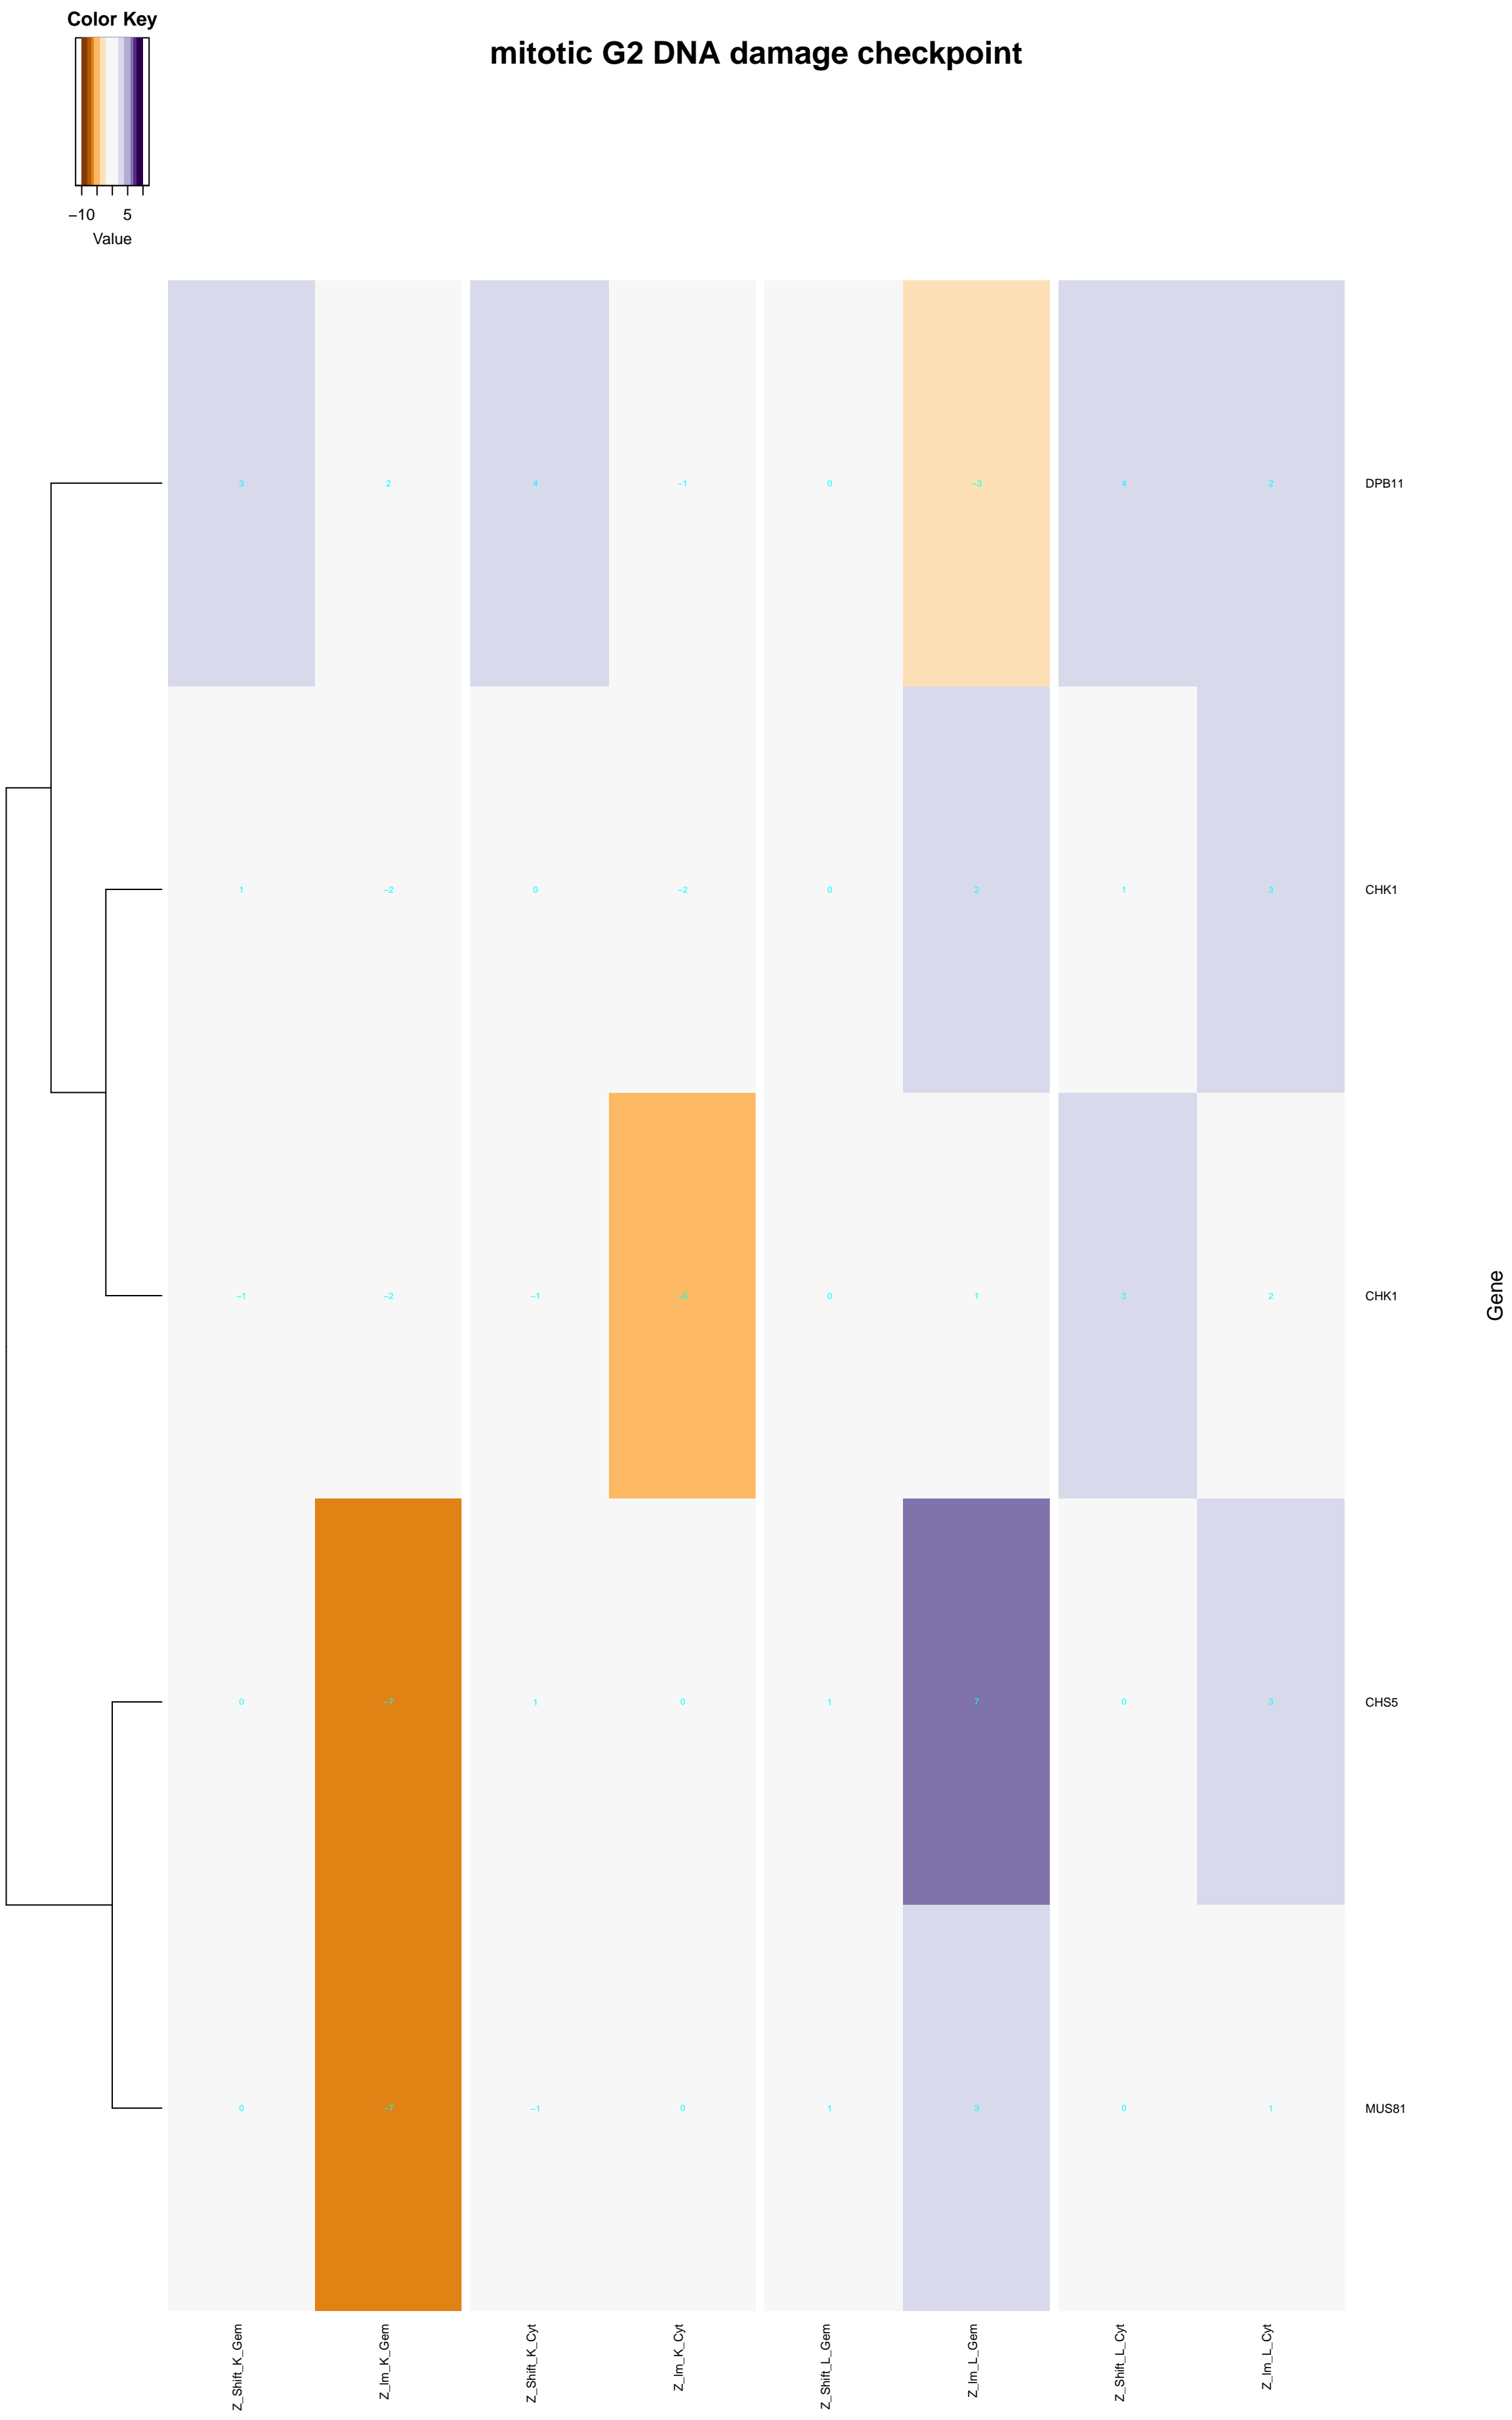

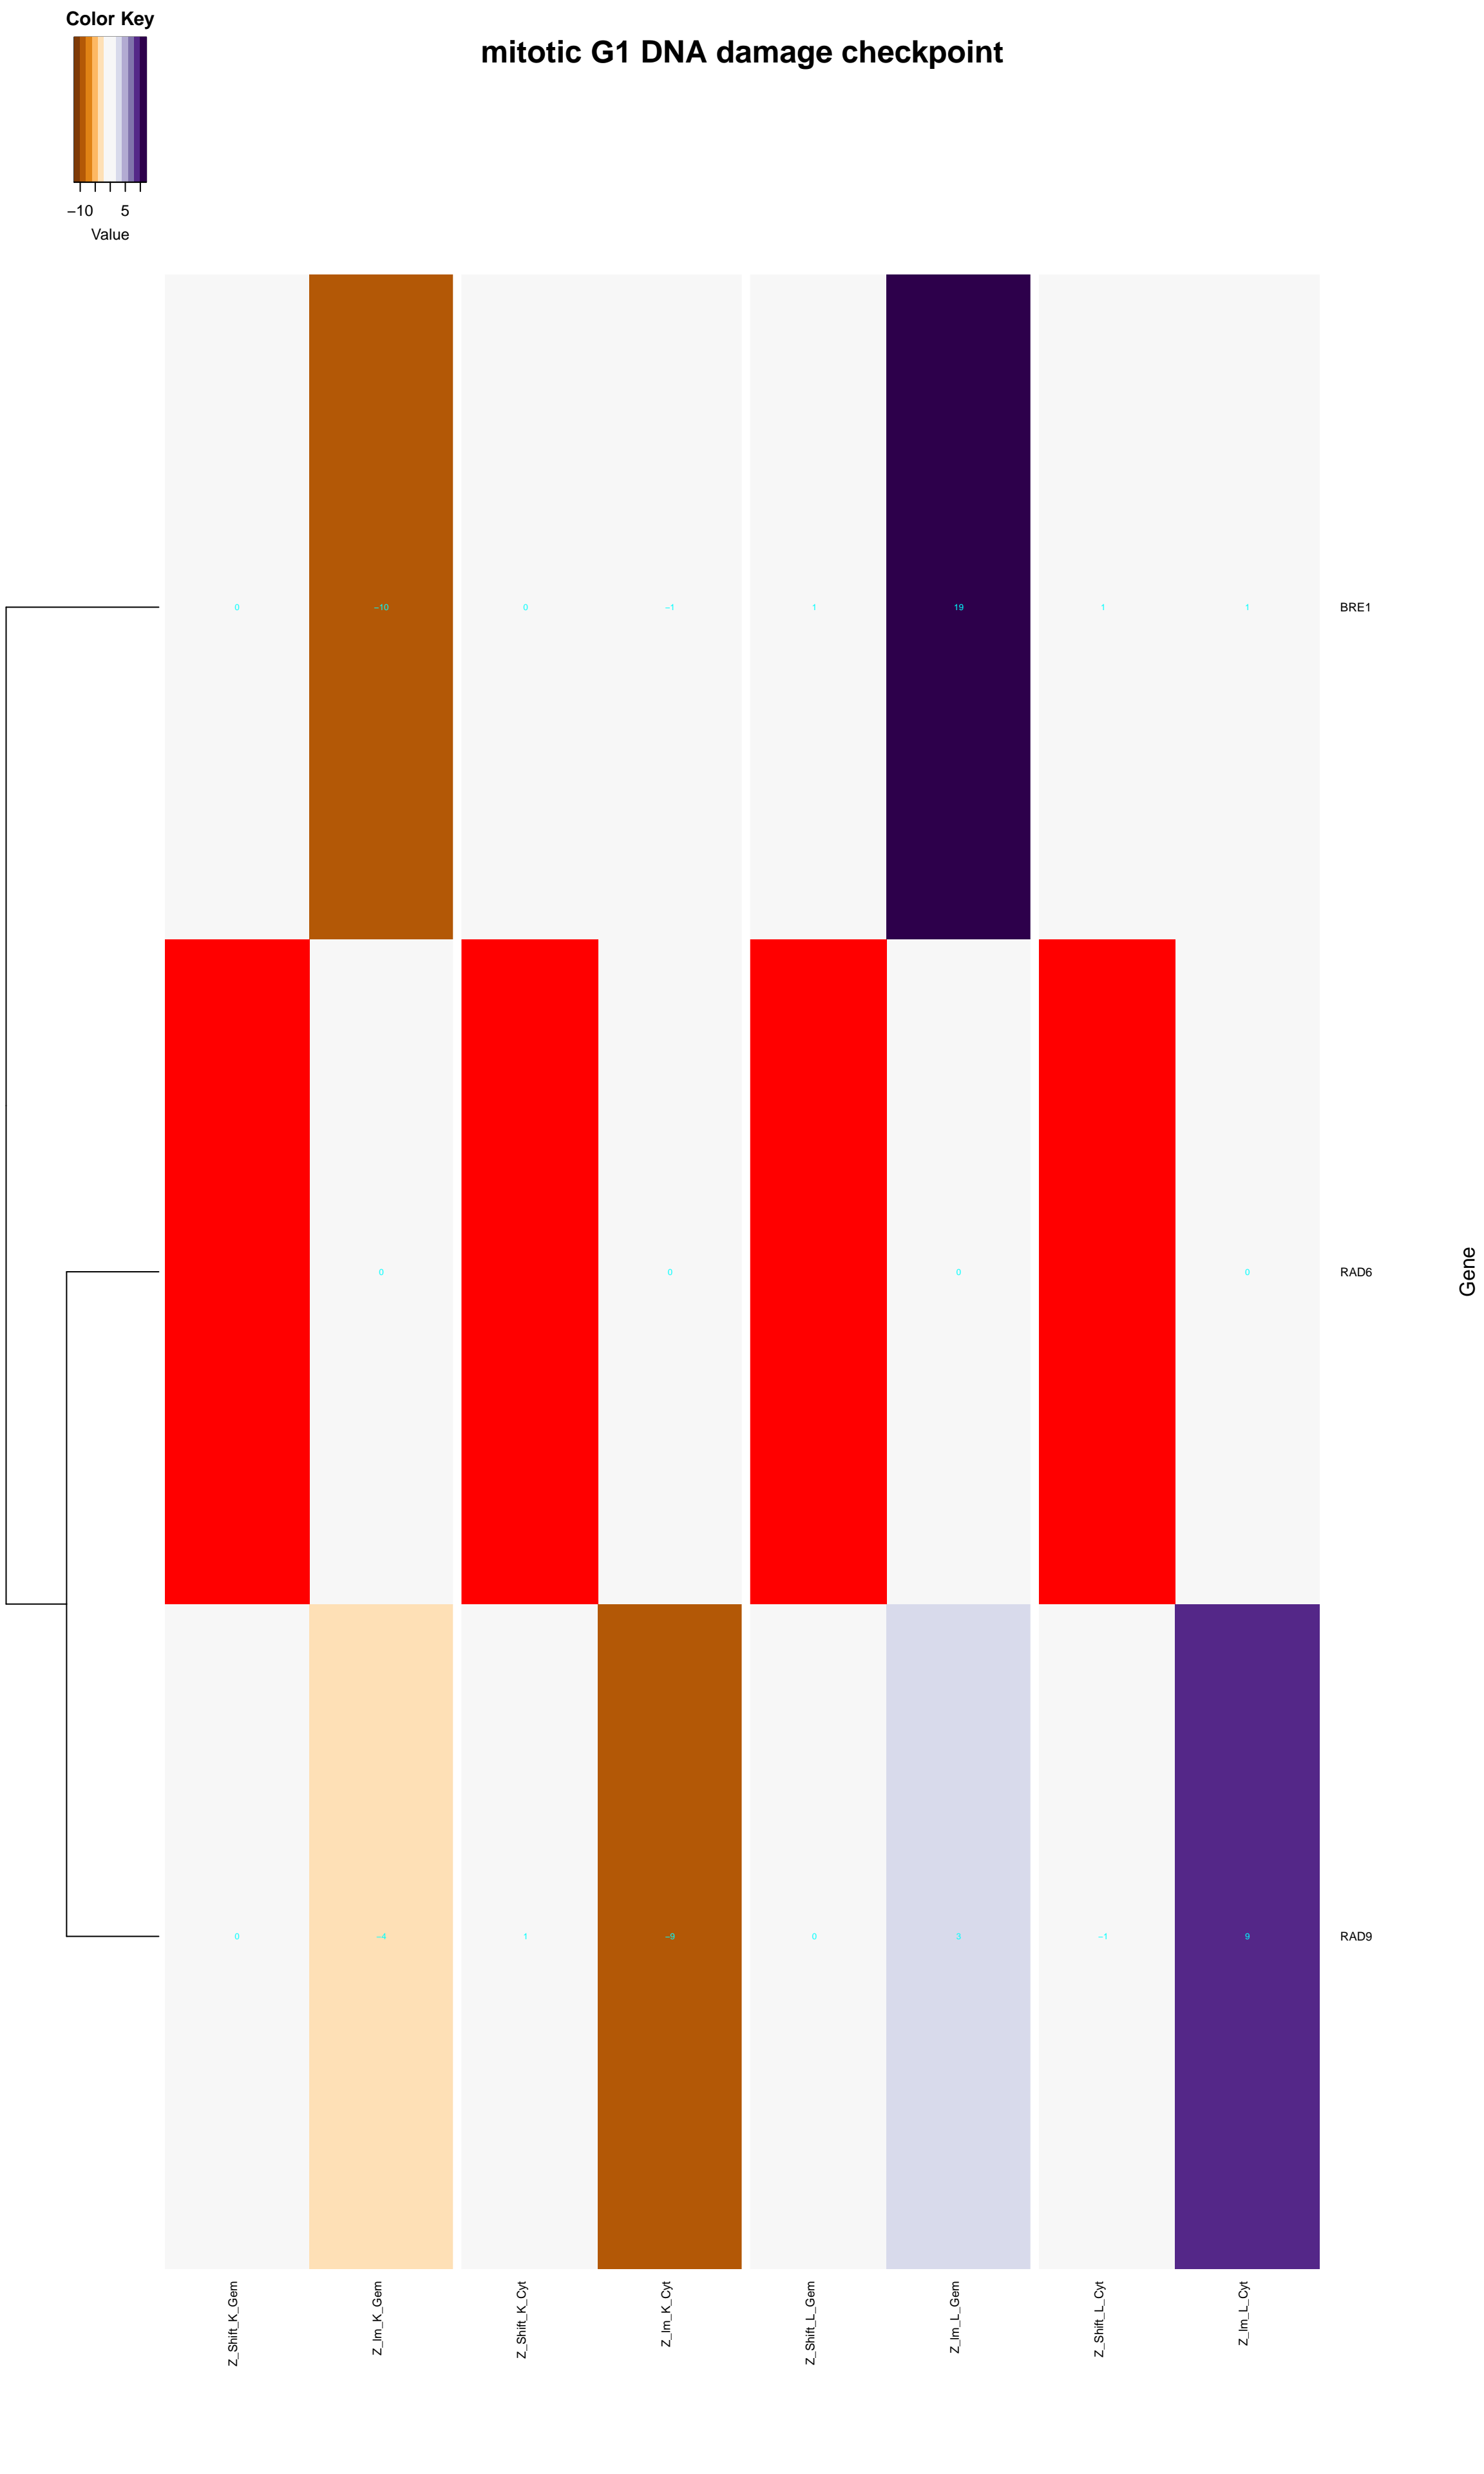

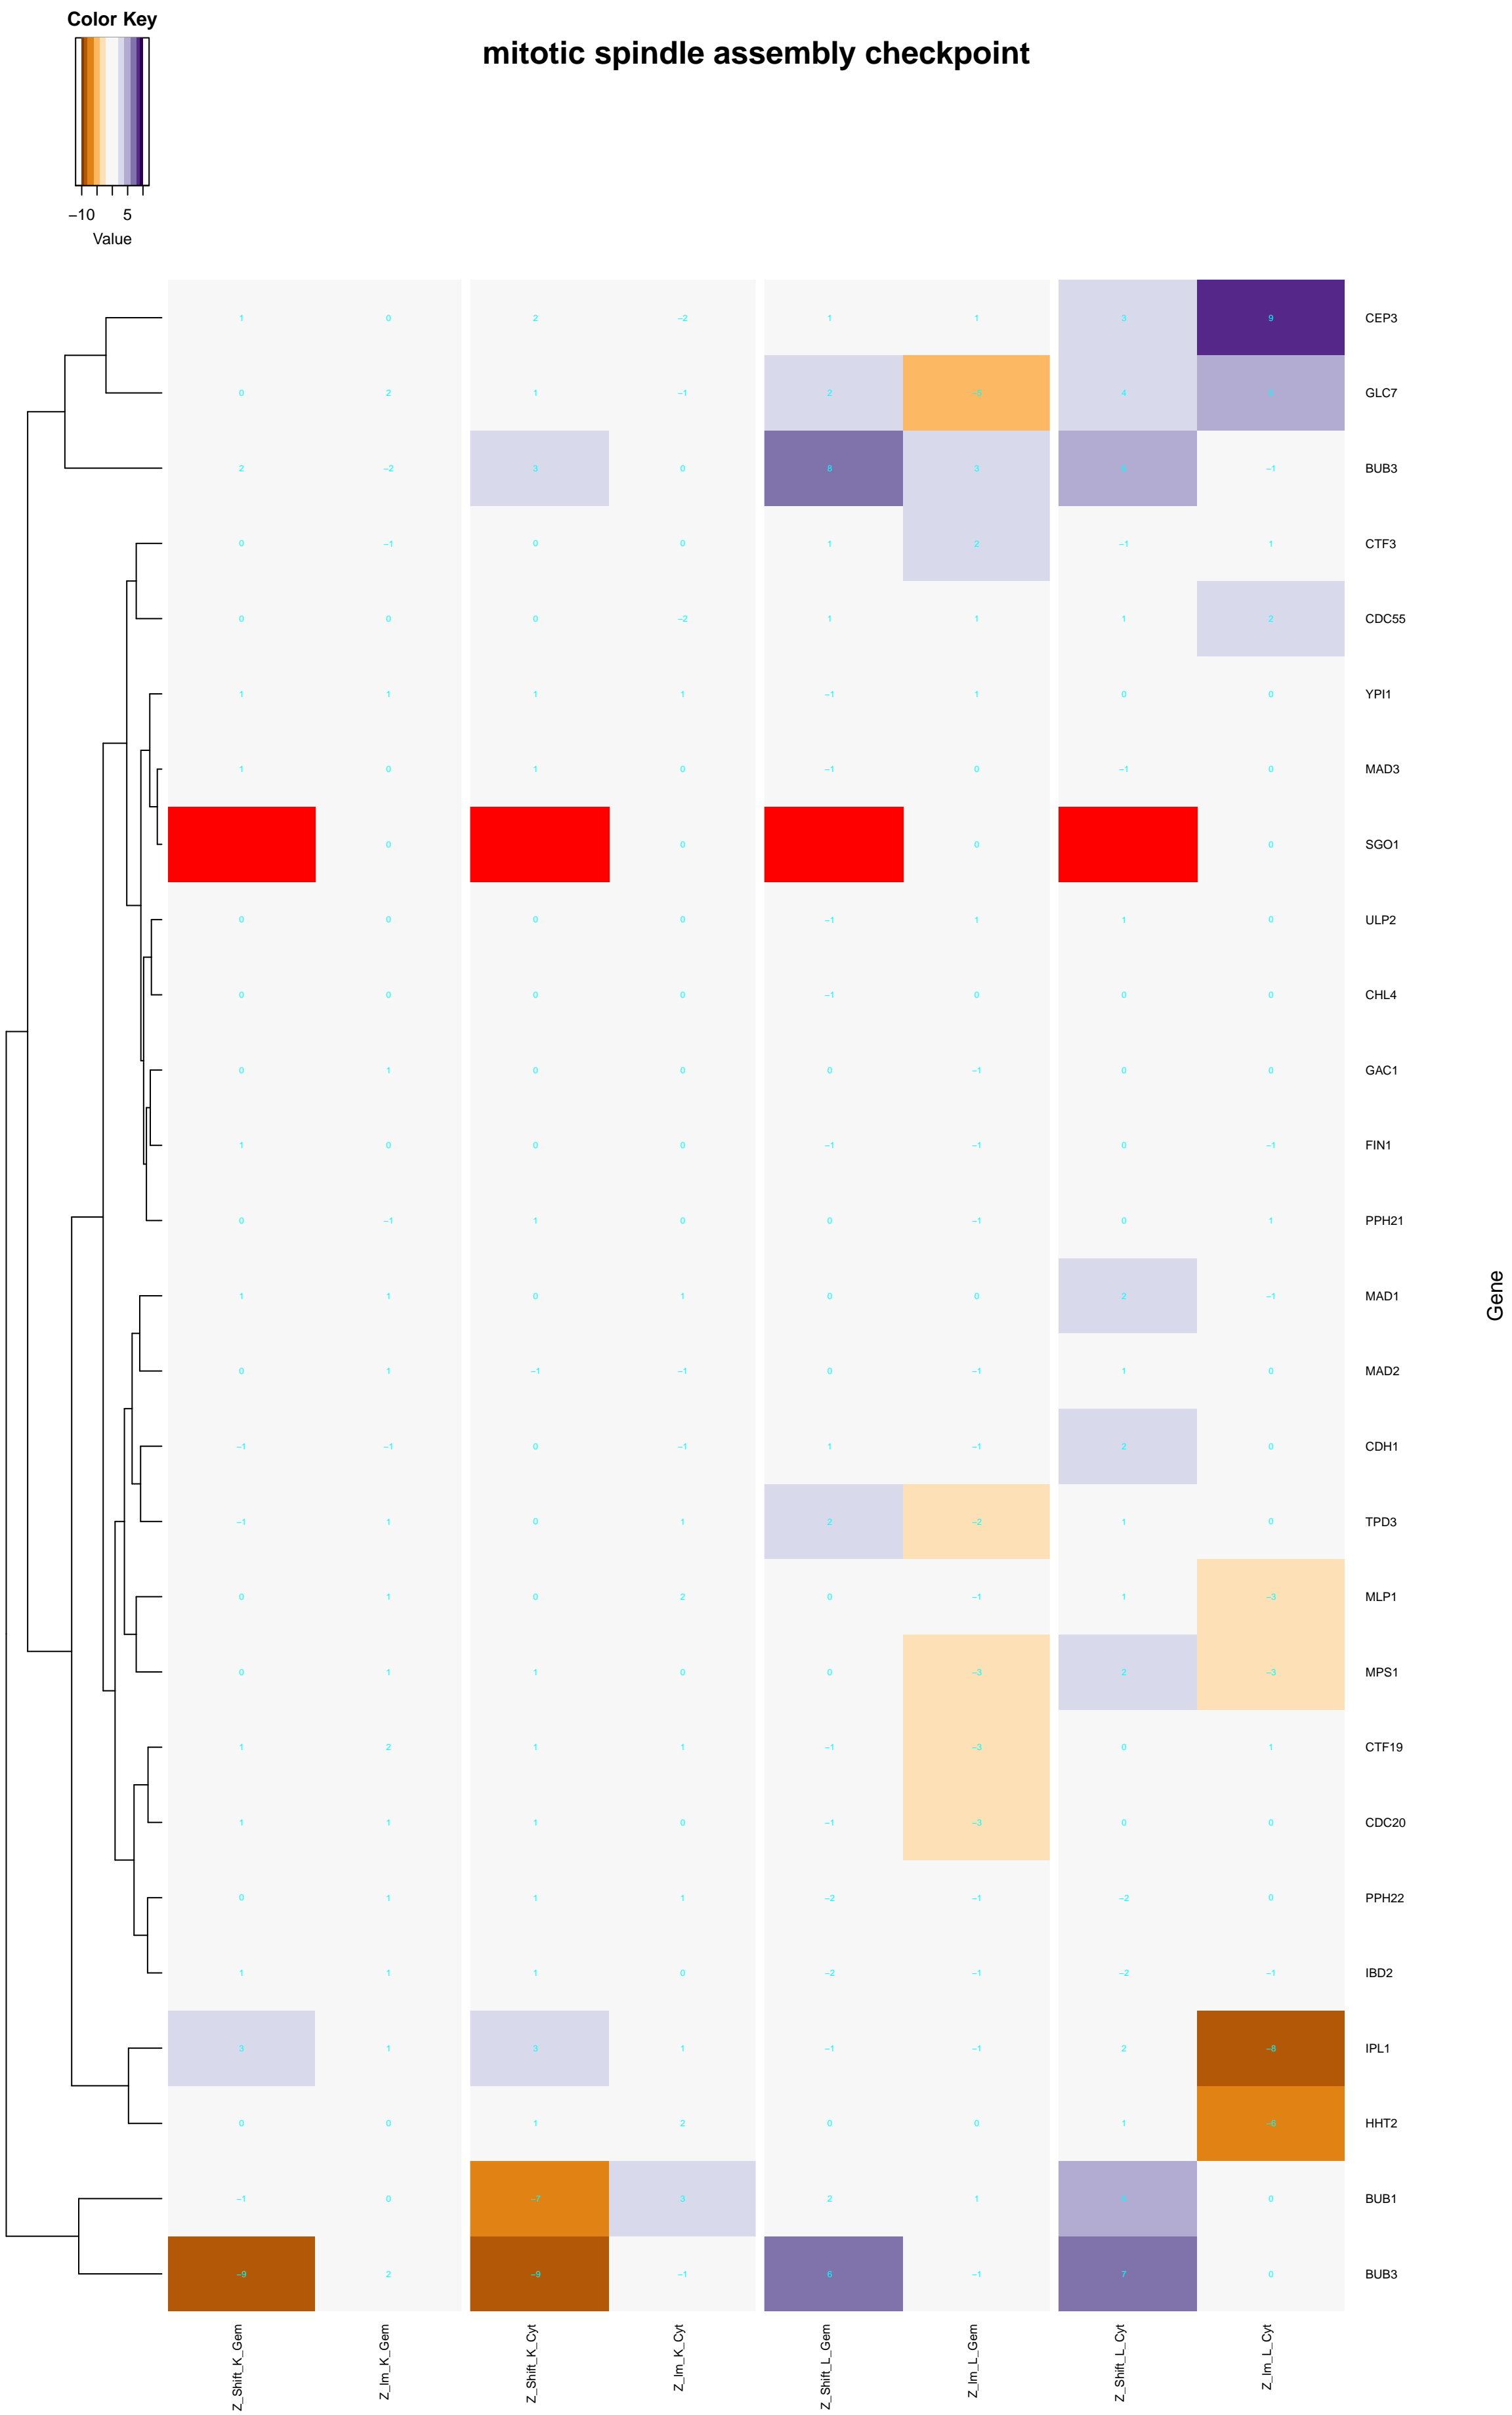

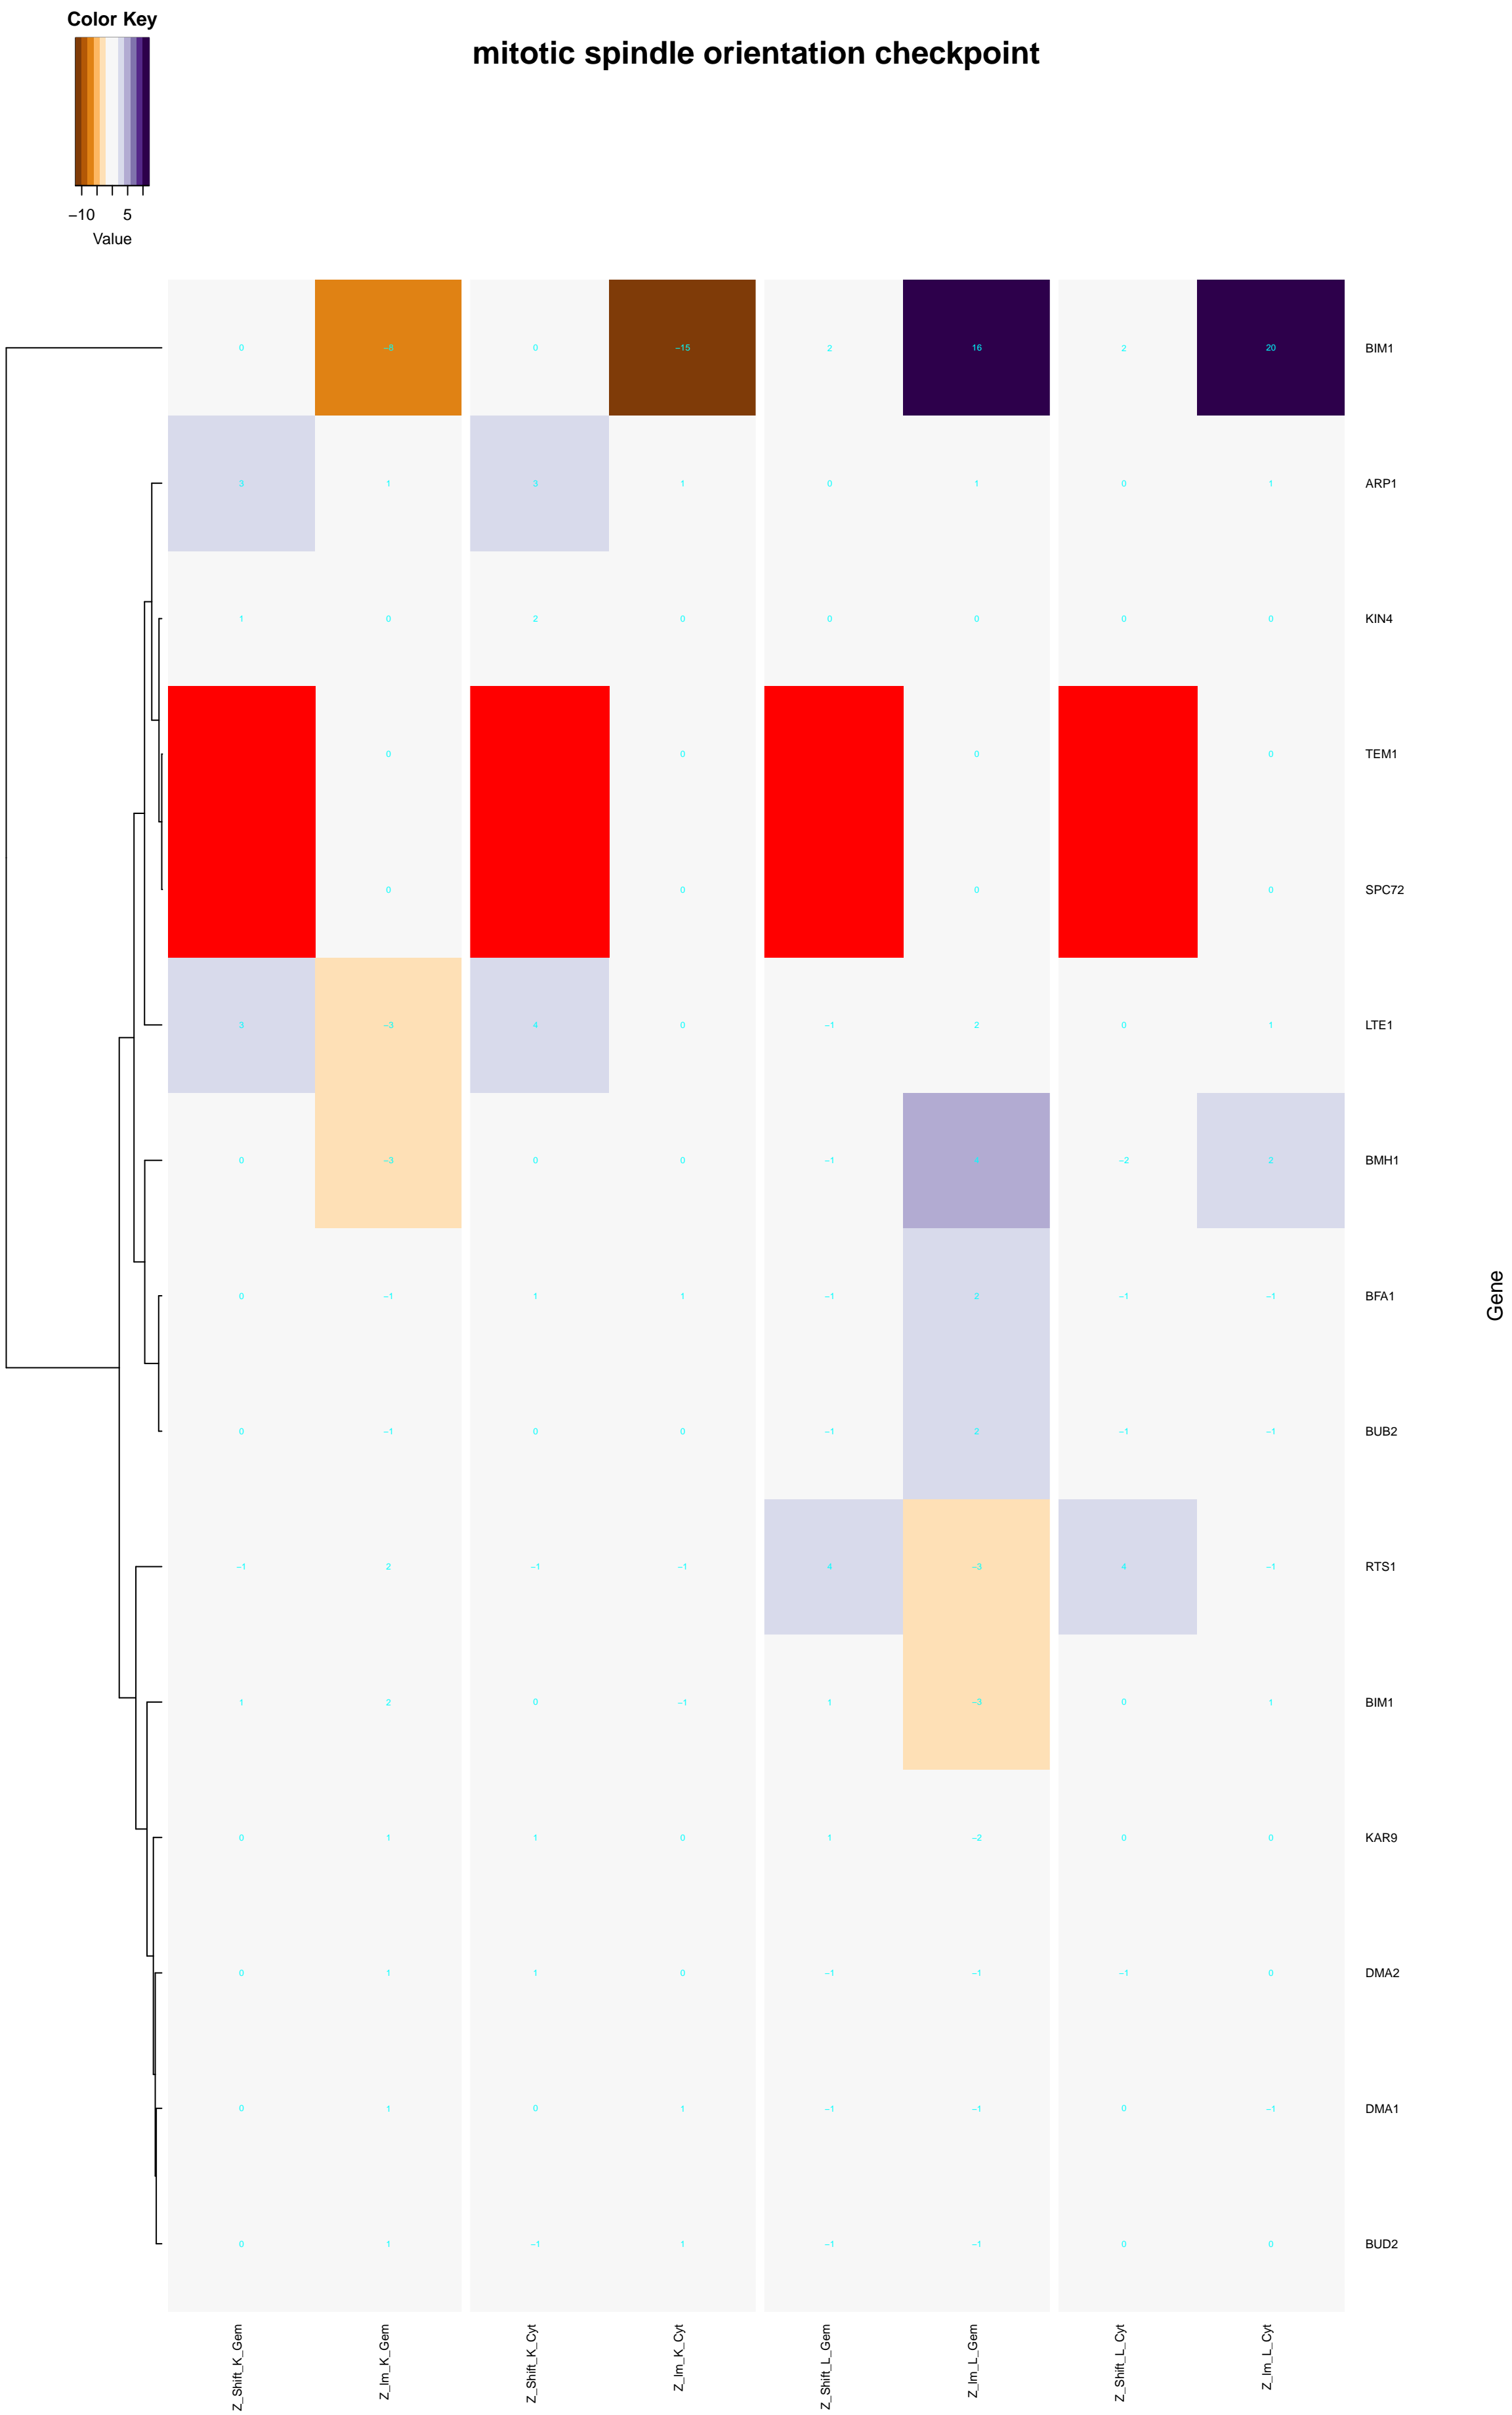

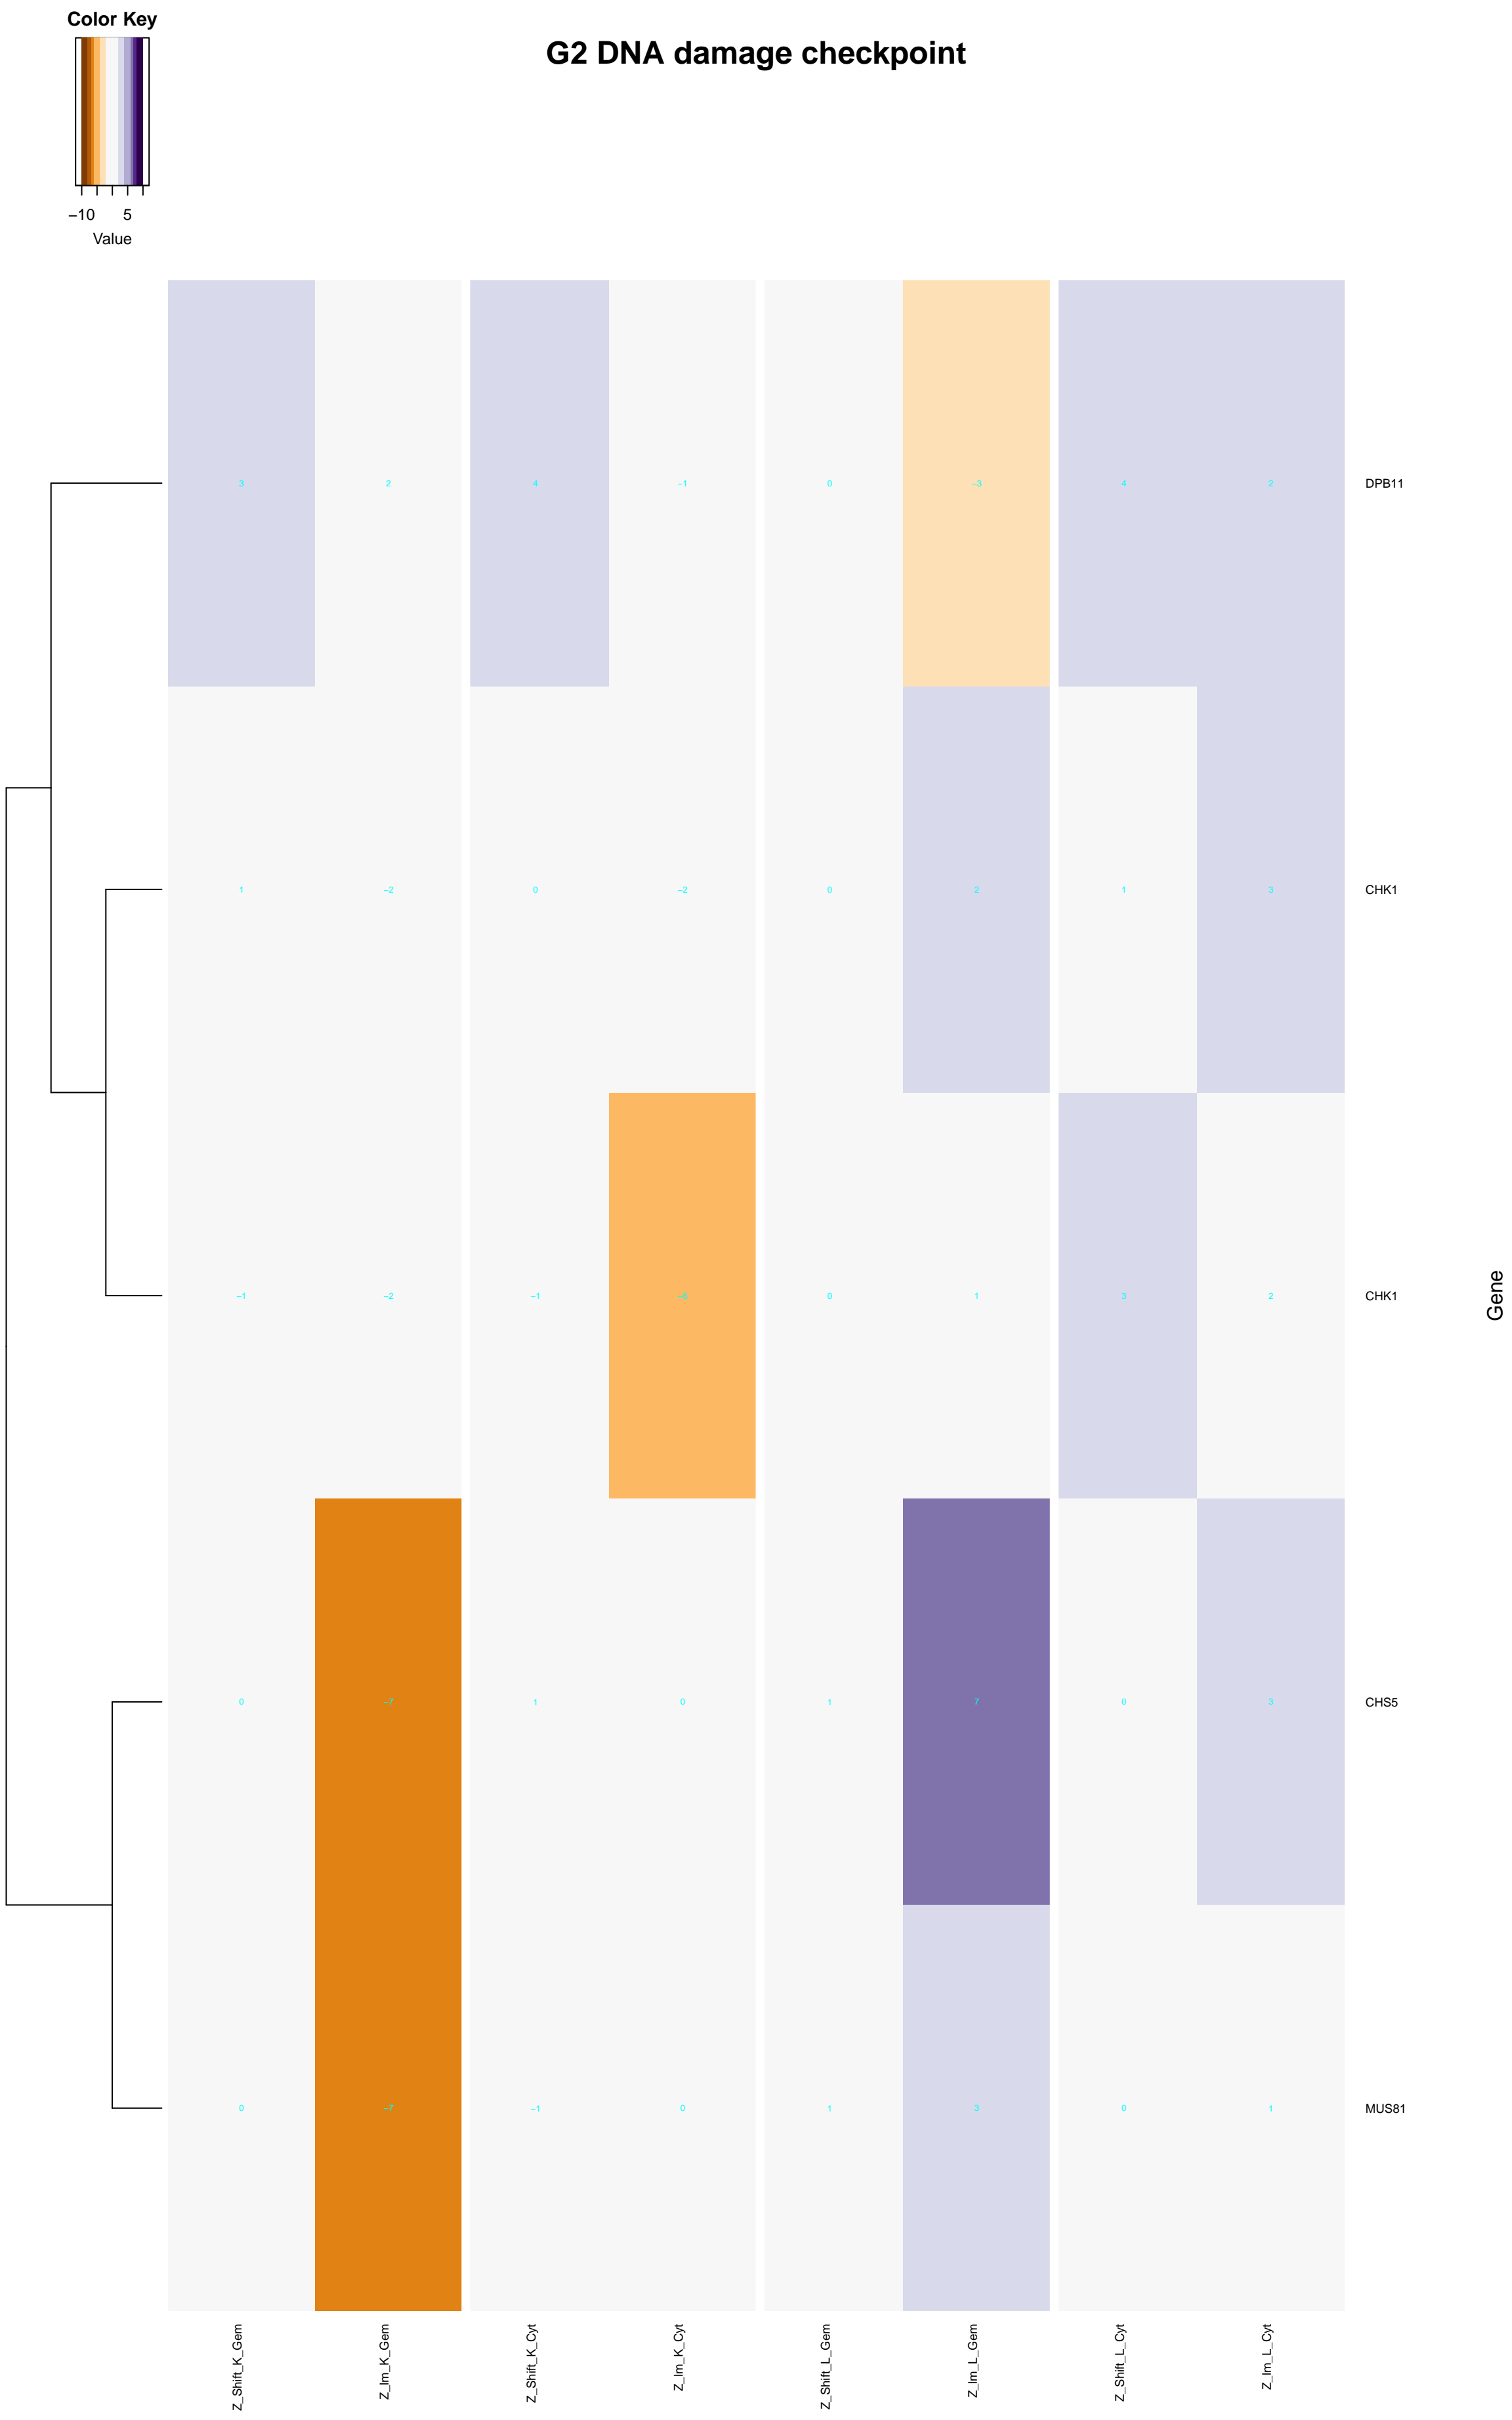

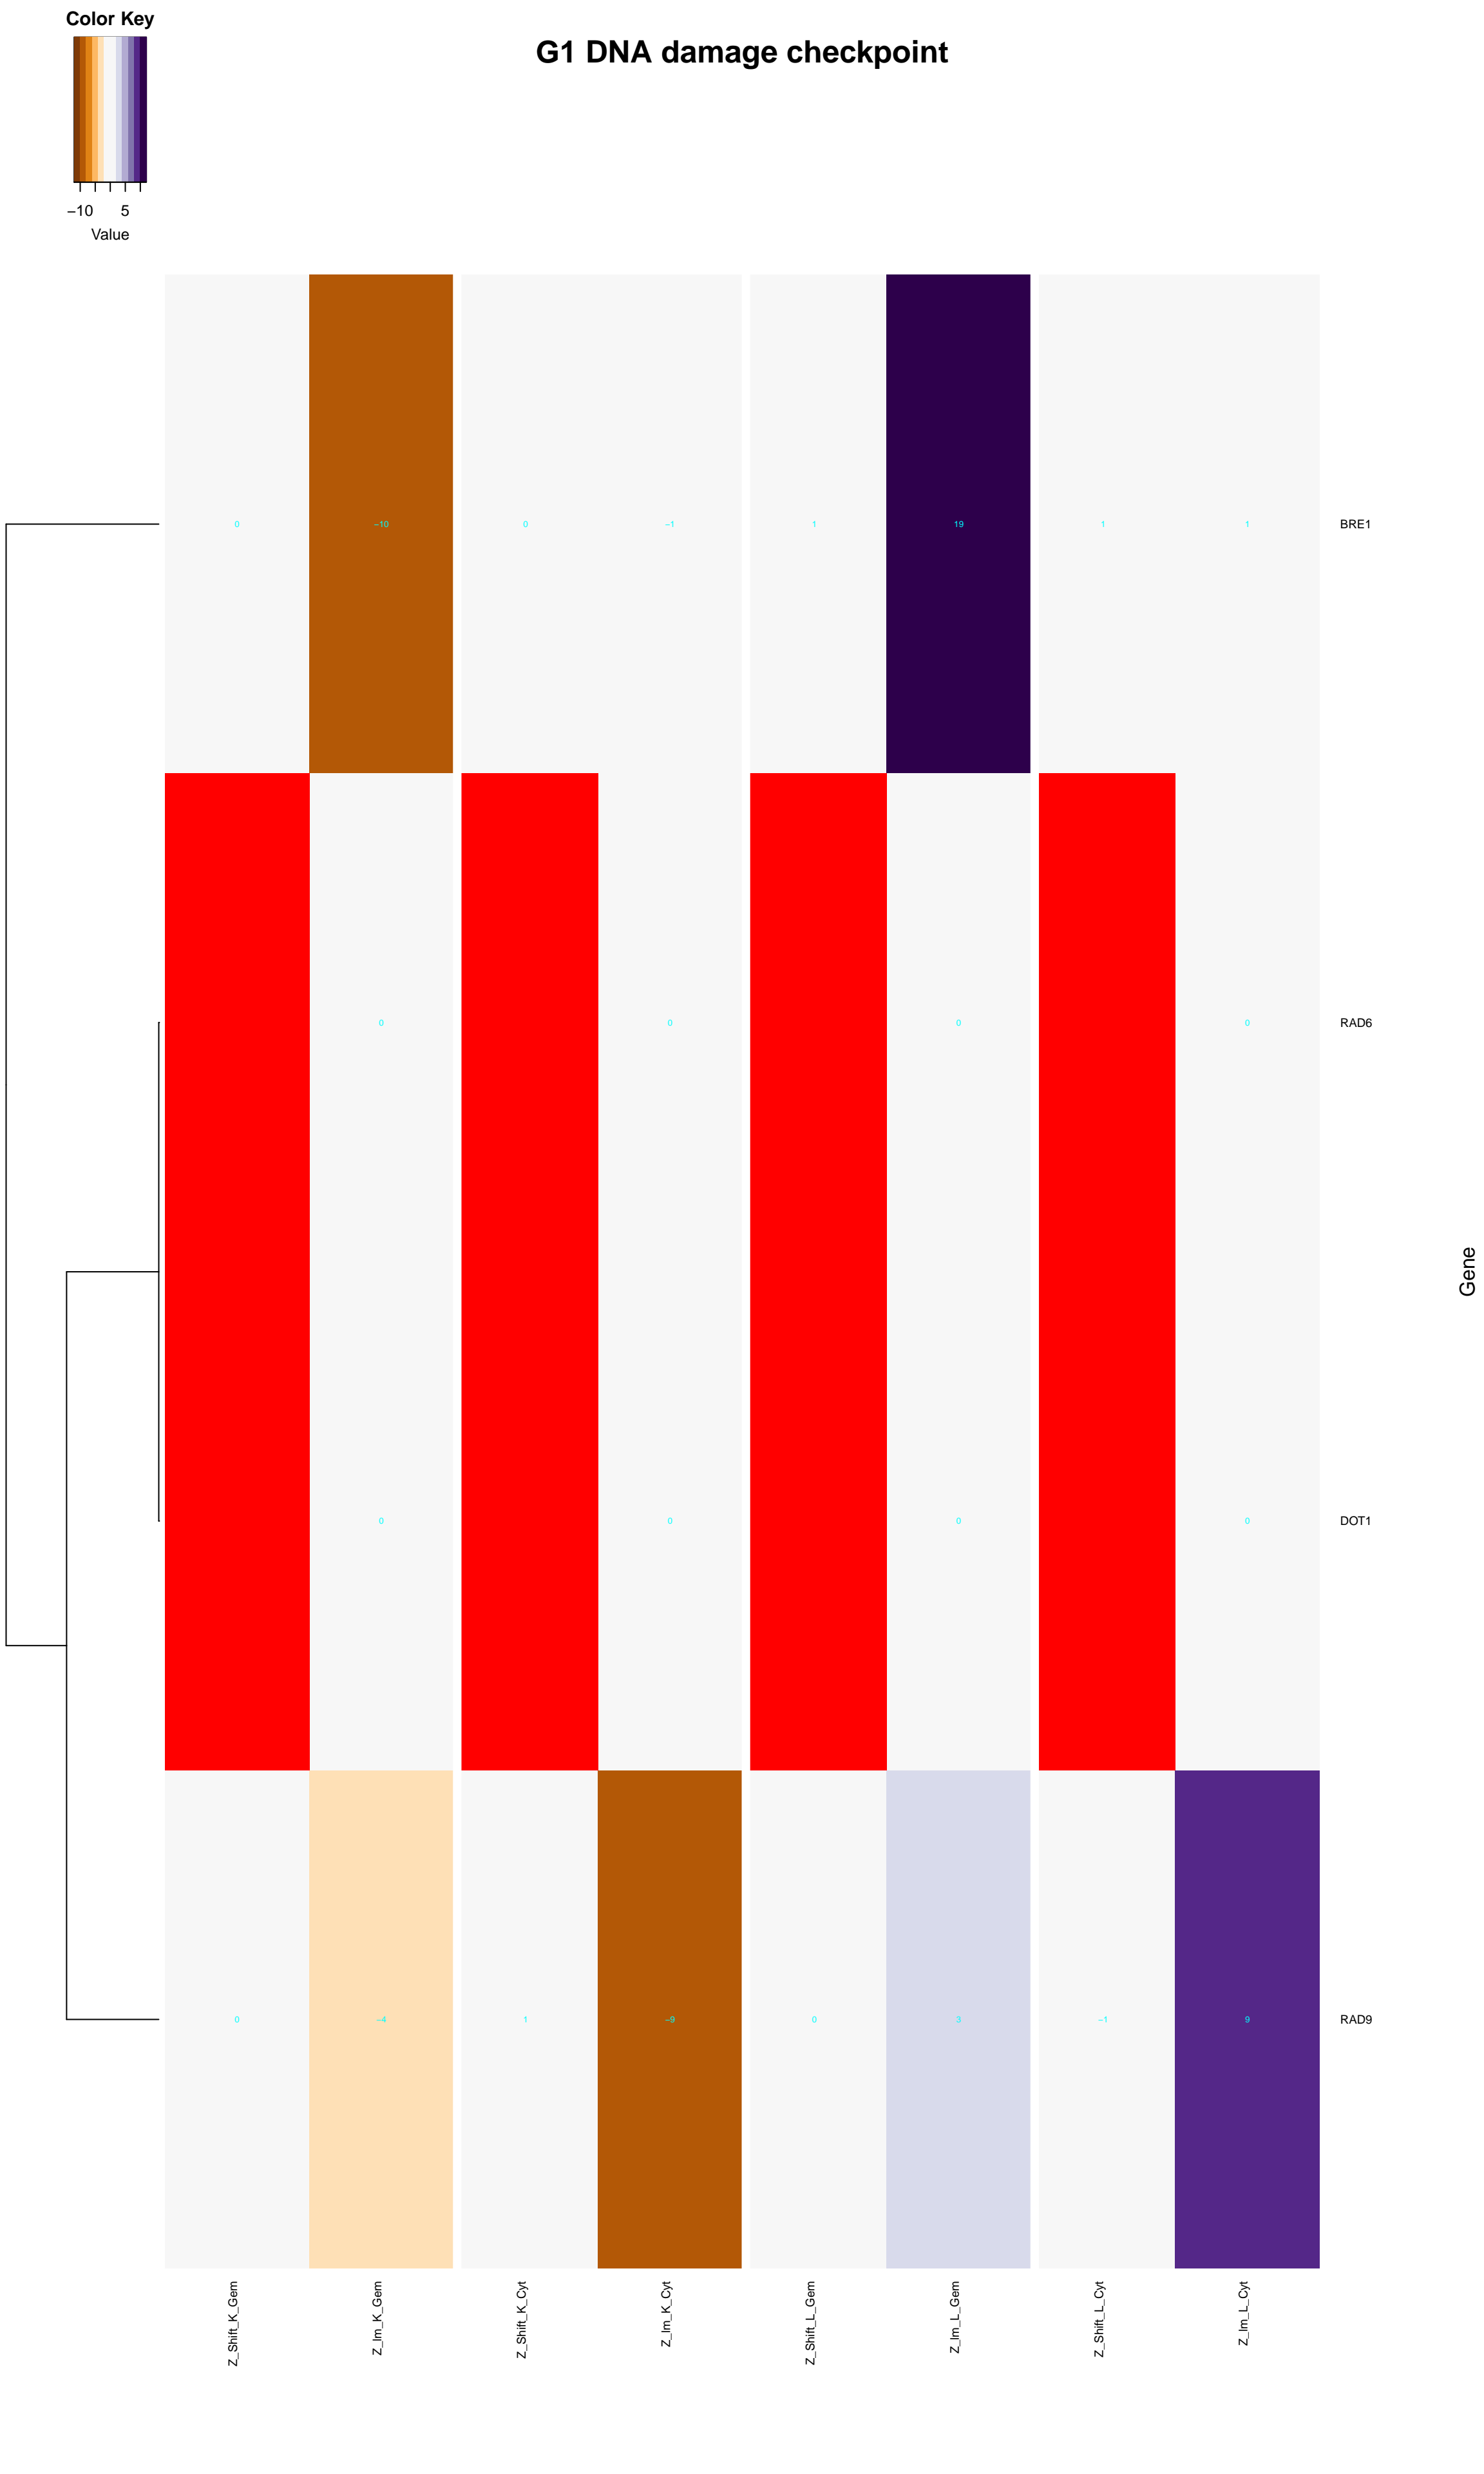

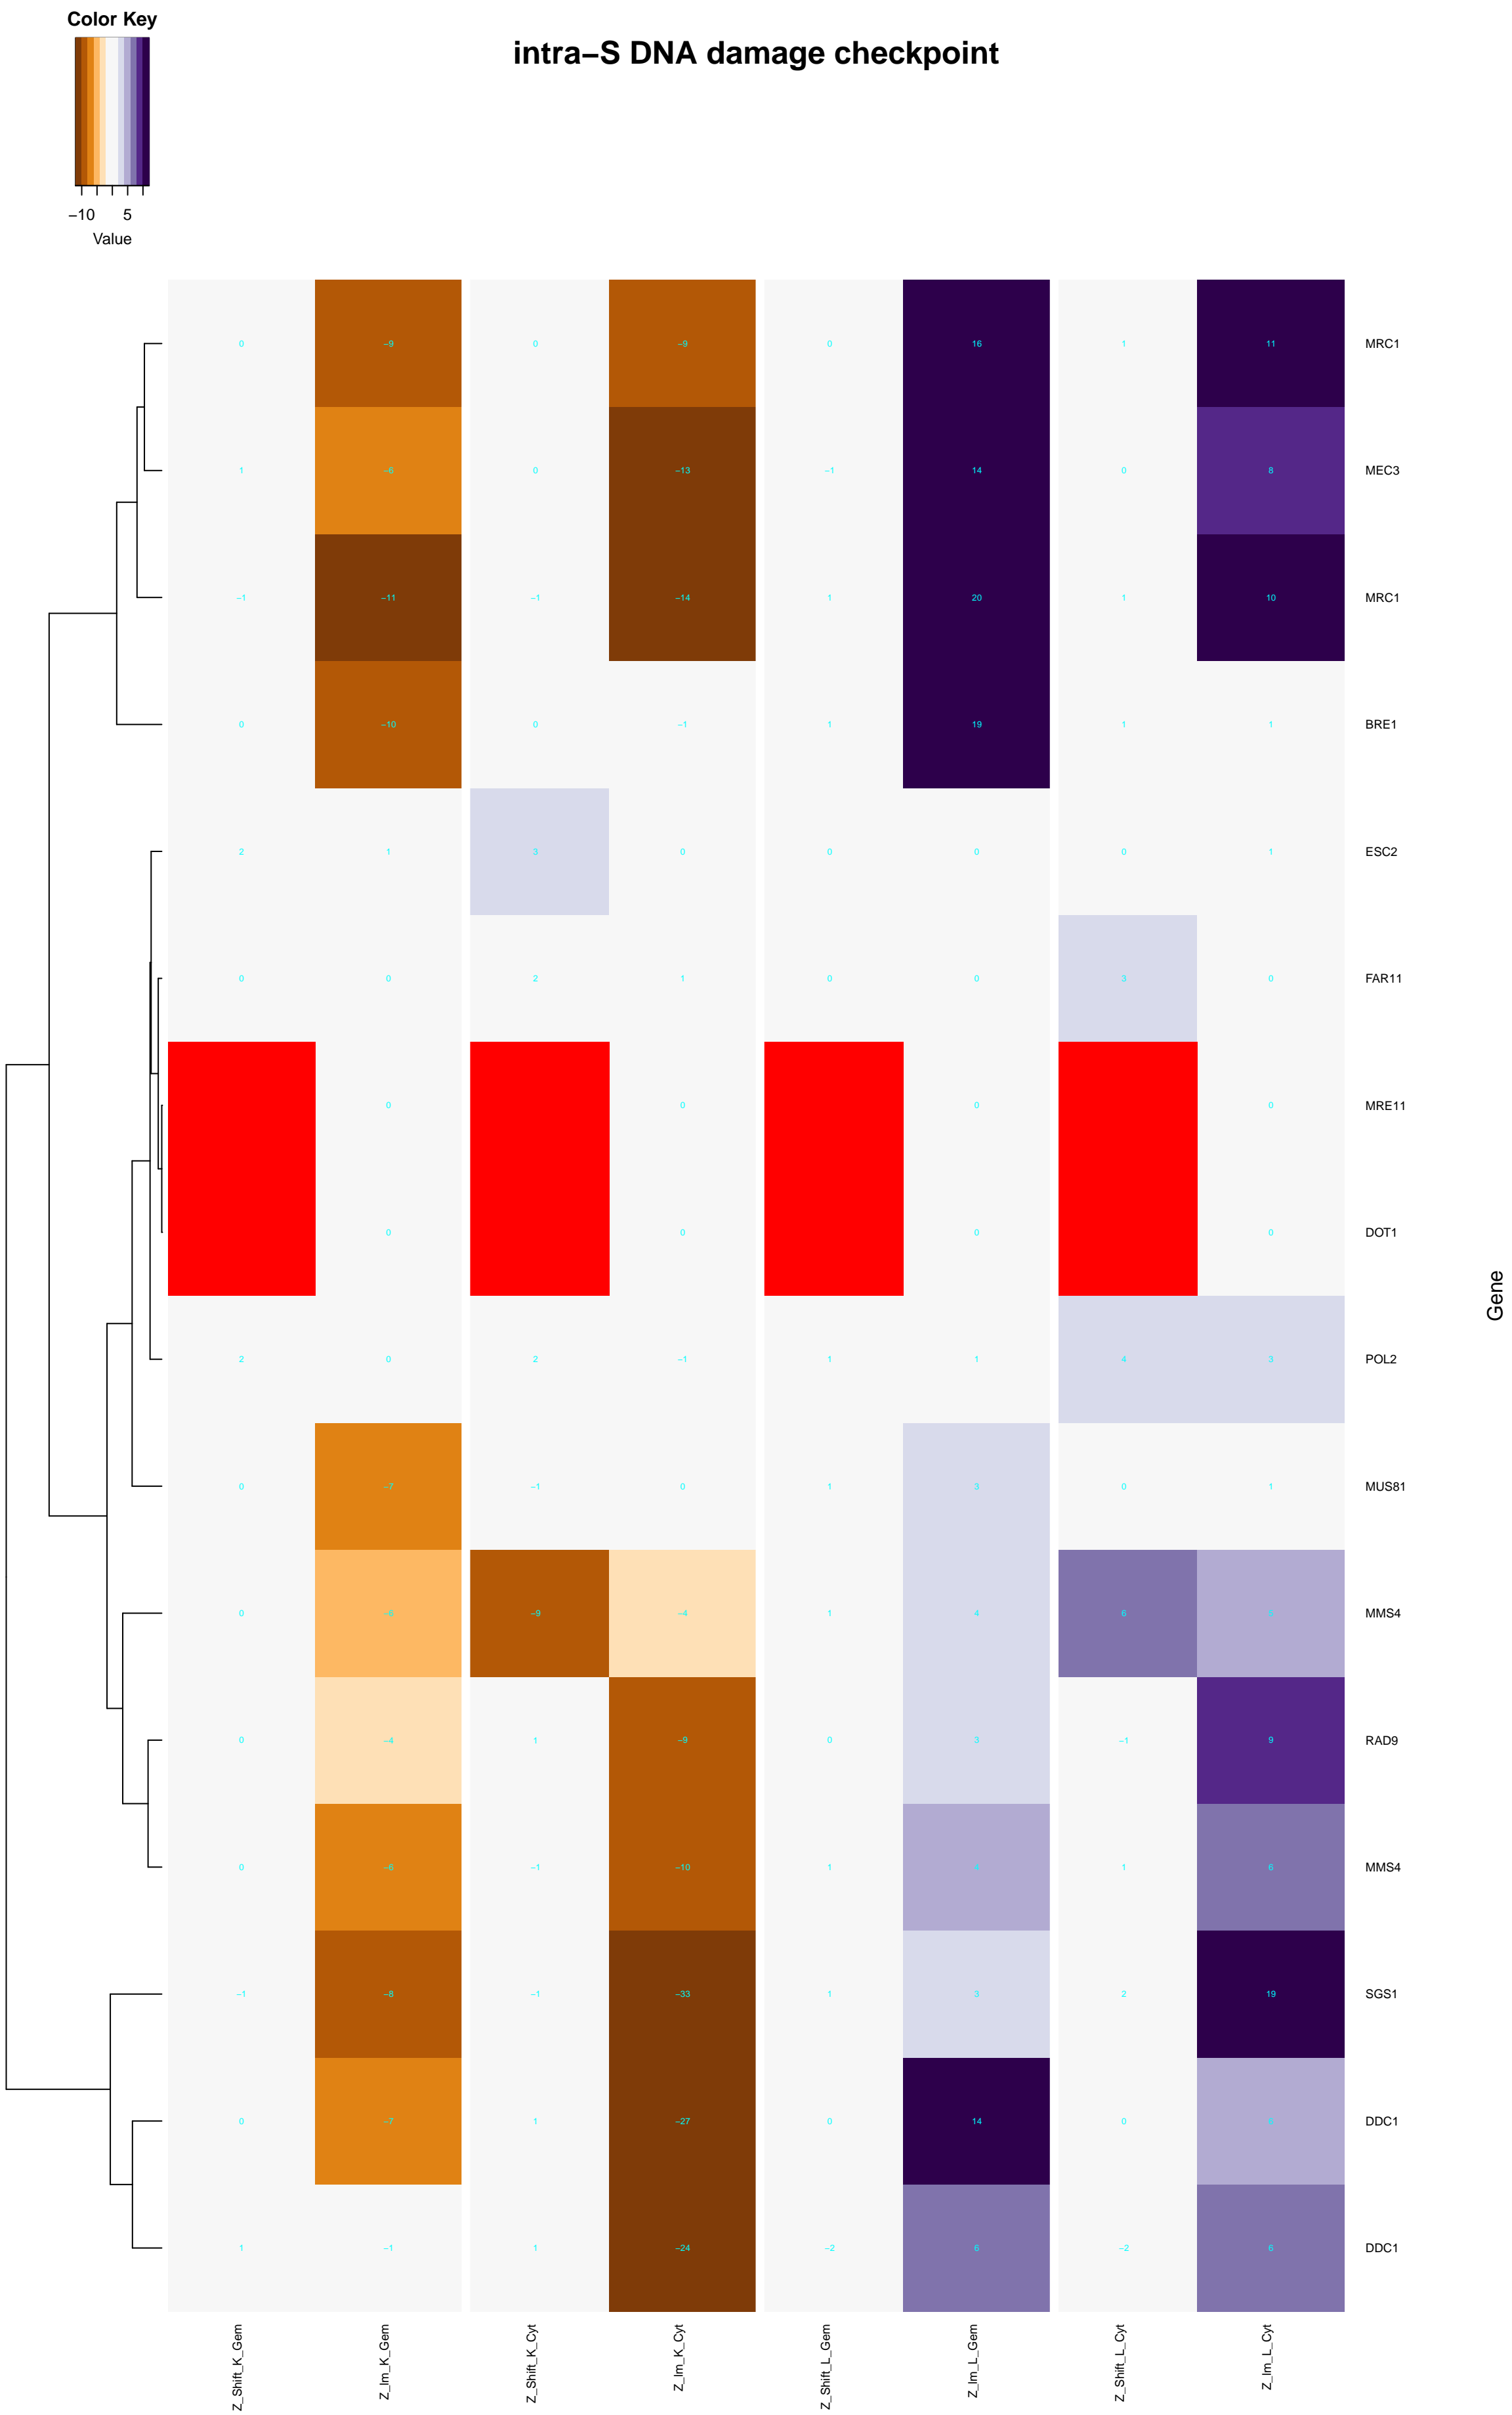

Supplement: s1 [file s1]

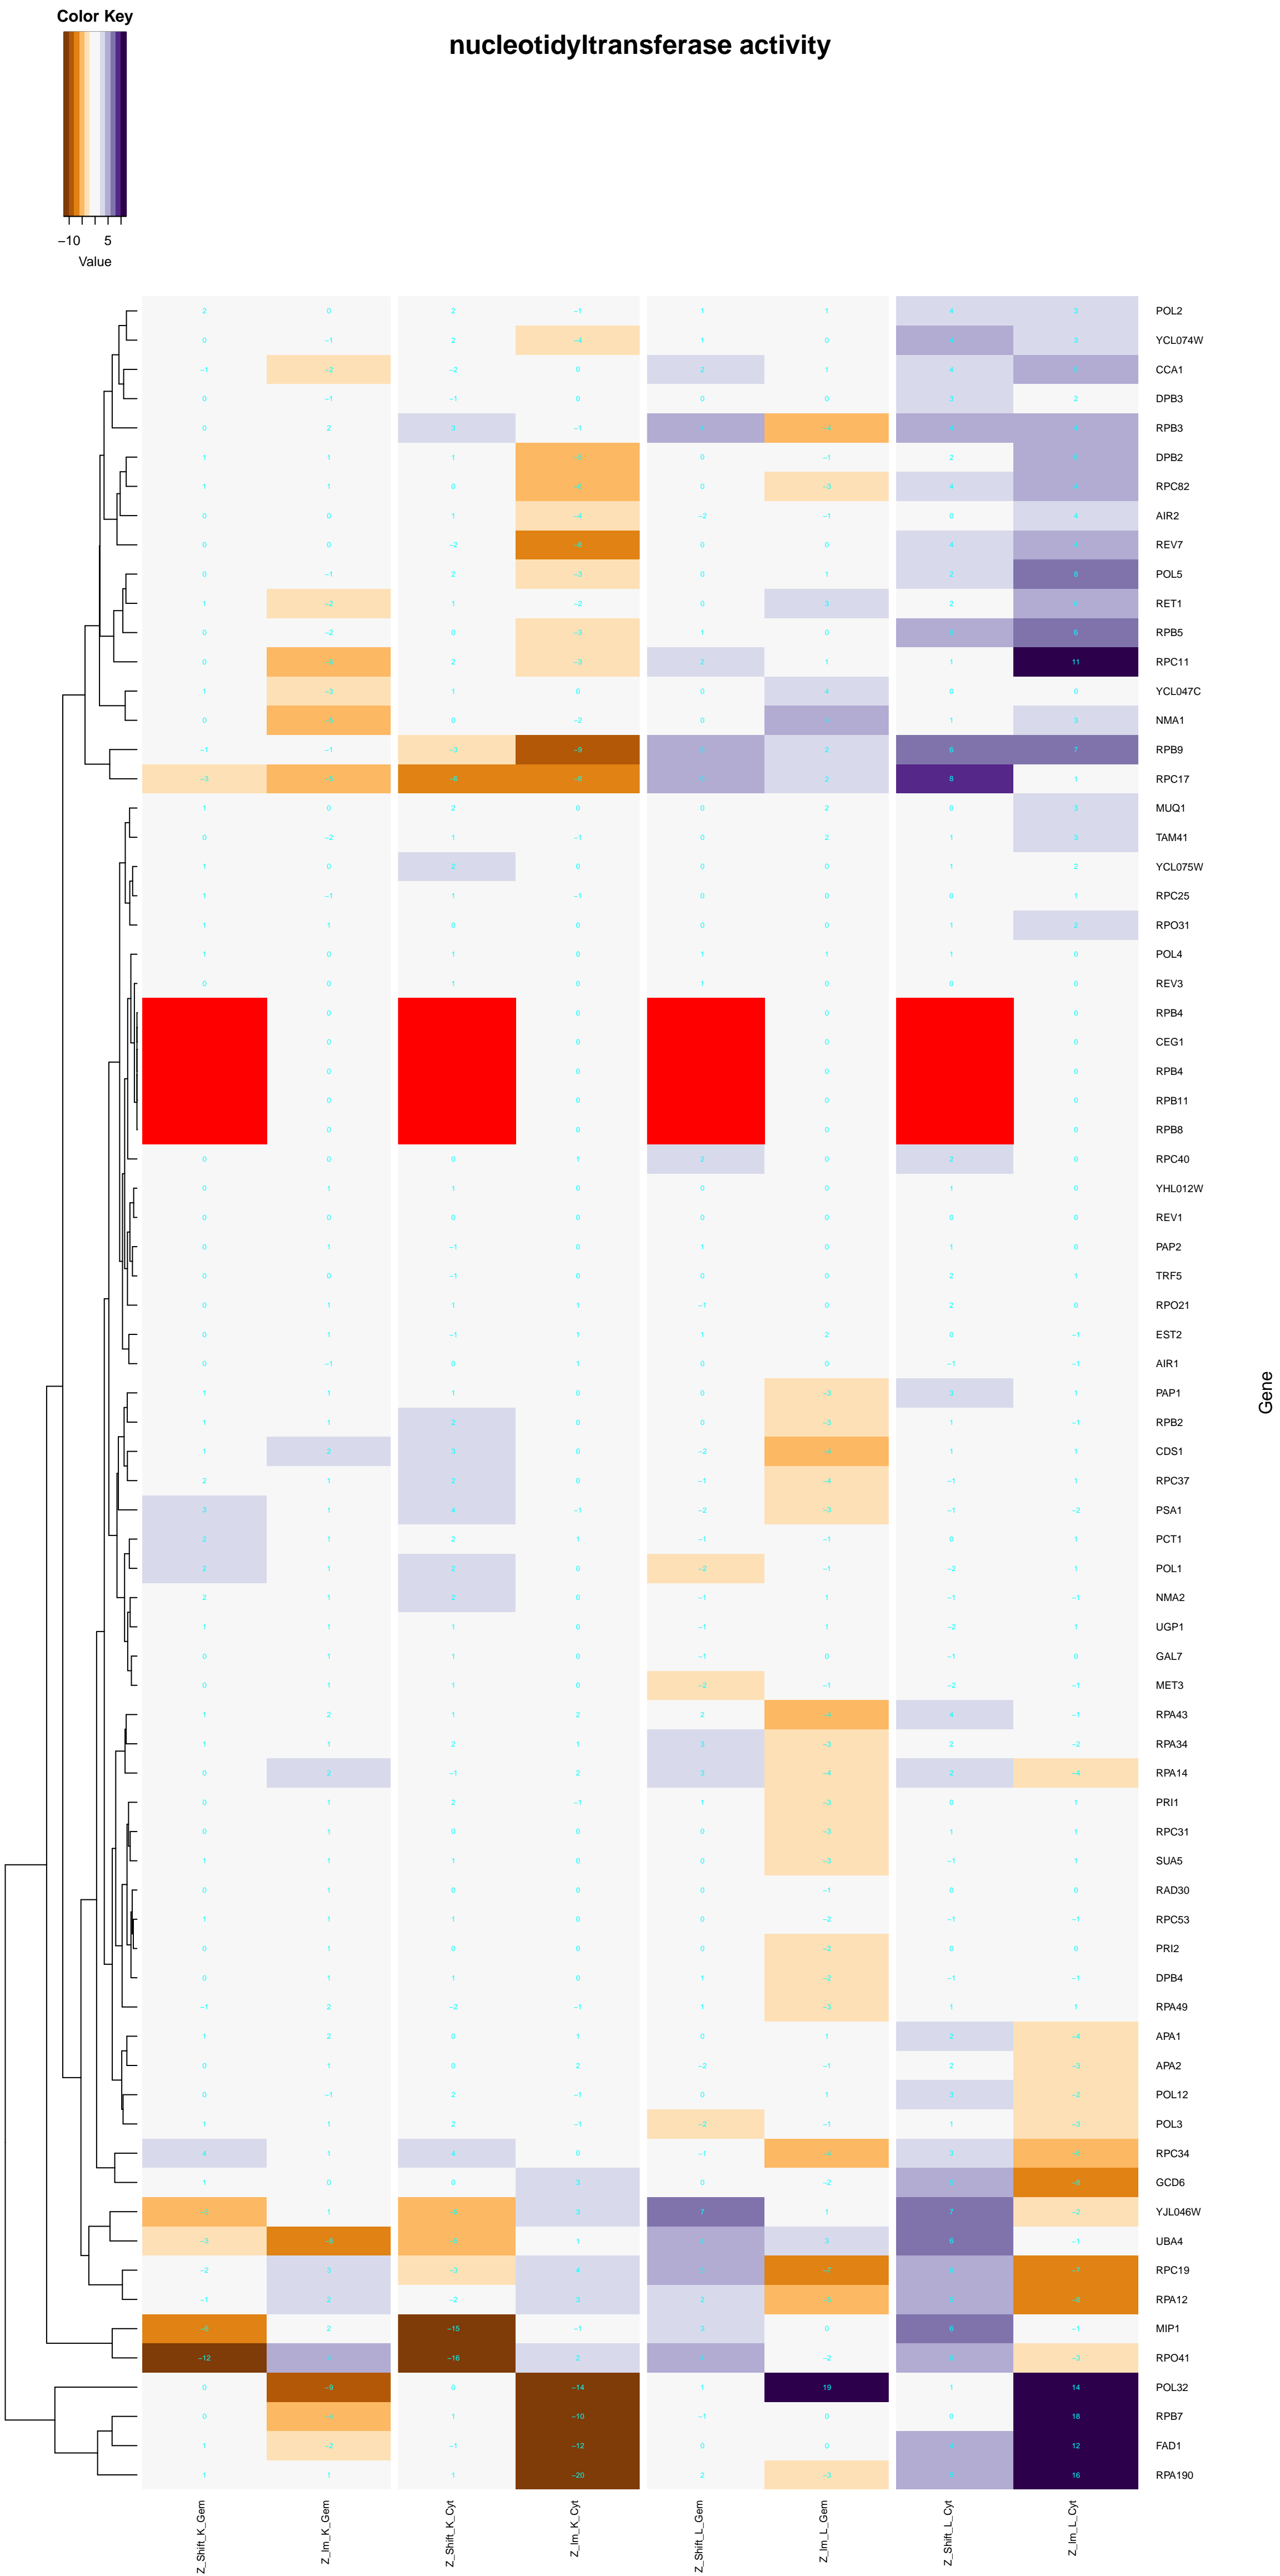

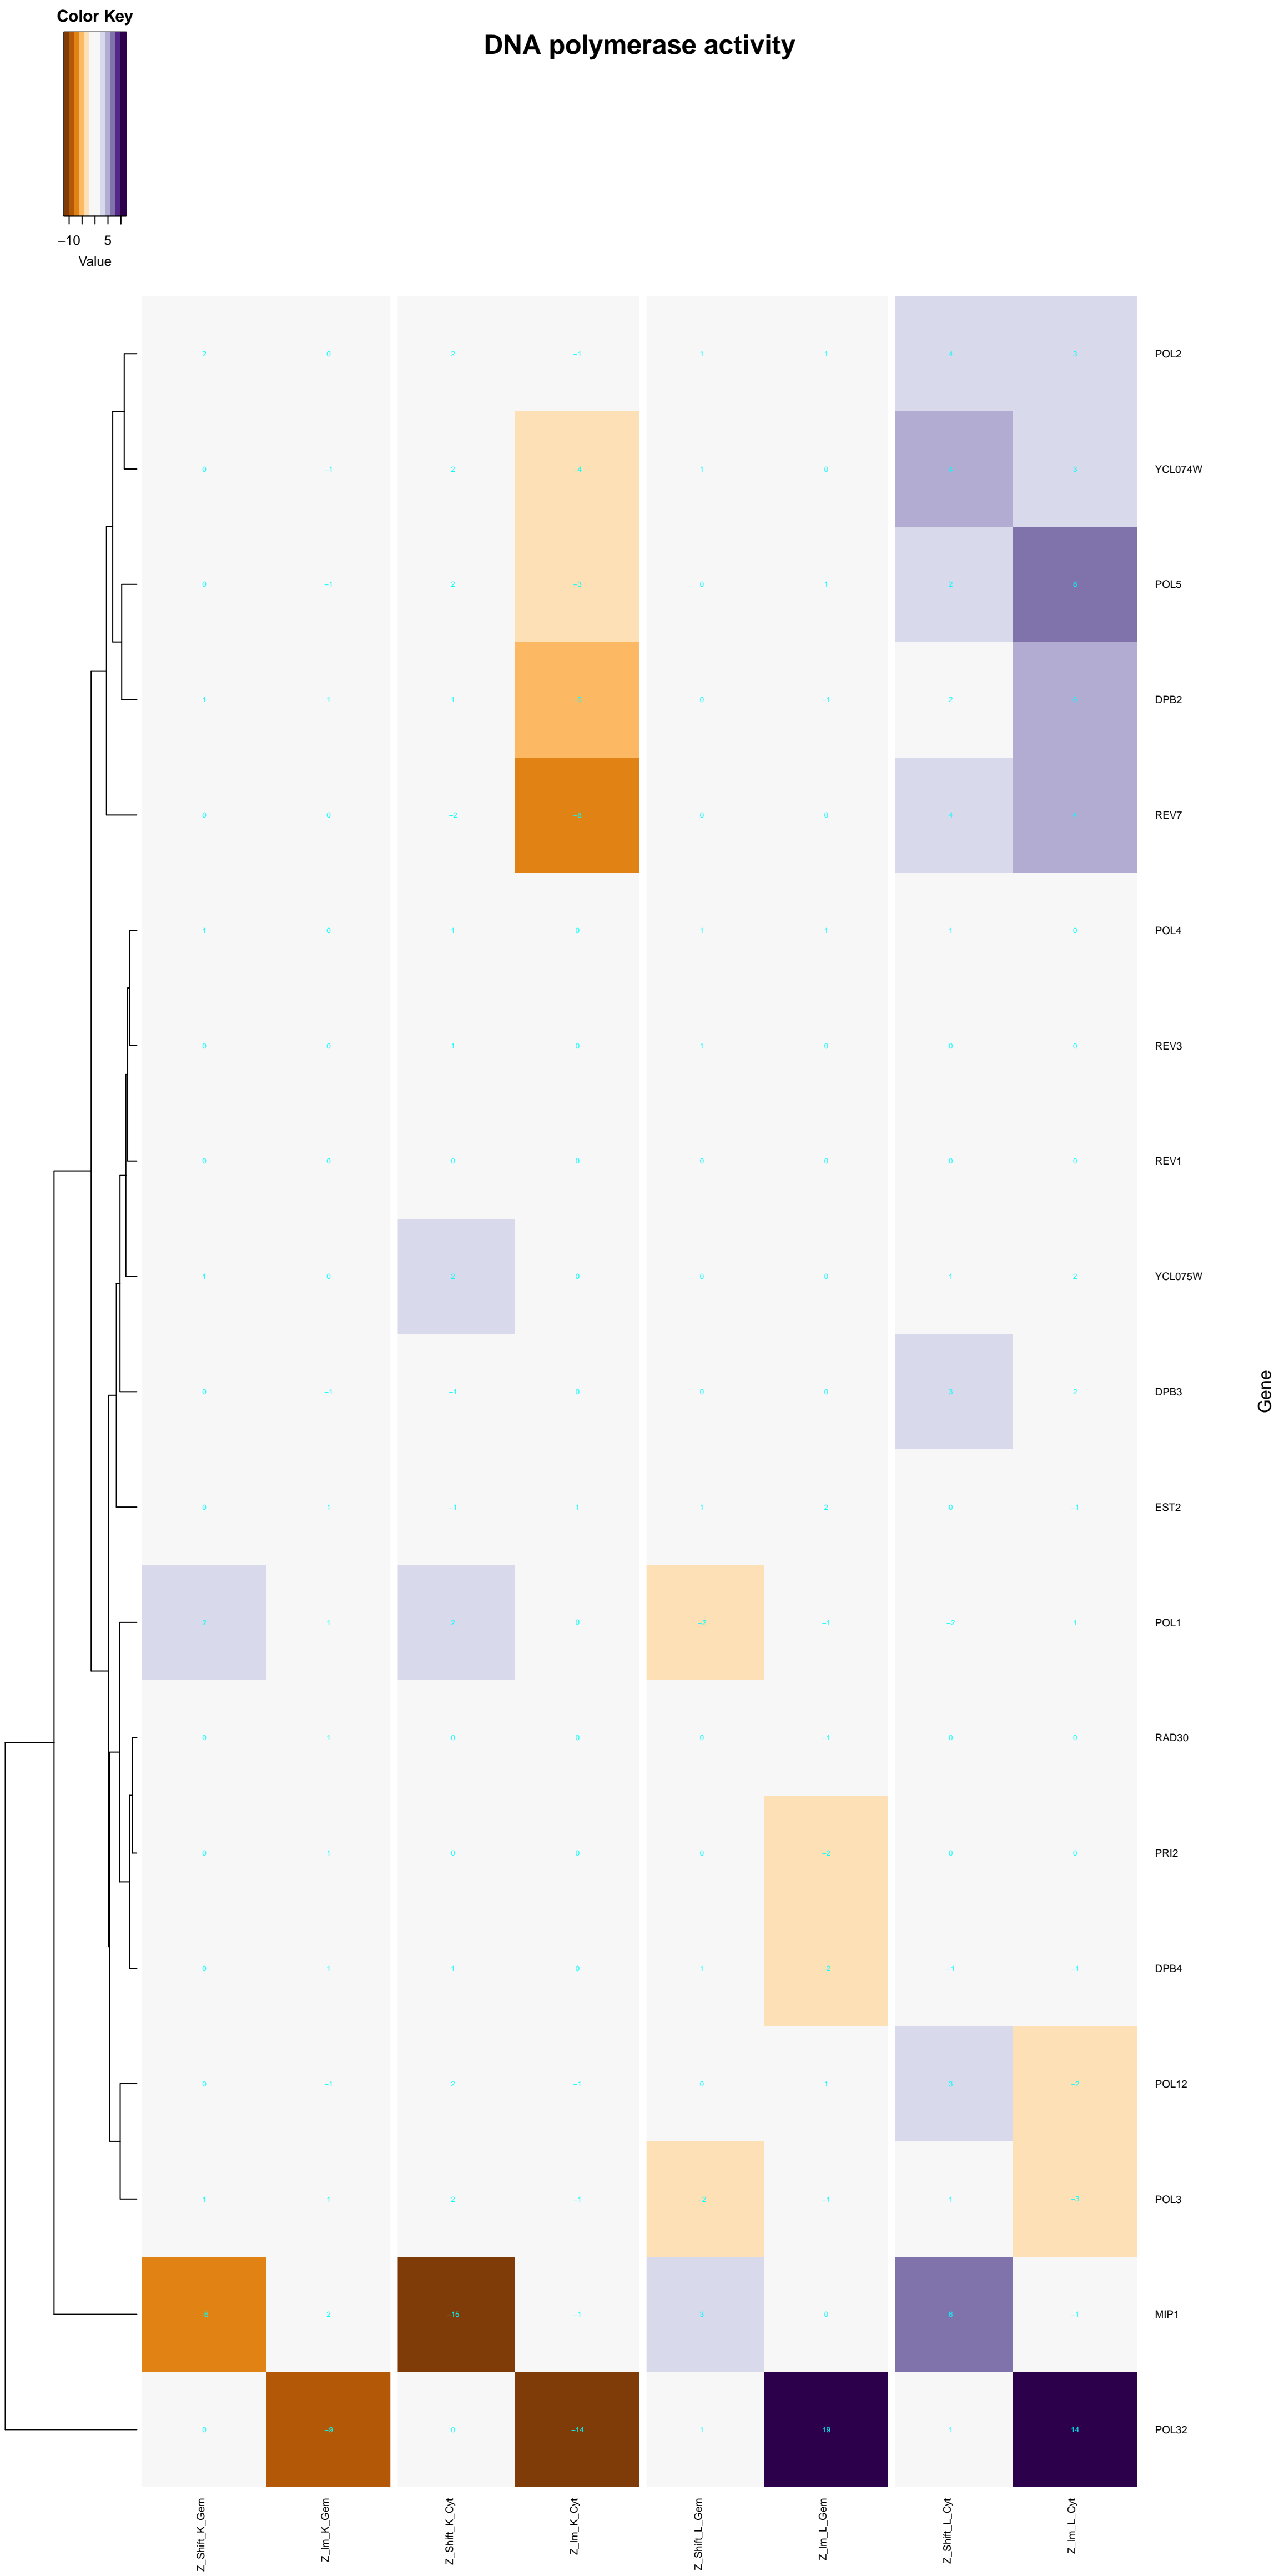

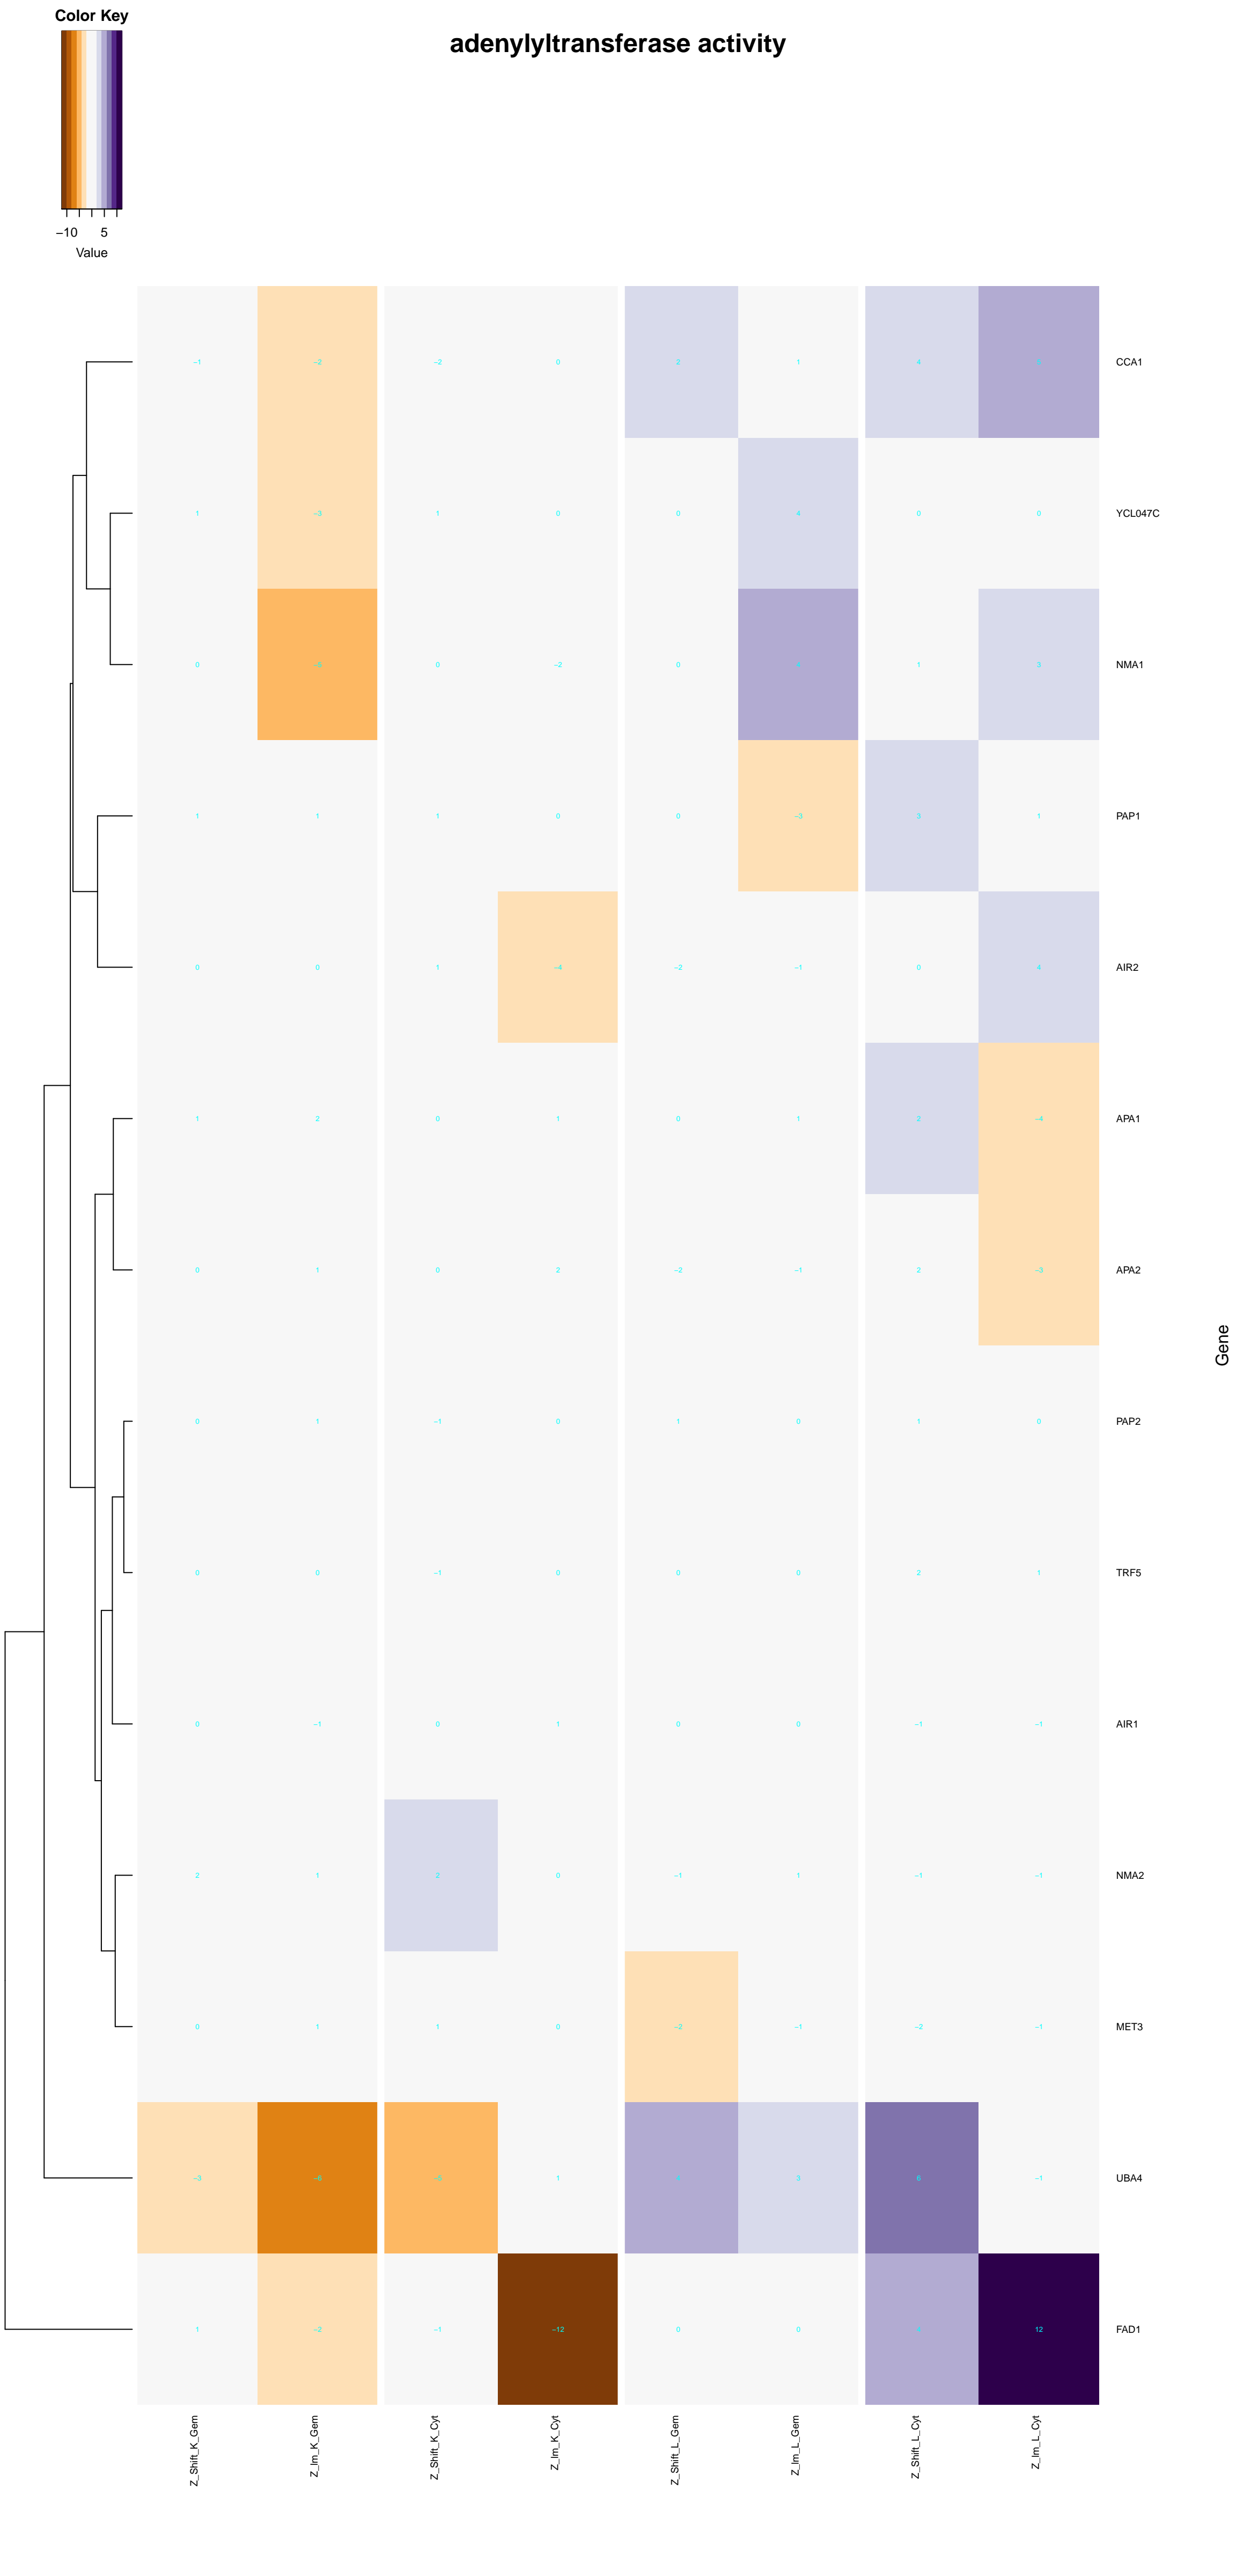

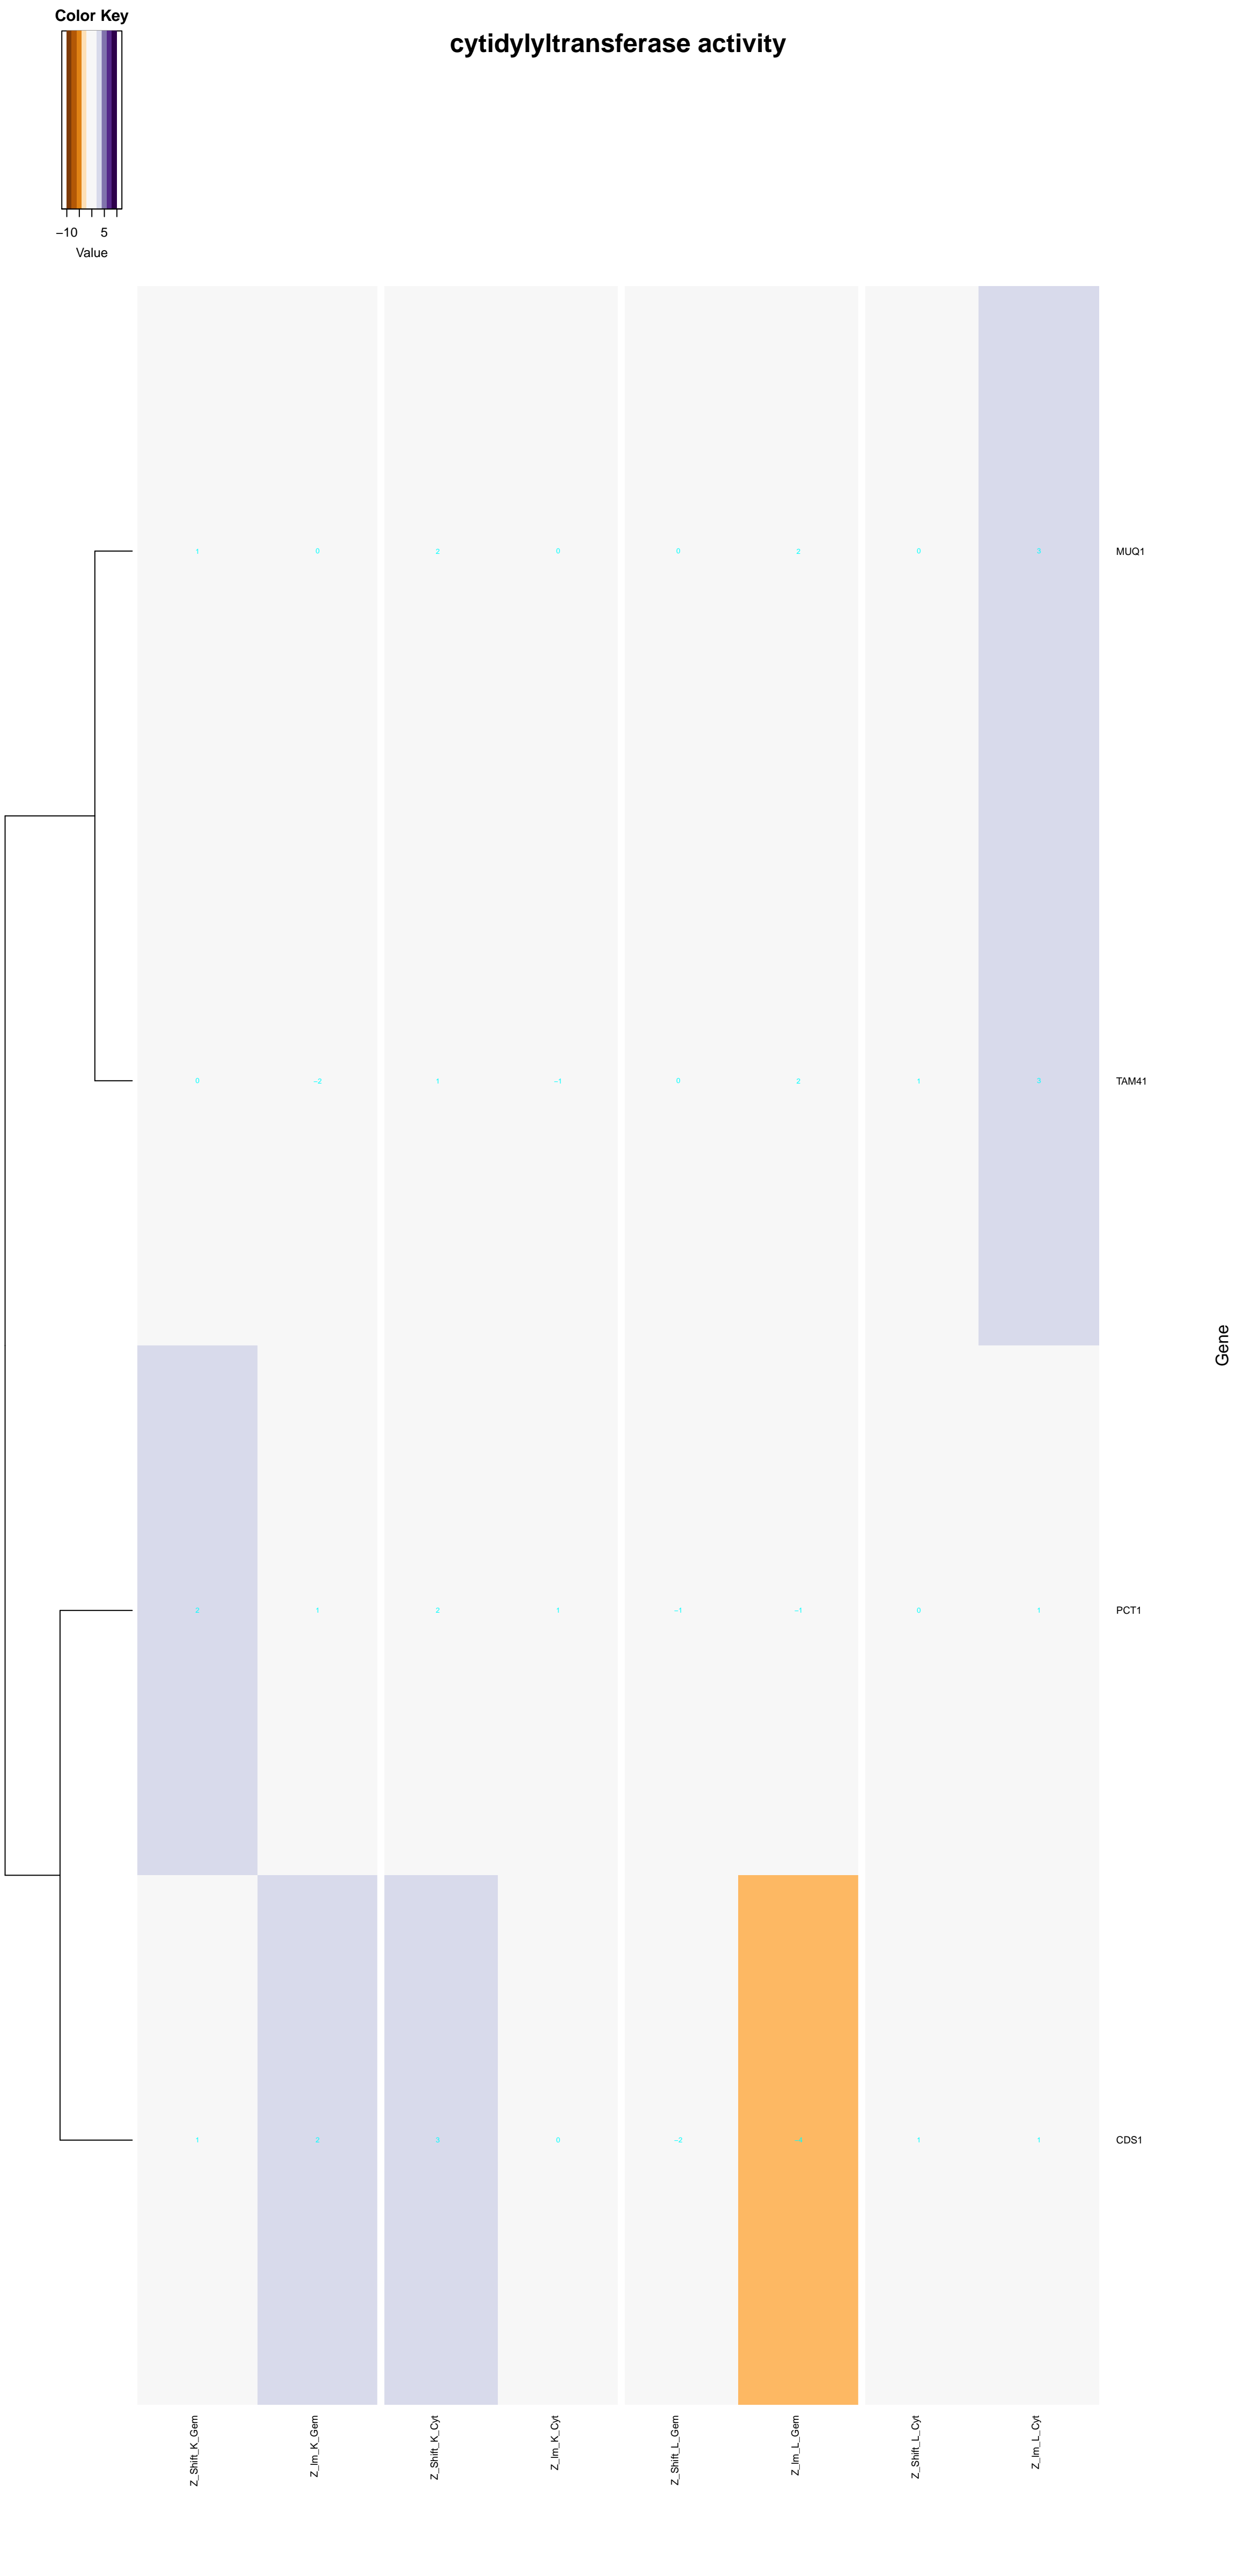

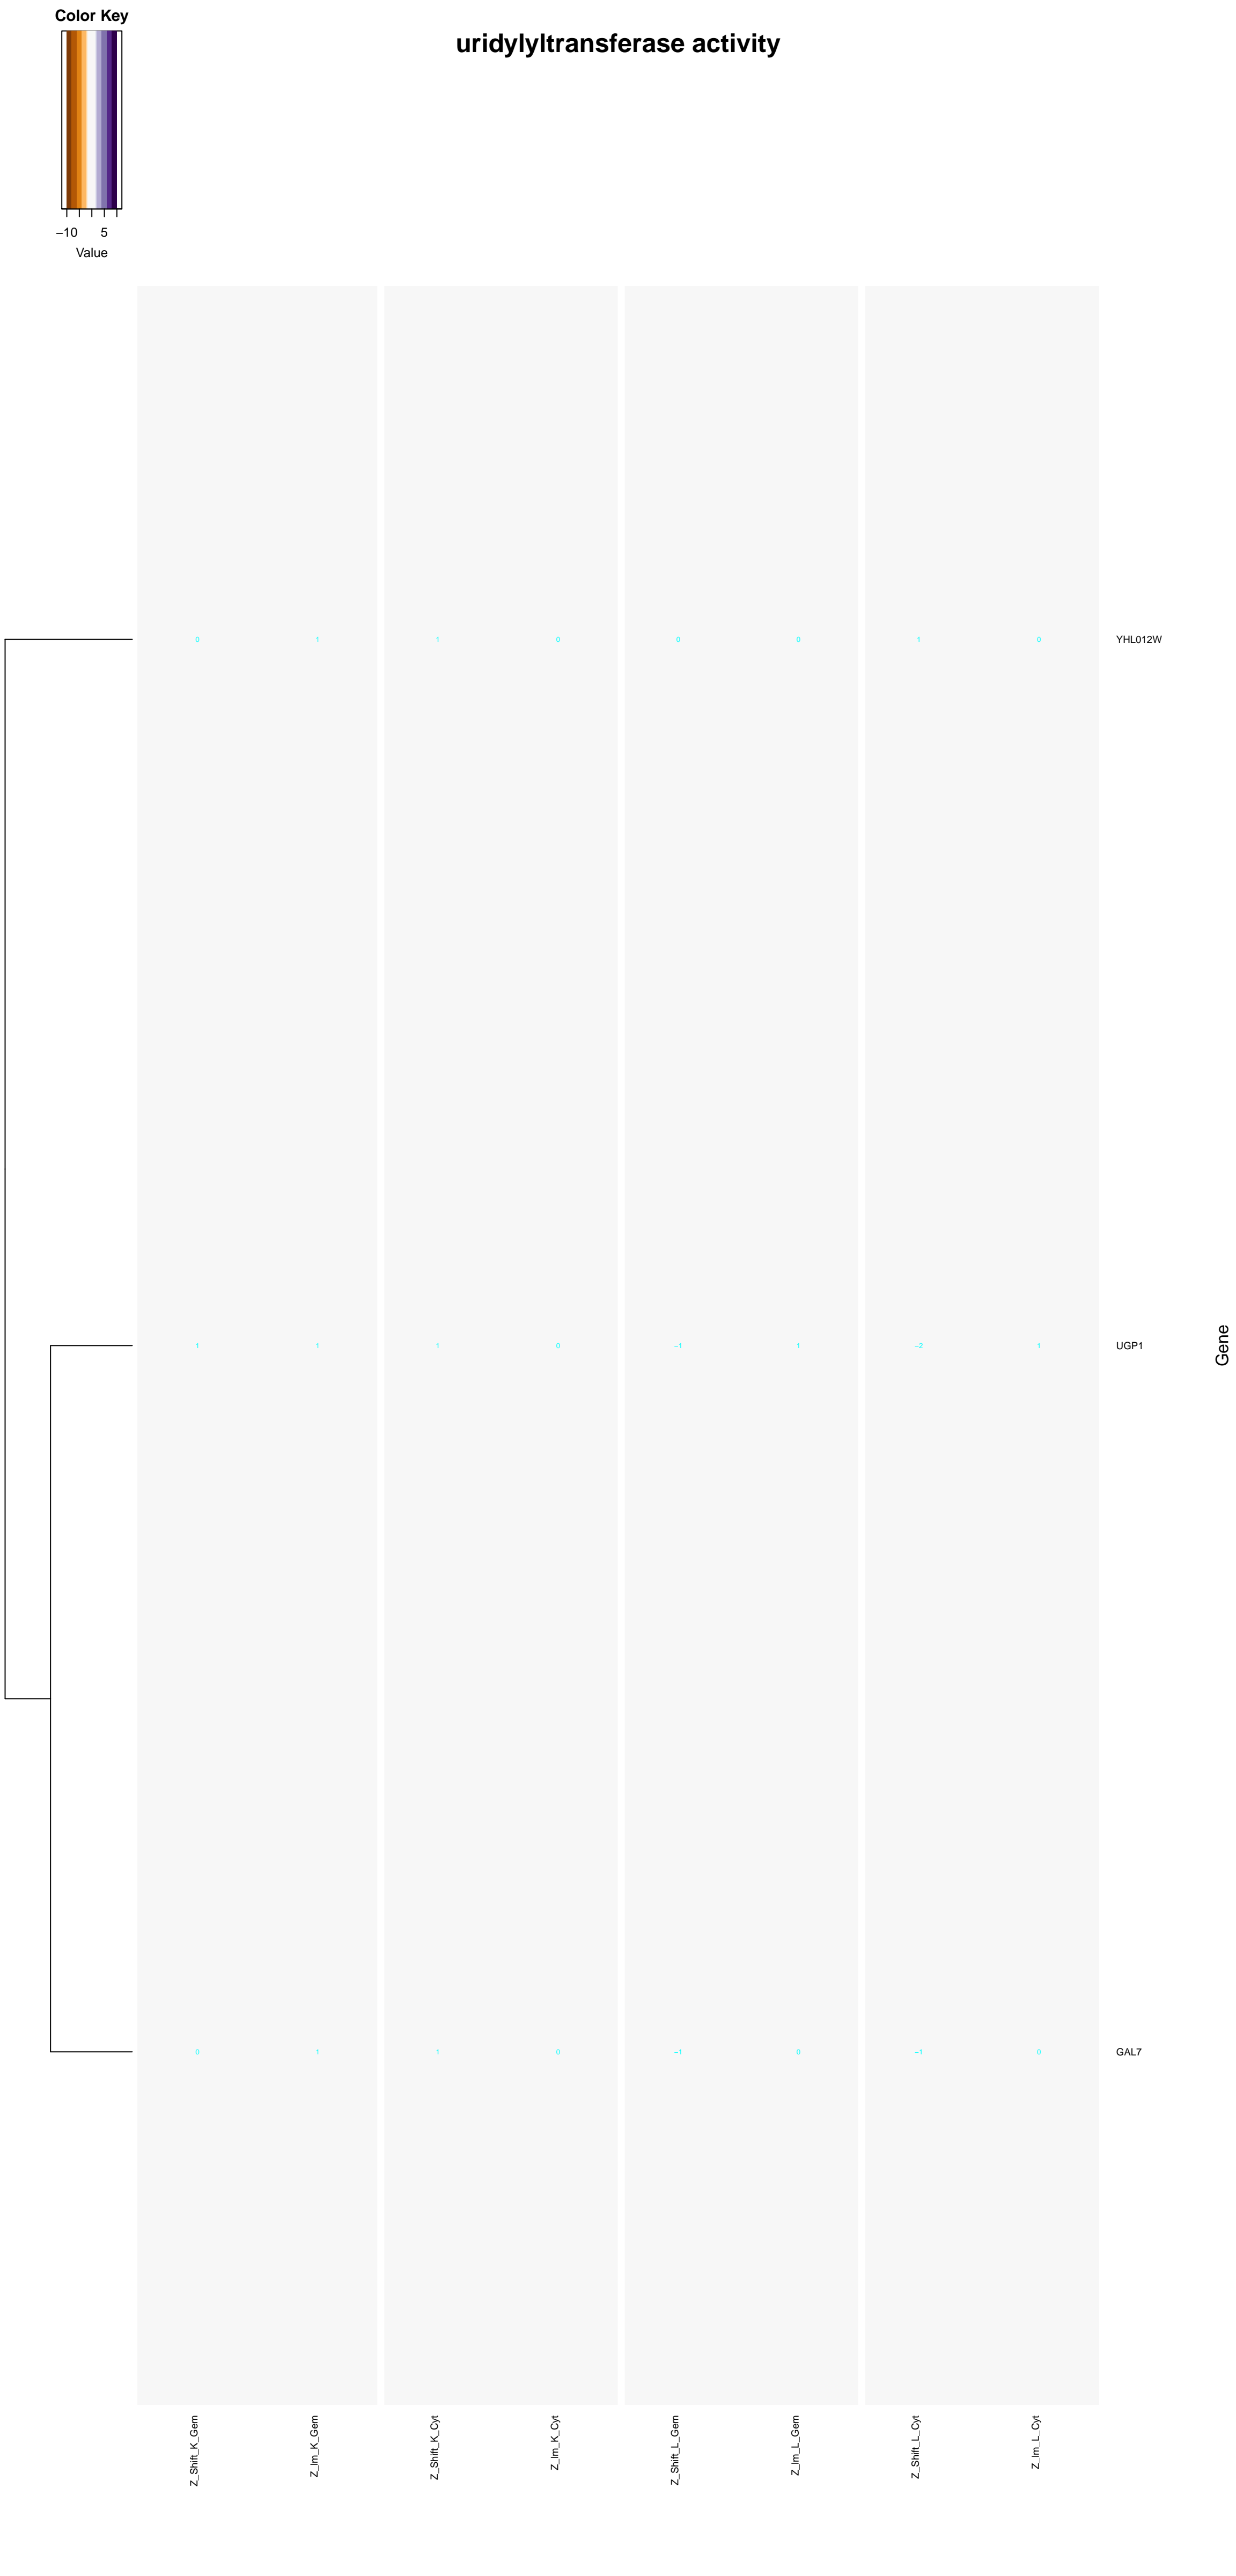

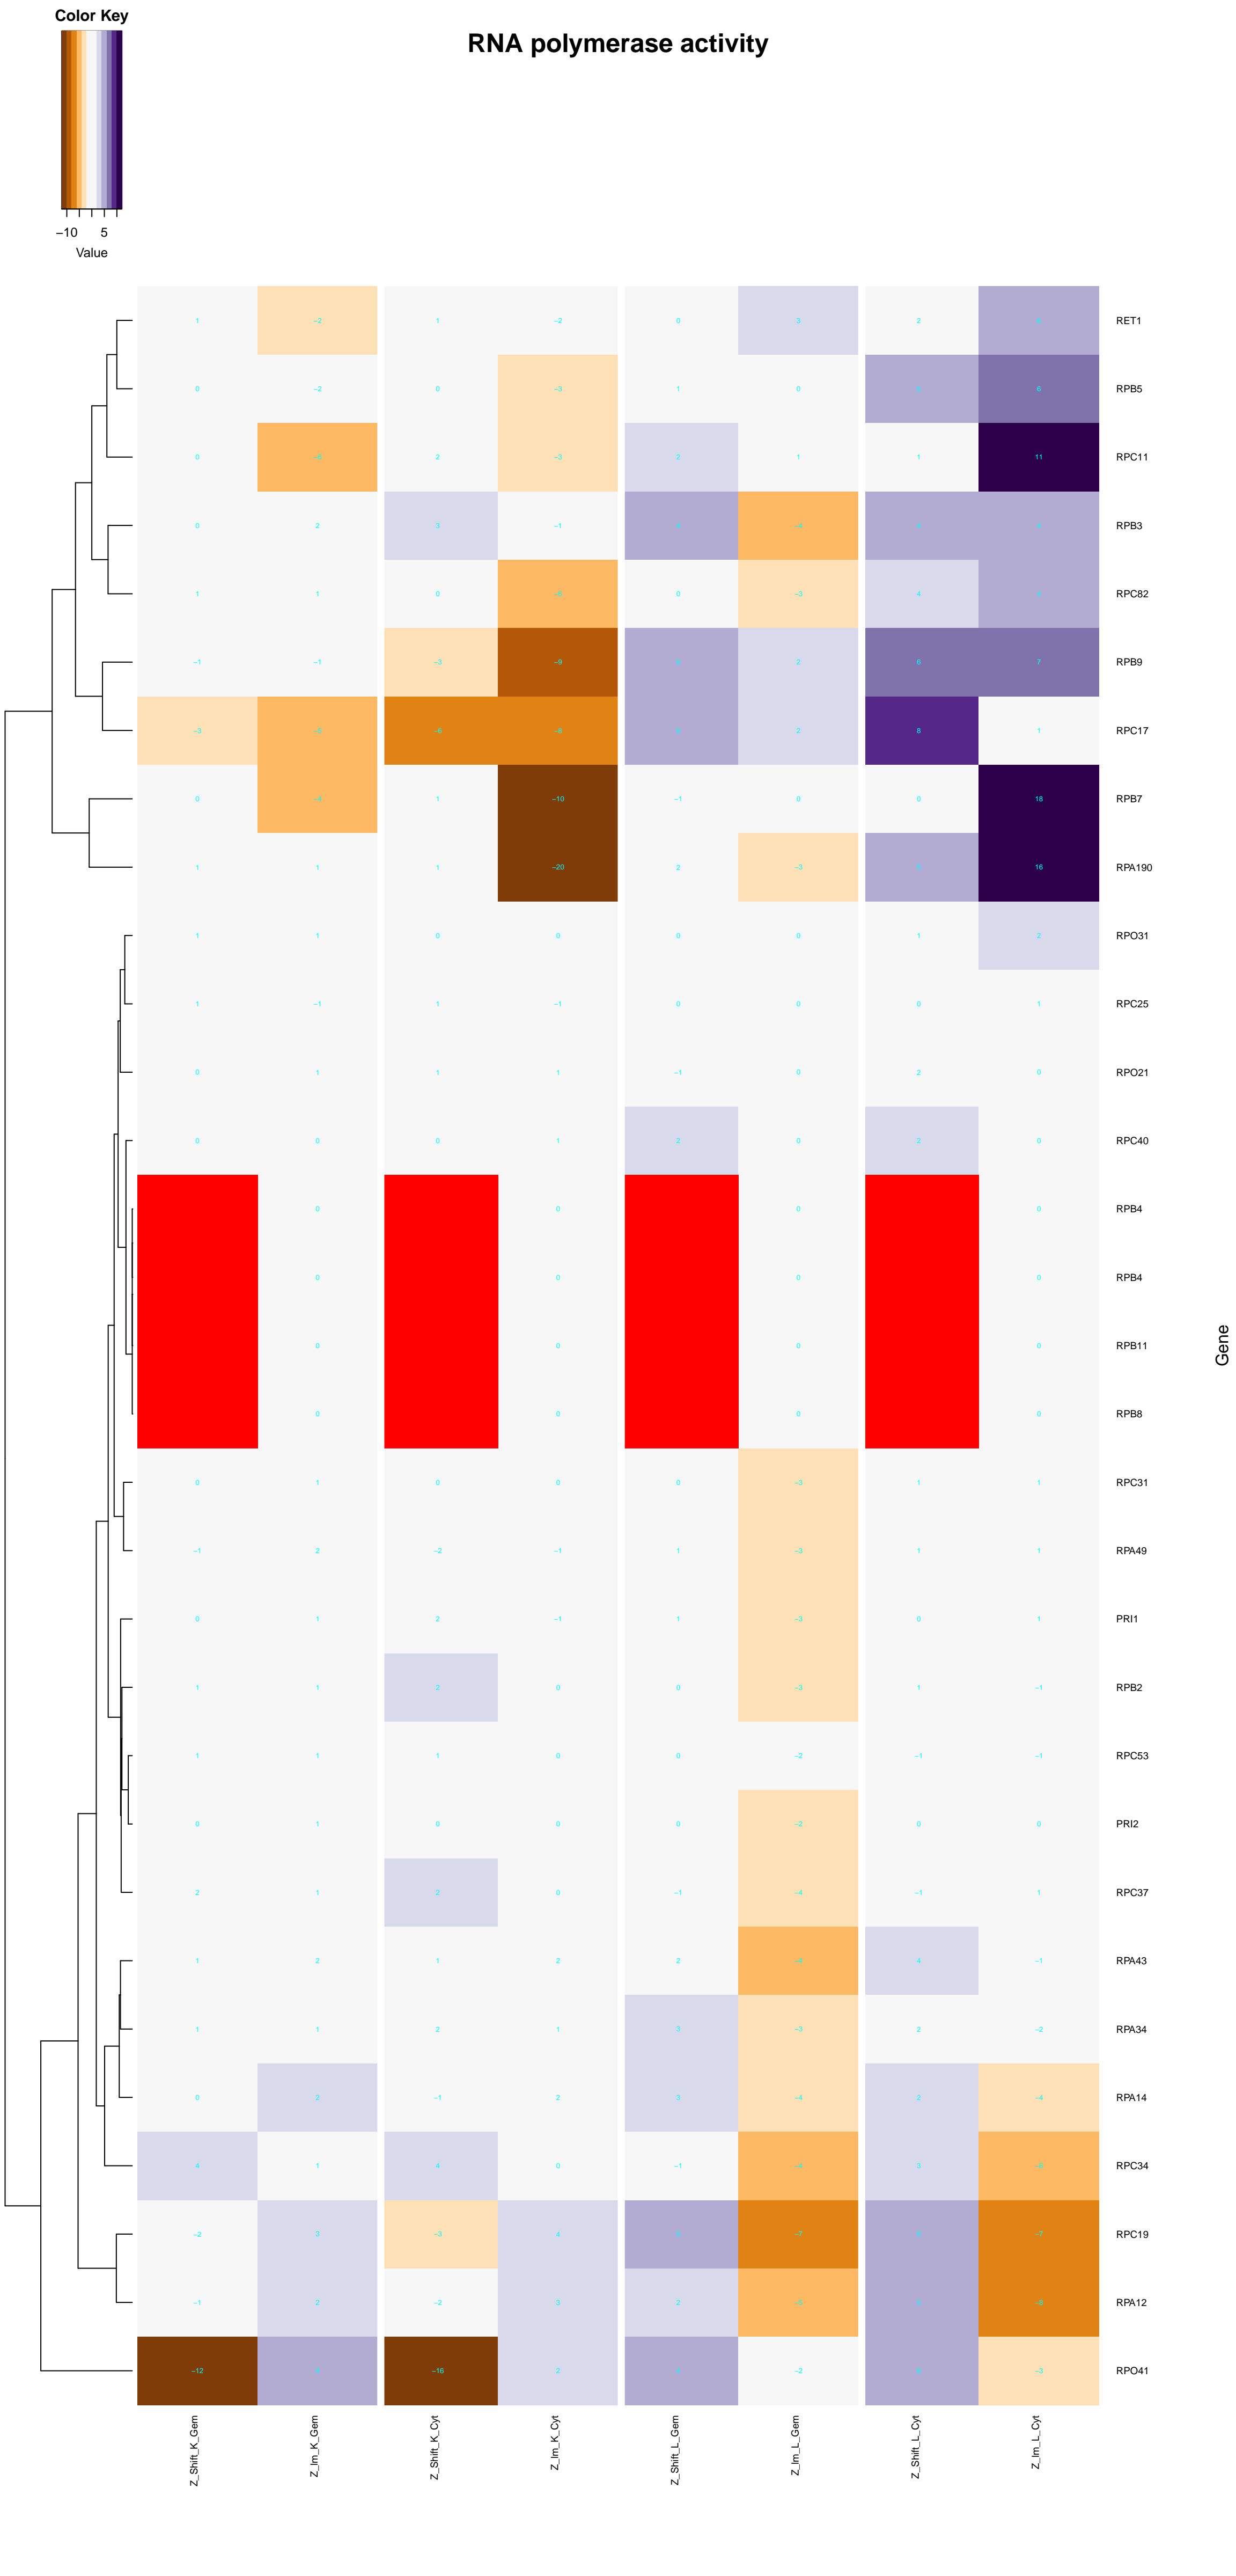

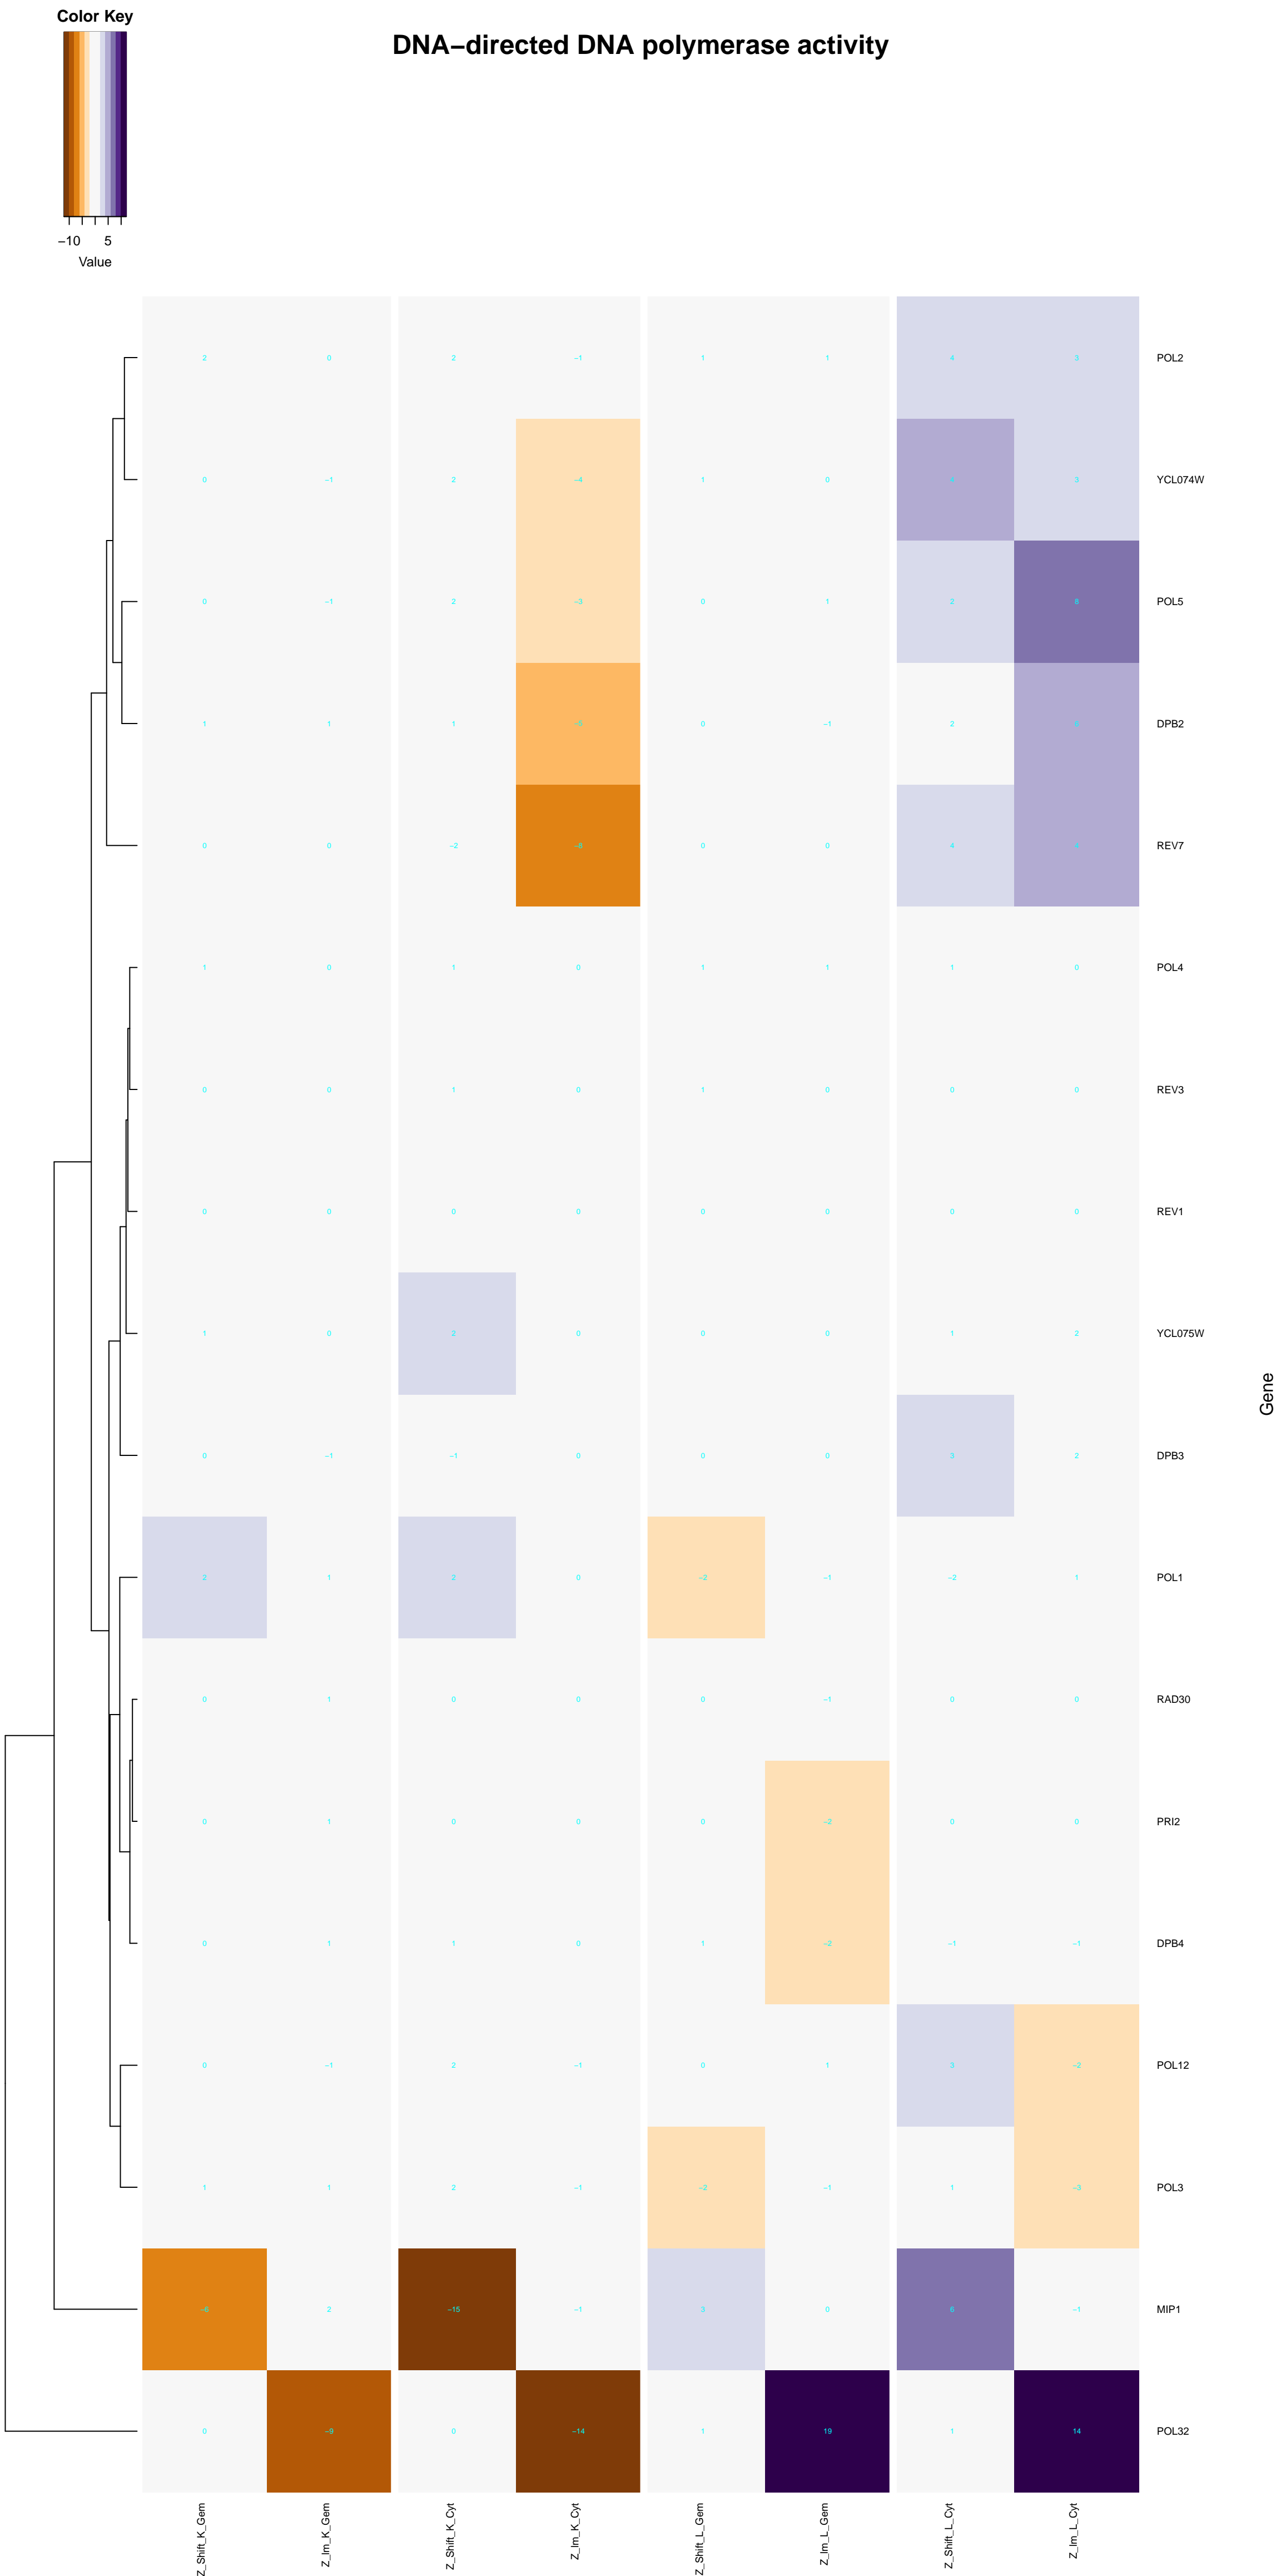

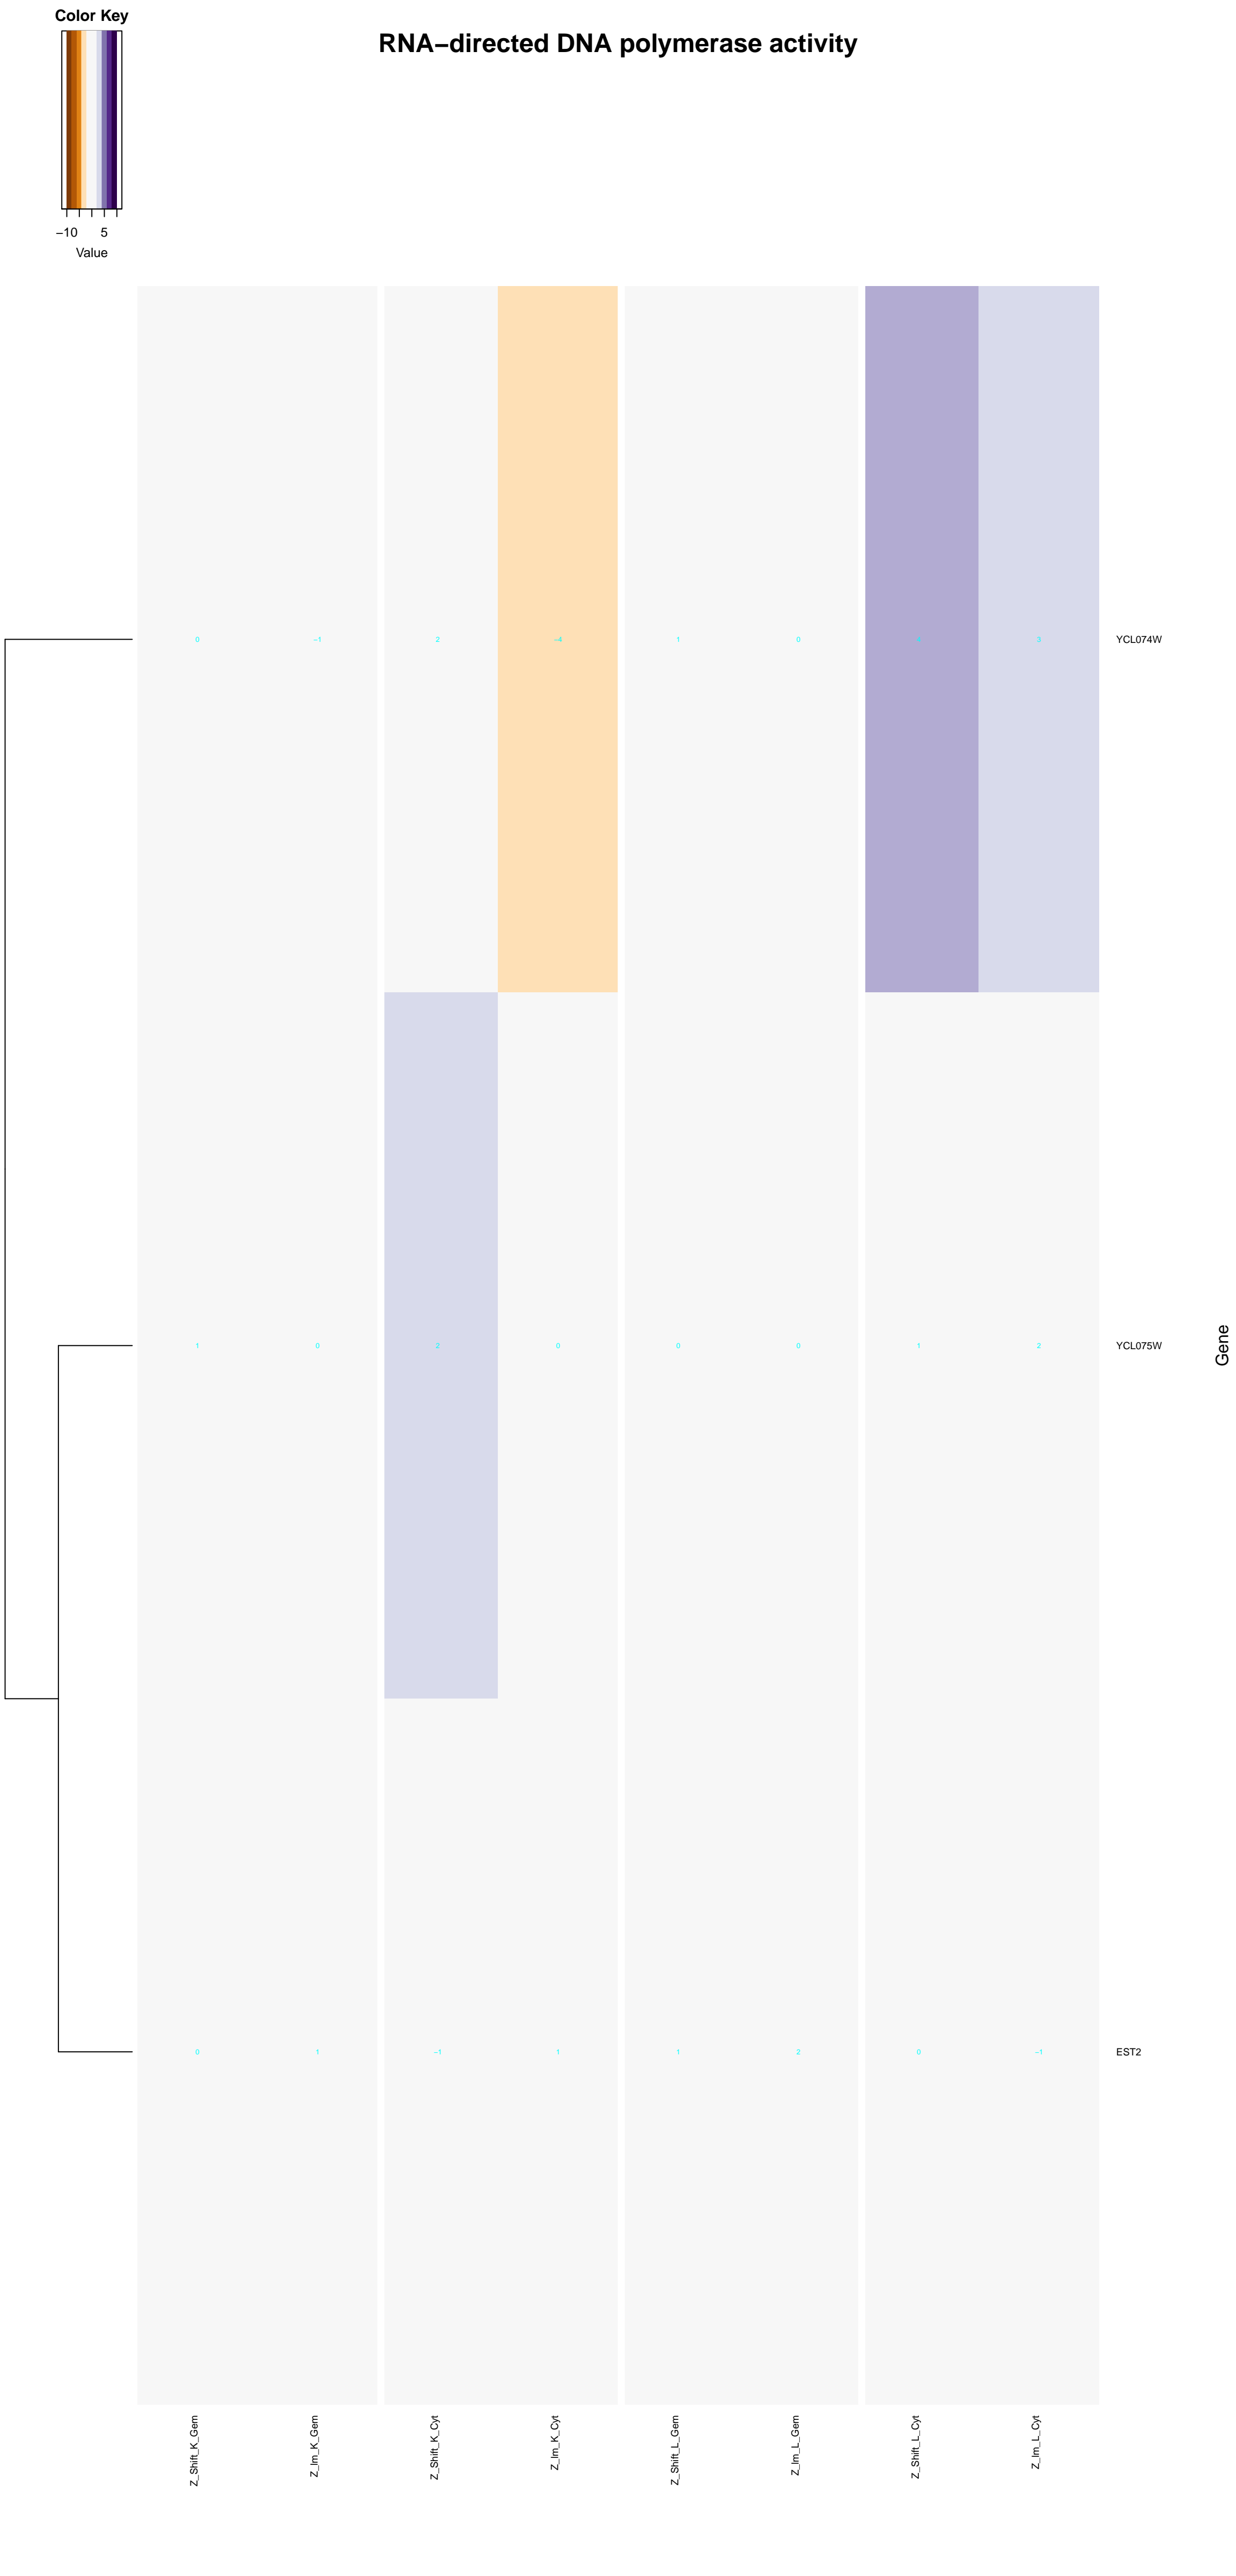

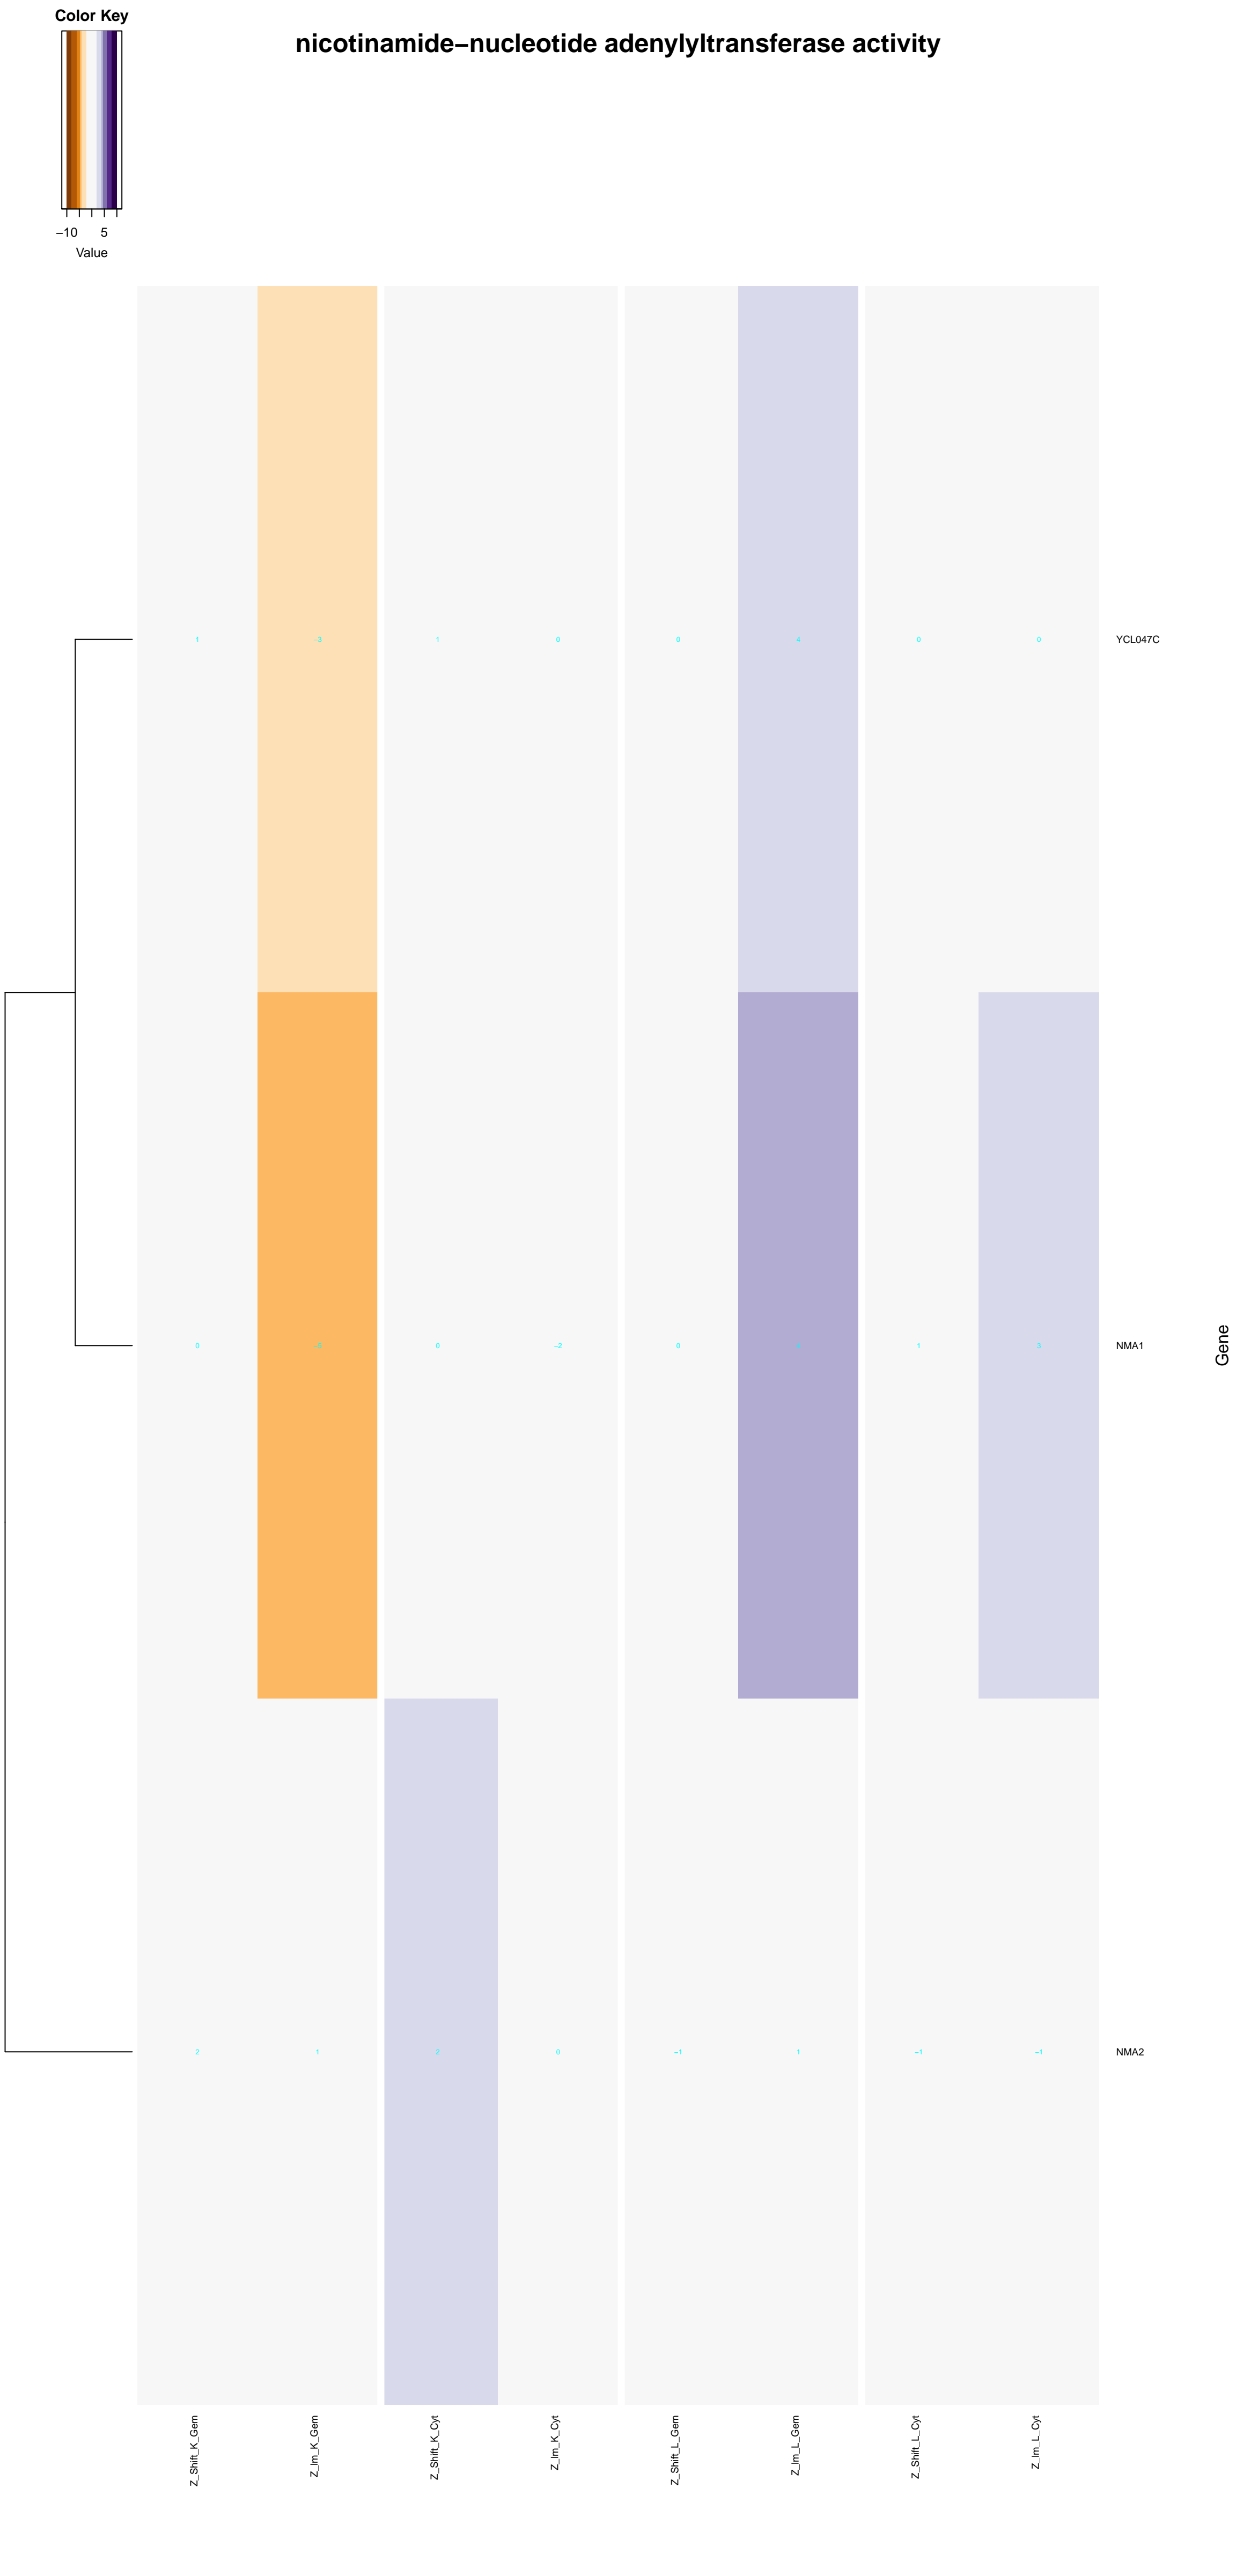

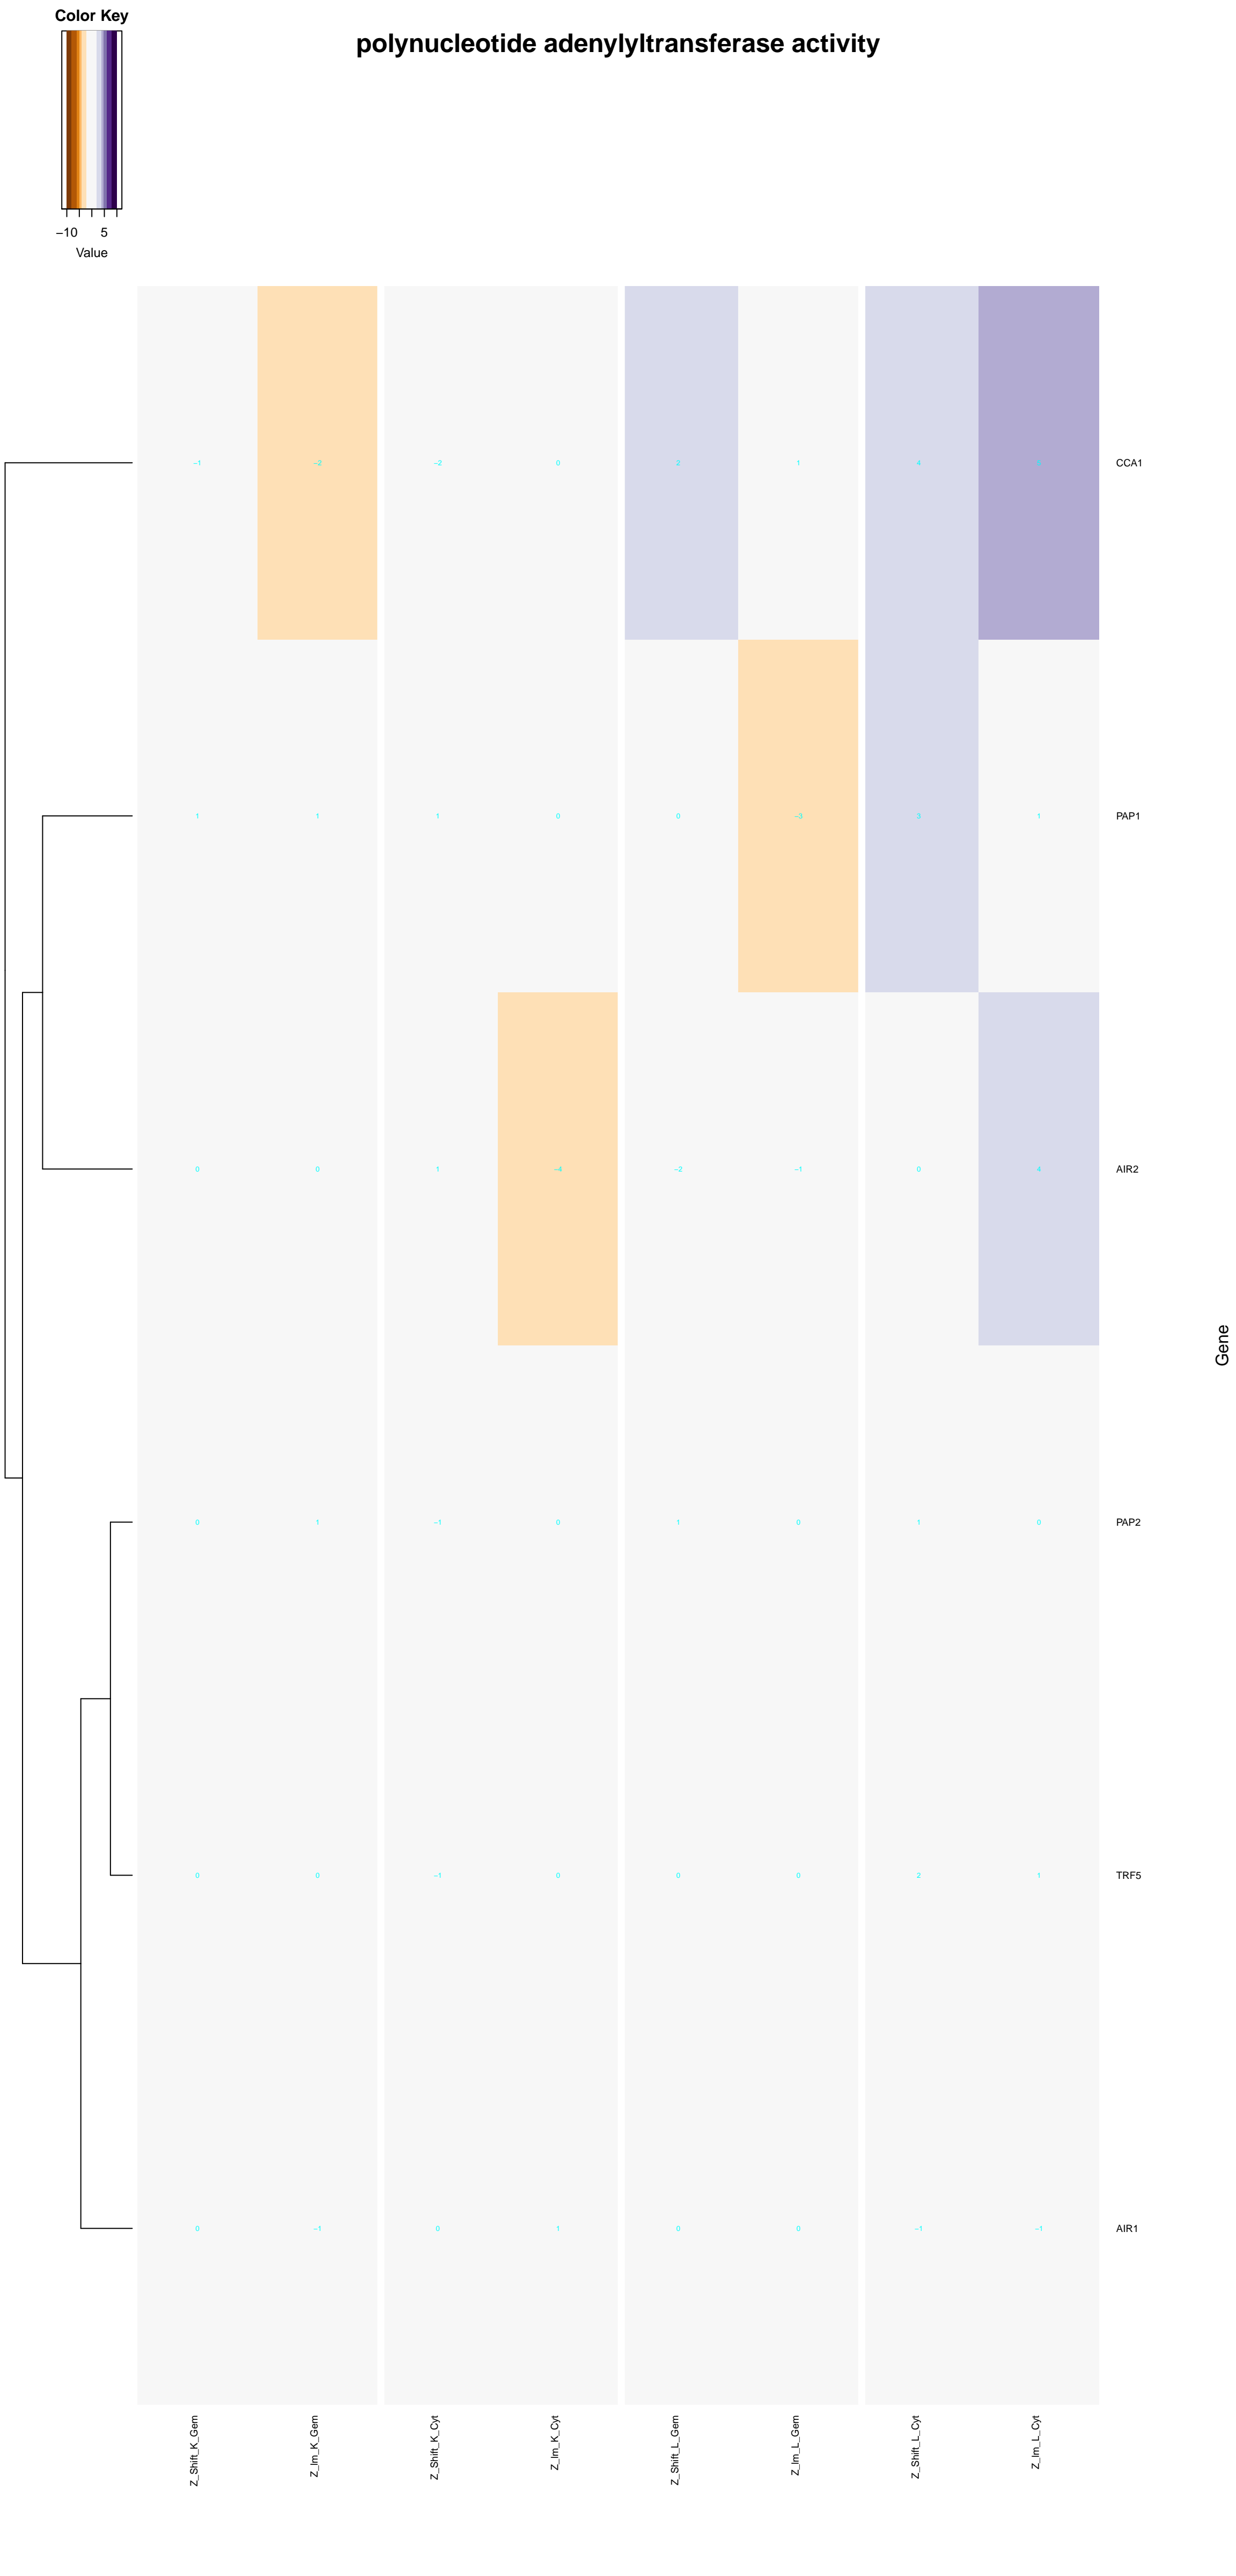

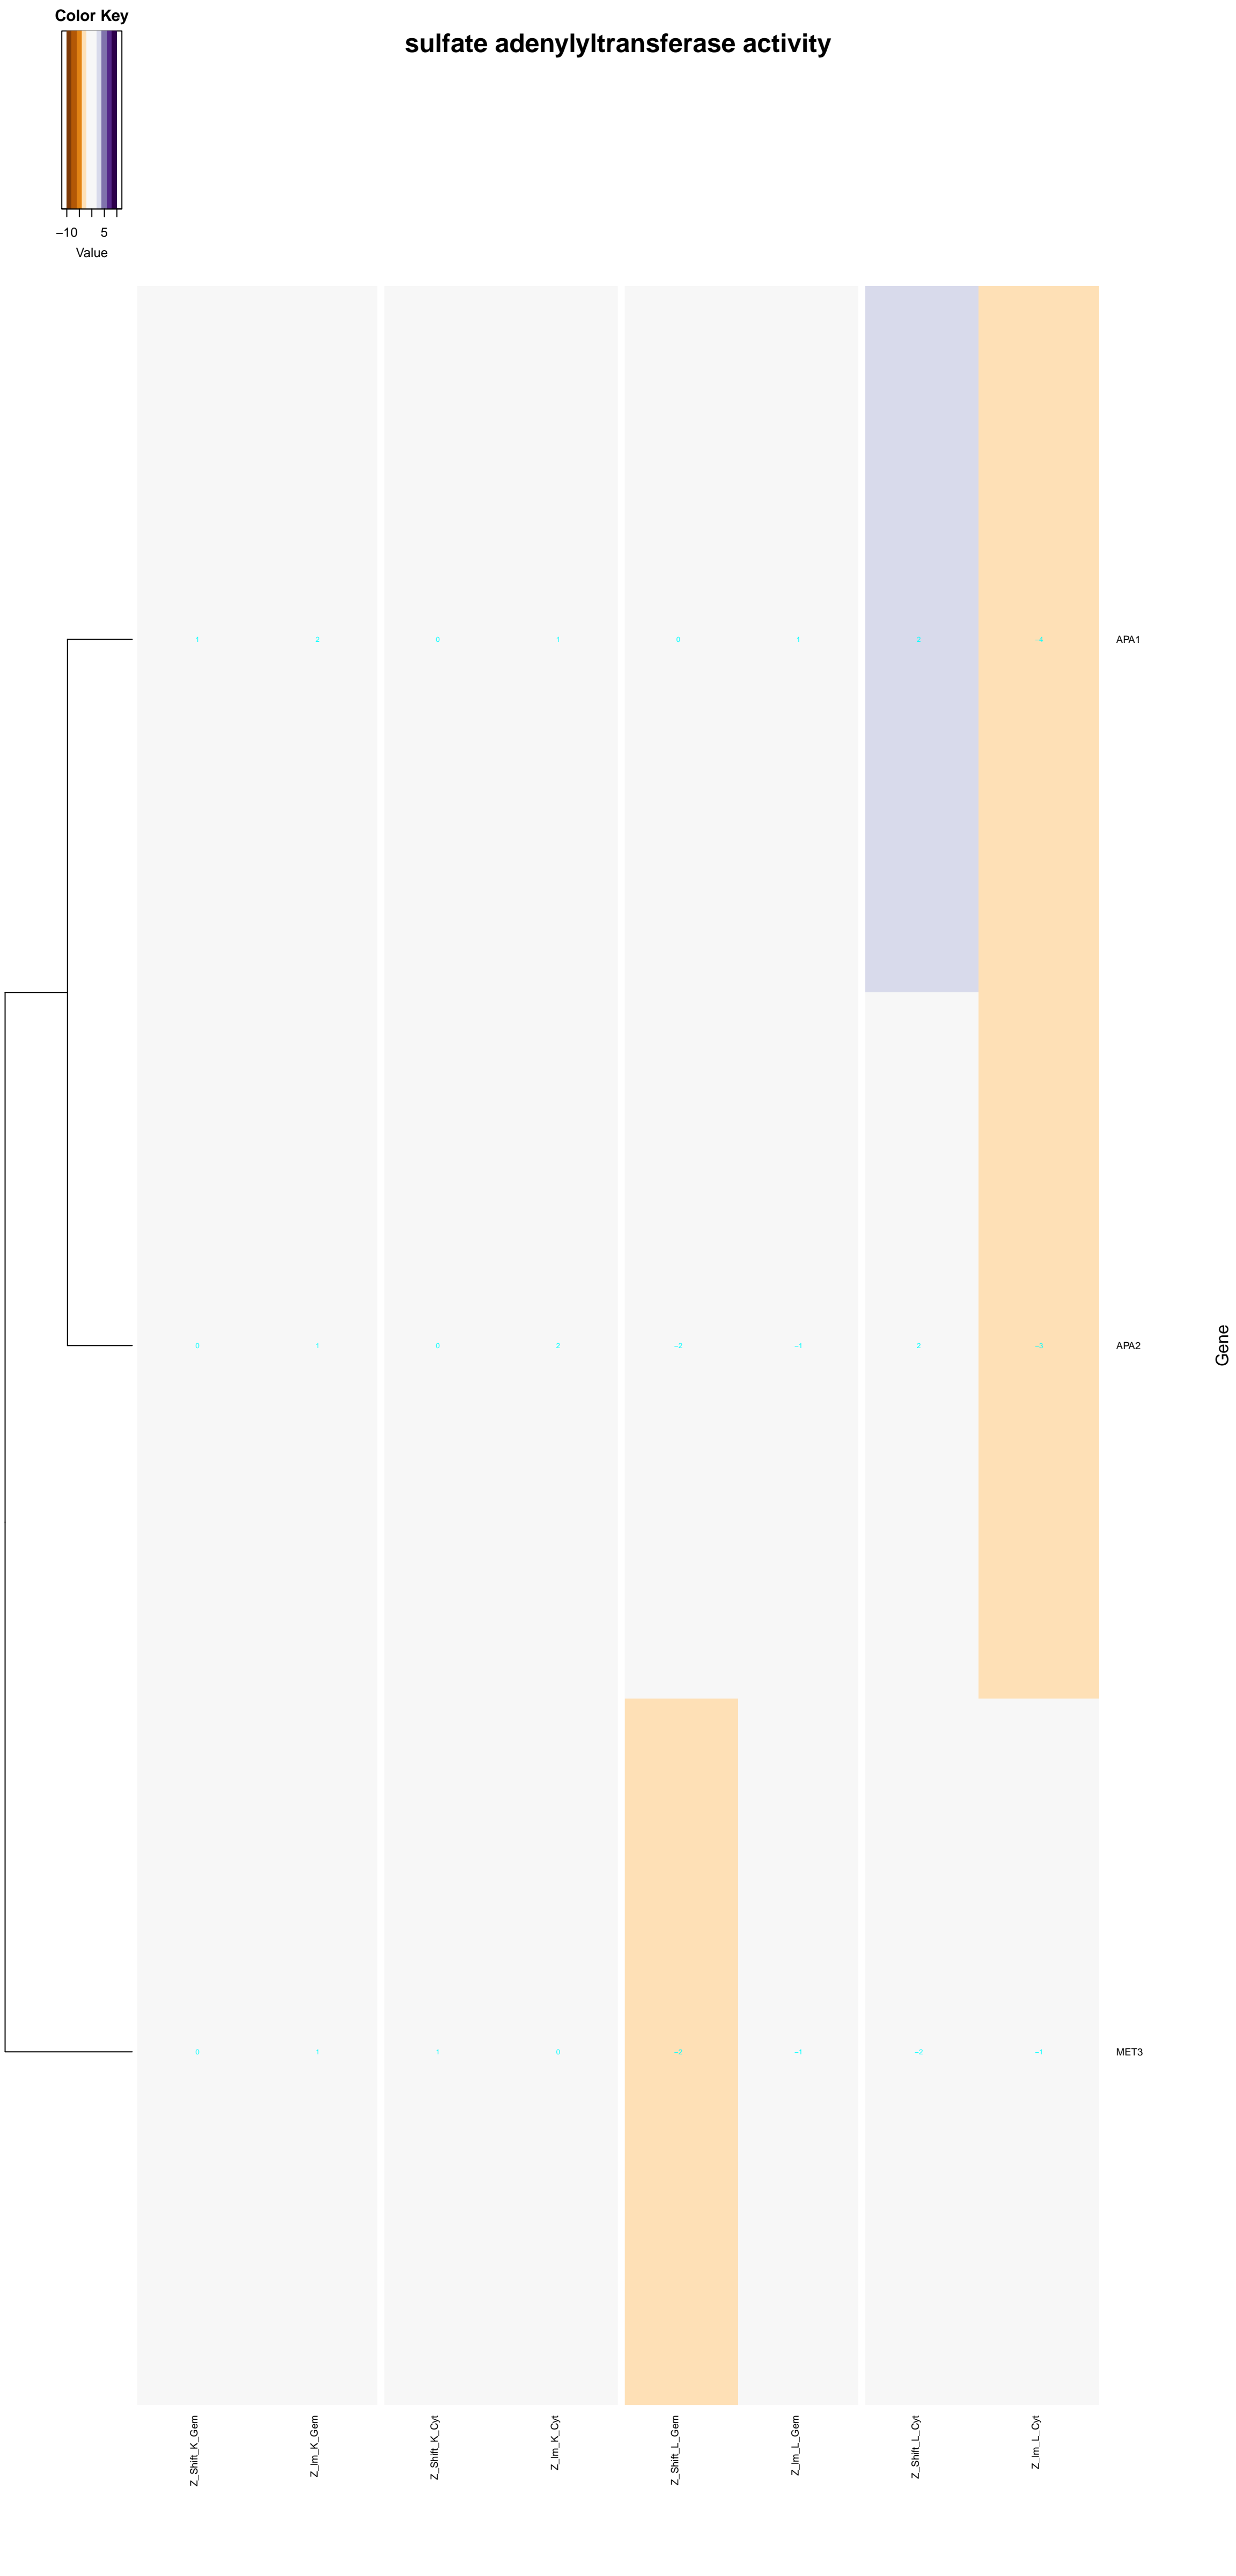

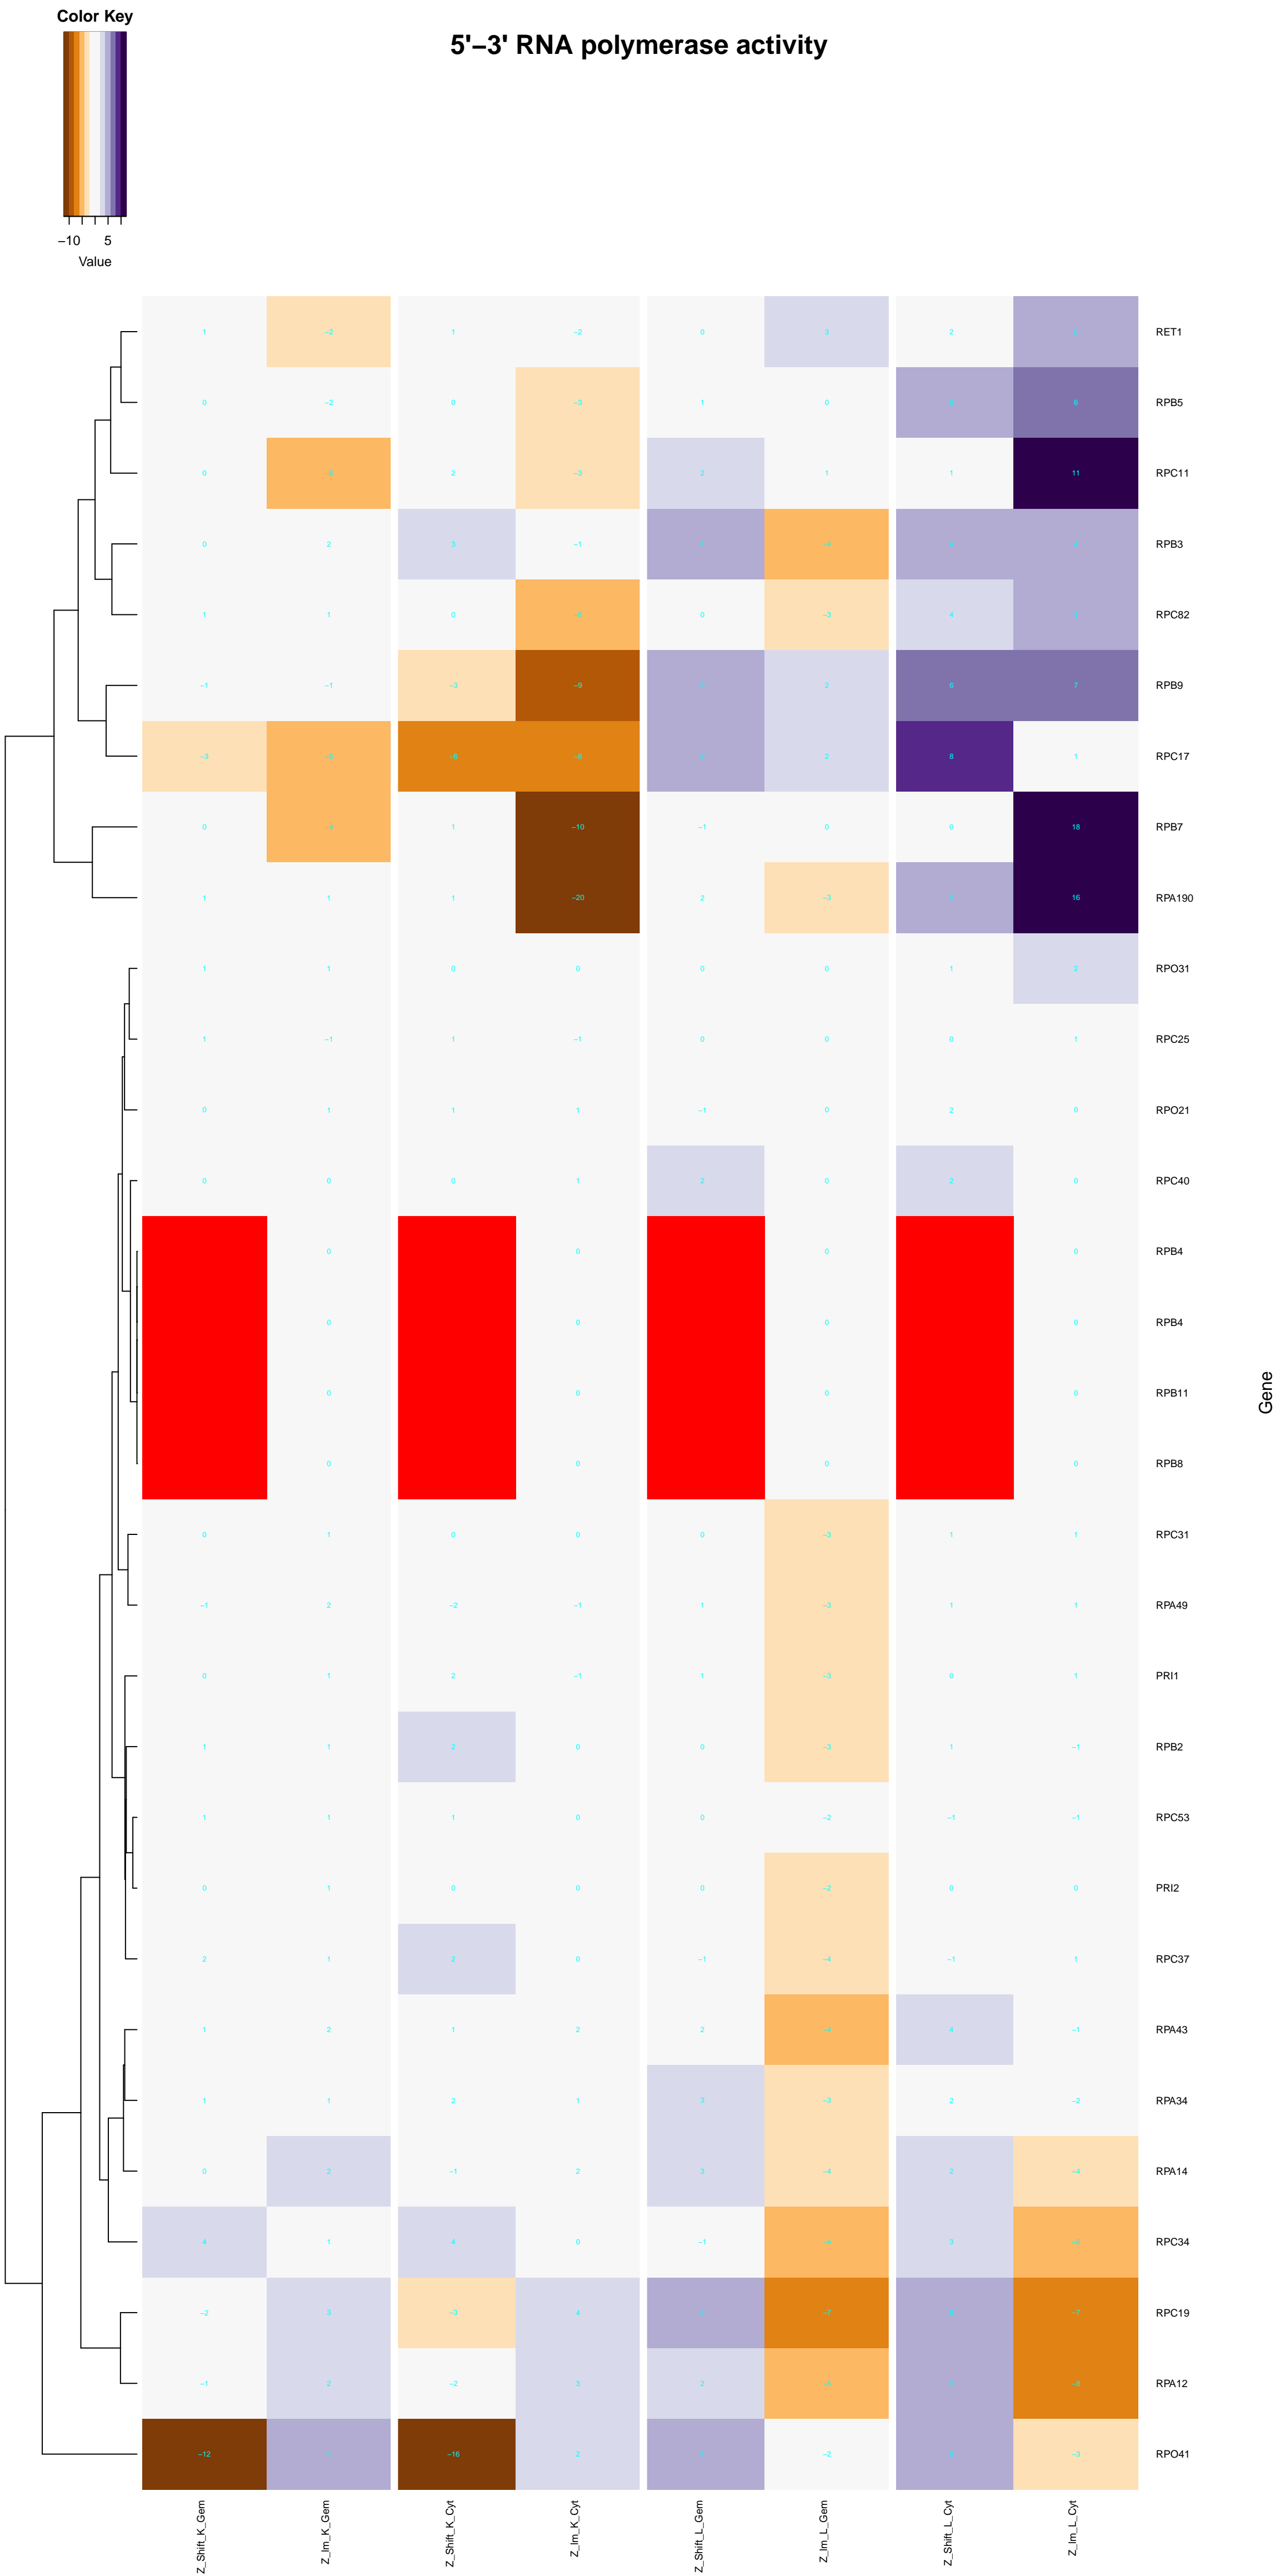

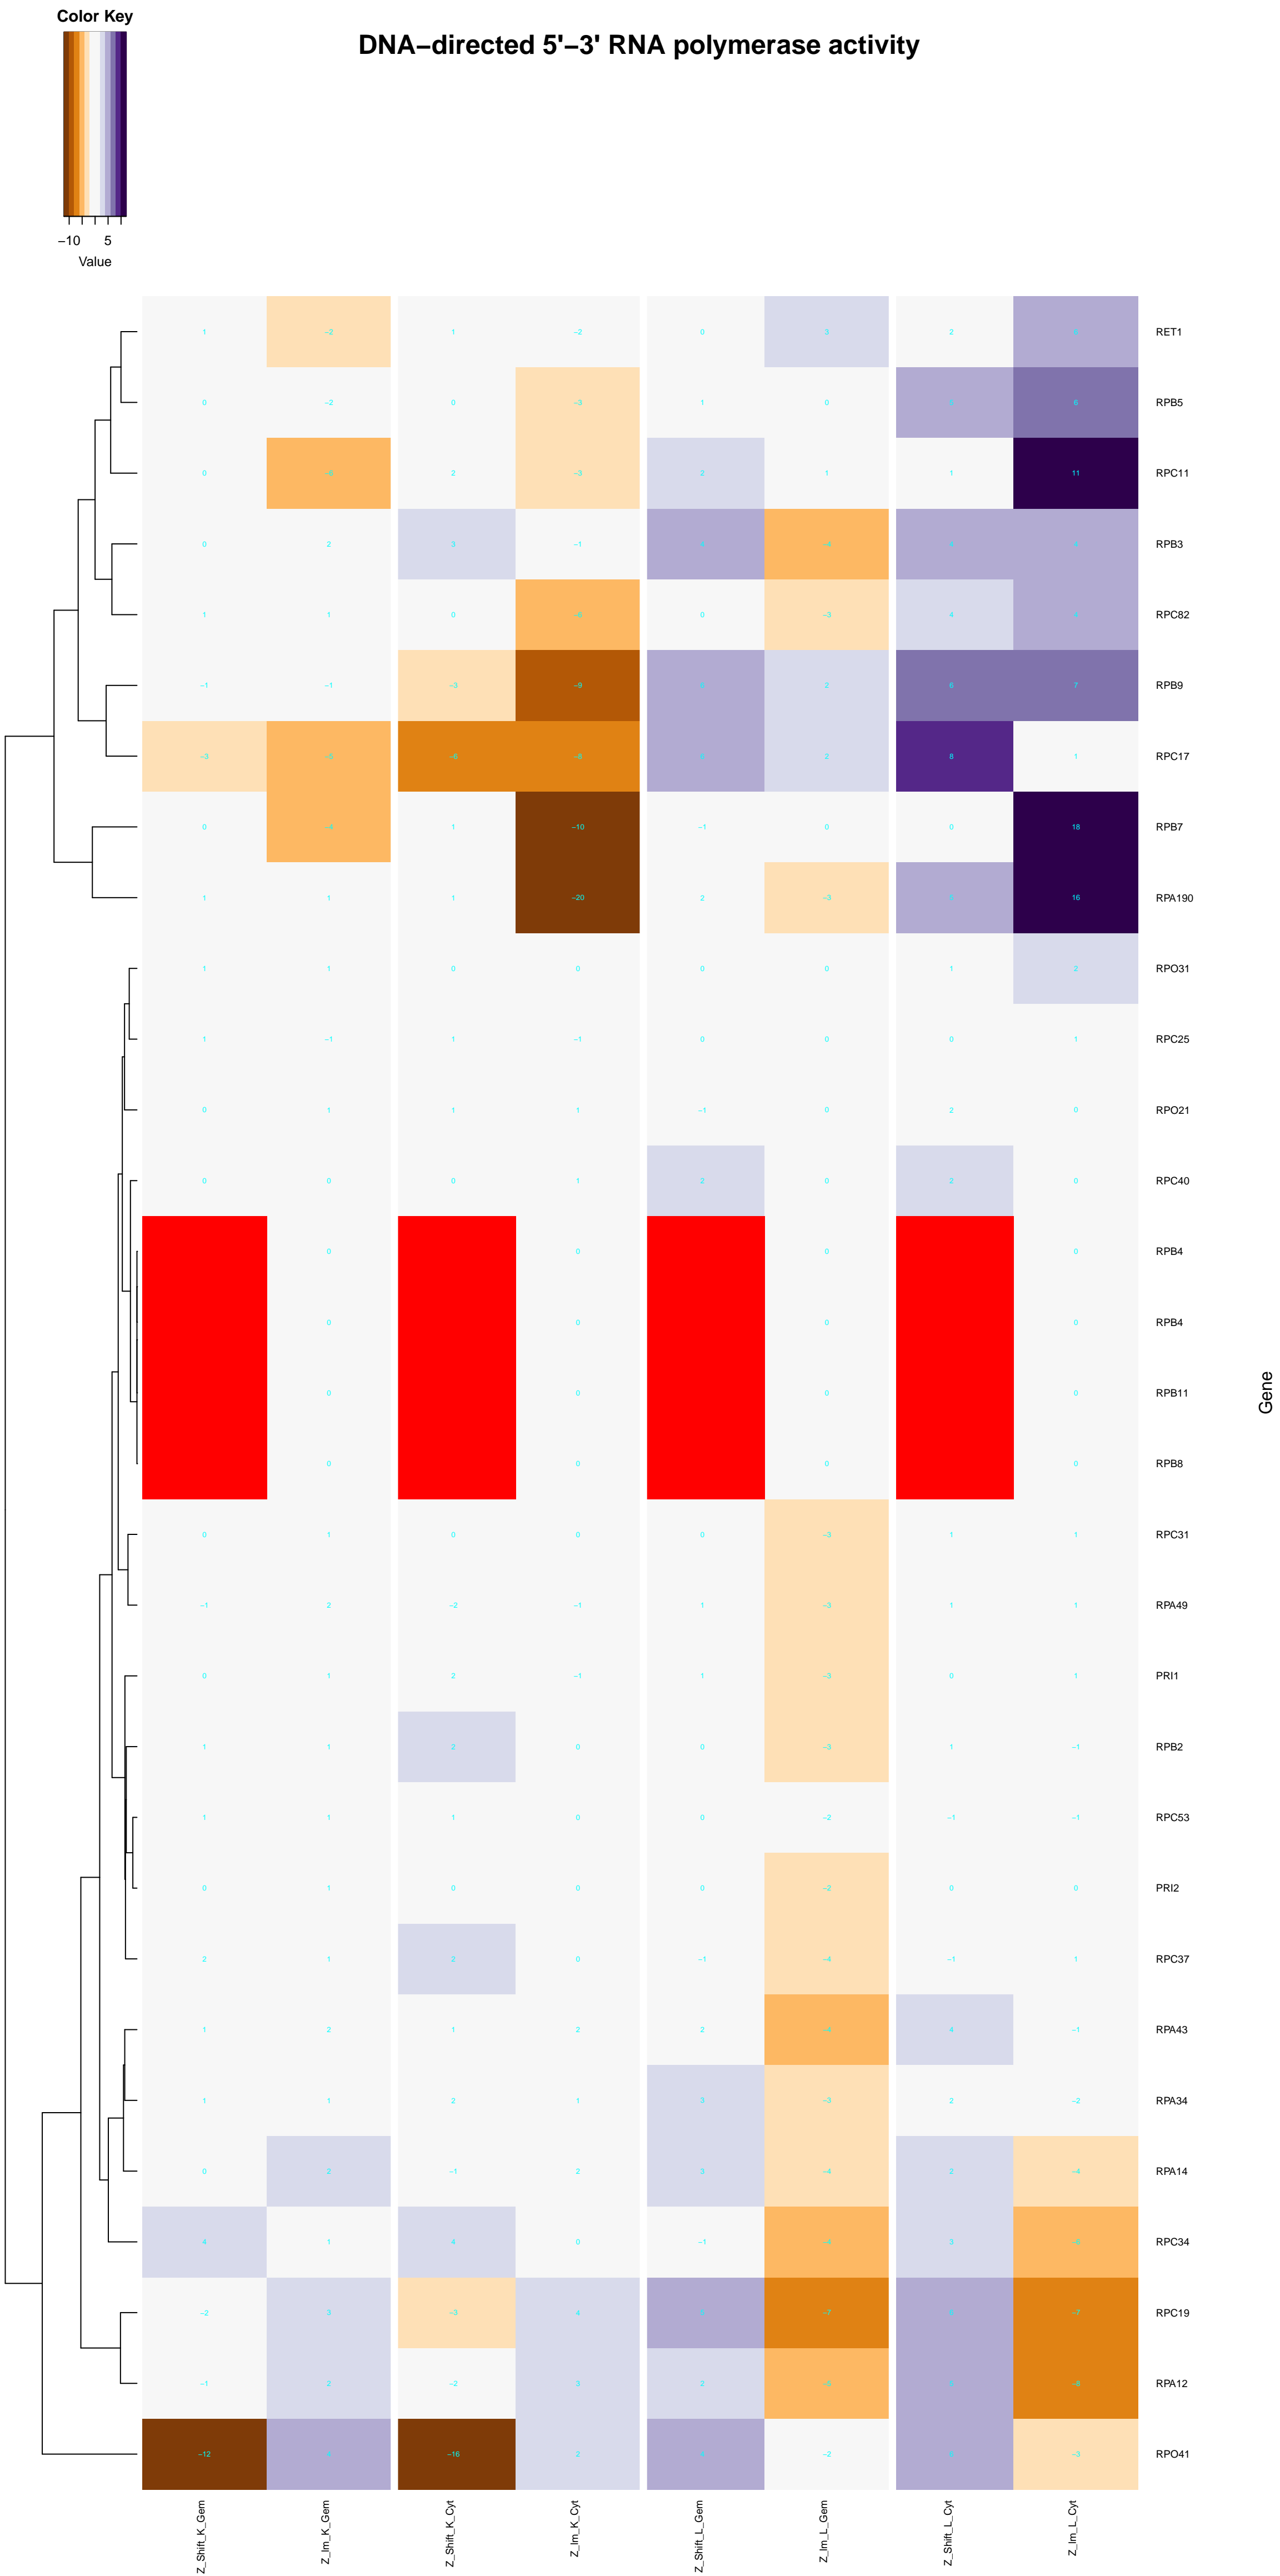

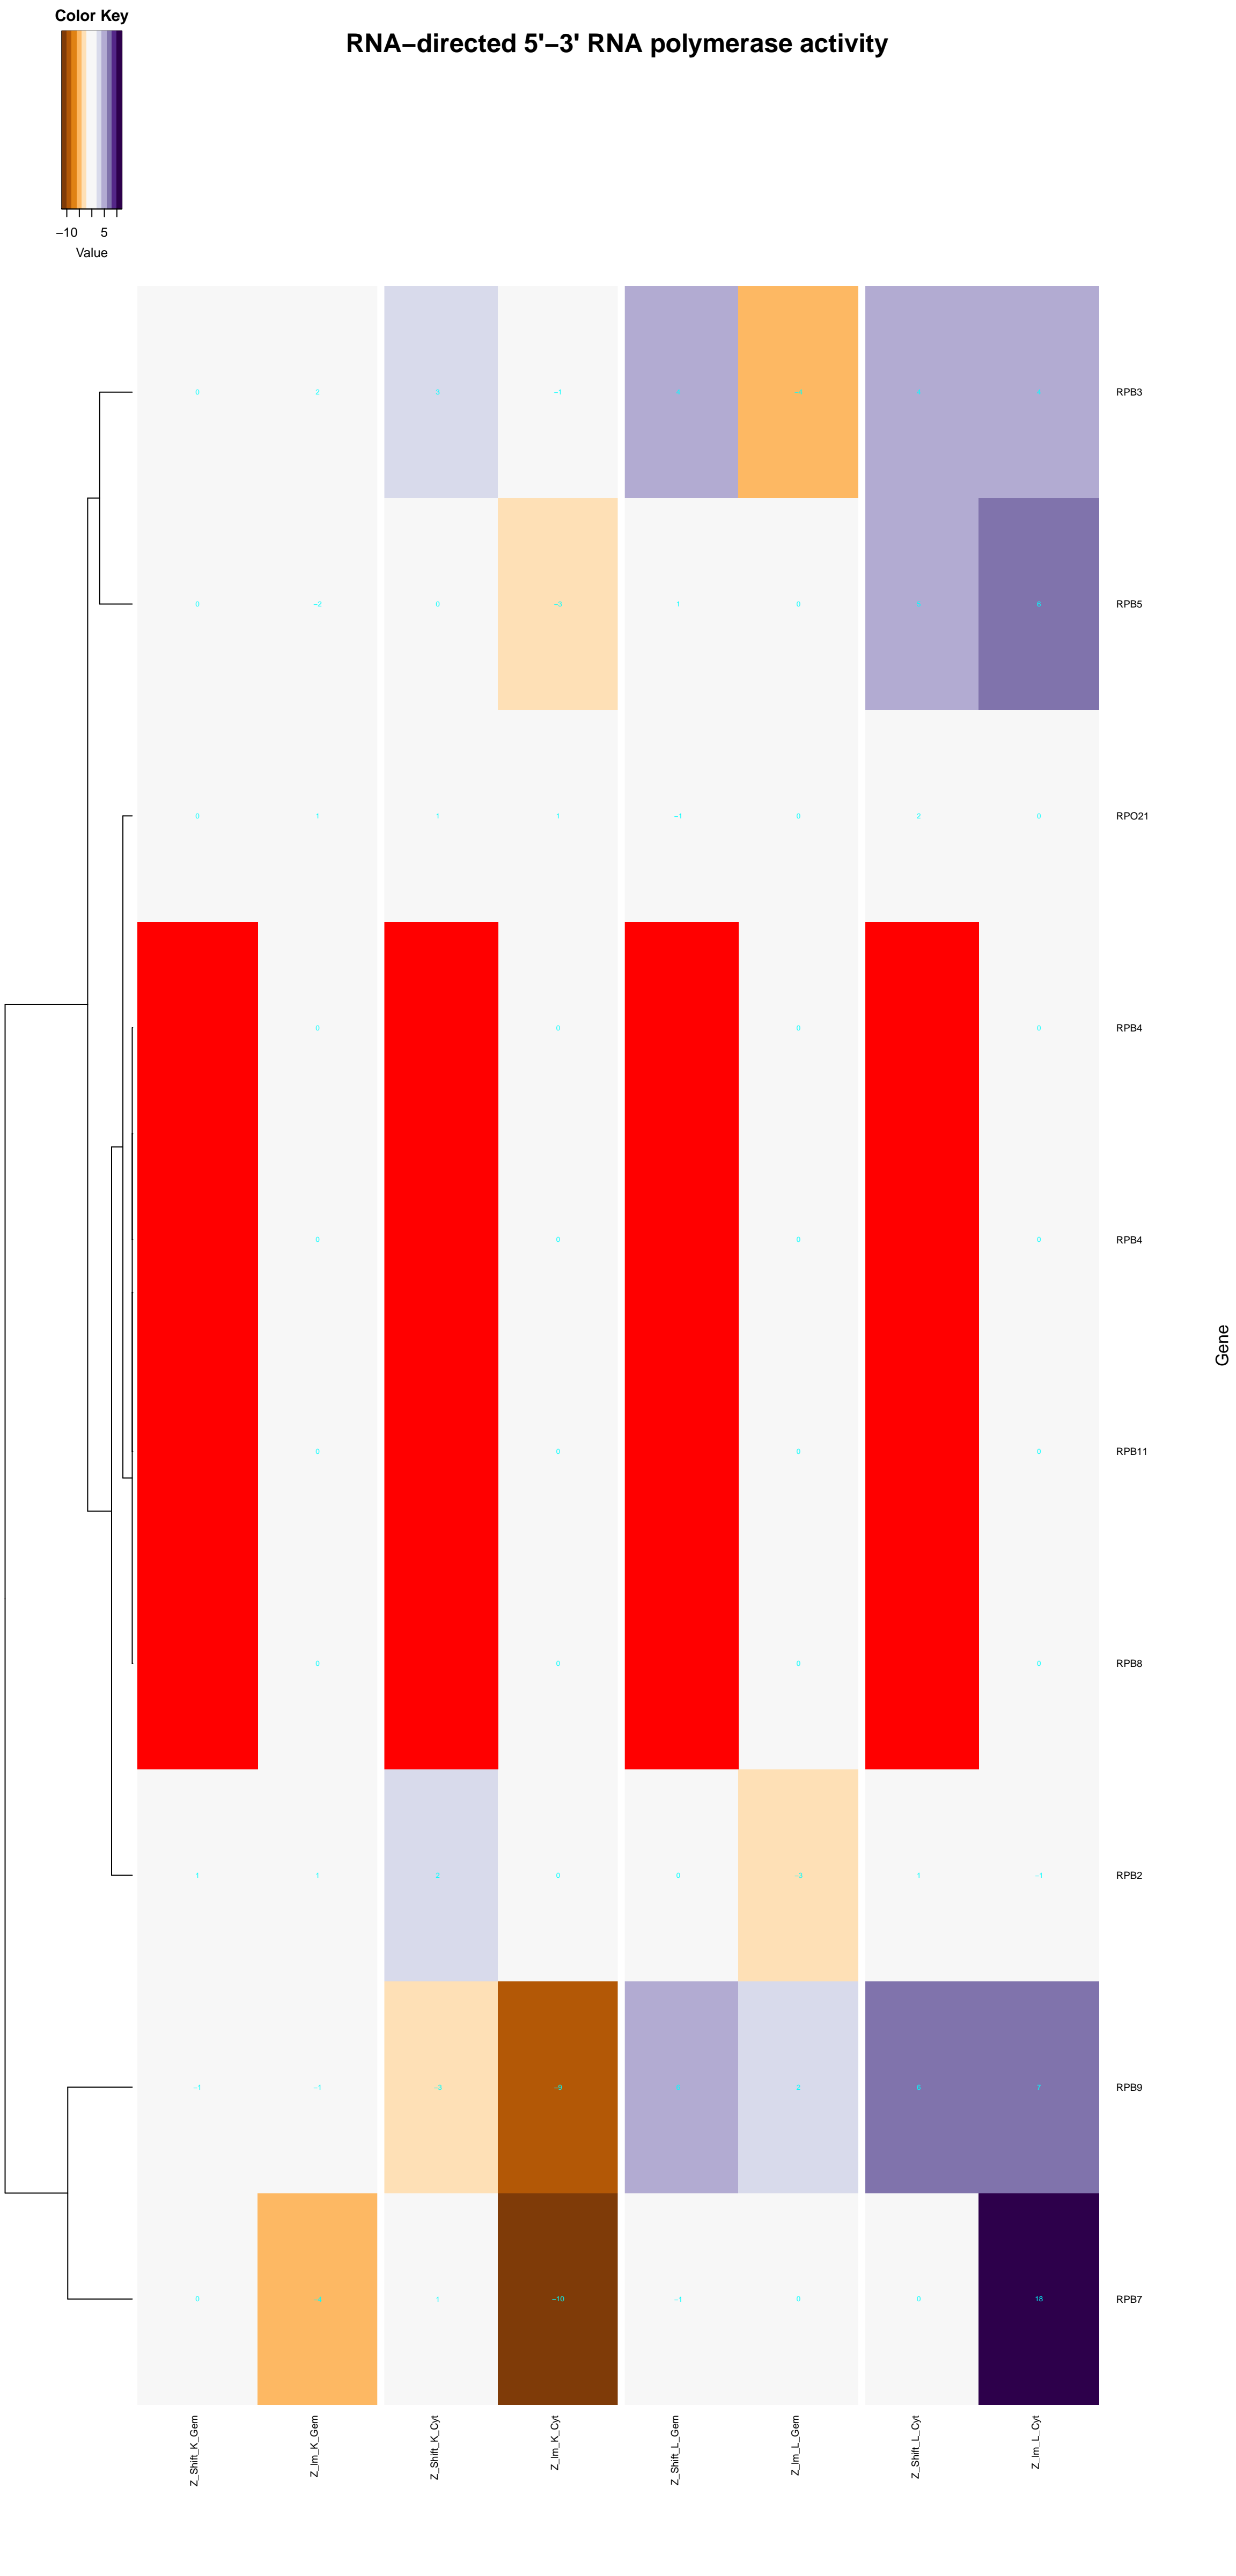

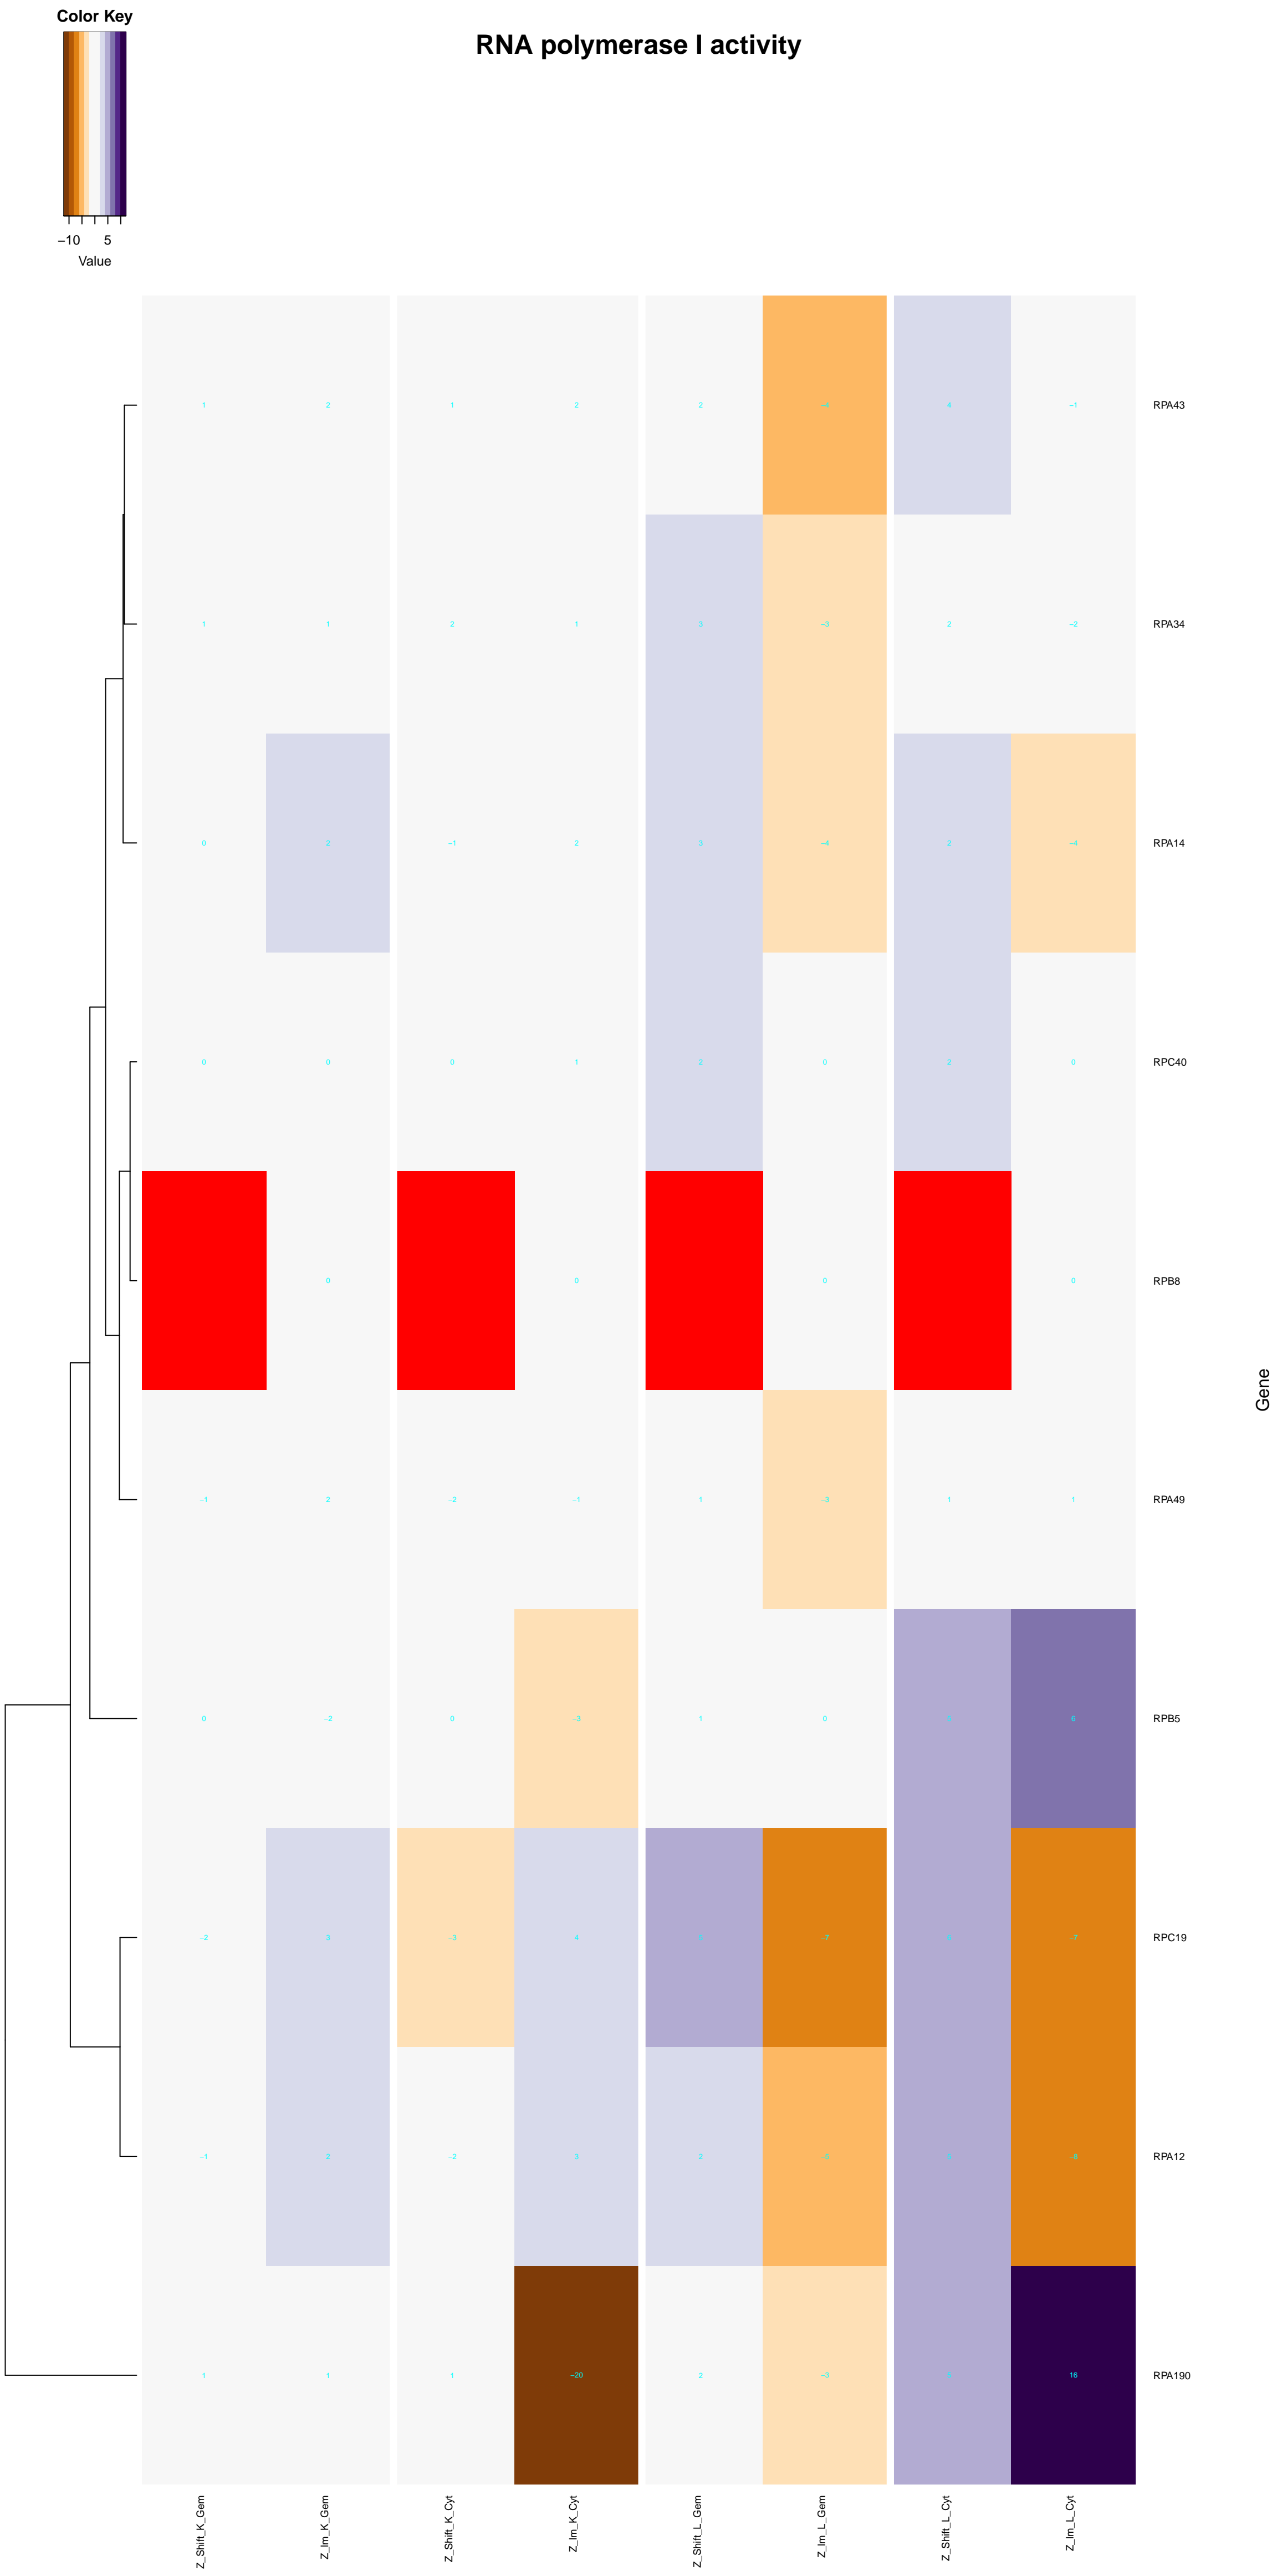

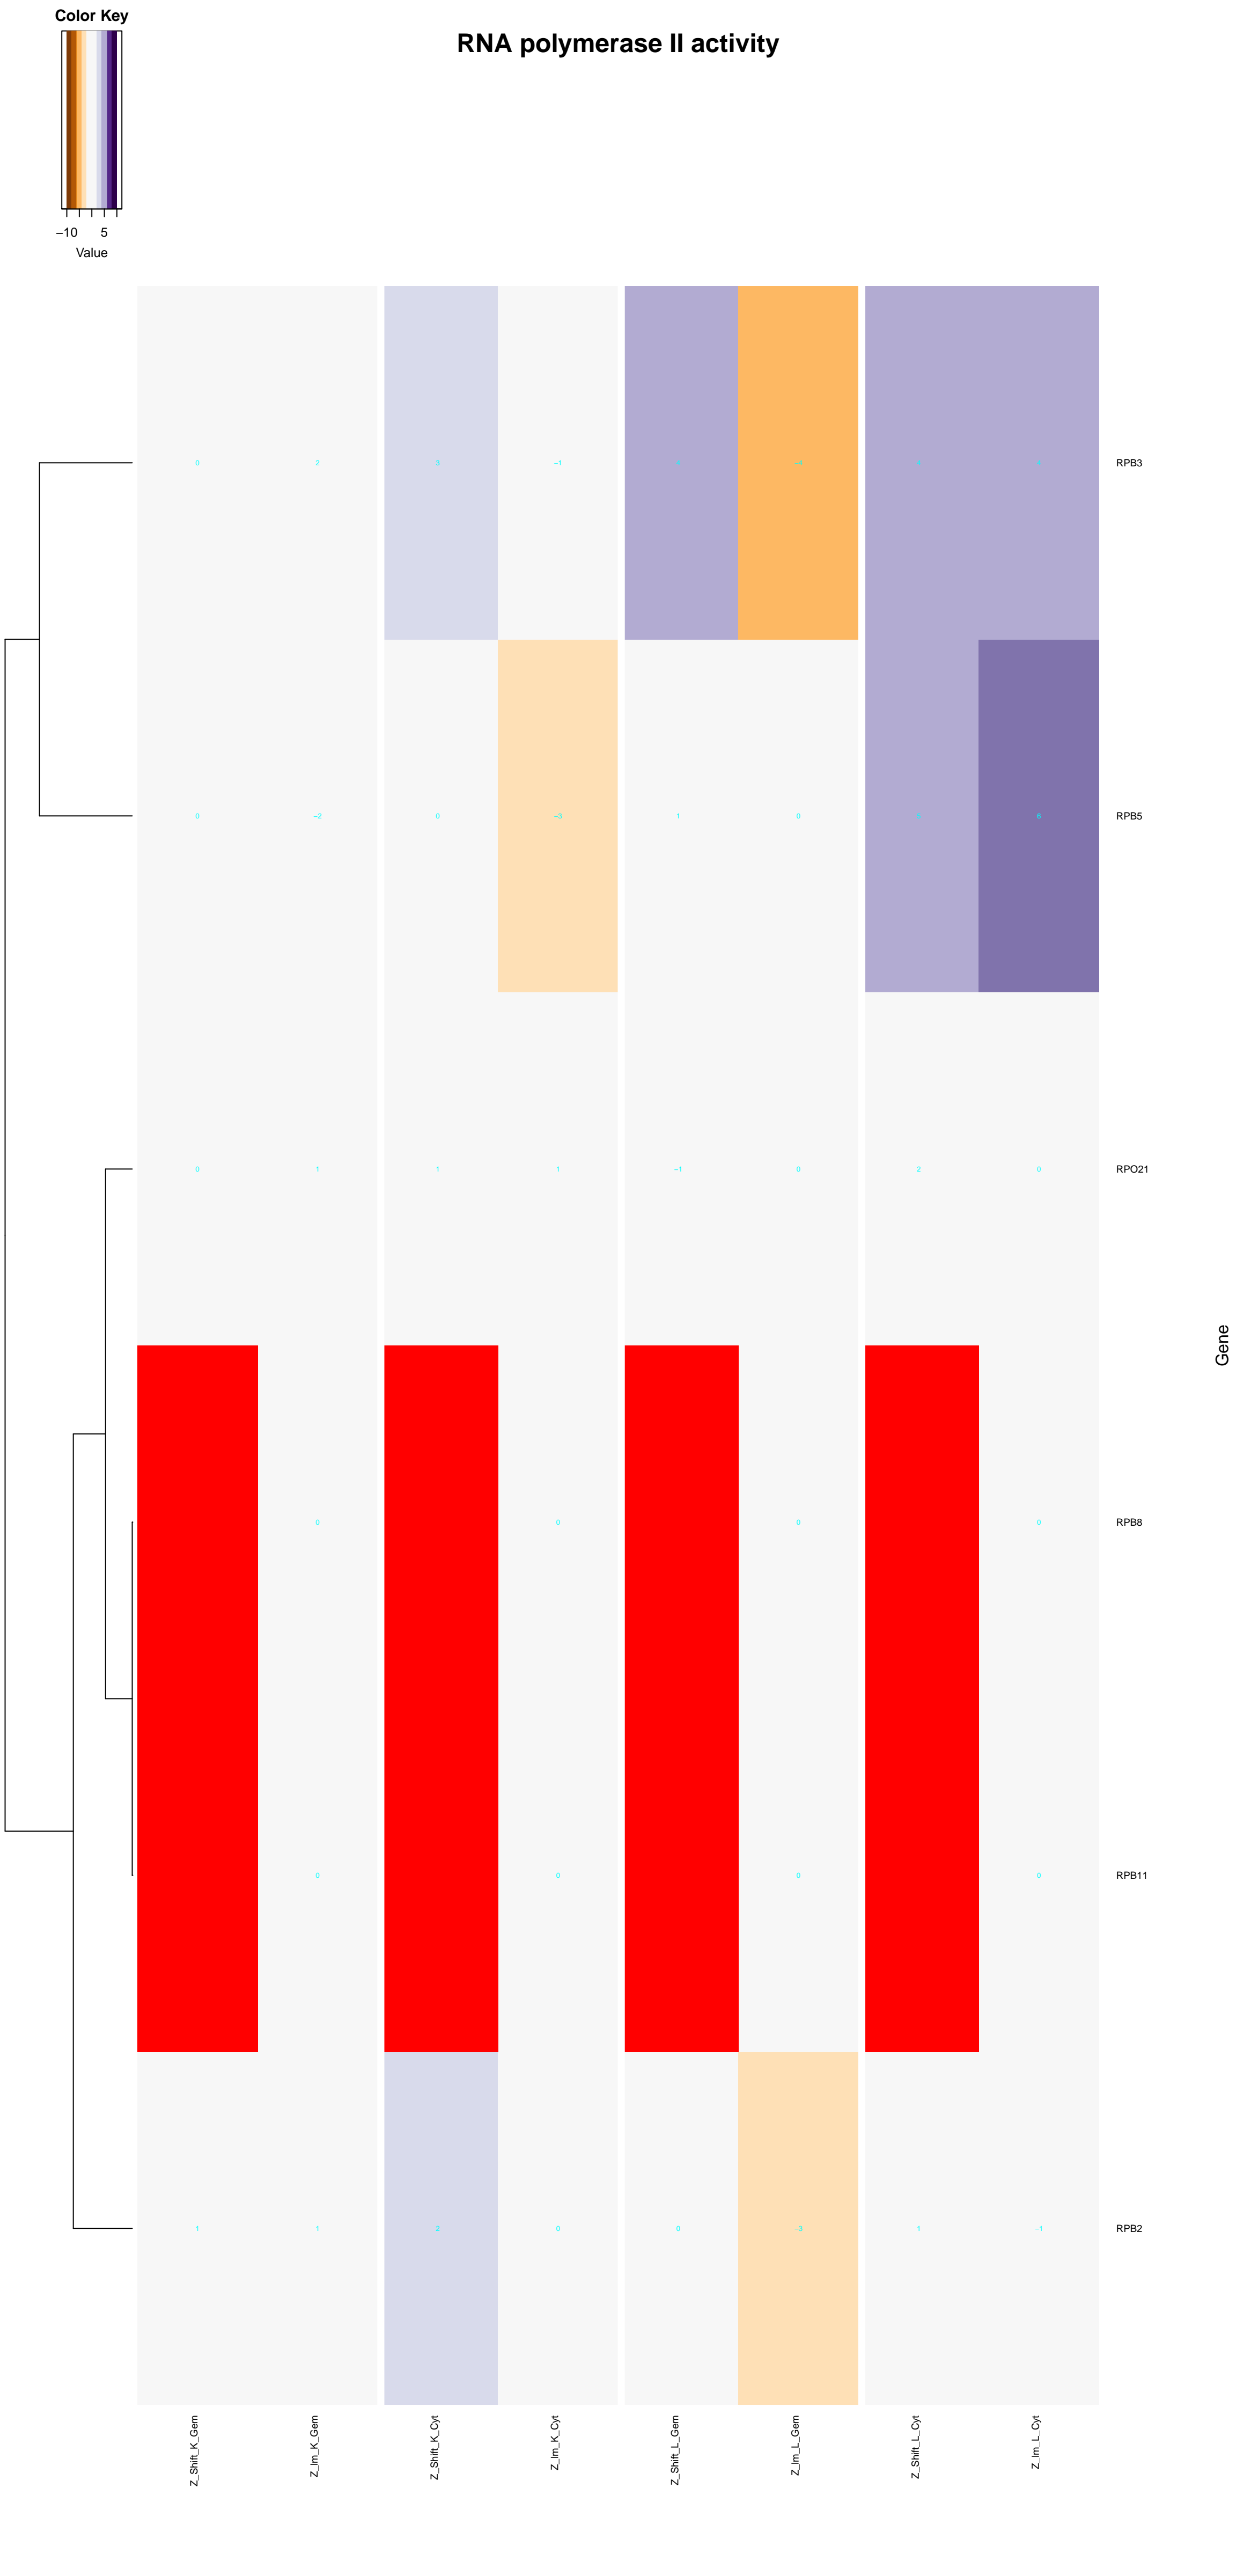

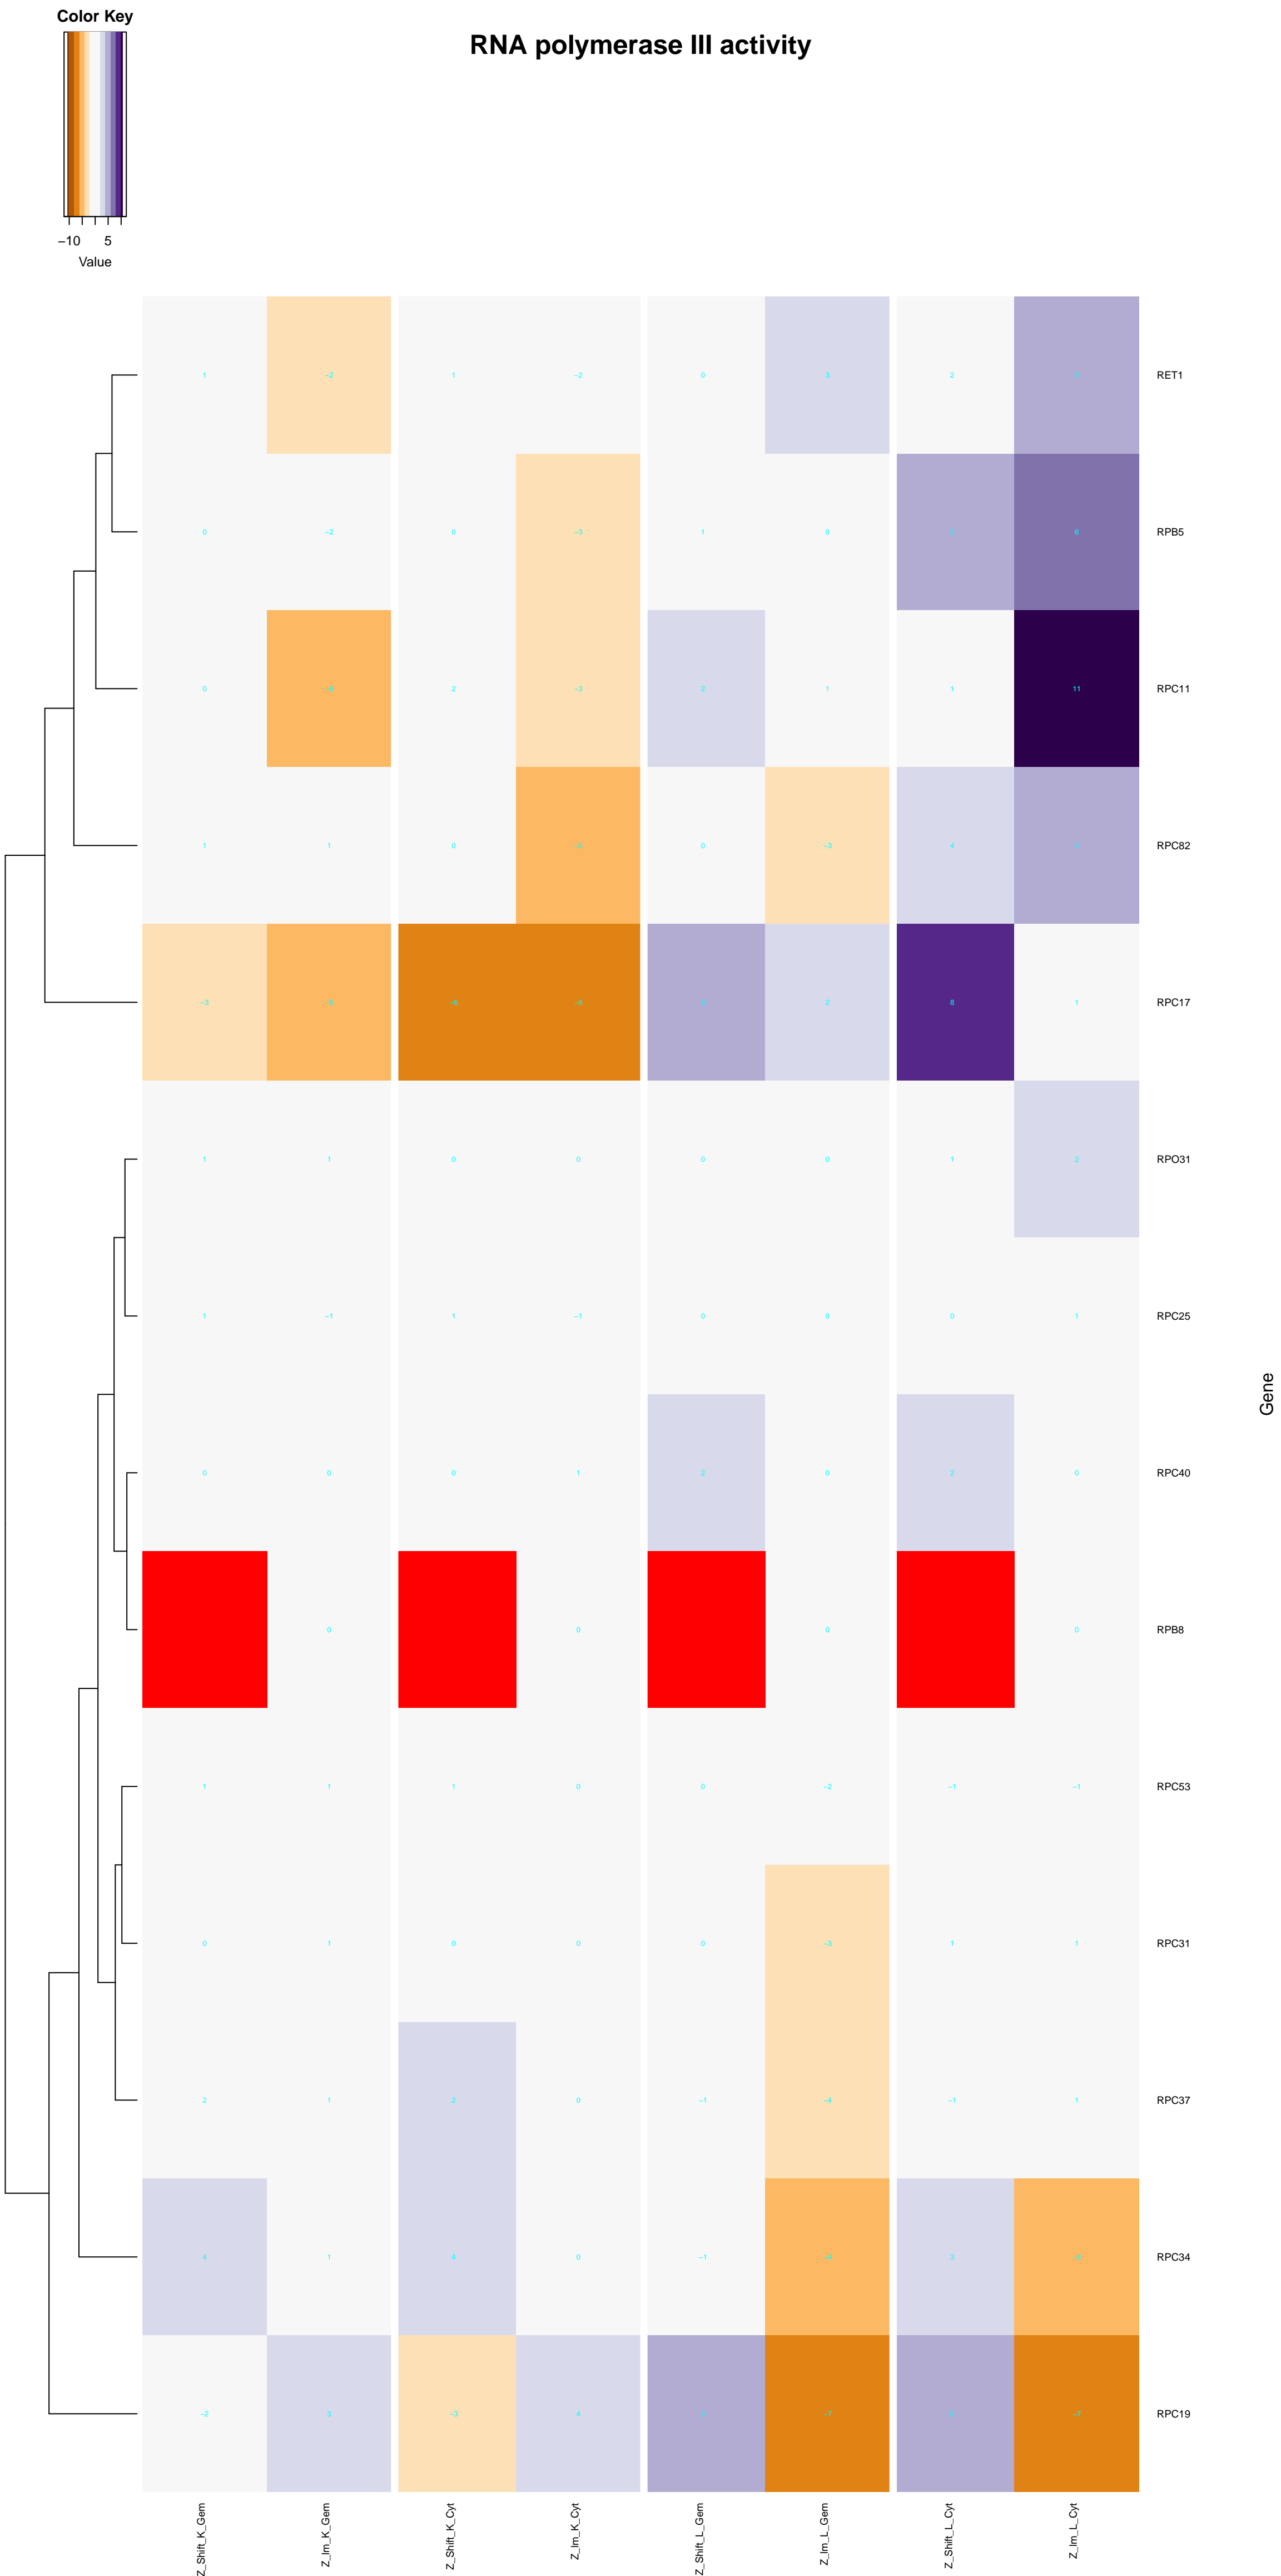

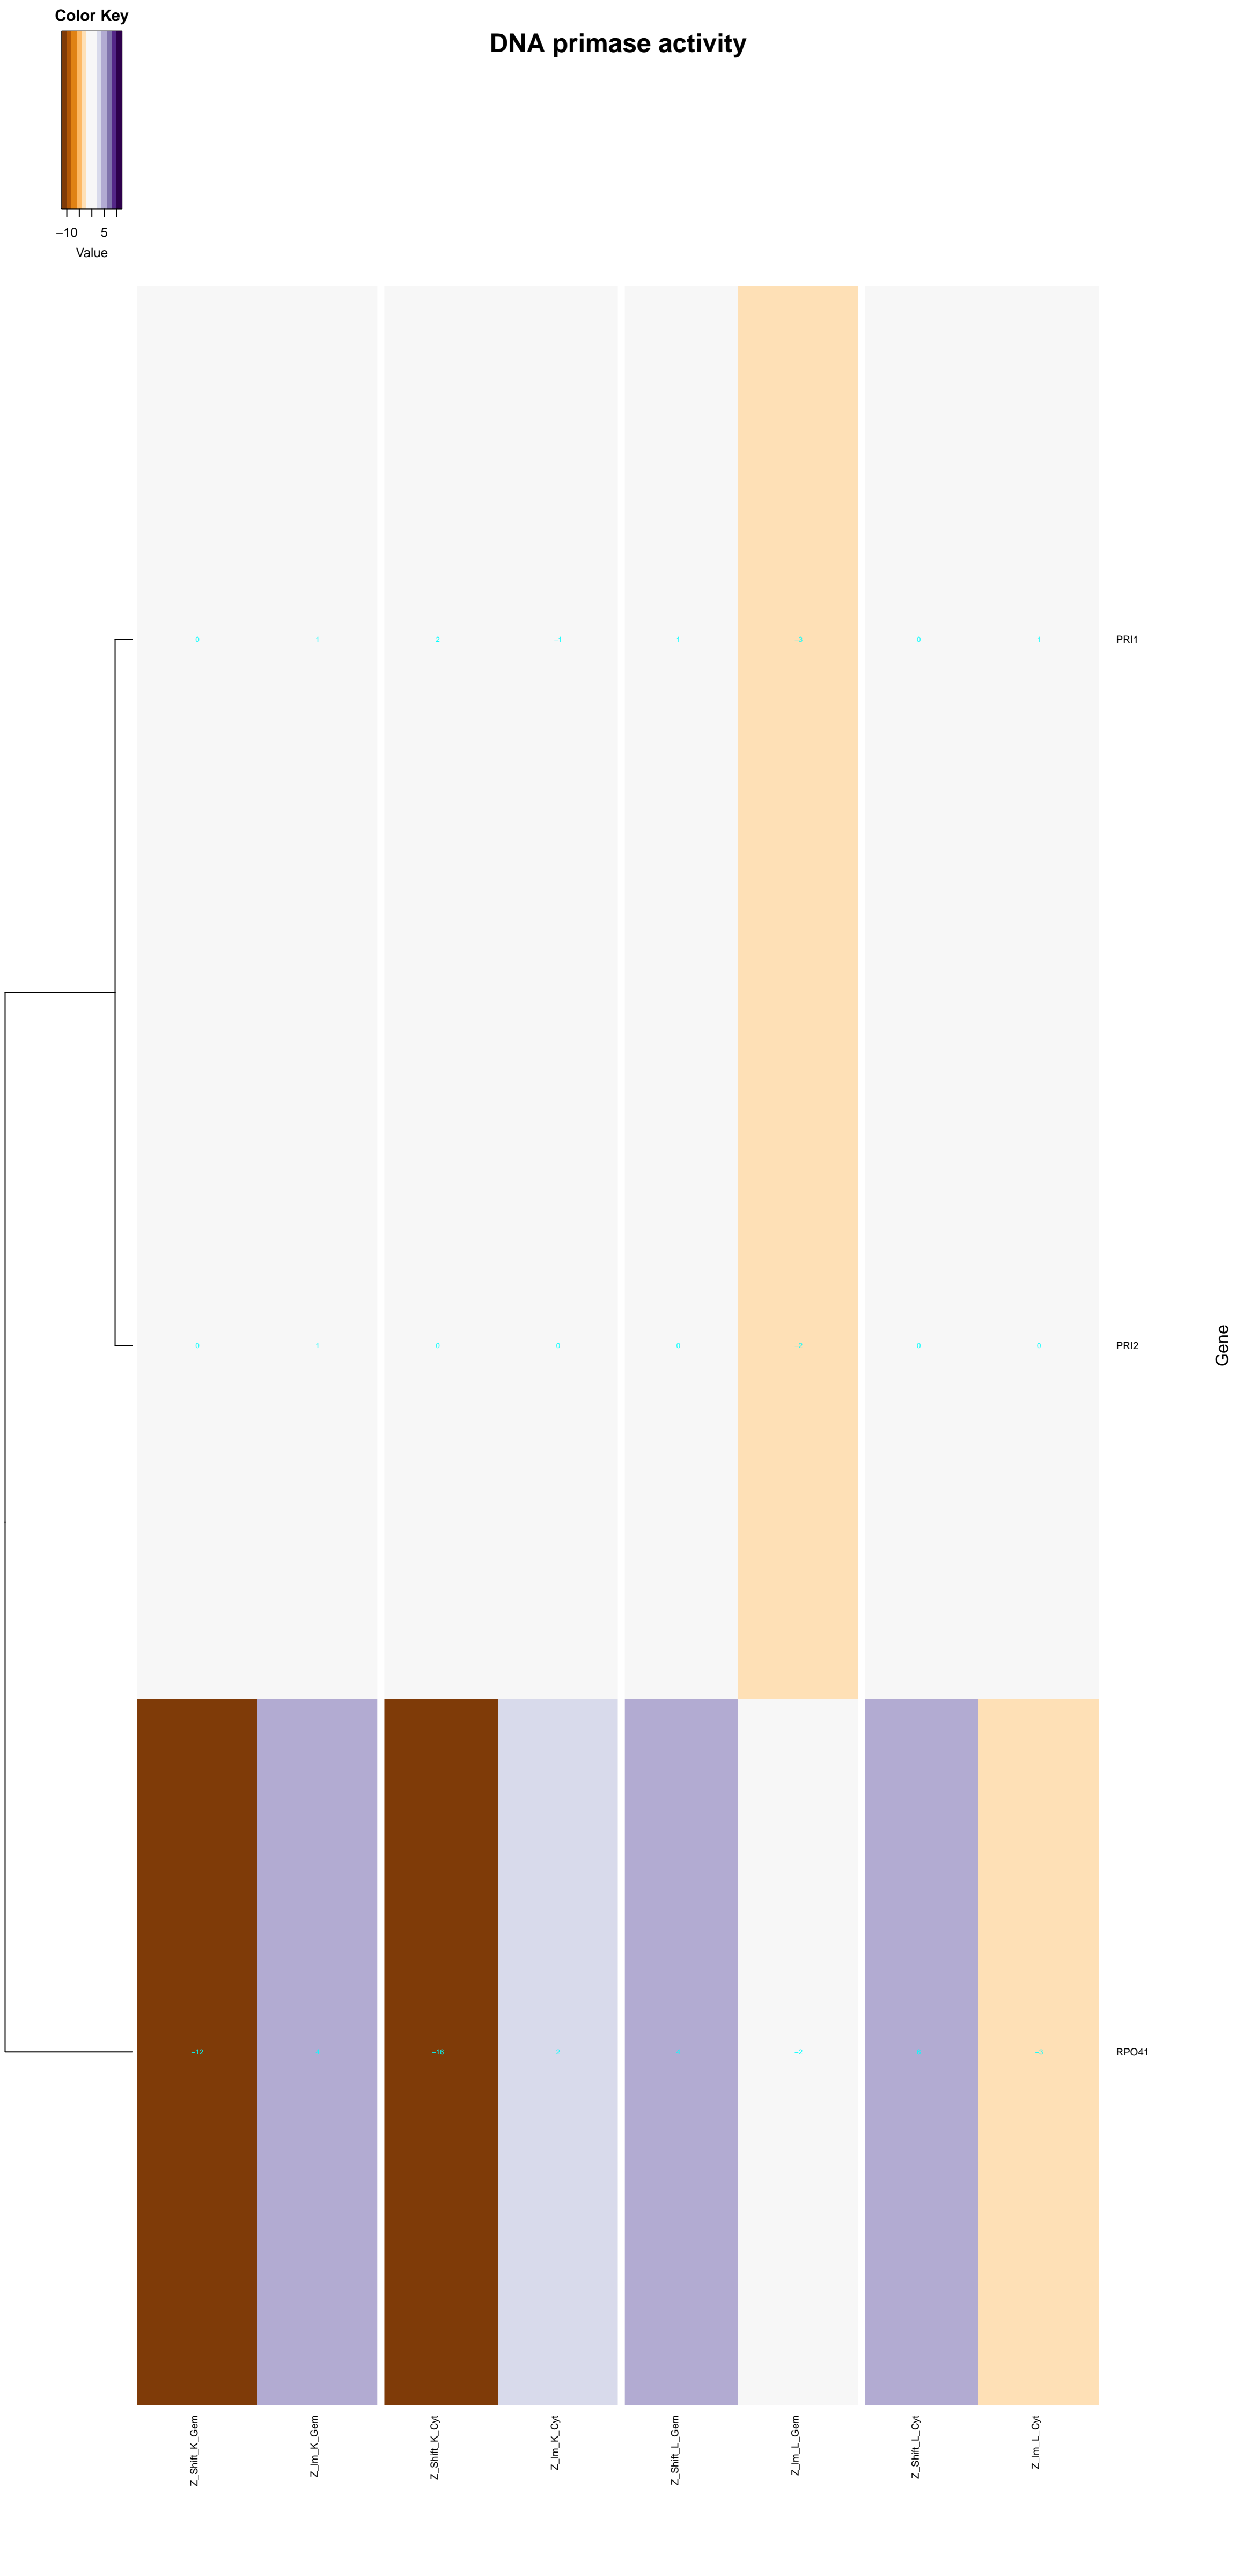

Supplement: s1 [file s1]

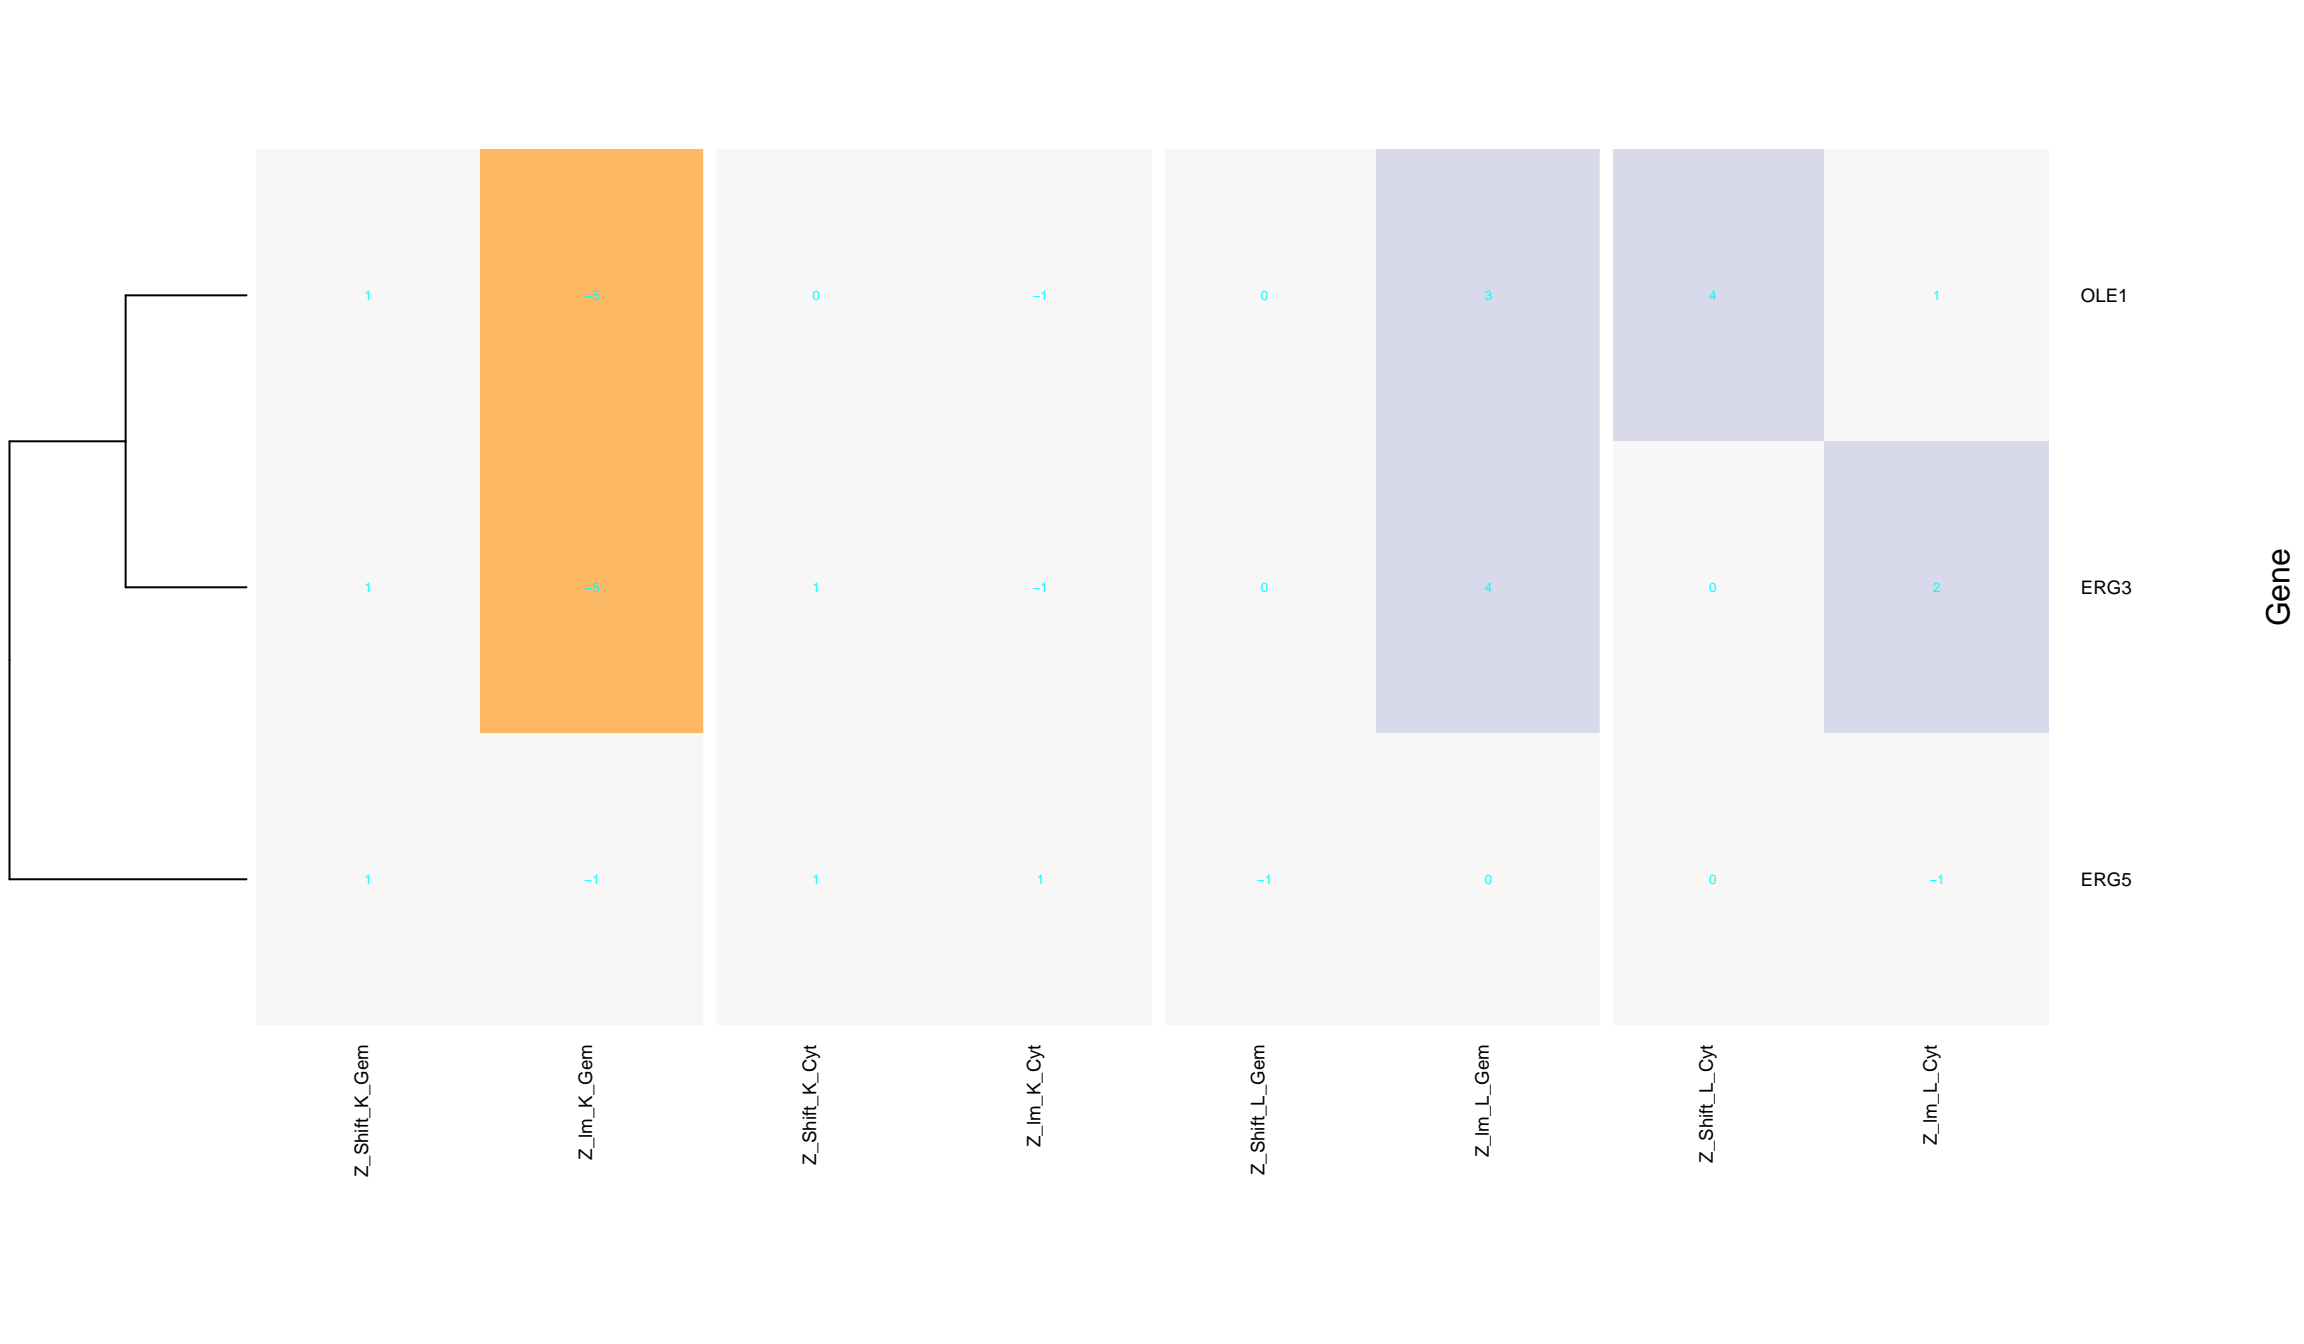

Supplement: s1 [file s1]

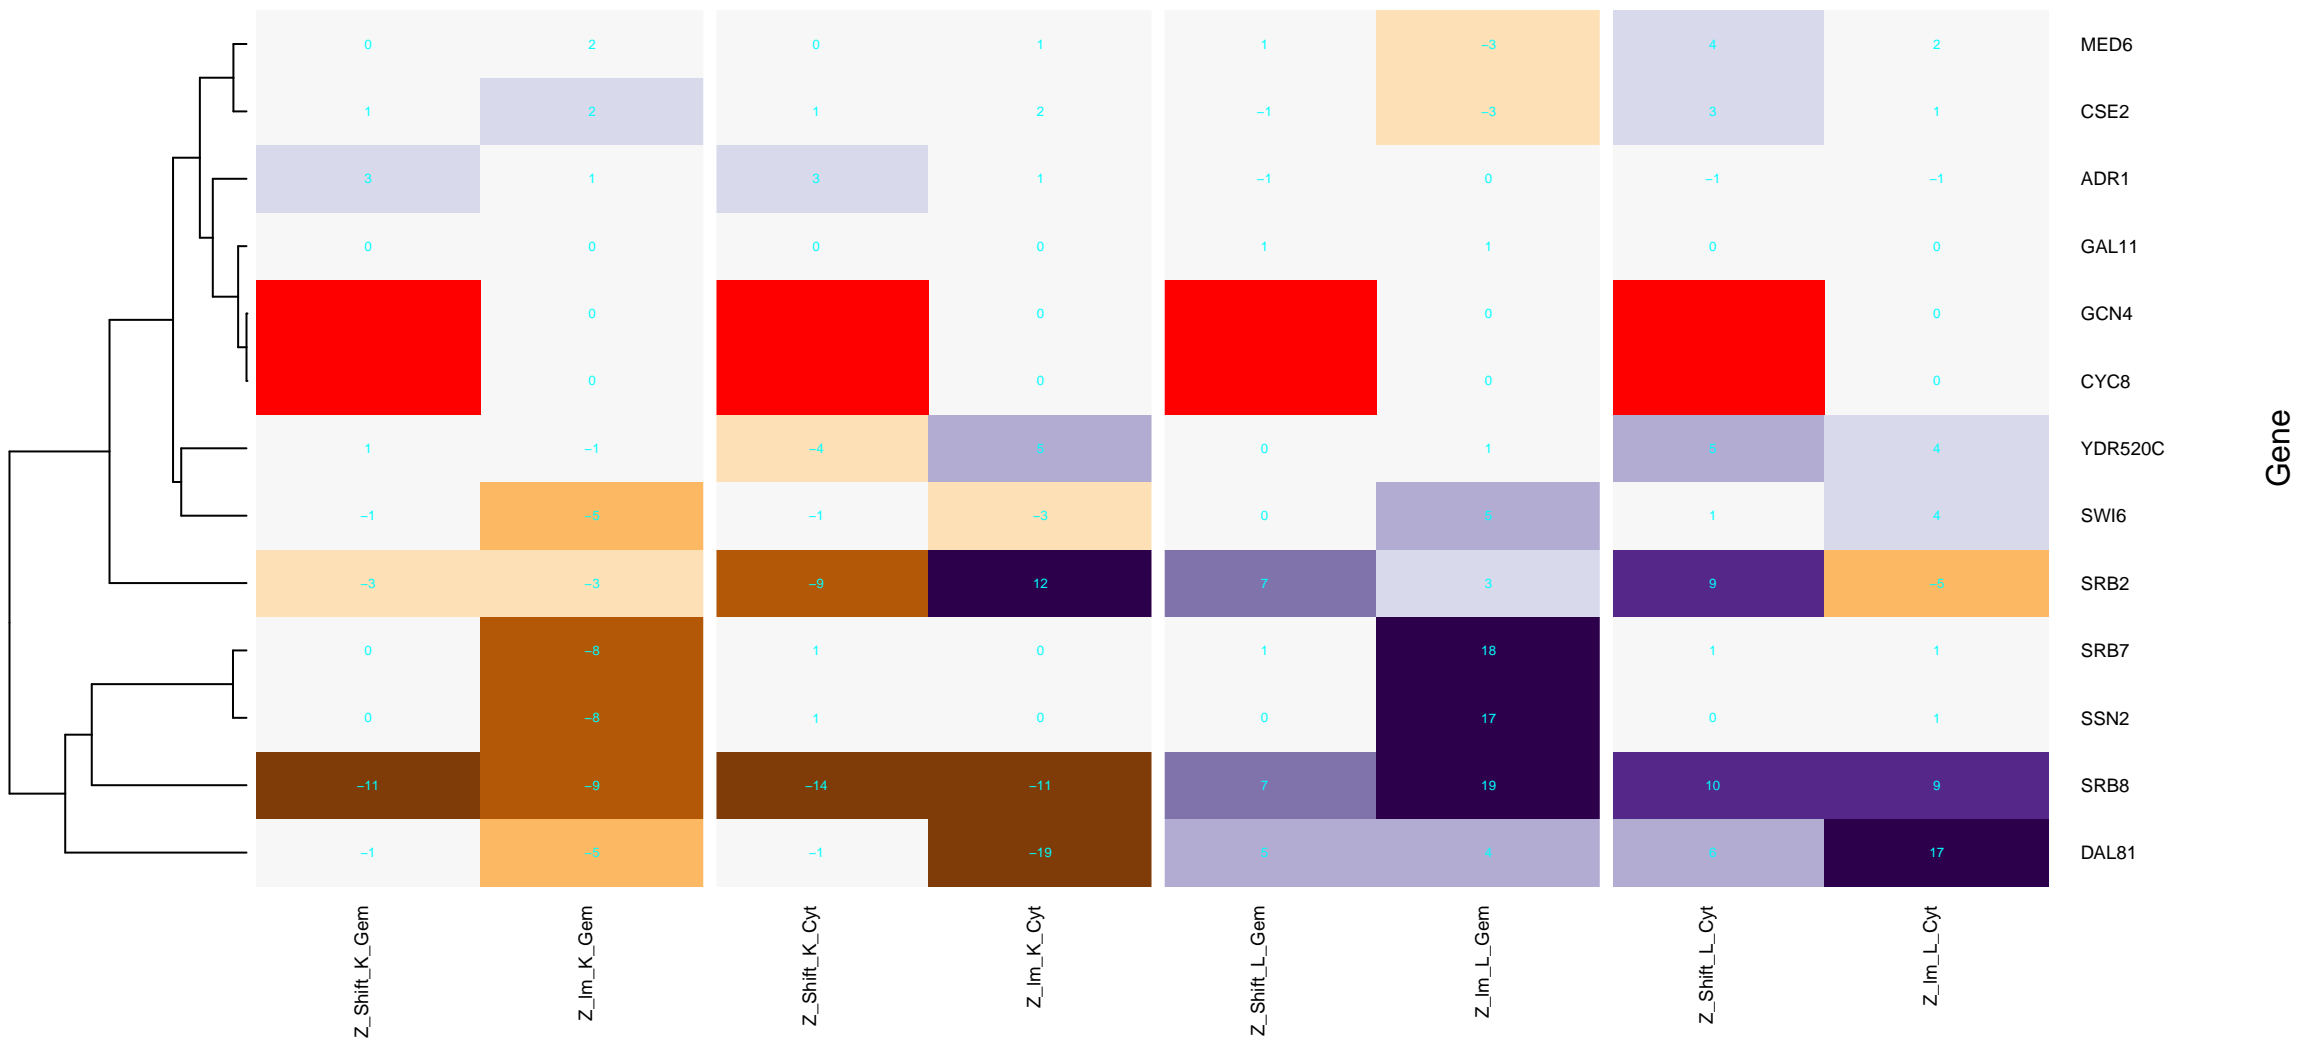

Supplement: s1 [file s1]

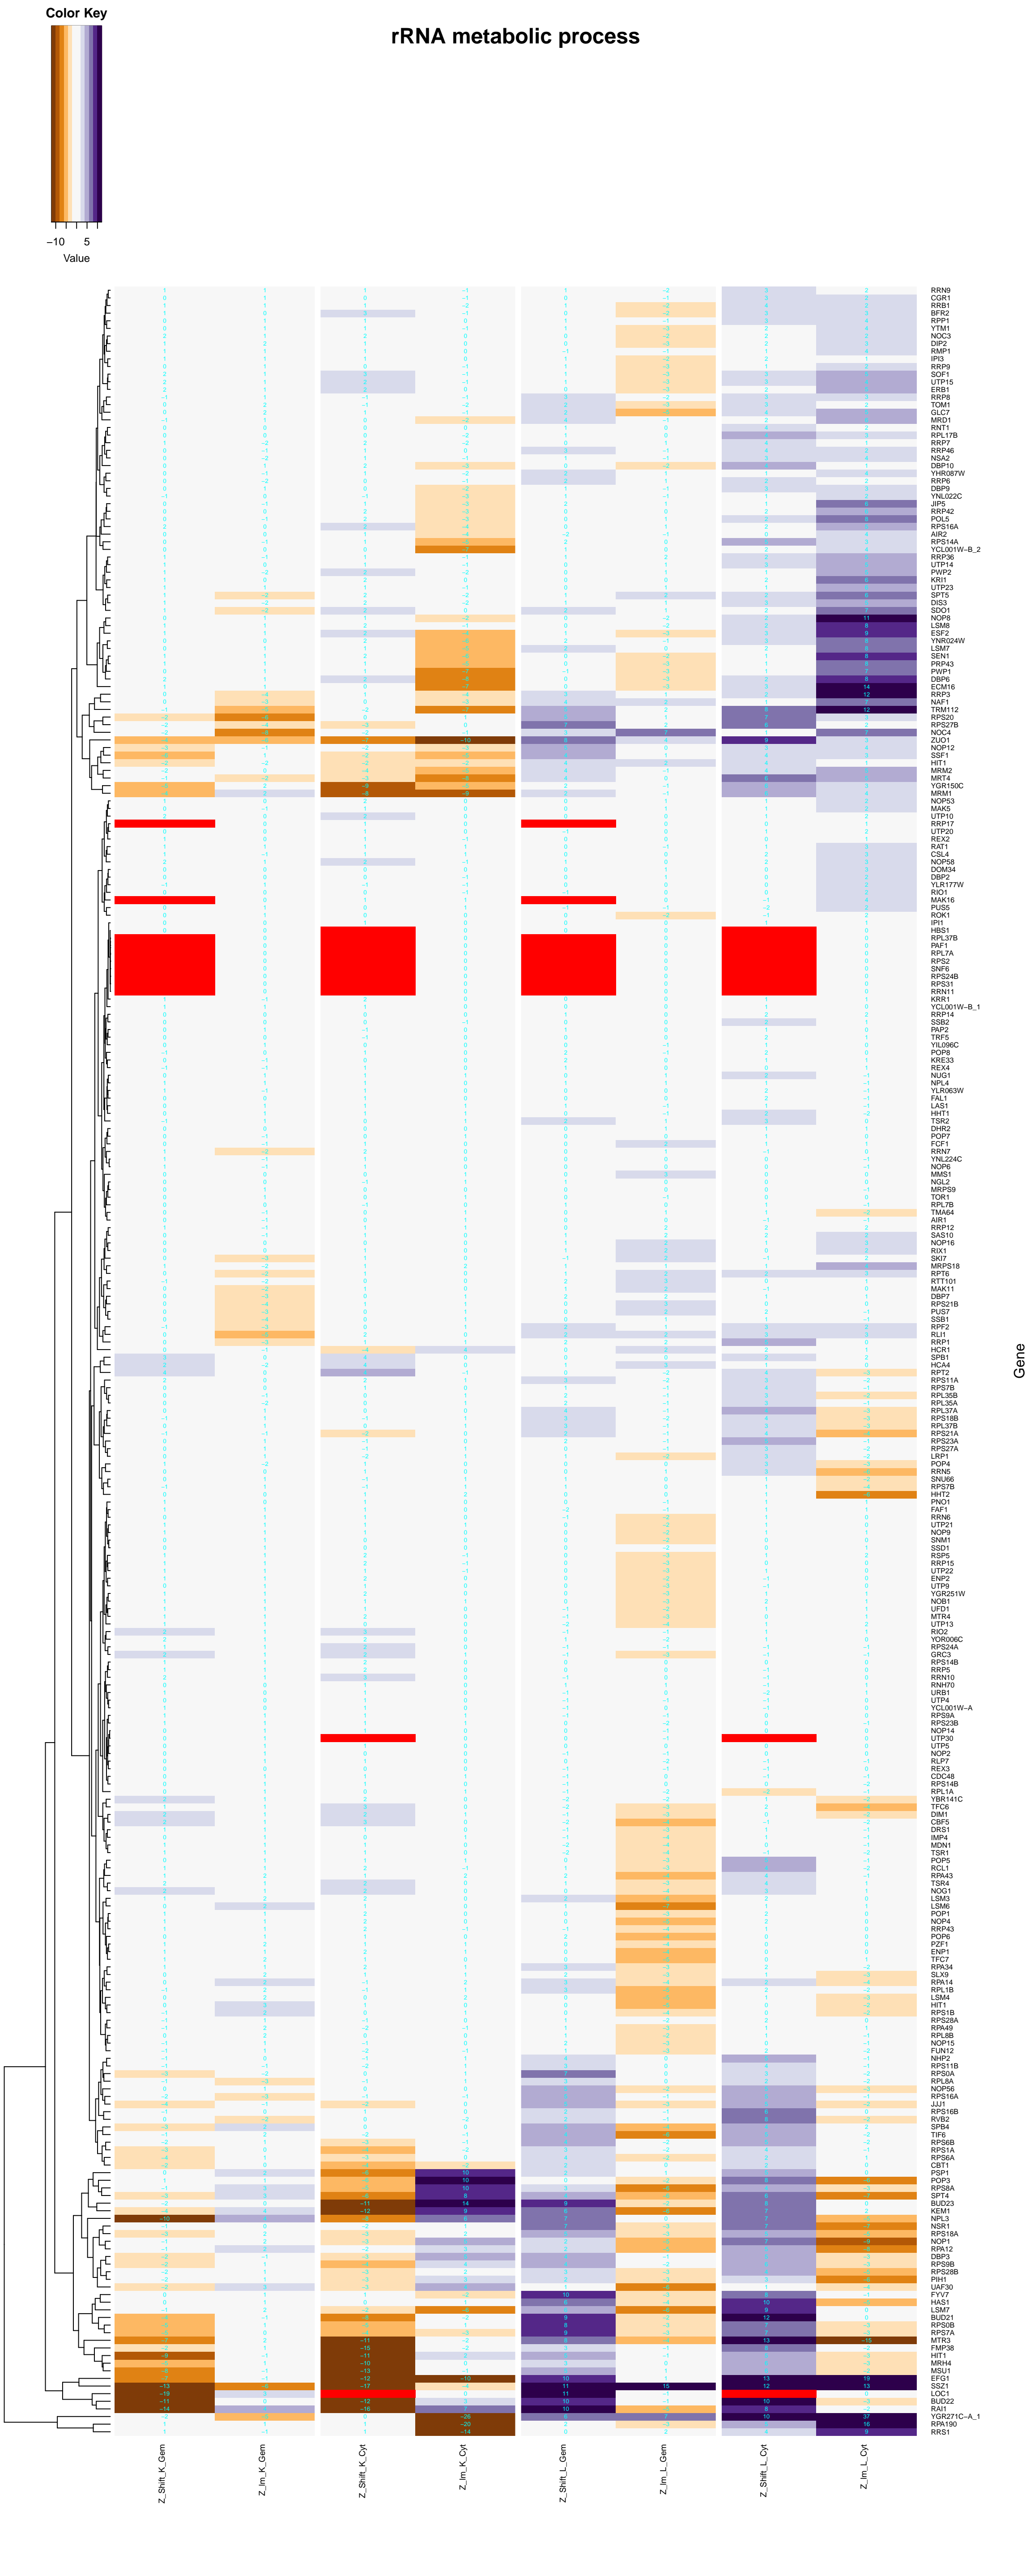



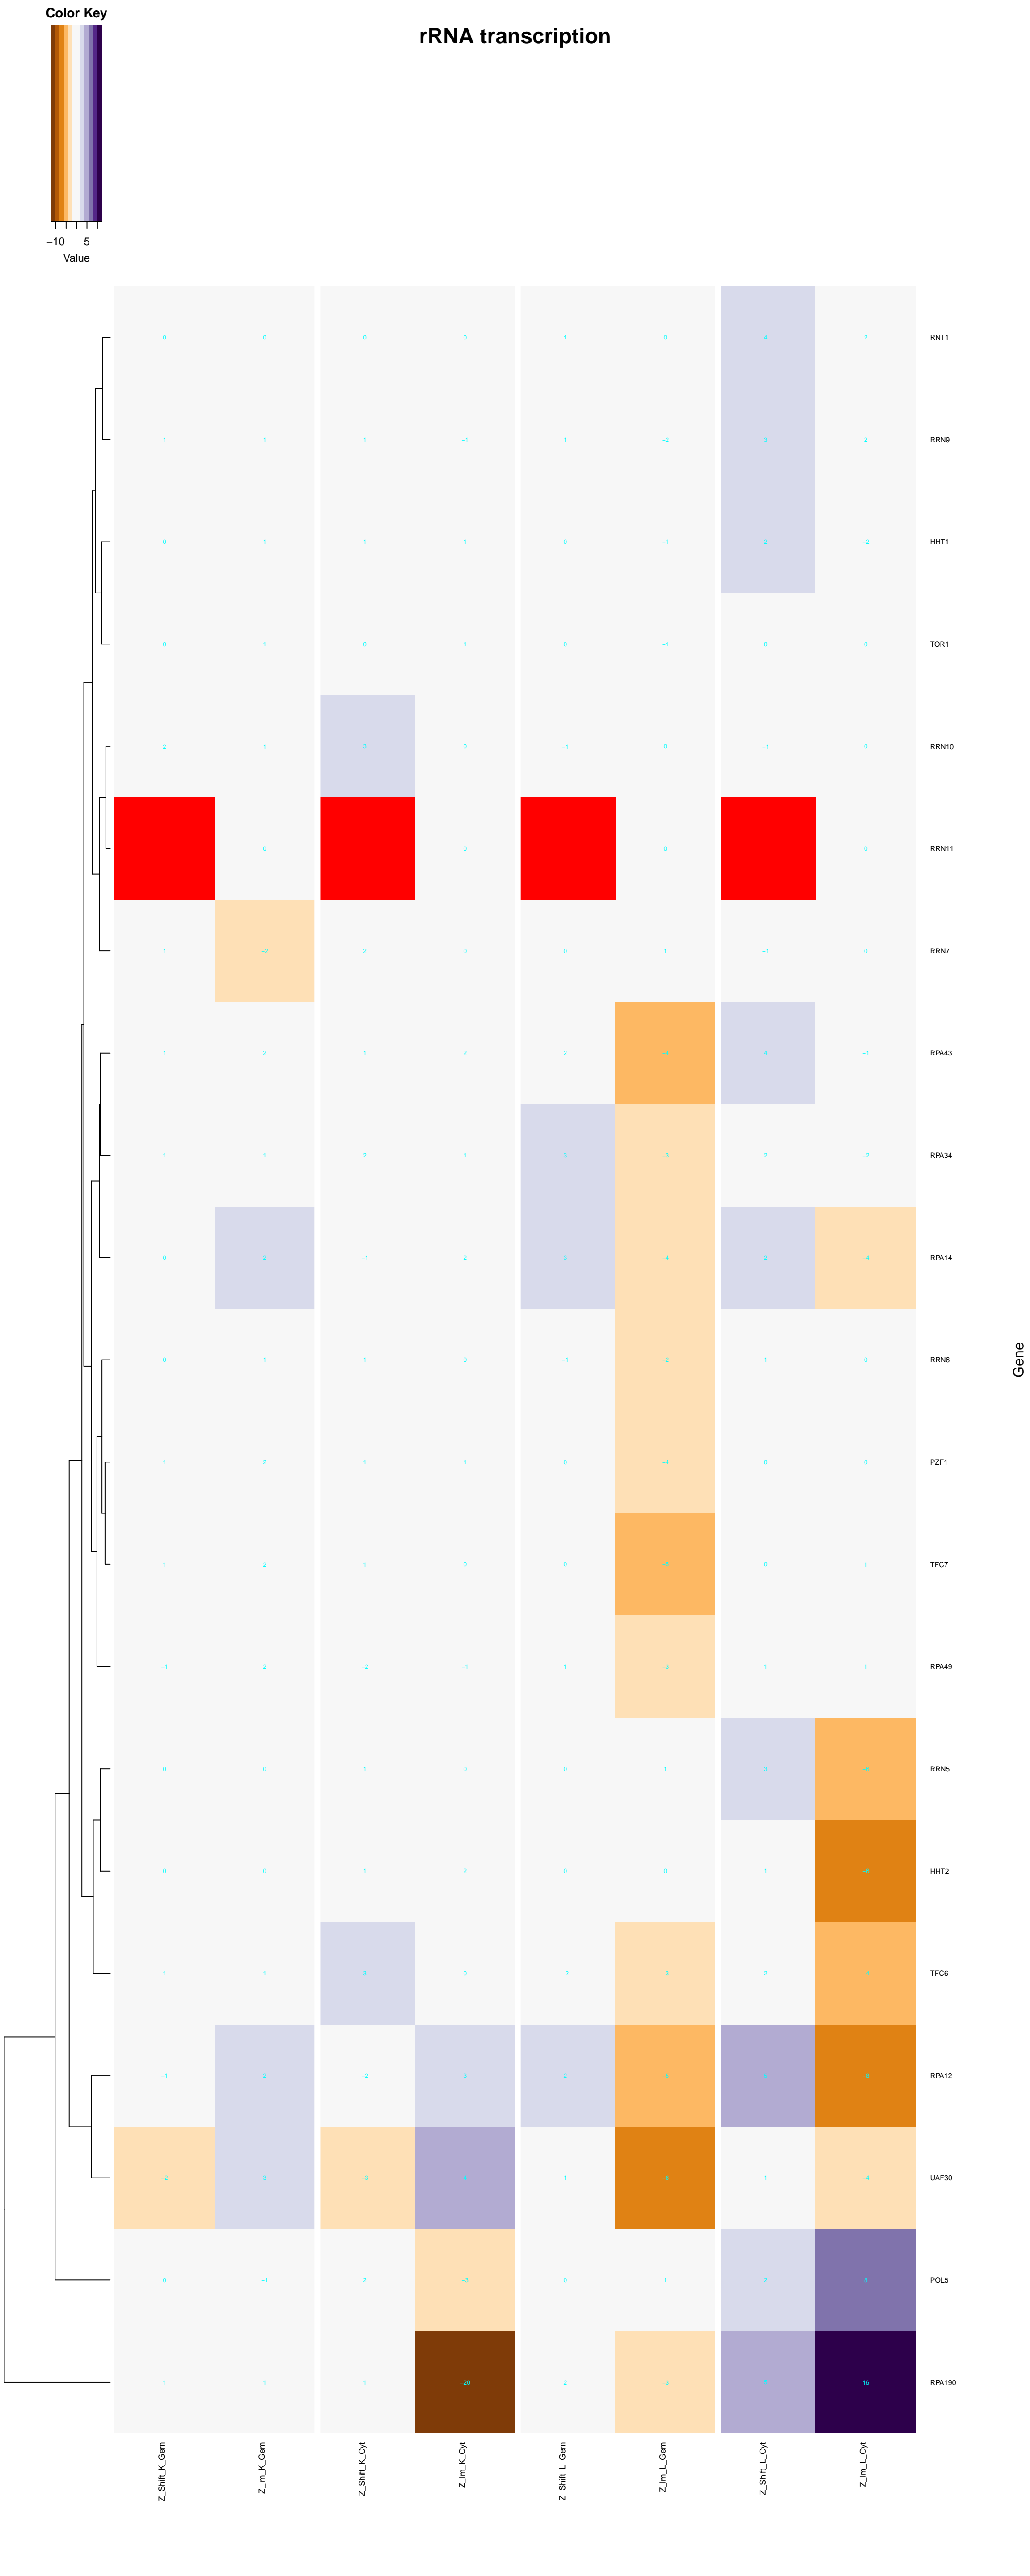

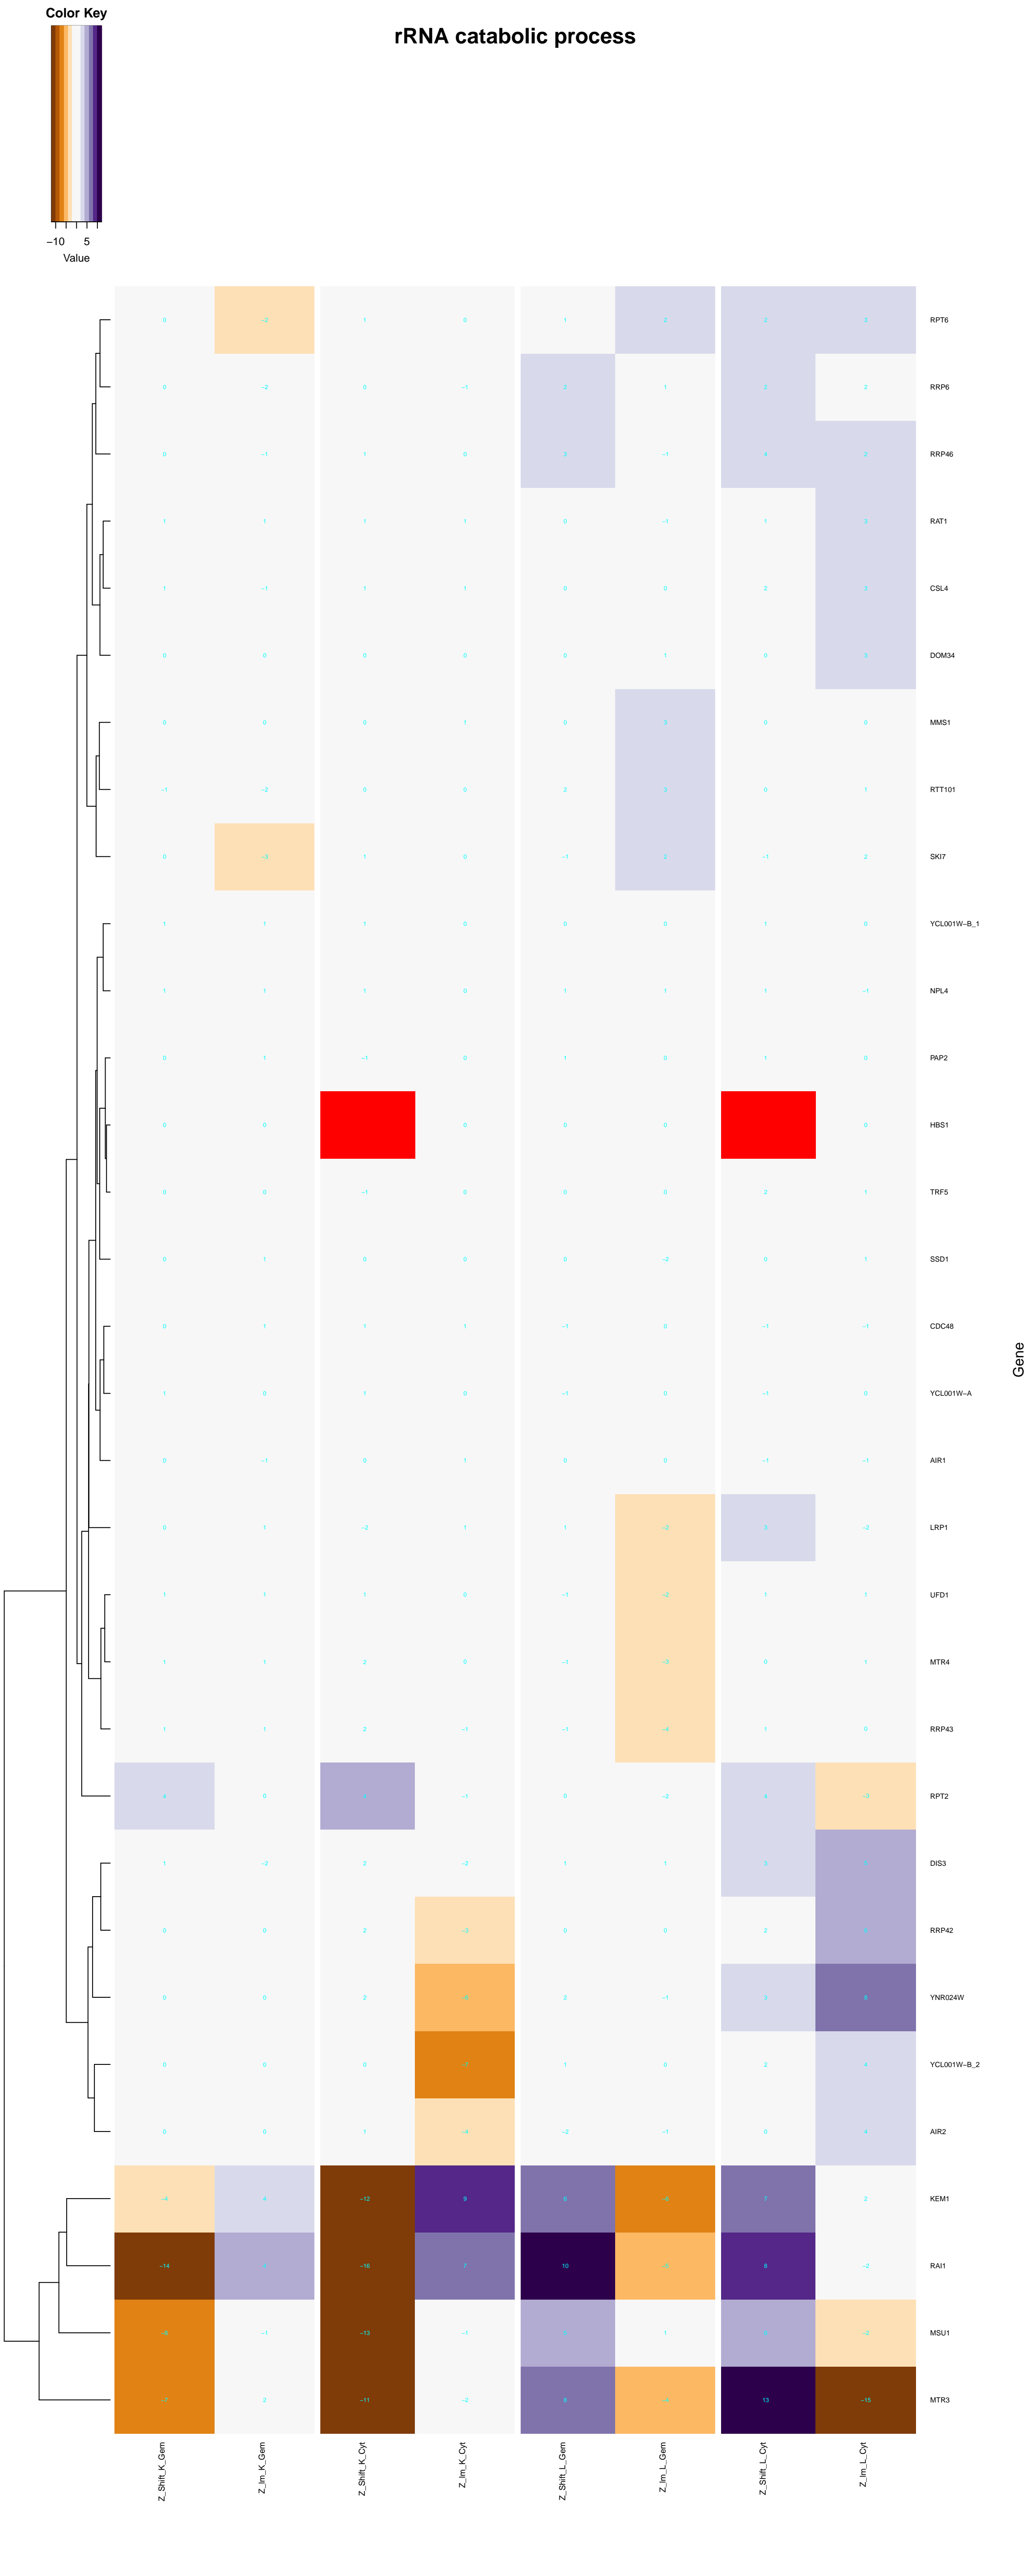













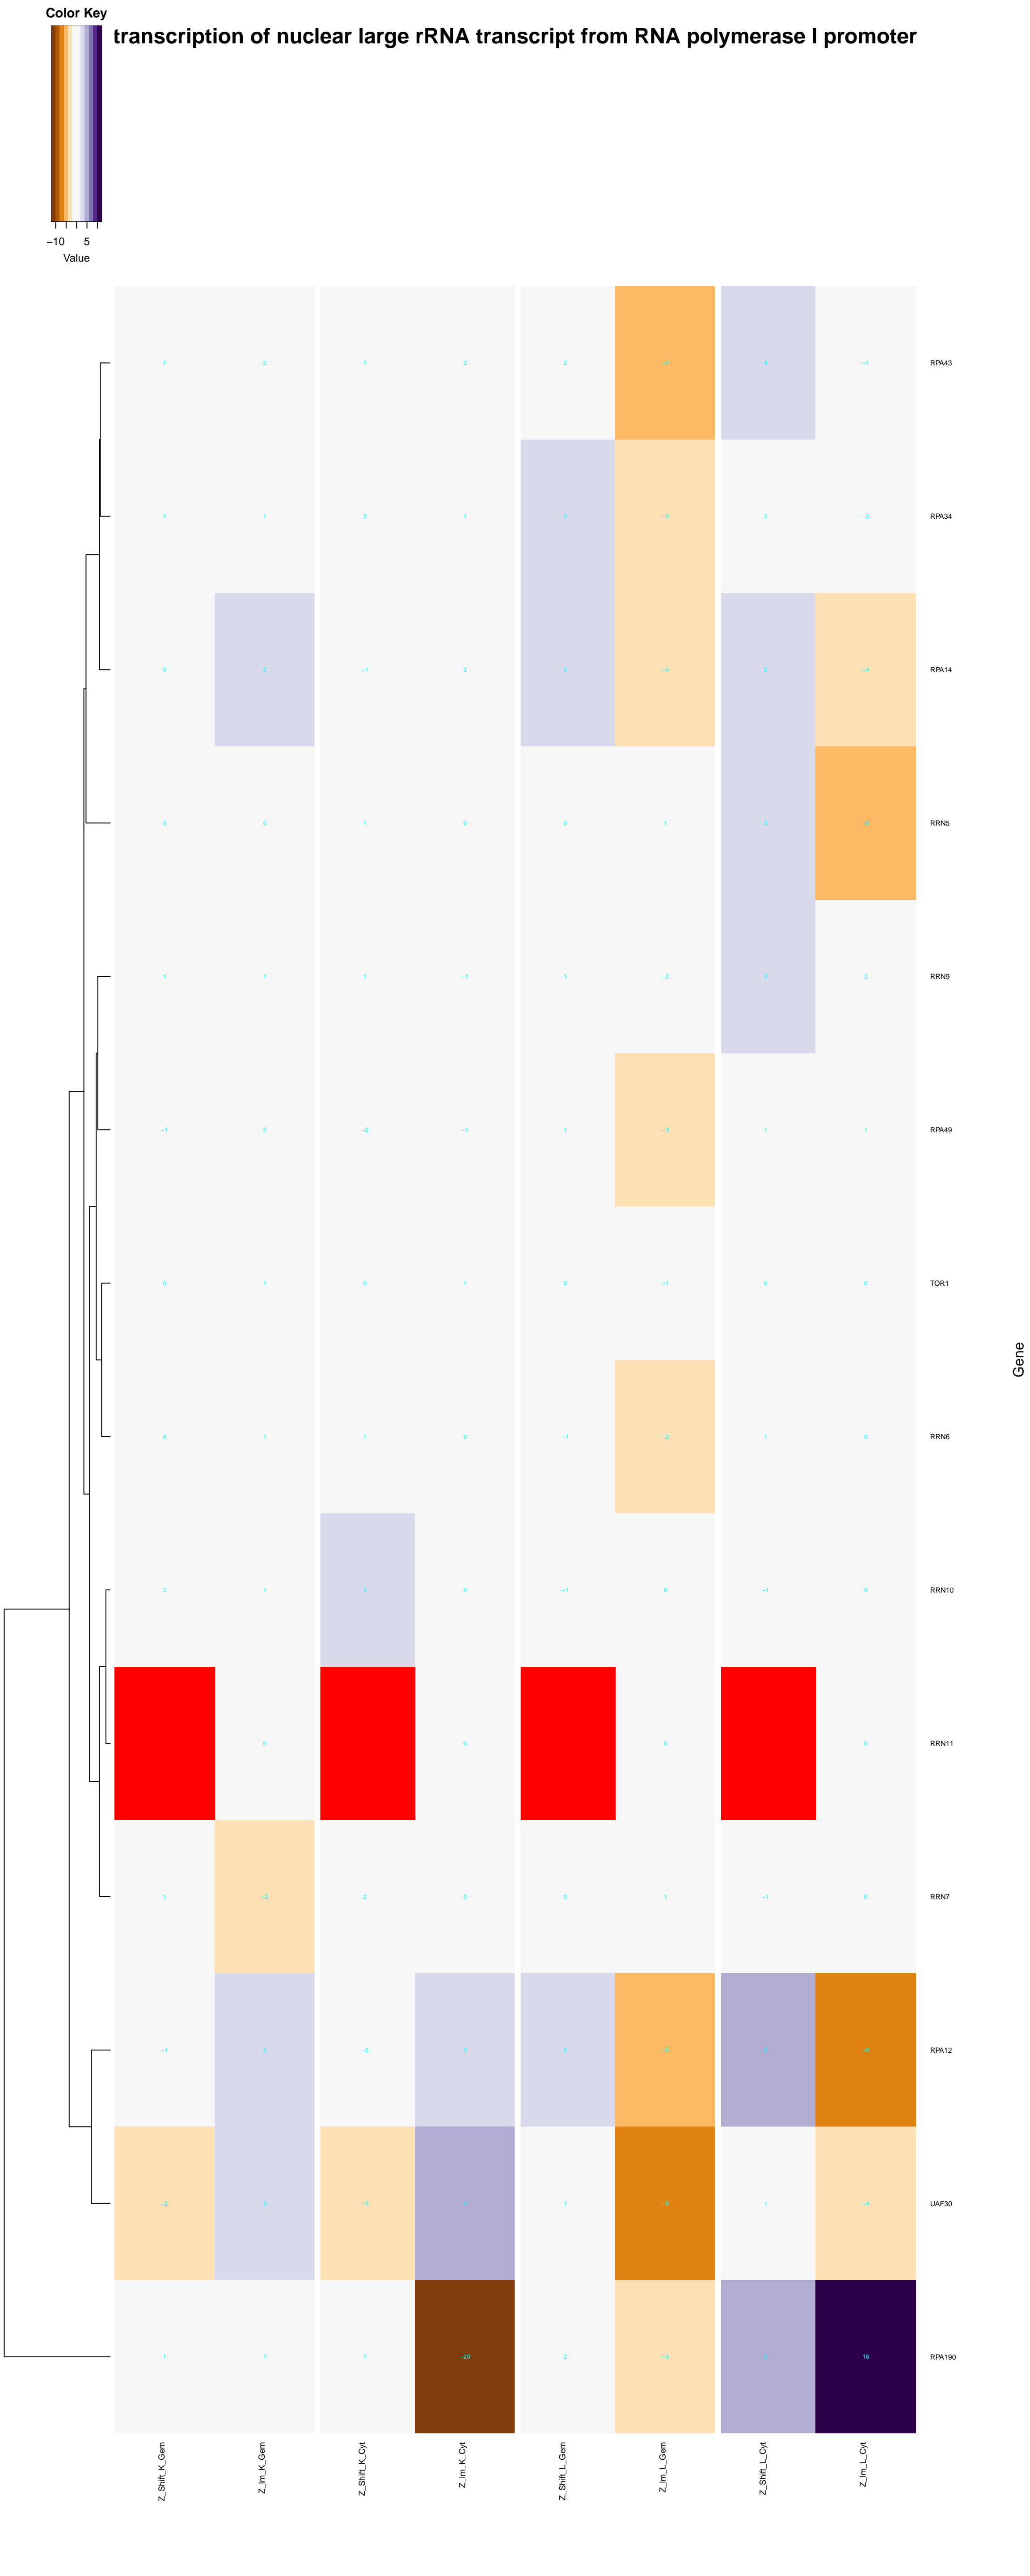

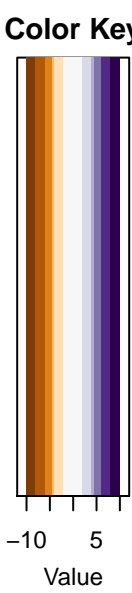

# 5S class rRNA transcription from RNA polymerase III type 1 promoter

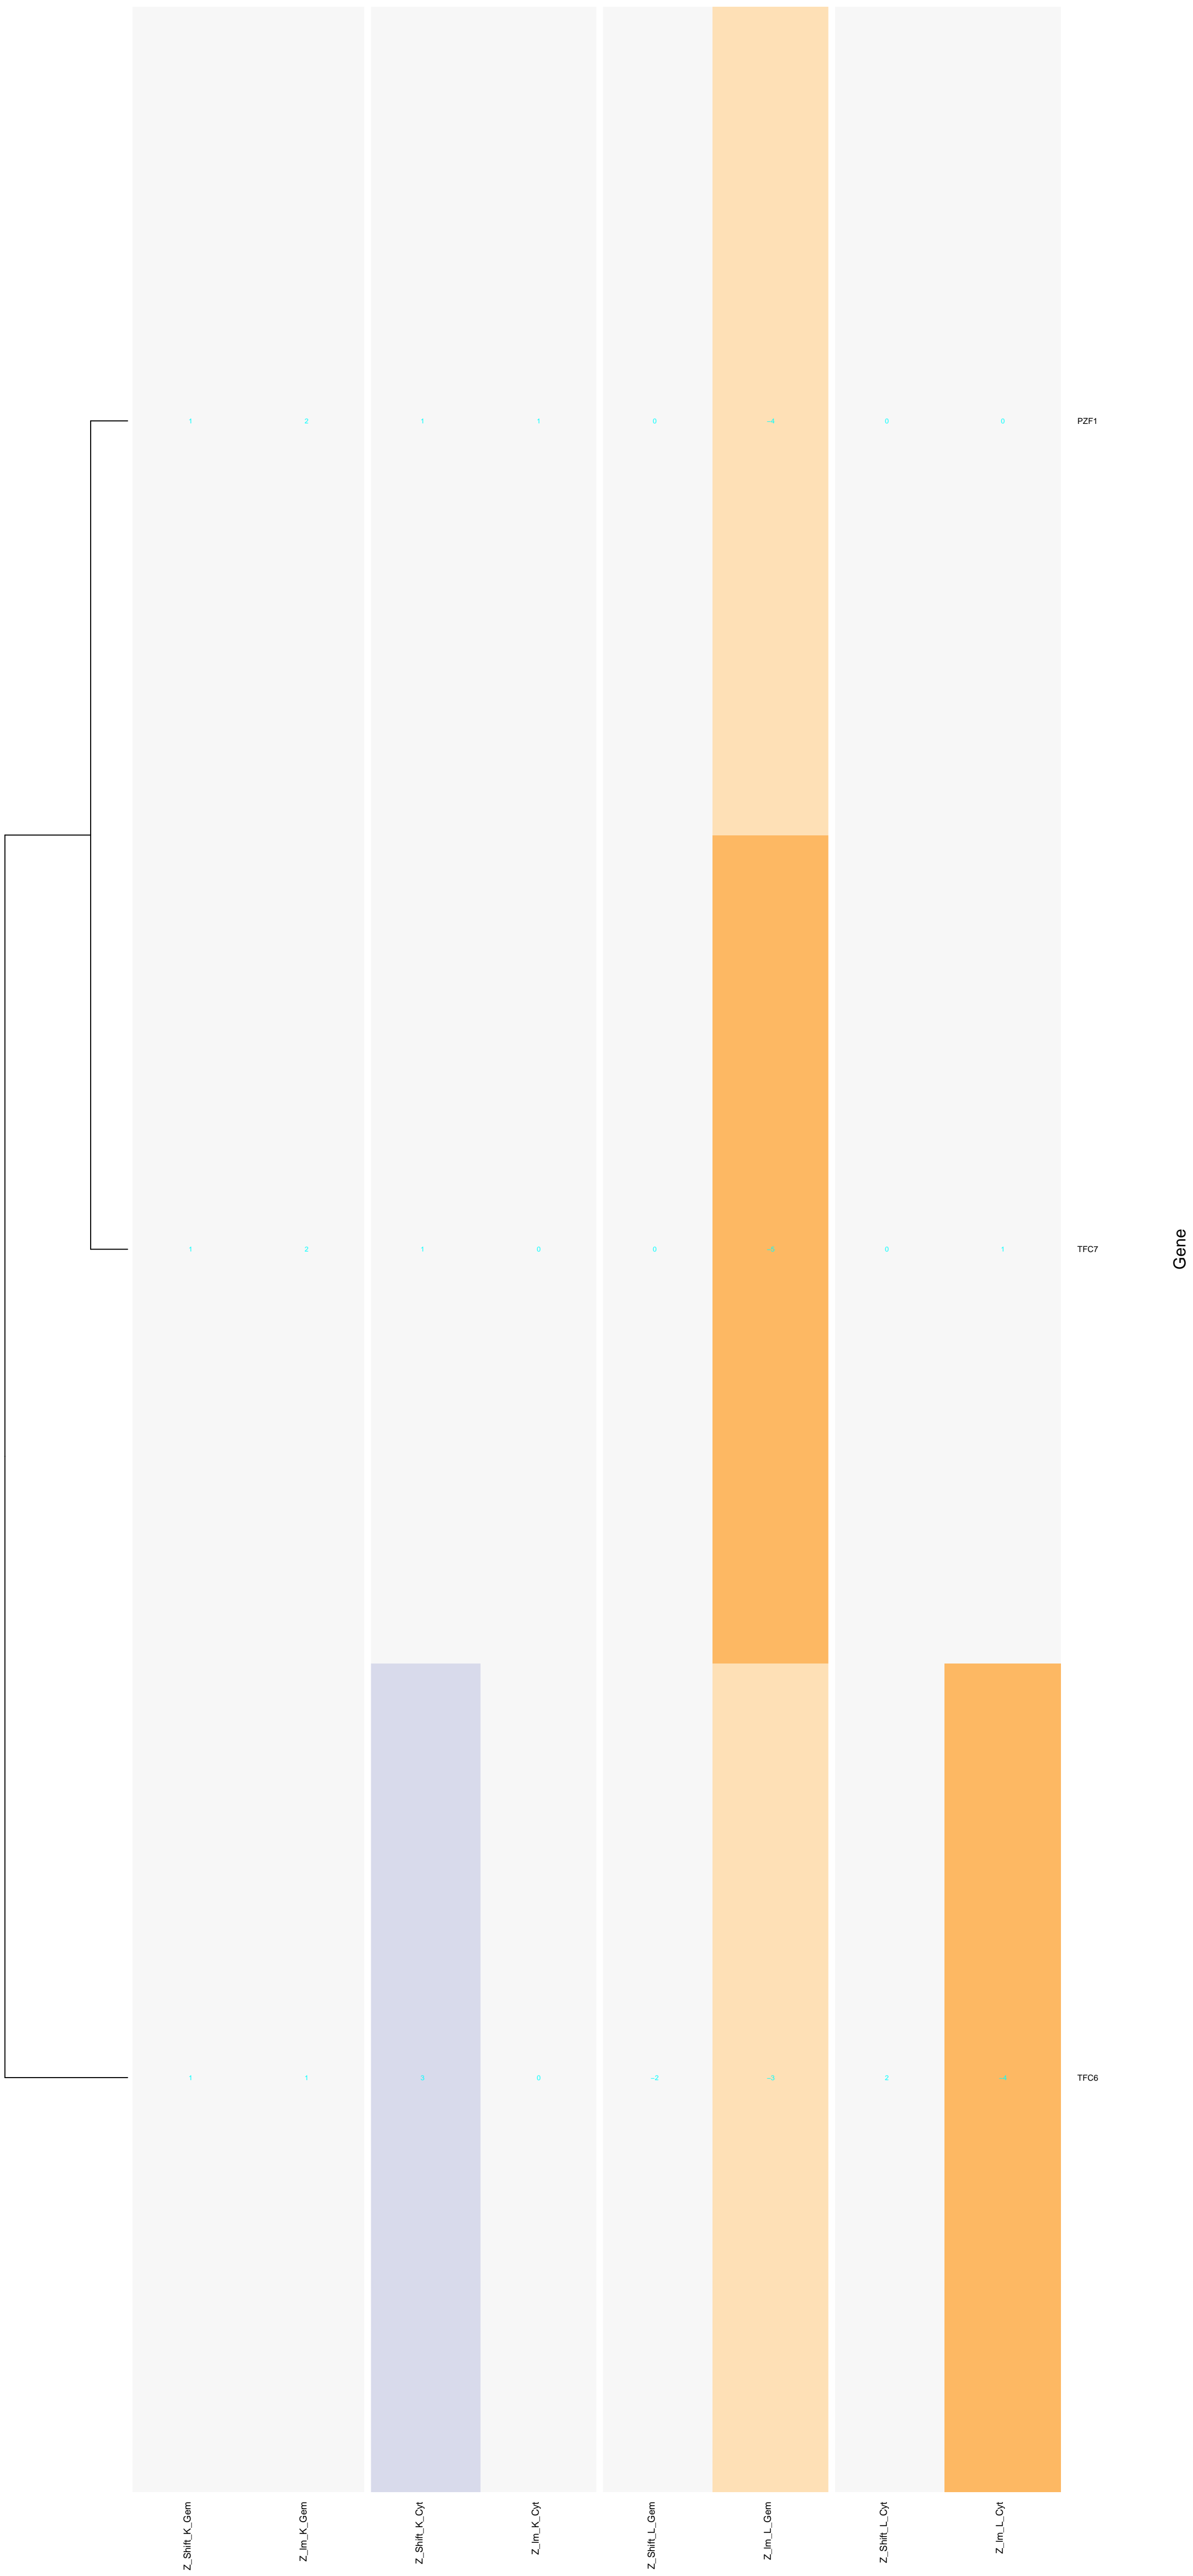

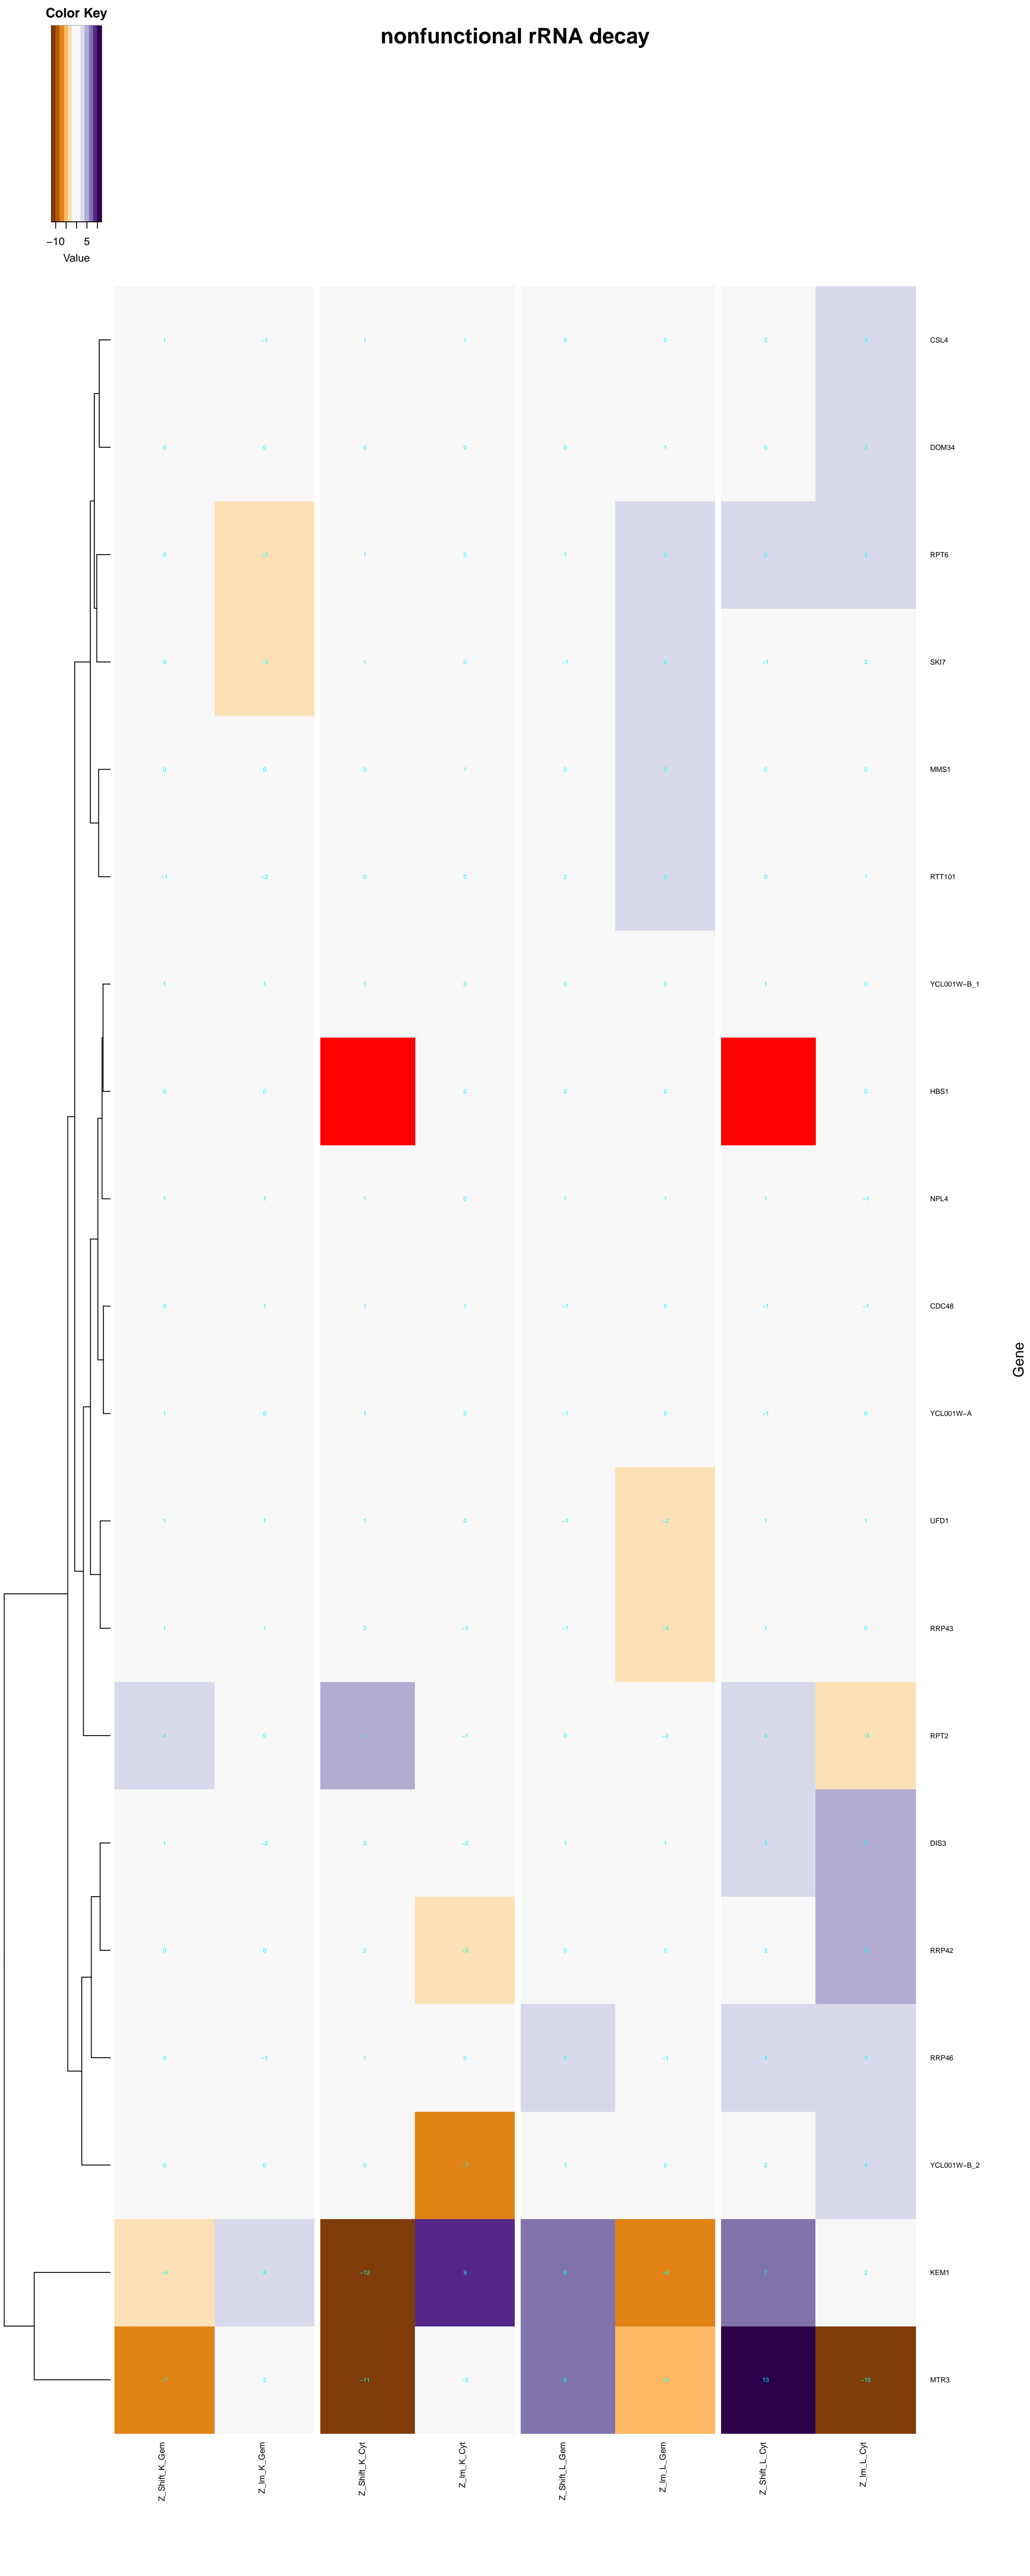

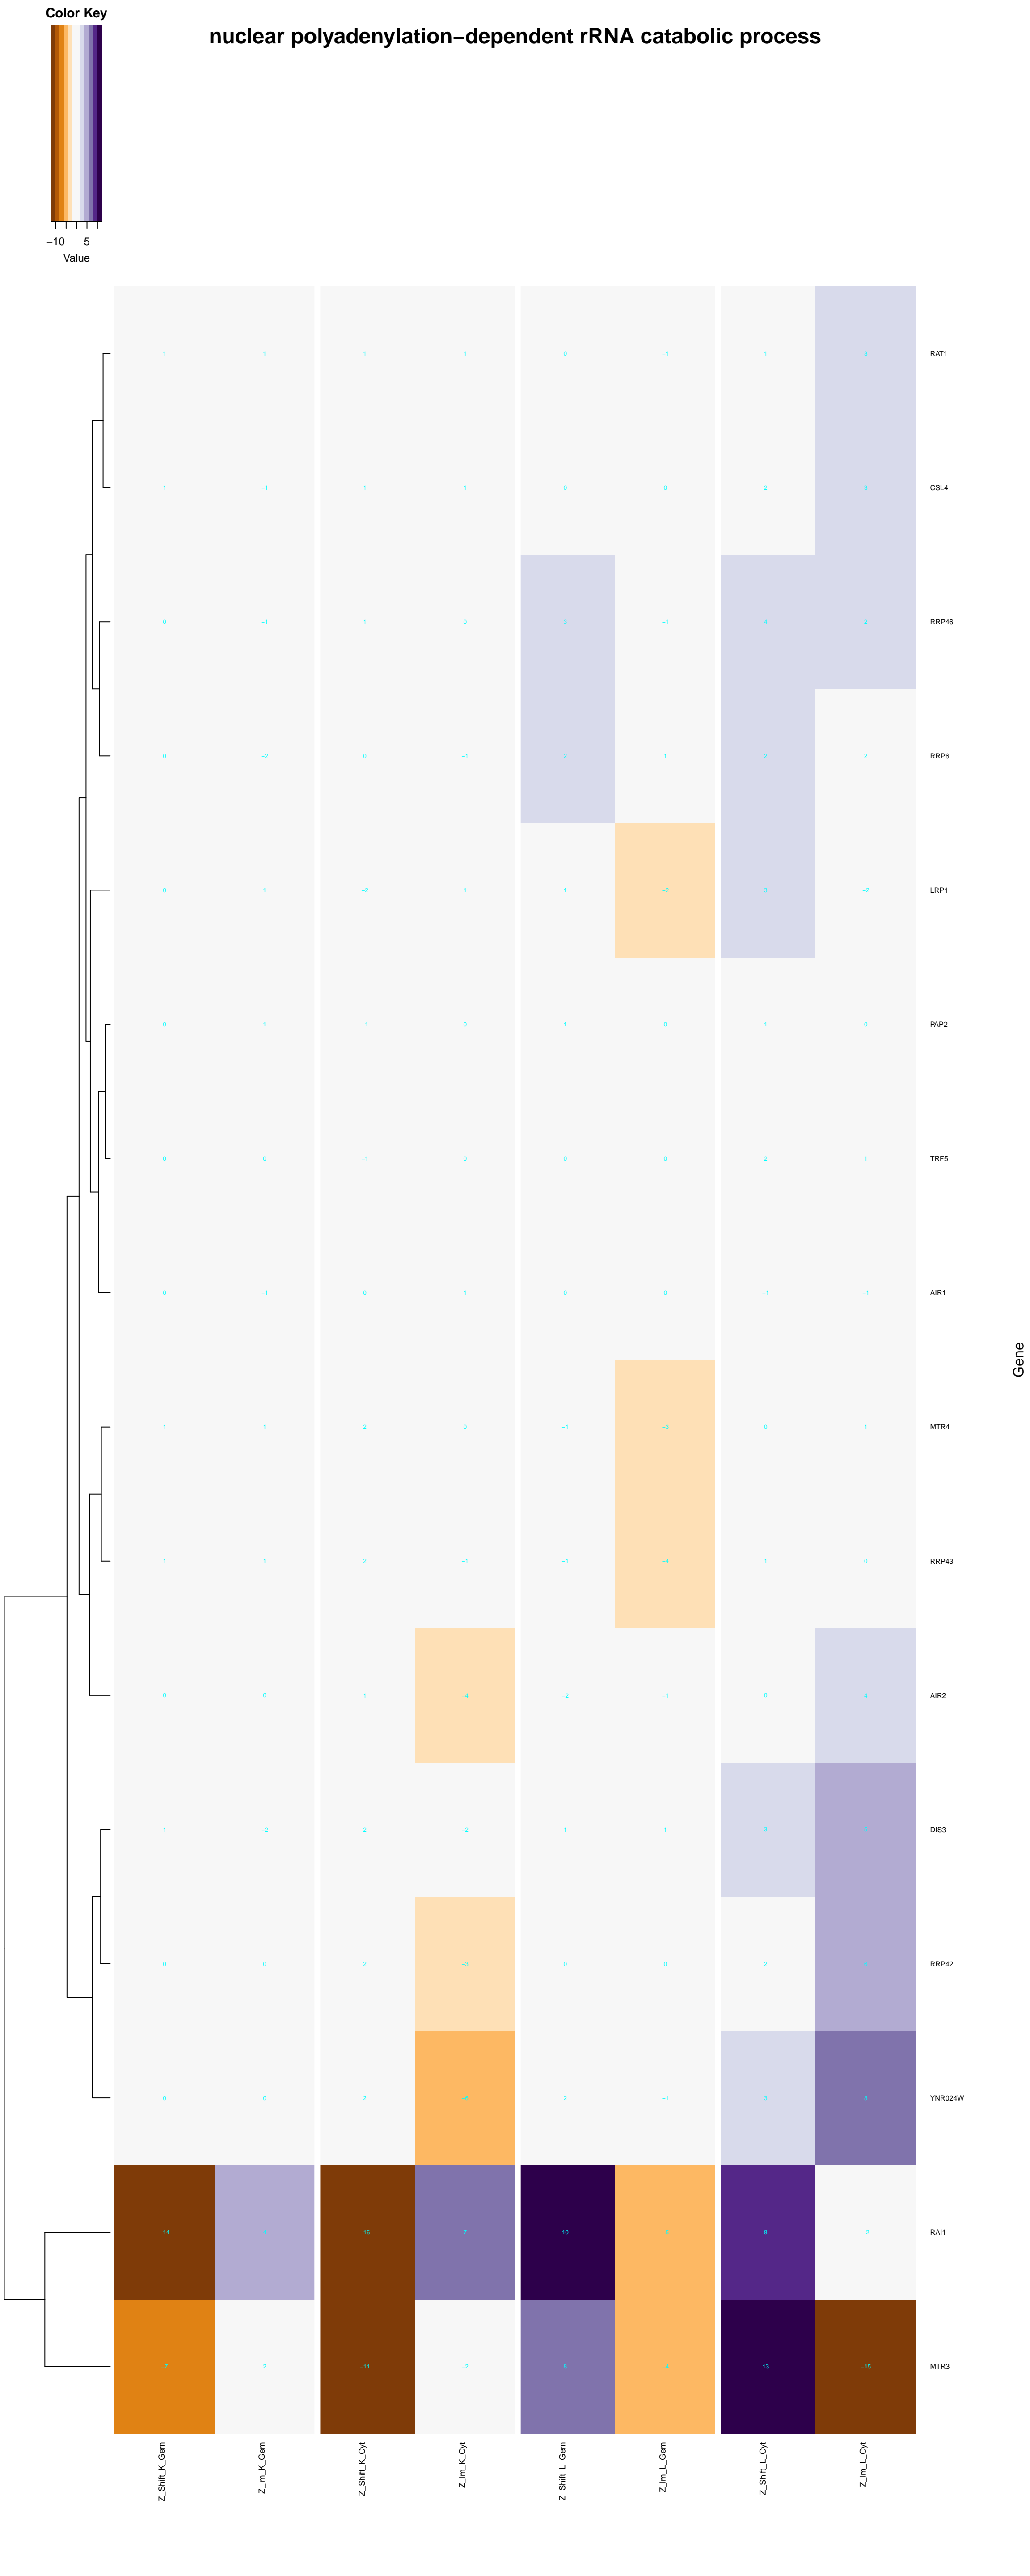

















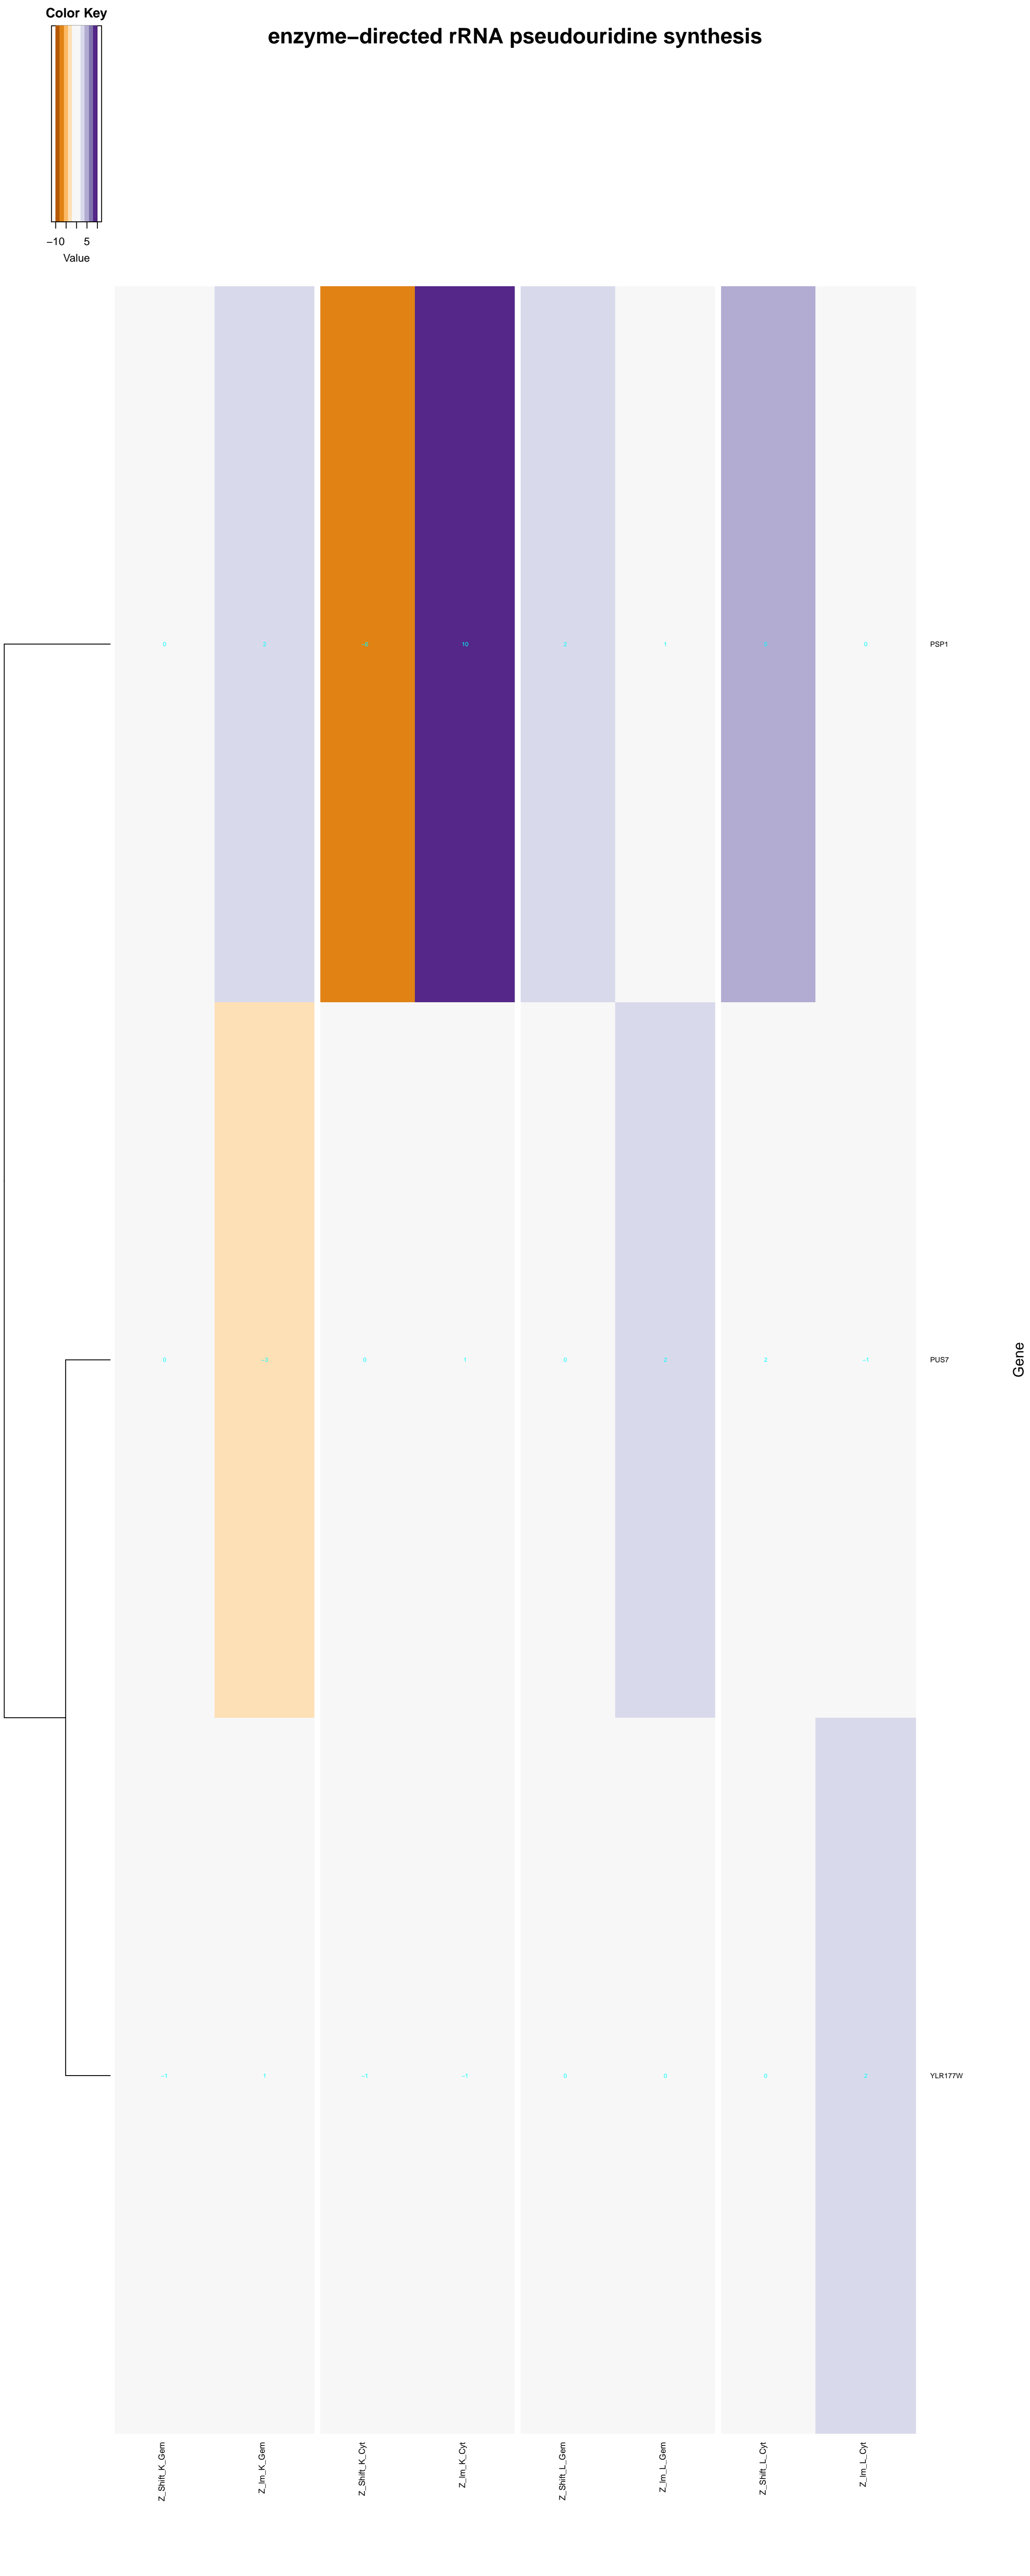



Supplement: s1 [file s1]

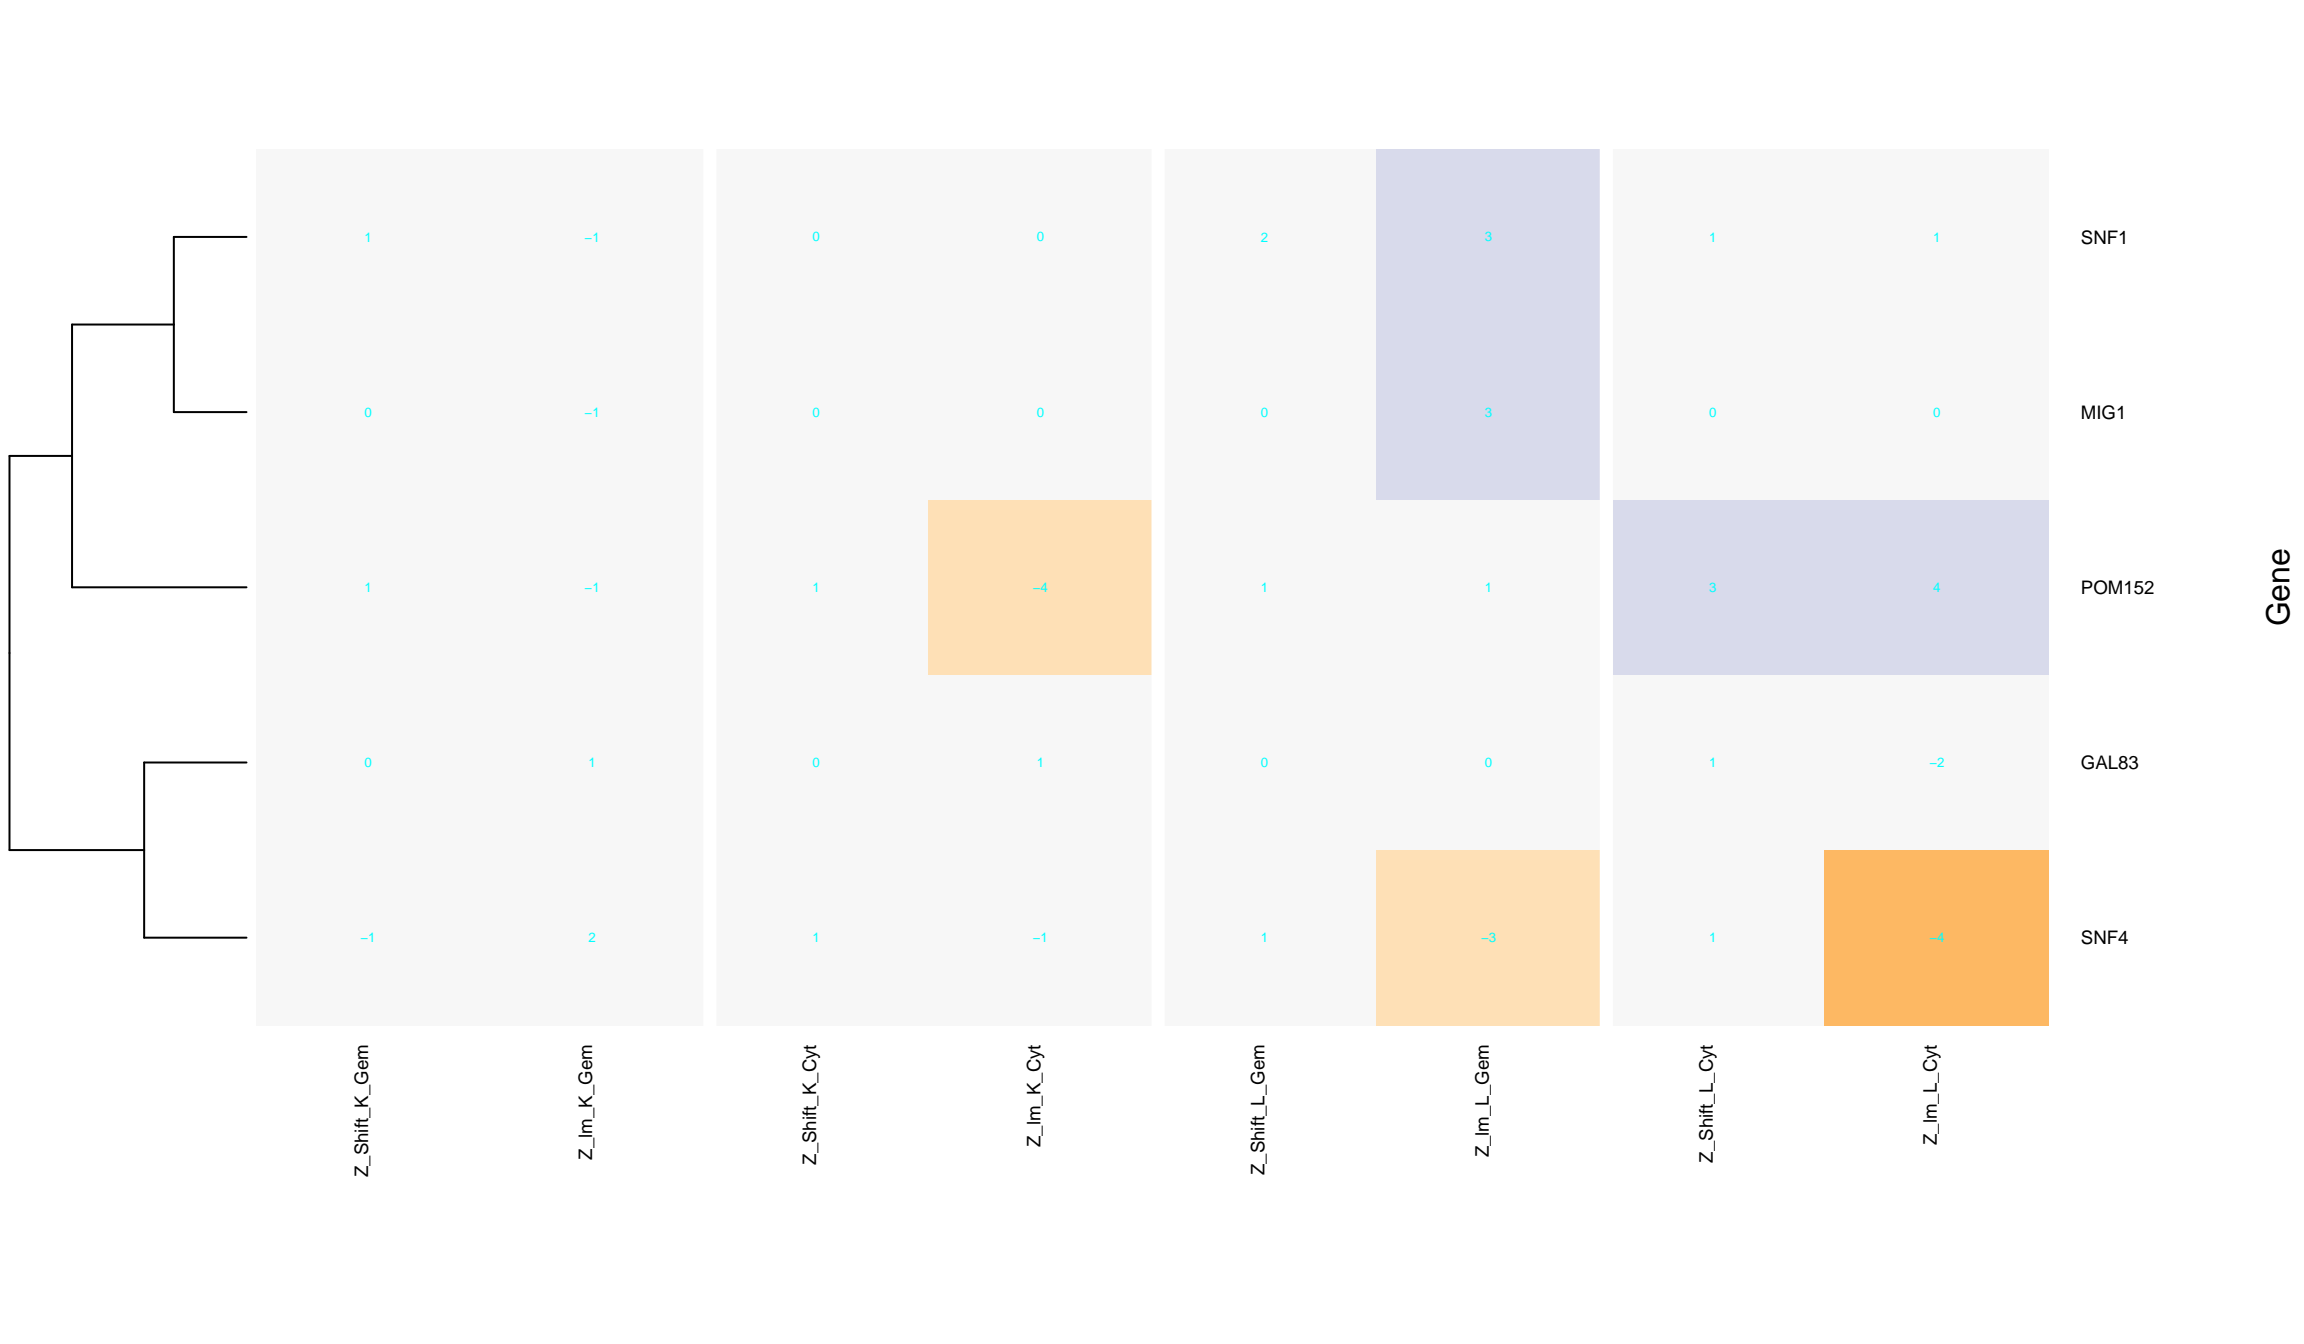

Supplement: s1 [file s1]

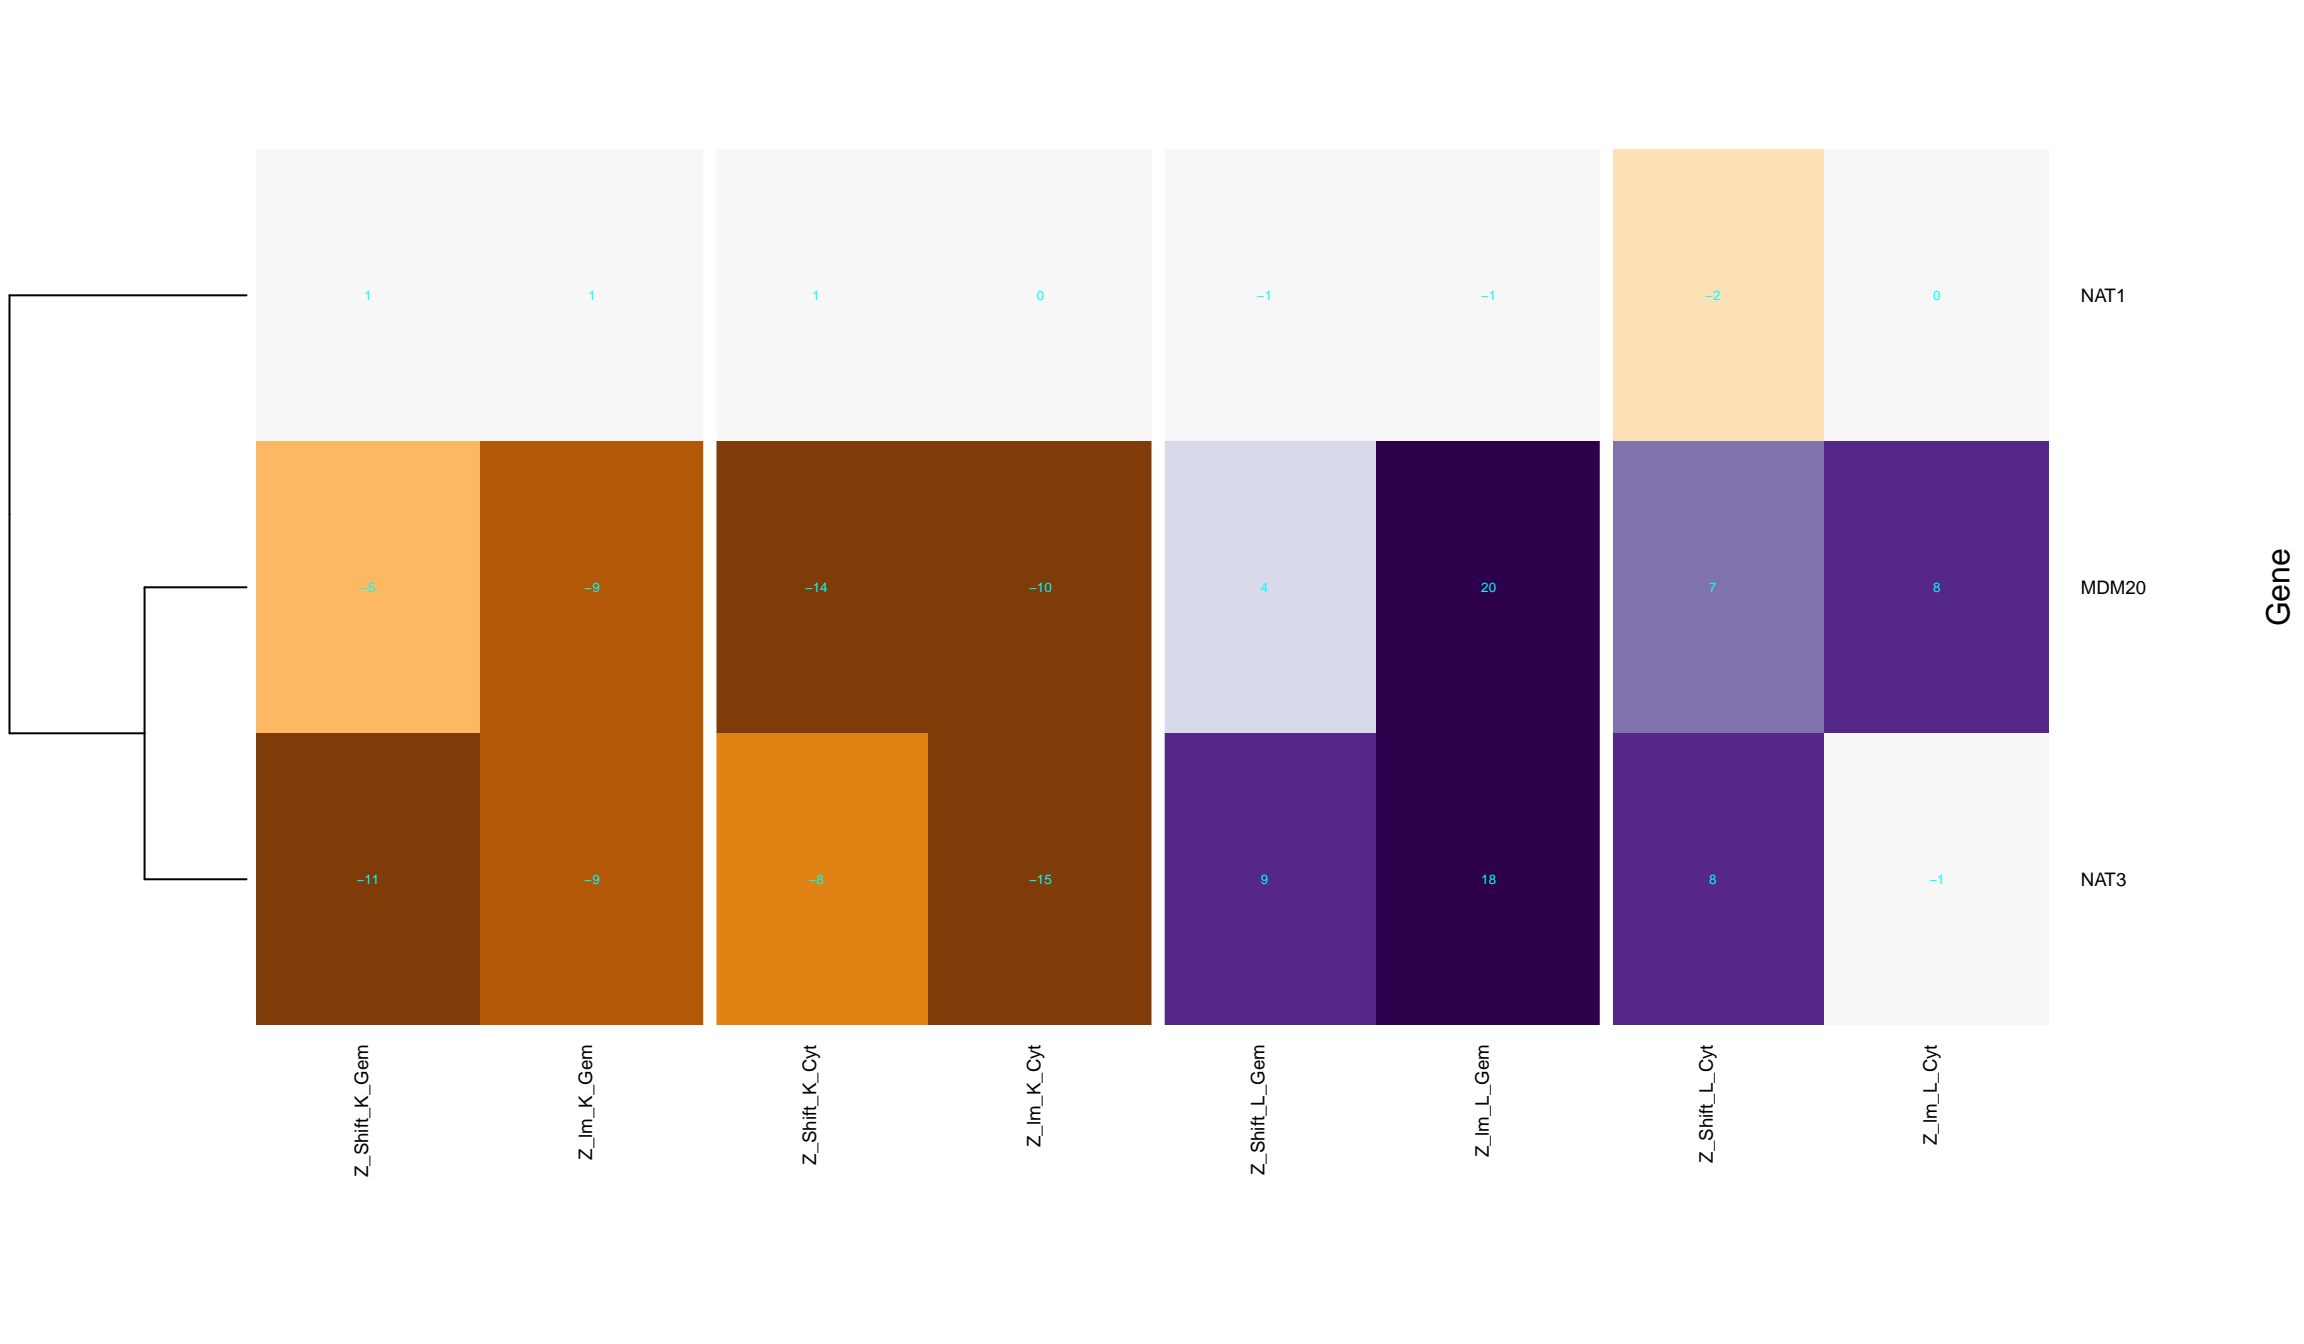

Supplement: s1 [file s1]

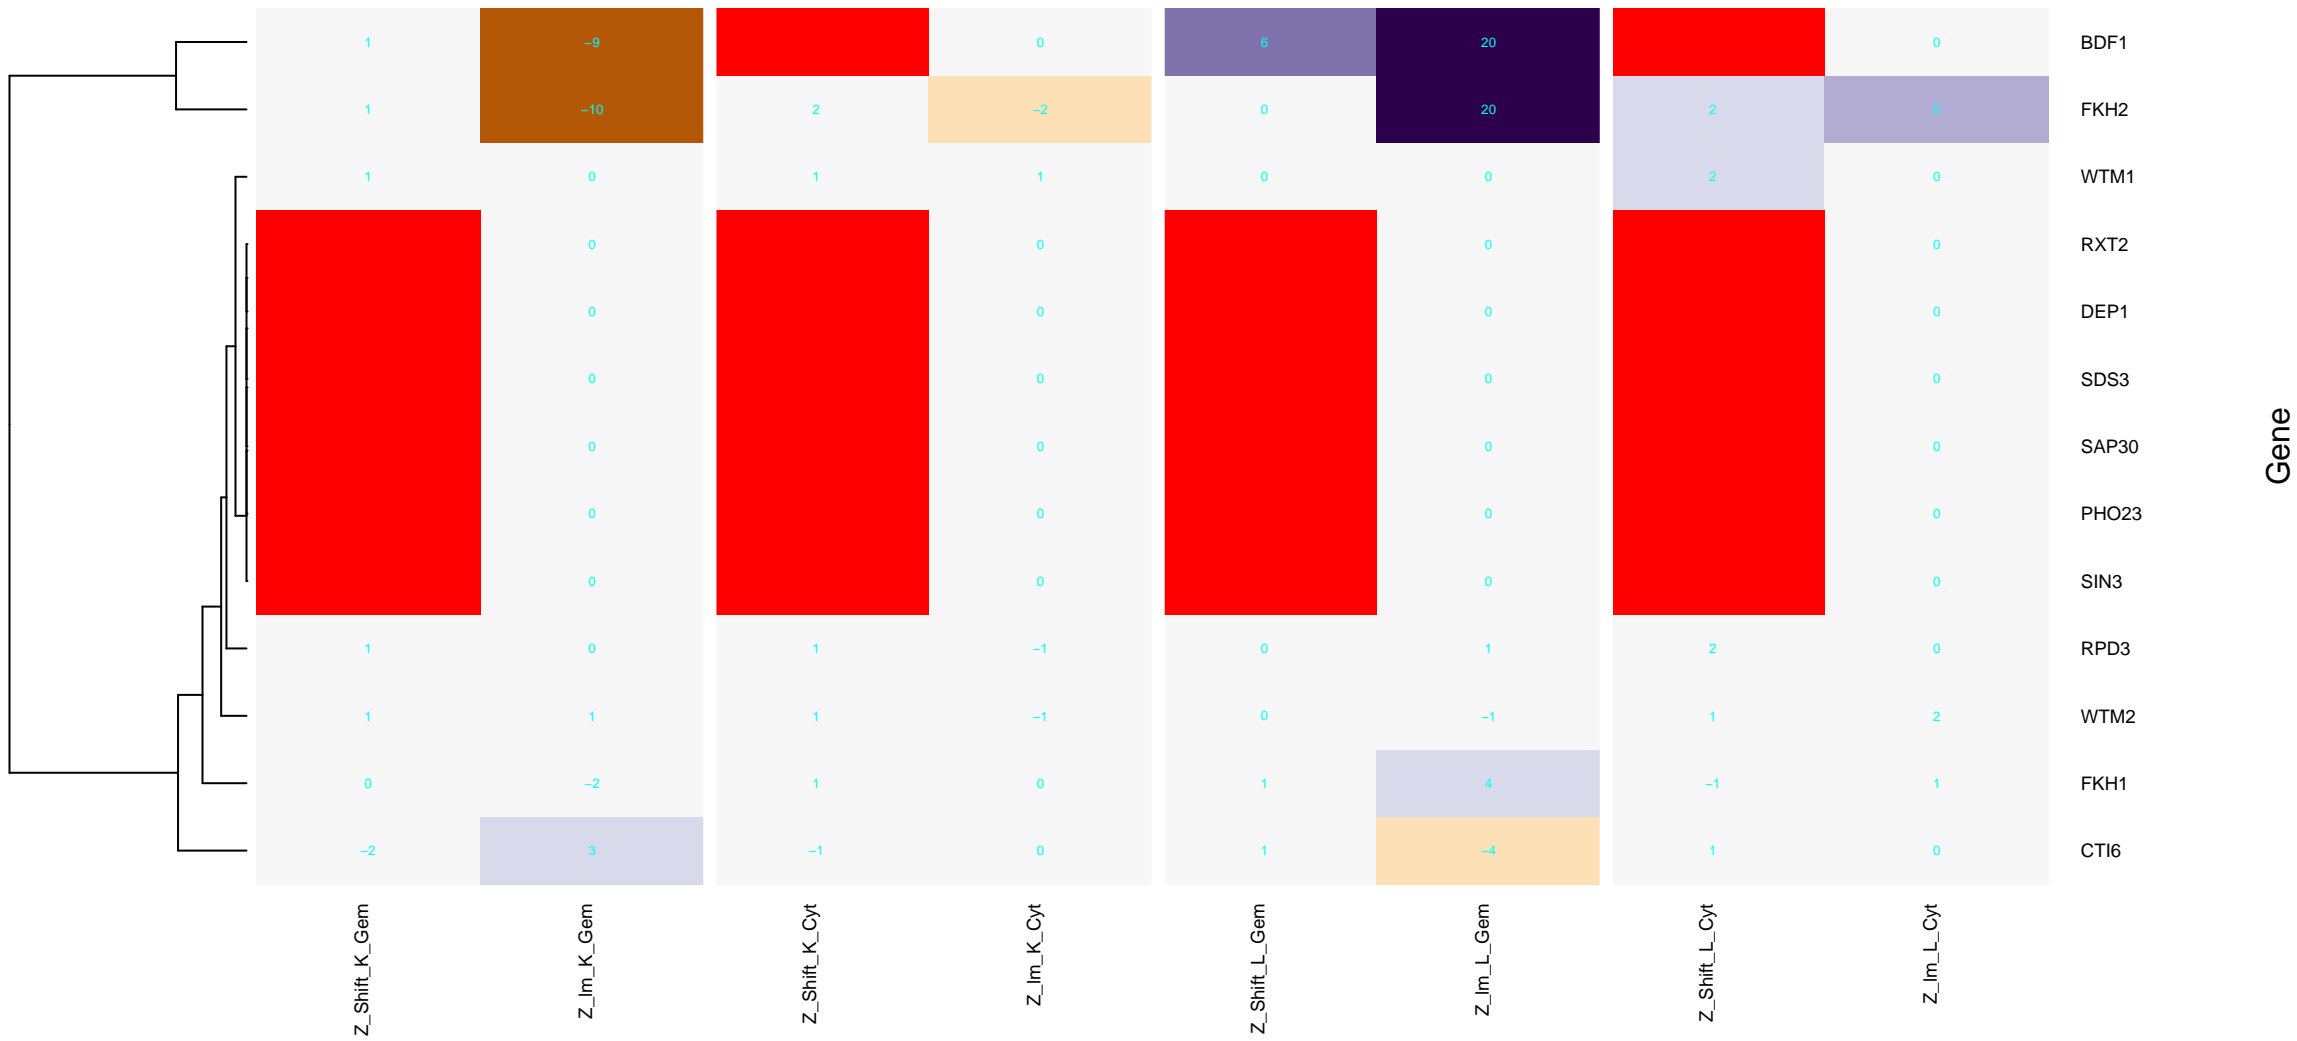

Supplement: s1 [file s1]

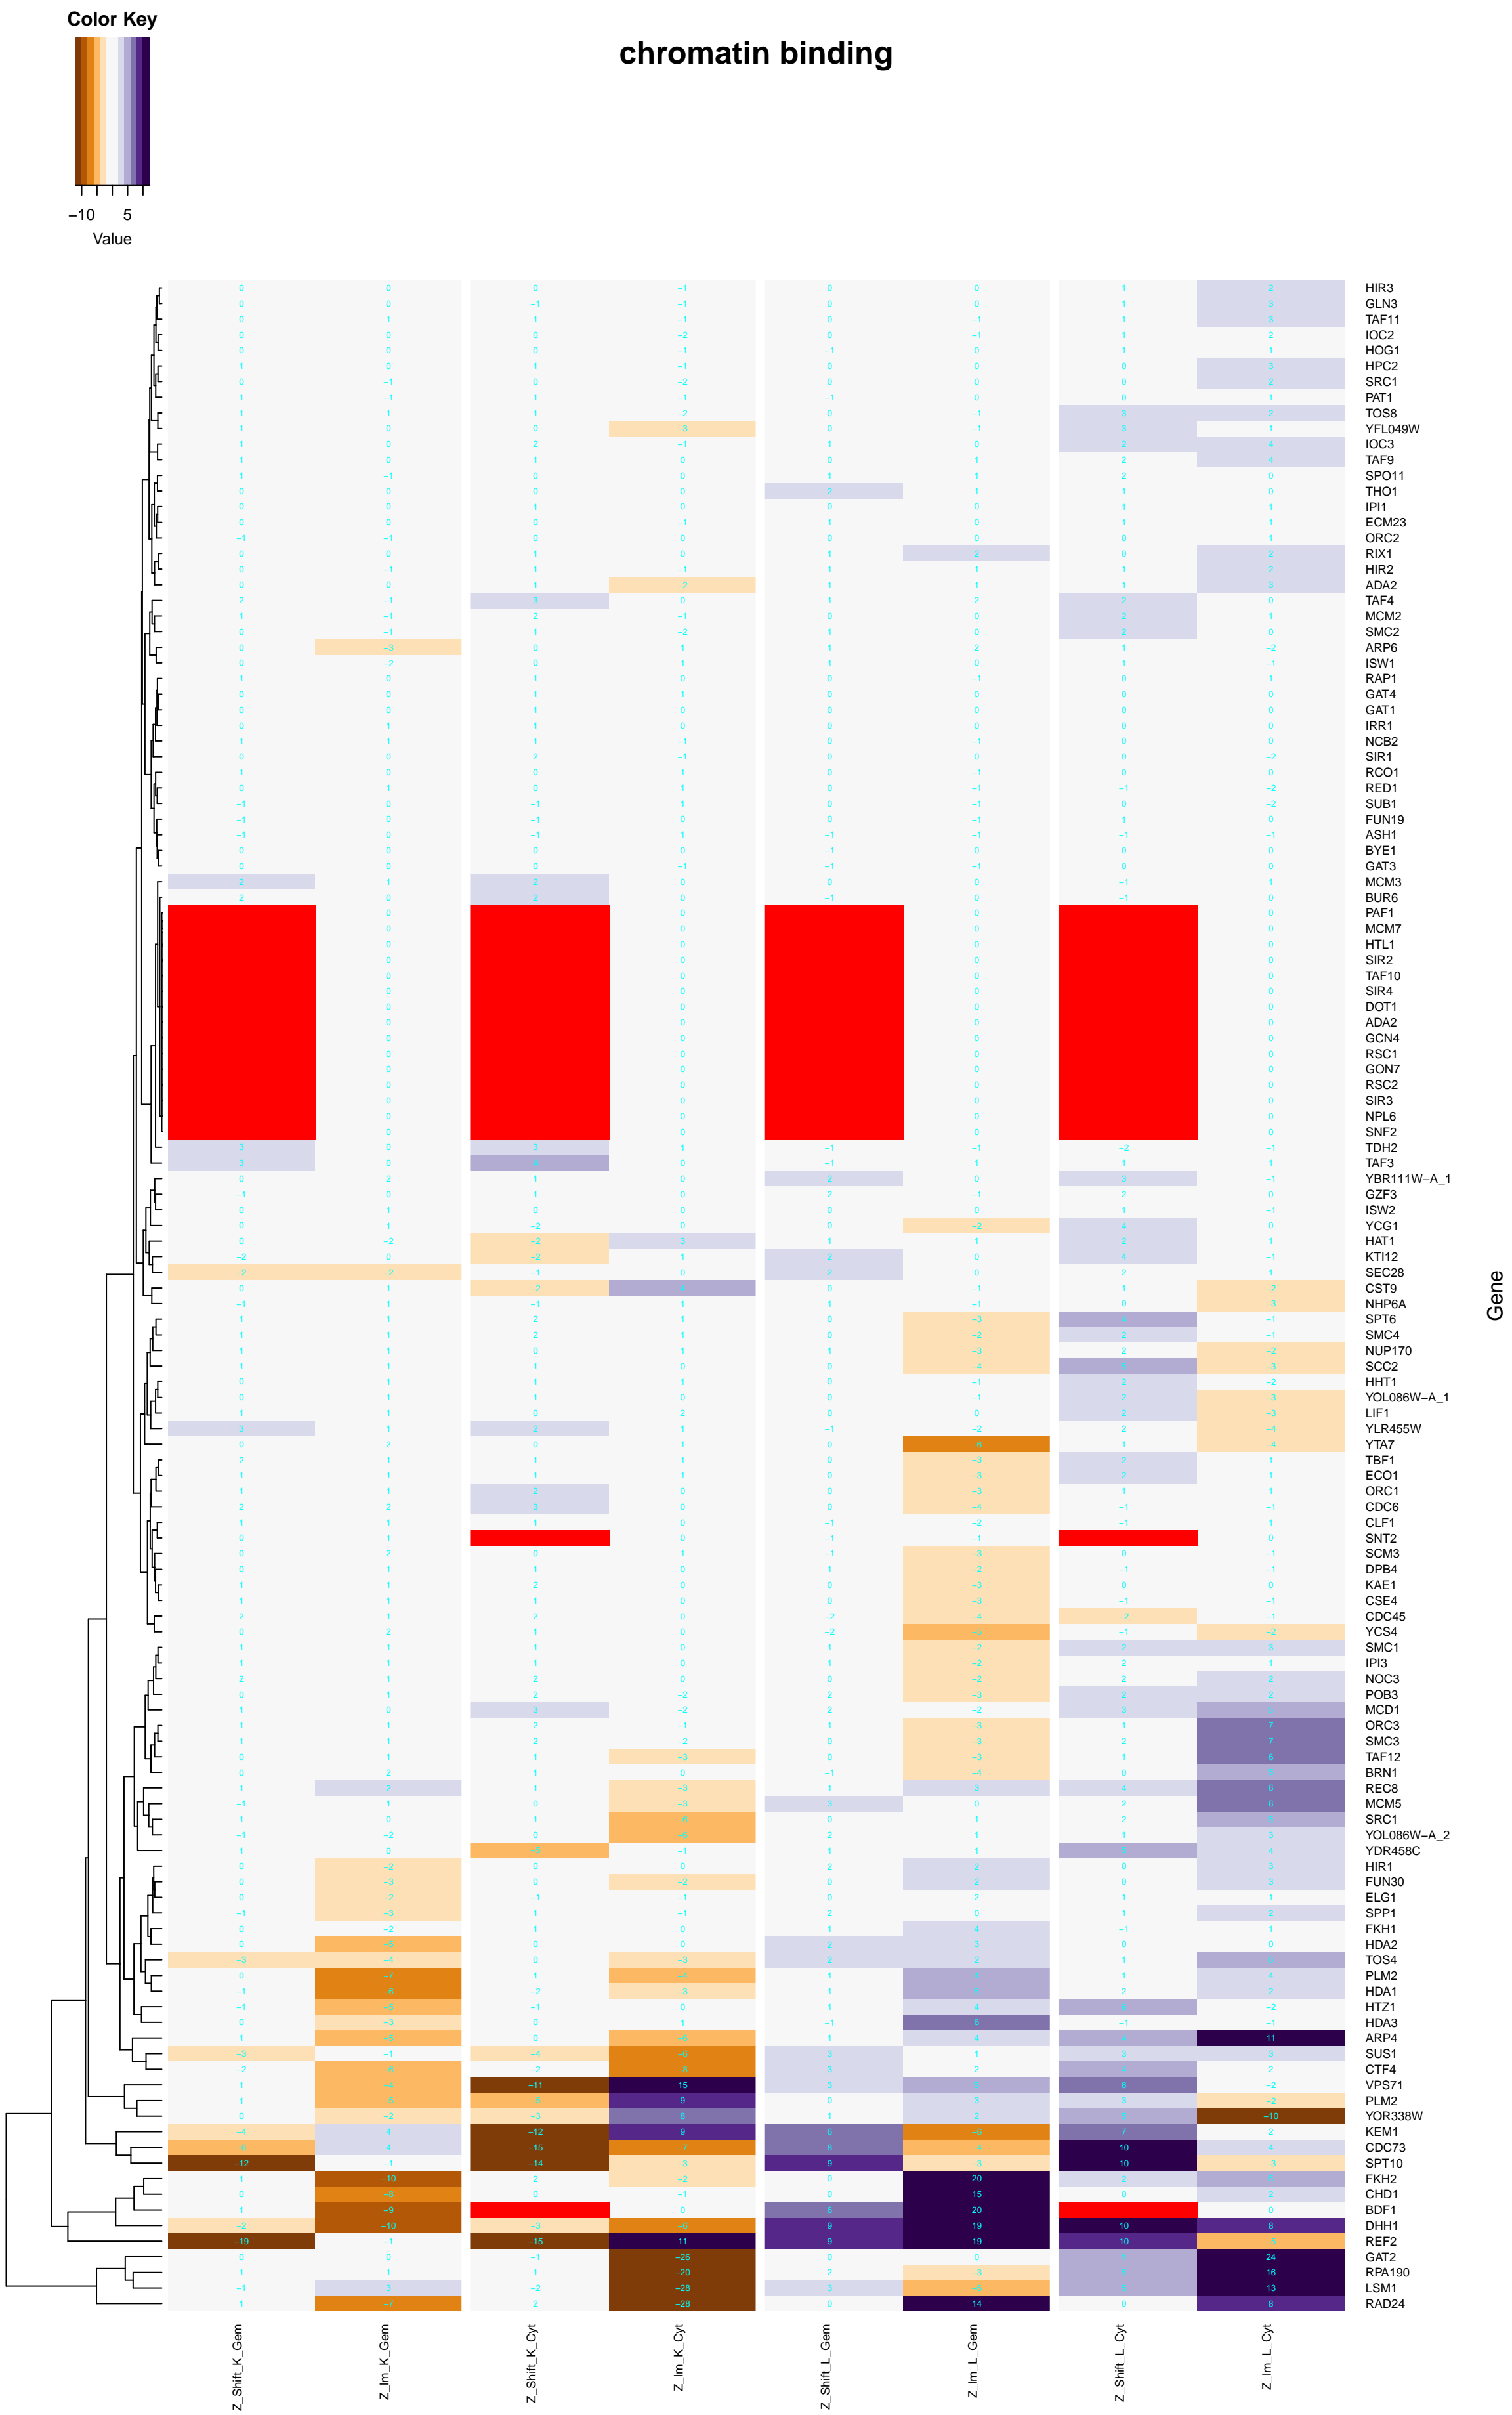

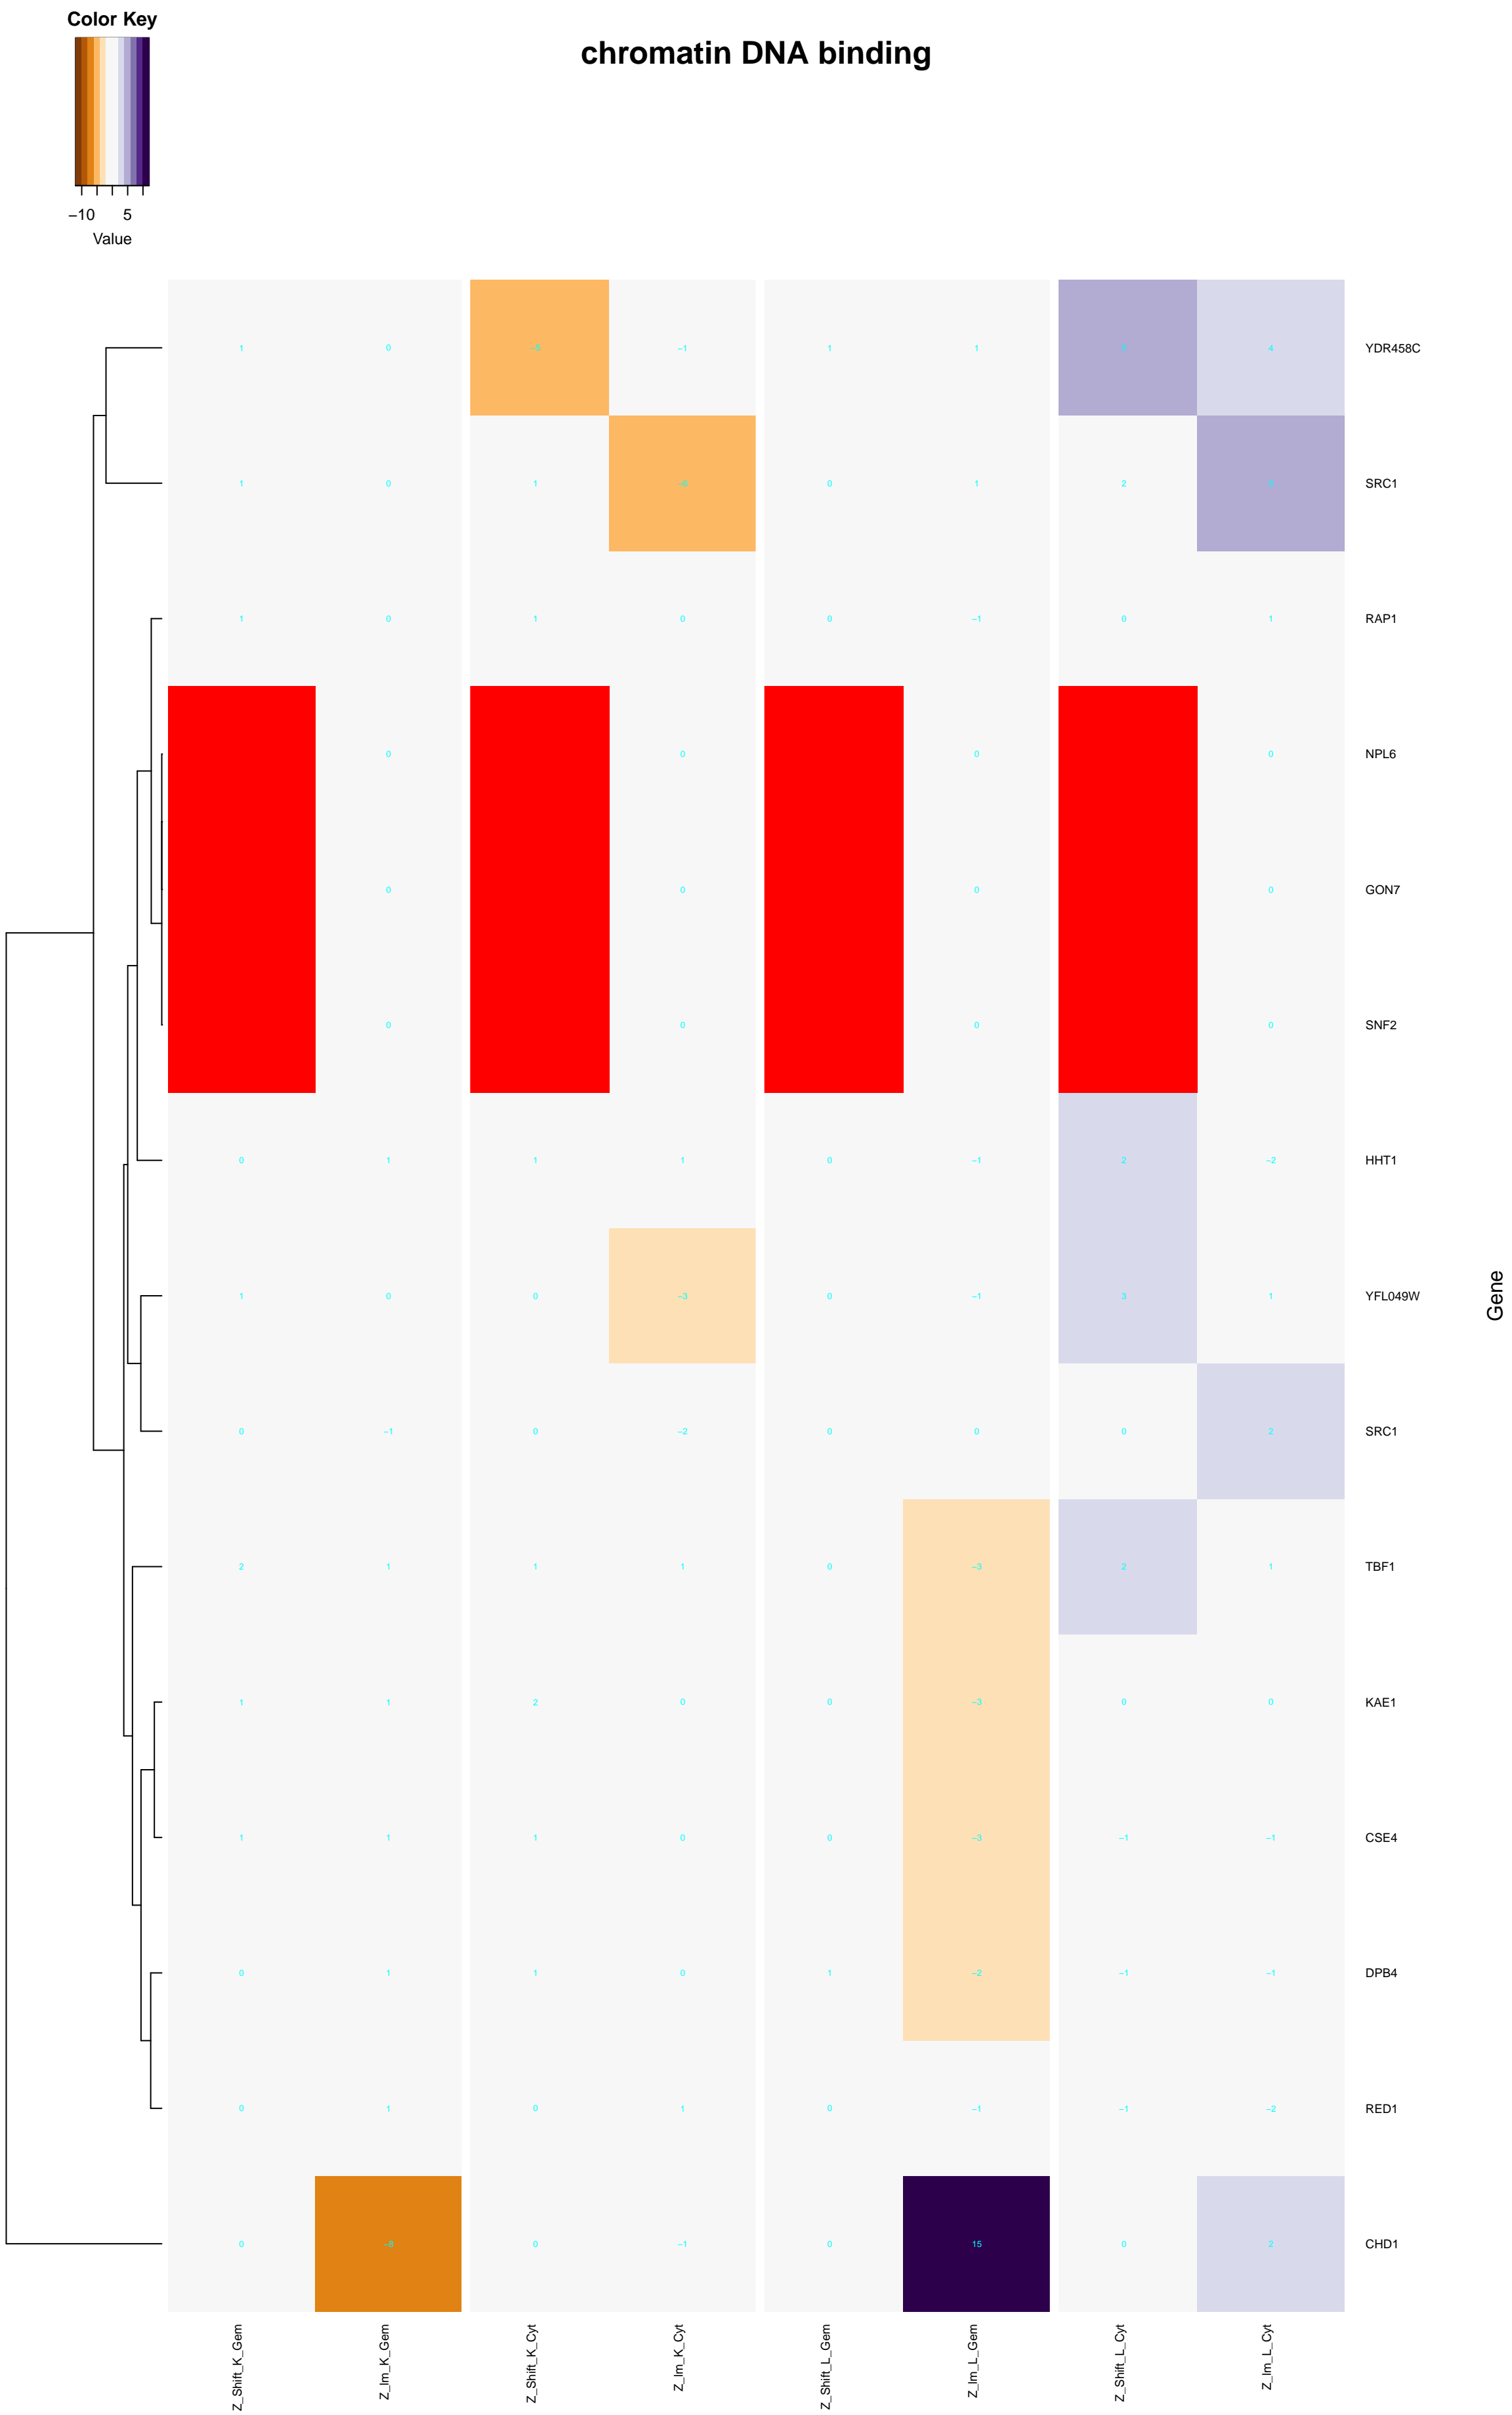

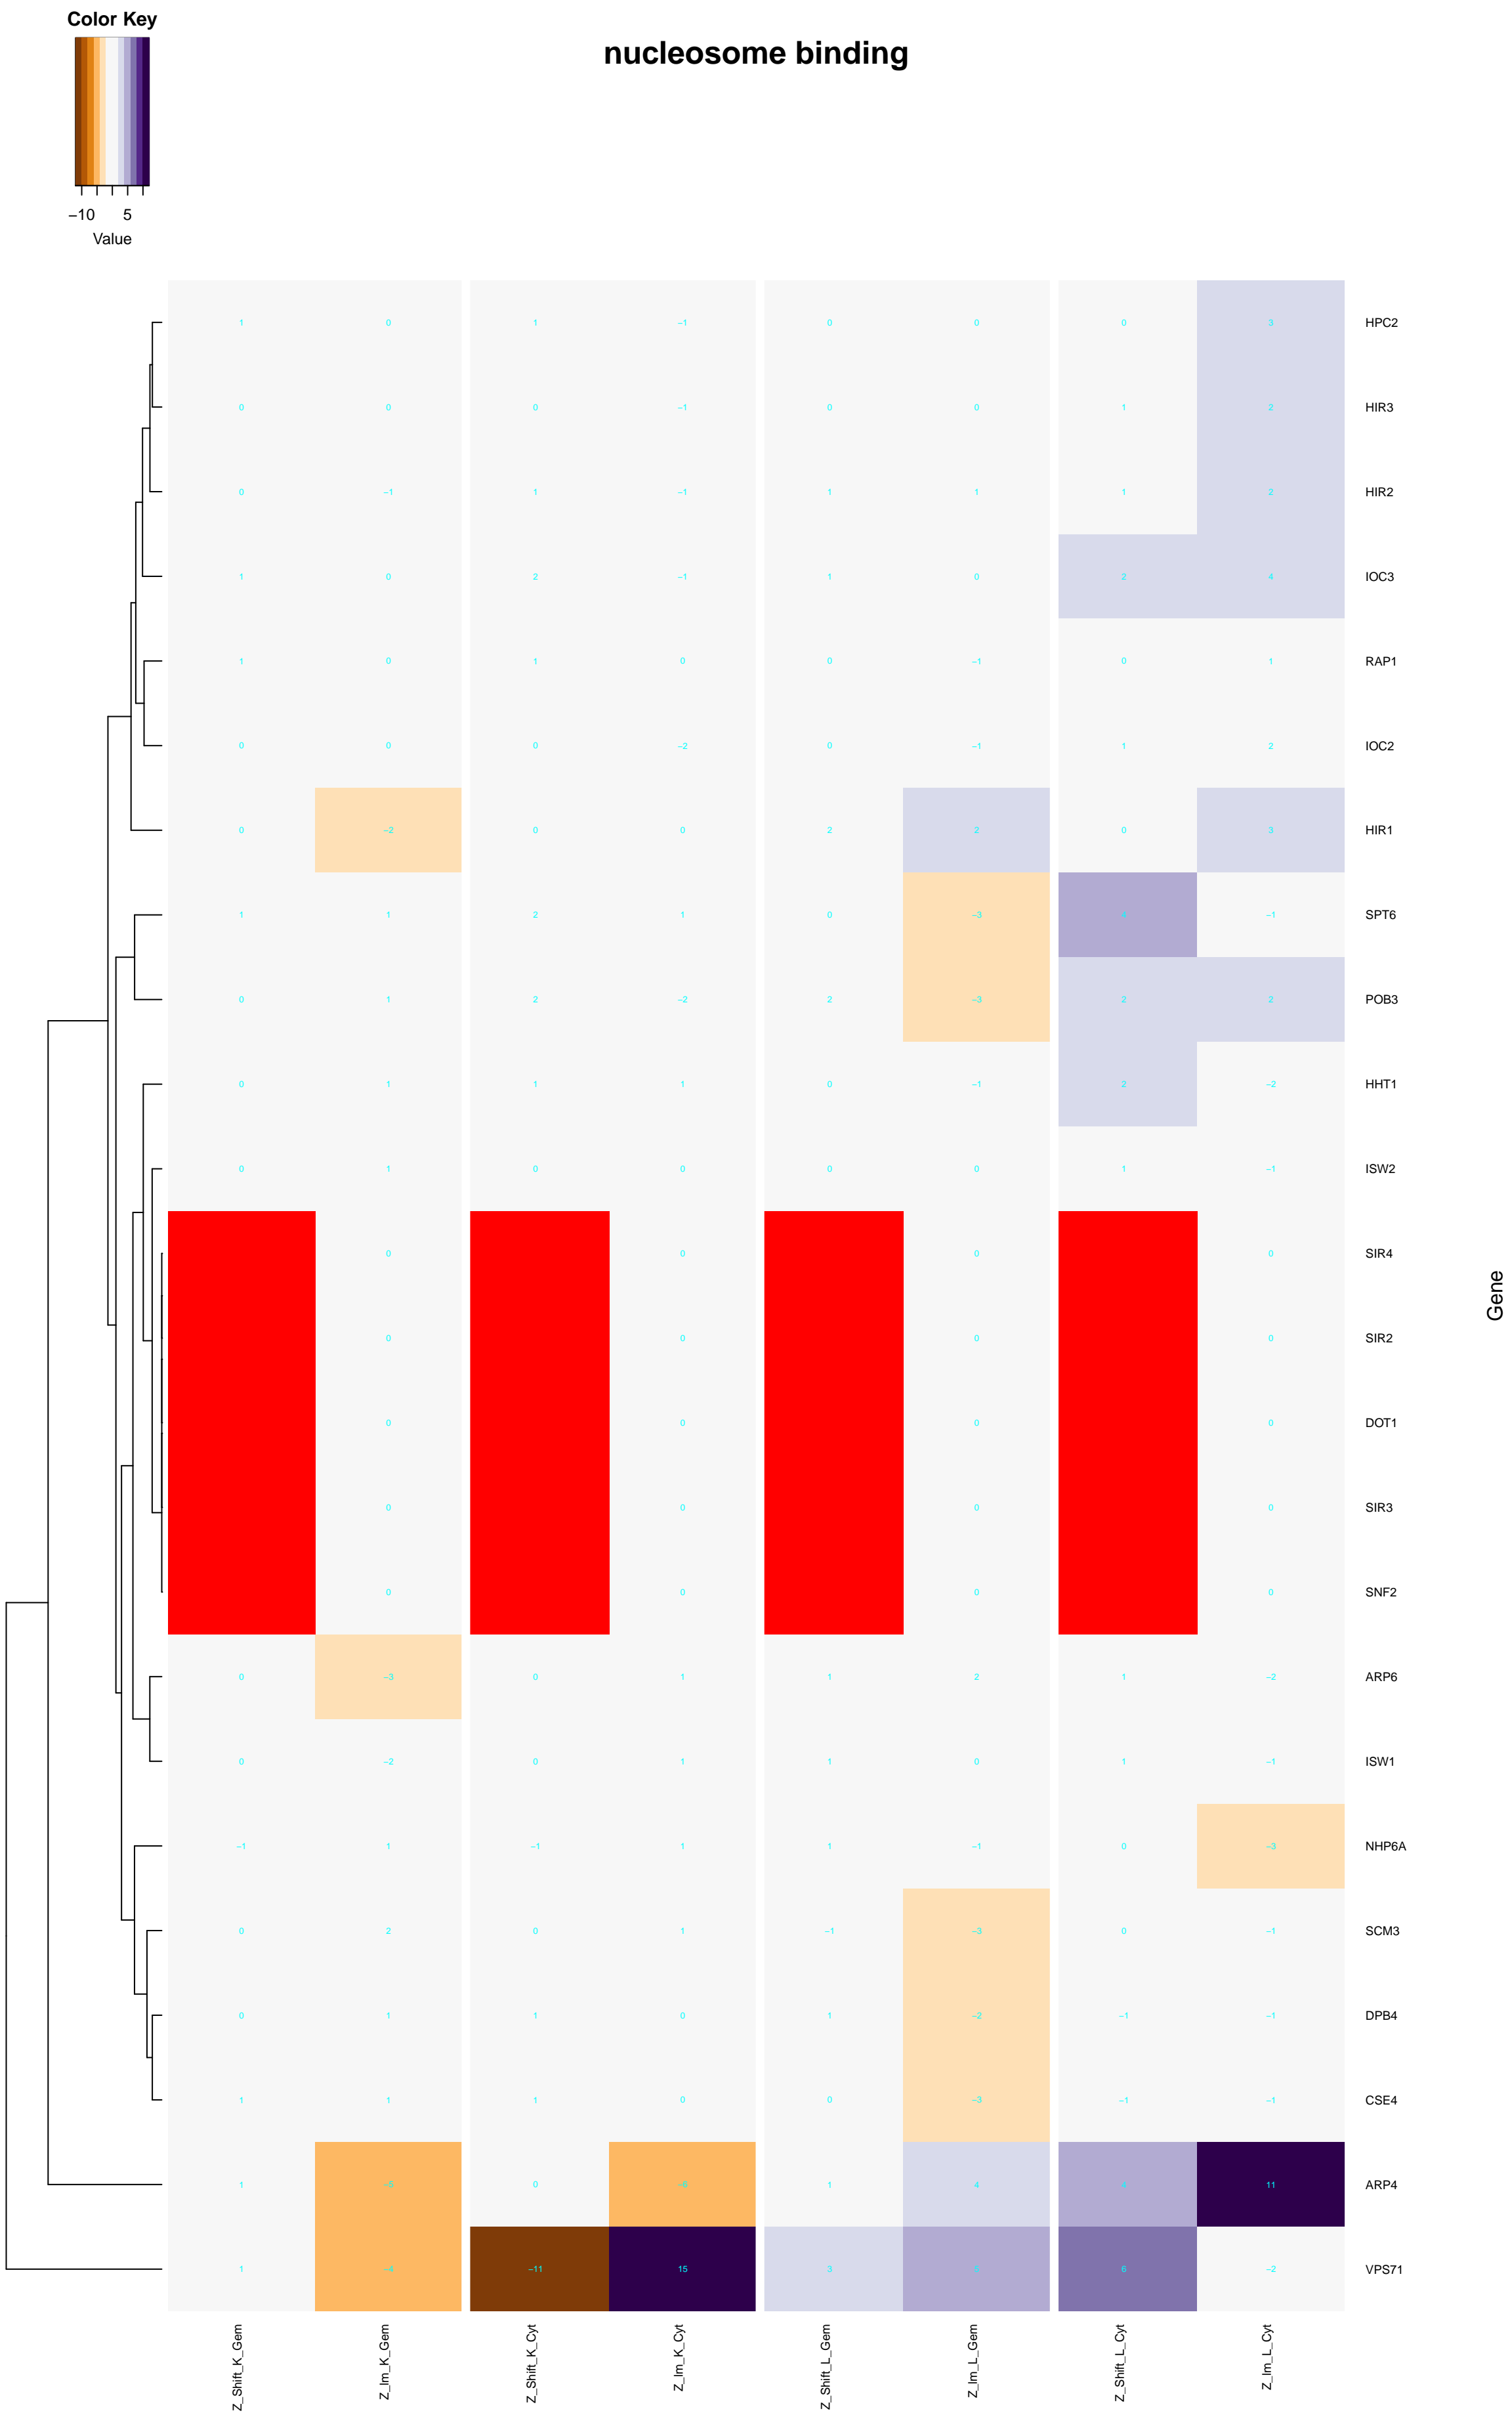

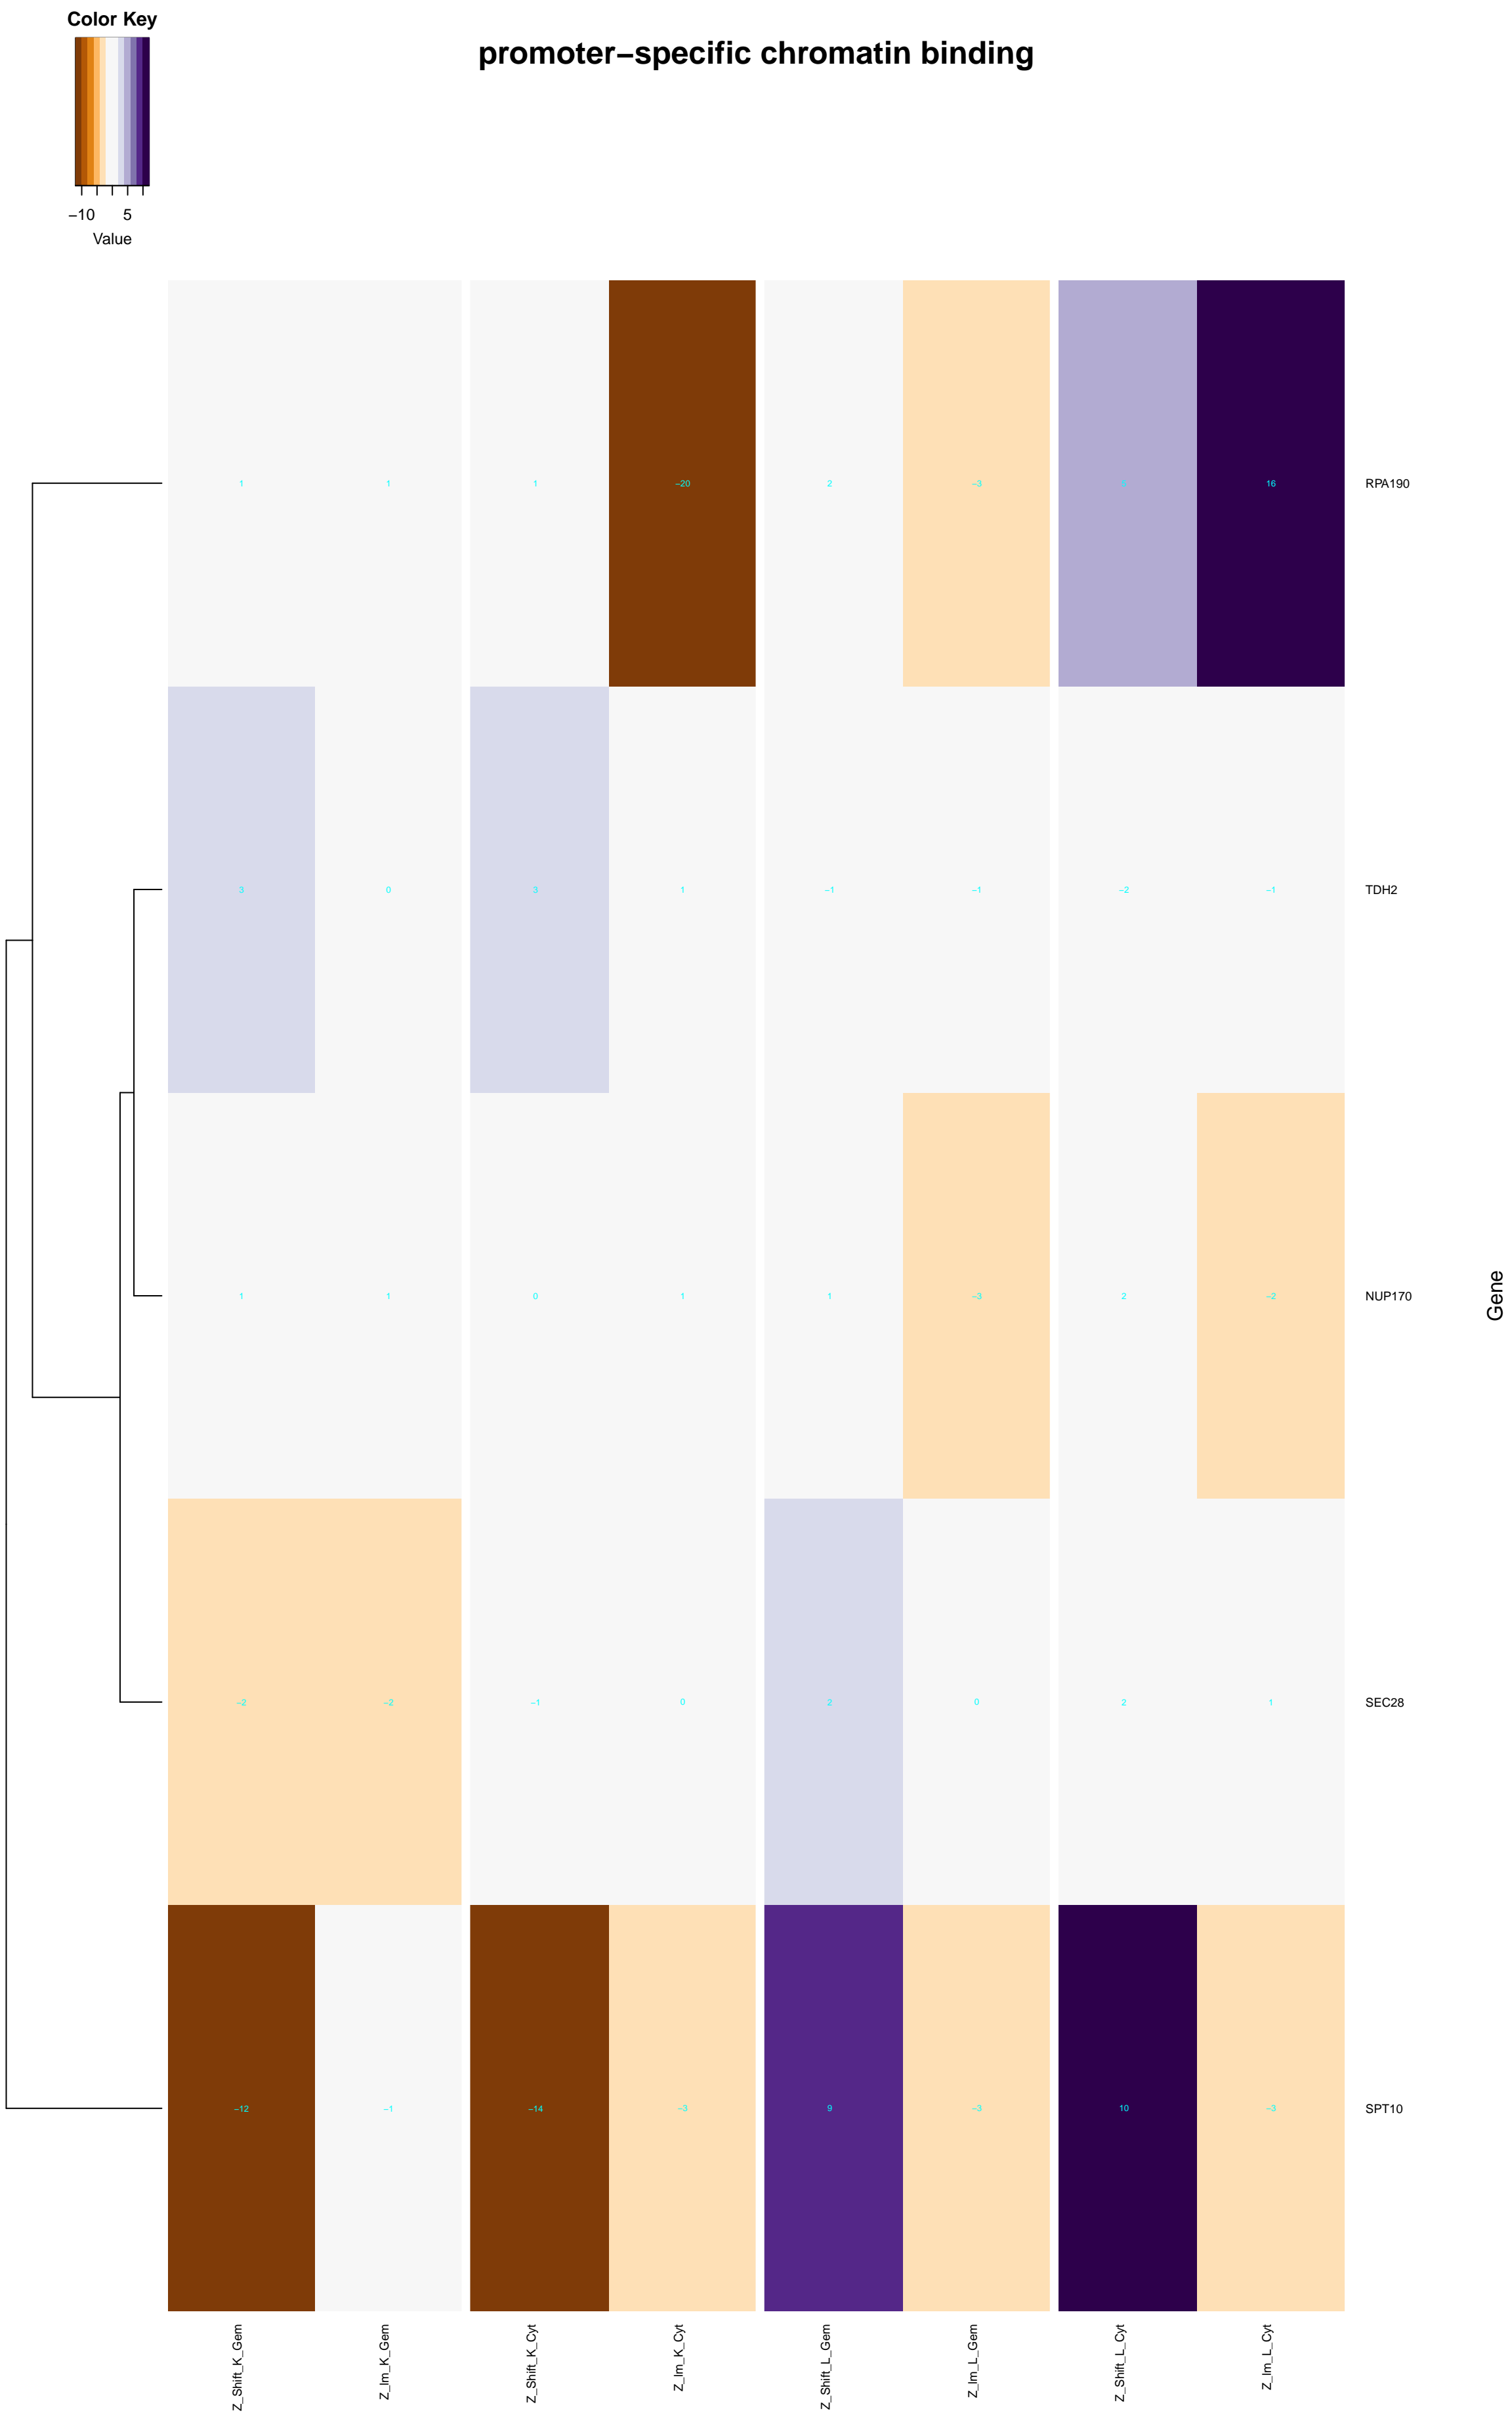

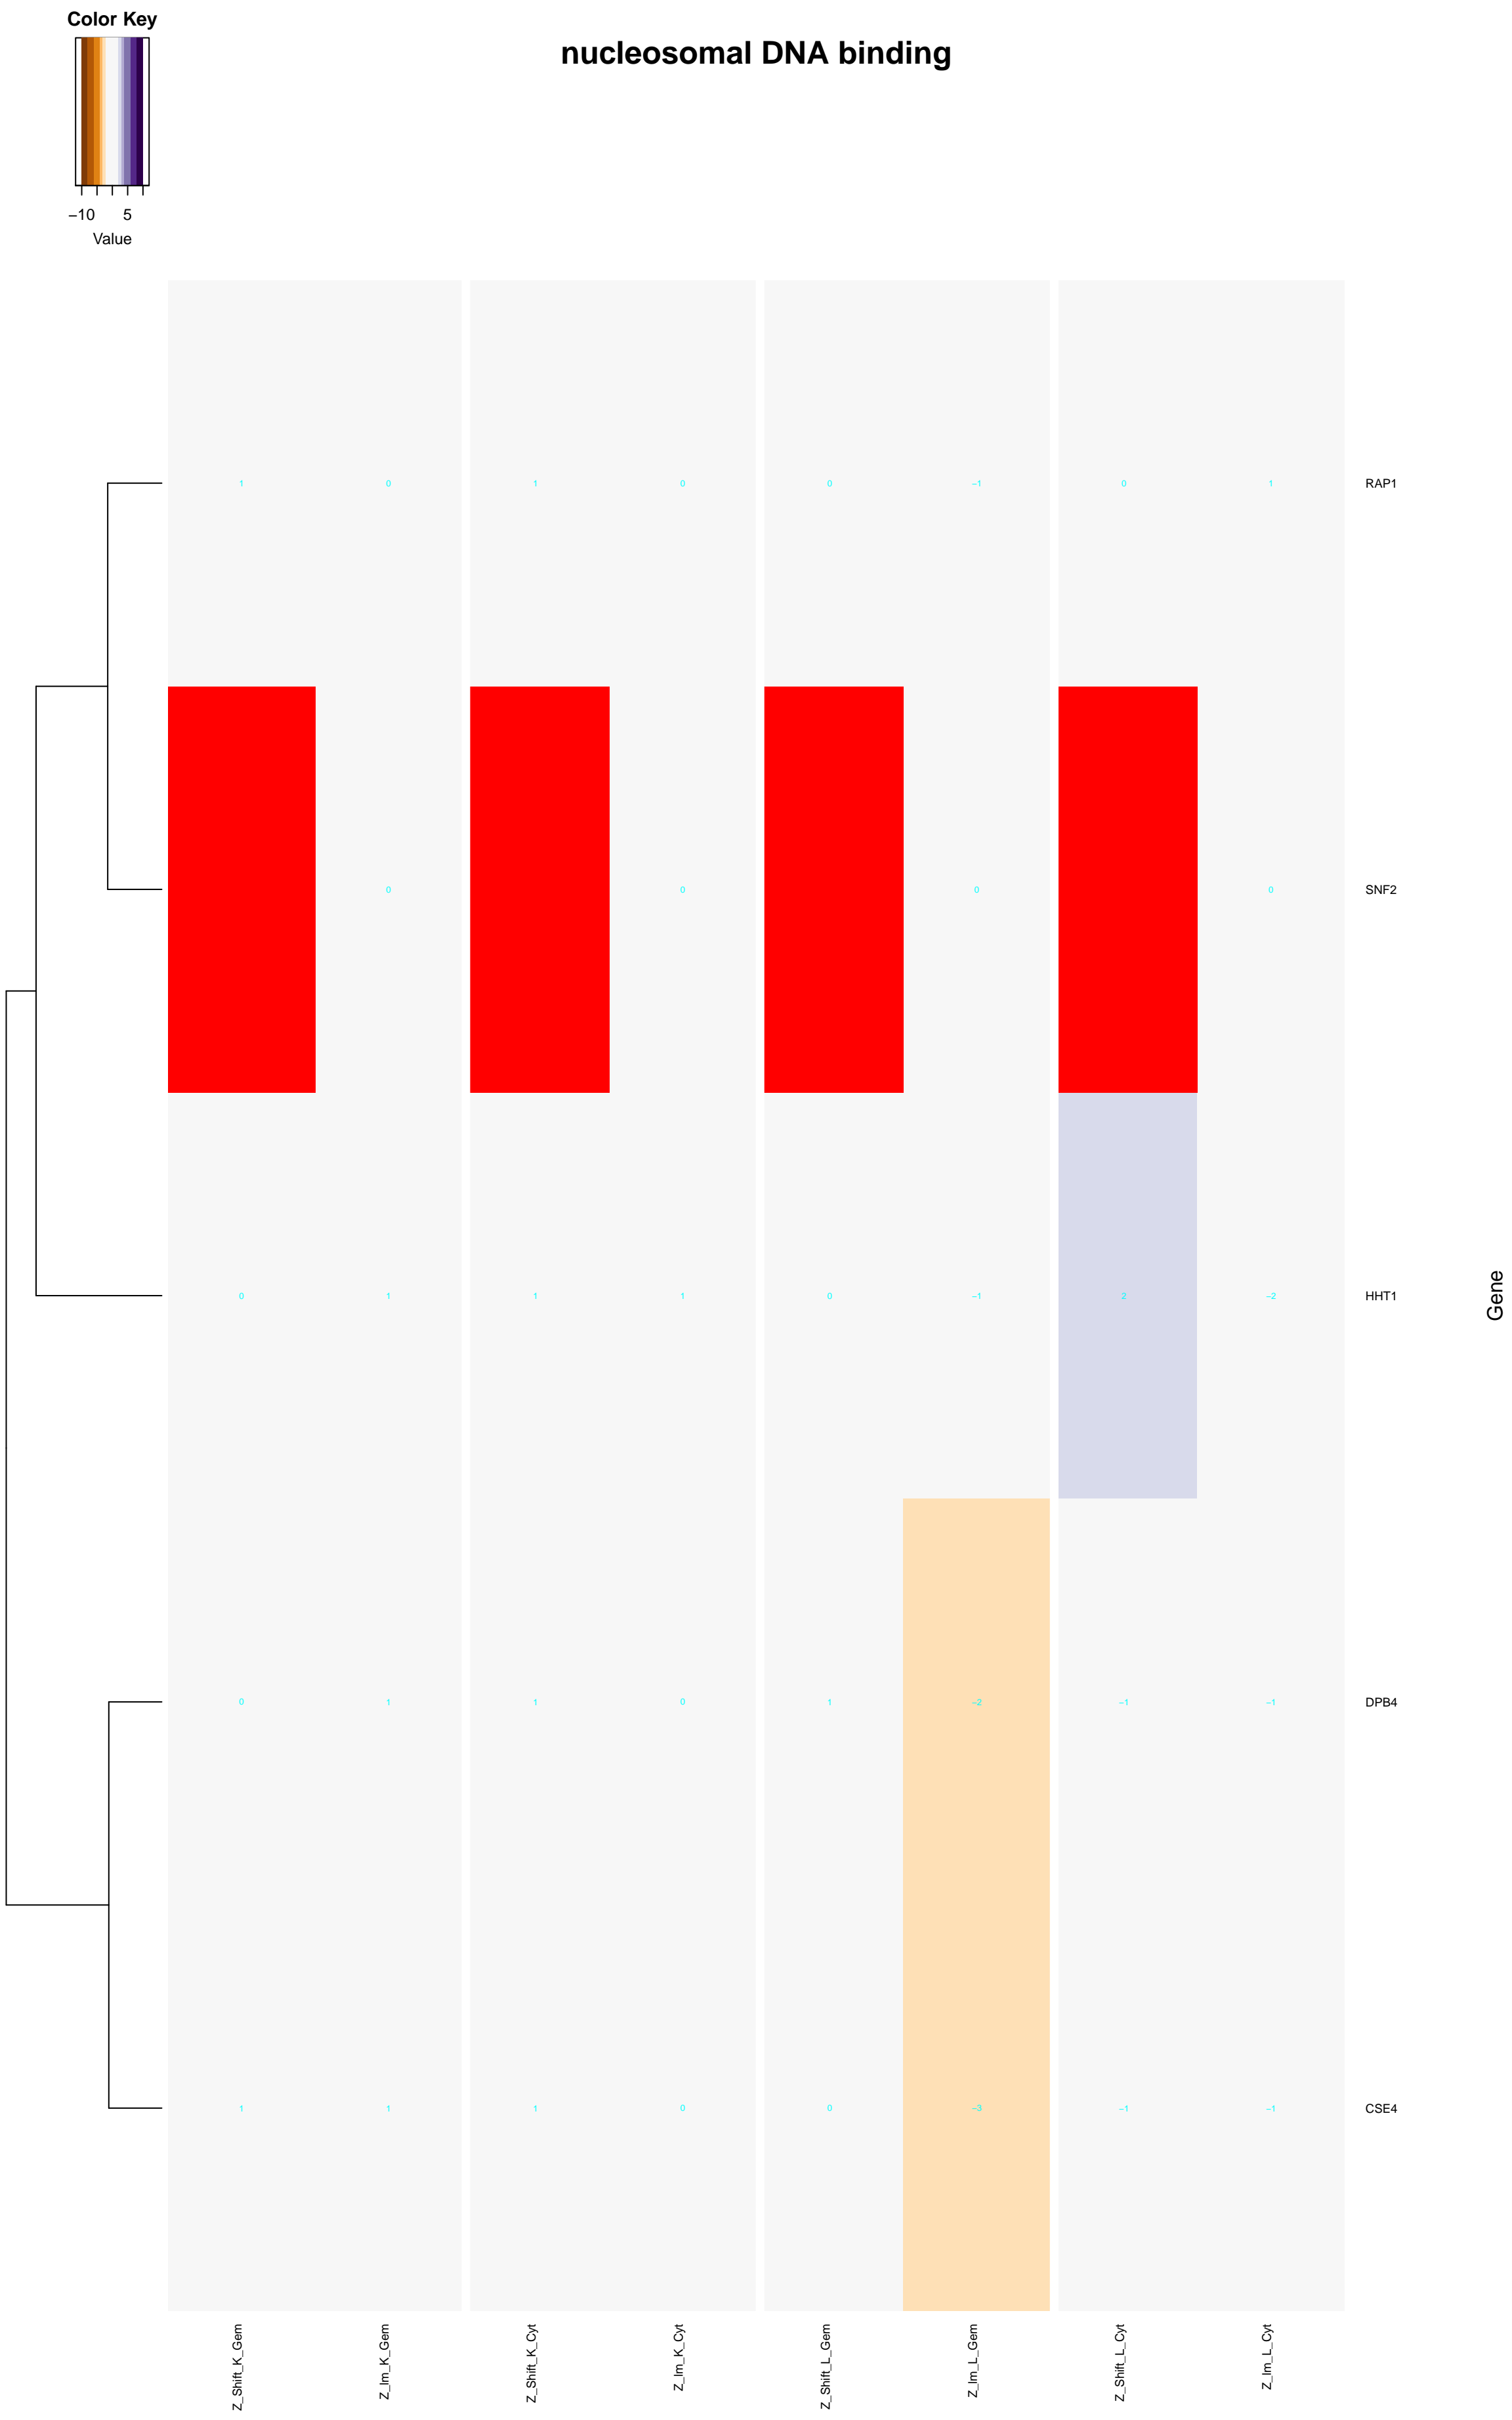

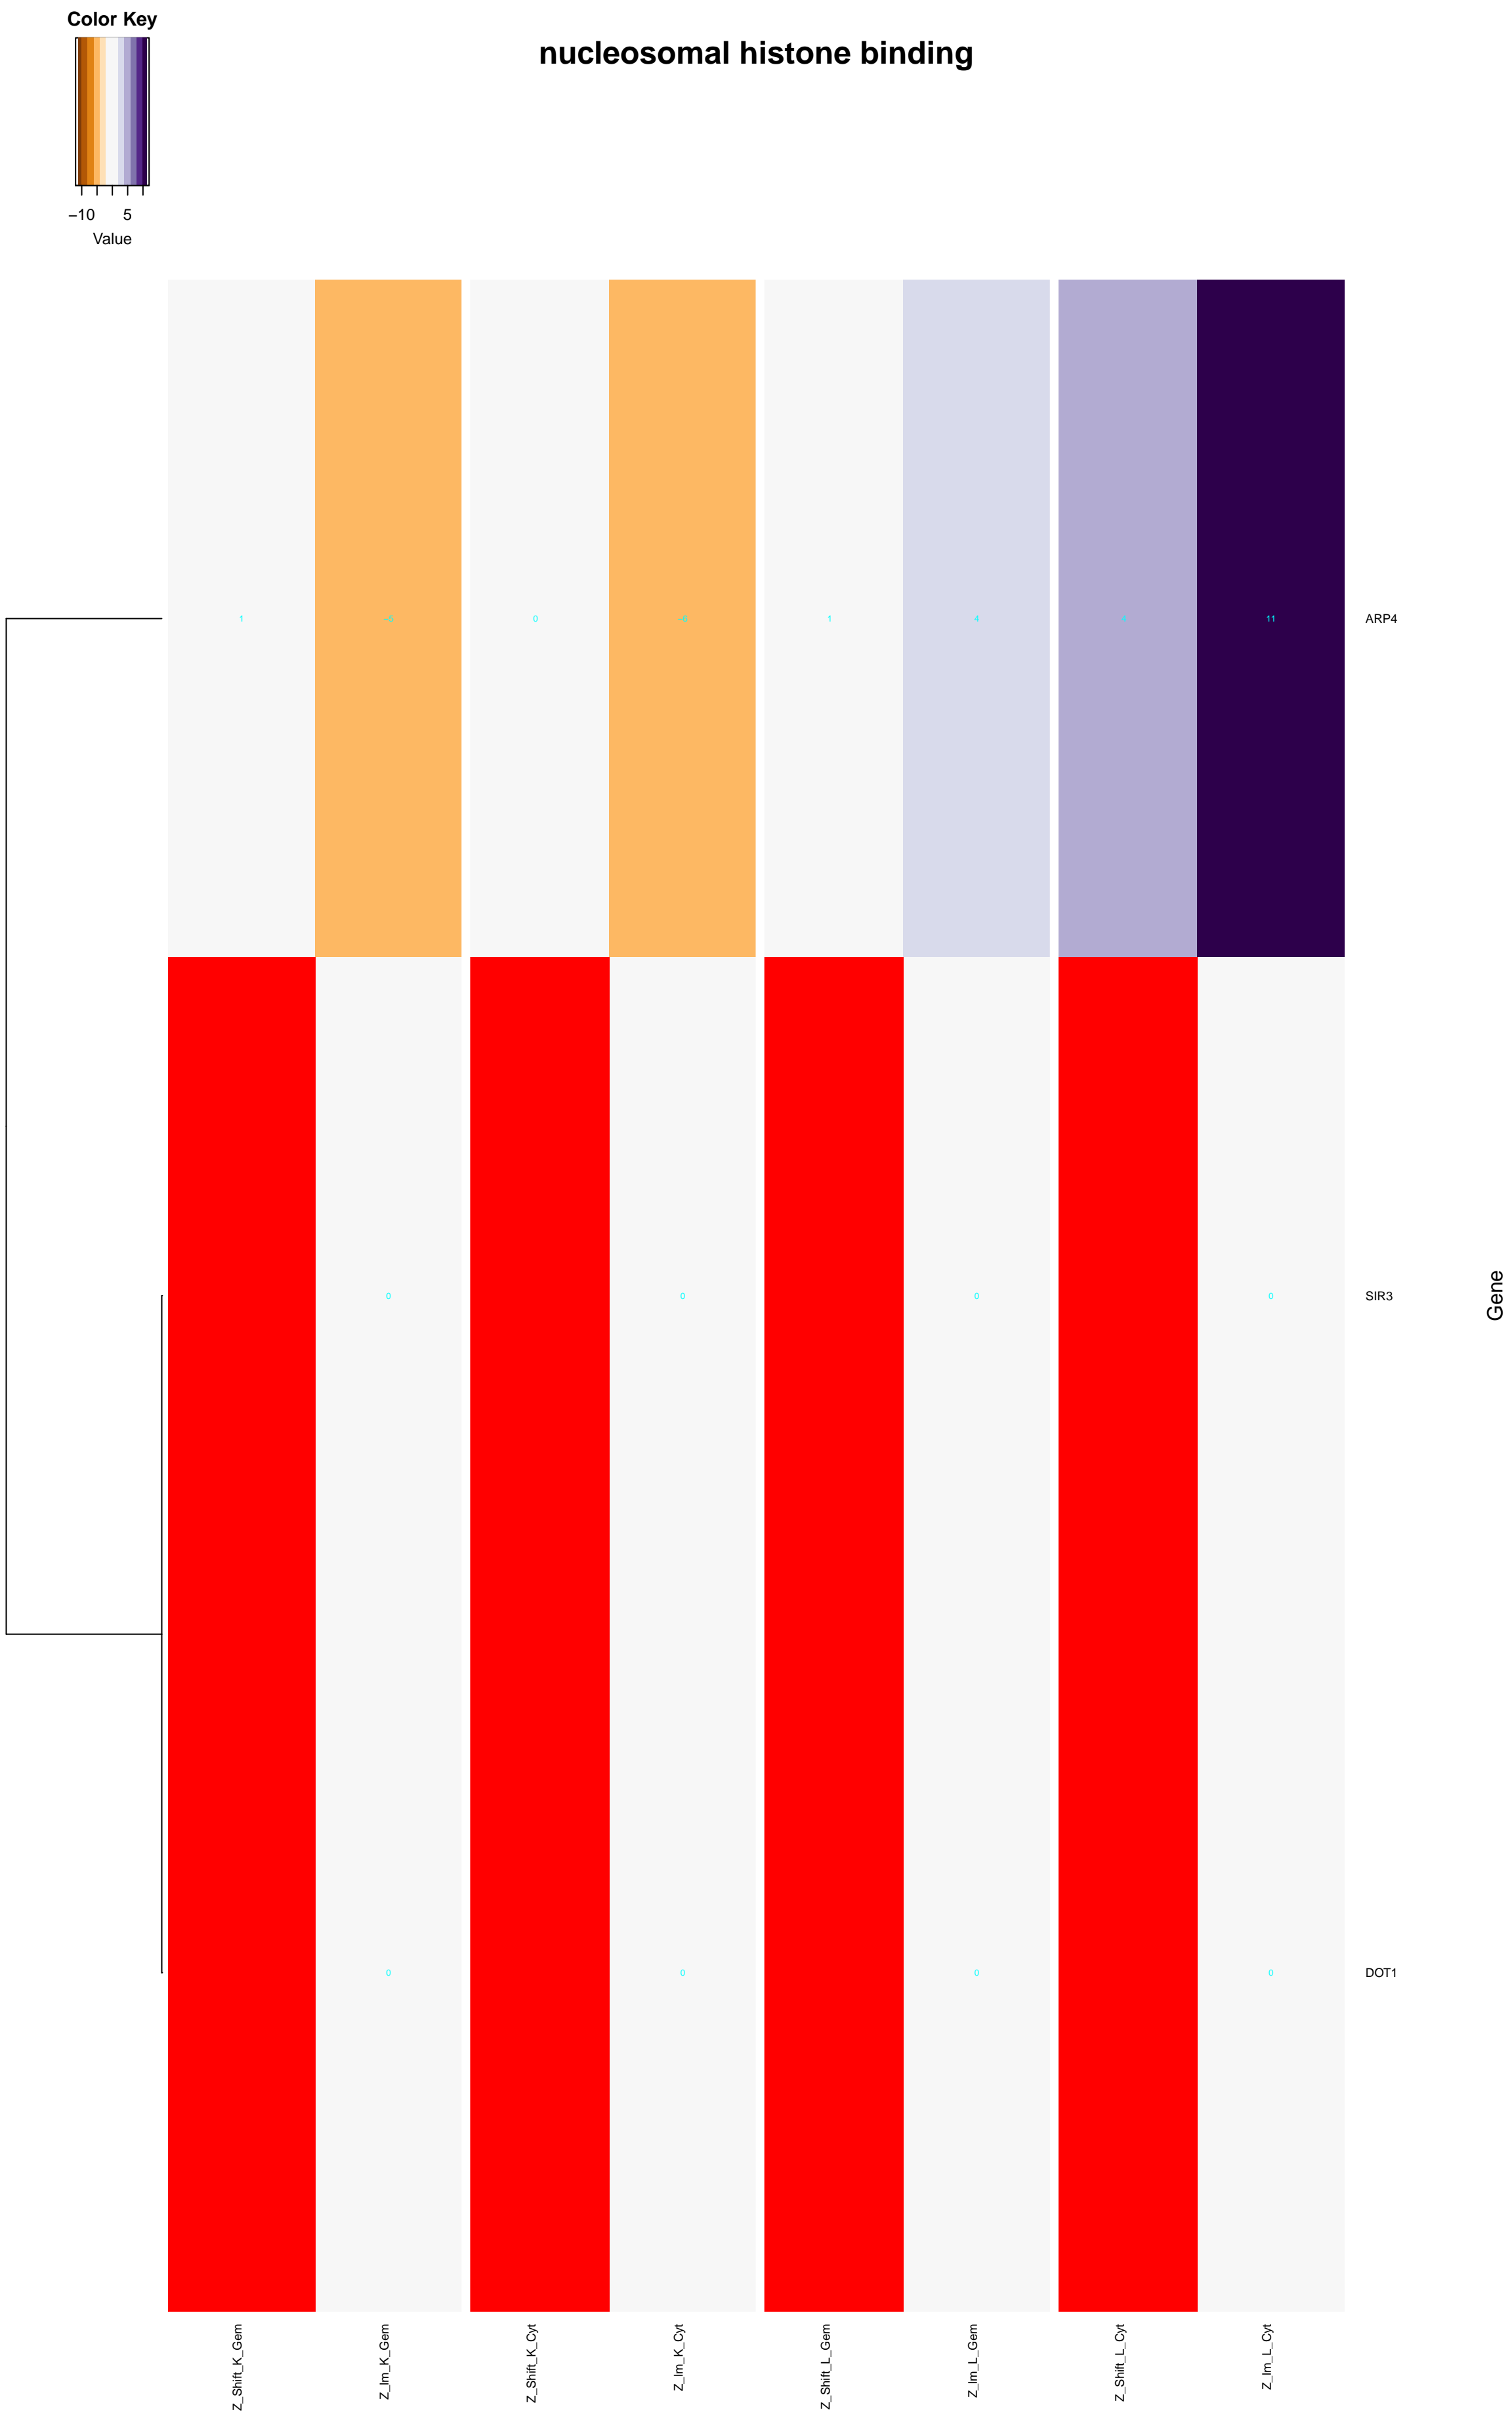

Supplement: s1 [file s1]

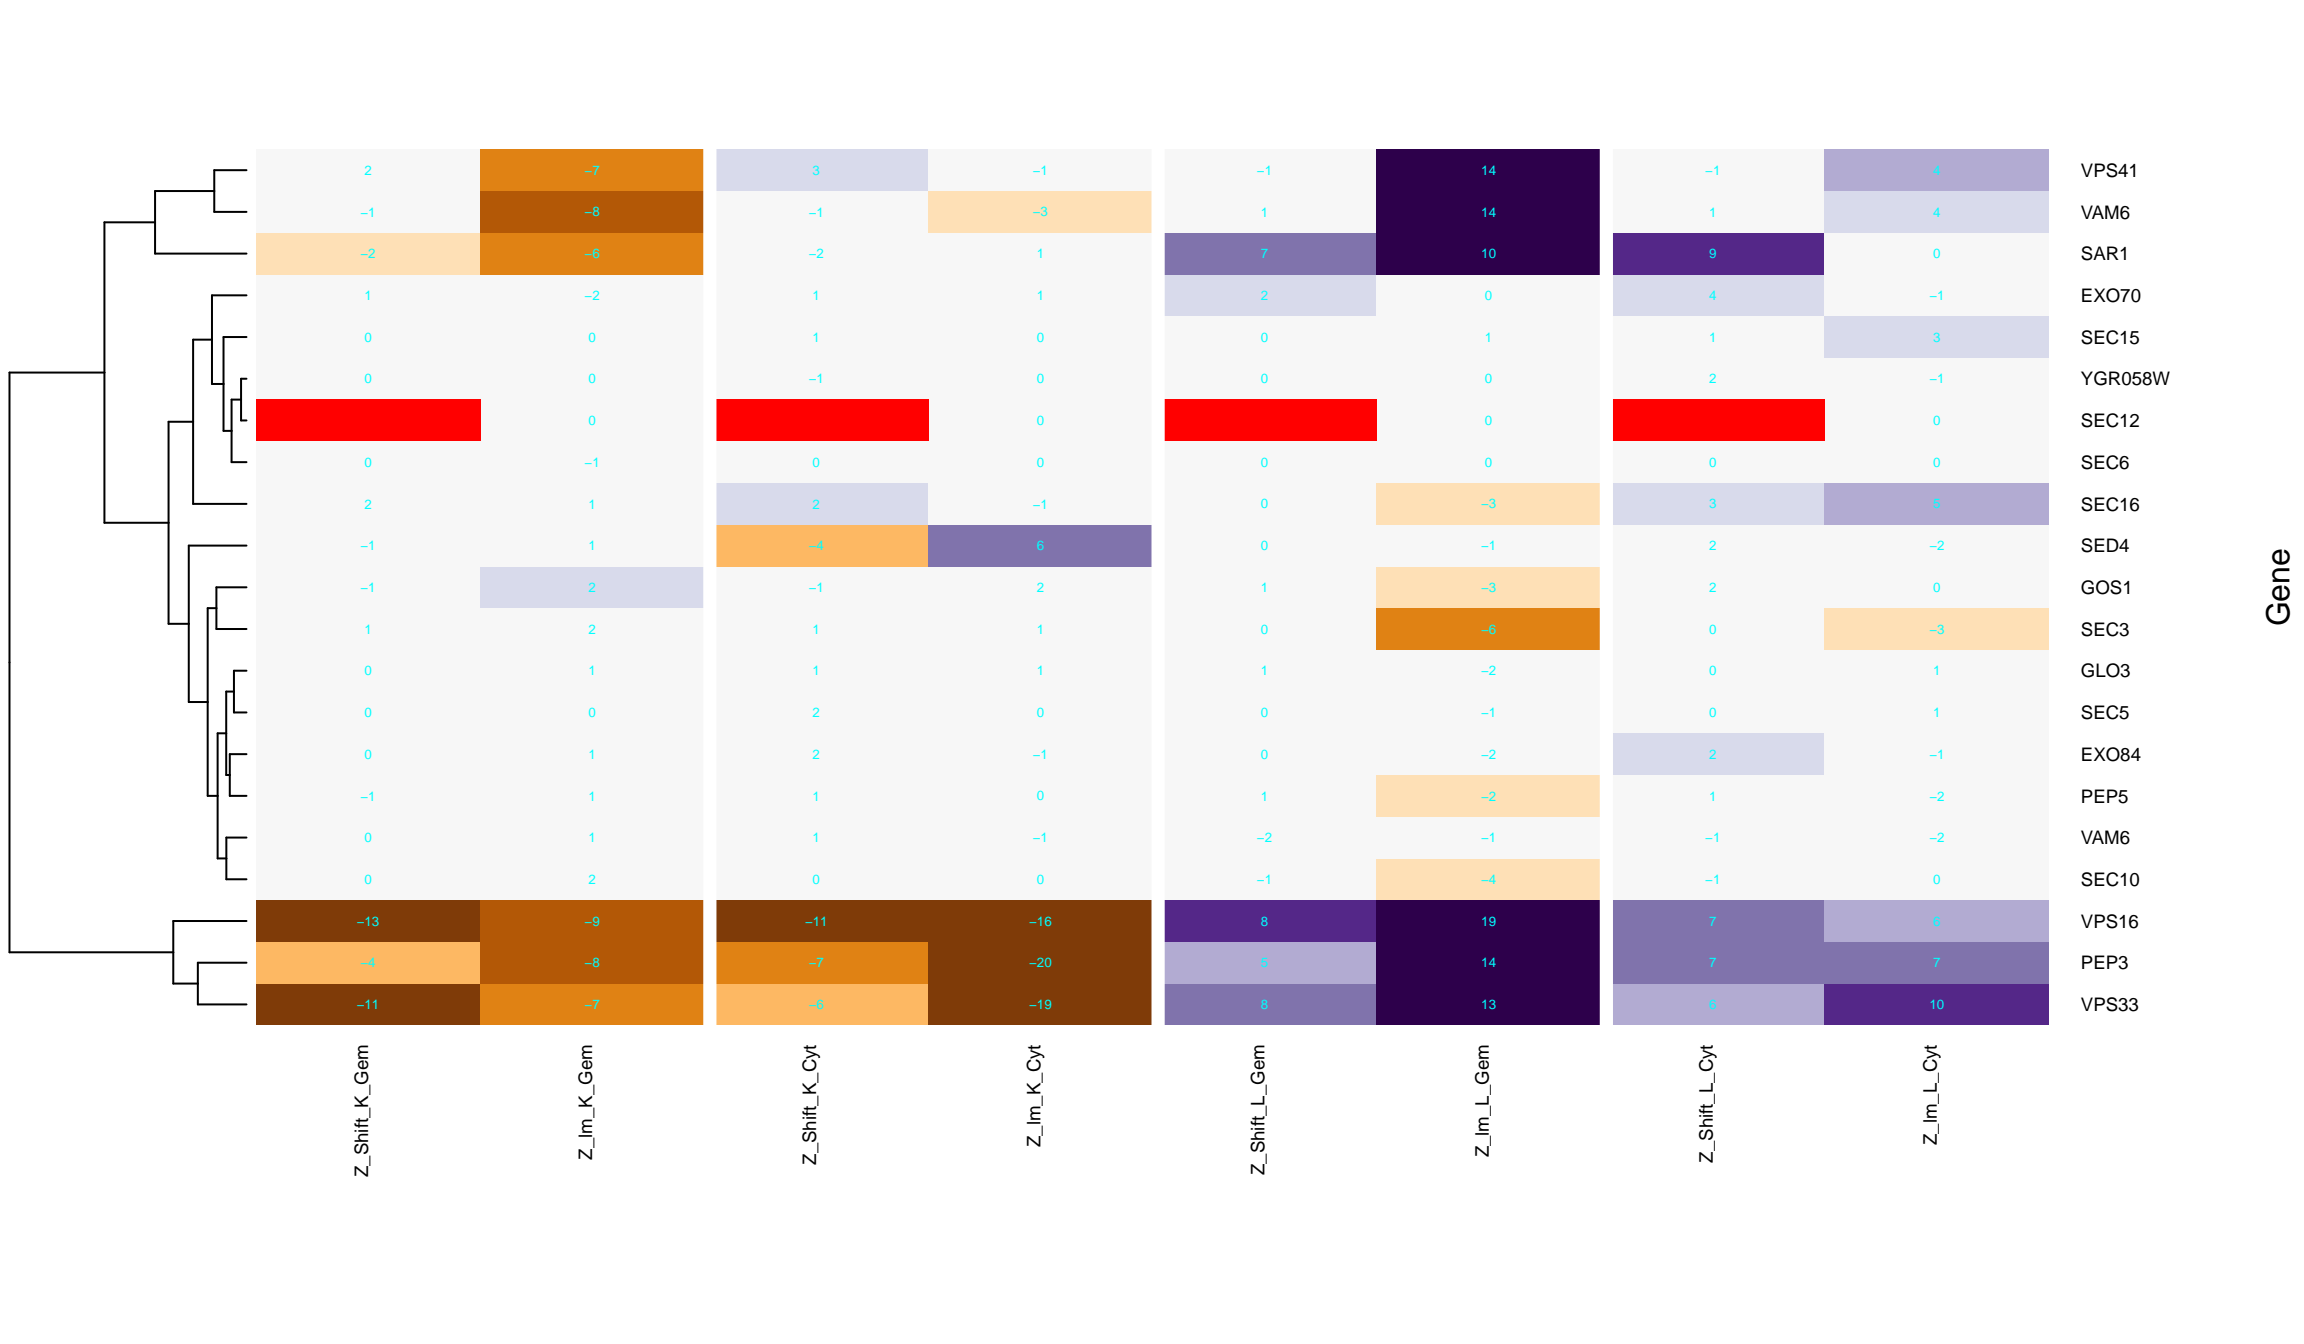

Supplement: s1 [file s1]

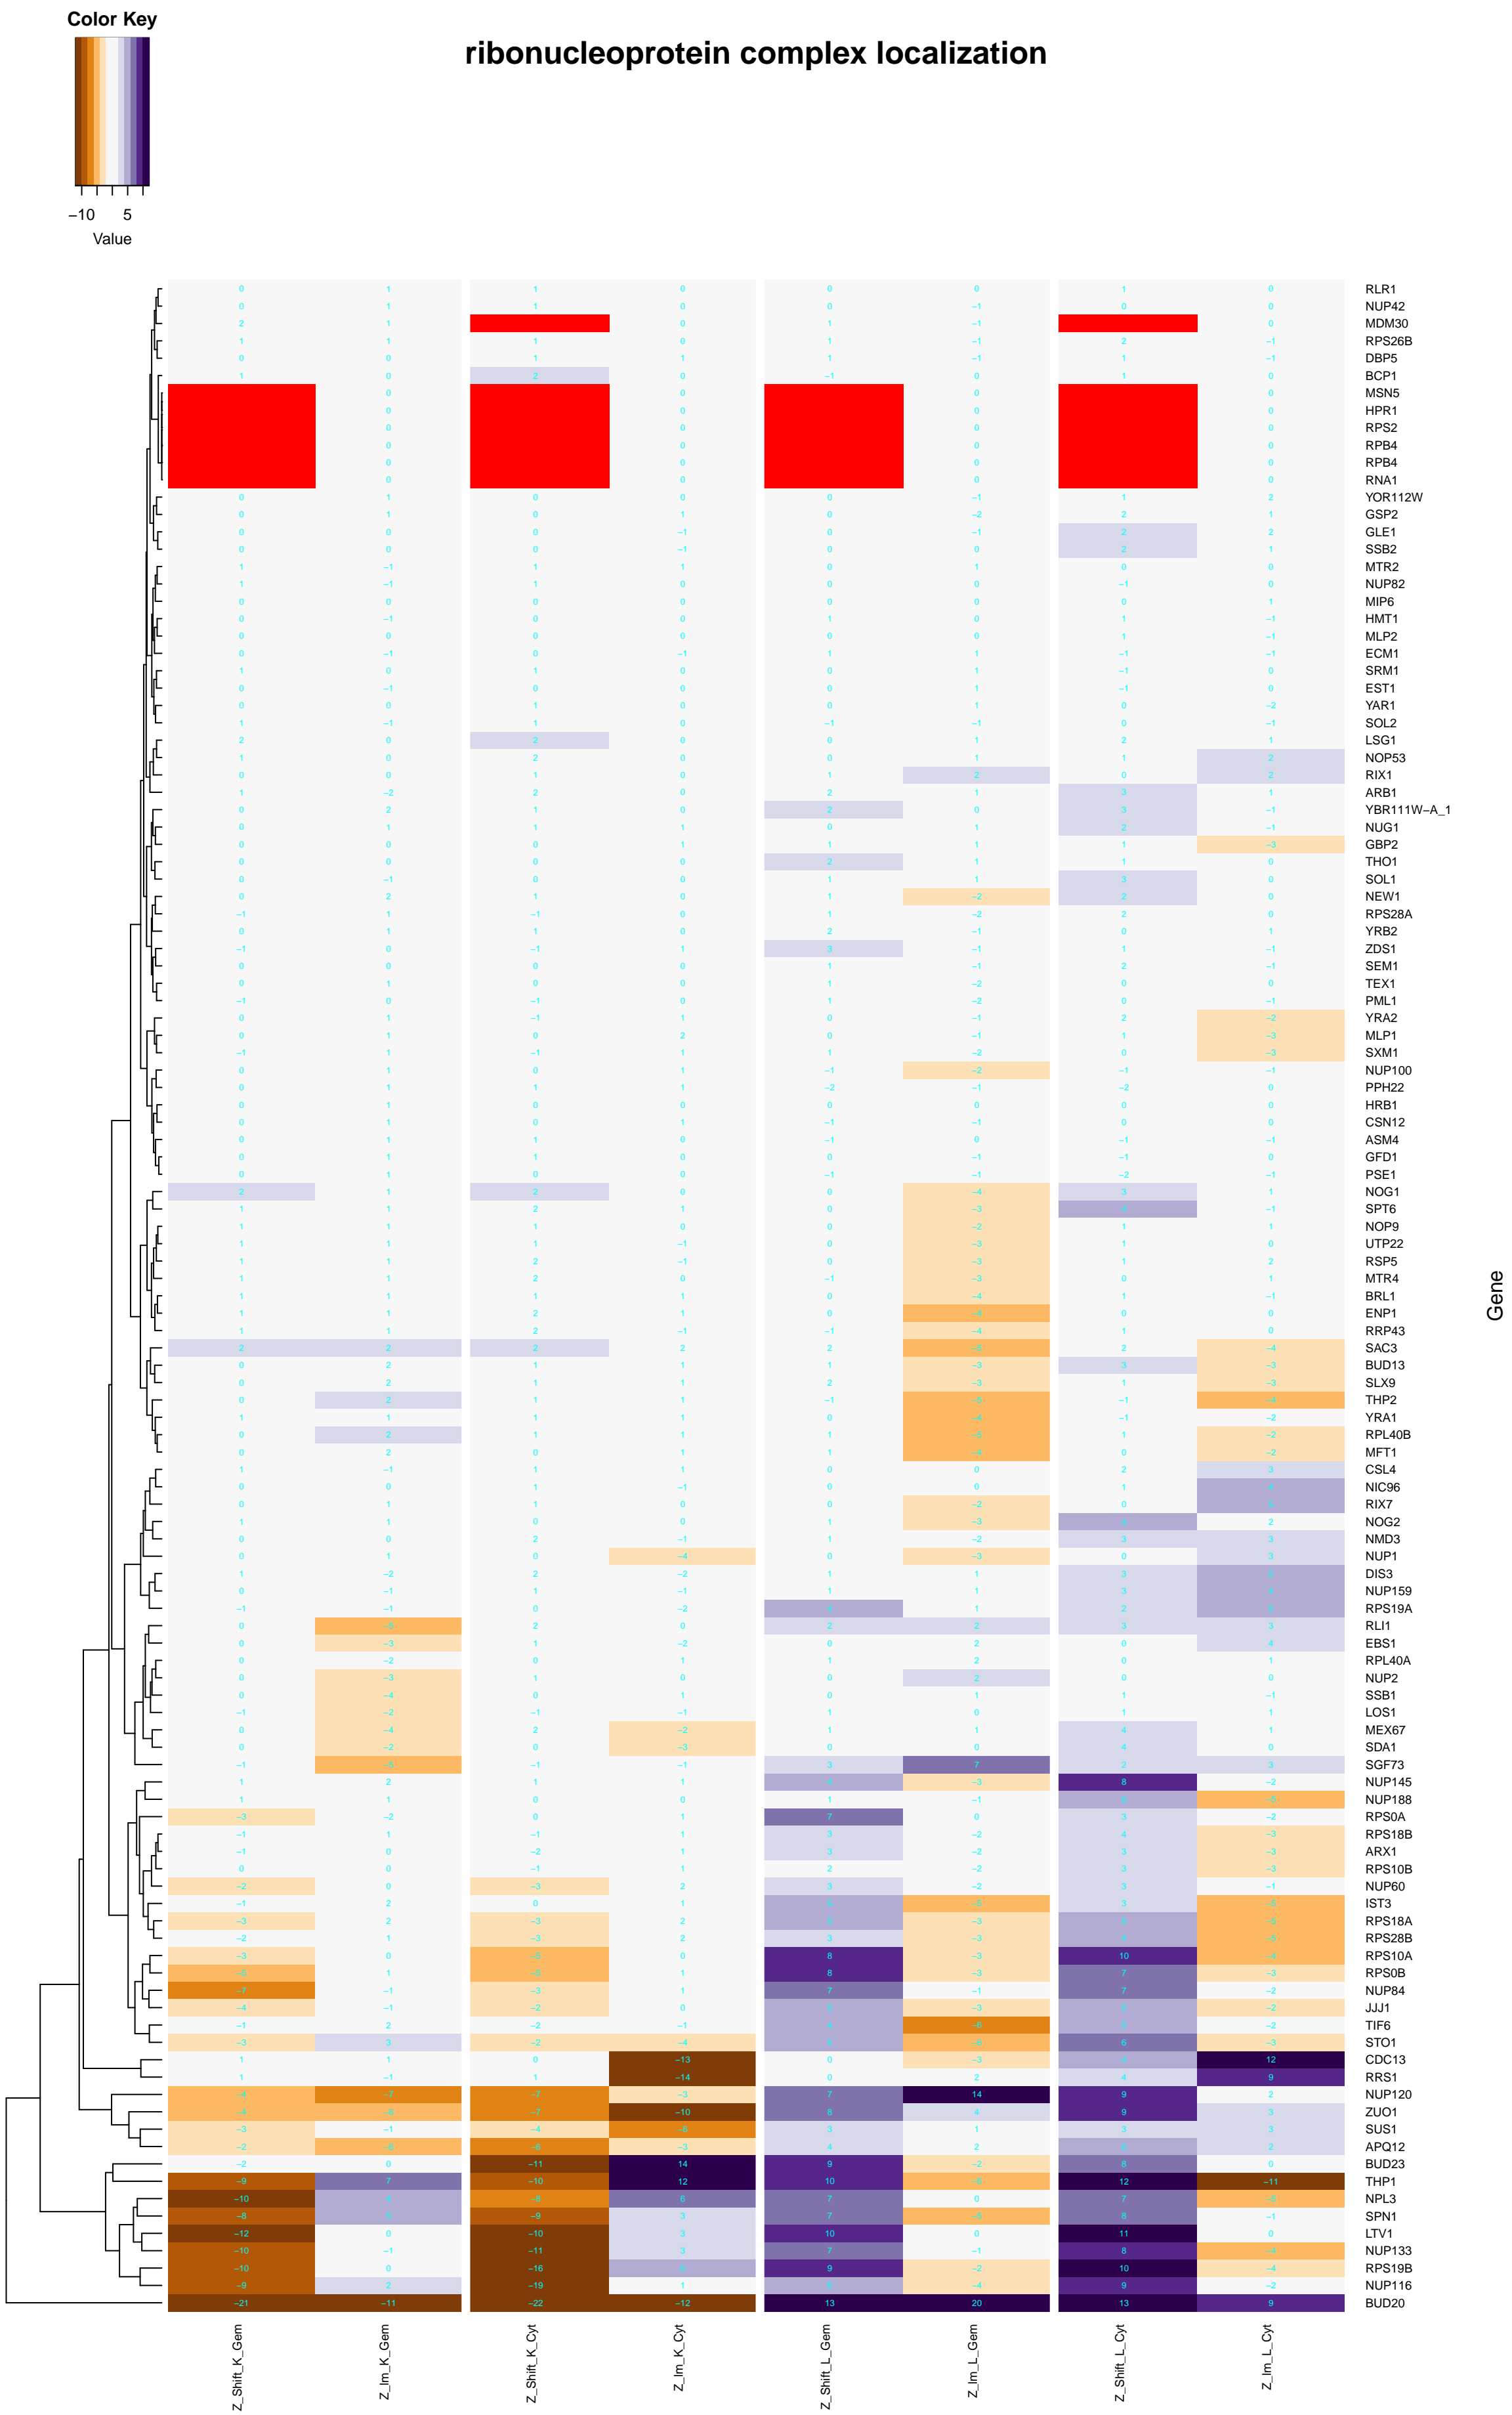

Supplement: s1 [file s1]

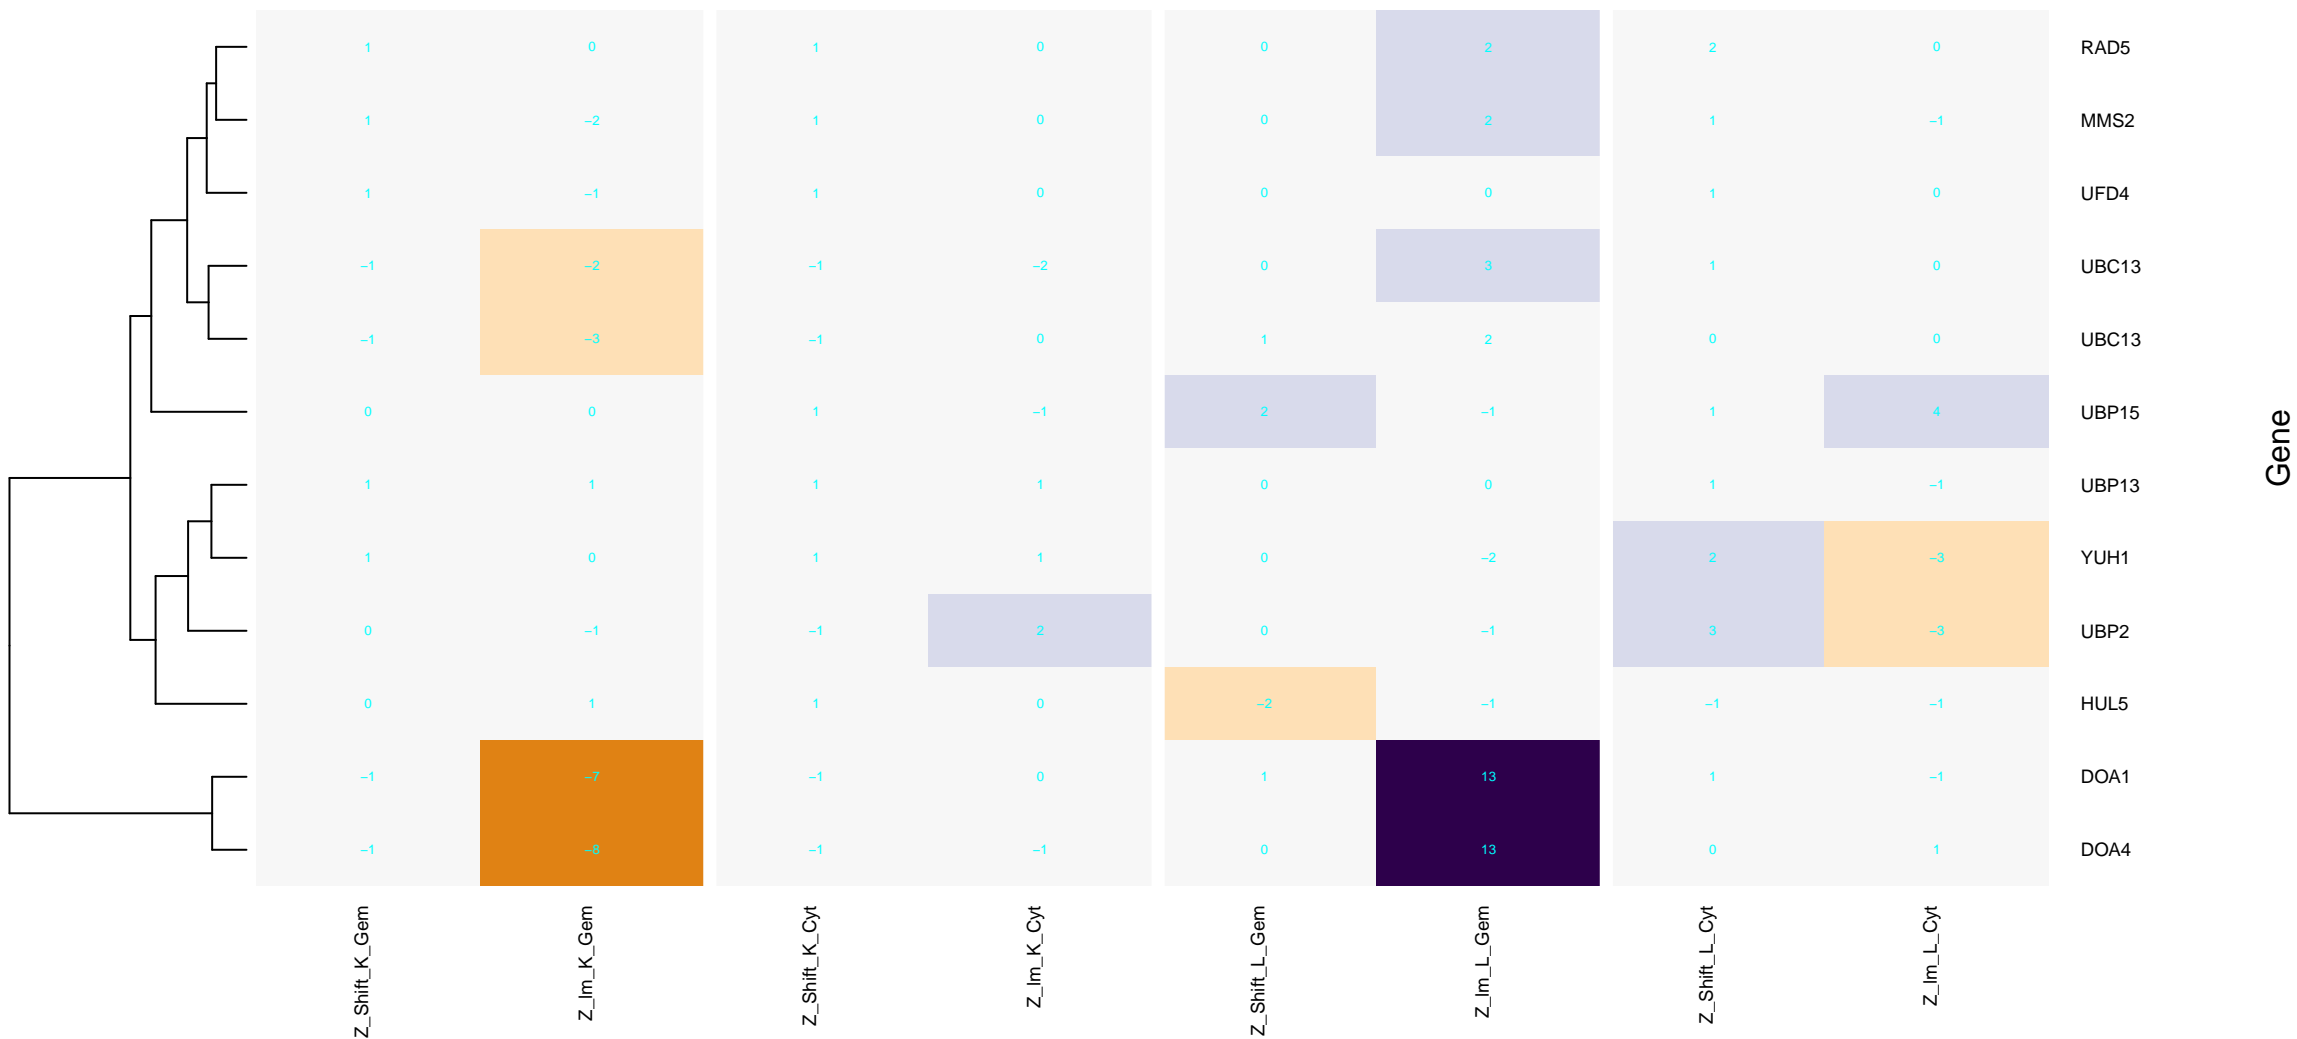

Supplement: s1 [file s1]

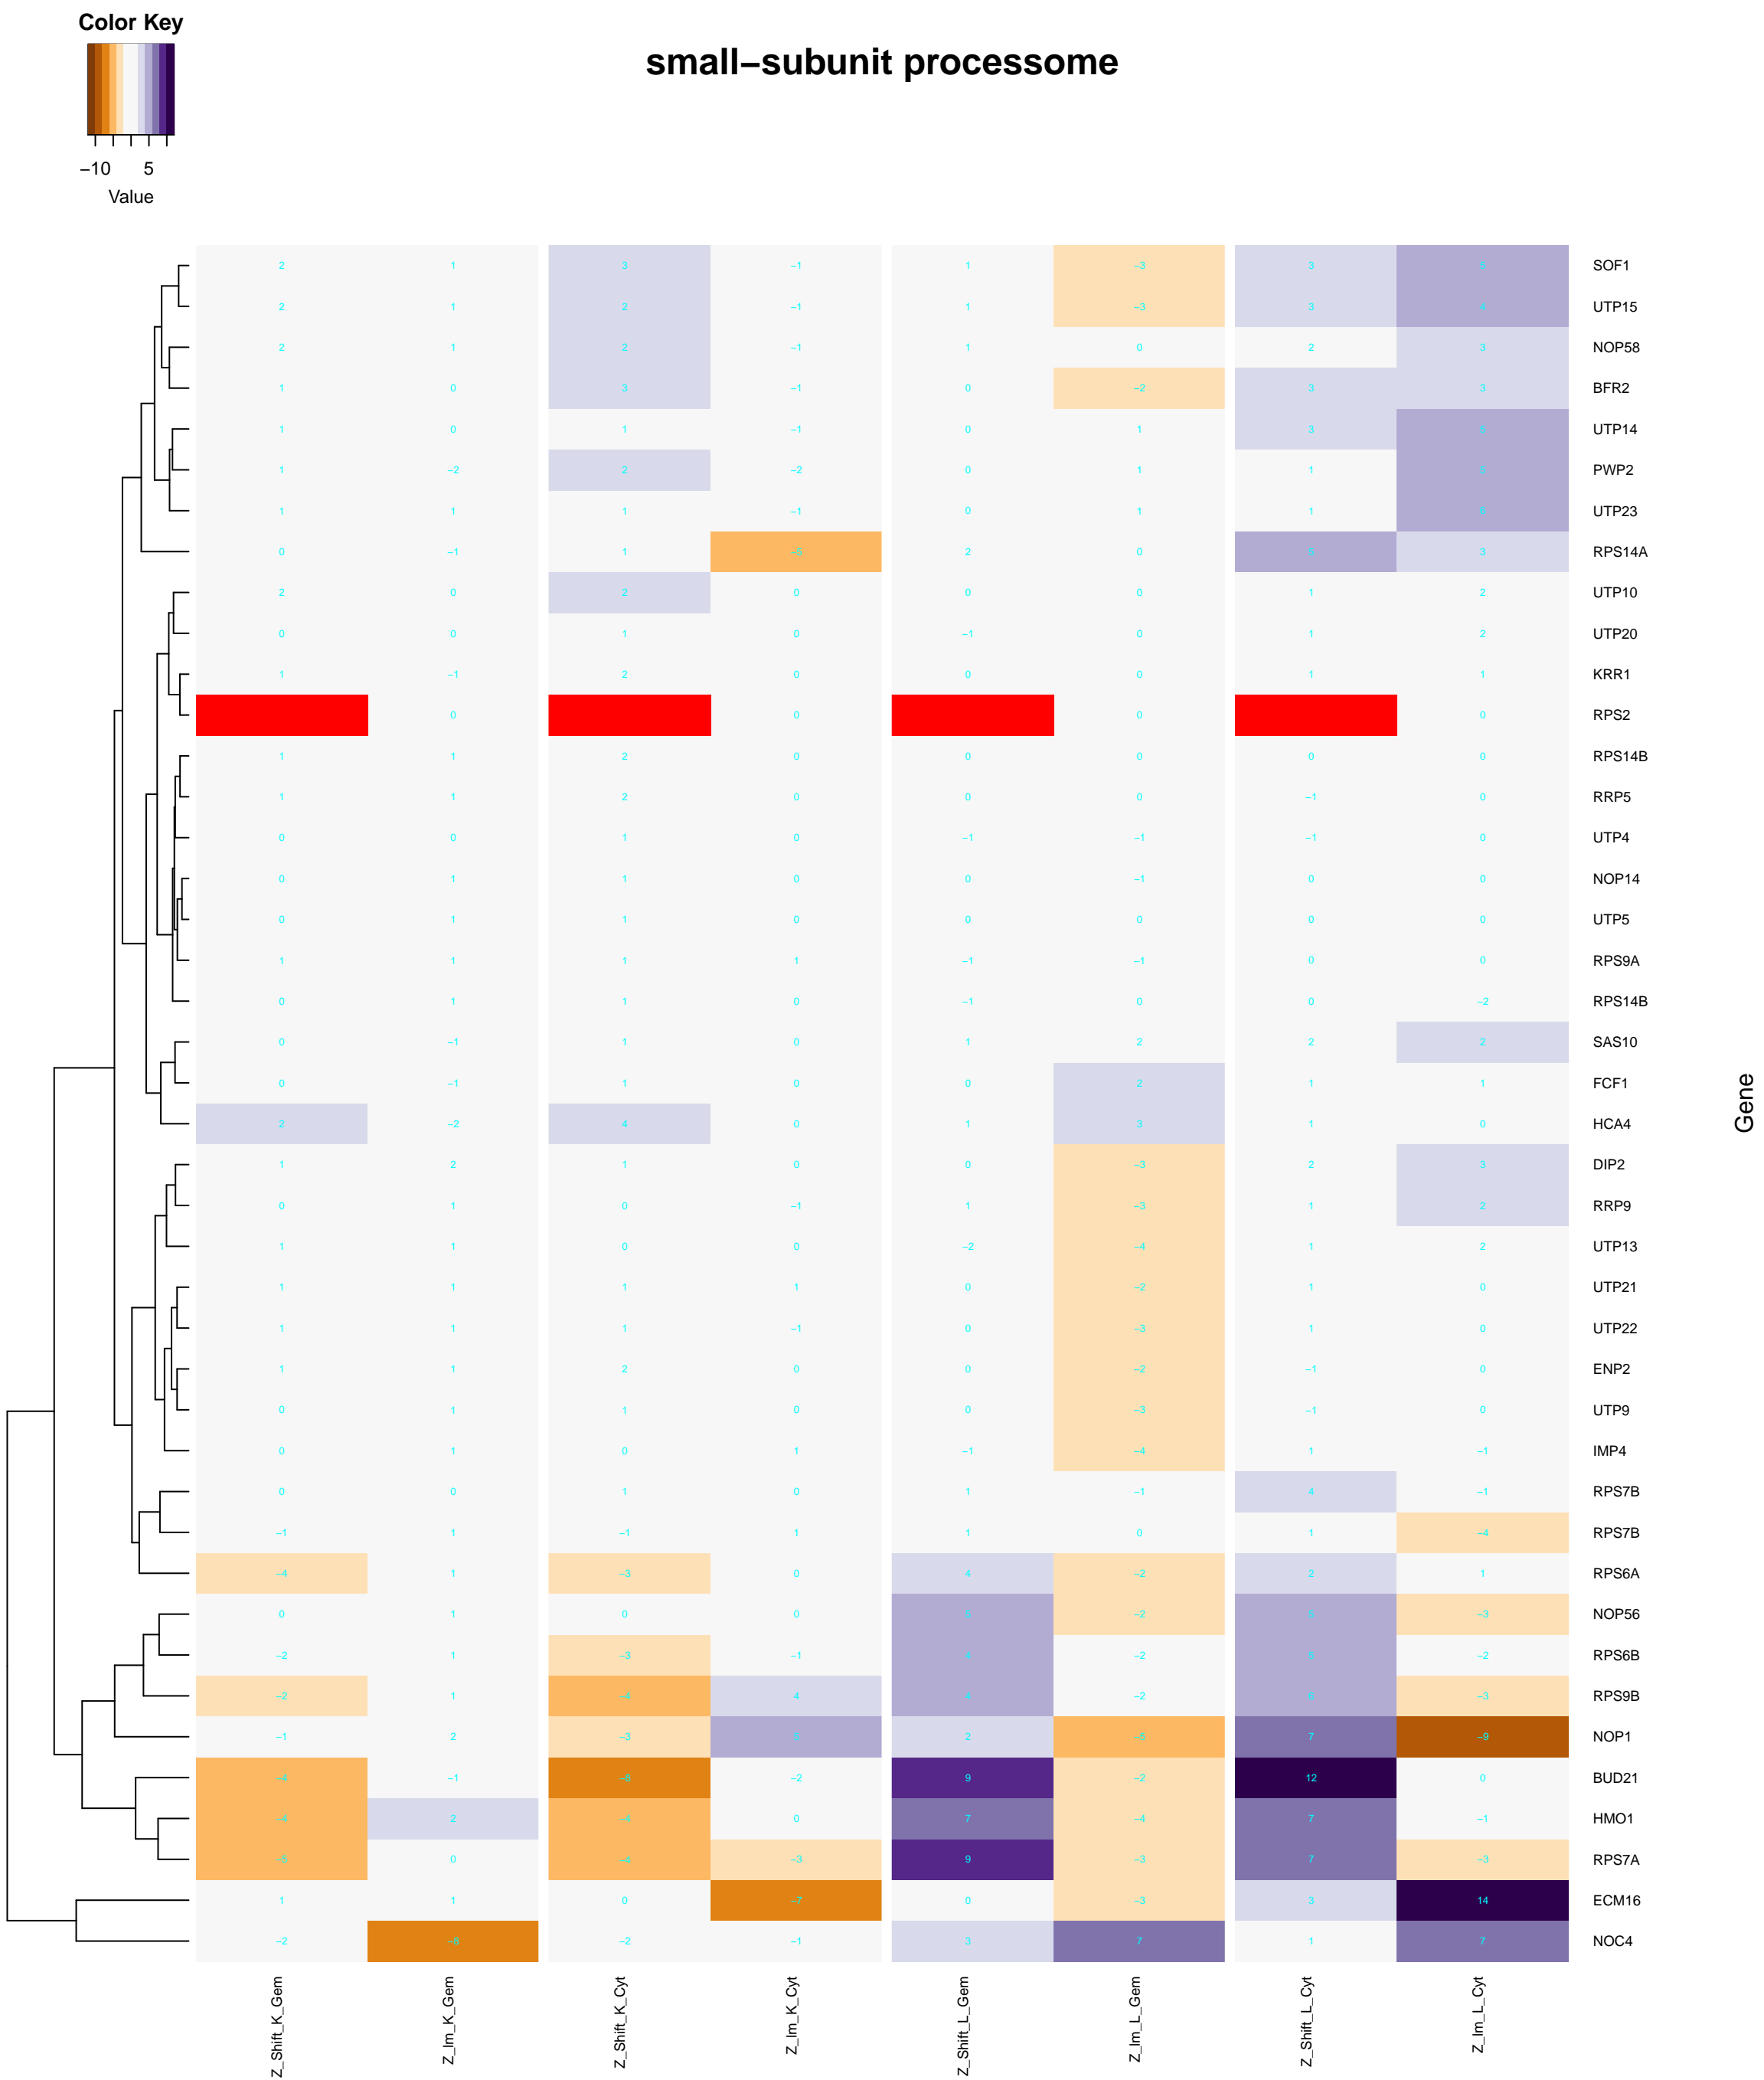

Supplement: s1 [file s1]

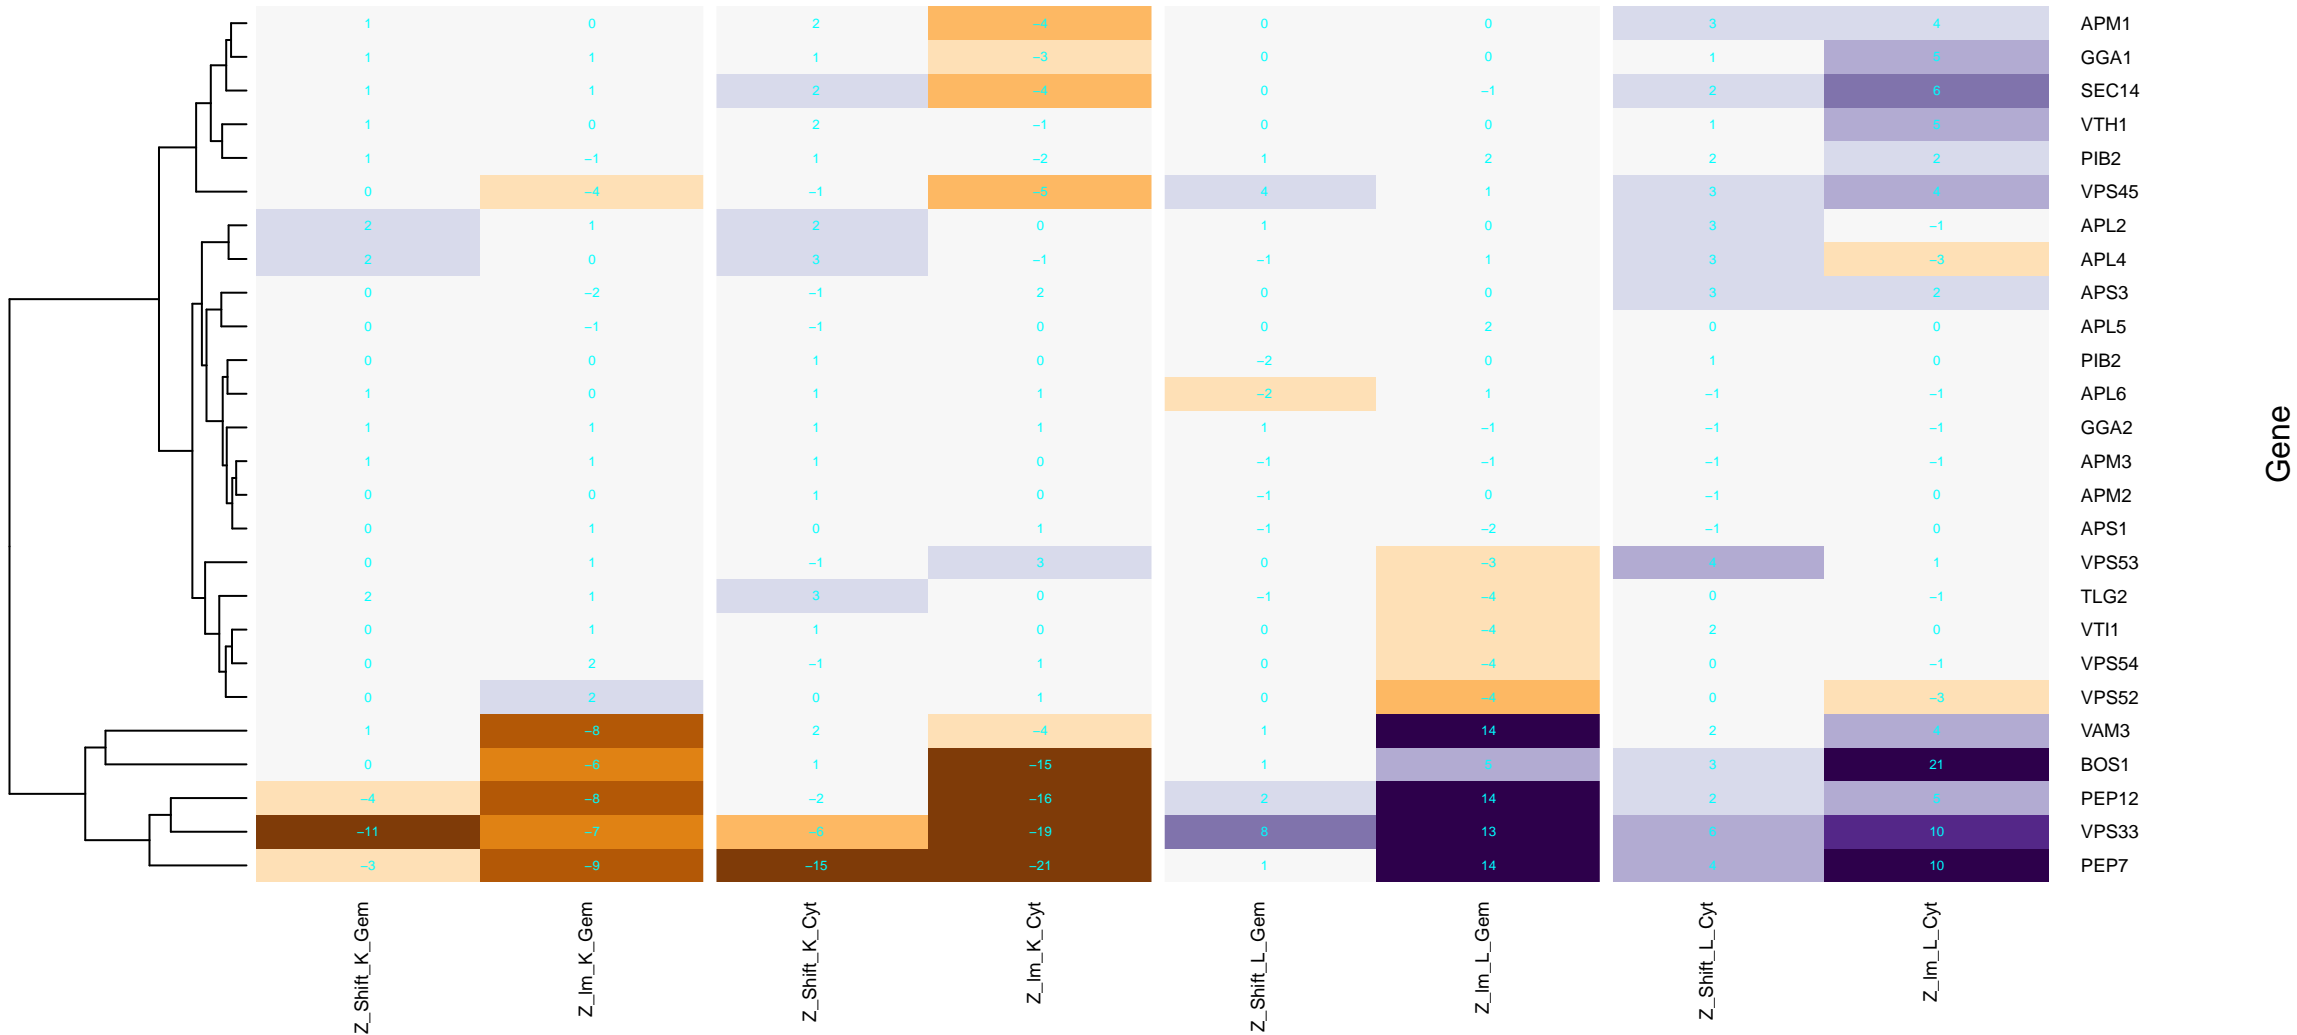

Supplement: s1 [file s1]

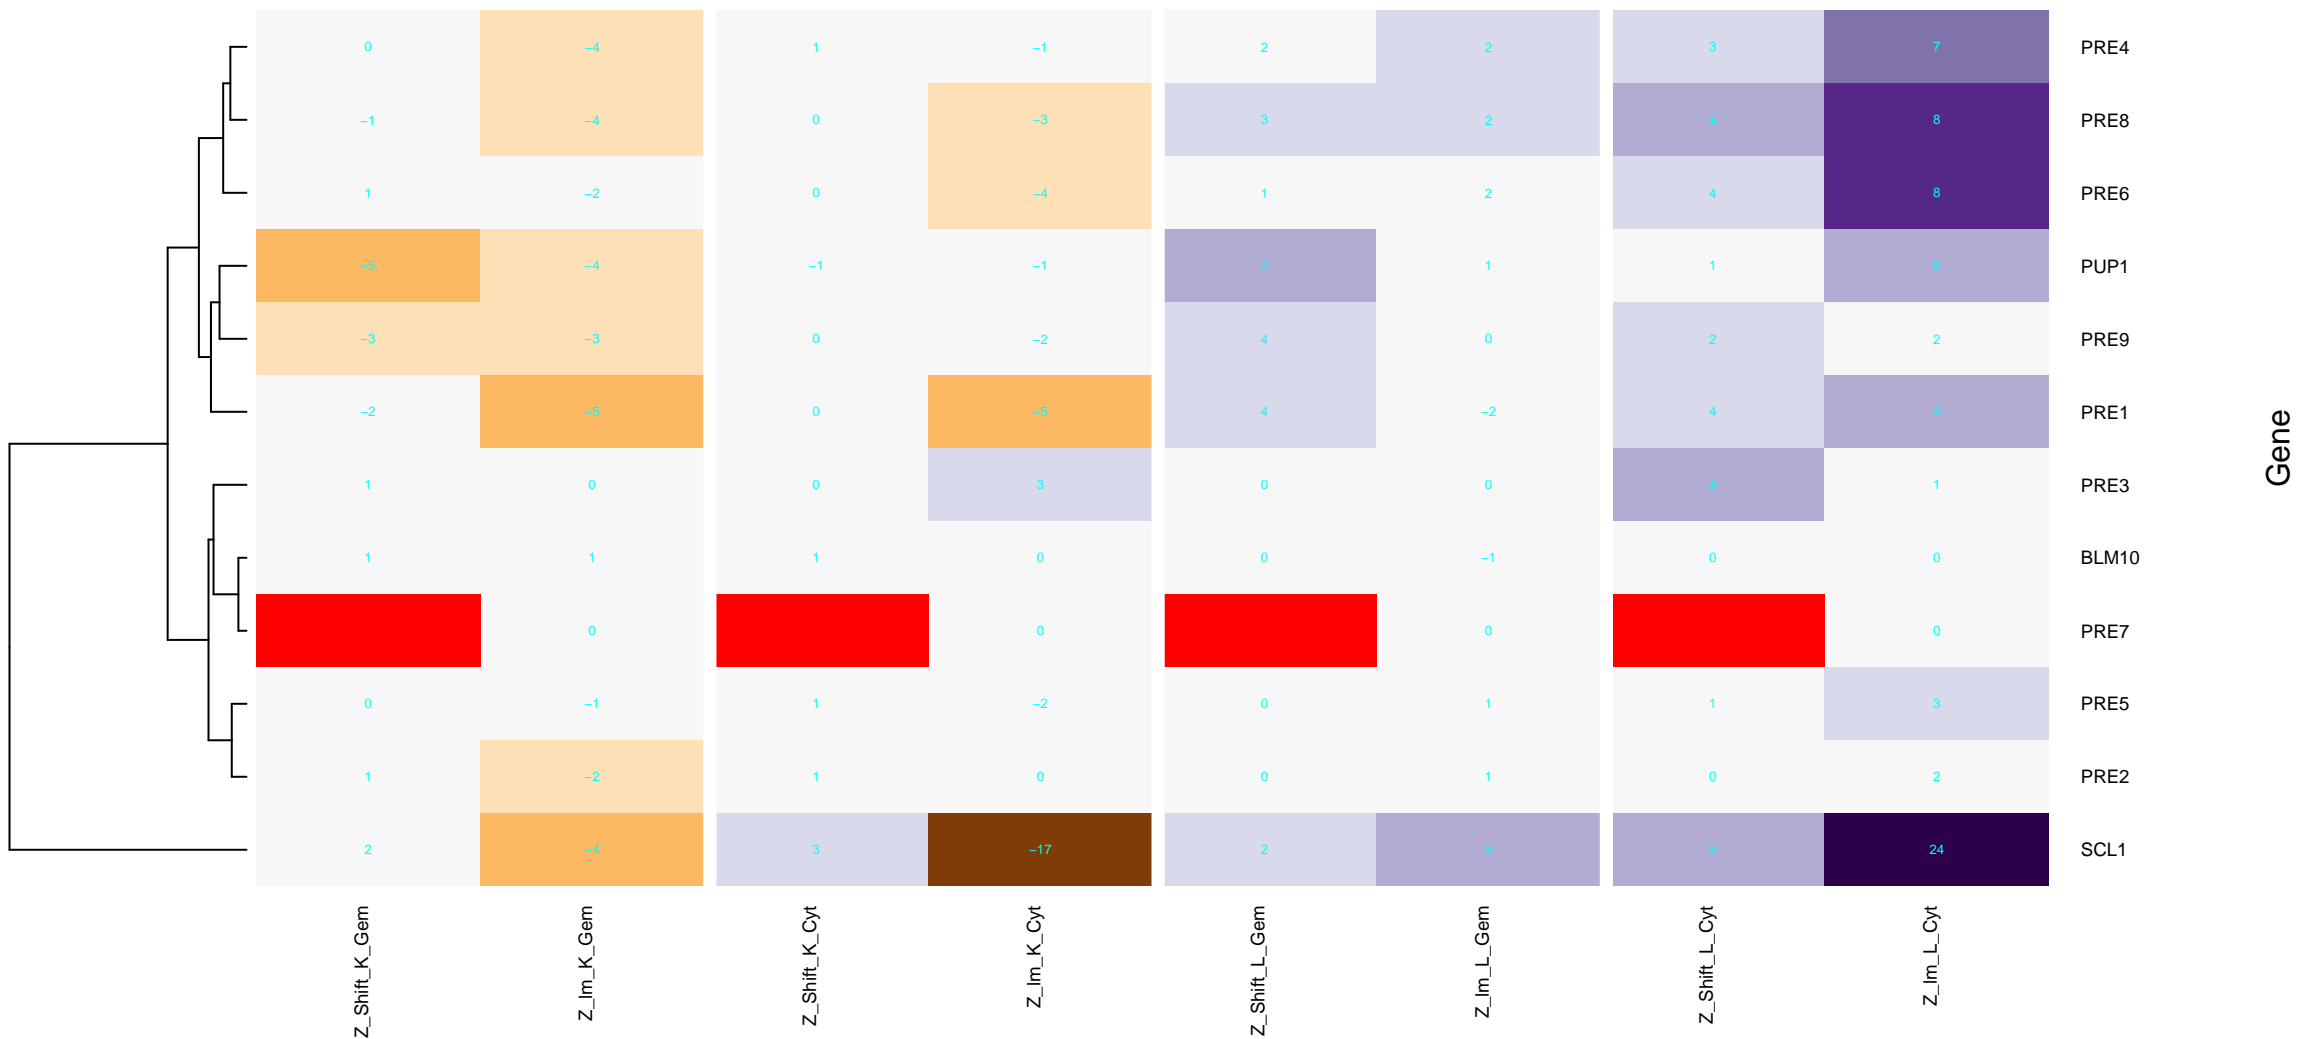

Supplement: s1 [file s1]

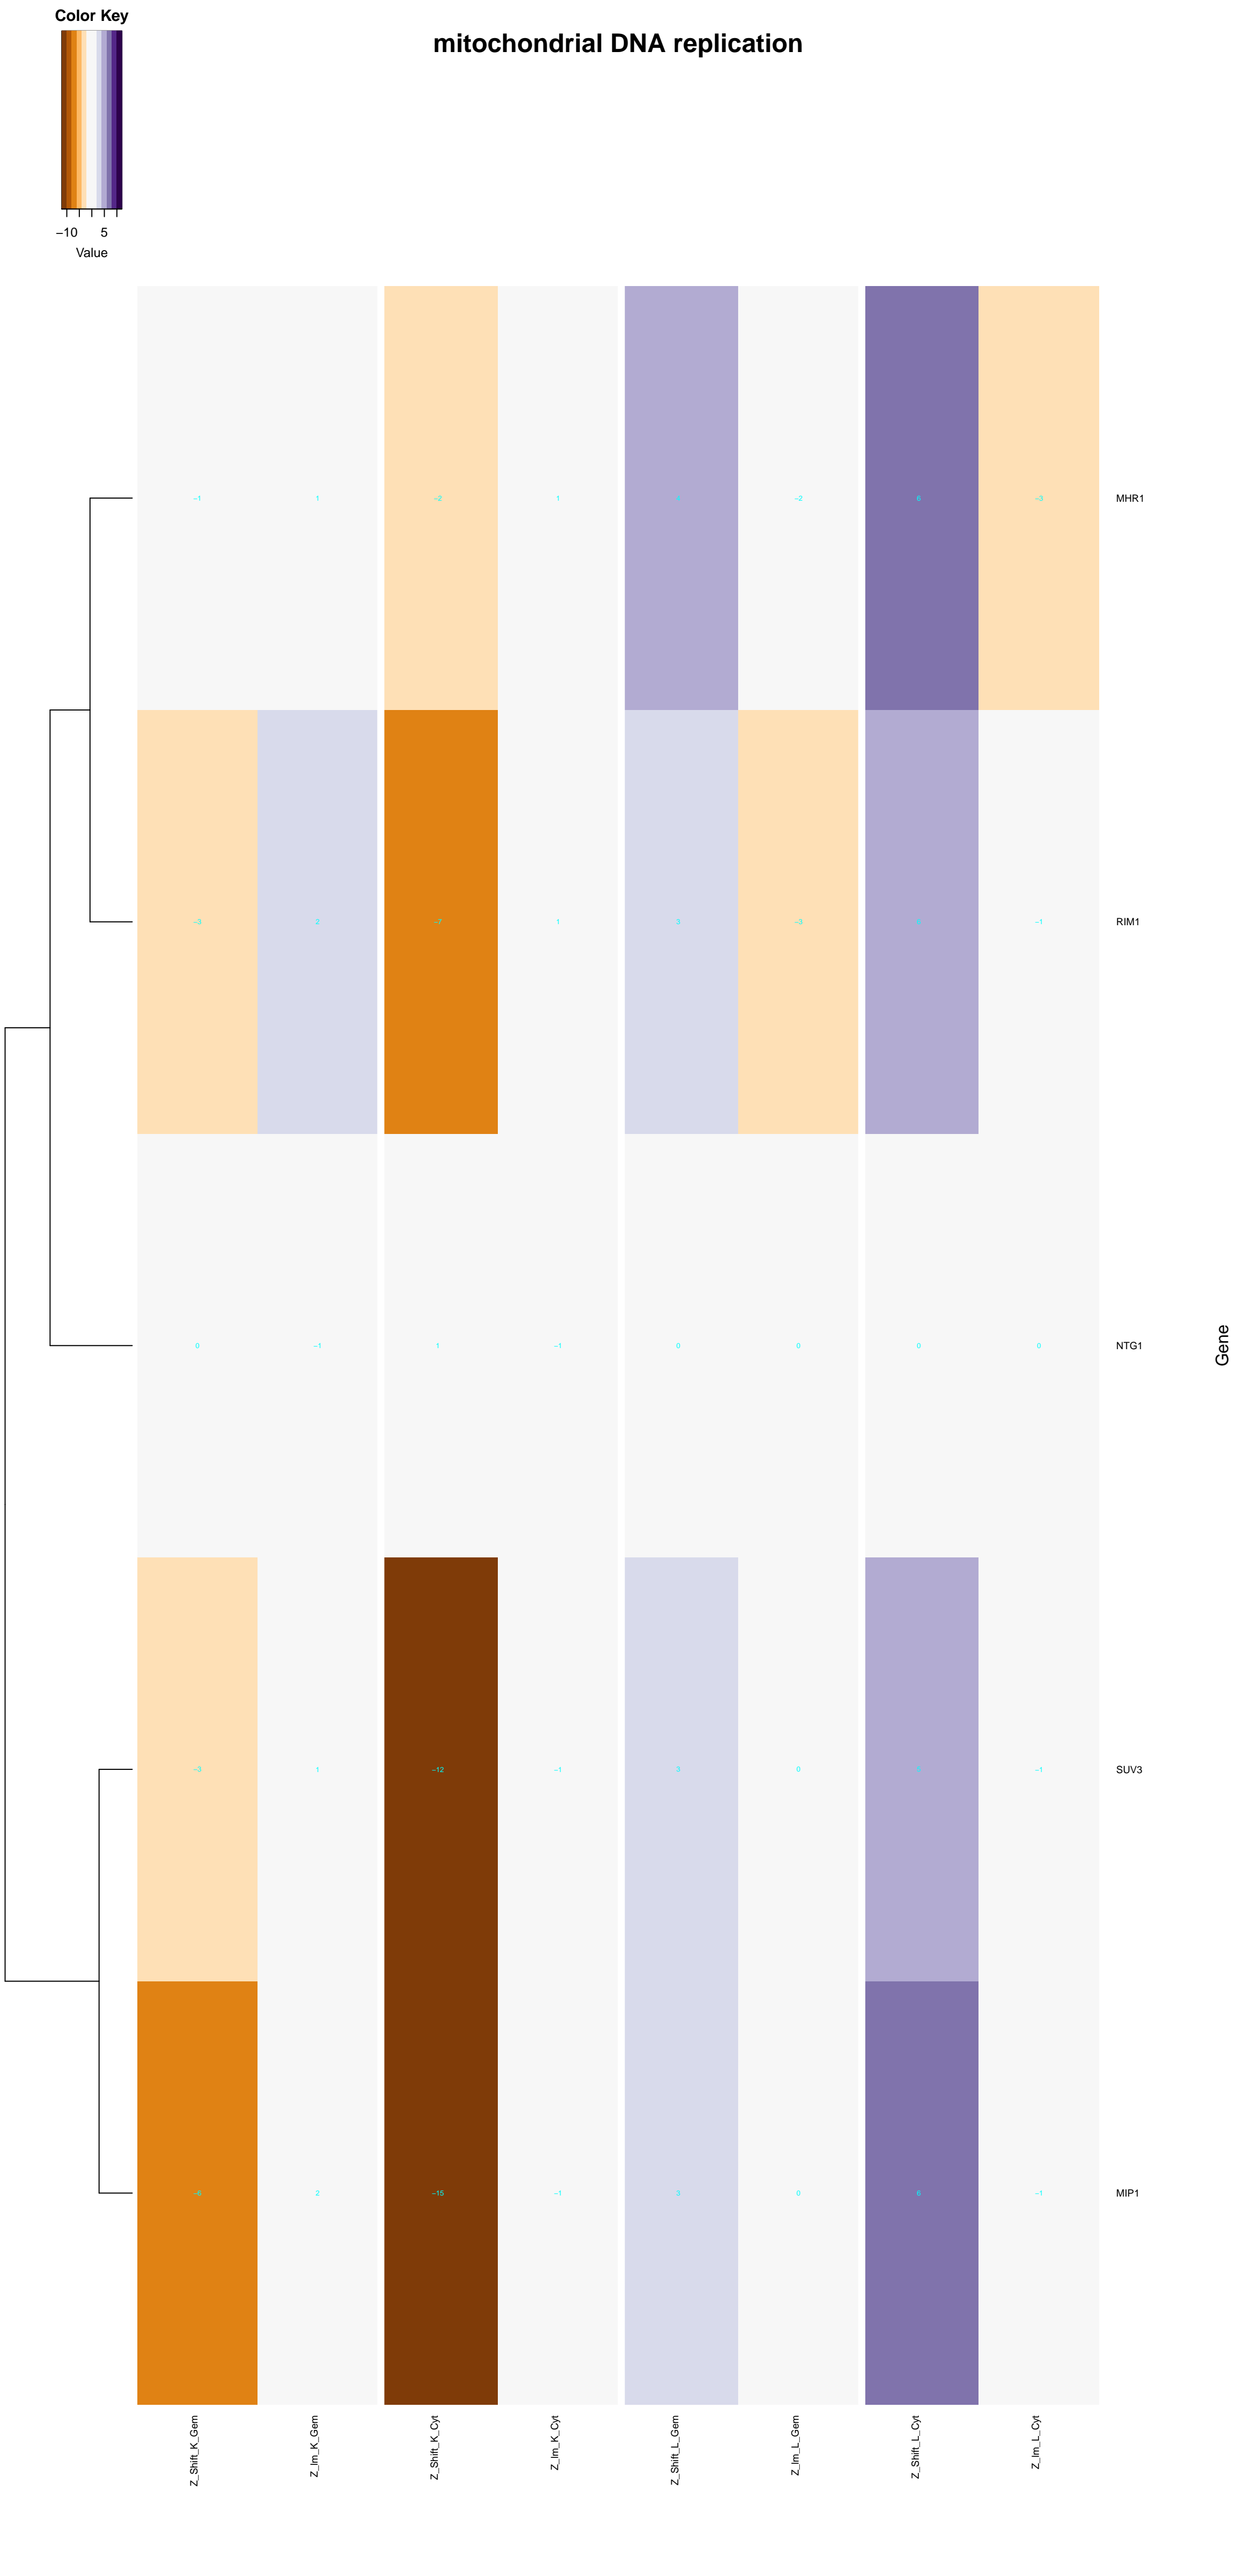

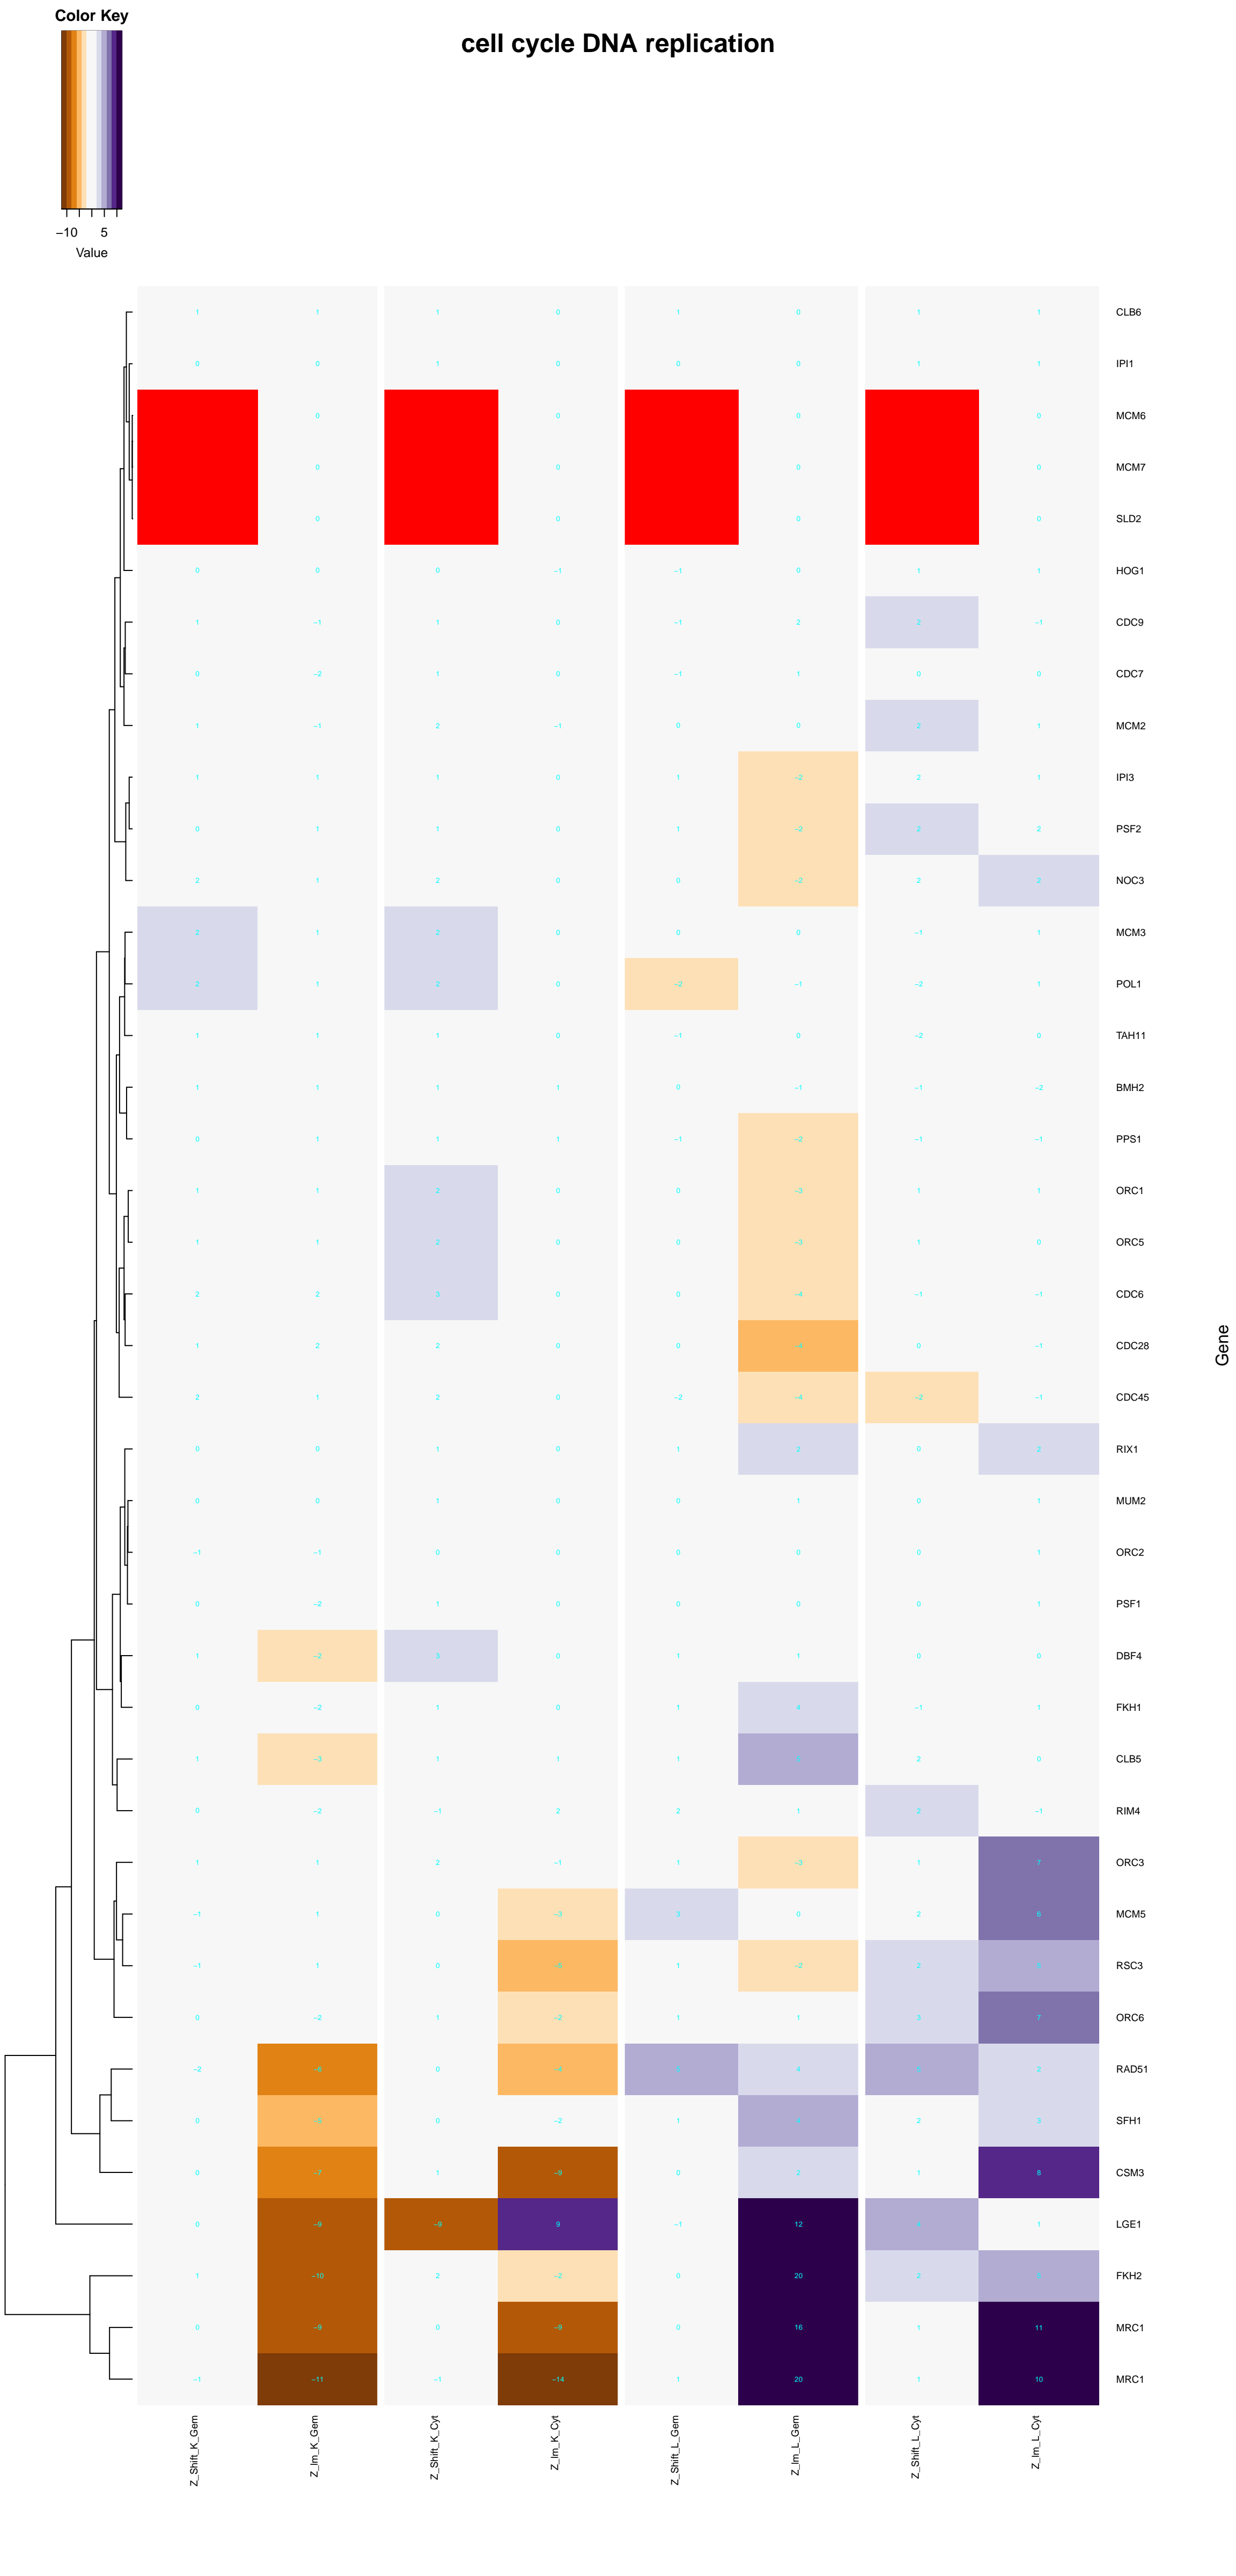

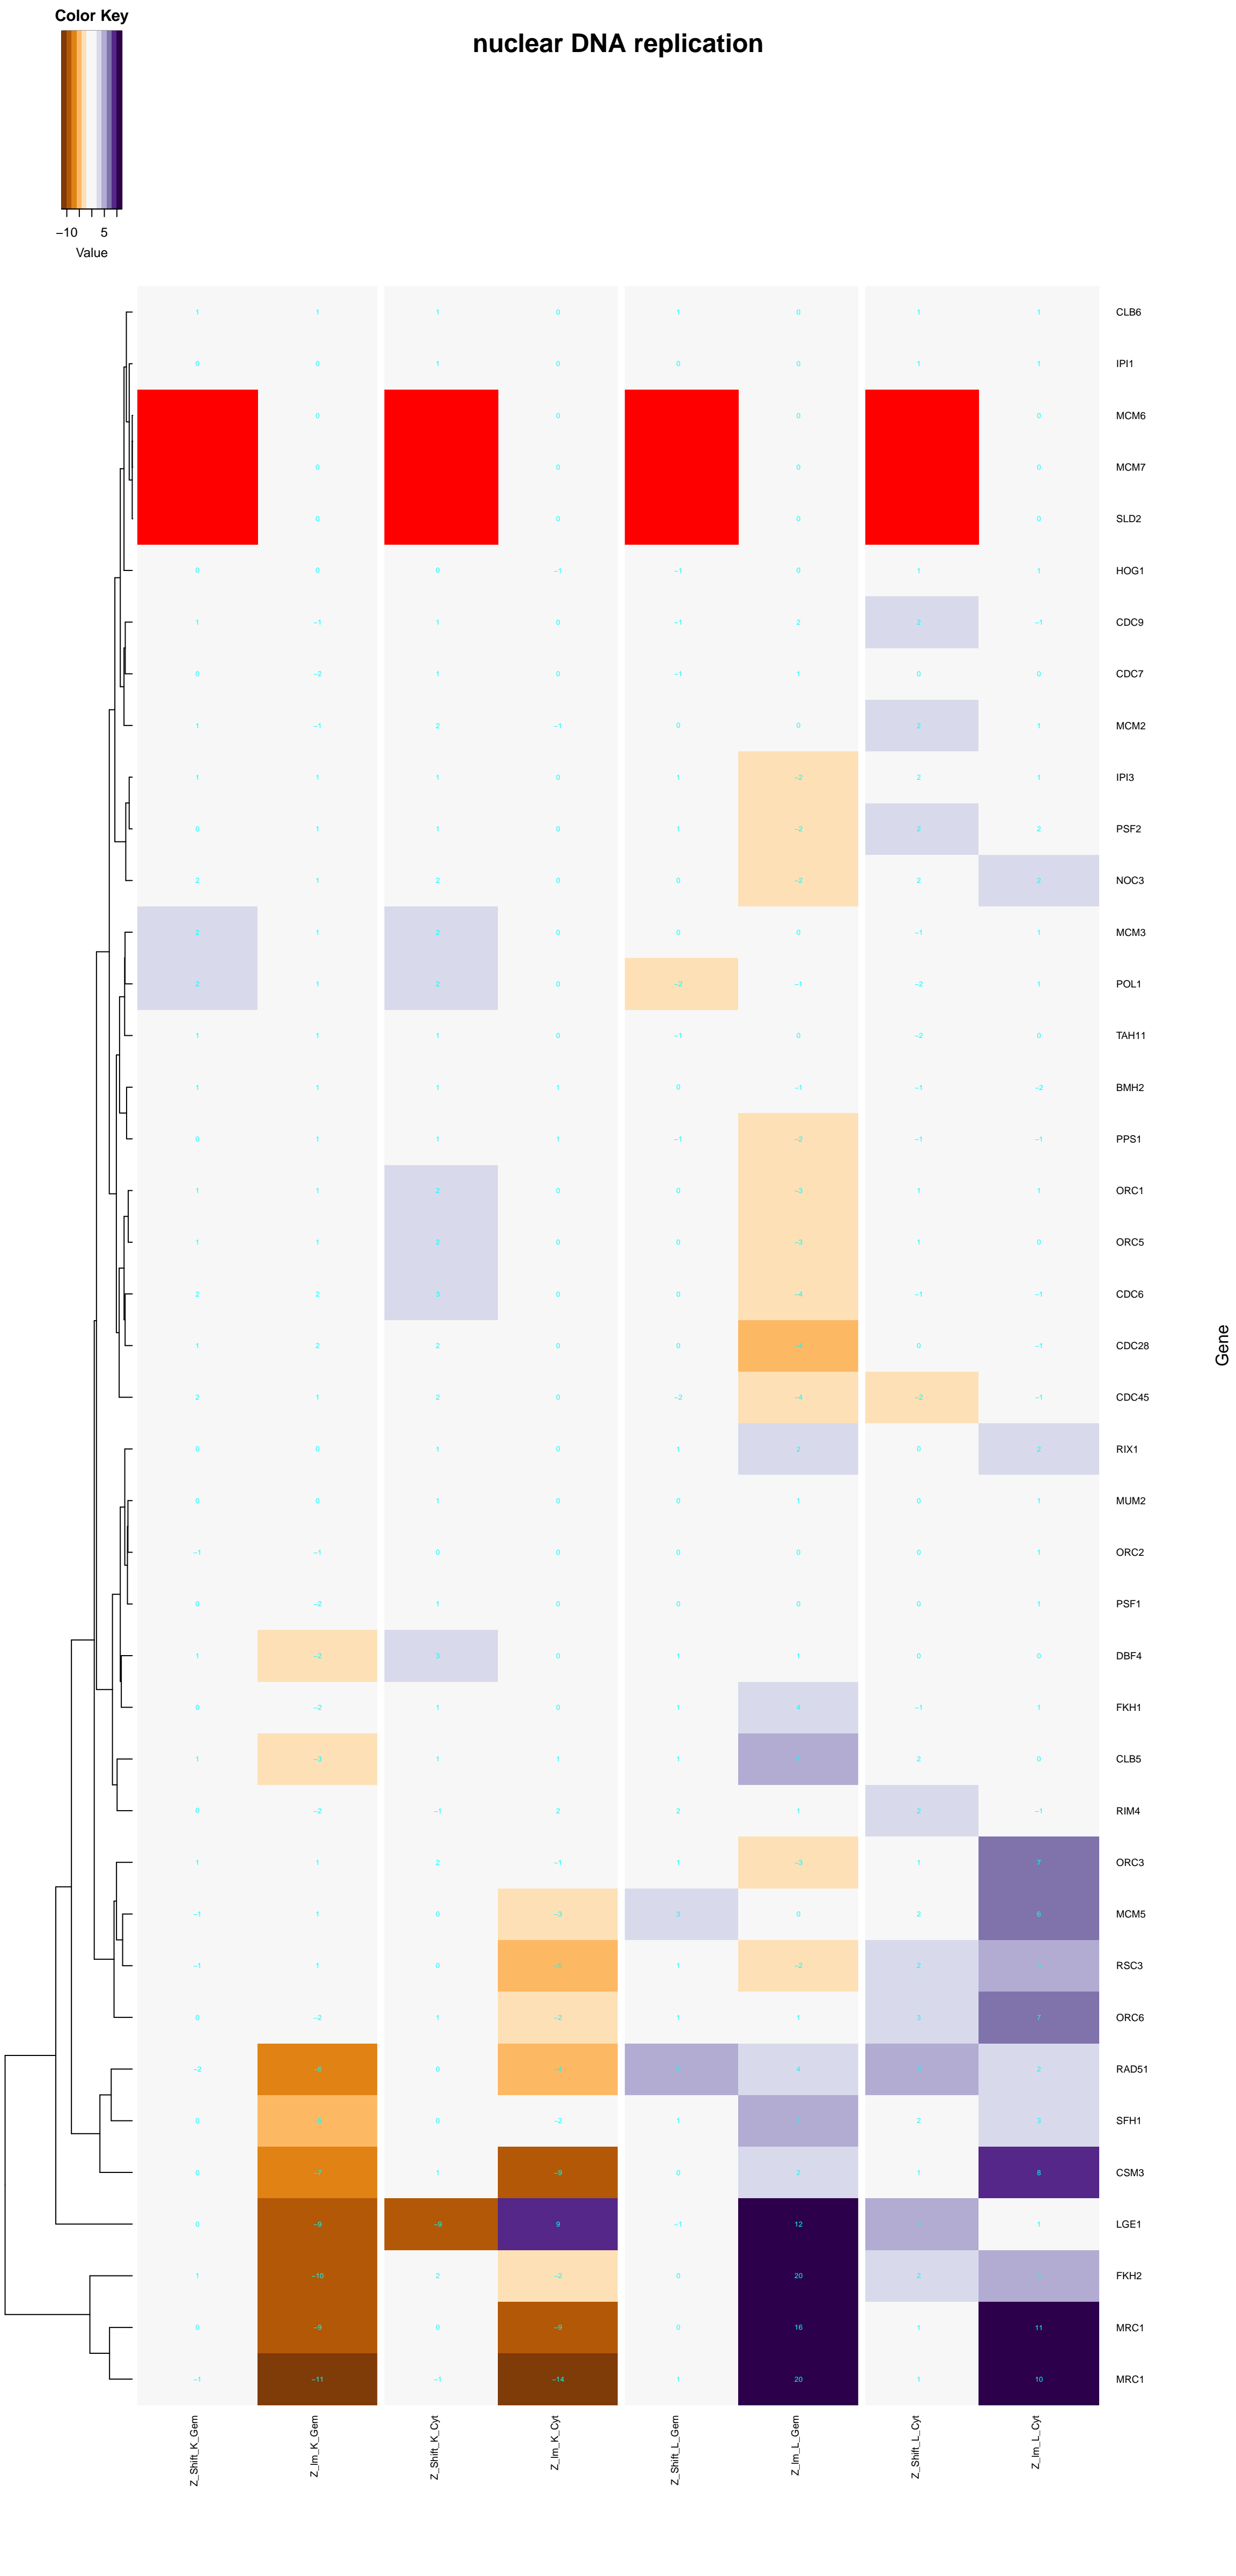

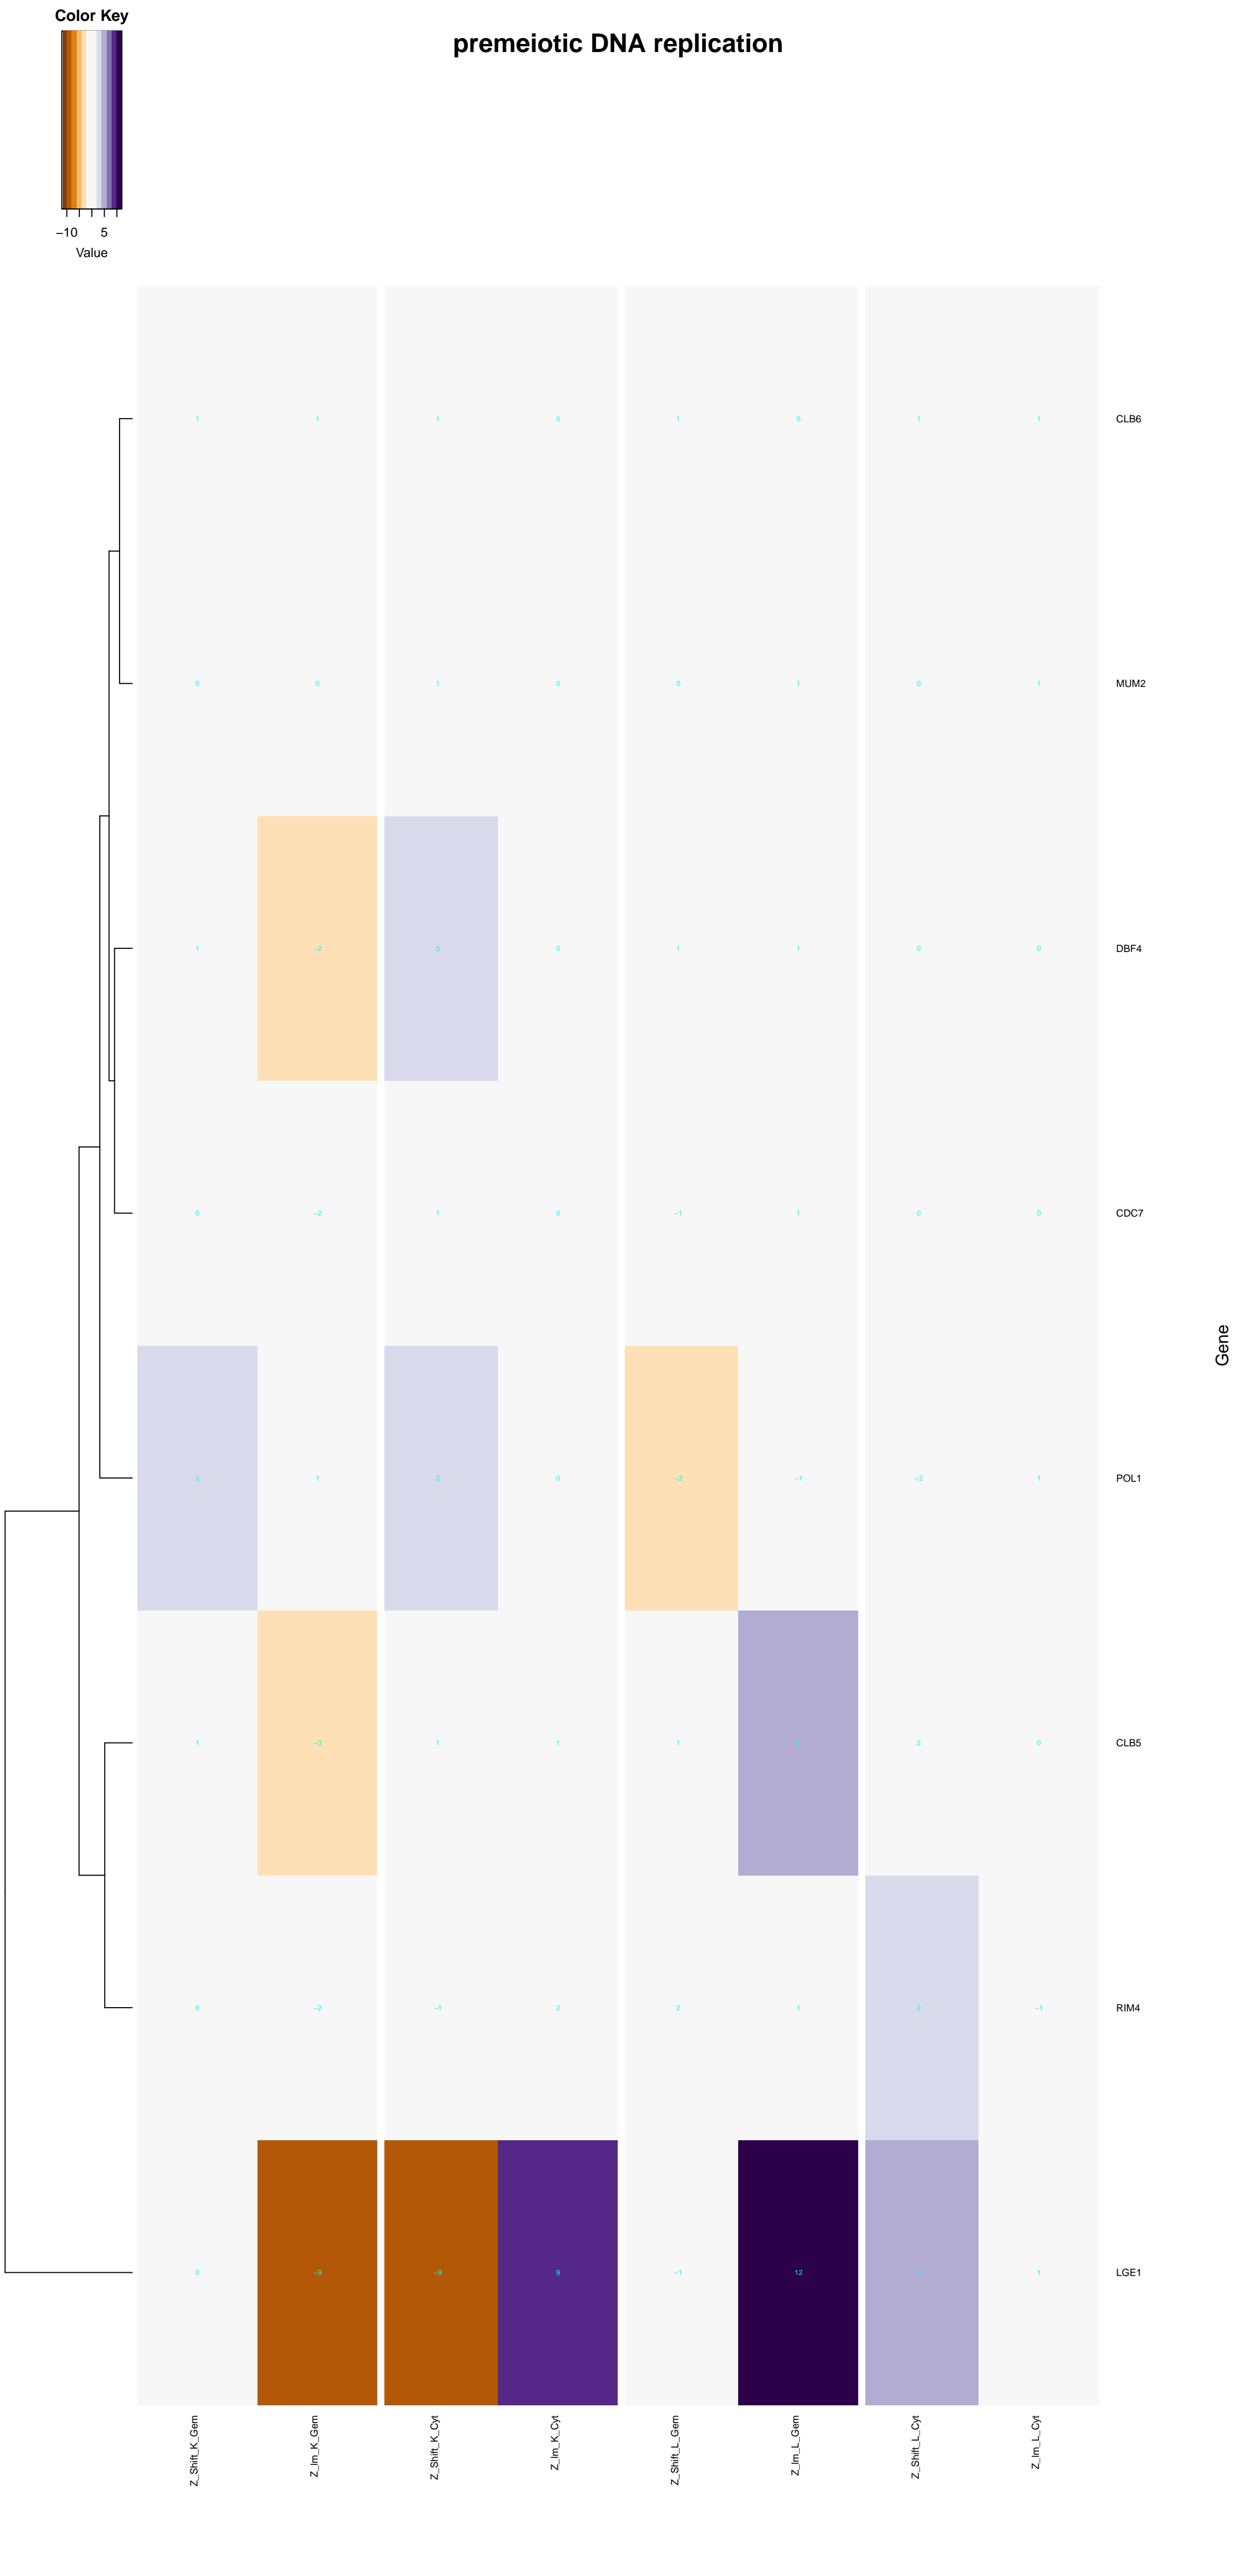

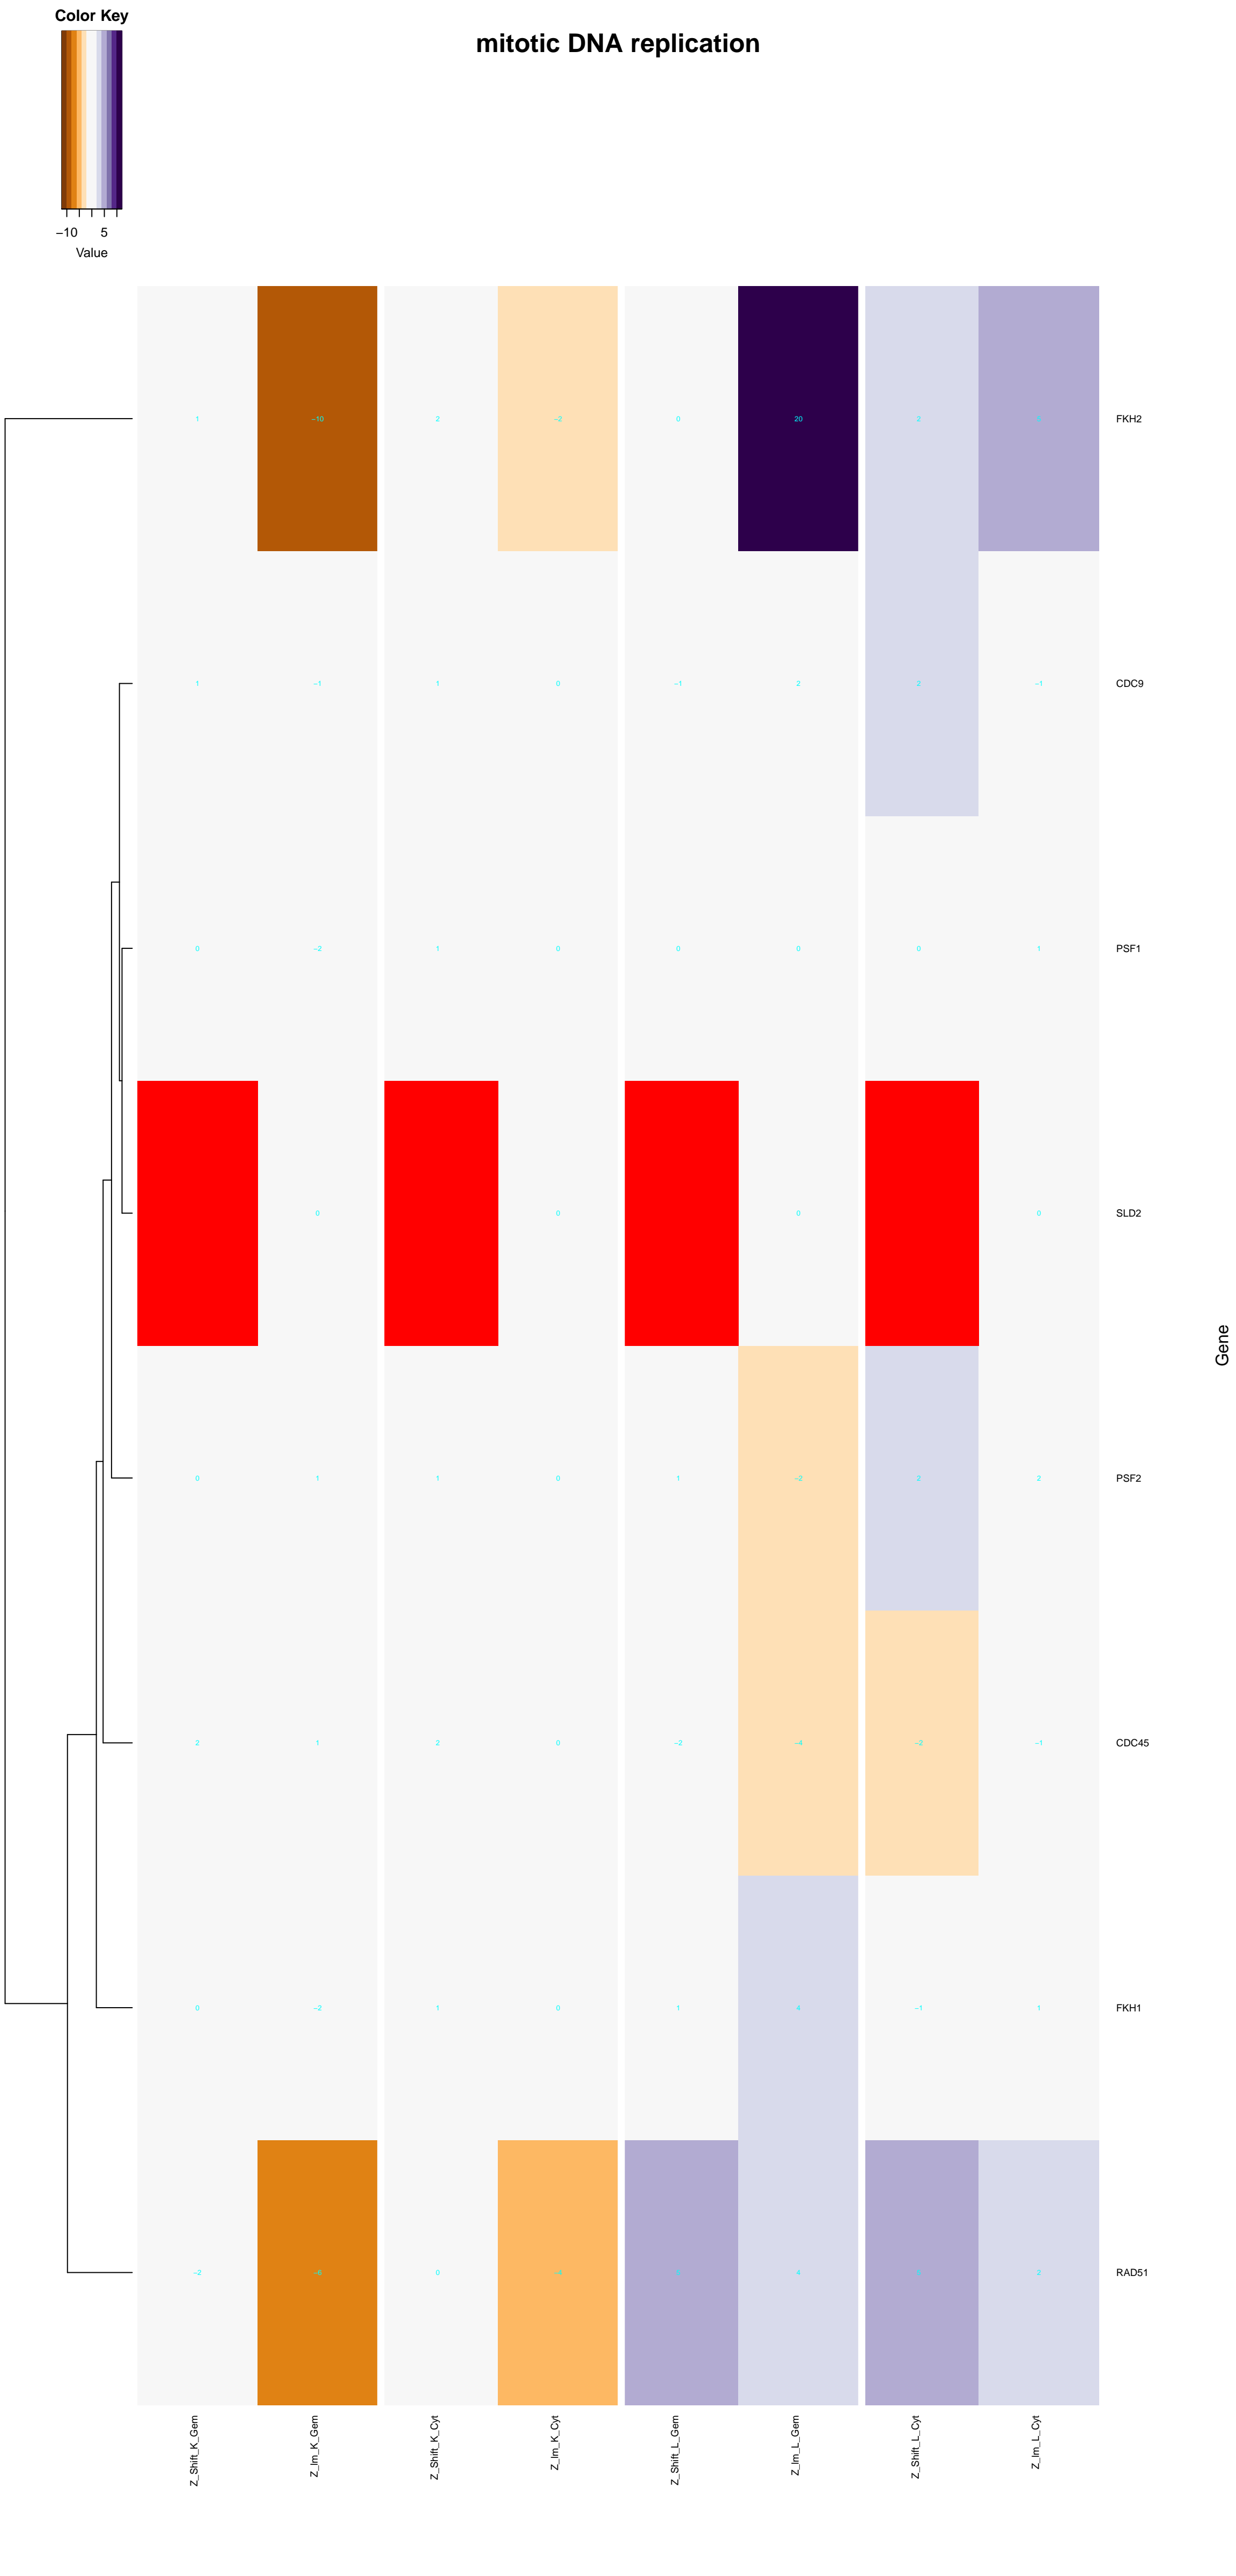

Supplement: s1 [file s1]

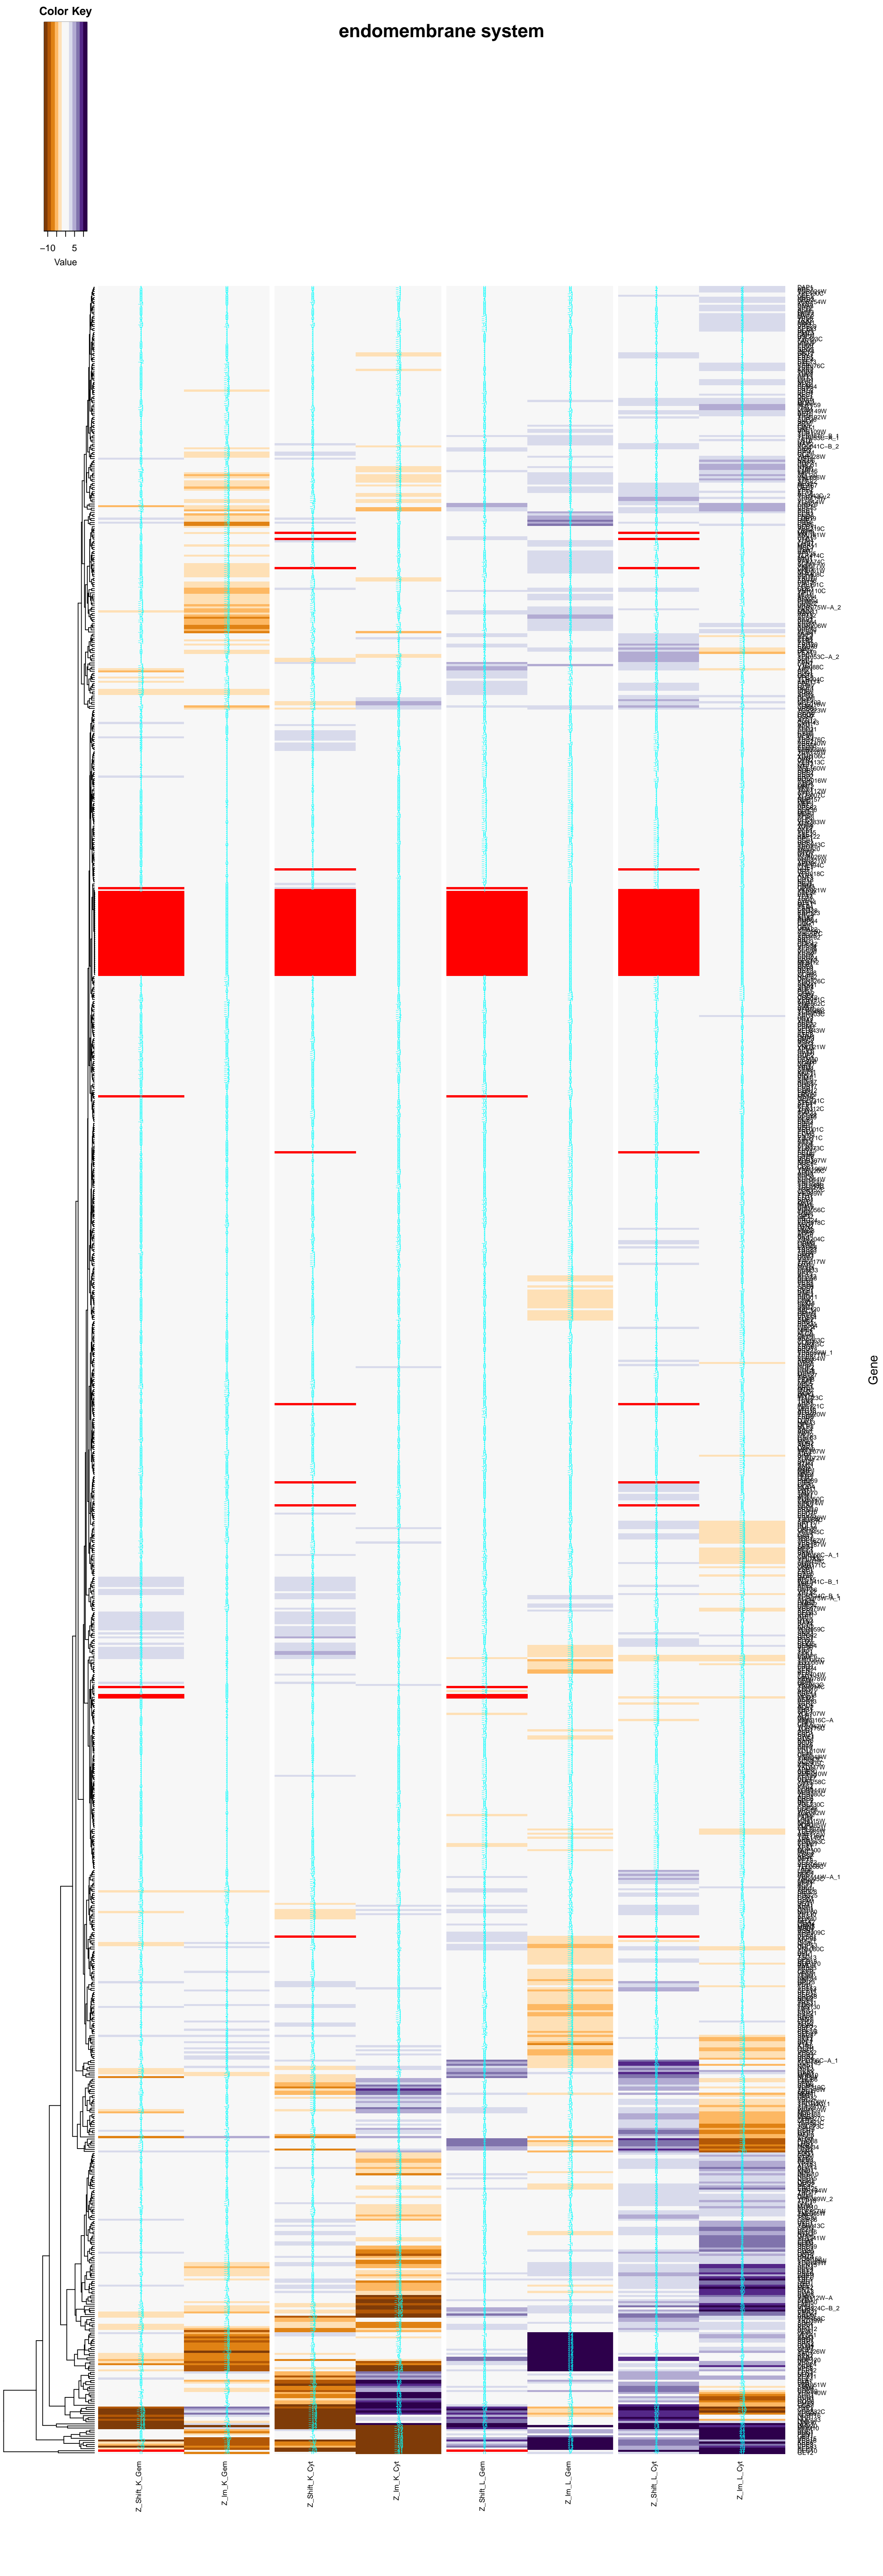

Supplement: s1 [file s1]

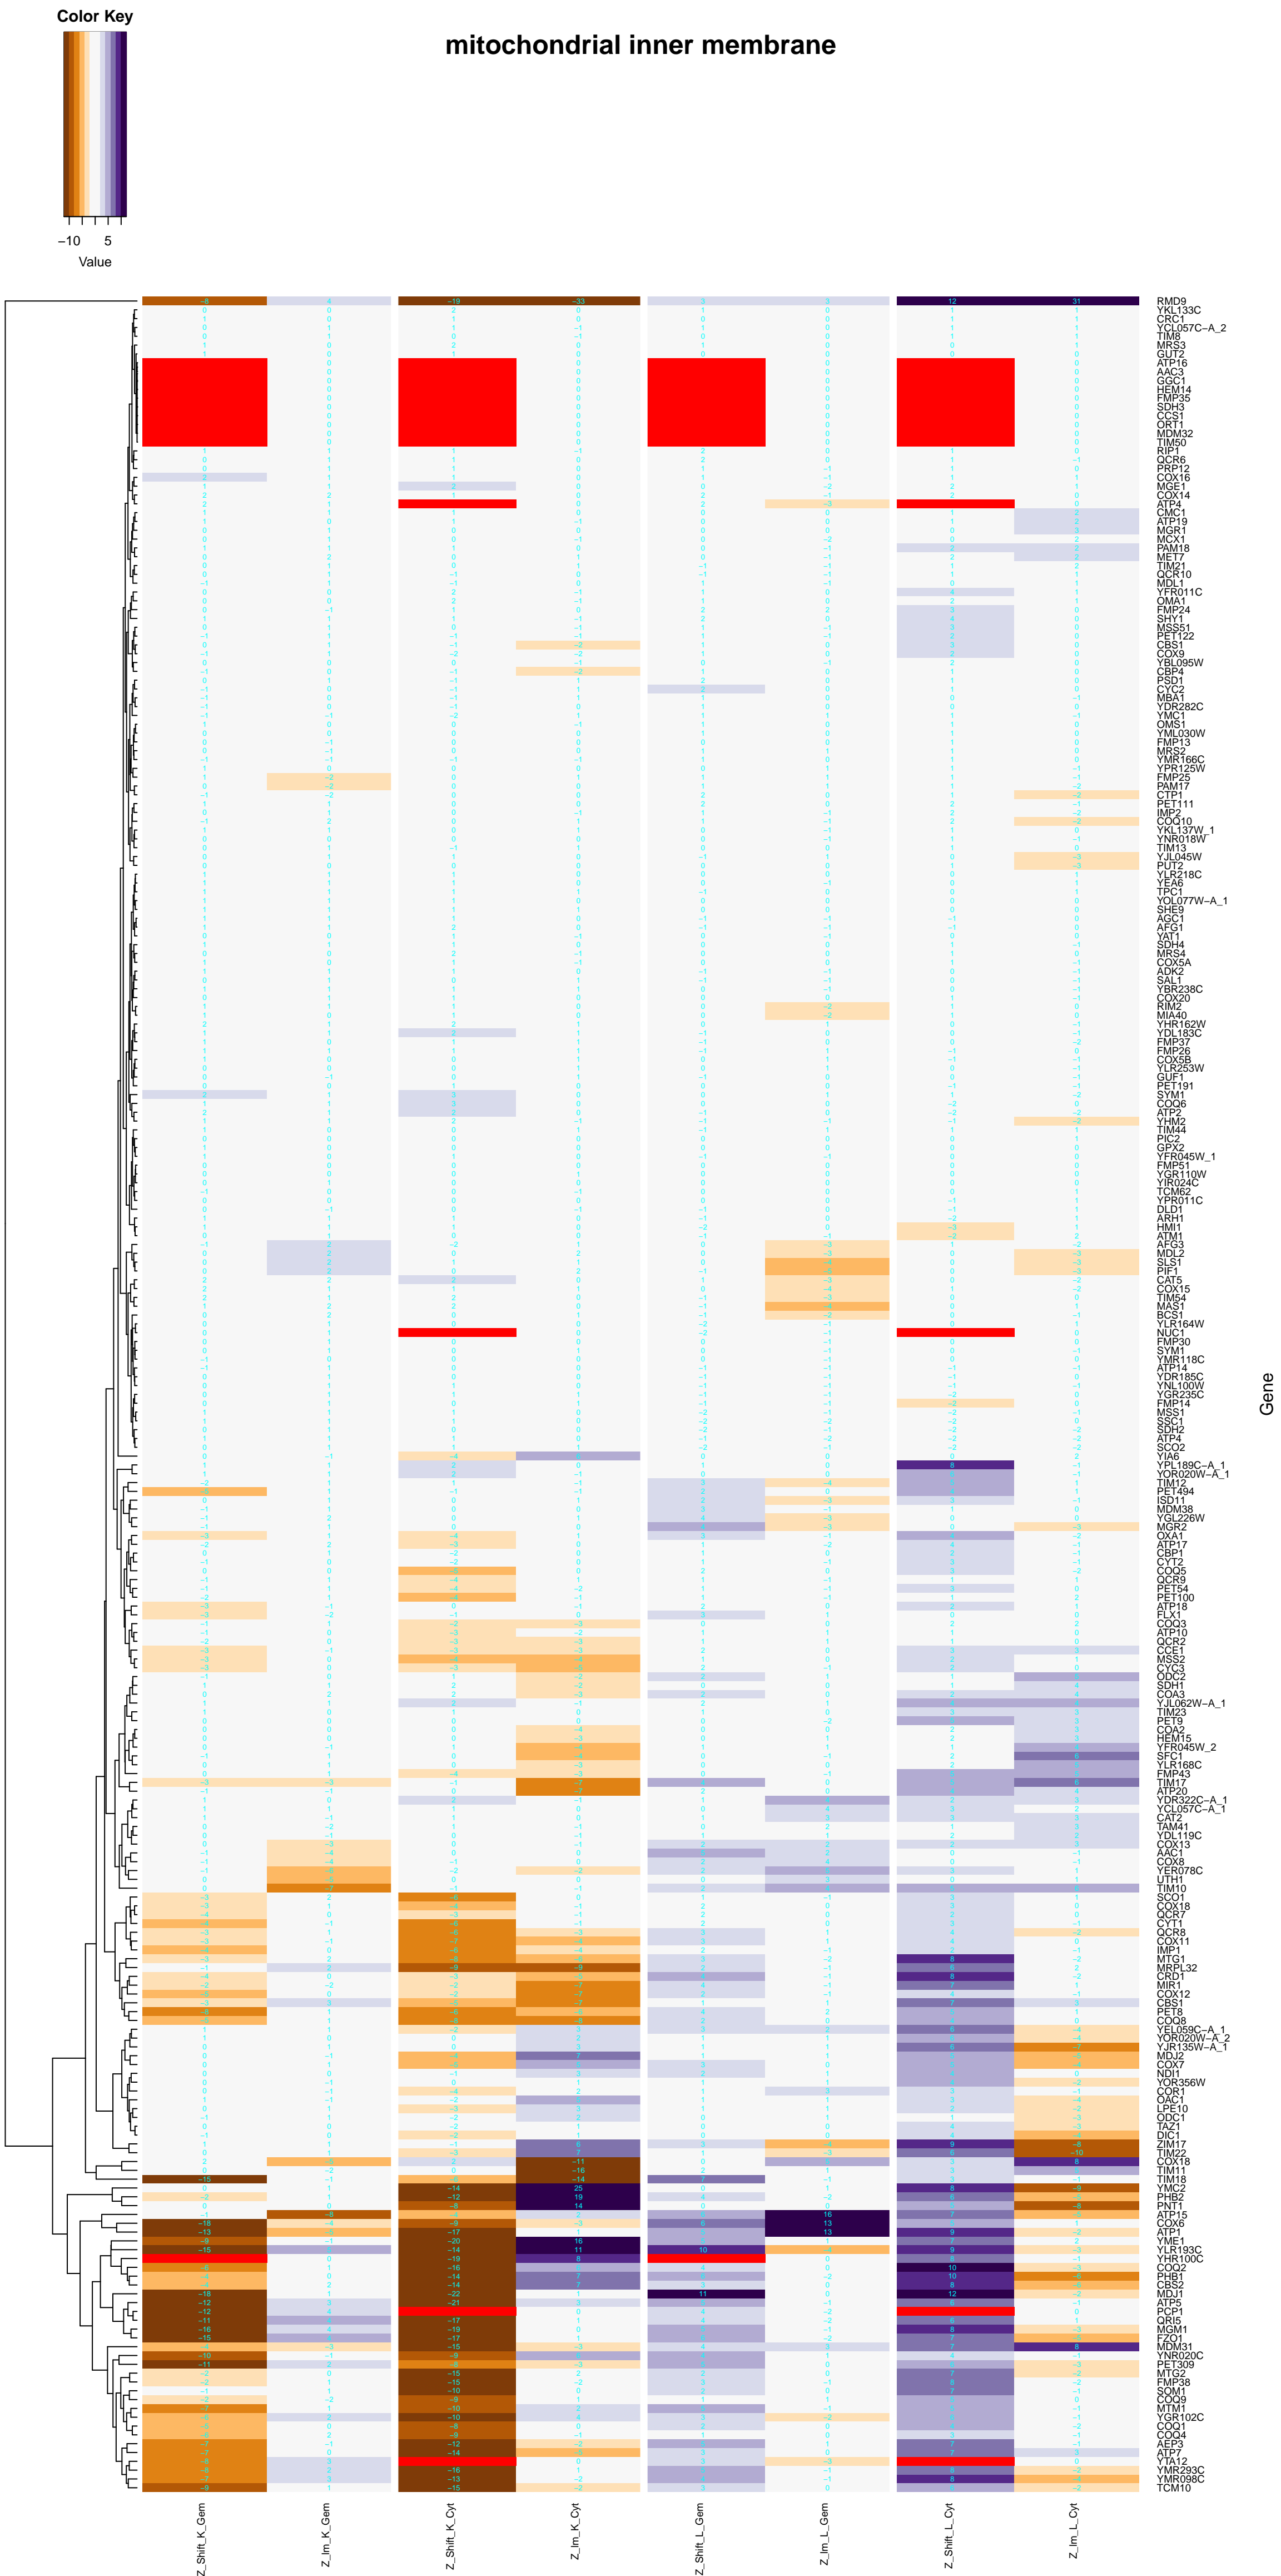

Supplement: s1 [file s1]

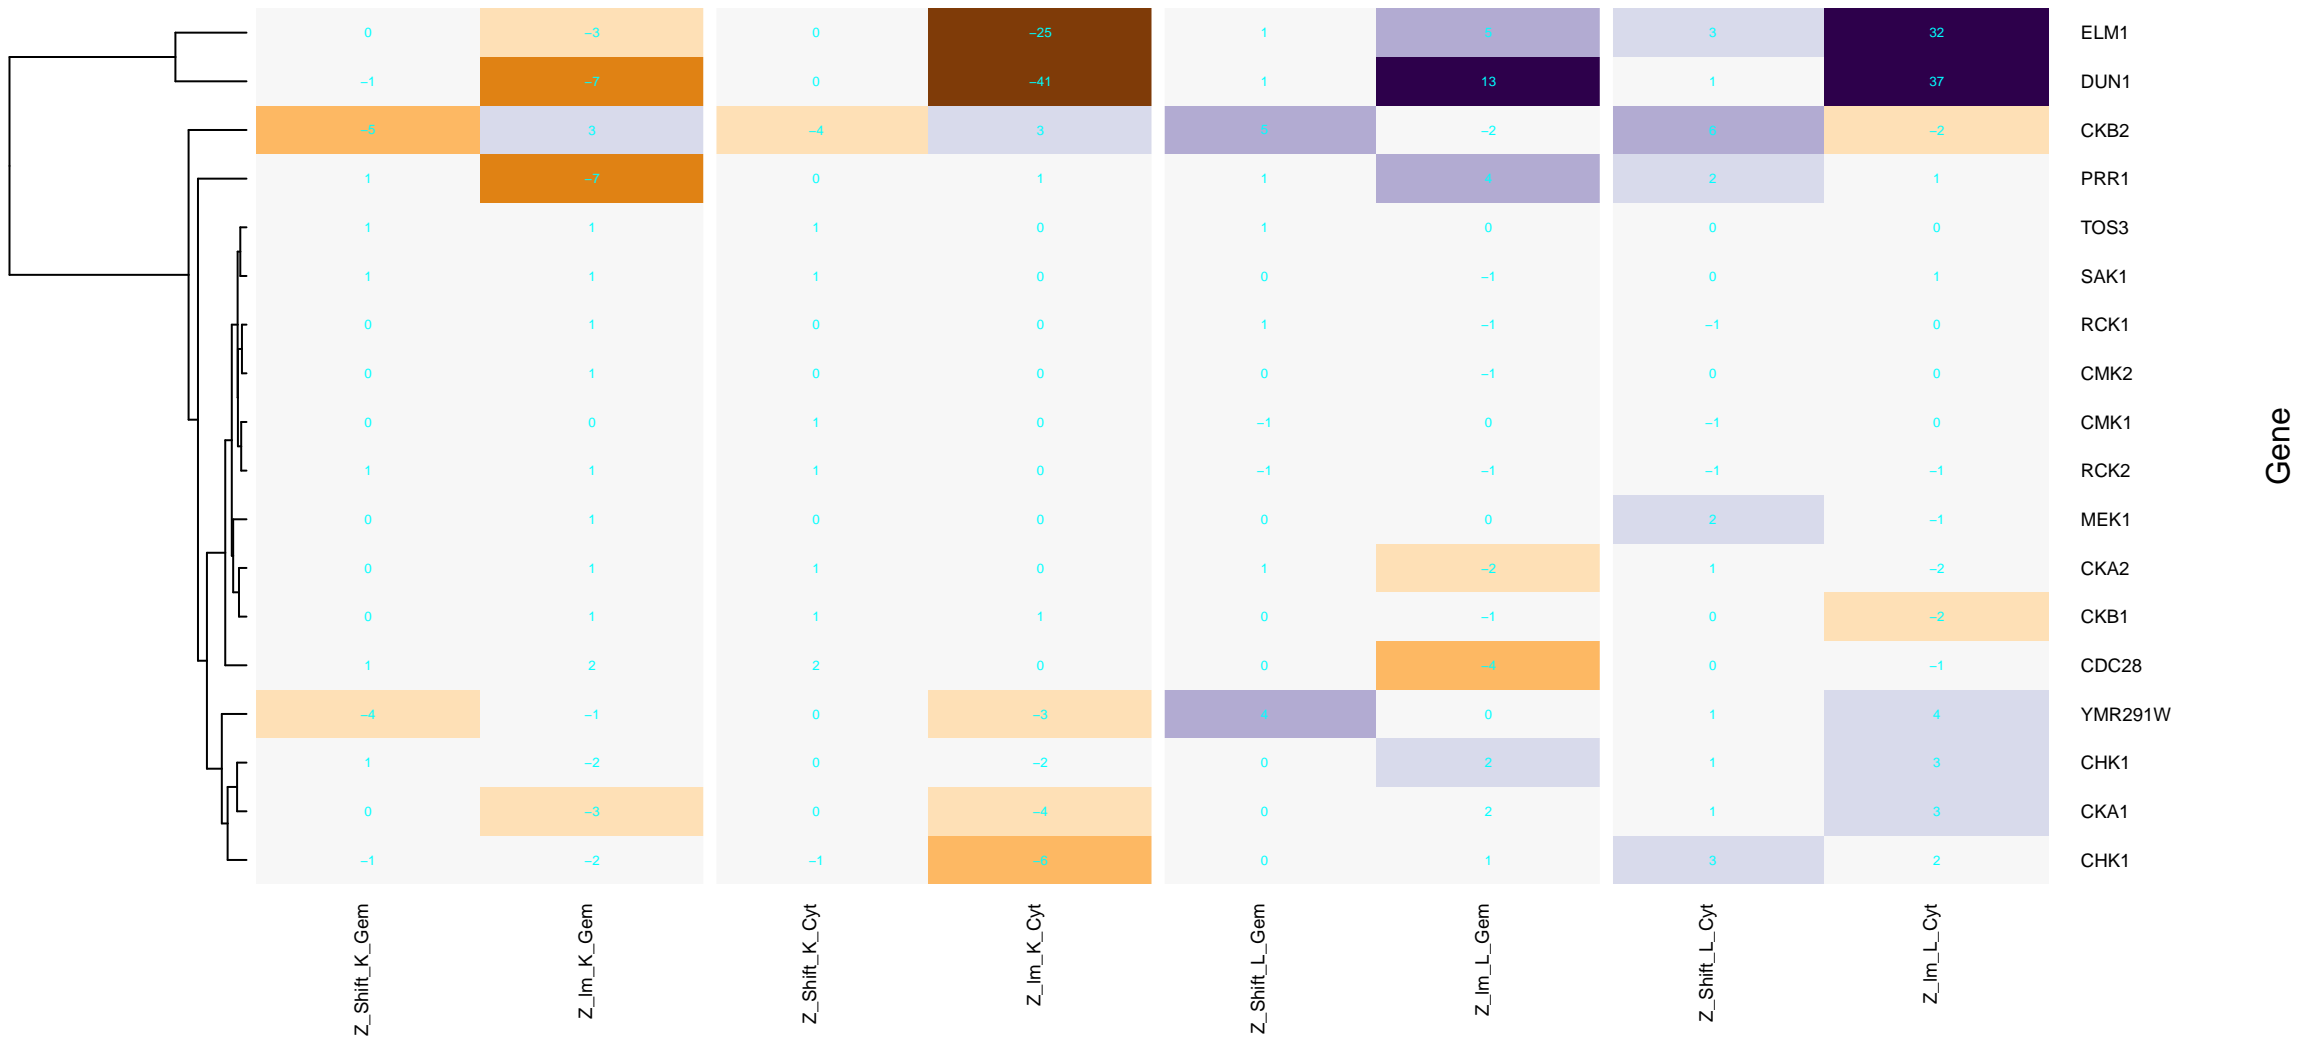

Supplement: s1 [file s1]

## DNA-directed 5'–3' RNA polymerase activity

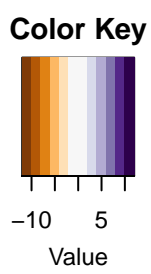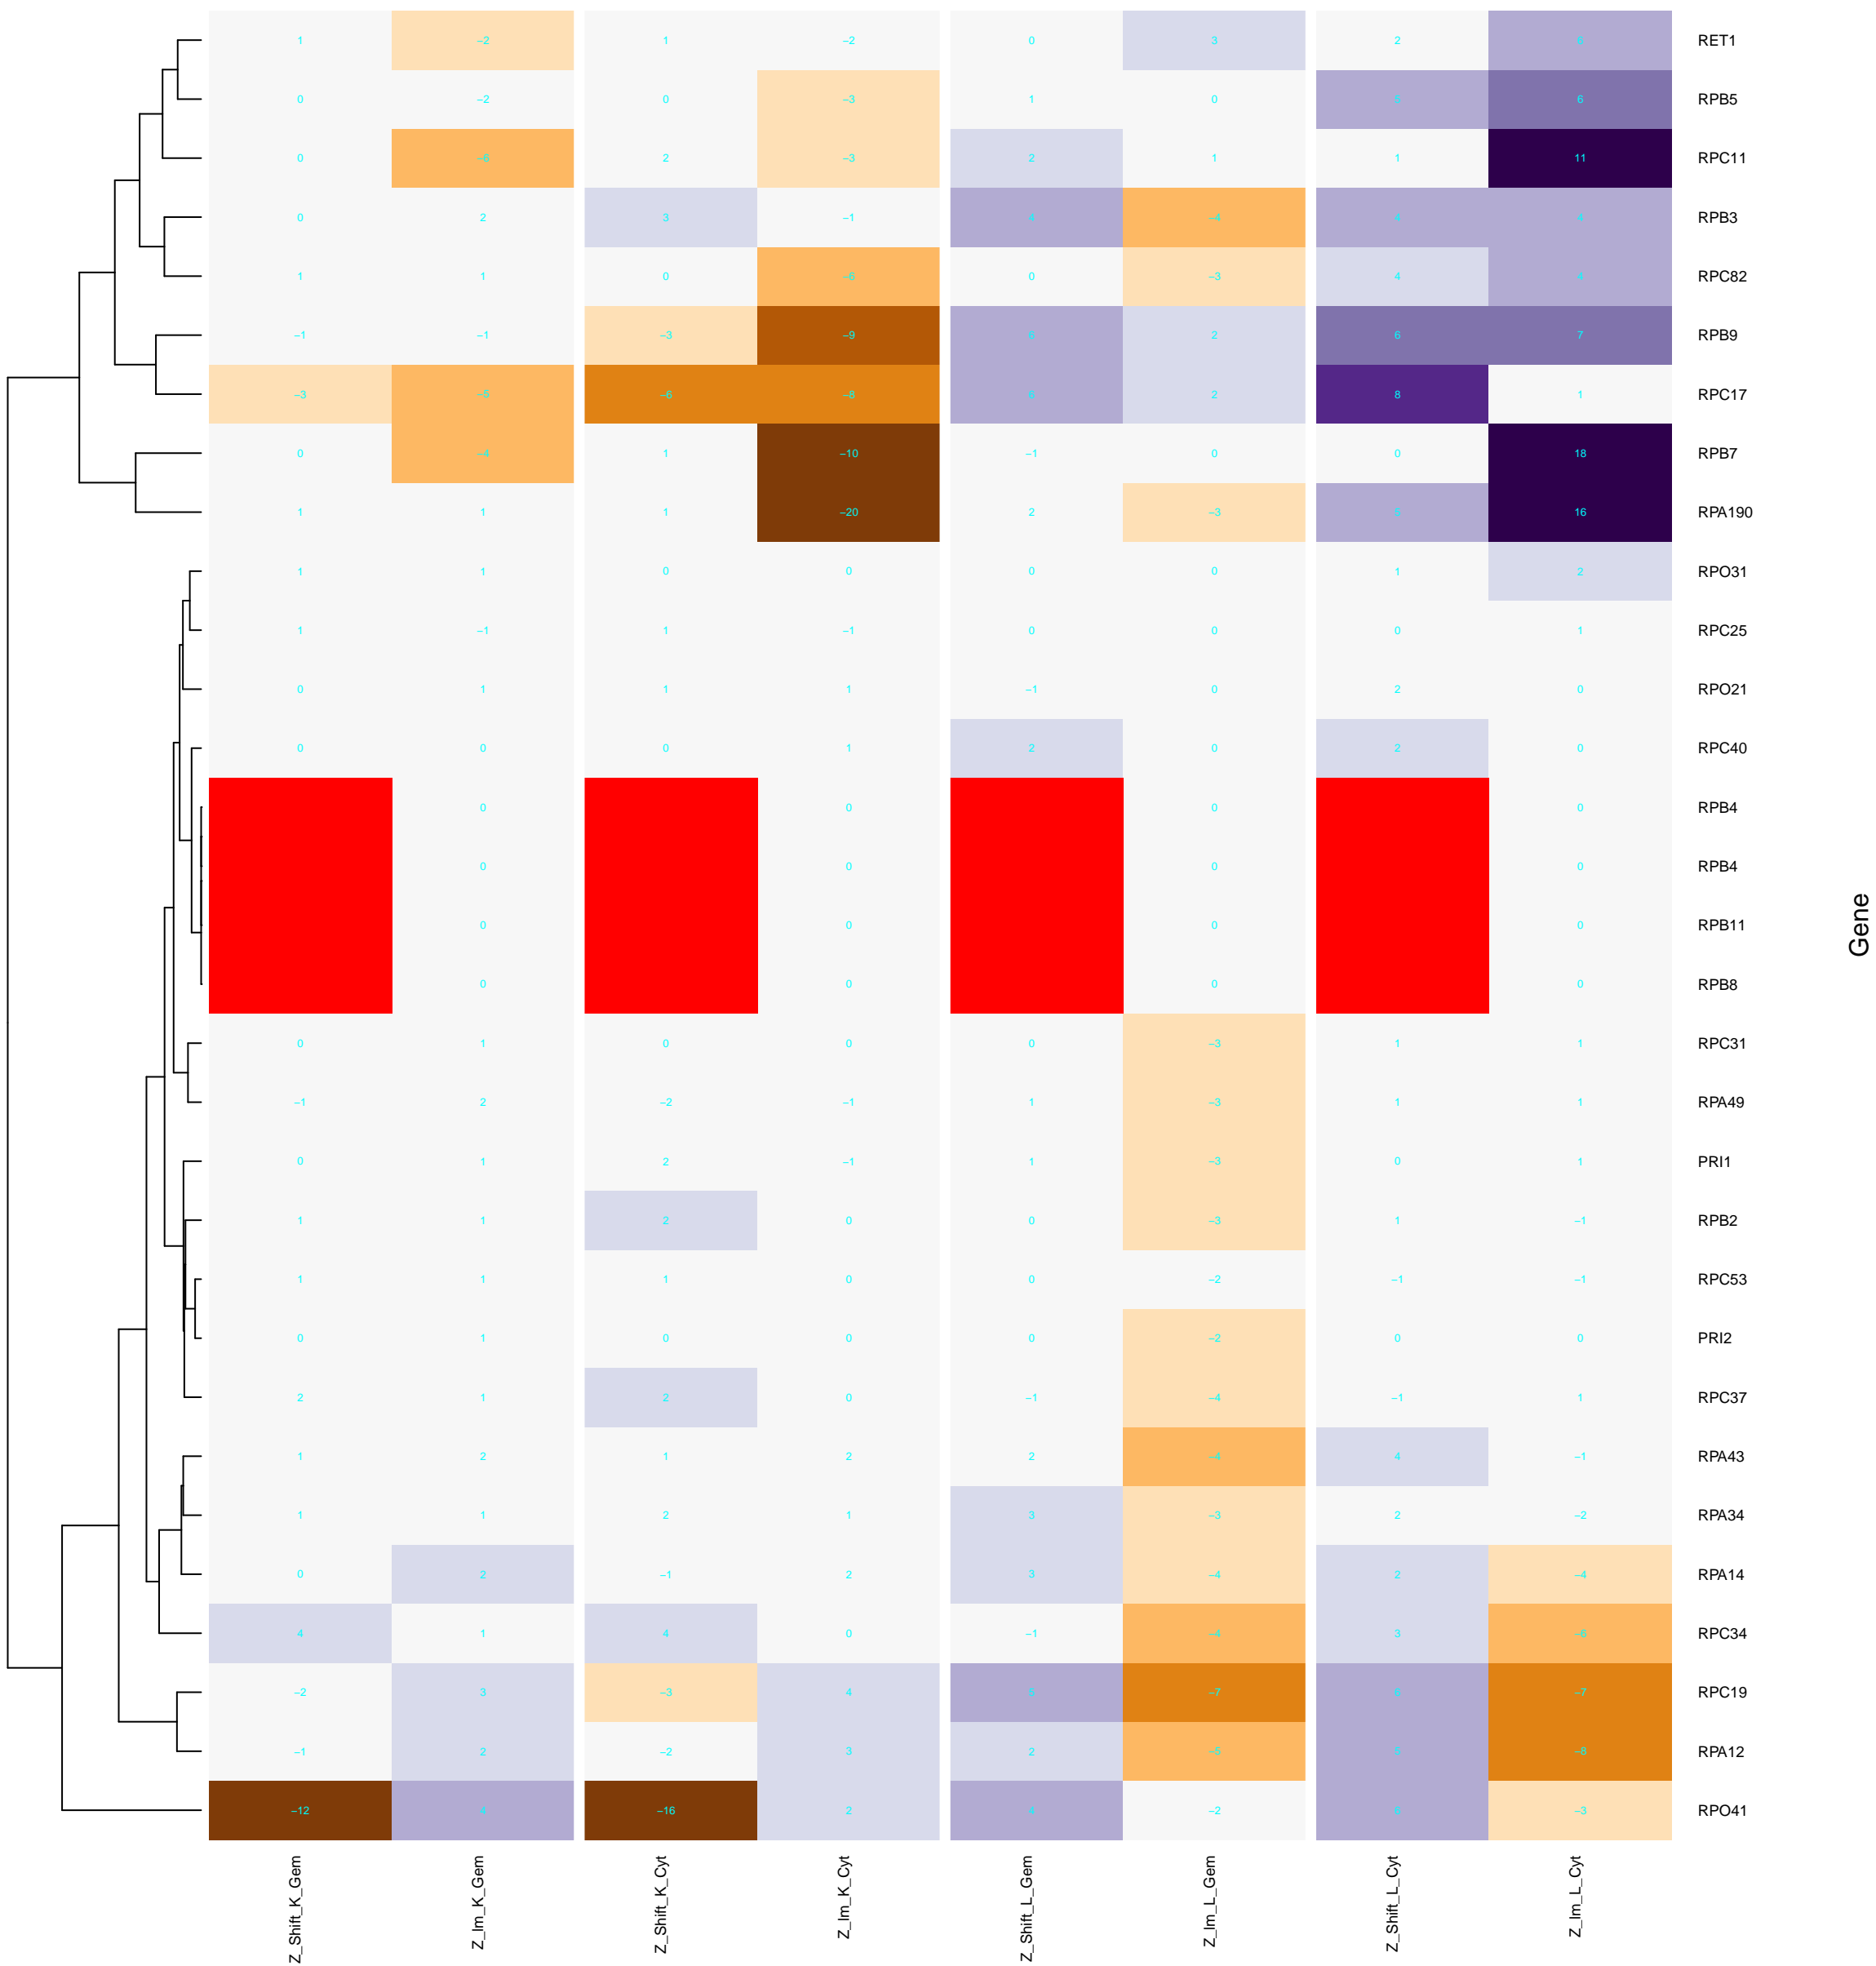

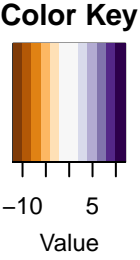

RNA polymerase I activity

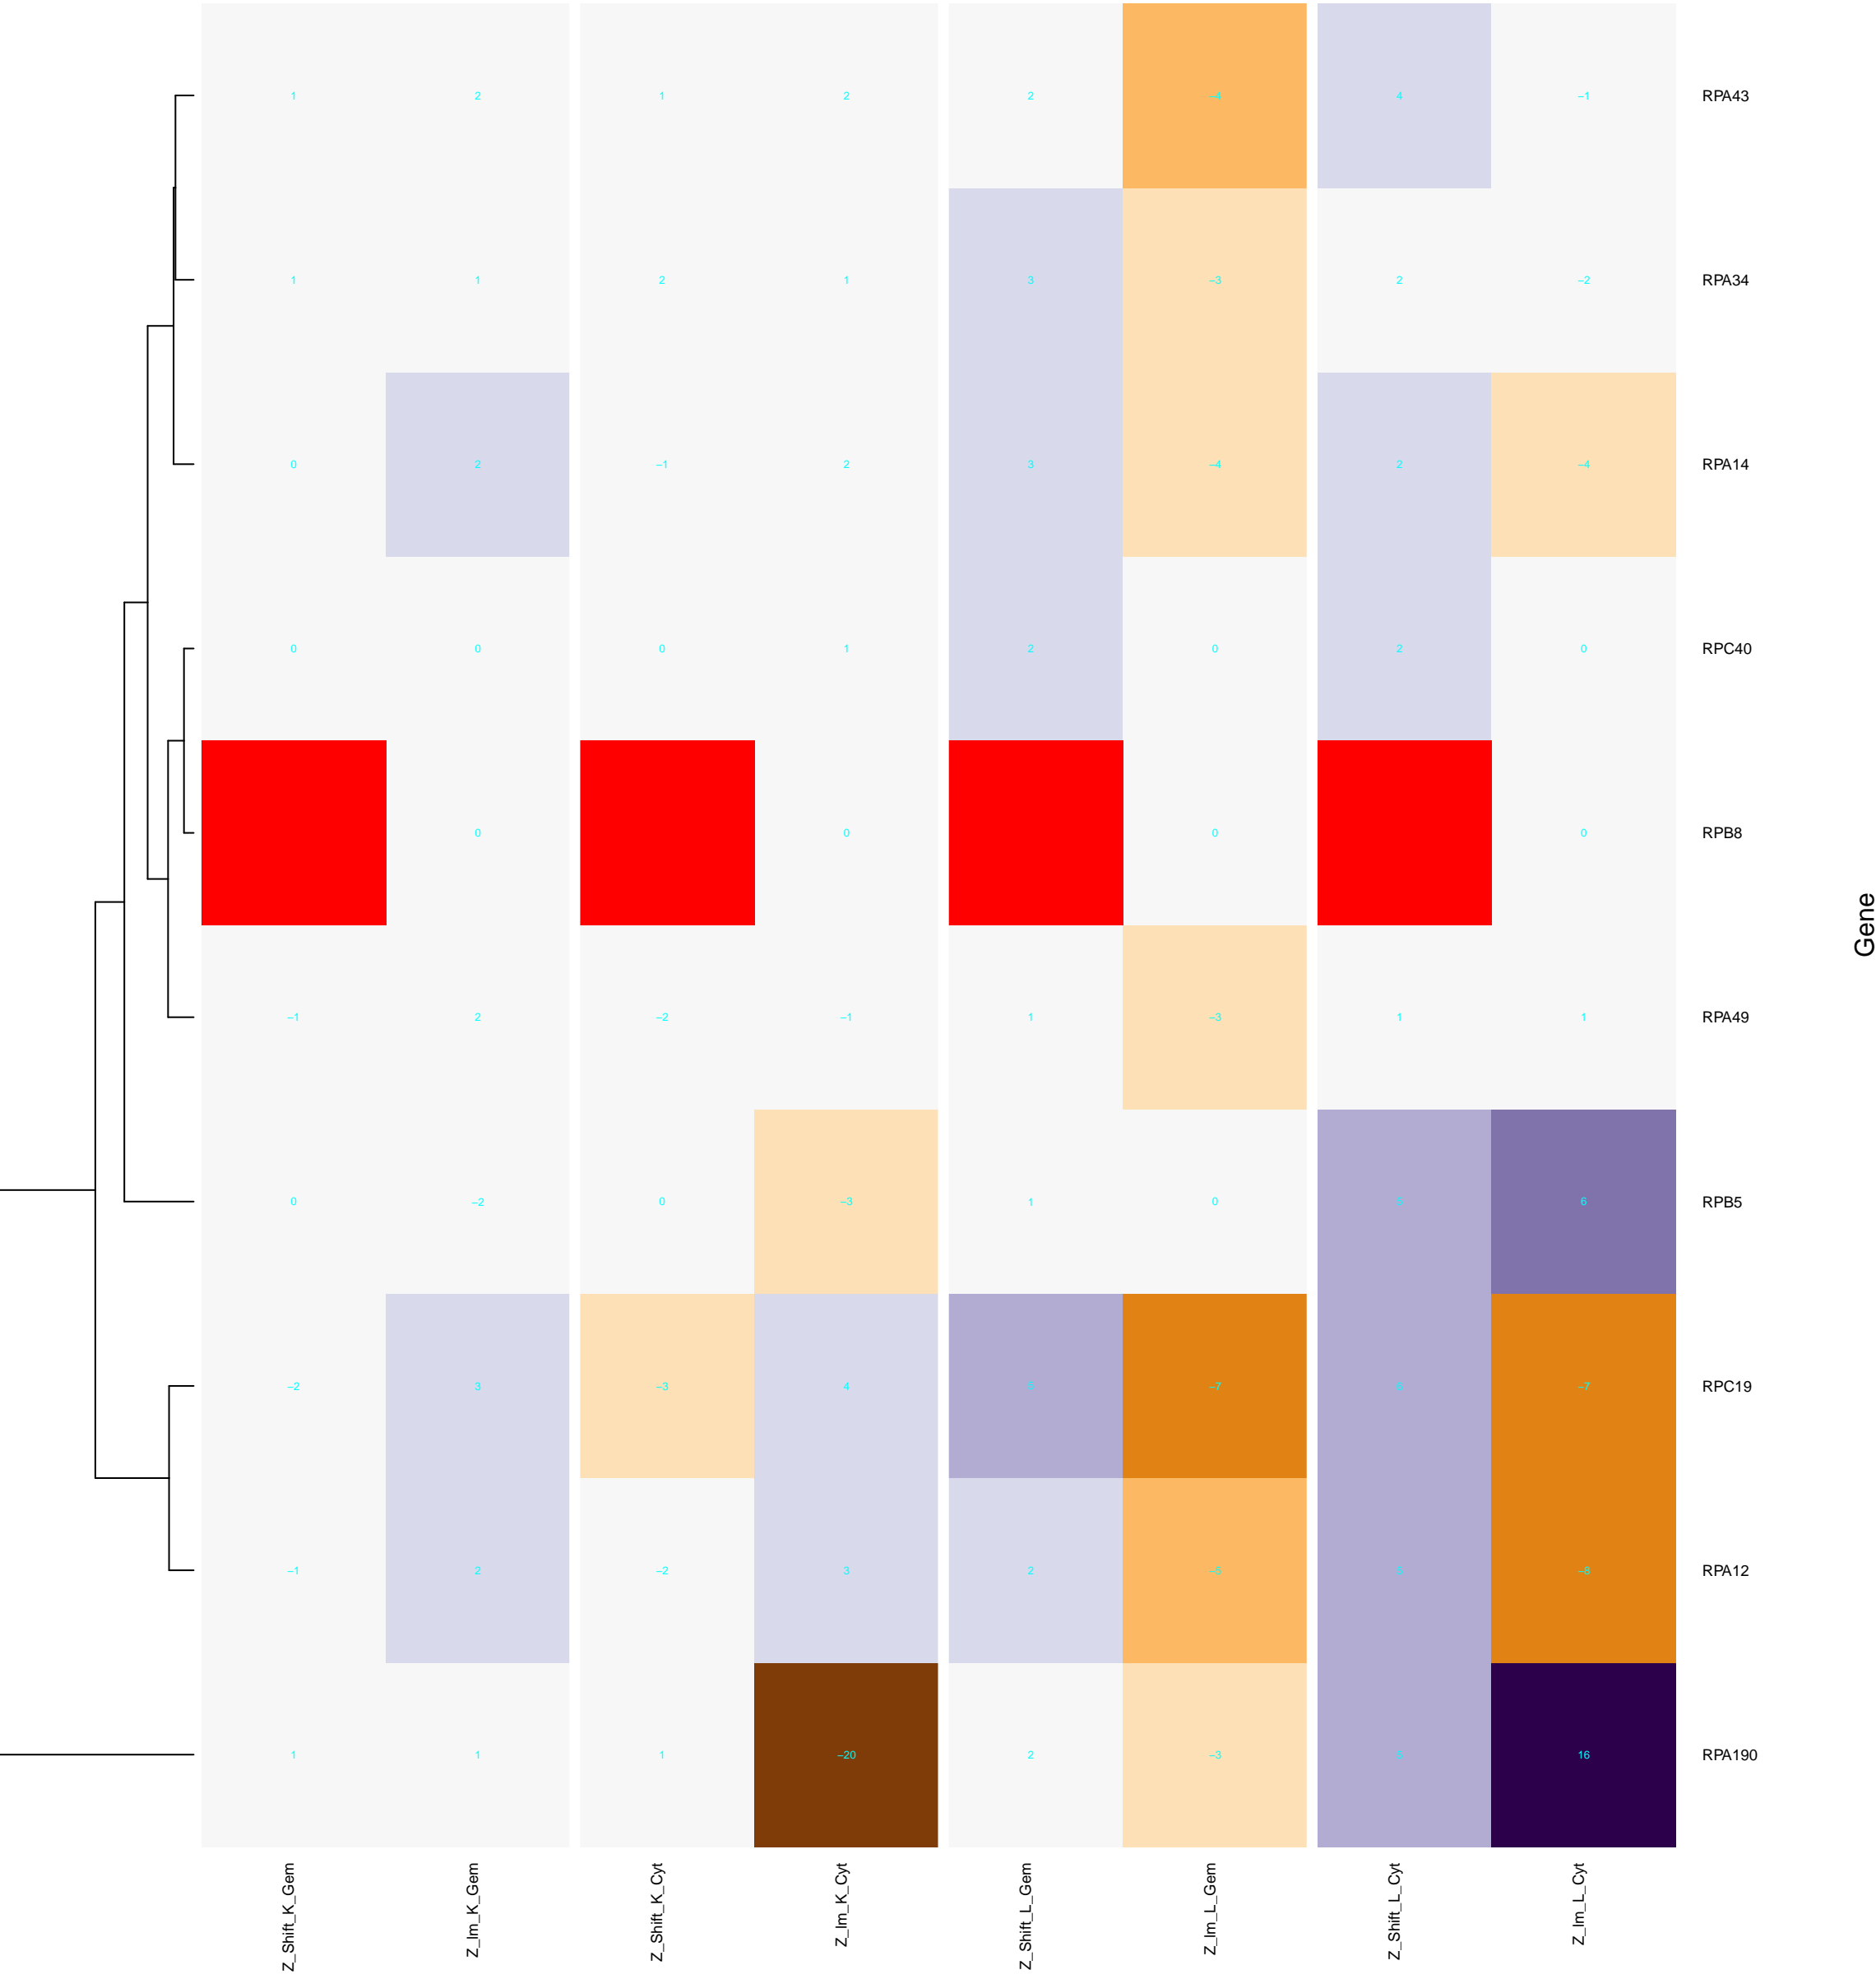

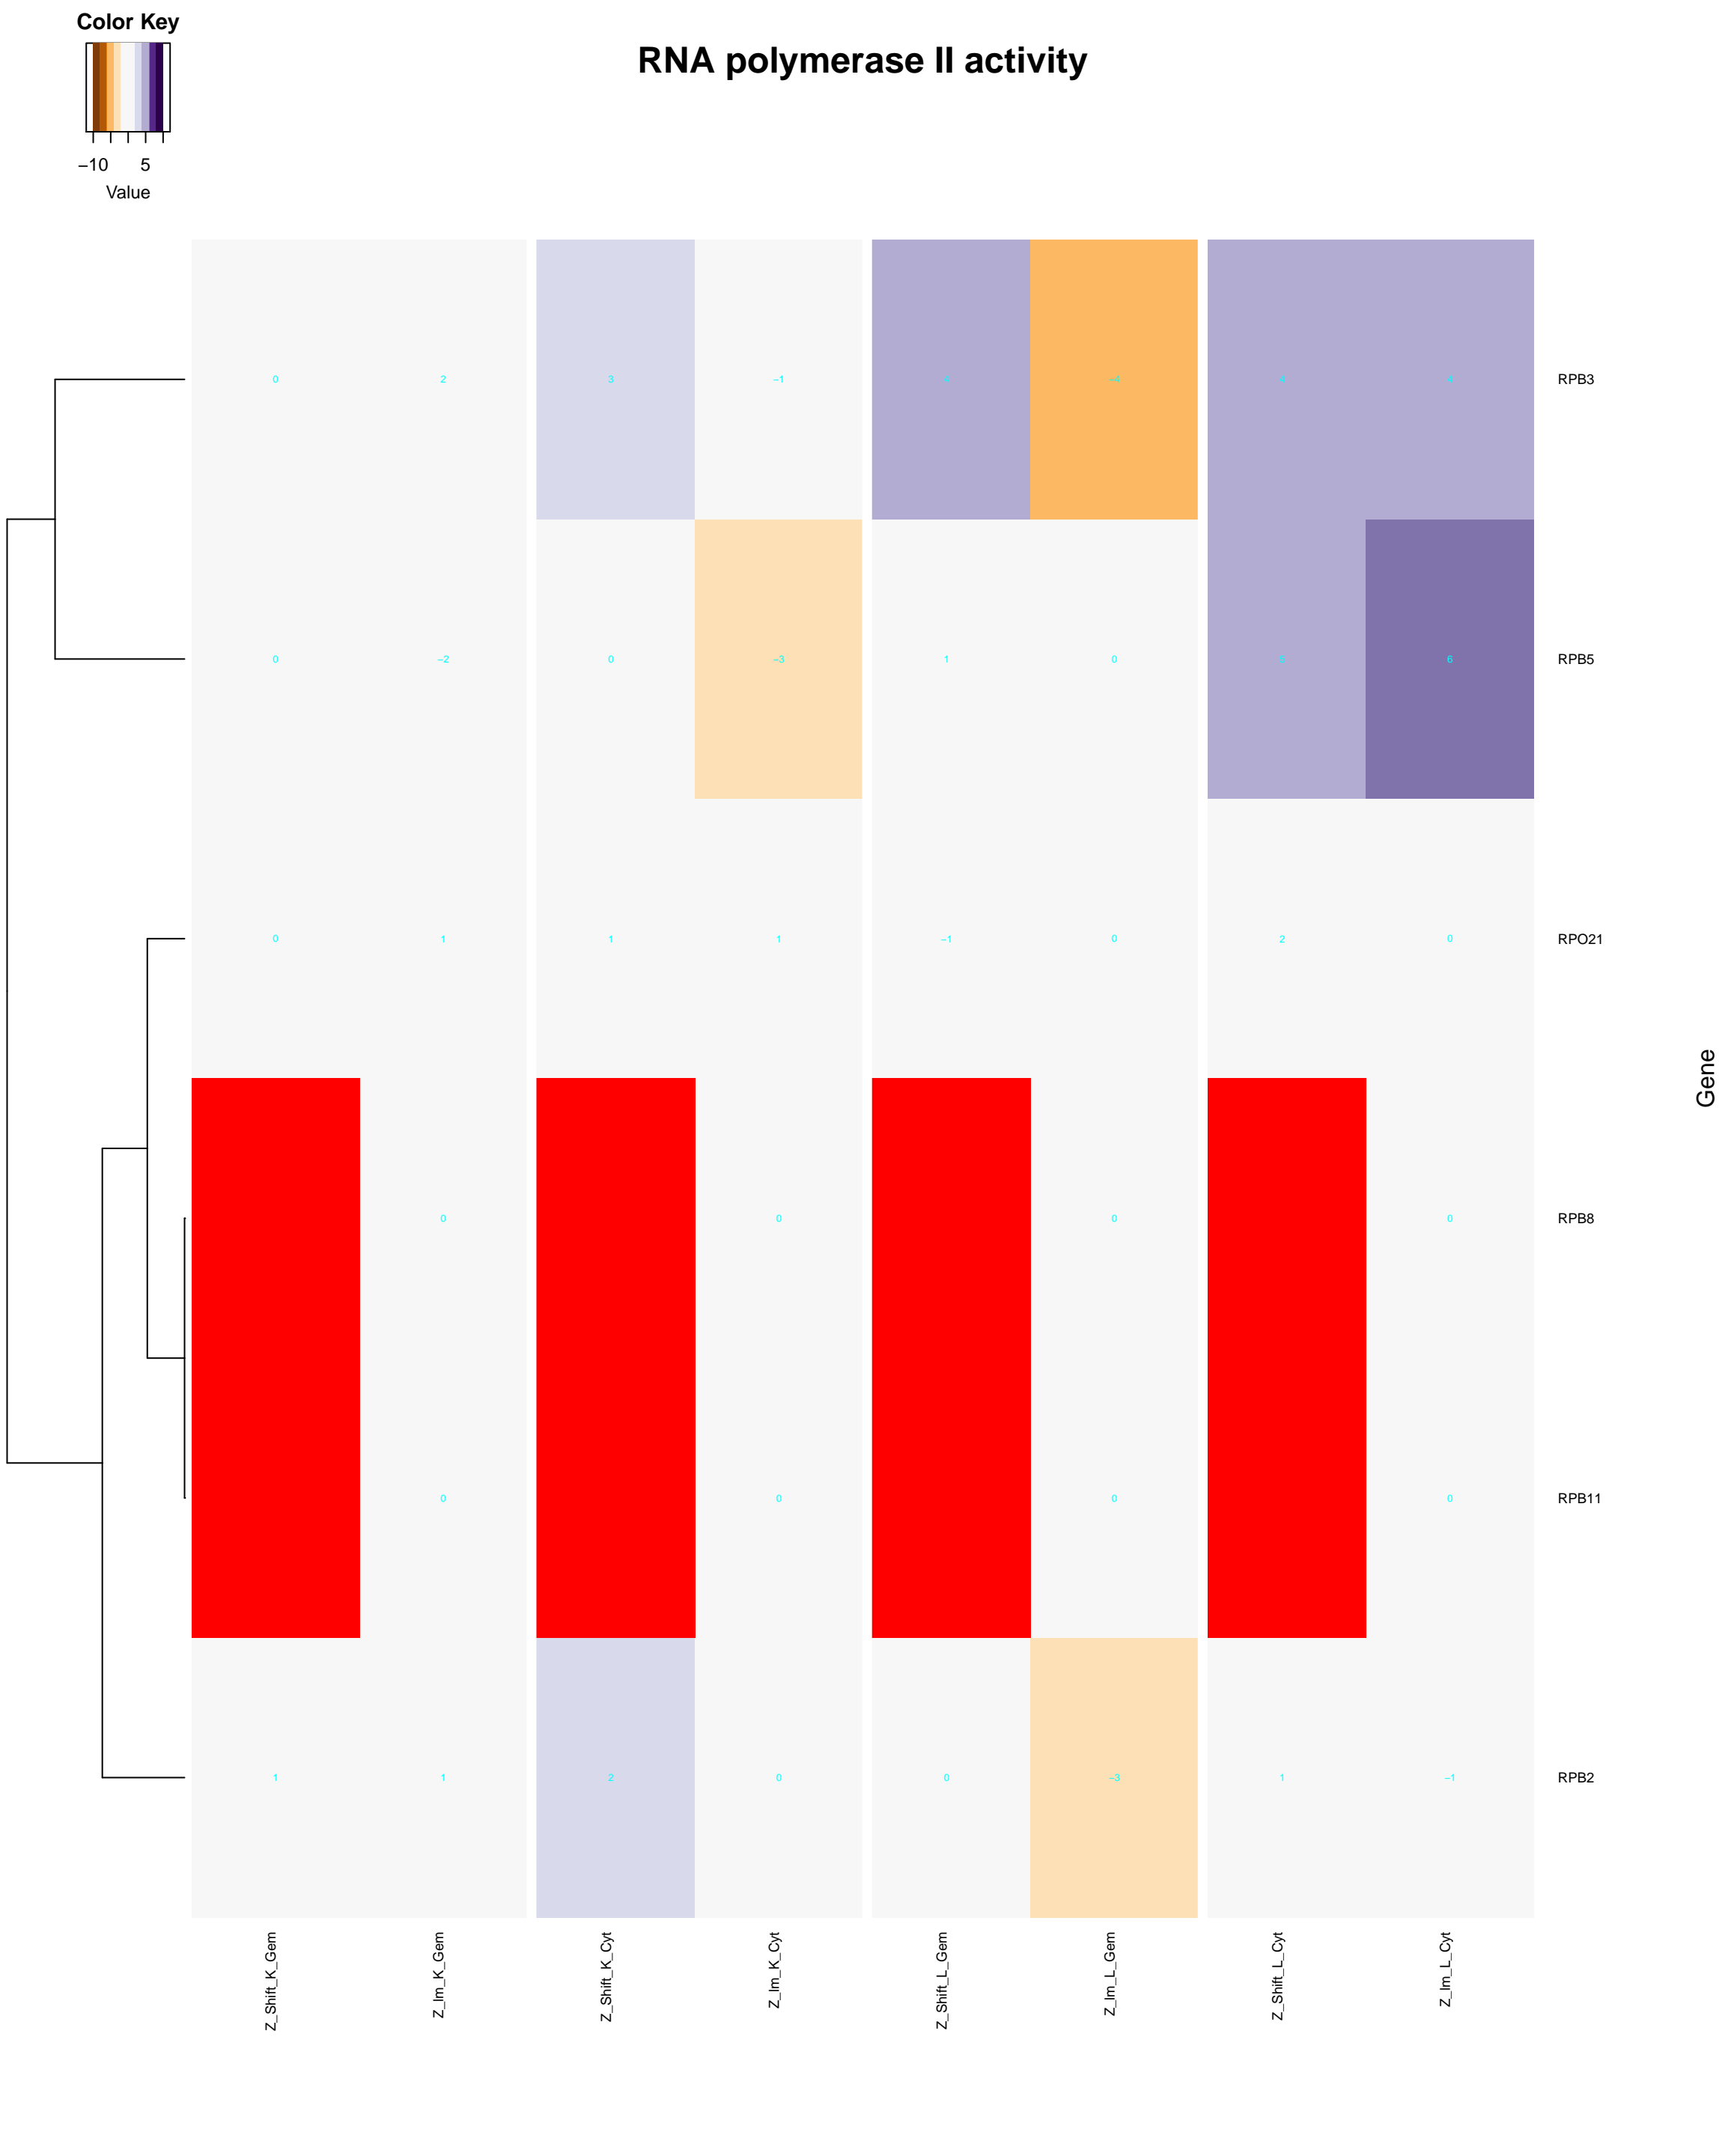

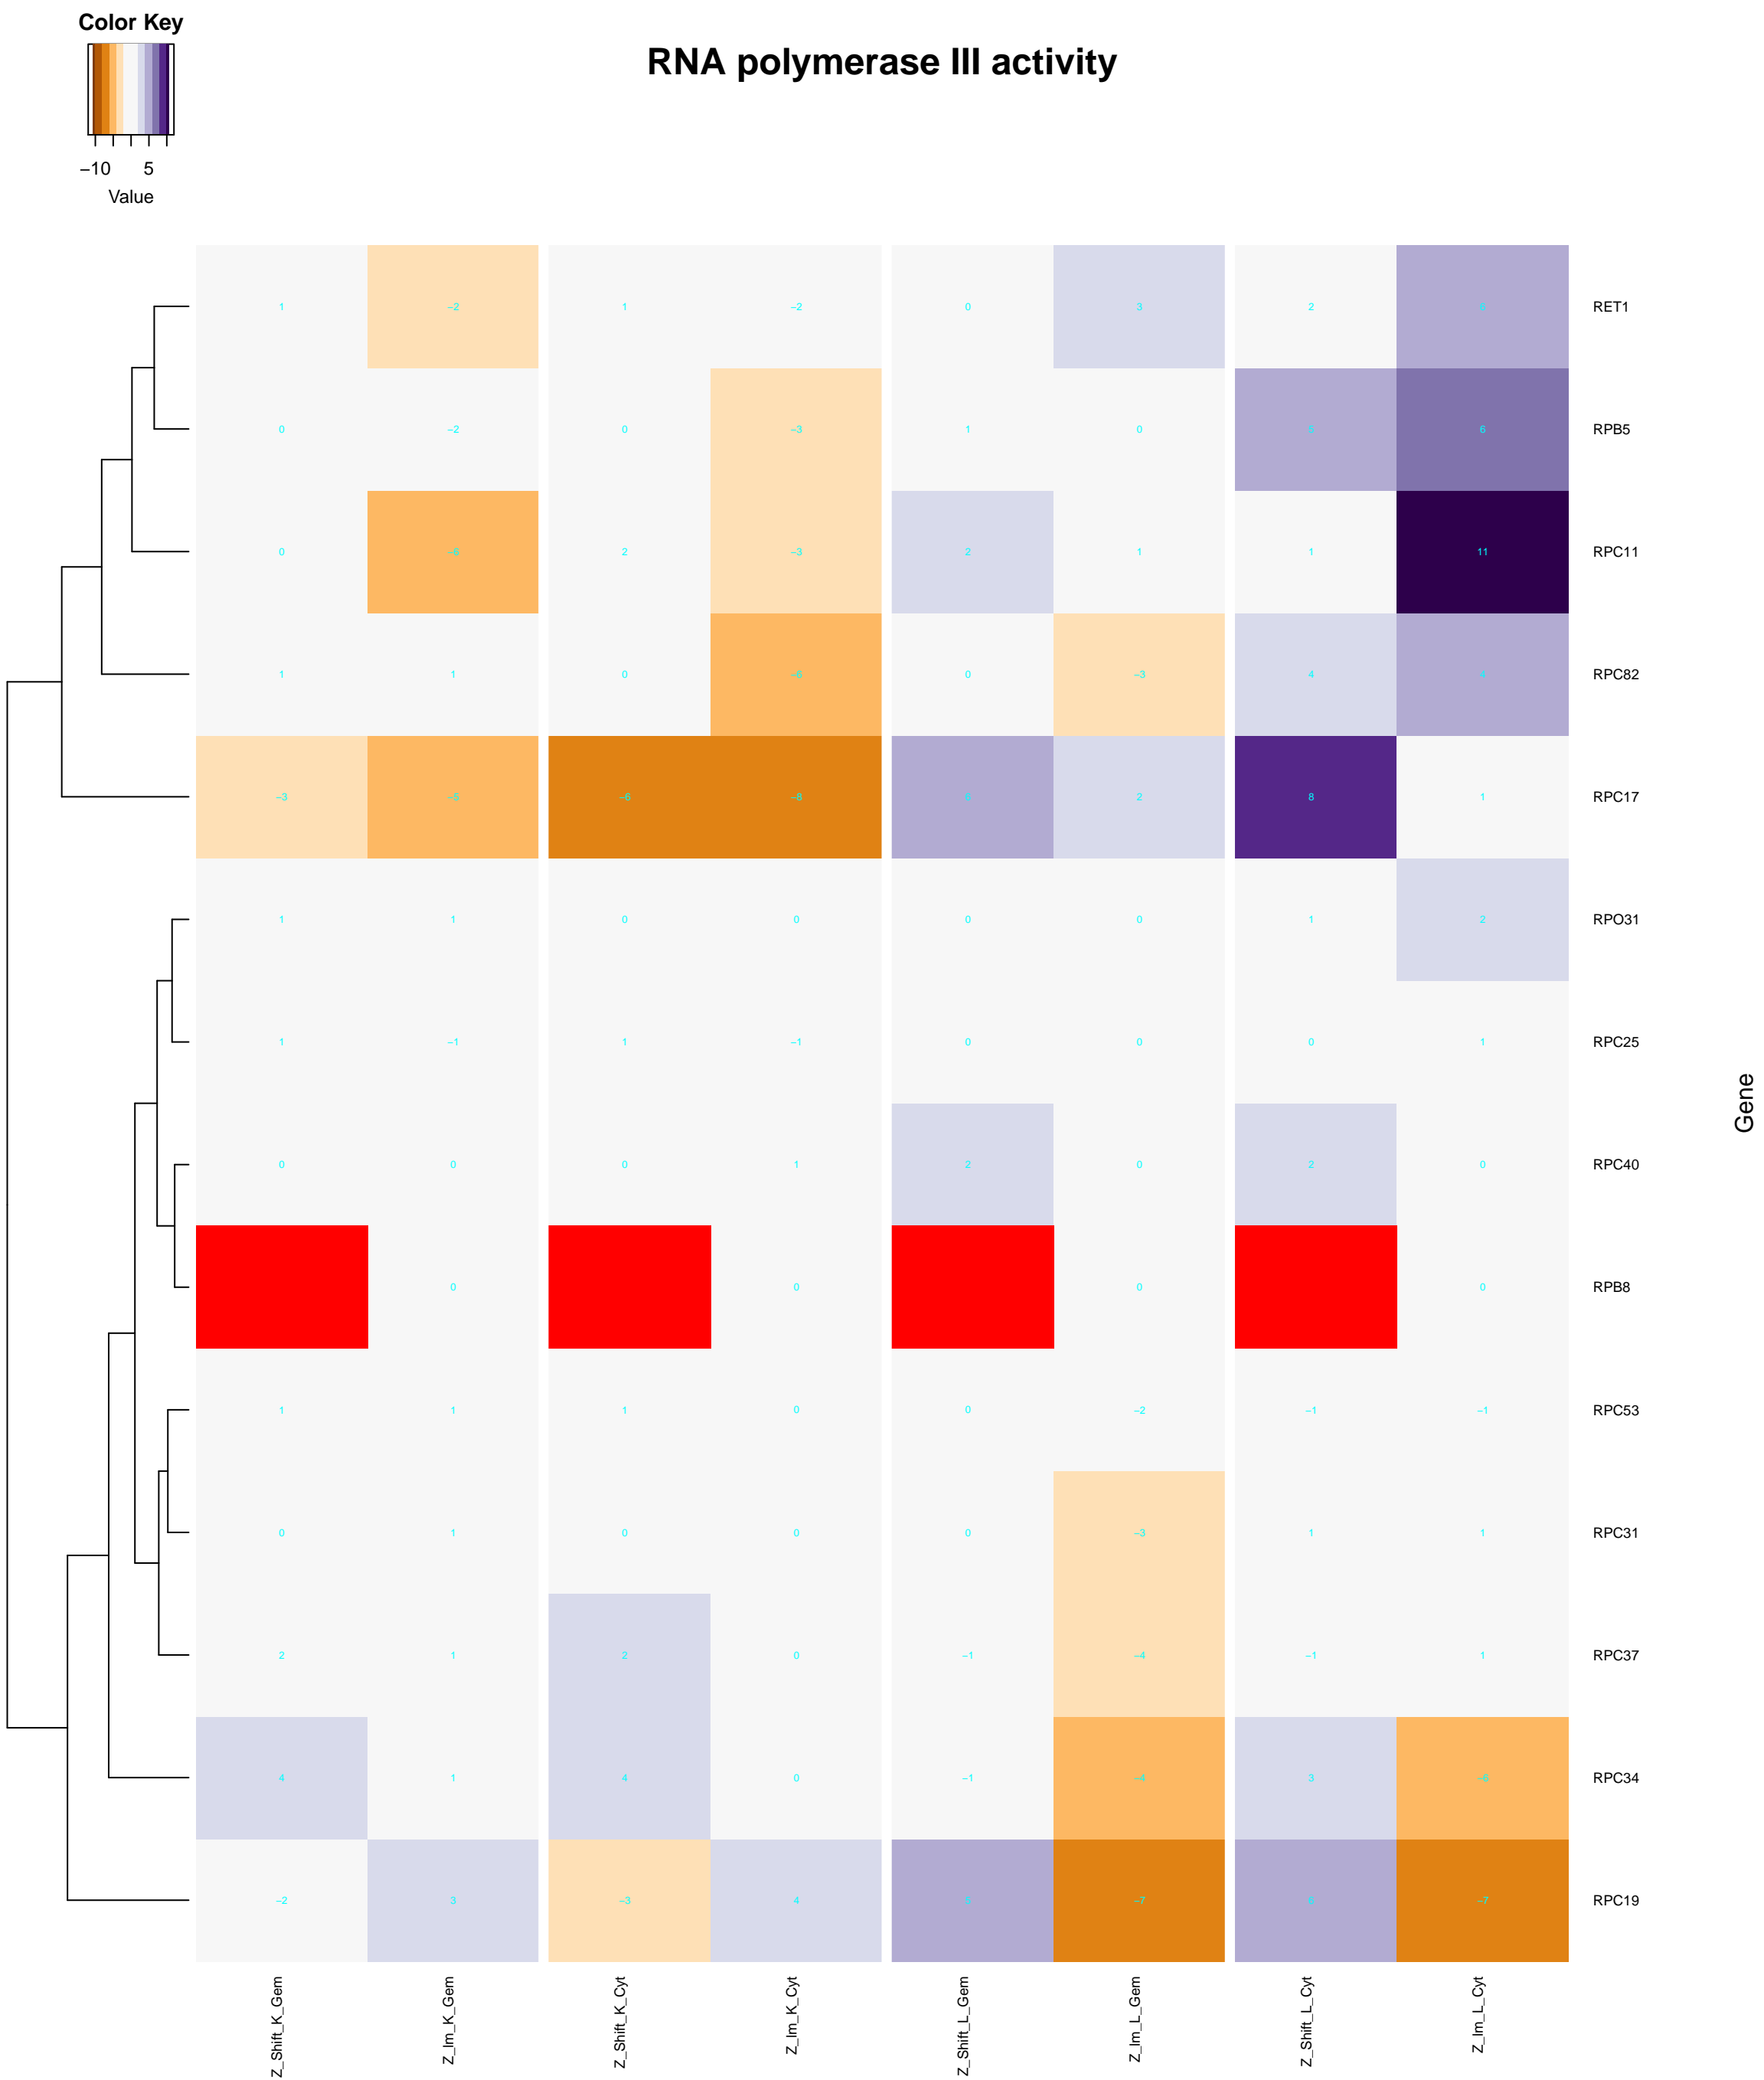



DNA primase activity

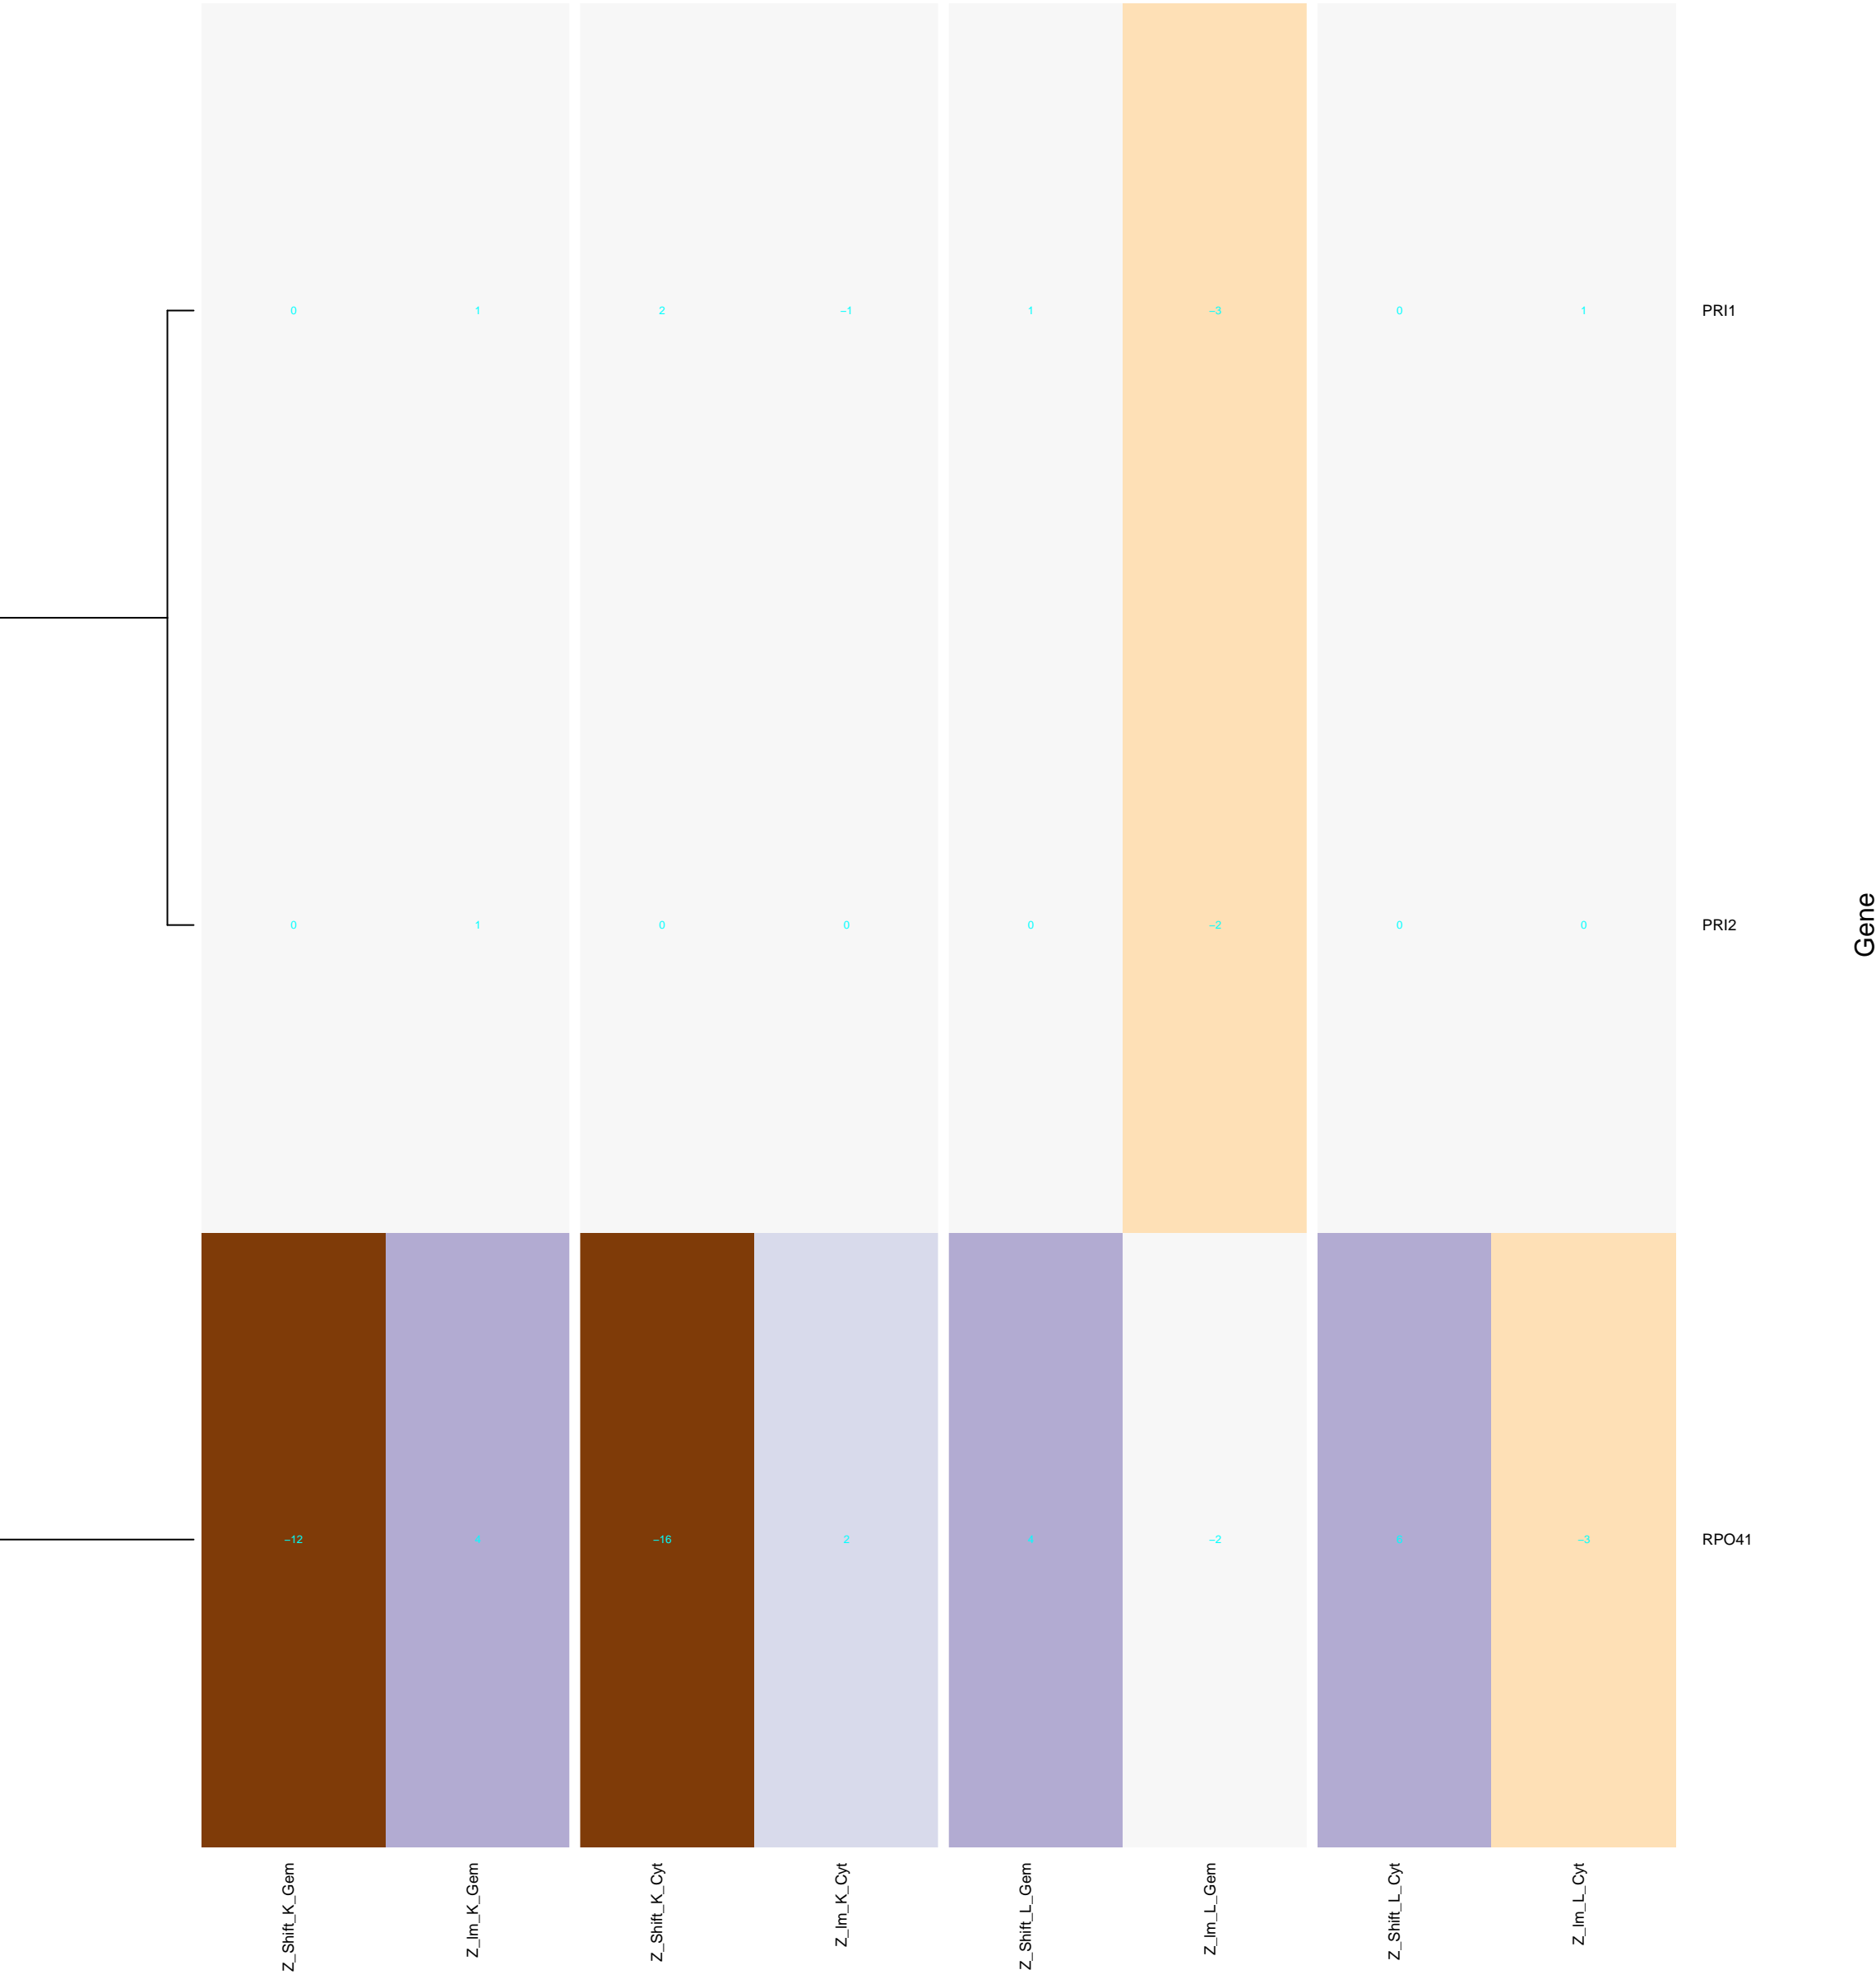

Supplement: s1 [file s1]

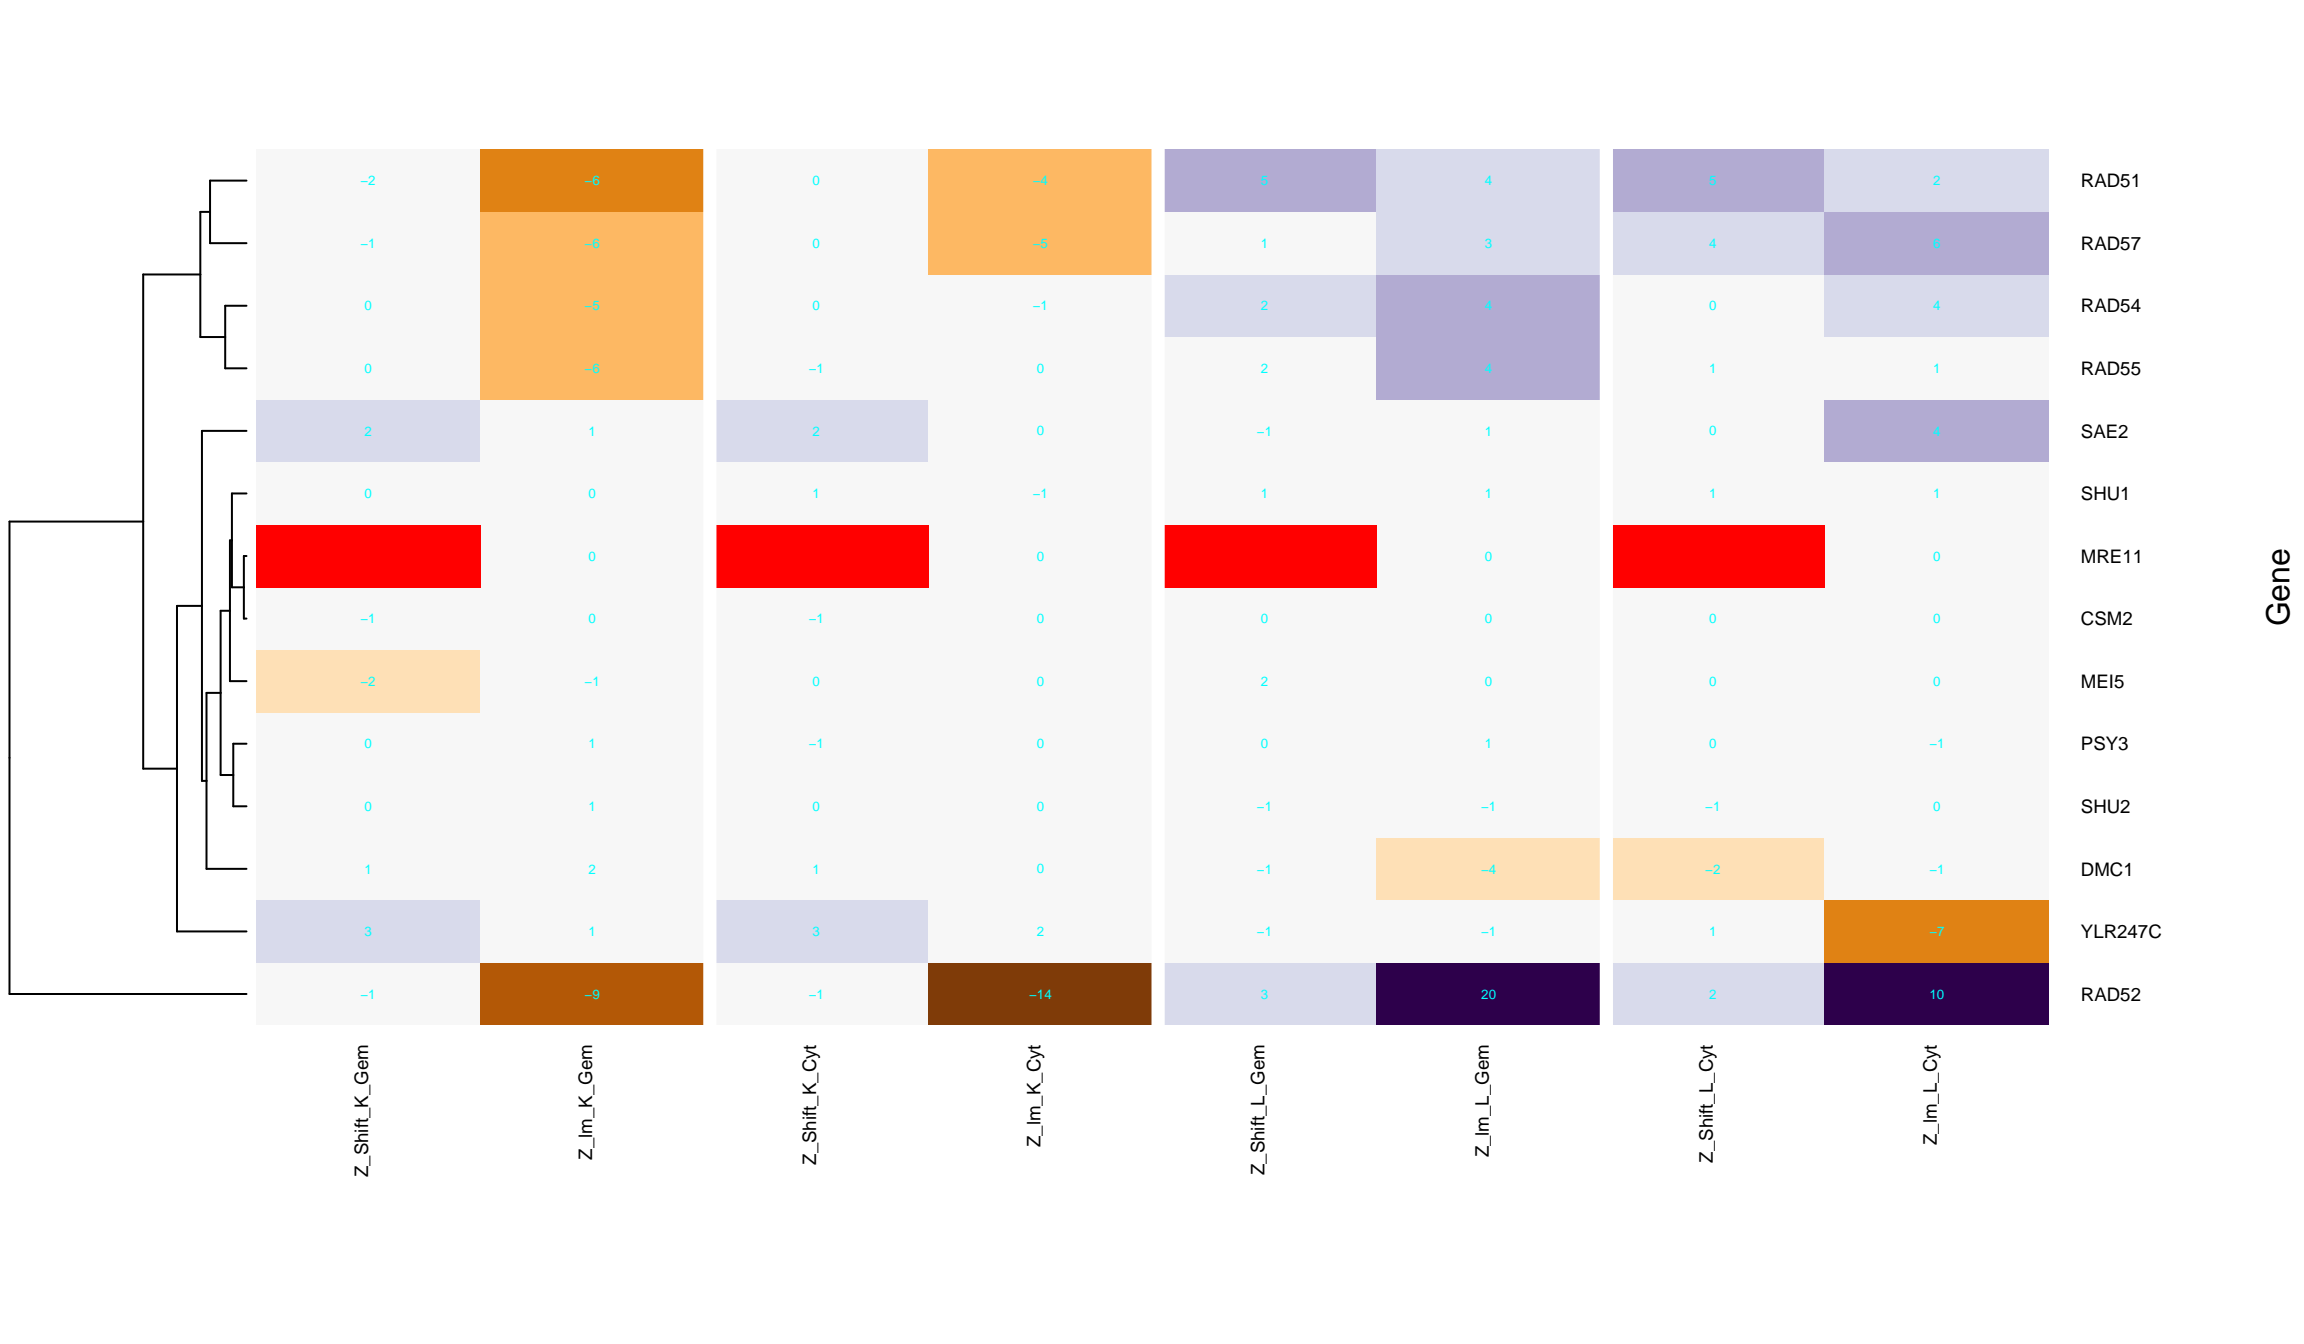

Supplement: s1 [file s1]

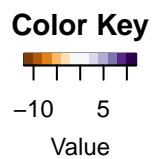

# ER to Golgi transport vesicle

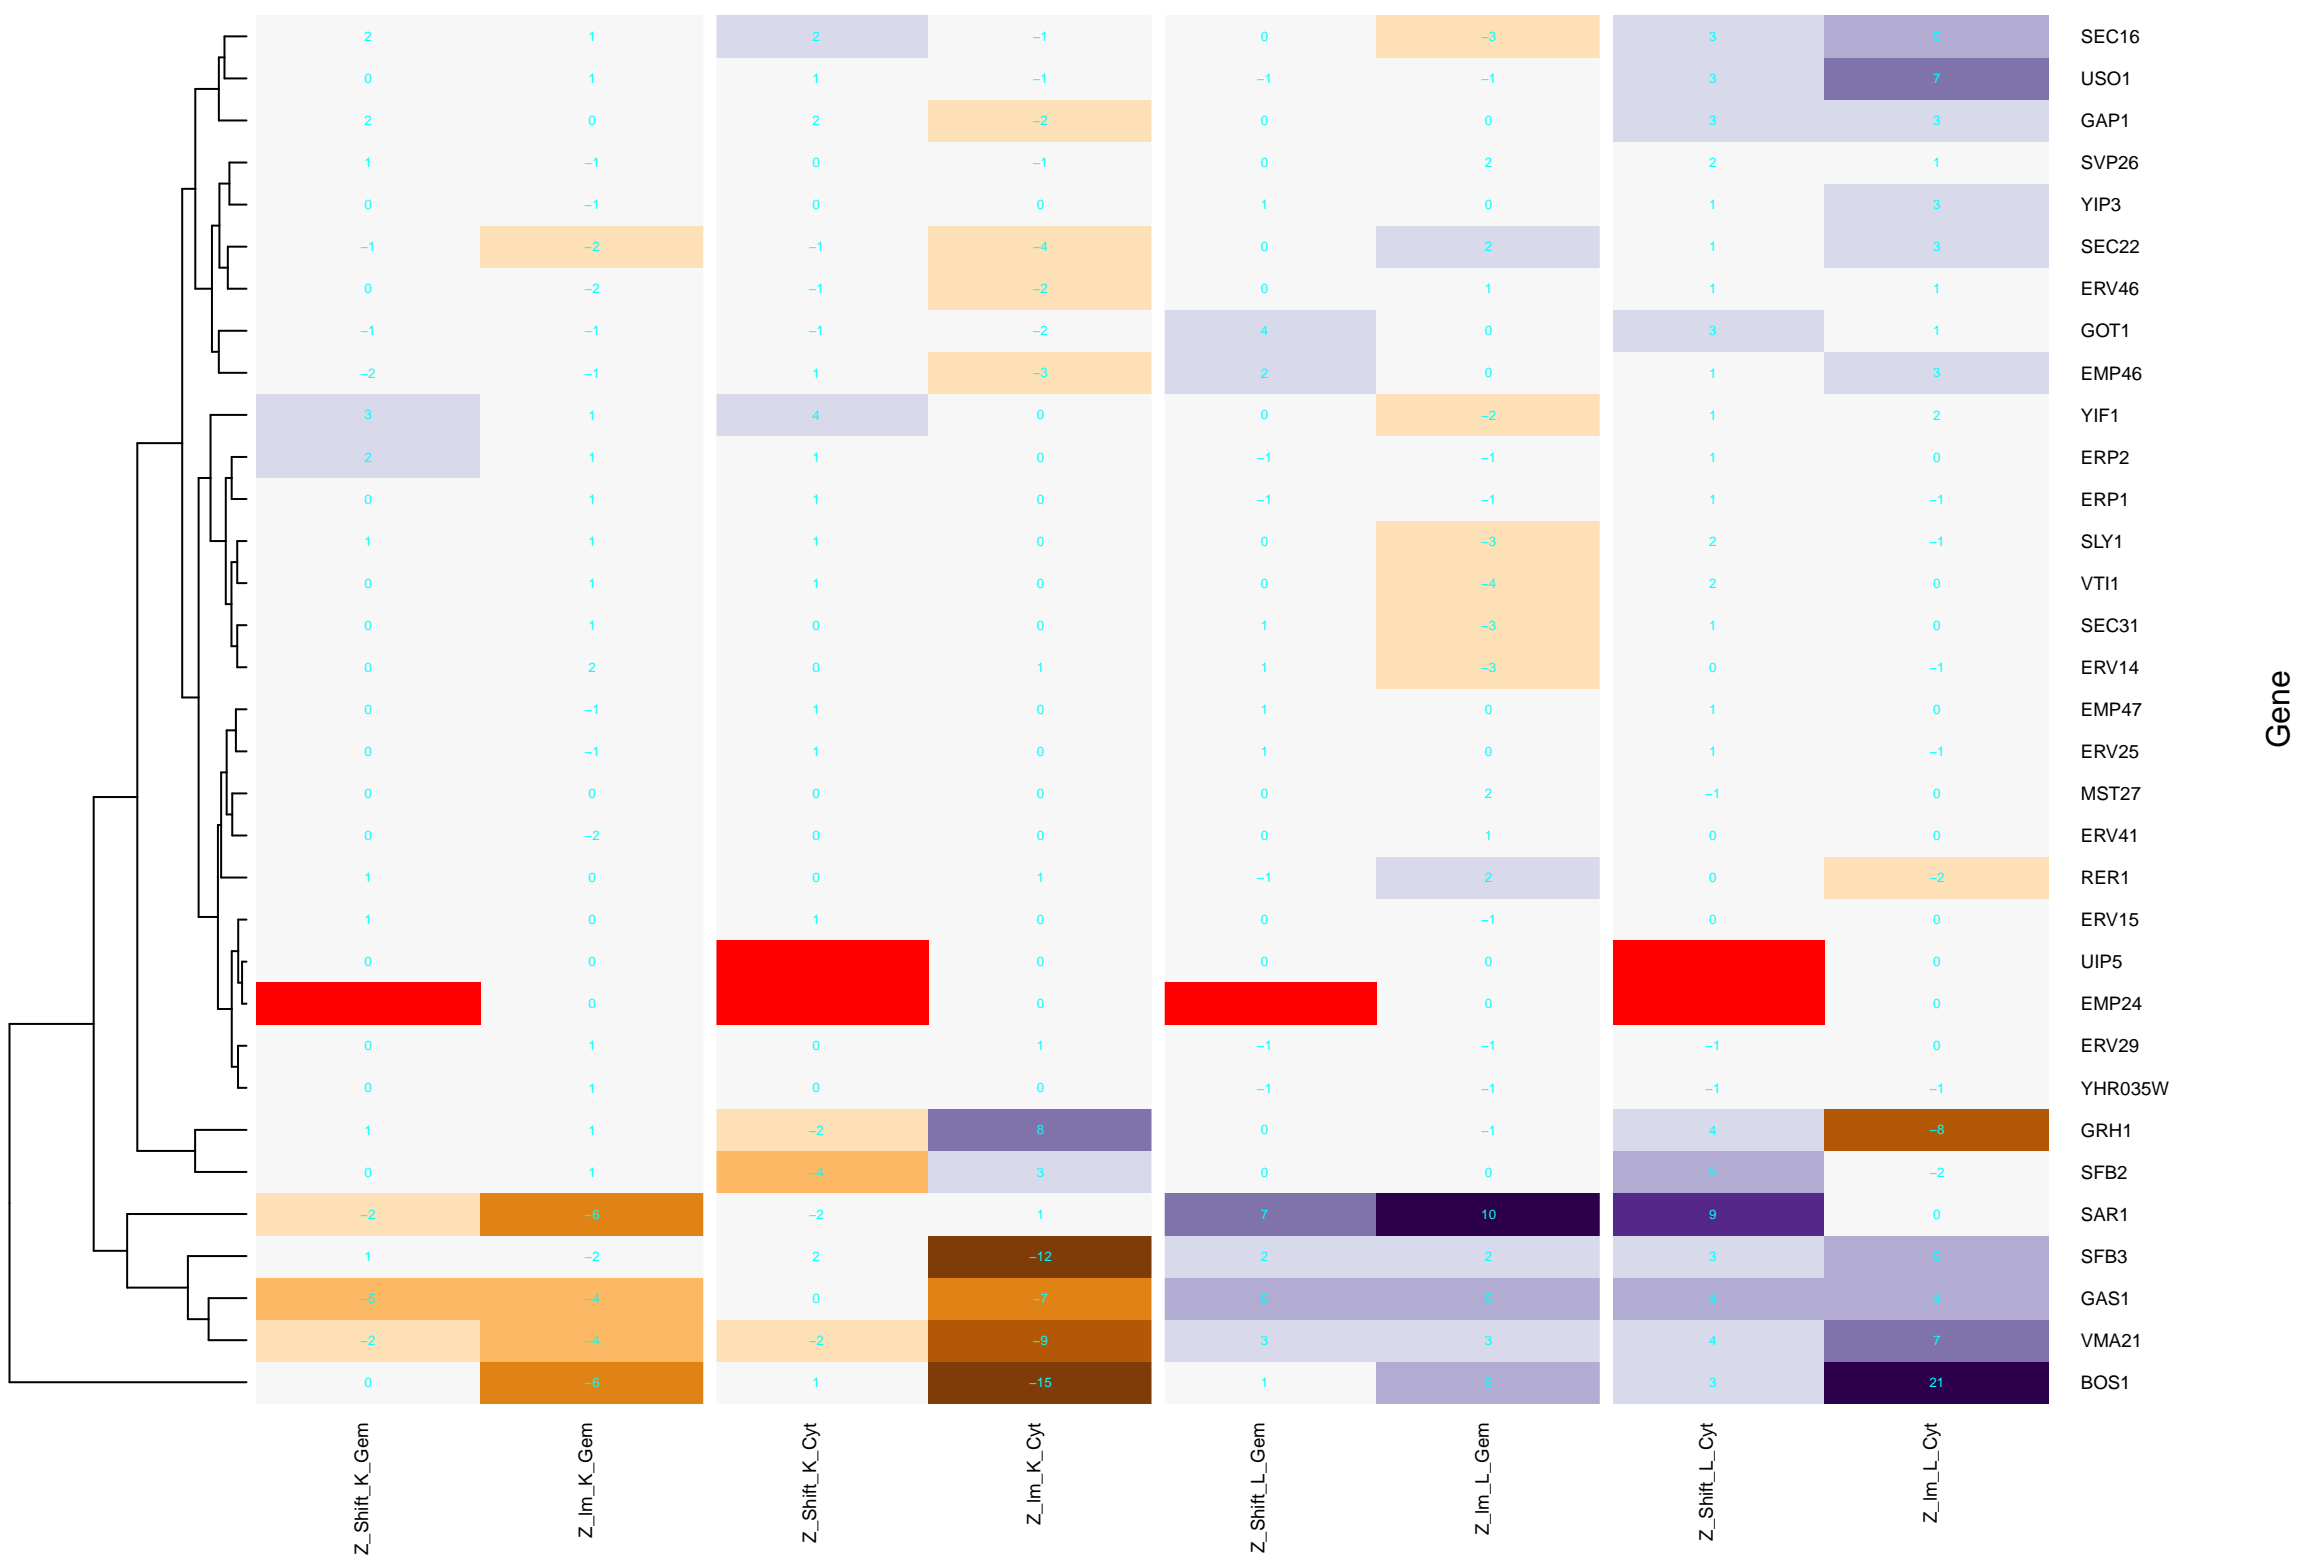

Supplement: s1 [file s1]

Color Key

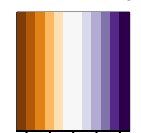

-10 5  
Value

mitochondrial ribosome

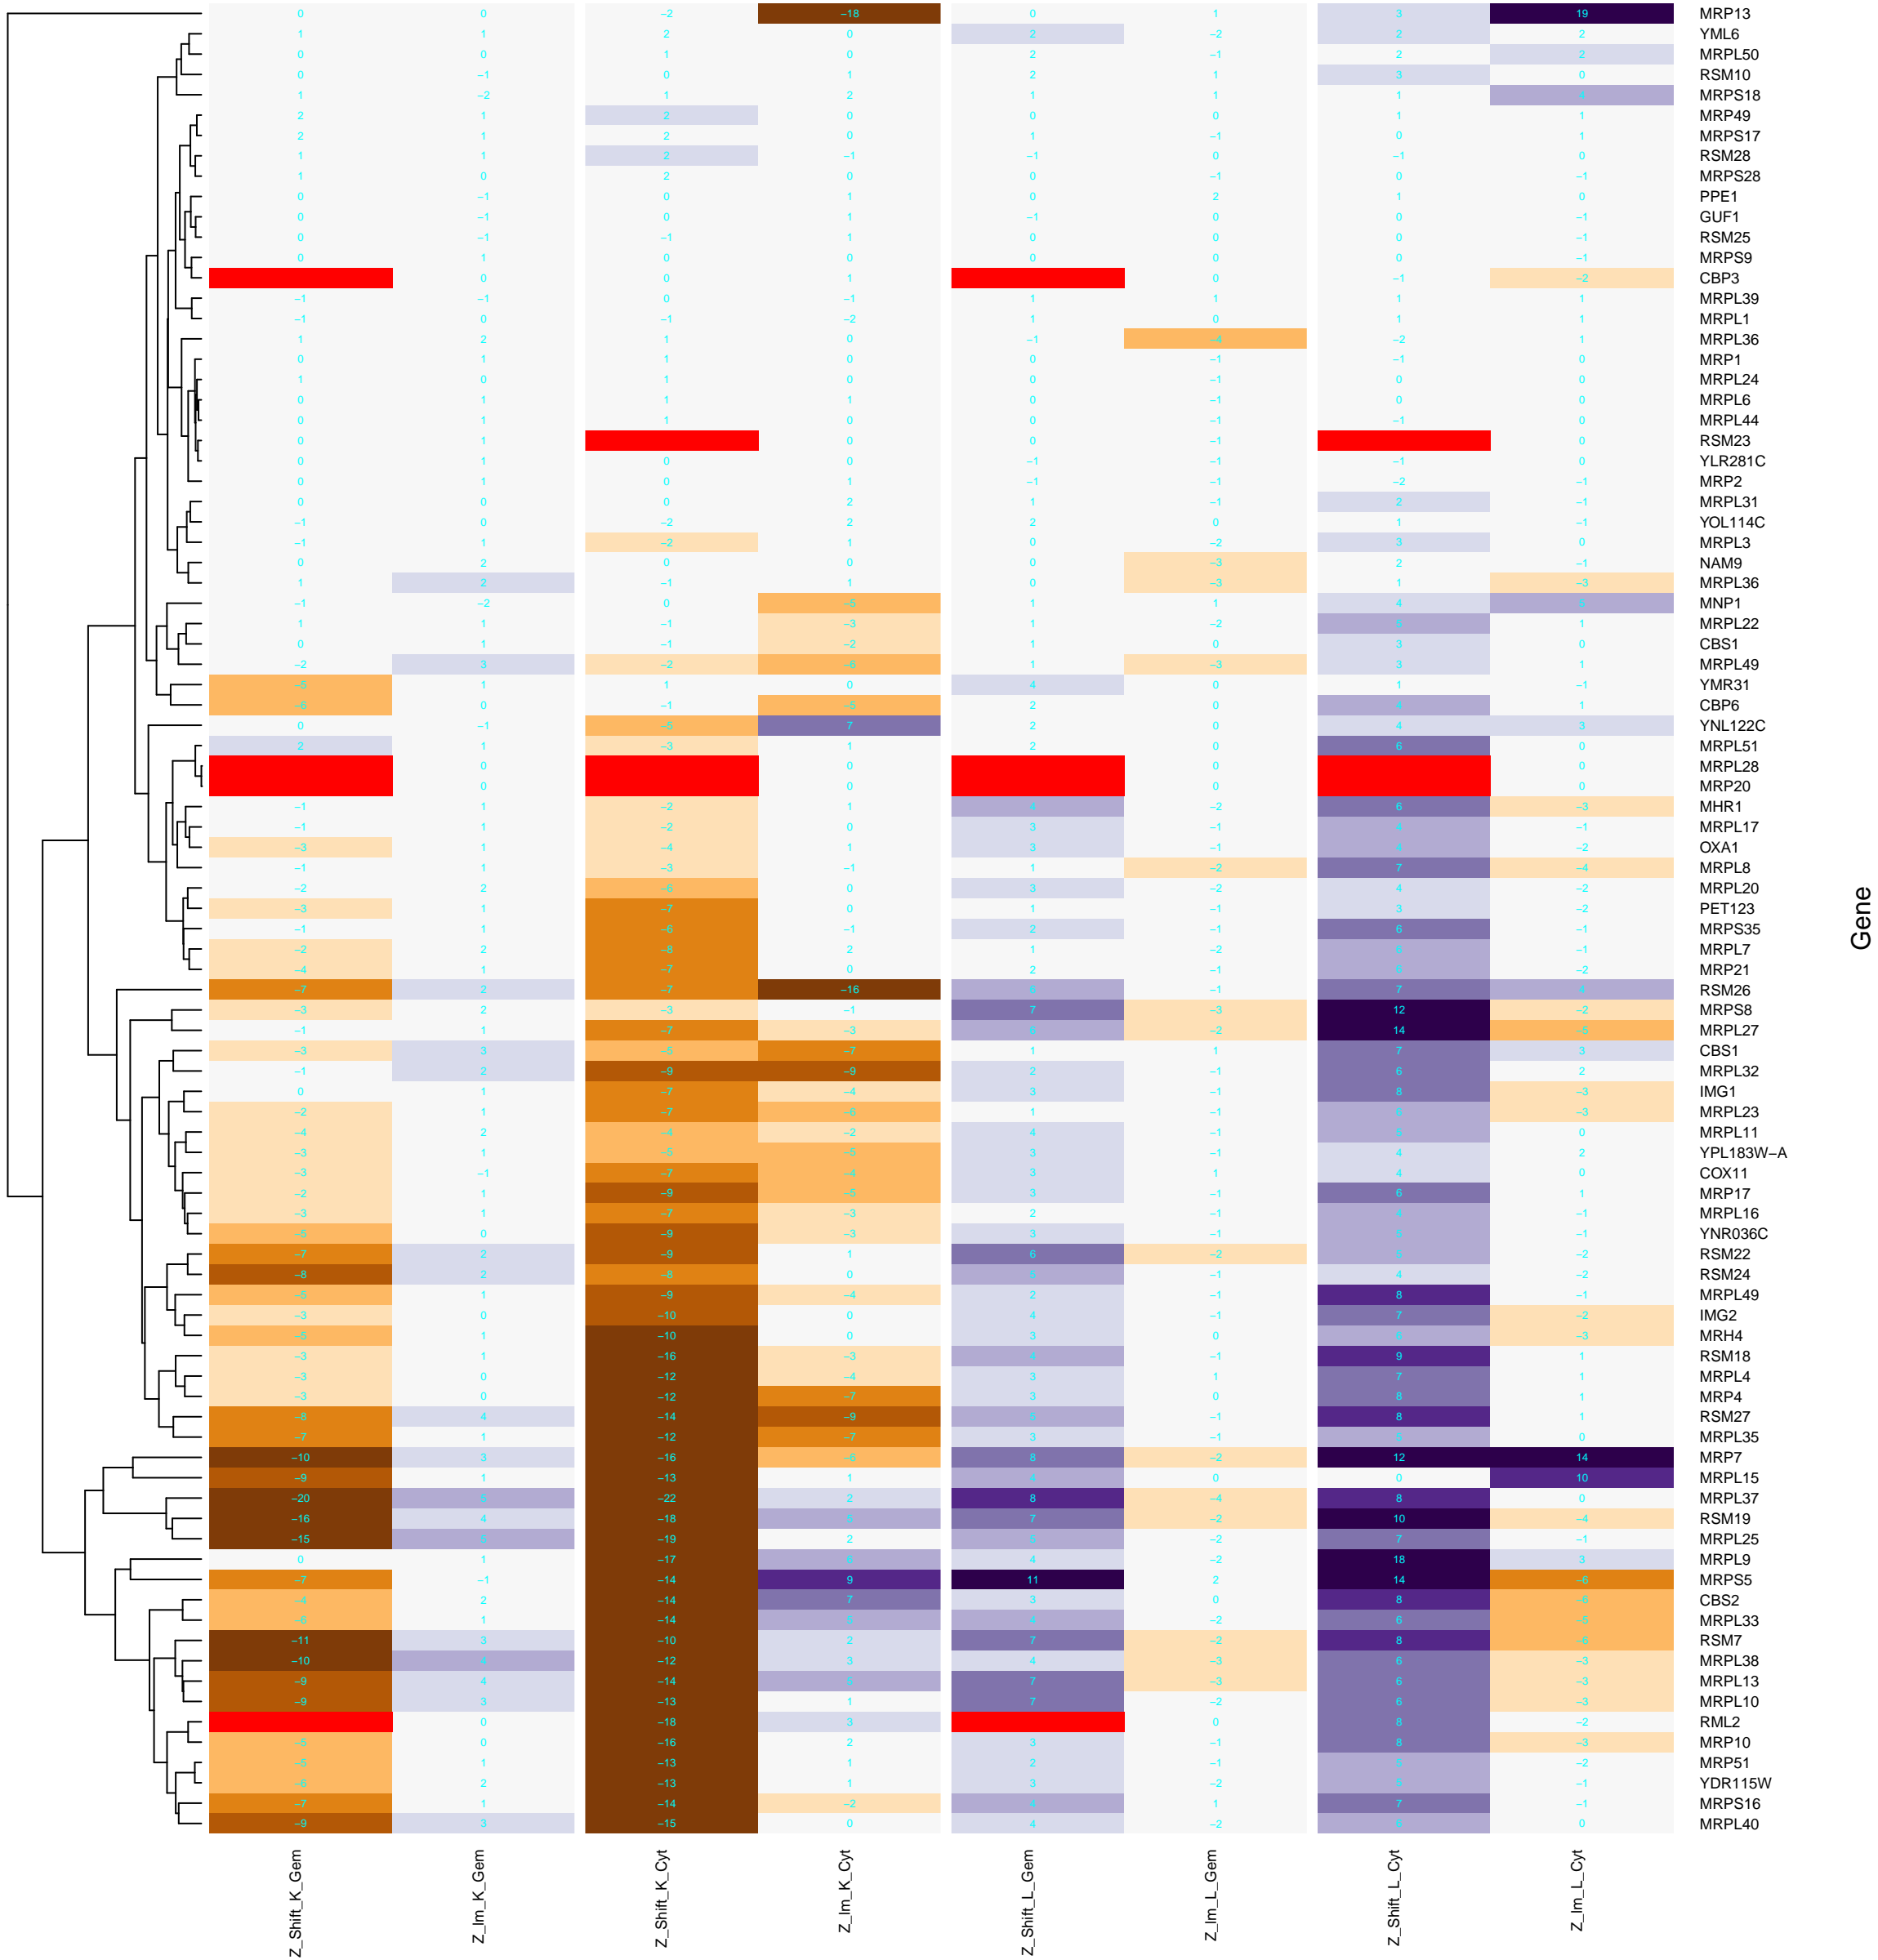

Gene

Supplement: s1 [file s1]

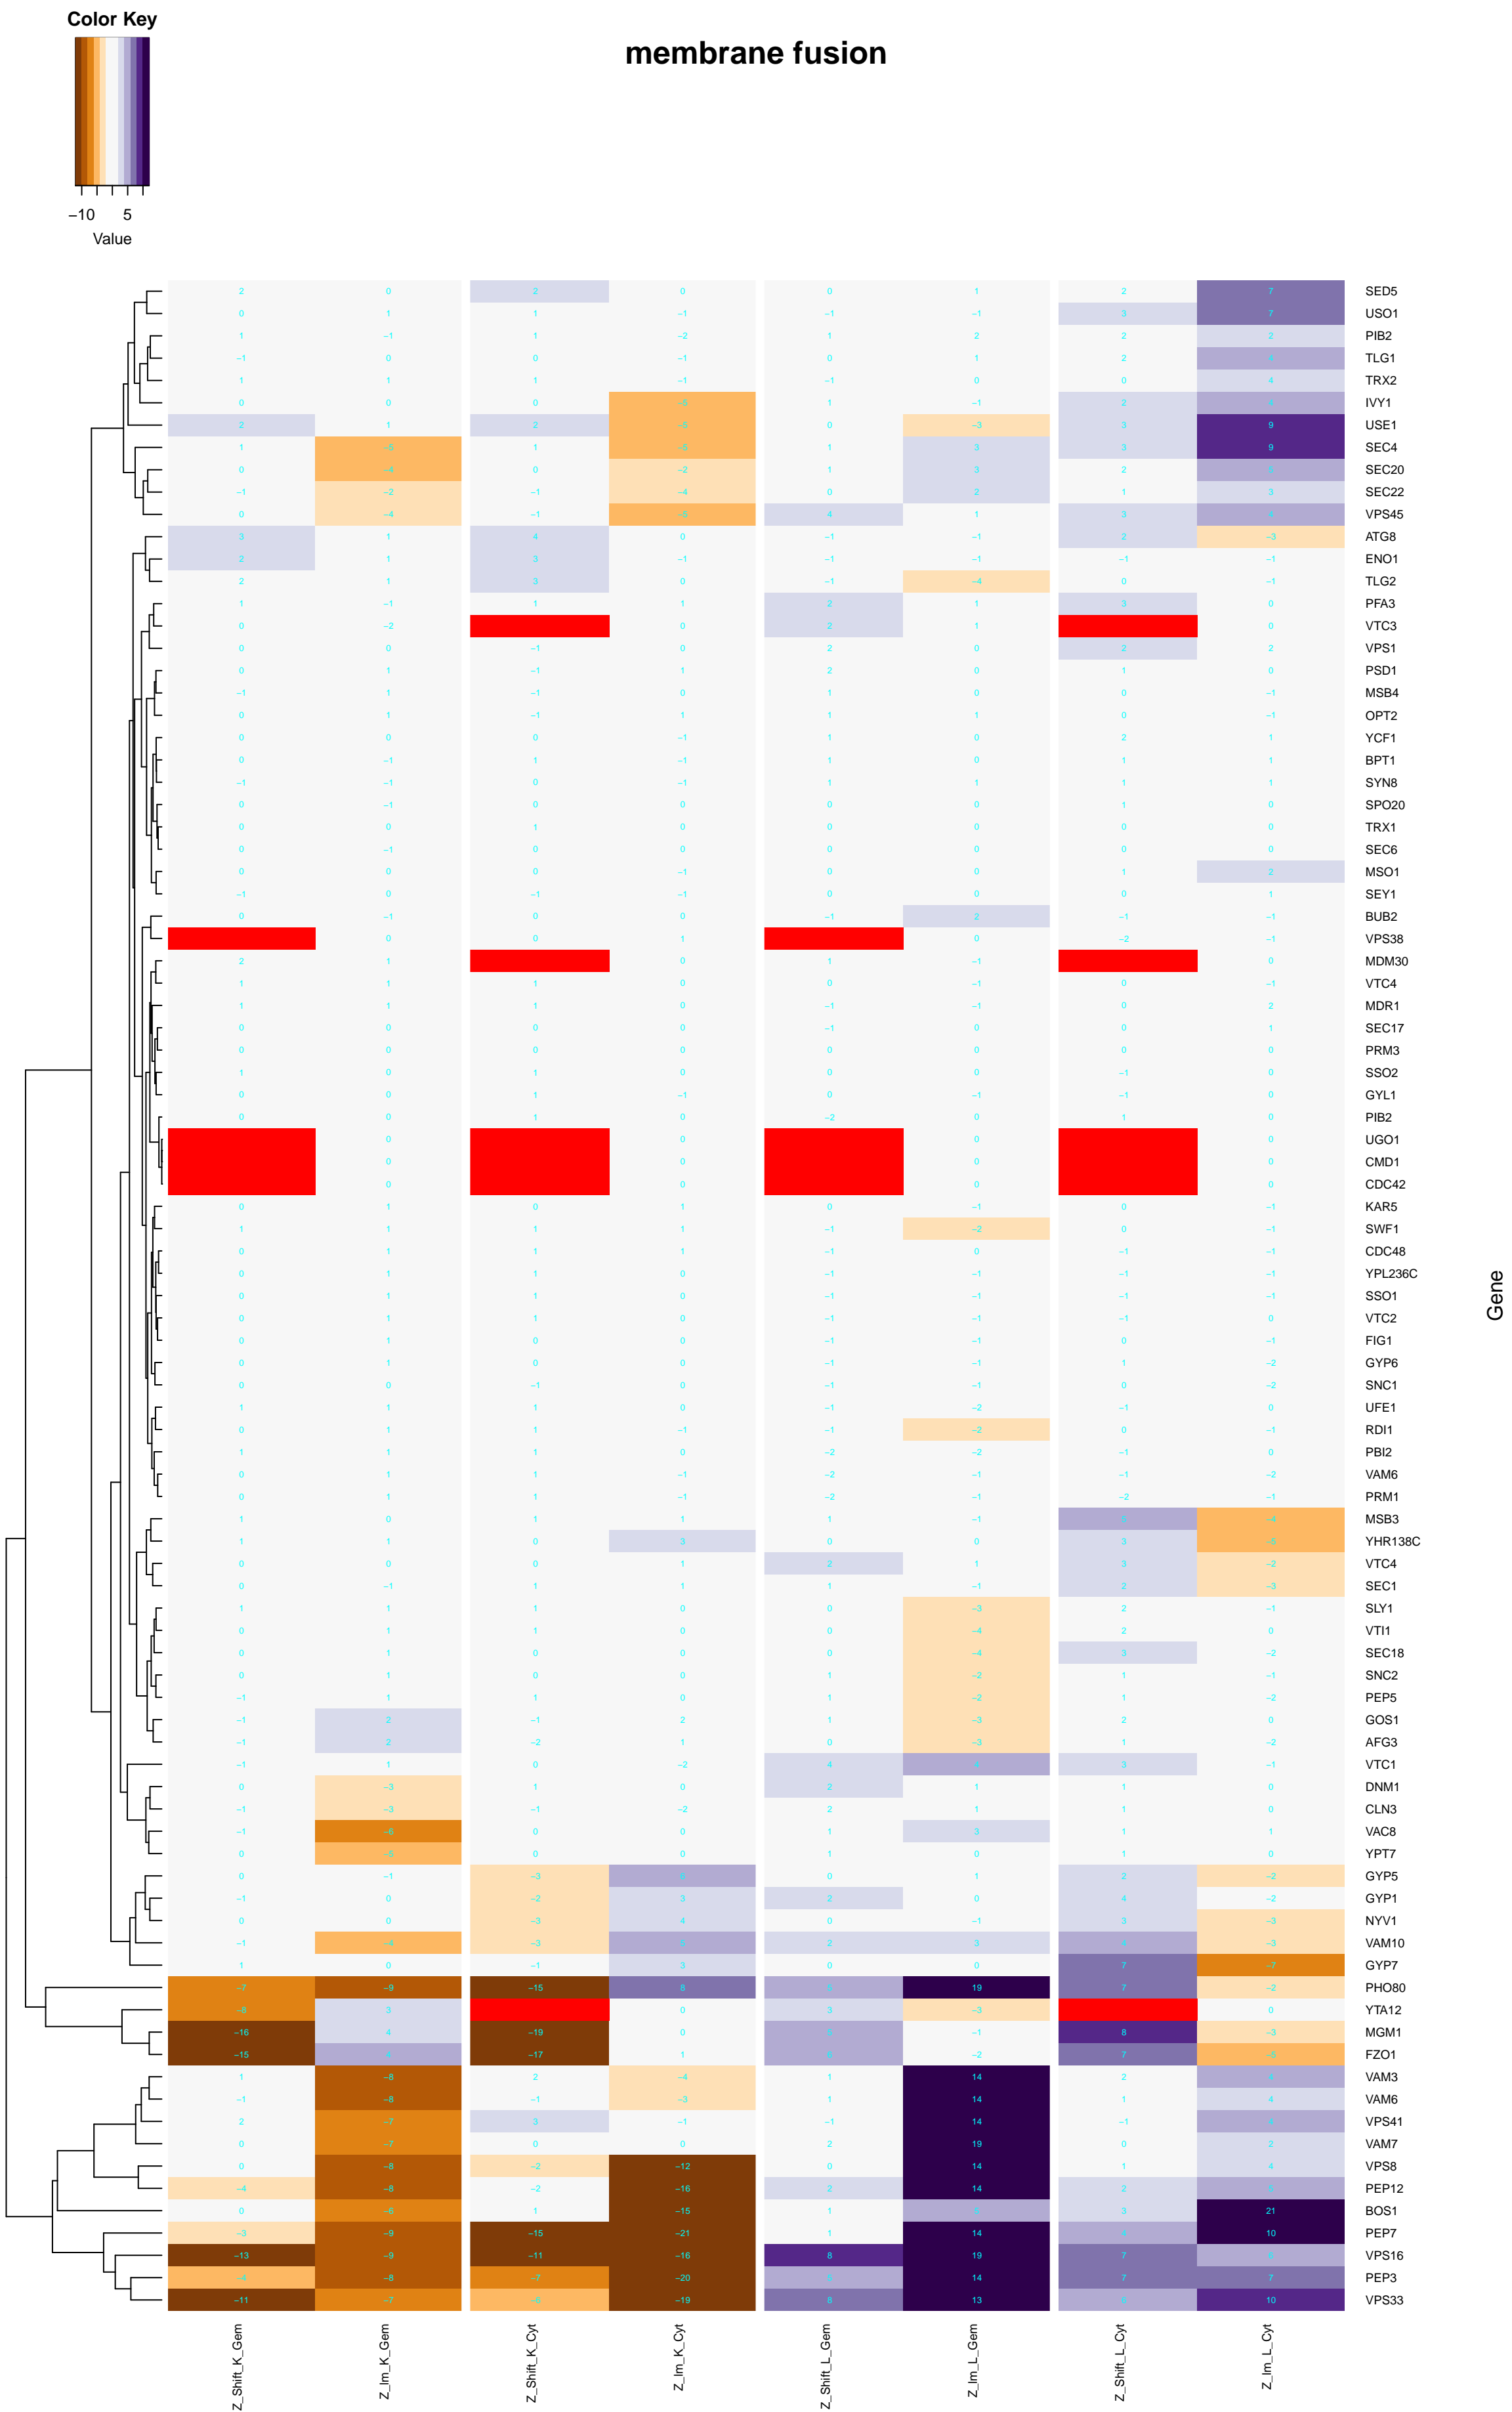

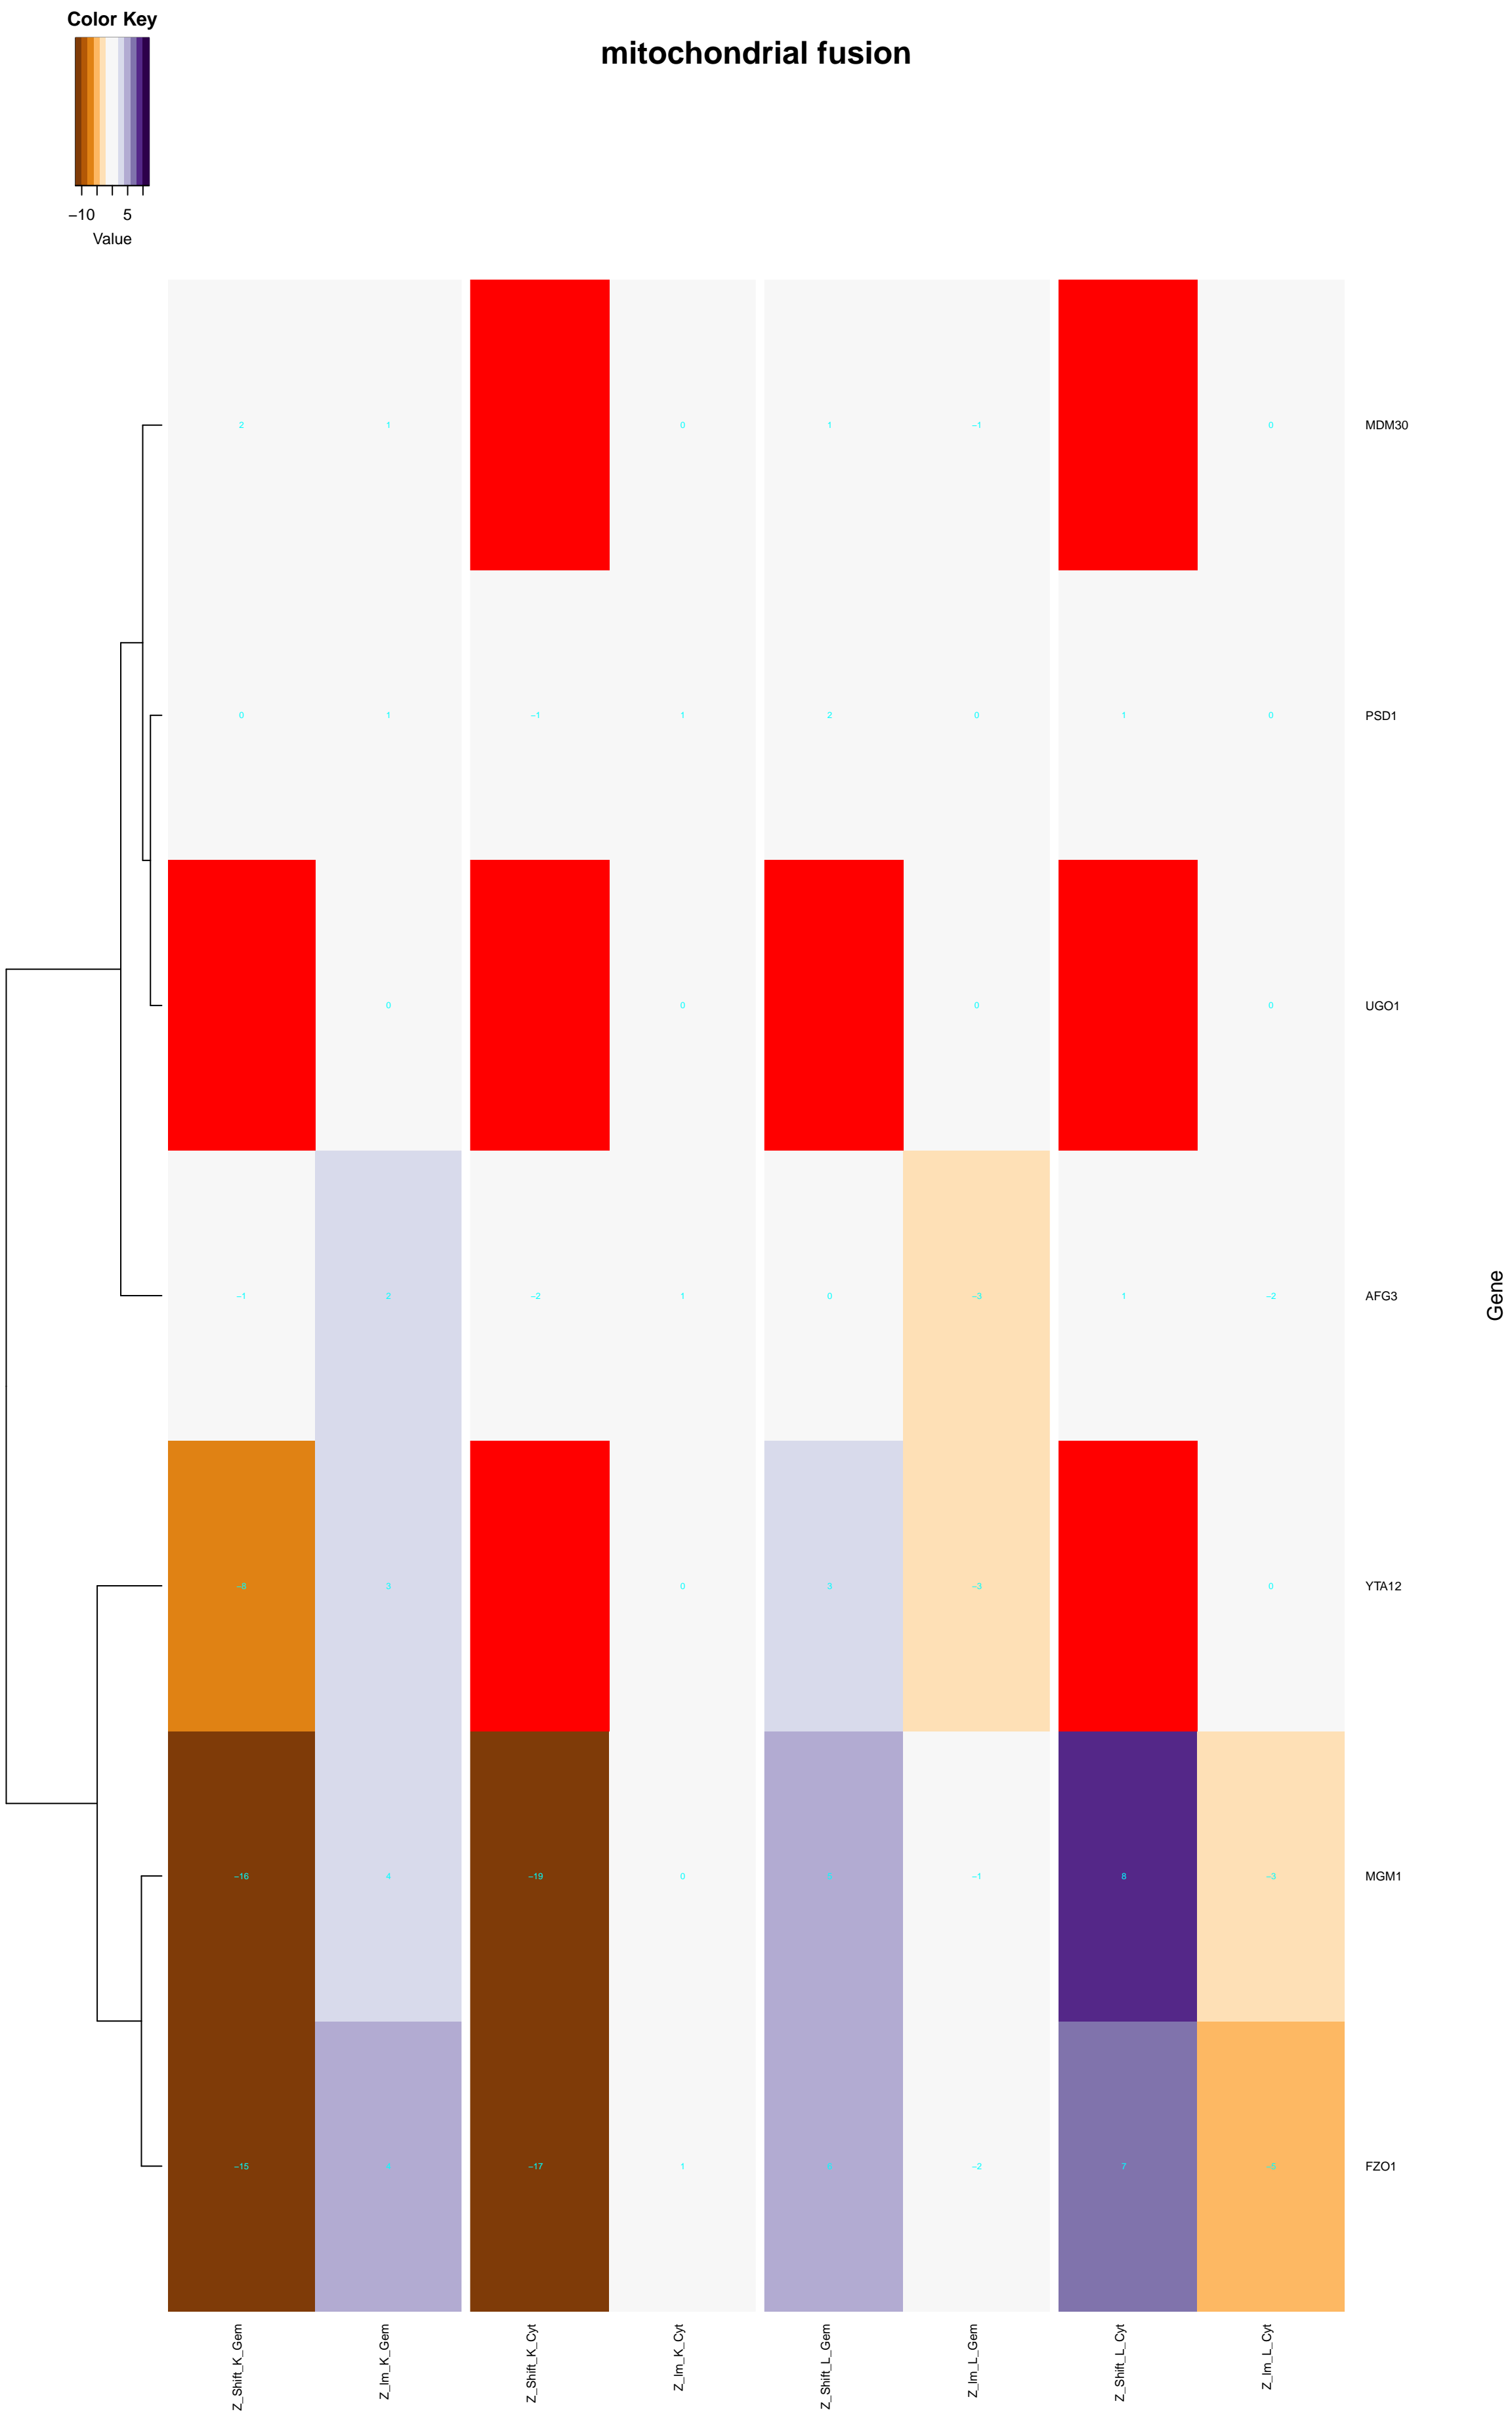



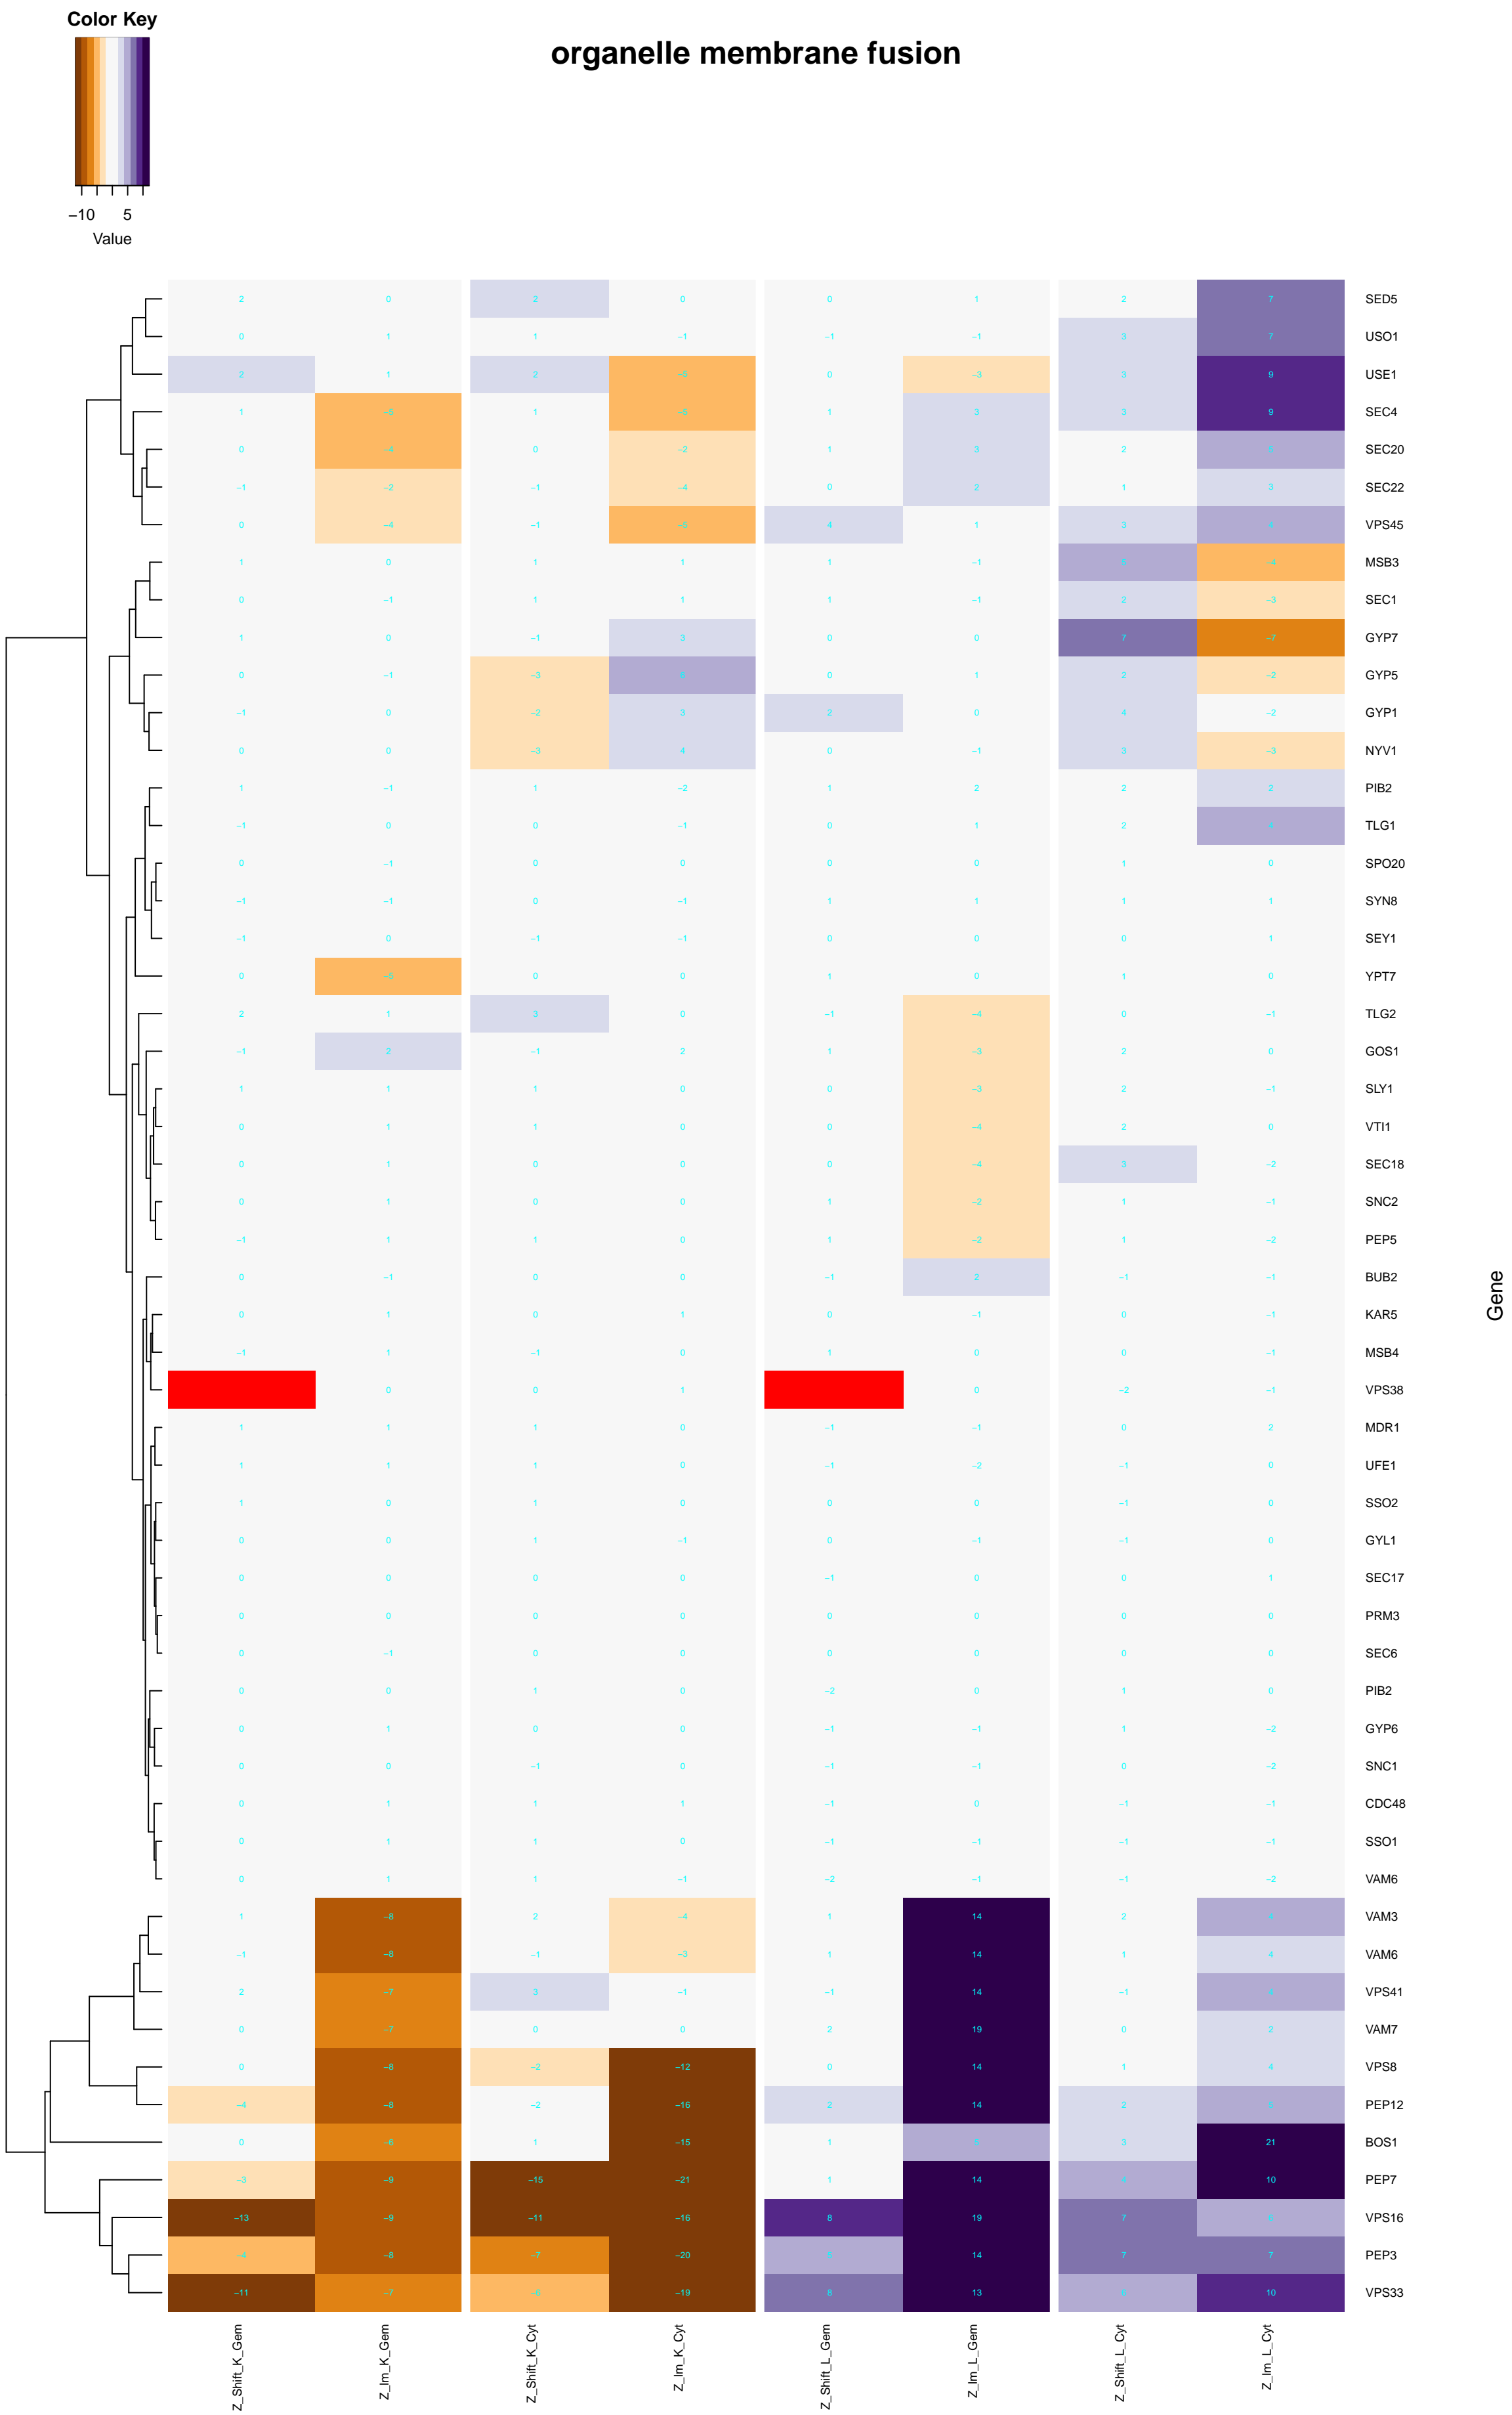

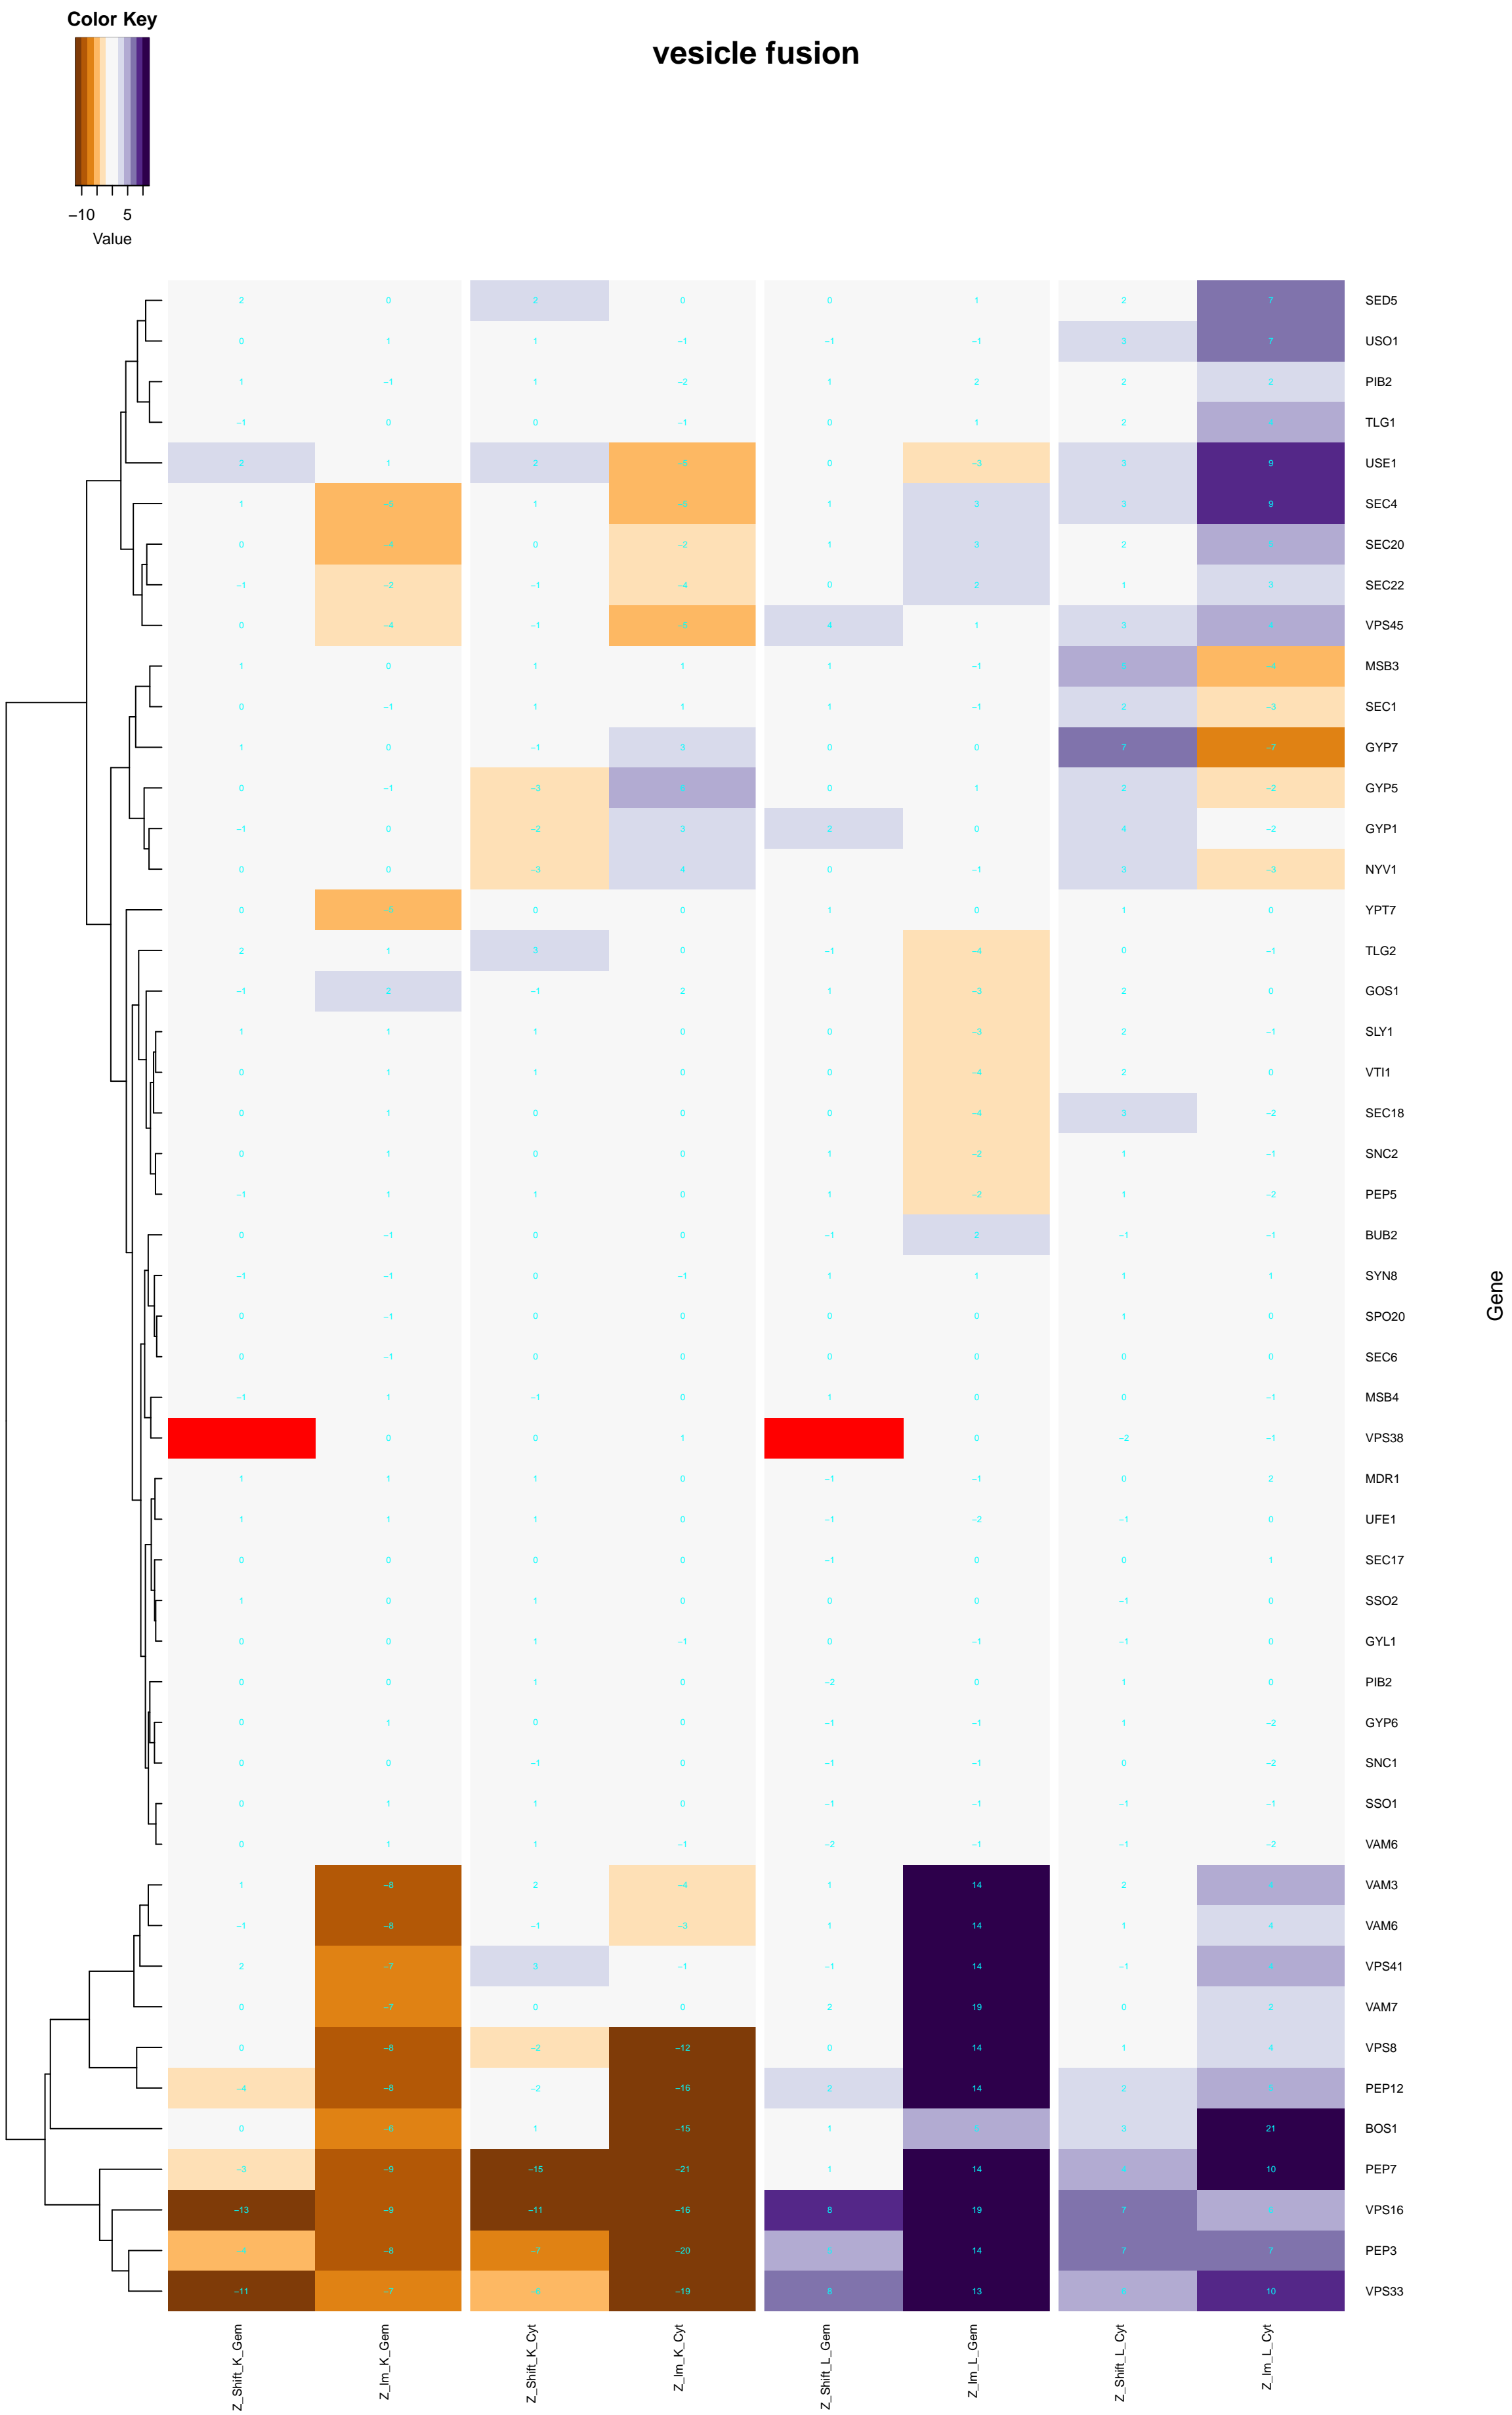

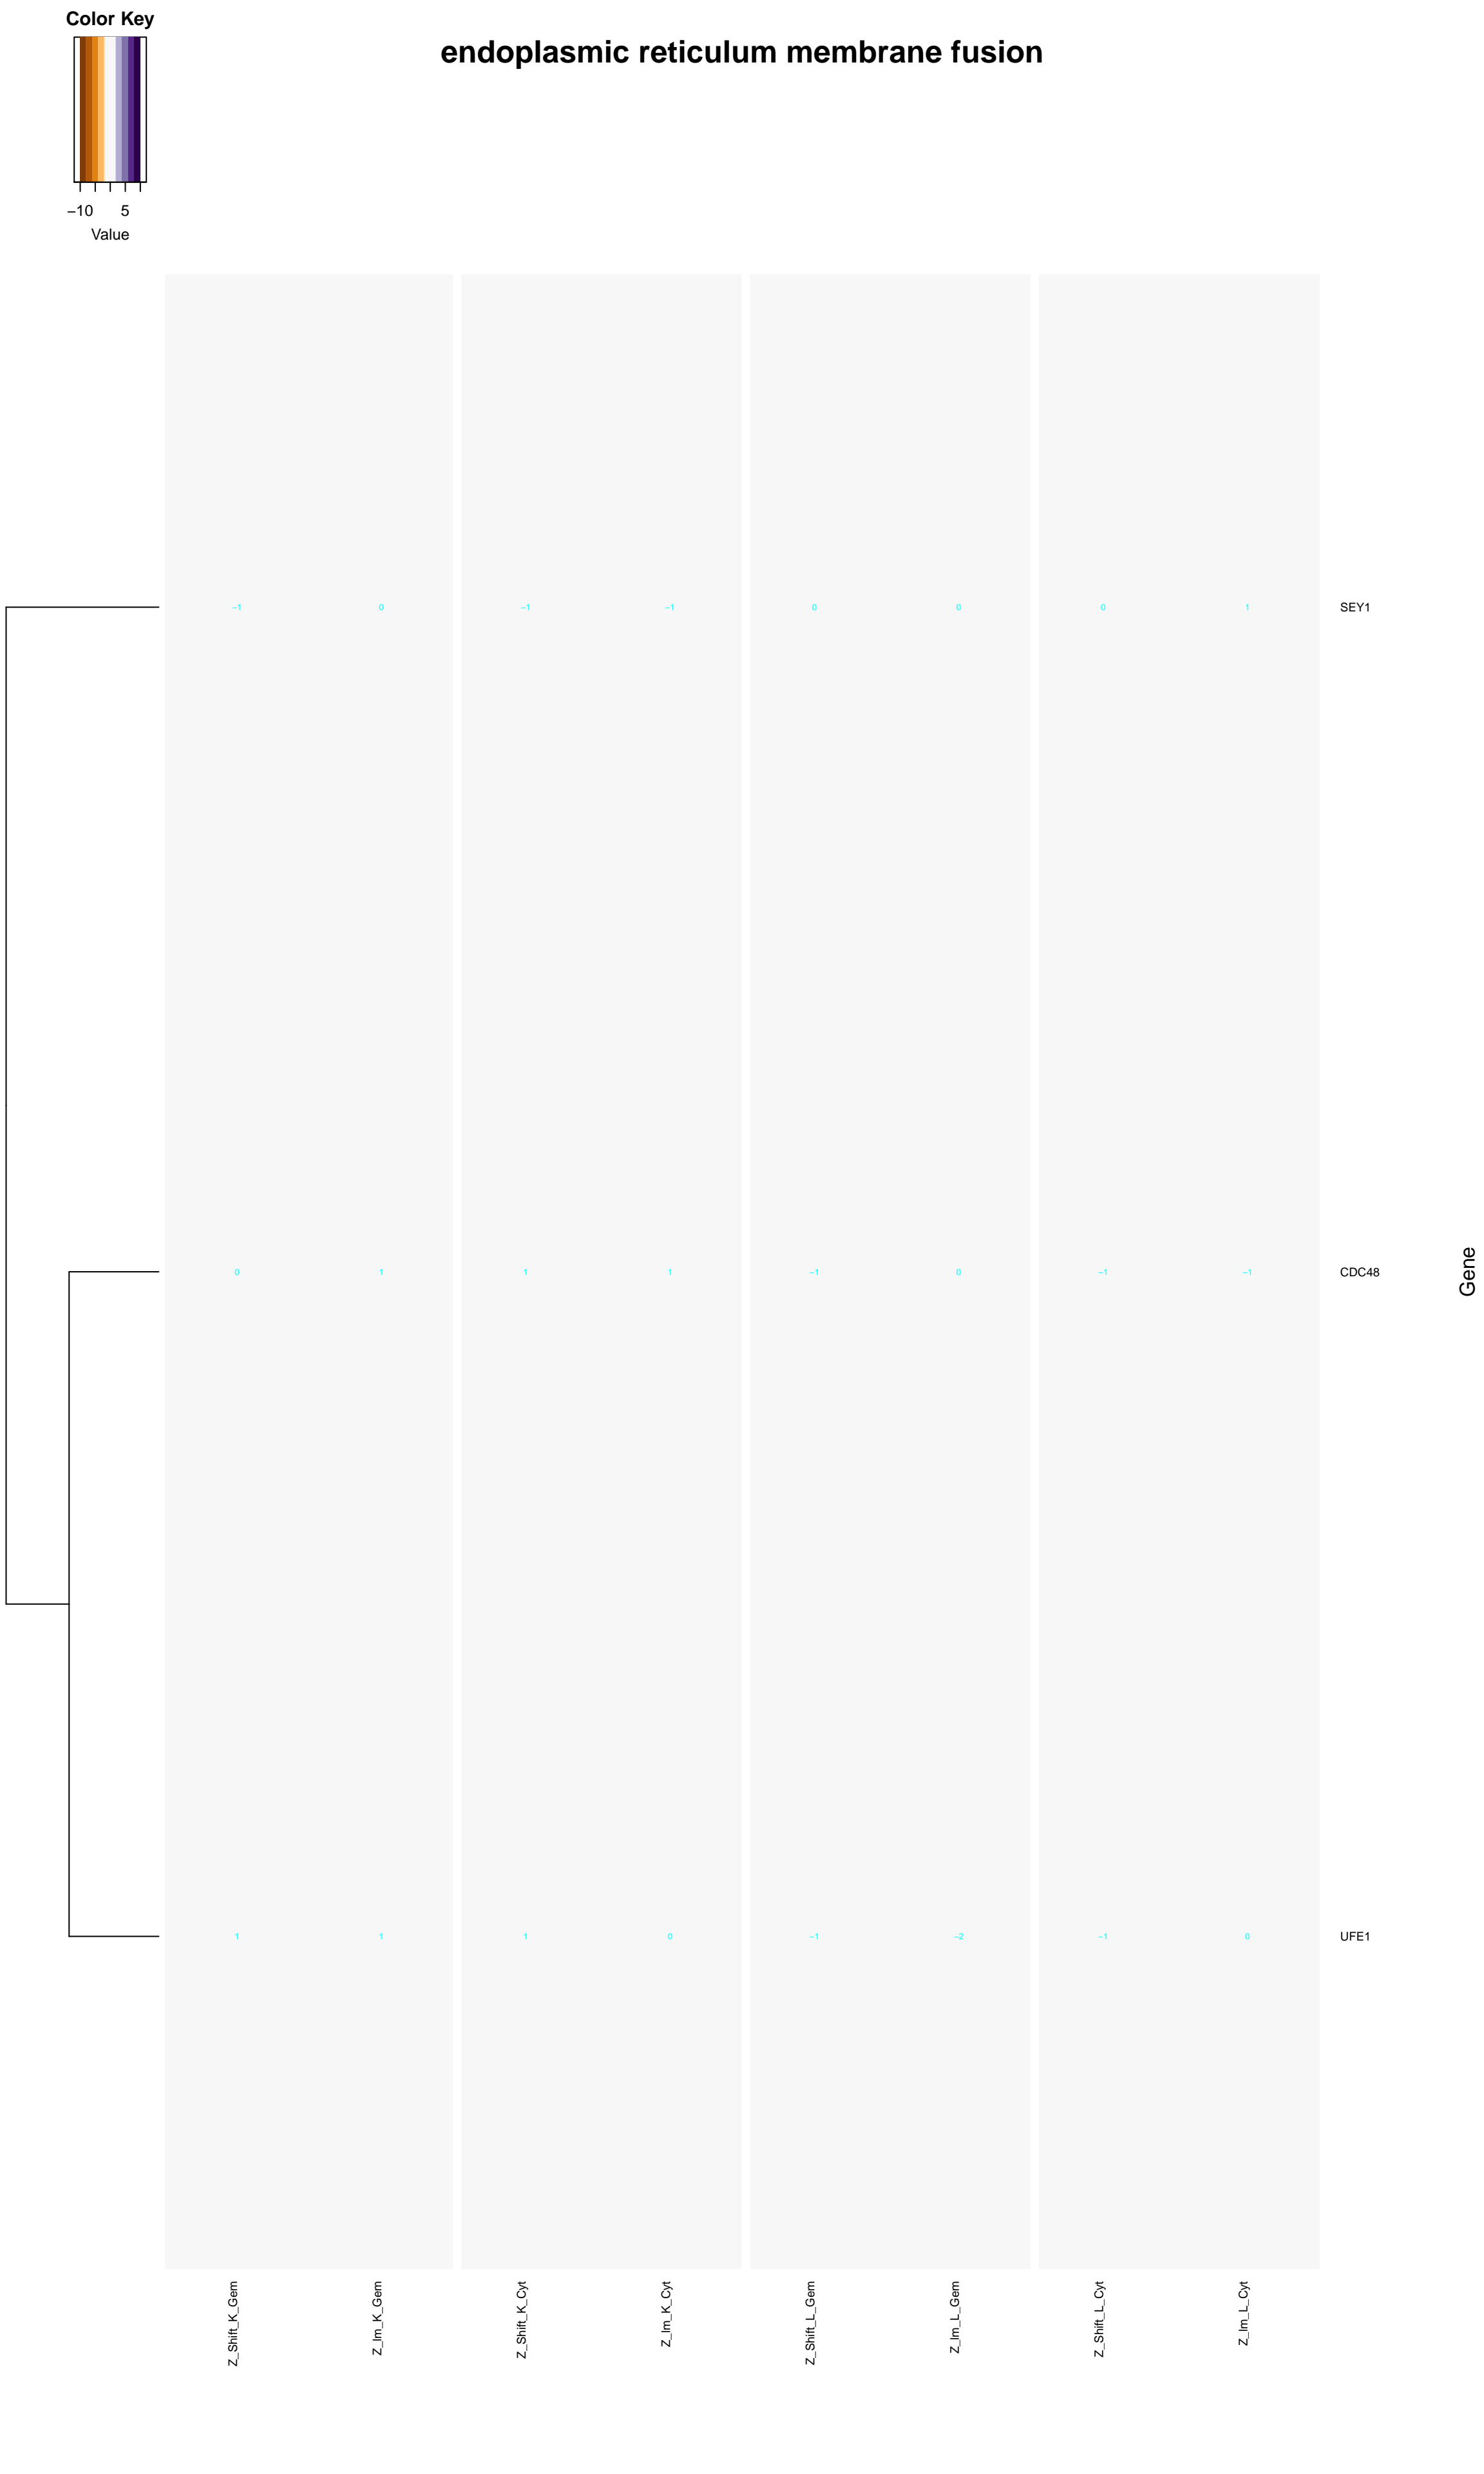

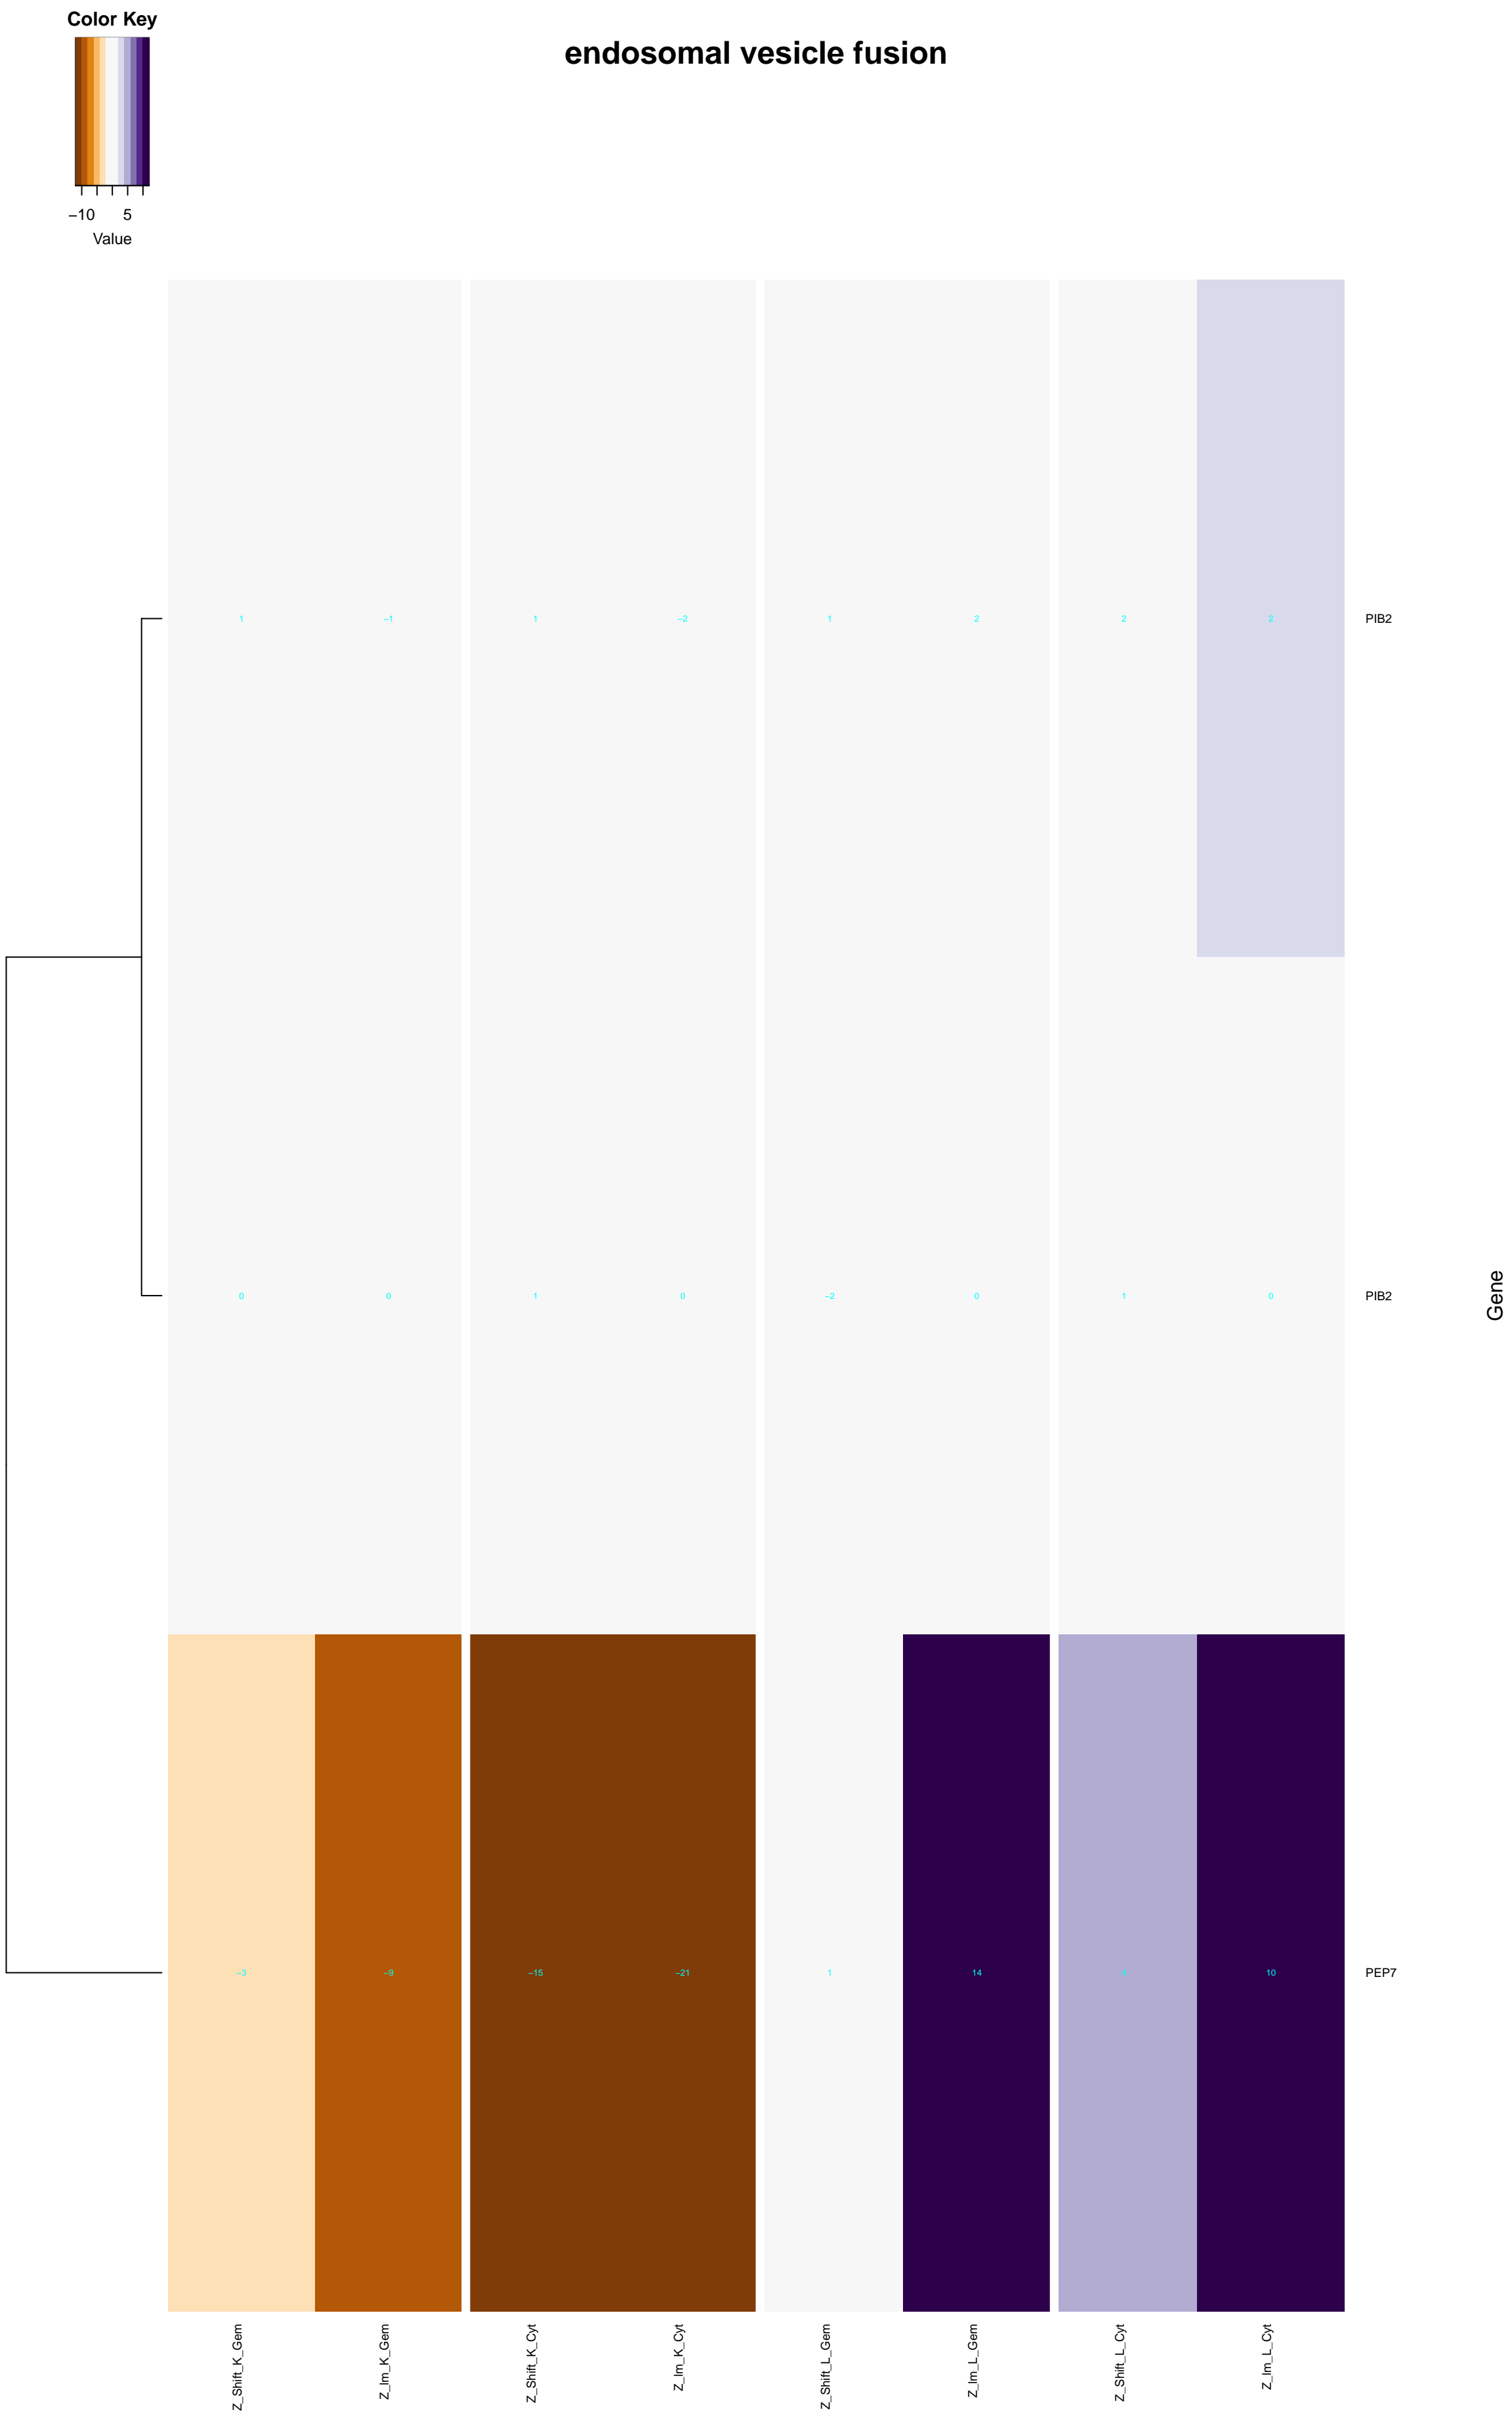

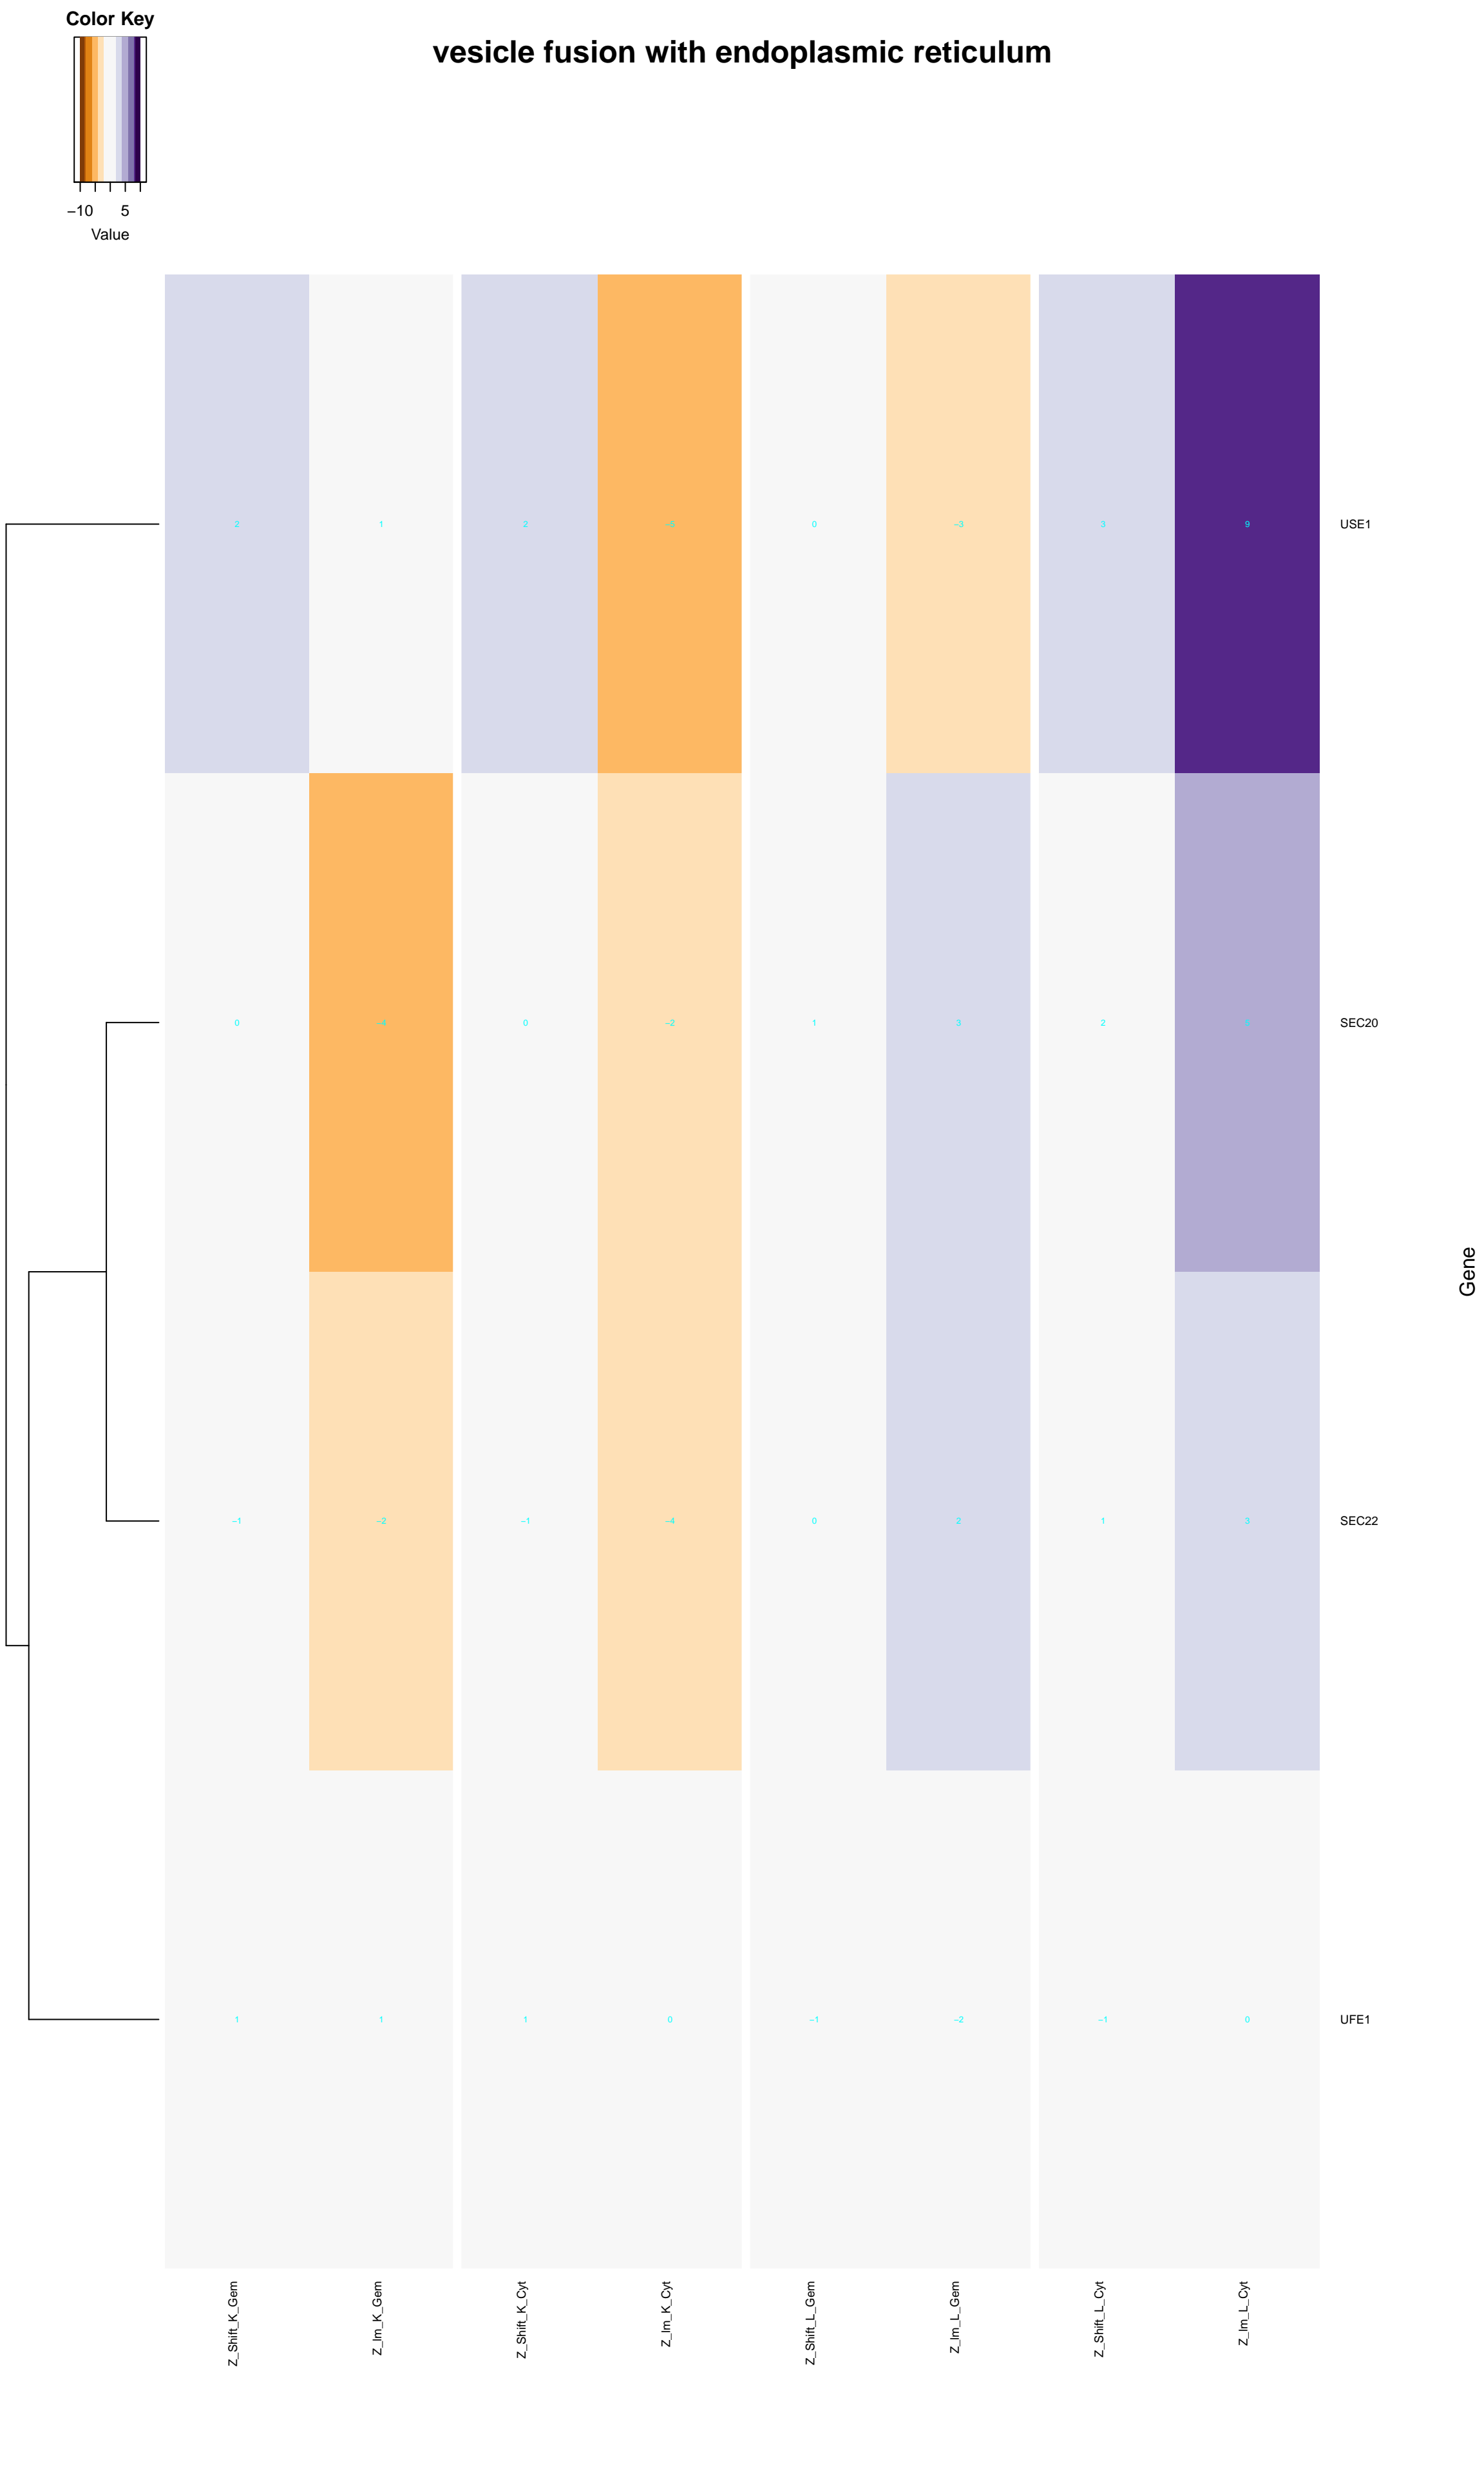

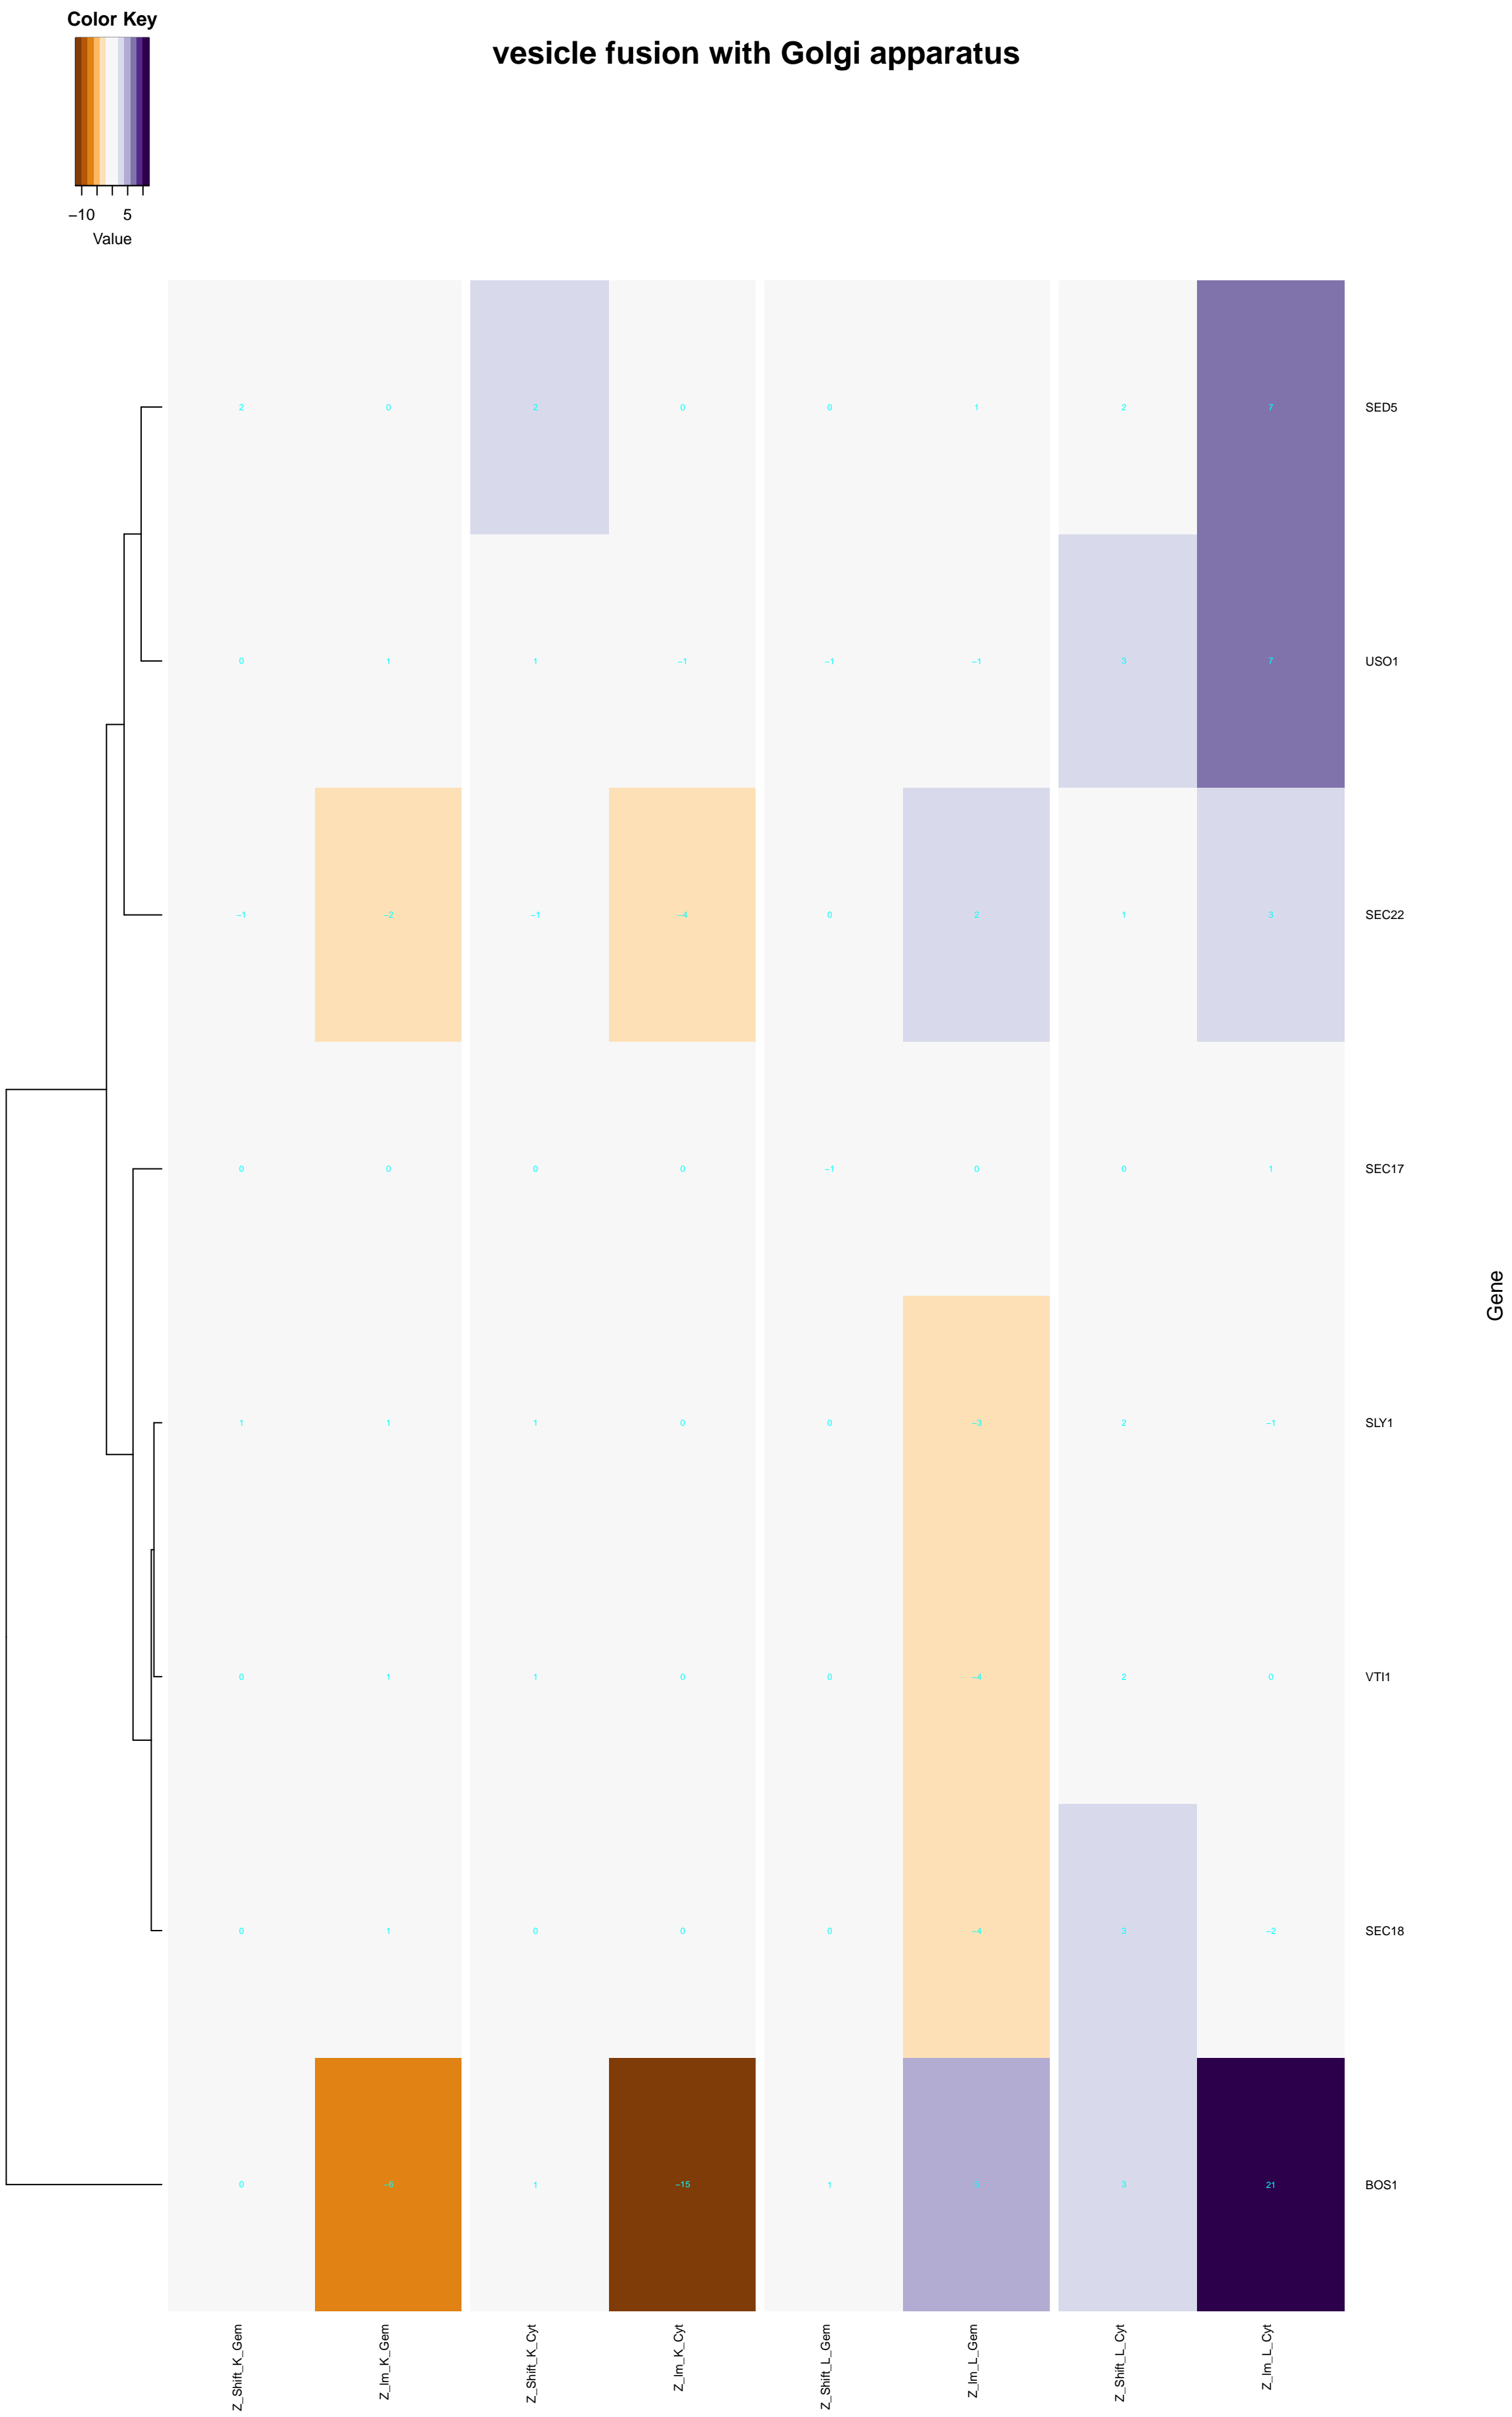

Supplement: s1 [file s1]

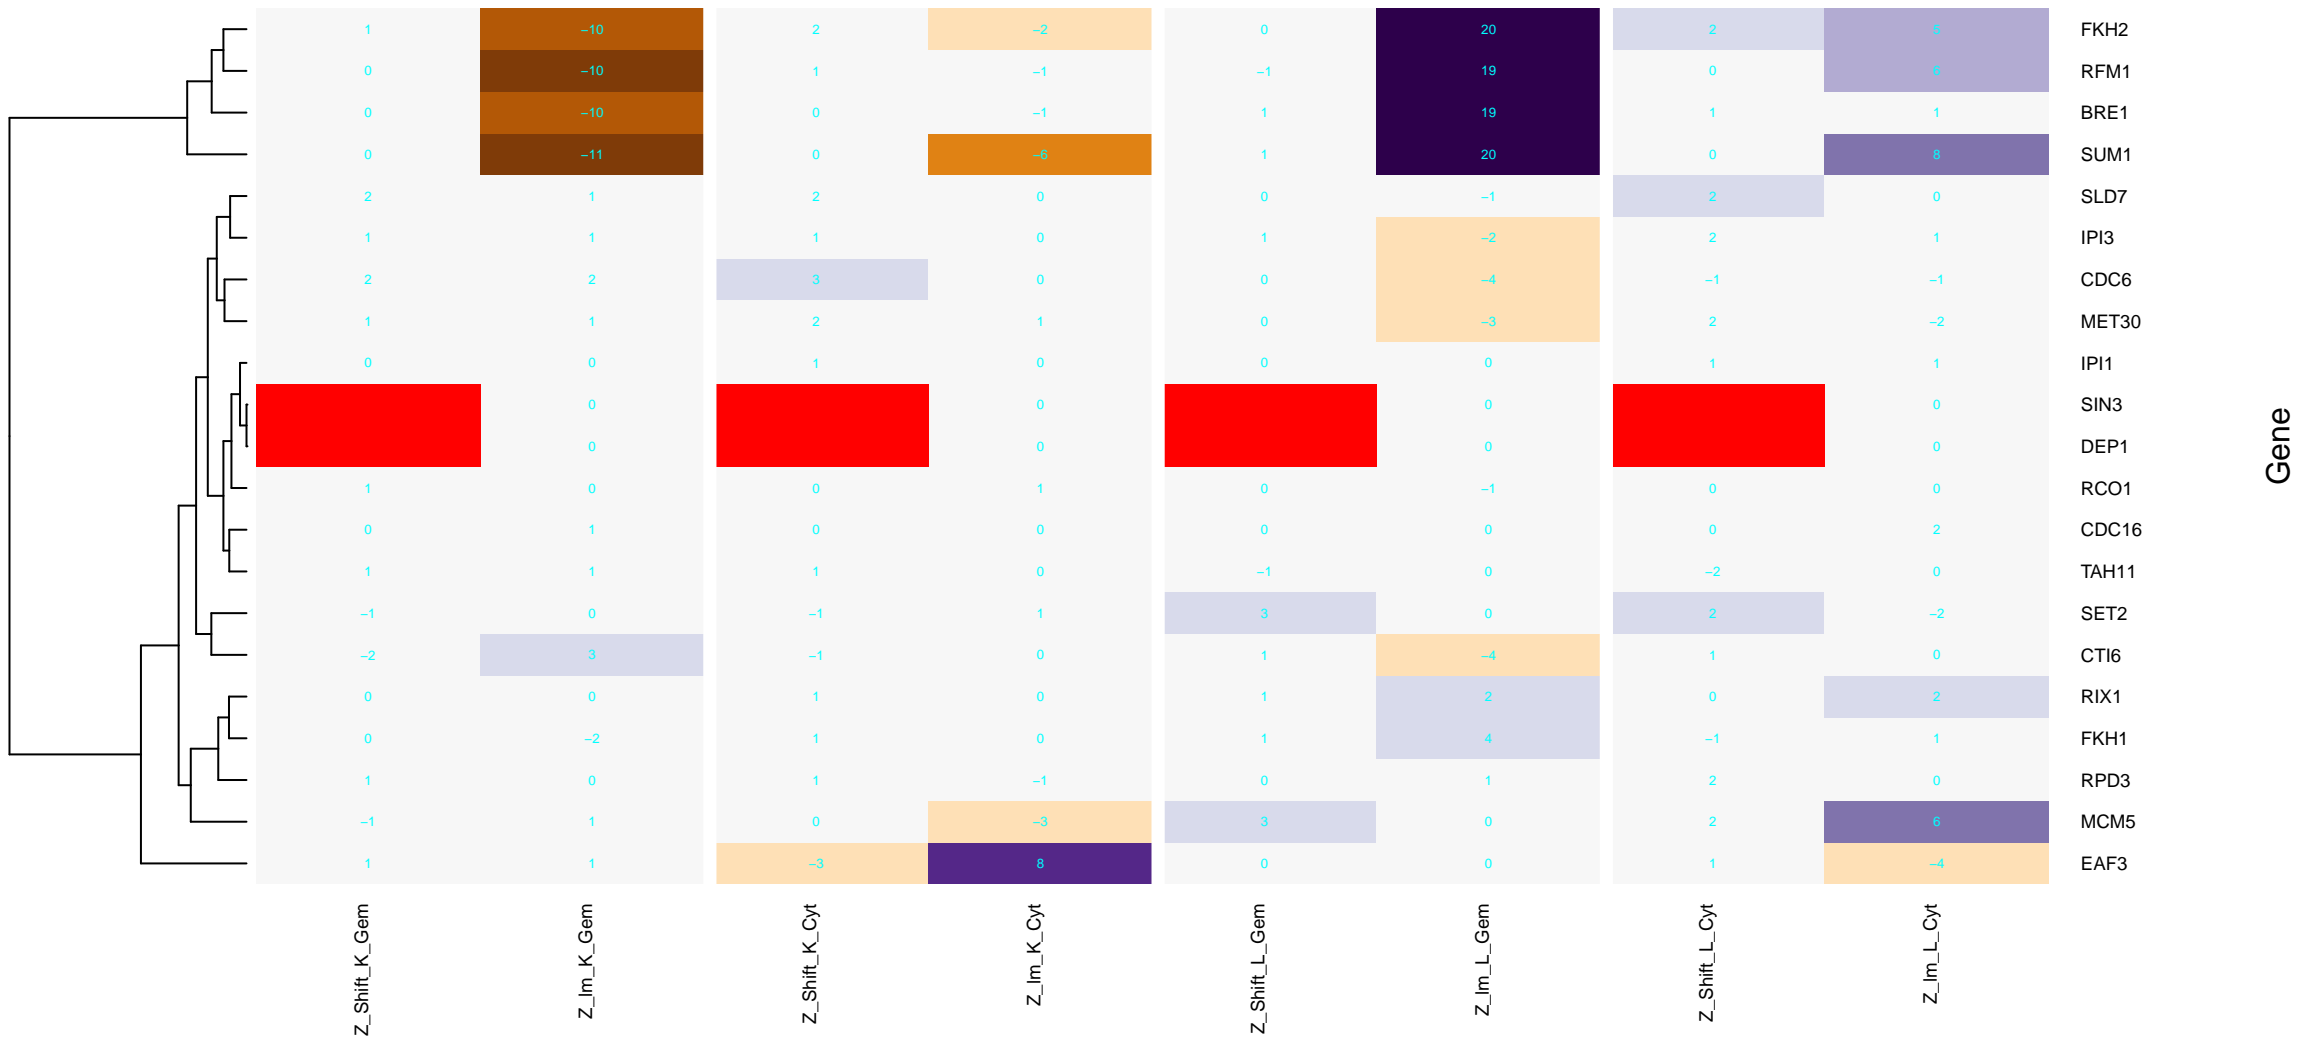

Supplement: s1 [file s1]

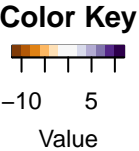

spliceosomal complex assembly

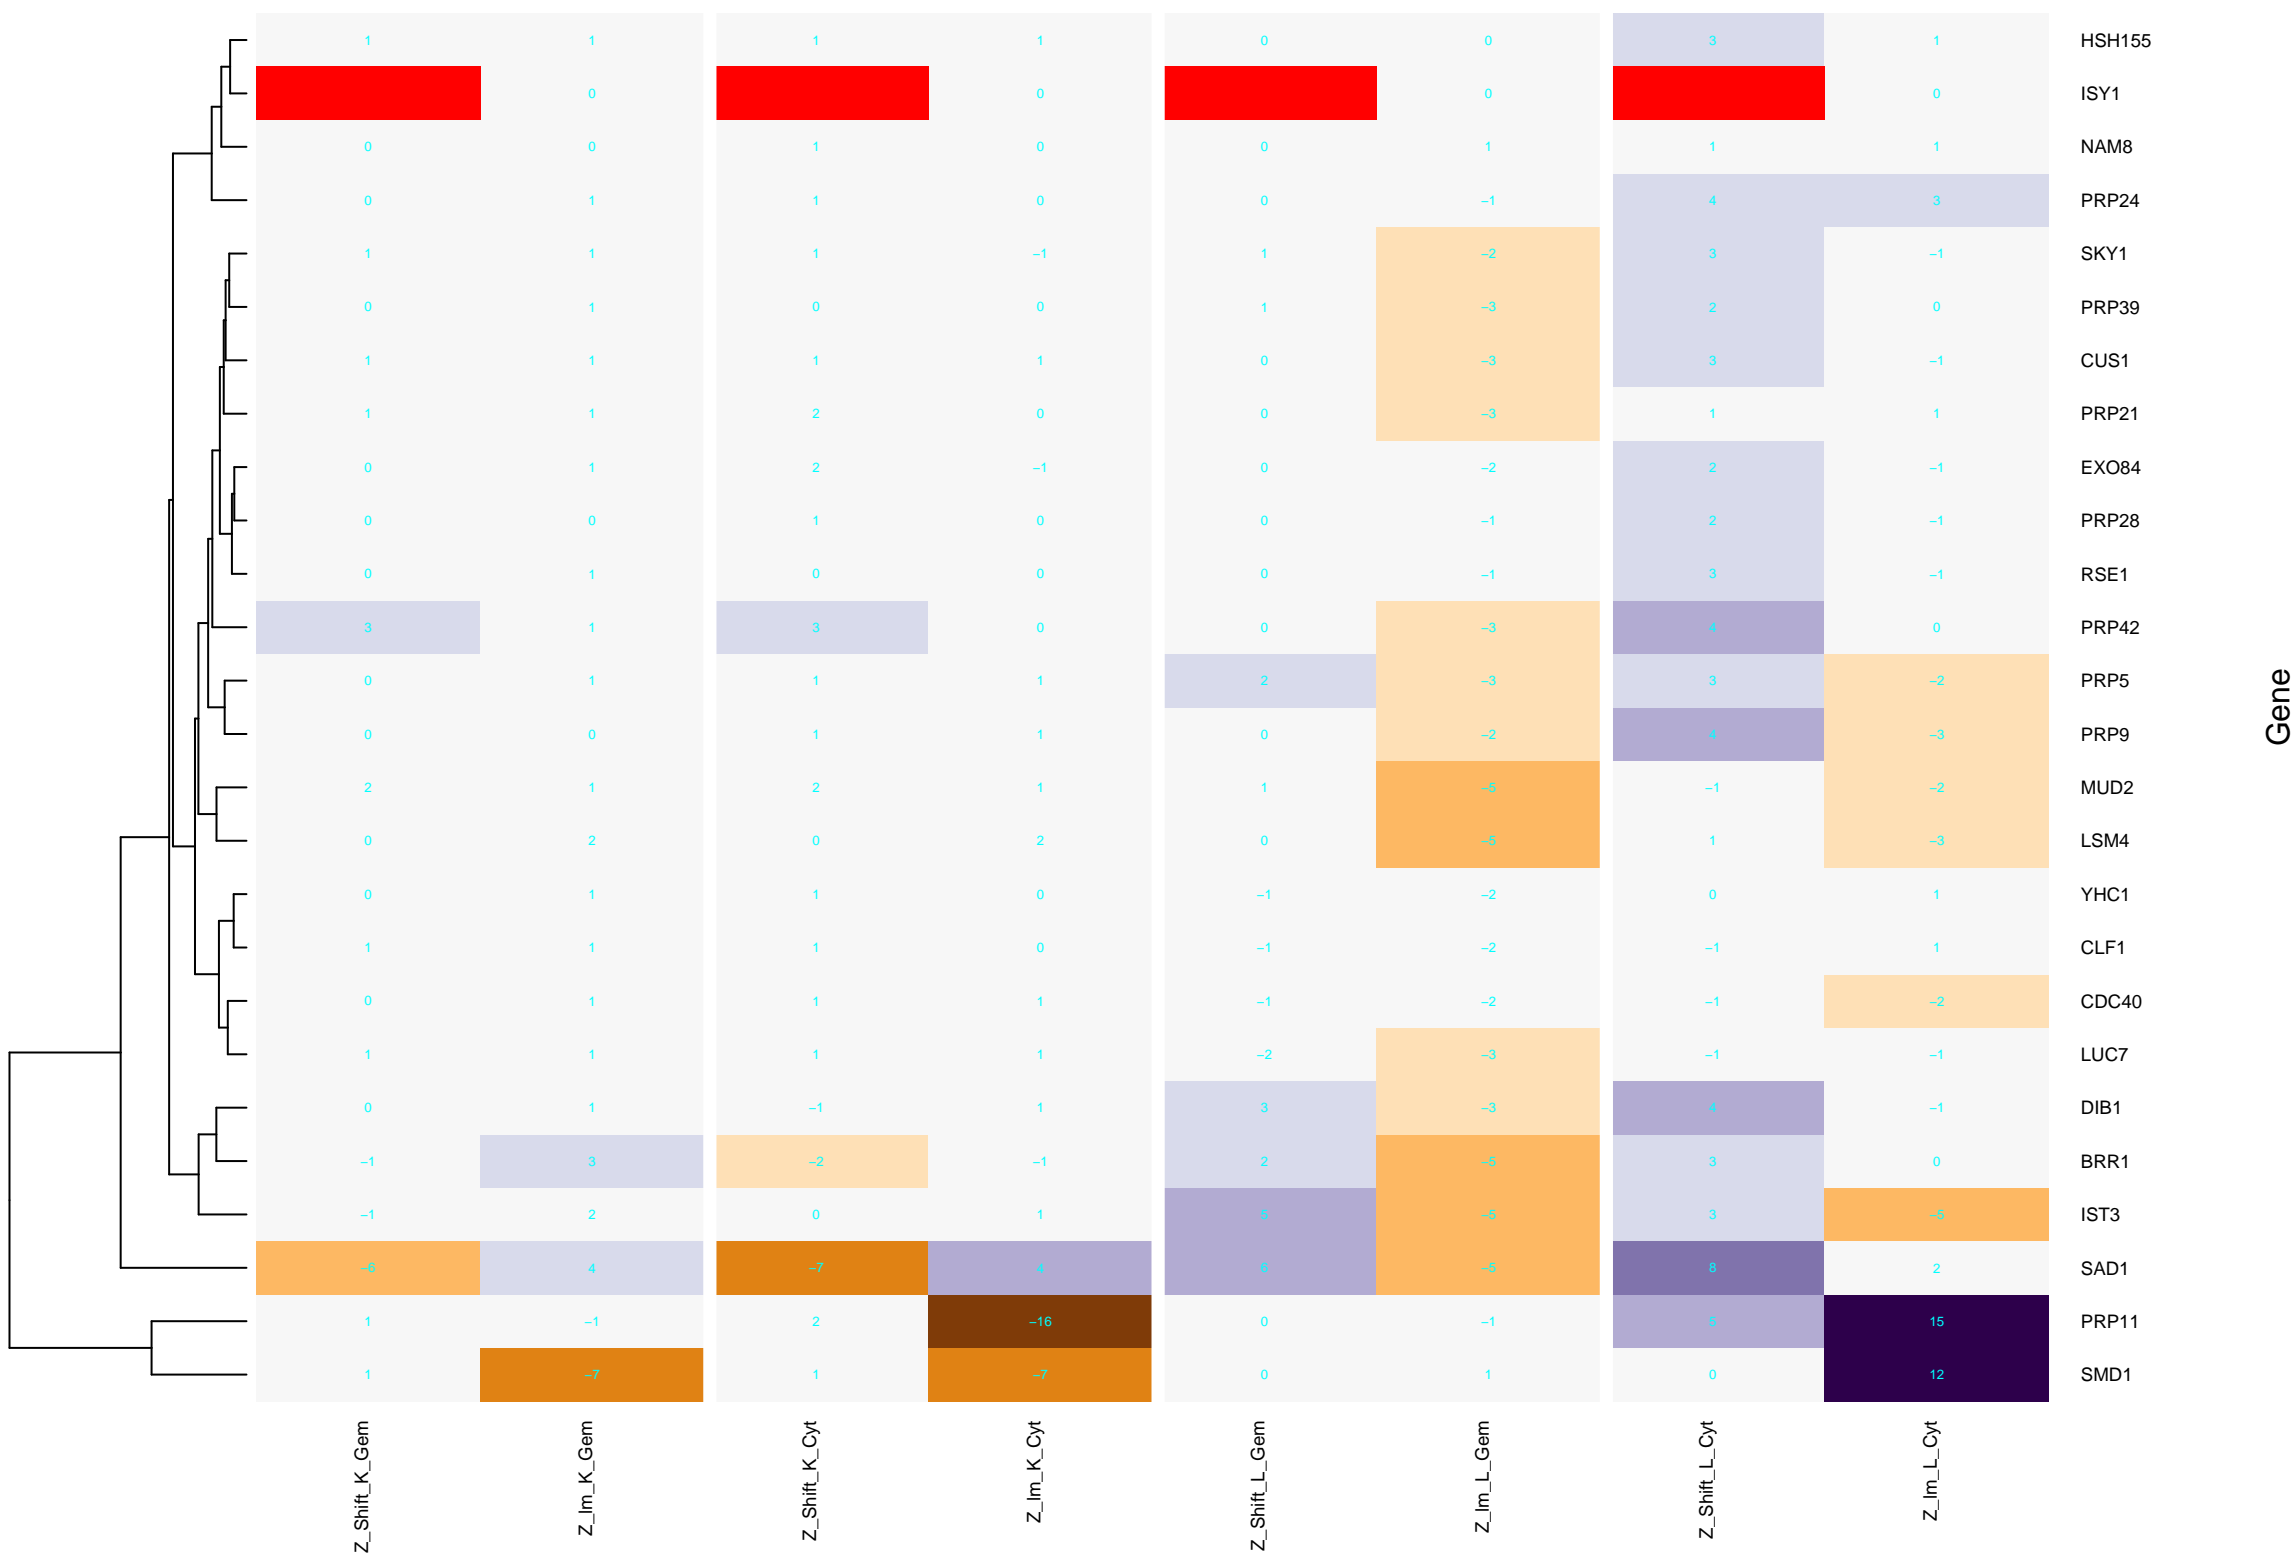

Supplement: s1 [file s1]

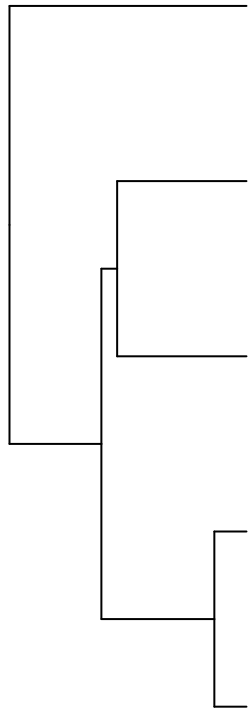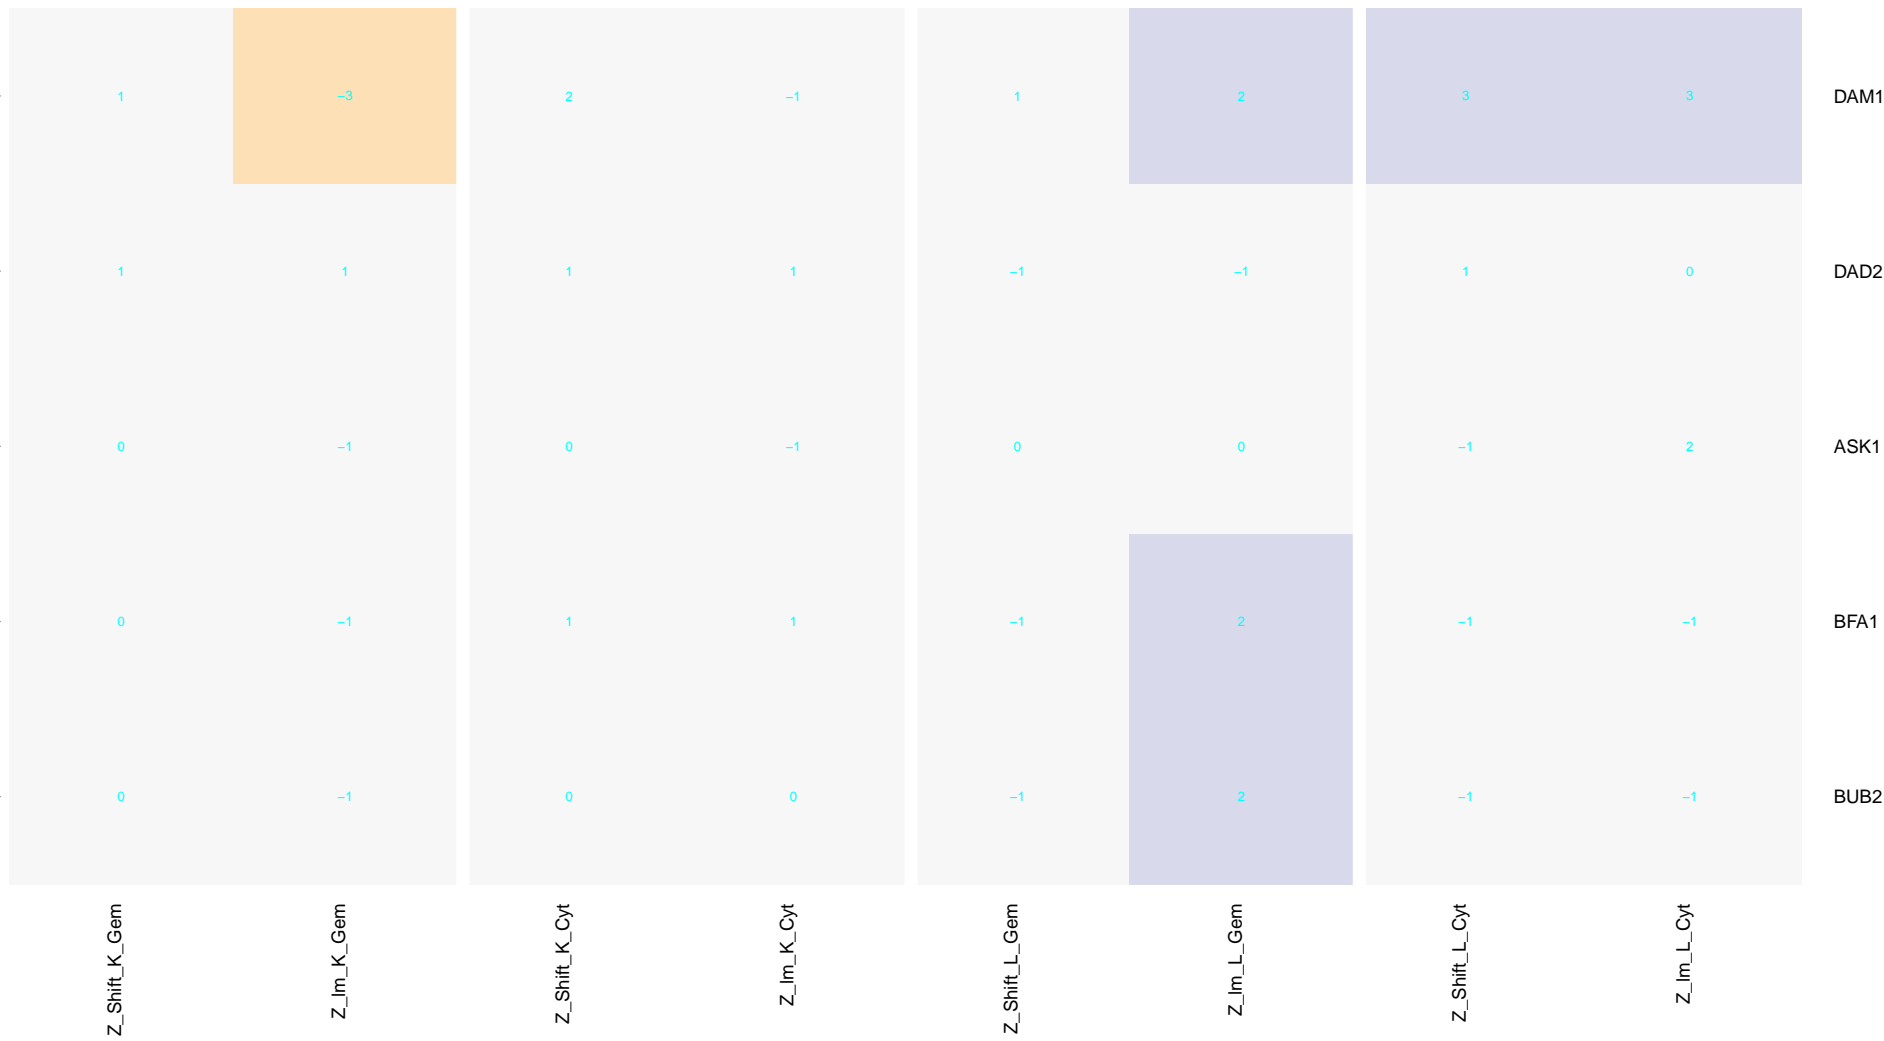

Gene

Supplement: s1 [file s1]

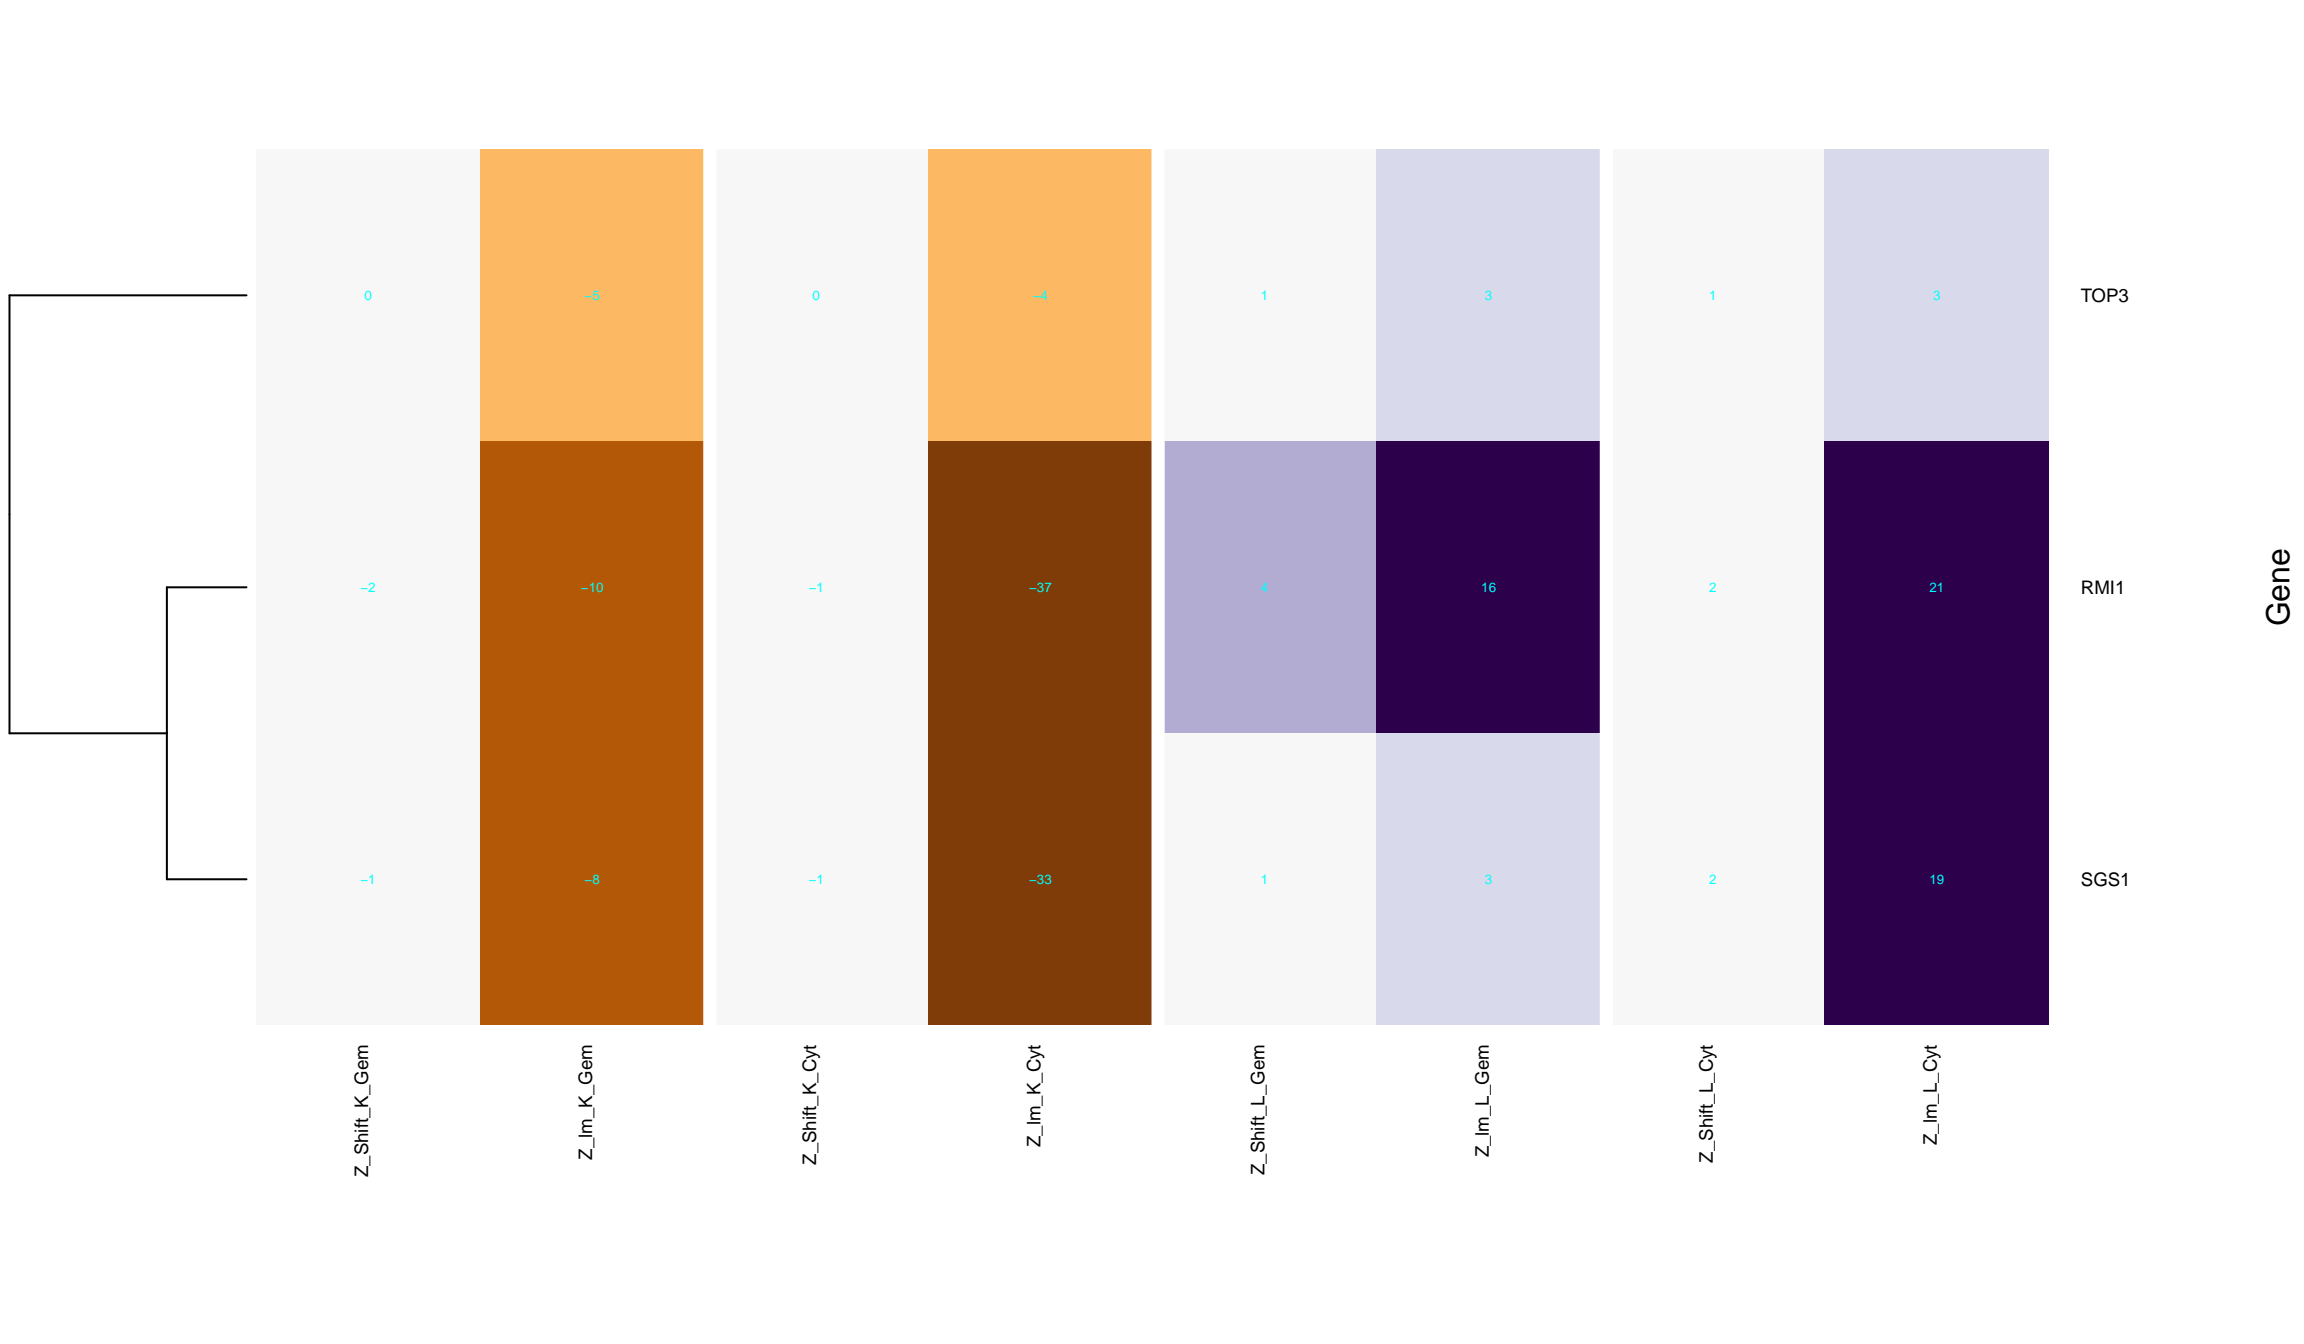

Supplement: s1 [file s1]

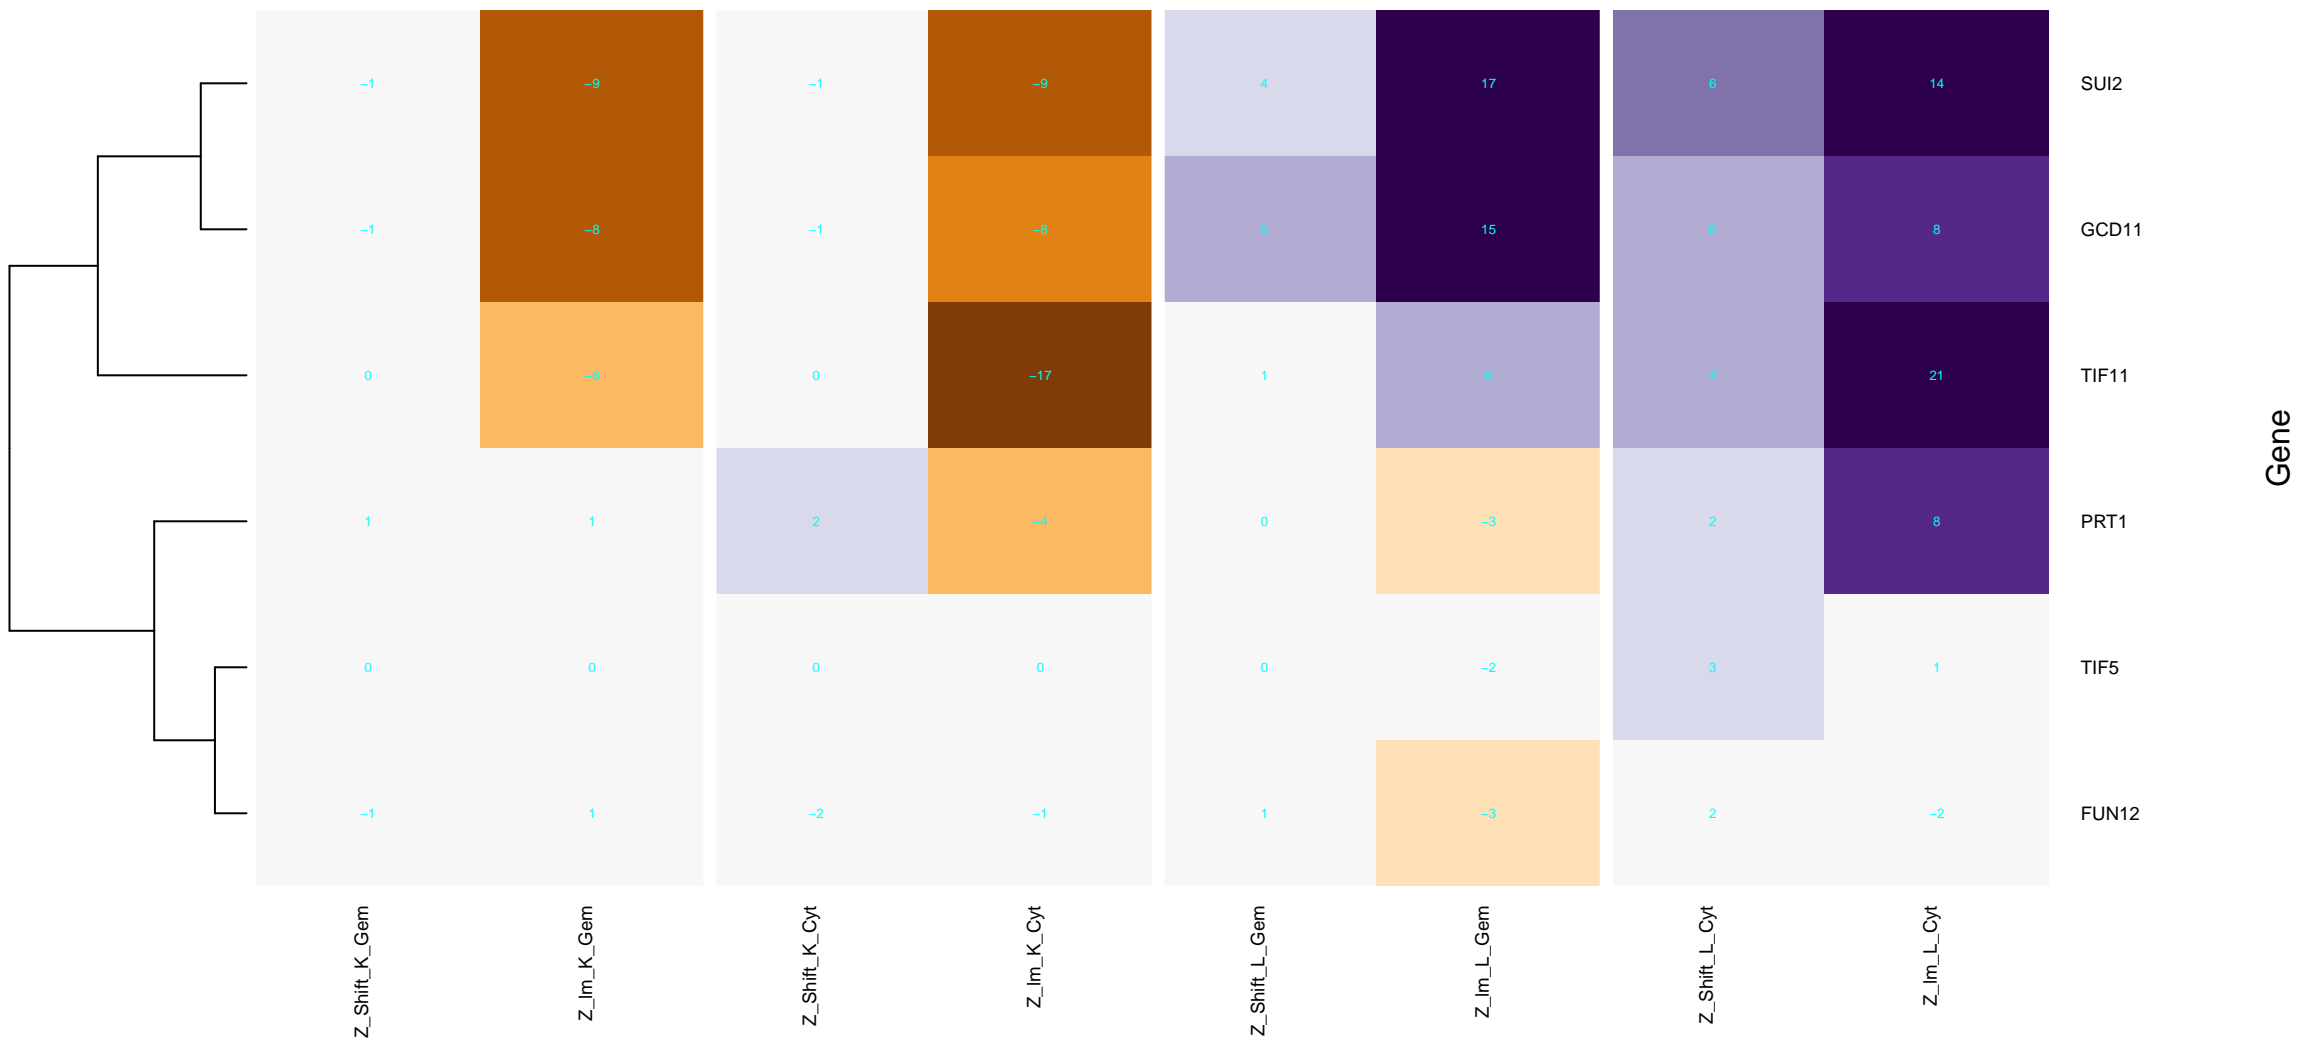

Supplement: s1 [file s1]

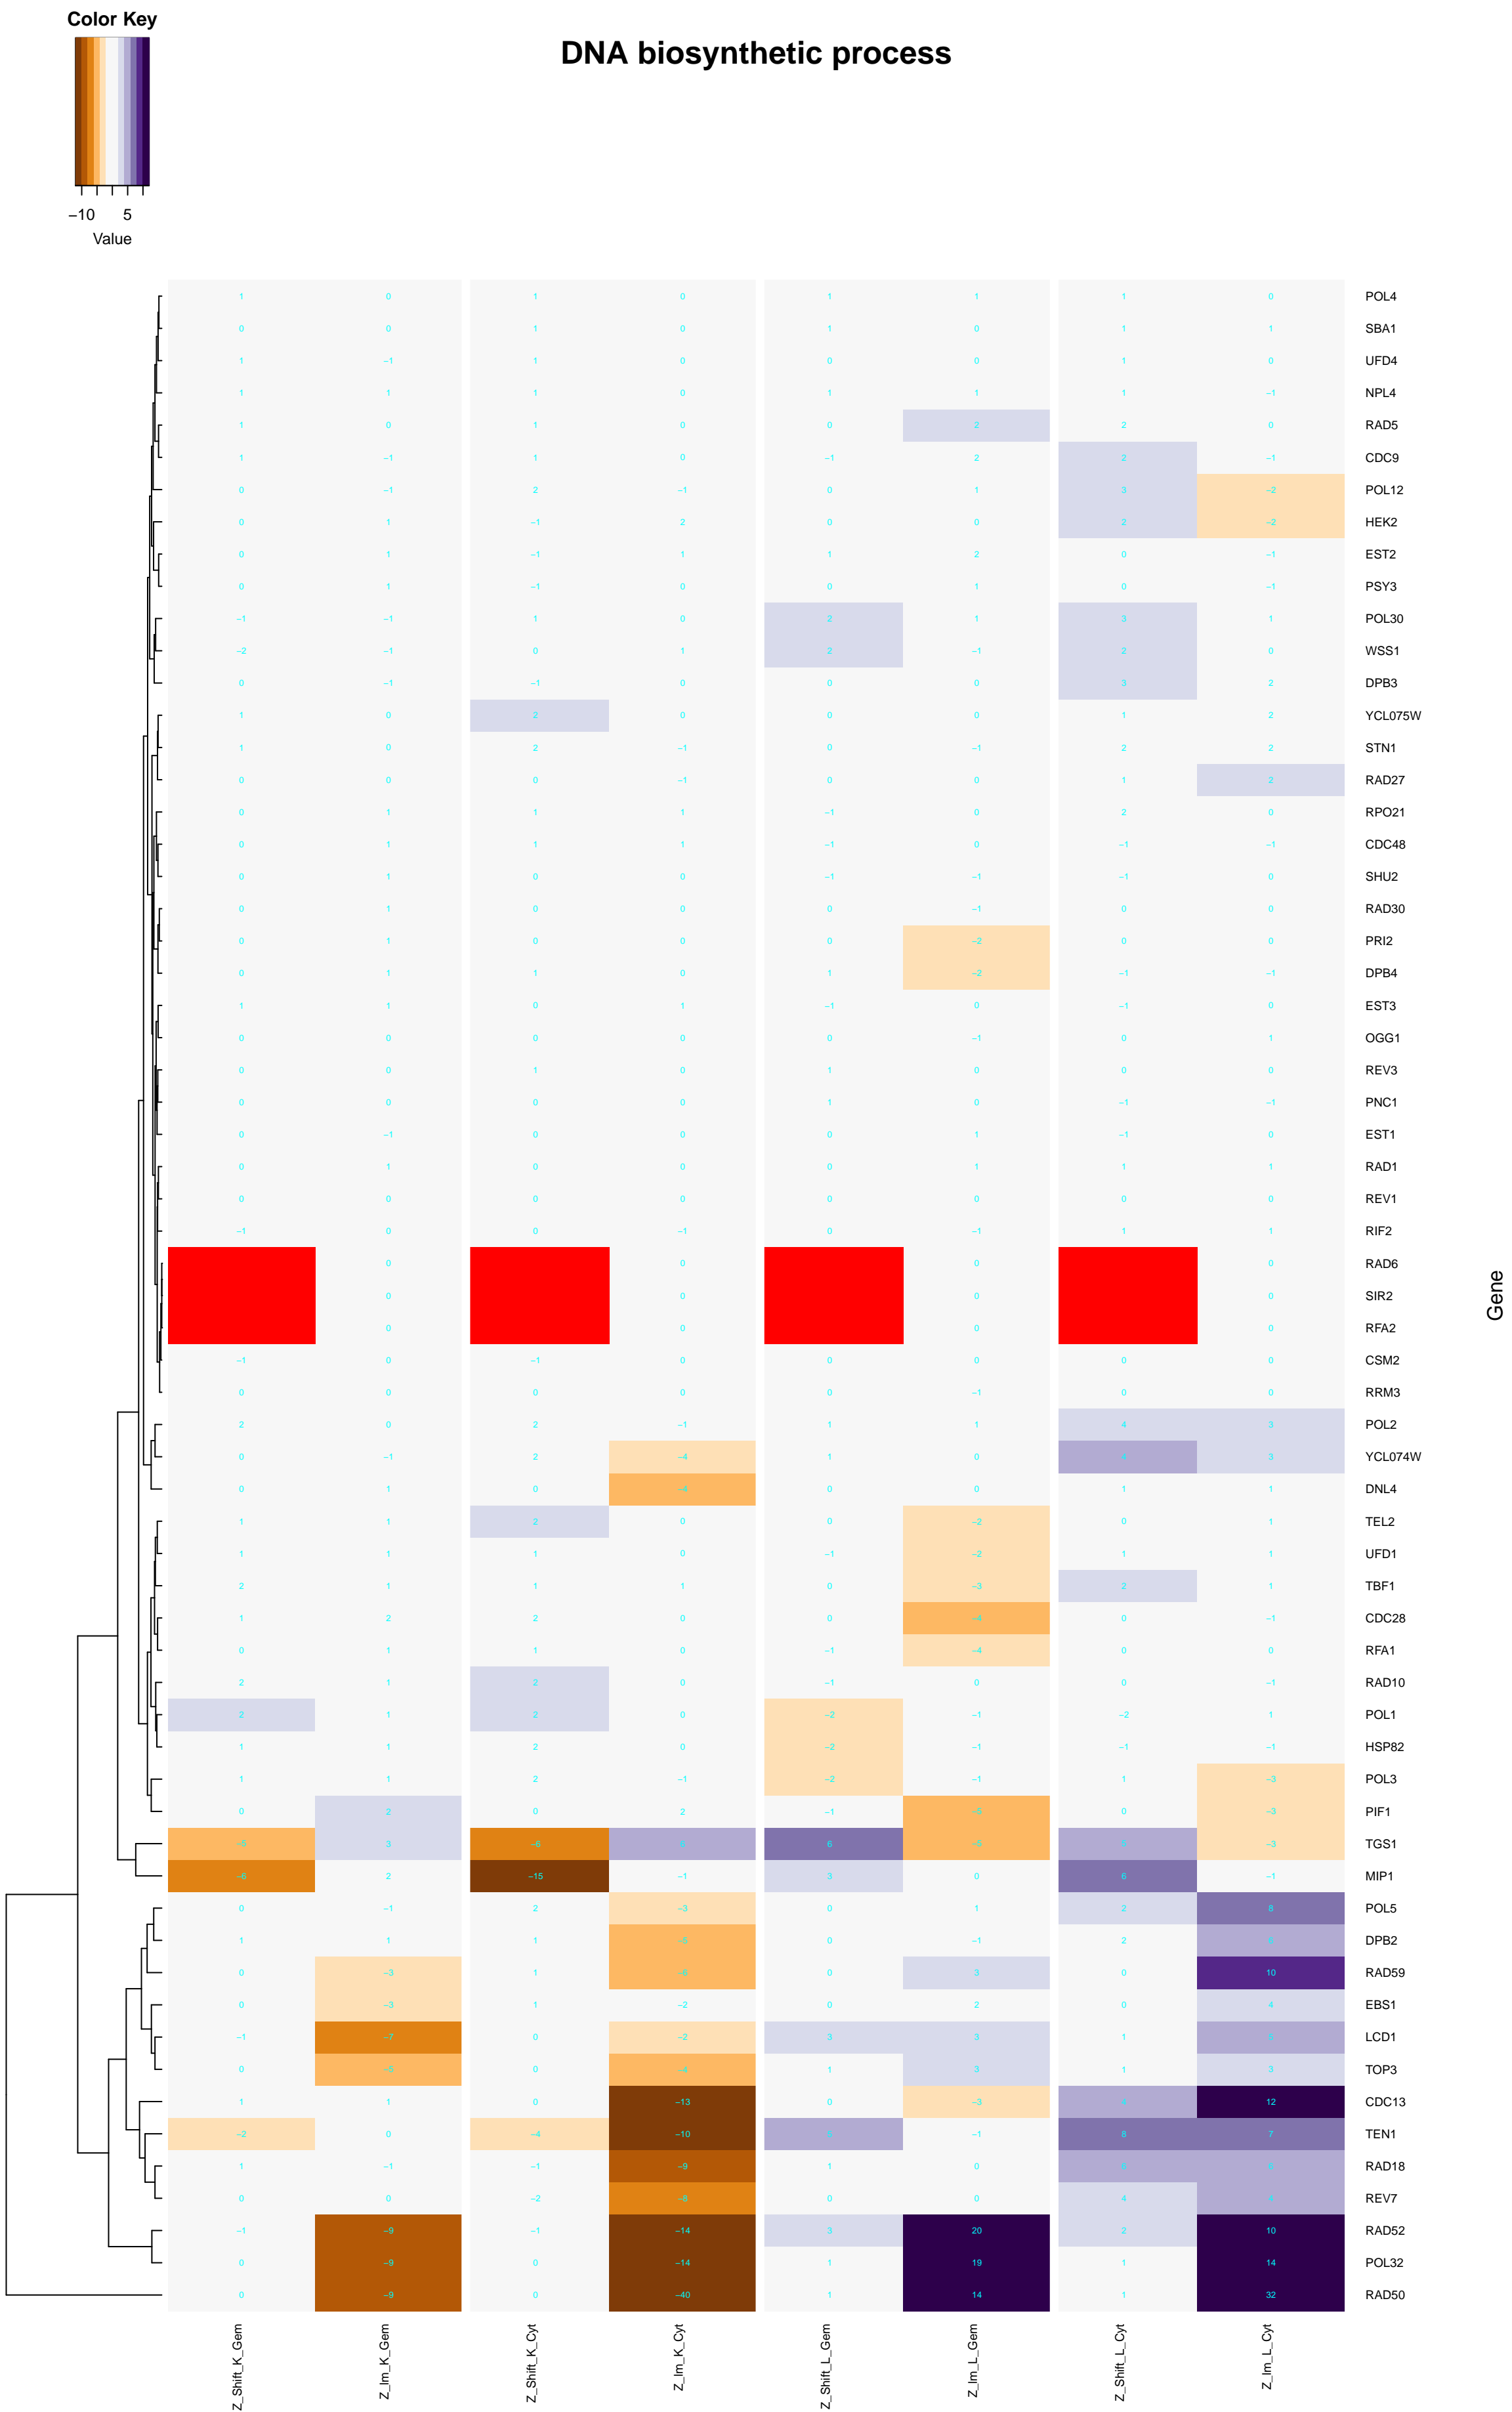

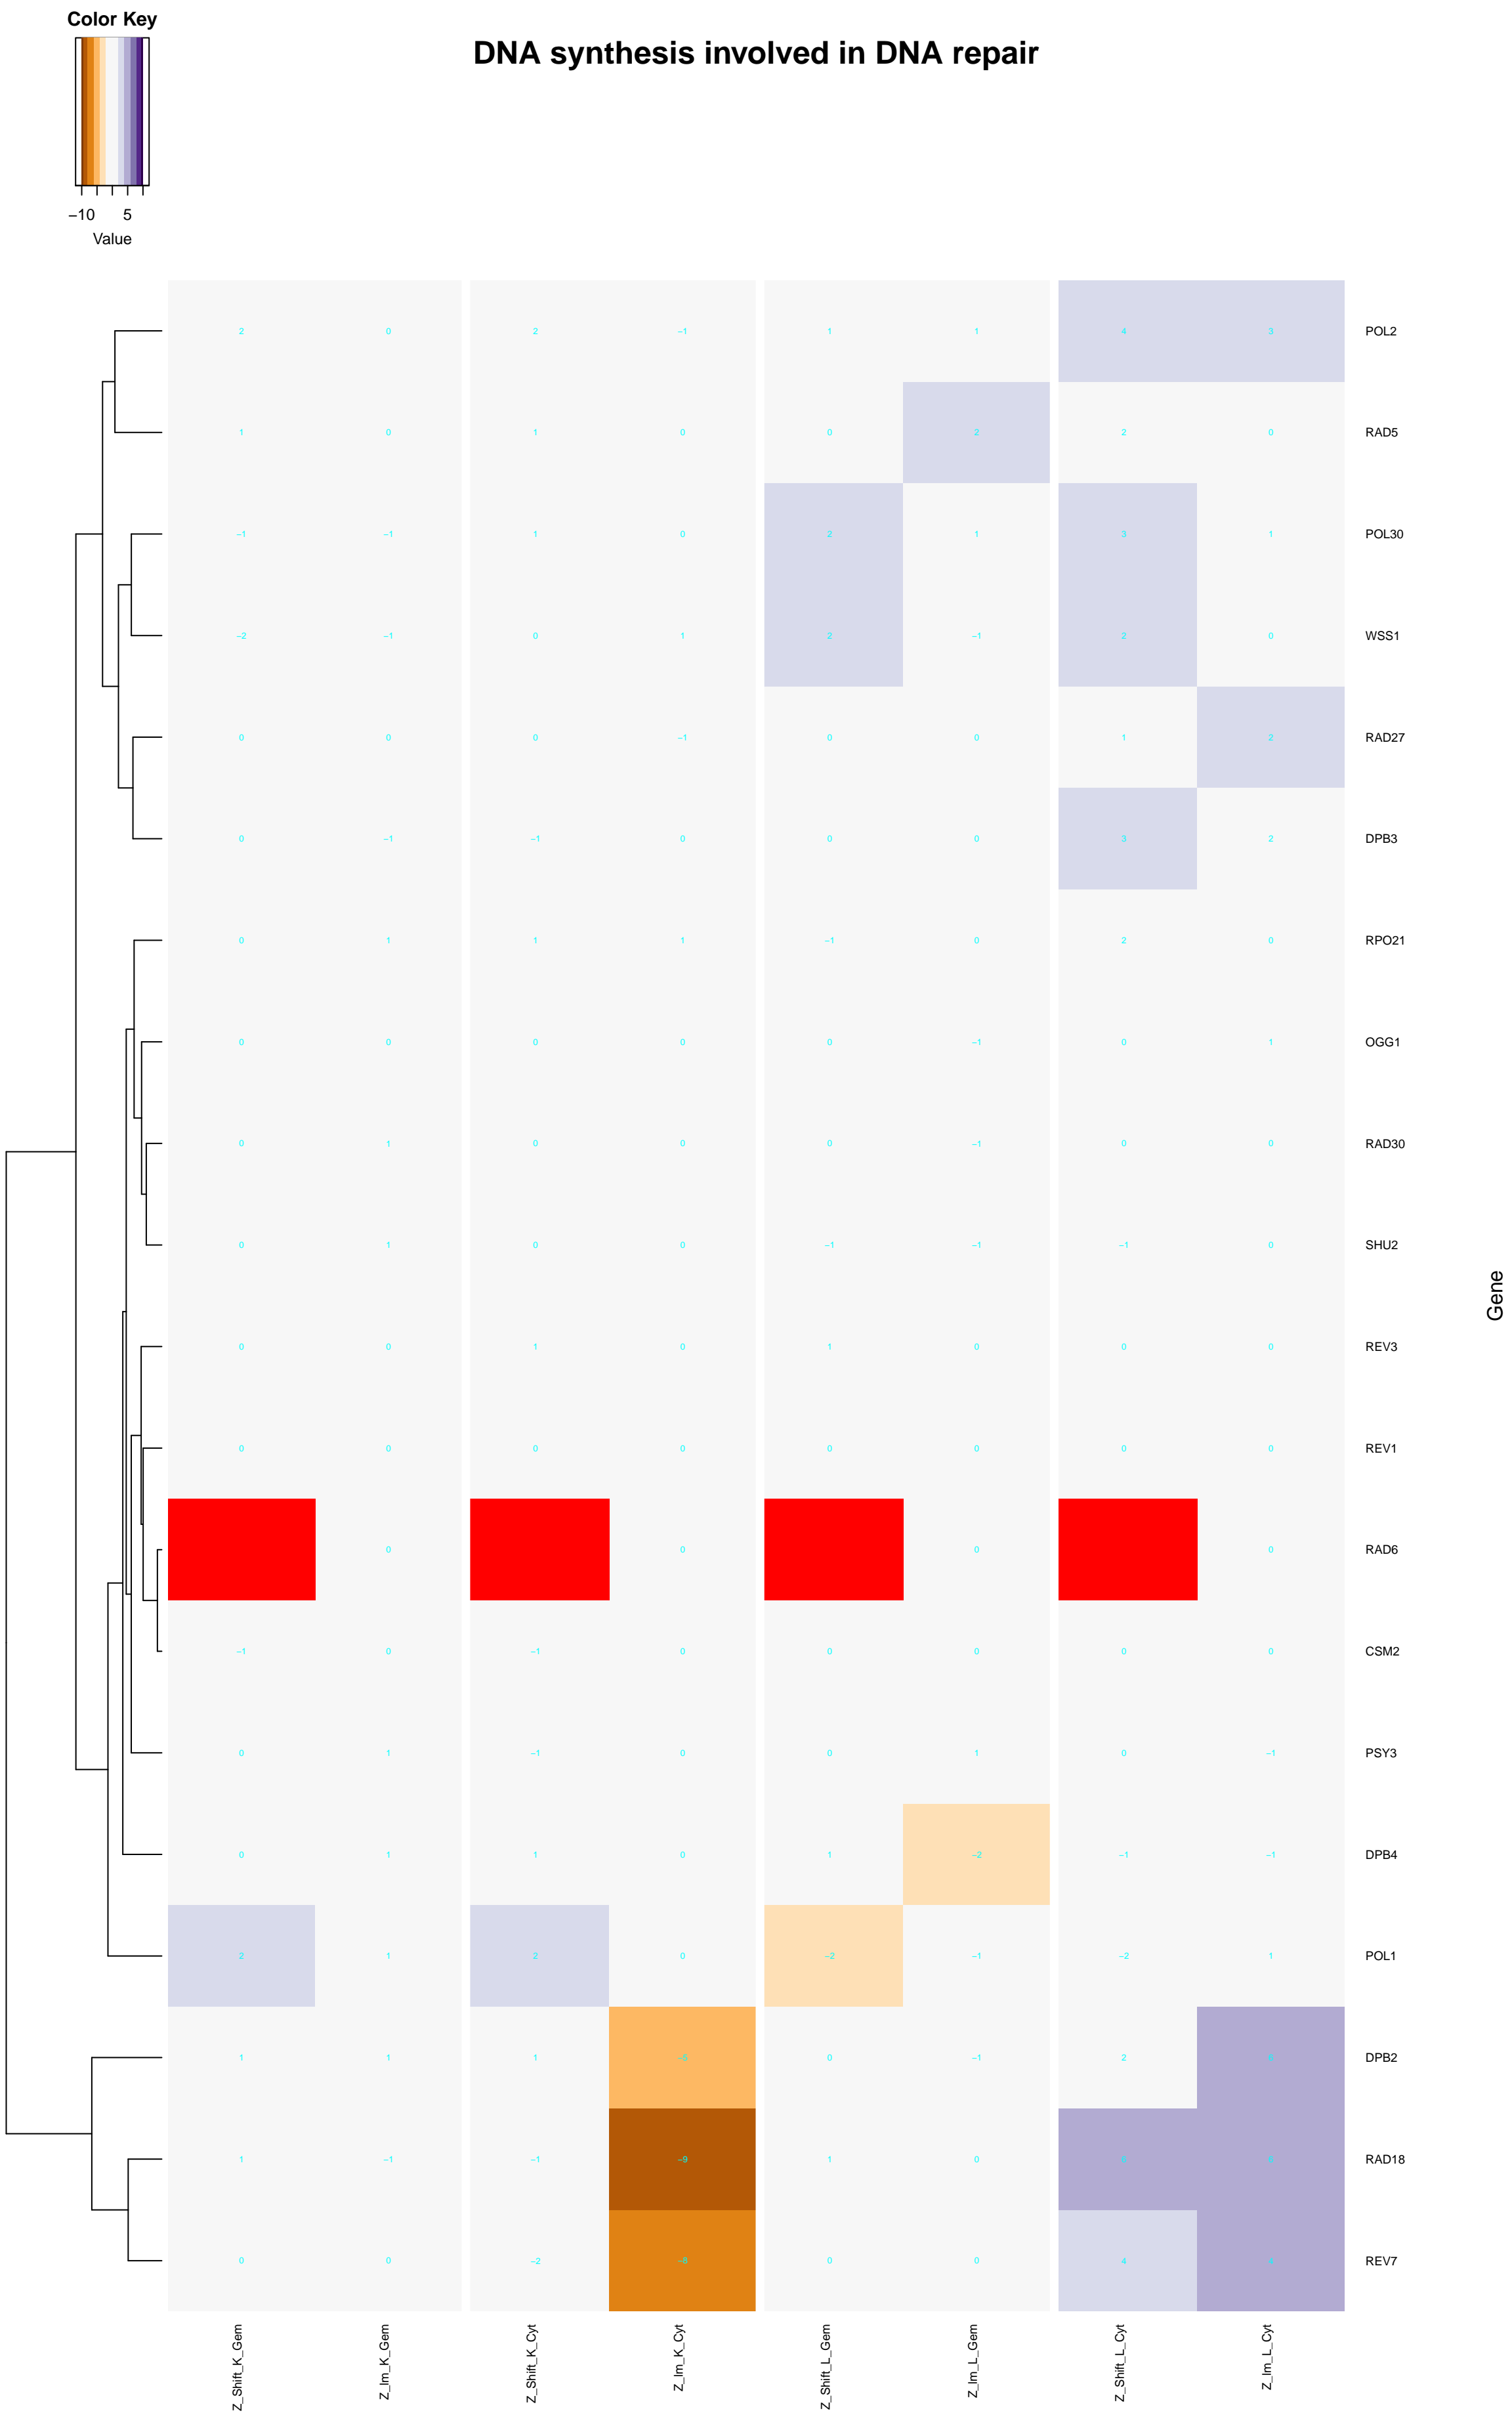

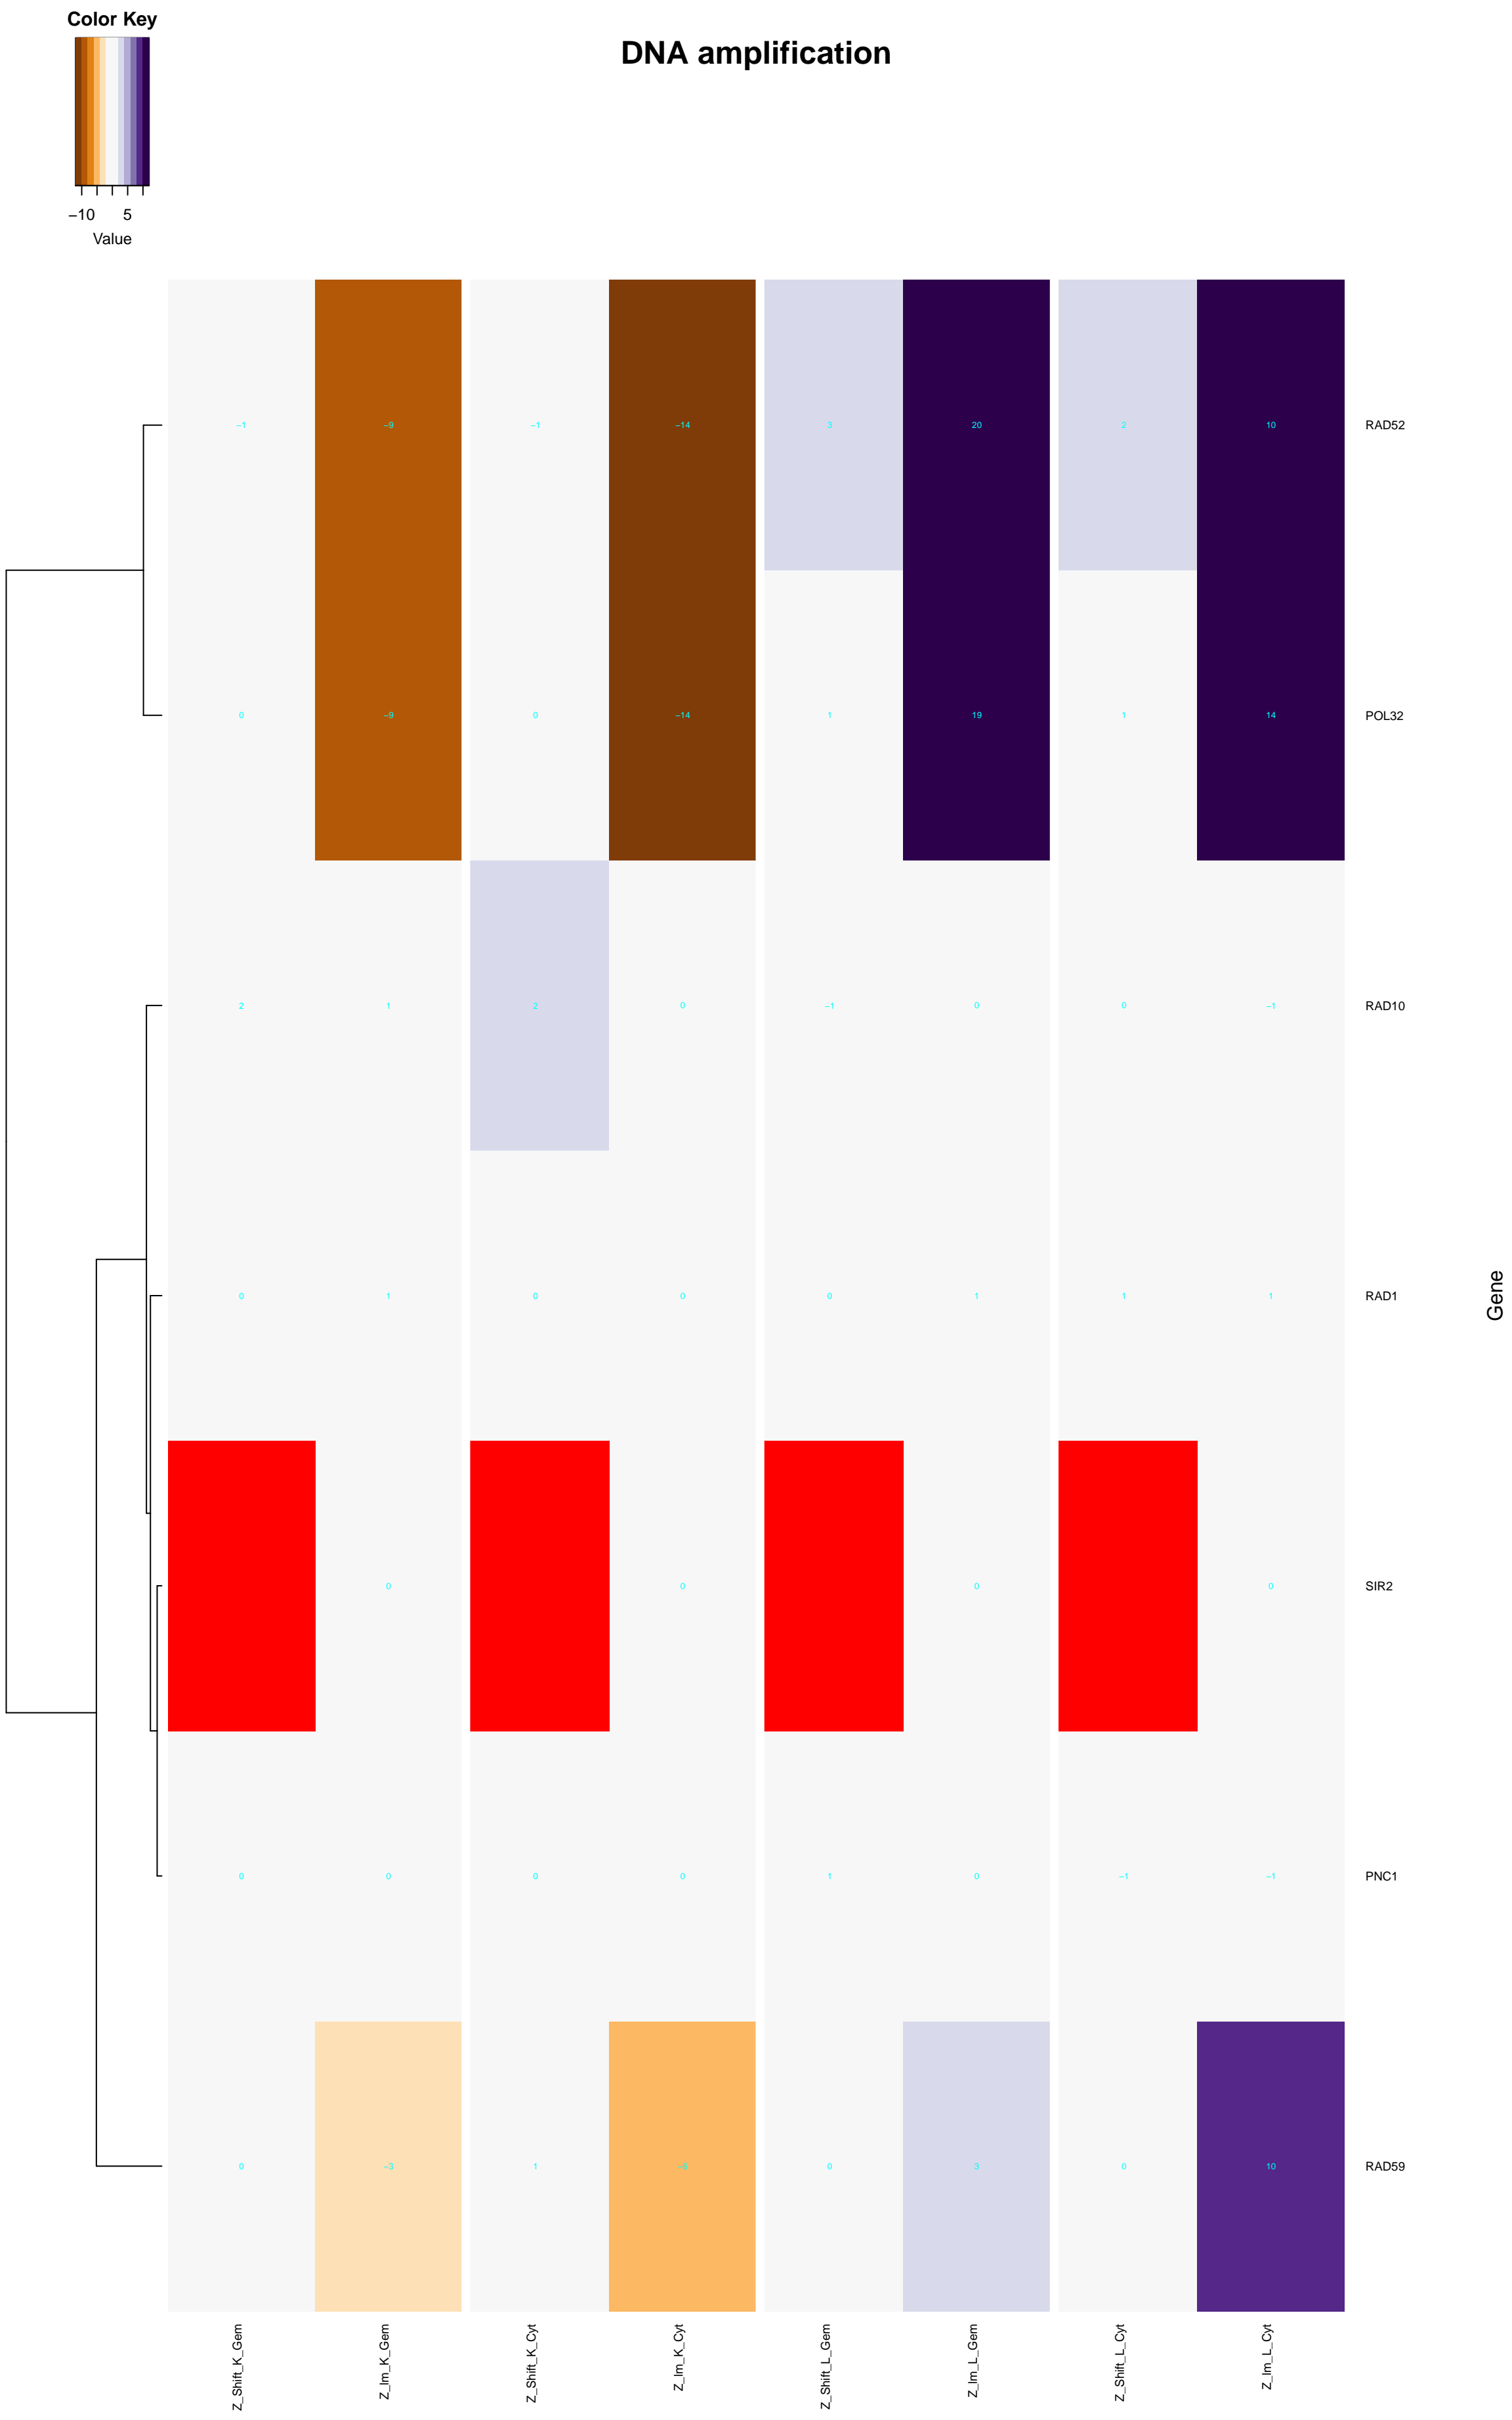

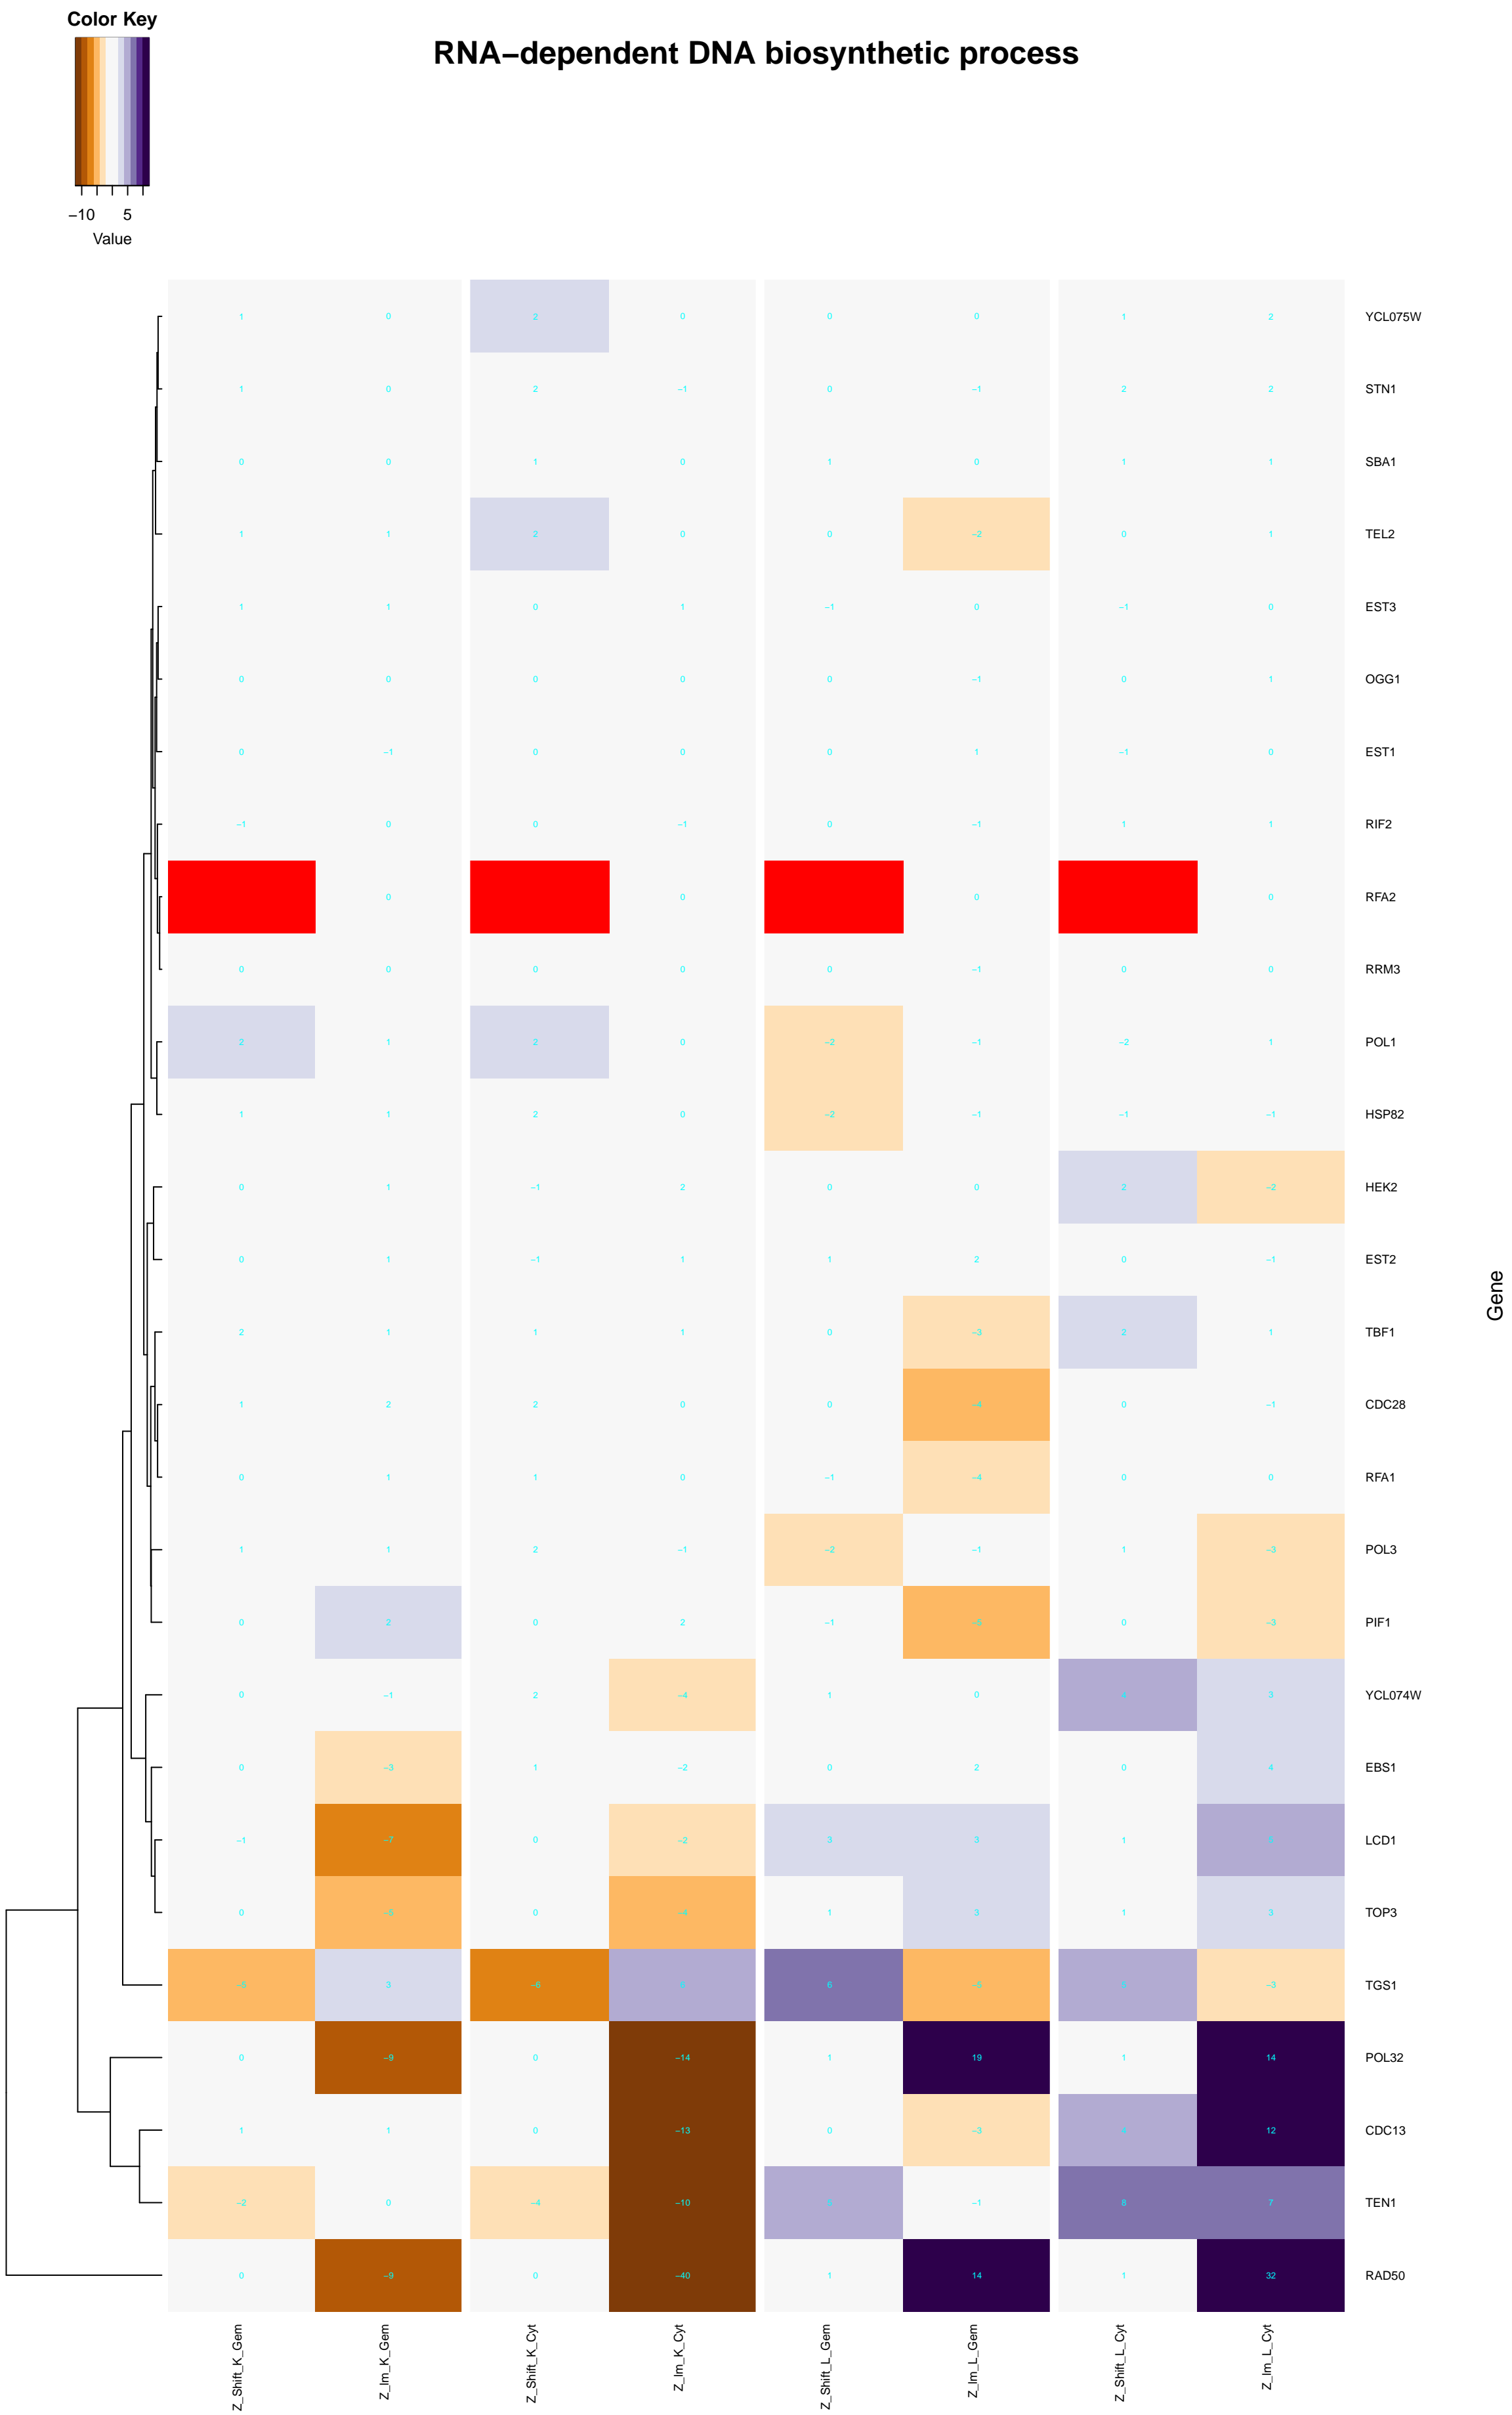

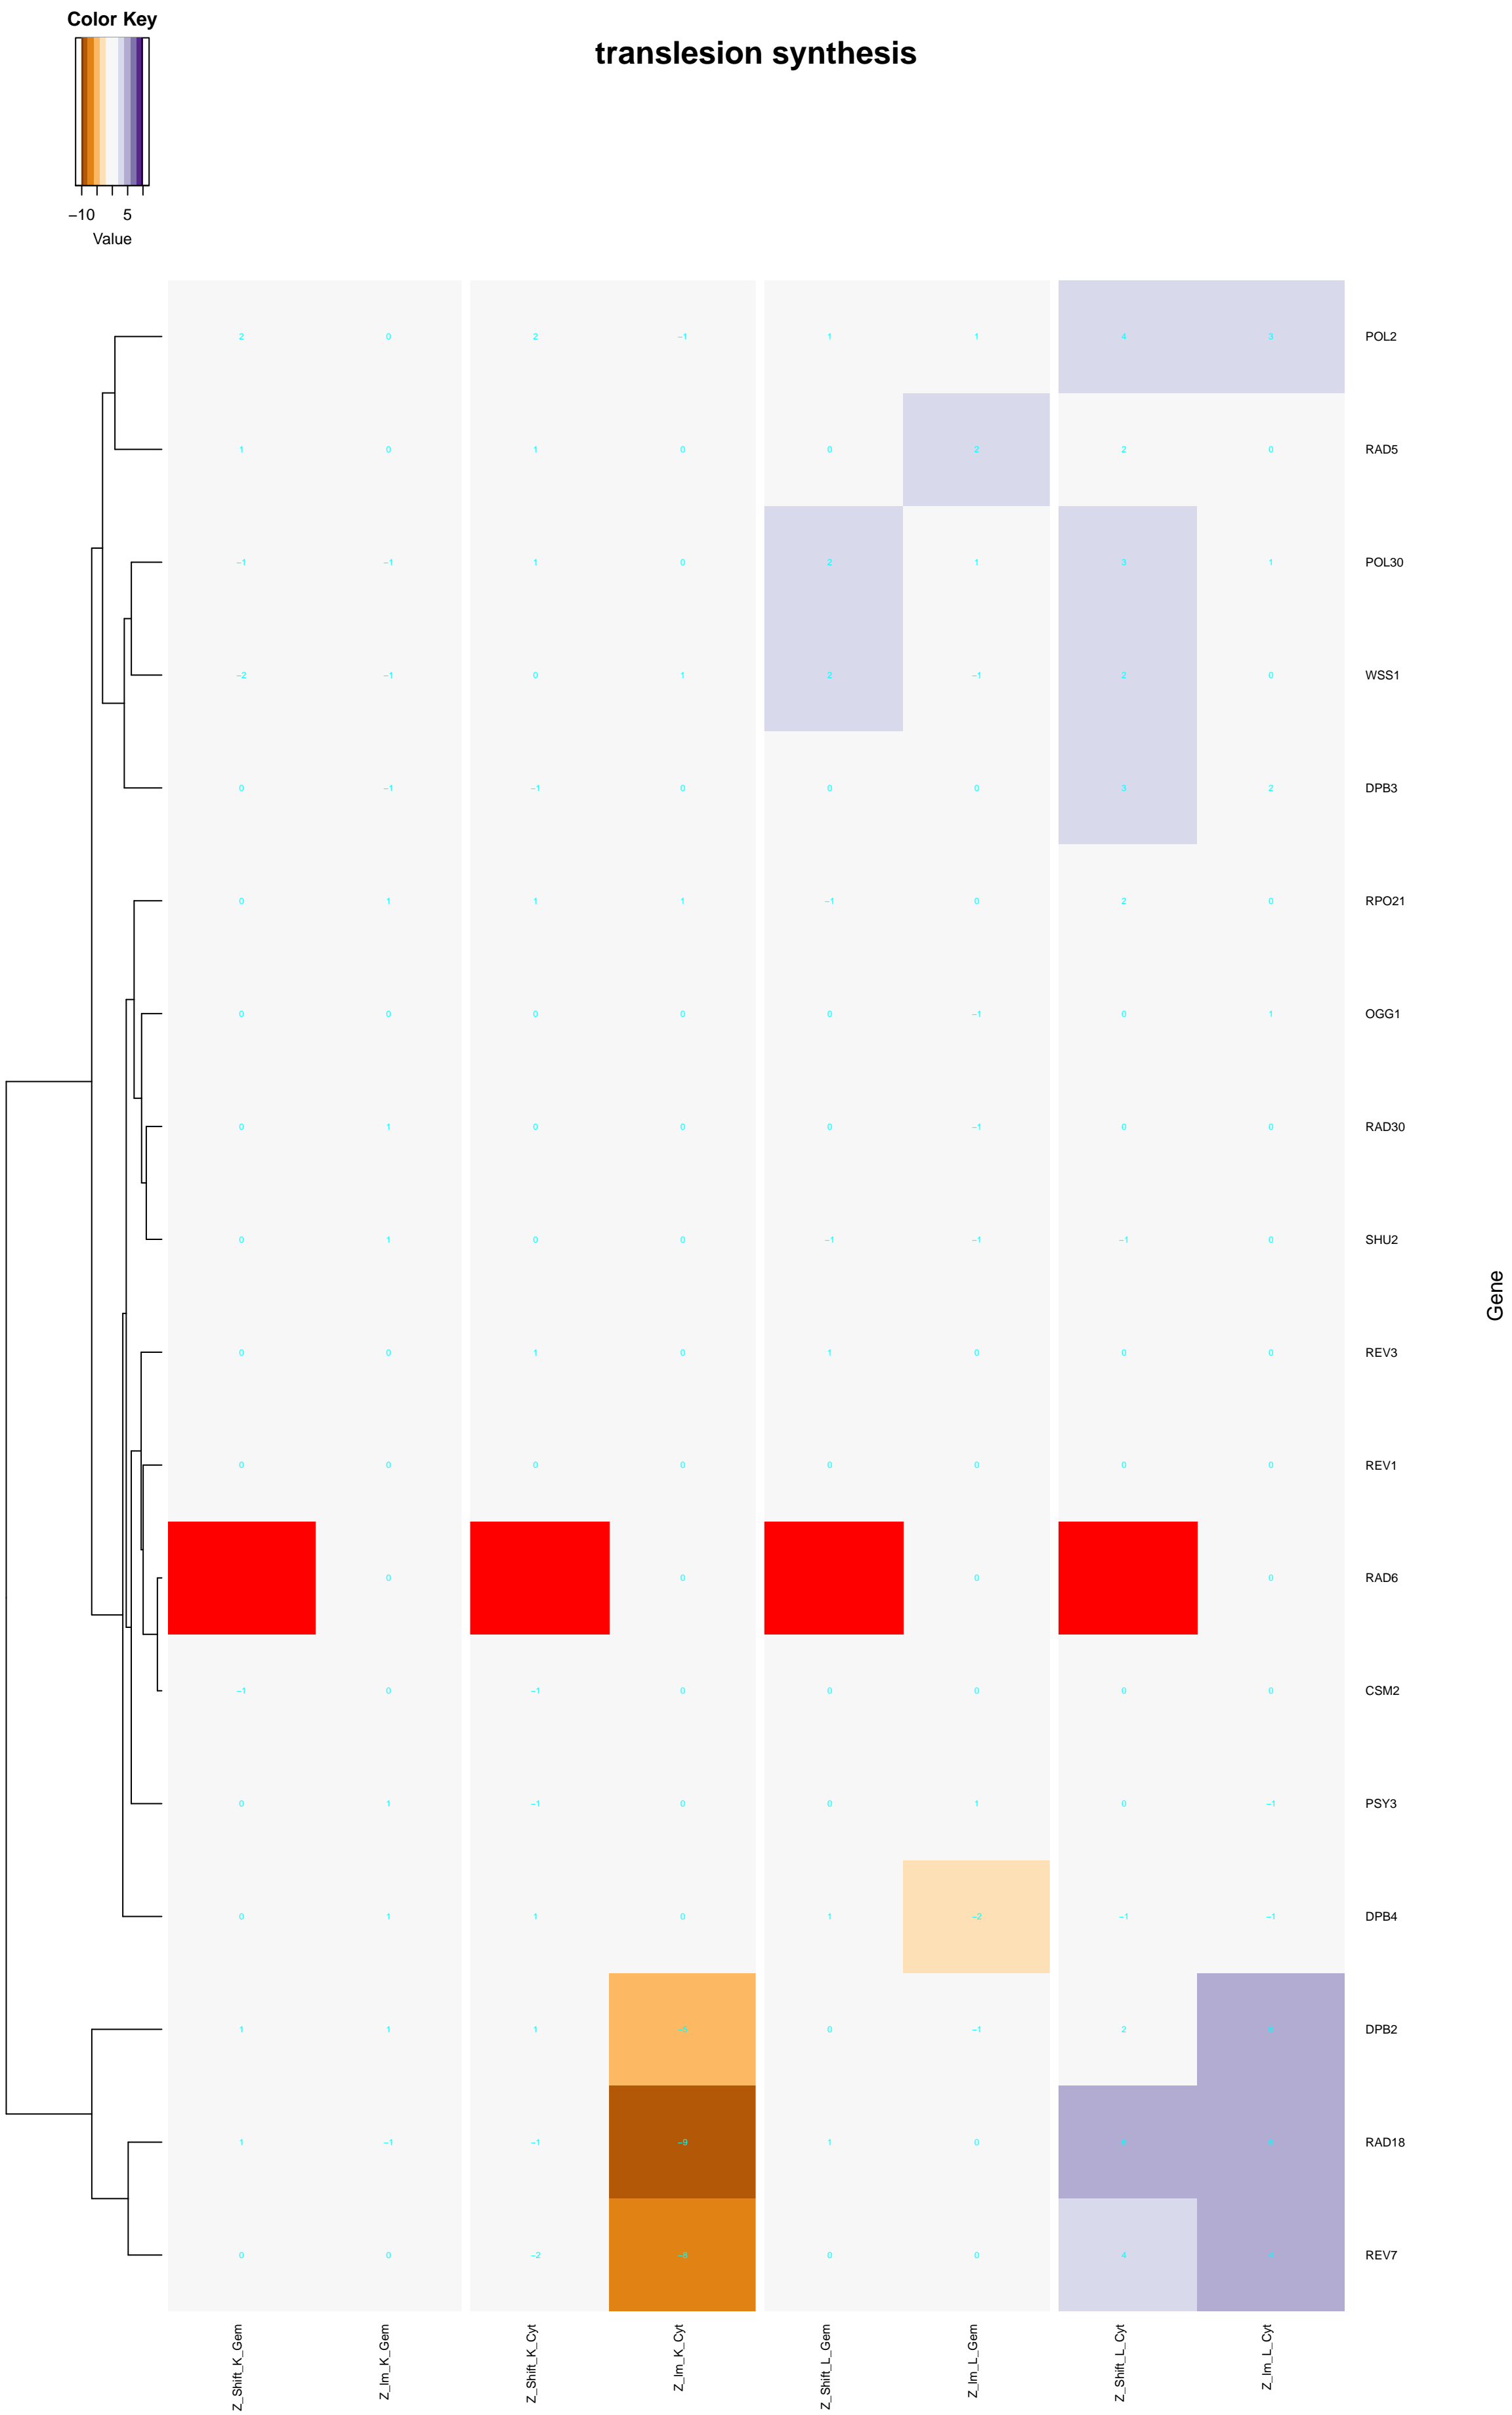



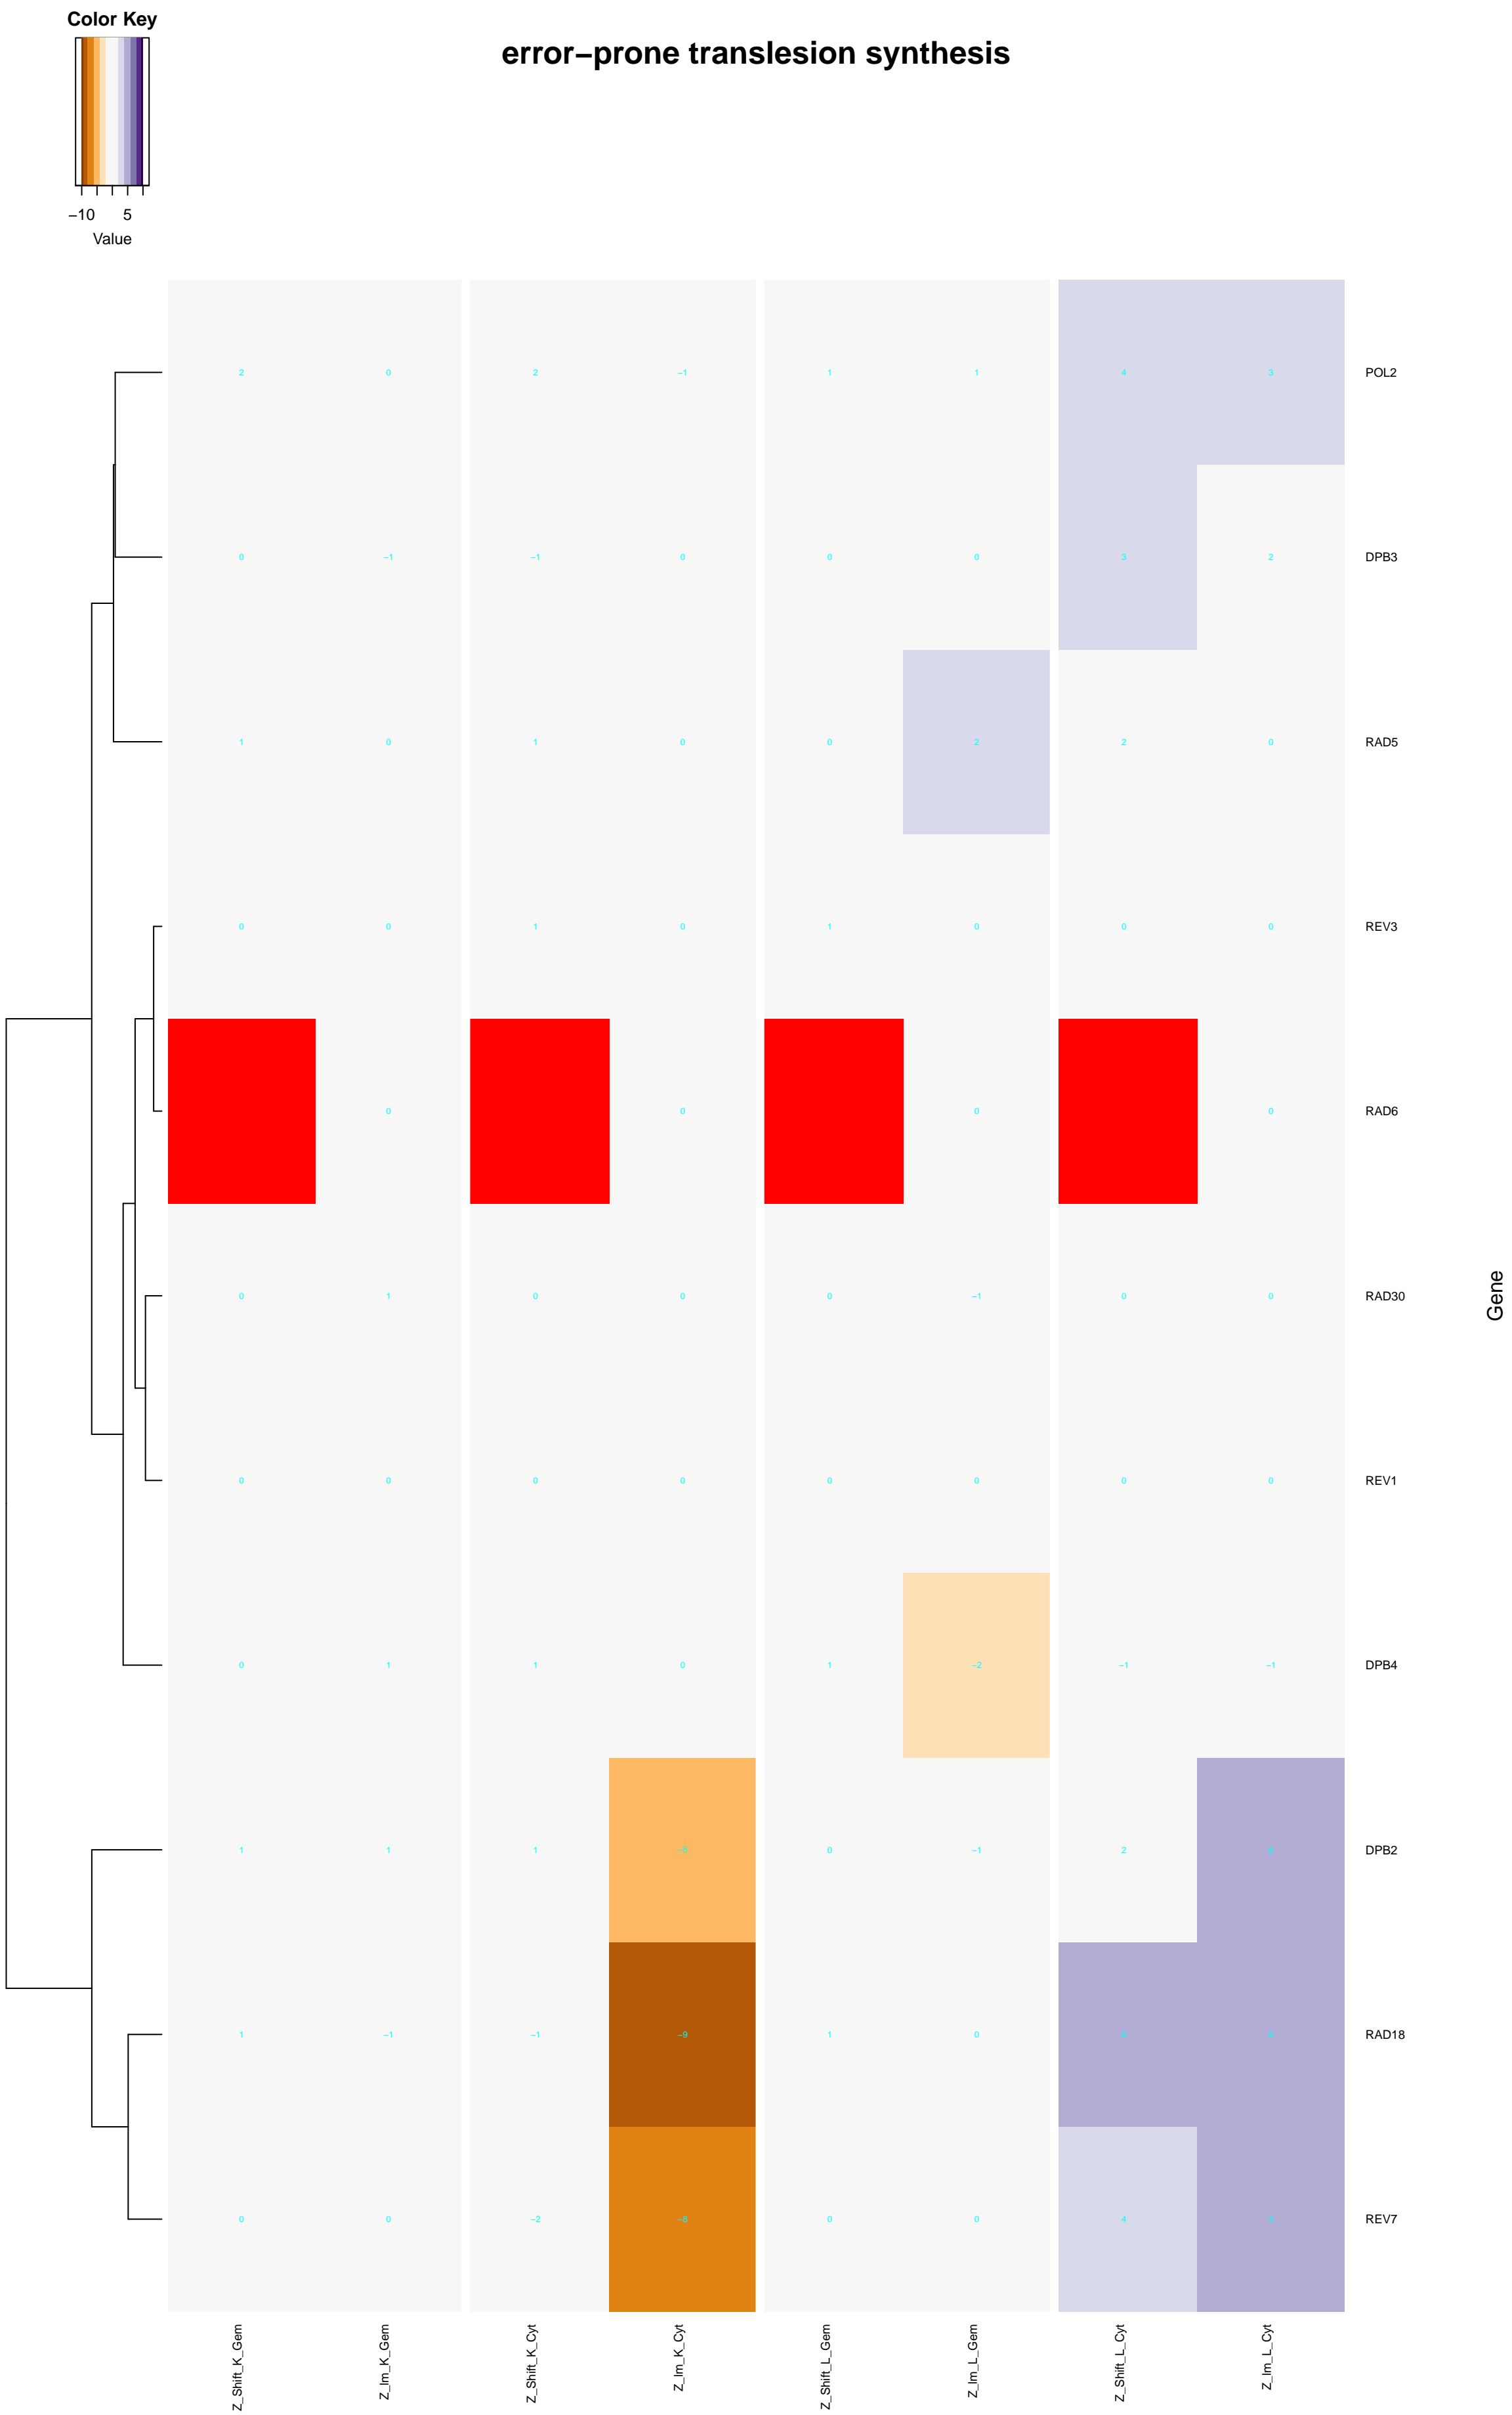

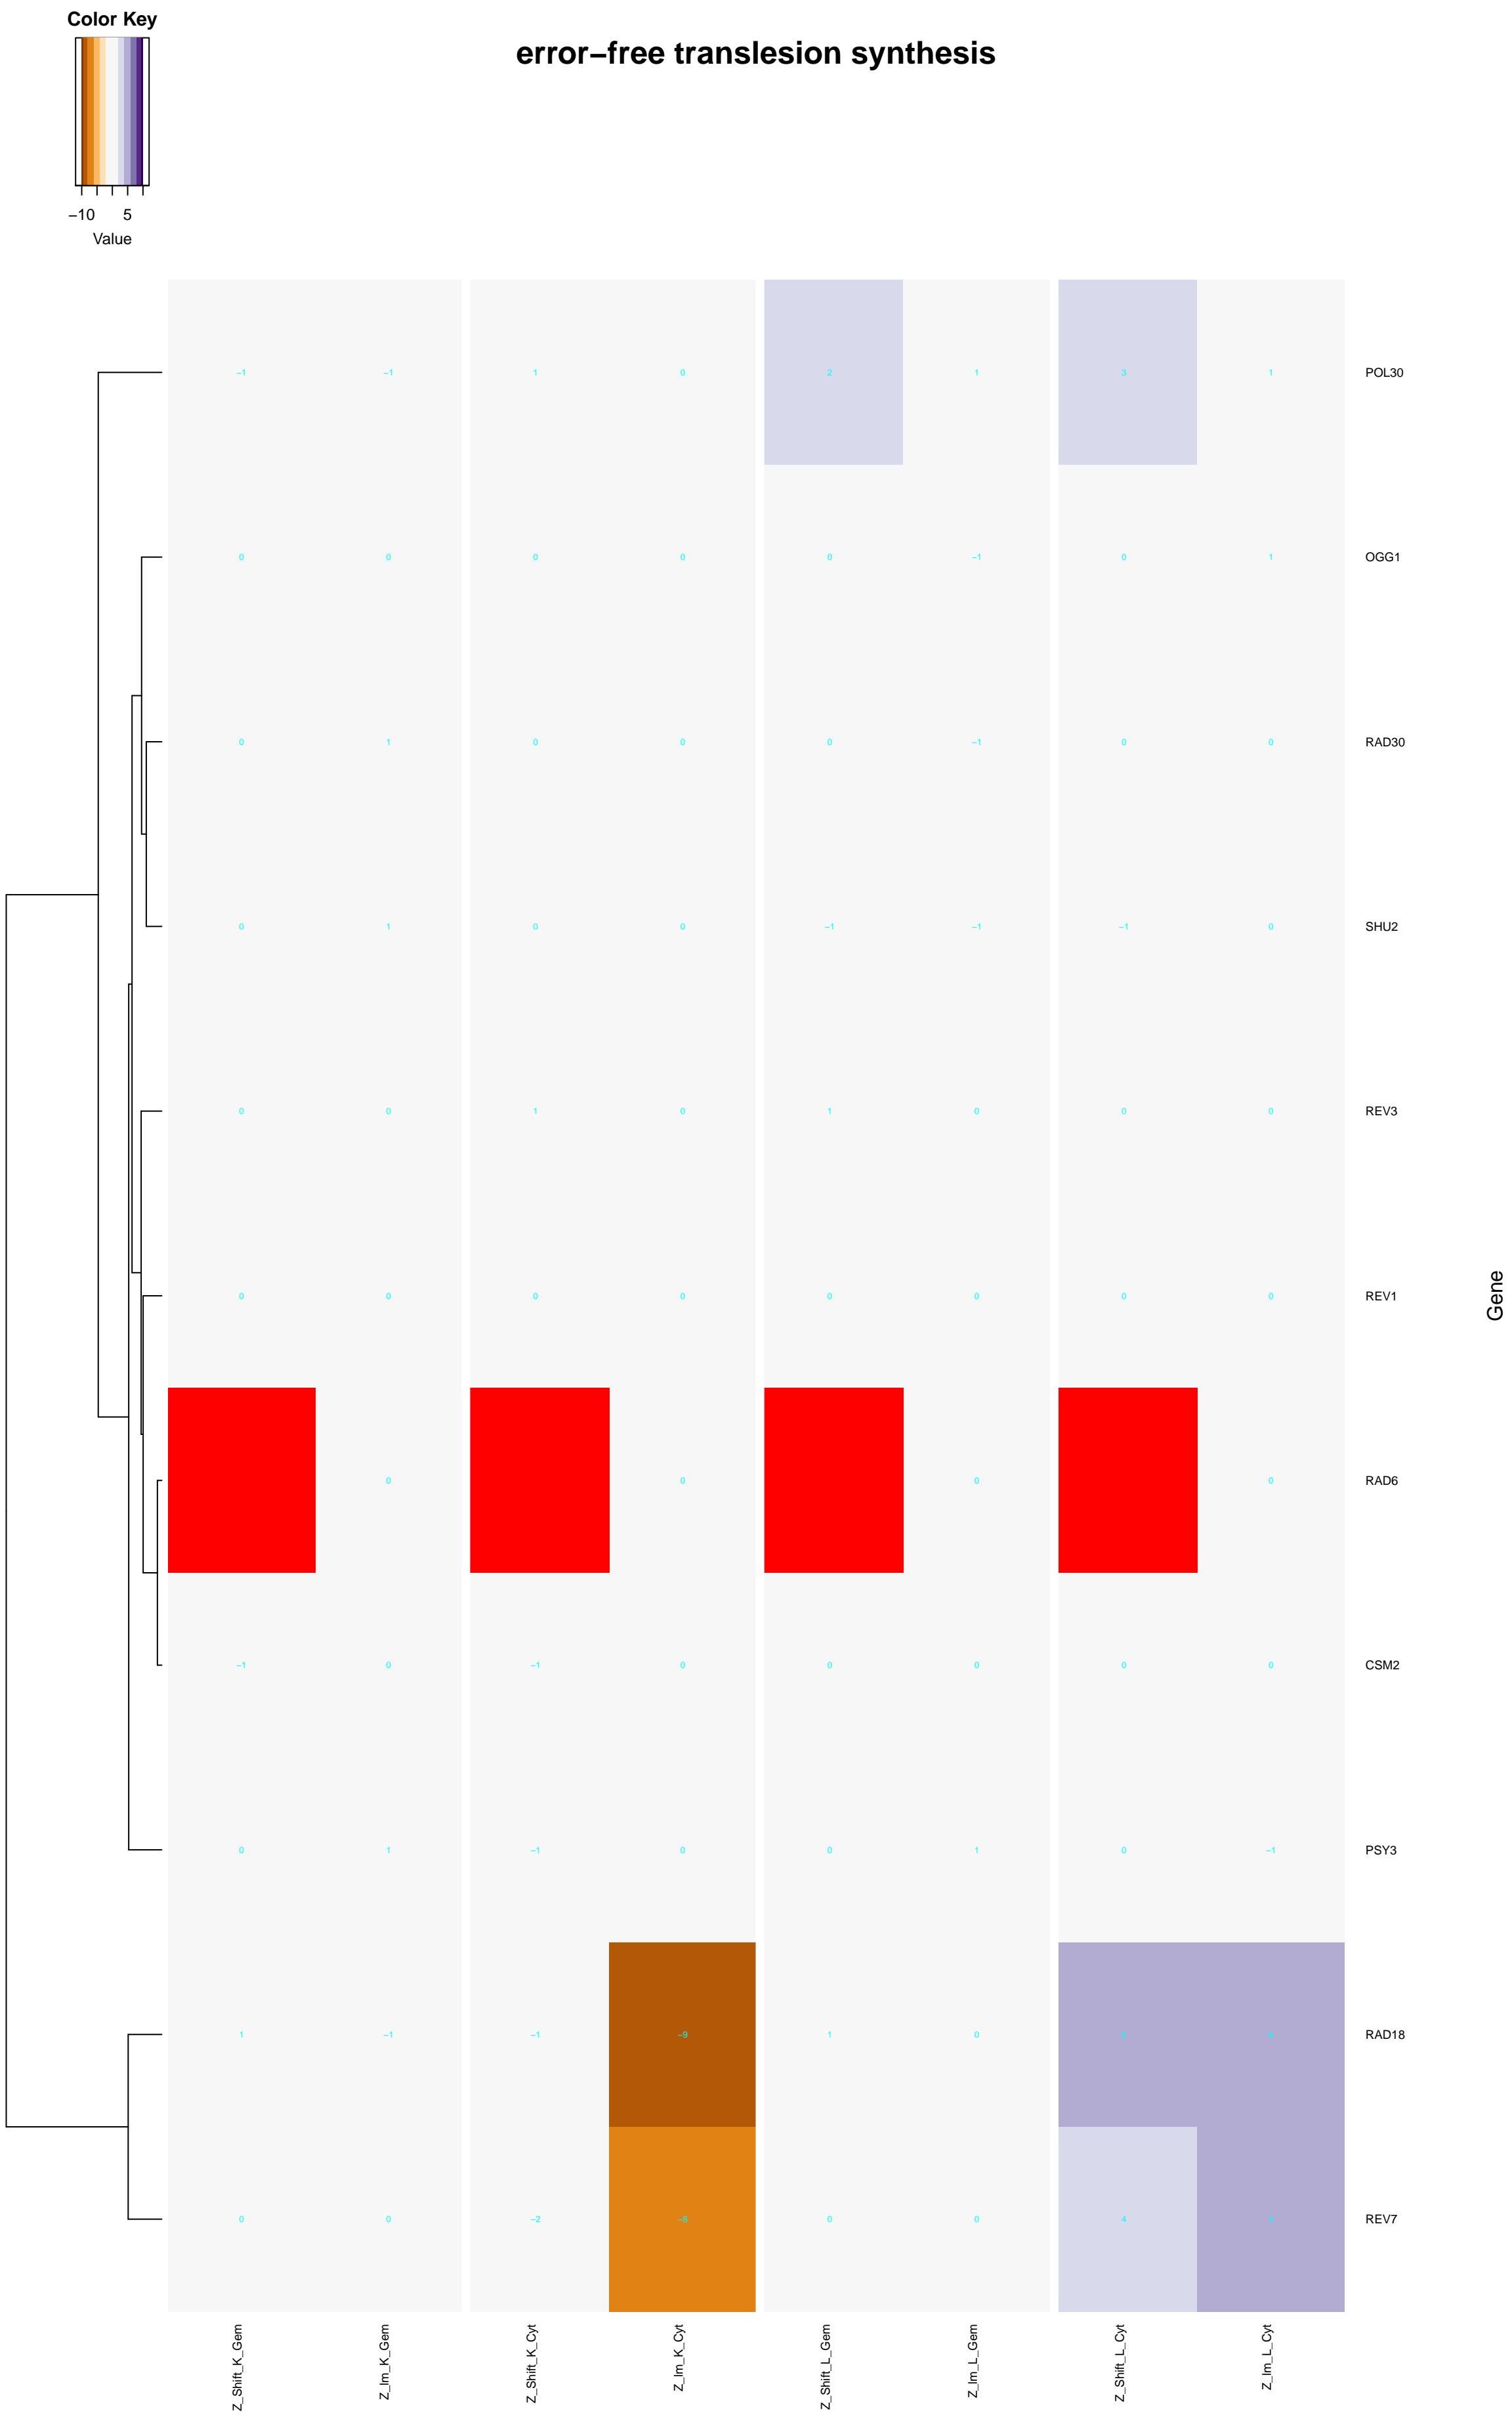

Supplement: s1 [file s1]

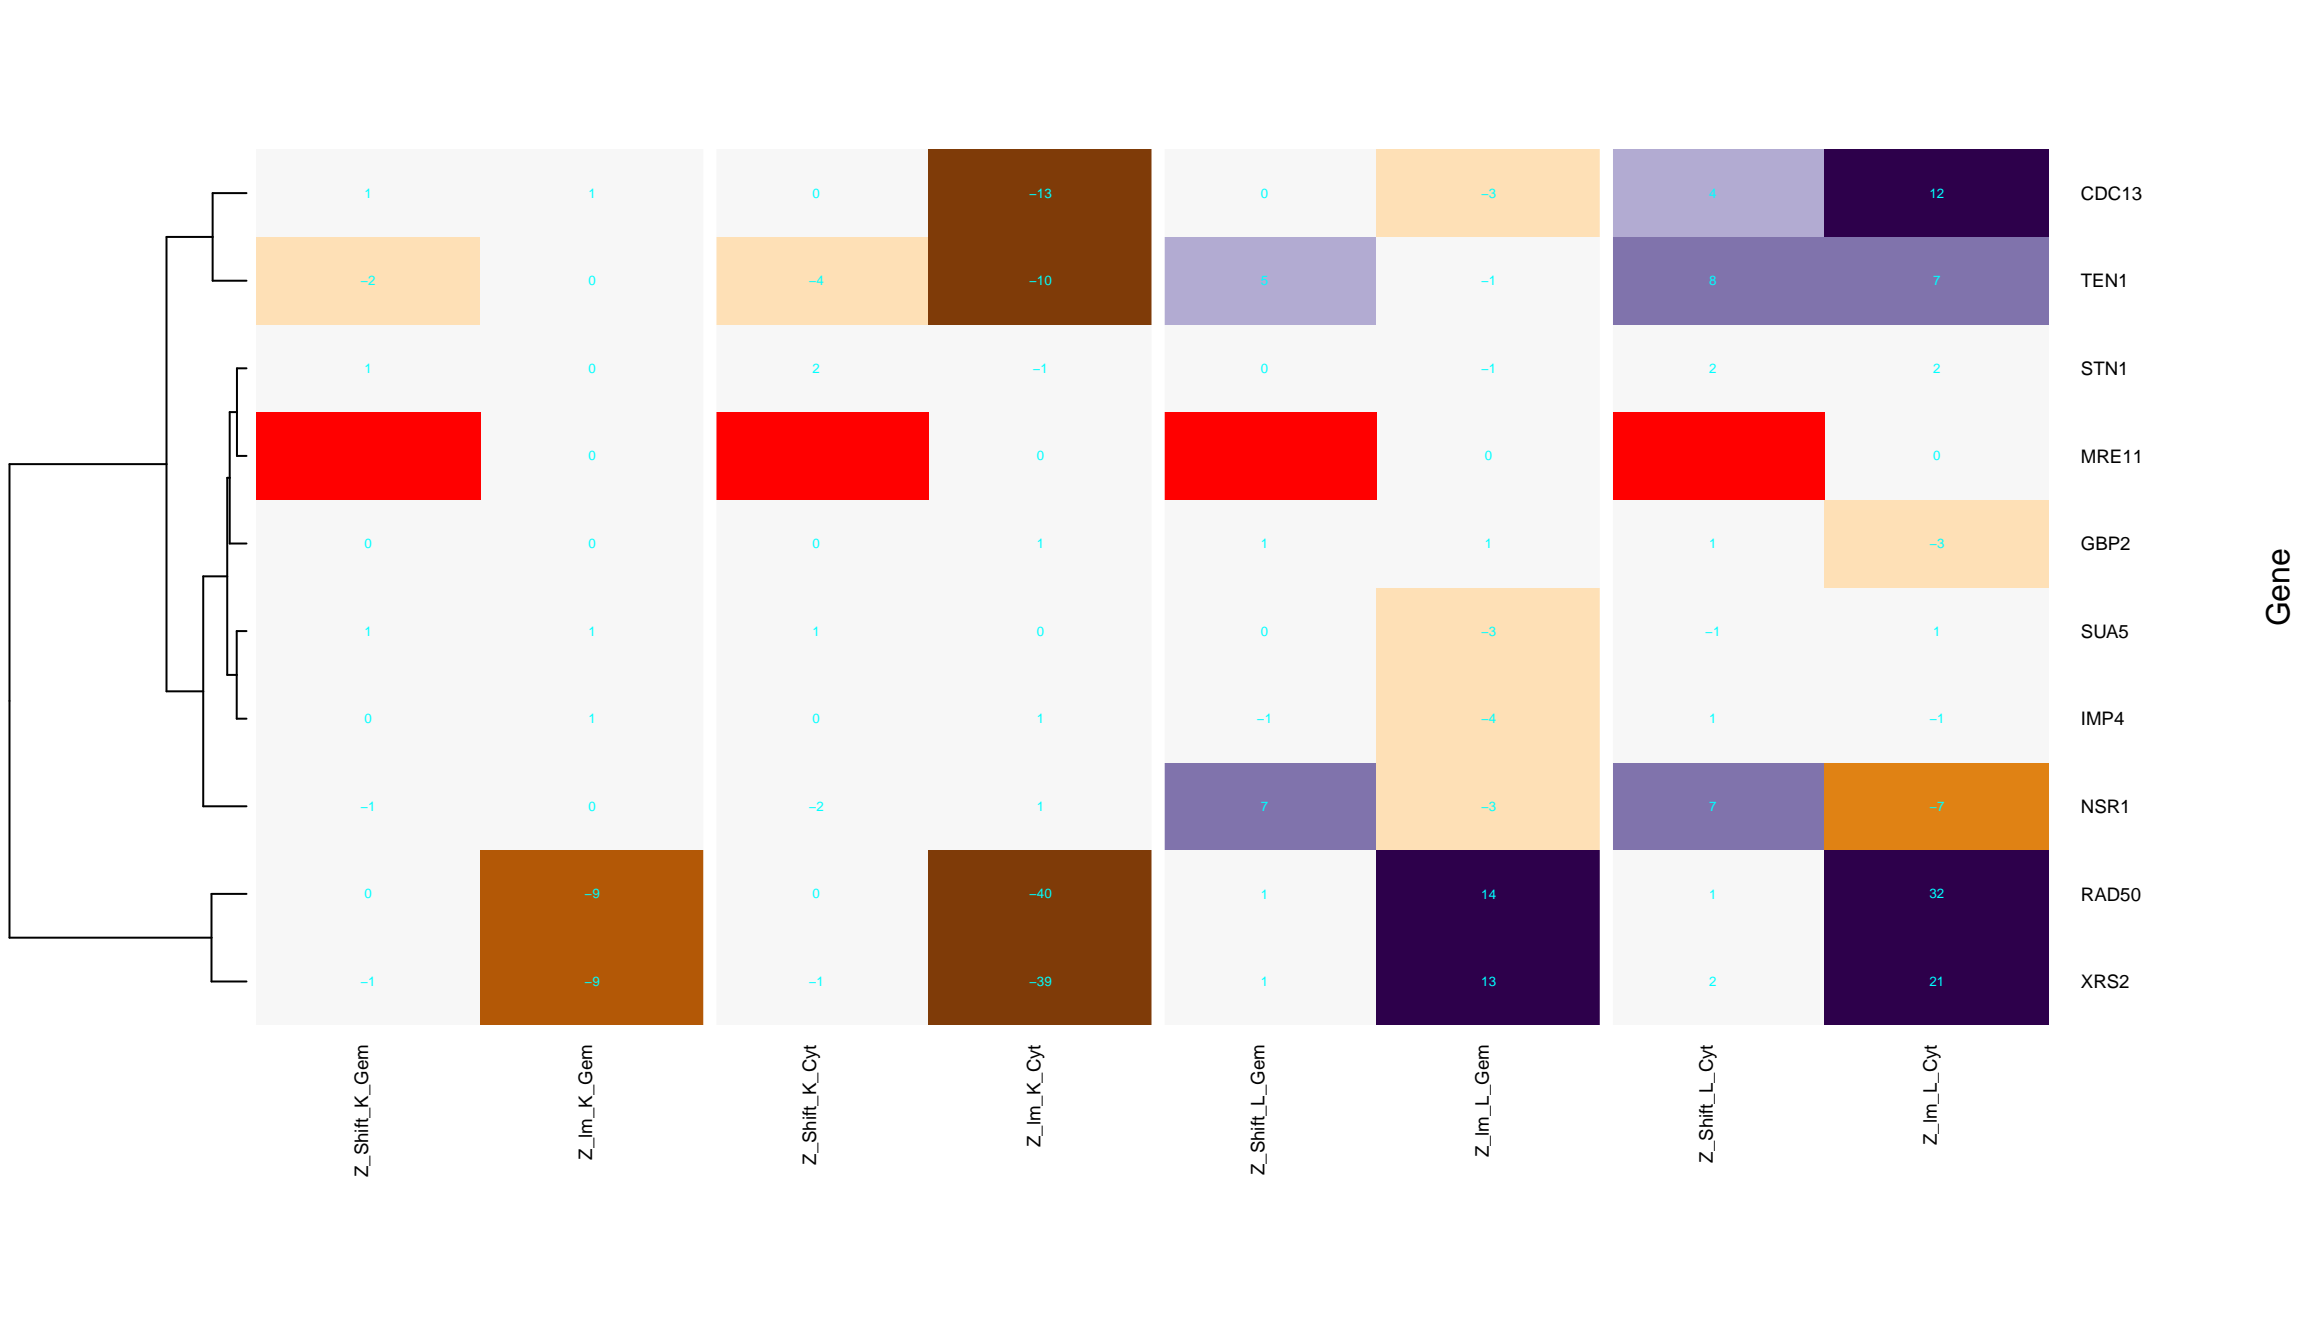

Supplement: s1 [file s1]

## DNA-directed RNA polymerase II, holoenzyme

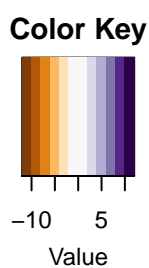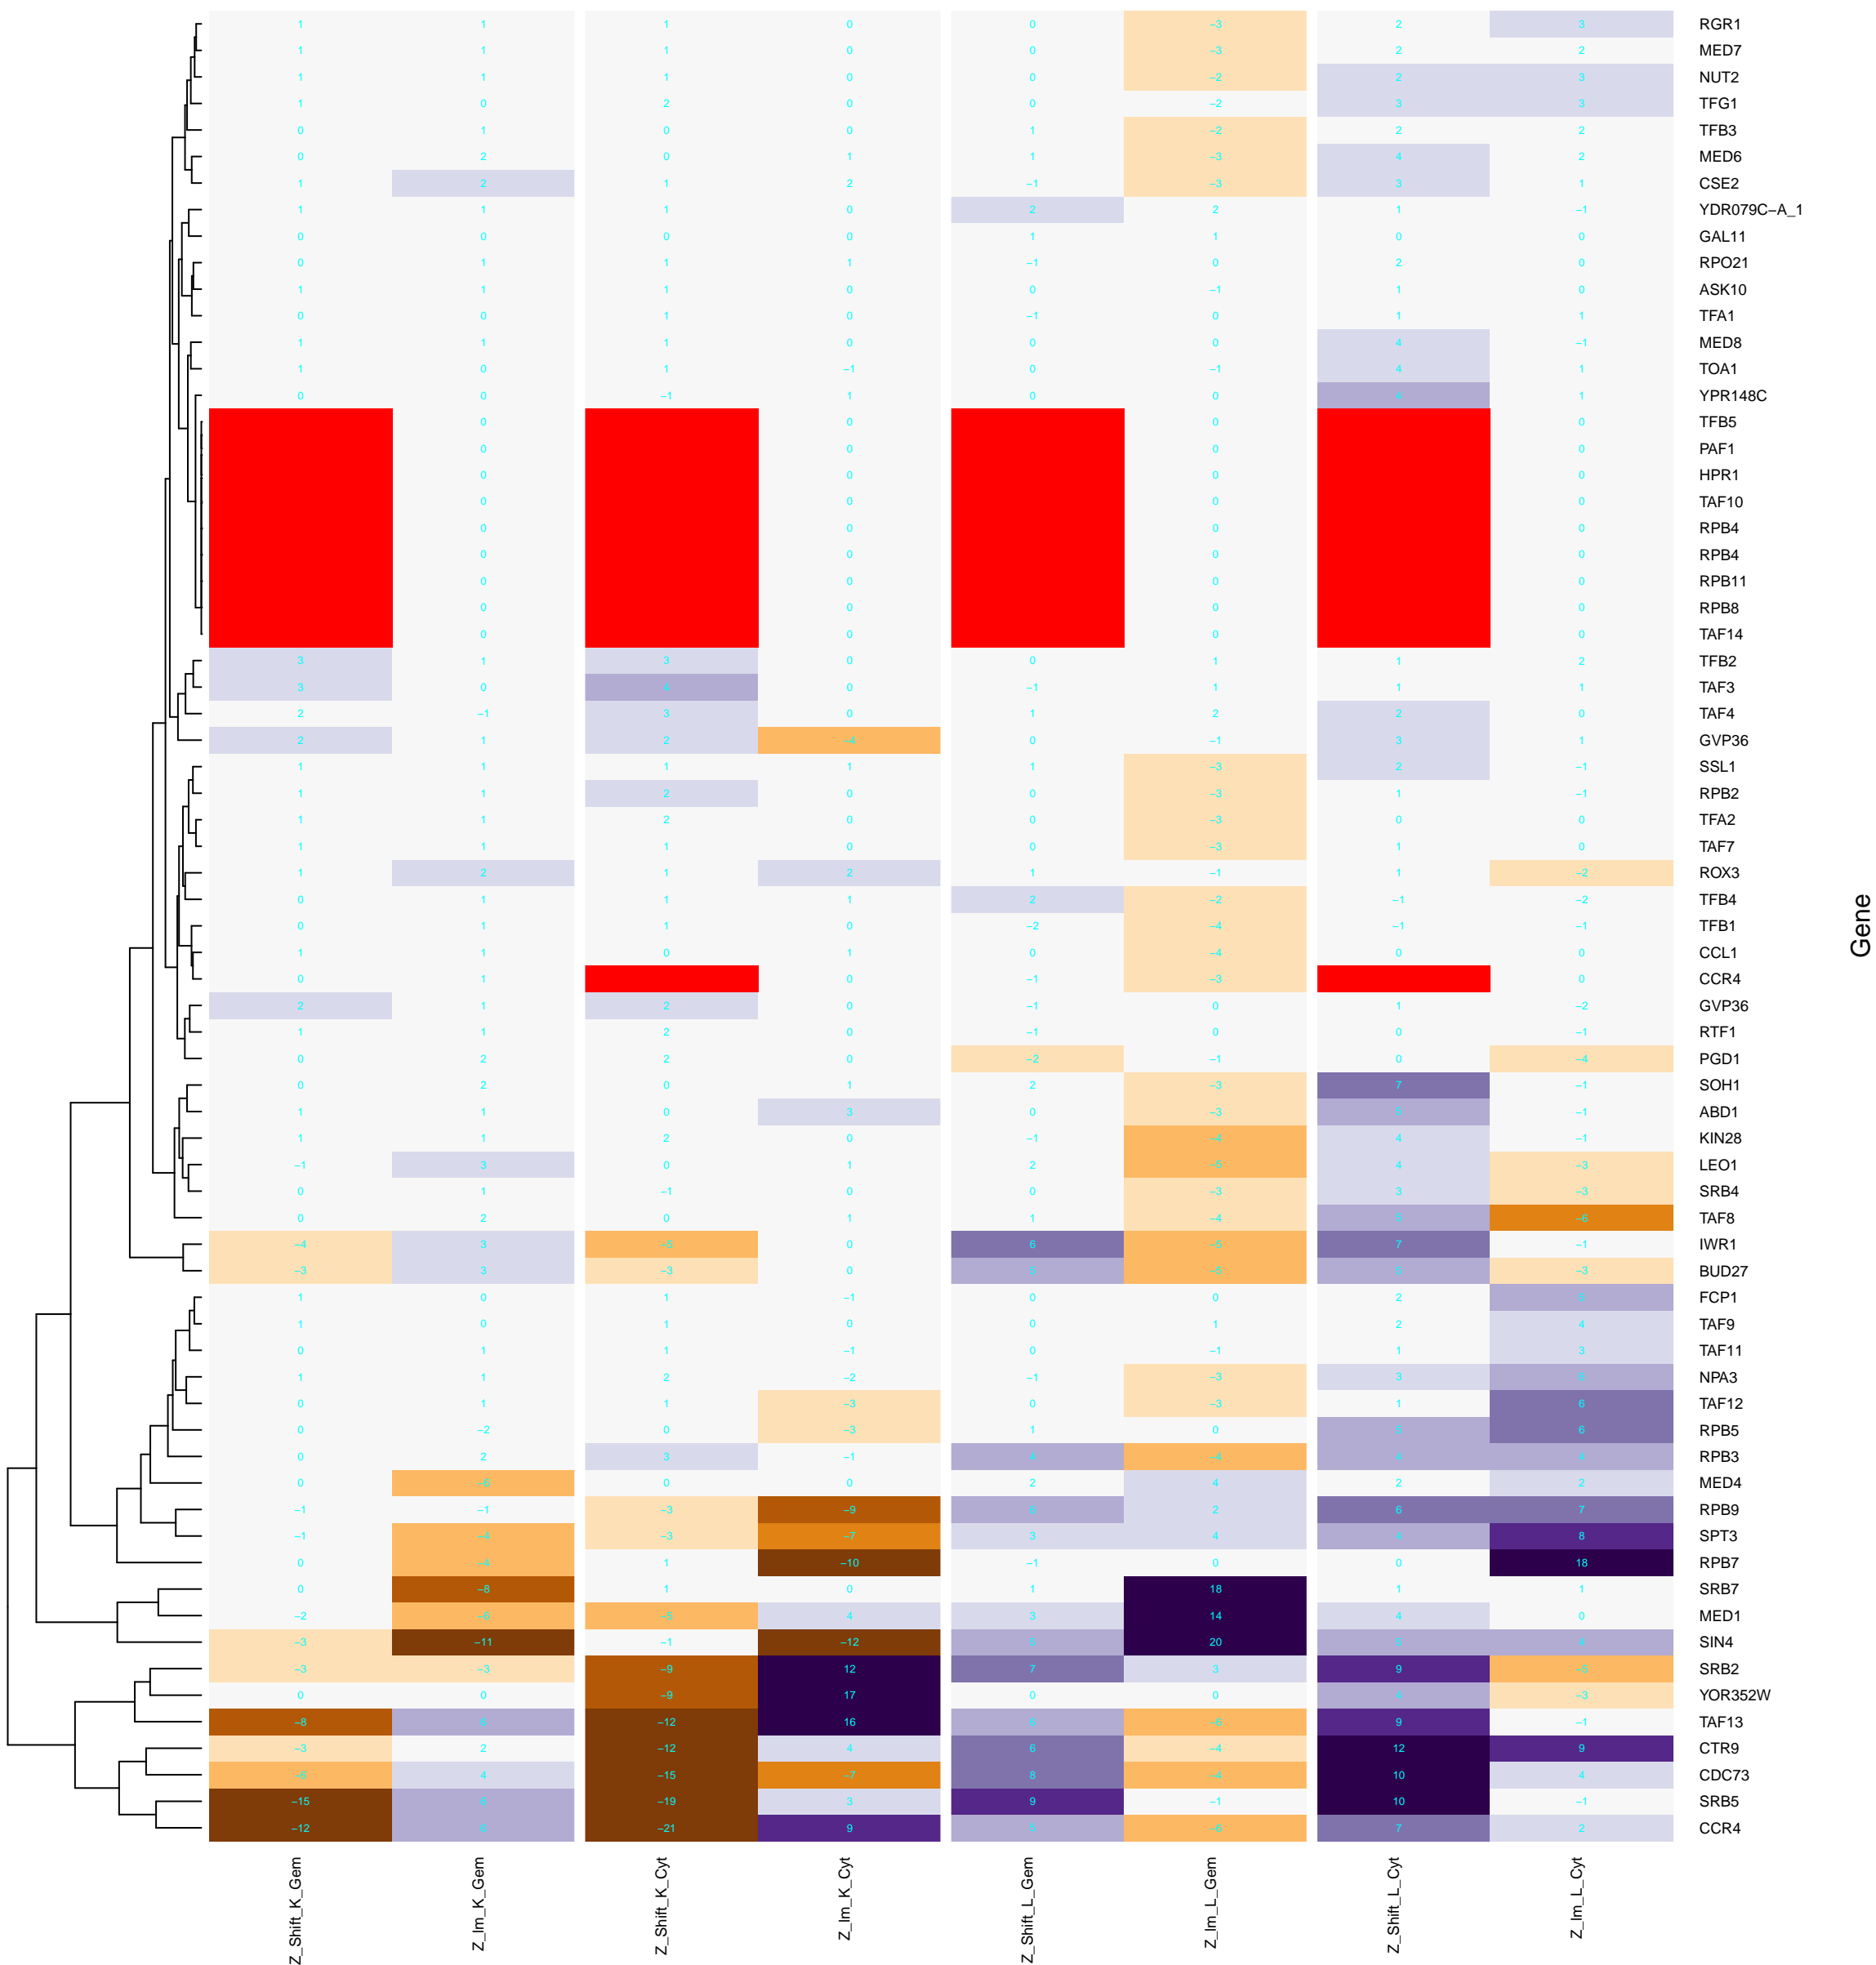

Supplement: s1 [file s1]

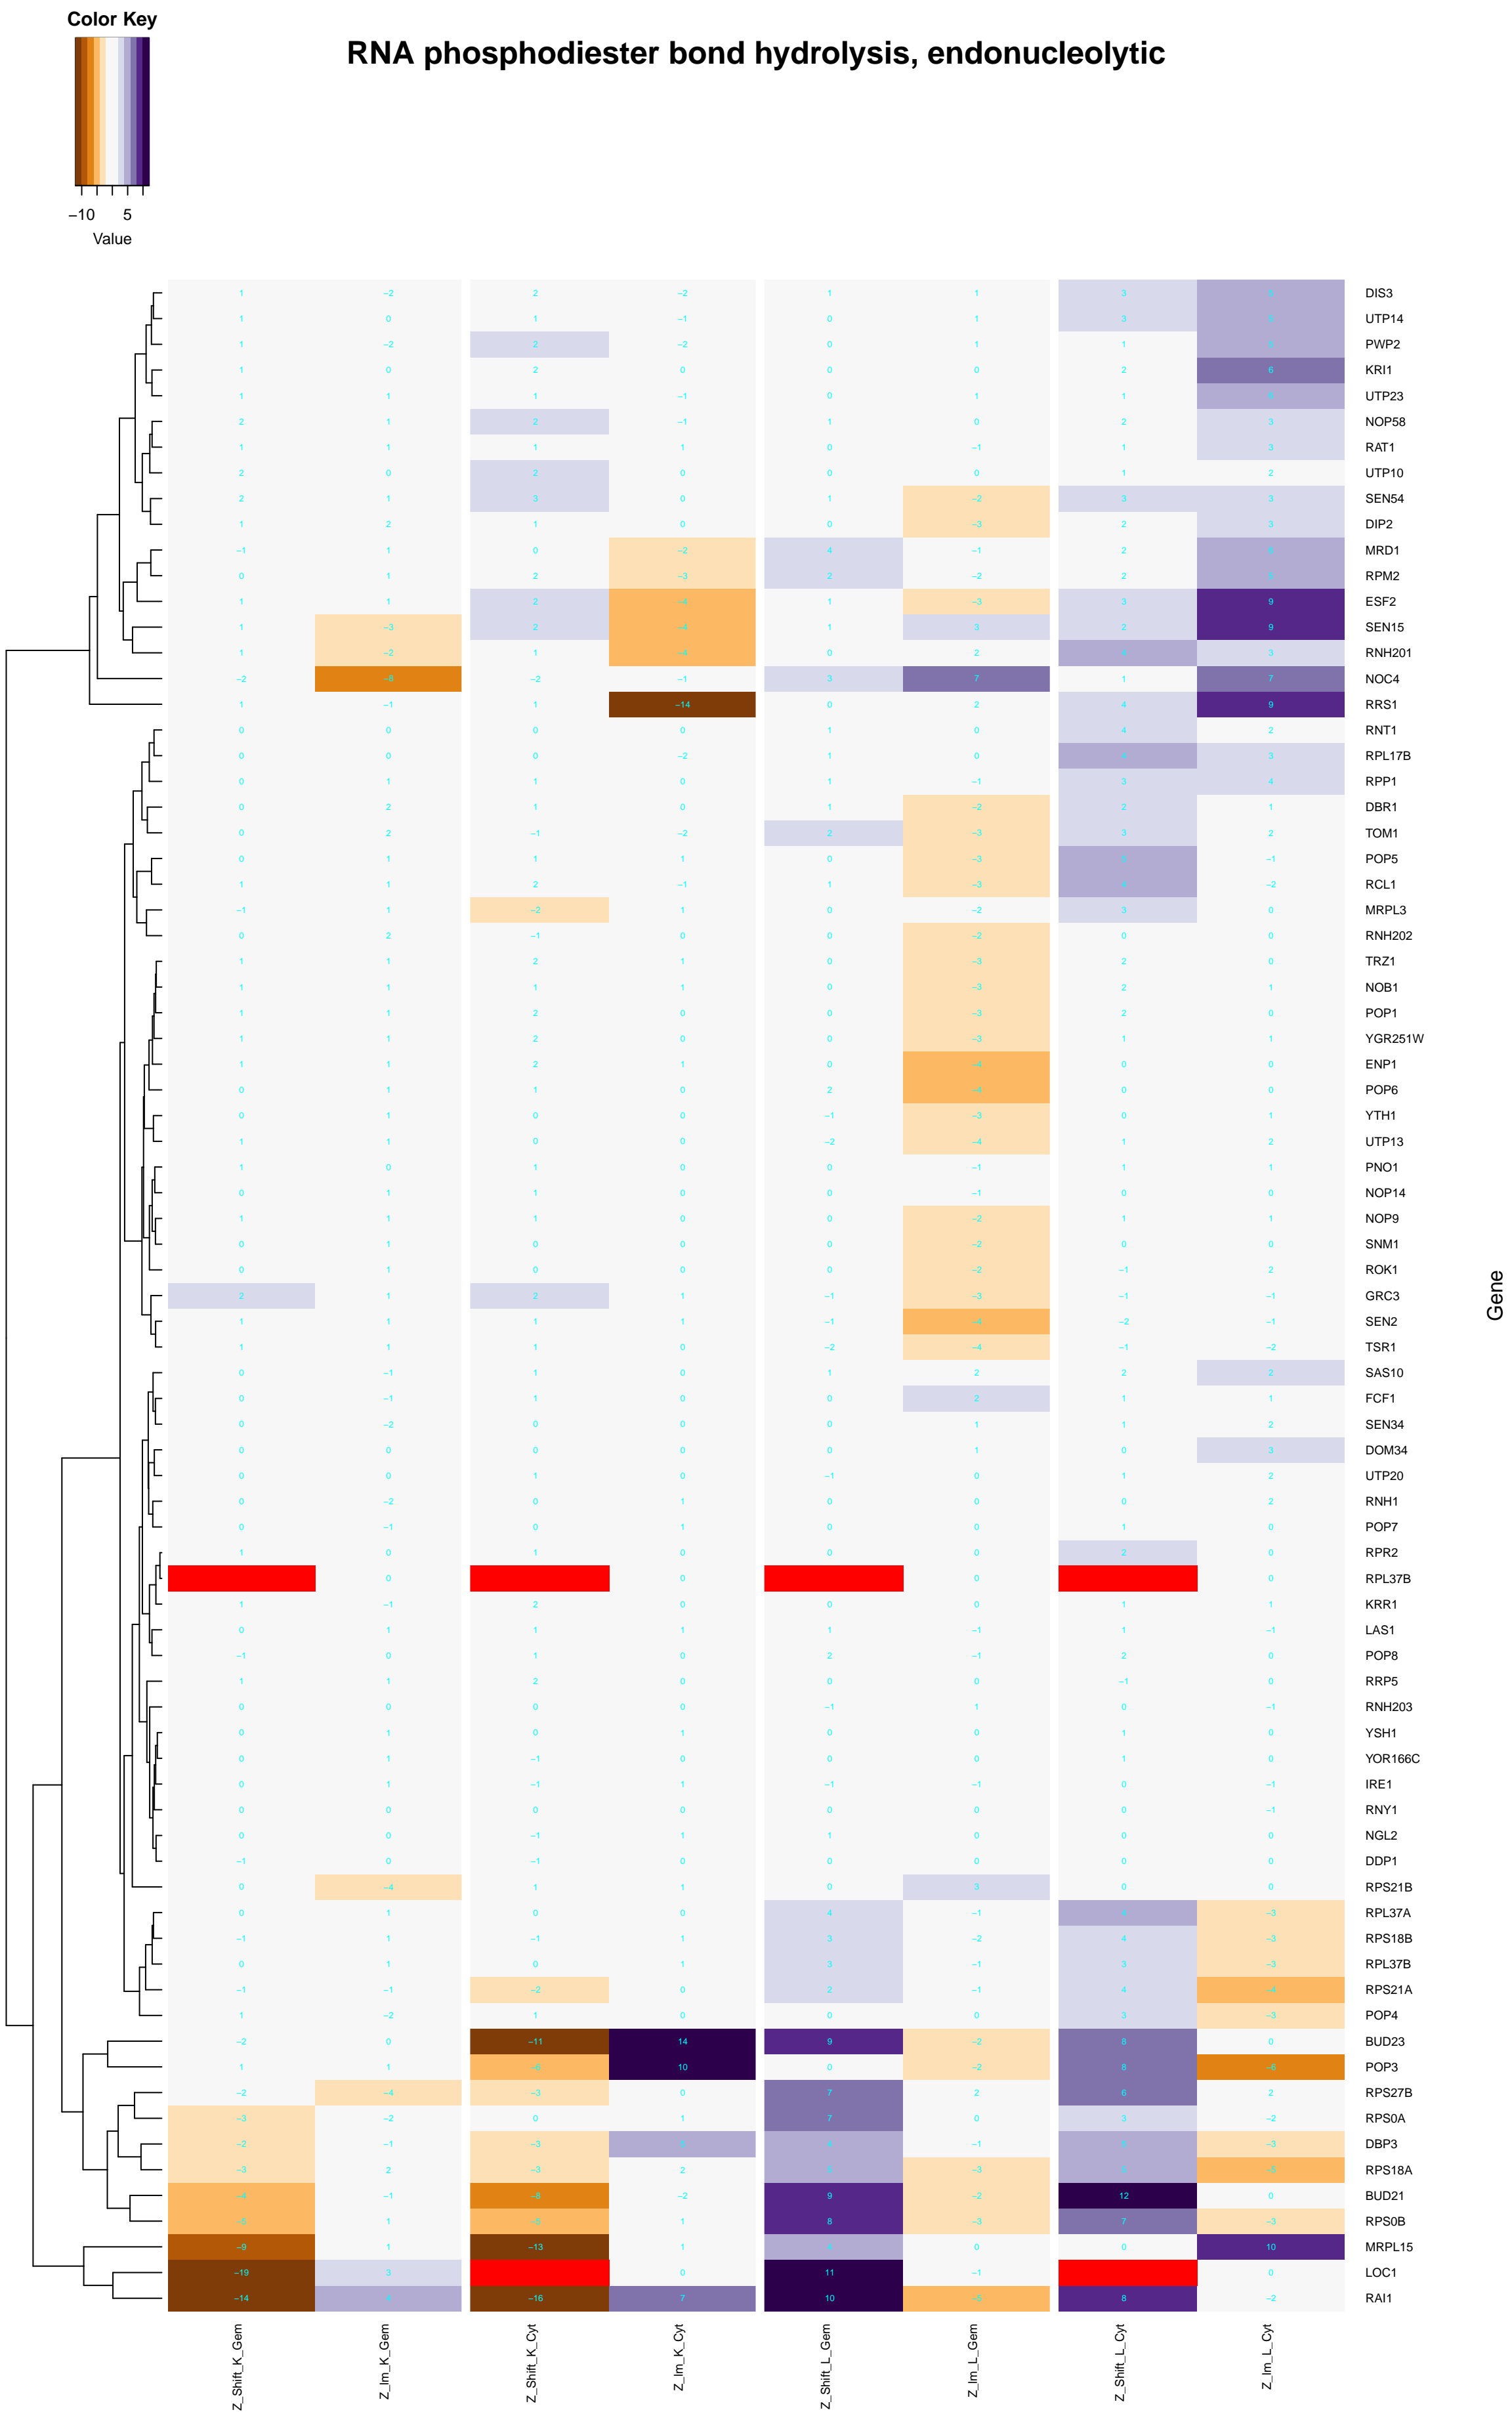

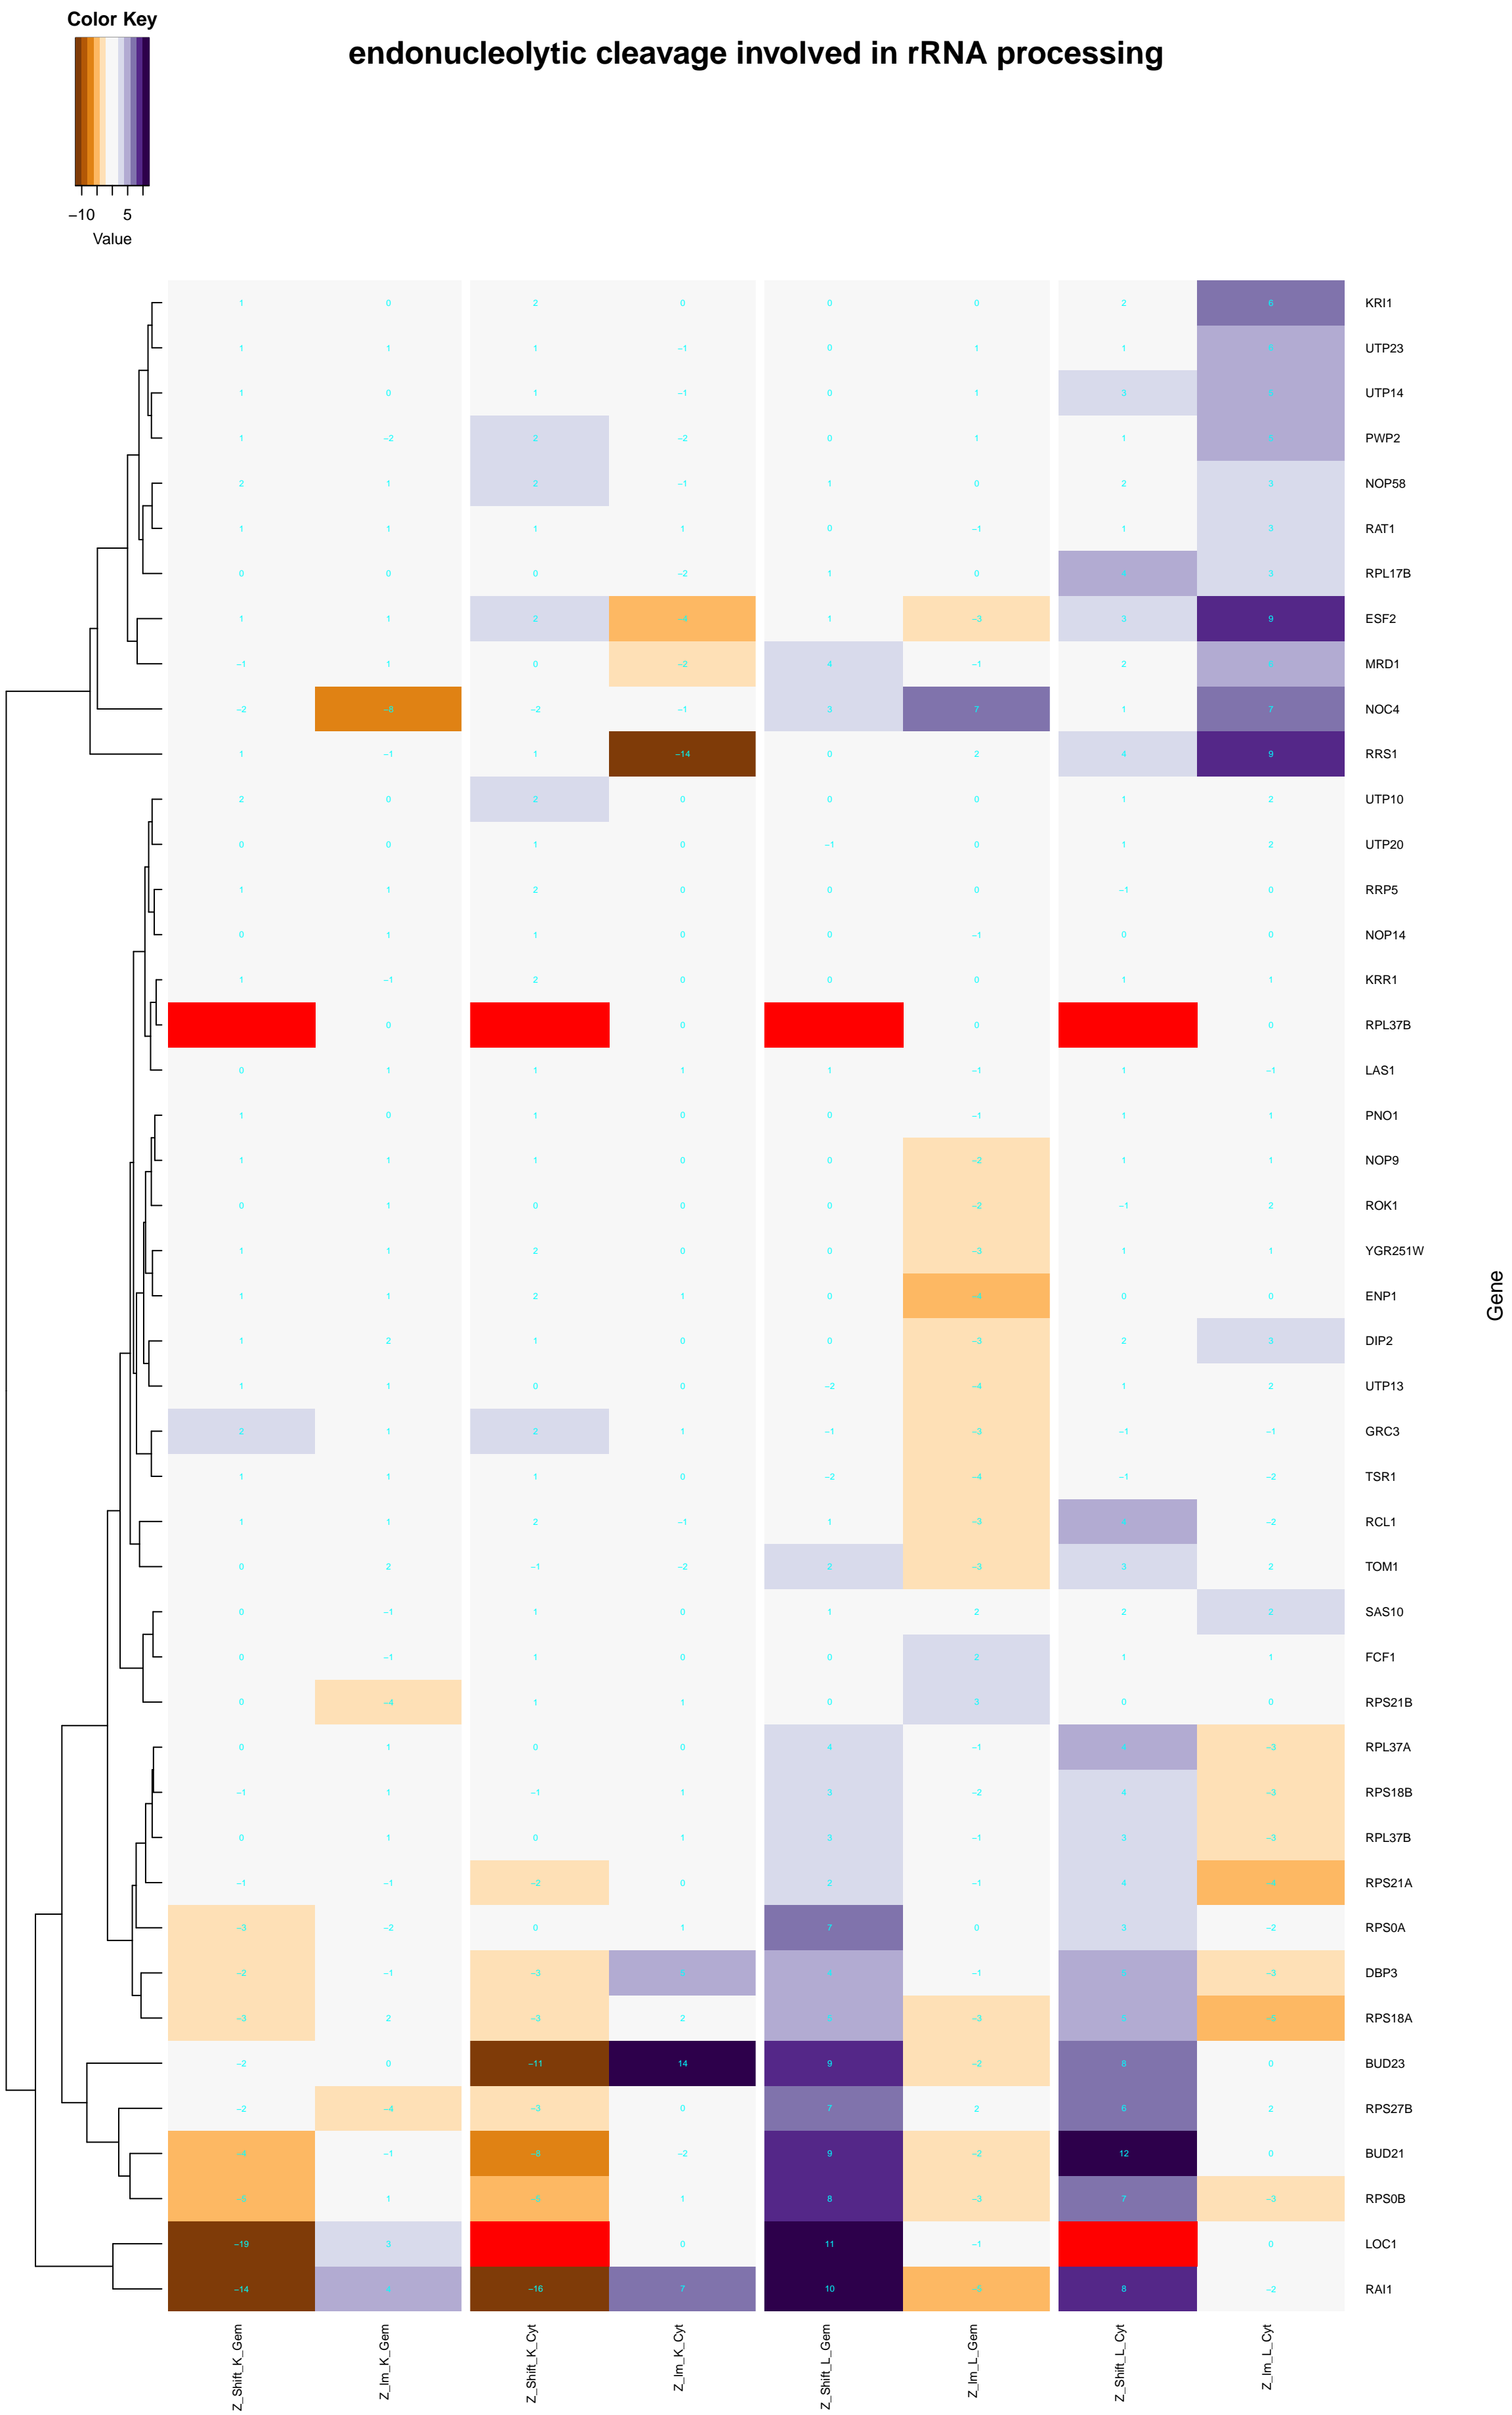

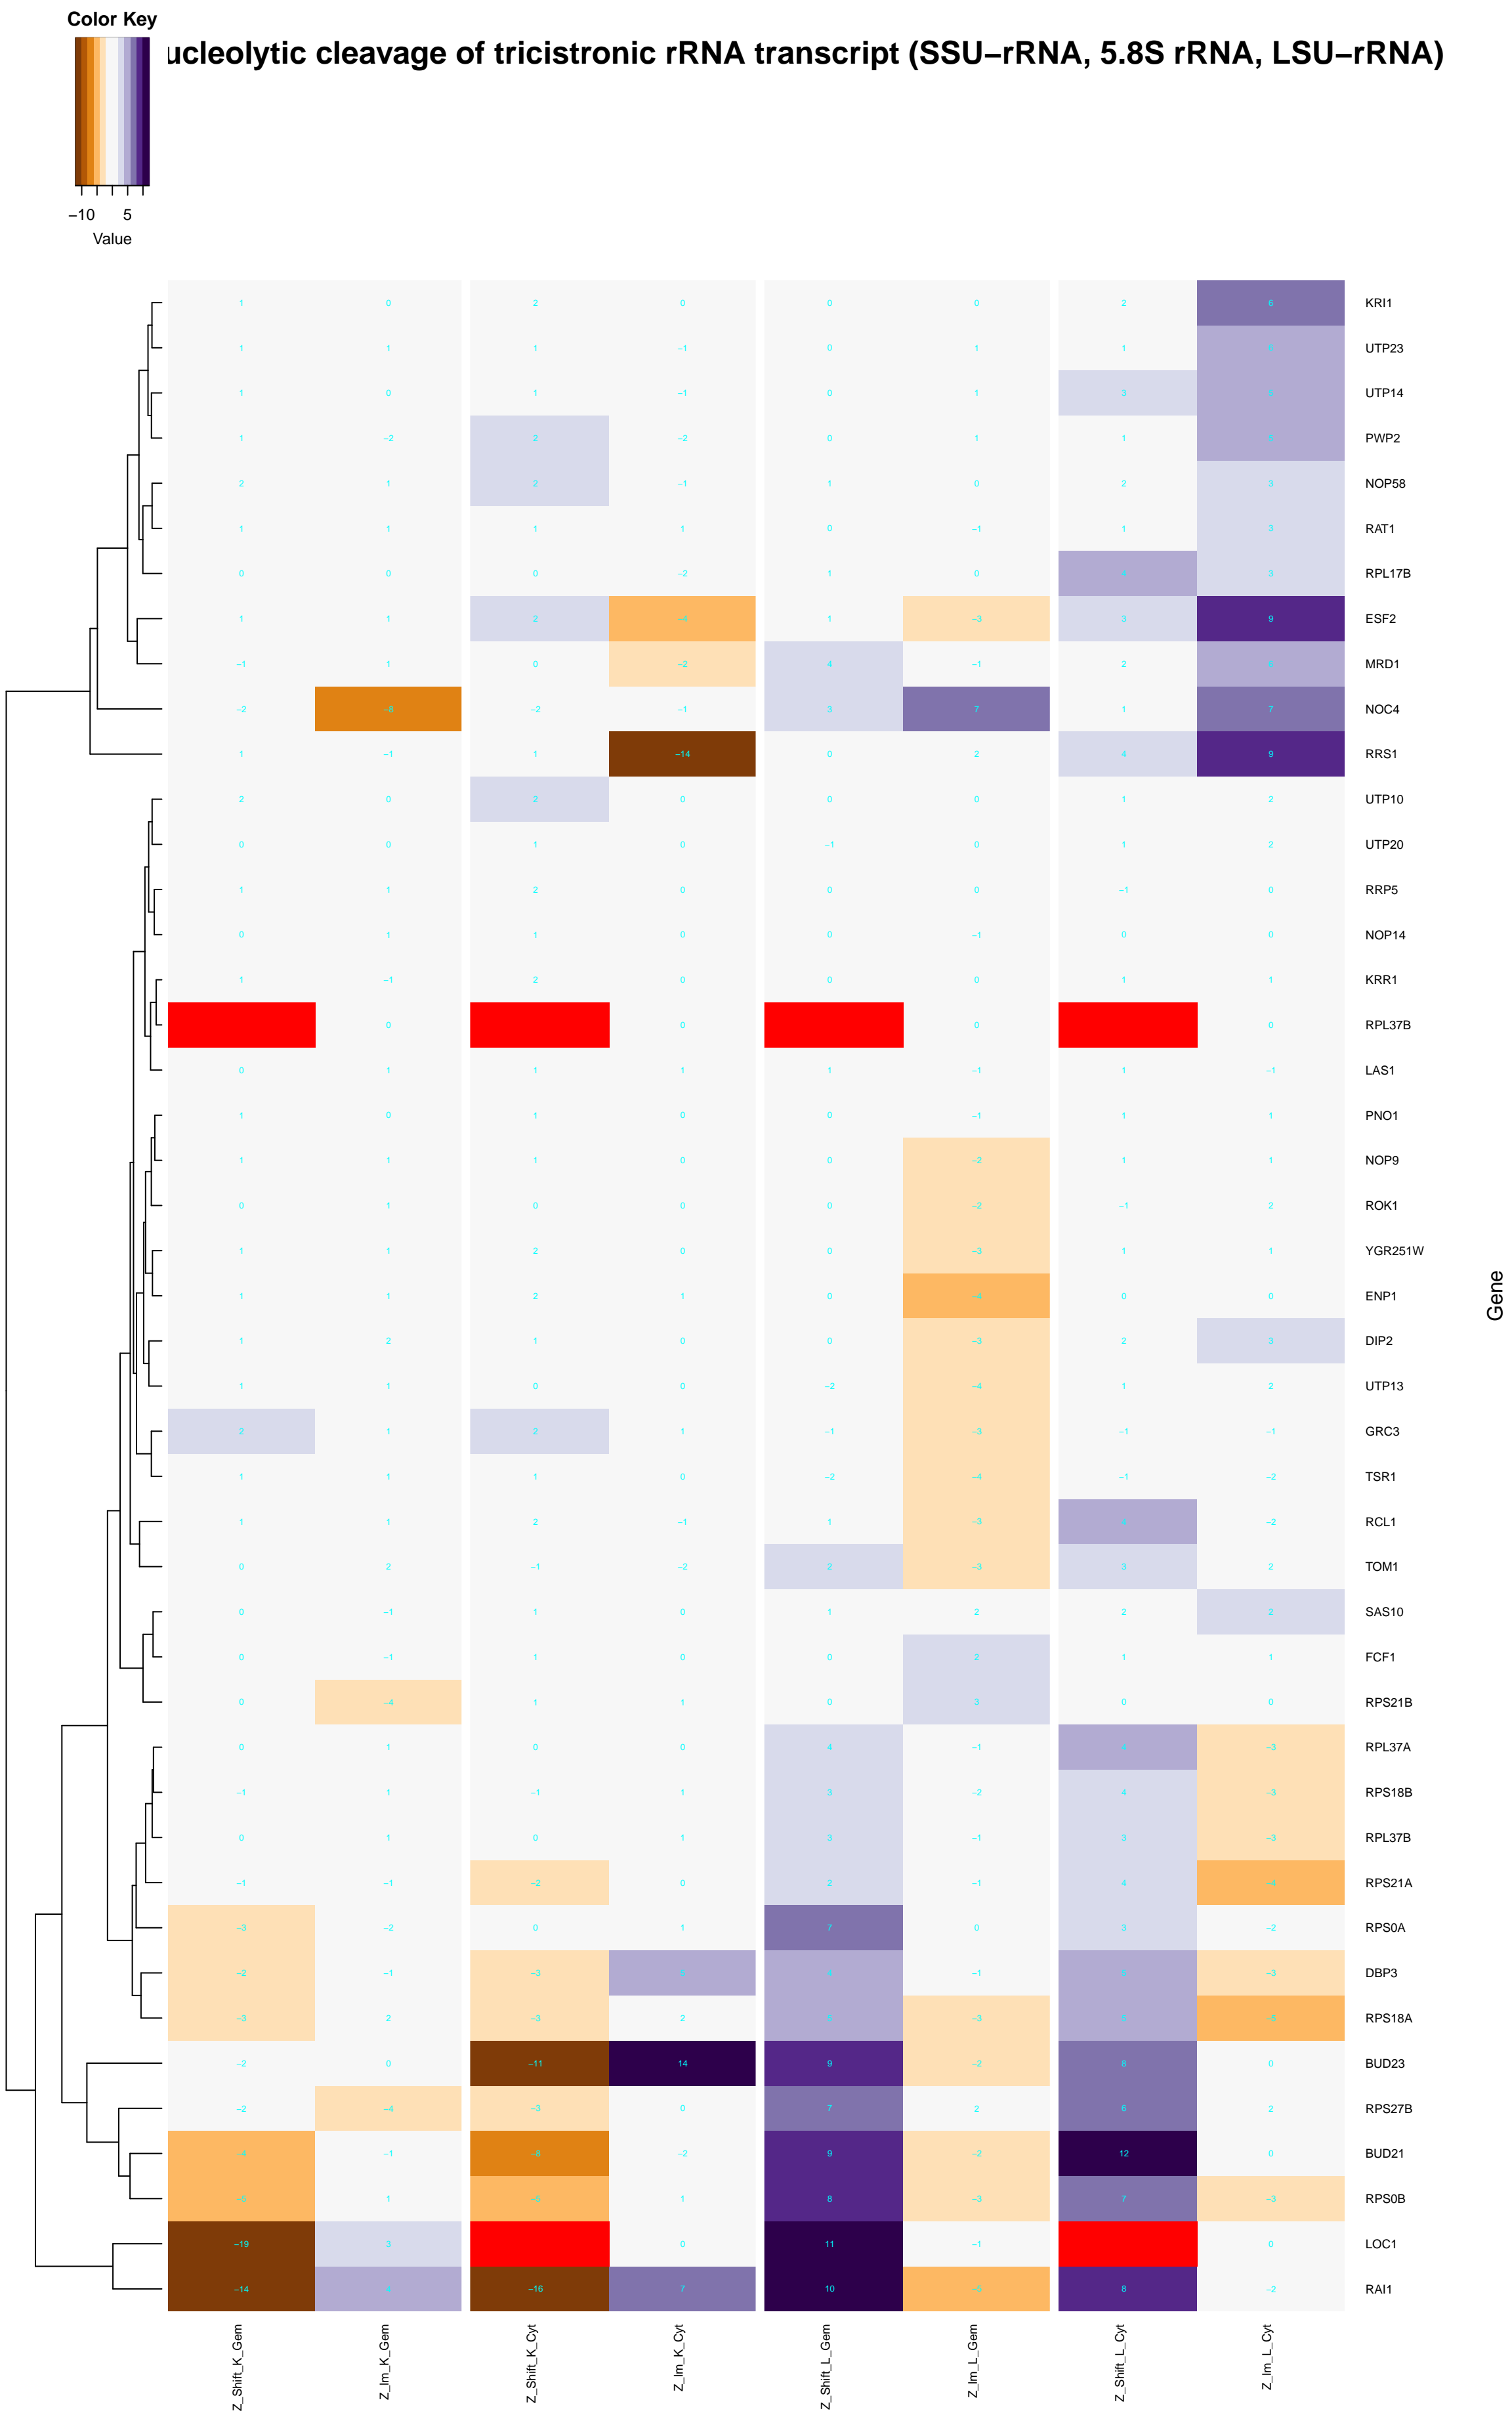

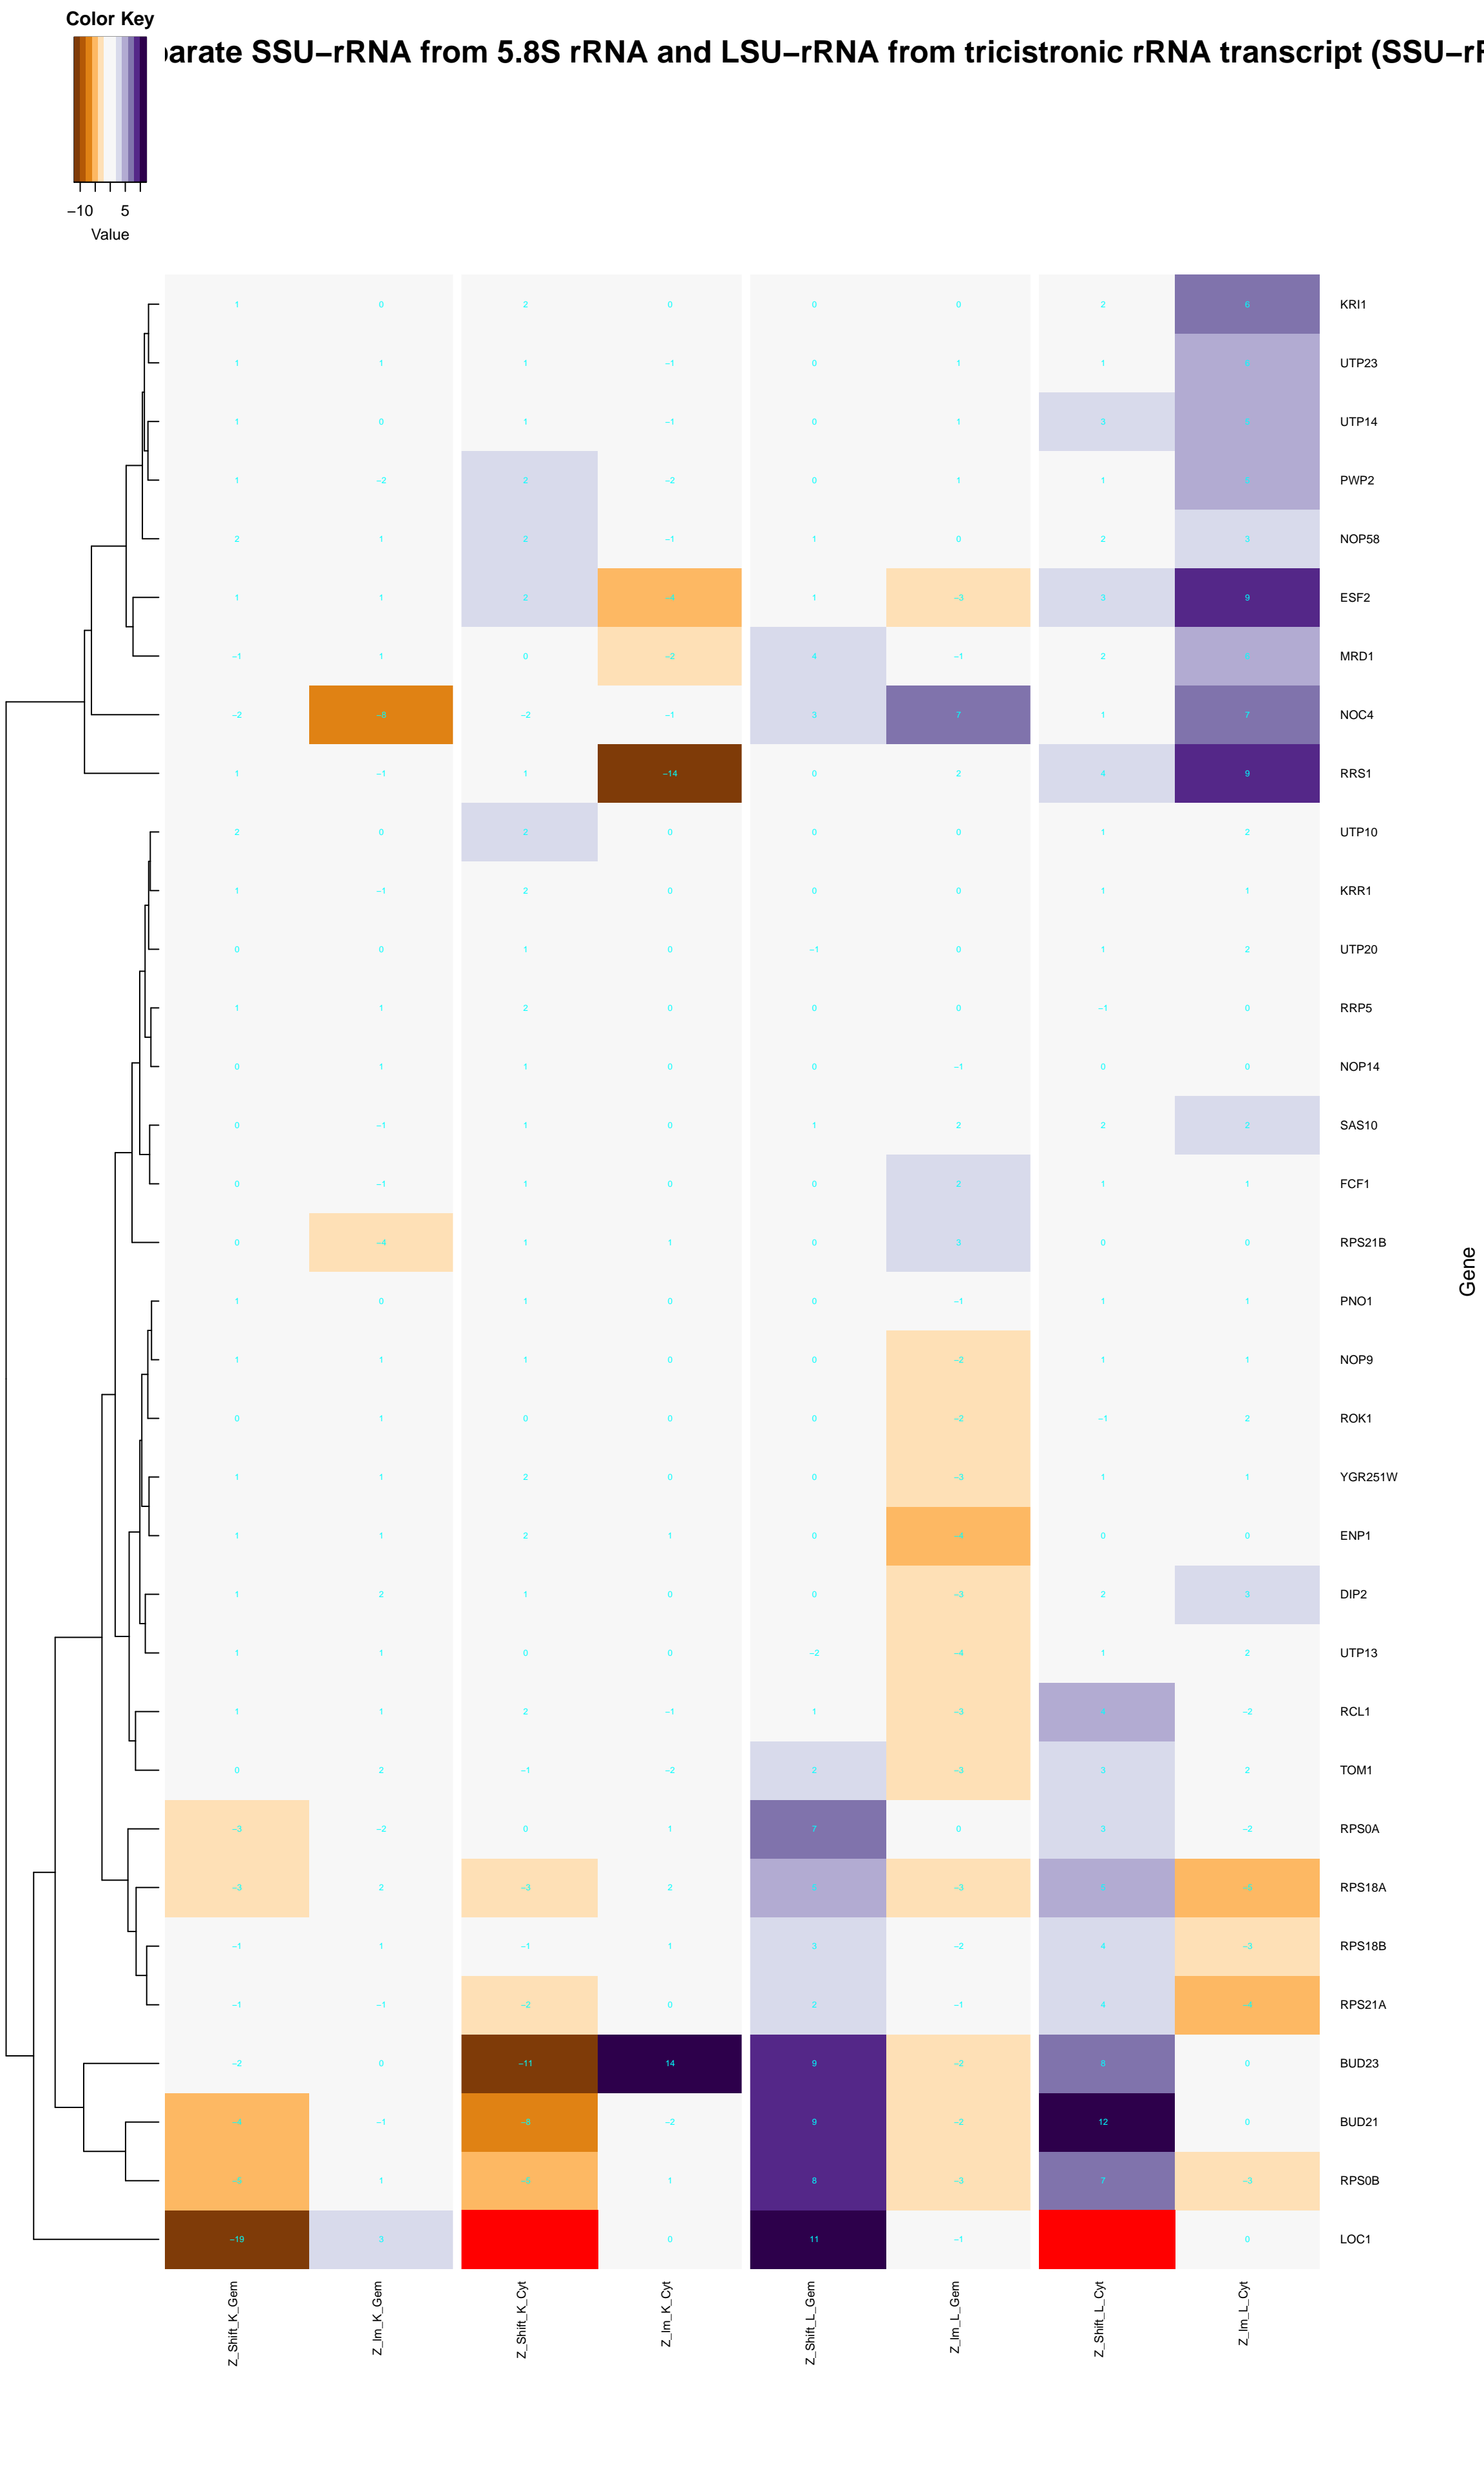

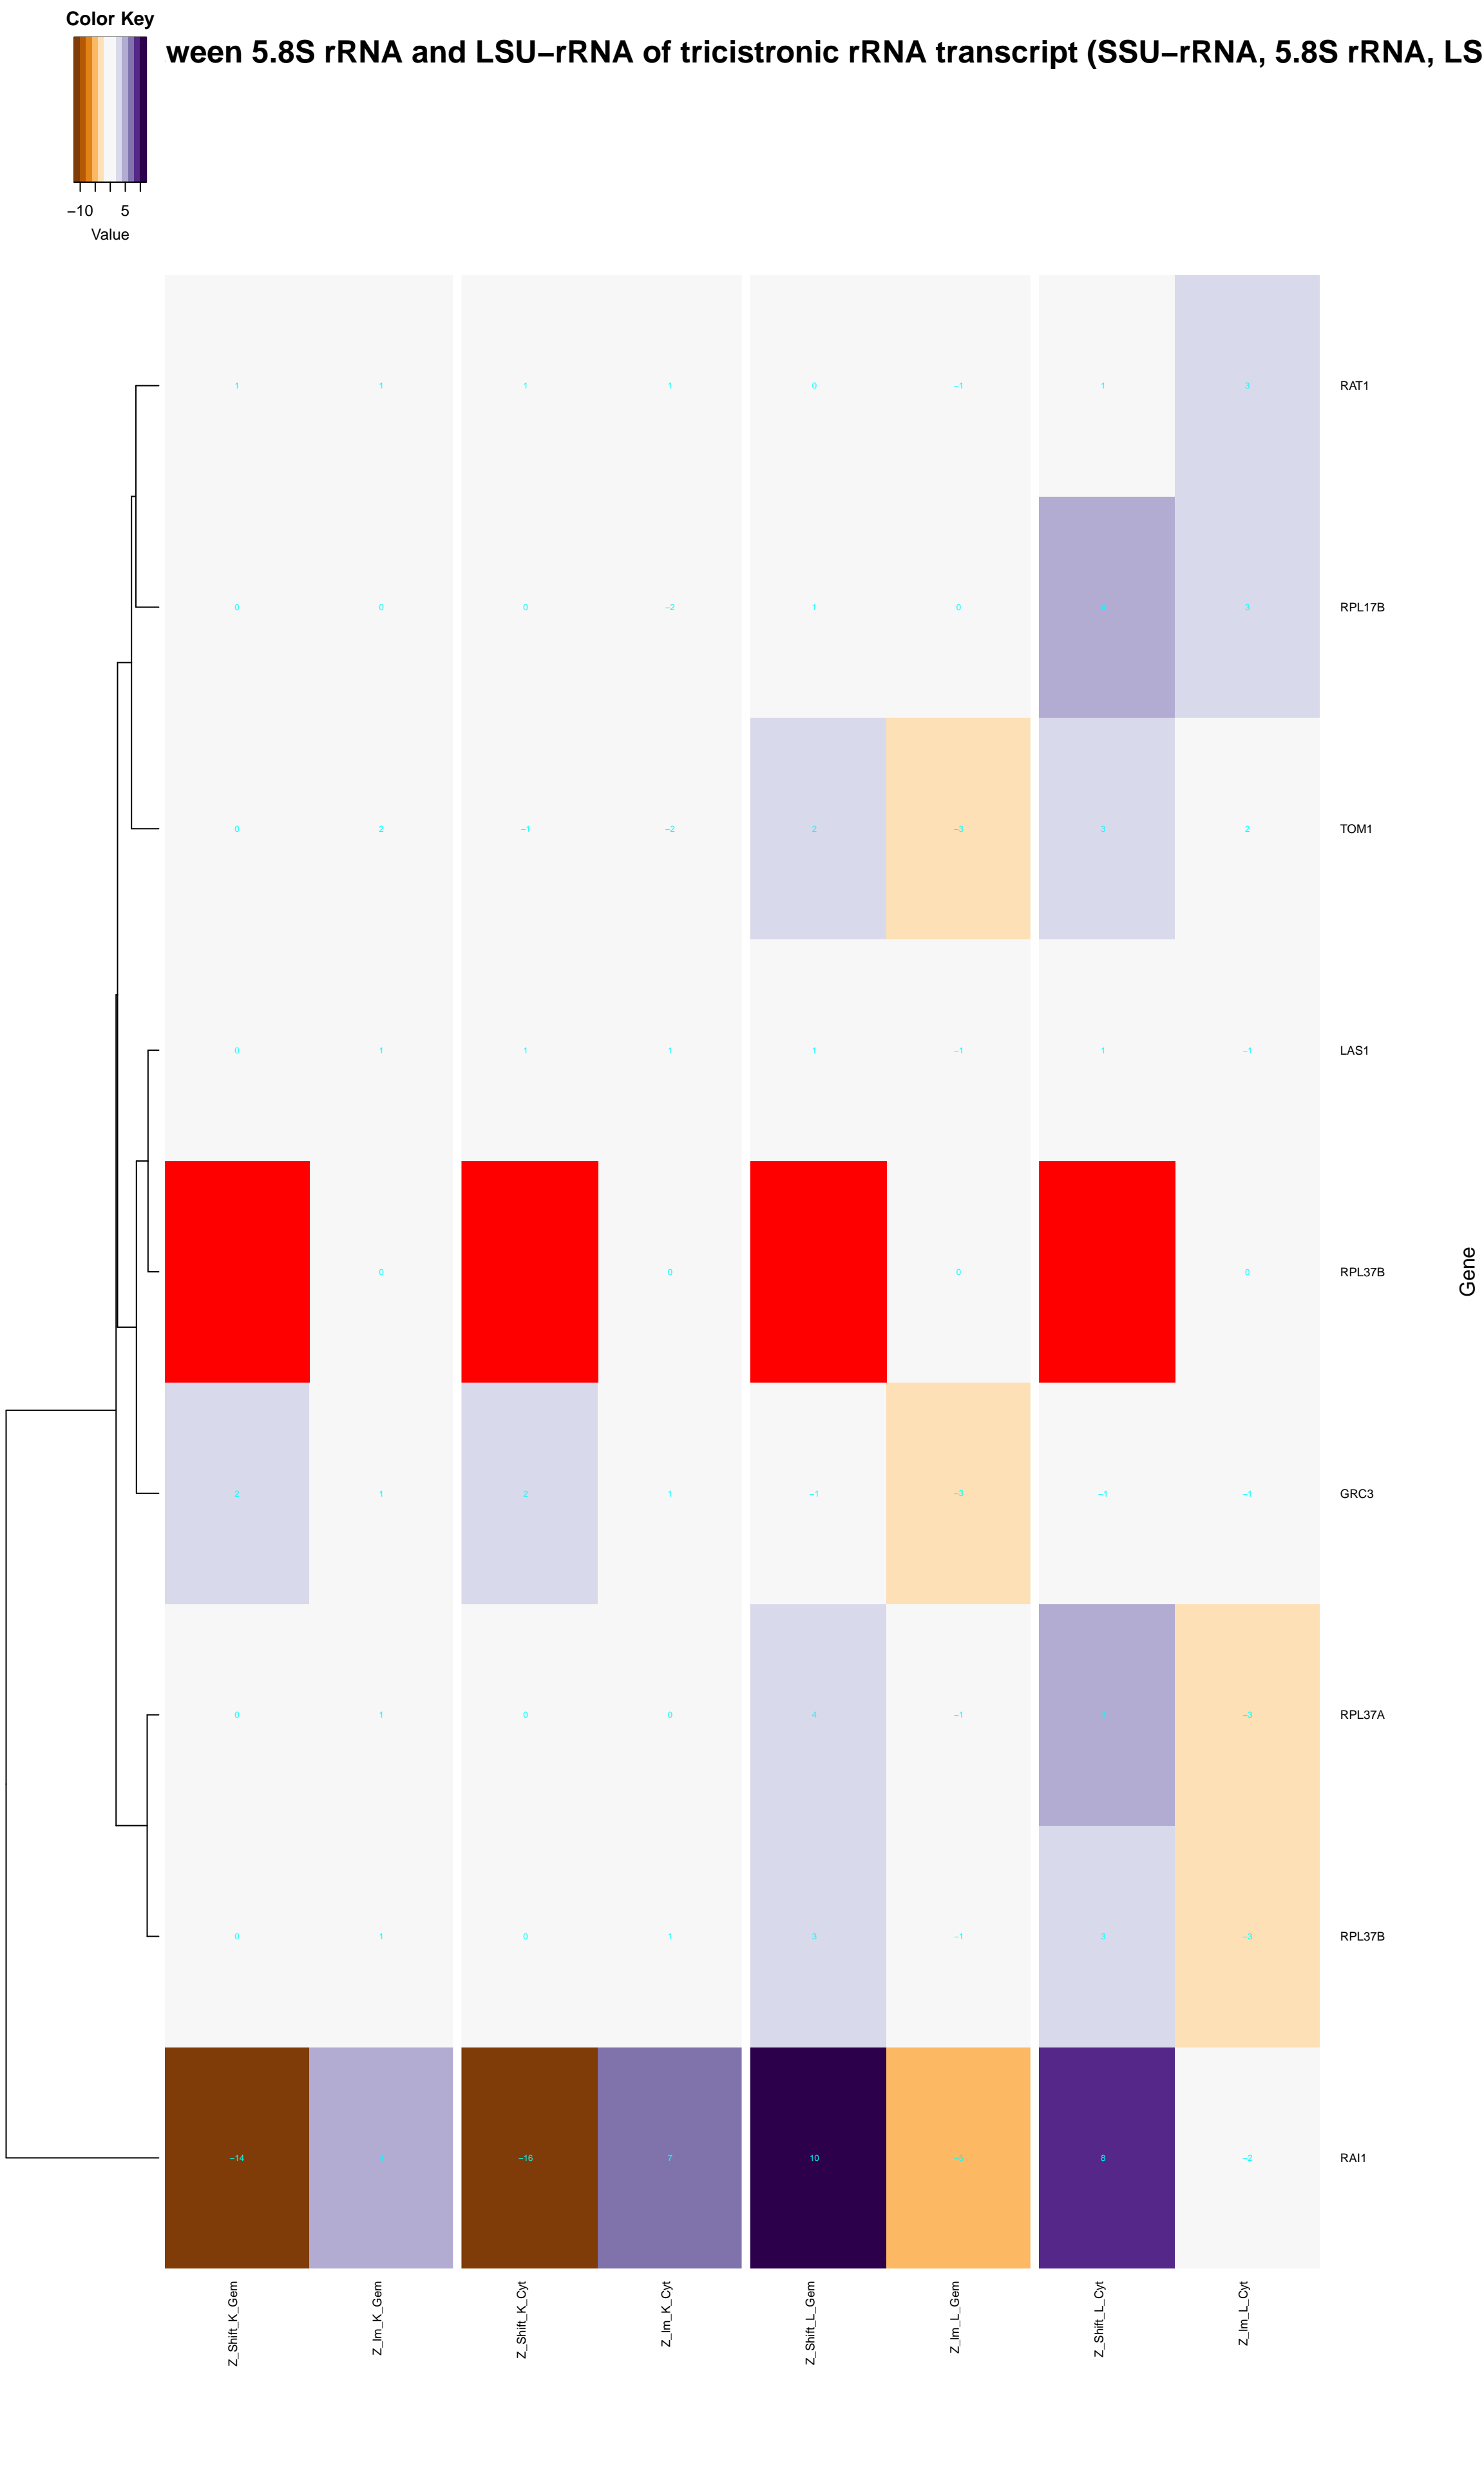

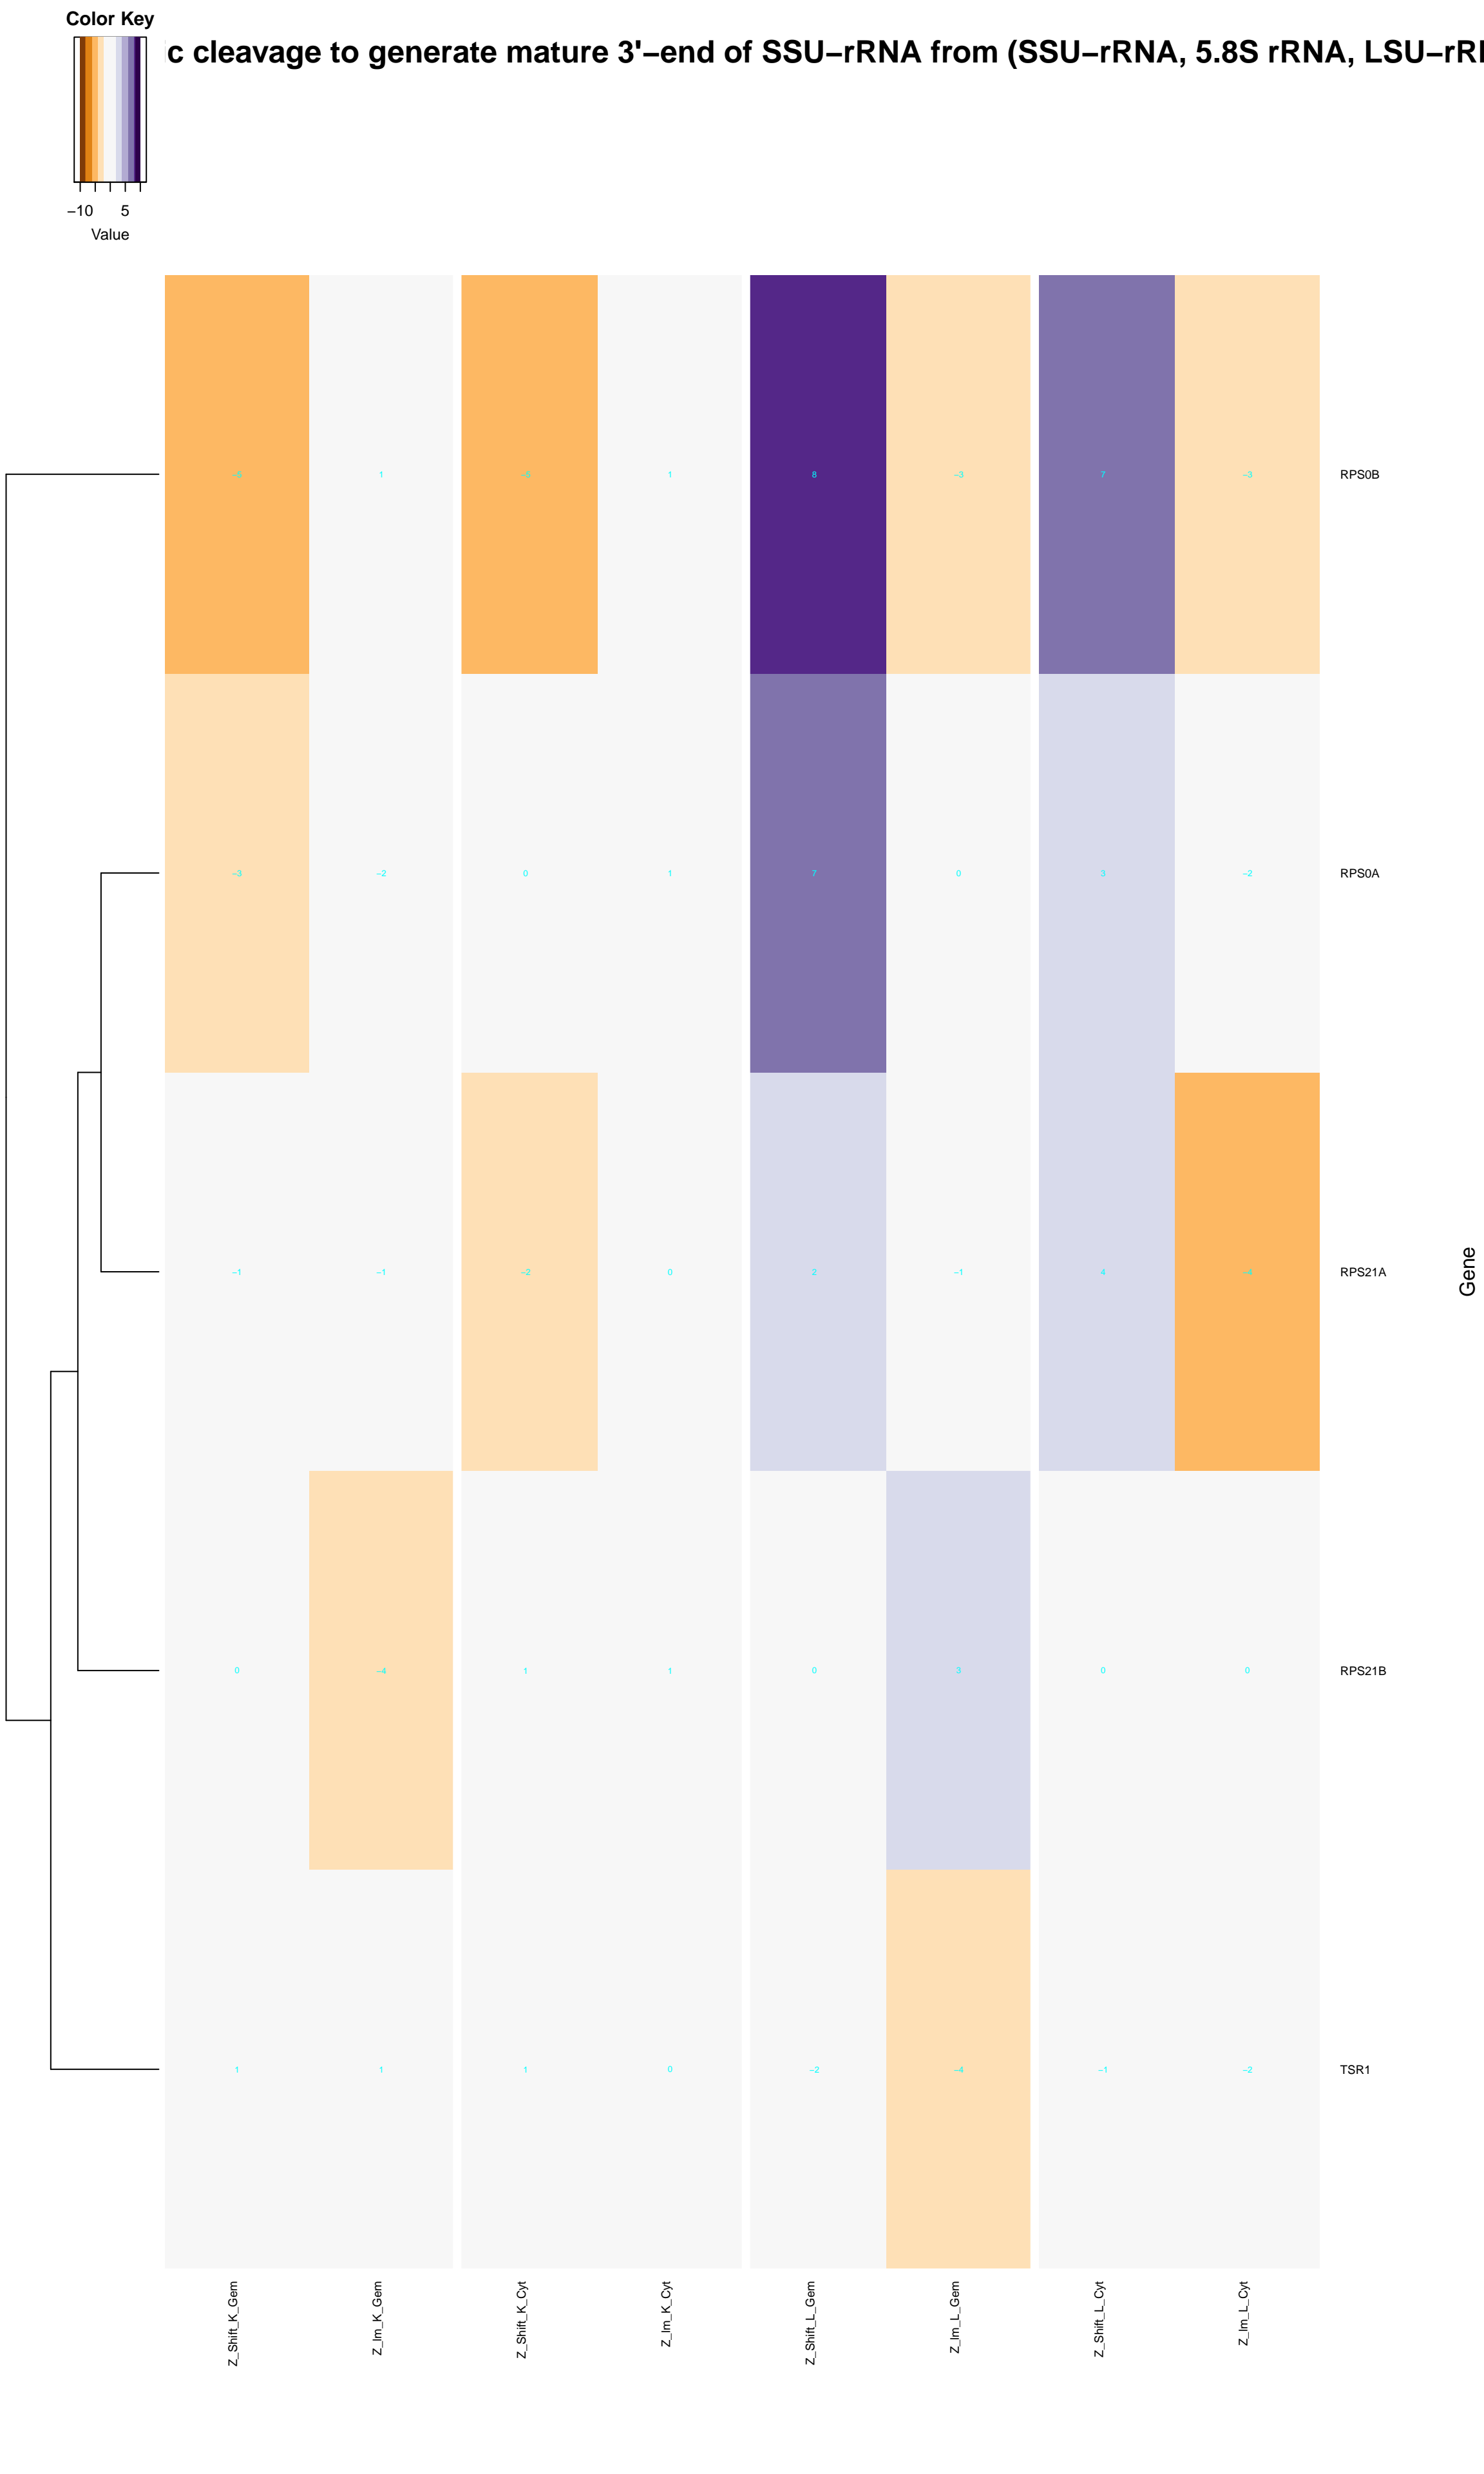

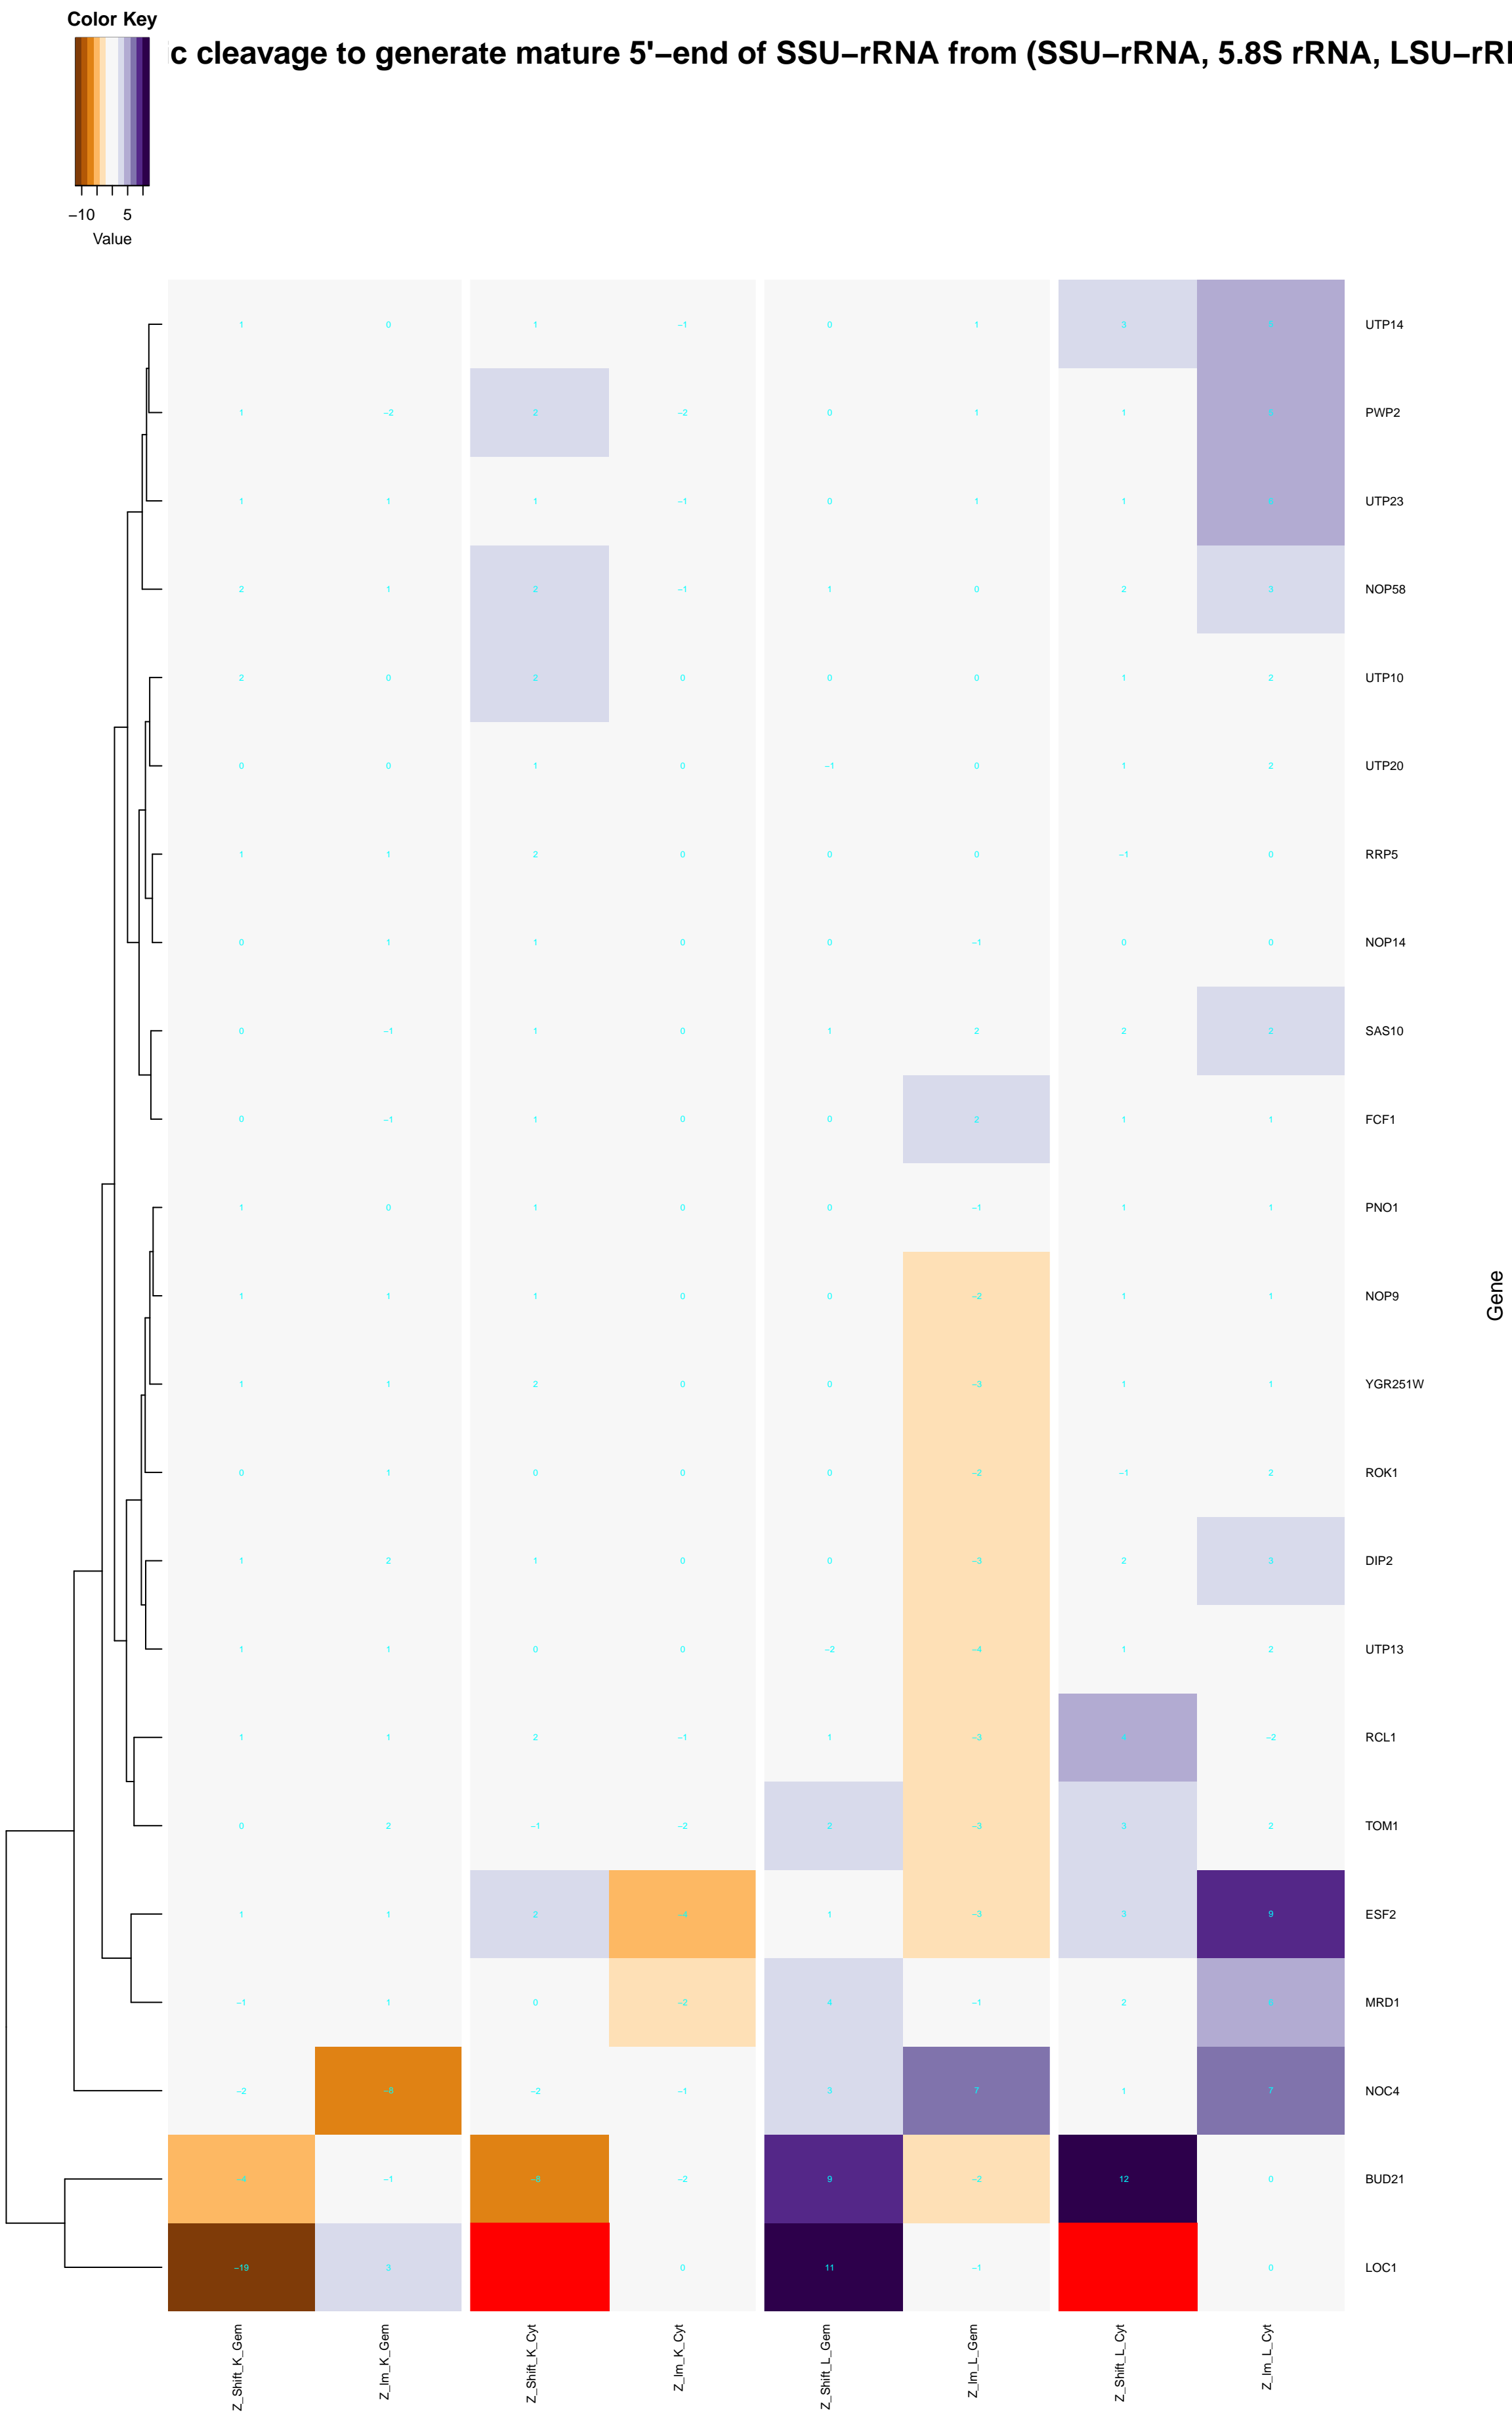

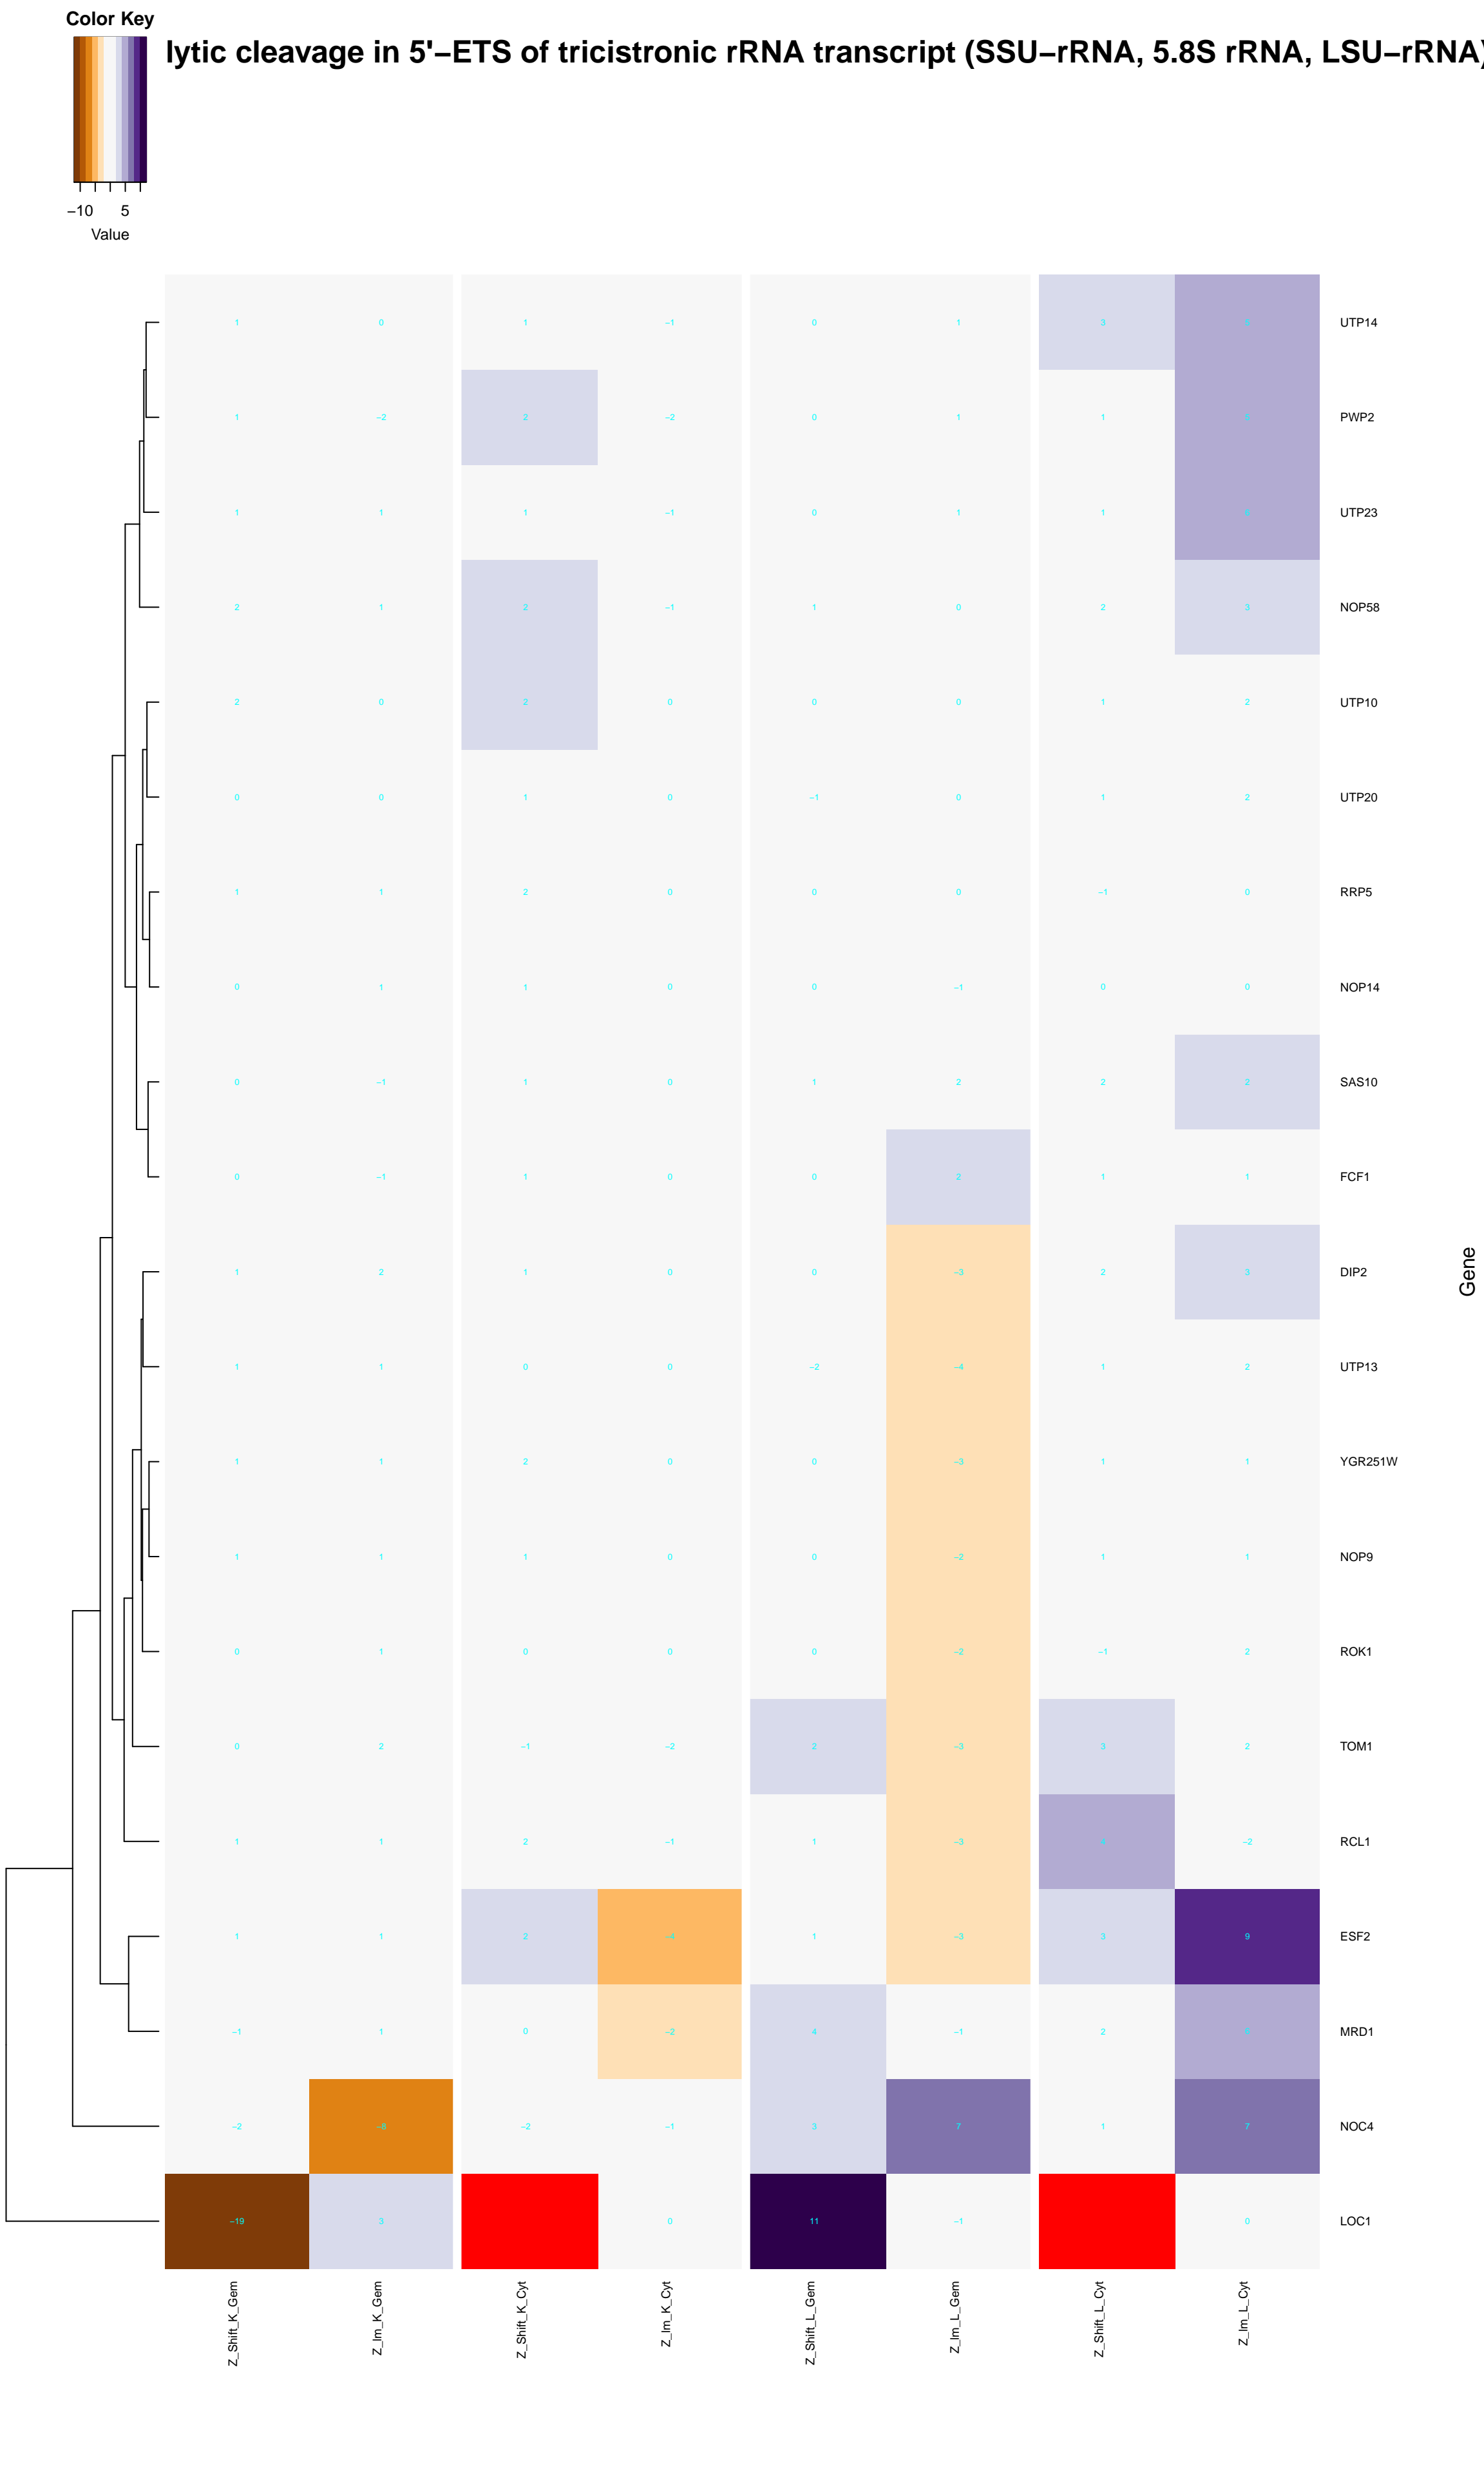

Supplement: s1 [file s1]

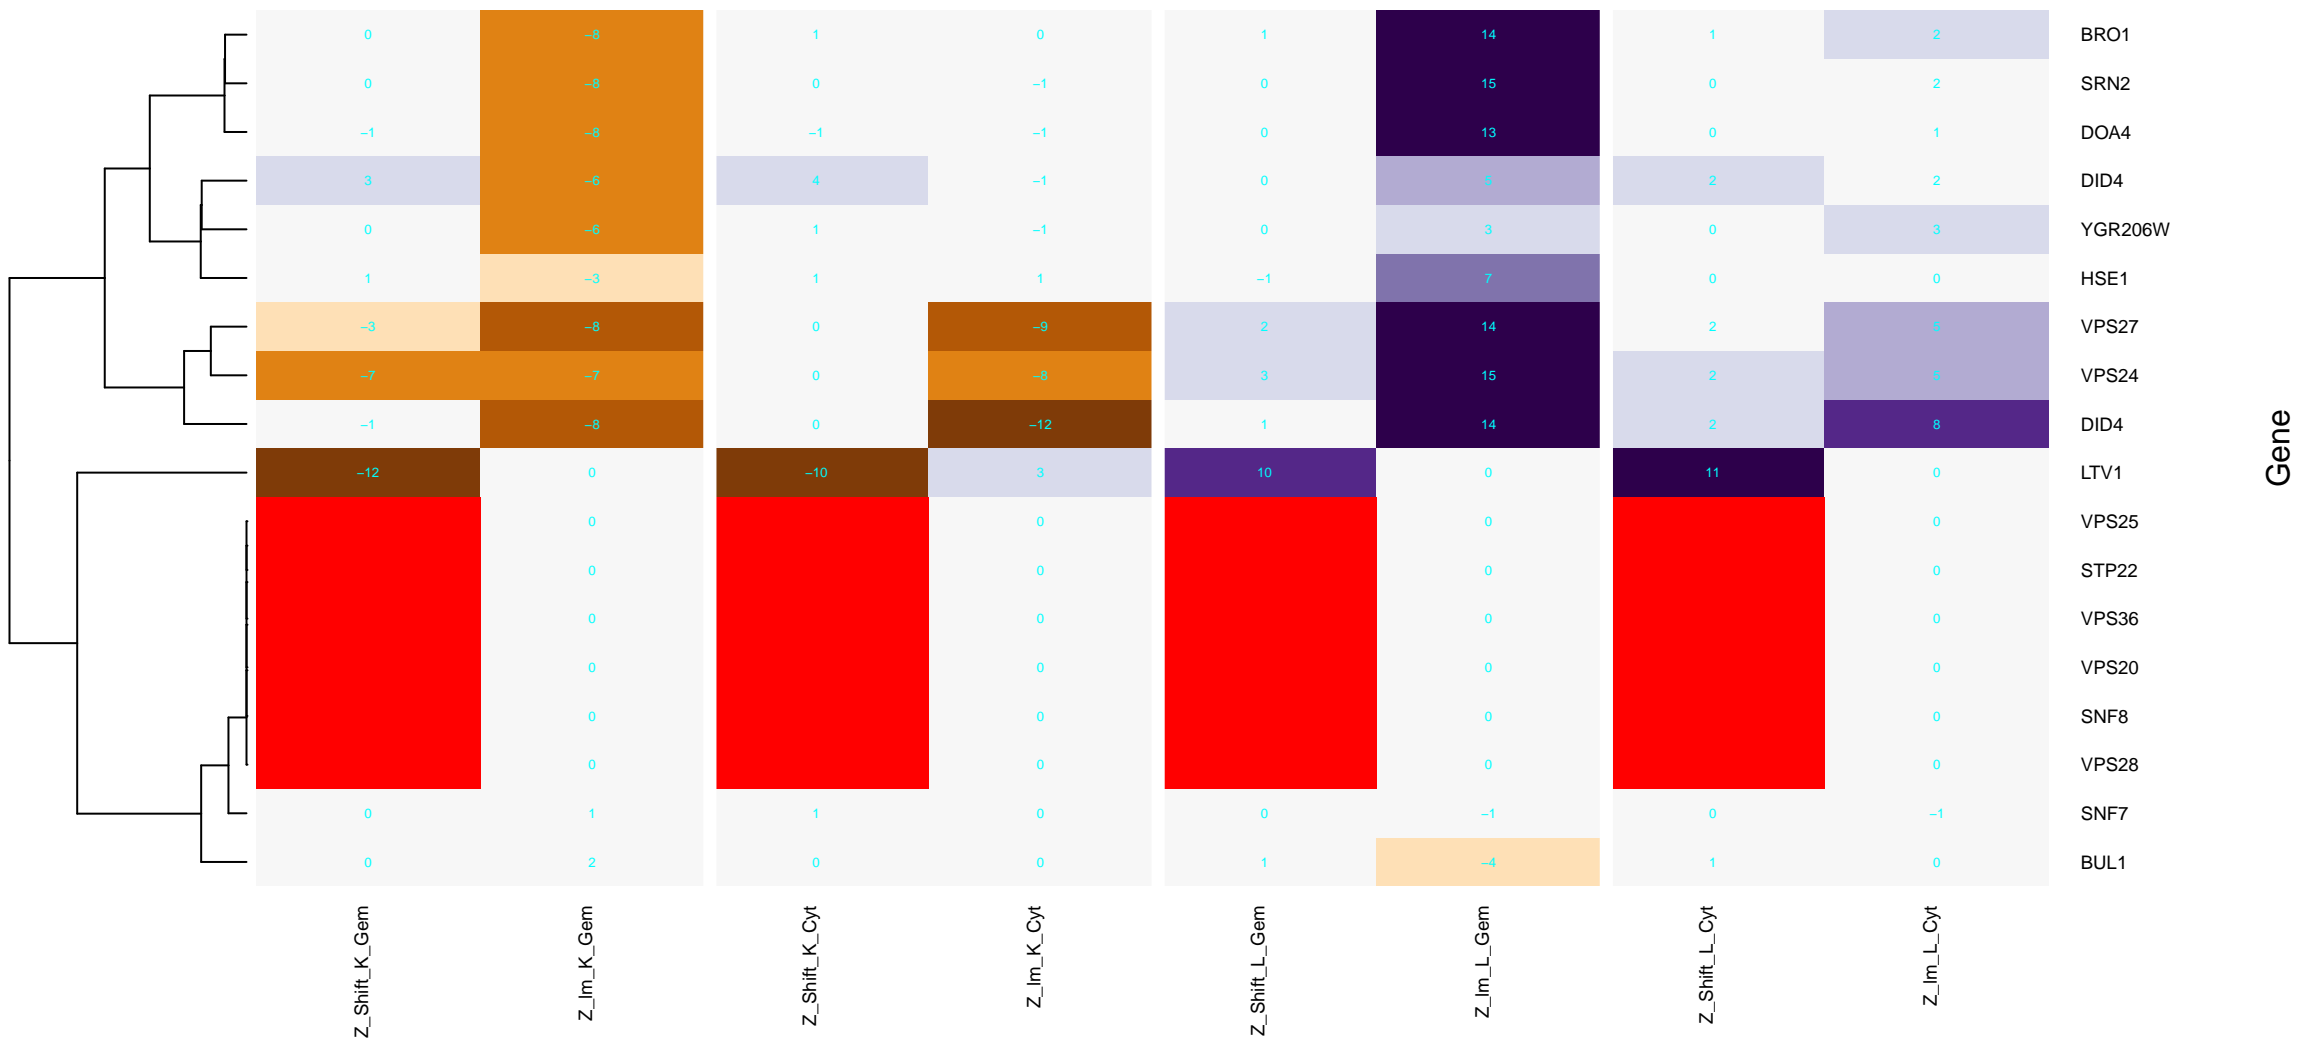

Supplement: s1 [file s1]

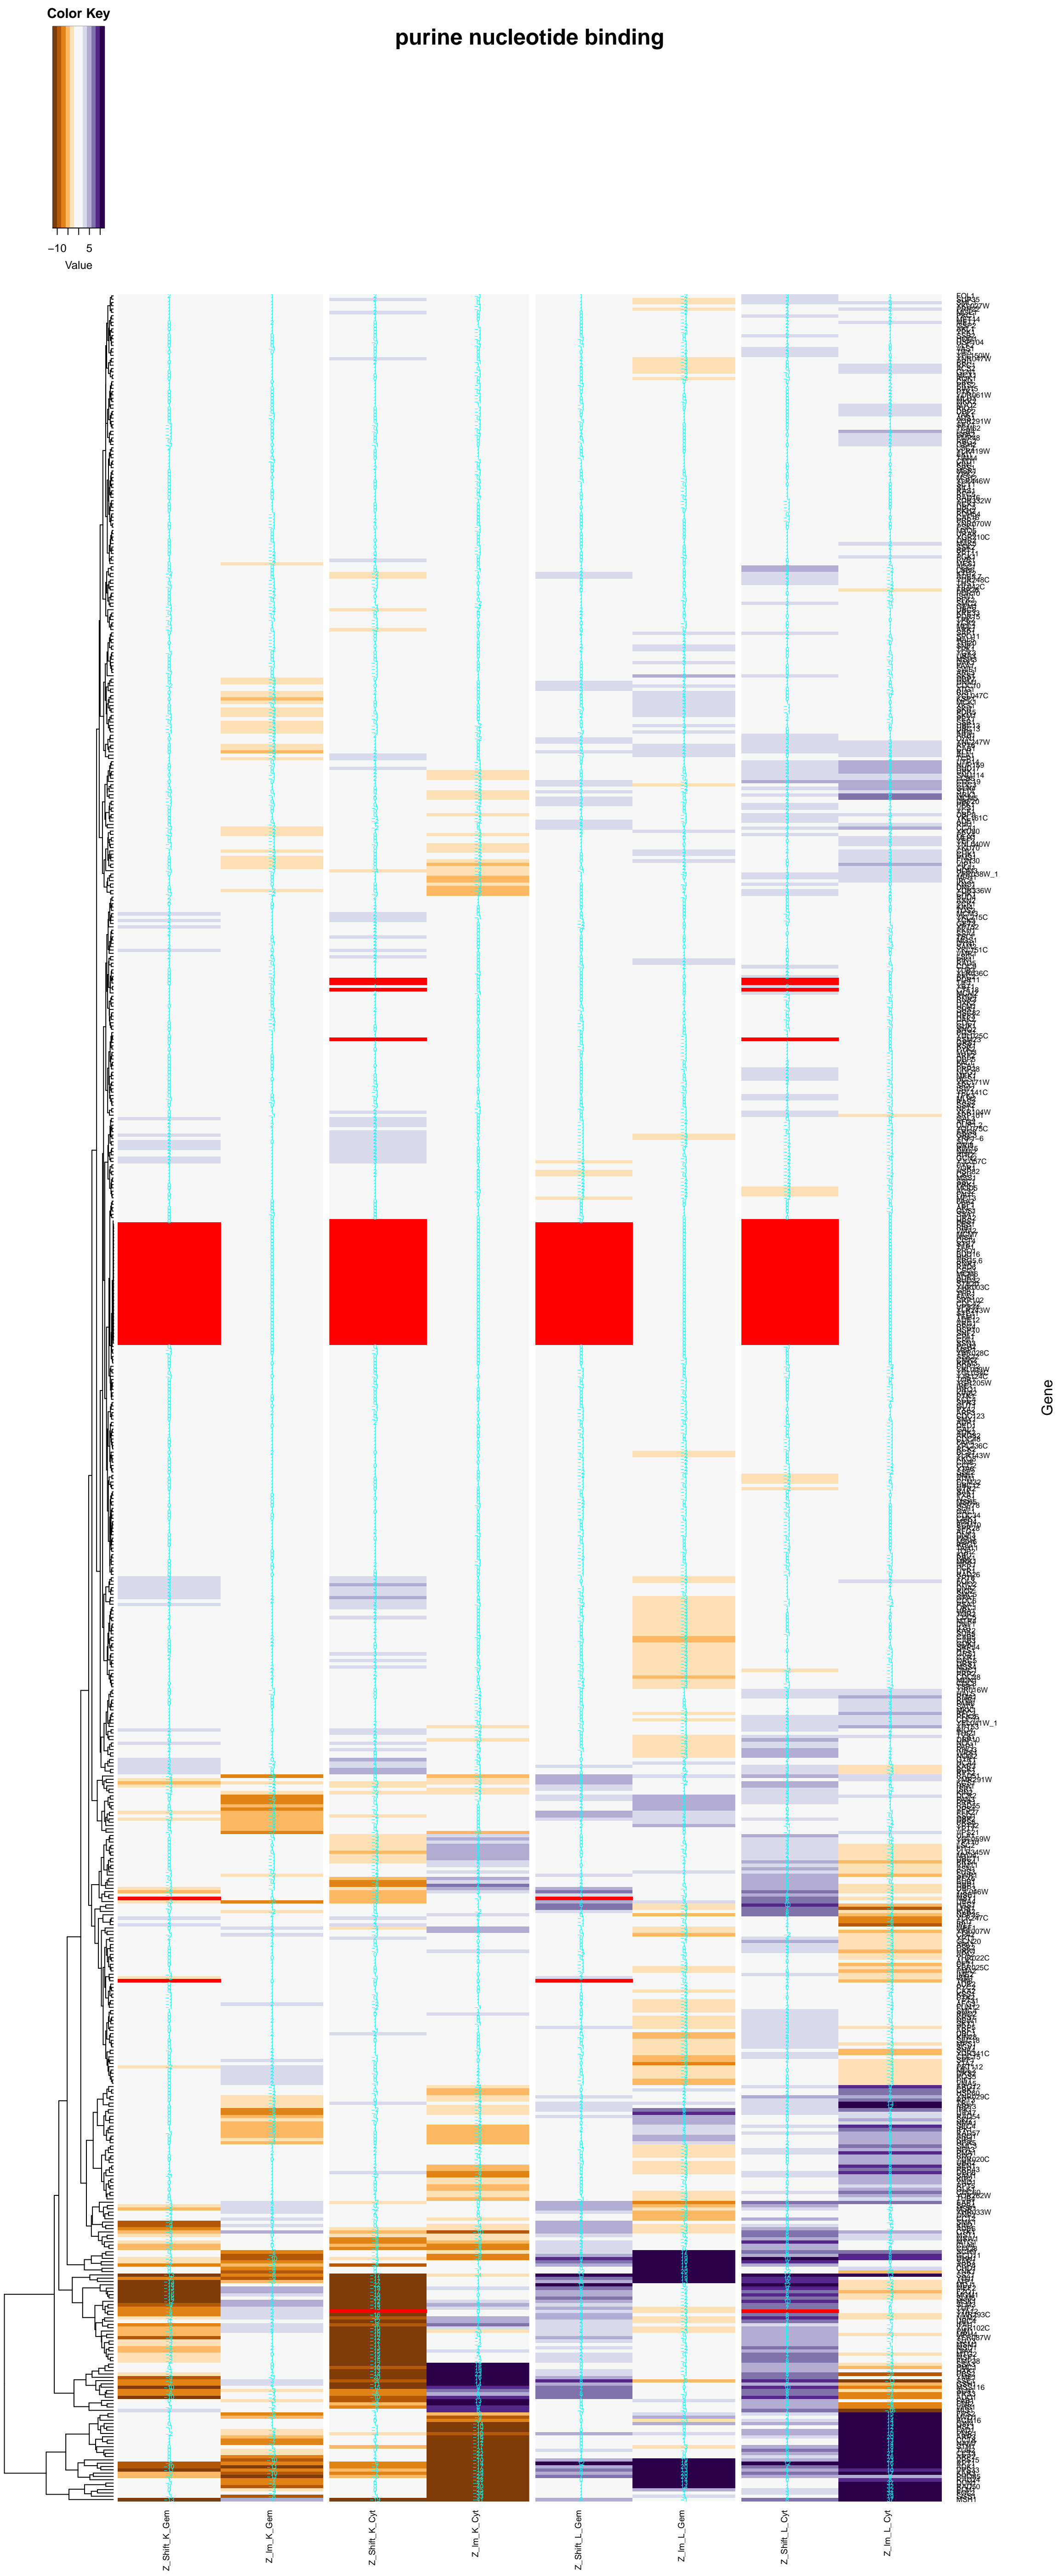

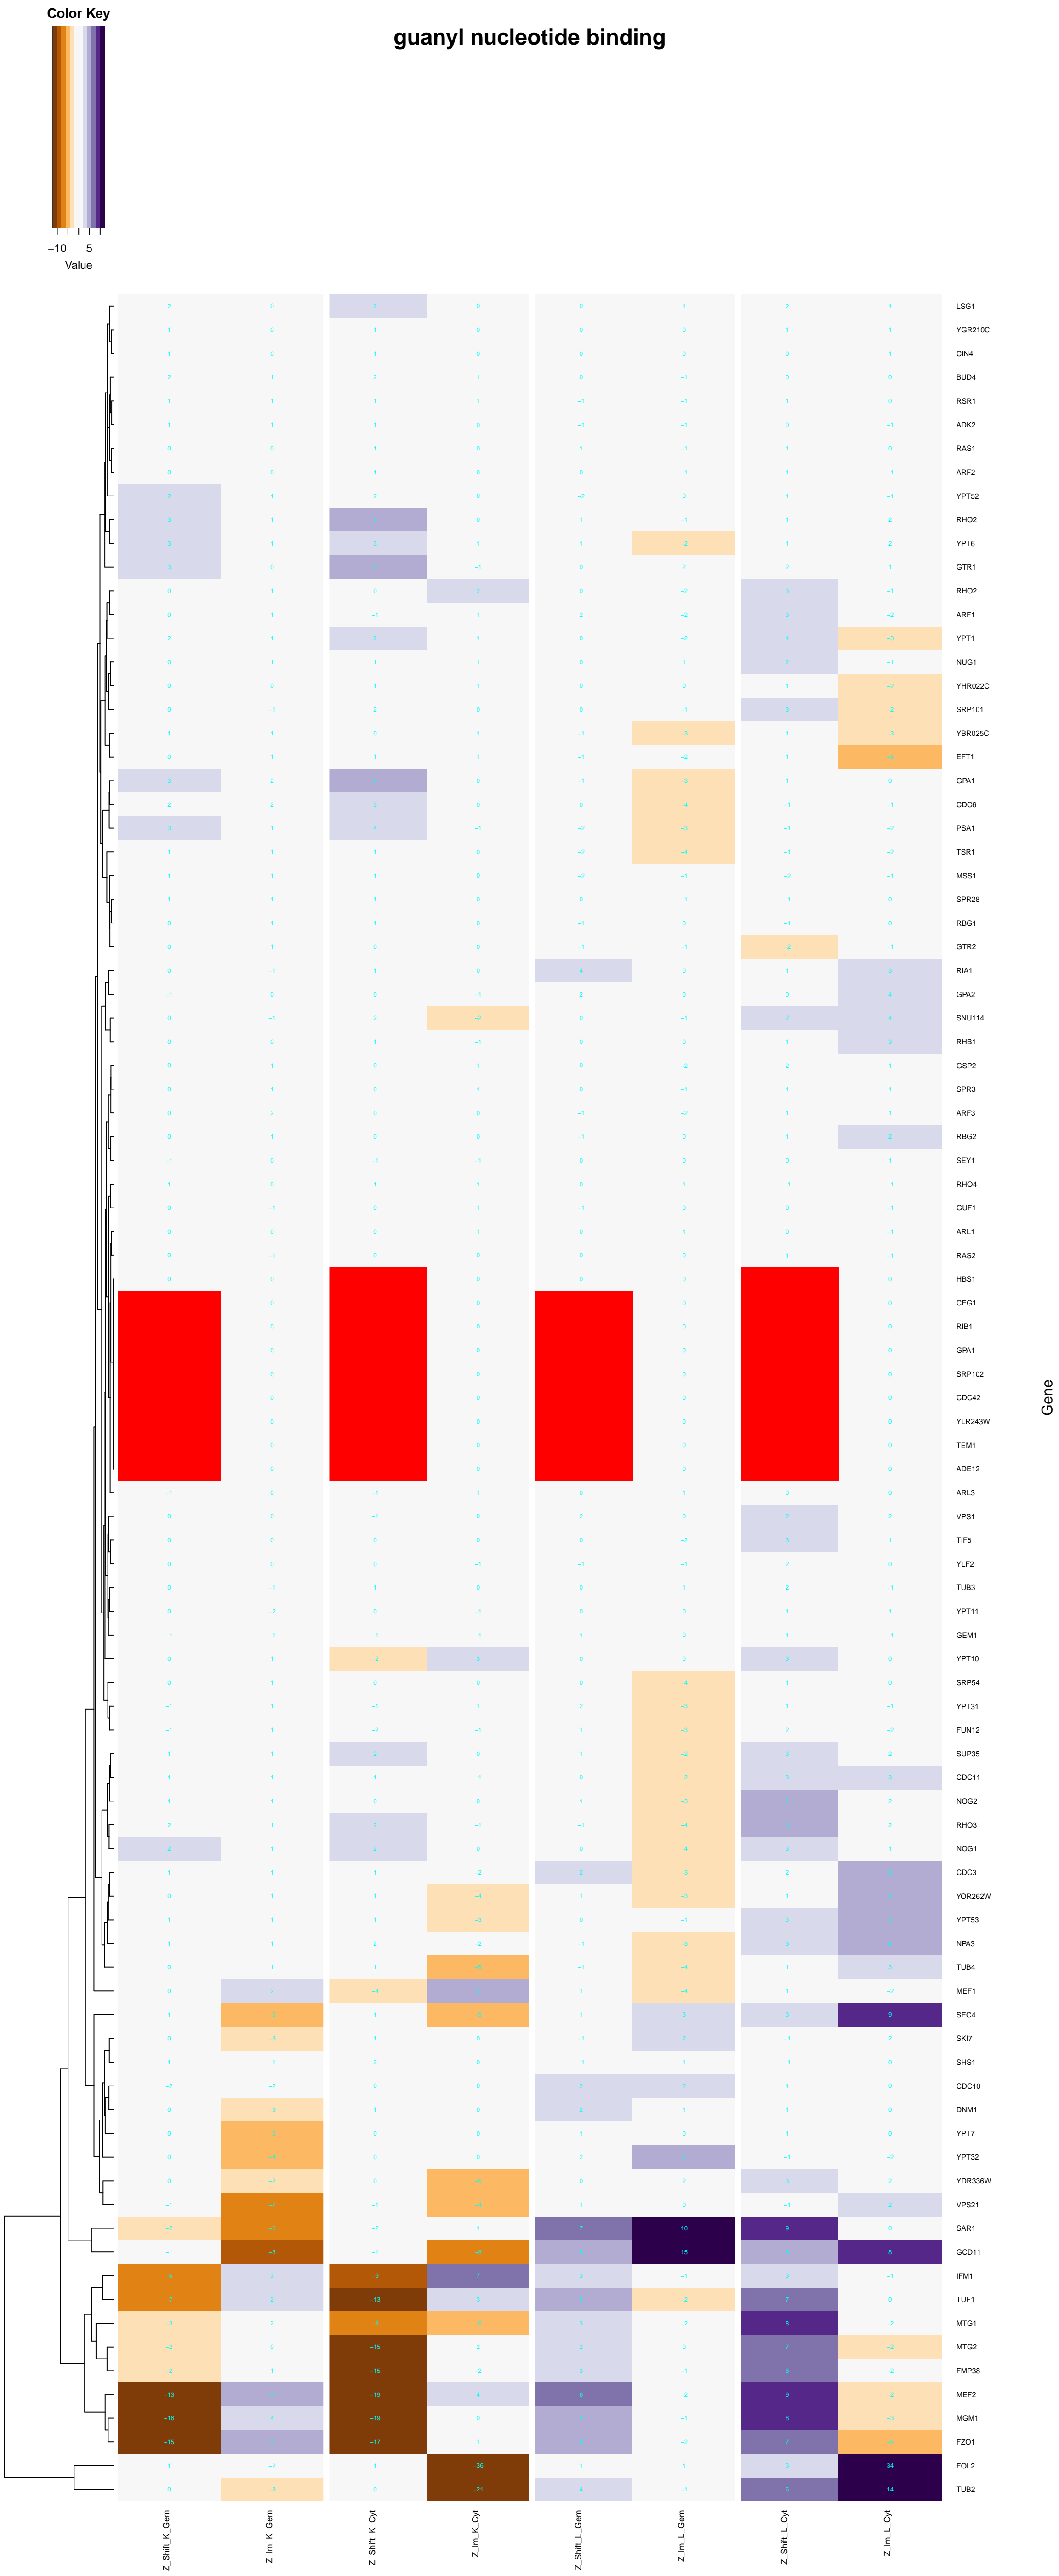

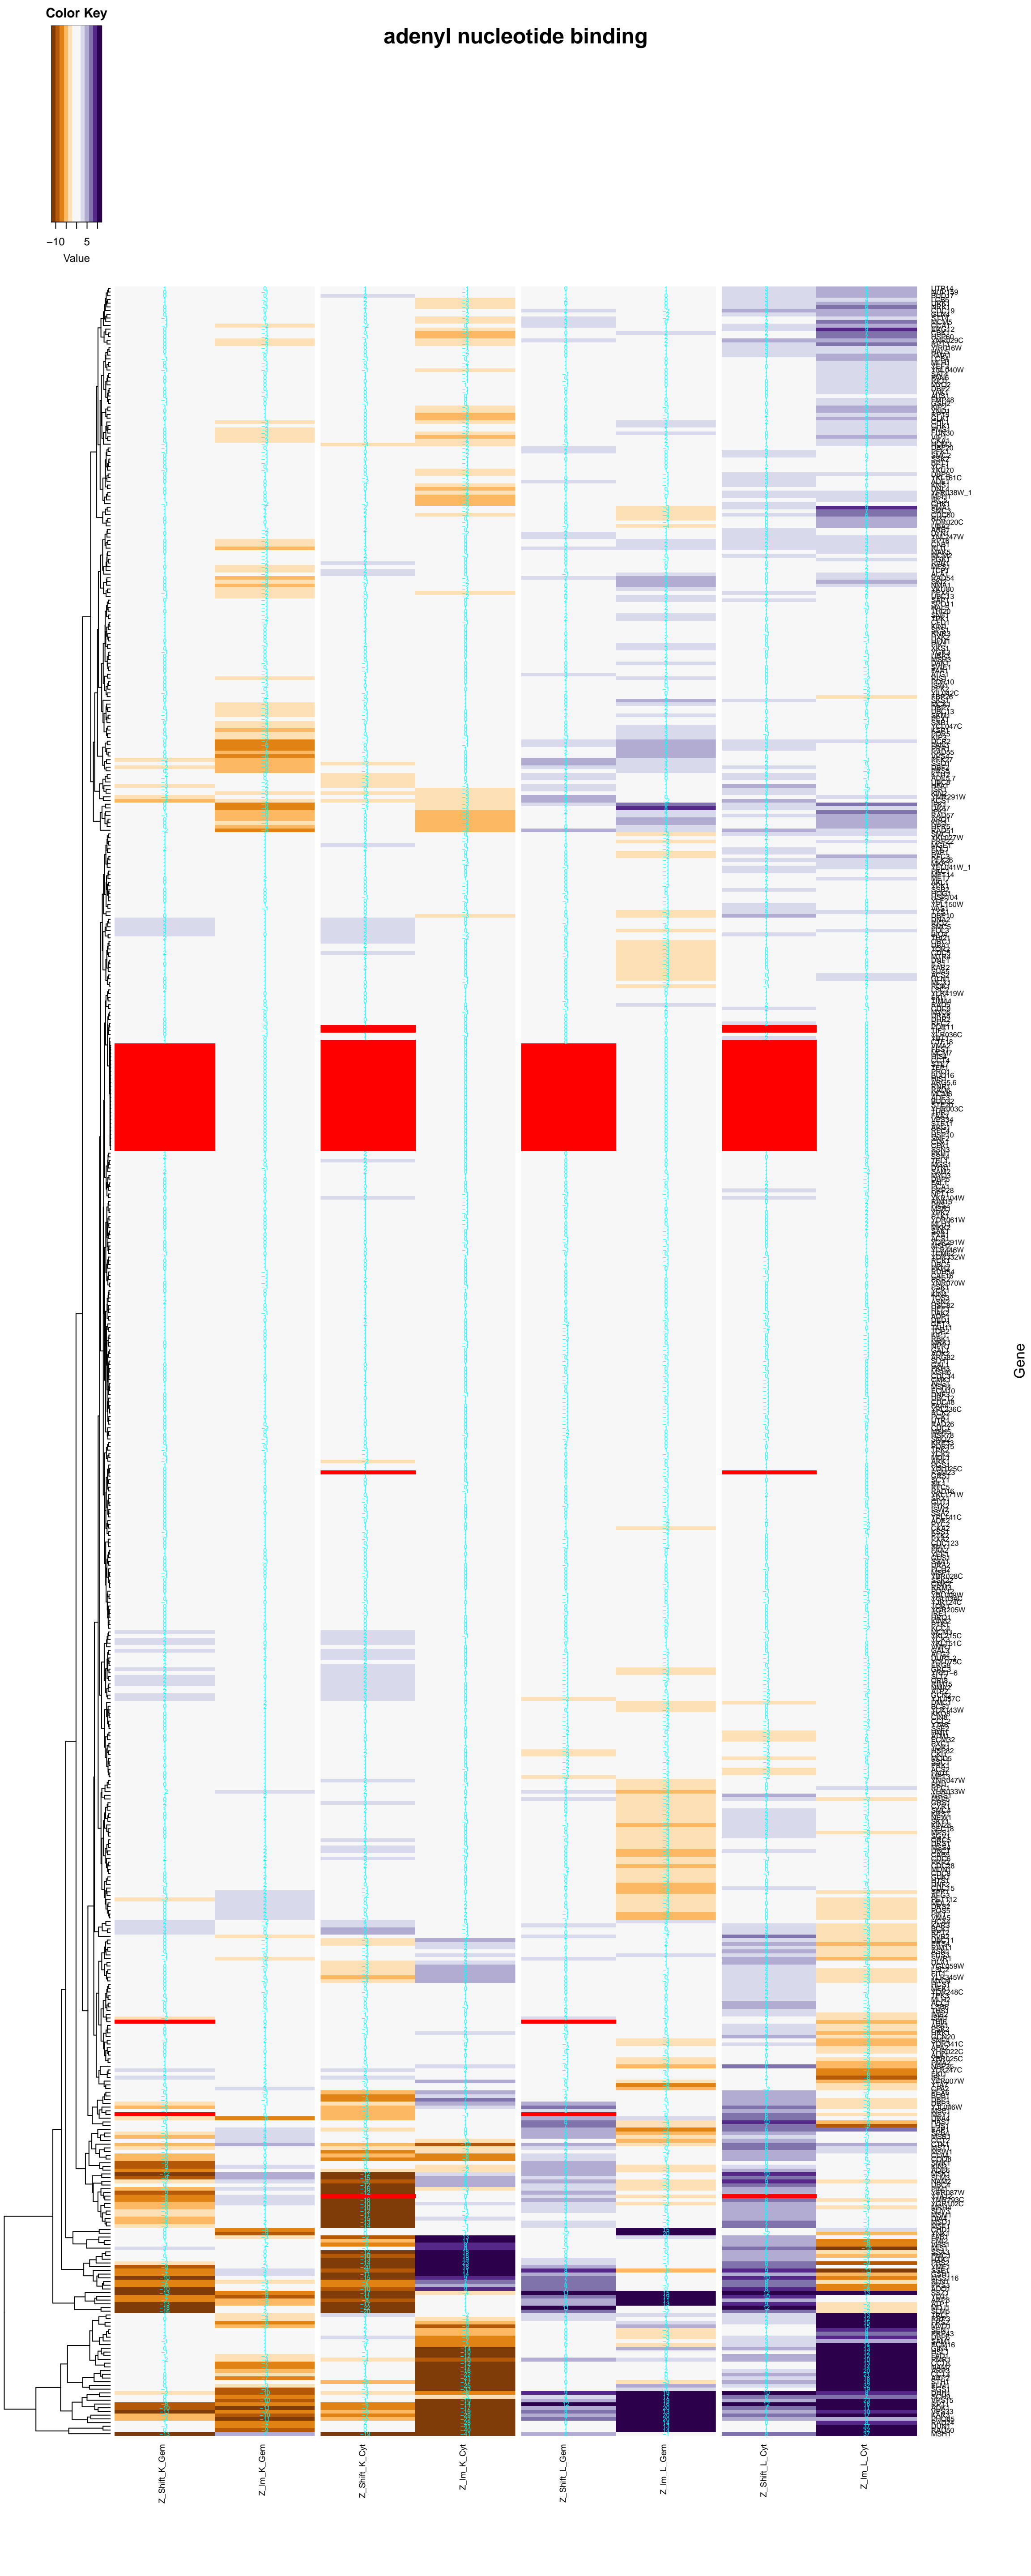



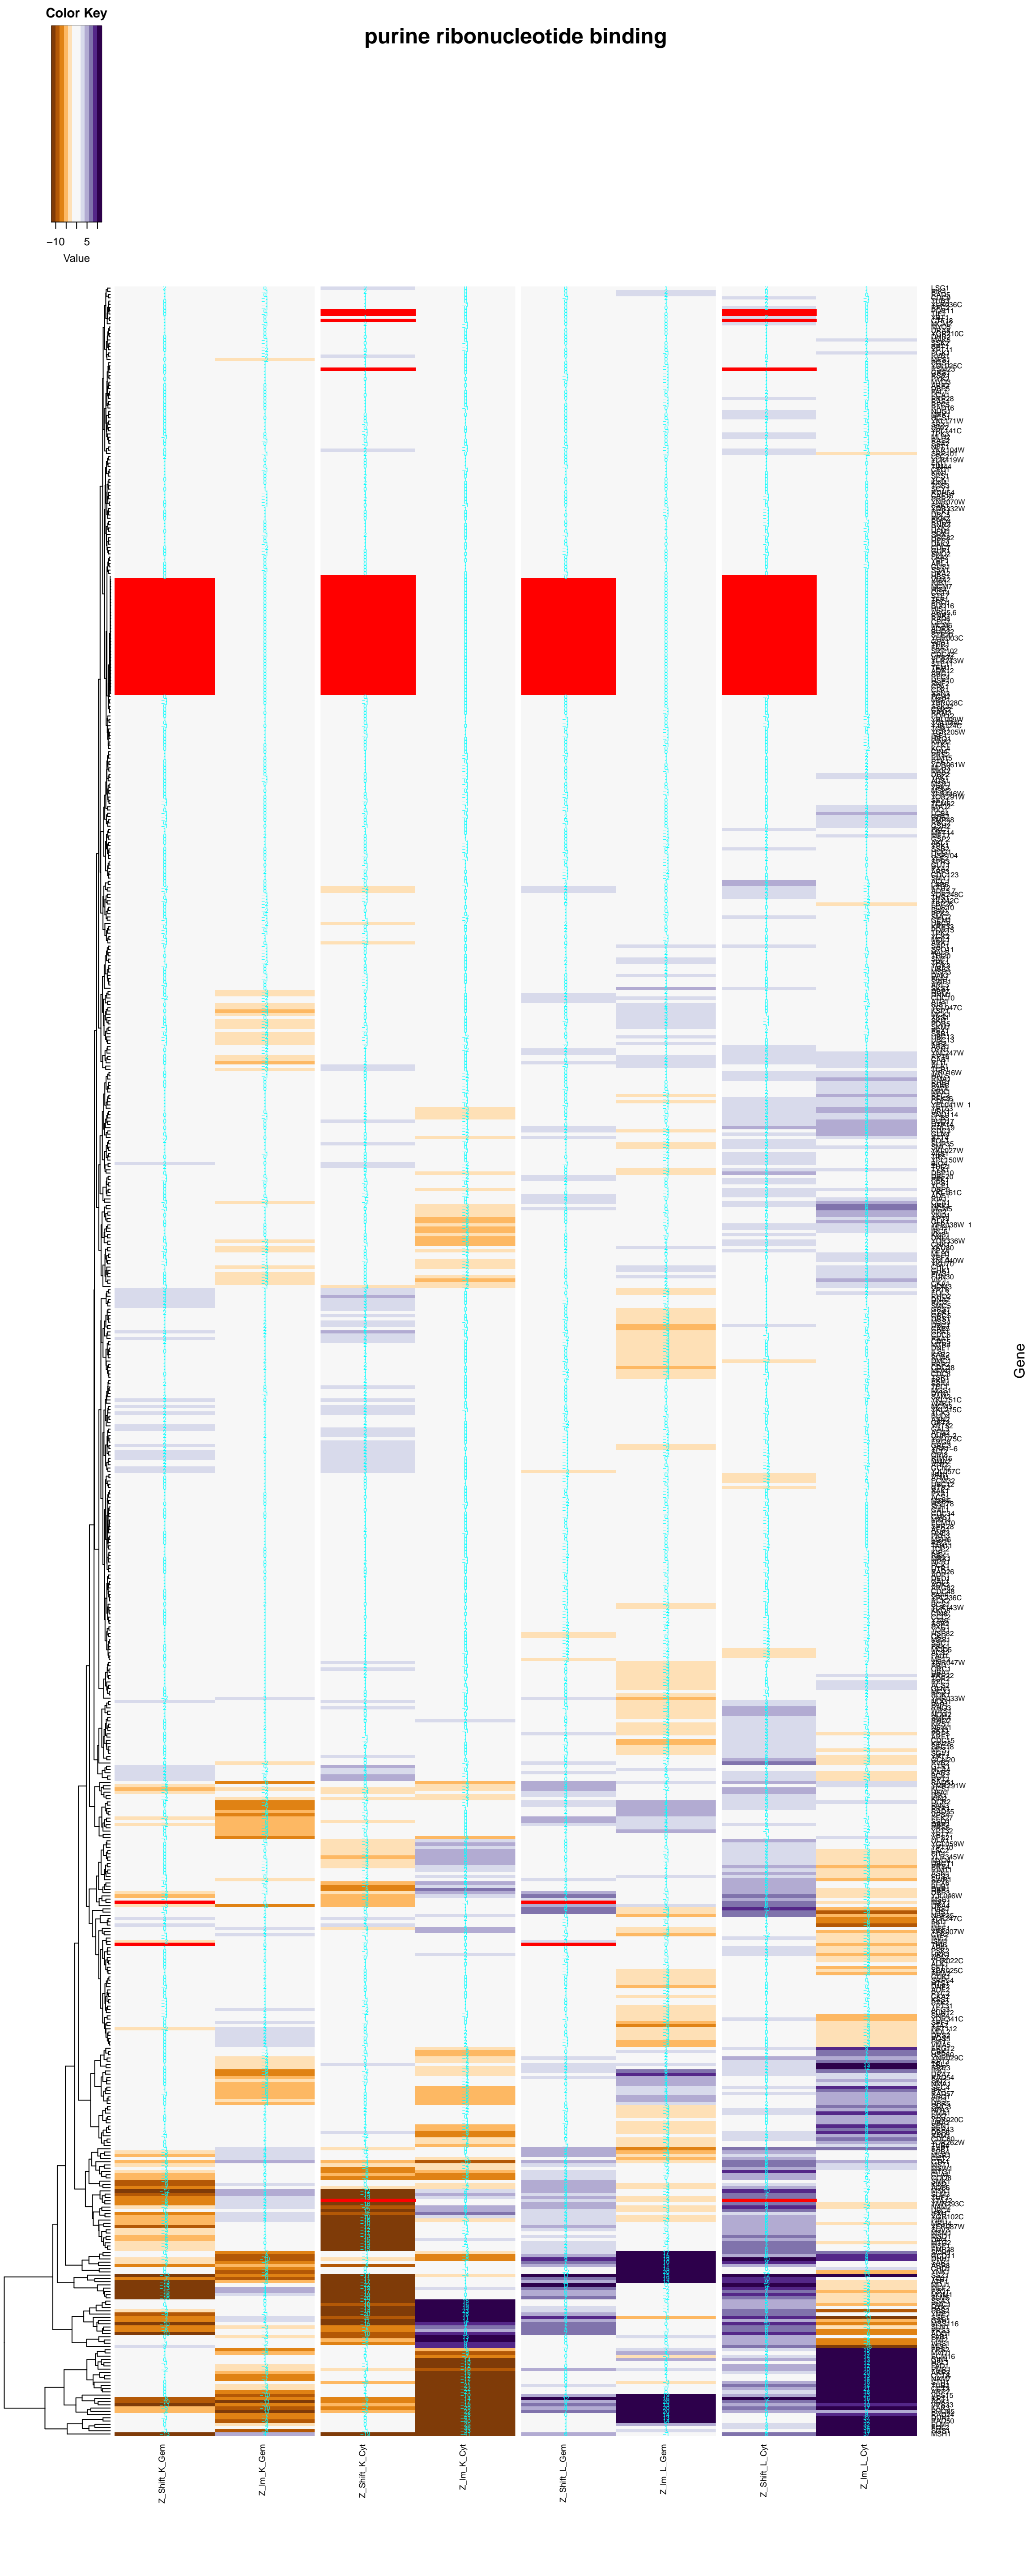

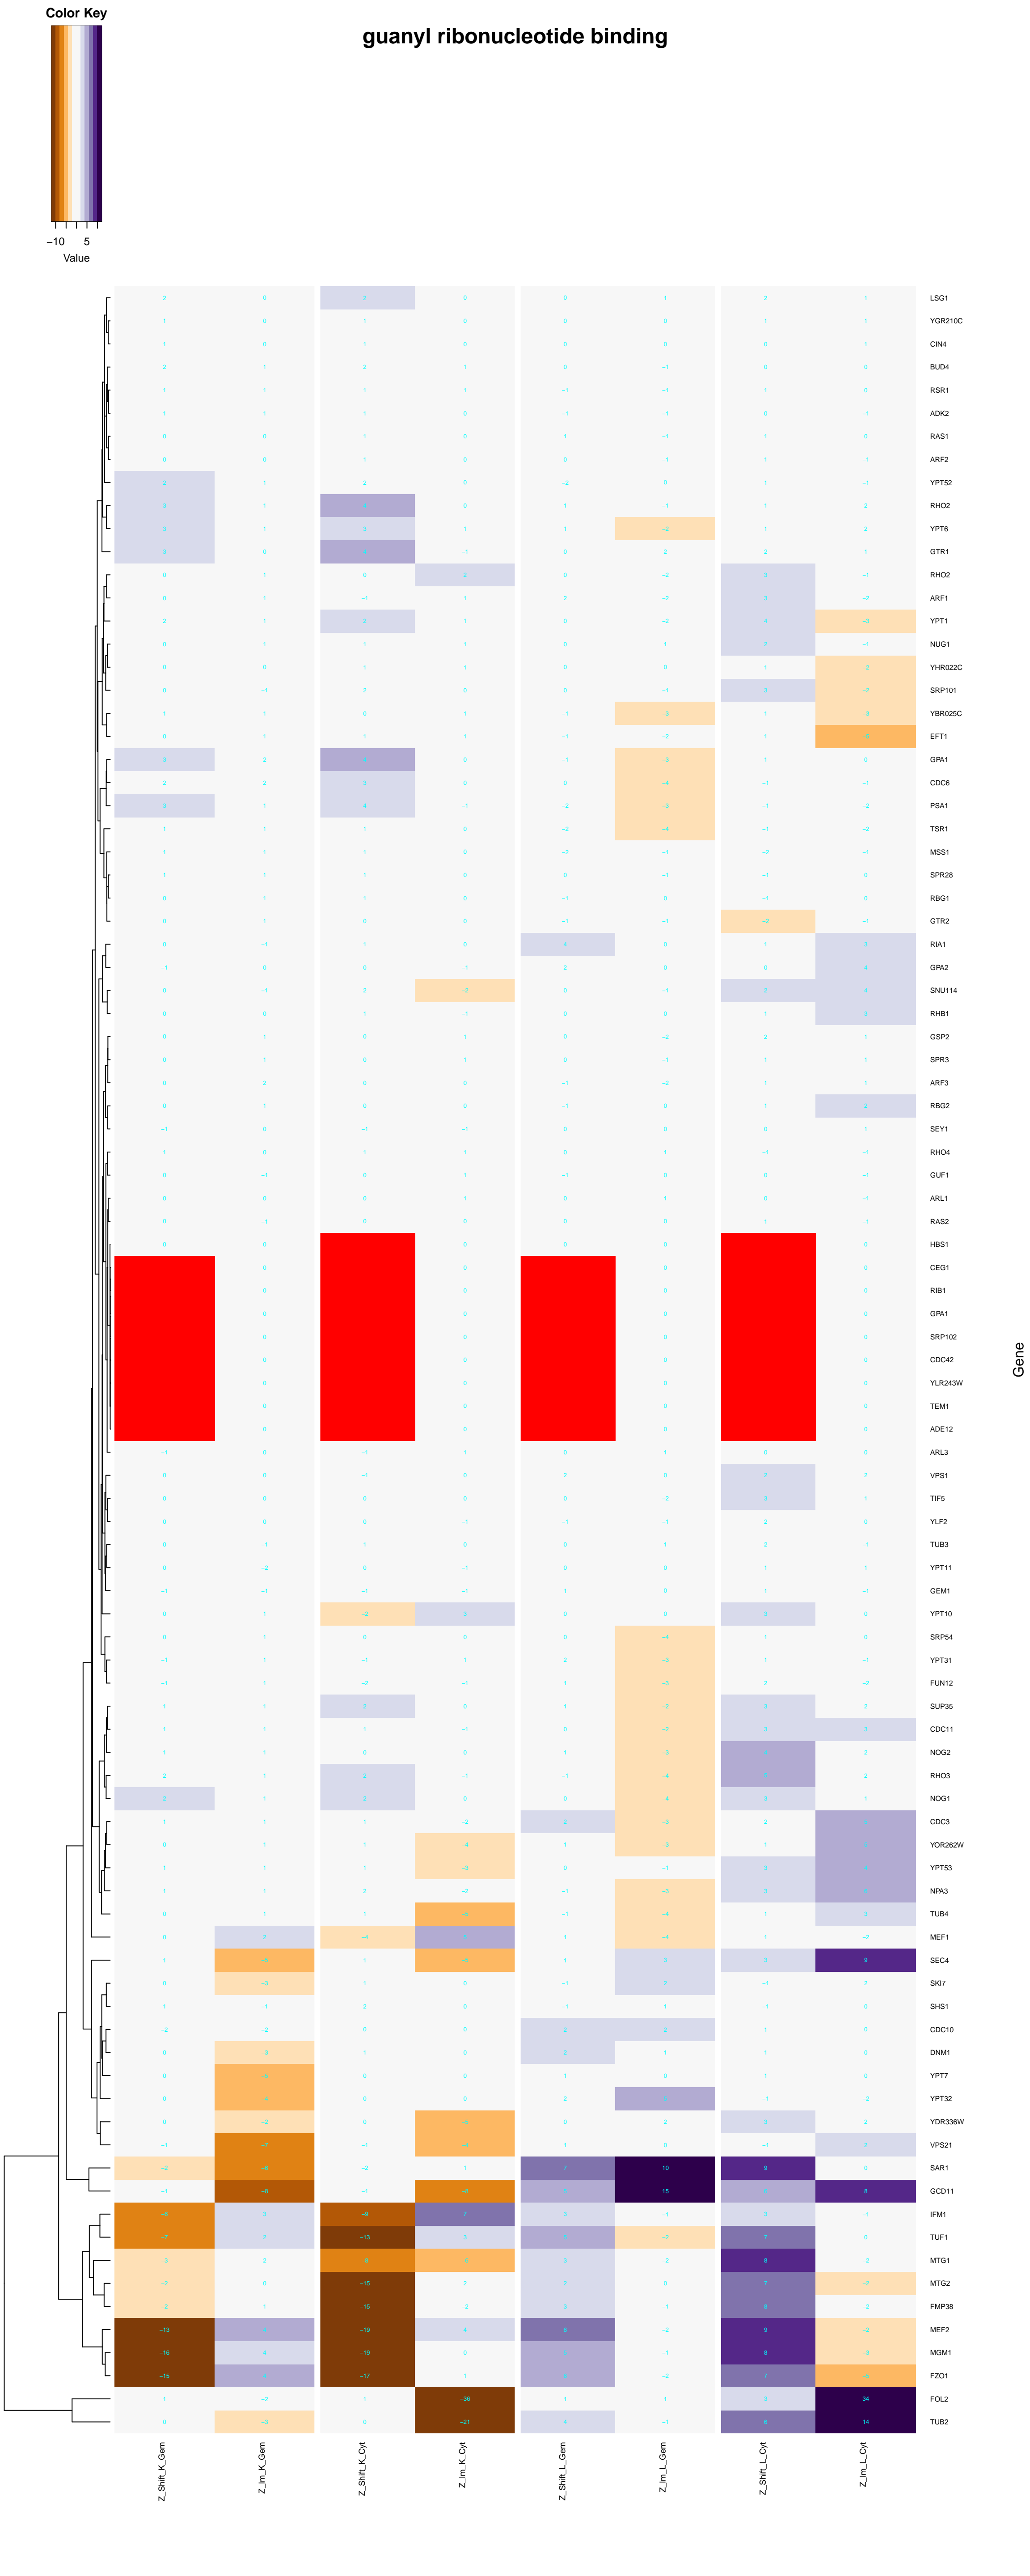

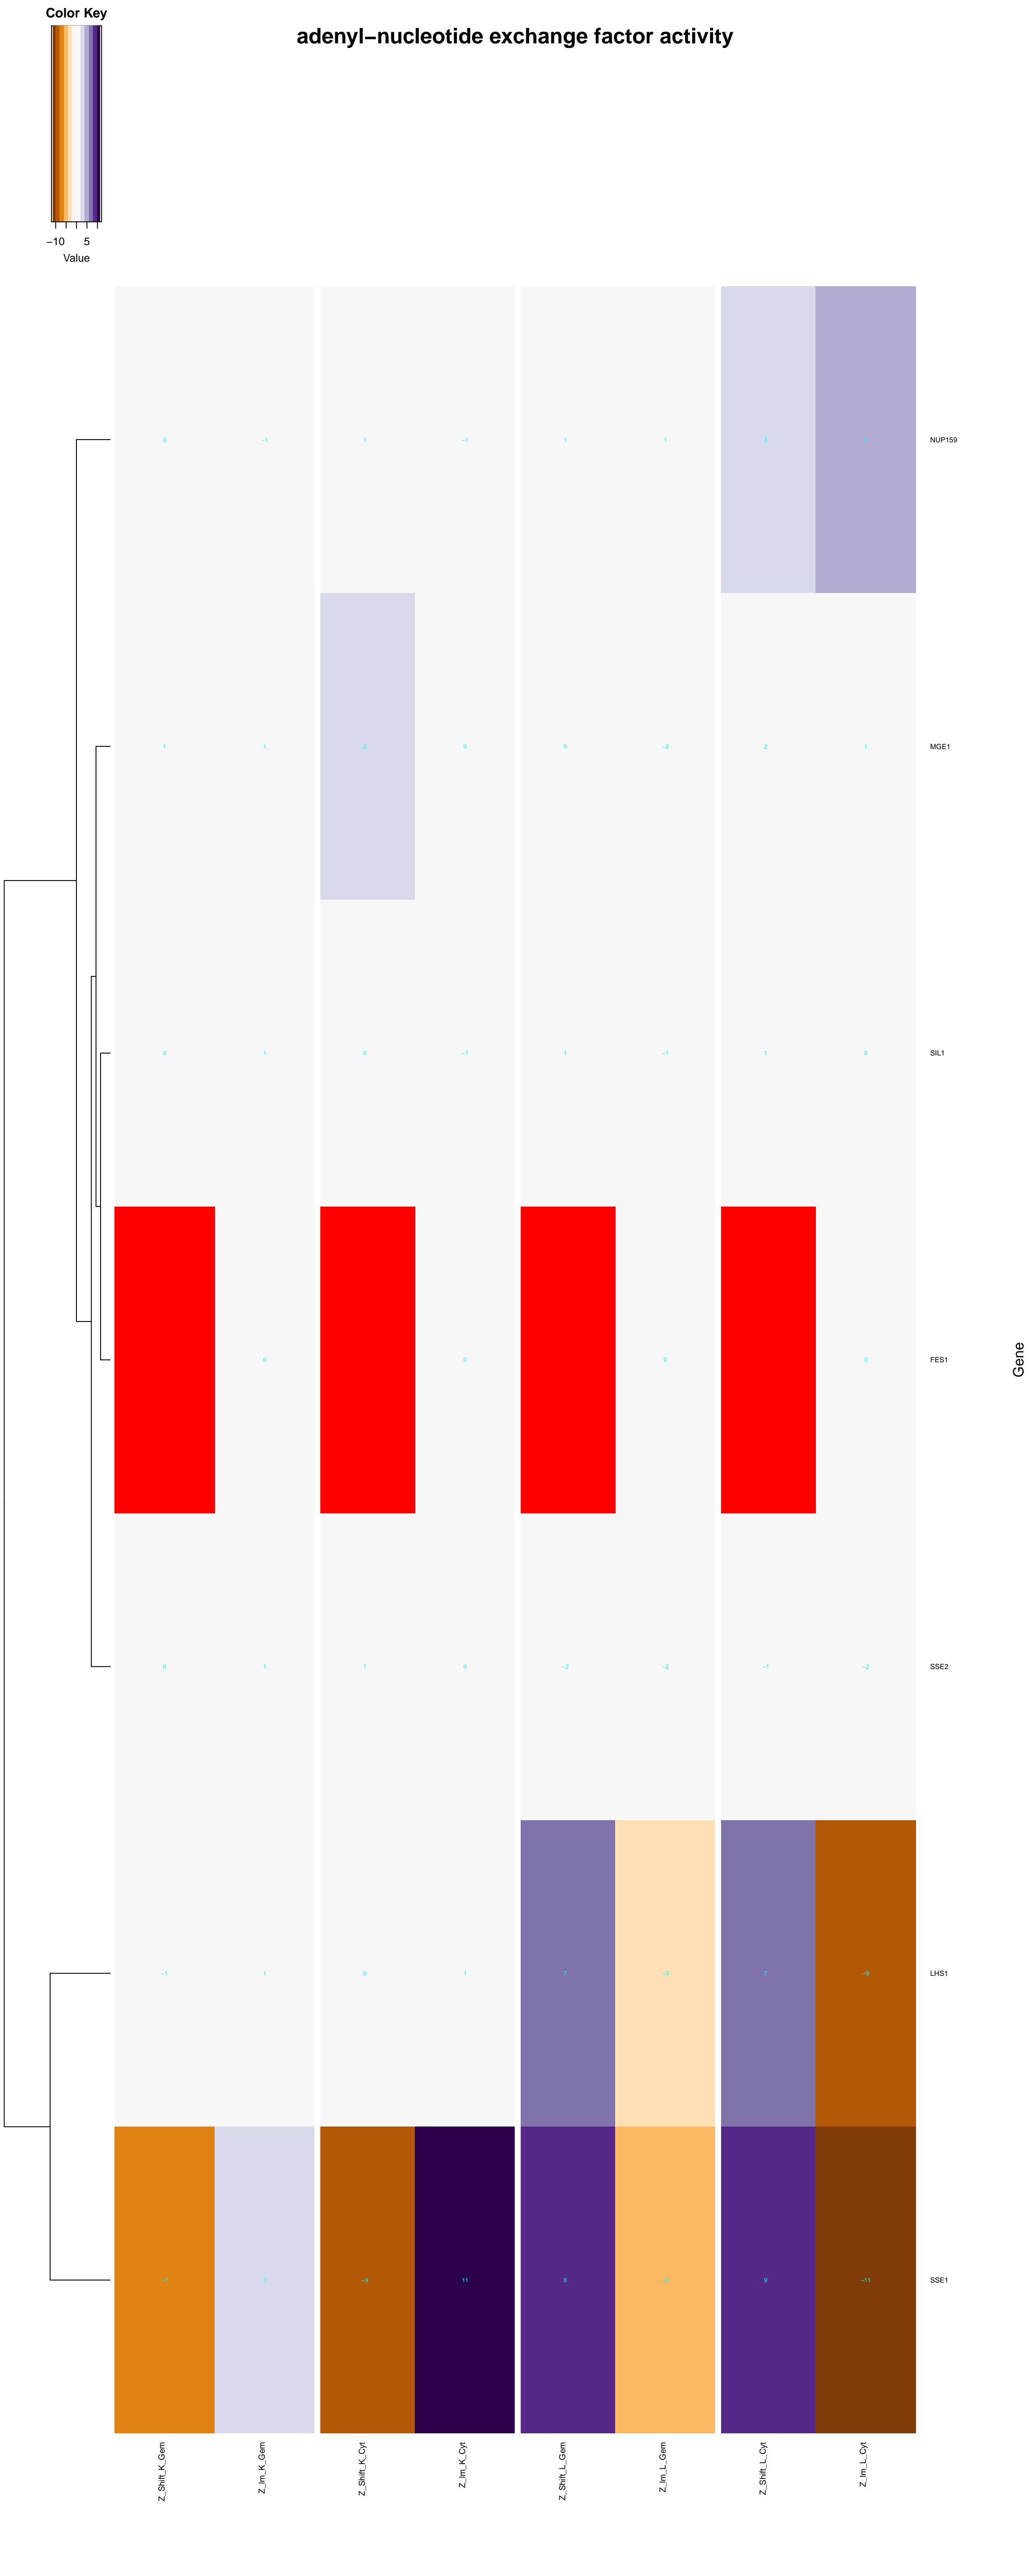

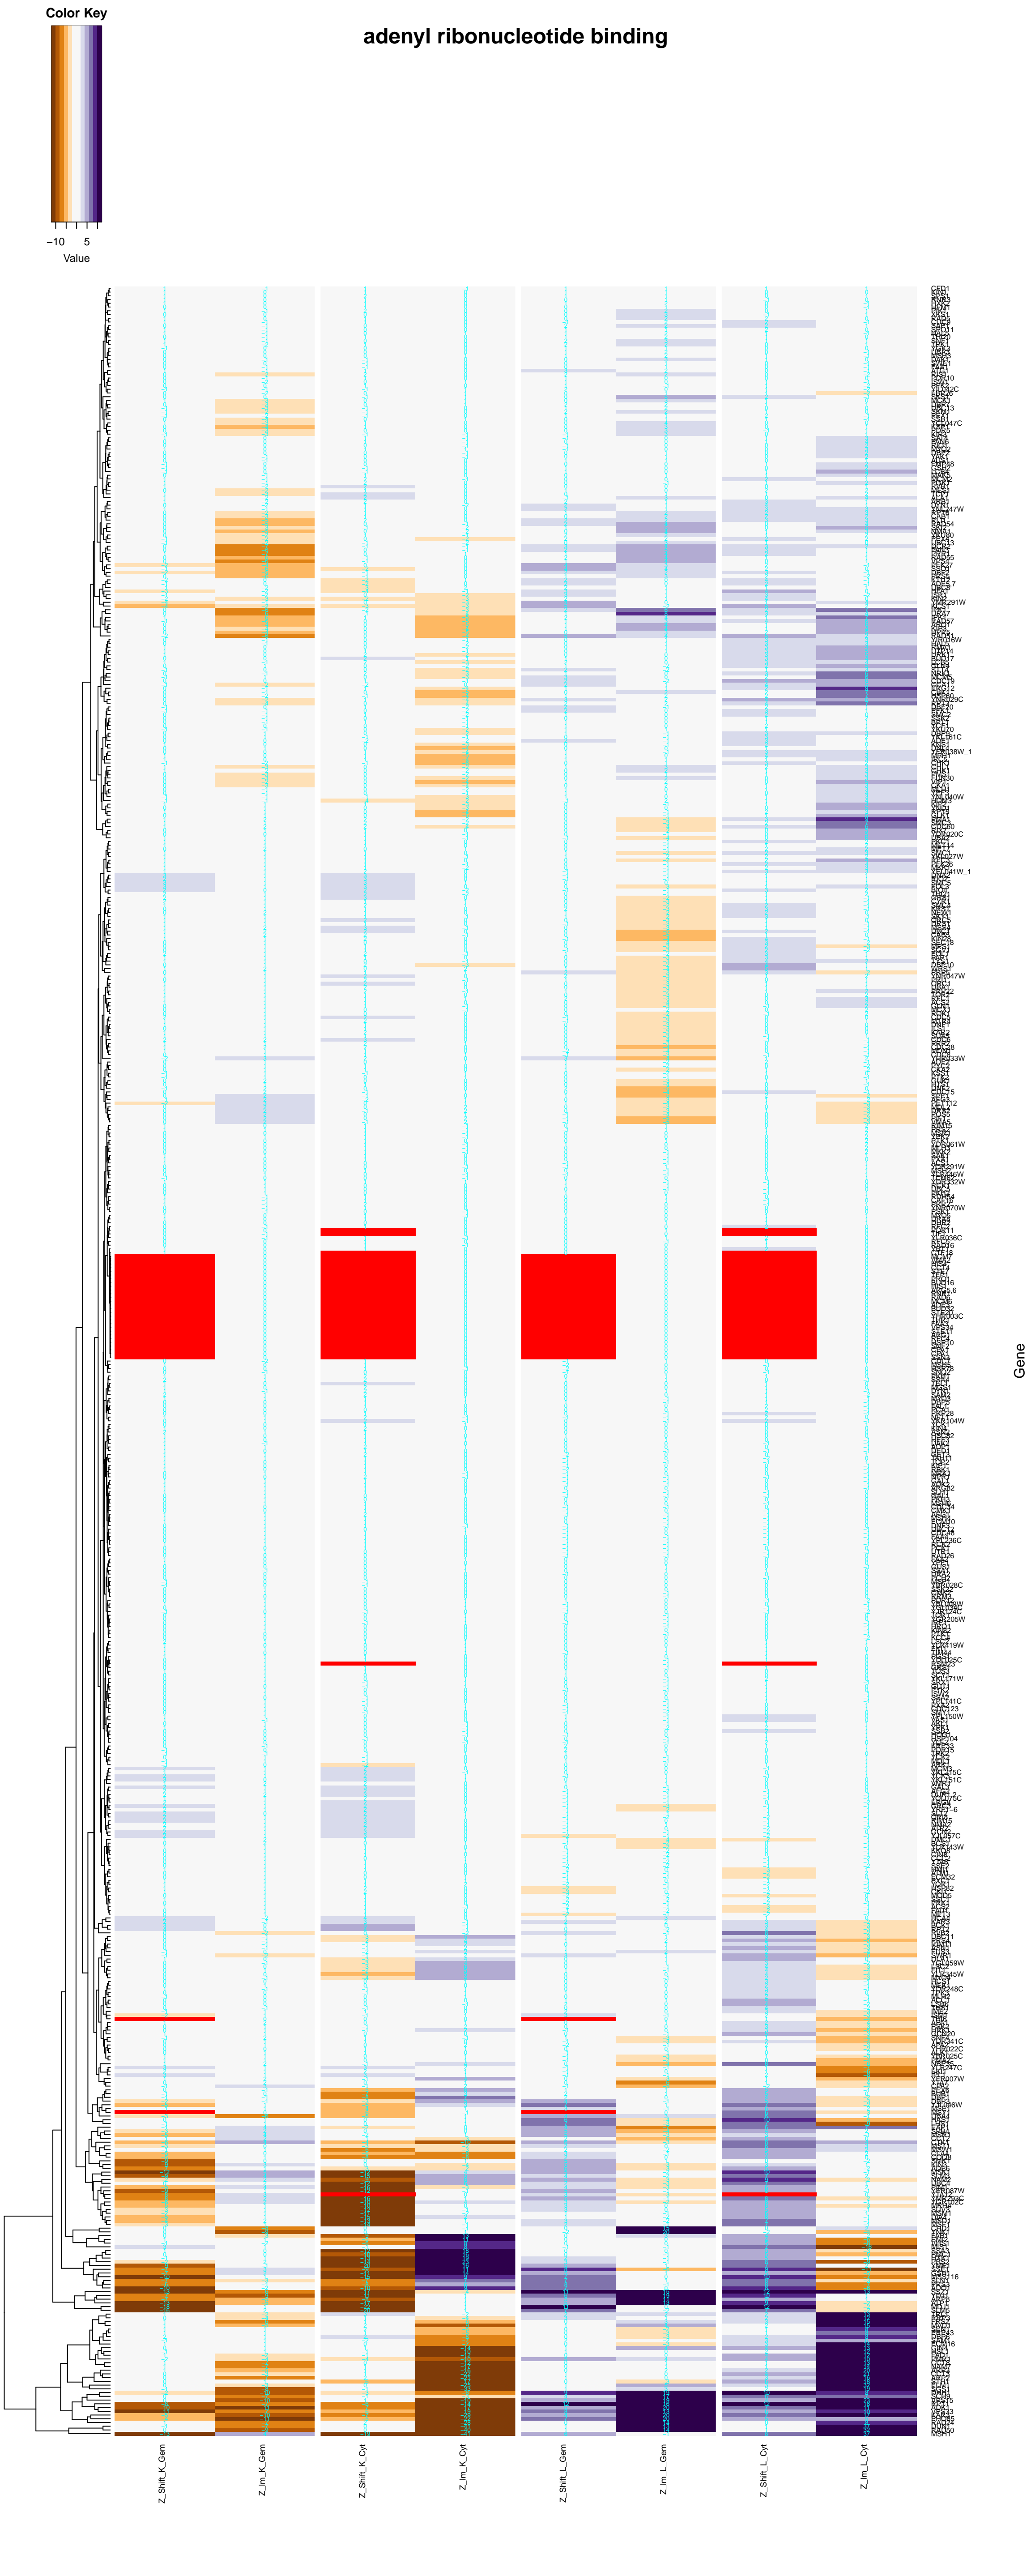

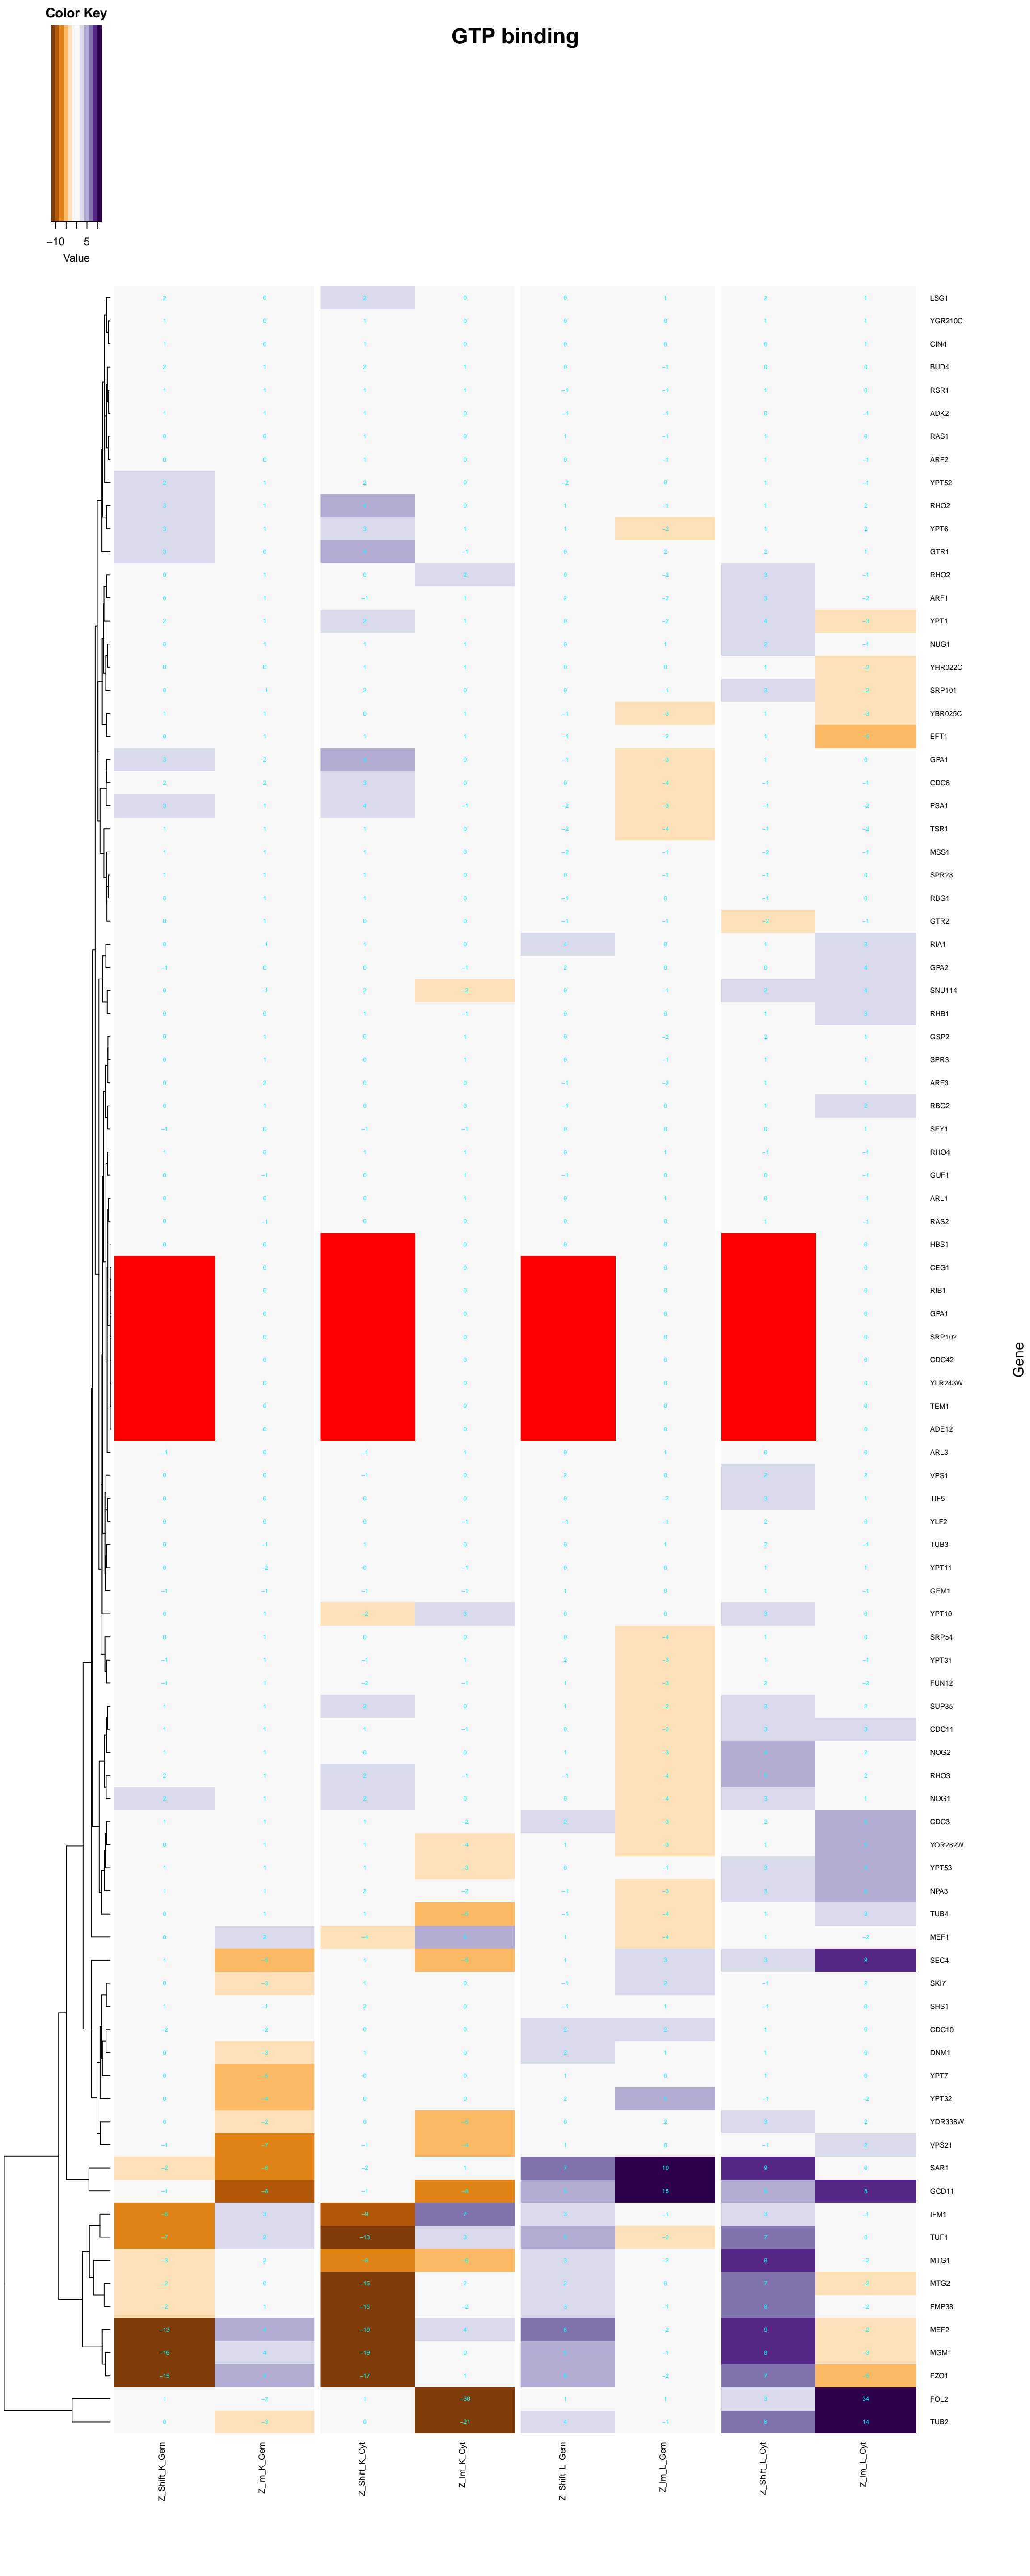



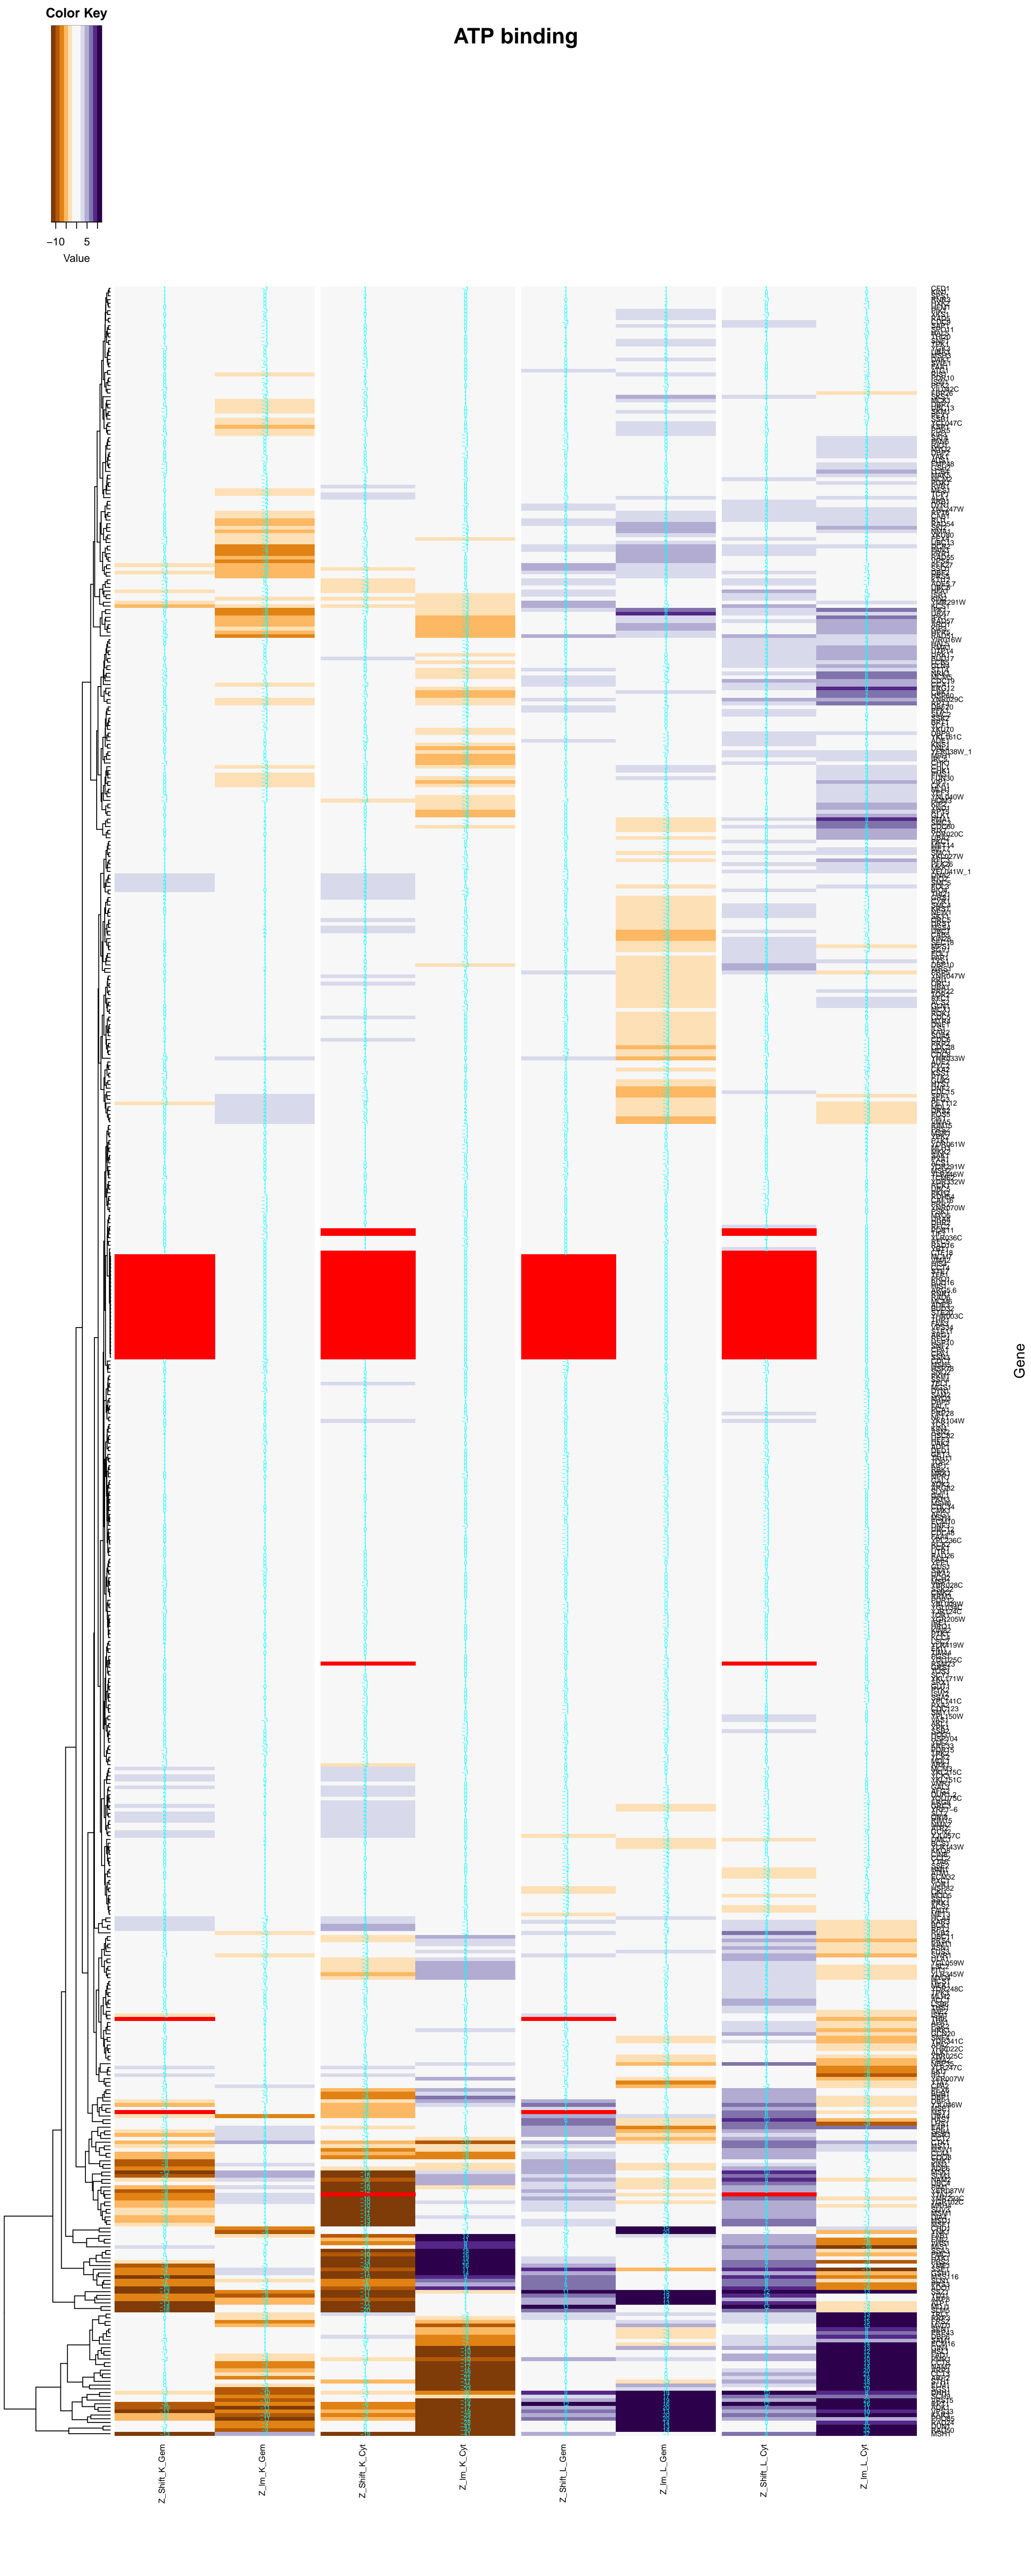

AMP binding

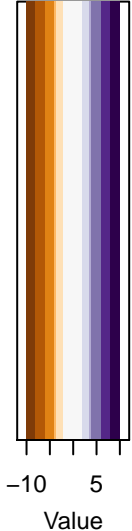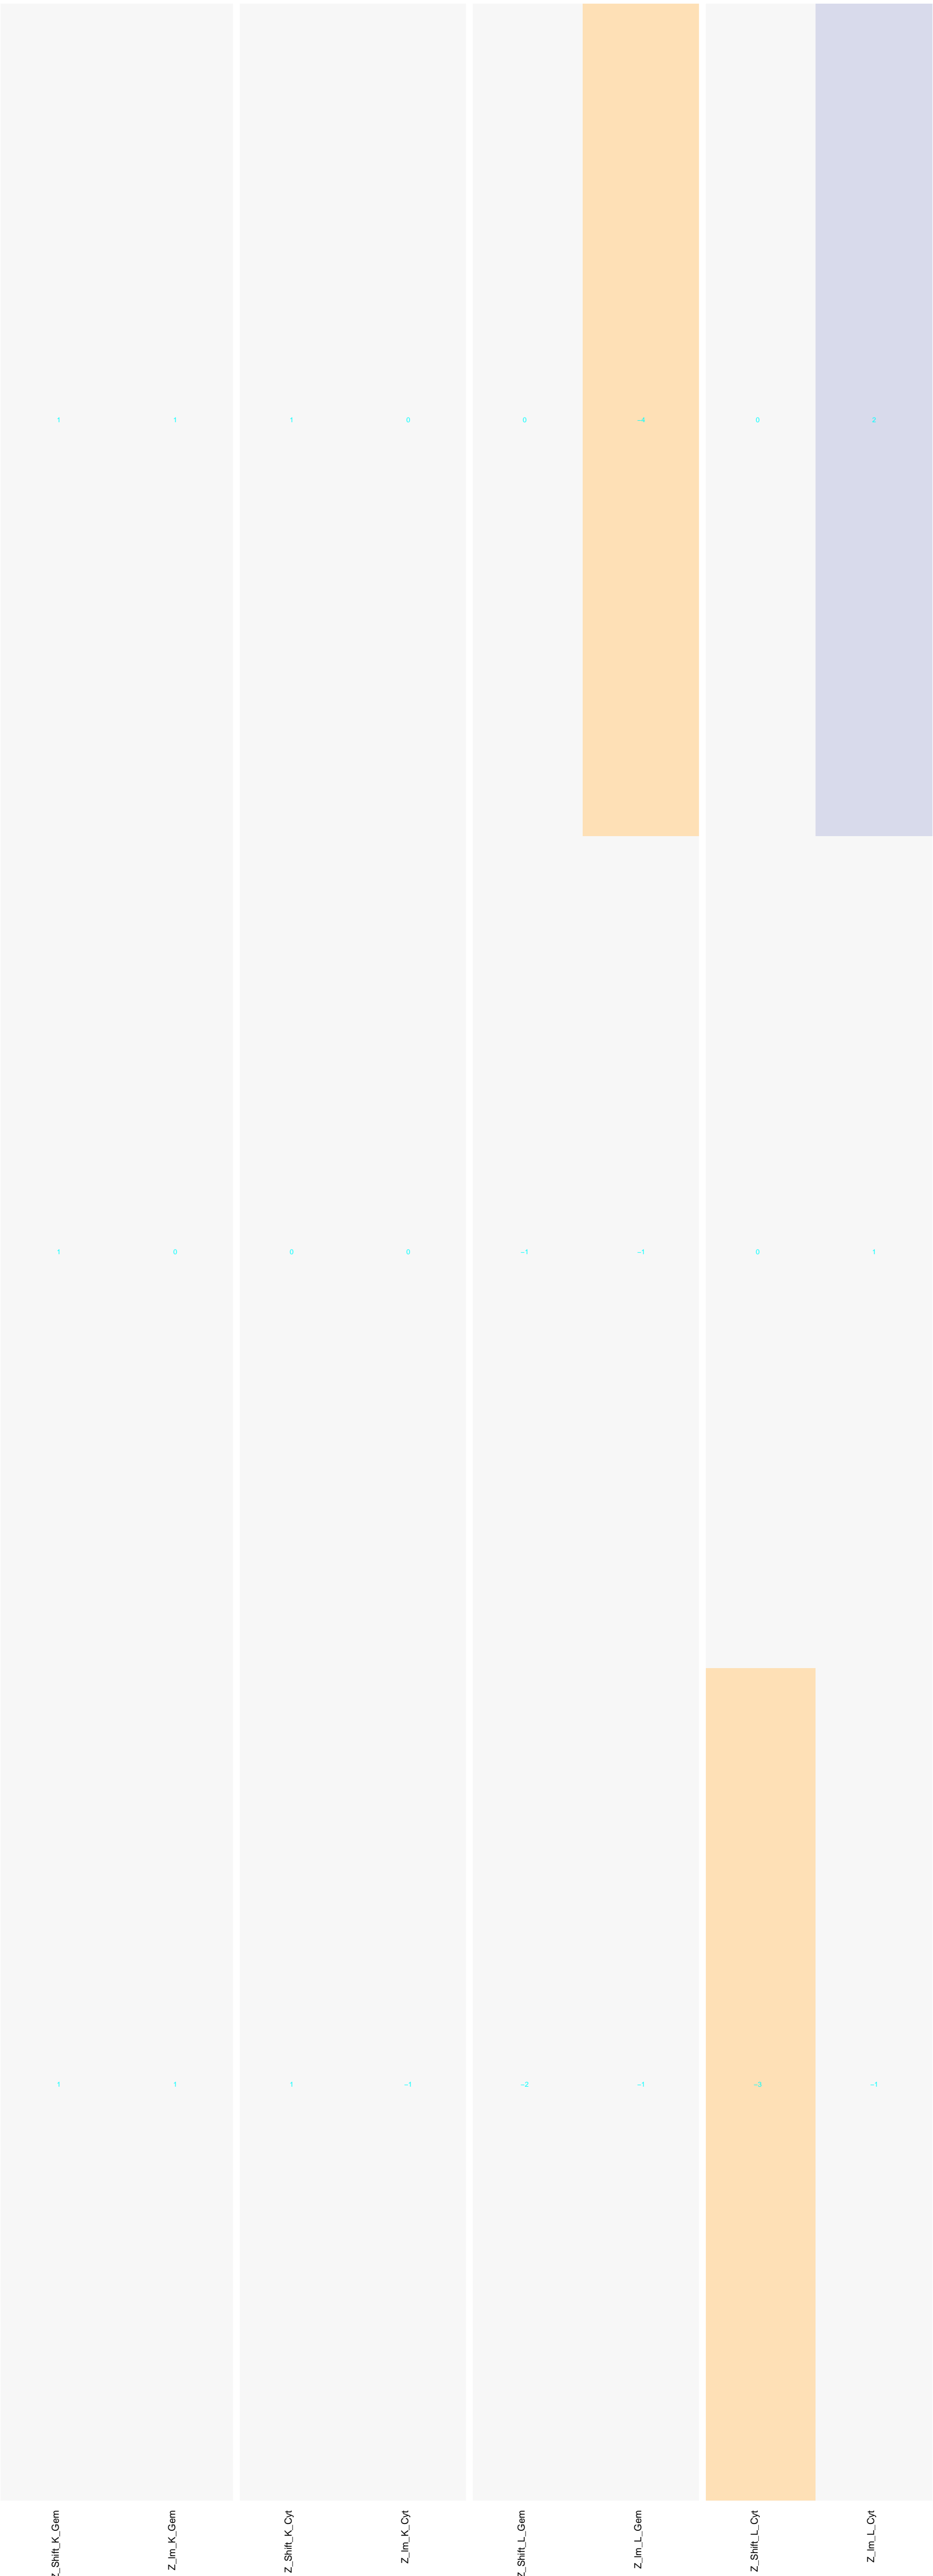

Gene

Supplement: s1 [file s1]

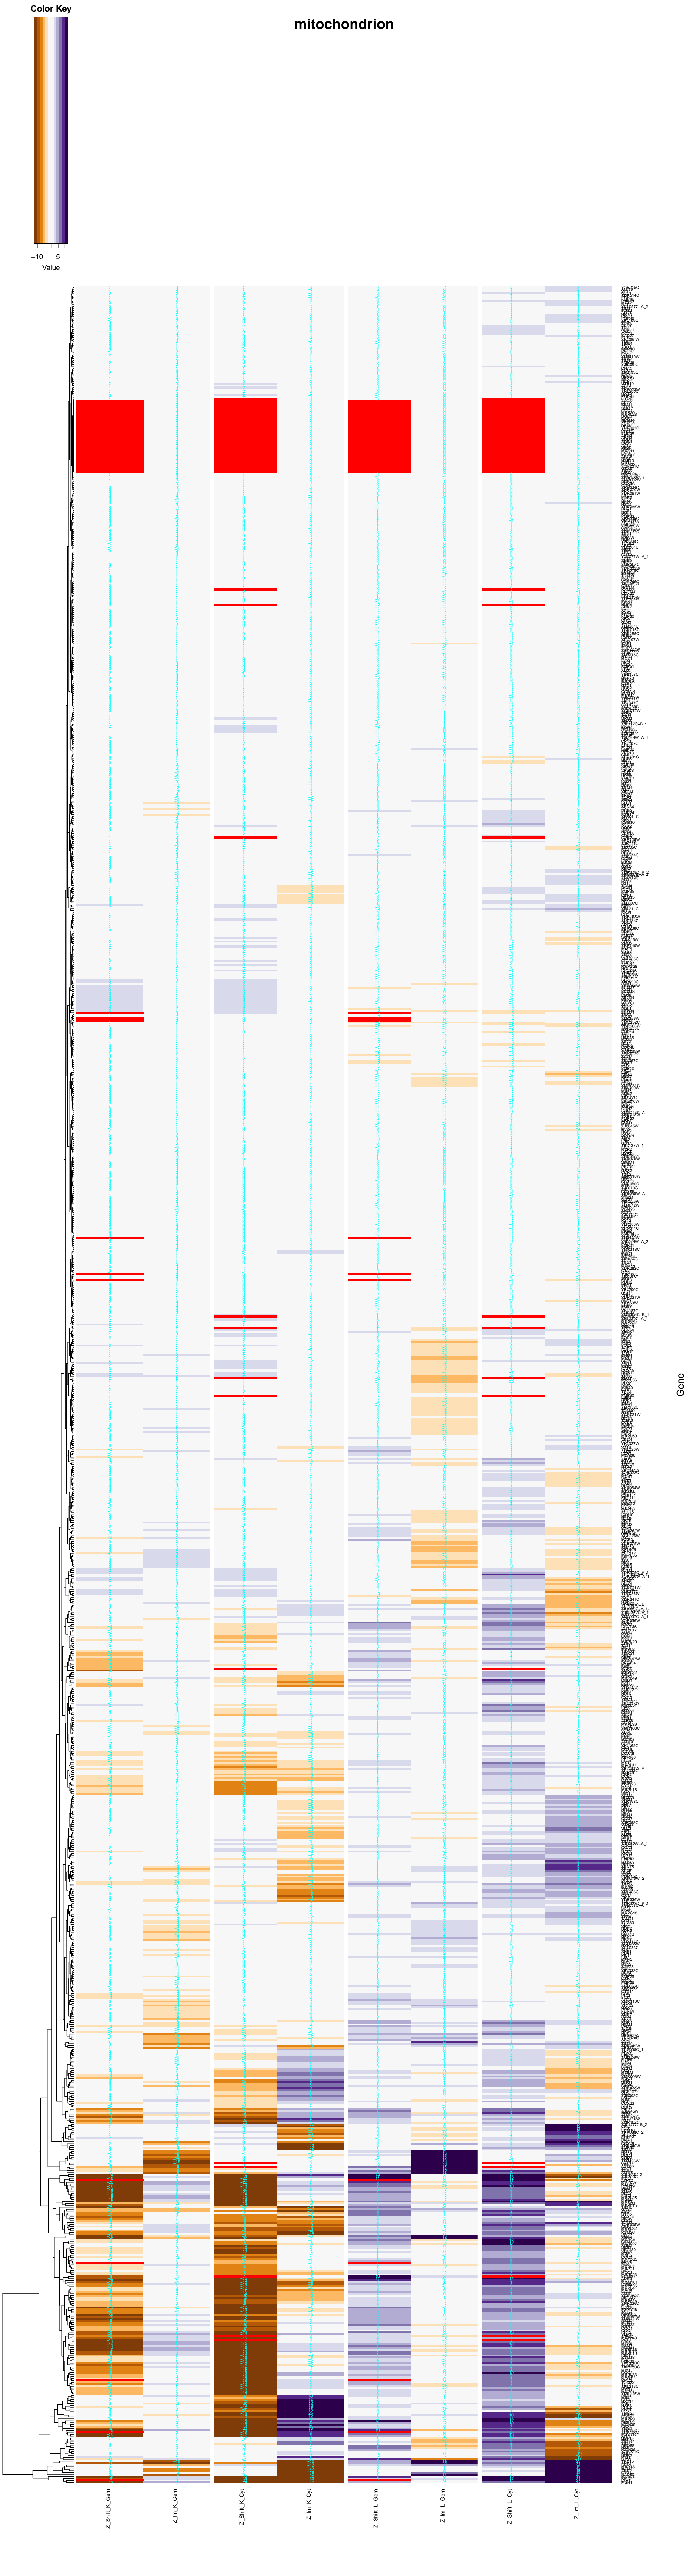

Supplement: s1 [file s1]

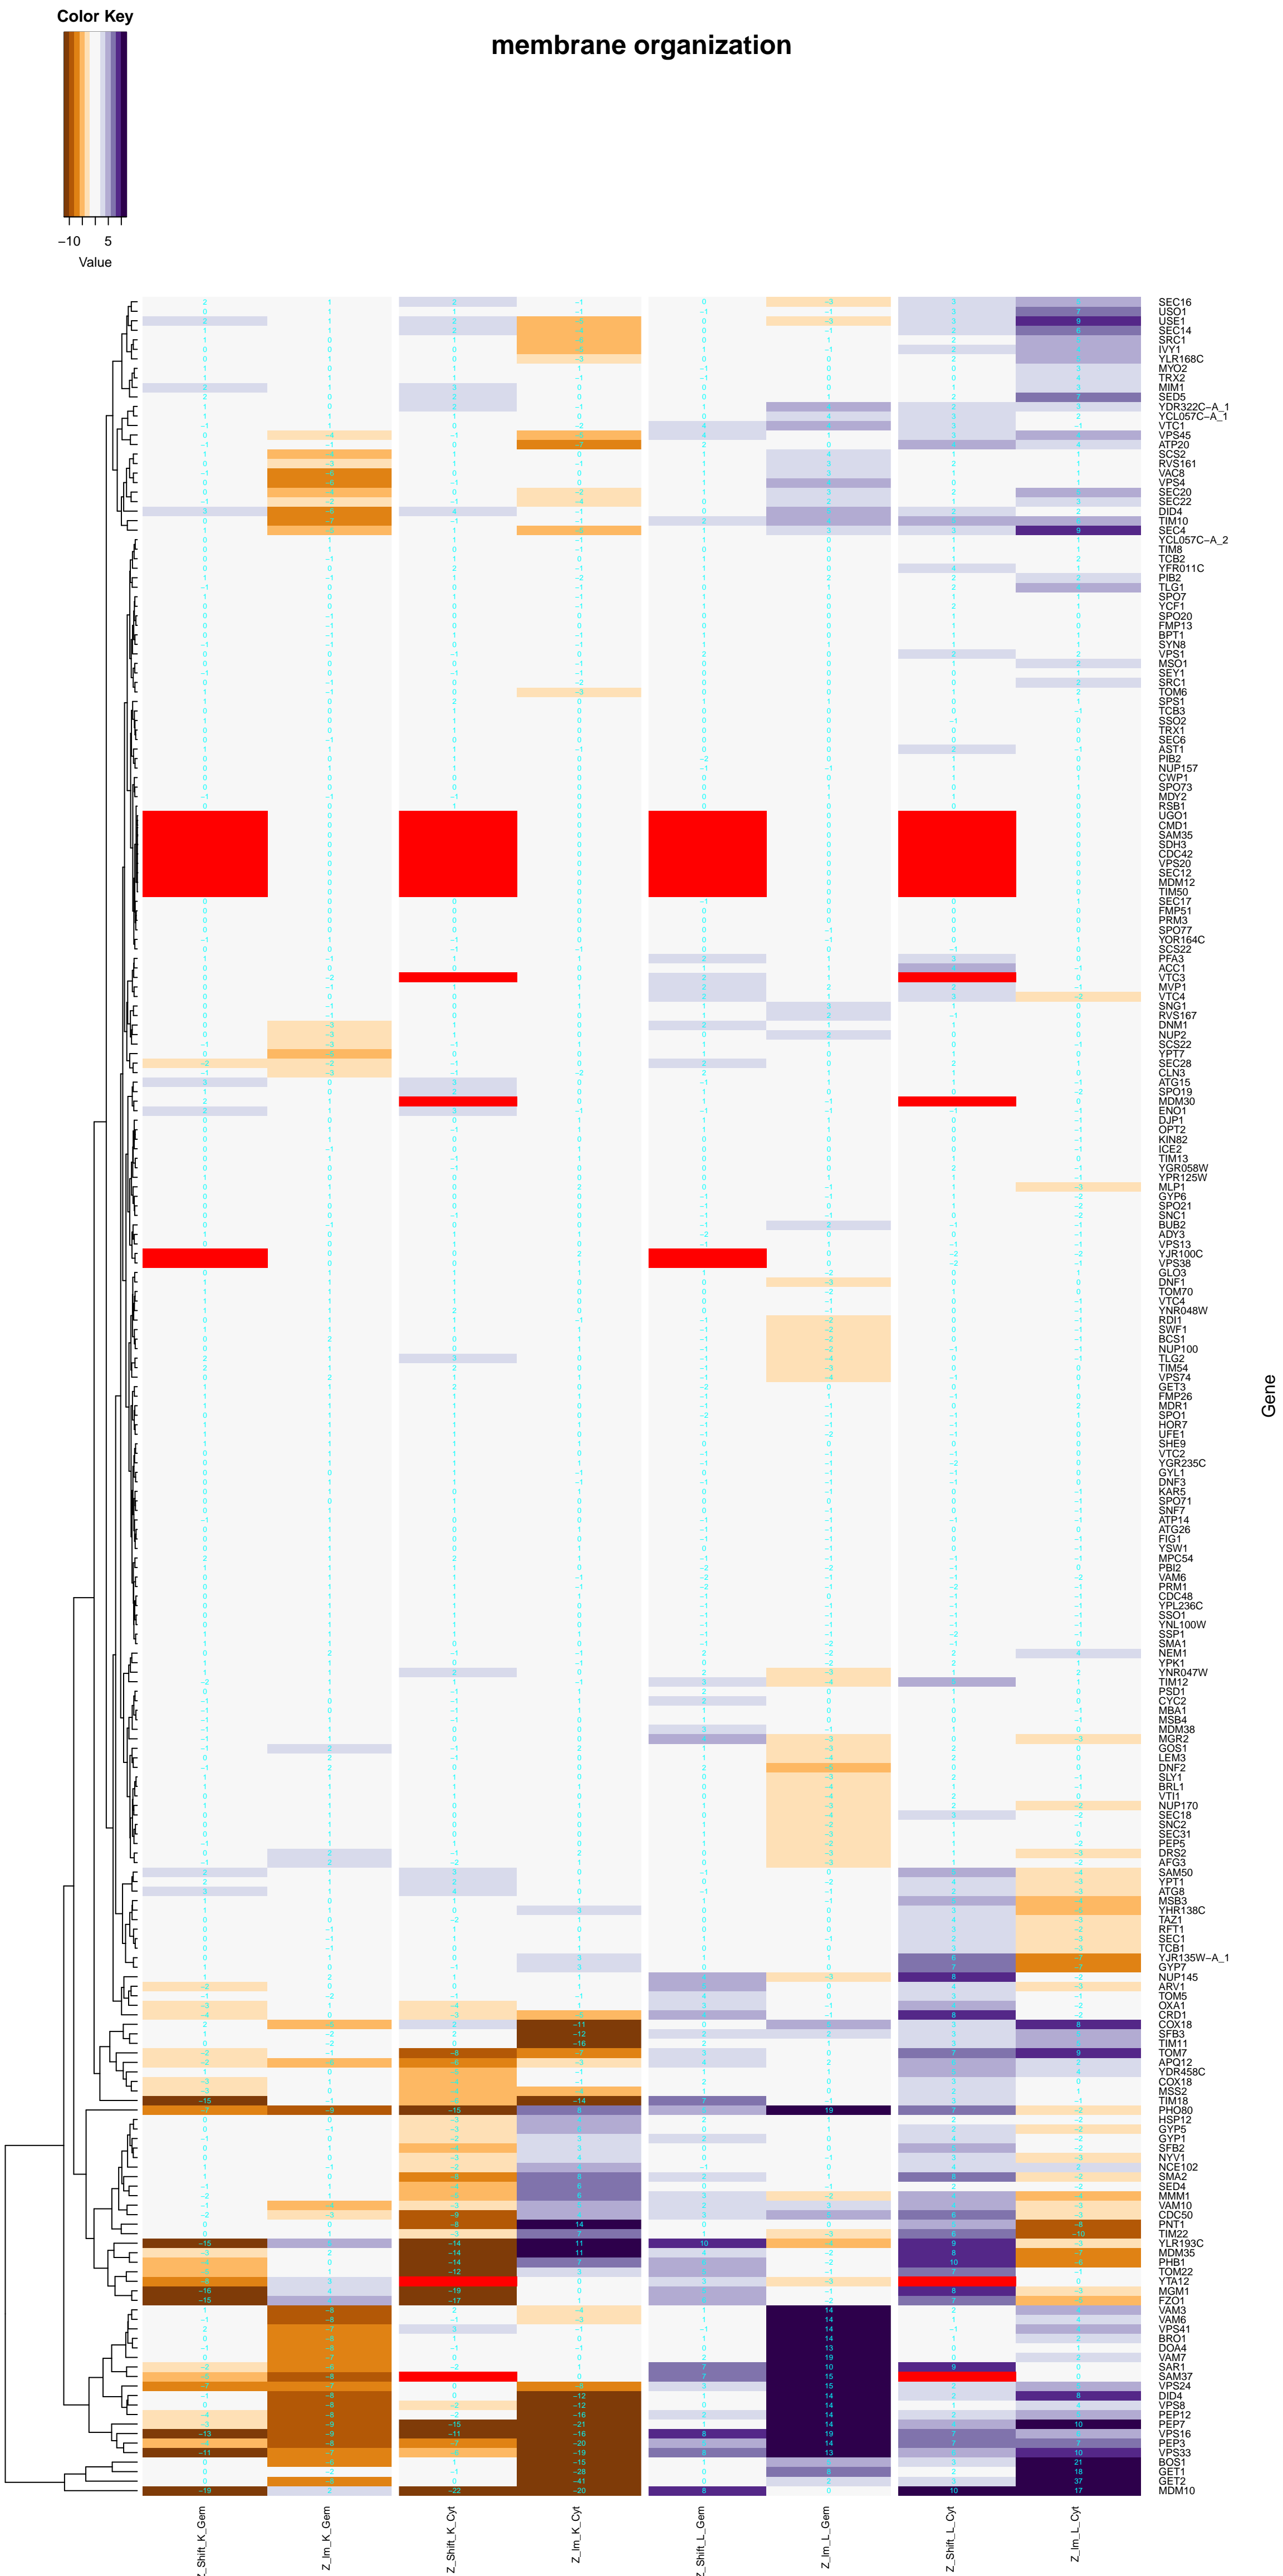

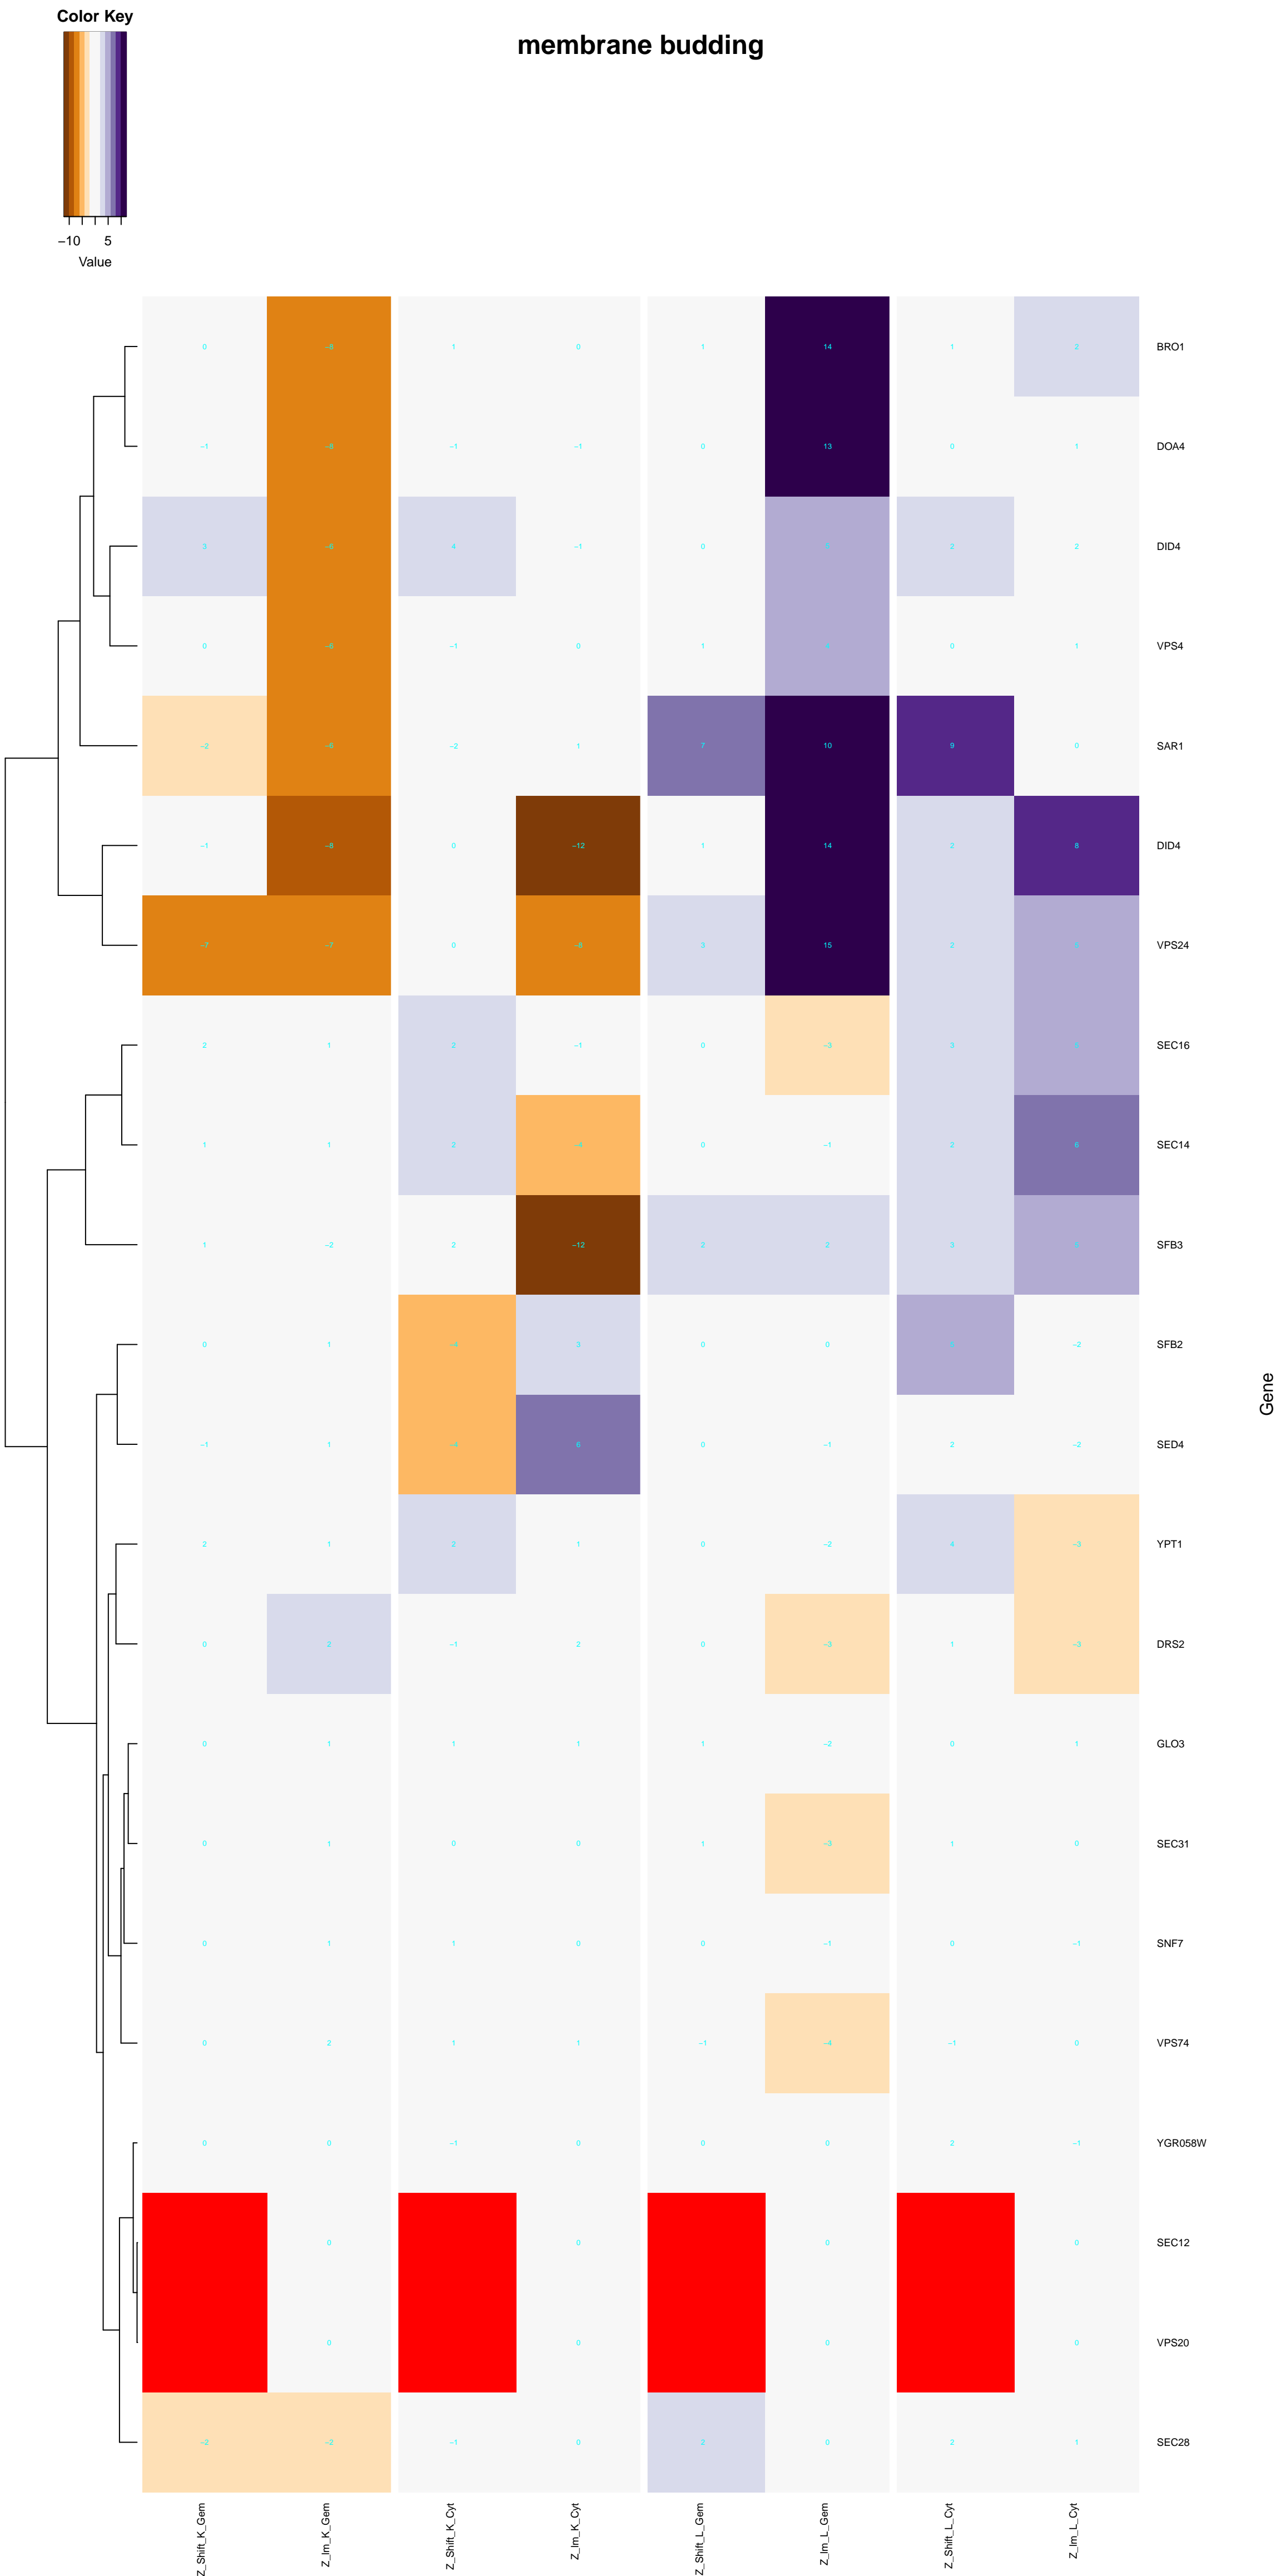

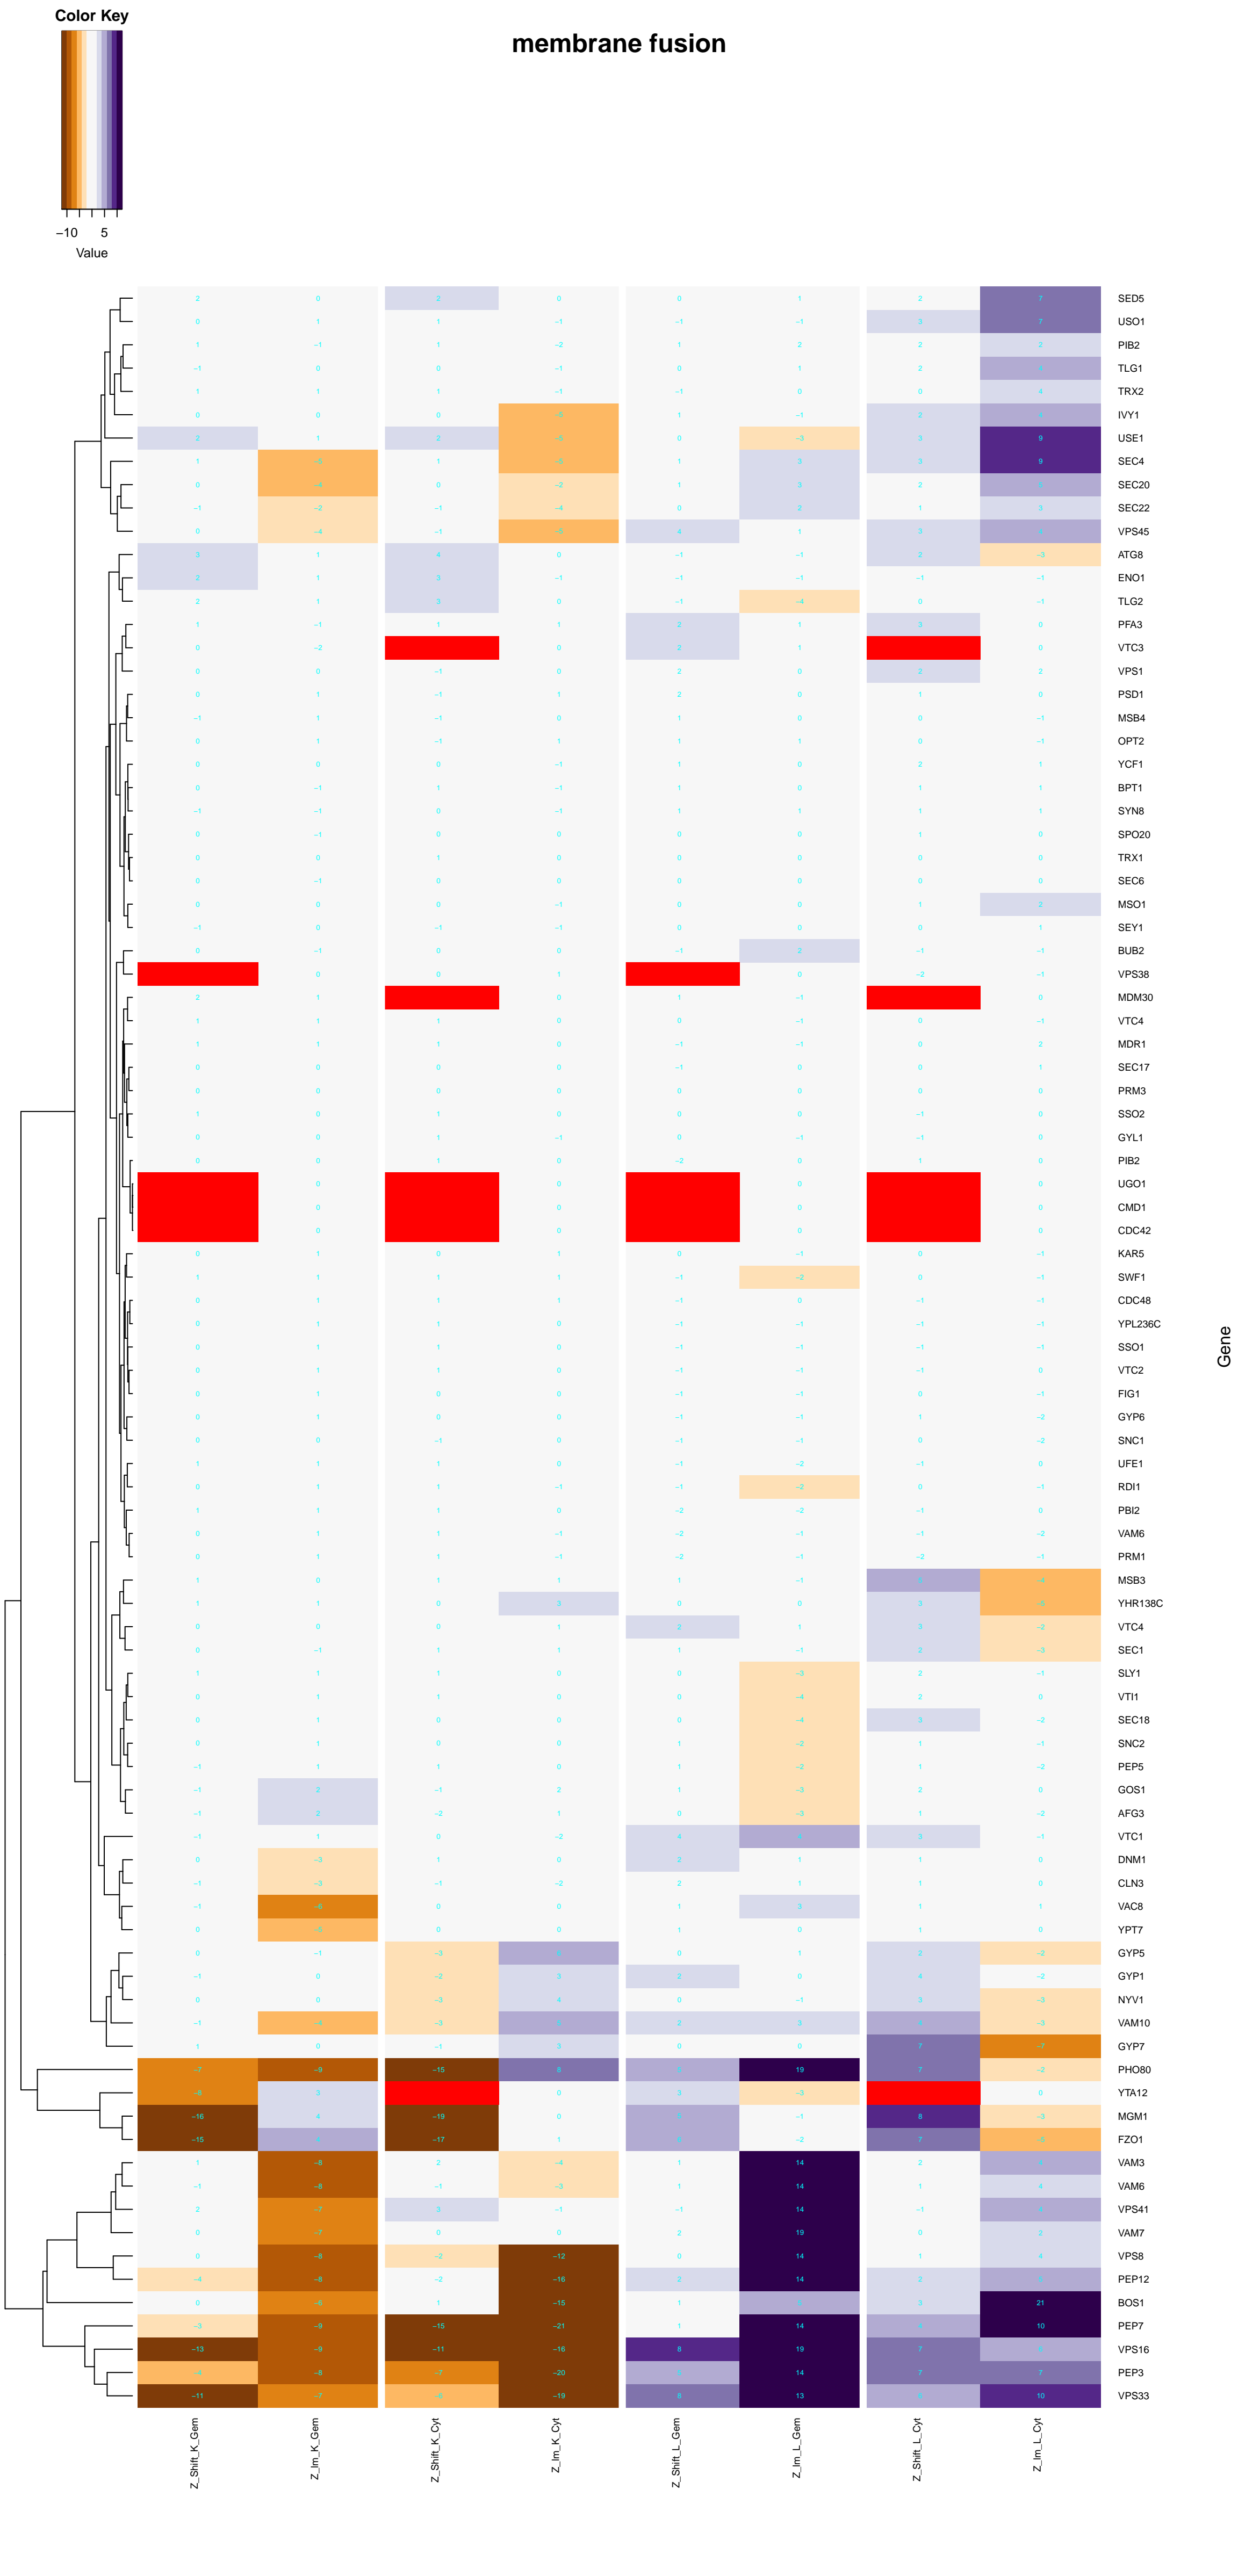

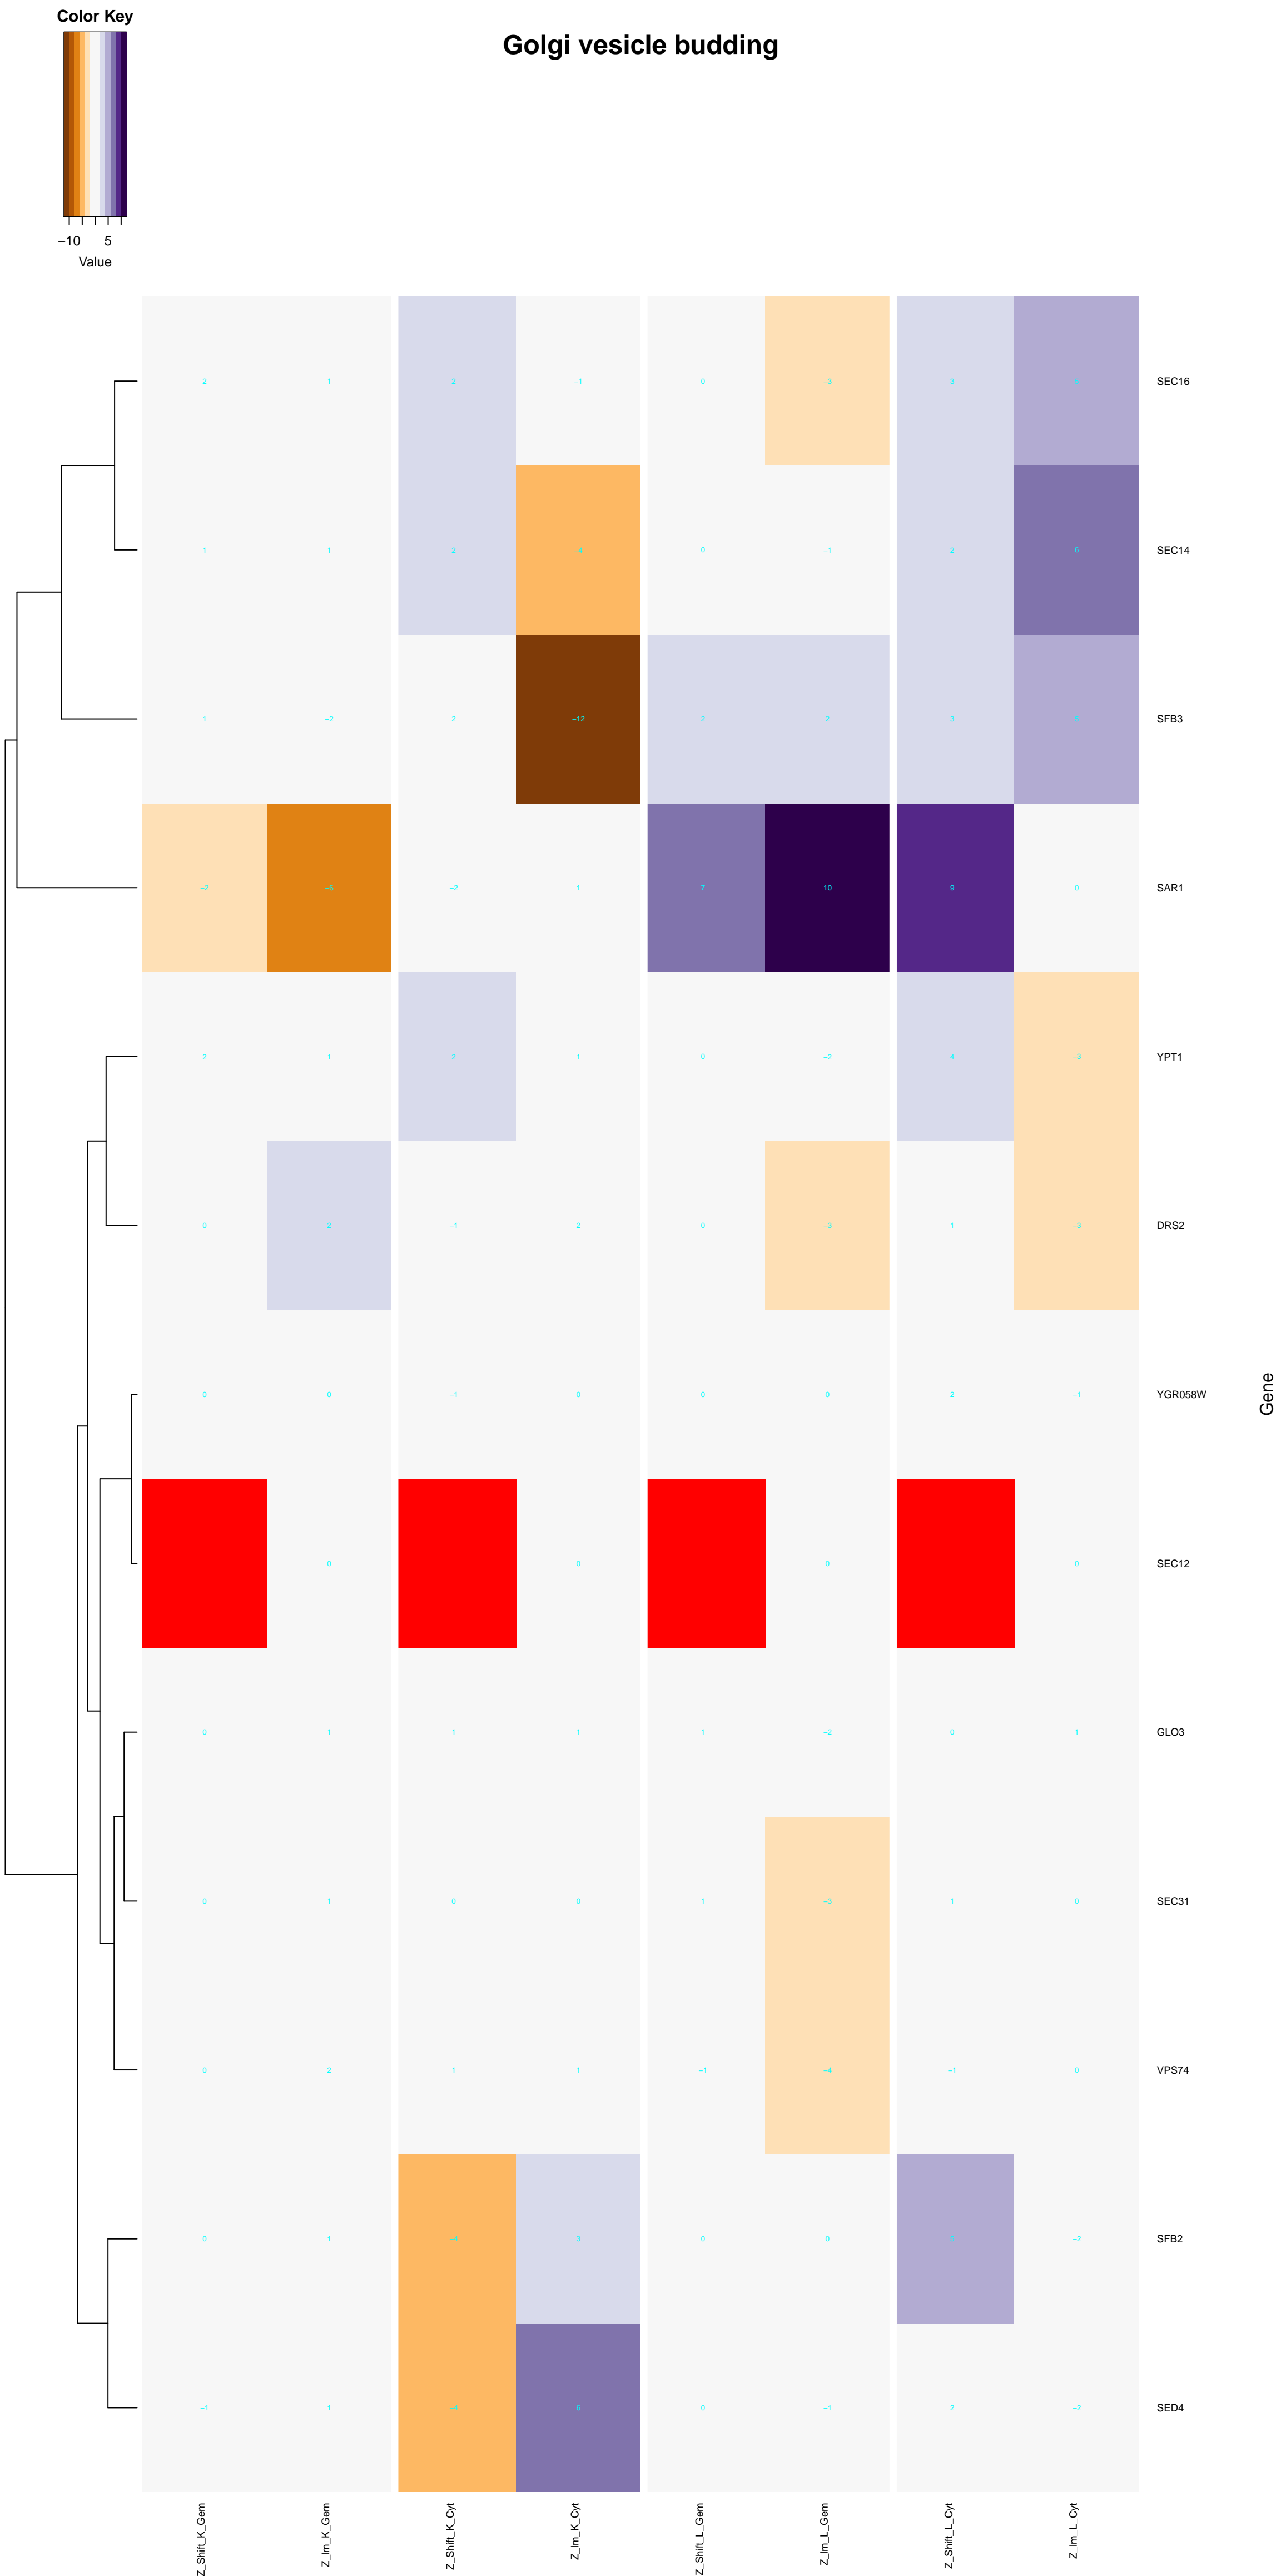

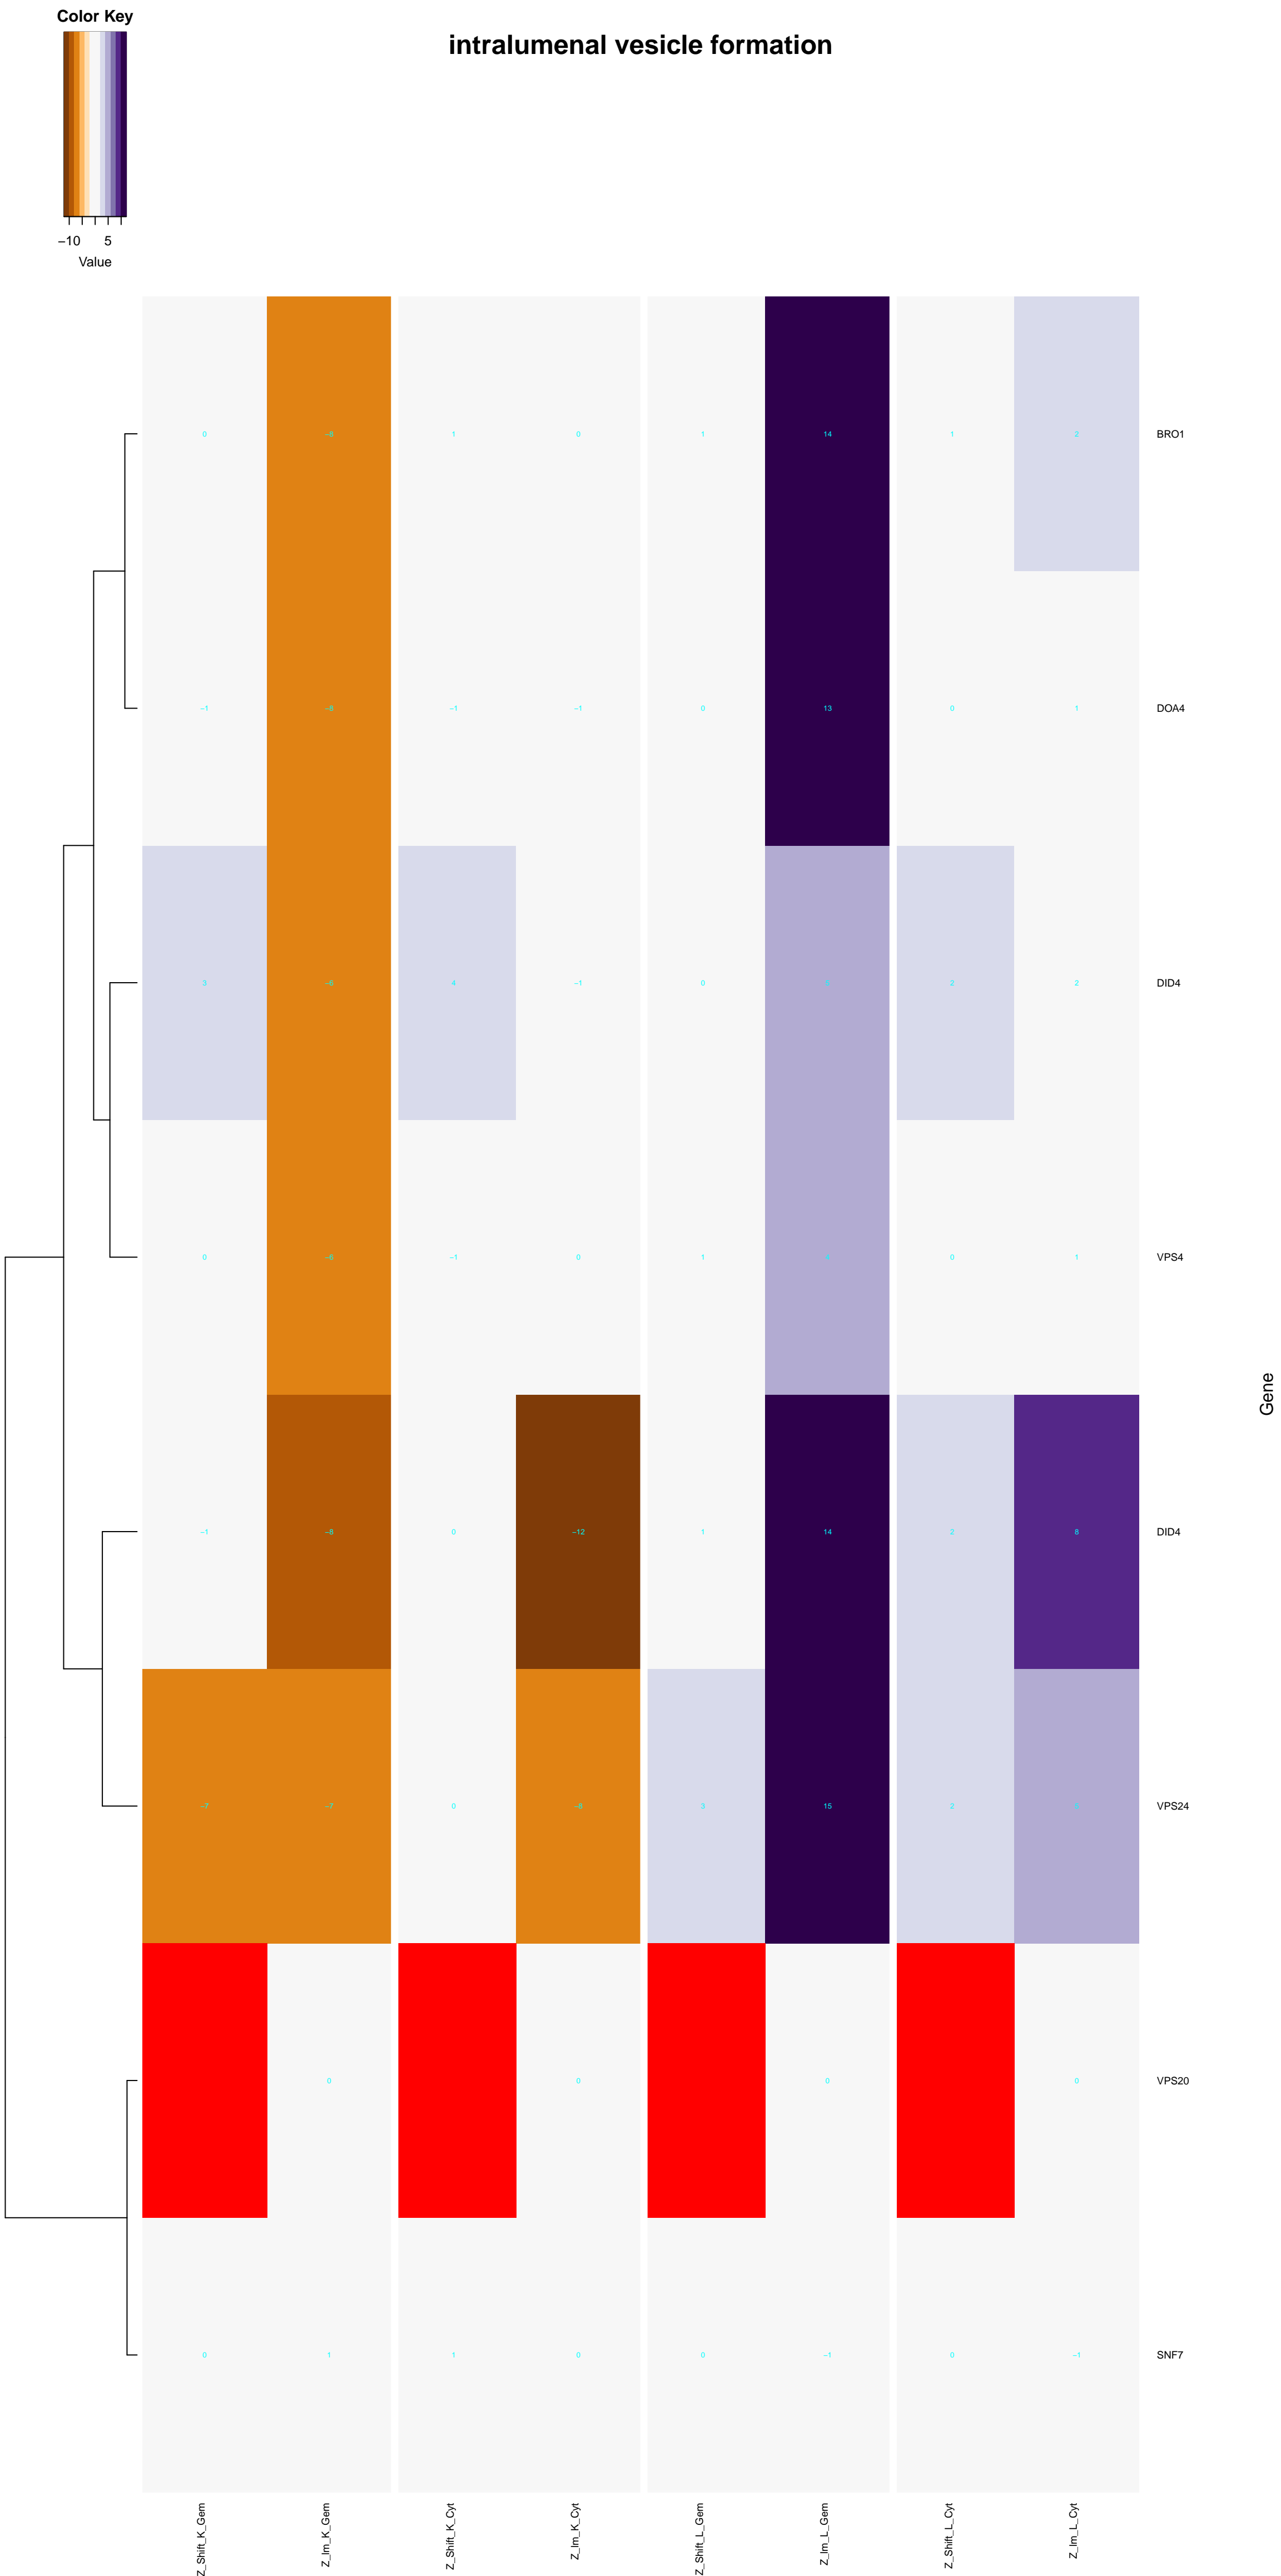

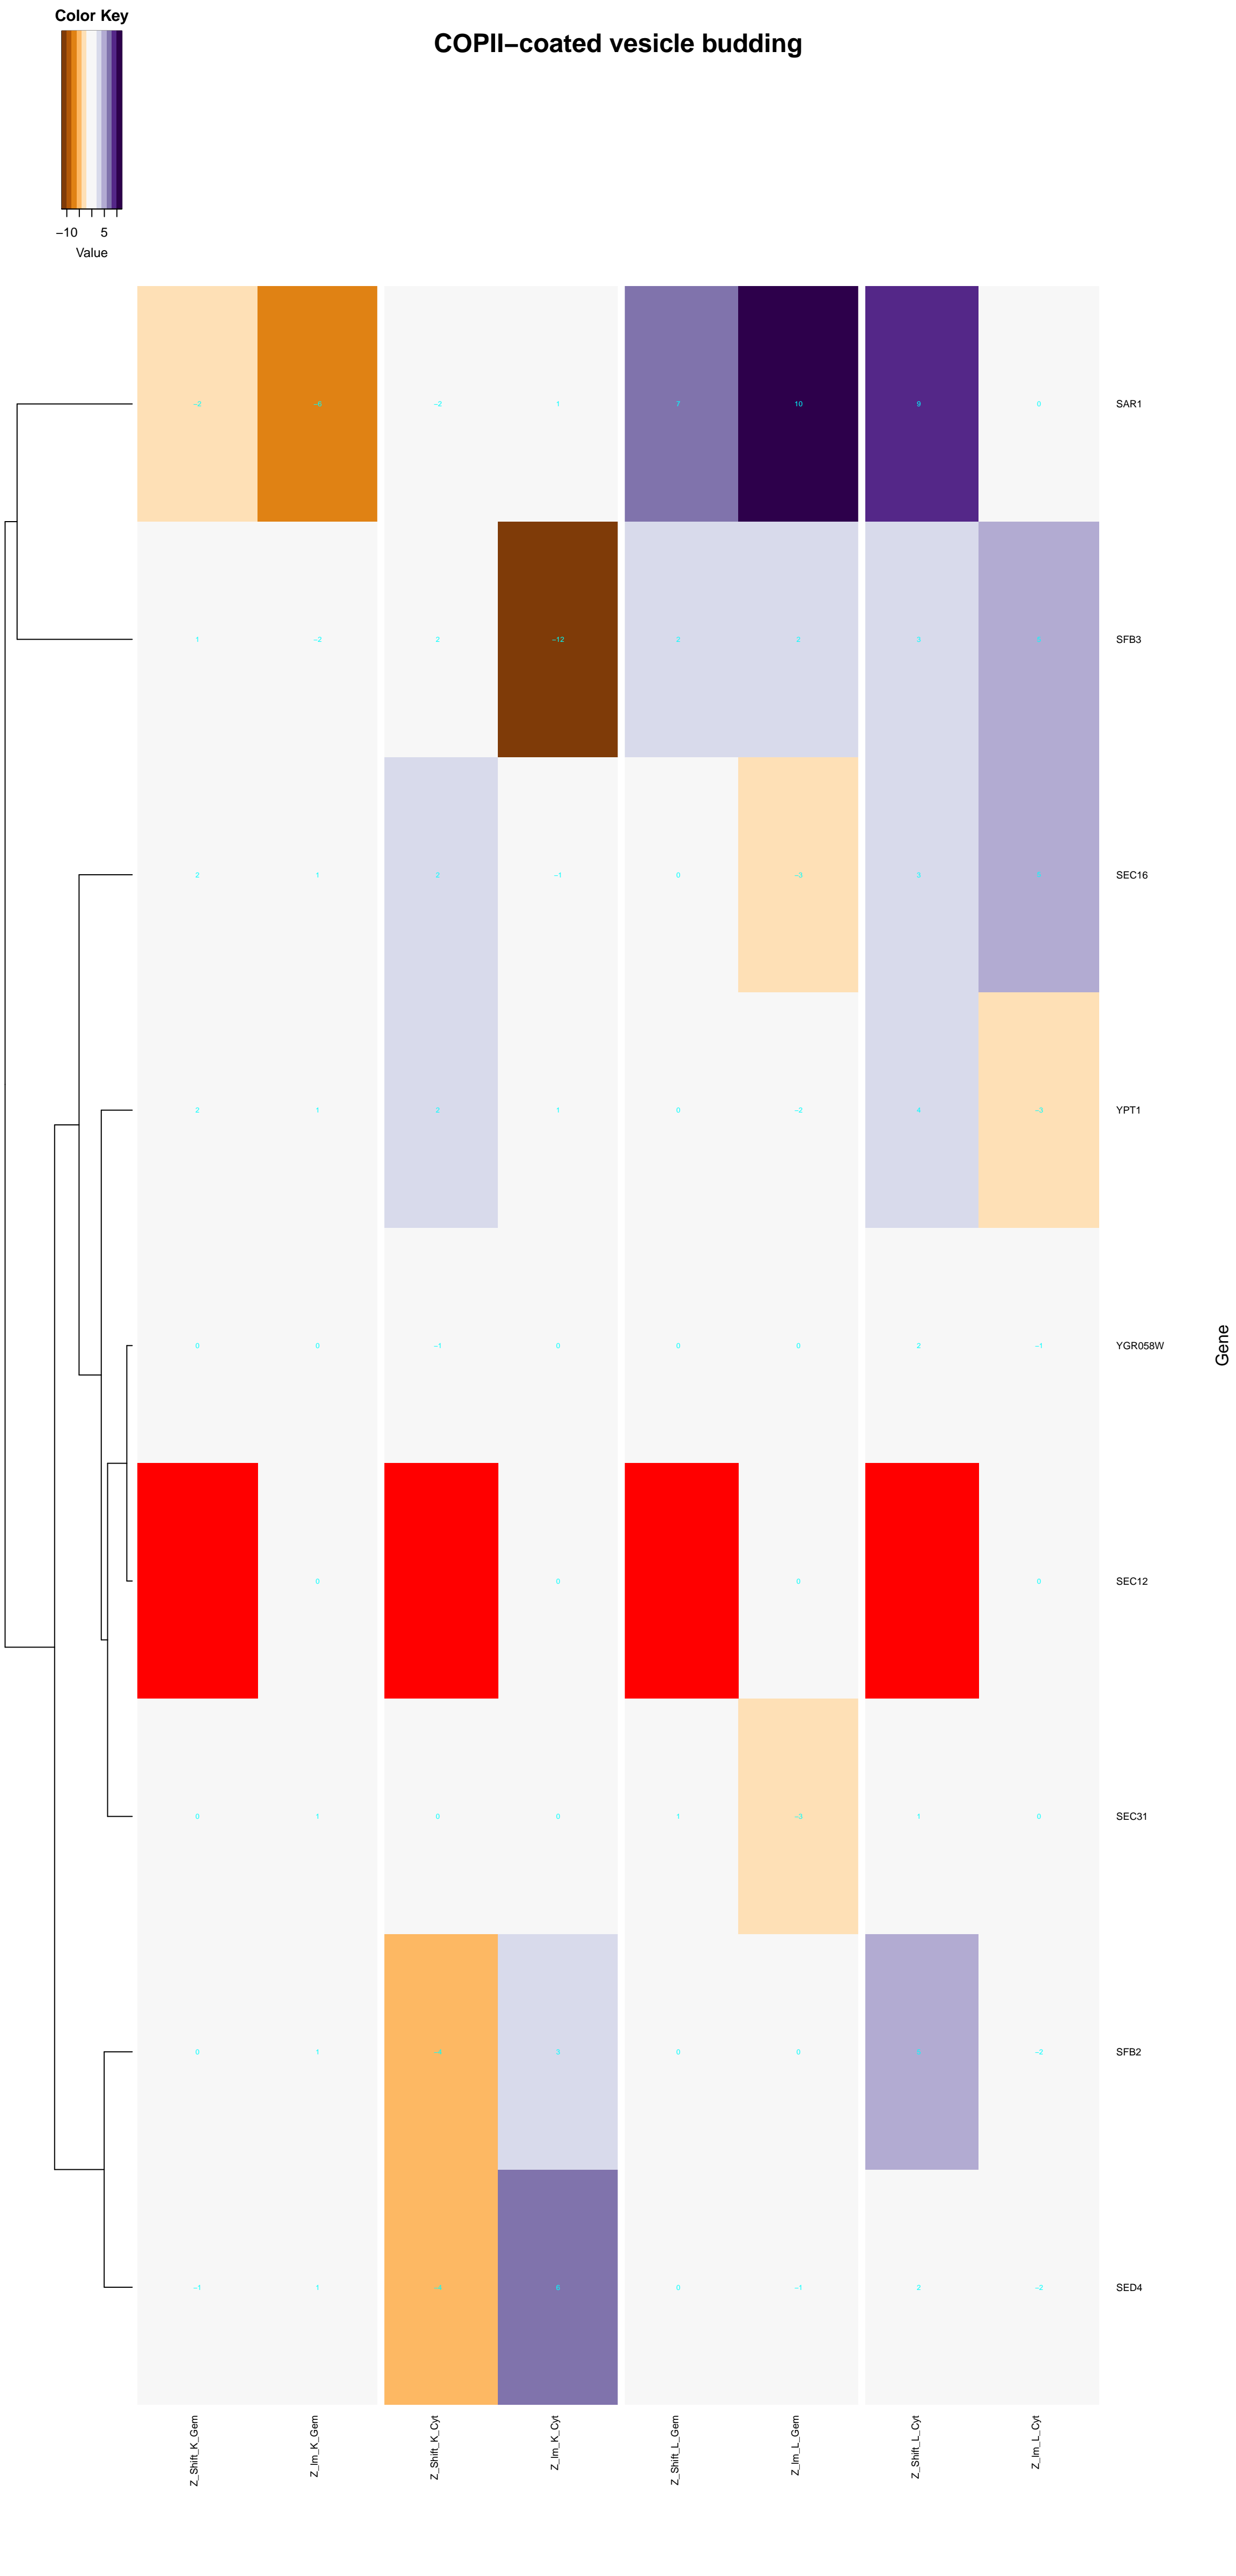

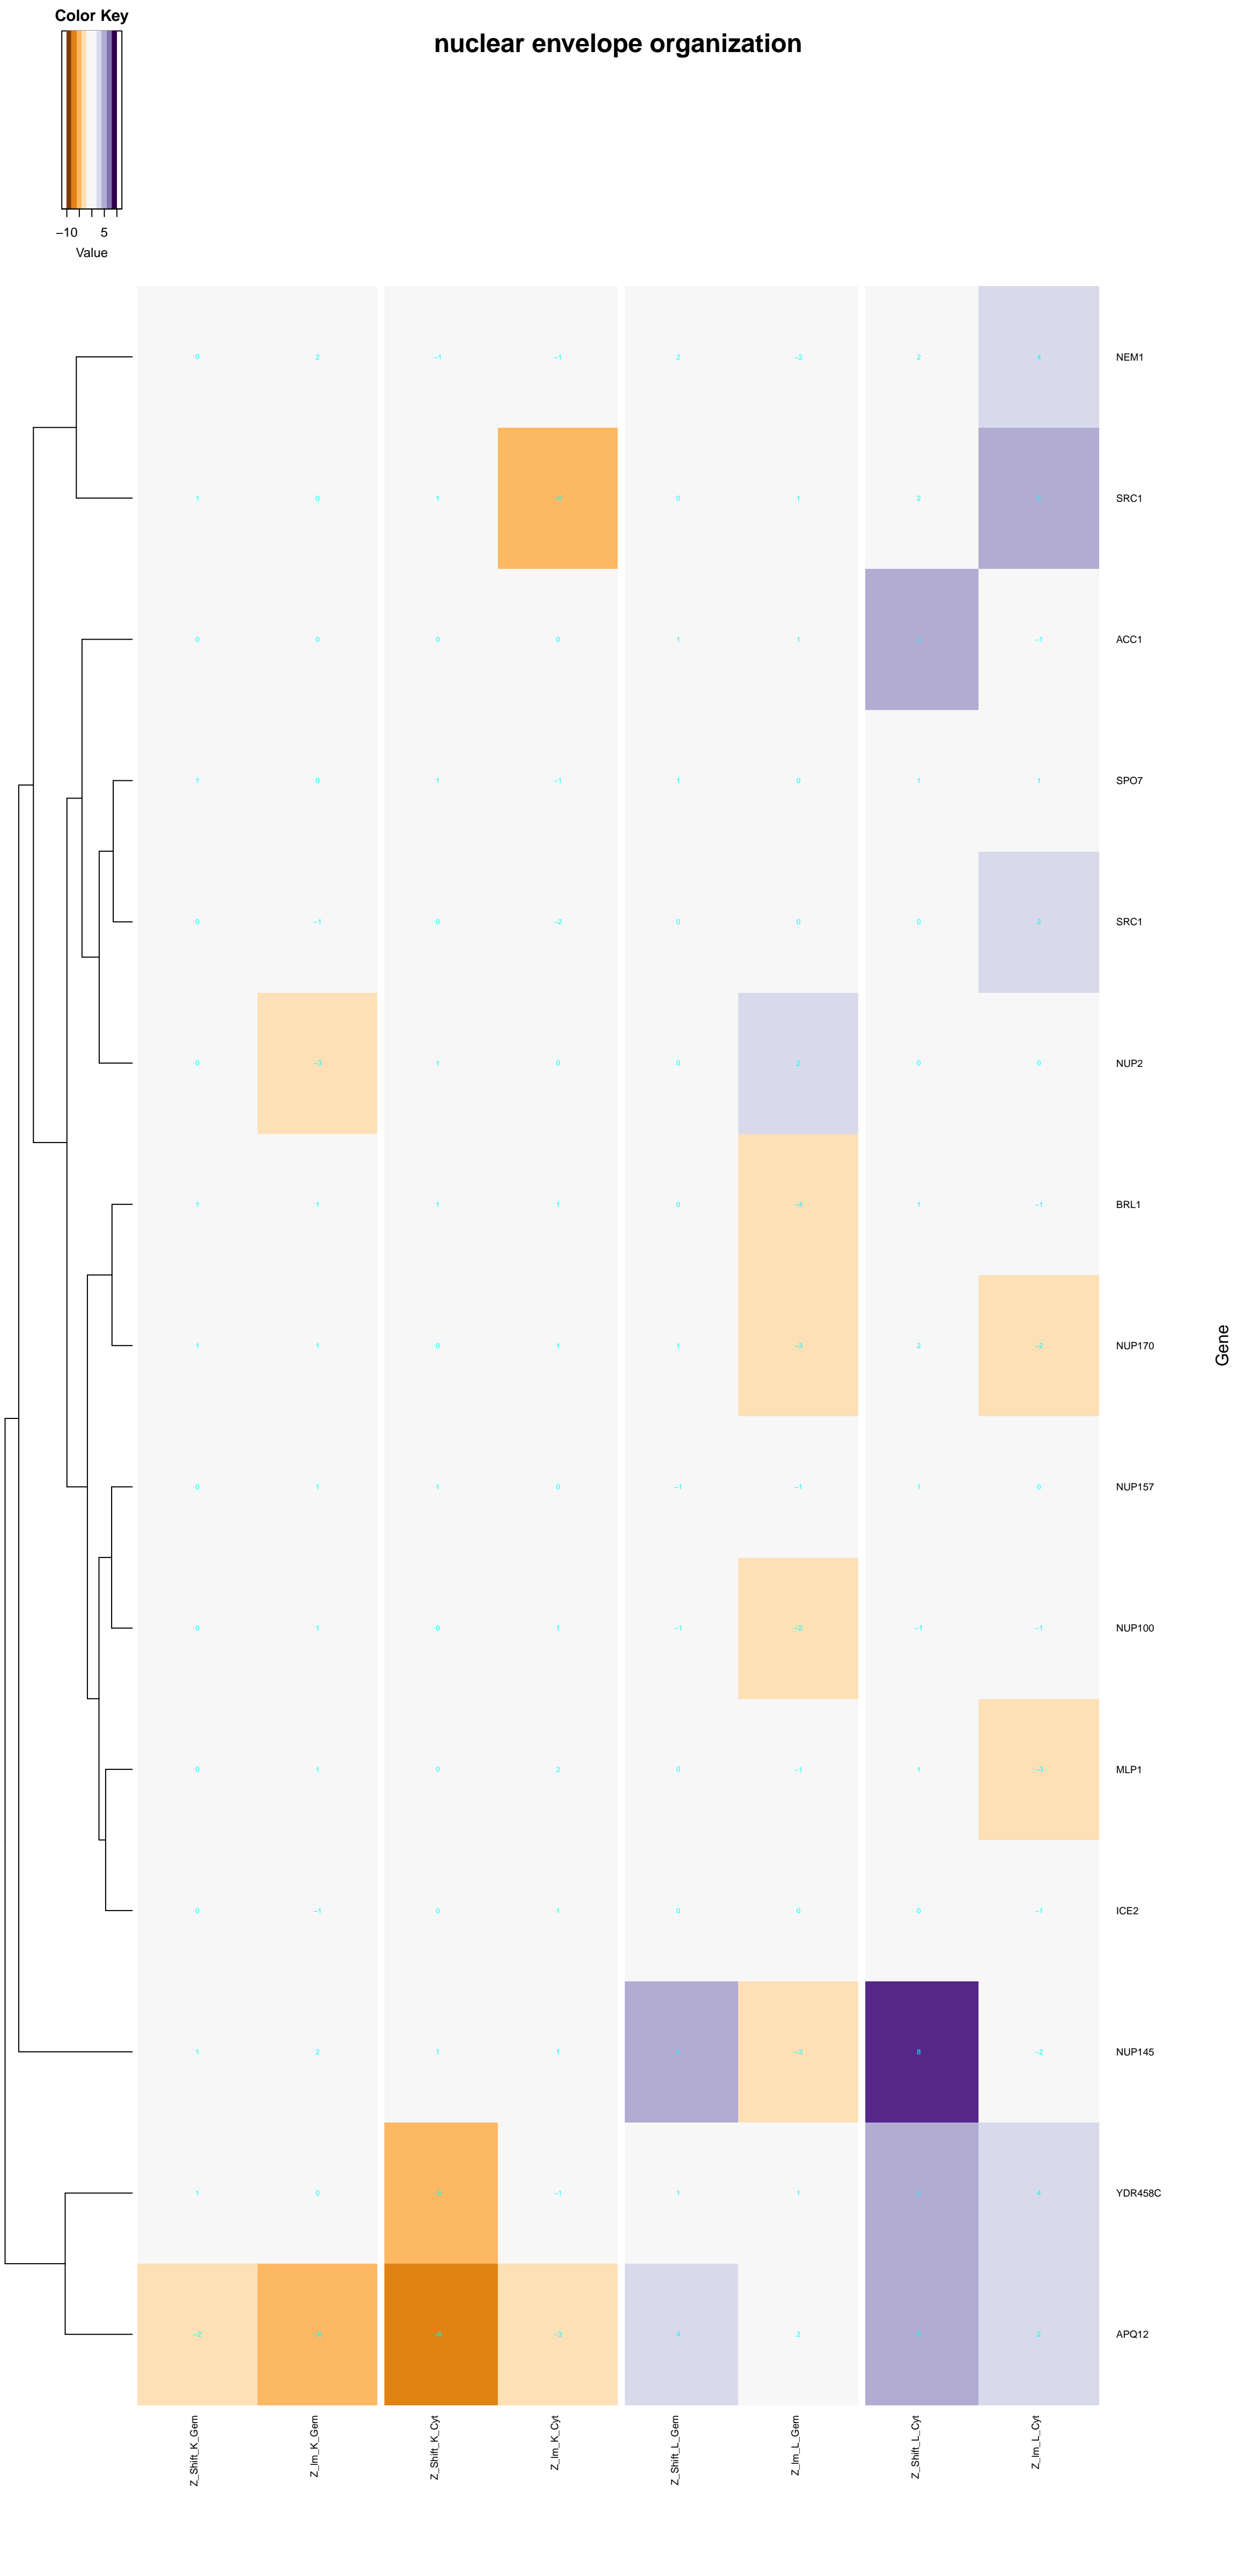

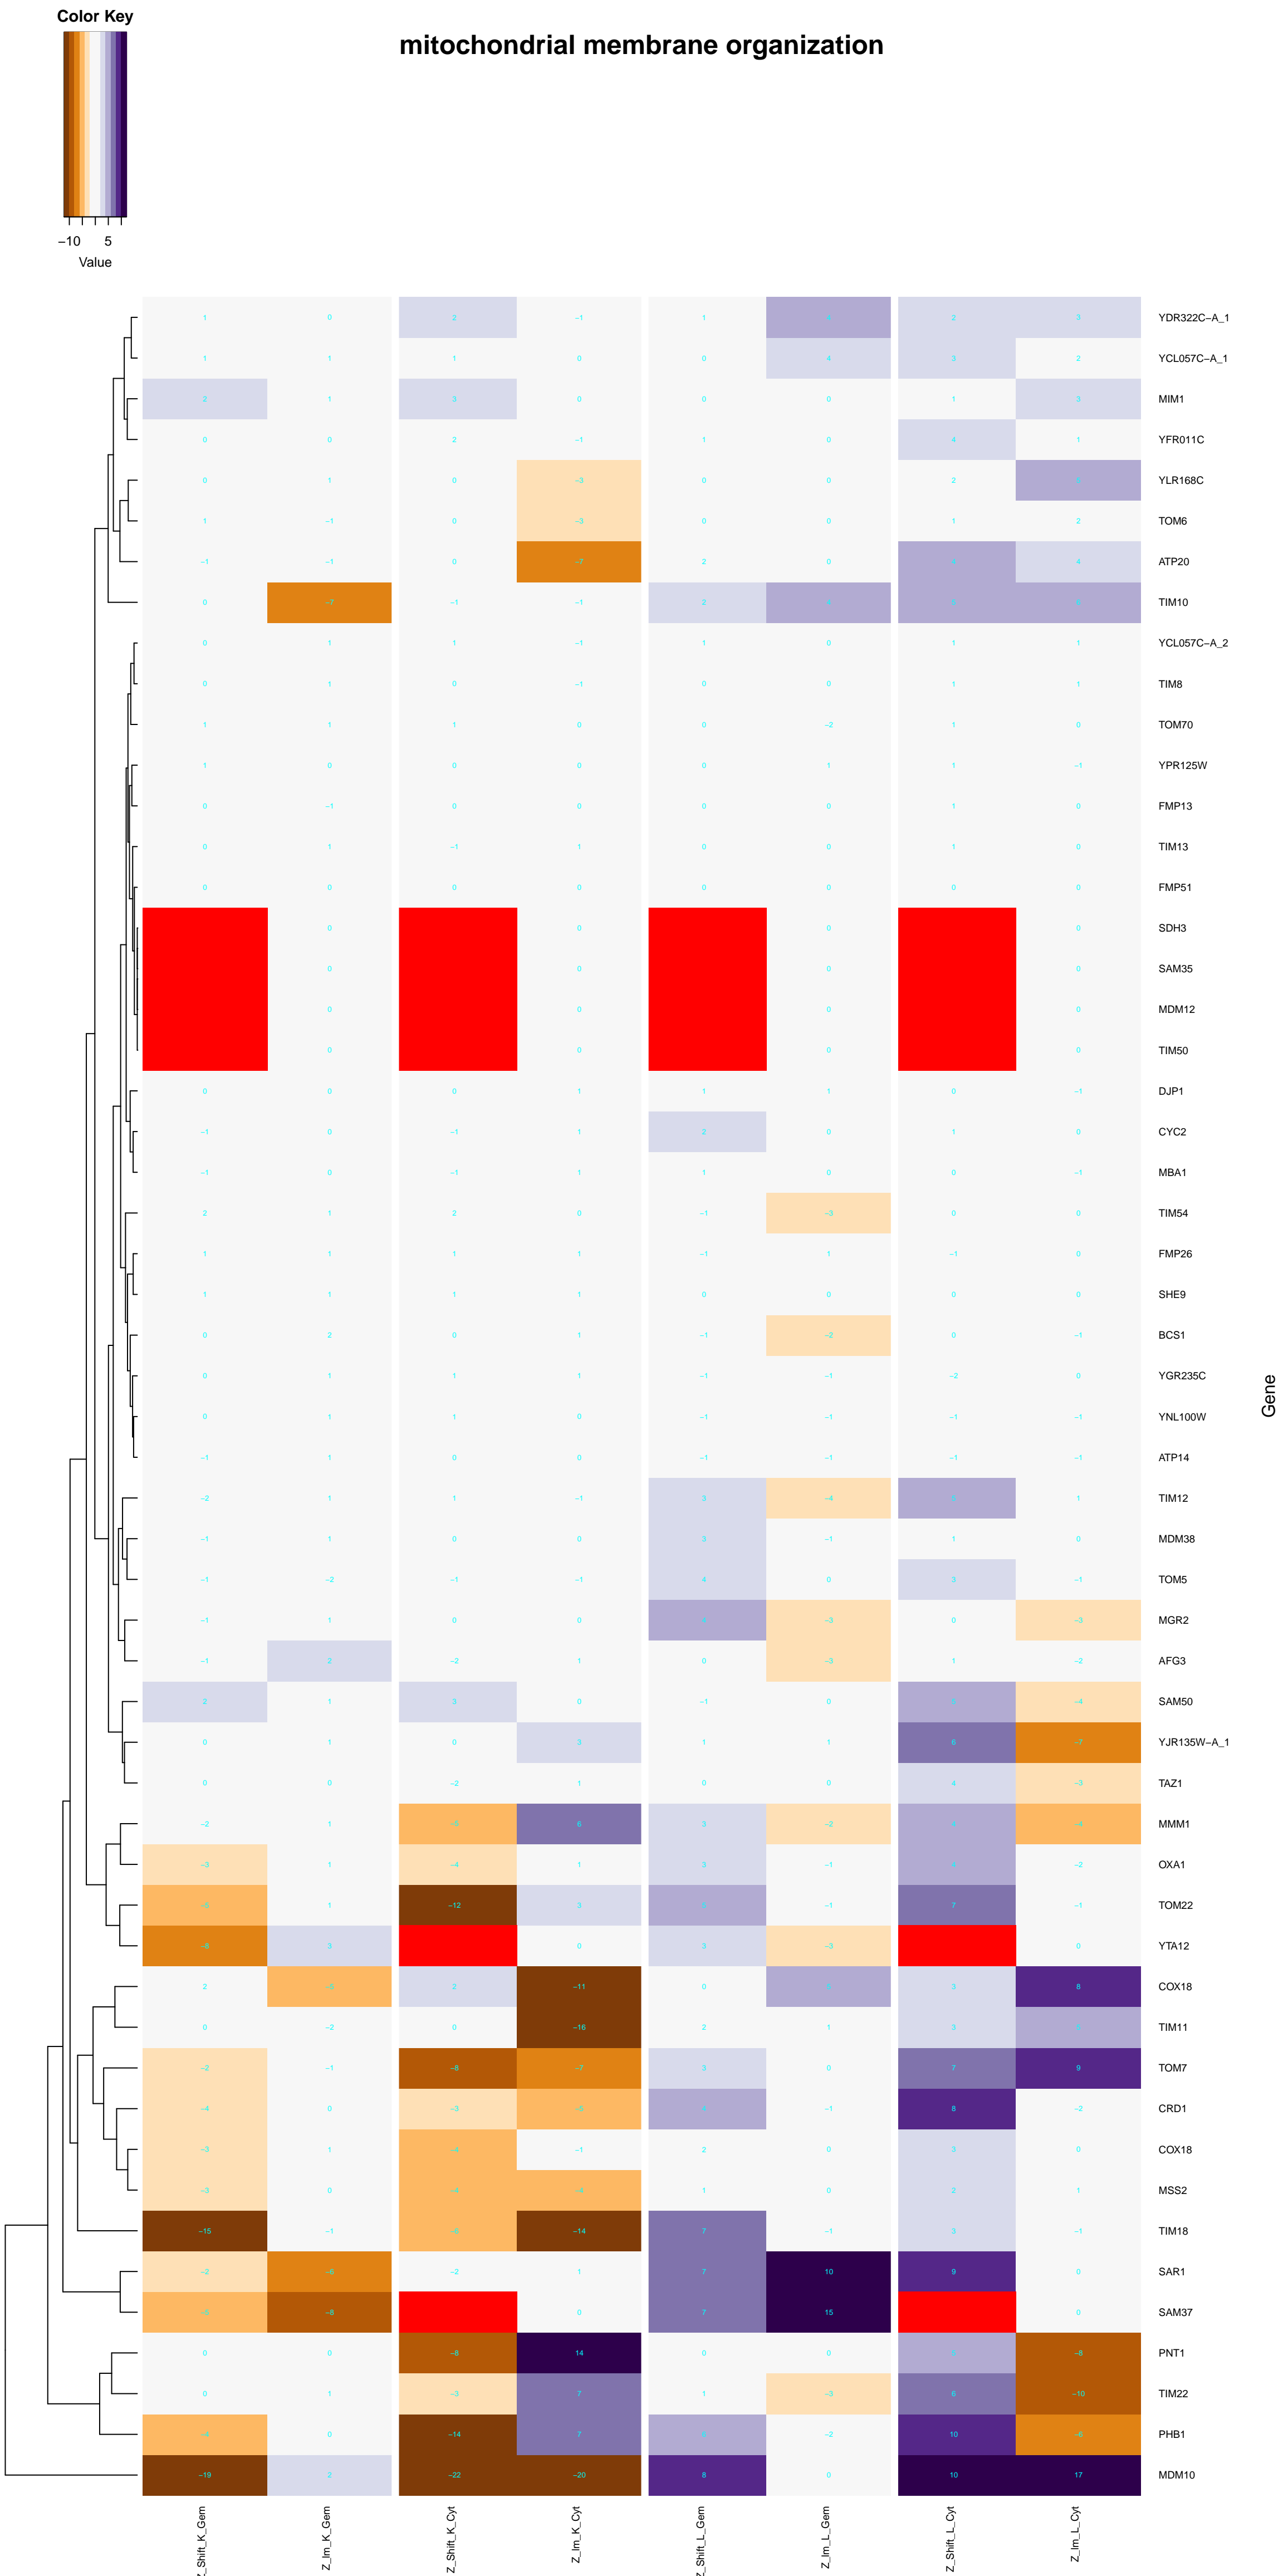

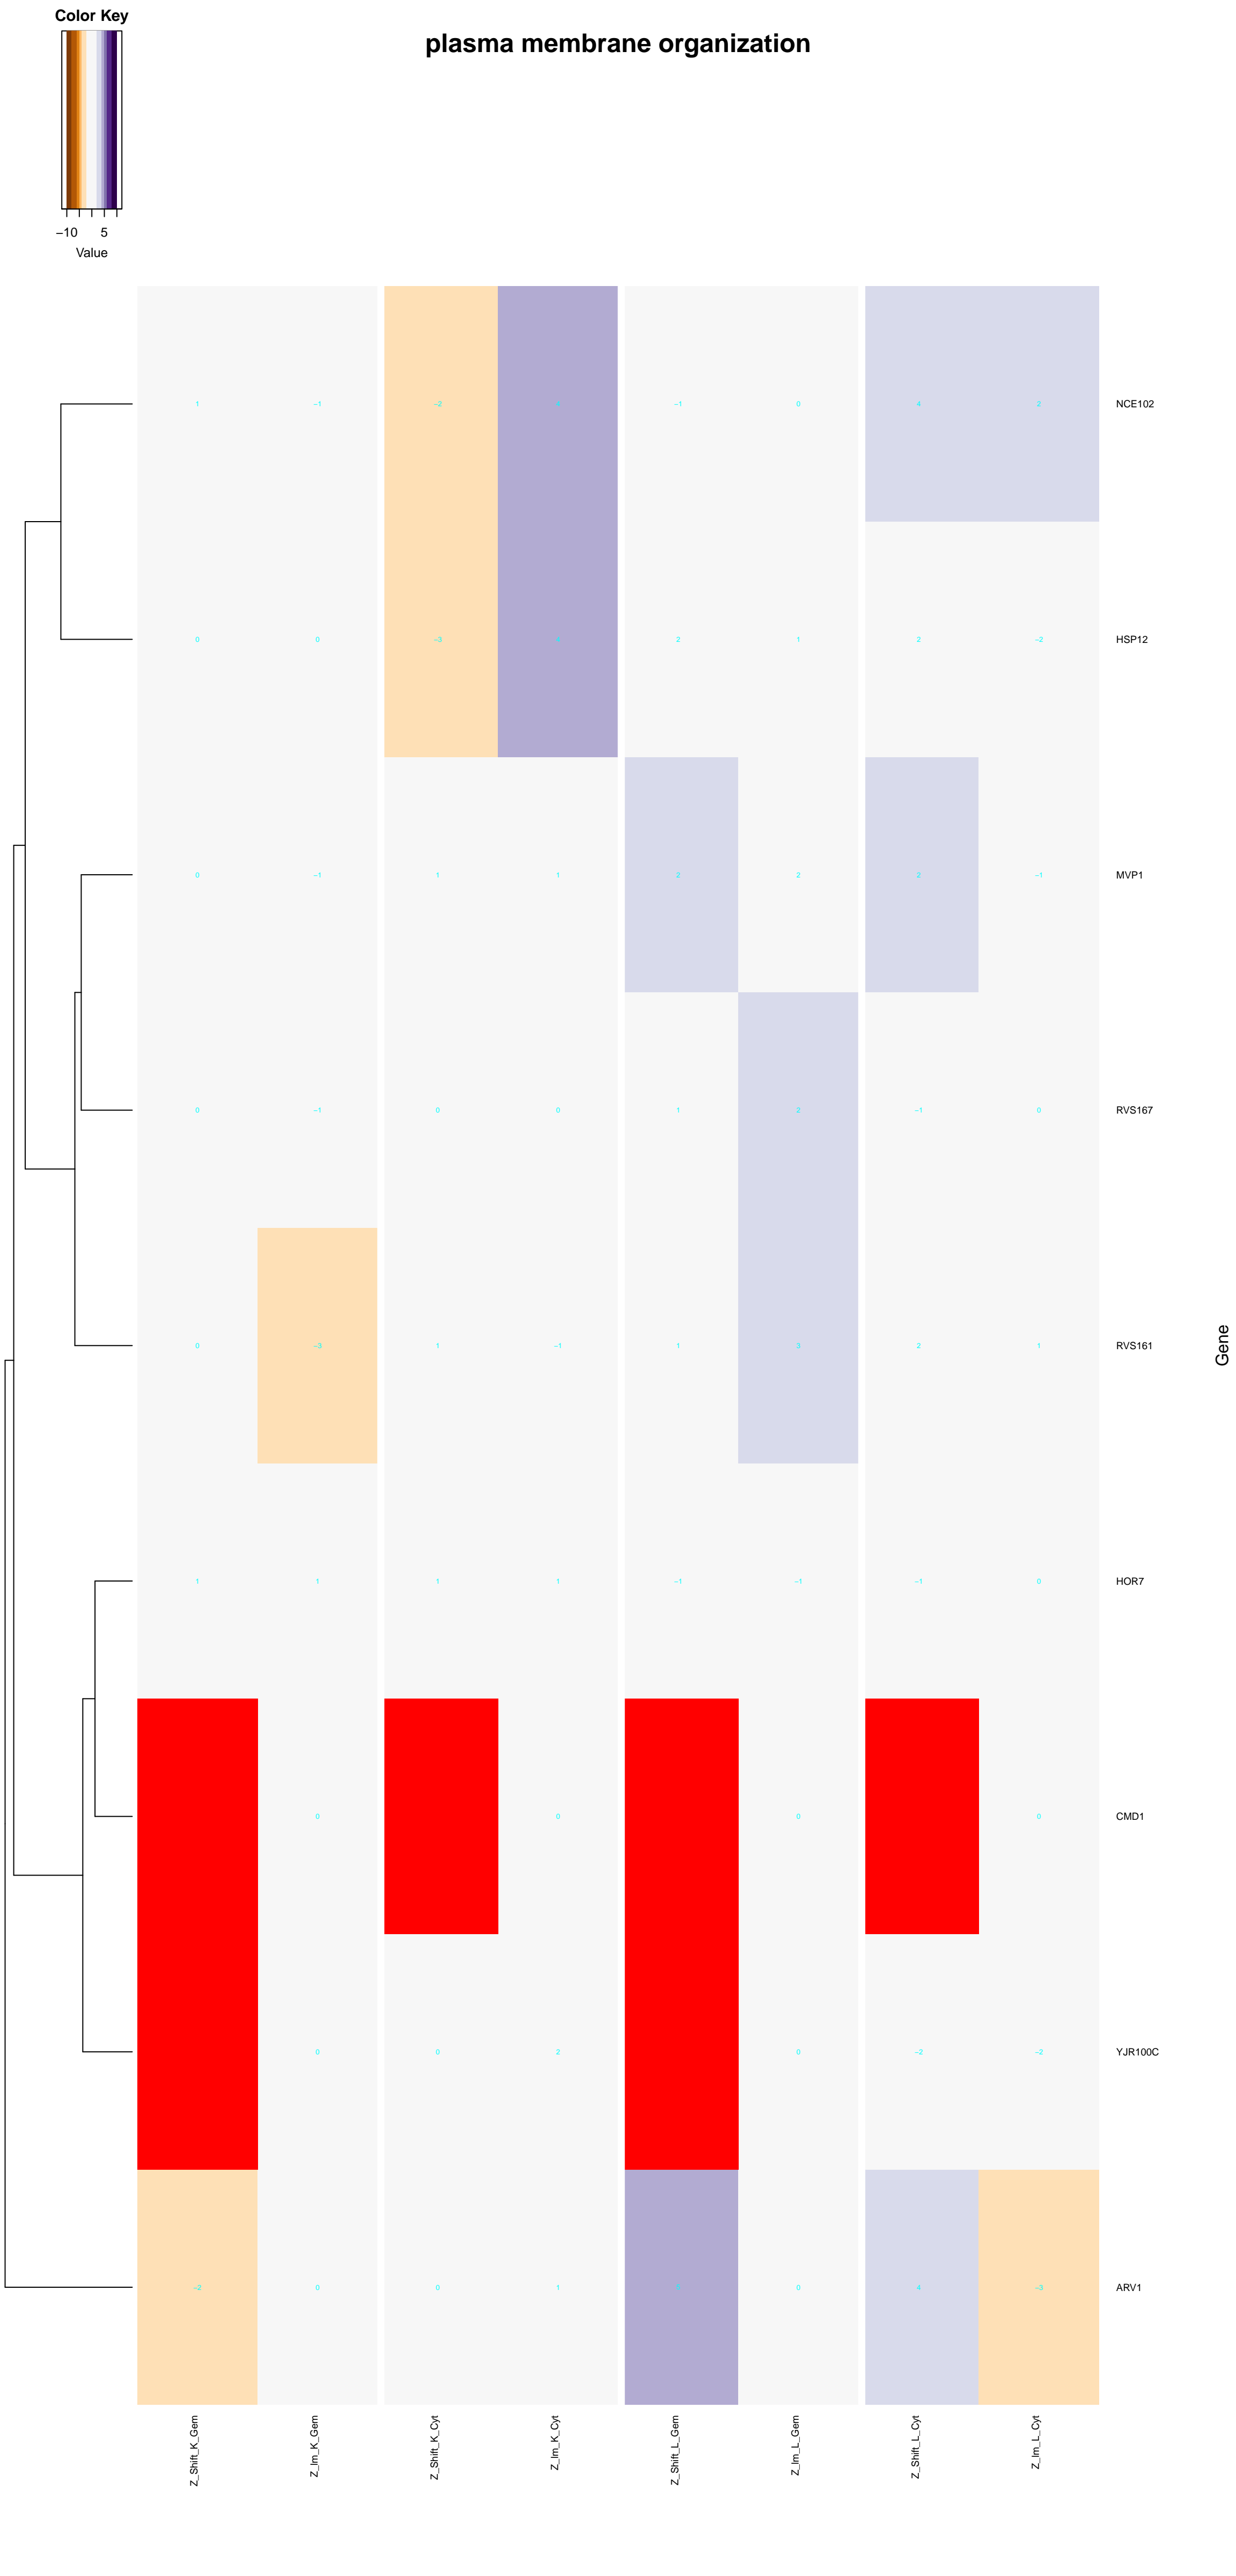

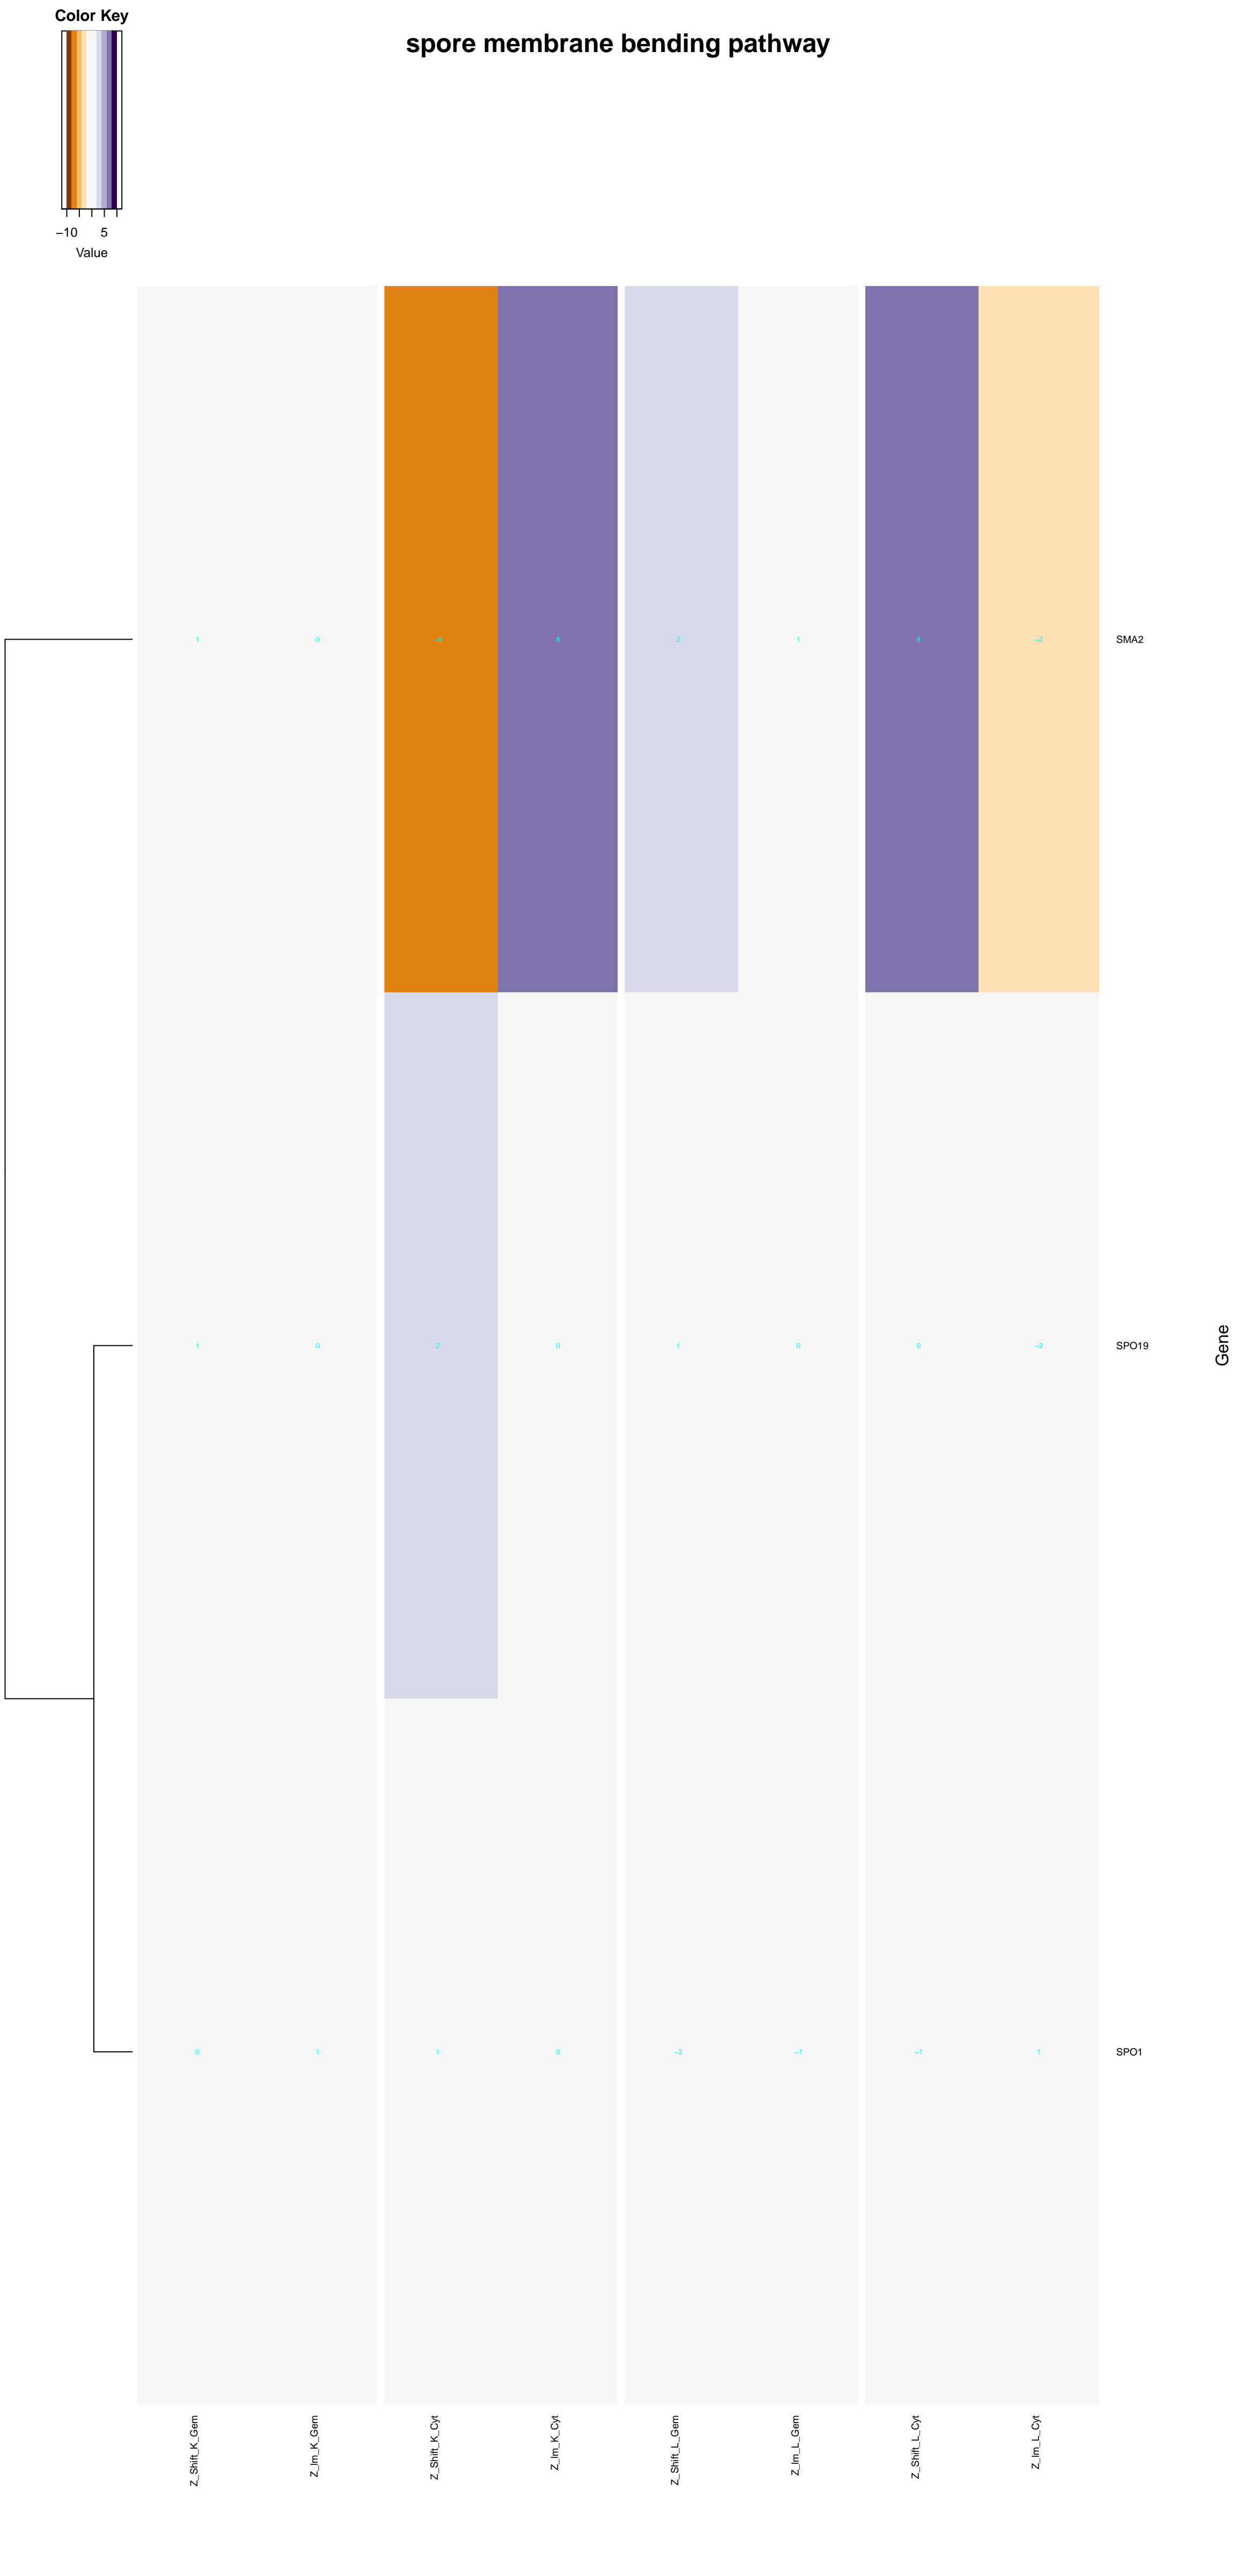

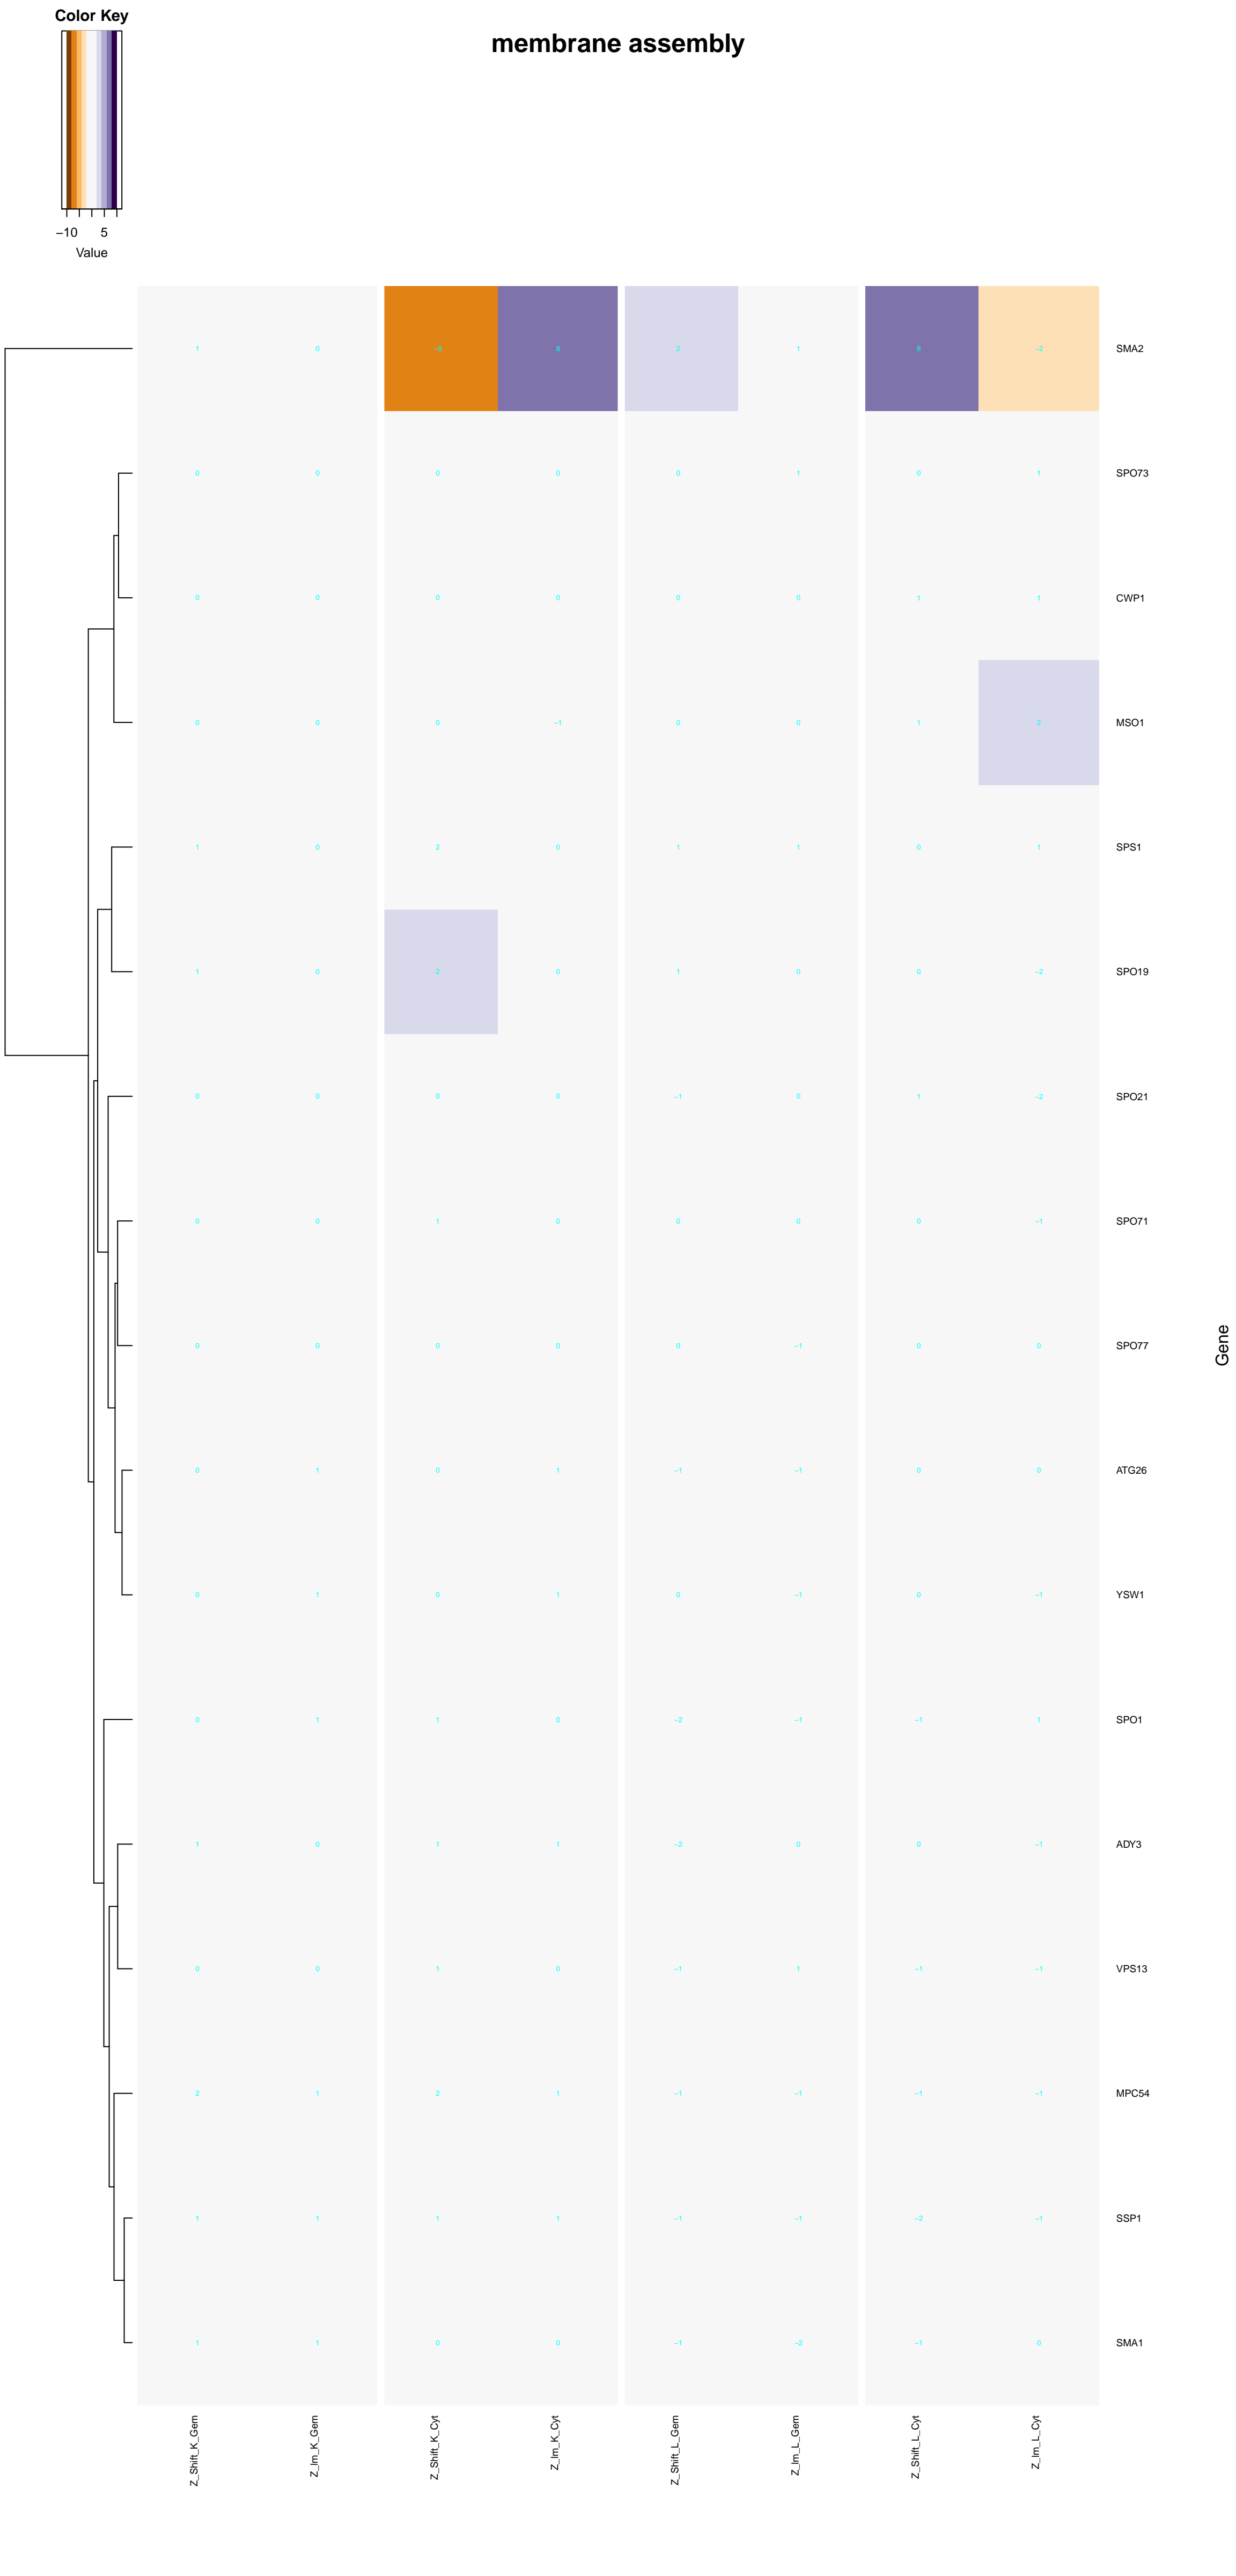

membrane fission

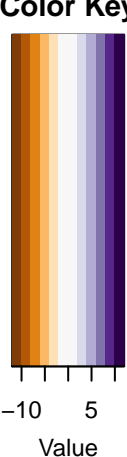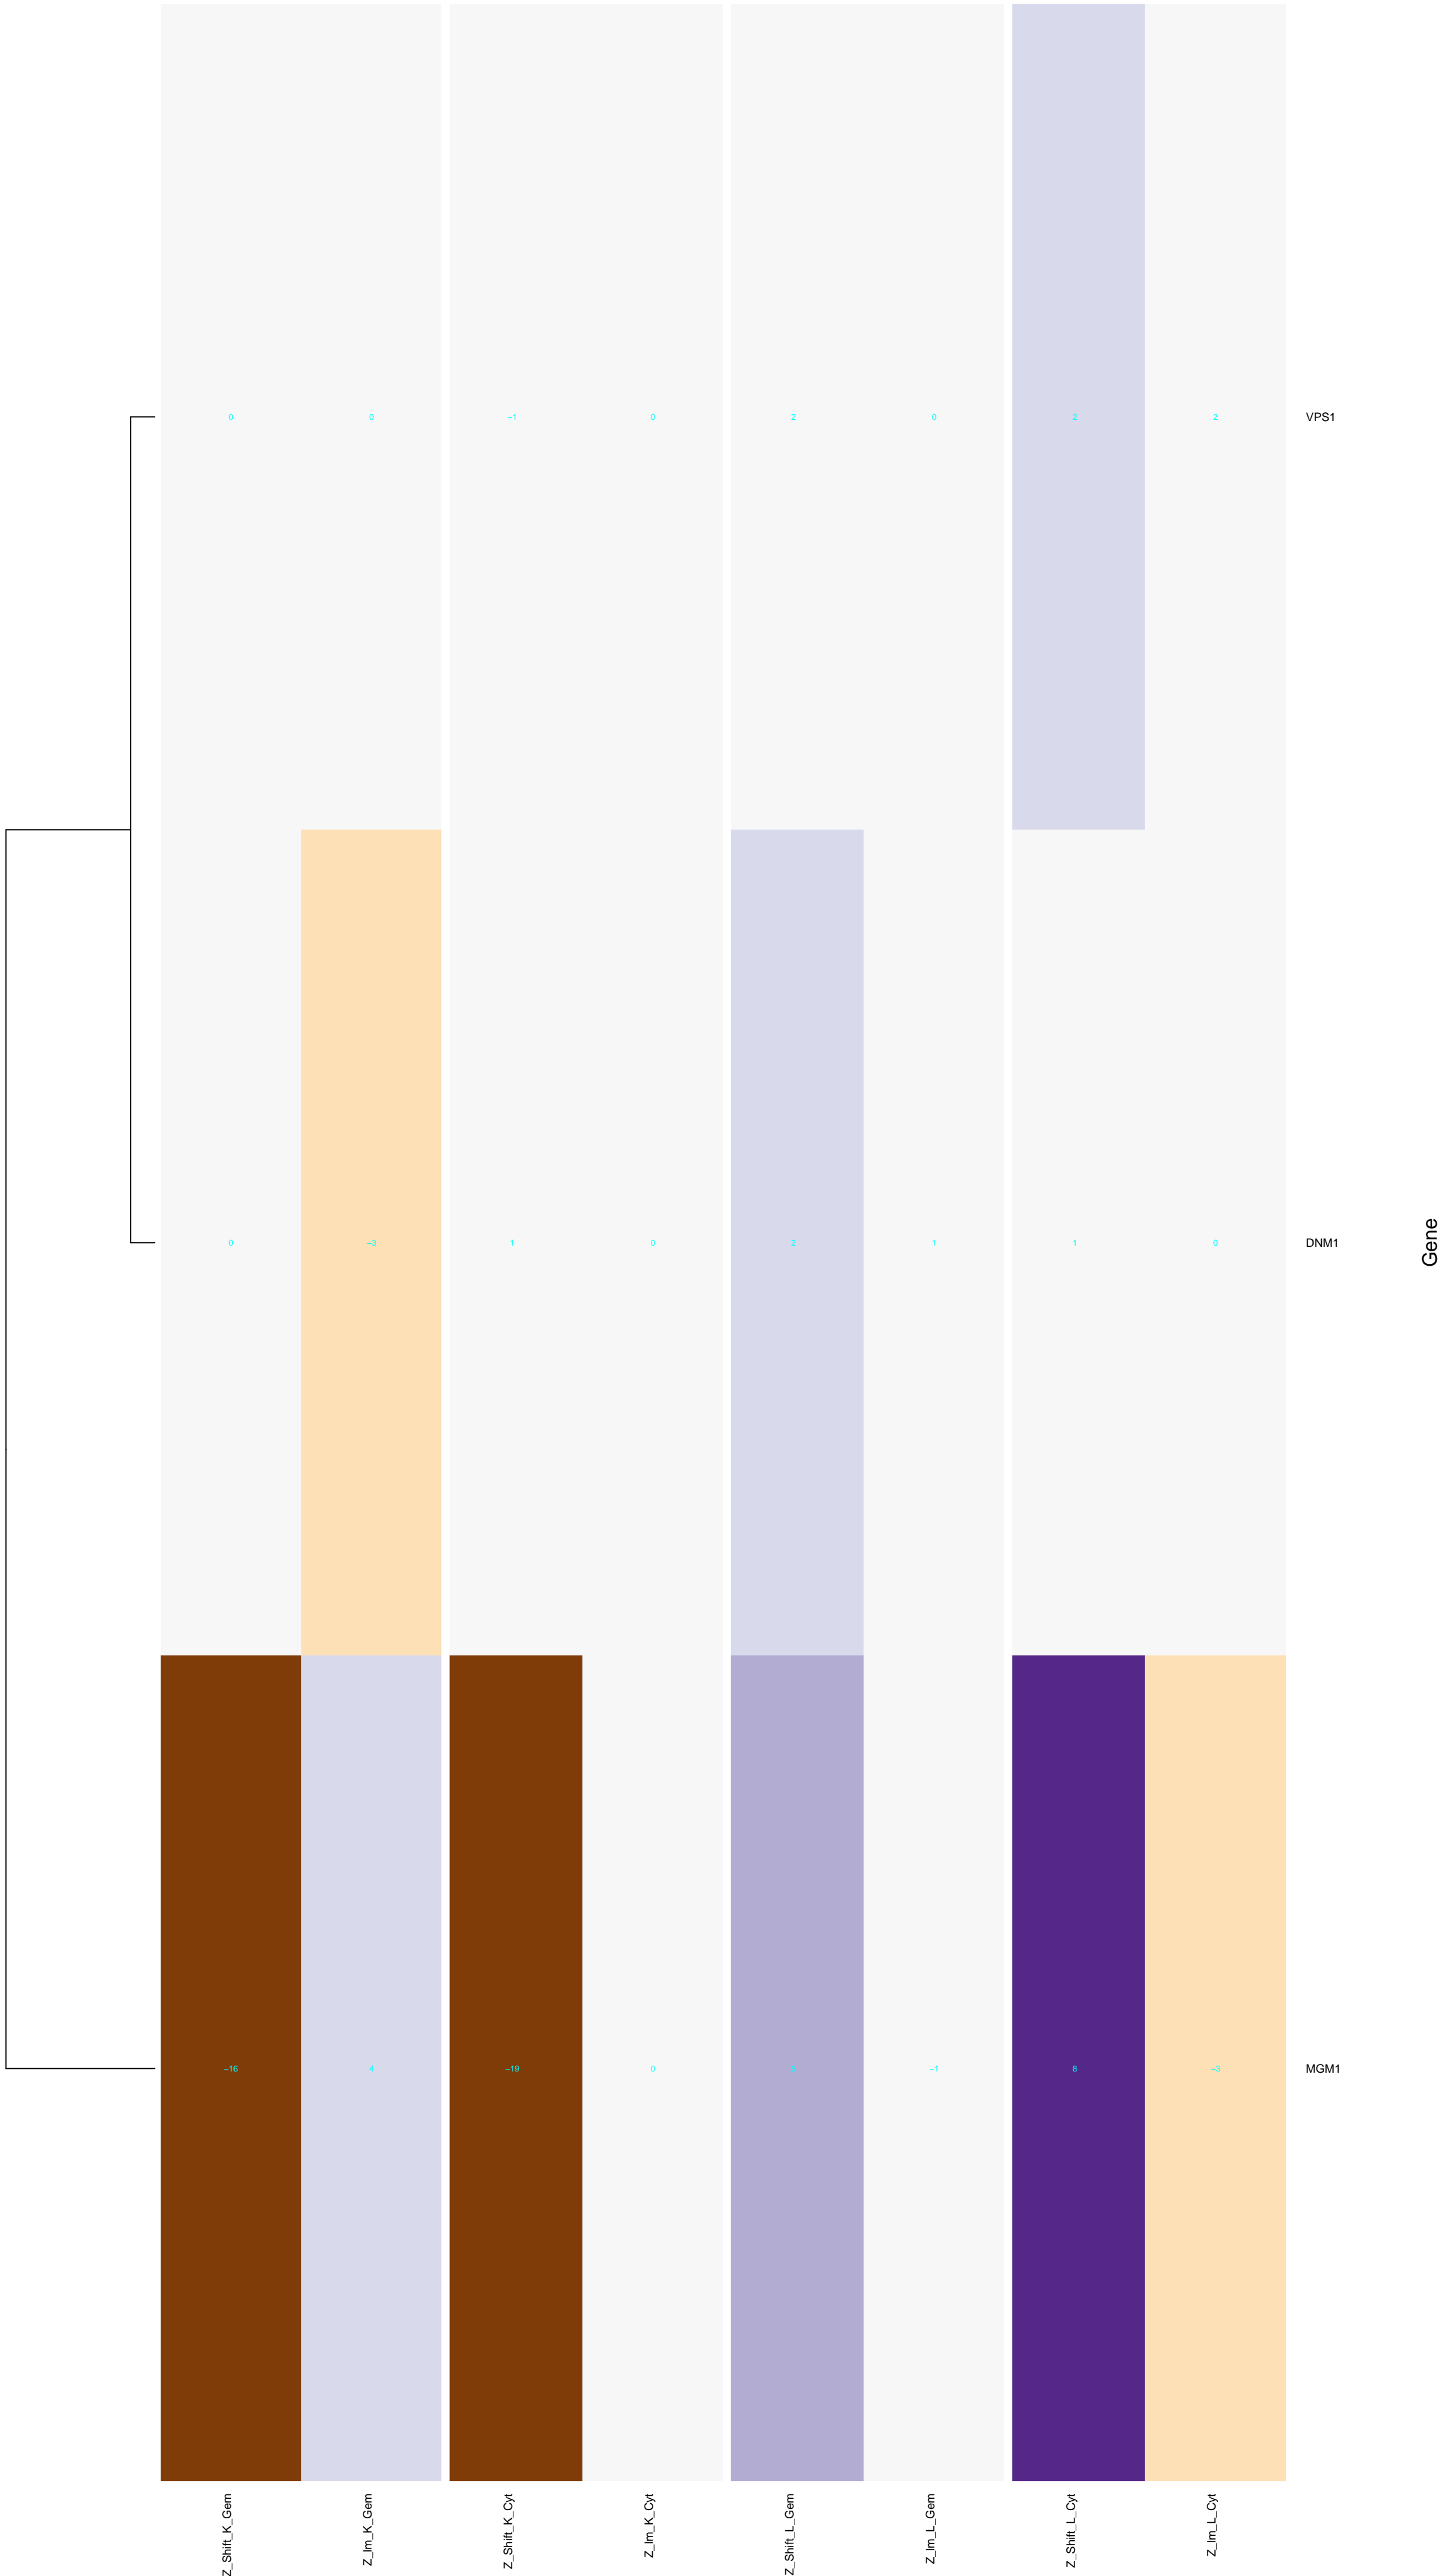

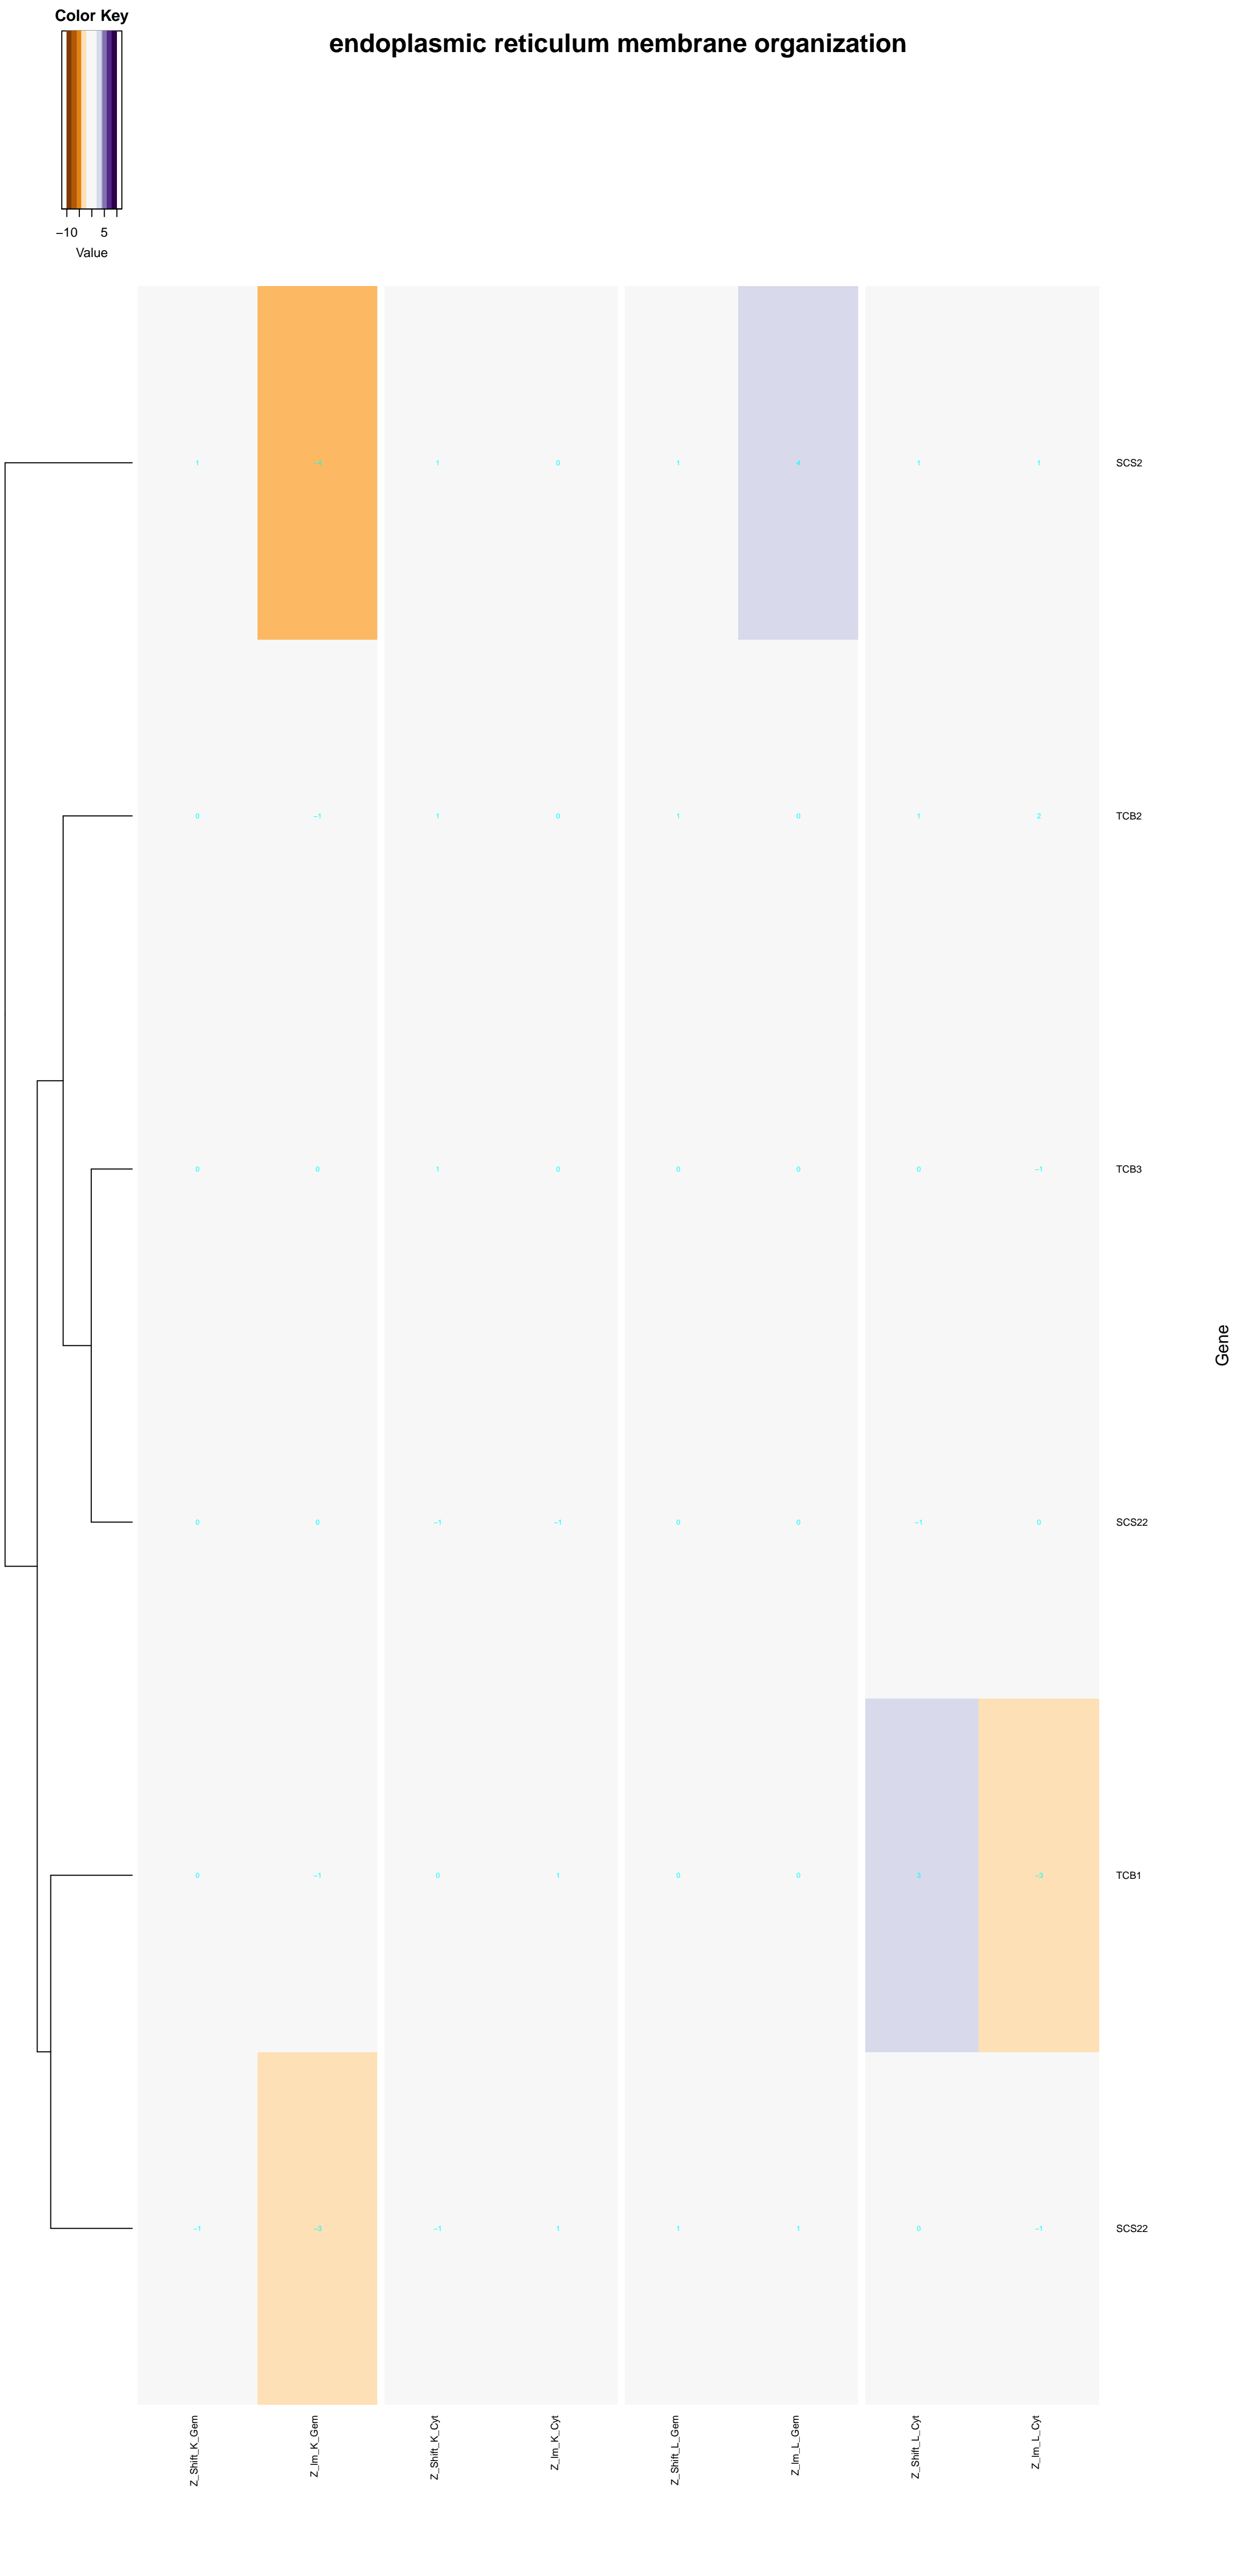

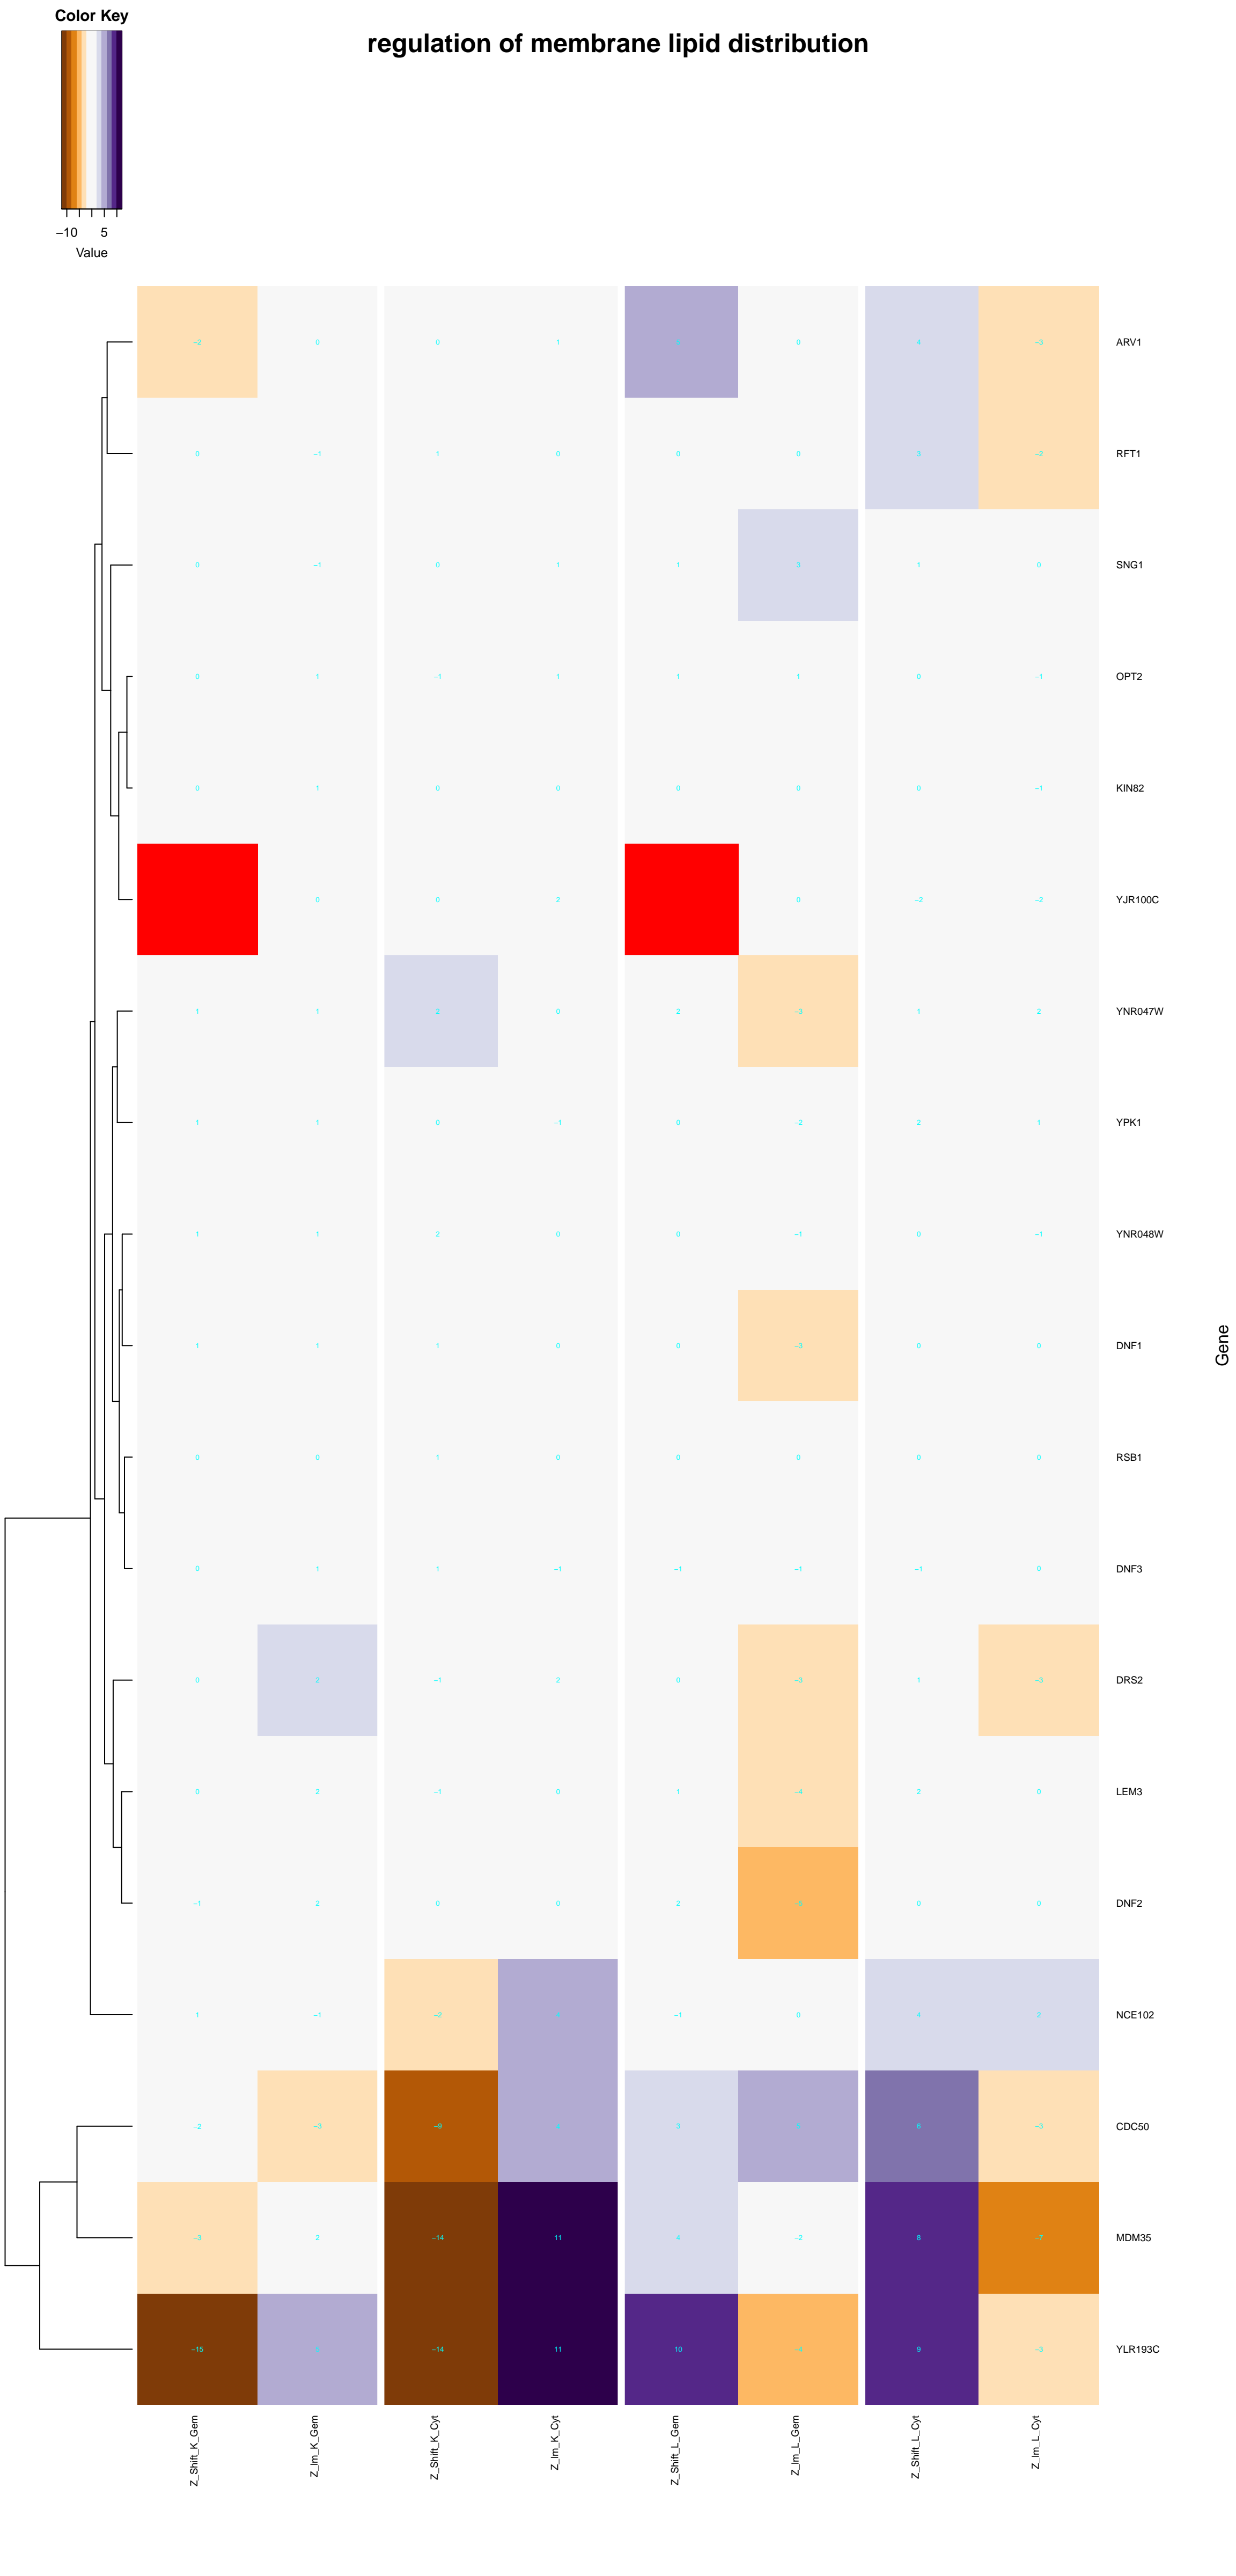

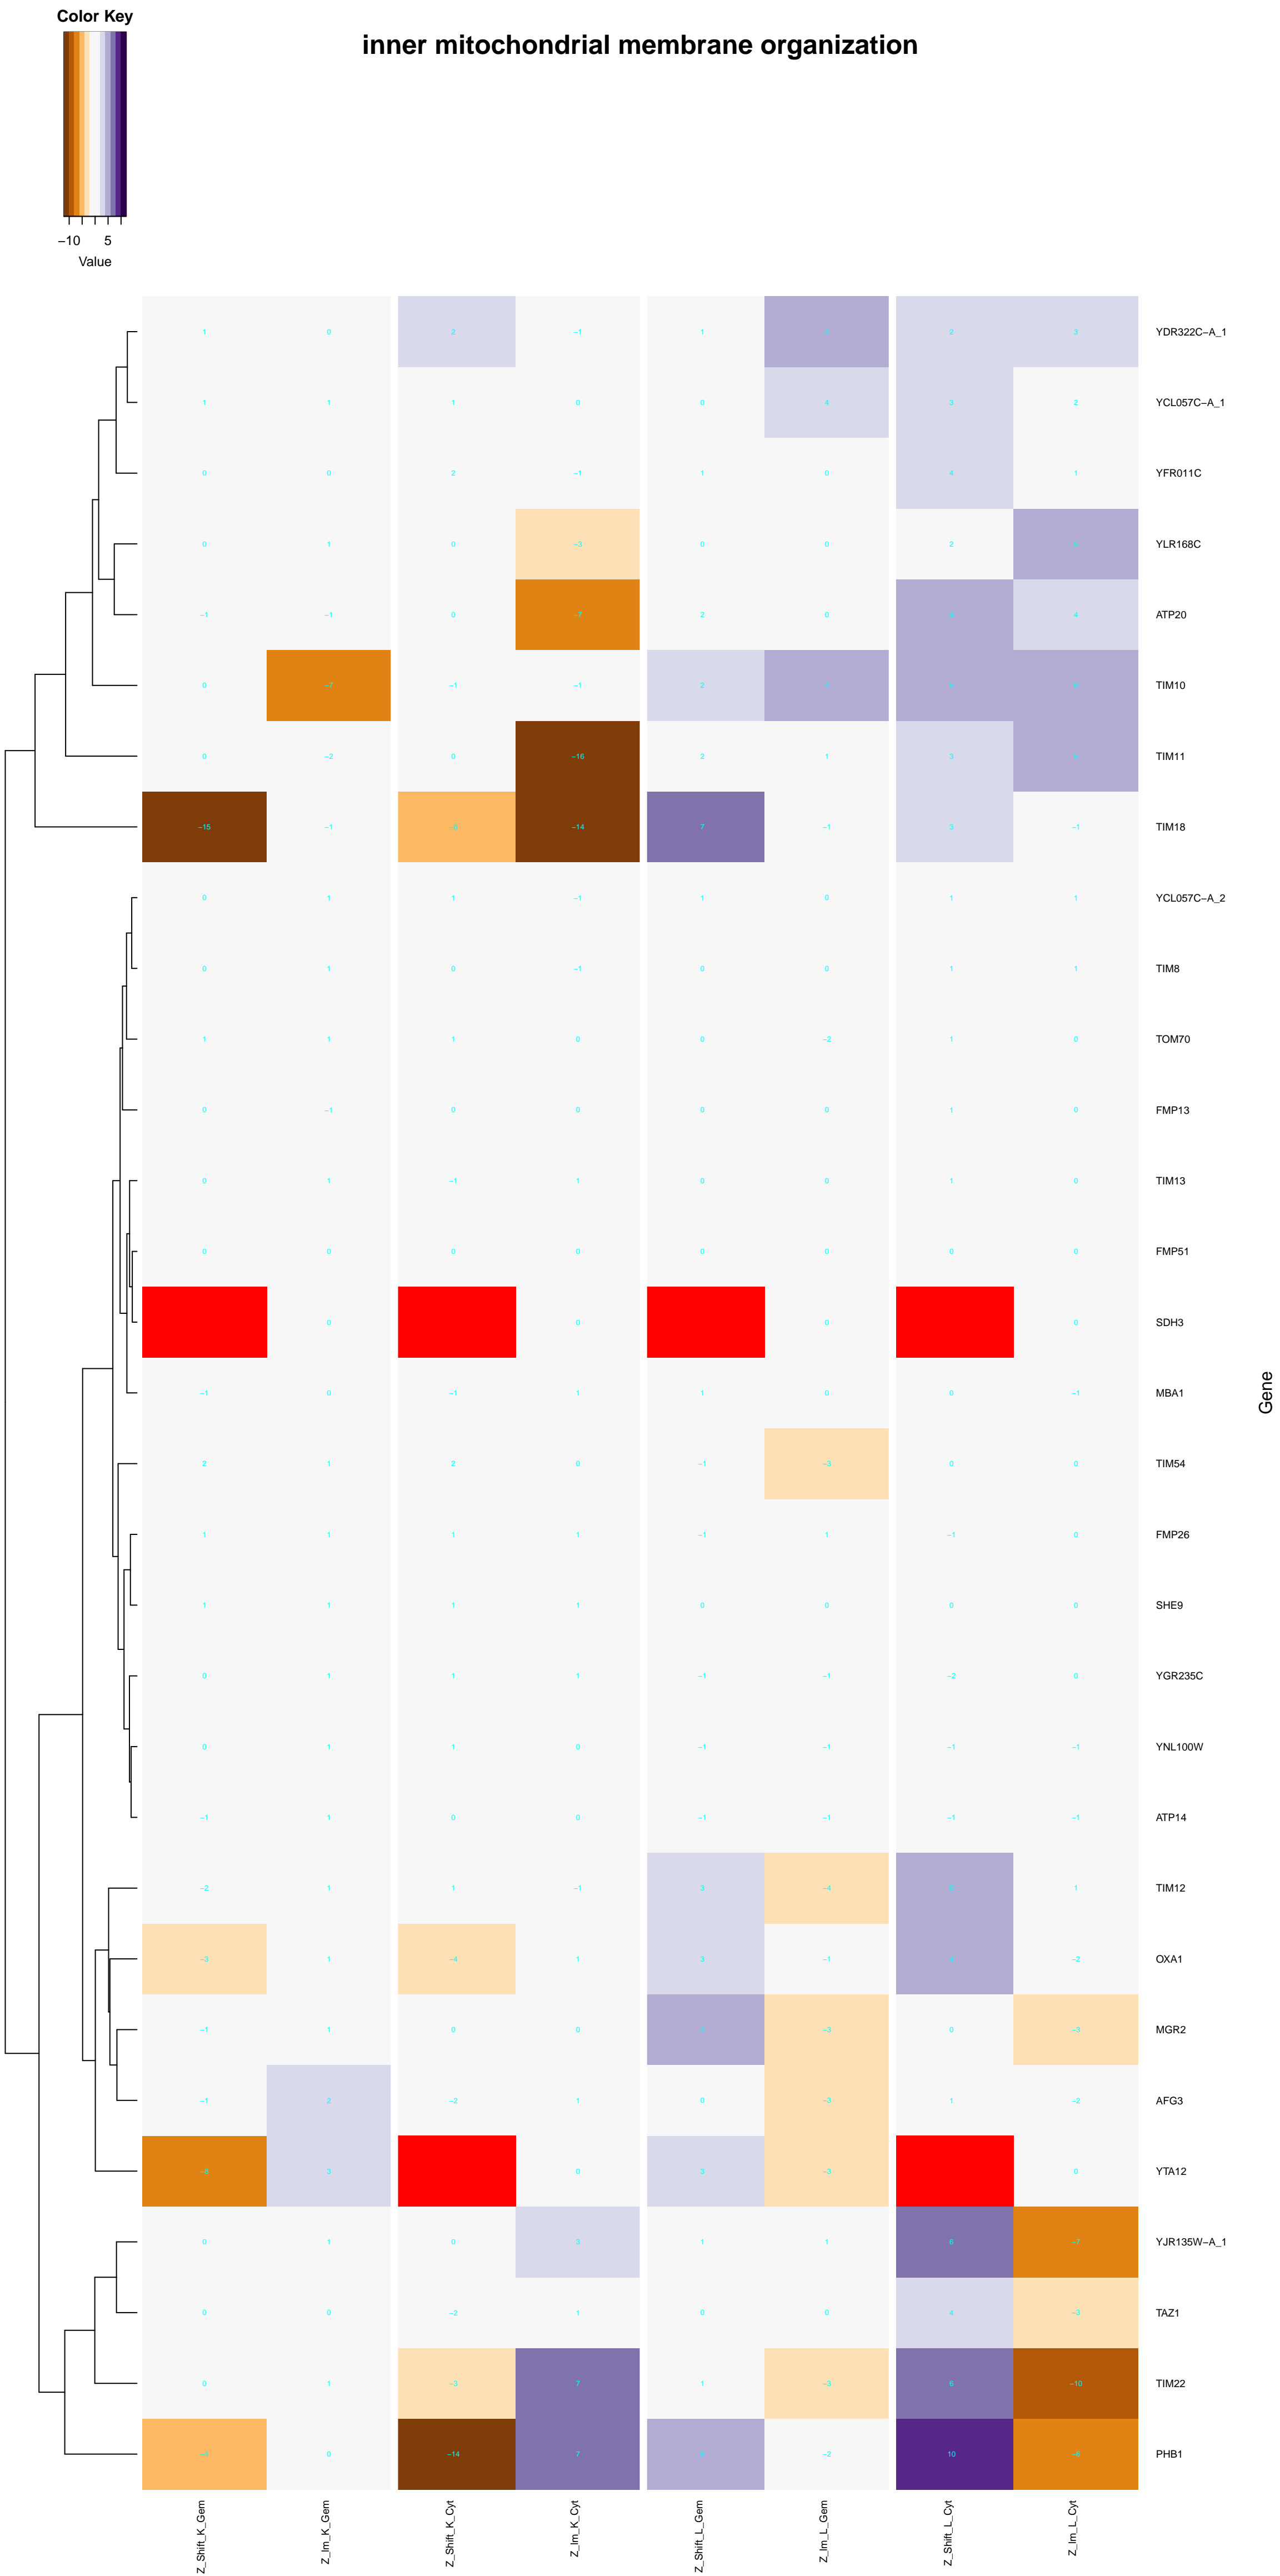

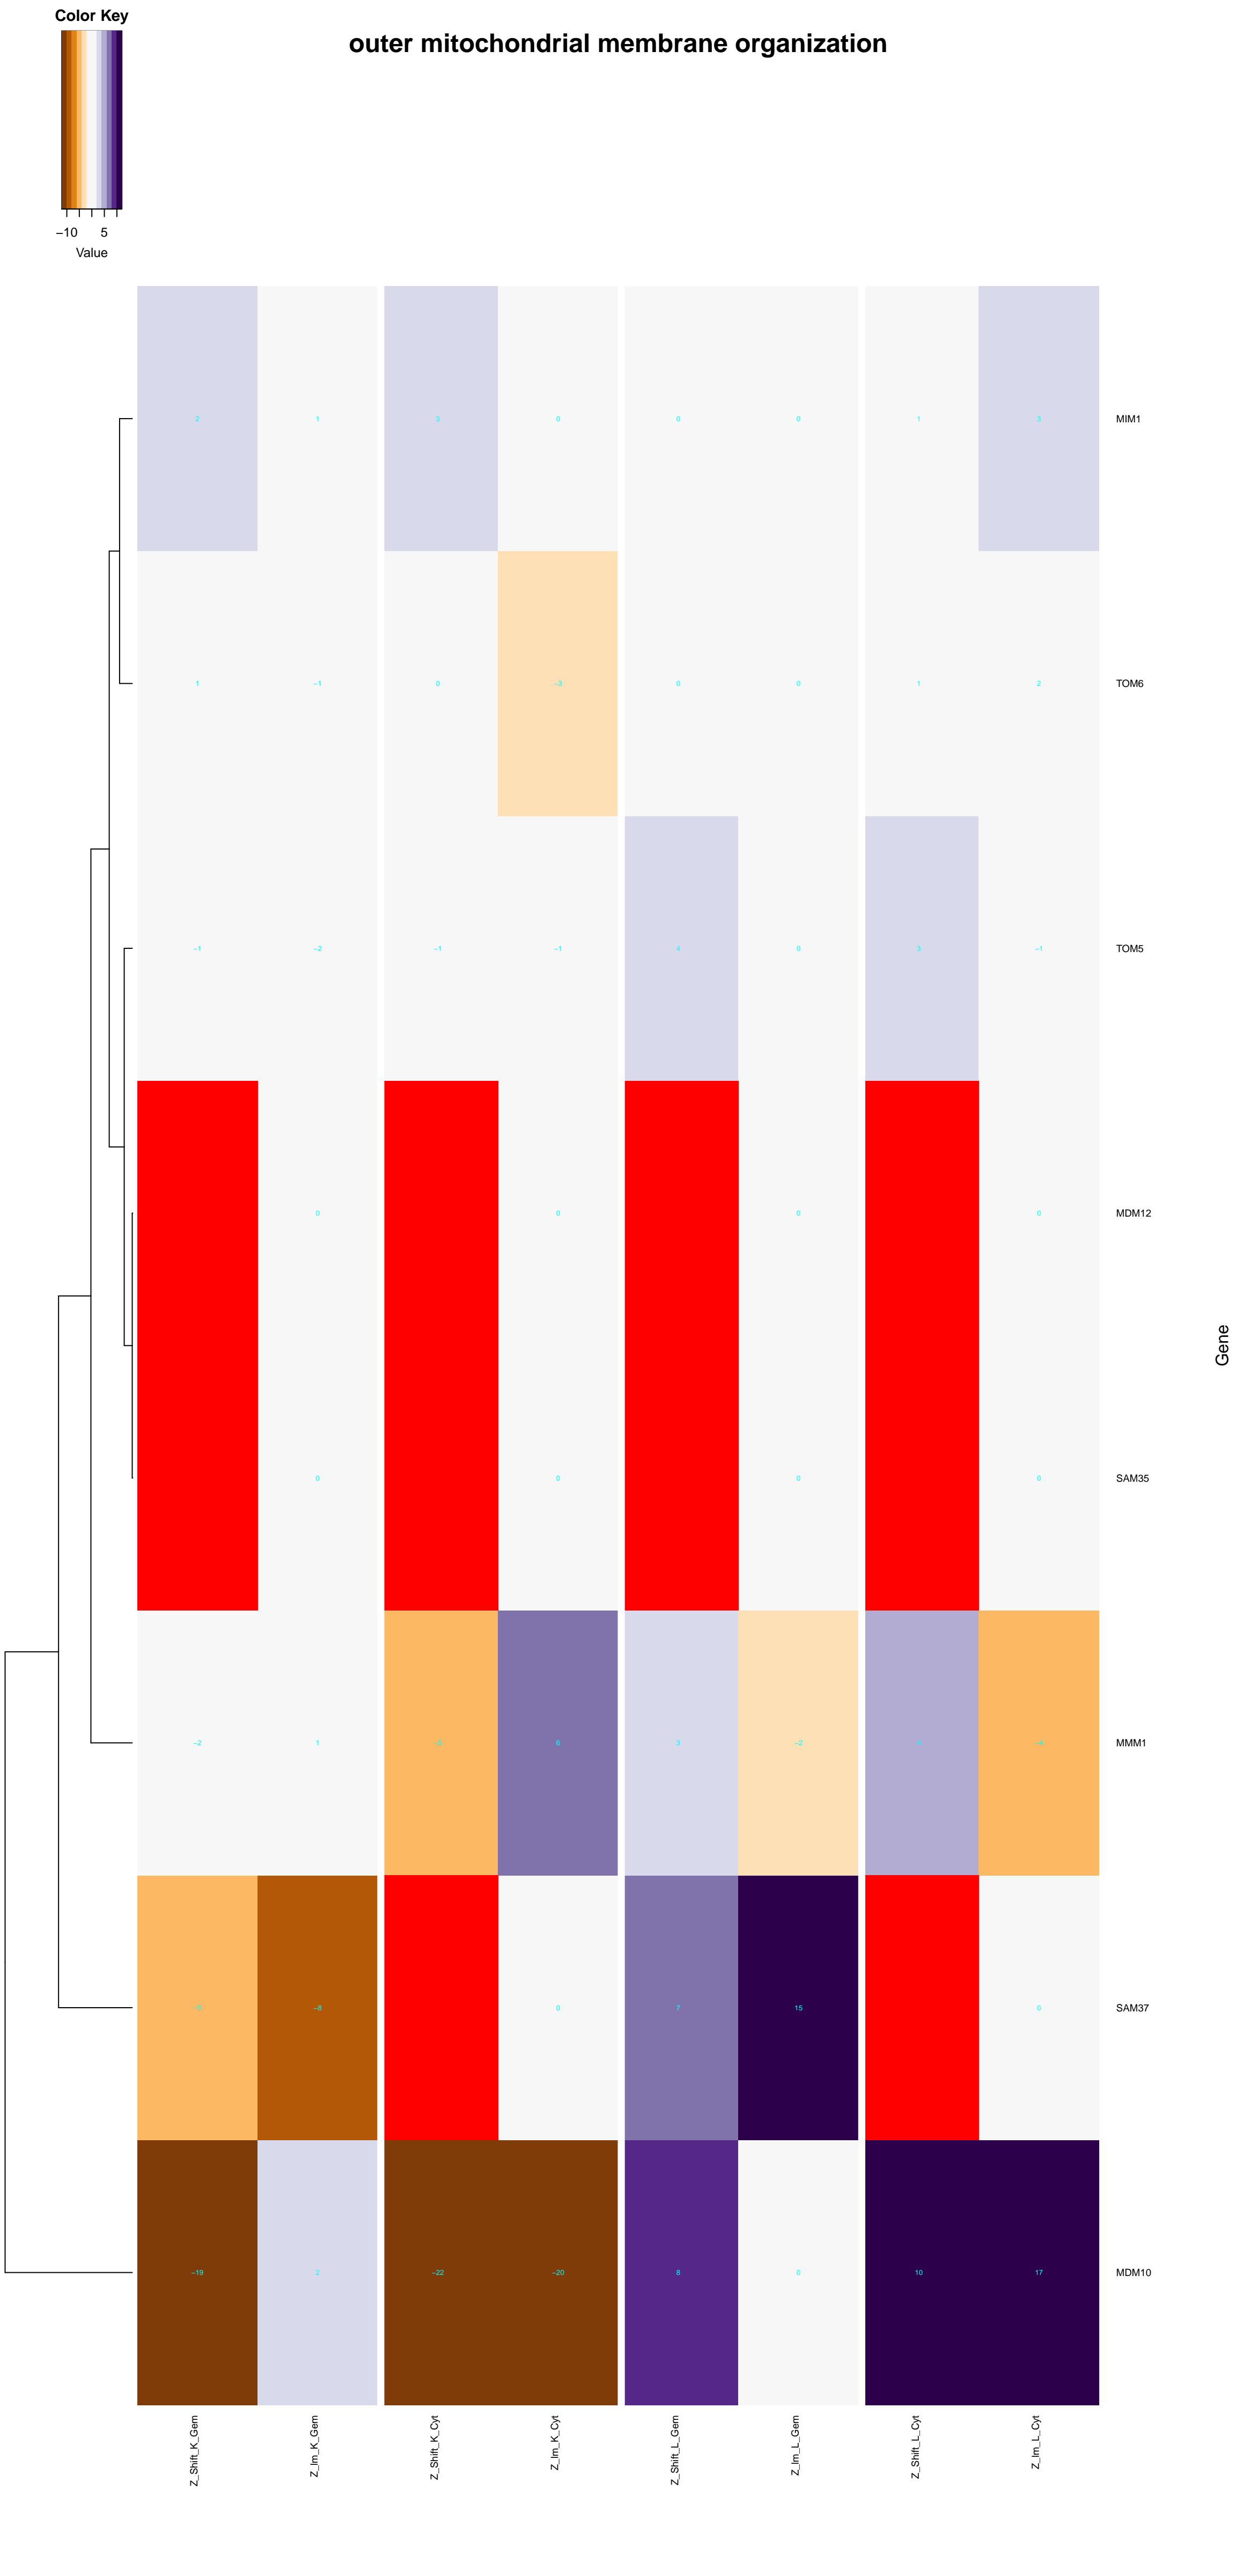

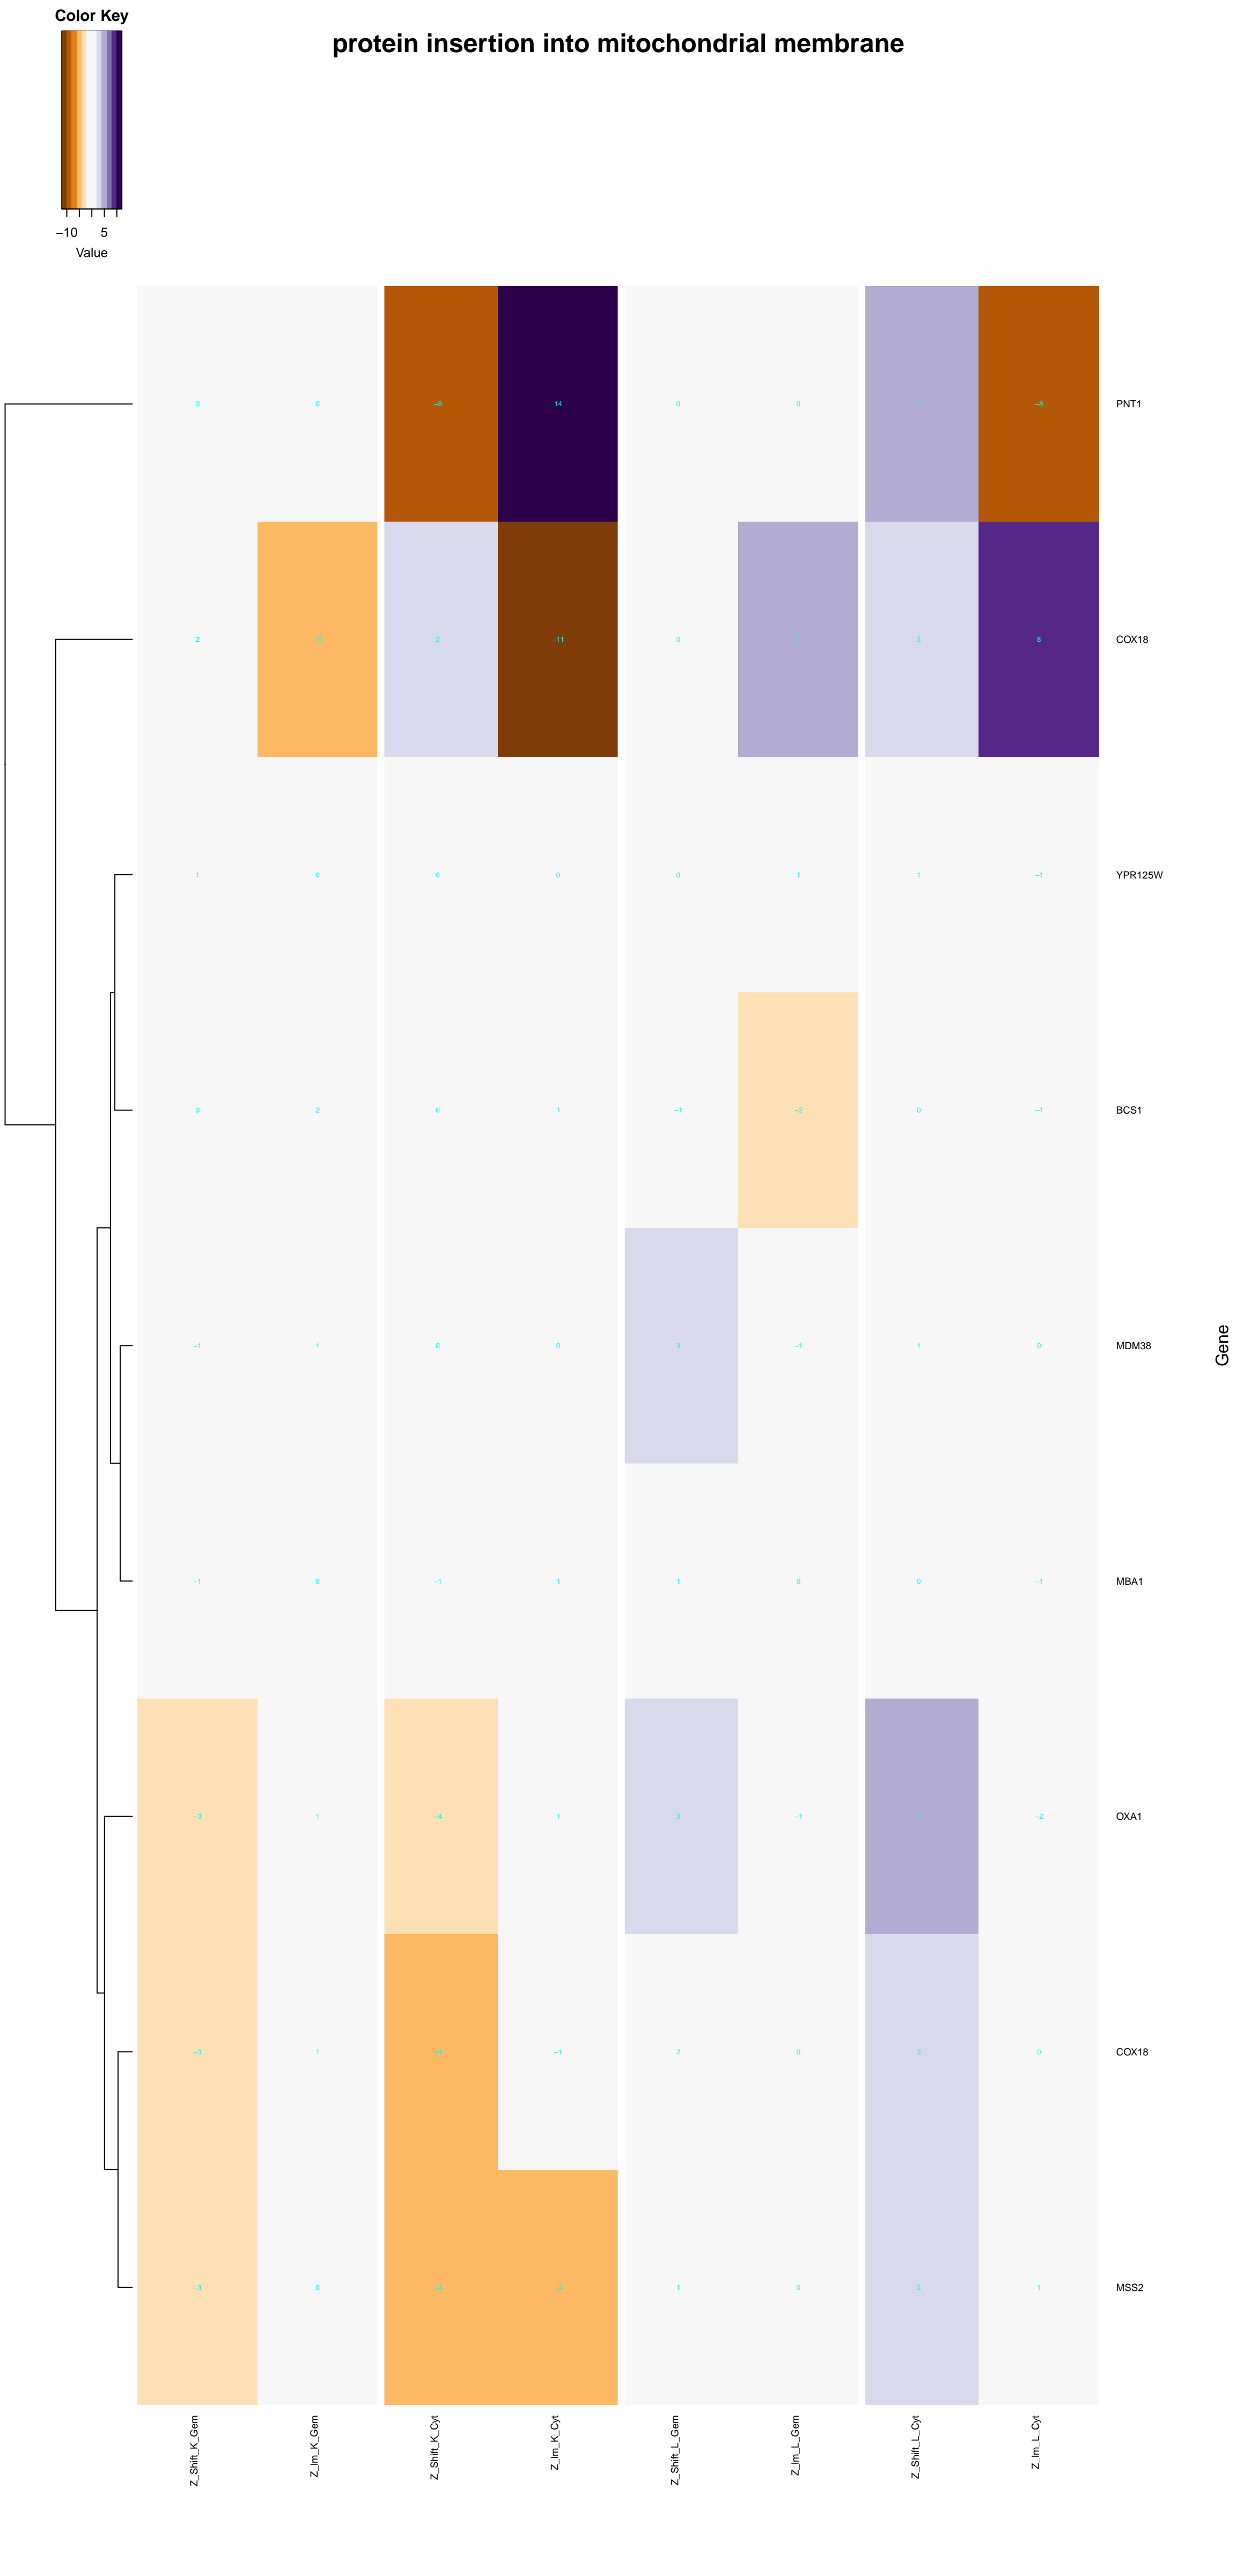

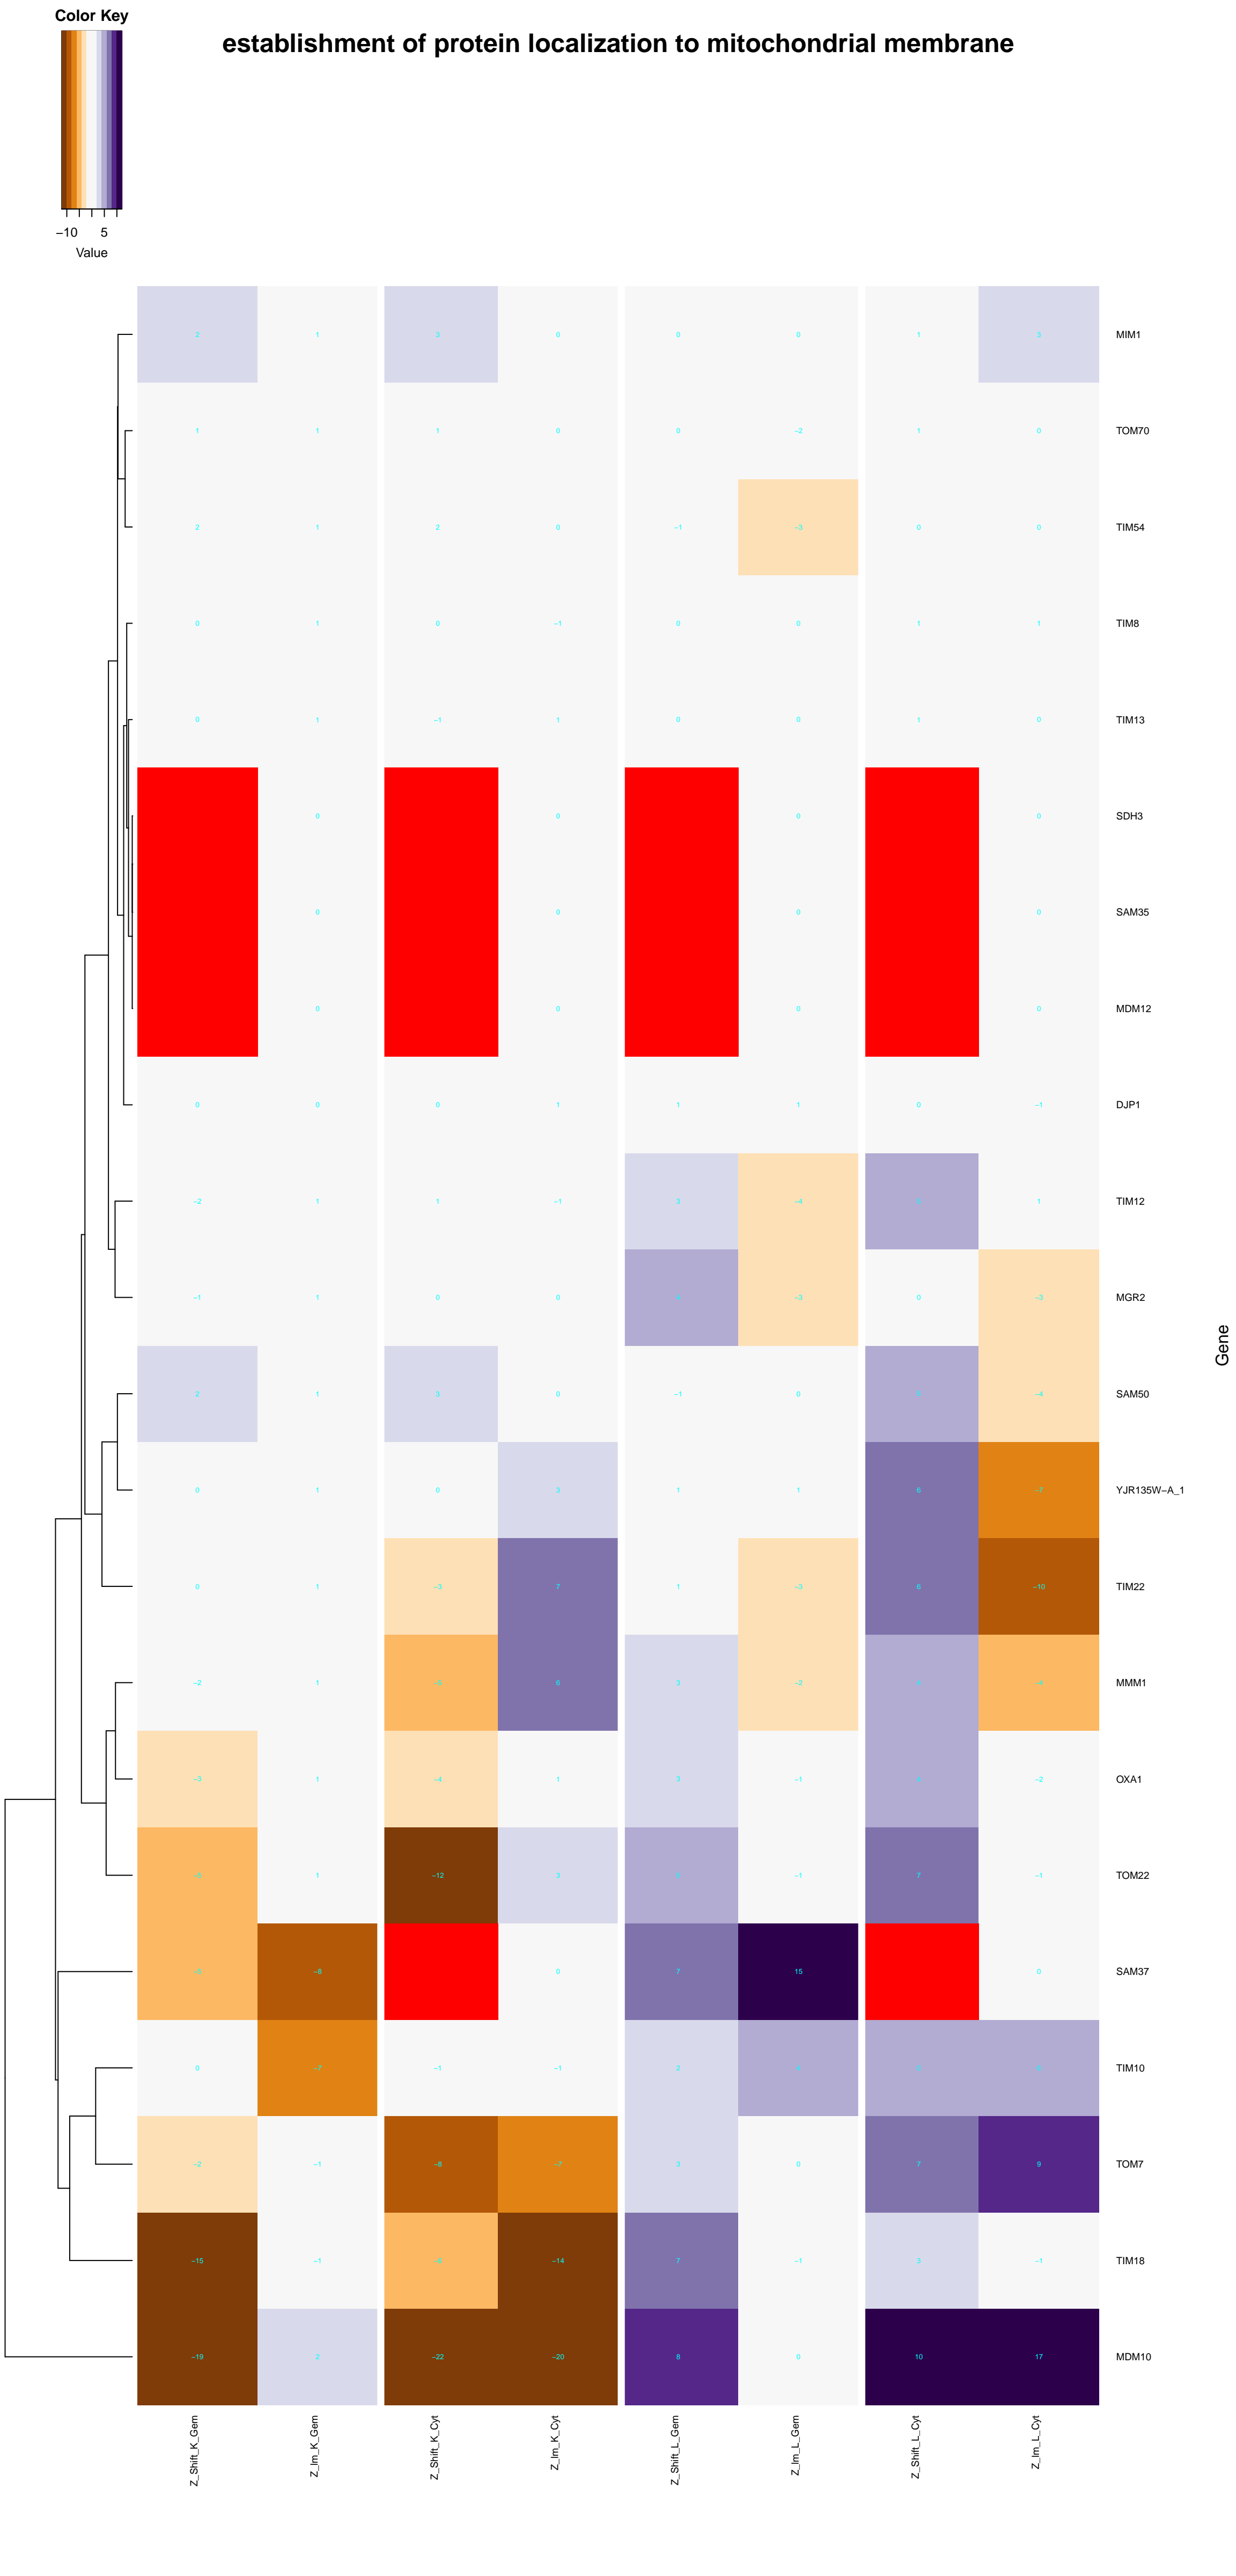

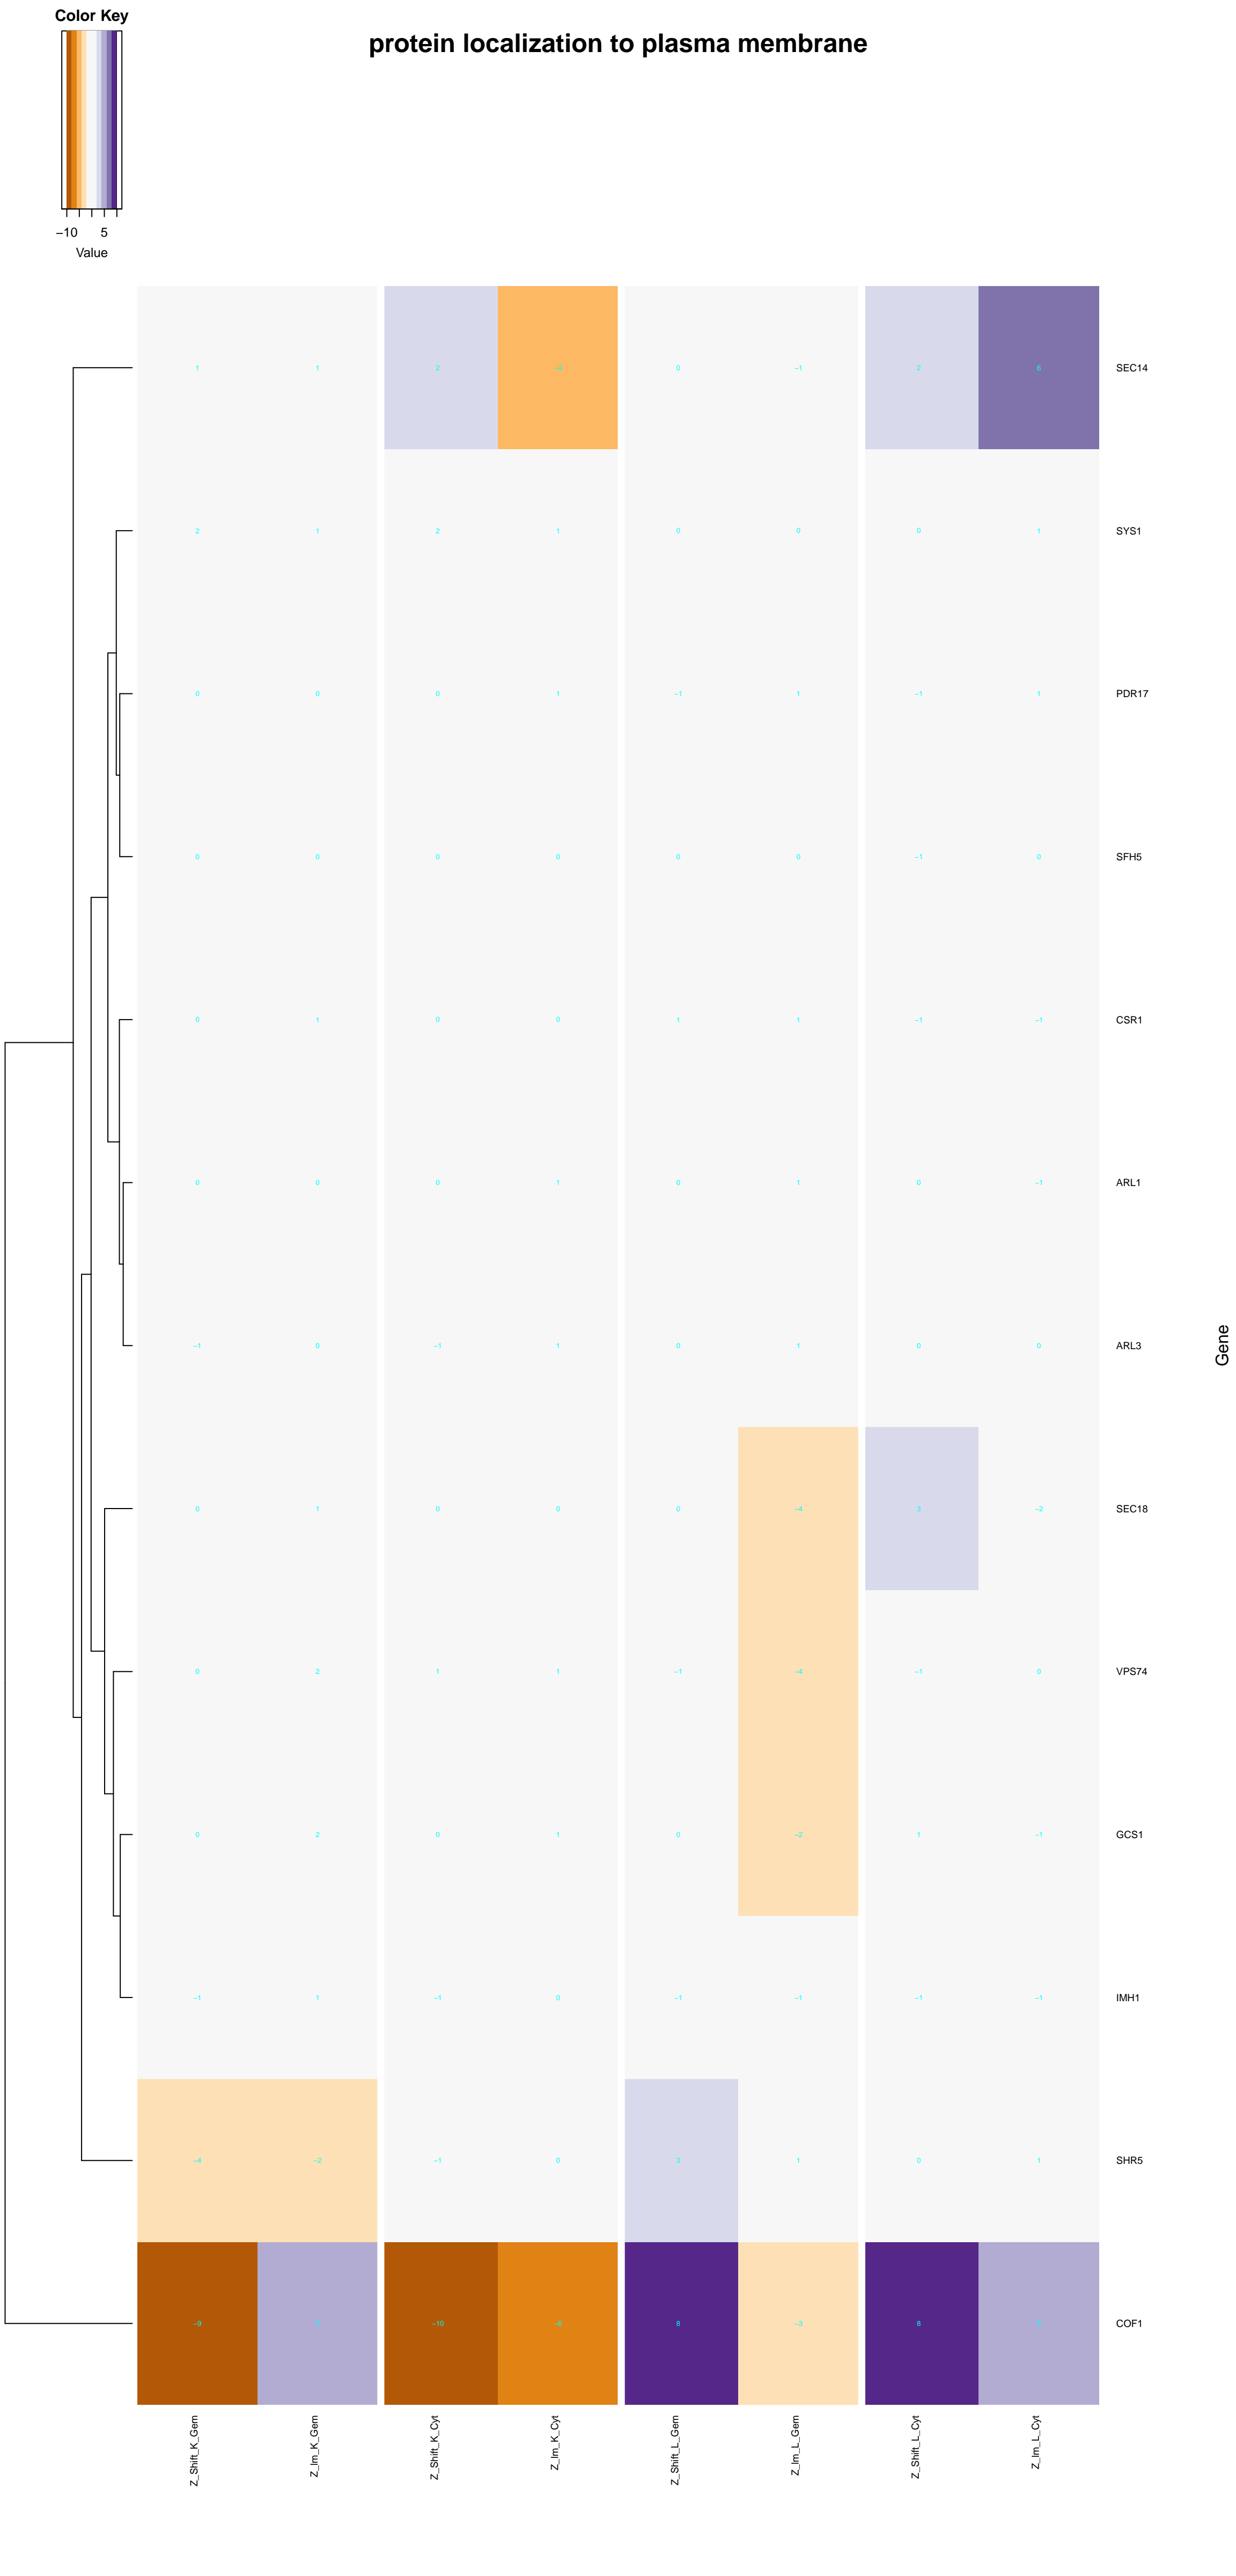

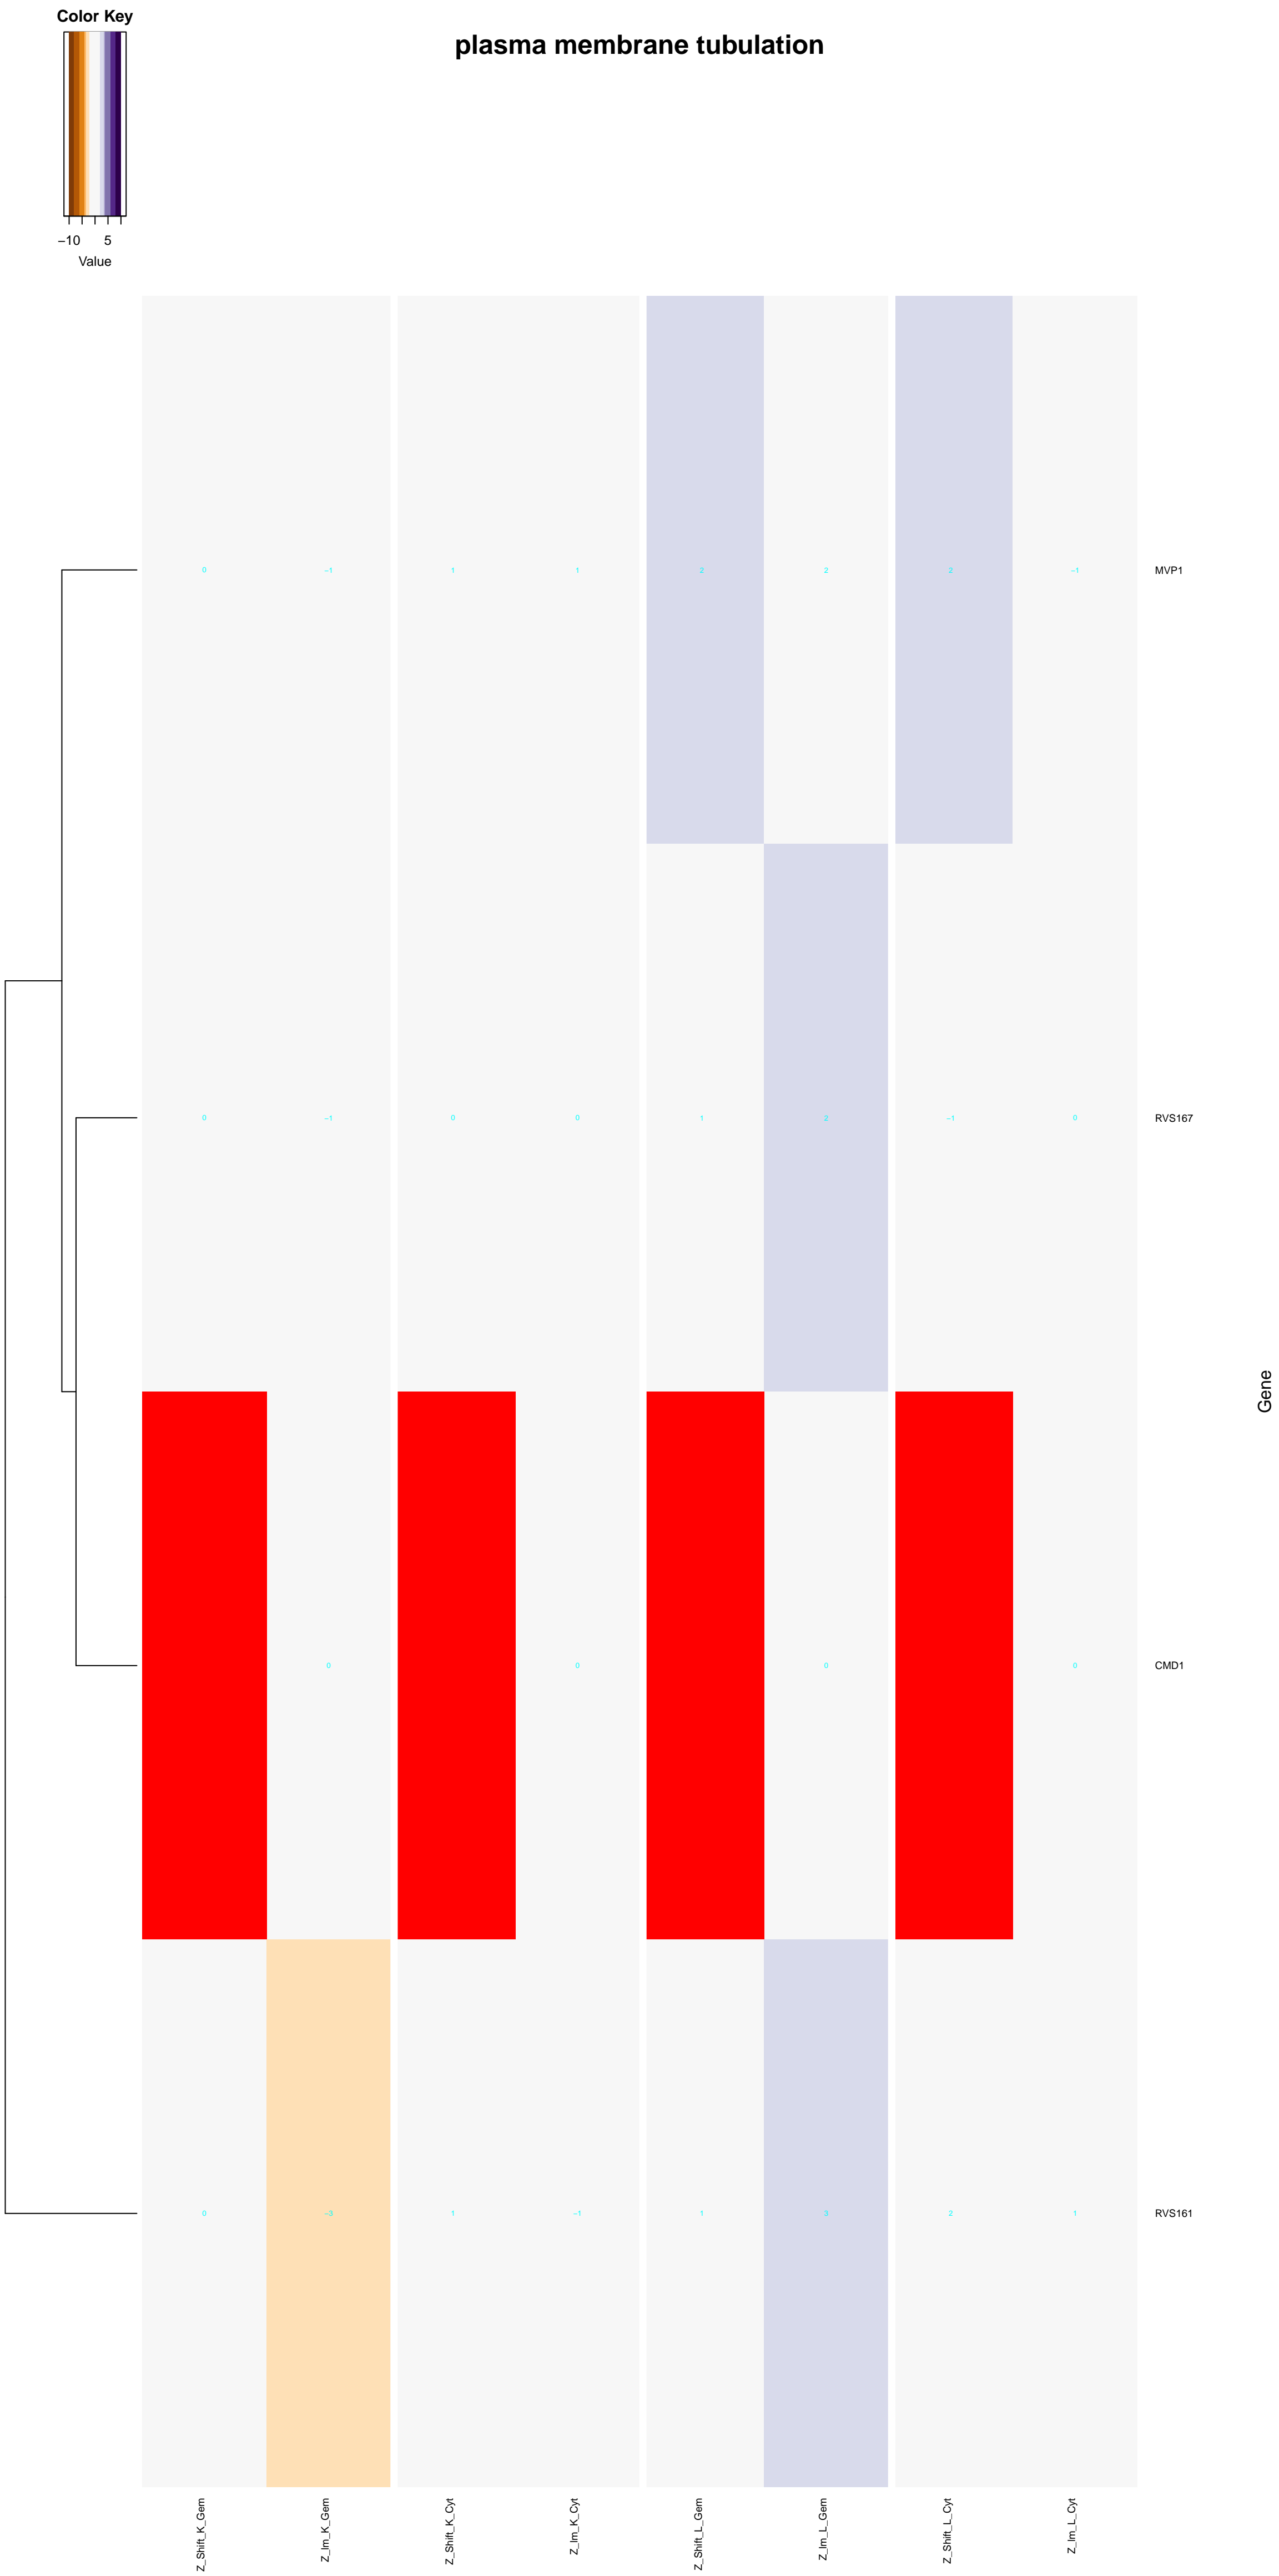

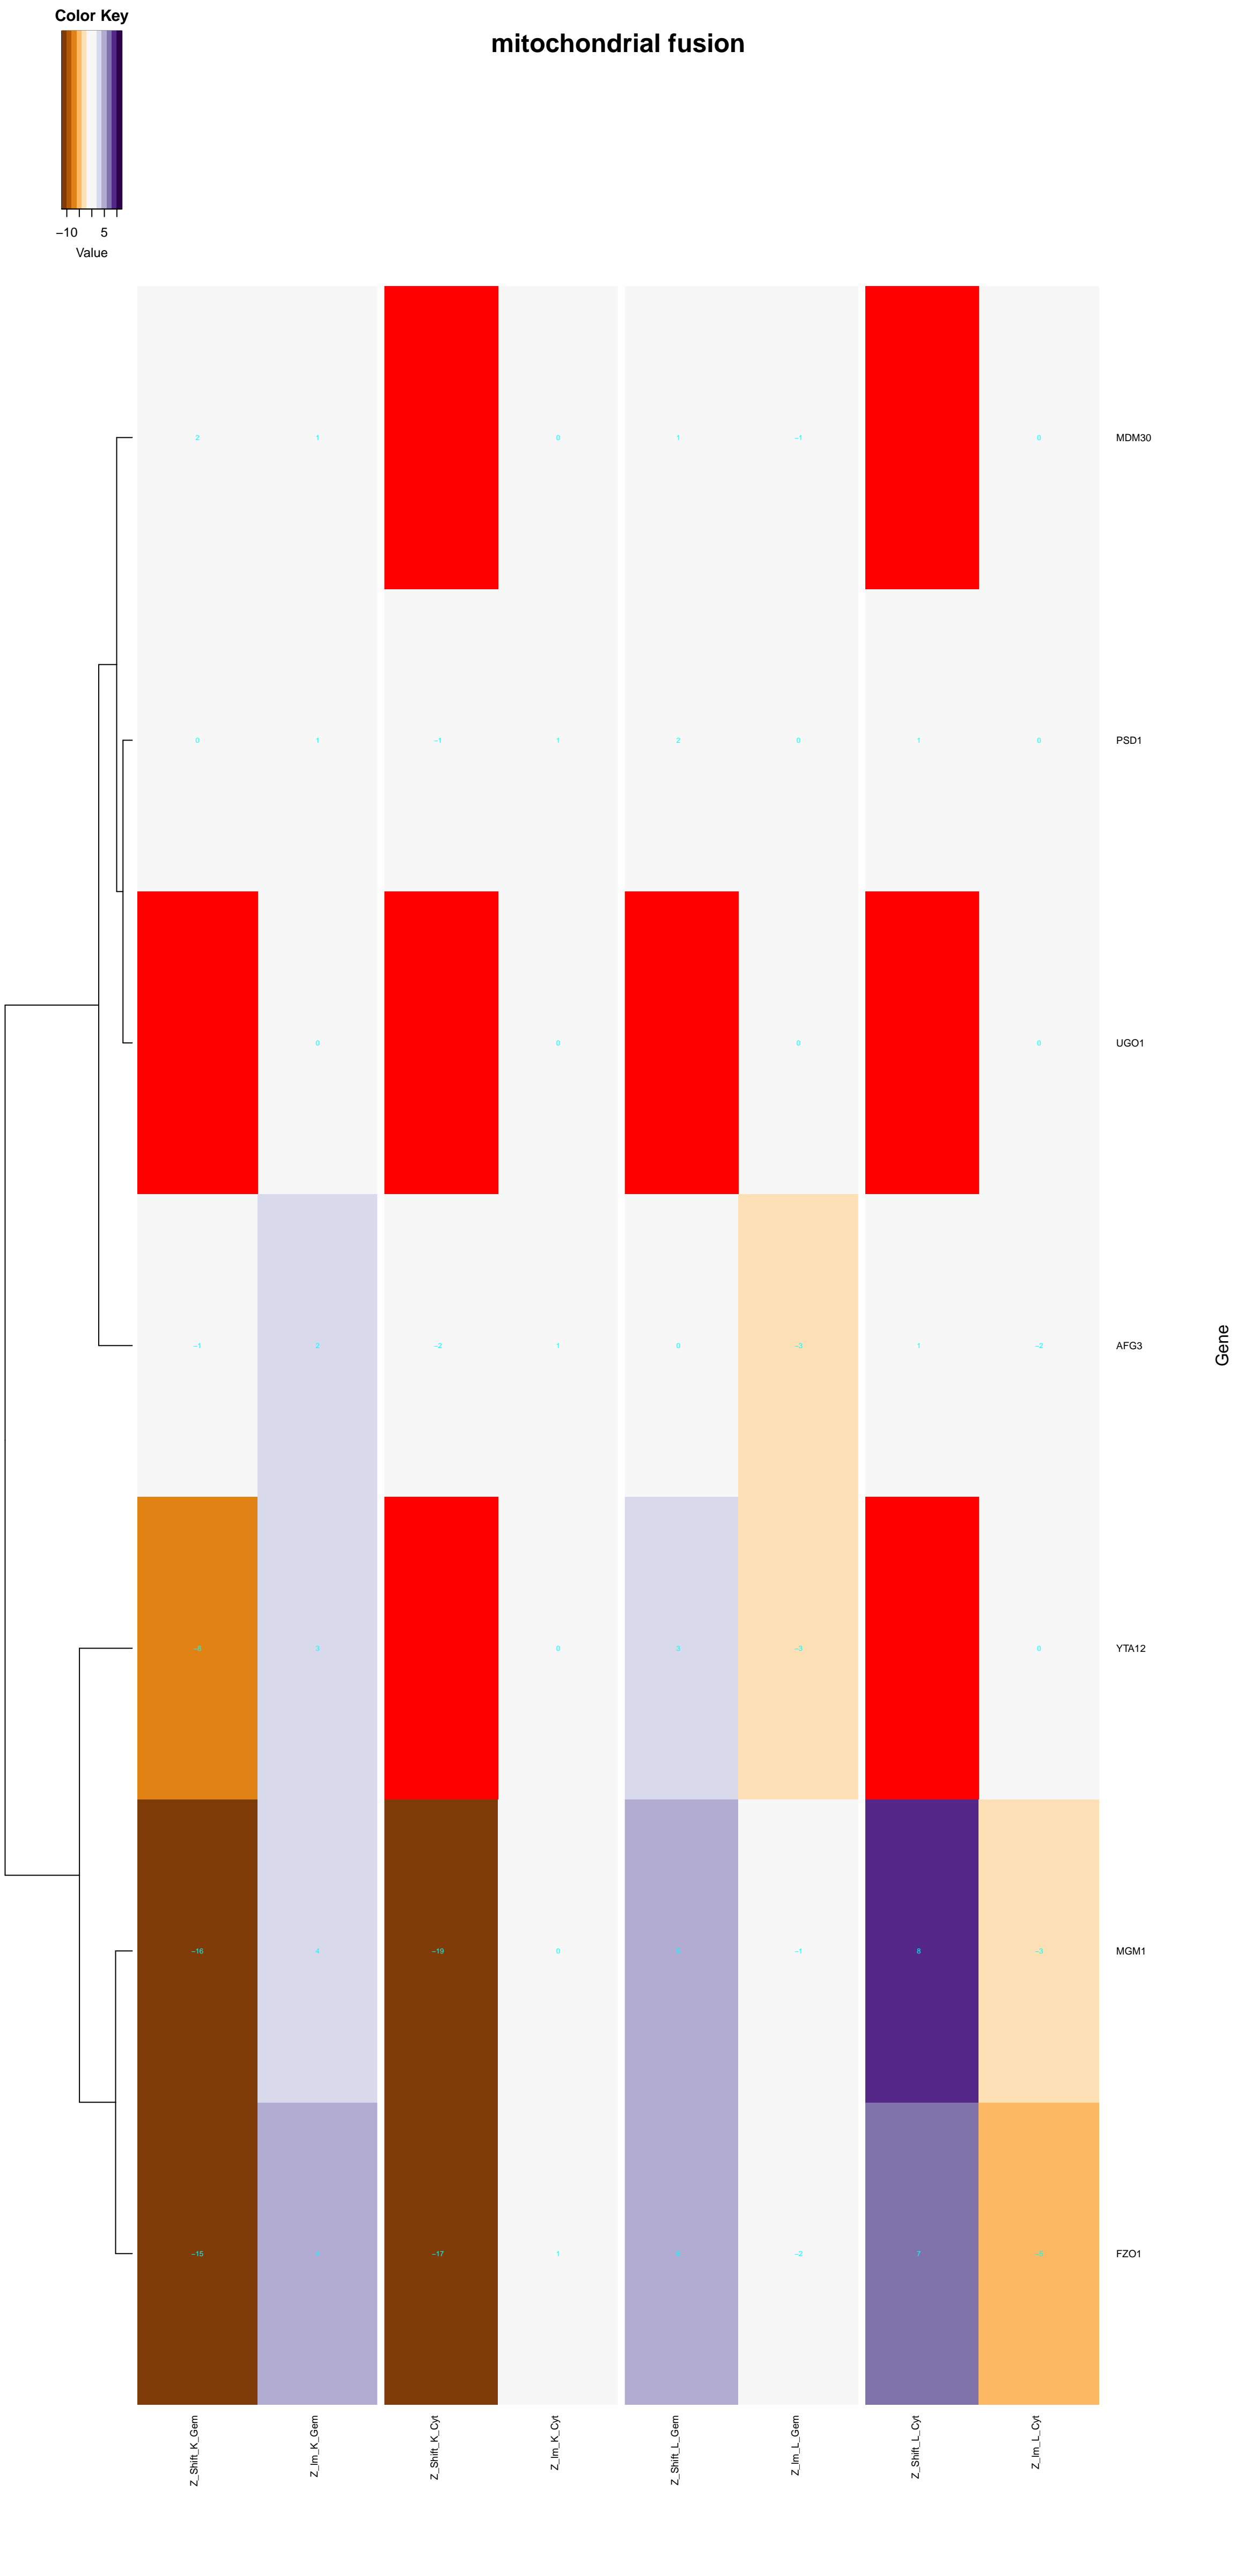

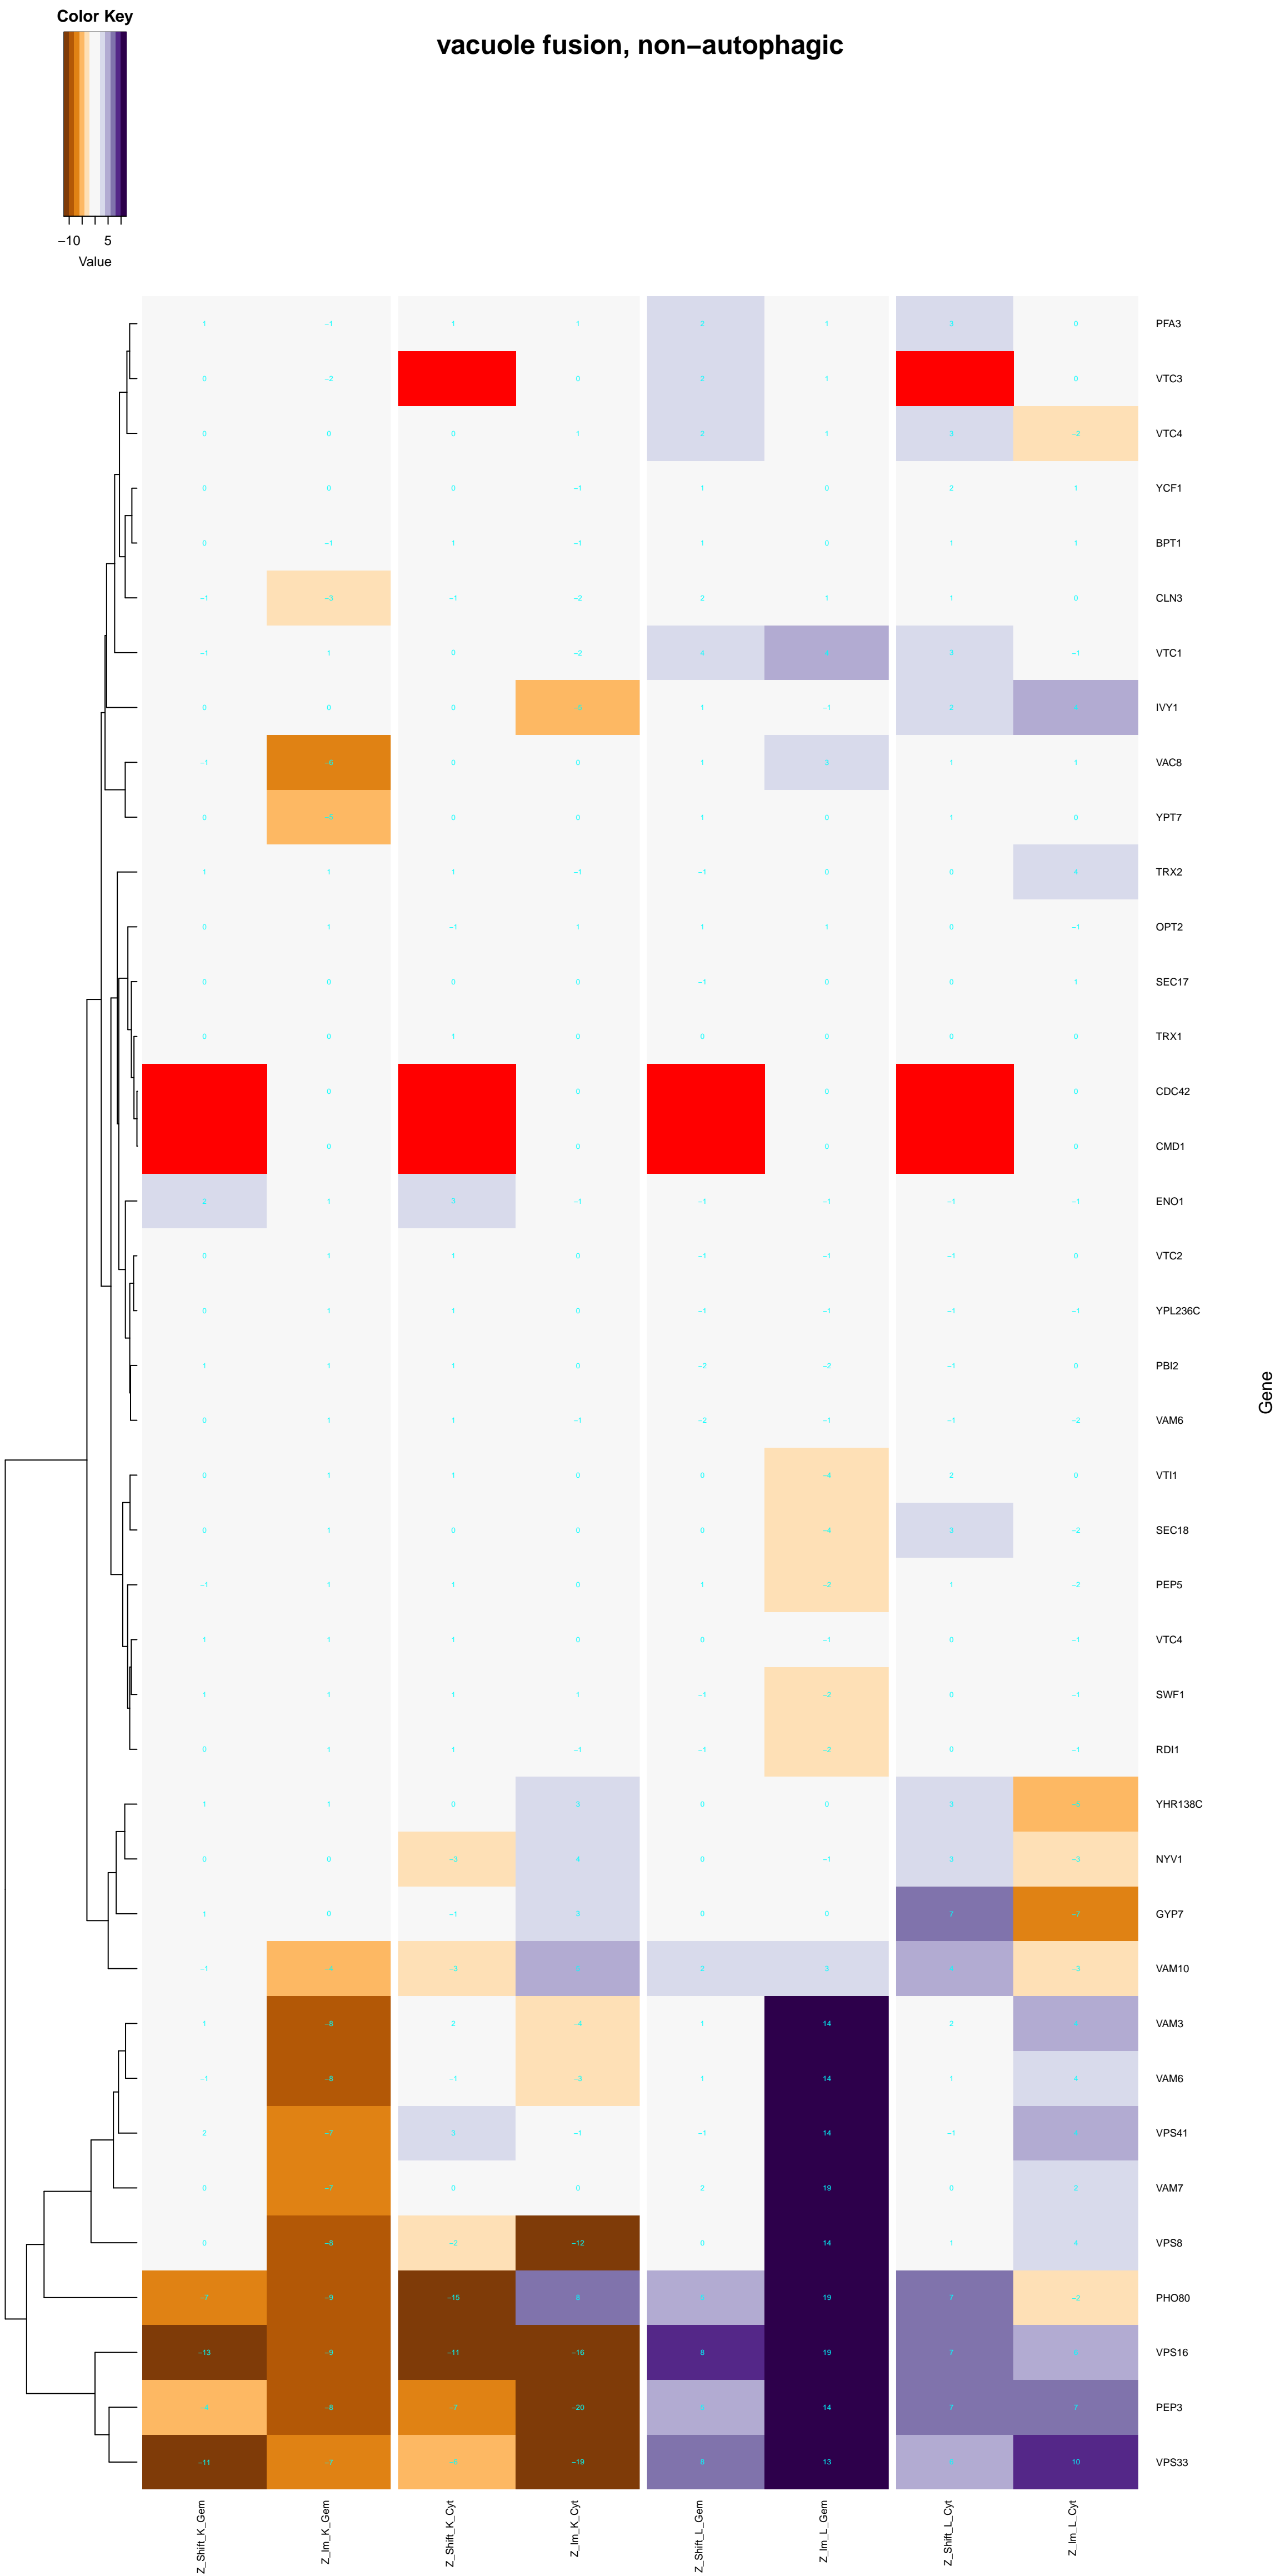

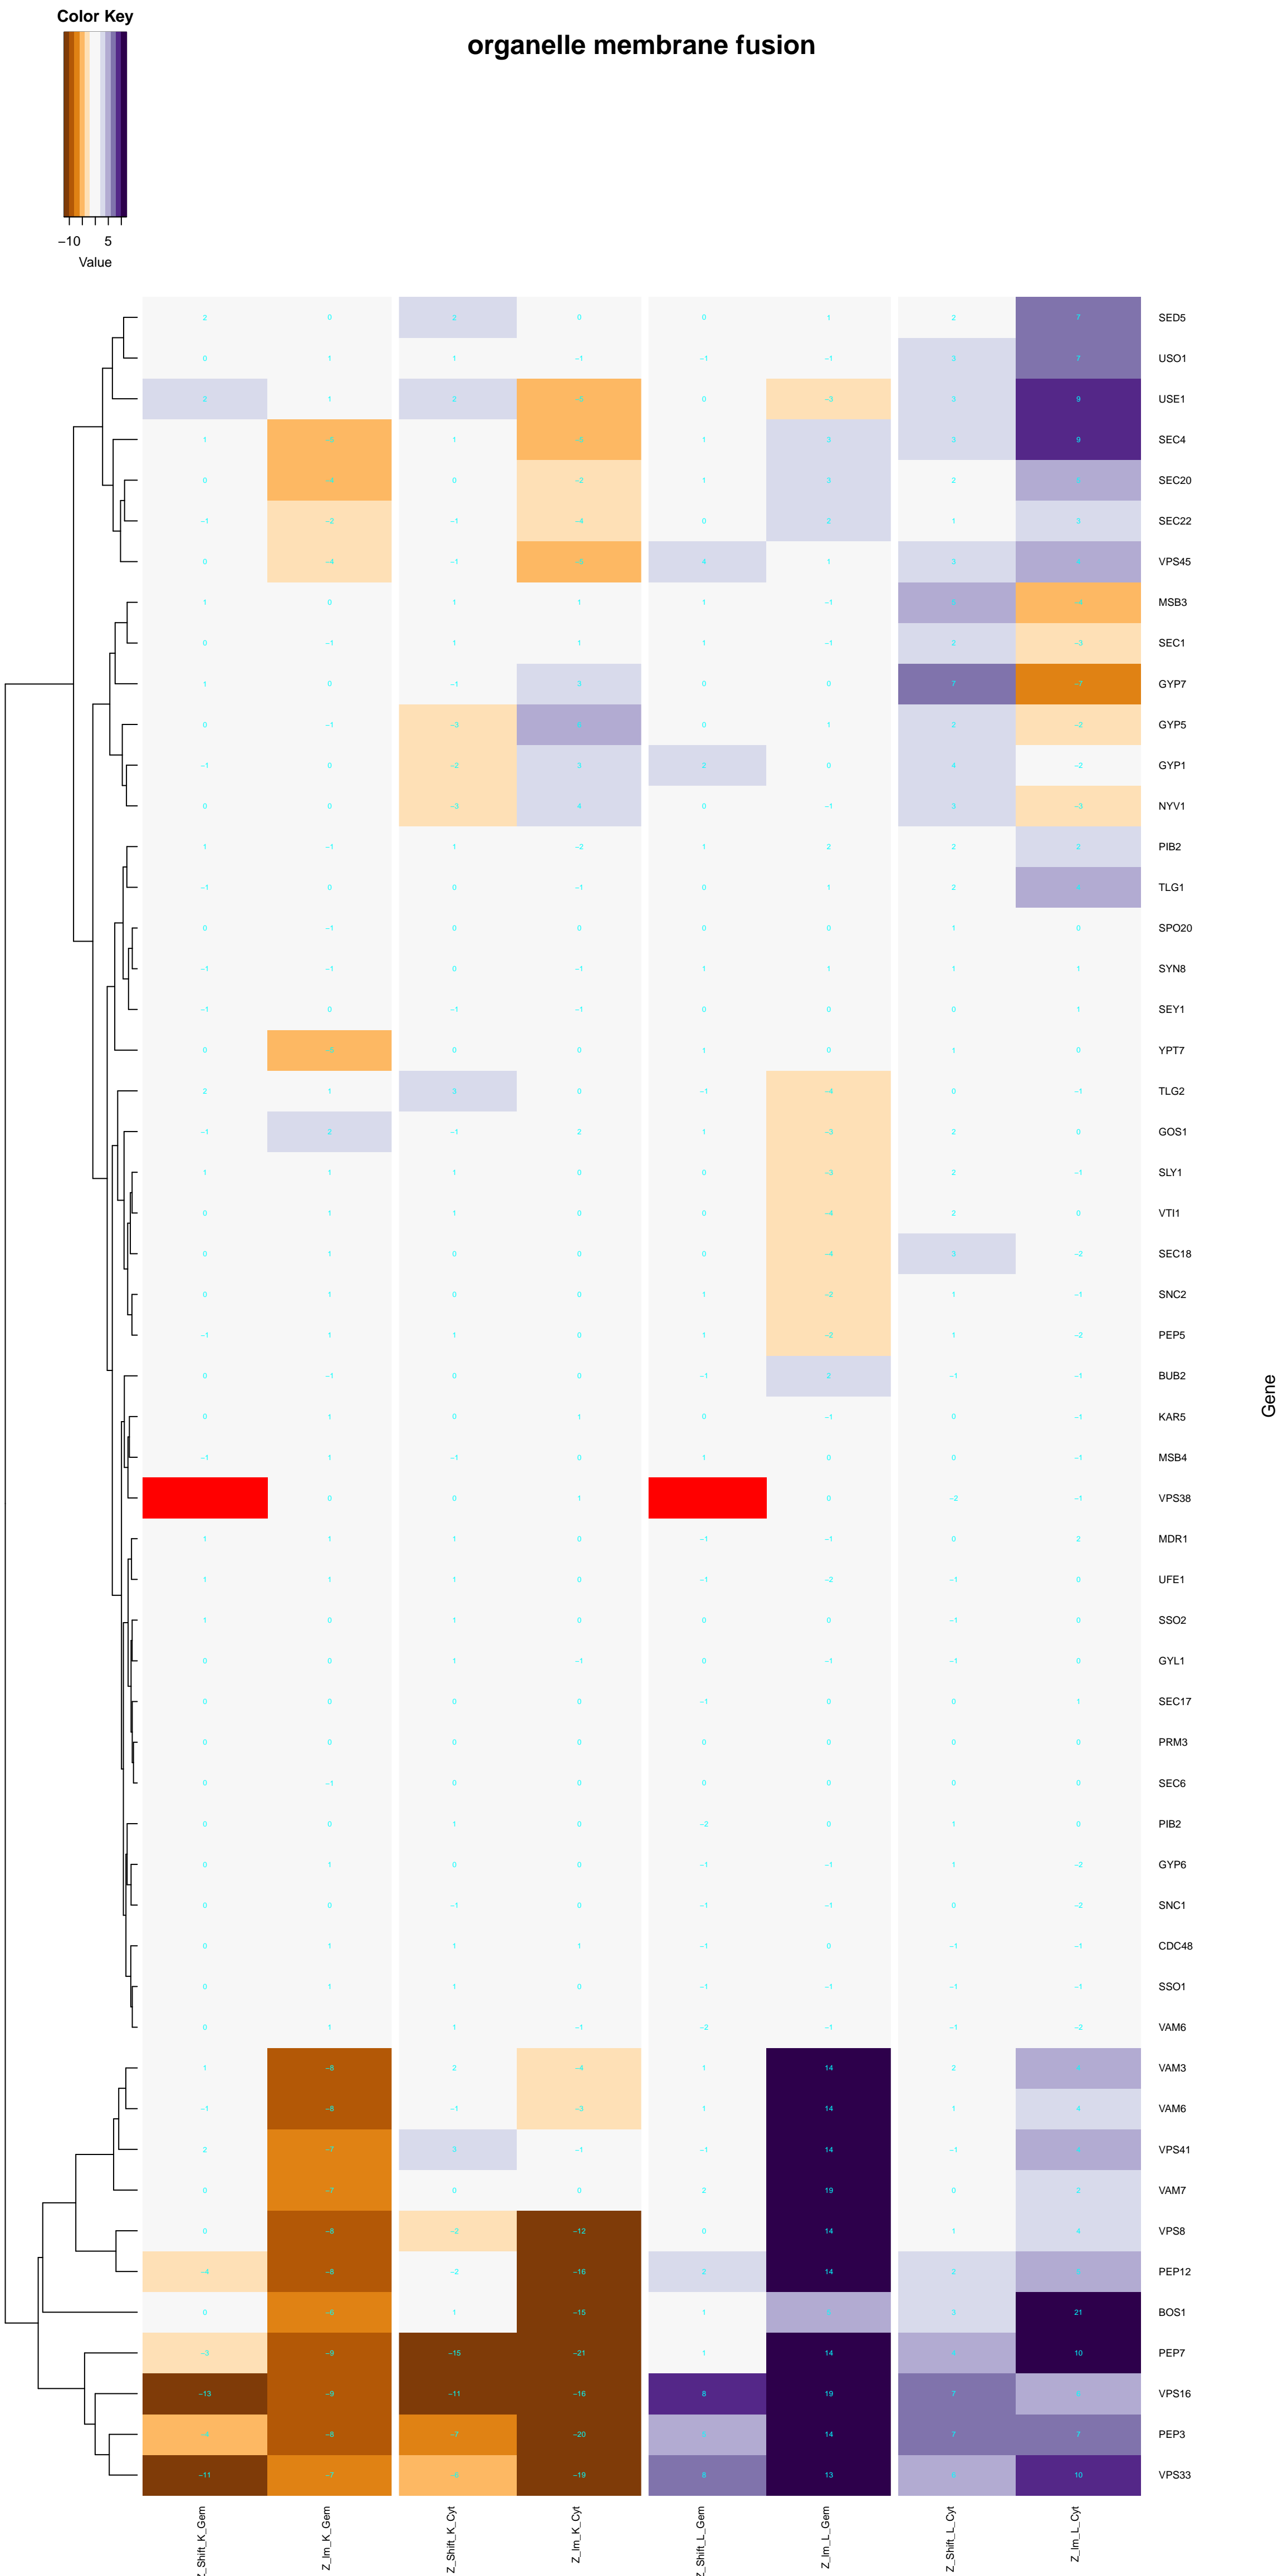

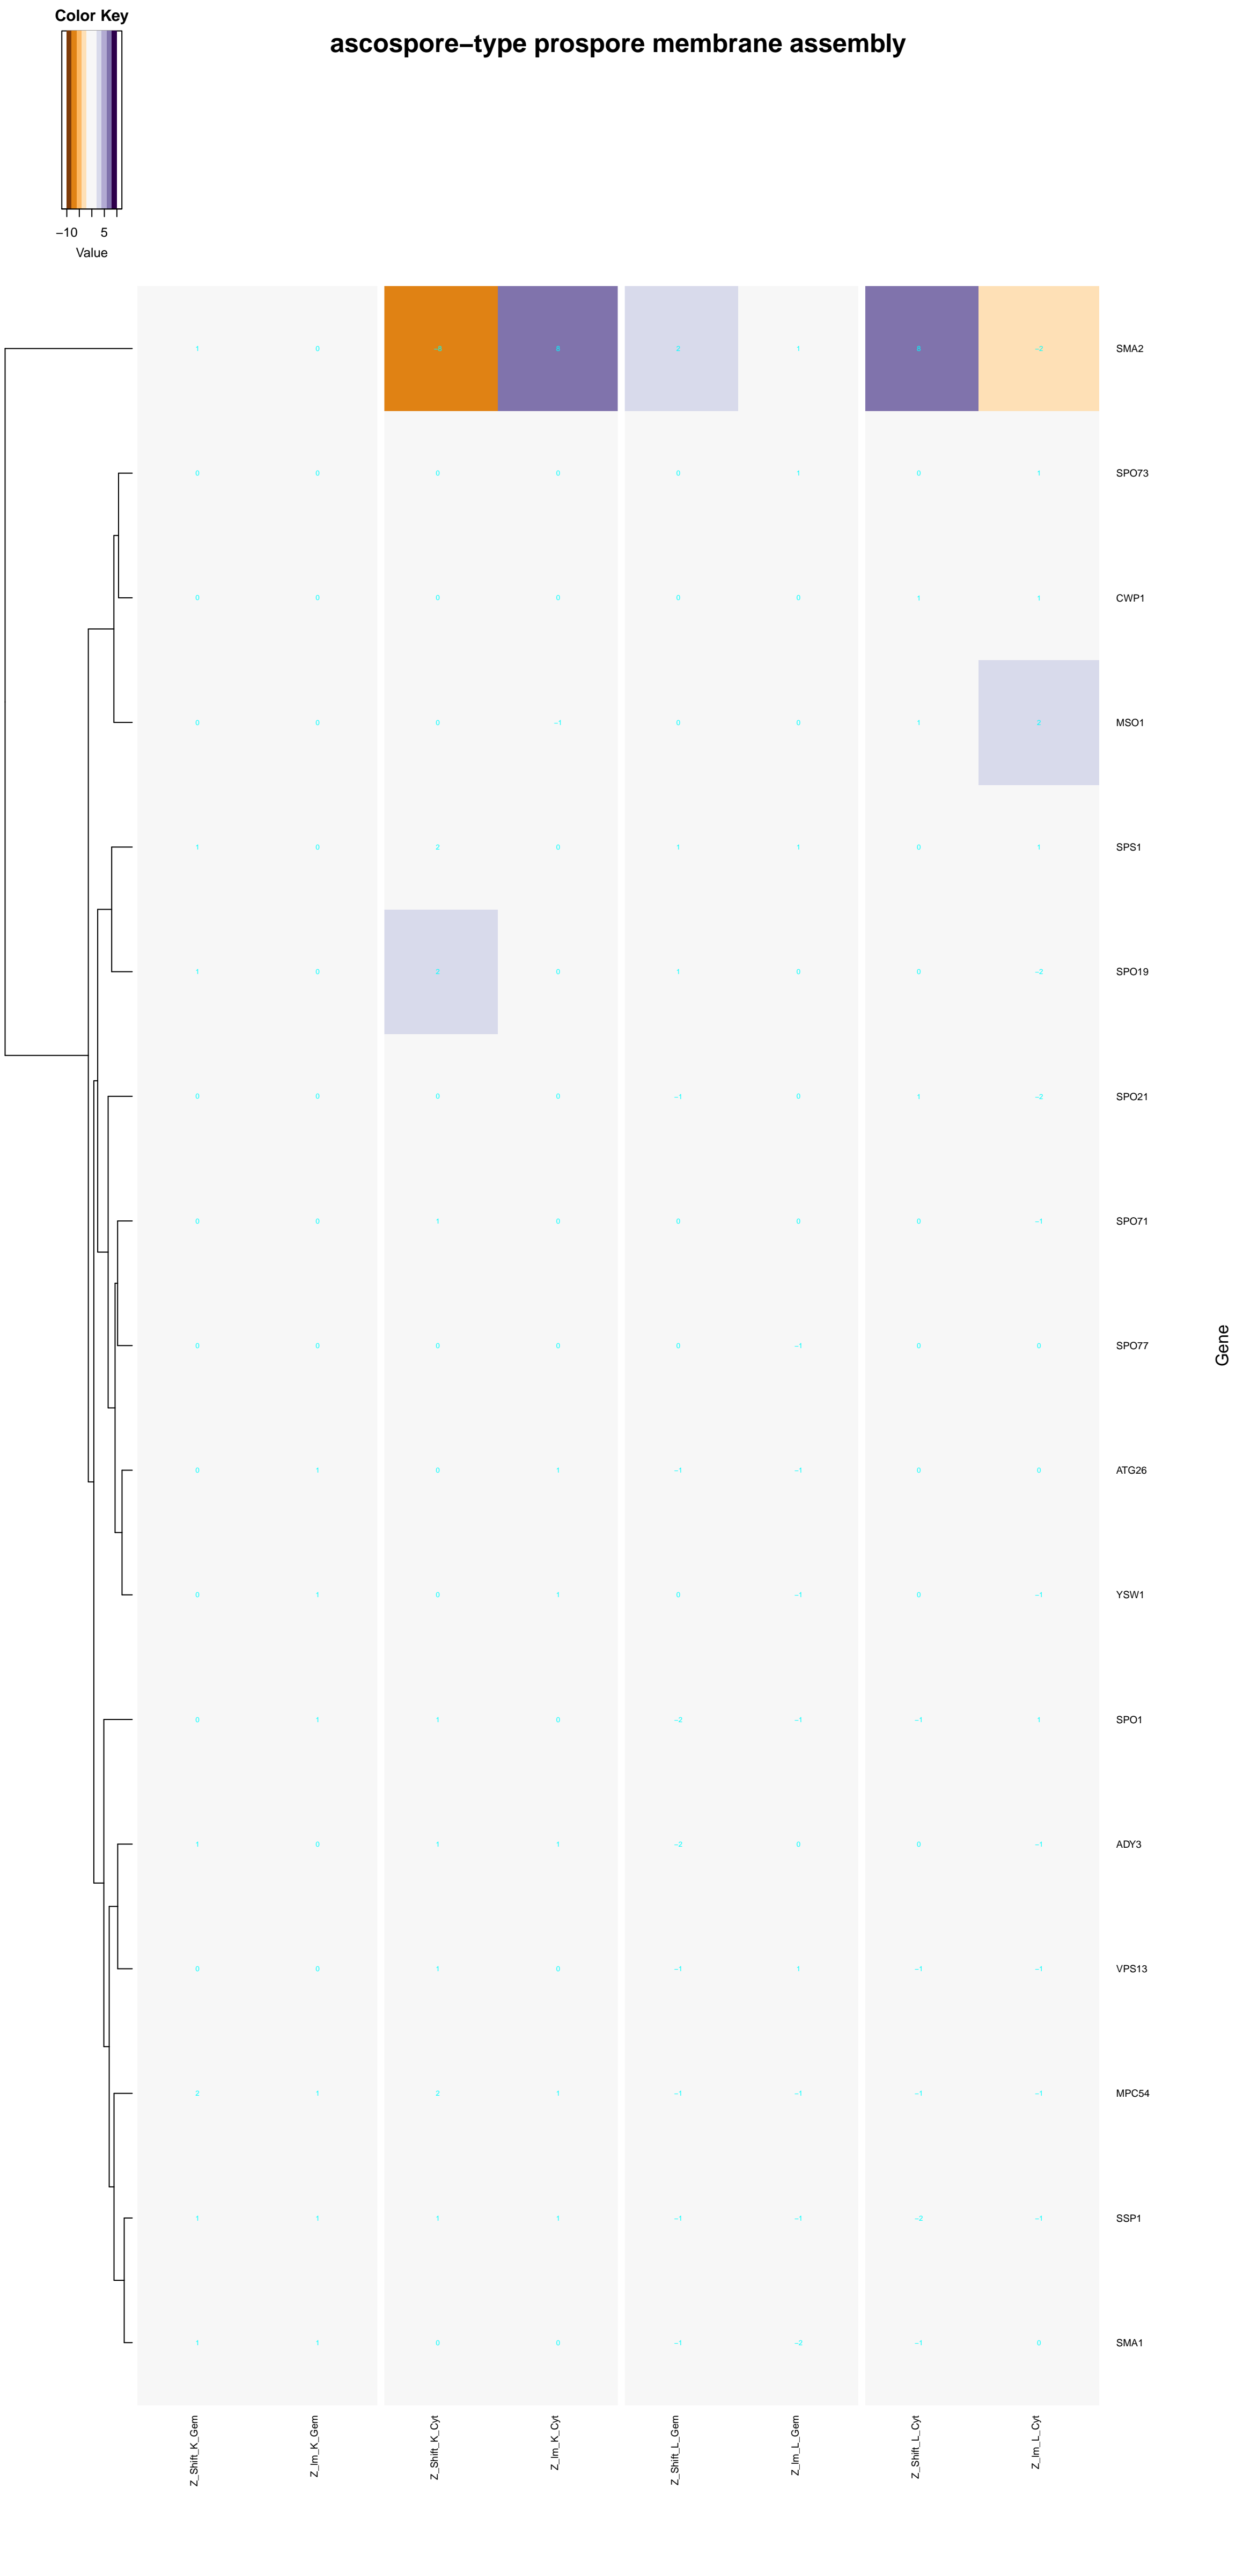

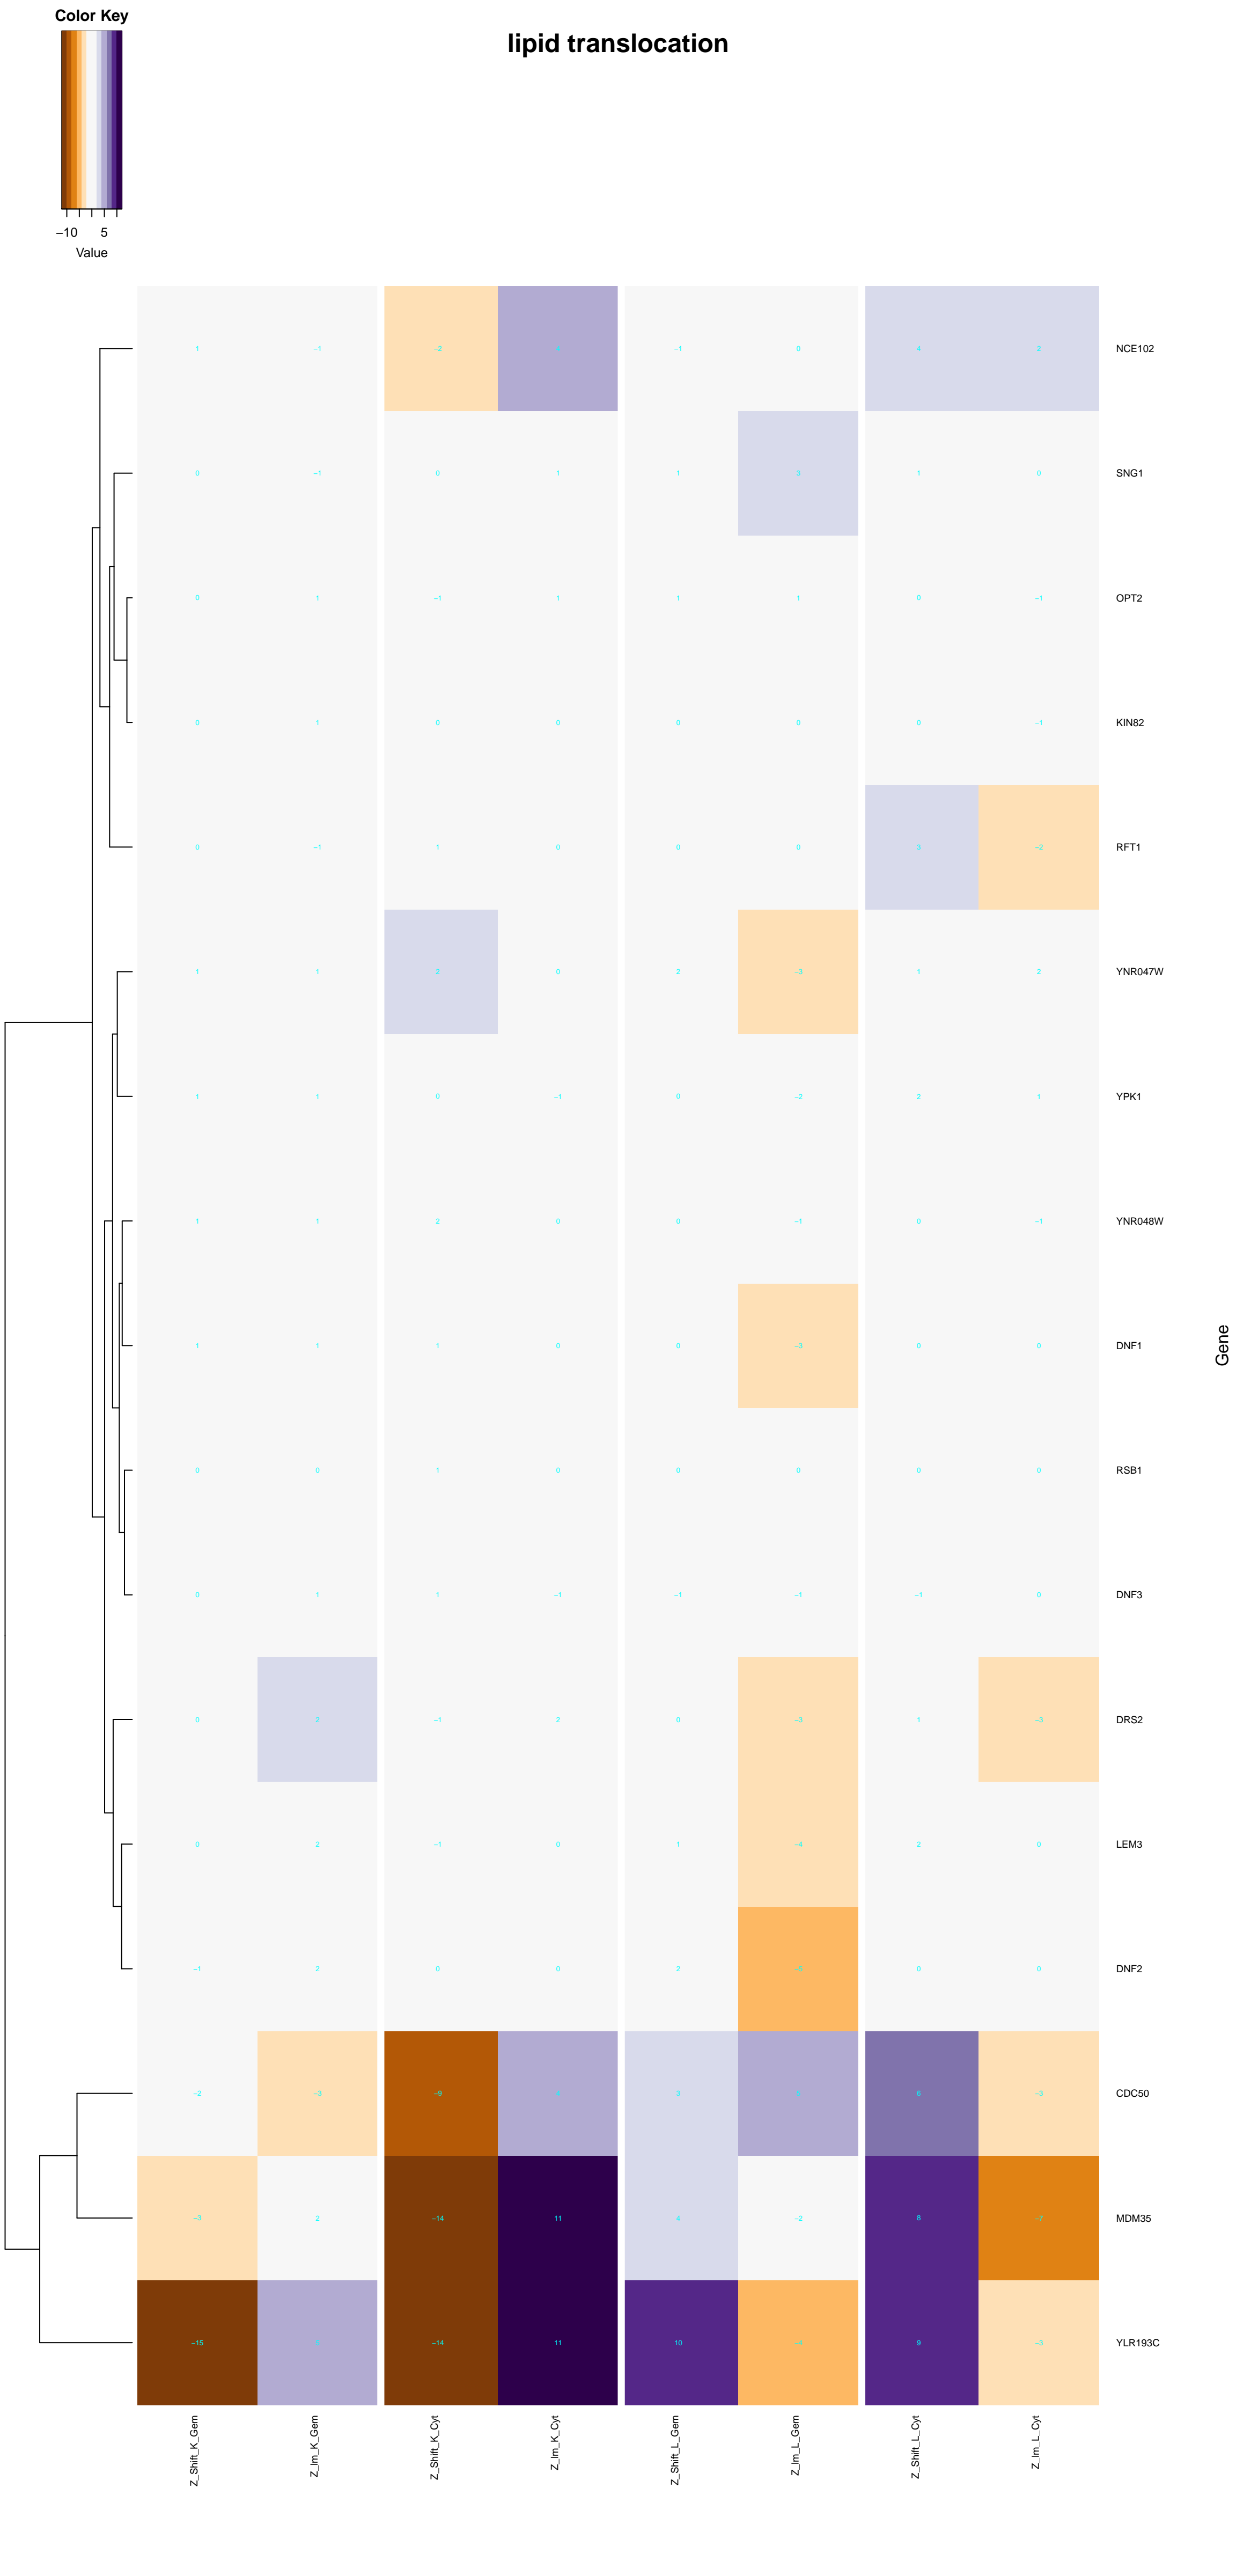



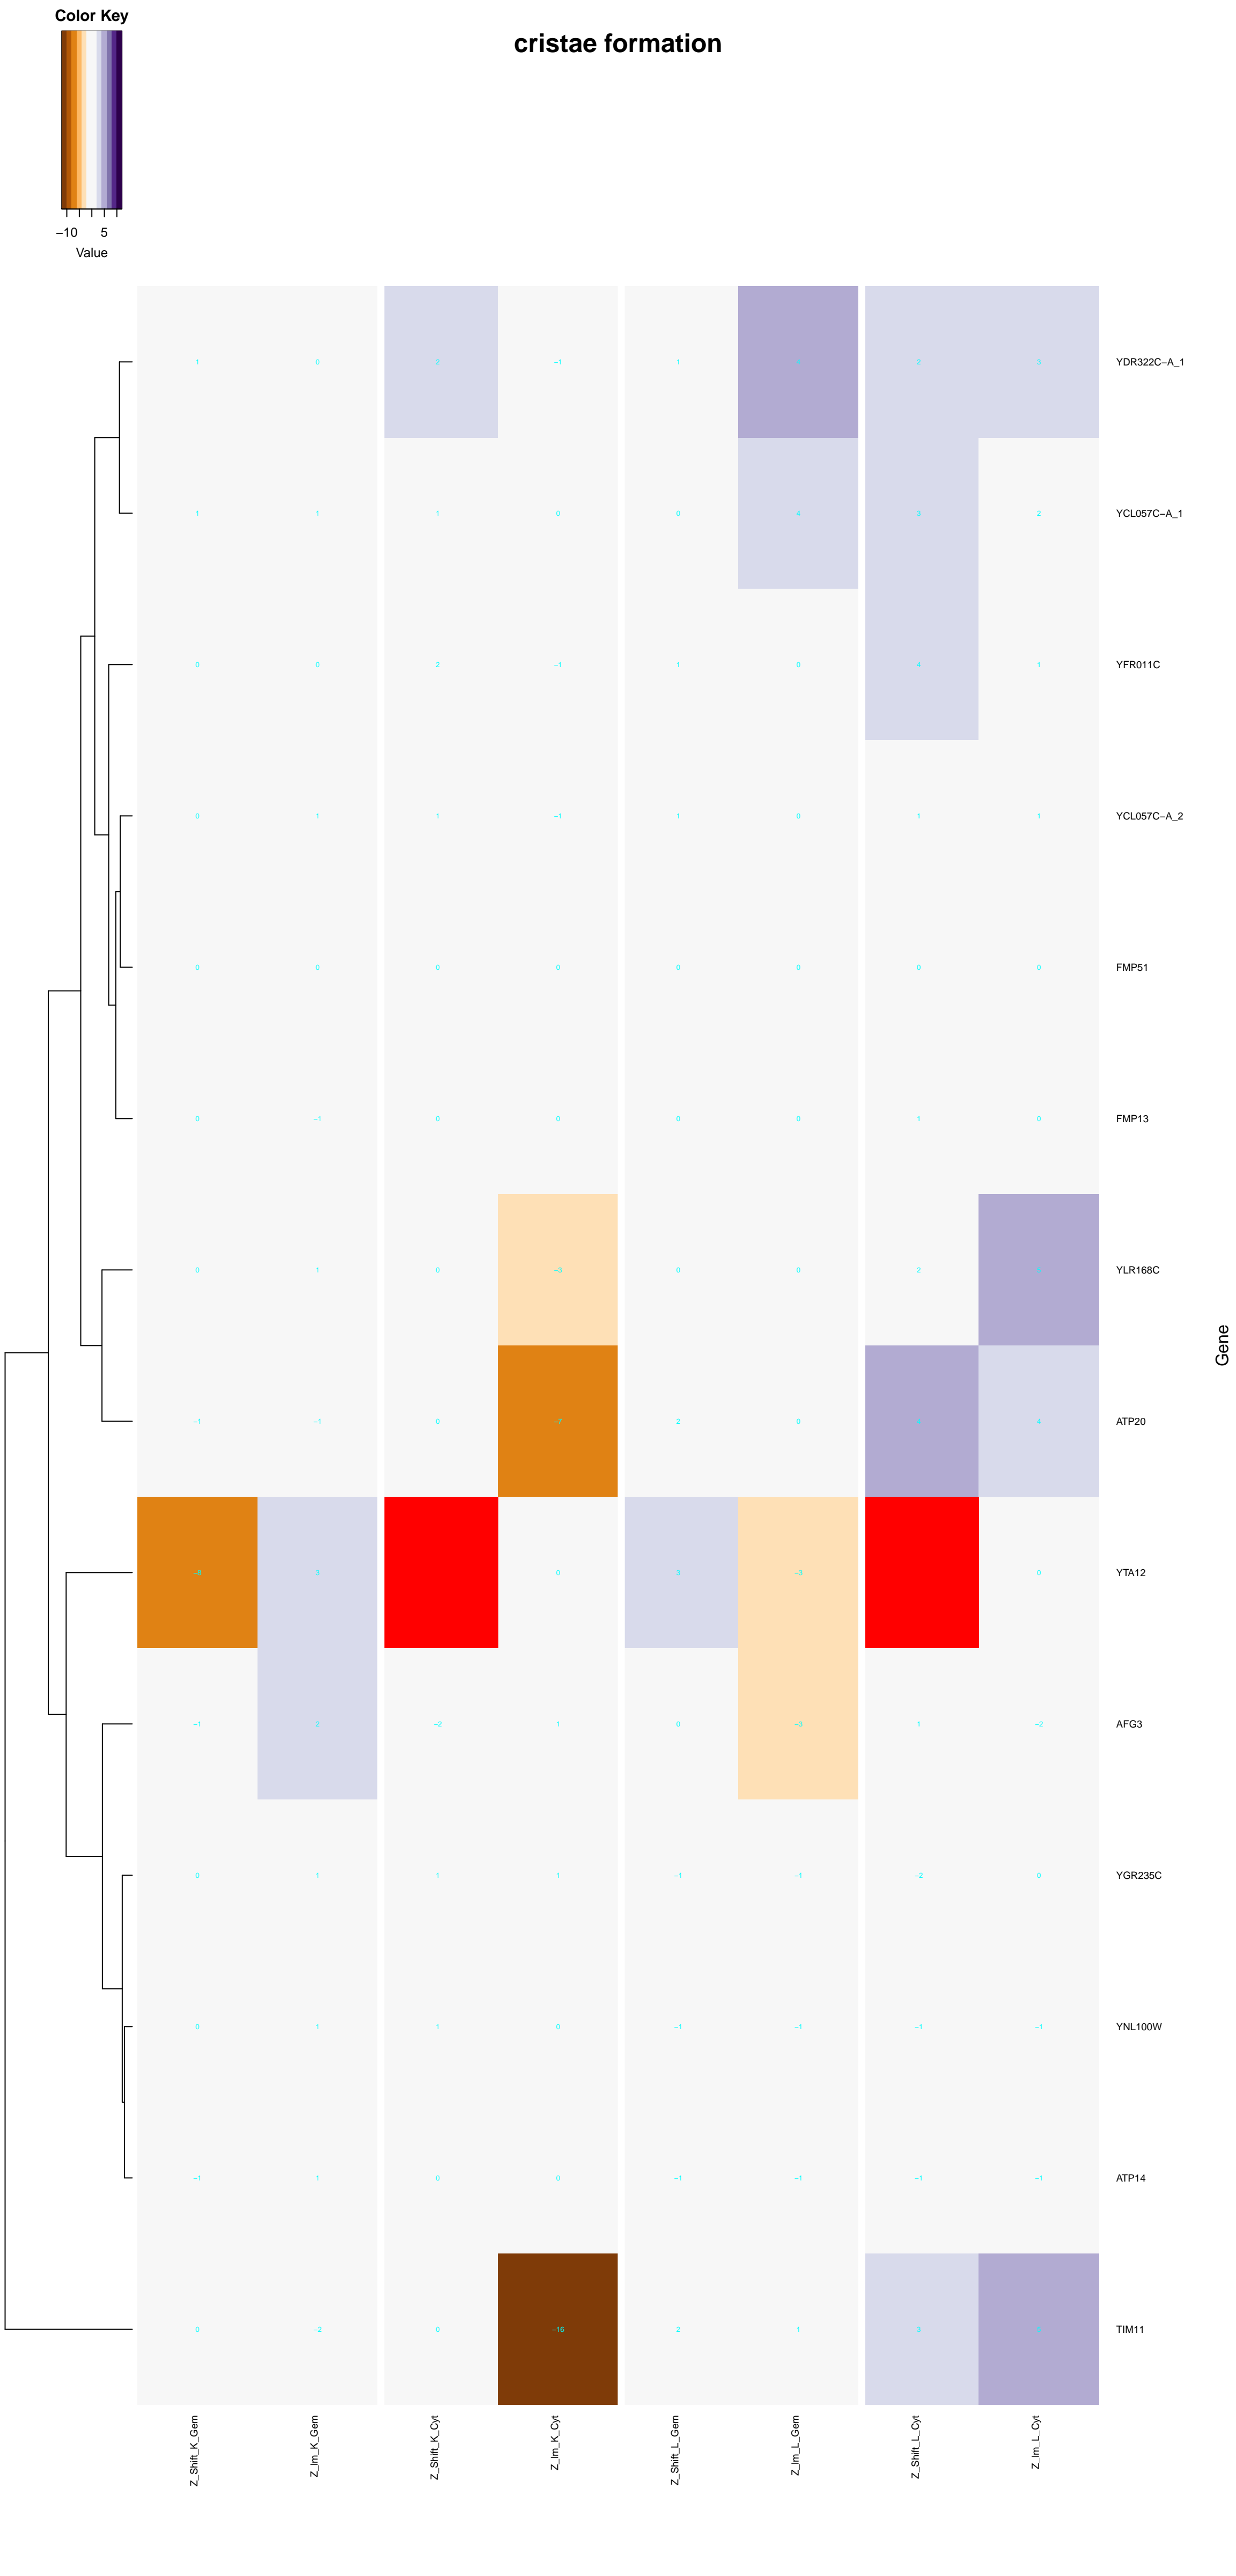

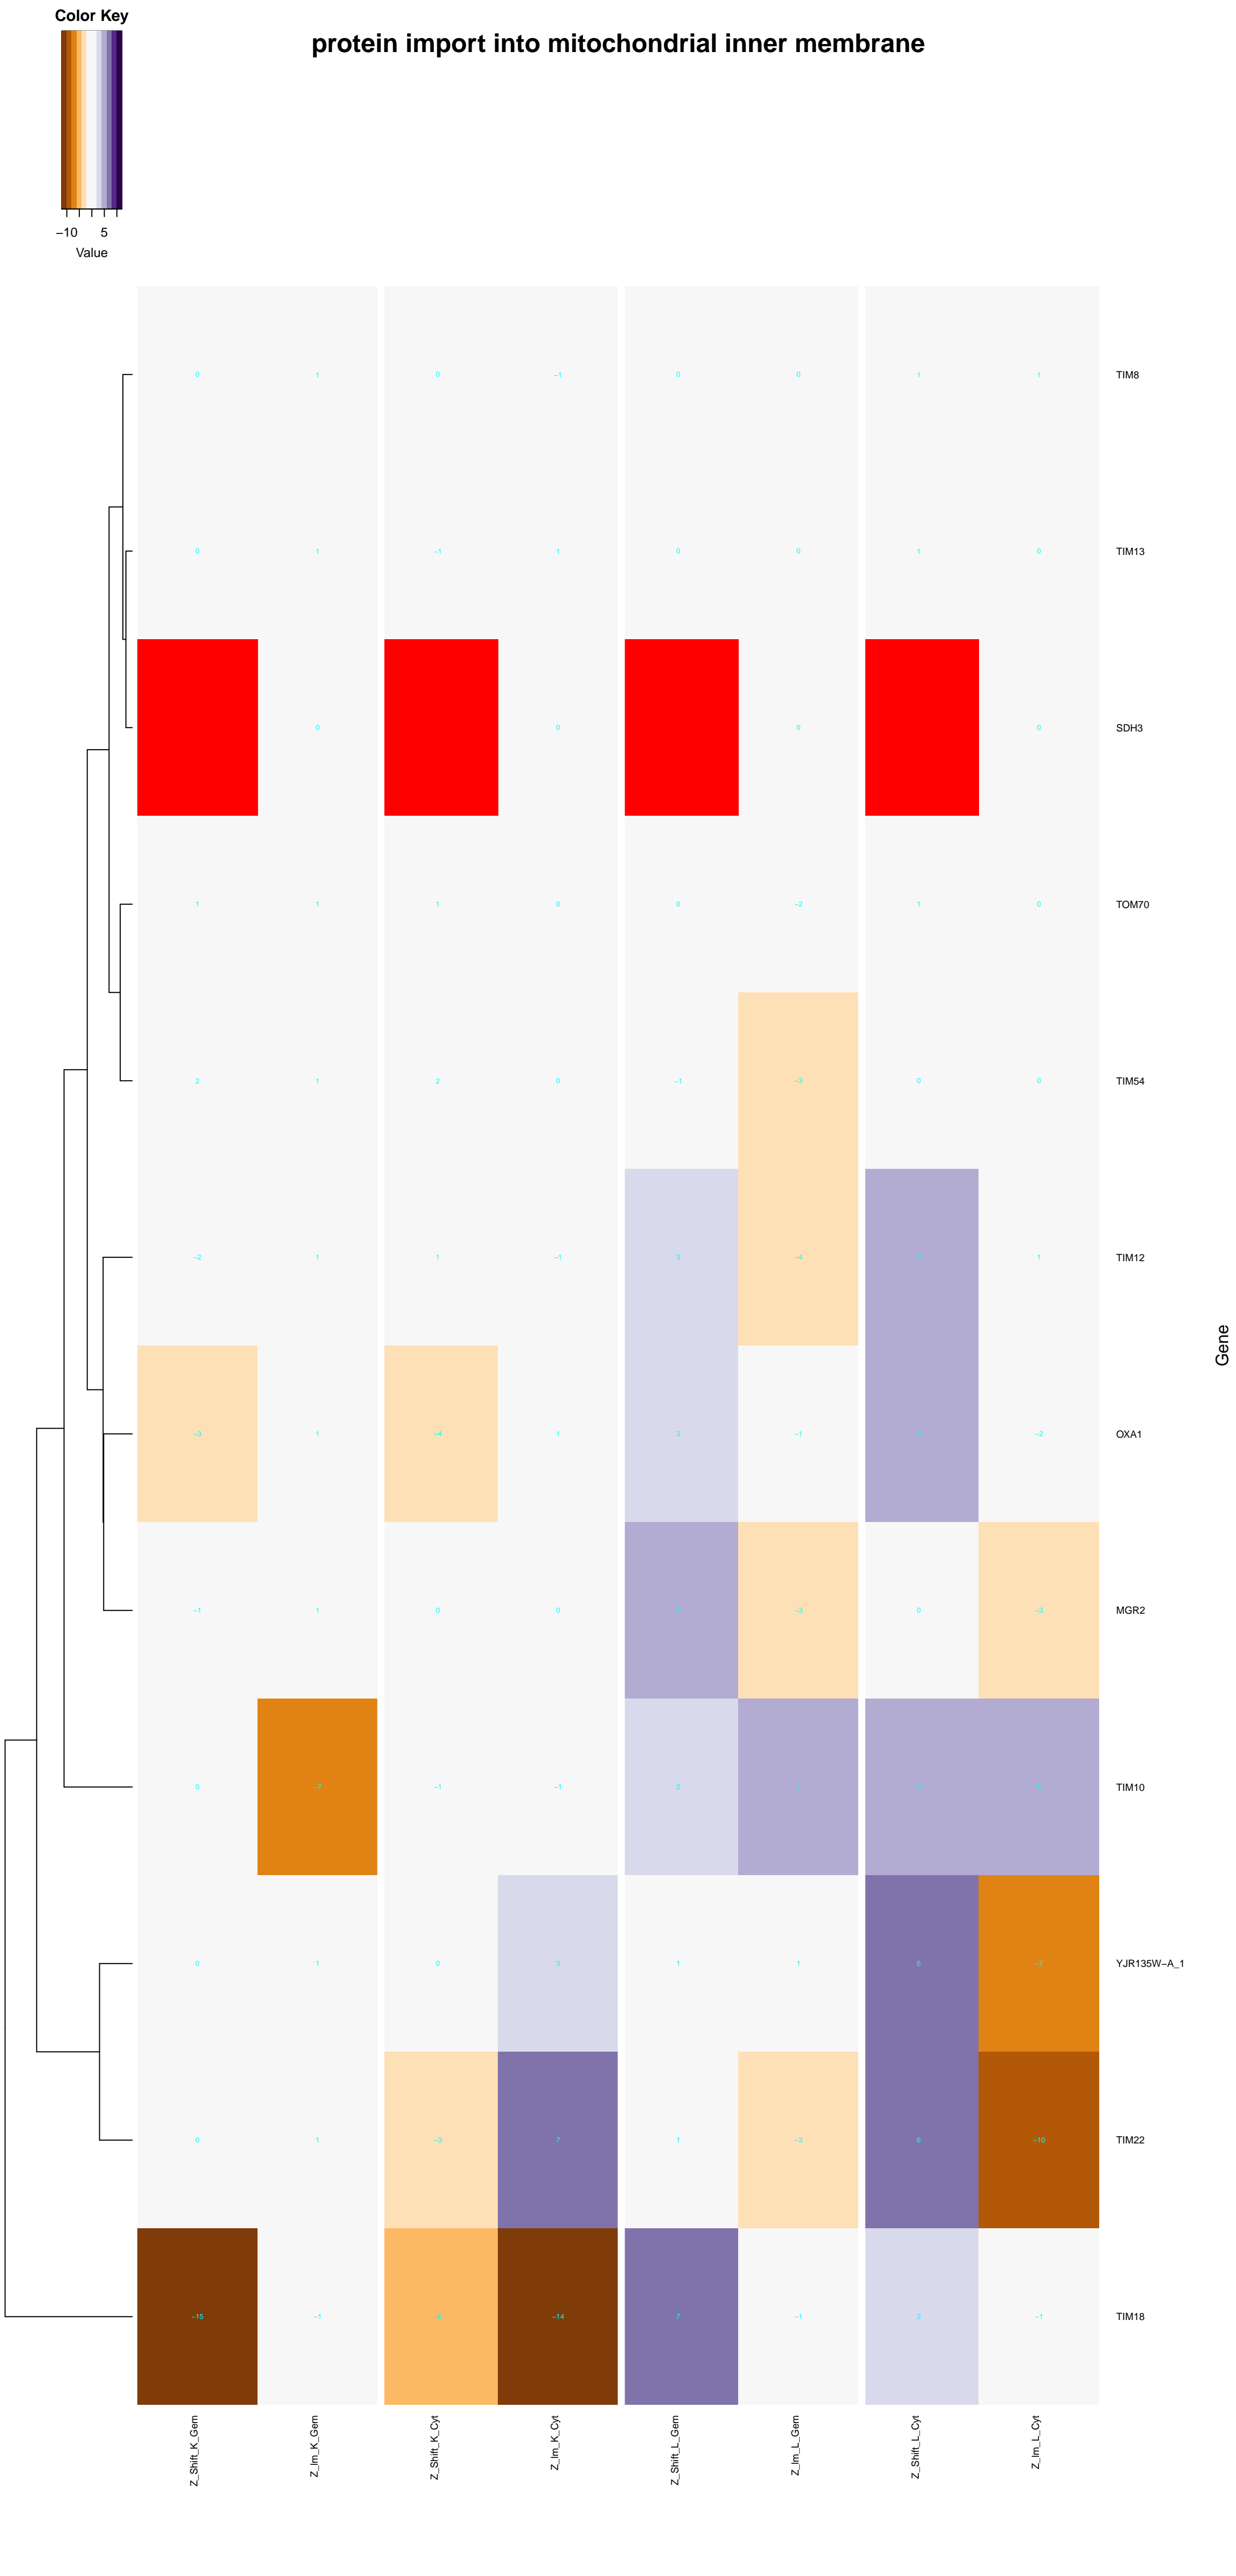

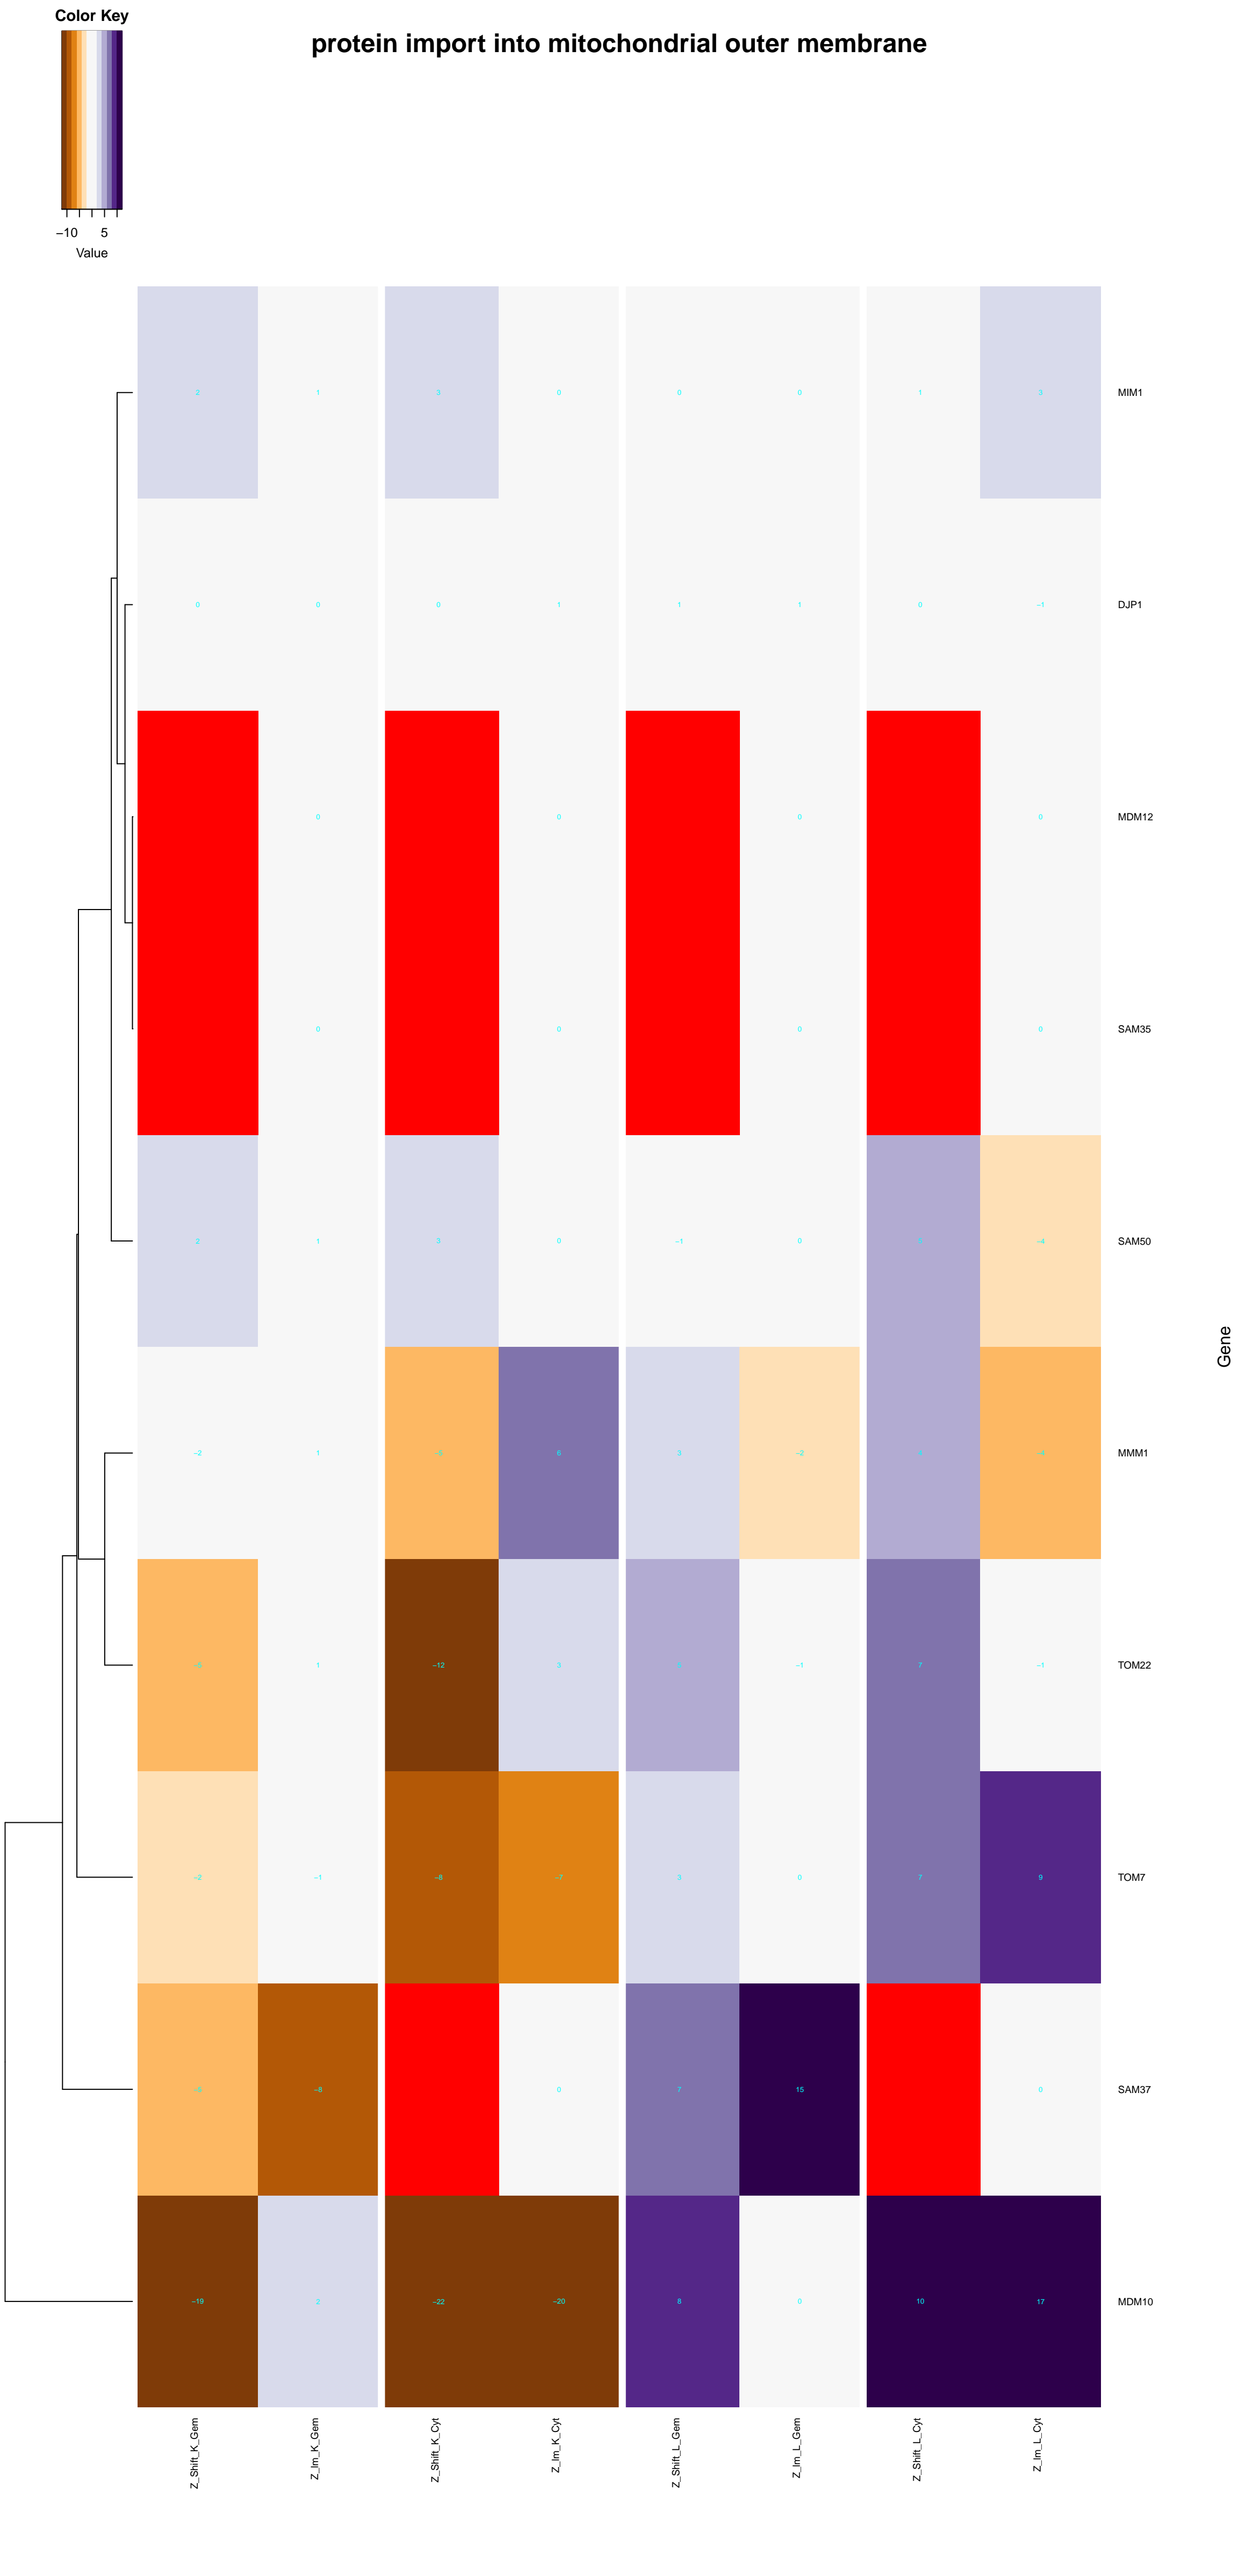

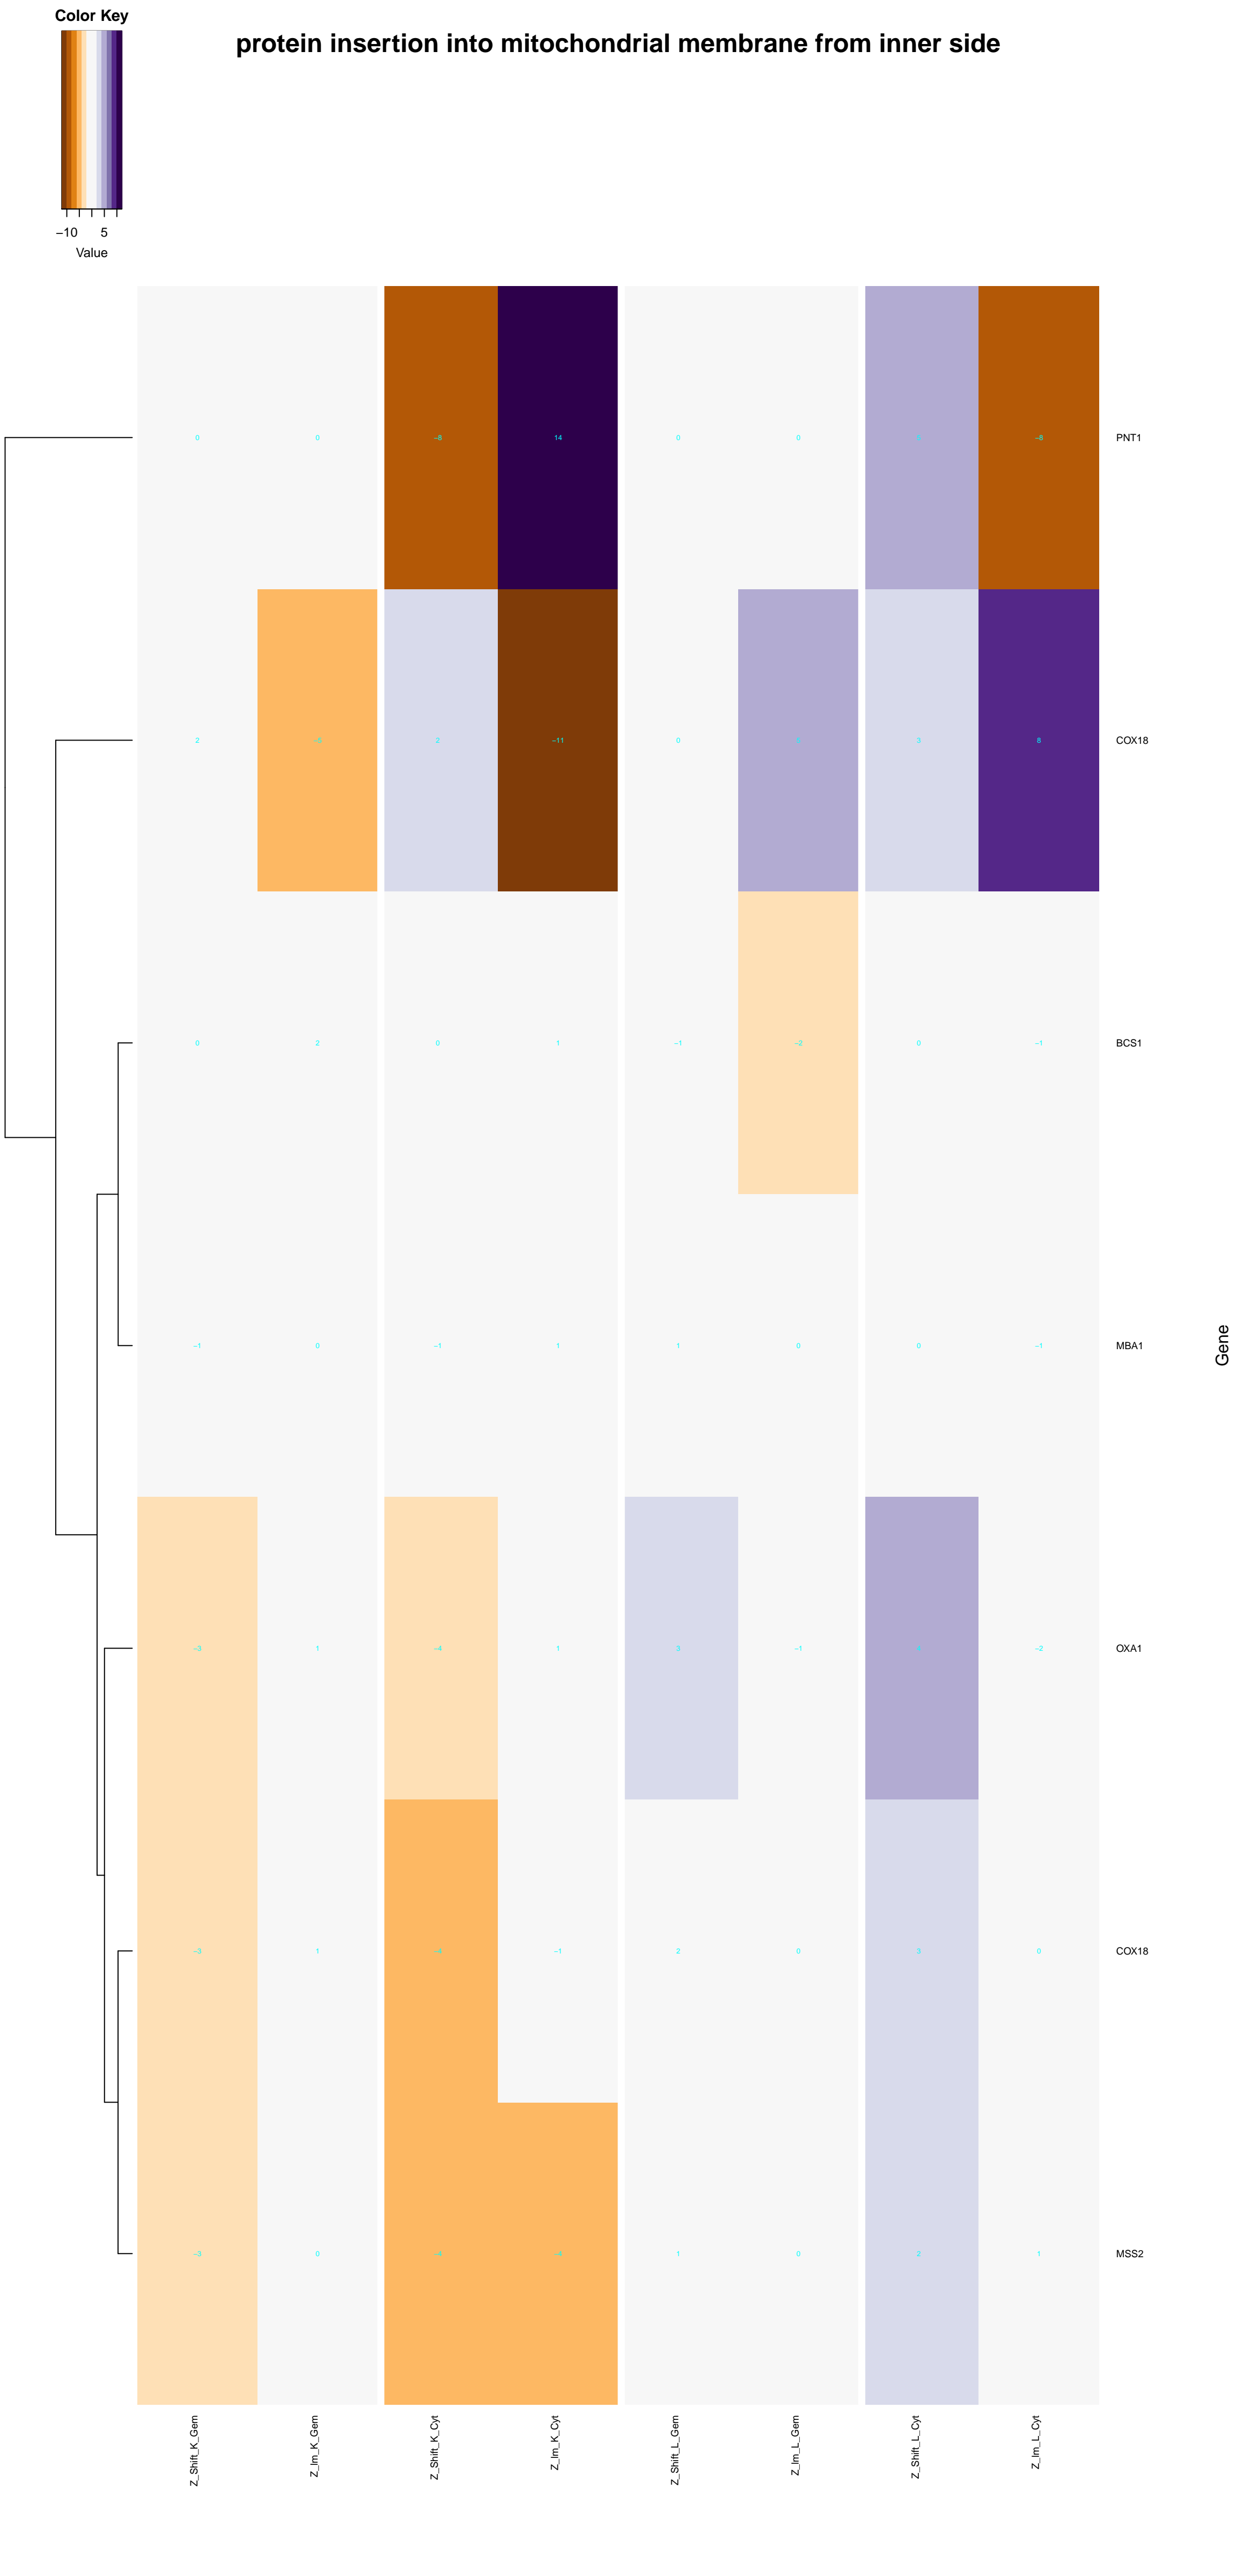

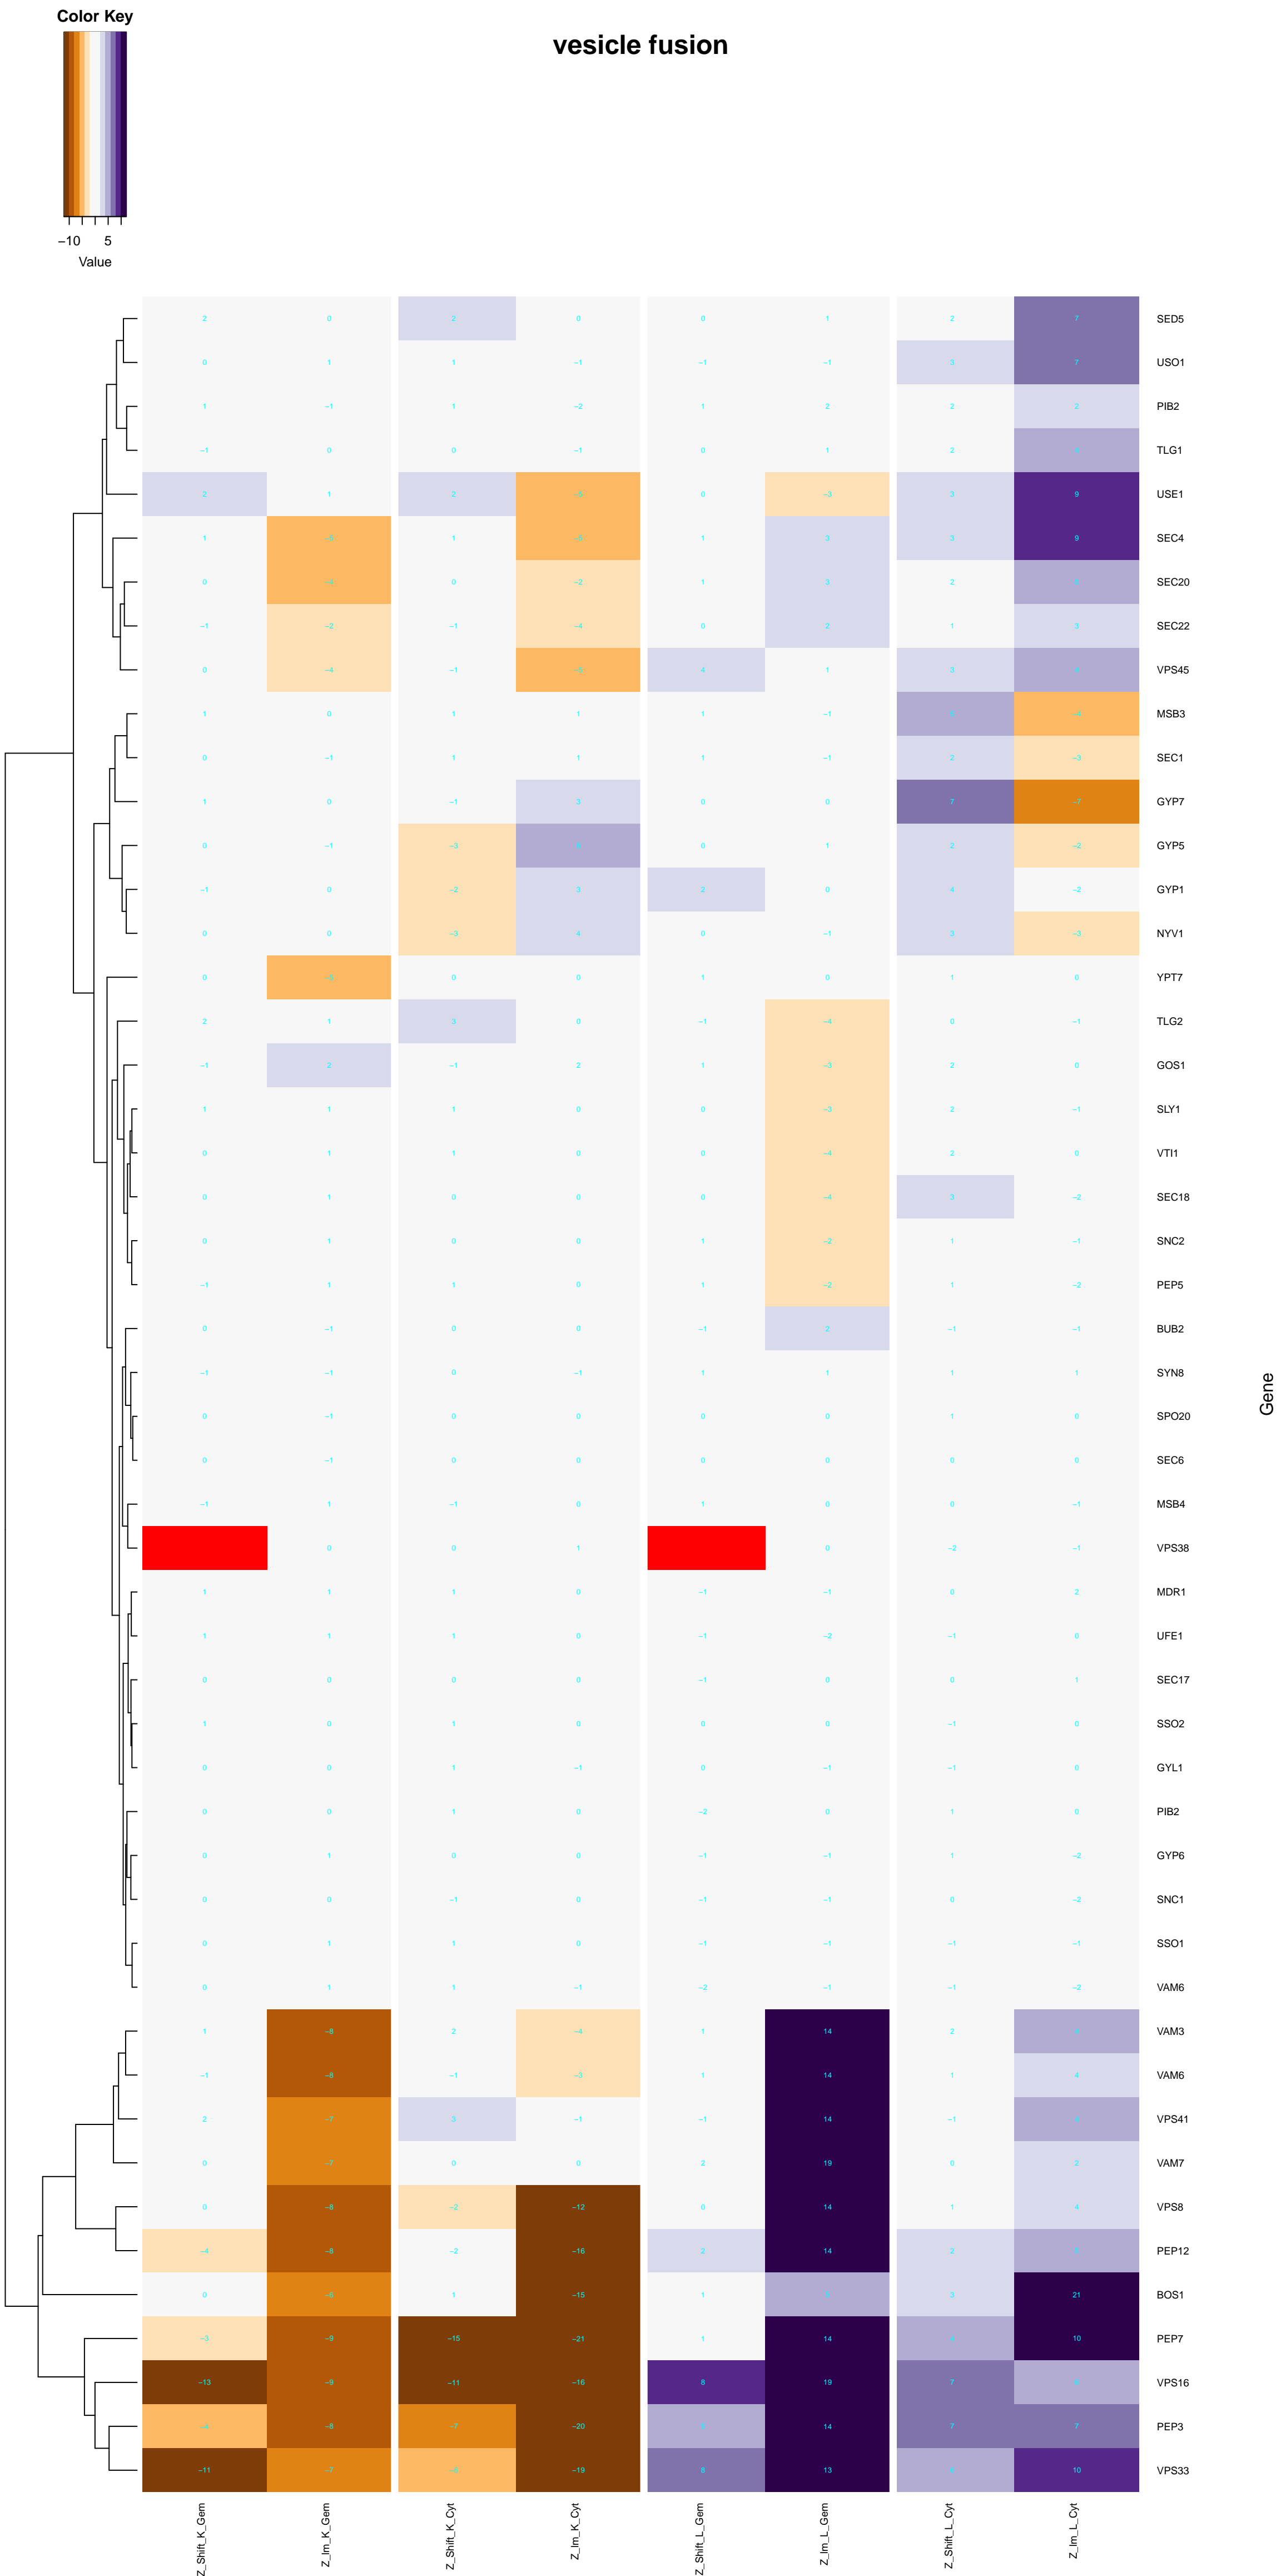

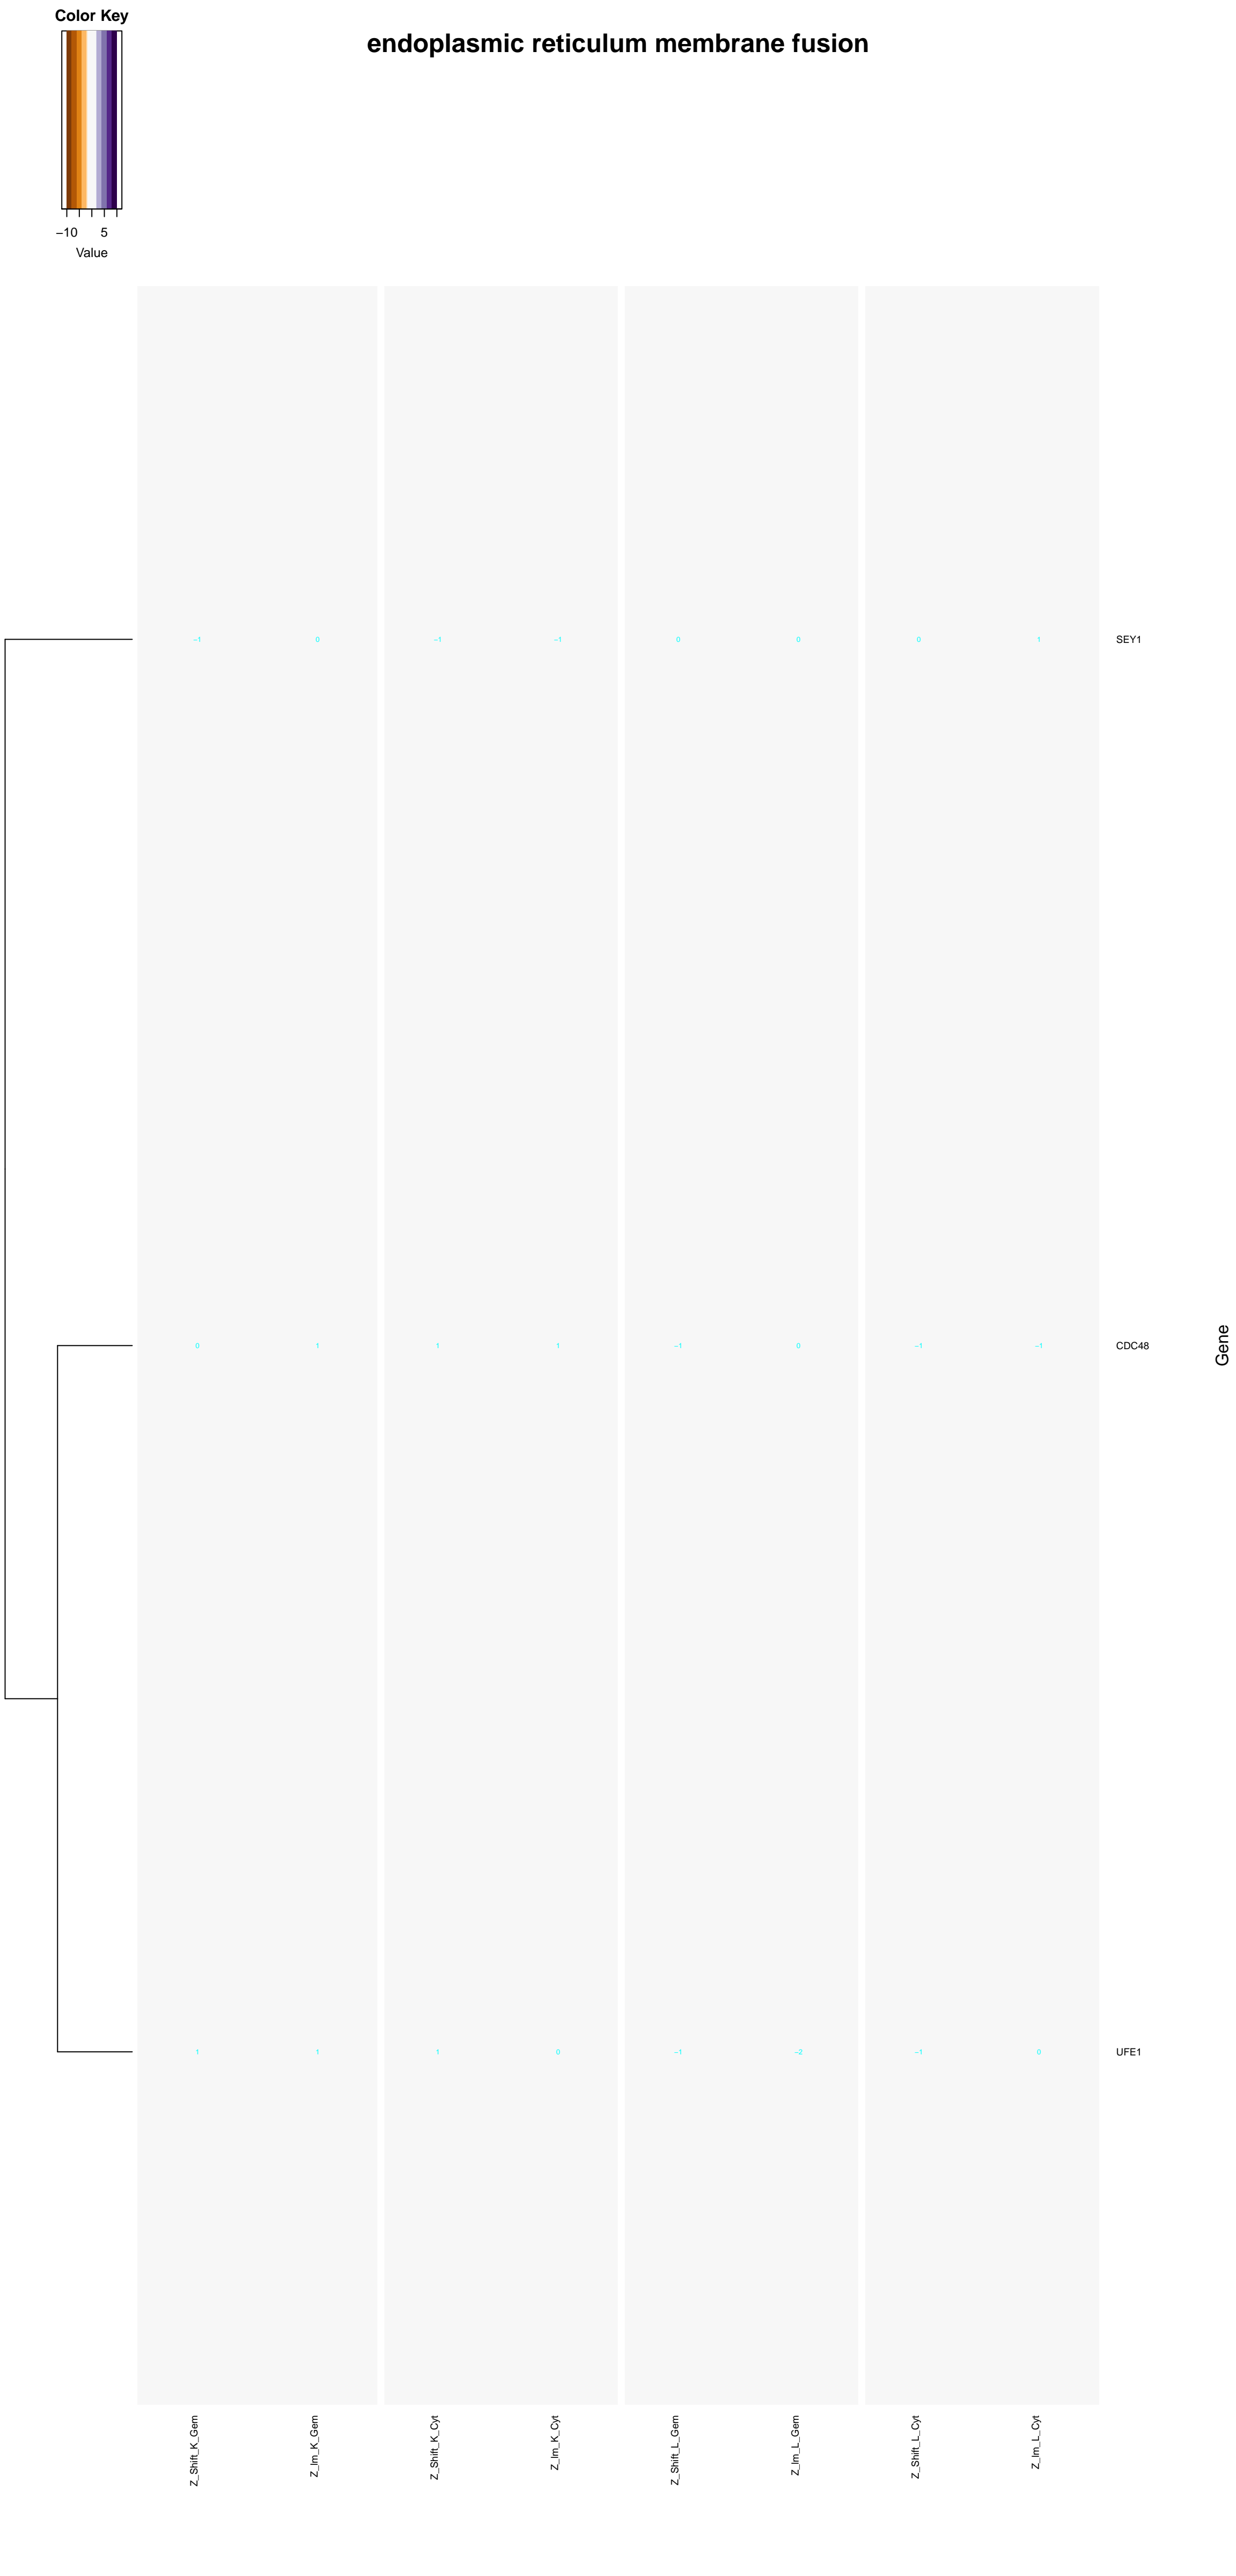

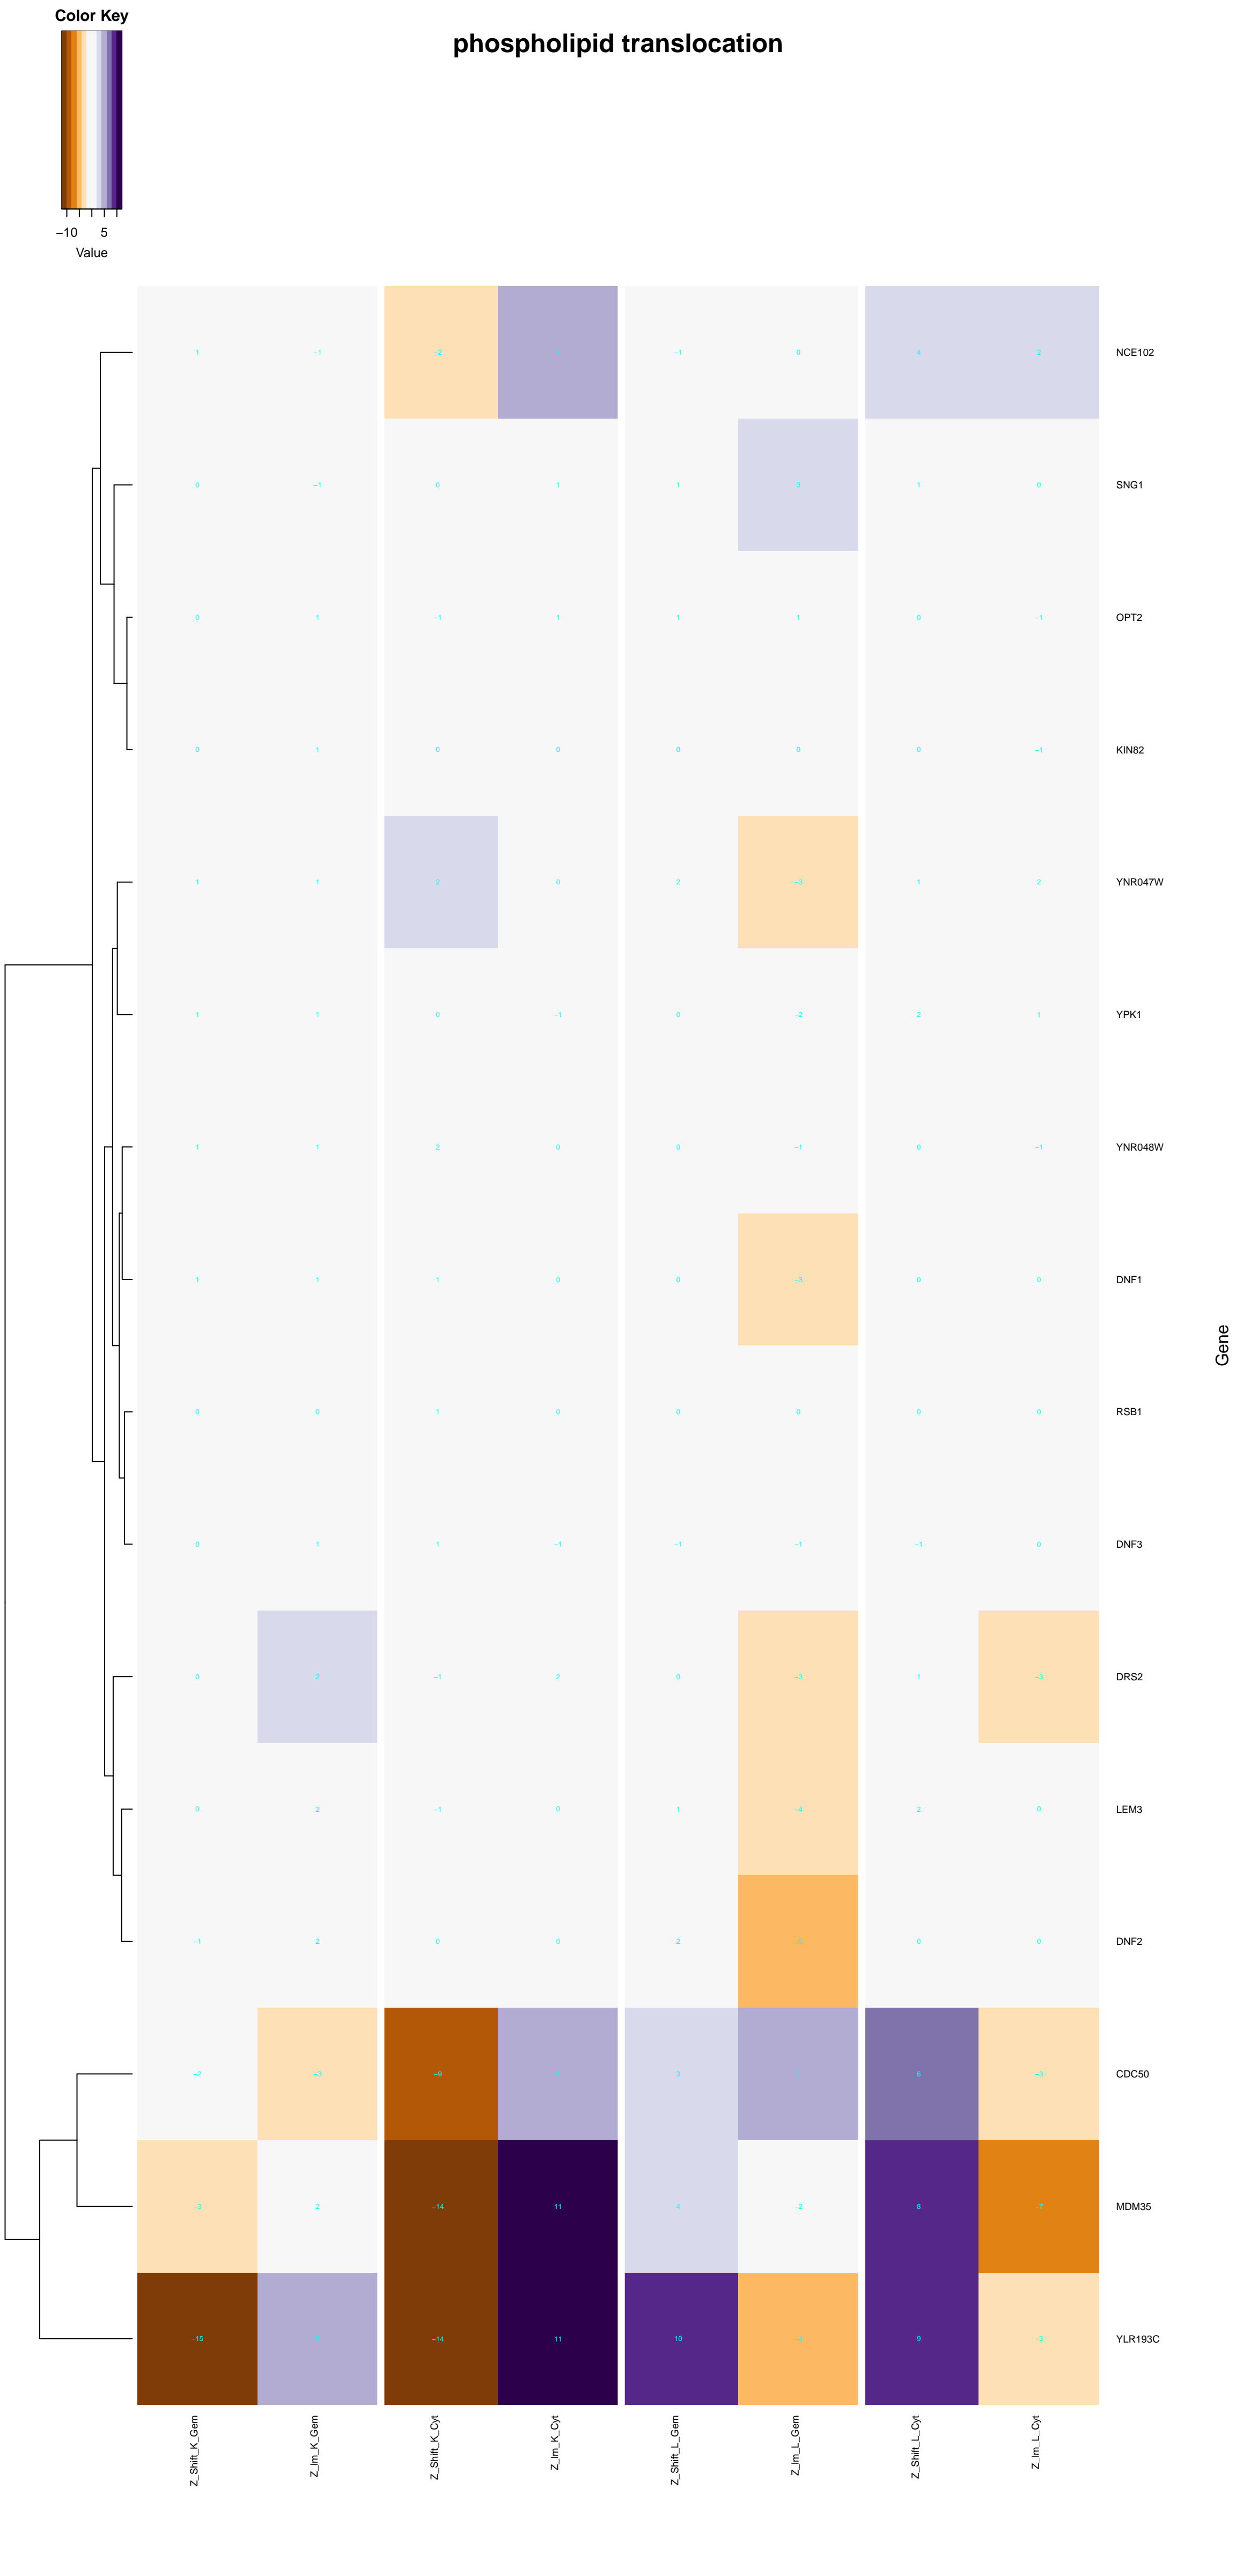

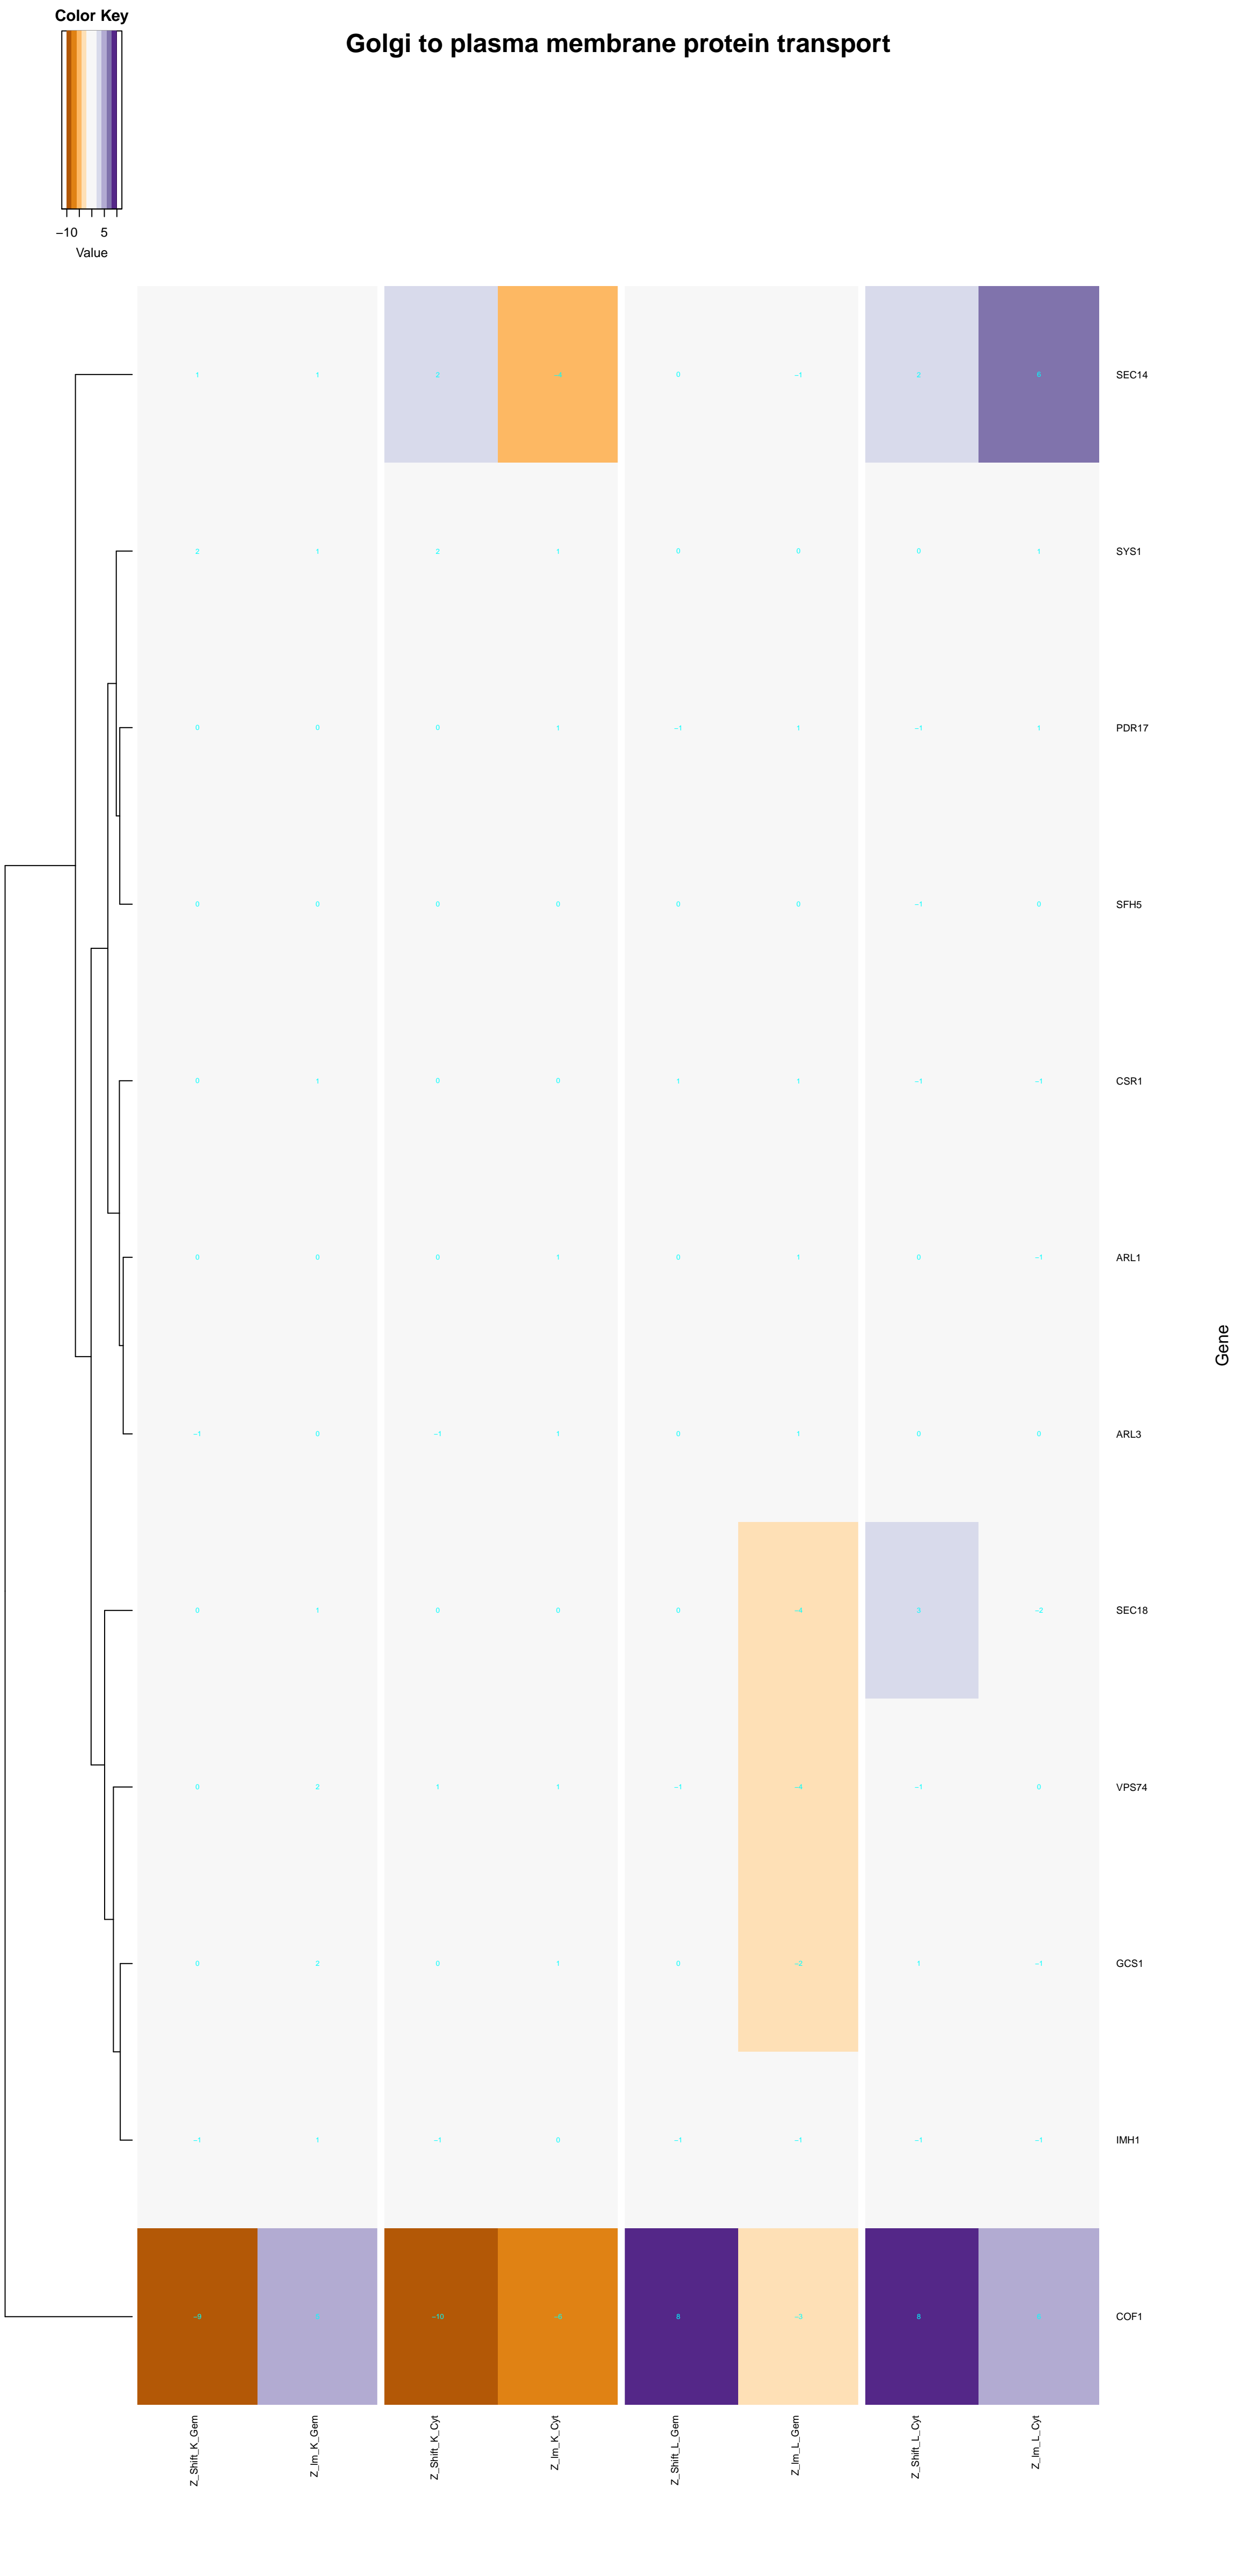

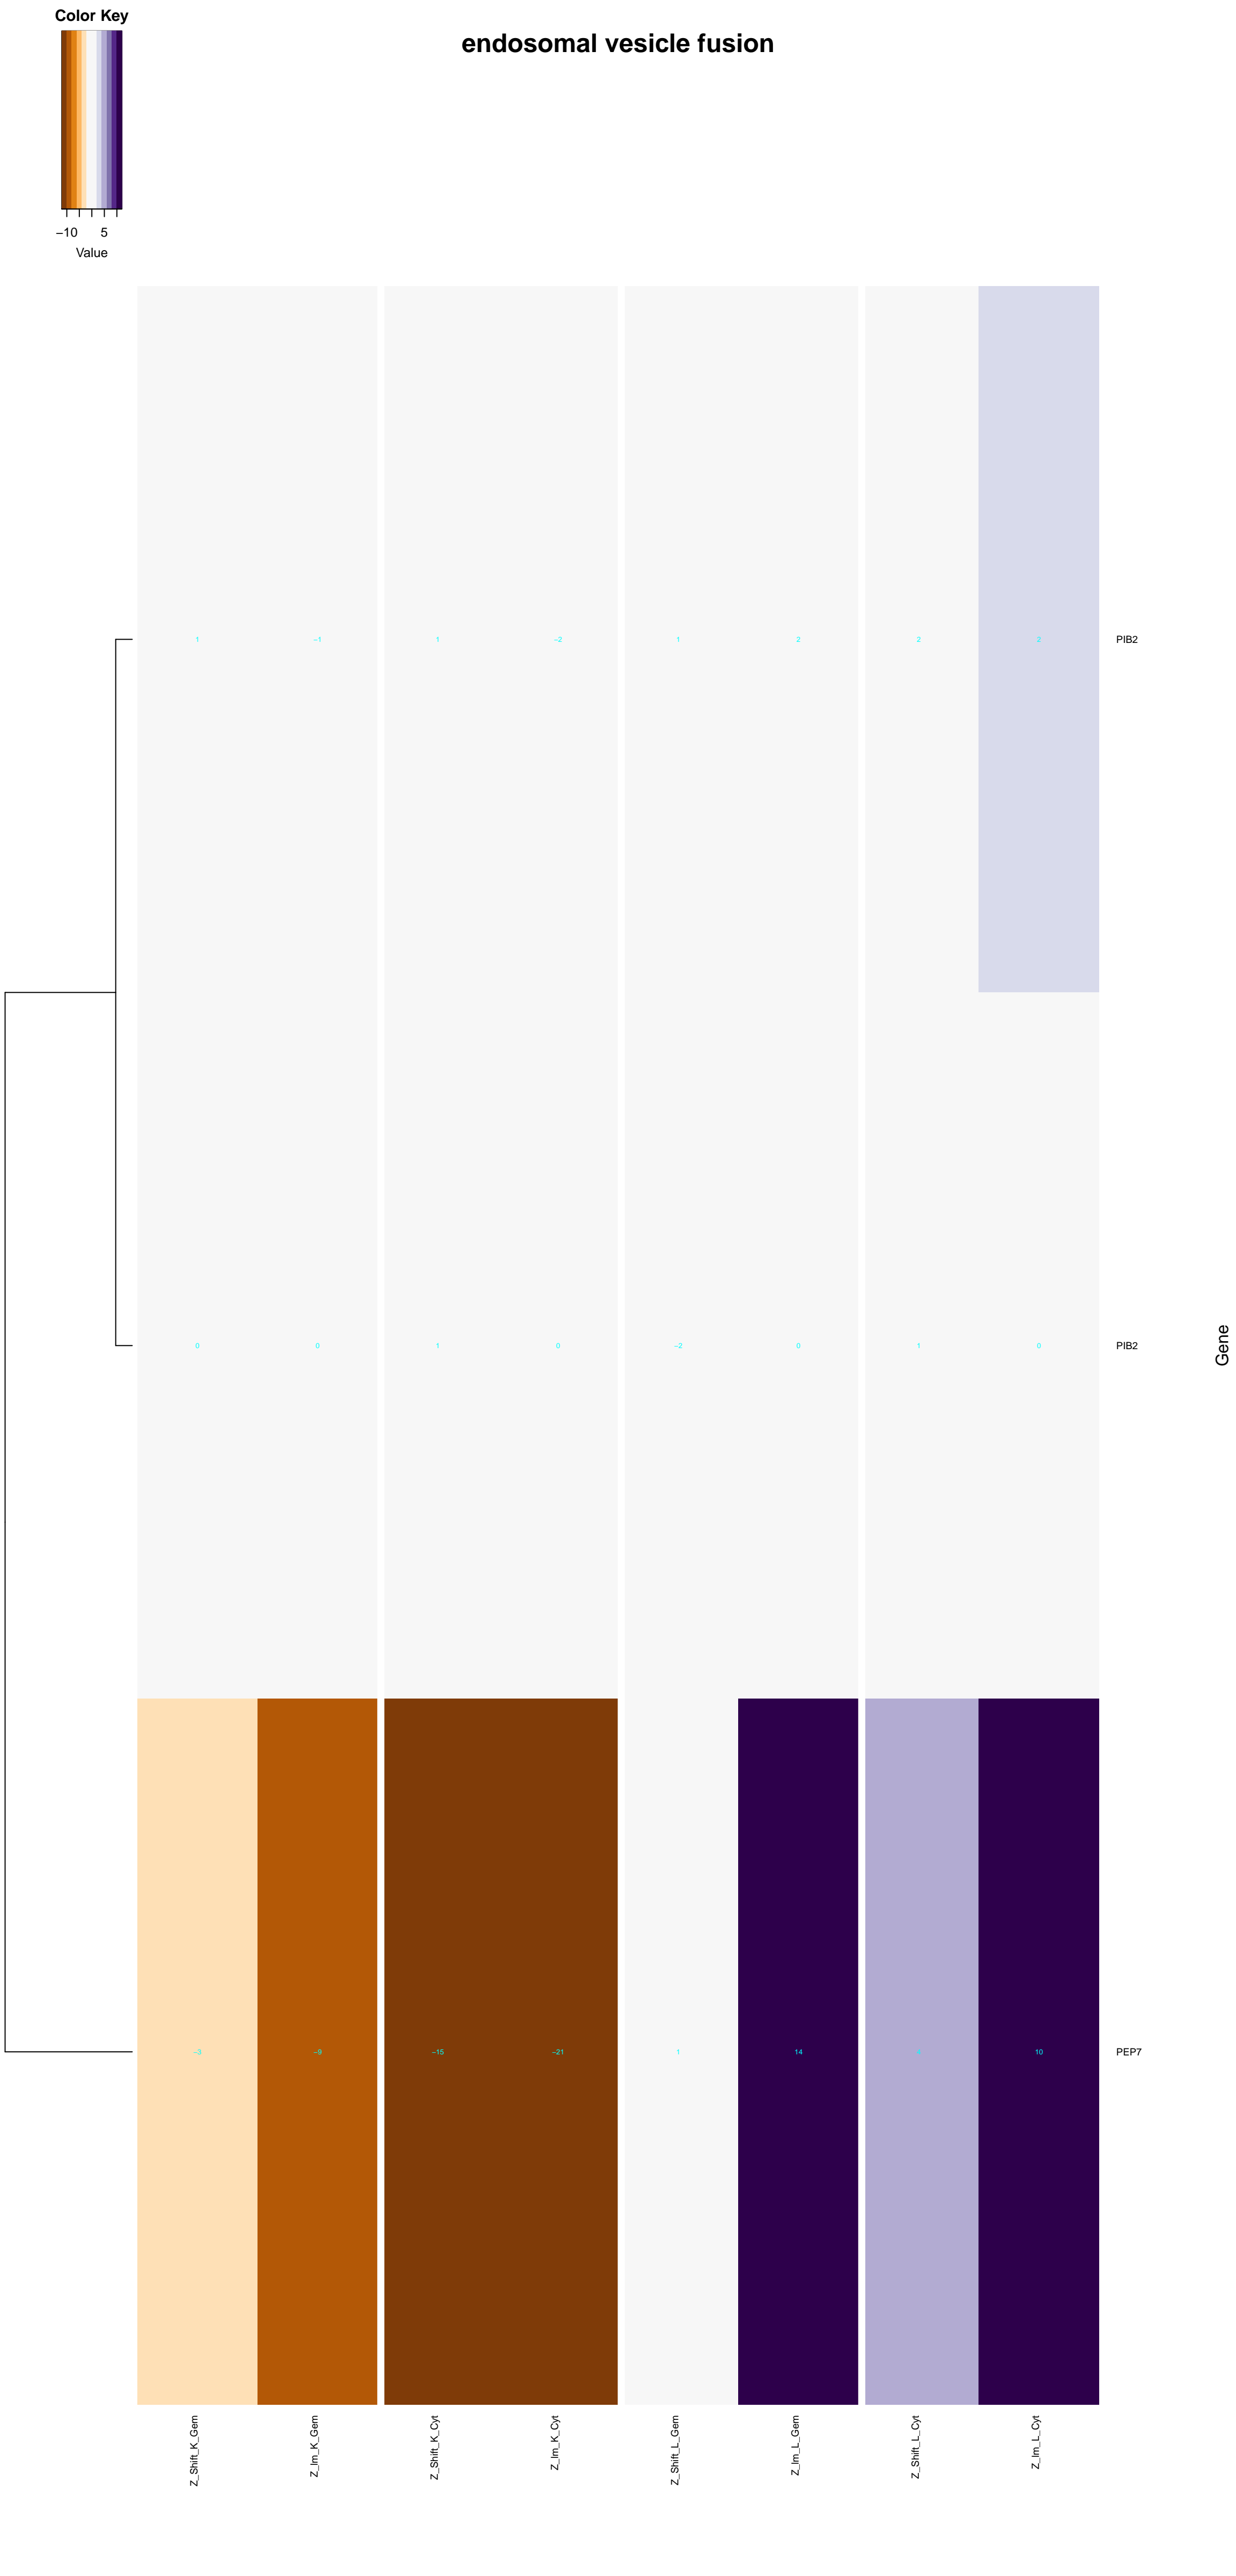

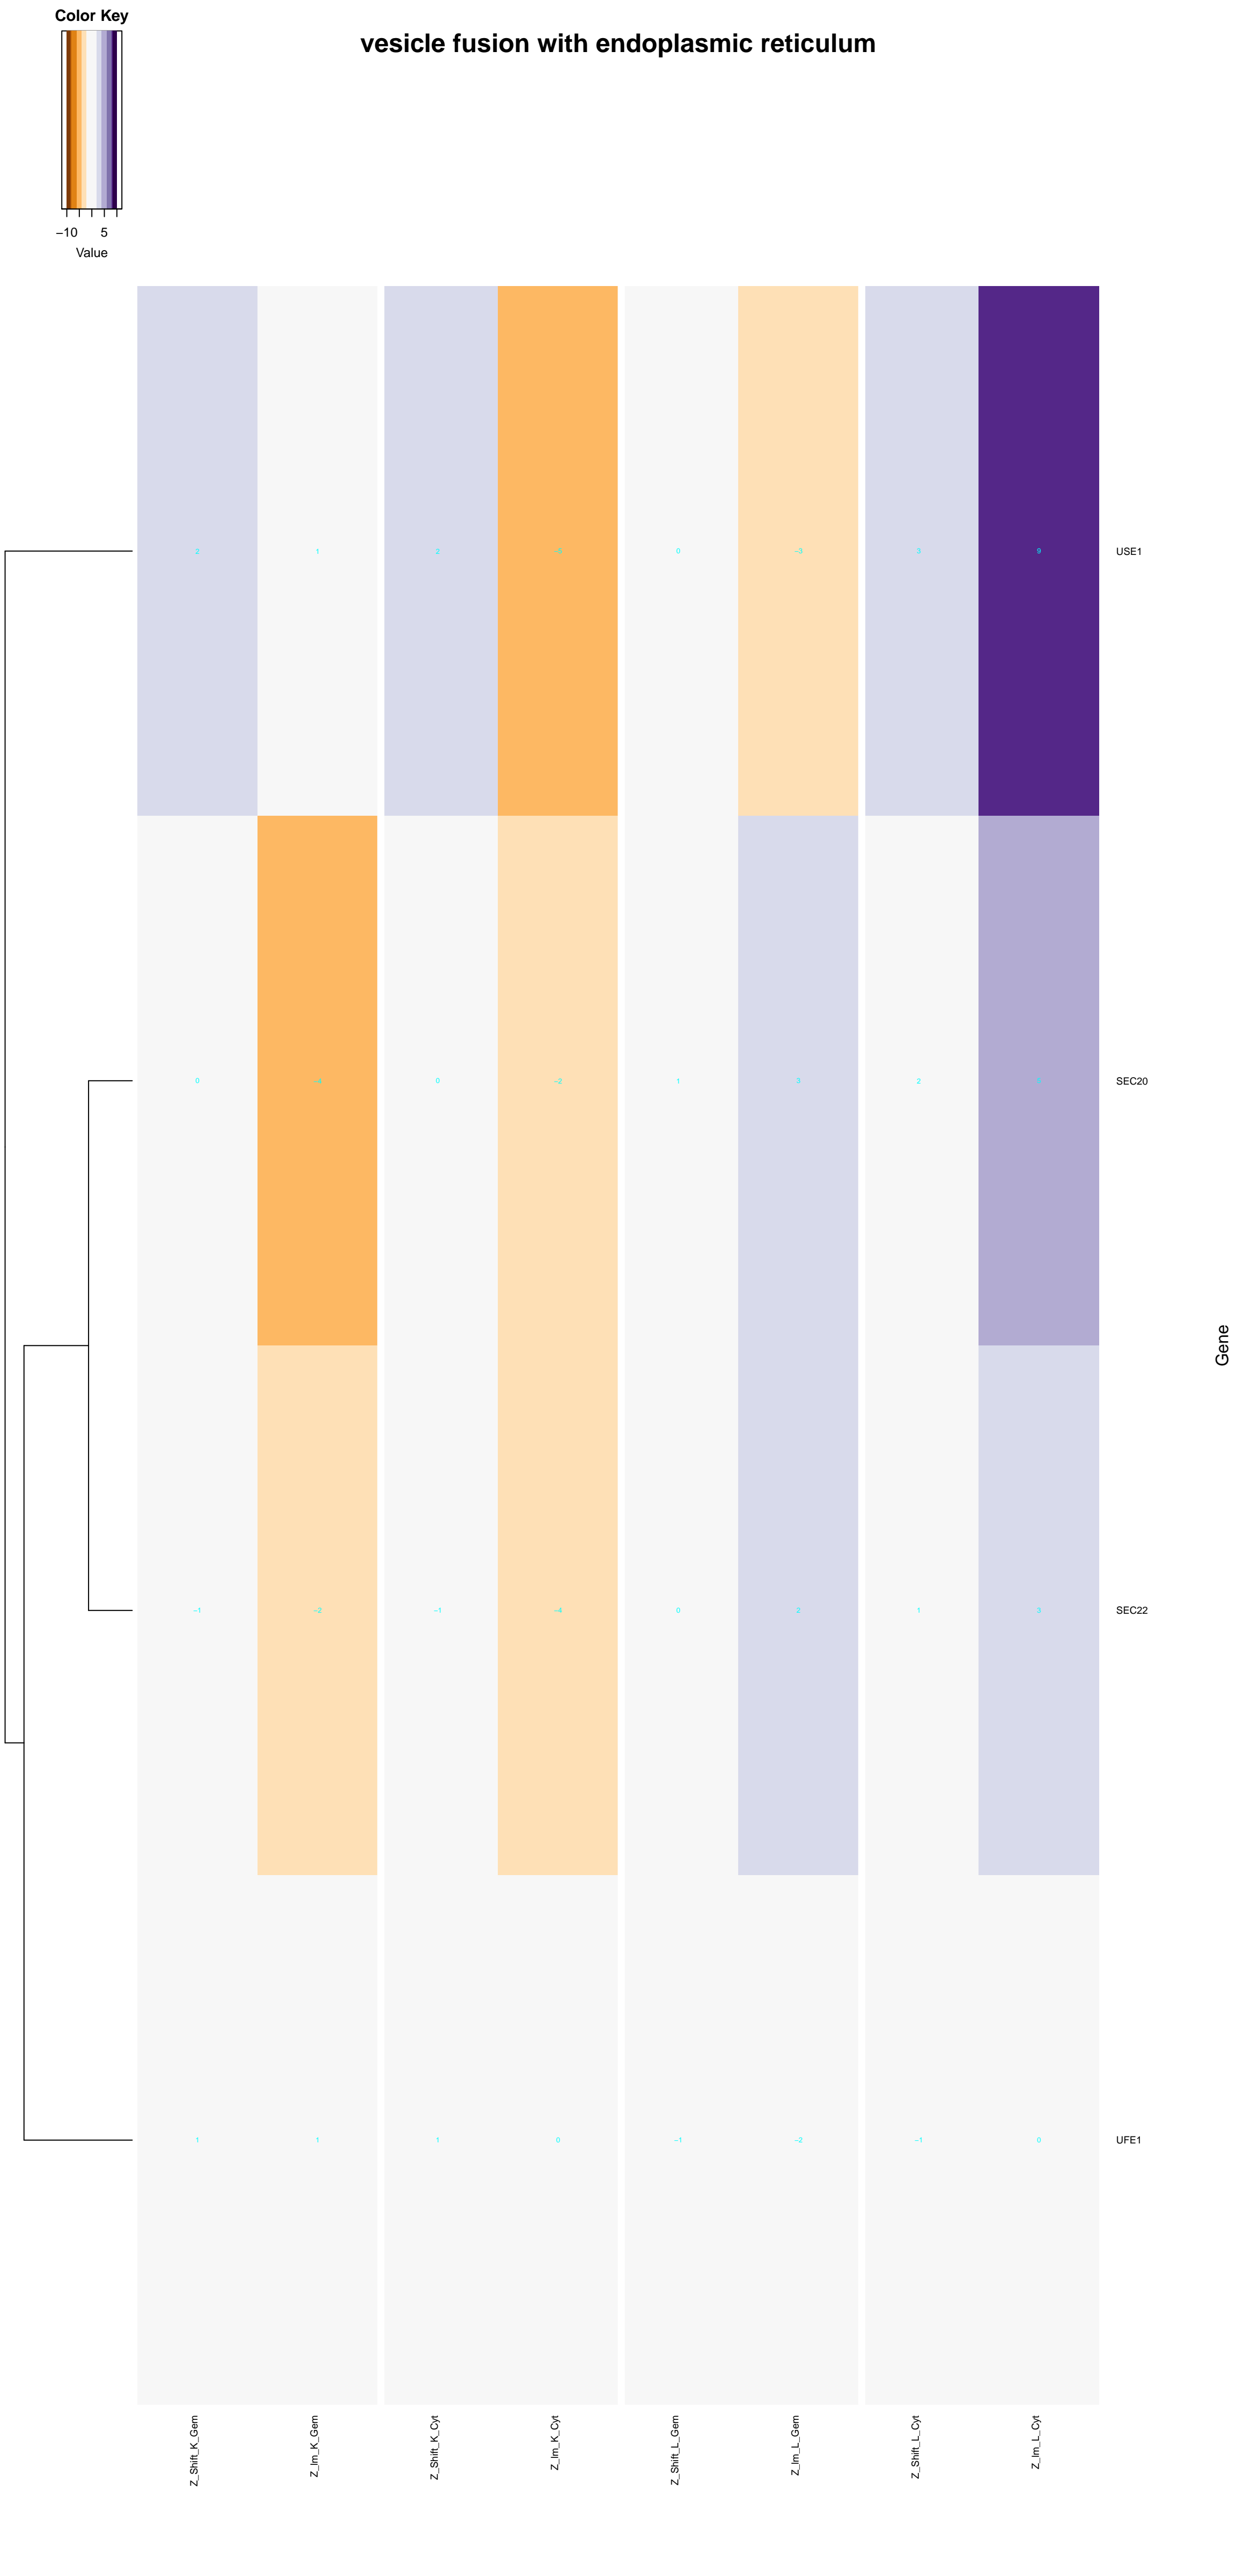

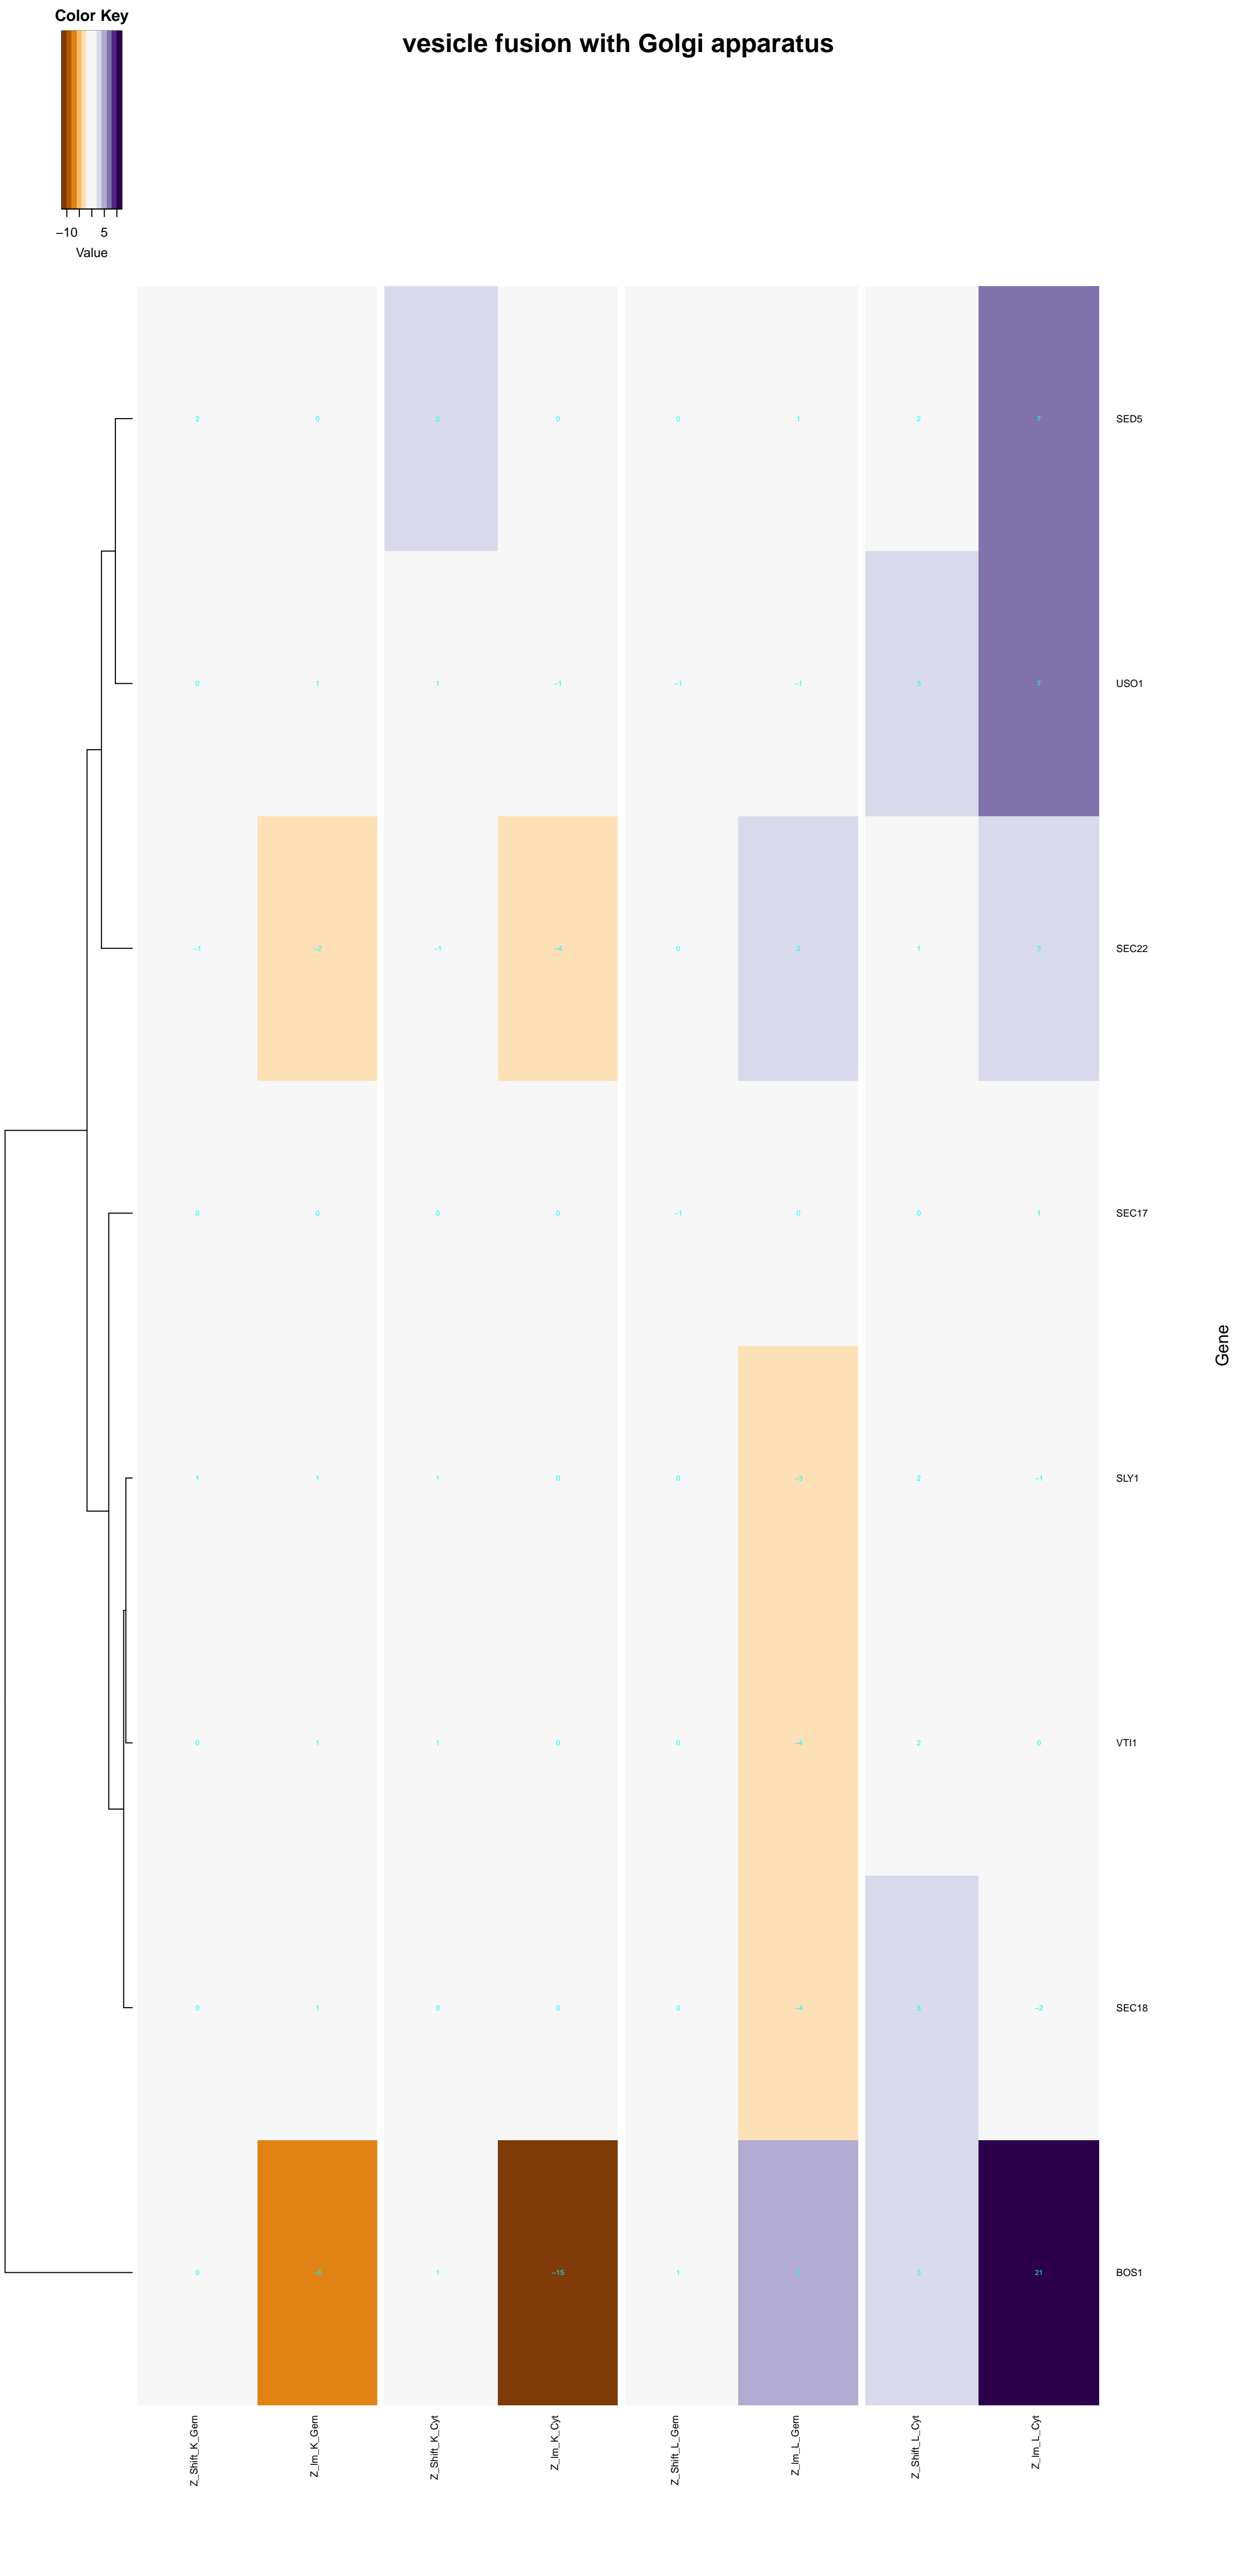

Supplement: s1 [file s1]

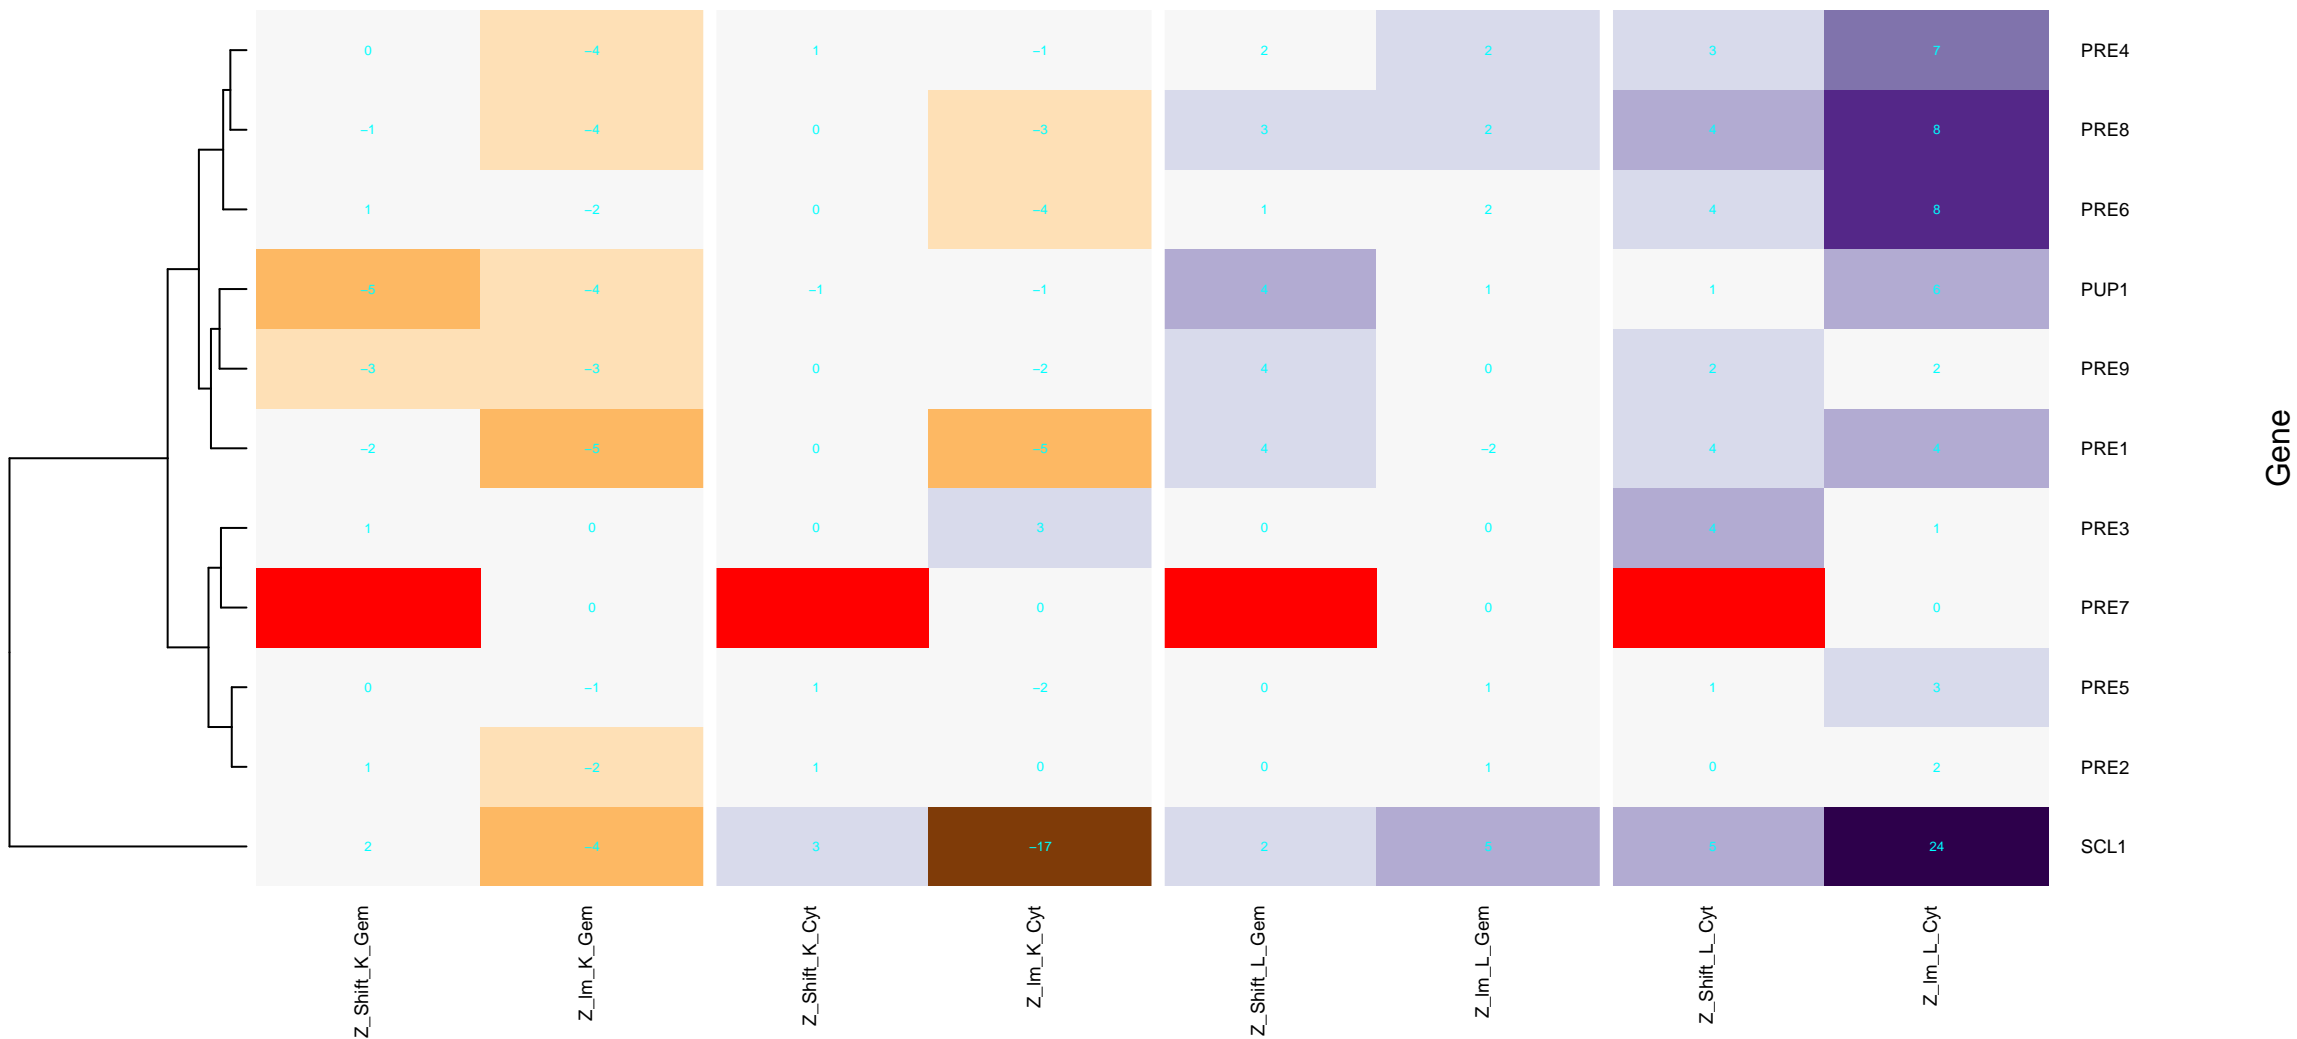

Supplement: s1 [file s1]

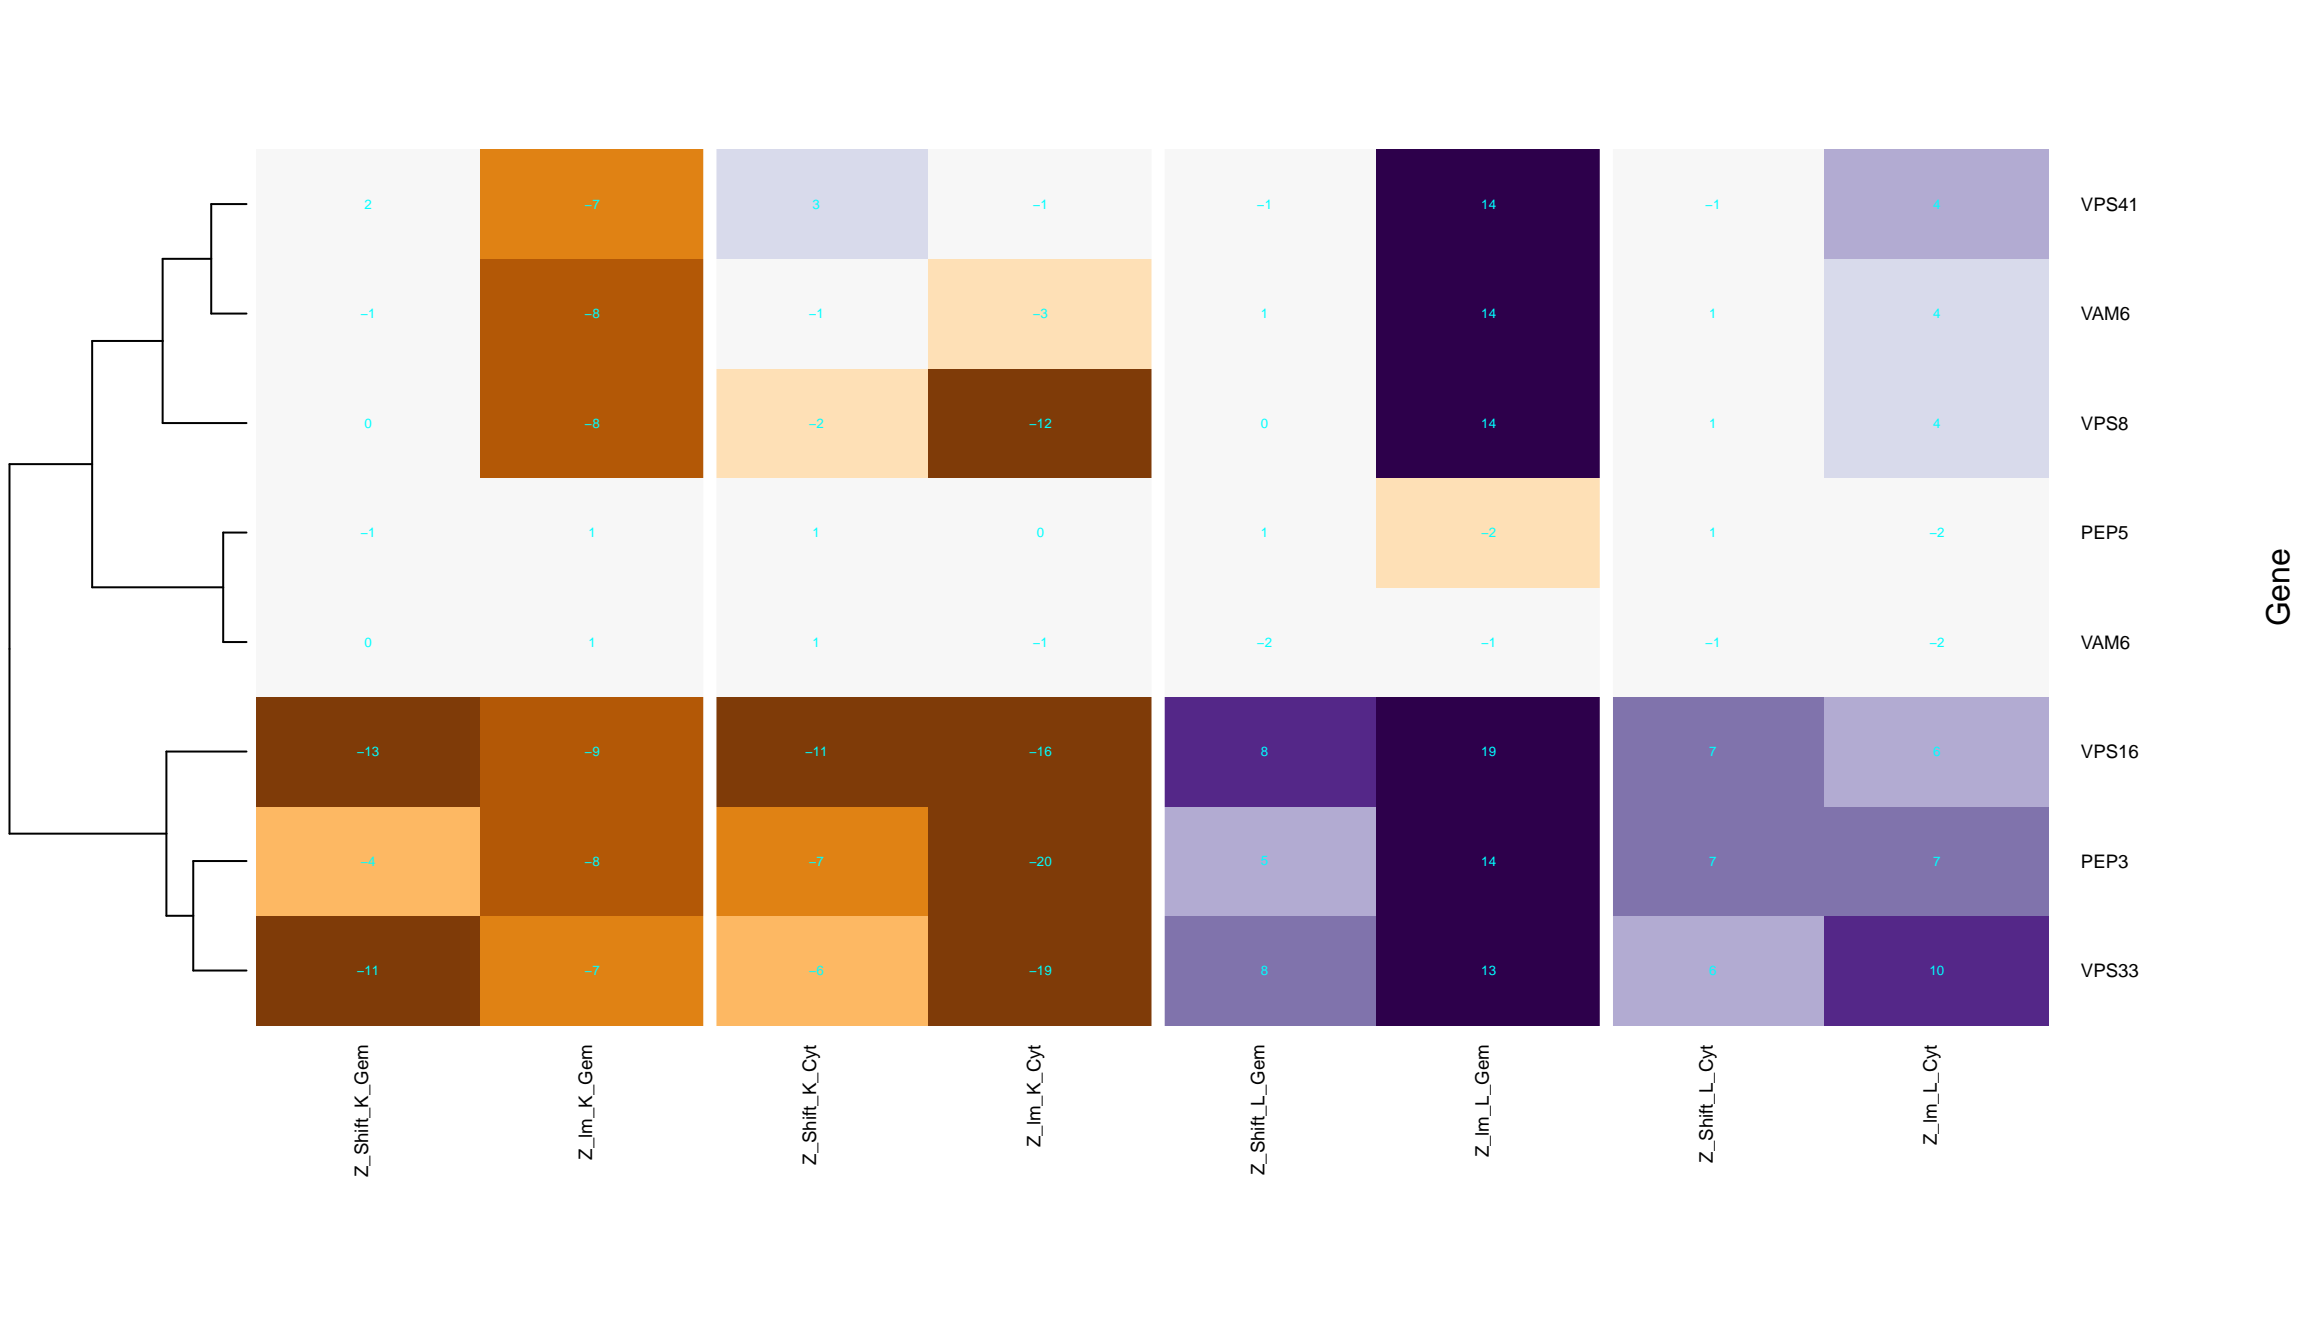

Supplement: s1 [file s1]

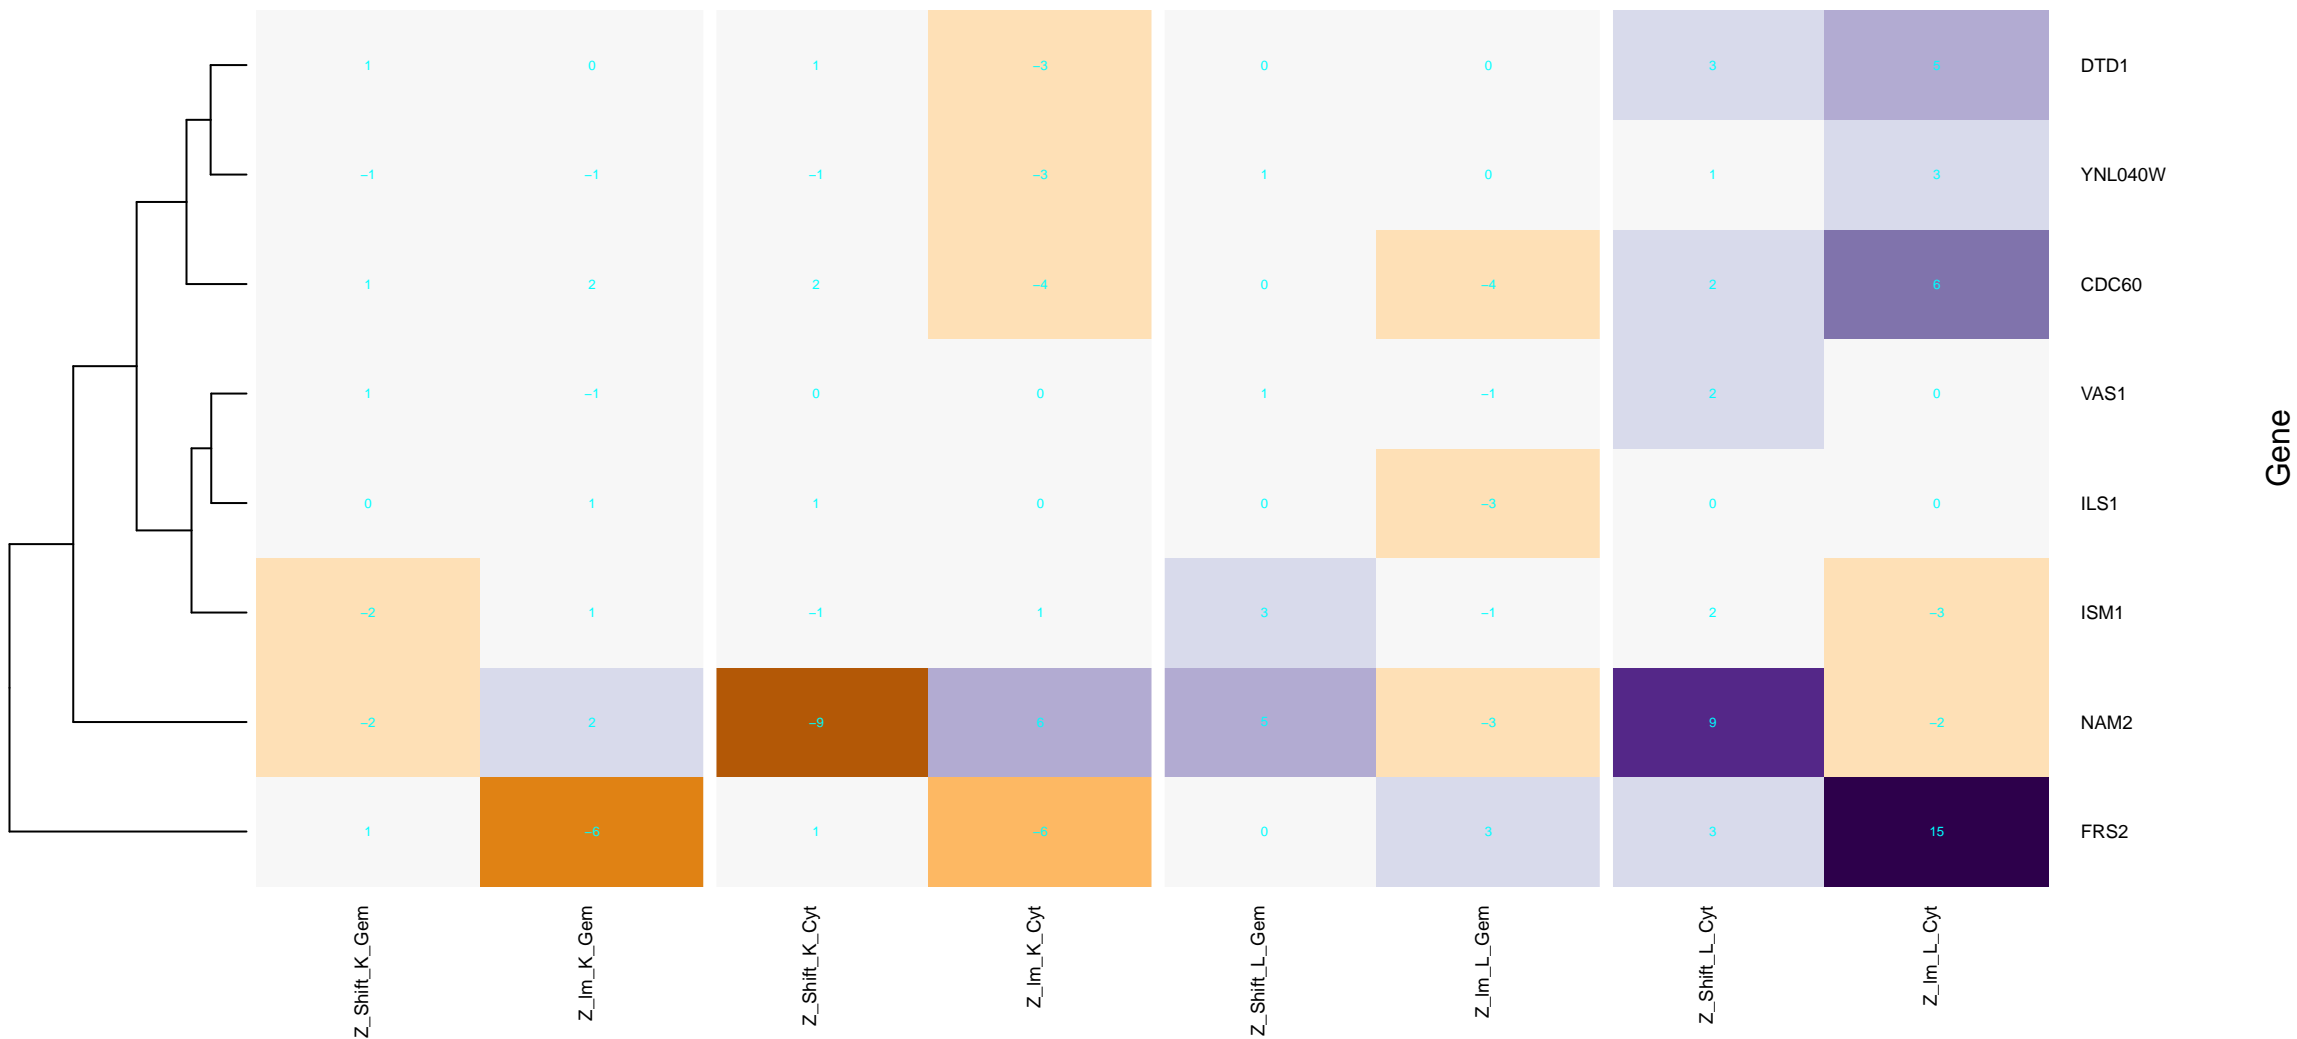

Supplement: s1 [file s1]

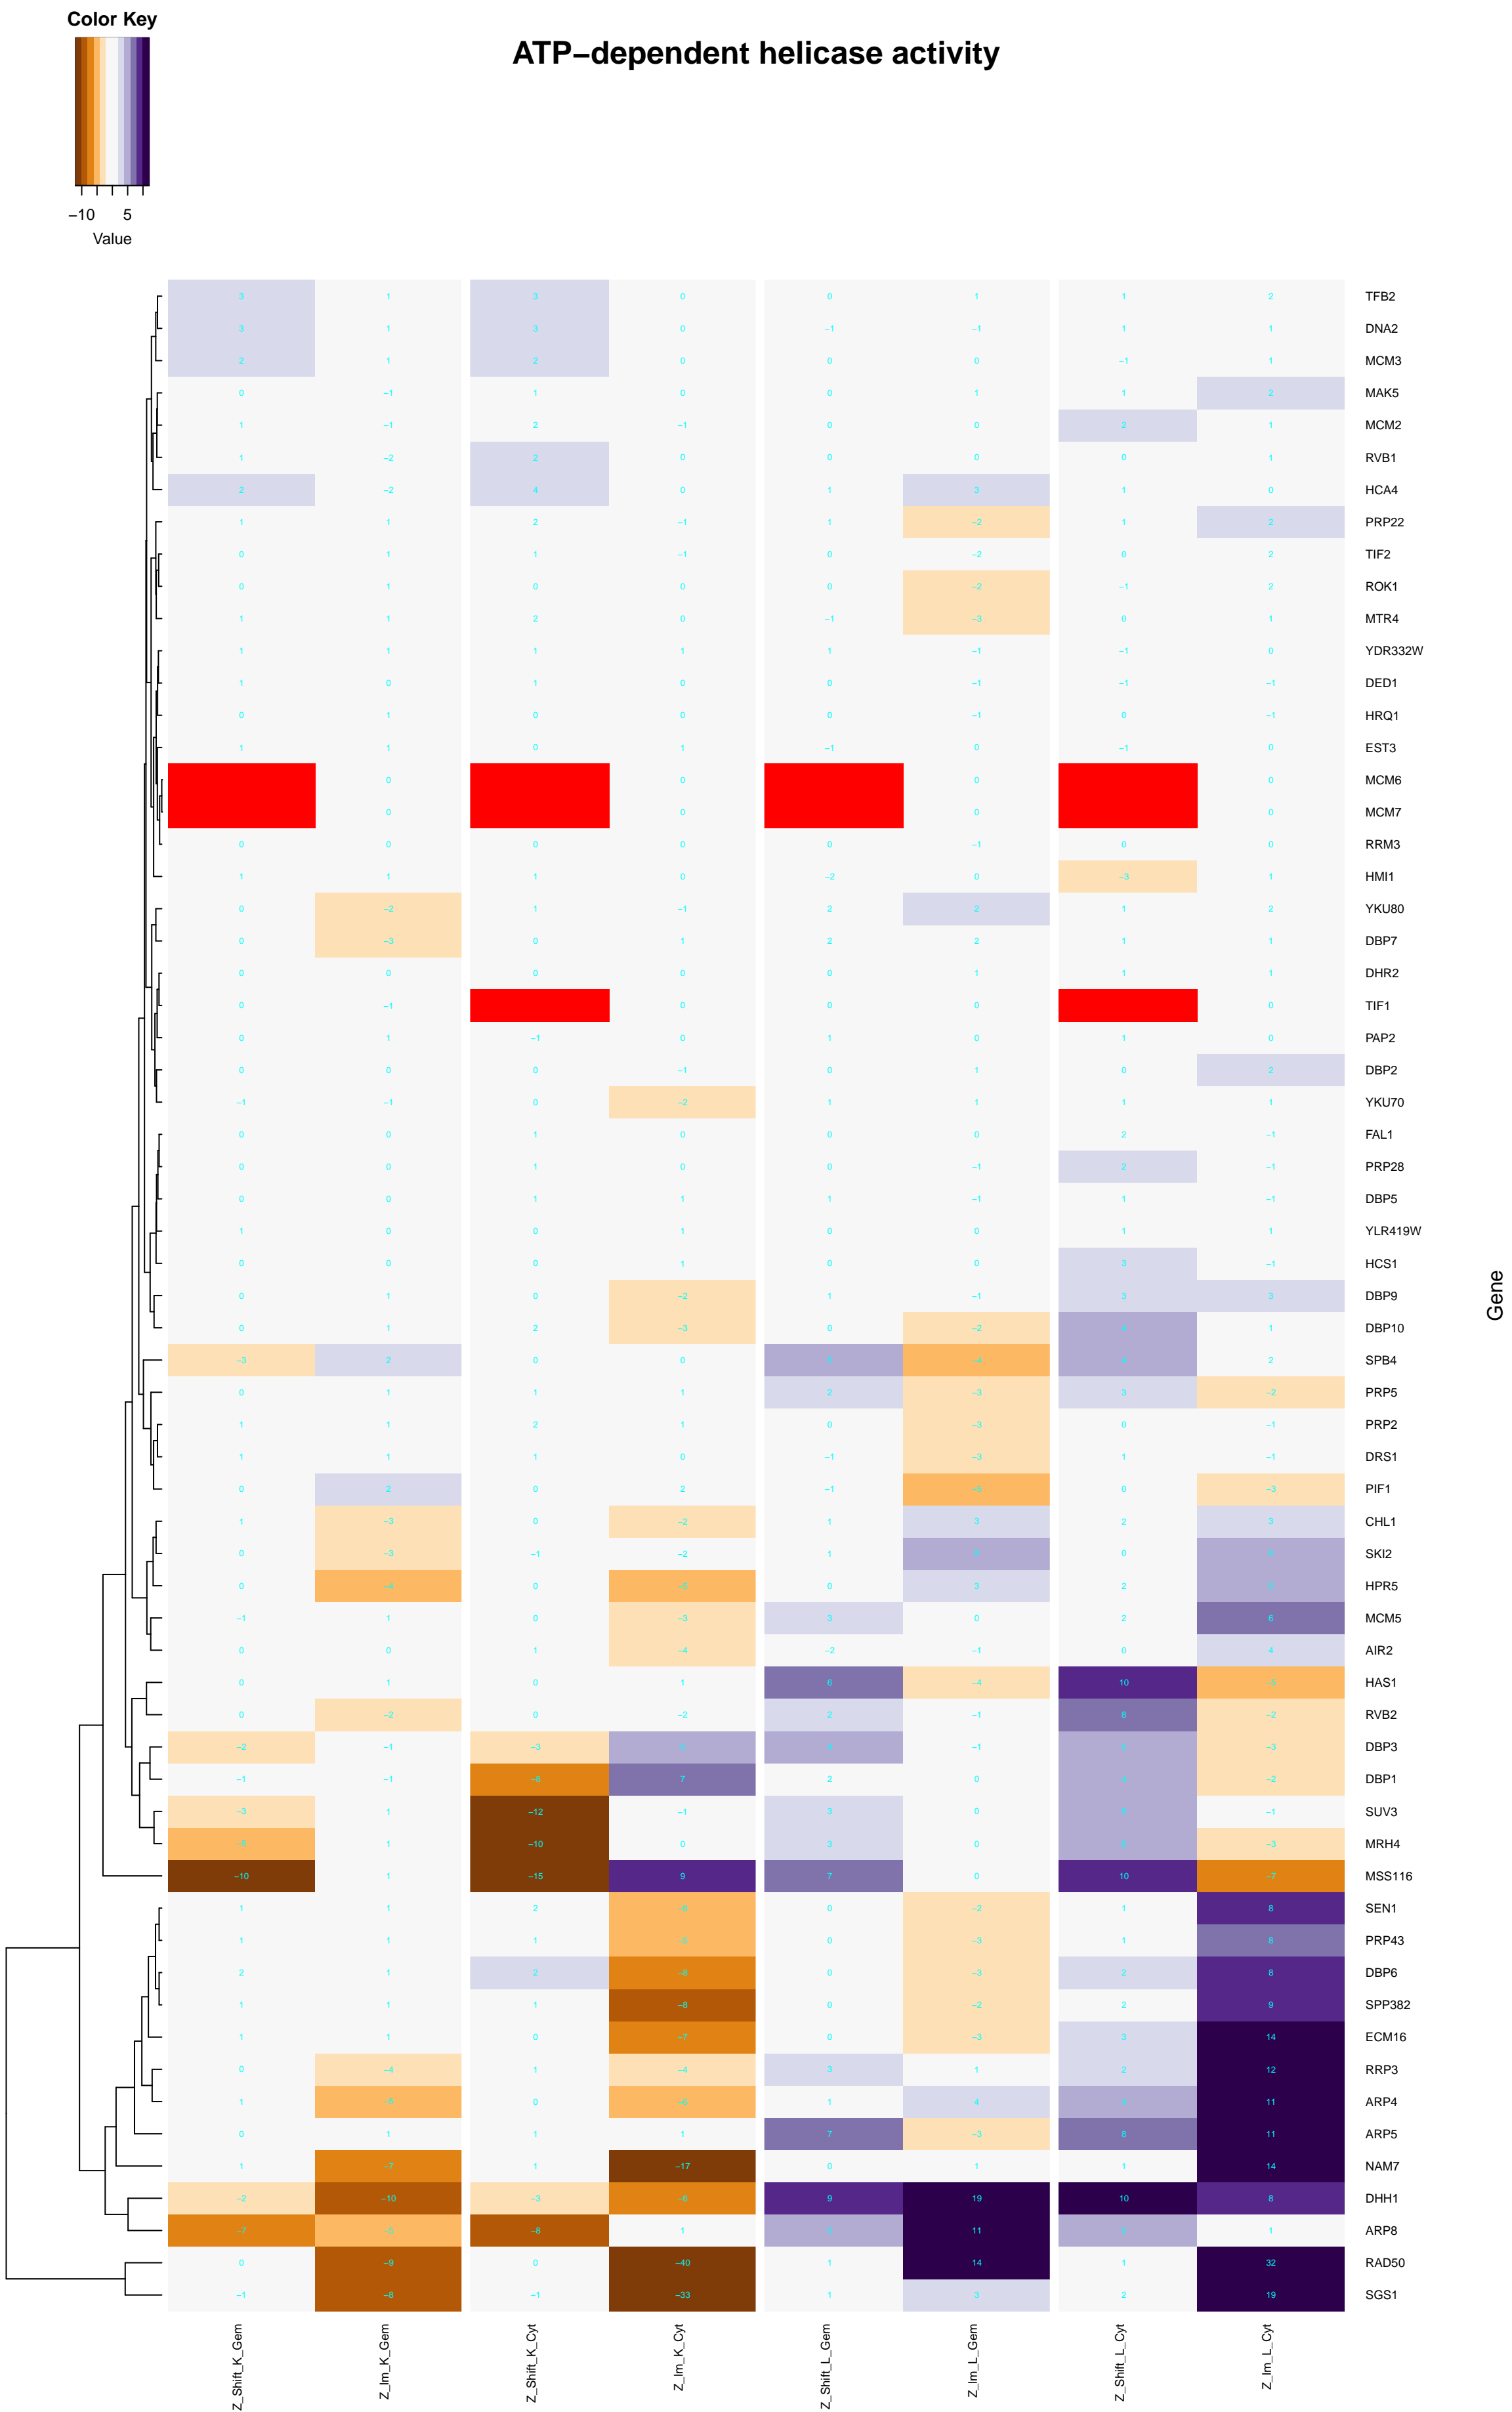

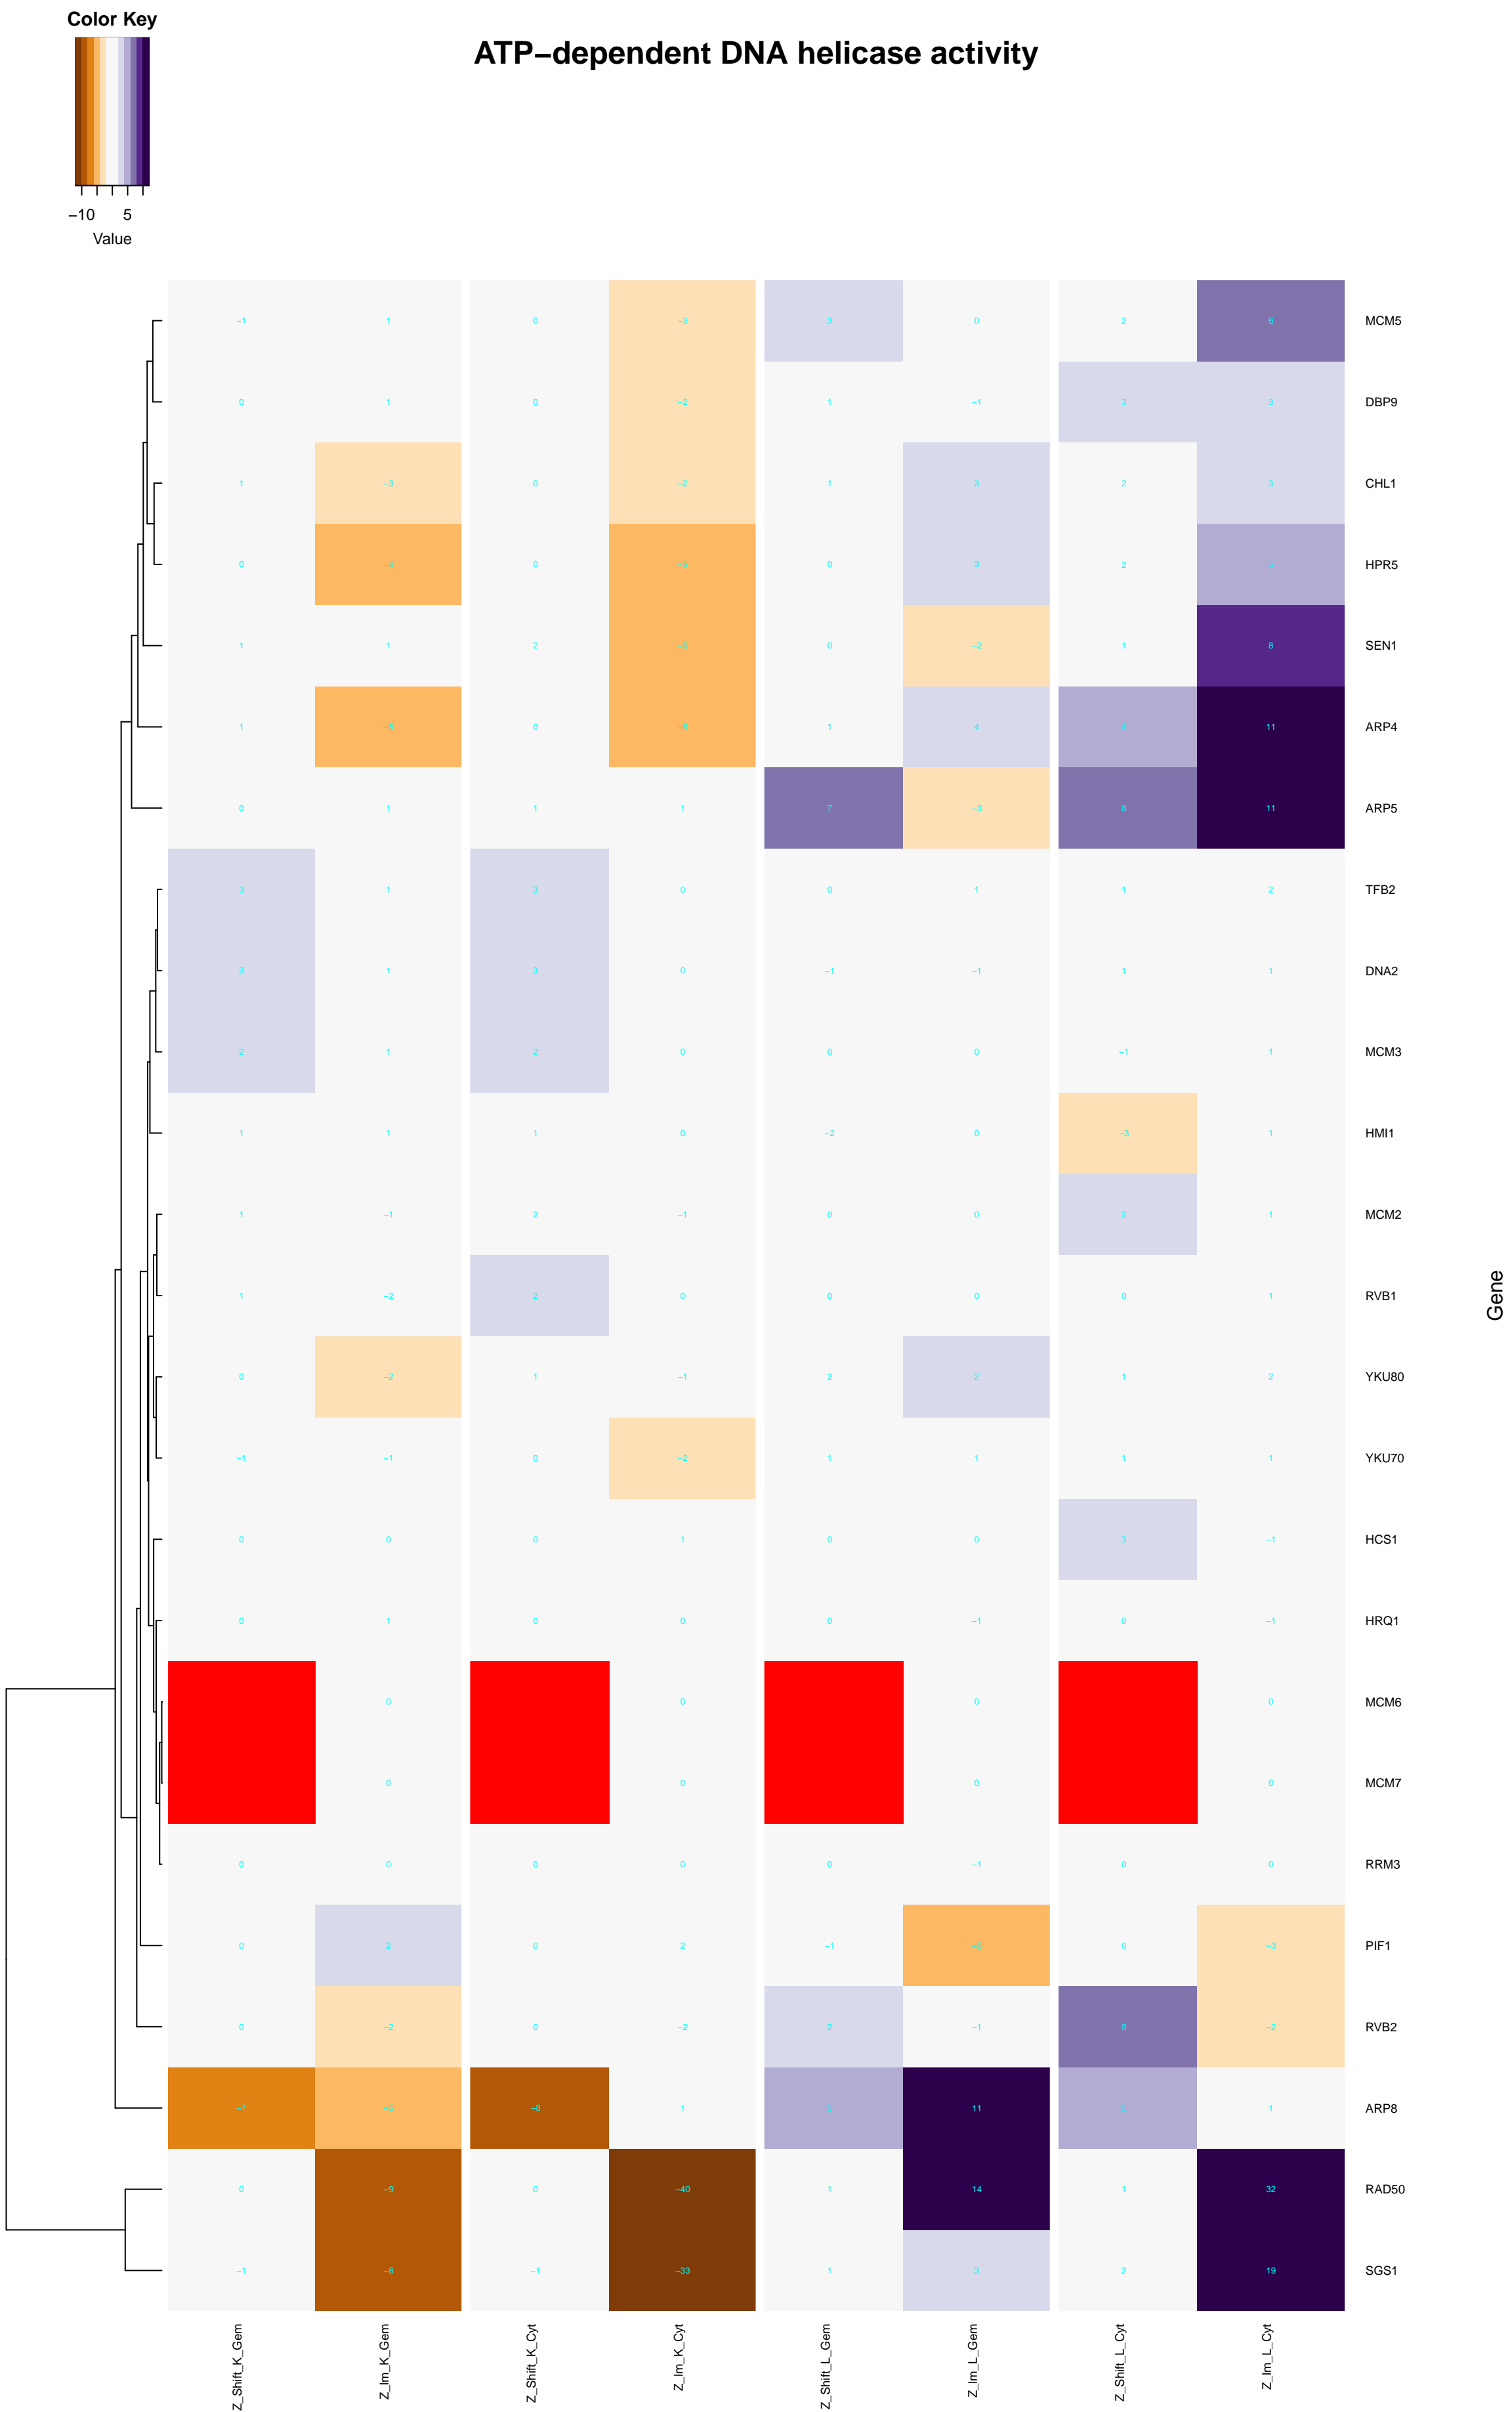

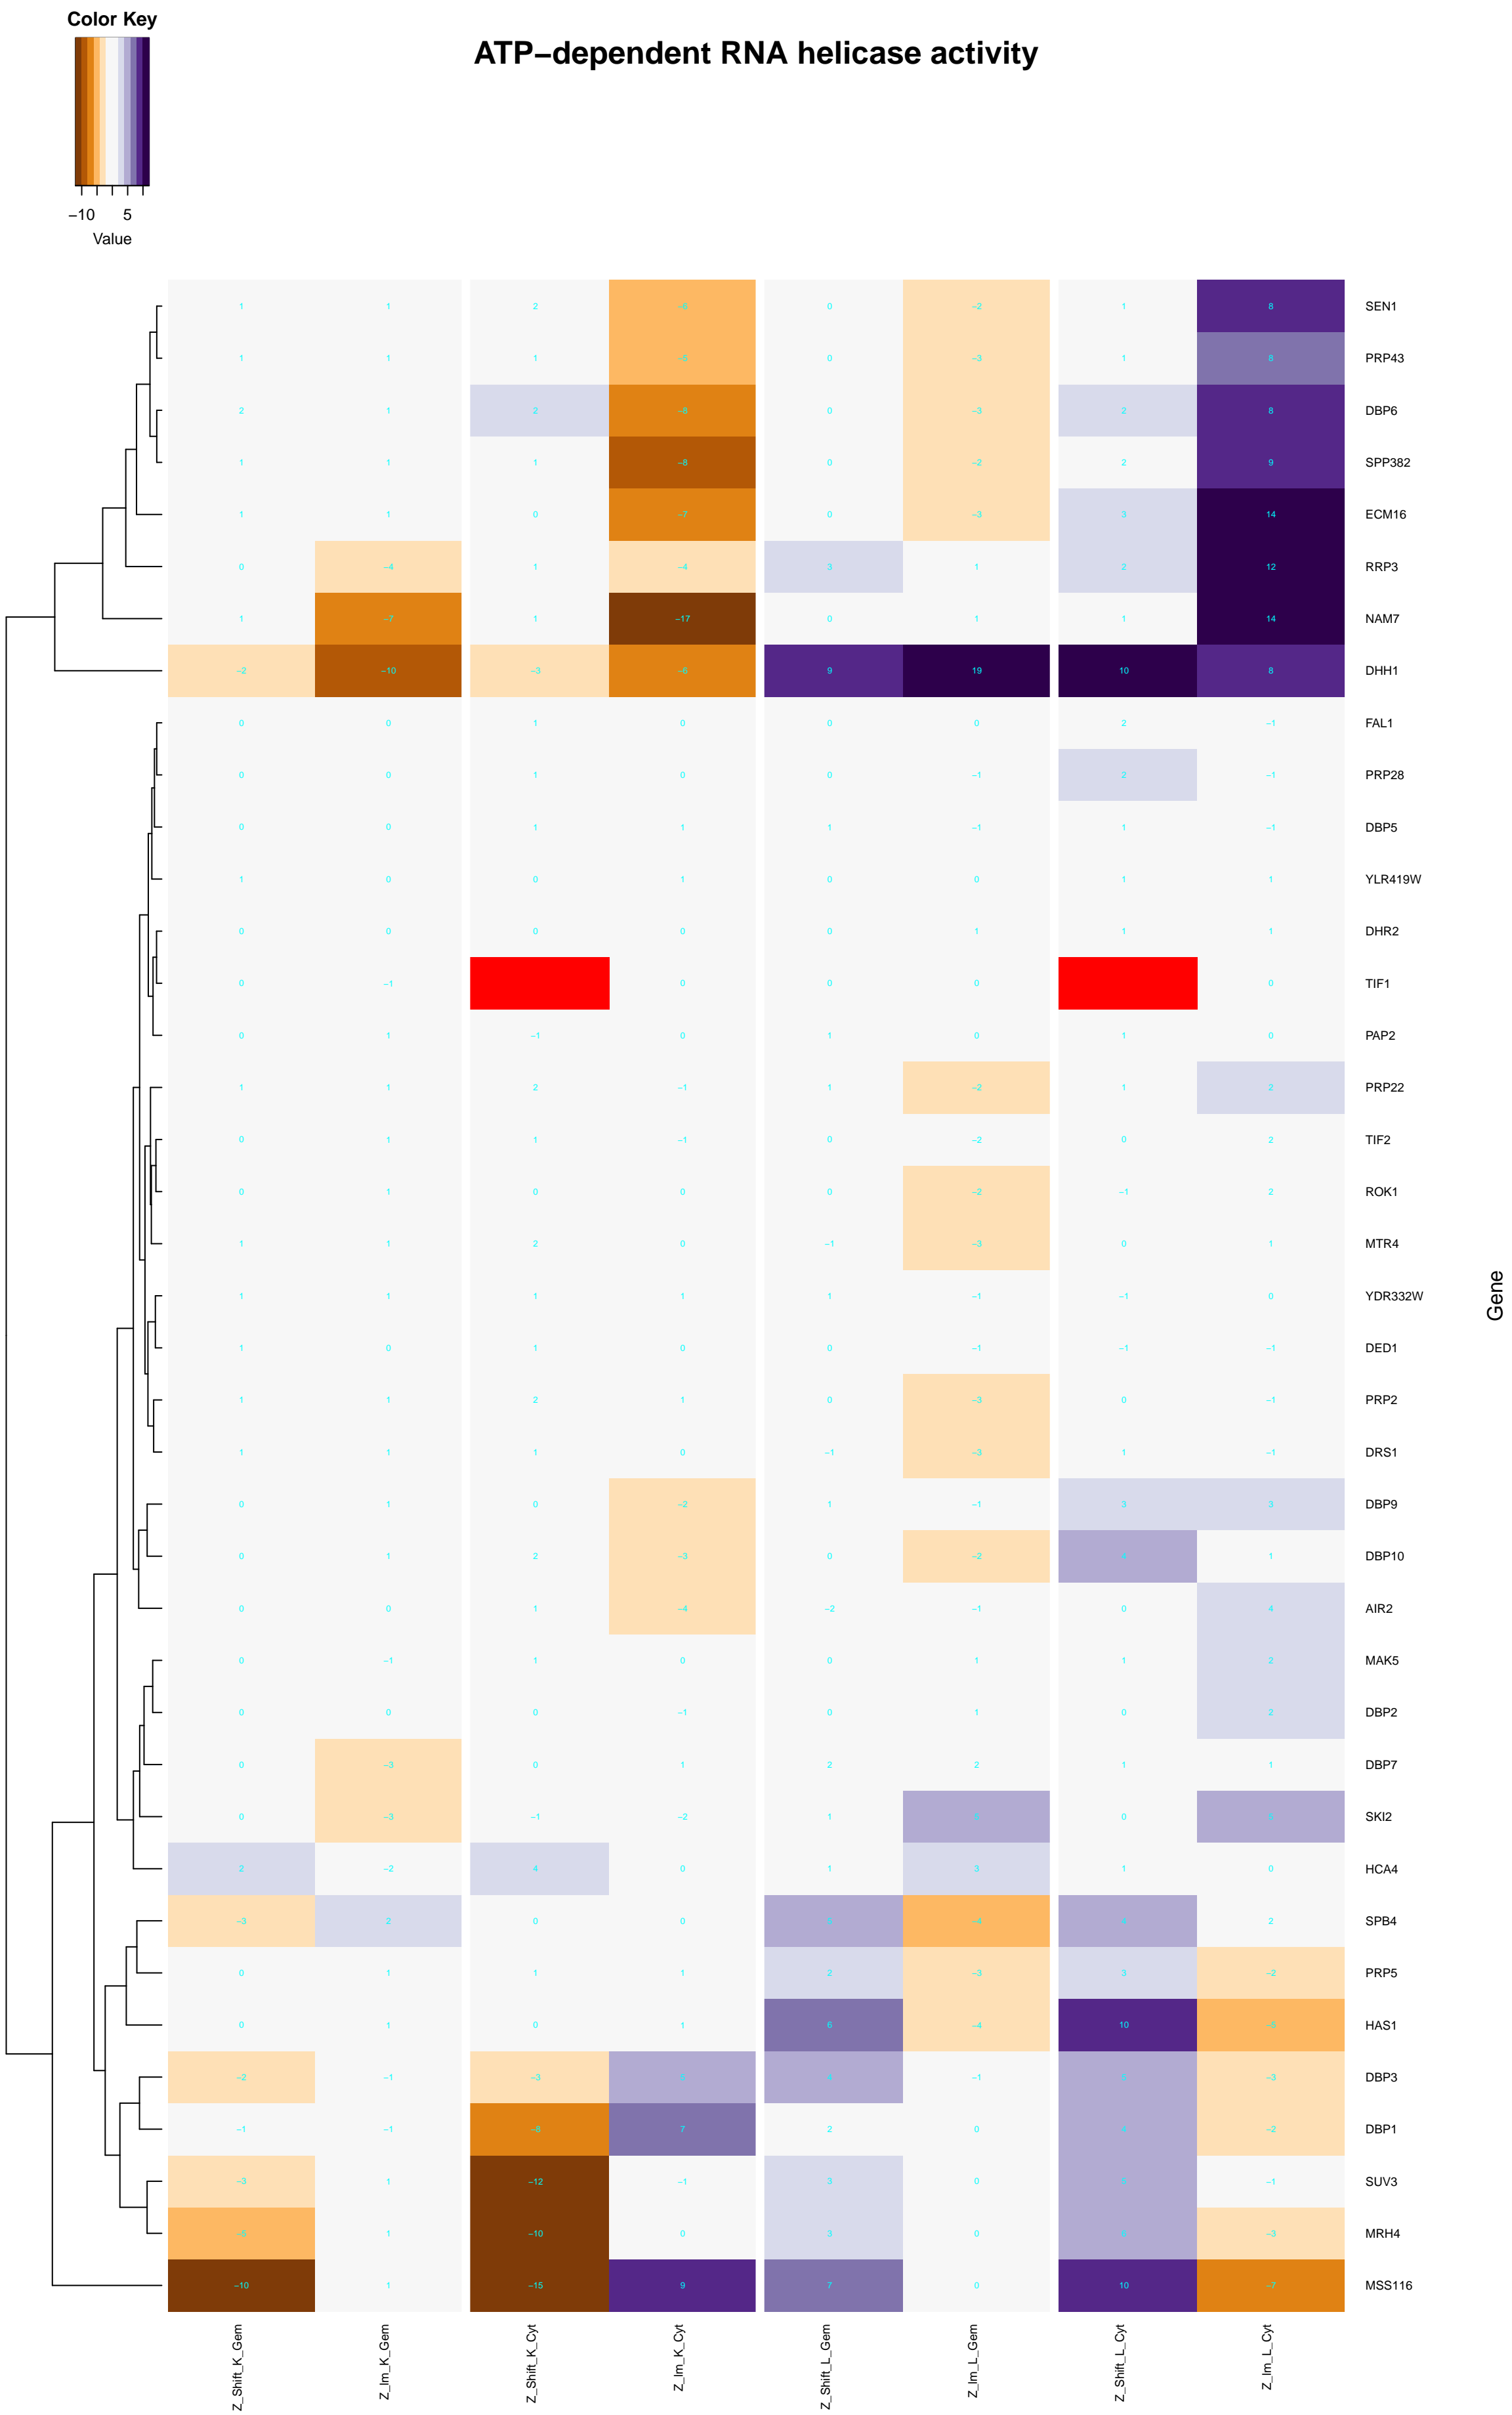

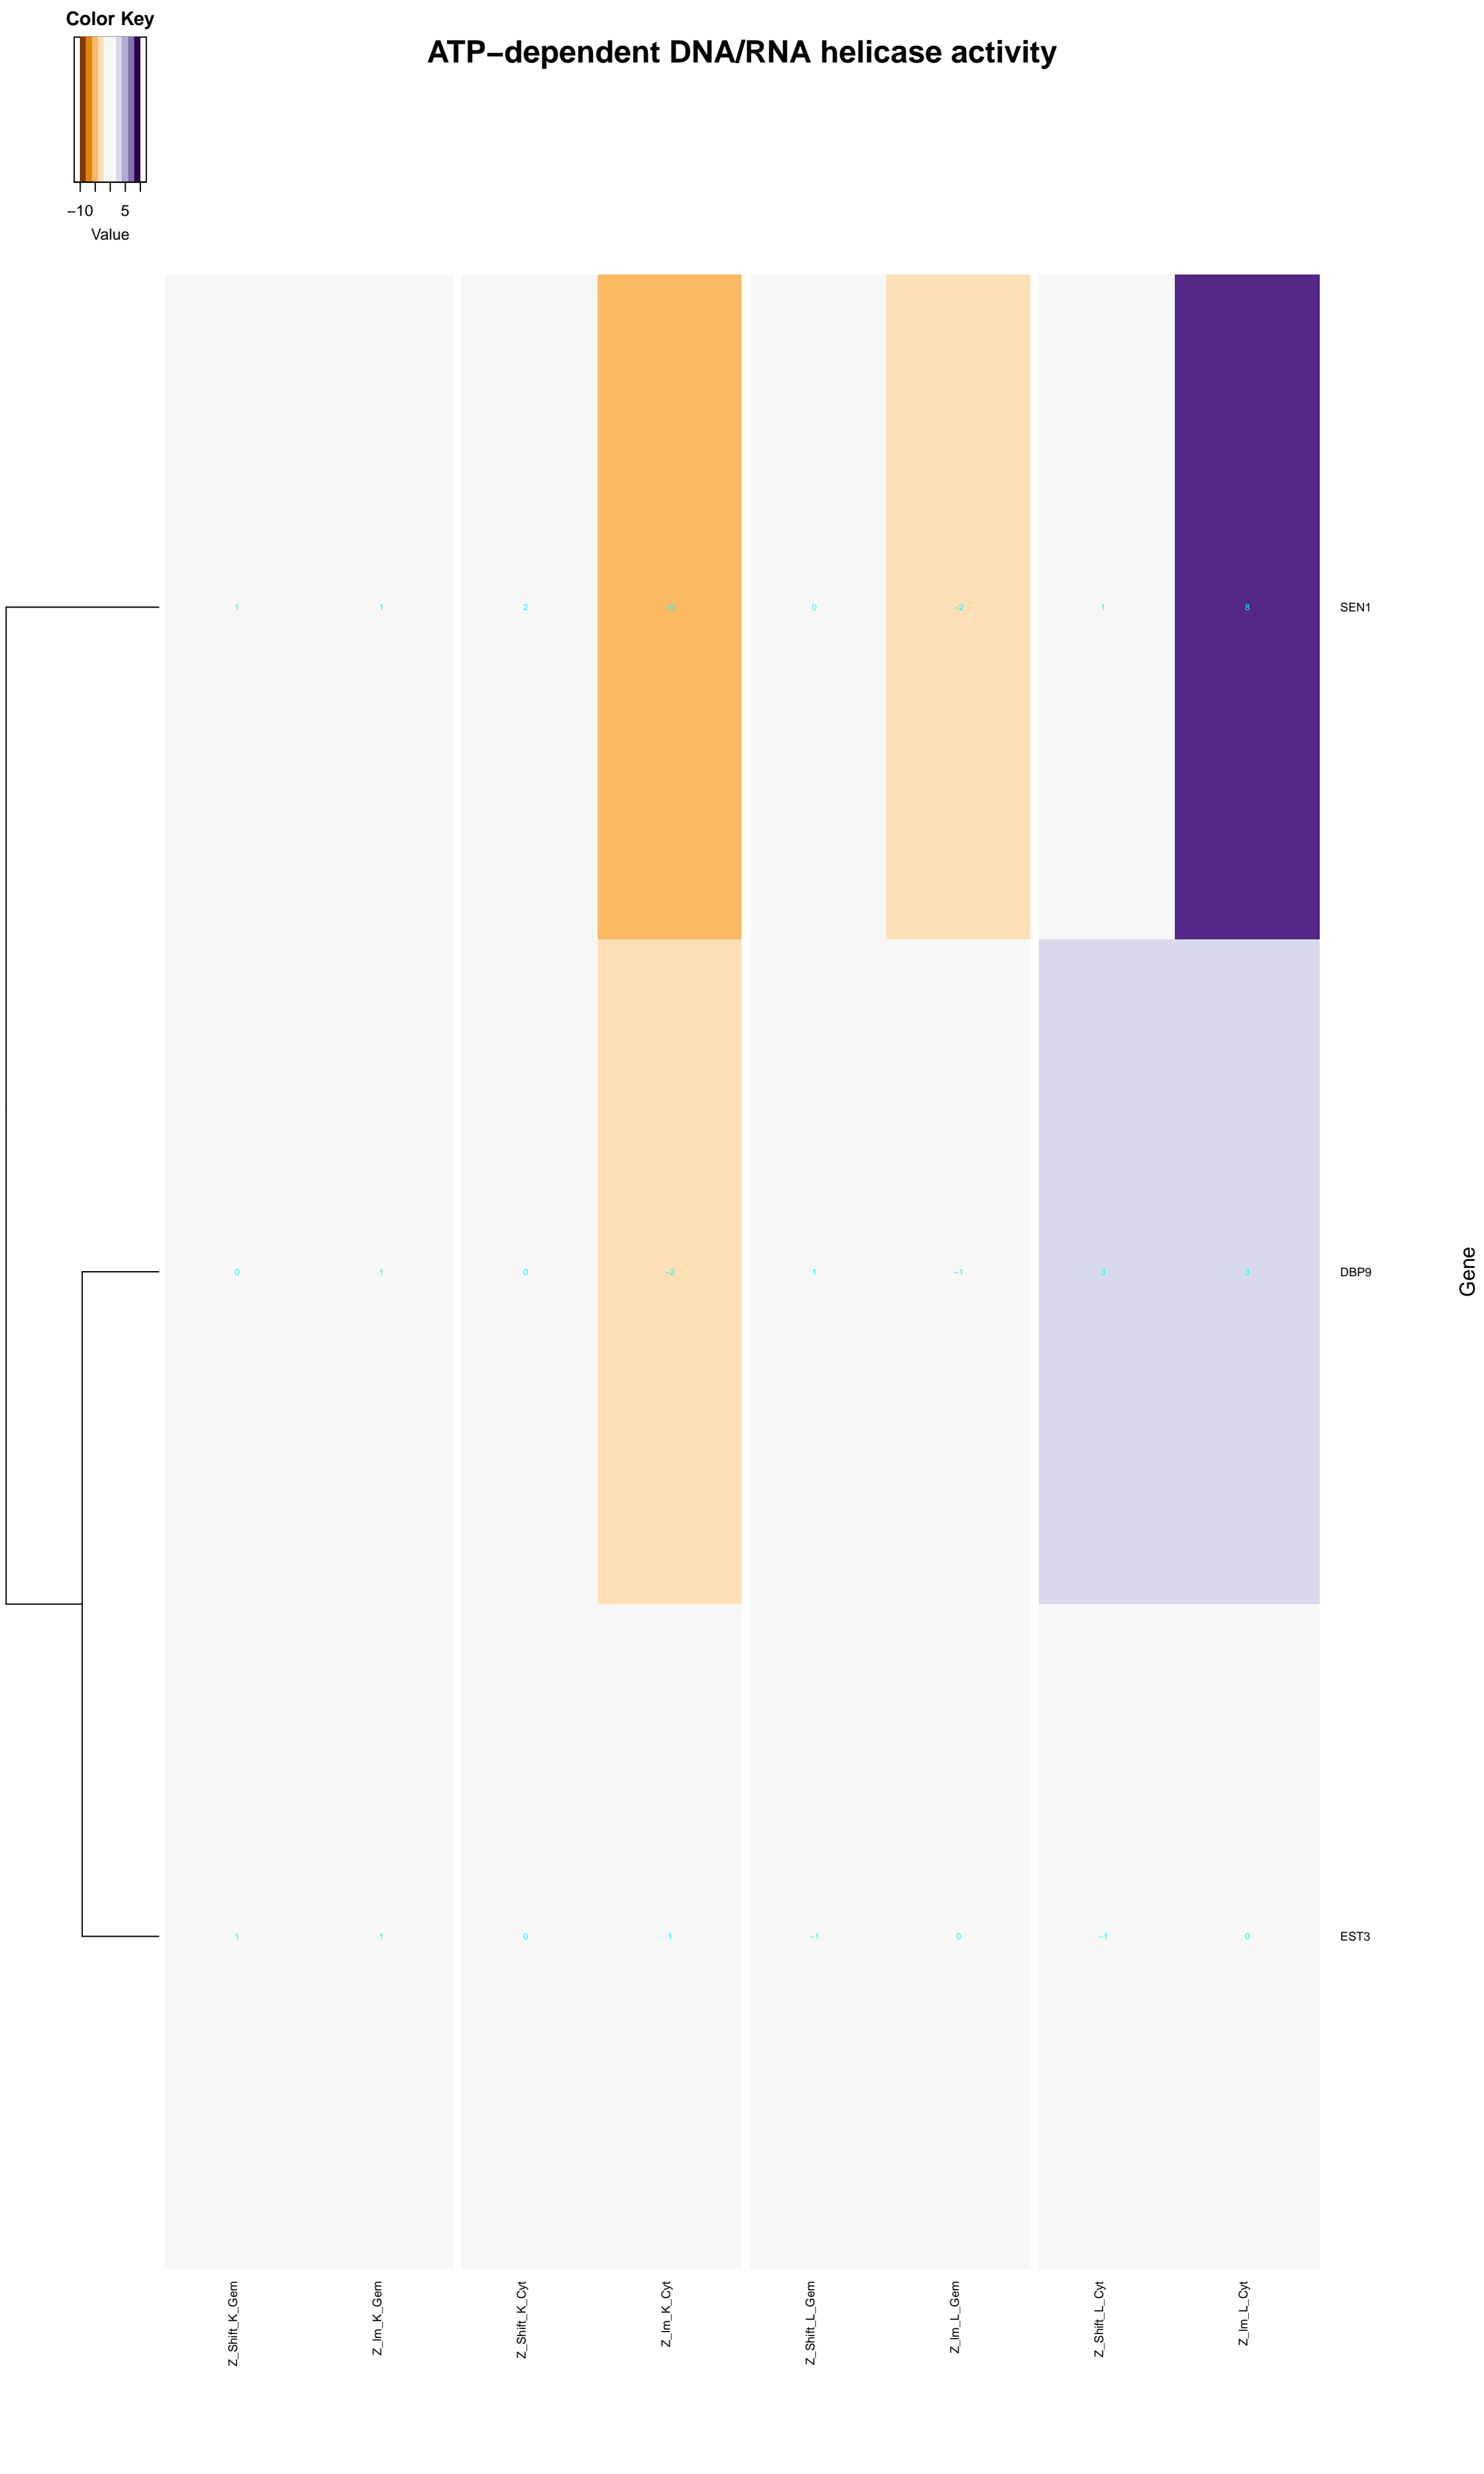

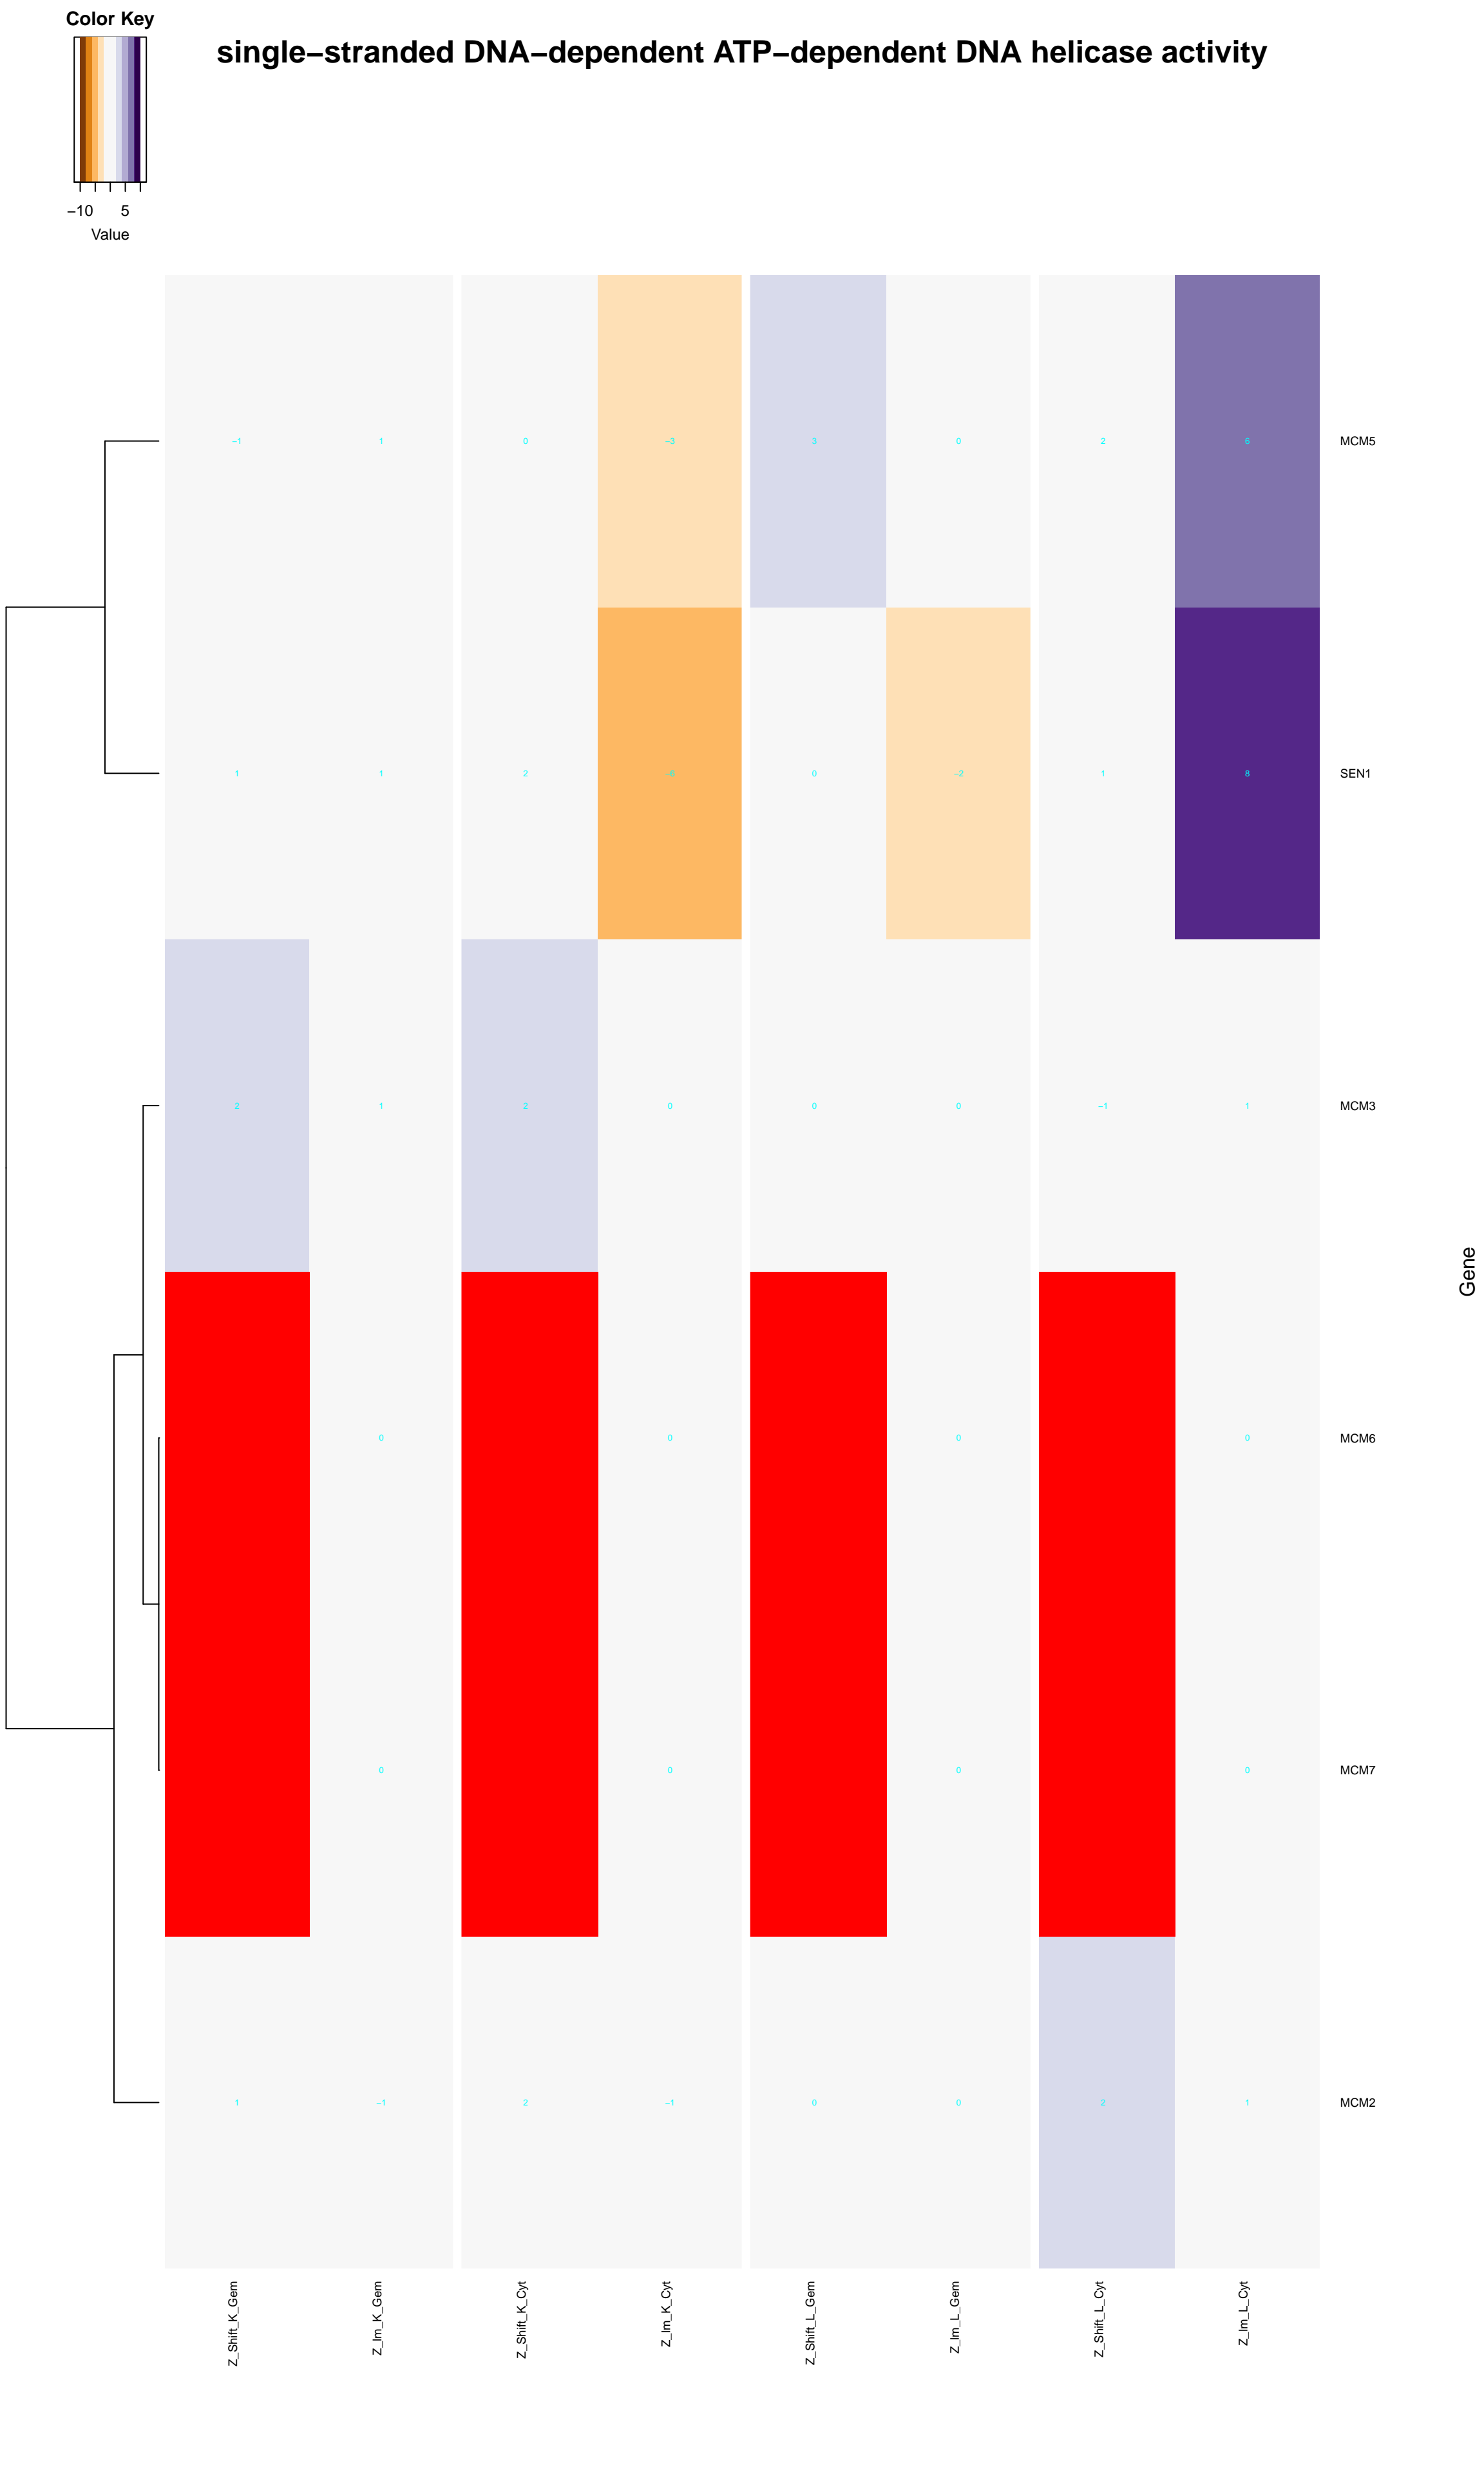

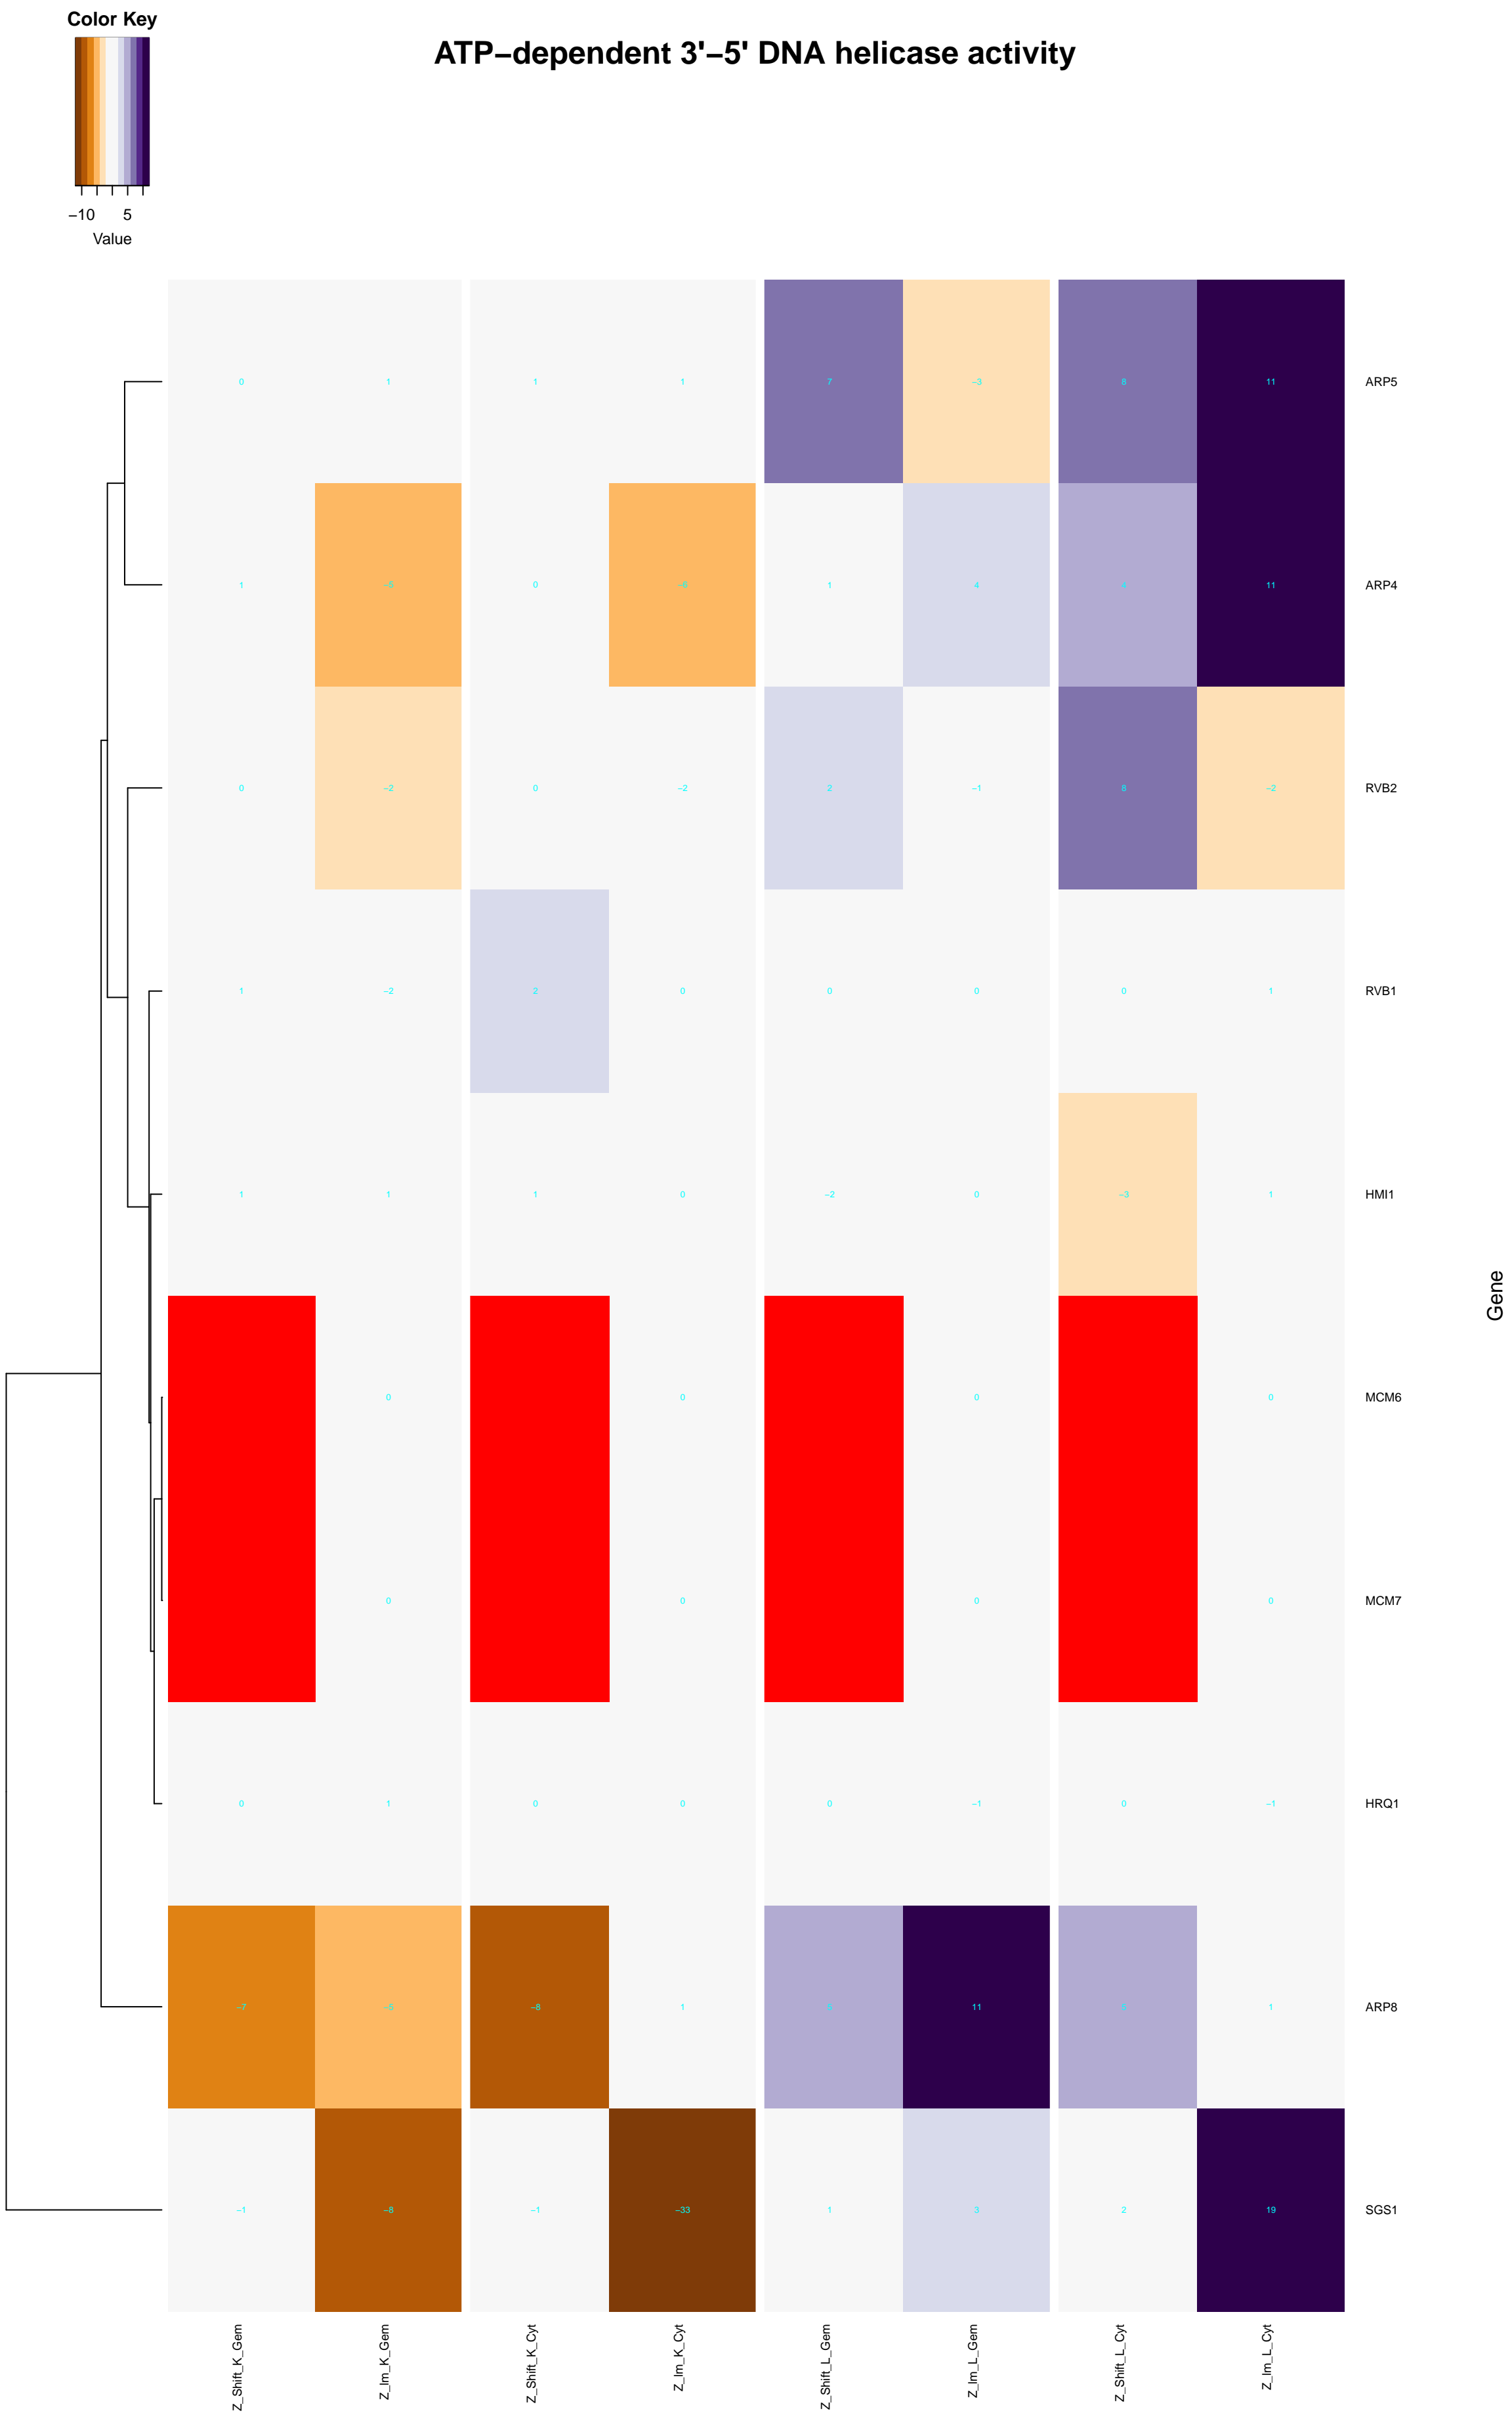

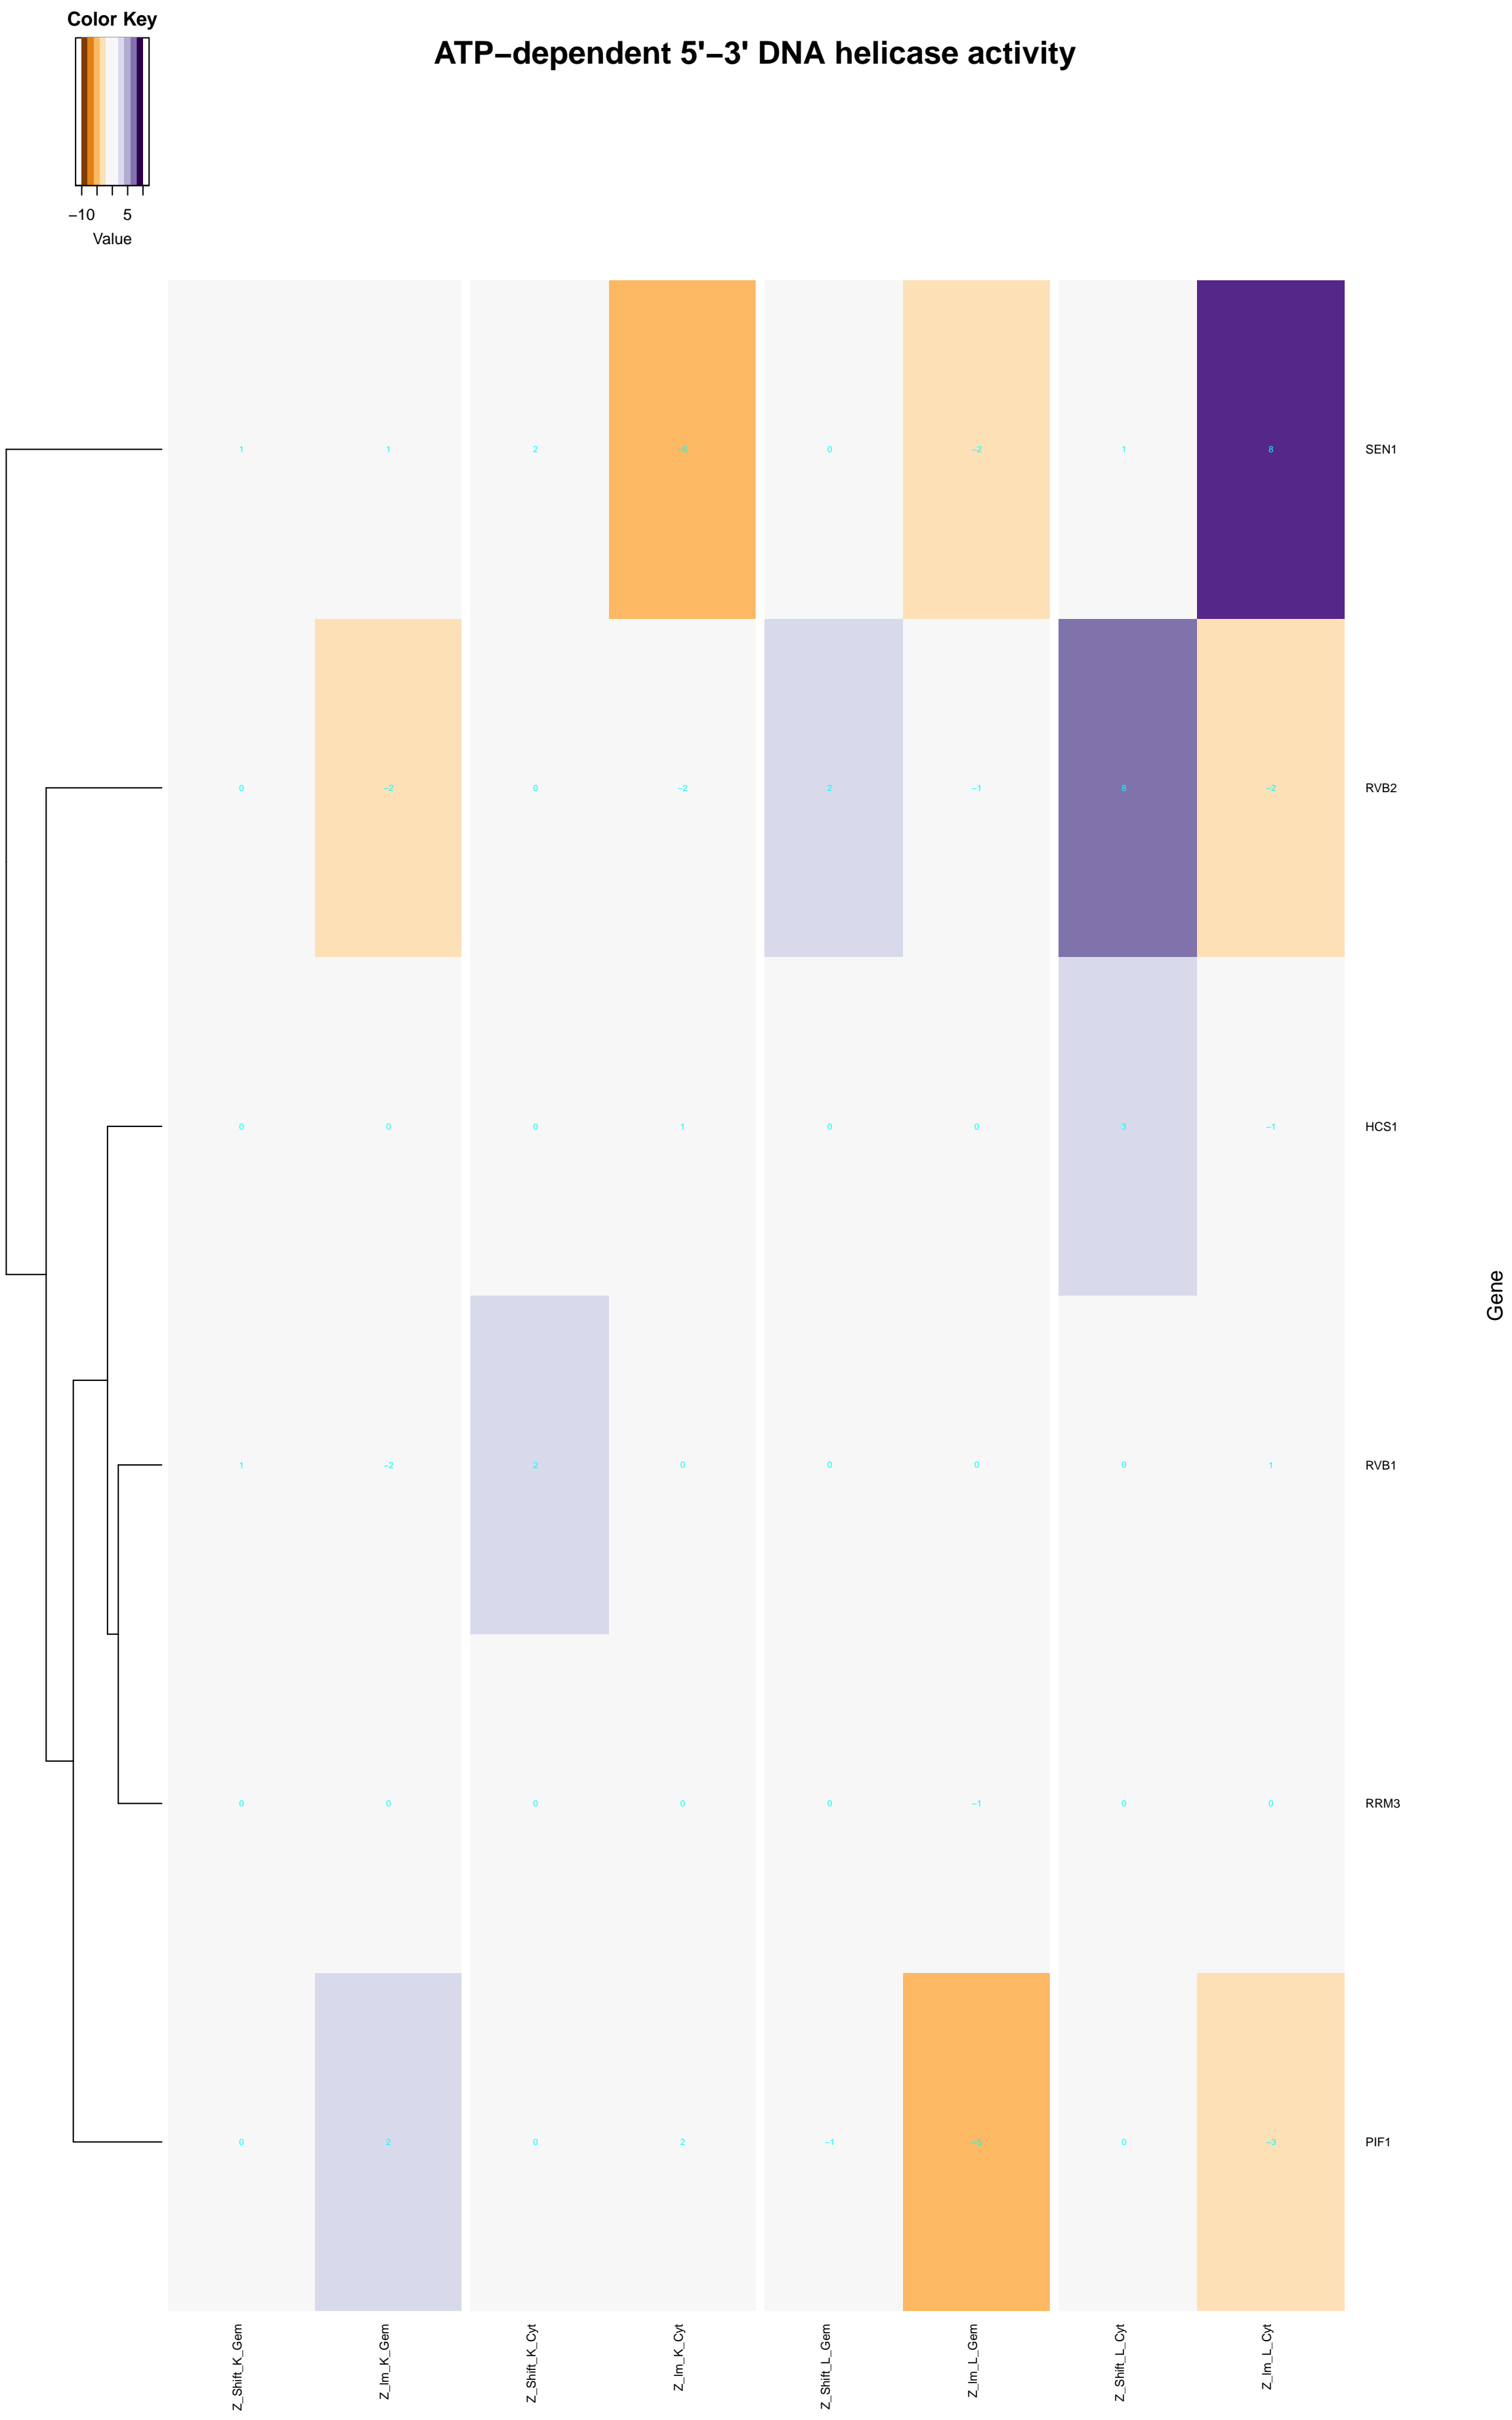

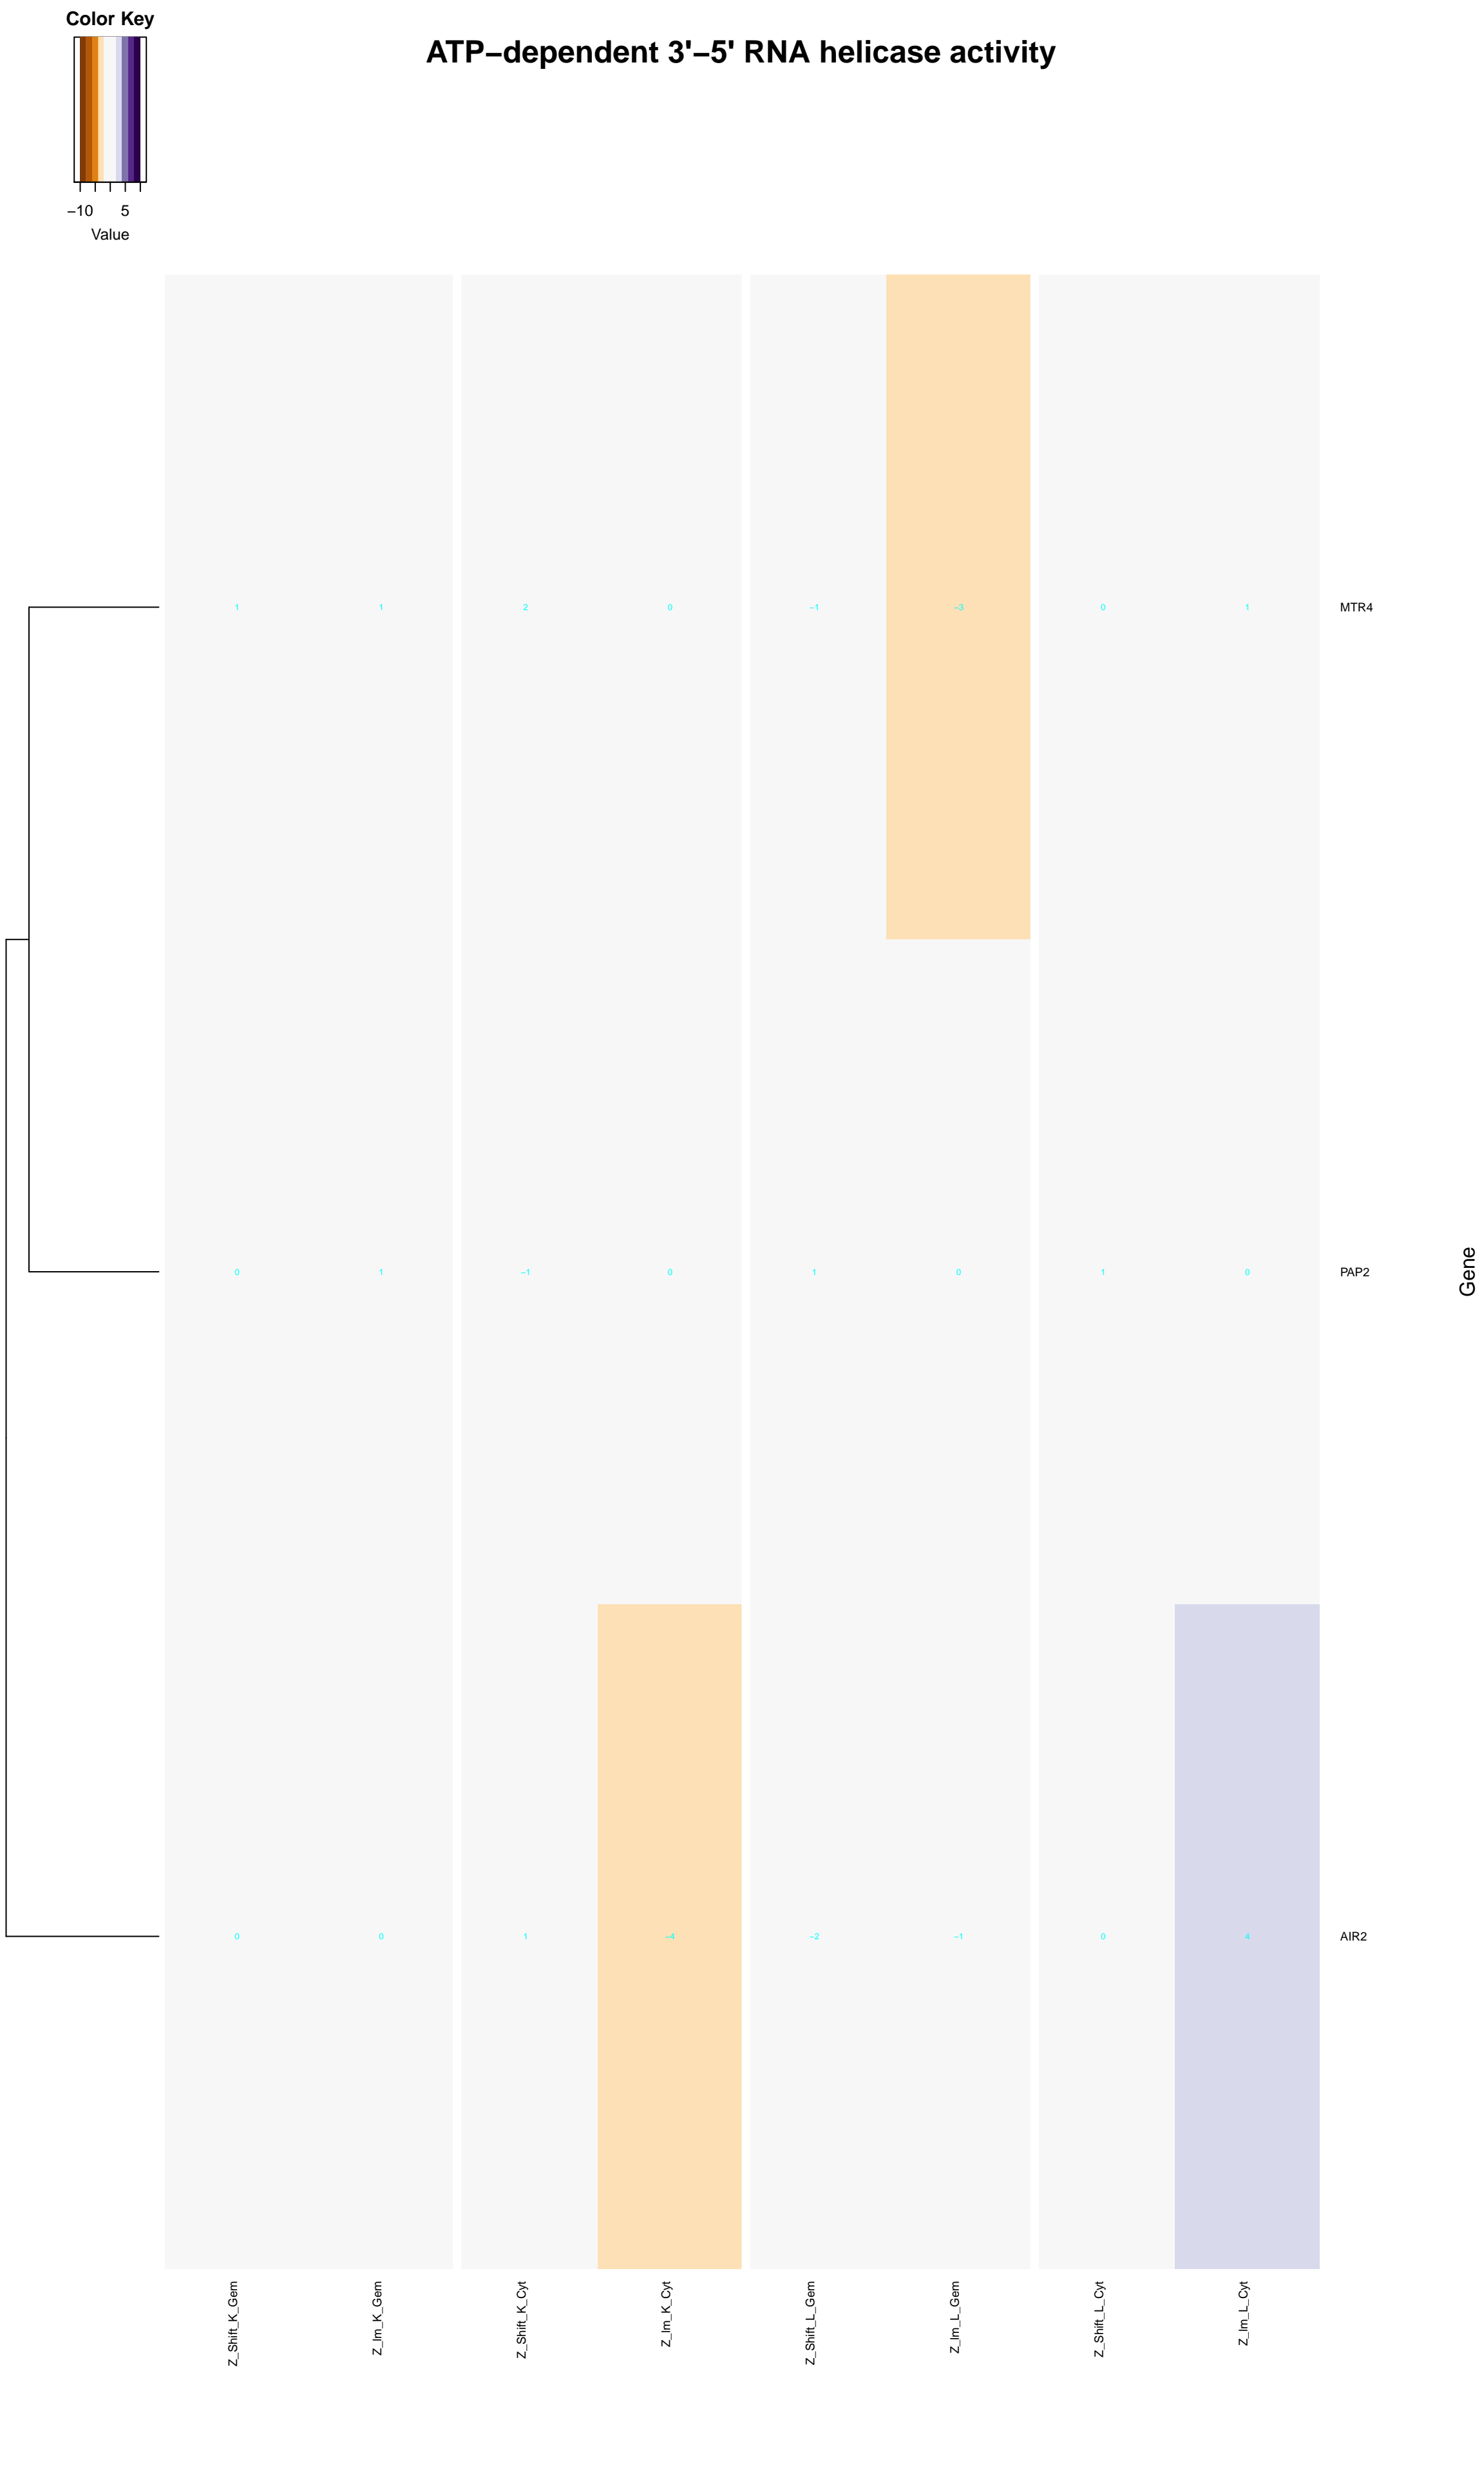

Supplement: s1 [file s1]

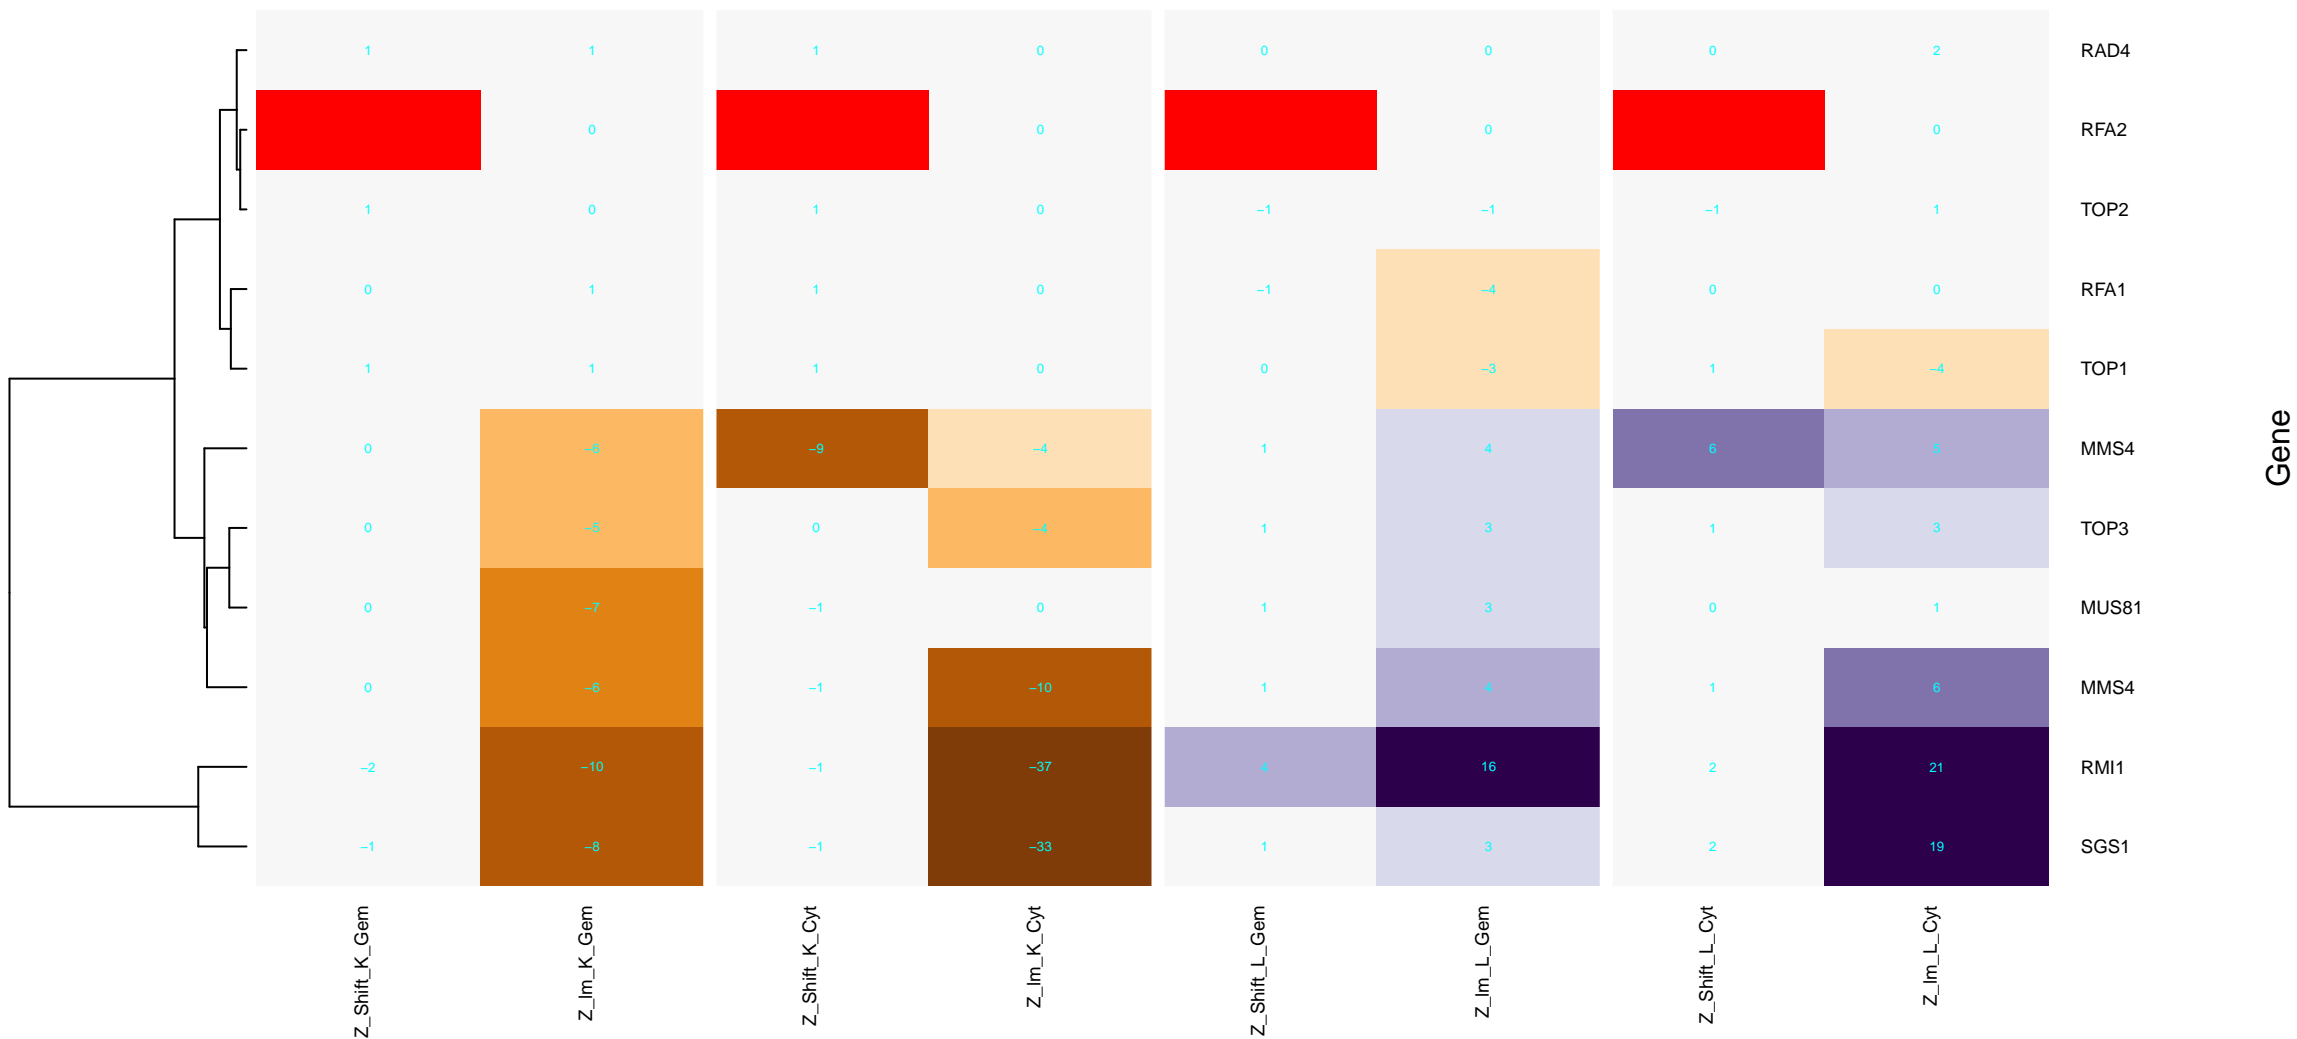

Supplement: s1 [file s1]

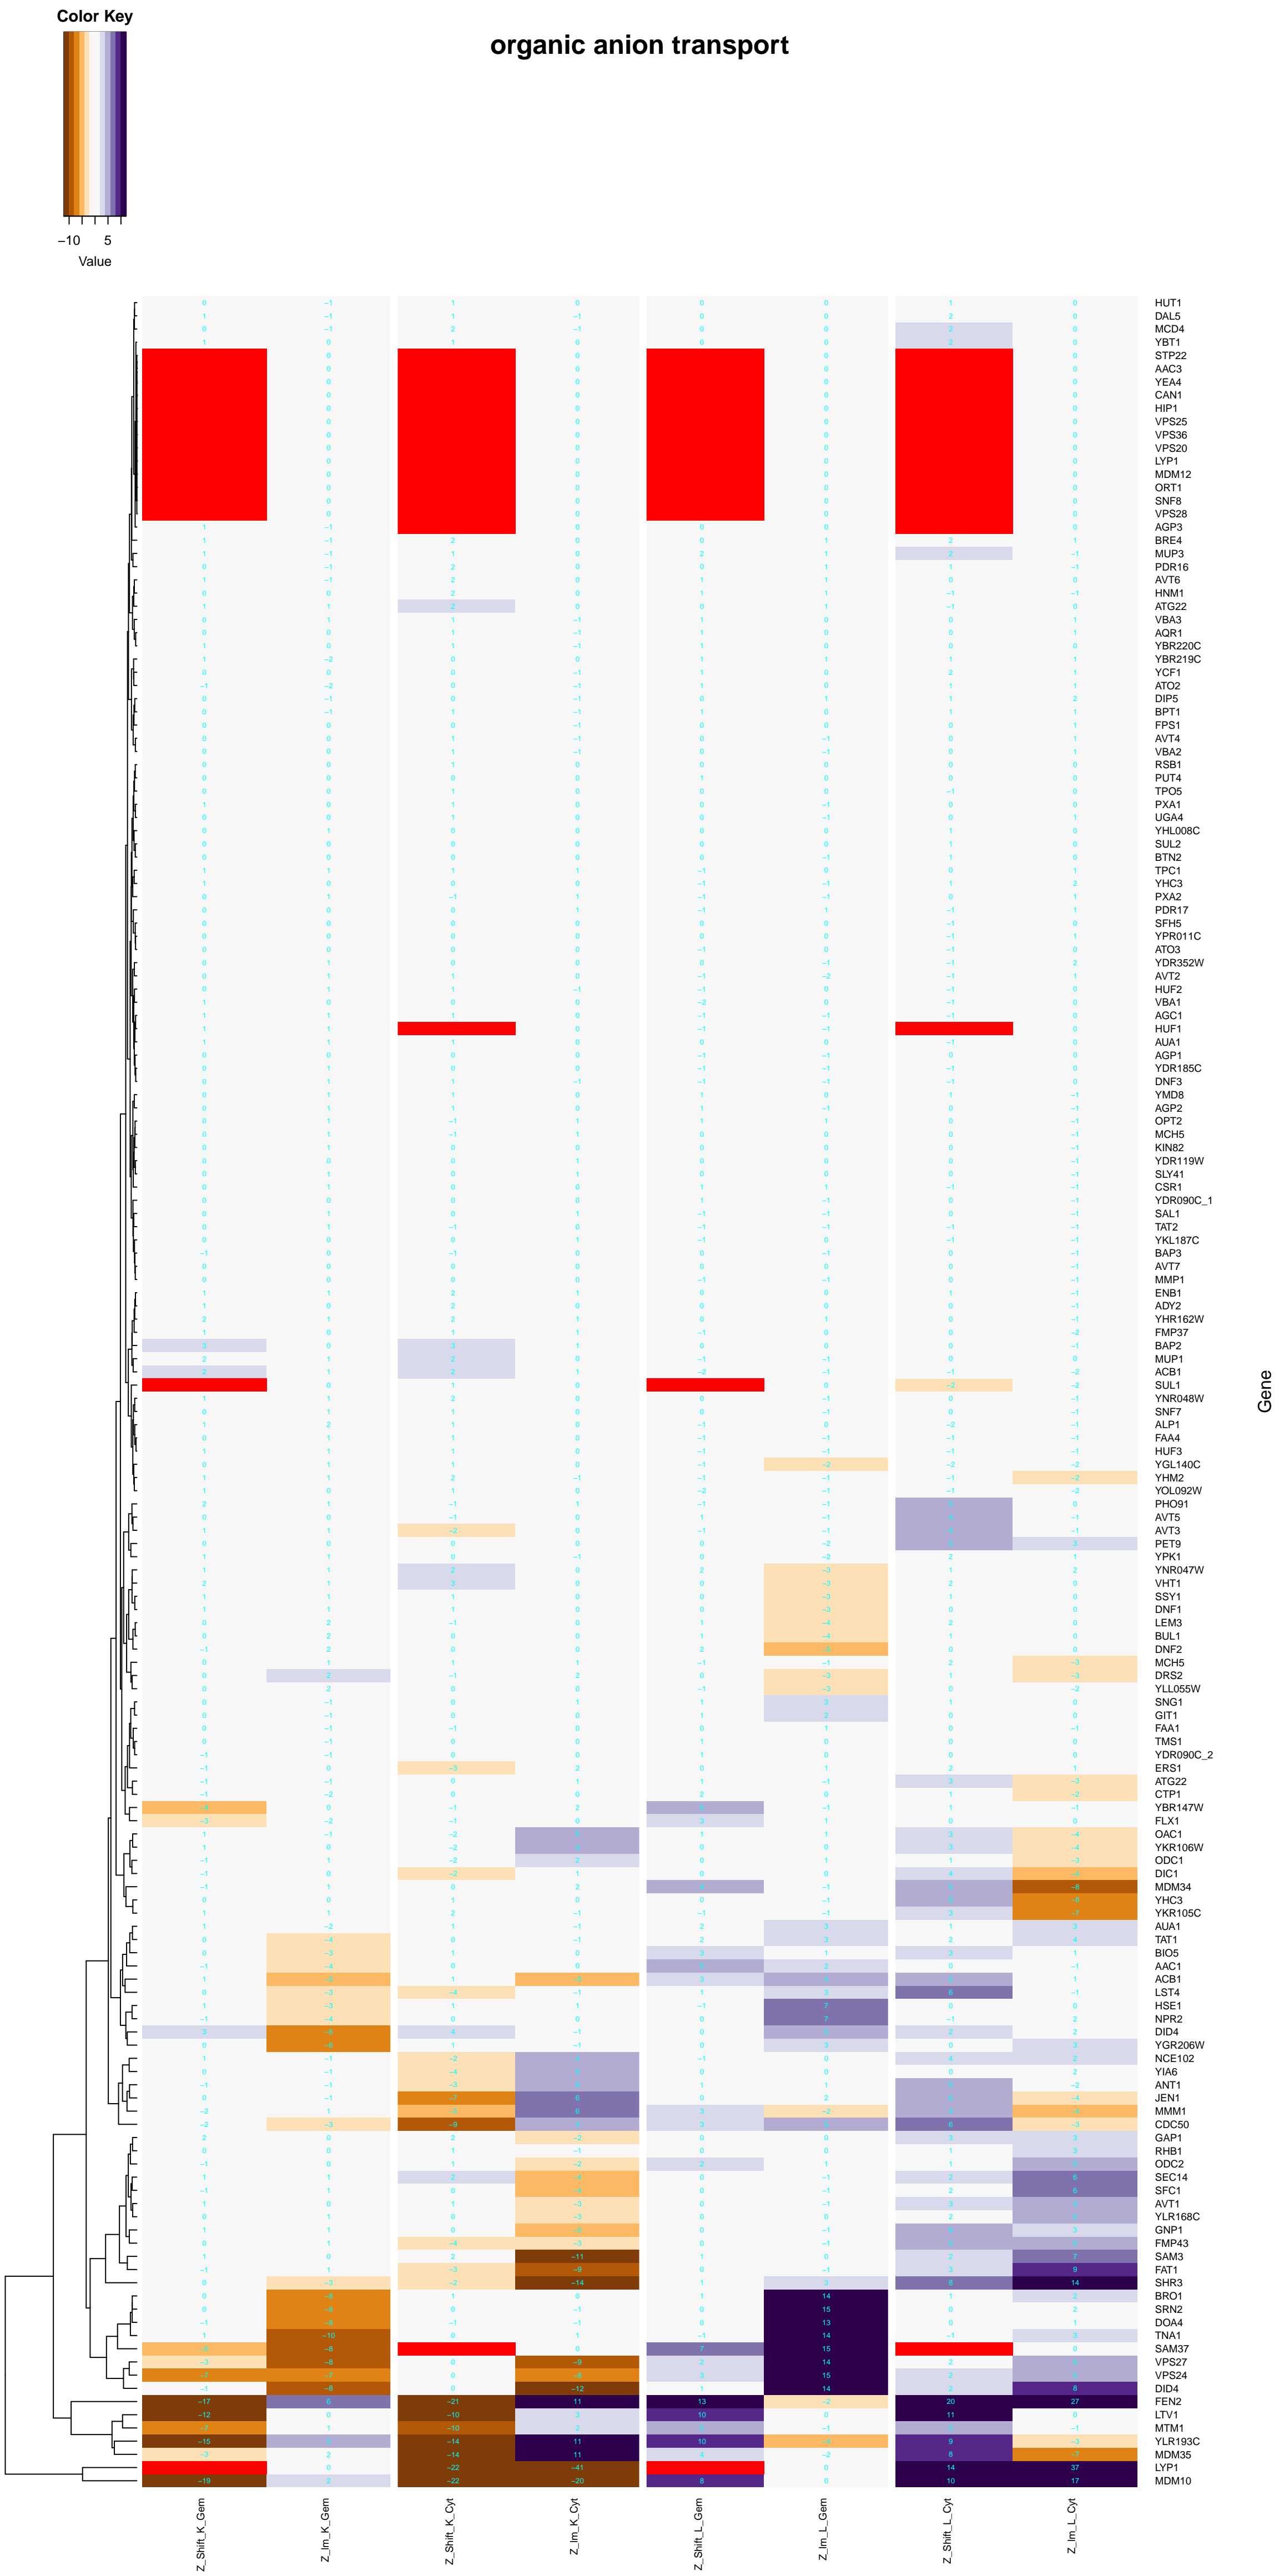

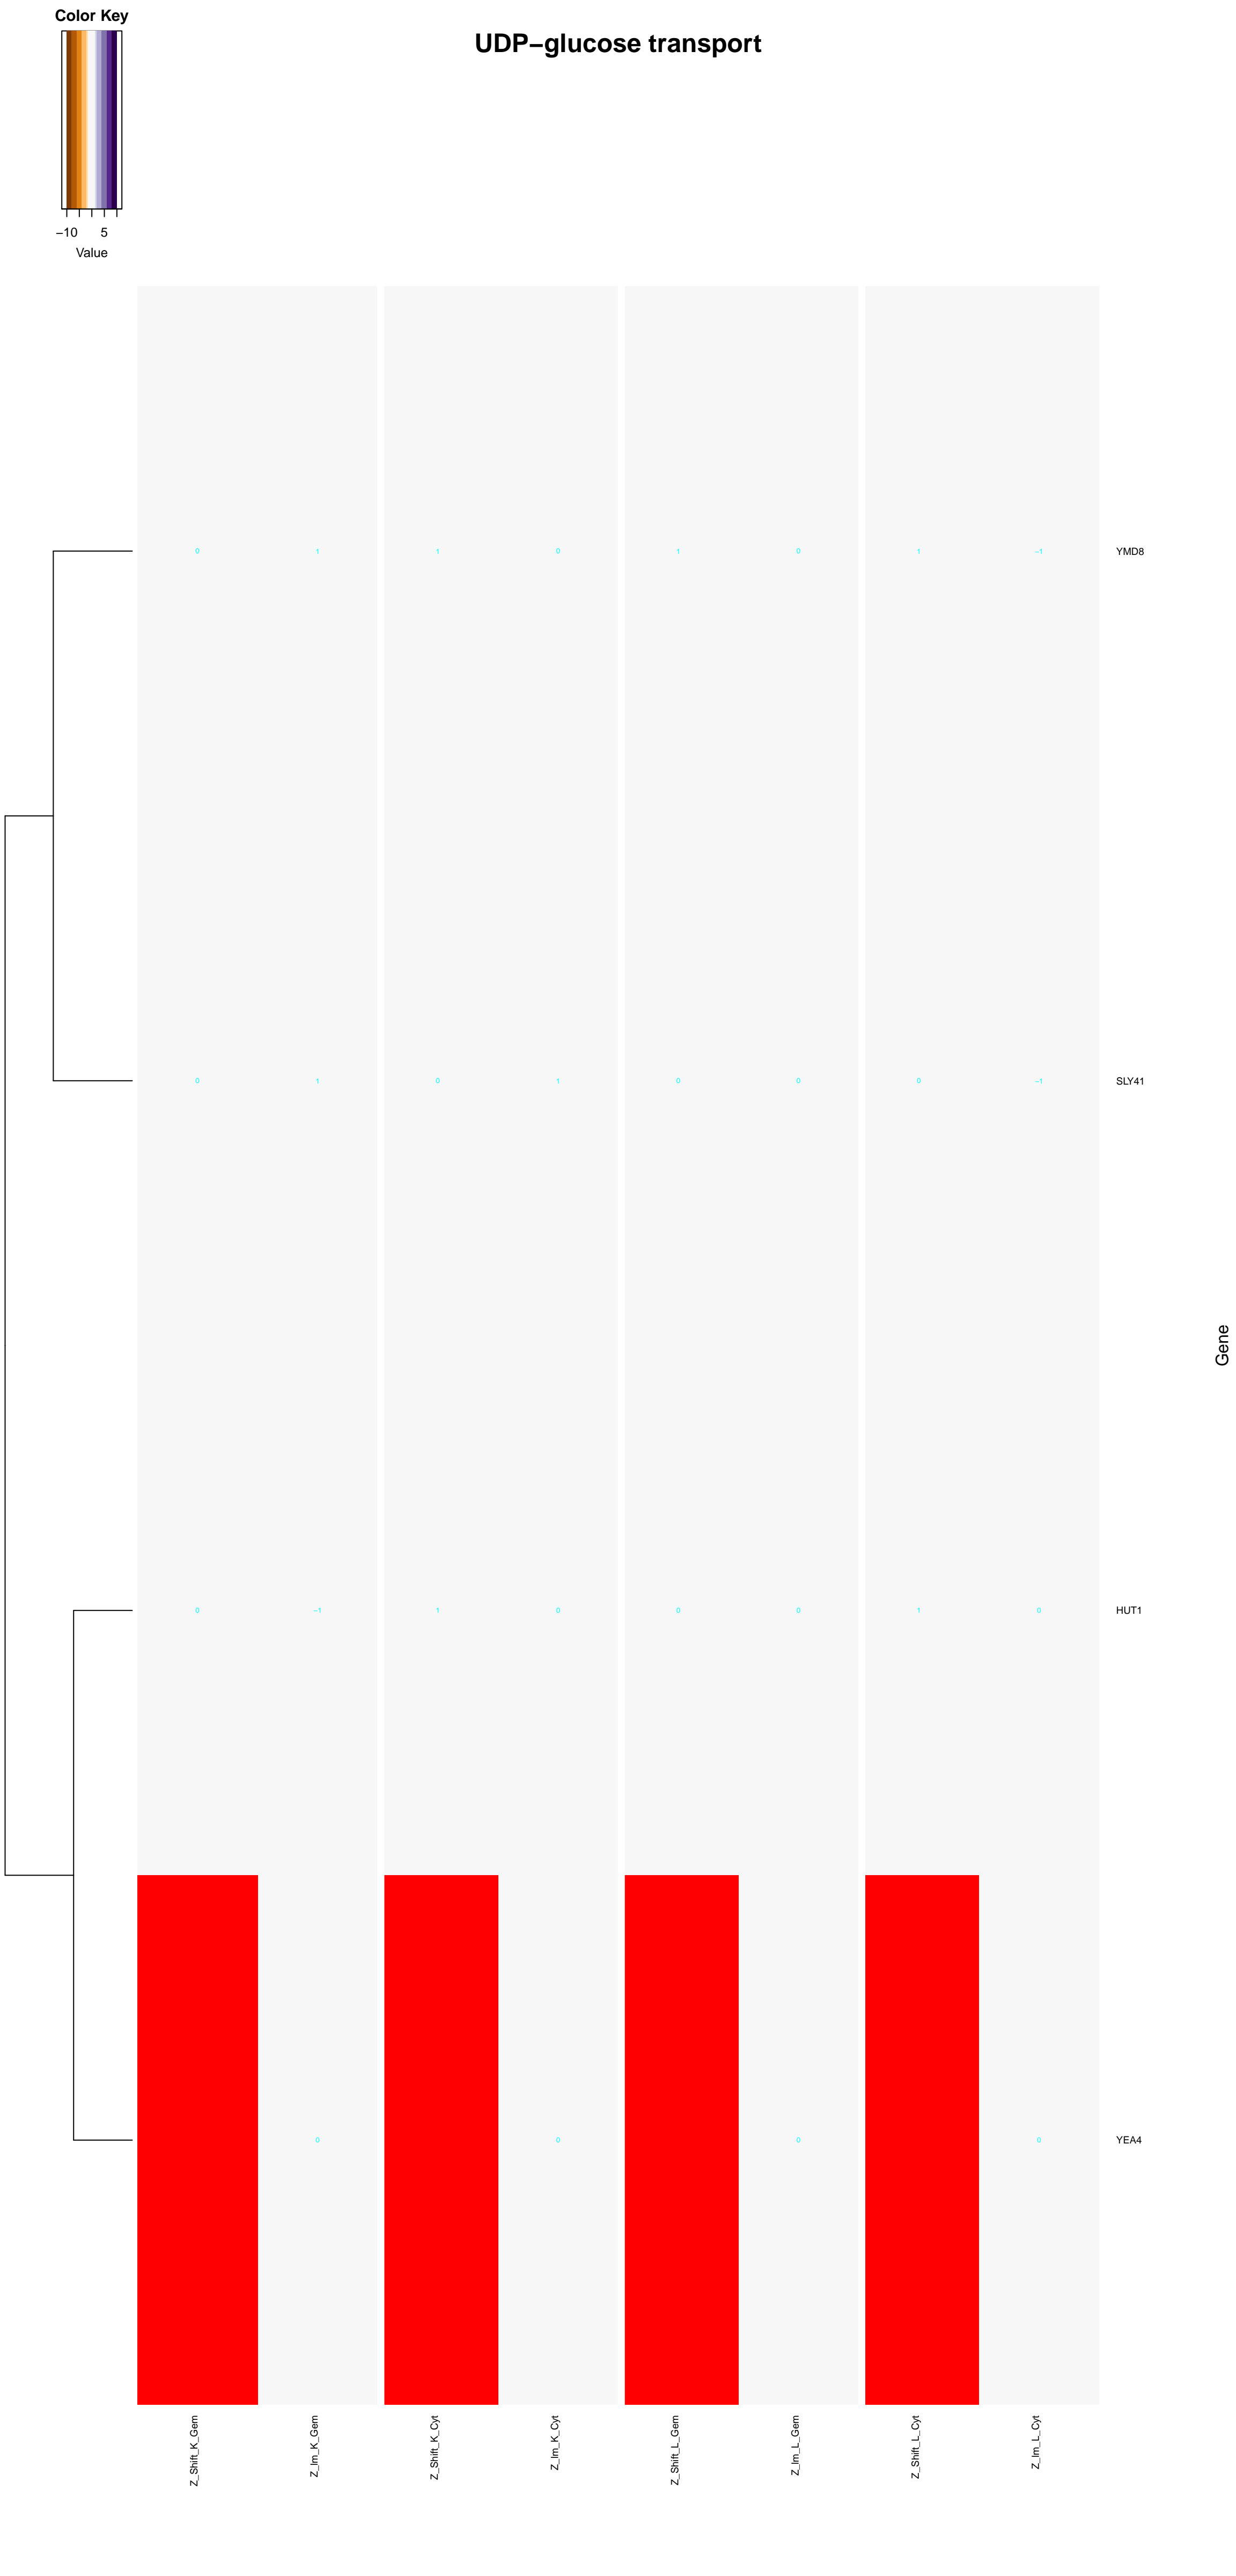

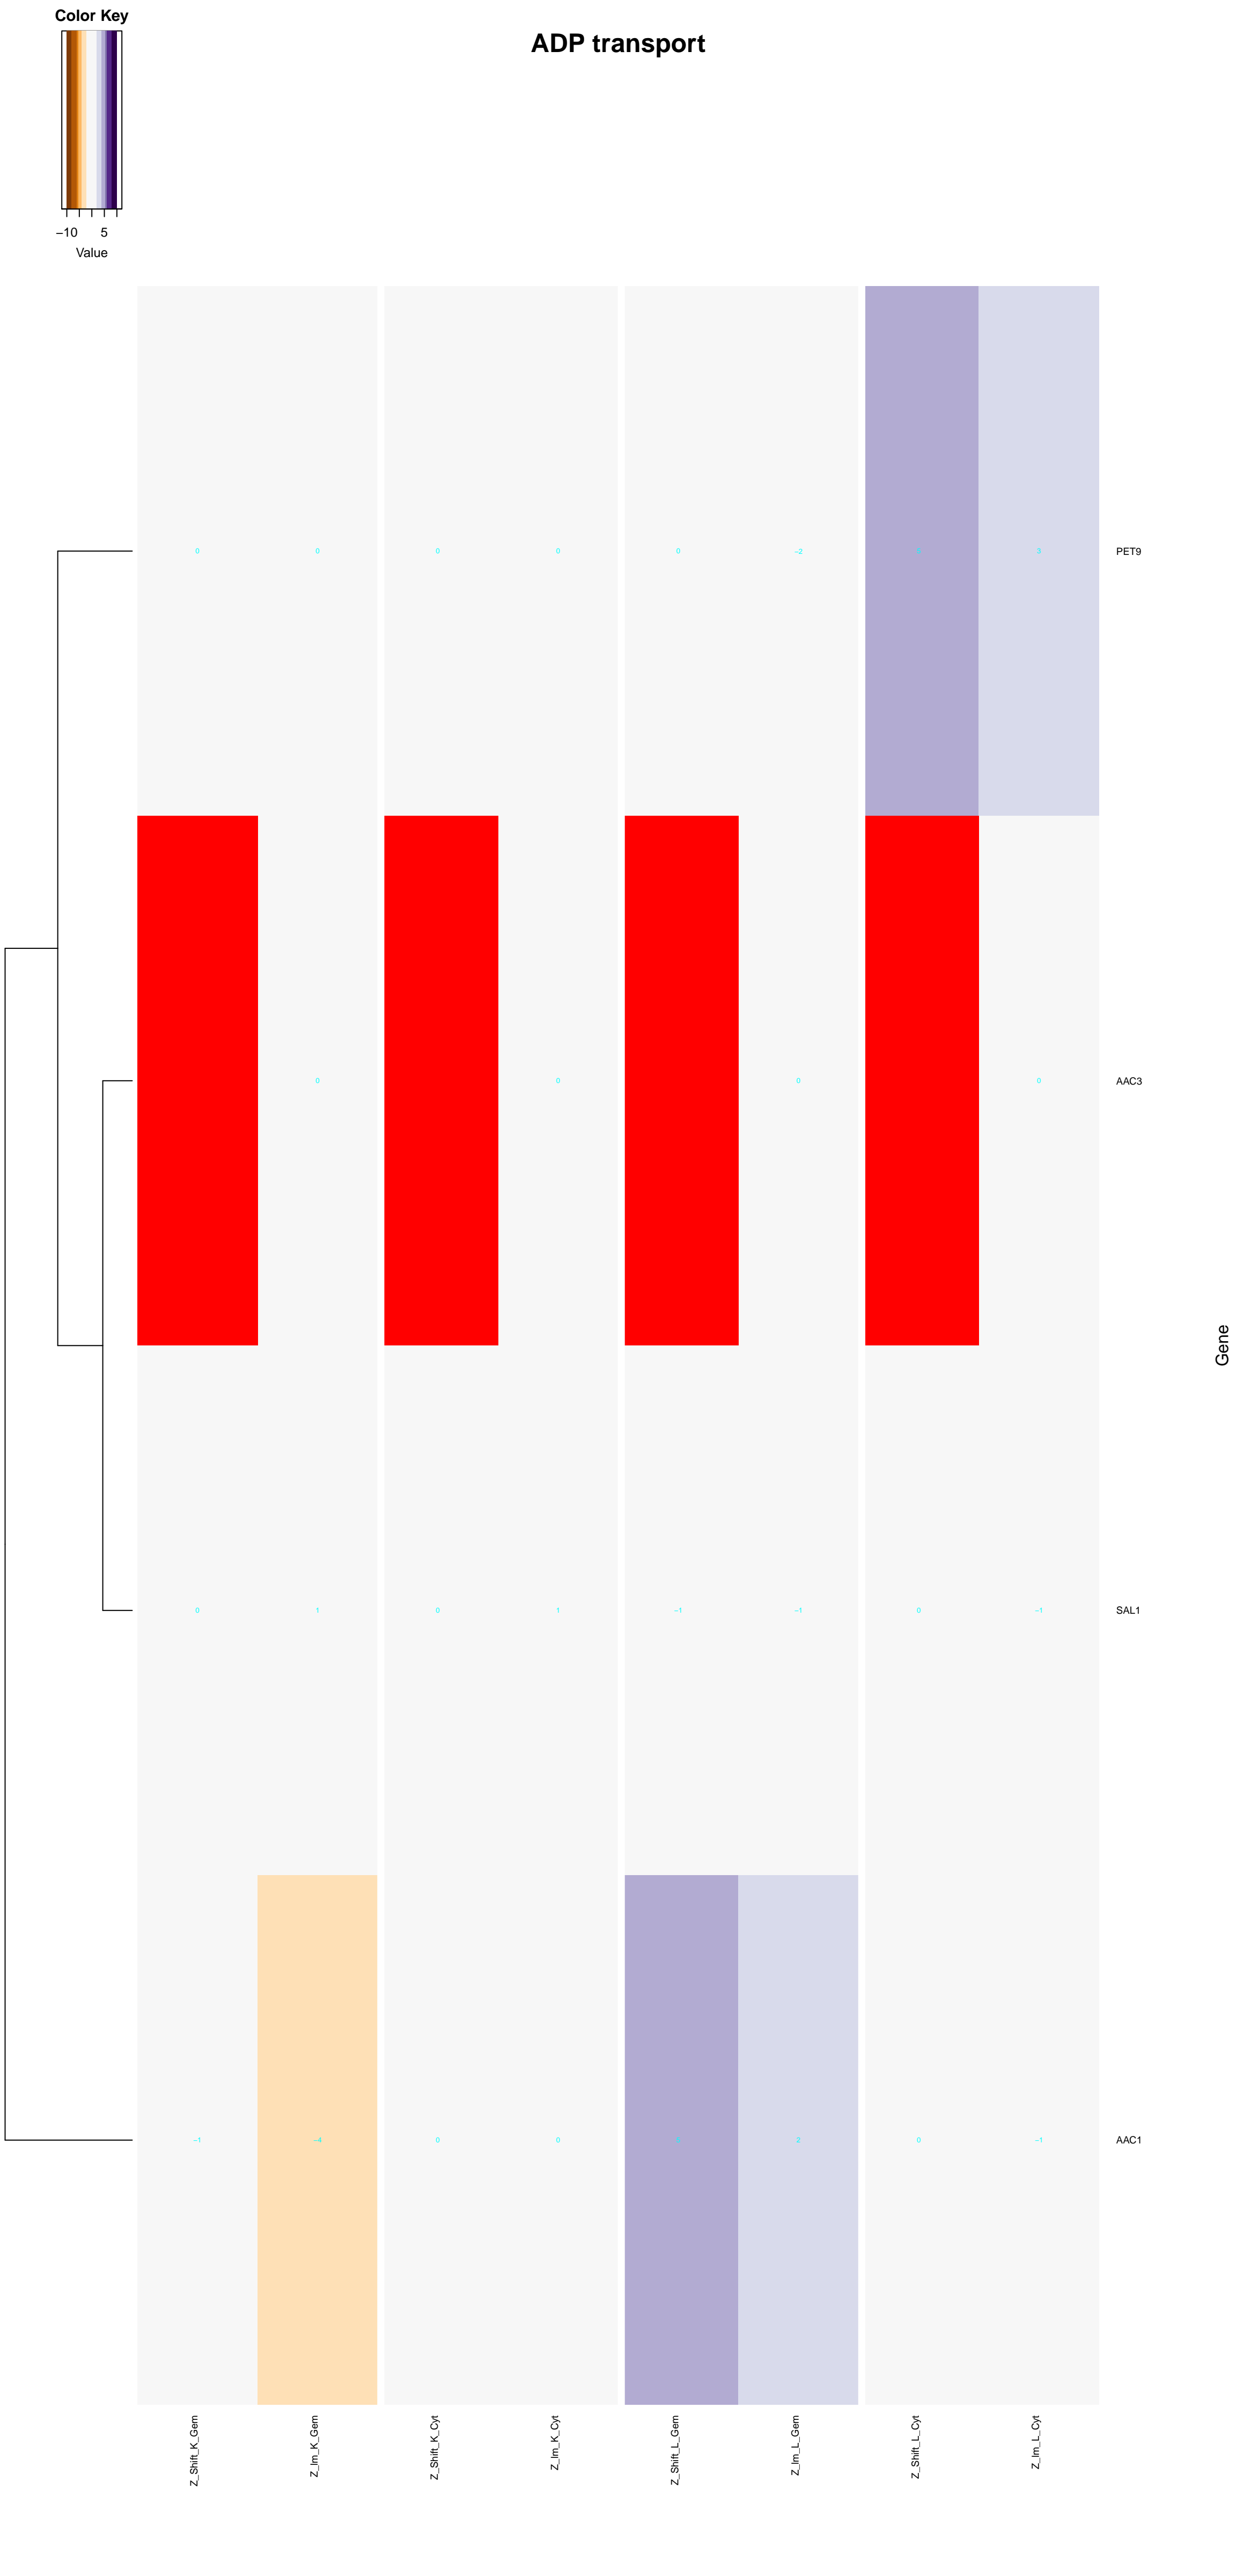

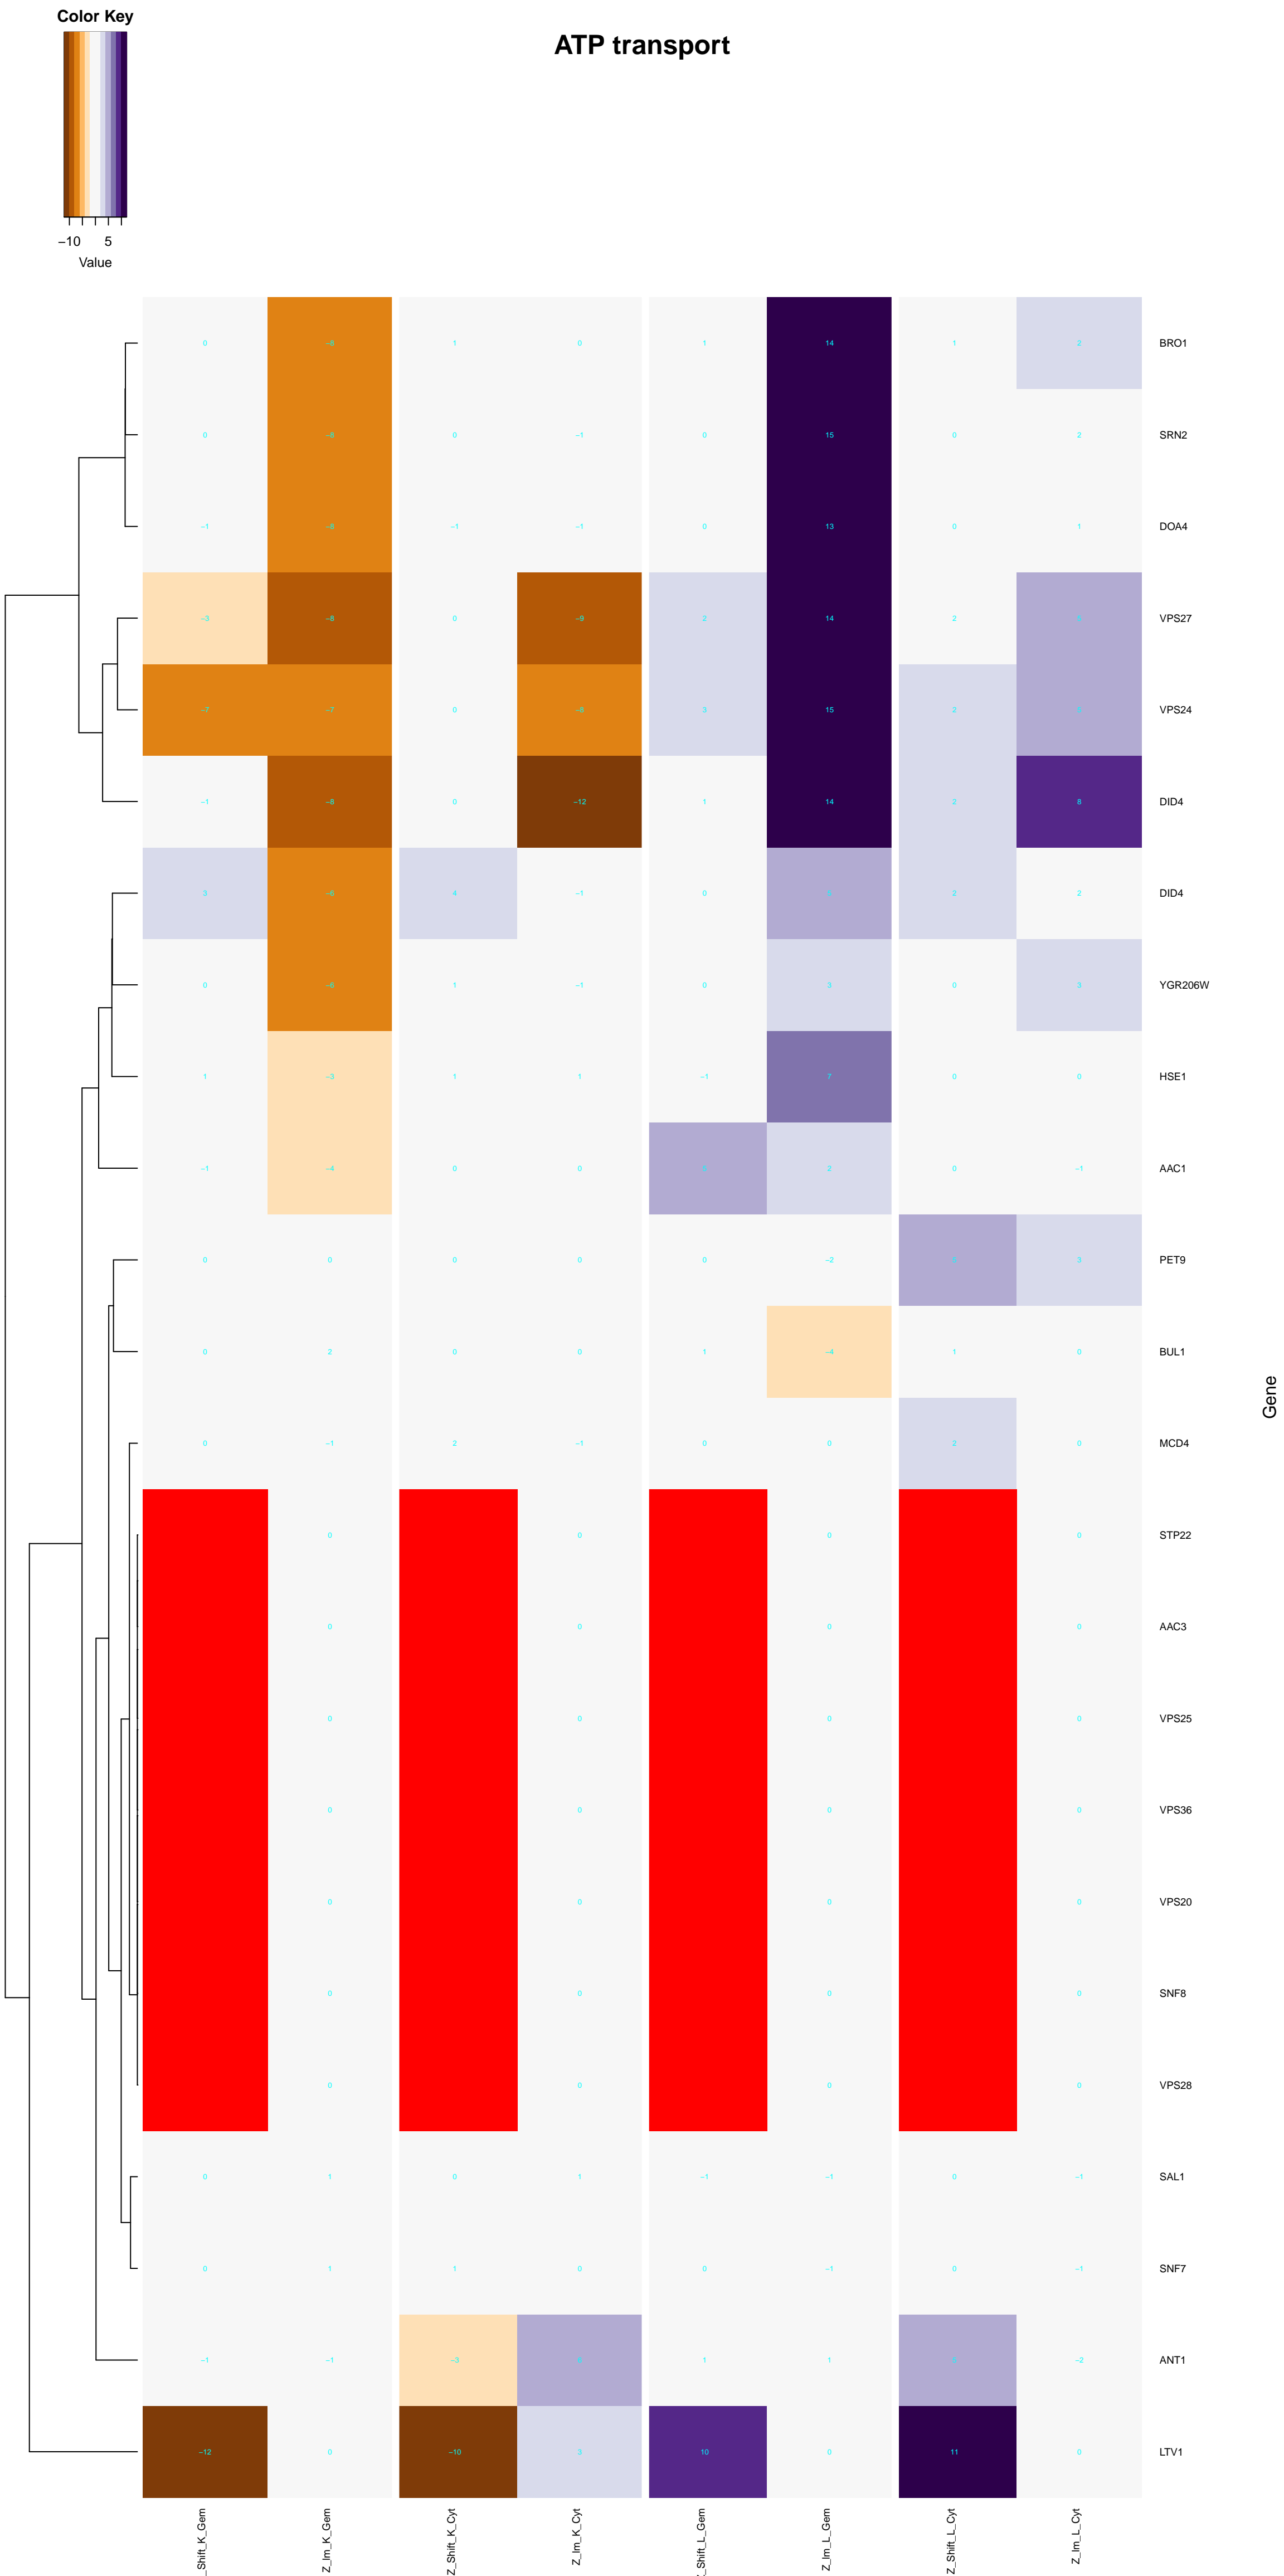

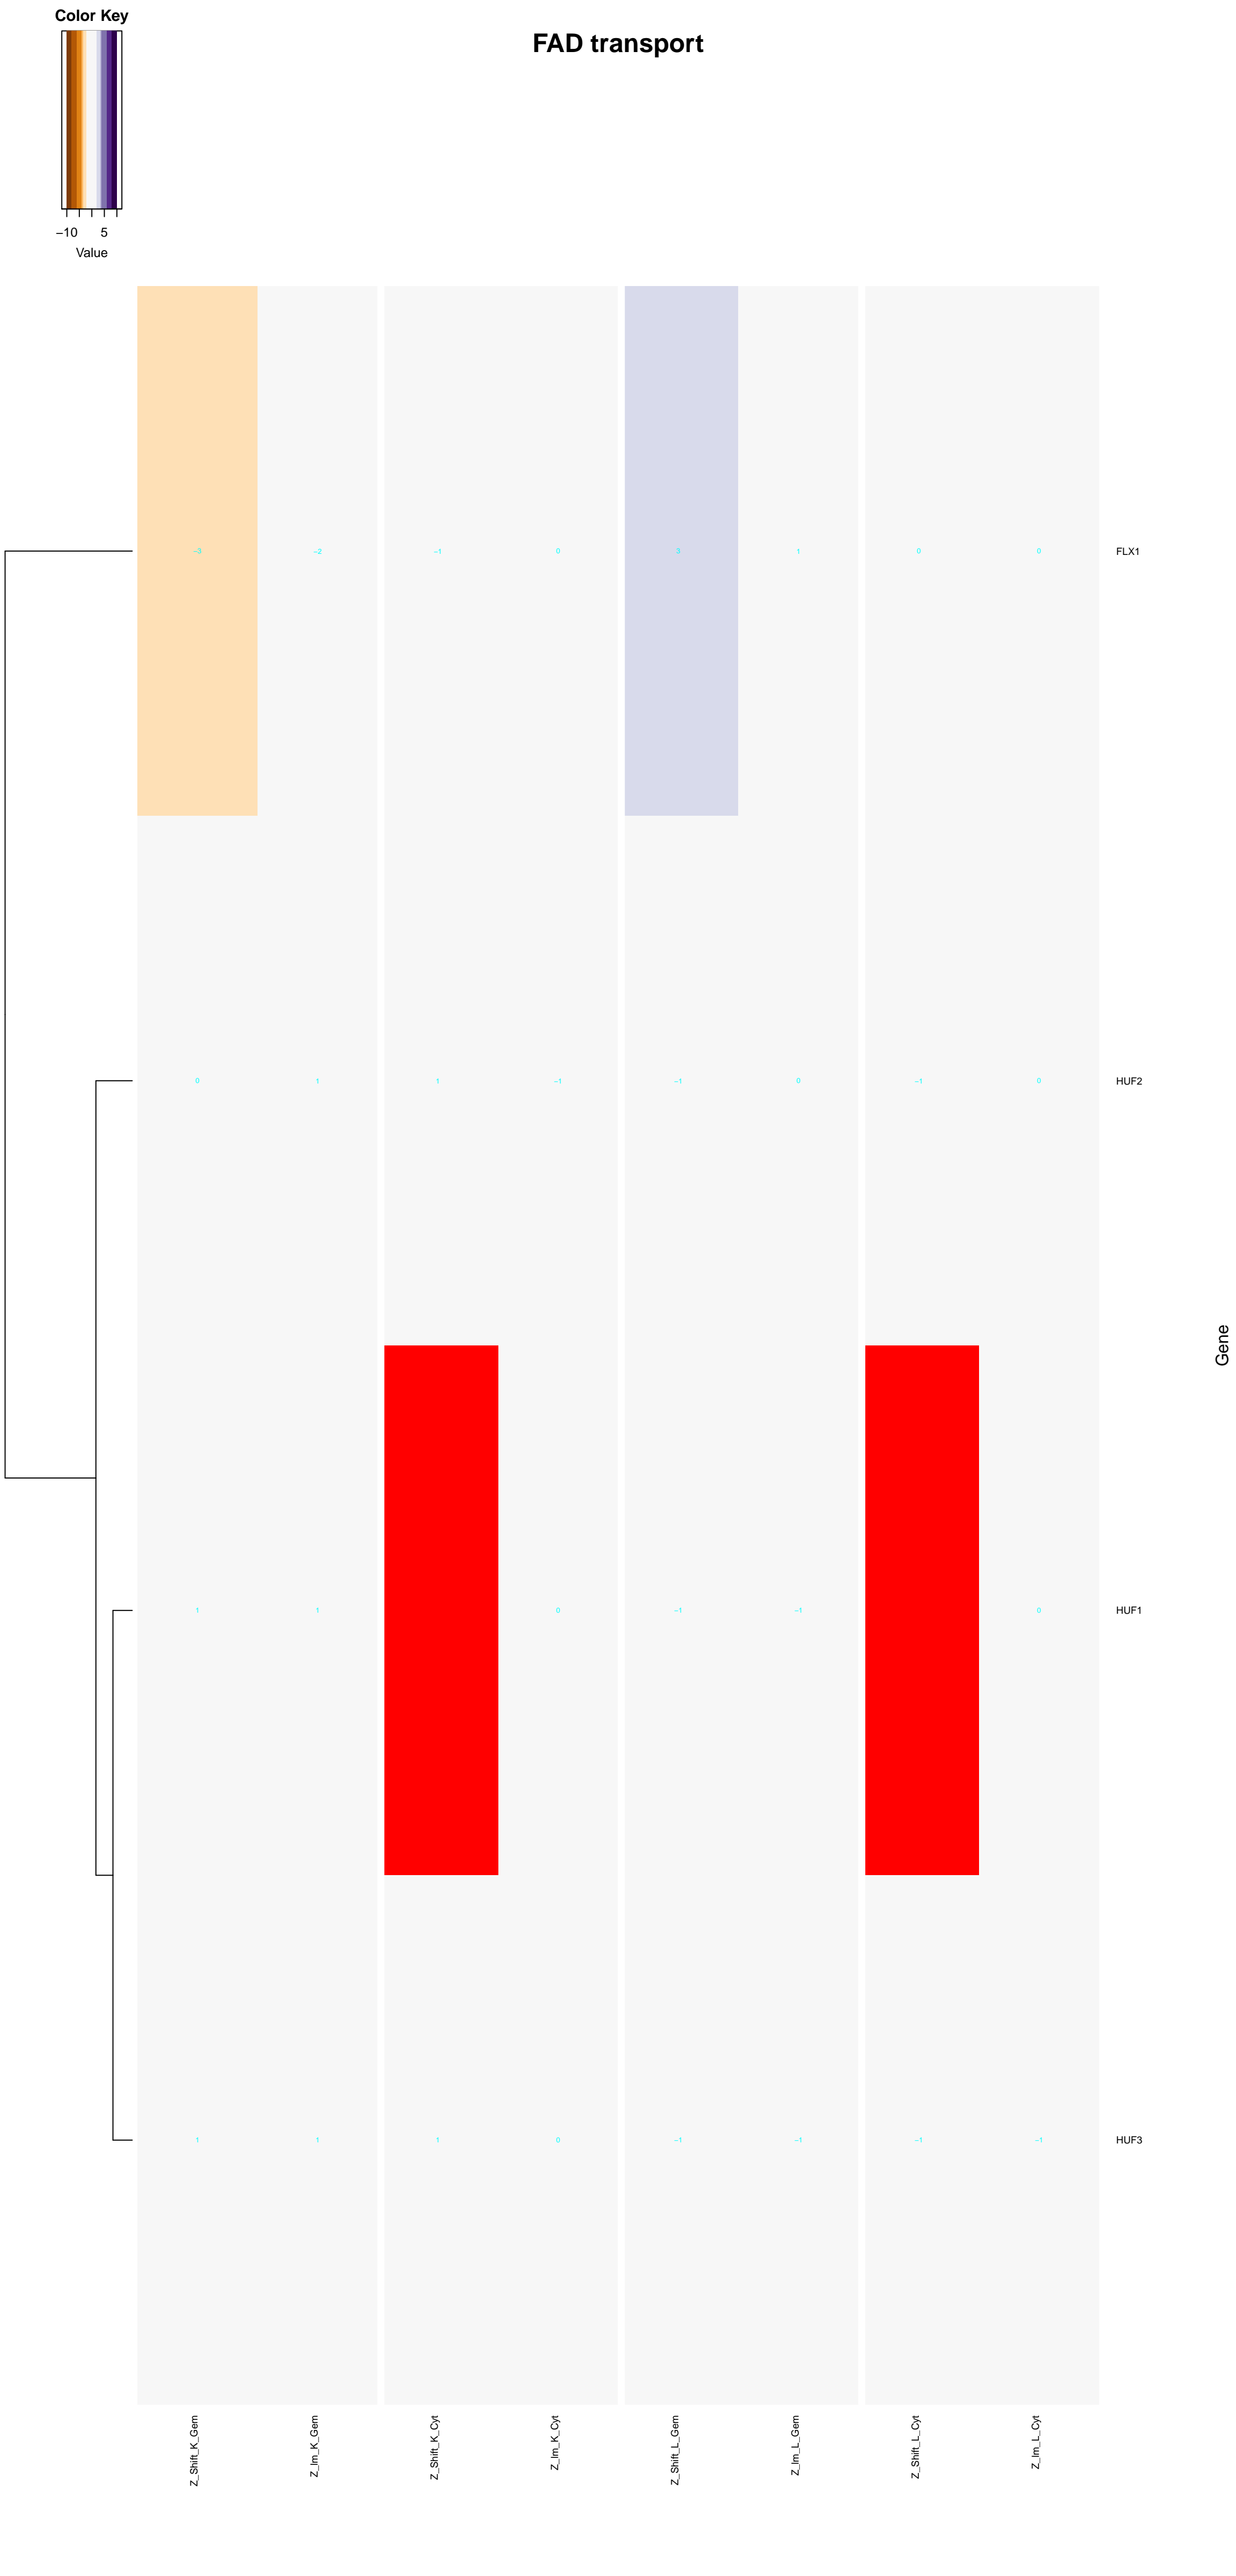

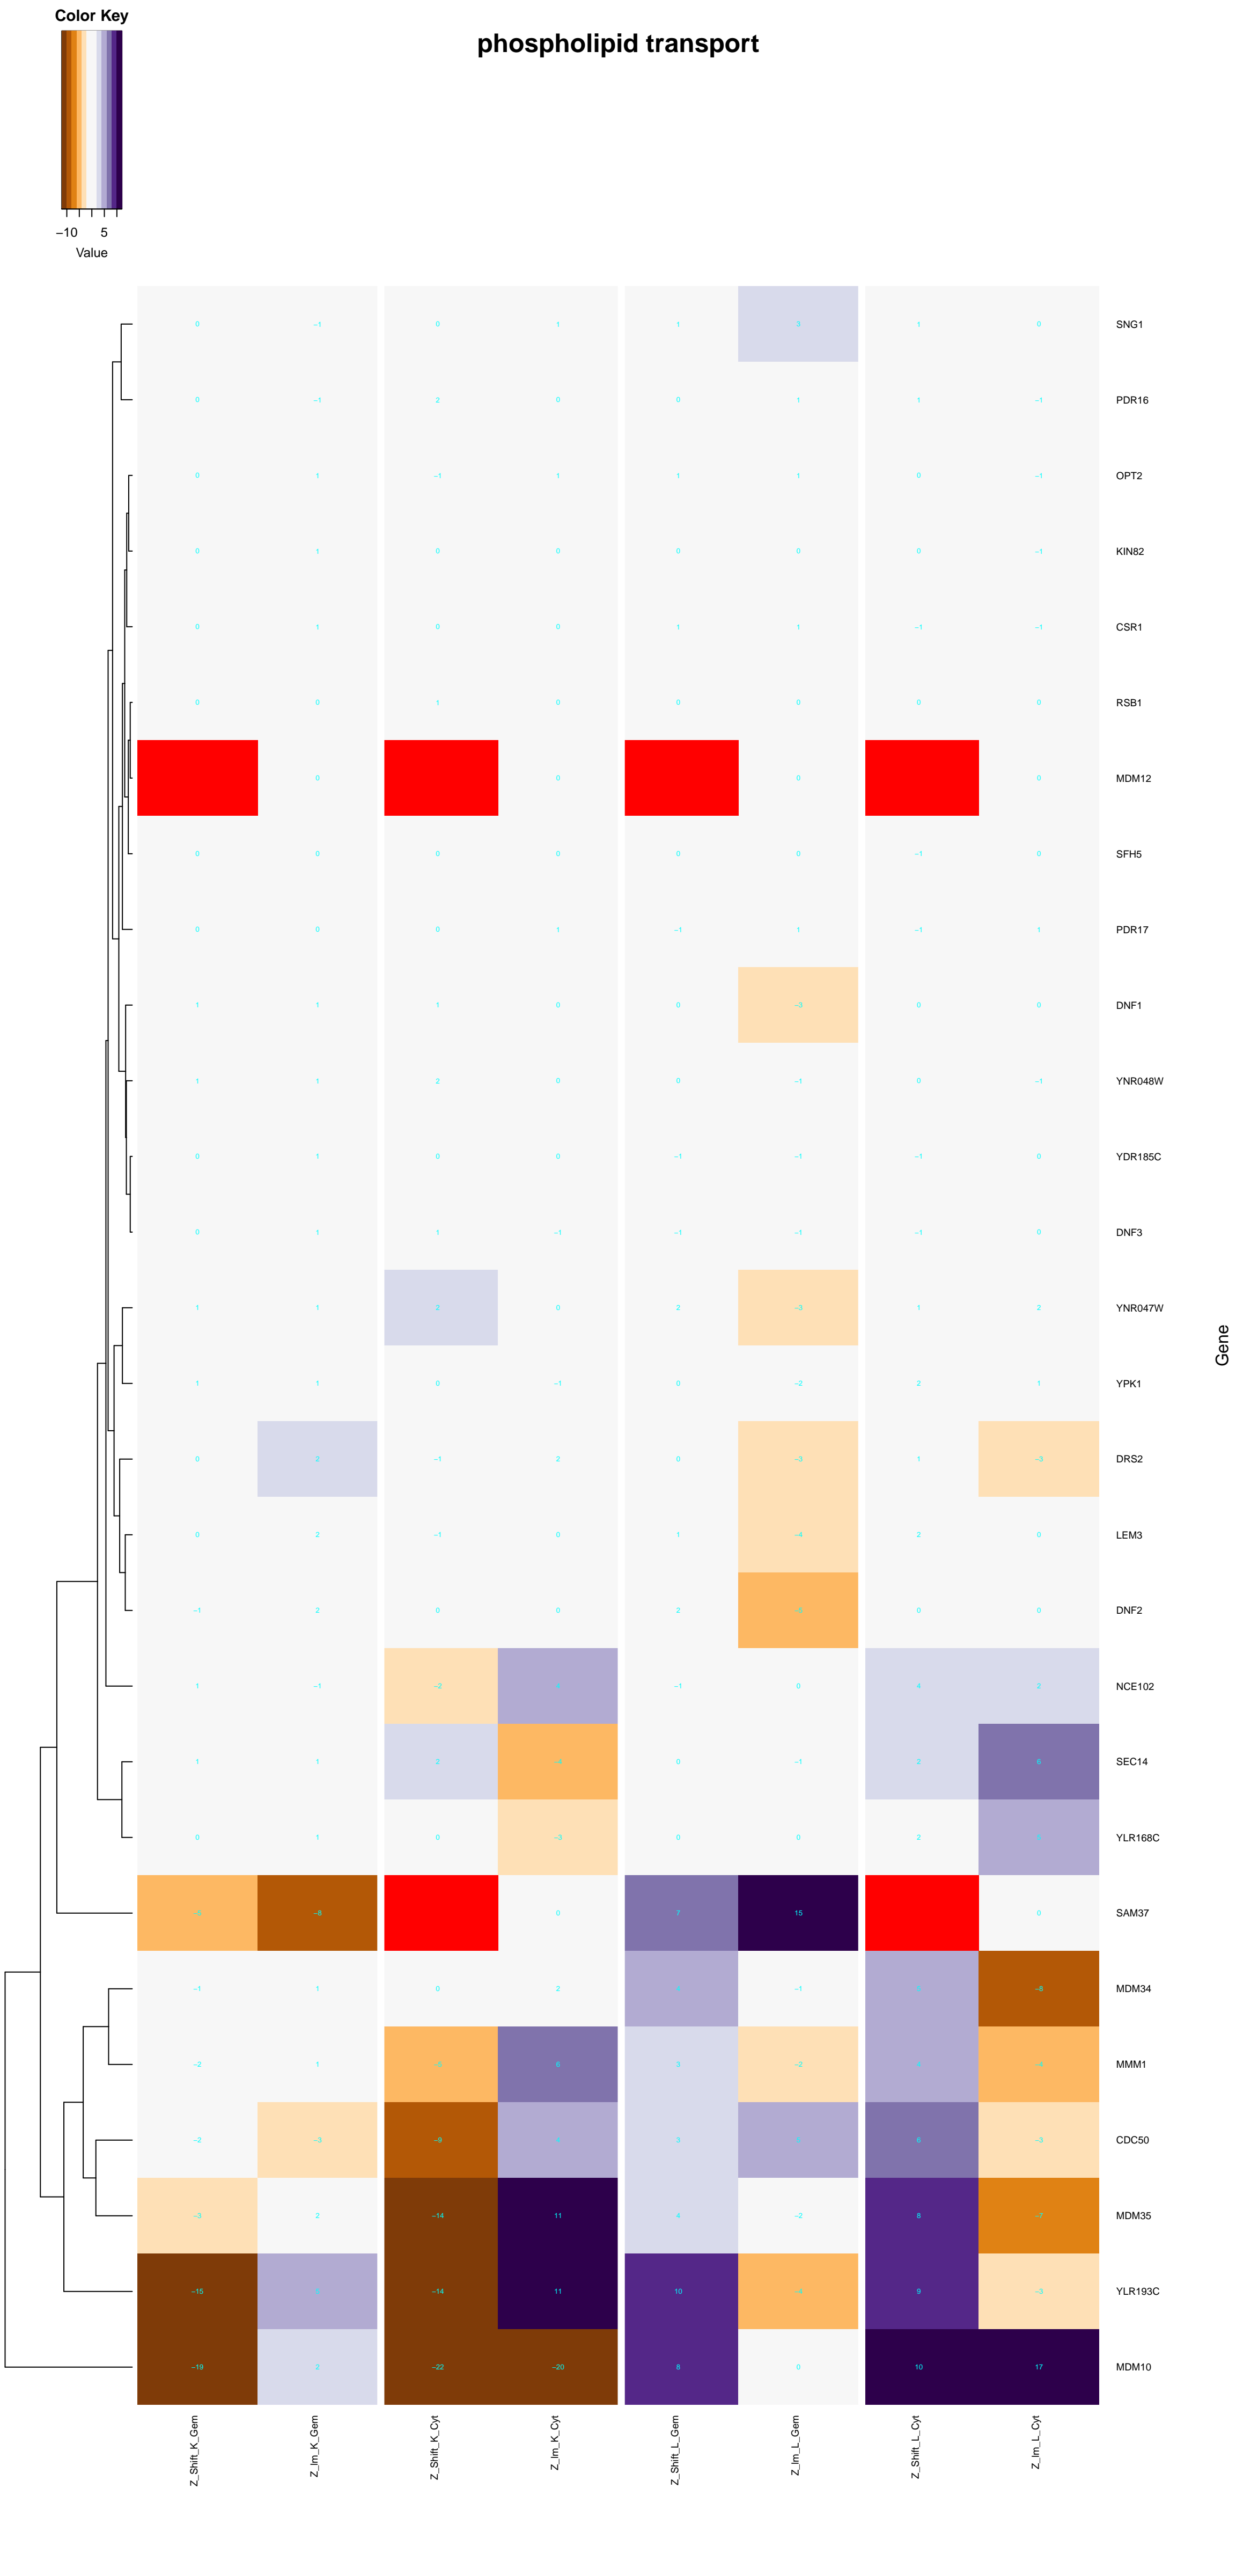

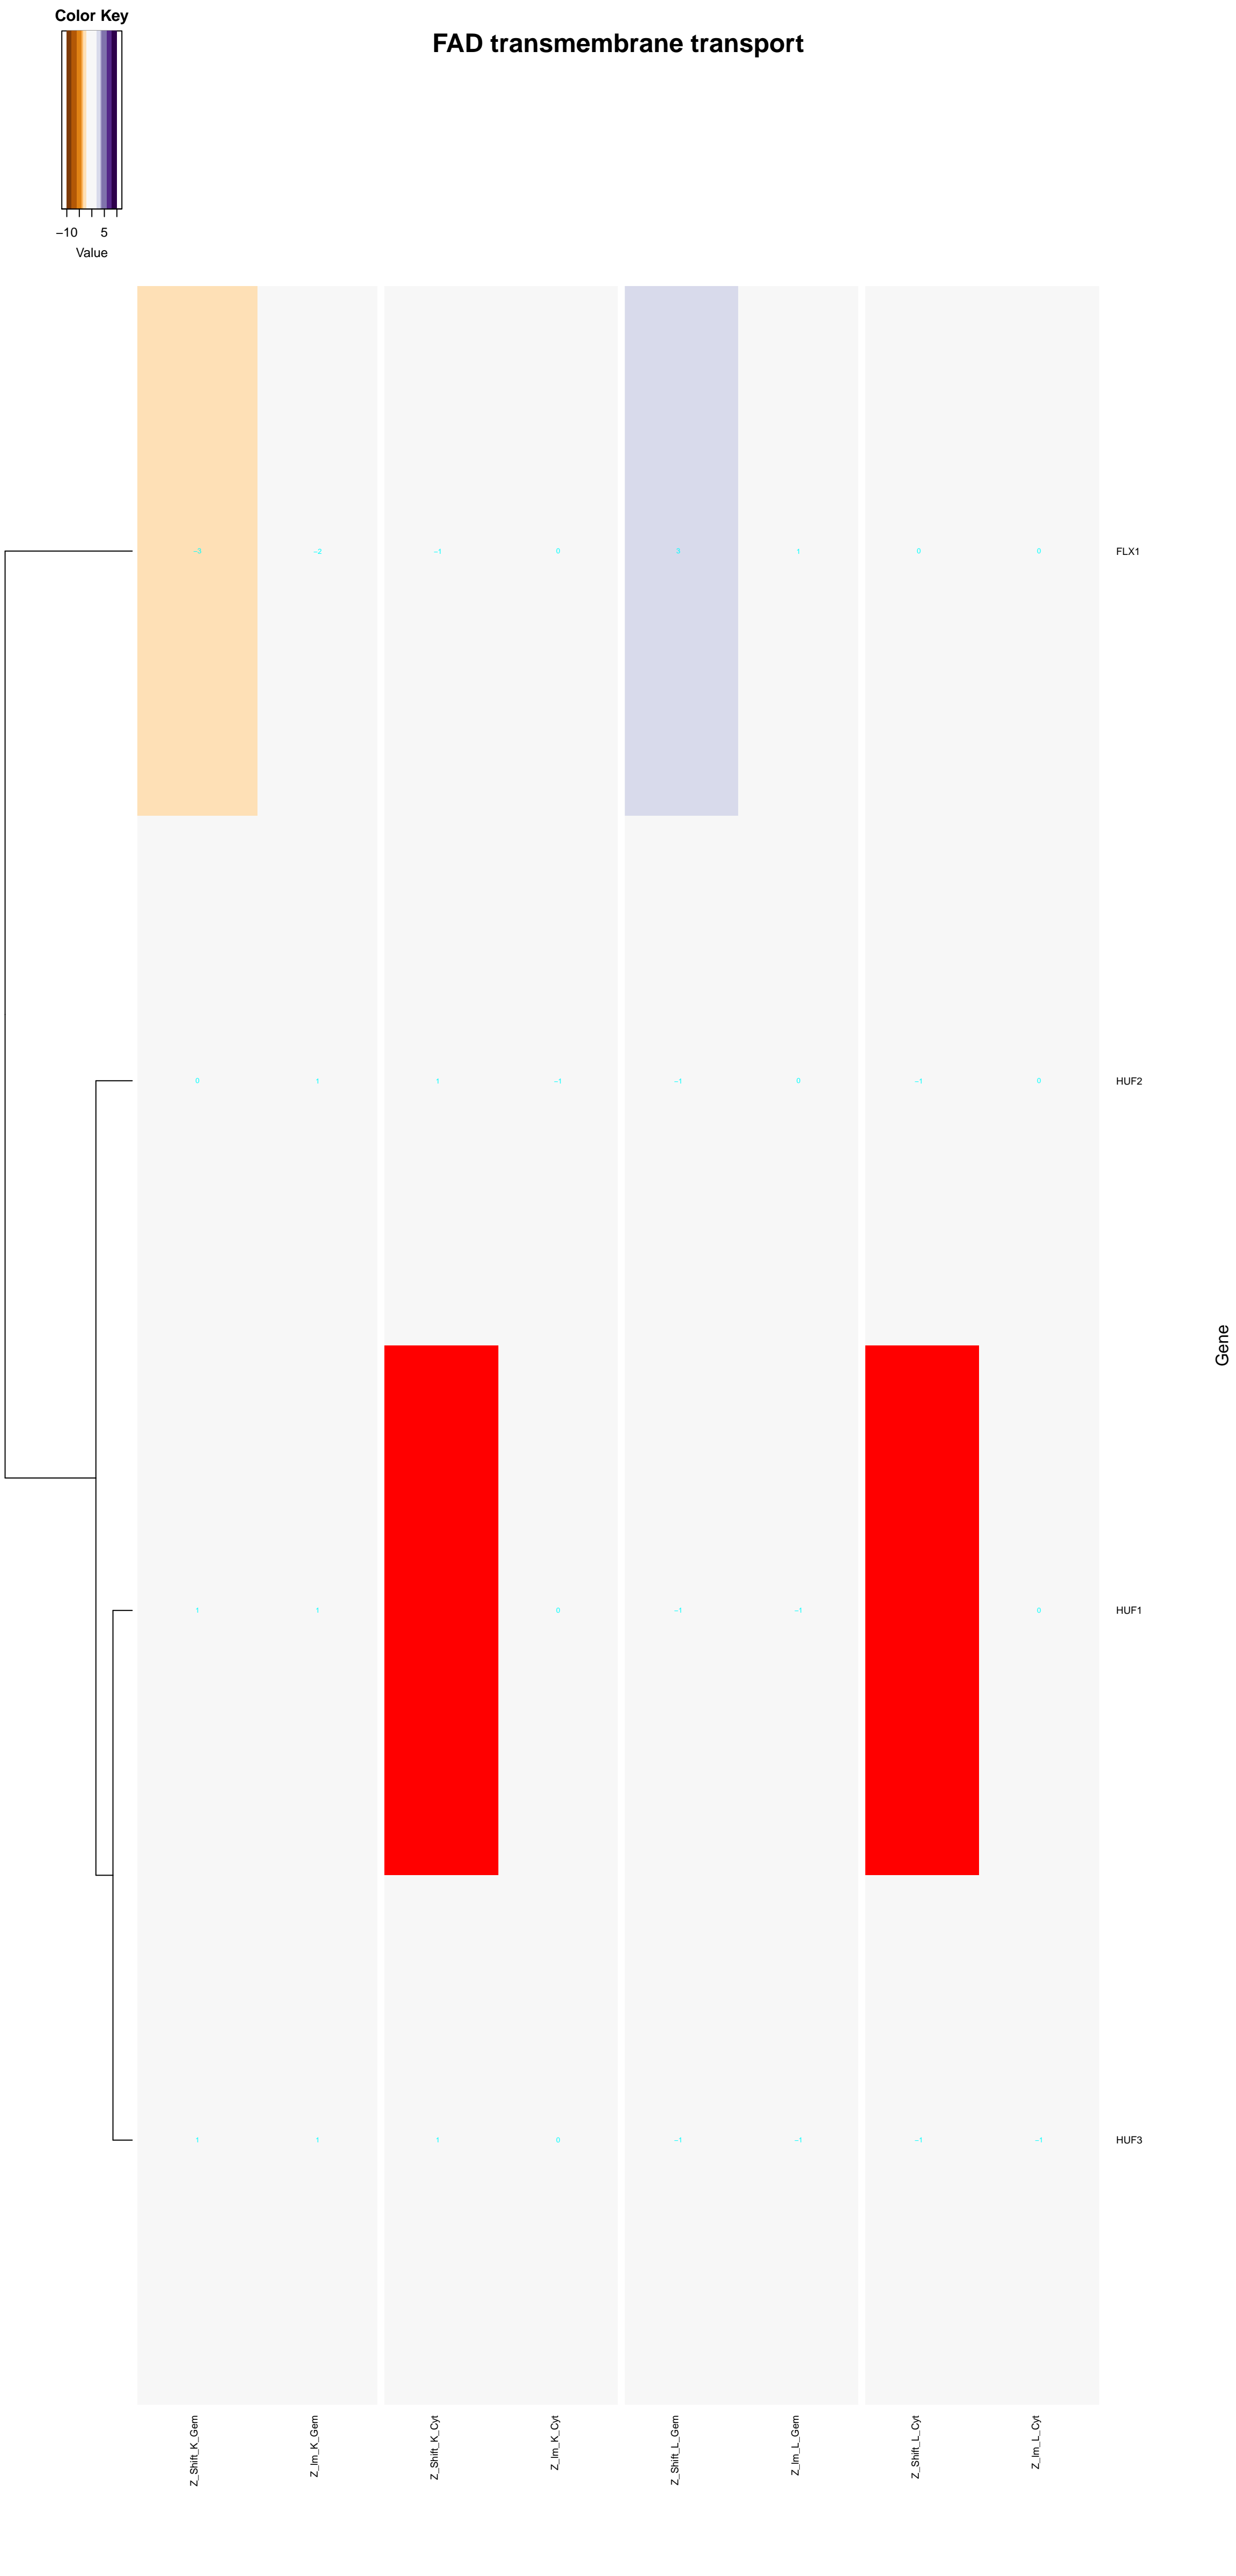

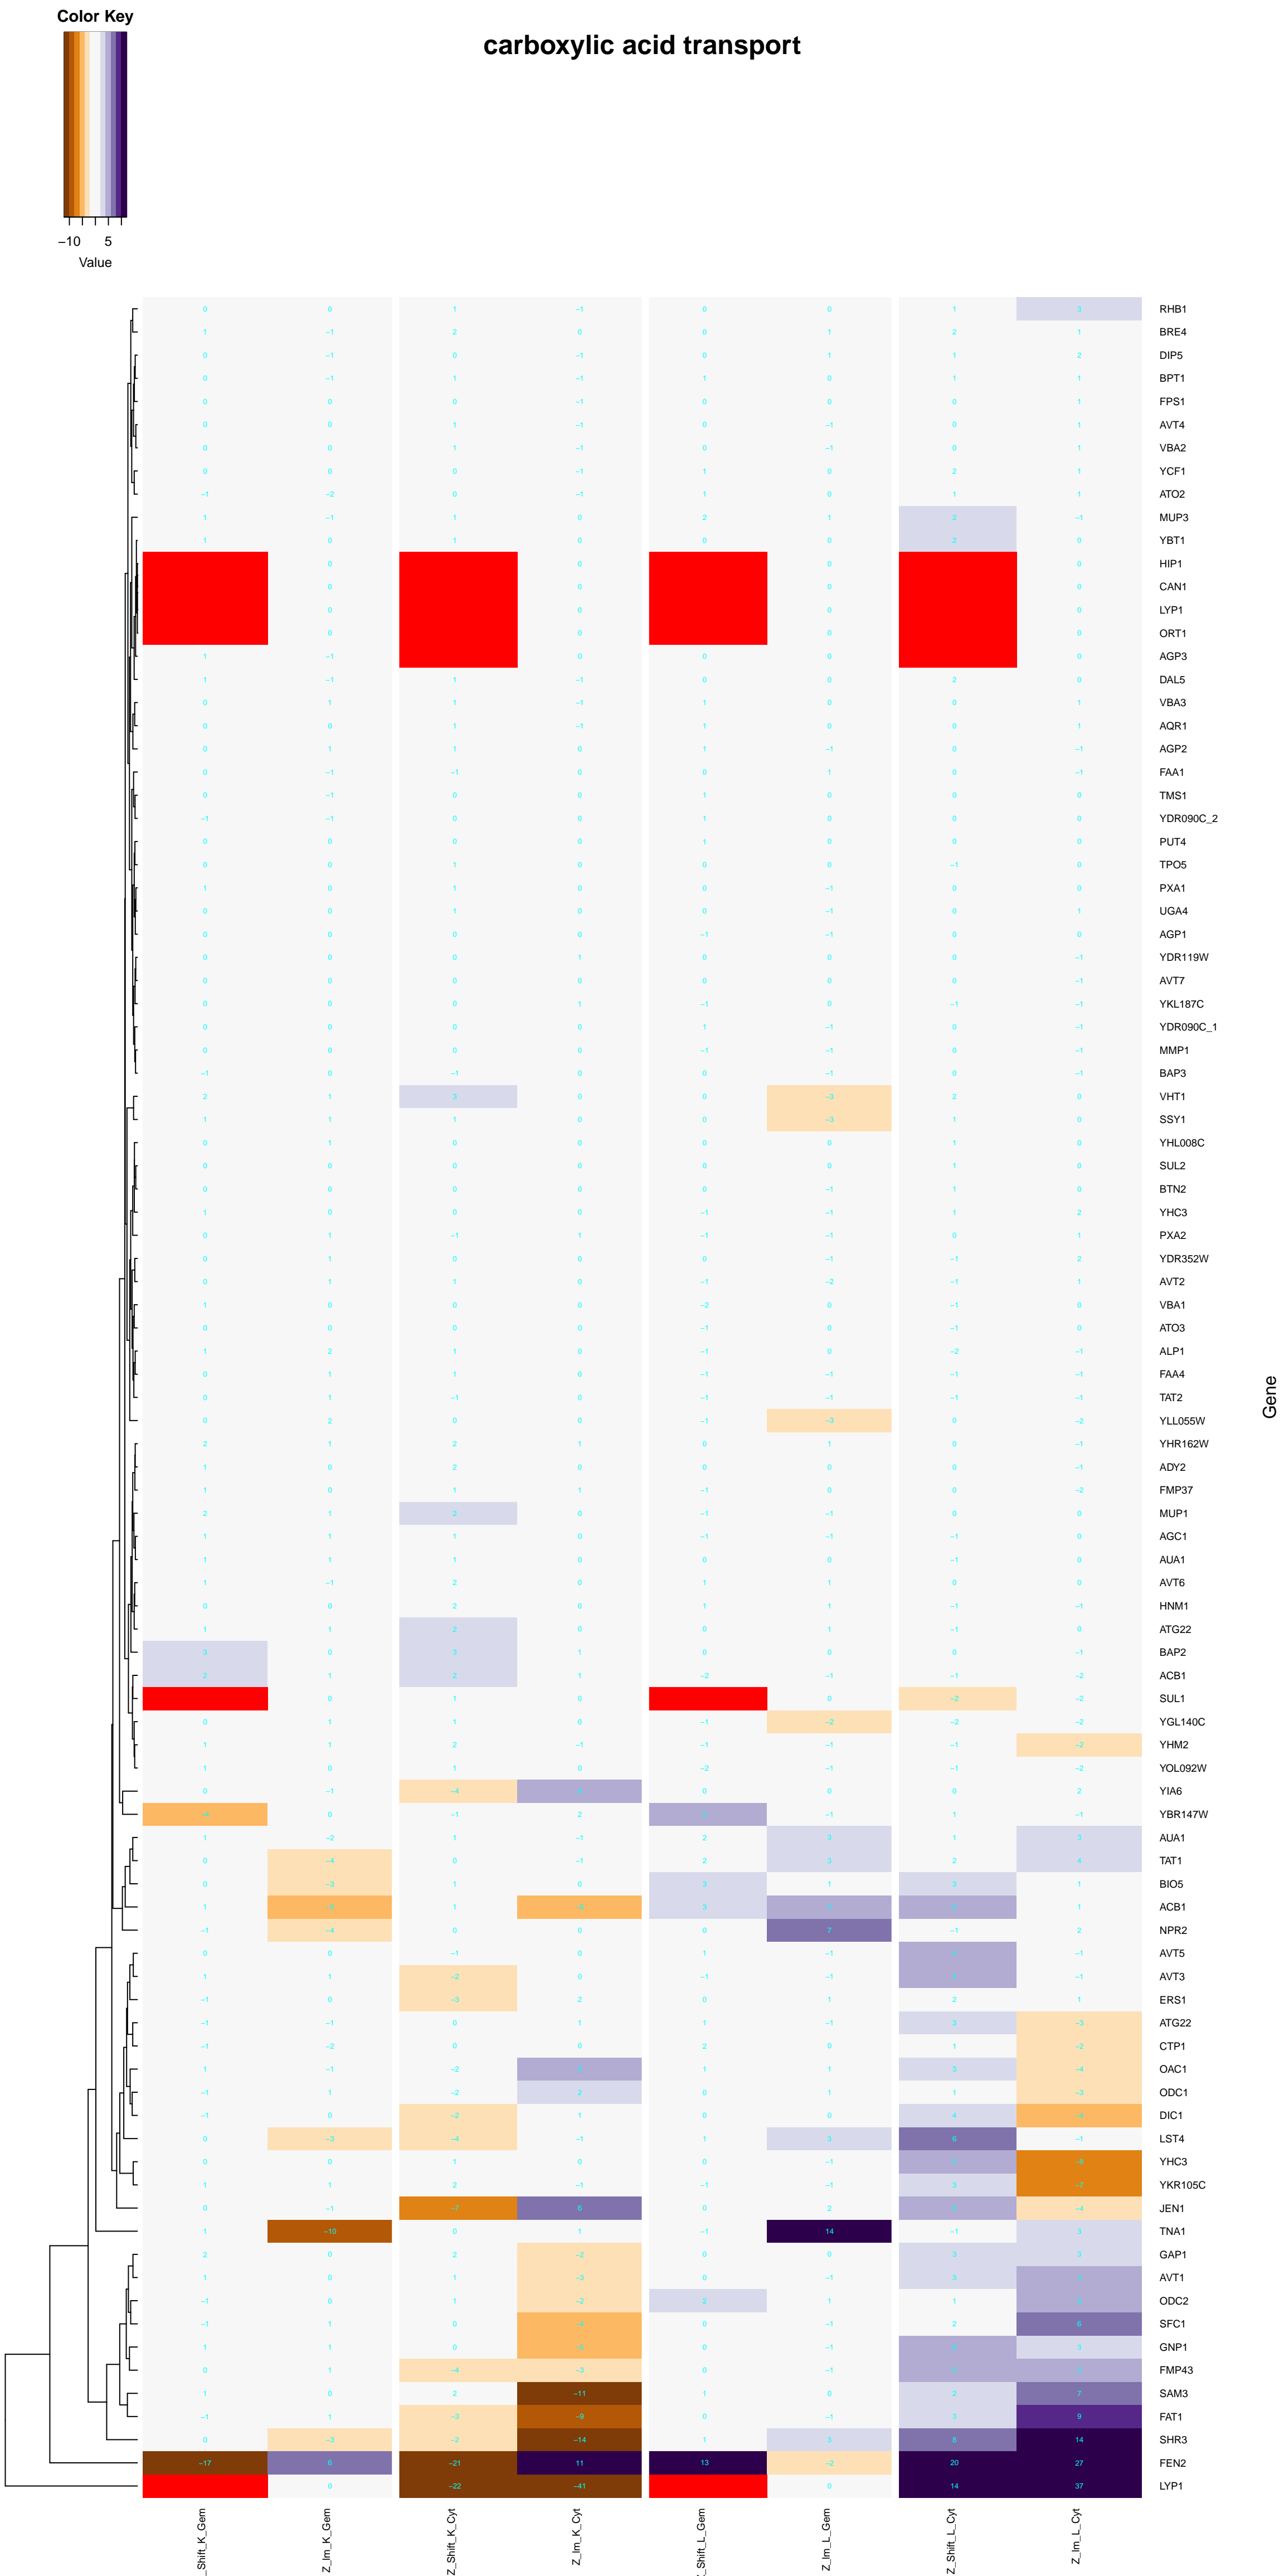



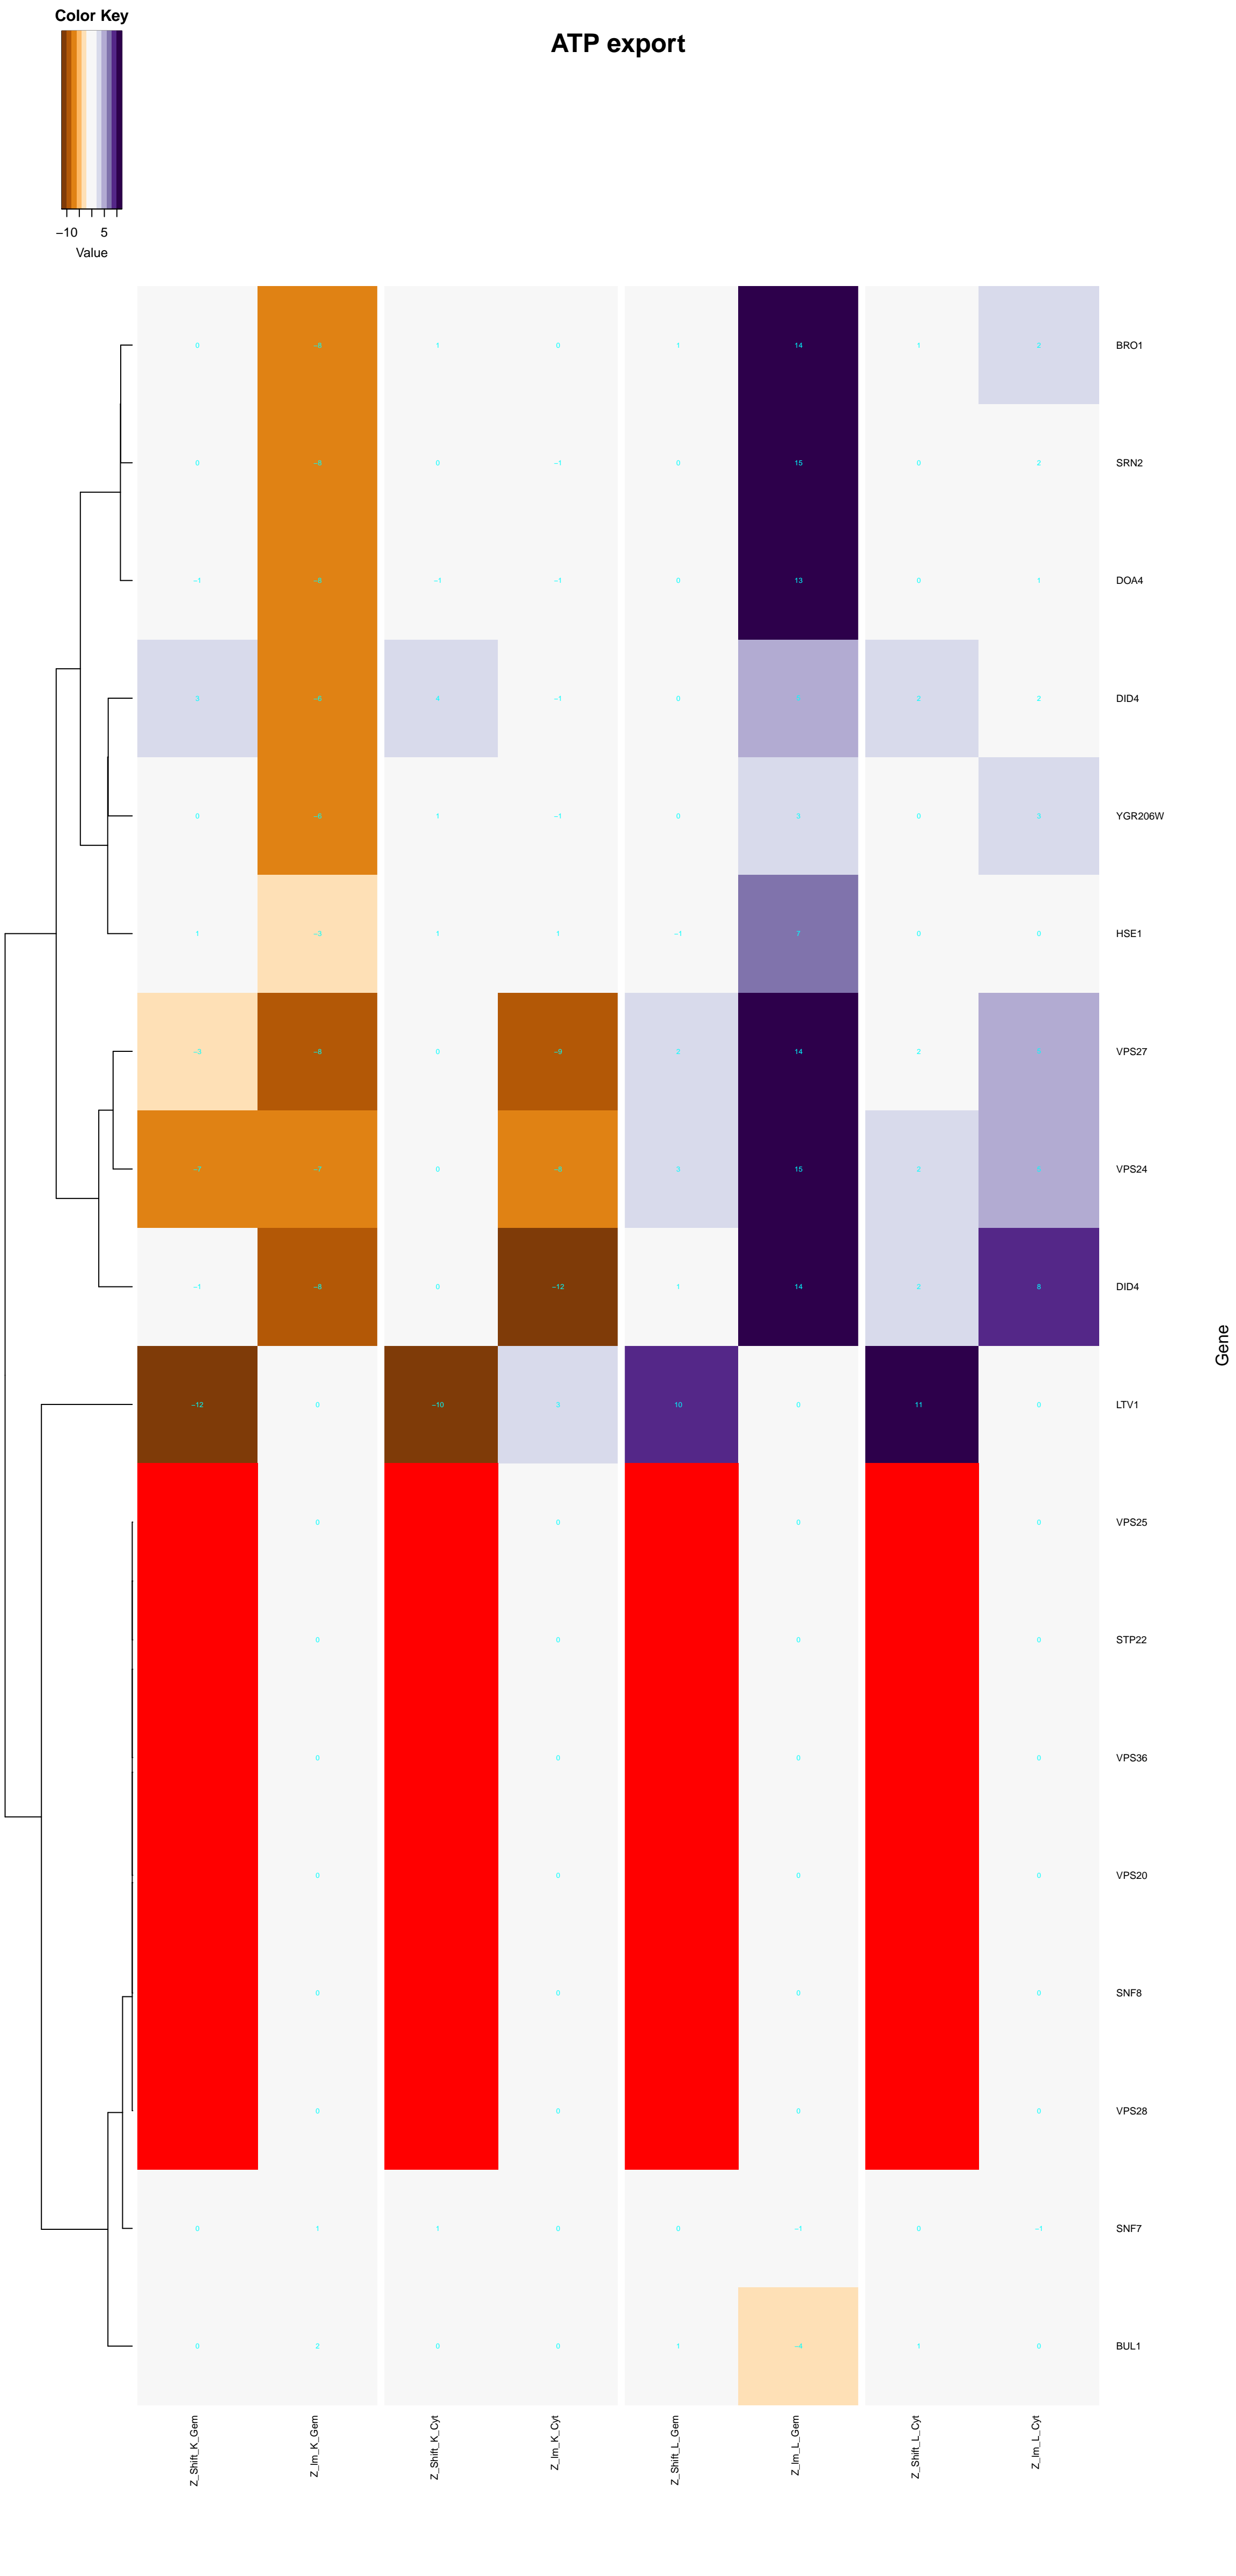



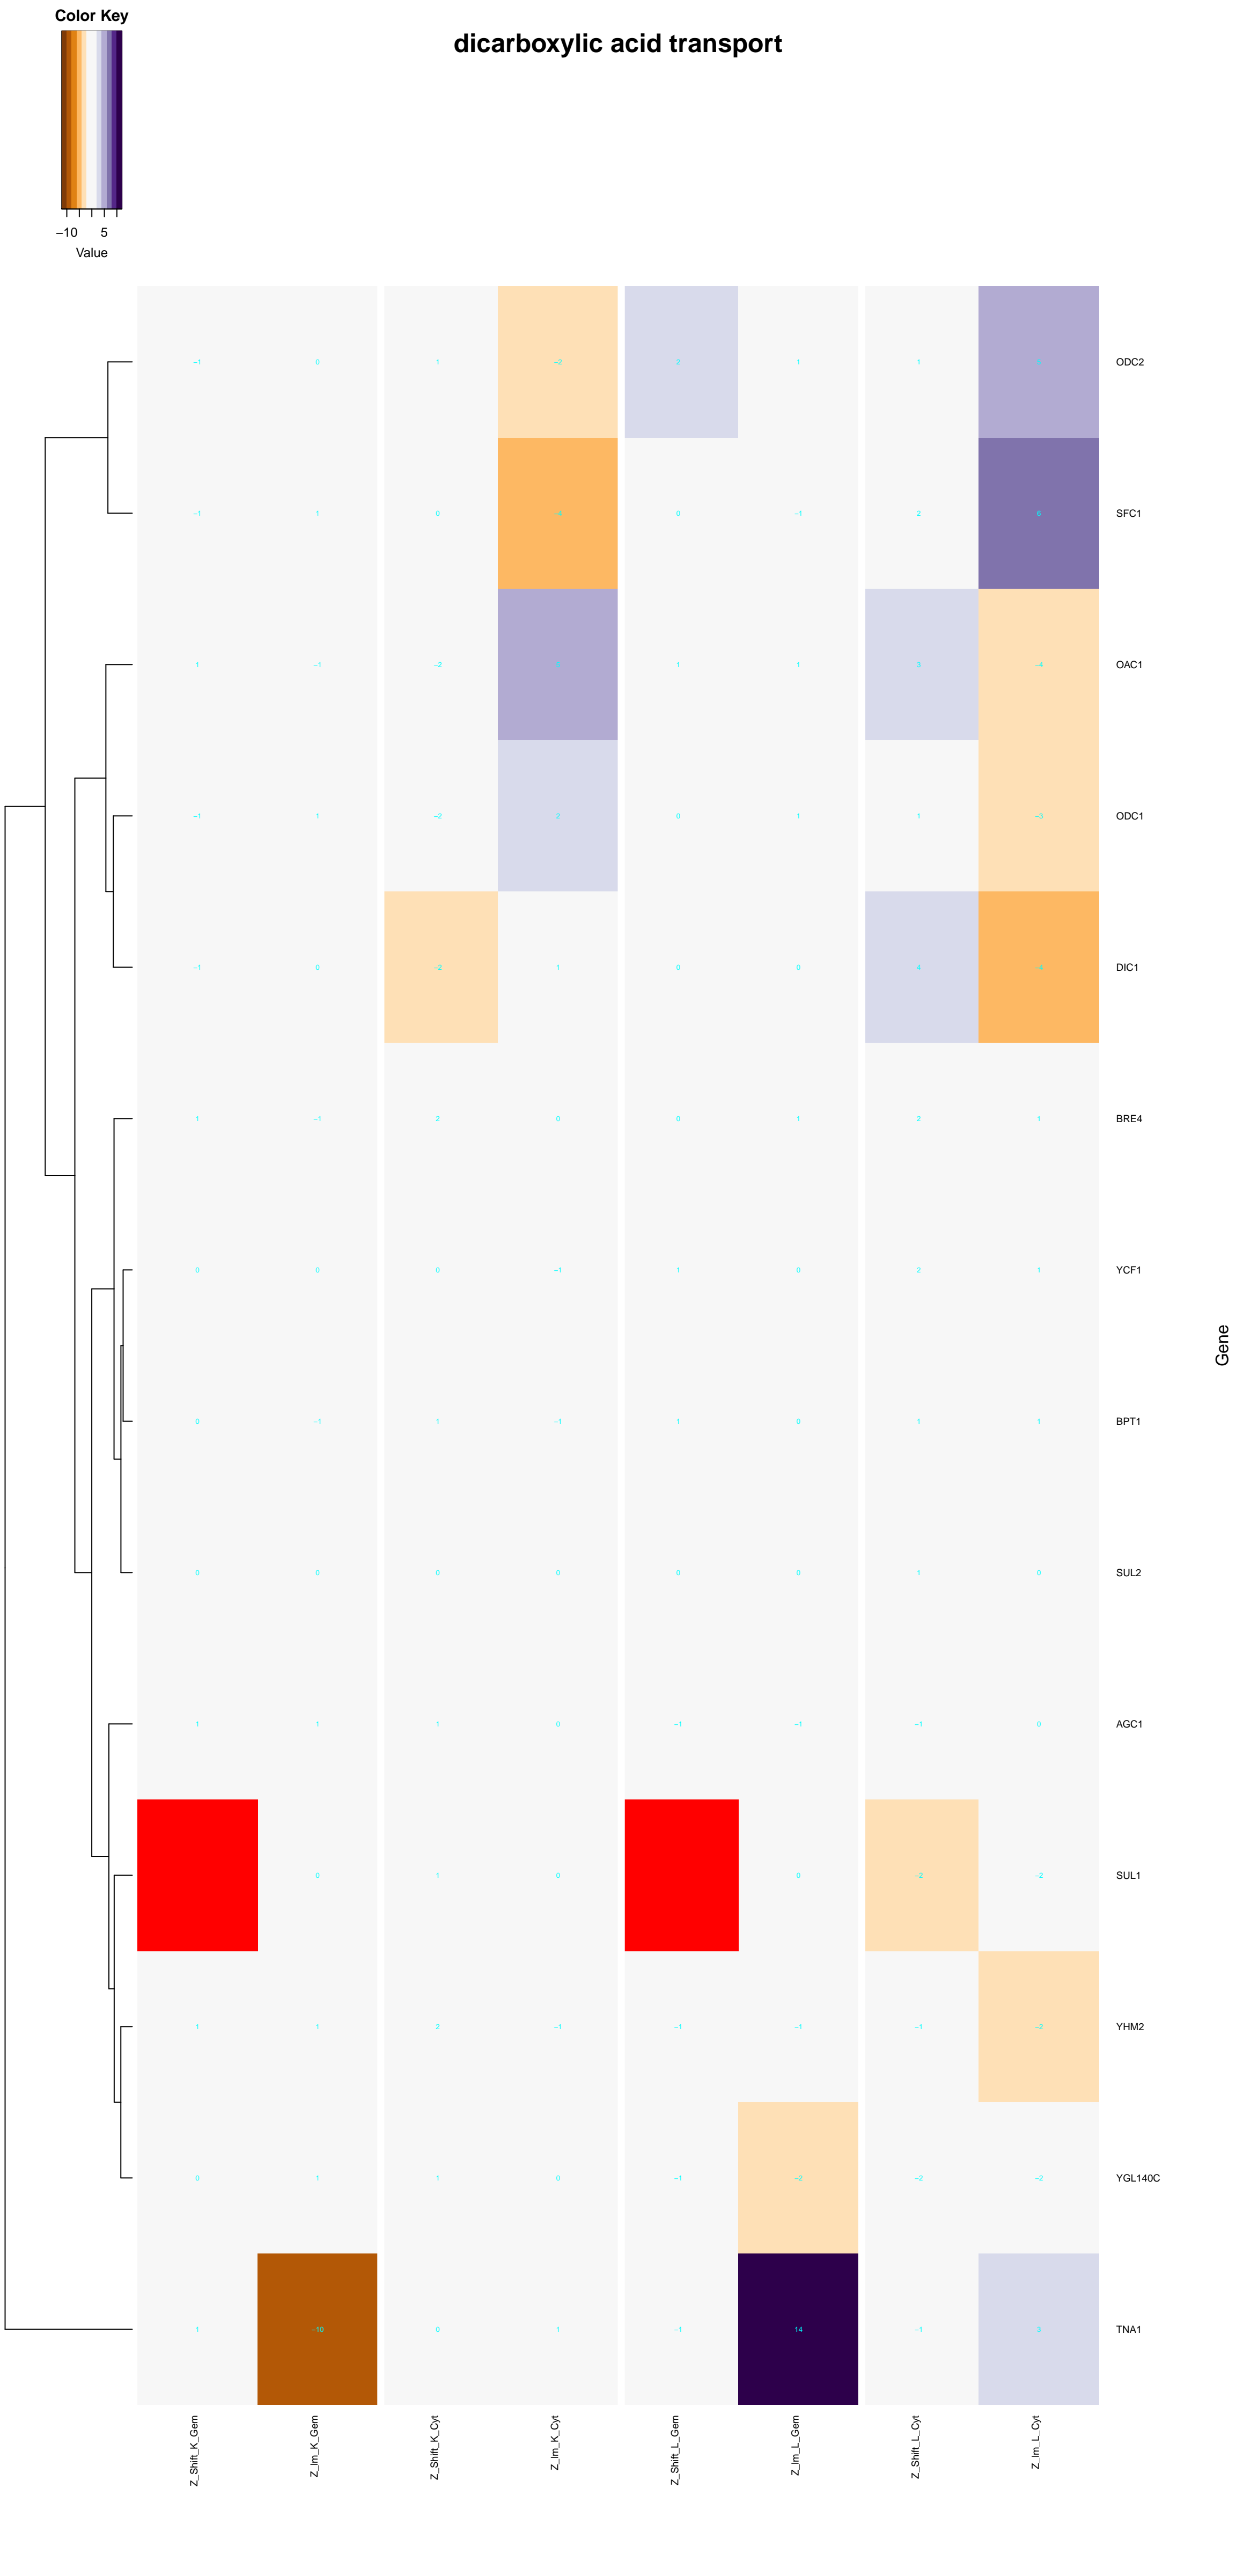

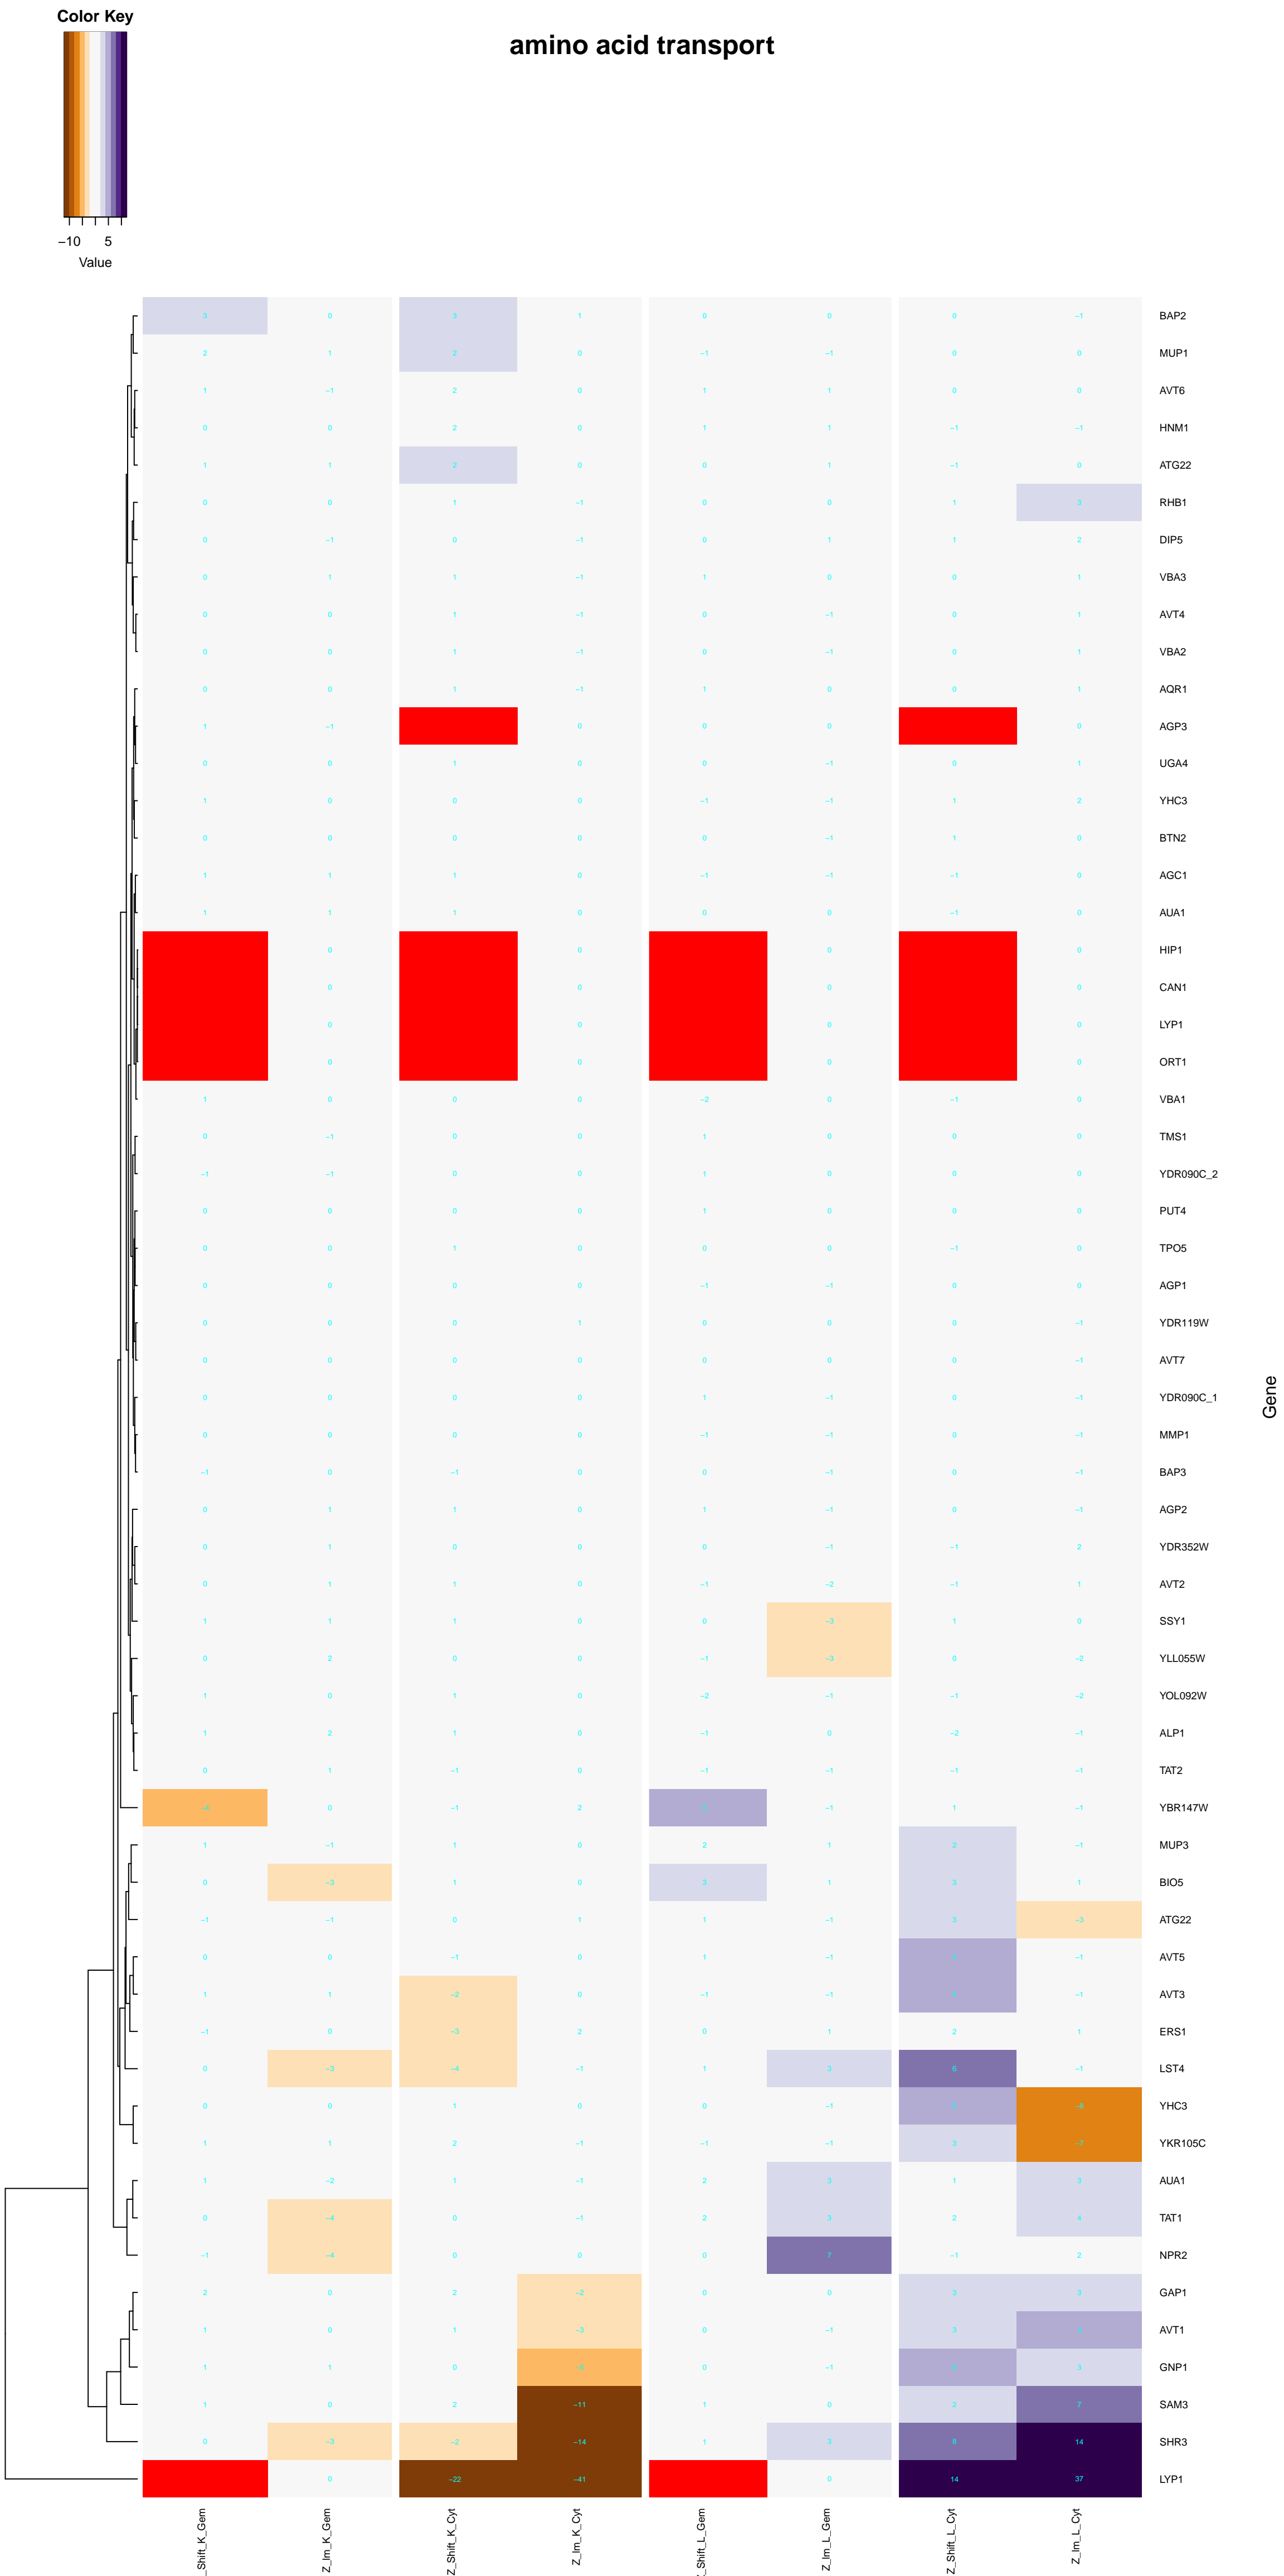

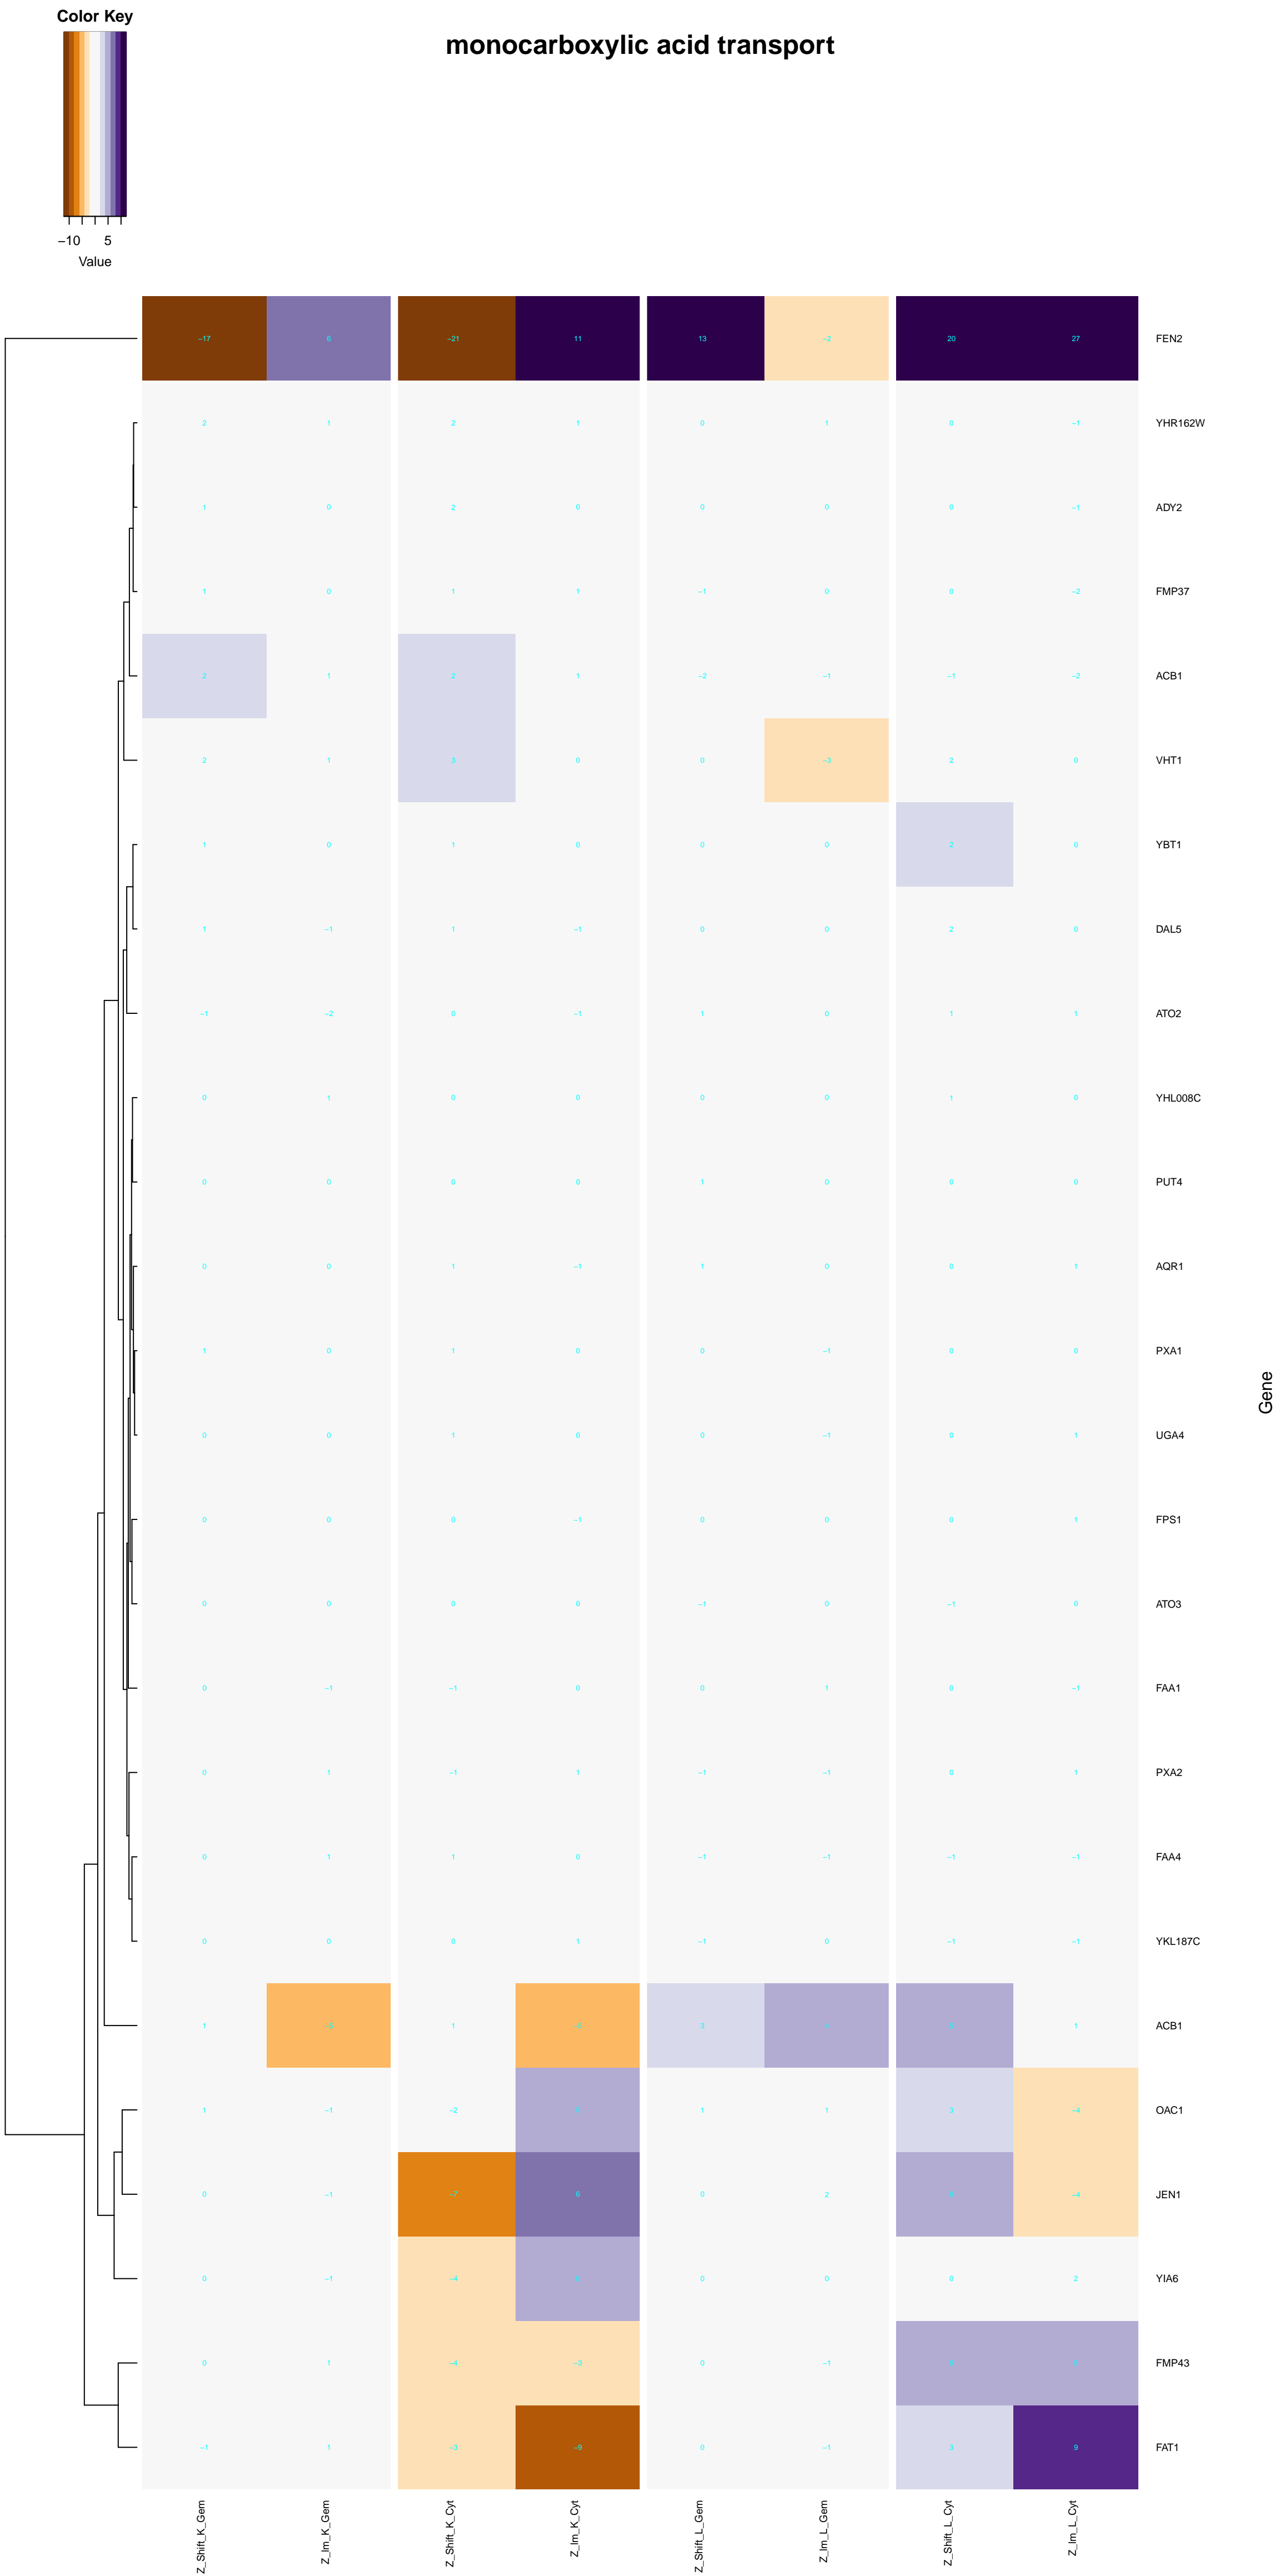

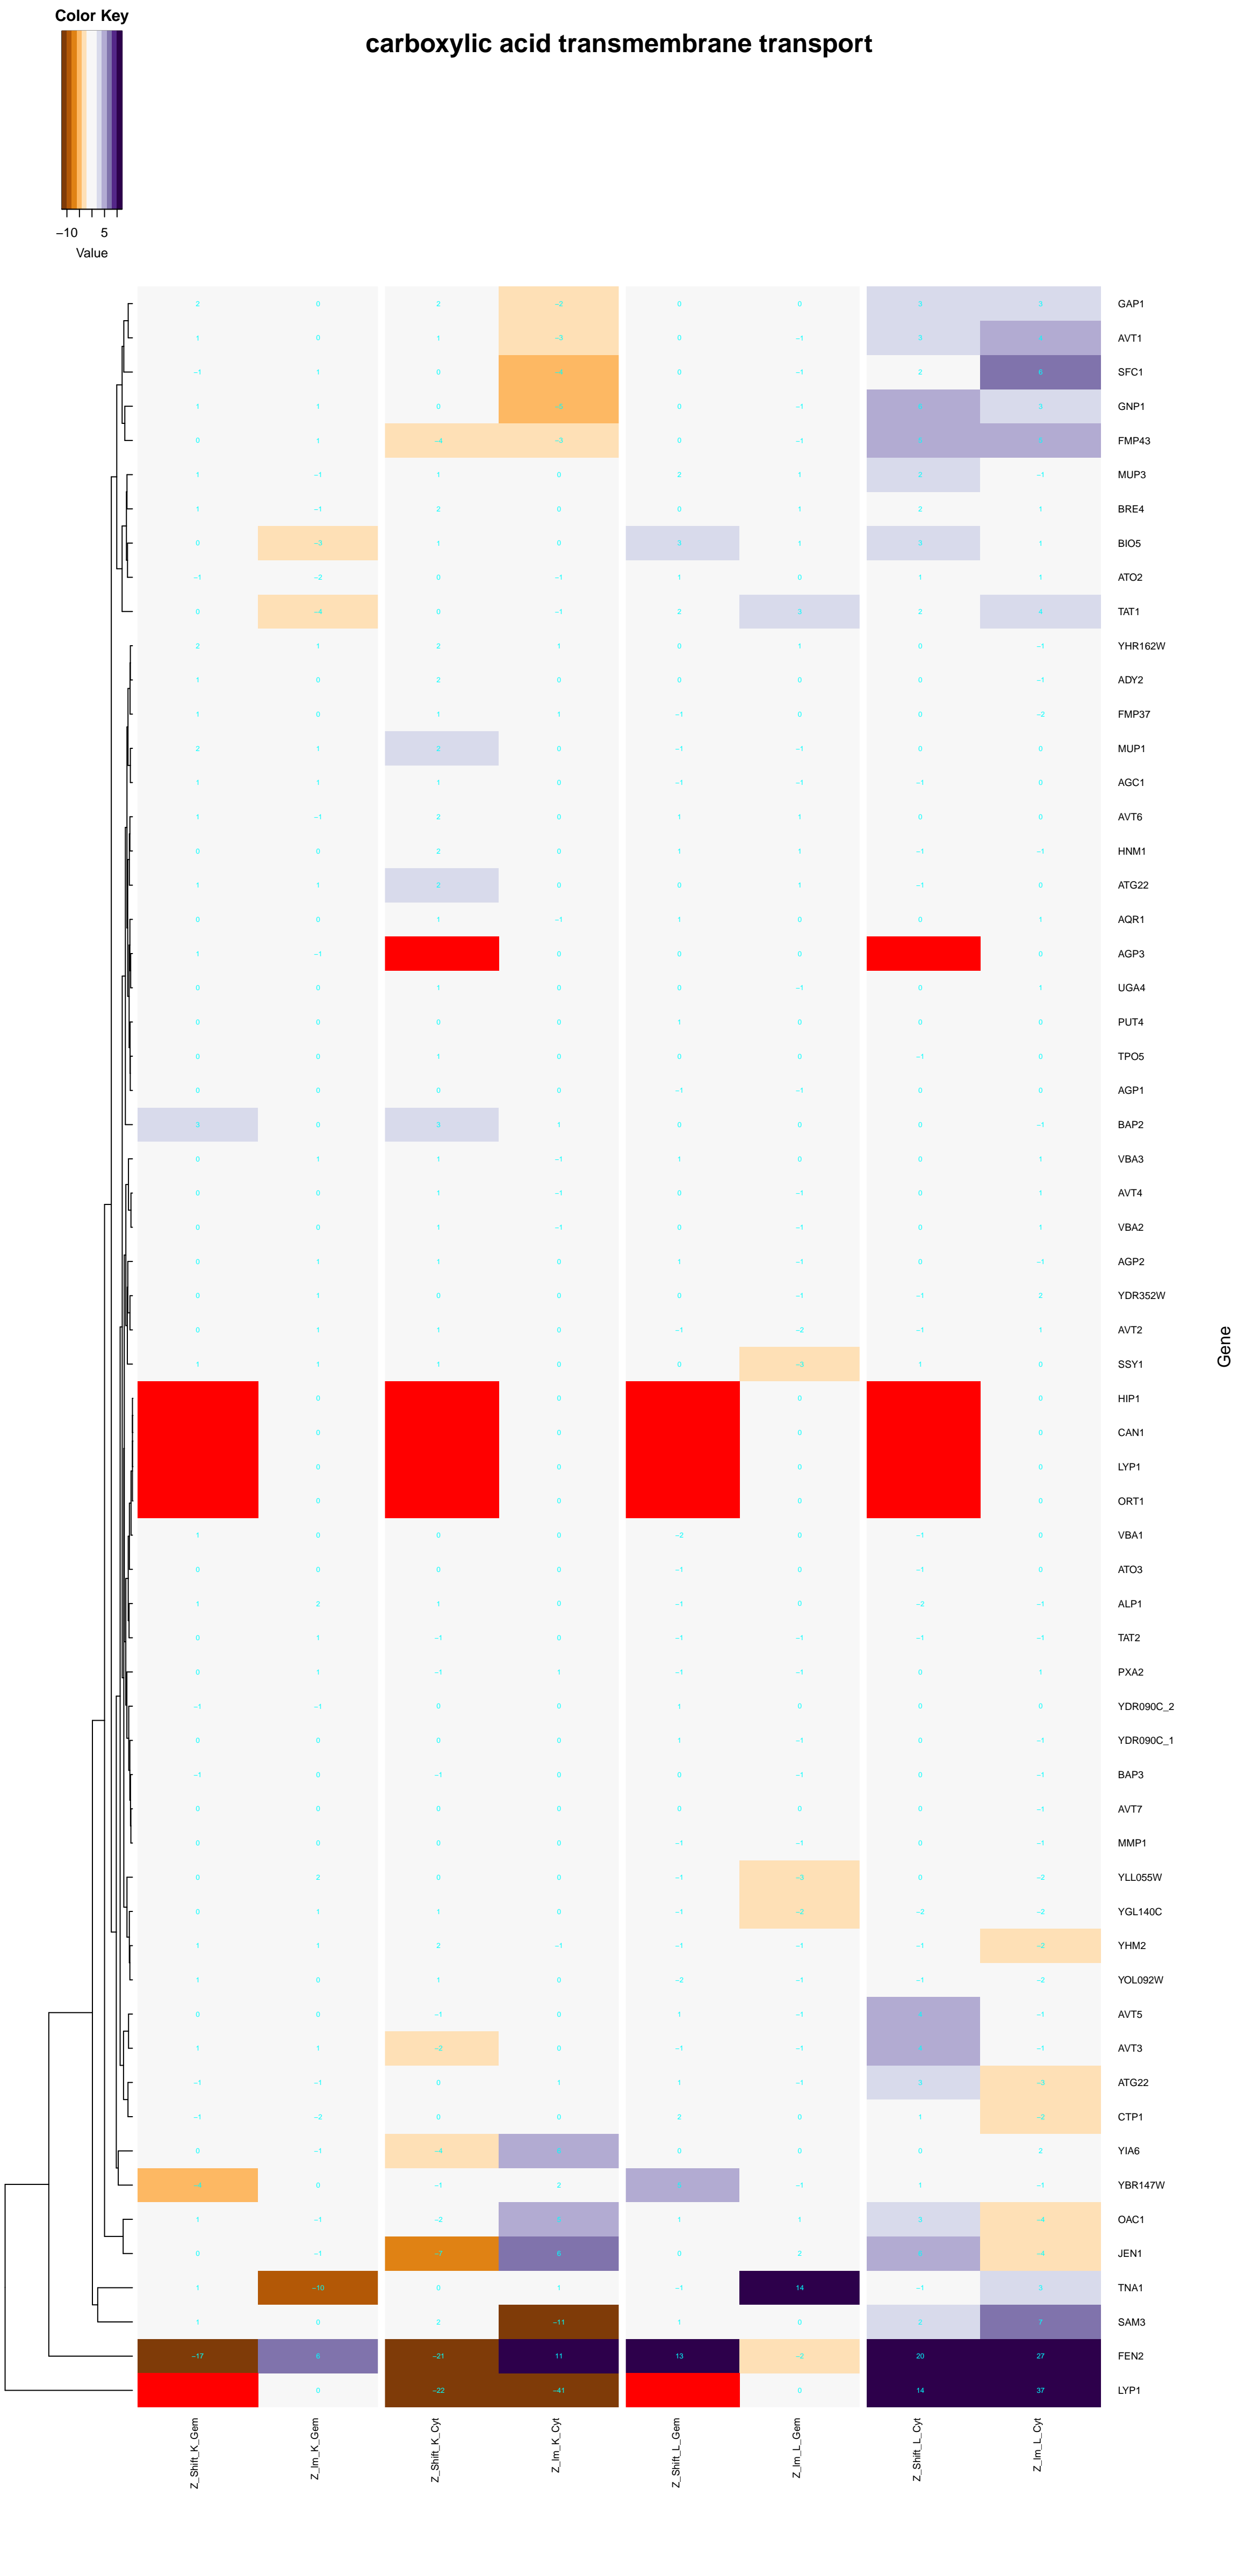

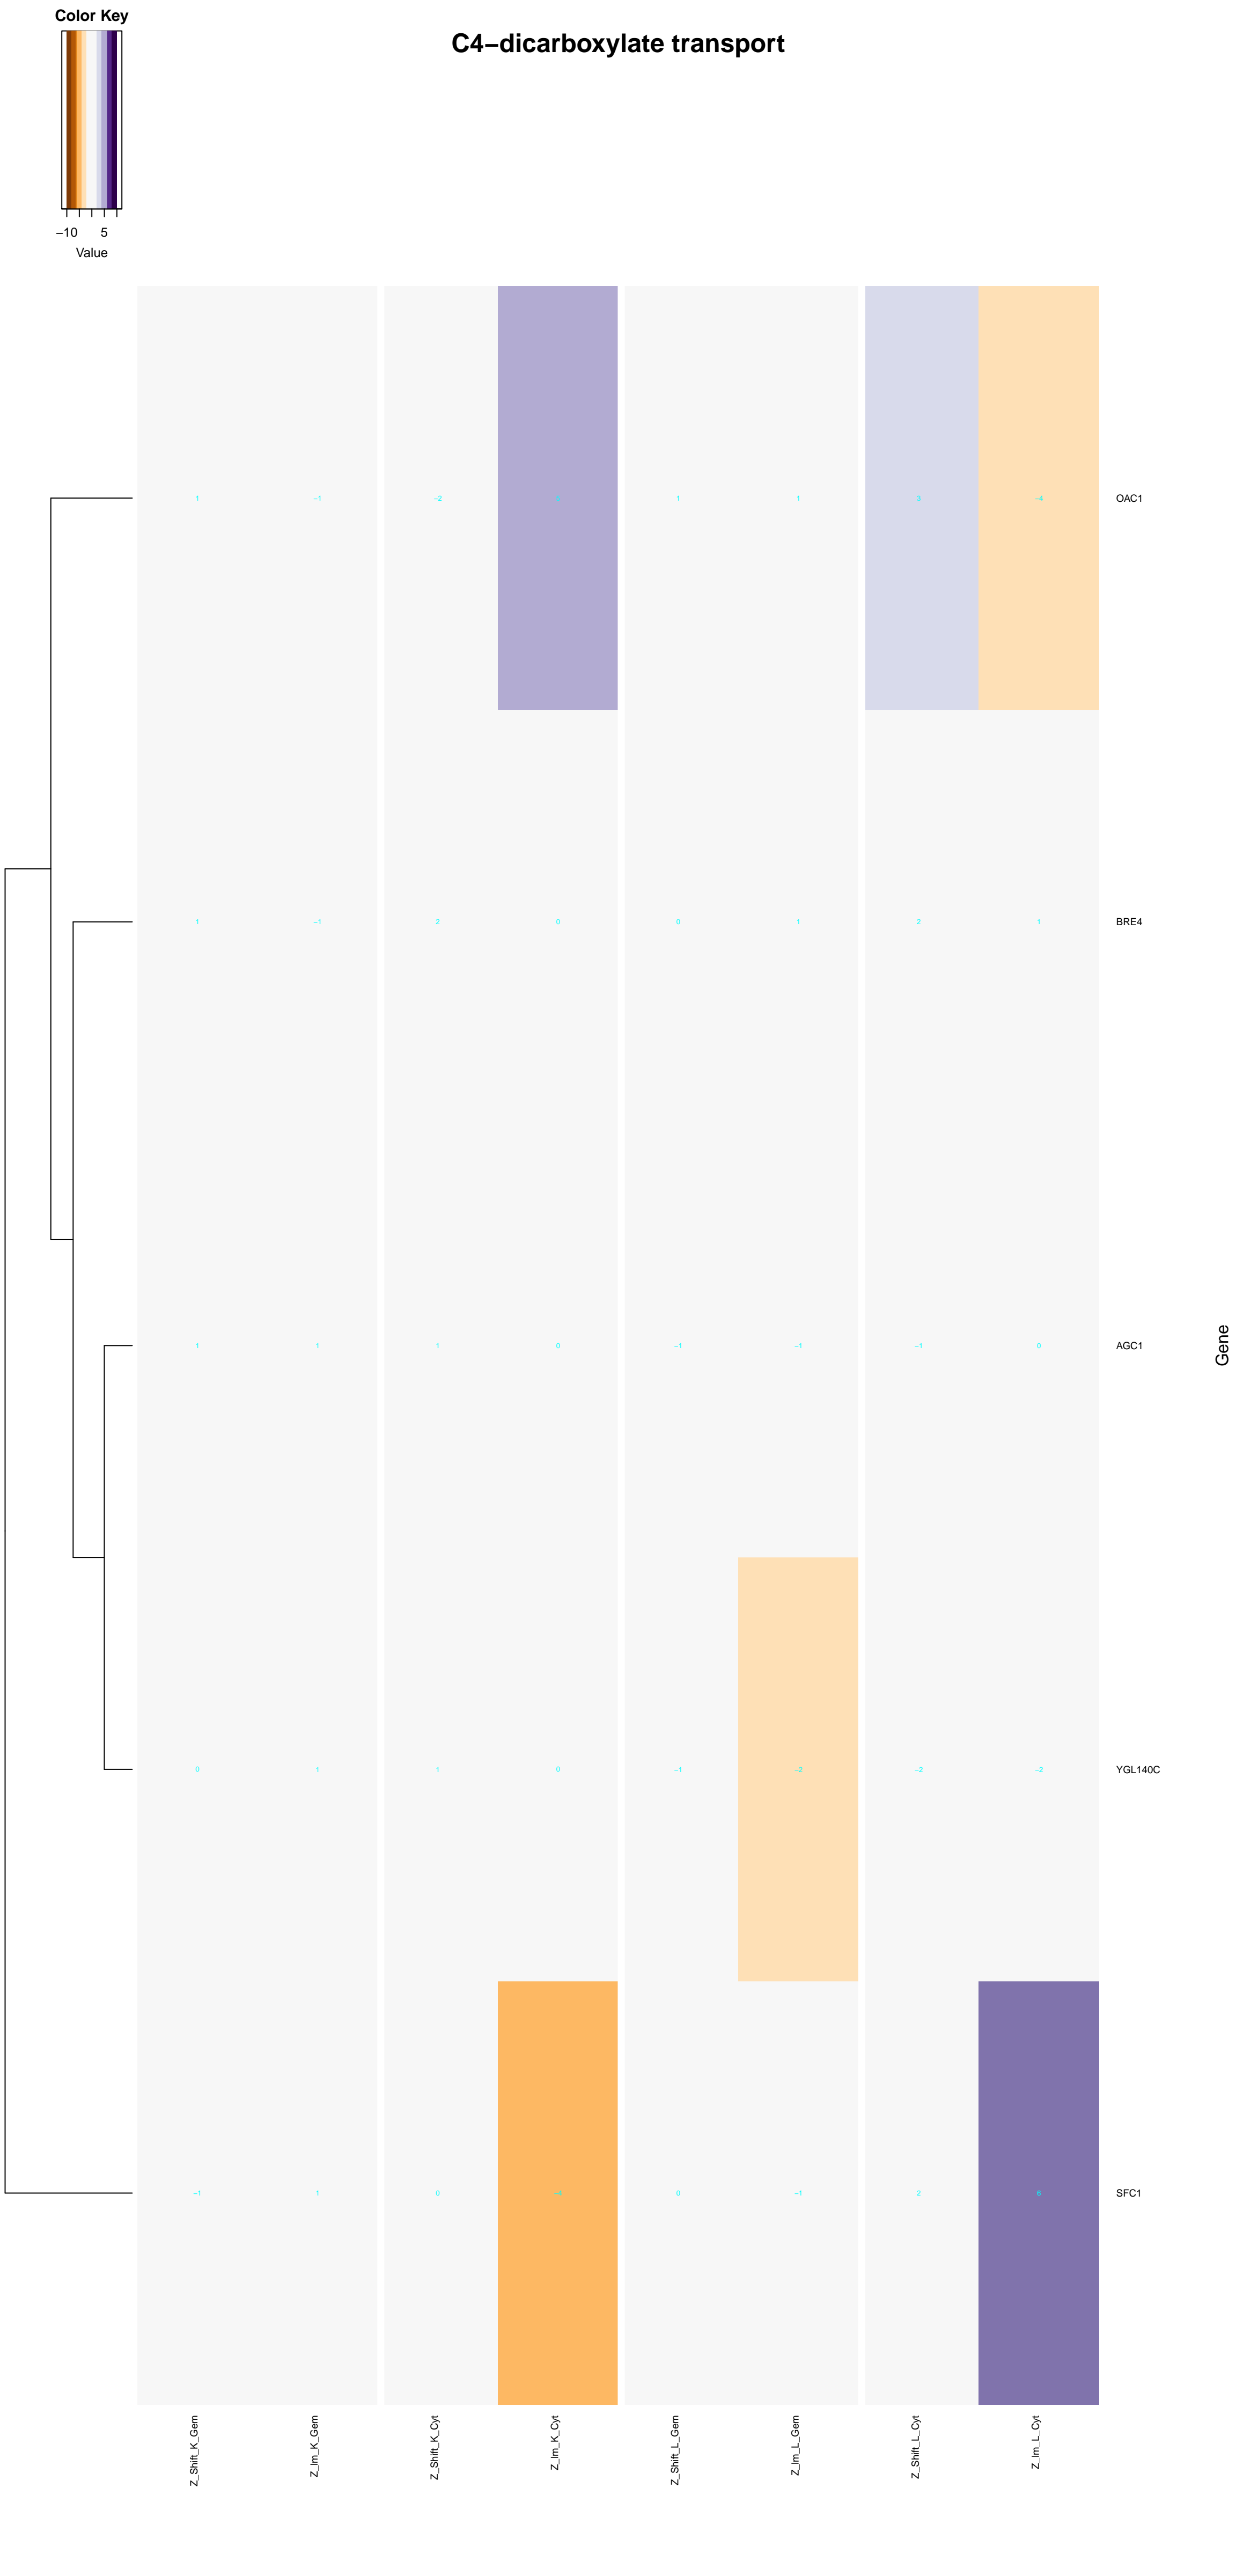

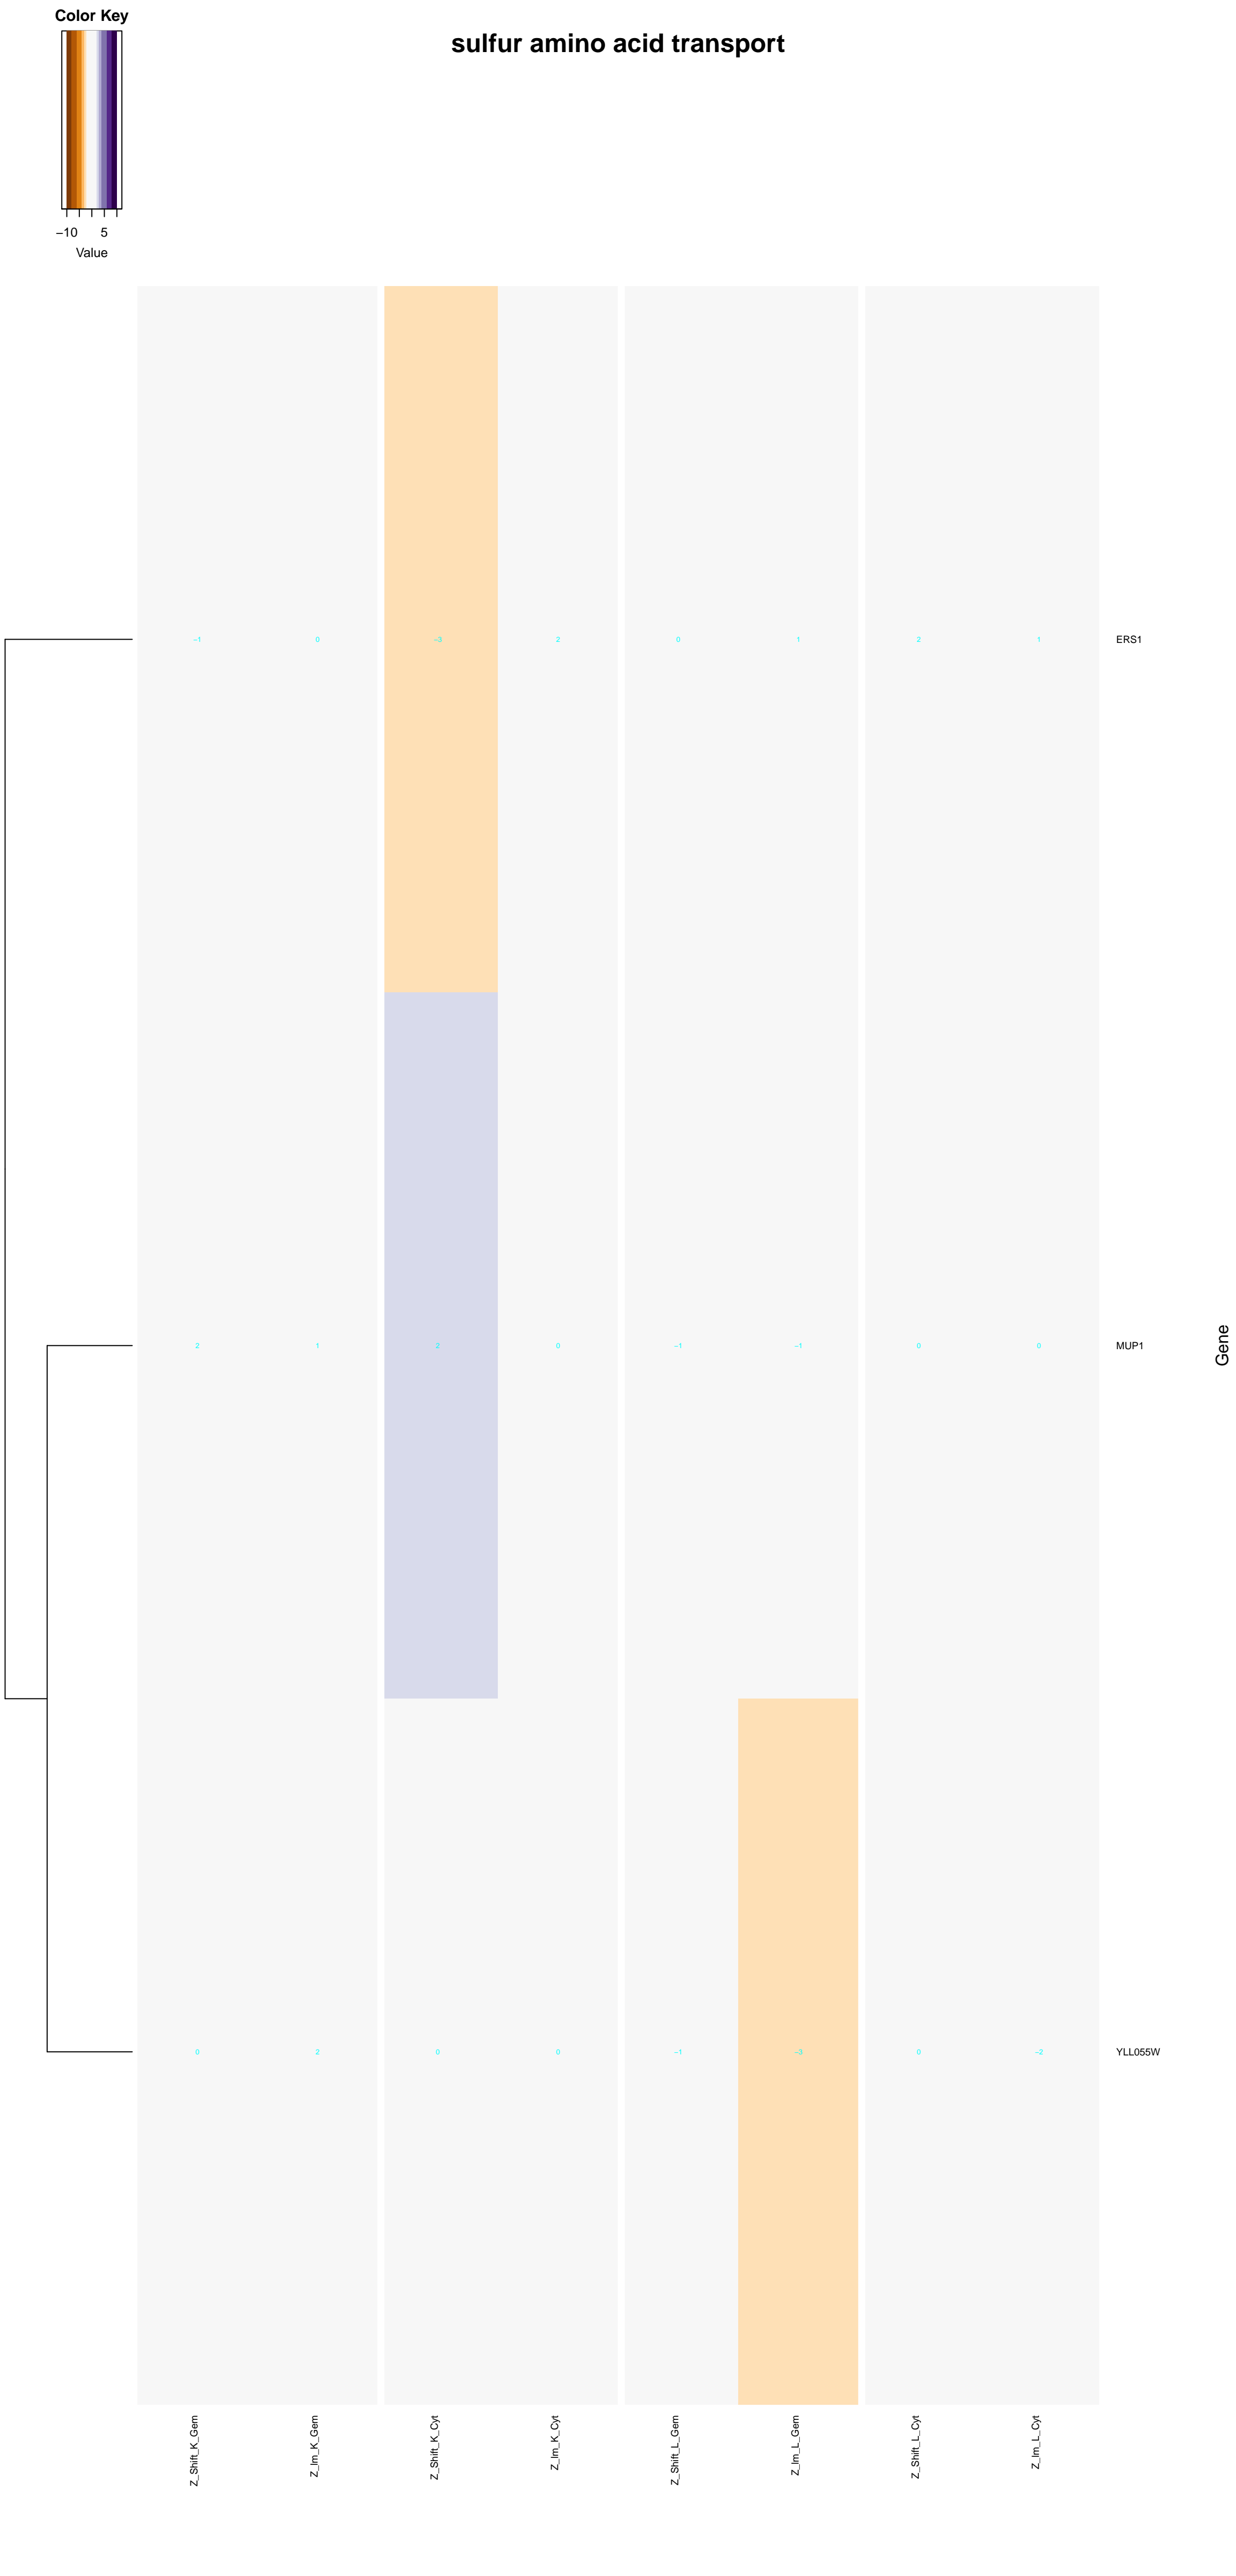



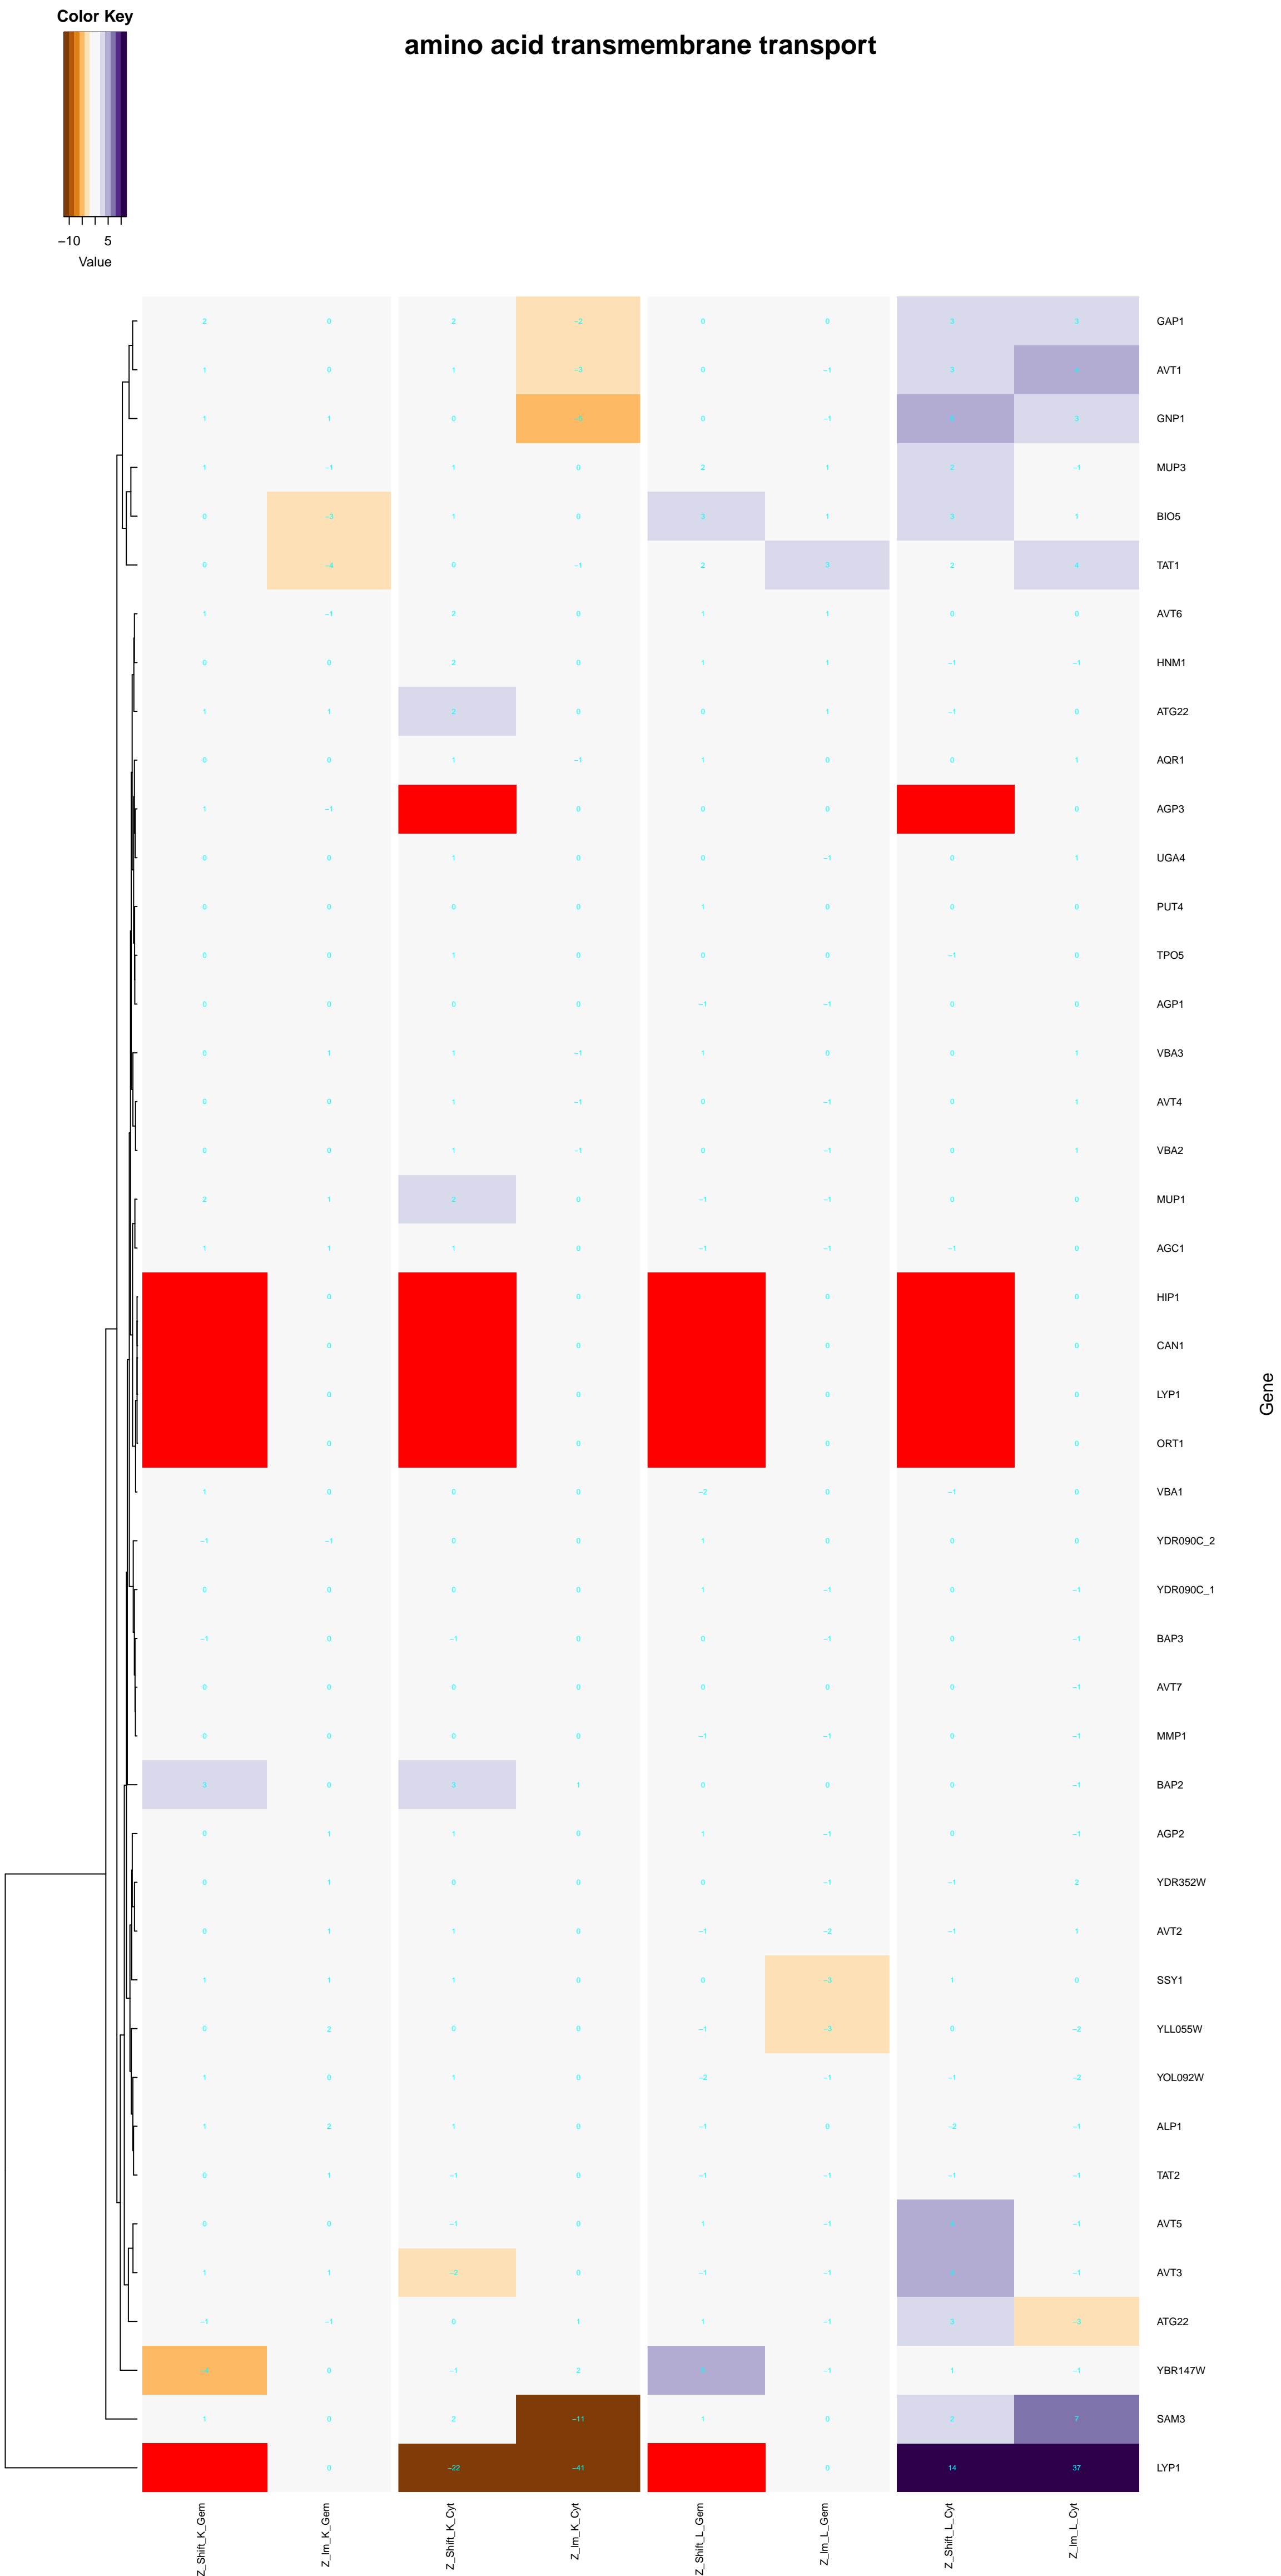

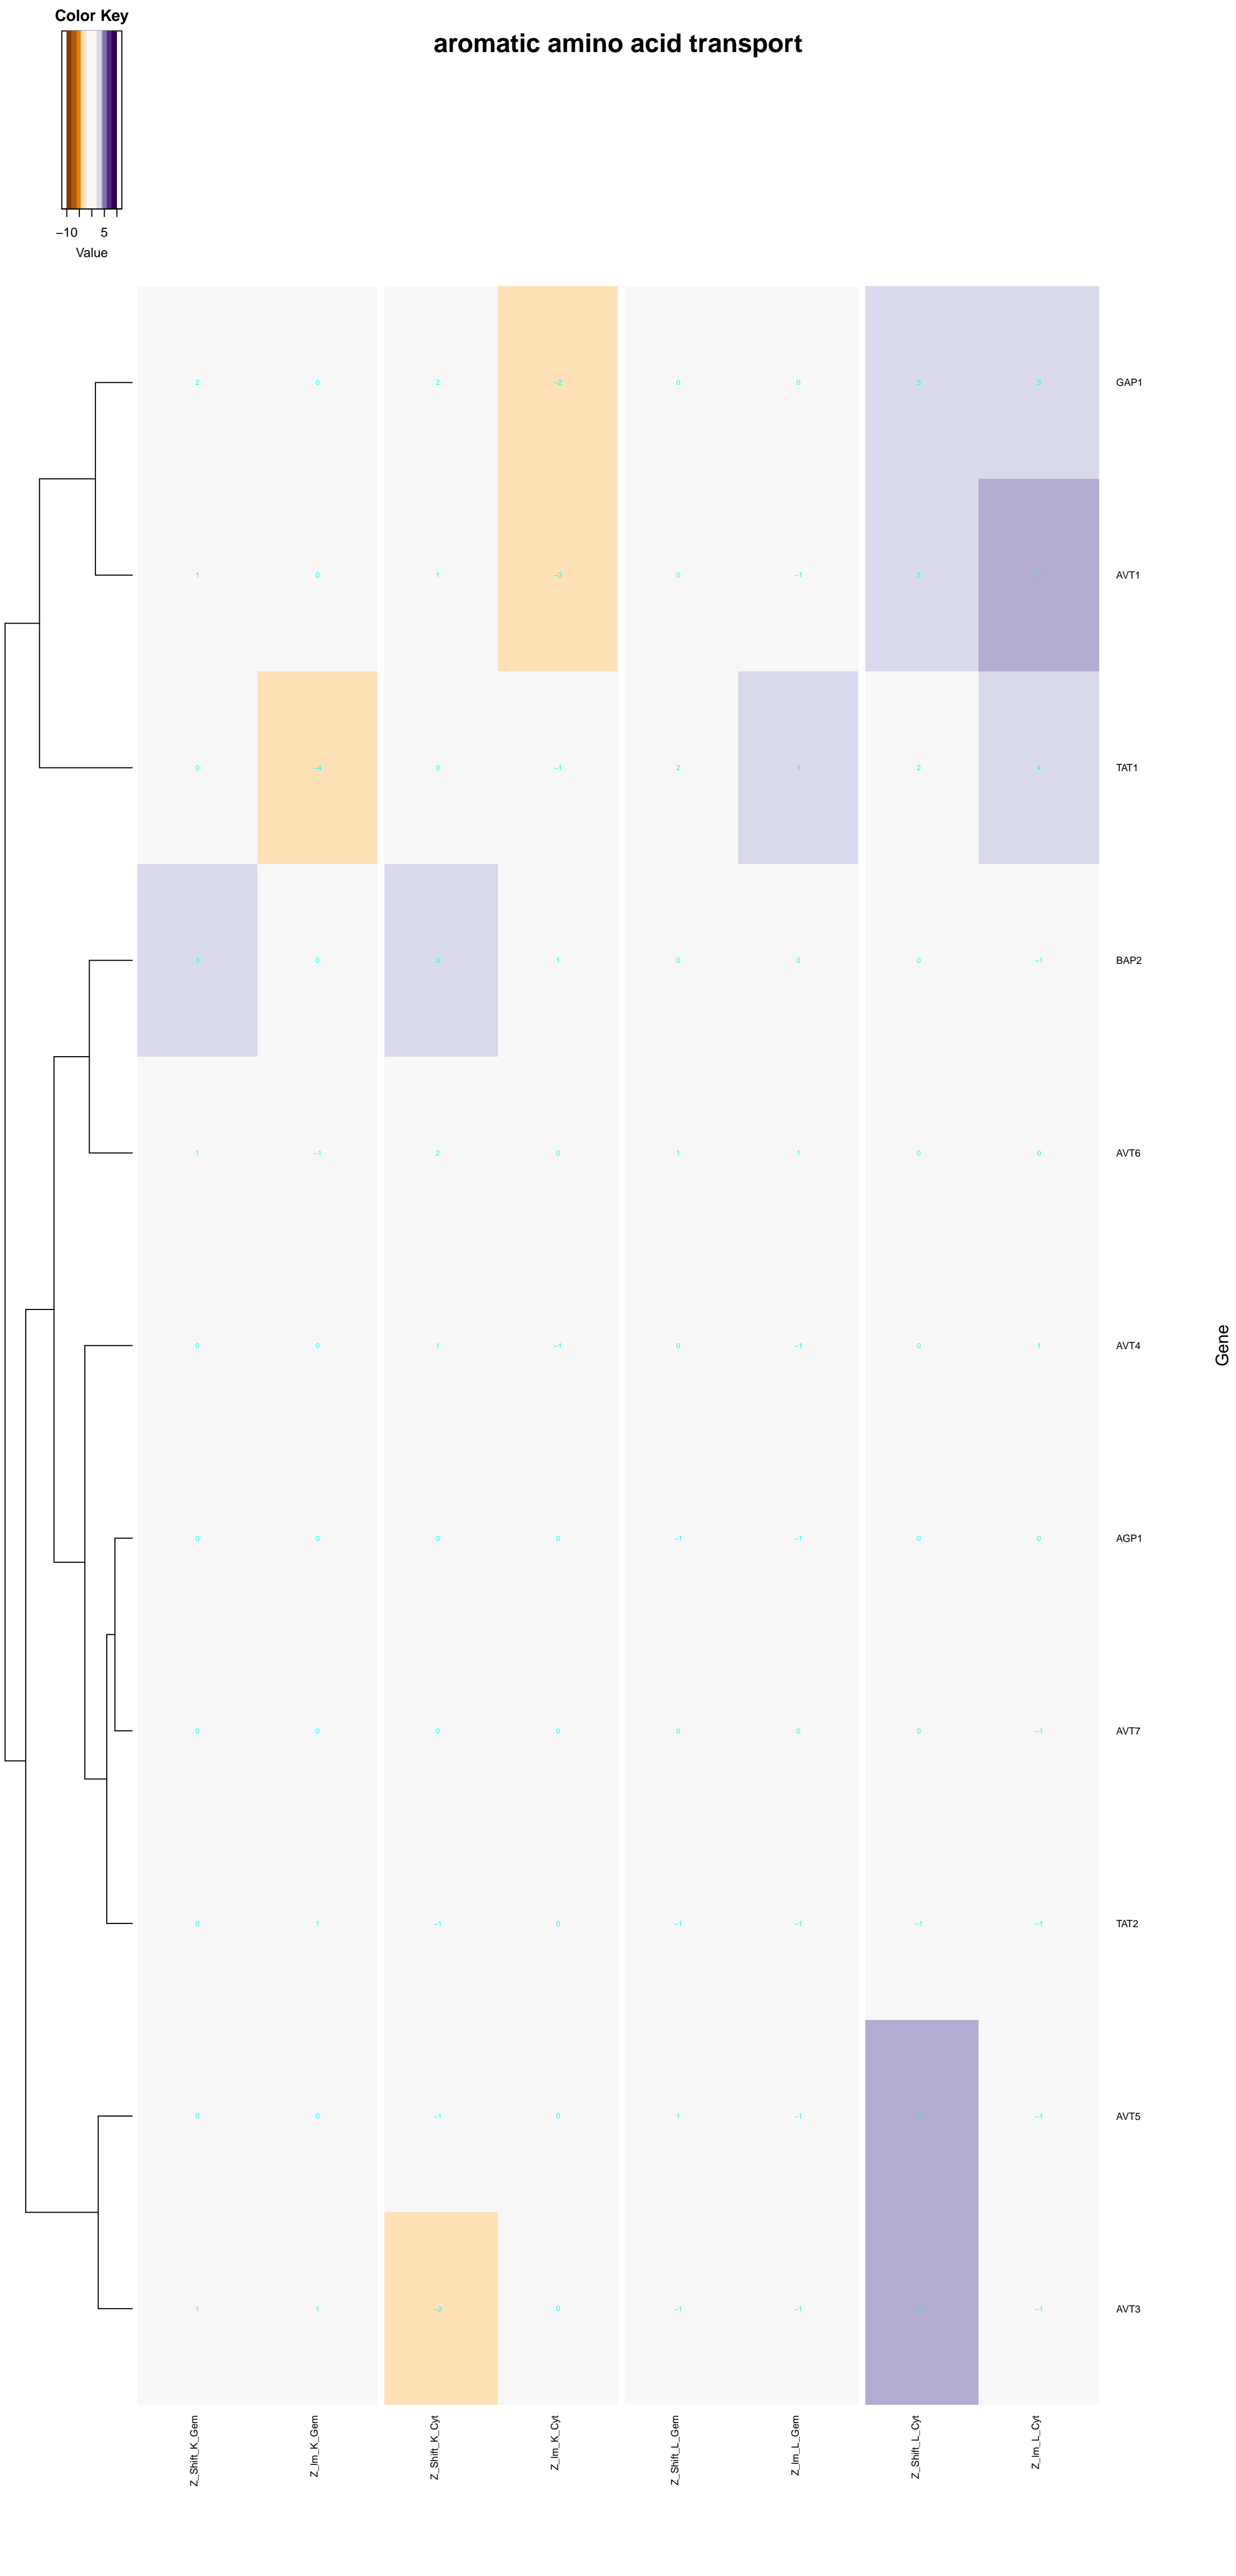

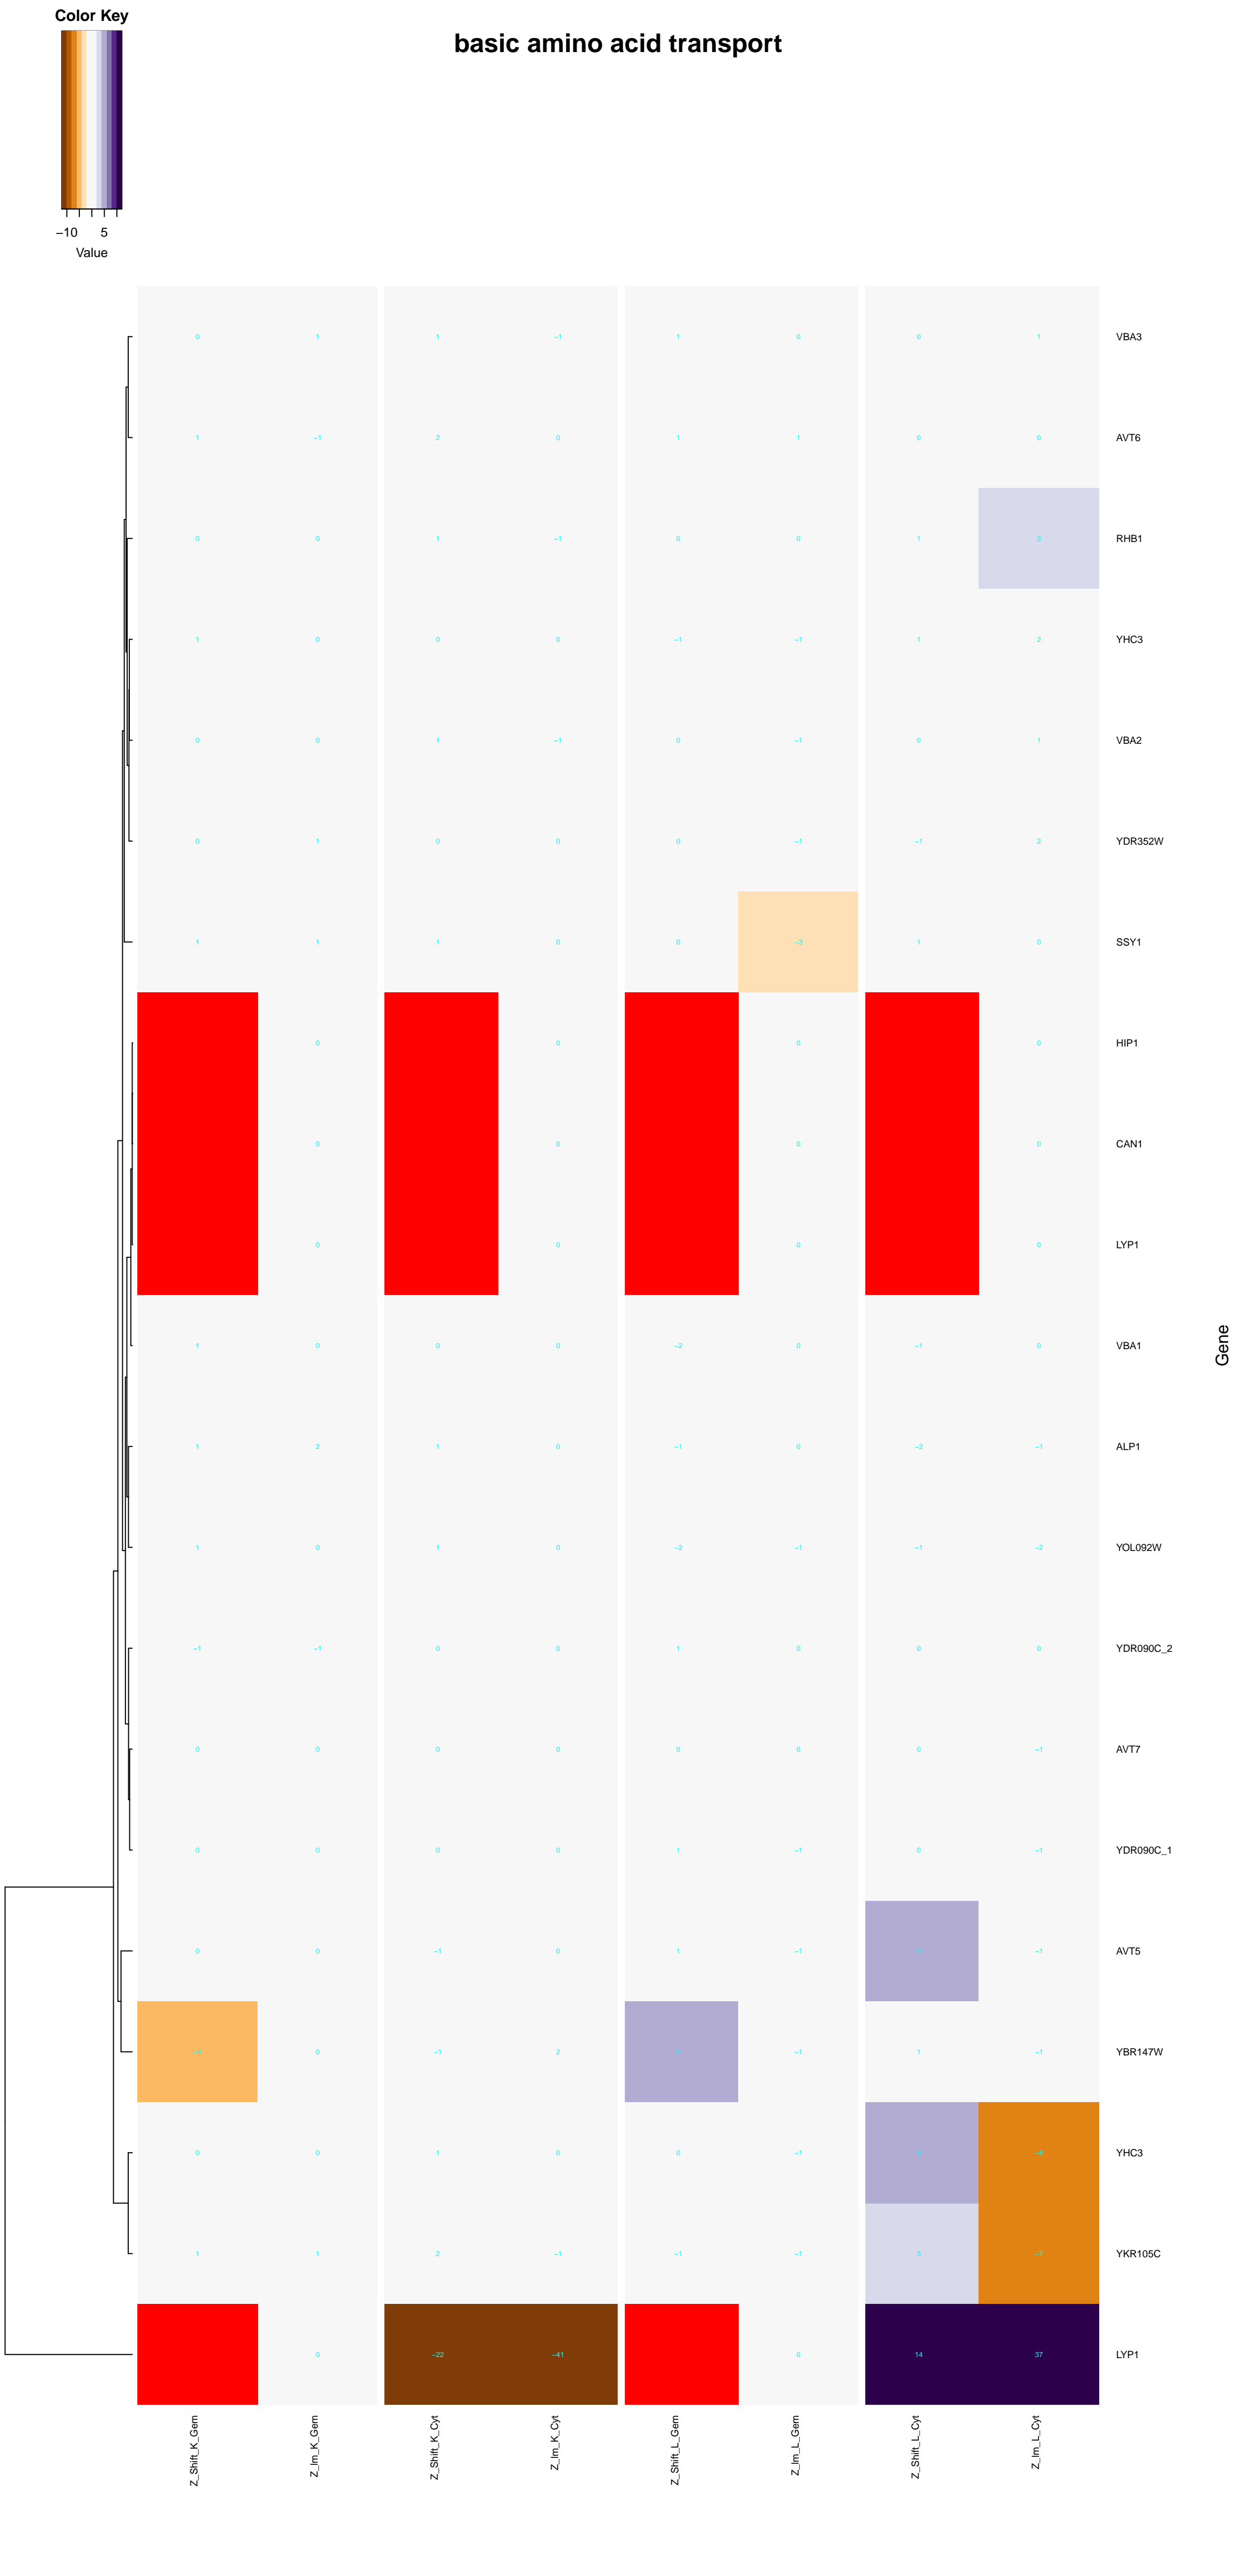

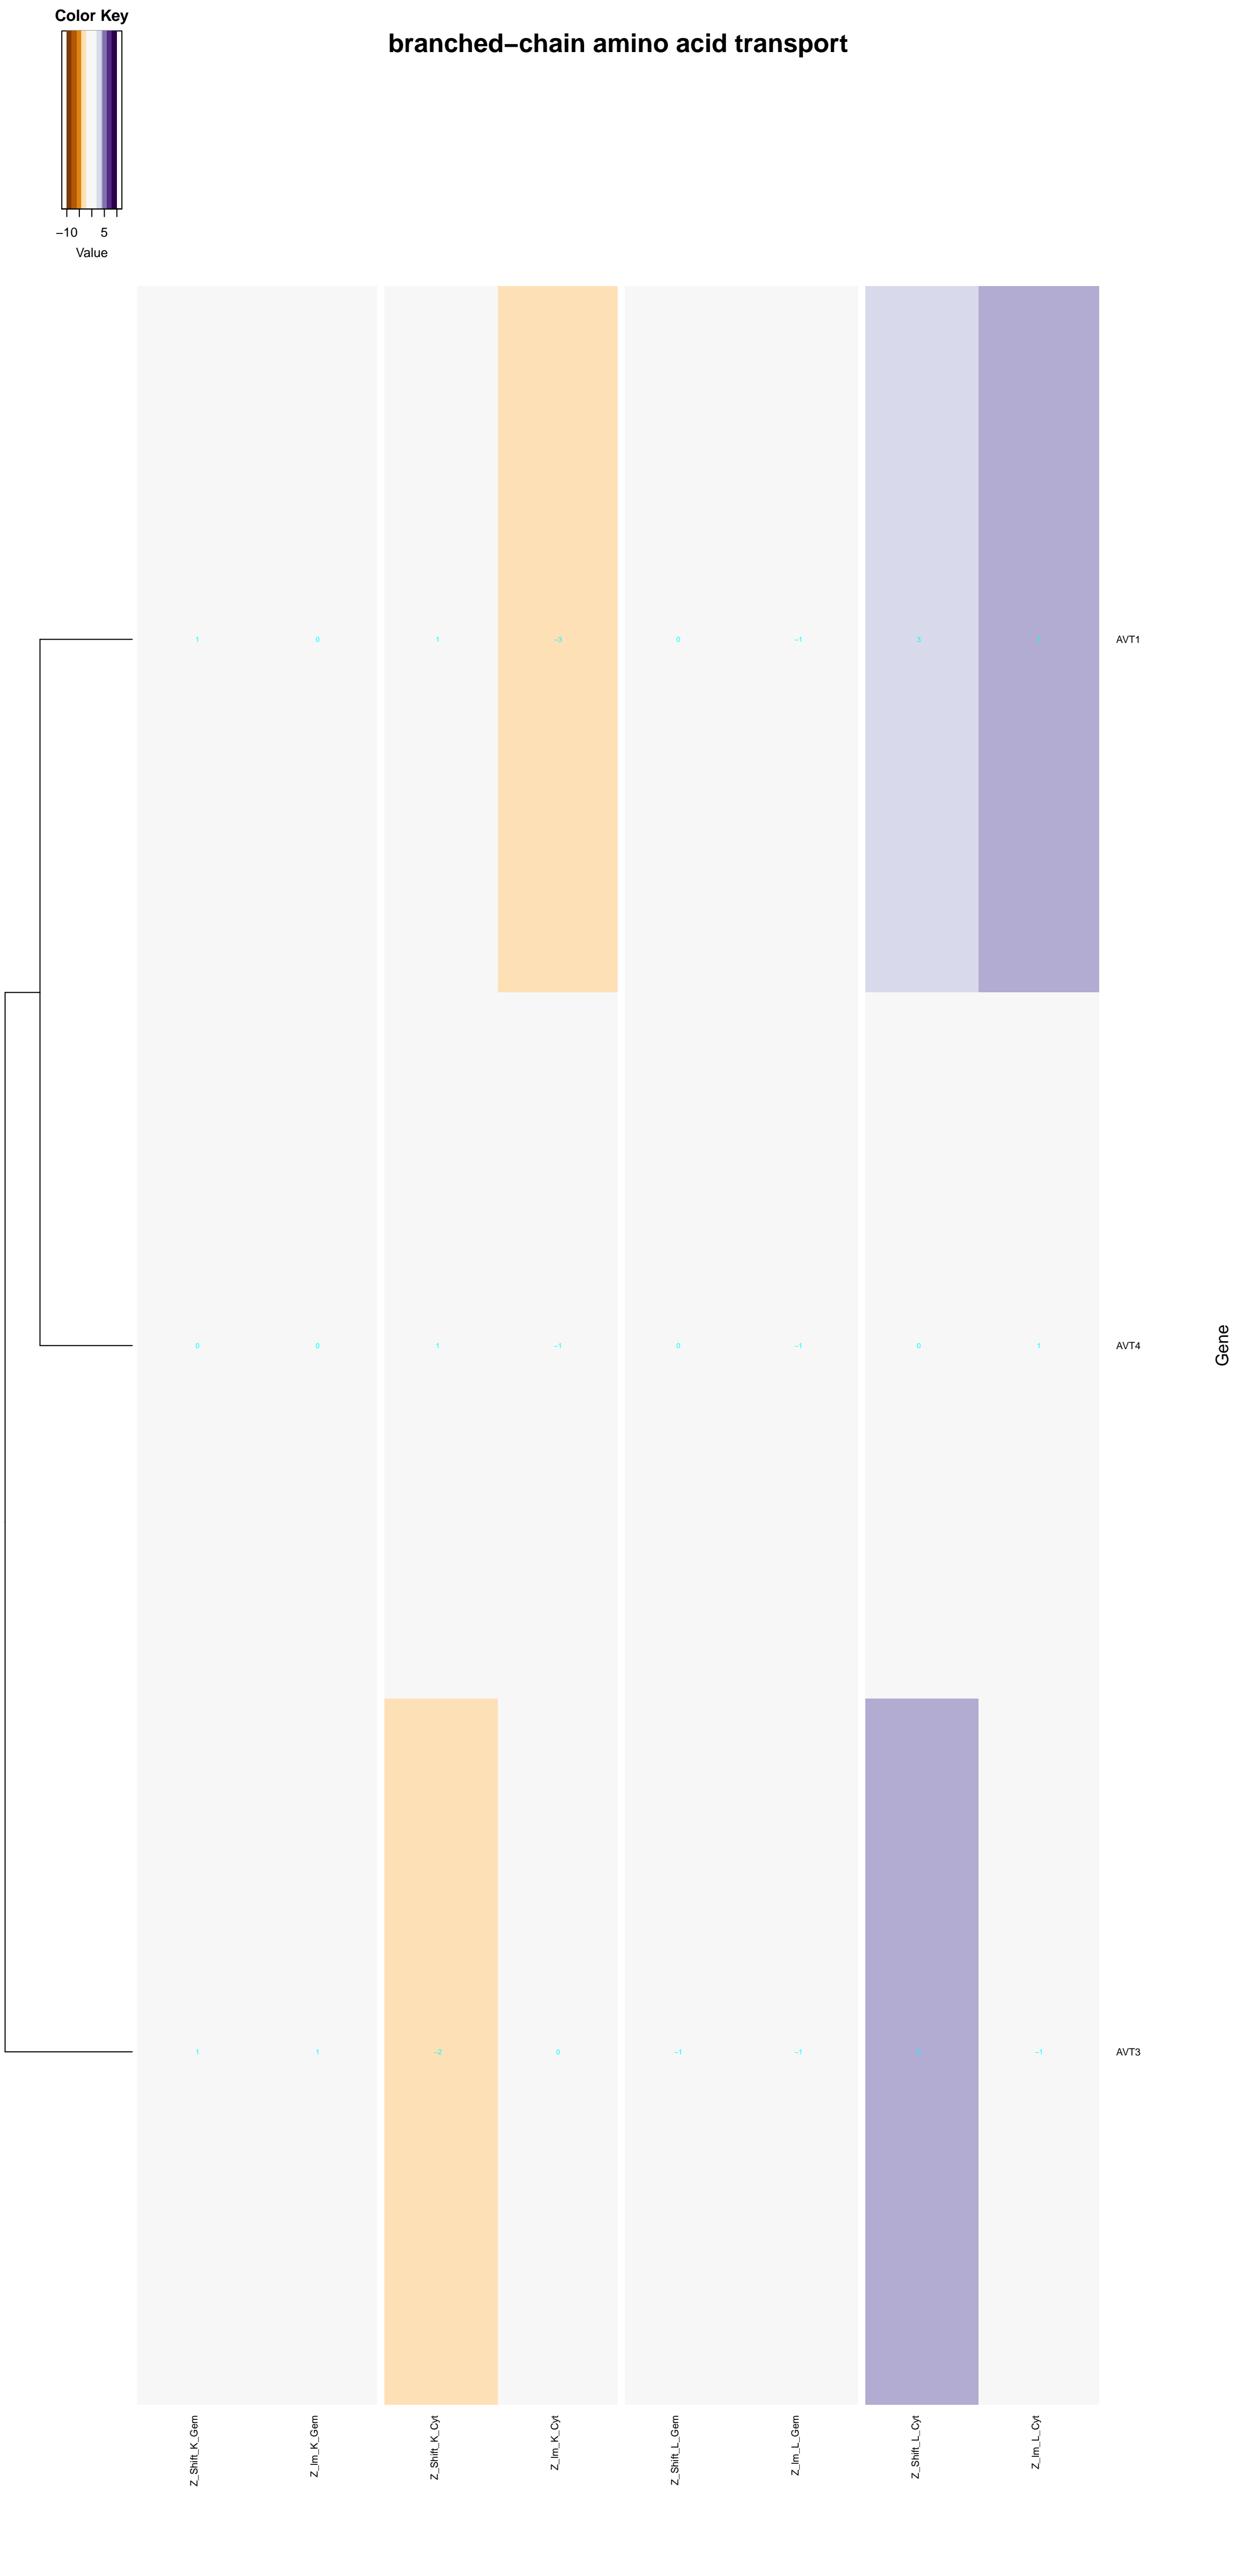

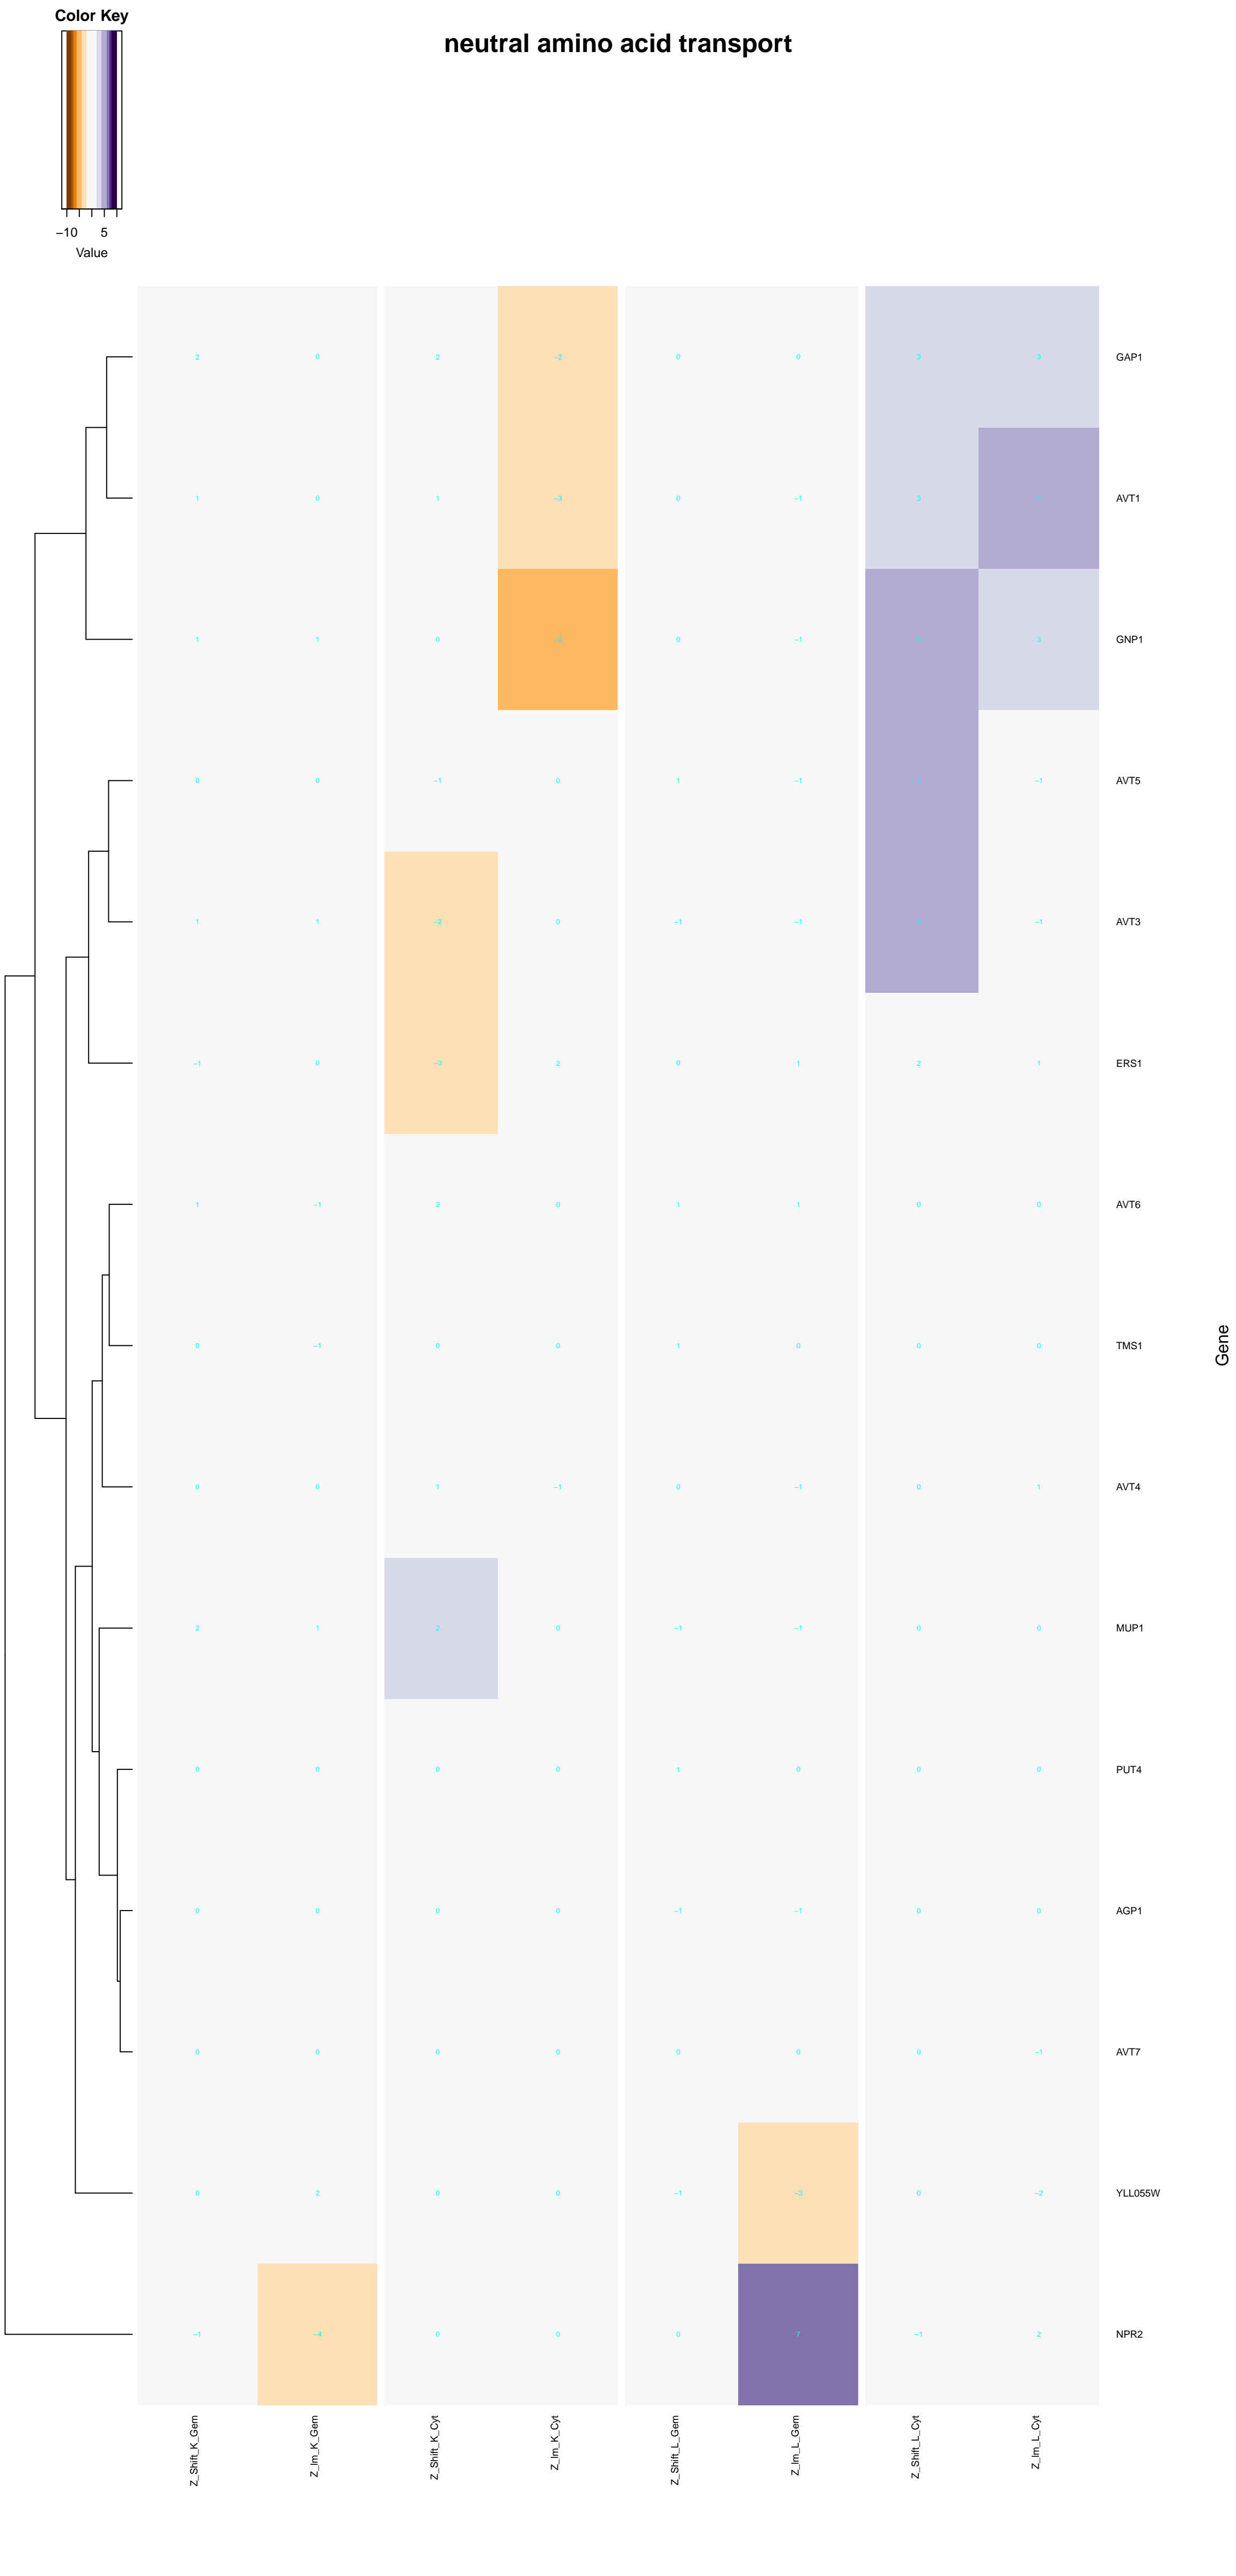

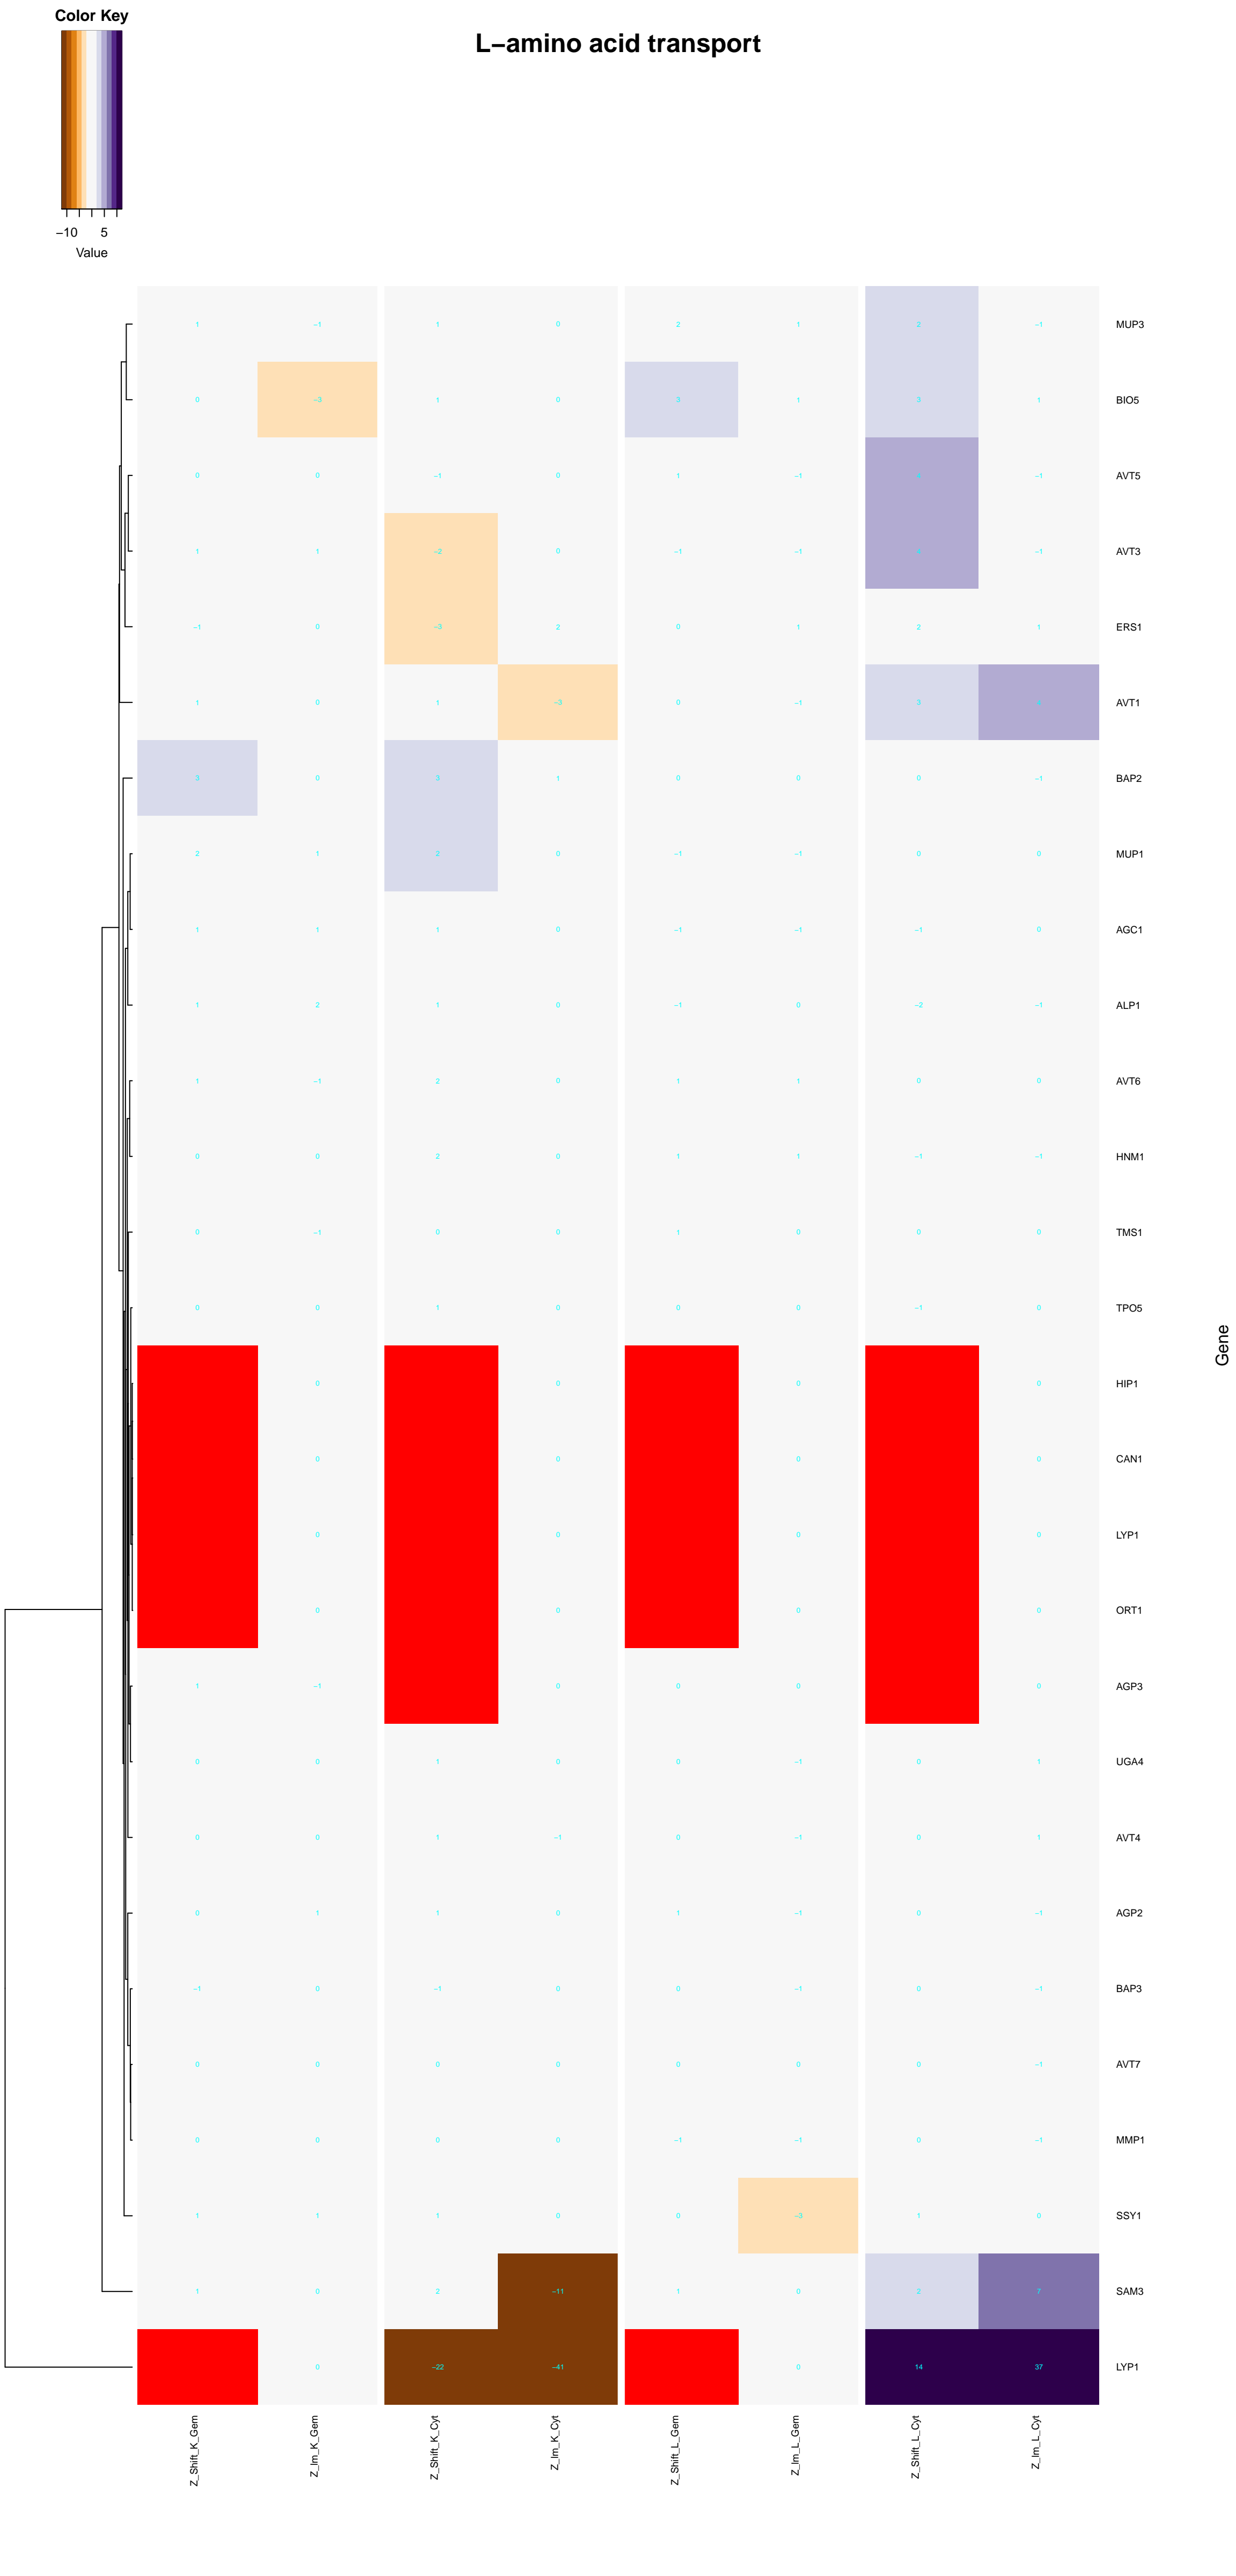

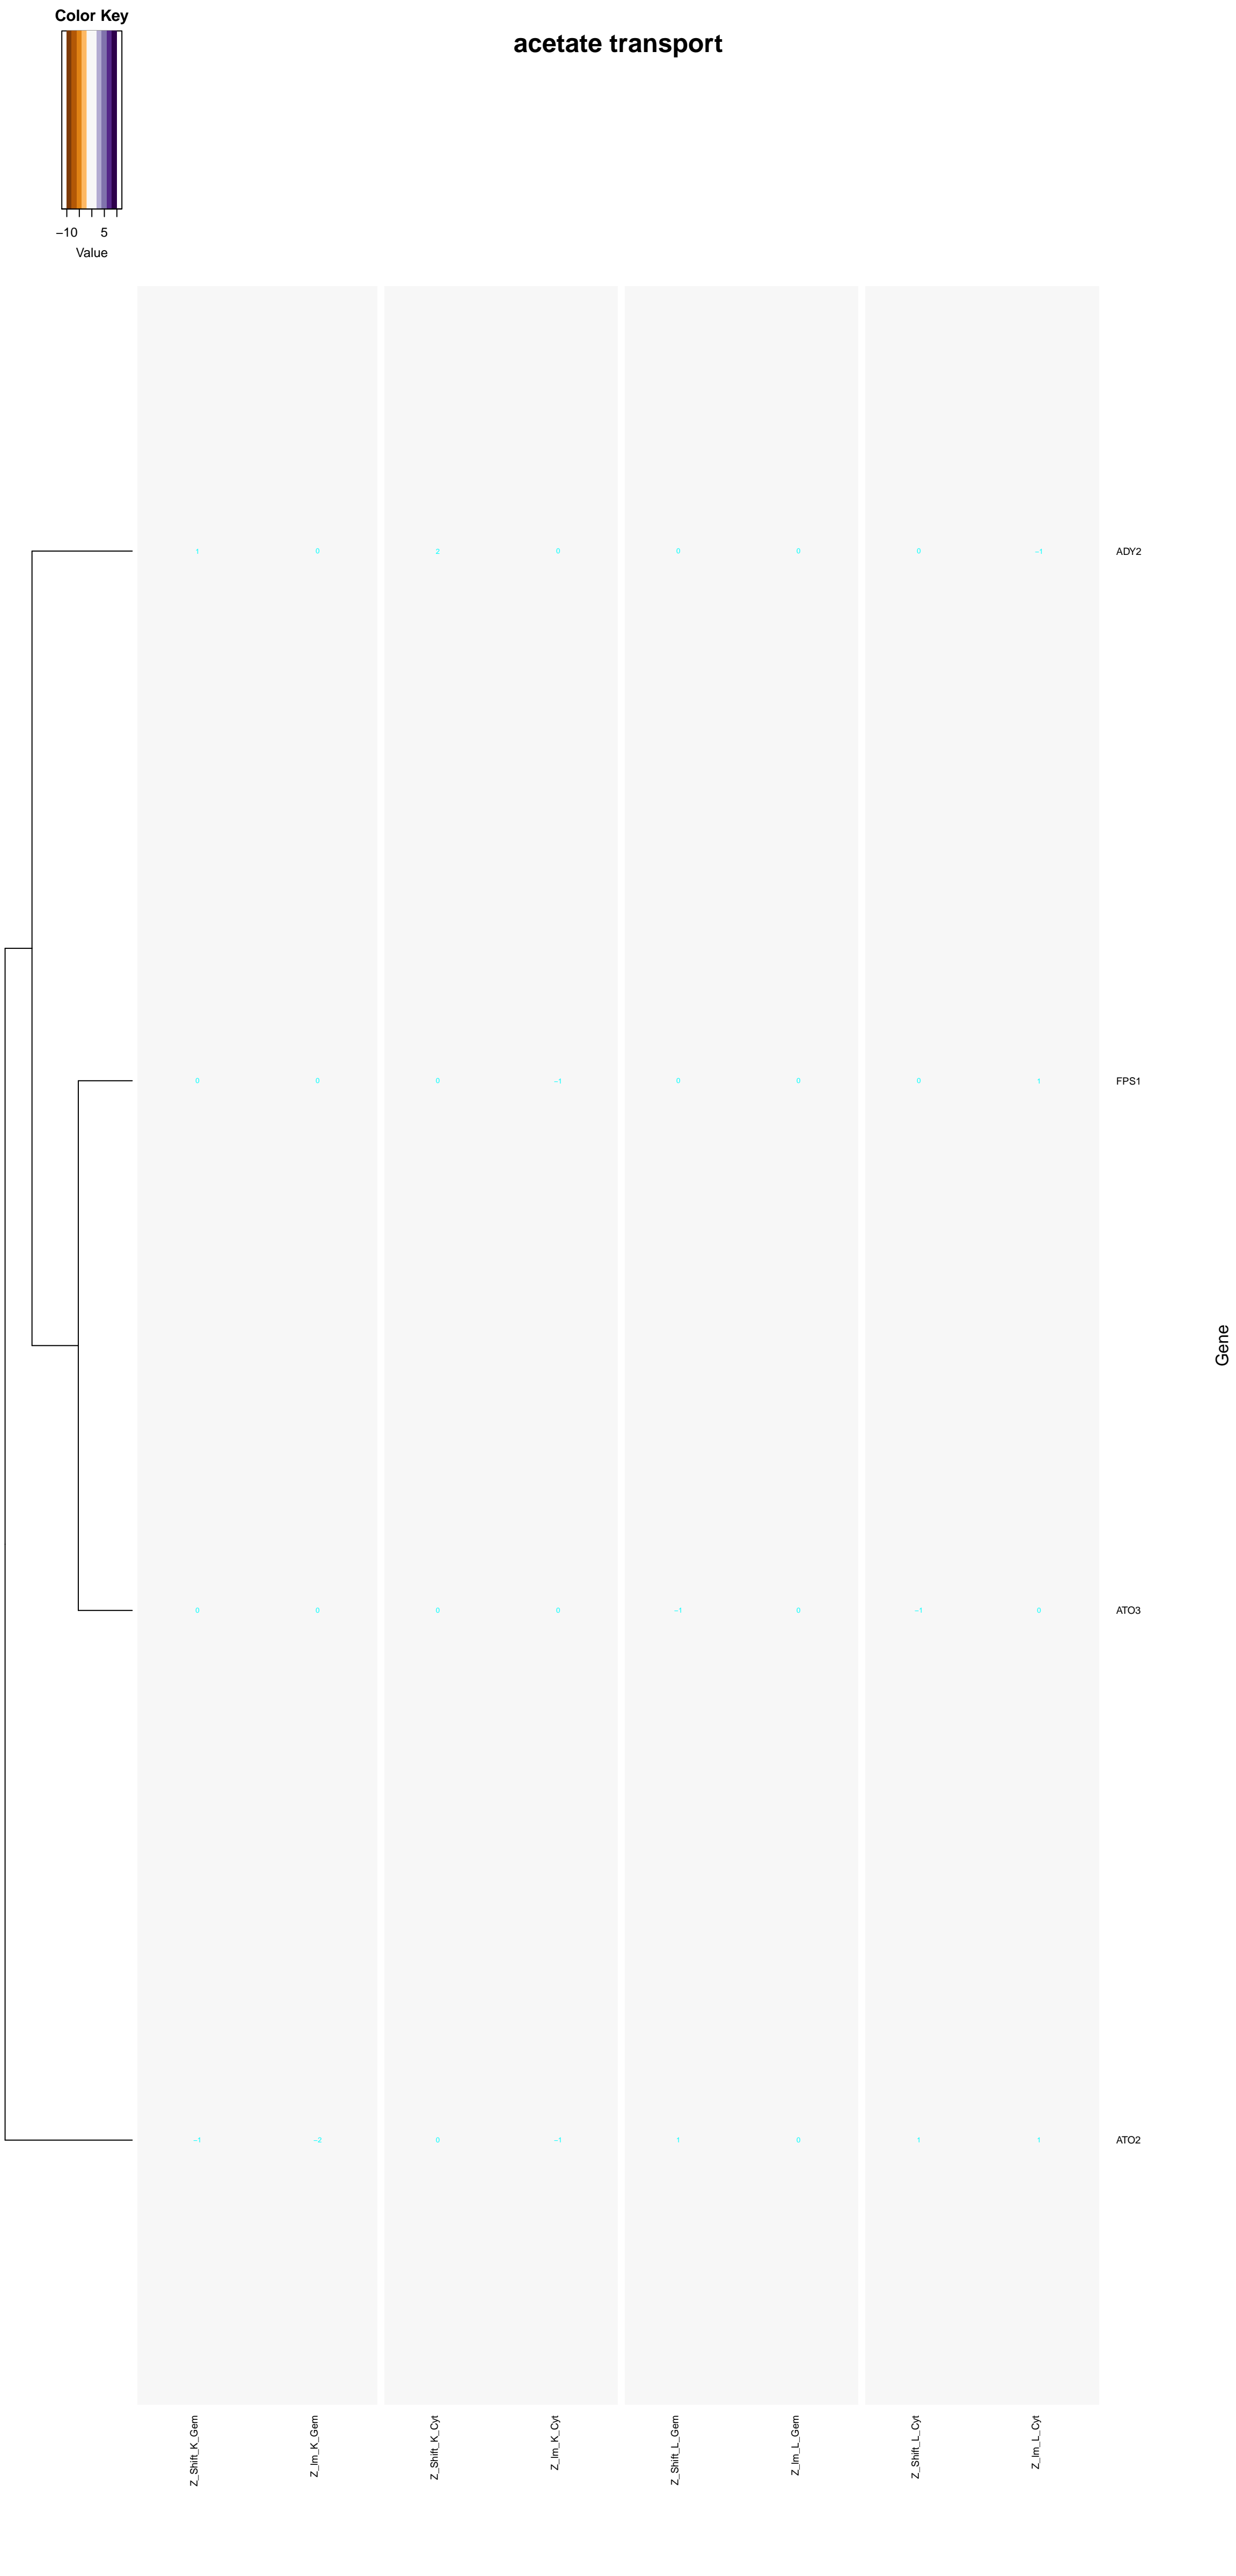

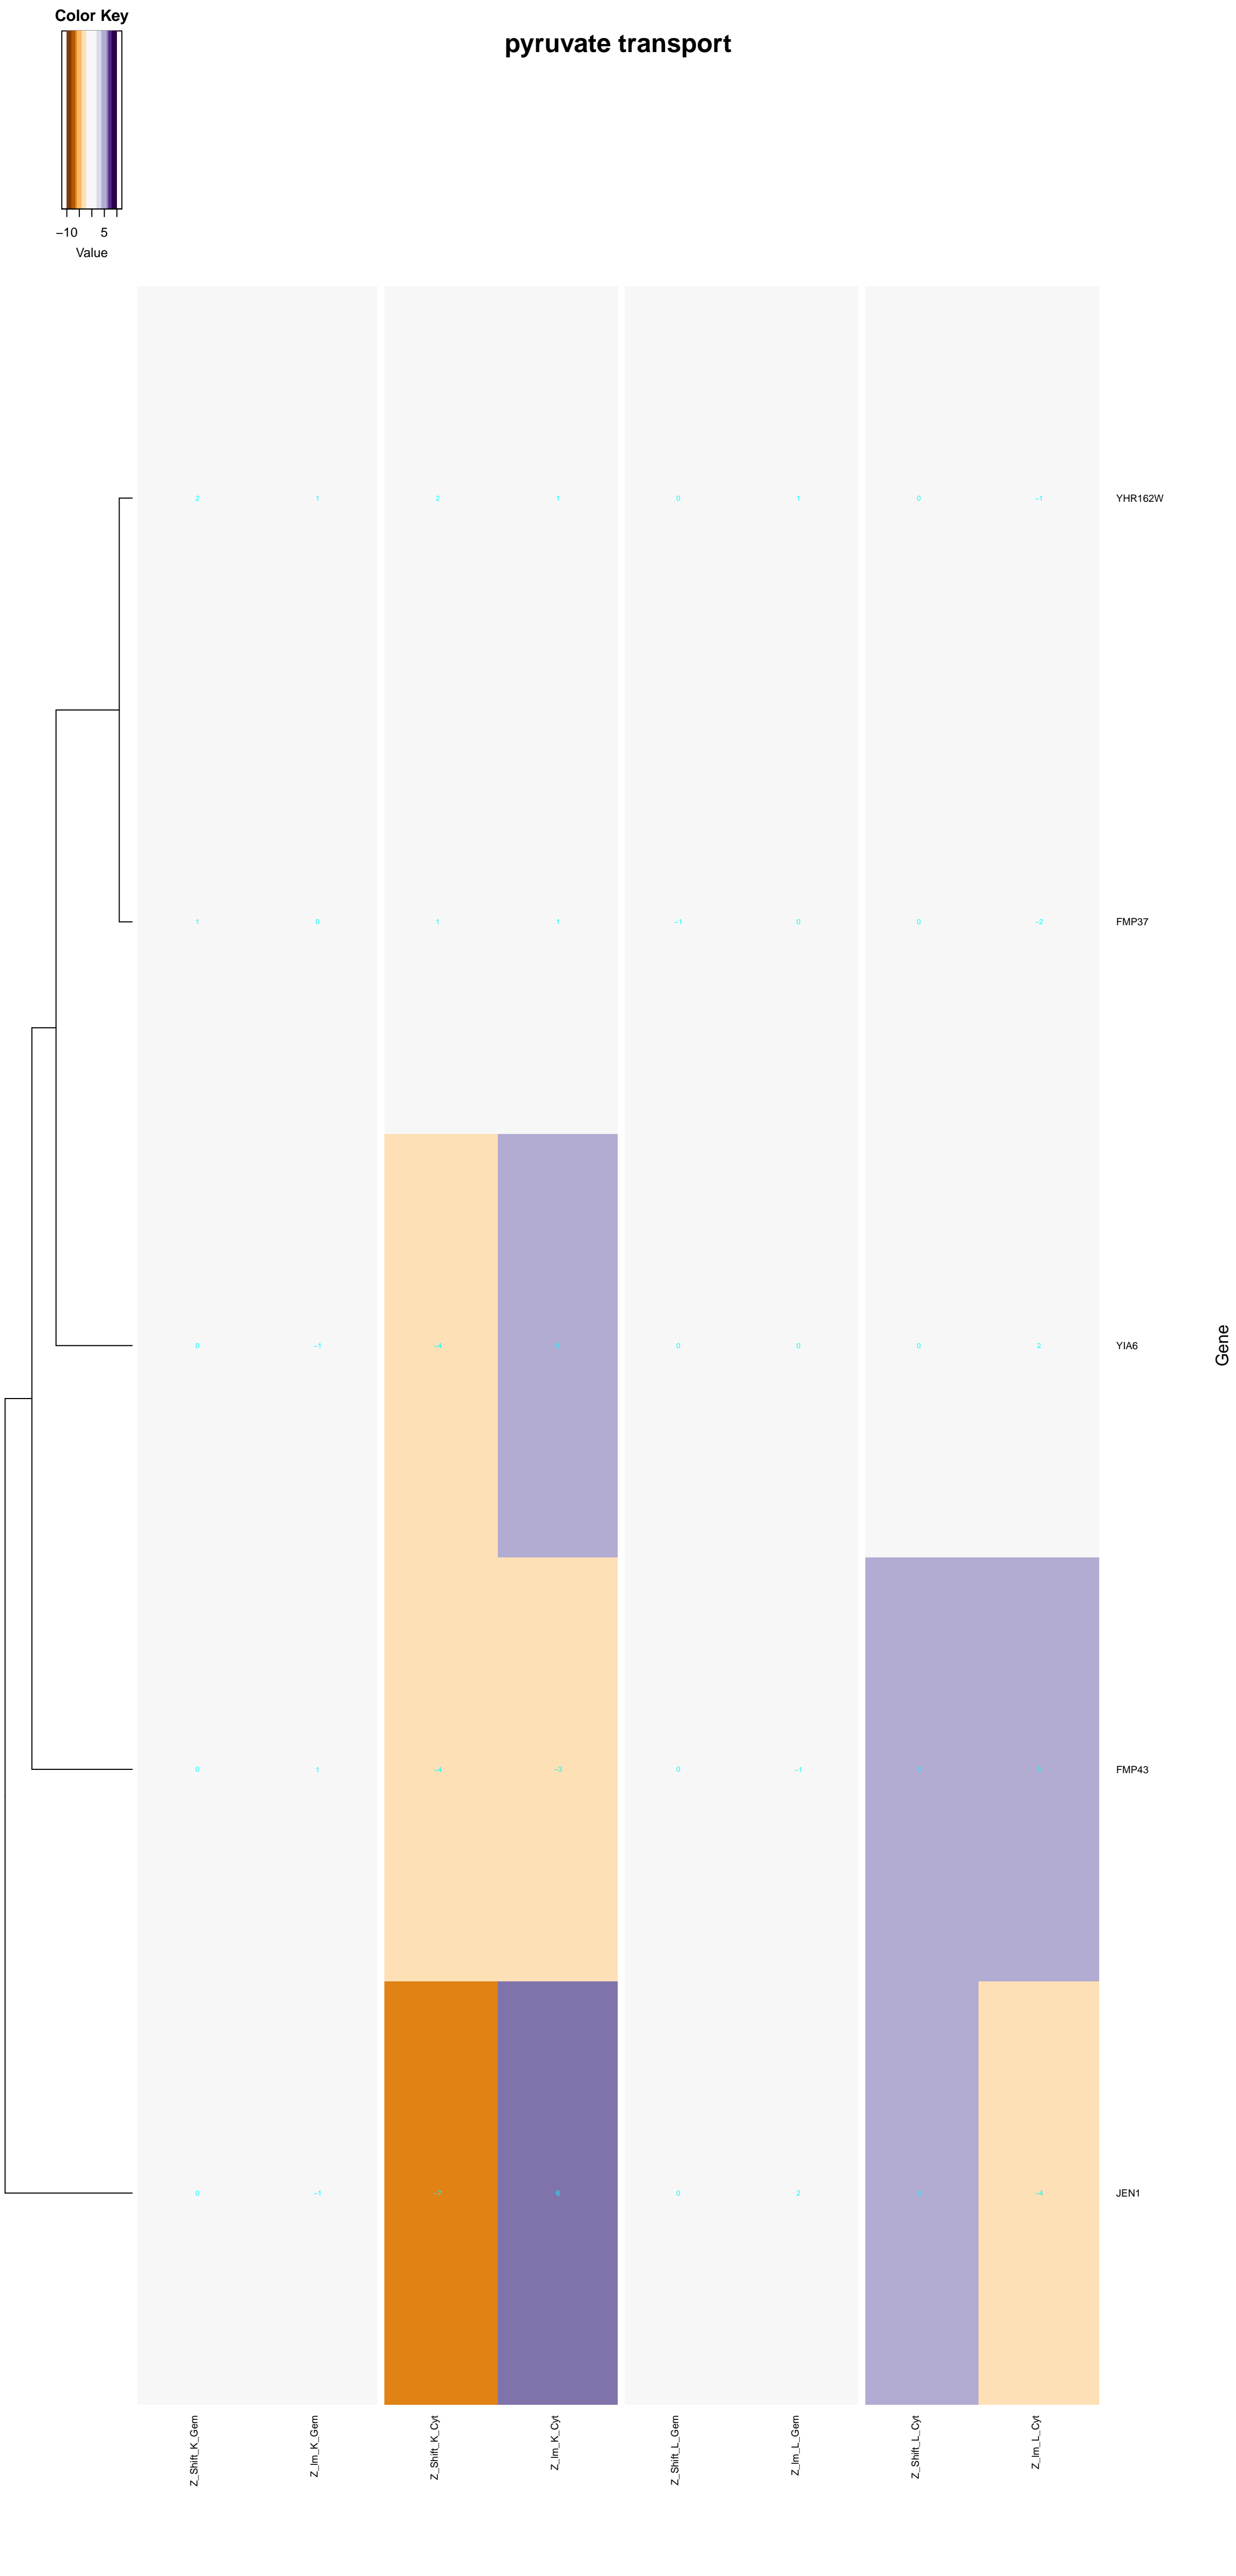



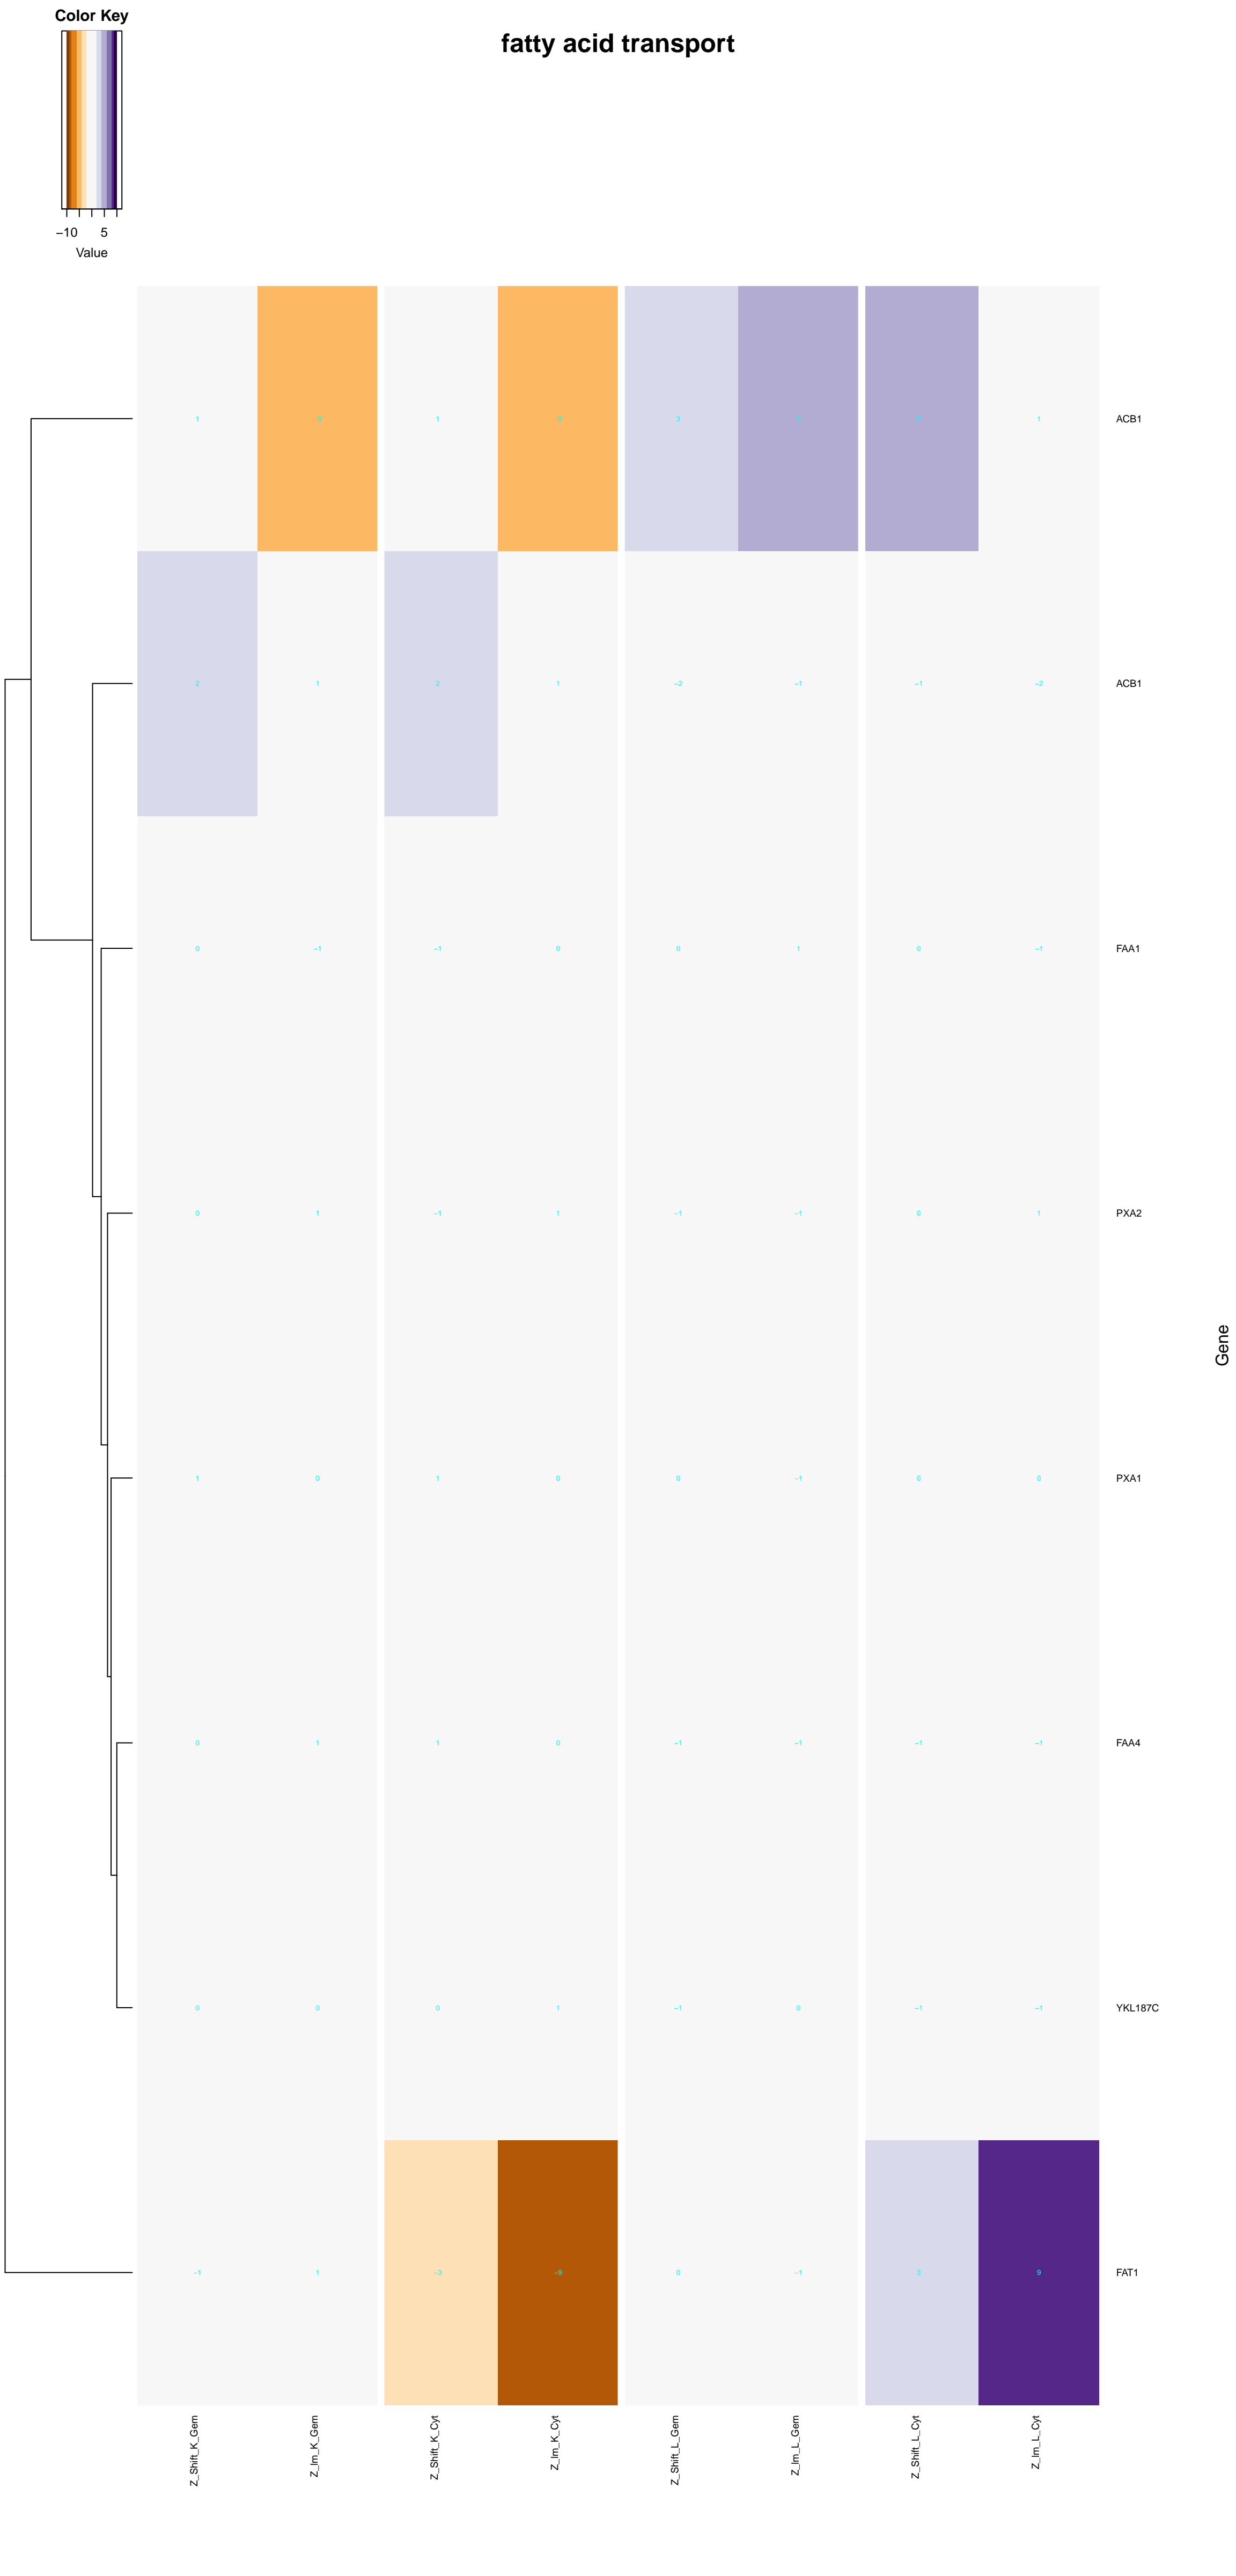

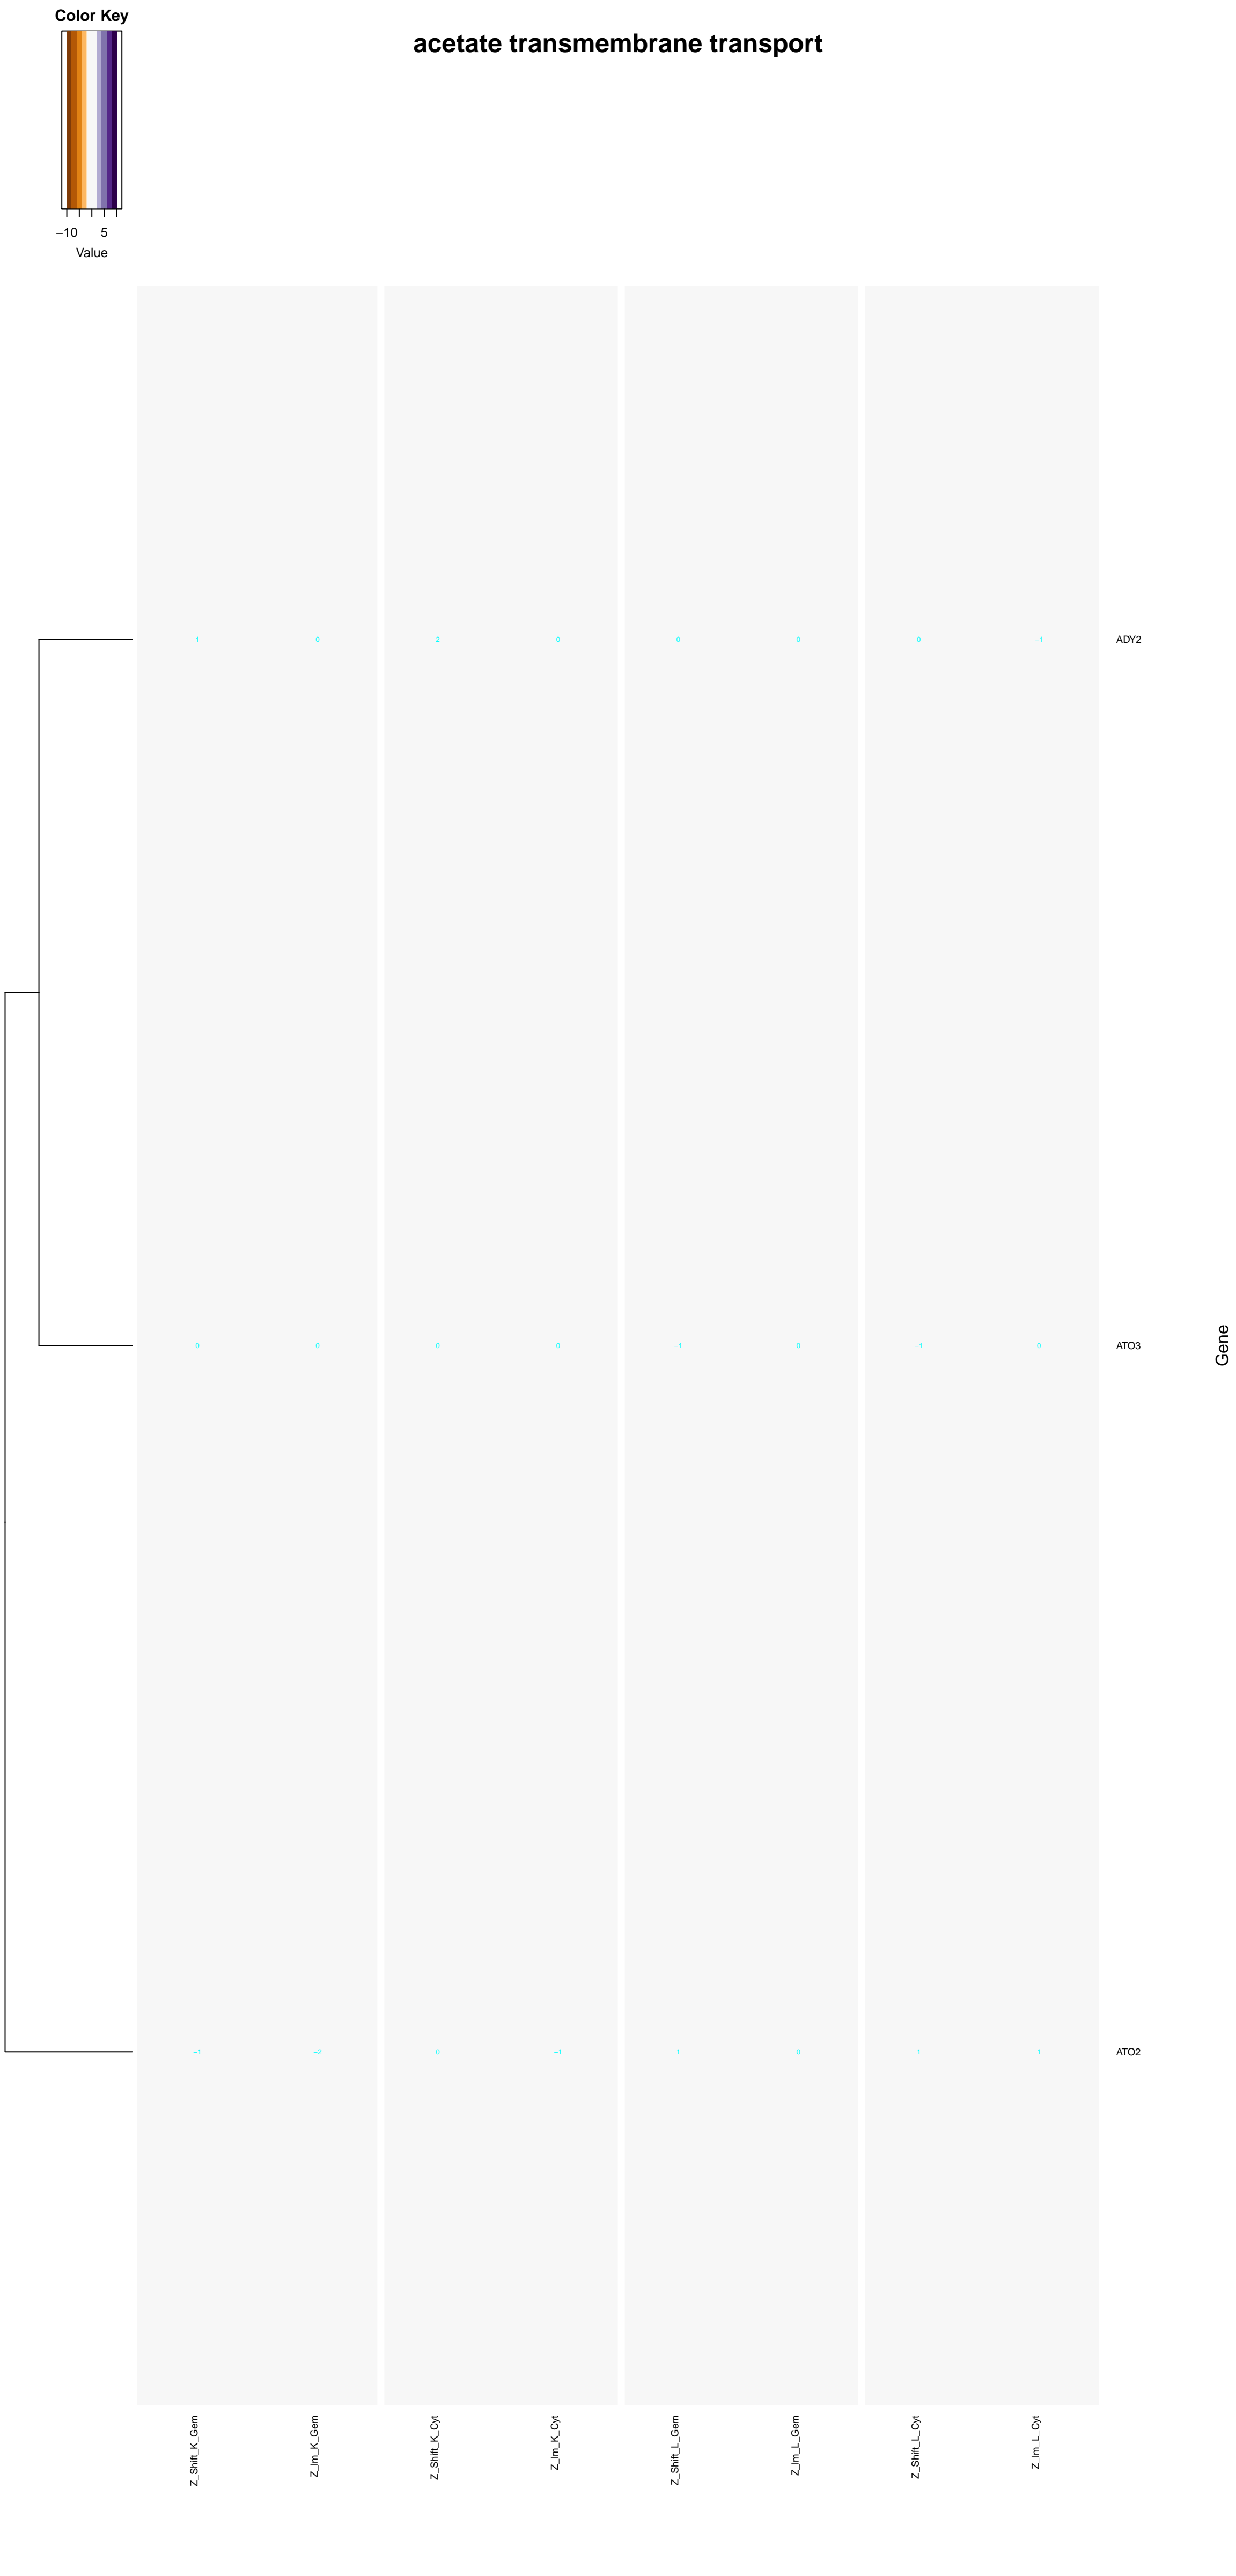

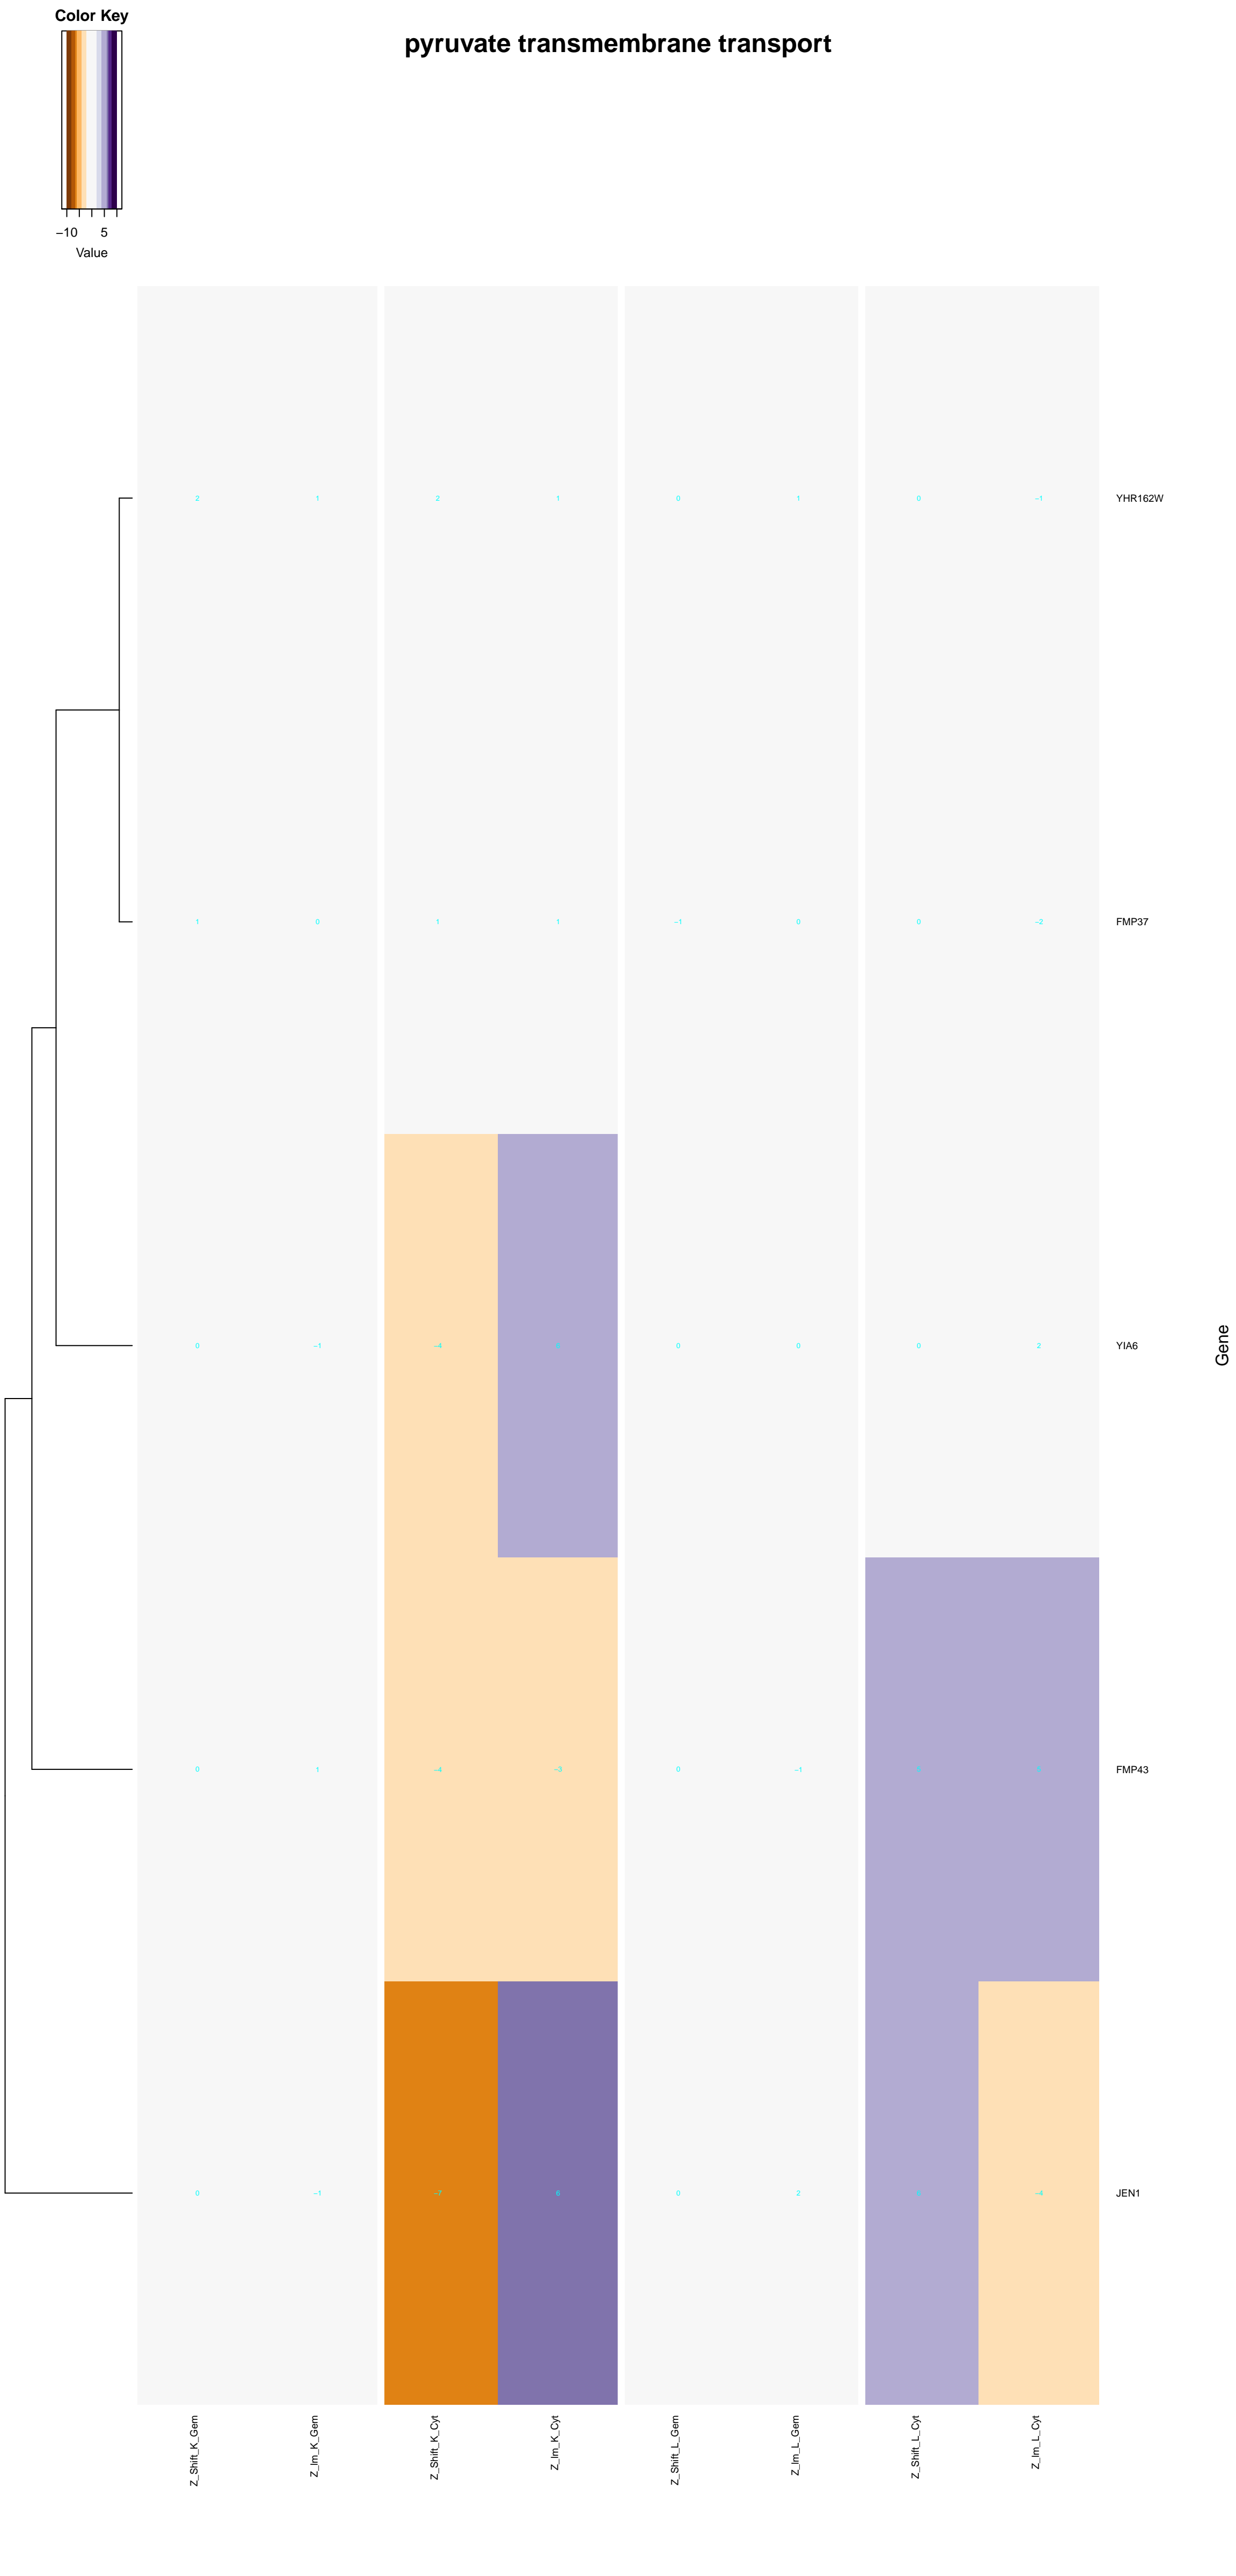

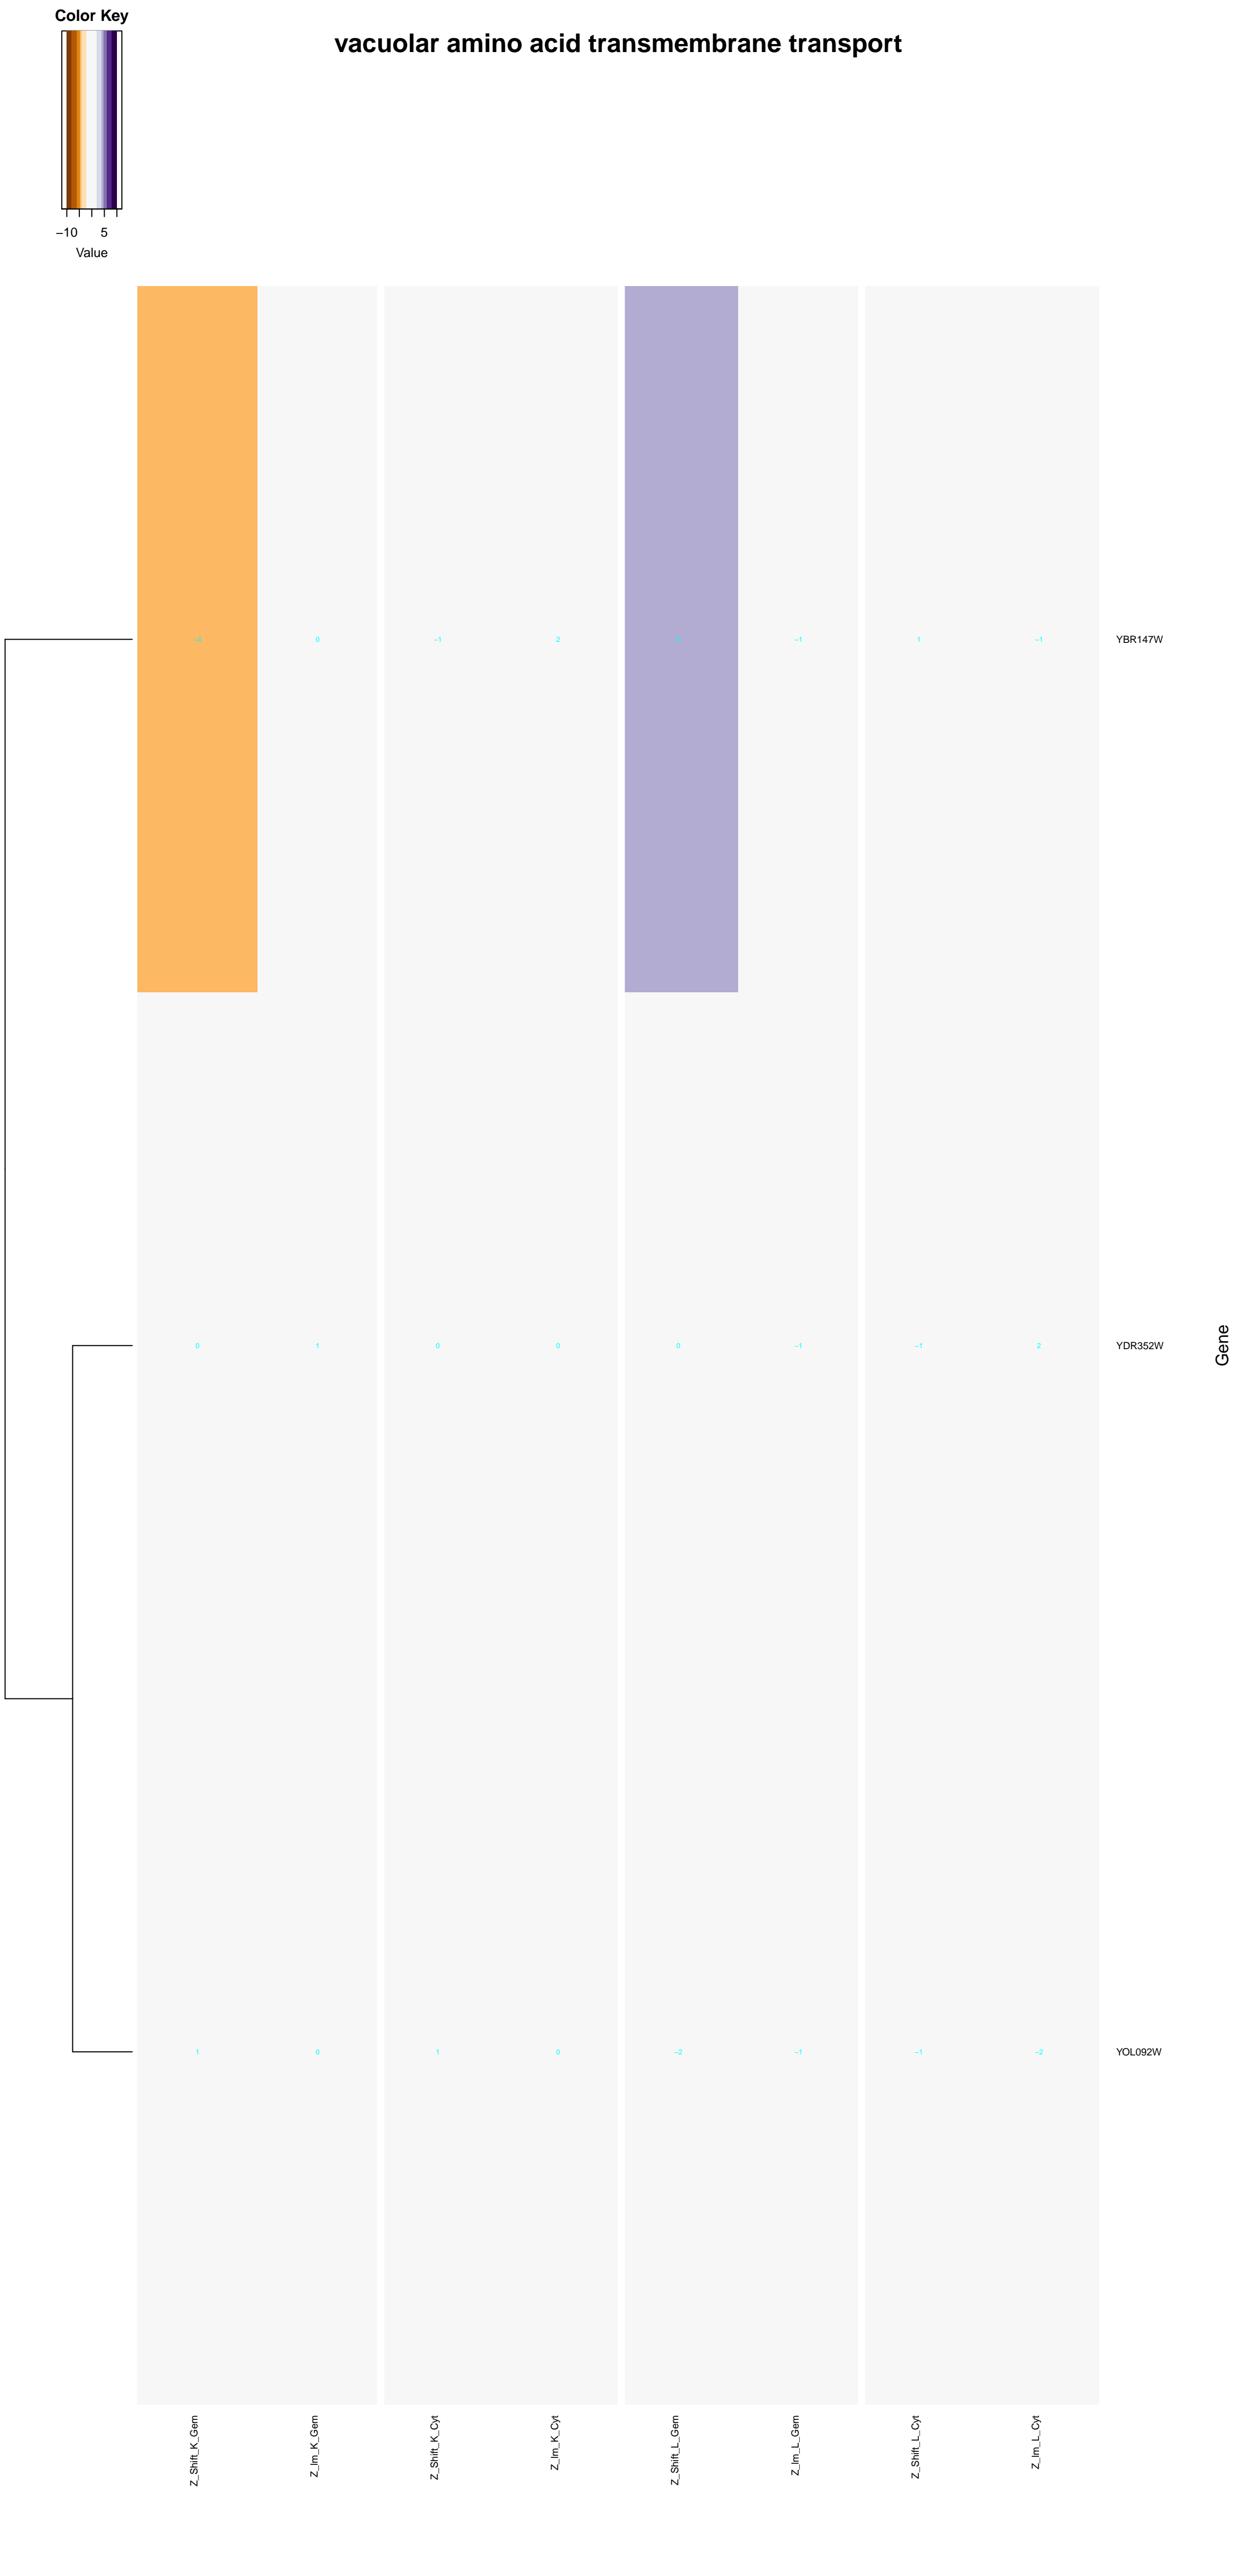

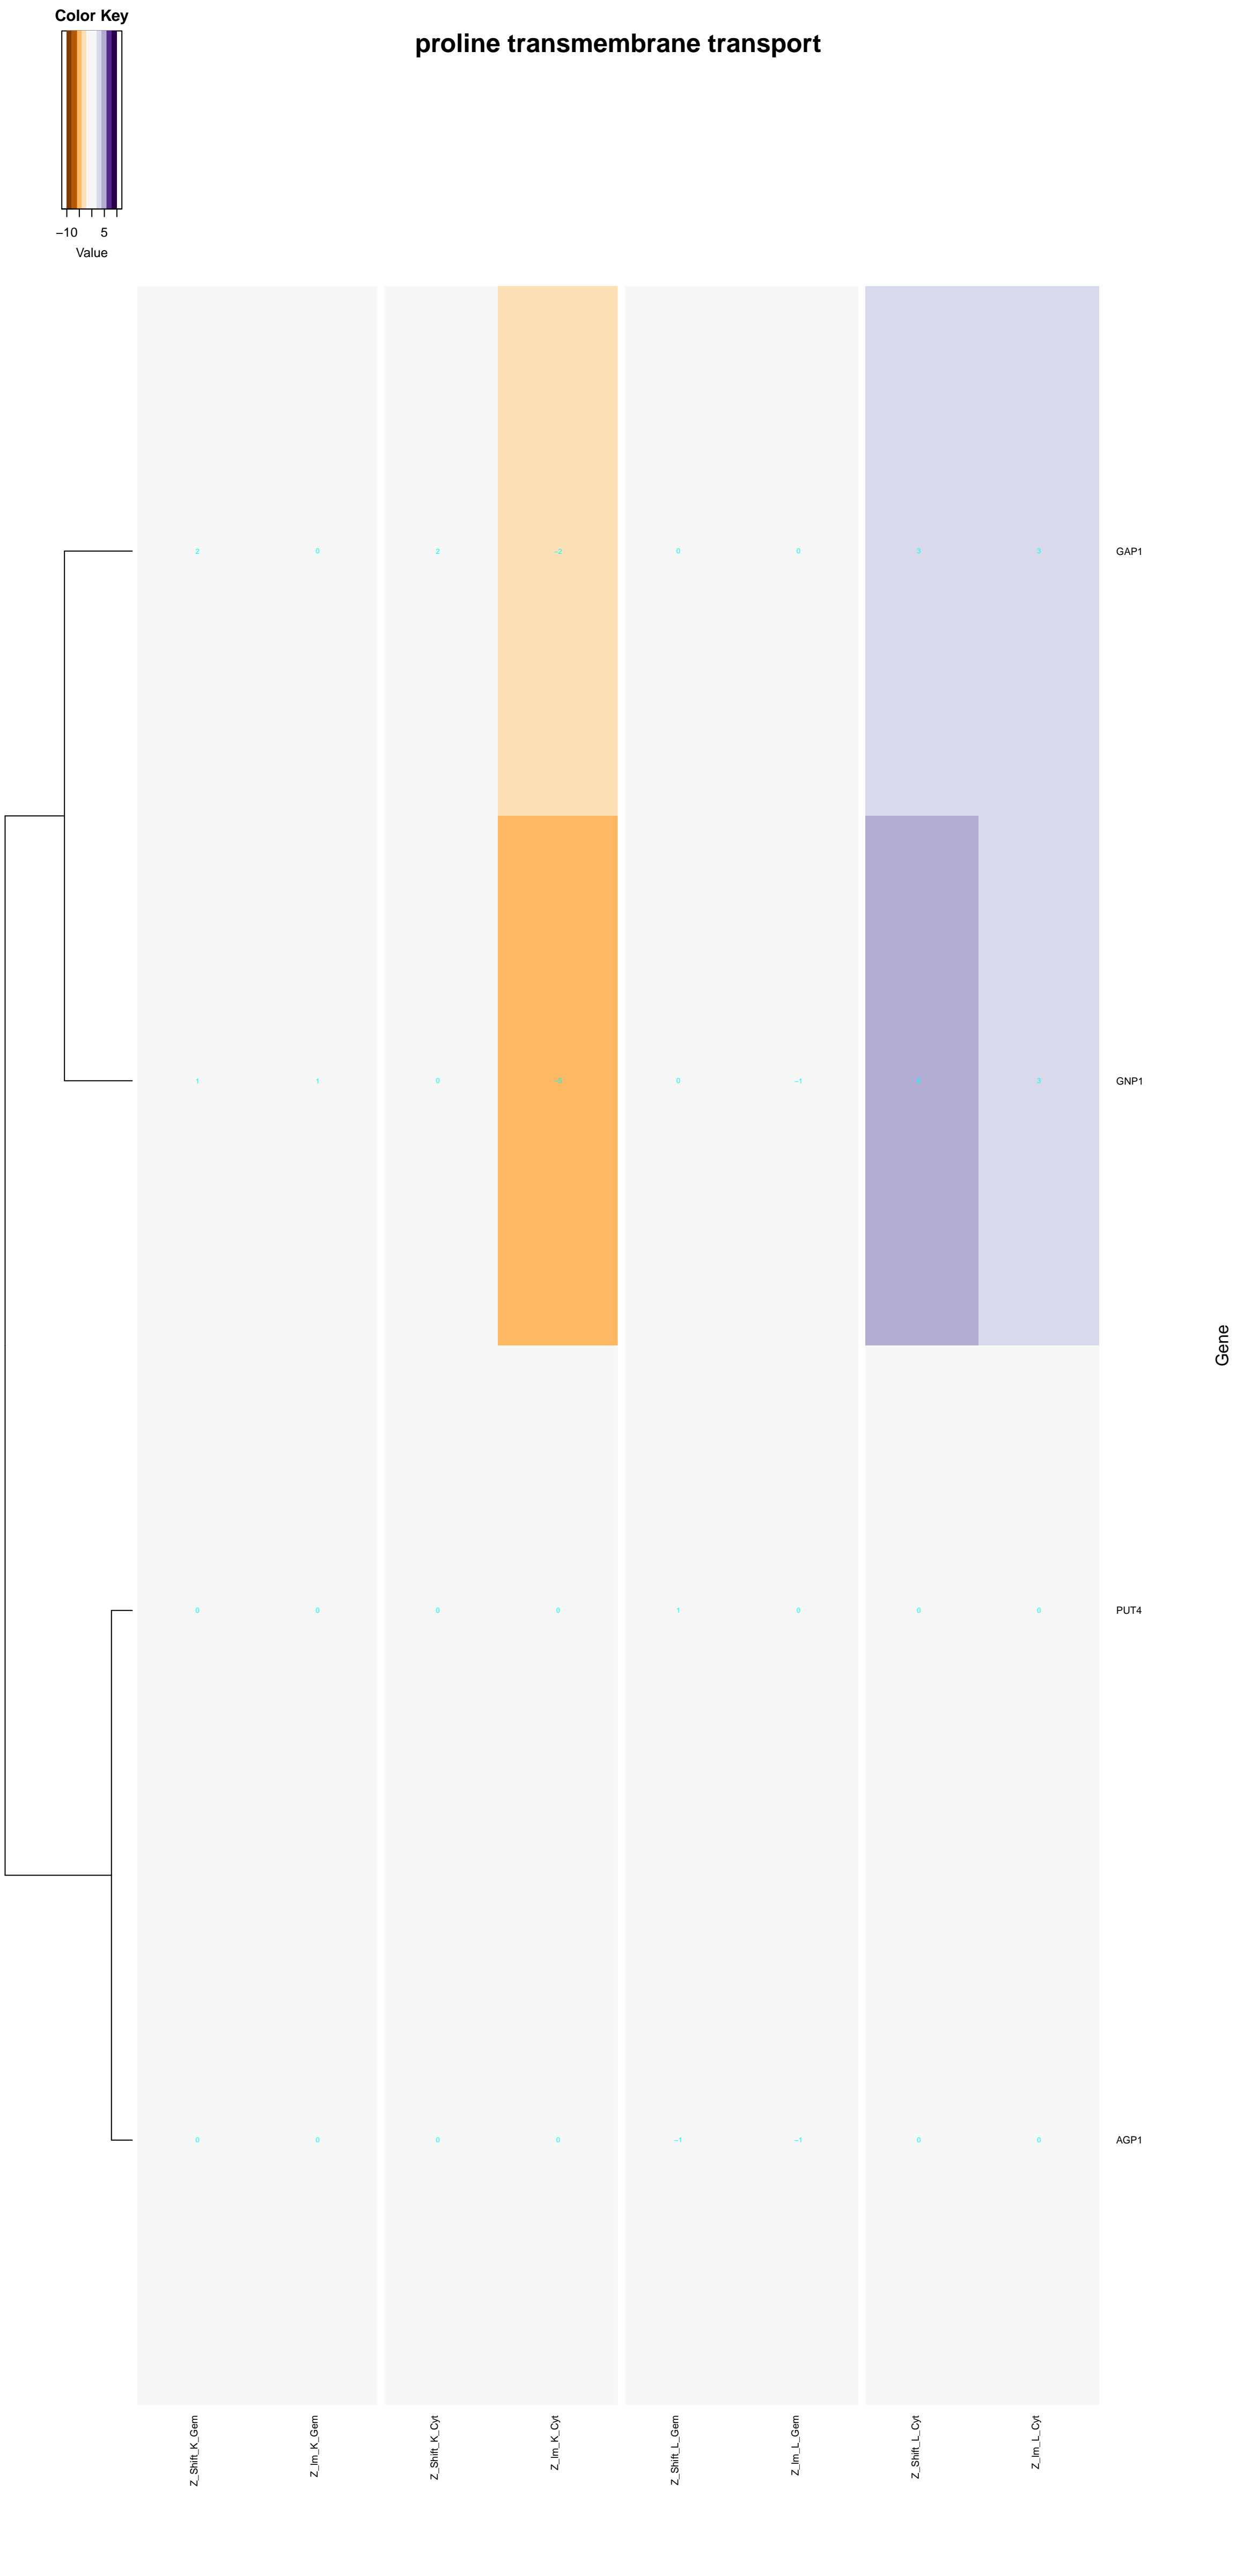

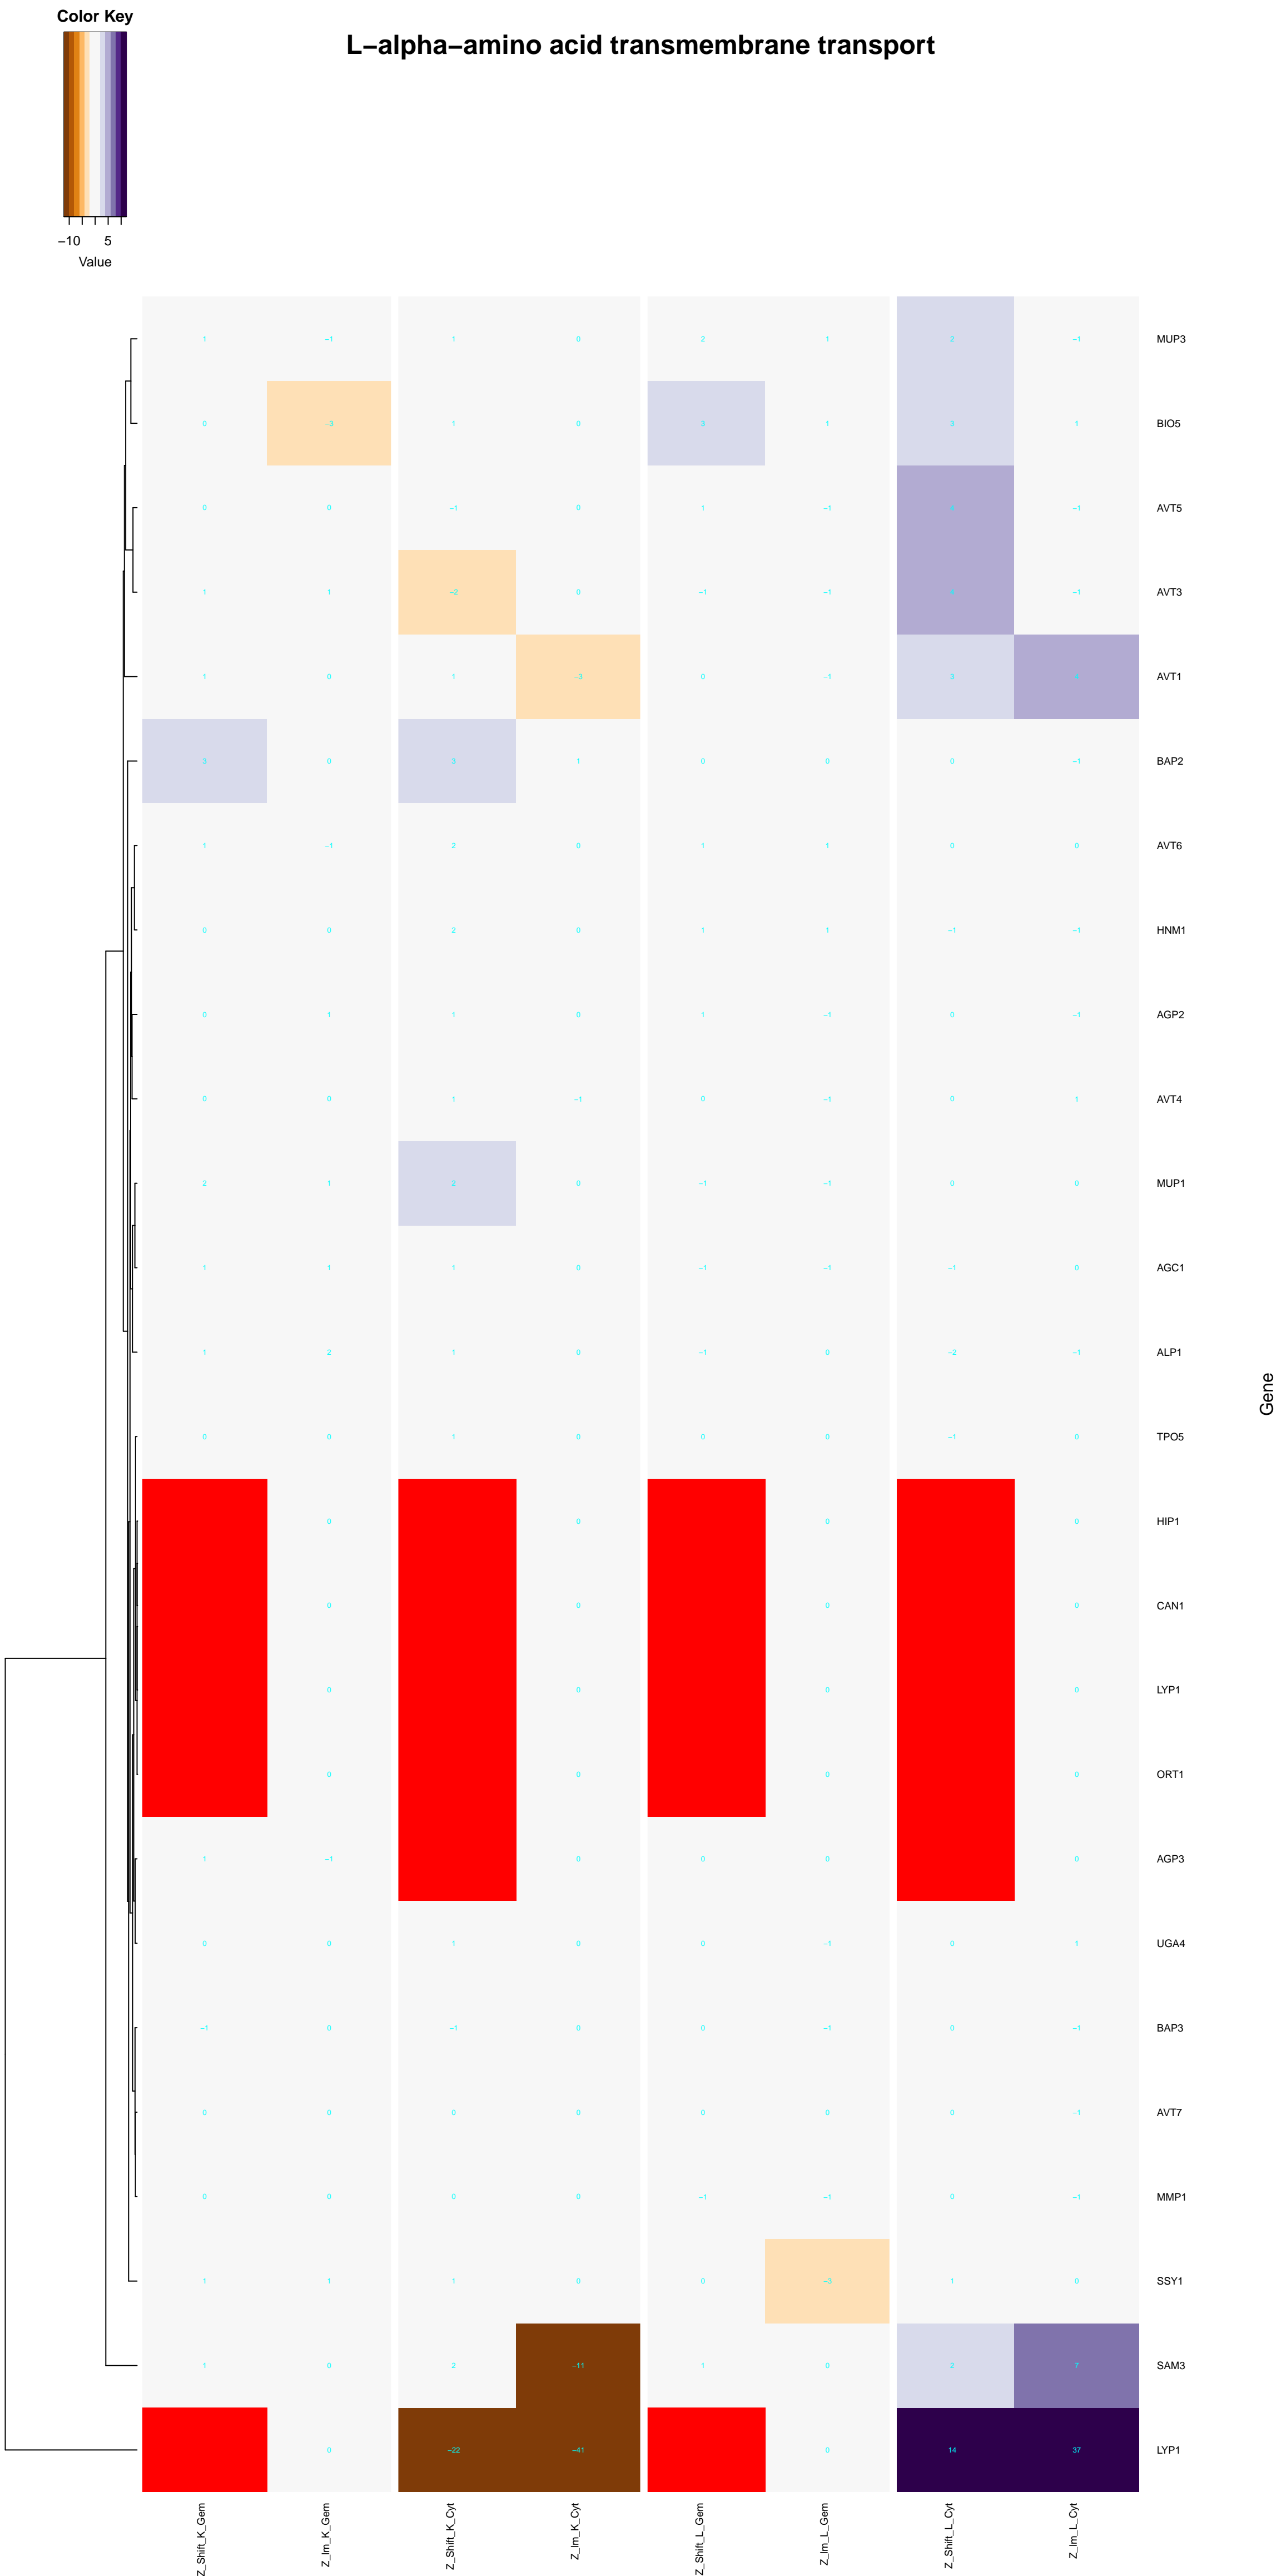

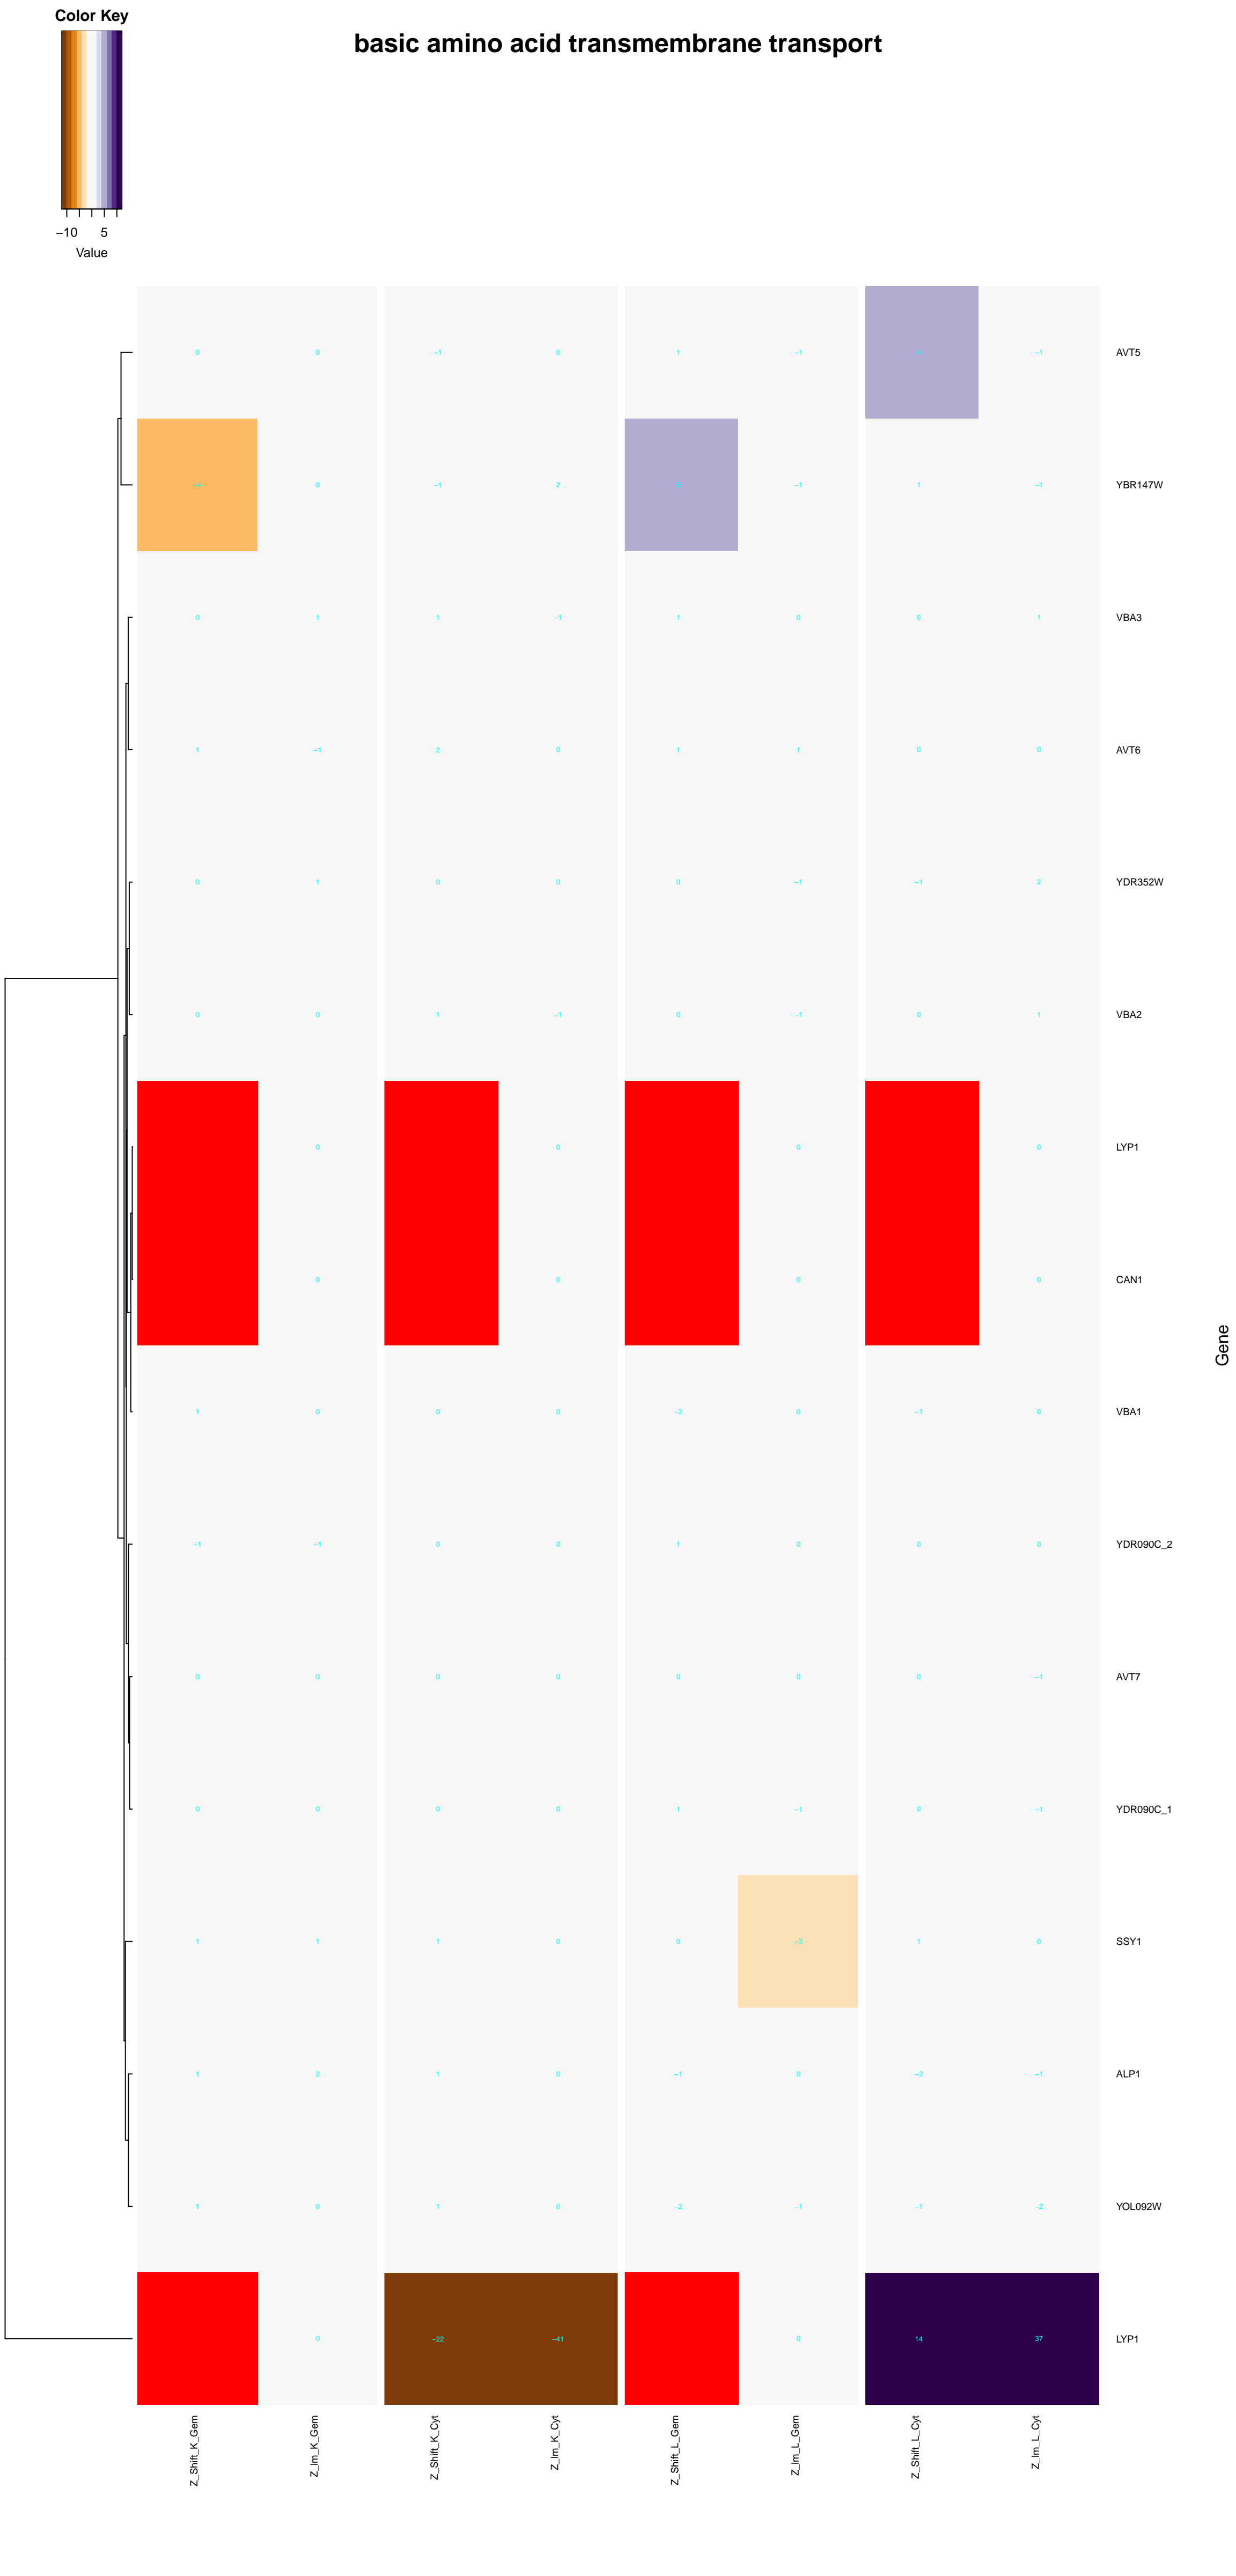

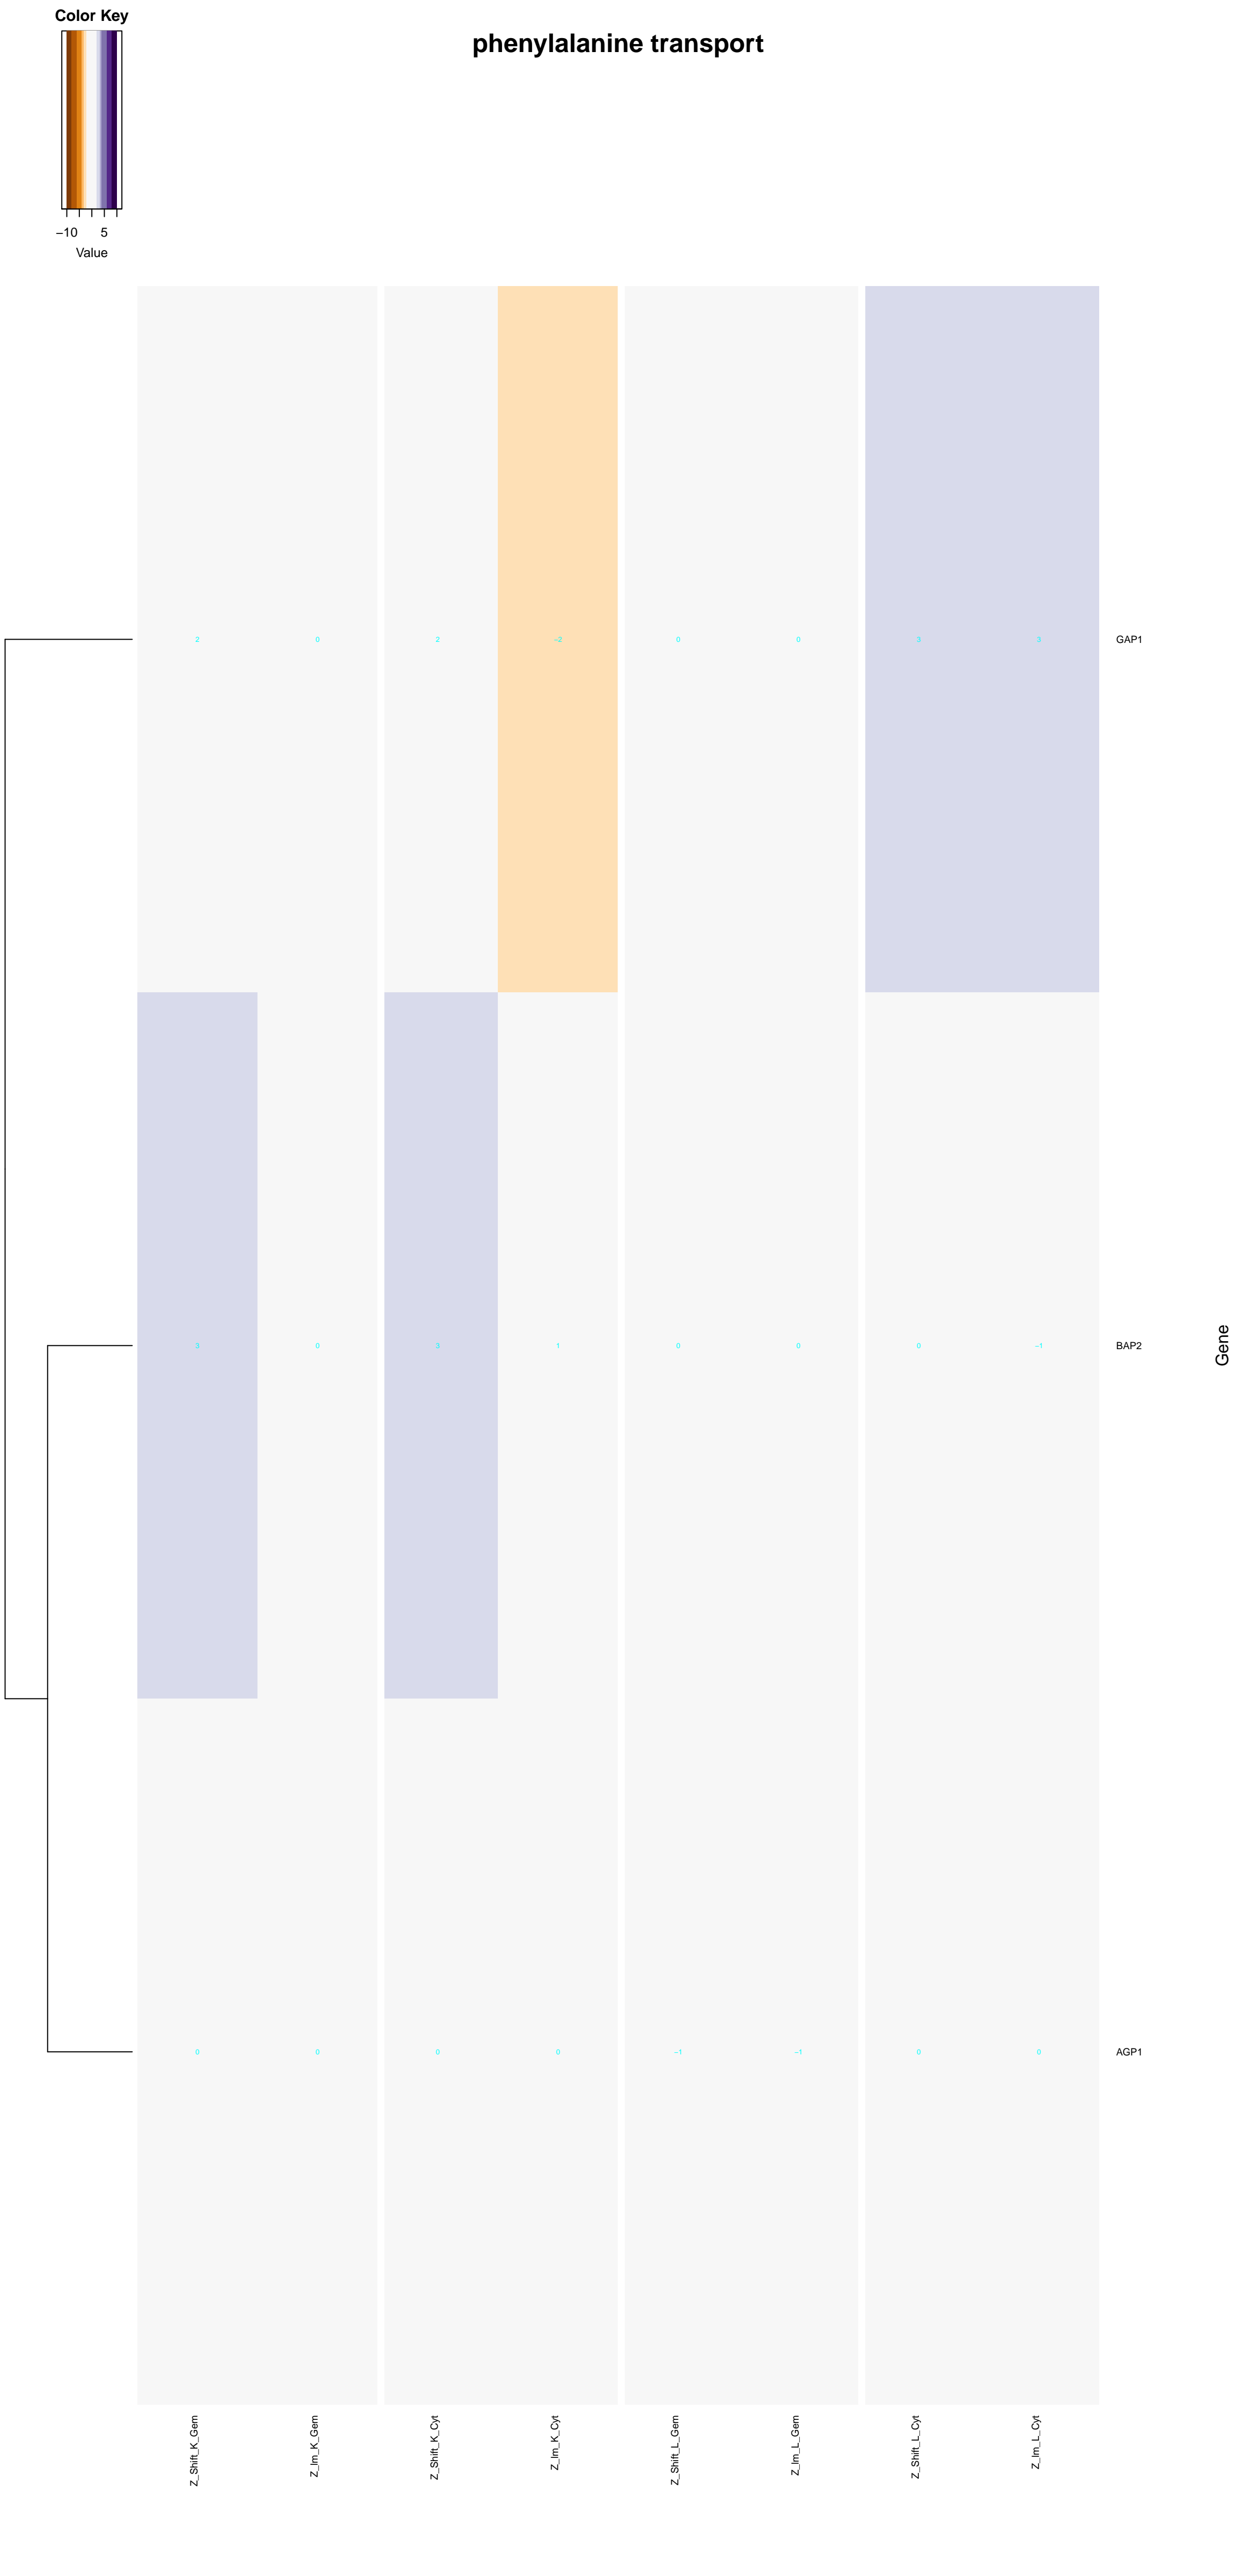



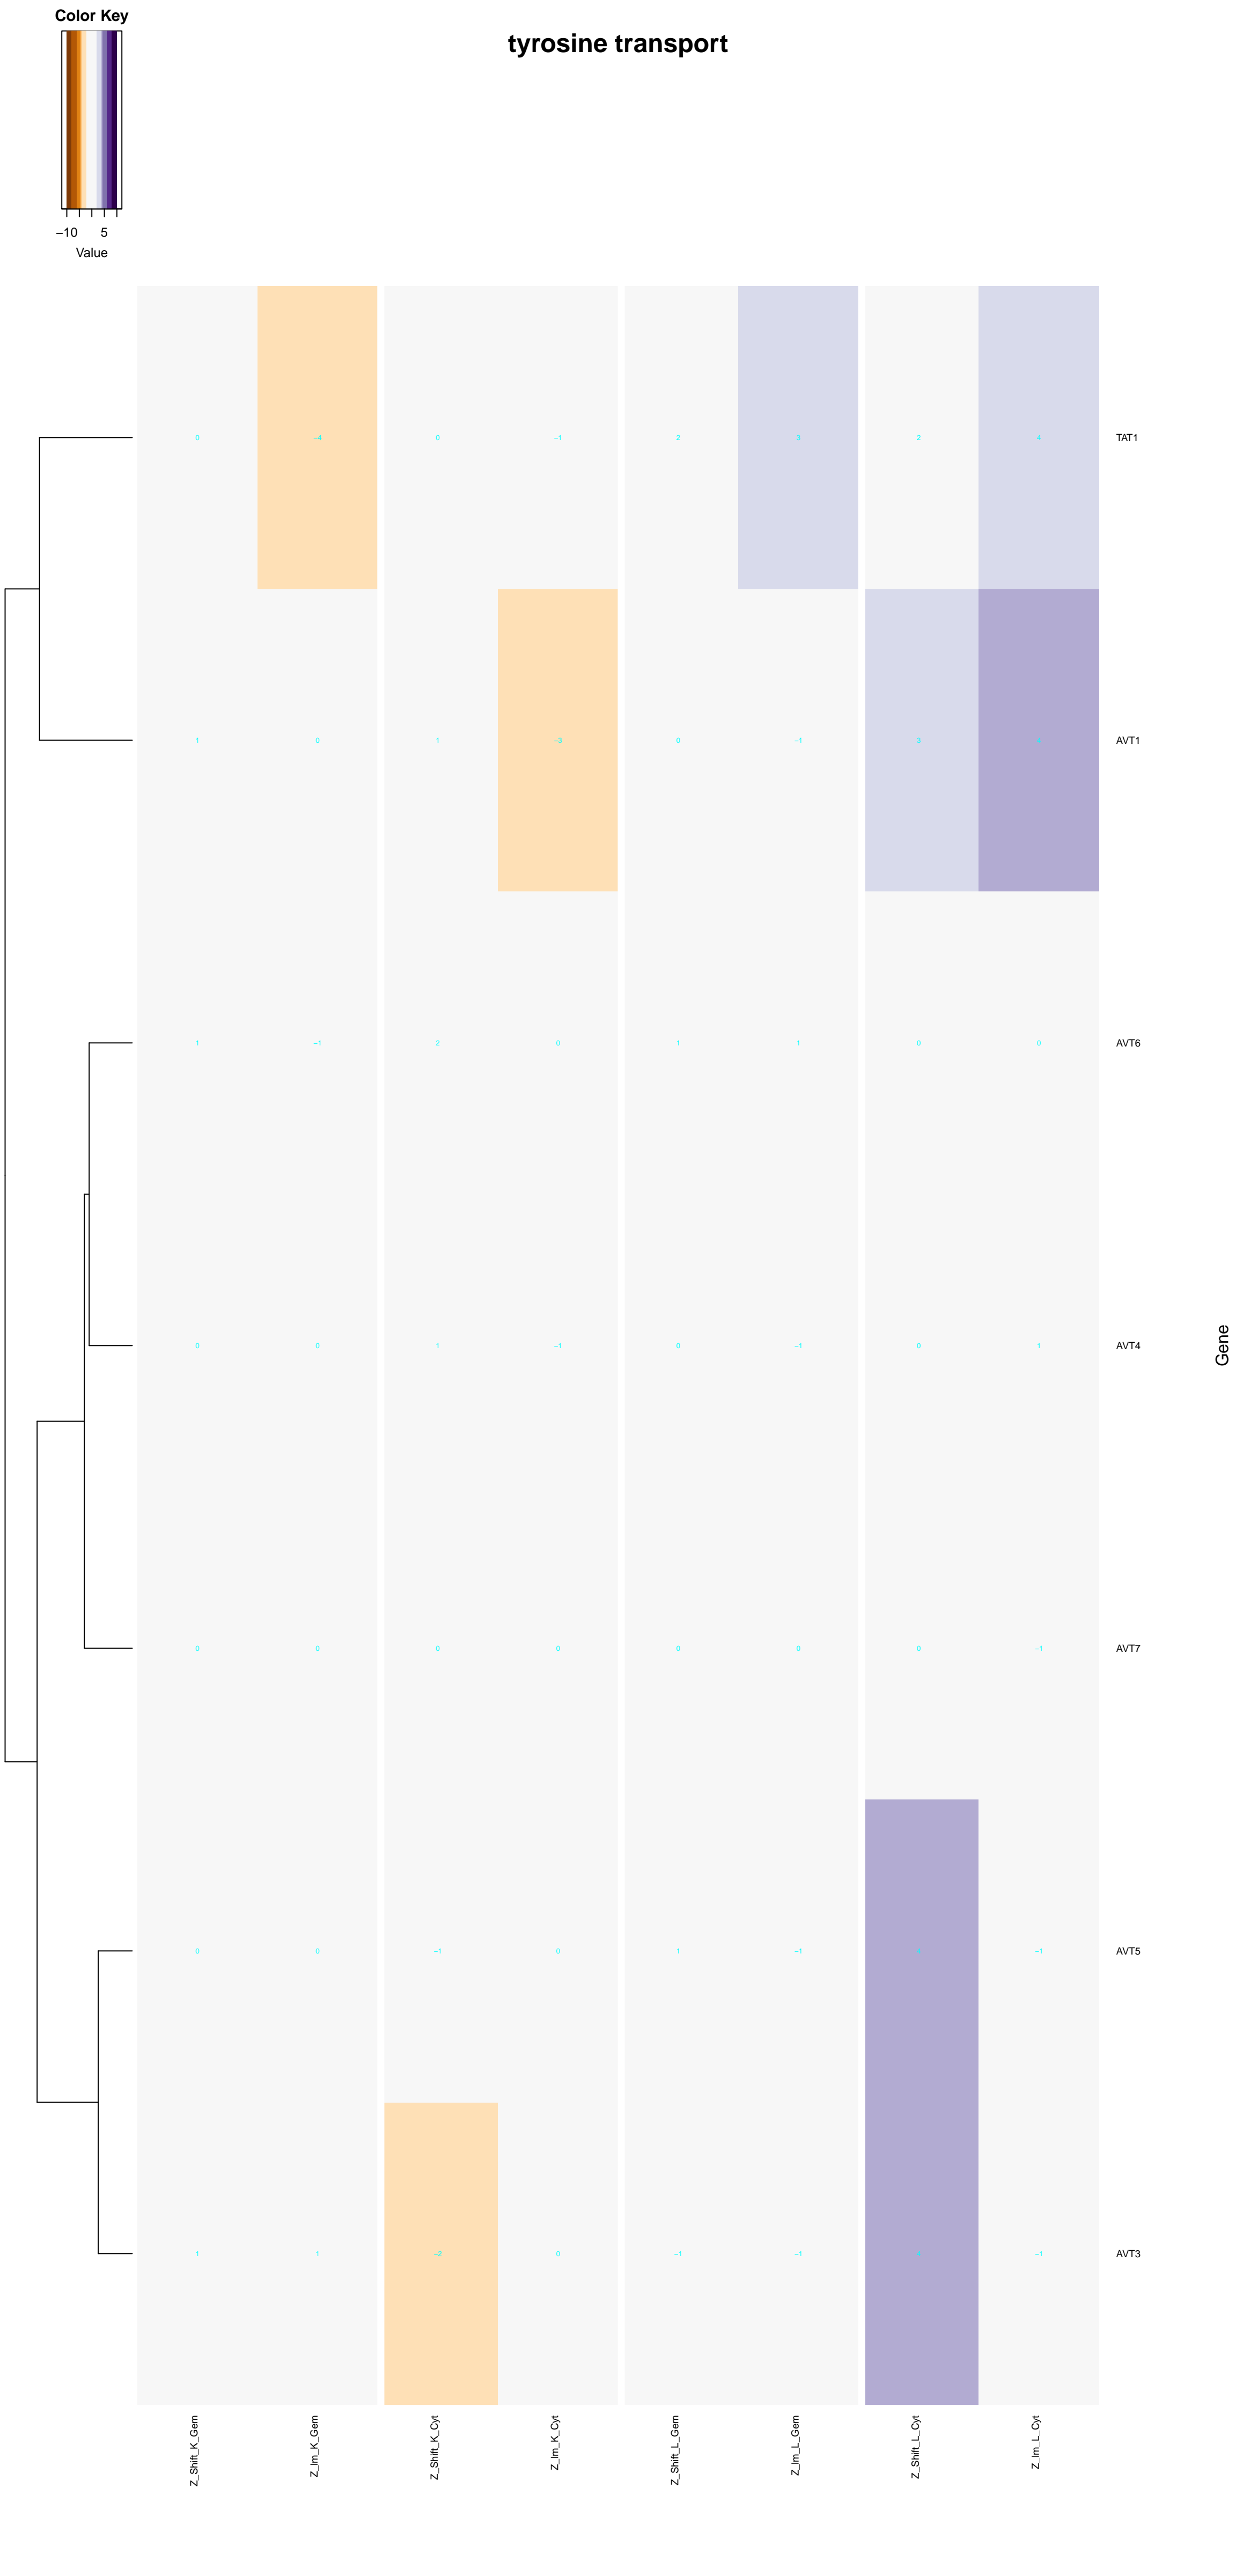

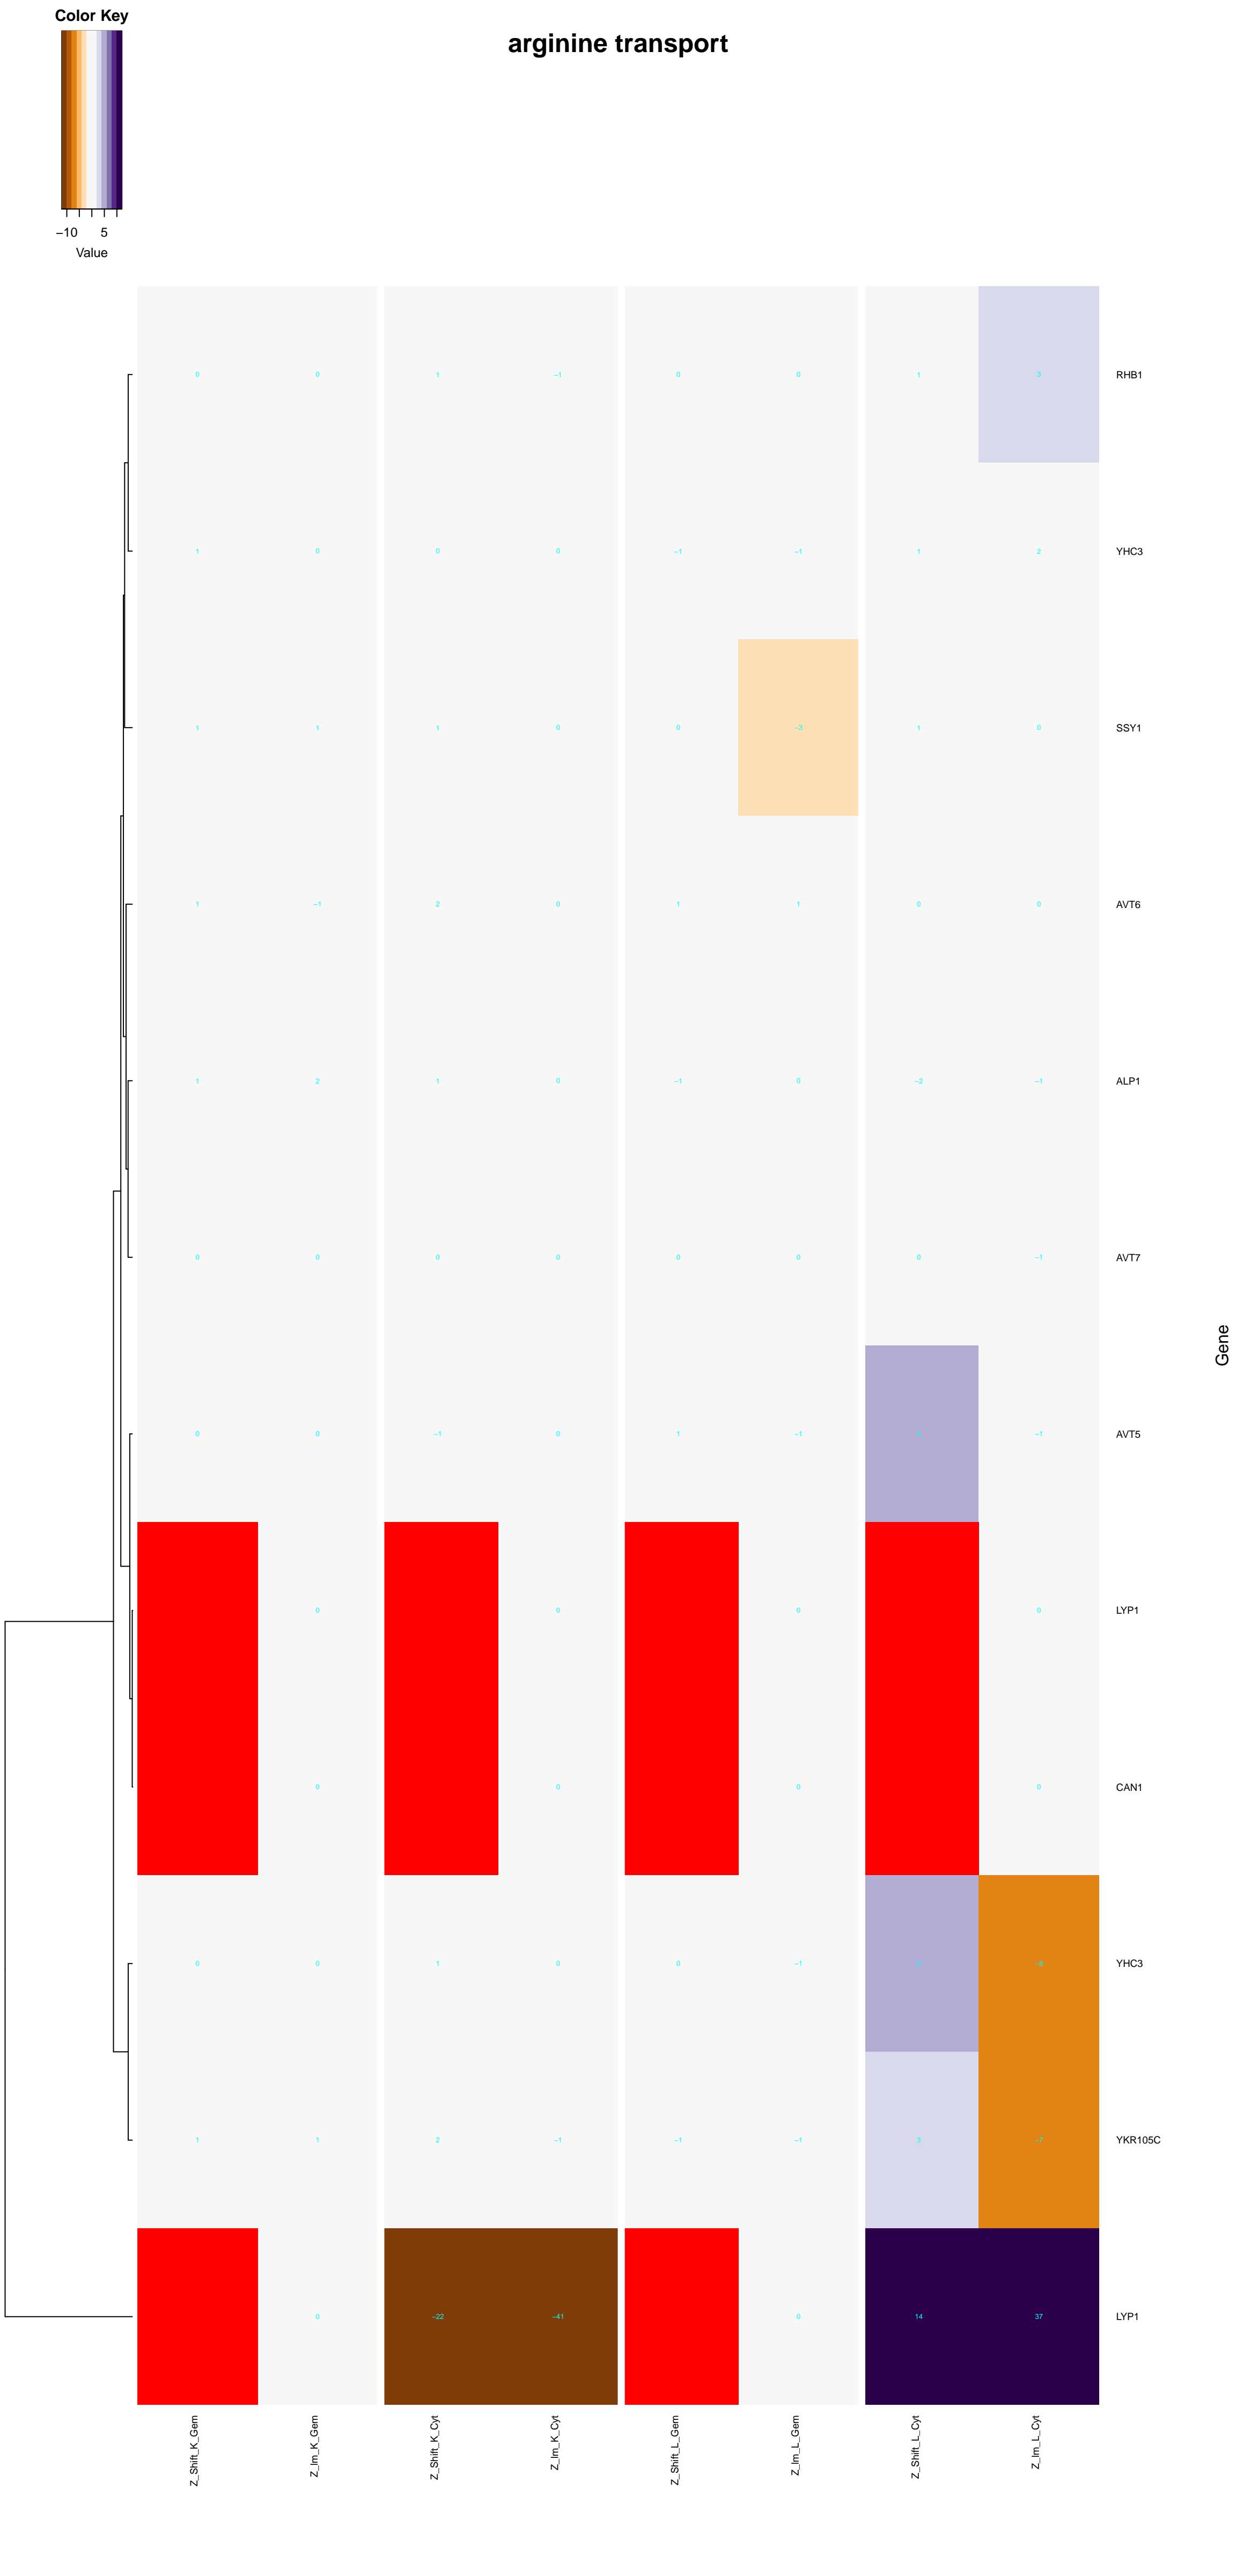

lysine transport

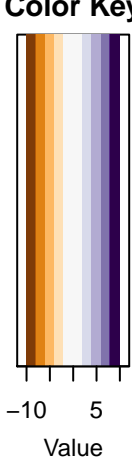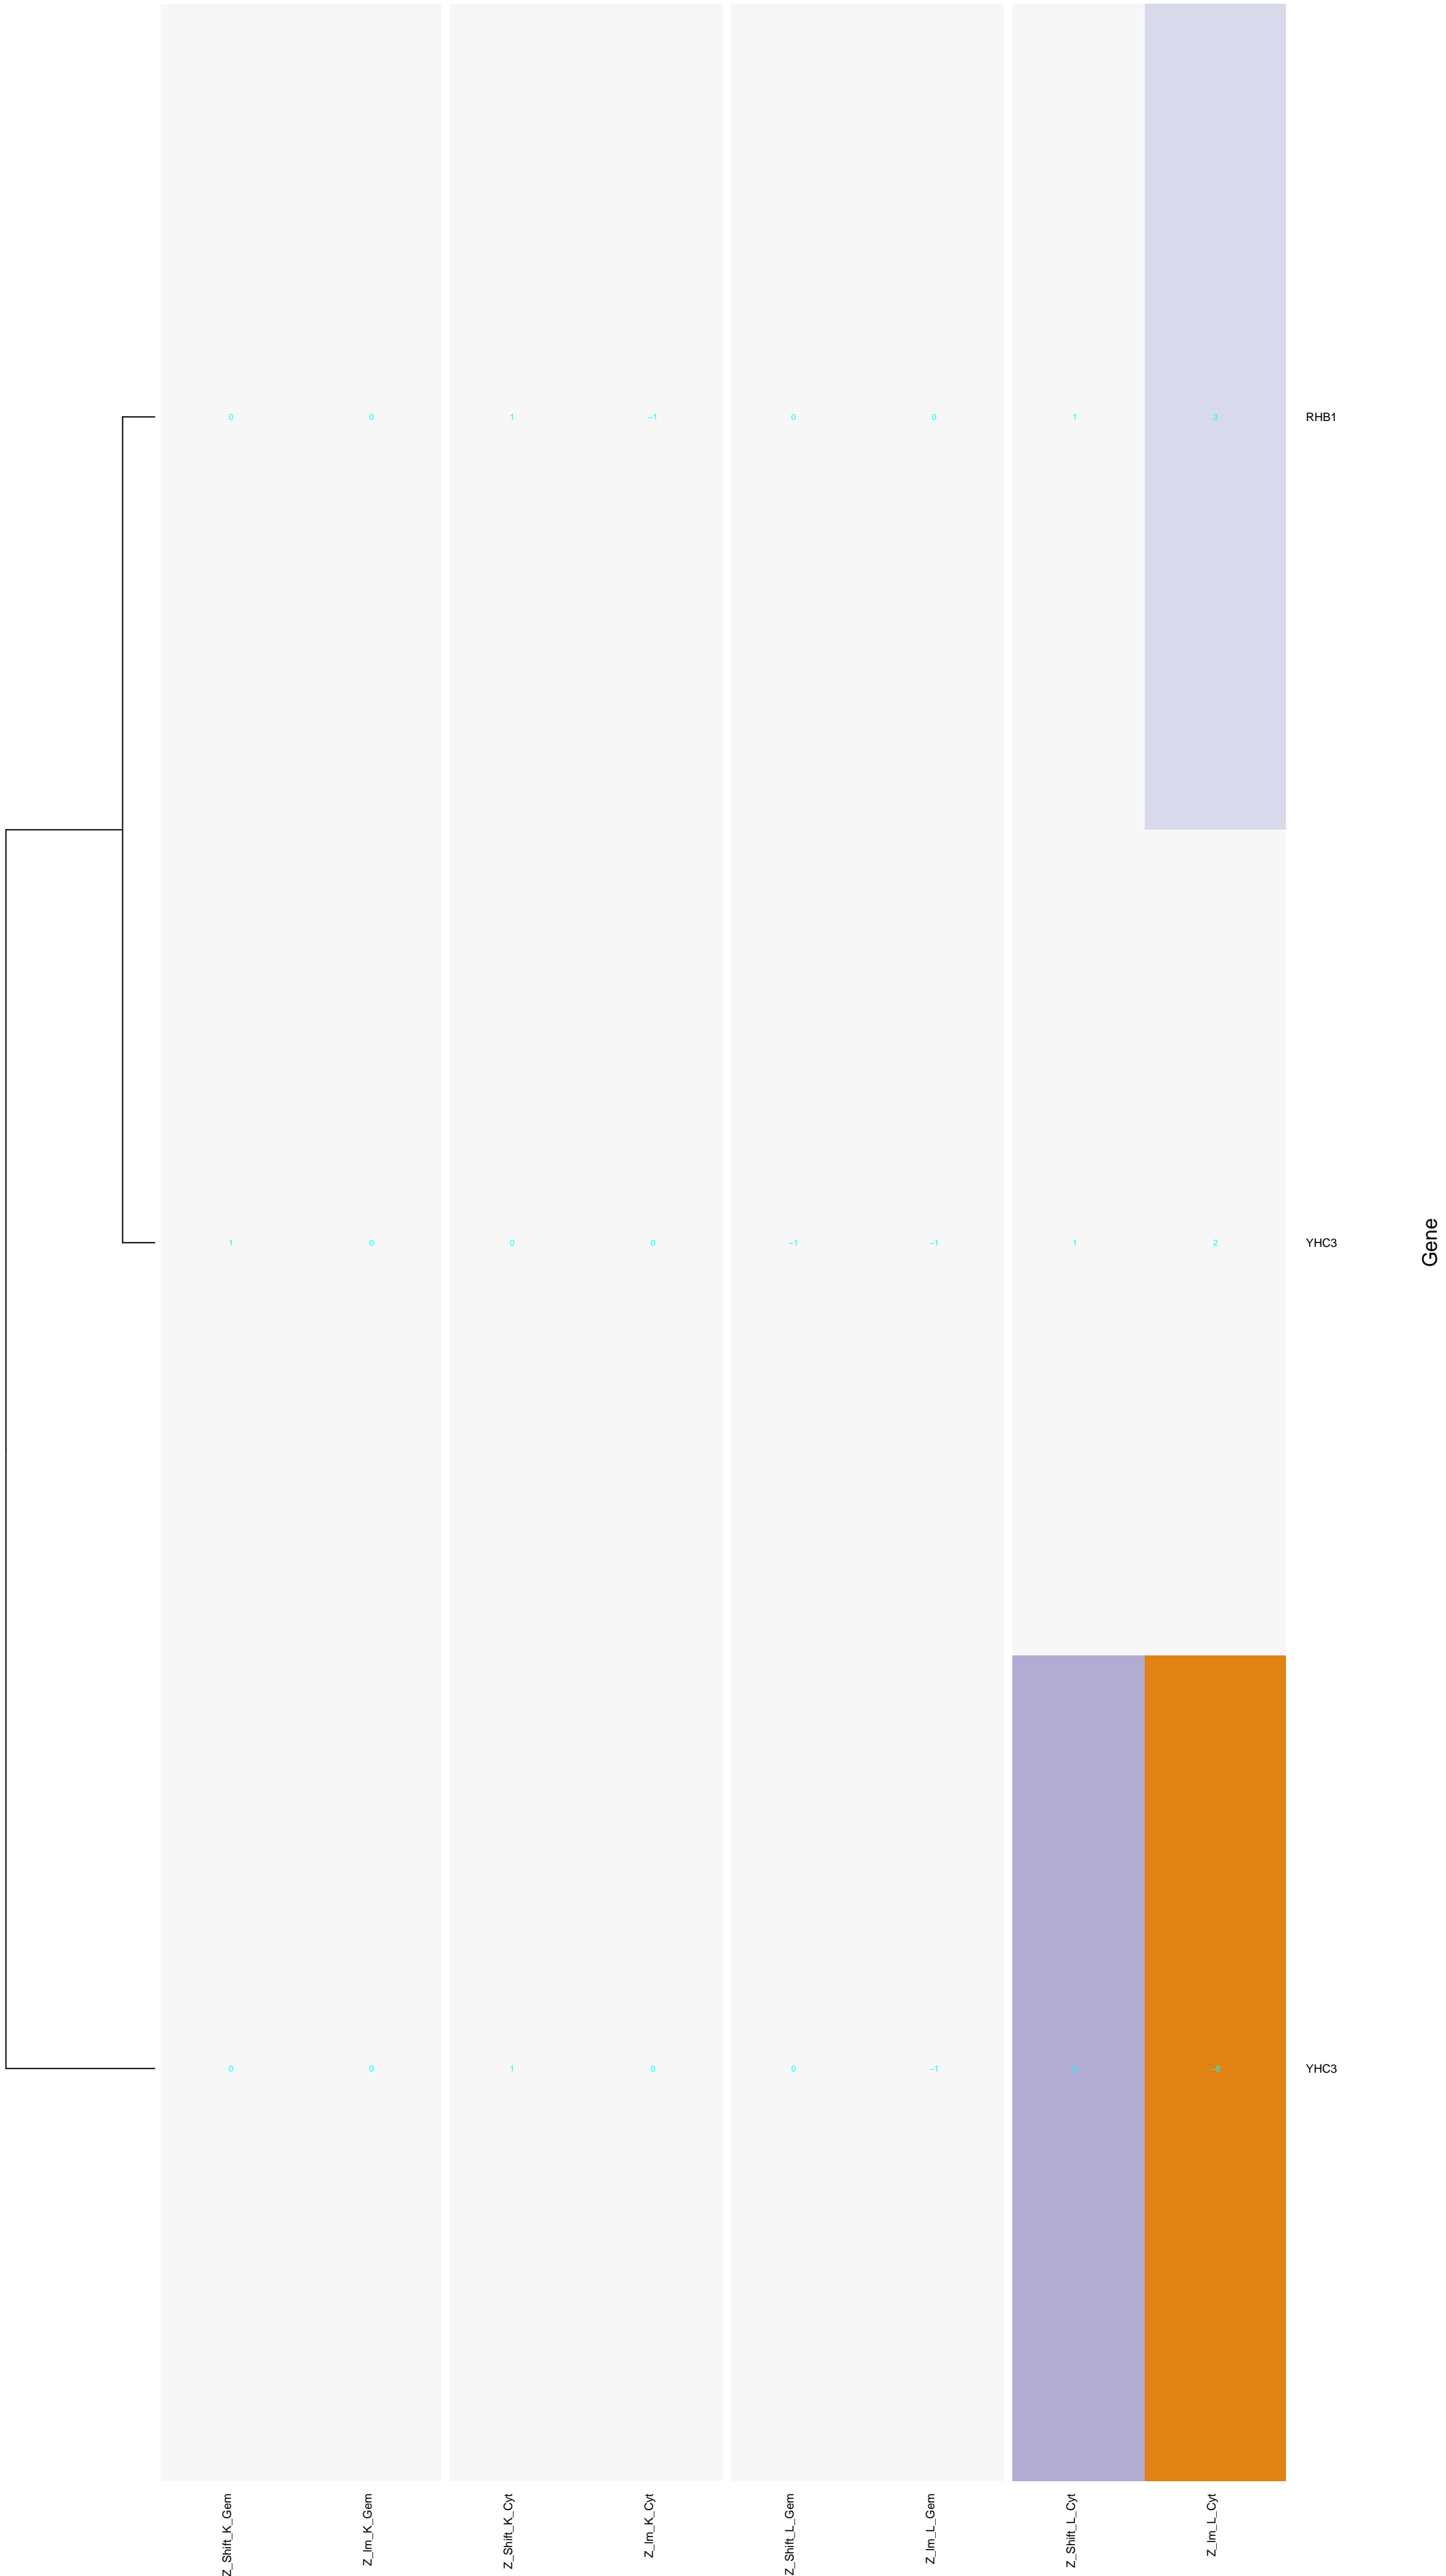

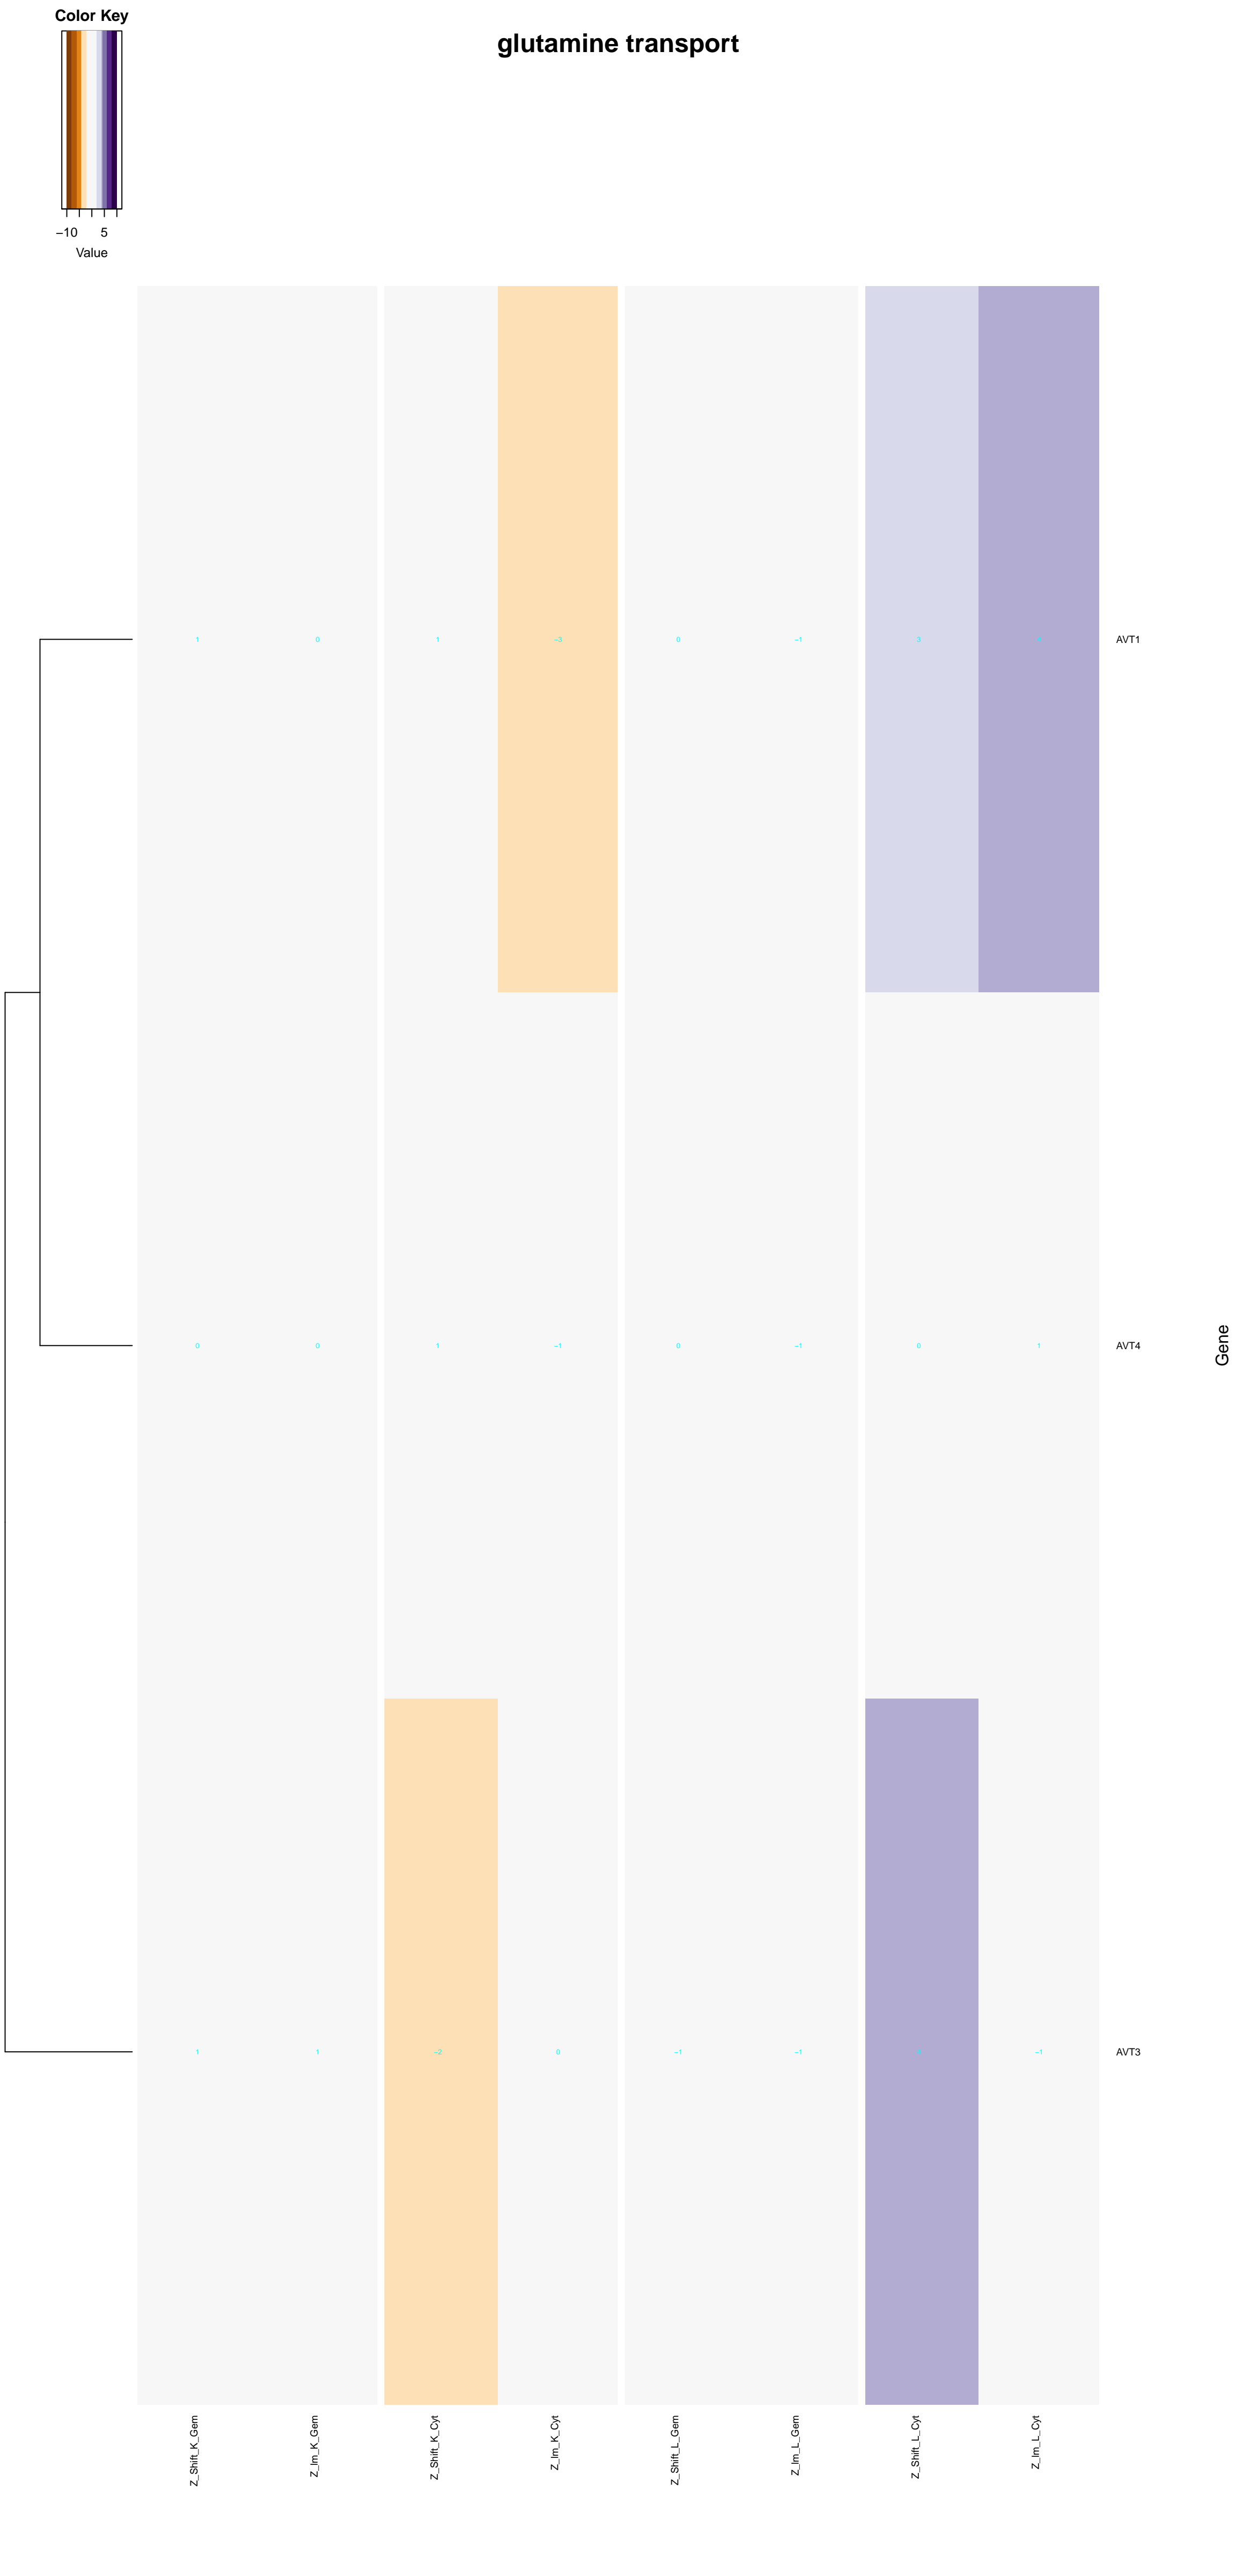

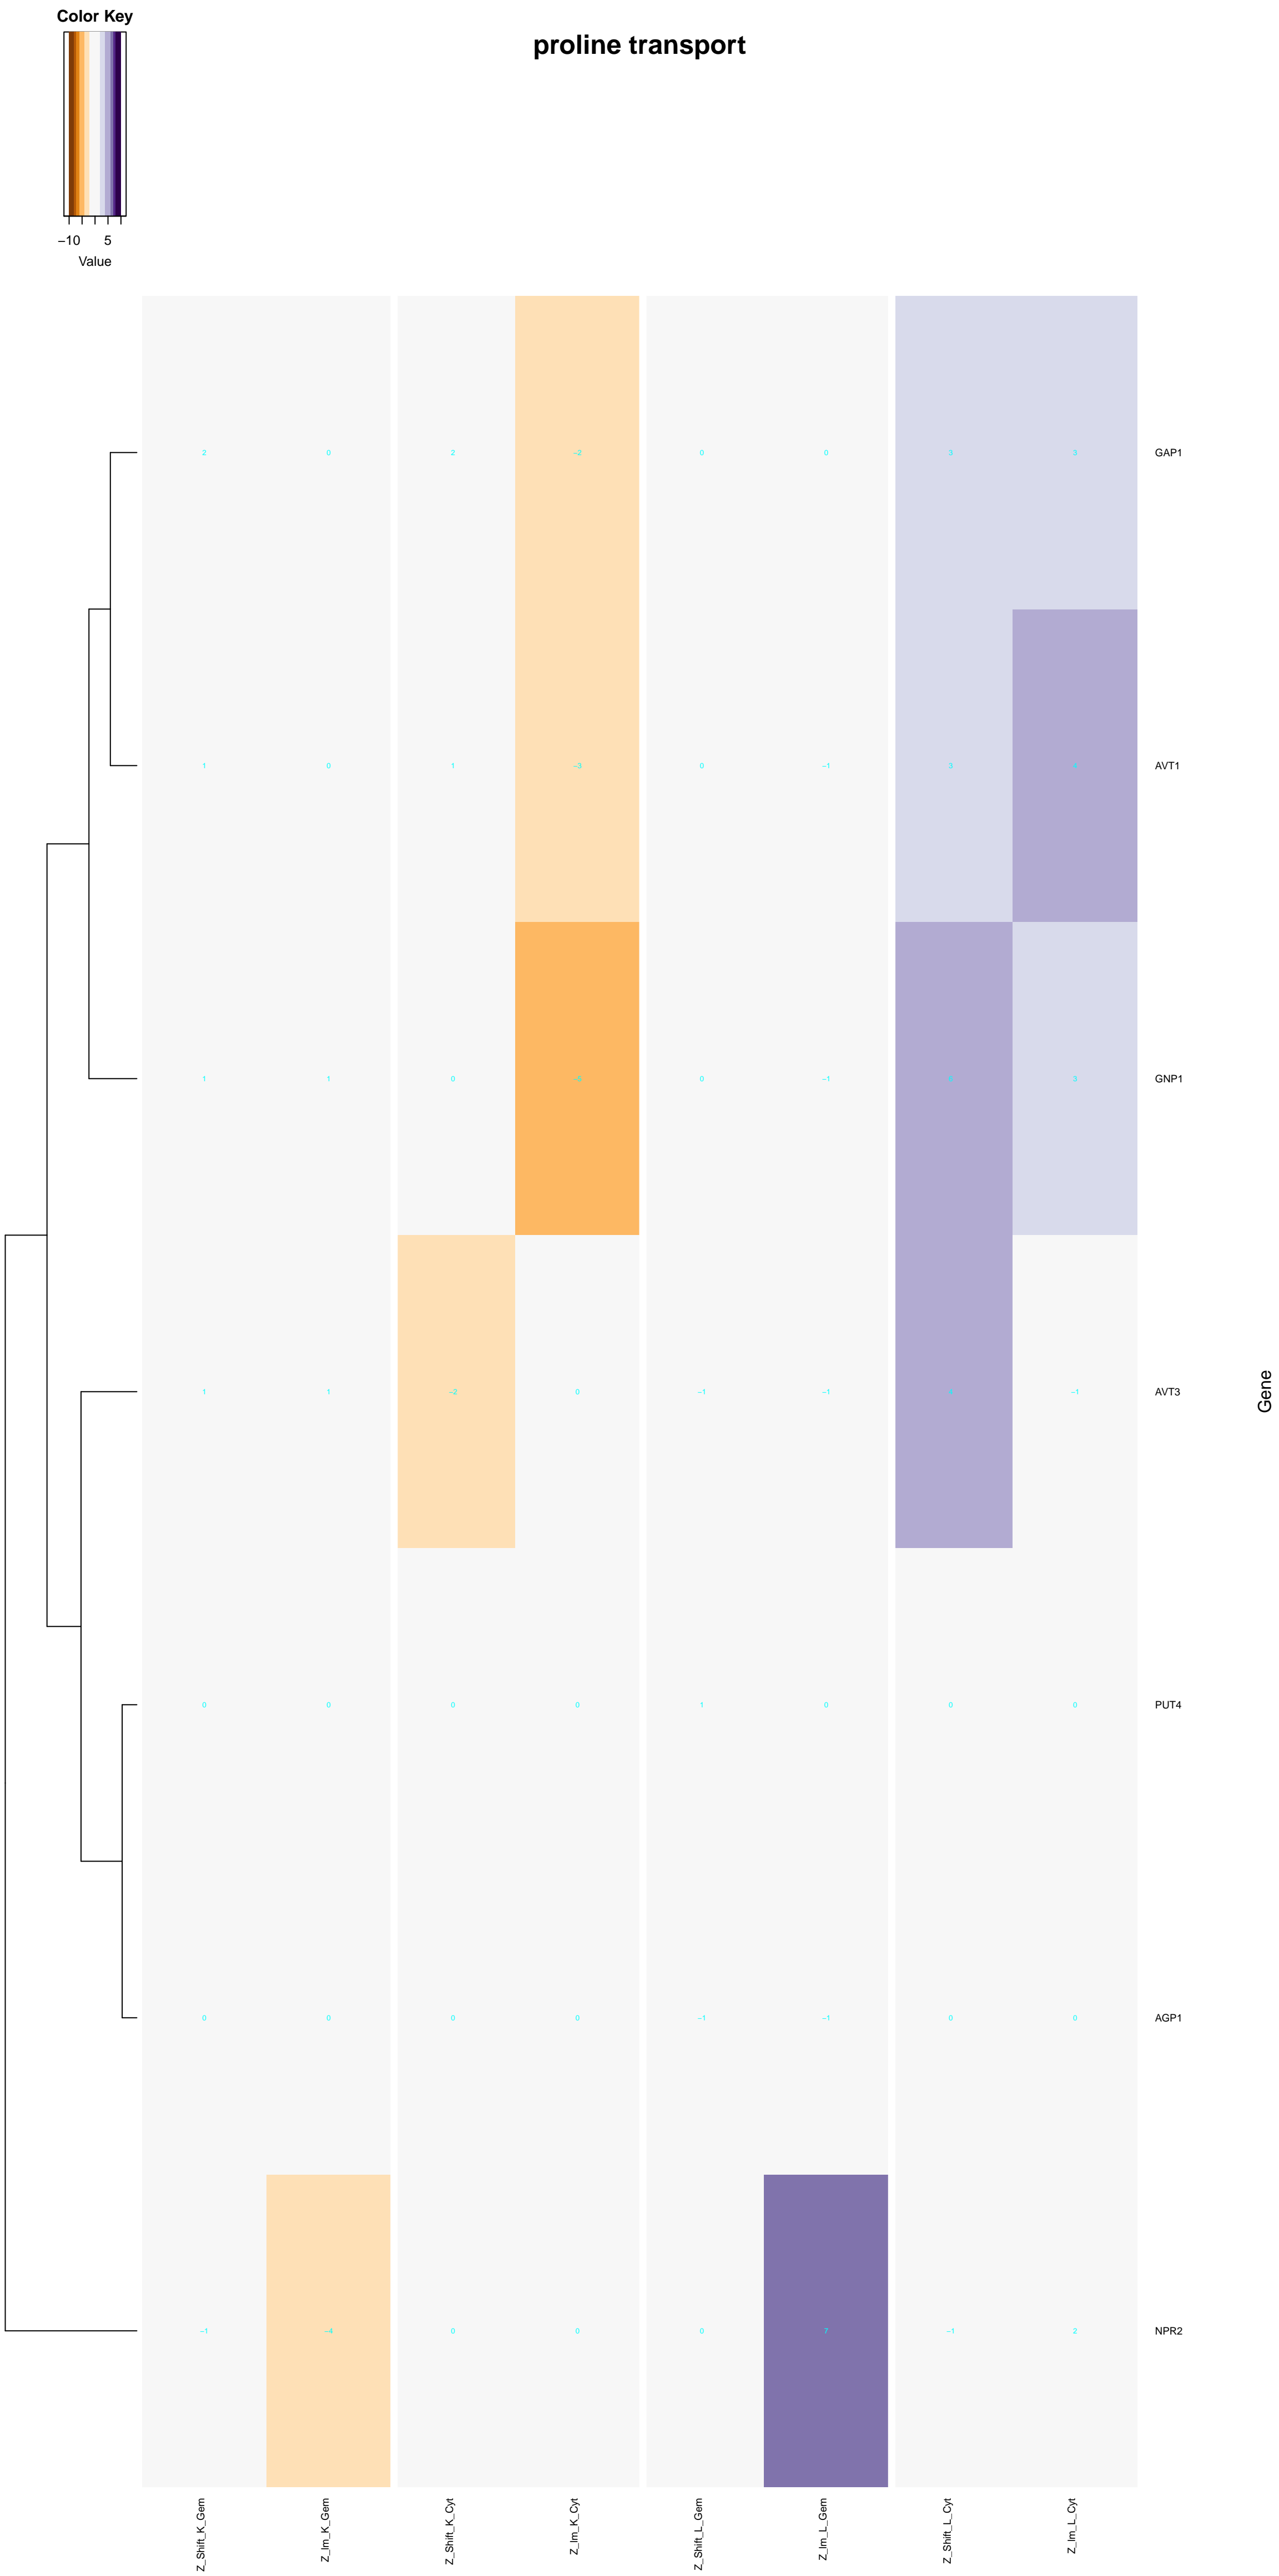

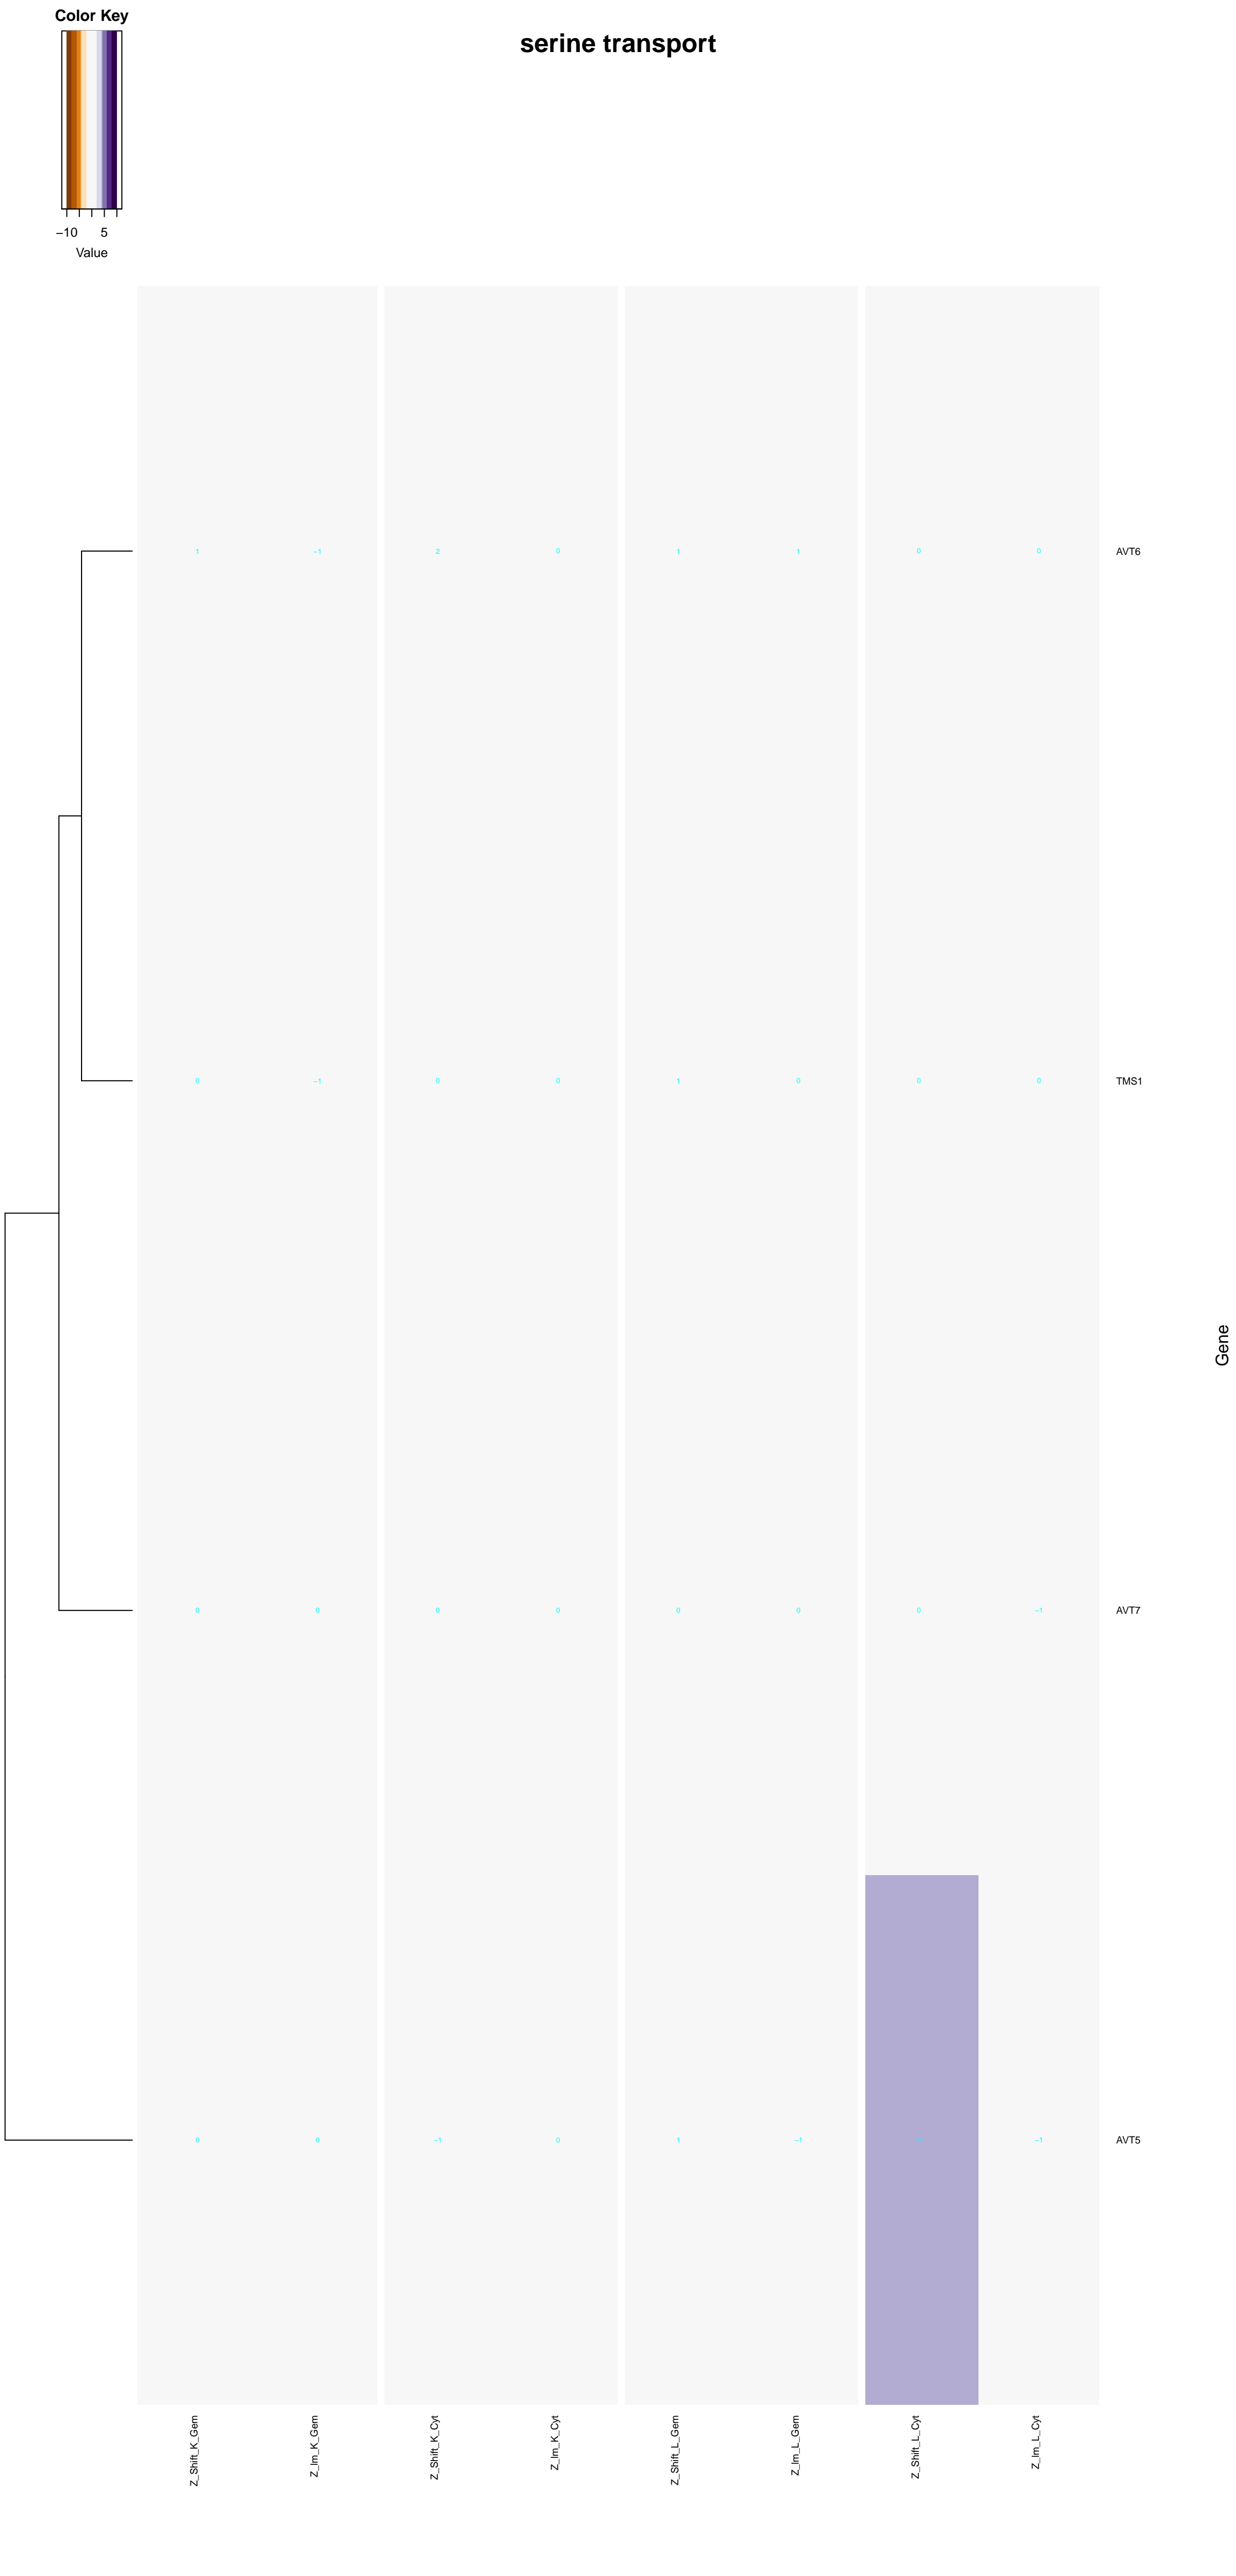

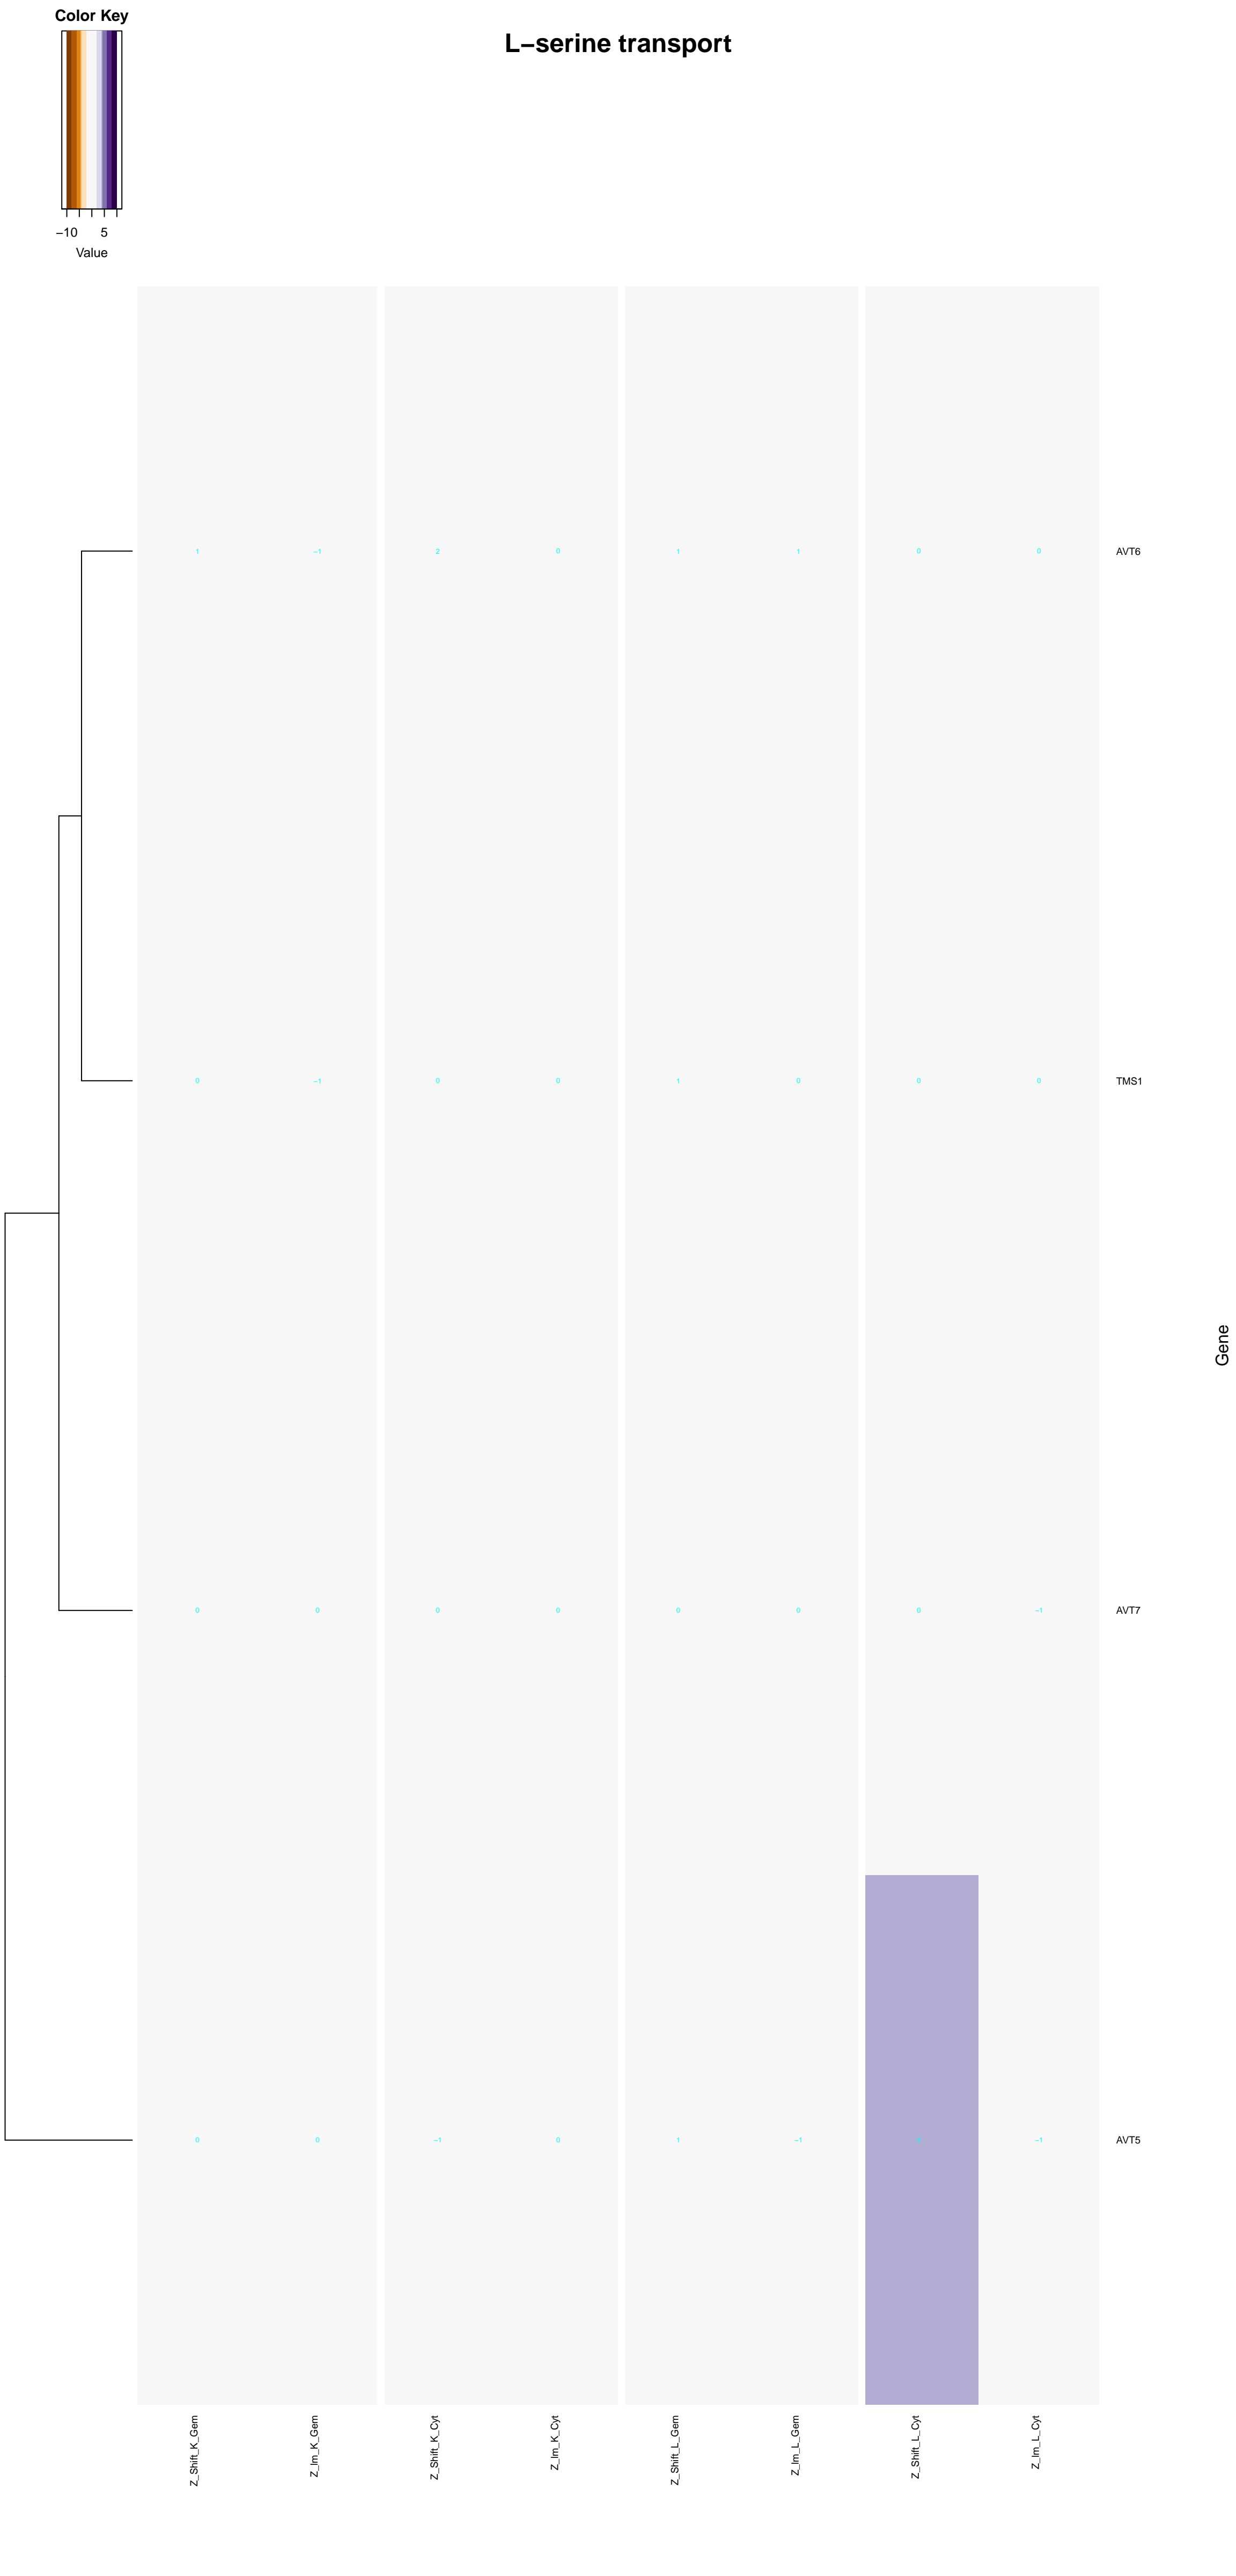

L-lysine transport

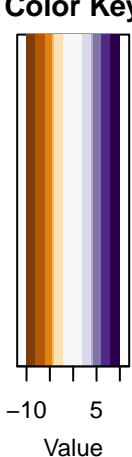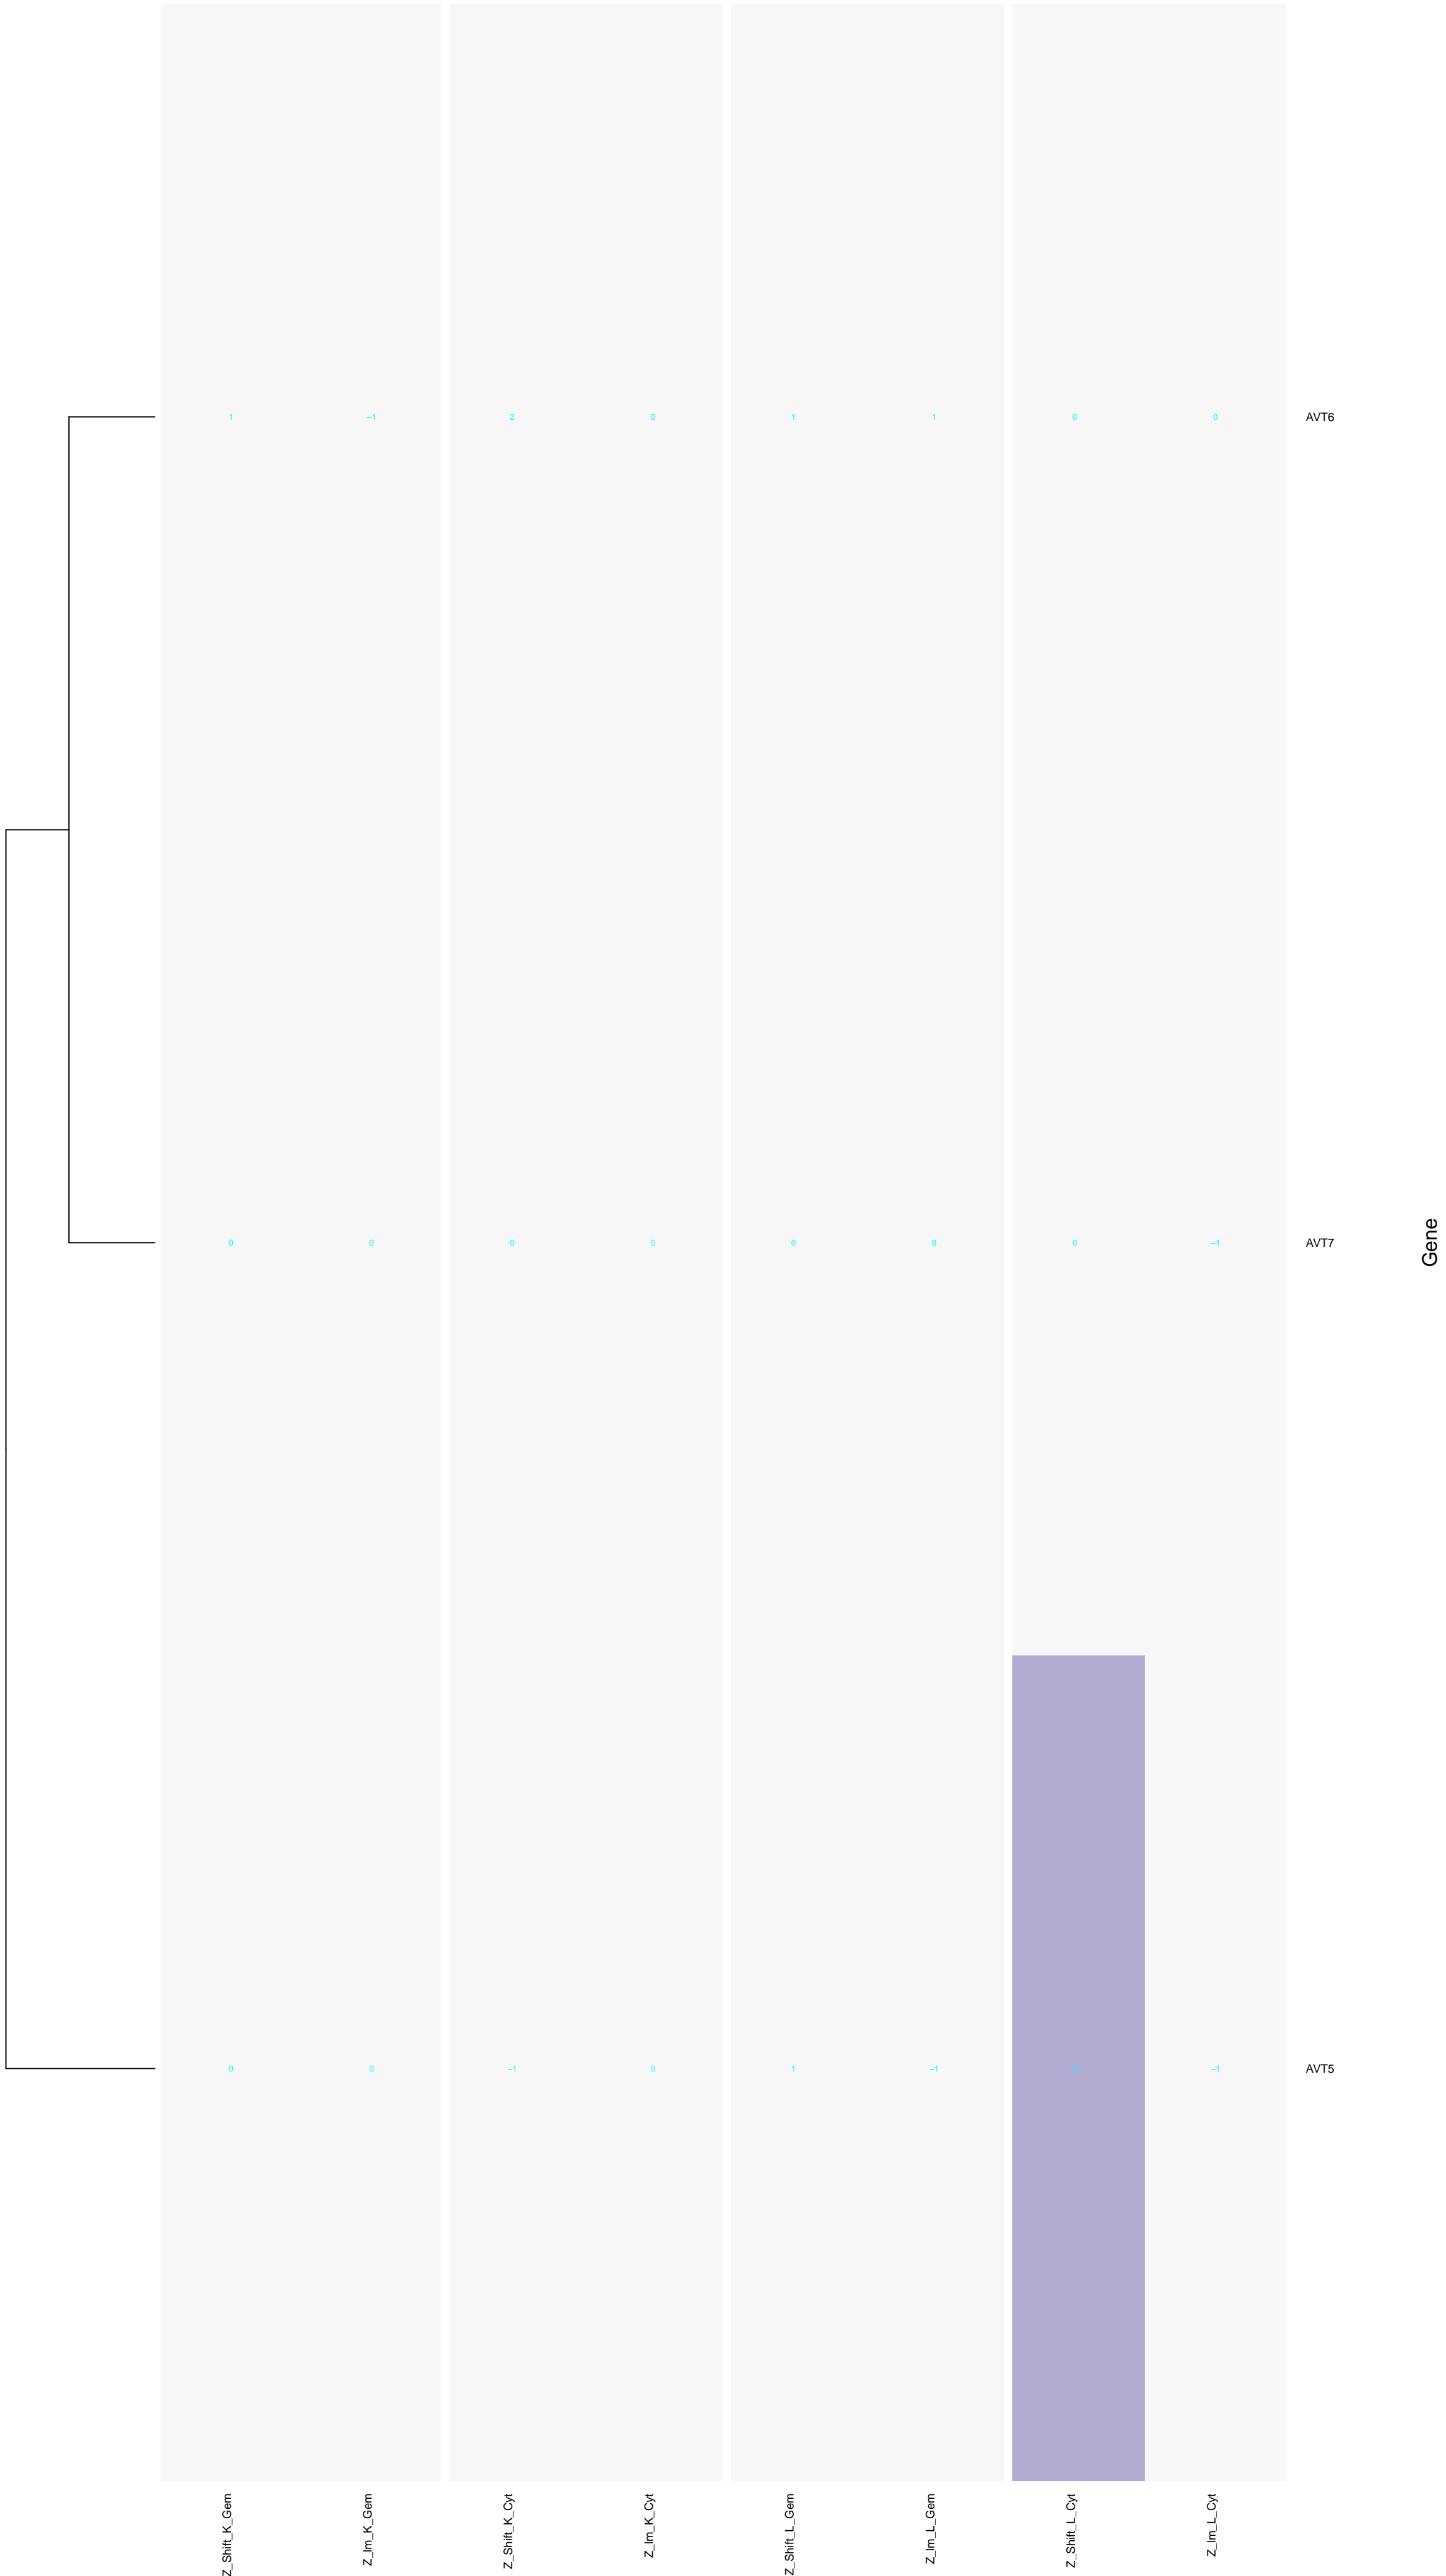



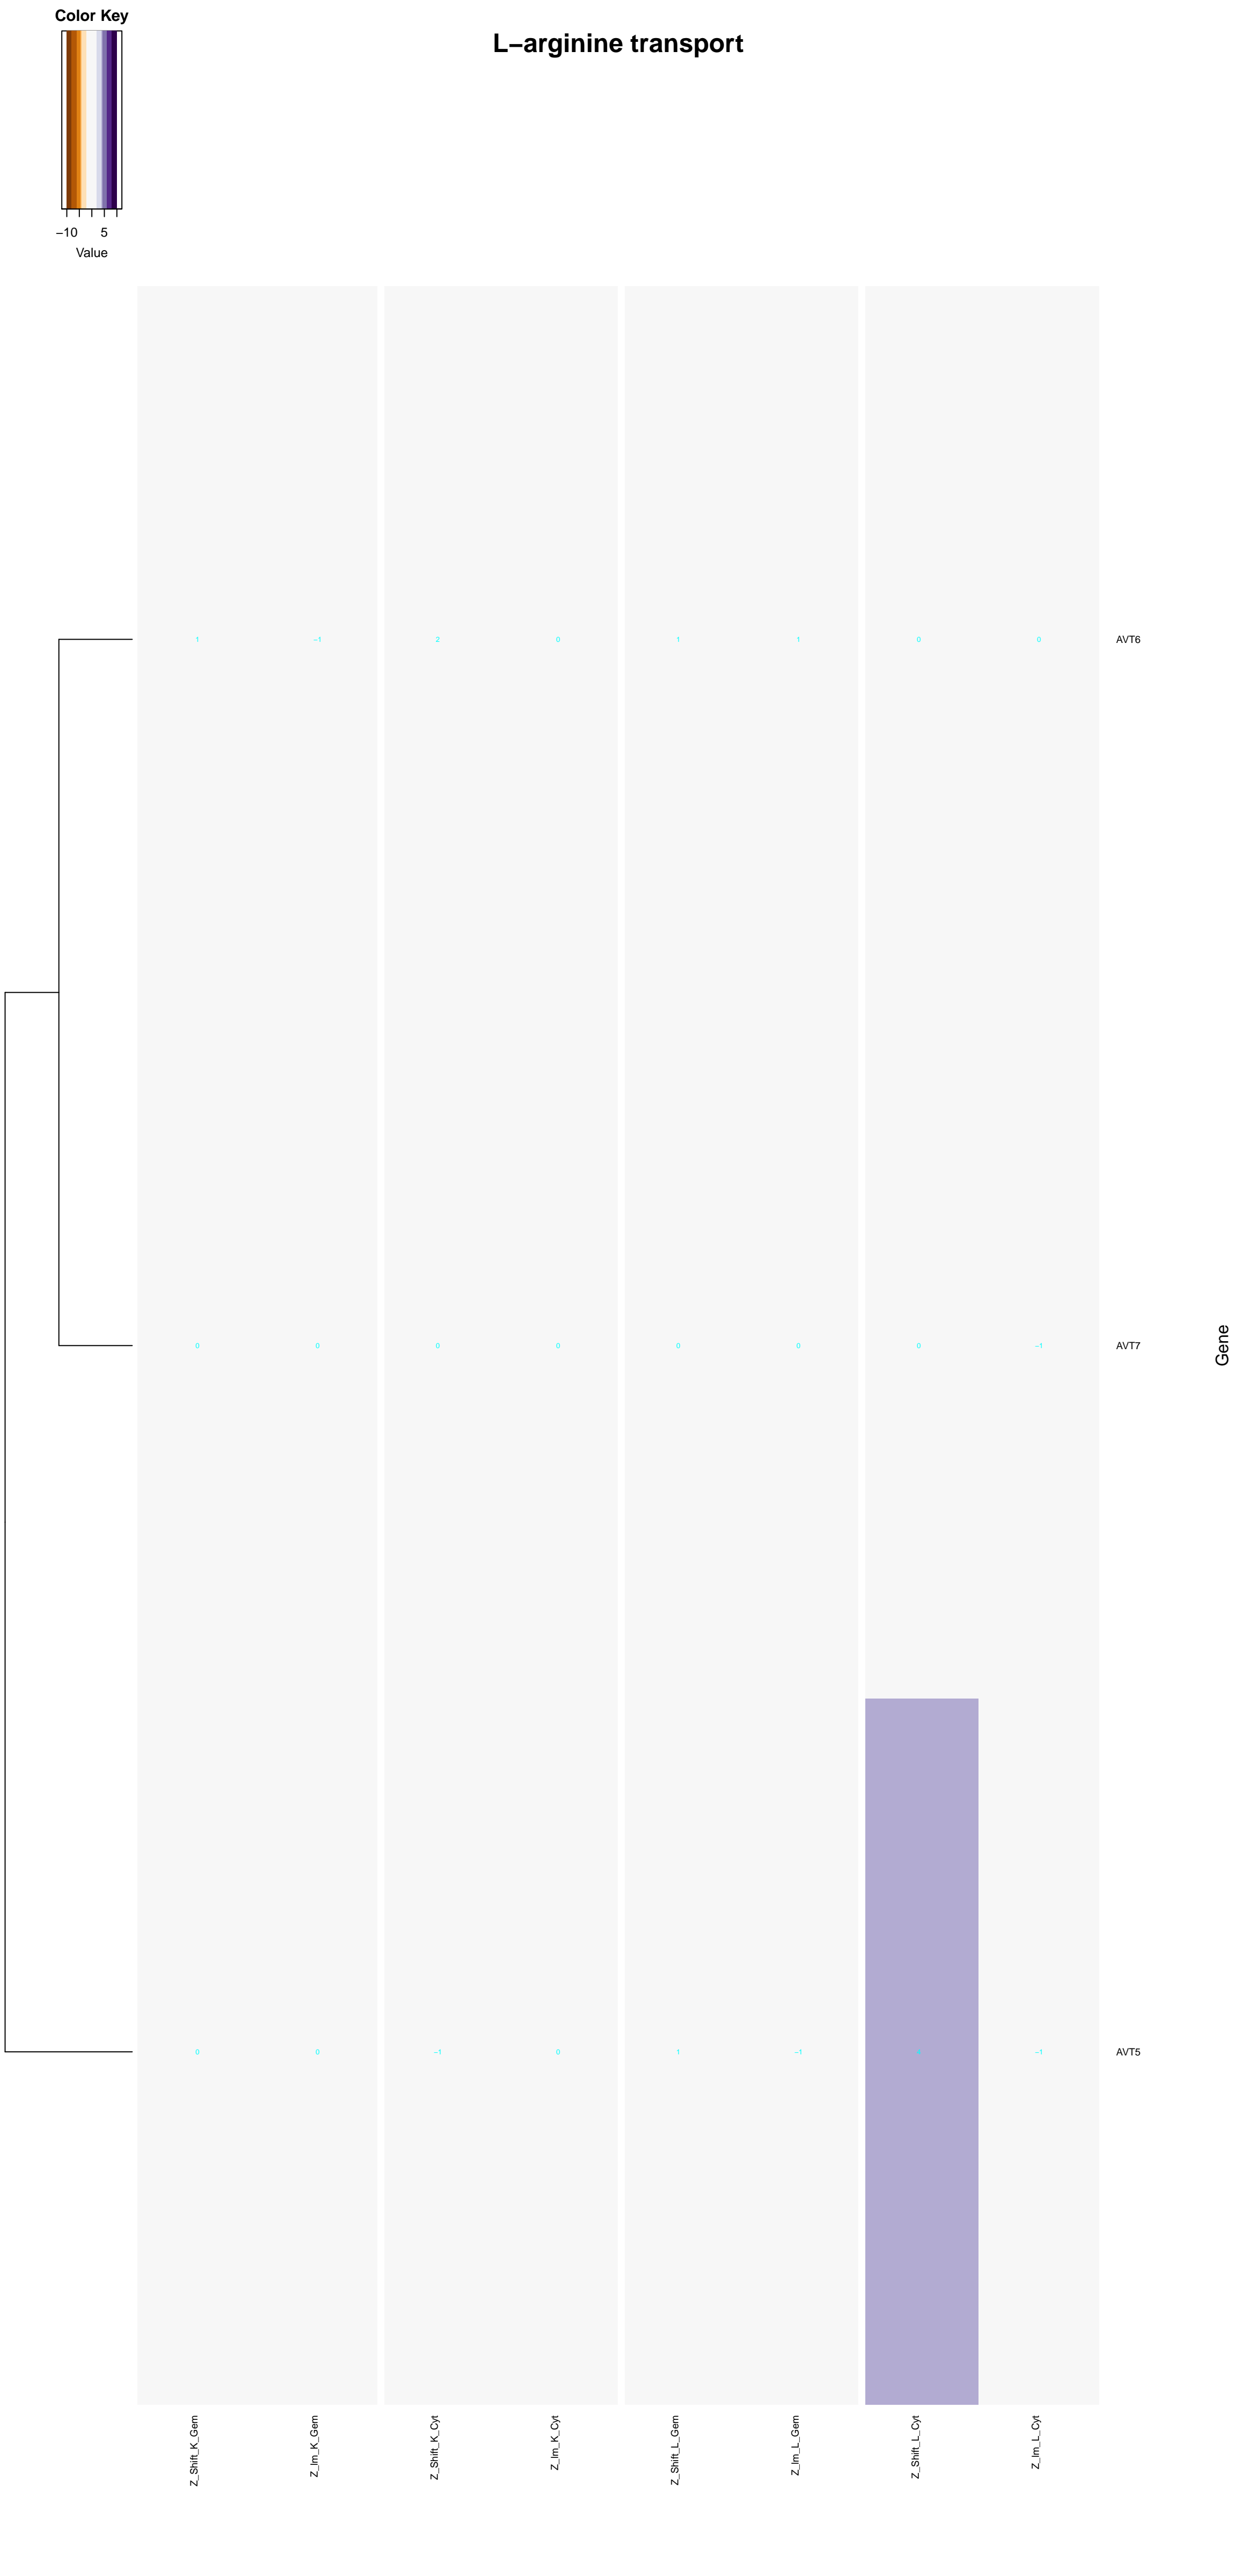

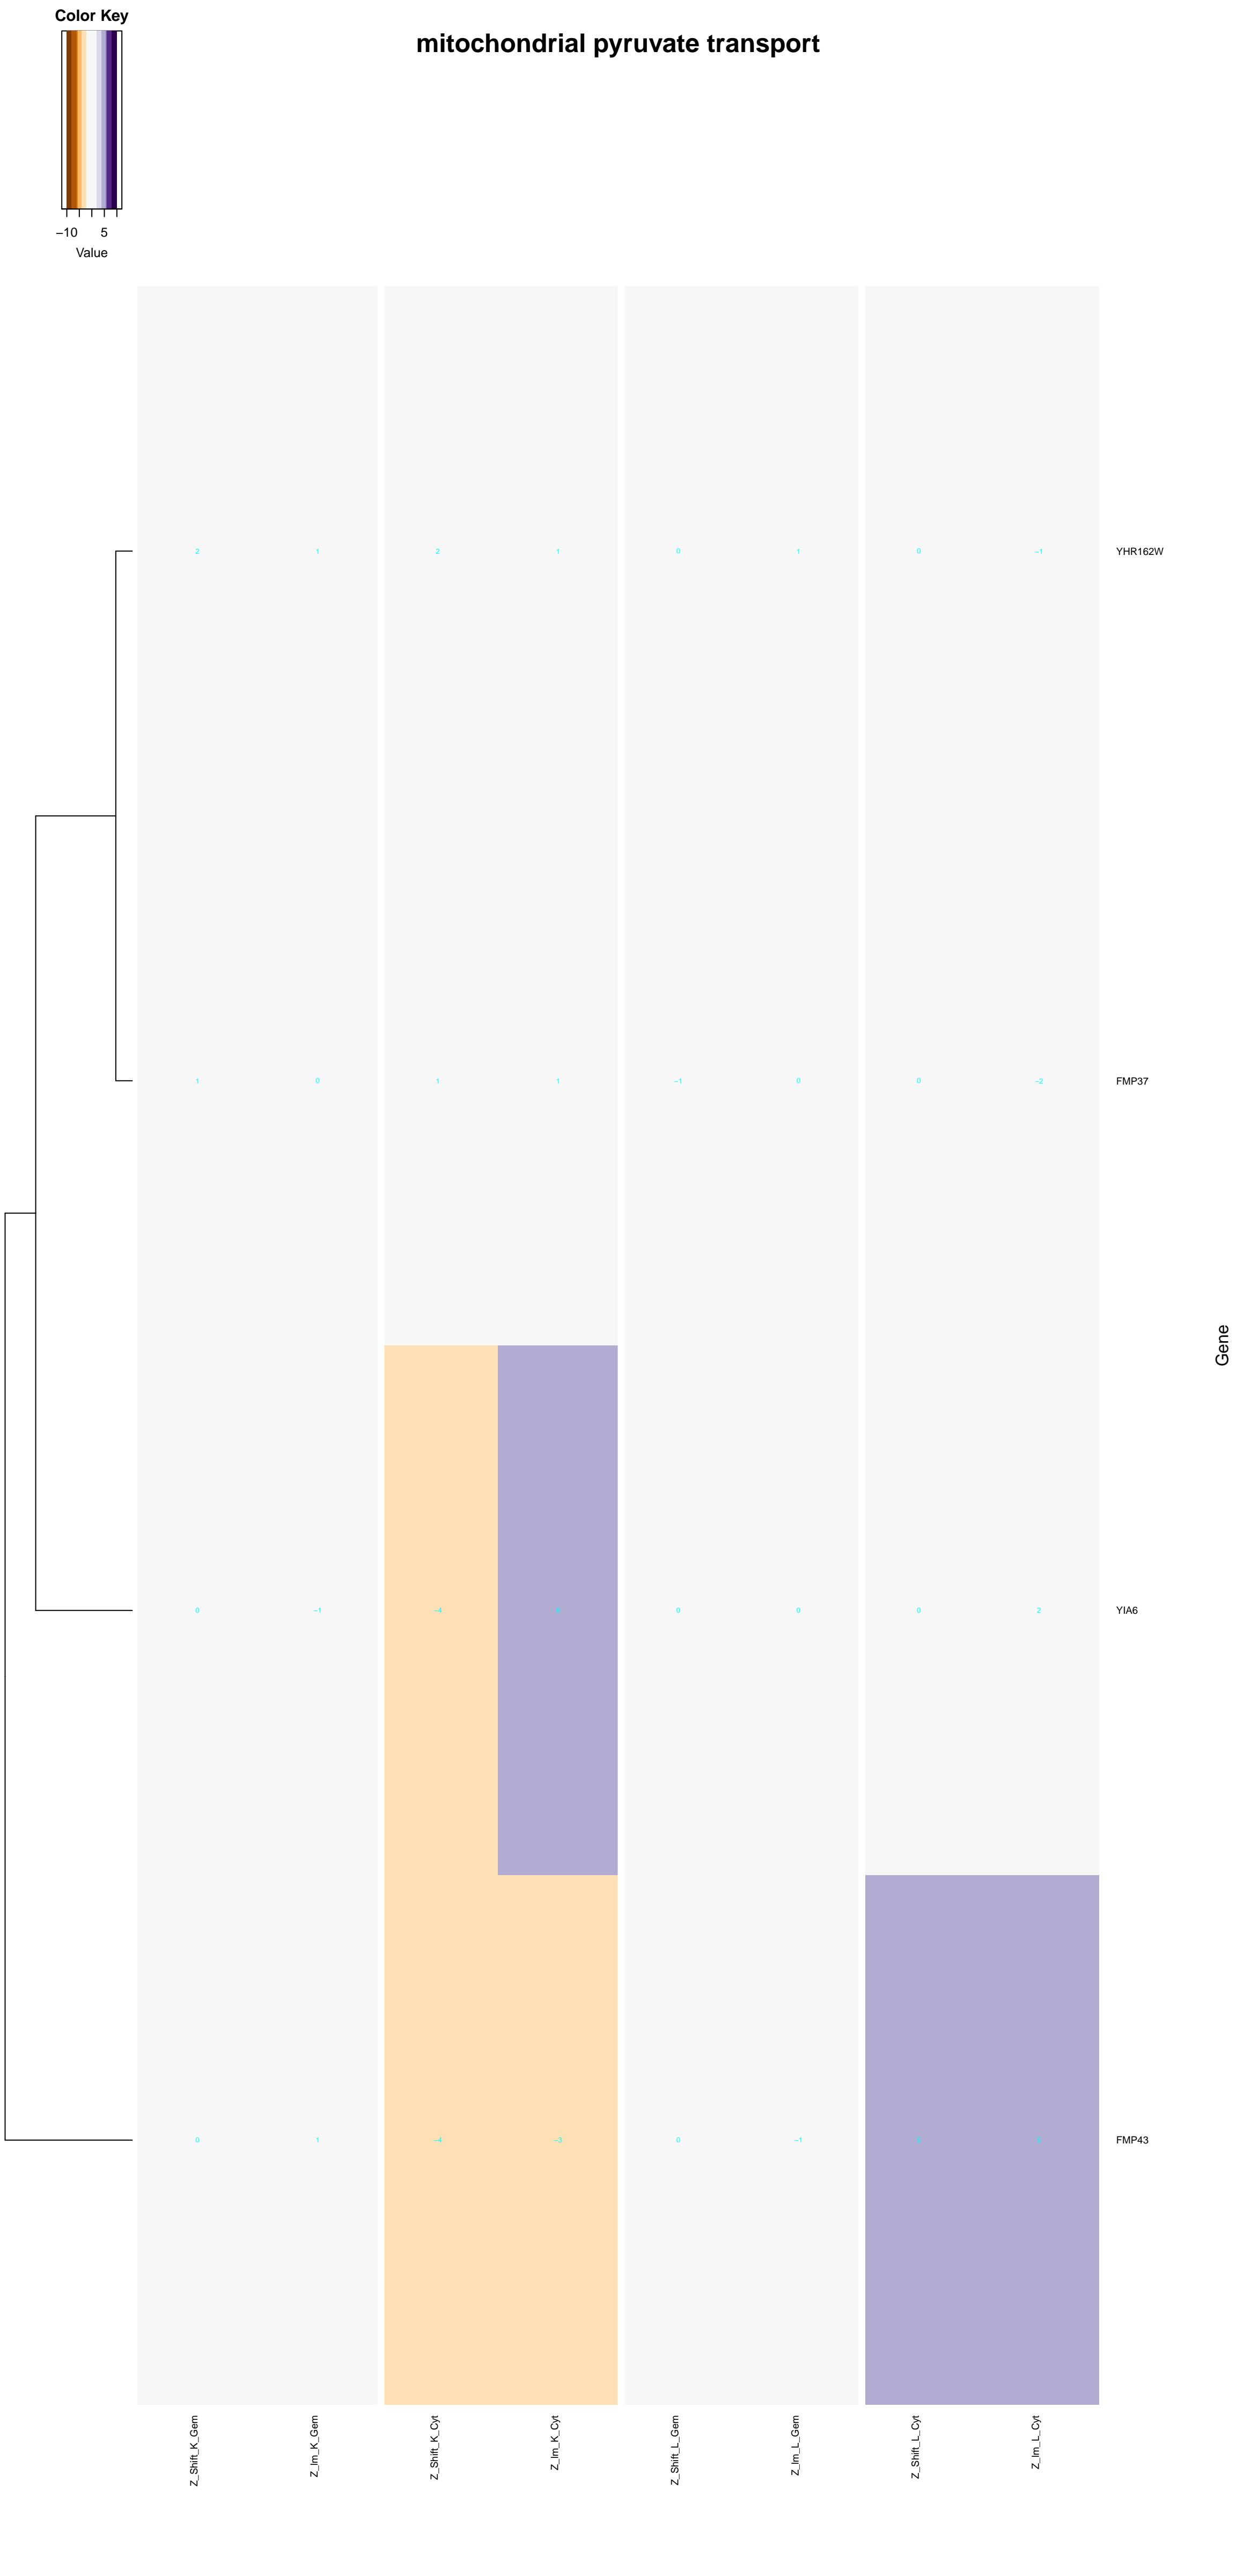

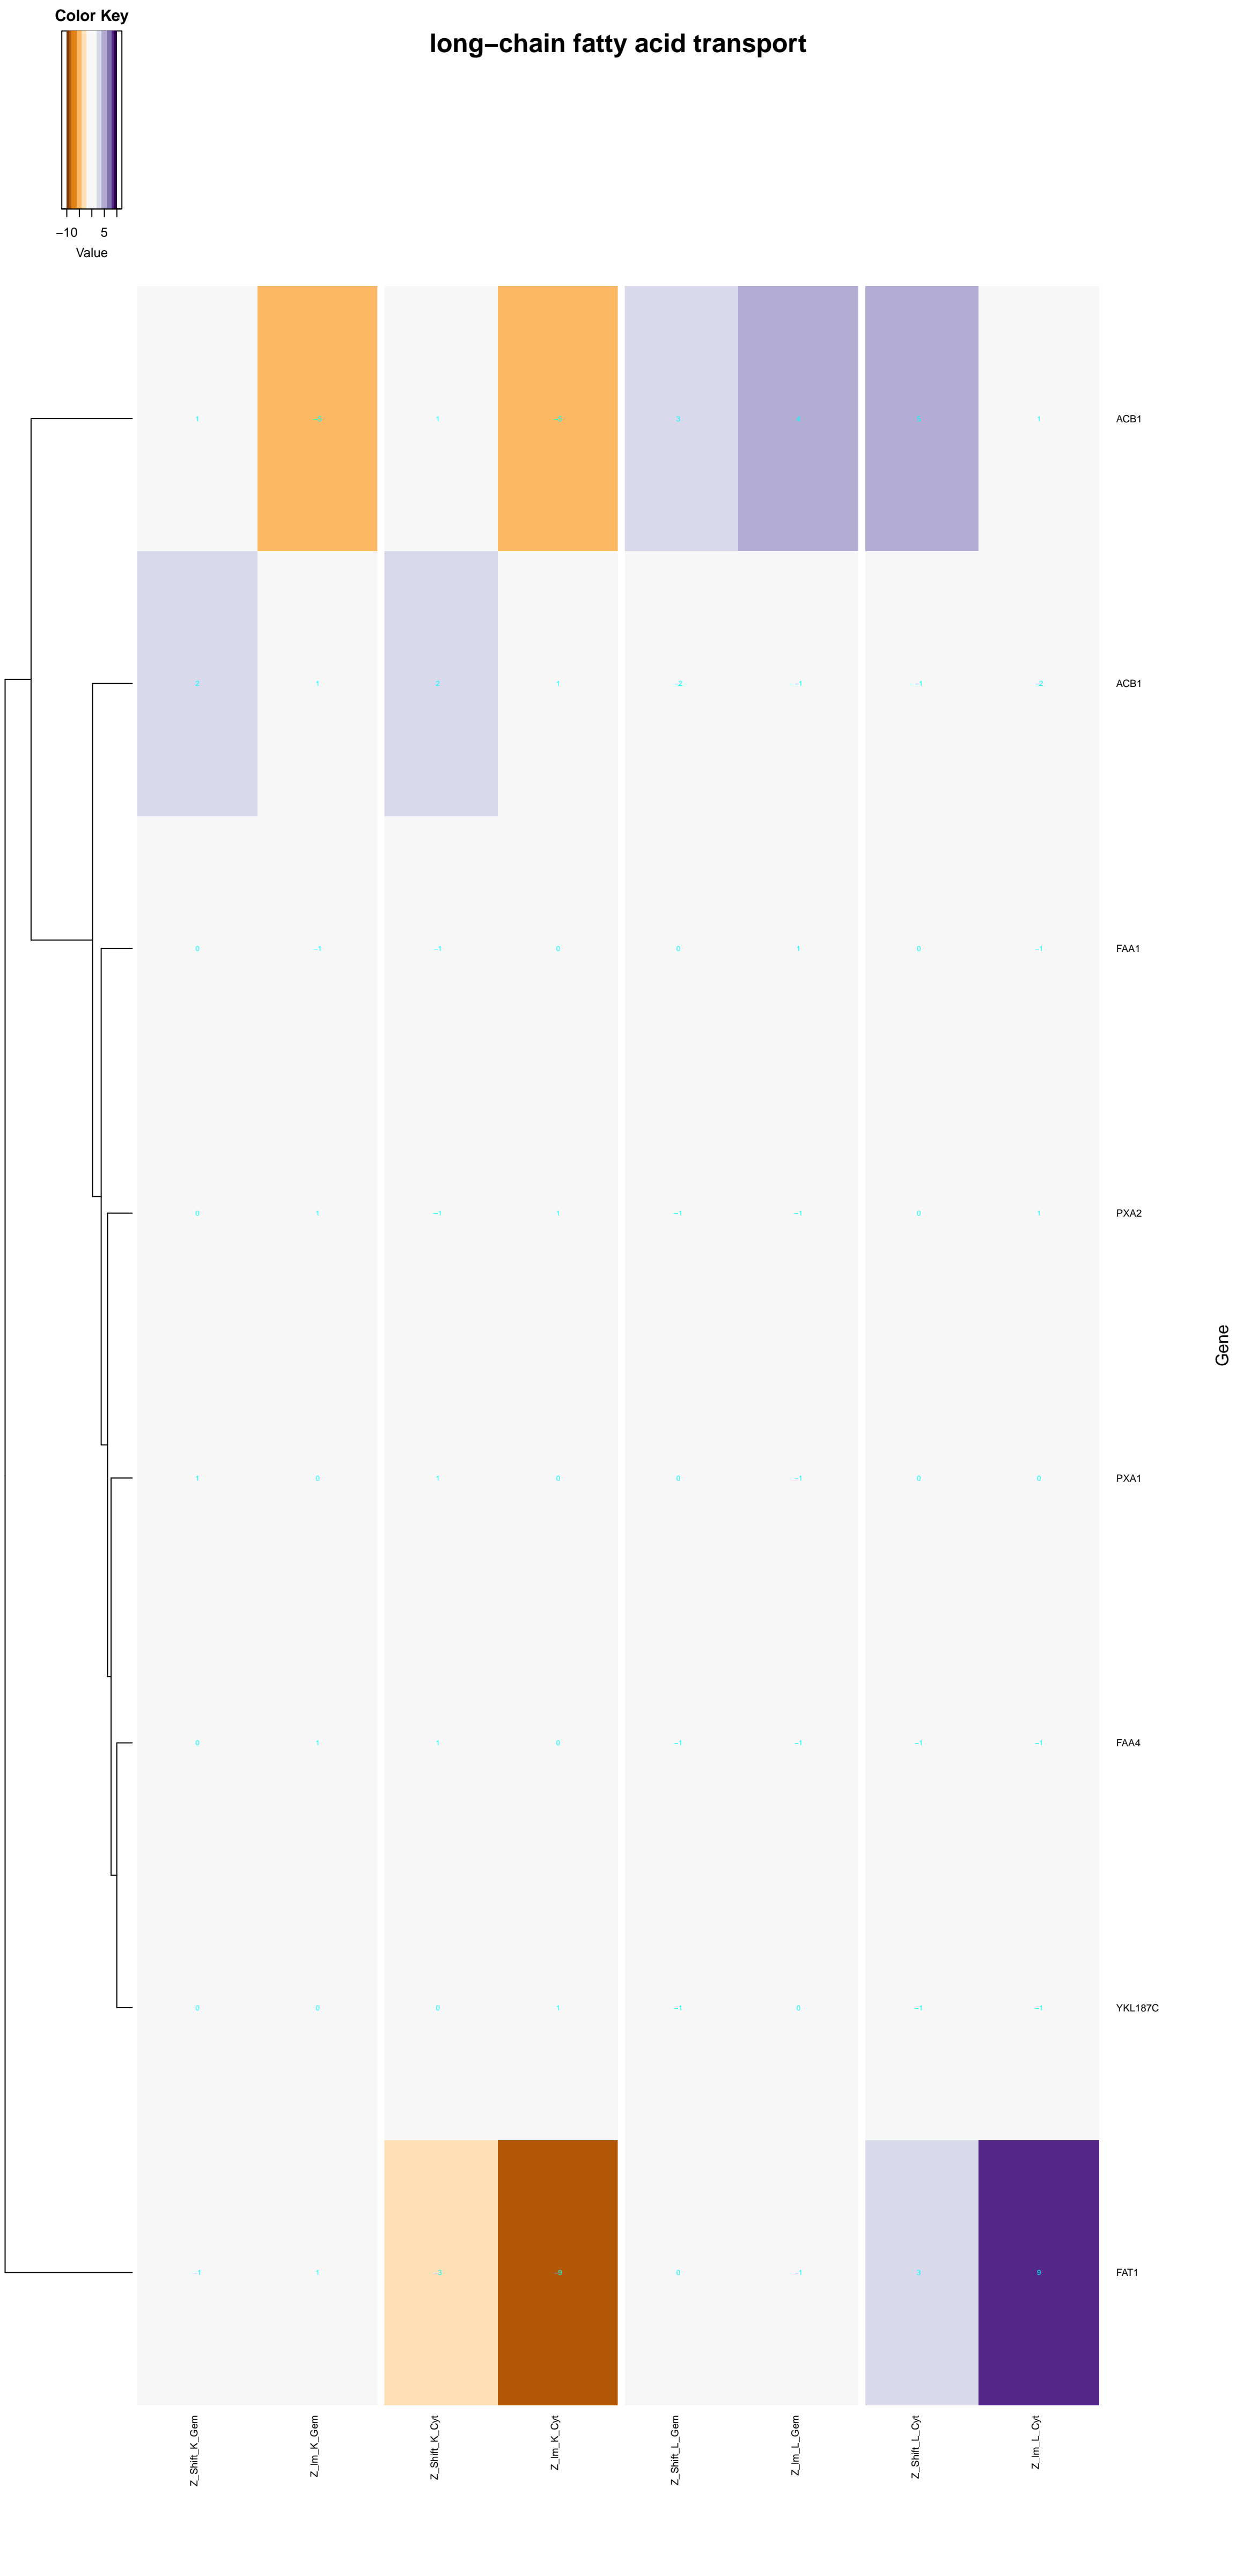

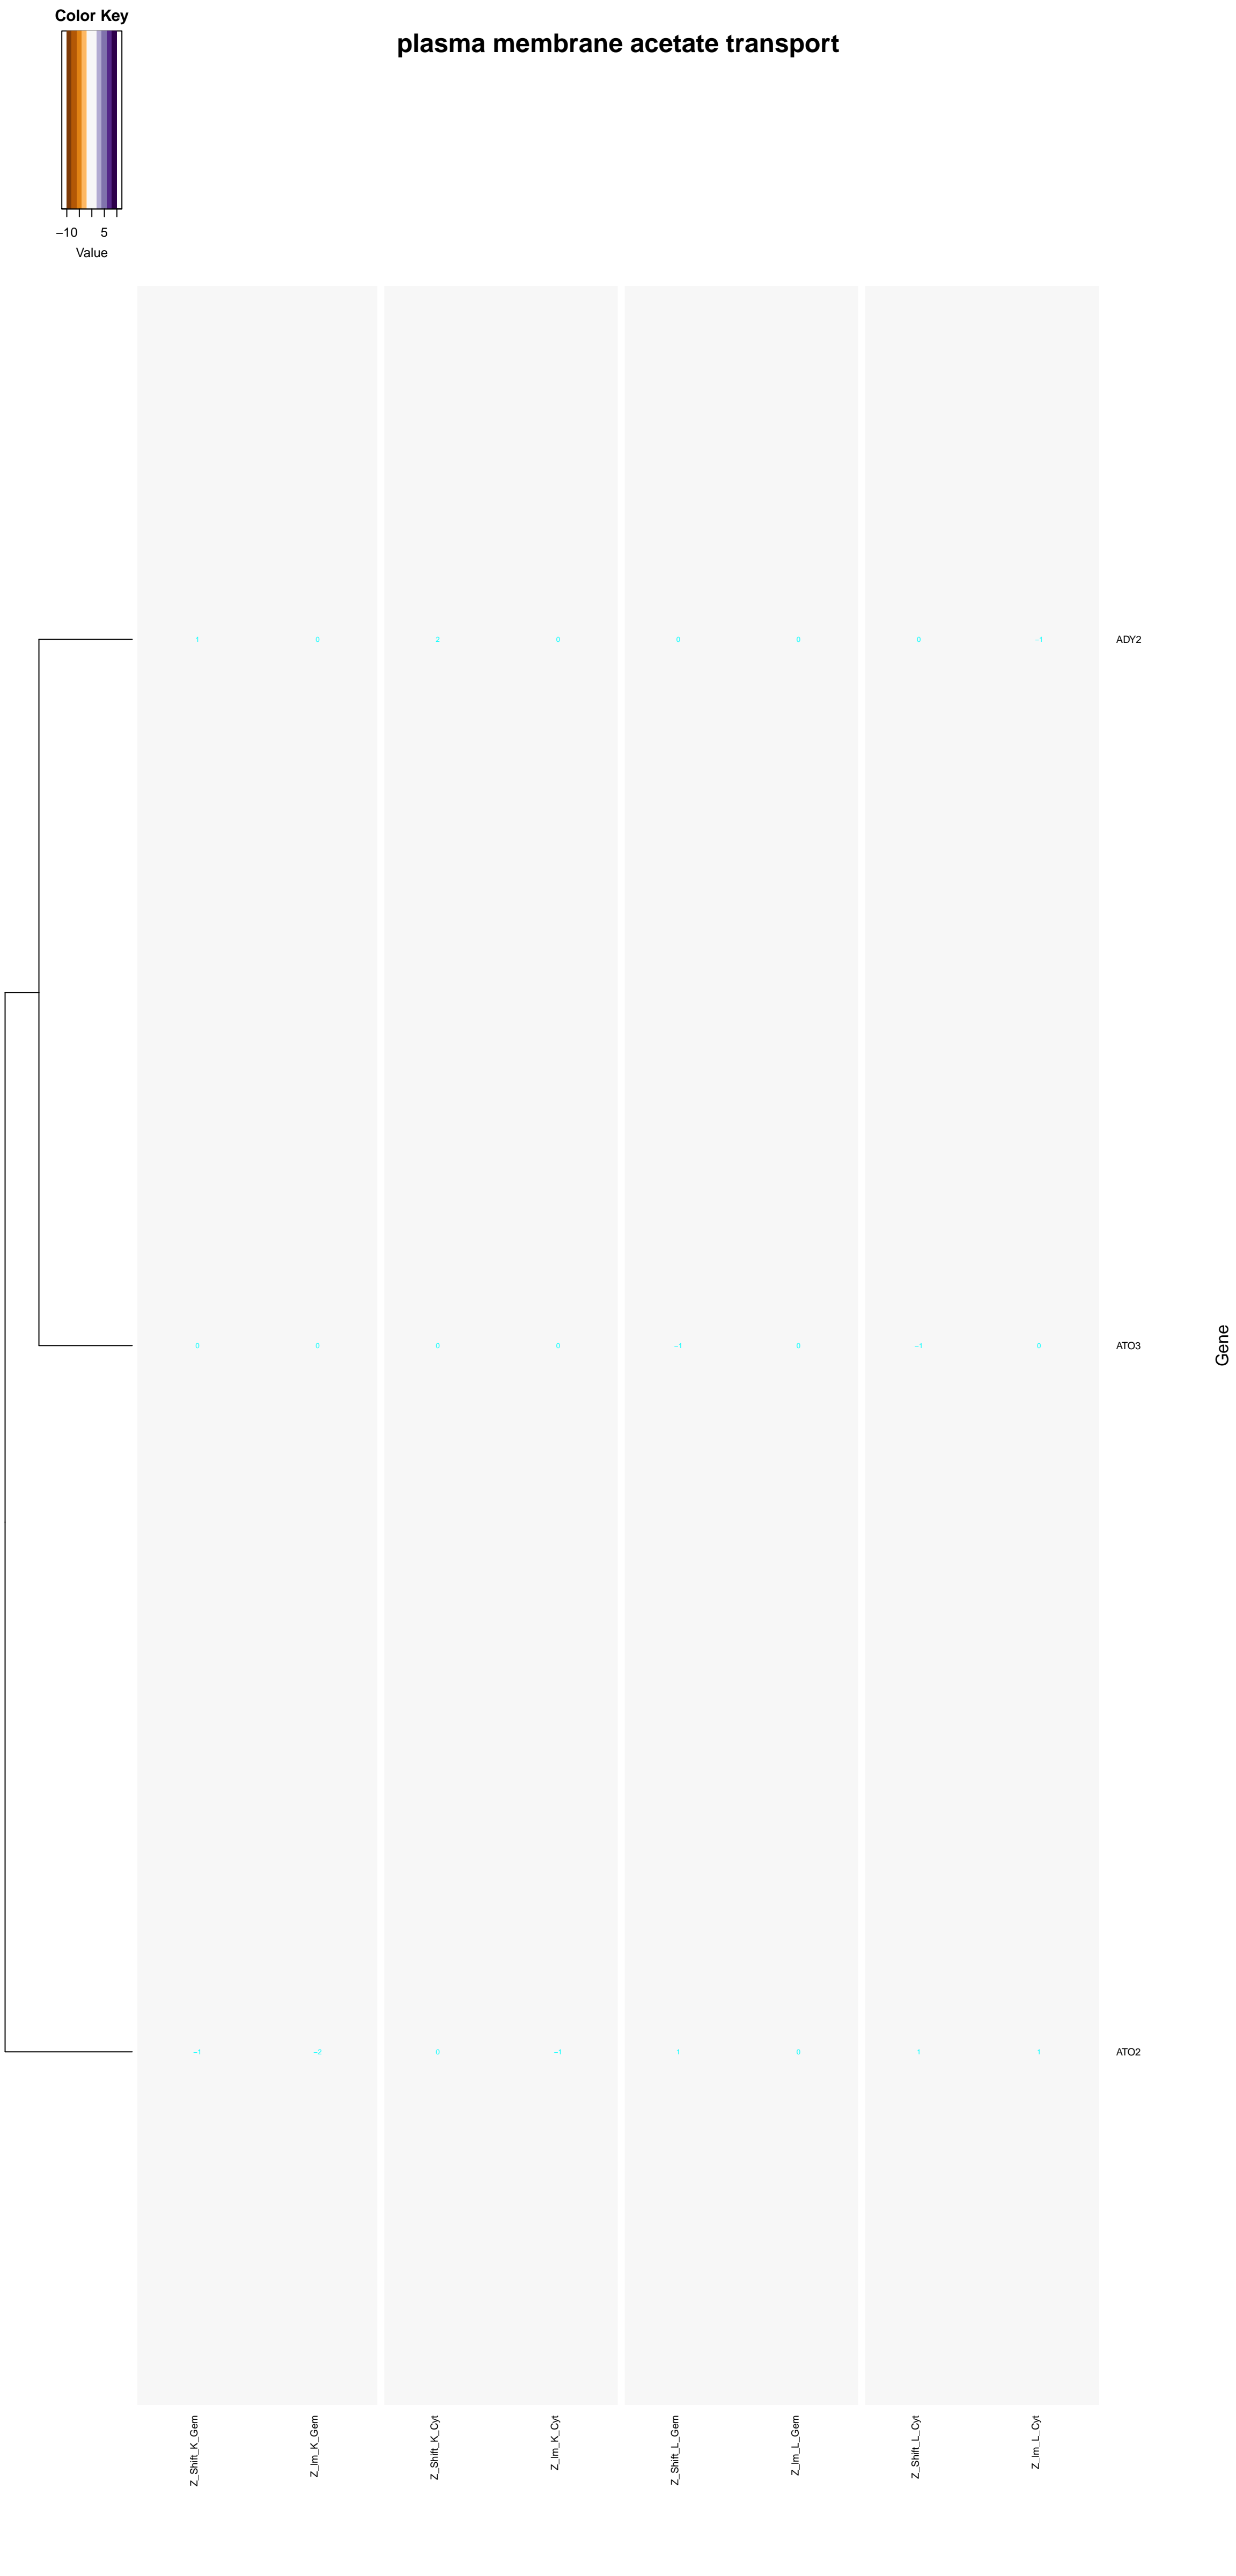

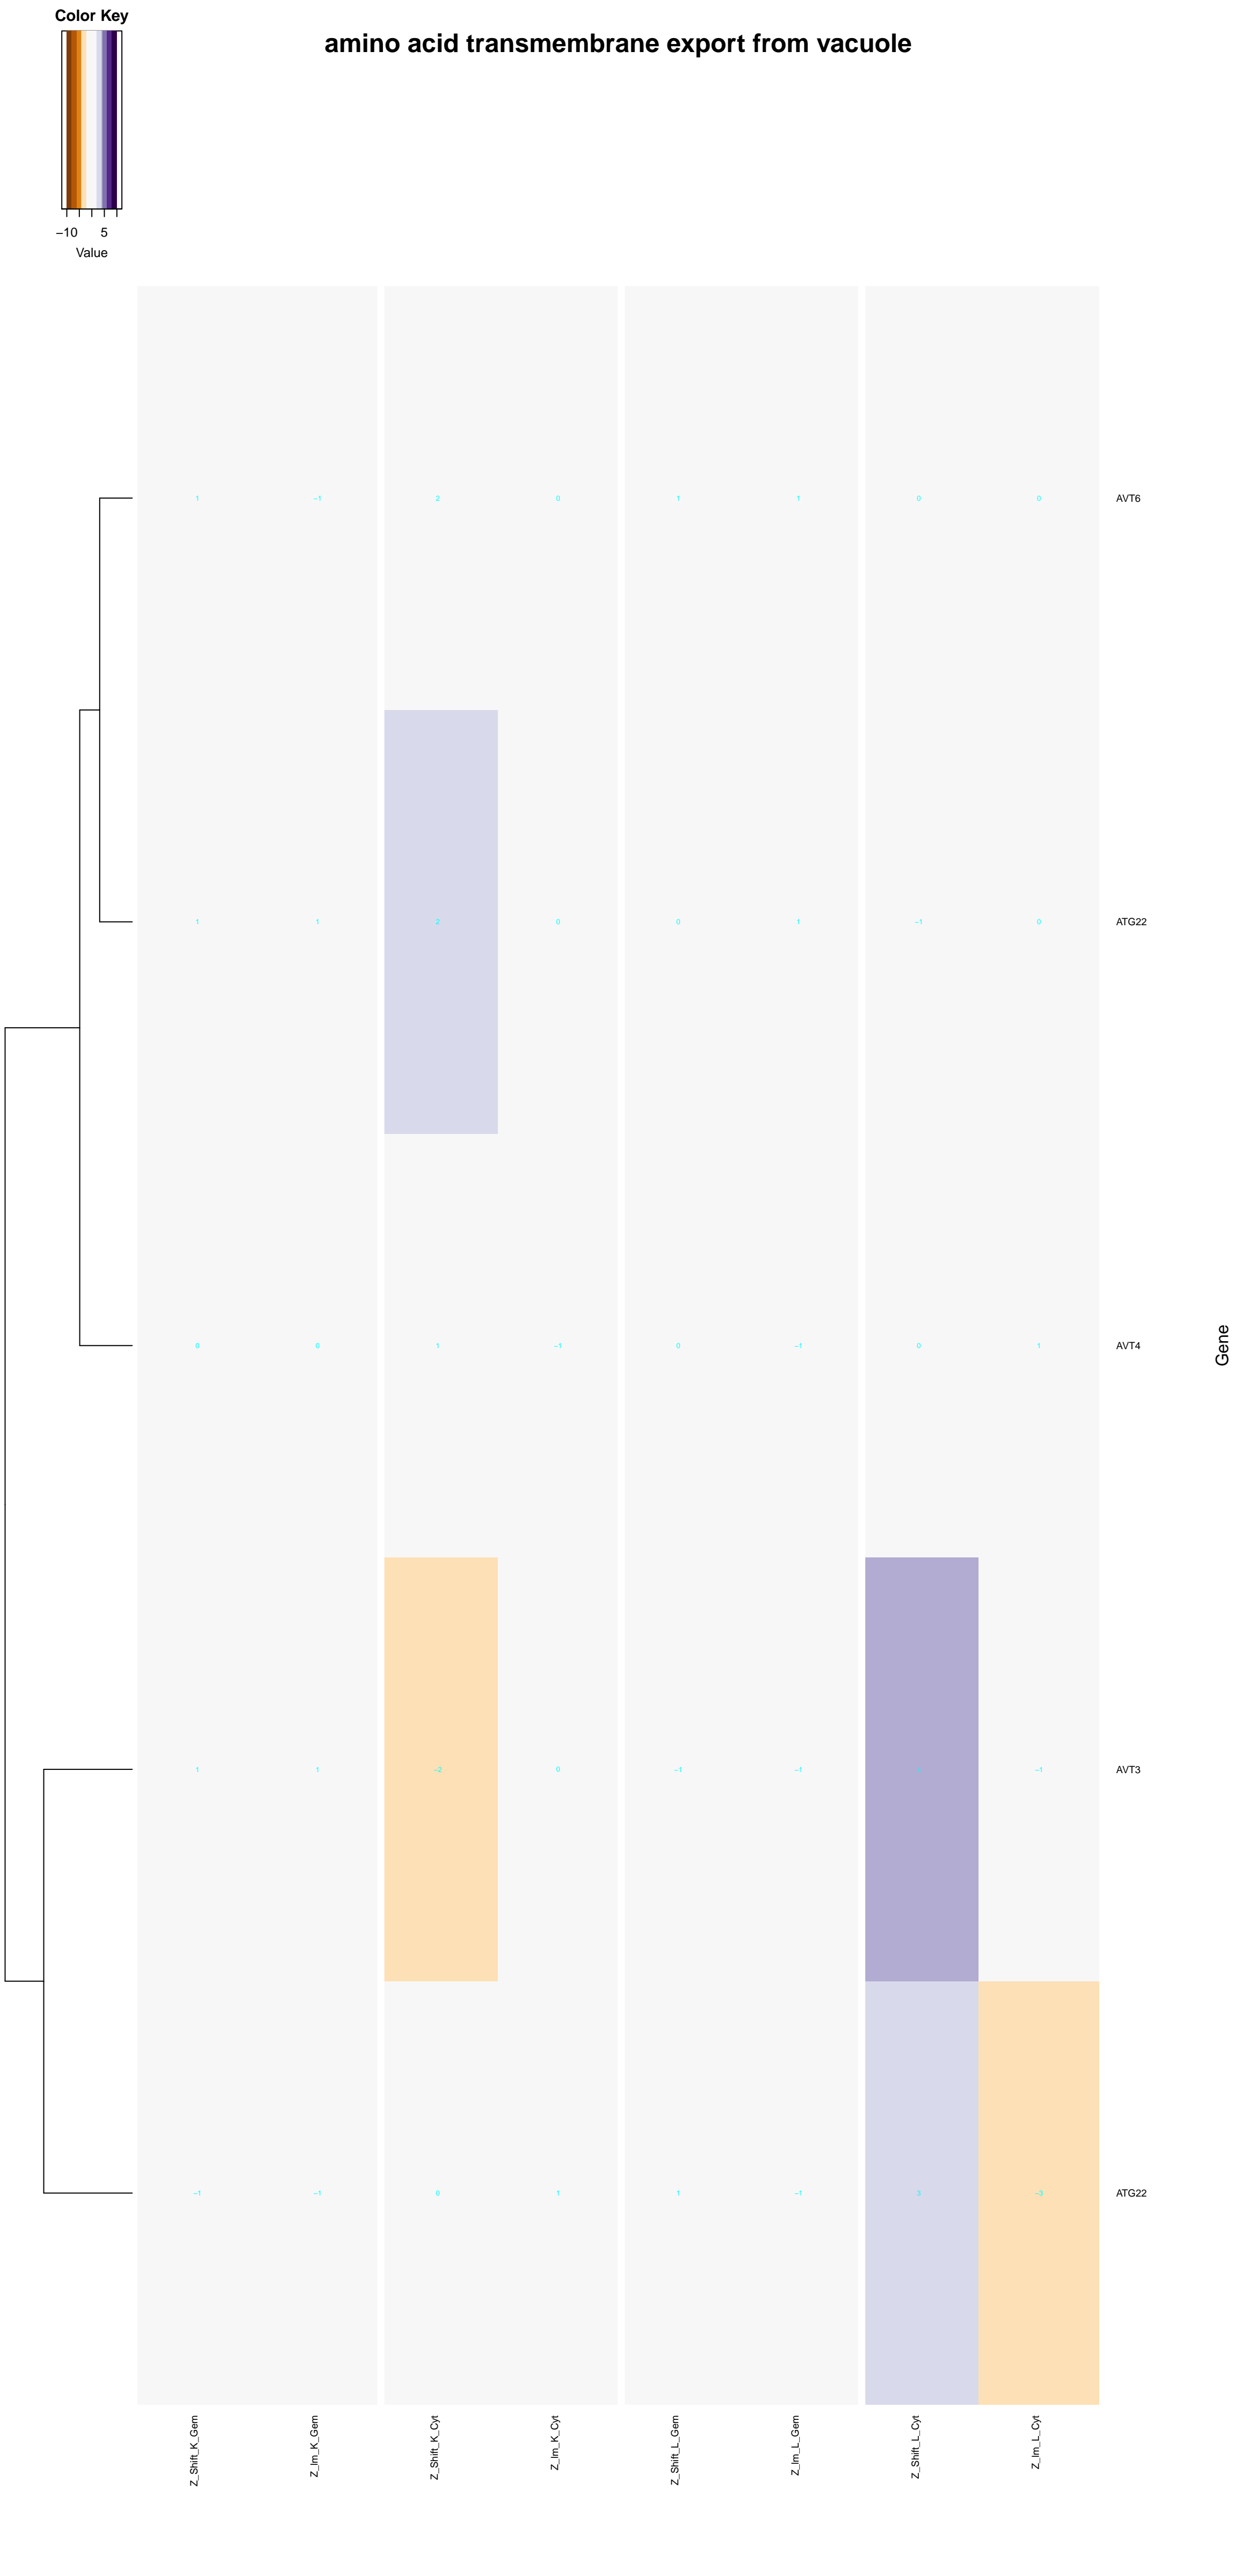

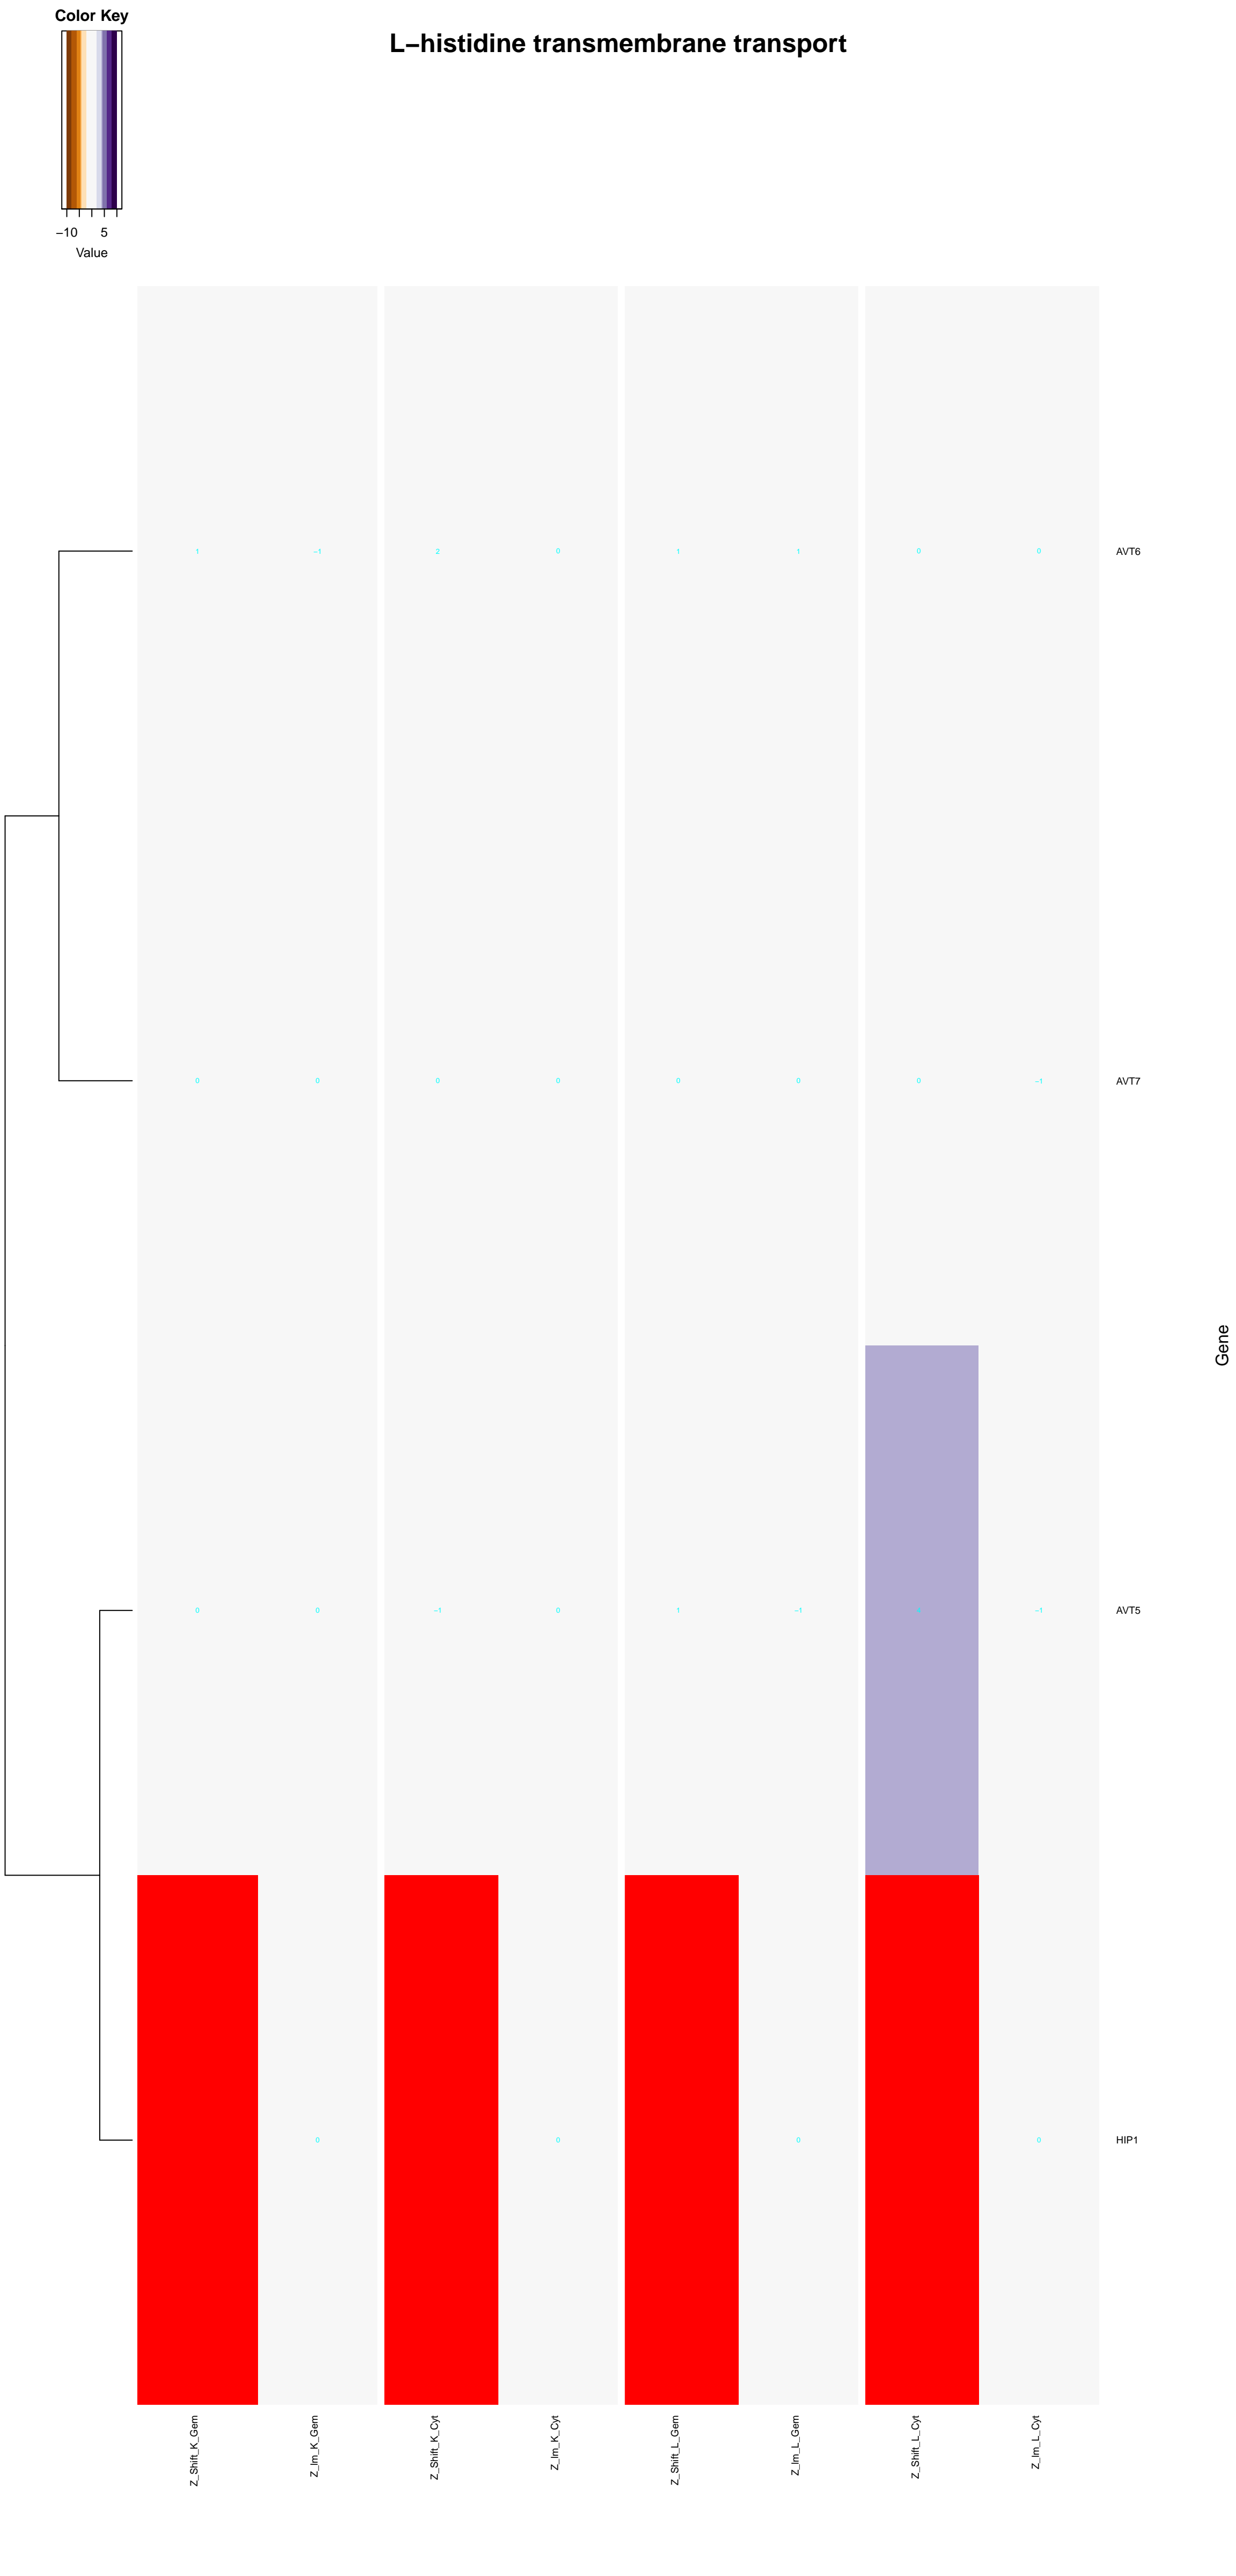

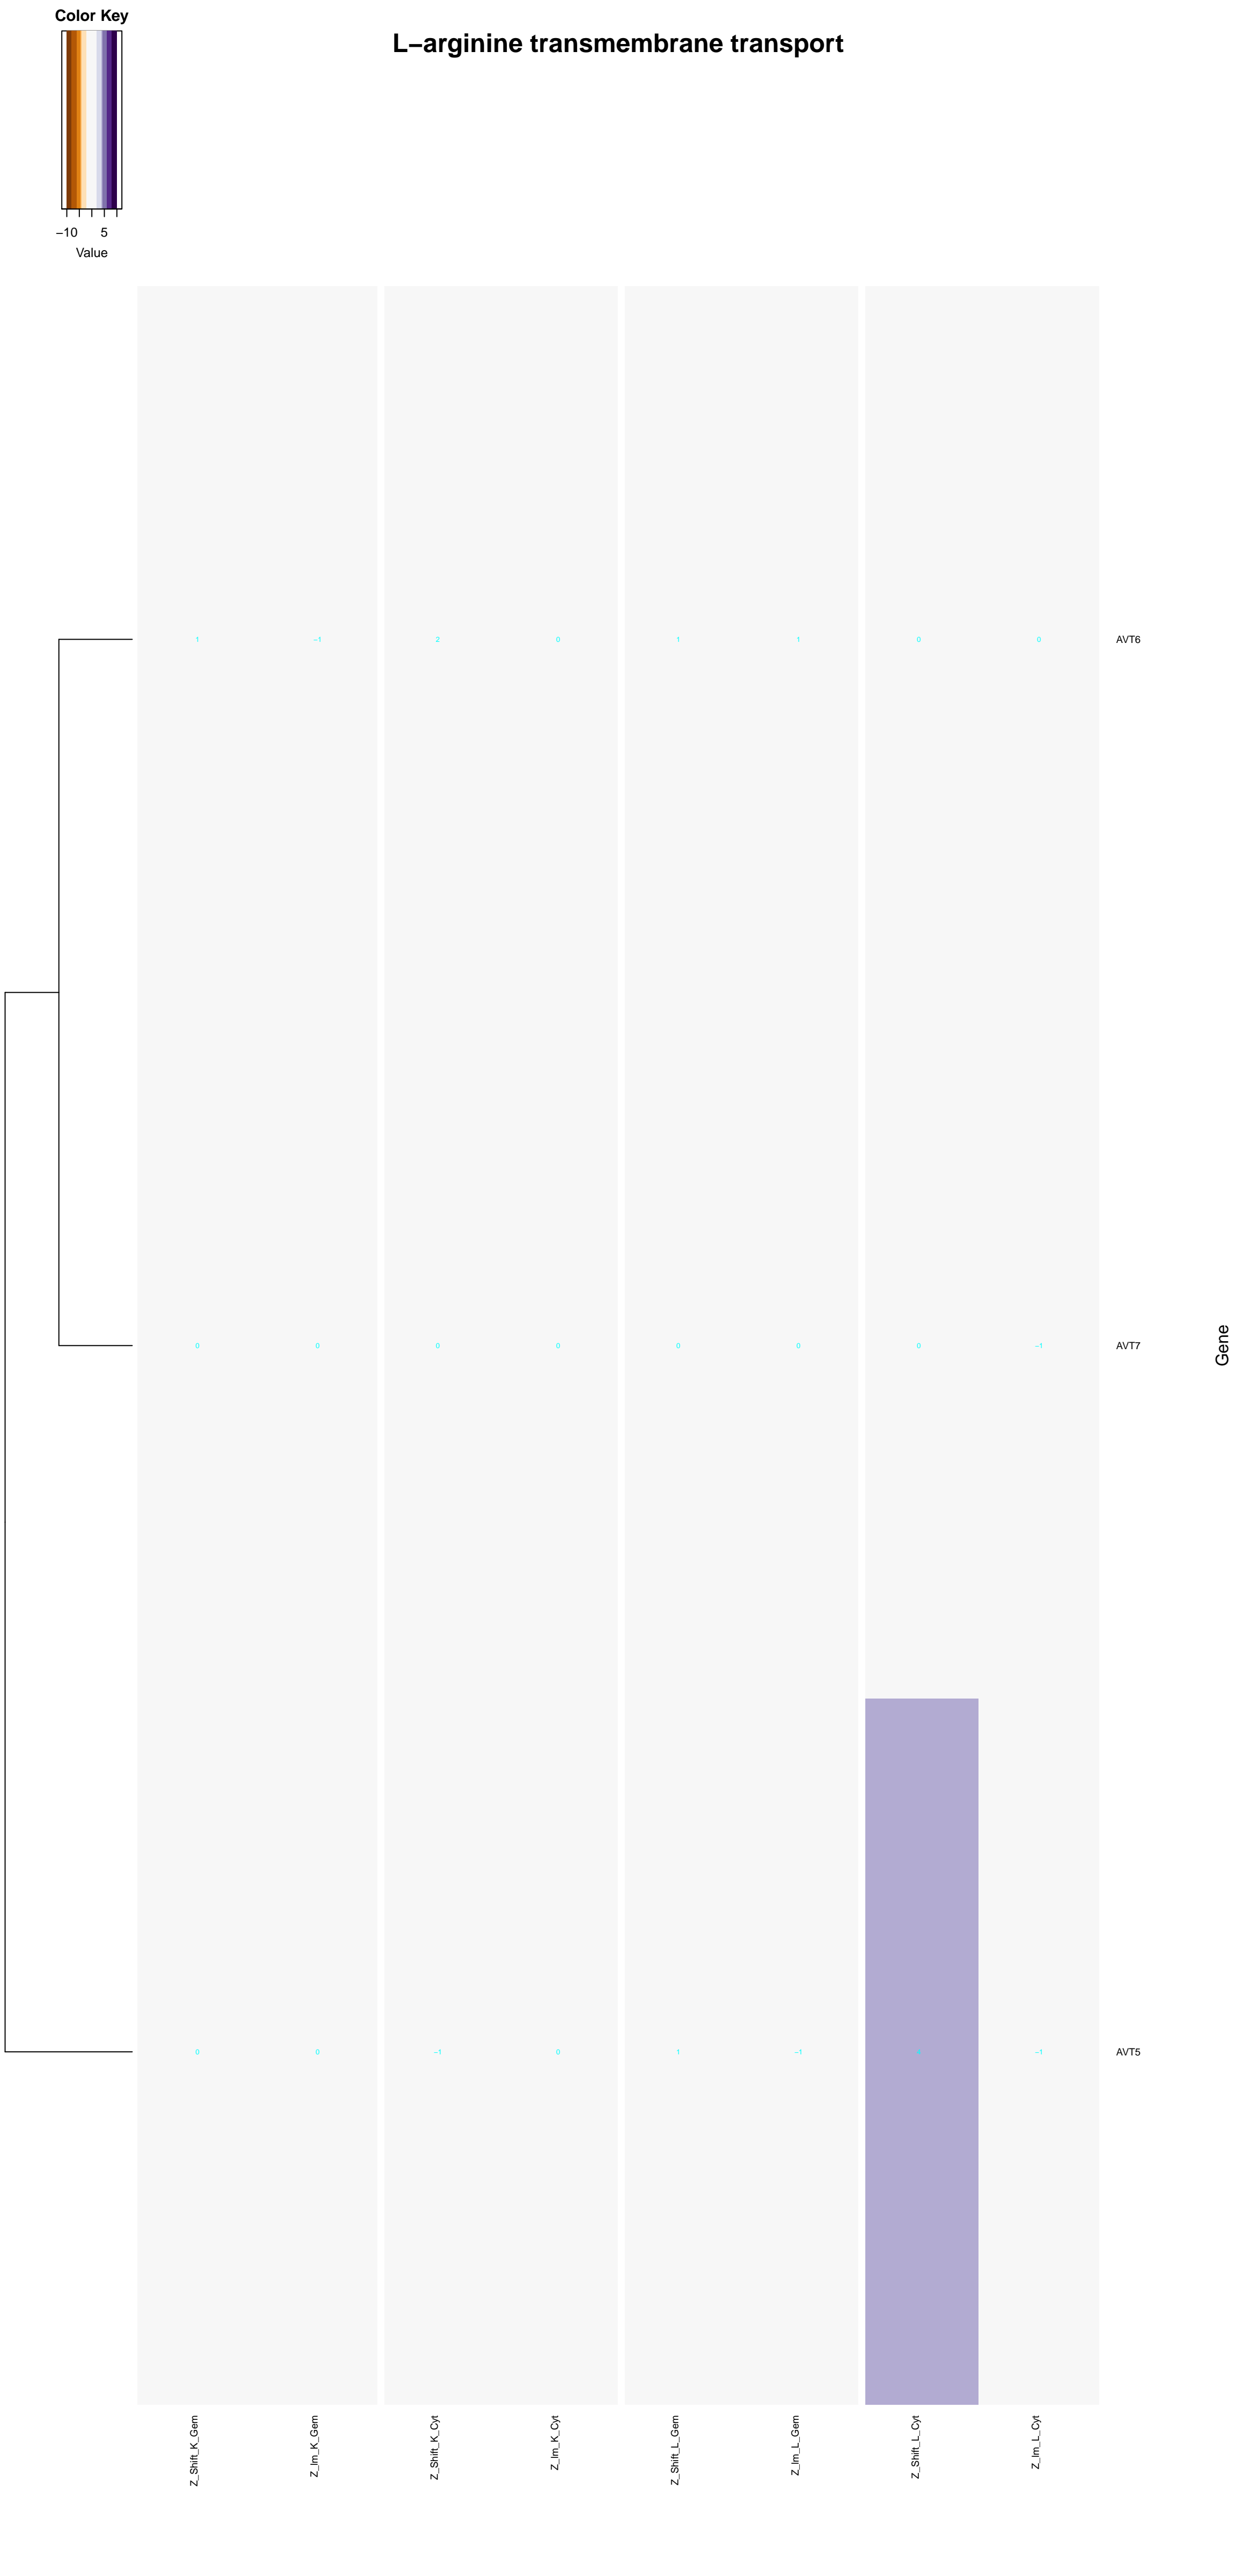

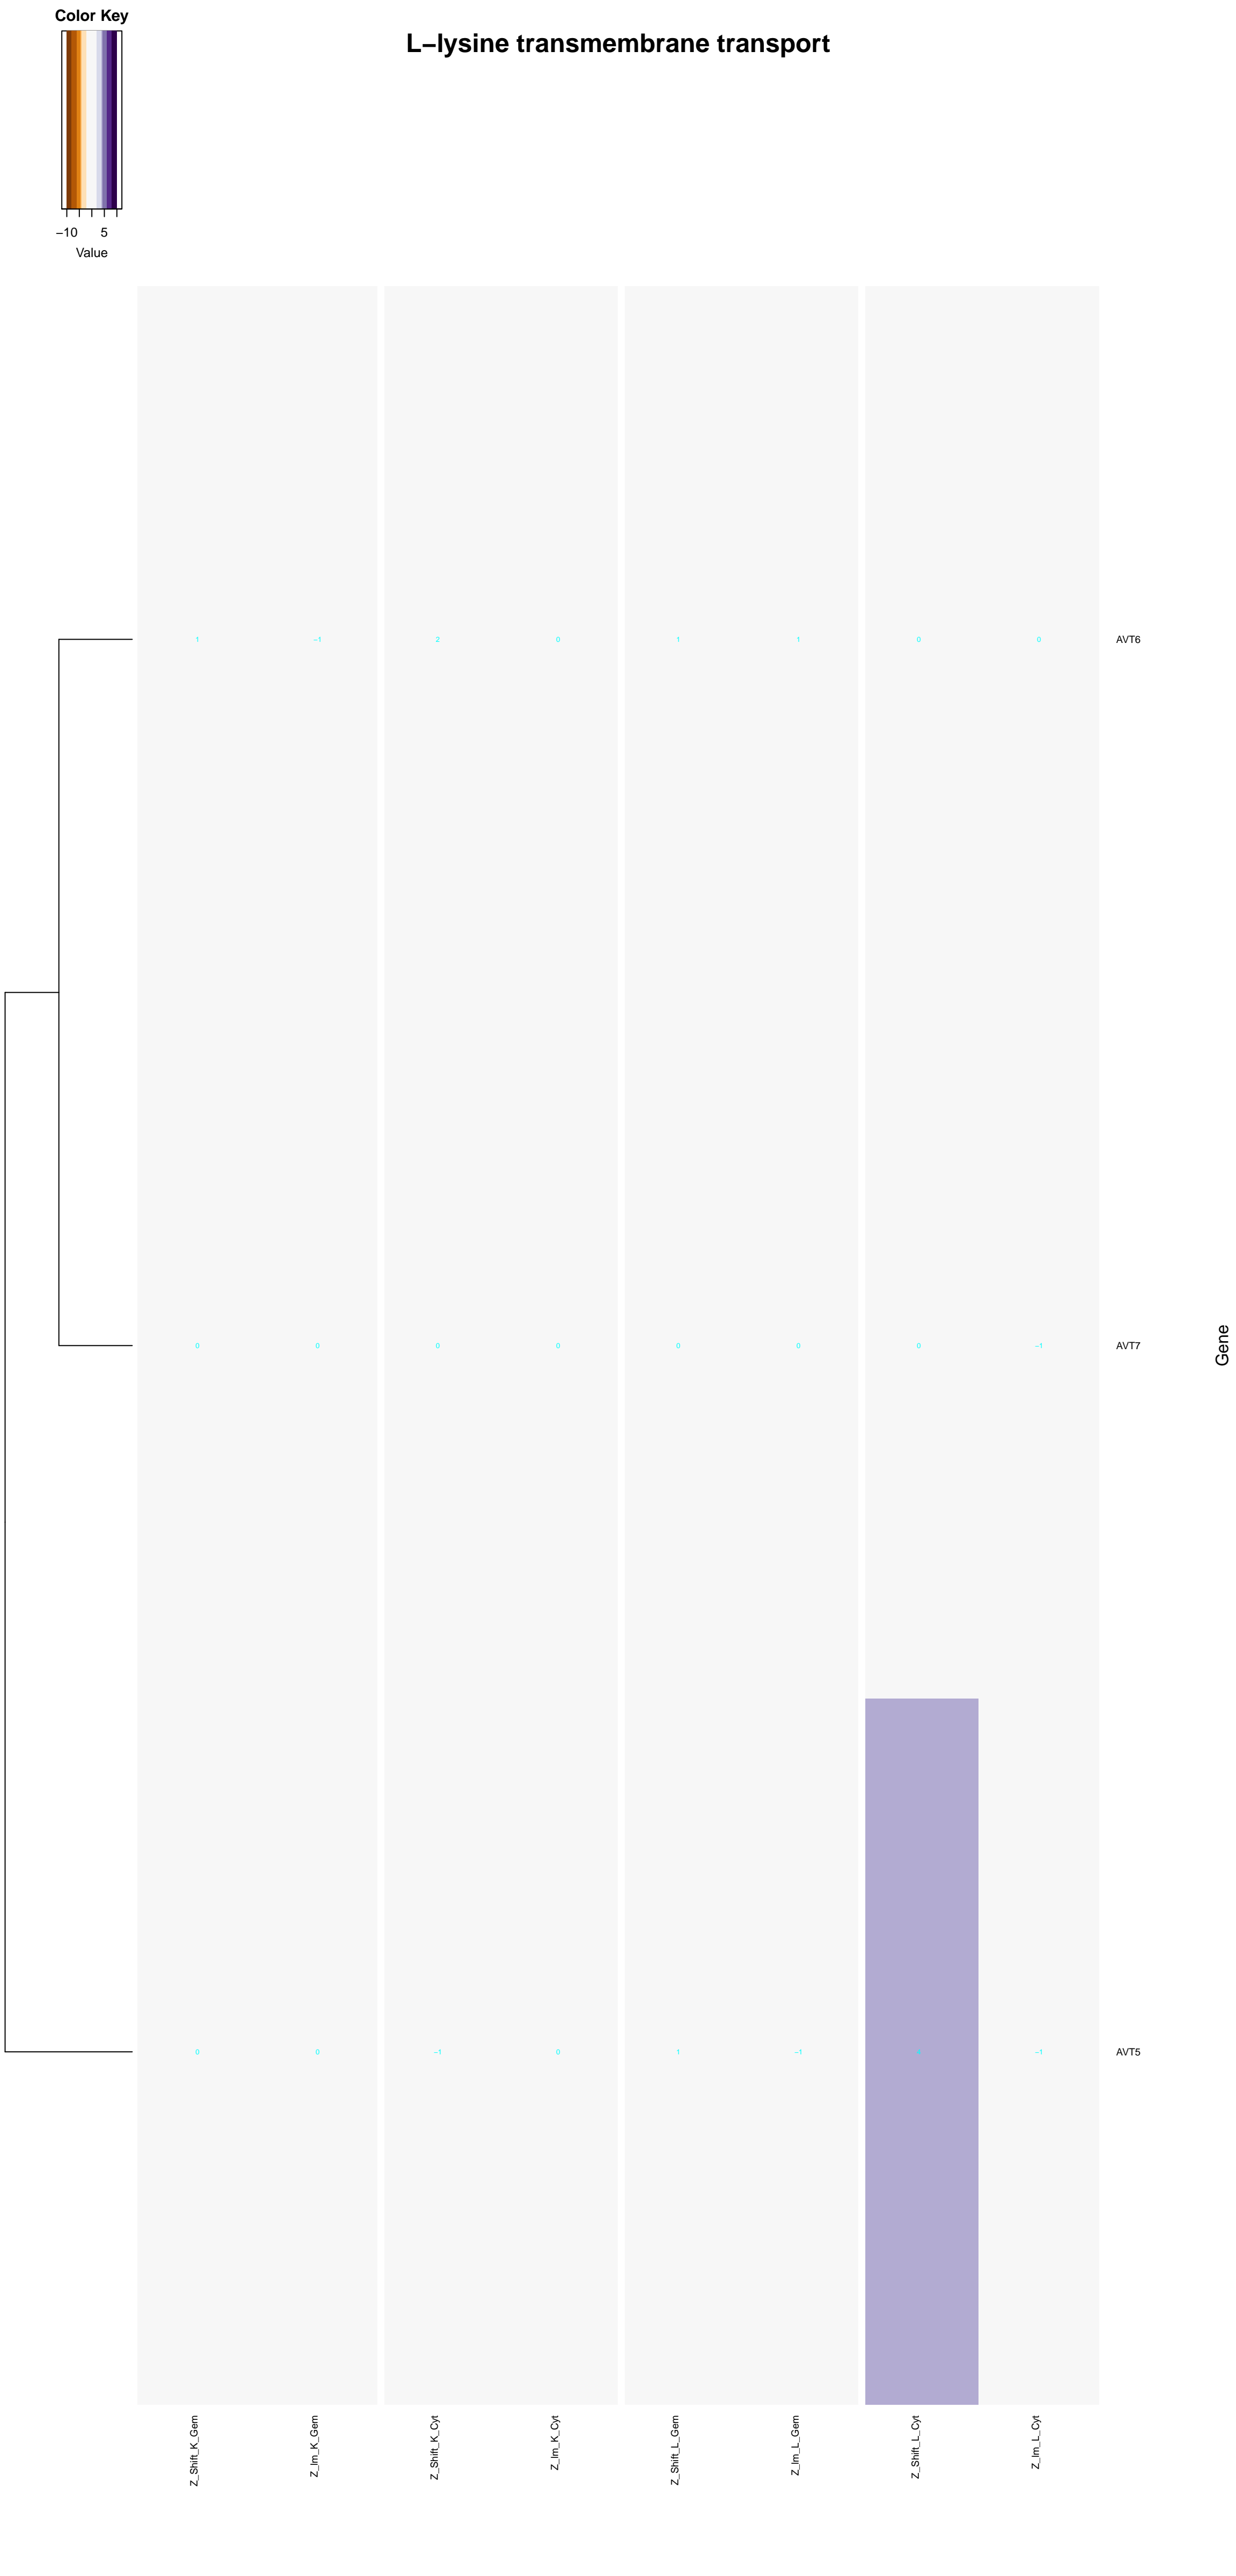



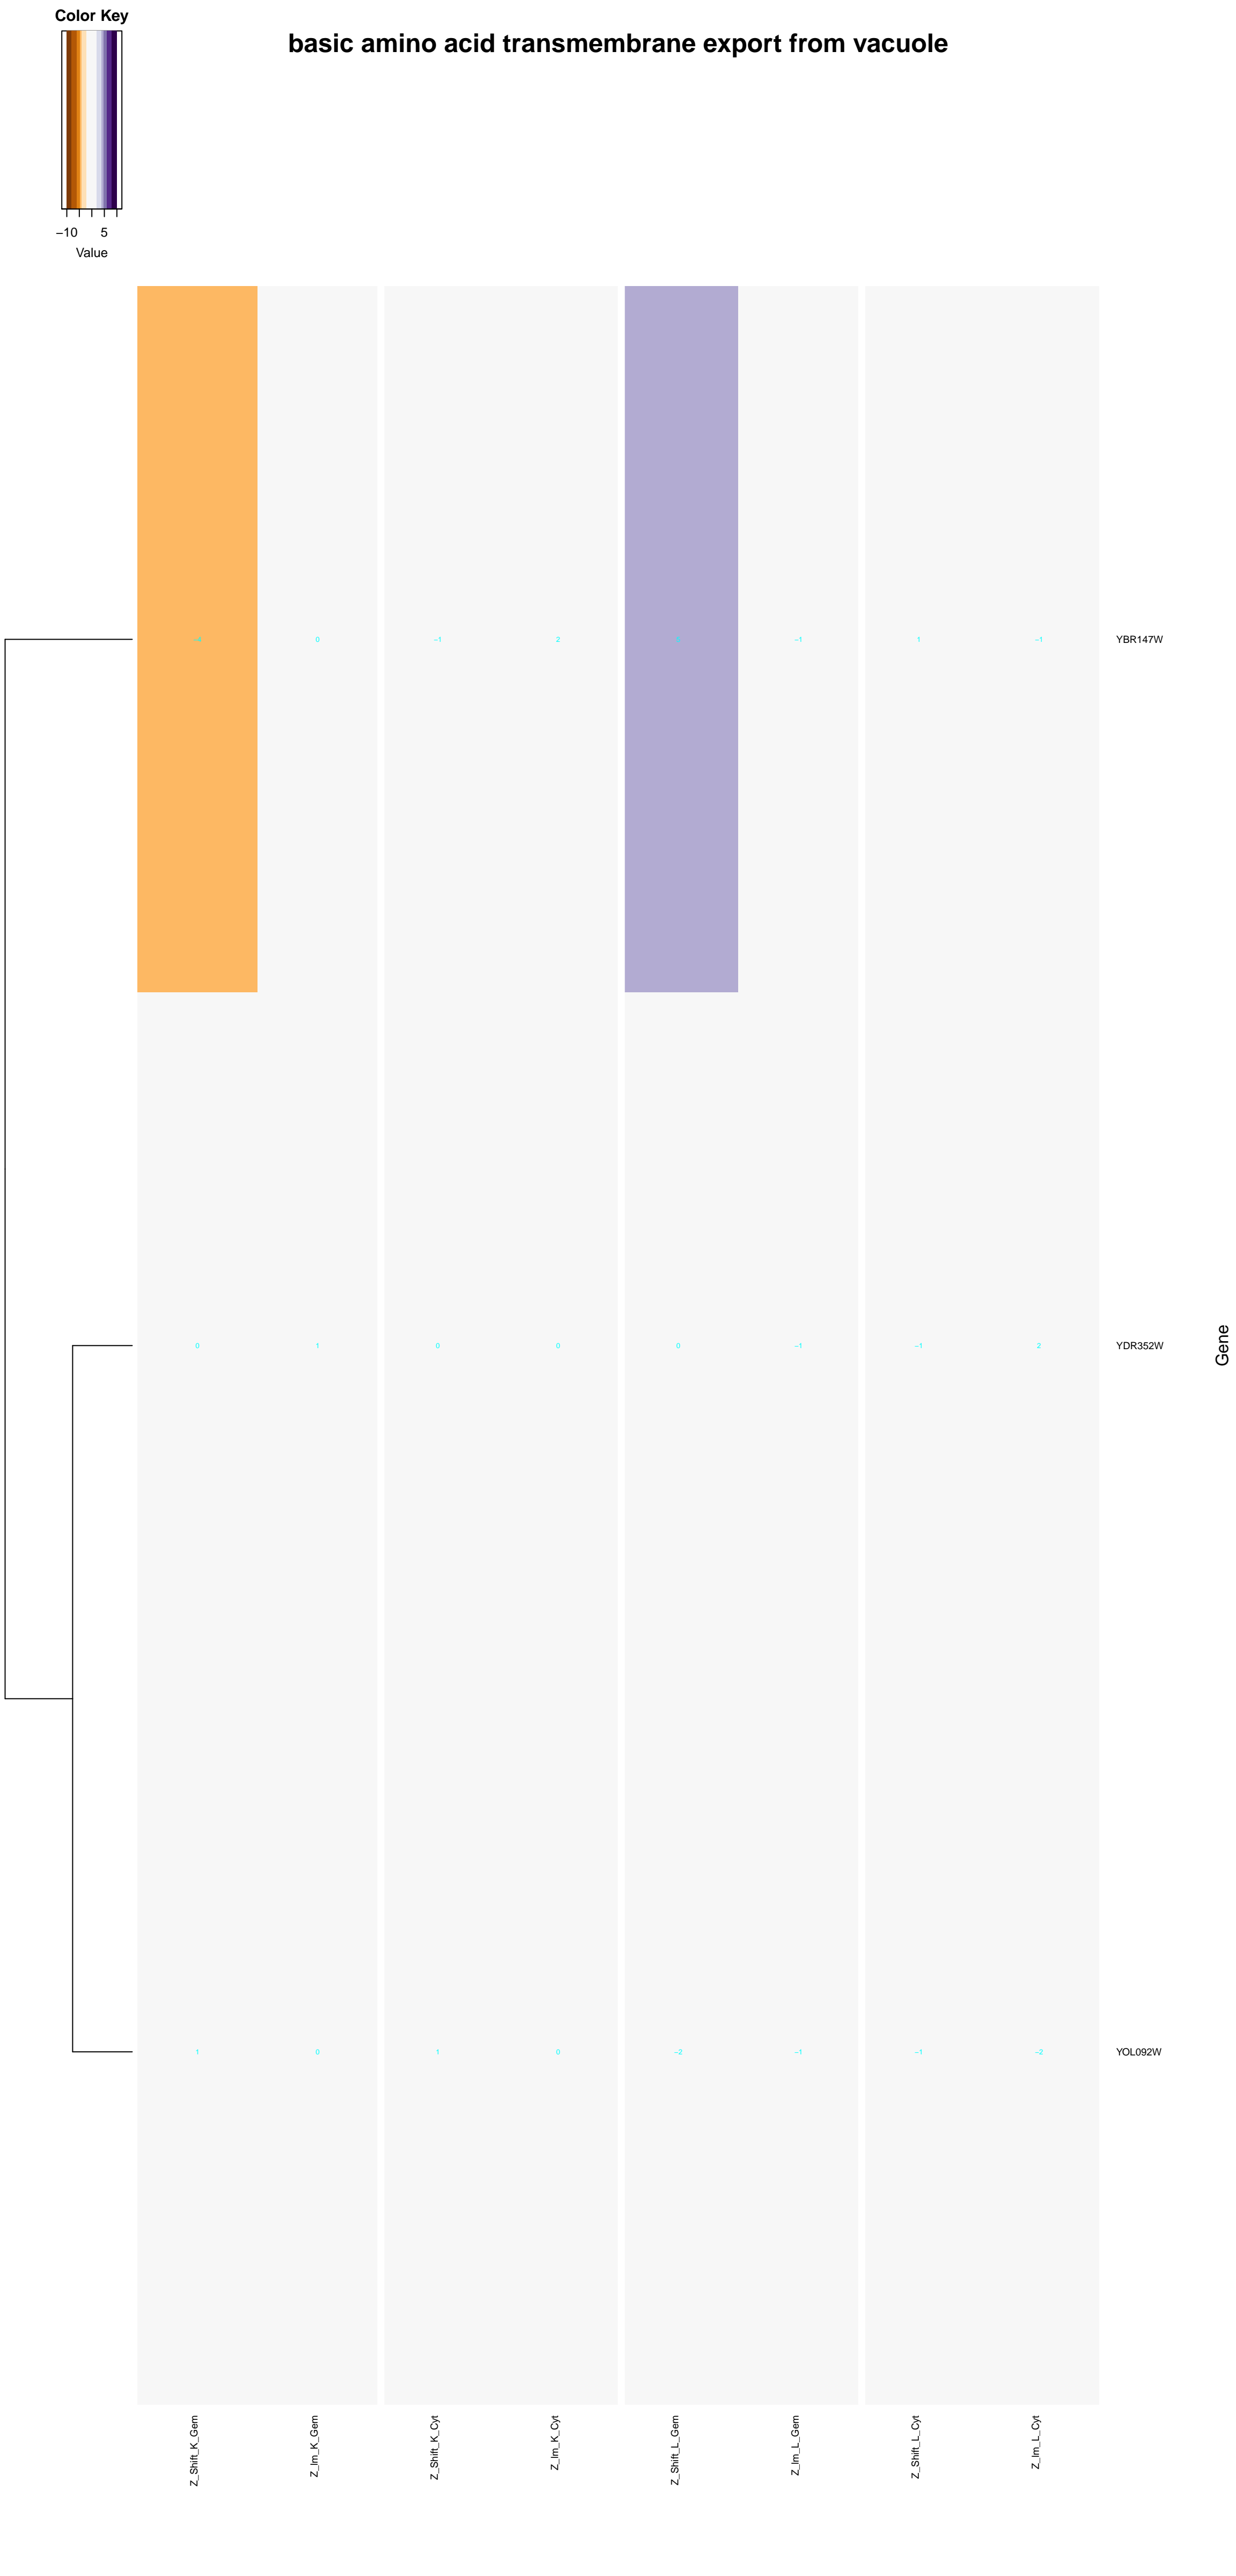

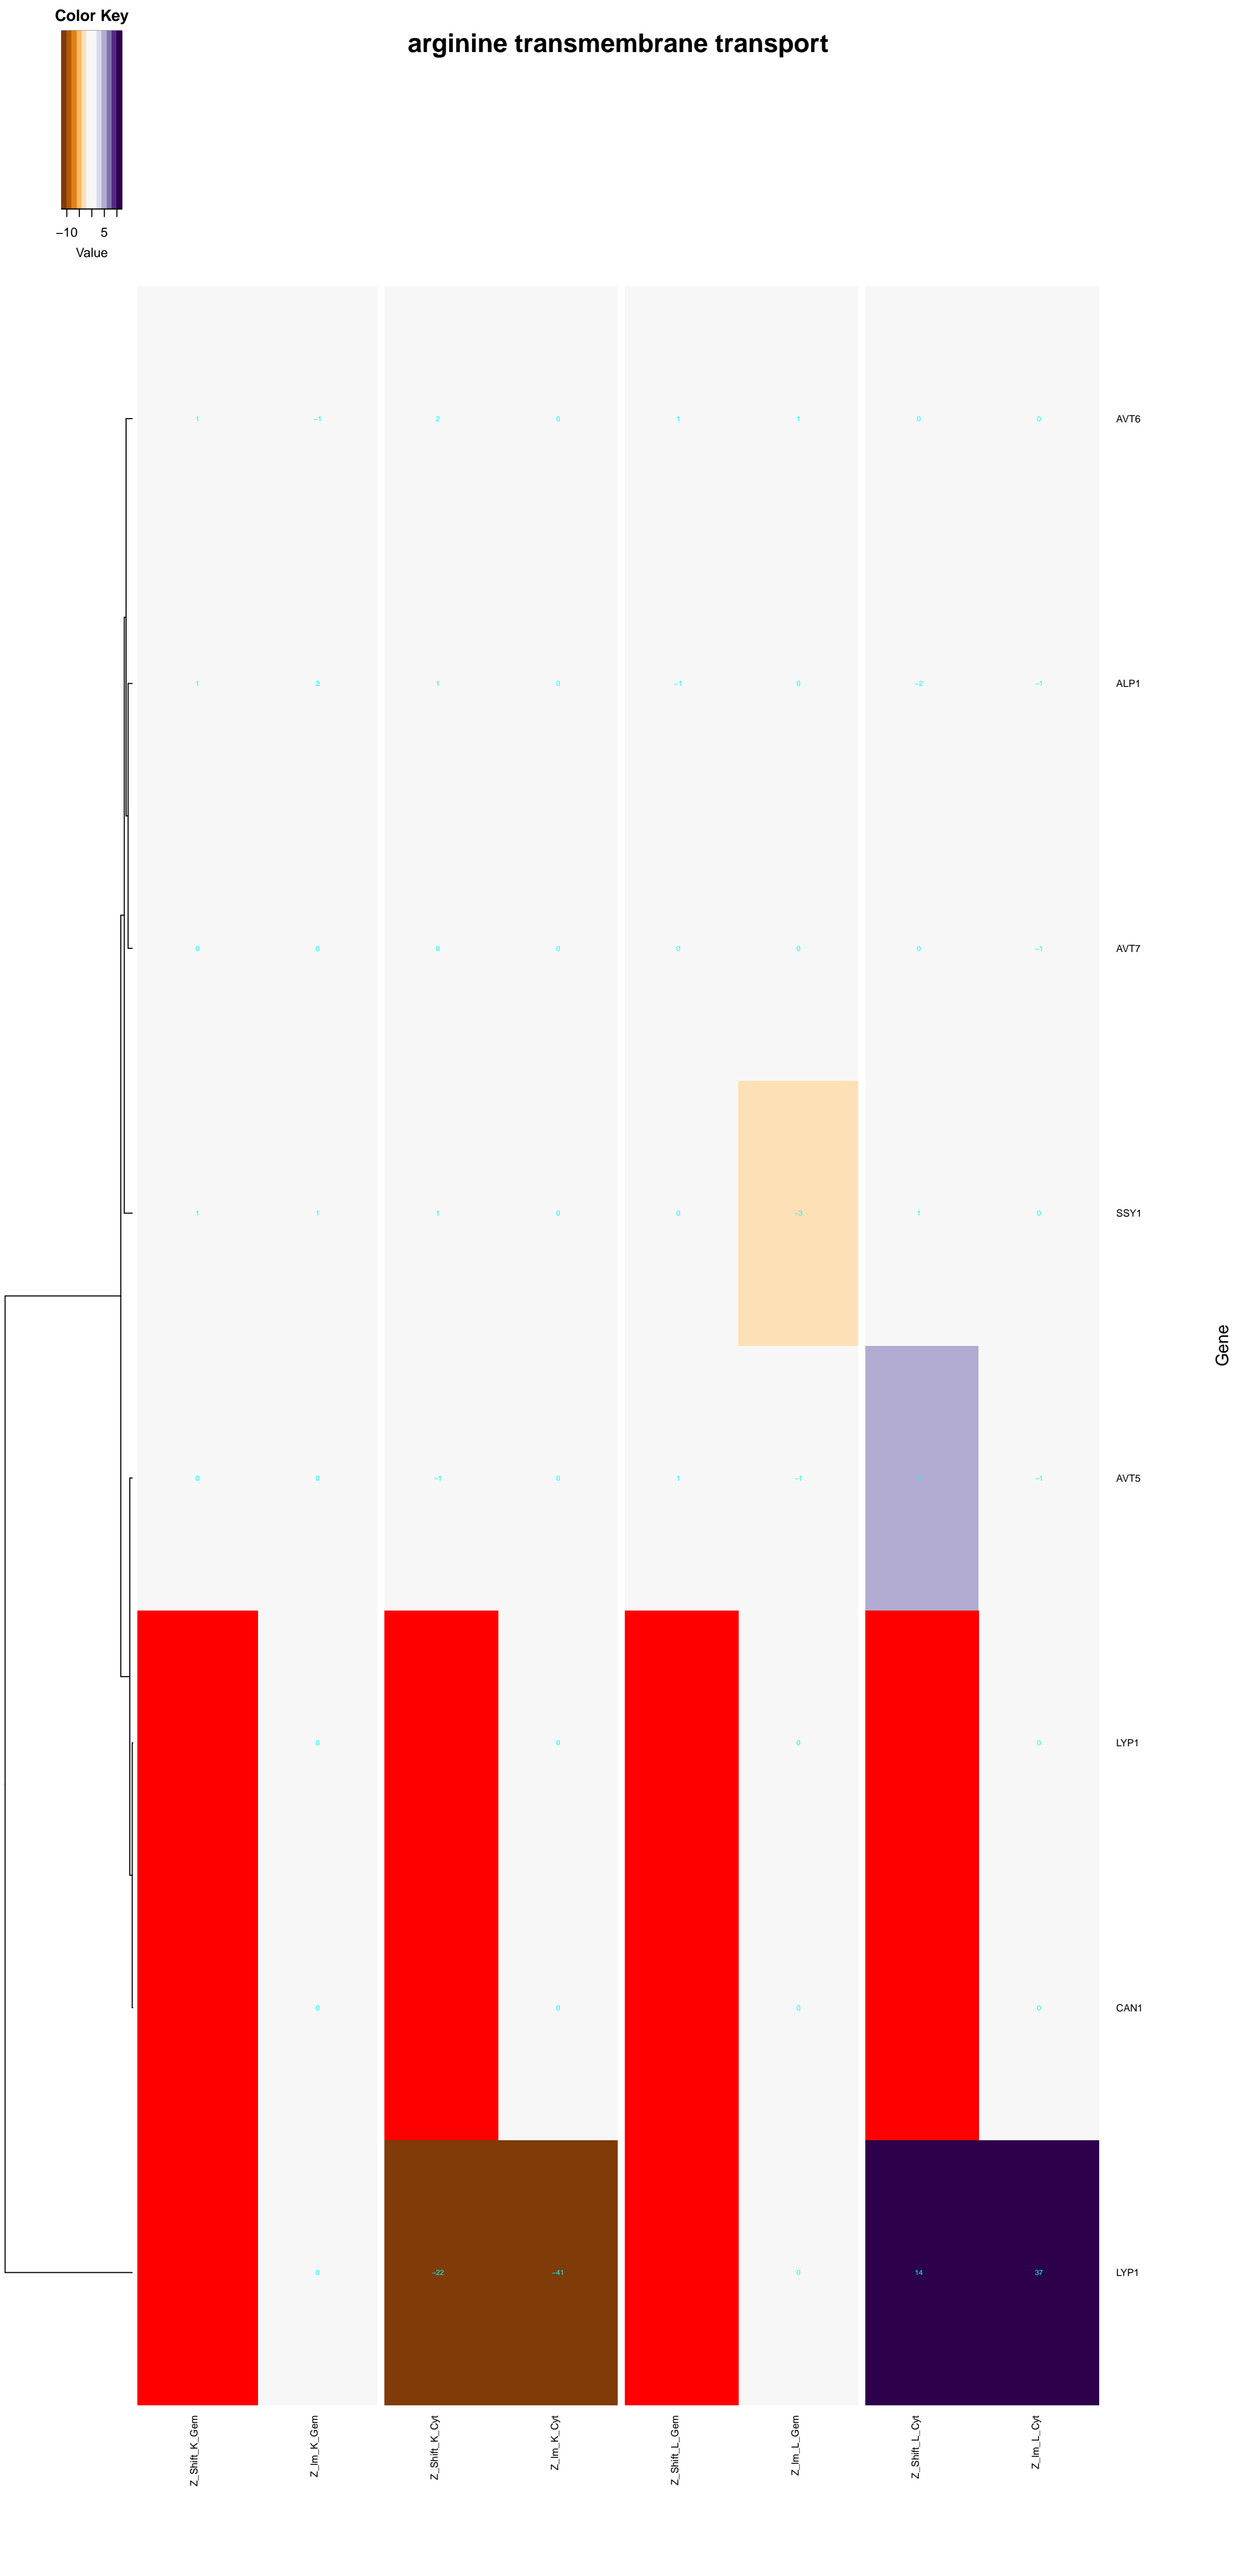

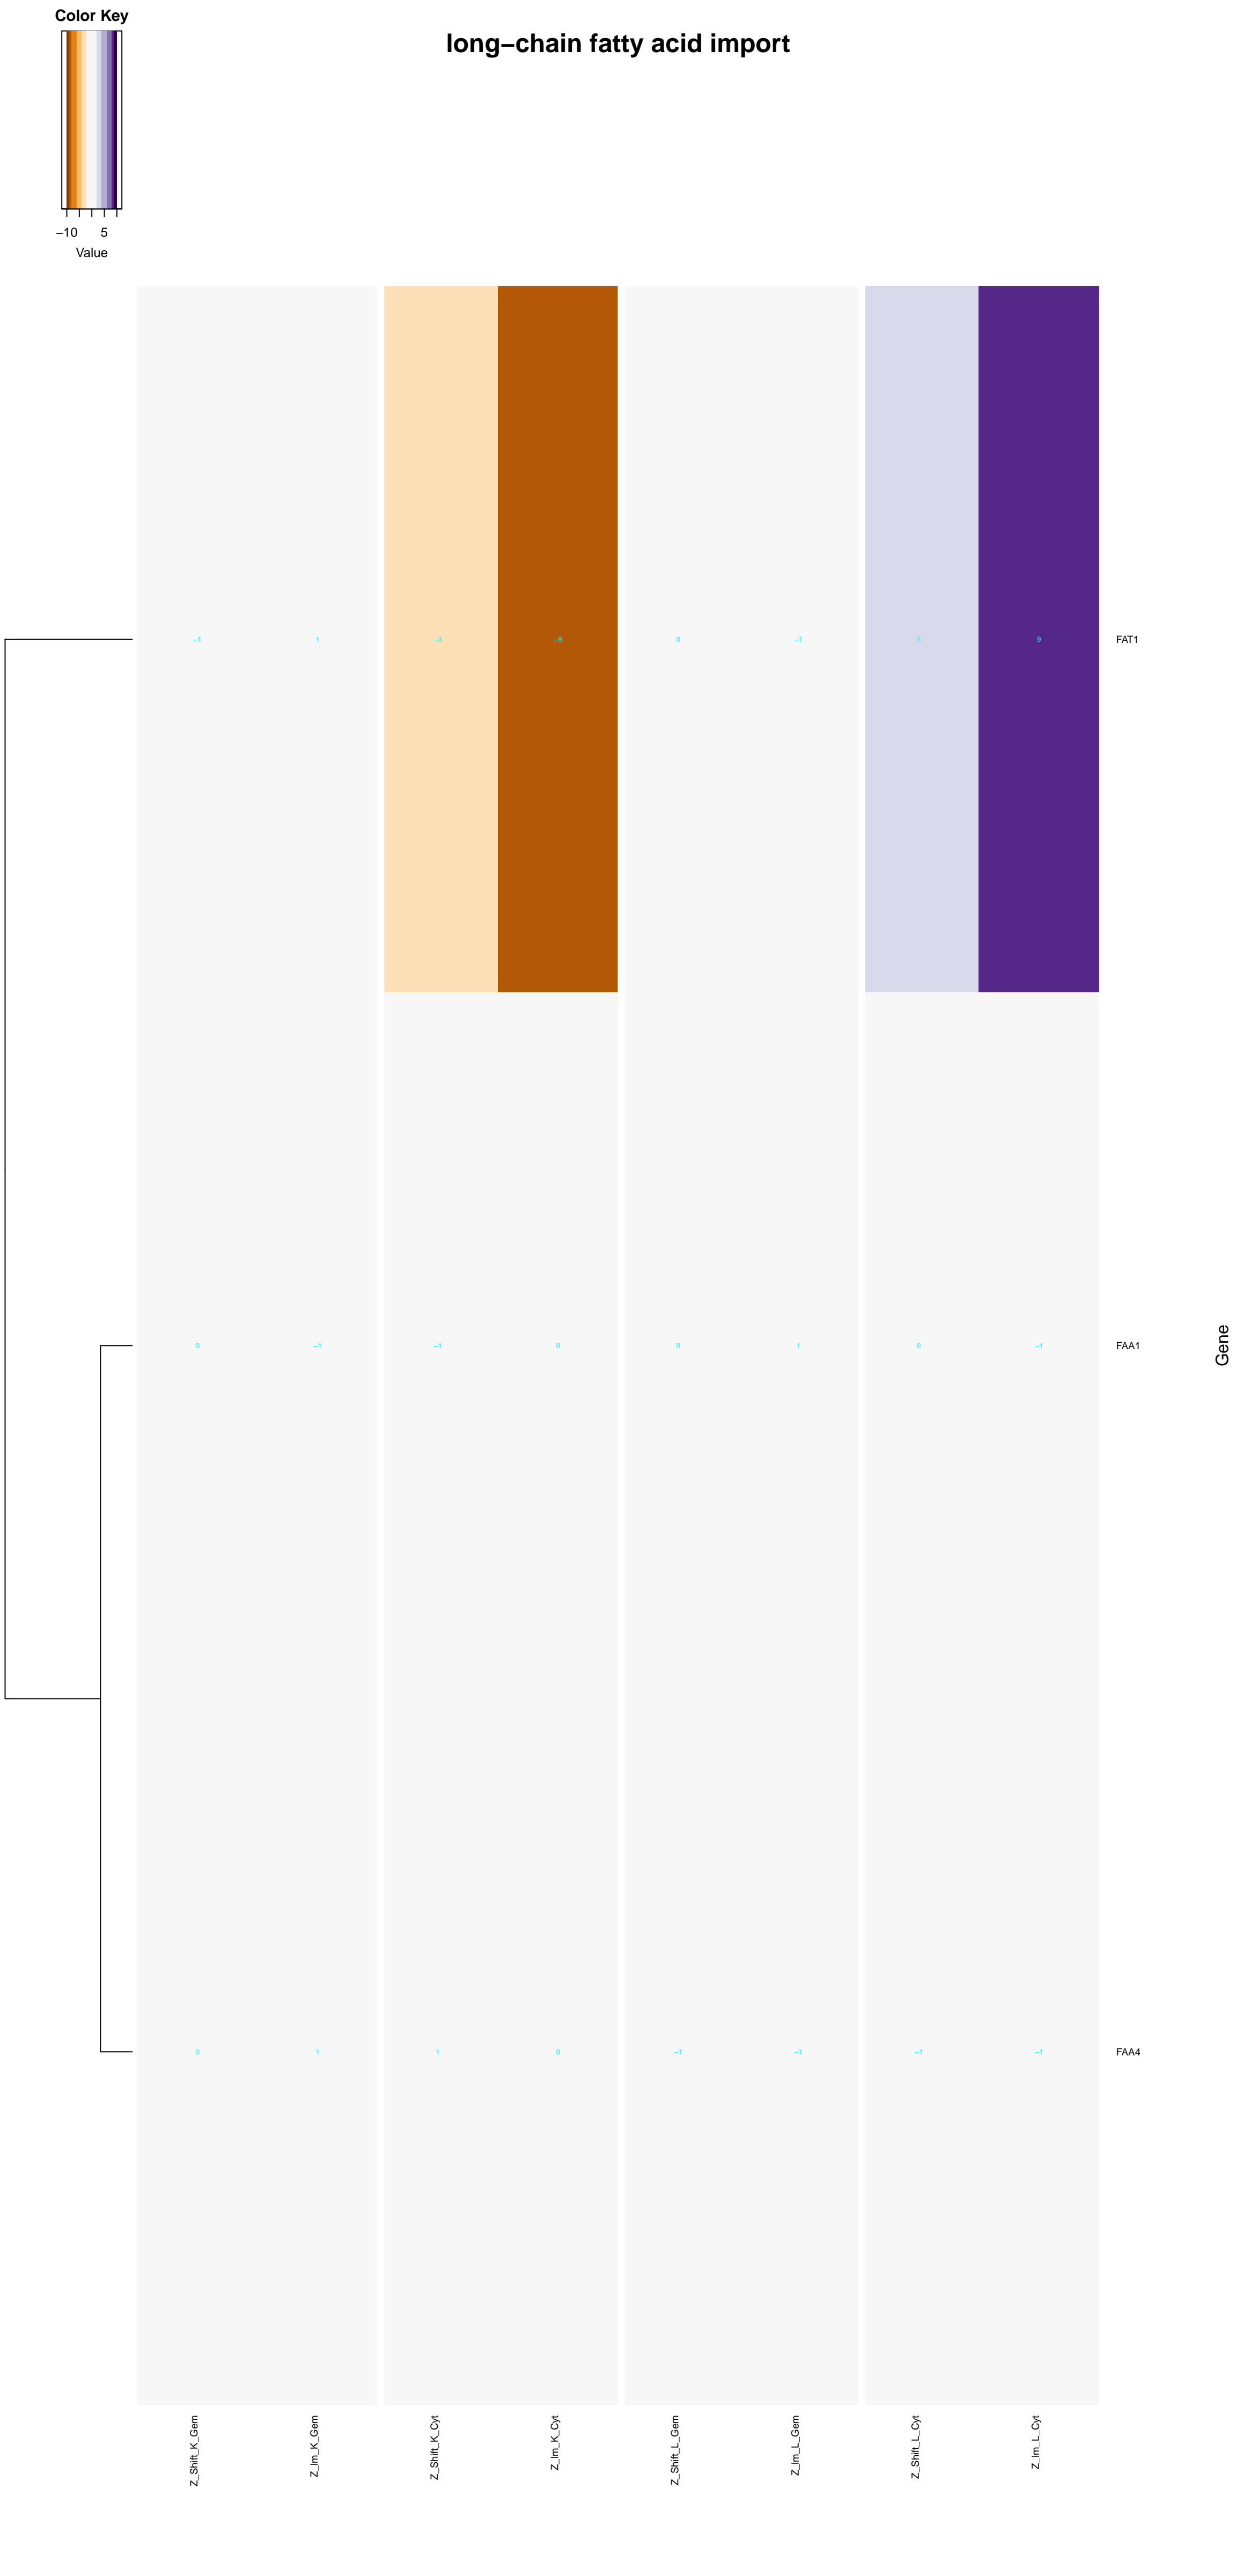

Supplement: s1 [file s1]

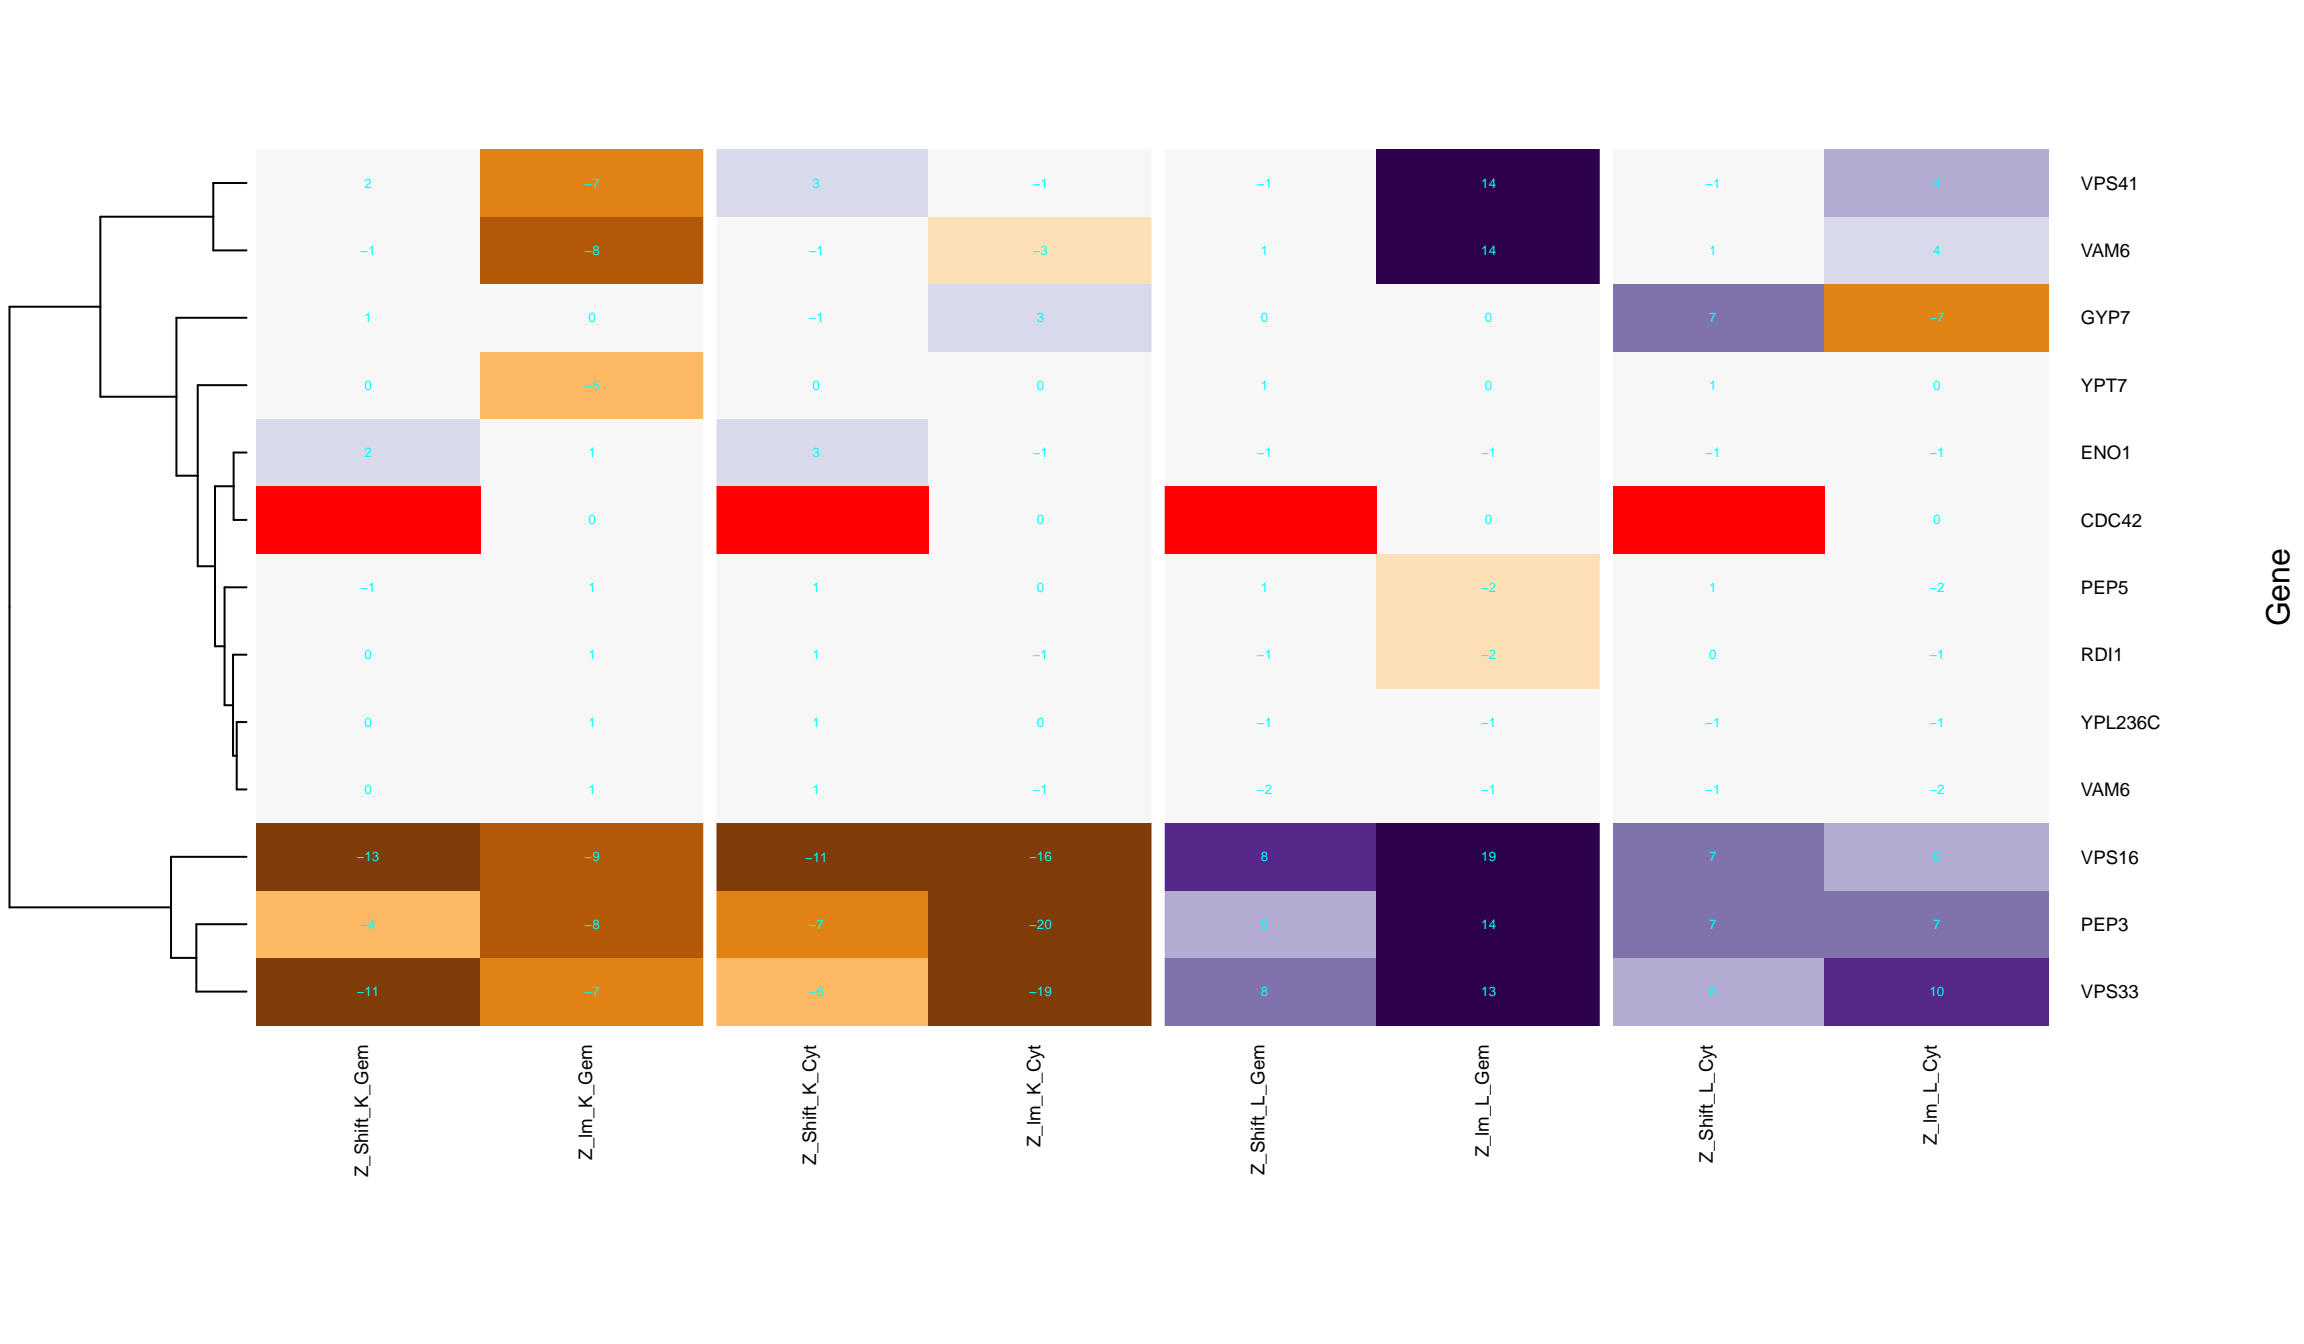

Supplement: s1 [file s1]

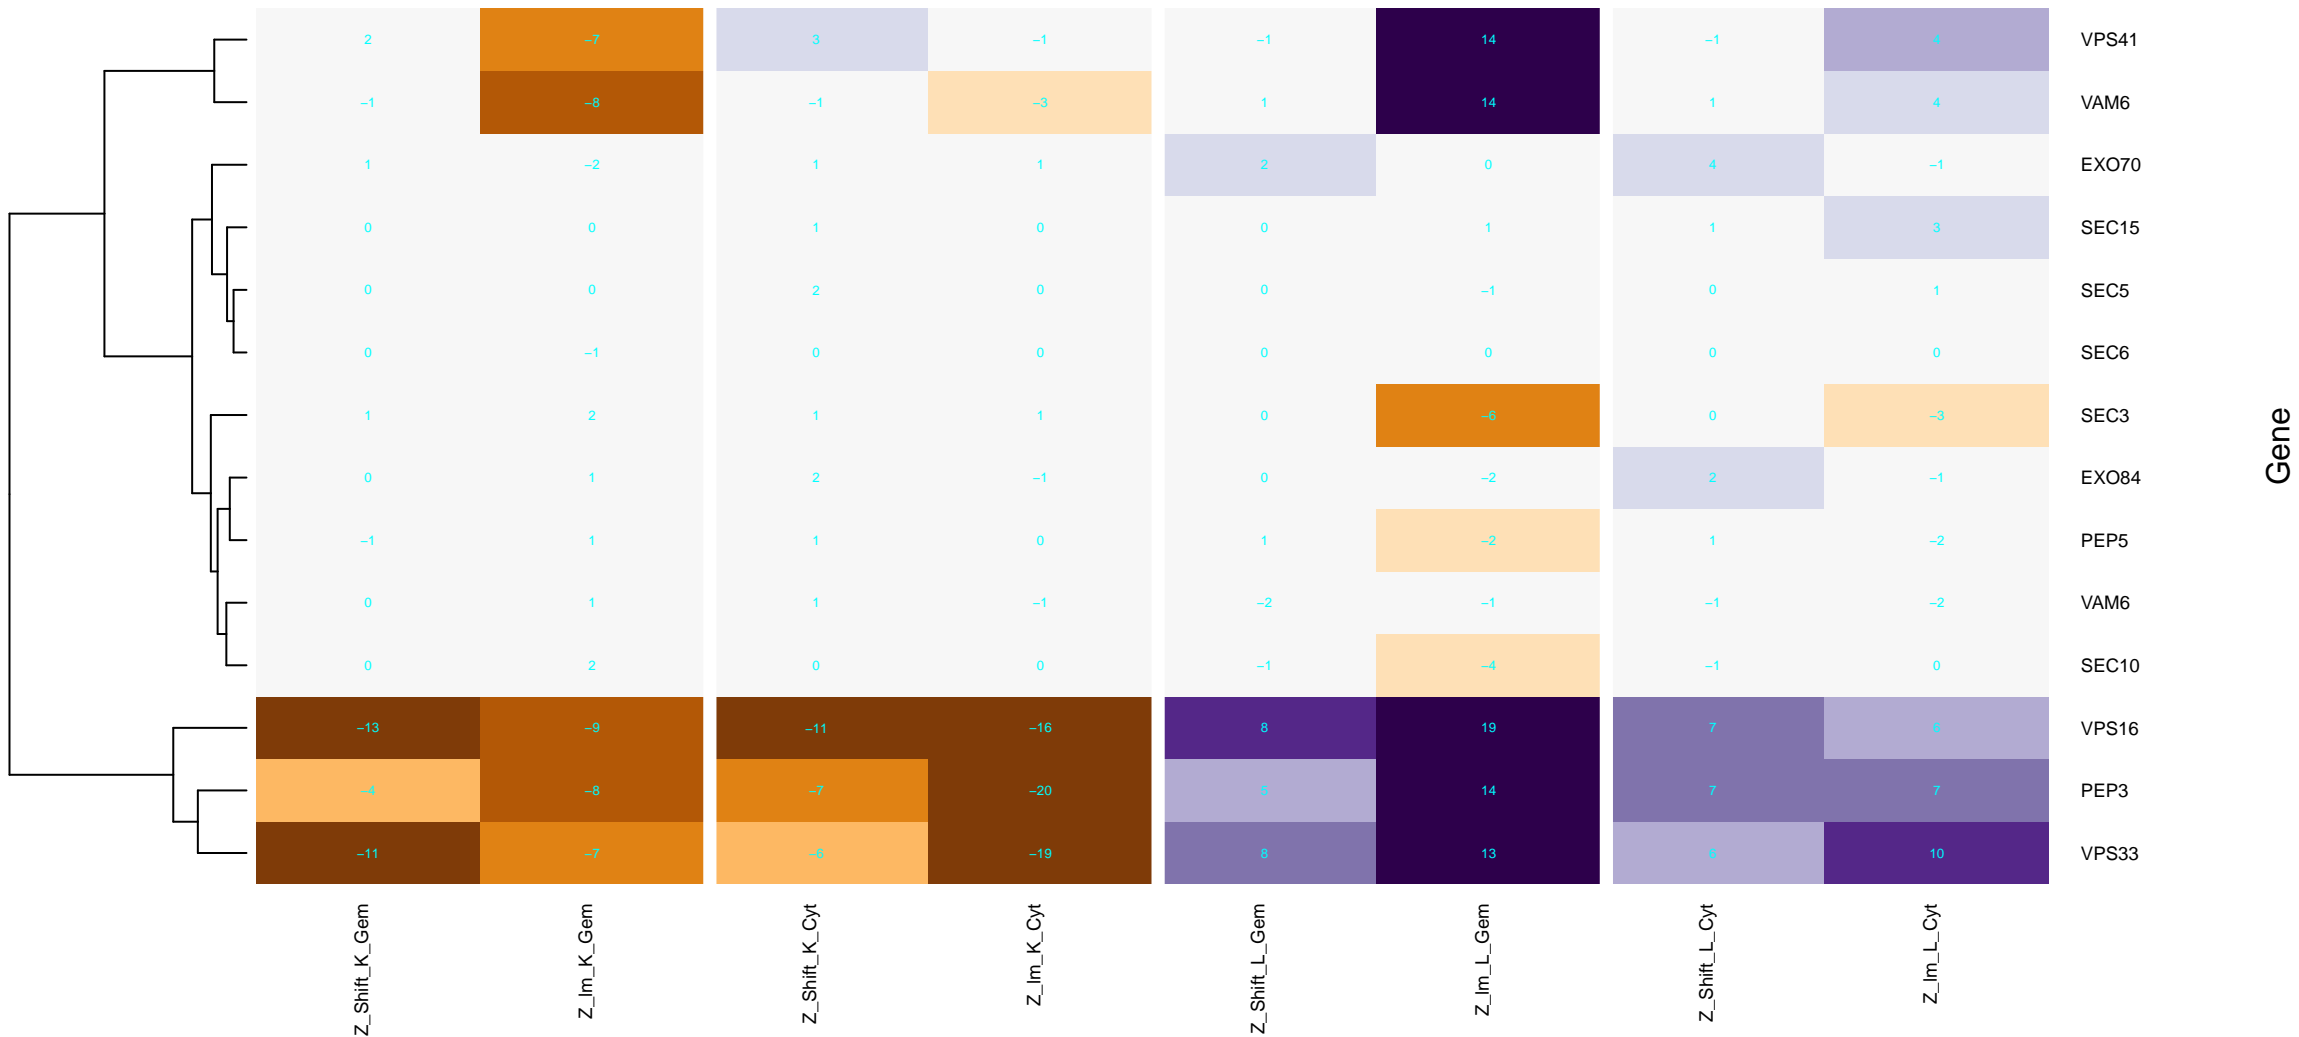

Supplement: s1 [file s1]

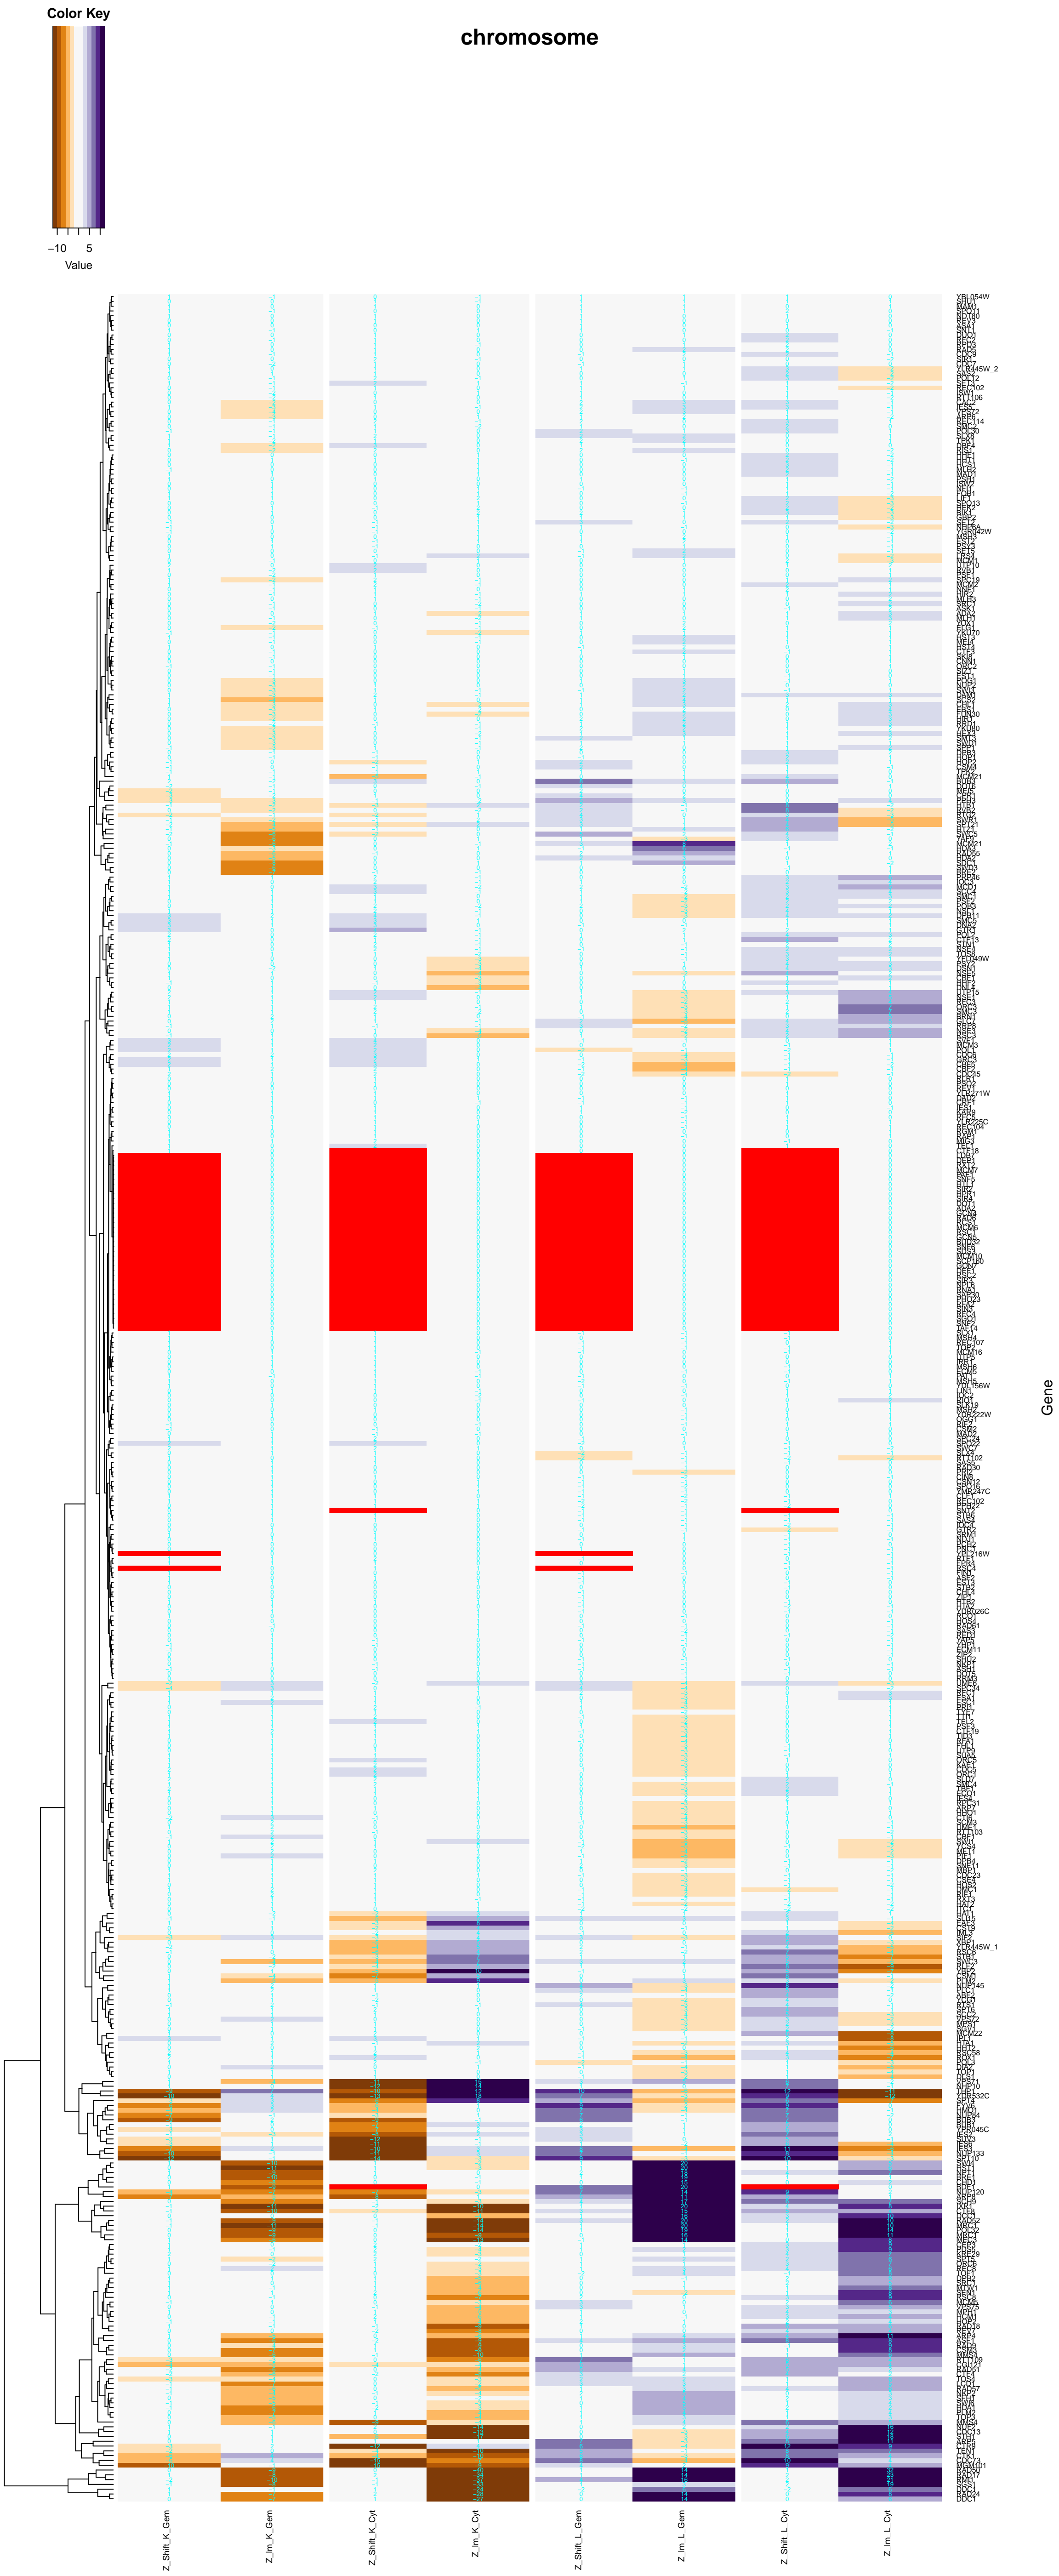

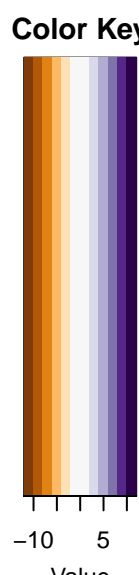

nuclear chromosome

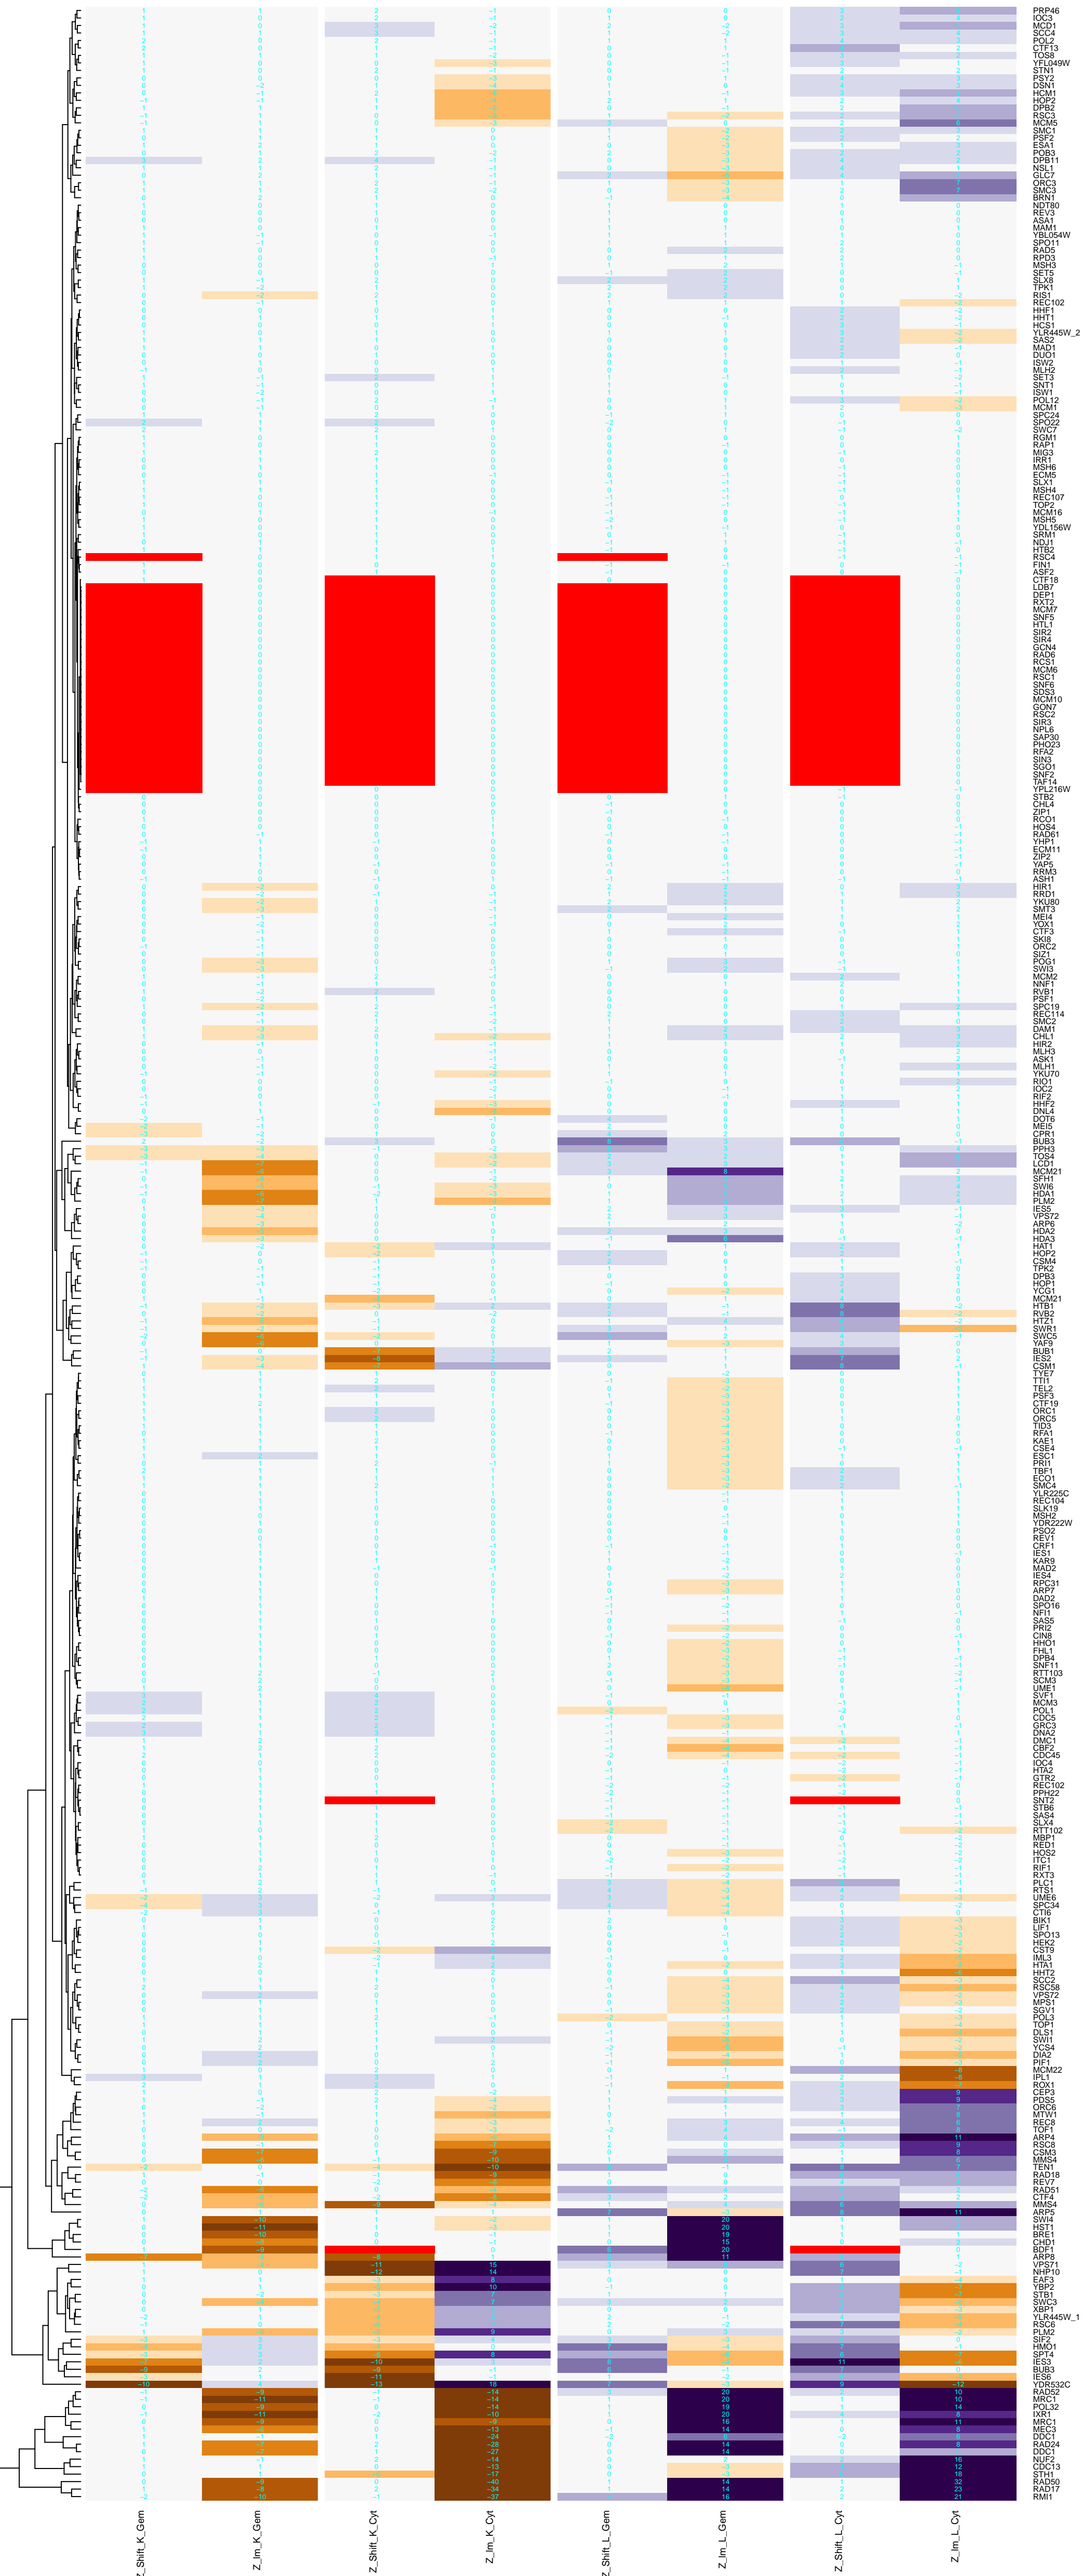

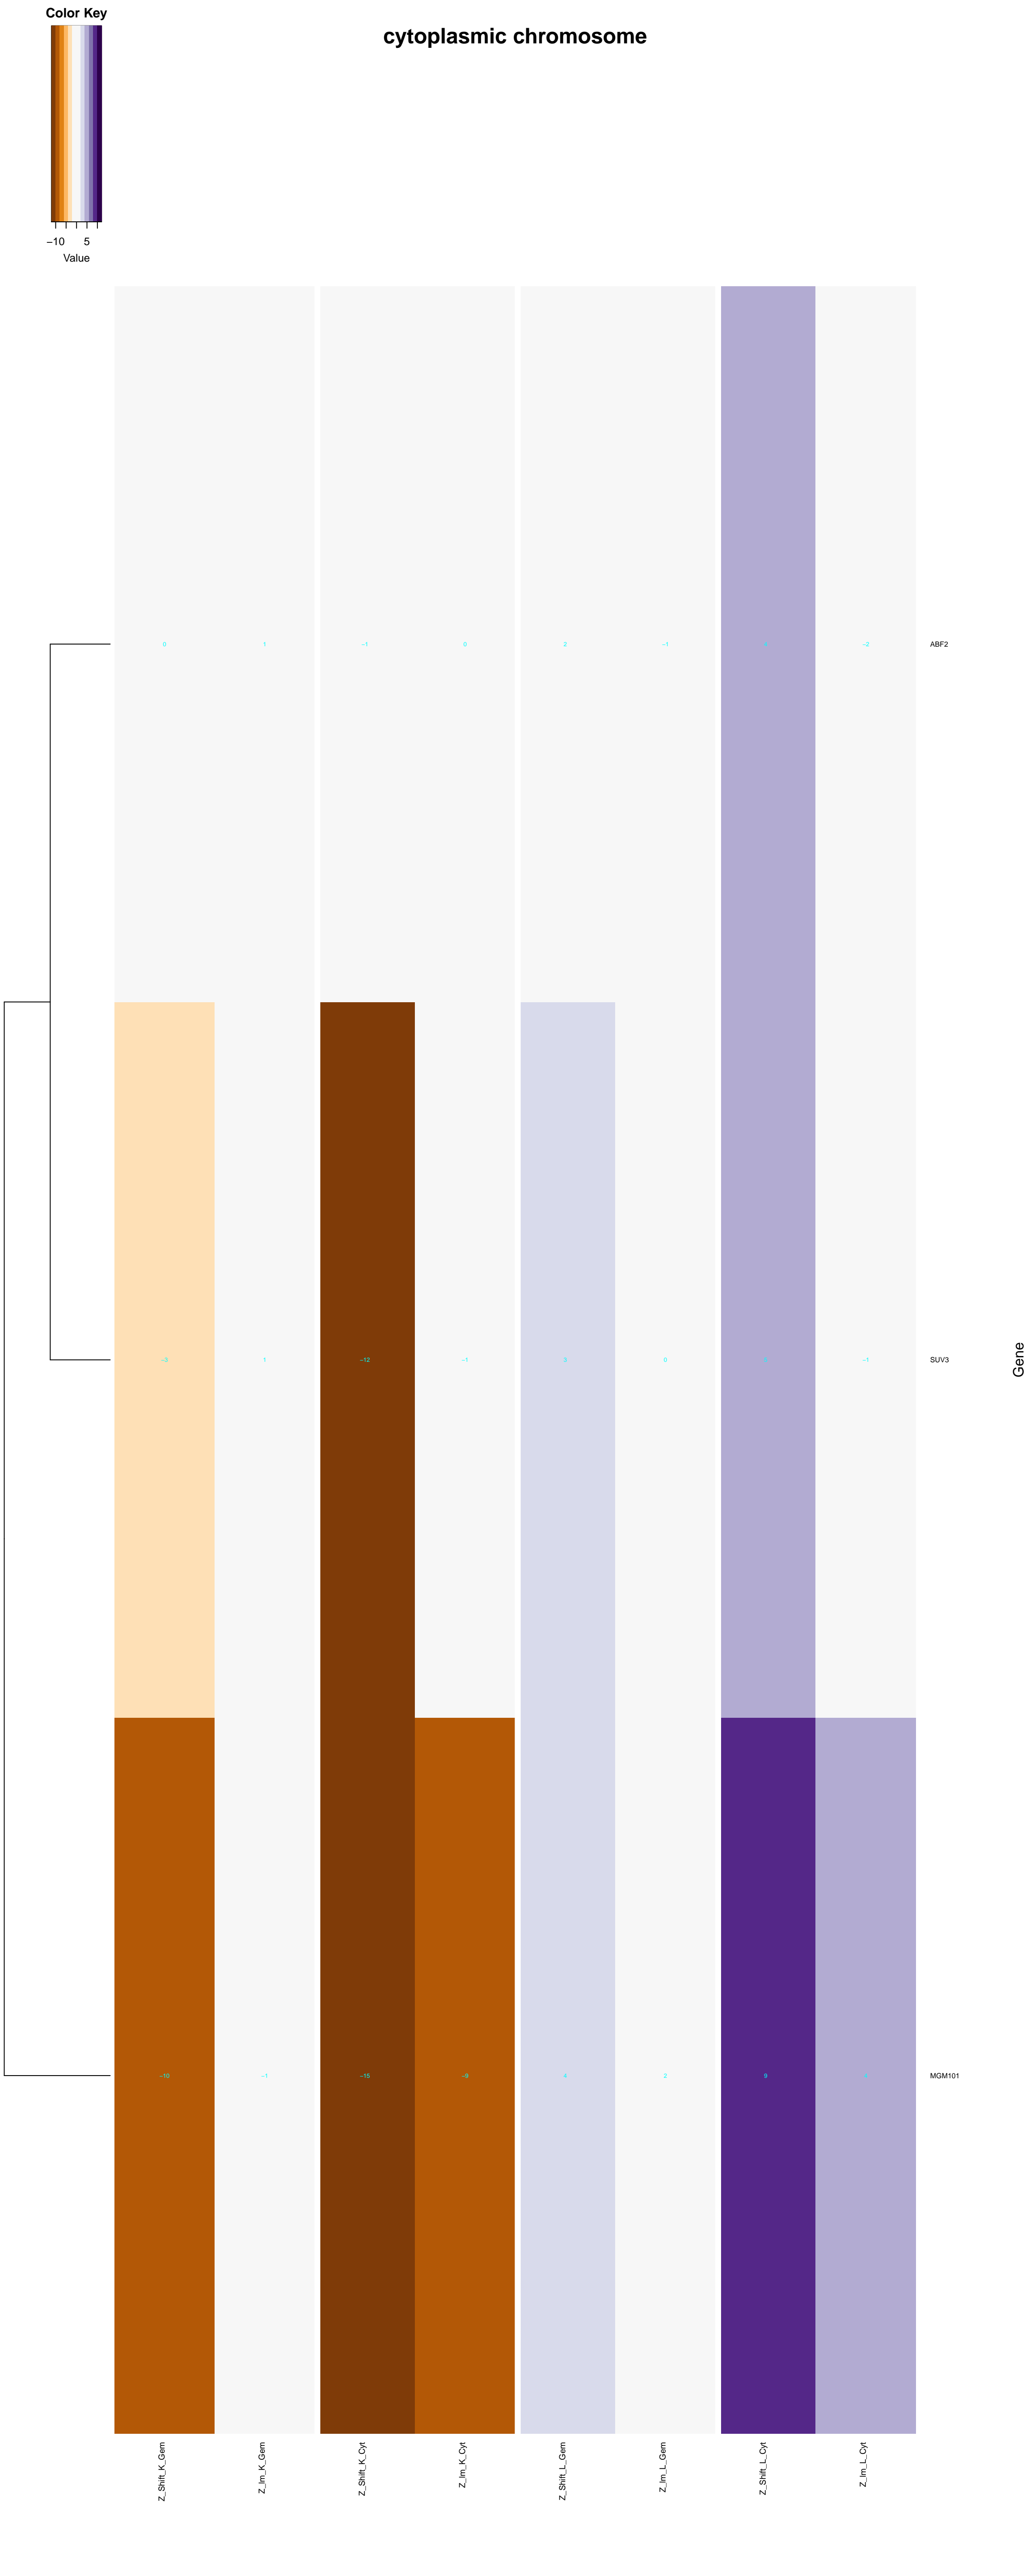

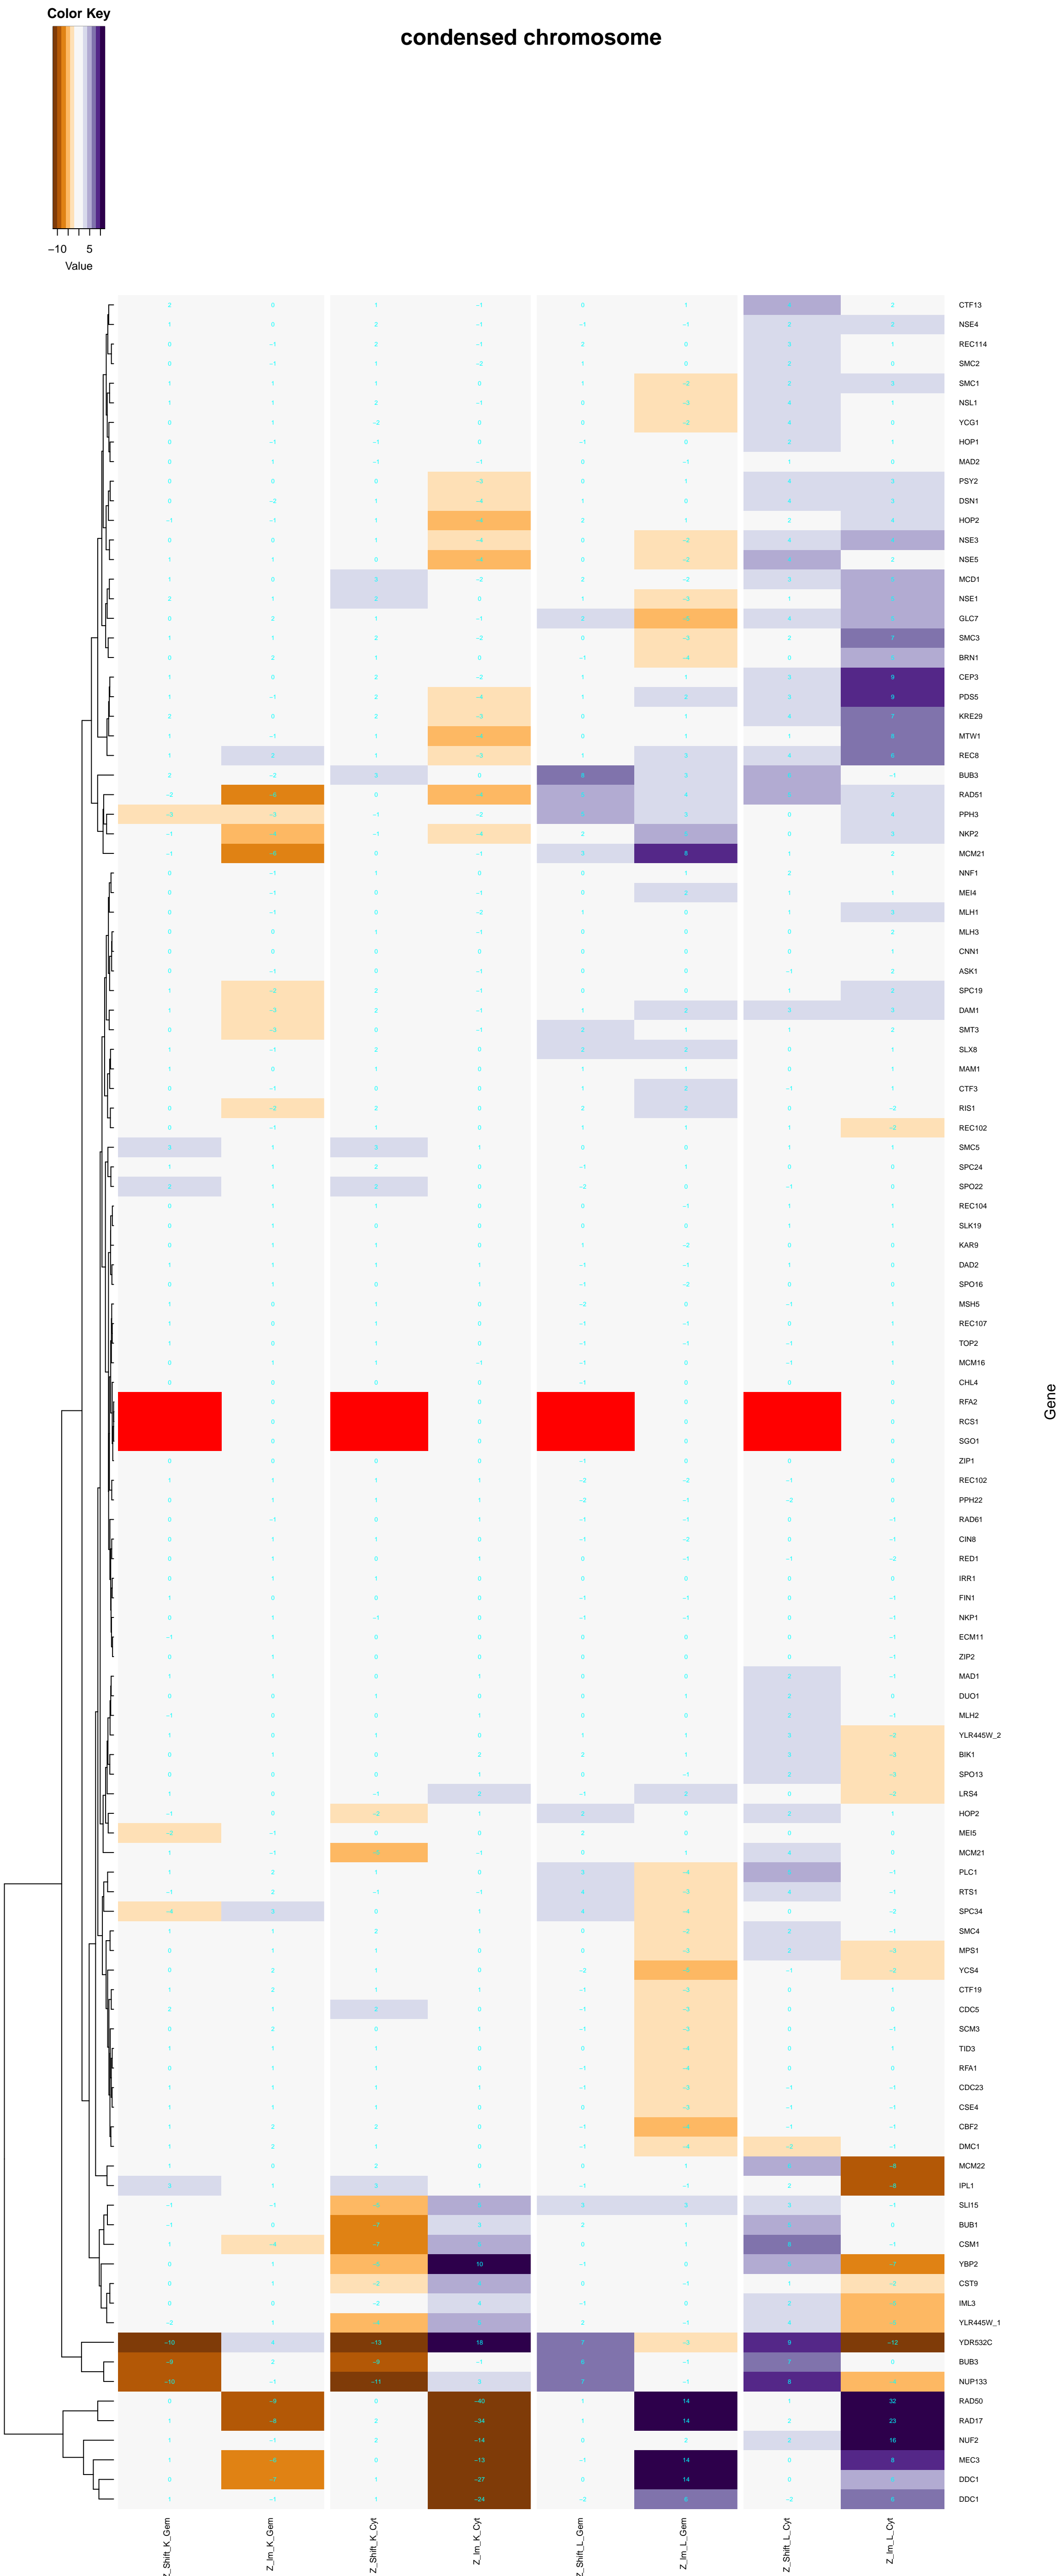

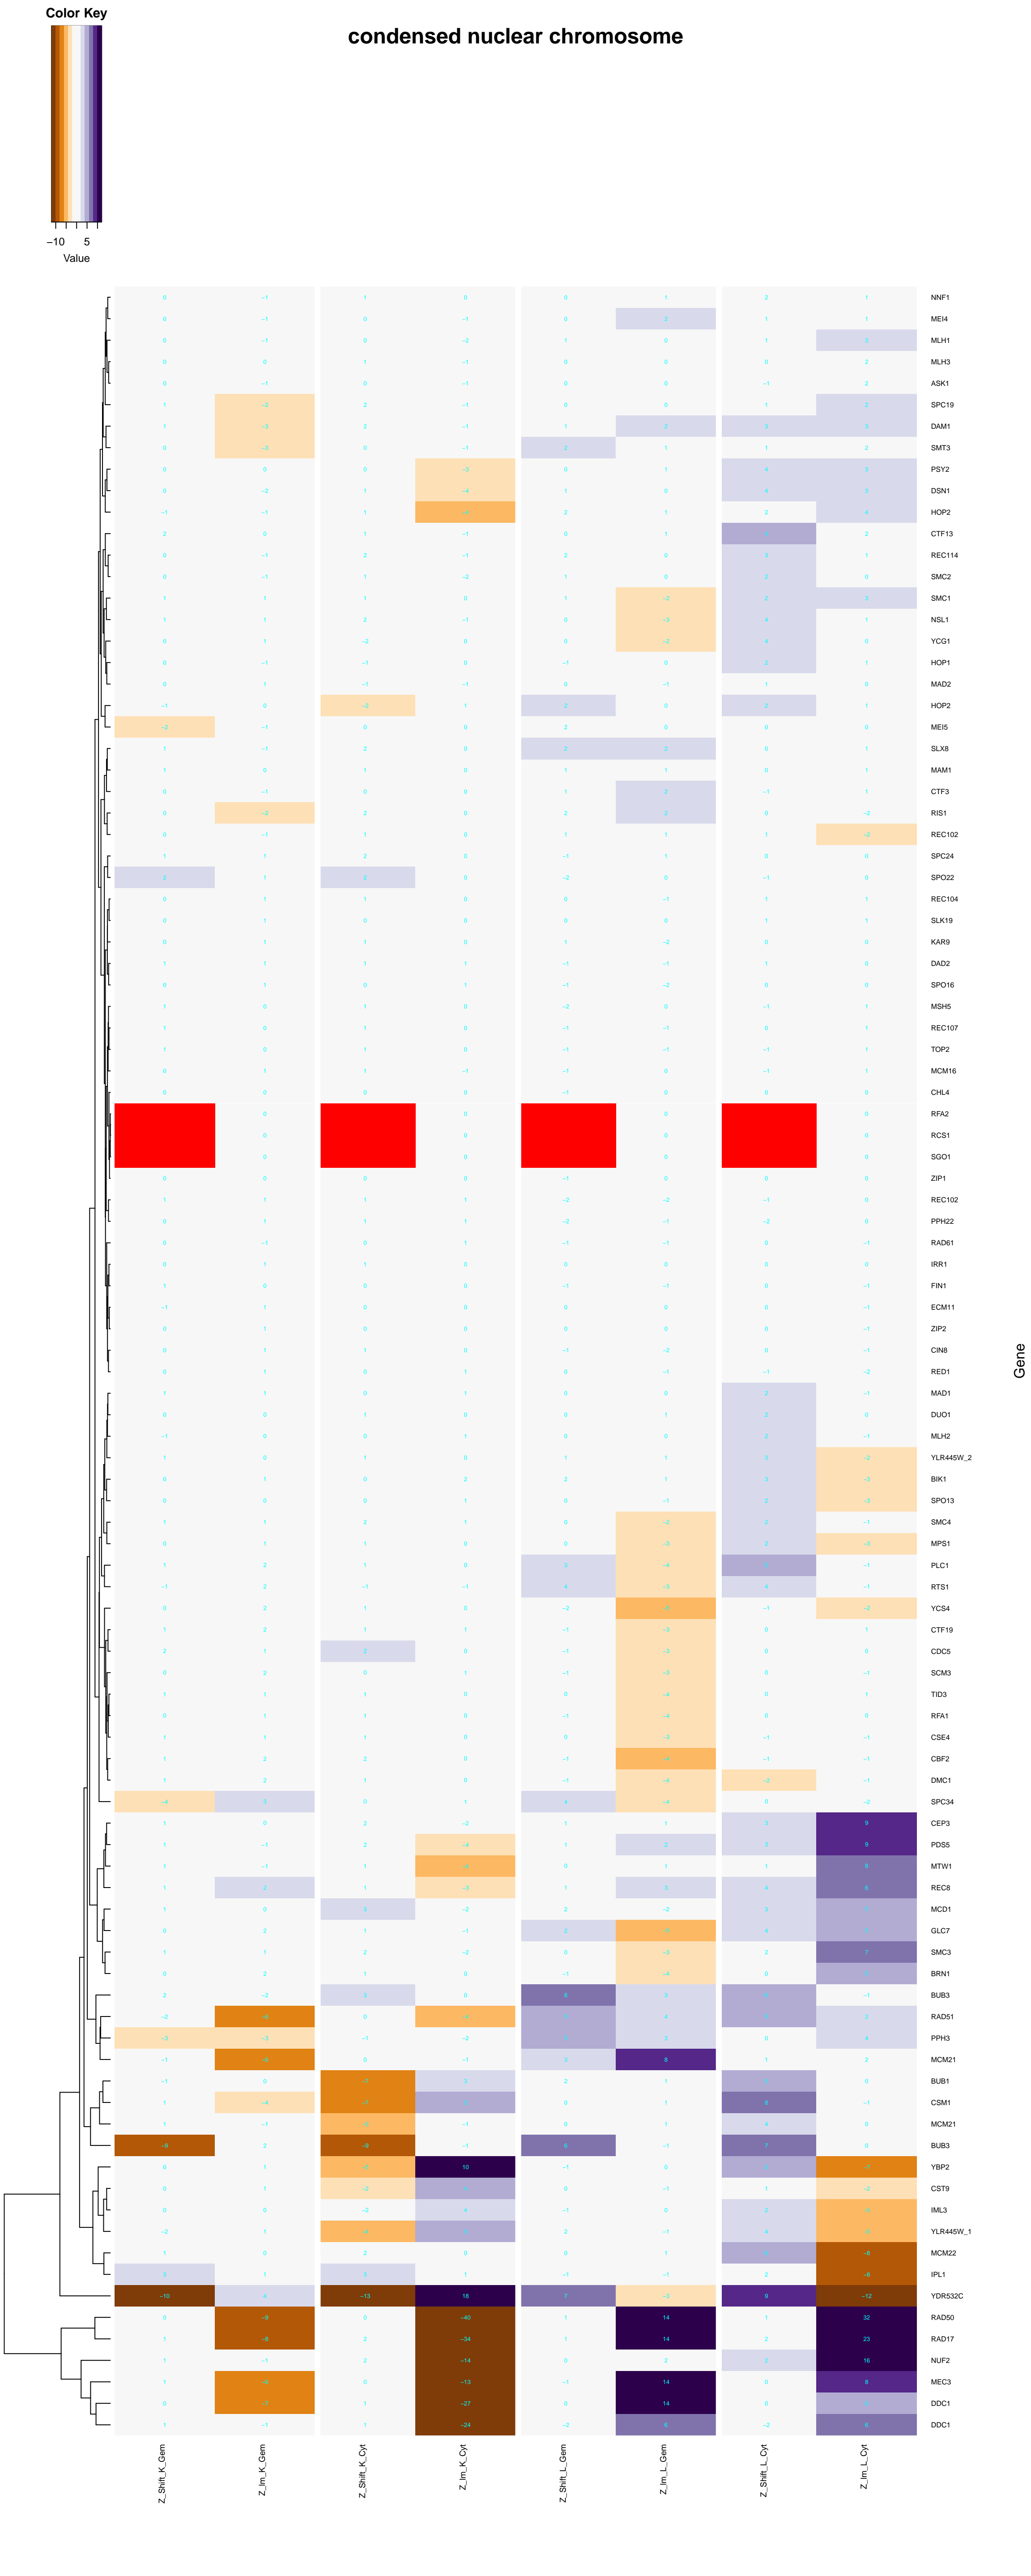

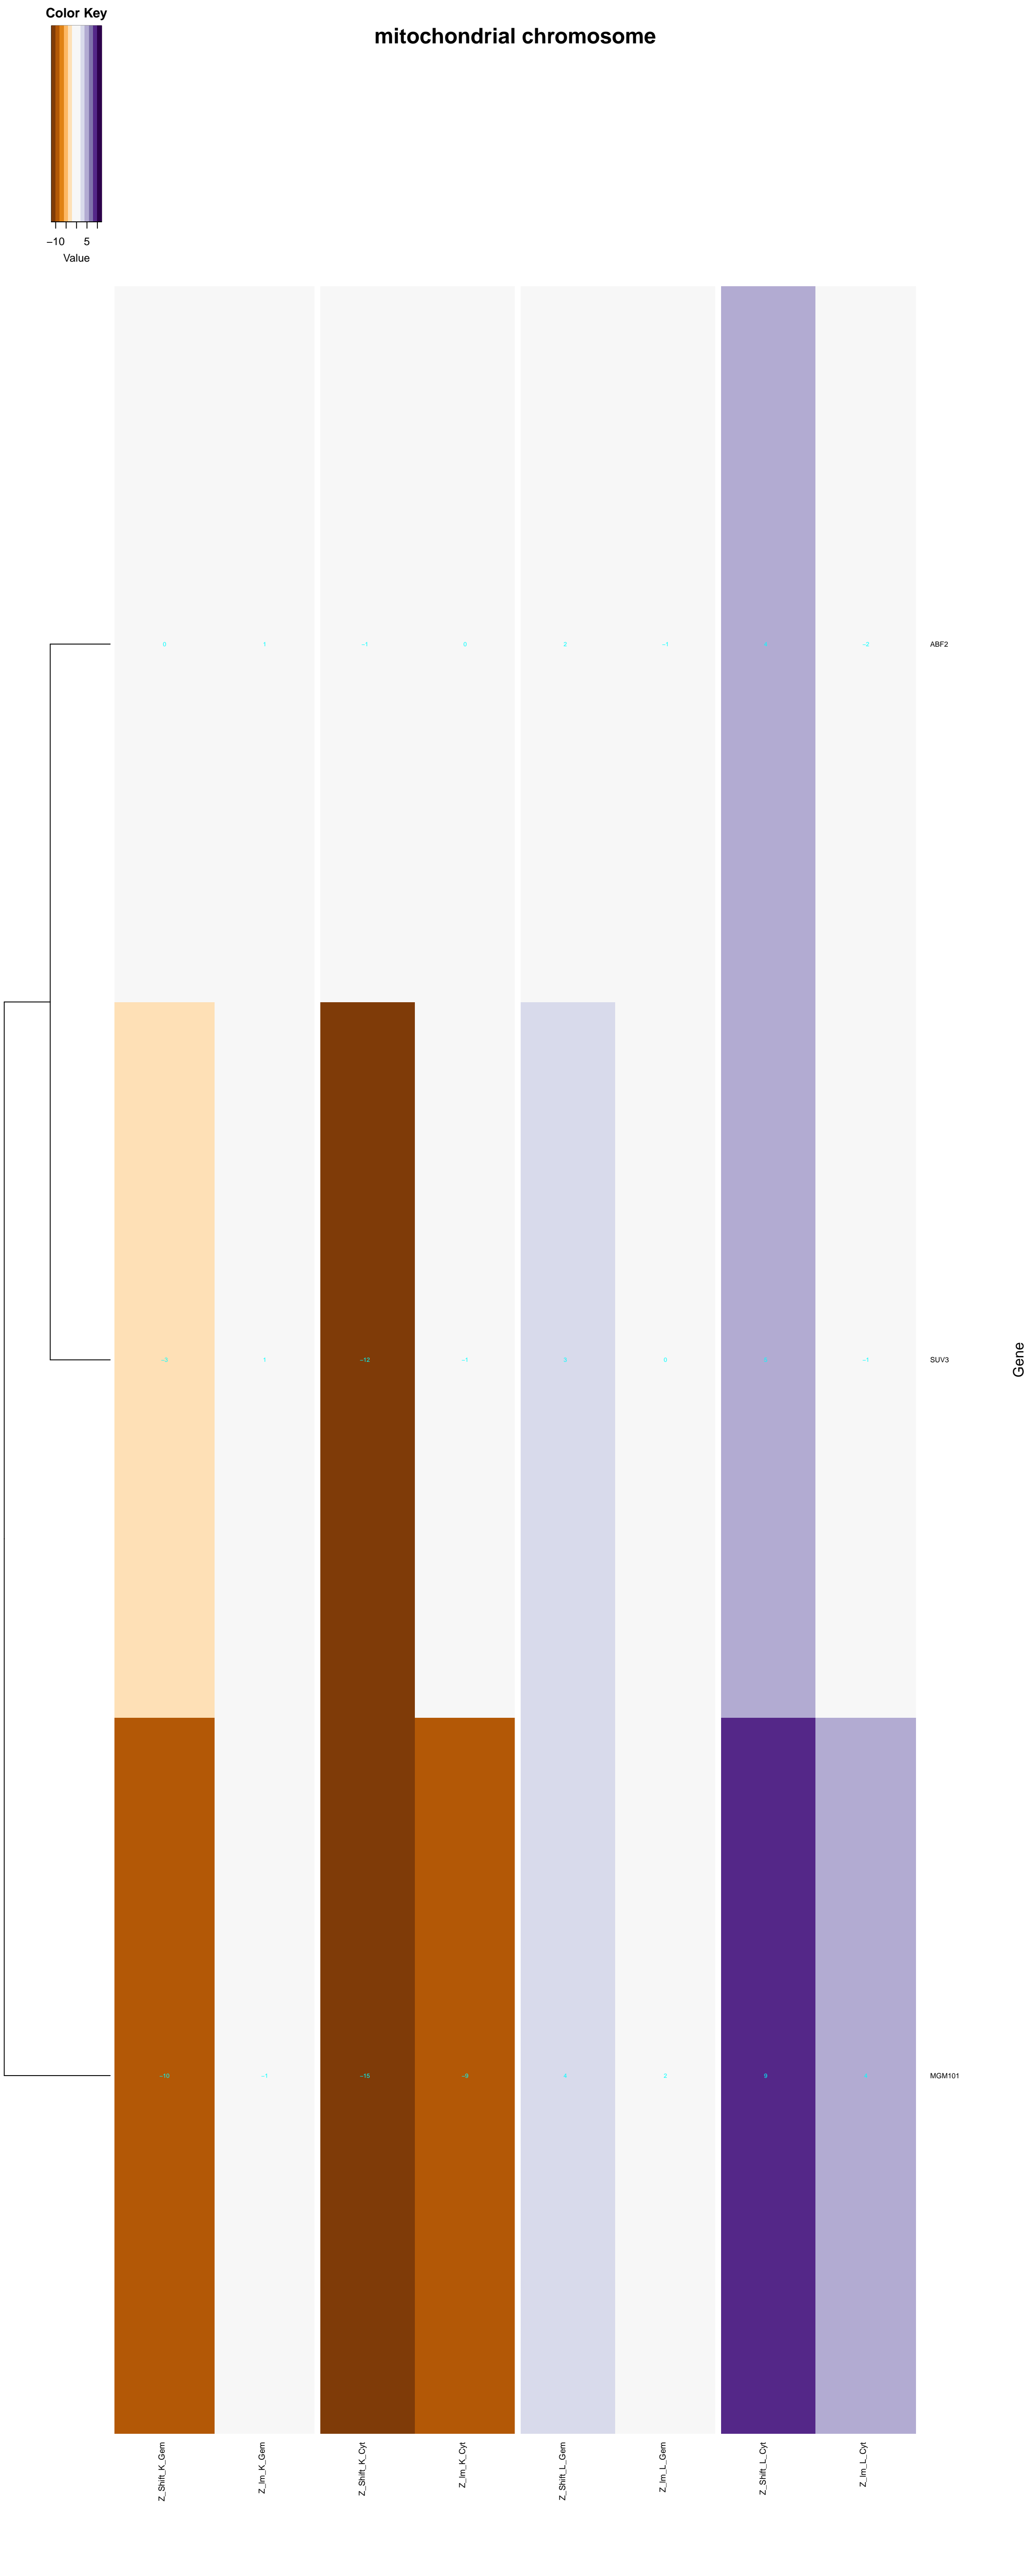

Supplement: s1 [file s1]

Color Key

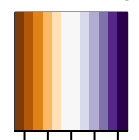

-10 5  
Value

cytosolic small ribosomal subunit

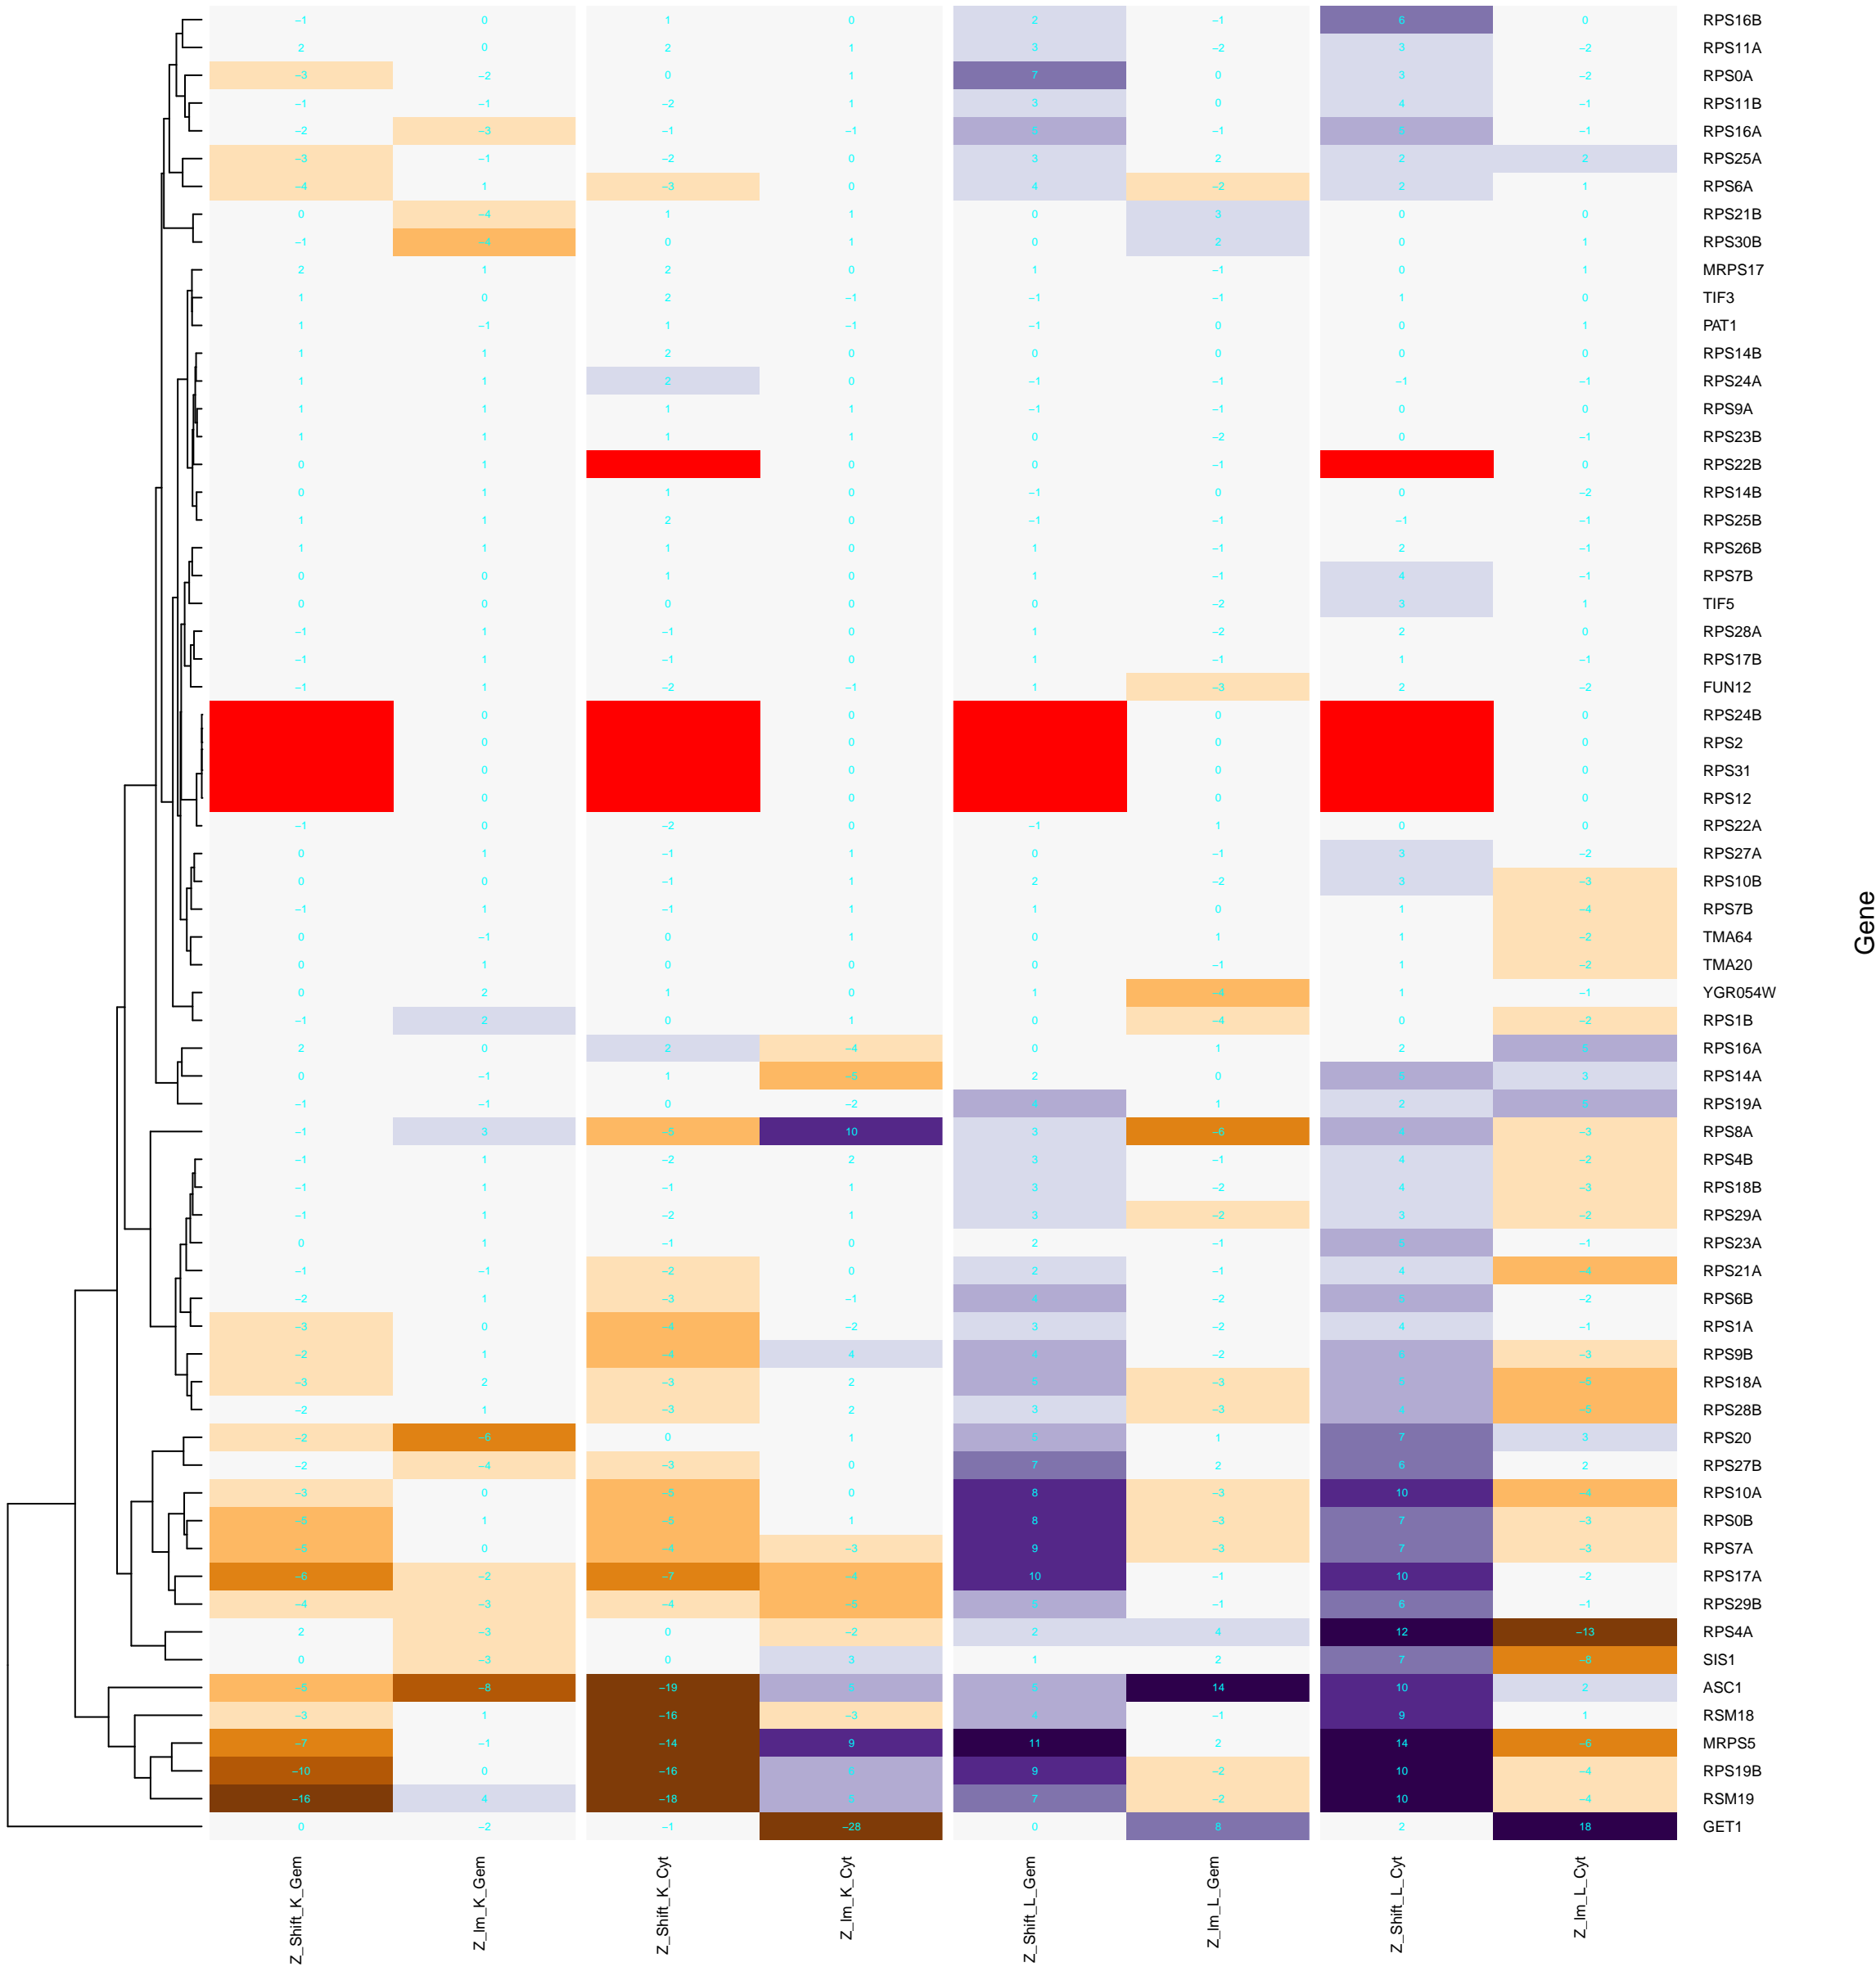

Supplement: s1 [file s1]

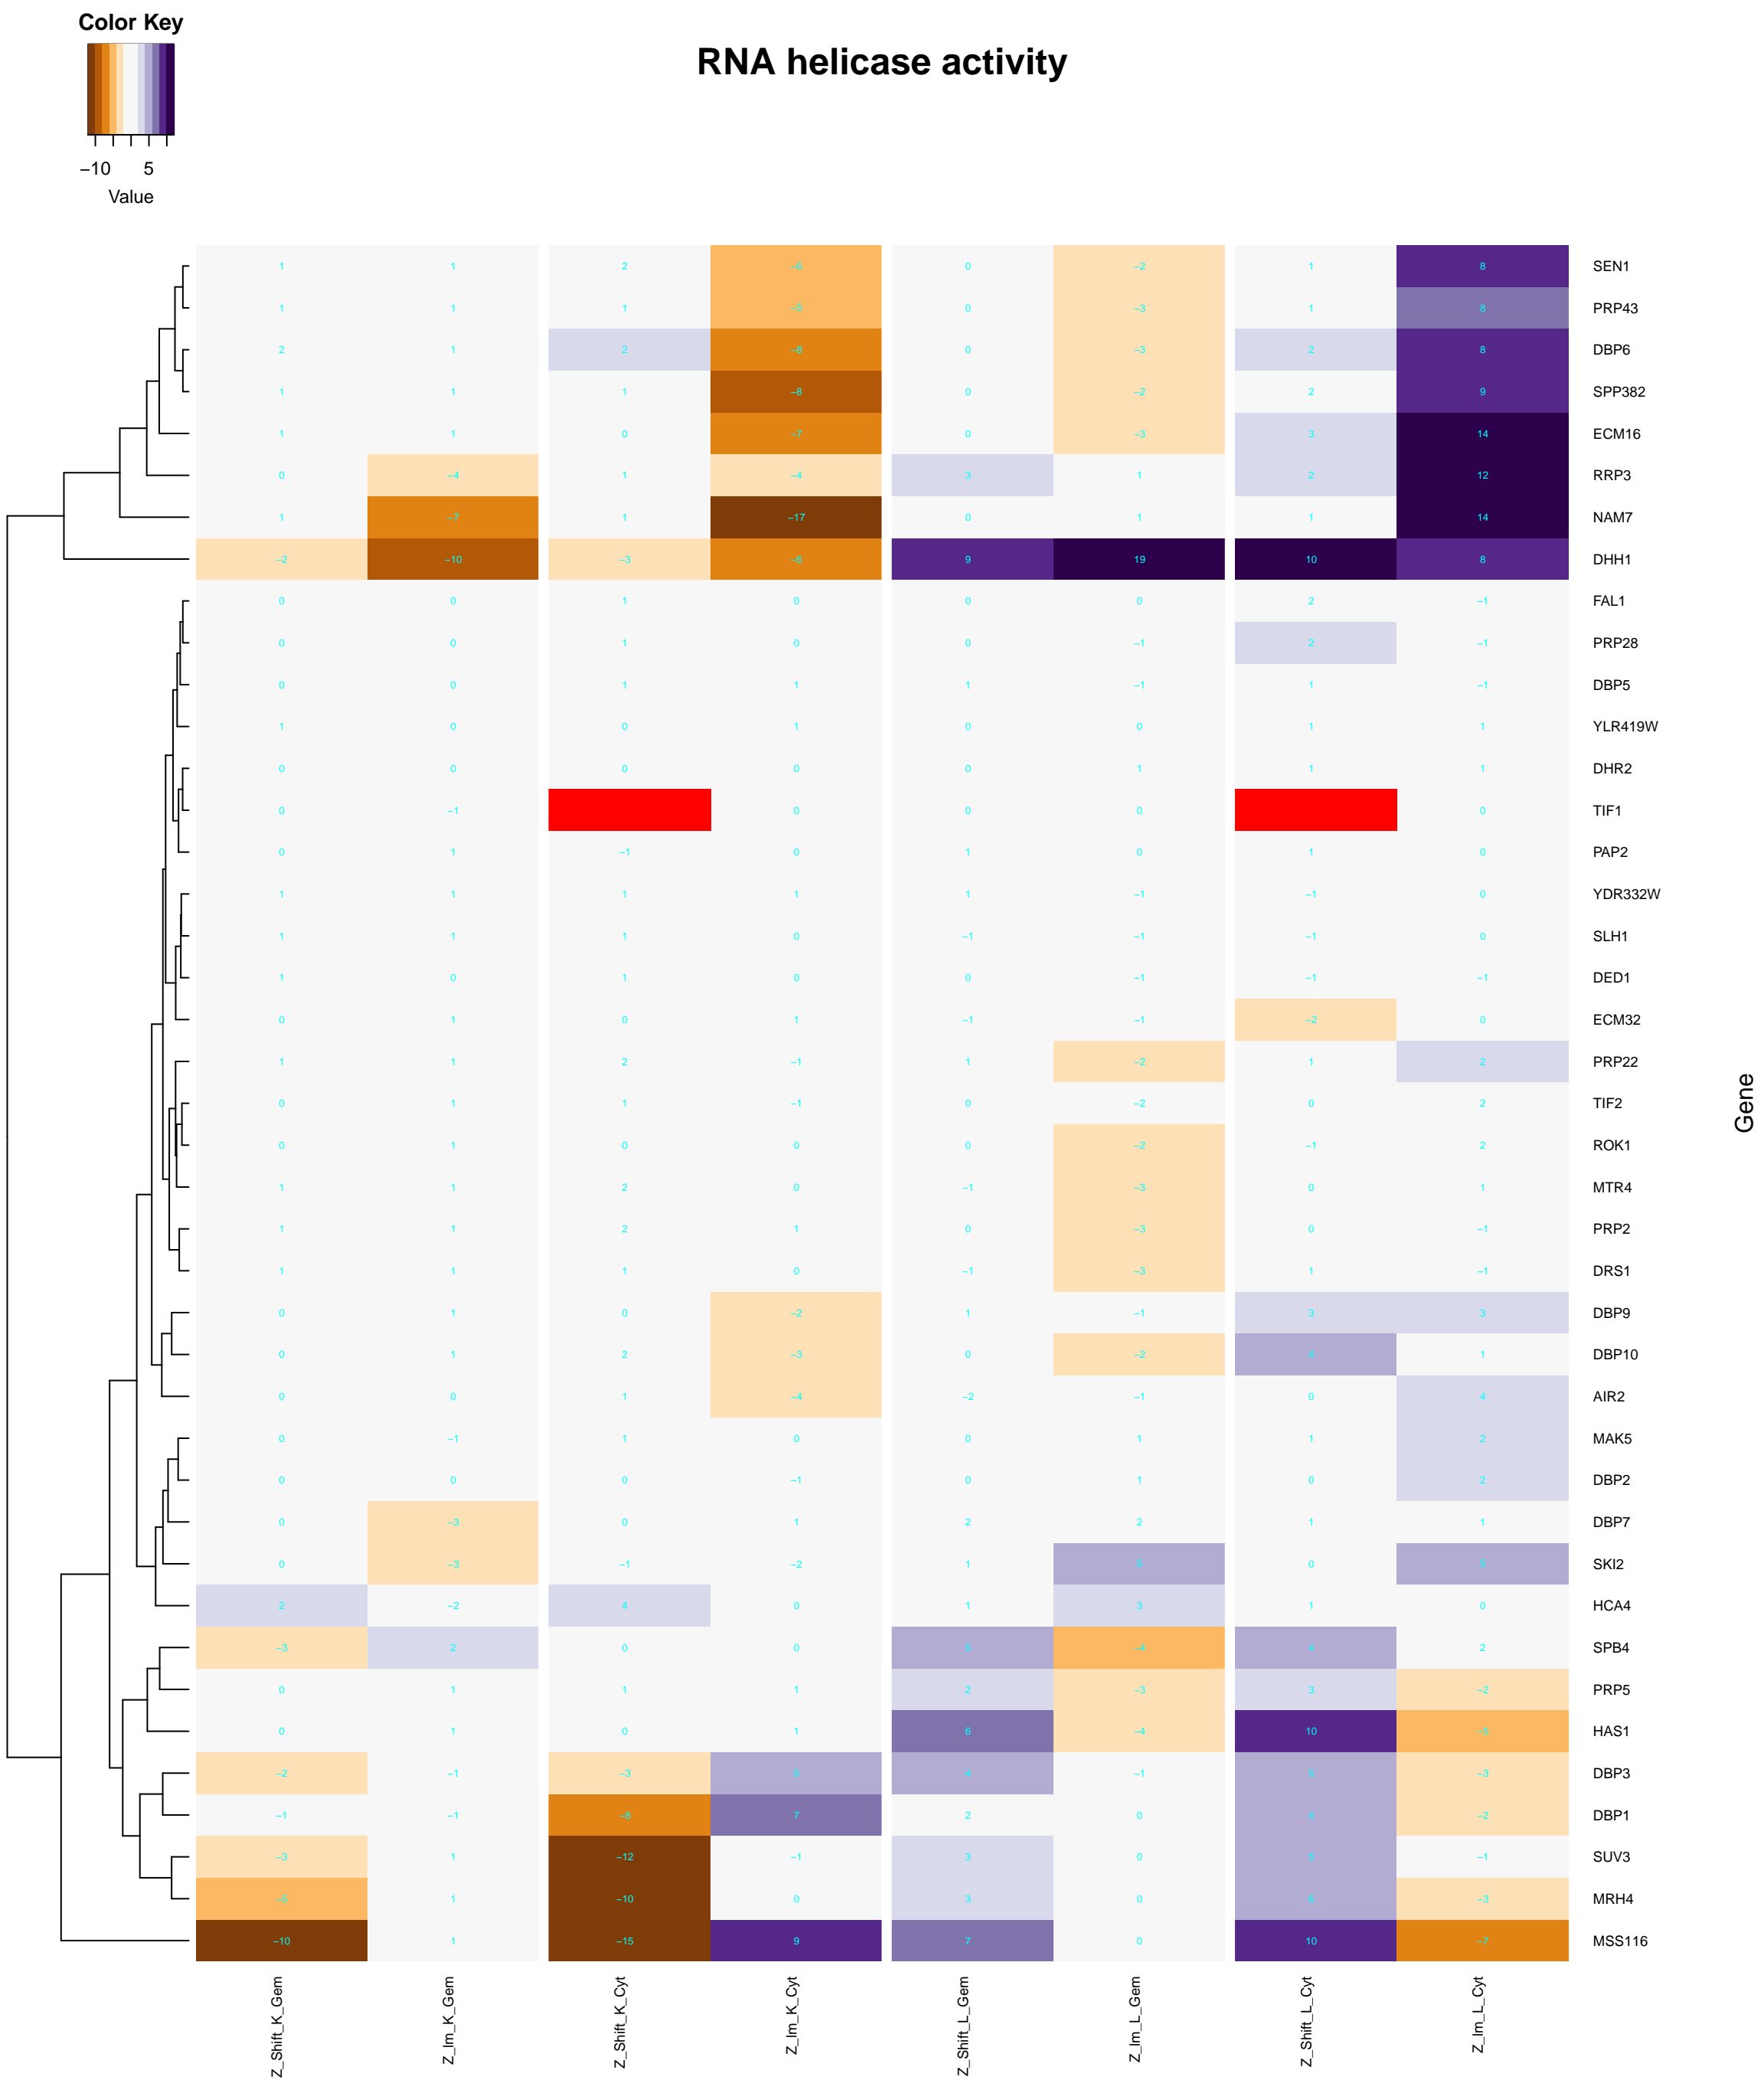

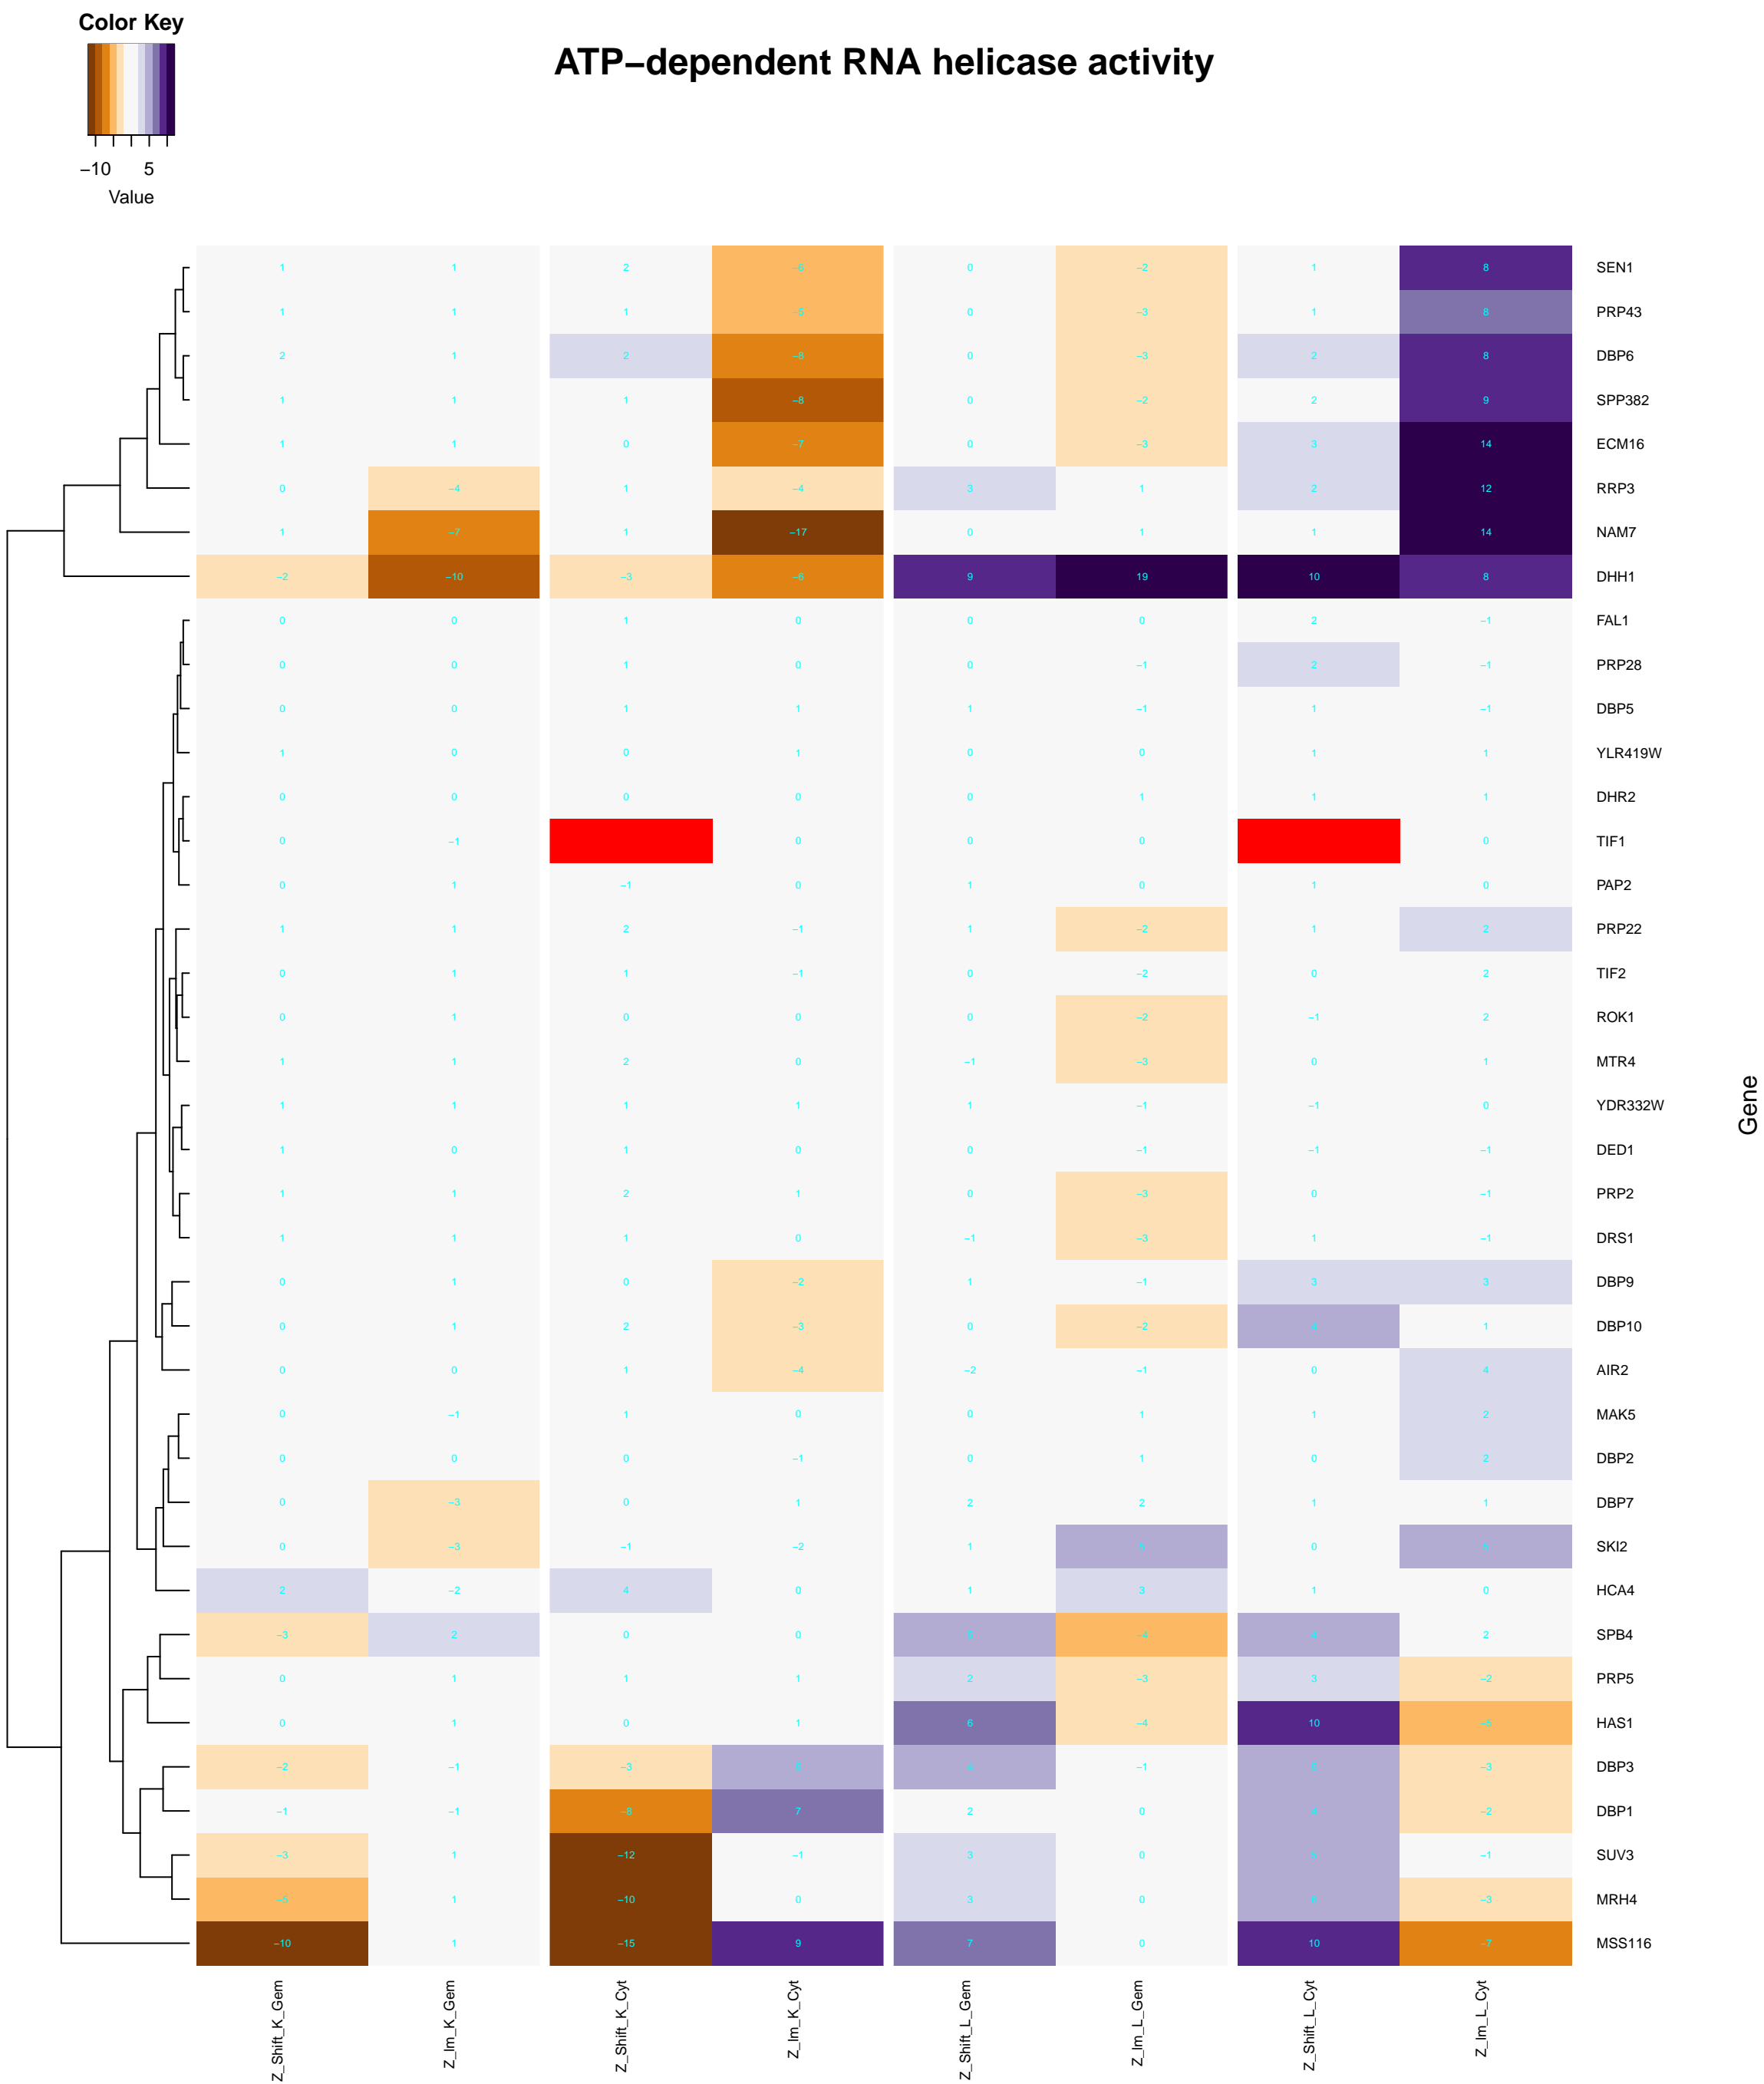

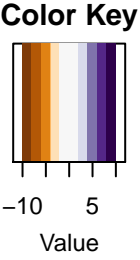

3'-5' RNA helicase activity

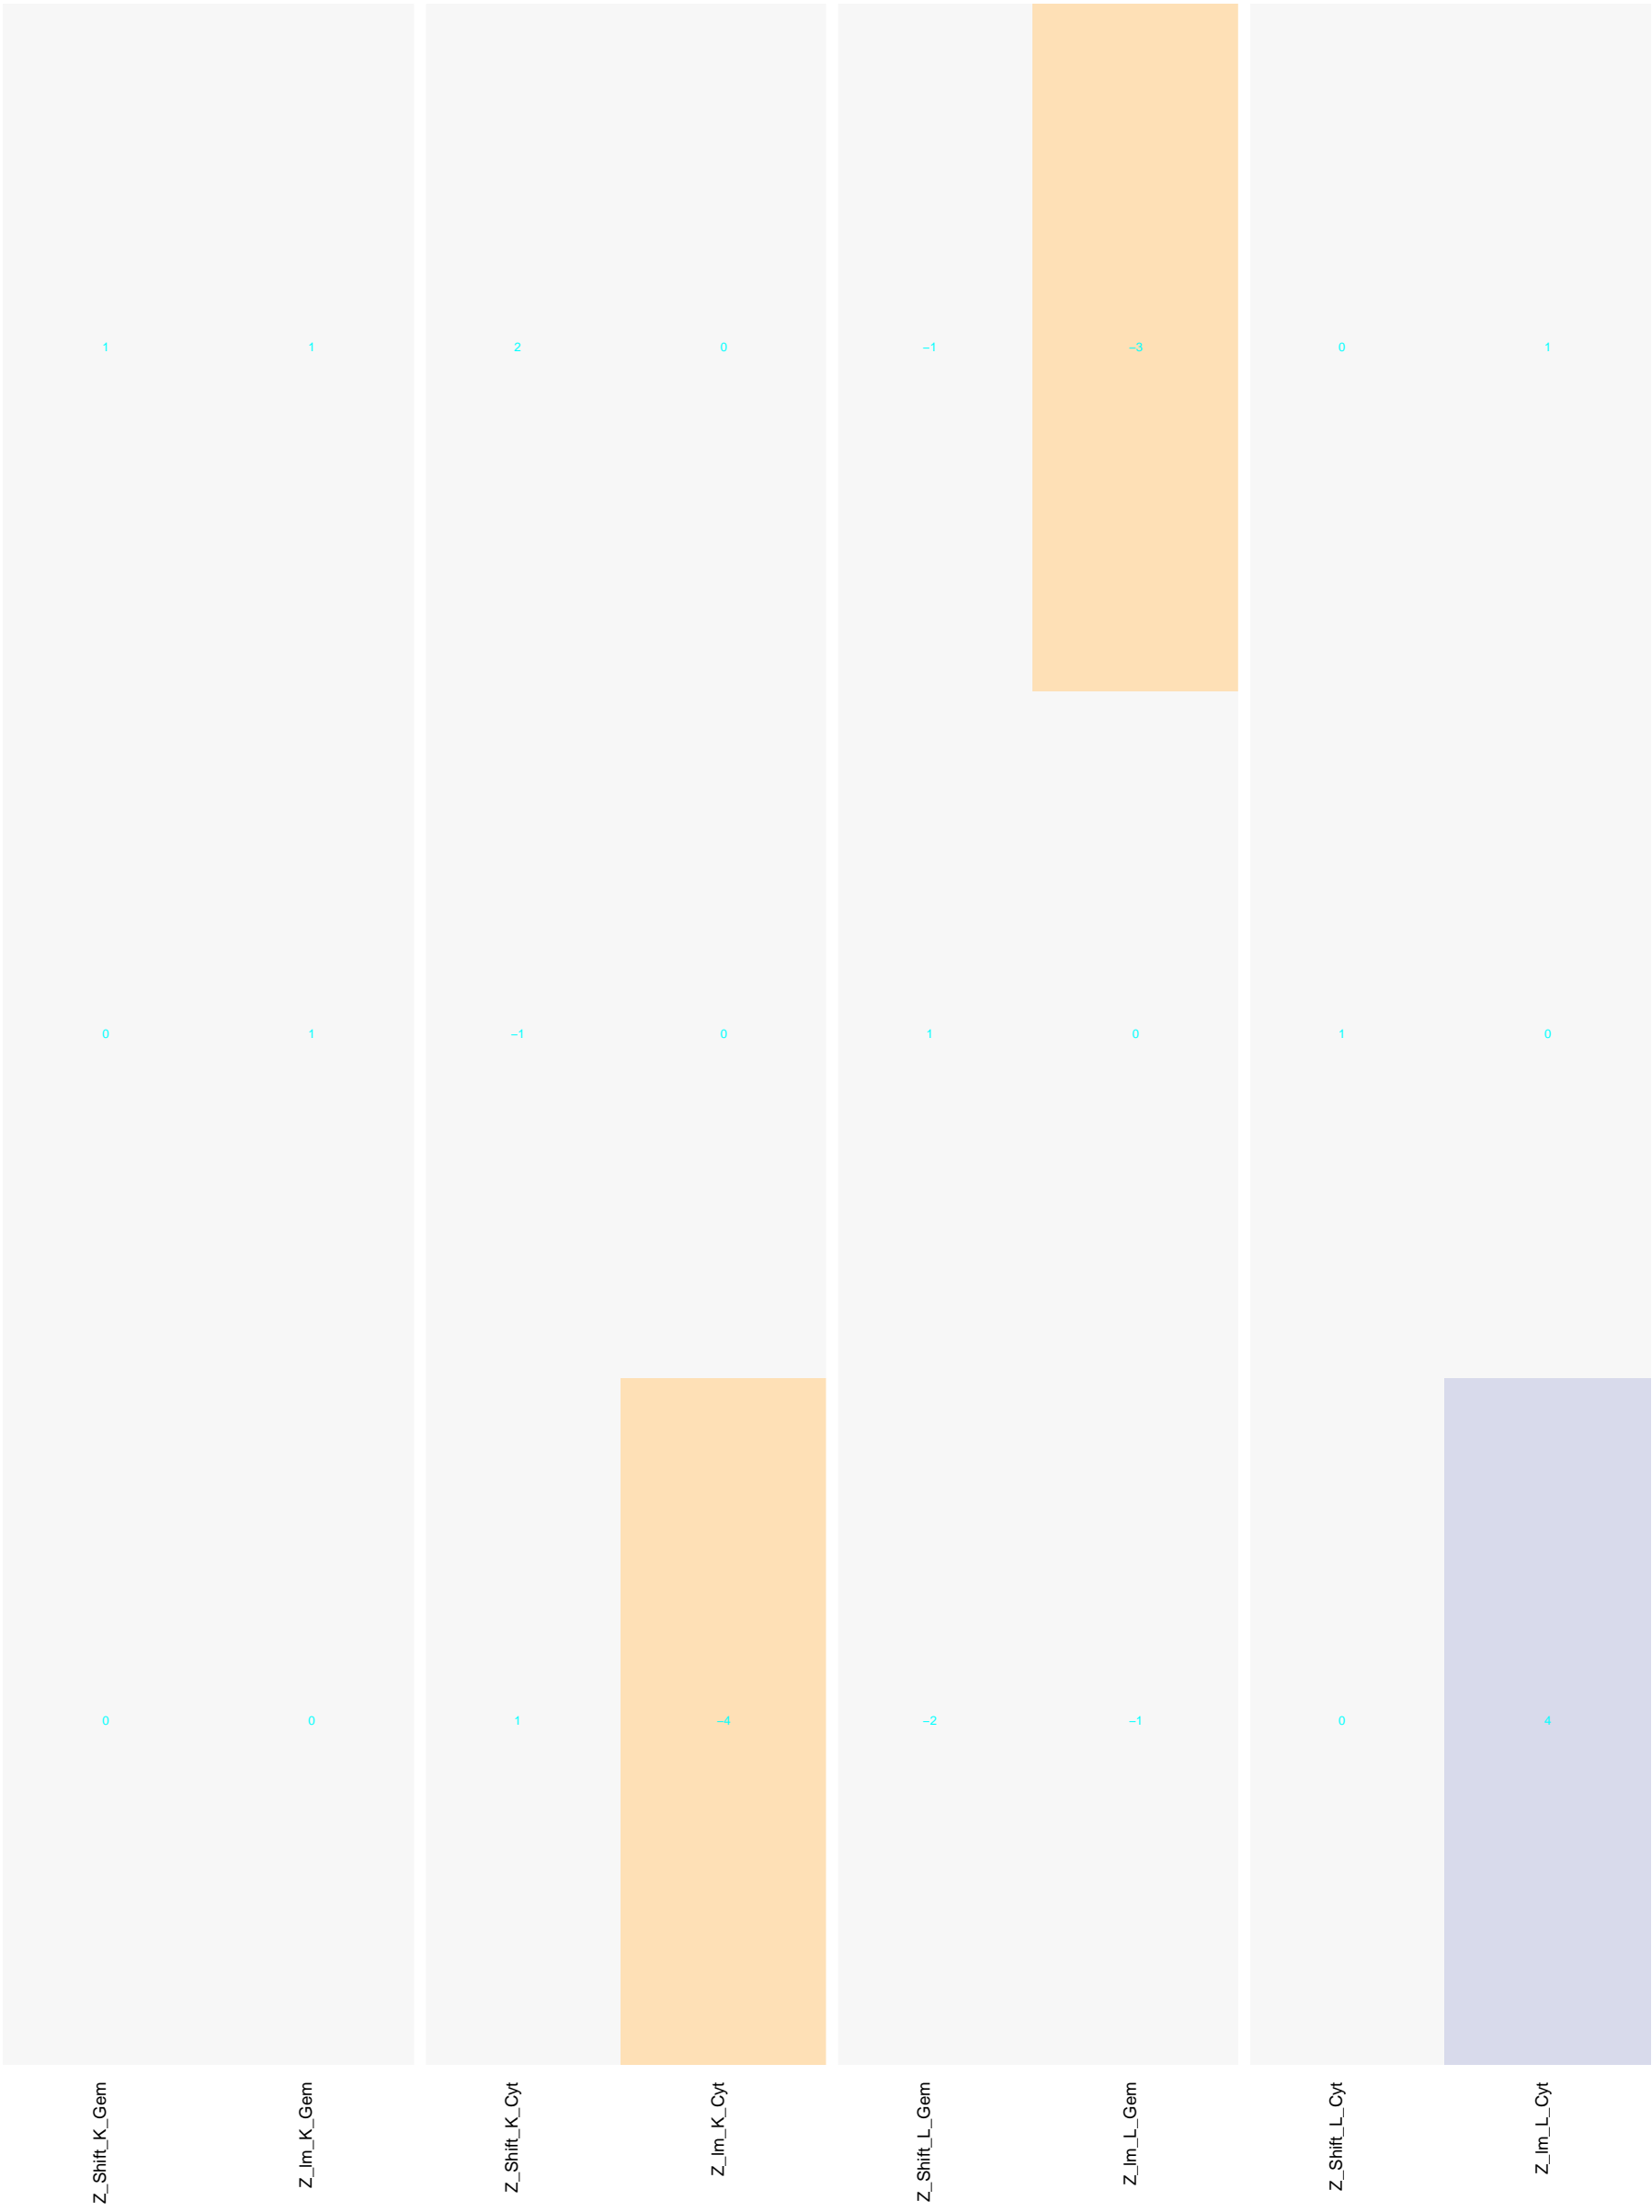

Gene



ATP-dependent 3'-5' RNA helicase activity

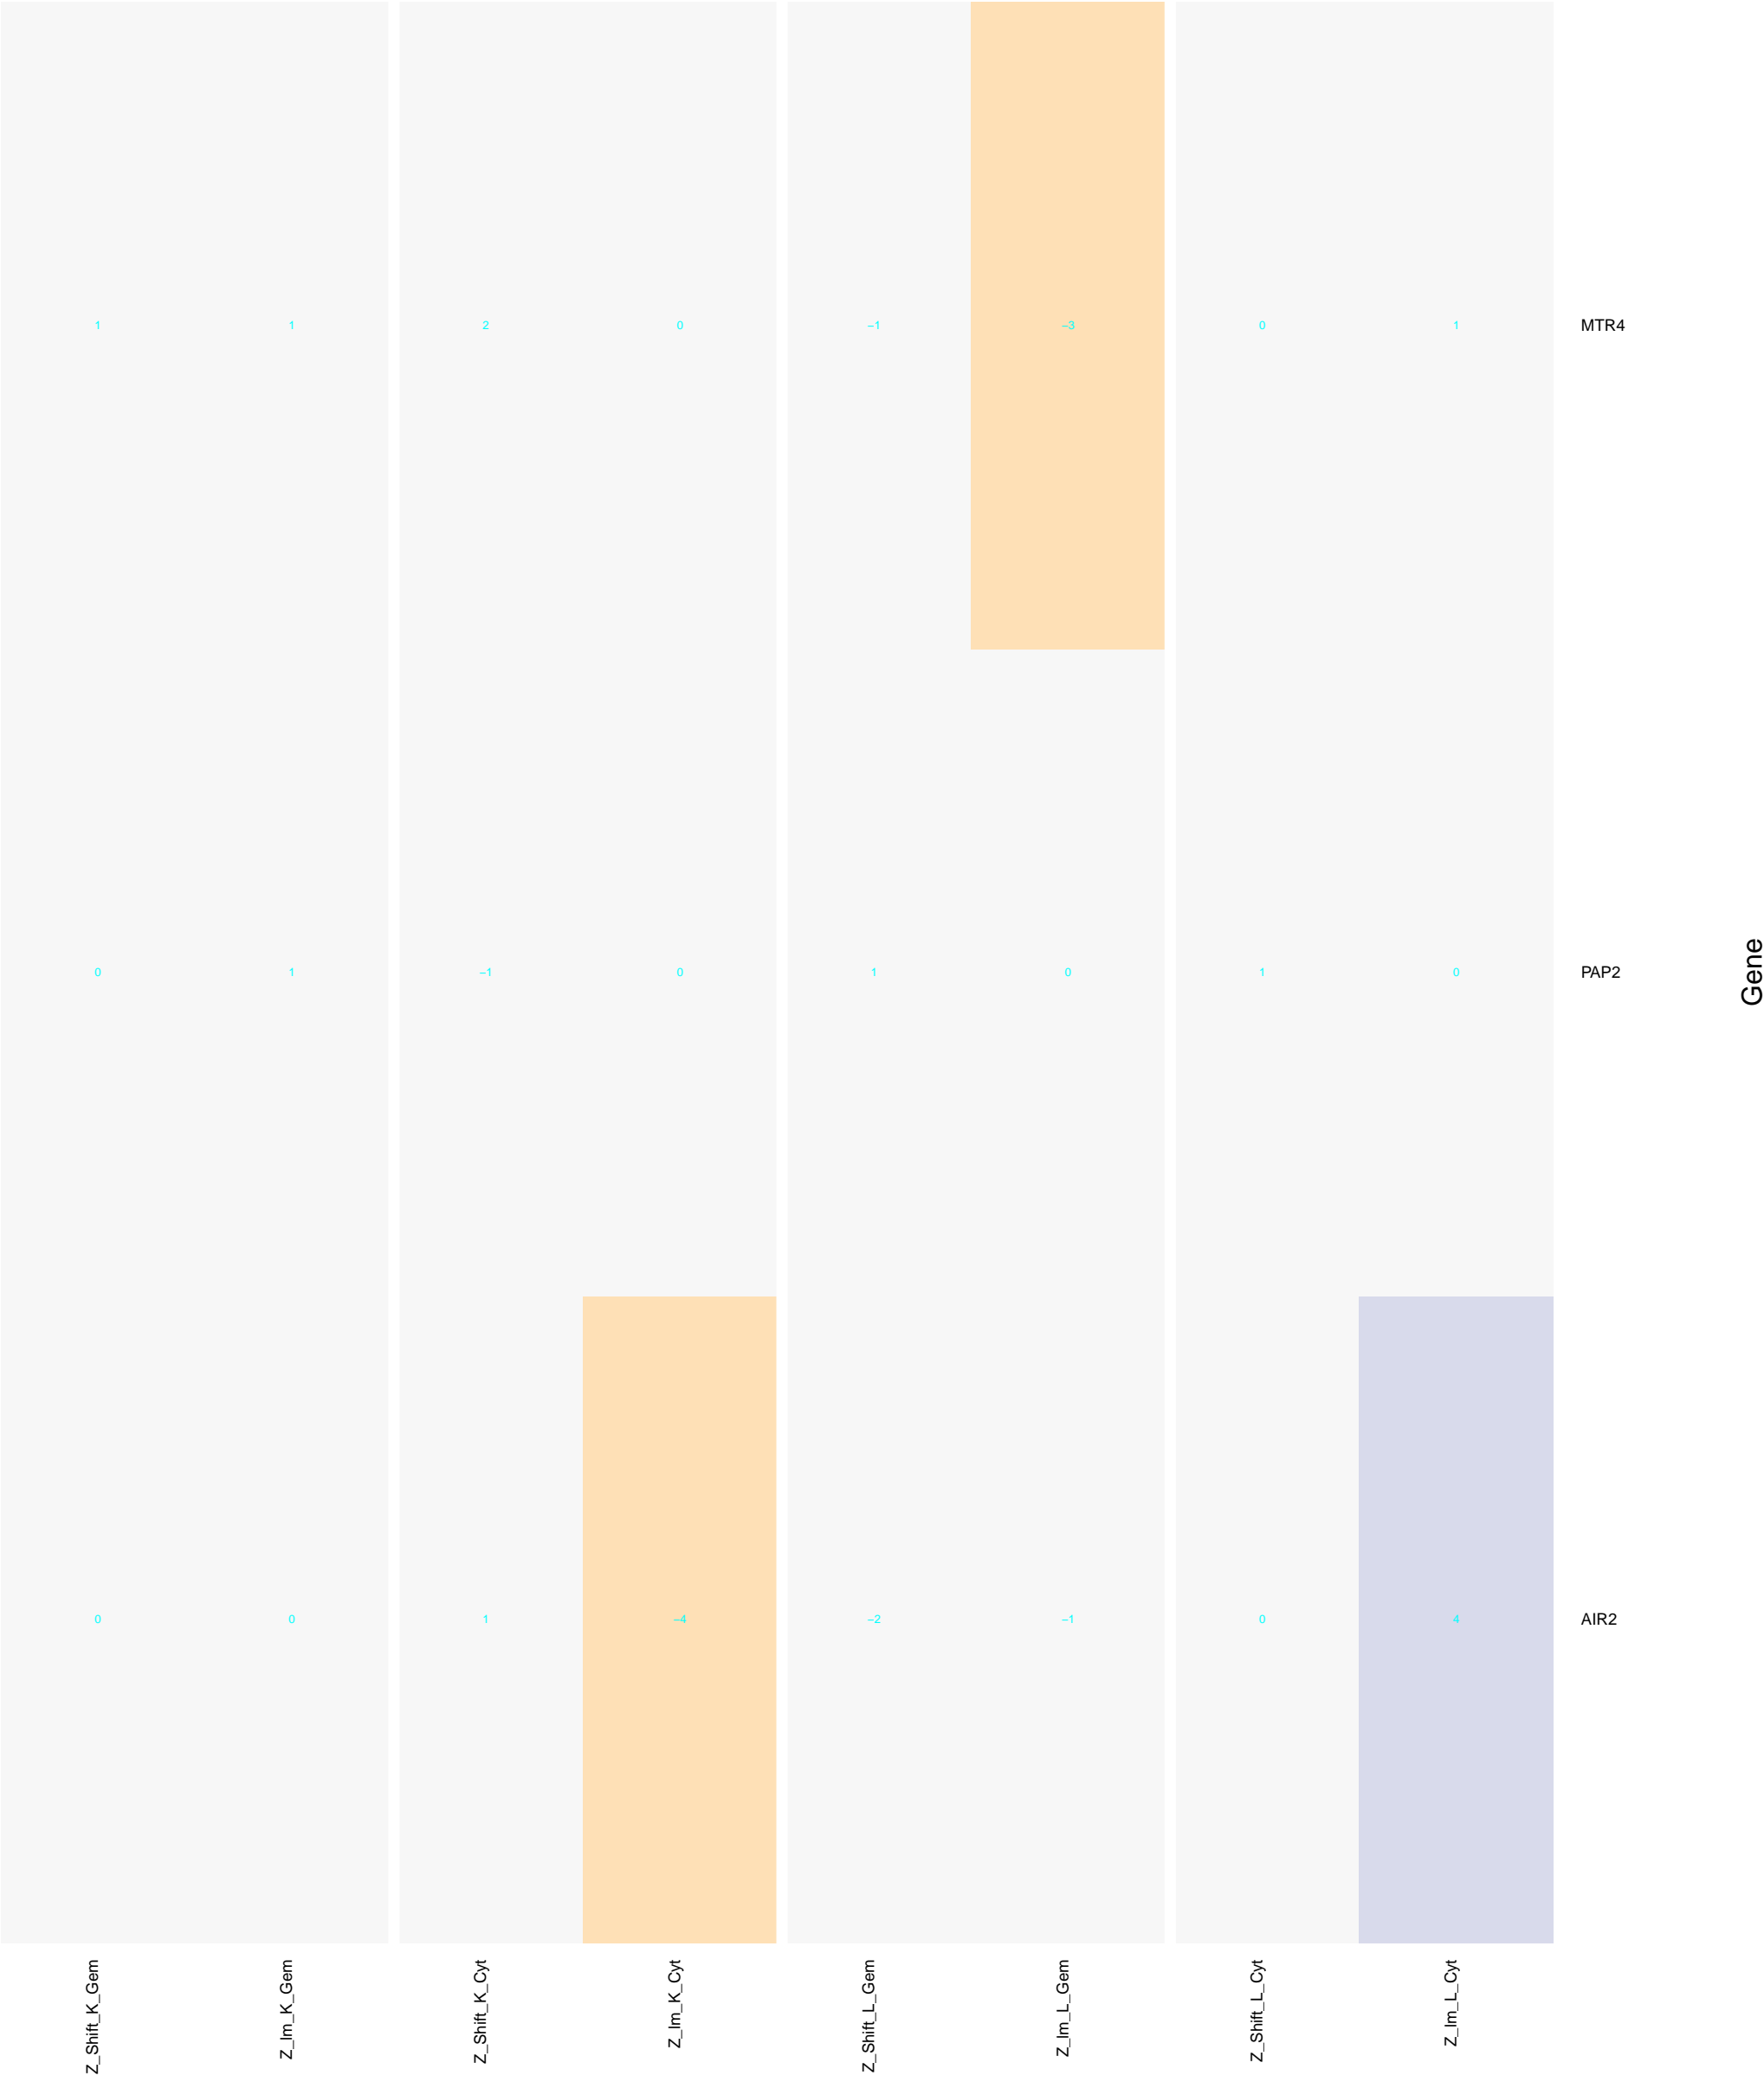

Supplement: s1 [file s1]

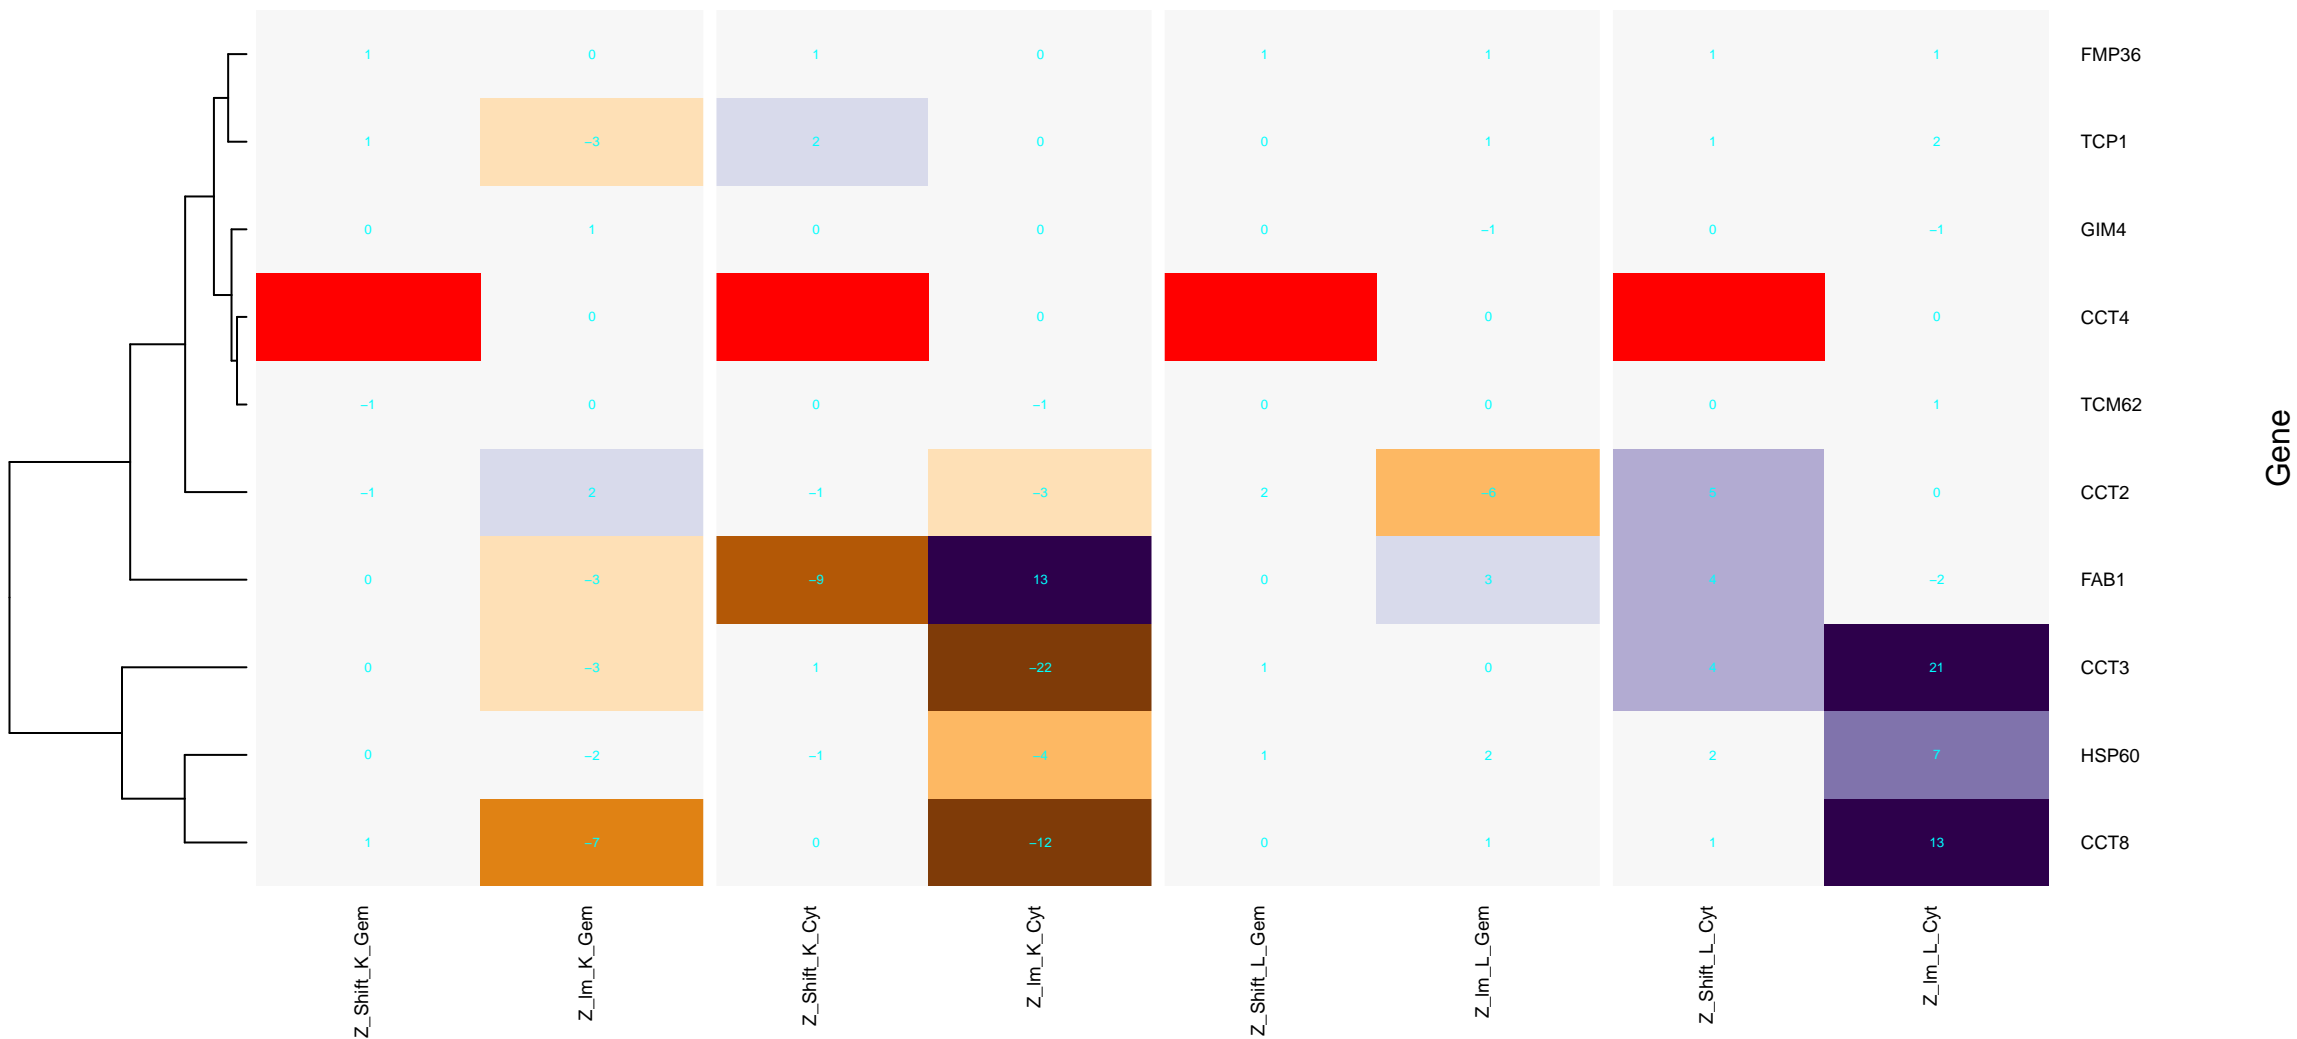

Supplement: s1 [file s1]

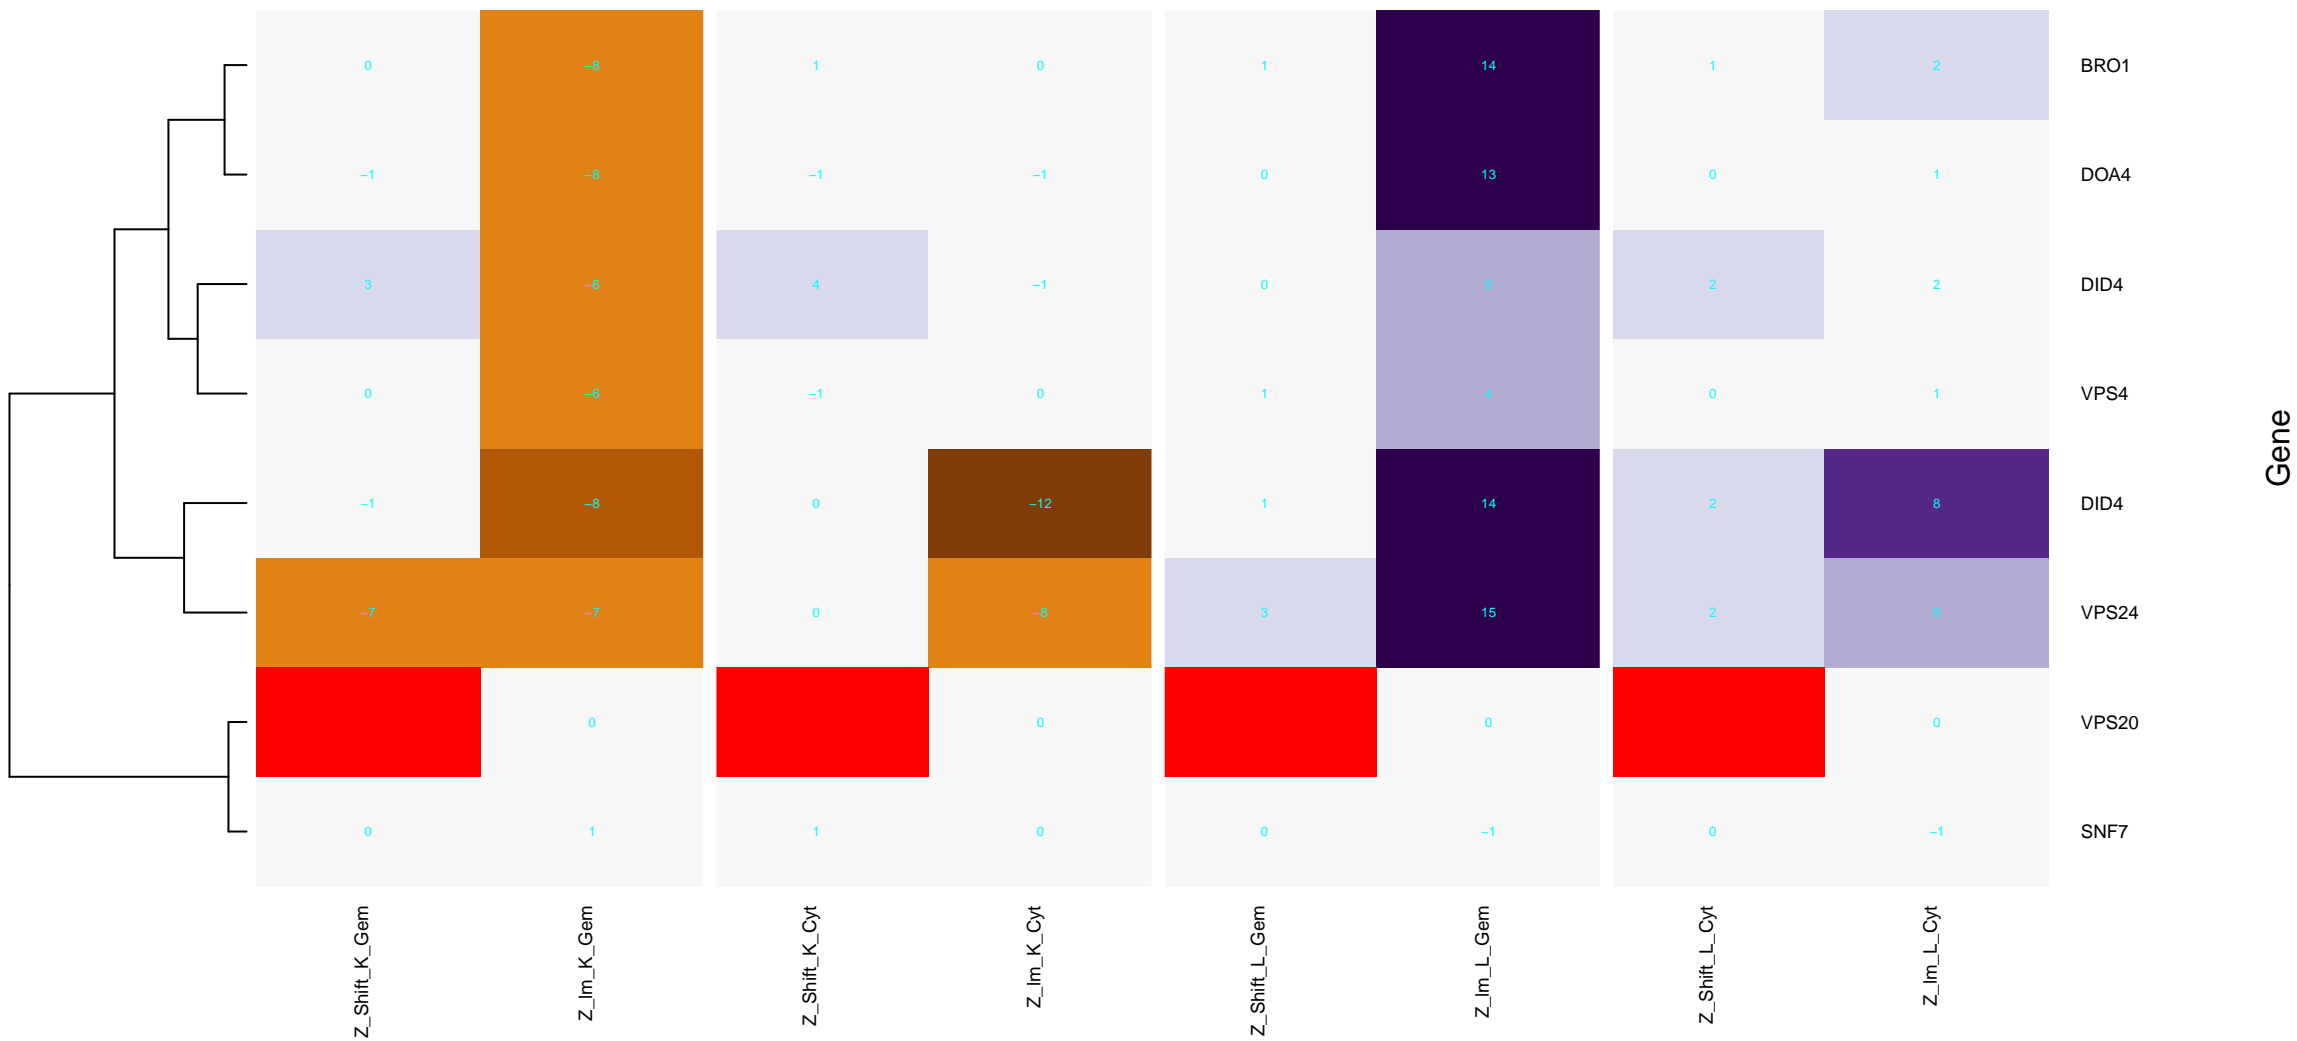

Supplement: s1 [file s1]

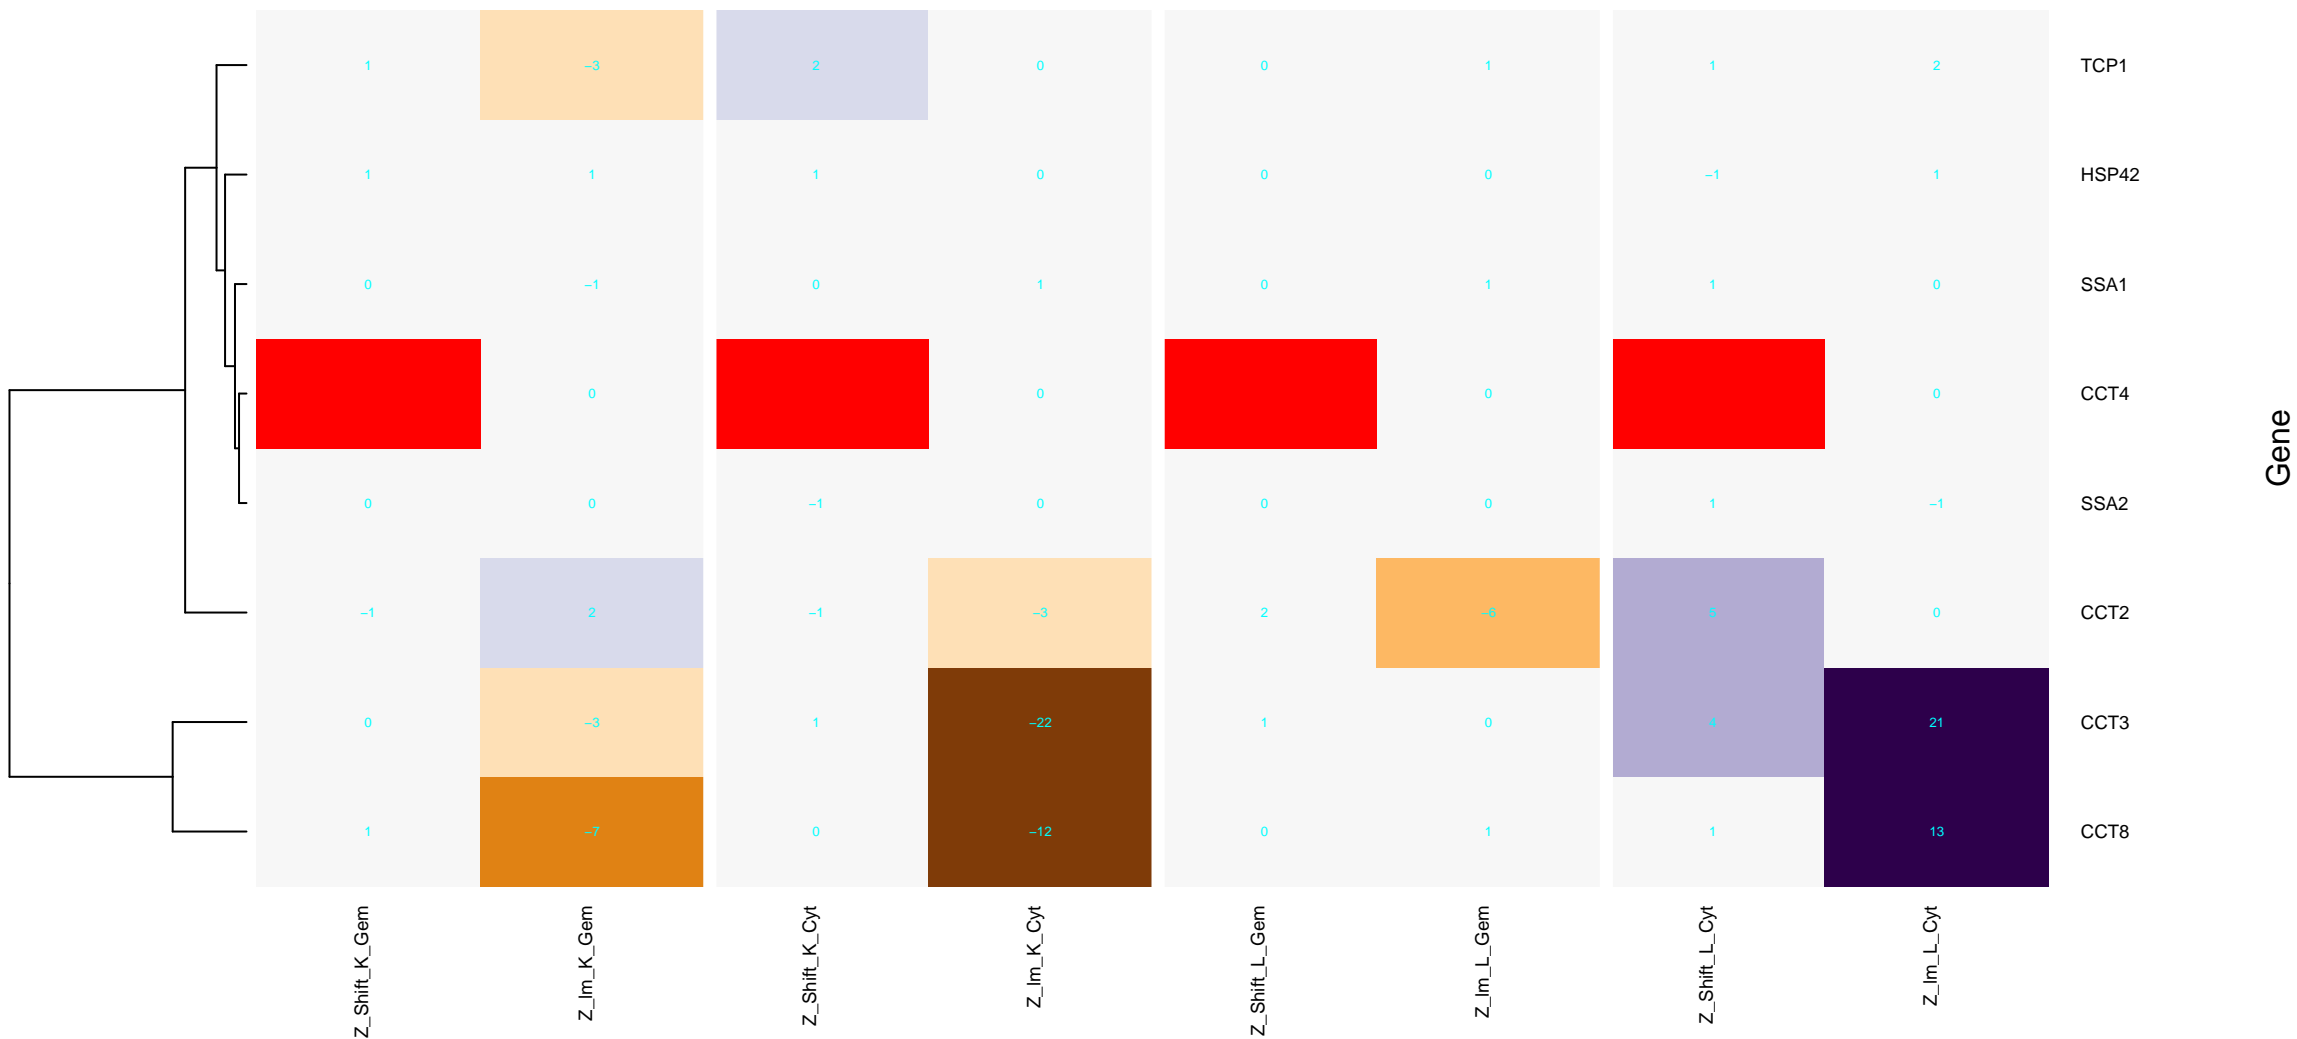

Supplement: s1 [file s1]

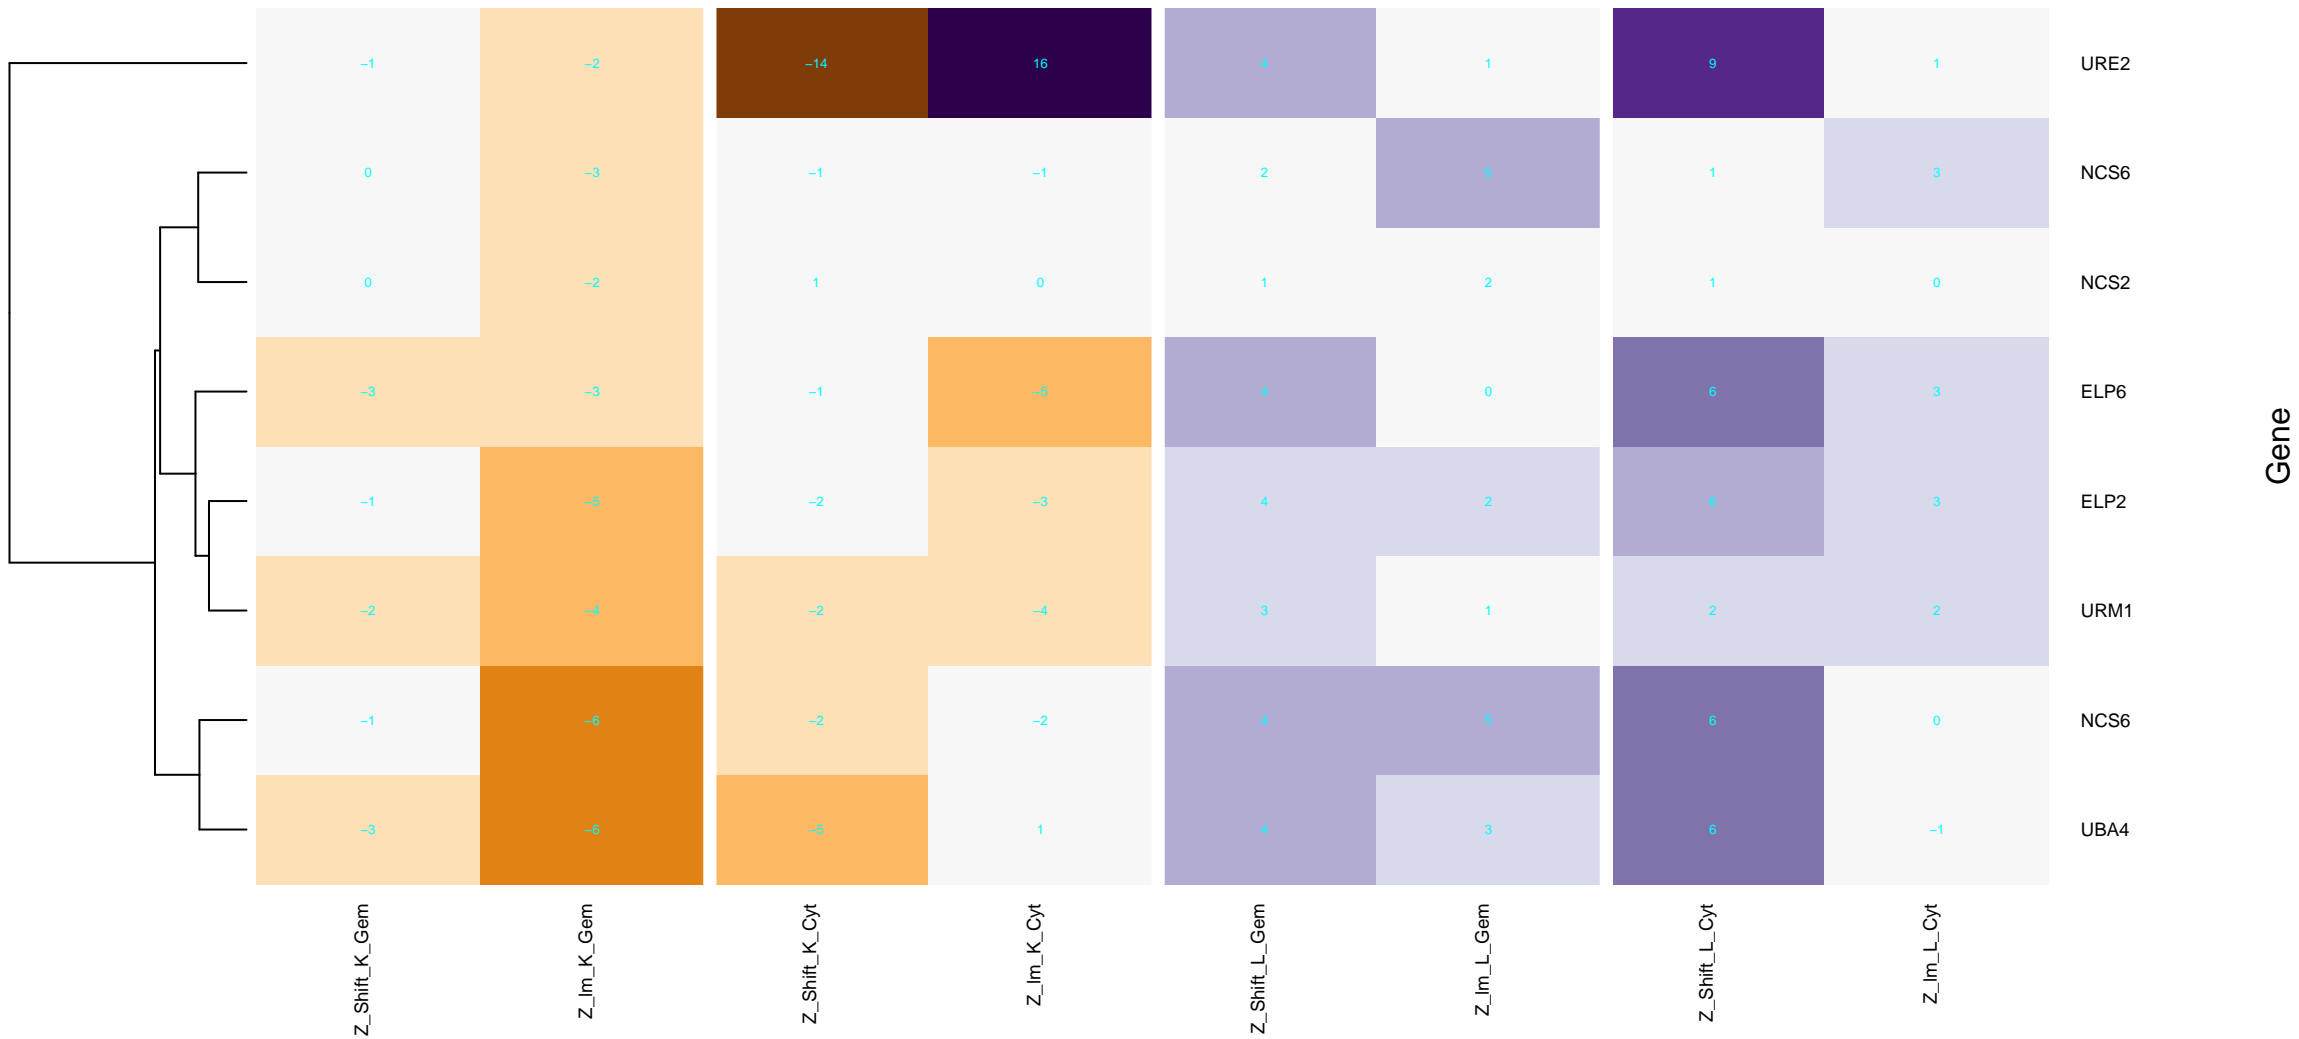

Supplement: s1 [file s1]

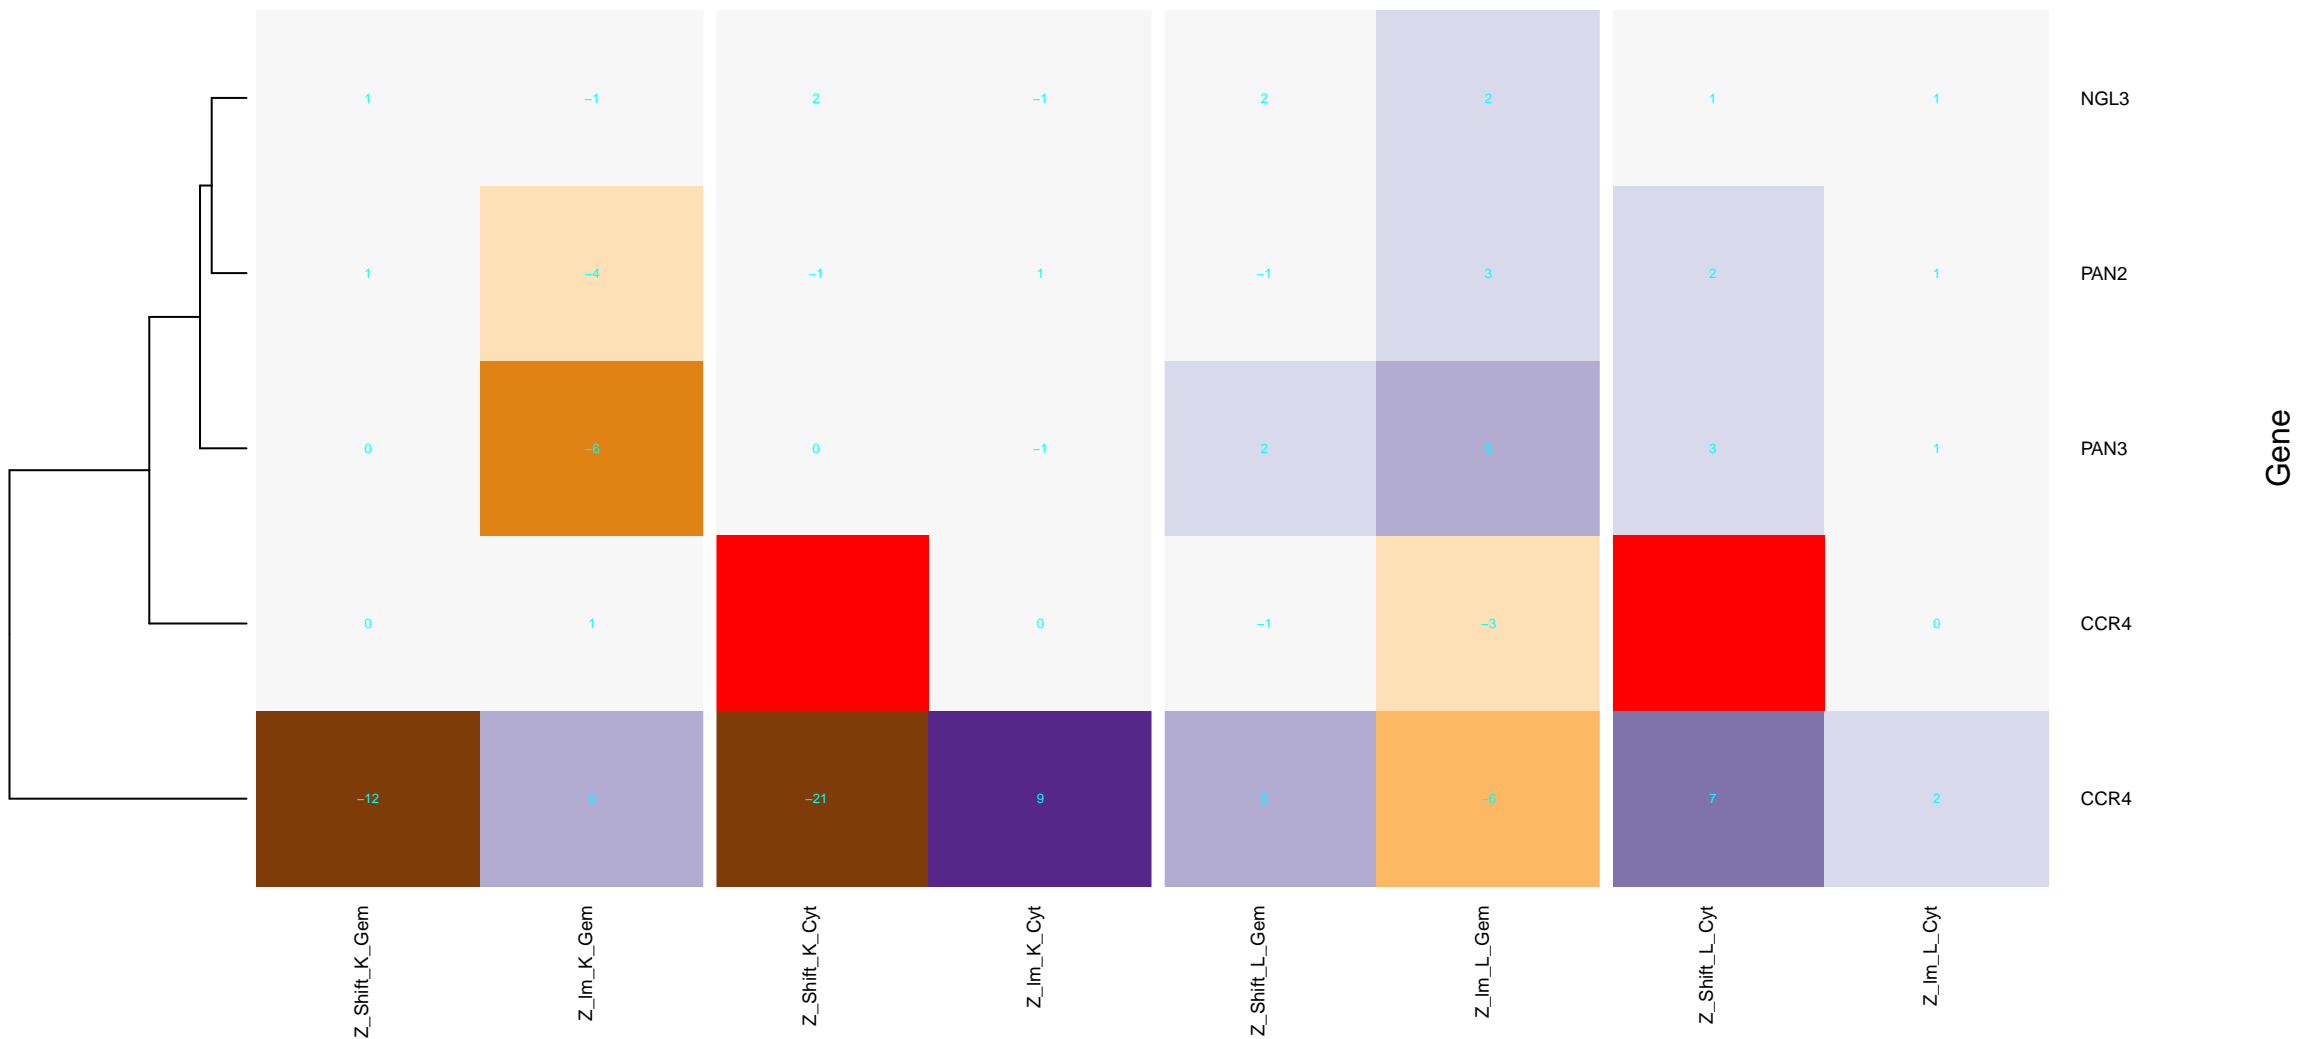

Supplement: s1 [file s1]

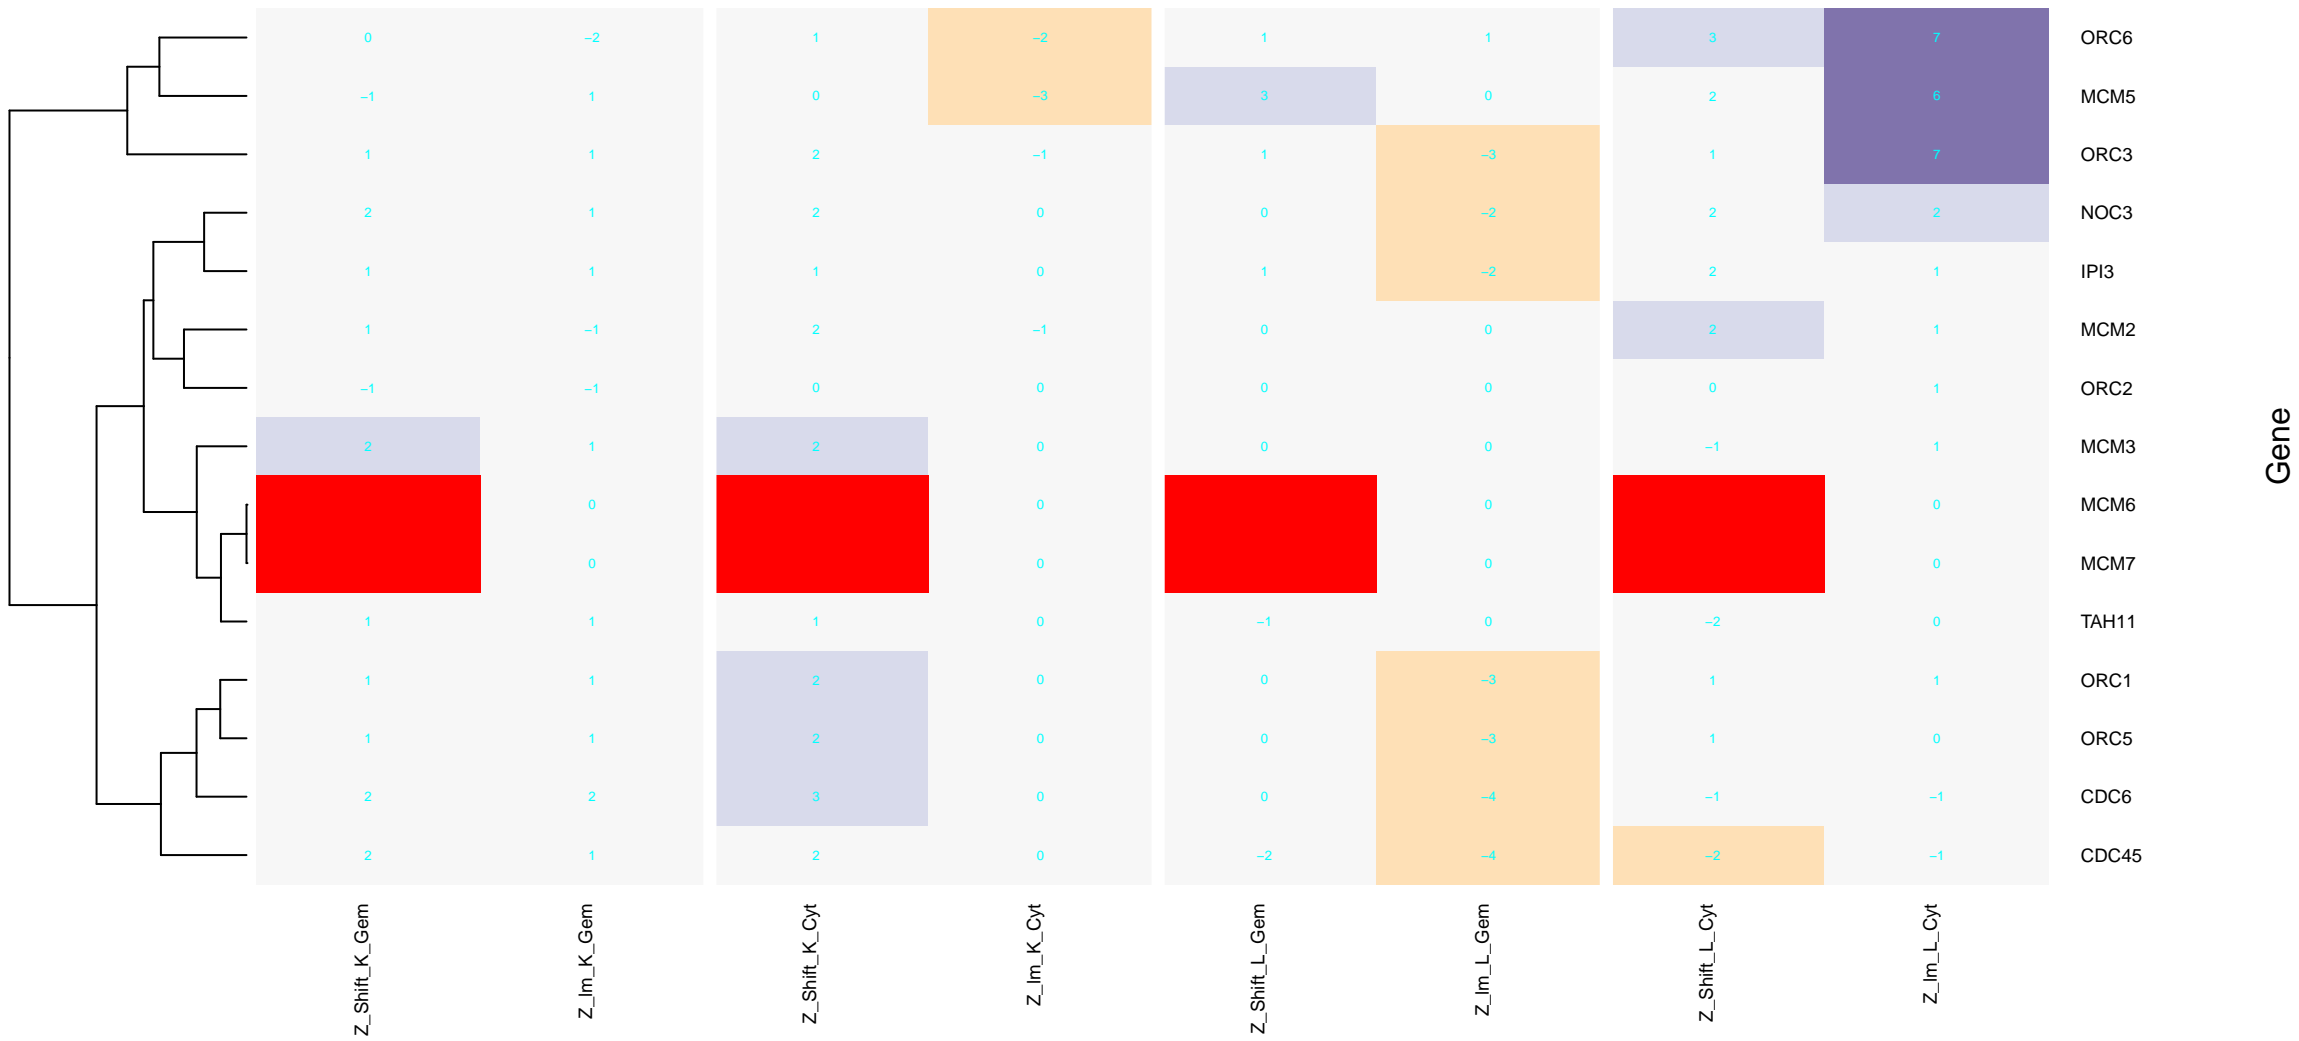

Supplement: s1 [file s1]

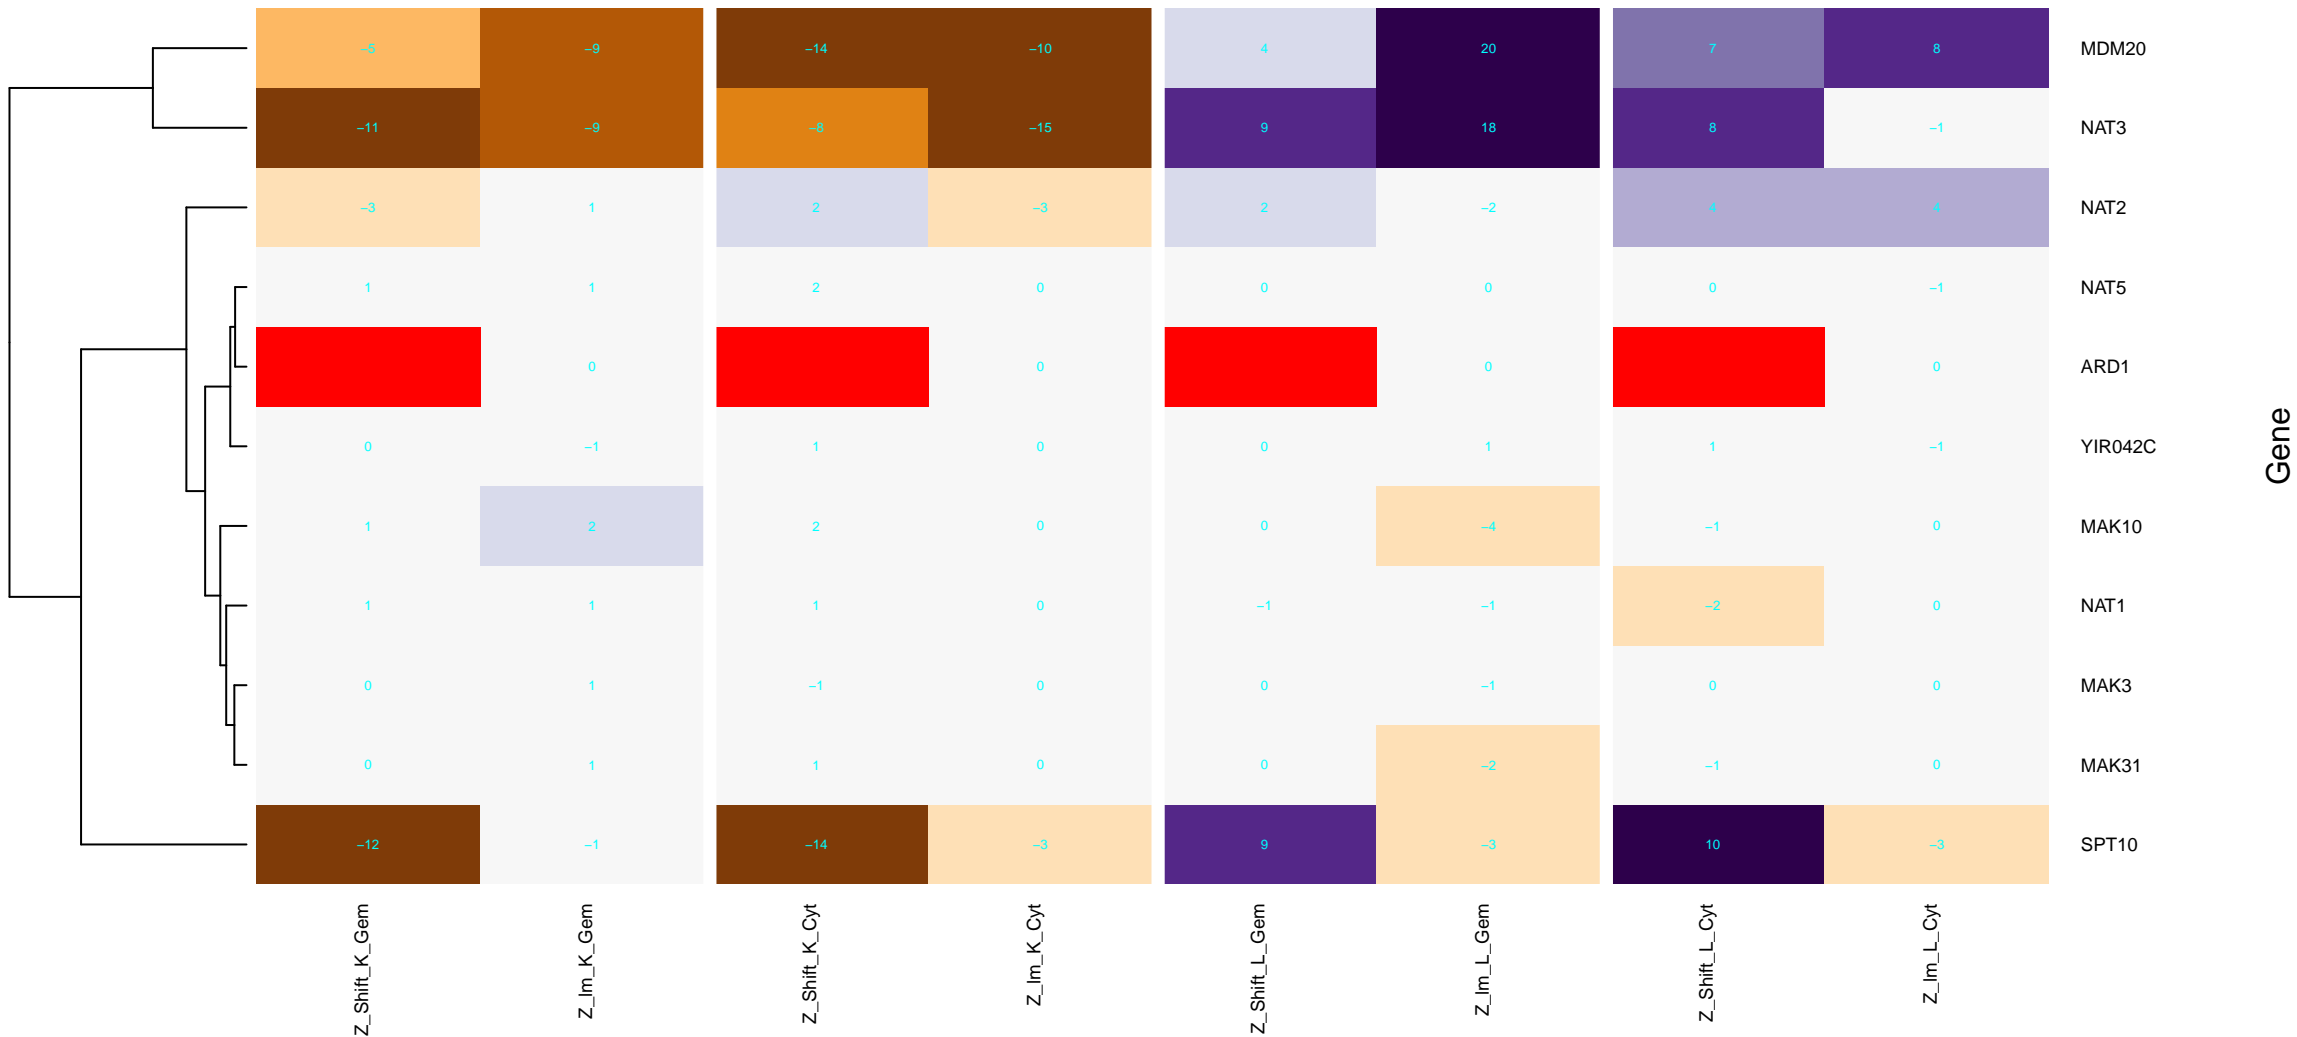

Supplement: s1 [file s1]

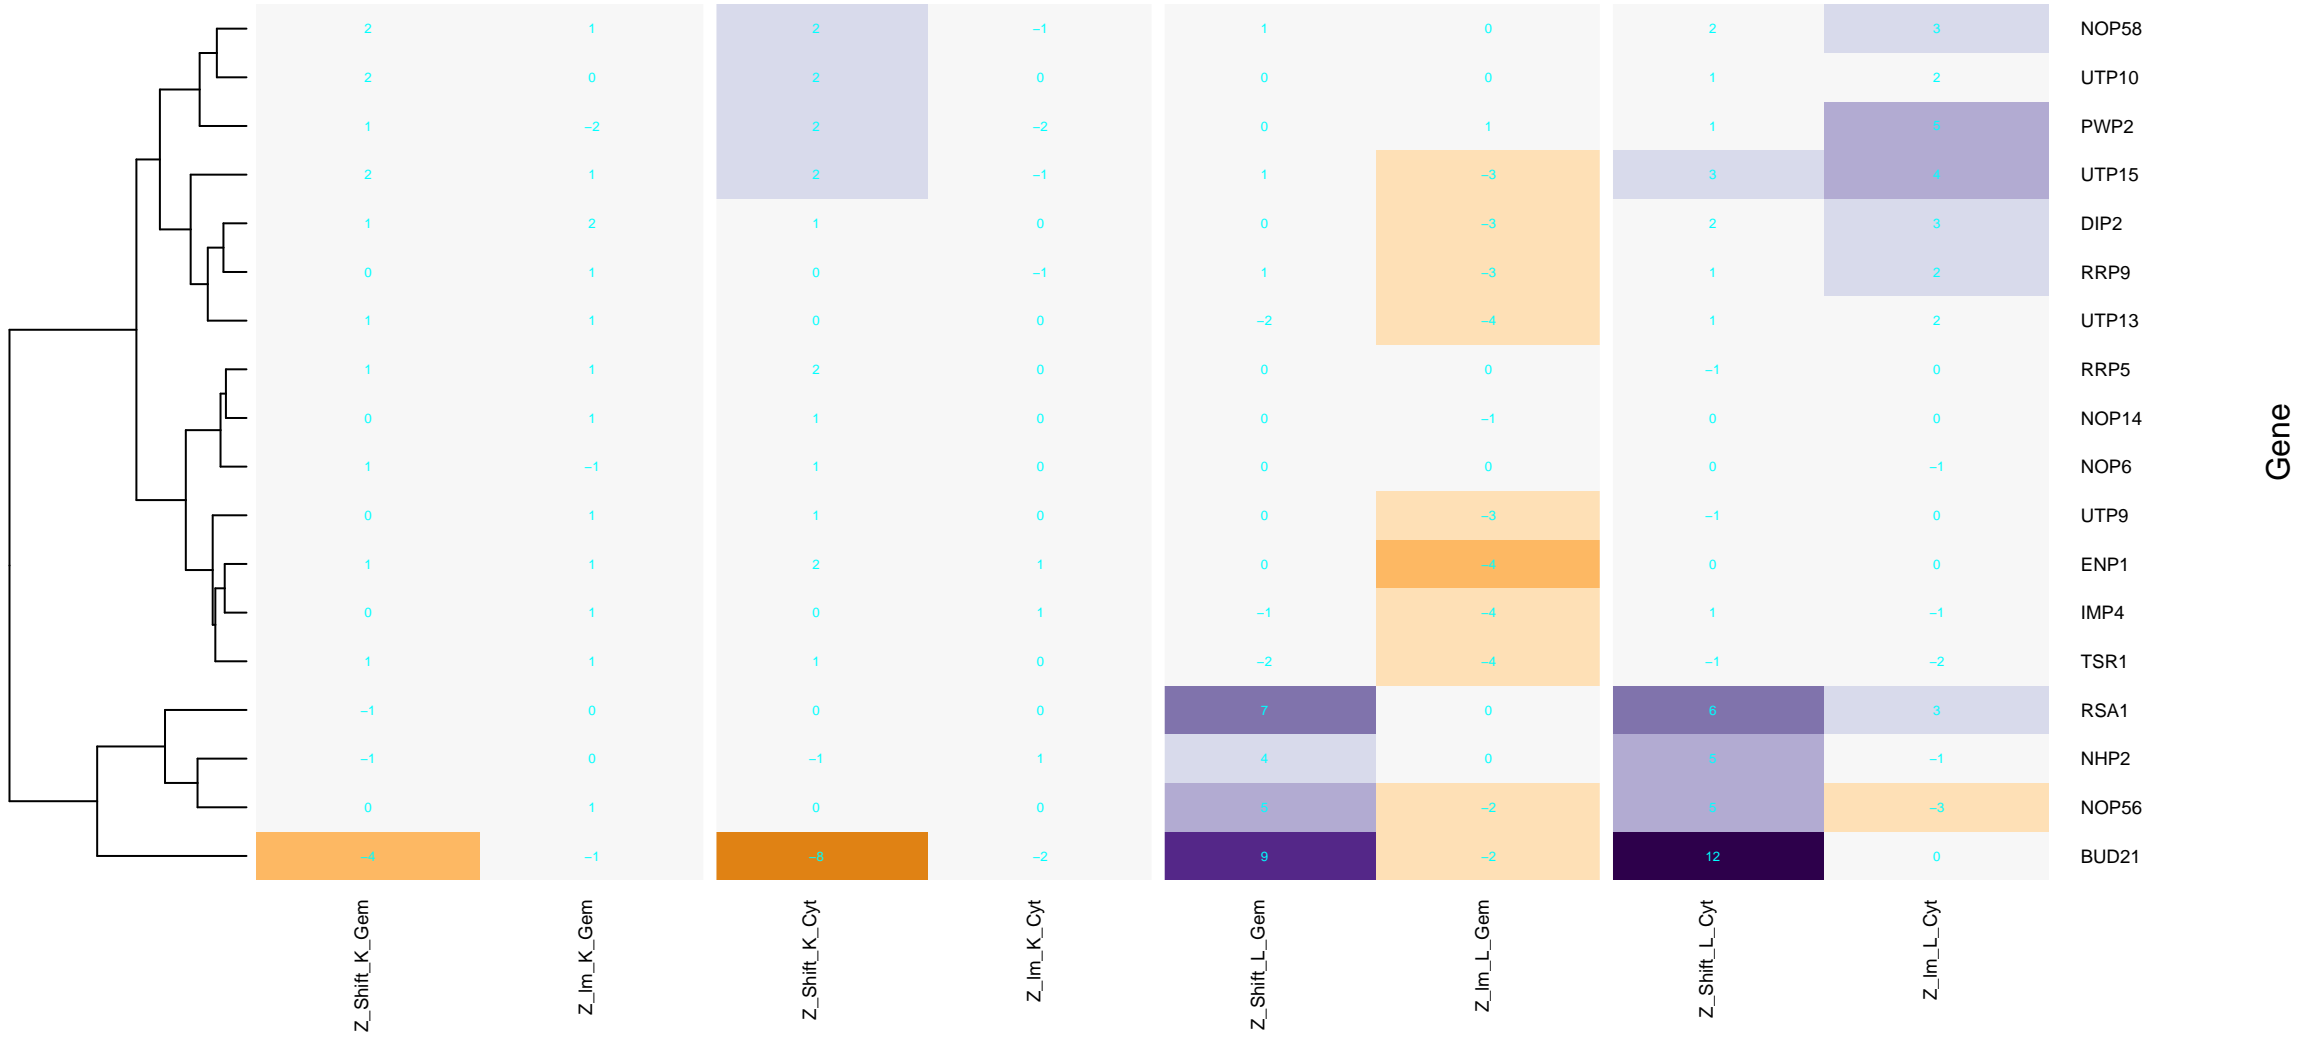

Supplement: s1 [file s1]

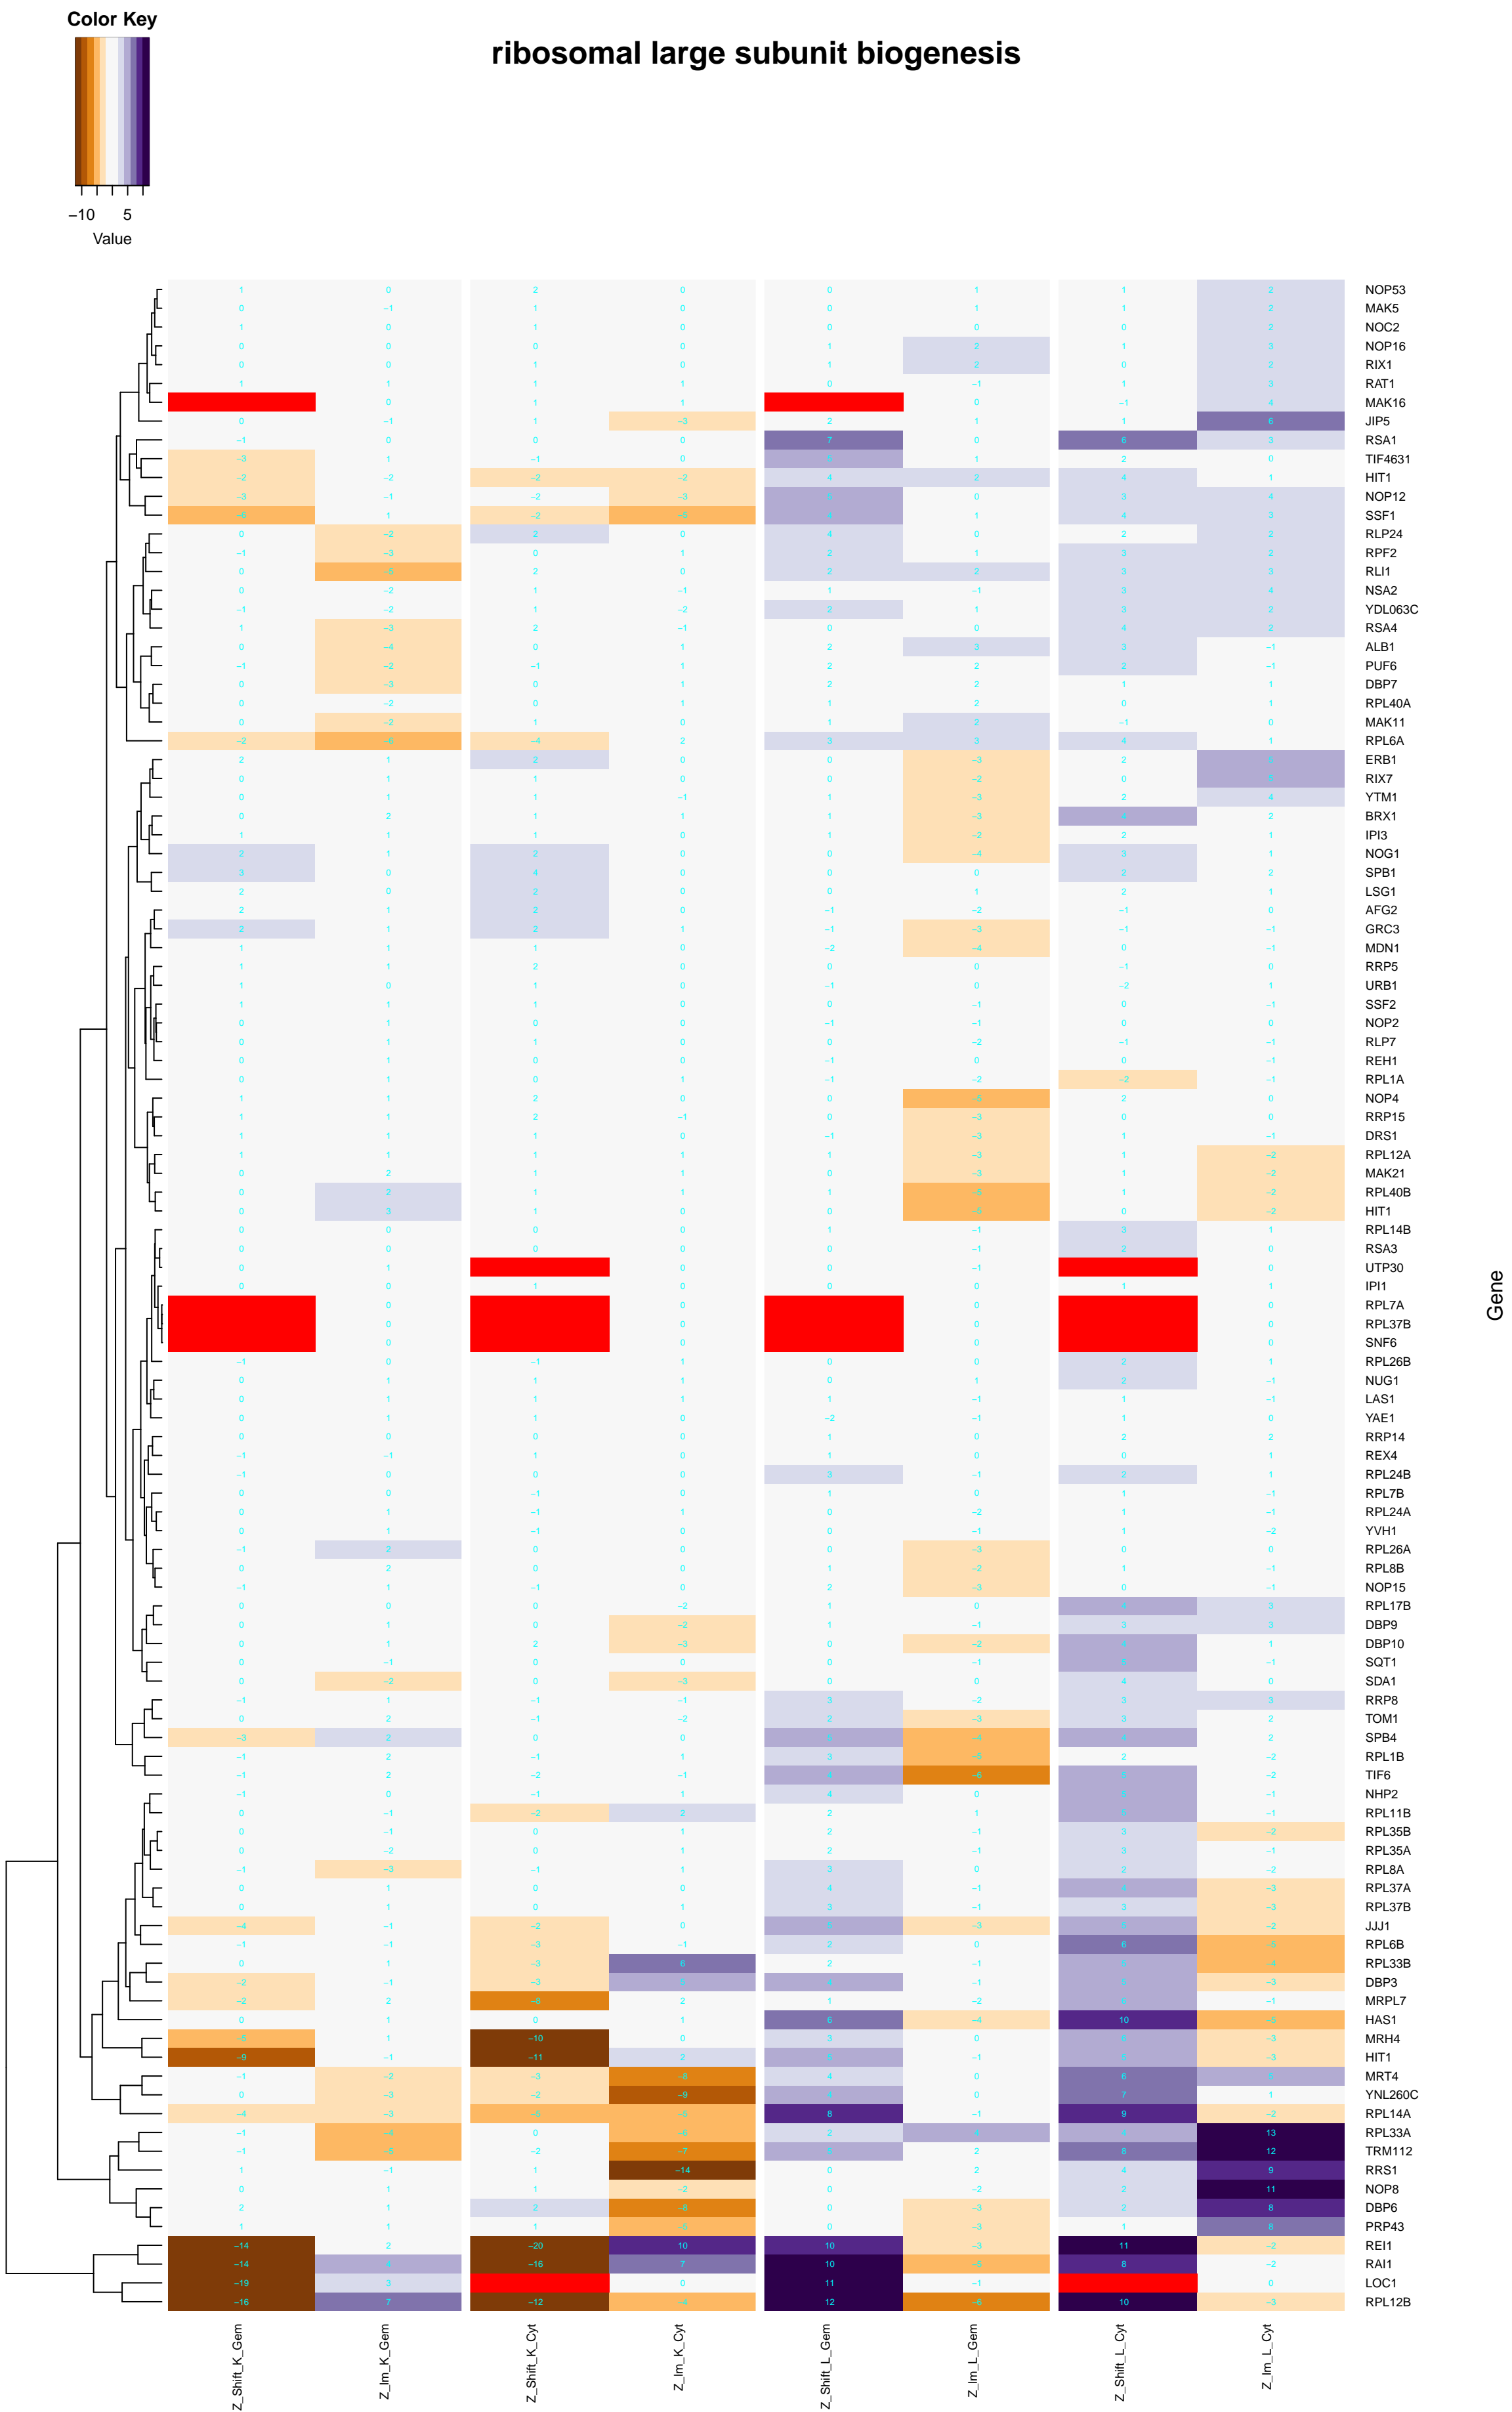

Supplement: s1 [file s1]

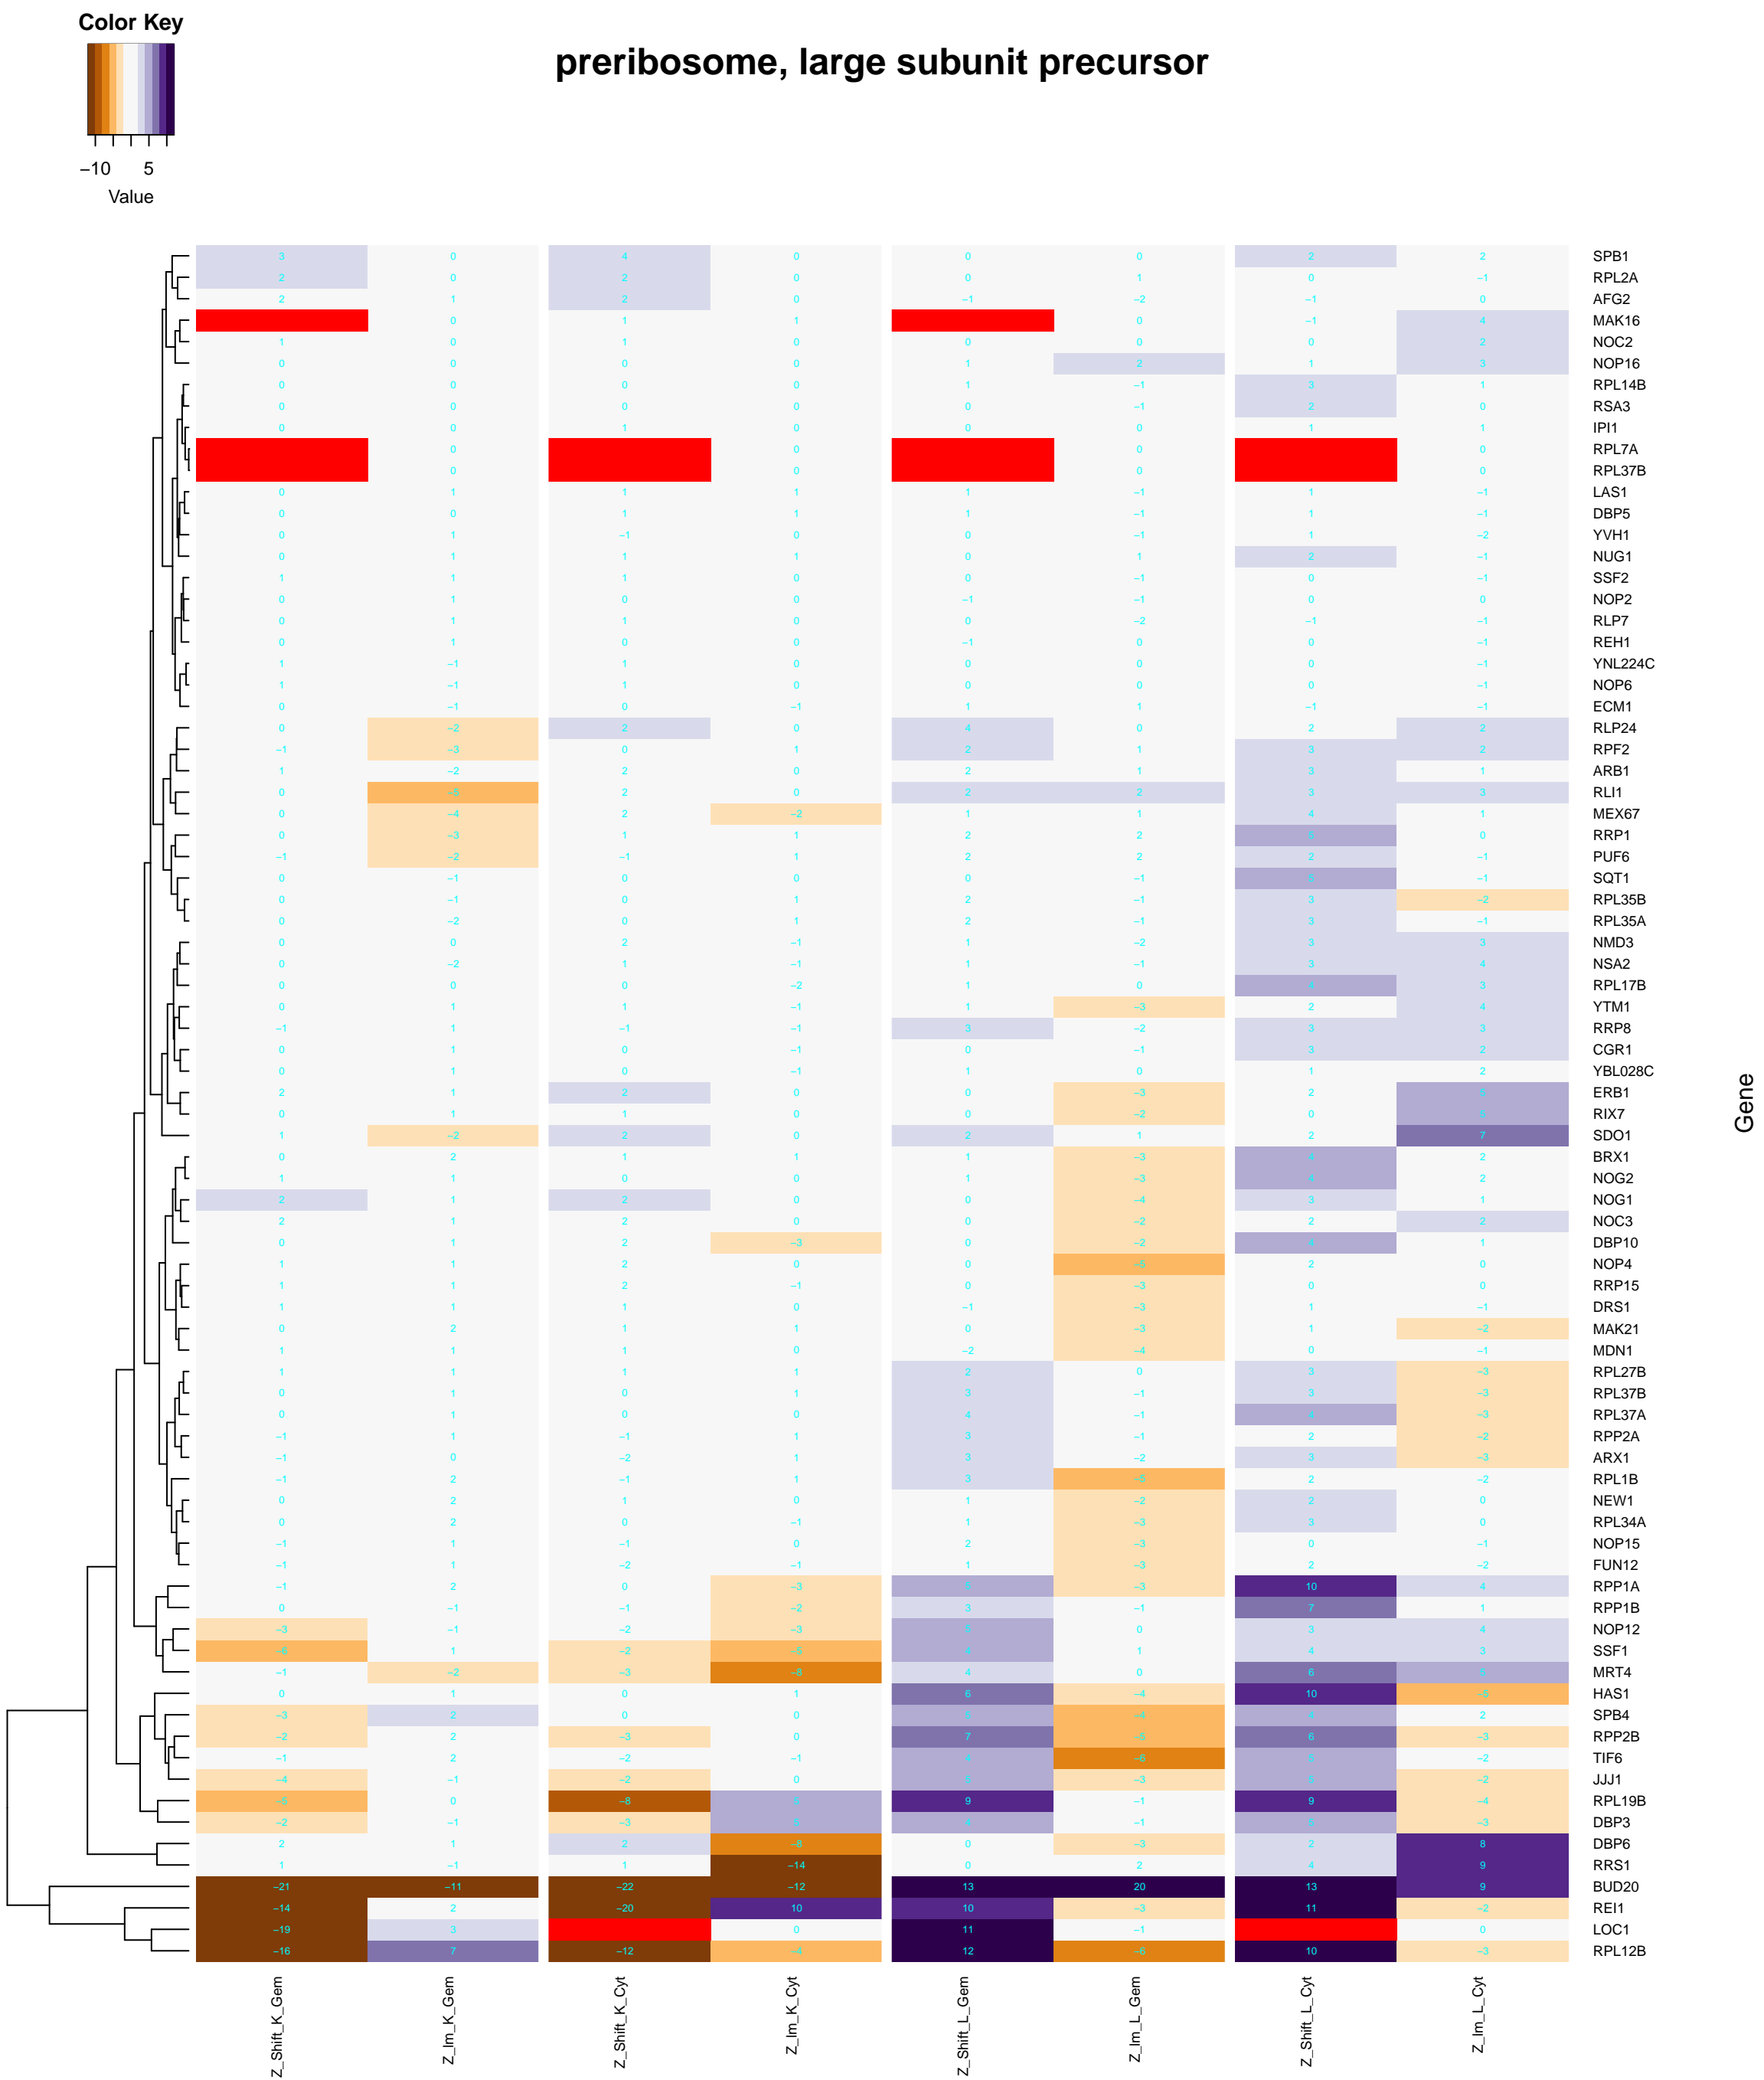

Supplement: s1 [file s1]

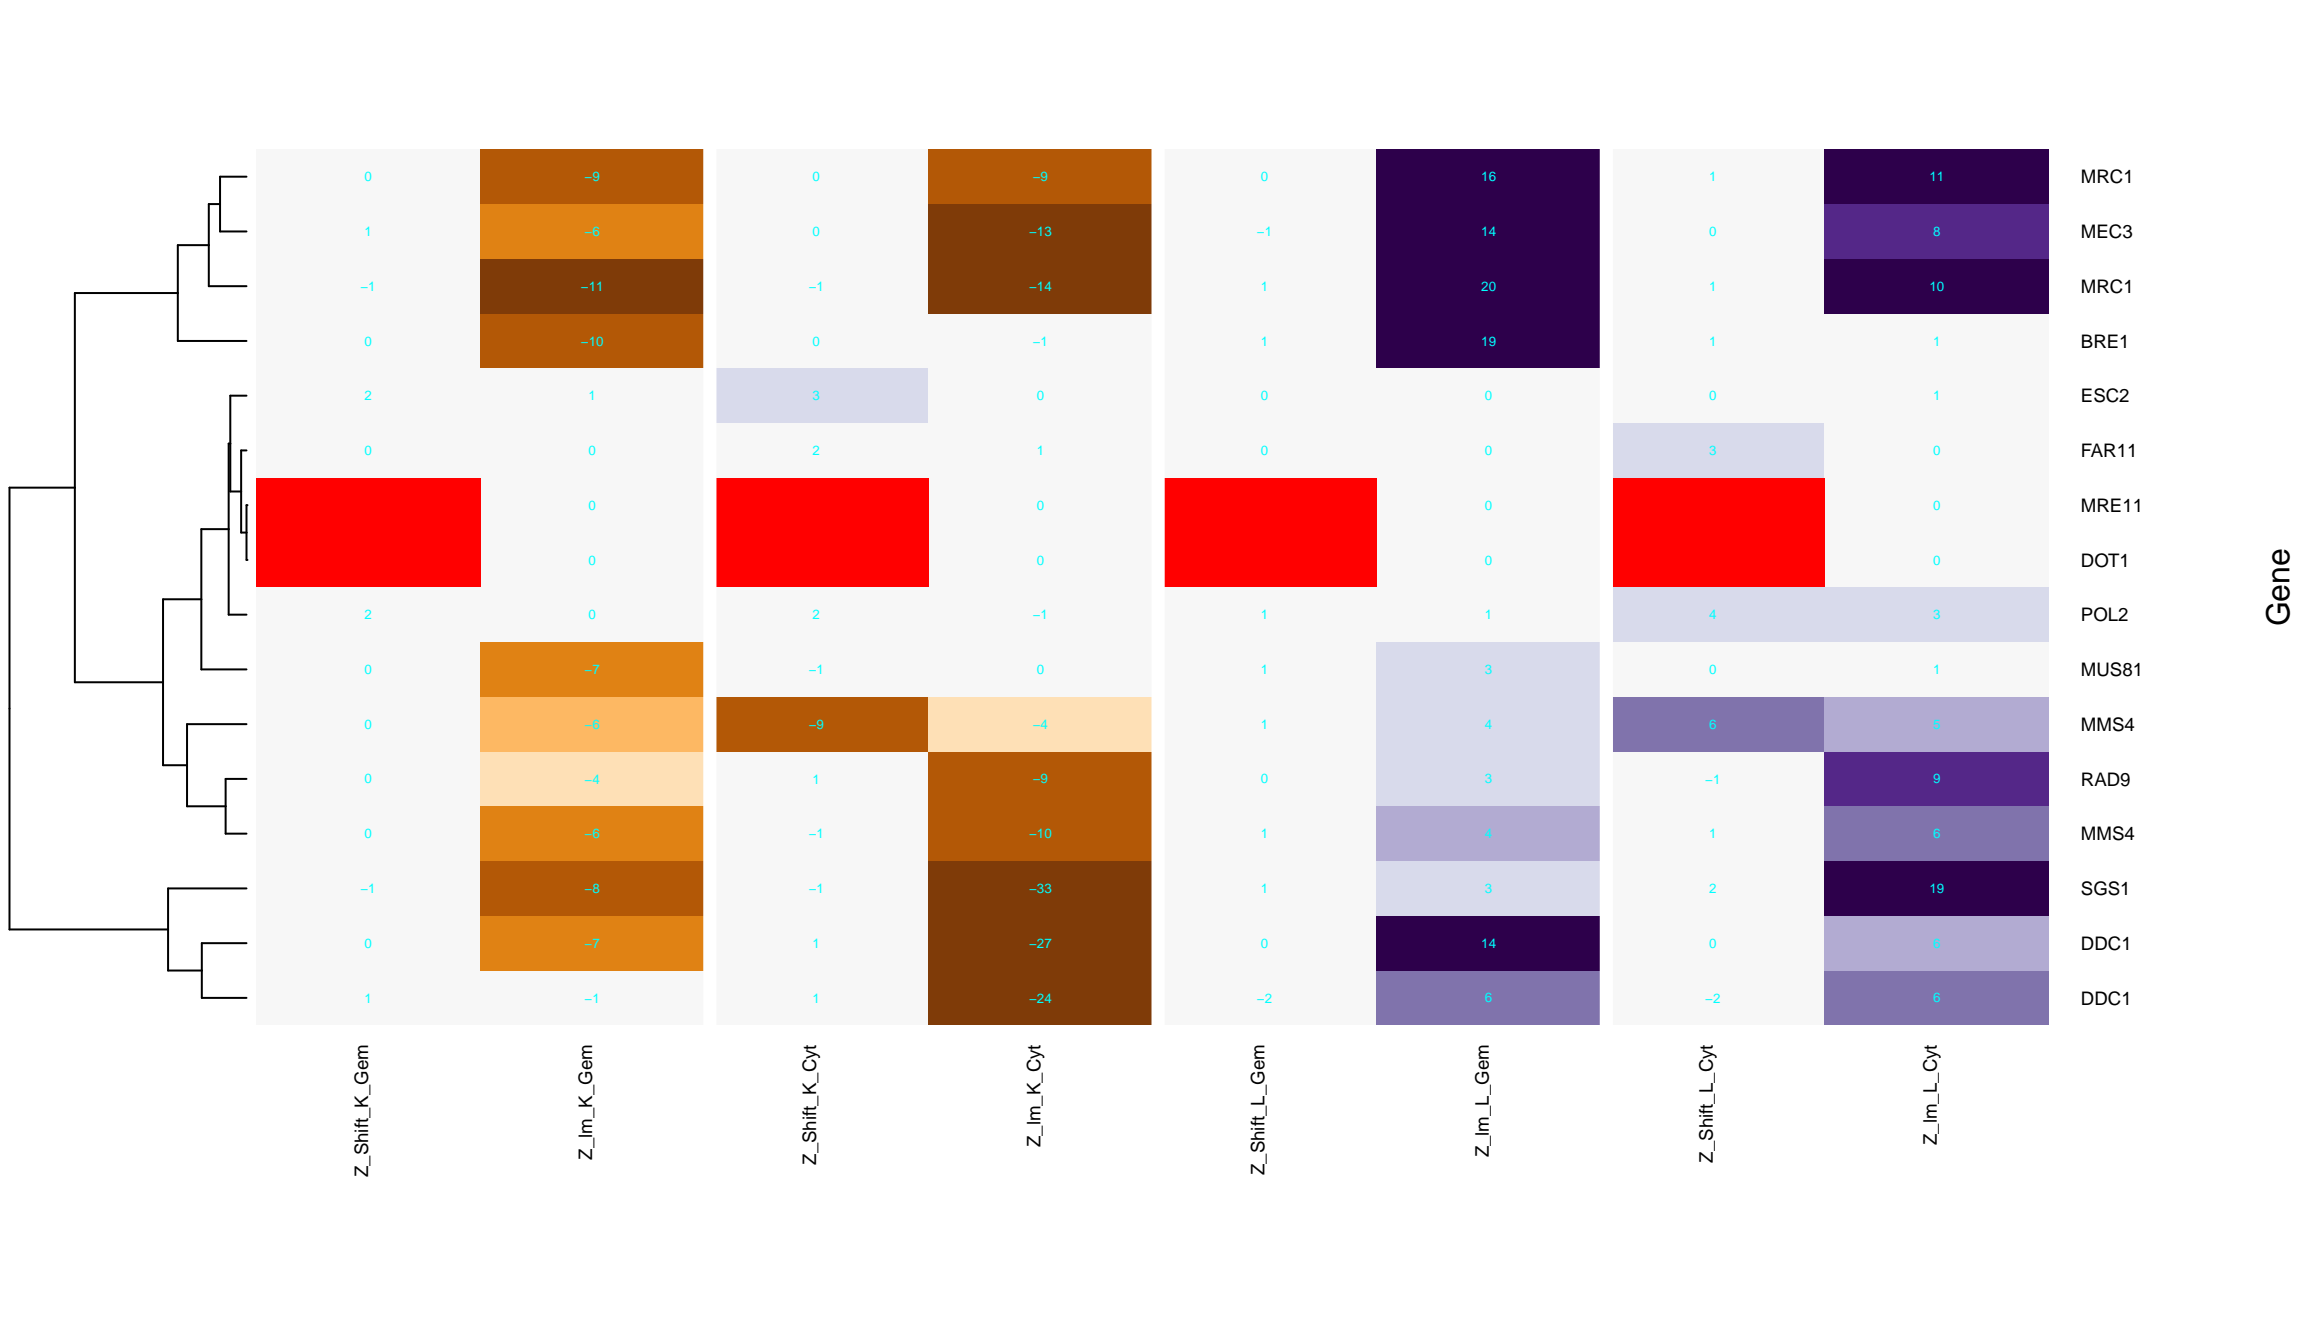

Supplement: s1 [file s1]

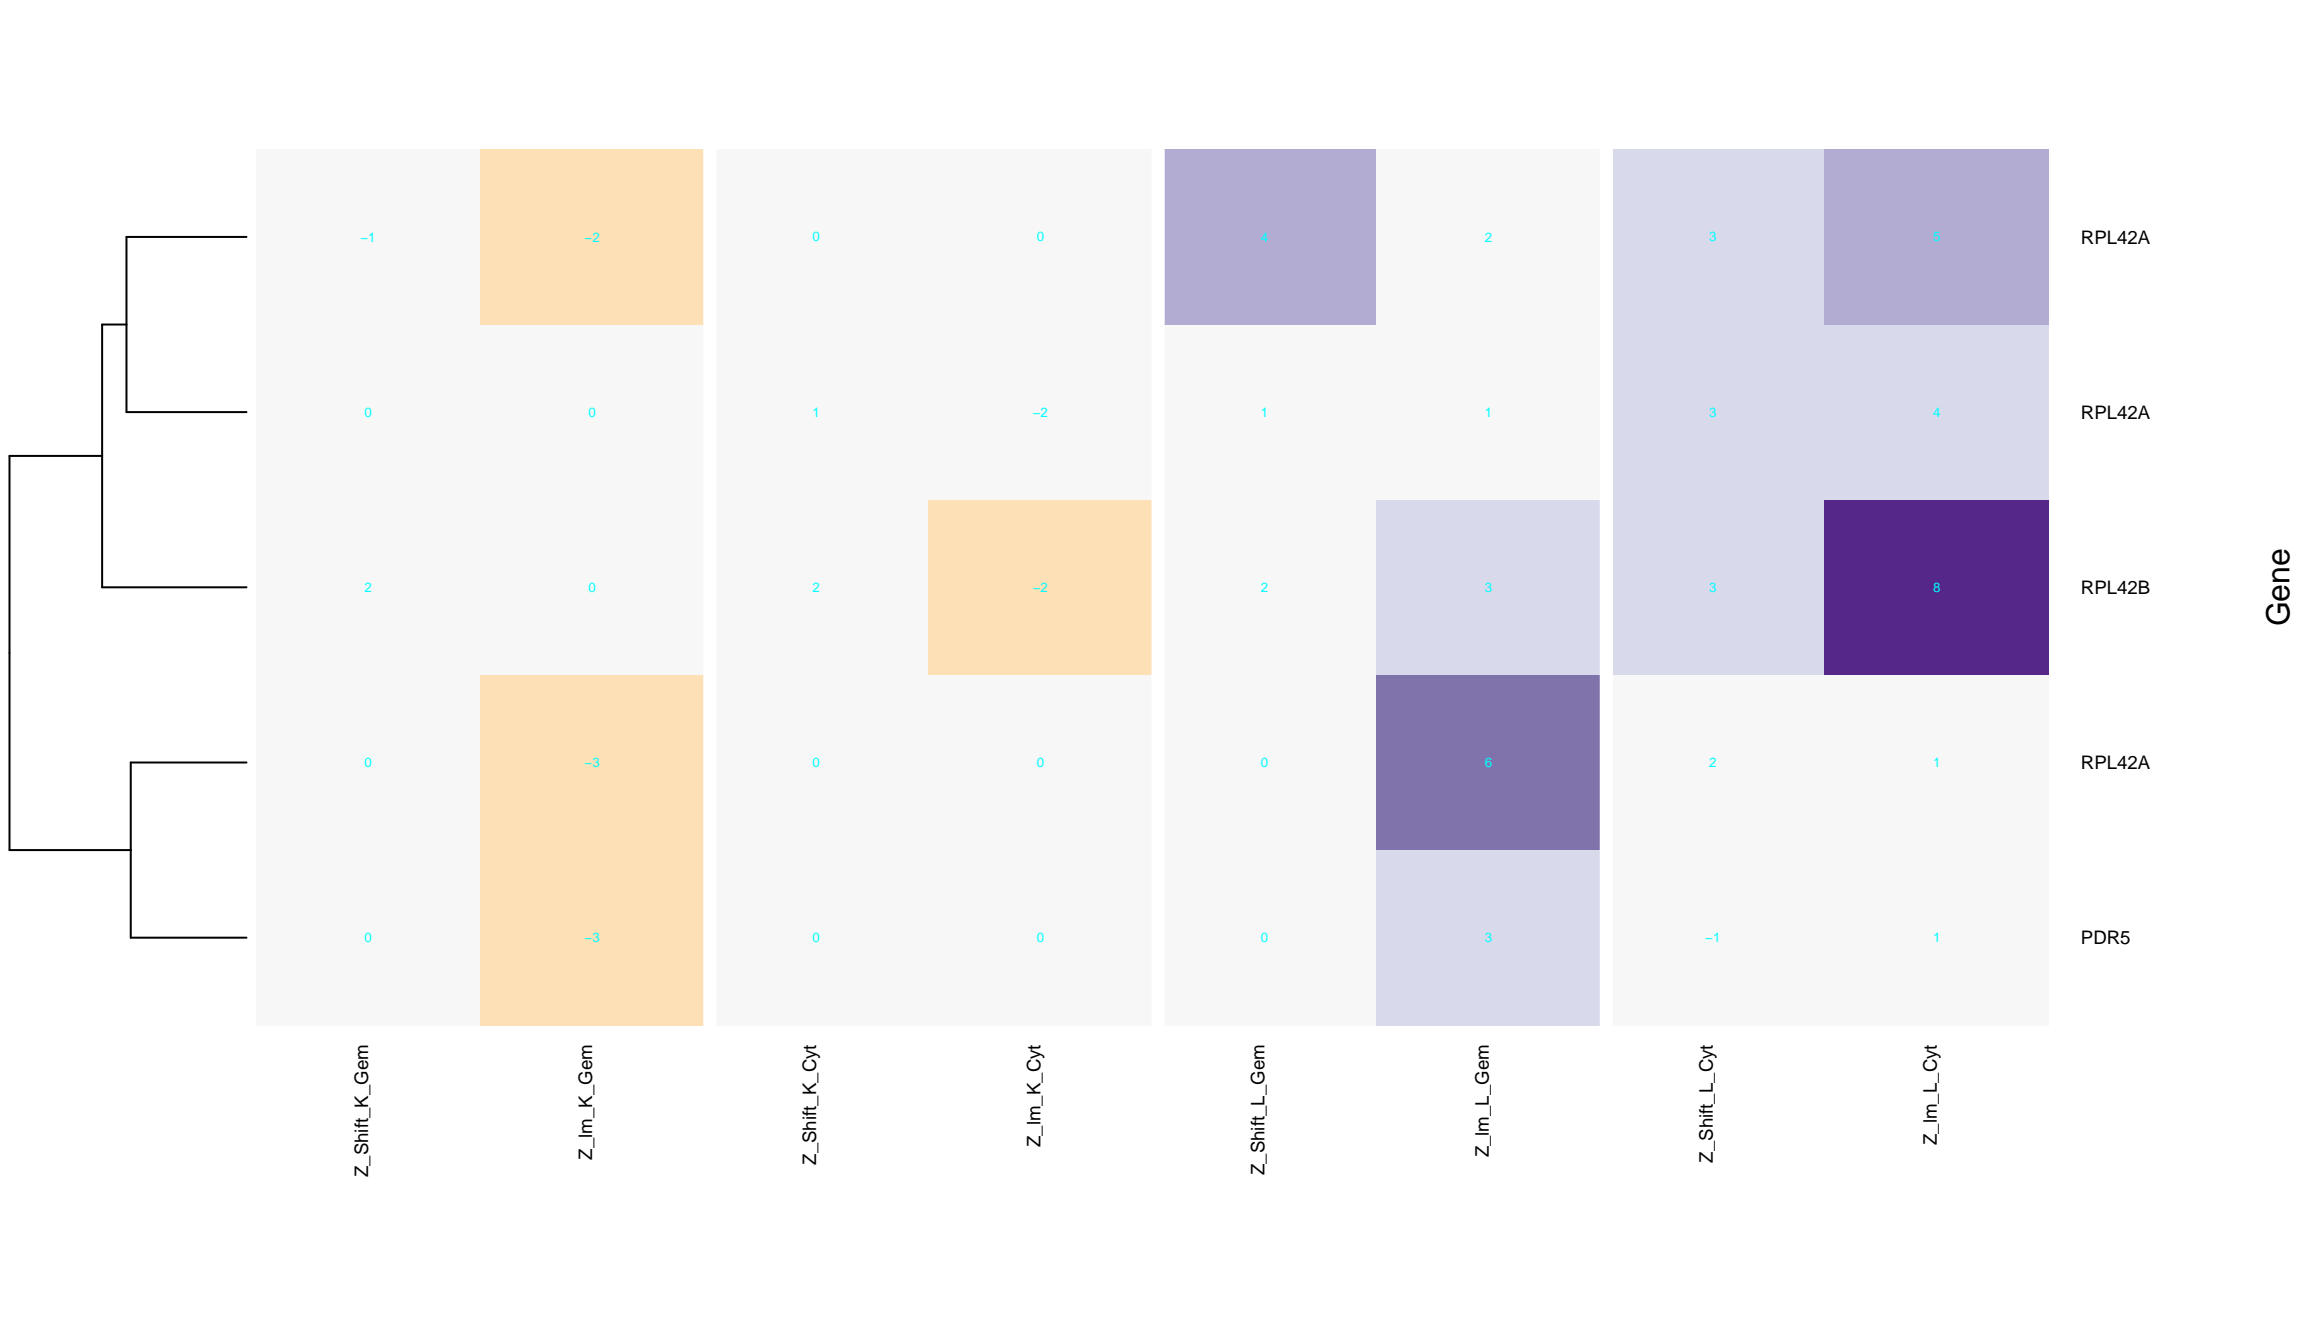

Supplement: s1 [file s1]

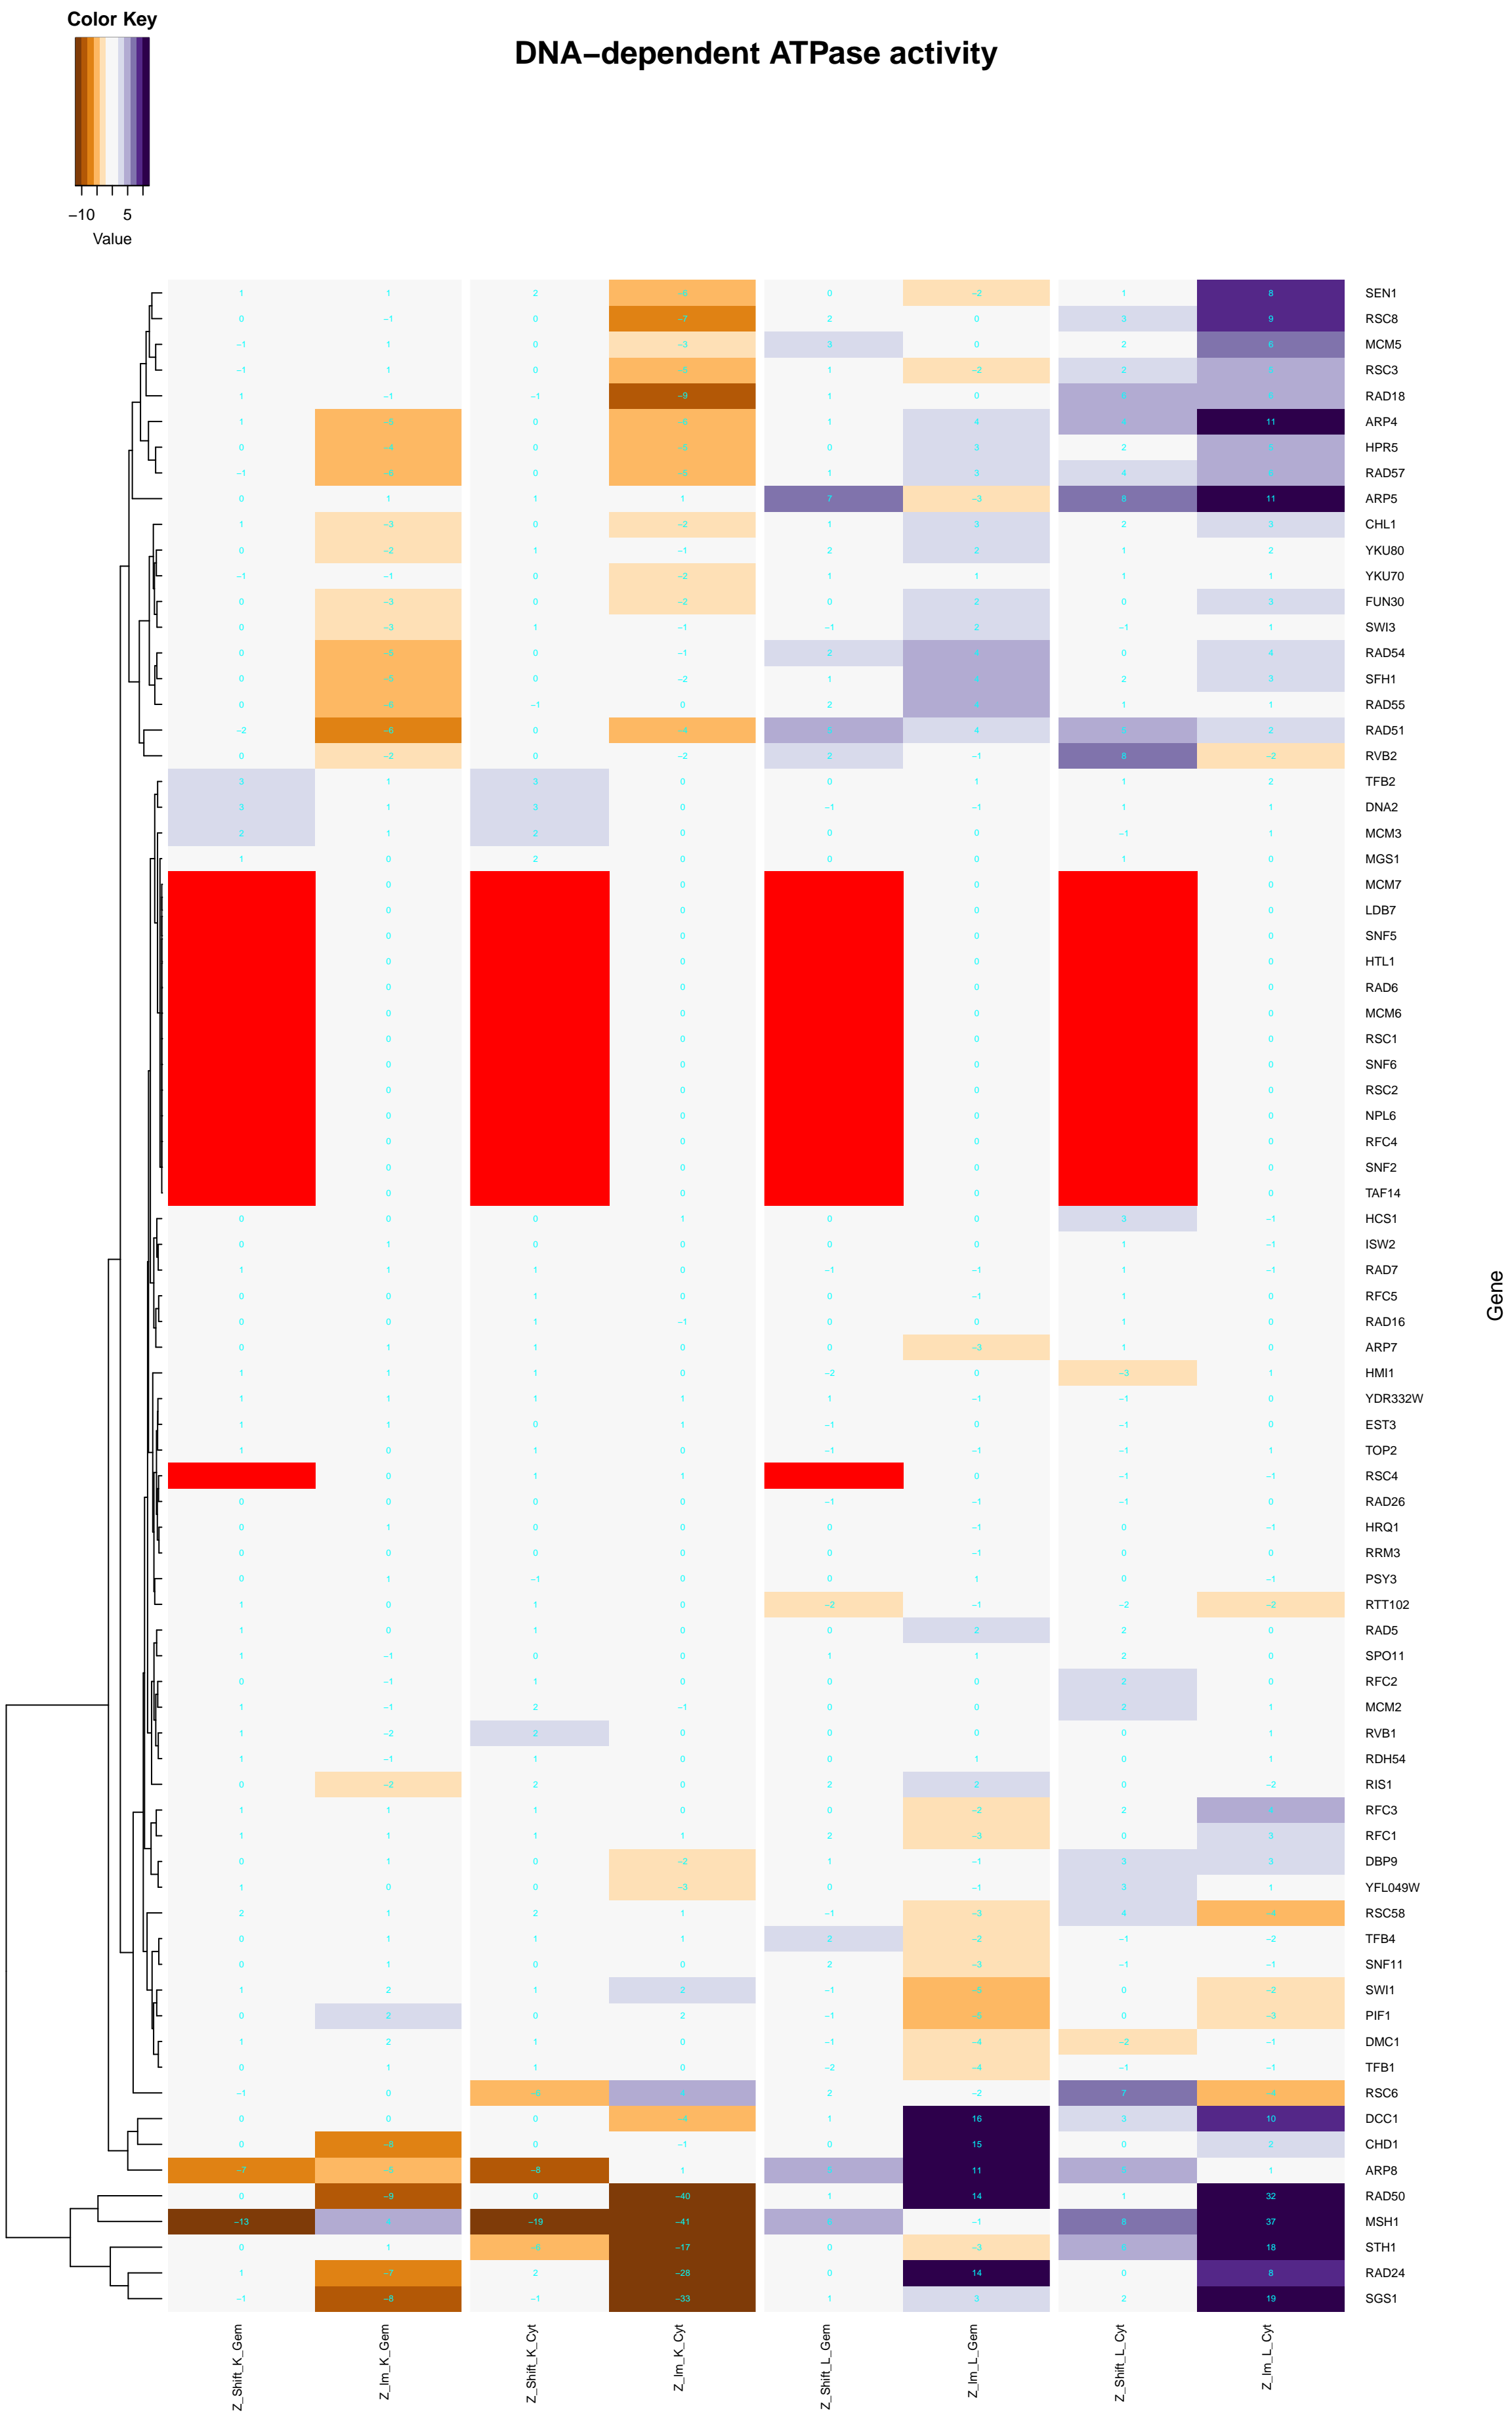



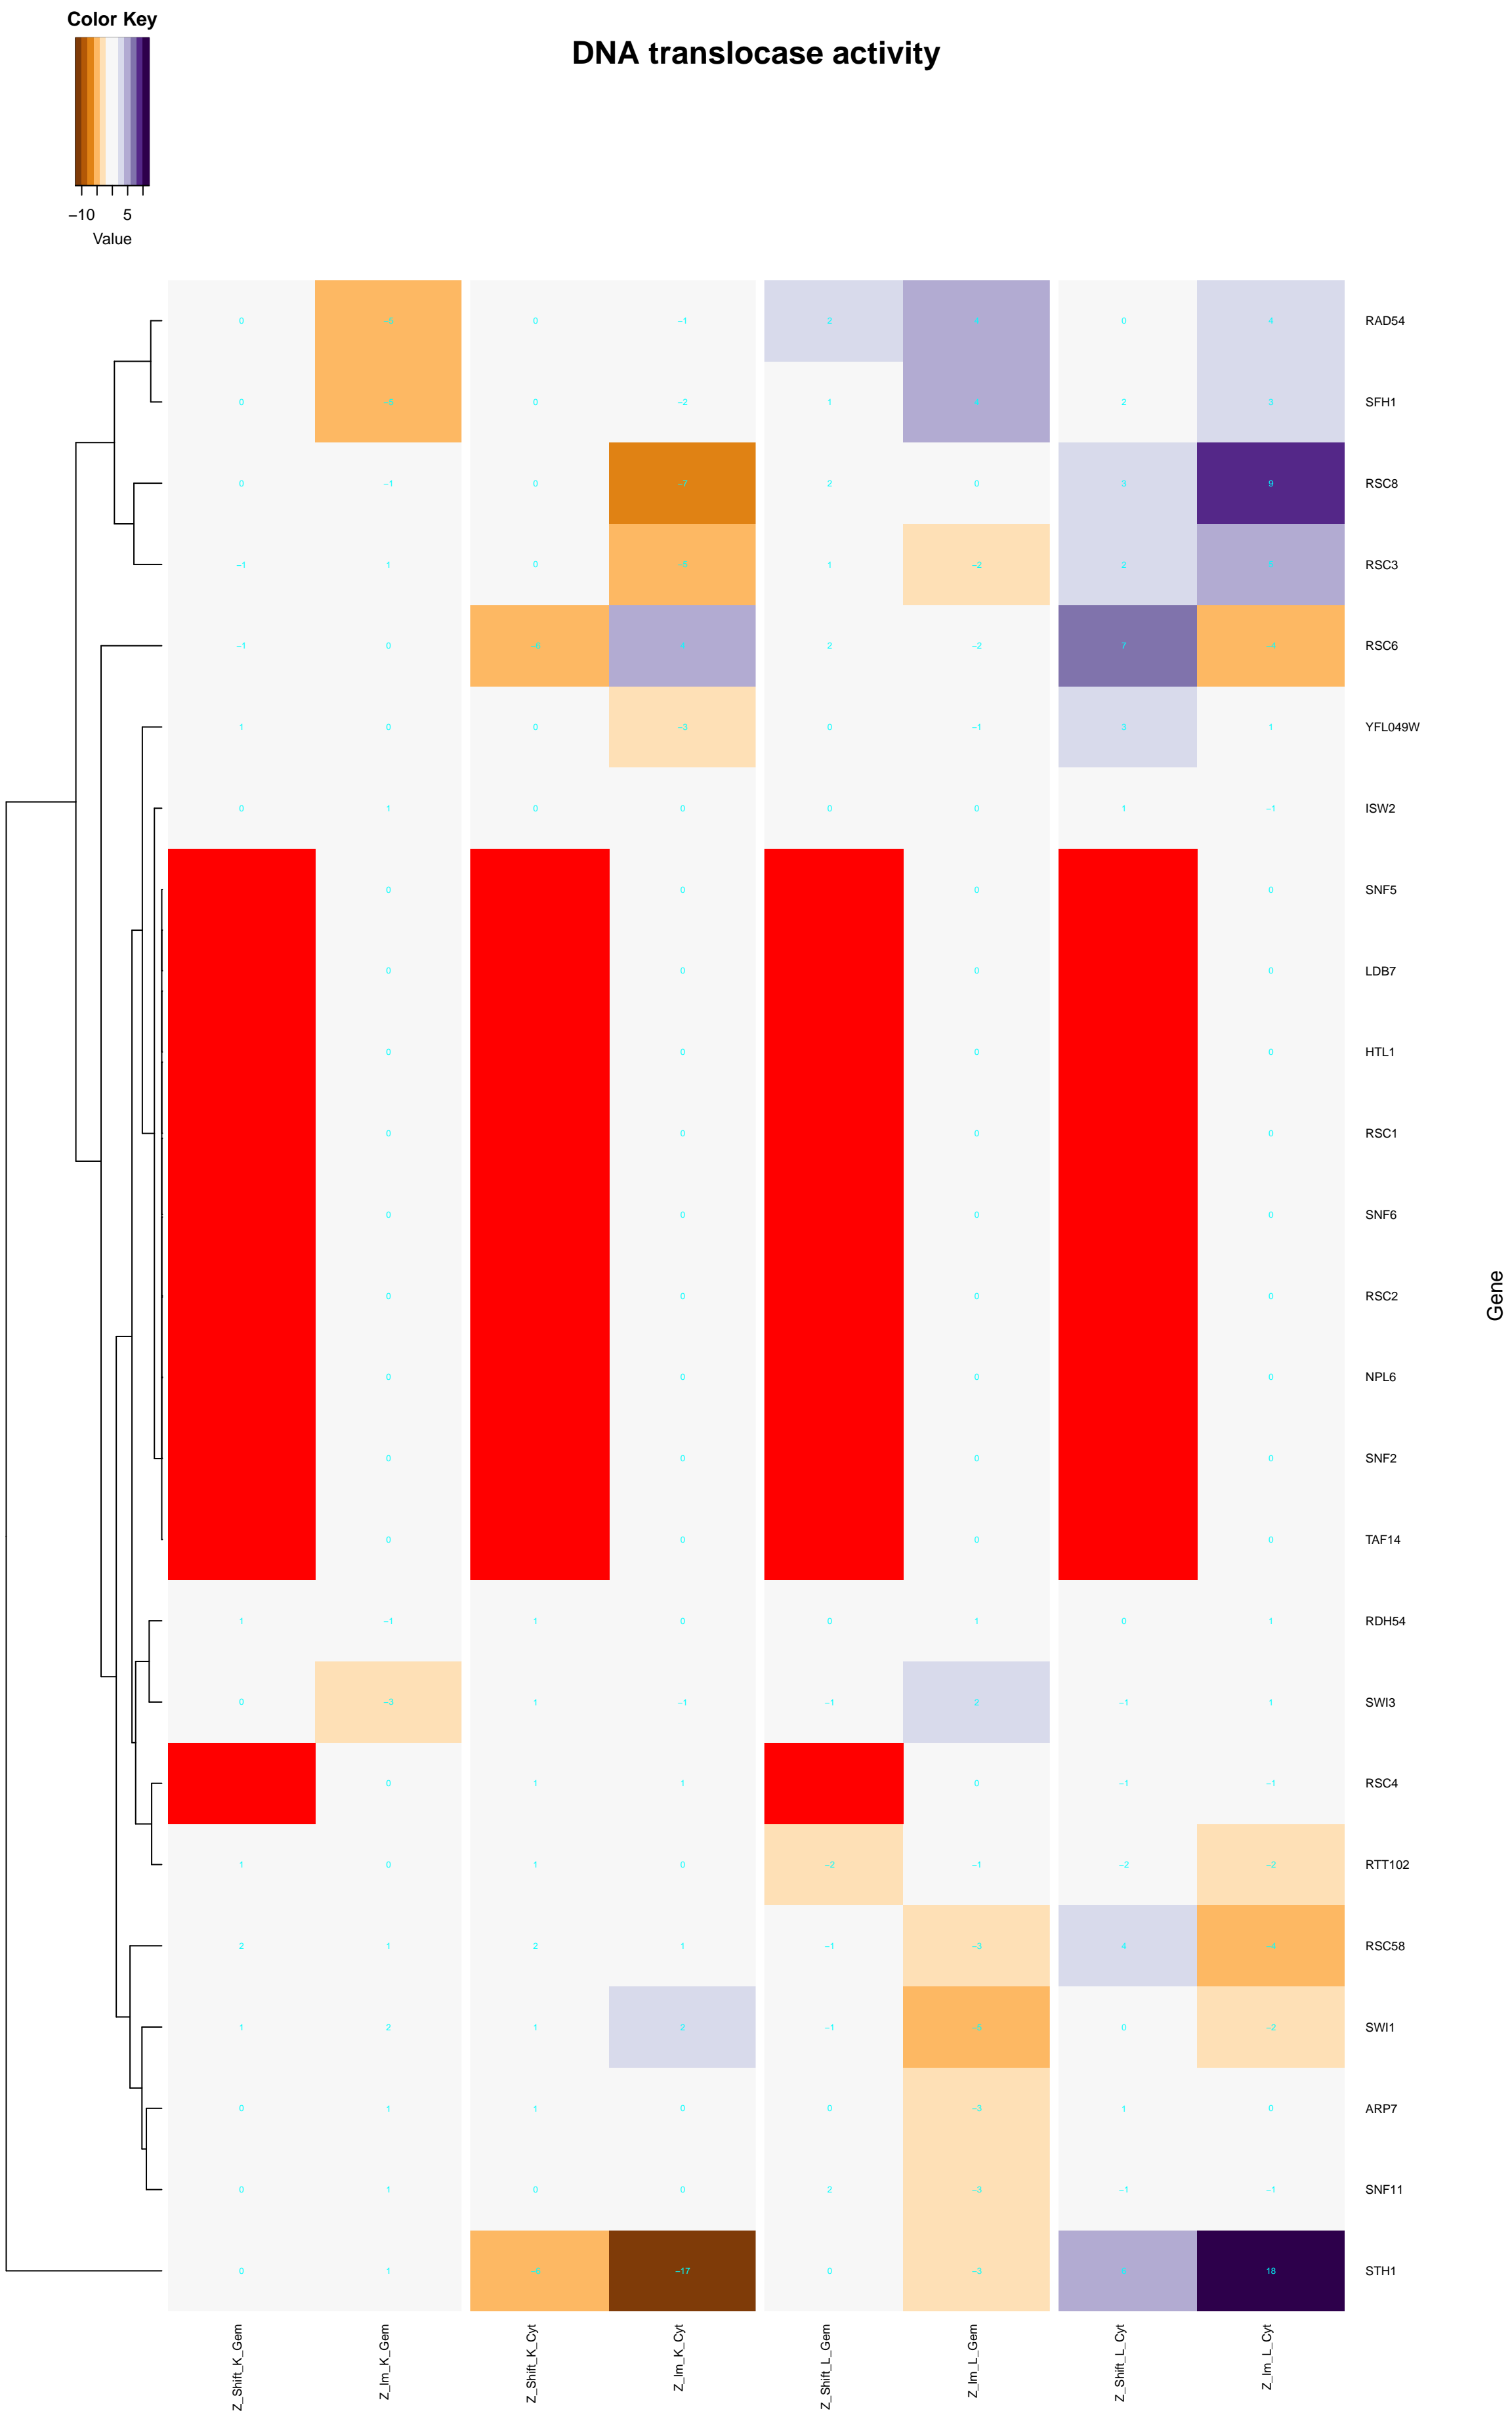

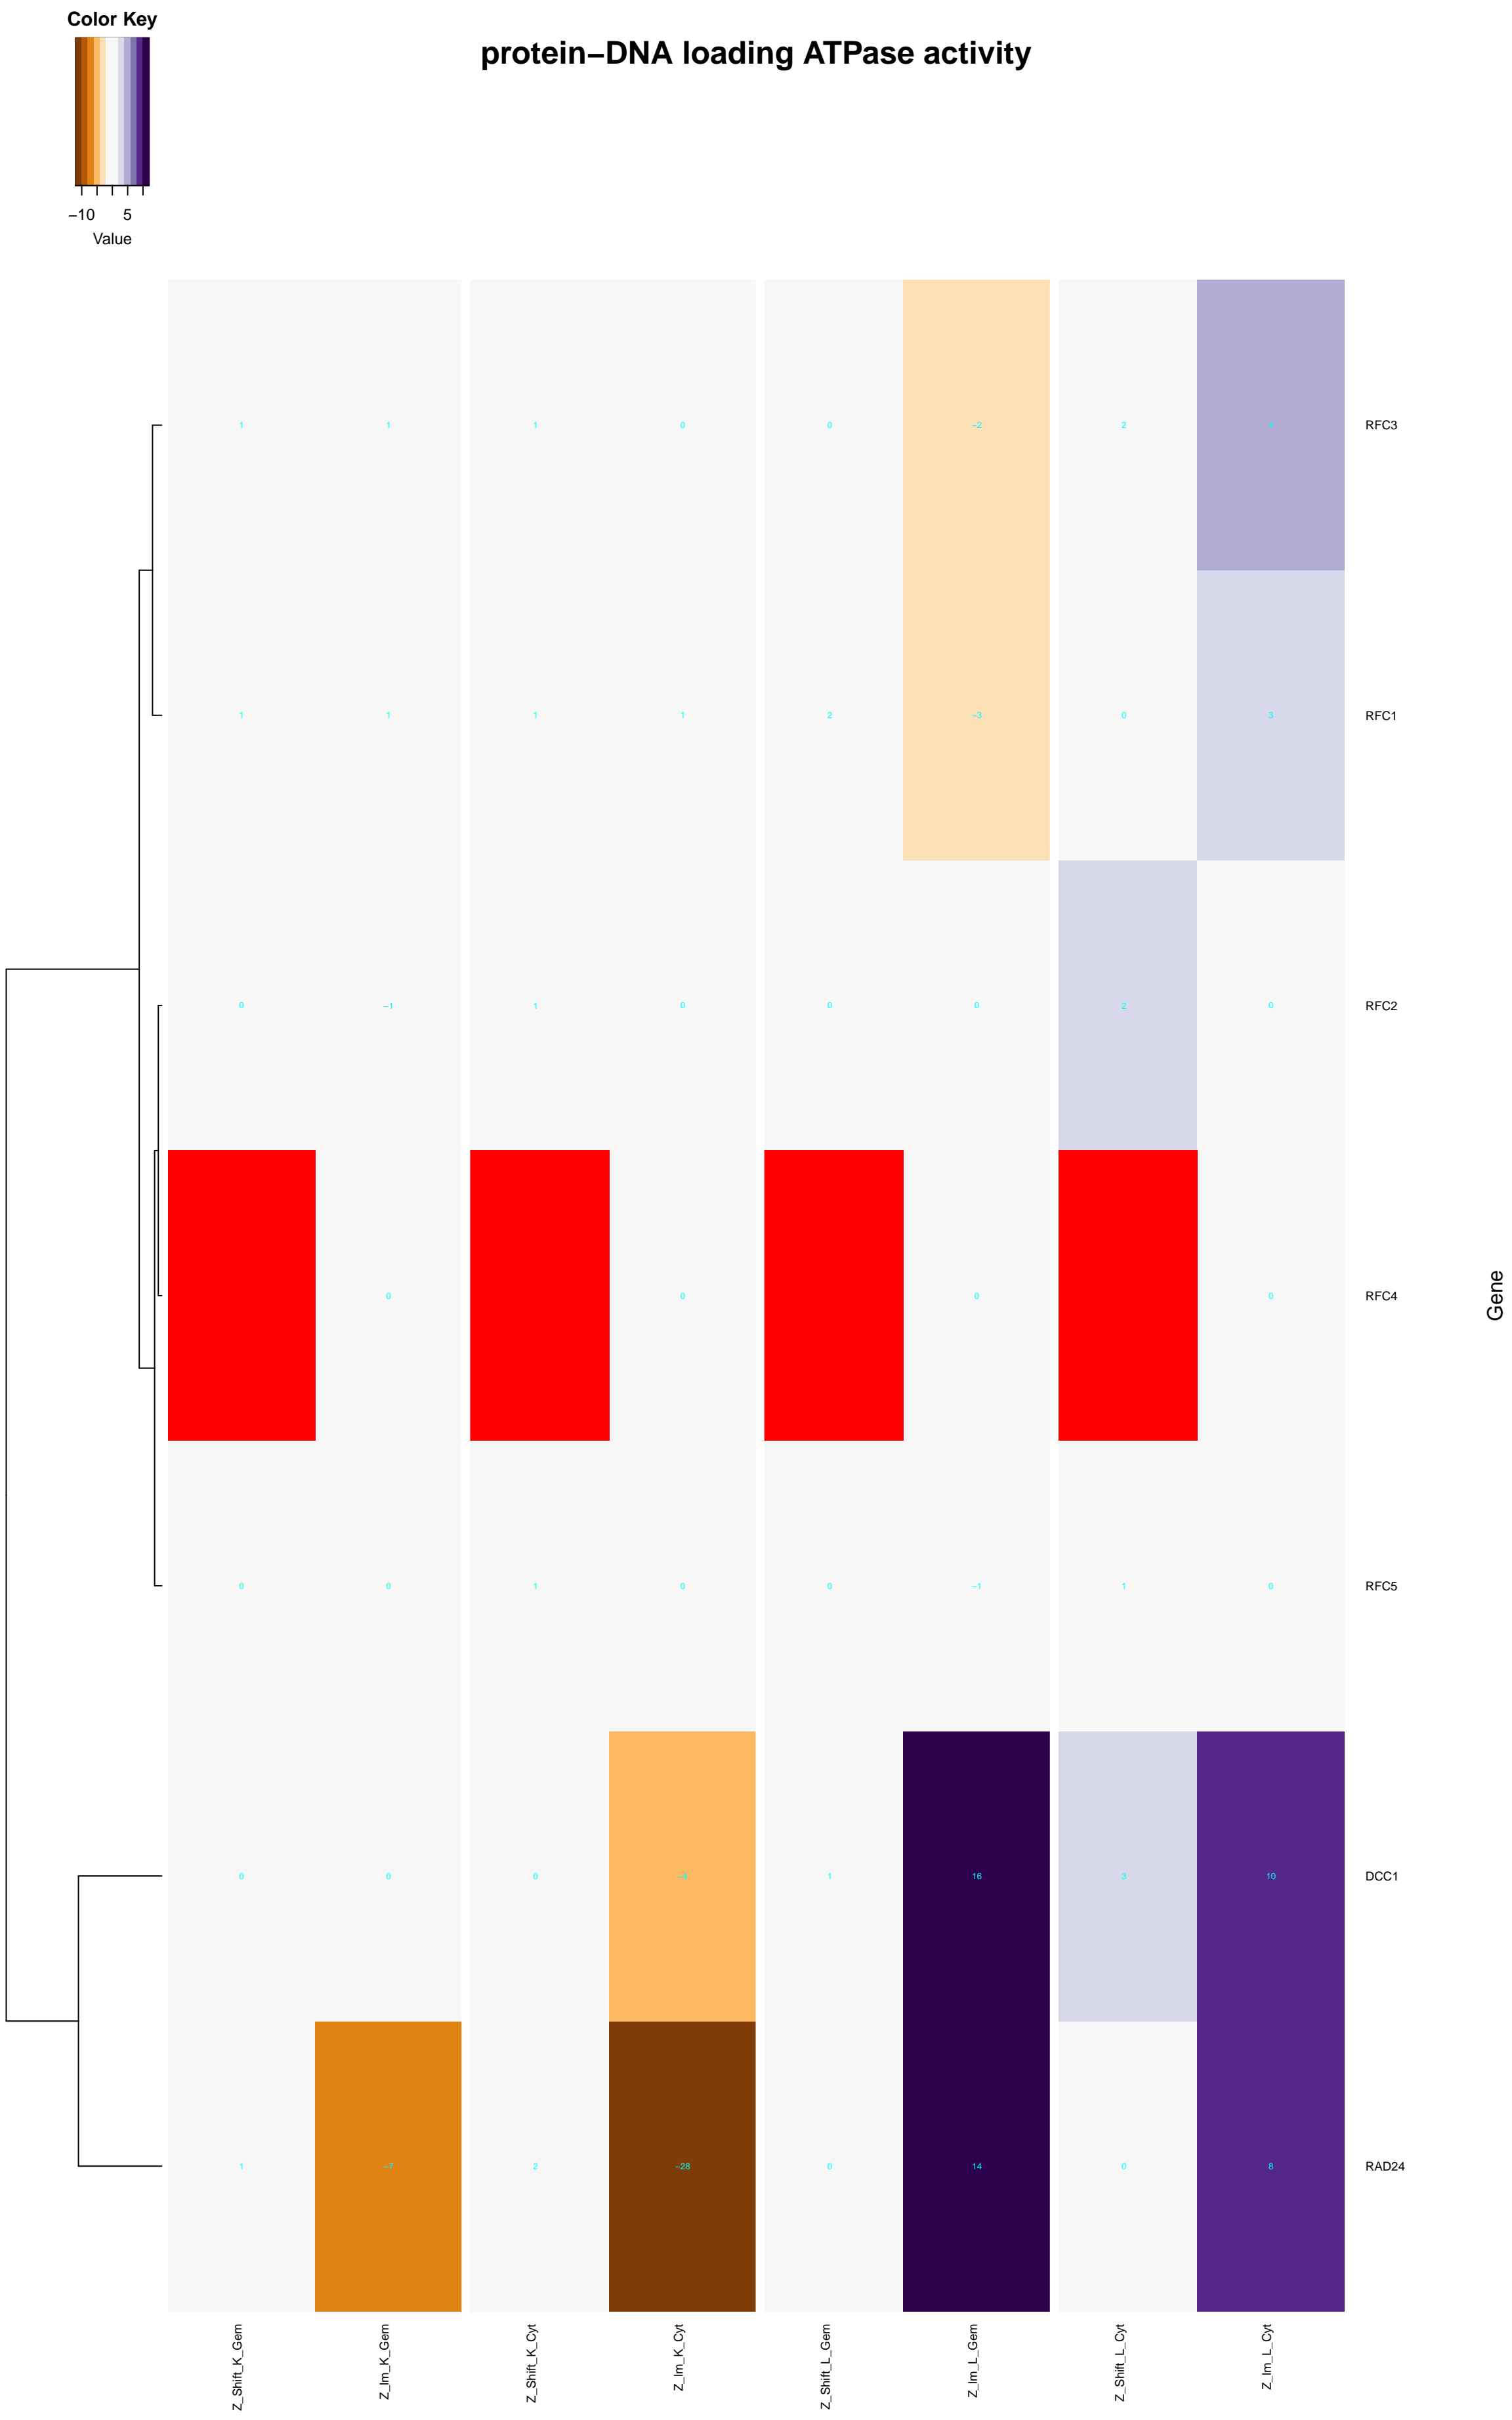



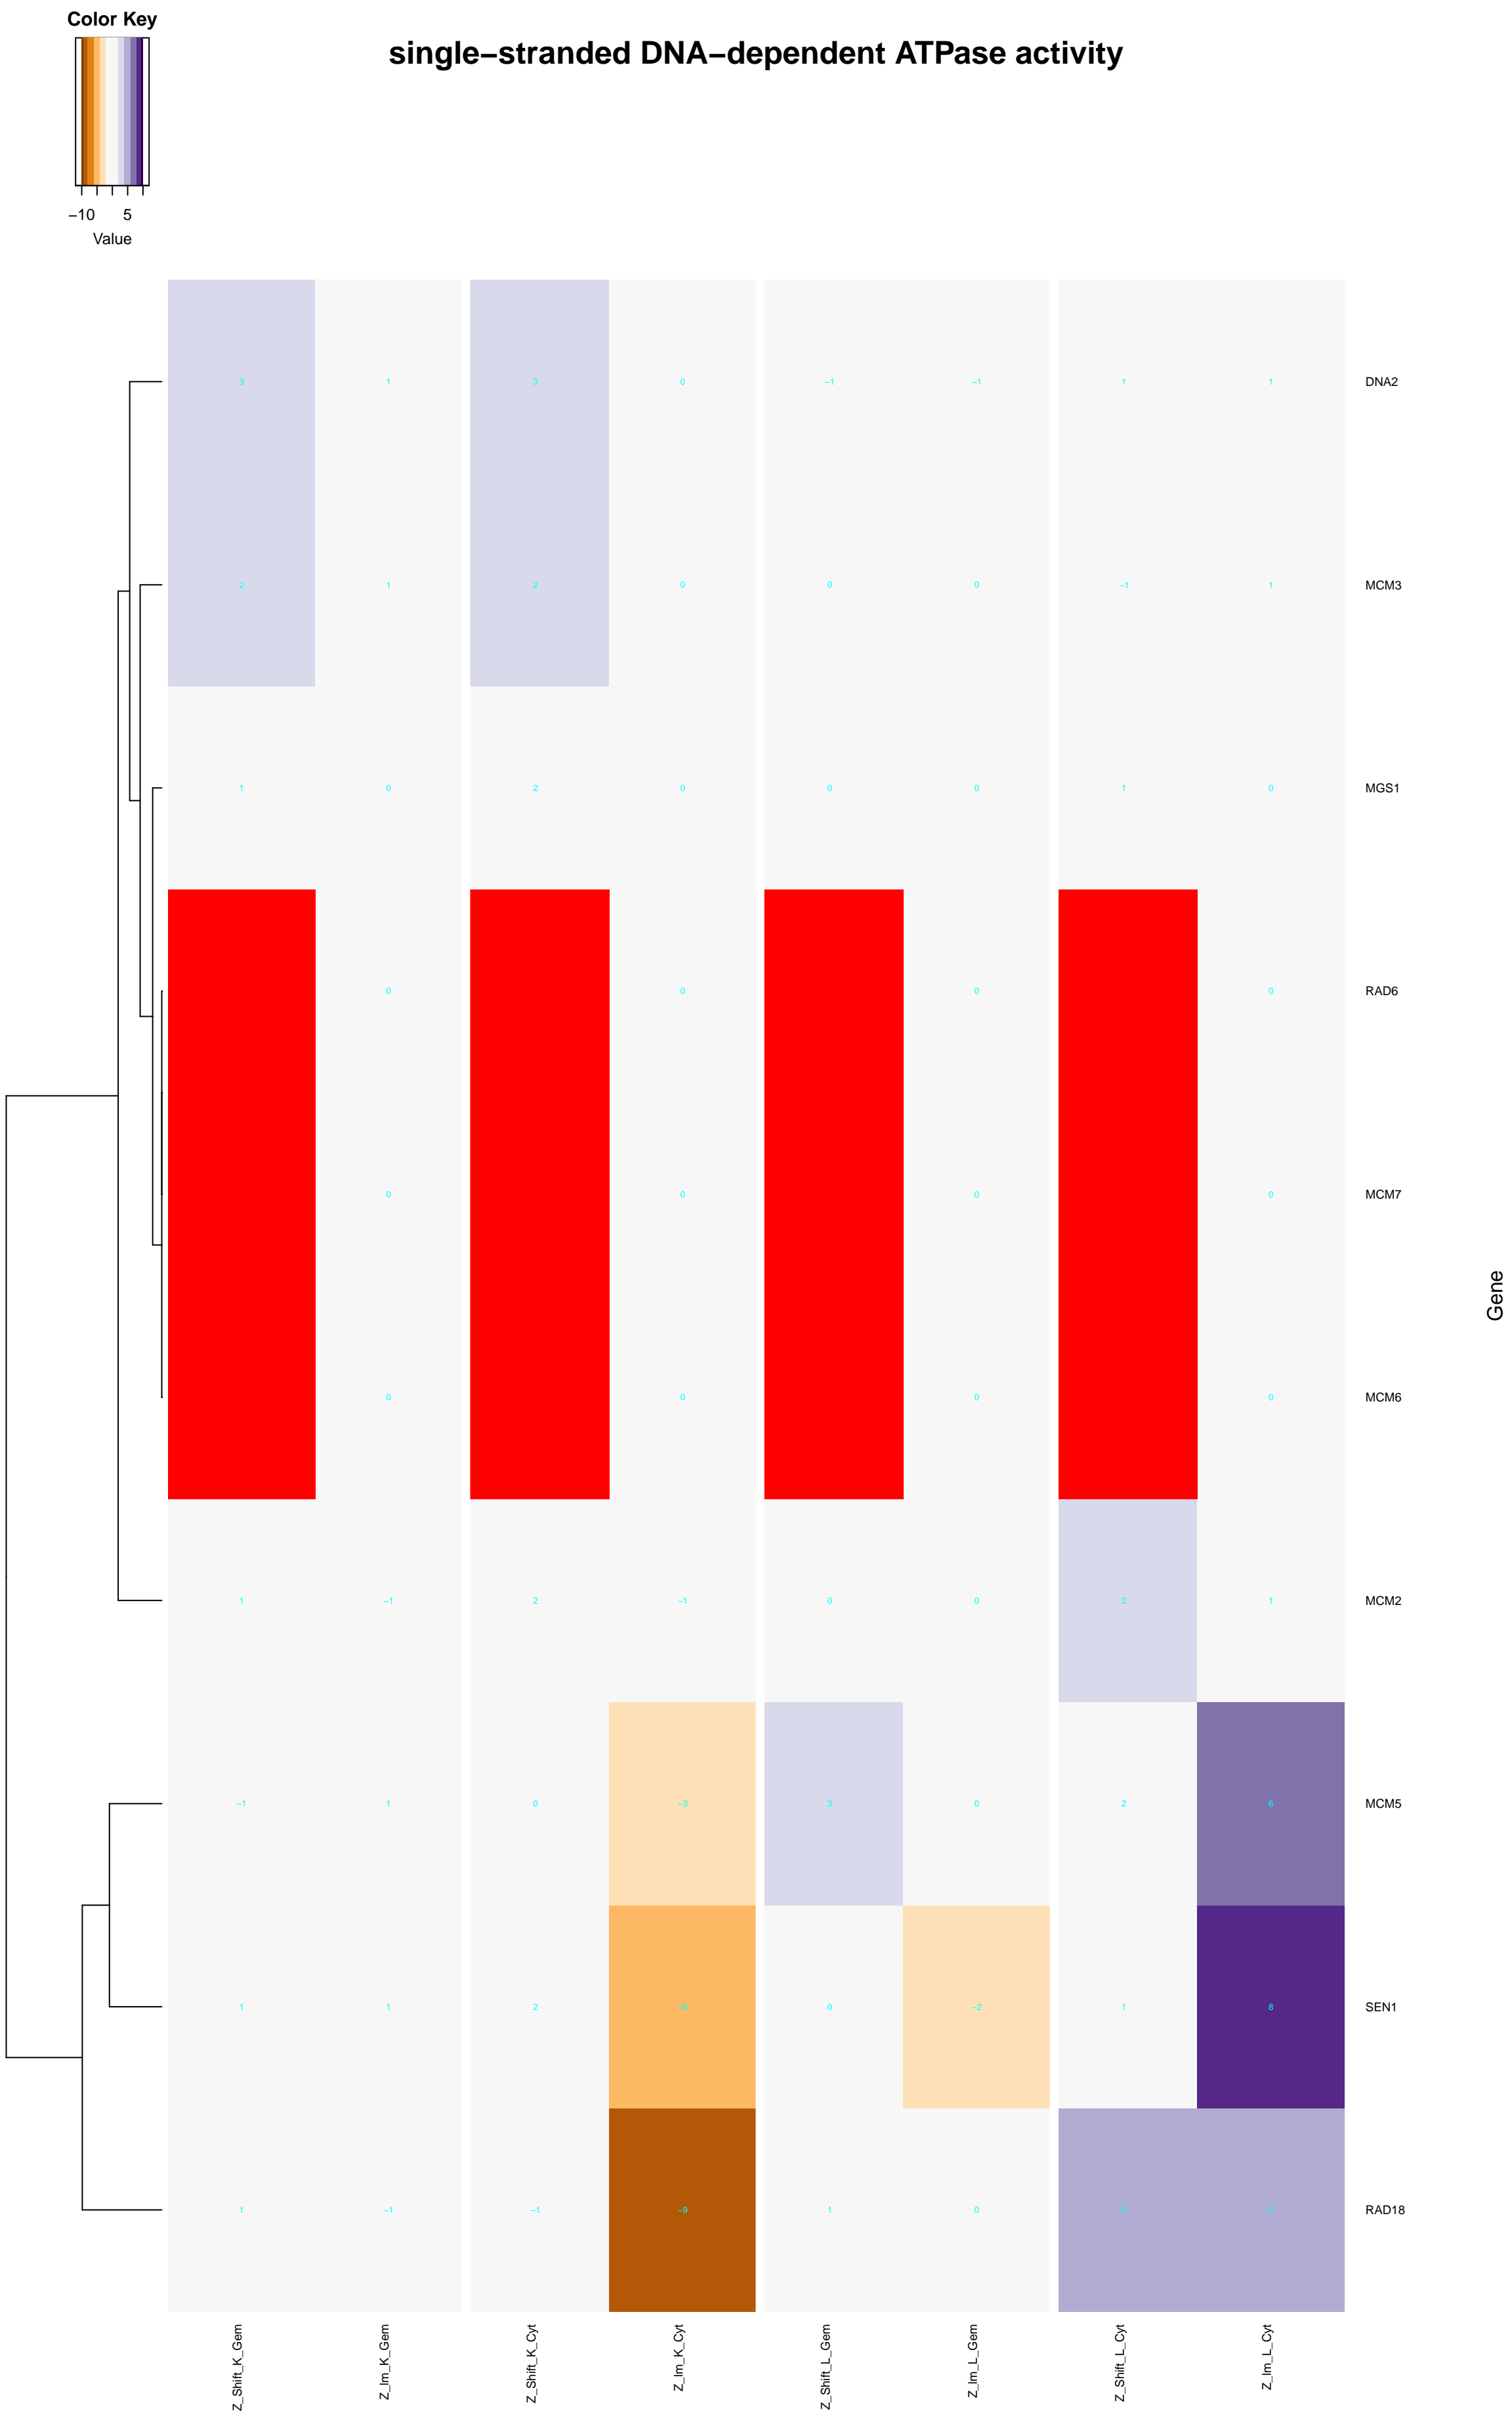







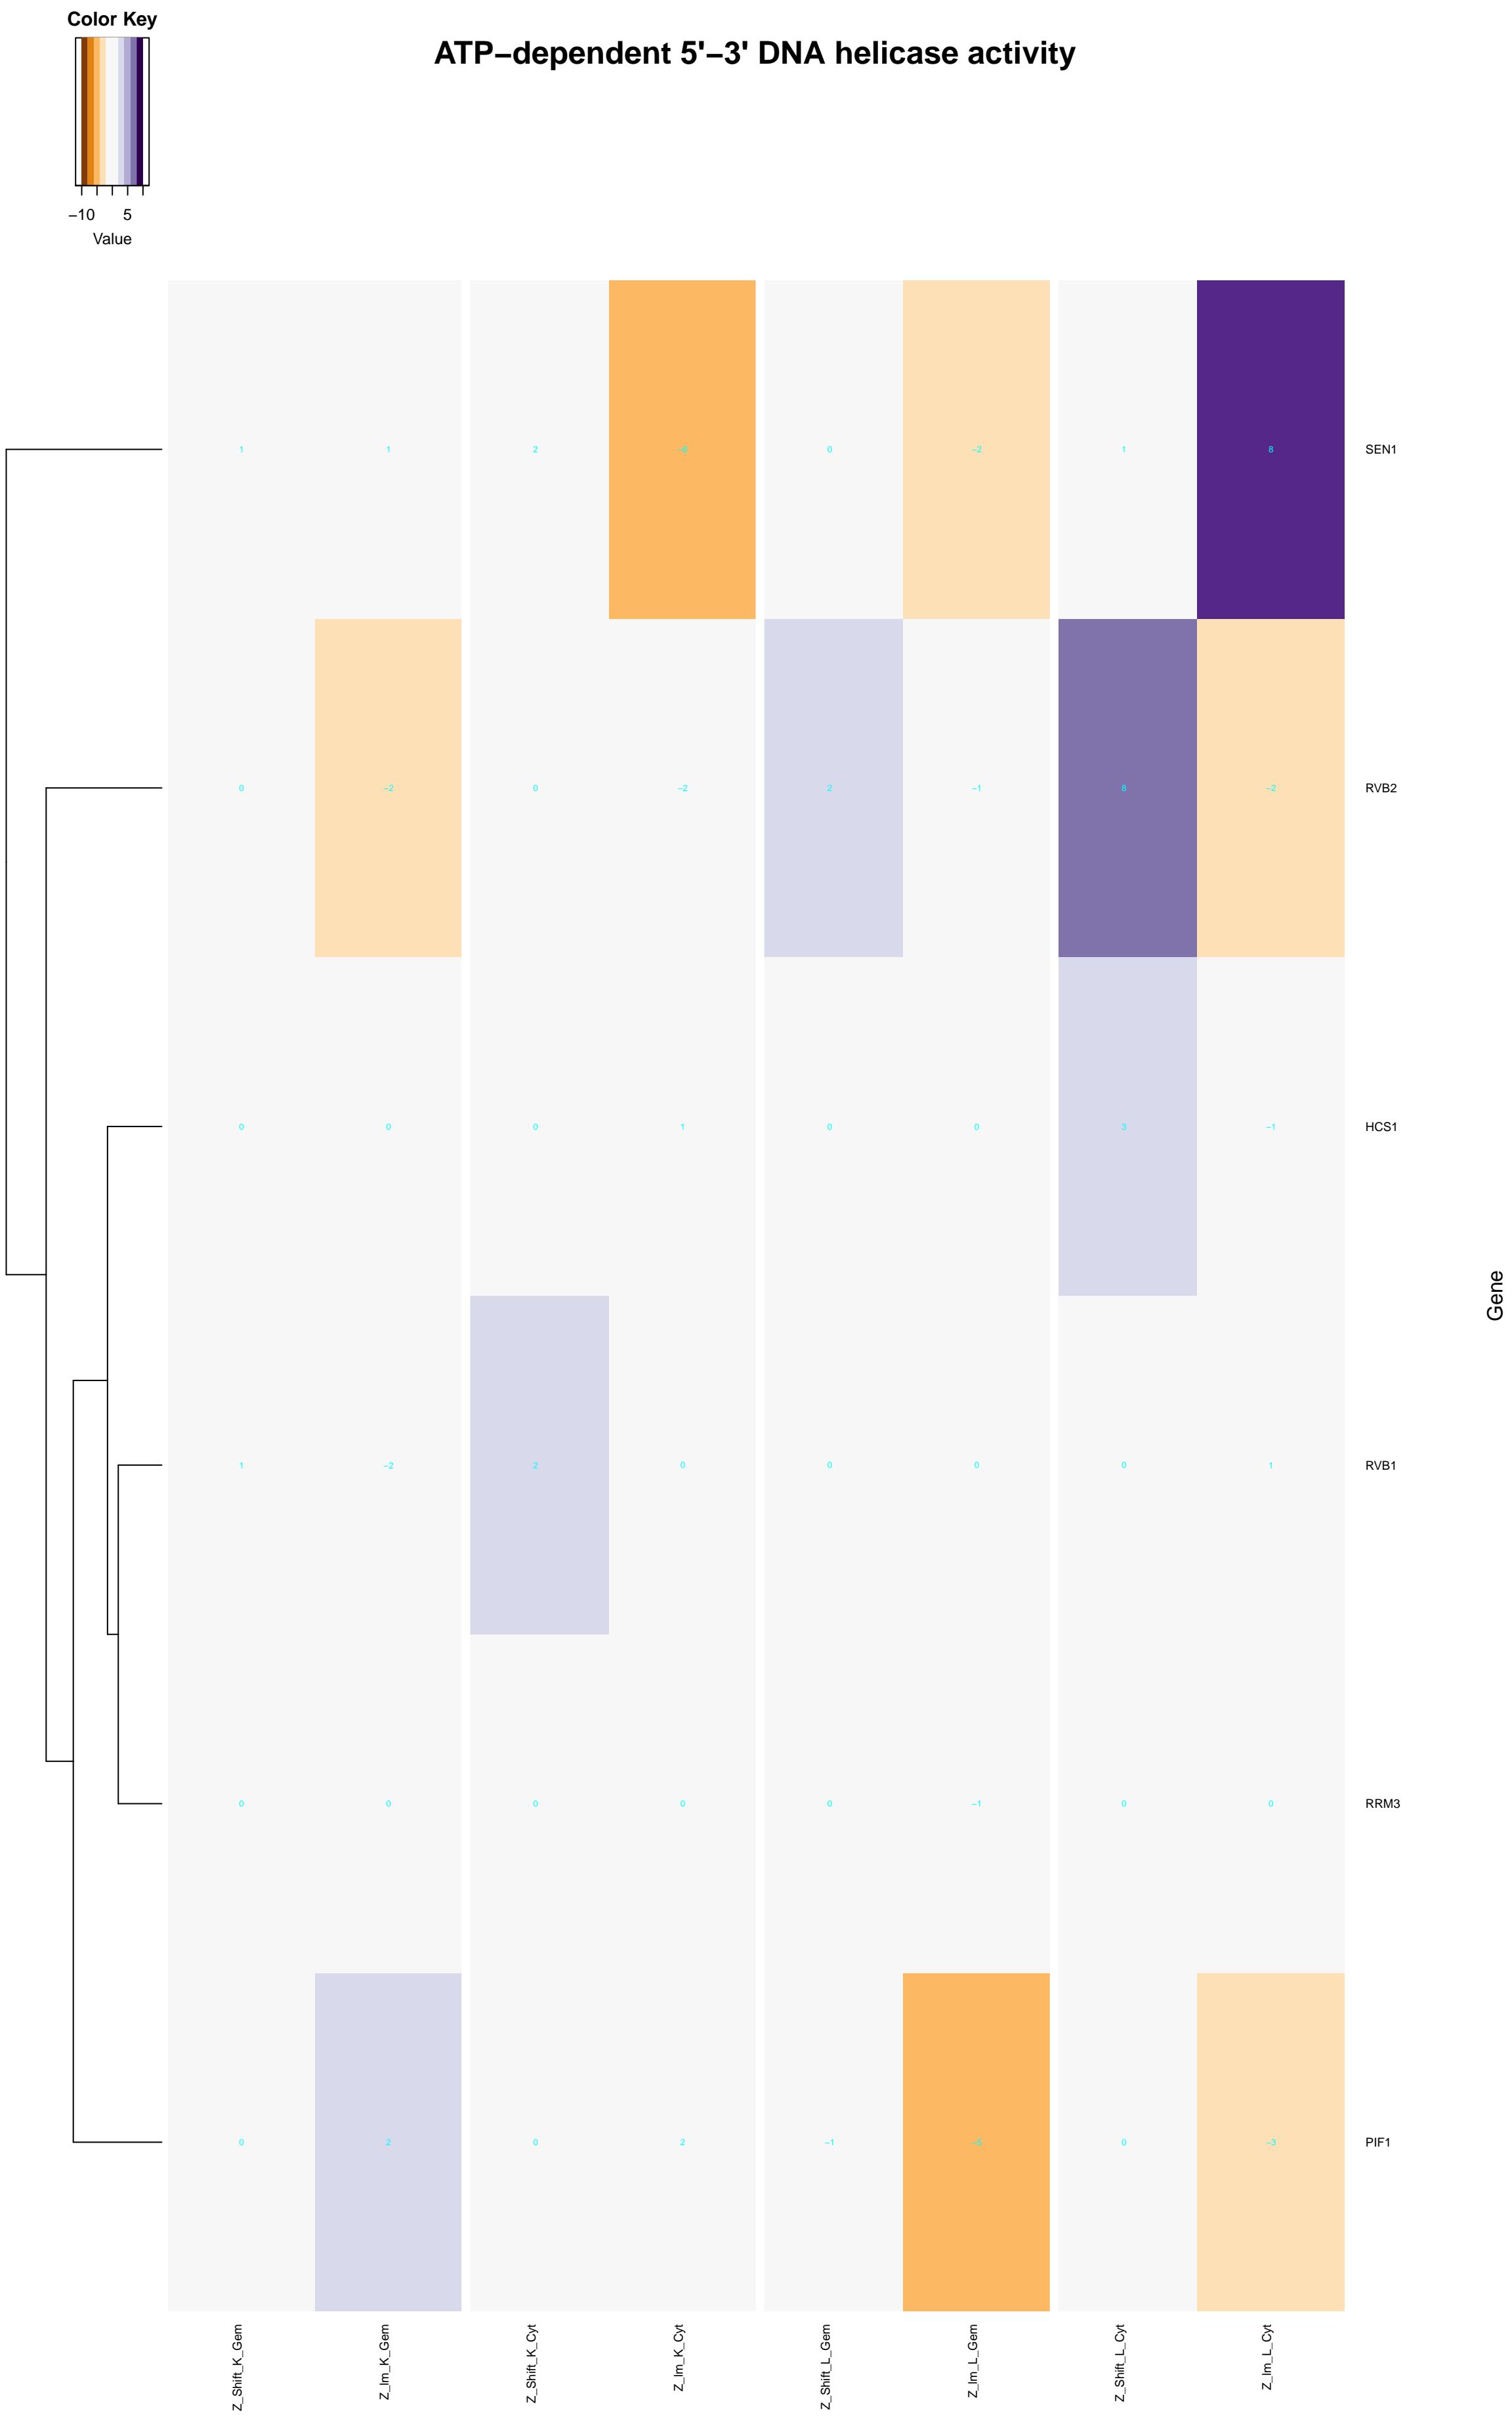

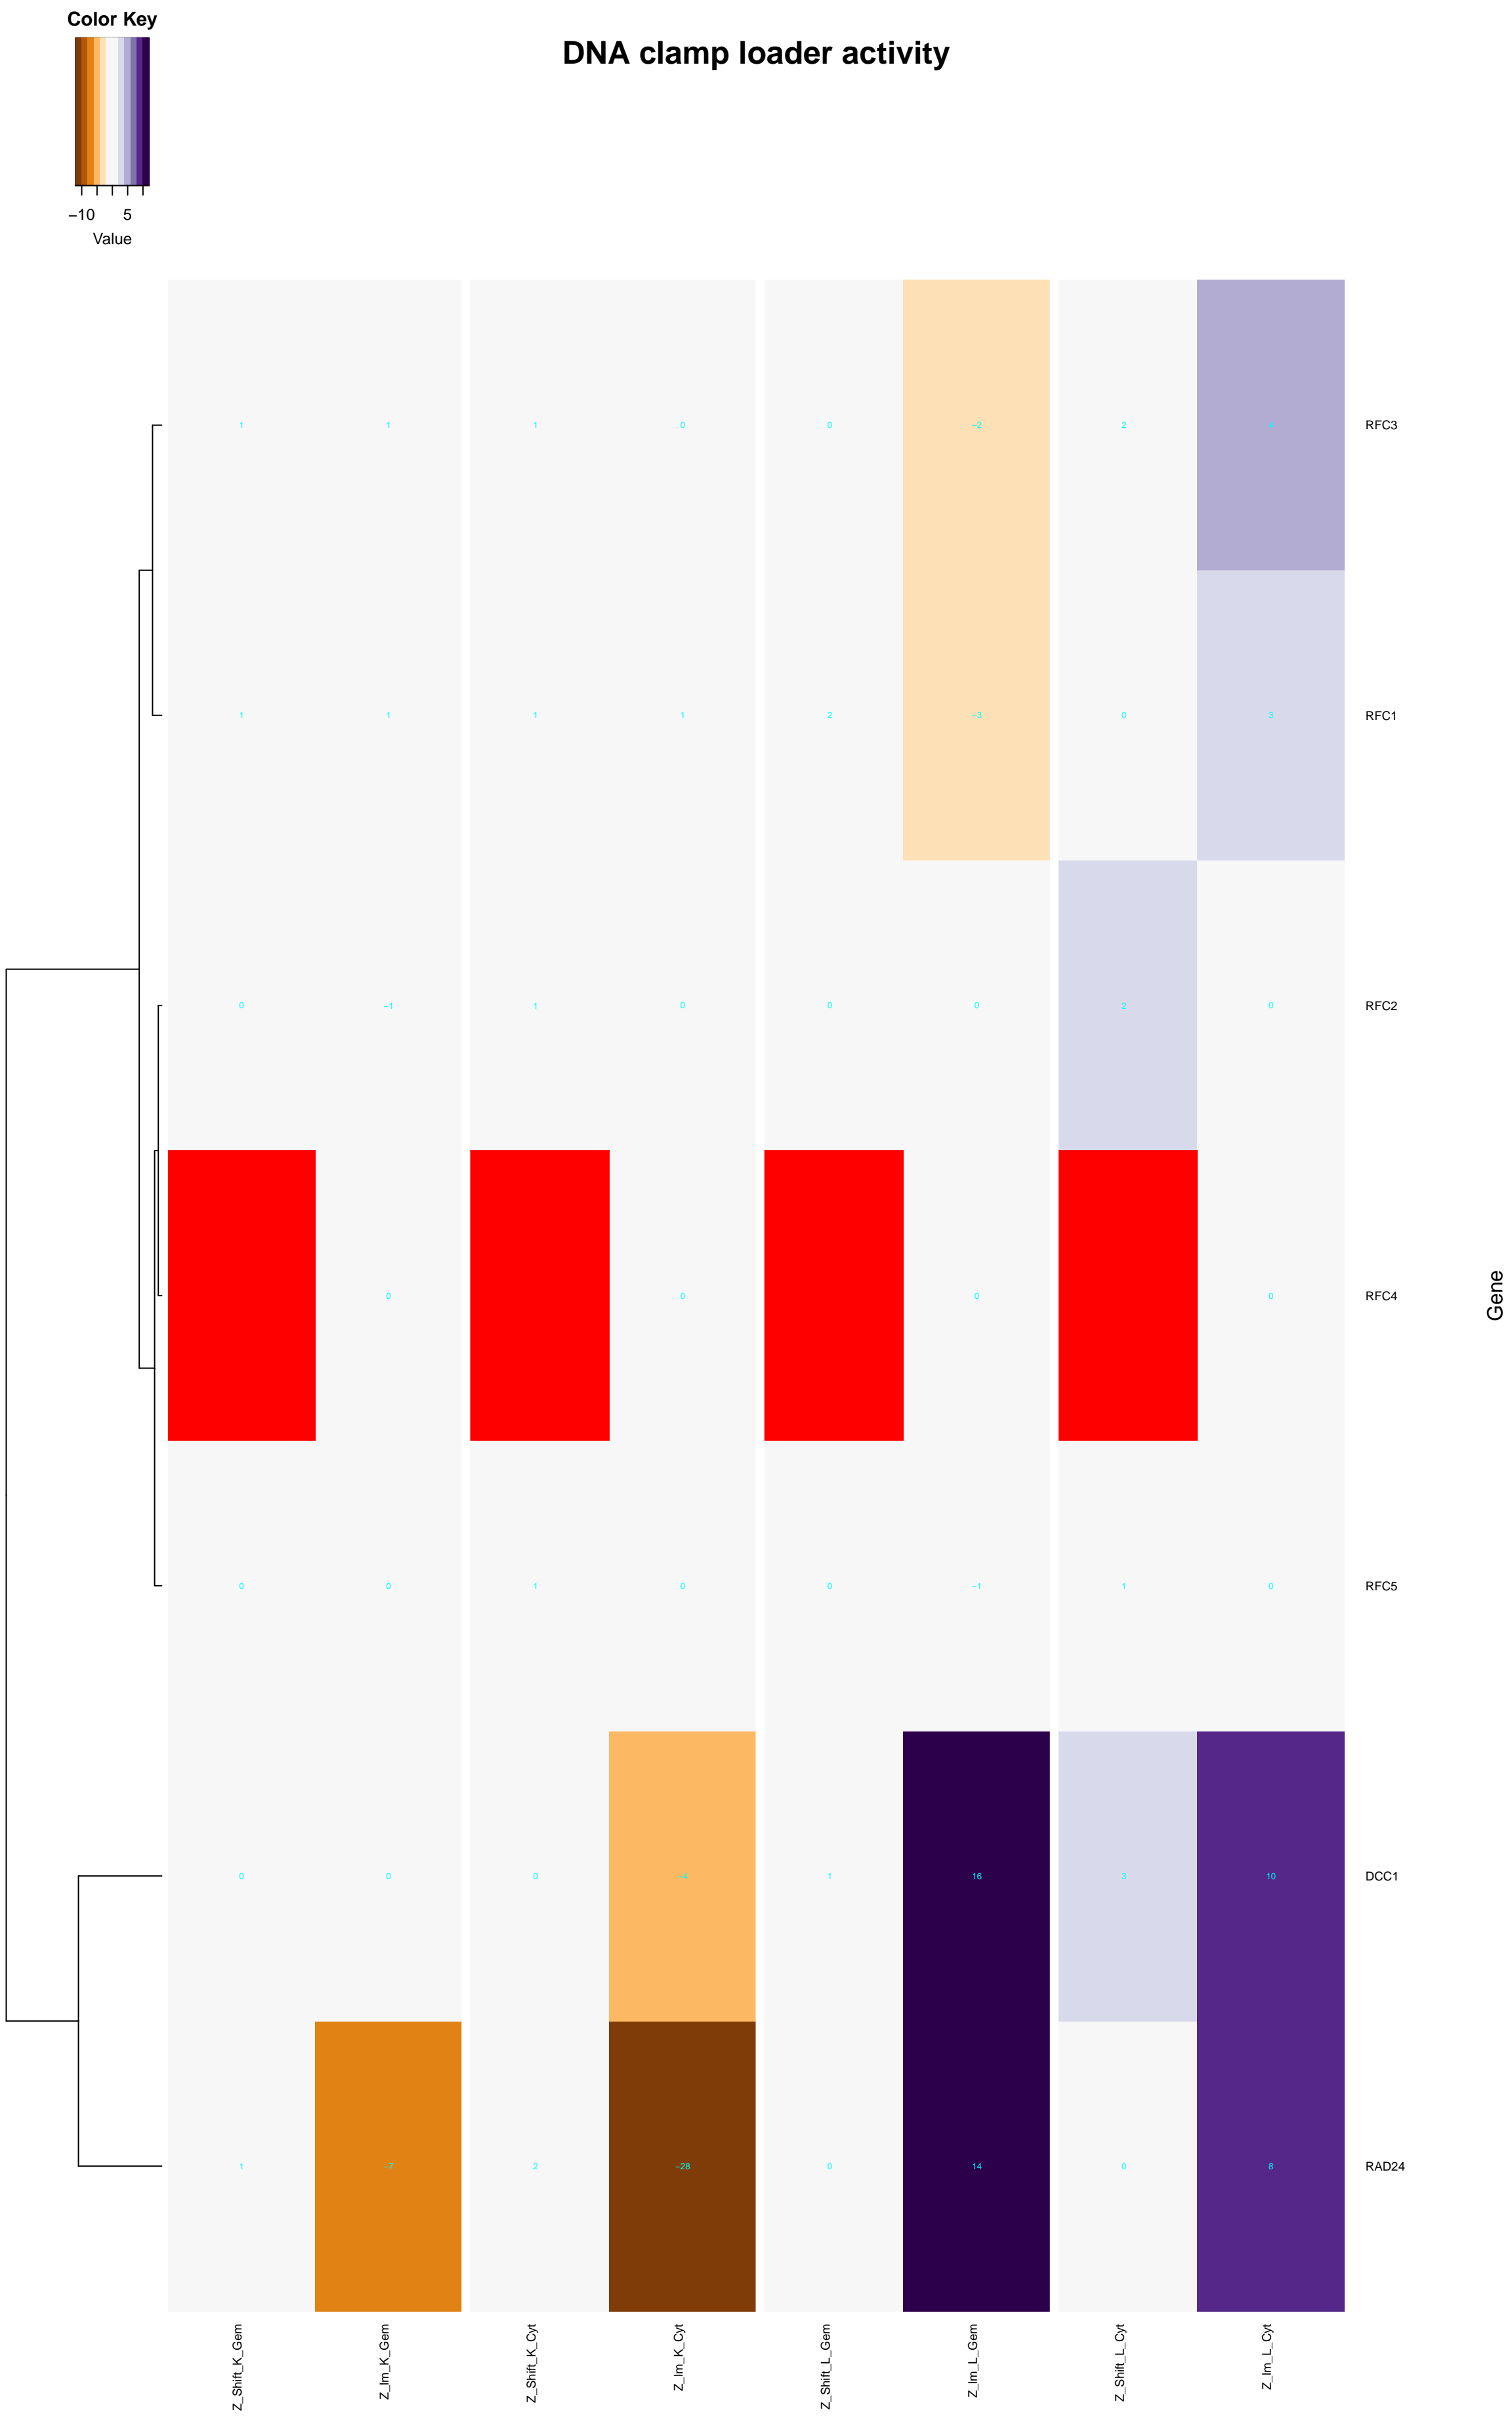

Supplement: s1 [file s1]
